# Supplementary material for: A Proteomic Approach to Investigate the Drought Response in the Orphan Crop Eragrostis tef
Source: MDPI journal article supplement (doi:10.3390/proteomes5040032), 2017-11-15
Supplement: s1 [file s1]

# 1. Notes

## 2. Result Statistics

**Figure 1:** The false discovery rate (FDR) curve. X-axis is the number of peptide-spectrum matches (PSM) being kept and the y-axis is the FDR. ?

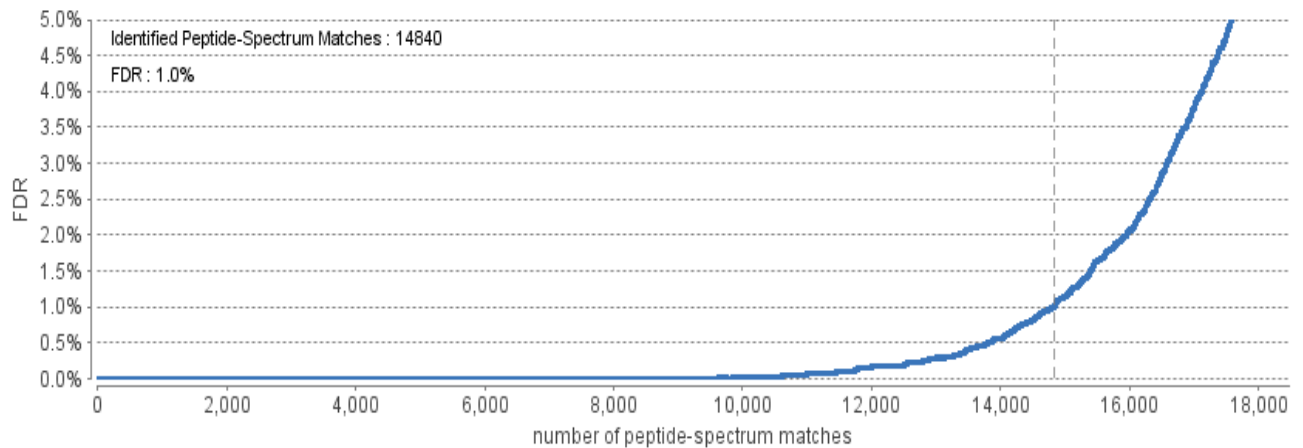

**Figure 2:** The distribution of PEAKS peptide score ( $-\log P$ ): (a) histogram of score; (b) The plot of precursor mass error vs. score. ?

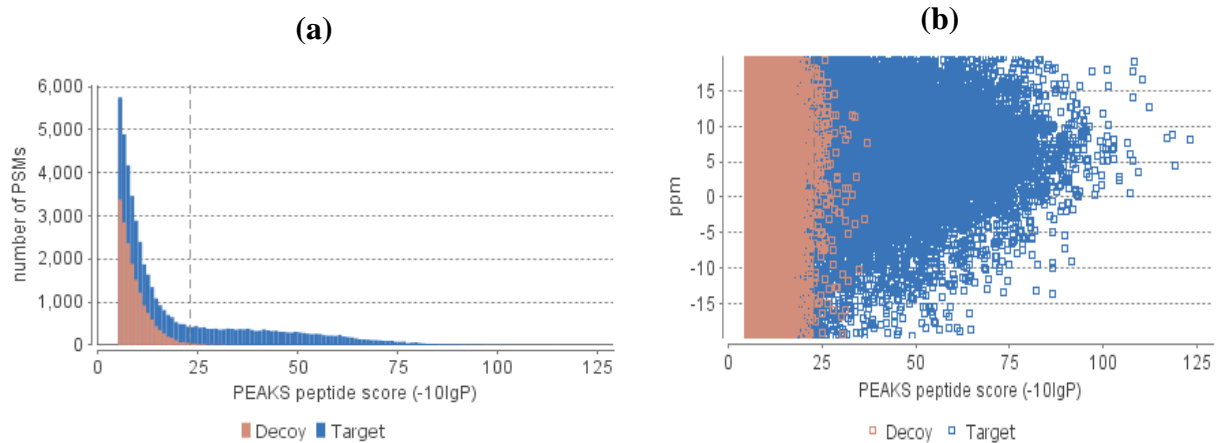

**Table 1.** Statistics of data.

# of MS Scans 76564  
 # of MS/MS Scans 102696

**Table 2.** Result filtration parameters.

|                          |           |             |             |
|--------------------------|-----------|-------------|-------------|
| Peptide -10lgP           | $\geq 23$ | De Novo     | $\geq 3$    |
| Protein -10lgP           | $\geq 20$ | TLC         |             |
| Proteins Unique Peptides | $\geq 2$  | De Novo ALC | $\geq 50\%$ |

**Table 3.** Statistics of filtered result.

|                                |                             |
|--------------------------------|-----------------------------|
| Peptide-Spectrum Matches       | 14840                       |
| Peptide Sequences              | 6244                        |
| Protein Groups                 | 570                         |
| Proteins                       | 774                         |
| Proteins (#Unique Peptides)    | 503 (>2); 271 (=2); 0 (=1); |
| FDR (Peptide-Spectrum Matches) | 1.0%                        |
| FDR (Peptide Sequences)        | 2.3%                        |
| FDR (Protein)                  | 0.0%                        |
| De Novo Only                   | 51022                       |

**Table 4.** PTM Profile.

| Name                  | $\Delta$ Mass | #PSM  | Position |
|-----------------------|---------------|-------|----------|
| iTRAQ-8plex (K)       | 304.20        | 14840 | K,N-term |
| Beta-methylthiolation | 45.99         | 1338  | C        |
| Oxidation             | 15.99         | 653   | M        |
| iTRAQ-8plex (Y)       | 304.20        | 649   | Y        |

### 3. Experiment Control

**Figure 3:** The precursor mass error (observed  $m/z$  - theoretical  $m/z$ ) distribution of the PSMs in filtered result. **(a)** Each bar indicates the number of PSMs (y-axis) with a certain precursor error (x-axis); **(b)** Each data point represents a PSM. x-axis is the theoretical  $m/z$  and y-axis is the precursor mass error

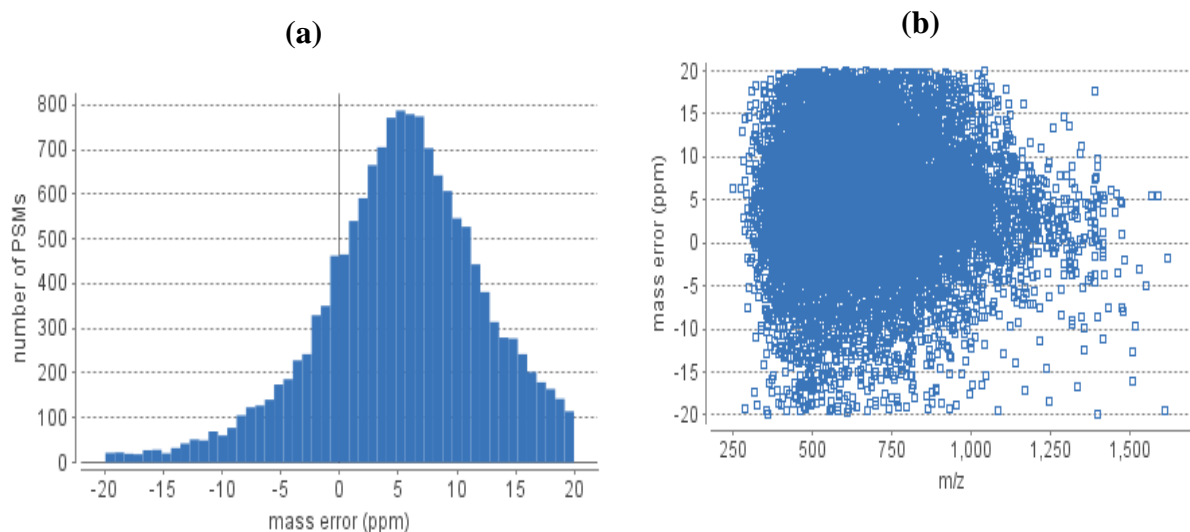

**Table 5.** Number of peptides by number of missed cleavages

| Missed Cleavages                      | 0    | 1   | 2  | 3 | 4+ |
|---------------------------------------|------|-----|----|---|----|
| Tef extended db<br>search 6 fract1-12 | 5795 | 431 | 18 | 0 | 0  |

### 4. Other Information

**Table 6.** Search parameters.

Search Engine Name: PEAKS 6.0  
Parent Mass Error Tolerance:  
20.0 ppm  
Fragment Mass Error Tolerance:  
0.1 Da  
Precursor Mass Search Type:  
monoisotopic  
Enzyme: Trypsin  
Max Missed Cleavages: 2  
Non-specific Cleavage: one  
Fixed Modifications:  
Beta-methylthiolation: 45.99

**Table 7.** Instrument parameters.

Fractions: Riz\_April8\_2013\_TEF\_iTRAQF1.mzML,Riz\_April8\_2013\_  
\_iTRAQF10.mzML,Riz\_April8\_2013\_TEF\_iTRAQF11.mzML,Riz\_Ap  
013\_TEF\_iTRAQF12.mzML,Riz\_April8\_2013\_TEF\_iTRAQF2.mzML  
ril8\_2013\_TEF\_iTRAQF3.mzML,Riz\_April8\_2013\_TEF\_iTRAQF4.m  
iz\_April8\_2013\_TEF\_iTRAQF5.mzML,Riz\_April8\_2013\_TEF\_iTRAQ  
zML,Riz\_April8\_2013\_TEF\_iTRAQF7.mzML,Riz\_April8\_2013\_TEF  
QF8.mzML,Riz\_April8\_2013\_TEF\_iTRAQF9.mzML  
Ion Source: ESI(nano-spray)  
Fragmentation Mode: CID, CAD, IRMPD (y and b ions)  
MS Scan Mode: Quadrupole  
MS/MS Scan Mode: Time of Flight

iTRAQ 8plex (K, N-term):  
304.20  
Variable Modifications:  
iTRAQ 8plex (Y): 304.20  
Oxidation (M): 15.99  
Max variable PTM per peptide: 3  
Database: Tef extended sp out  
validated  
Taxon: All  
Searched Entry: 68593  
Decoy DB Size: 1  
Merge Options: no merge  
Precursor Options: corrected  
Charge Options: no correction  
Filter Options: no filter  
Process: true
