# Supplementary material for: A Proteomic Approach to Investigate the Drought Response in the Orphan Crop Eragrostis tef
Source: MDPI journal article supplement (doi:10.3390/proteomes5040032), 2017-11-15
Supplement: s1 [file s1]

# ACSF1\_ERATE|ACSF1\_ERATE

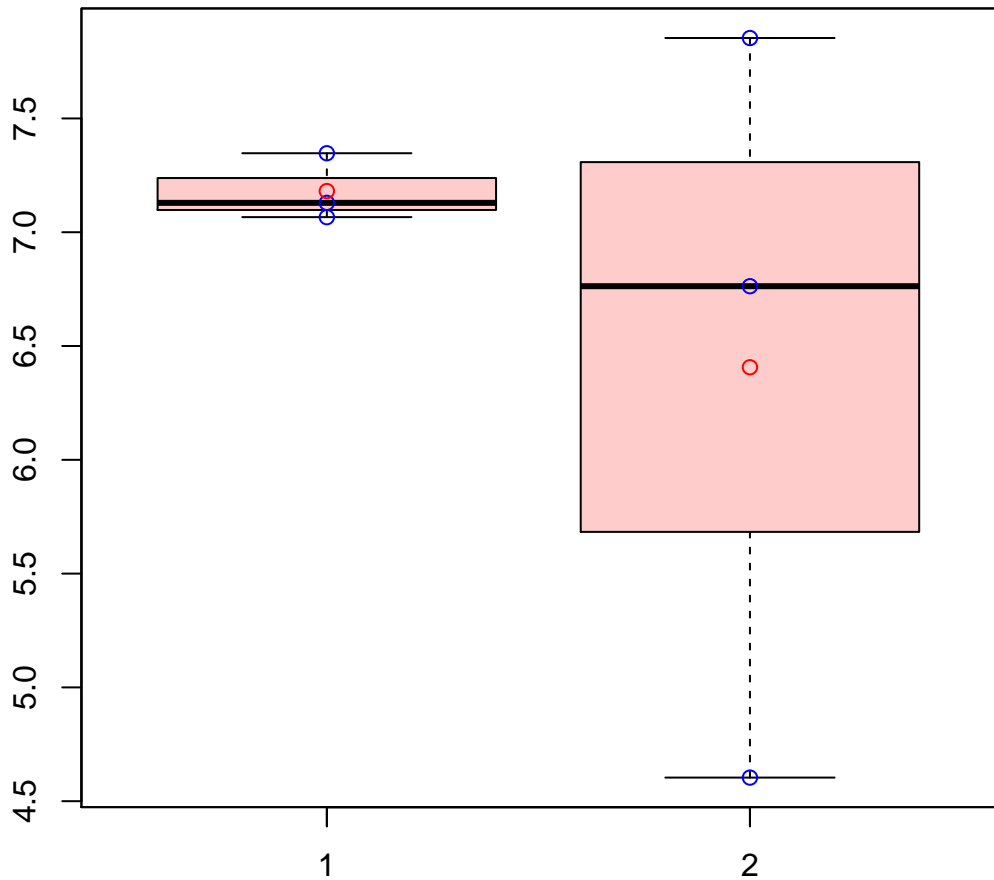

t-Test: p-value = 0.5

# AMPA14\_ERATE|AMPA14\_ERATE

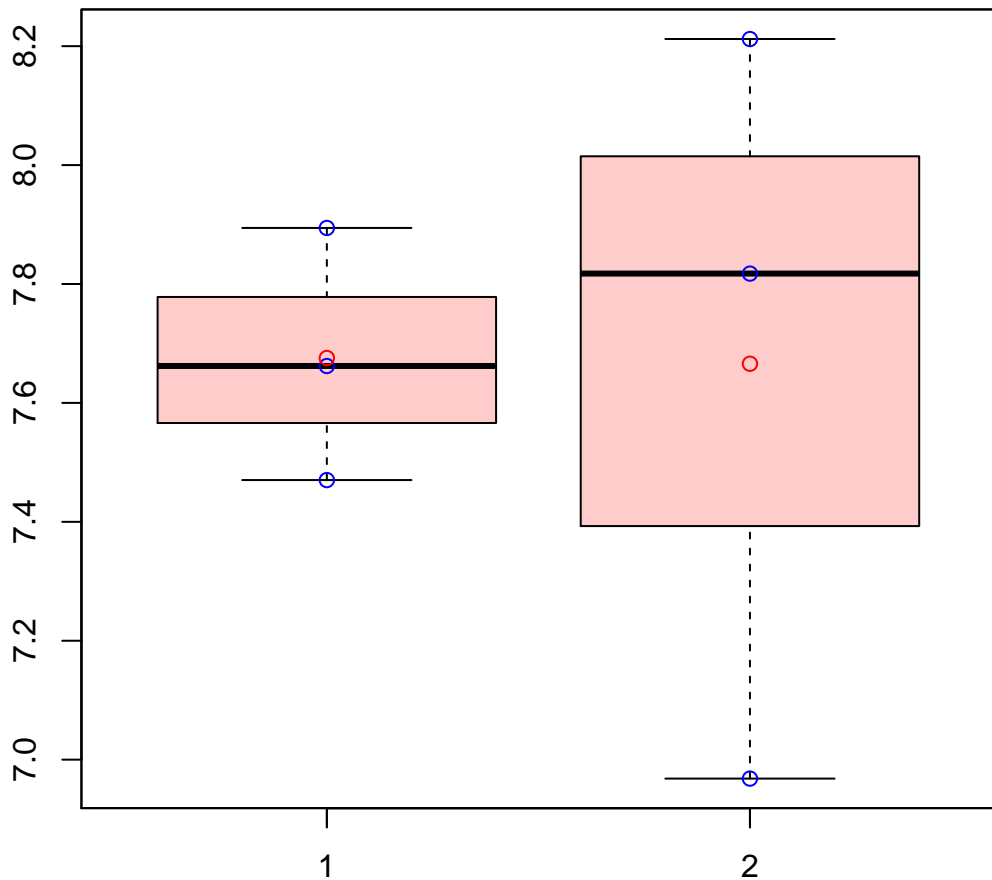

t-Test: p-value = 0.98

# AMPA5\_ERATE|AMPA5\_ERATE

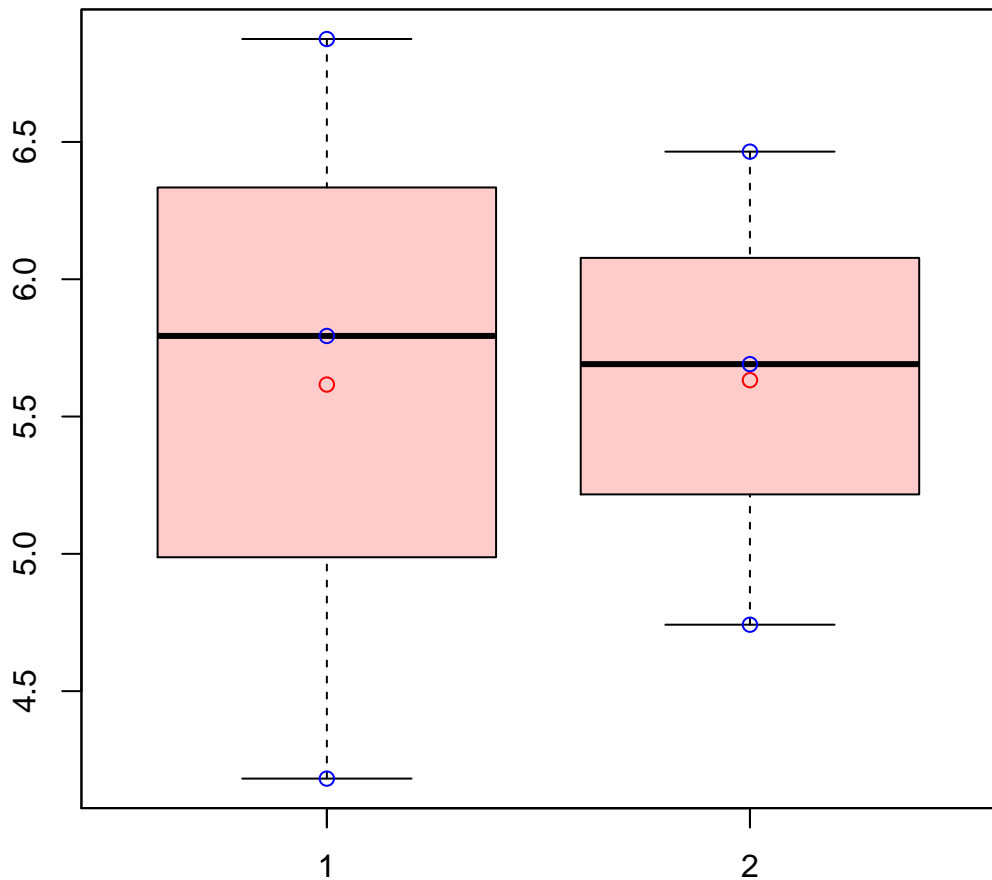

t-Test: p-value = 0.99

# AMPA9\_ERATE|AMPA9\_ERATE

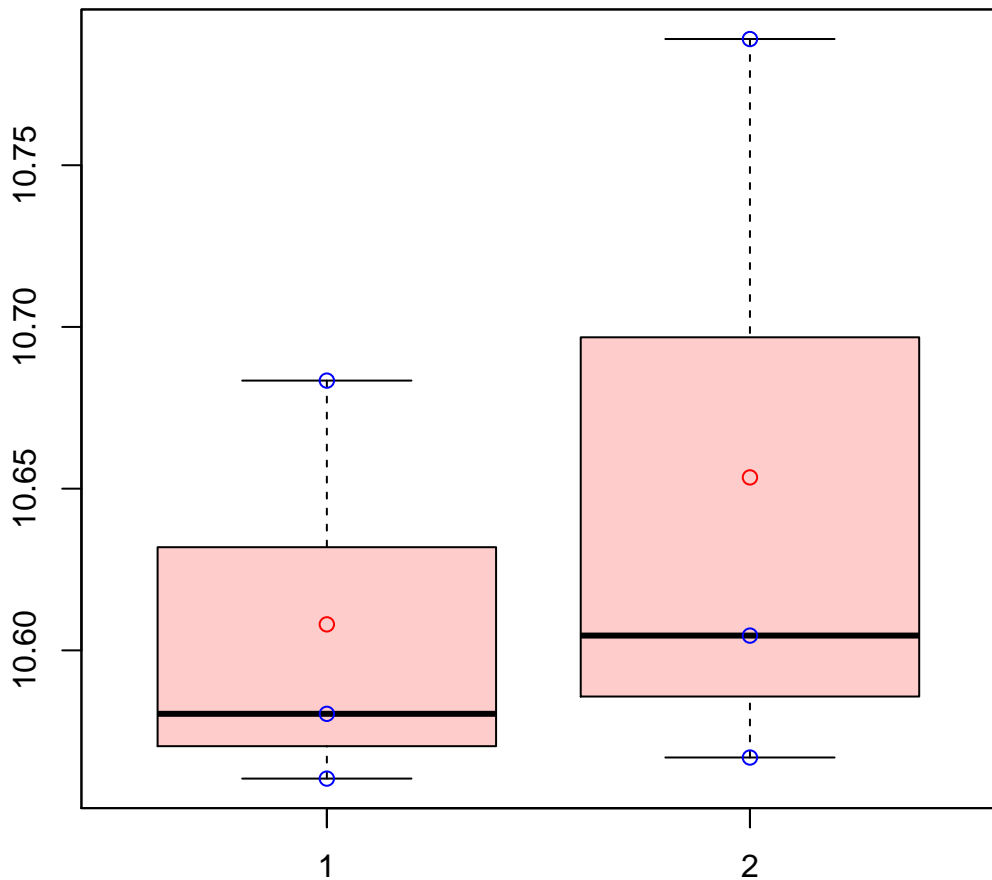

t-Test: p-value = 0.6

# ARGC2\_ERATE|ARGC2\_ERATE

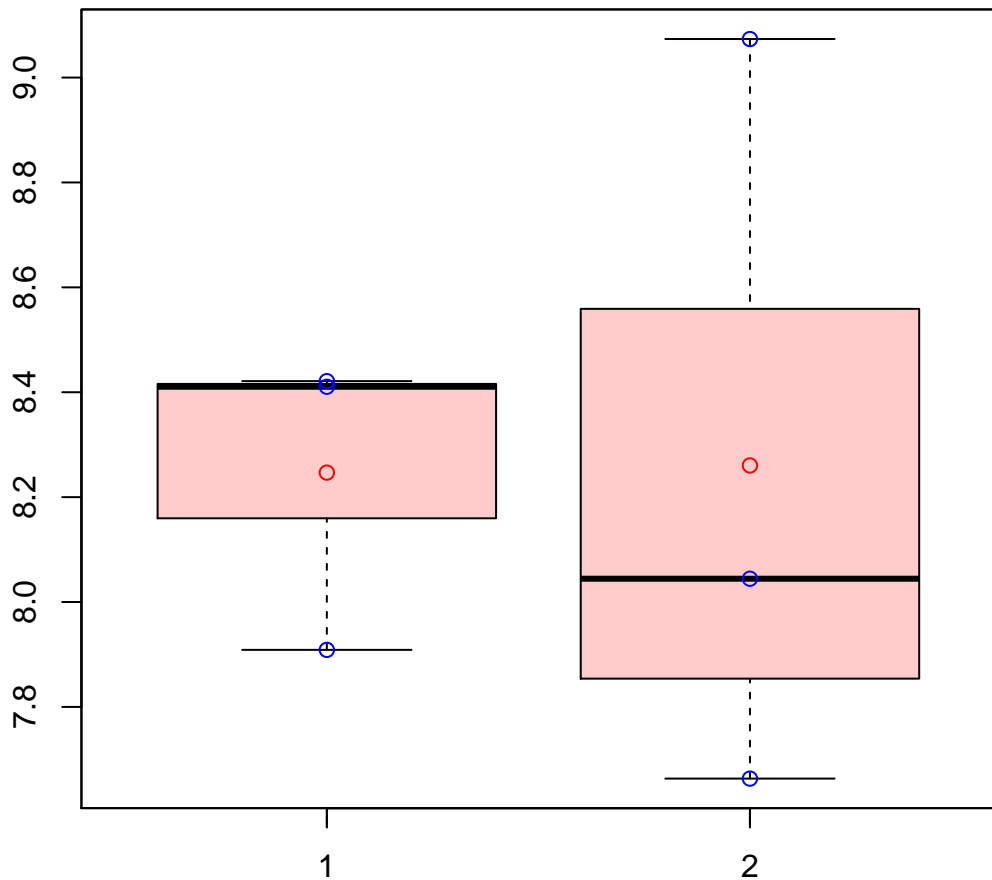

t-Test: p-value = 0.98

# AROB5\_ERATE|AROB5\_ERATE

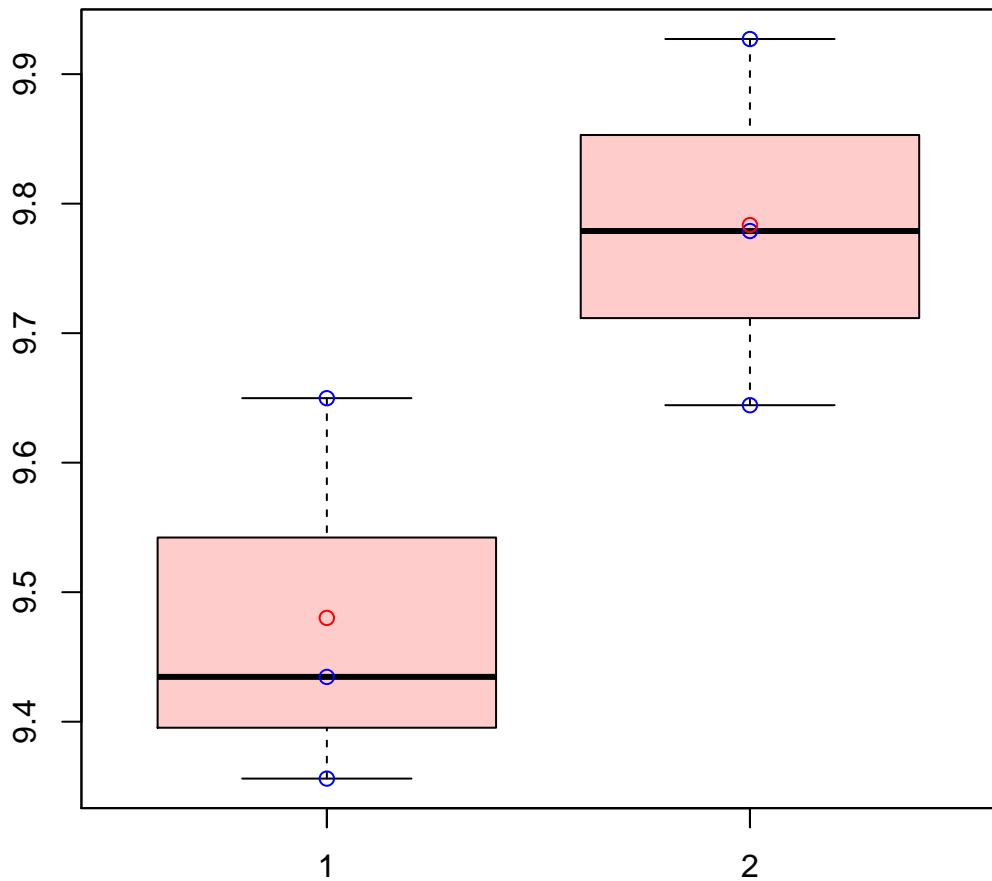

t-Test: p-value = 0.07

# ATPA6\_ERATE|ATPA6\_ERATE

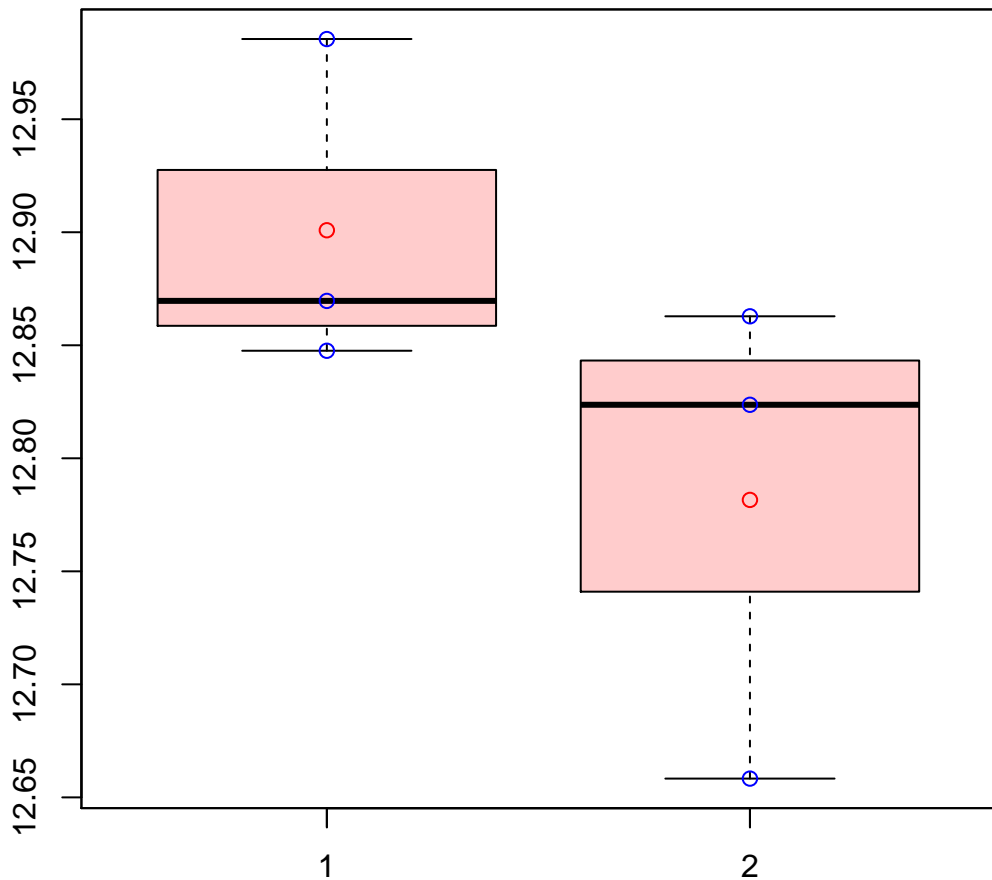

t-Test: p-value = 0.2

# ATPB10\_ERATE|ATPB10\_ERATE

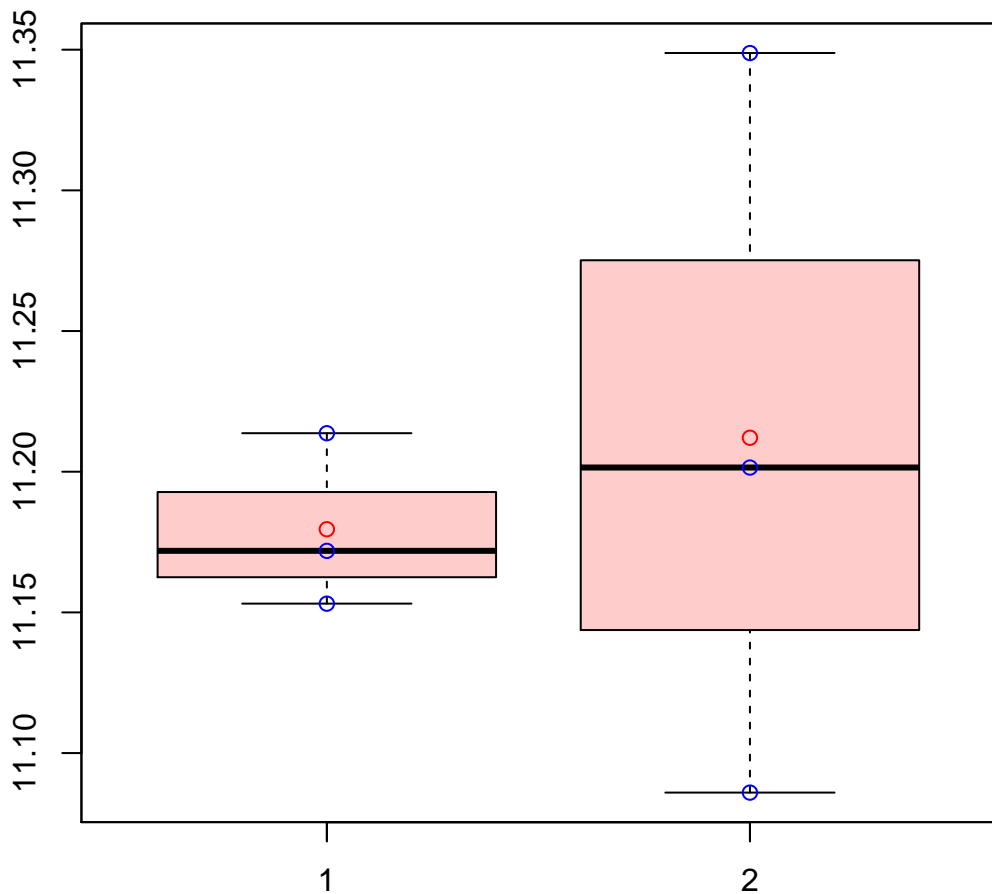

t-Test: p-value = 0.71



# ATPB5\_ERATE|ATPB5\_ERATE

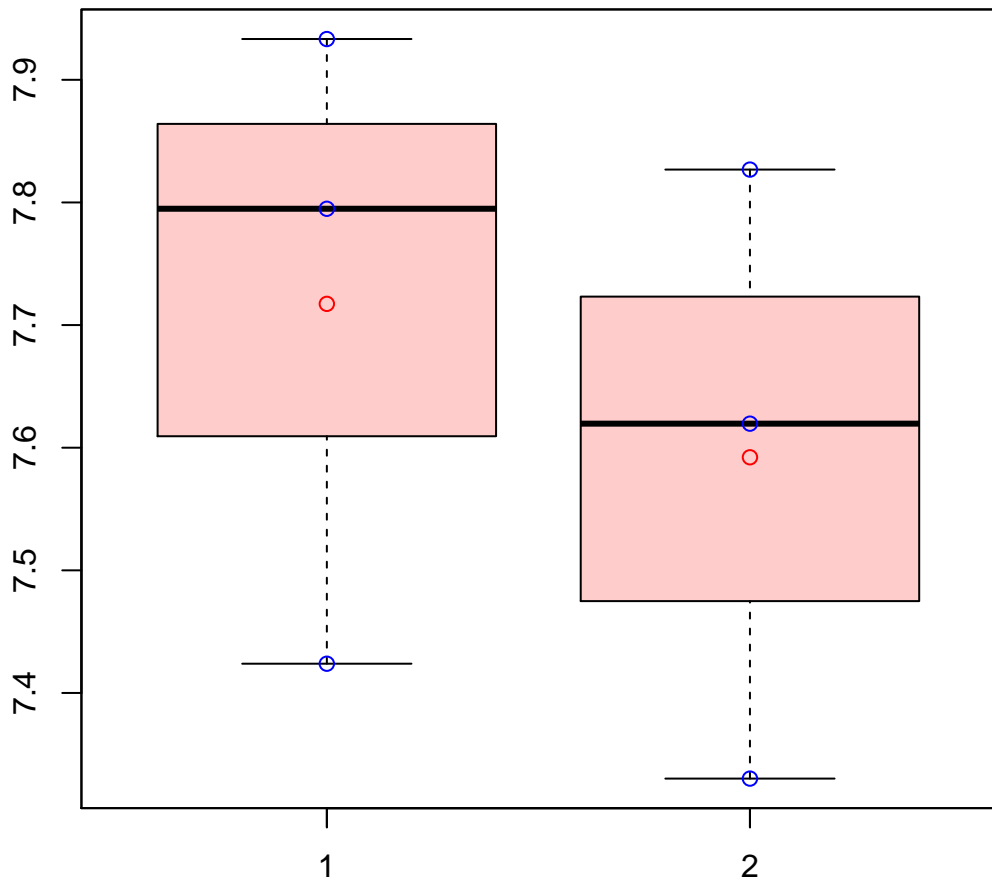

t-Test: p-value = 0.58

# ATPG7\_ERATE|ATPG7\_ERATE

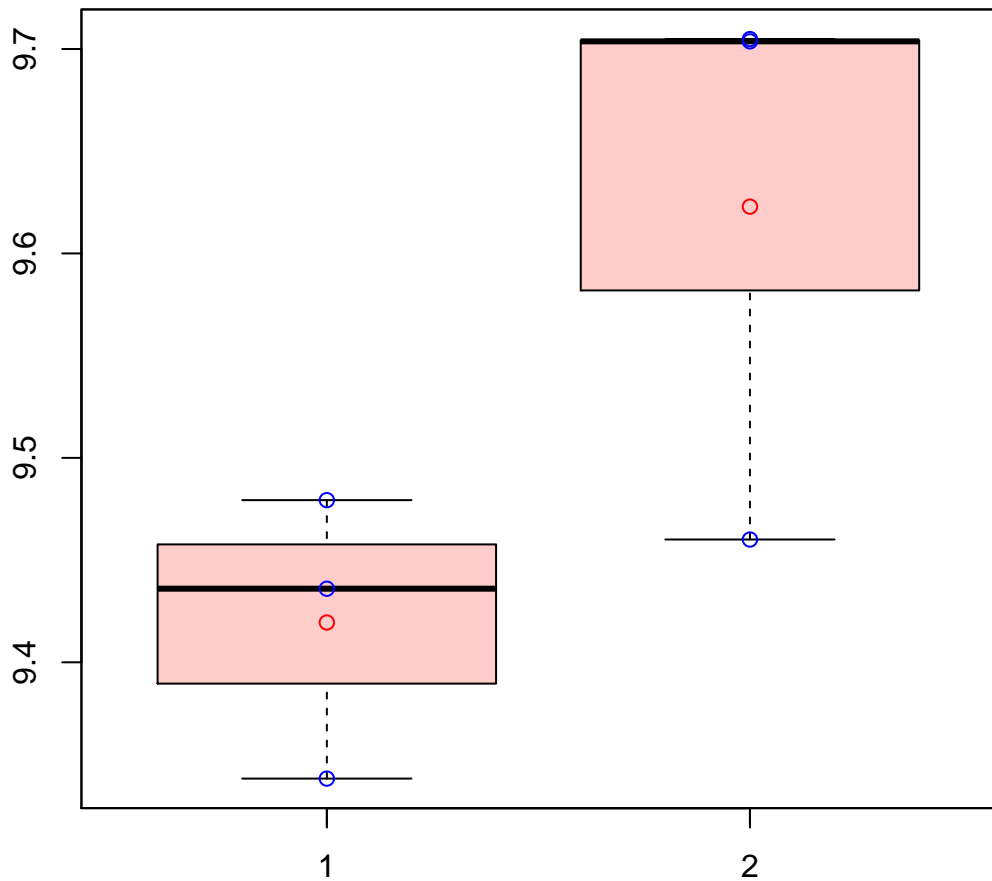

t-Test: p-value = 0.11

# CAPP12\_ERATE|CAPP12\_ERATE

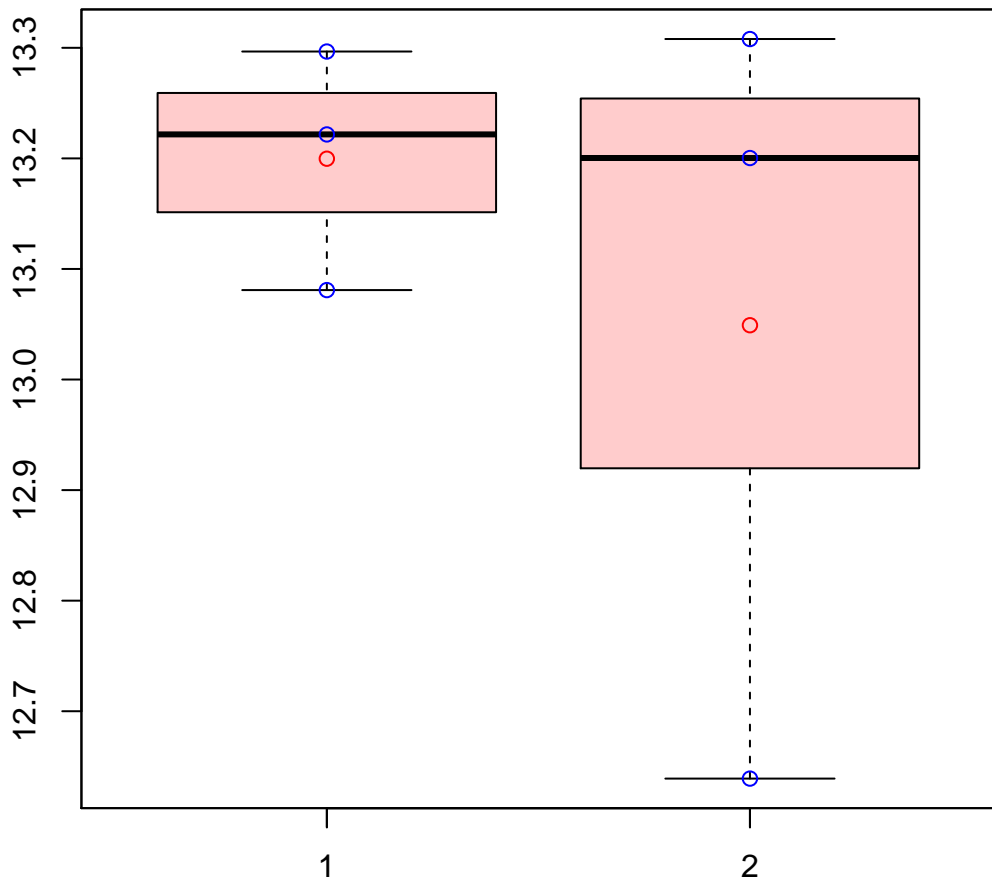

t-Test: p-value = 0.55

# CAPP1\_ERATE|CAPP1\_ERATE

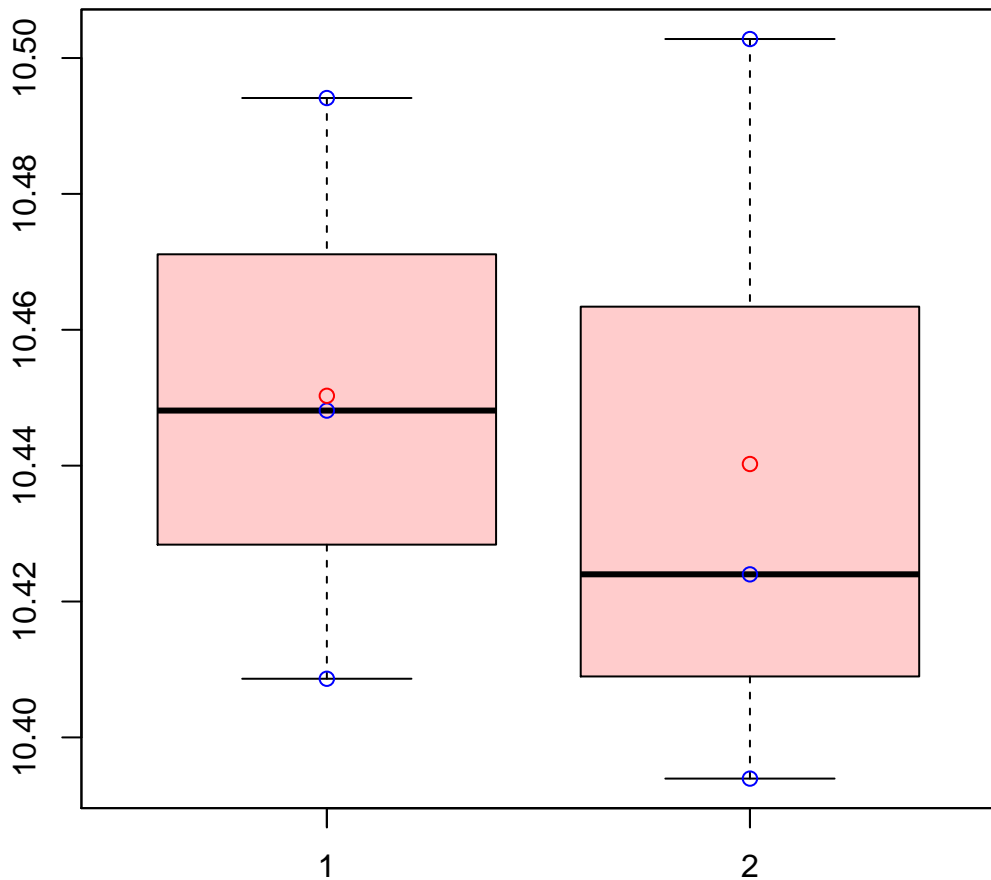

t-Test: p-value = 0.82

# CAPP2\_ERATE|CAPP2\_ERATE

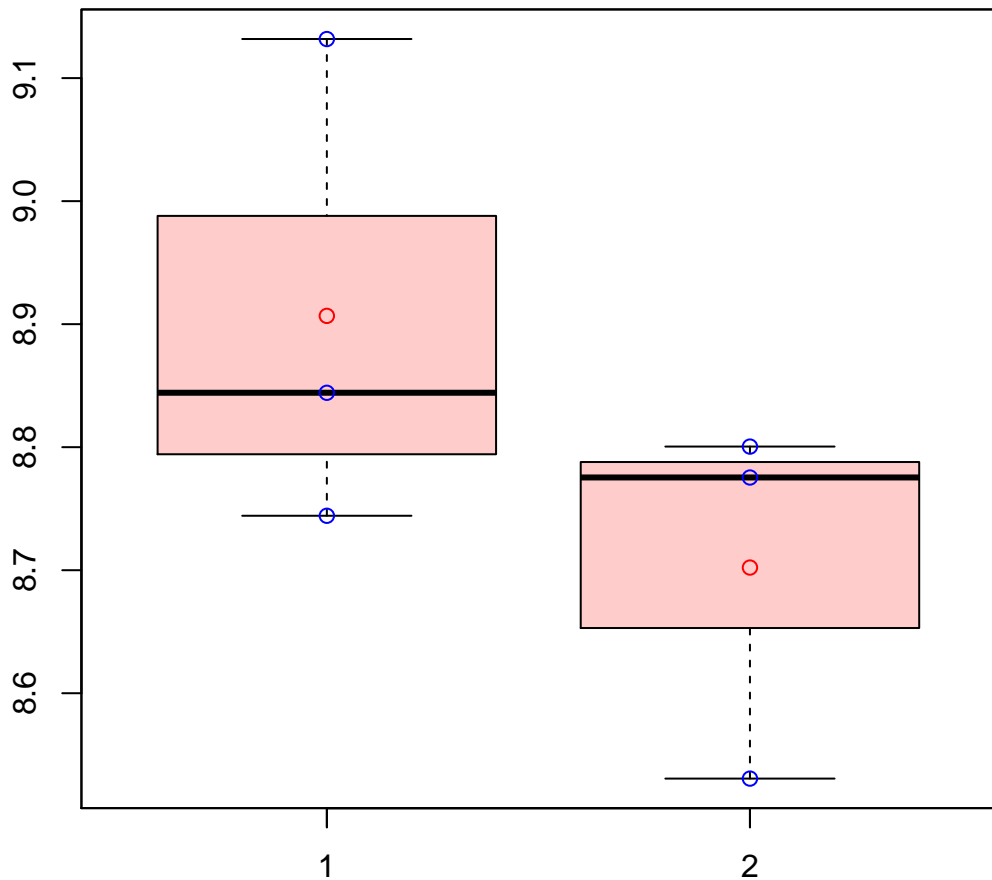

t-Test: p-value = 0.24

# CAPP3\_ERATE|CAPP3\_ERATE

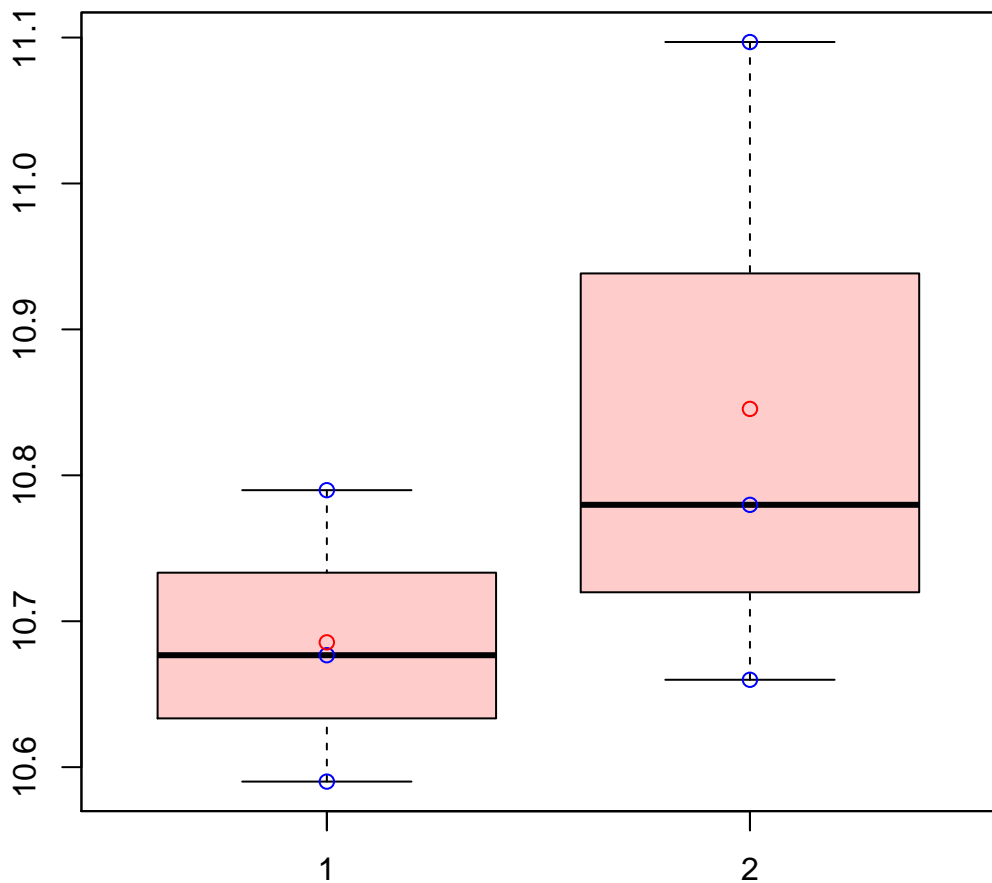

t-Test: p-value = 0.35

# CAPP5\_ERATE|CAPP5\_ERATE

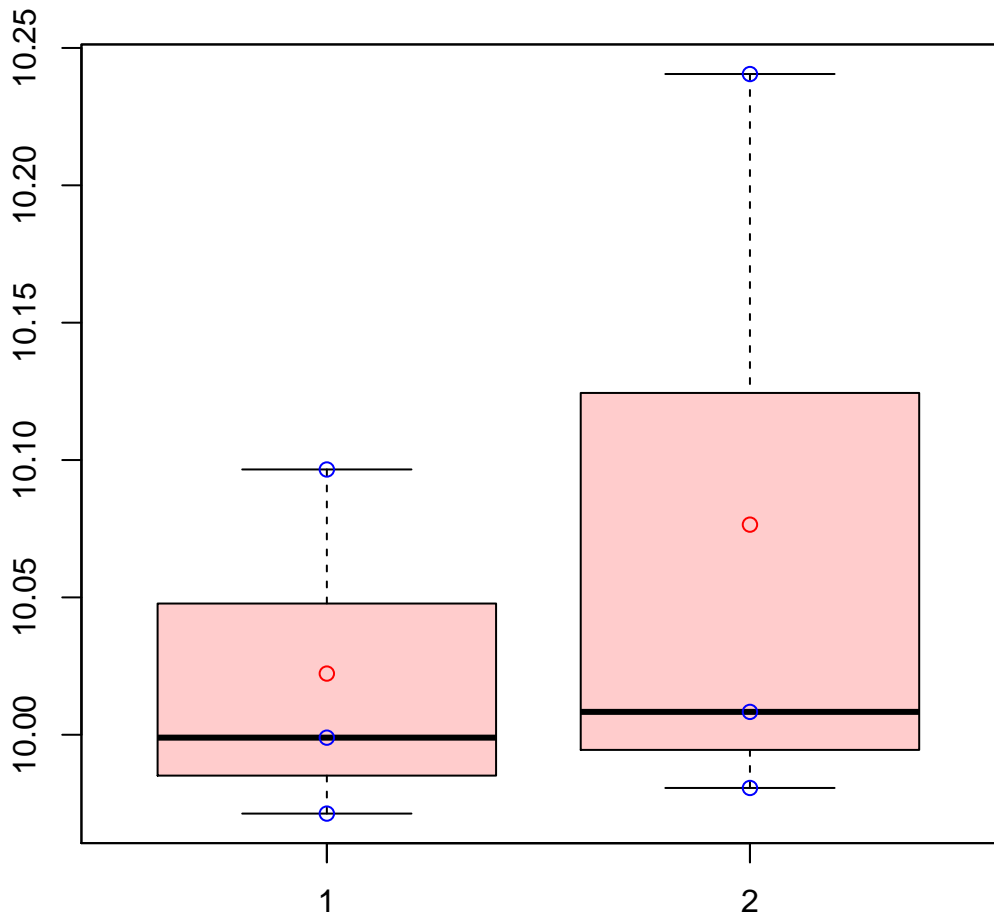

t-Test: p-value = 0.59

# CAPP7\_ERATE|CAPP7\_ERATE

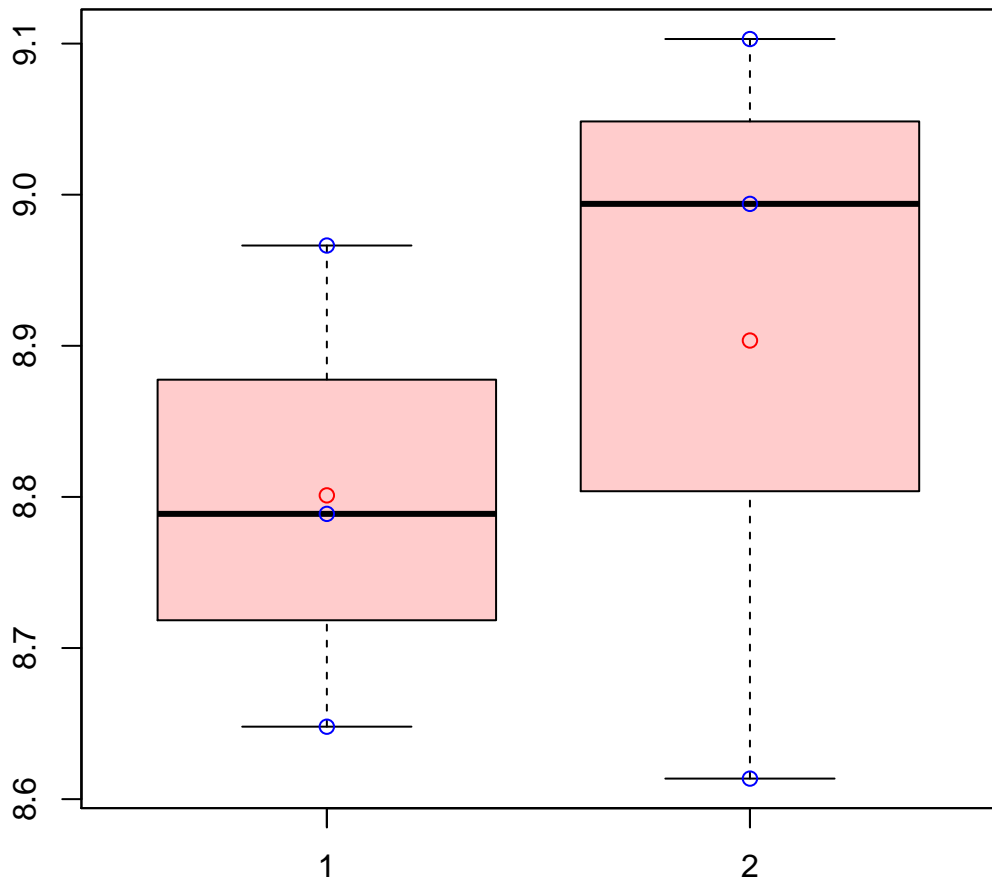

t-Test: p-value = 0.59



# CAPP8\_ERATE|CAPP8\_ERATE

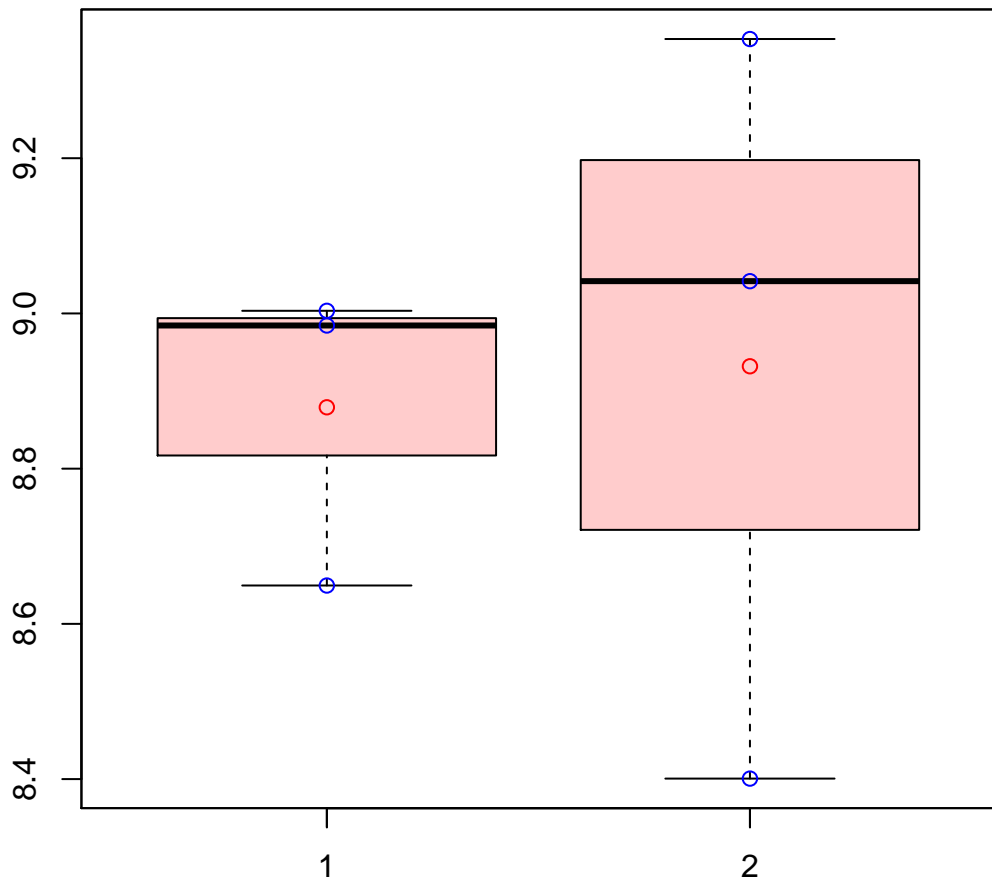

t-Test: p-value = 0.87

# CH601\_ERATE|CH601\_ERATE

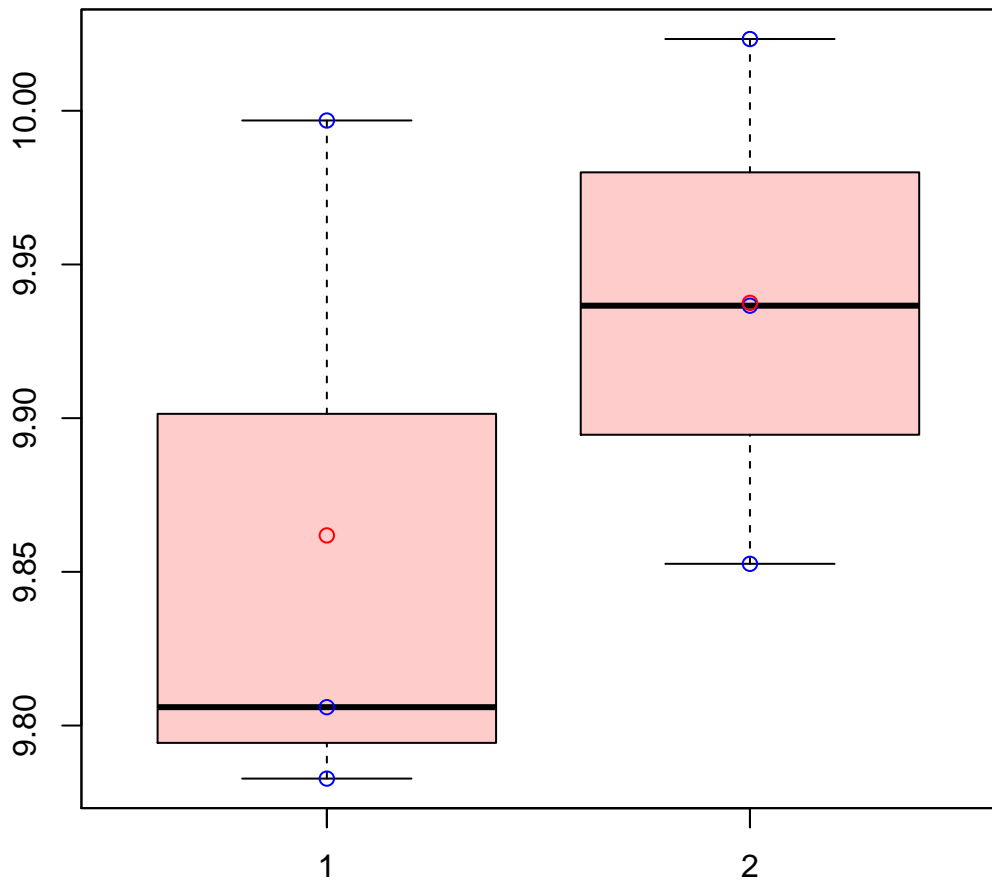

t-Test: p-value = 0.42

# CH604\_ERATE|CH604\_ERATE

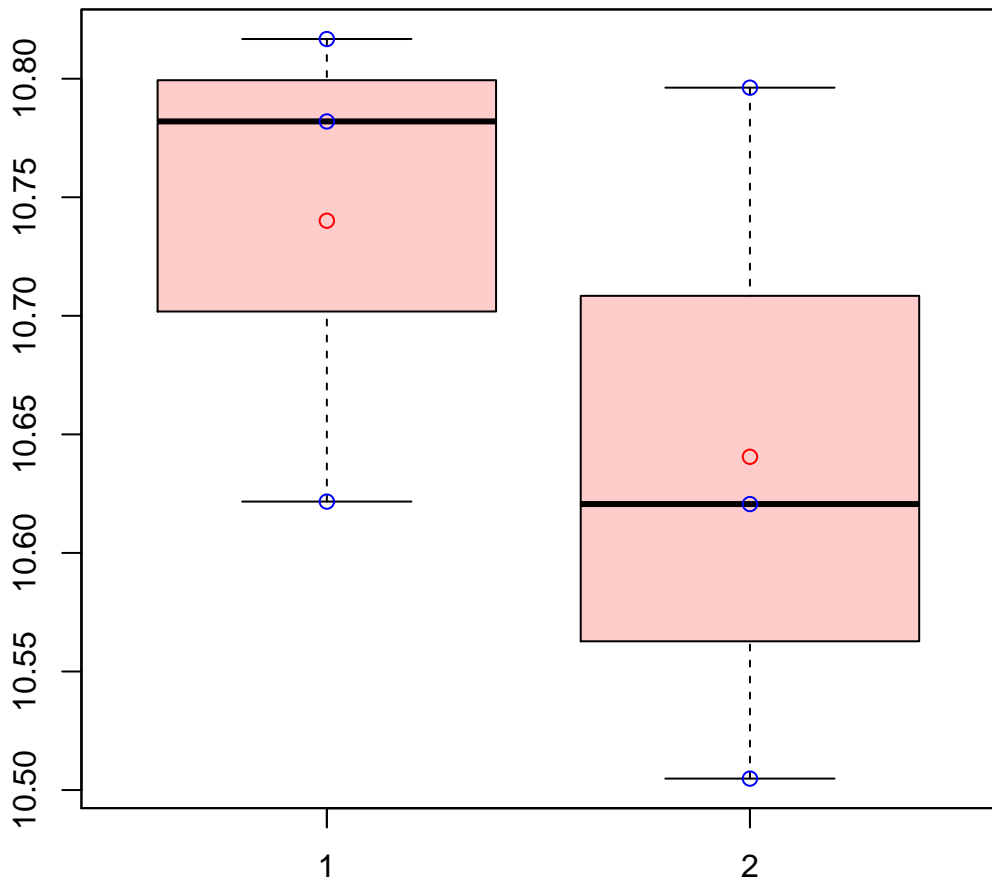

t-Test: p-value = 0.4

# CL10027Contig2|CL10027Contig2

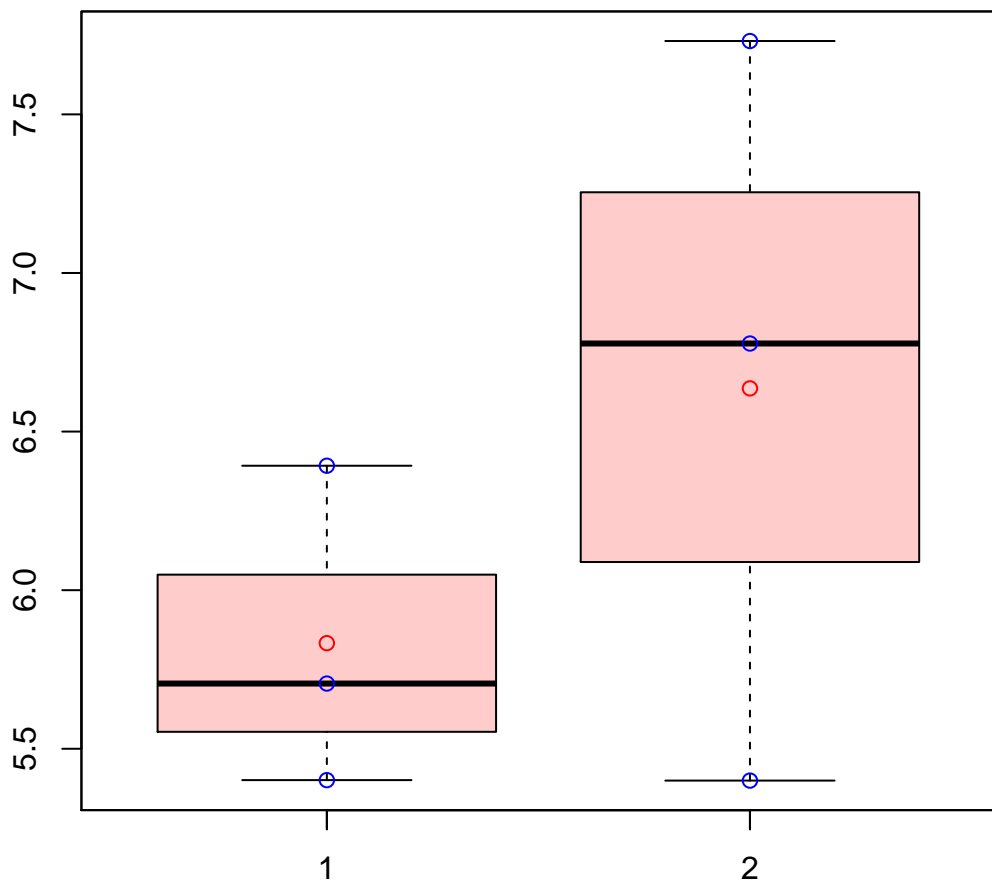

t-Test: p-value = 0.36

# CL1002Contig4|CL1002Contig4

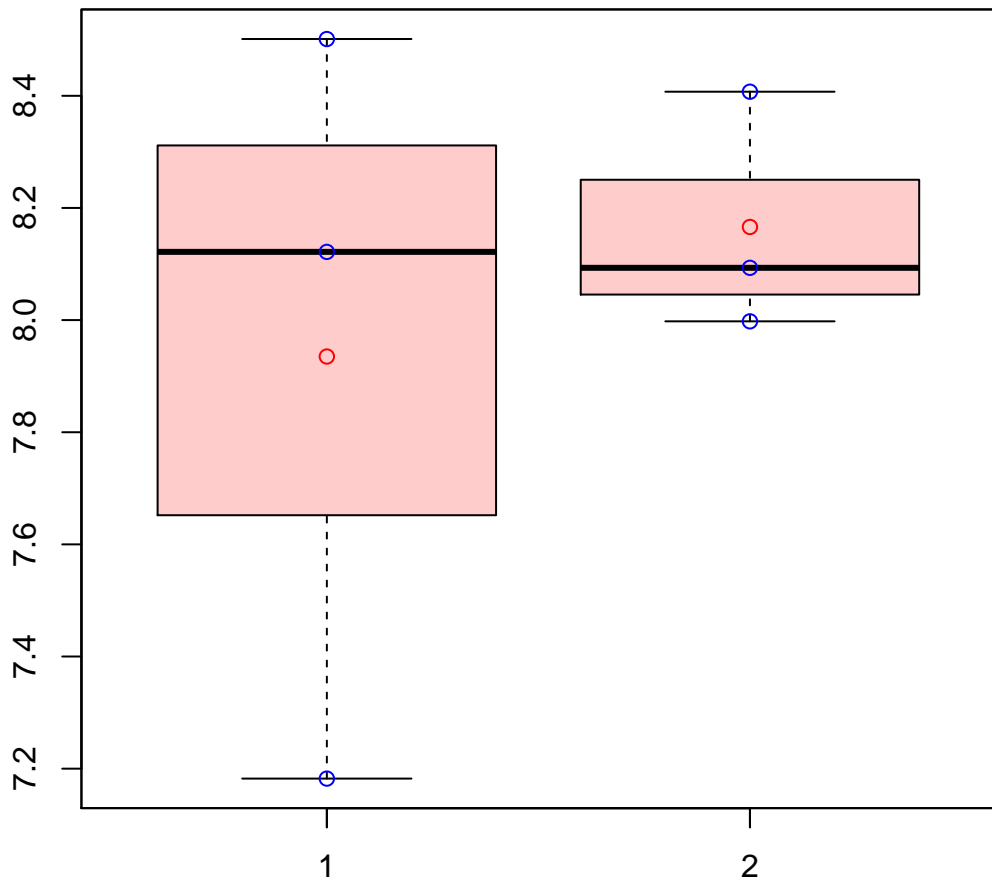

t-Test: p-value = 0.62

# CL1002Contig6|CL1002Contig6

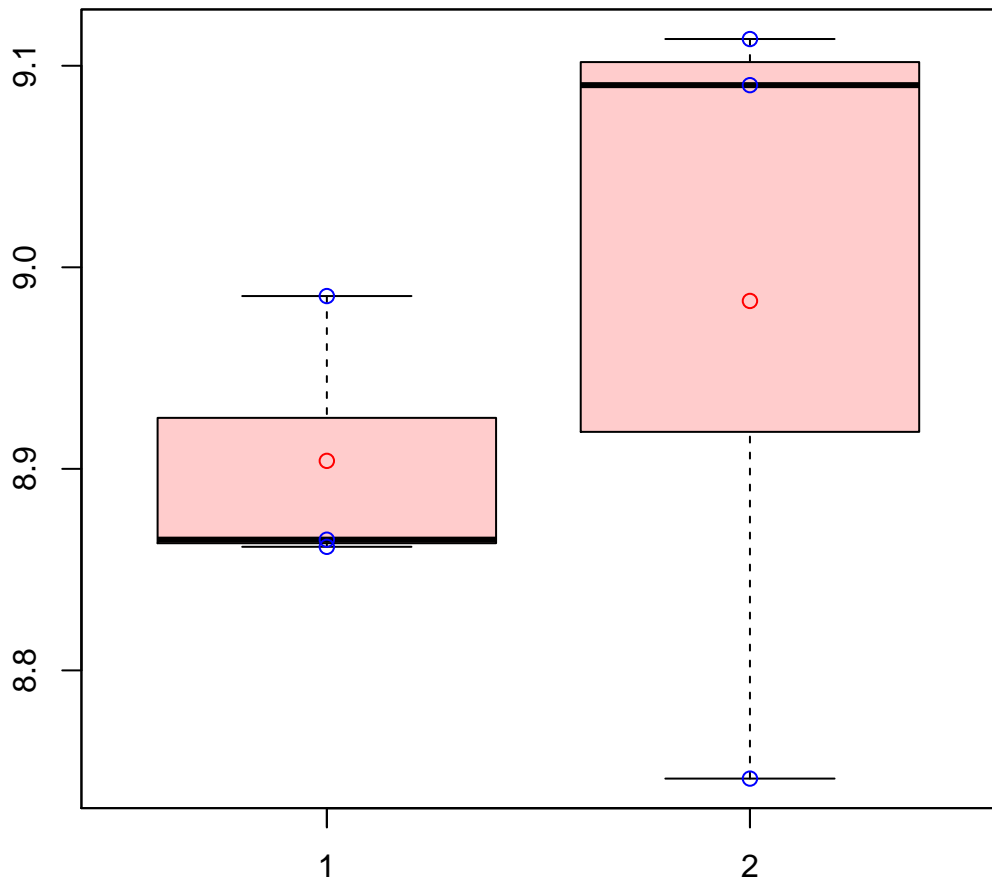

t-Test: p-value = 0.58

# CL10034Contig2|CL10034Contig2

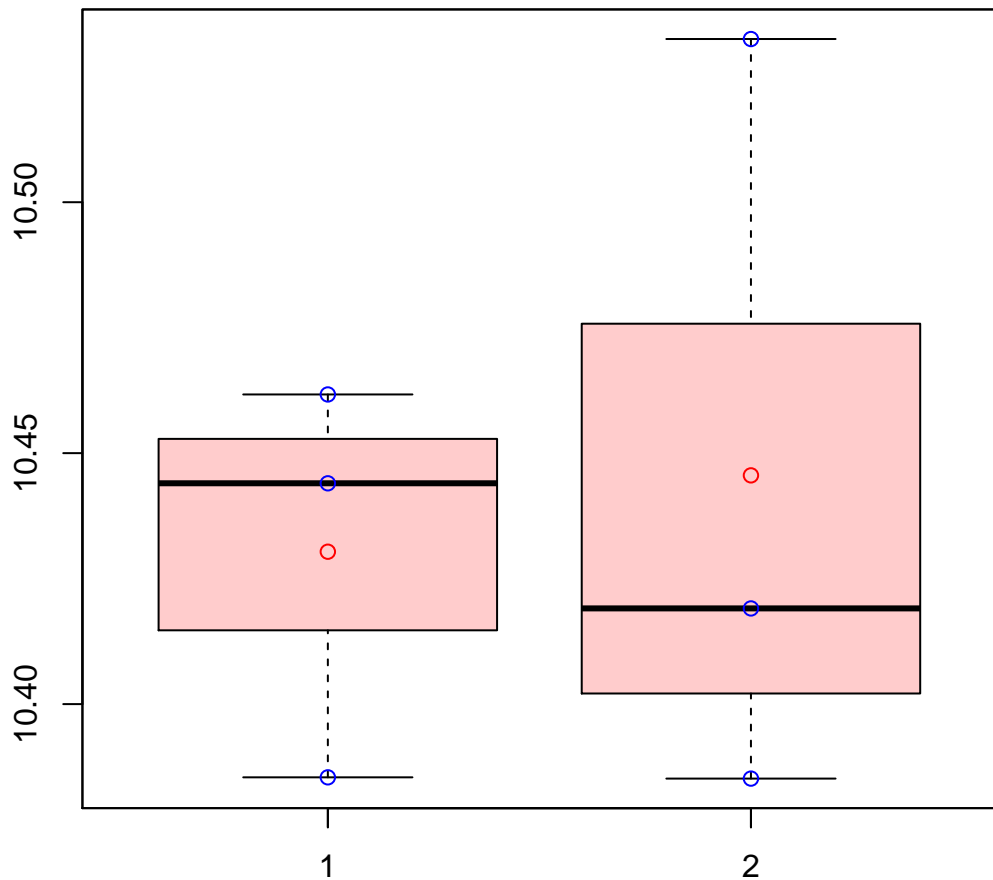

t-Test: p-value = 0.78

# CL10037Contig1|CL10037Contig1

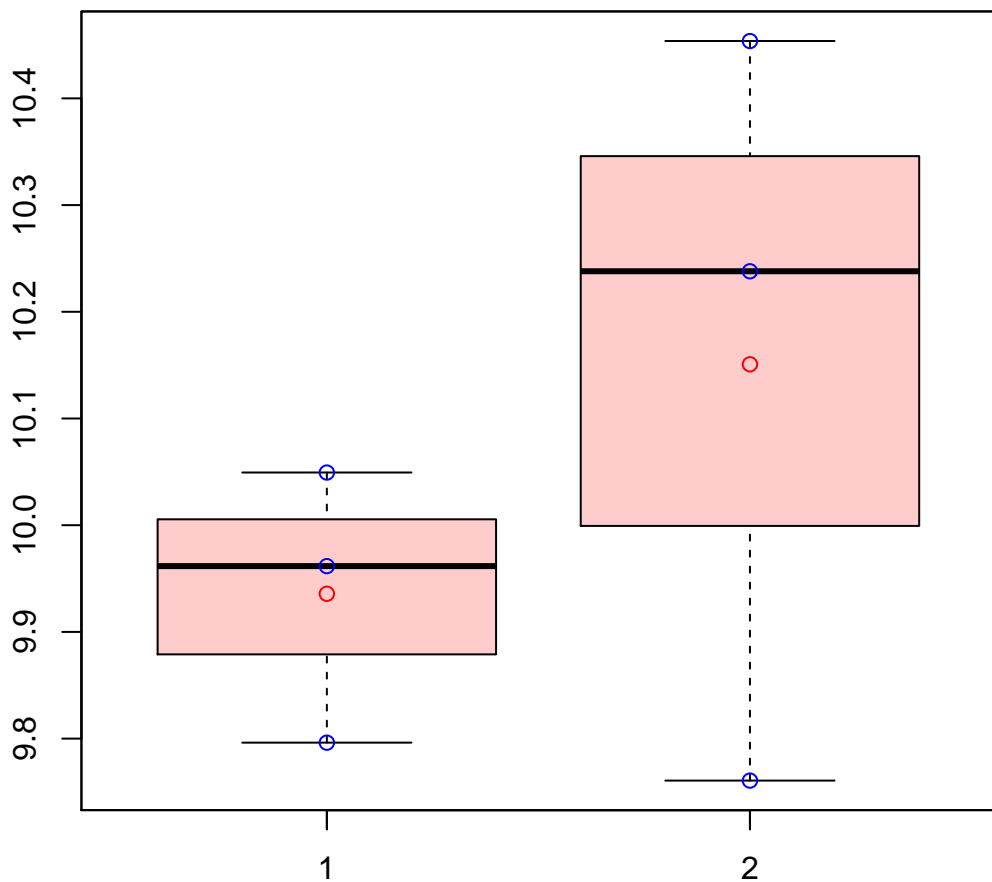

t-Test: p-value = 0.41



# CL1004Contig1|CL1004Contig1

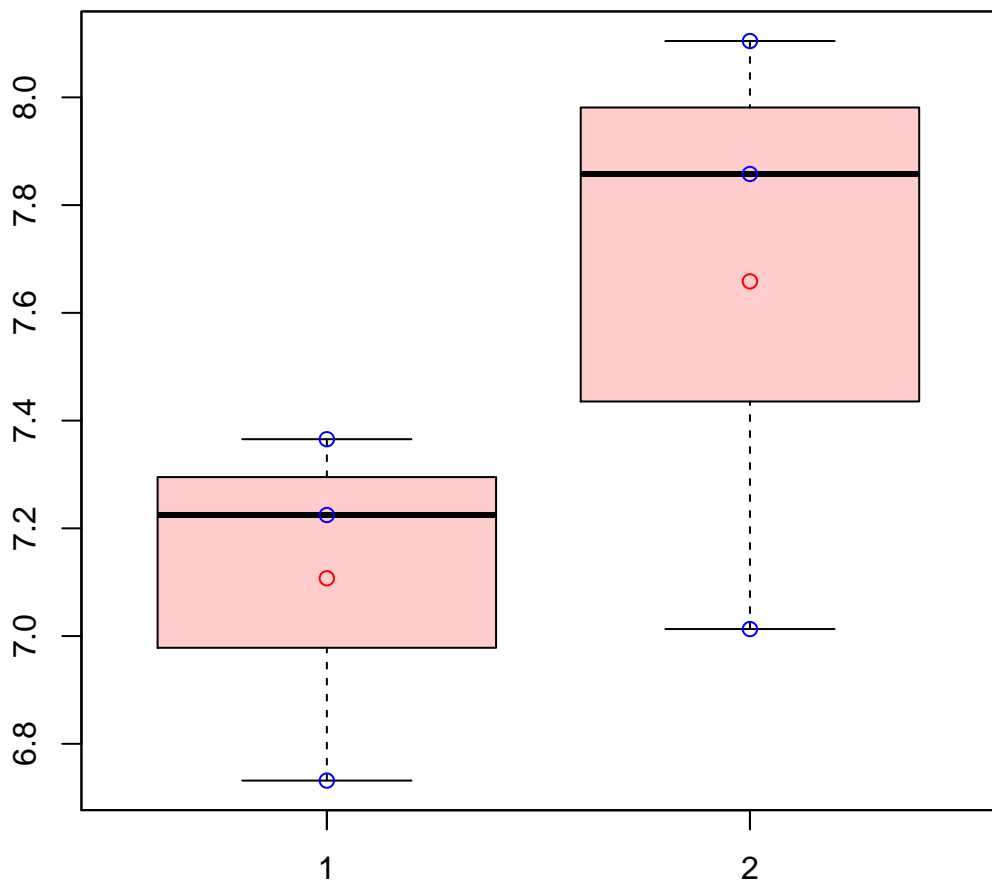

t-Test: p-value = 0.24

# CL1004Contig2|CL1004Contig2

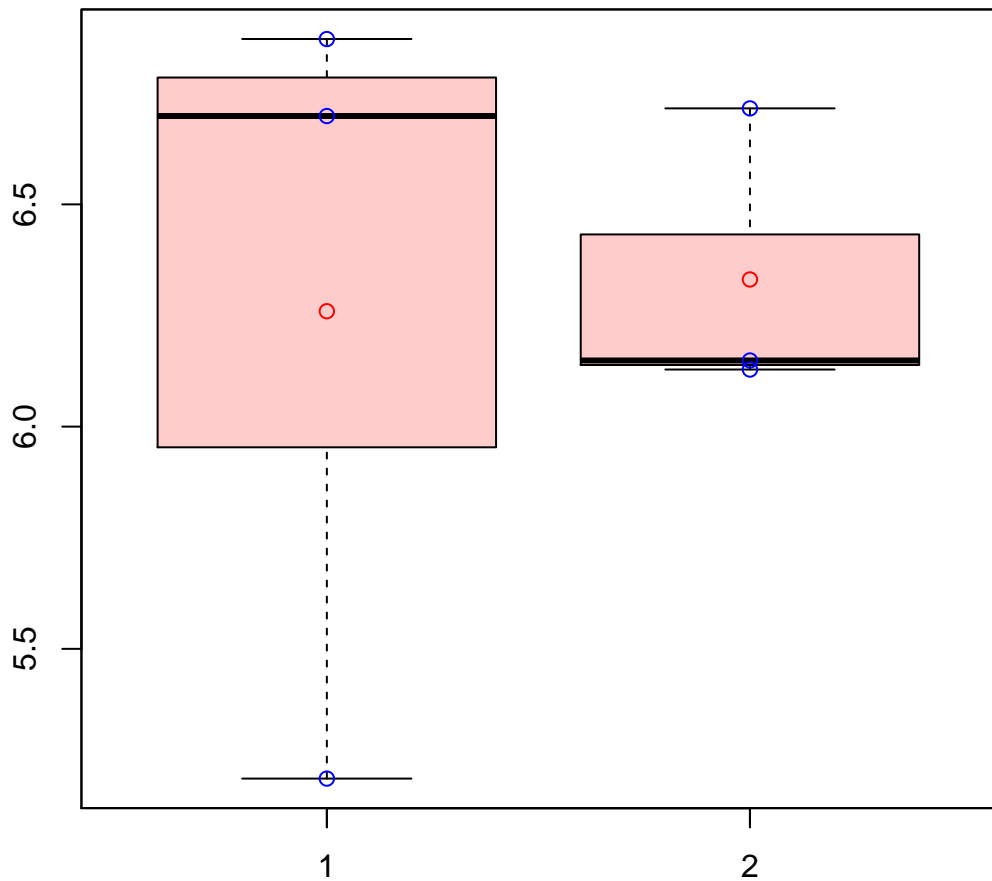

t-Test: p-value = 0.91

# CL1005Contig1|CL1005Contig1

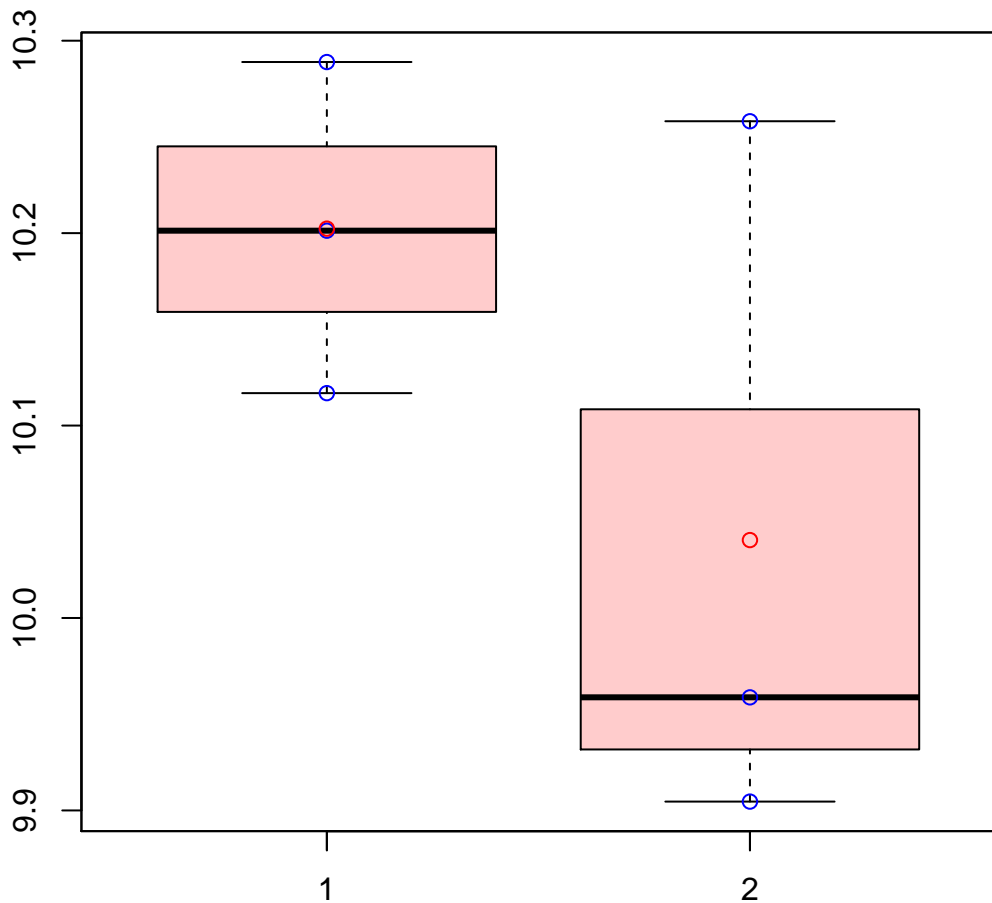

t-Test: p-value = 0.28

# CL10079Contig1|CL10079Contig1

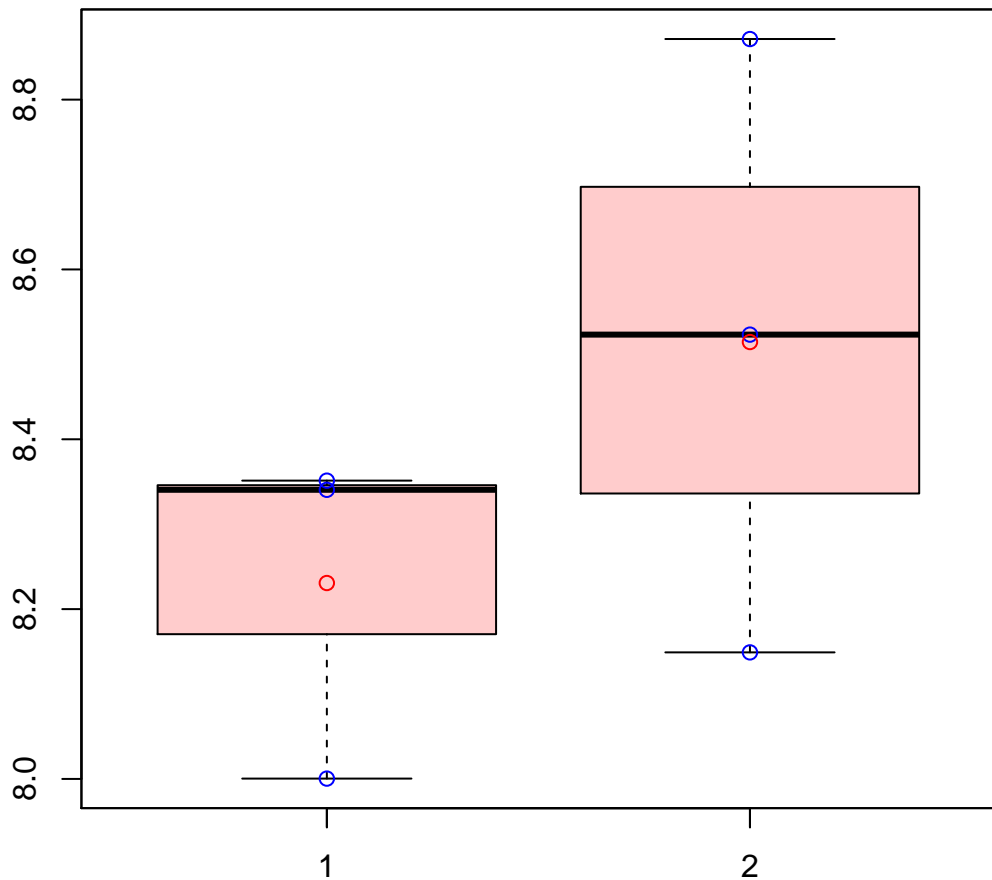

t-Test: p-value = 0.32

# CL100Contig17|CL100Contig17

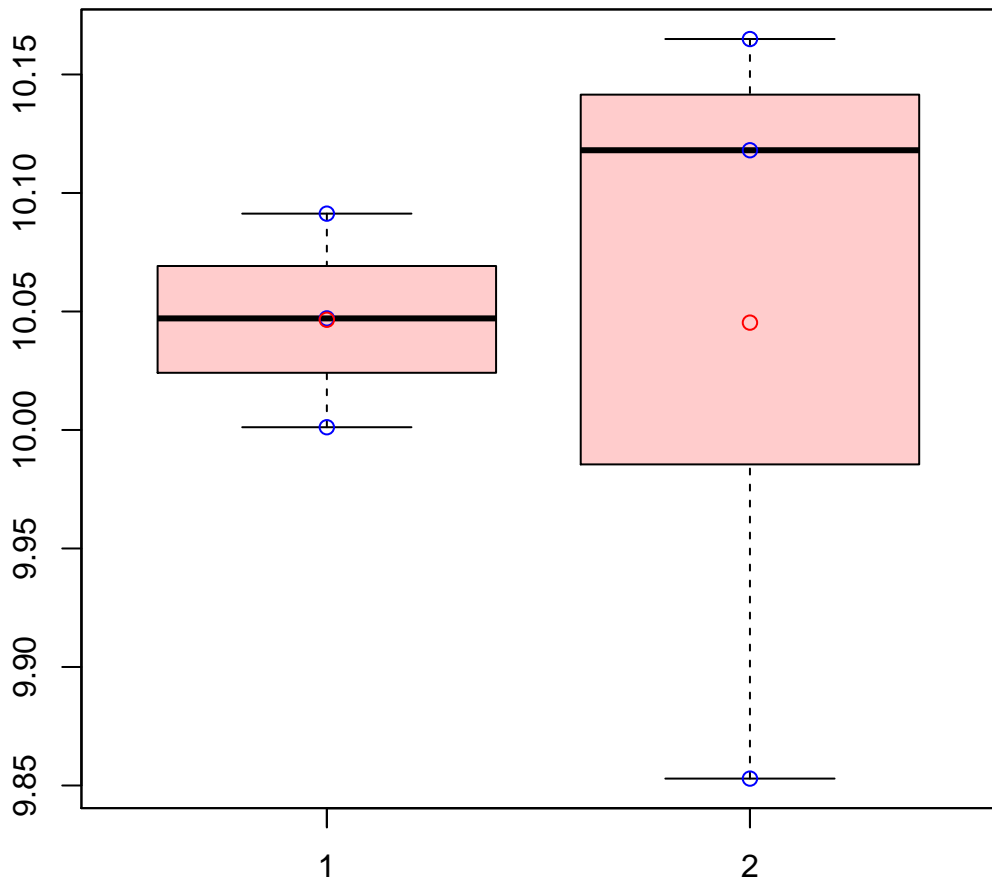

t-Test: p-value = 0.99

# CL100Contig19|CL100Contig19

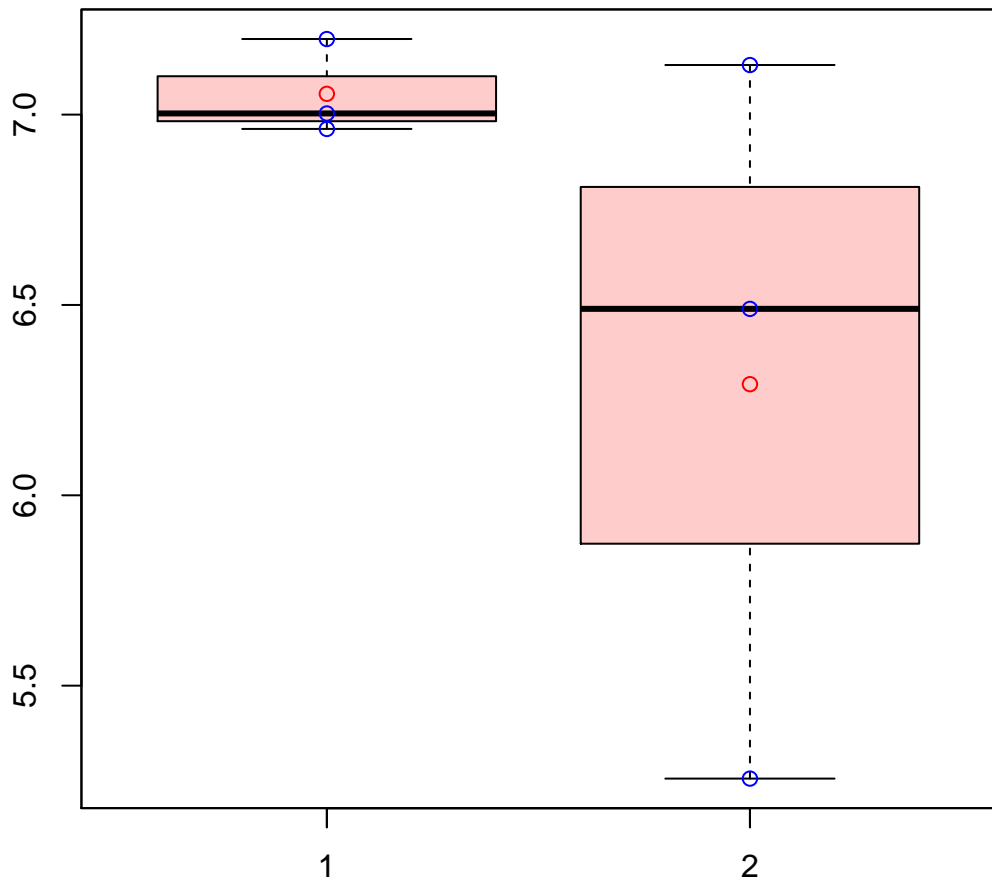

t-Test: p-value = 0.3

# CL100Contig5|CL100Contig5

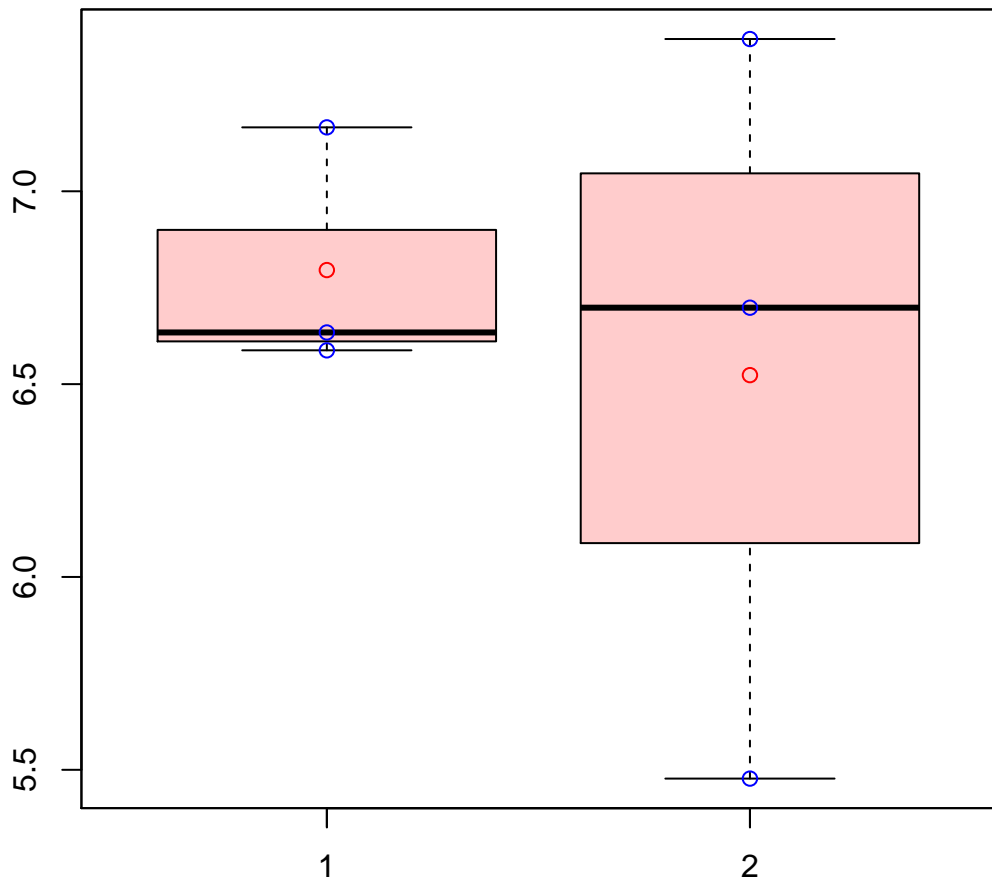

t-Test: p-value = 0.68

# CL10106Contig3|CL10106Contig3

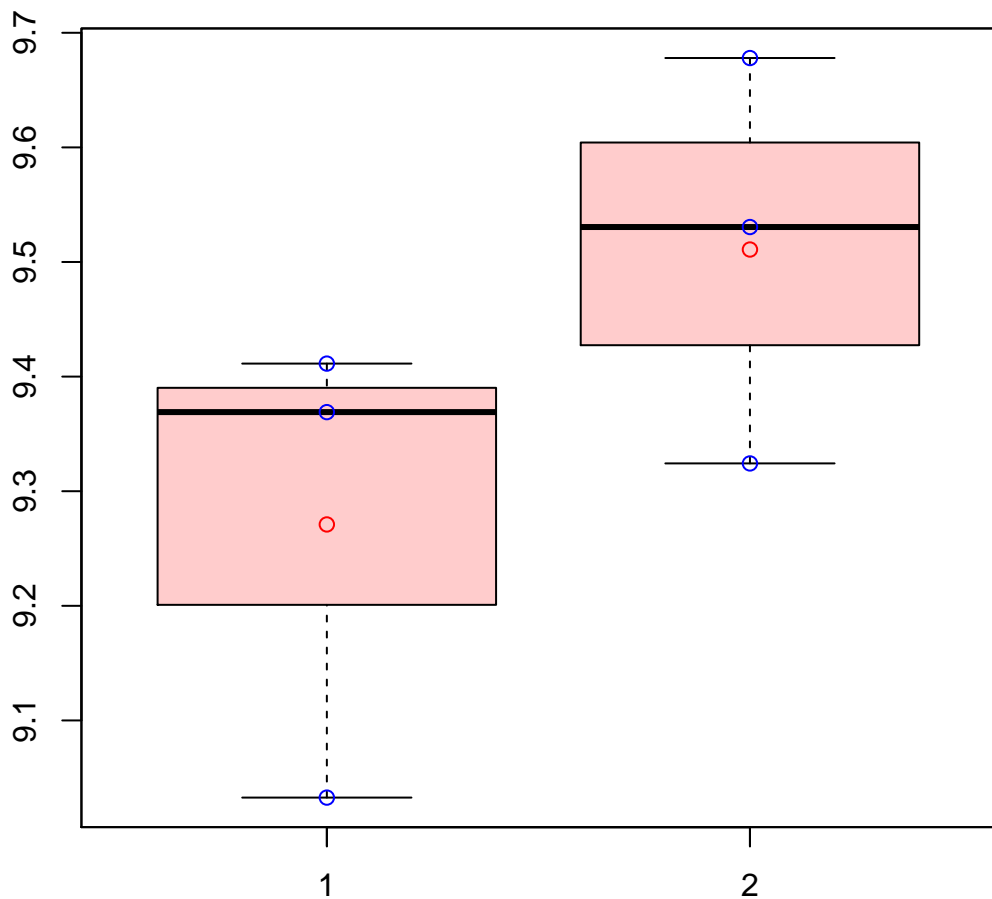

t-Test: p-value = 0.2



# CL1010Contig2|CL1010Contig2

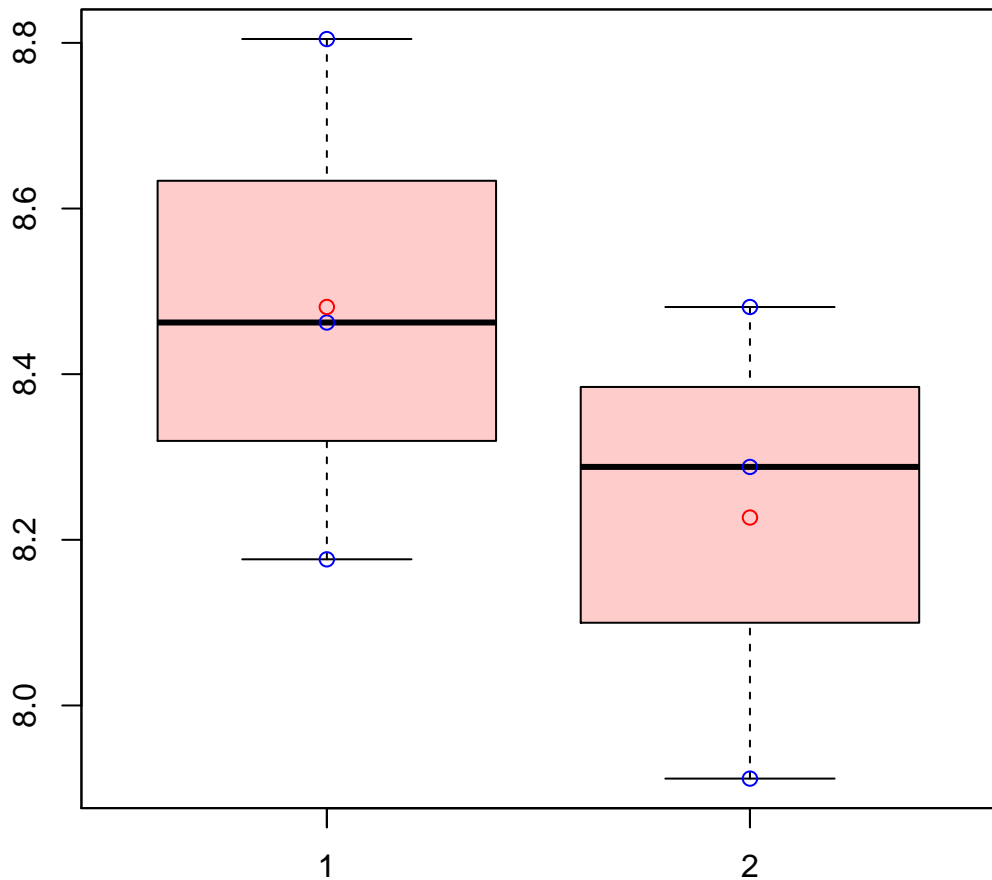

t-Test: p-value = 0.36

# CL1010Contig4|CL1010Contig4

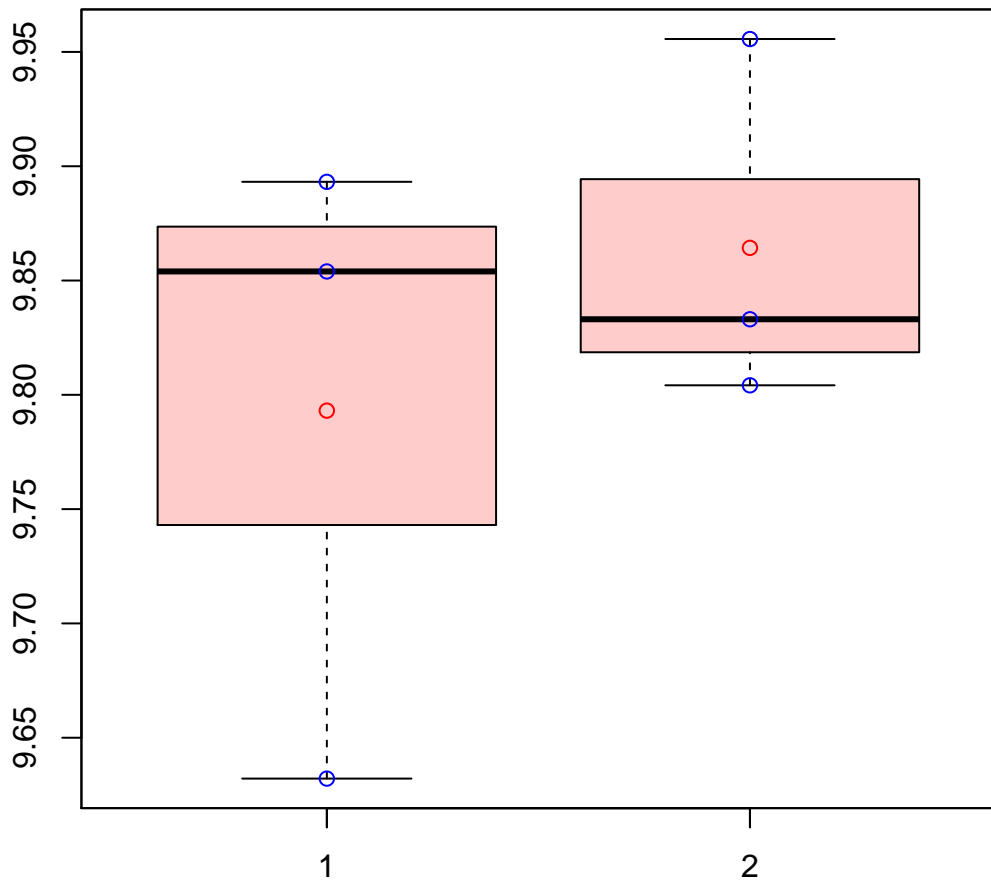

t-Test: p-value = 0.5

# CL10114Contig2|CL10114Contig2

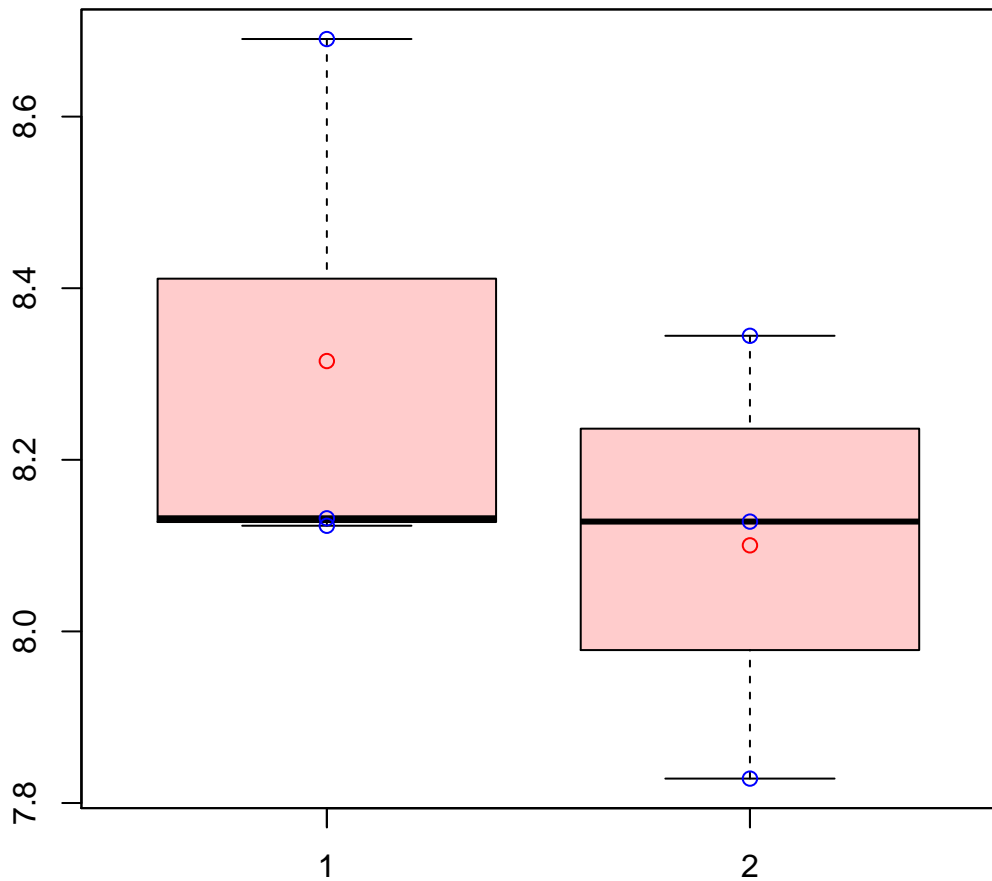

t-Test: p-value = 0.42

# CL1011Contig3|CL1011Contig3

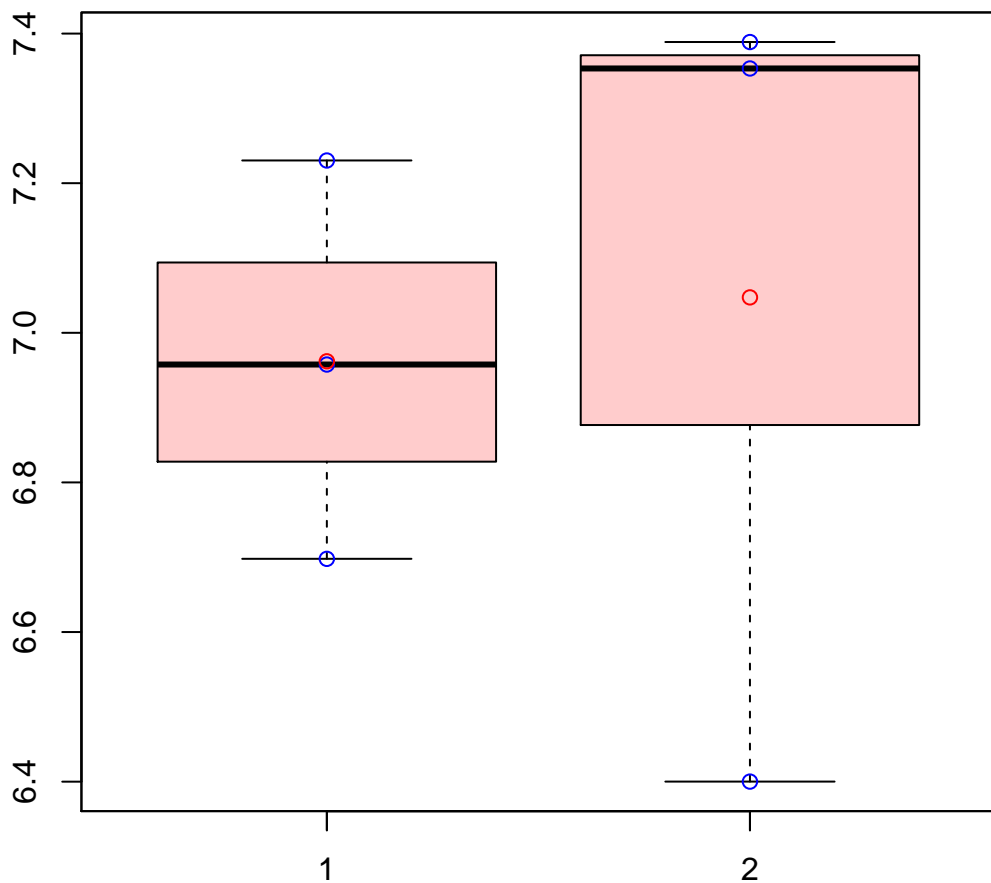

t-Test: p-value = 0.83

# CL1013Contig3|CL1013Contig3

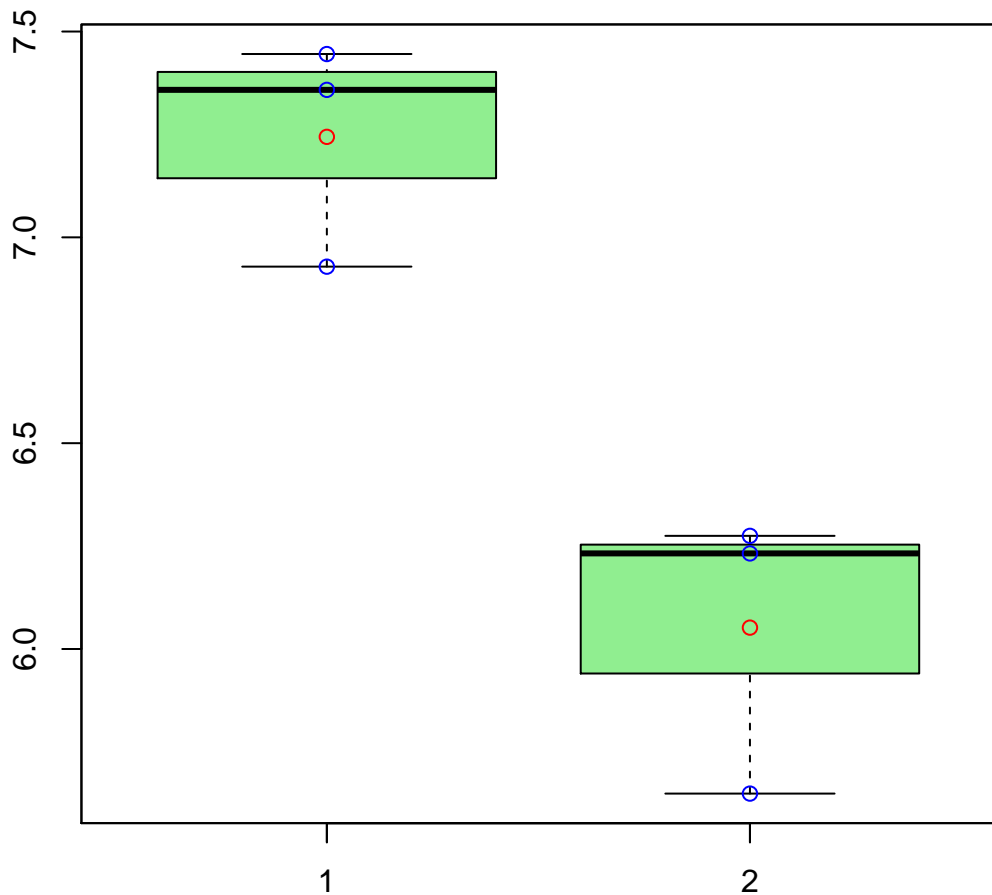

t-Test: p-value = 0.01

# CL1013Contig9|CL1013Contig9

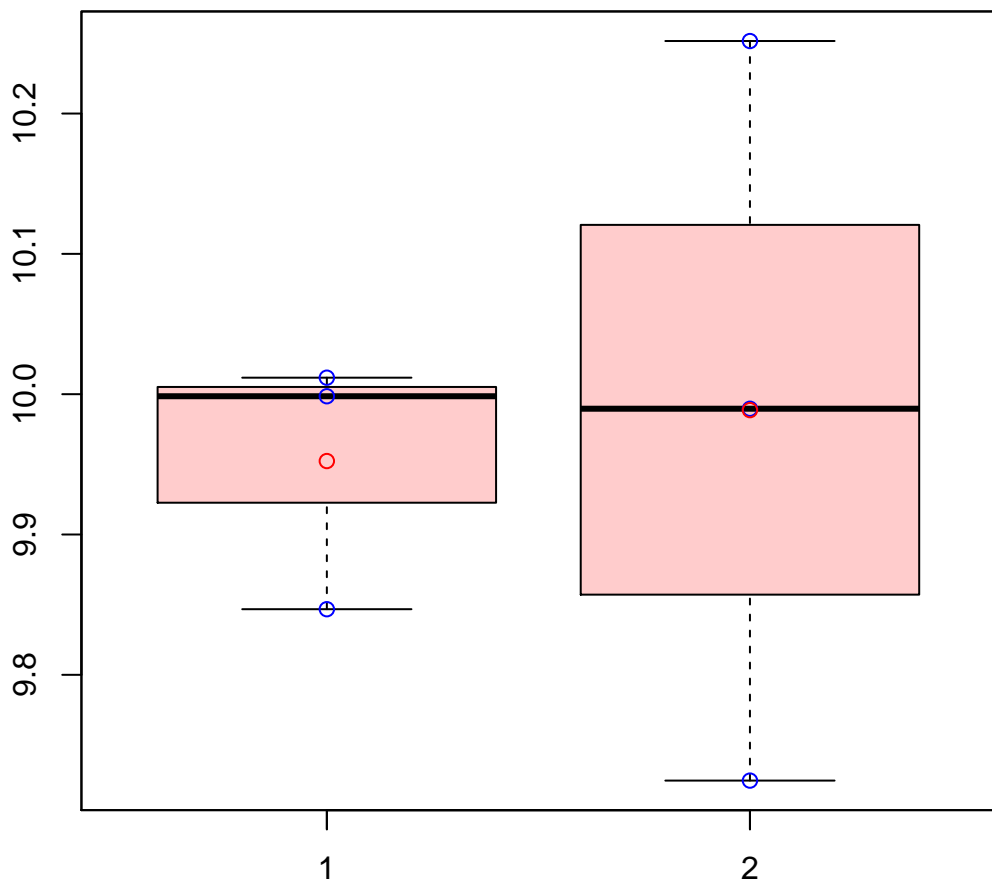

t-Test: p-value = 0.84

# CL10162Contig3|CL10162Contig3

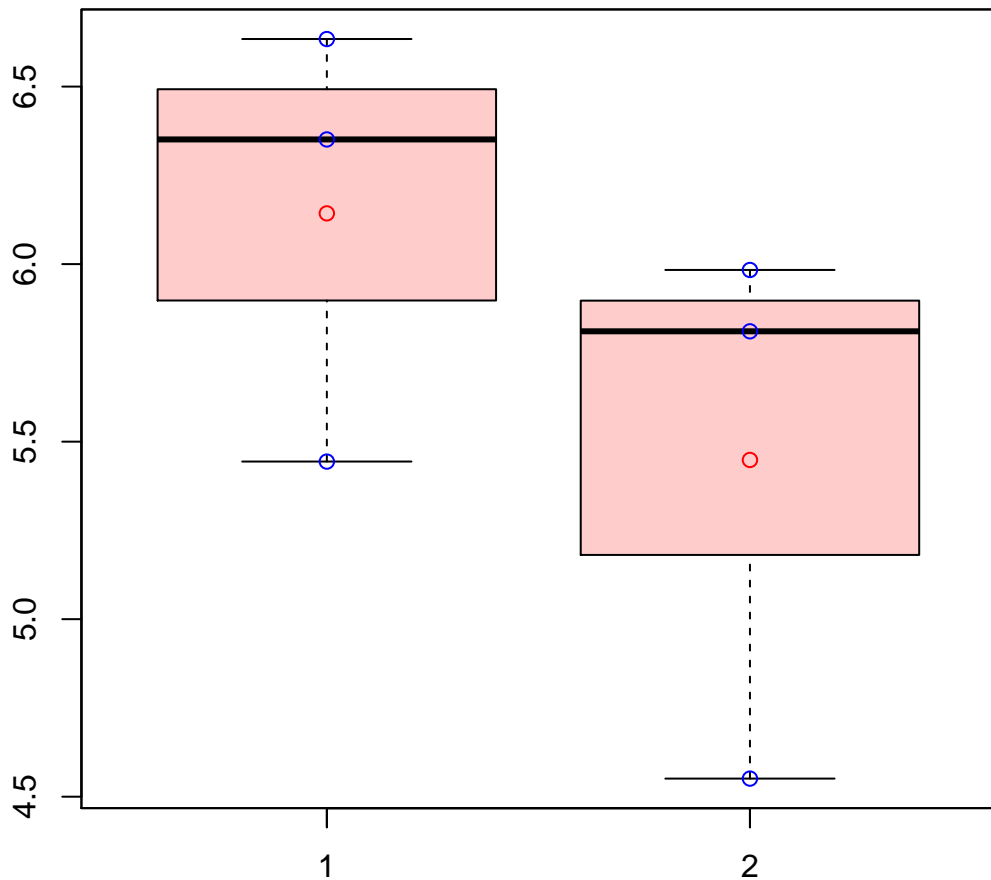

t-Test: p-value = 0.3

# CL10171Contig2|CL10171Contig2

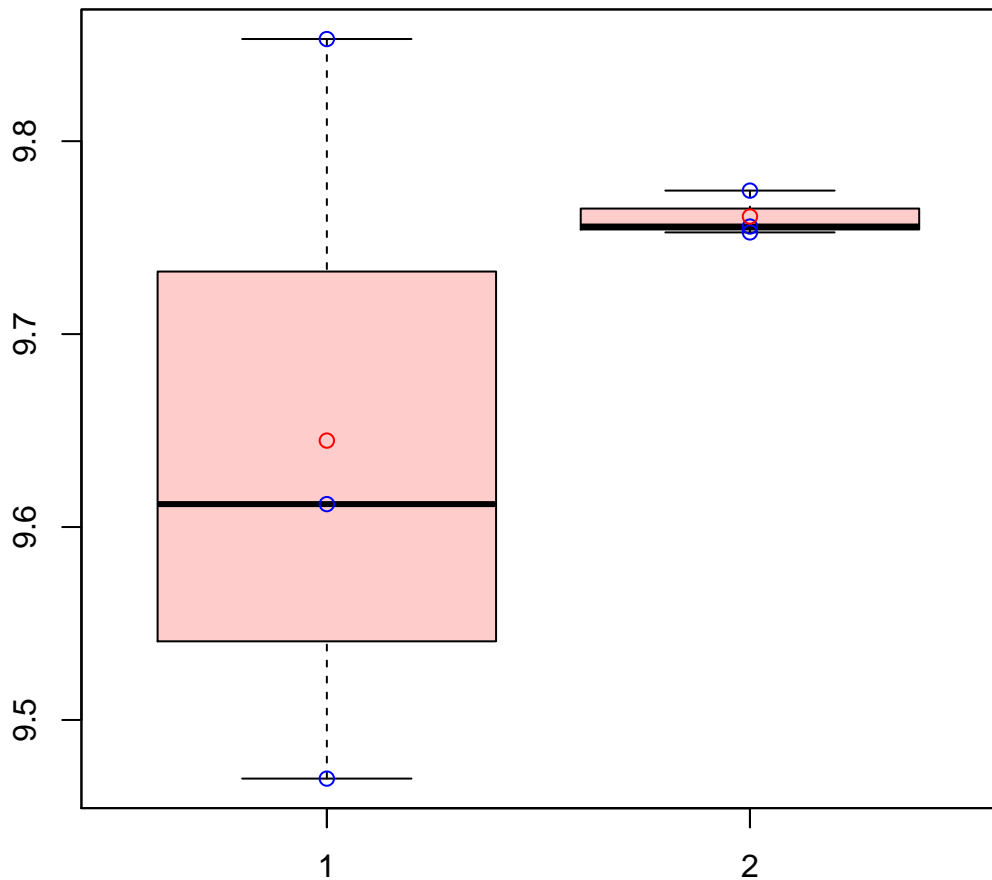

t-Test: p-value = 0.41



# CL10197Contig1|CL10197Contig1

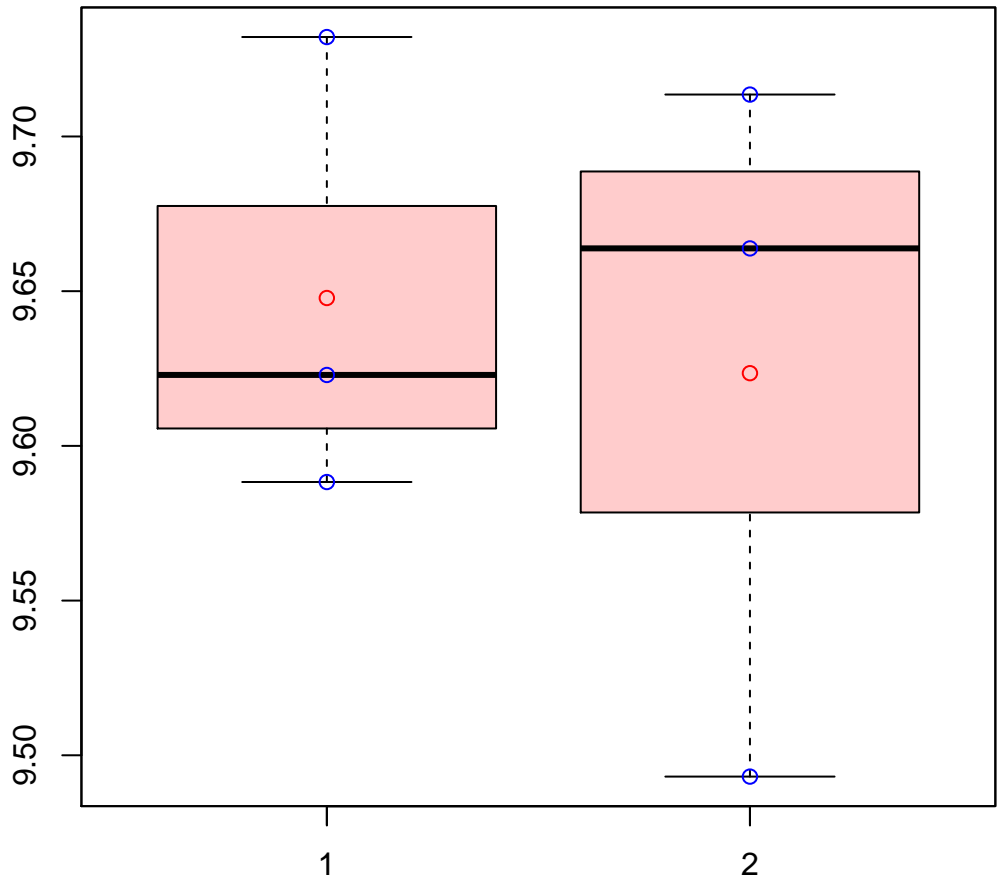

t-Test: p-value = 0.78

# CL10223Contig2|CL10223Contig2

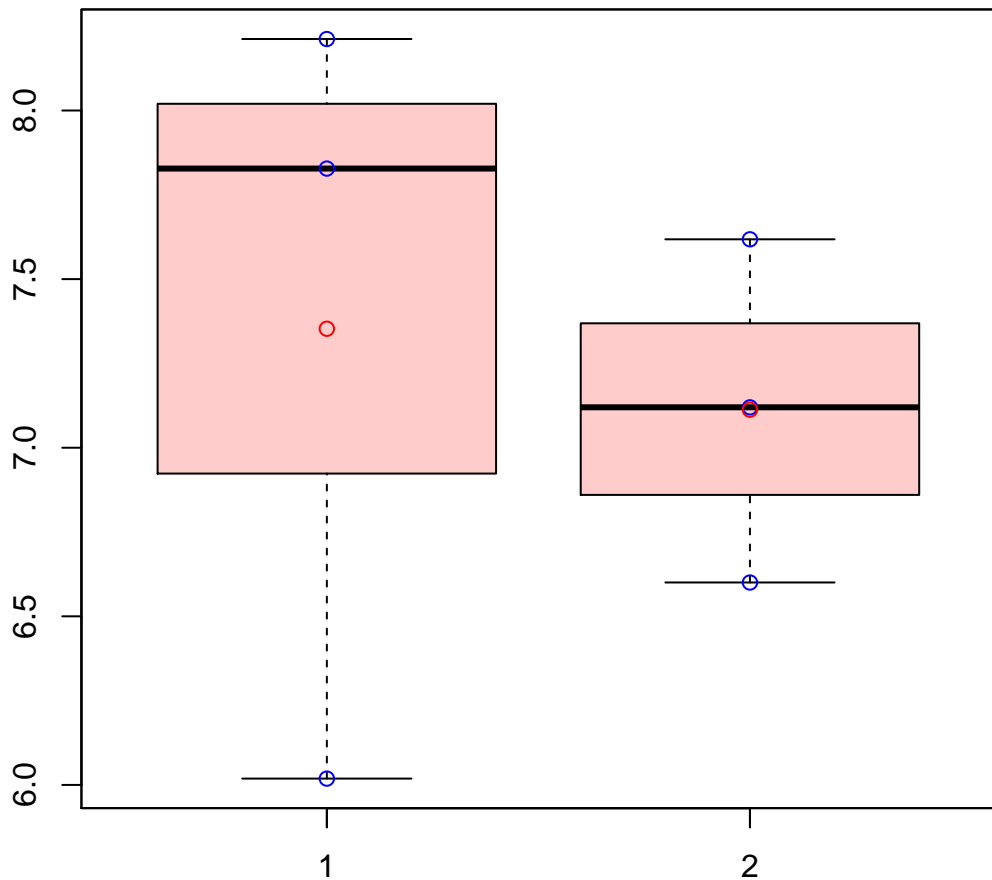

t-Test: p-value = 0.77

# CL10226Contig1|CL10226Contig1

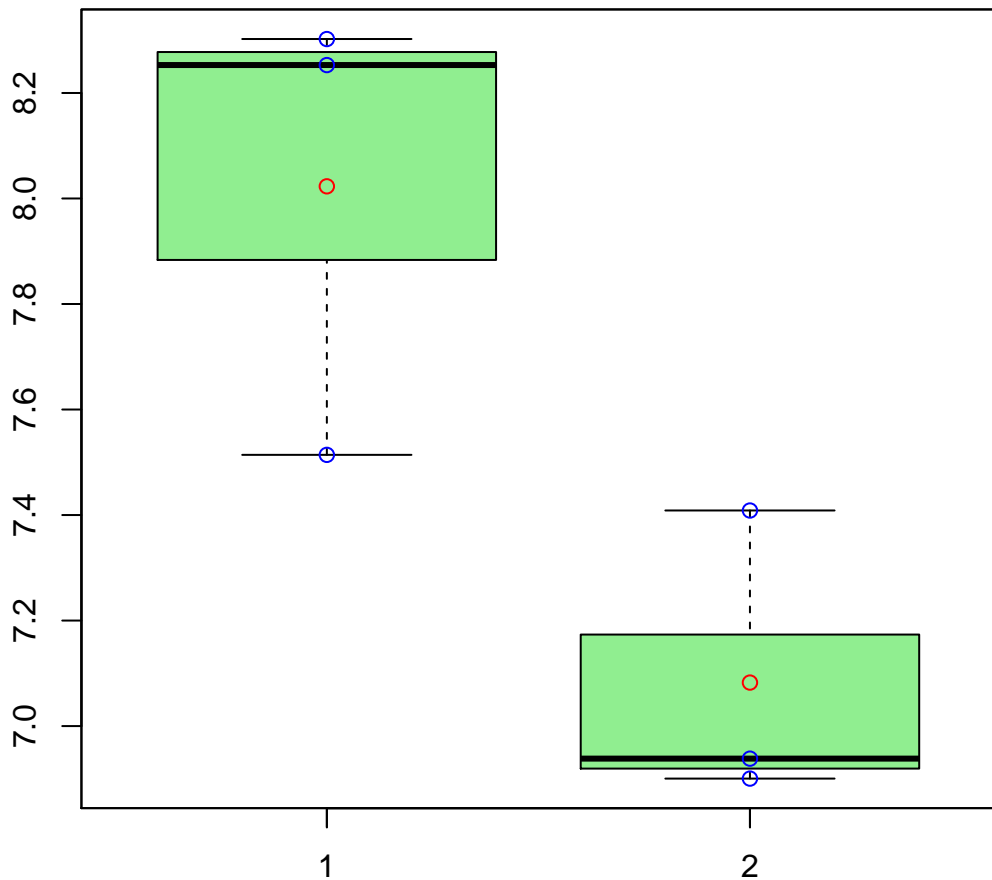

t-Test: p-value = 0.04

# CL1026Contig6|CL1026Contig6

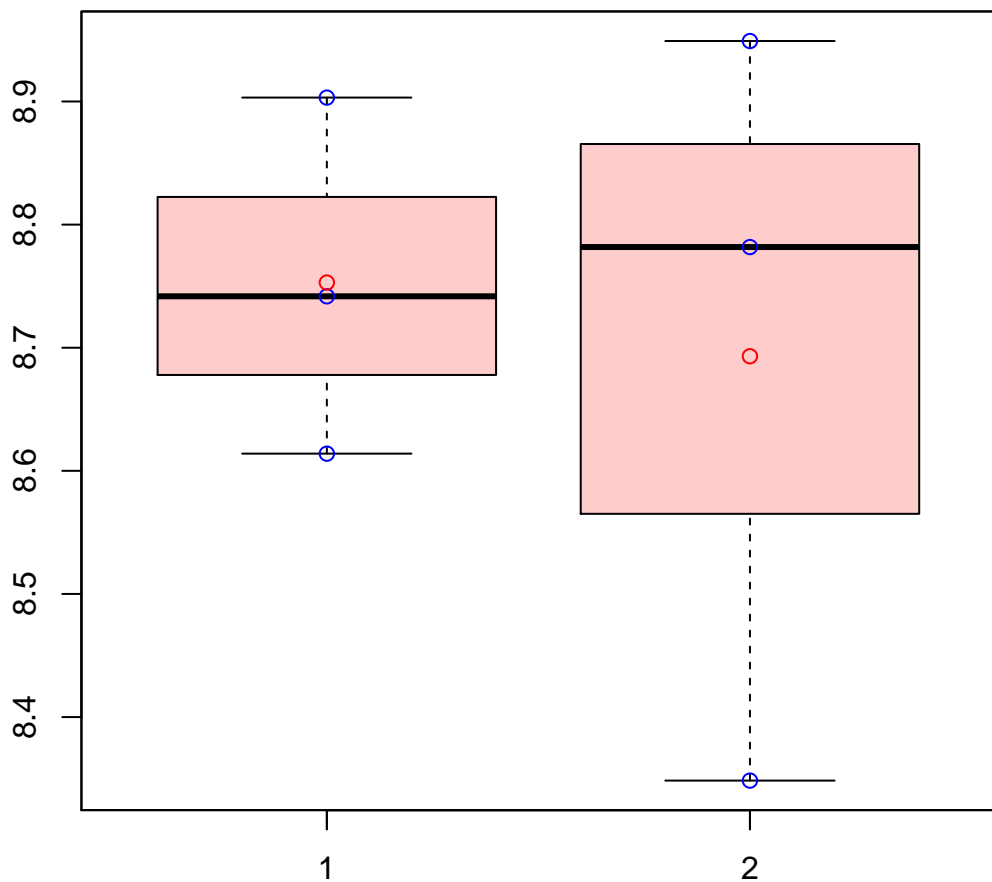

t-Test: p-value = 0.78

# CL10274Contig1|CL10274Contig1

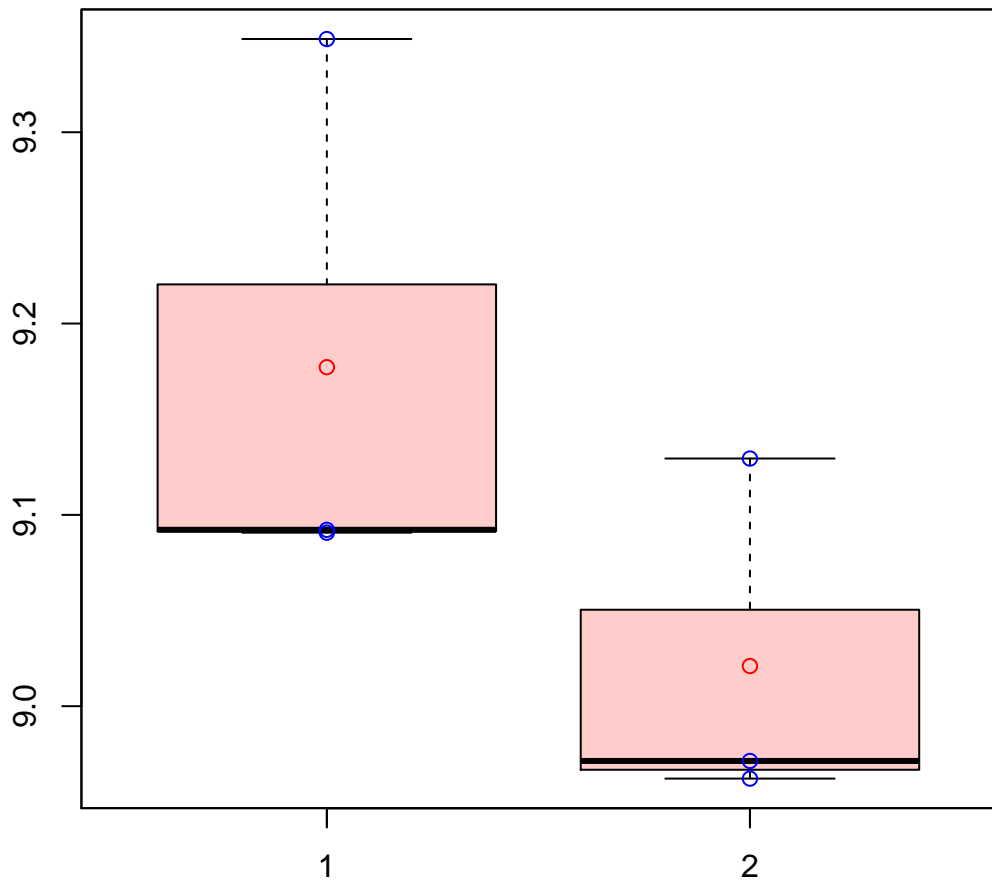

t-Test: p-value = 0.21

# CL10279Contig1|CL10279Contig1

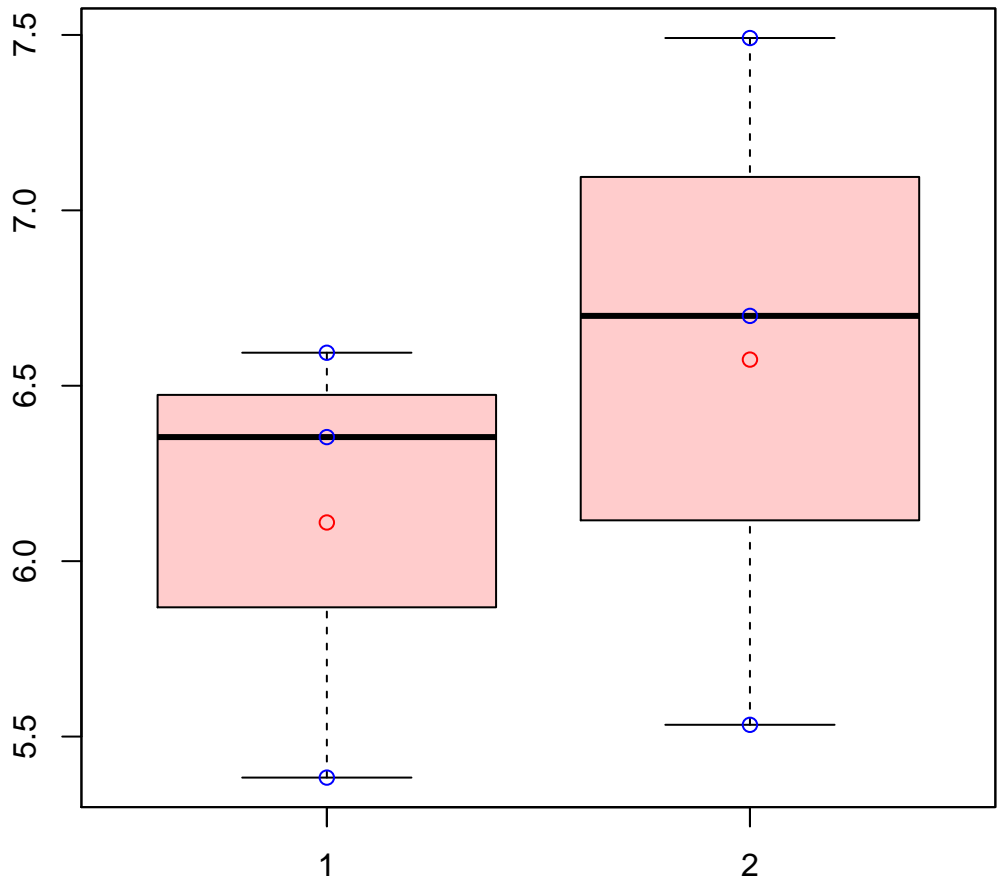

t-Test: p-value = 0.54

# CL1027Contig10|CL1027Contig10

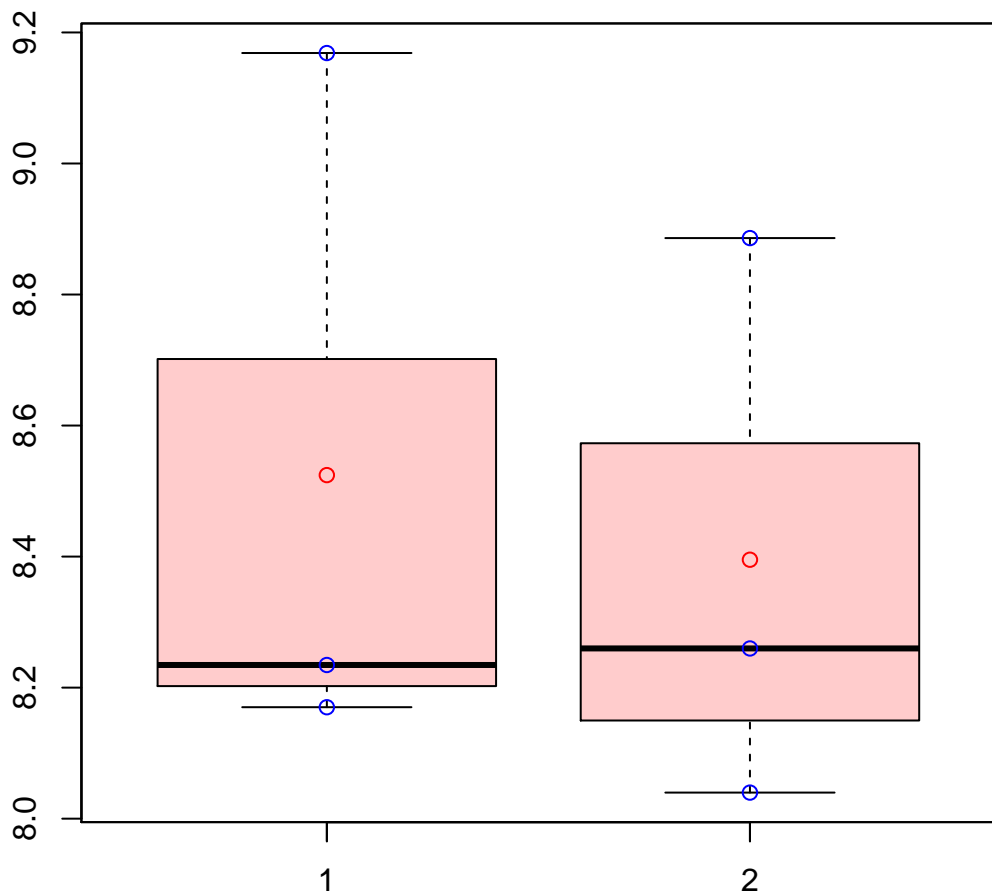

t-Test: p-value = 0.77

# CL1027Contig6|CL1027Contig6

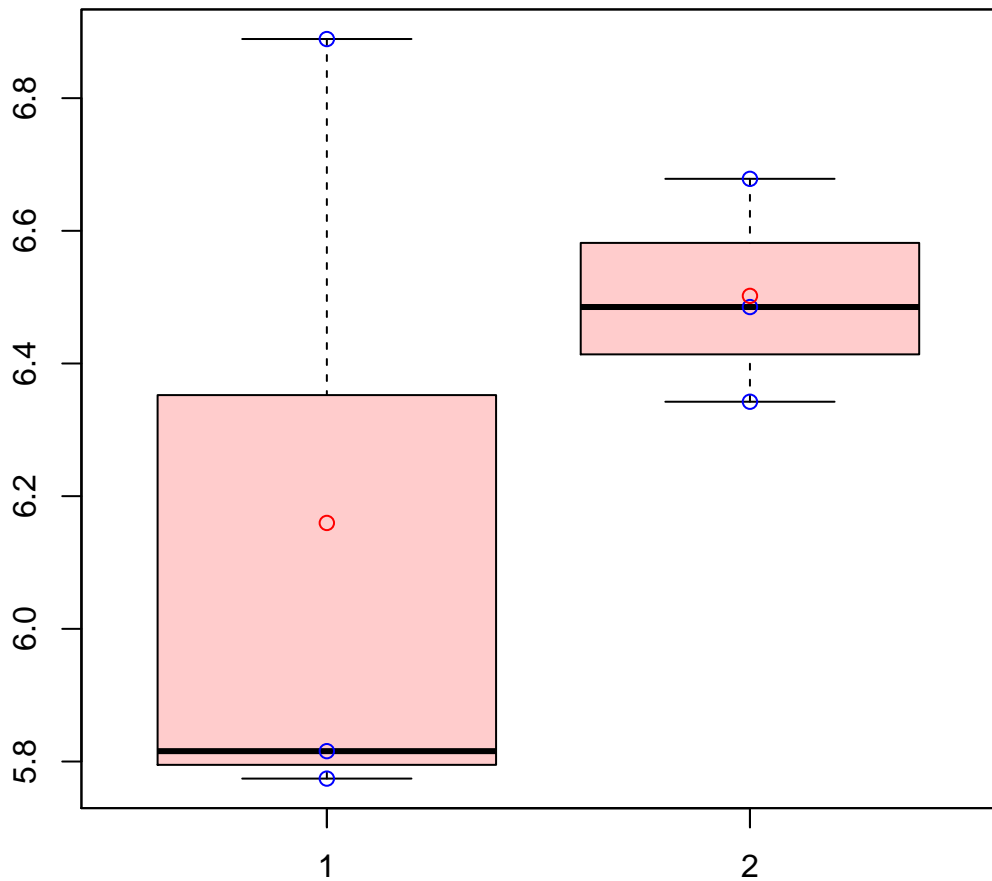

t-Test: p-value = 0.45



# CL102Contig20|CL102Contig20

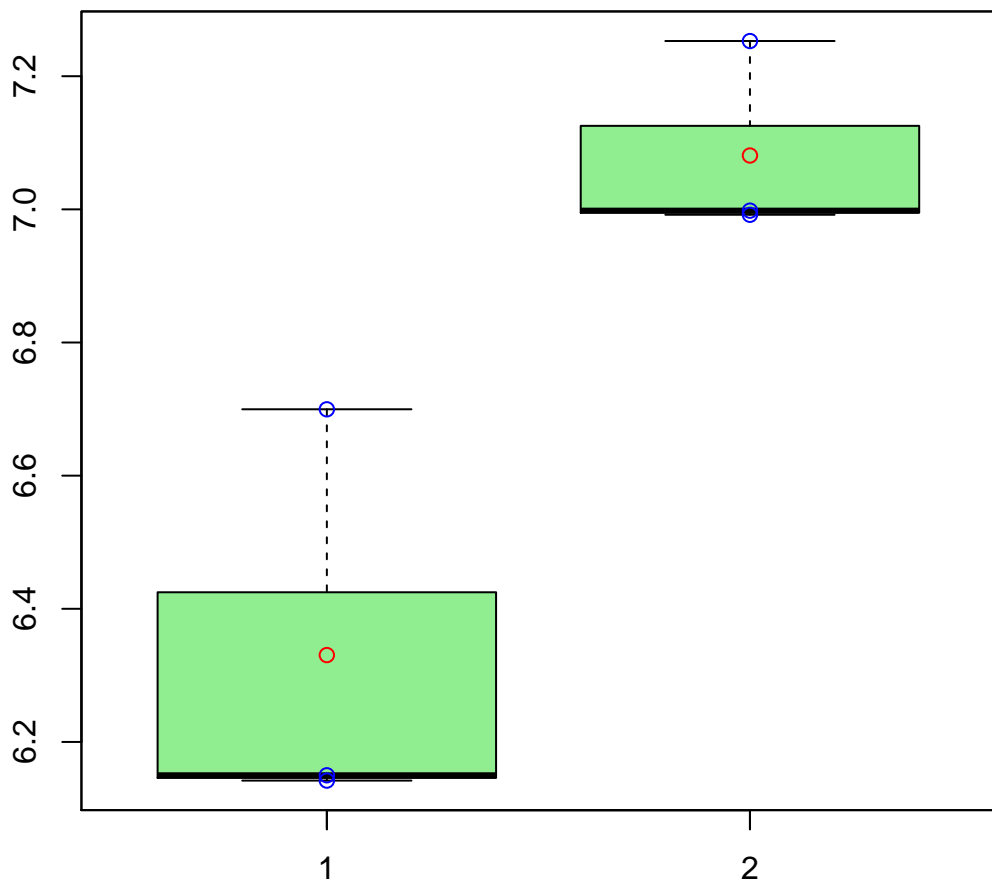

t-Test: p-value = 0.04

# CL1030Contig10|CL1030Contig10

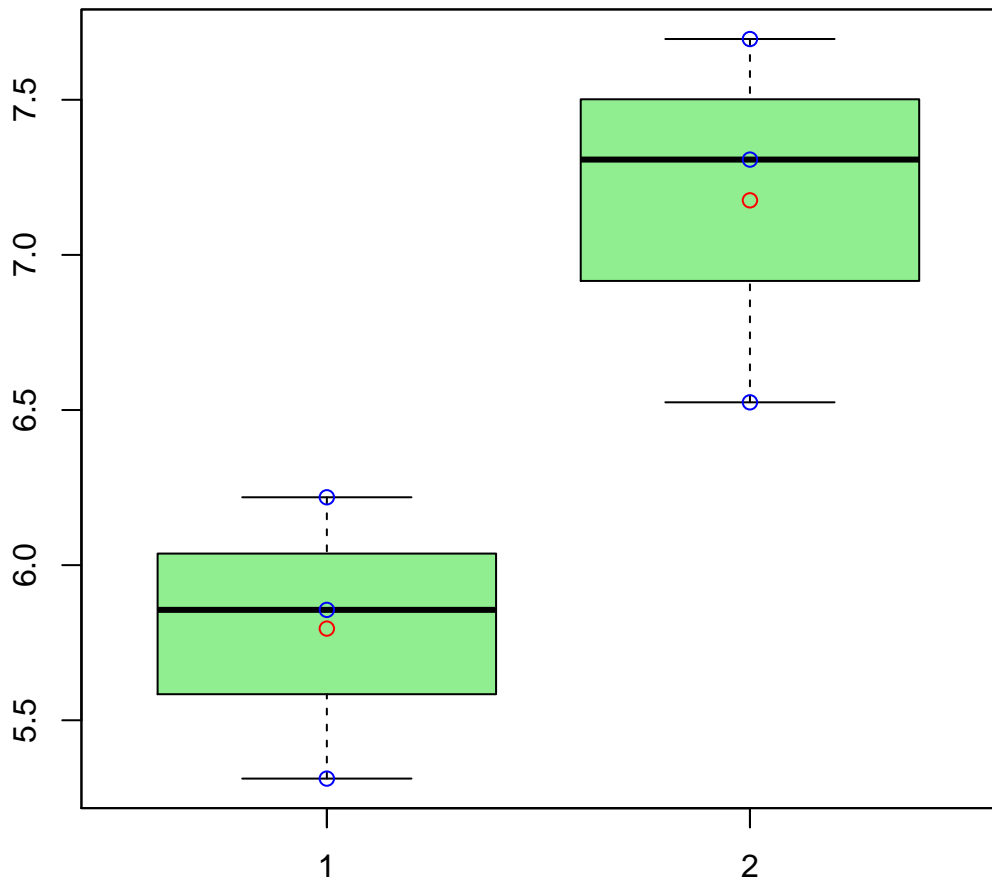

t-Test: p-value = 0.04

# CL1030Contig8|CL1030Contig8

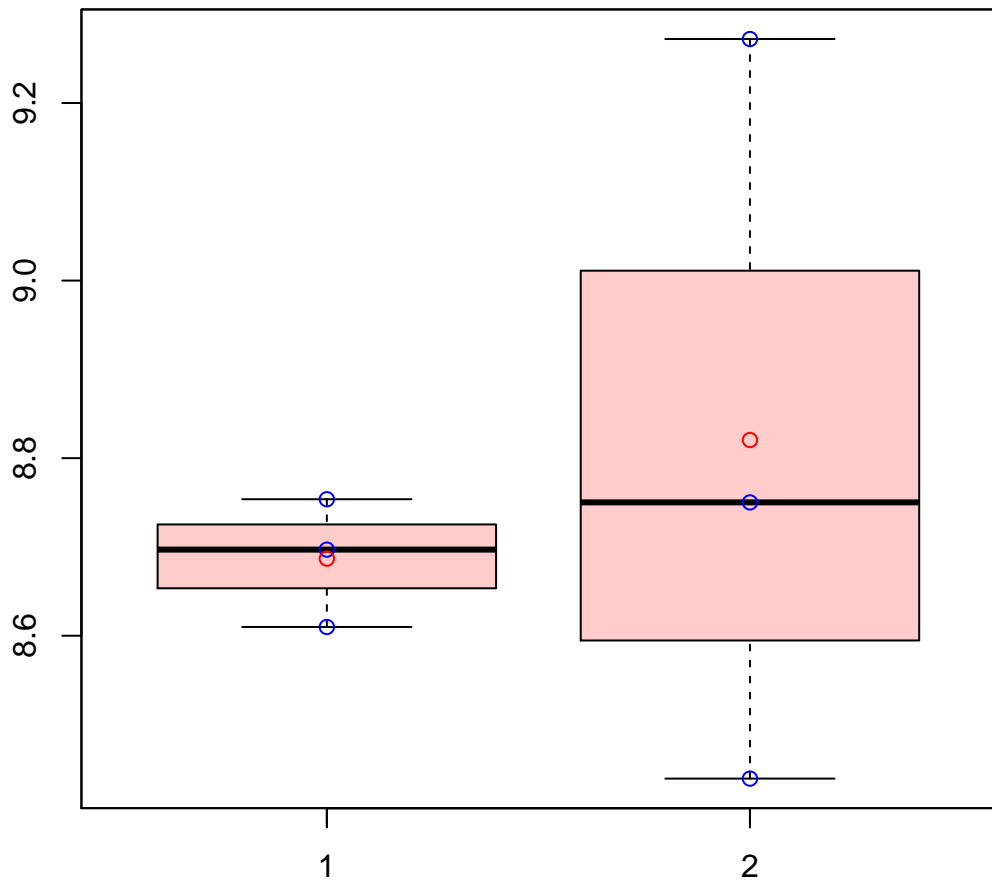

t-Test: p-value = 0.64

# CL10344Contig2|CL10344Contig2

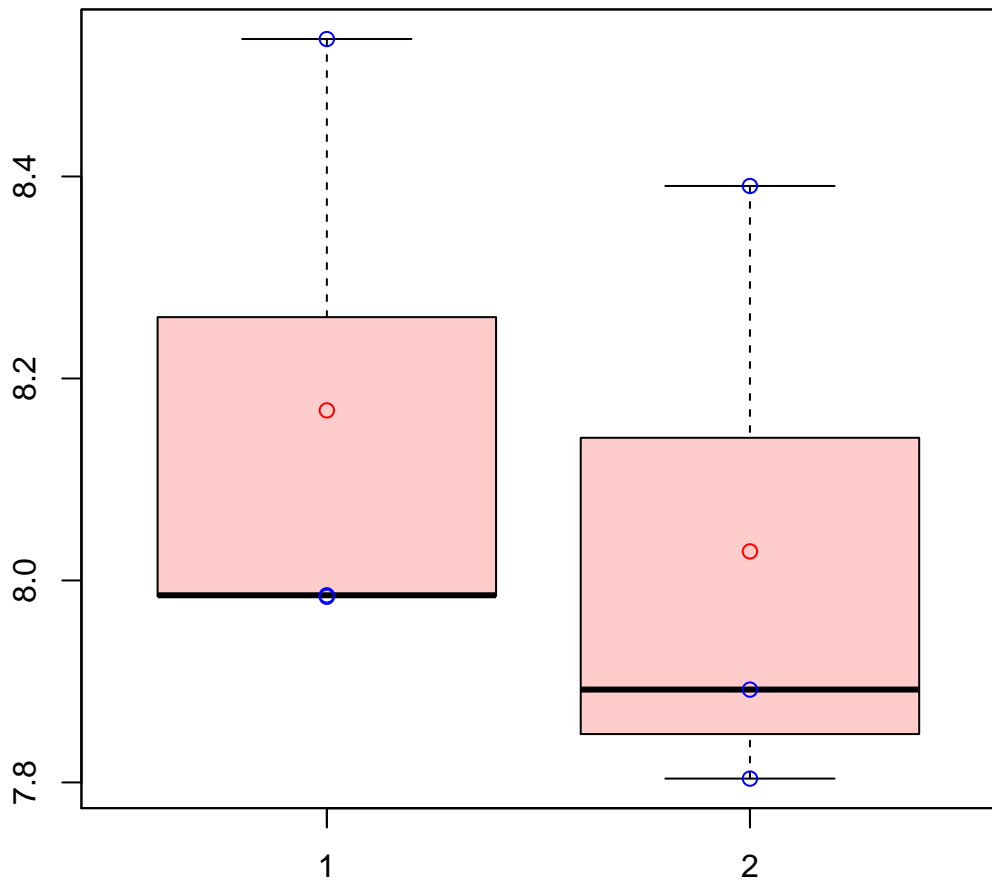

t-Test: p-value = 0.62

# CL1034Contig1|CL1034Contig1

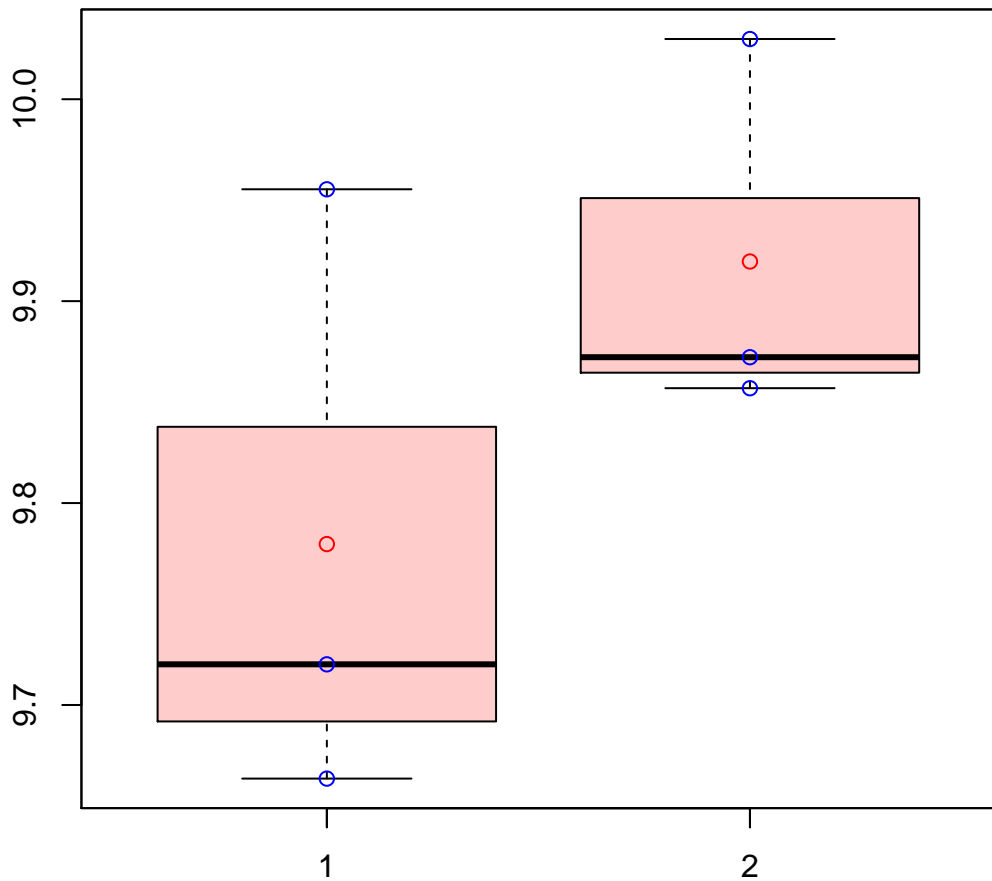

t-Test: p-value = 0.27

# CL1034Contig2|CL1034Contig2

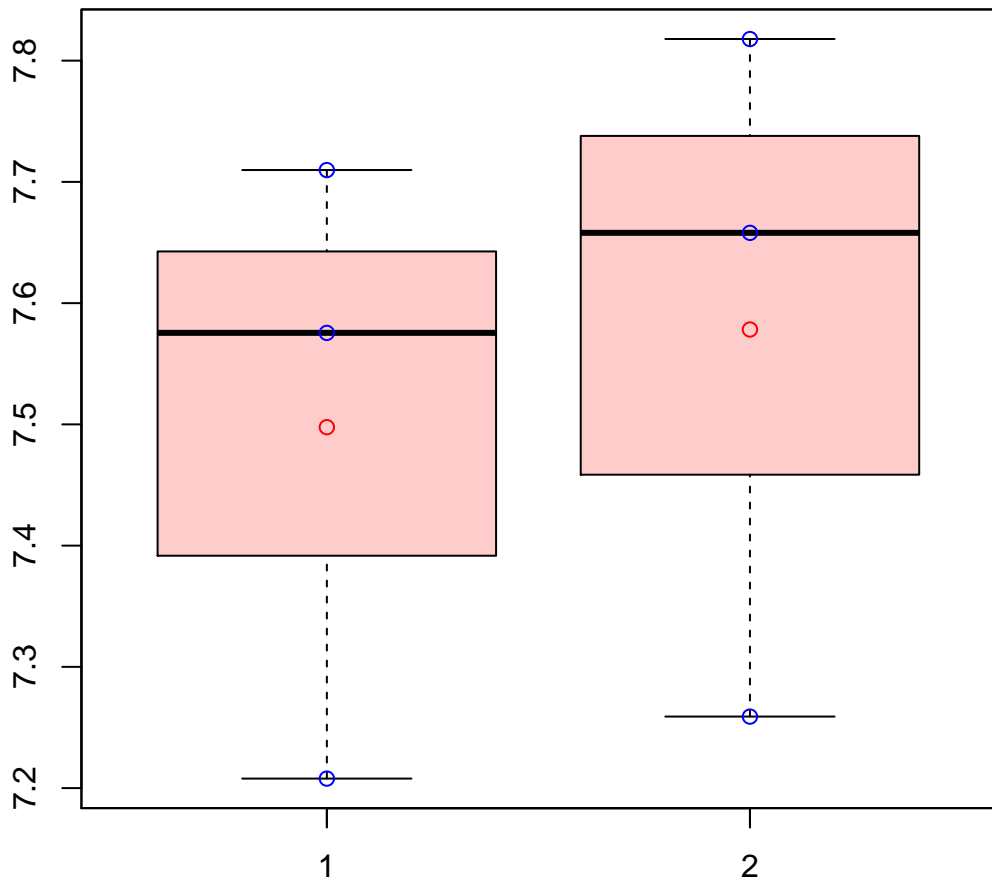

t-Test: p-value = 0.74

# CL1034Contig5|CL1034Contig5

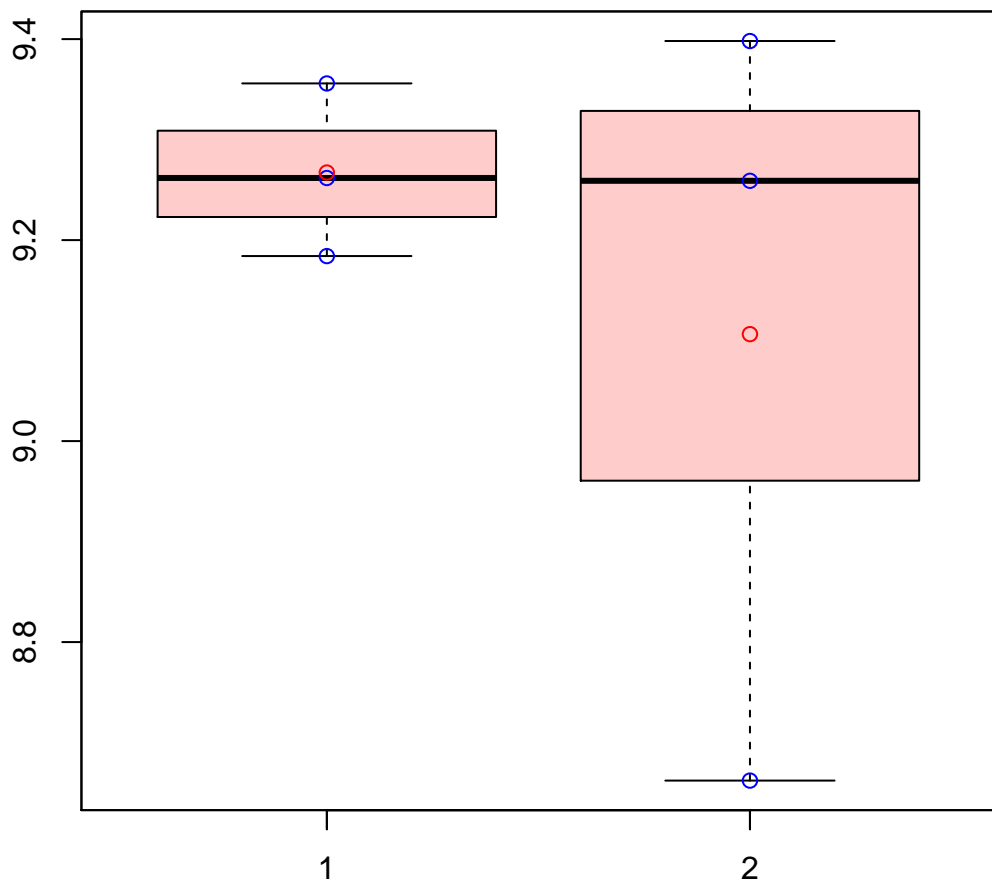

t-Test: p-value = 0.55

# CL1035Contig11|CL1035Contig11

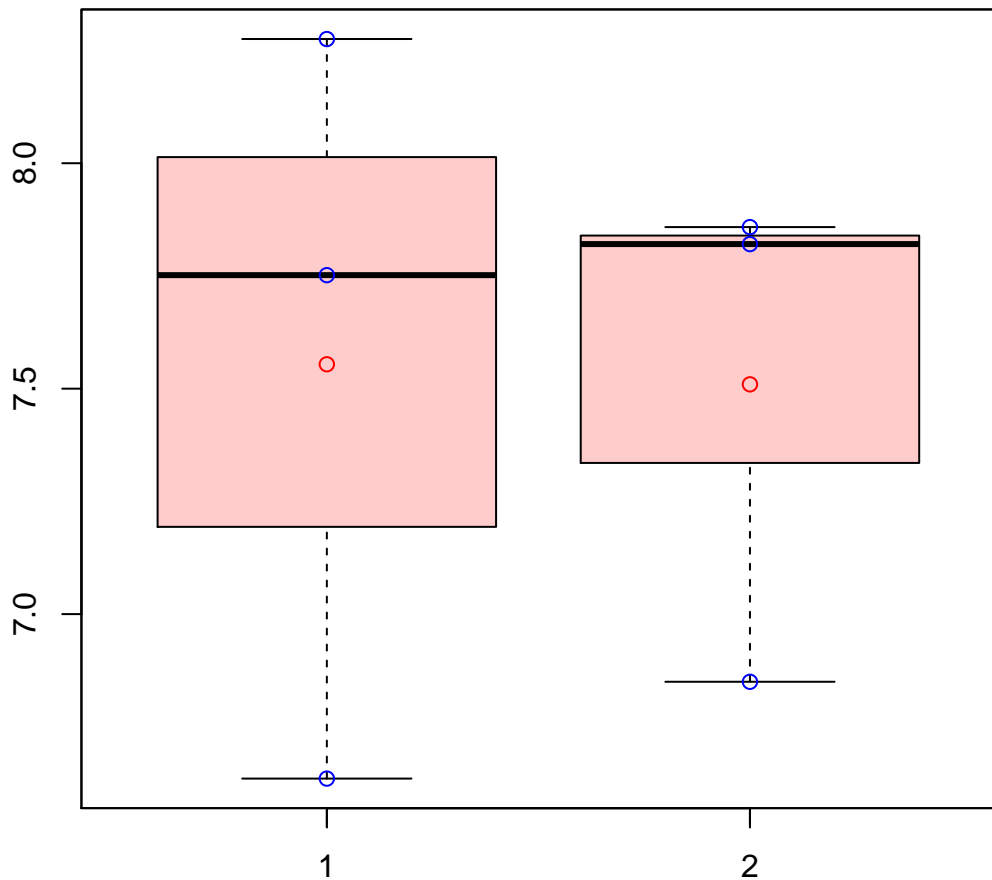

t-Test: p-value = 0.94



# CL1035Contig6|CL1035Contig6

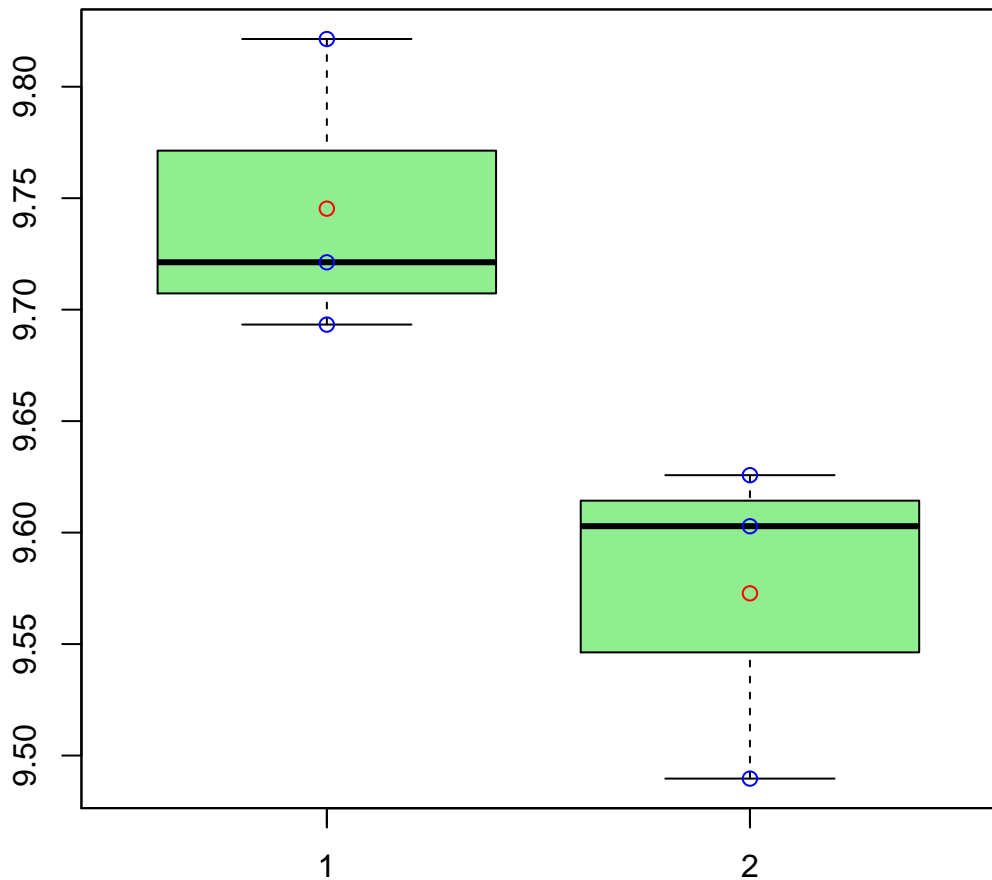

t-Test: p-value = 0.04

# CL103Contig6|CL103Contig6

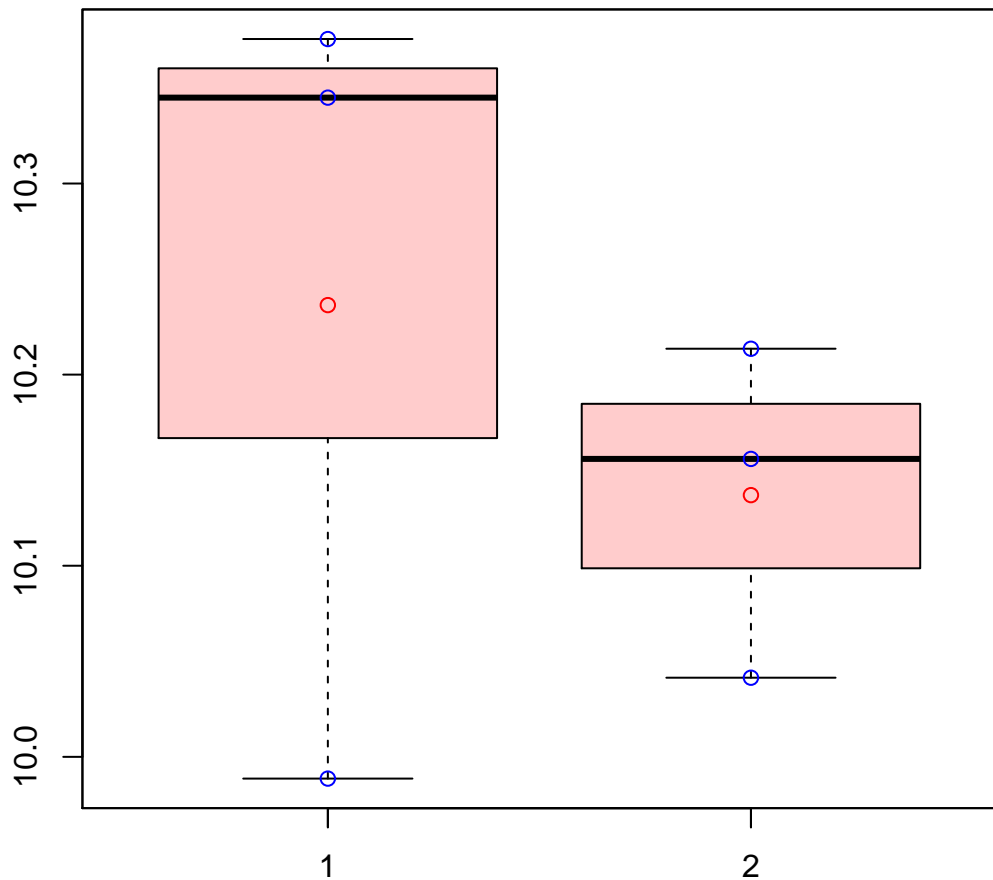

t-Test: p-value = 0.52

# CL1040Contig3|CL1040Contig3

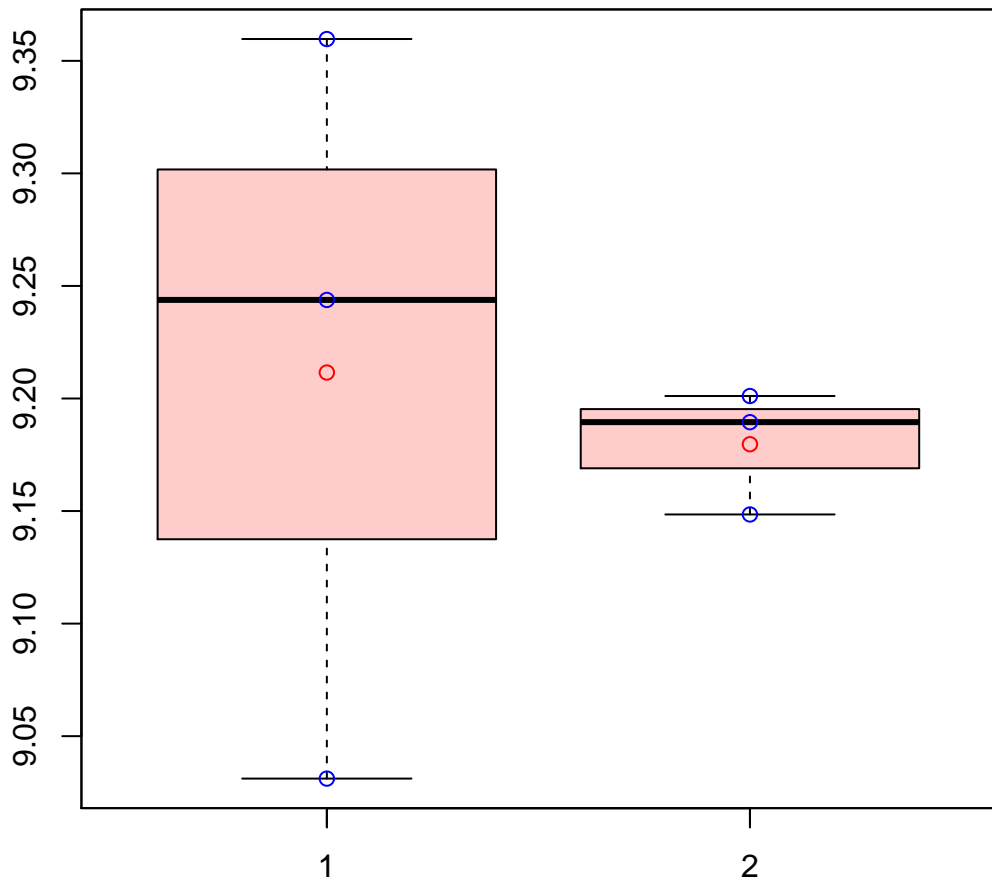

t-Test: p-value = 0.77

# CL1040Contig8|CL1040Contig8

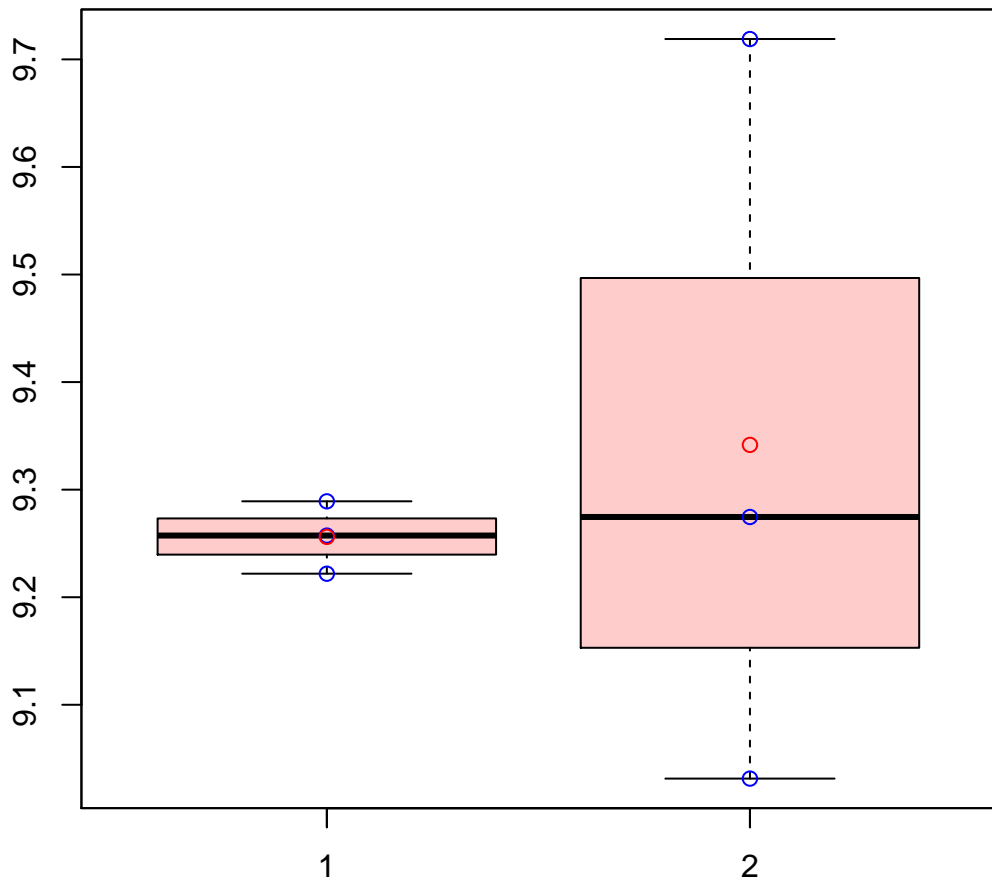

t-Test: p-value = 0.71

# CL10414Contig2|CL10414Contig2

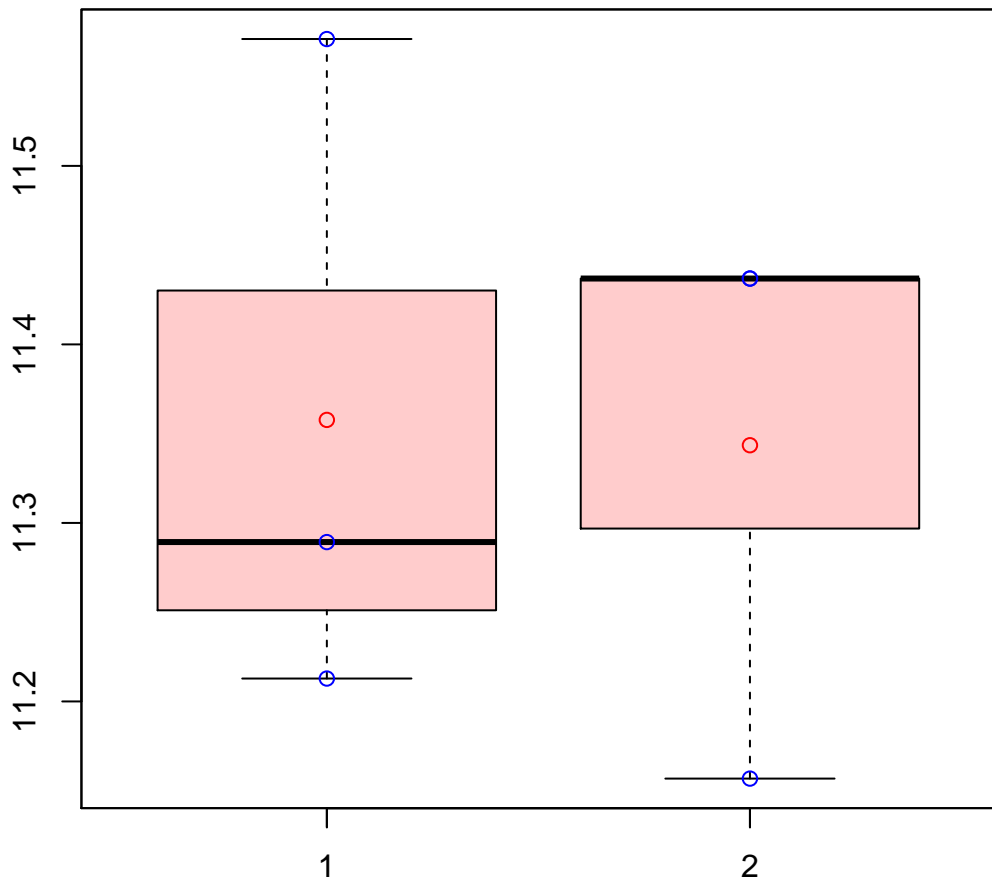

t-Test: p-value = 0.93

# CL1042Contig2|CL1042Contig2

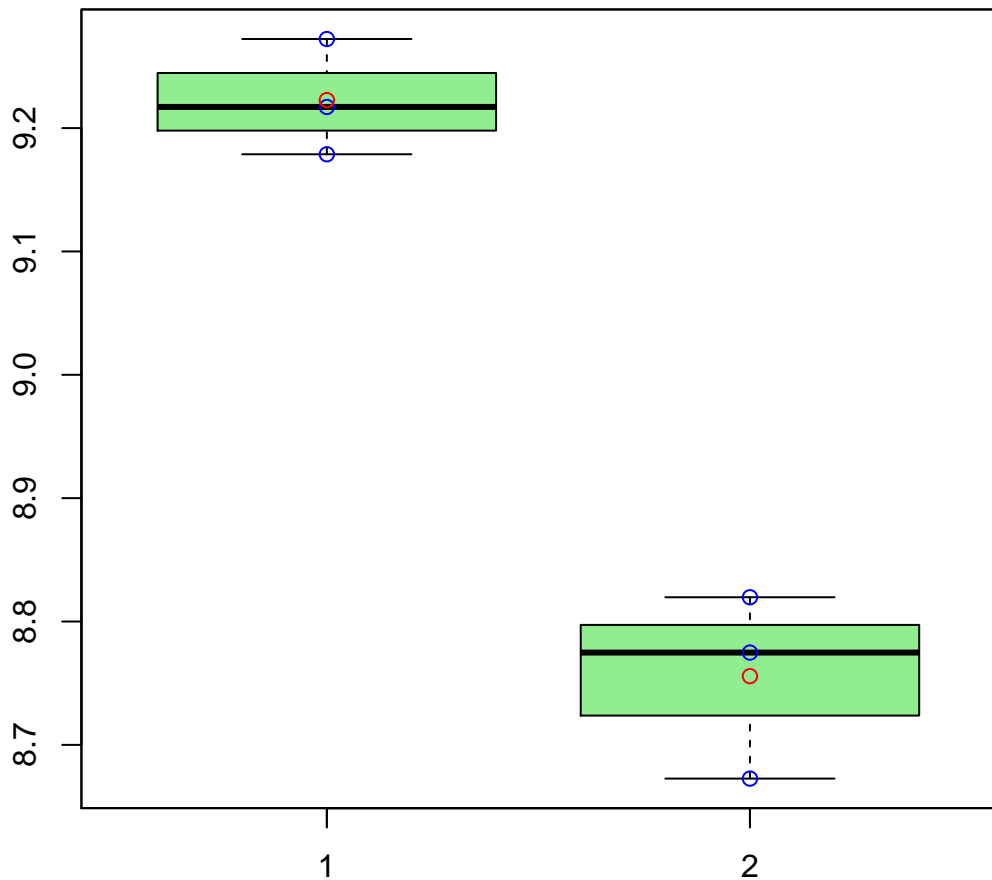

t-Test: p-value = 0

# CL1043Contig8|CL1043Contig8

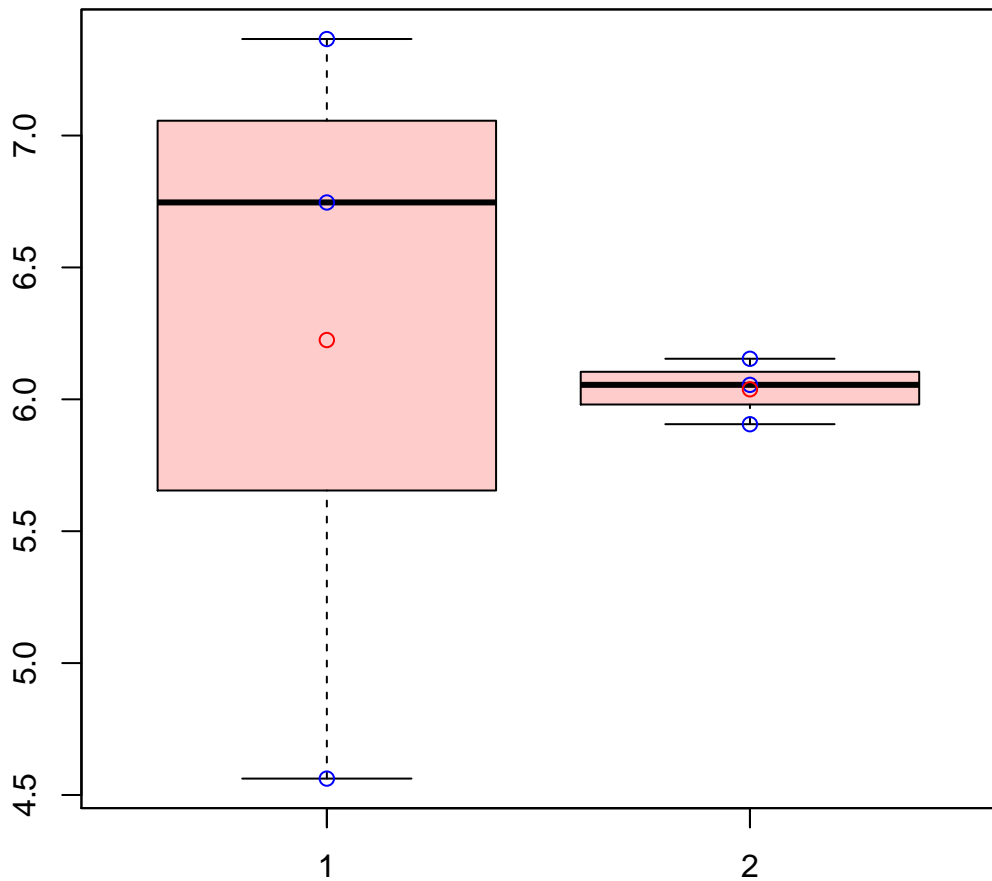

t-Test: p-value = 0.85

# CL10449Contig2|CL10449Contig2

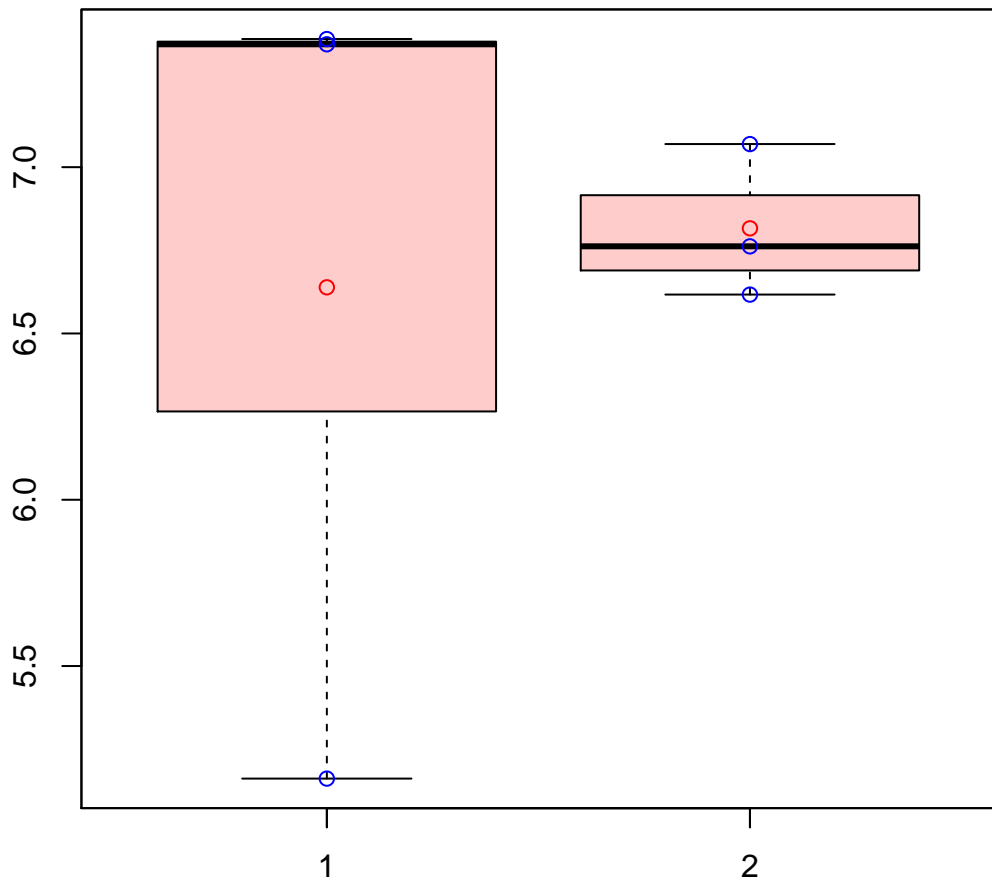

t-Test: p-value = 0.83



# CL10469Contig1|CL10469Contig1

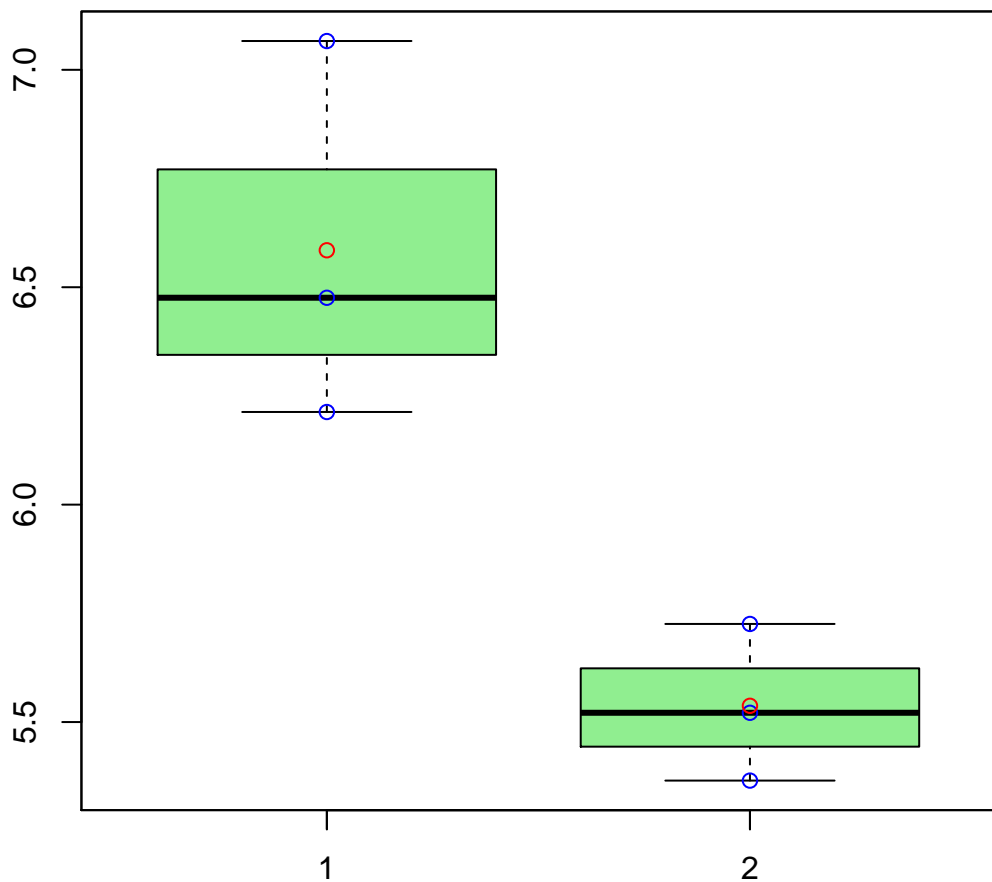

t-Test: p-value = 0.04

# CL1046Contig13|CL1046Contig13

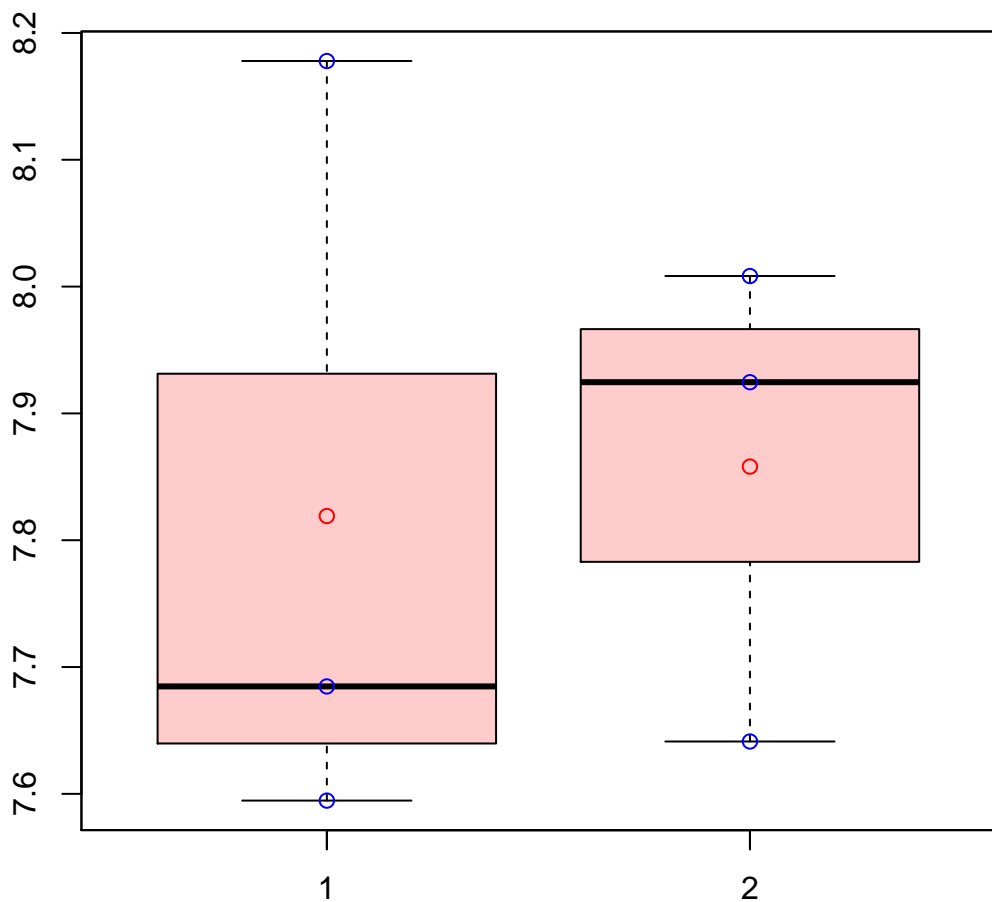

t-Test: p-value = 0.87

# CL10481Contig2|CL10481Contig2

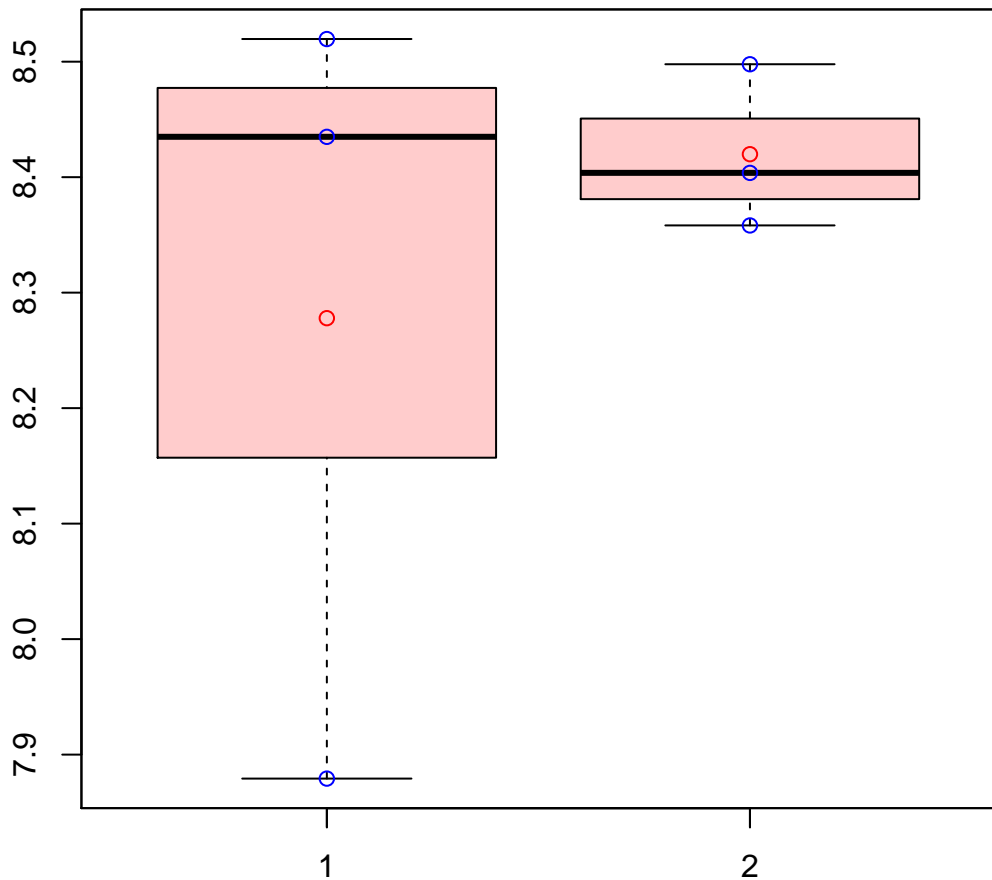

t-Test: p-value = 0.56

# CL10481Contig3|CL10481Contig3

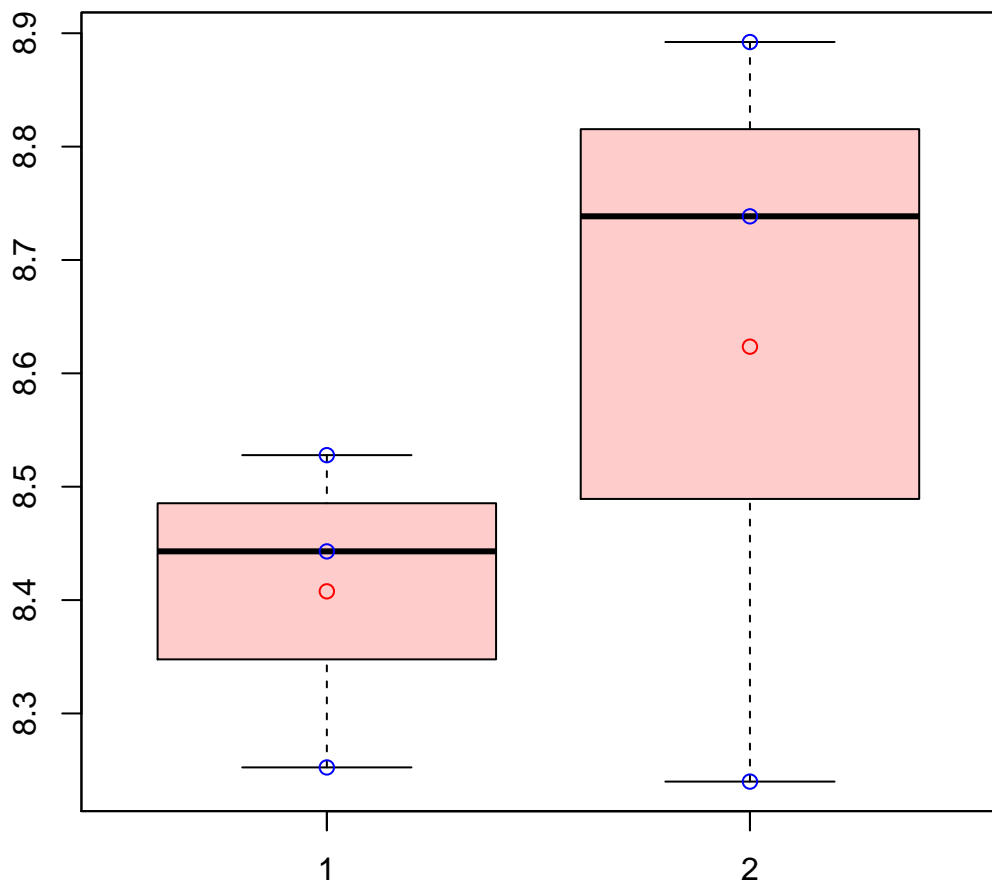

t-Test: p-value = 0.39

# CL10491Contig1|CL10491Contig1

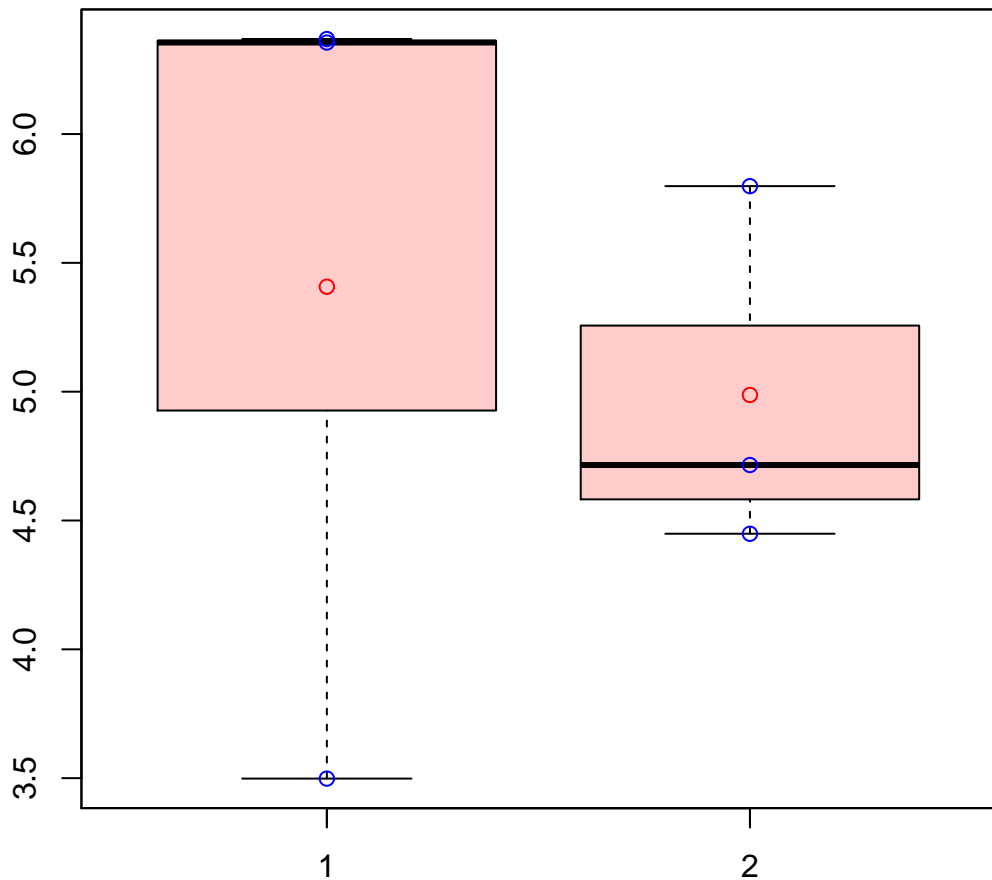

t-Test: p-value = 0.72

# CL104Contig2|CL104Contig2

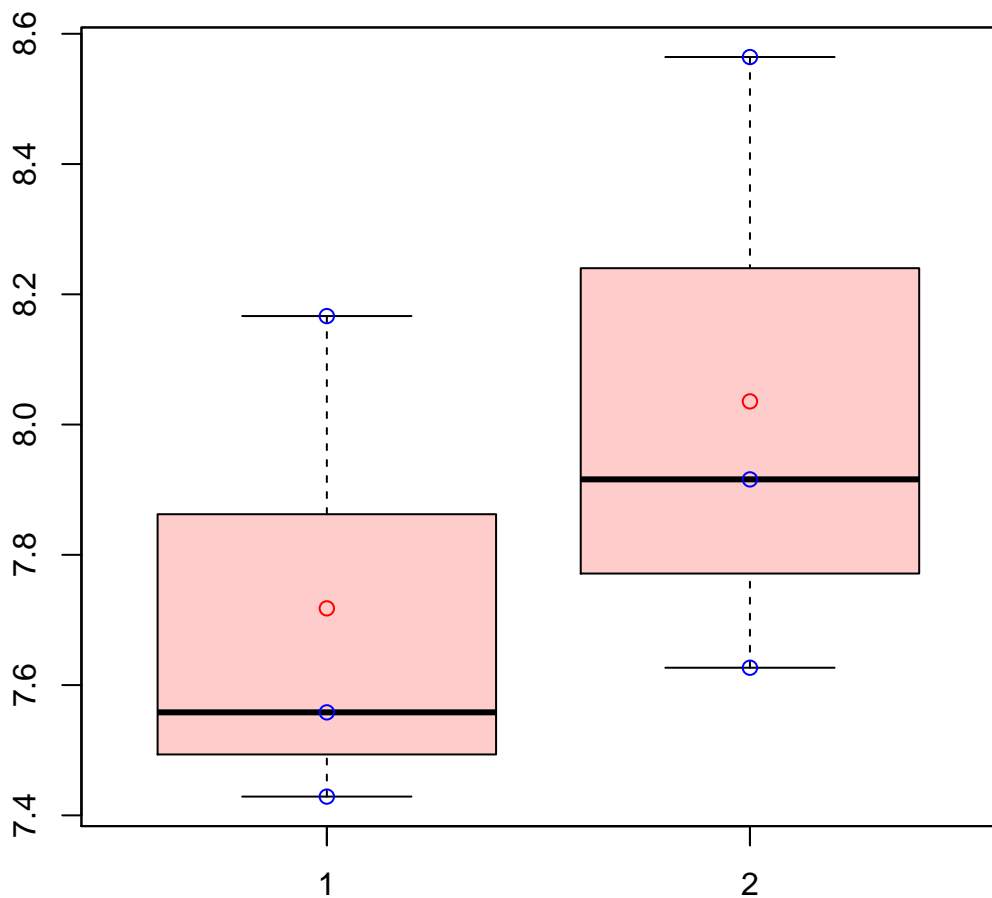

t-Test: p-value = 0.43

# CL10519Contig1|CL10519Contig1

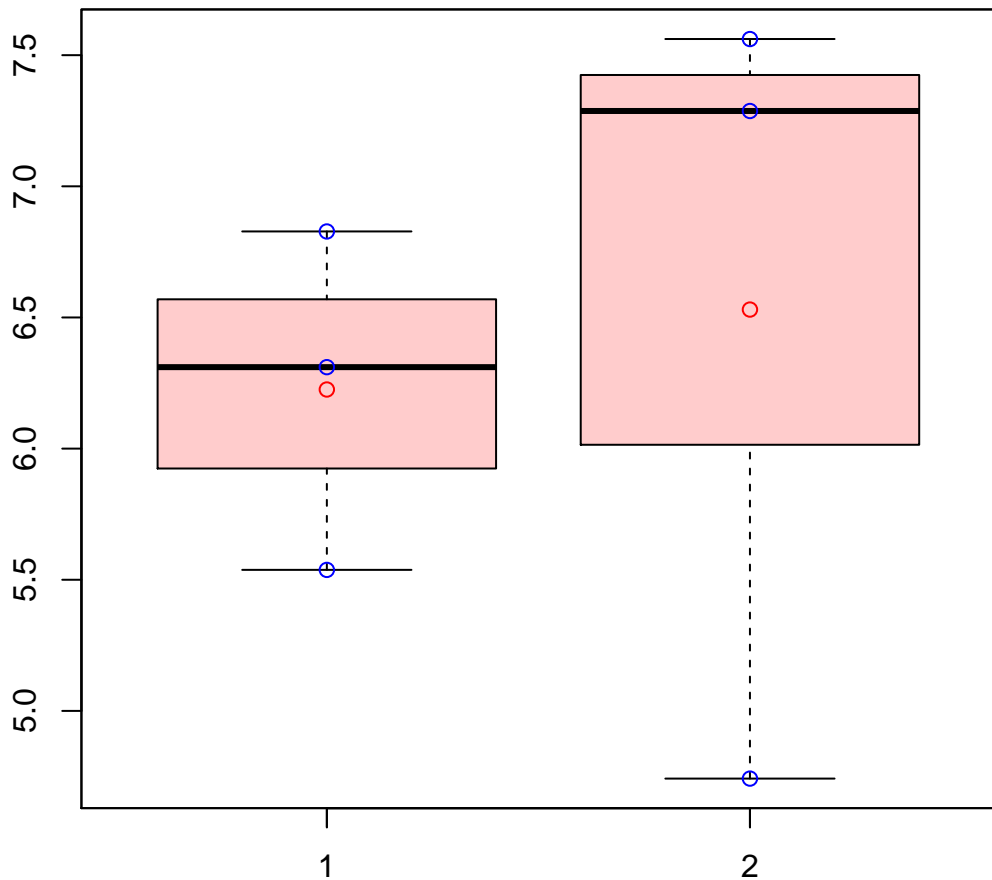

t-Test: p-value = 0.78

# CL10533Contig2|CL10533Contig2

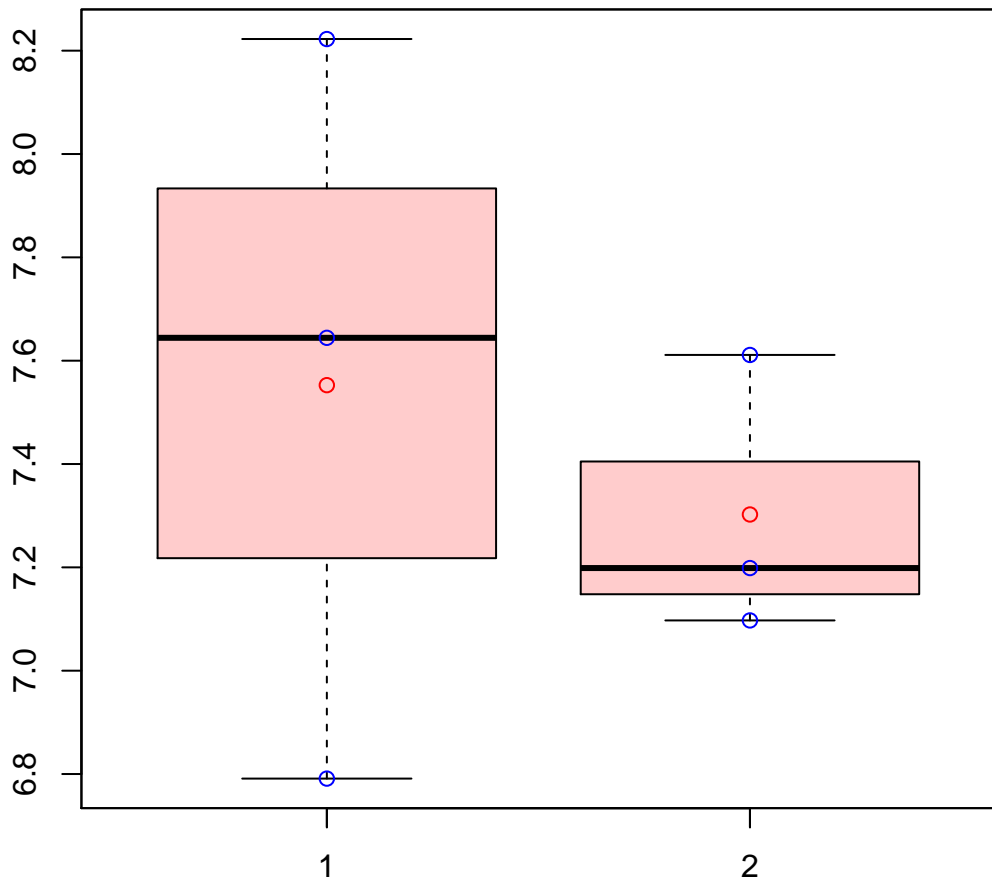

t-Test: p-value = 0.62



# CL1054Contig1|CL1054Contig1

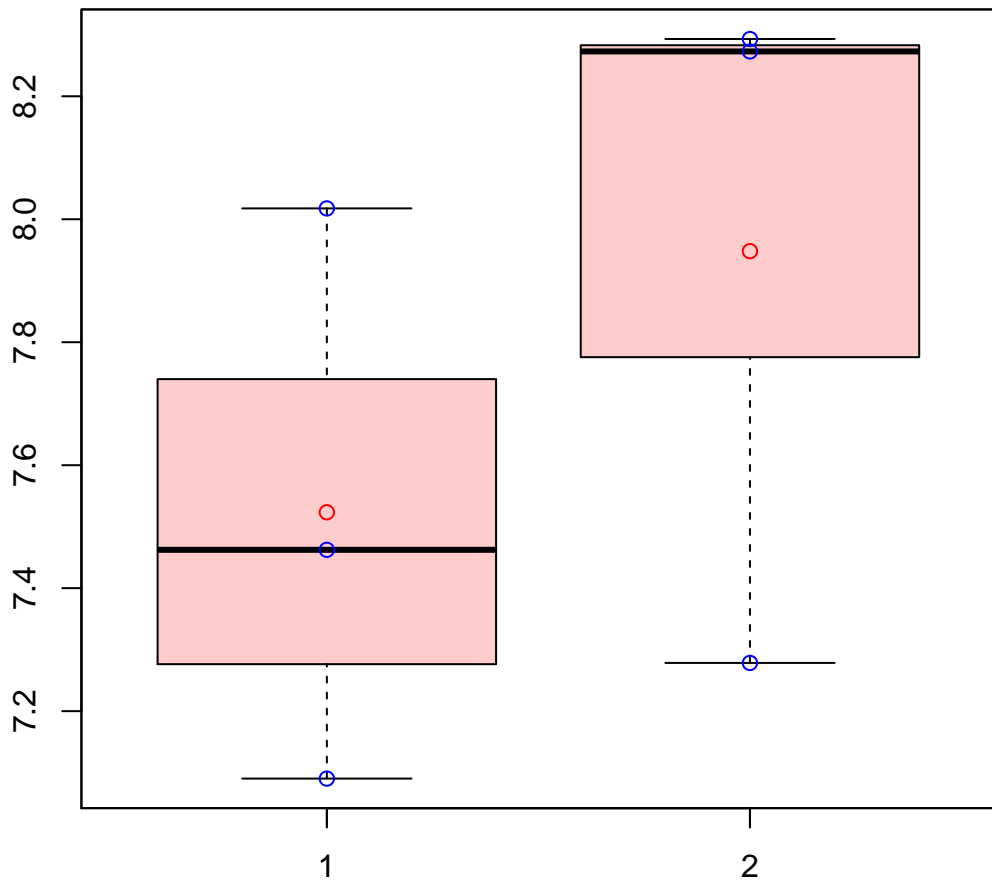

t-Test: p-value = 0.38

# CL1056Contig5|CL1056Contig5

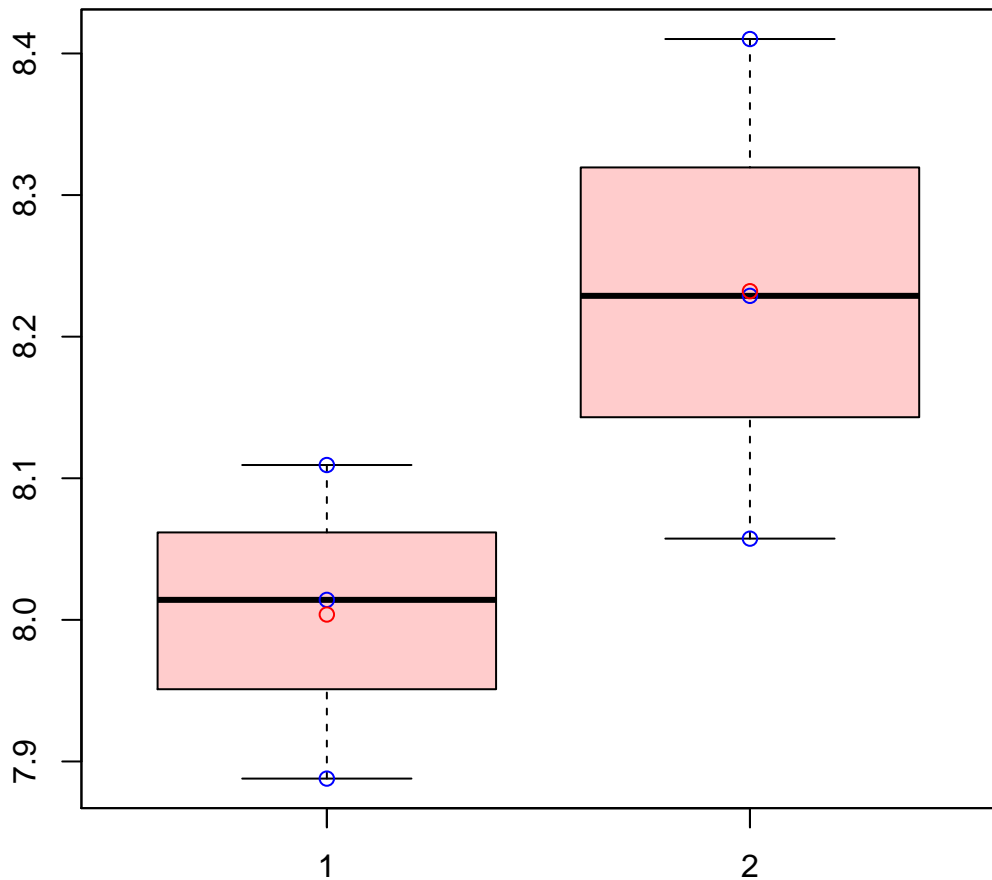

t-Test: p-value = 0.14

# CL10586Contig1|CL10586Contig1

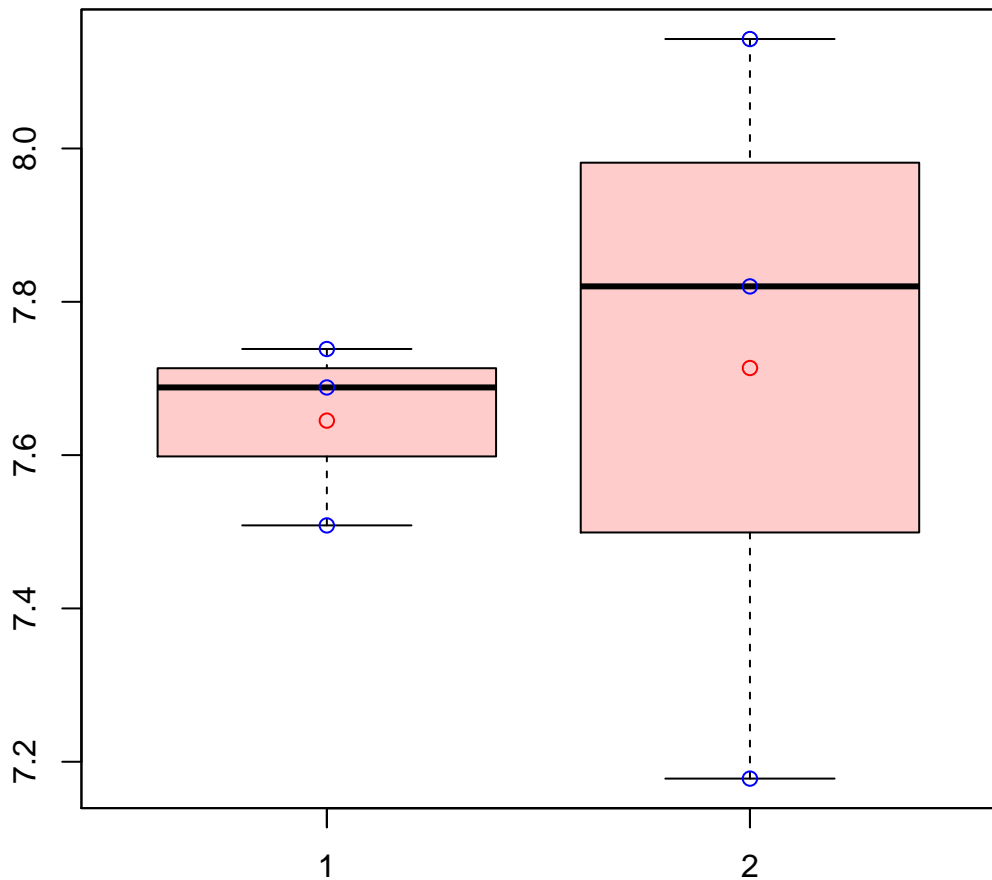

t-Test: p-value = 0.83

# CL10587Contig2|CL10587Contig2

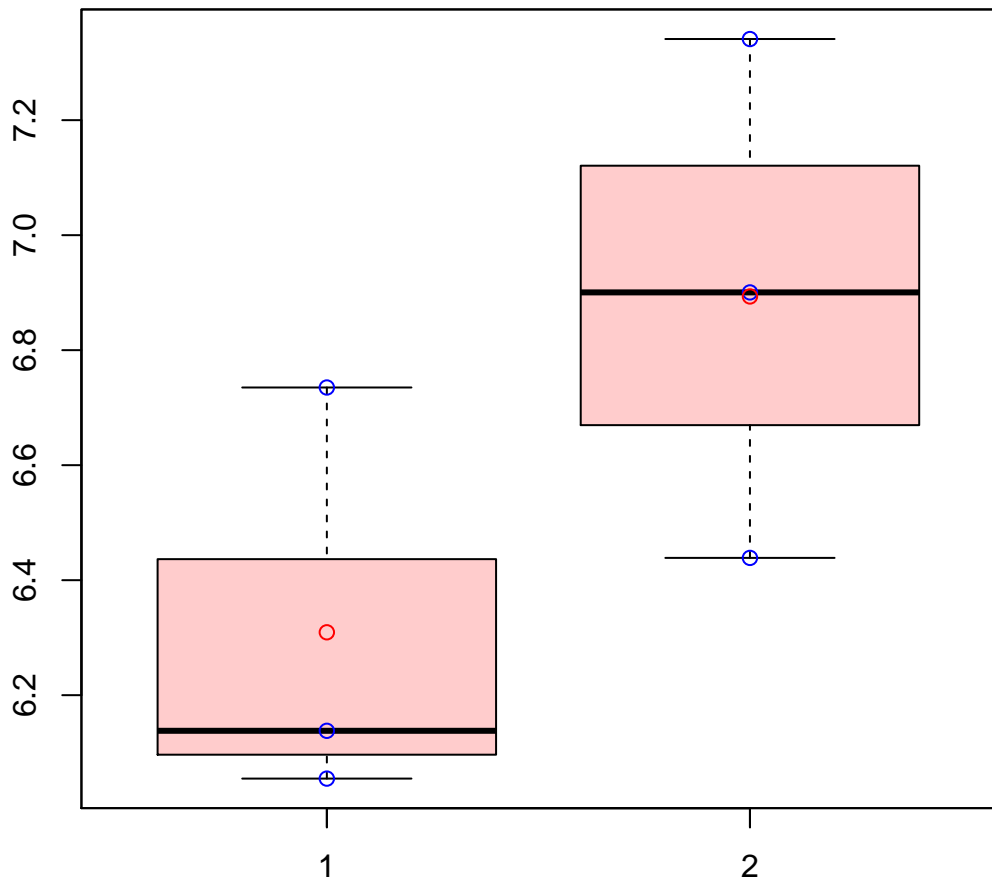

t-Test: p-value = 0.16

# CL105Contig4|CL105Contig4

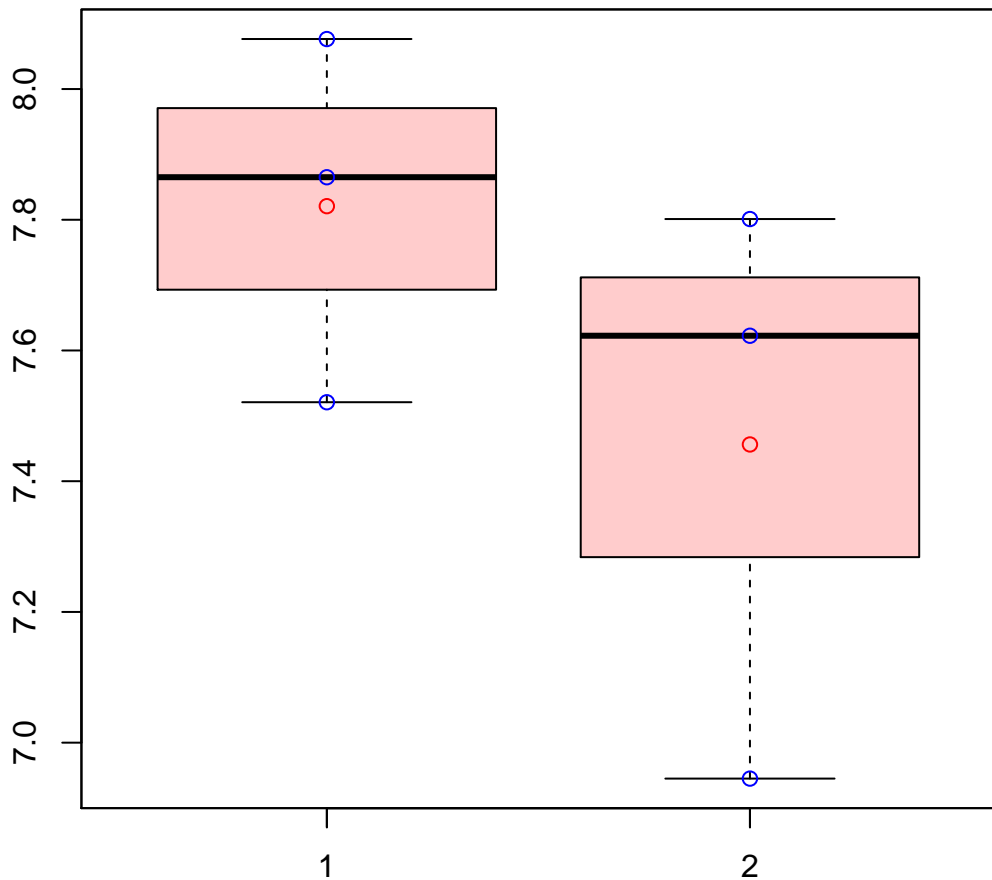

t-Test: p-value = 0.31

# CL10608Contig1|CL10608Contig1

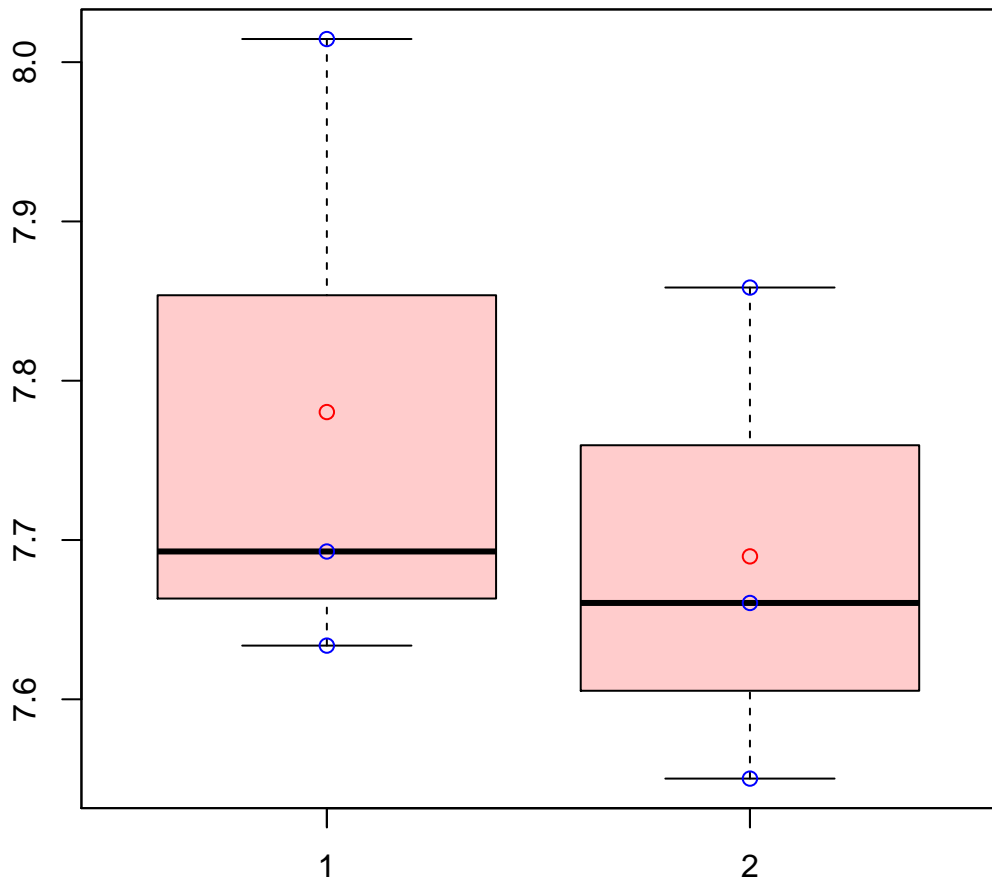

t-Test: p-value = 0.58

# CL1062Contig5|CL1062Contig5

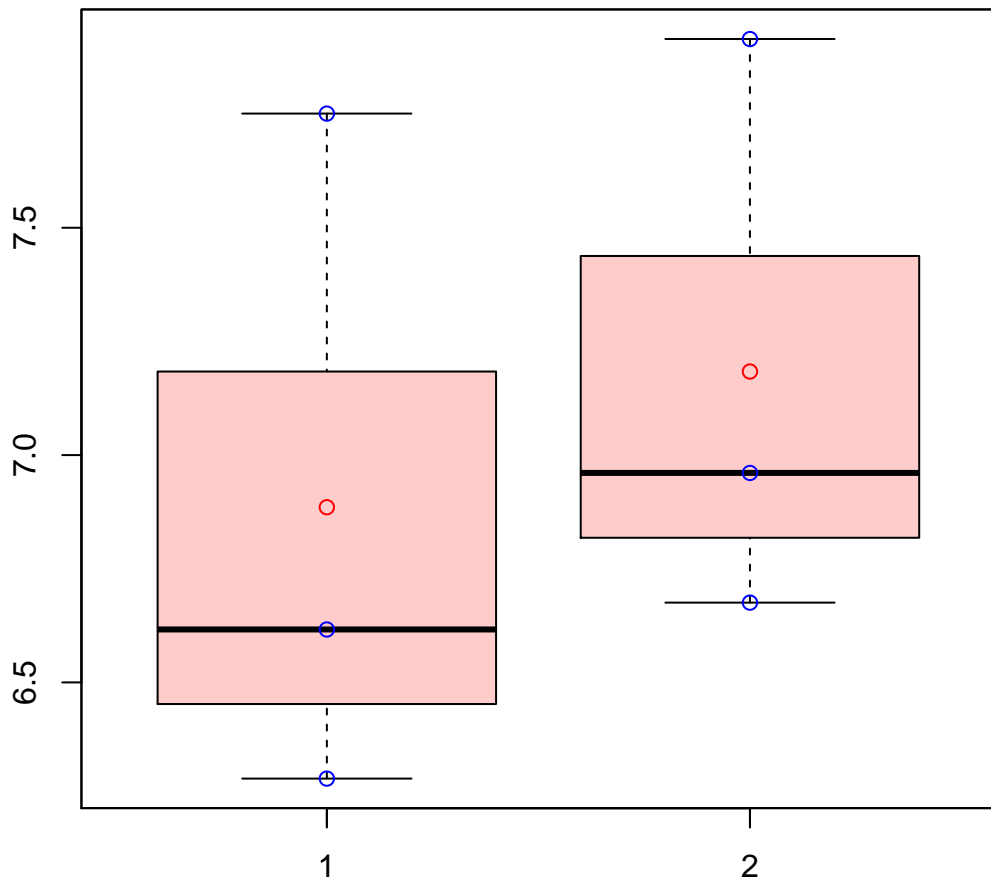

t-Test: p-value = 0.63

# CL1063Contig6|CL1063Contig6

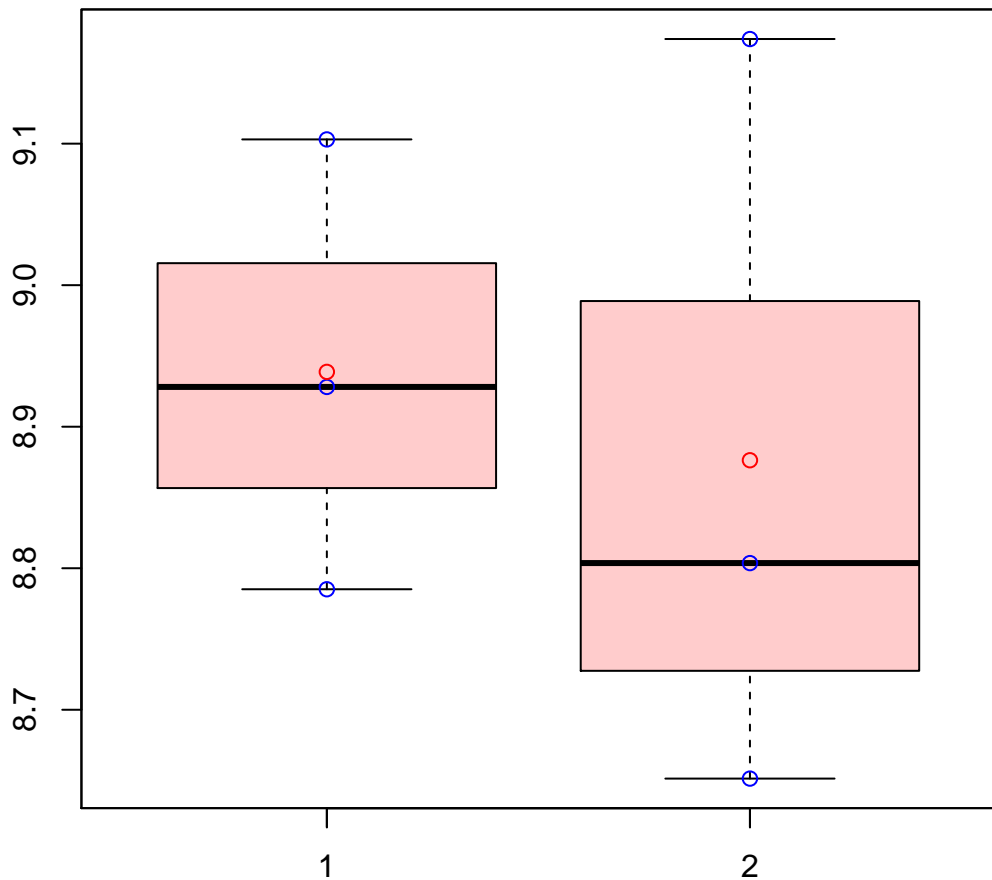

t-Test: p-value = 0.75



# CL10646Contig2|CL10646Contig2

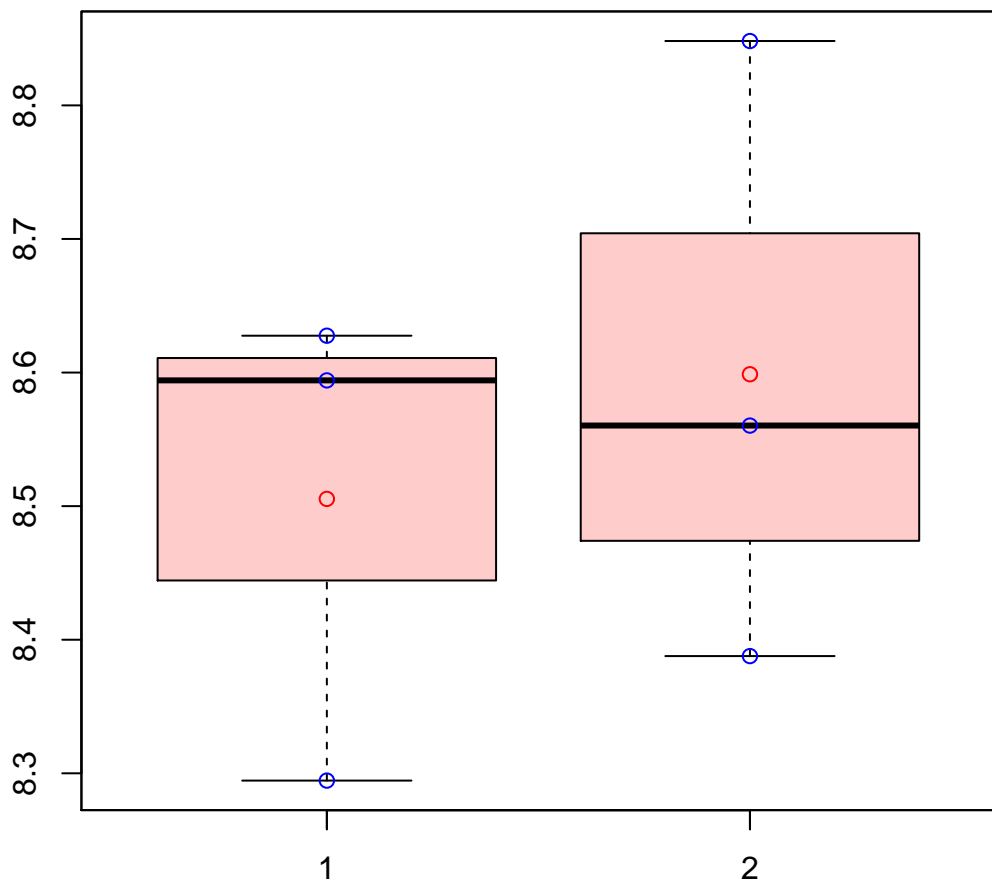

t-Test: p-value = 0.62

# CL10661Contig2|CL10661Contig2

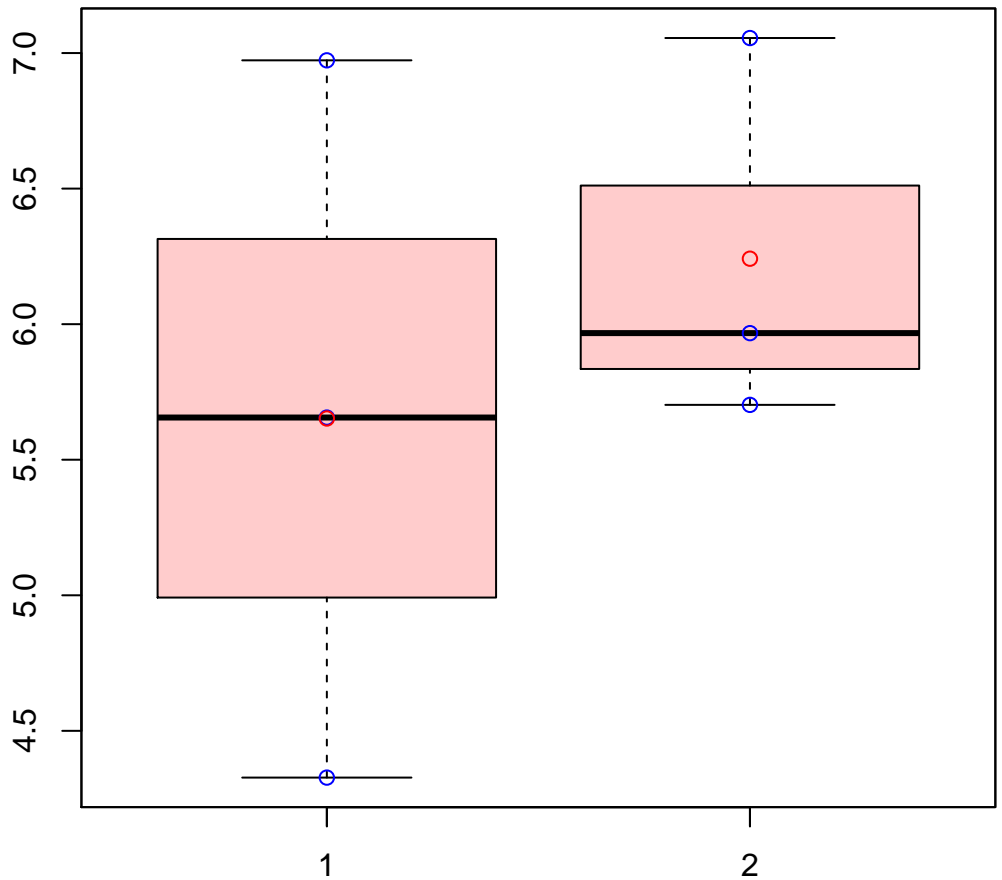

t-Test: p-value = 0.54

# CL10667Contig2|CL10667Contig2

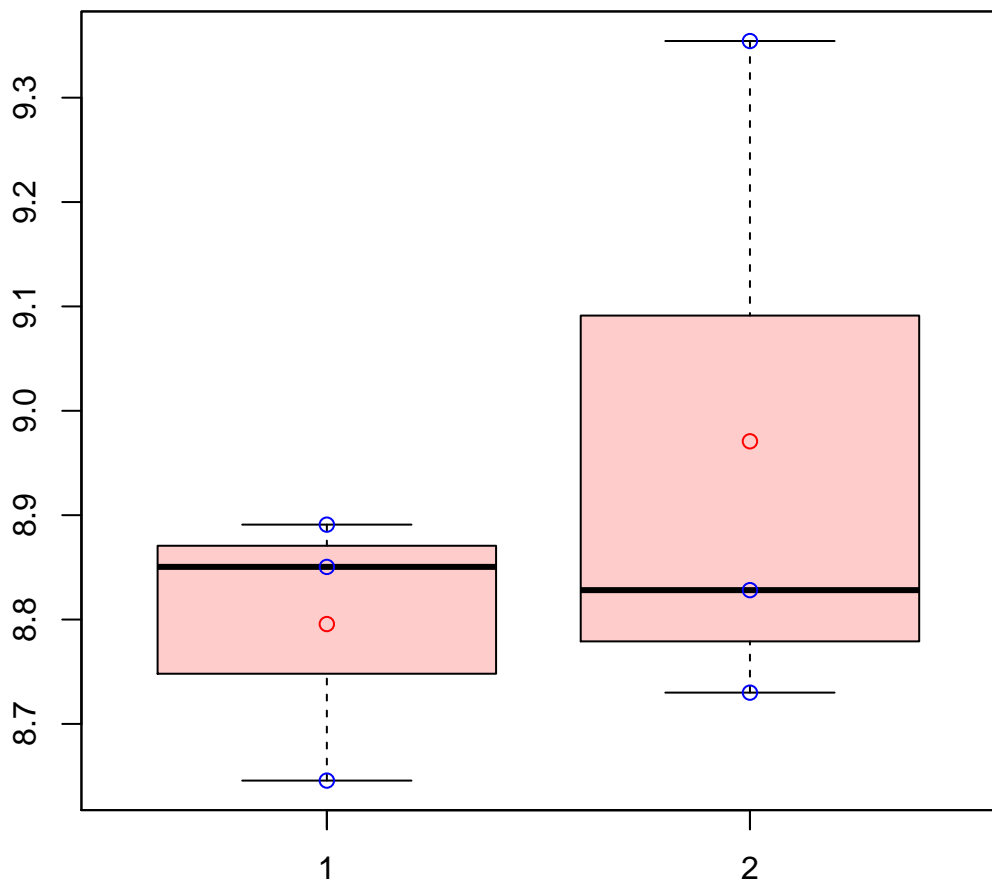

t-Test: p-value = 0.47

# CL1067Contig15|CL1067Contig15

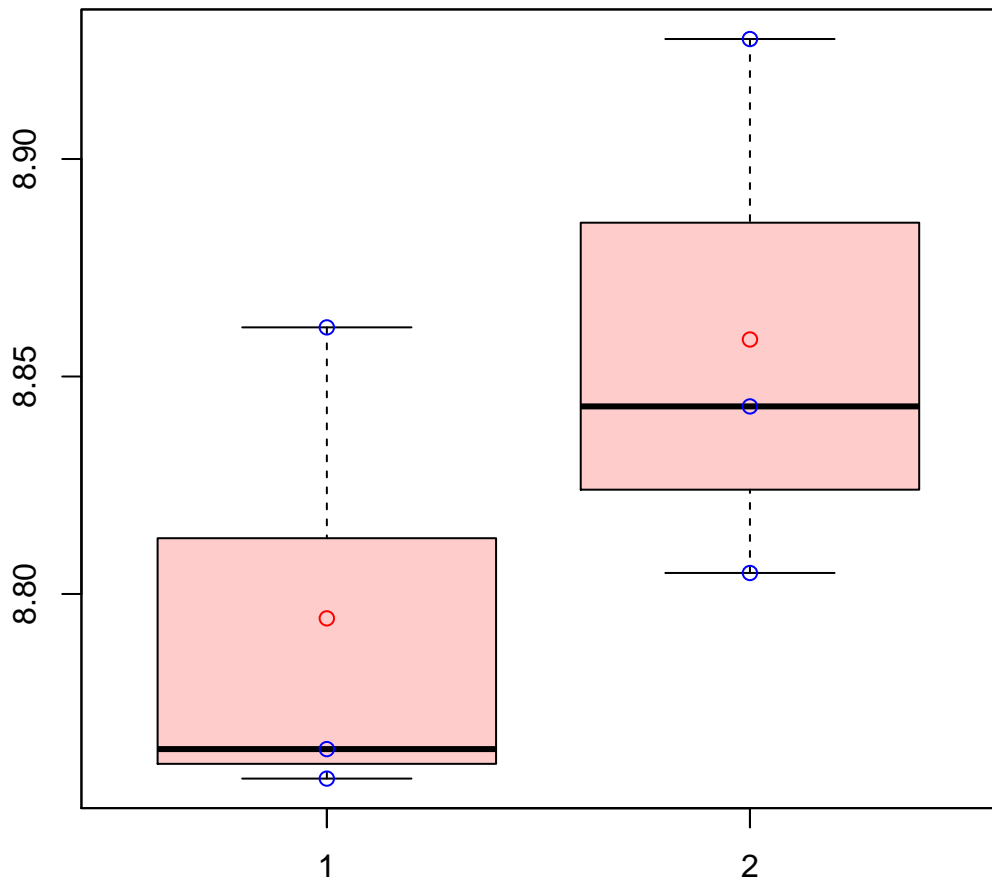

t-Test: p-value = 0.26

# CL106Contig4|CL106Contig4

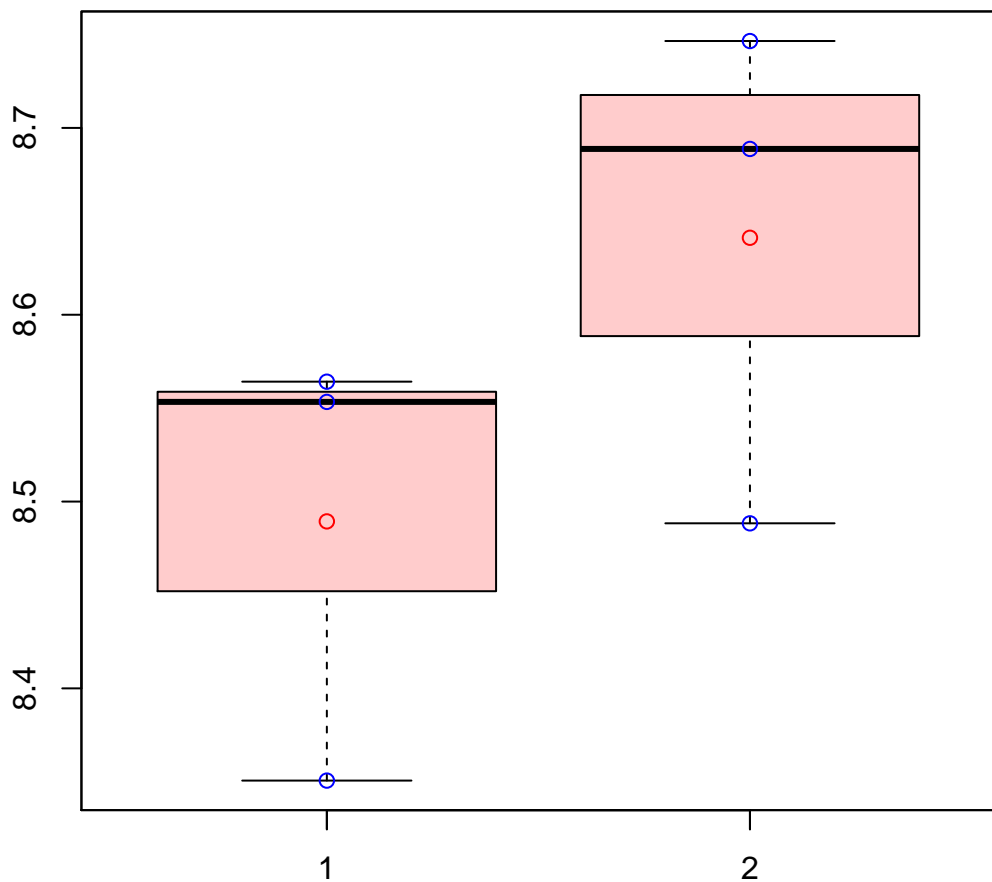

t-Test: p-value = 0.22

# CL1072Contig2|CL1072Contig2

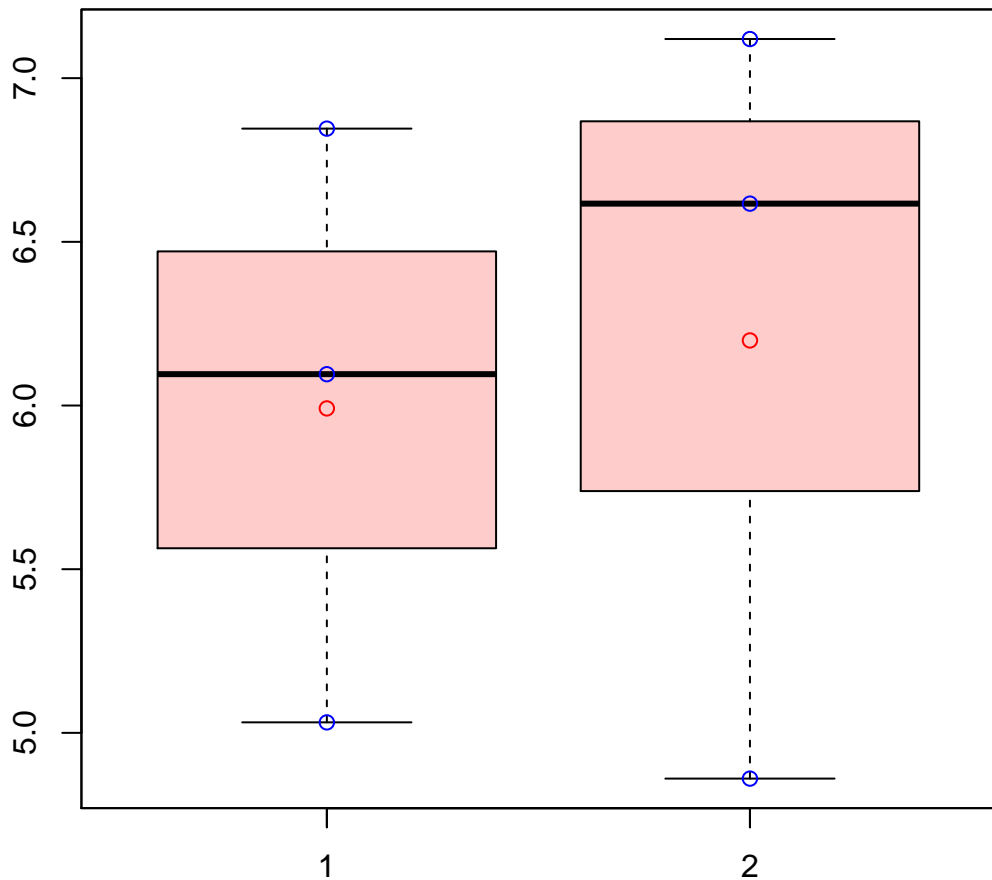

t-Test: p-value = 0.82

# CL1073Contig4|CL1073Contig4

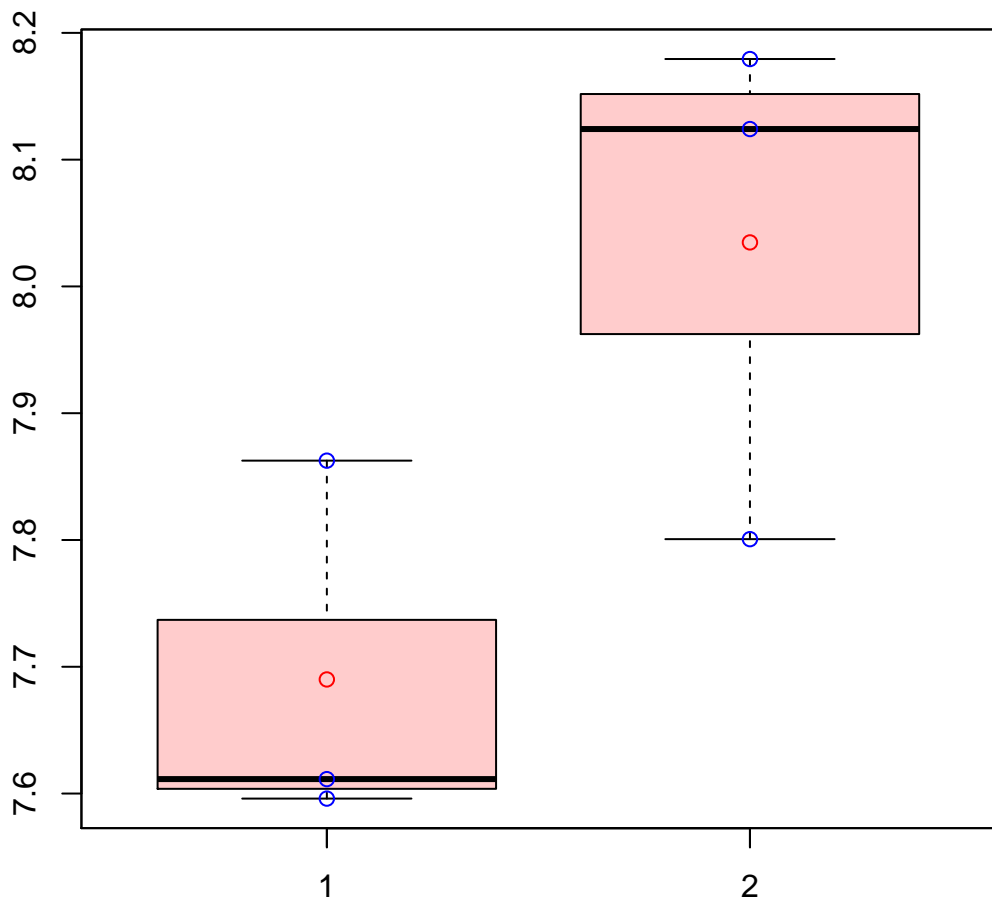

t-Test: p-value = 0.08

# CL1074Contig5|CL1074Contig5

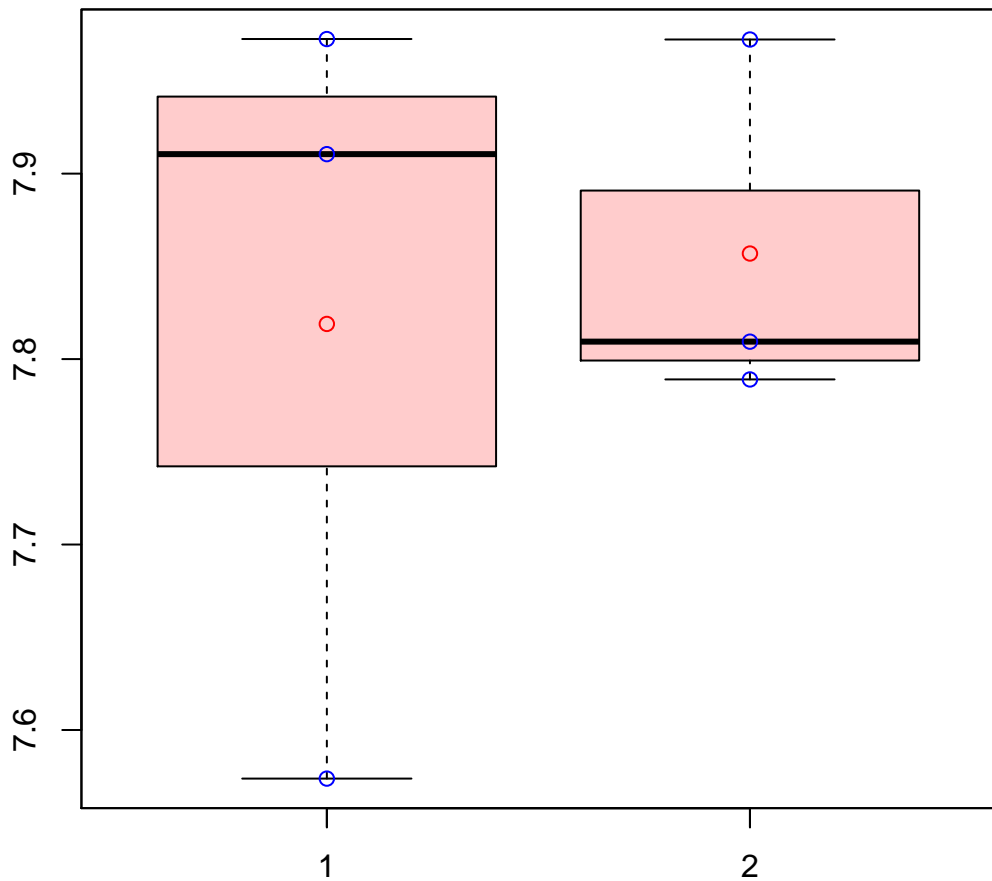

t-Test: p-value = 0.8



# CL1075Contig9|CL1075Contig9

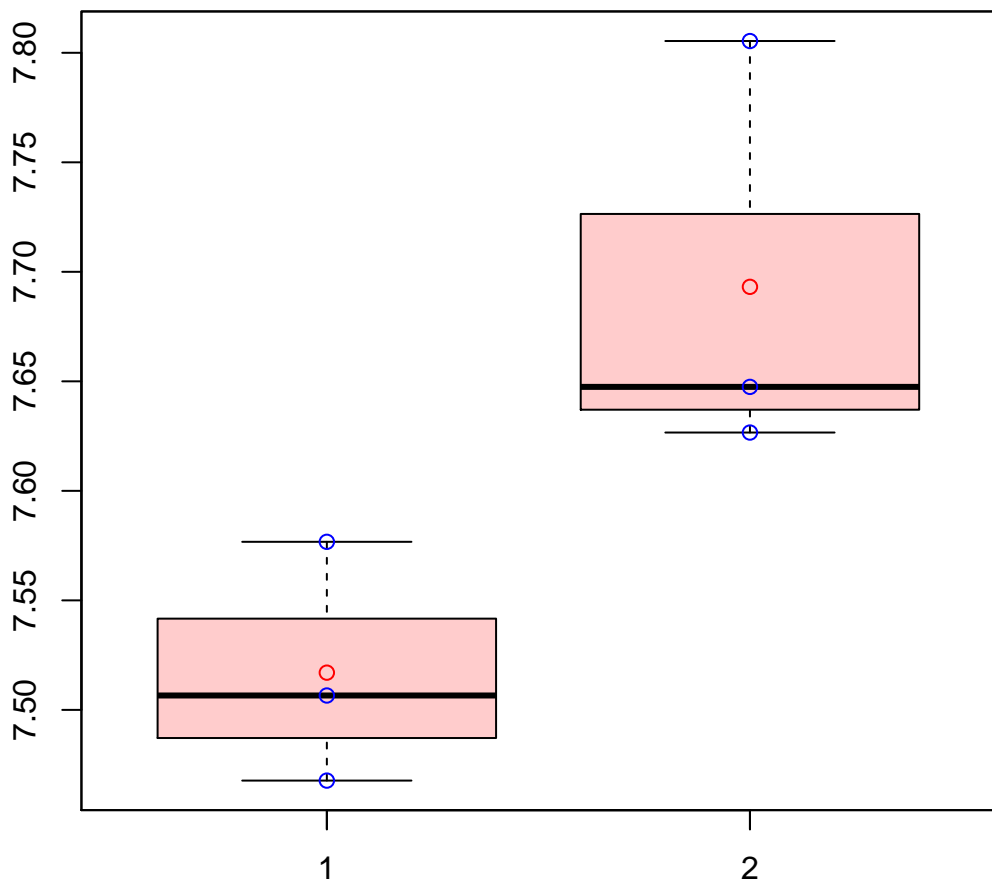

t-Test: p-value = 0.07

# CL10763Contig1|CL10763Contig1

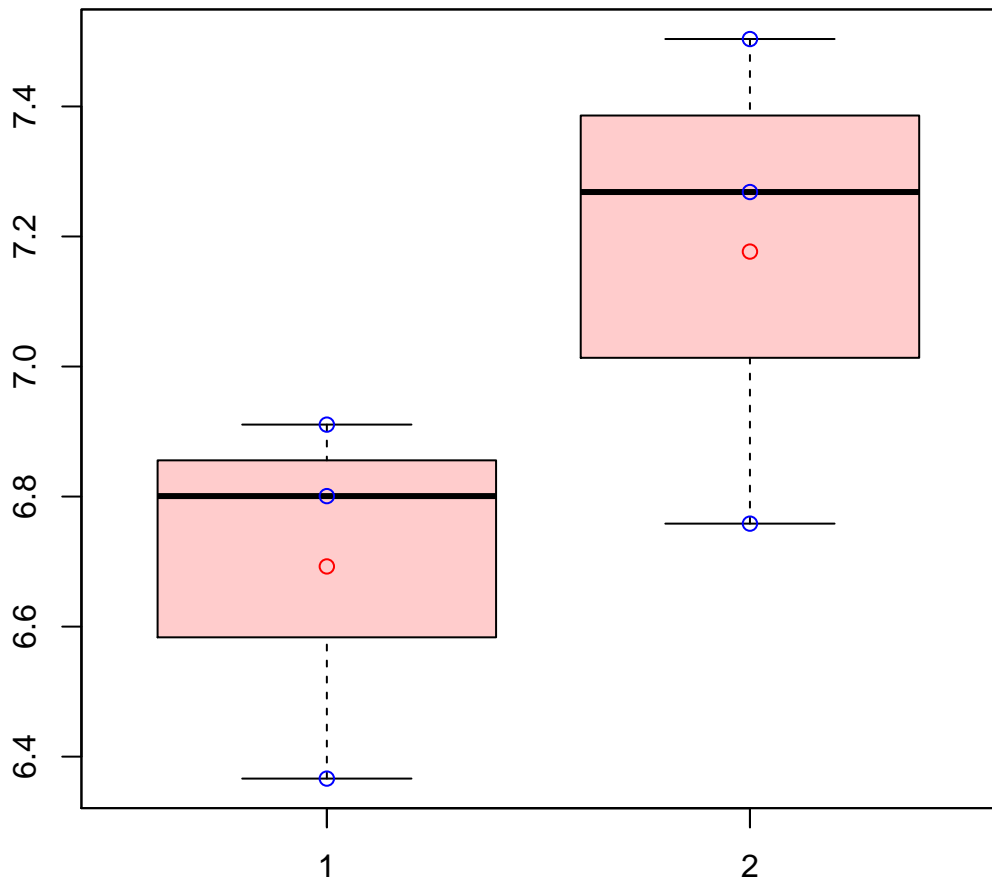

t-Test: p-value = 0.16

# CL10787Contig1|CL10787Contig1

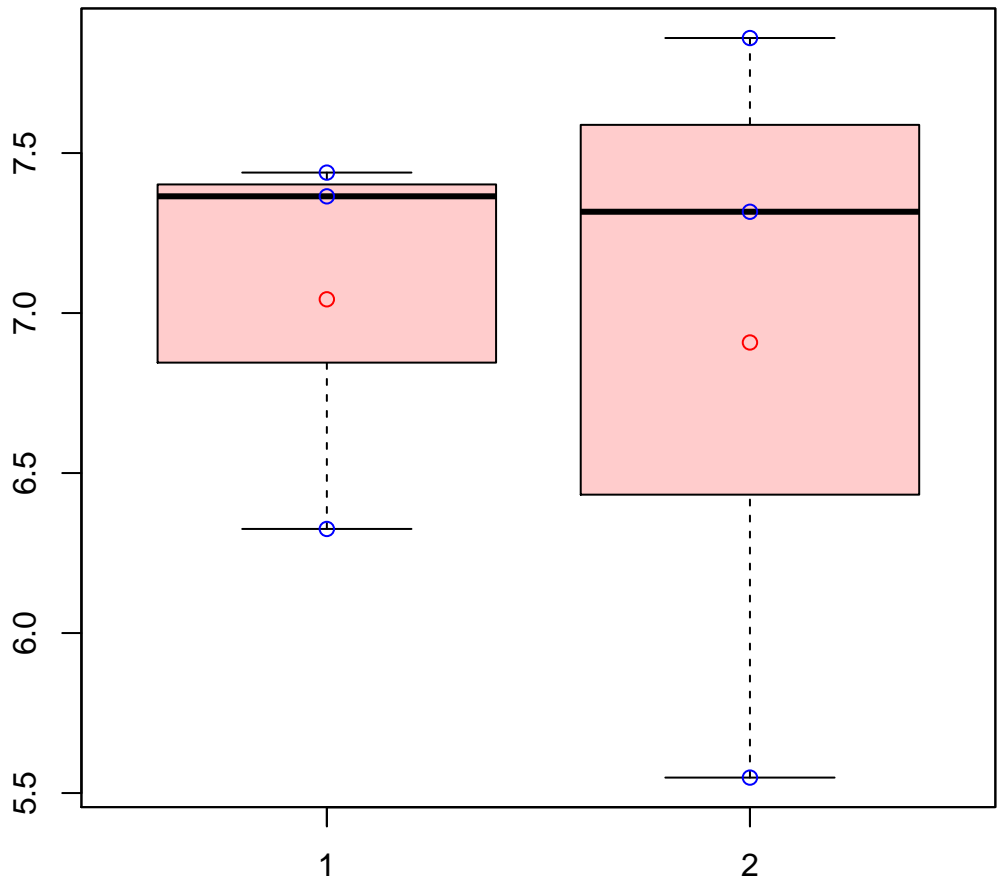

t-Test: p-value = 0.87

# CL107Contig15|CL107Contig15

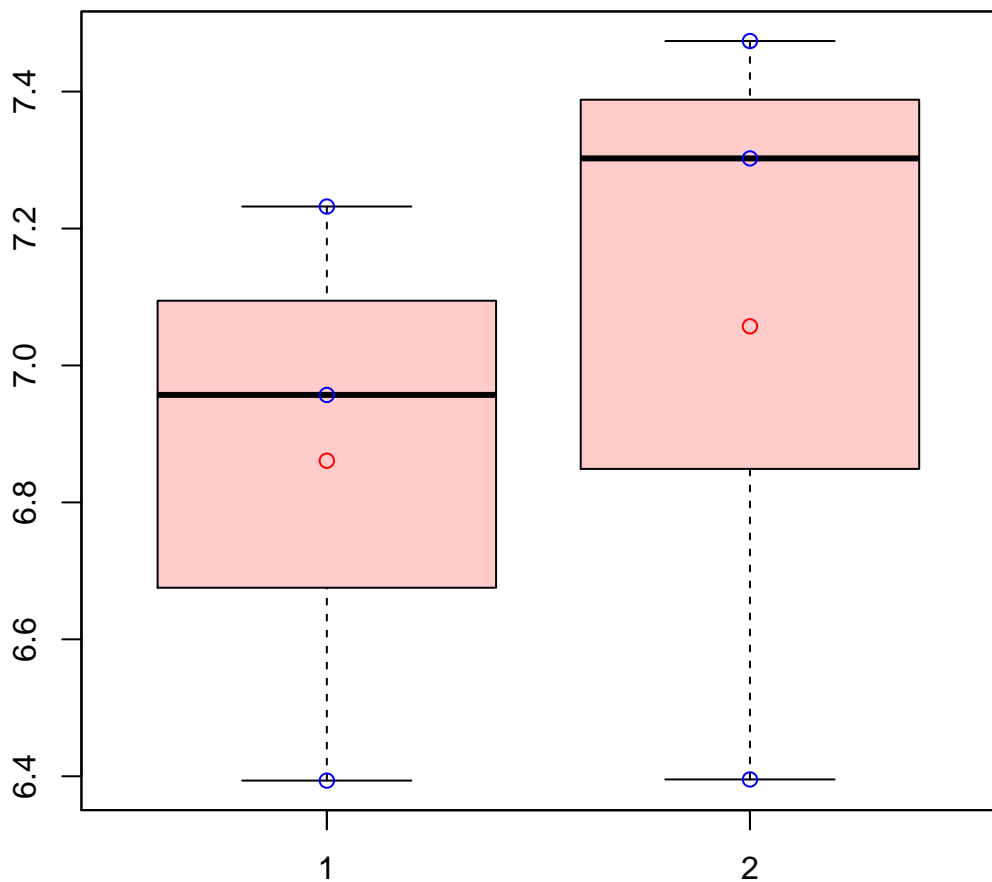

t-Test: p-value = 0.66

# CL107Contig5|CL107Contig5

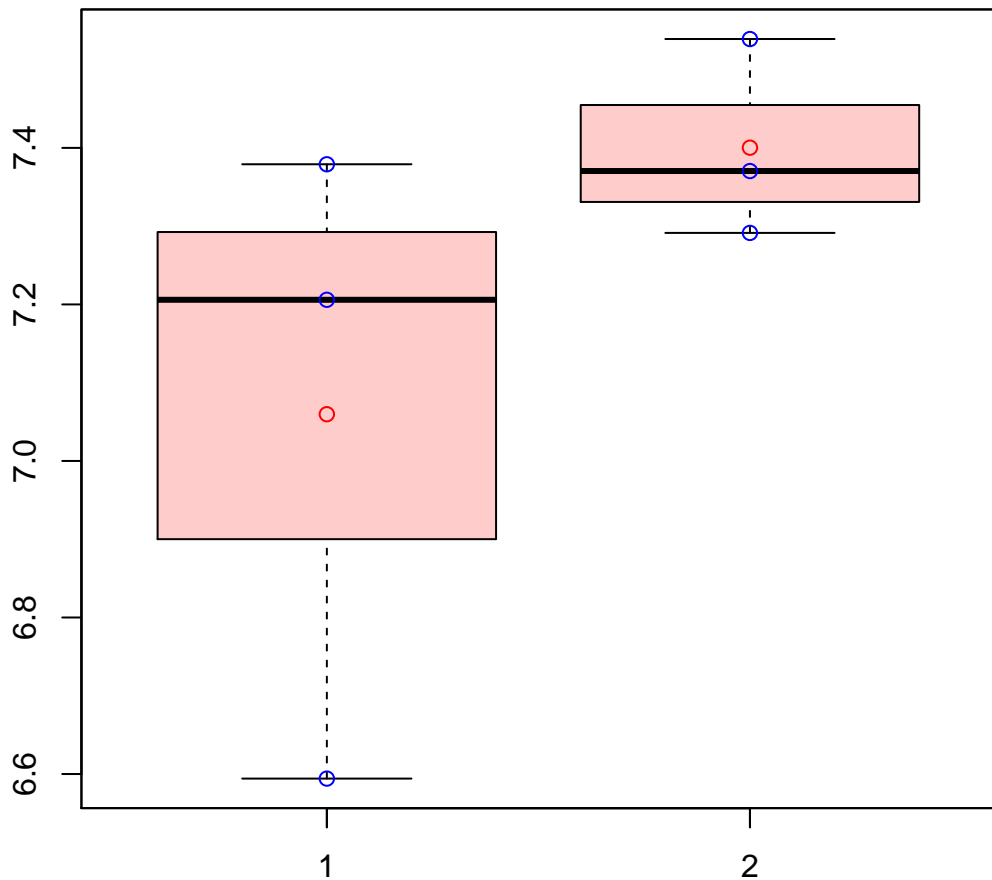

t-Test: p-value = 0.29

# CL10811Contig2|CL10811Contig2

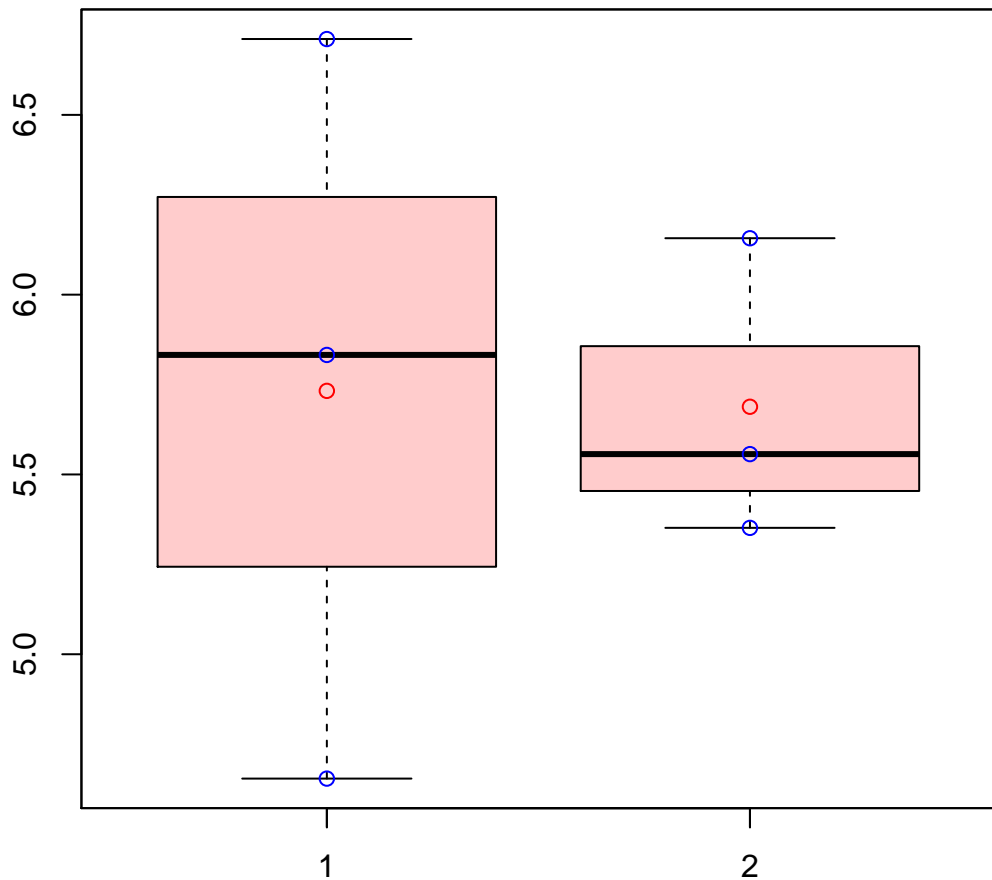

t-Test: p-value = 0.95

# CL10841Contig2|CL10841Contig2

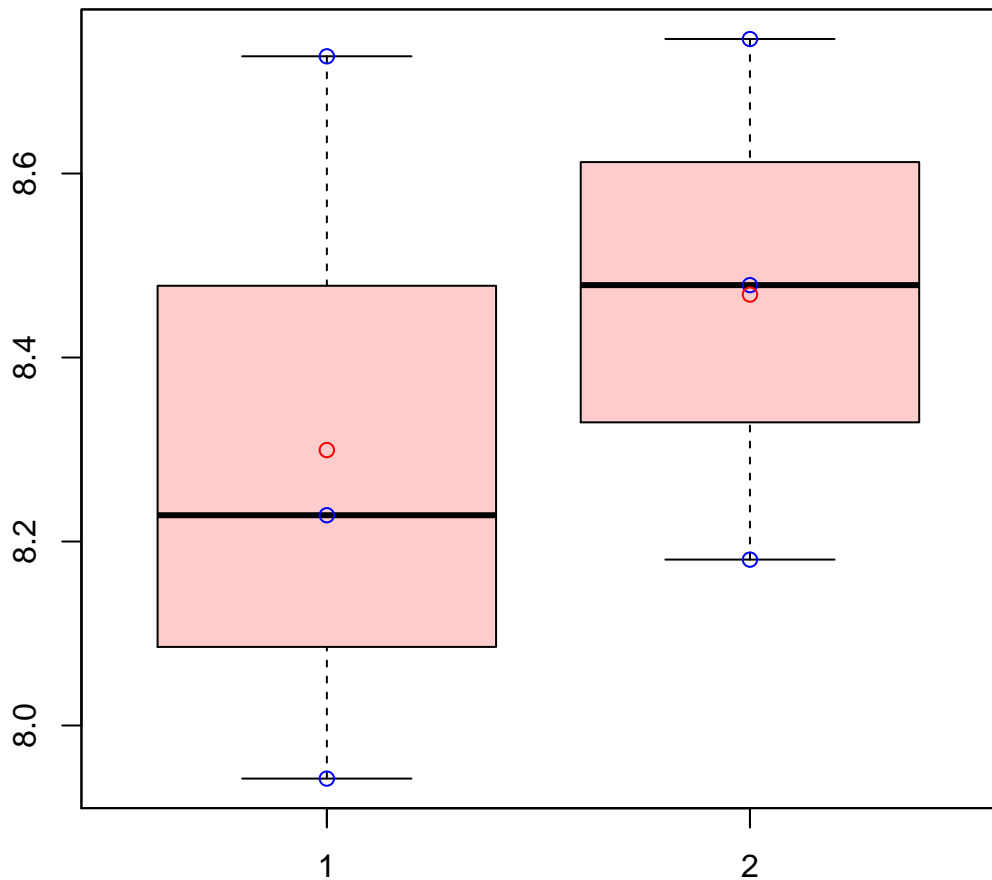

t-Test: p-value = 0.58

# CL10848Contig2|CL10848Contig2

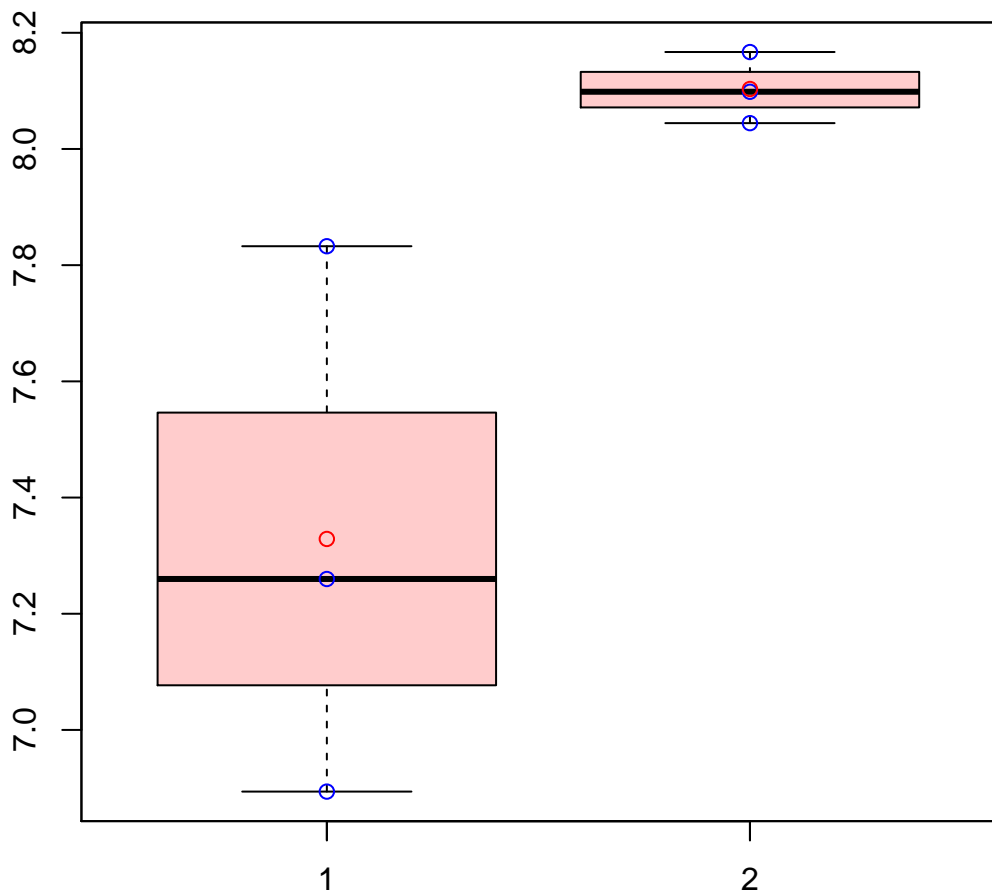

t-Test: p-value = 0.1



# CL10857Contig1|CL10857Contig1

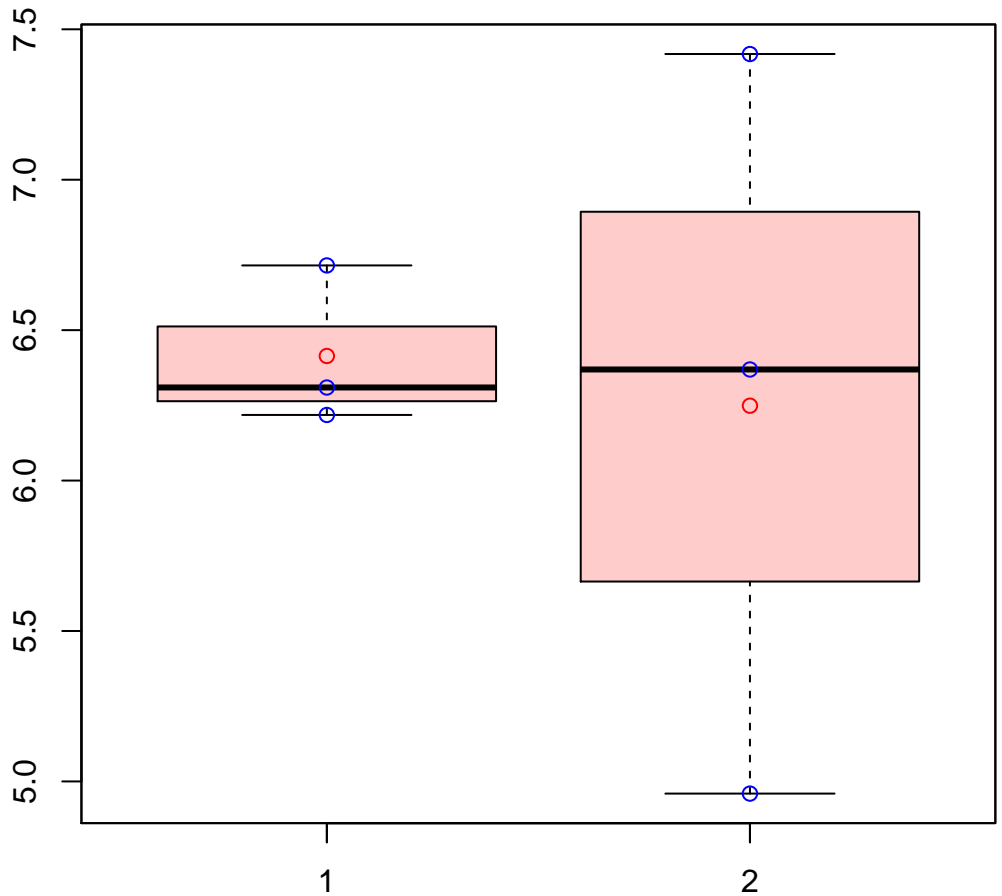

t-Test: p-value = 0.84

# CL1085Contig2|CL1085Contig2

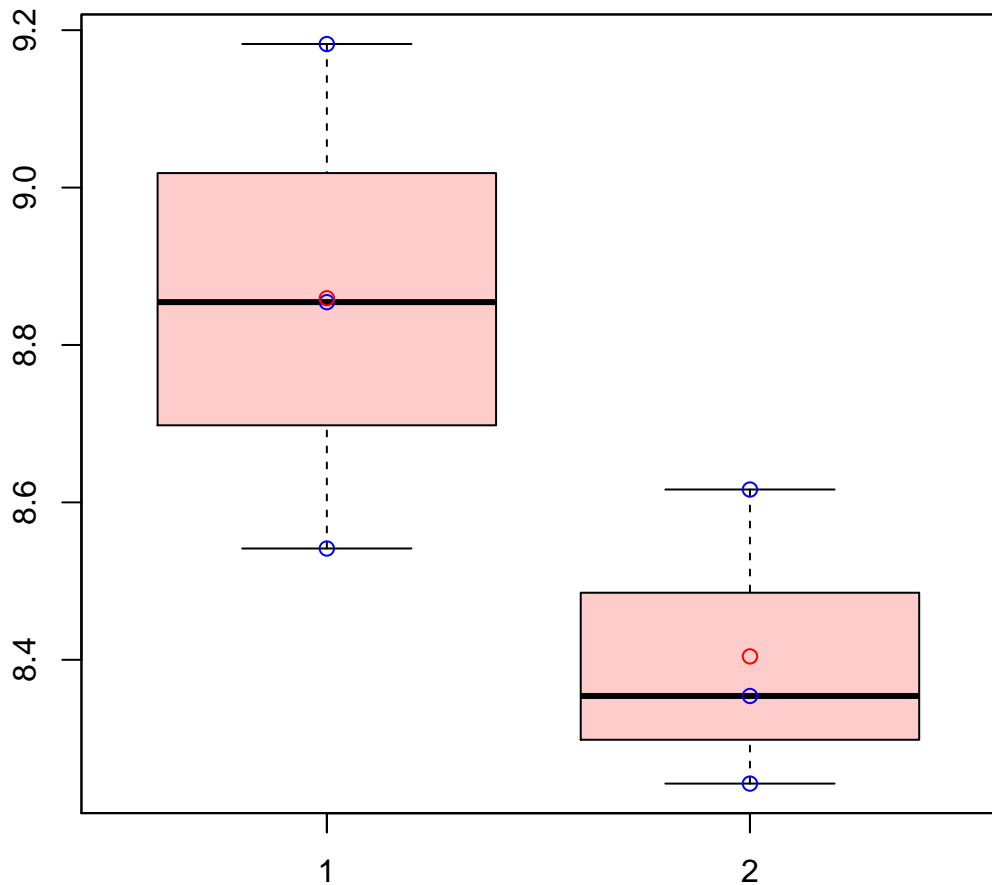

t-Test: p-value = 0.12

# CL1085Contig7|CL1085Contig7

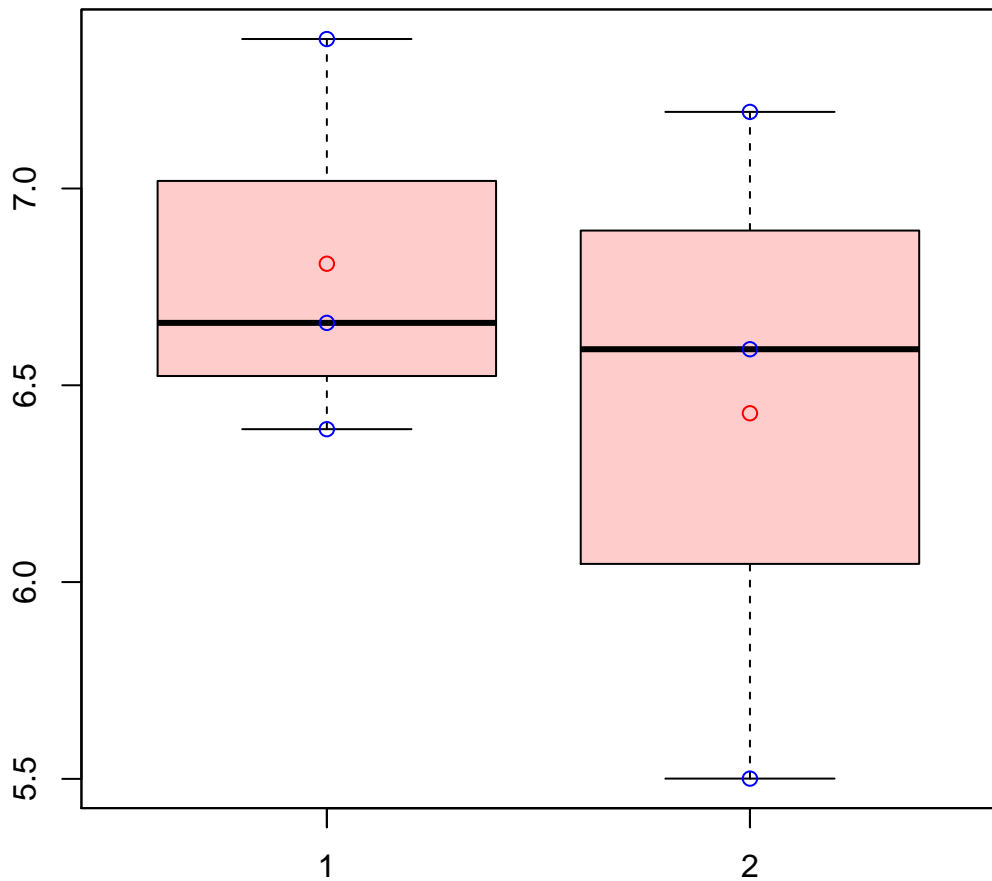

t-Test: p-value = 0.55

# CL10863Contig2|CL10863Contig2

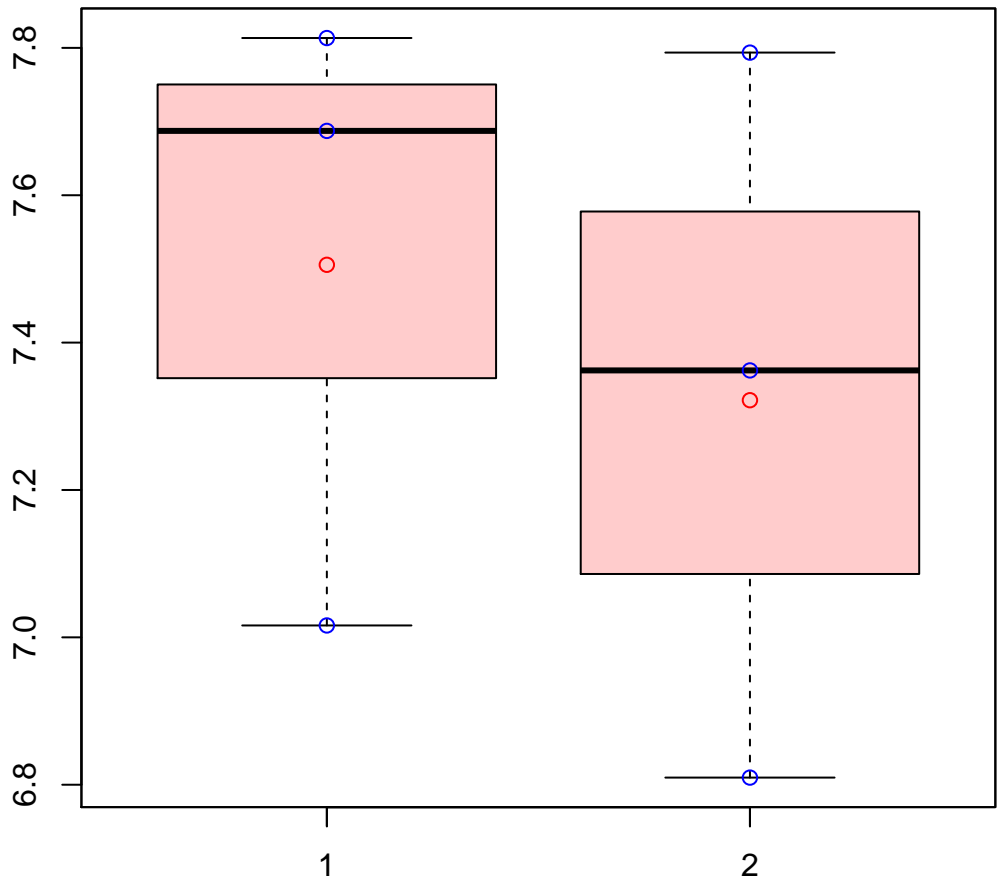

t-Test: p-value = 0.65

# CL10865Contig2|CL10865Contig2

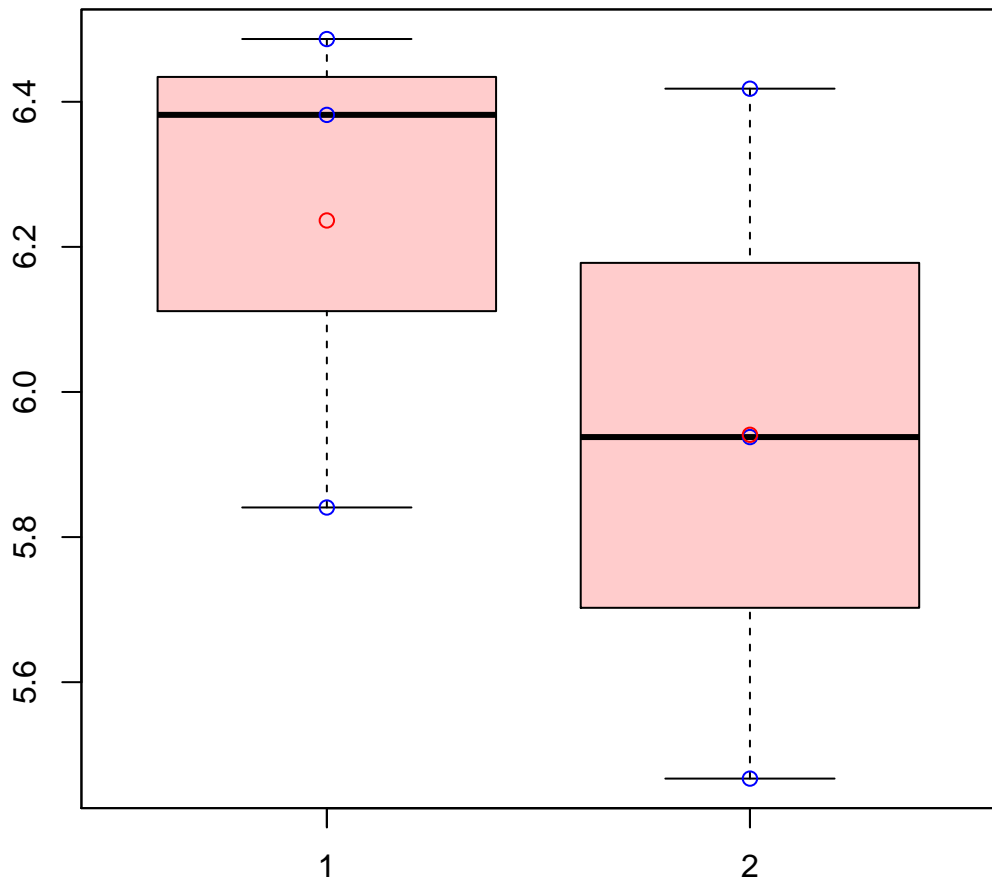

t-Test: p-value = 0.44

# CL10869Contig1|CL10869Contig1

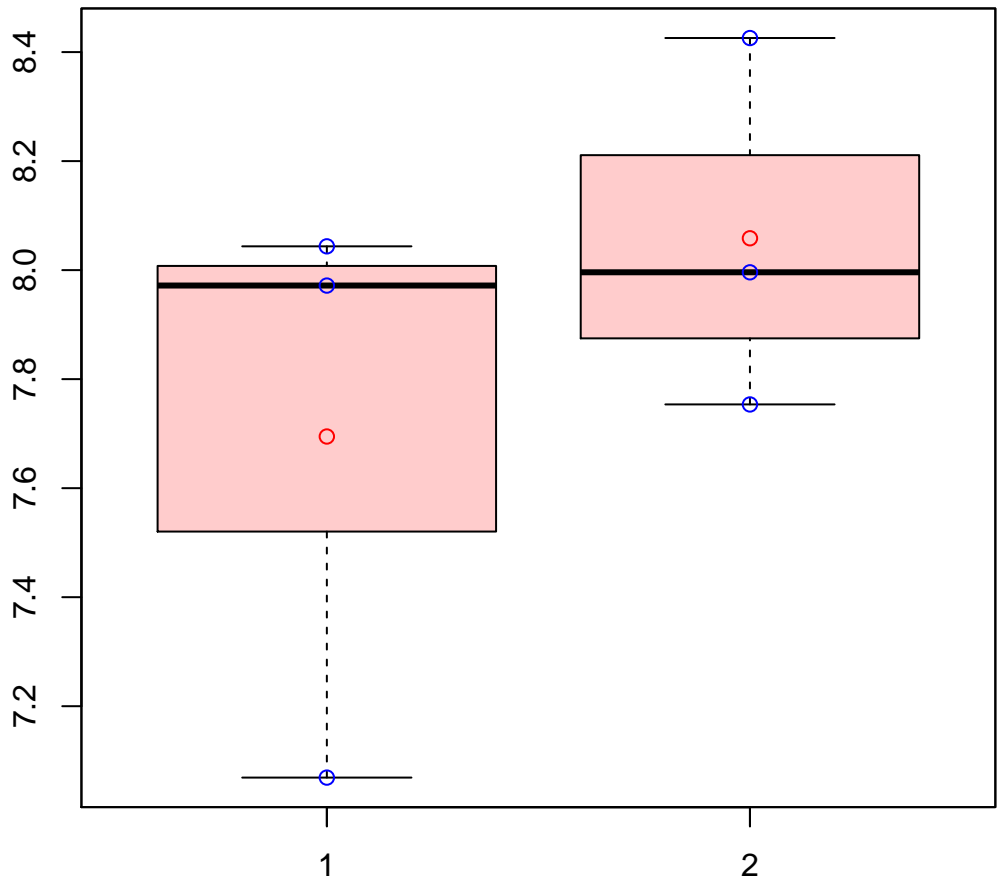

t-Test: p-value = 0.39

# CL10874Contig1|CL10874Contig1

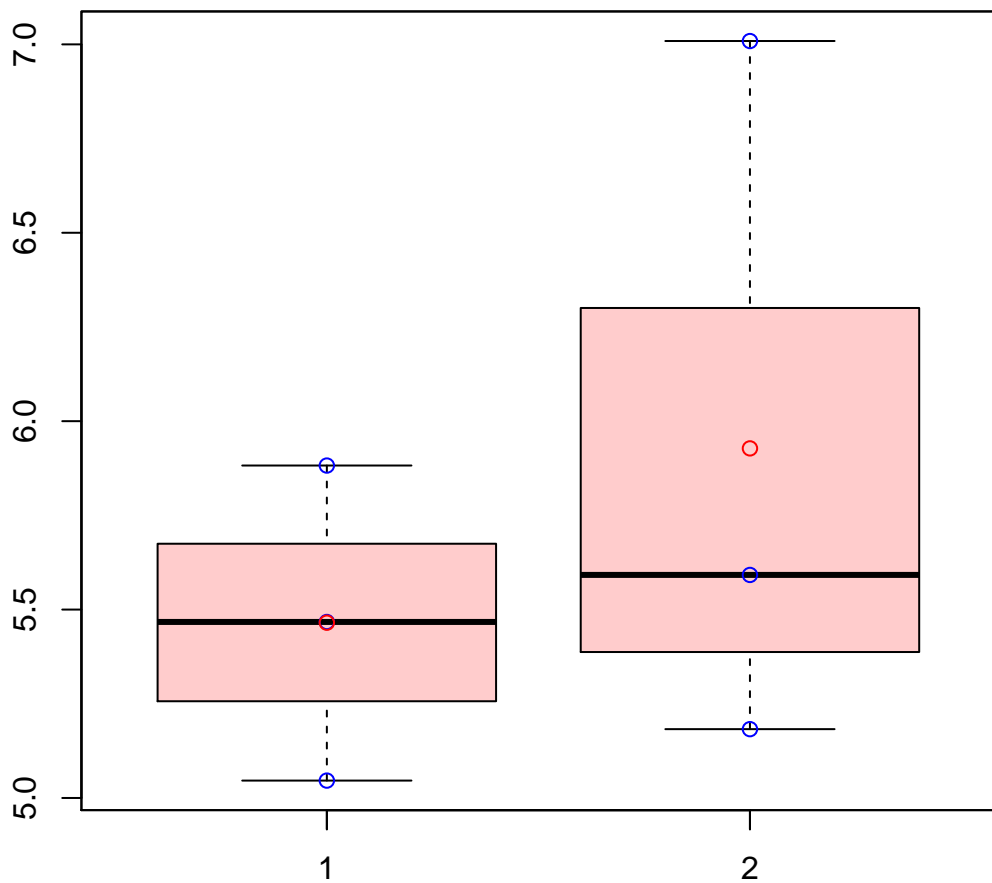

t-Test: p-value = 0.5

# CL1087Contig13|CL1087Contig13

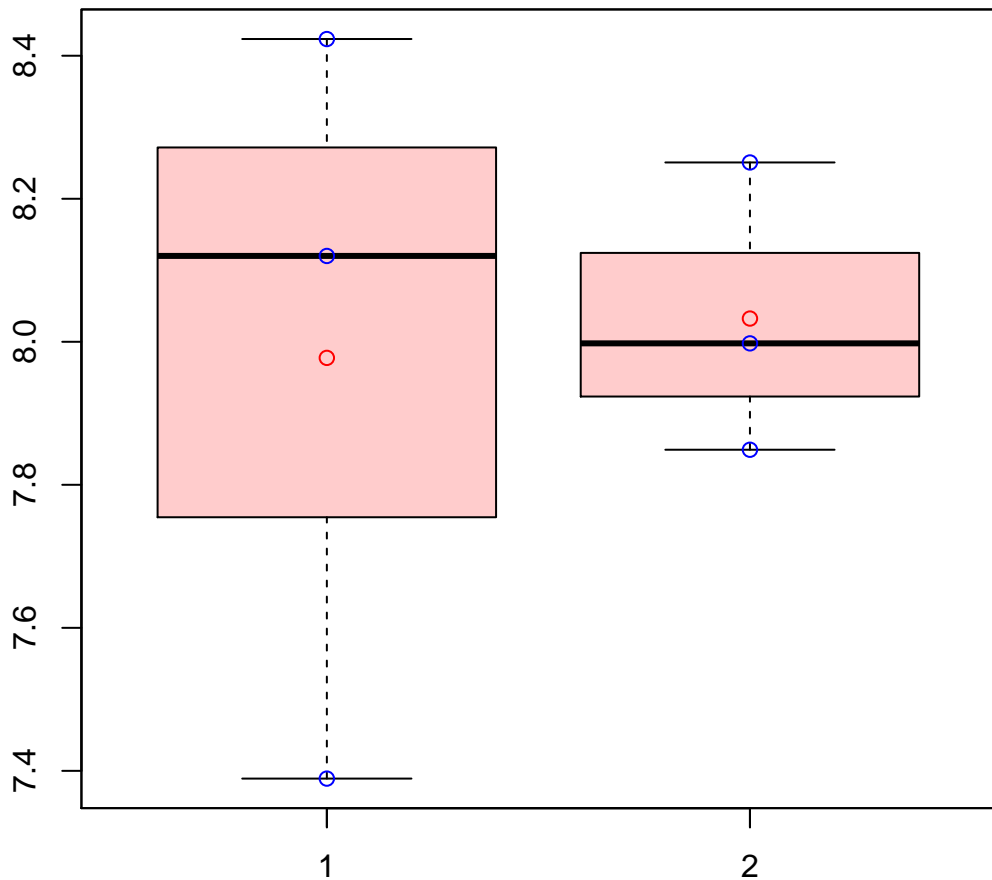

t-Test: p-value = 0.88



# CL1087Contig7|CL1087Contig7

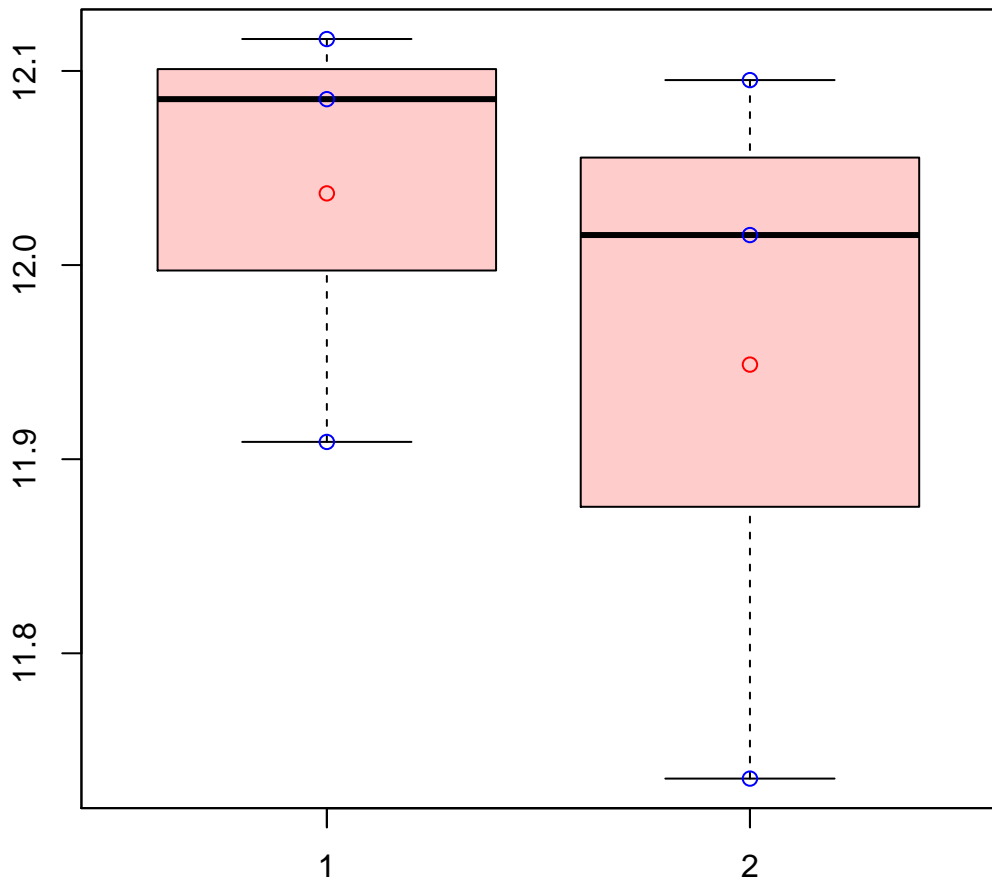

t-Test: p-value = 0.53

# CL1087Contig8|CL1087Contig8

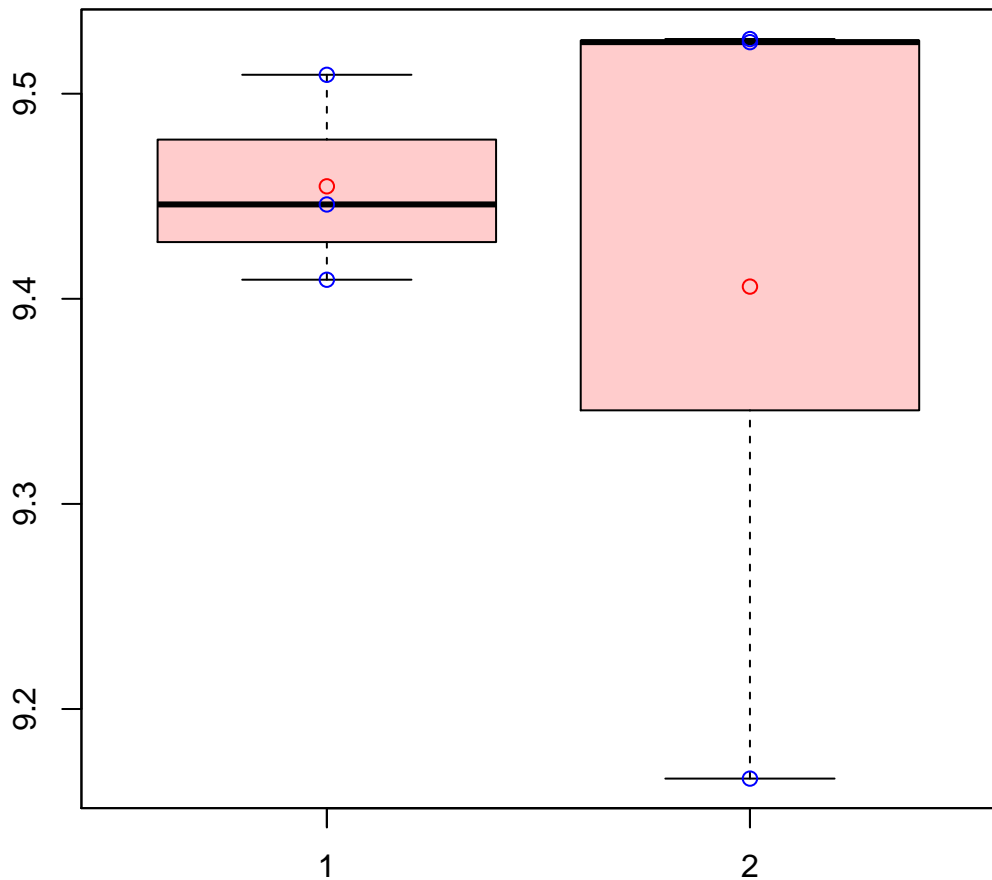

t-Test: p-value = 0.73

# CL10896Contig1|CL10896Contig1

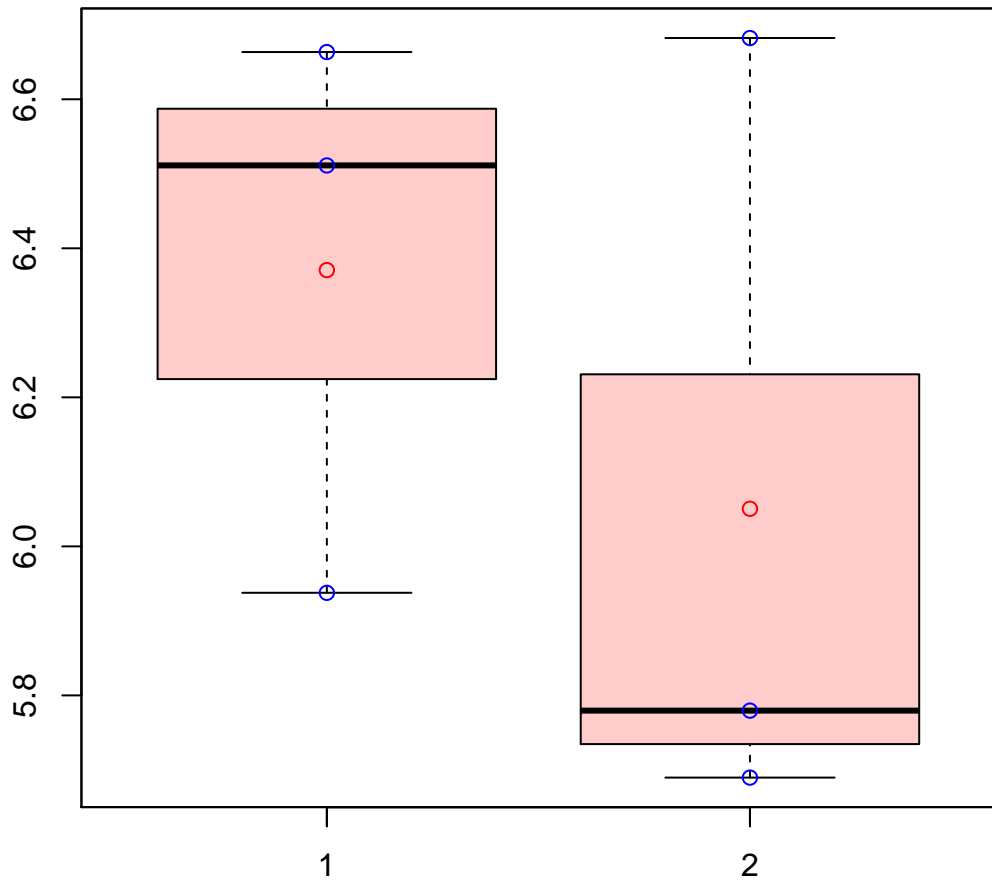

t-Test: p-value = 0.46

# CL108Contig8|CL108Contig8

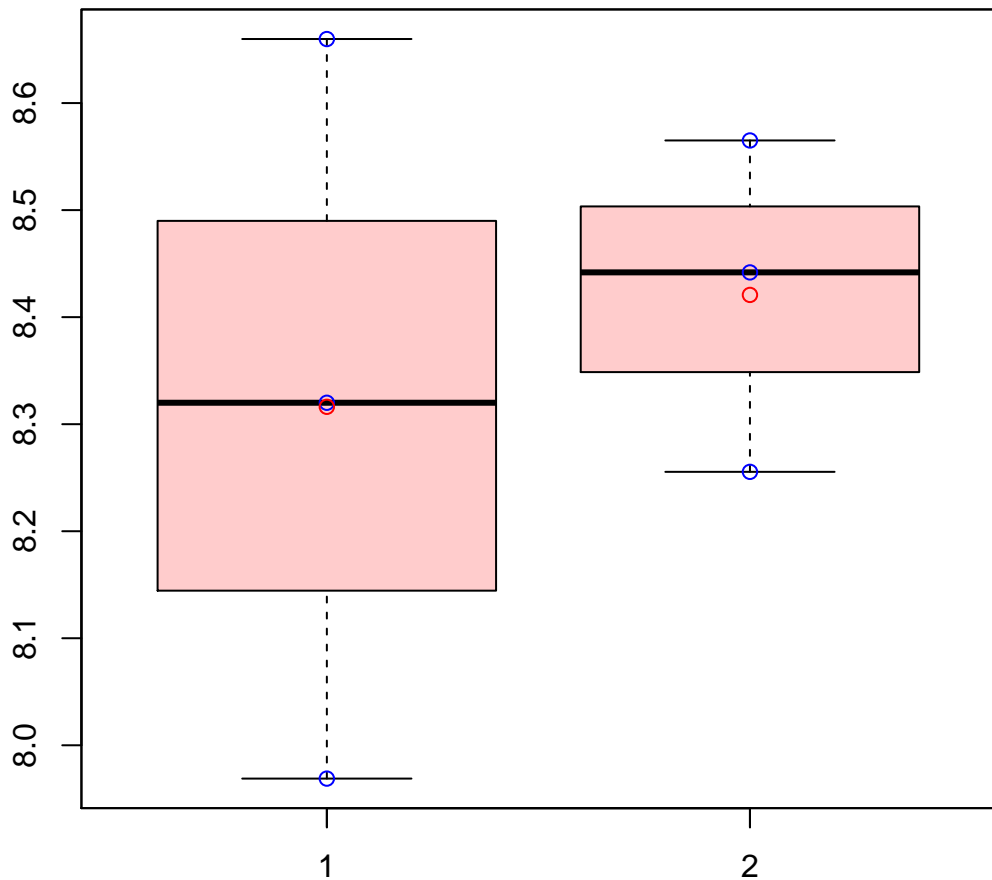

t-Test: p-value = 0.67

# CL1092Contig2|CL1092Contig2

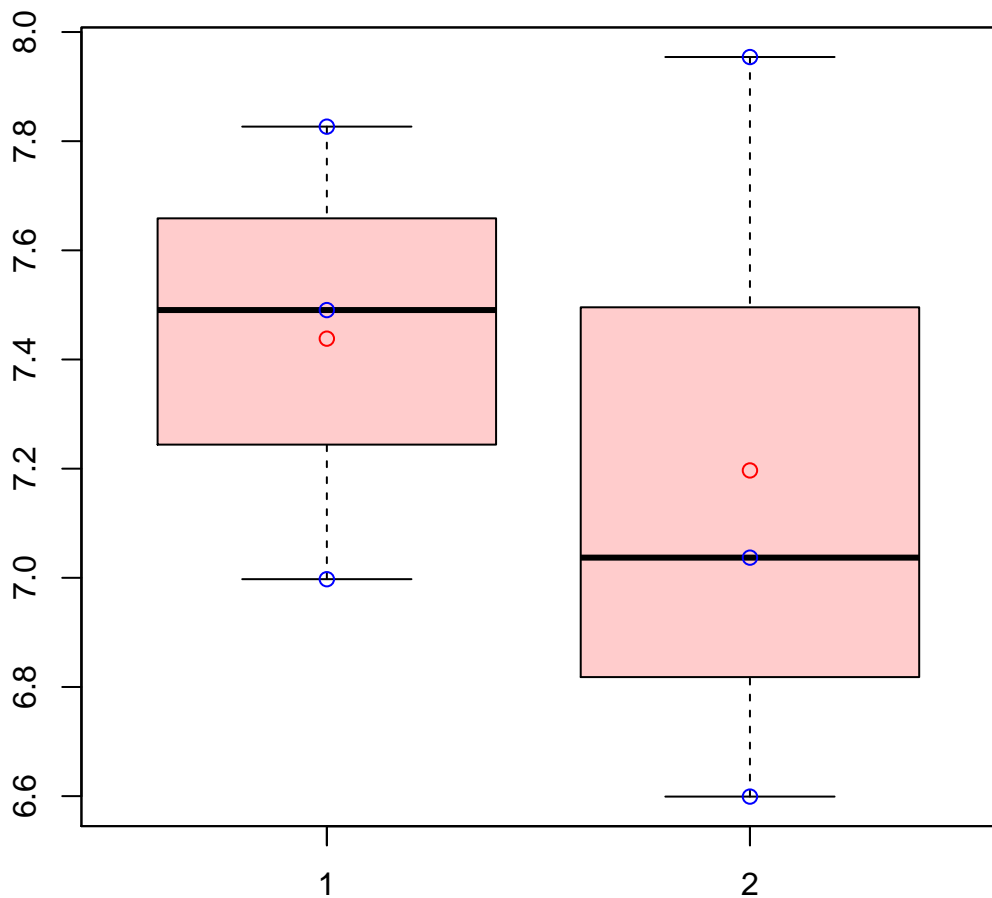

t-Test: p-value = 0.64

# CL1092Contig5|CL1092Contig5

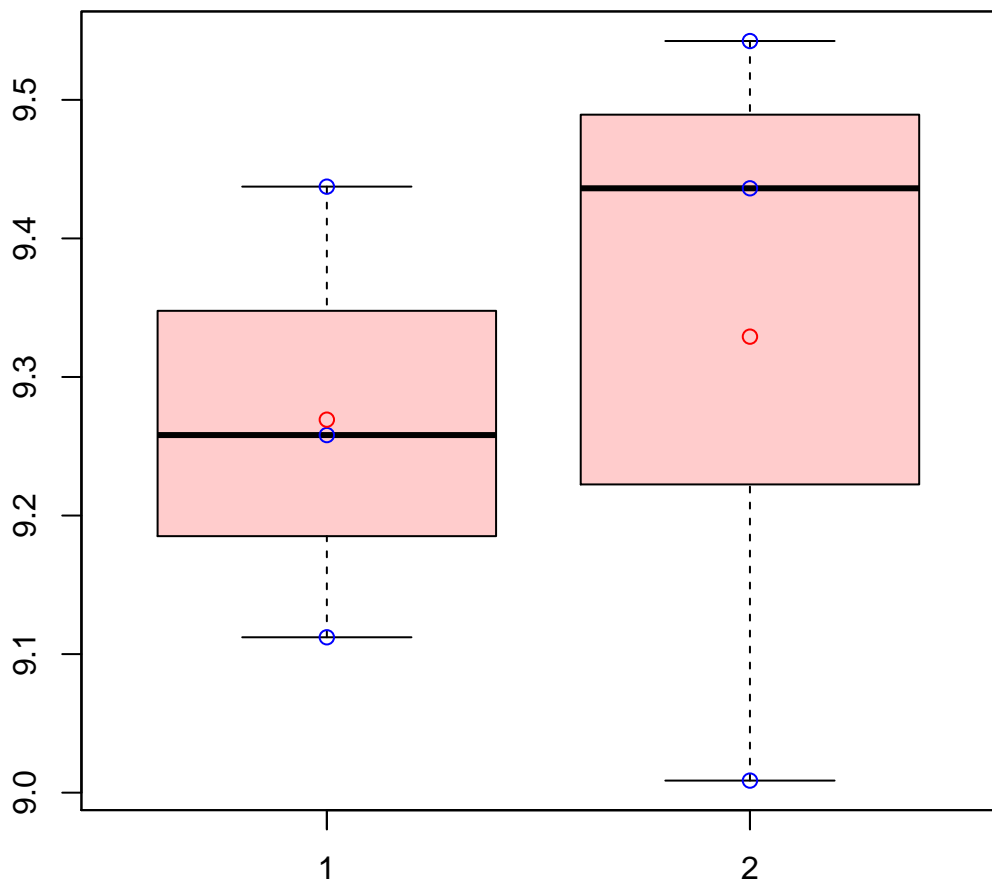

t-Test: p-value = 0.77

# CL10931Contig2|CL10931Contig2

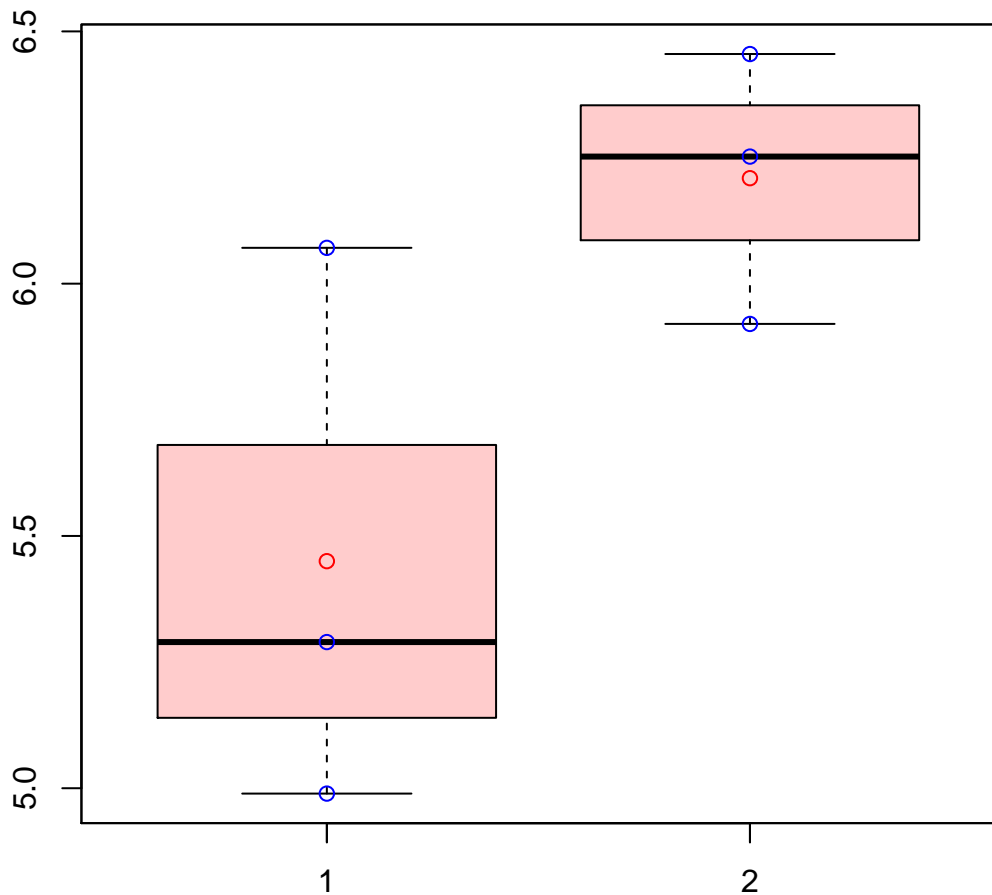

t-Test: p-value = 0.13

# CL1094Contig10|CL1094Contig10

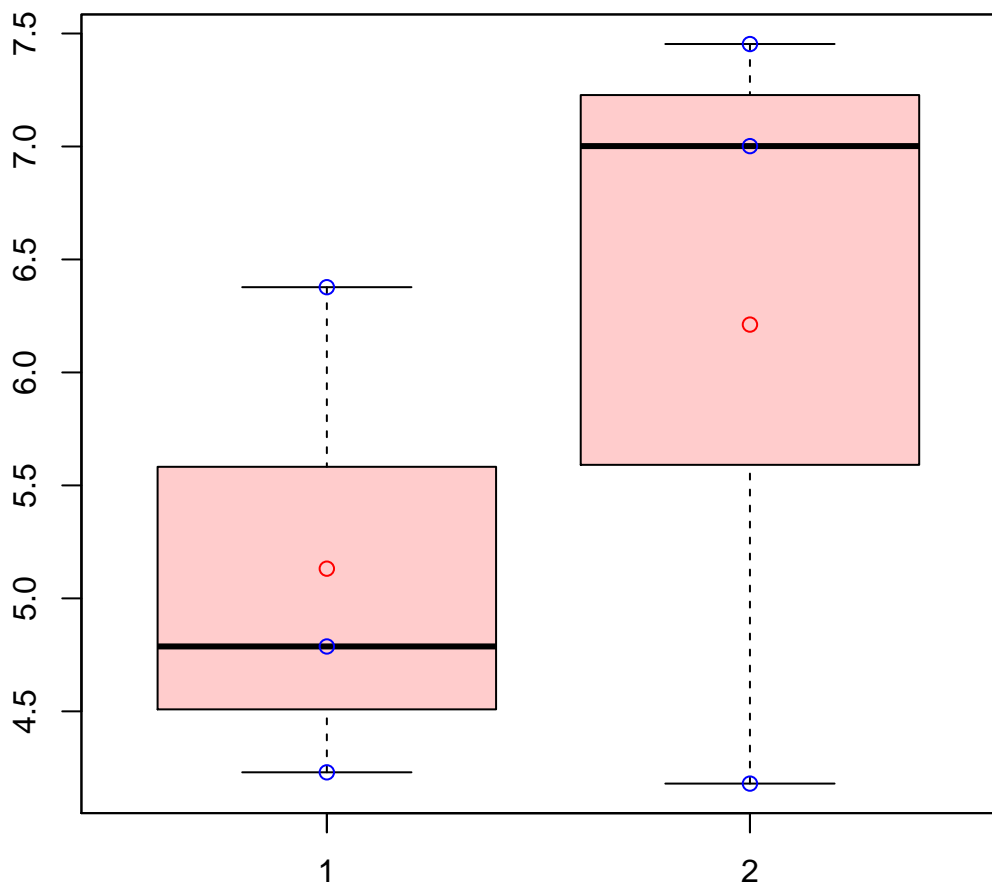

t-Test: p-value = 0.43



# CL10977Contig1|CL10977Contig1

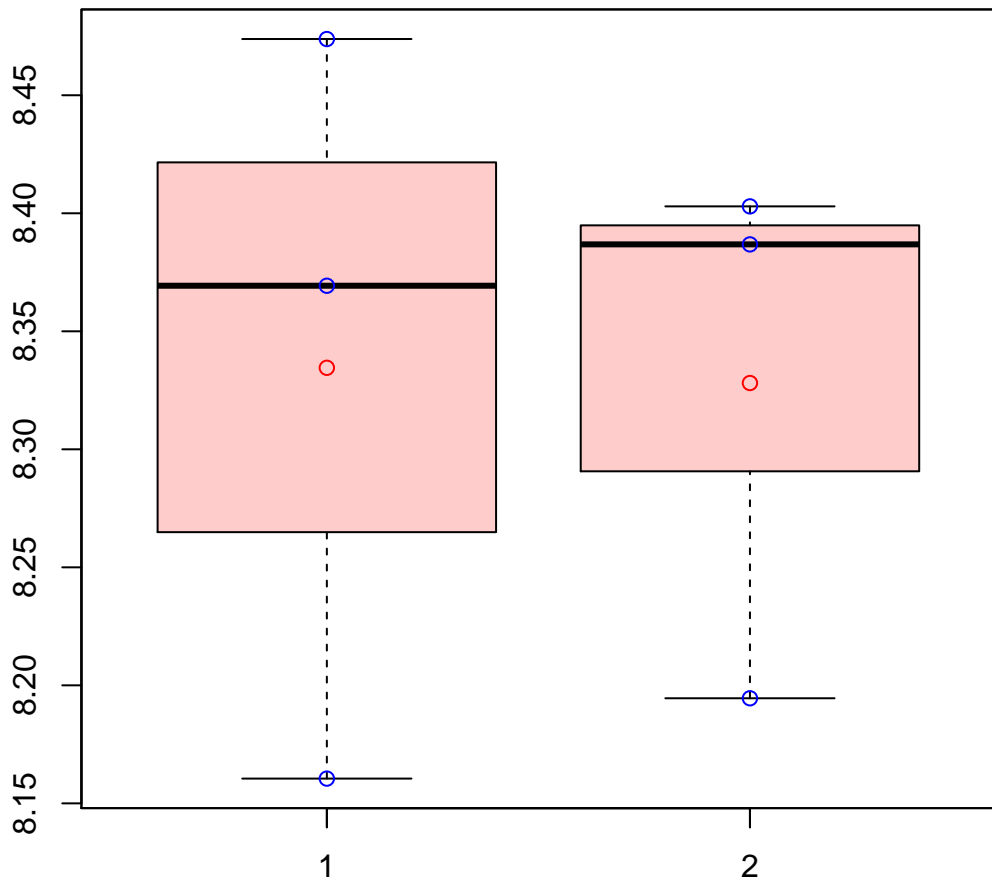

t-Test: p-value = 0.96

# CL10Contig48|CL10Contig48

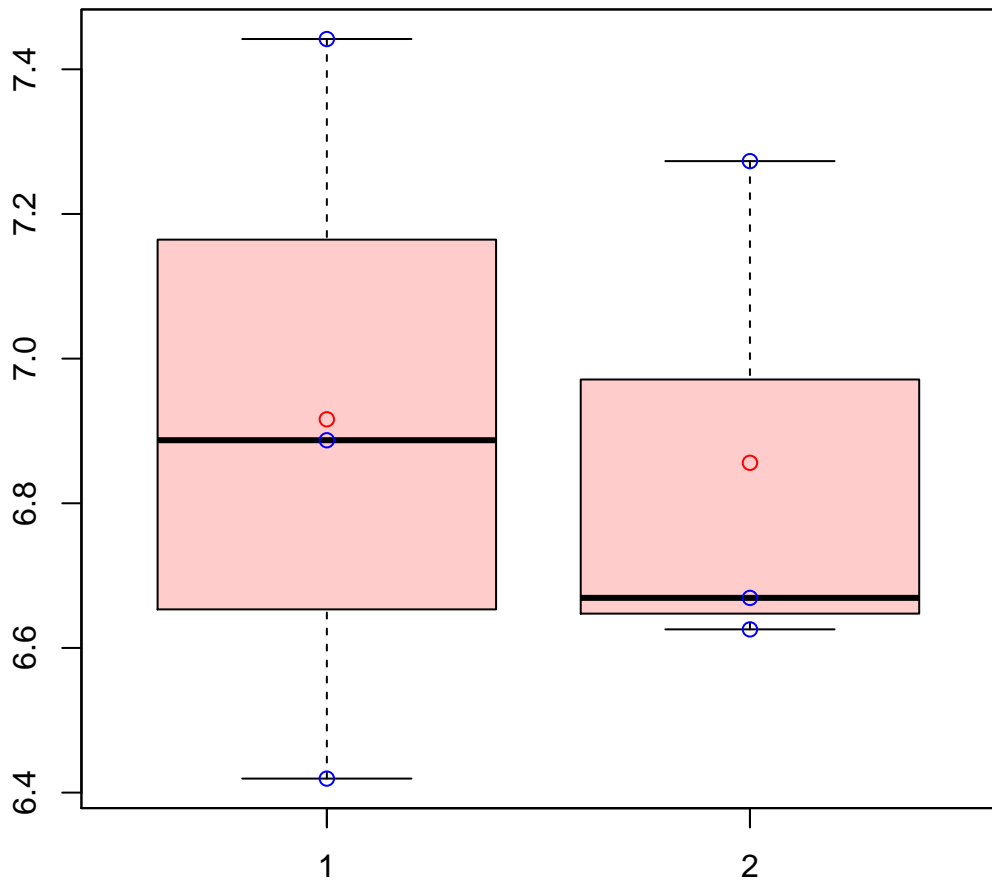

t-Test: p-value = 0.88

# CL10Contig9|CL10Contig9

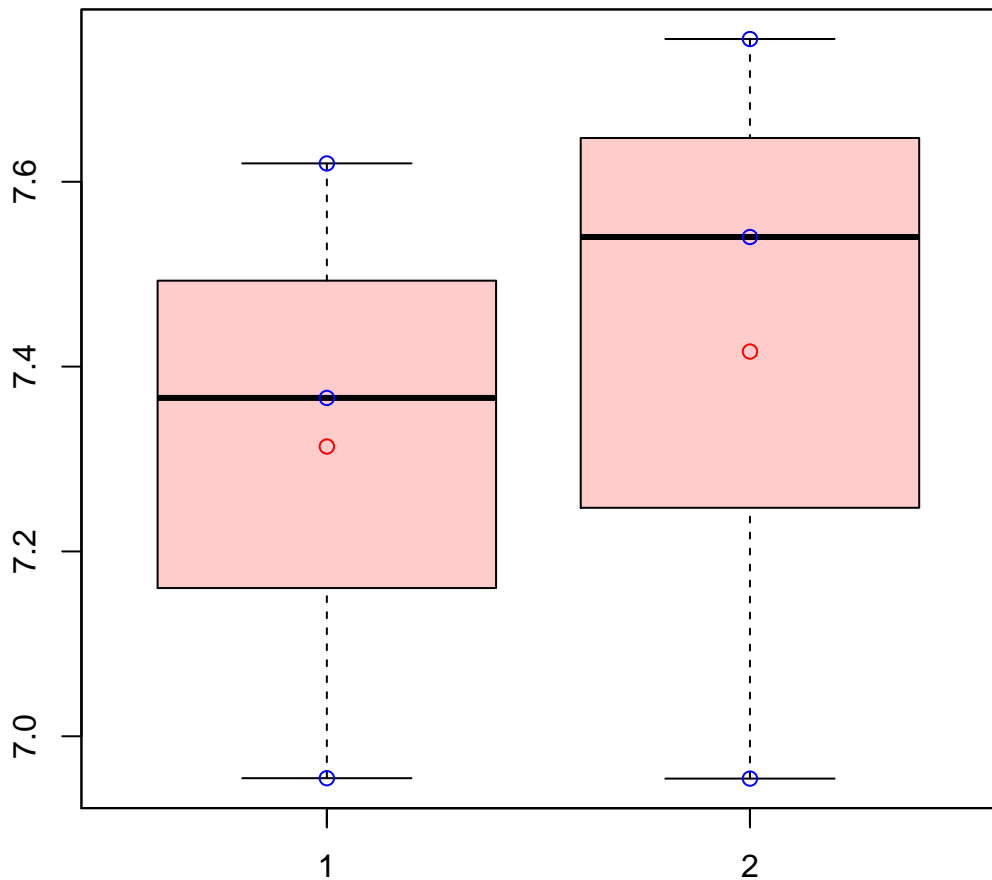

t-Test: p-value = 0.76

# CL11027Contig1|CL11027Contig1

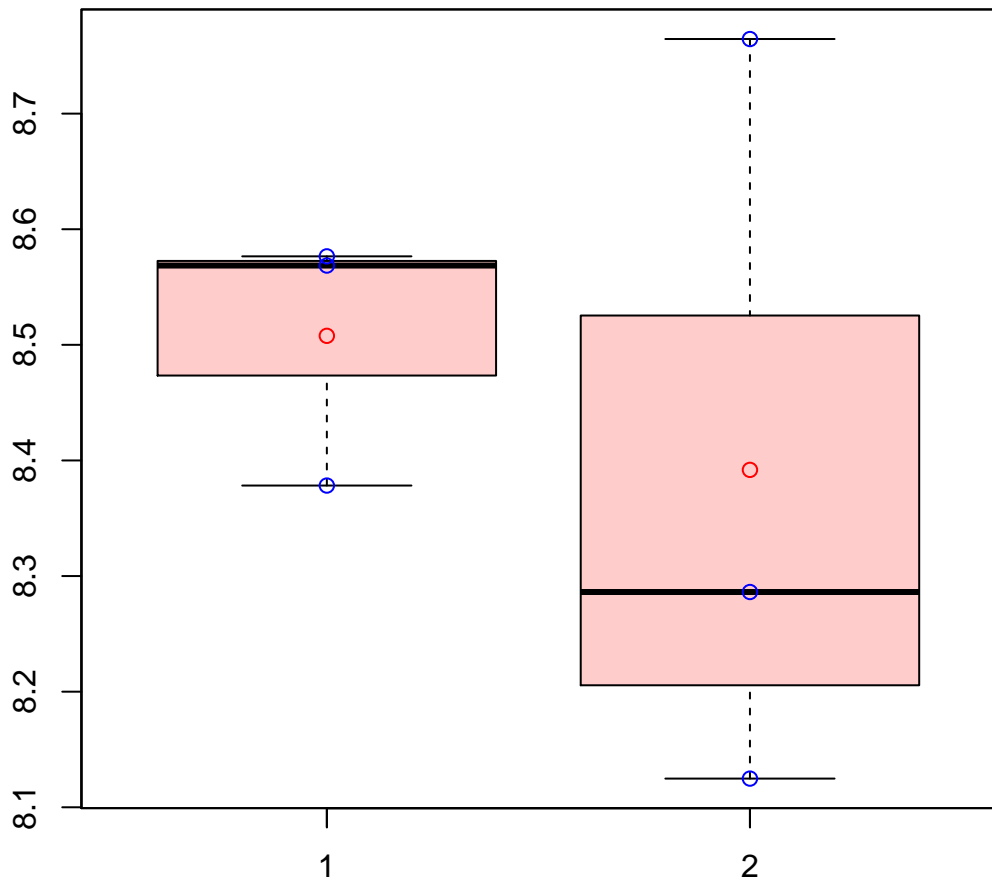

t-Test: p-value = 0.62

# CL1102Contig2|CL1102Contig2

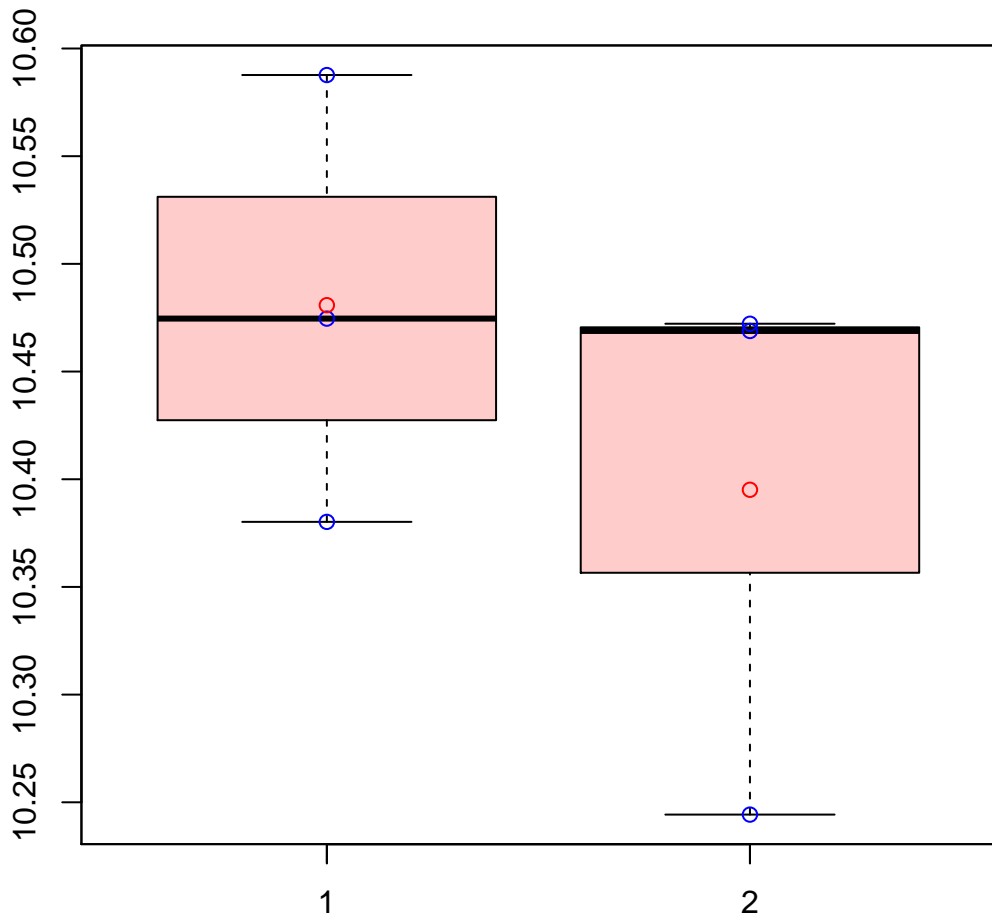

t-Test: p-value = 0.43

# CL11043Contig1|CL11043Contig1

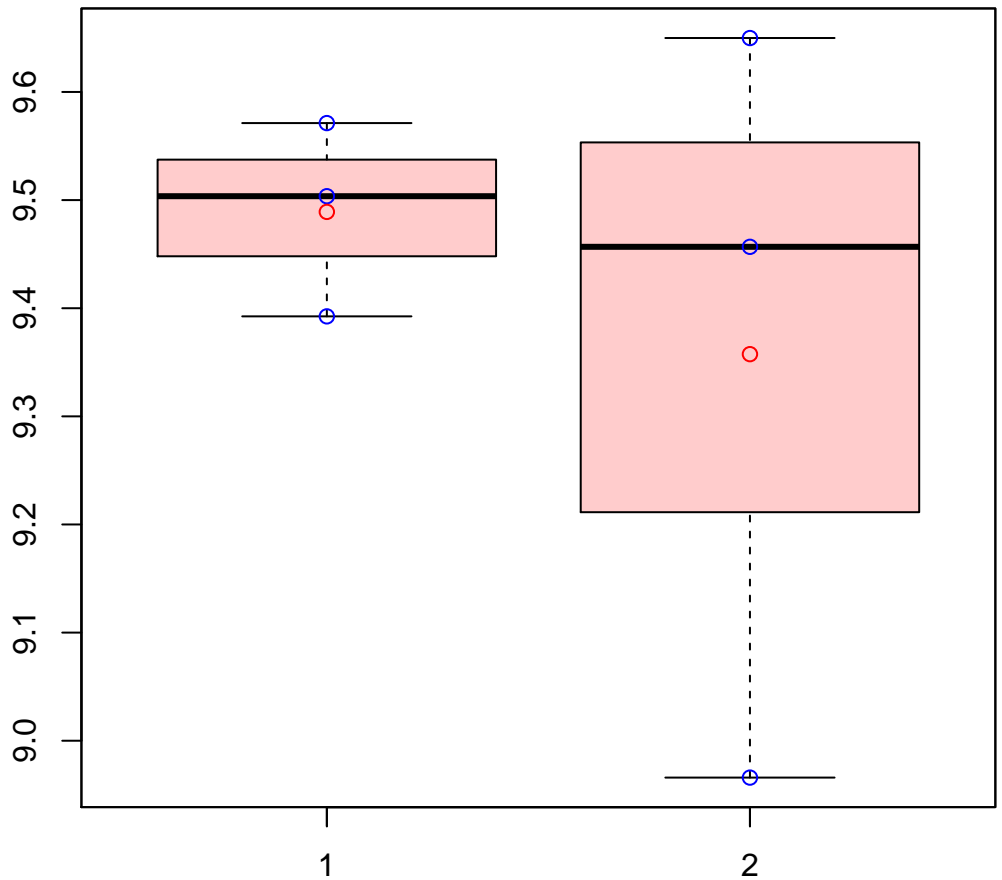

t-Test: p-value = 0.59

# CL11065Contig1|CL11065Contig1

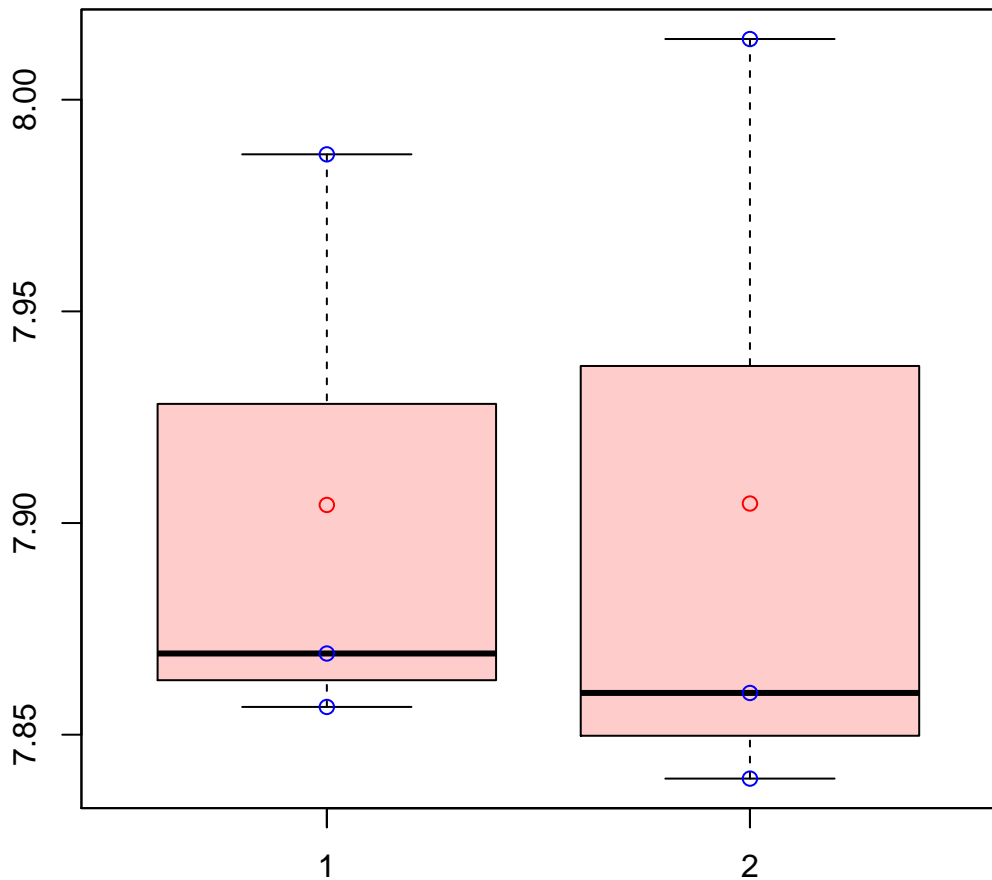

t-Test: p-value = 1

# CL1107Contig3|CL1107Contig3

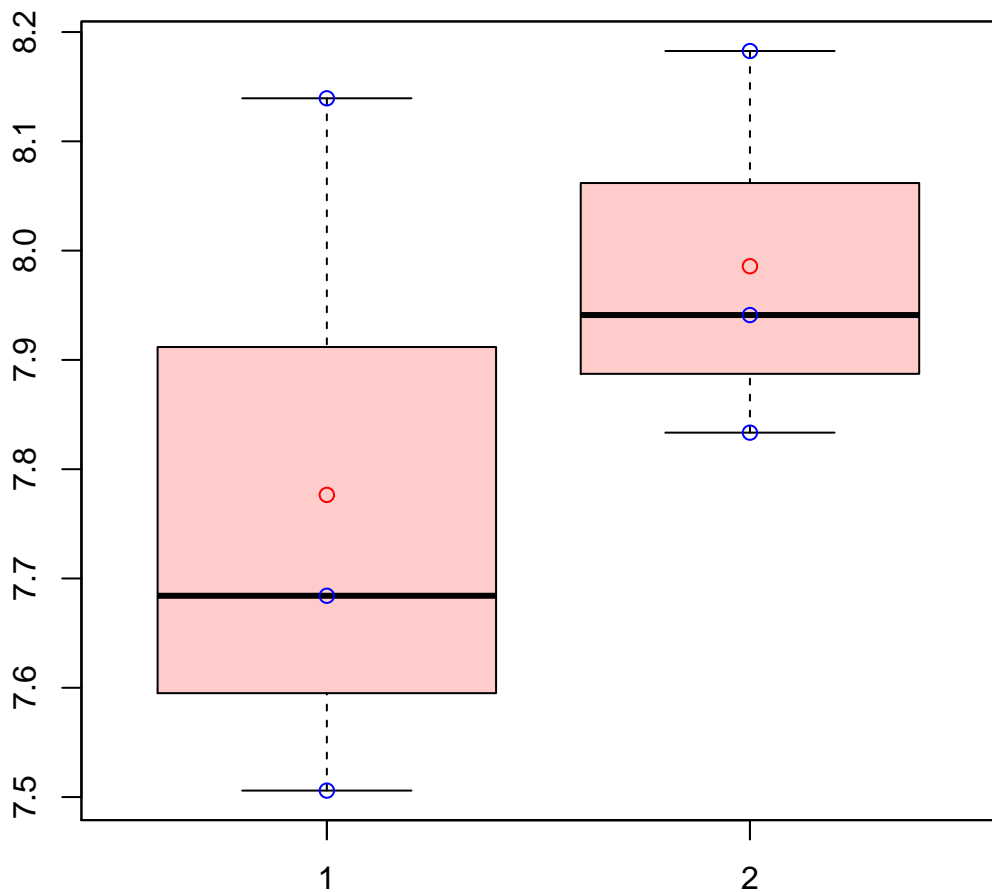

t-Test: p-value = 0.4



# CL1107Contig5|CL1107Contig5

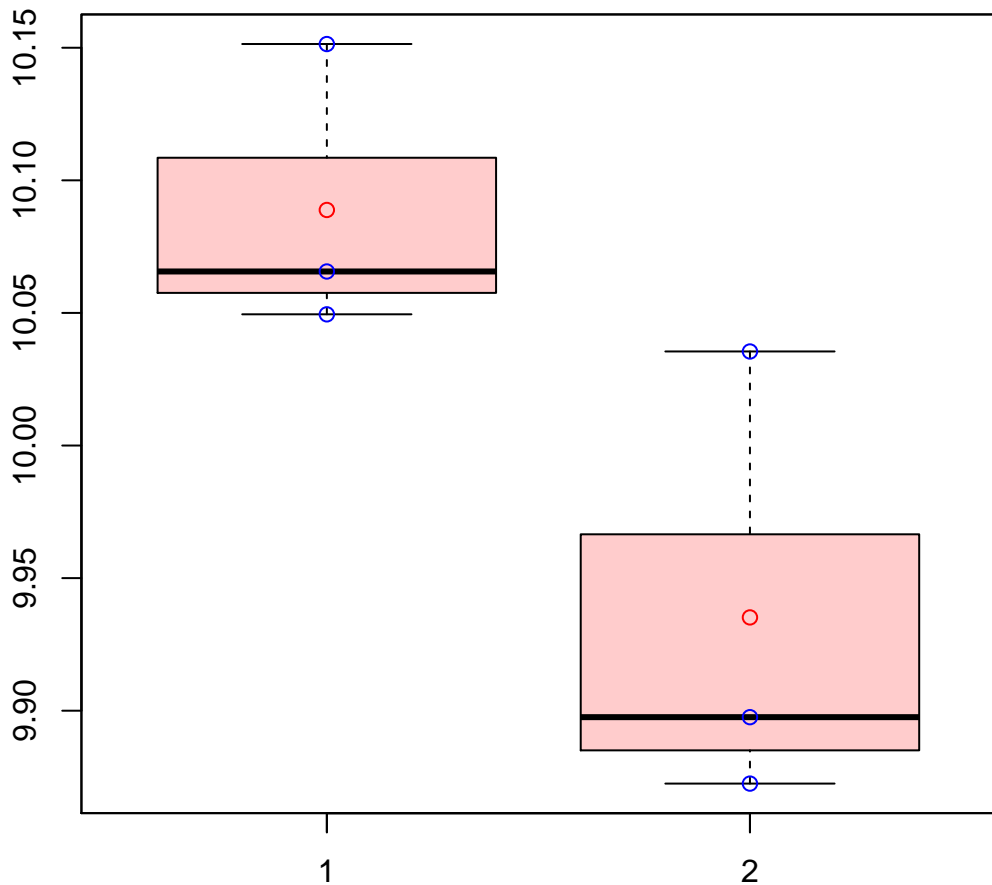

t-Test: p-value = 0.07

# CL110Contig8|CL110Contig8

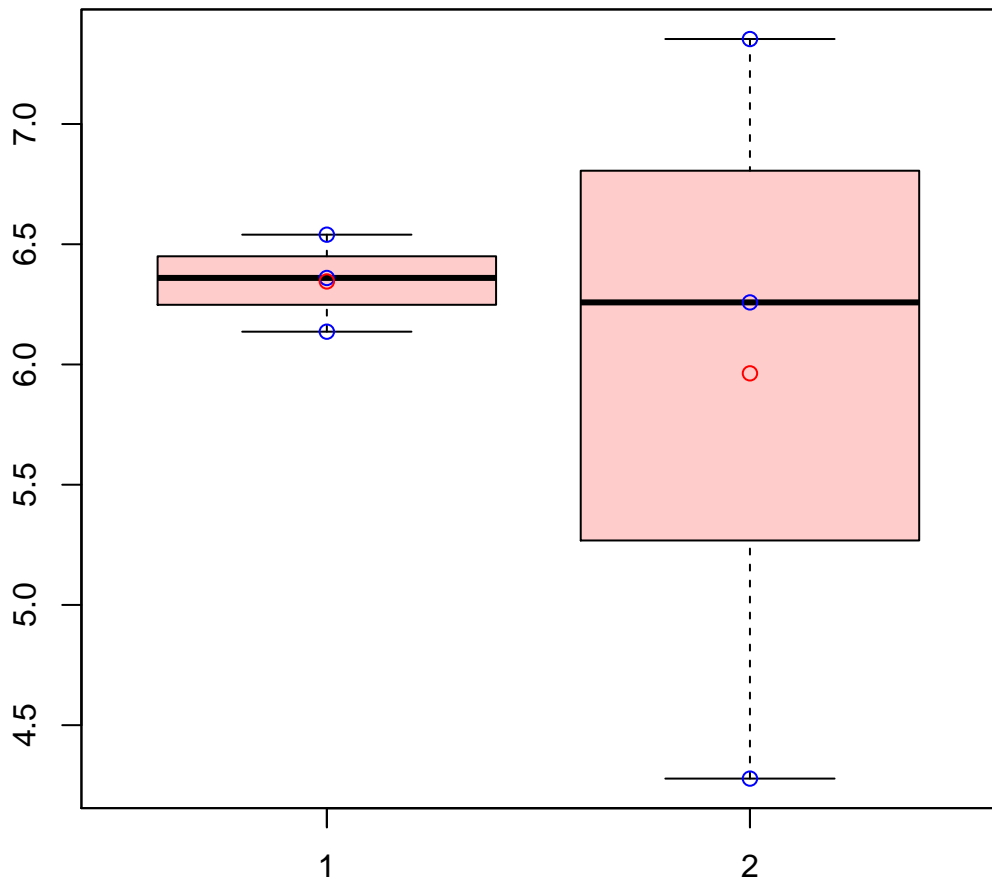

t-Test: p-value = 0.71

# CL11137Contig2|CL11137Contig2

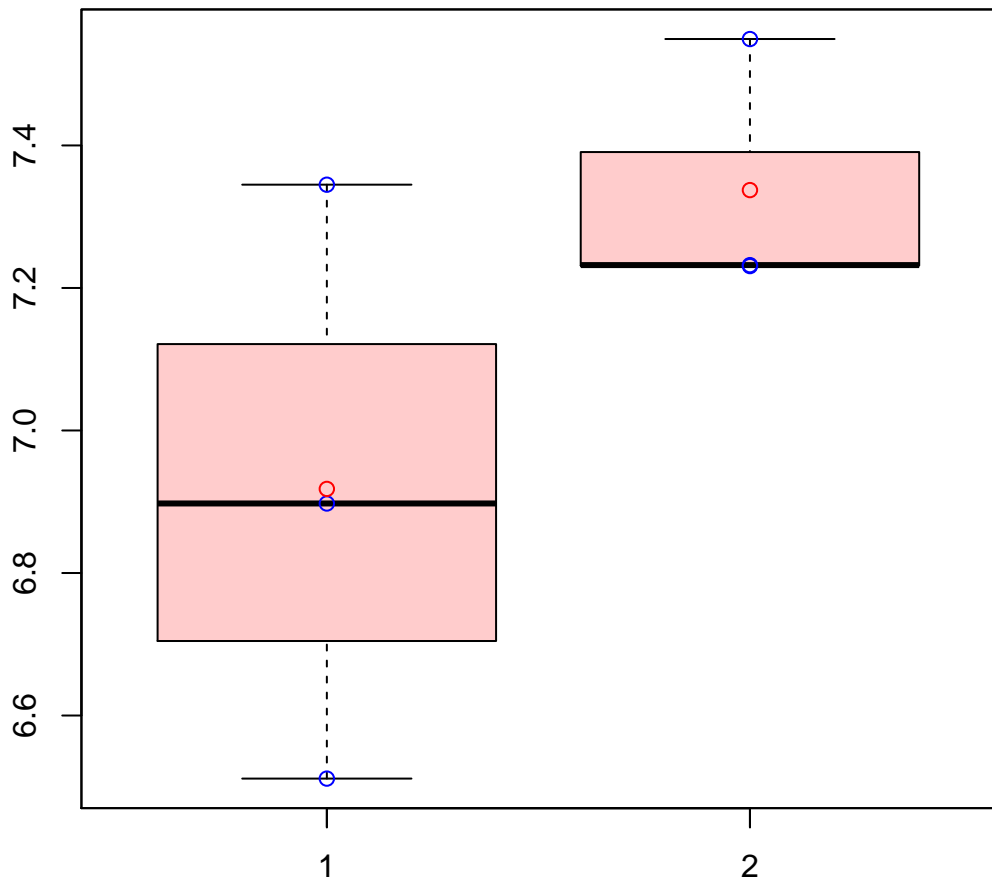

t-Test: p-value = 0.22

# CL1114Contig3|CL1114Contig3

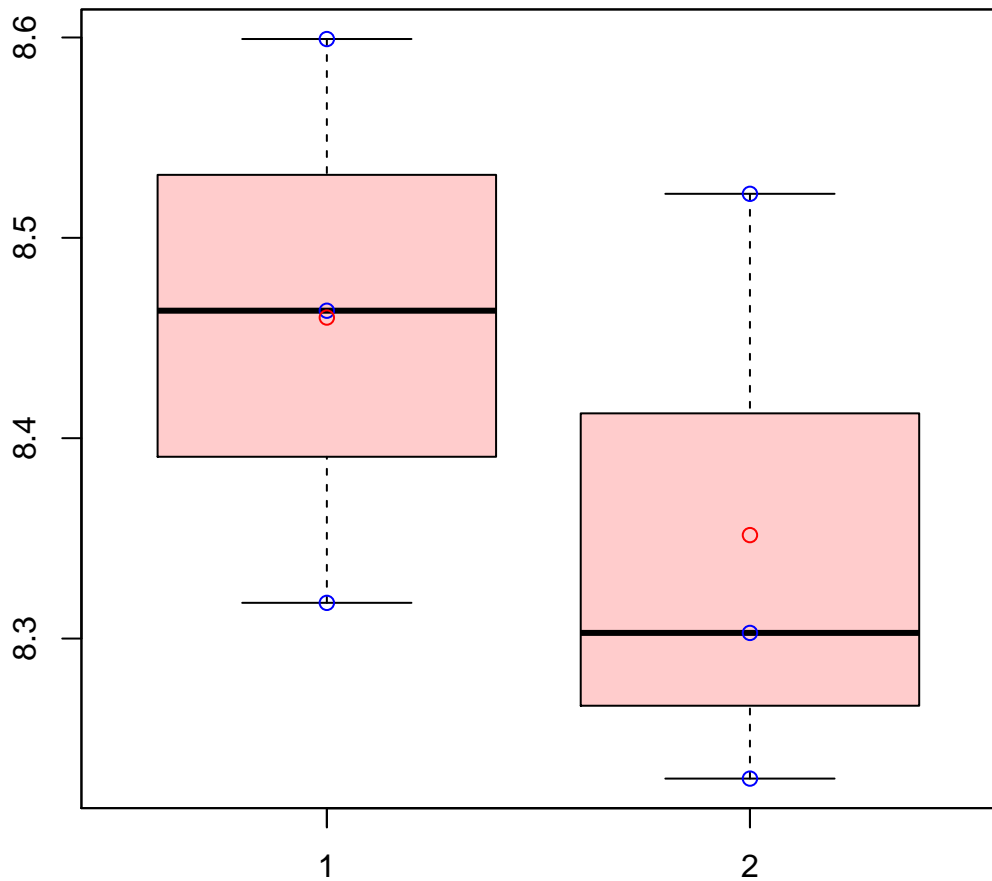

t-Test: p-value = 0.42

# CL1115Contig6|CL1115Contig6

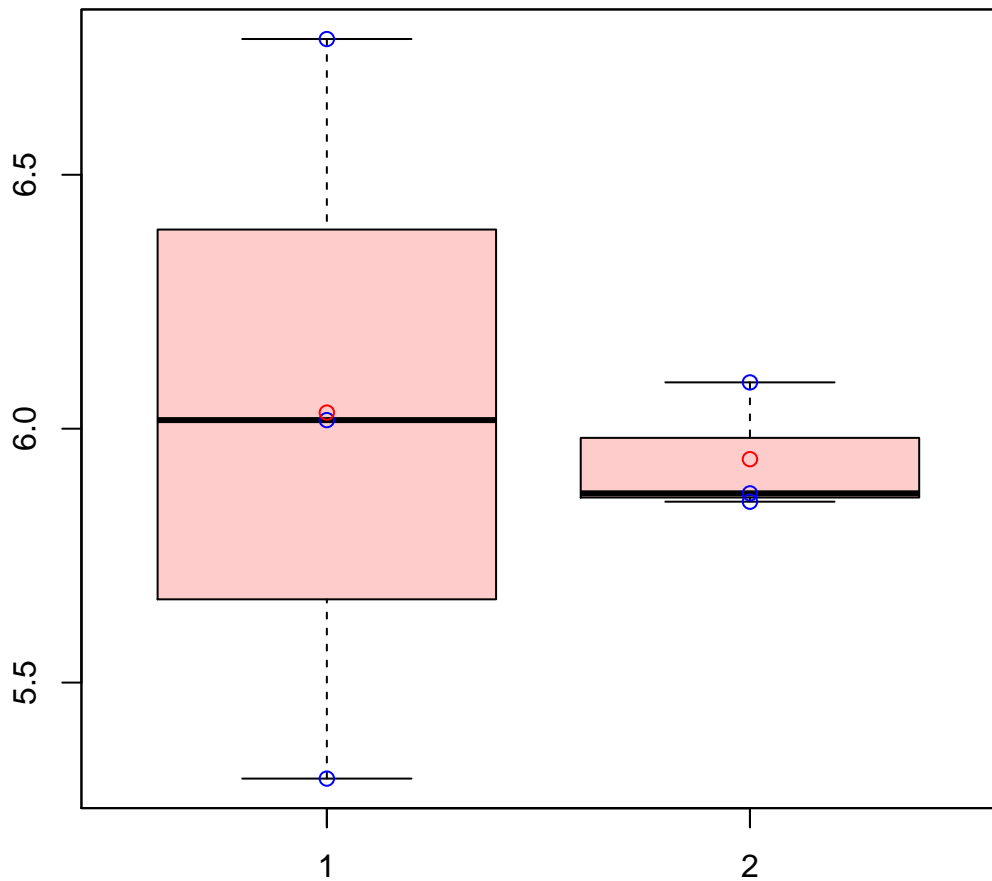

t-Test: p-value = 0.85

# CL1115Contig7|CL1115Contig7

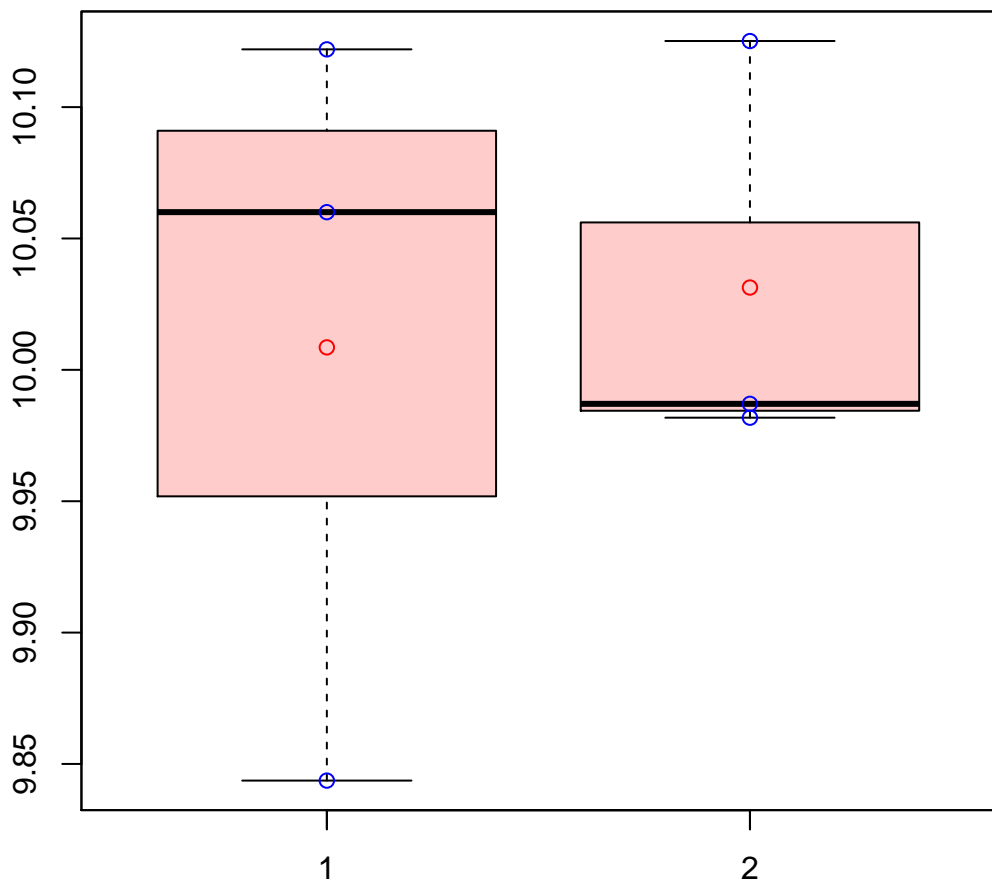

t-Test: p-value = 0.83

# CL11160Contig1|CL11160Contig1

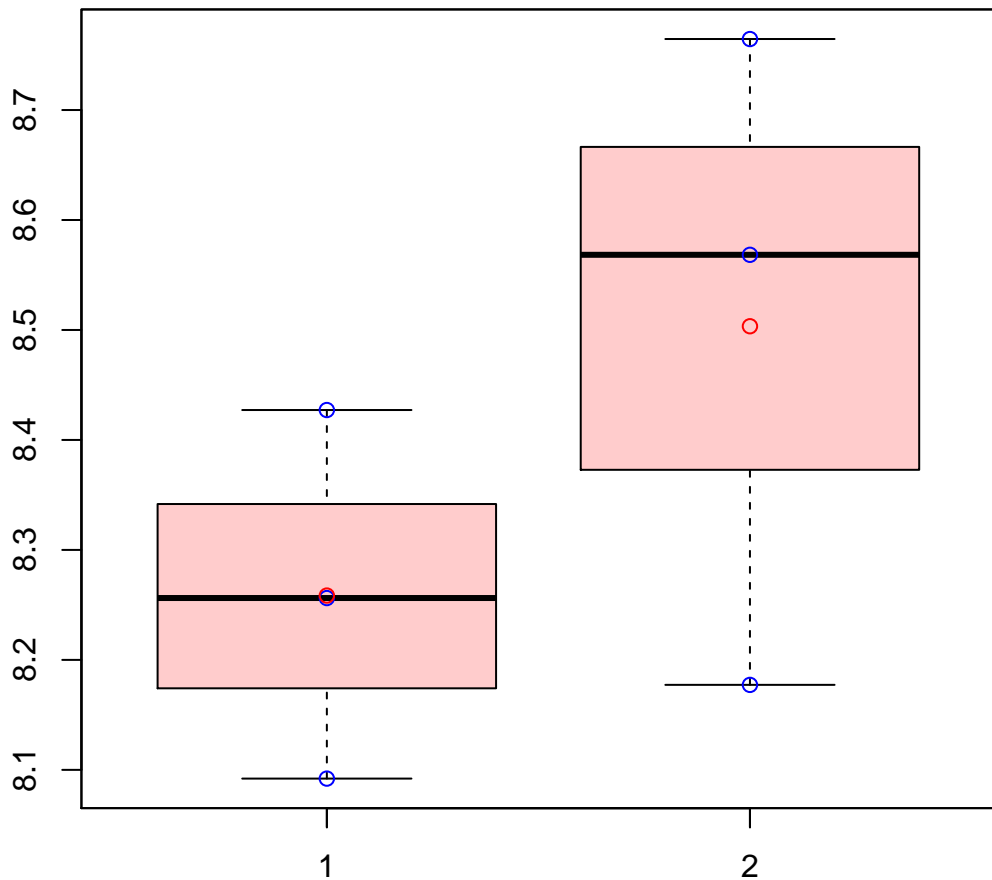

t-Test: p-value = 0.3

# CL11170Contig2|CL11170Contig2

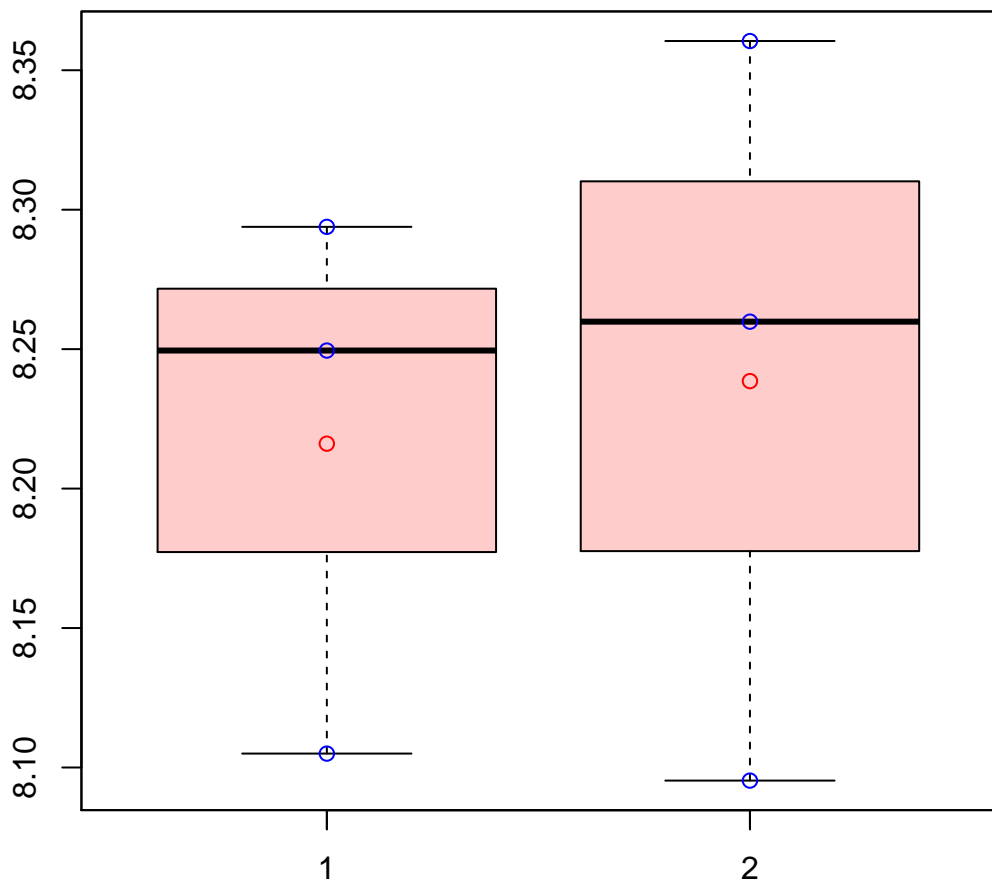

t-Test: p-value = 0.83



# CL11175Contig2|CL11175Contig2

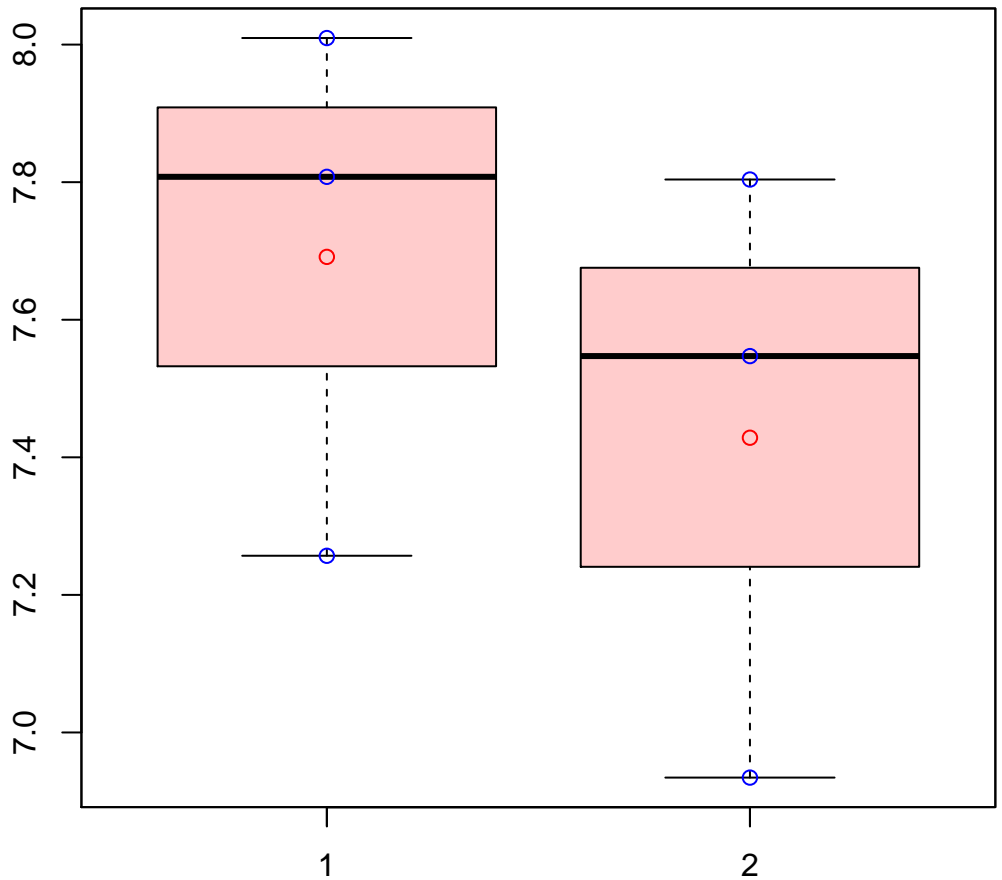

t-Test: p-value = 0.49

# CL11178Contig1|CL11178Contig1

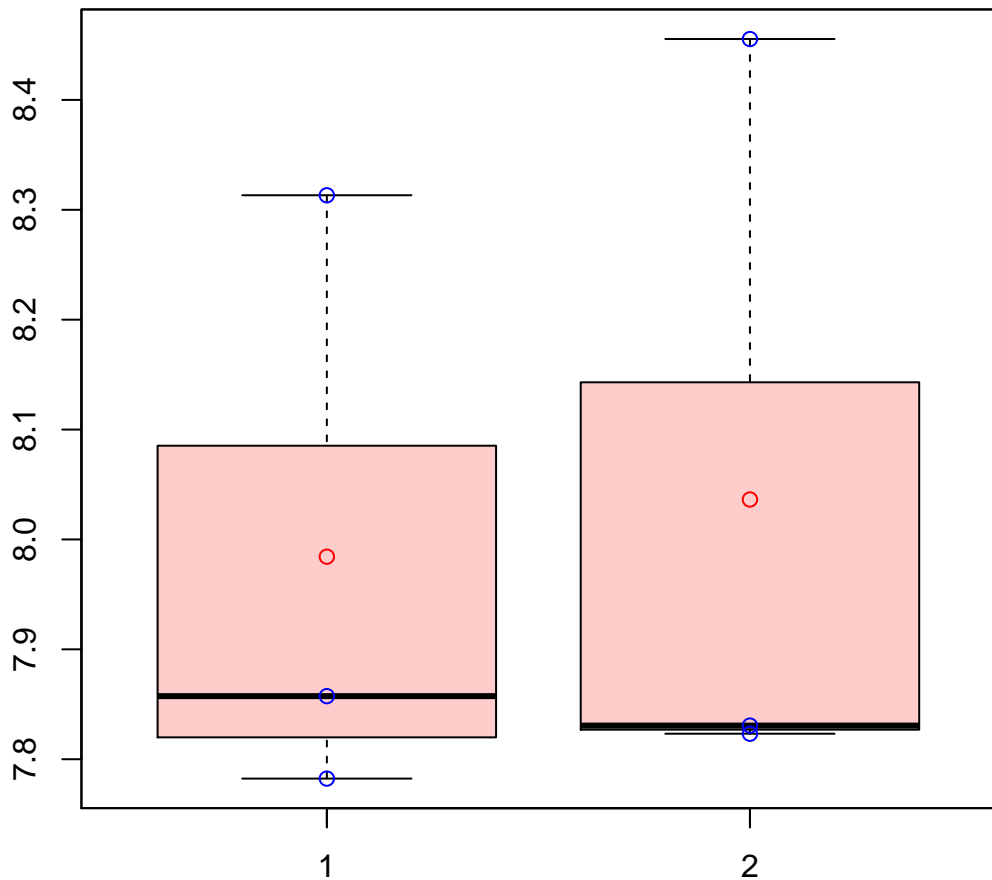

t-Test: p-value = 0.86

# CL11181Contig1|CL11181Contig1

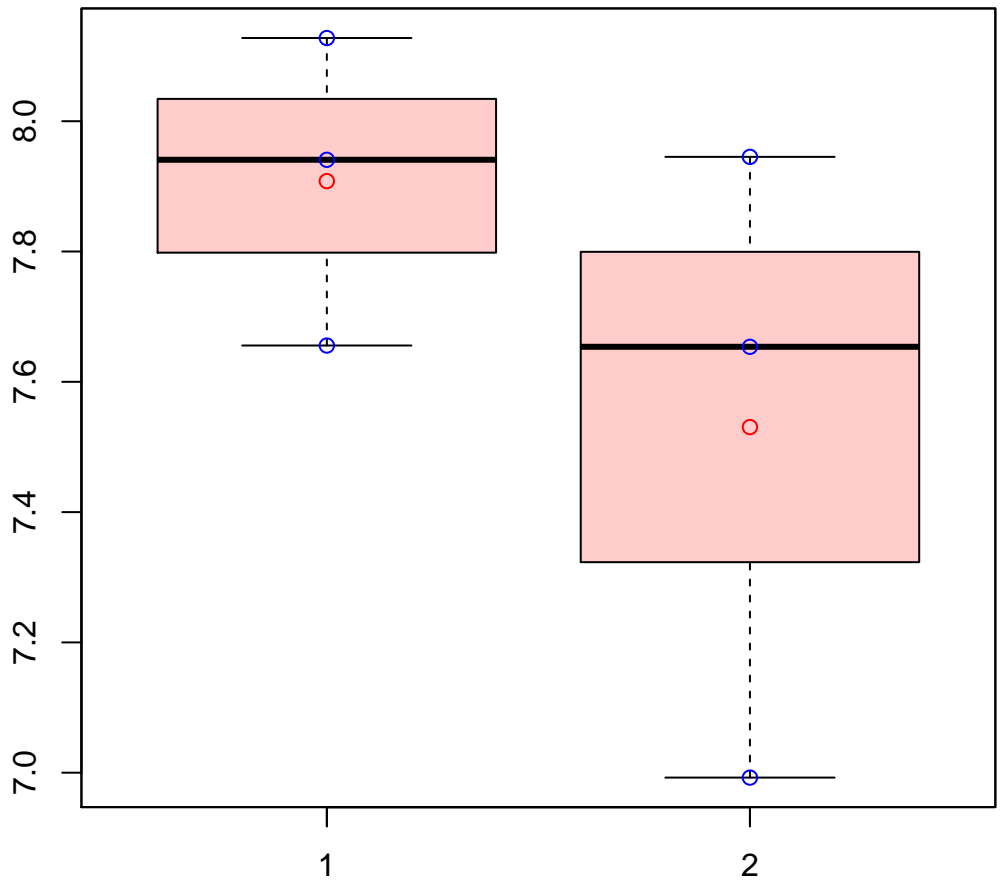

t-Test: p-value = 0.32

# CL1119Contig4|CL1119Contig4

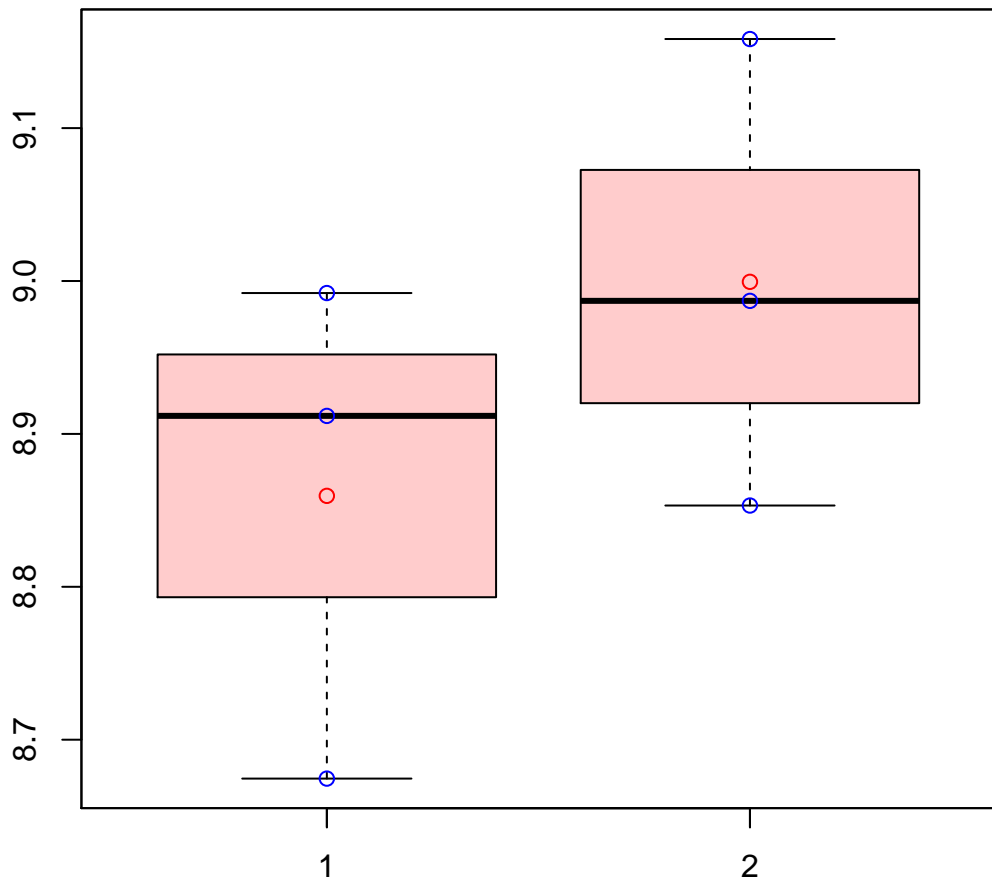

t-Test: p-value = 0.34

# CL111Contig14|CL111Contig14

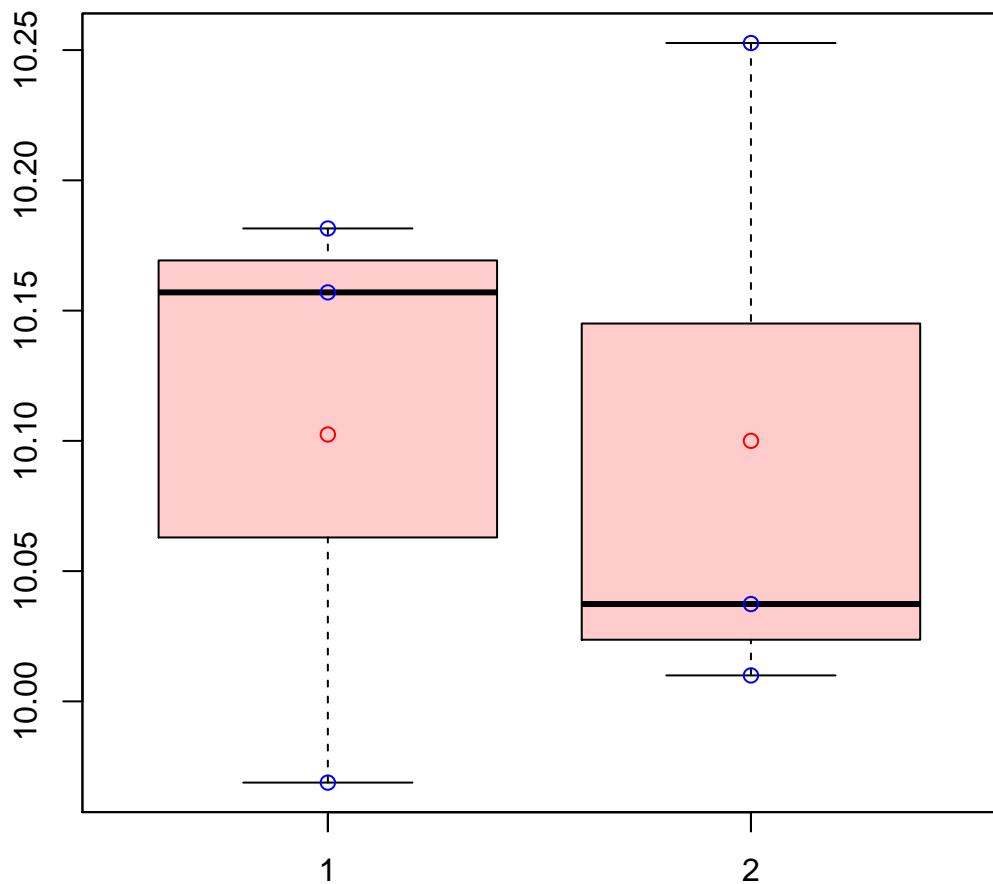

t-Test: p-value = 0.98

# CL111Contig6|CL111Contig6

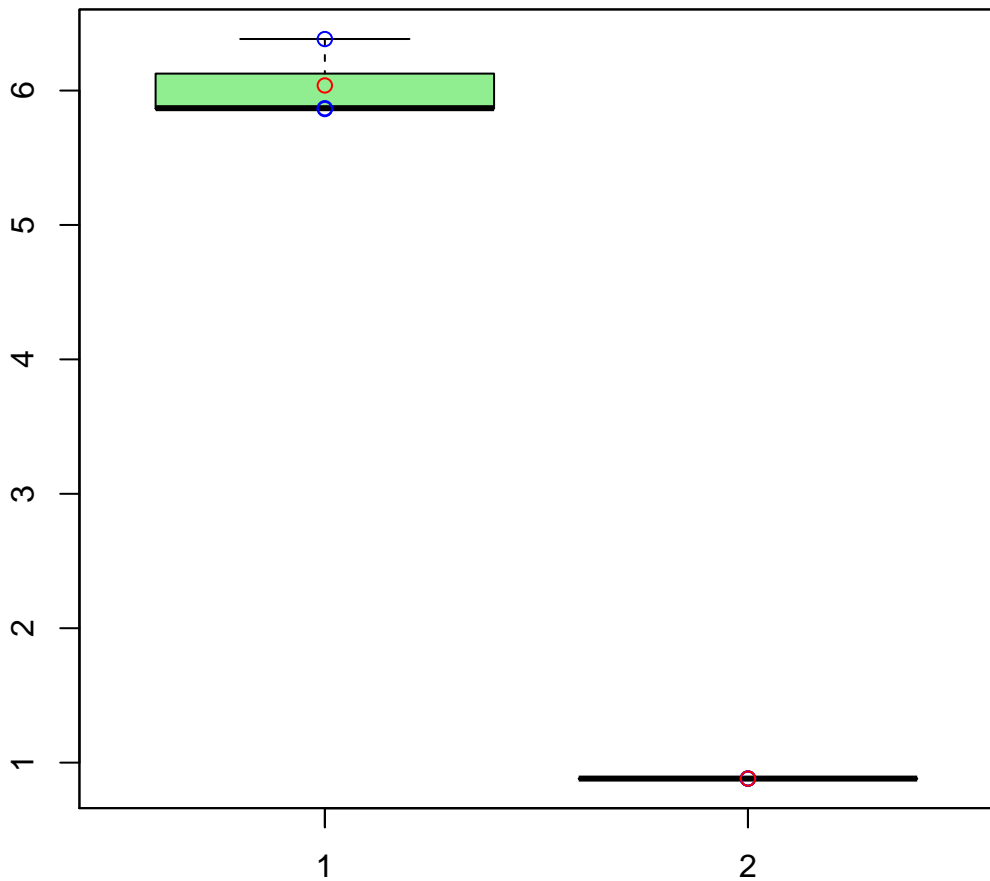

t-Test: p-value = 0

# CL1125Contig1|CL1125Contig1

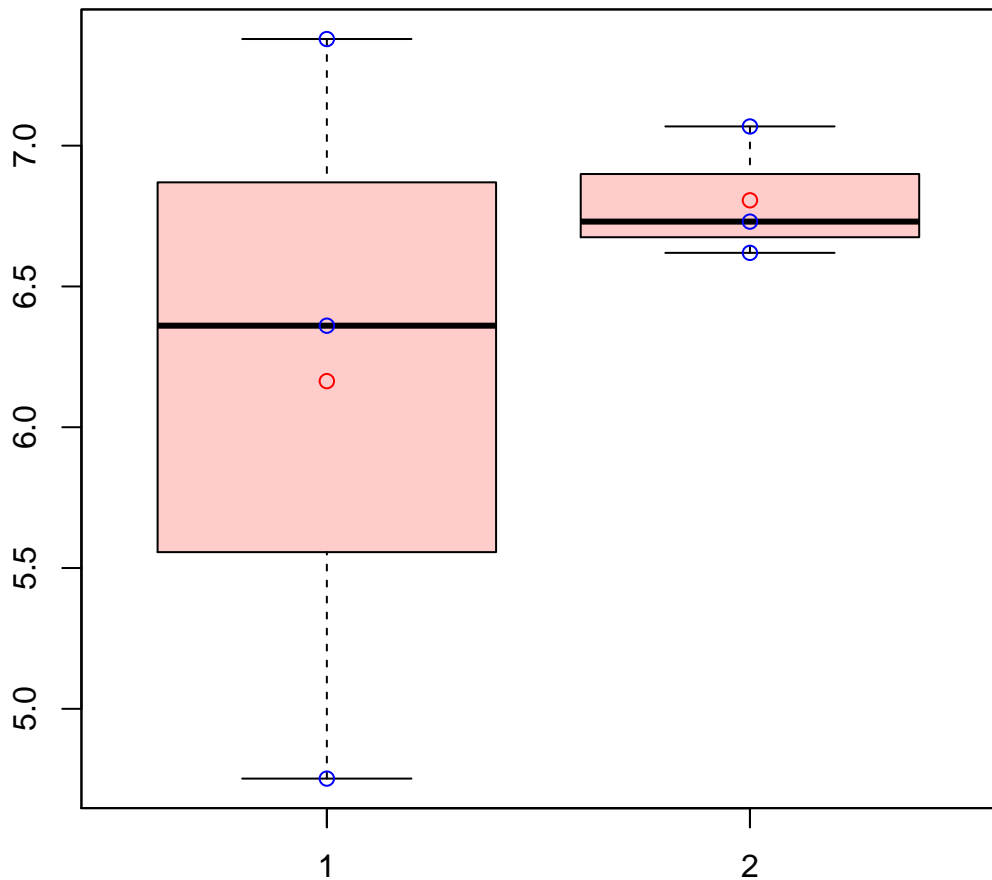

t-Test: p-value = 0.49

# CL1127Contig6|CL1127Contig6

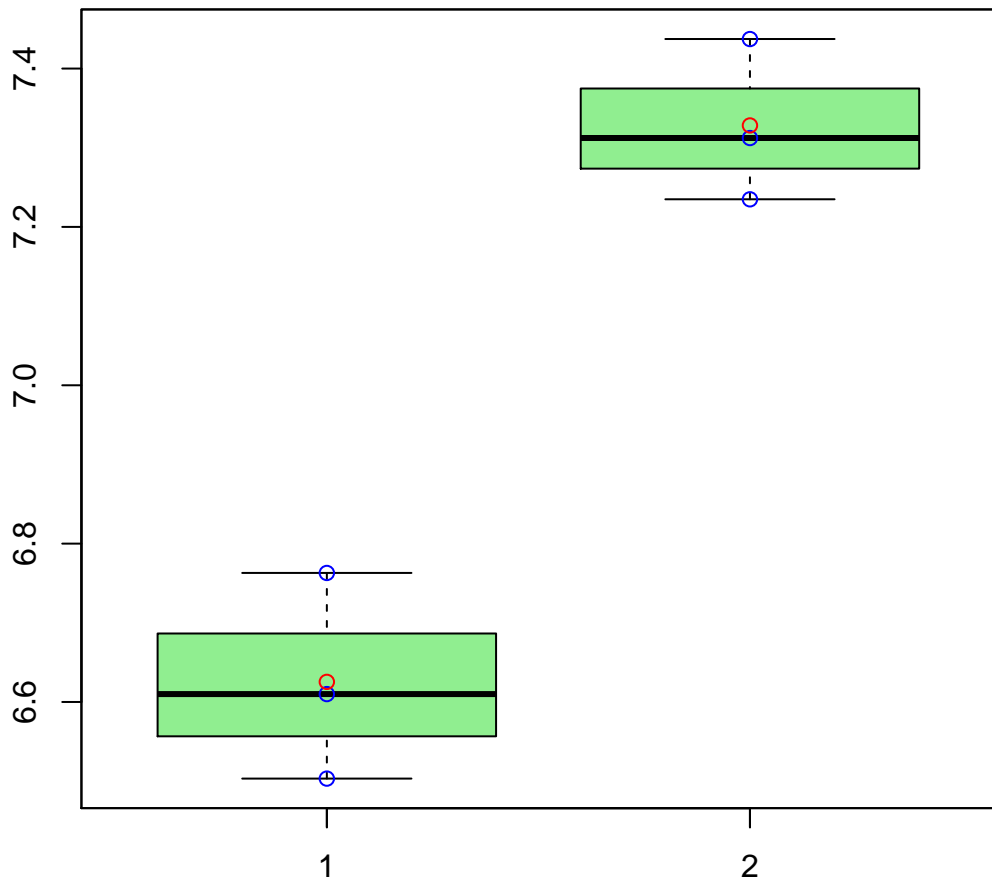

t-Test: p-value = 0



# CL11294Contig1|CL11294Contig1

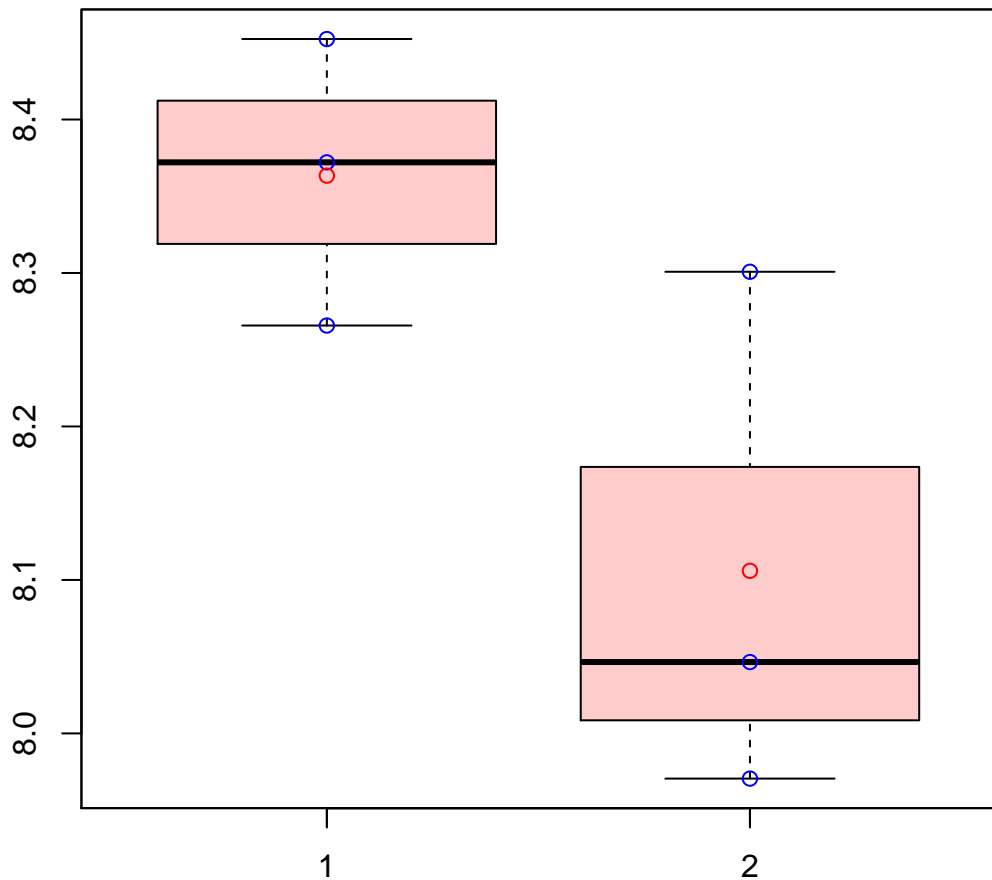

t-Test: p-value = 0.11

# CL1130Contig1|CL1130Contig1

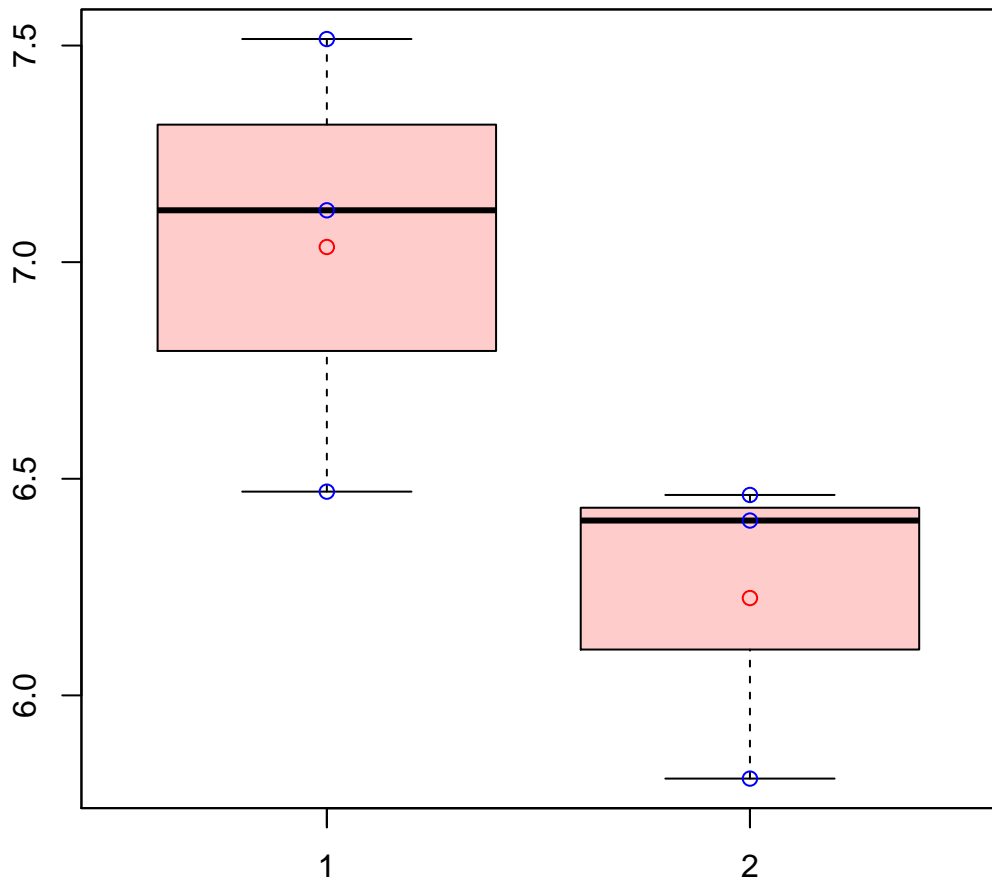

t-Test: p-value = 0.1

# CL11312Contig1|CL11312Contig1

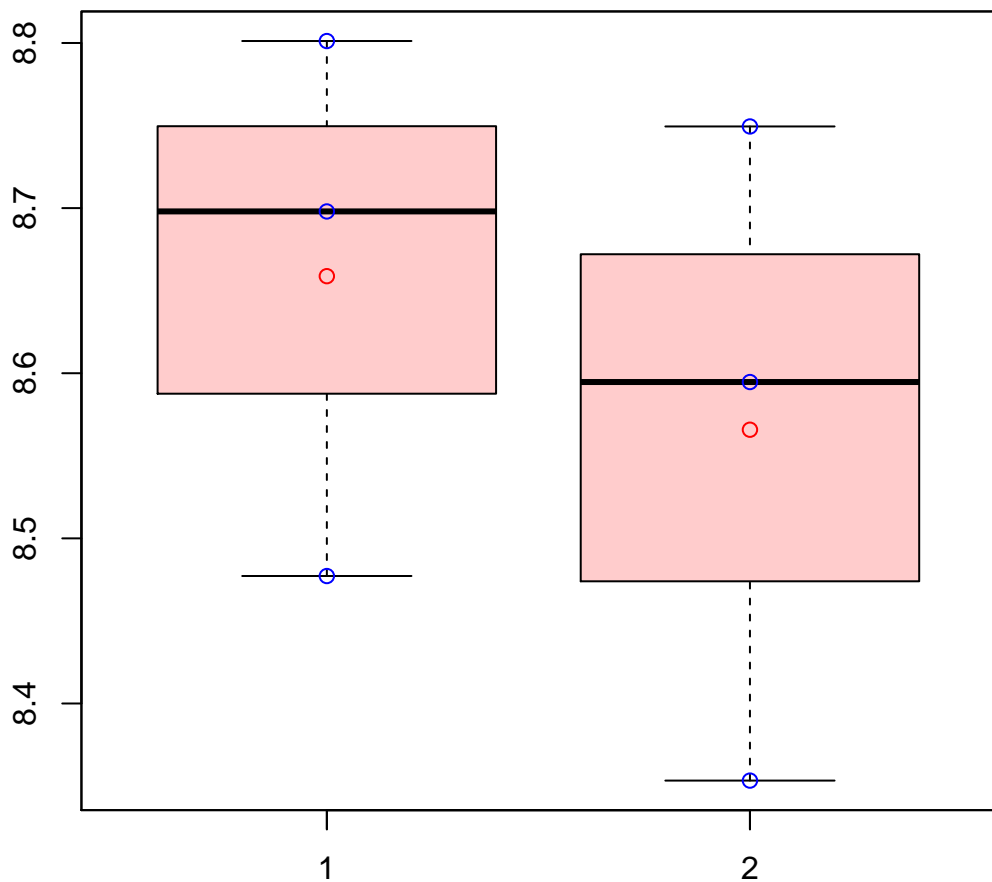

t-Test: p-value = 0.57

# CL11329Contig1|CL11329Contig1

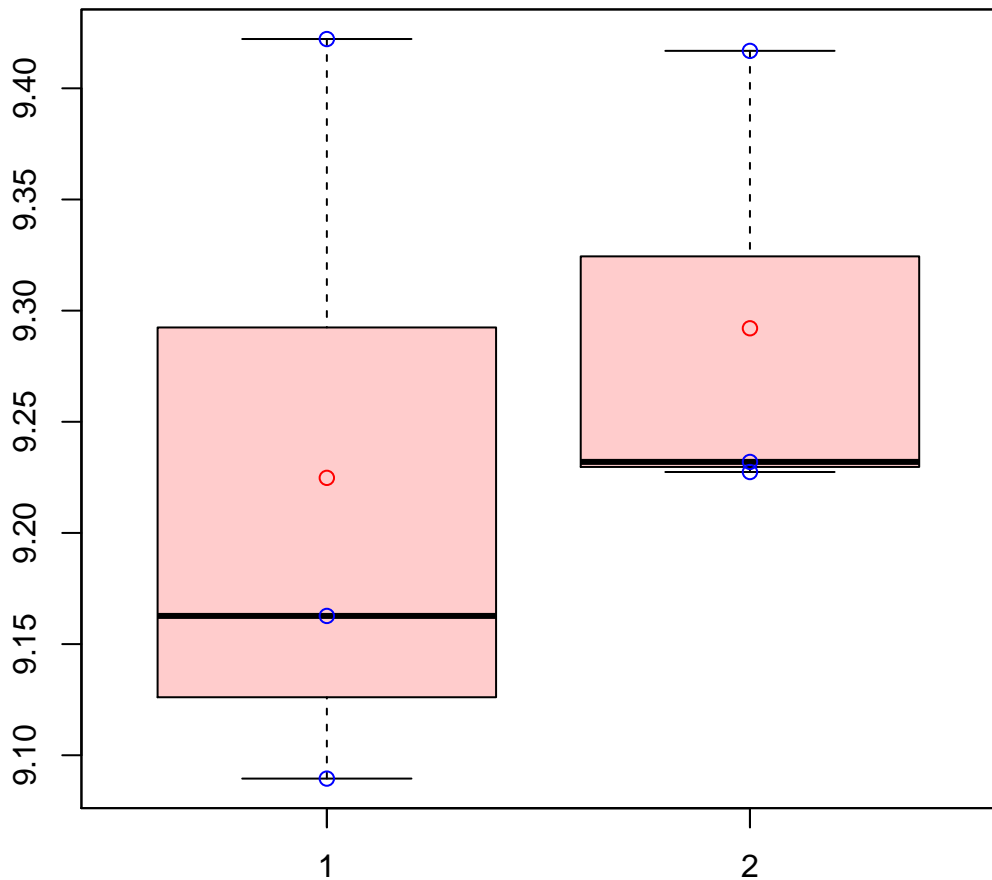

t-Test: p-value = 0.61

# CL1135Contig4|CL1135Contig4

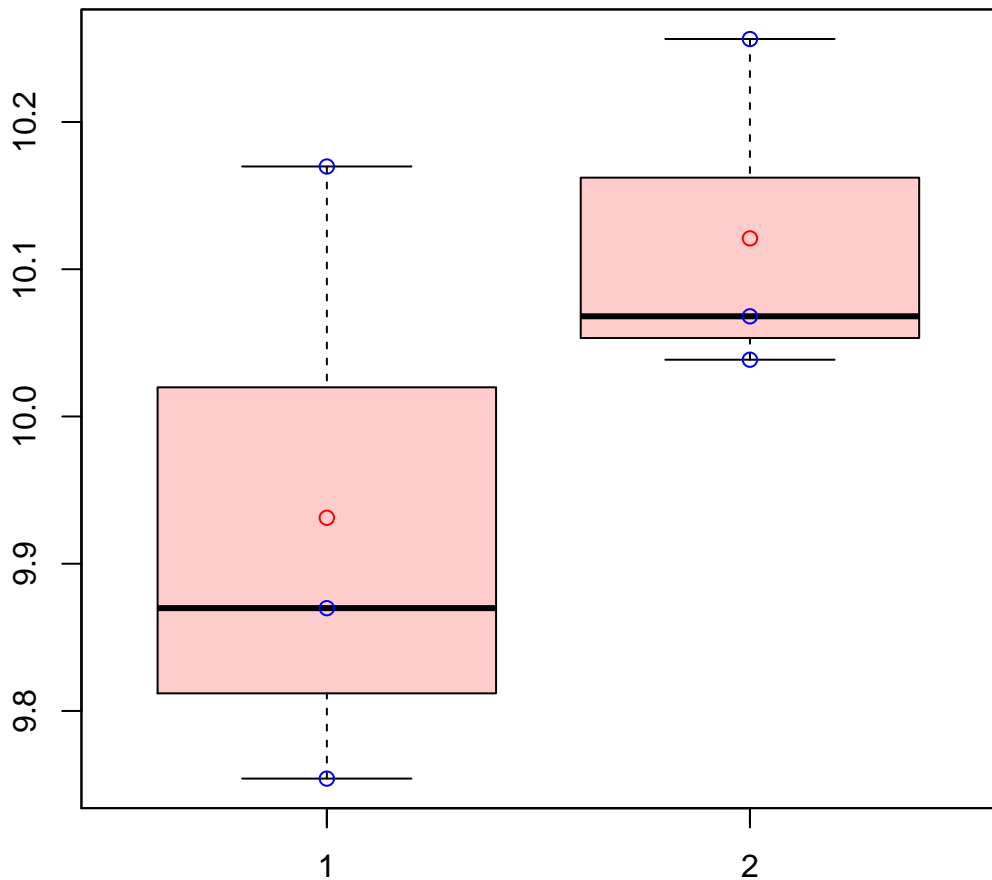

t-Test: p-value = 0.27

# CL1135Contig7|CL1135Contig7

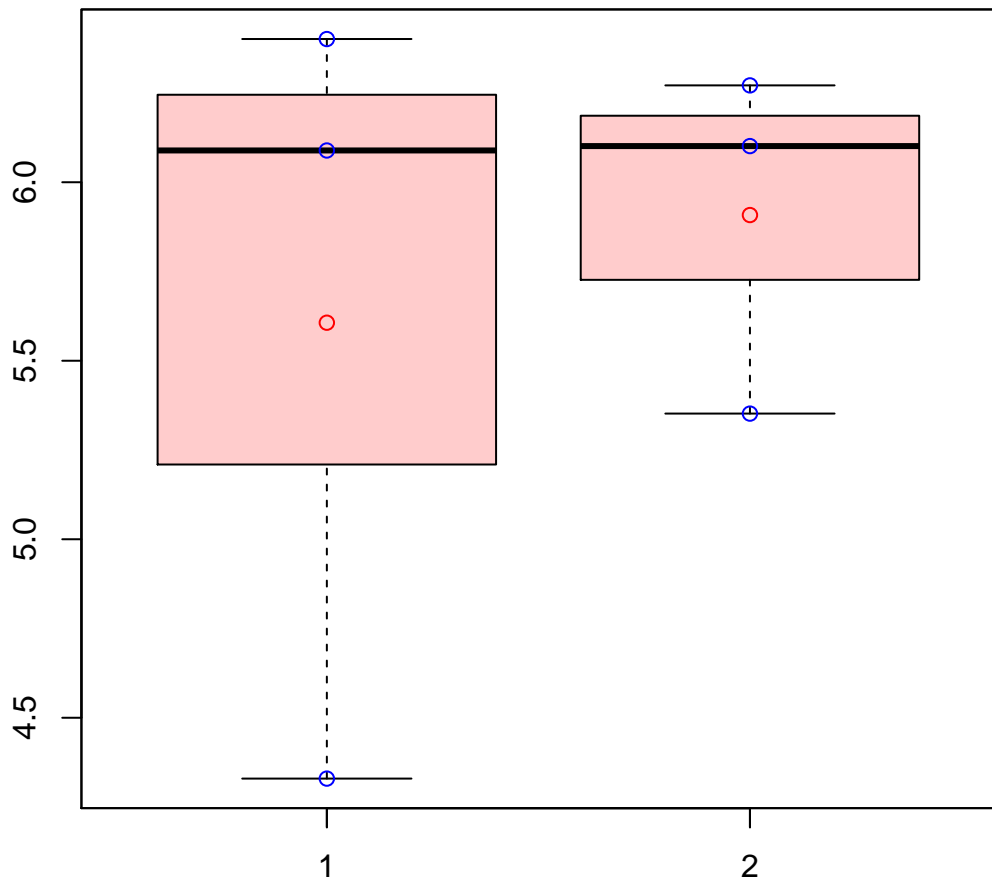

t-Test: p-value = 0.7

# CL11374Contig2|CL11374Contig2

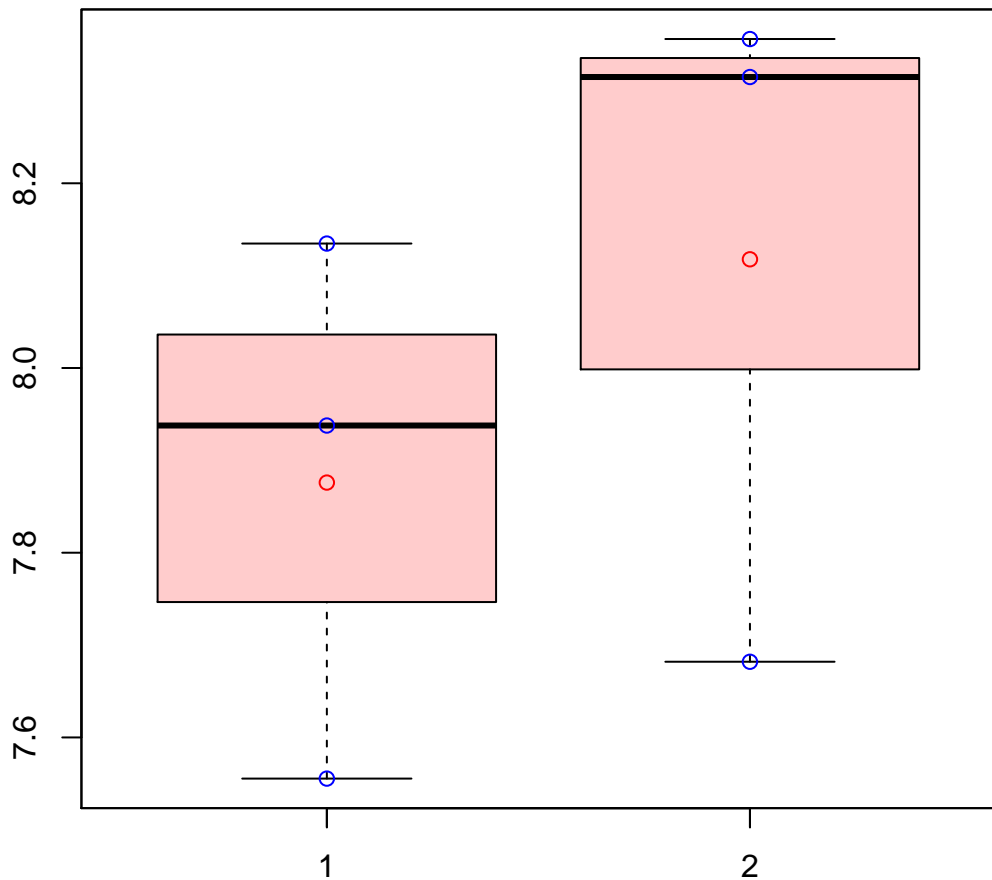

t-Test: p-value = 0.43

# CL11382Contig2|CL11382Contig2

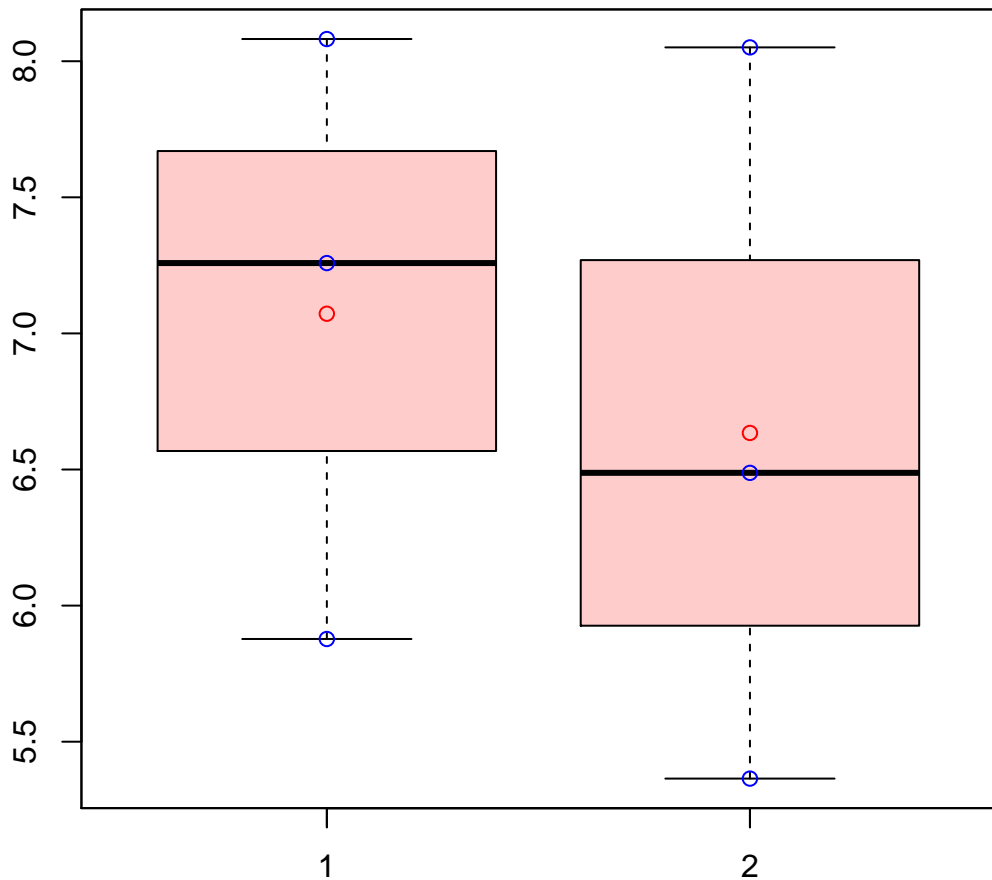

t-Test: p-value = 0.69



# CL11388Contig1|CL11388Contig1

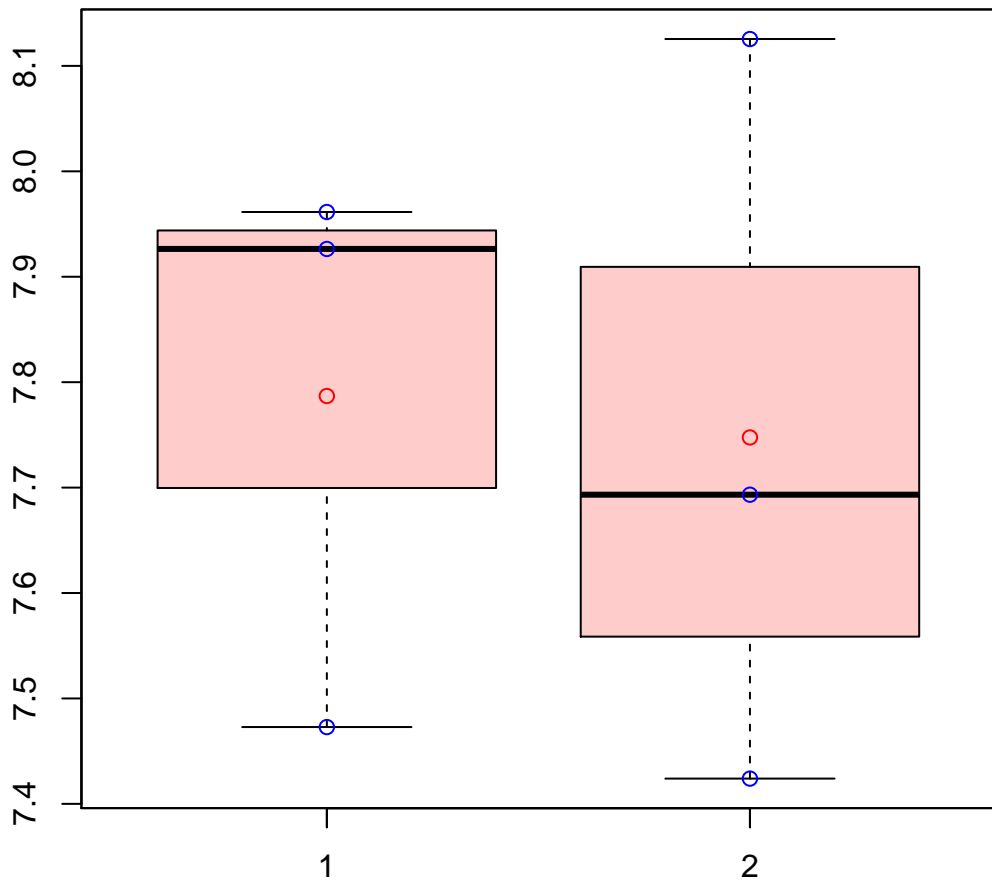

t-Test: p-value = 0.89

# CL11390Contig2|CL11390Contig2

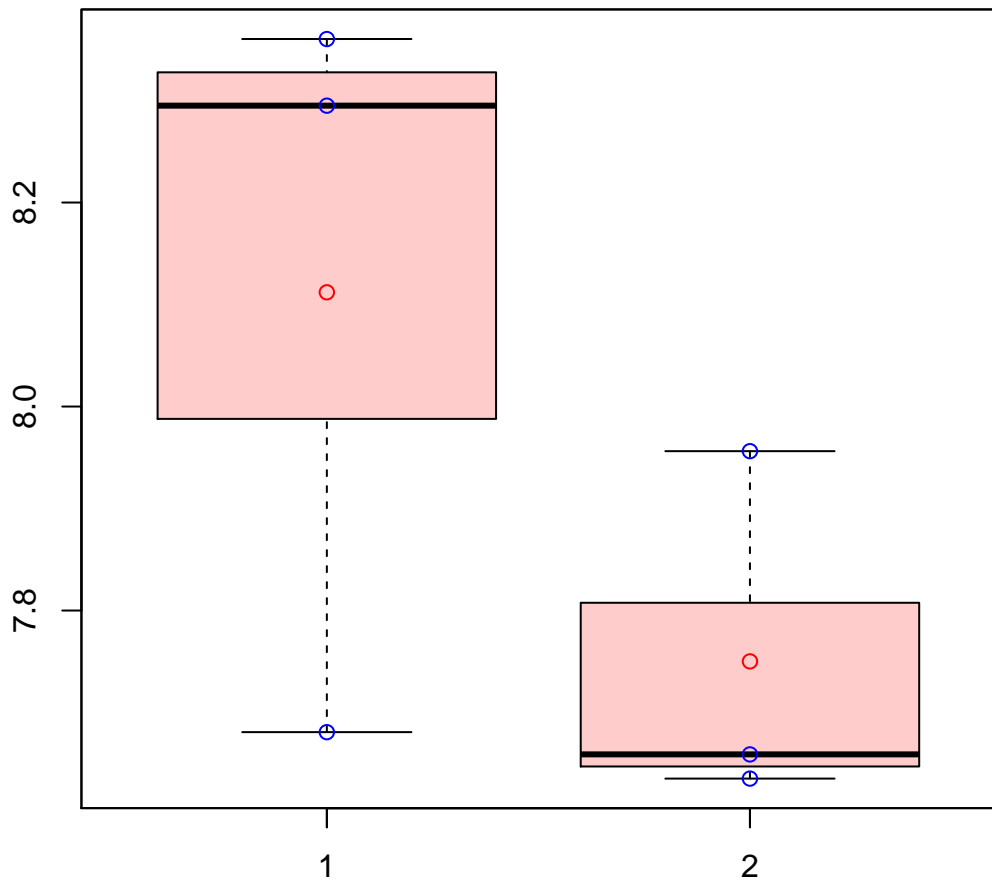

t-Test: p-value = 0.23

# CL11398Contig2|CL11398Contig2

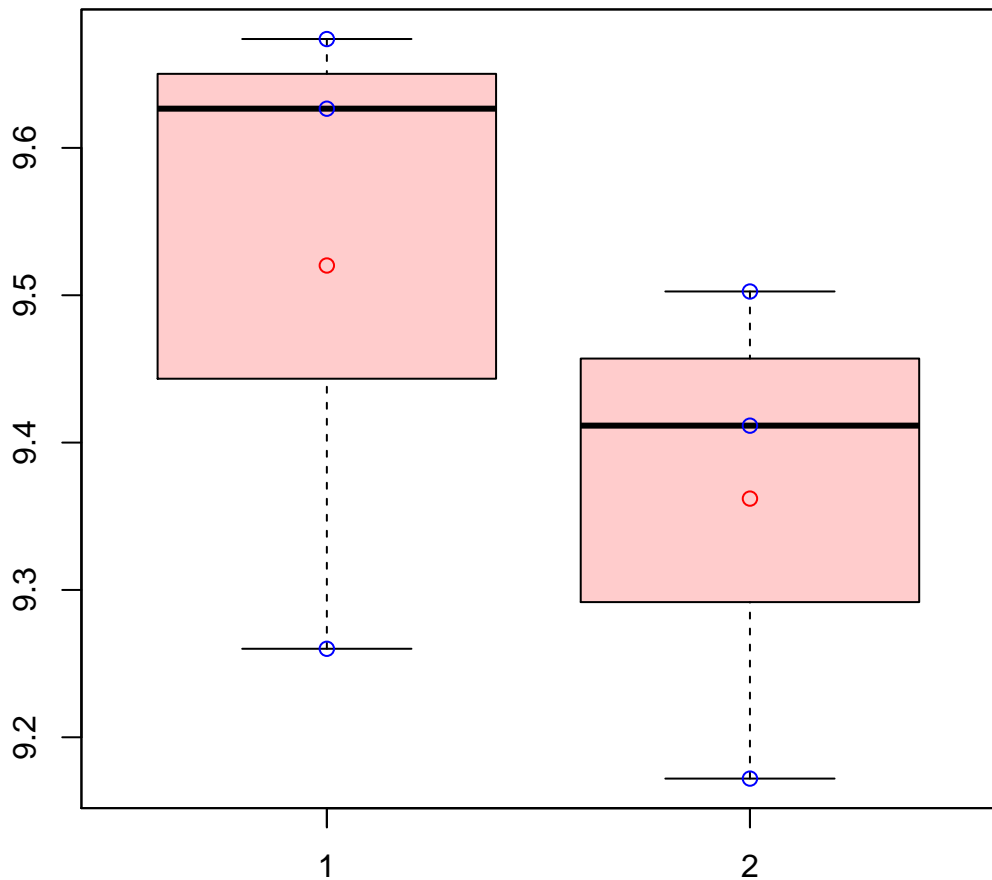

t-Test: p-value = 0.39

# CL113Contig3|CL113Contig3

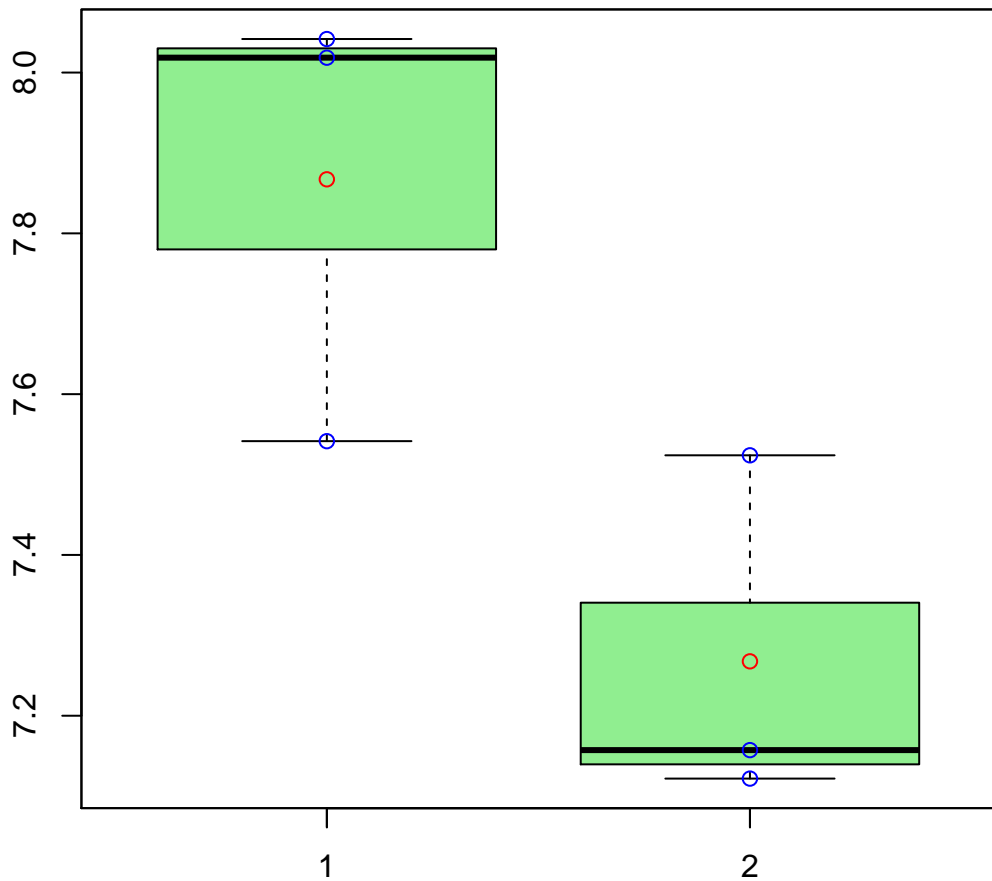

t-Test: p-value = 0.05

# CL1144Contig1|CL1144Contig1

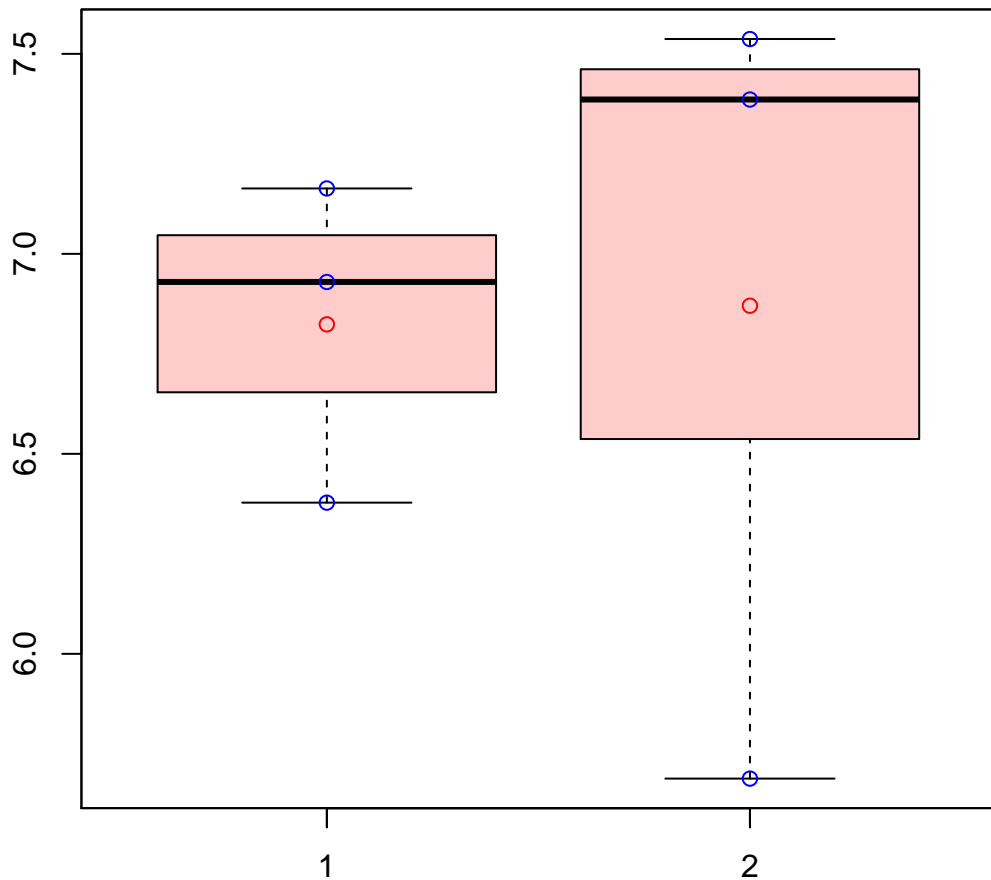

t-Test: p-value = 0.95

# CL1144Contig4|CL1144Contig4

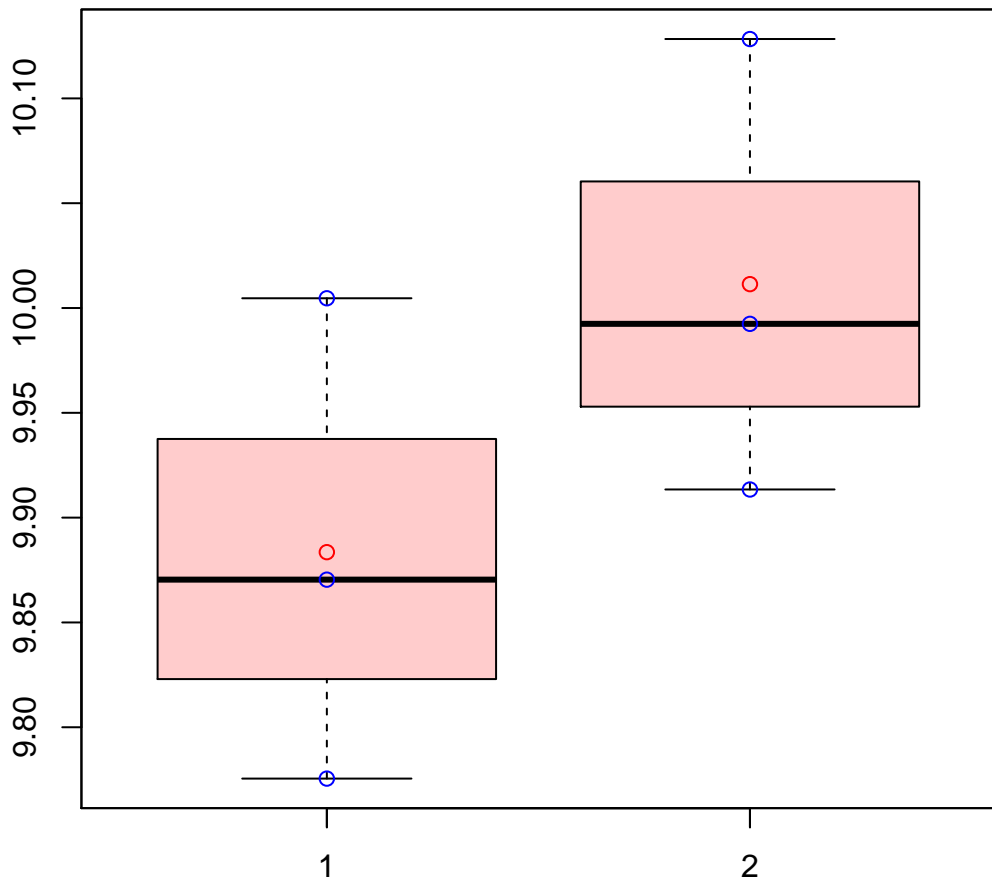

t-Test: p-value = 0.23

# CL11470Contig1|CL11470Contig1

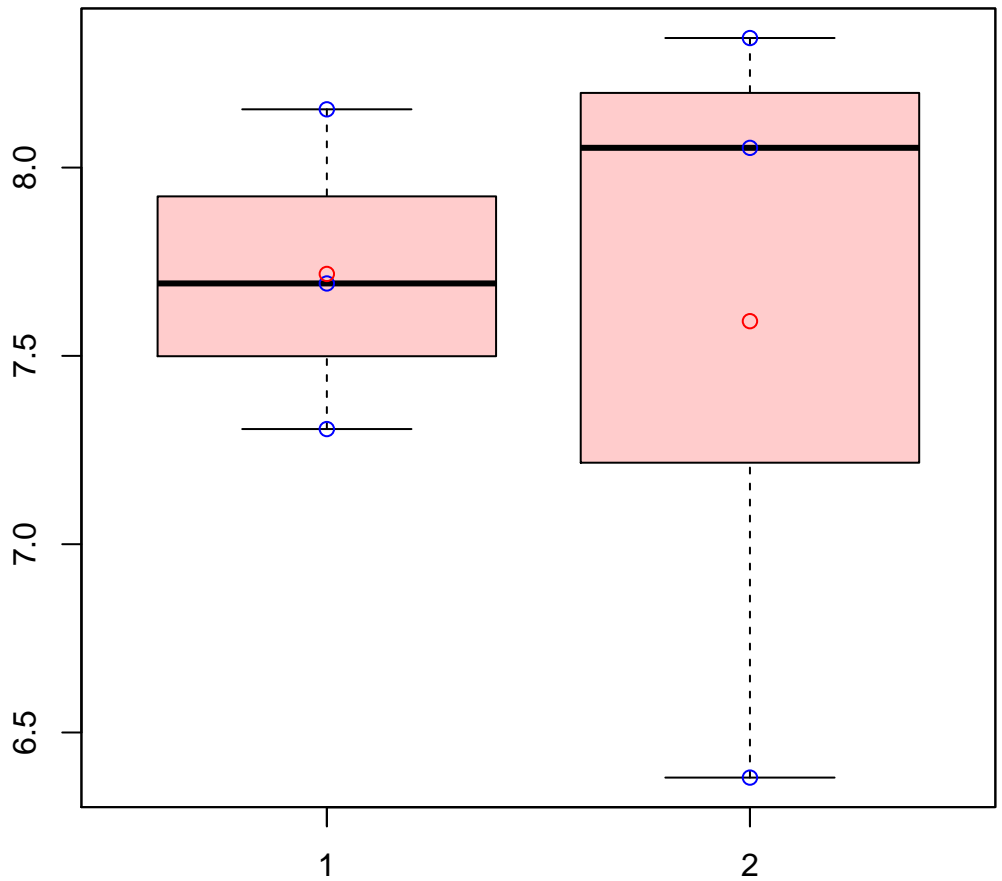

t-Test: p-value = 0.86

# CL114Contig10|CL114Contig10

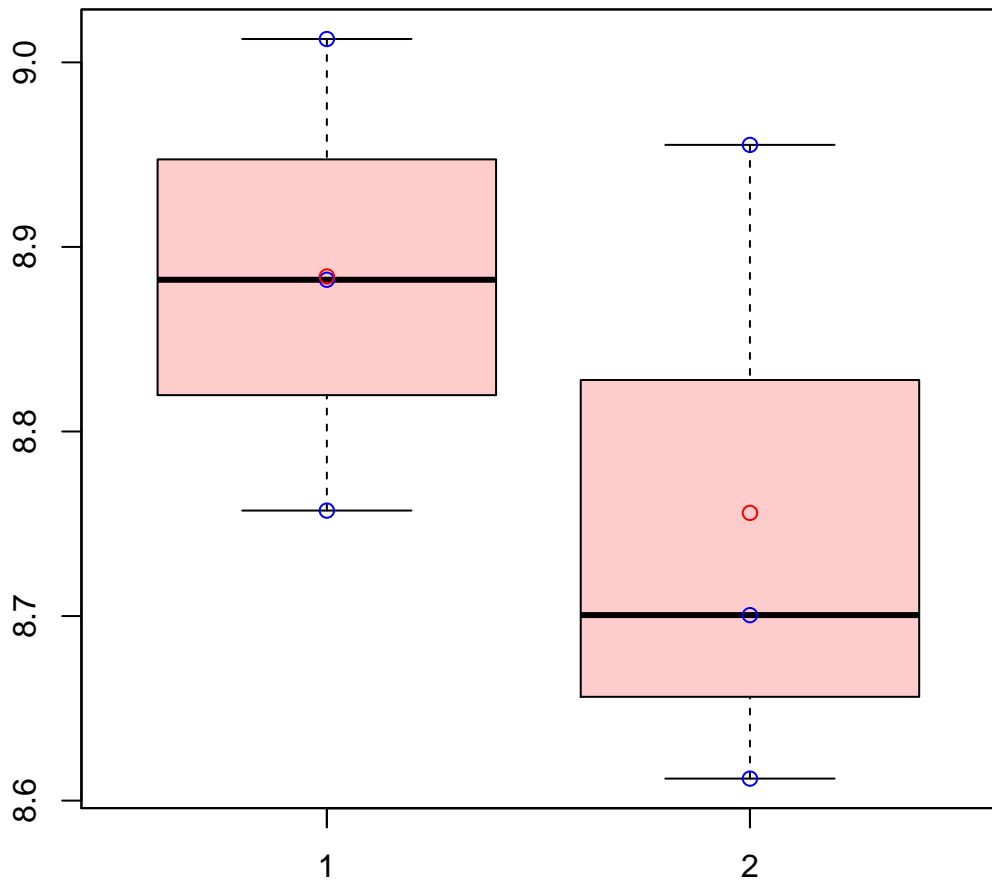

t-Test: p-value = 0.37



# CL11513Contig1|CL11513Contig1

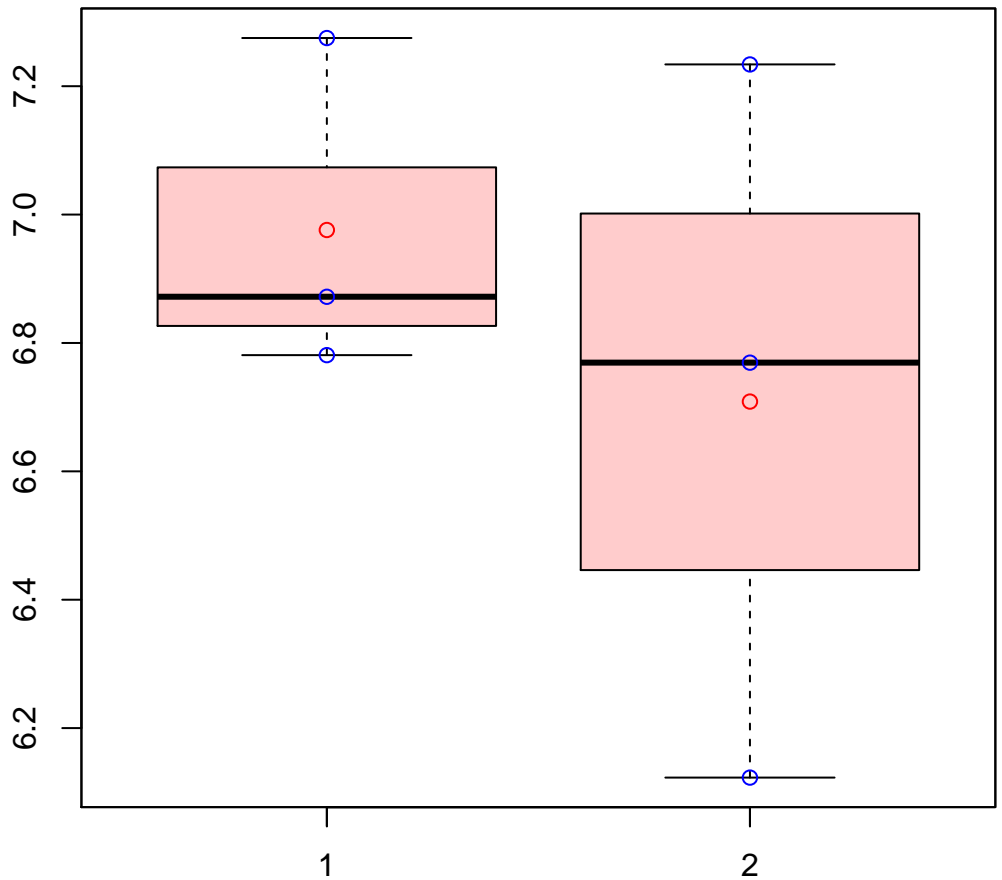

t-Test: p-value = 0.51

# CL1152Contig1|CL1152Contig1

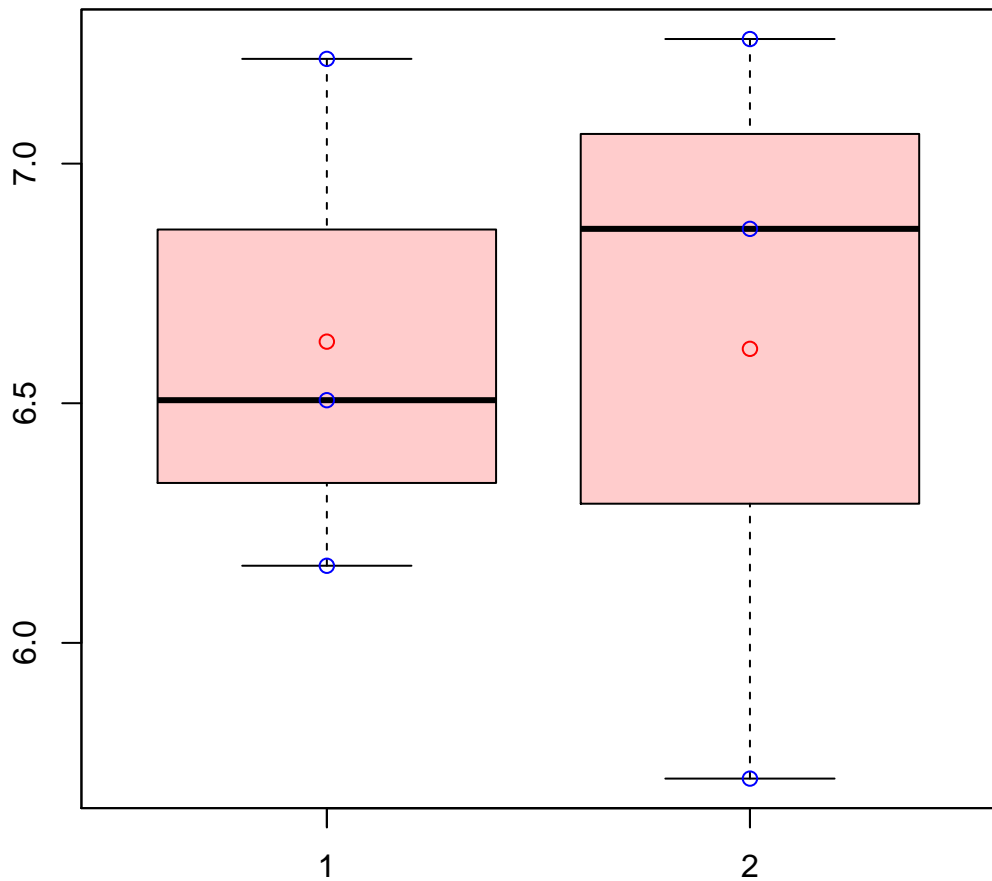

t-Test: p-value = 0.98

# CL1152Contig2|CL1152Contig2

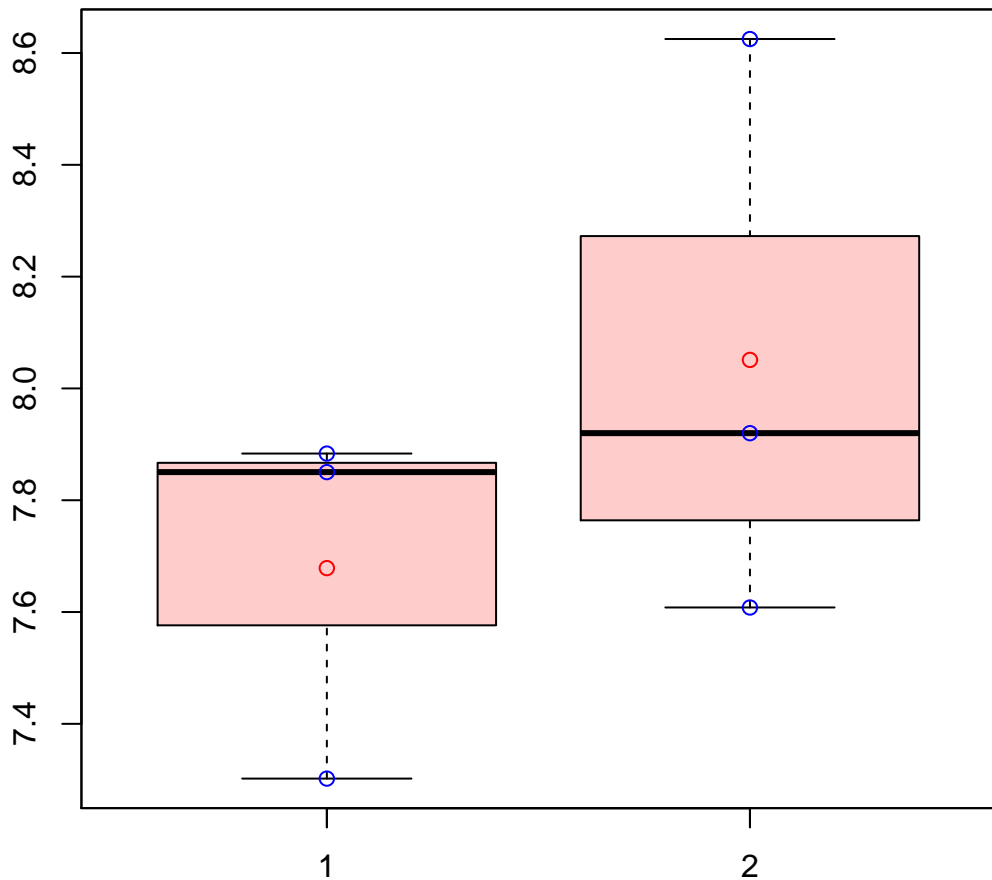

t-Test: p-value = 0.36

# CL1153Contig4|CL1153Contig4

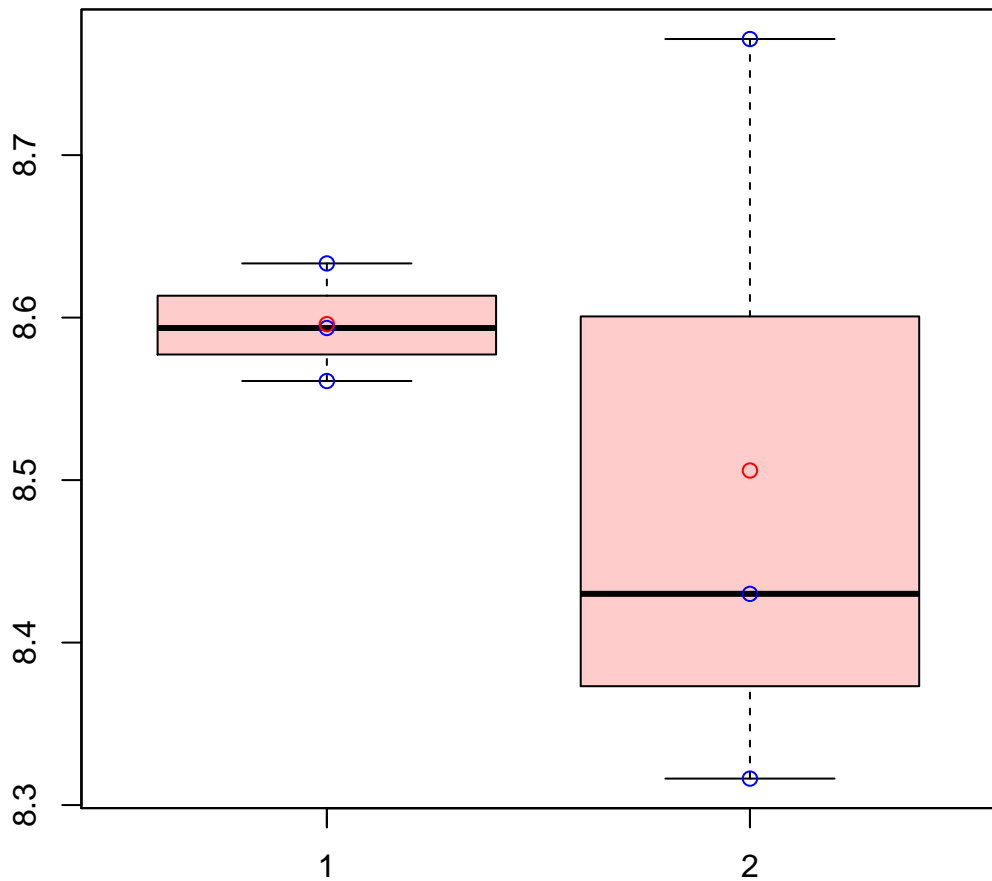

# CL11549Contig1|CL11549Contig1

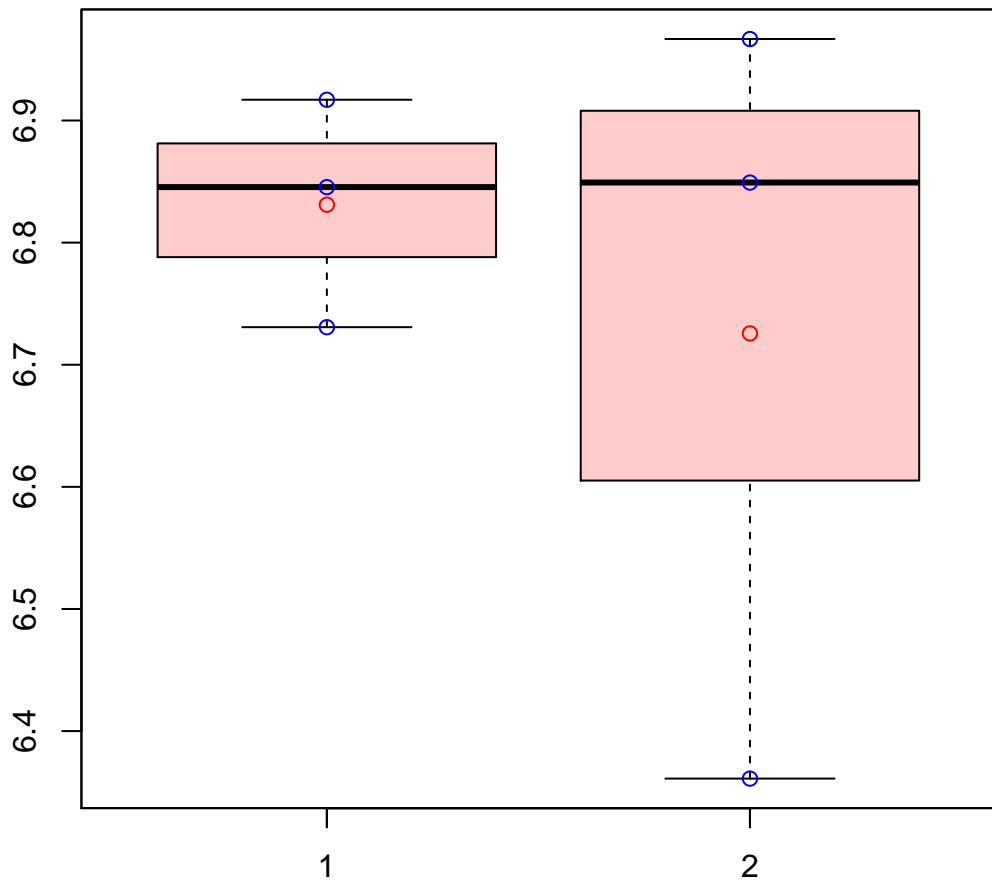

t-Test: p-value = 0.63

# CL1156Contig3|CL1156Contig3

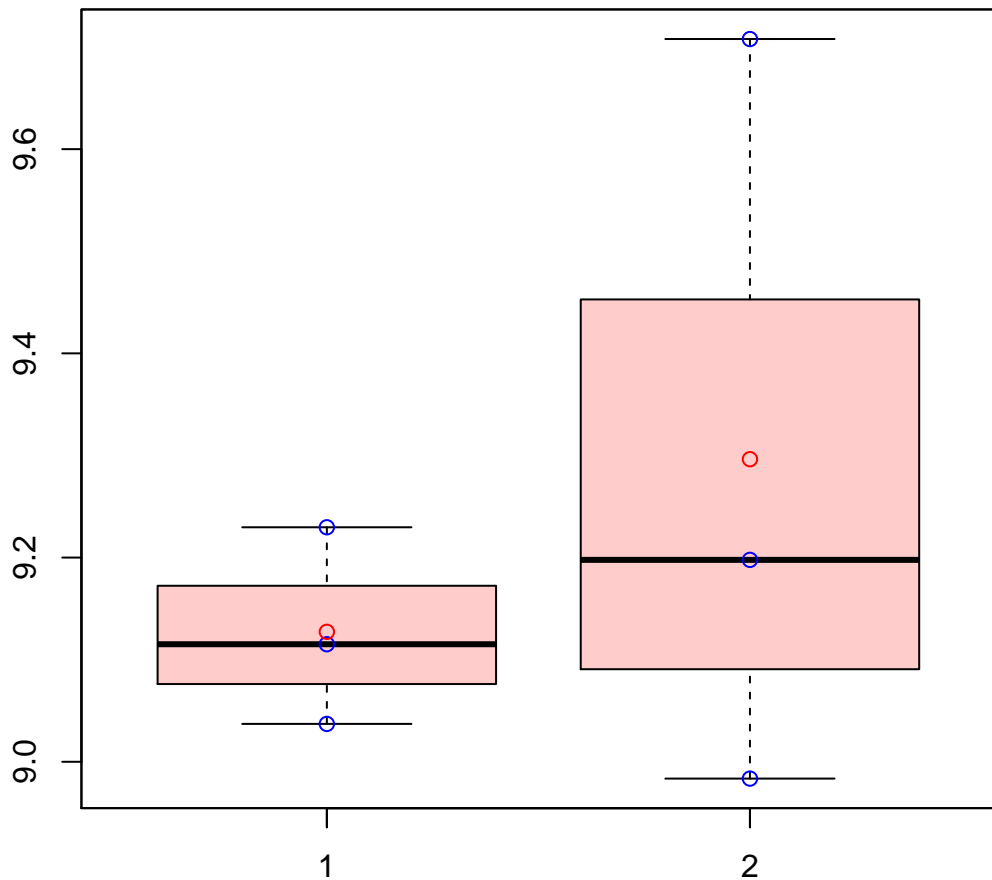

t-Test: p-value = 0.52

# CL1158Contig2|CL1158Contig2

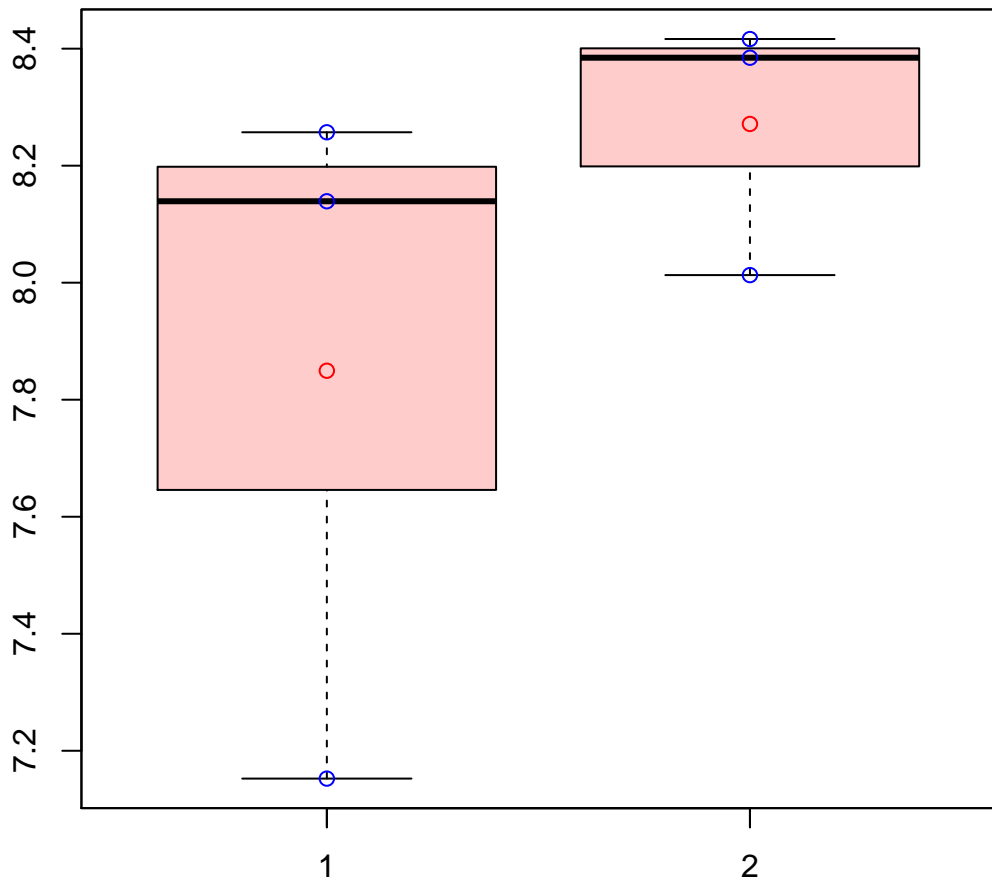

t-Test: p-value = 0.35

# CL1158Contig3|CL1158Contig3

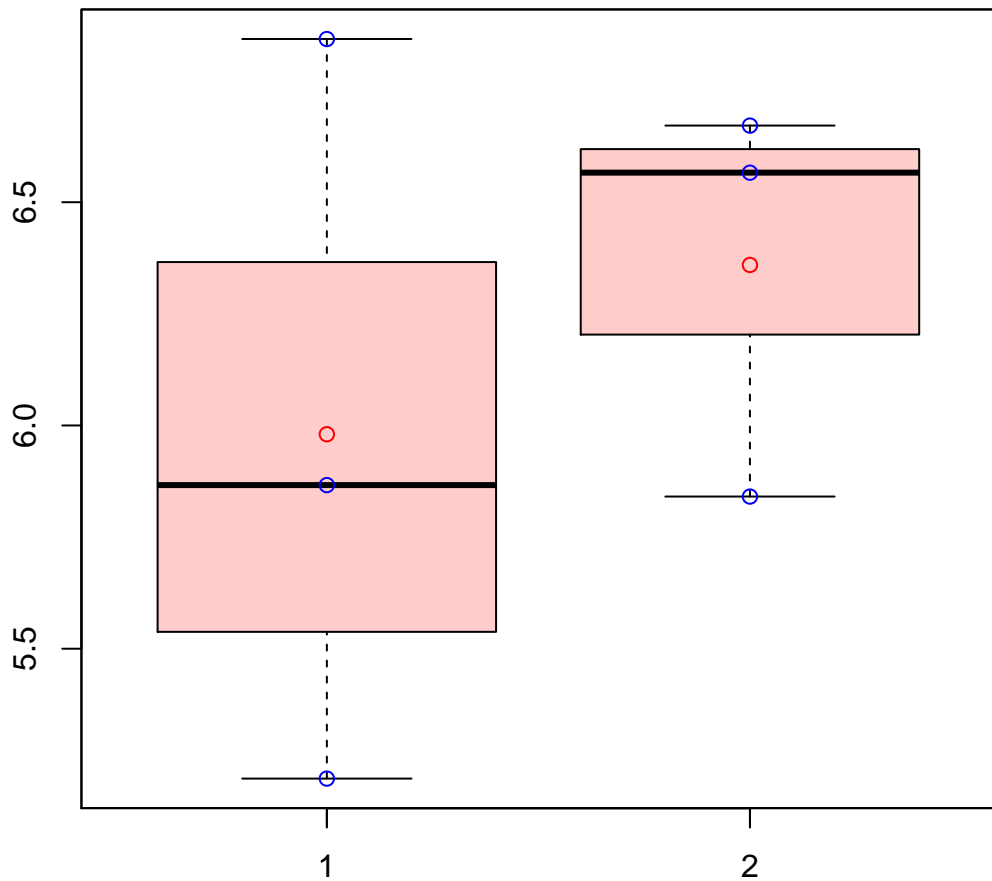

t-Test: p-value = 0.54



# CL115Contig5|CL115Contig5

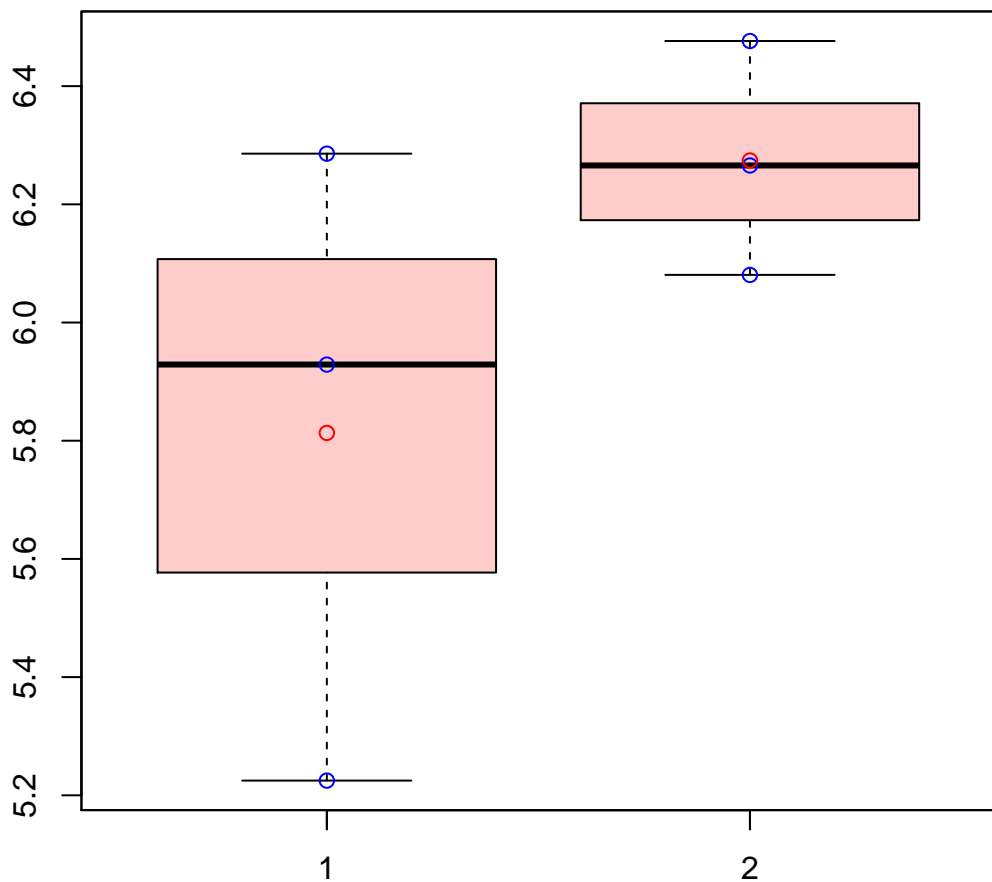

t-Test: p-value = 0.27

# CL115Contig7|CL115Contig7

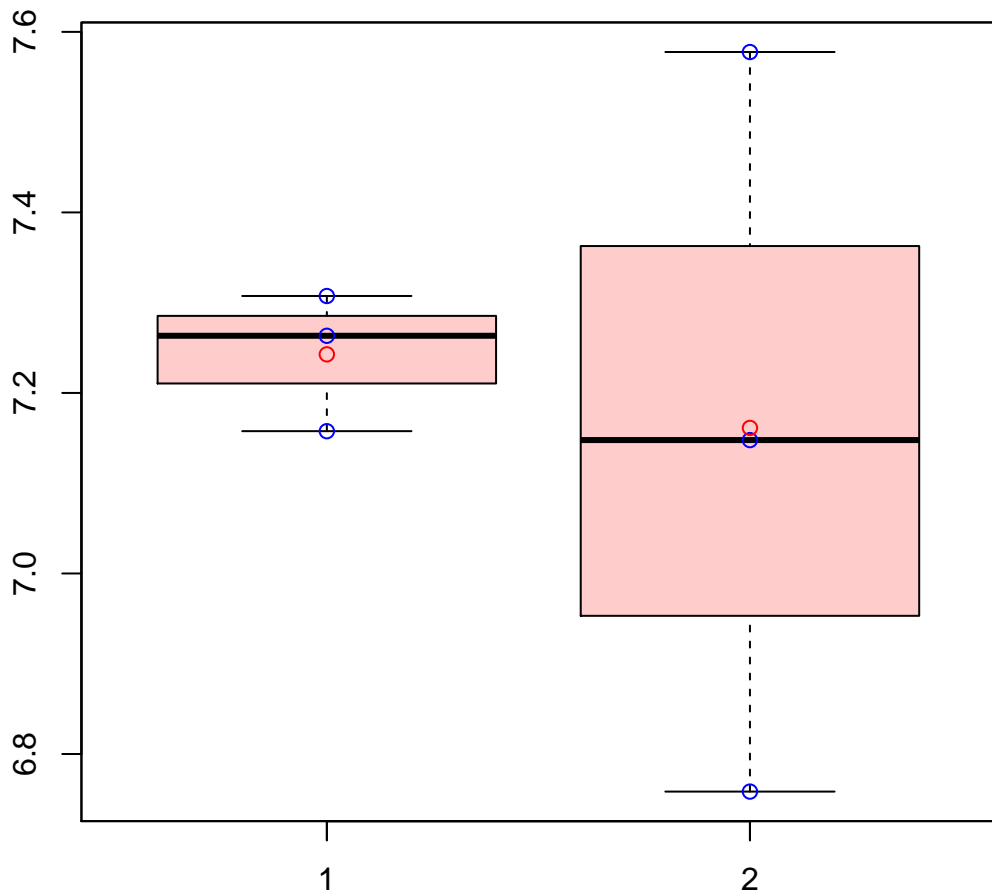

t-Test: p-value = 0.77

# CL11604Contig1|CL11604Contig1

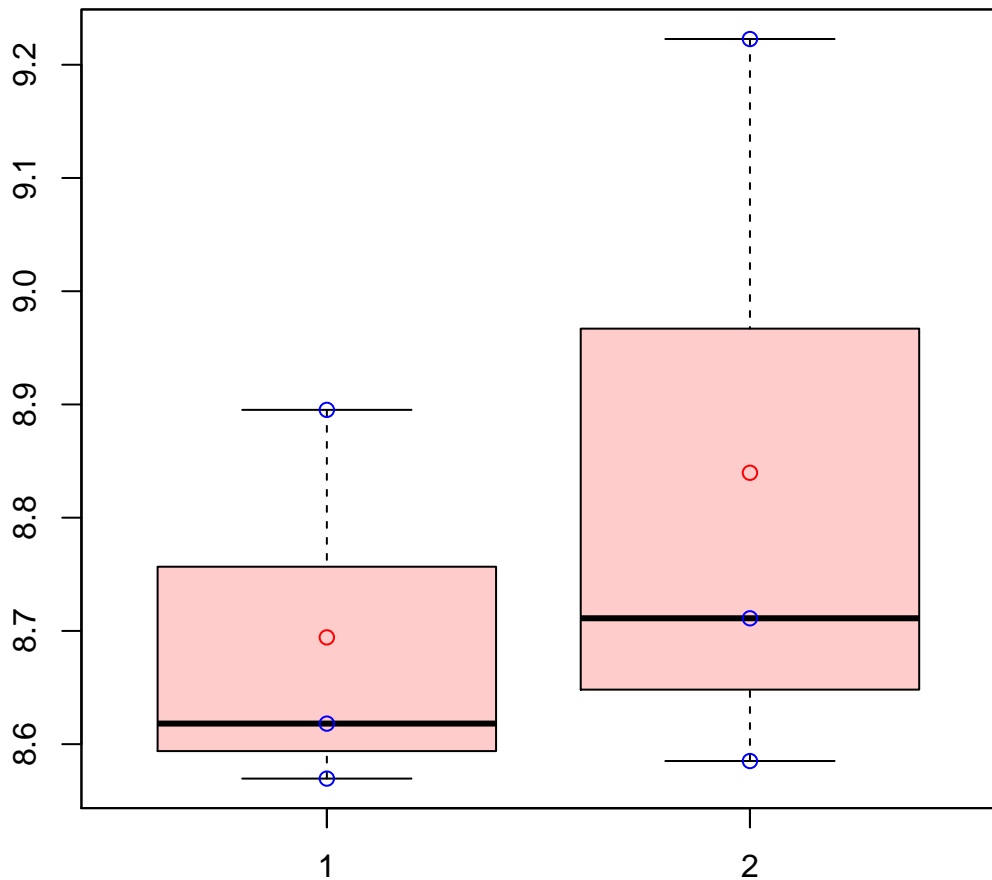

t-Test: p-value = 0.56

# CL11608Contig1|CL11608Contig1

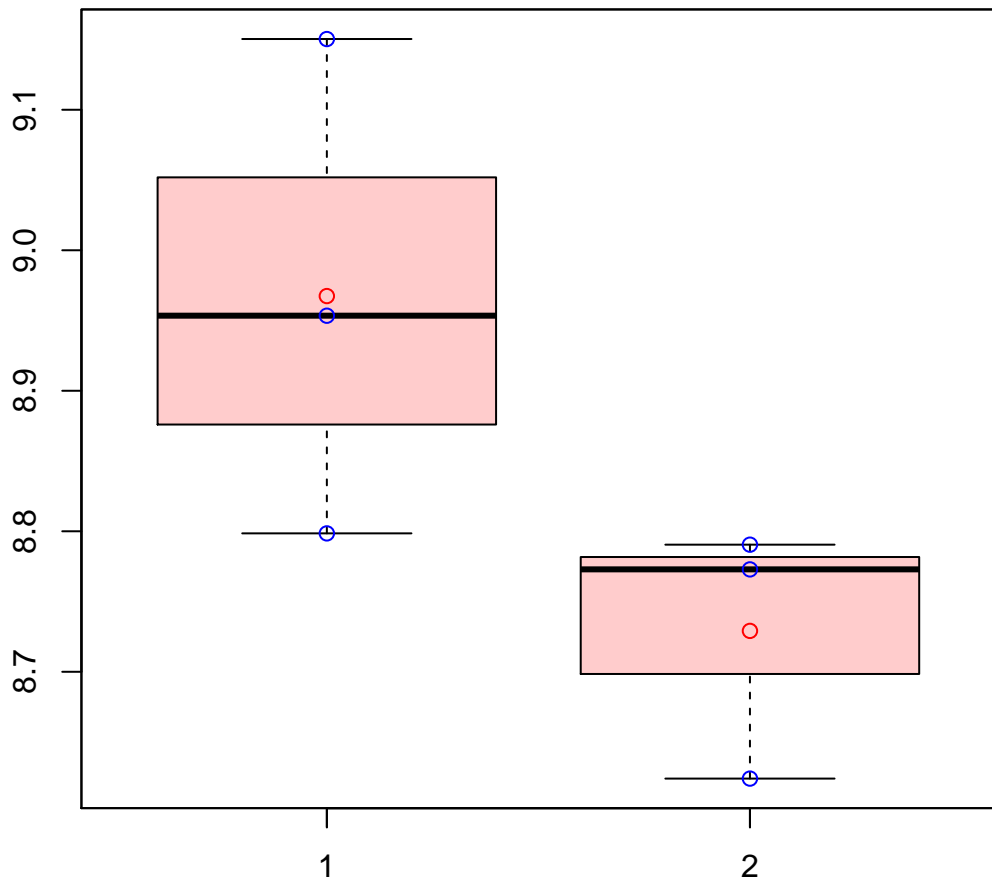

t-Test: p-value = 0.13

# CL1162Contig4|CL1162Contig4

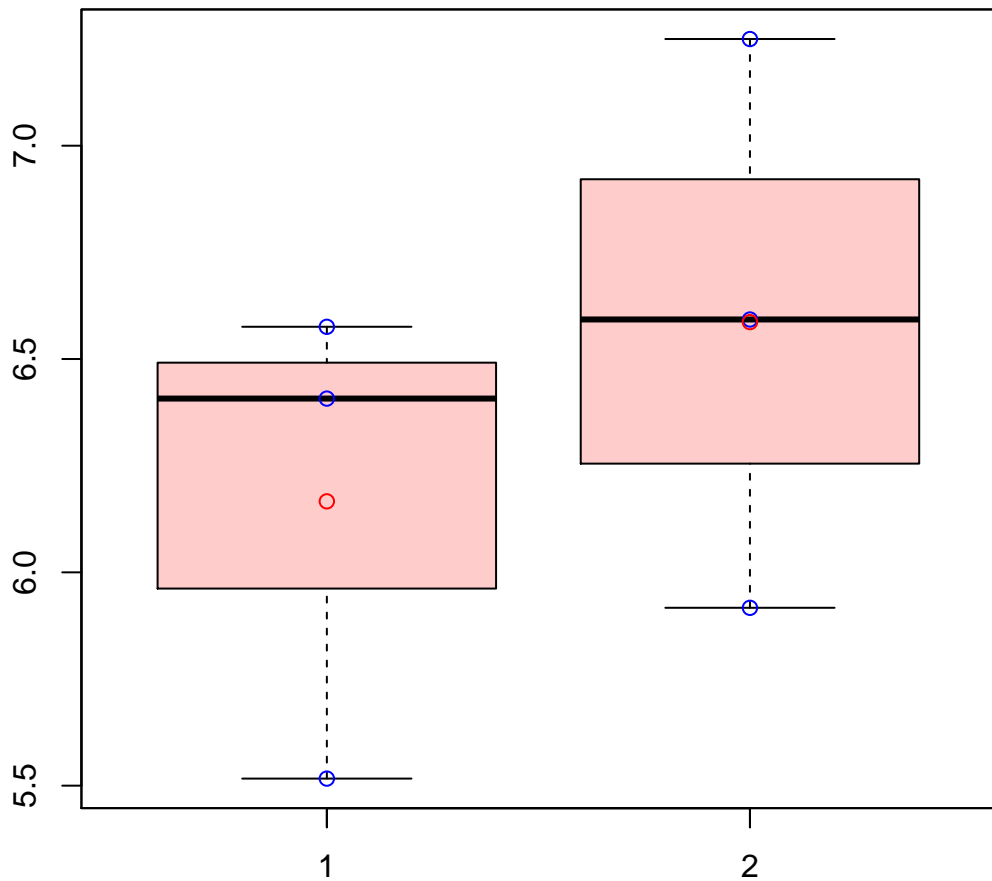

t-Test: p-value = 0.45

# CL11653Contig2|CL11653Contig2

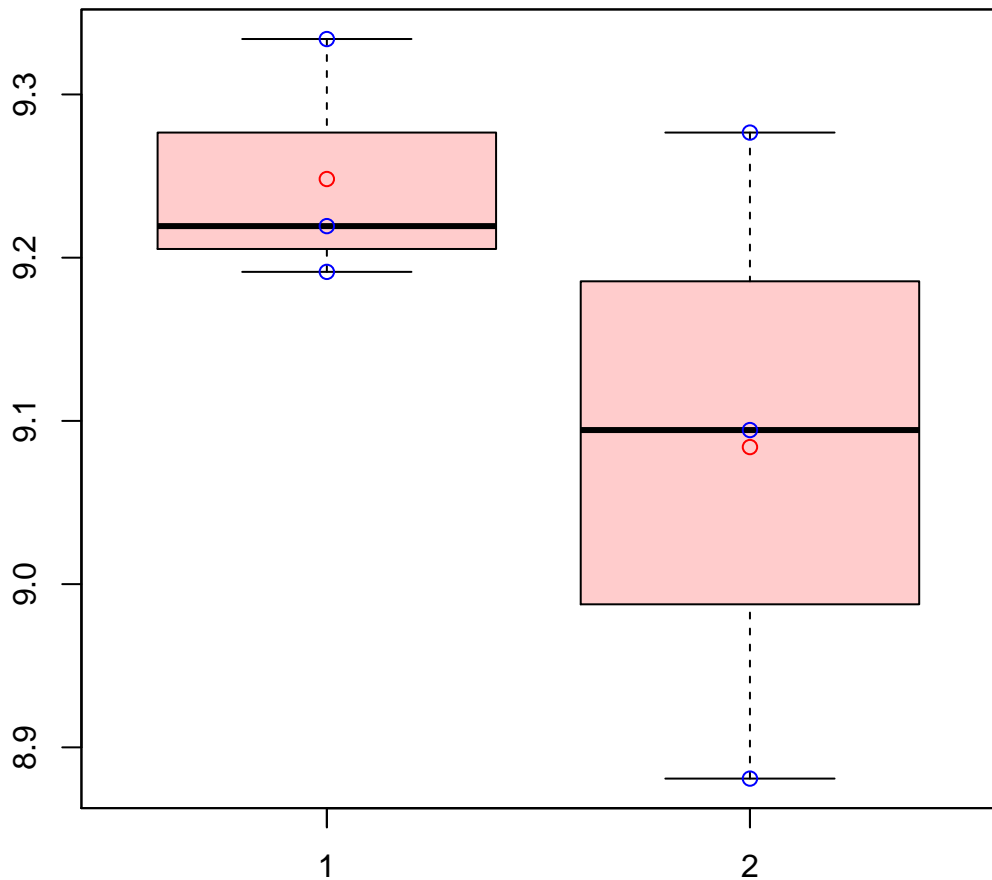

t-Test: p-value = 0.29

# CL1165Contig1|CL1165Contig1

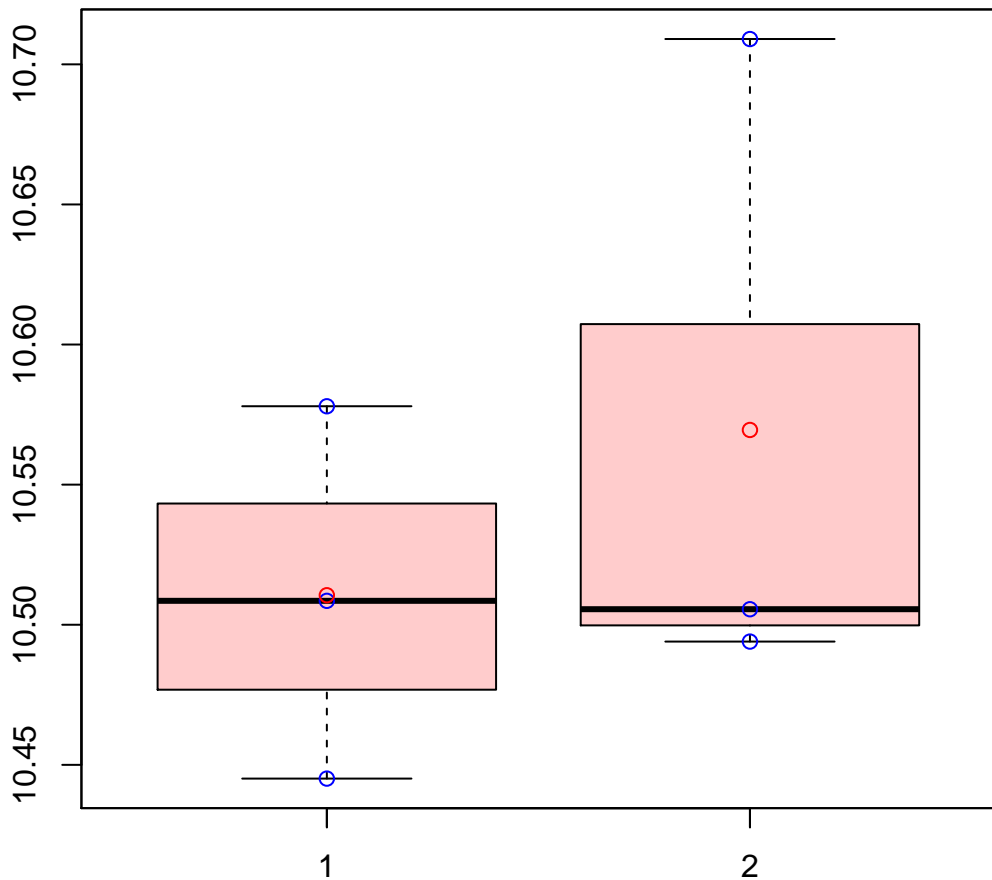

t-Test: p-value = 0.51

# CL116Contig18|CL116Contig18

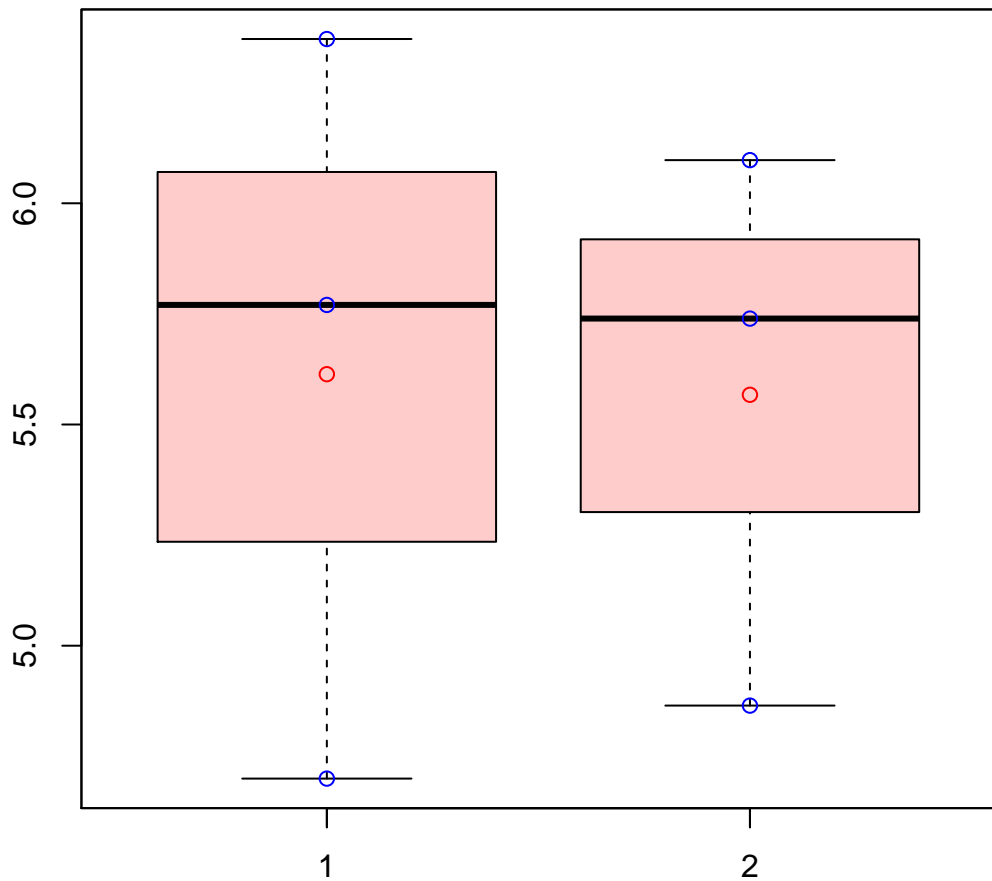

t-Test: p-value = 0.94



# CL1172Contig2|CL1172Contig2

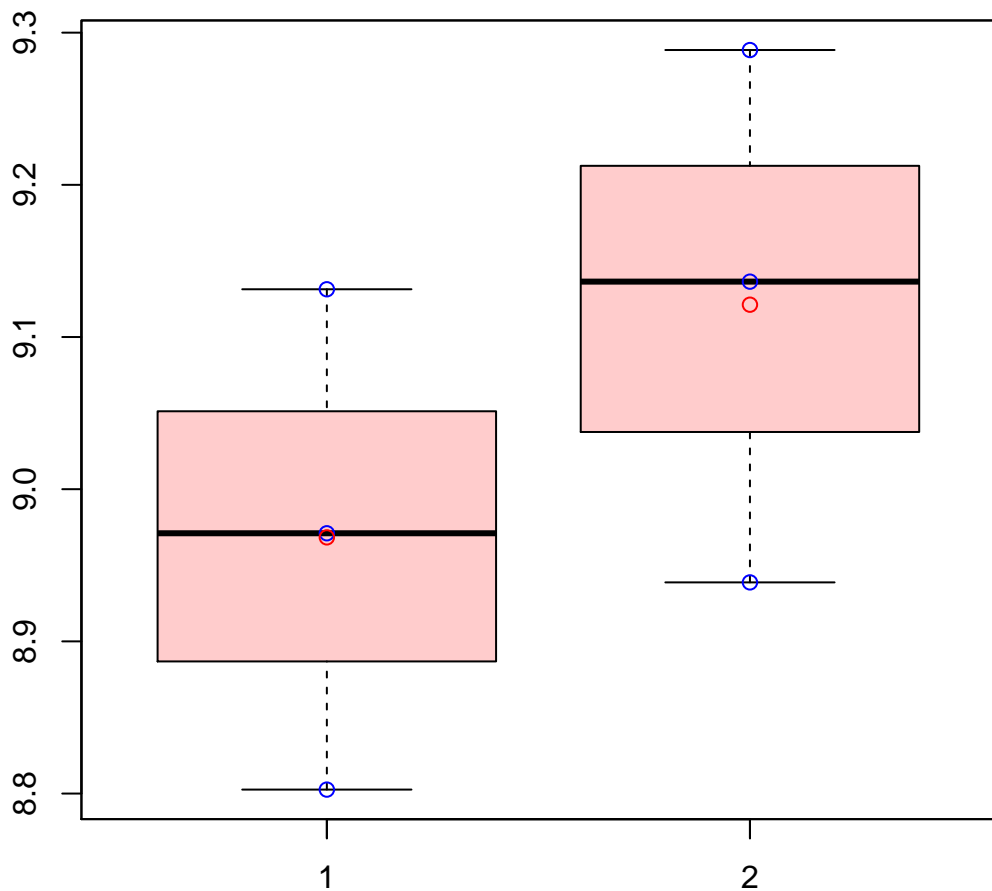

t-Test: p-value = 0.33

# CL11731Contig1|CL11731Contig1

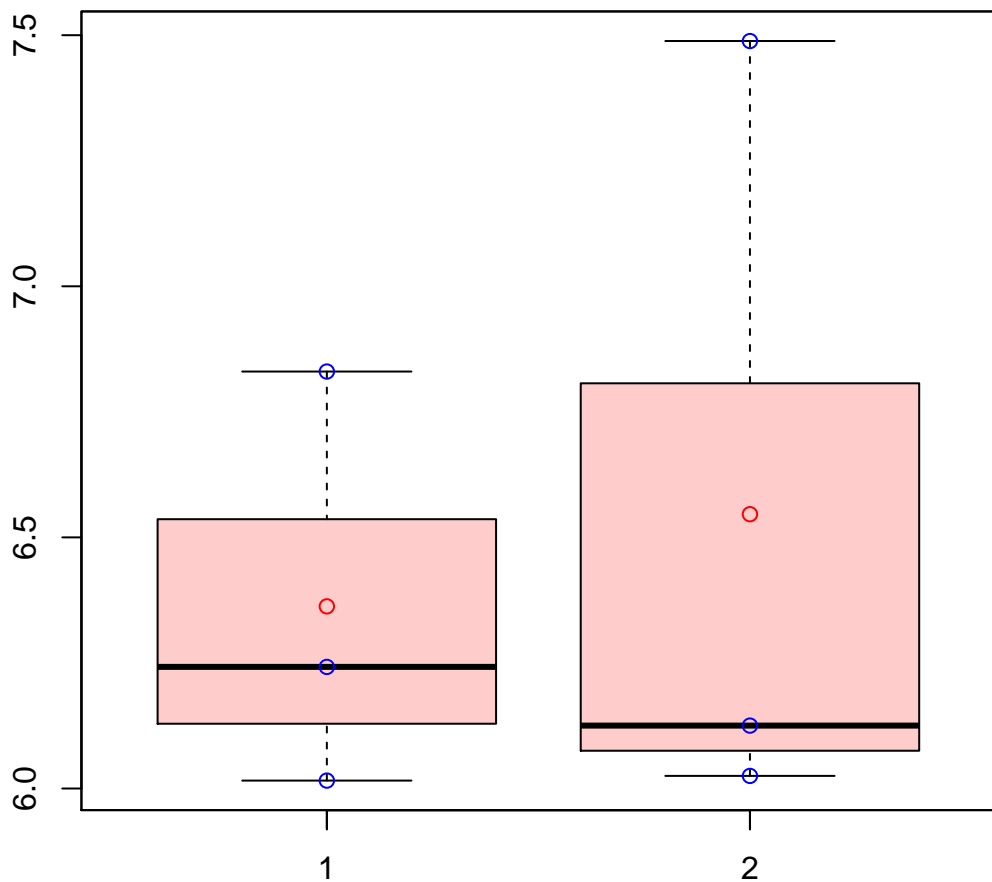

t-Test: p-value = 0.75

# CL1177Contig6|CL1177Contig6

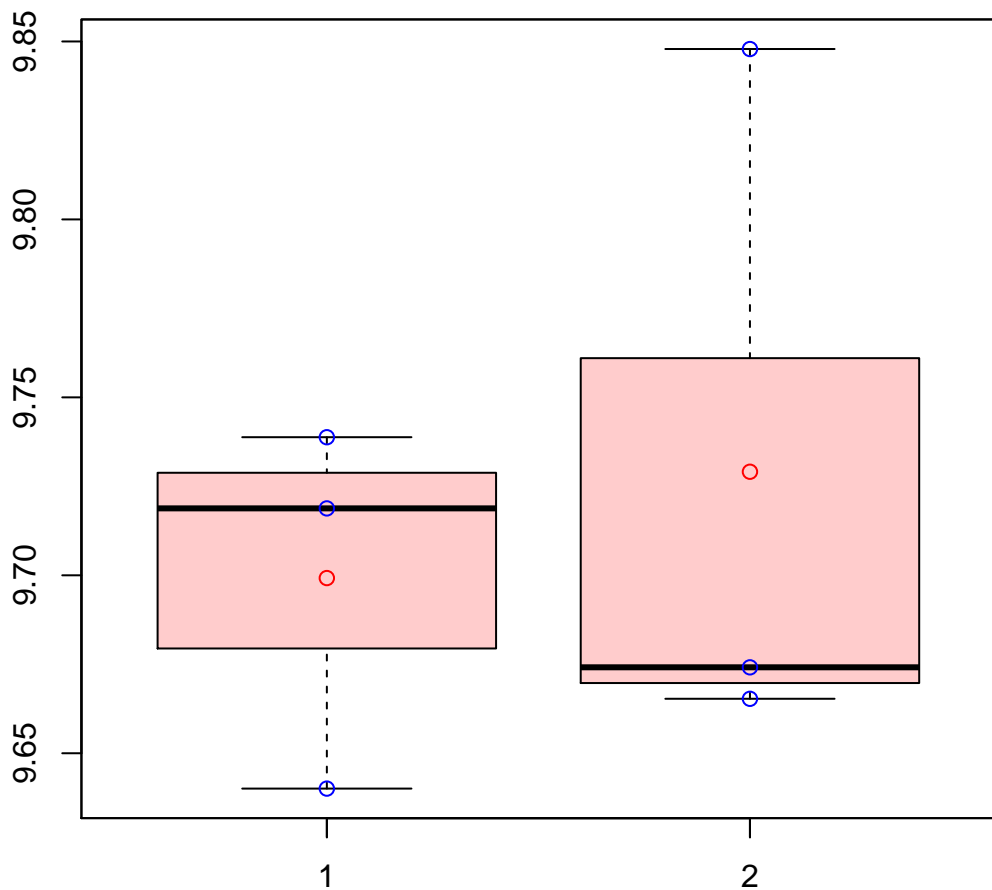

t-Test: p-value = 0.68

# CL11786Contig2|CL11786Contig2

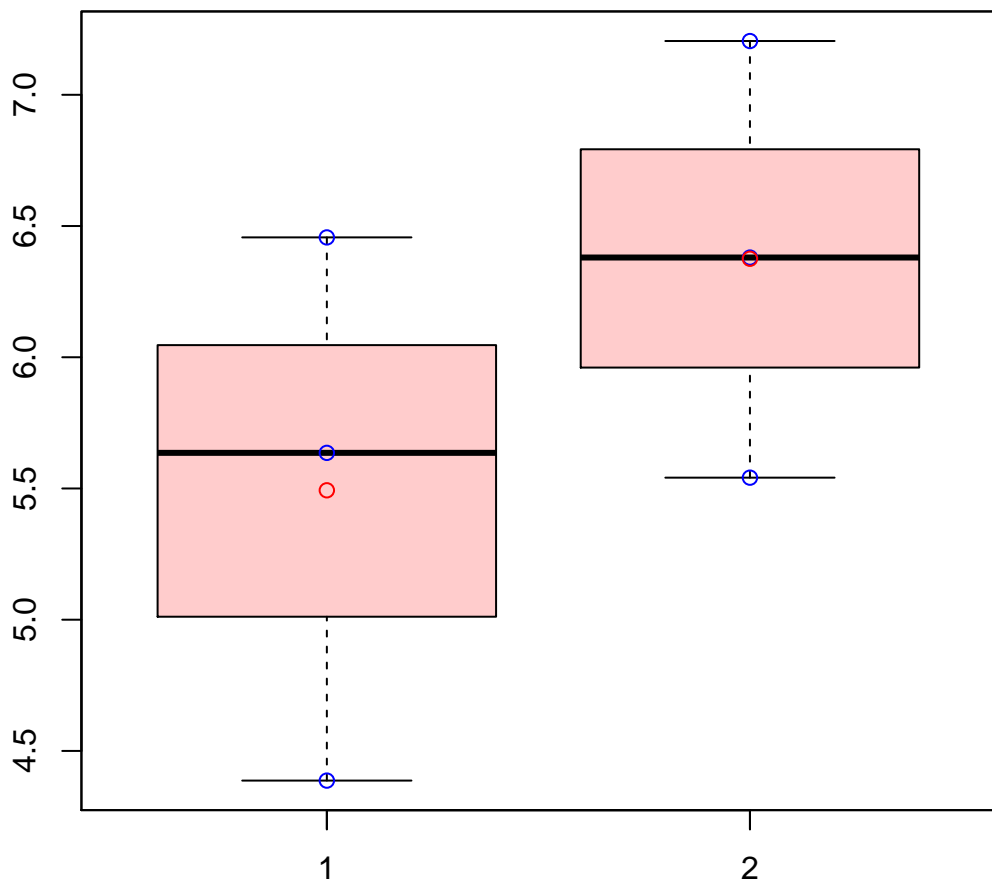

t-Test: p-value = 0.32

# CL1179Contig2|CL1179Contig2

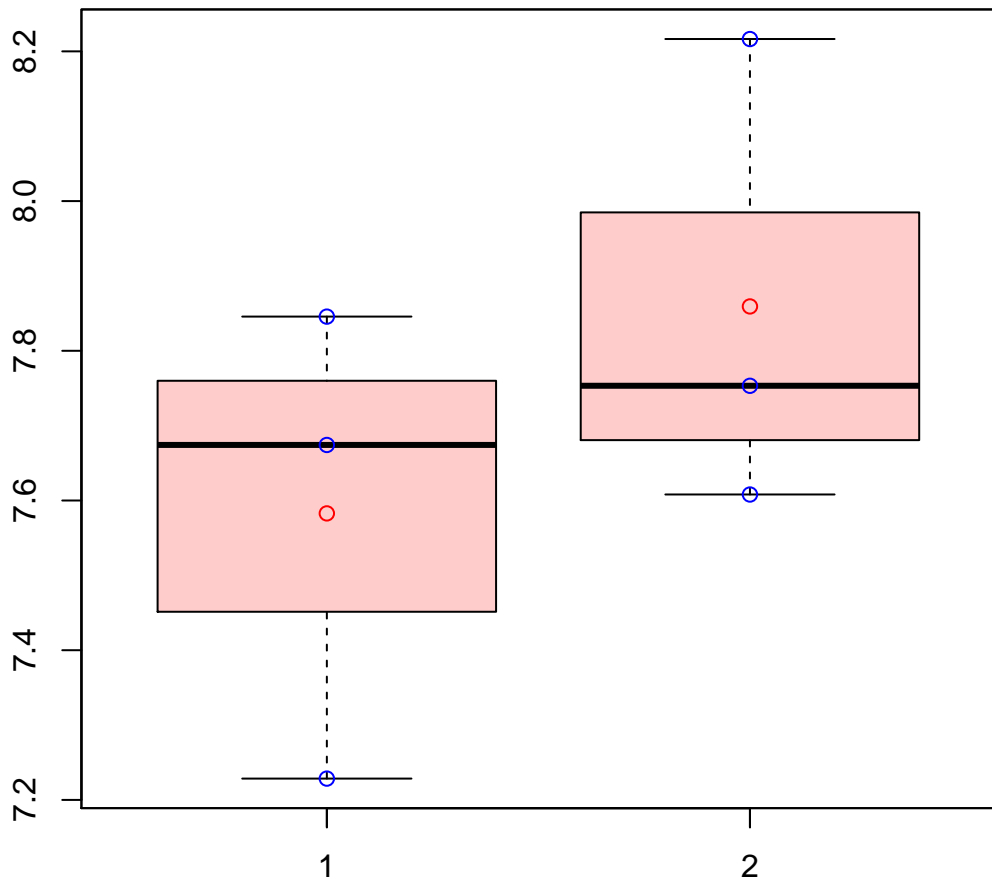

t-Test: p-value = 0.35

# CL1179Contig3|CL1179Contig3

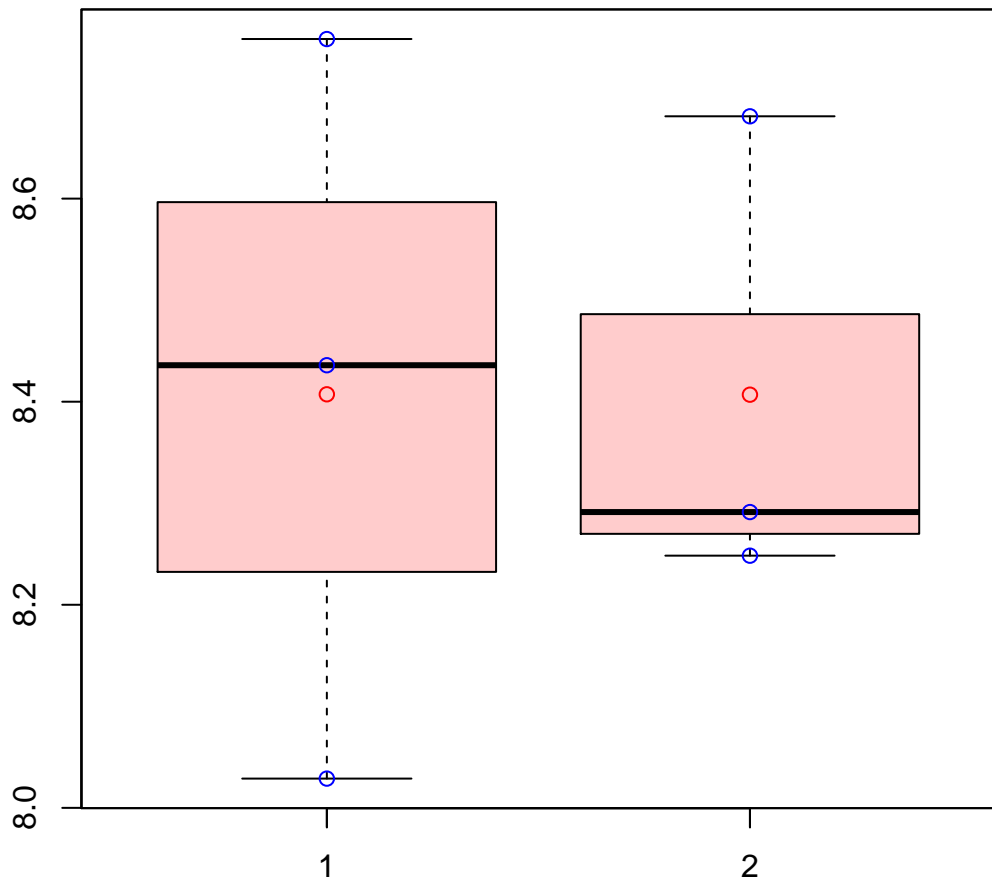

t-Test: p-value = 1

# CL11824Contig1|CL11824Contig1

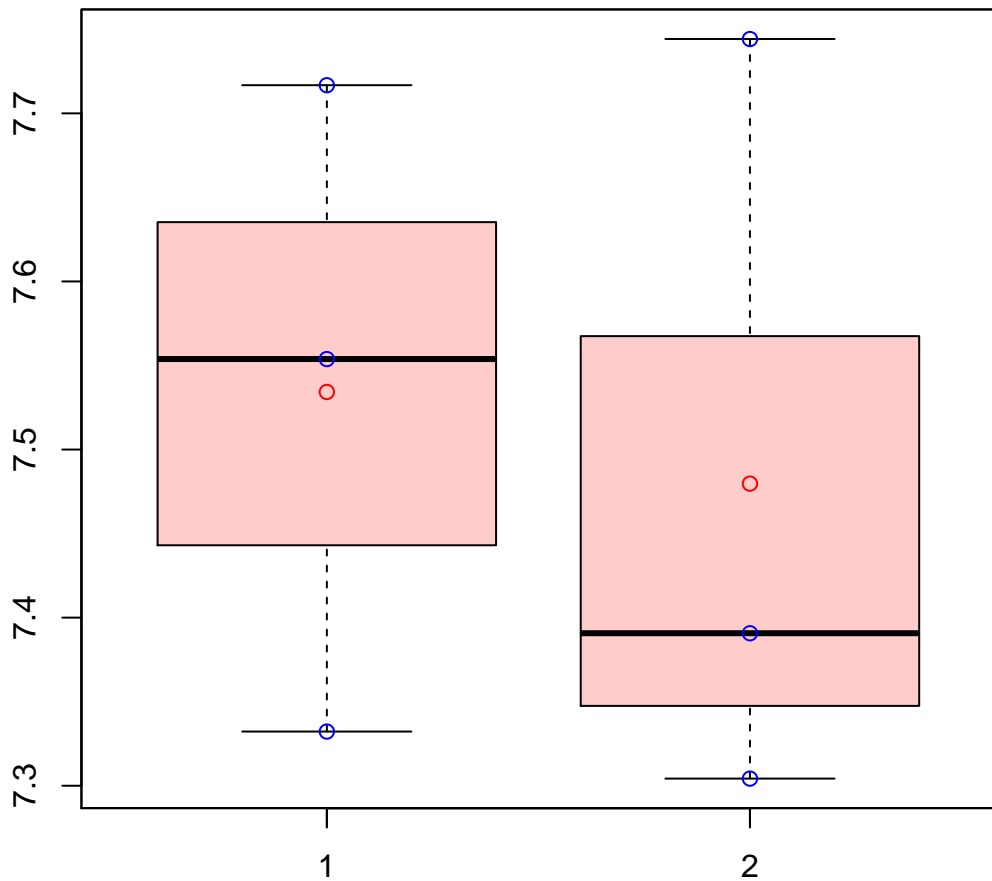

t-Test: p-value = 0.77

# CL1183Contig5|CL1183Contig5

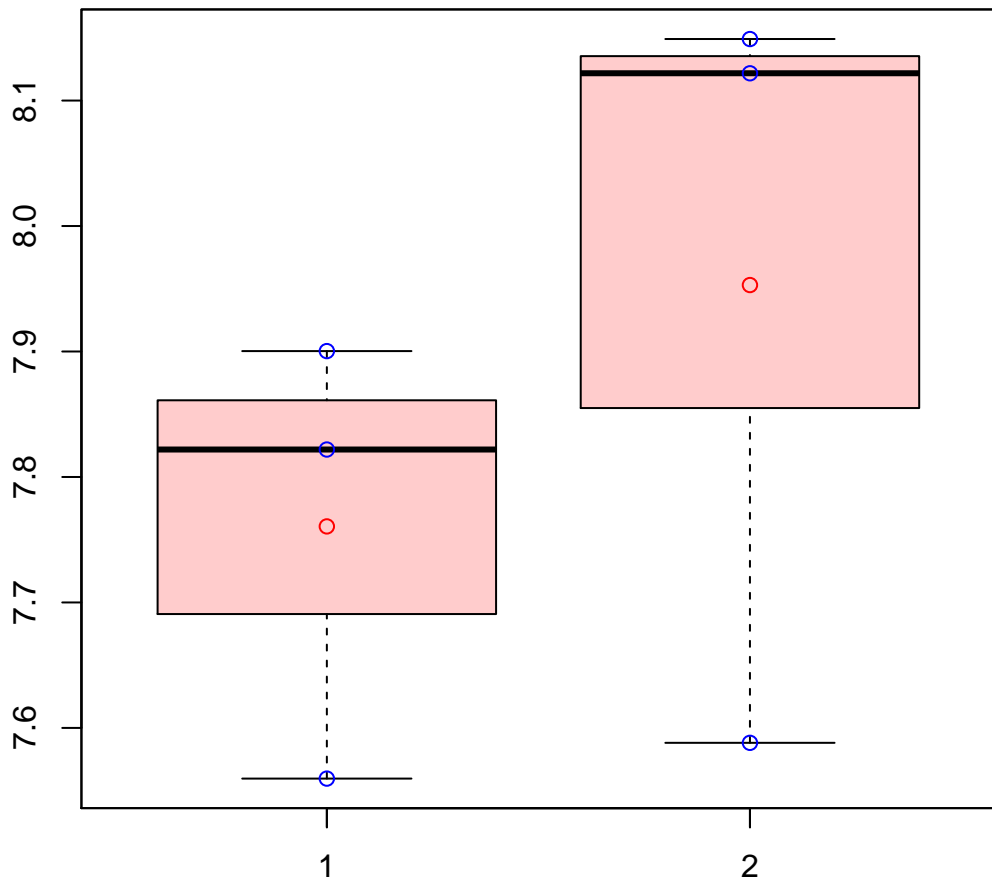

t-Test: p-value = 0.42



# CL11887Contig1|CL11887Contig1

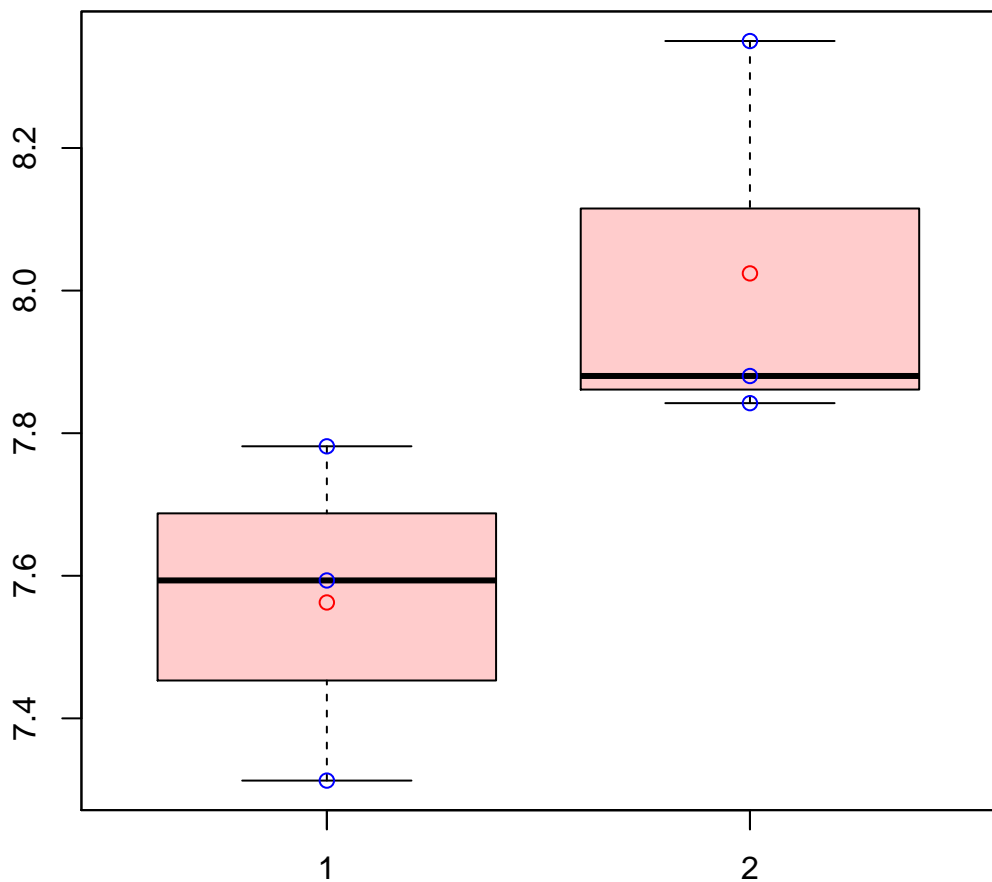

t-Test: p-value = 0.1

# CL1189Contig1|CL1189Contig1

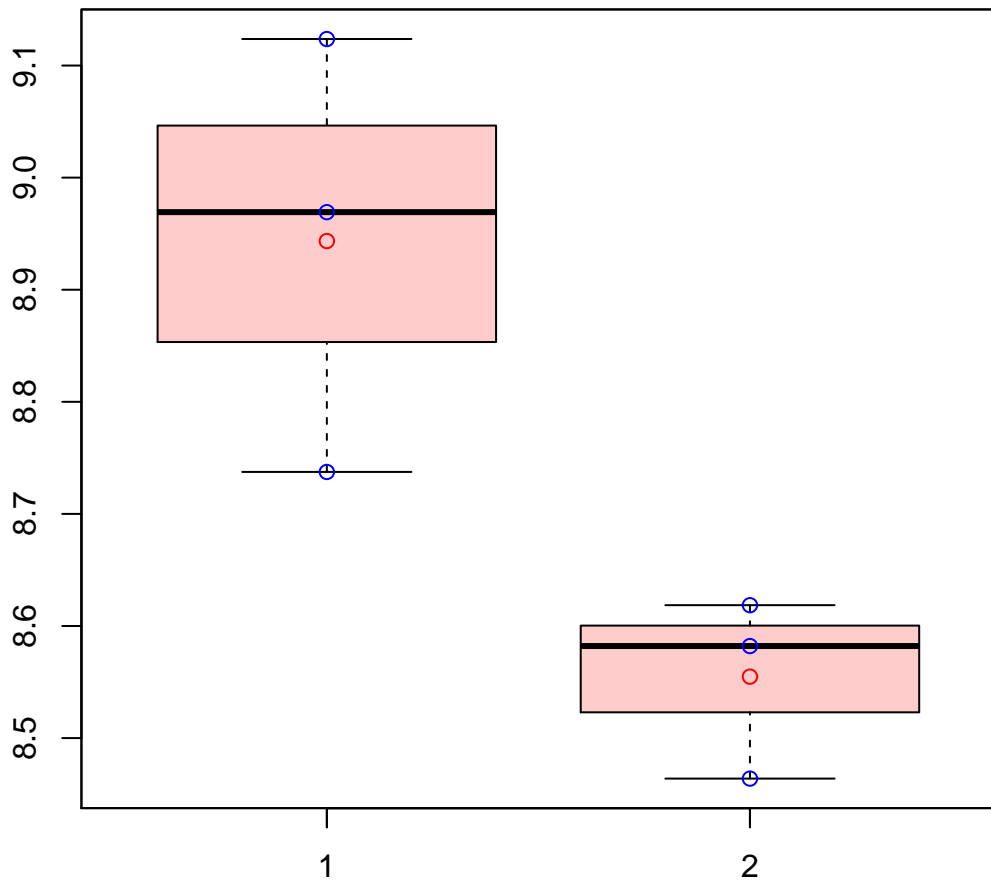

t-Test: p-value = 0.06

# CL118Contig5|CL118Contig5

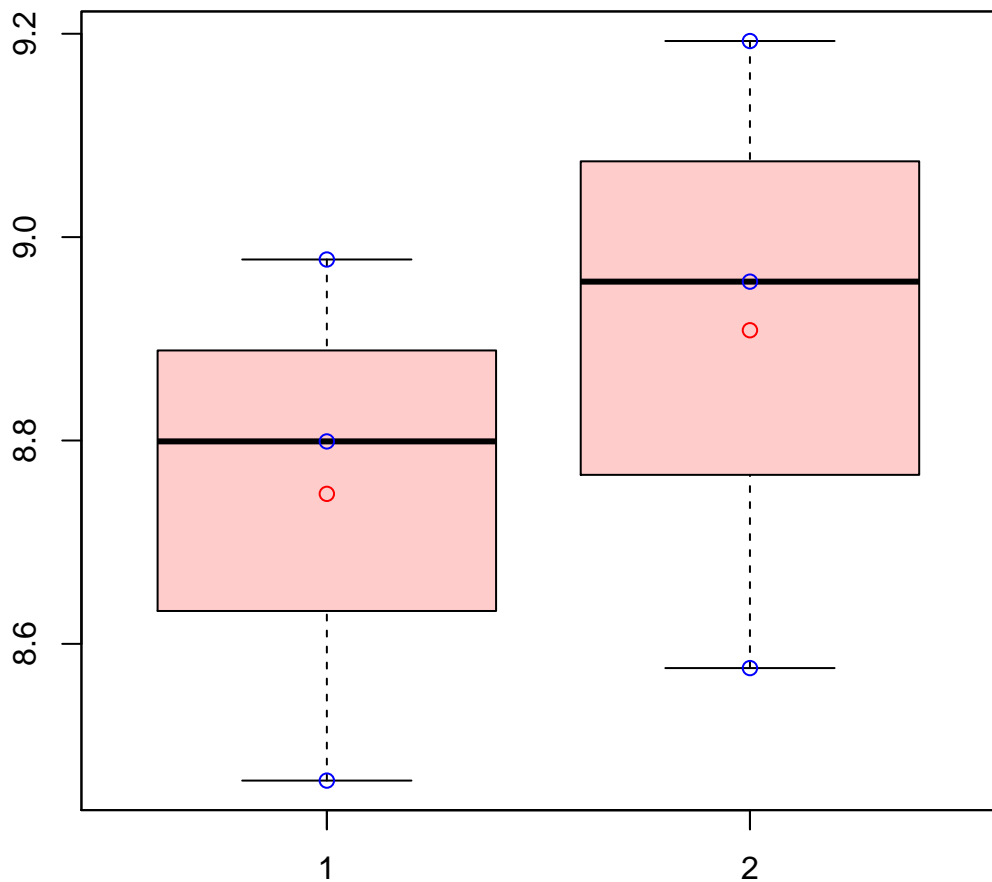

t-Test: p-value = 0.53

# CL118Contig6|CL118Contig6

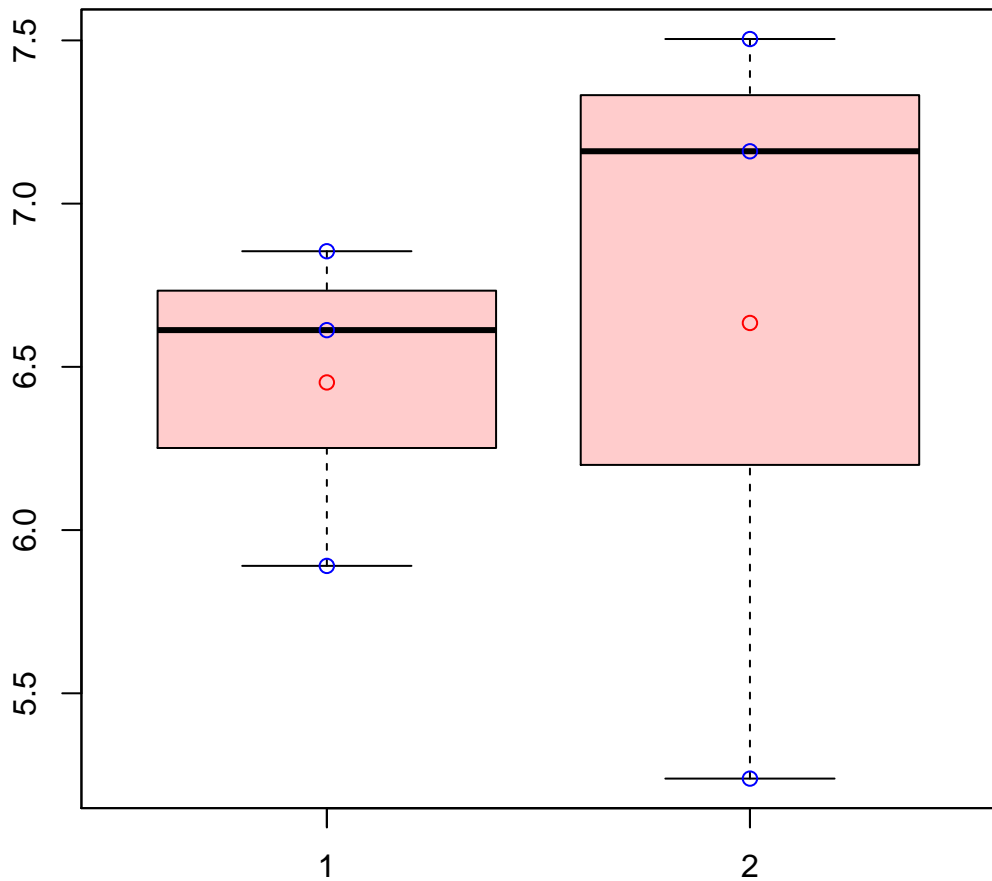

t-Test: p-value = 0.83

# CL11931Contig1|CL11931Contig1

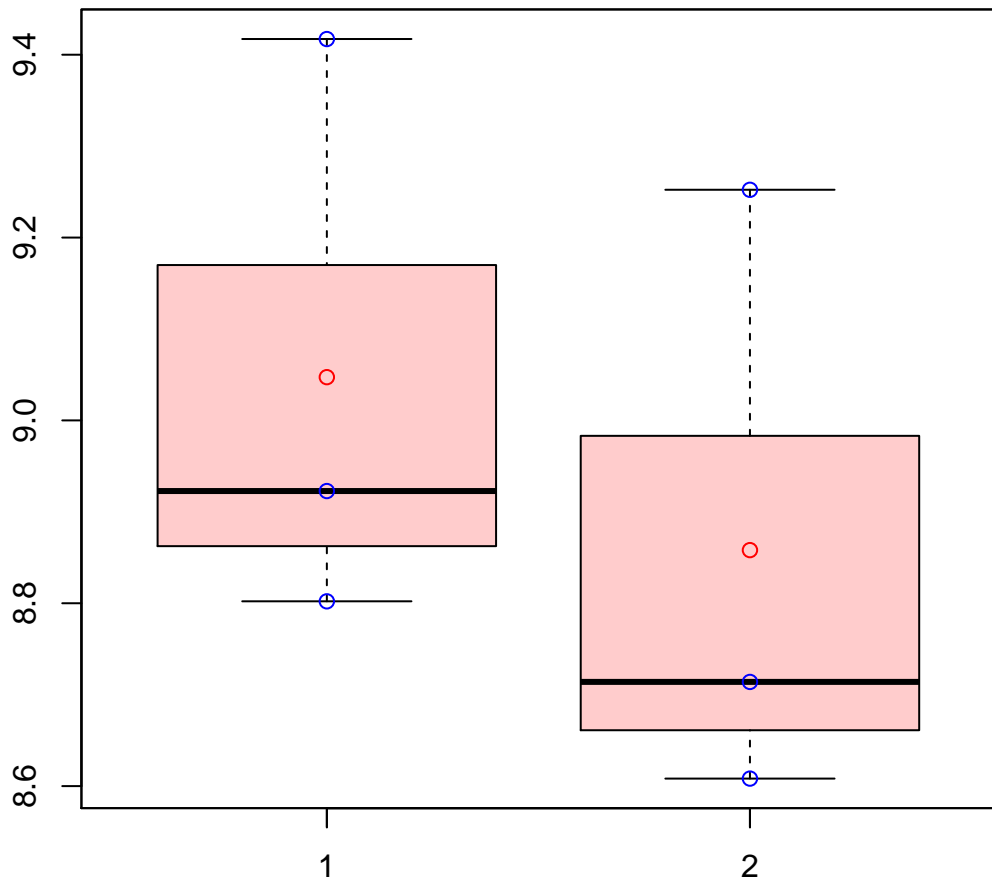

t-Test: p-value = 0.53

# CL1195Contig7|CL1195Contig7

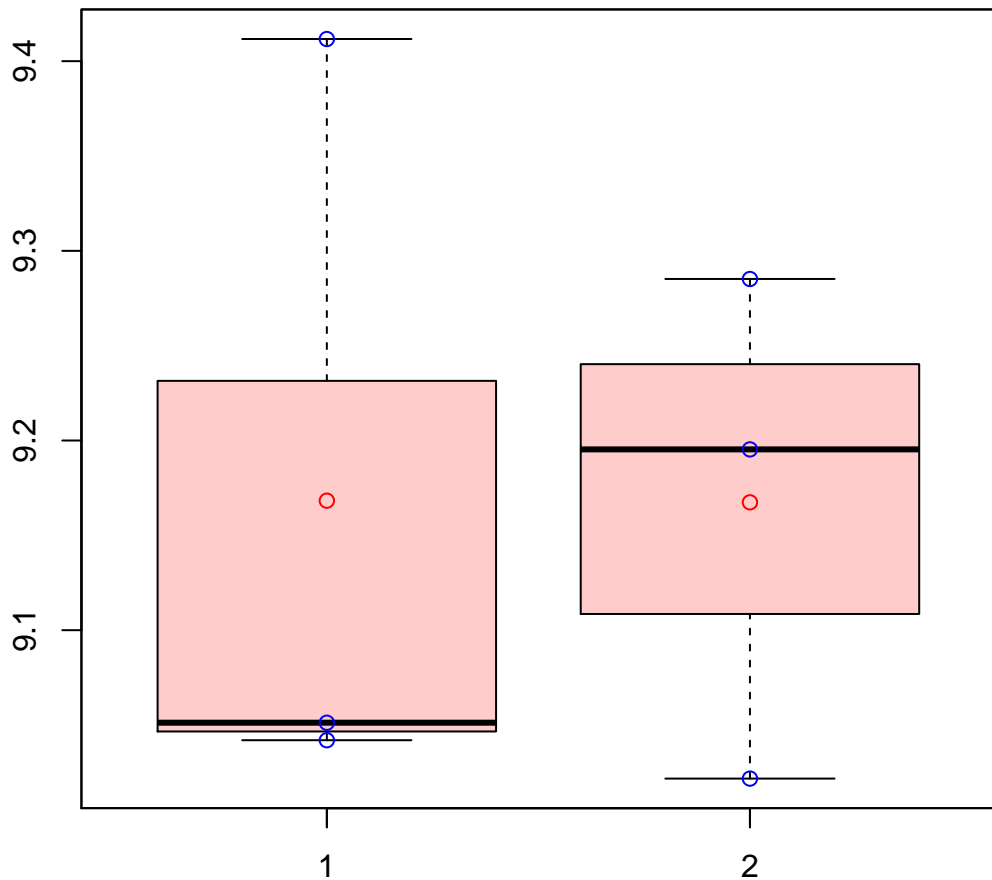

t-Test: p-value = 1

# CL11970Contig1|CL11970Contig1

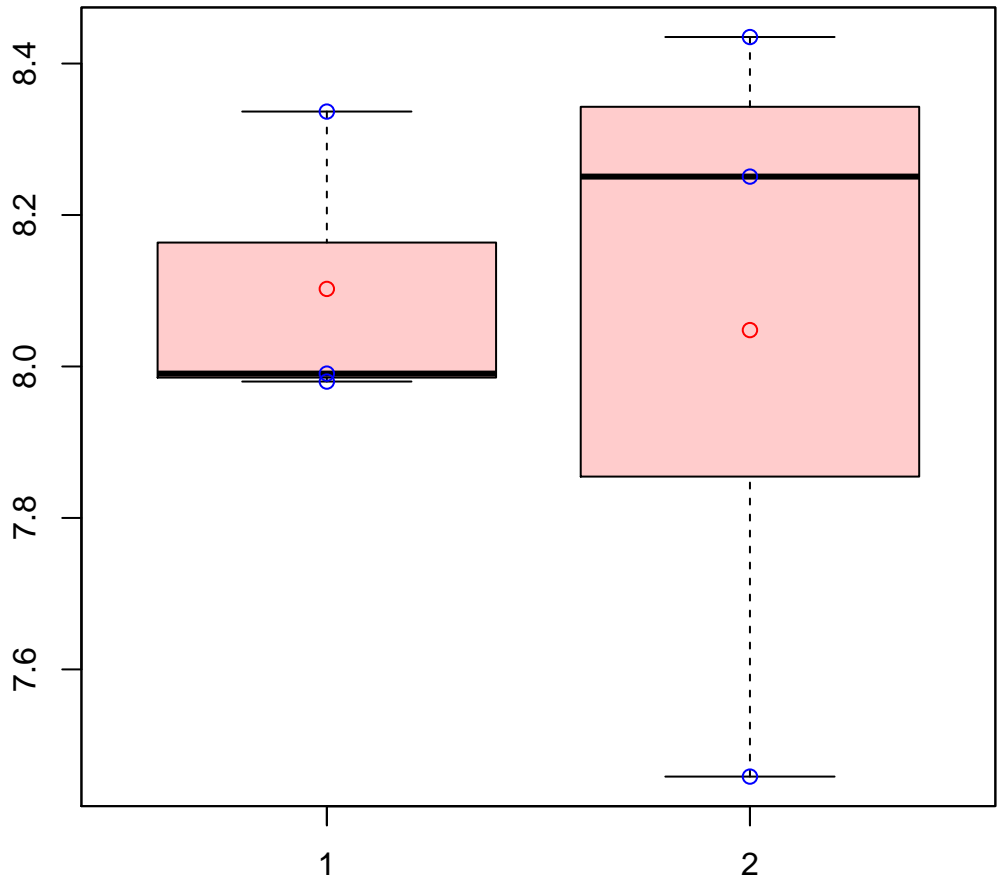

t-Test: p-value = 0.88

# CL119Contig7|CL119Contig7

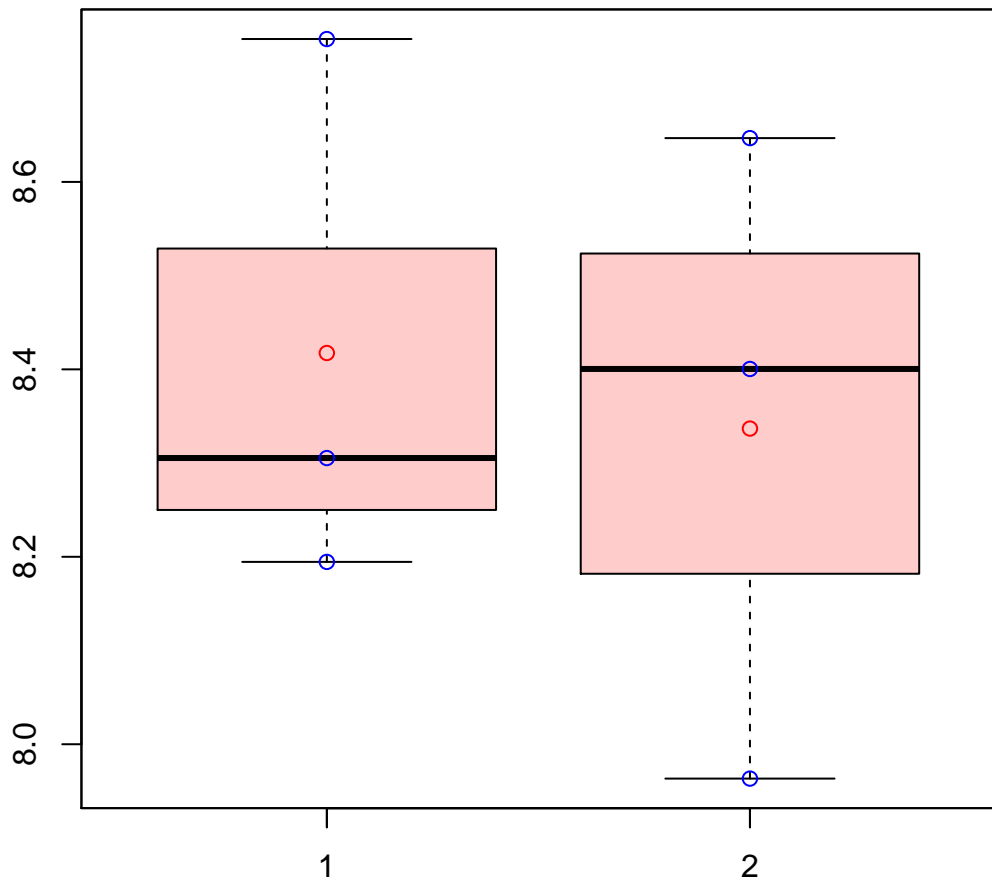

t-Test: p-value = 0.77



# CL11Contig53|CL11Contig53

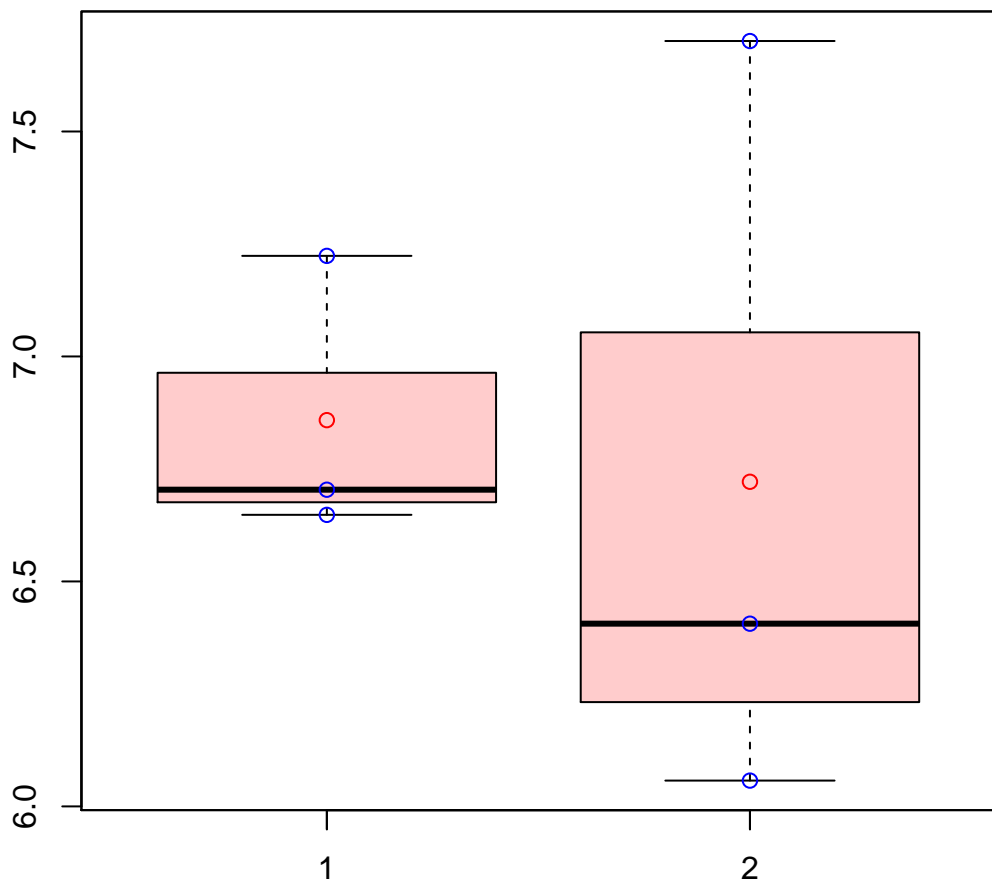

t-Test: p-value = 0.82

# CL12000Contig1|CL12000Contig1

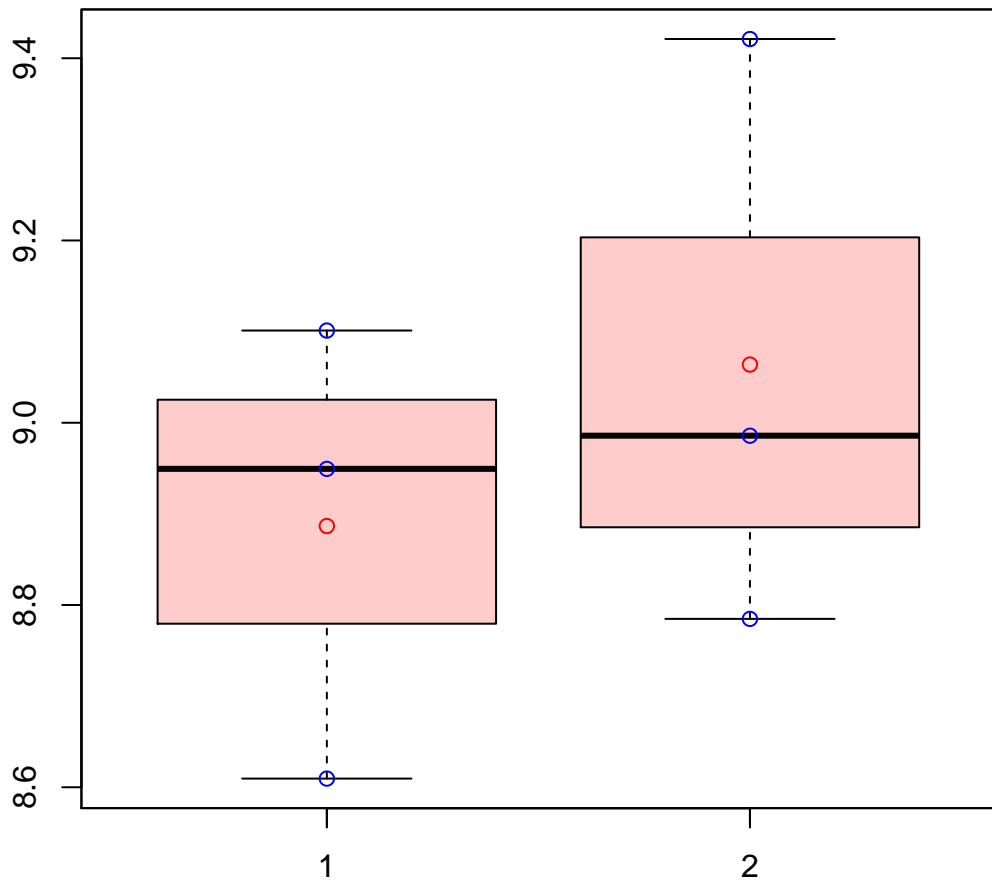

t-Test: p-value = 0.5

# CL12009Contig2|CL12009Contig2

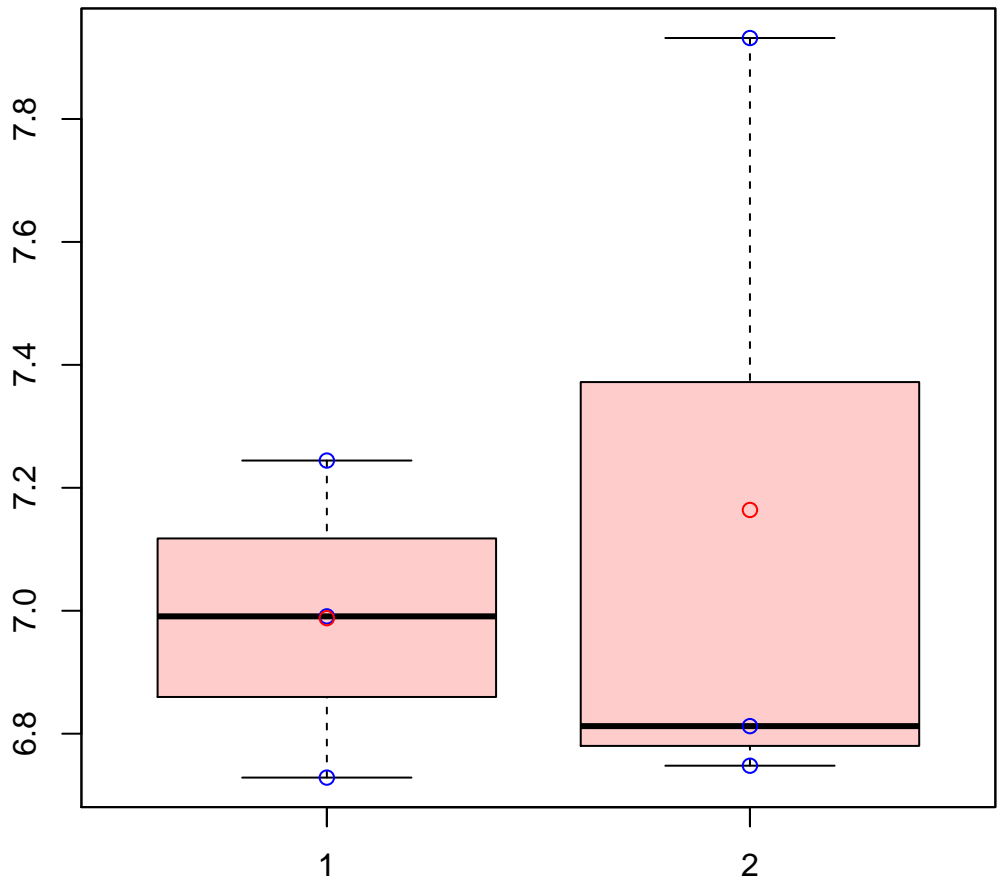

t-Test: p-value = 0.7

# CL1200Contig1|CL1200Contig1

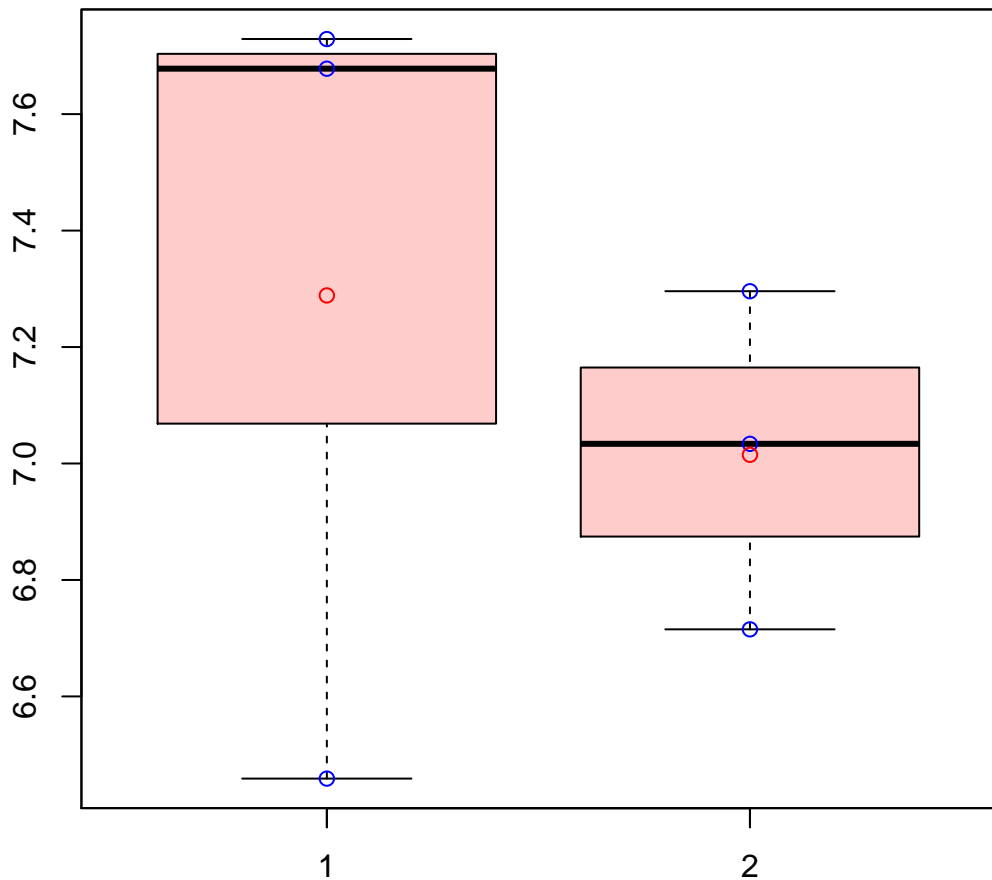

t-Test: p-value = 0.59

# CL1201Contig1|CL1201Contig1

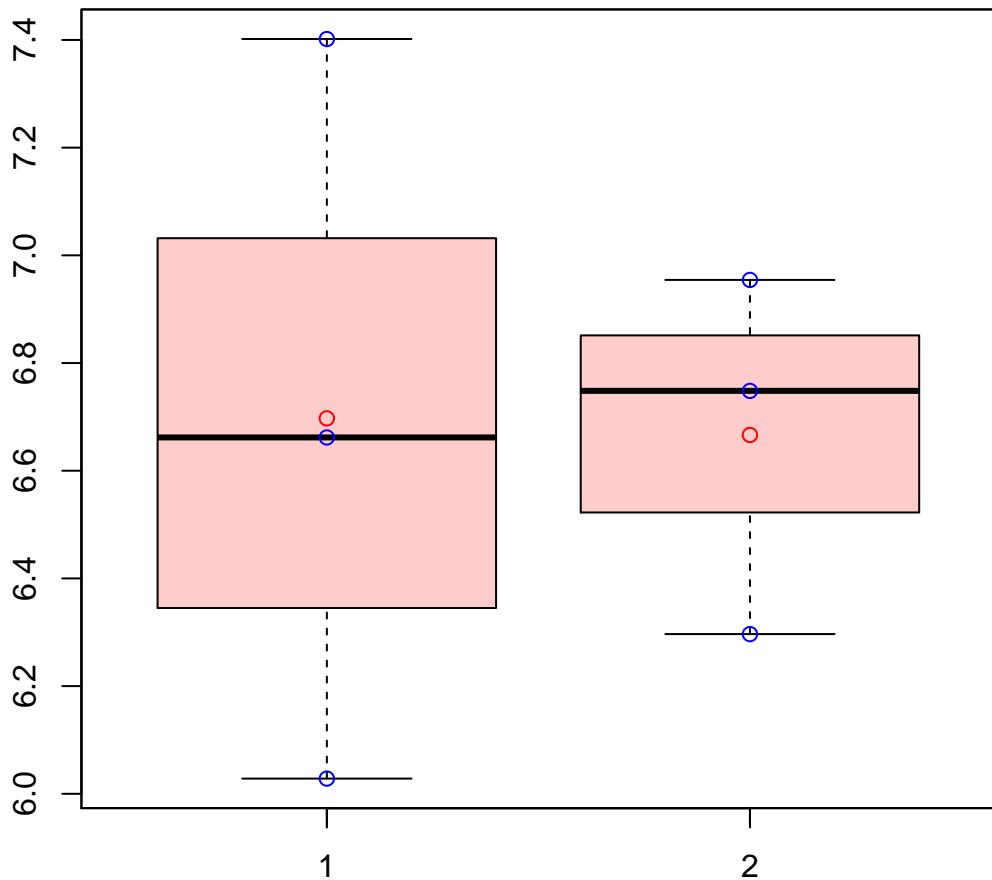

t-Test: p-value = 0.95

# CL1202Contig3|CL1202Contig3

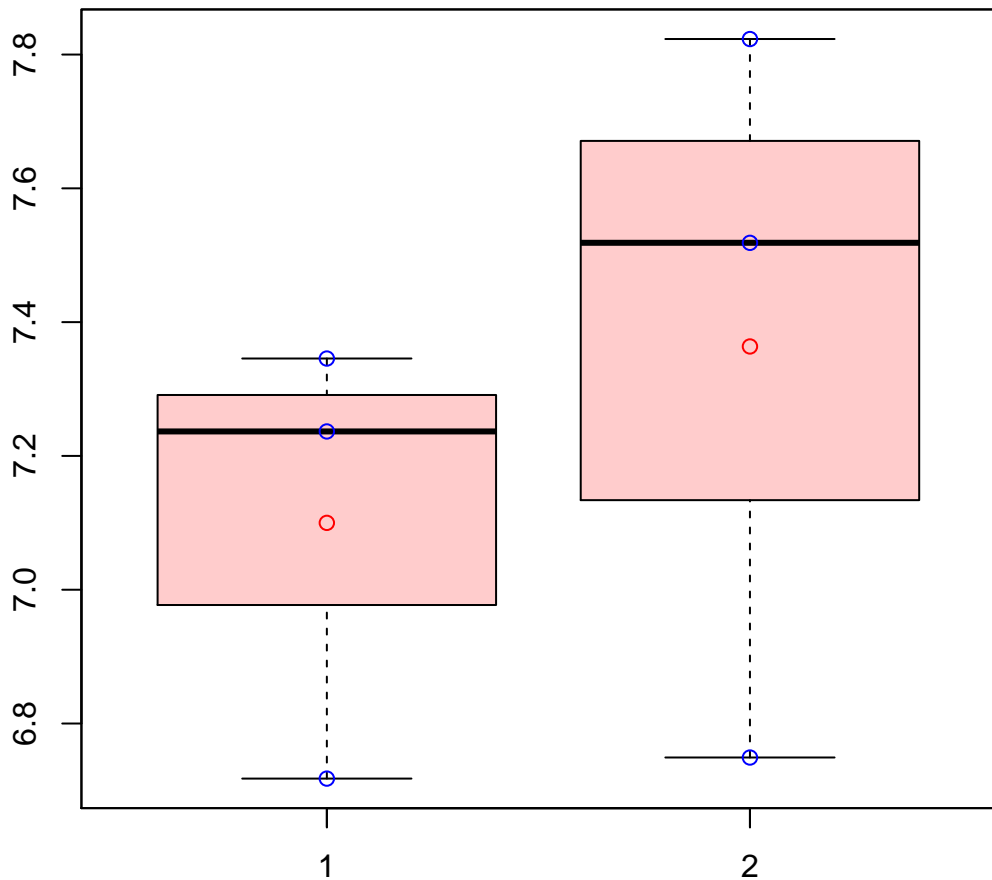

t-Test: p-value = 0.53

# CL120Contig16|CL120Contig16

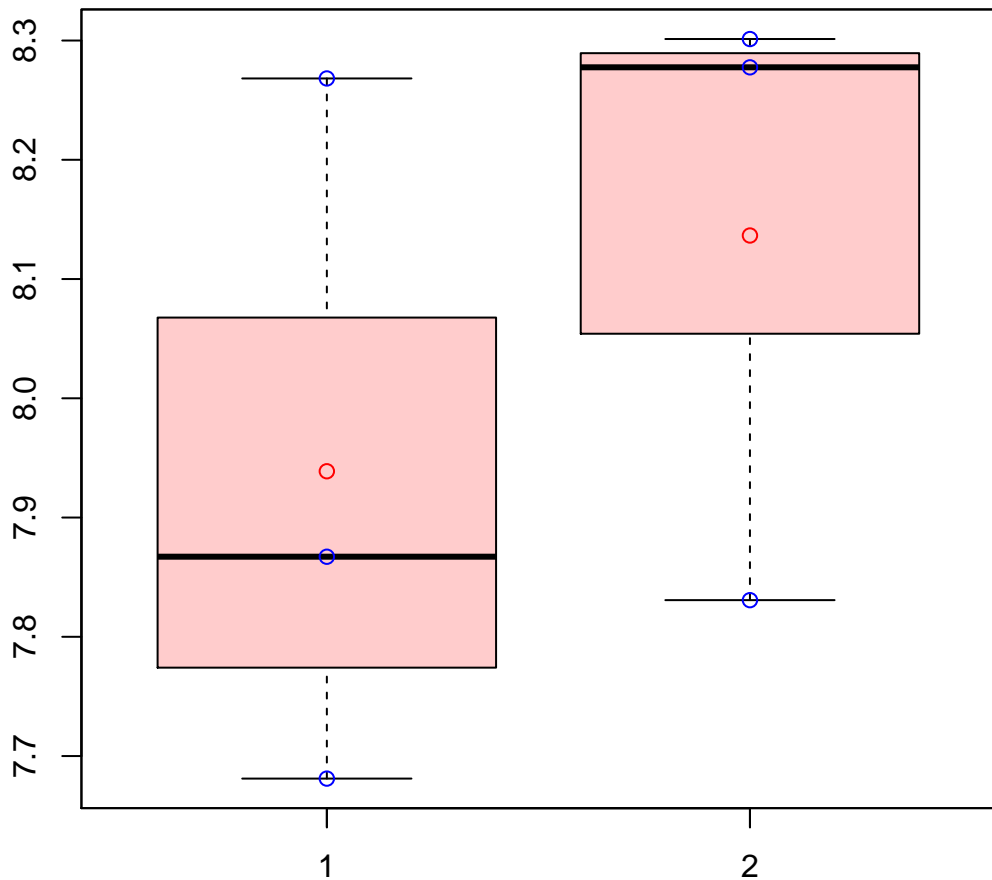

t-Test: p-value = 0.44

# CL120Contig26|CL120Contig26

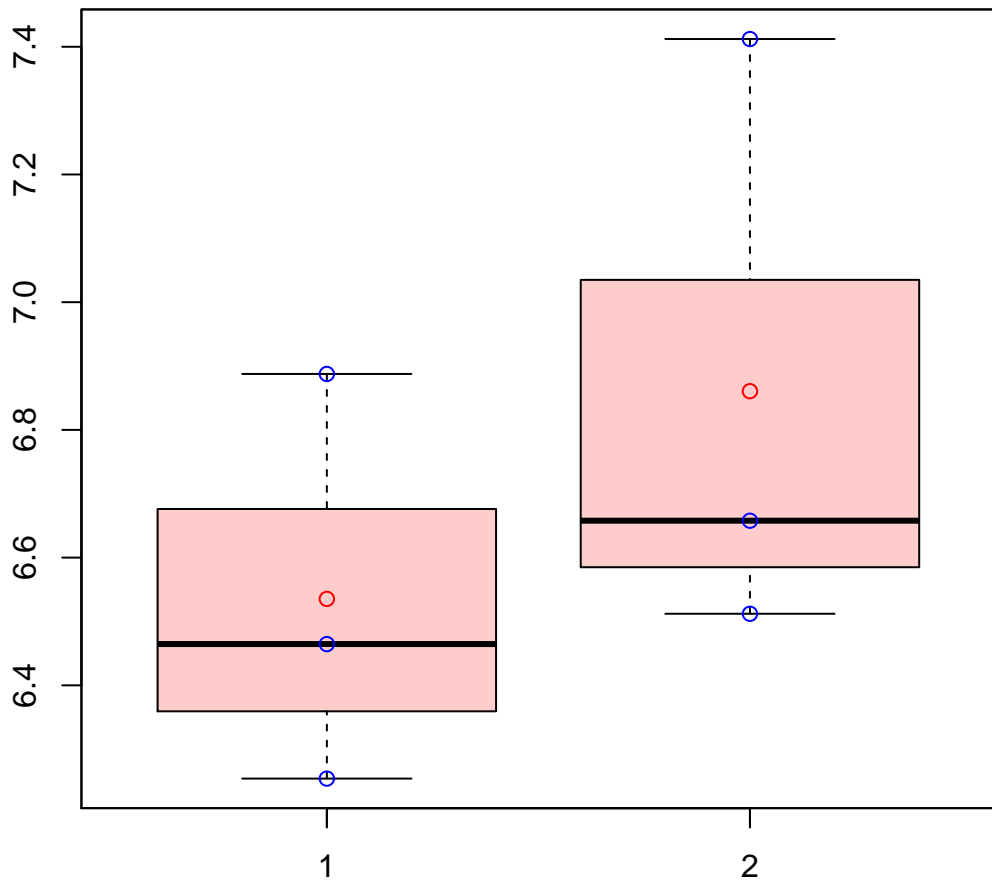

t-Test: p-value = 0.39



# CL120Contig9|CL120Contig9

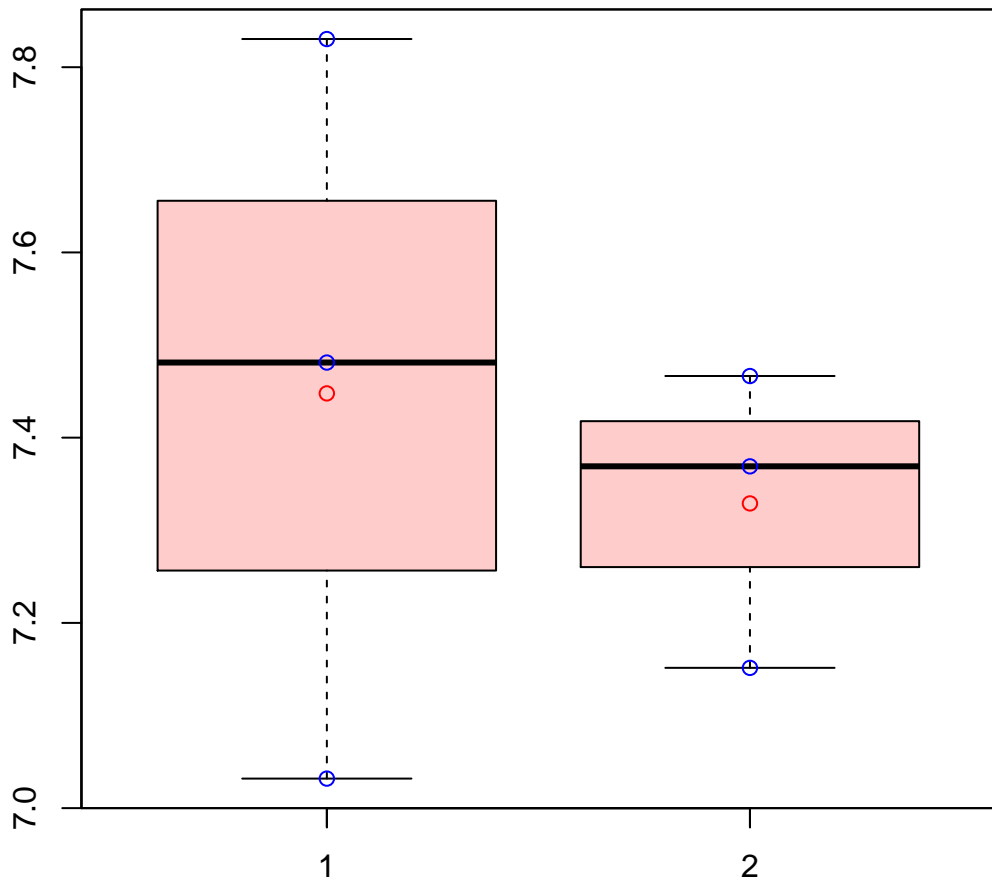

t-Test: p-value = 0.67

# CL12131Contig1|CL12131Contig1

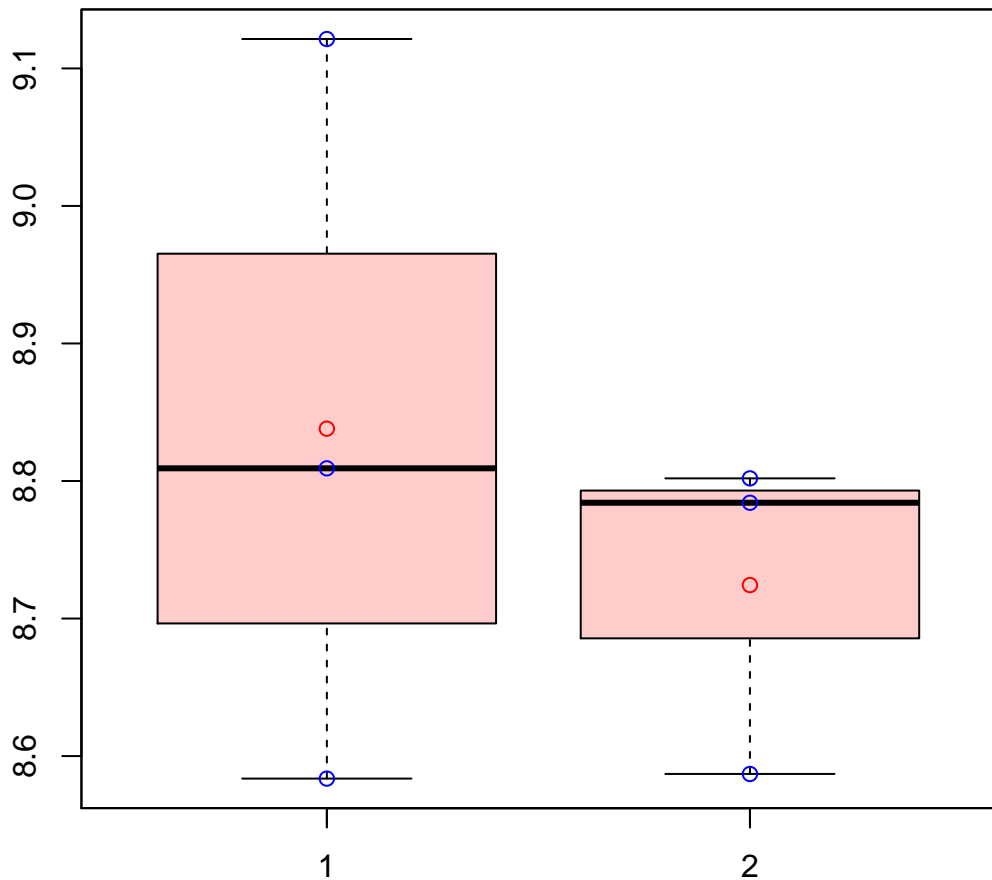

t-Test: p-value = 0.56

# CL1215Contig1|CL1215Contig1

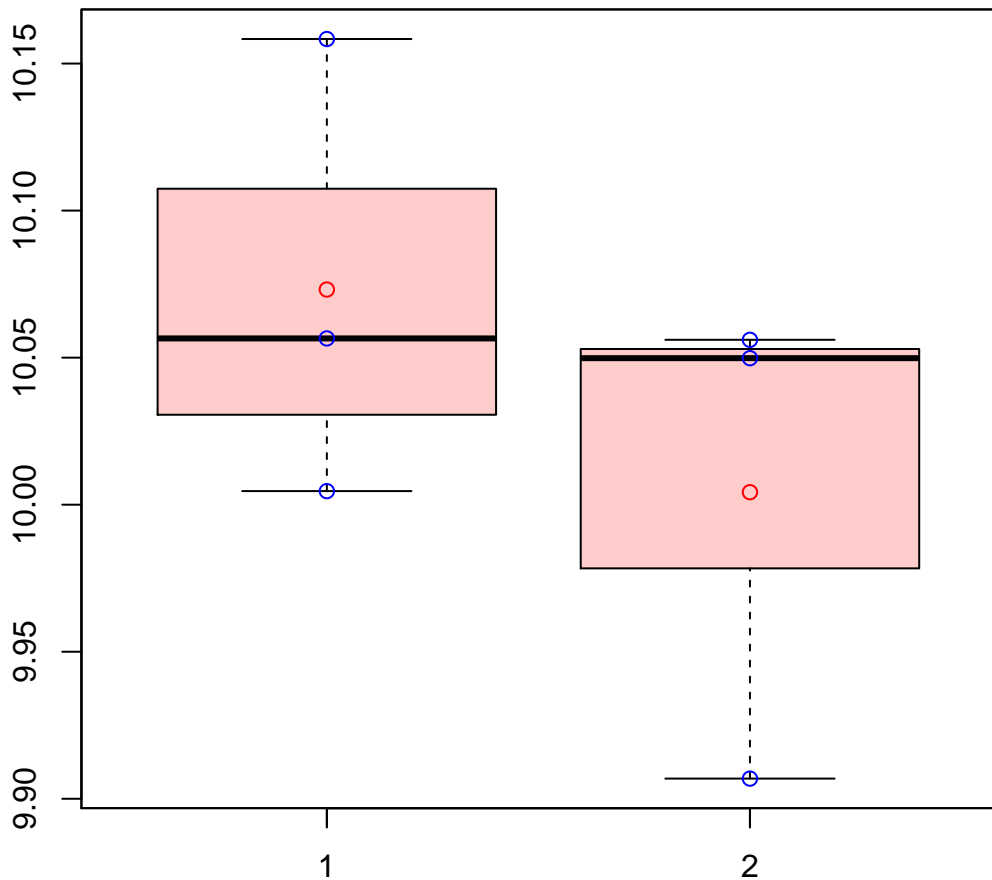

t-Test: p-value = 0.36

# CL1215Contig3|CL1215Contig3

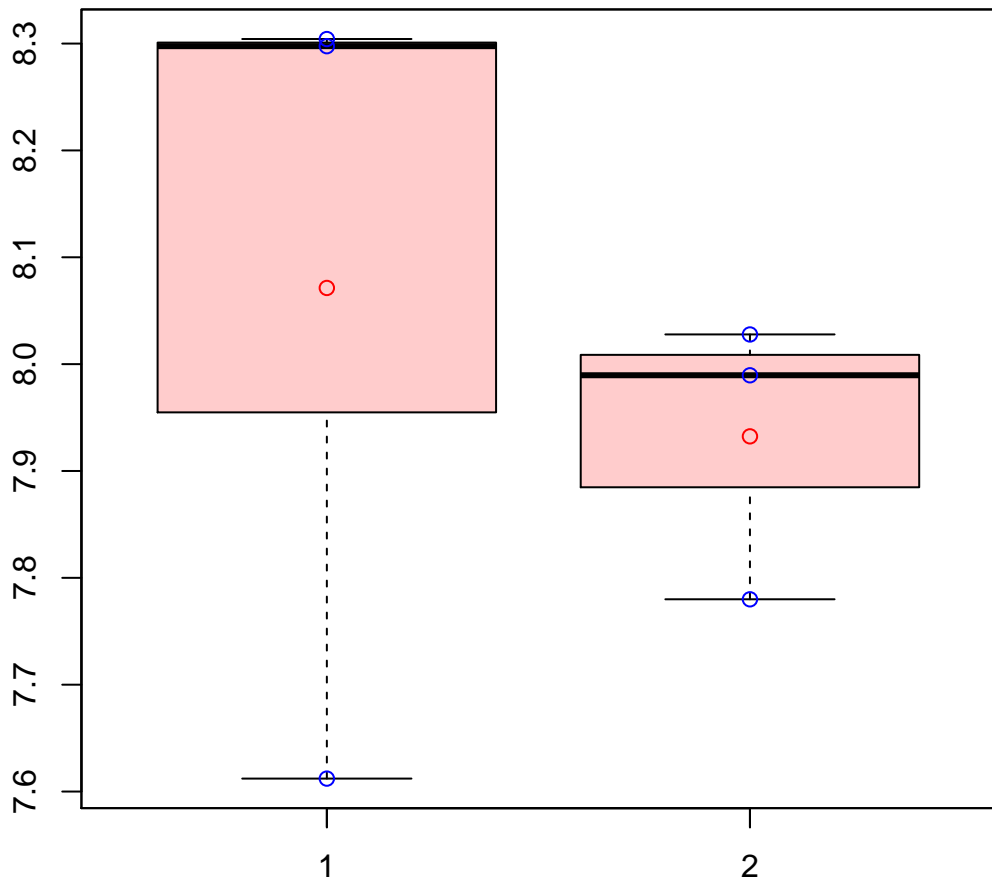

t-Test: p-value = 0.61

# CL12161Contig1|CL12161Contig1

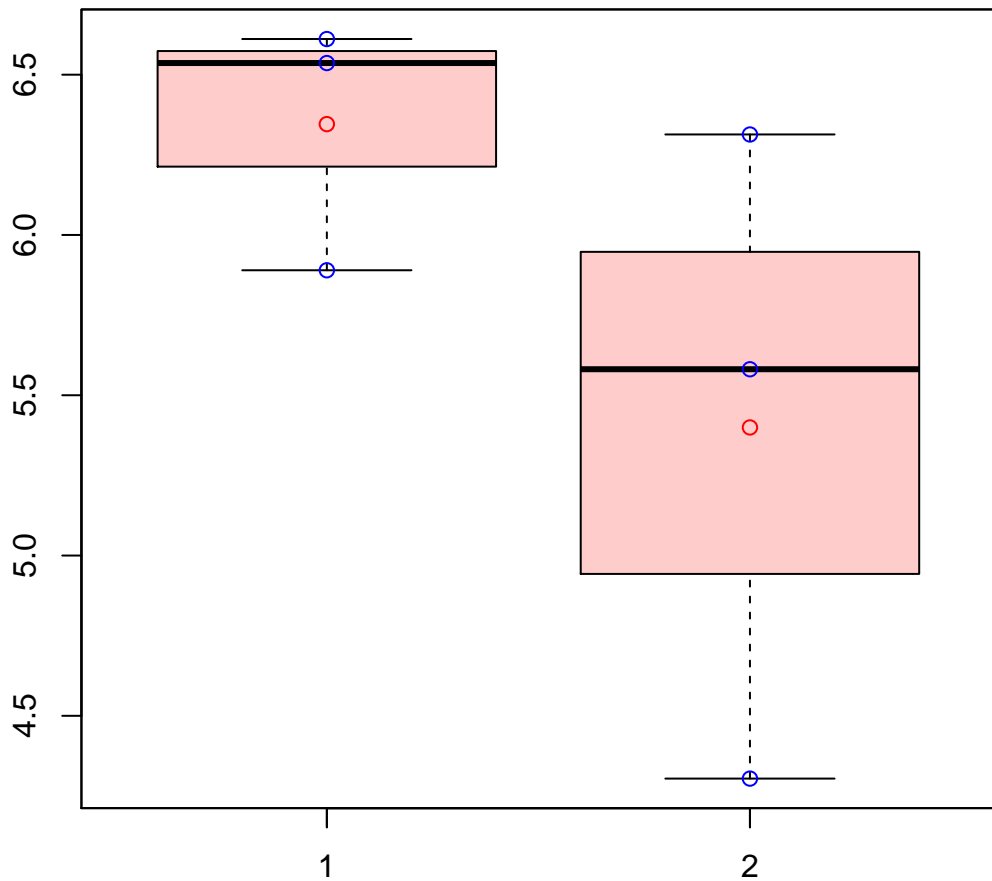

t-Test: p-value = 0.24

# CL12175Contig2|CL12175Contig2

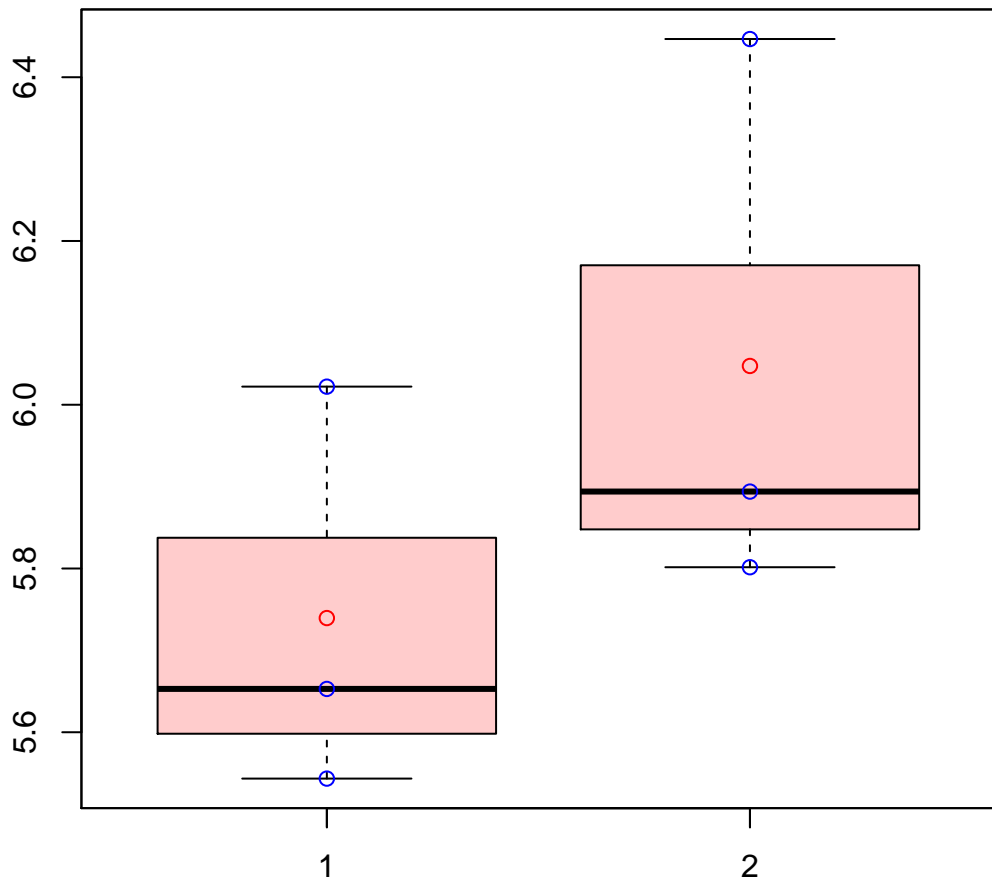

t-Test: p-value = 0.29

# CL1217Contig1|CL1217Contig1

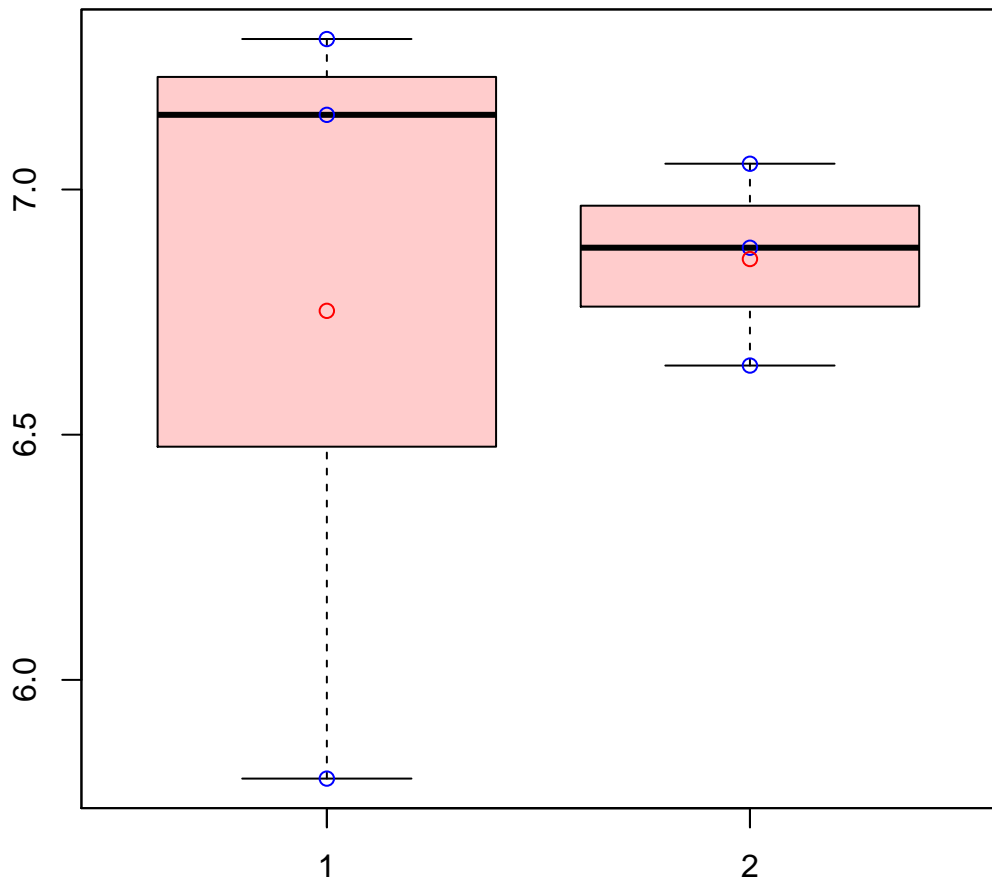

t-Test: p-value = 0.85

# CL1217Contig3|CL1217Contig3

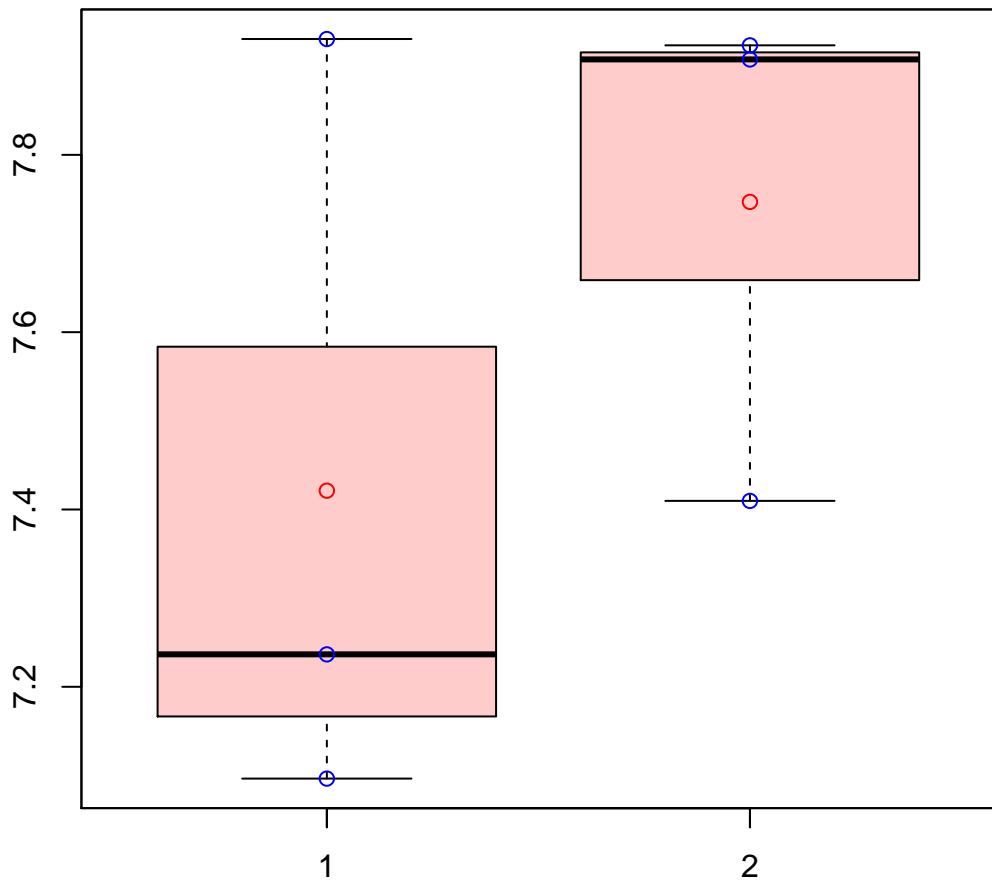

t-Test: p-value = 0.36



# CL1217Contig4|CL1217Contig4

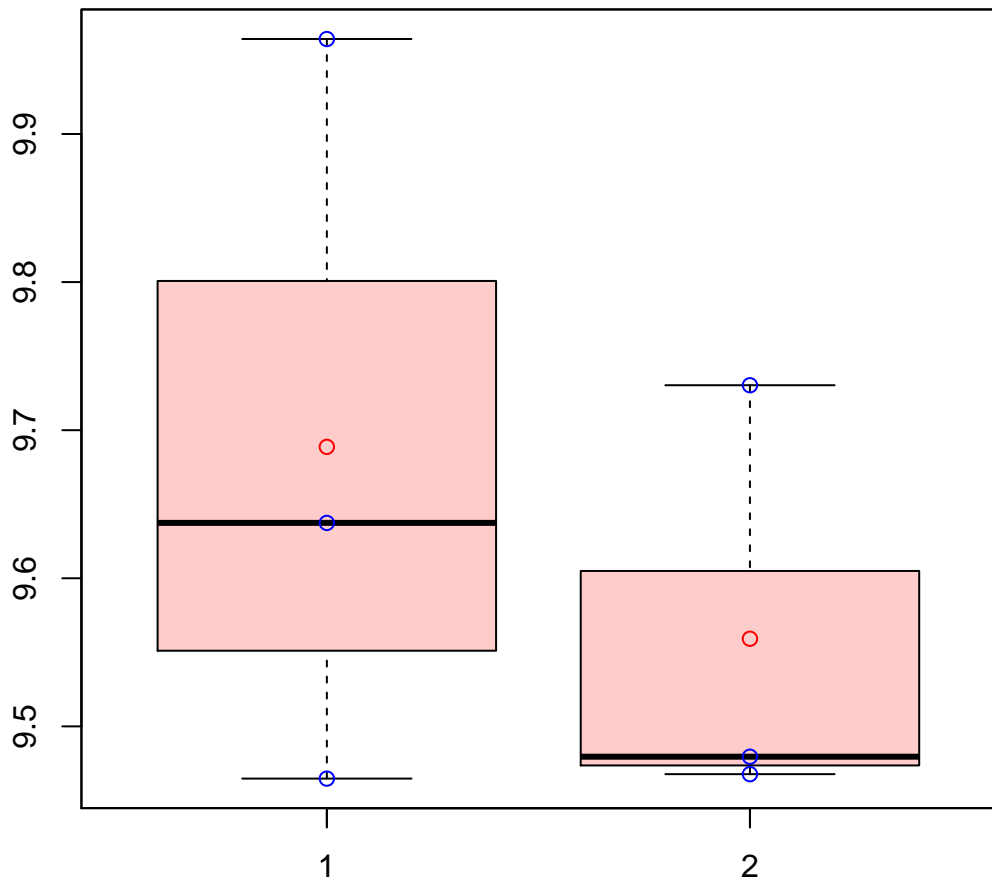

t-Test: p-value = 0.5

# CL12182Contig1|CL12182Contig1

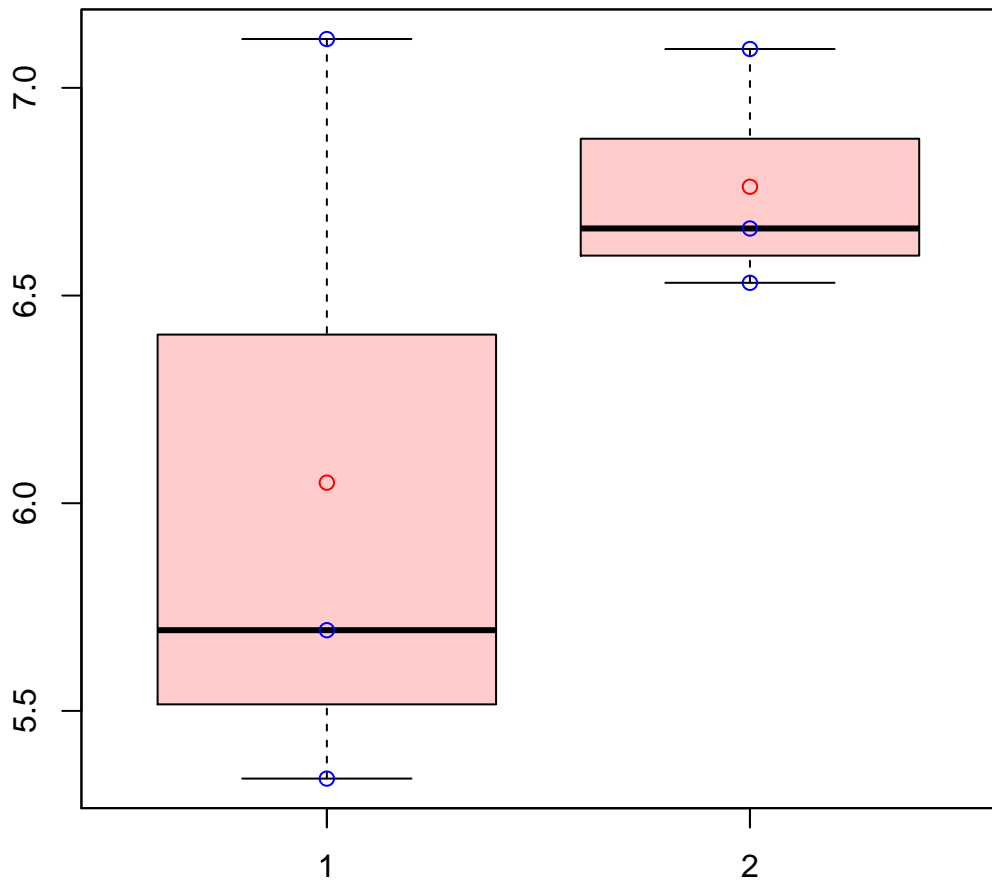

t-Test: p-value = 0.32

# CL1218Contig1|CL1218Contig1

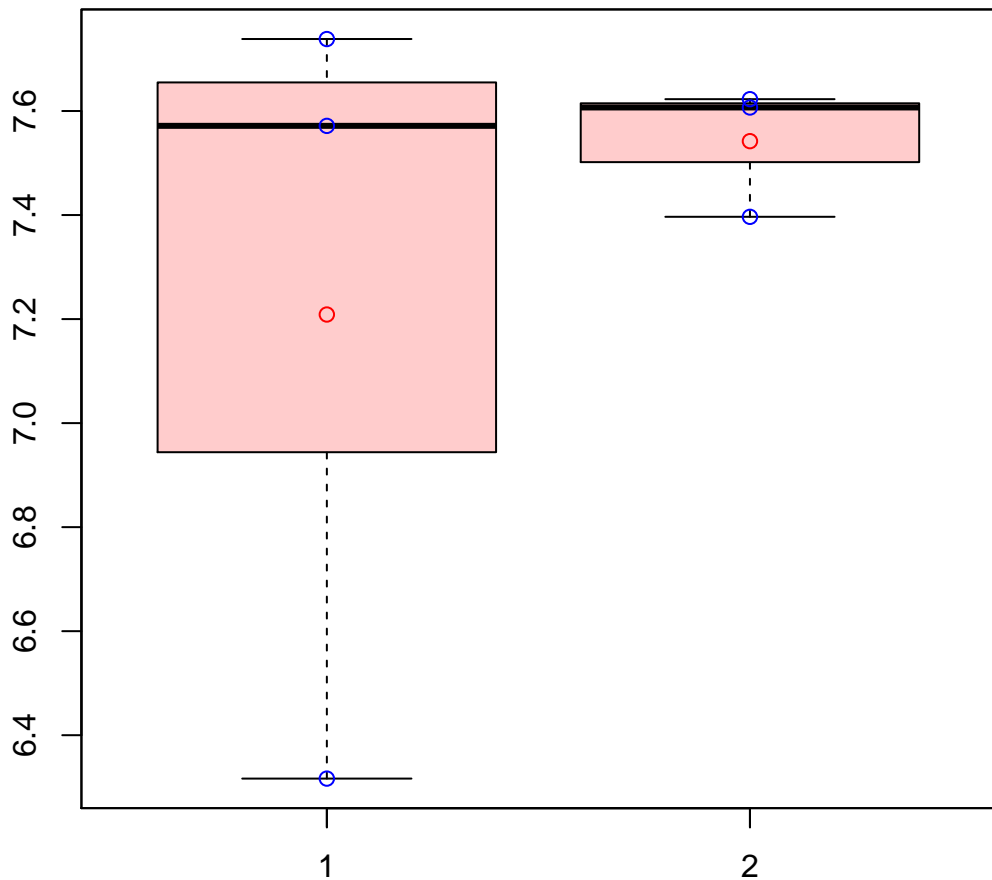

t-Test: p-value = 0.54

# CL1218Contig5|CL1218Contig5

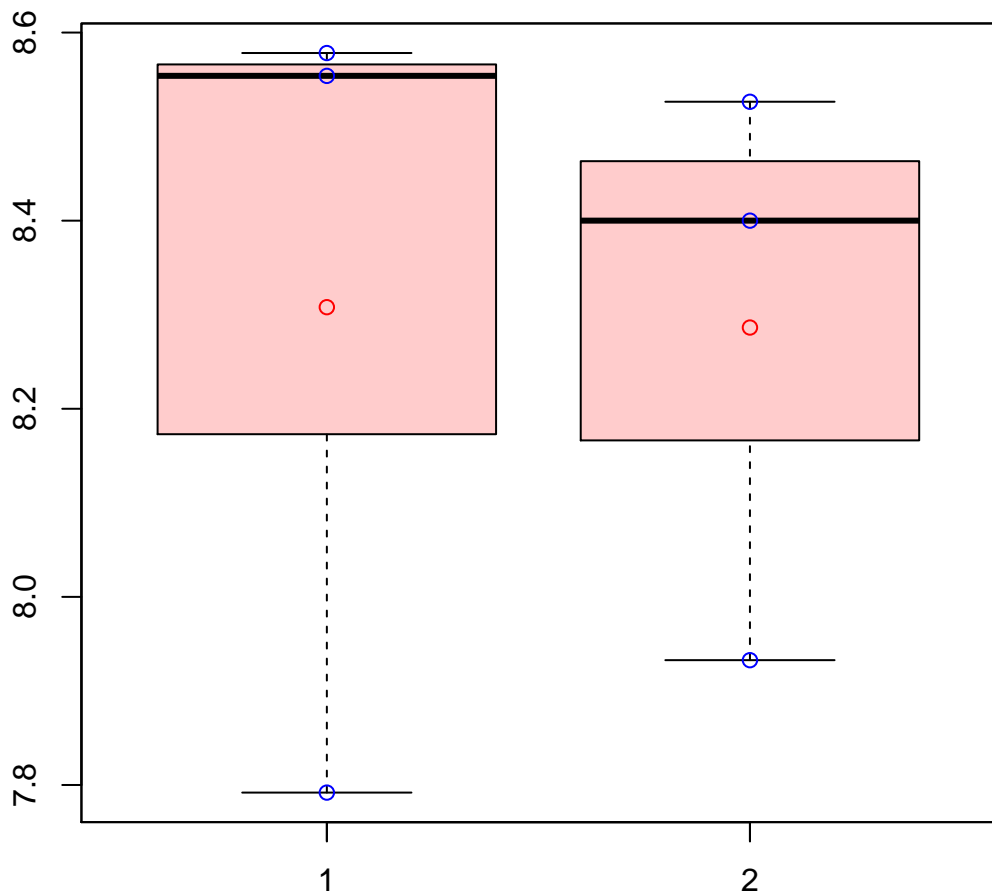

t-Test: p-value = 0.95

# CL121Contig1|CL121Contig1

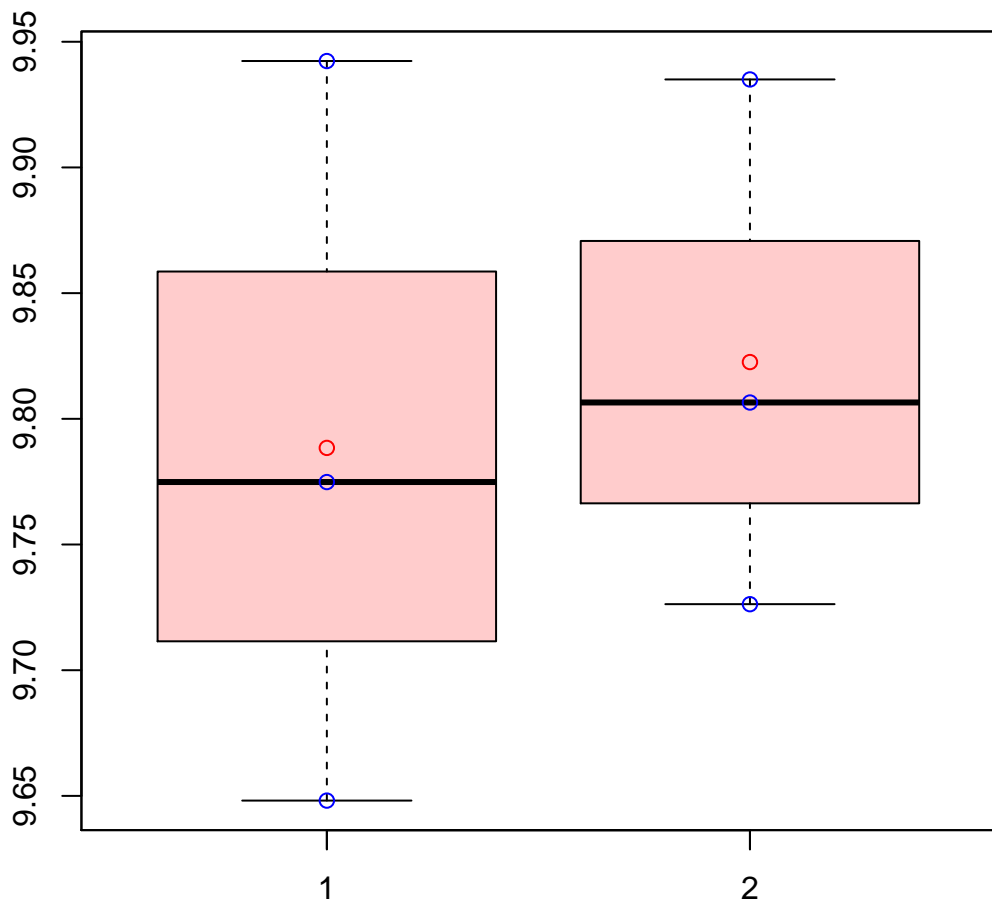

t-Test: p-value = 0.76

# CL12213Contig1|CL12213Contig1

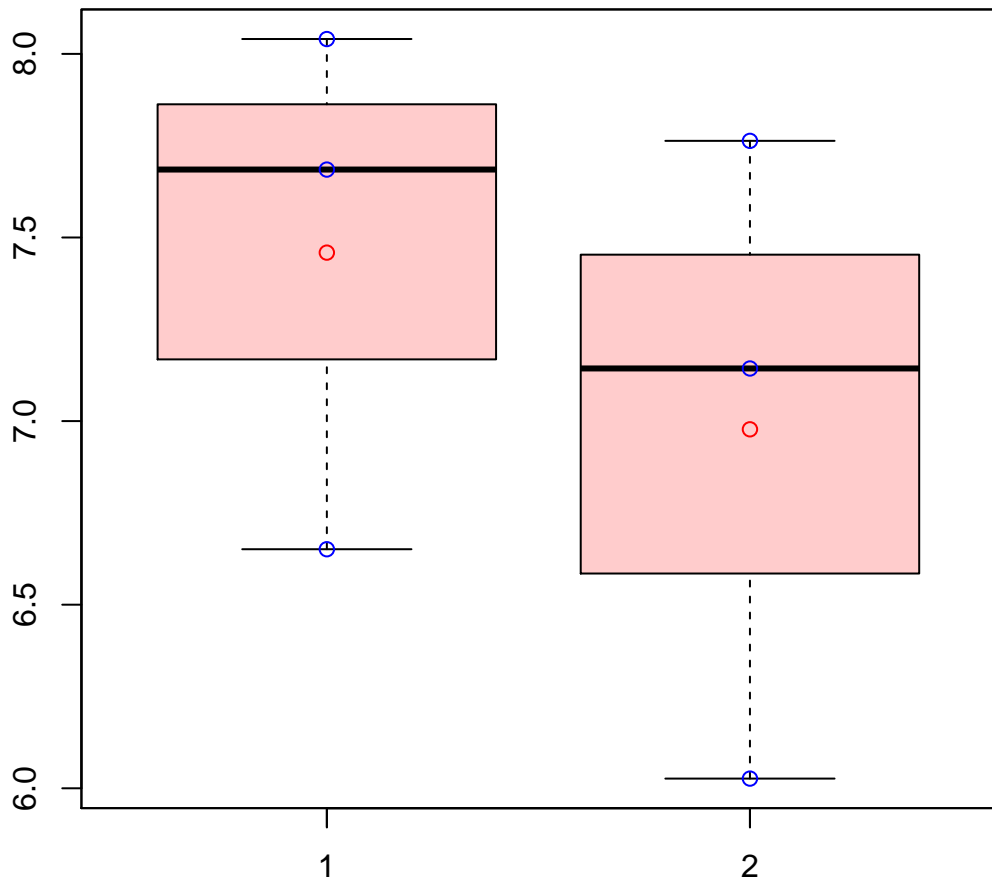

t-Test: p-value = 0.51

# CL1224Contig2|CL1224Contig2

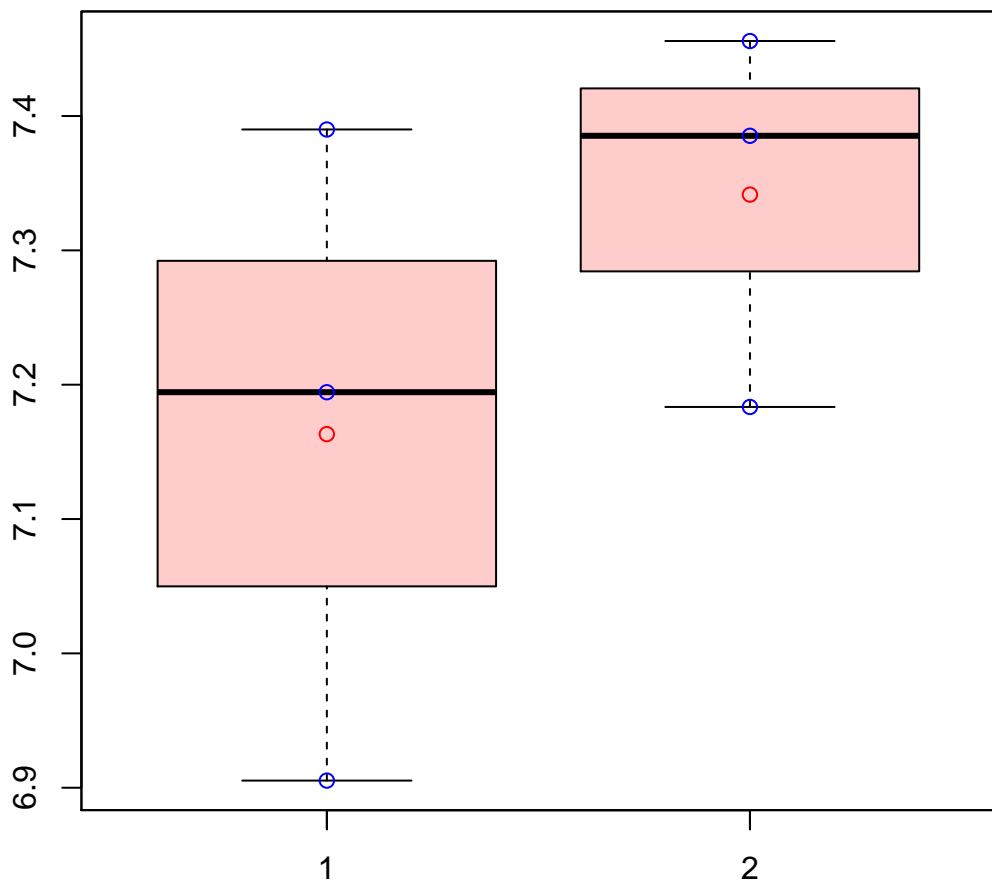

t-Test: p-value = 0.35

# CL1224Contig6|CL1224Contig6

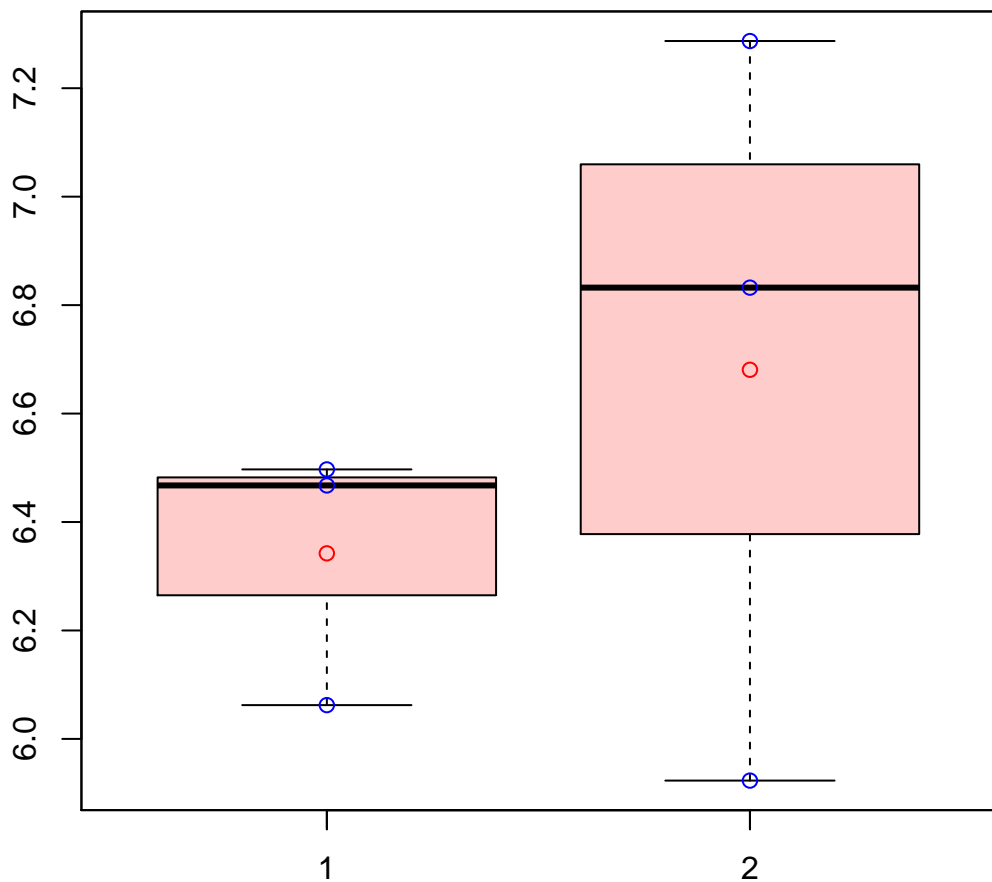

t-Test: p-value = 0.49



# CL1224Contig8|CL1224Contig8

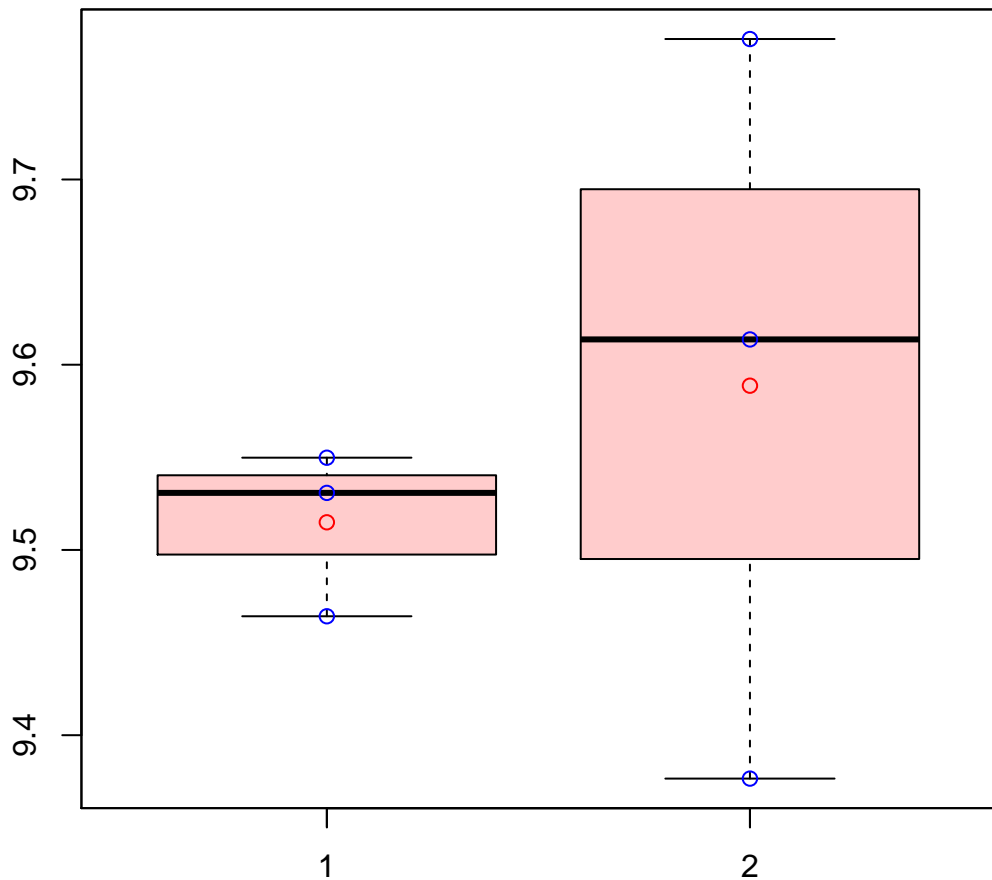

t-Test: p-value = 0.59

# CL1225Contig7|CL1225Contig7

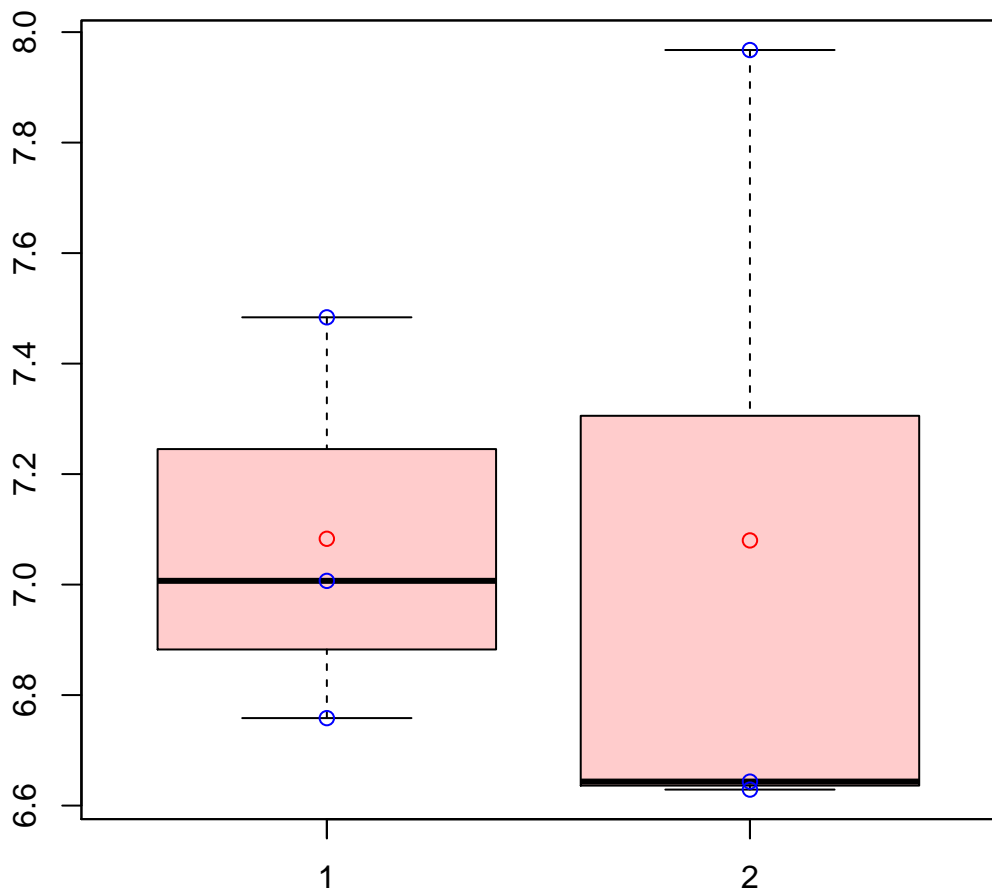

t-Test: p-value = 1

# CL12260Contig1|CL12260Contig1

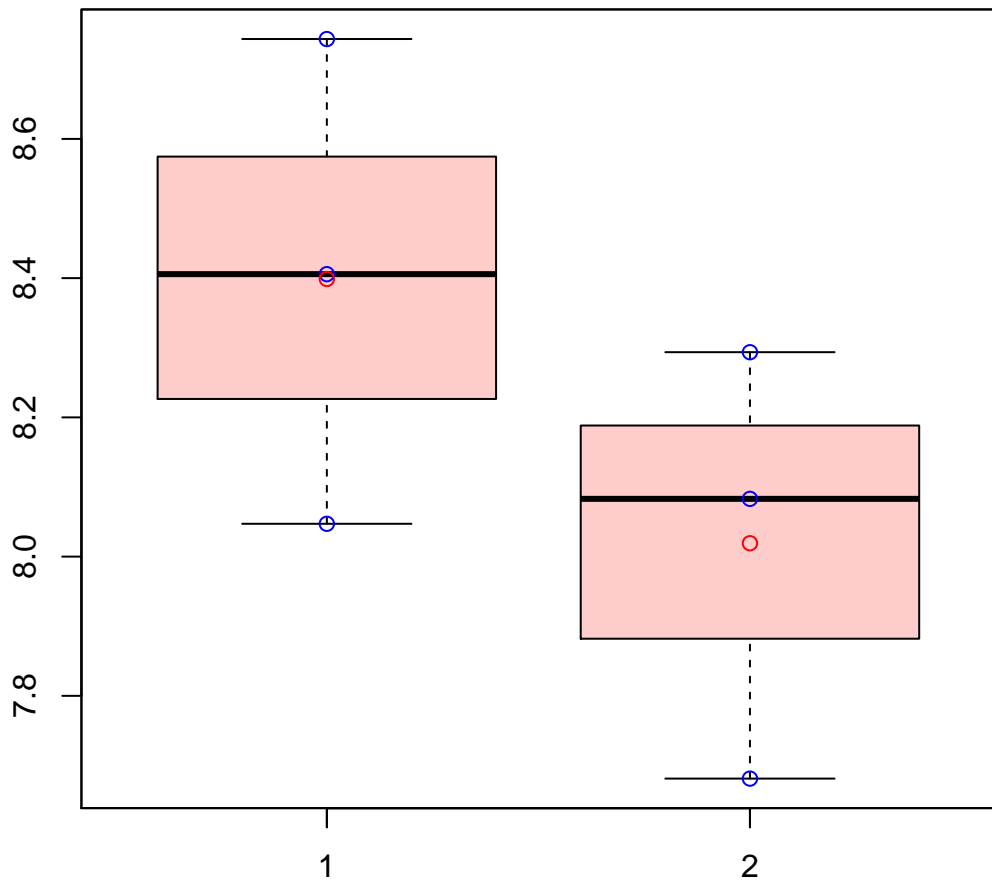

t-Test: p-value = 0.23

# CL12277Contig2|CL12277Contig2

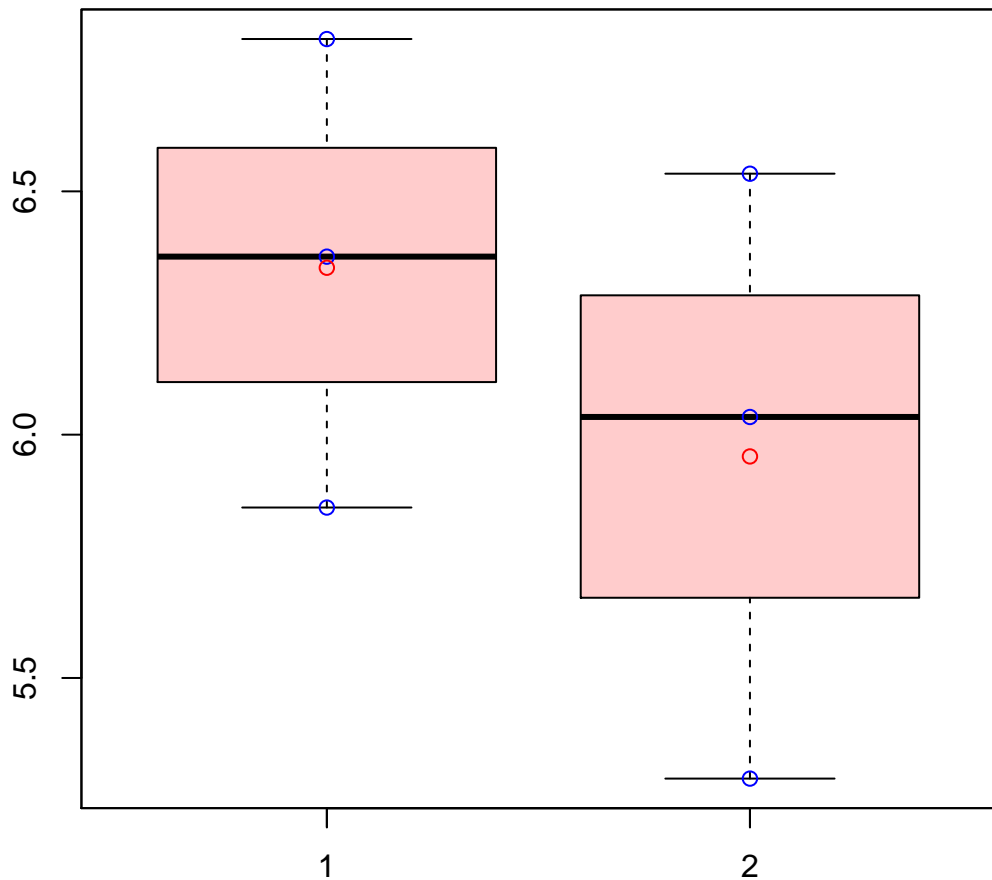

t-Test: p-value = 0.45

# CL12285Contig1|CL12285Contig1

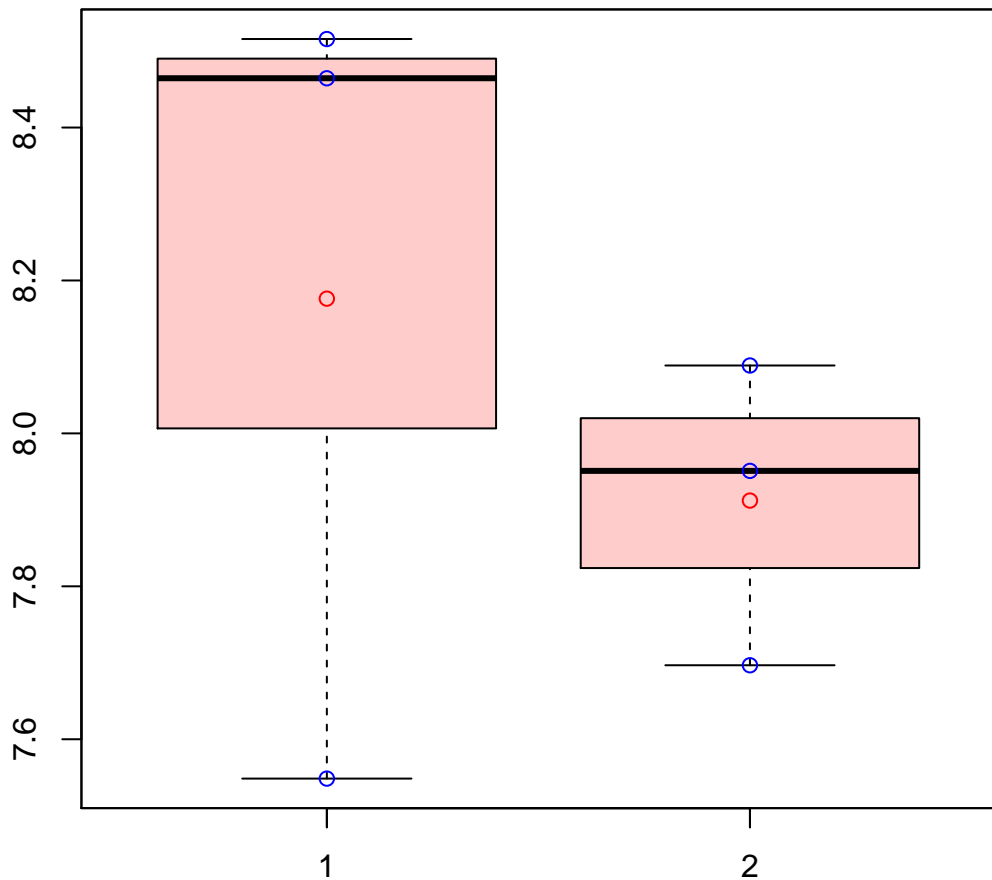

t-Test: p-value = 0.5

# CL1228Contig9|CL1228Contig9

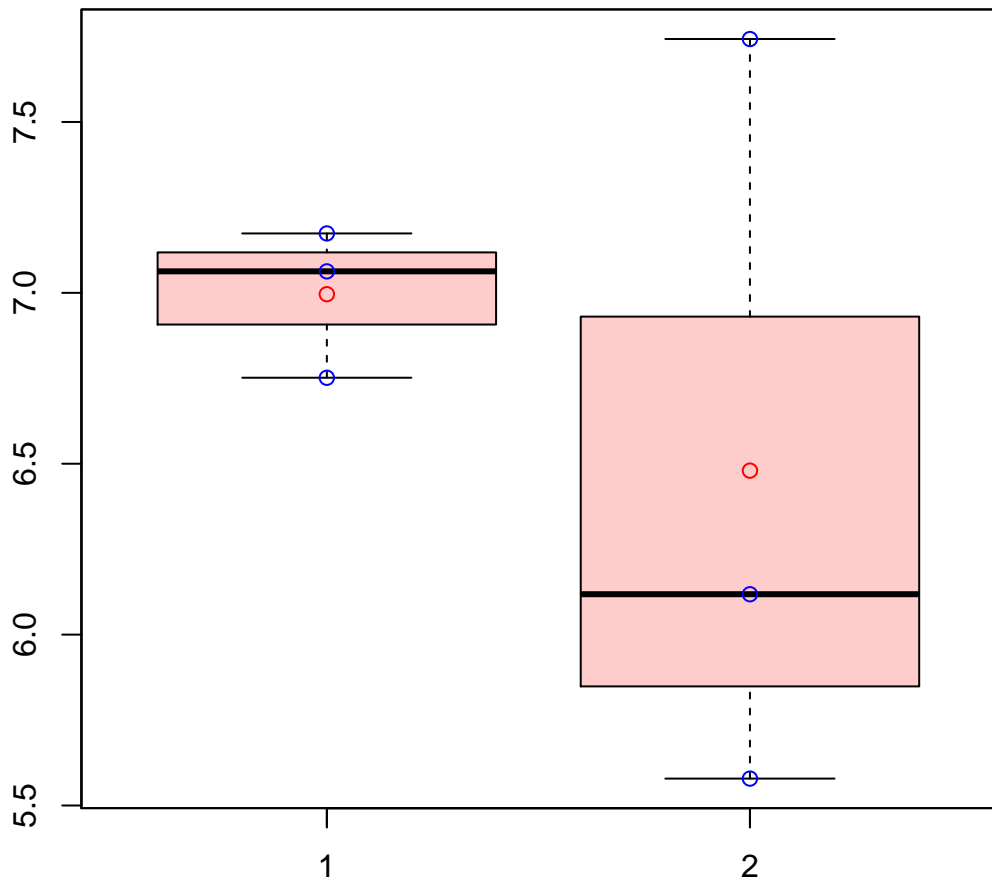

t-Test: p-value = 0.51

# CL122Contig13|CL122Contig13

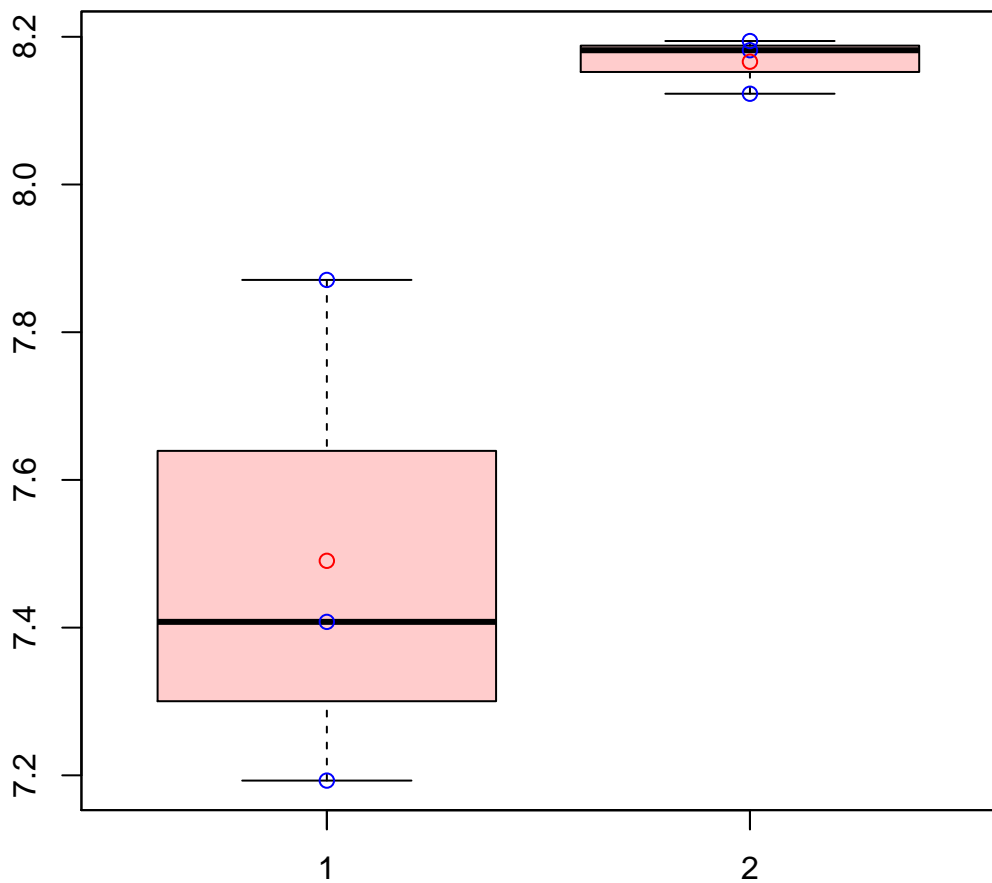

t-Test: p-value = 0.08

# CL122Contig6|CL122Contig6

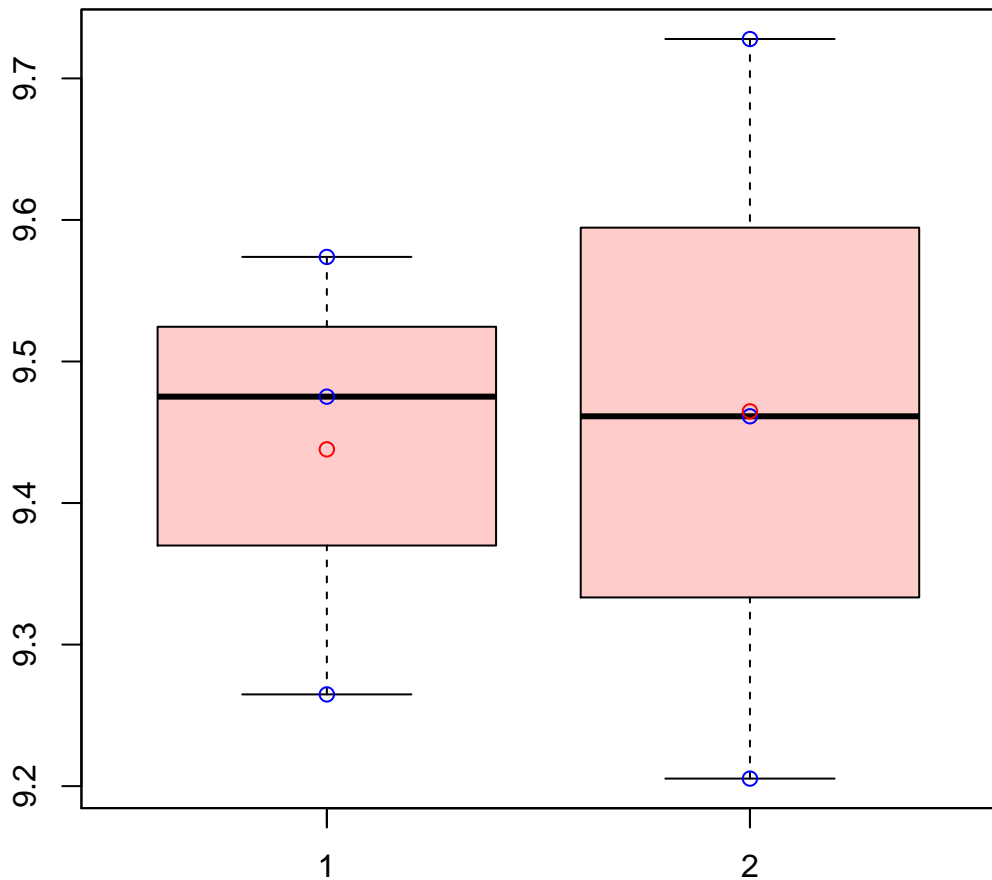

t-Test: p-value = 0.89



# CL122Contig8|CL122Contig8

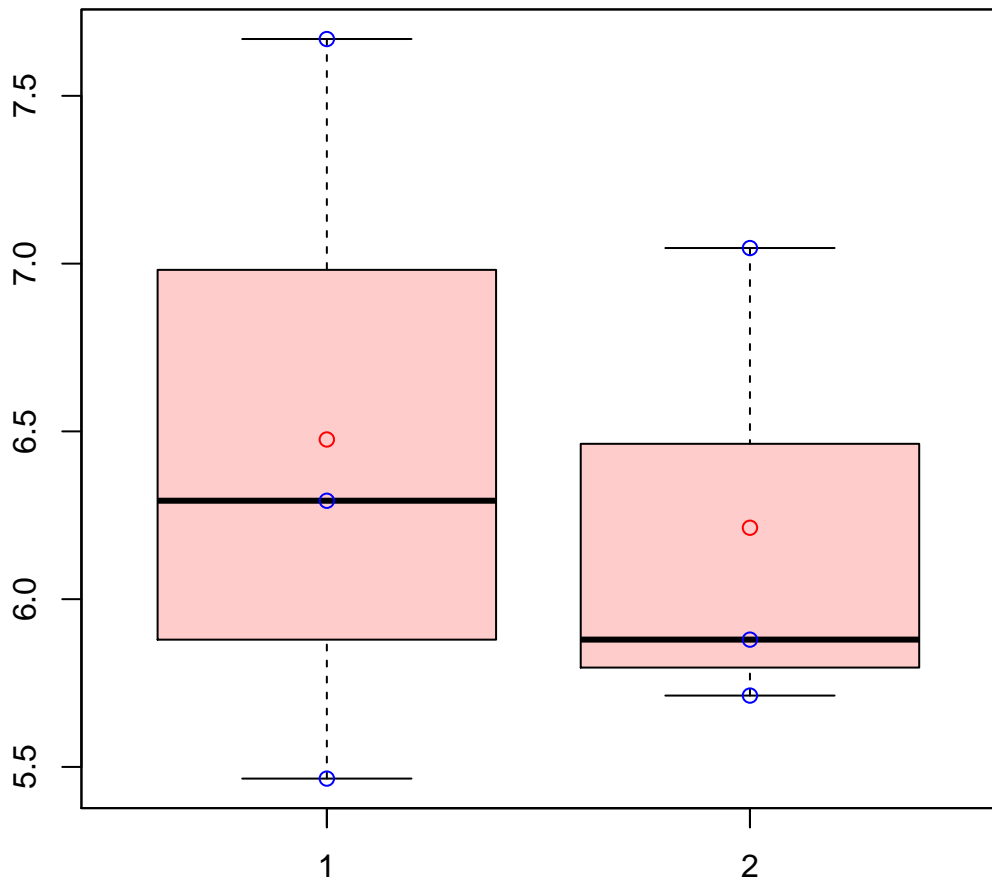

t-Test: p-value = 0.75

# CL122Contig9|CL122Contig9

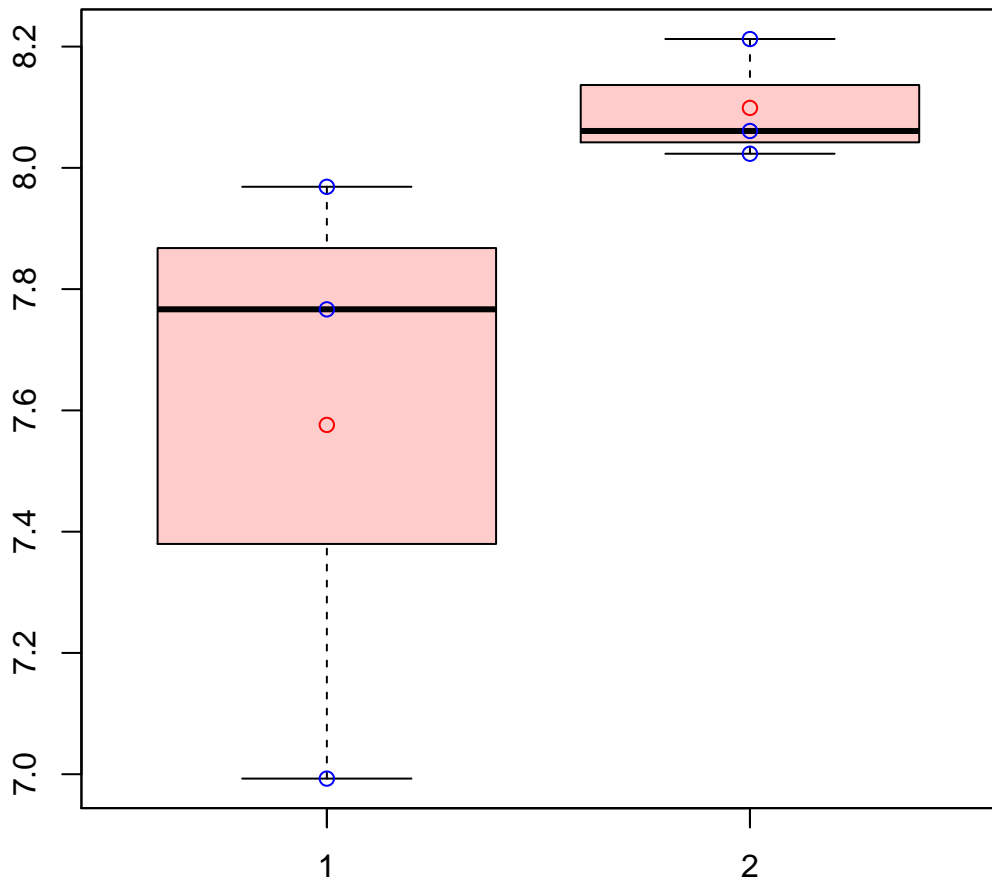

t-Test: p-value = 0.22

# CL12340Contig1|CL12340Contig1

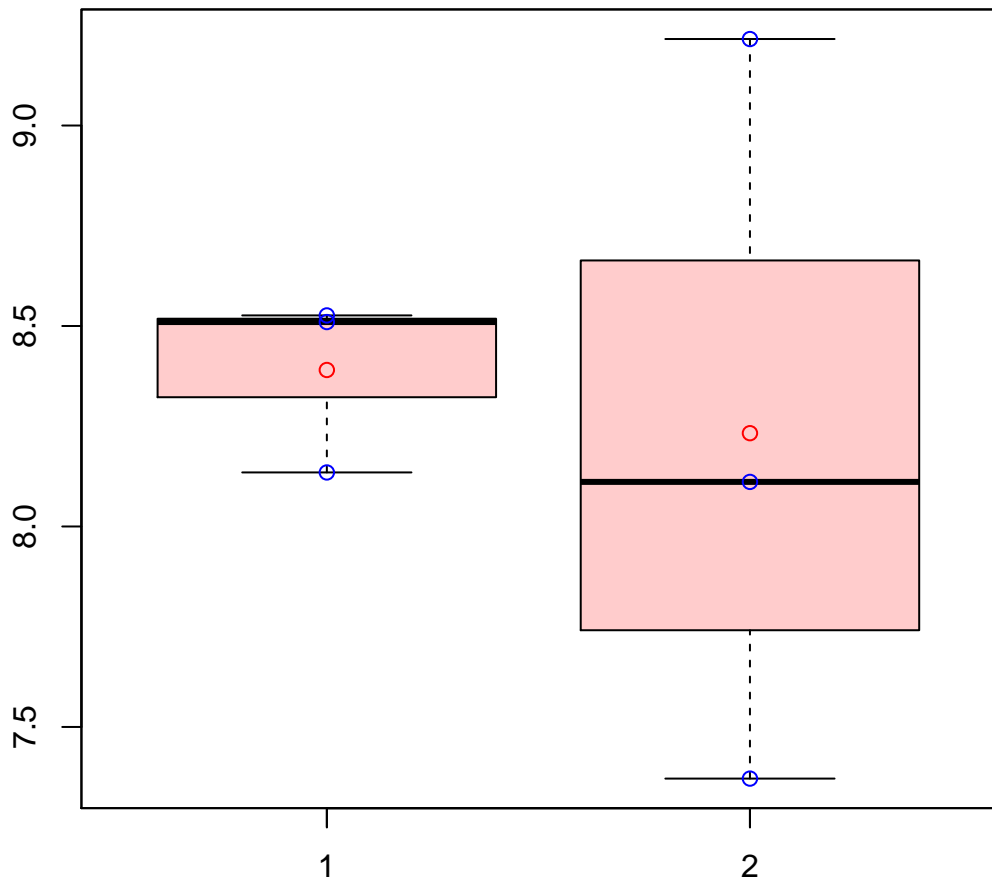

t-Test: p-value = 0.8

# CL123Contig14|CL123Contig14

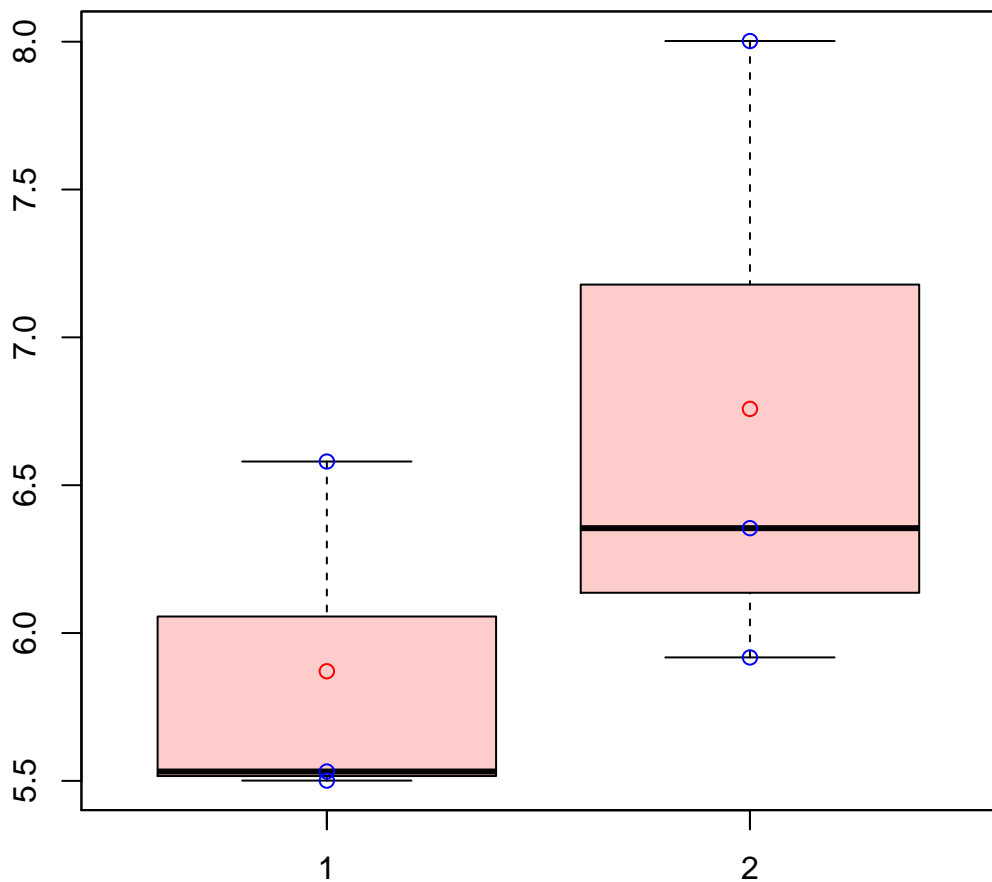

t-Test: p-value = 0.31

# CL123Contig15|CL123Contig15

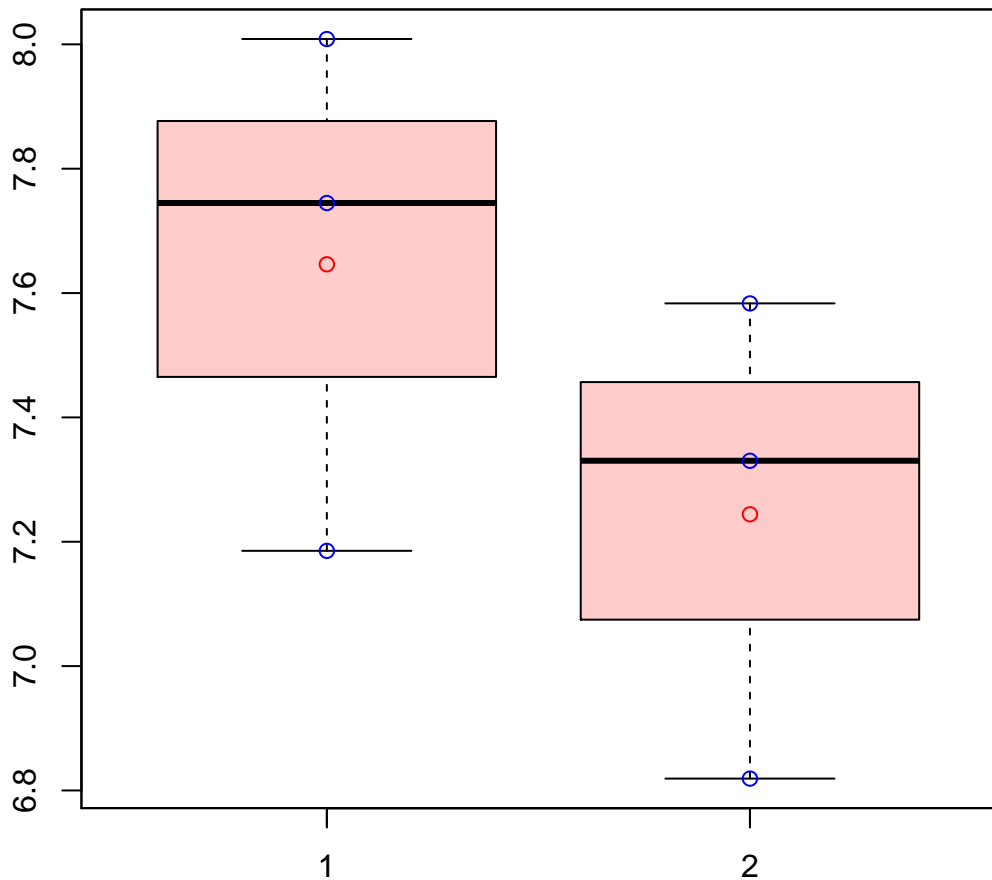

t-Test: p-value = 0.29

# CL123Contig21|CL123Contig21

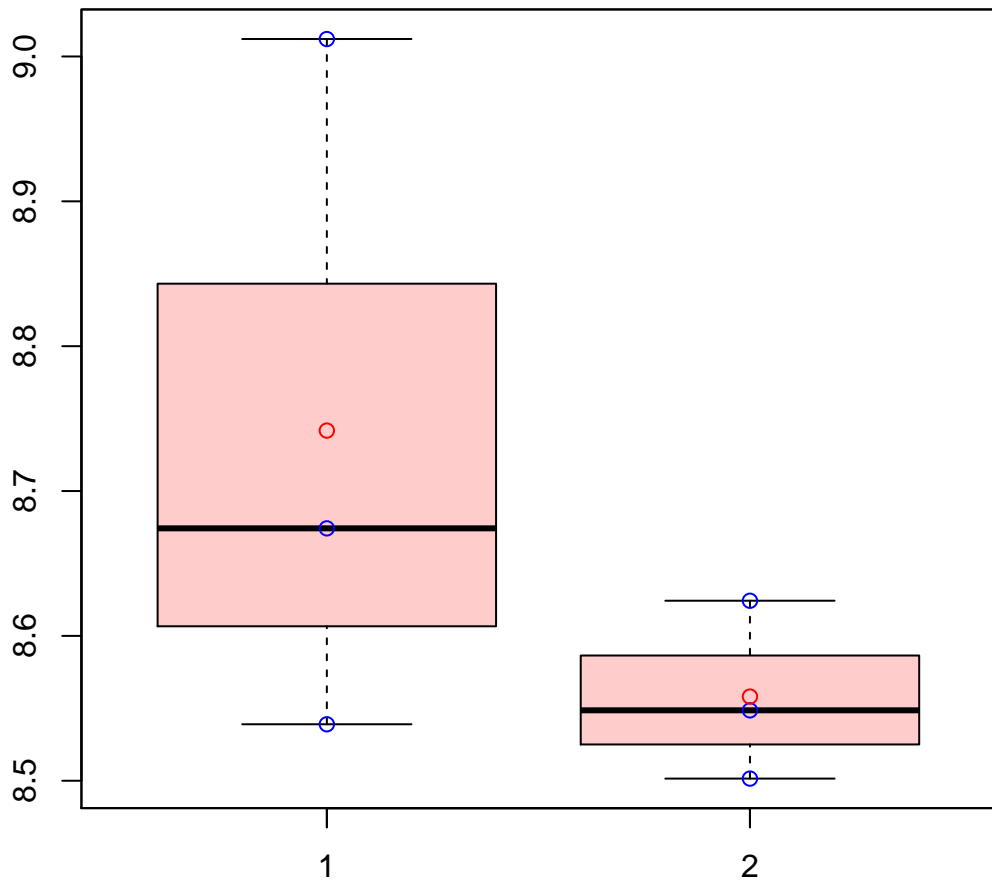

t-Test: p-value = 0.32

# CL123Contig22|CL123Contig22

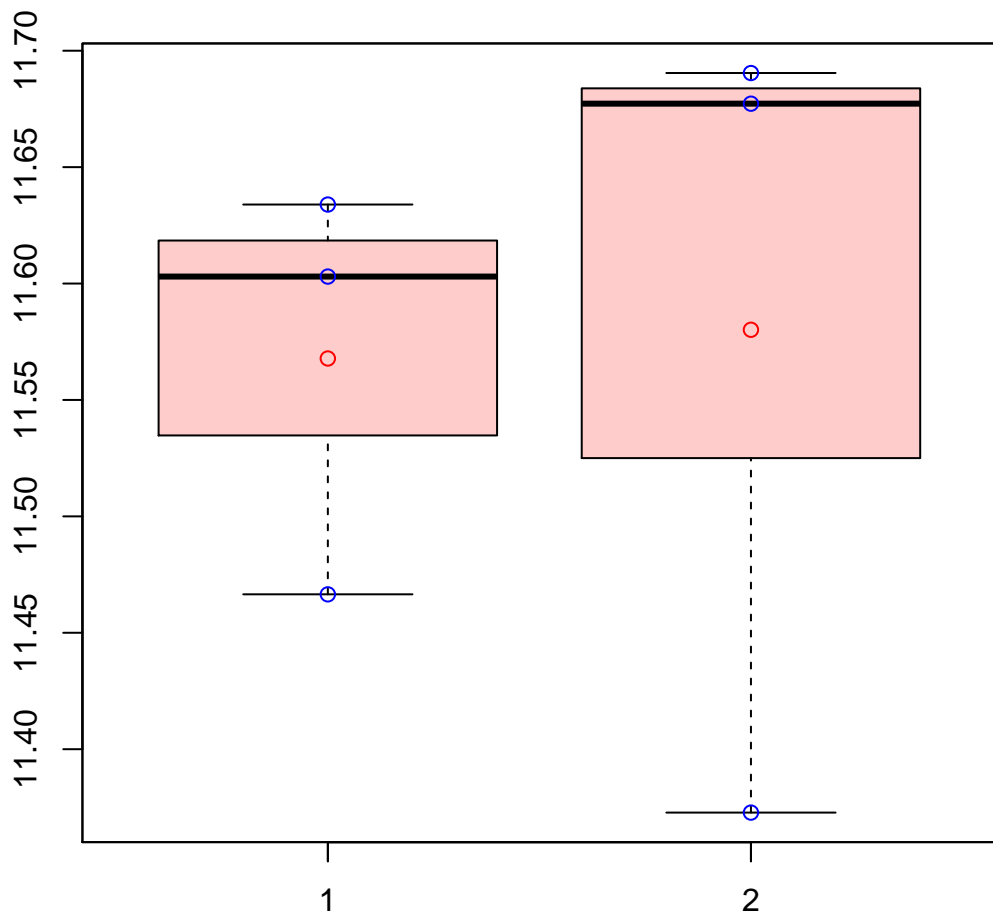

t-Test: p-value = 0.92

# CL123Contig26|CL123Contig26

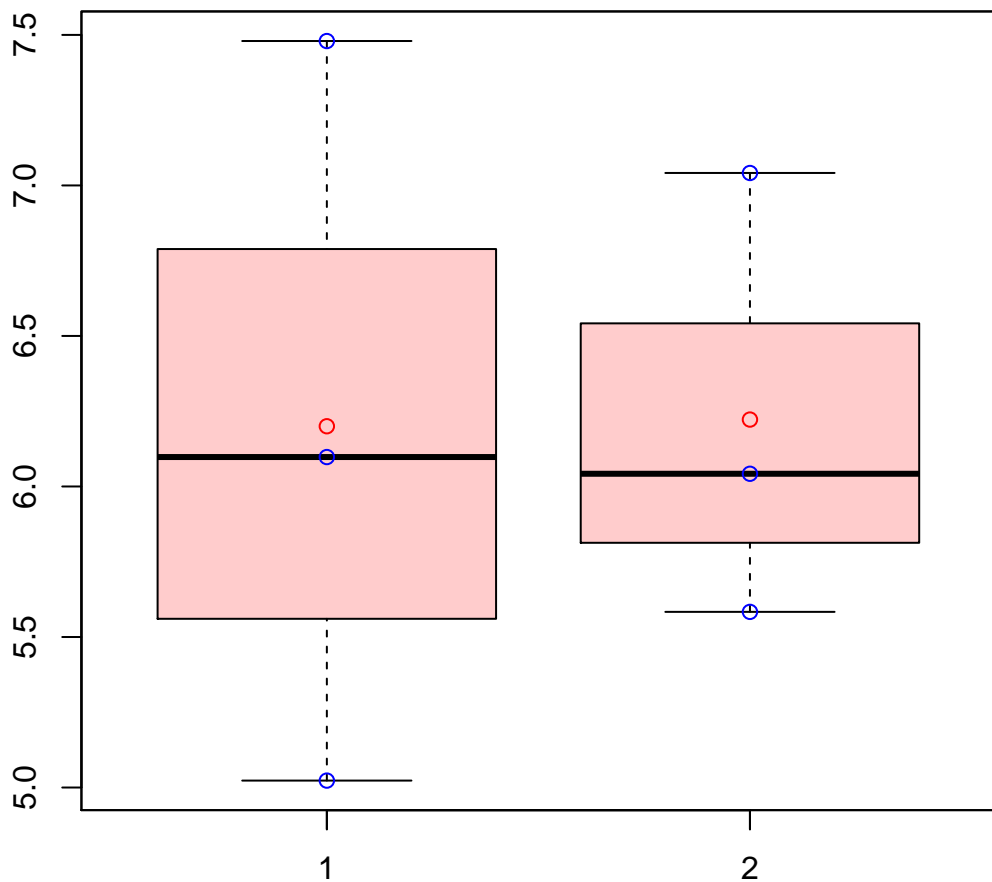

t-Test: p-value = 0.98



# CL123Contig27|CL123Contig27

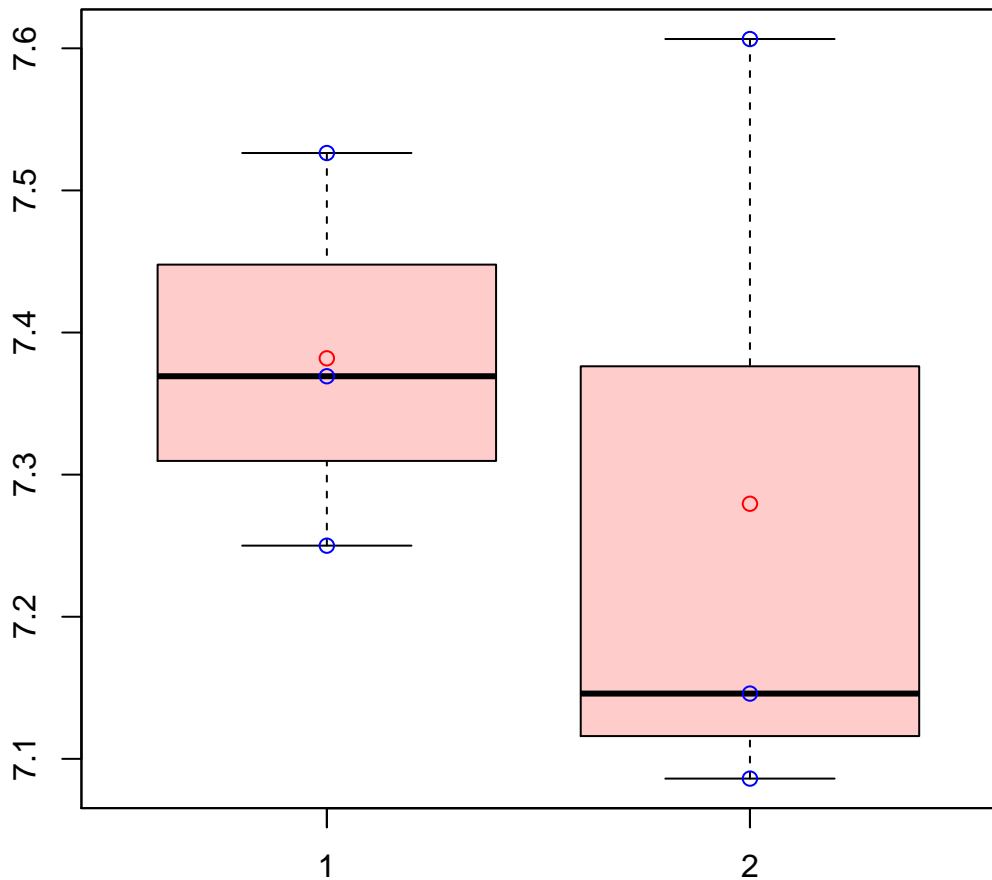

t-Test: p-value = 0.62

# CL123Contig30|CL123Contig30

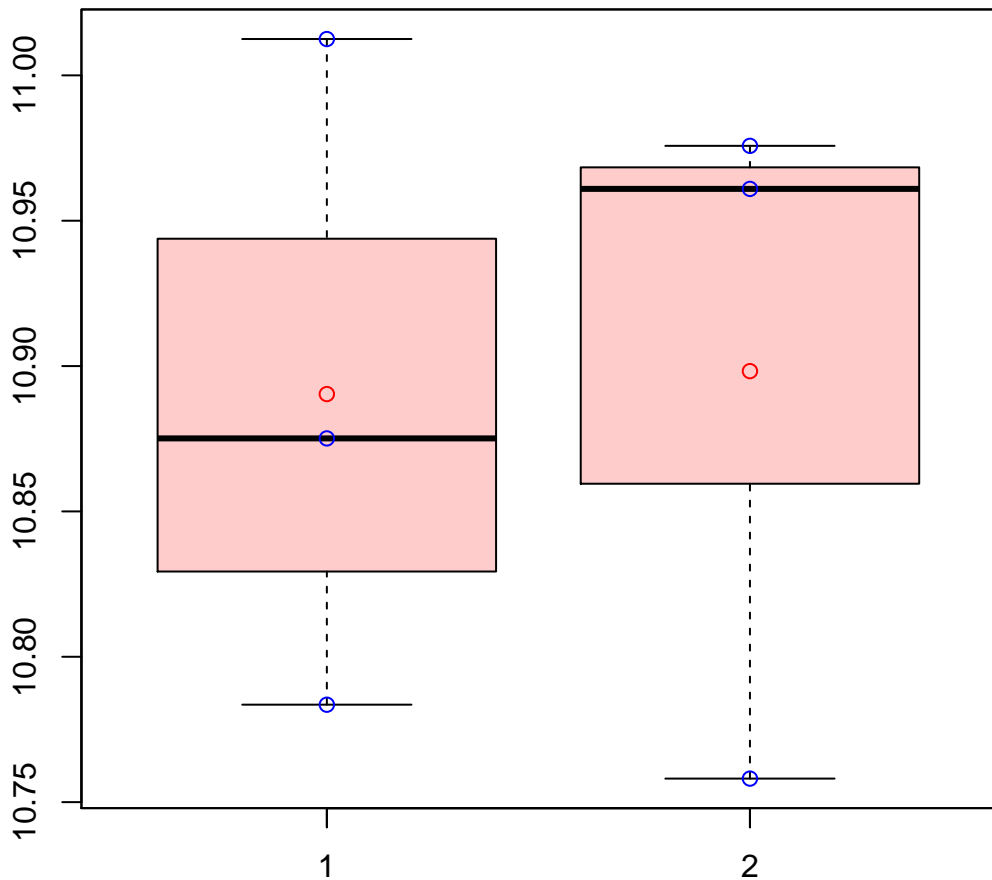

t-Test: p-value = 0.94

# CL1241Contig2|CL1241Contig2

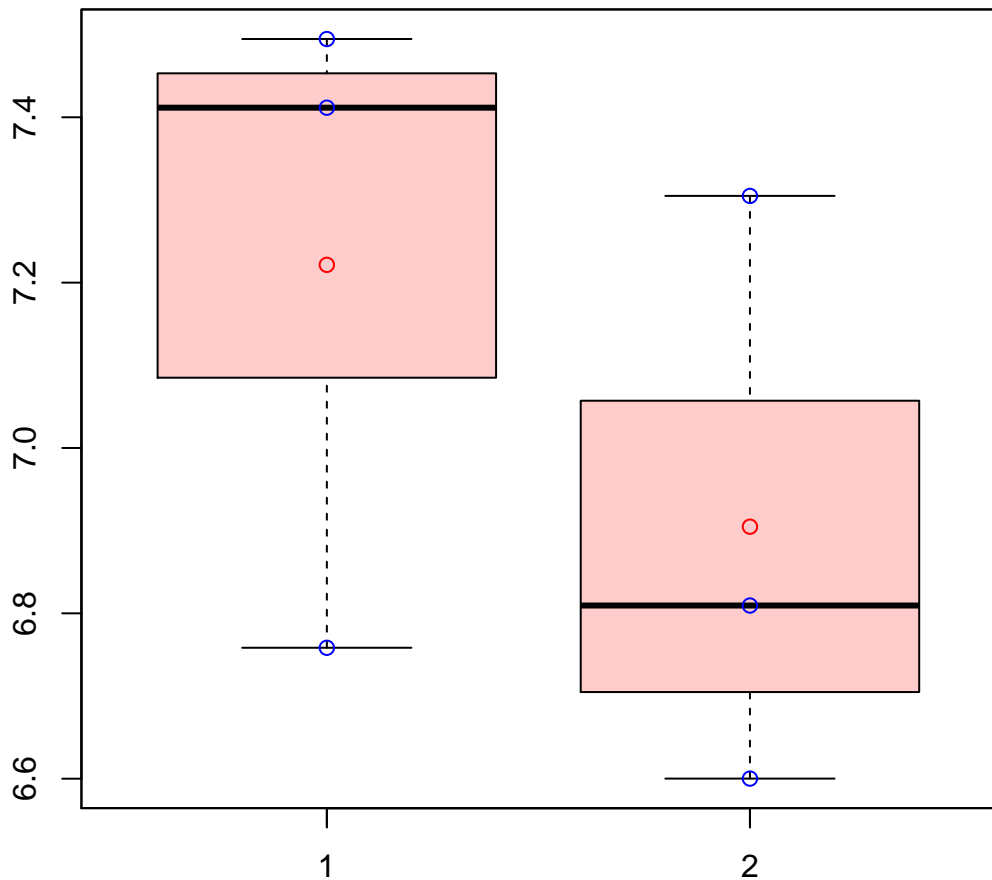

t-Test: p-value = 0.37

# CL12448Contig1|CL12448Contig1

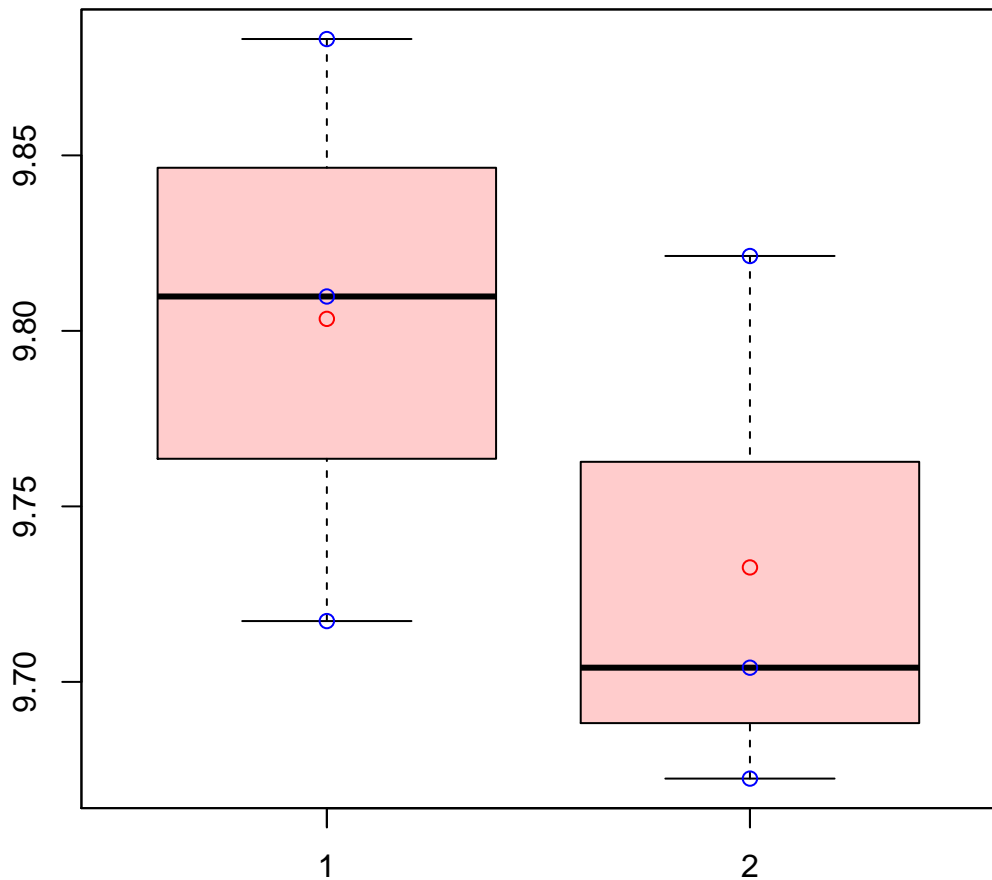

t-Test: p-value = 0.34

# CL1248Contig11|CL1248Contig11

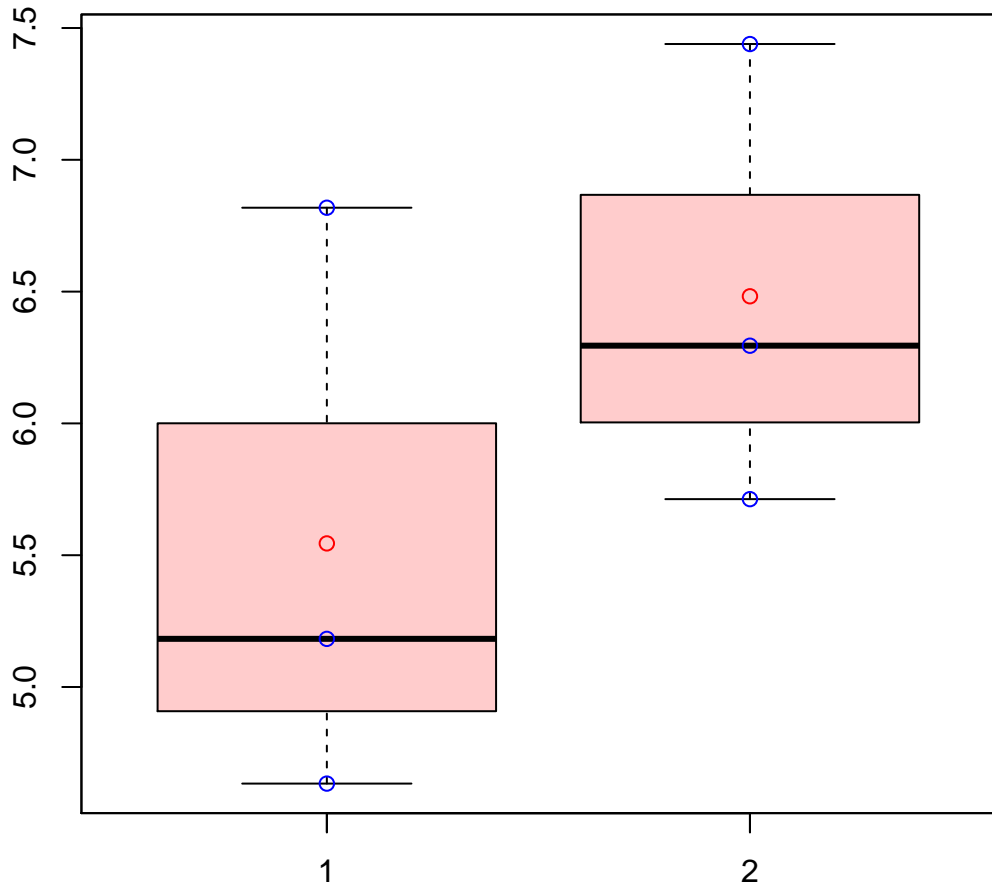

t-Test: p-value = 0.33

# CL12496Contig1|CL12496Contig1

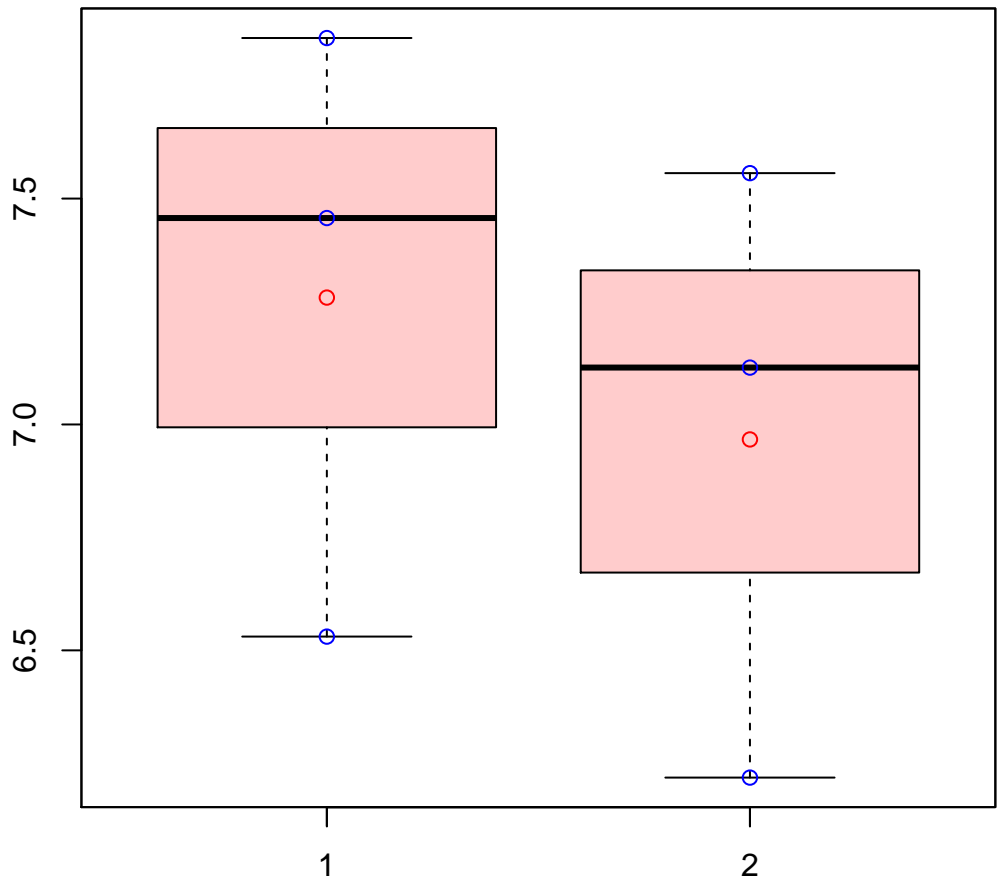

t-Test: p-value = 0.6

# CL1249Contig1|CL1249Contig1

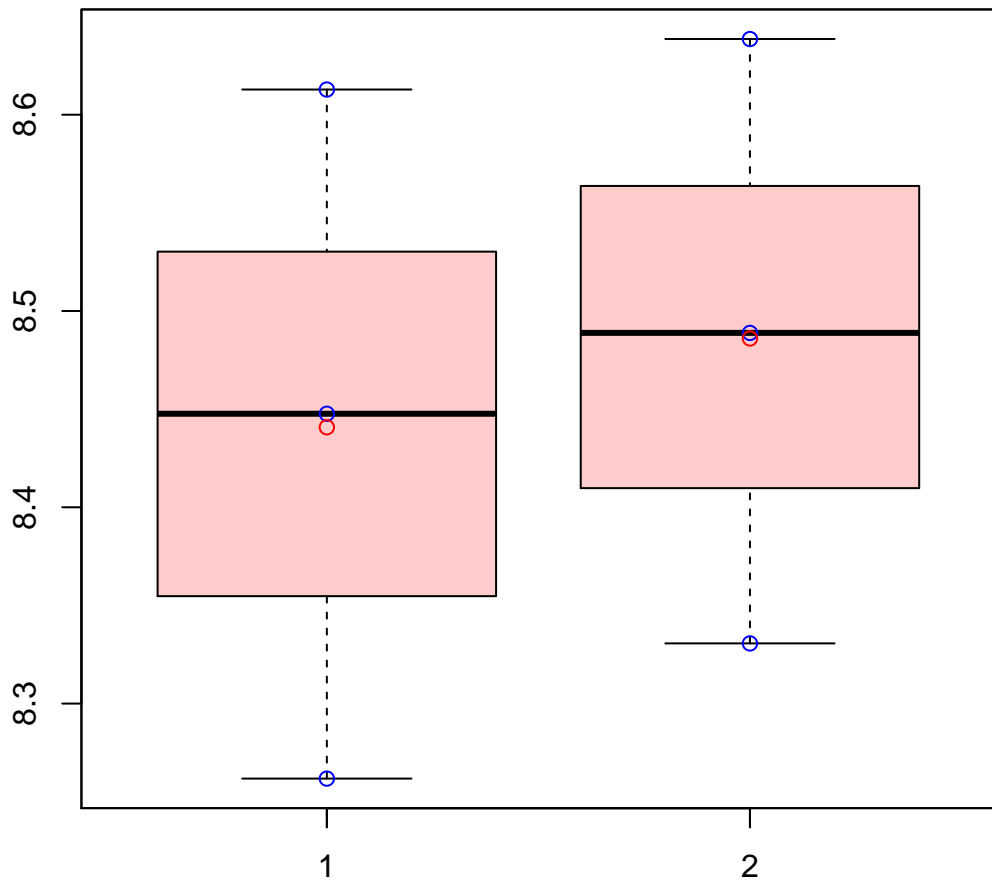

t-Test: p-value = 0.75

# CL124Contig2|CL124Contig2

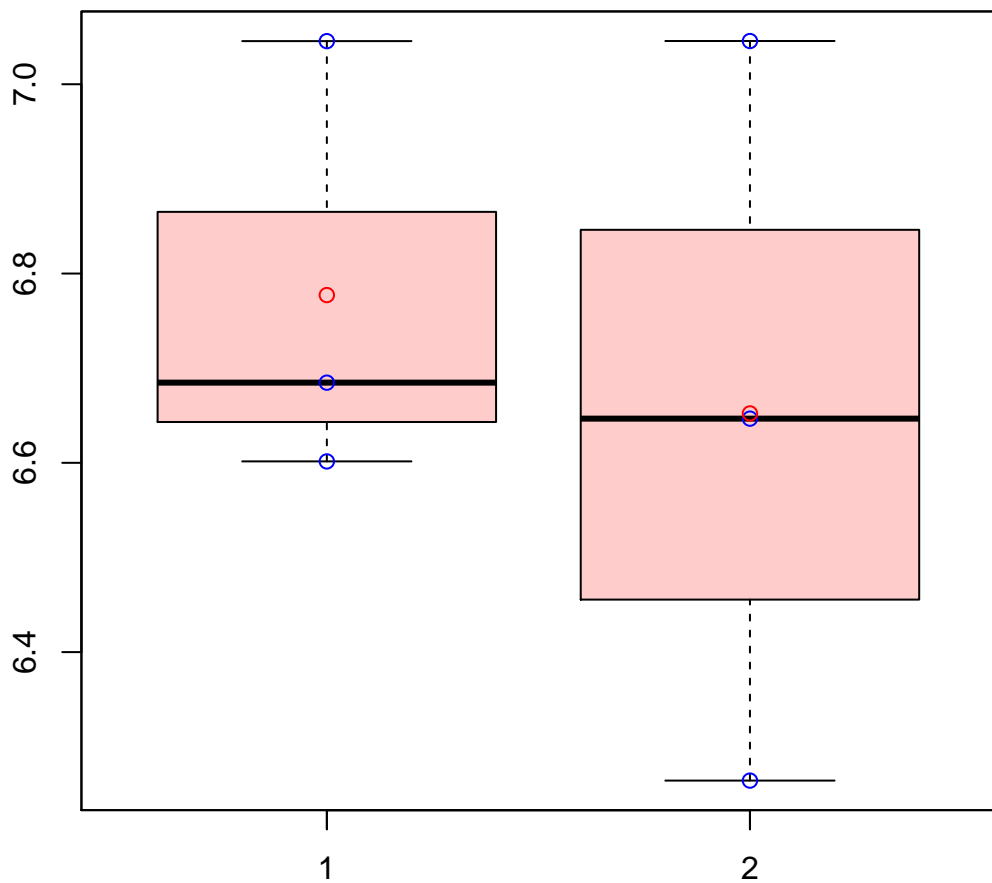

t-Test: p-value = 0.66



# CL124Contig7|CL124Contig7

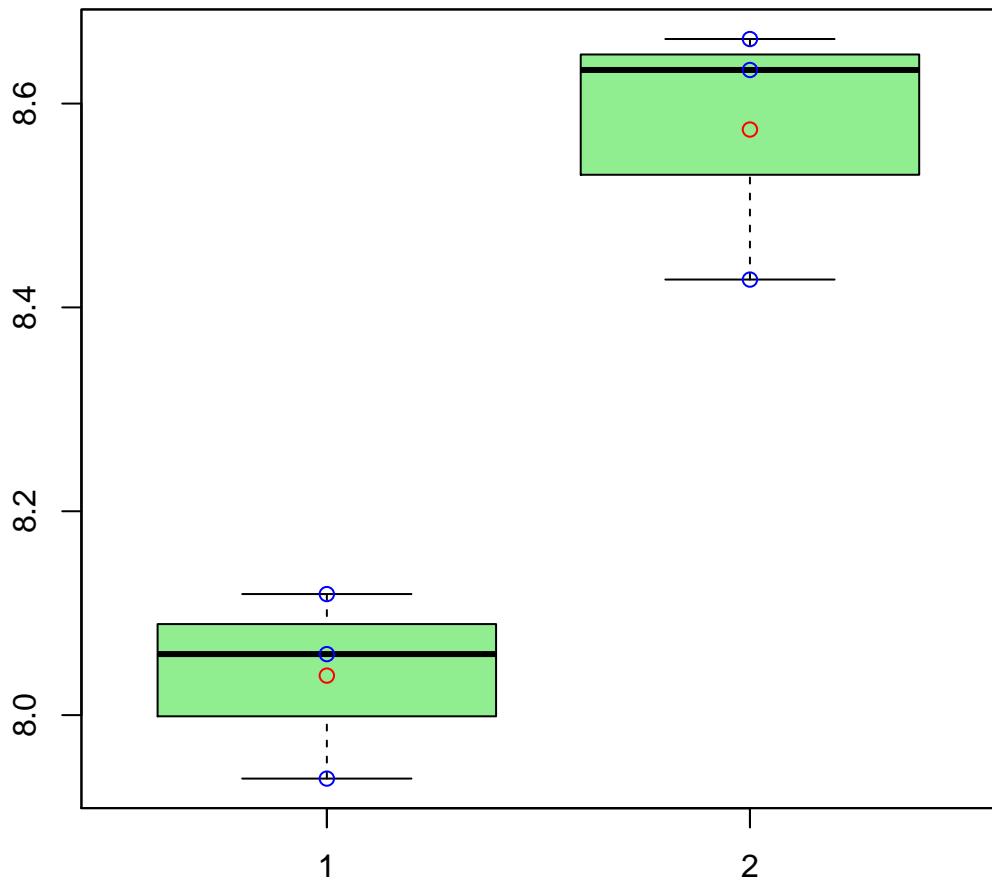

t-Test: p-value = 0.01

# CL1251Contig2|CL1251Contig2

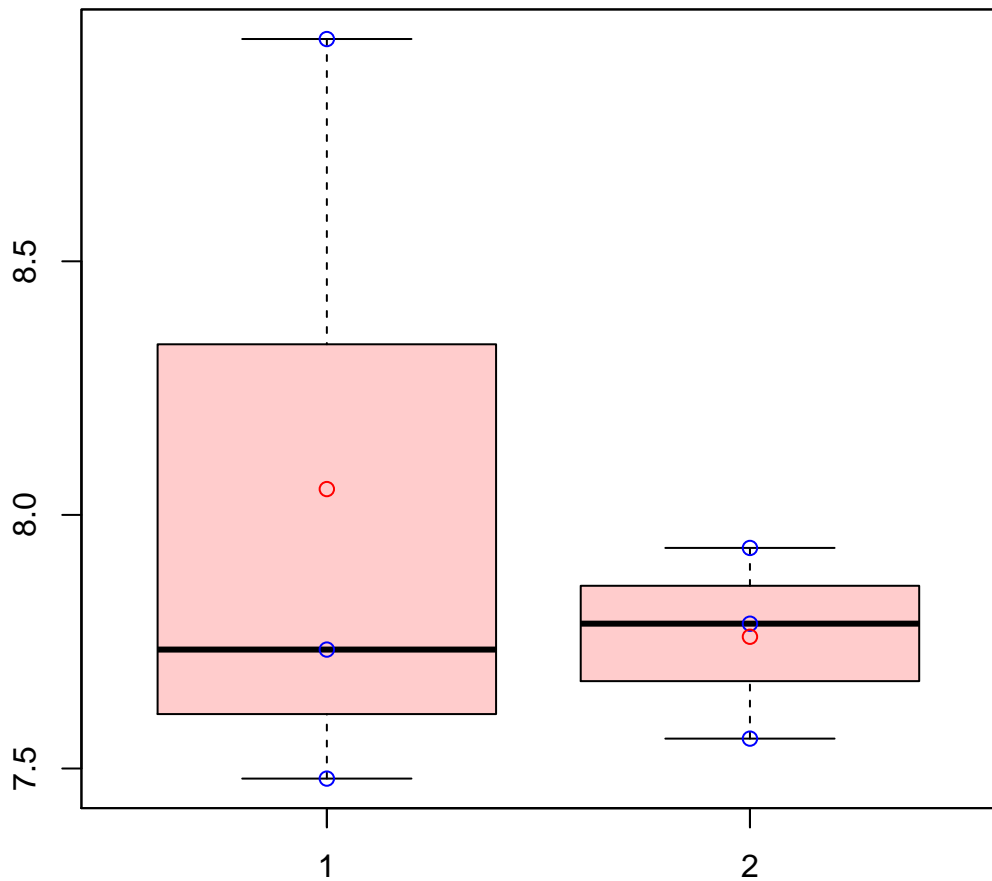

t-Test: p-value = 0.59

# CL1254Contig1|CL1254Contig1

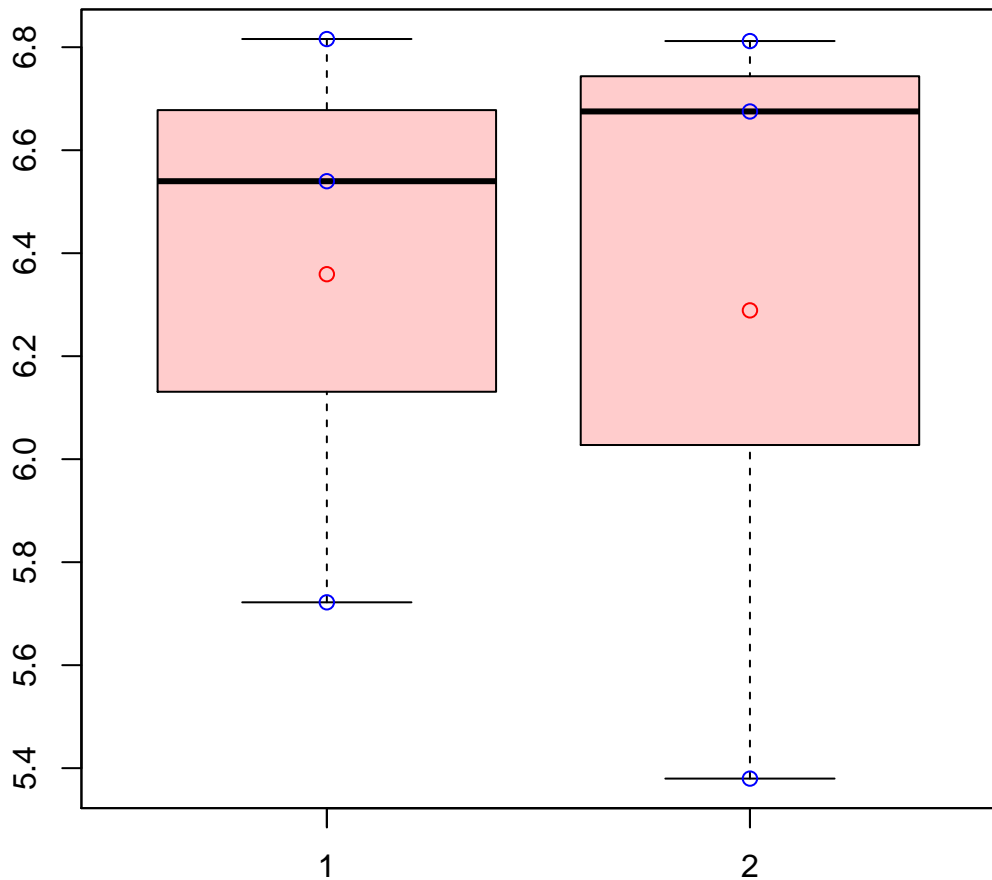

t-Test: p-value = 0.91

# CL12558Contig1|CL12558Contig1

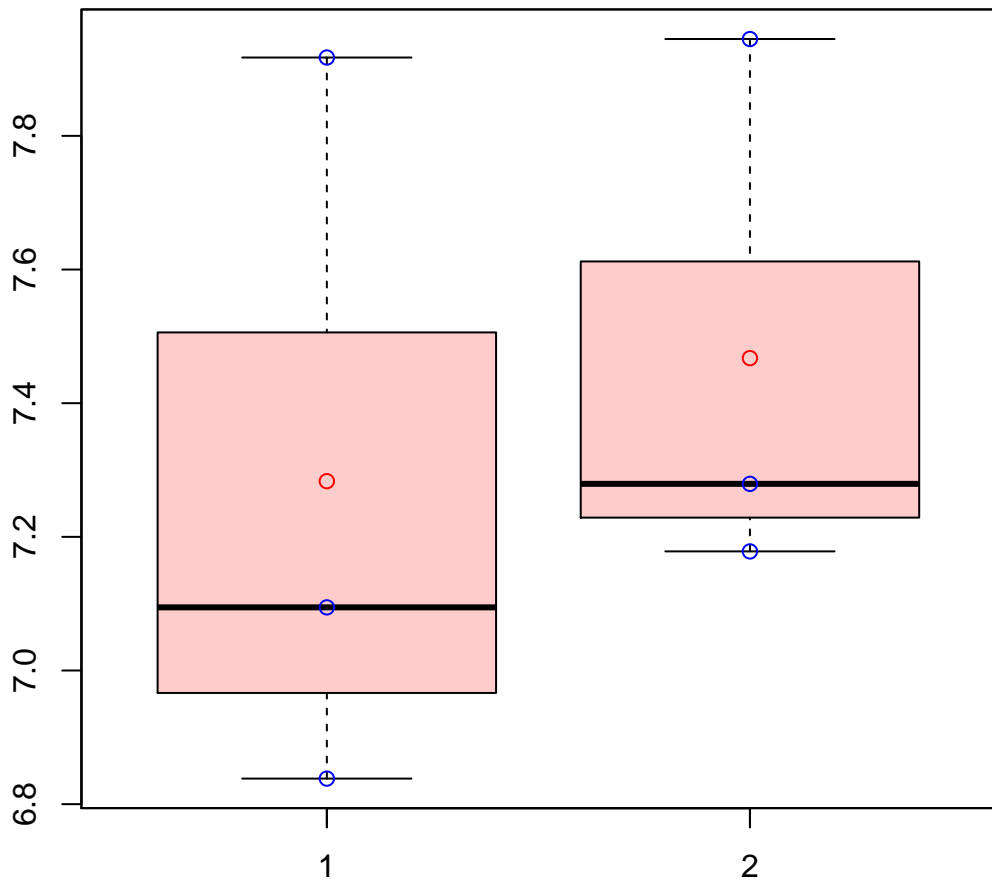

t-Test: p-value = 0.67

# CL1259Contig1|CL1259Contig1

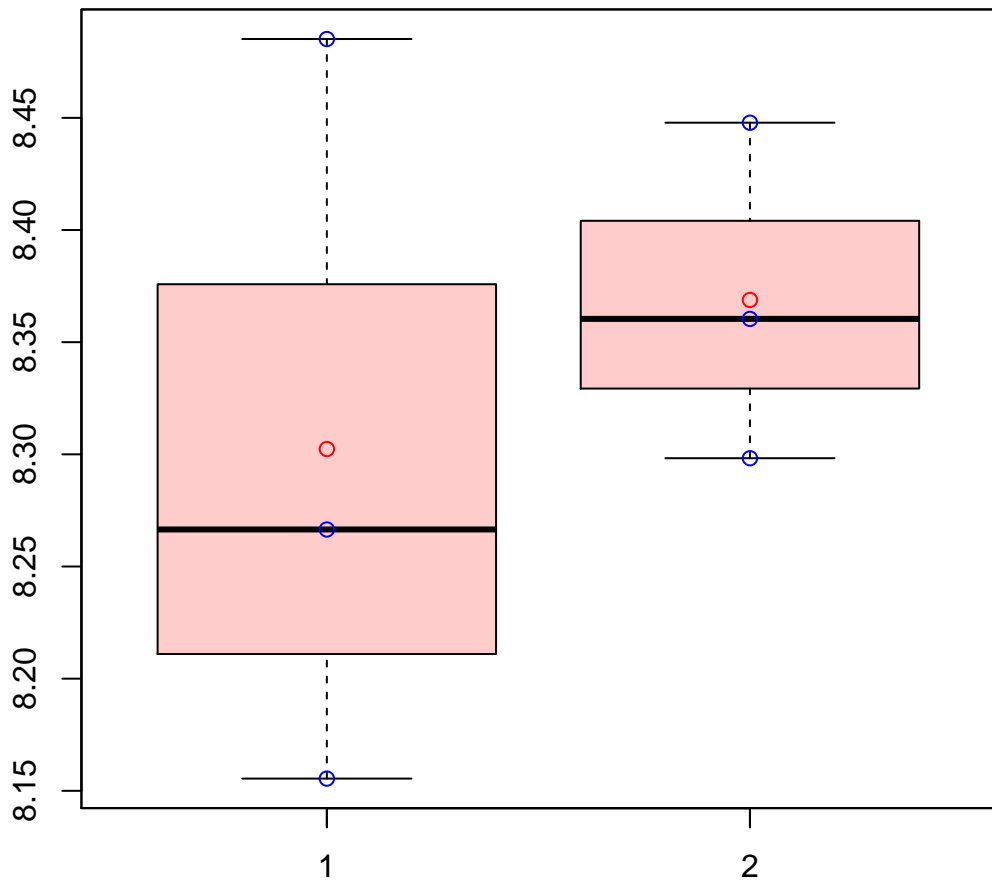

t-Test: p-value = 0.58

# CL125Contig2|CL125Contig2

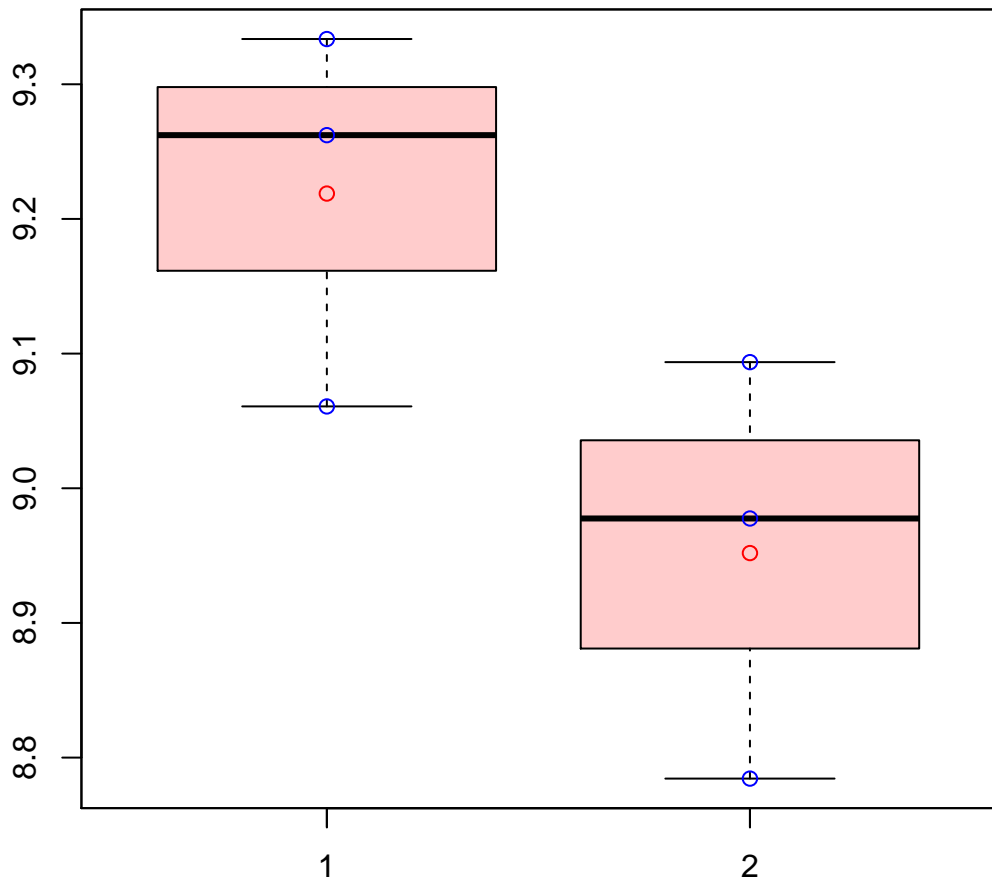

t-Test: p-value = 0.09

# CL125Contig3|CL125Contig3

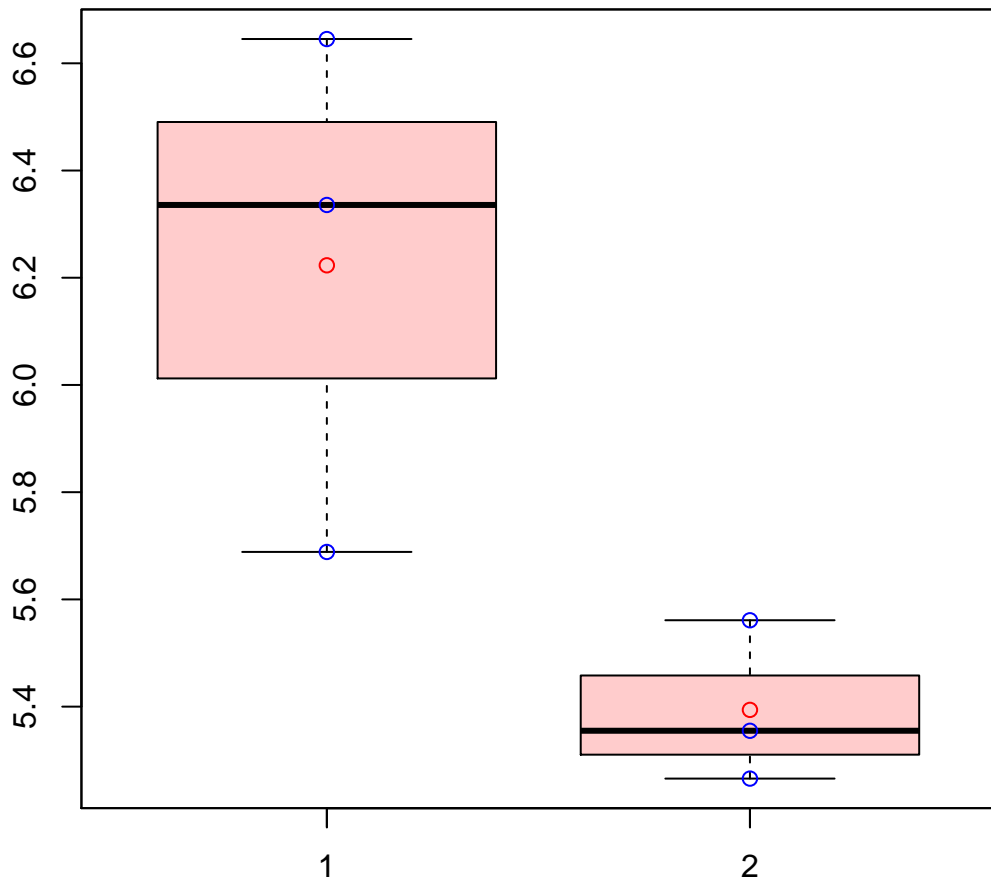

t-Test: p-value = 0.09

# CL125Contig4|CL125Contig4

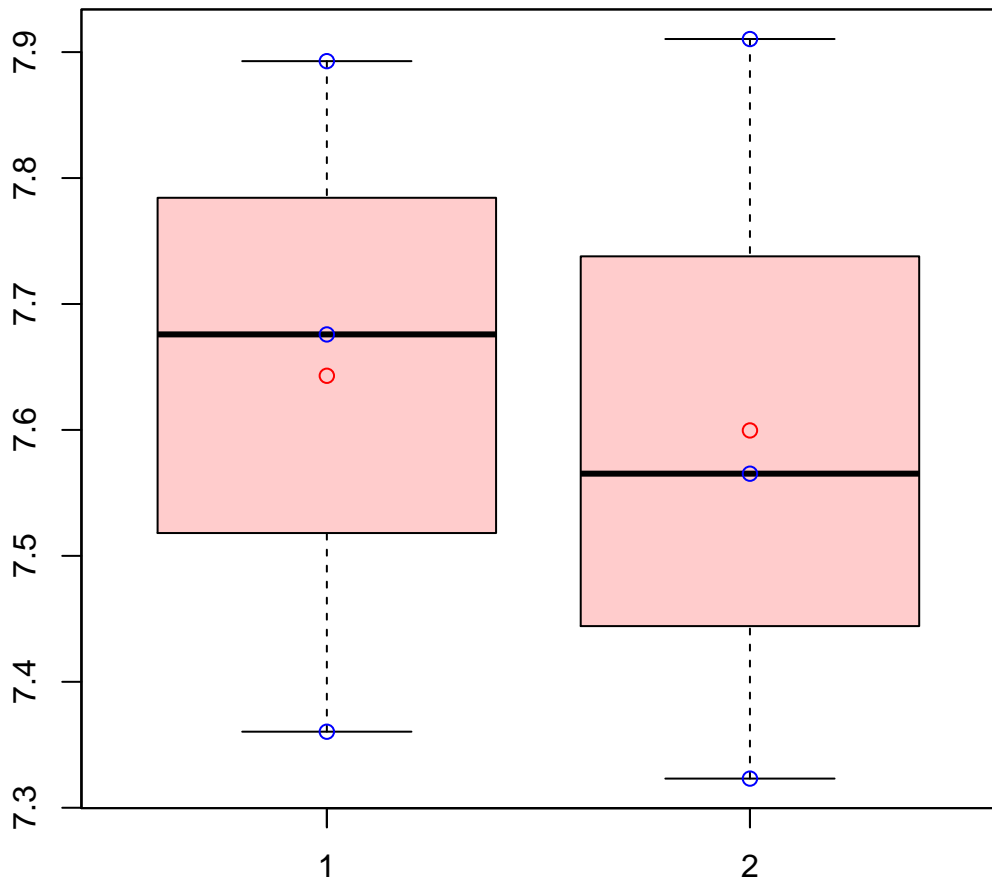

t-Test: p-value = 0.86



# CL1261Contig10|CL1261Contig10

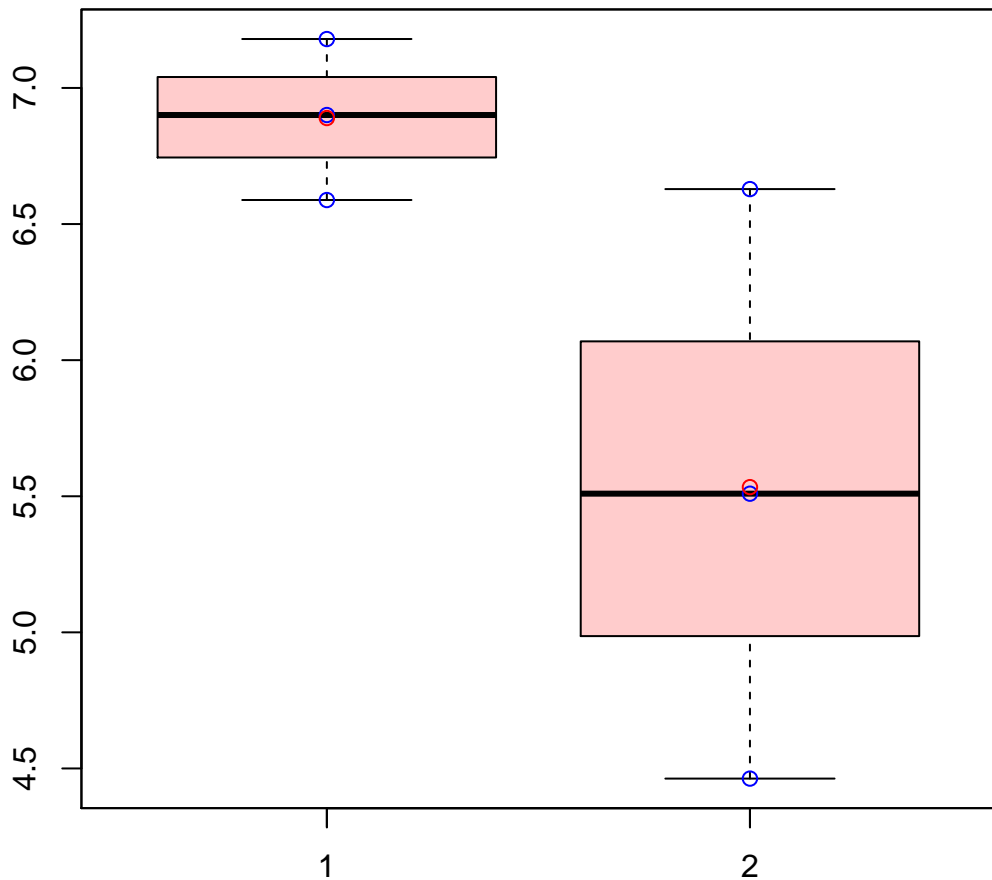

t-Test: p-value = 0.15

# CL1262Contig13|CL1262Contig13

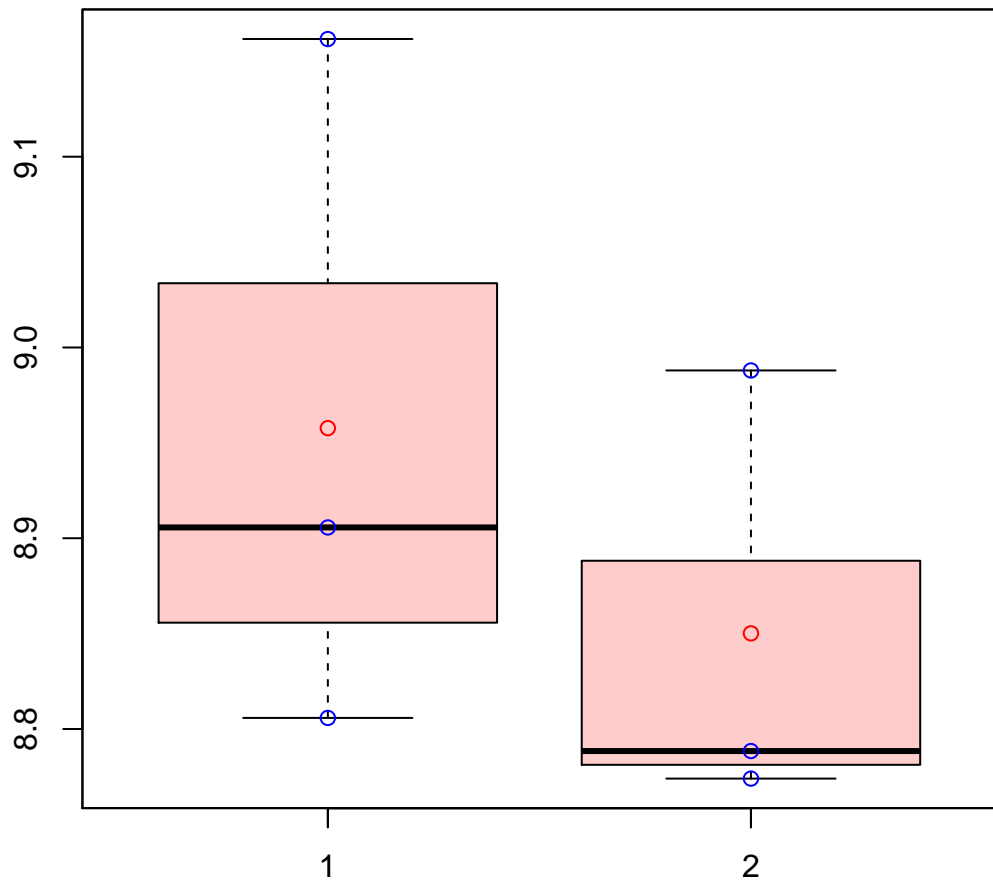

t-Test: p-value = 0.45

# CL1264Contig6|CL1264Contig6

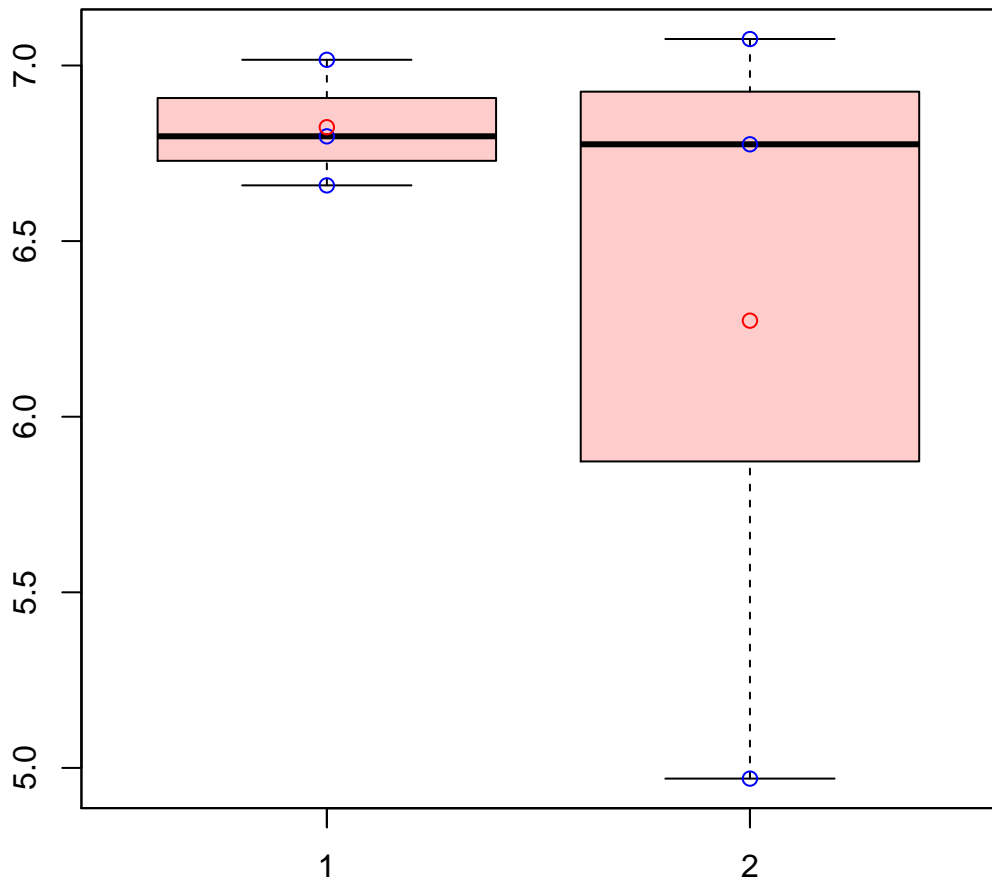

t-Test: p-value = 0.49

# CL12657Contig1|CL12657Contig1

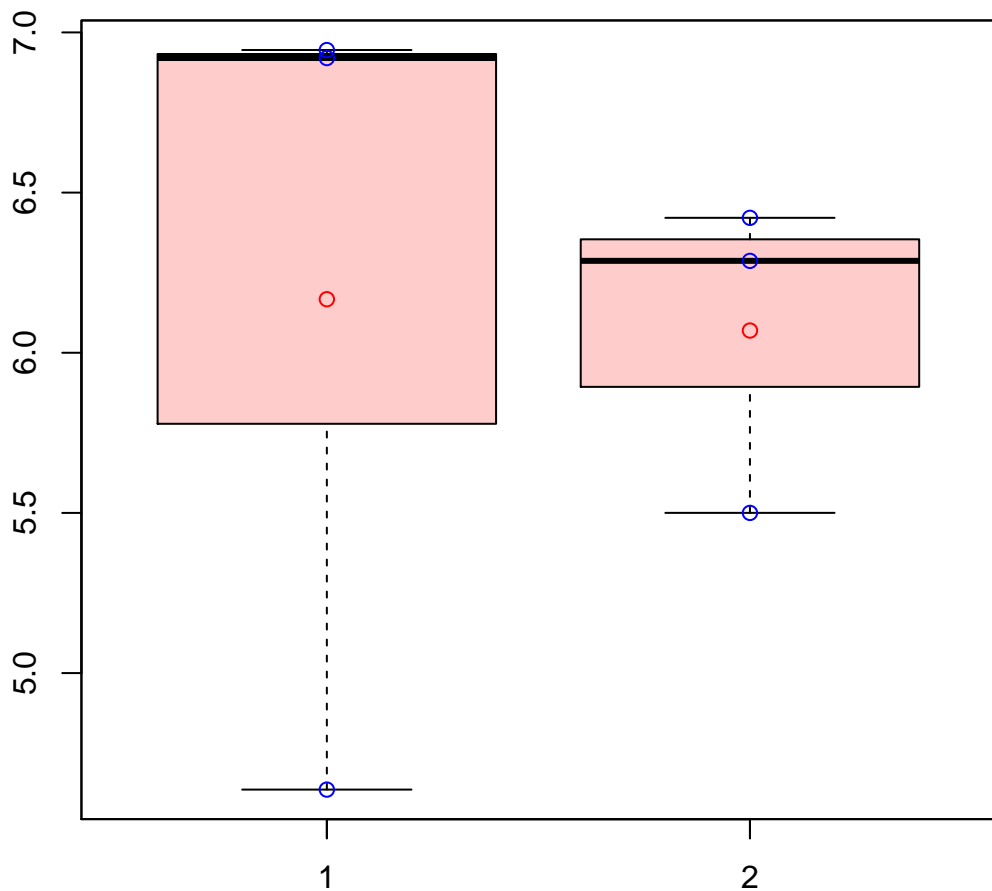

t-Test: p-value = 0.91

# CL12659Contig1|CL12659Contig1

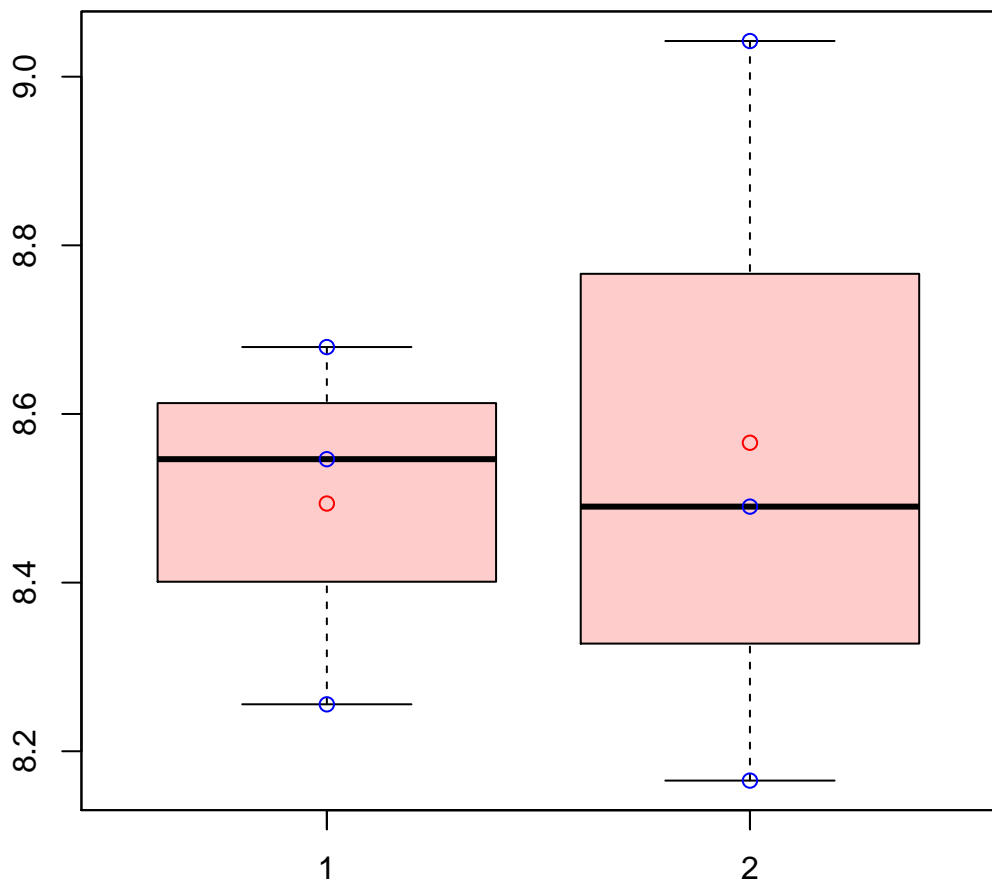

t-Test: p-value = 0.82

# CL12666Contig1|CL12666Contig1

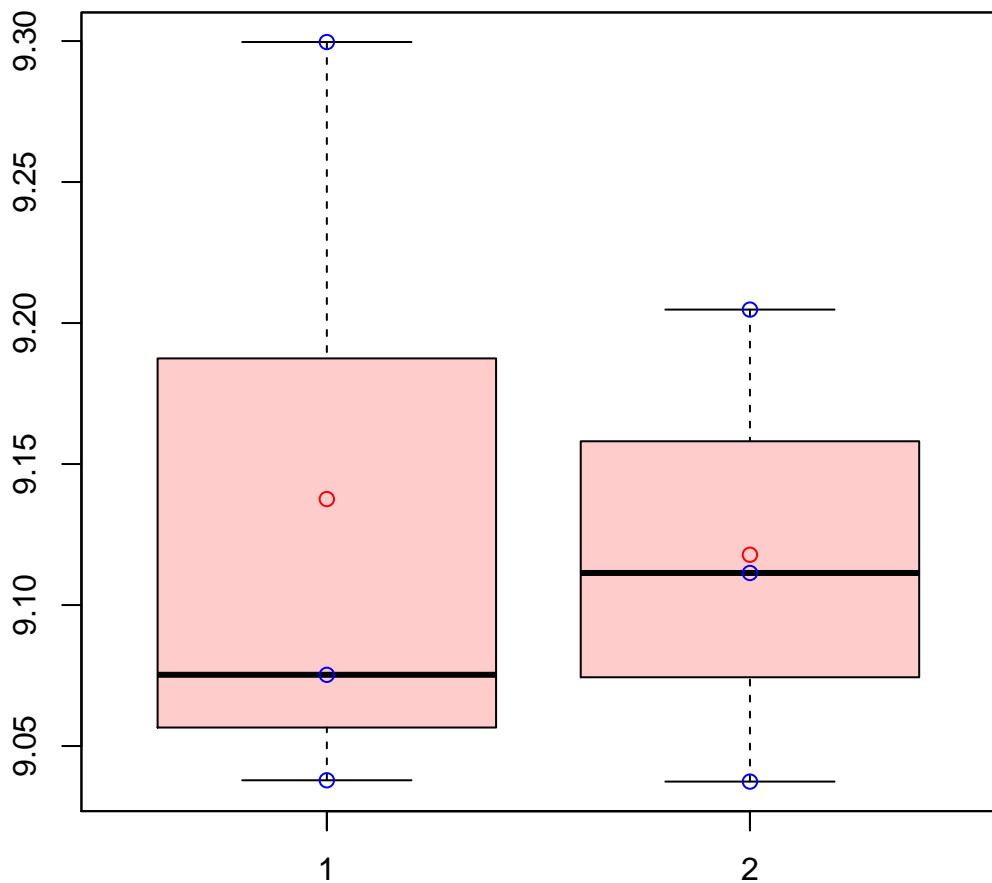

t-Test: p-value = 0.85

# CL12677Contig1|CL12677Contig1

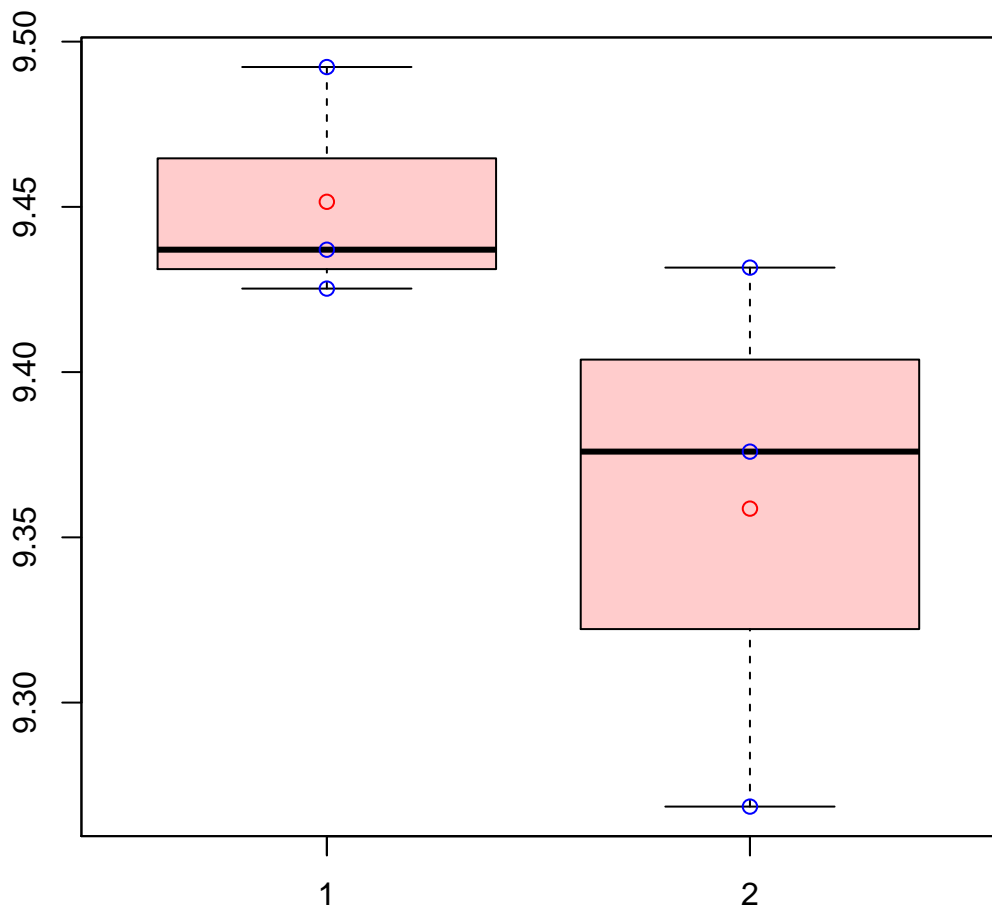

t-Test: p-value = 0.18

# CL1269Contig8|CL1269Contig8

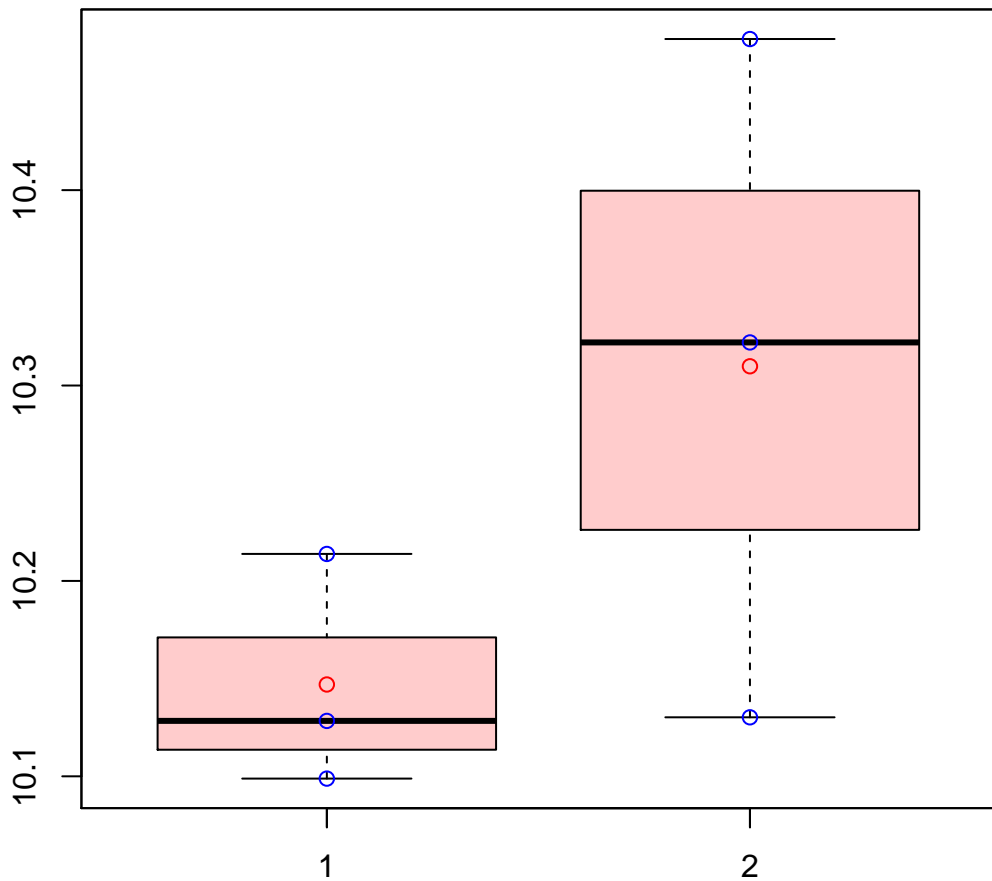

t-Test: p-value = 0.24



# CL126Contig14|CL126Contig14

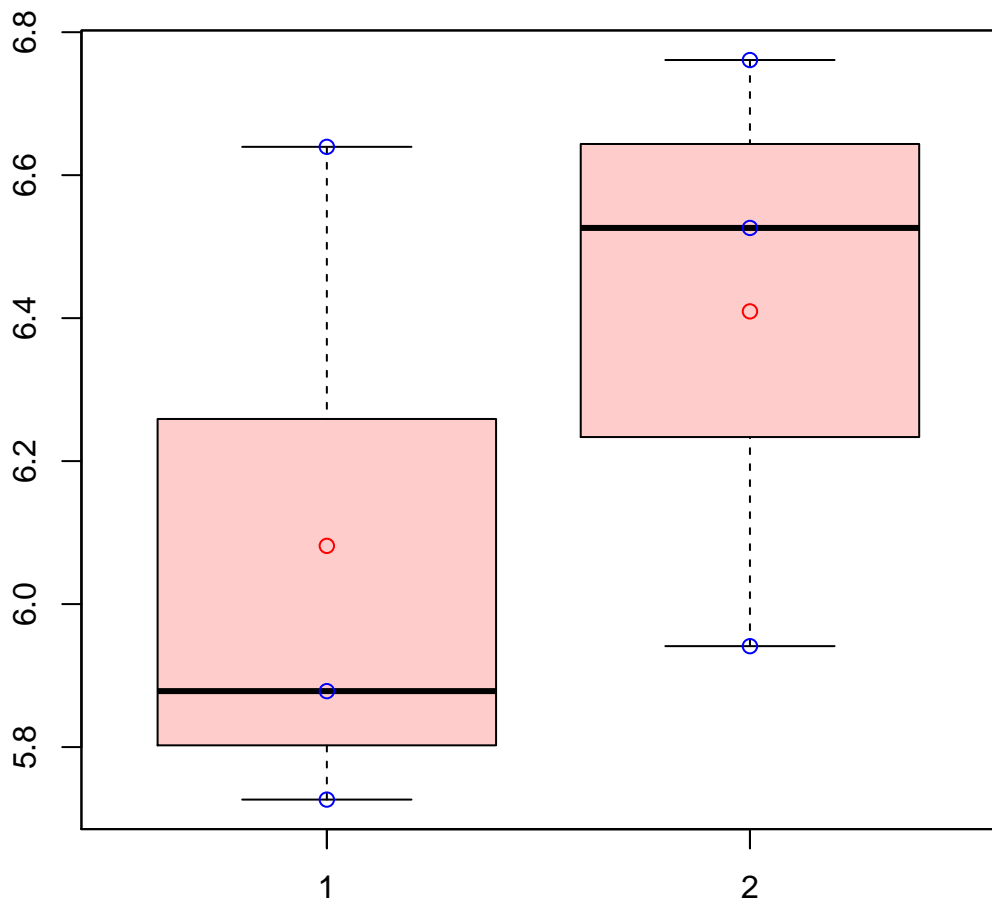

t-Test: p-value = 0.43

# CL12723Contig1|CL12723Contig1

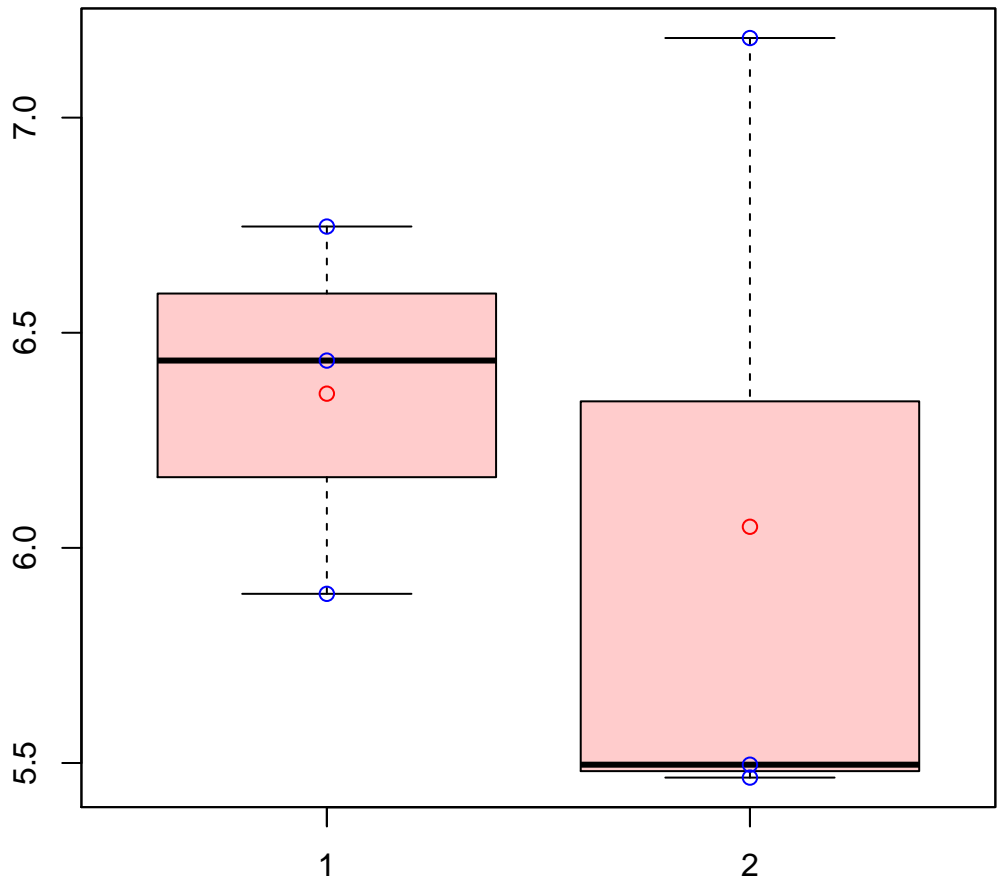

t-Test: p-value = 0.66

# CL12771Contig1|CL12771Contig1

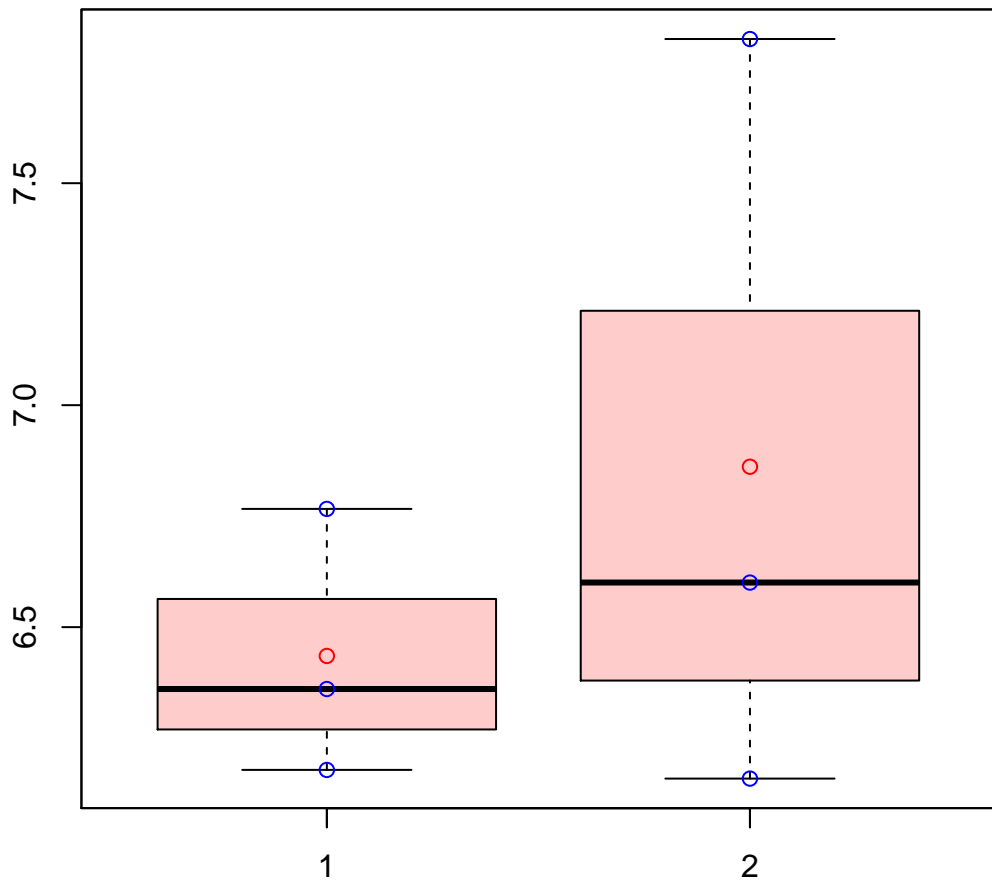

t-Test: p-value = 0.49

# CL1279Contig11|CL1279Contig11

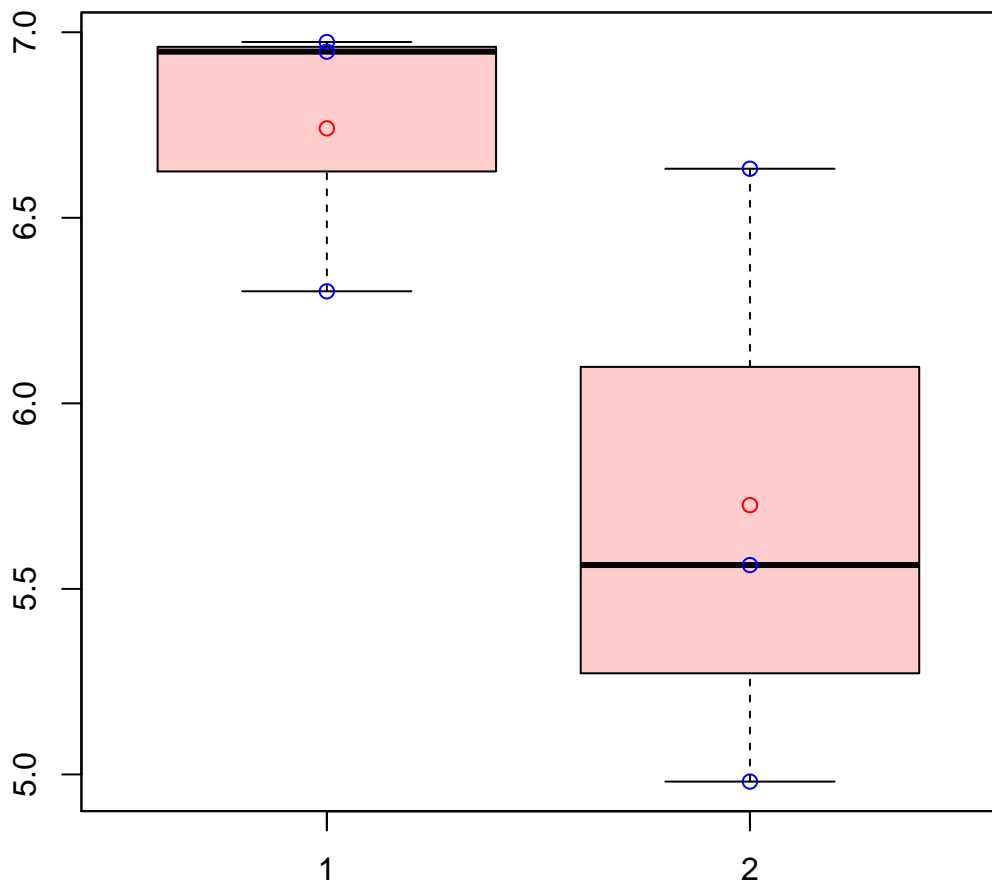

t-Test: p-value = 0.16

# CL12809Contig1|CL12809Contig1

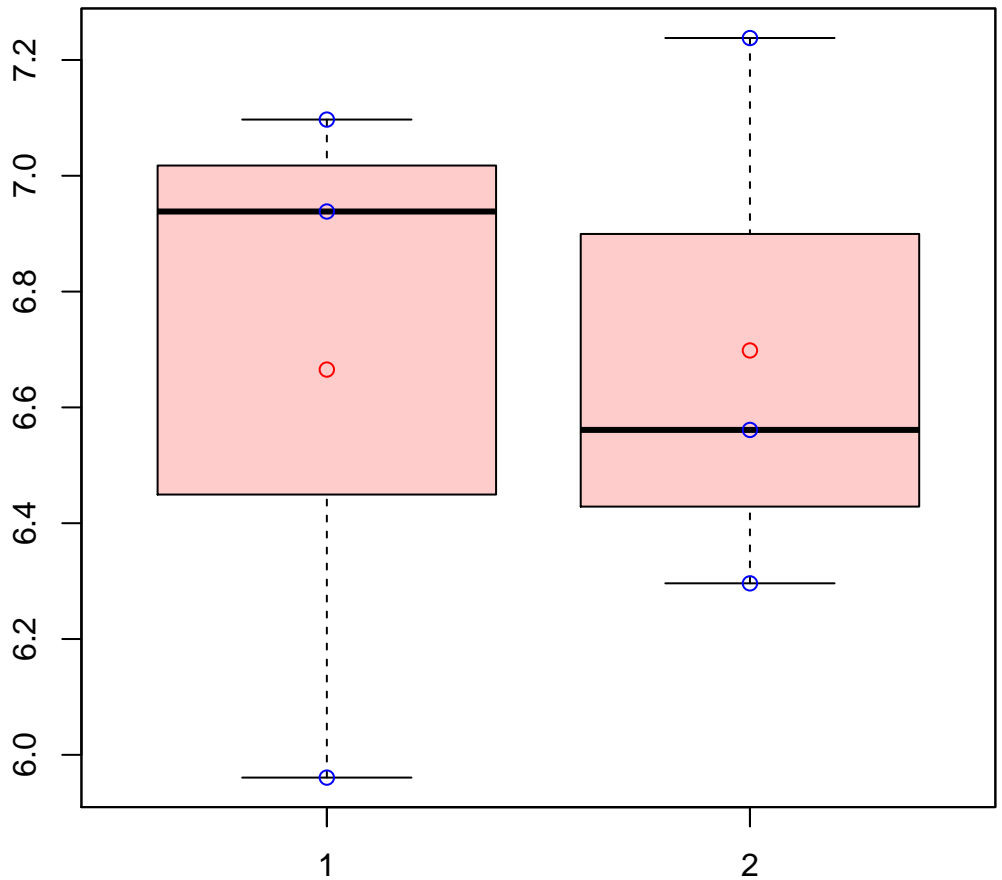

t-Test: p-value = 0.95

# CL1280Contig2|CL1280Contig2

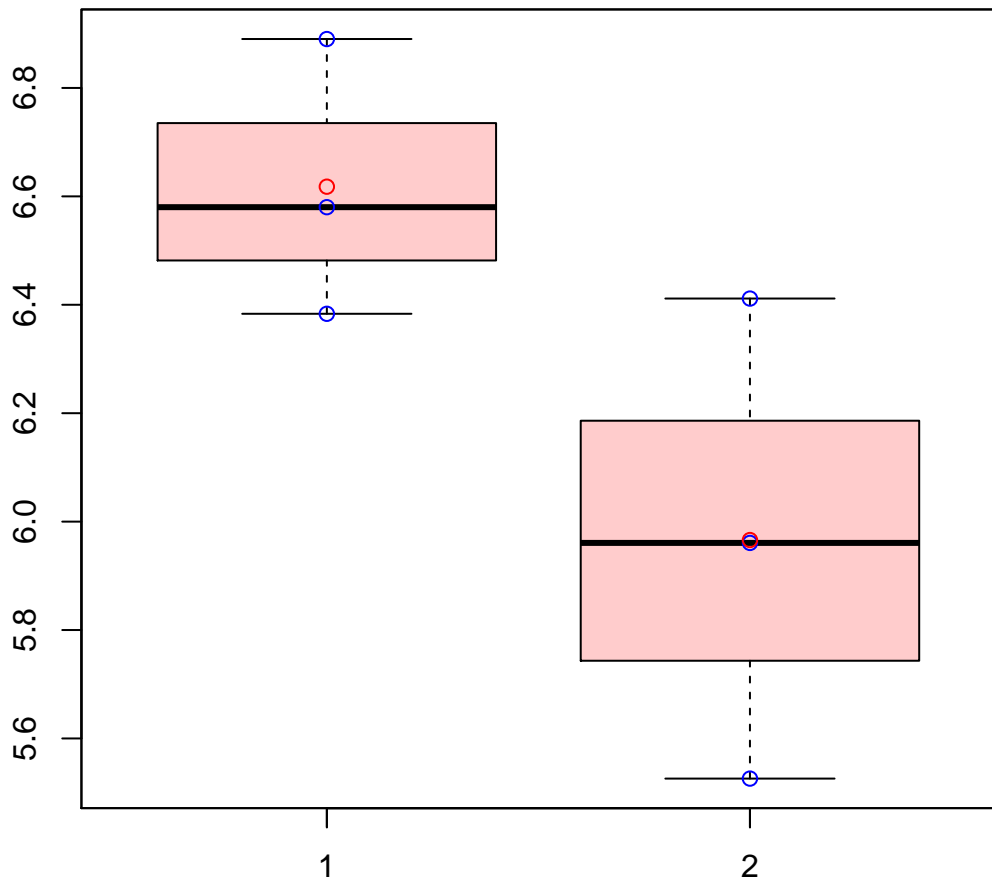

t-Test: p-value = 0.11

# CL12834Contig2|CL12834Contig2

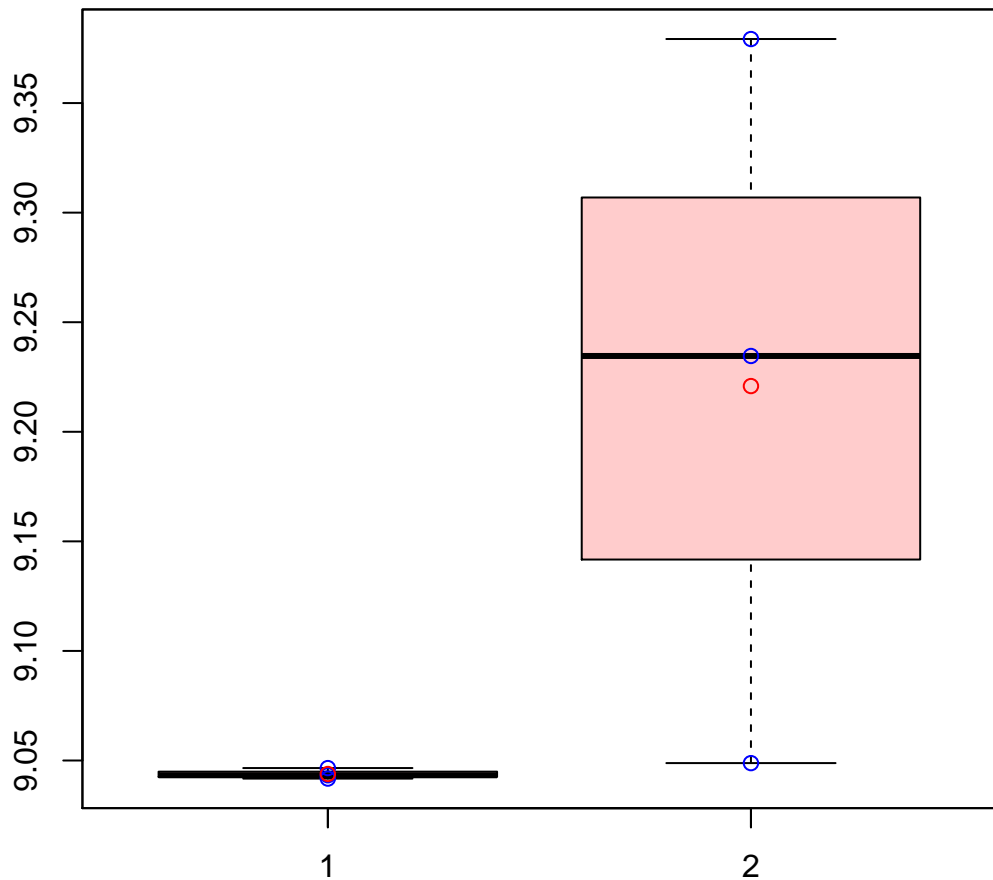

t-Test: p-value = 0.21

# CL1285Contig3|CL1285Contig3

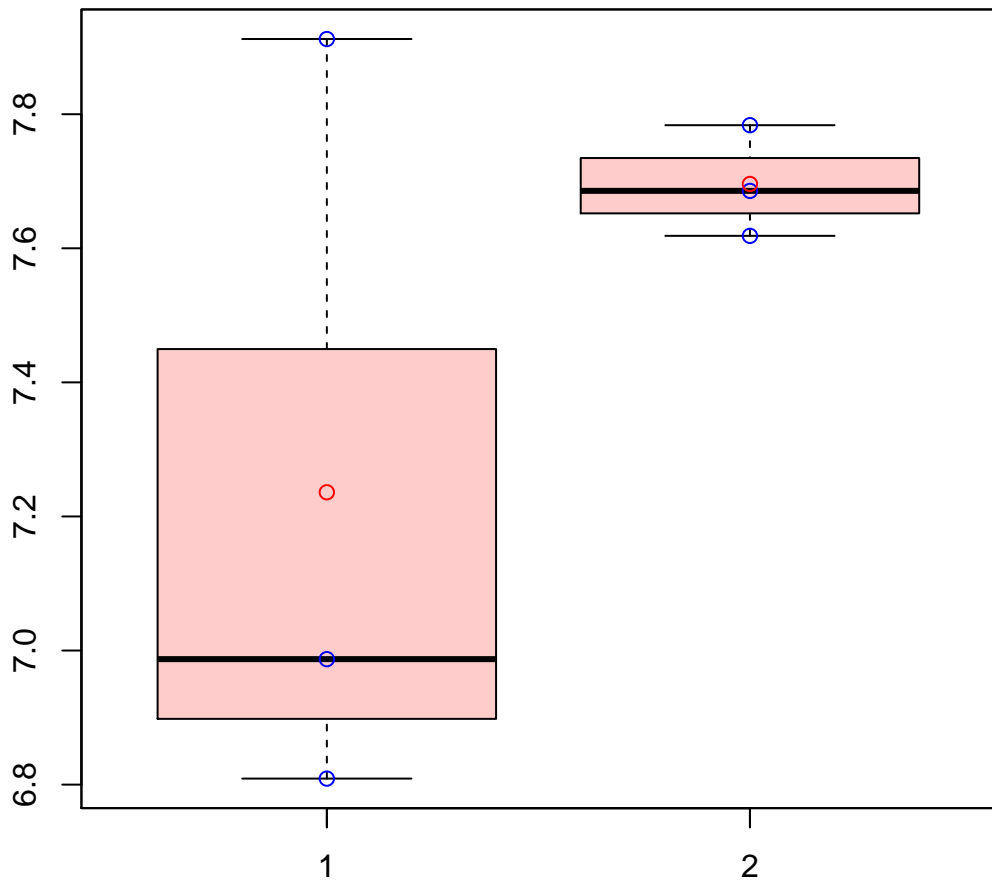

t-Test: p-value = 0.31



# CL12863Contig1|CL12863Contig1

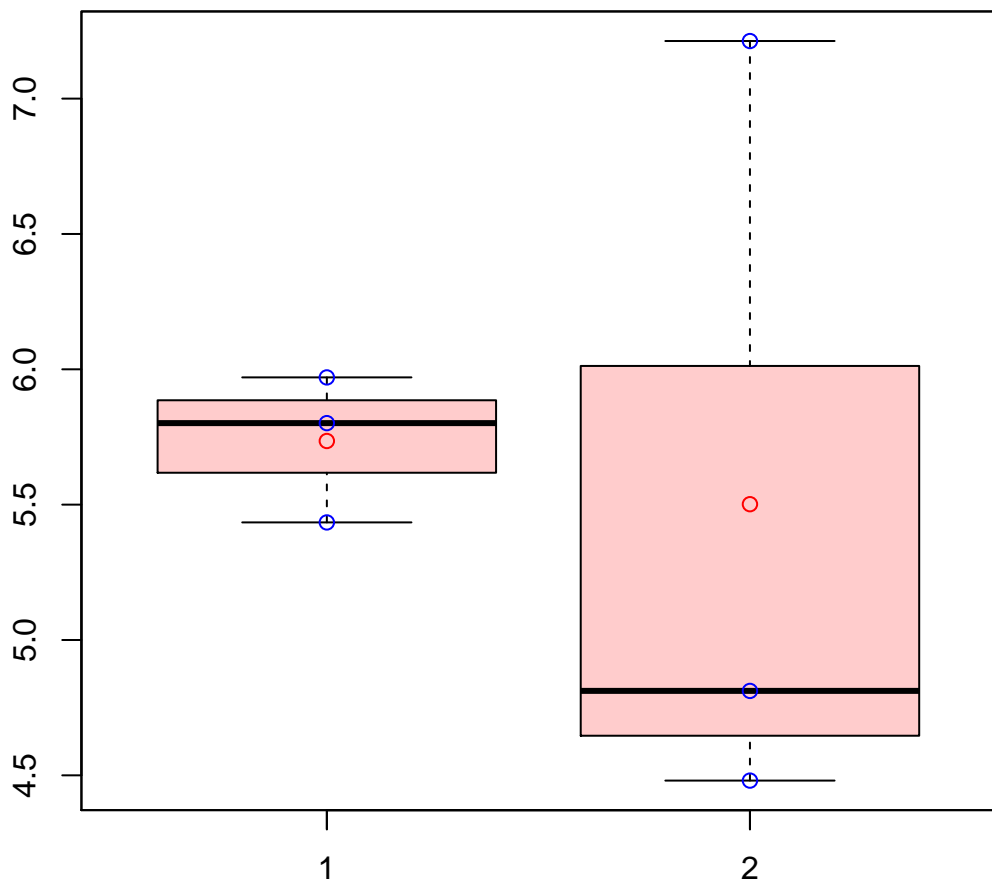

t-Test: p-value = 0.81

# CL1295Contig1|CL1295Contig1

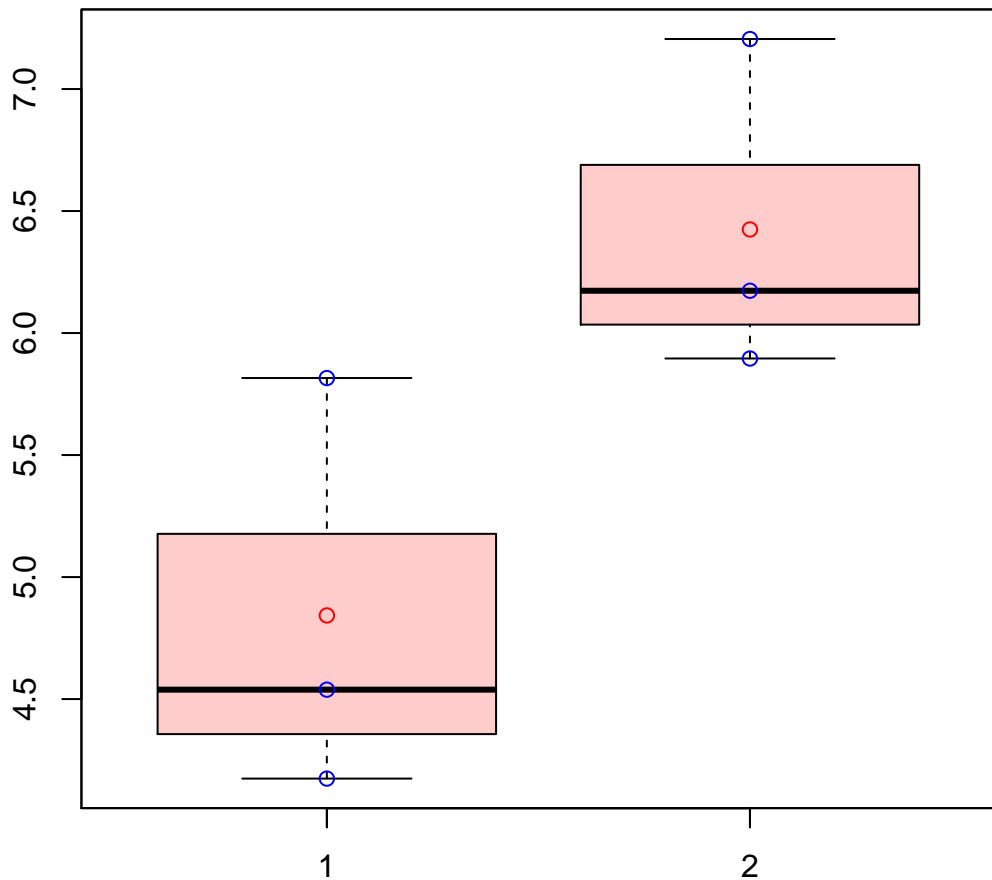

t-Test: p-value = 0.07

# CL12988Contig1|CL12988Contig1

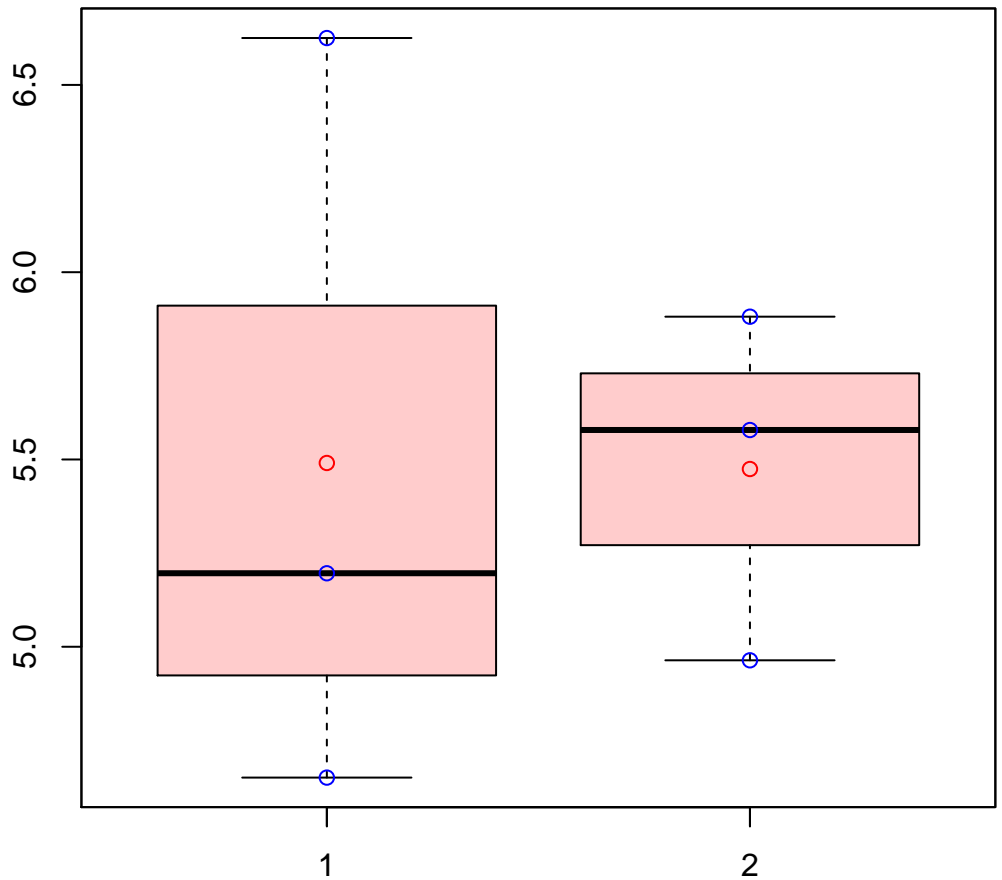

t-Test: p-value = 0.98

# CL129Contig9|CL129Contig9

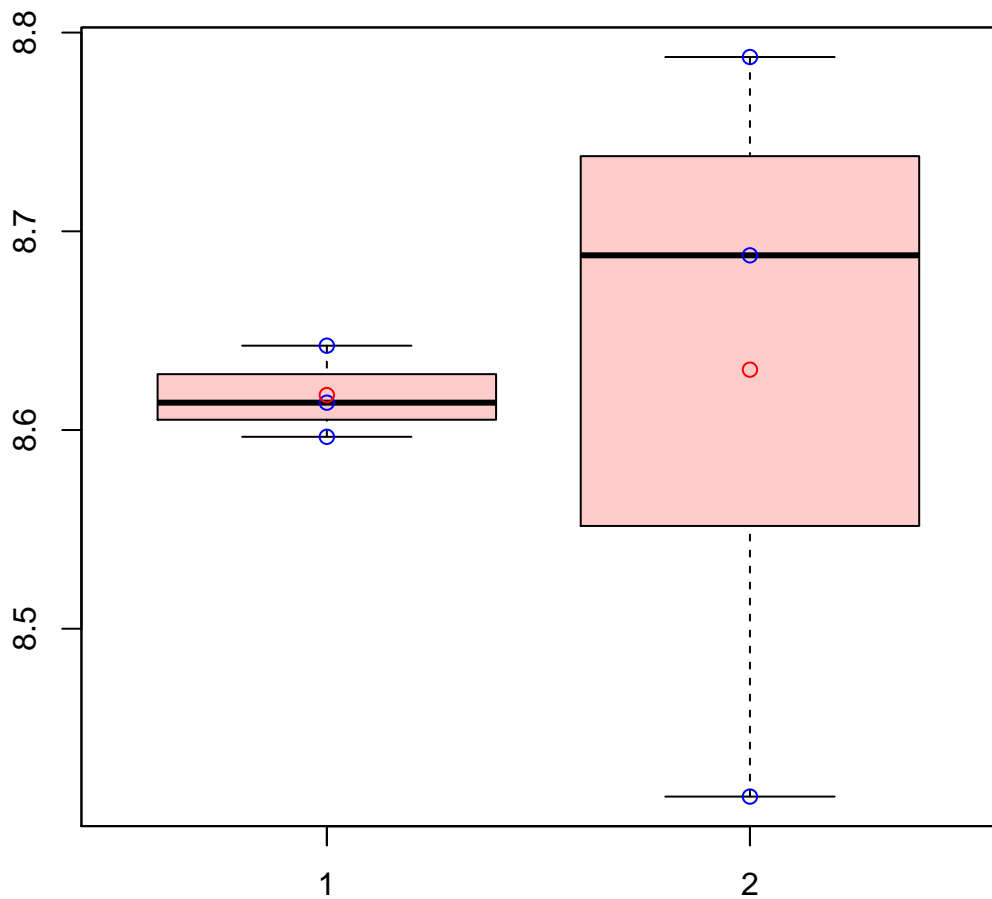

t-Test: p-value = 0.92

# CL1301Contig2|CL1301Contig2

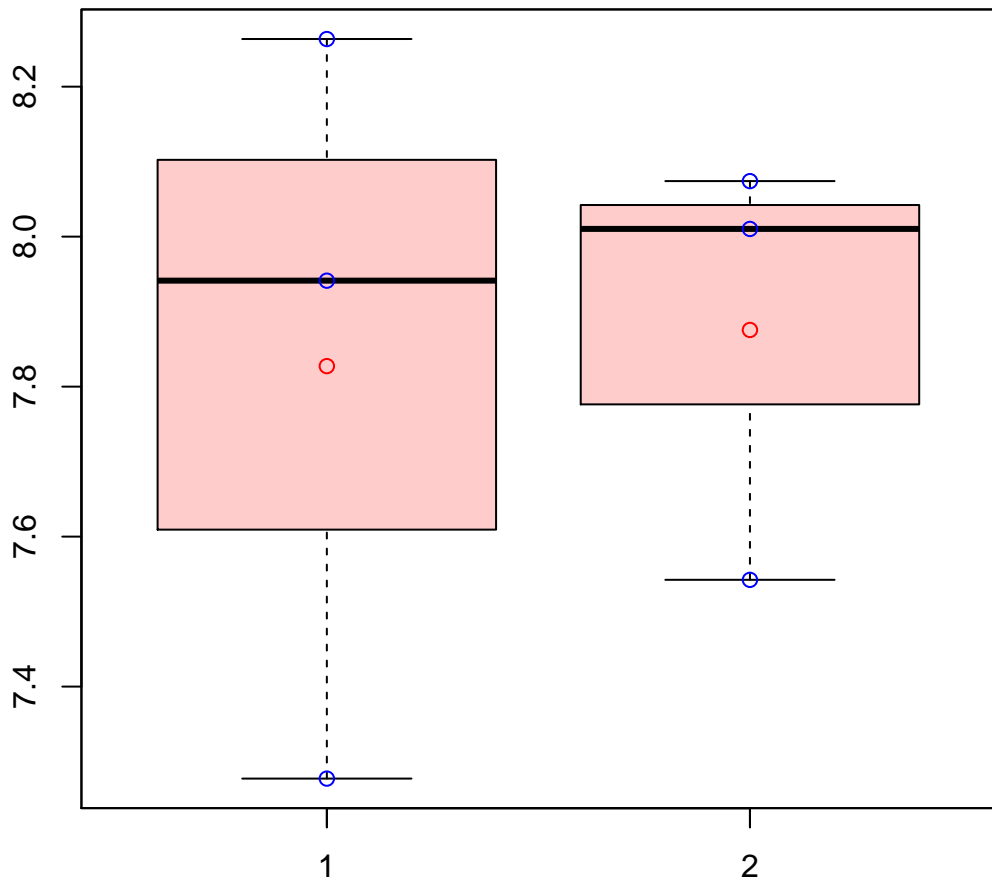

t-Test: p-value = 0.89

# CL13040Contig1|CL13040Contig1

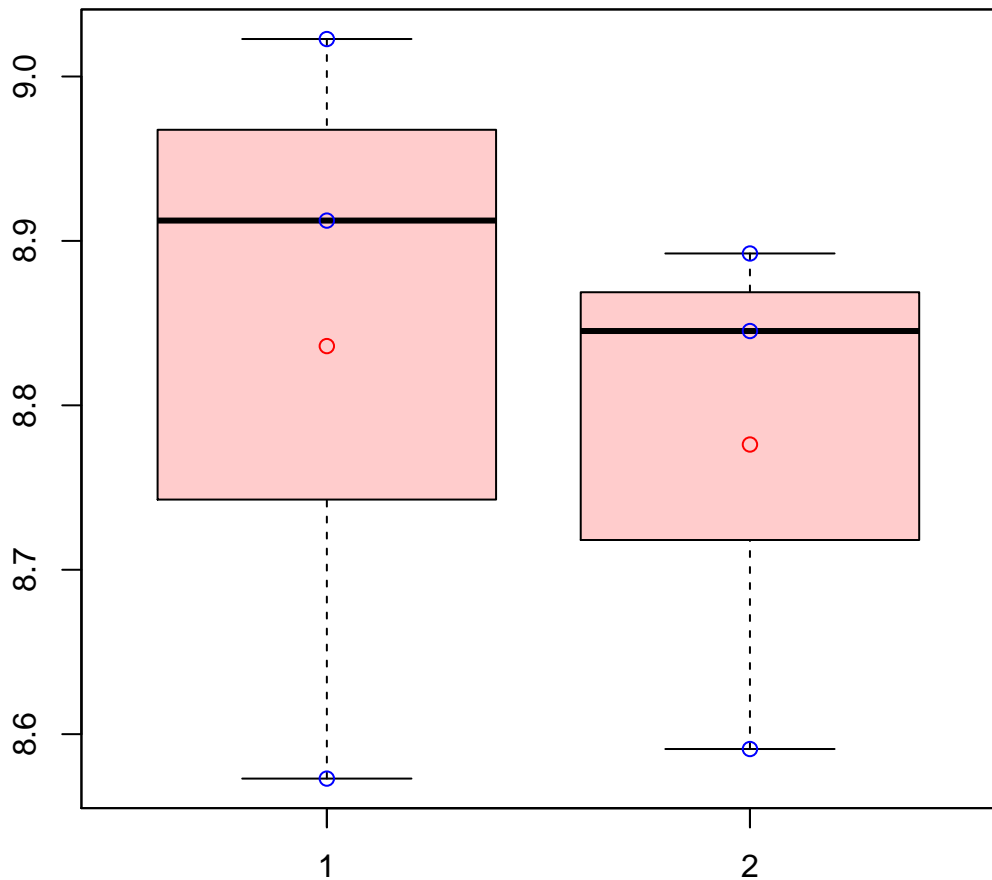

t-Test: p-value = 0.74

# CL1304Contig9|CL1304Contig9

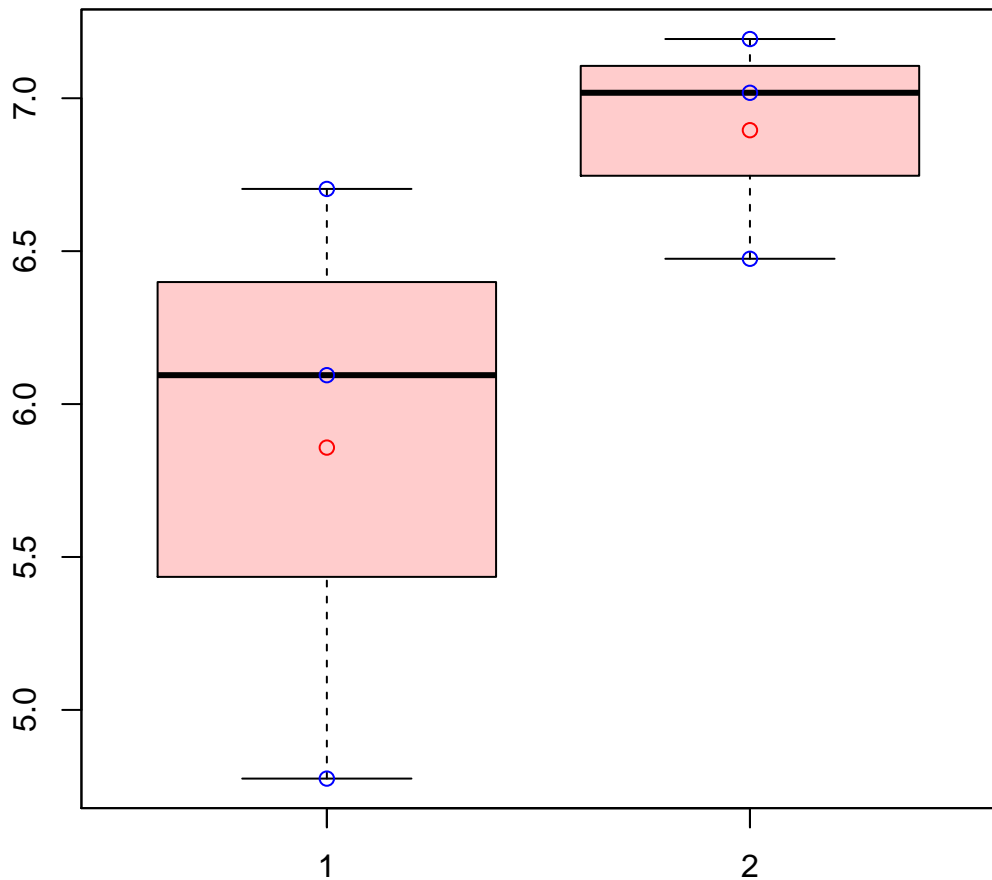

t-Test: p-value = 0.2

# CL1307Contig3|CL1307Contig3

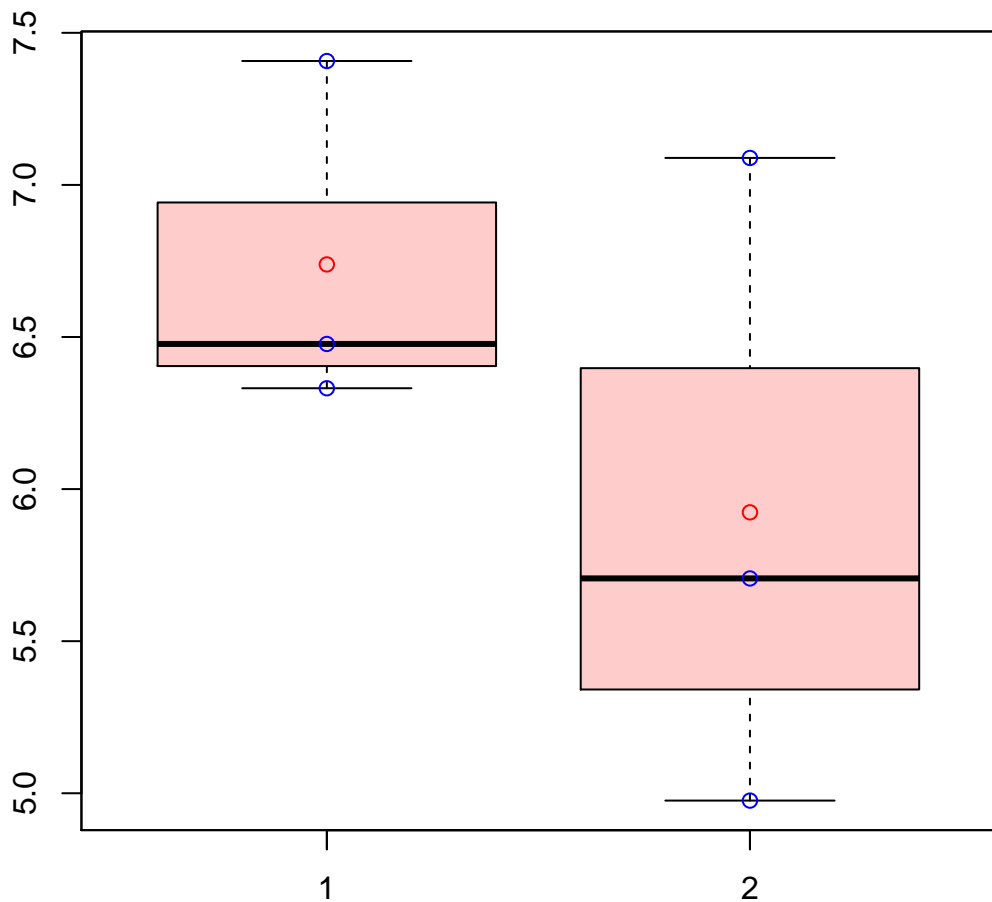

t-Test: p-value = 0.33



# CL1309Contig10|CL1309Contig10

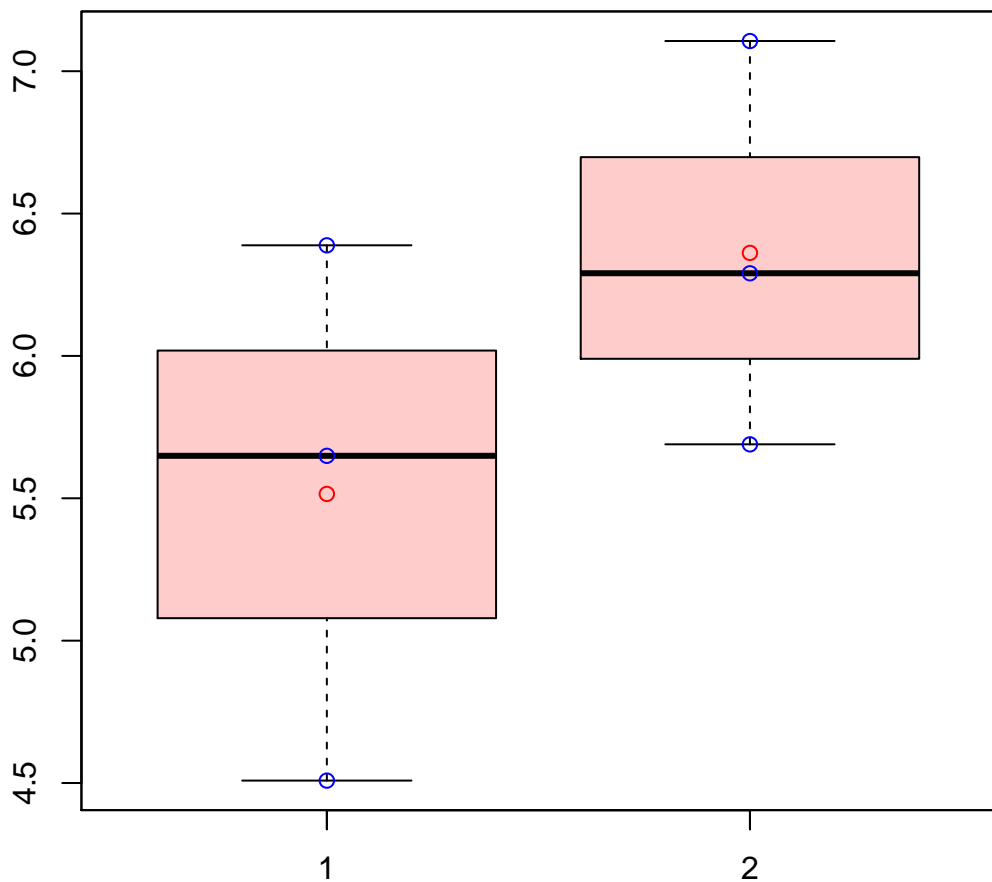

t-Test: p-value = 0.29

# CL1309Contig16|CL1309Contig16

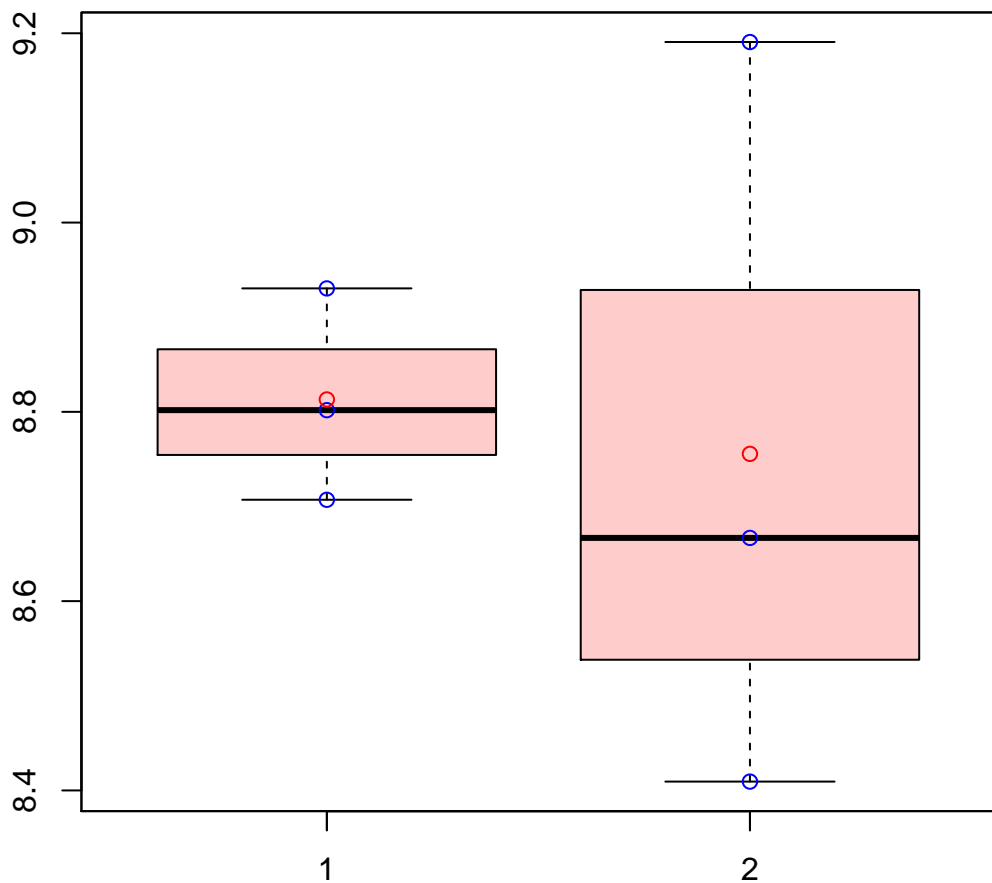

t-Test: p-value = 0.83

# CL1309Contig18|CL1309Contig18

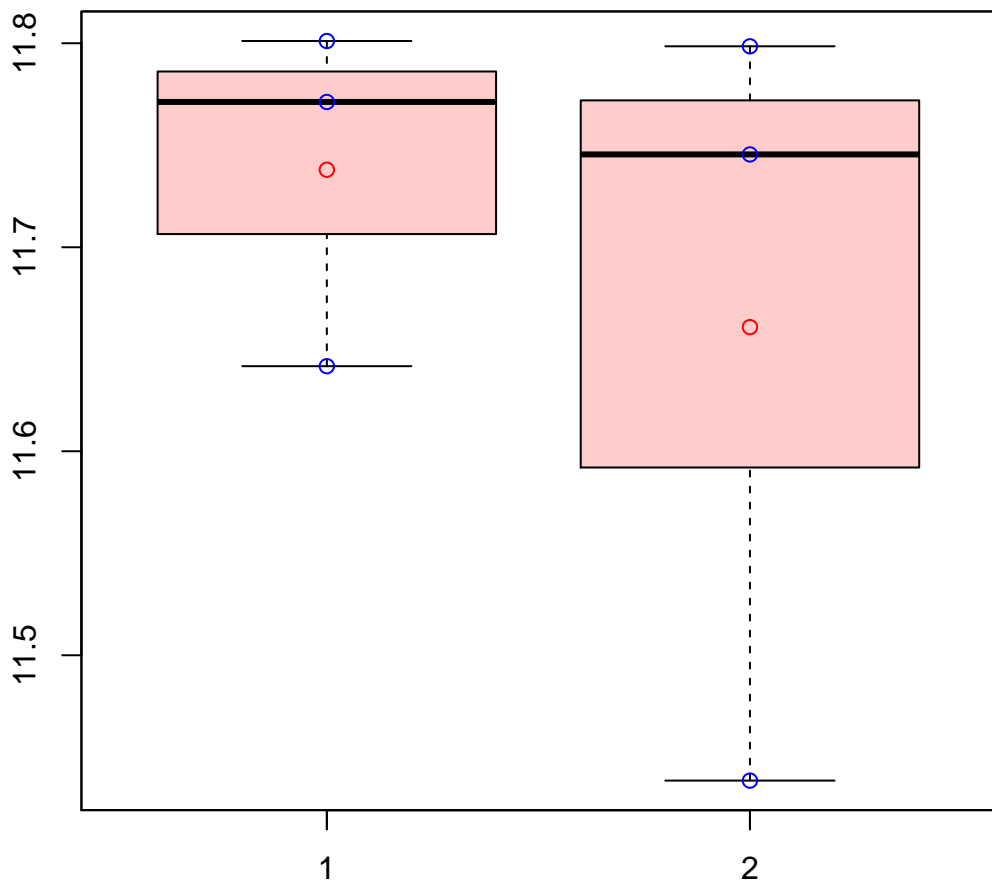

t-Test: p-value = 0.58

# CL1309Contig5|CL1309Contig5

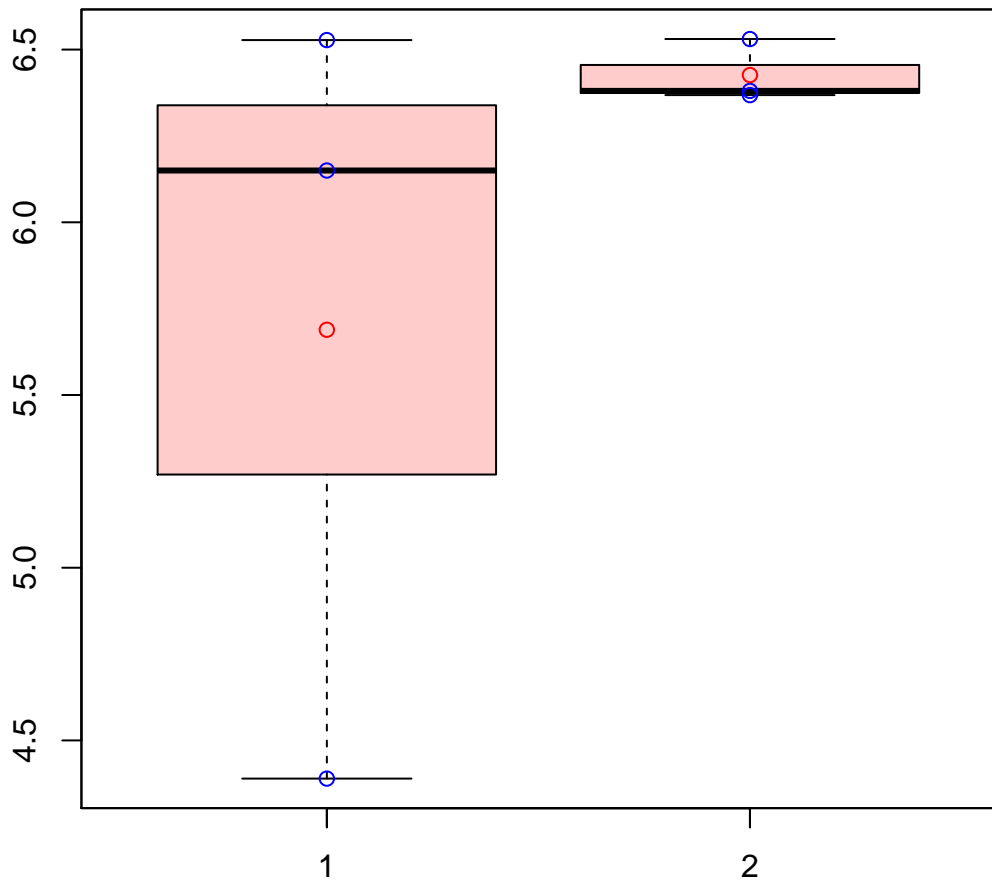

t-Test: p-value = 0.38

# CL1309Contig7|CL1309Contig7

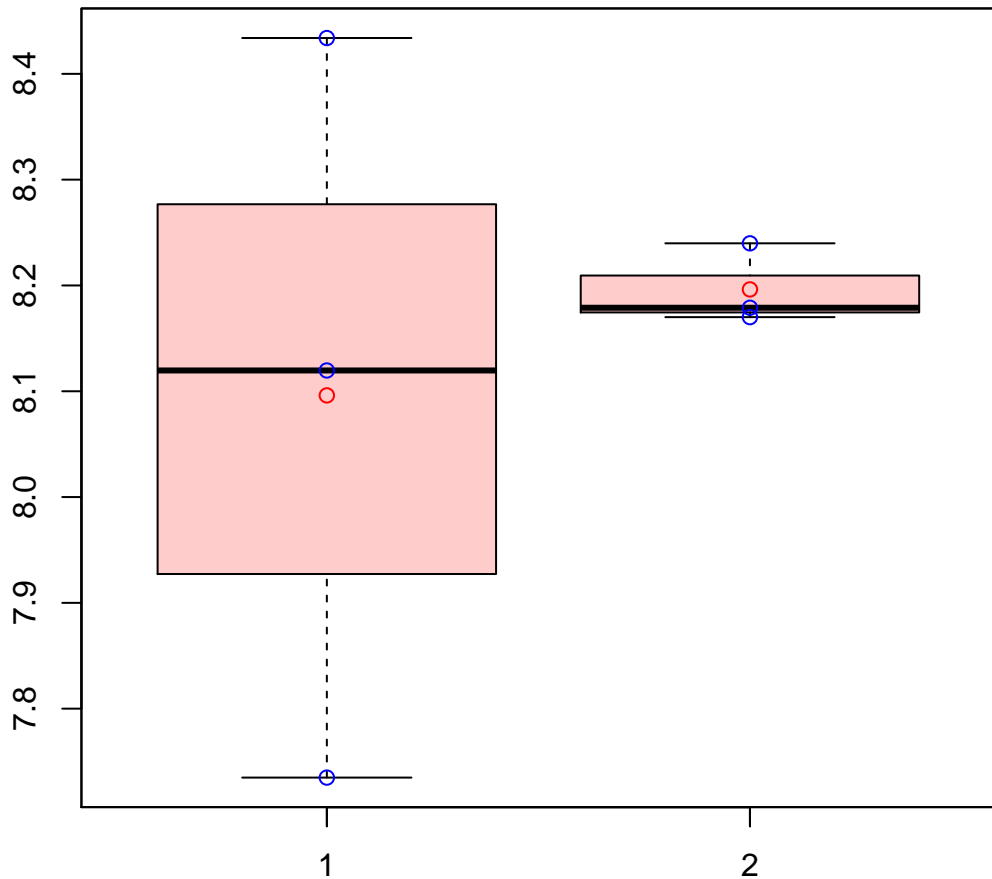

t-Test: p-value = 0.67

# CL1309Contig8|CL1309Contig8

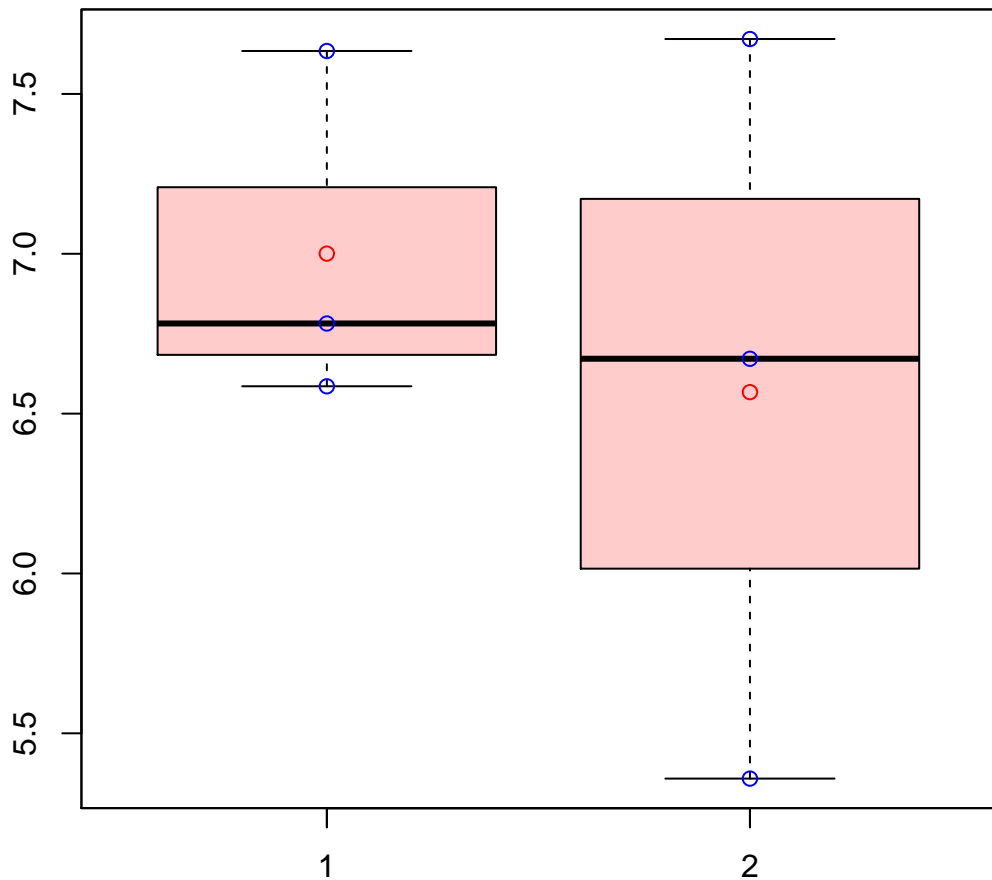

t-Test: p-value = 0.6

# CL1309Contig9|CL1309Contig9

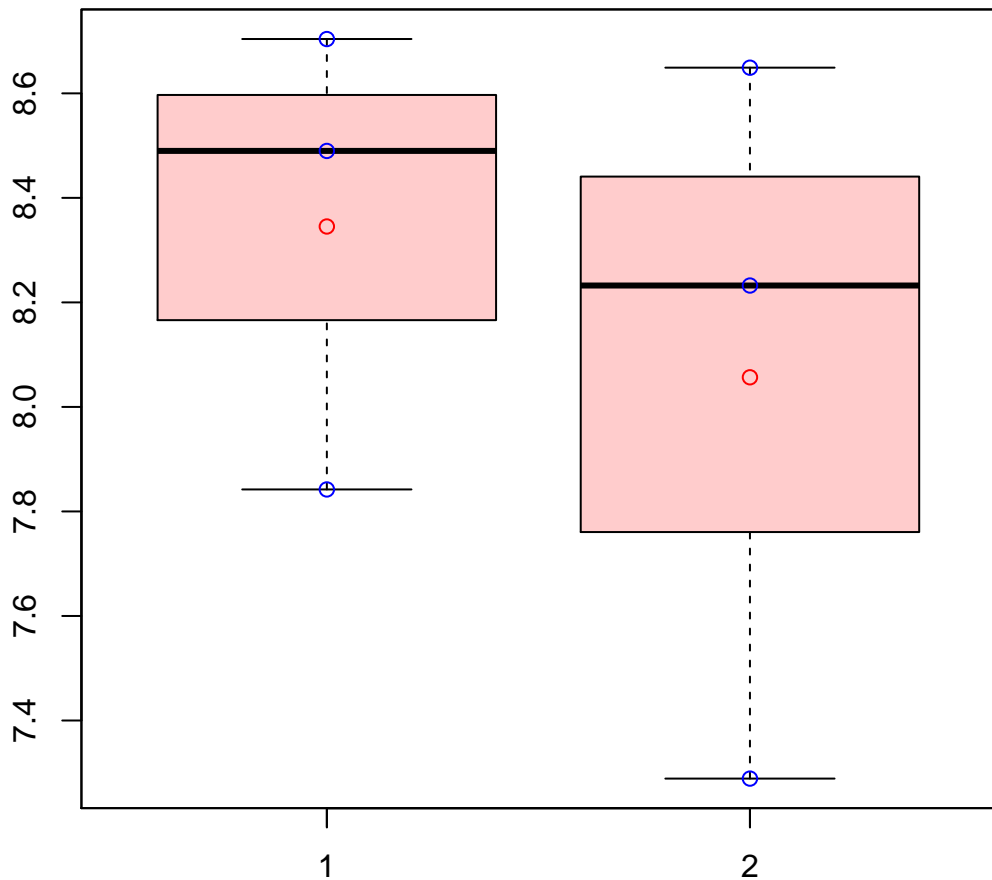

t-Test: p-value = 0.58

# CL130Contig11|CL130Contig11

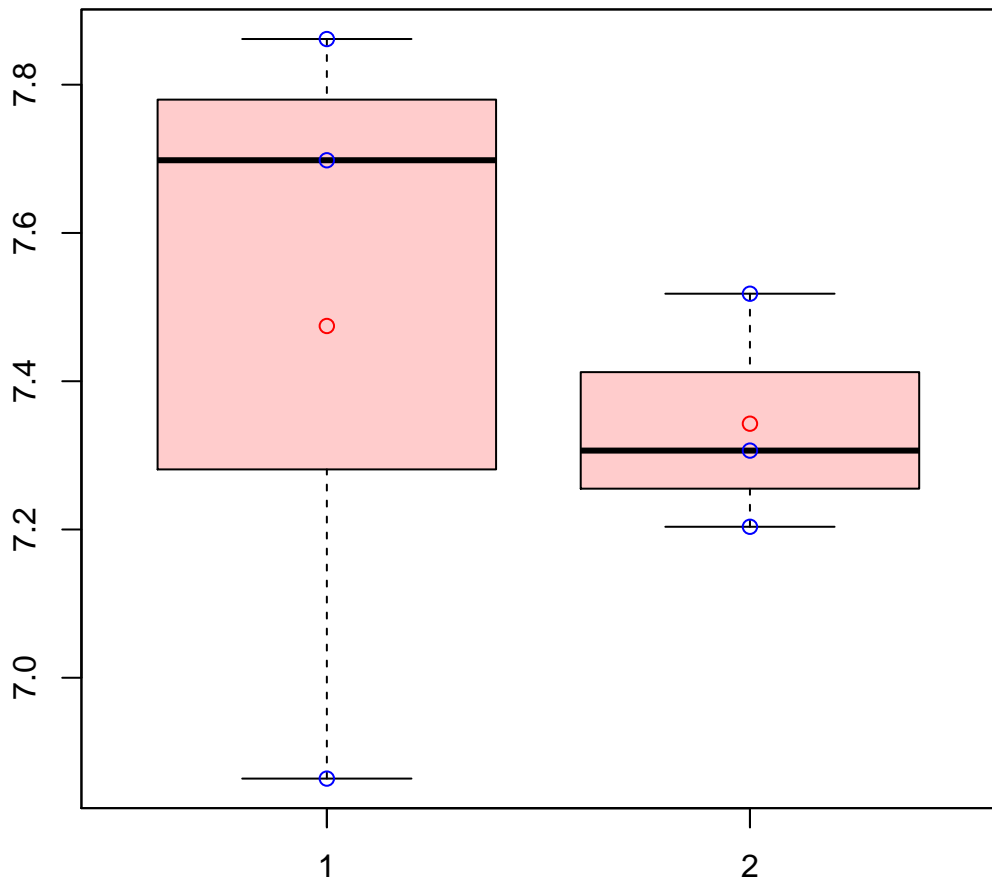

t-Test: p-value = 0.72



# CL130Contig16|CL130Contig16

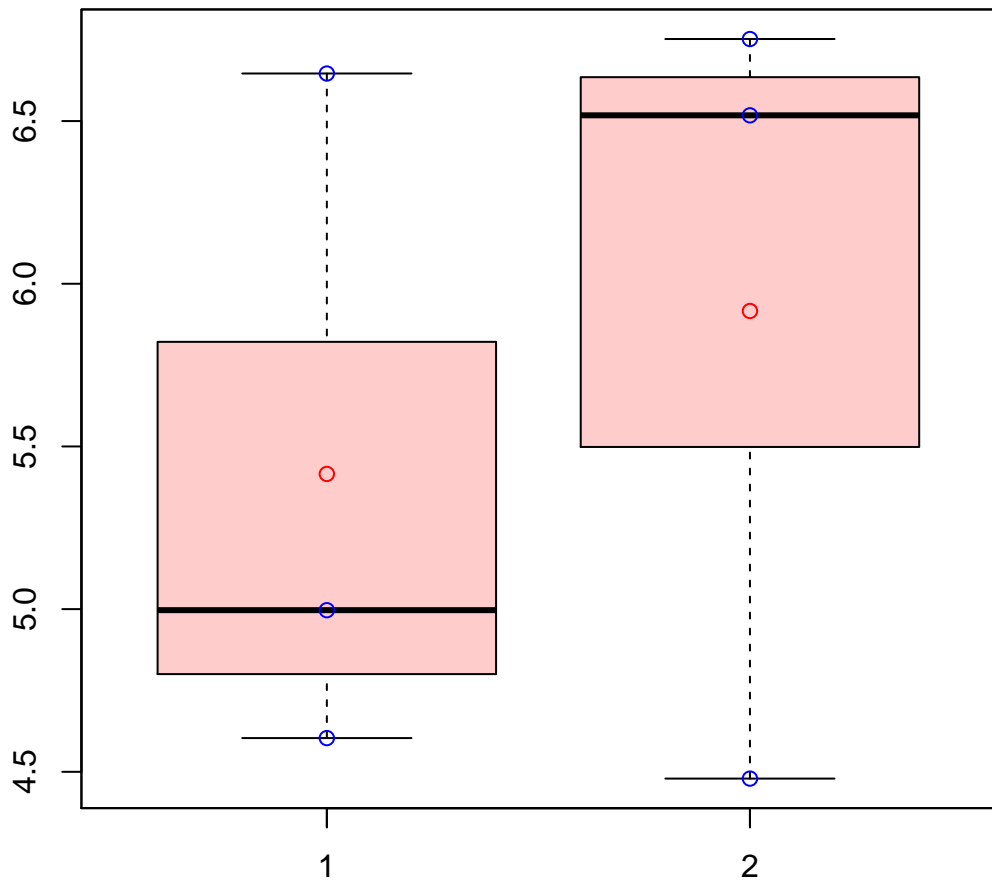

t-Test: p-value = 0.63

# CL13136Contig1|CL13136Contig1

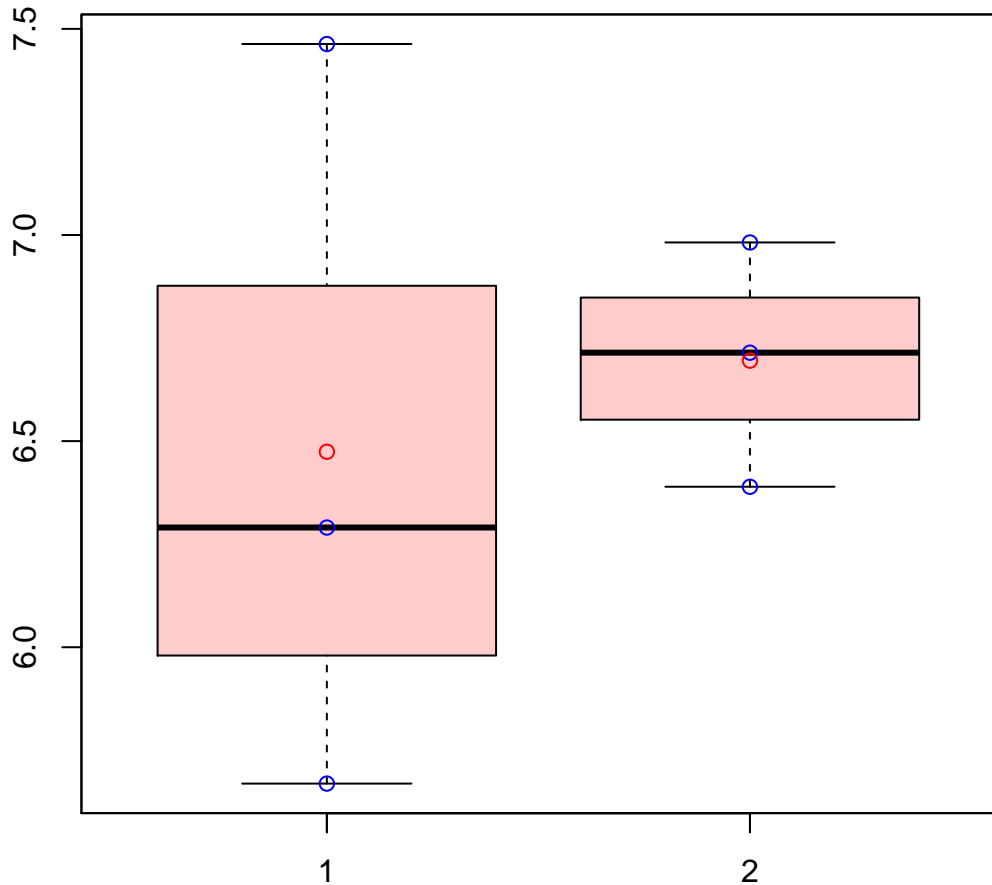

t-Test: p-value = 0.72

# CL1317Contig2|CL1317Contig2

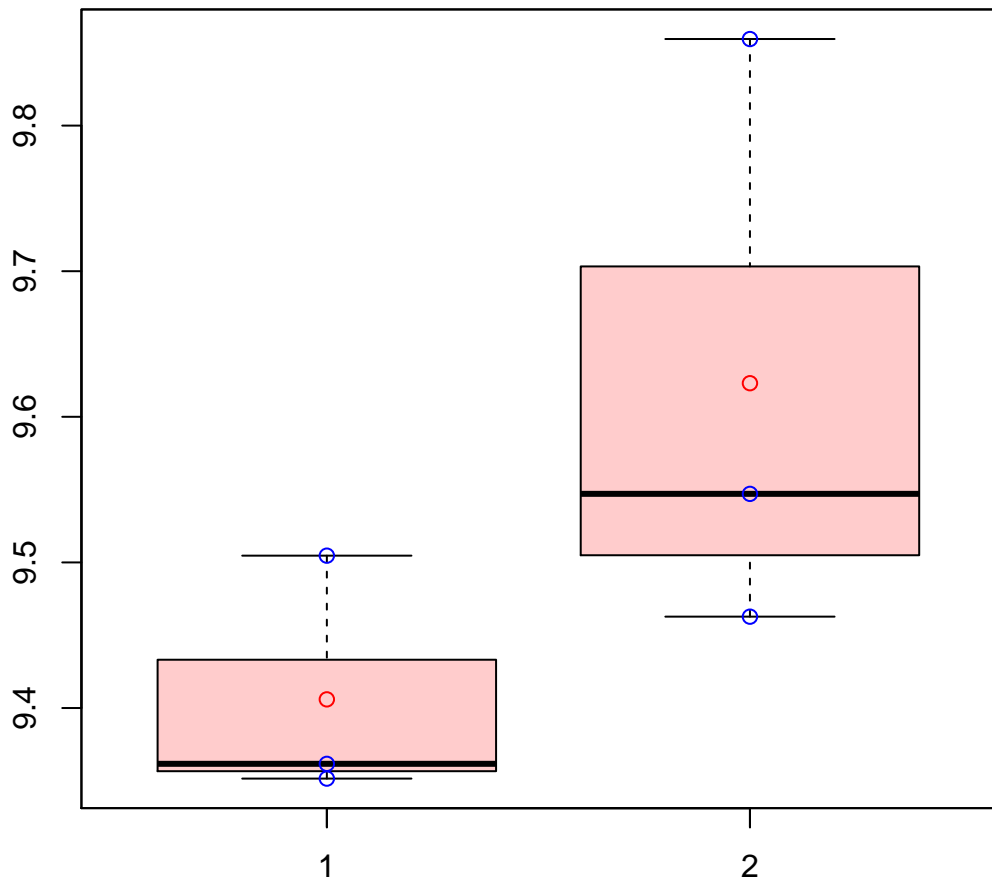

t-Test: p-value = 0.21

# CL1317Contig6|CL1317Contig6

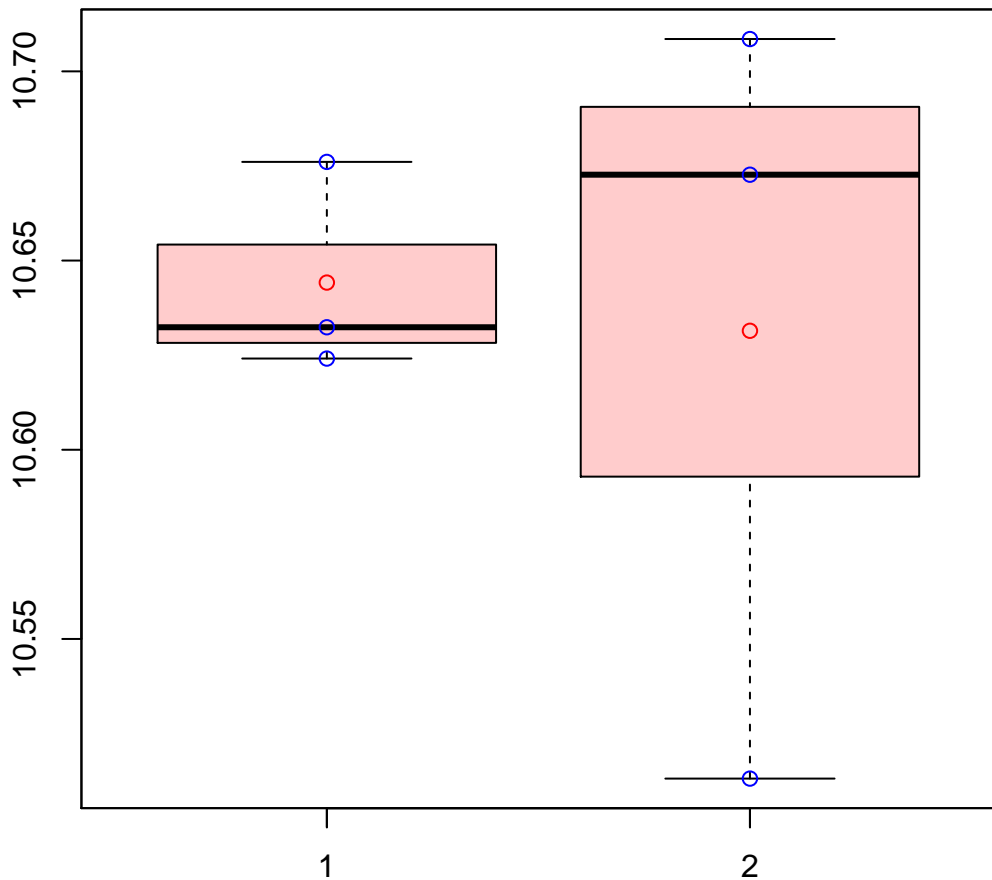

t-Test: p-value = 0.85

# CL1317Contig7|CL1317Contig7

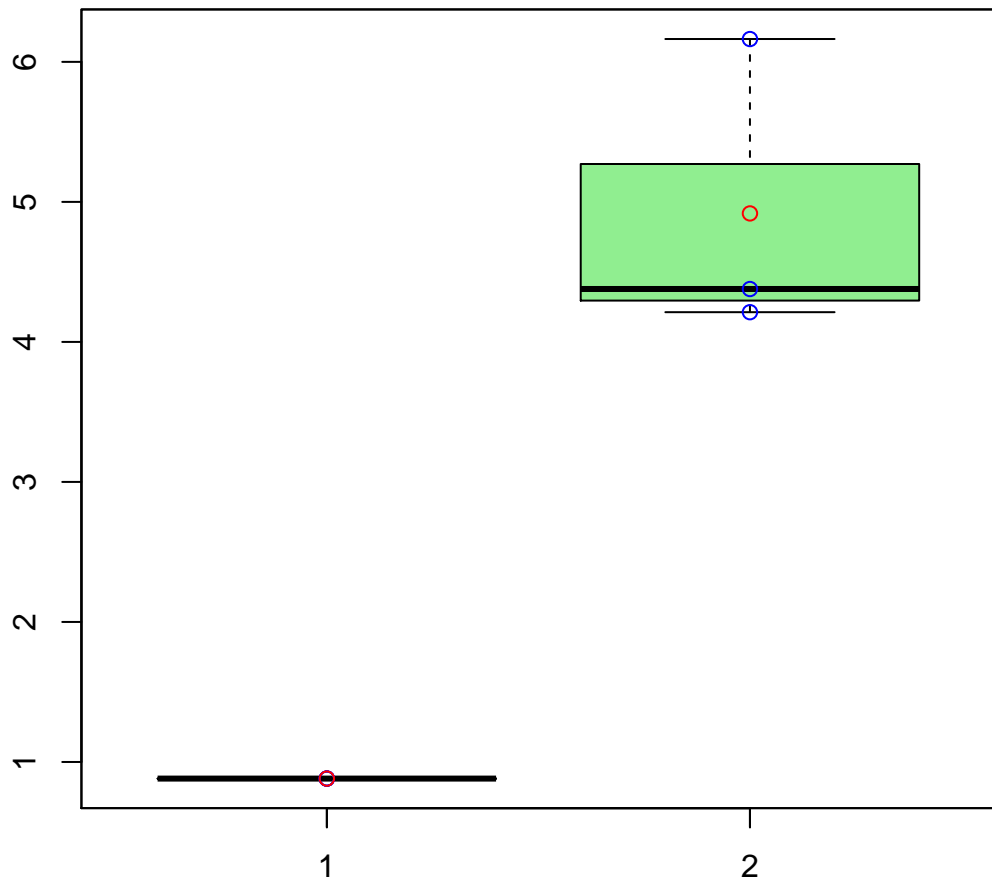

t-Test: p-value = 0.02

# CL1322Contig2|CL1322Contig2

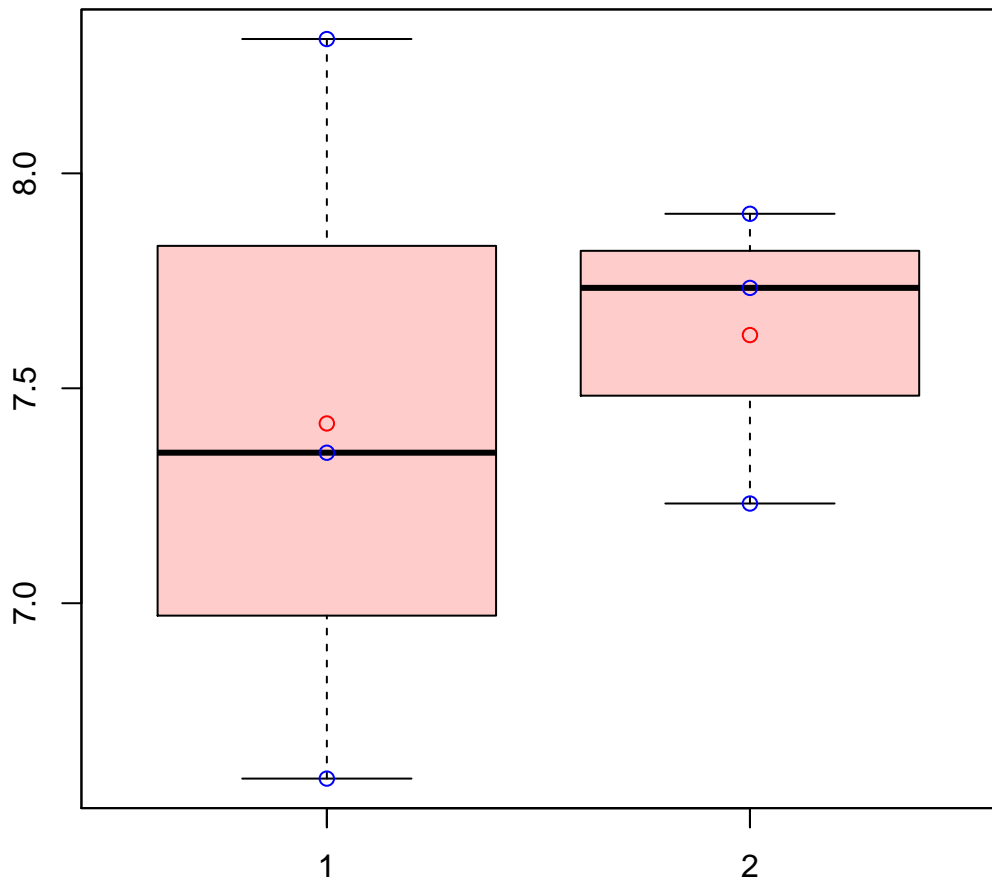

t-Test: p-value = 0.73

# CL1322Contig3|CL1322Contig3

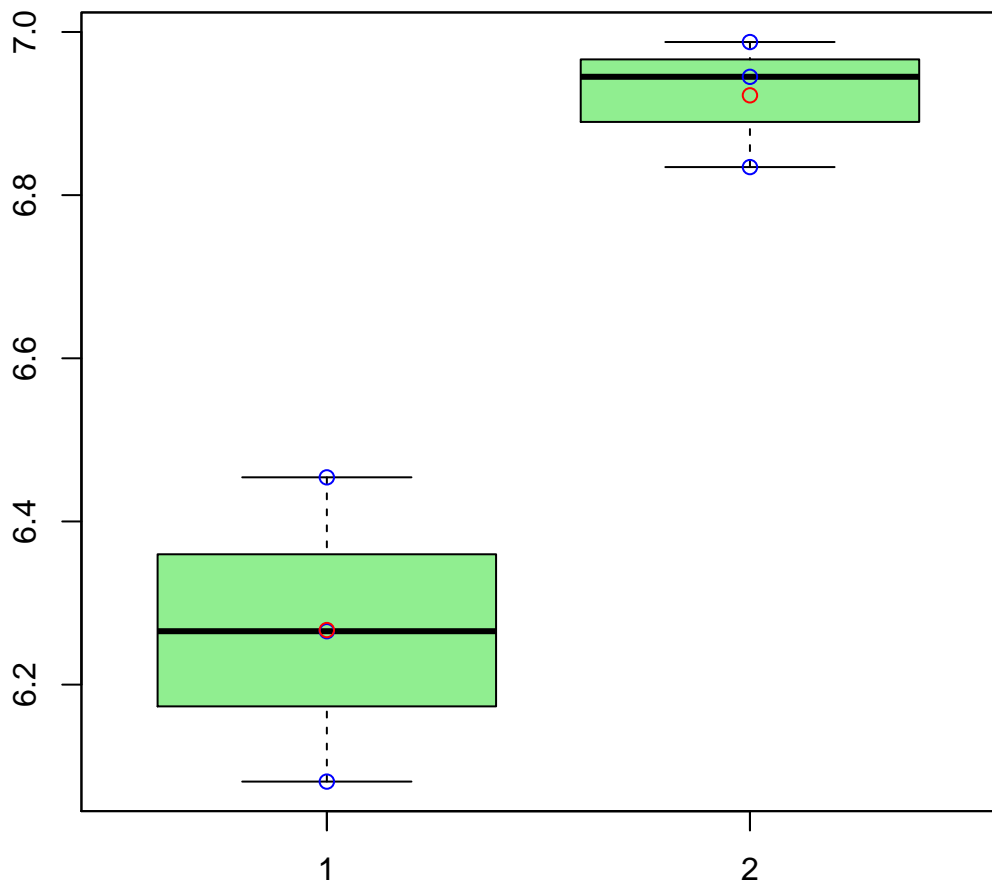

t-Test: p-value = 0.01

# CL1322Contig5|CL1322Contig5

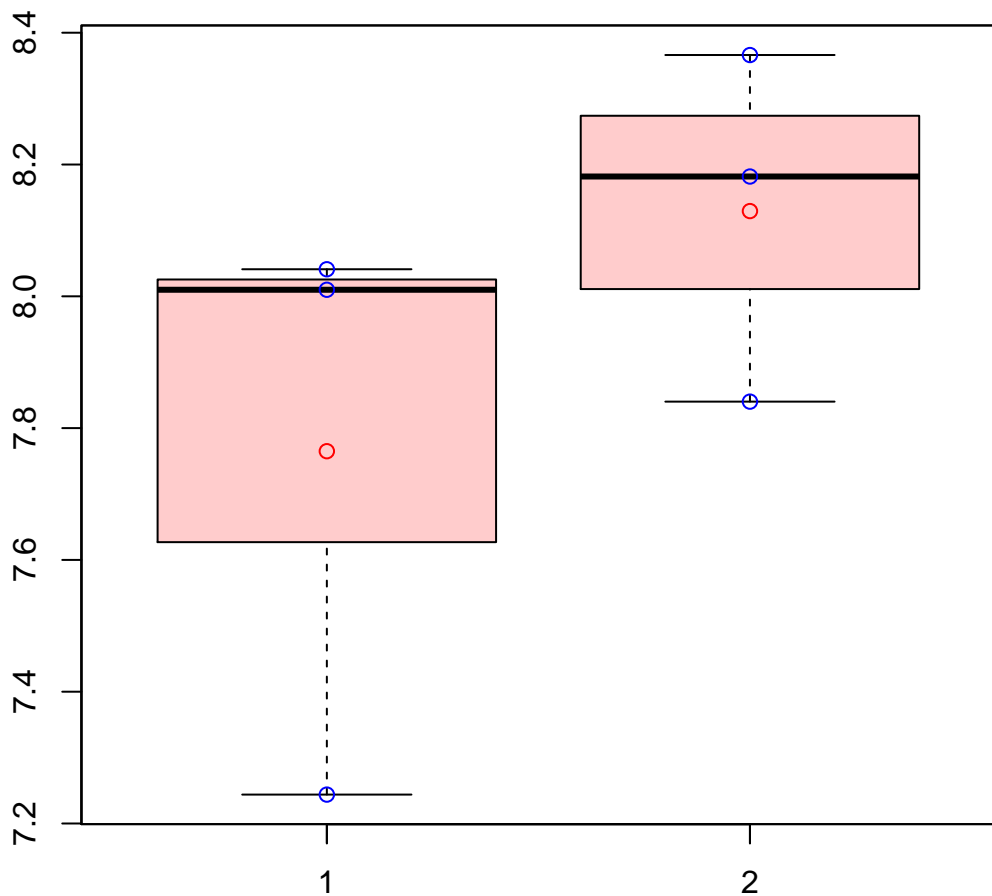

t-Test: p-value = 0.31



# CL13244Contig1|CL13244Contig1

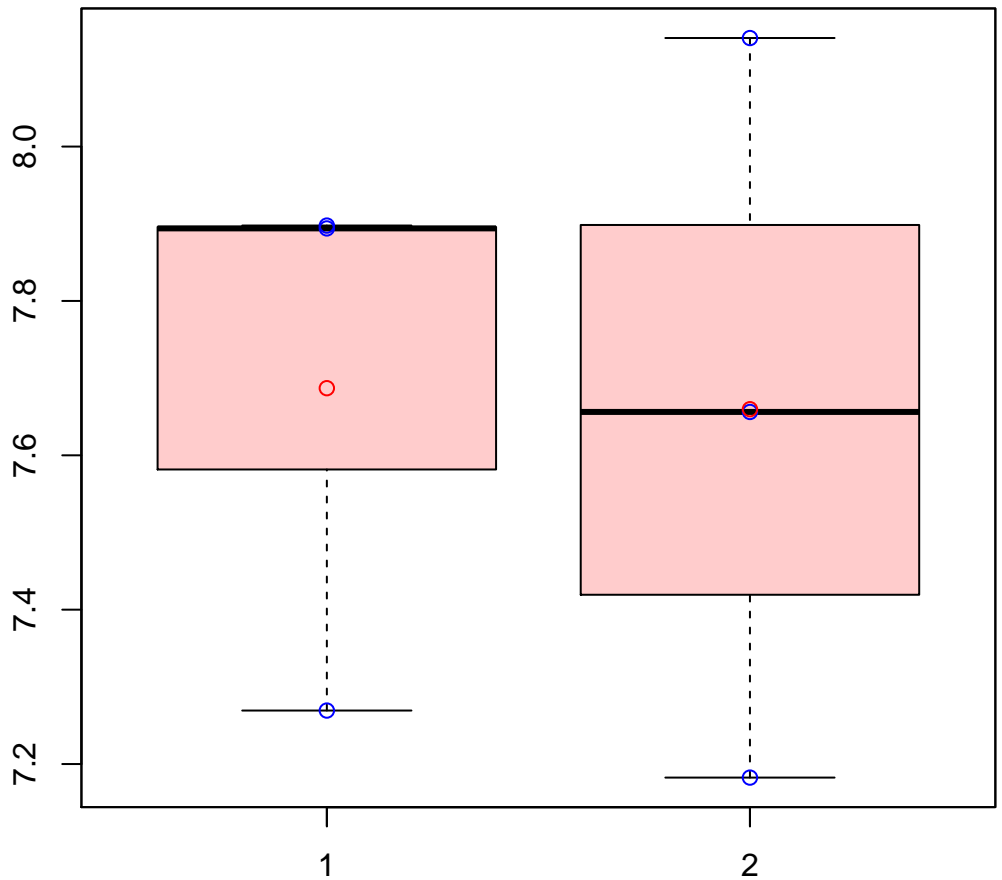

t-Test: p-value = 0.94

# CL13261Contig2|CL13261Contig2

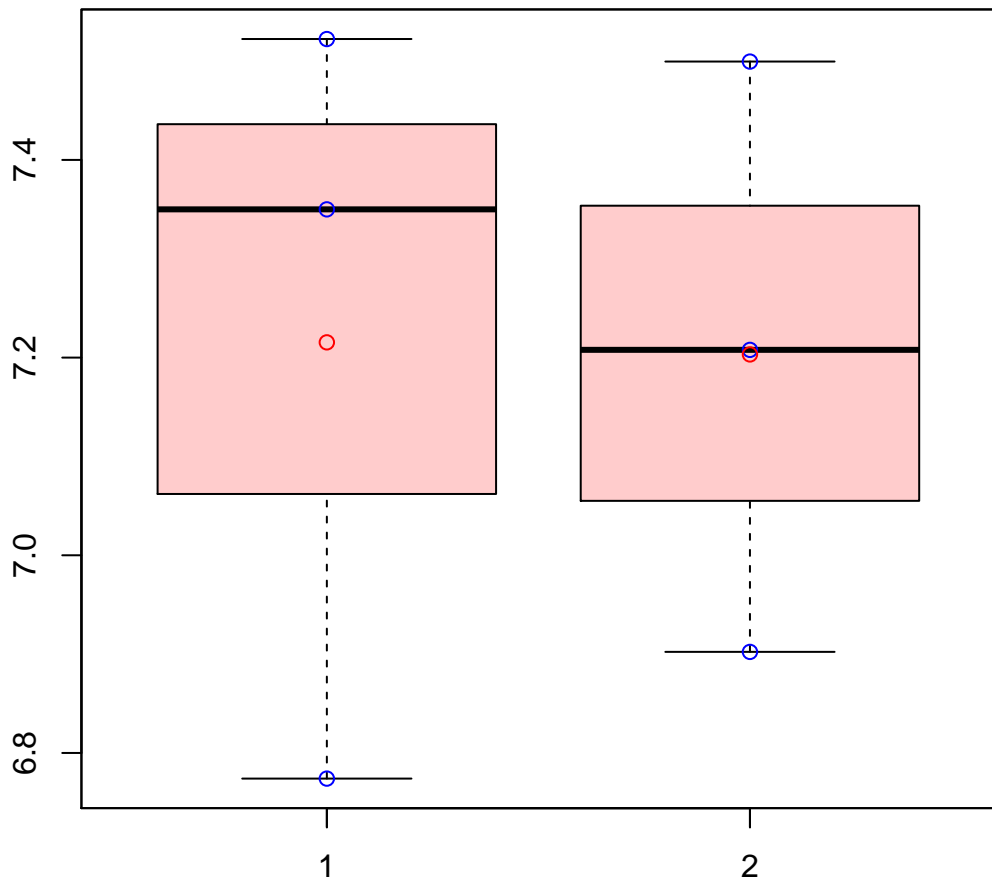

t-Test: p-value = 0.97

# CL1326Contig6|CL1326Contig6

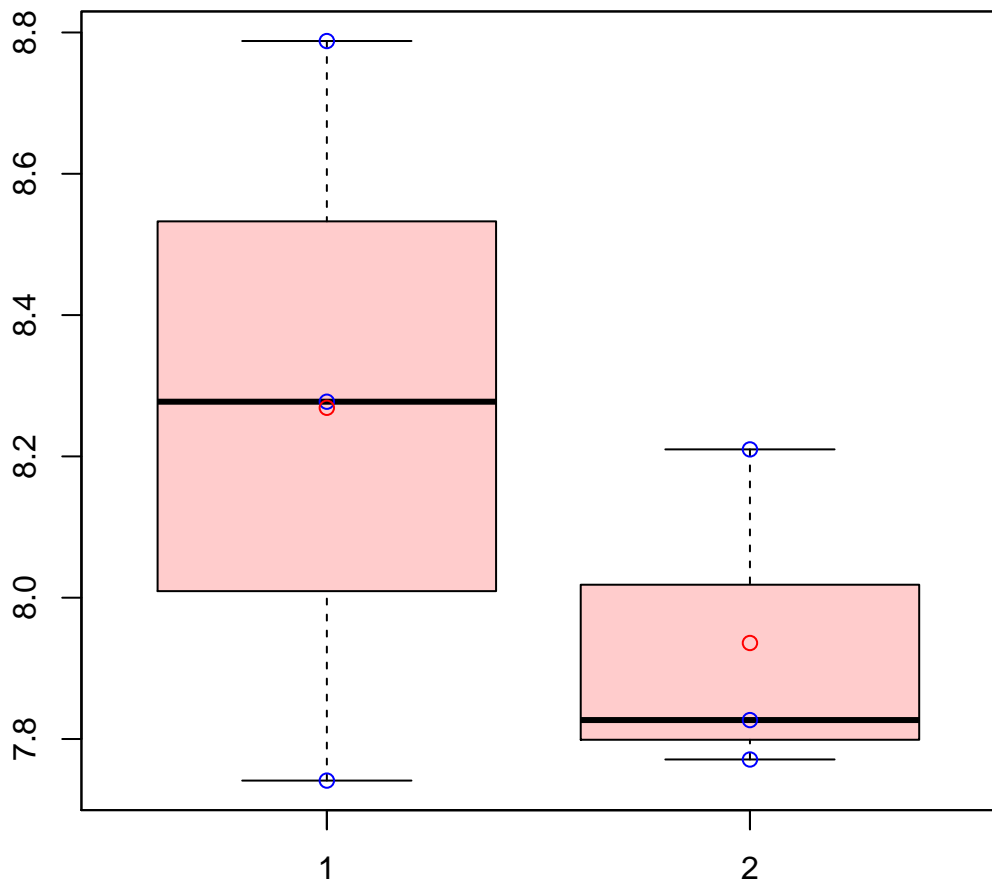

t-Test: p-value = 0.39

# CL1328Contig3|CL1328Contig3

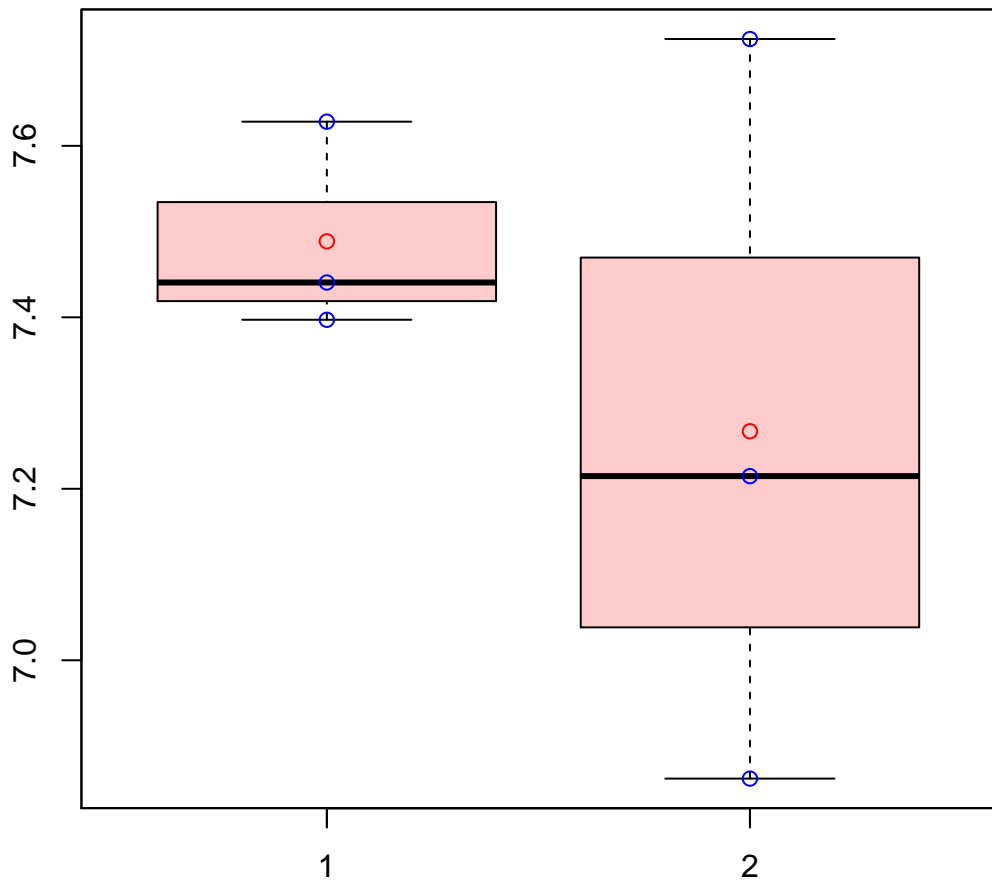

t-Test: p-value = 0.47

# CL1328Contig5|CL1328Contig5

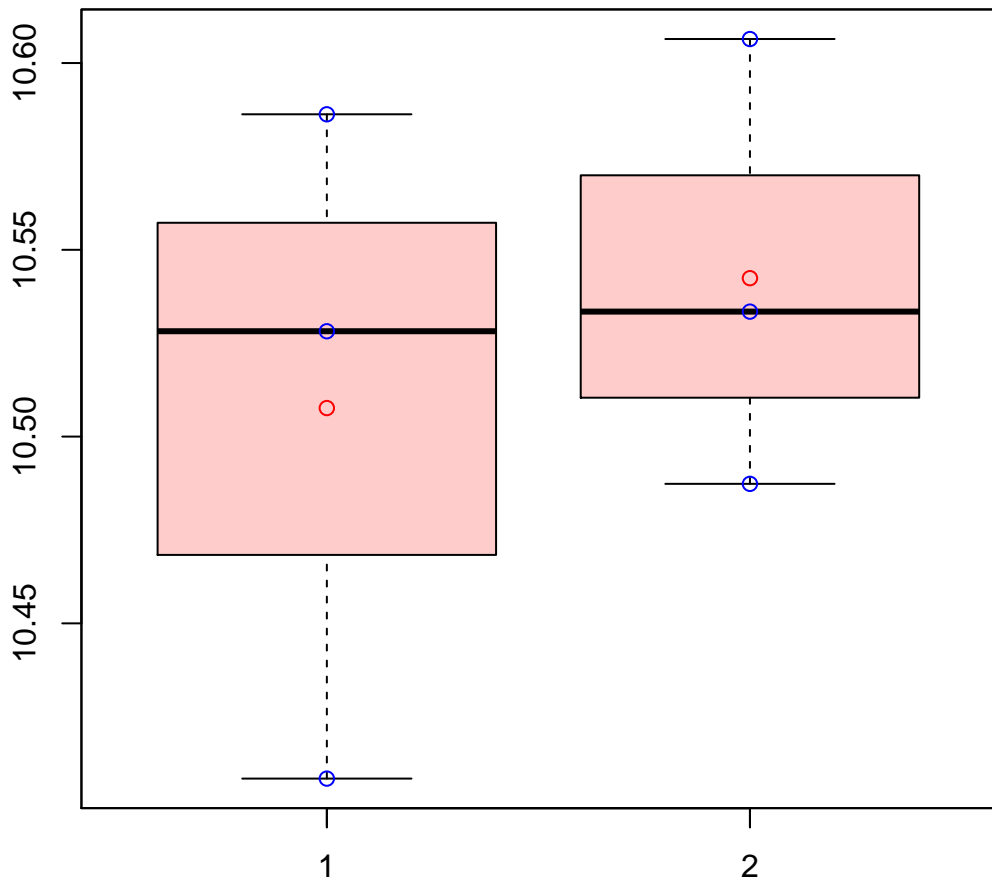

t-Test: p-value = 0.61

# CL1330Contig3|CL1330Contig3

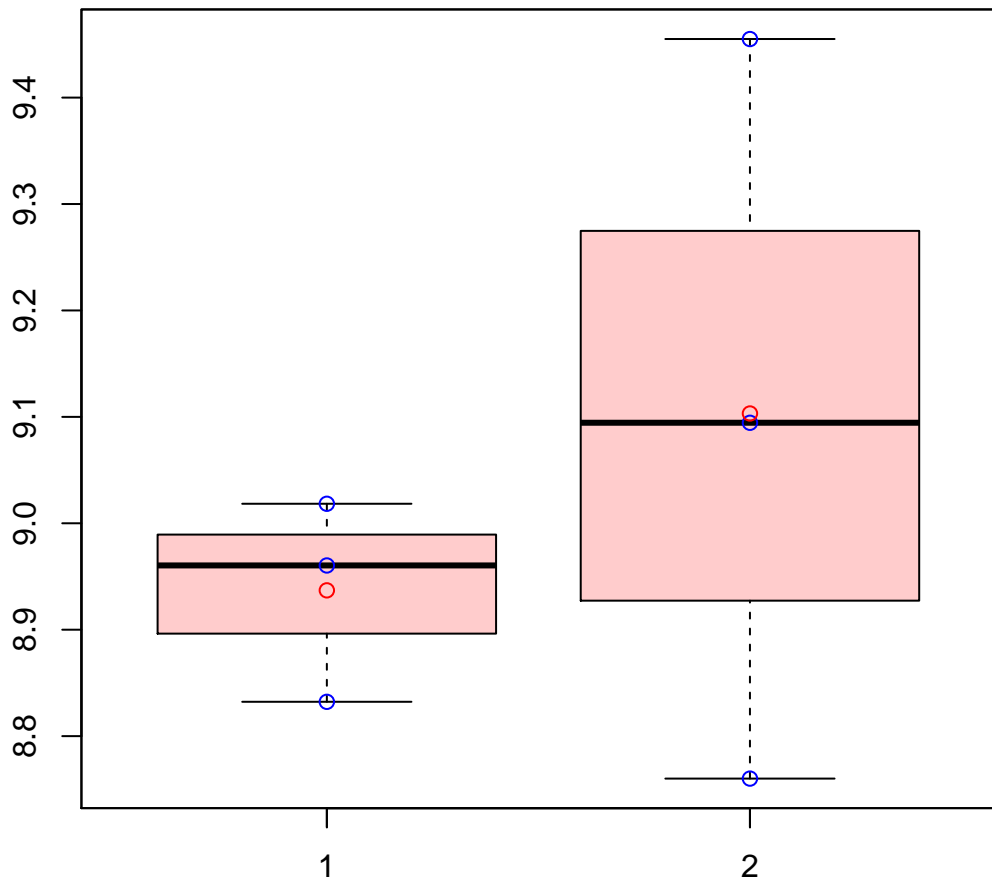

t-Test: p-value = 0.5

# CL13319Contig2|CL13319Contig2

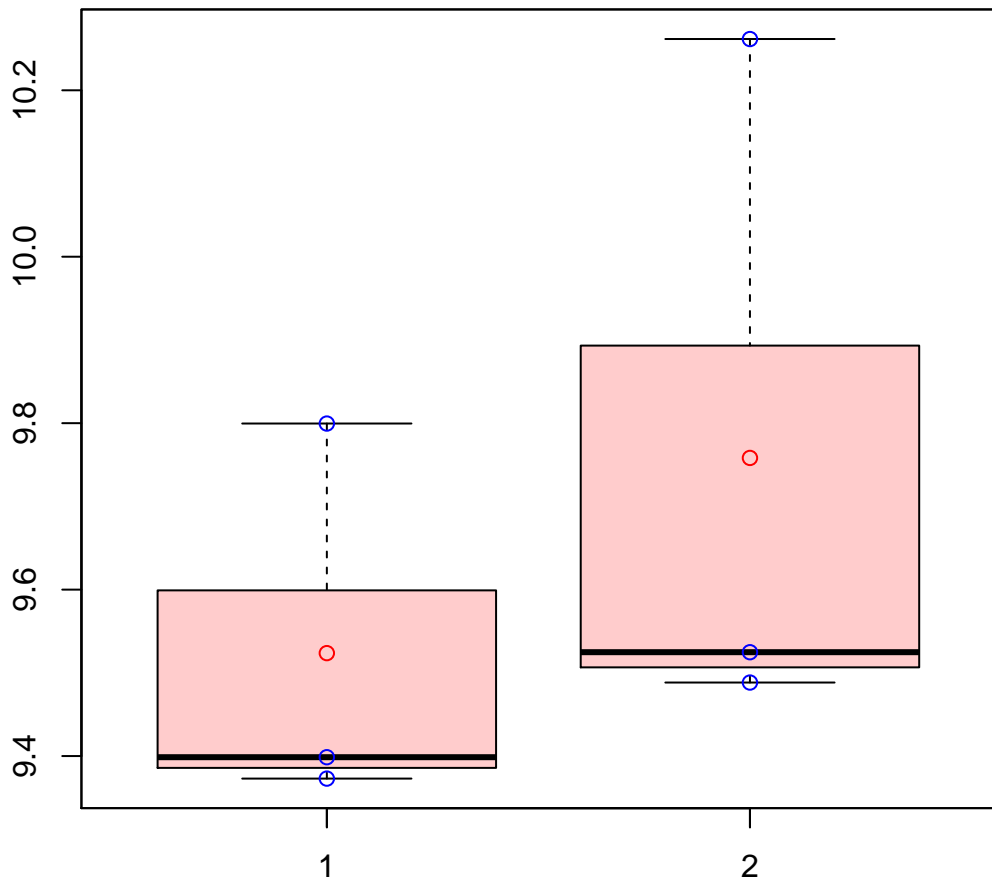

t-Test: p-value = 0.47

# CL1331Contig1|CL1331Contig1

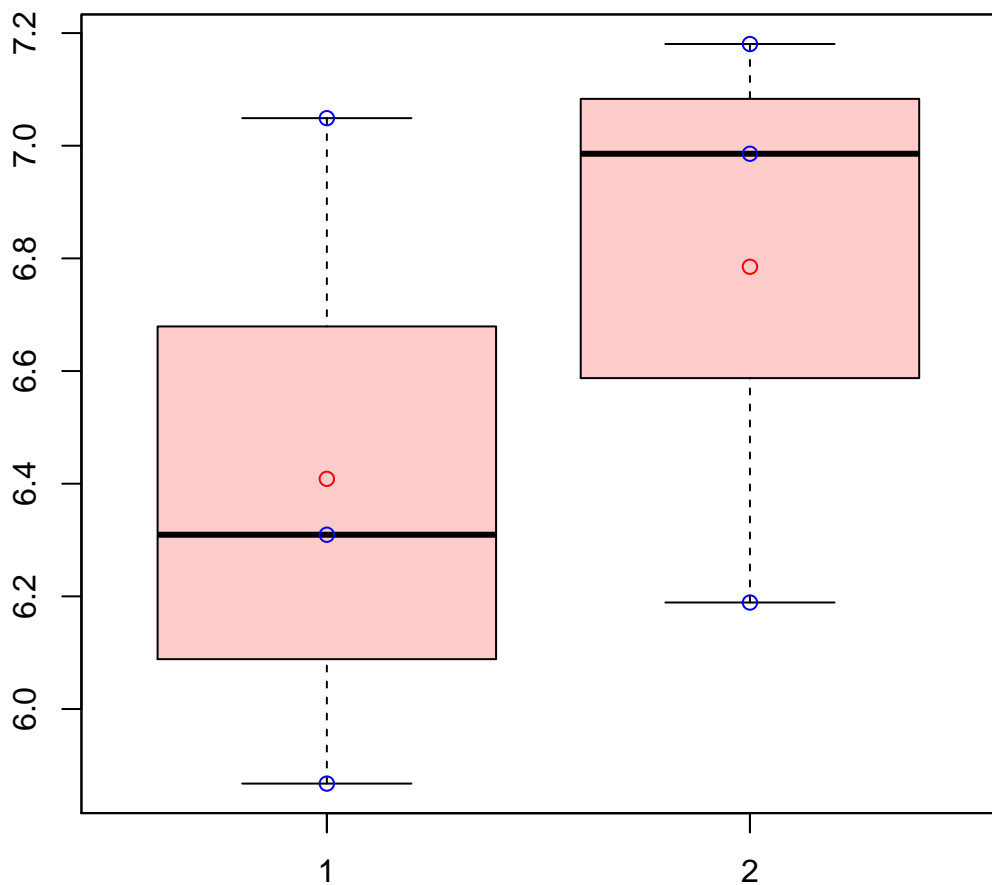

t-Test: p-value = 0.46



# CL1332Contig11|CL1332Contig11

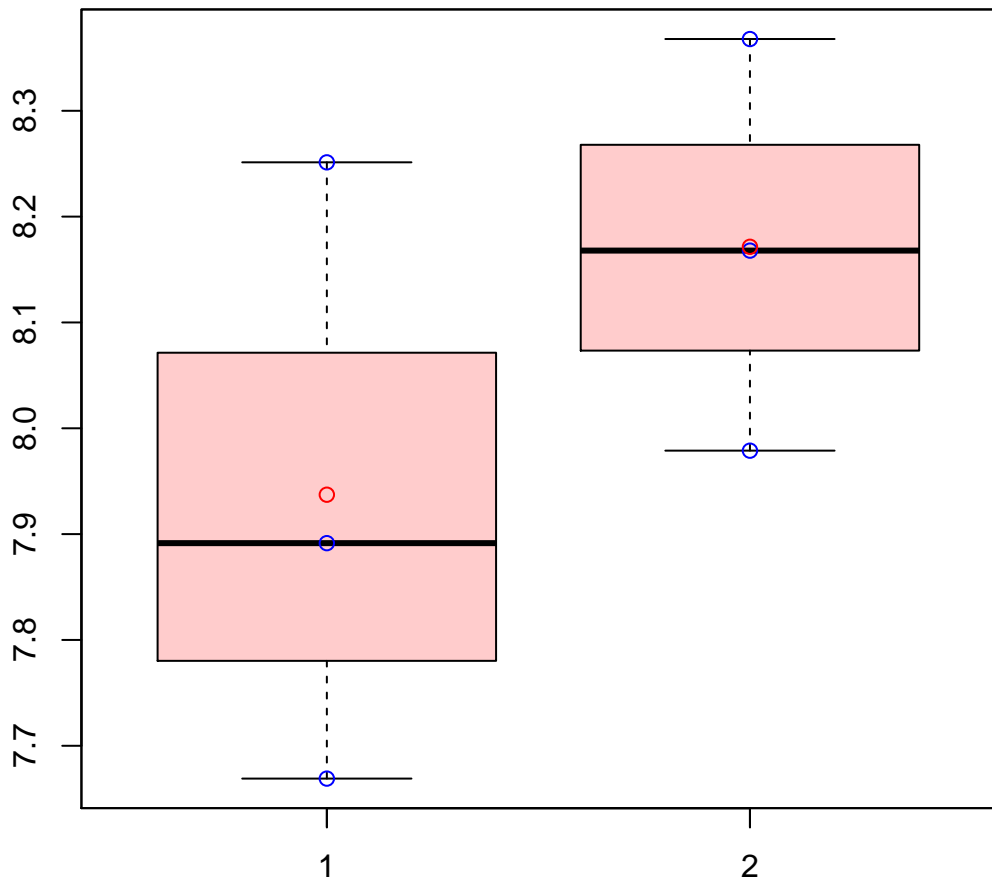

t-Test: p-value = 0.32

# CL1332Contig12|CL1332Contig12

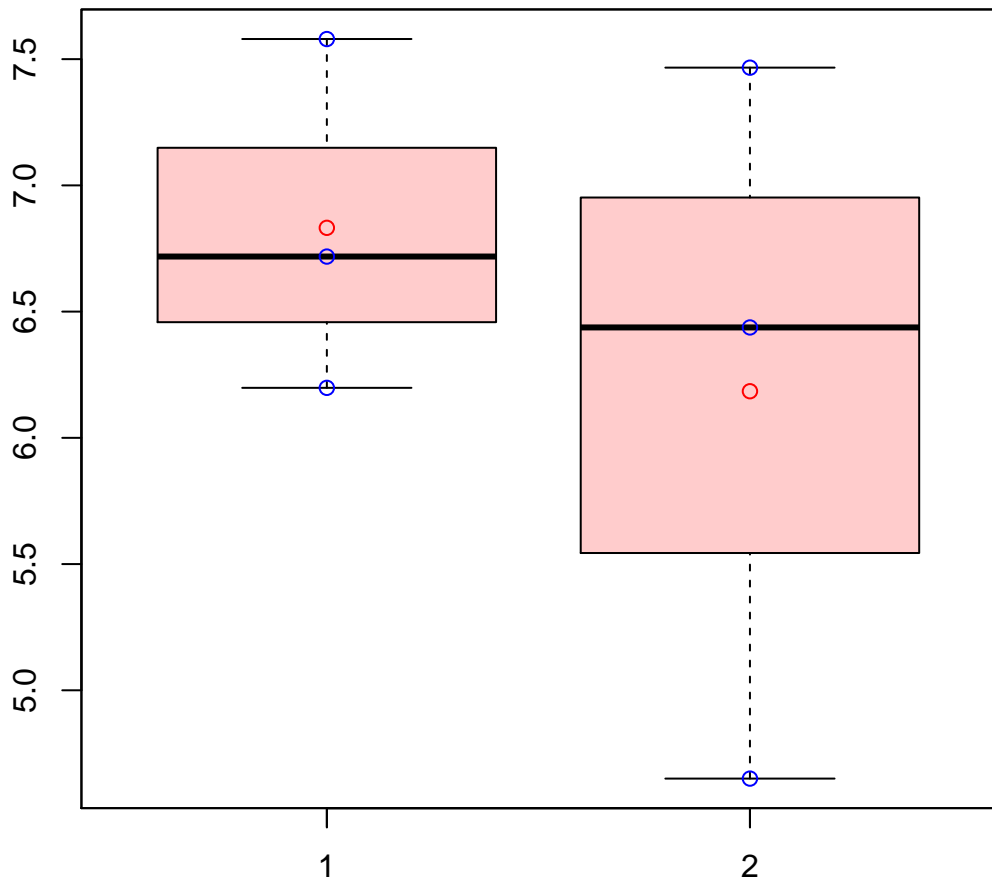

t-Test: p-value = 0.53

# CL13341Contig1|CL13341Contig1

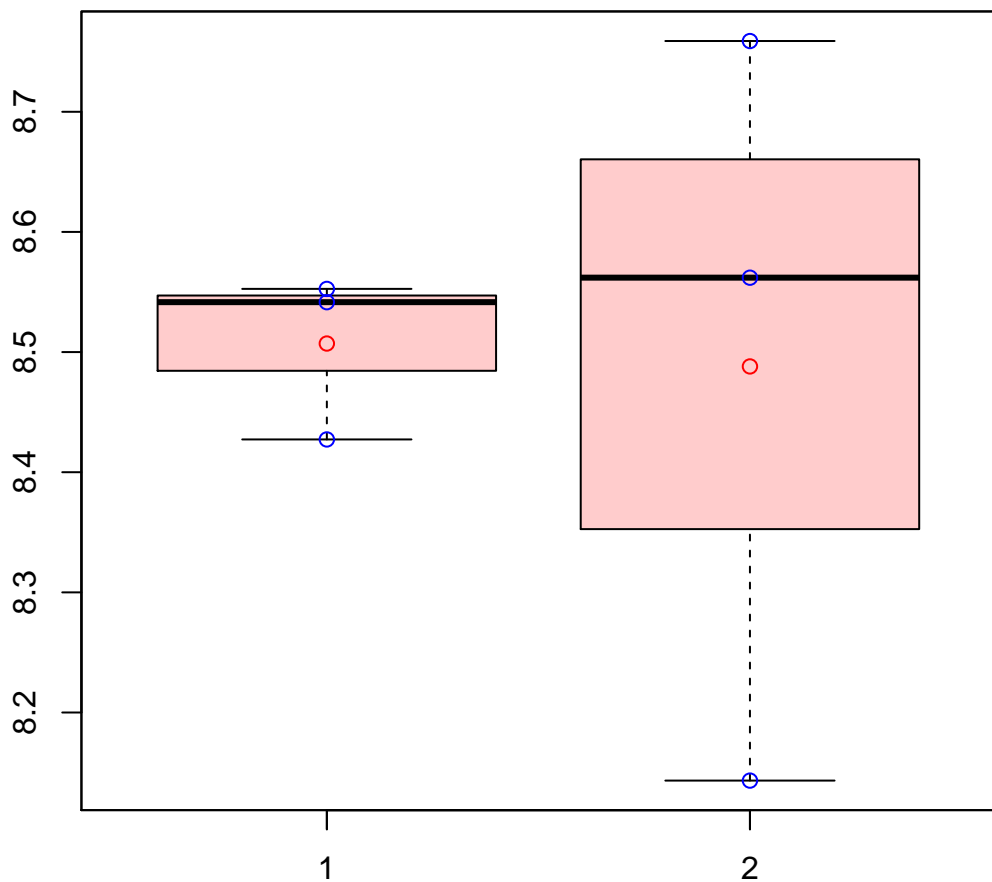

t-Test: p-value = 0.93

# CL1335Contig12|CL1335Contig12

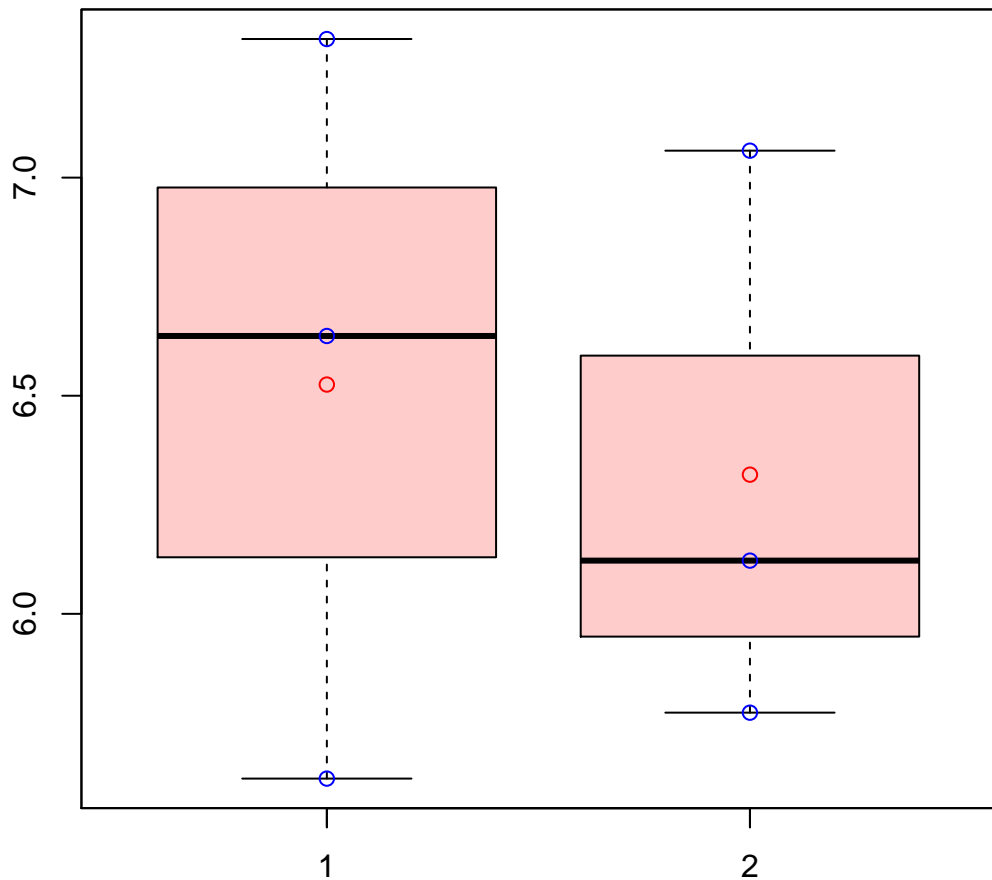

t-Test: p-value = 0.76

# CL1335Contig6|CL1335Contig6

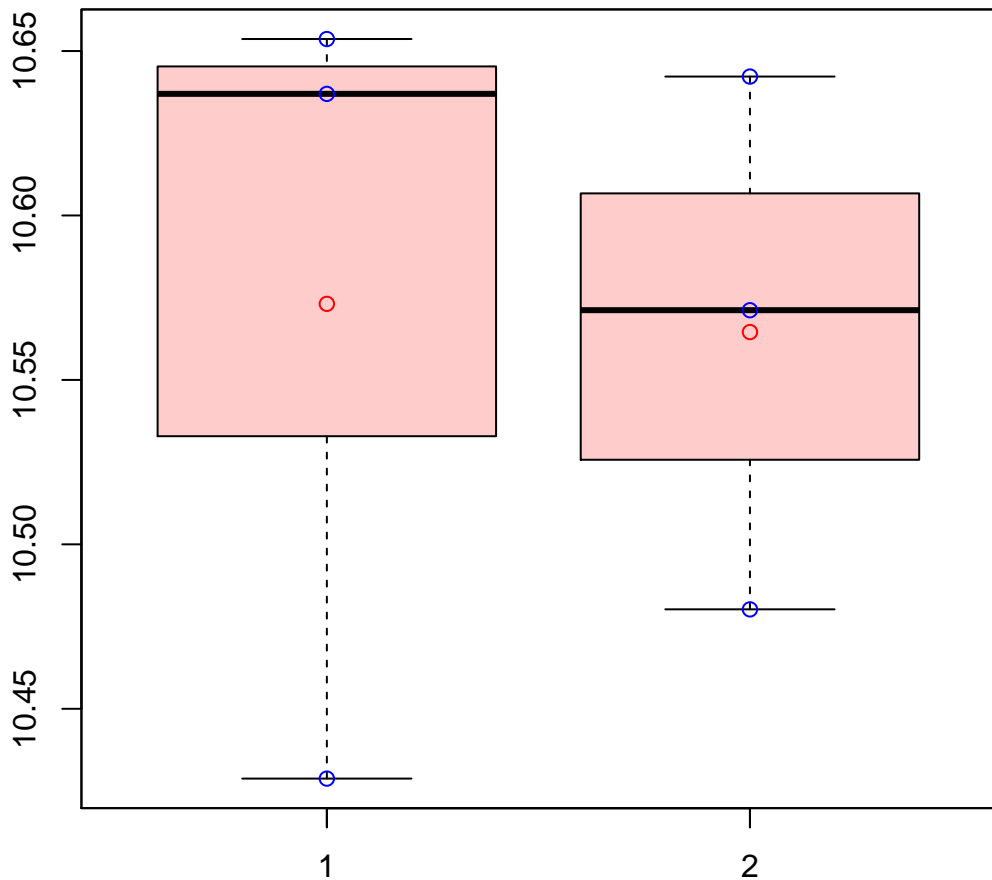

t-Test: p-value = 0.93

# CL13481Contig1|CL13481Contig1

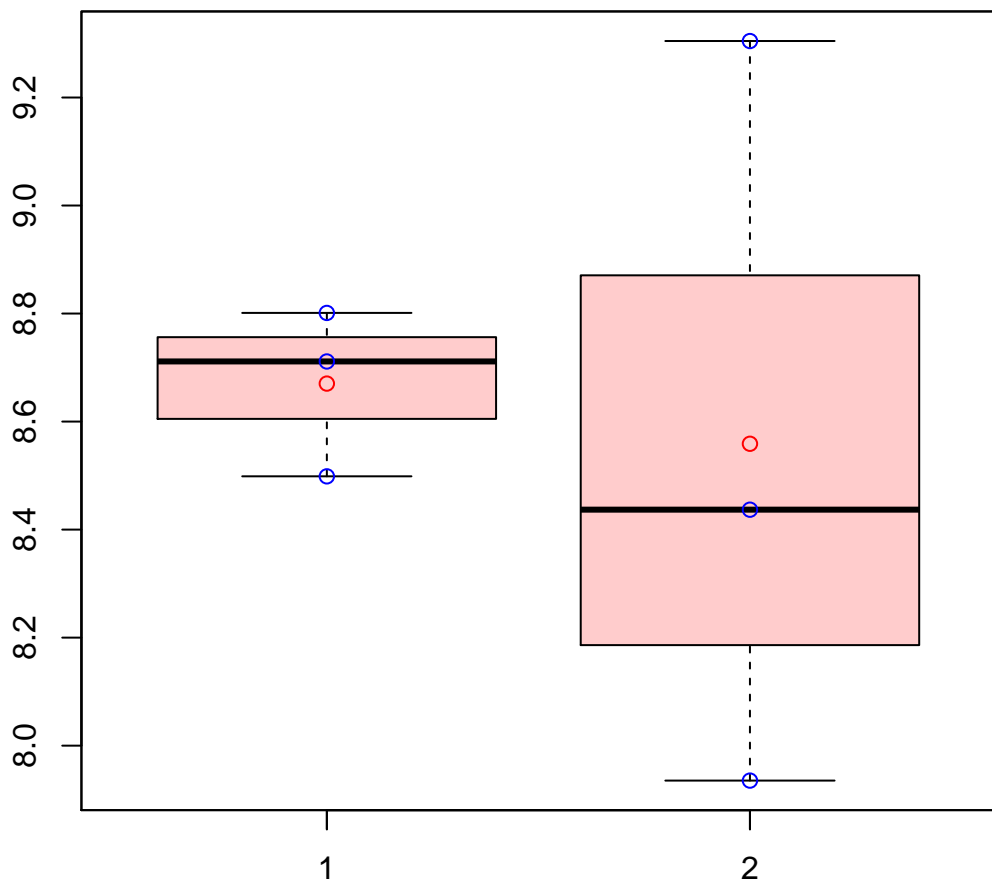

t-Test: p-value = 0.81

# CL1349Contig1|CL1349Contig1

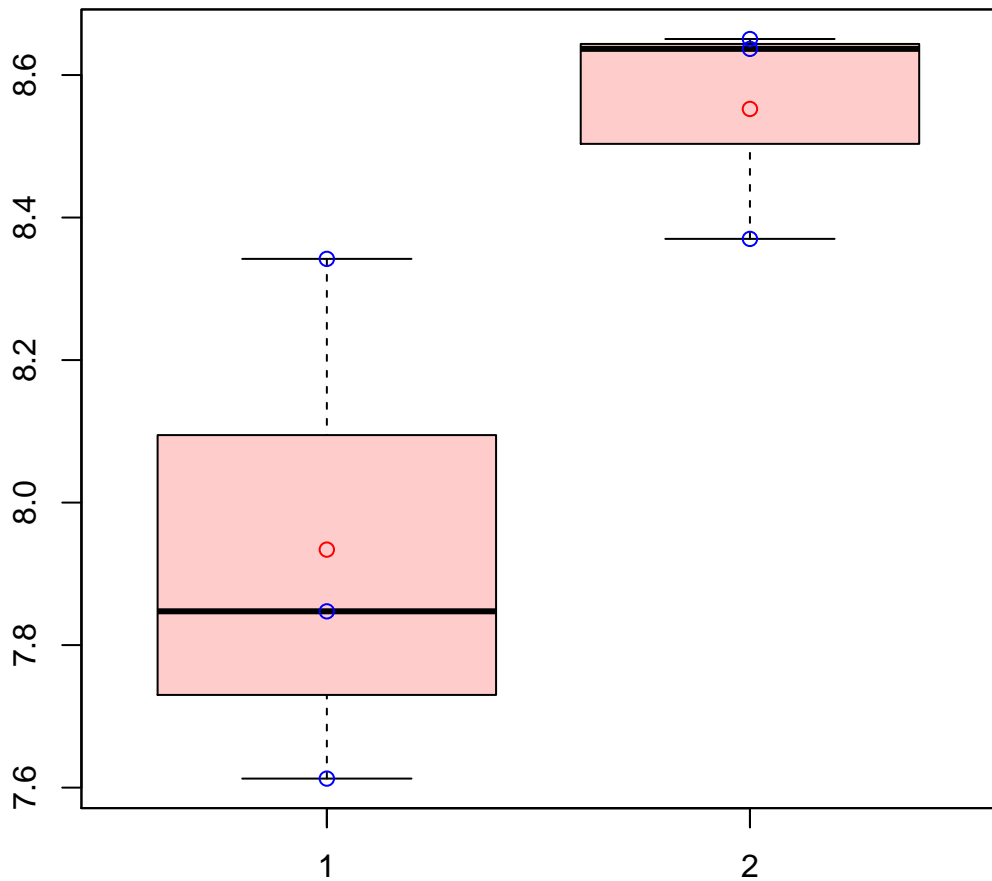

t-Test: p-value = 0.09

# CL1349Contig2|CL1349Contig2

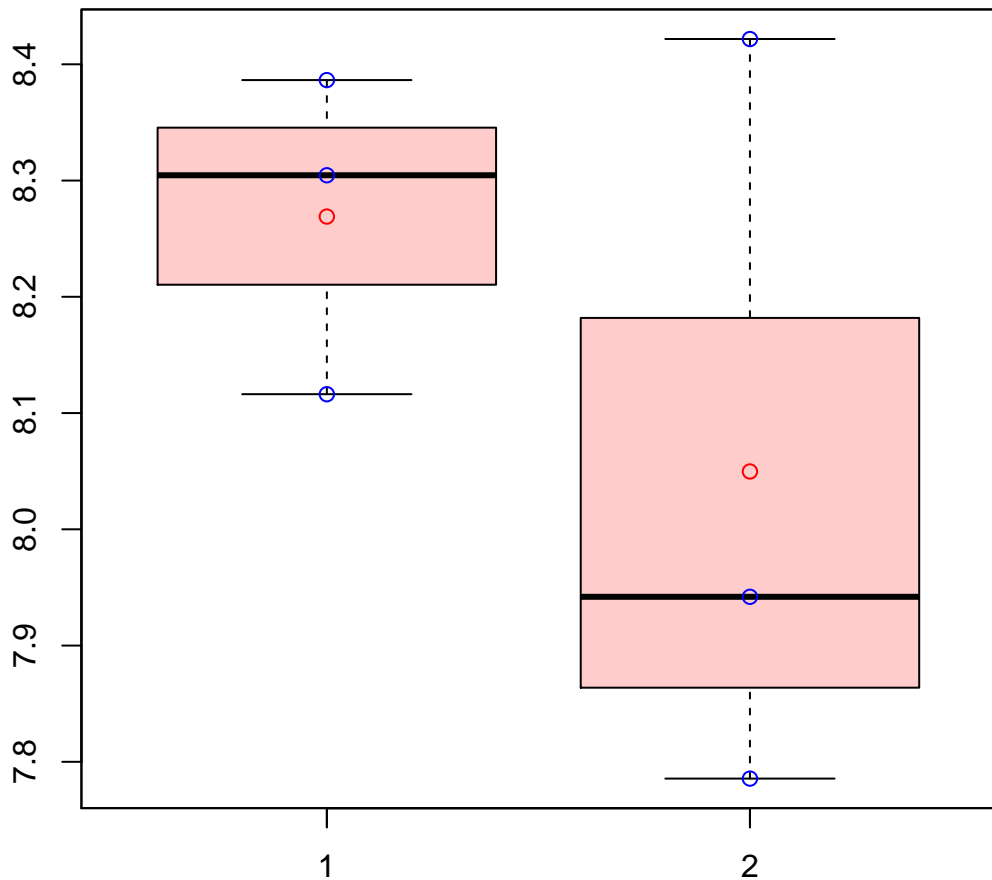

t-Test: p-value = 0.38



# CL1353Contig1|CL1353Contig1

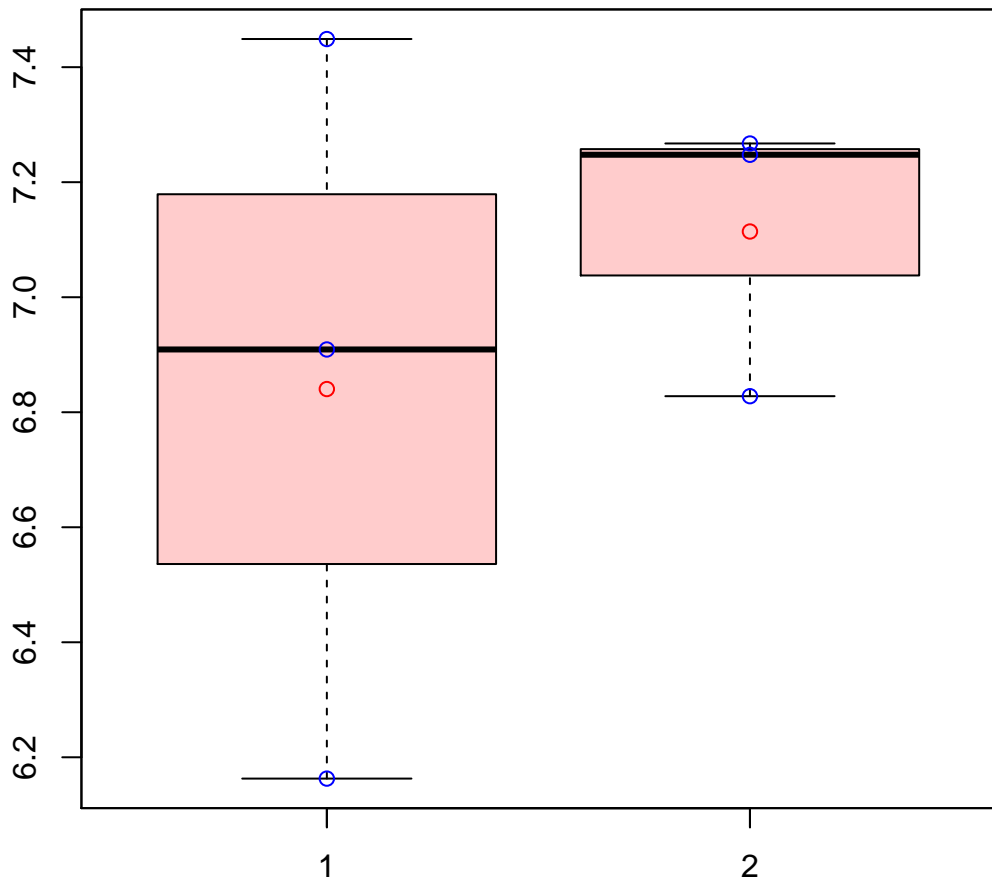

t-Test: p-value = 0.55

# CL1353Contig2|CL1353Contig2

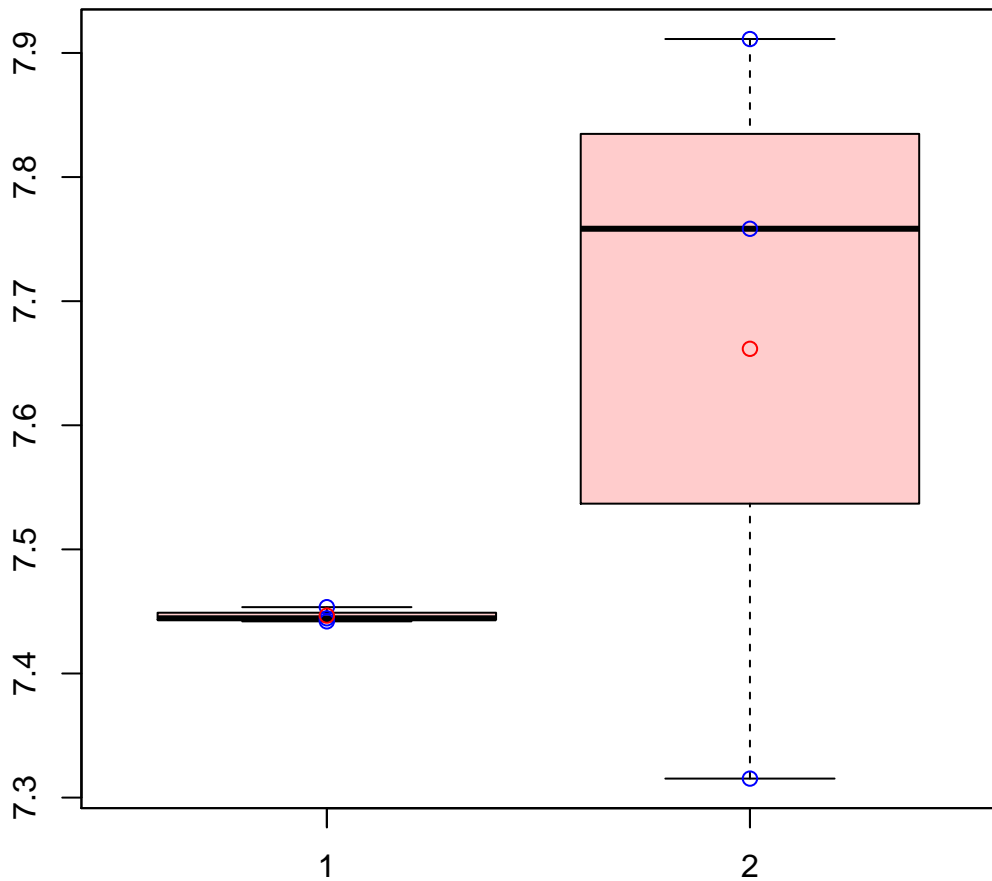

t-Test: p-value = 0.35

# CL1353Contig3|CL1353Contig3

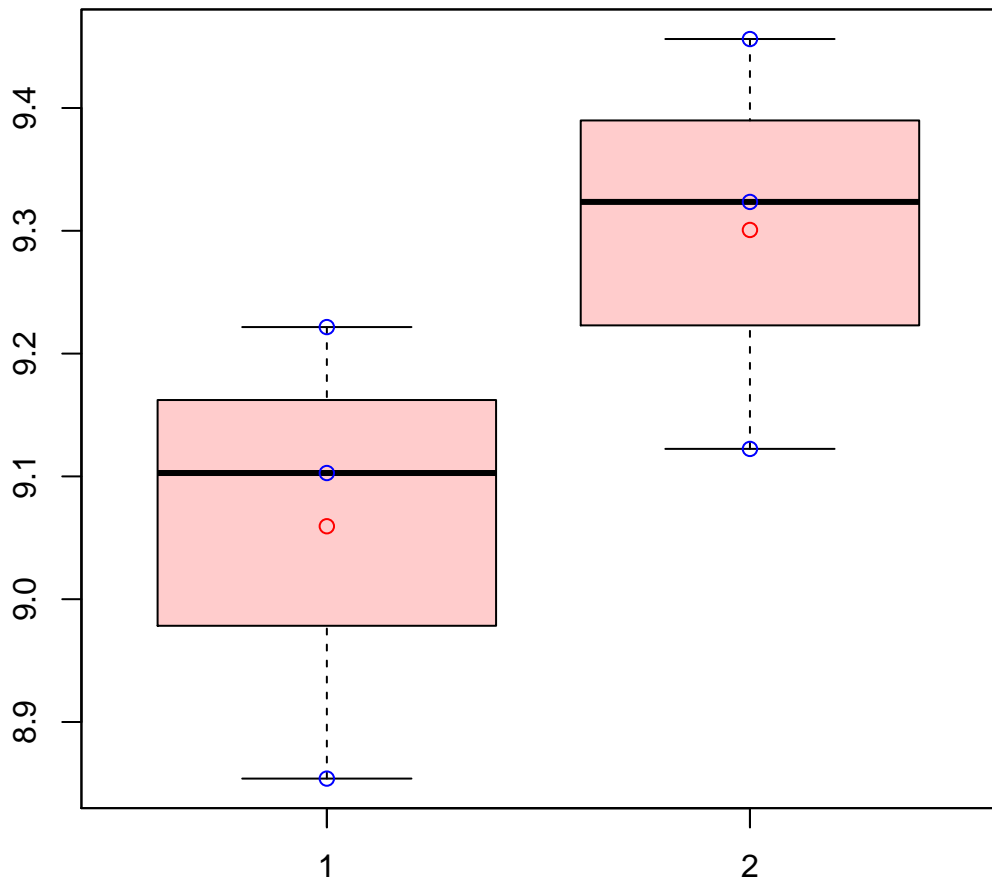

t-Test: p-value = 0.17

# CL1354Contig10|CL1354Contig10

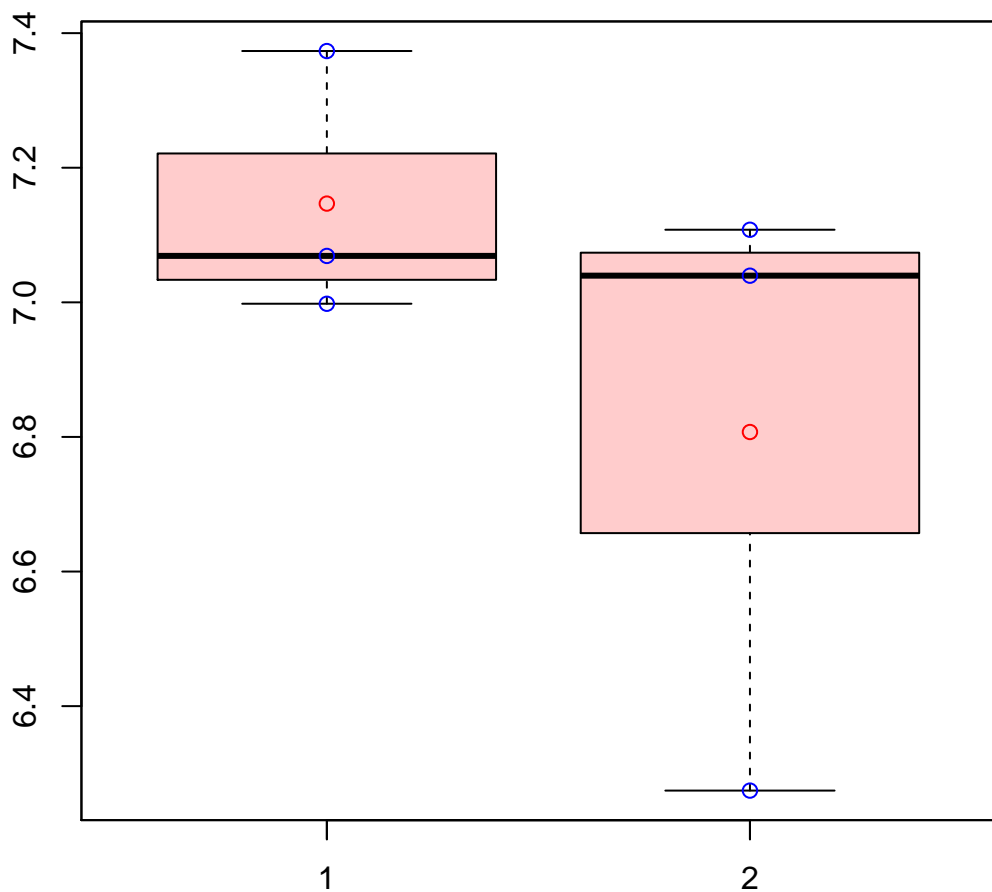

t-Test: p-value = 0.34

# CL1361Contig6|CL1361Contig6

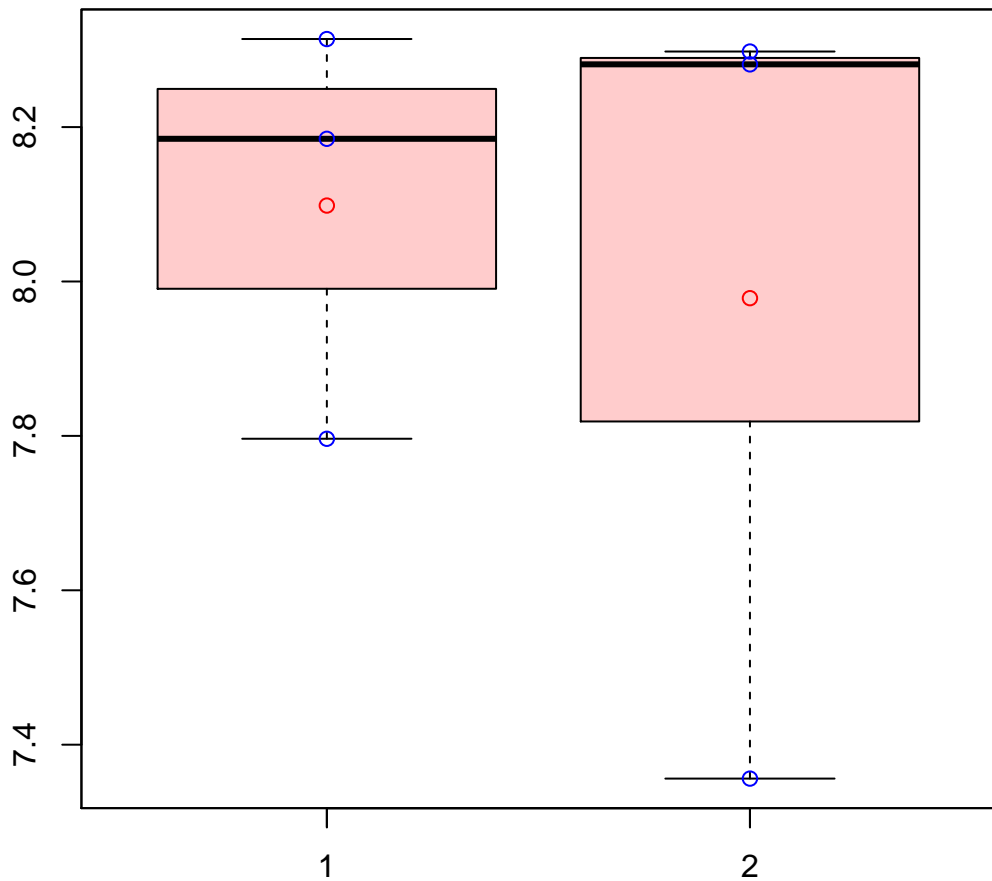

t-Test: p-value = 0.75

# CL1363Contig3|CL1363Contig3

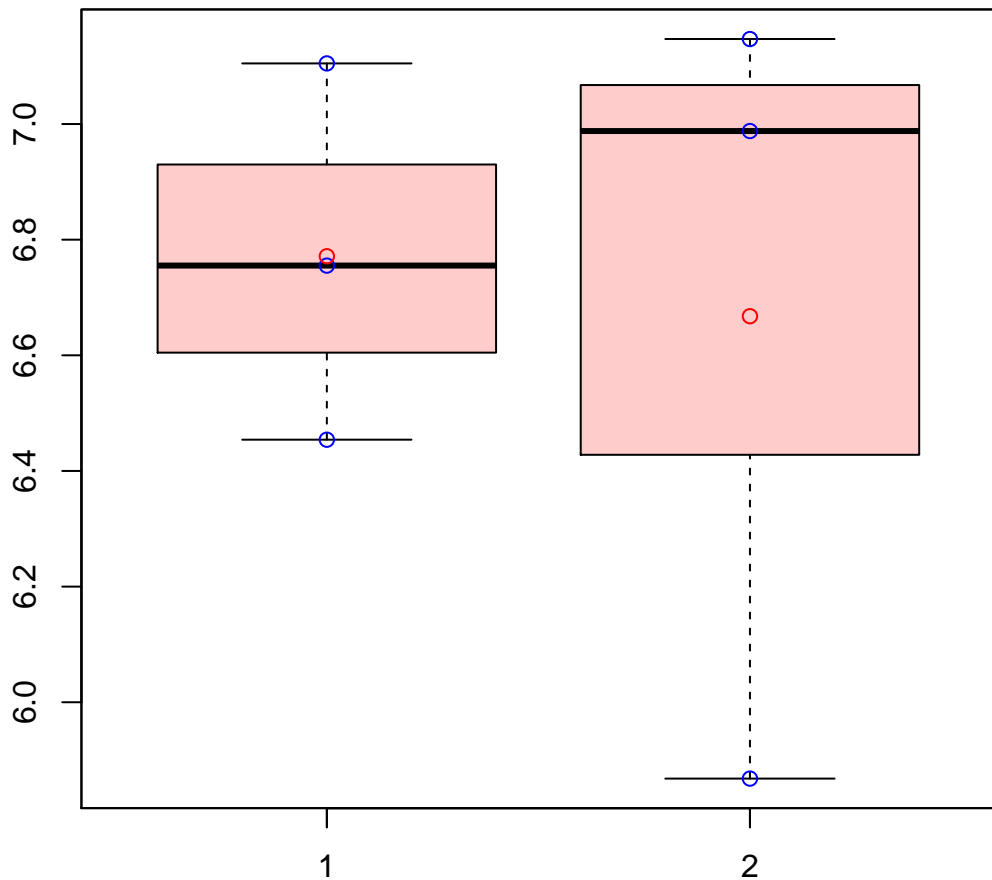

t-Test: p-value = 0.83

# CL13640Contig1|CL13640Contig1

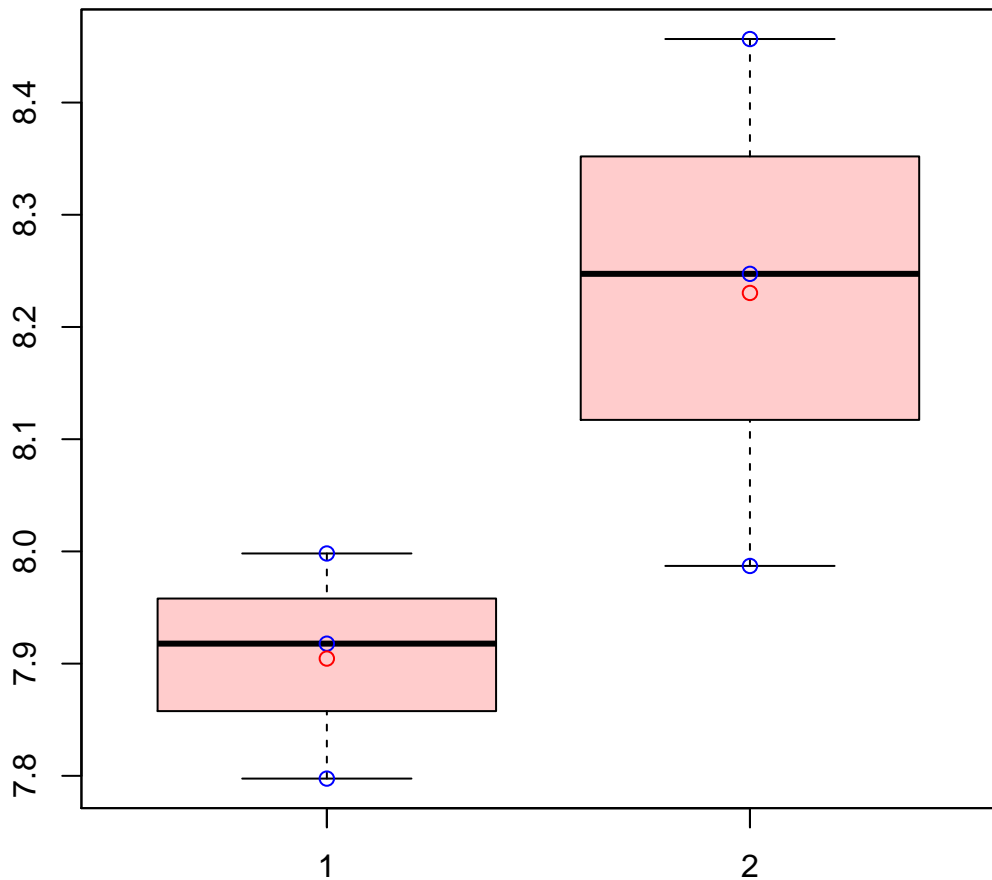

t-Test: p-value = 0.12

# CL13655Contig1|CL13655Contig1

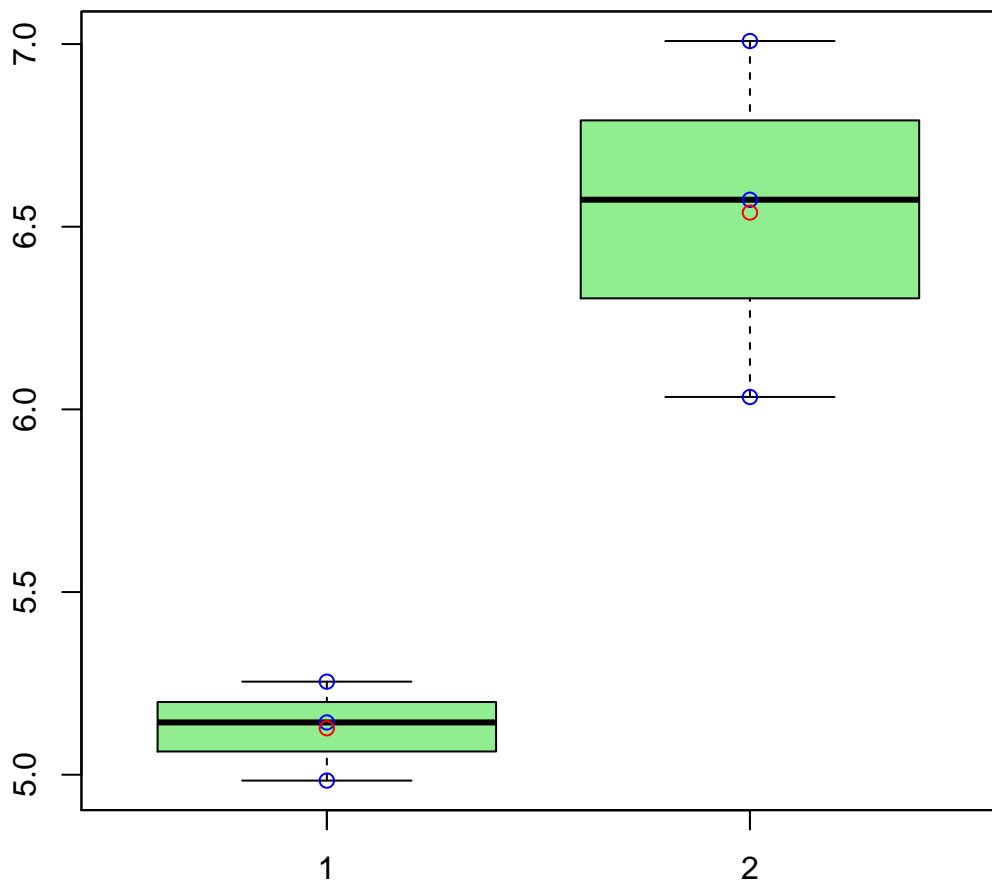

t-Test: p-value = 0.03



# CL1365Contig1|CL1365Contig1

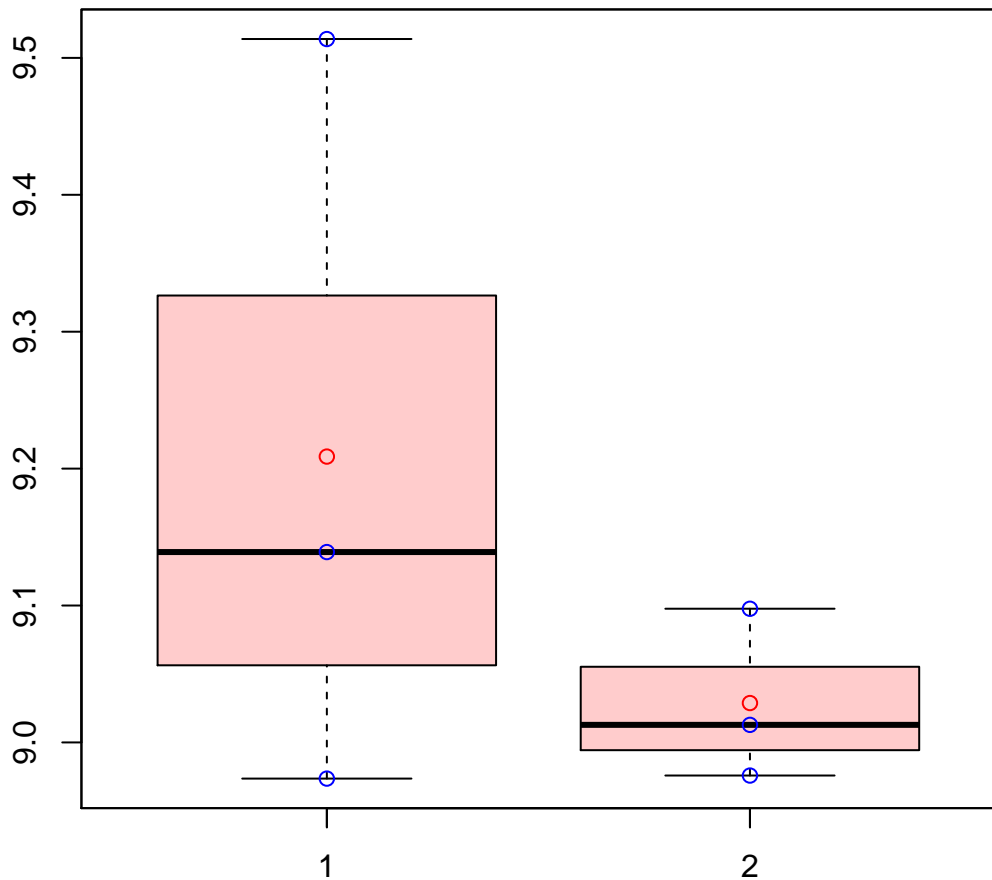

t-Test: p-value = 0.38

# CL1367Contig5|CL1367Contig5

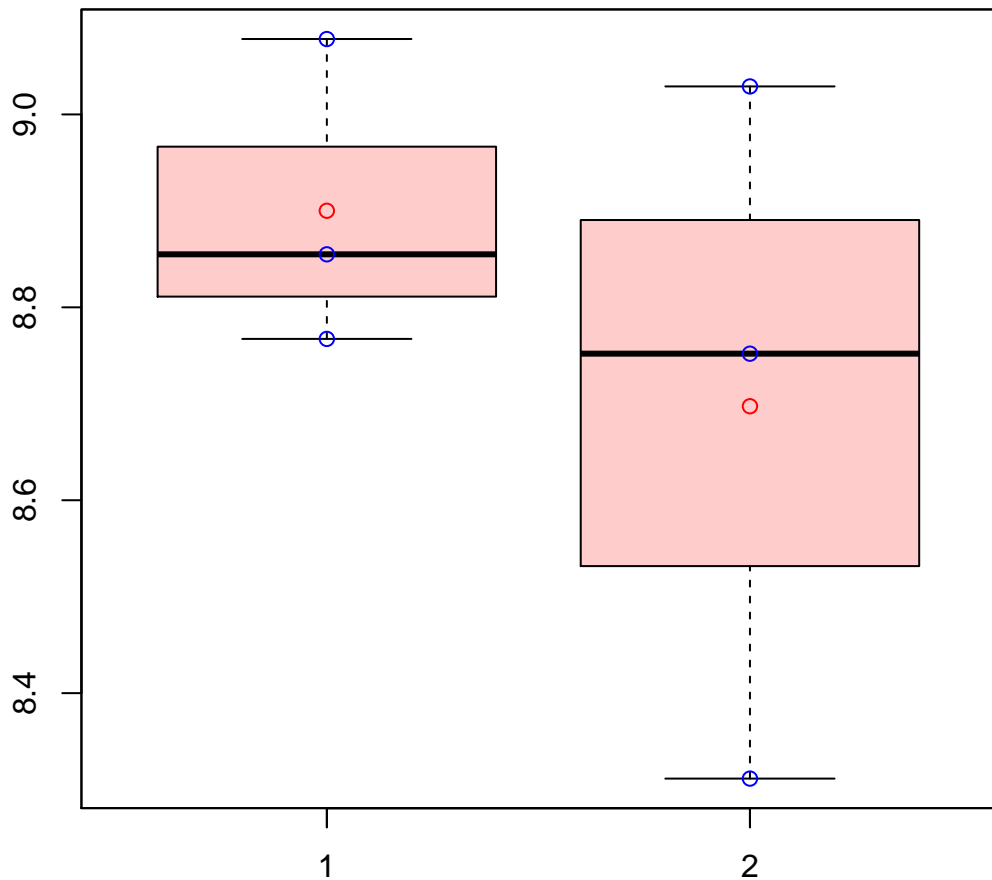

t-Test: p-value = 0.45

# CL1369Contig1|CL1369Contig1

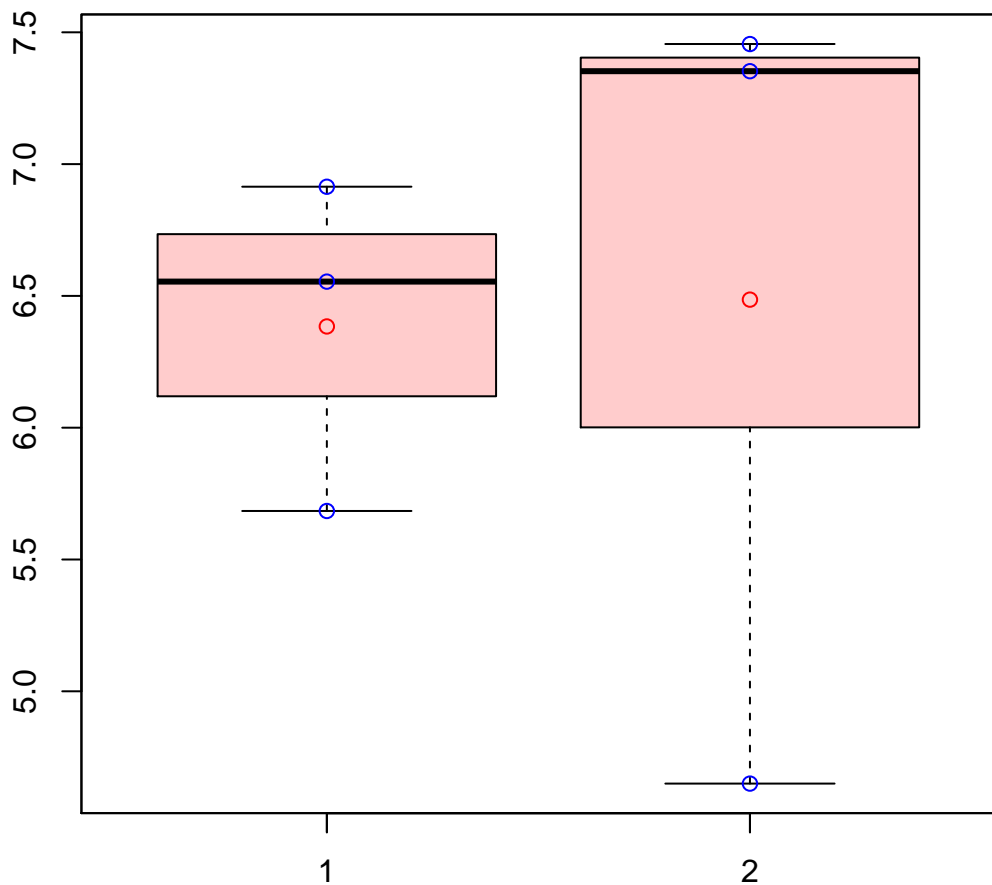

t-Test: p-value = 0.93

# CL136Contig17|CL136Contig17

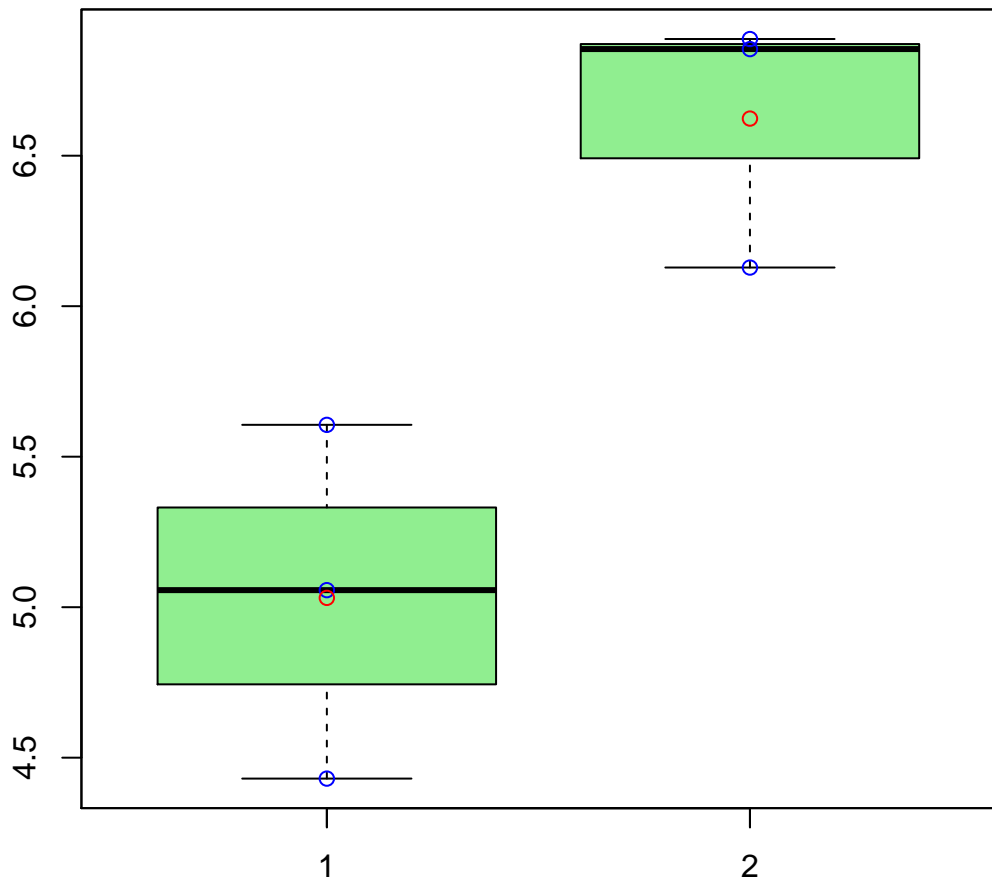

t-Test: p-value = 0.02

# CL136Contig18|CL136Contig18

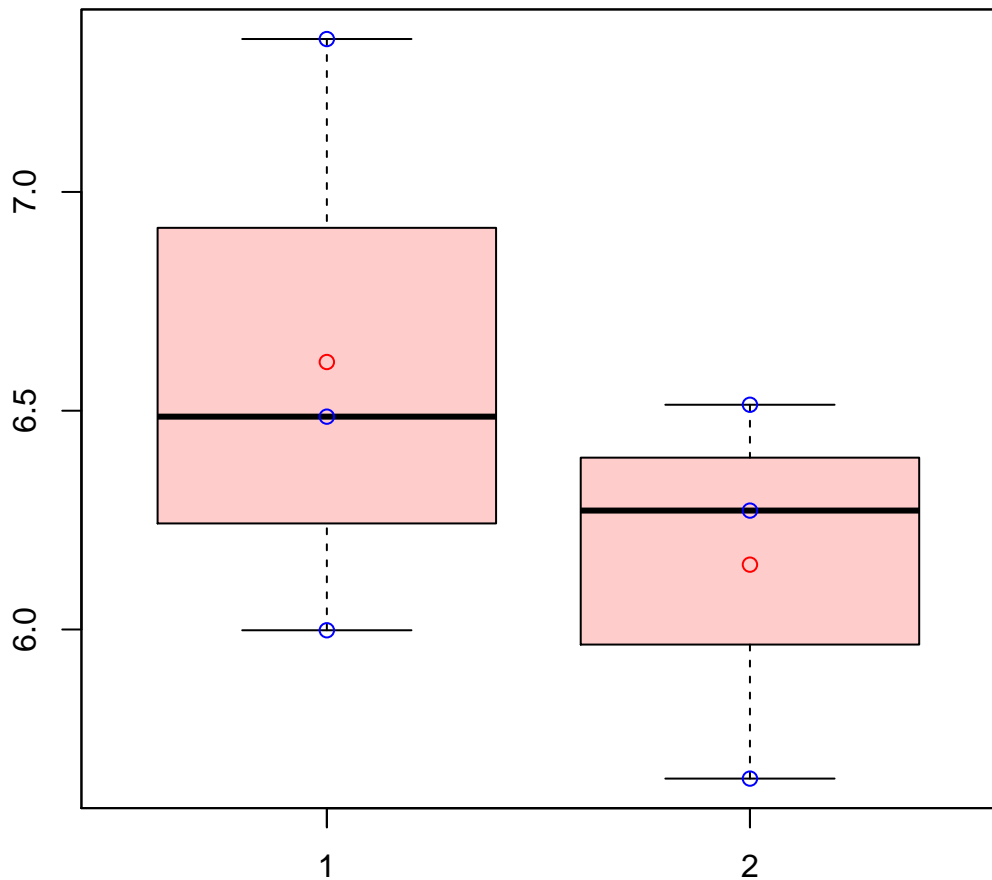

t-Test: p-value = 0.39

# CL1371Contig3|CL1371Contig3

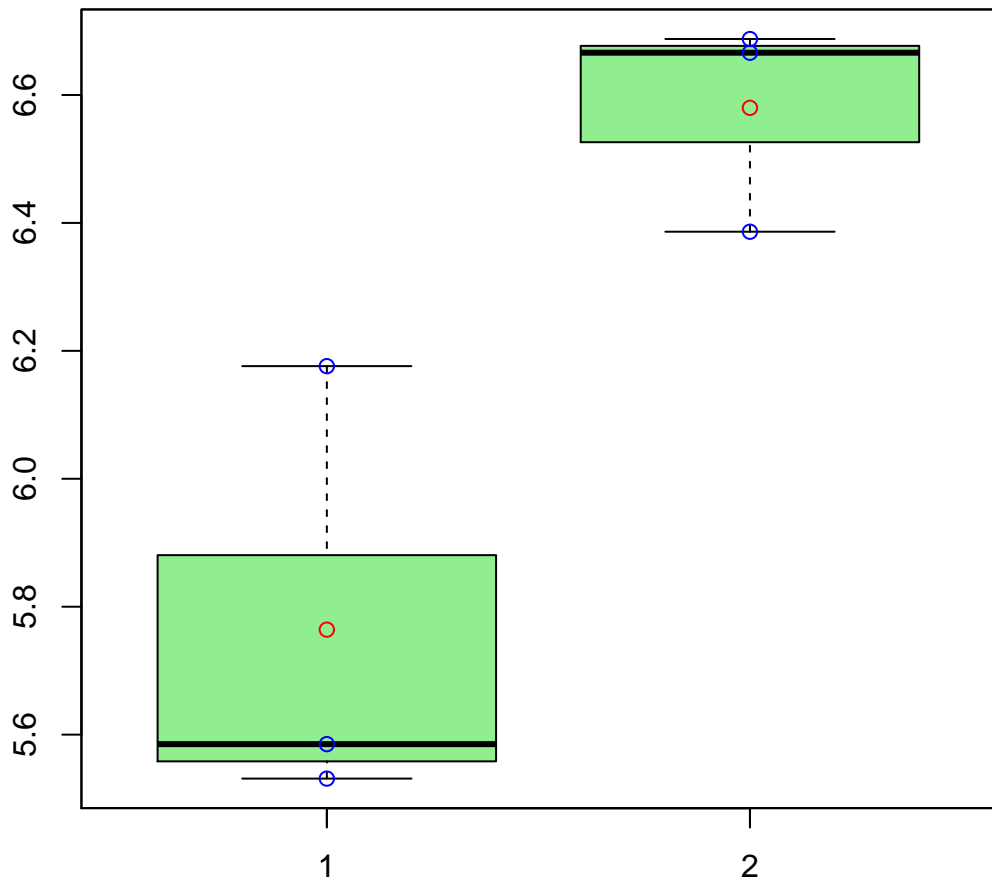

t-Test: p-value = 0.04

# CL1371Contig5|CL1371Contig5

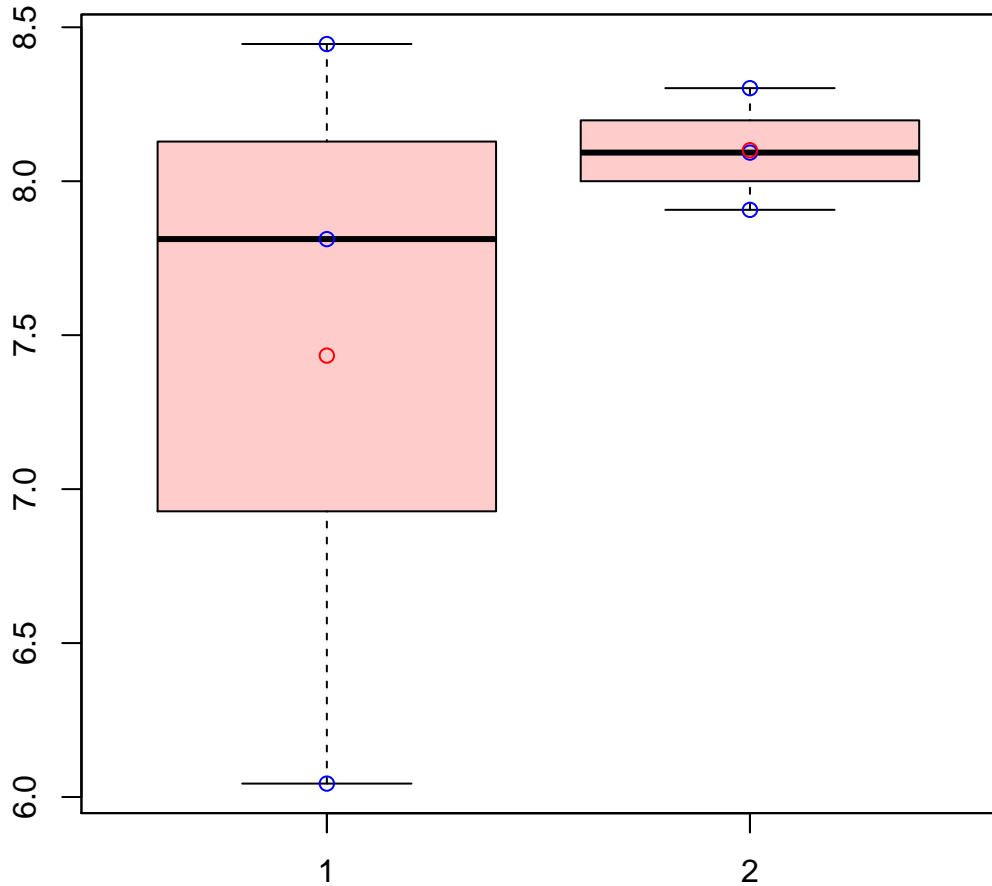

t-Test: p-value = 0.45

# CL13746Contig1|CL13746Contig1

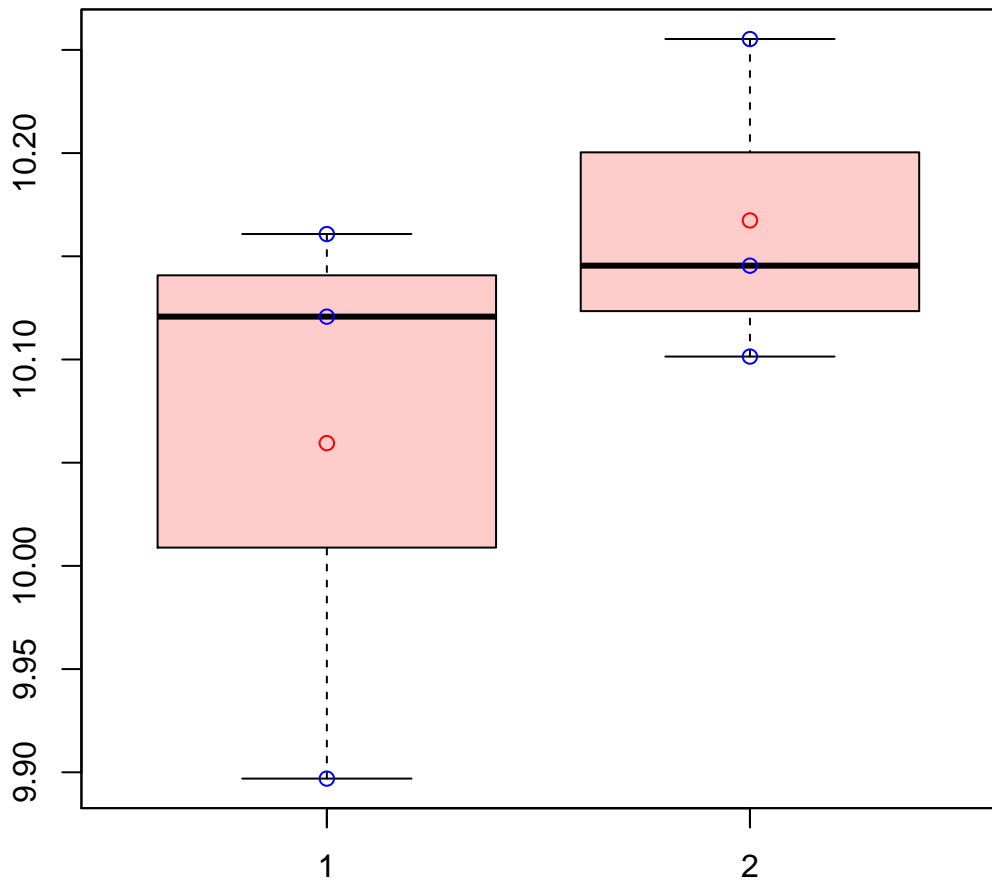

t-Test: p-value = 0.33



# CL1375Contig6|CL1375Contig6

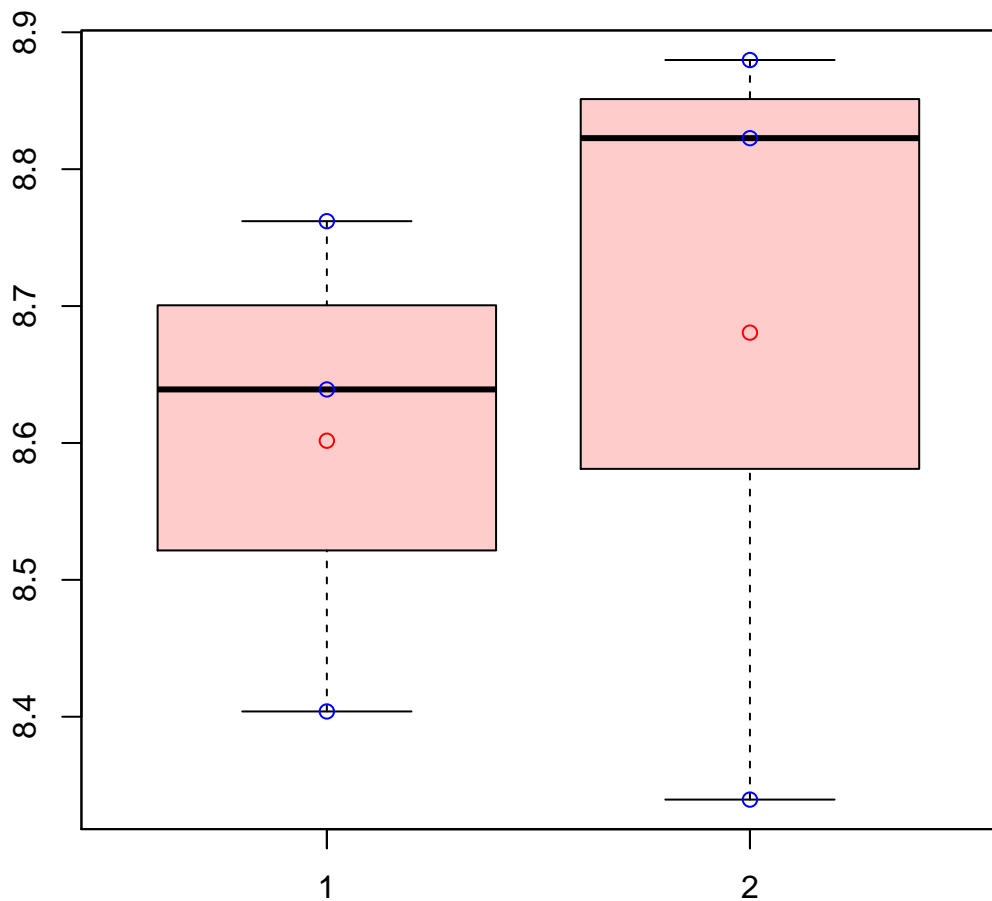

t-Test: p-value = 0.72

# CL13802Contig1|CL13802Contig1

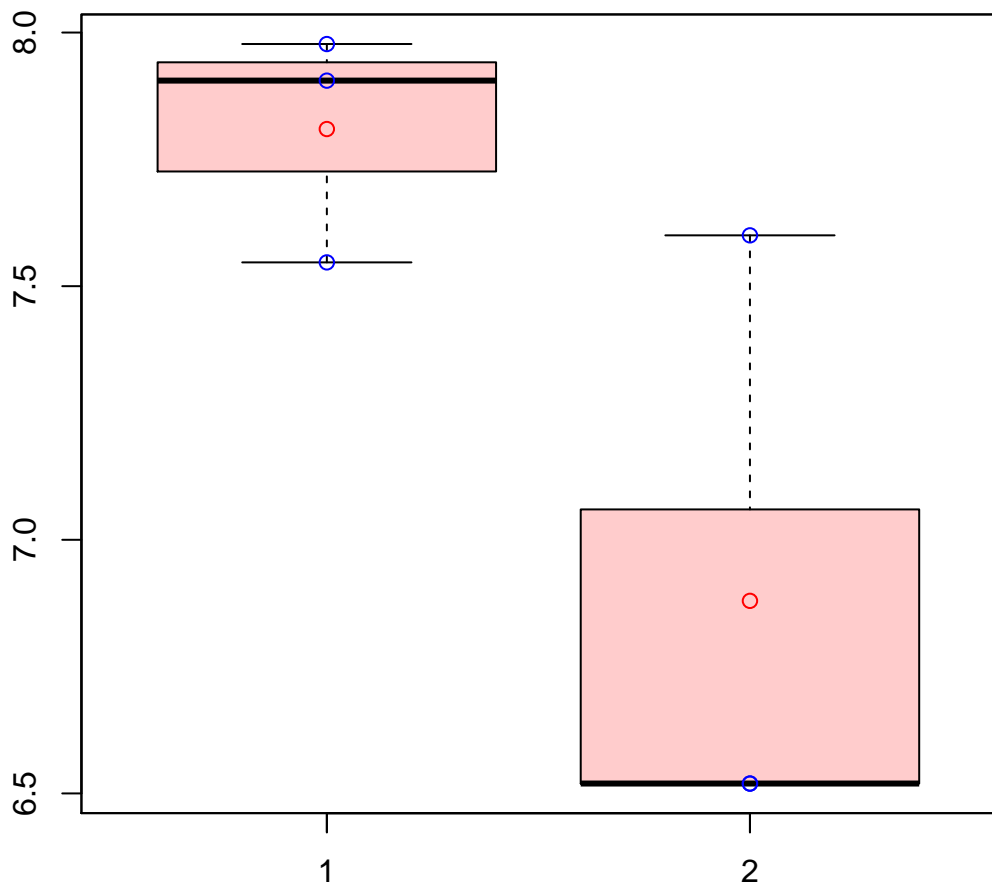

t-Test: p-value = 0.11

# CL1380Contig1|CL1380Contig1

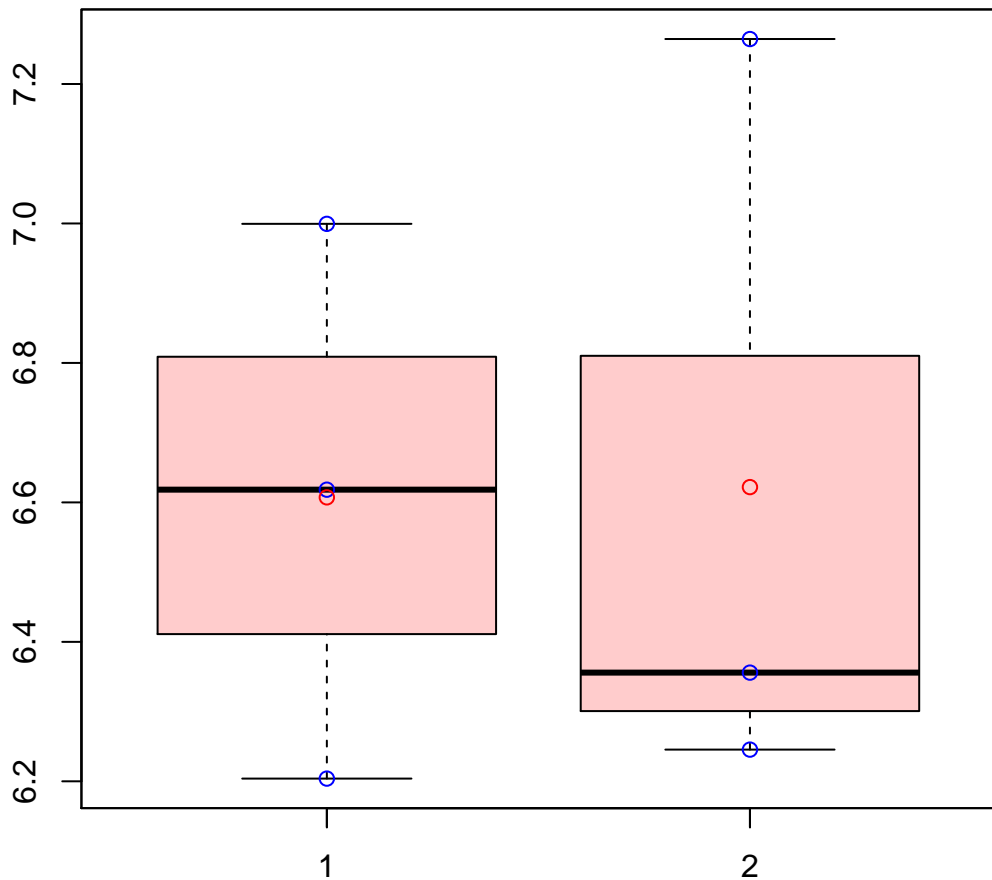

t-Test: p-value = 0.97

# CL13875Contig1|CL13875Contig1

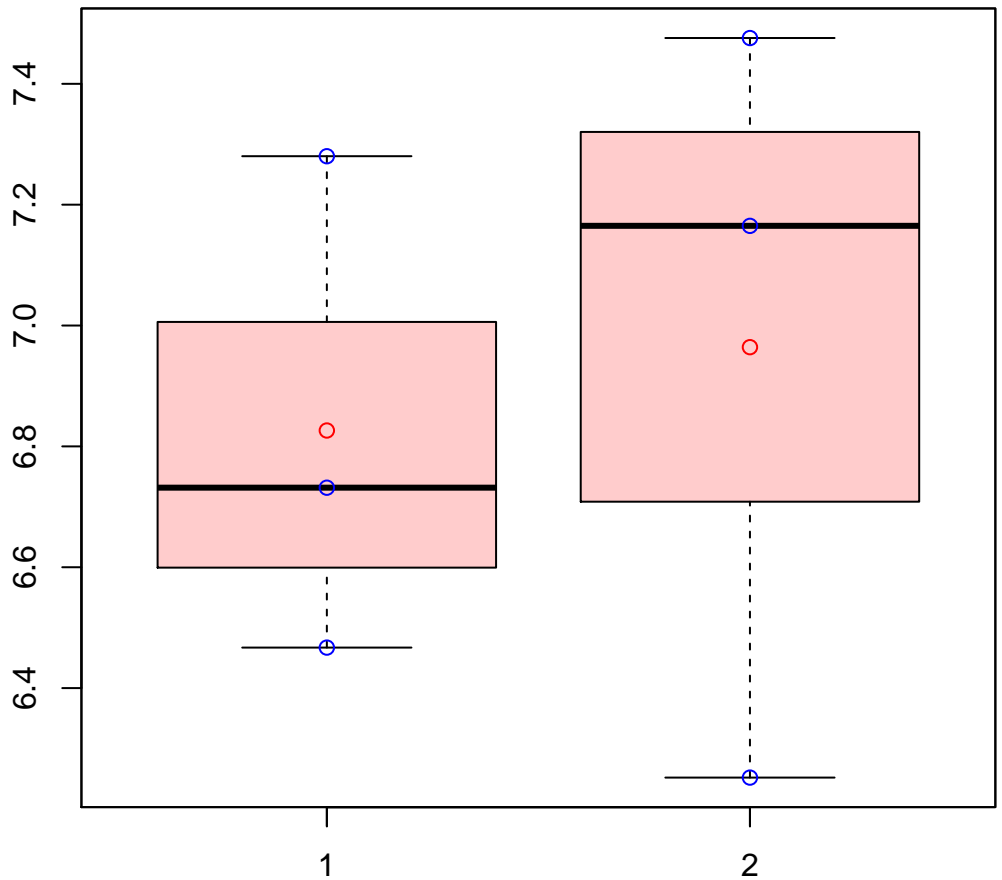

t-Test: p-value = 0.77

# CL138Contig6|CL138Contig6

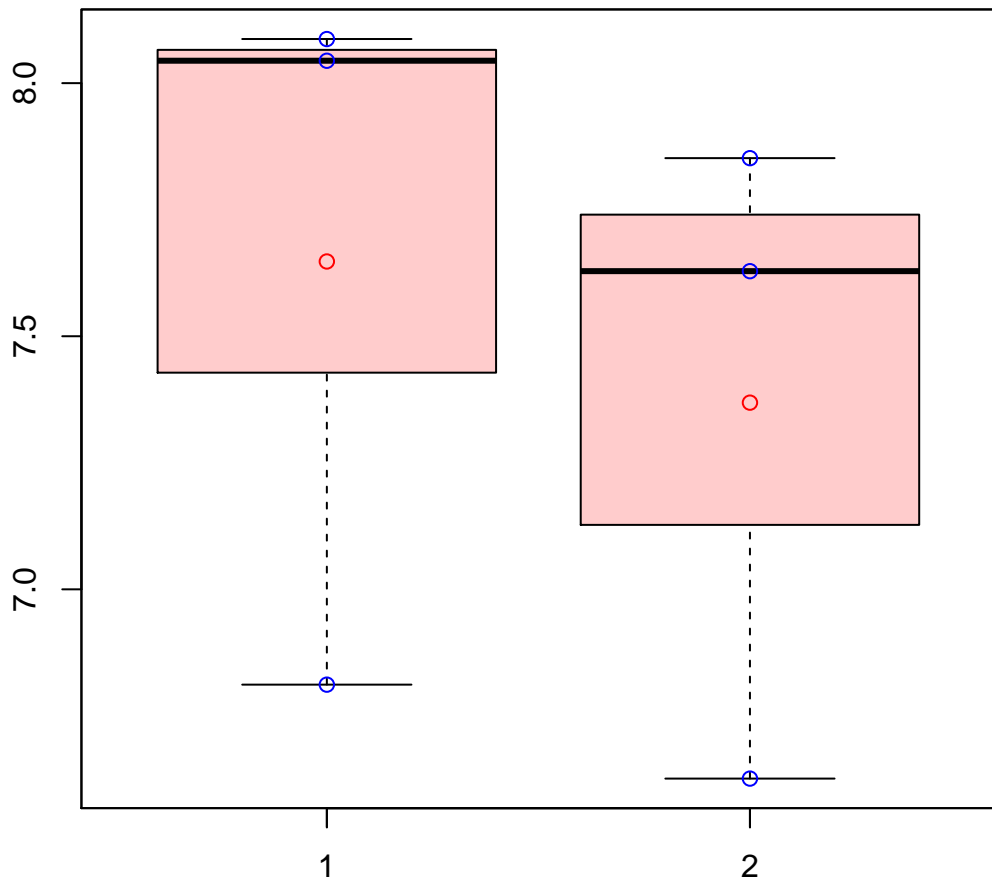

t-Test: p-value = 0.65

# CL138Contig8|CL138Contig8

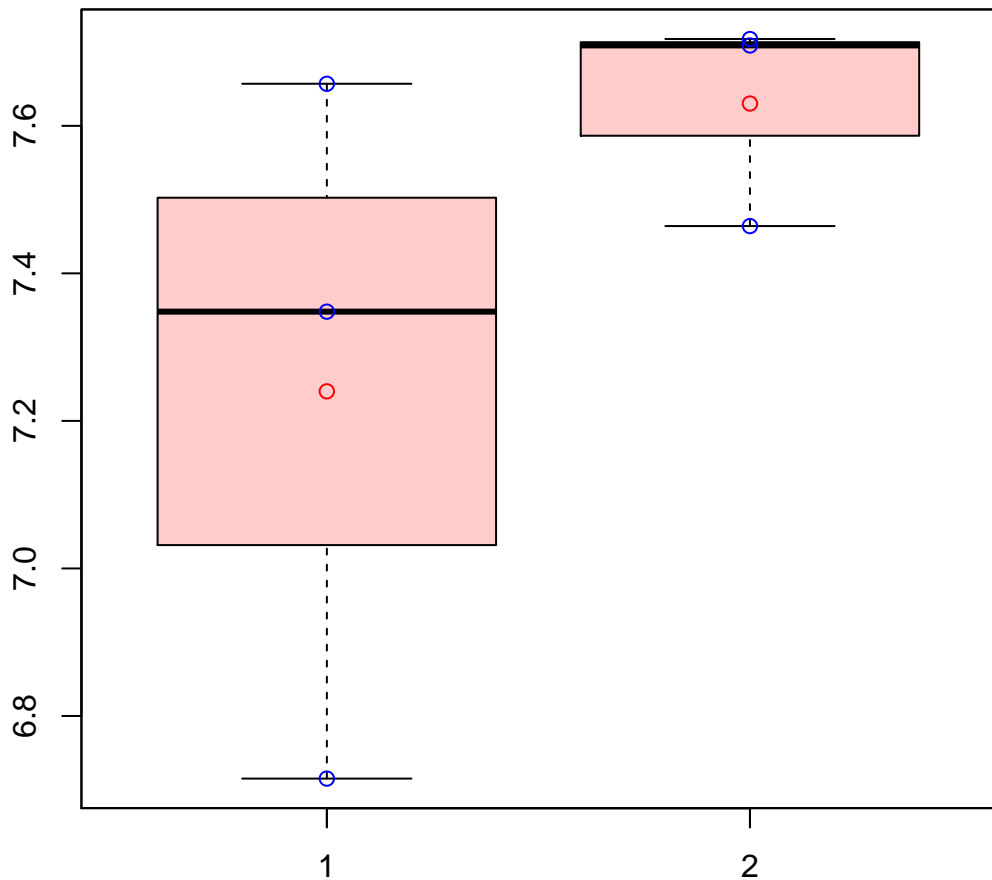

t-Test: p-value = 0.29

# CL138Contig9|CL138Contig9

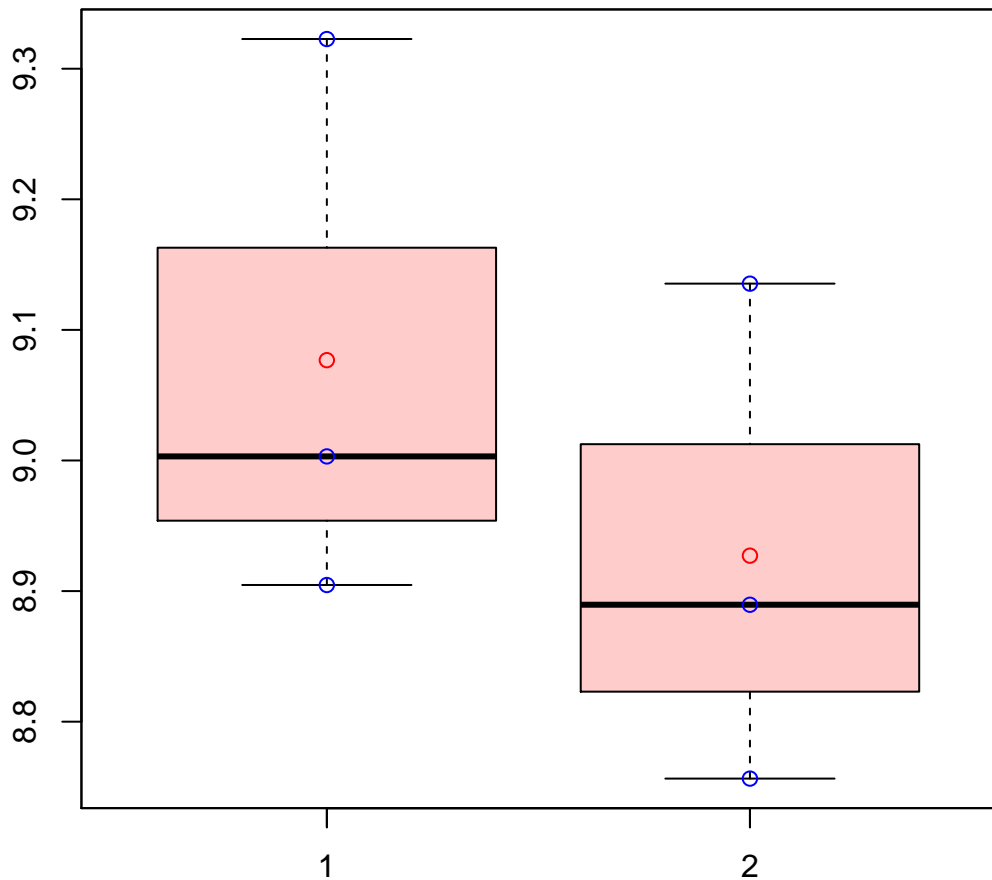

t-Test: p-value = 0.42

# CL1390Contig4|CL1390Contig4

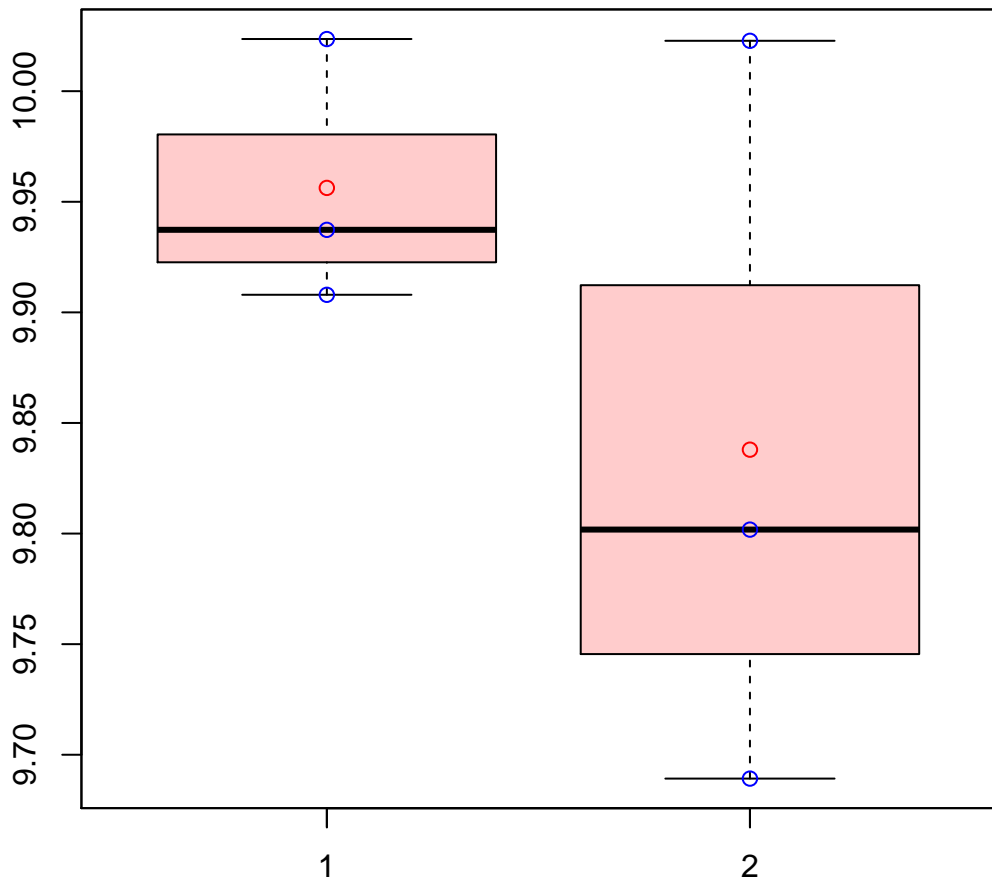

t-Test: p-value = 0.35



# CL1392Contig3|CL1392Contig3

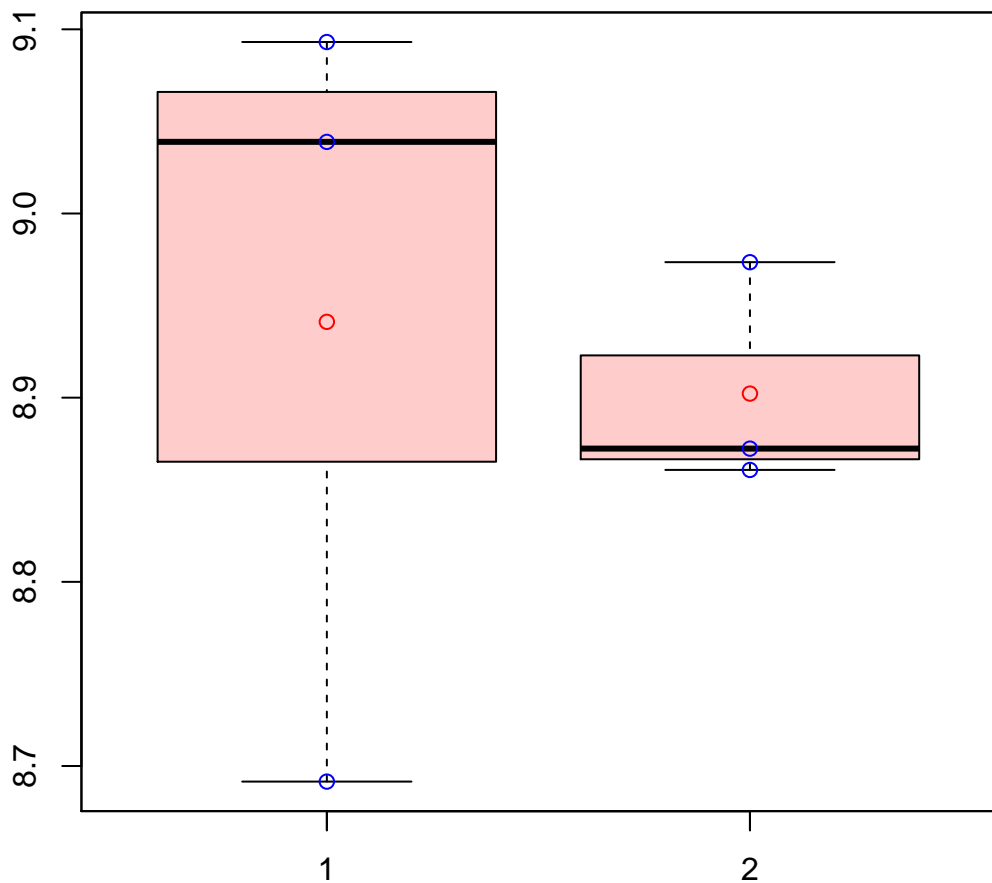

t-Test: p-value = 0.79

# CL13950Contig1|CL13950Contig1

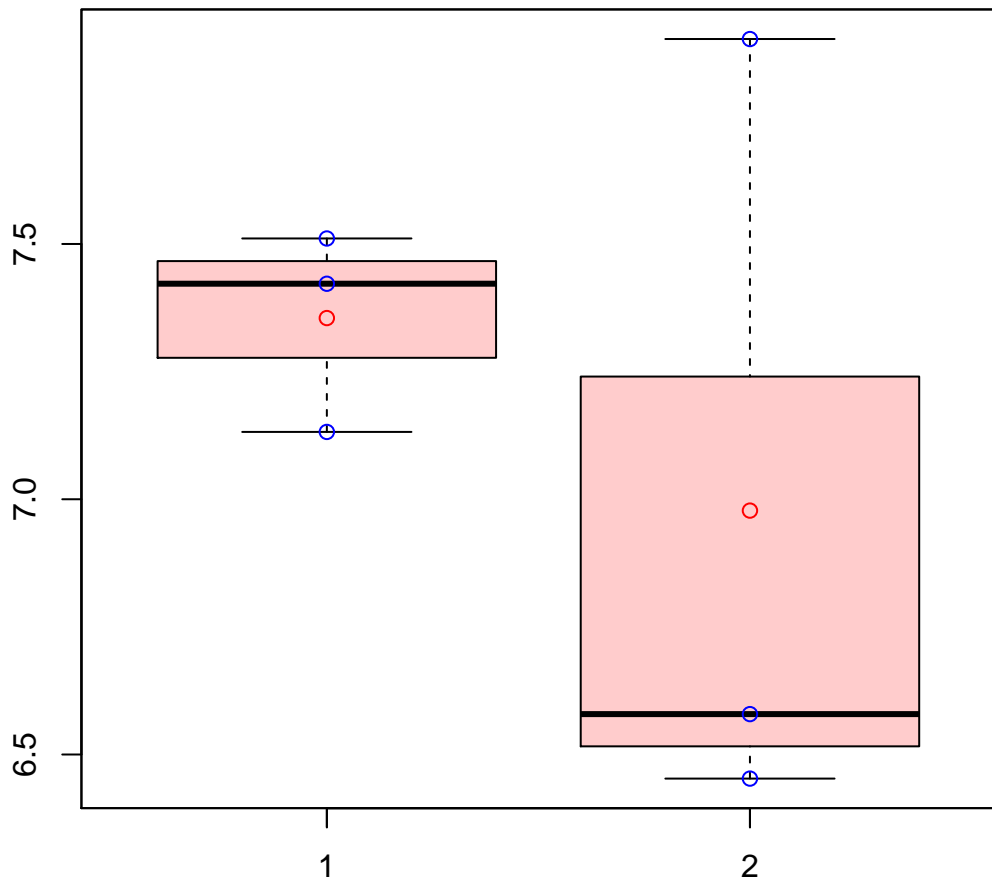

t-Test: p-value = 0.5

# CL13957Contig1|CL13957Contig1

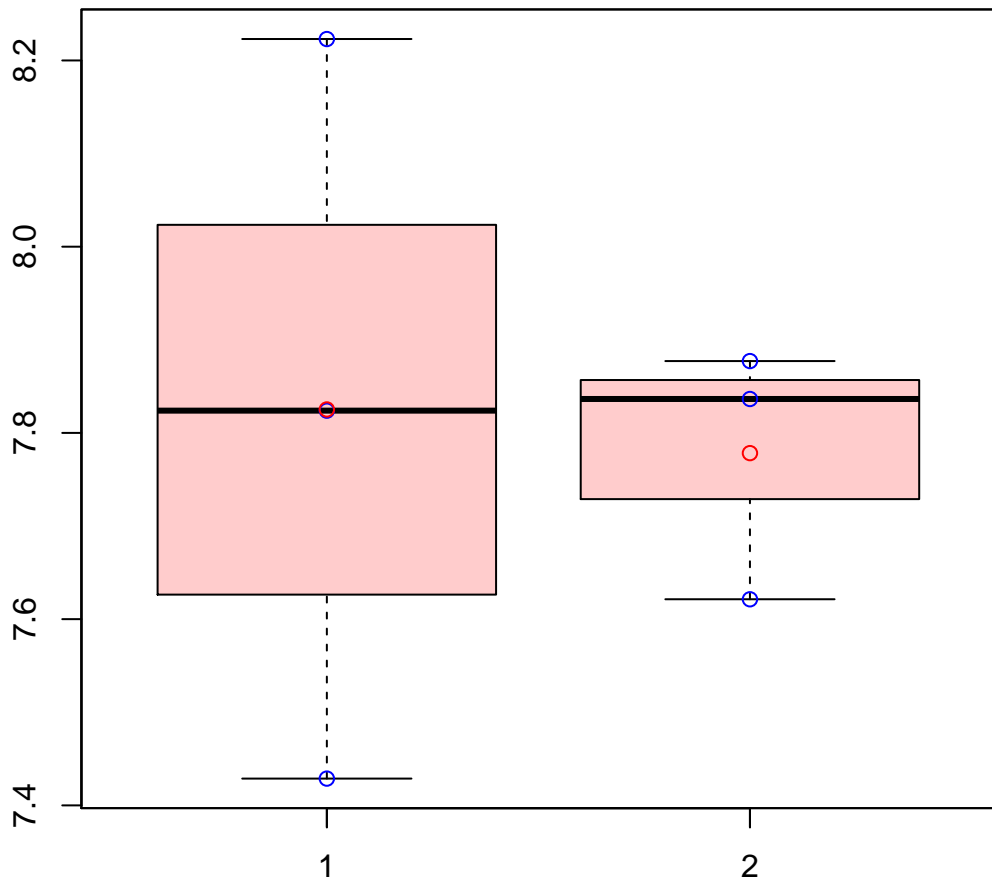

t-Test: p-value = 0.86

# CL13969Contig1|CL13969Contig1

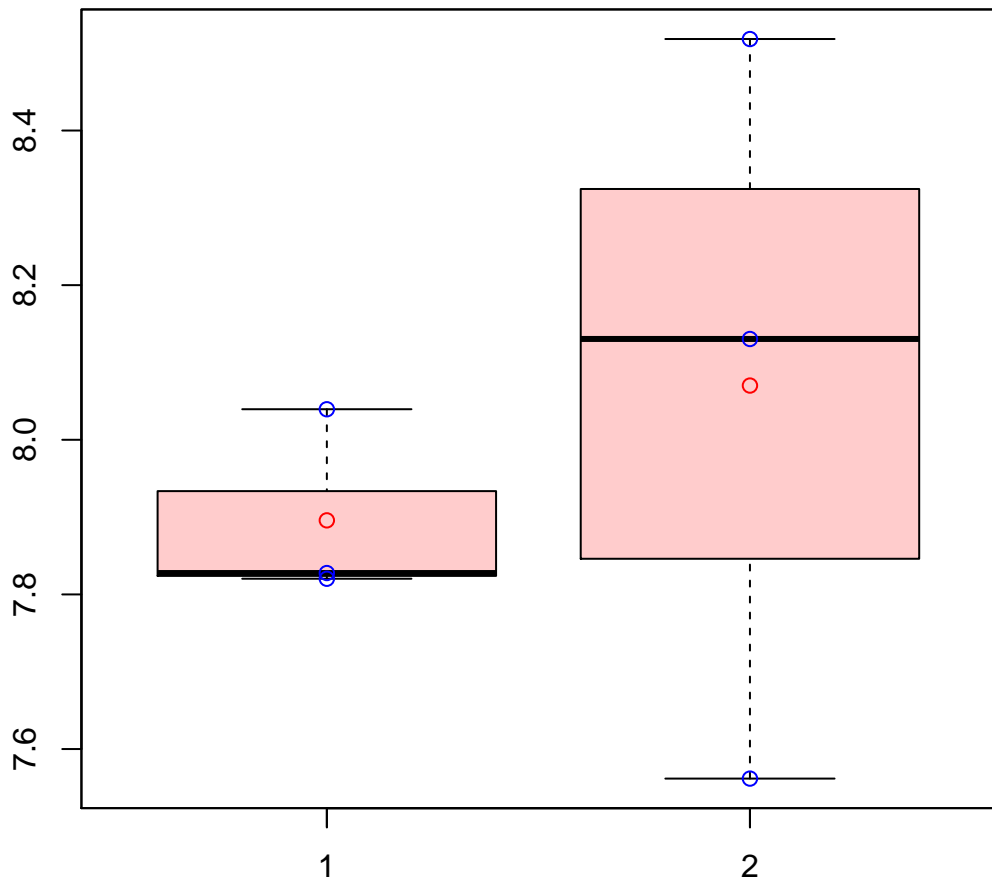

t-Test: p-value = 0.6

# CL1397Contig1|CL1397Contig1

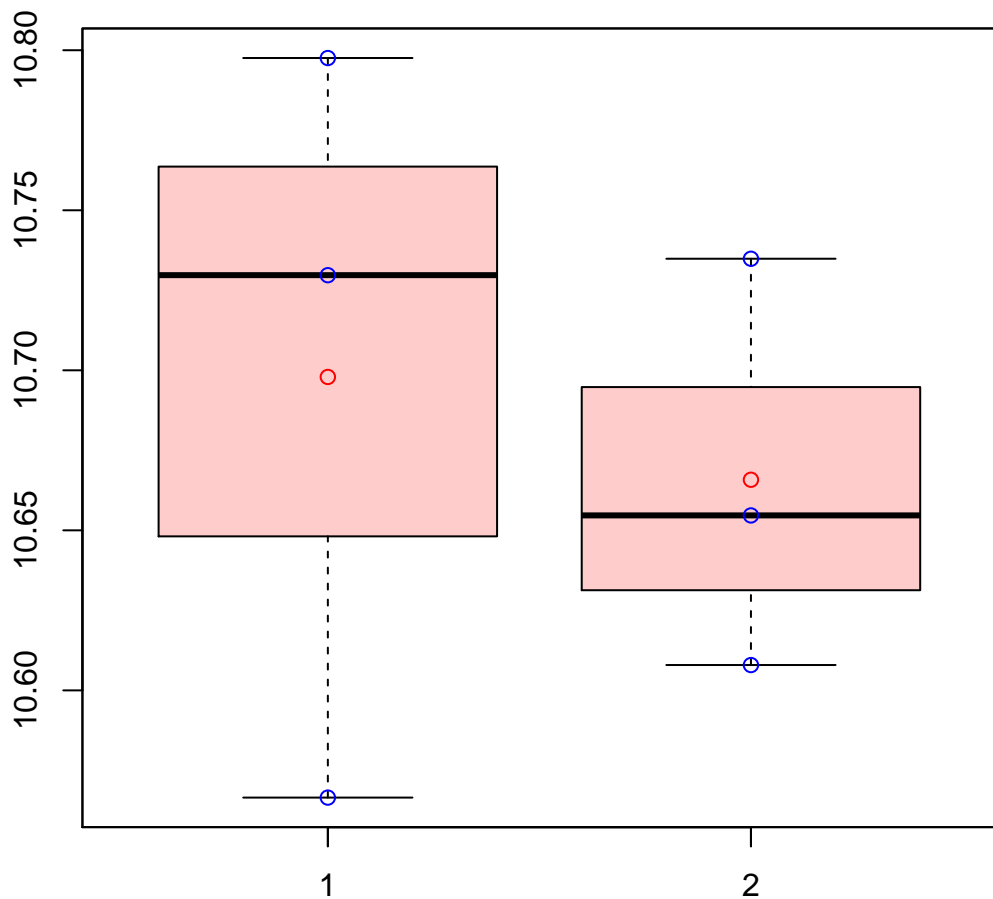

t-Test: p-value = 0.71

# CL13Contig10|CL13Contig10

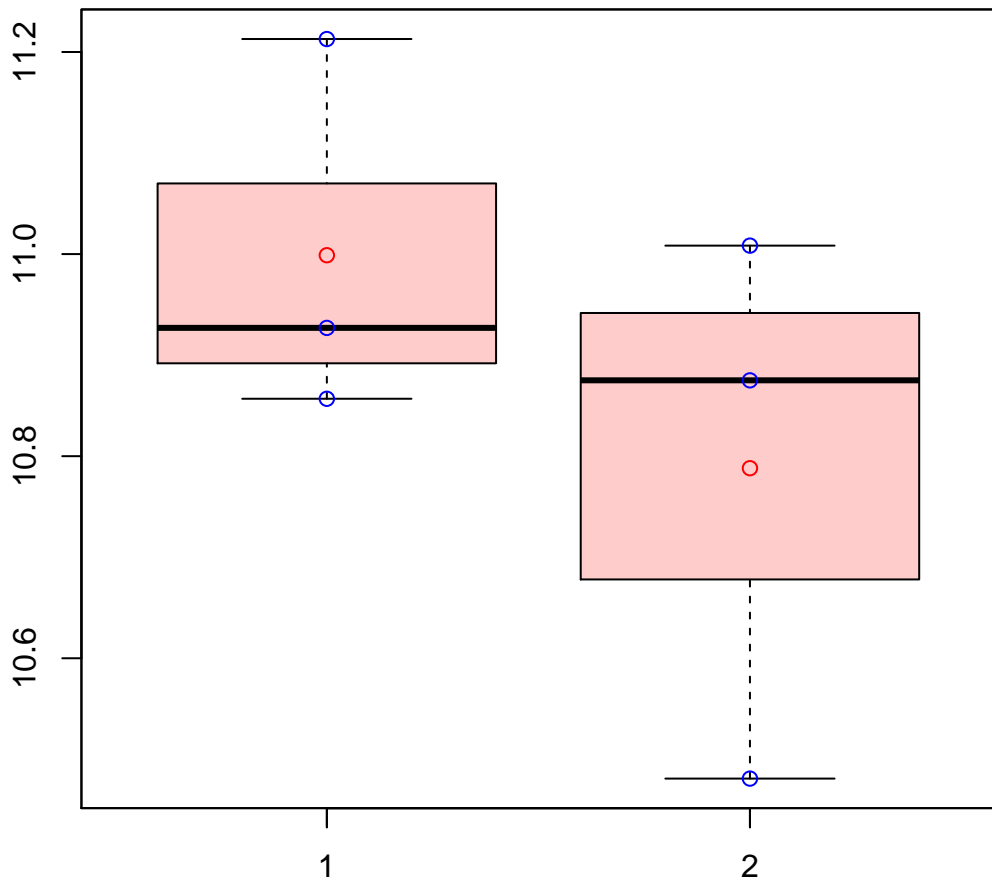

t-Test: p-value = 0.34

# CL13Contig25|CL13Contig25

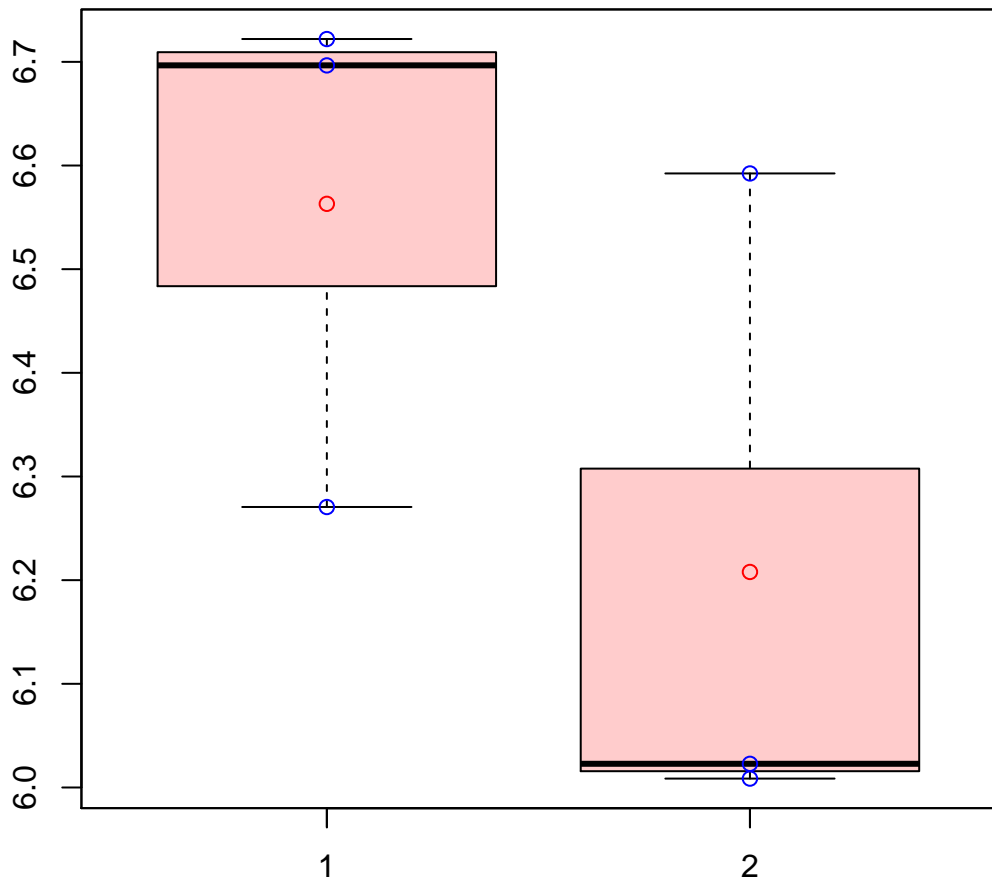

t-Test: p-value = 0.22

# CL13Contig42|CL13Contig42

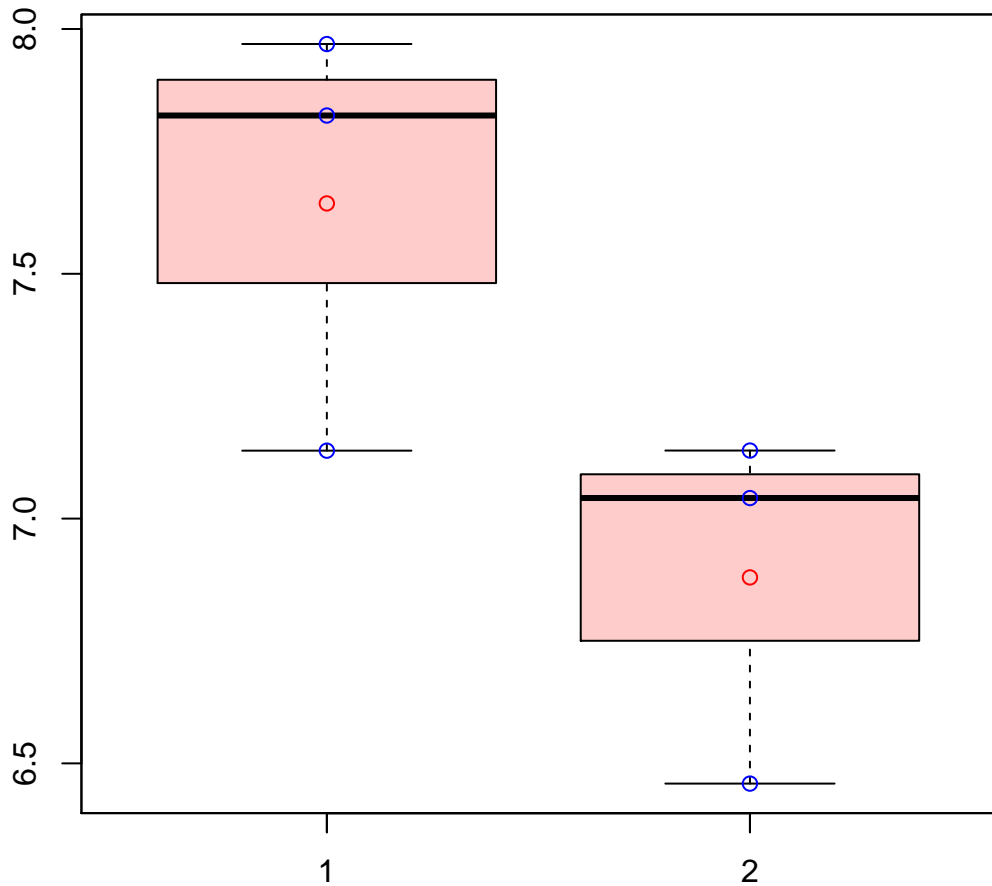

t-Test: p-value = 0.09



# CL13Contig53|CL13Contig53

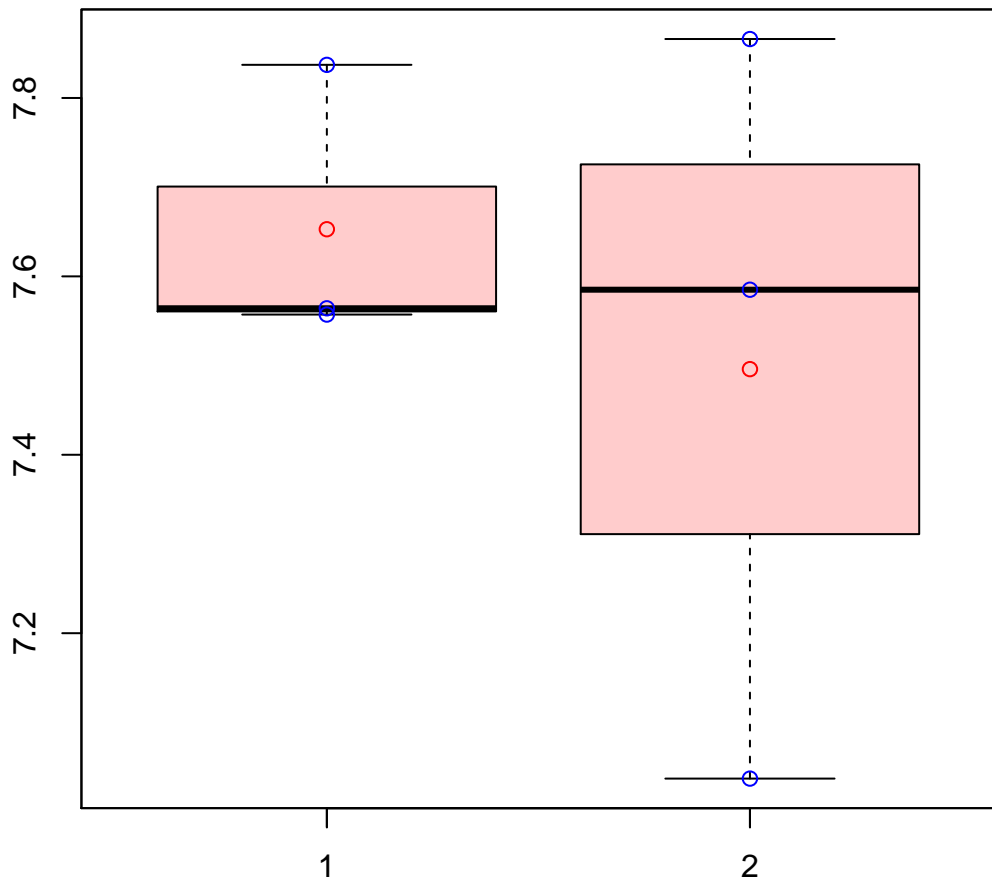

t-Test: p-value = 0.6

# CL13Contig8|CL13Contig8

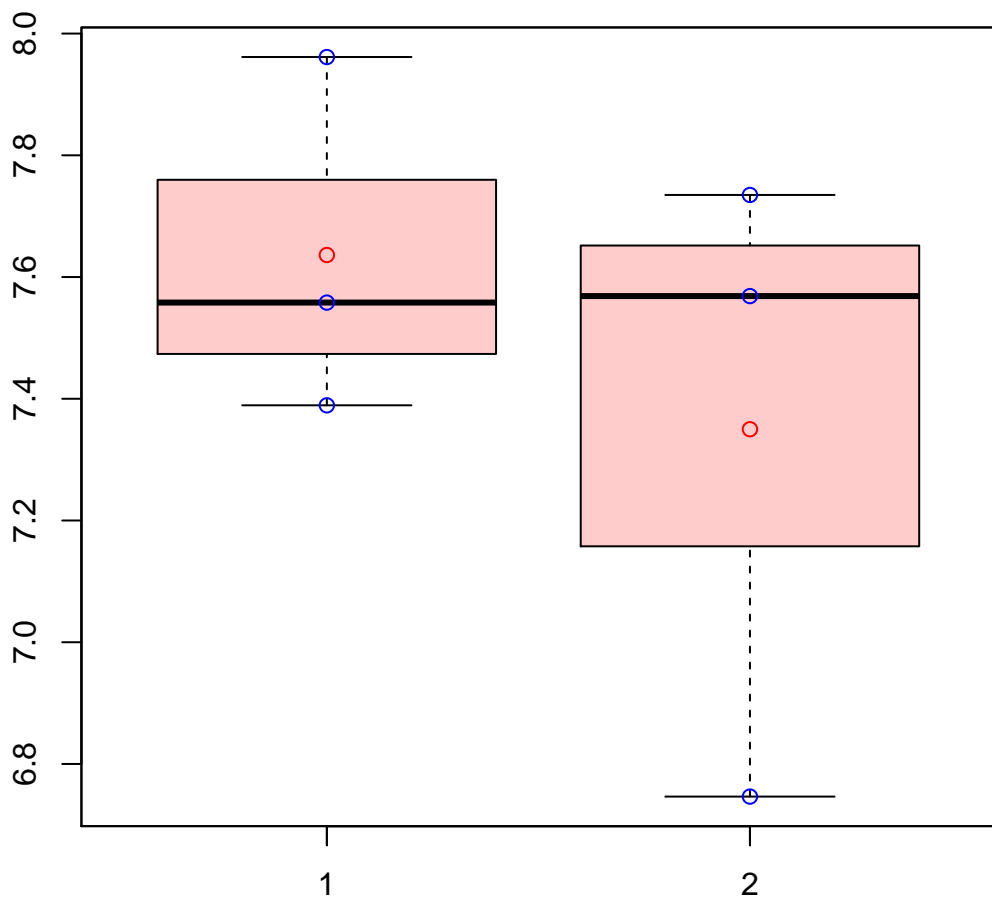

t-Test: p-value = 0.47

# CL1400Contig5|CL1400Contig5

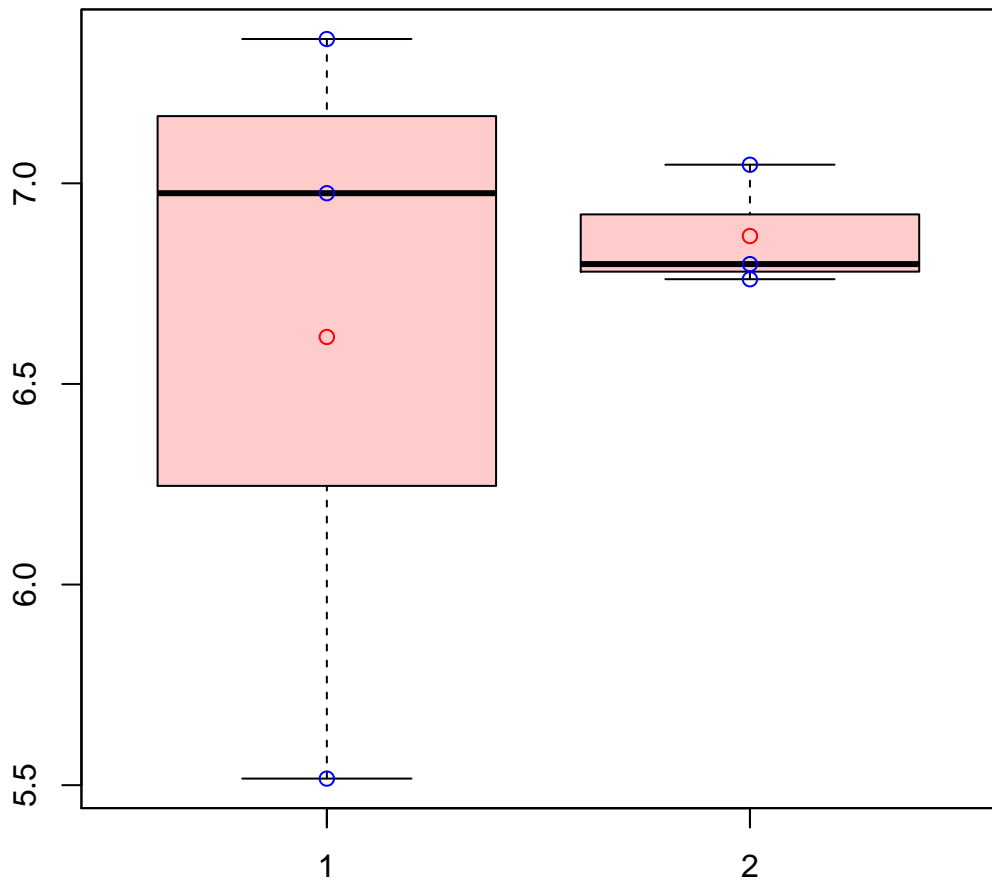

t-Test: p-value = 0.7

# CL1402Contig4|CL1402Contig4

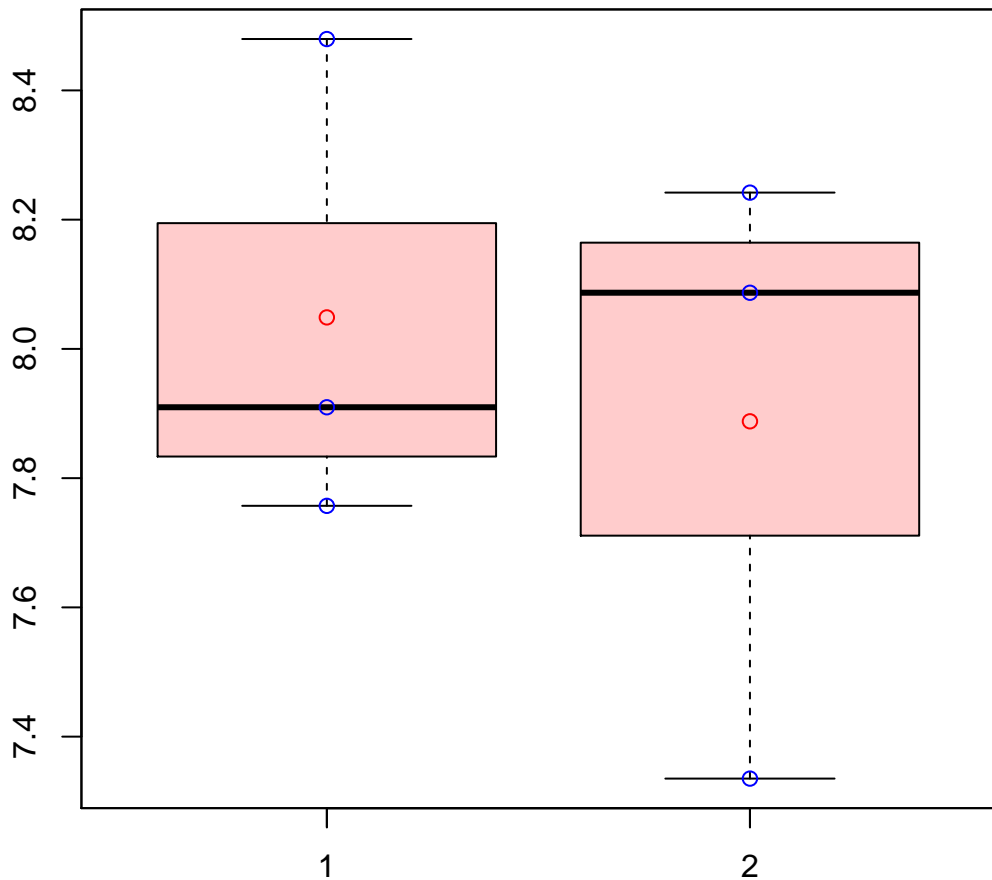

t-Test: p-value = 0.68

# CL140Contig12|CL140Contig12

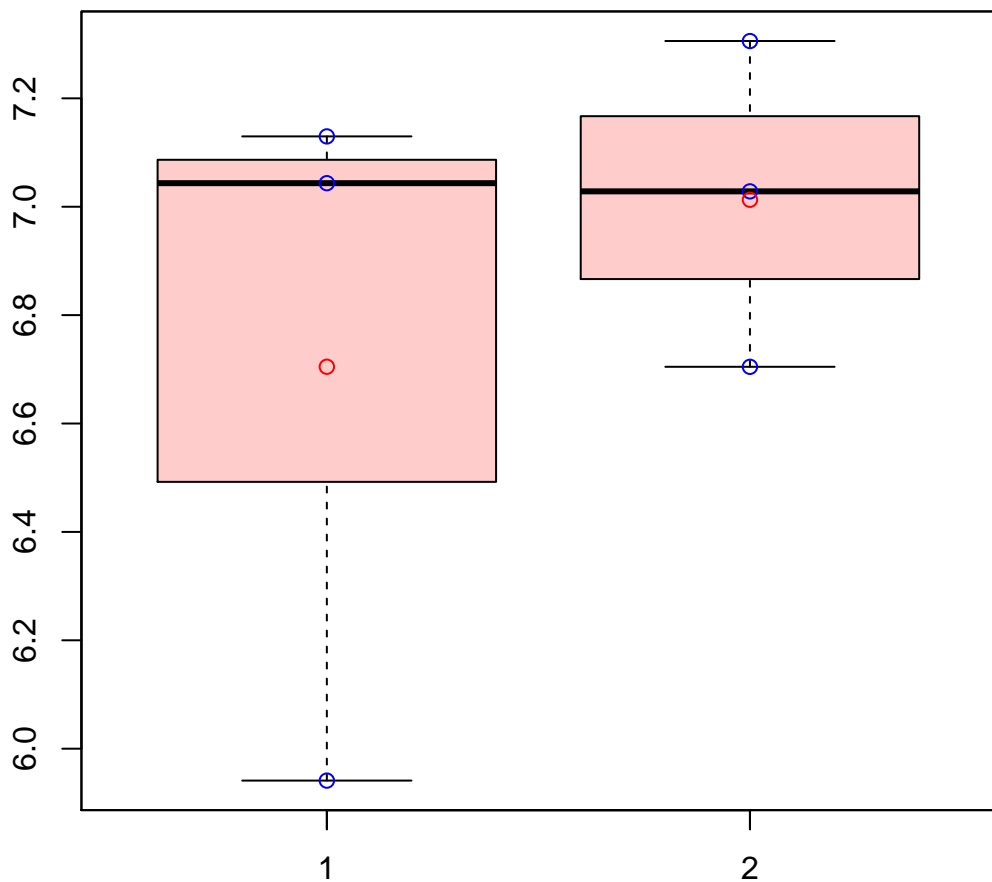

t-Test: p-value = 0.52

# CL14128Contig1|CL14128Contig1

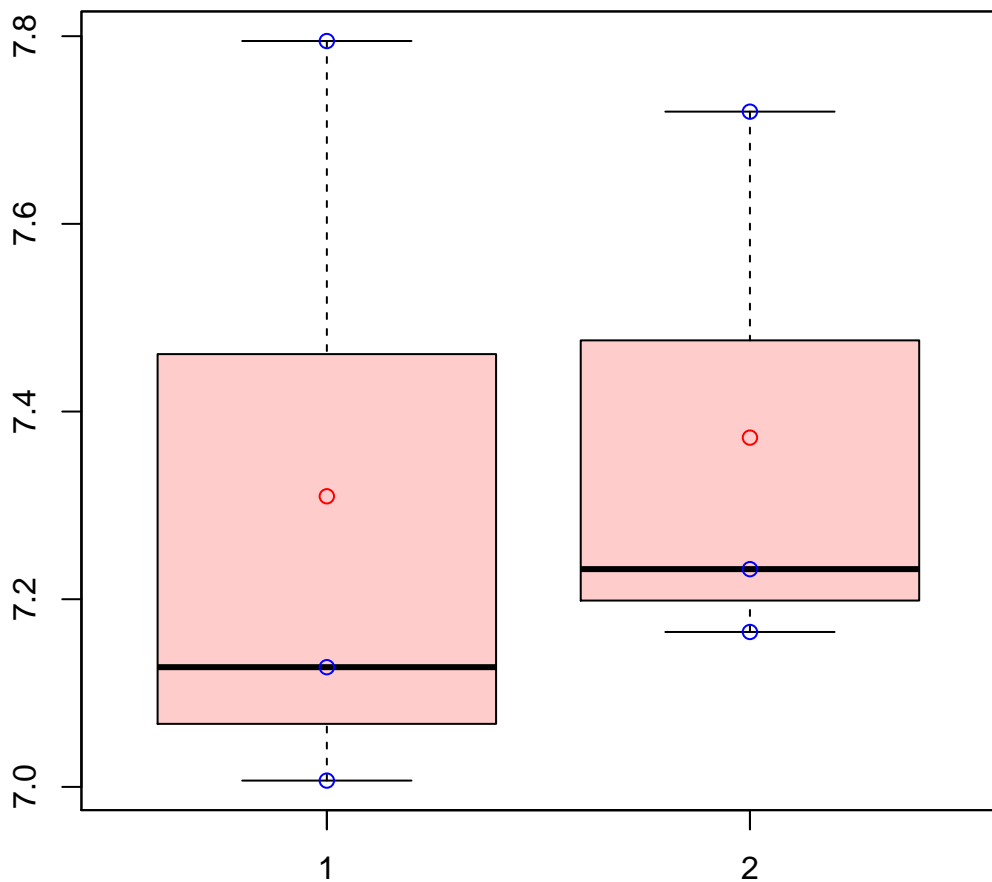

t-Test: p-value = 0.85

# CL14137Contig1|CL14137Contig1

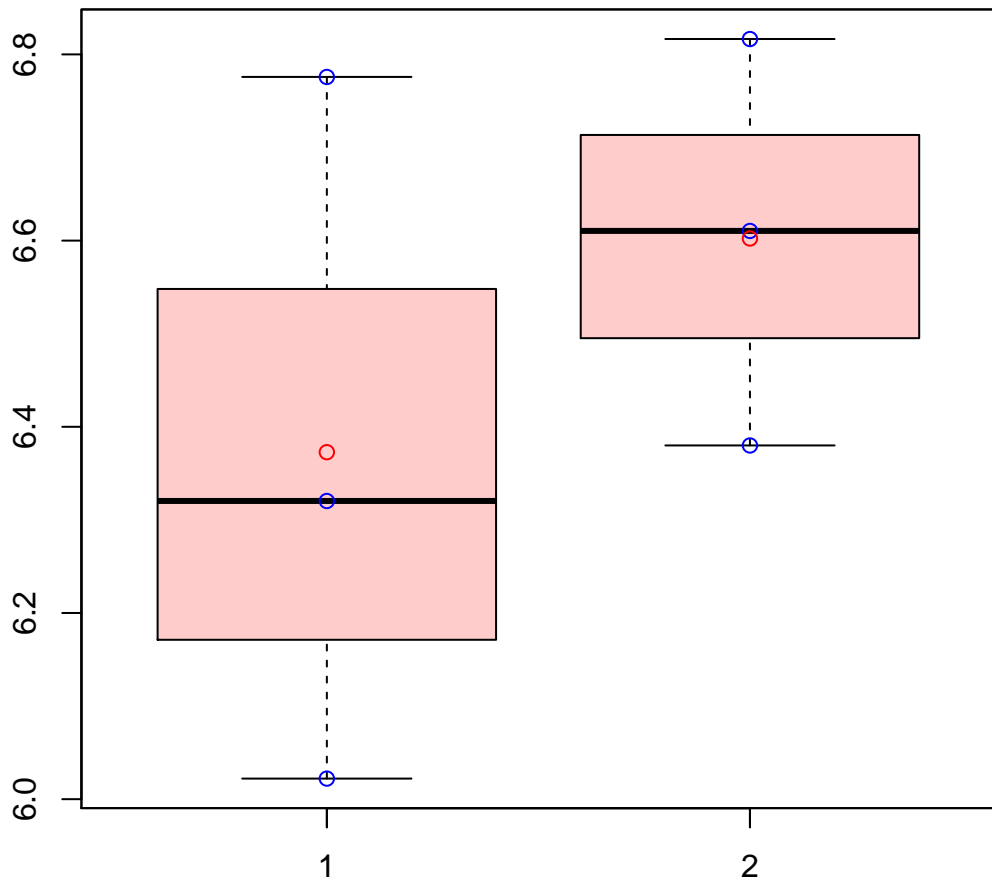

t-Test: p-value = 0.43

# CL1413Contig3|CL1413Contig3

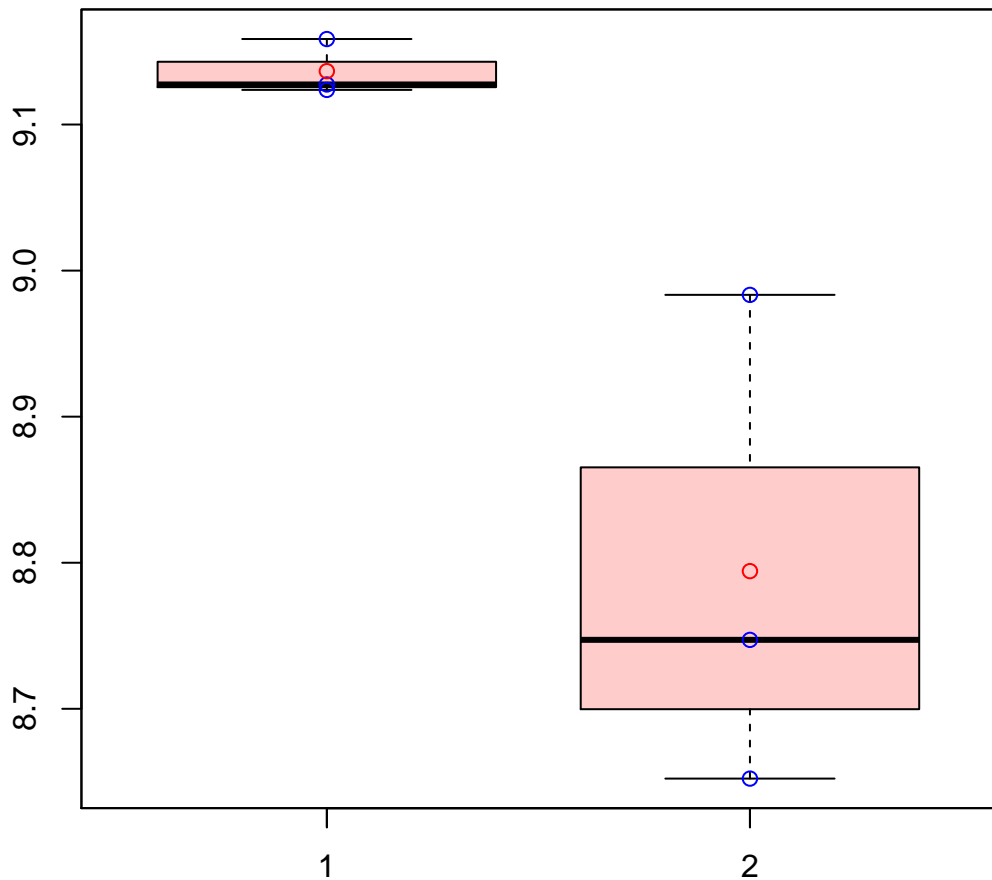

t-Test: p-value = 0.07



# CL1414Contig3|CL1414Contig3

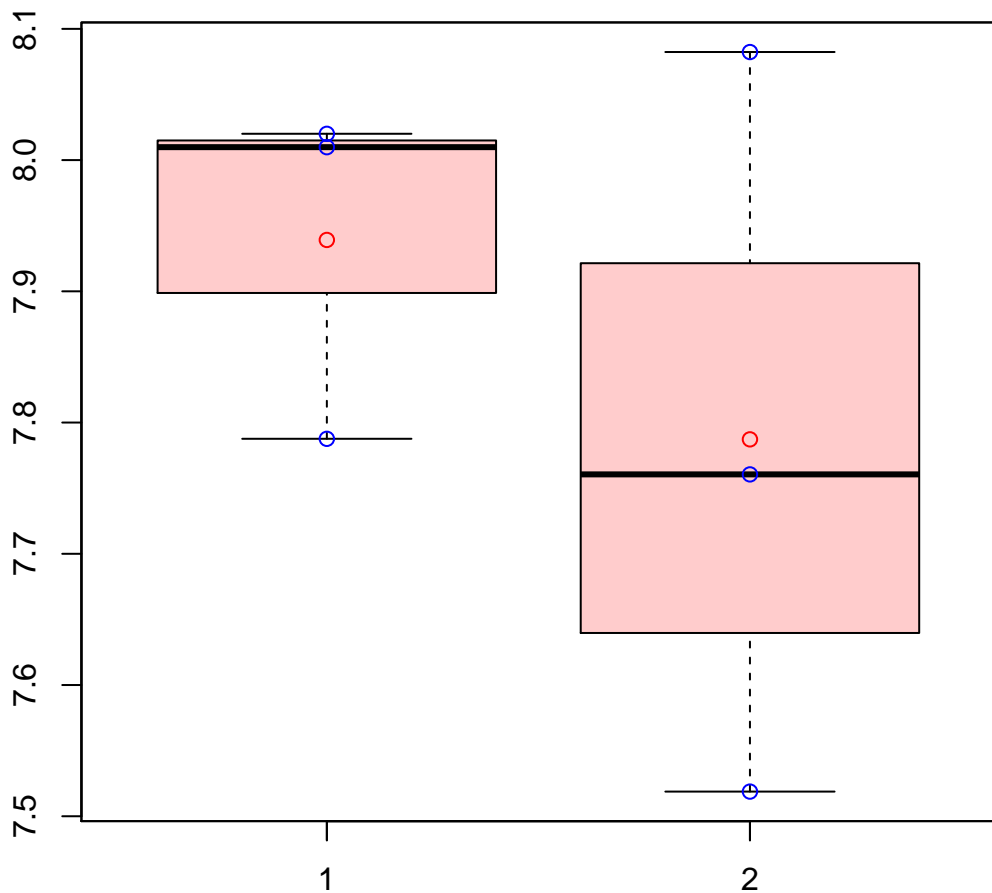

t-Test: p-value = 0.46

# CL1417Contig3|CL1417Contig3

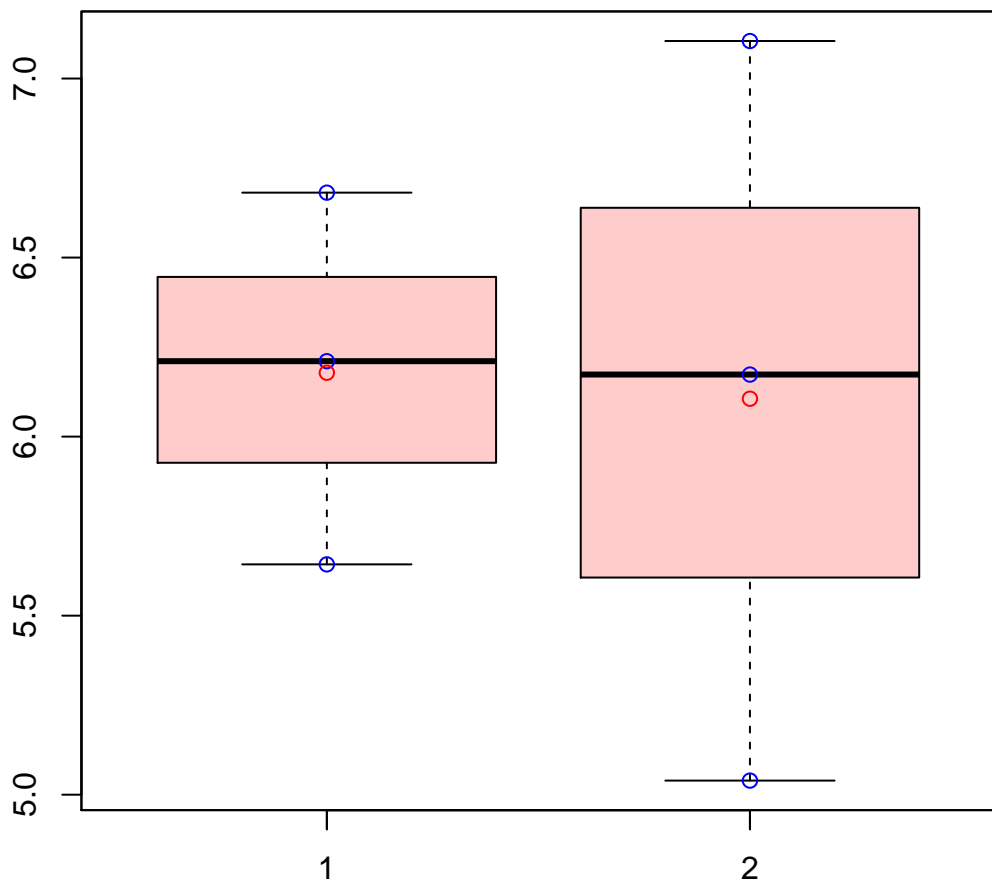

t-Test: p-value = 0.92

# CL141Contig6|CL141Contig6

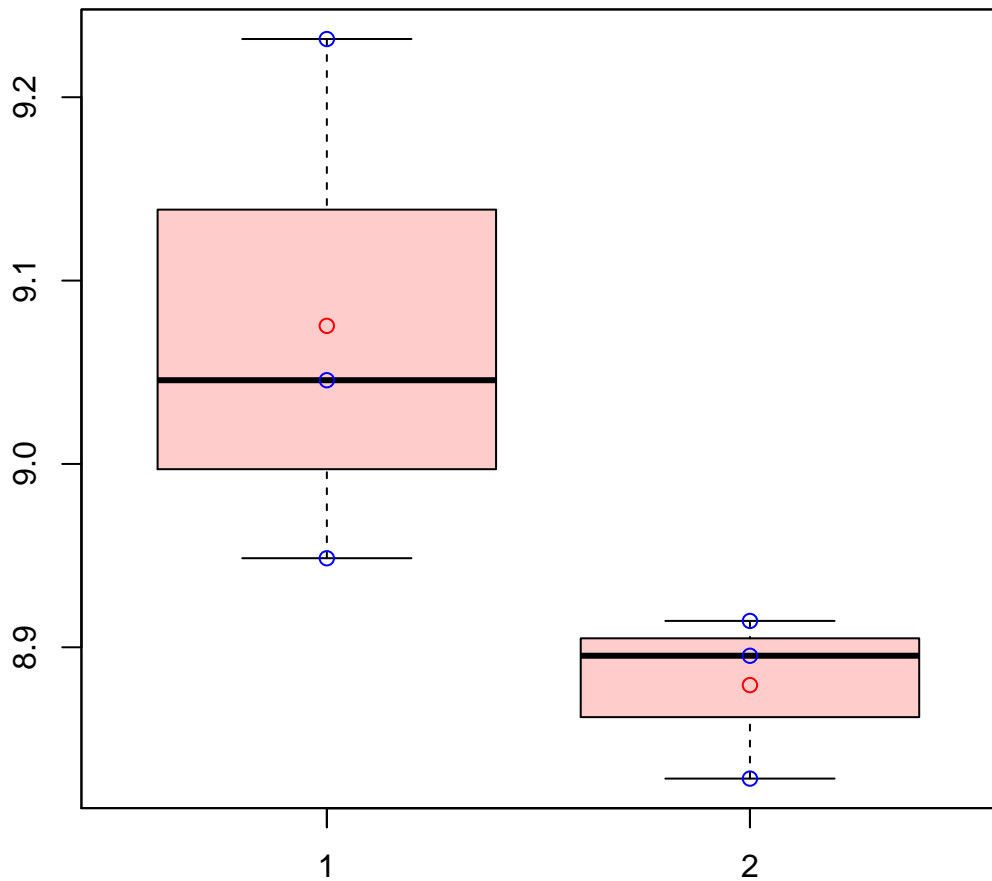

t-Test: p-value = 0.13

# CL14225Contig1|CL14225Contig1

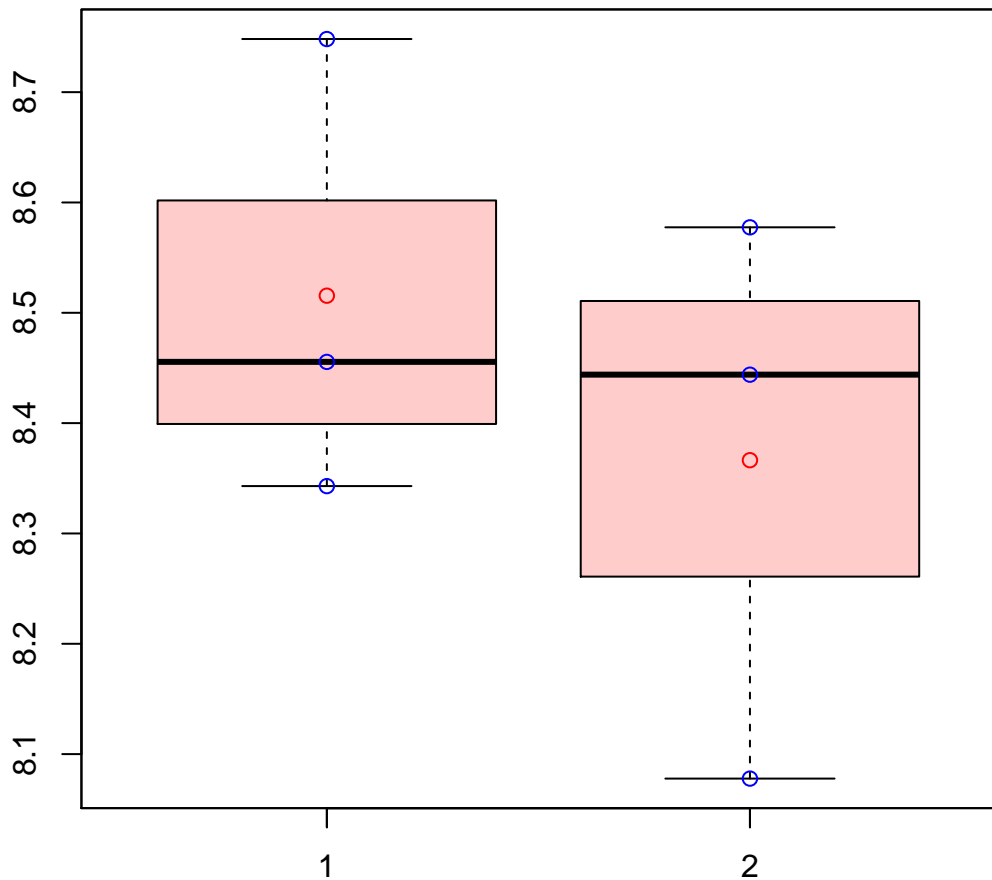

t-Test: p-value = 0.48

# CL1422Contig9|CL1422Contig9

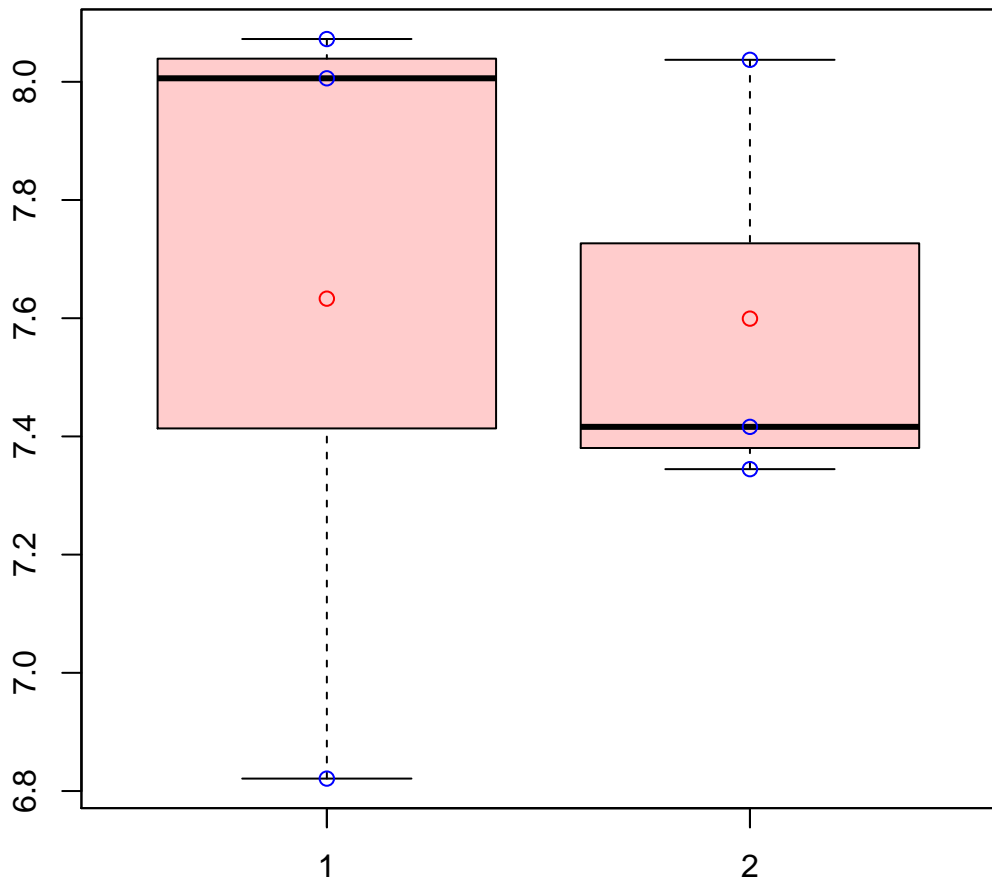

t-Test: p-value = 0.95

# CL1423Contig3|CL1423Contig3

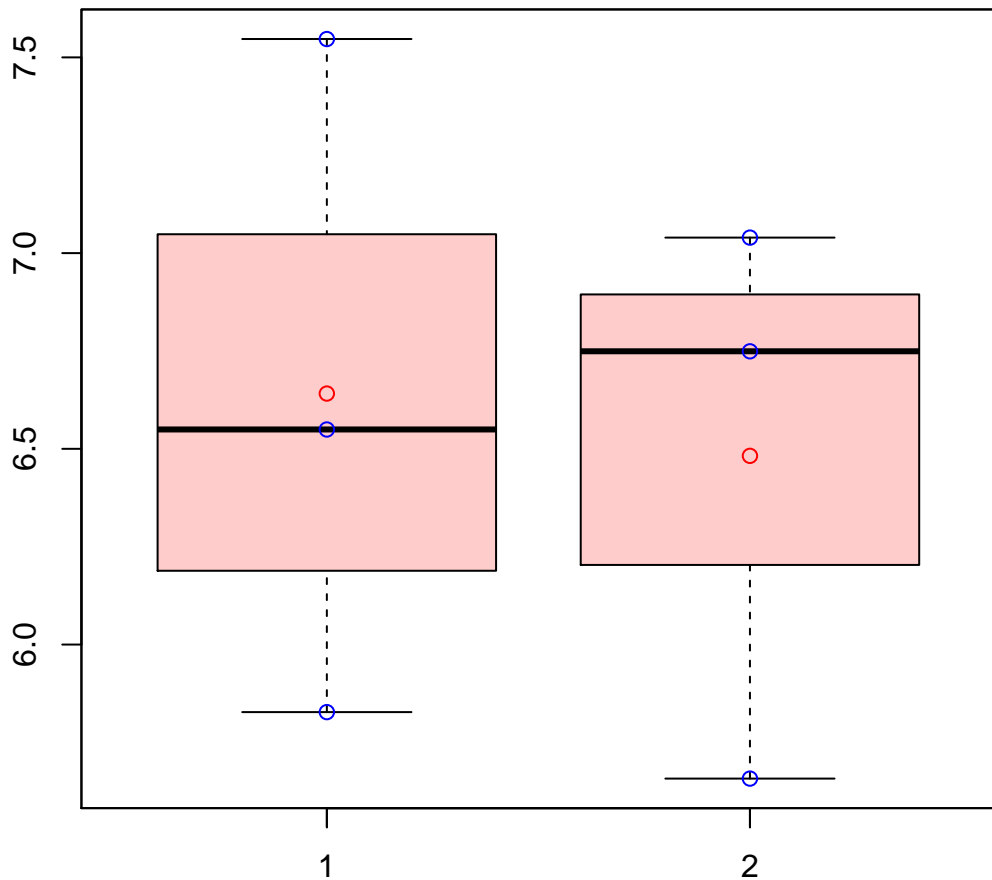

t-Test: p-value = 0.82

# CL14245Contig1|CL14245Contig1

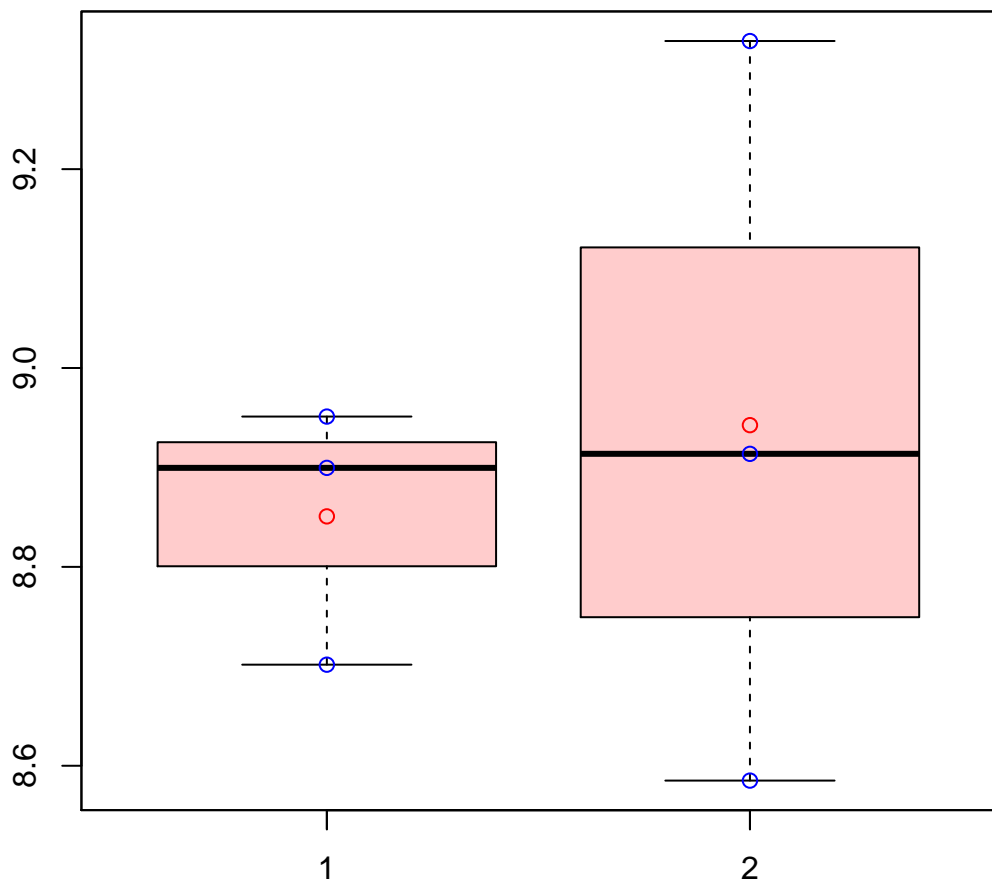

t-Test: p-value = 0.72

# CL14247Contig2|CL14247Contig2

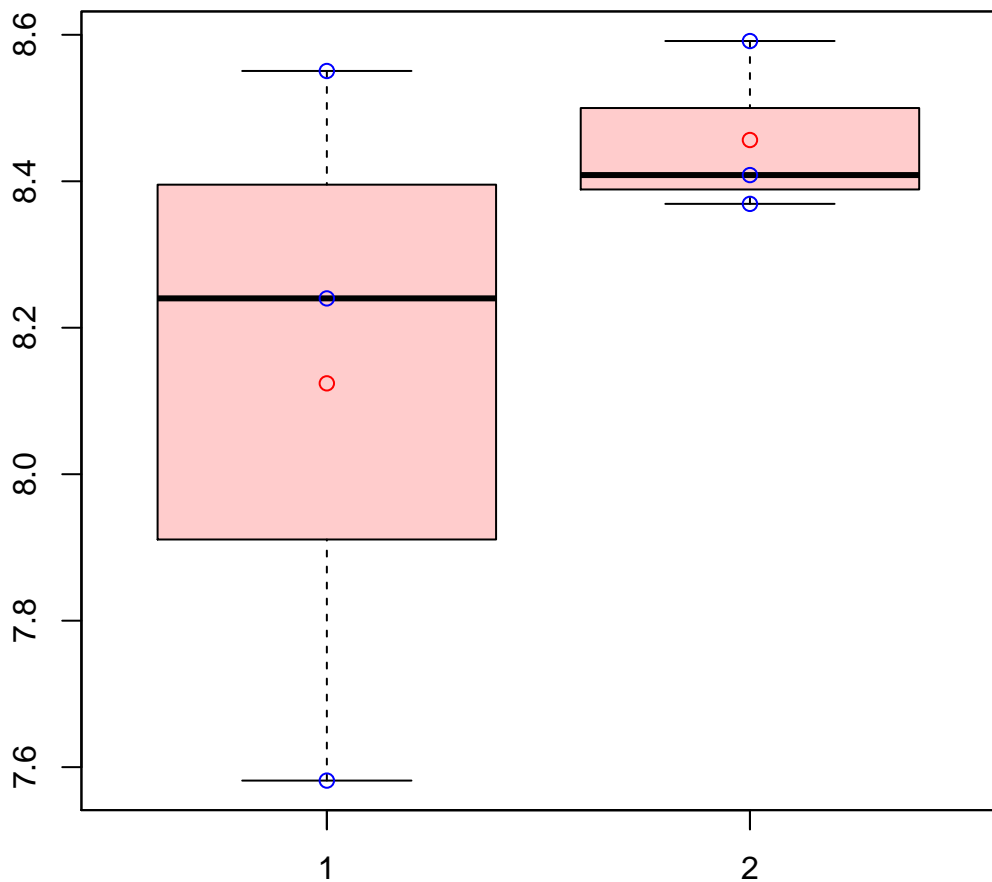

t-Test: p-value = 0.36



# CL1424Contig4|CL1424Contig4

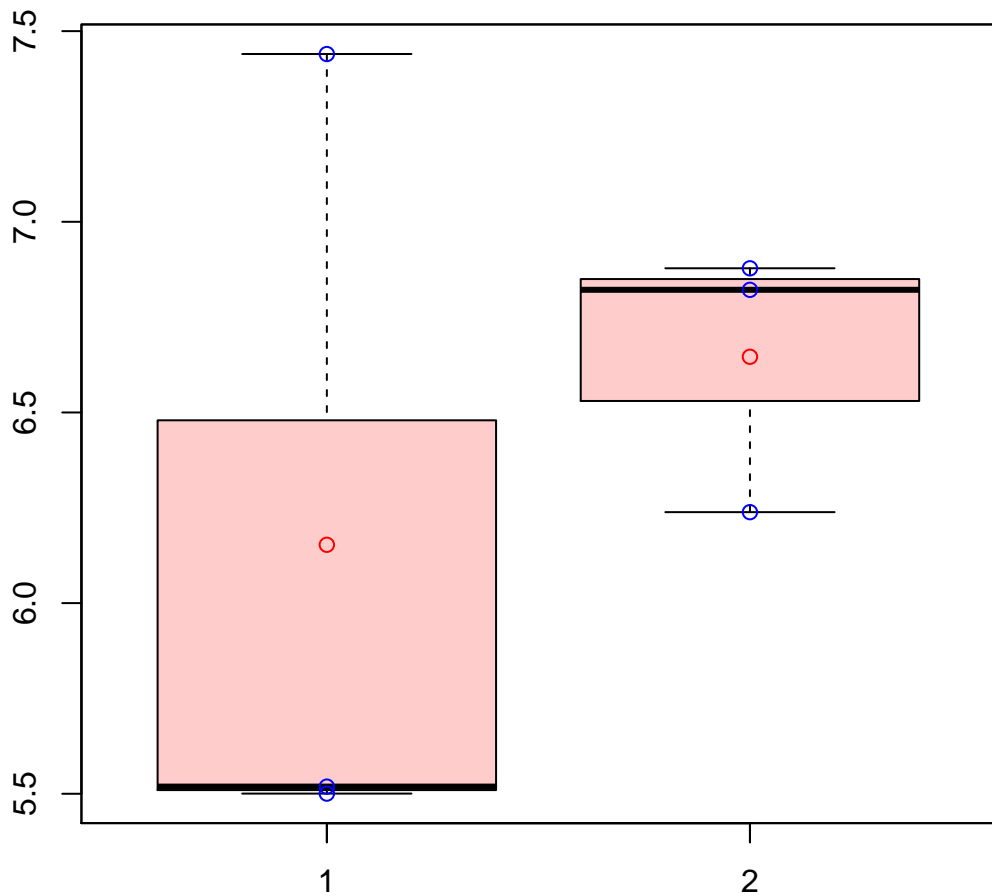

t-Test: p-value = 0.53

# CL14251Contig1|CL14251Contig1

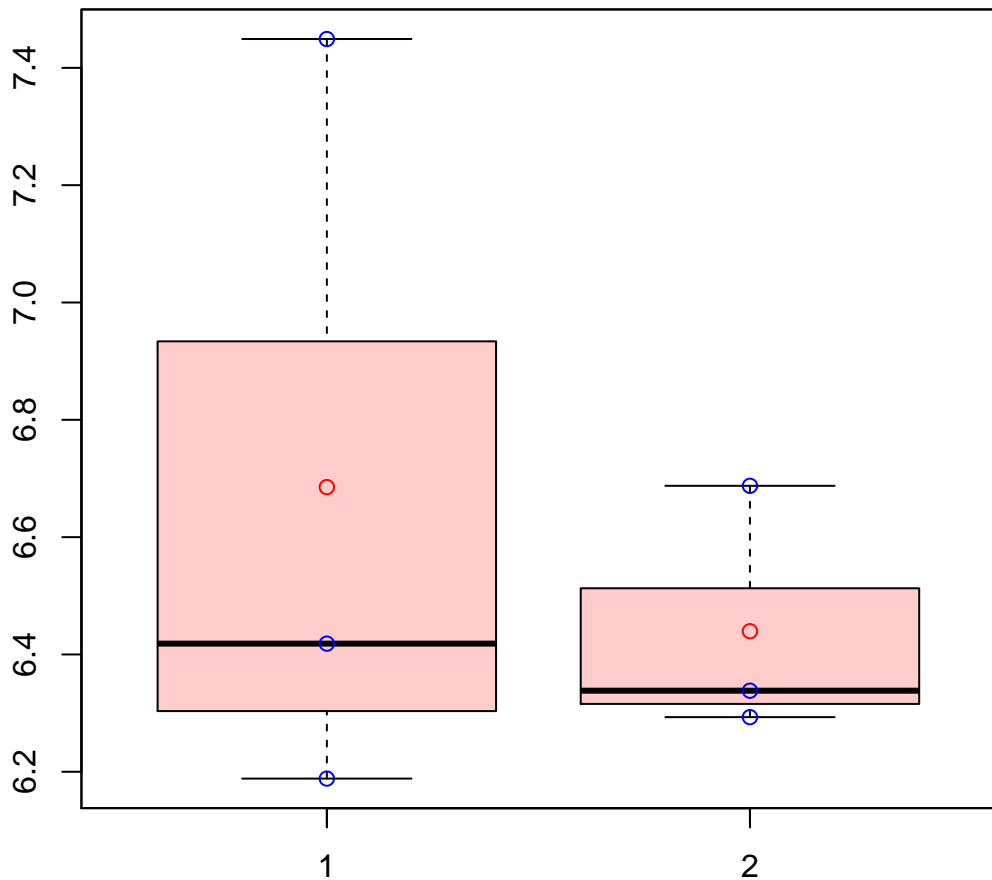

t-Test: p-value = 0.6

# CL142Contig16|CL142Contig16

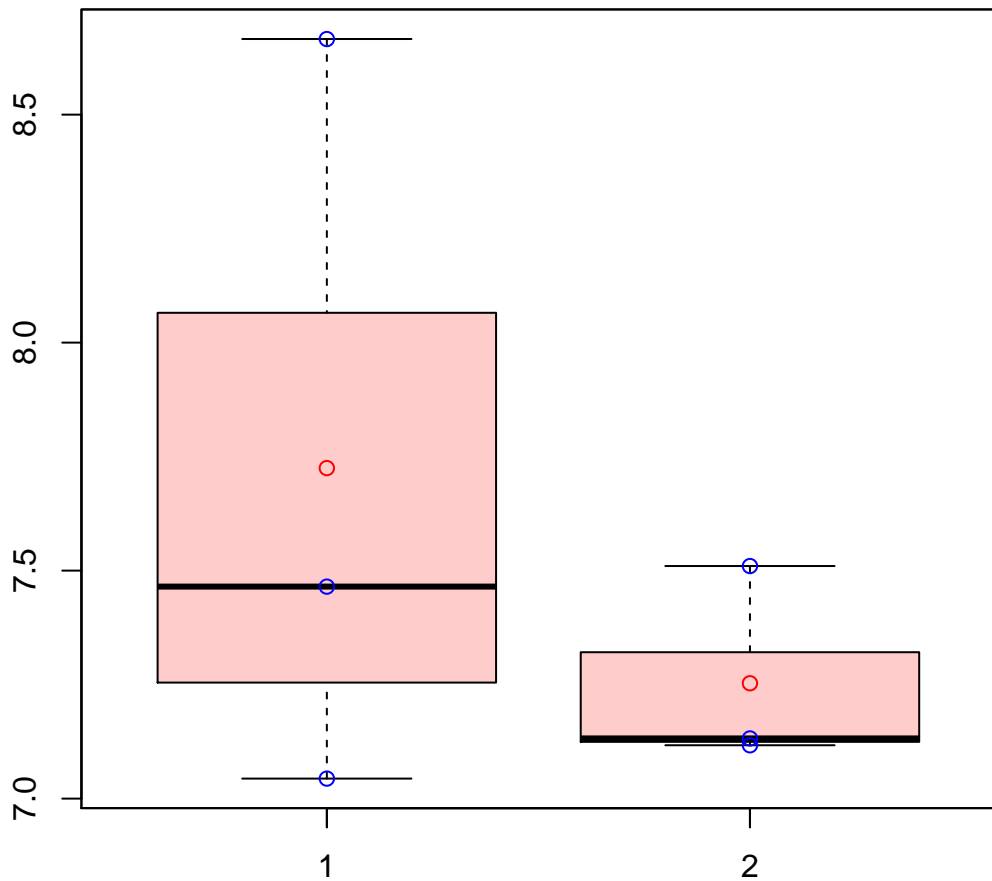

t-Test: p-value = 0.44

# CL1432Contig2|CL1432Contig2

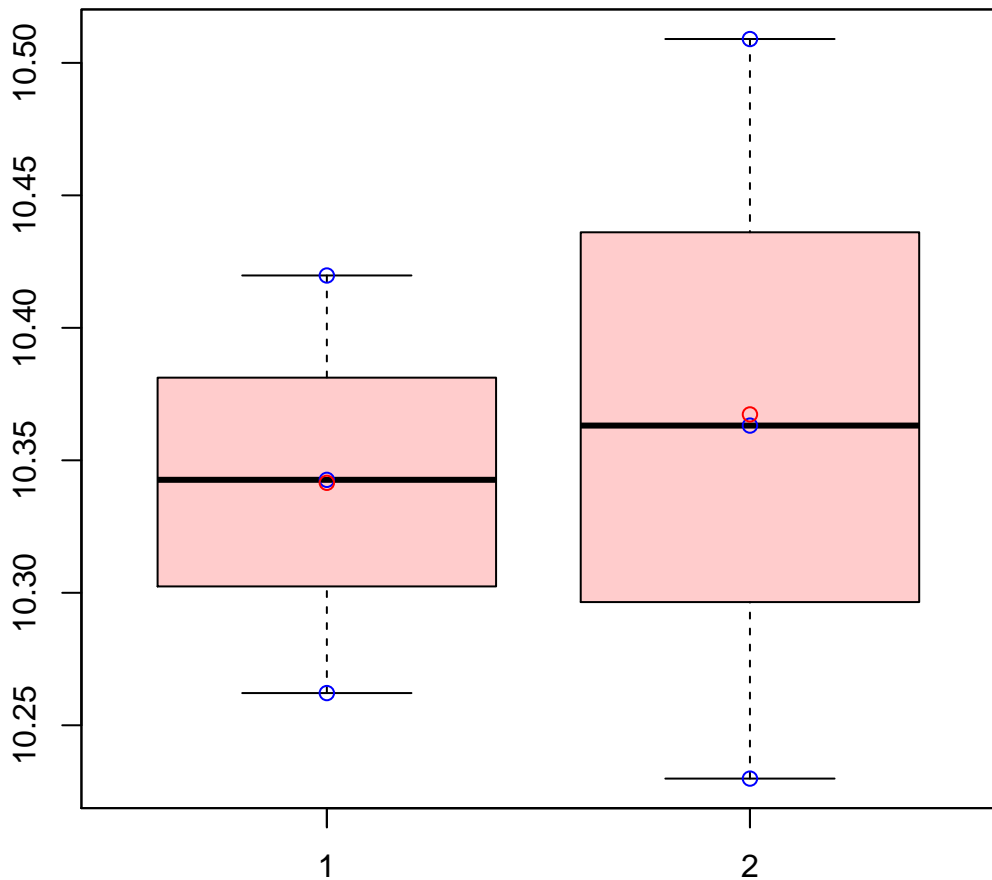

t-Test: p-value = 0.8

# CL1432Contig6|CL1432Contig6

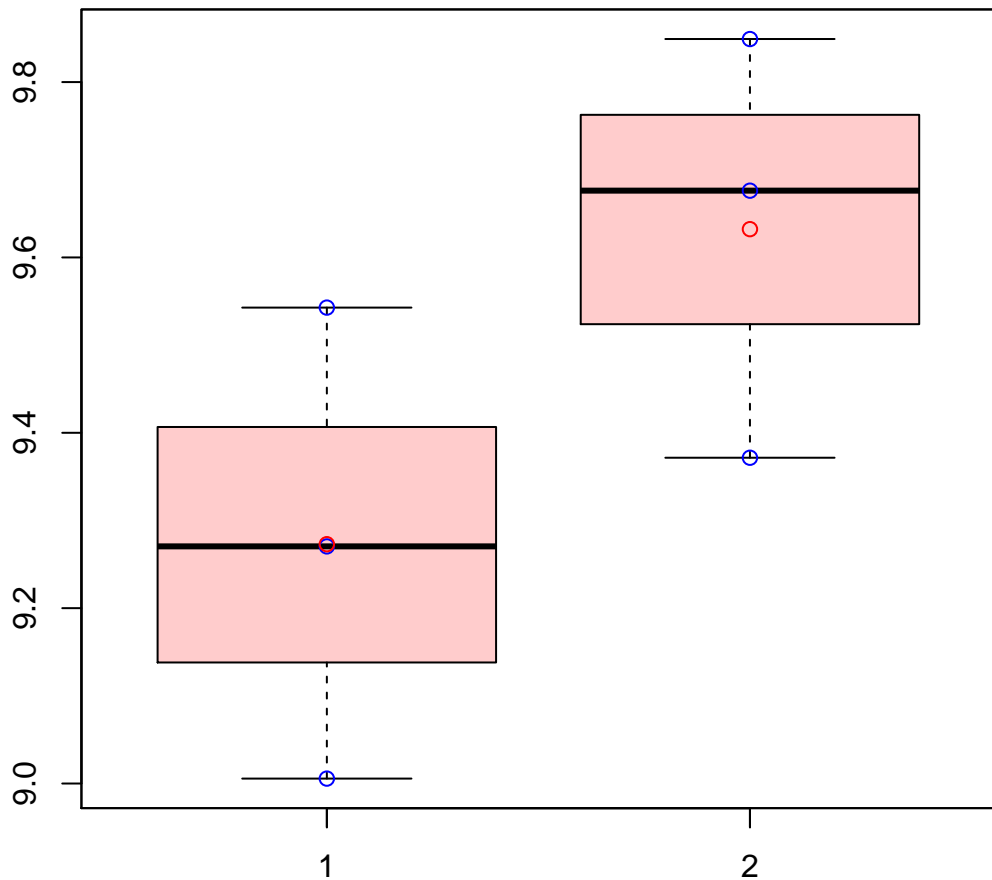

t-Test: p-value = 0.16

# CL1436Contig1|CL1436Contig1

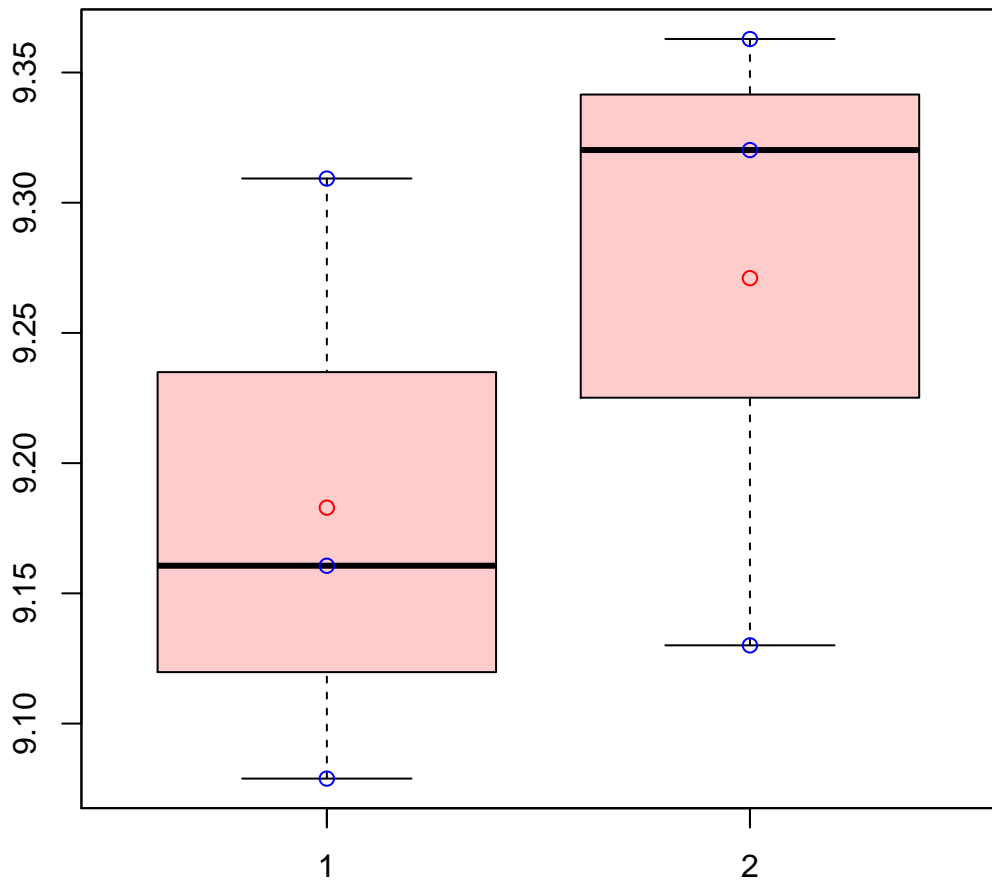

t-Test: p-value = 0.42

# CL1438Contig3|CL1438Contig3

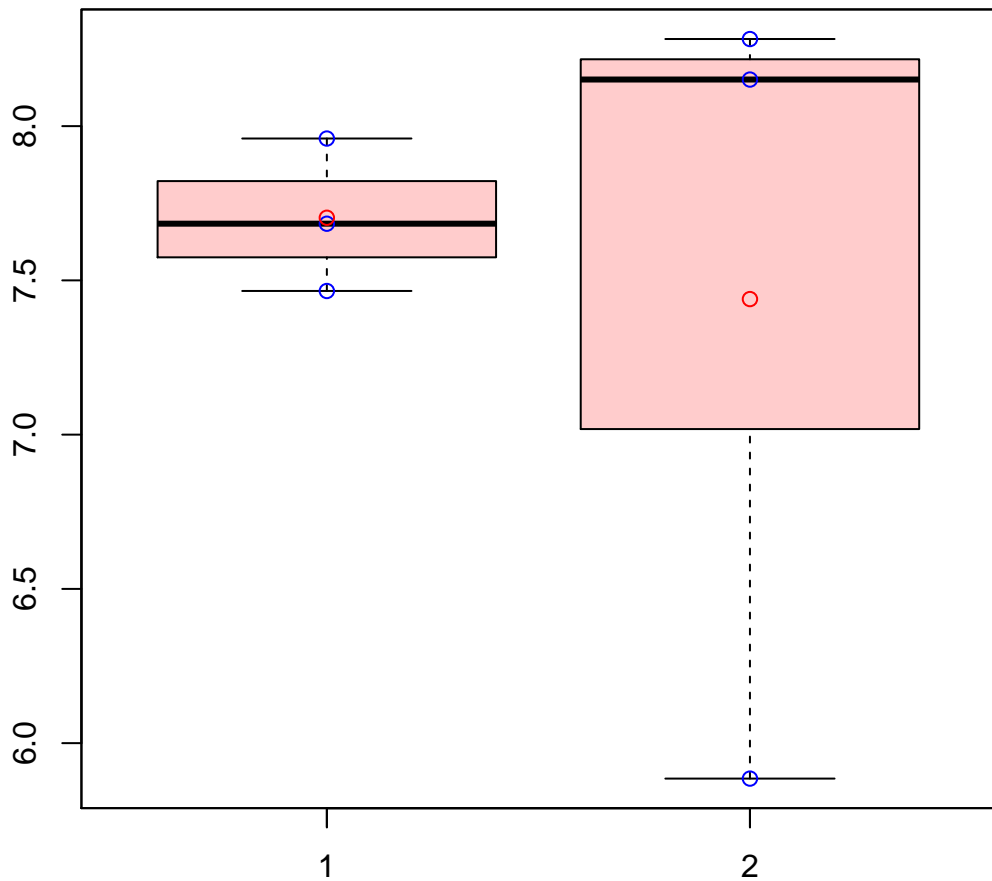

t-Test: p-value = 0.77

# CL1447Contig3|CL1447Contig3

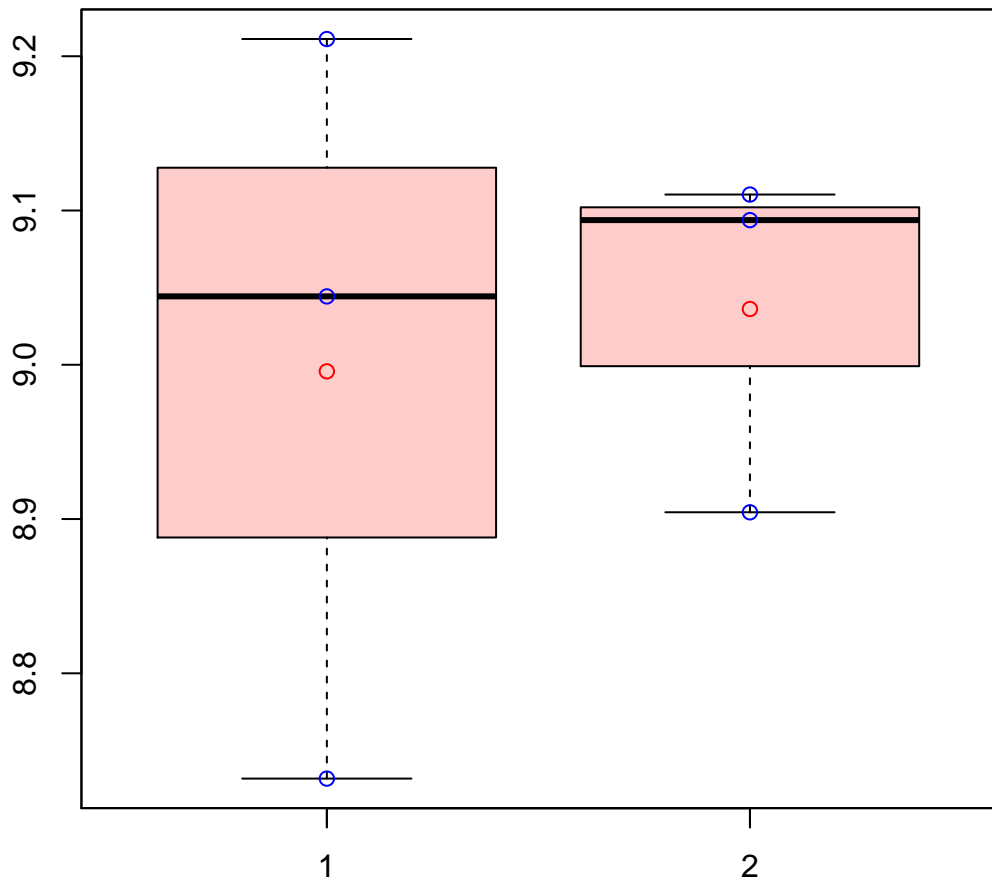

t-Test: p-value = 0.81



# CL1448Contig5|CL1448Contig5

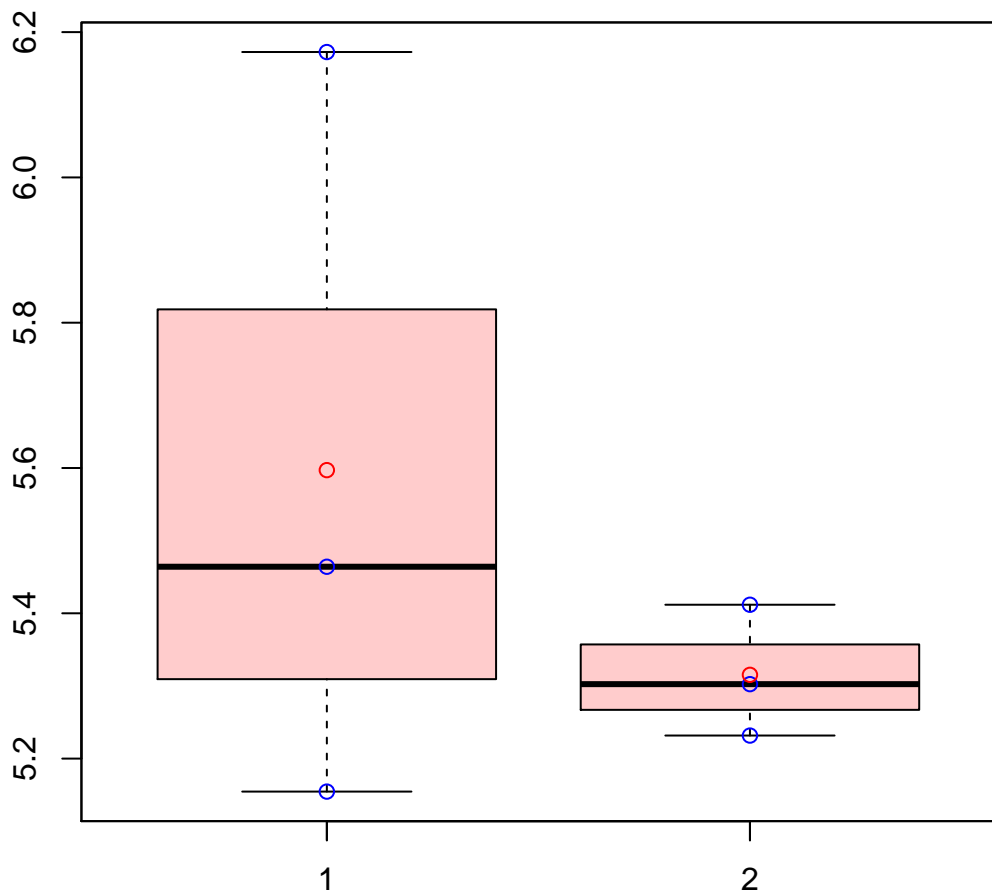

t-Test: p-value = 0.45

# CL1448Contig6|CL1448Contig6

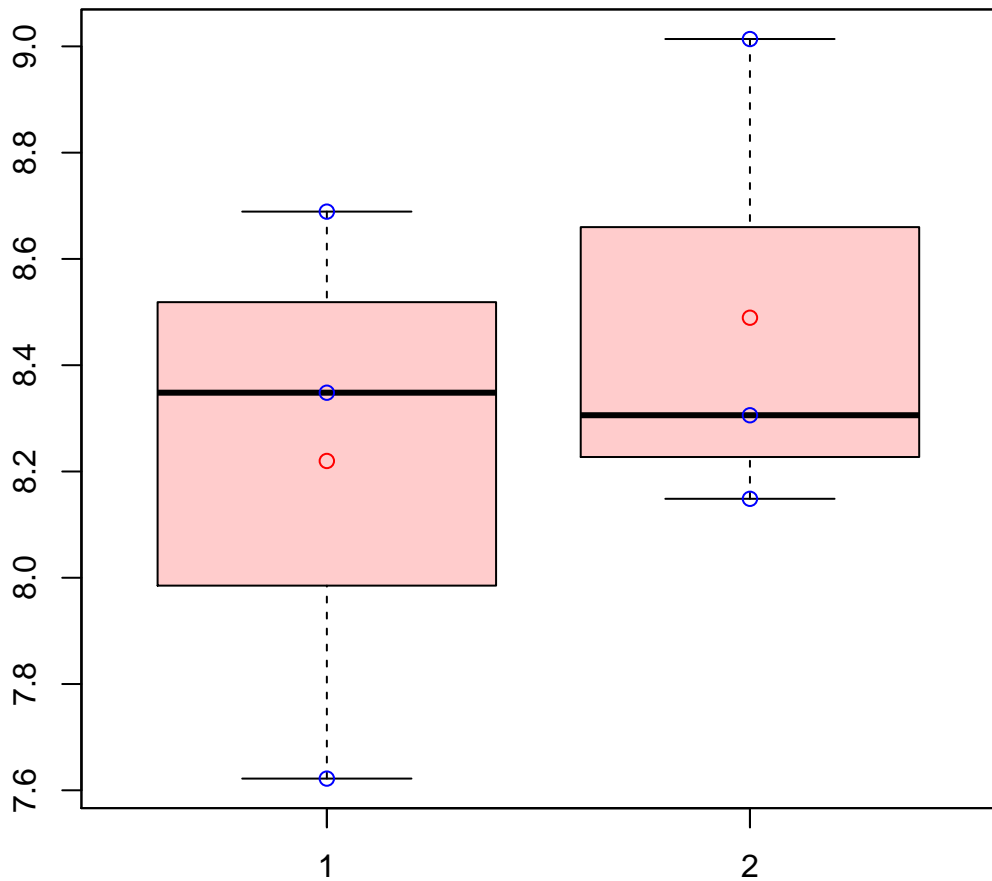

t-Test: p-value = 0.55

# CL144Contig2|CL144Contig2

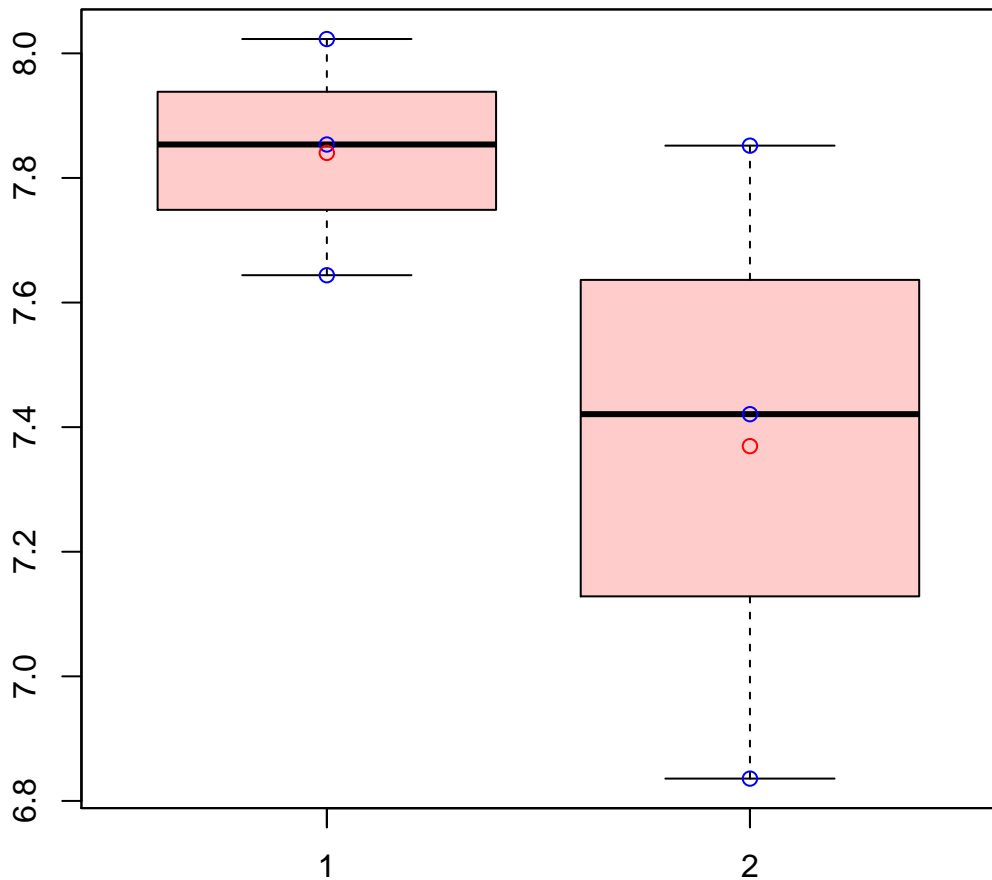

t-Test: p-value = 0.25

# CL144Contig4|CL144Contig4

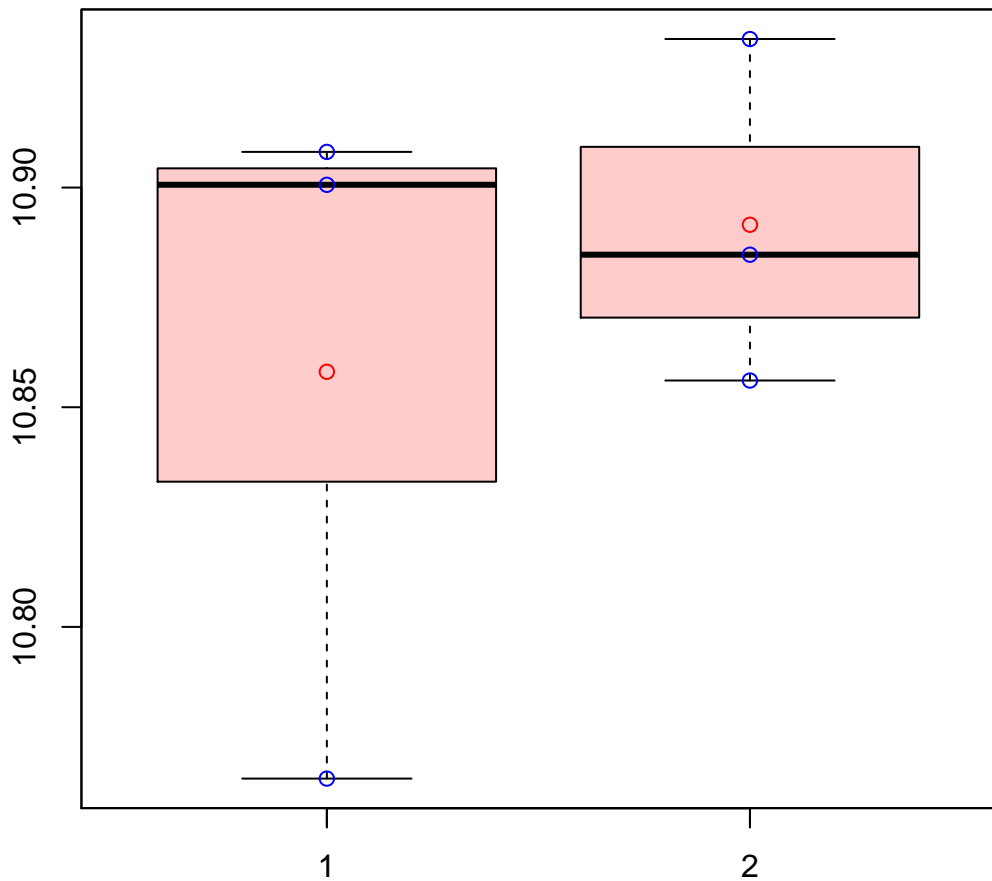

t-Test: p-value = 0.56

# CL1450Contig1|CL1450Contig1

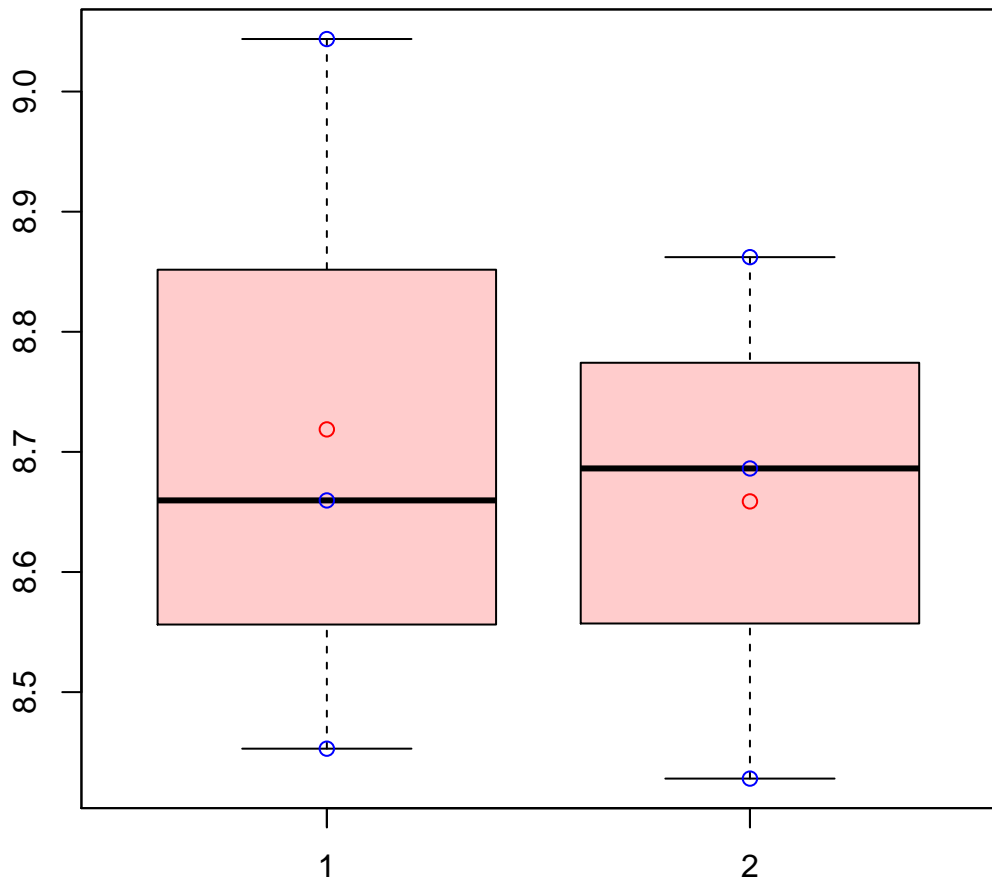

t-Test: p-value = 0.79

# CL1450Contig2|CL1450Contig2

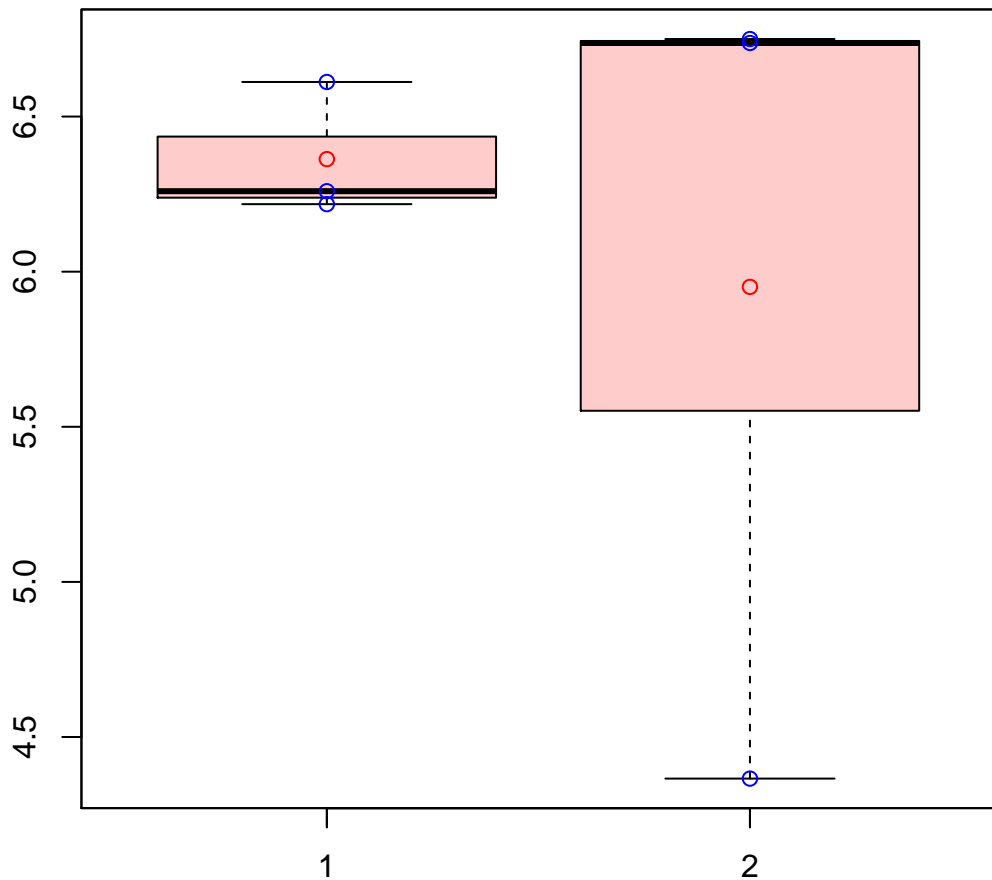

t-Test: p-value = 0.66

# CL1451Contig1|CL1451Contig1

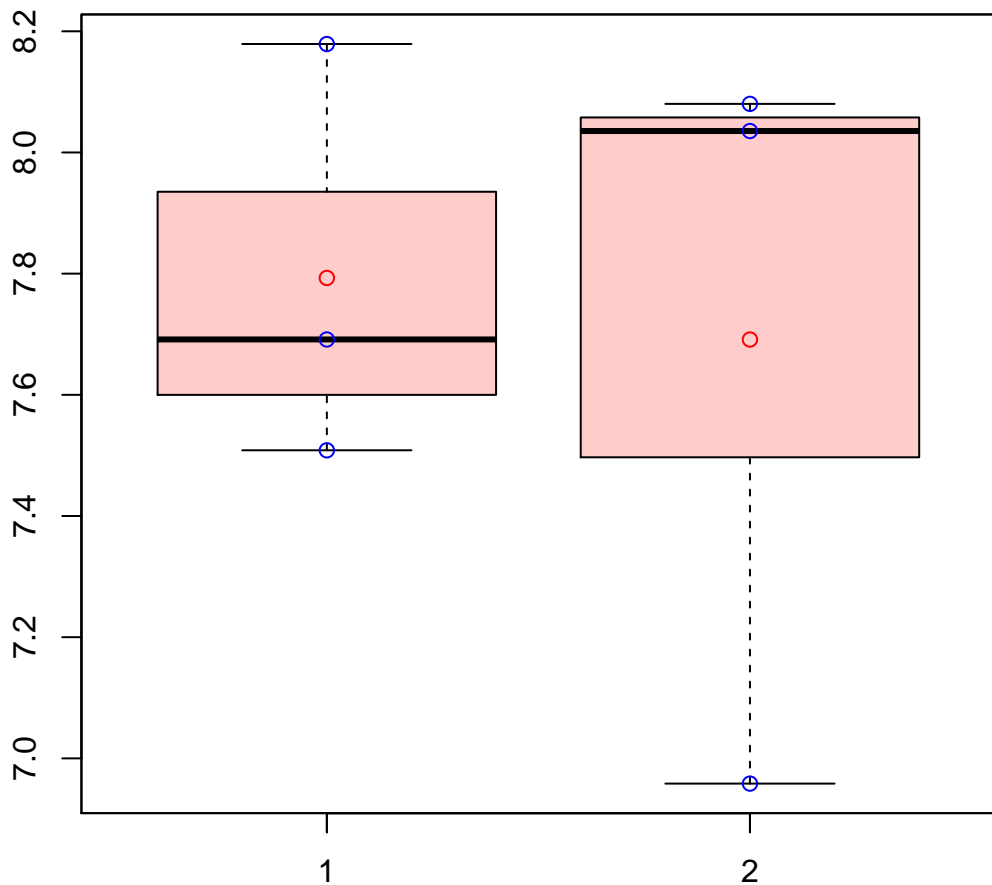

t-Test: p-value = 0.82

# CL1452Contig10|CL1452Contig10

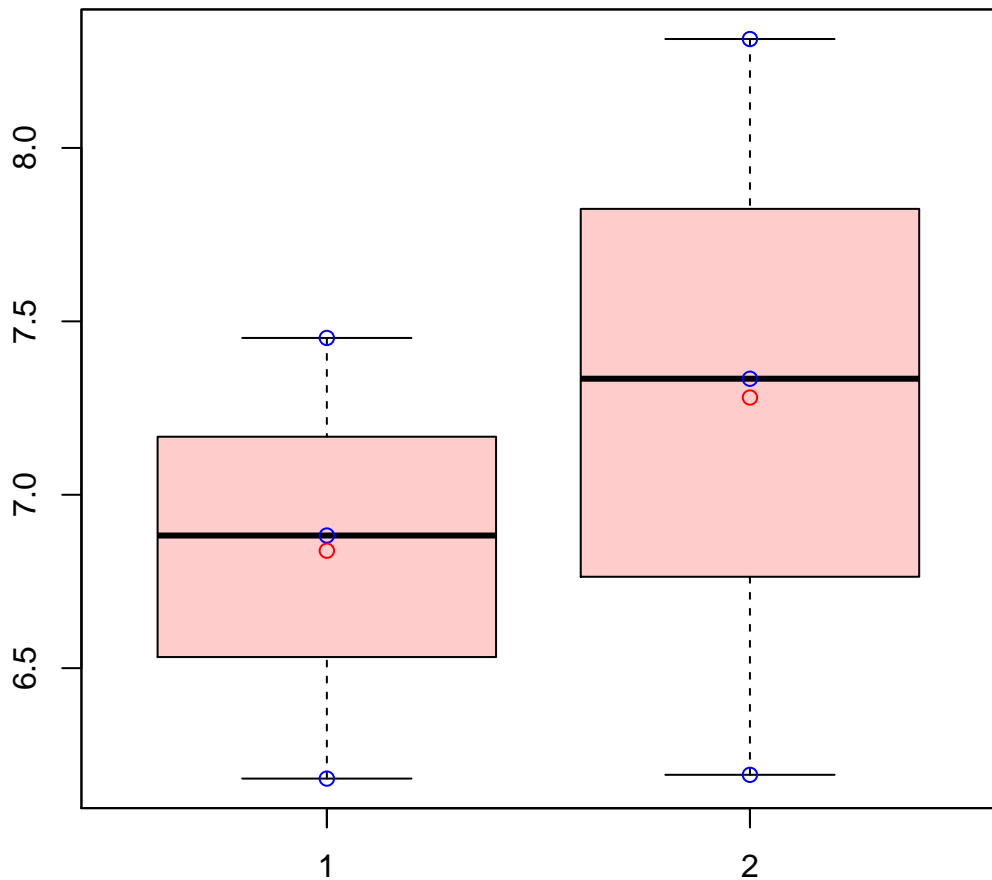

t-Test: p-value = 0.58



# CL1452Contig2|CL1452Contig2

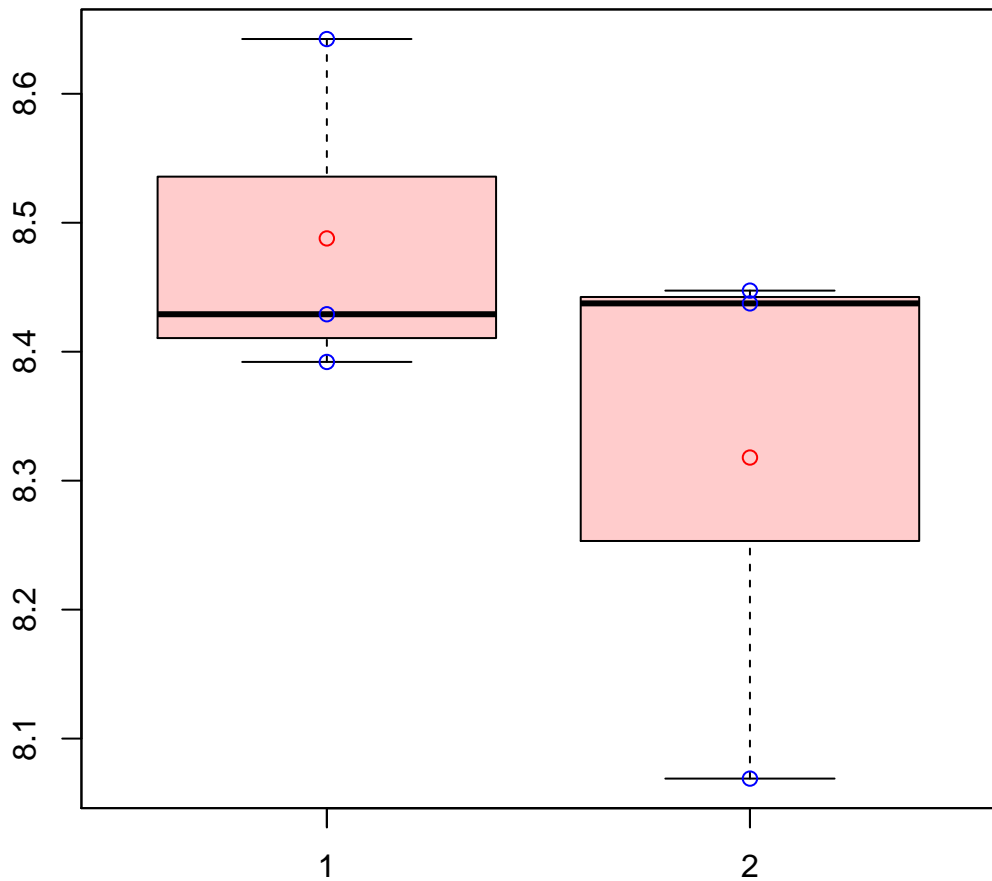

t-Test: p-value = 0.32

# CL1452Contig5|CL1452Contig5

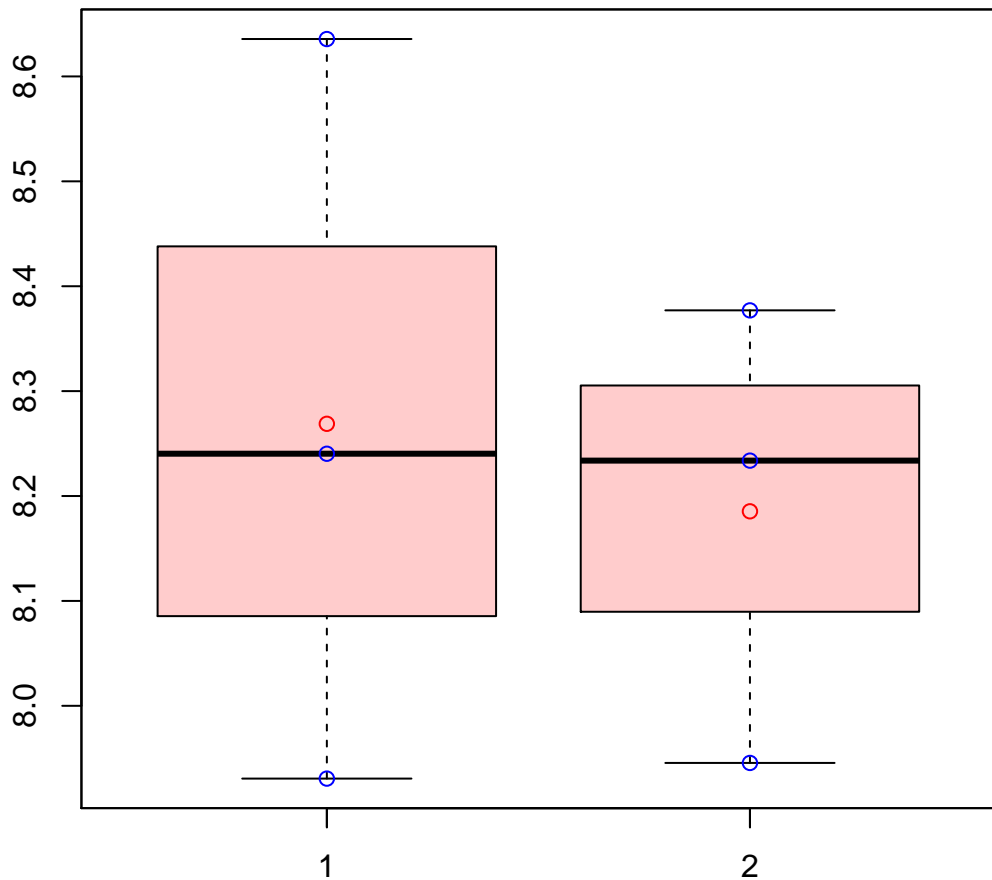

t-Test: p-value = 0.75

# CL1452Contig7|CL1452Contig7

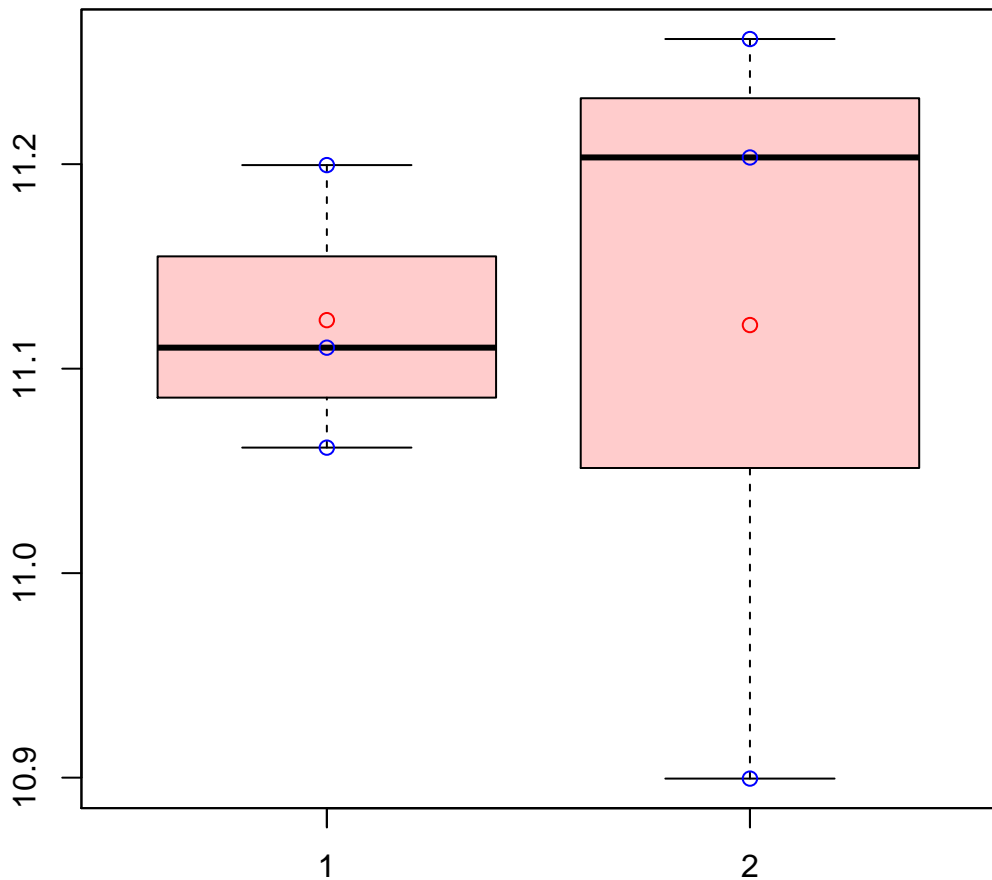

t-Test: p-value = 0.99

# CL1456Contig4|CL1456Contig4

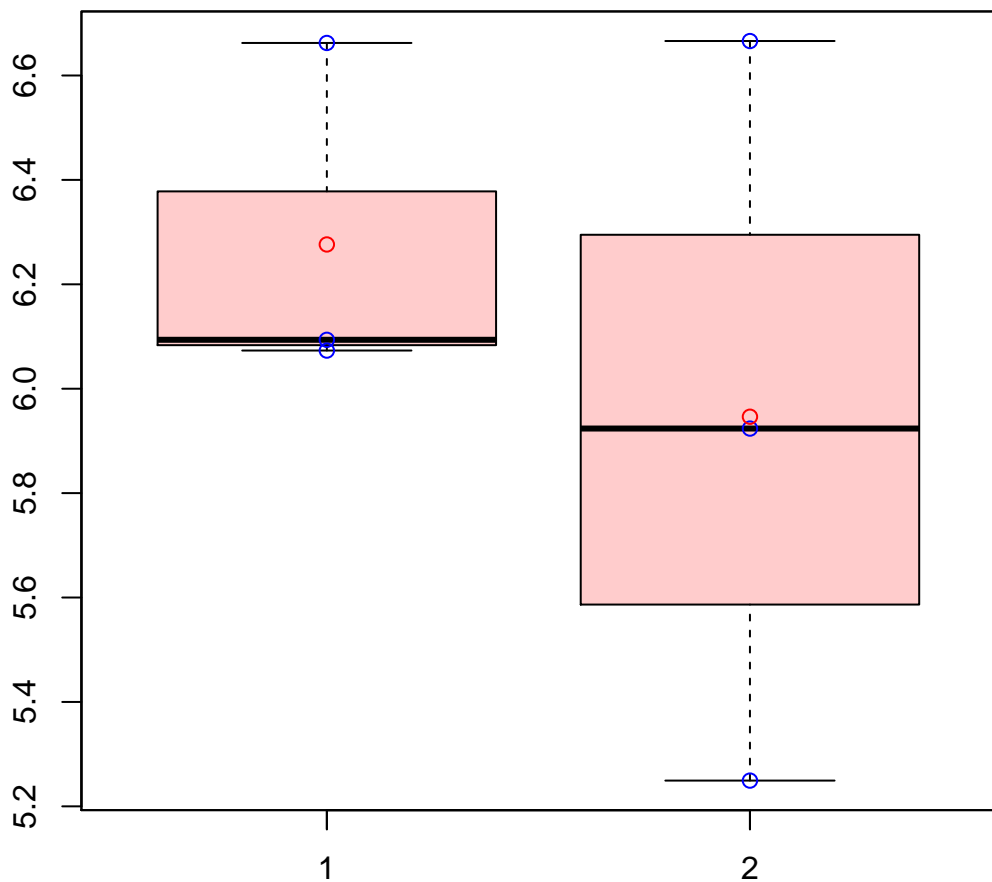

t-Test: p-value = 0.52

# CL1460Contig3|CL1460Contig3

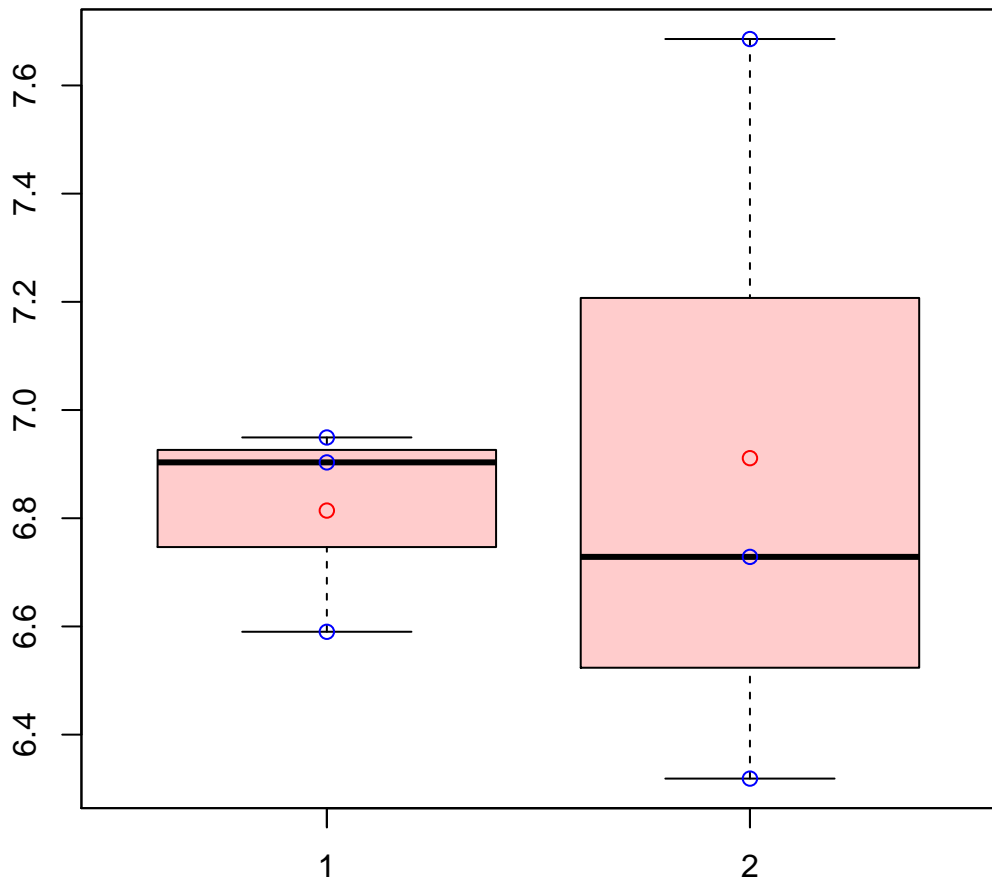

t-Test: p-value = 0.84

# CL14615Contig1|CL14615Contig1

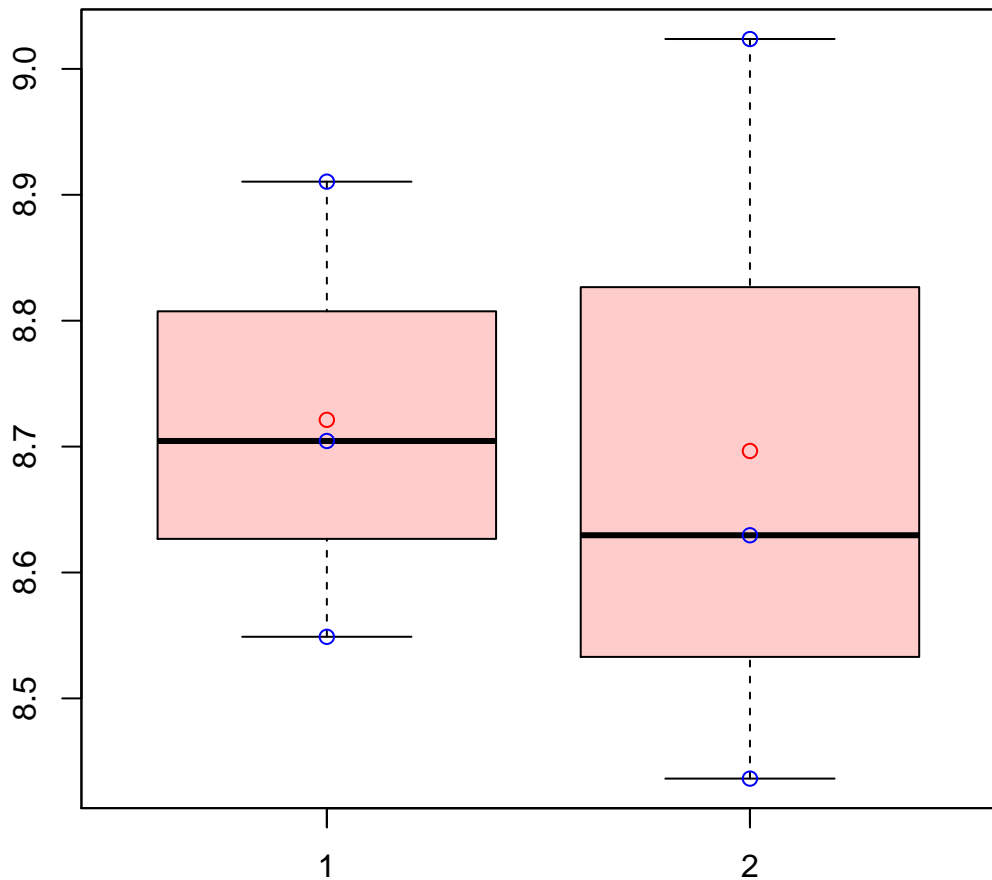

t-Test: p-value = 0.91

# CL1464Contig1|CL1464Contig1

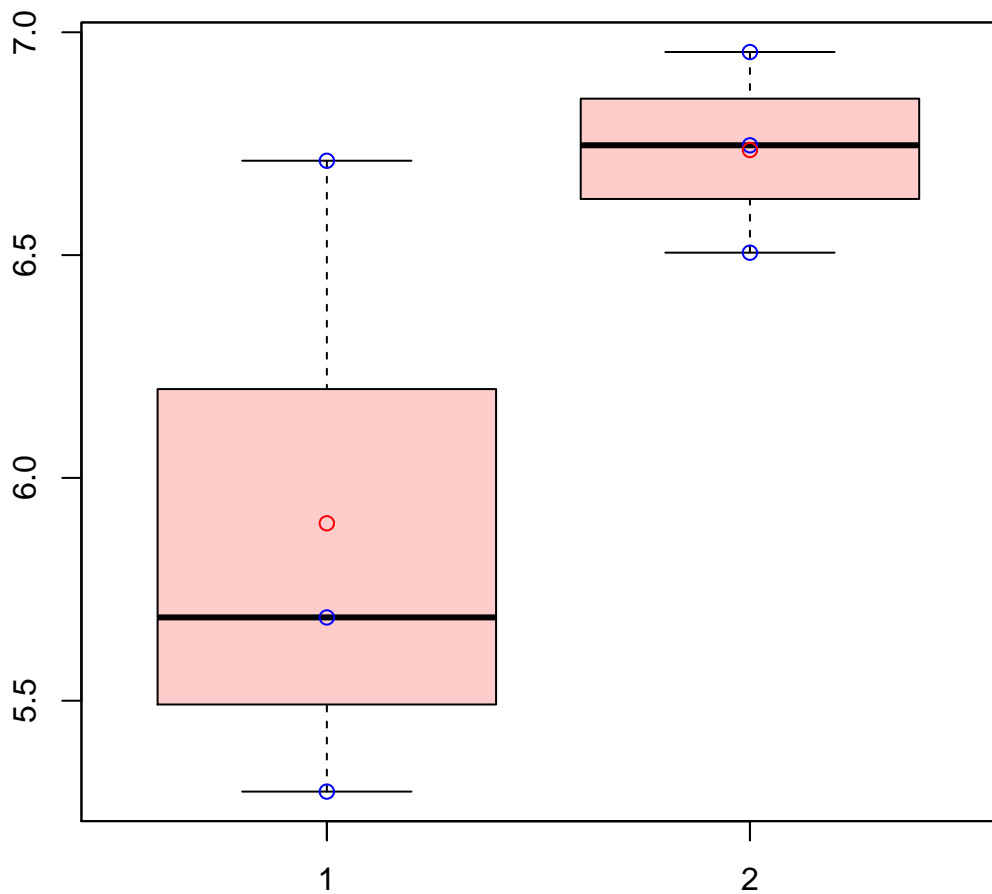

t-Test: p-value = 0.18

# CL1465Contig4|CL1465Contig4

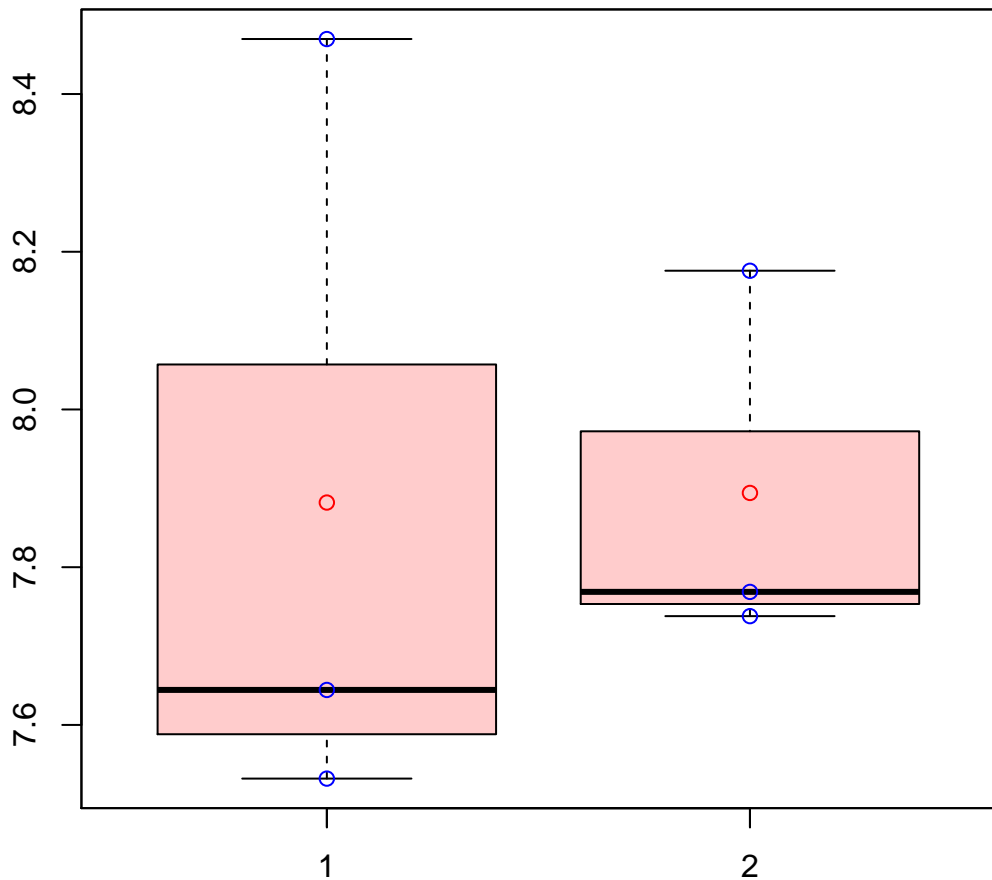

t-Test: p-value = 0.97



# CL14686Contig1|CL14686Contig1

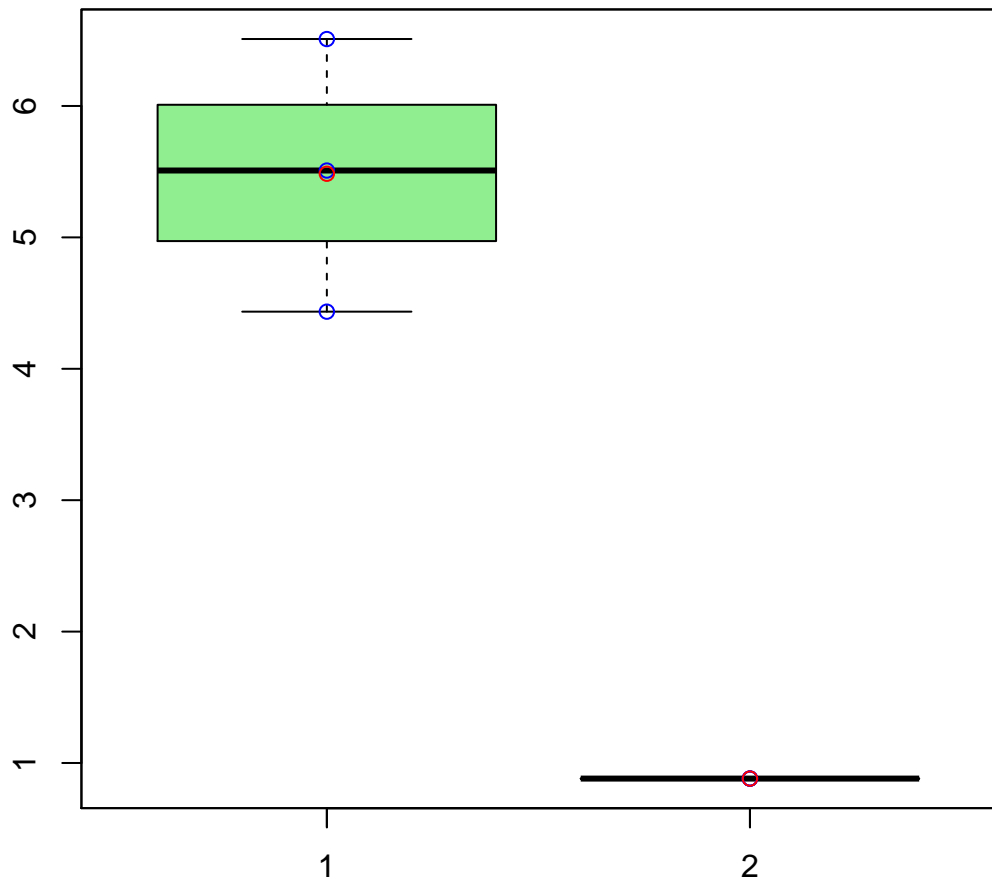

t-Test: p-value = 0.02

# CL1471Contig3|CL1471Contig3

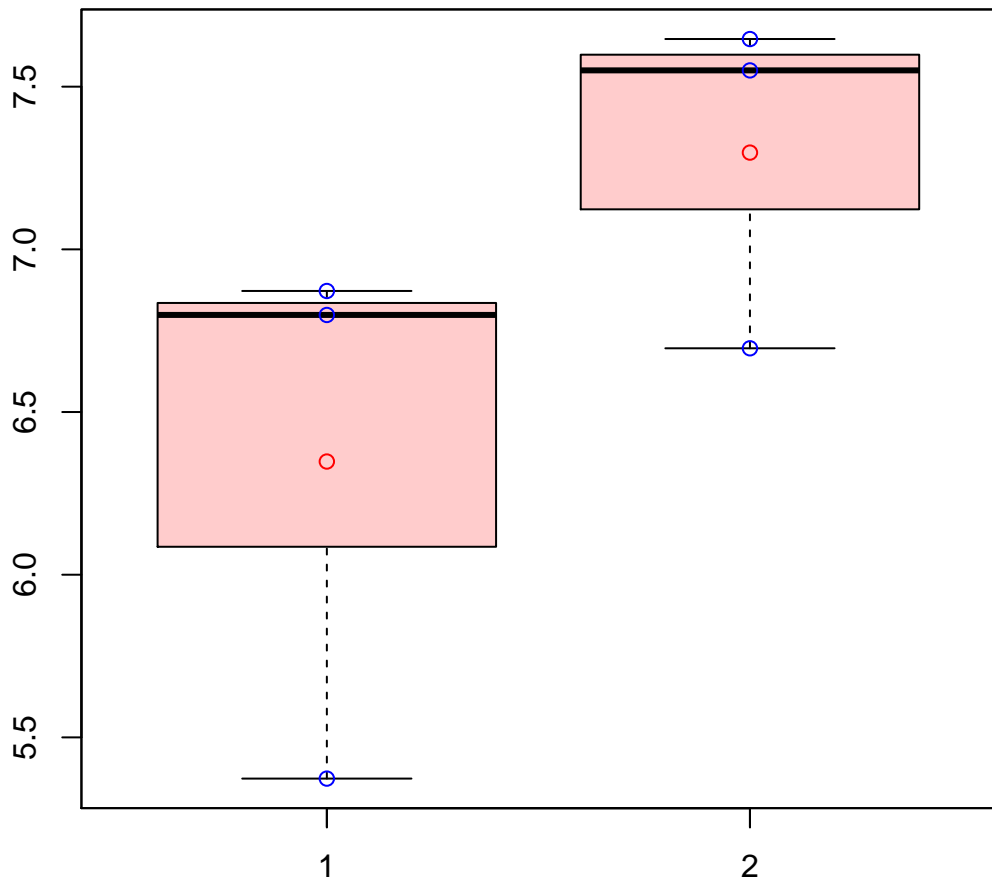

t-Test: p-value = 0.19

# CL14759Contig1|CL14759Contig1

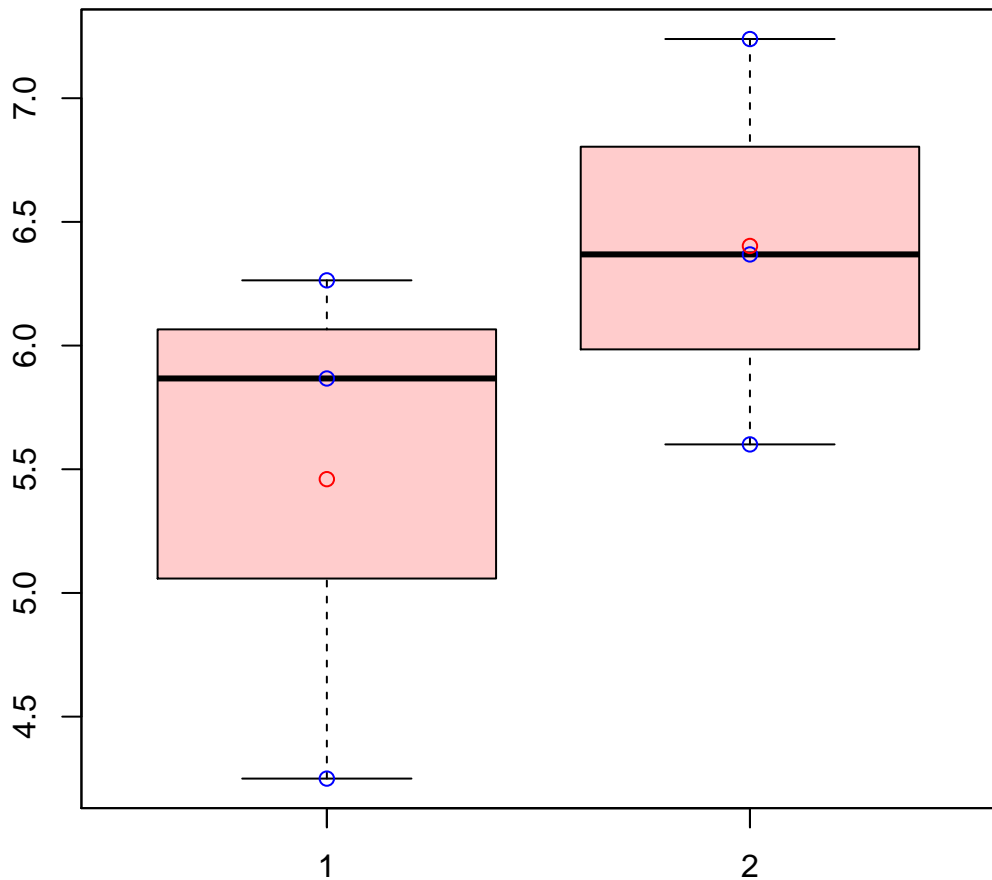

t-Test: p-value = 0.3

# CL1475Contig1|CL1475Contig1

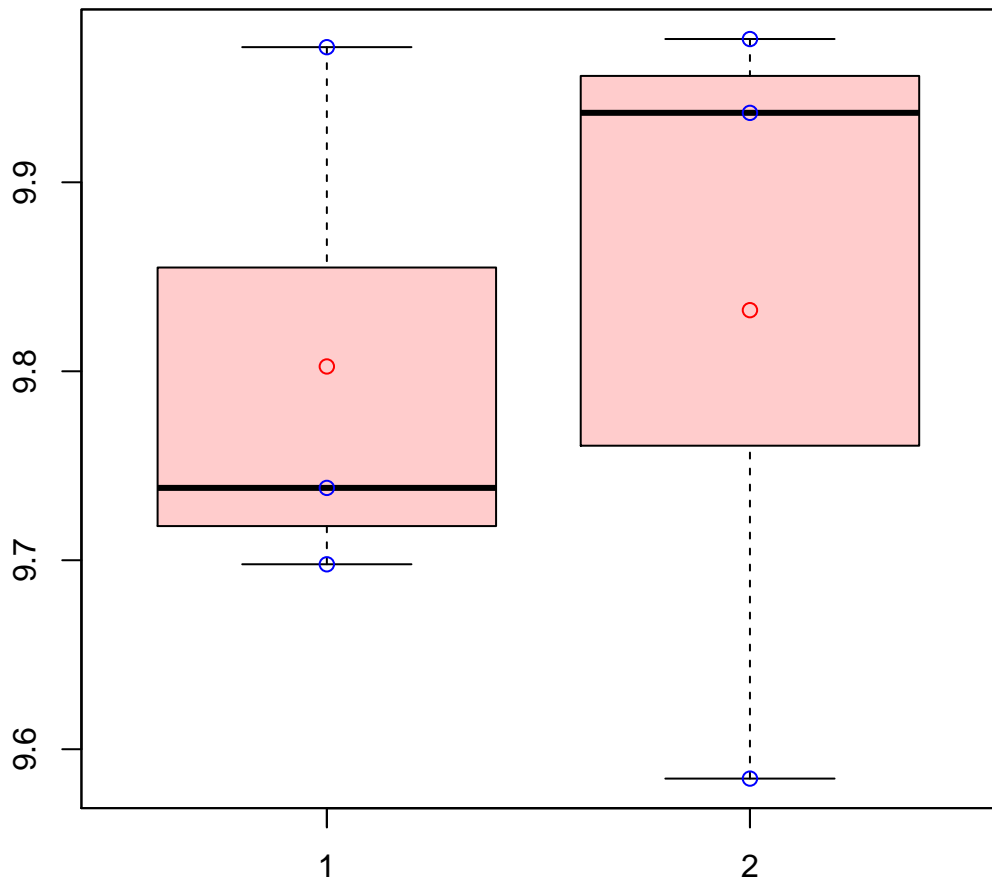

t-Test: p-value = 0.85

# CL1476Contig3|CL1476Contig3

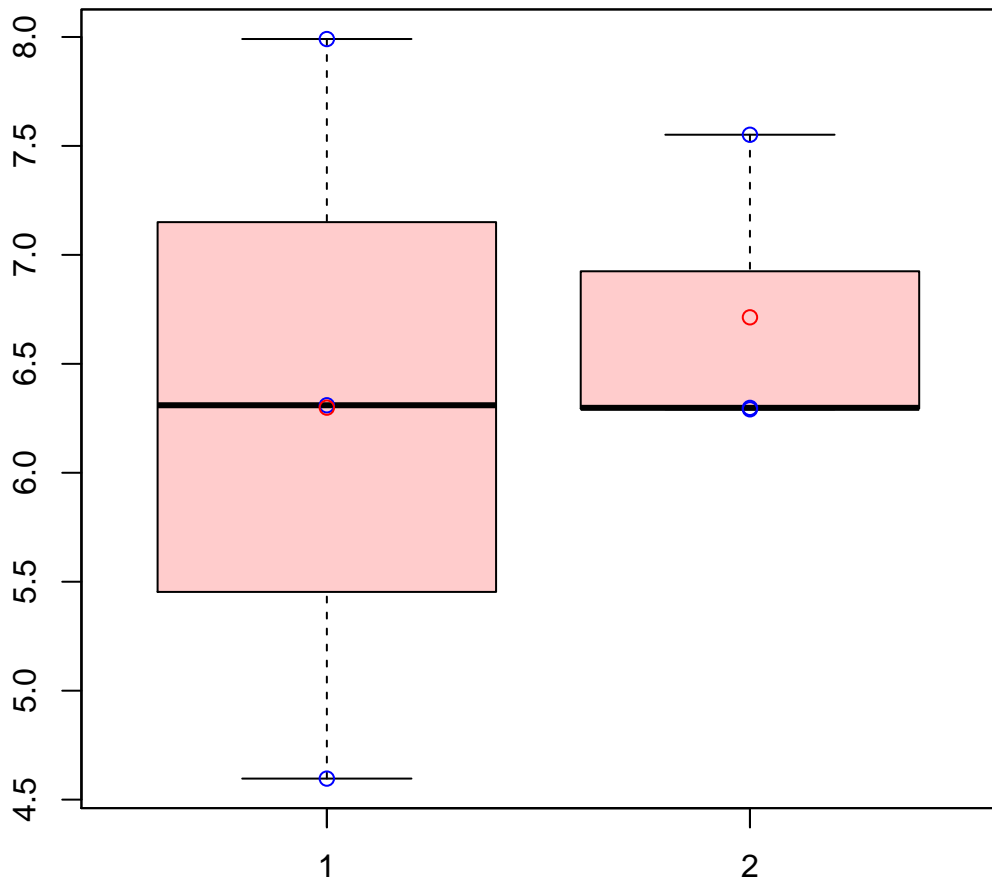

t-Test: p-value = 0.73

# CL147Contig1|CL147Contig1

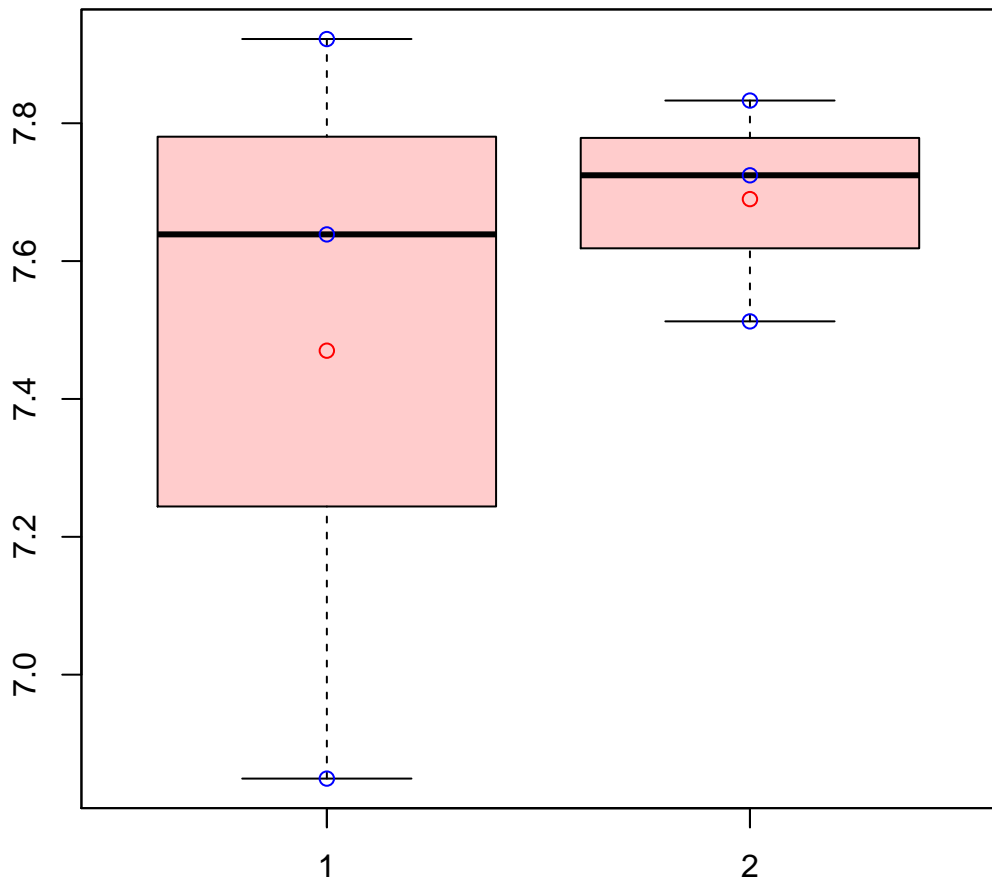

t-Test: p-value = 0.57

# CL1481Contig1|CL1481Contig1

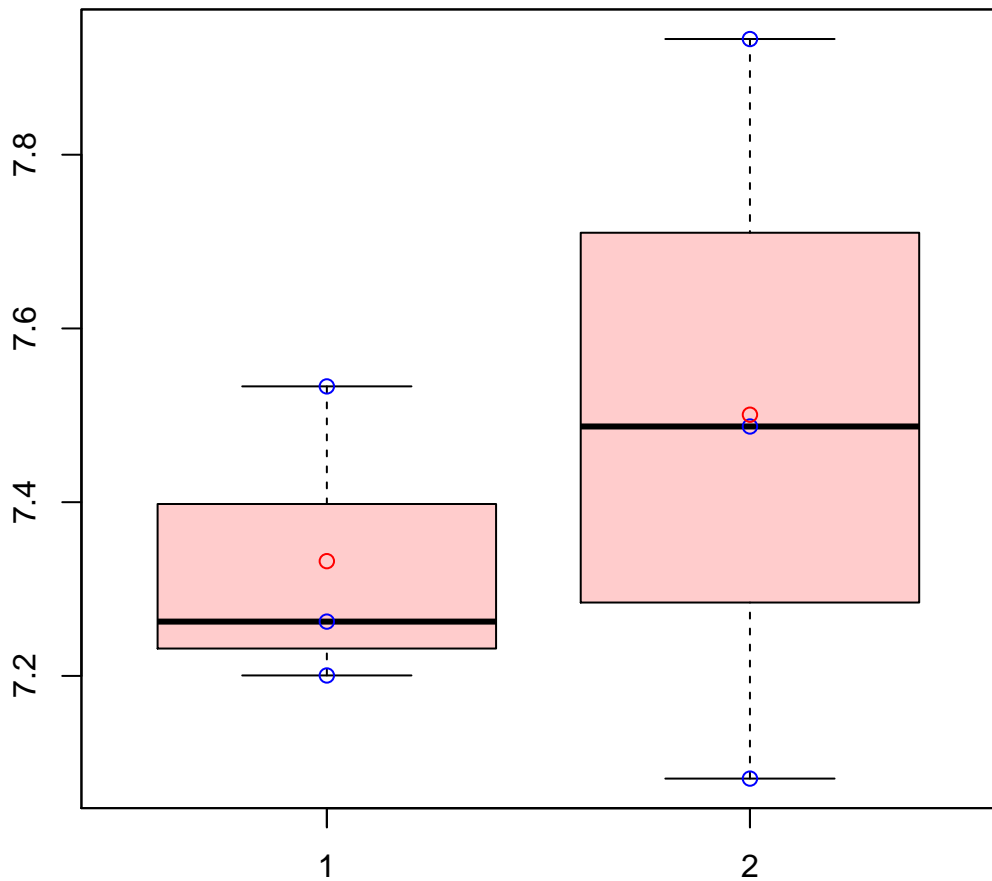

t-Test: p-value = 0.58

# CL1481Contig2|CL1481Contig2

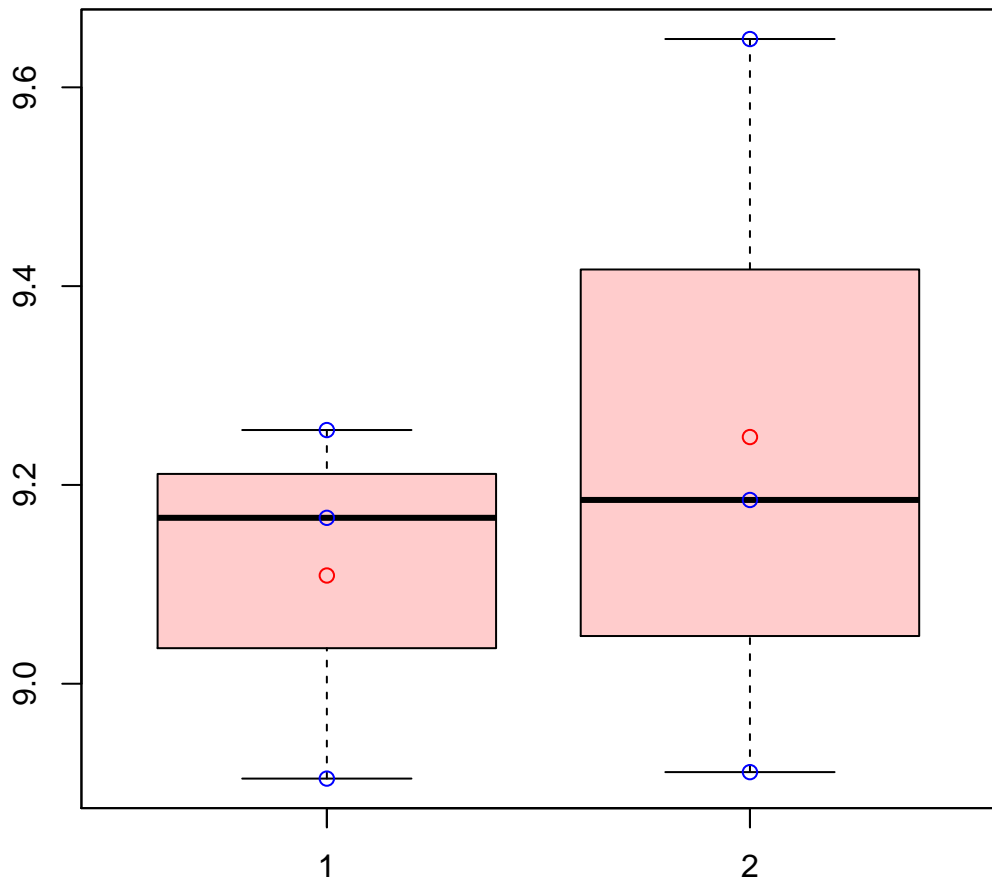

t-Test: p-value = 0.6



# CL14873Contig1|CL14873Contig1

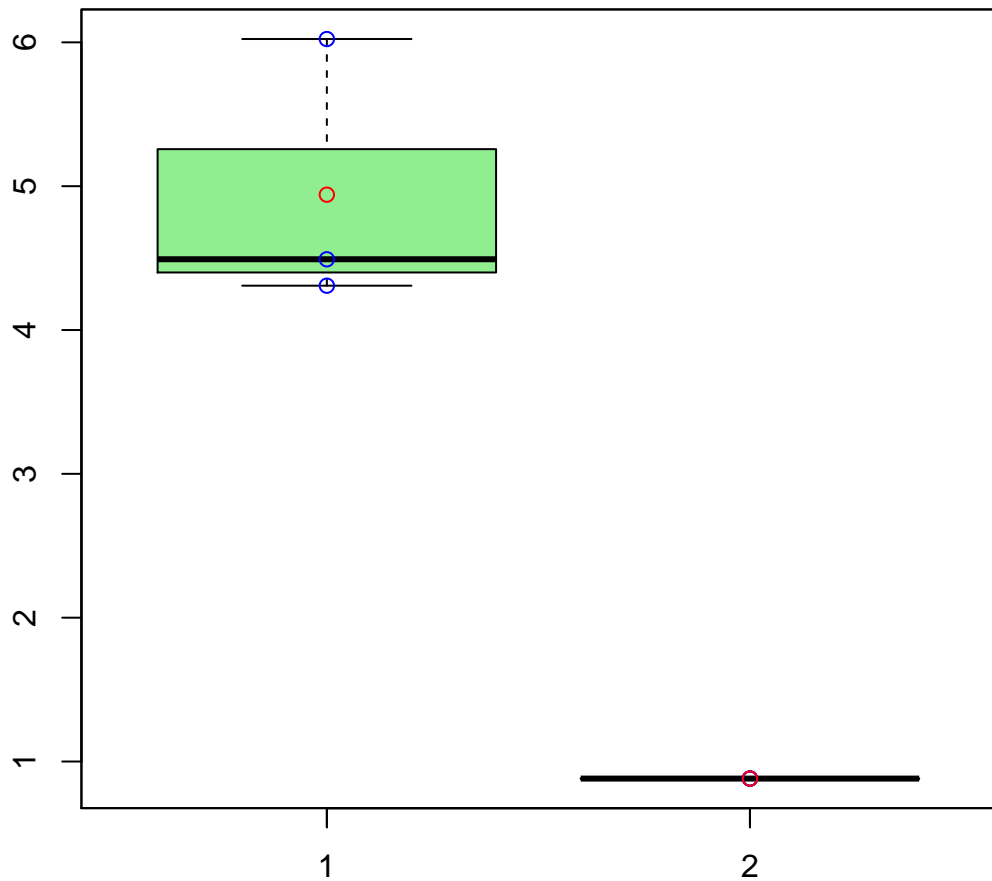

t-Test: p-value = 0.02

# CL14878Contig1|CL14878Contig1

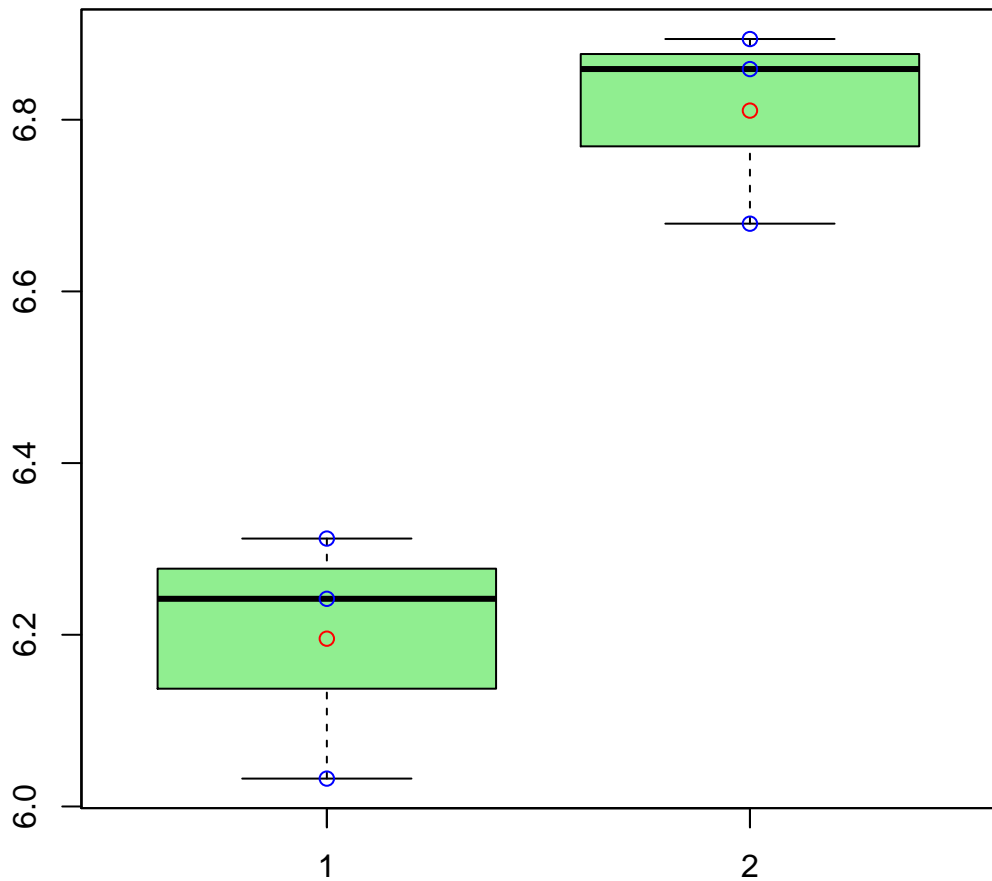

t-Test: p-value = 0.01

# CL14897Contig1|CL14897Contig1

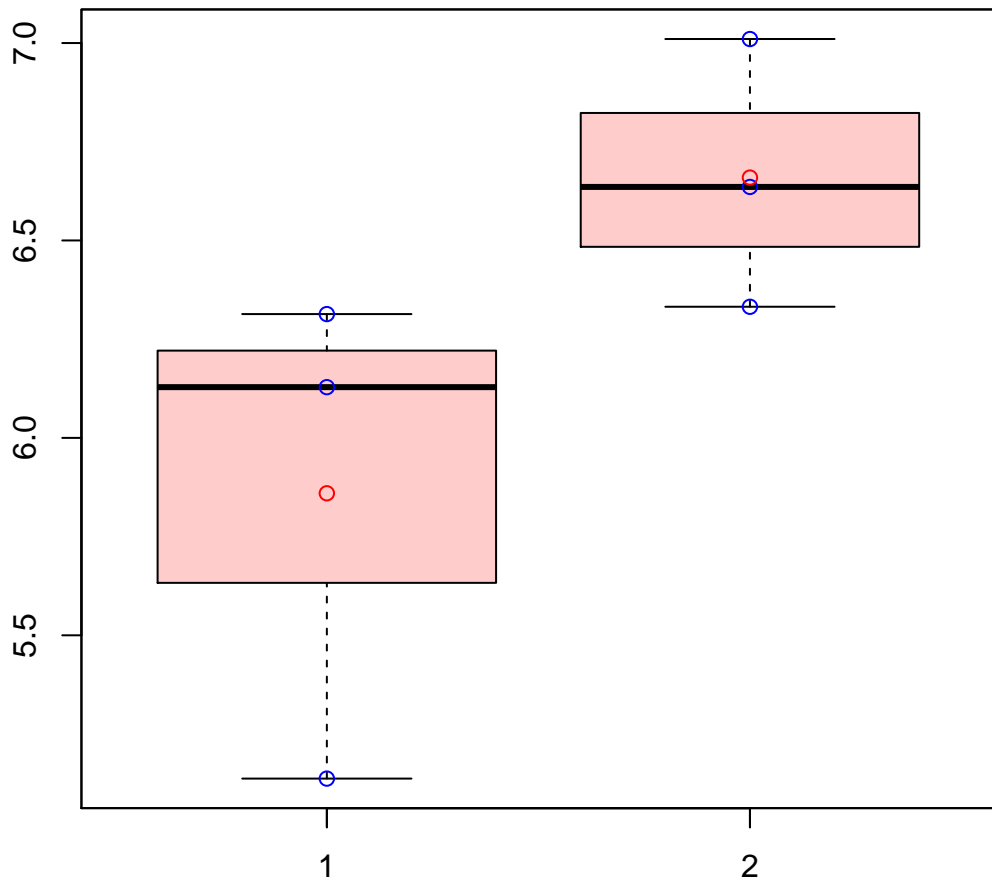

t-Test: p-value = 0.15

# CL1493Contig1|CL1493Contig1

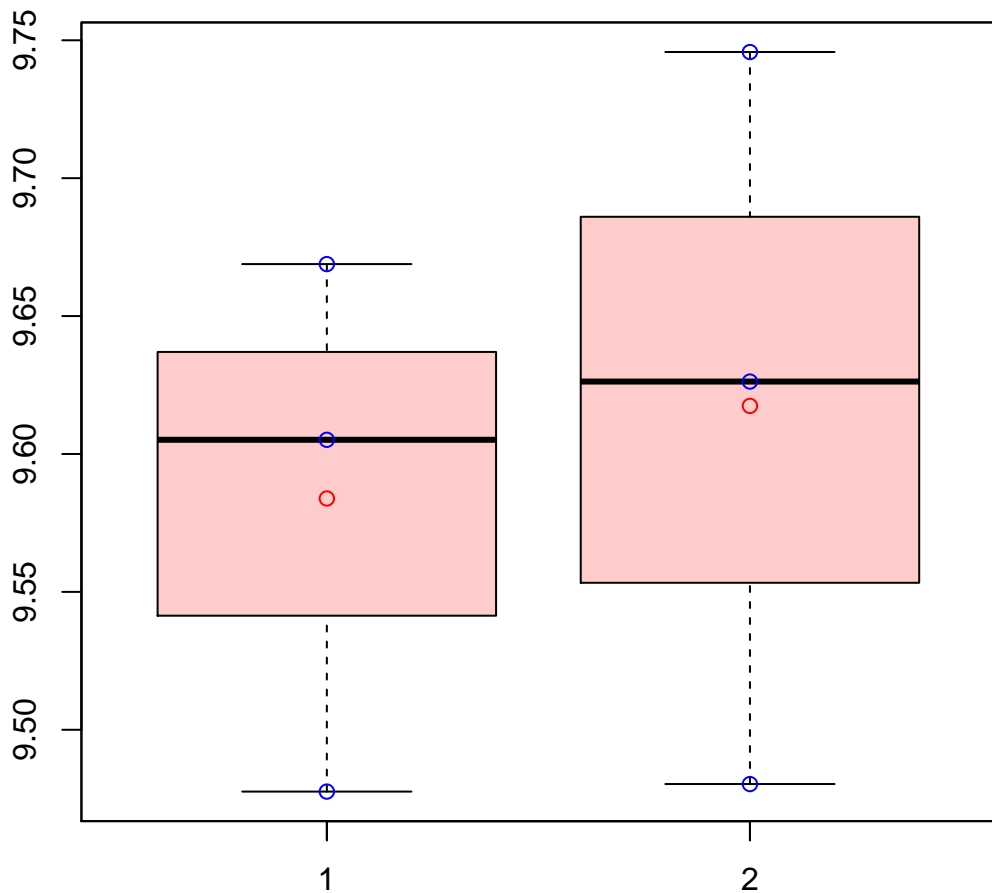

t-Test: p-value = 0.74

# CL1495Contig1|CL1495Contig1

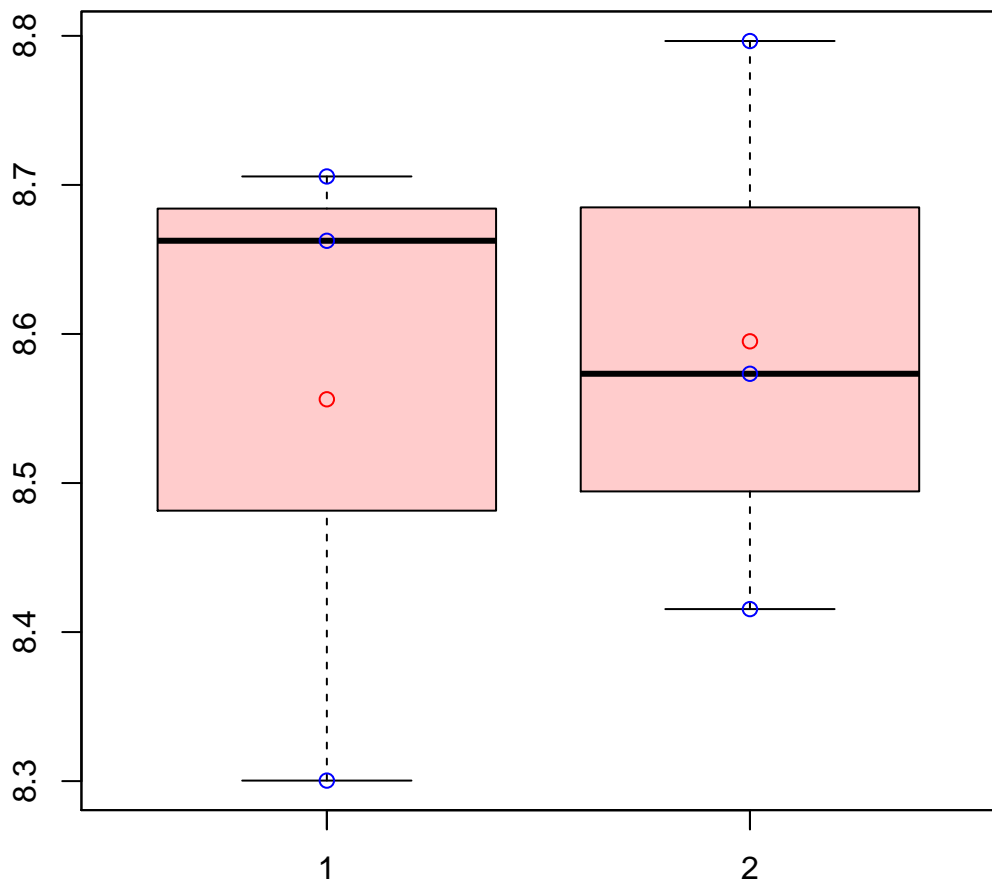

t-Test: p-value = 0.83

# CL1495Contig3|CL1495Contig3

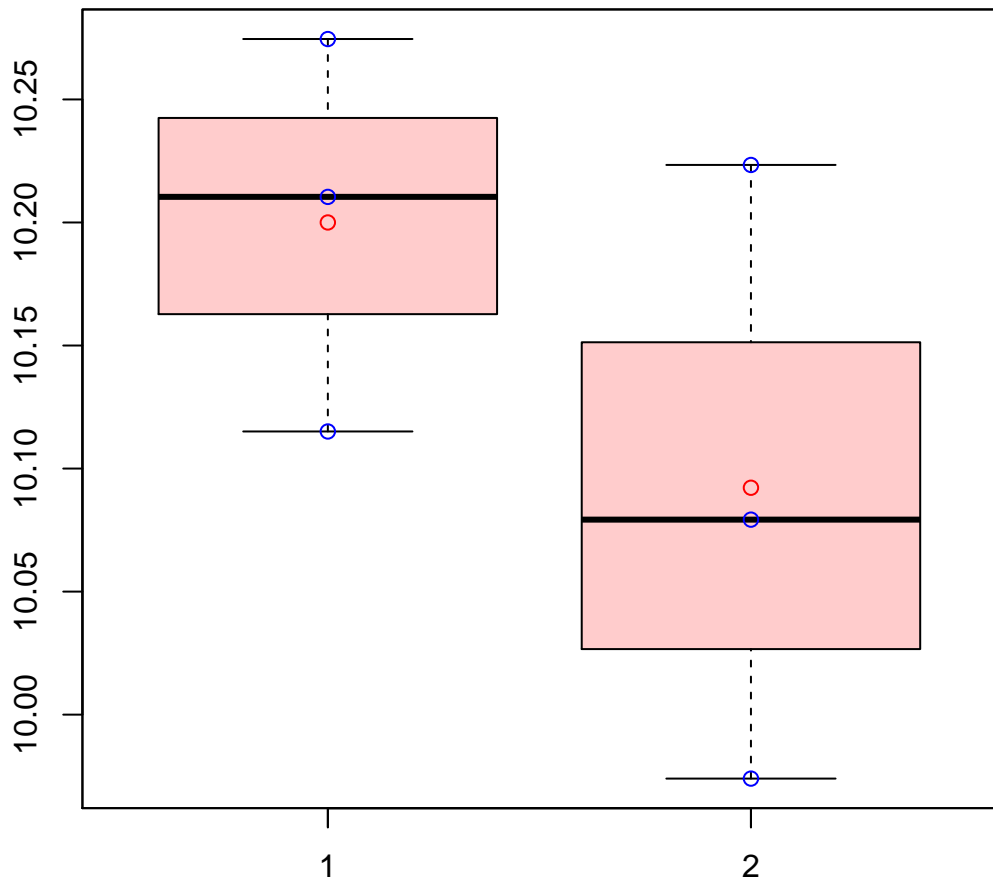

t-Test: p-value = 0.29

# CL1497Contig2|CL1497Contig2

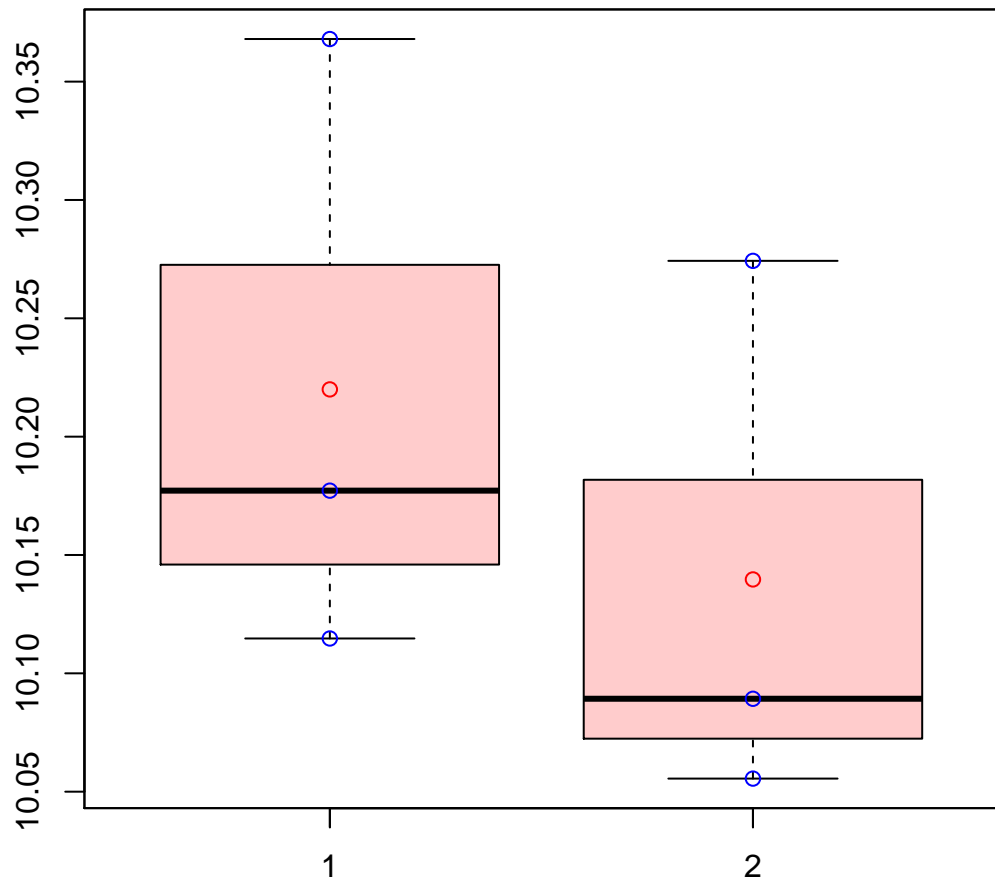

t-Test: p-value = 0.48

# CL1497Contig5|CL1497Contig5

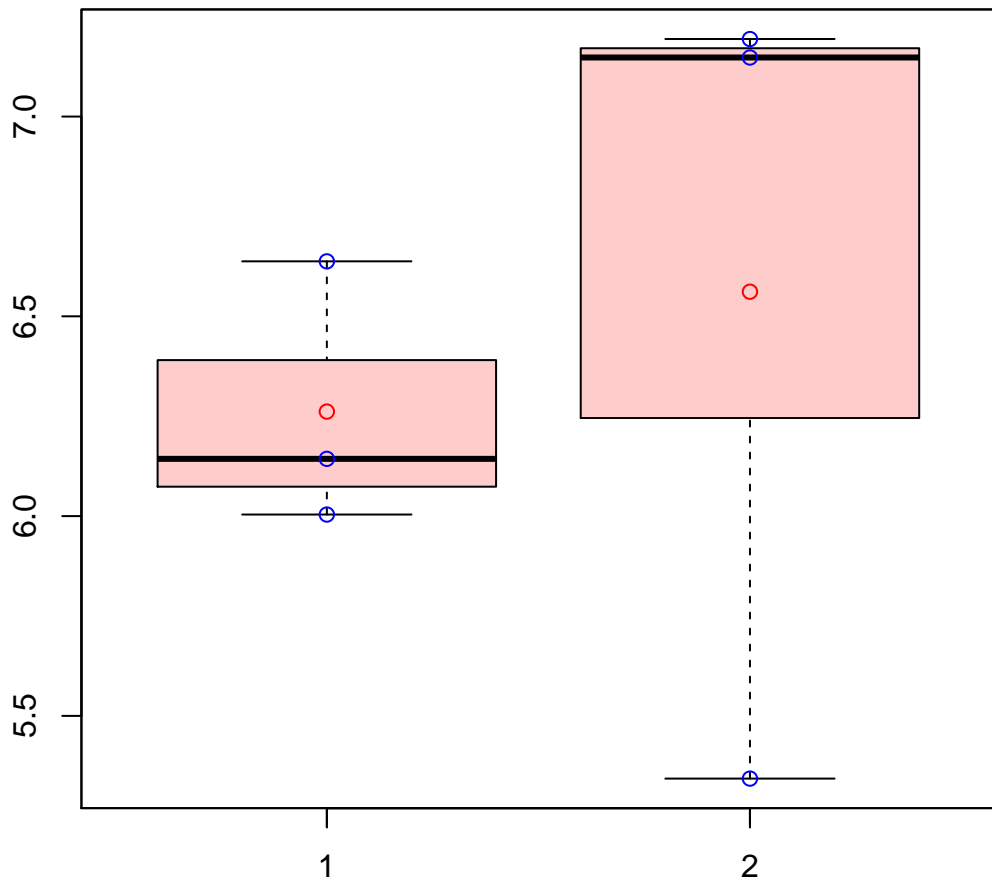

t-Test: p-value = 0.68



# CL1498Contig4|CL1498Contig4

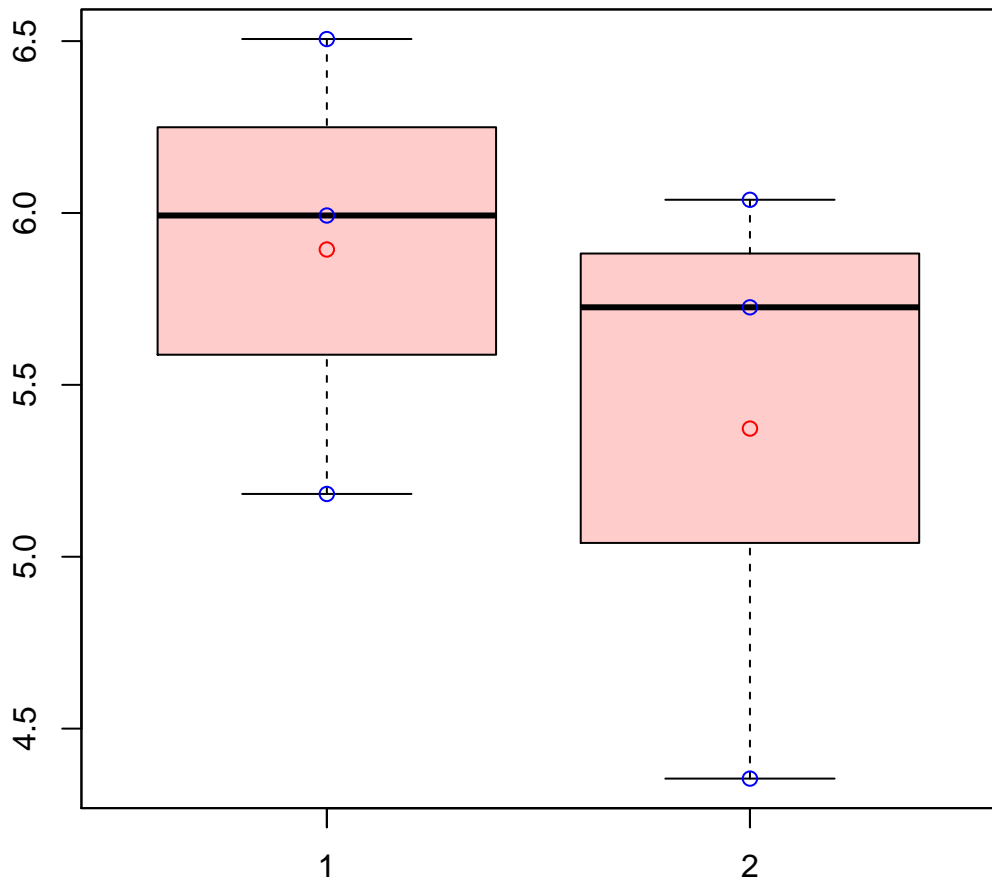

t-Test: p-value = 0.47

# CL1498Contig7|CL1498Contig7

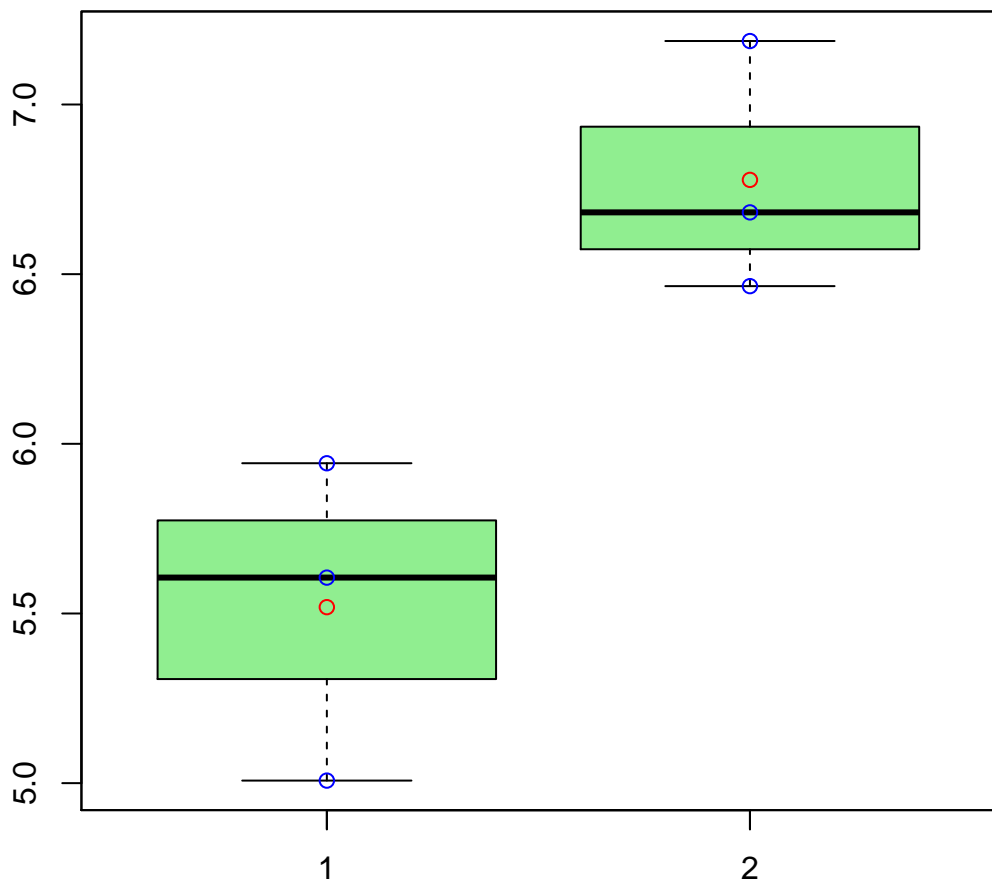

t-Test: p-value = 0.02

# CL1499Contig3|CL1499Contig3

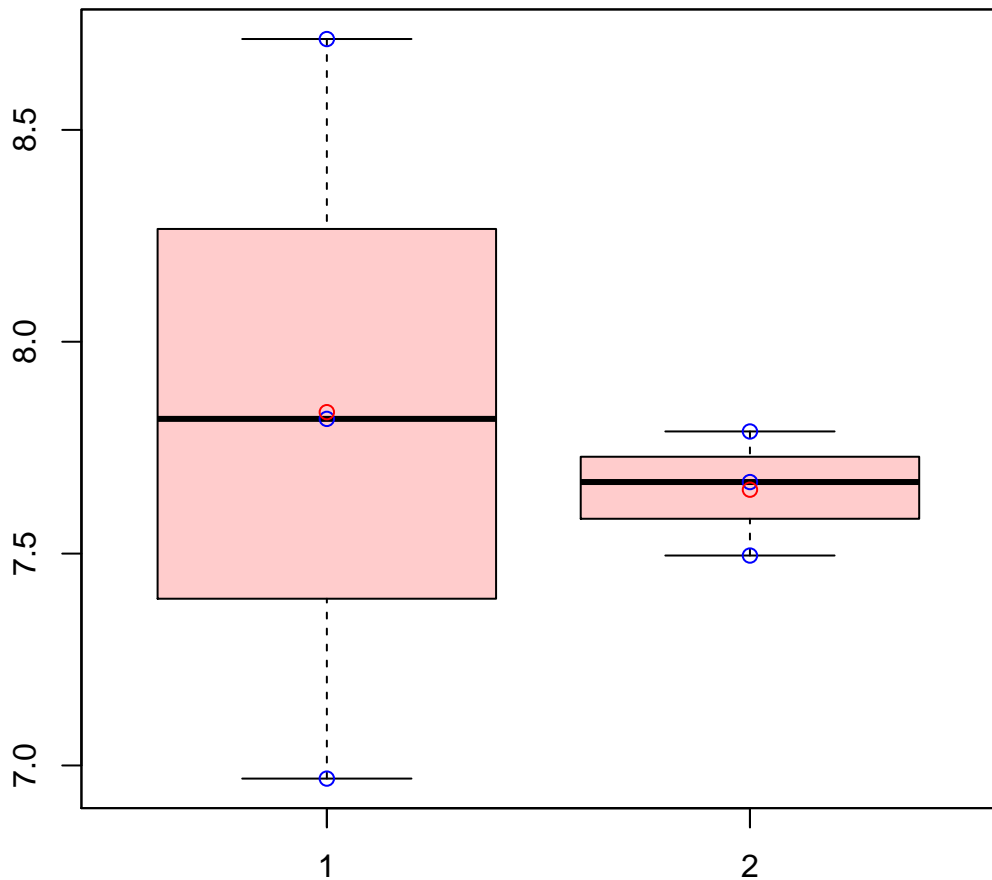

t-Test: p-value = 0.75

# CL1499Contig5|CL1499Contig5

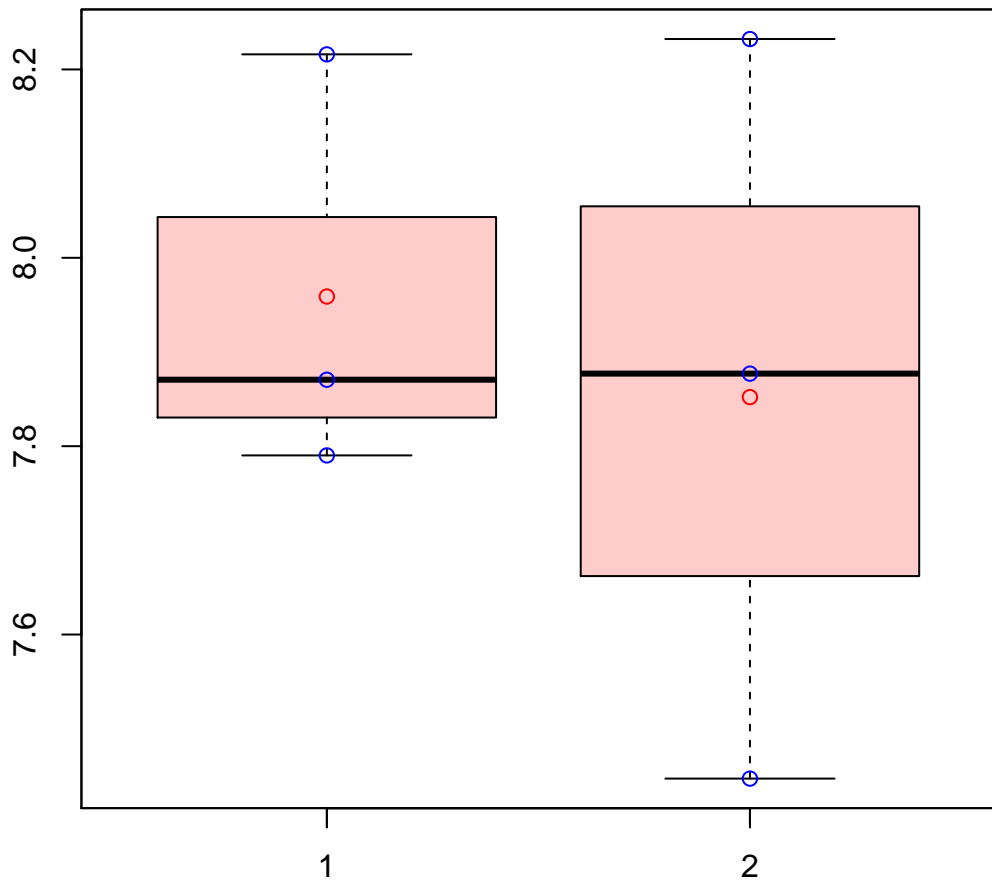

t-Test: p-value = 0.71

# CL14Contig15|CL14Contig15

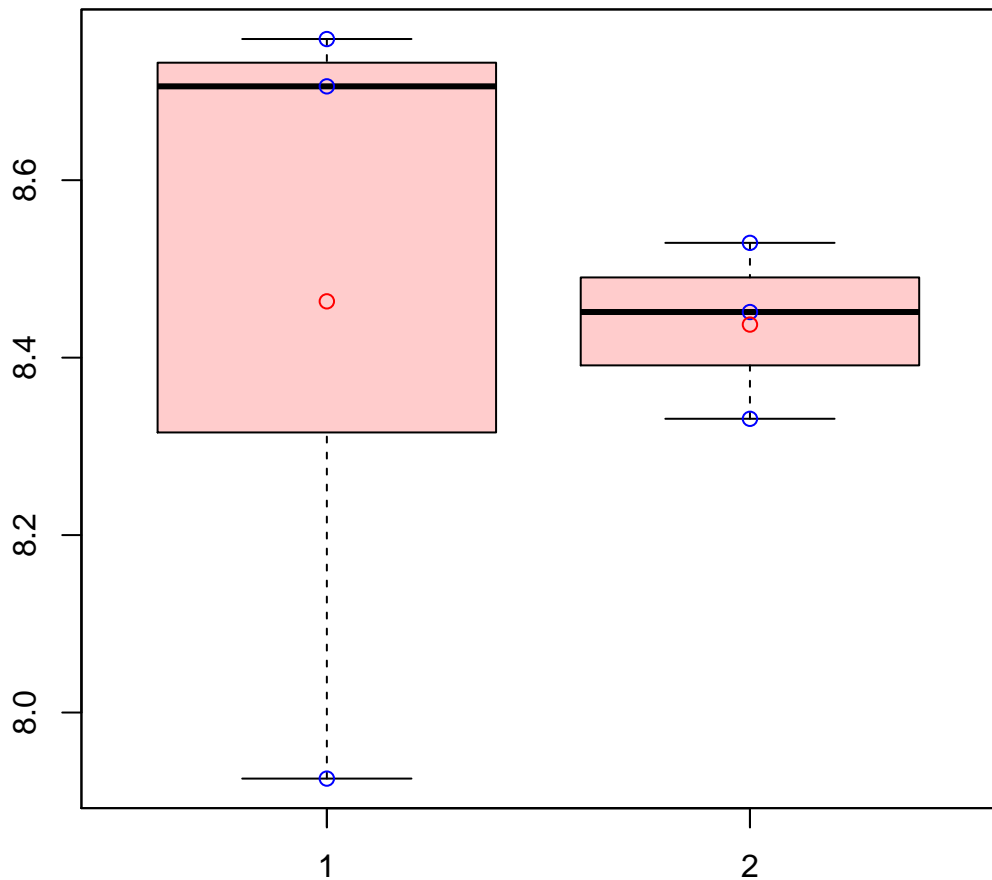

t-Test: p-value = 0.93

# CL14Contig20|CL14Contig20

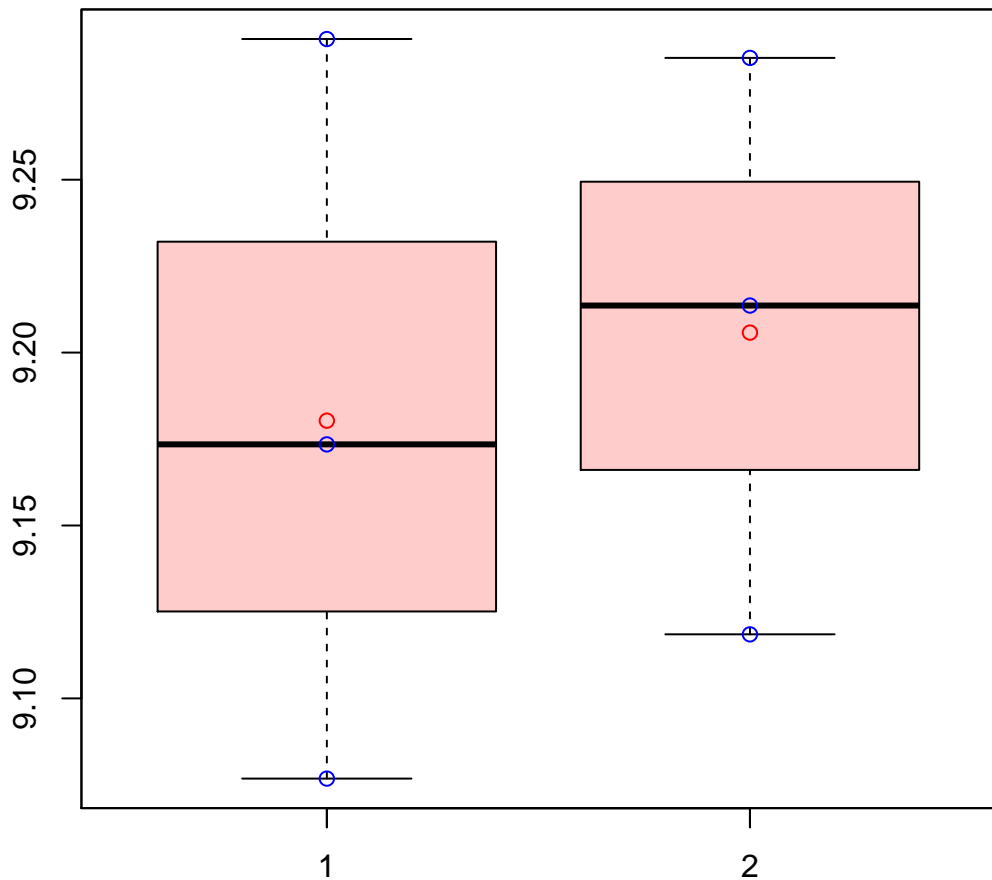

t-Test: p-value = 0.76

# CL14Contig24|CL14Contig24

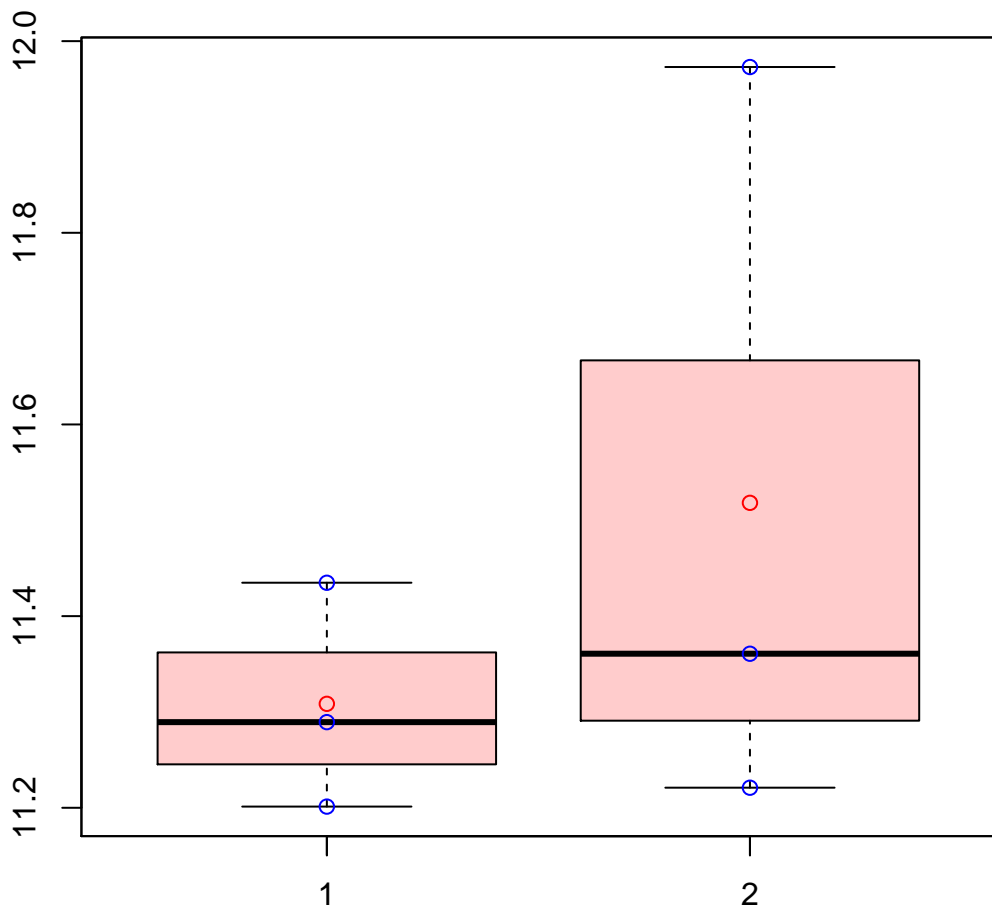

t-Test: p-value = 0.46

# CL14Contig29|CL14Contig29

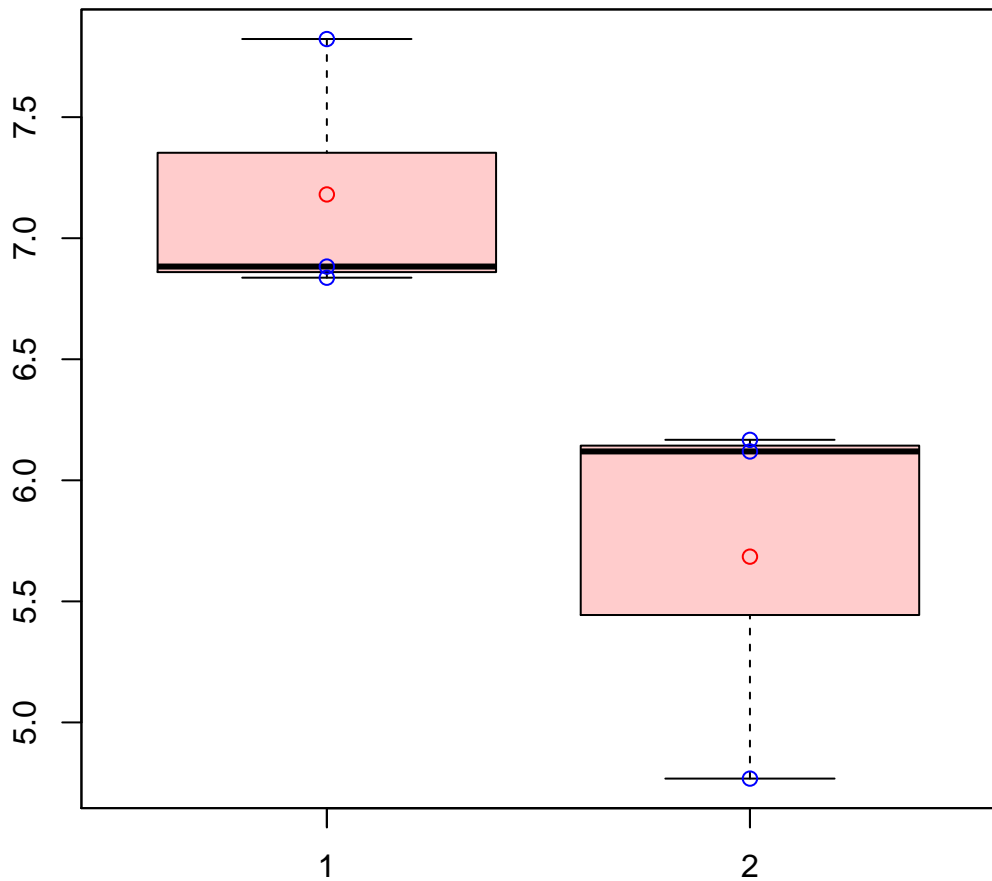

t-Test: p-value = 0.06



# CL14Contig9|CL14Contig9

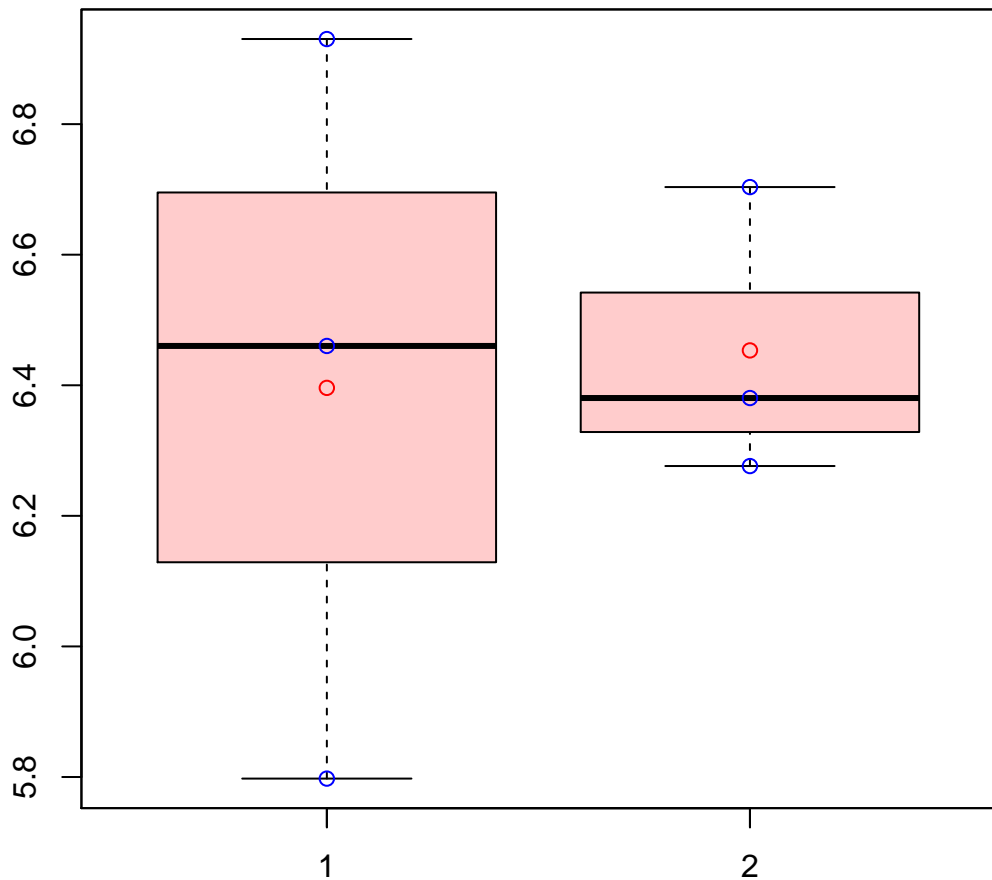

t-Test: p-value = 0.88

# CL1507Contig3|CL1507Contig3

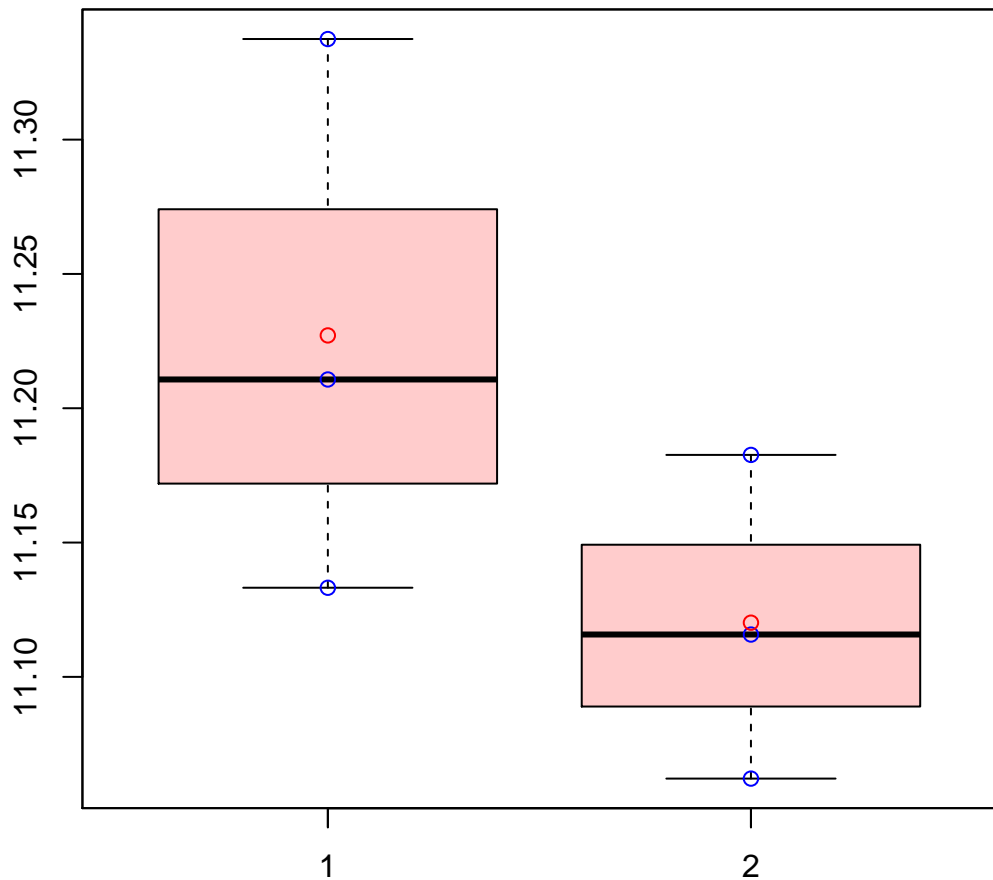

t-Test: p-value = 0.21

# CL1508Contig7|CL1508Contig7

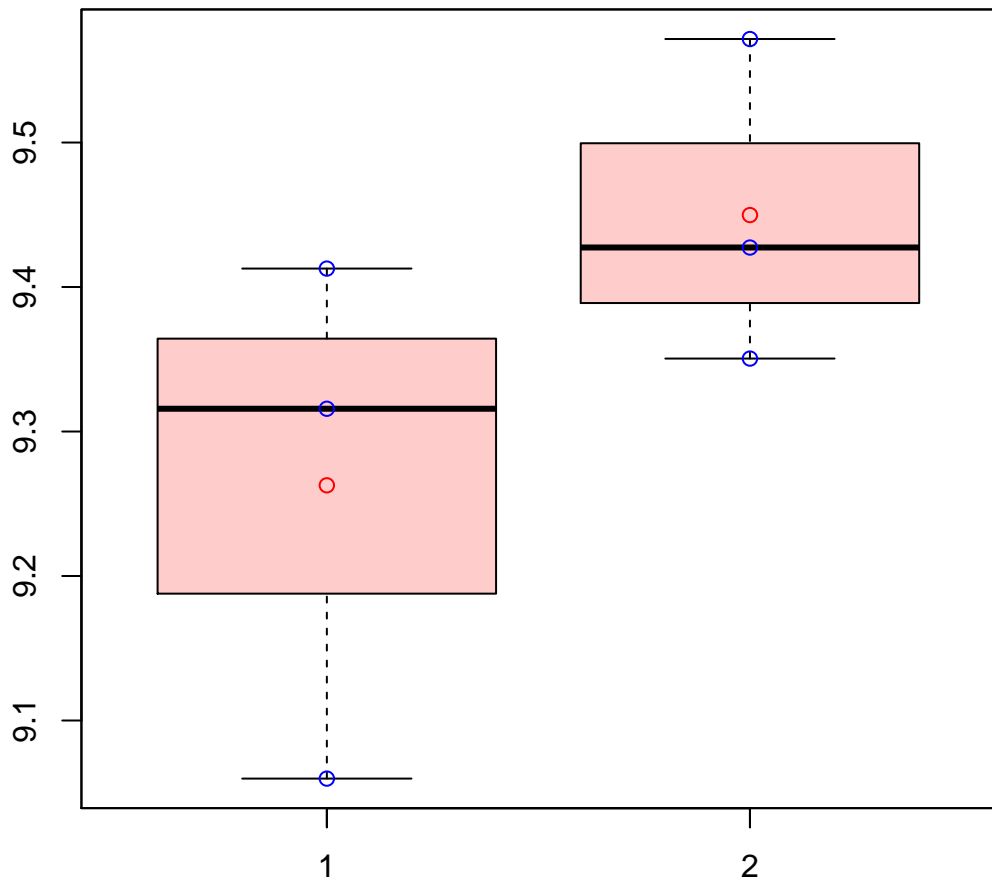

t-Test: p-value = 0.22

# CL150Contig11|CL150Contig11

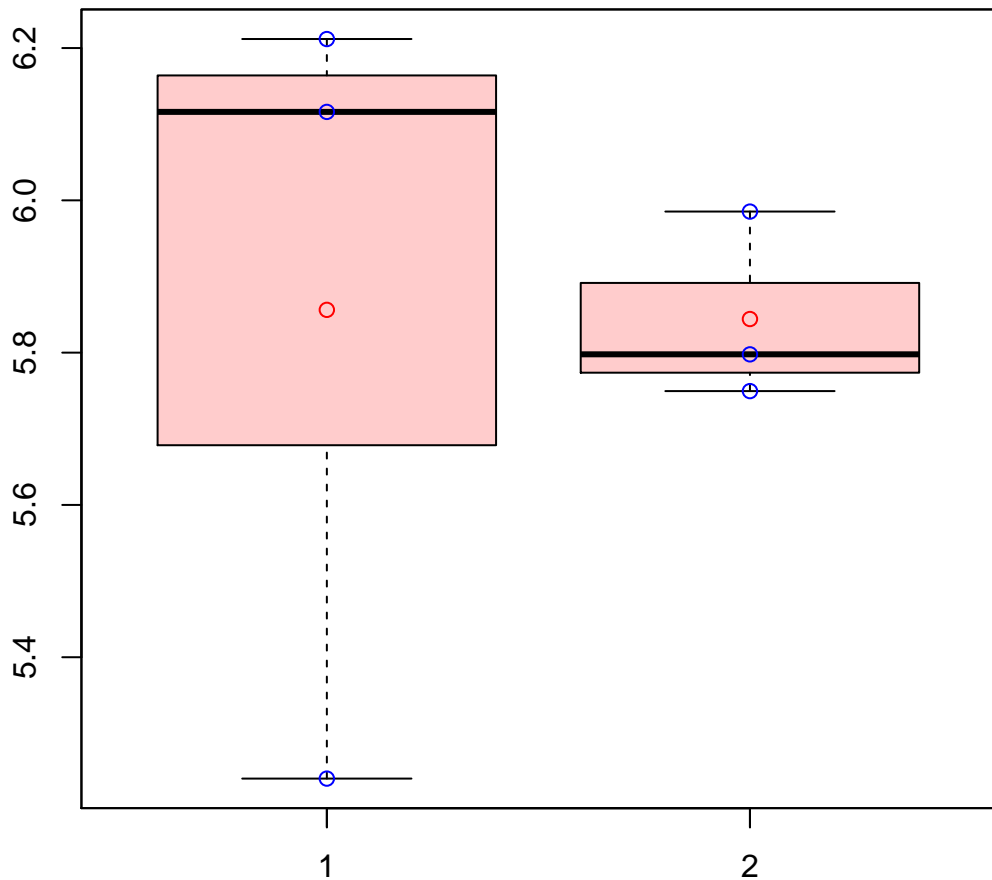

t-Test: p-value = 0.97

# CL1510Contig1|CL1510Contig1

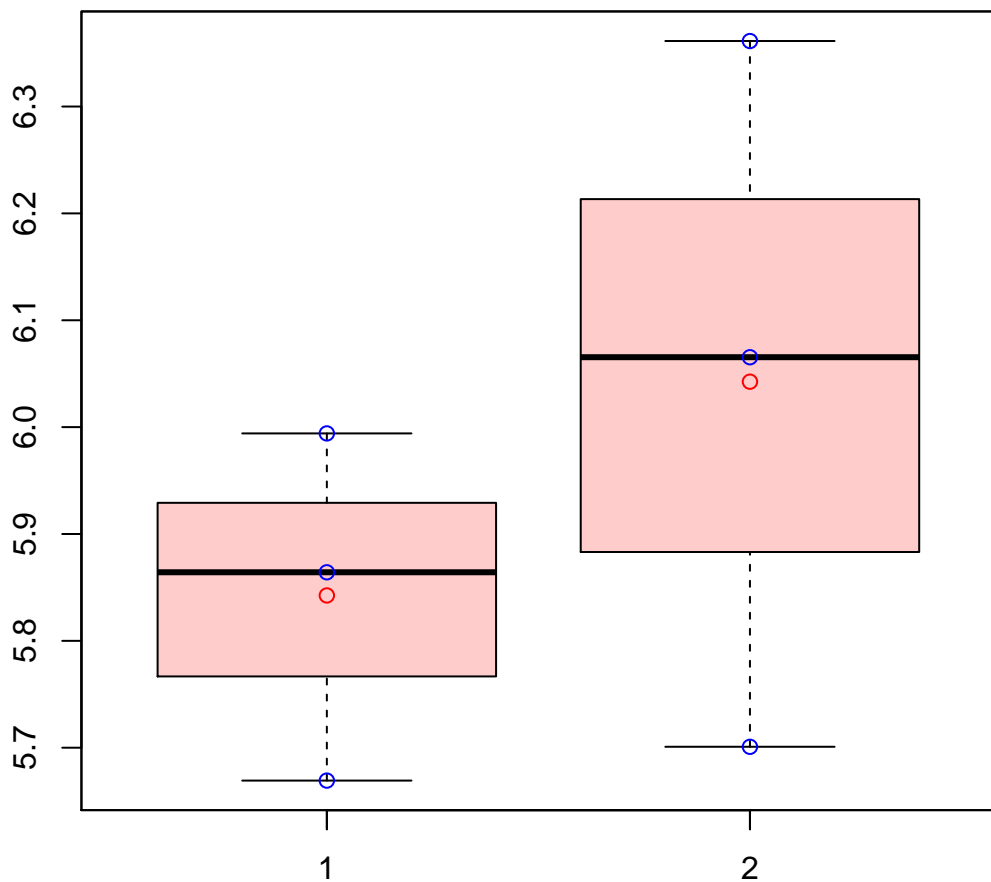

t-Test: p-value = 0.42

# CL151Contig13|CL151Contig13

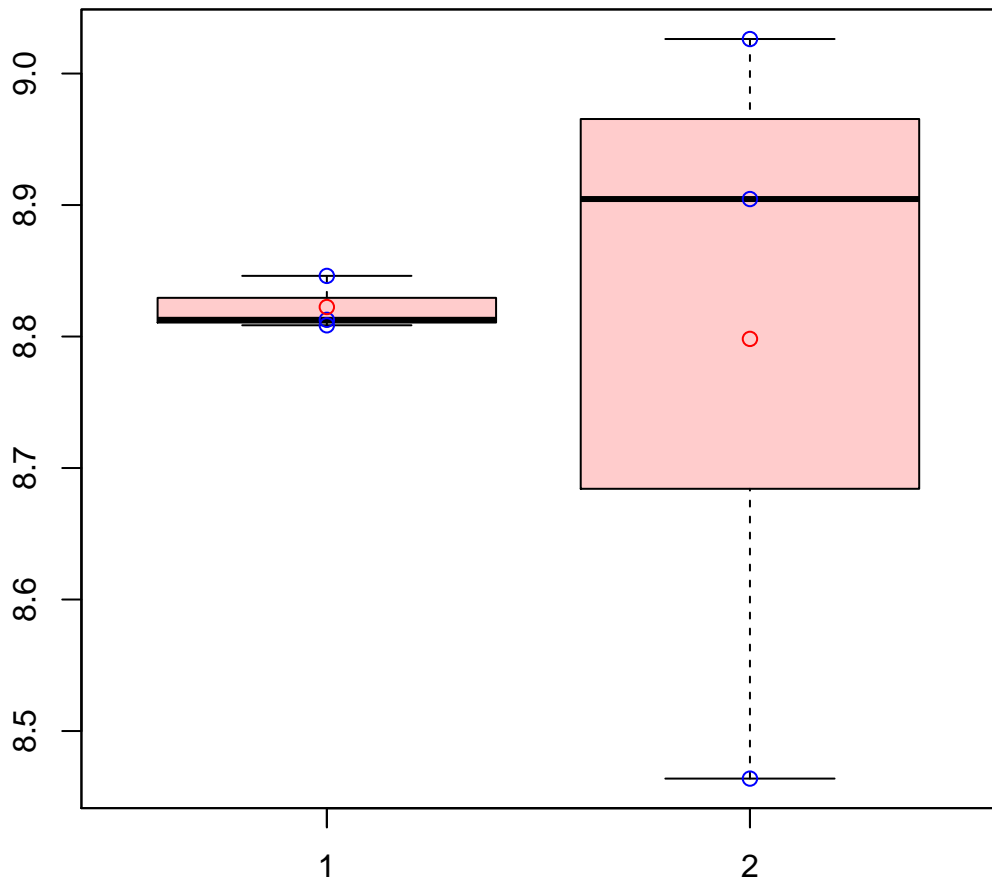

t-Test: p-value = 0.9

# CL151Contig1|CL151Contig1

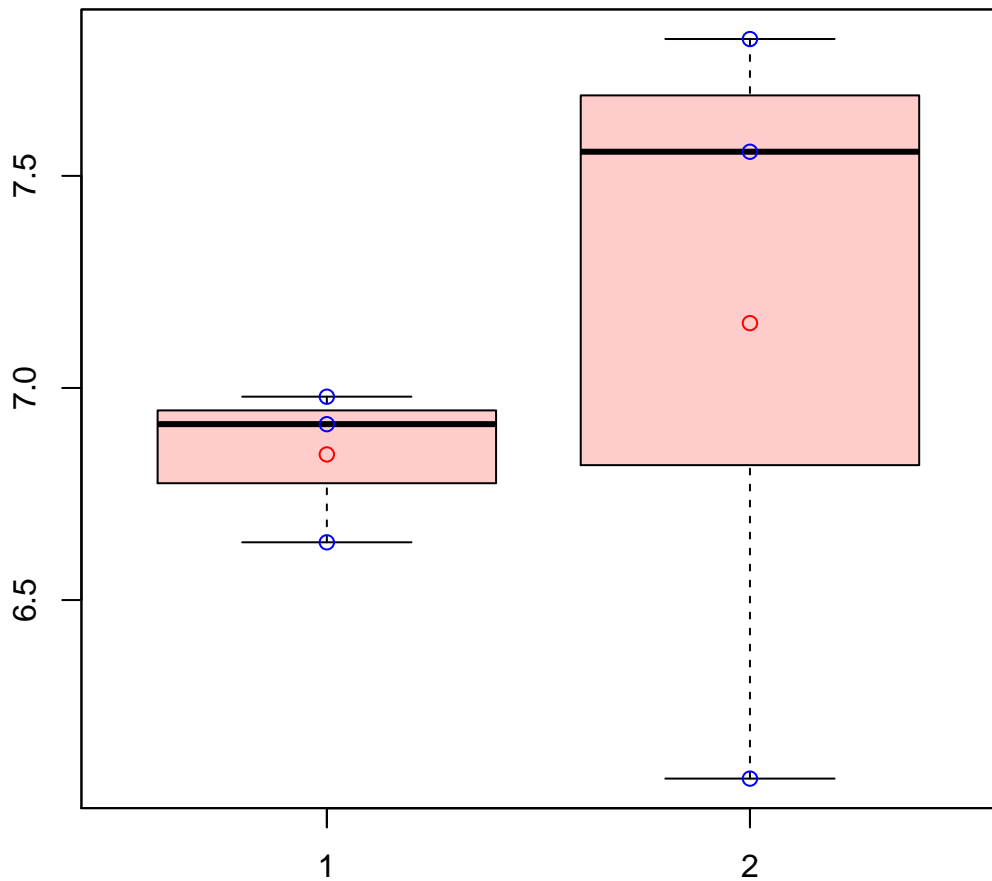

t-Test: p-value = 0.63

# CL1521Contig4|CL1521Contig4

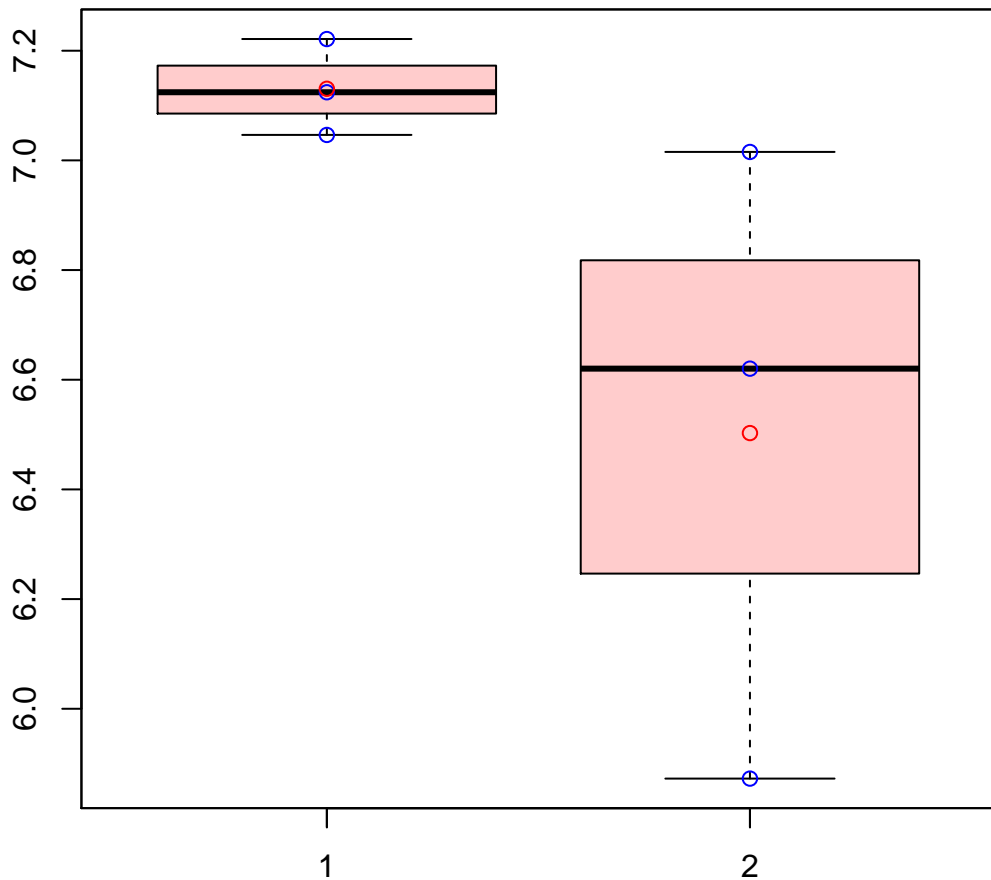

t-Test: p-value = 0.2



# CL1523Contig5|CL1523Contig5

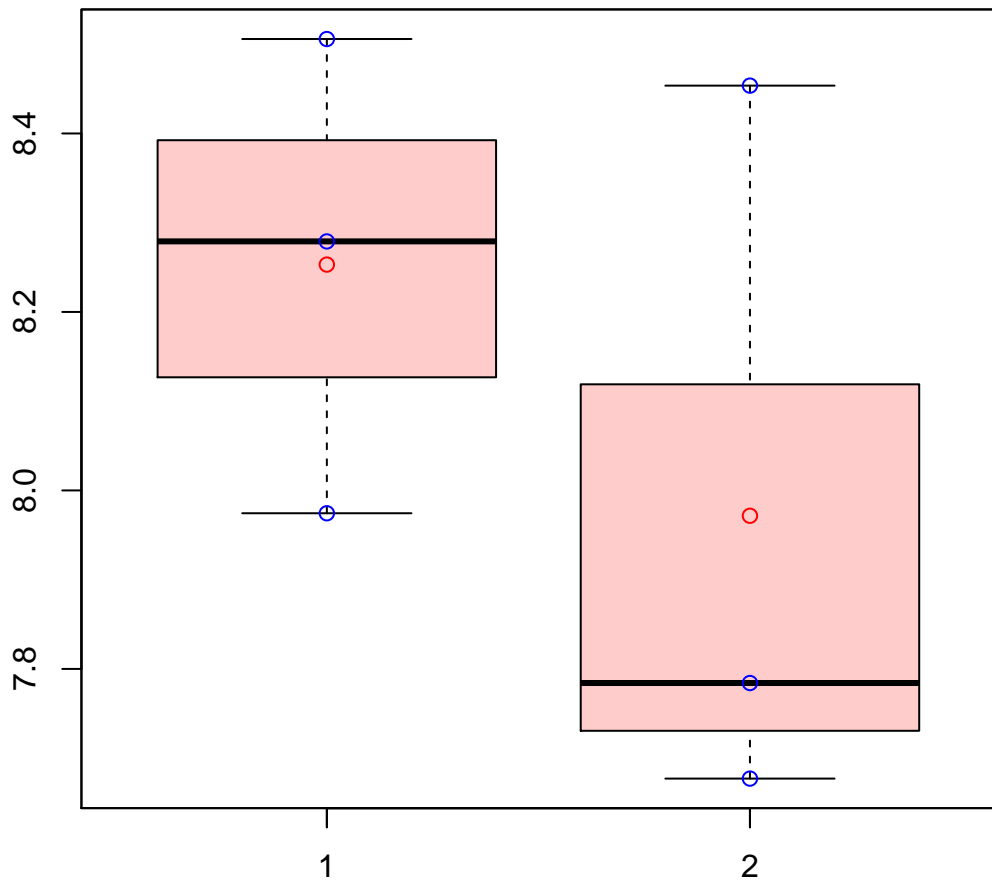

t-Test: p-value = 0.39

# CL1526Contig1|CL1526Contig1

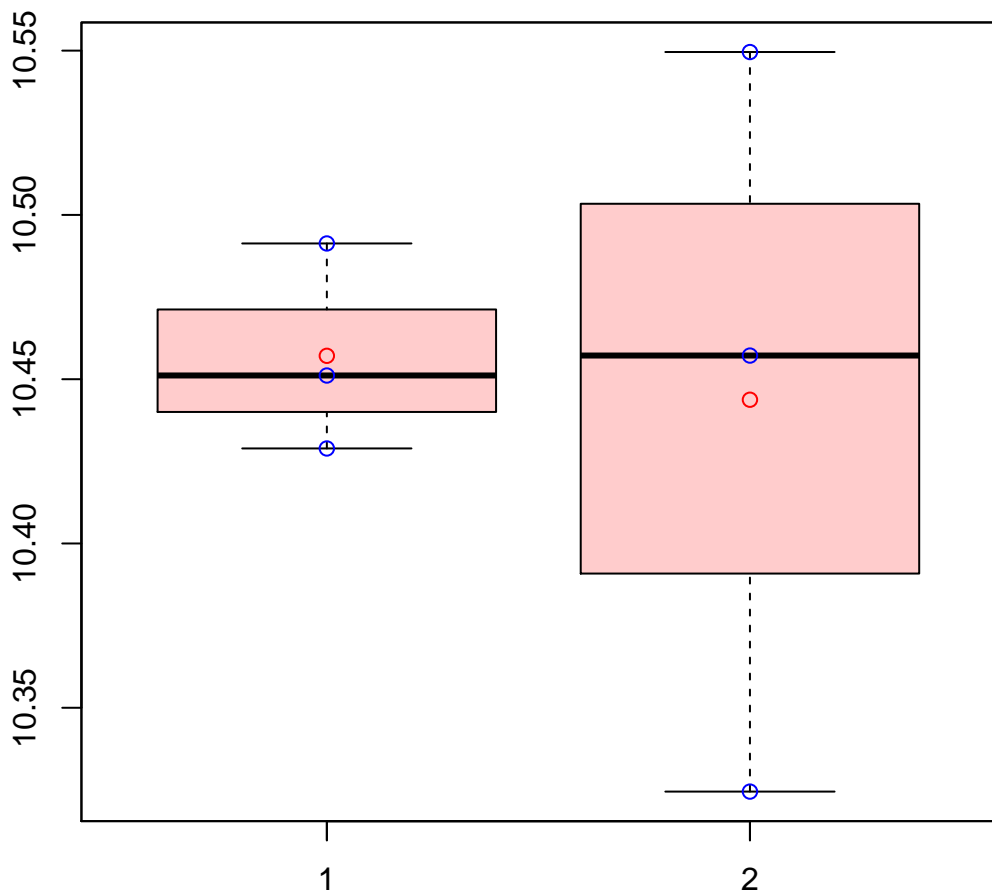

t-Test: p-value = 0.86

# CL1526Contig4|CL1526Contig4

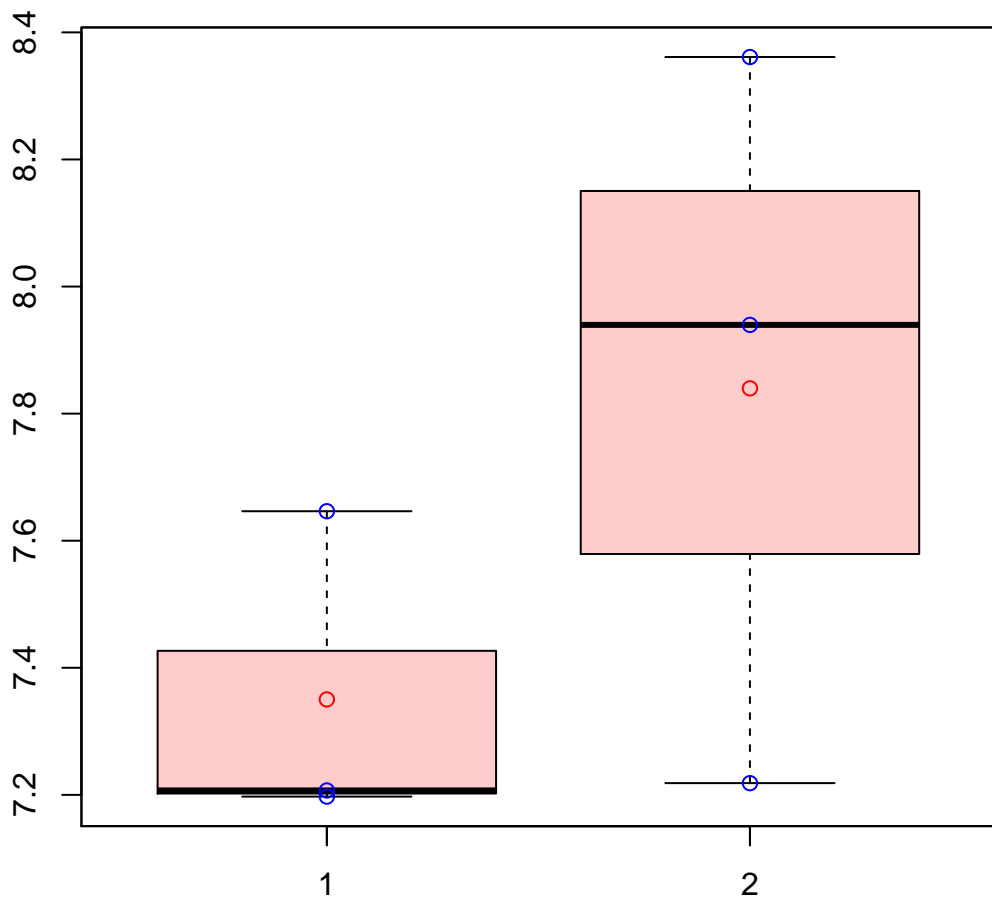

t-Test: p-value = 0.28

# CL1531Contig5|CL1531Contig5

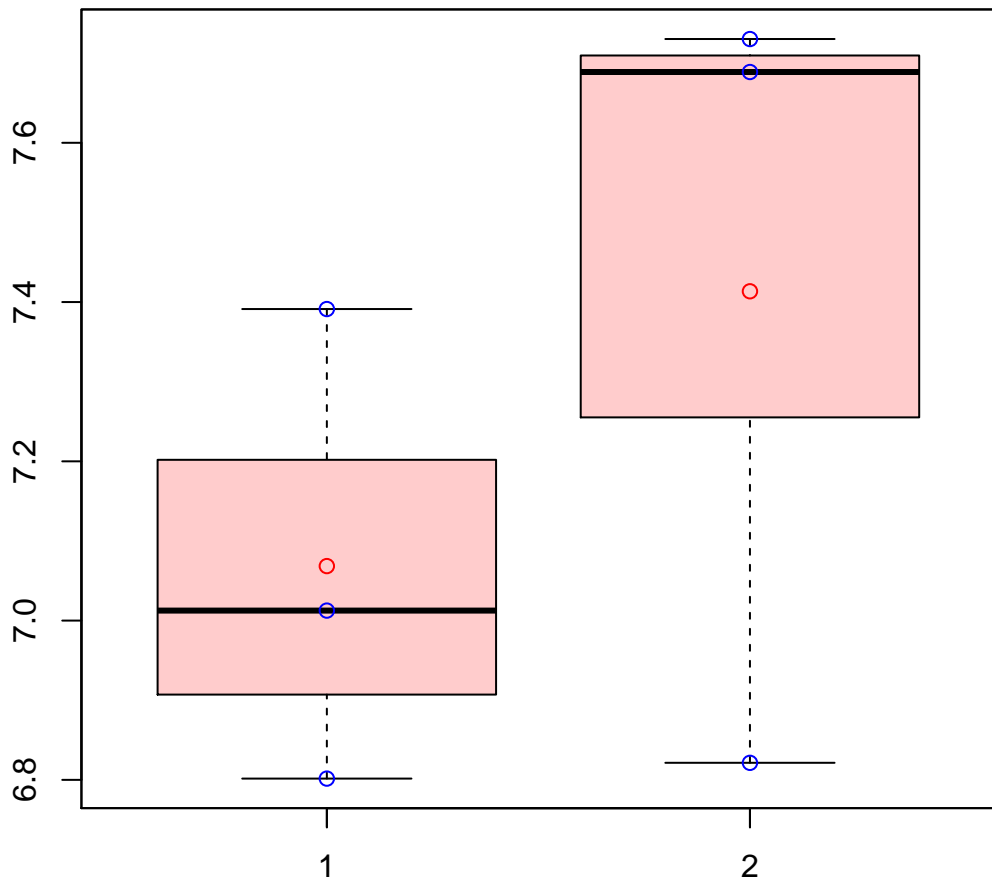

t-Test: p-value = 0.38

# CL1533Contig11|CL1533Contig11

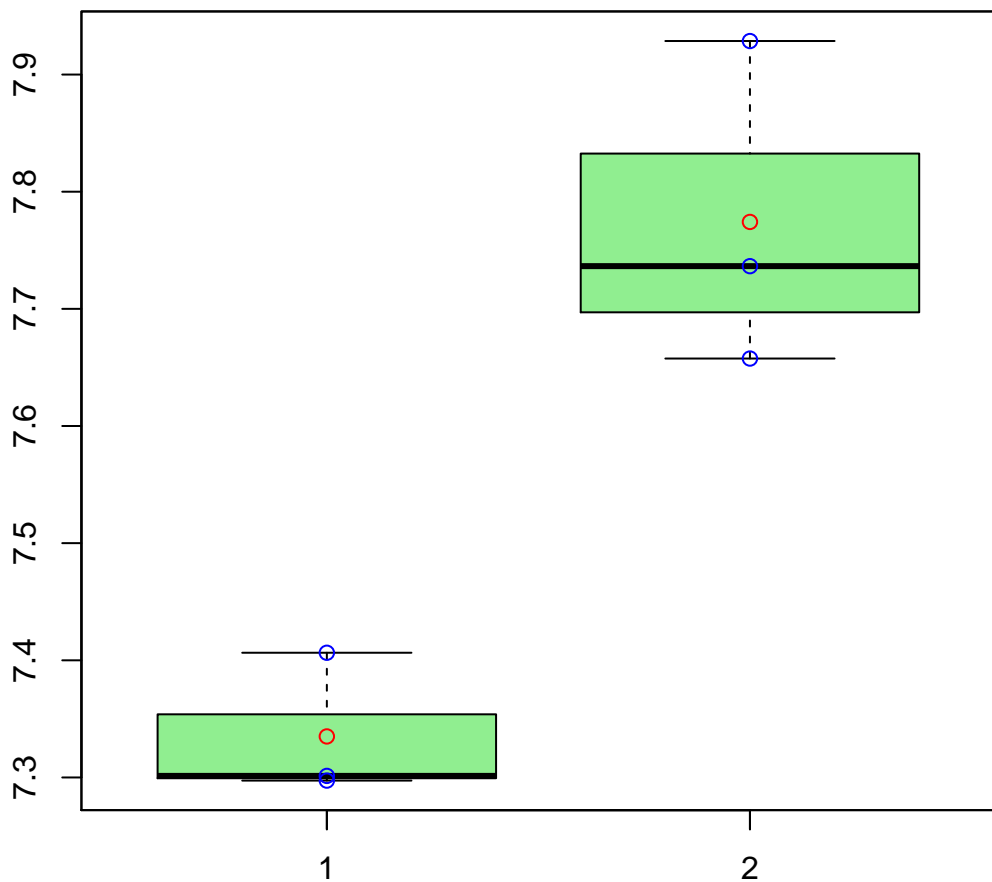

t-Test: p-value = 0.02

# CL1533Contig4|CL1533Contig4

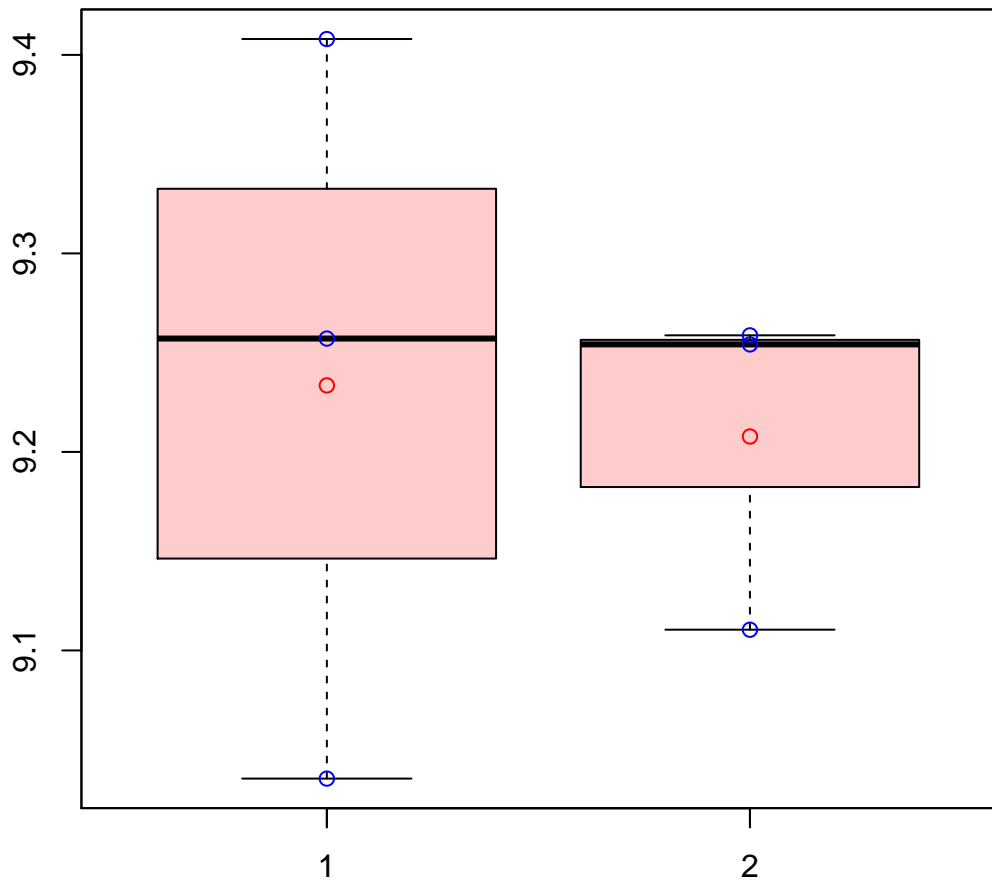

t-Test: p-value = 0.84

# CL1533Contig5|CL1533Contig5

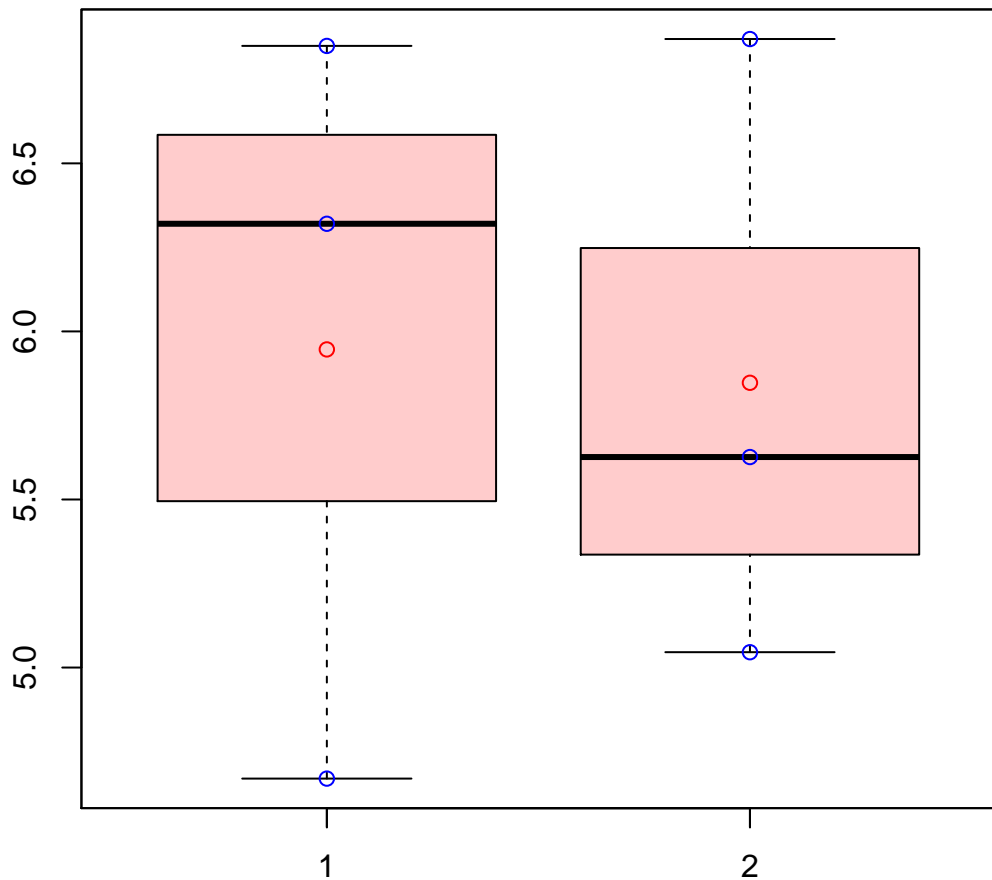

t-Test: p-value = 0.91

# CL1533Contig6|CL1533Contig6

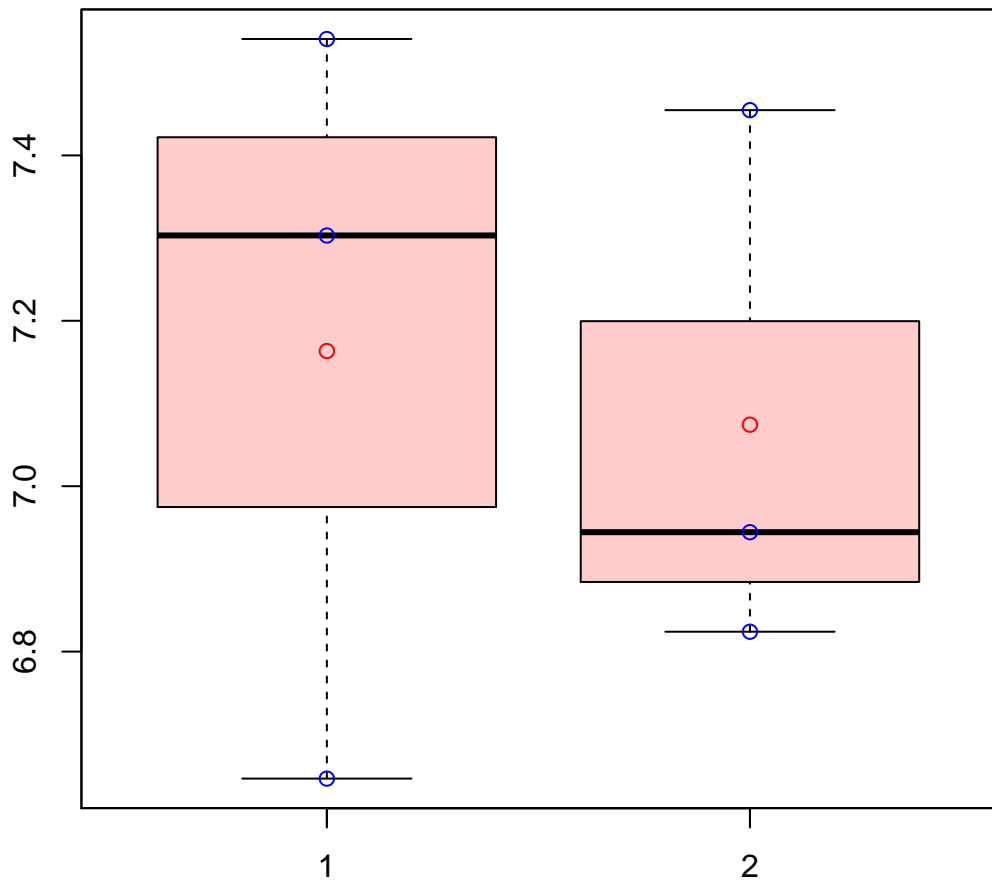

t-Test: p-value = 0.8



# CL15348Contig1|CL15348Contig1

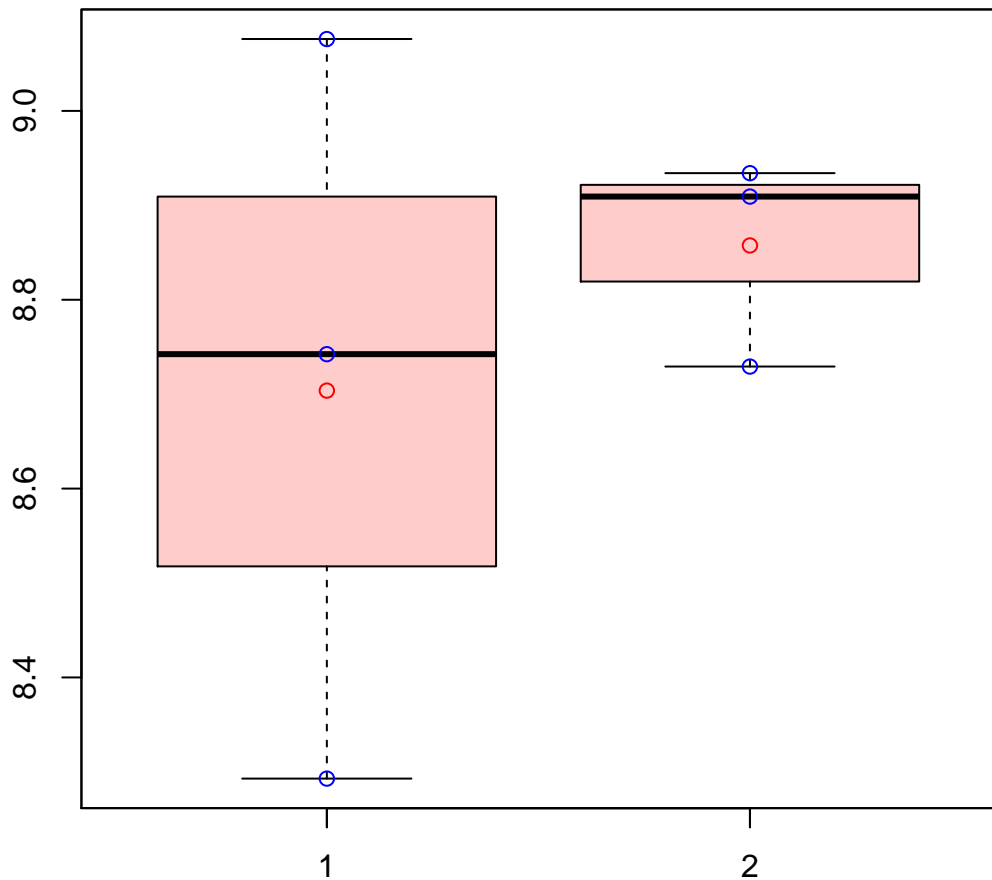

t-Test: p-value = 0.57

# CL15398Contig1|CL15398Contig1

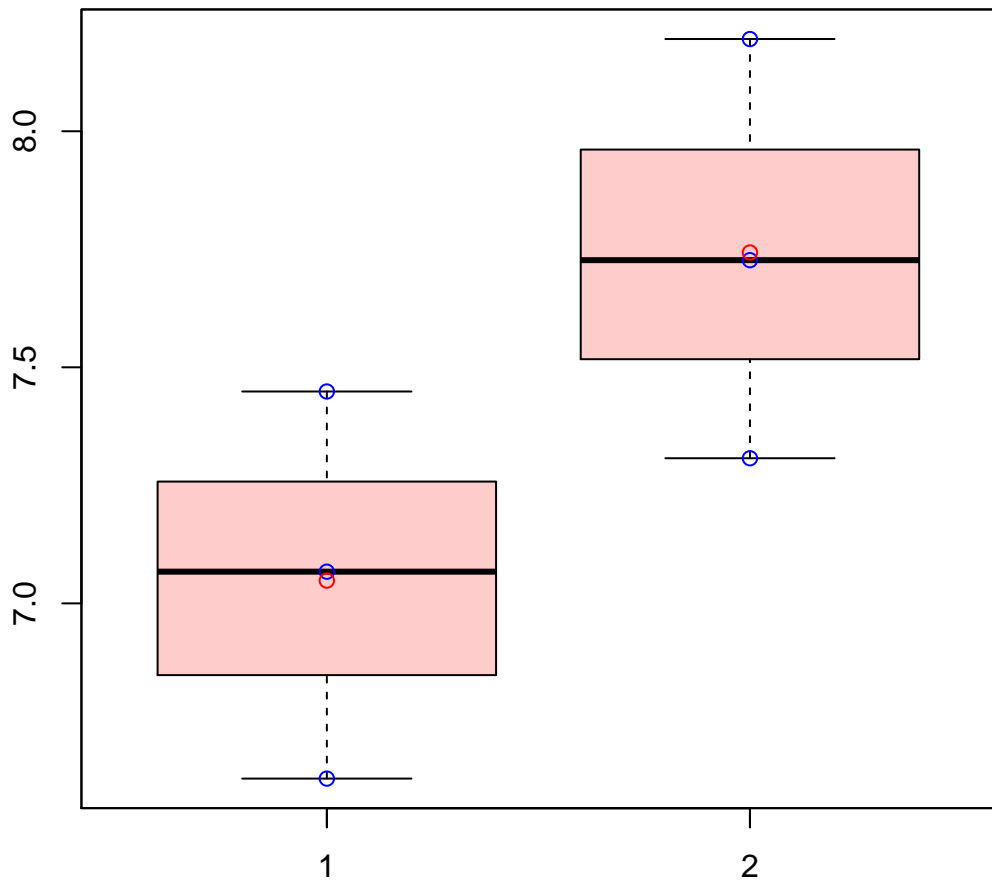

t-Test: p-value = 0.12

# CL153Contig9|CL153Contig9

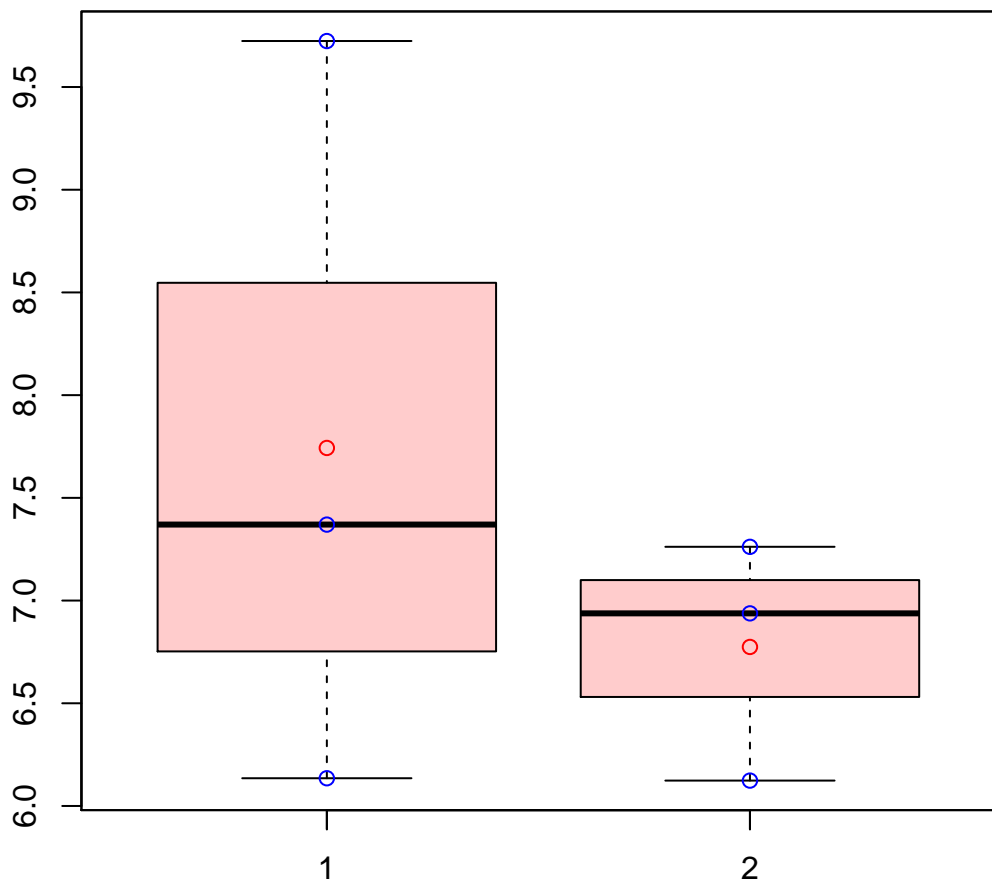

t-Test: p-value = 0.46

# CL1545Contig2|CL1545Contig2

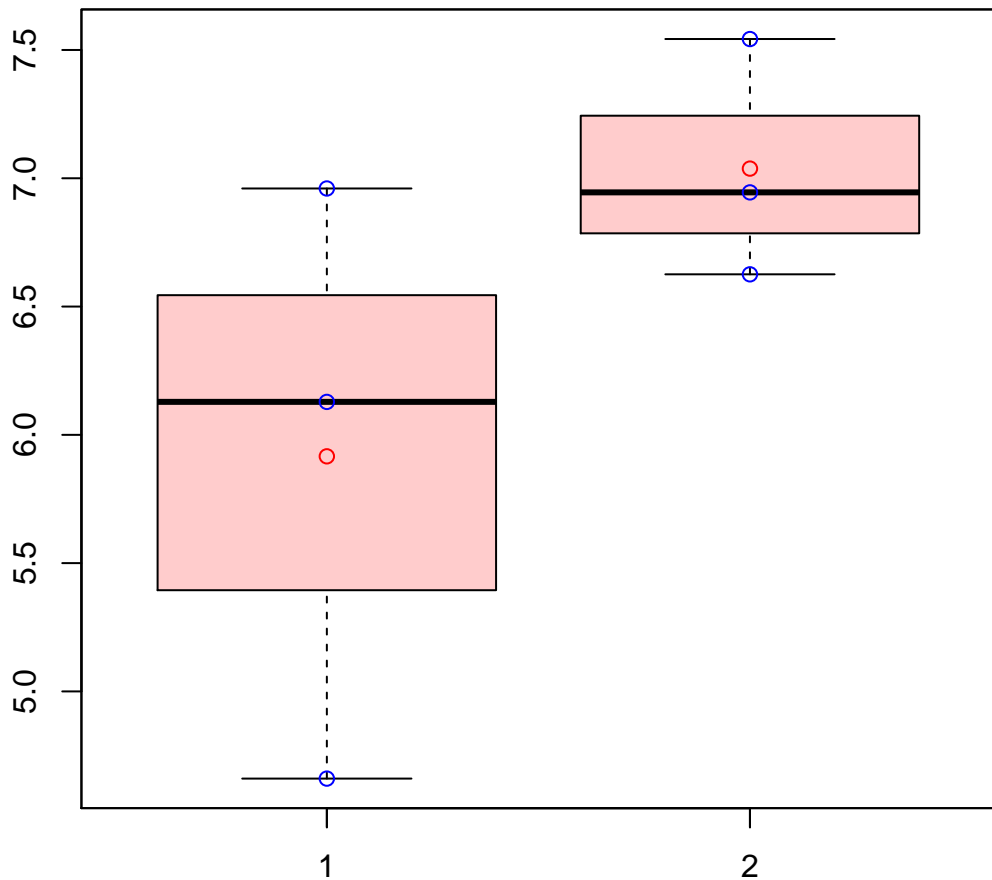

t-Test: p-value = 0.23

# CL1547Contig5|CL1547Contig5

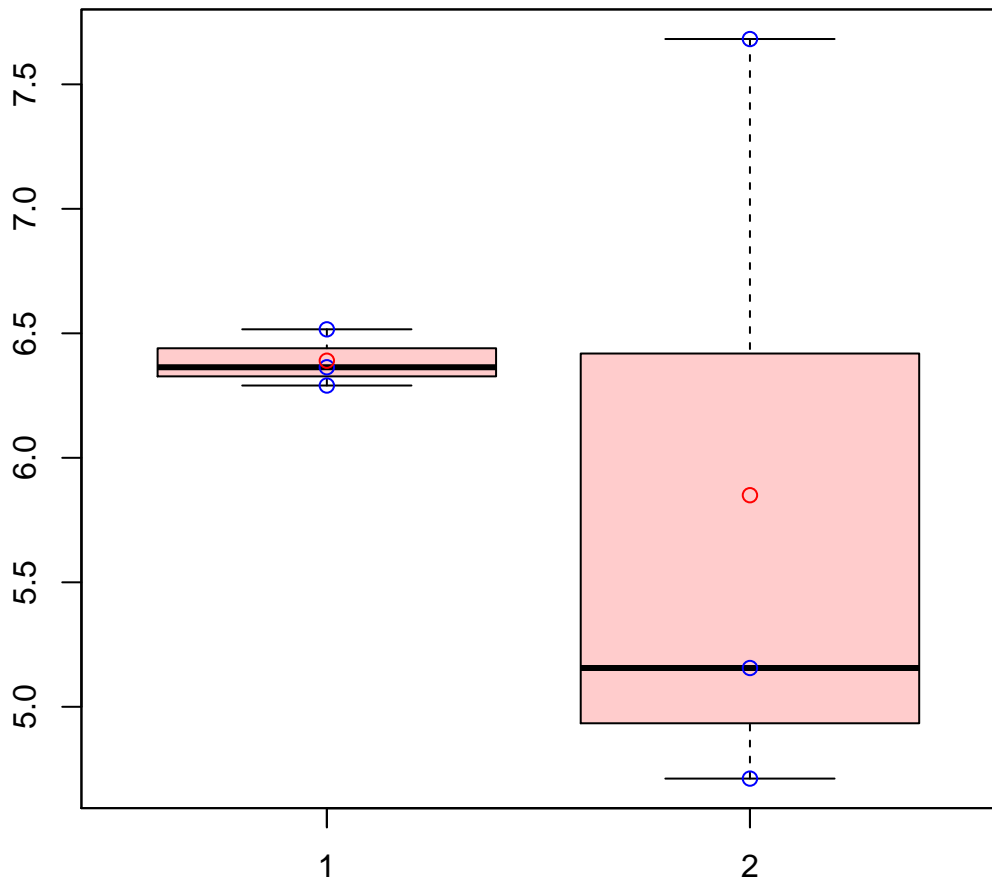

t-Test: p-value = 0.62

# CL154Contig18|CL154Contig18

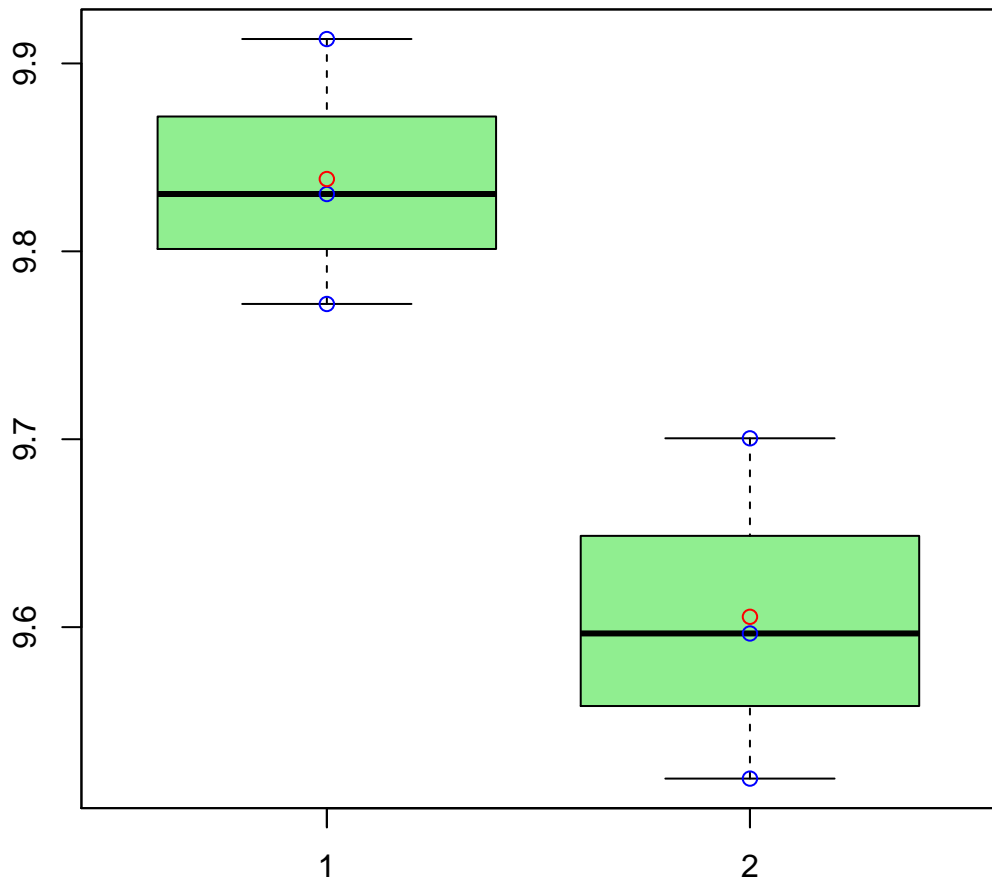

t-Test: p-value = 0.03

# CL1551Contig4|CL1551Contig4

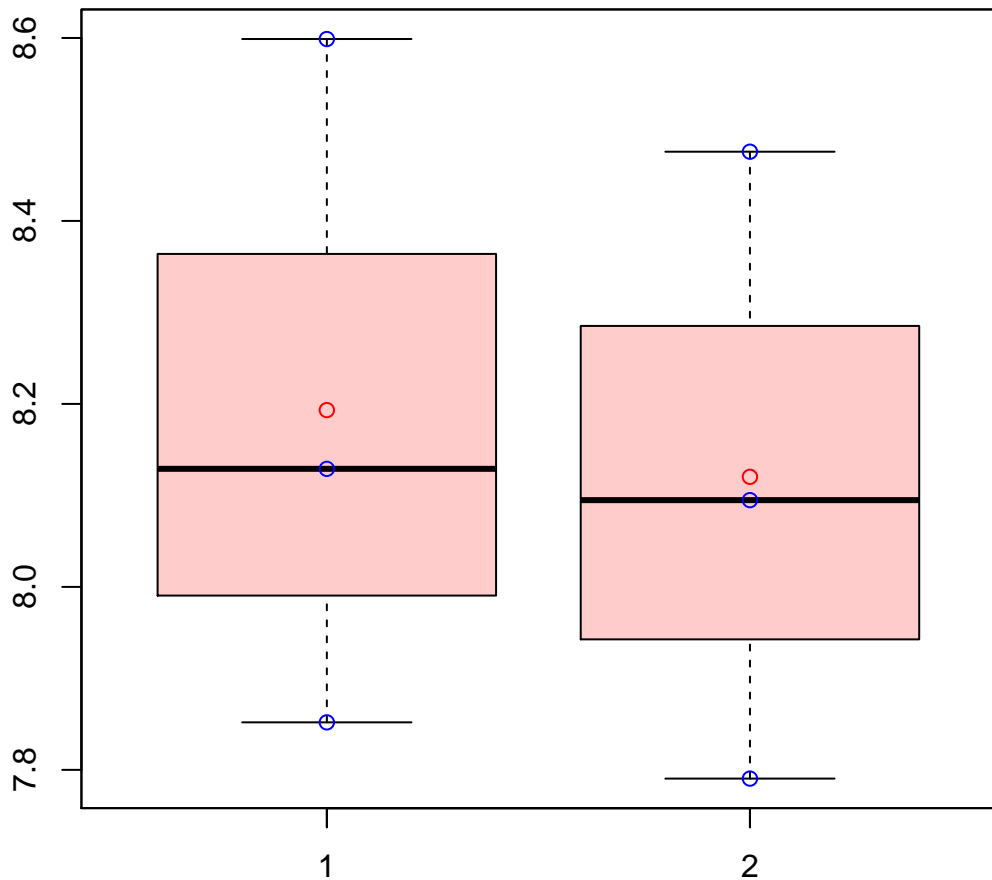

t-Test: p-value = 0.82

# CL15557Contig1|CL15557Contig1

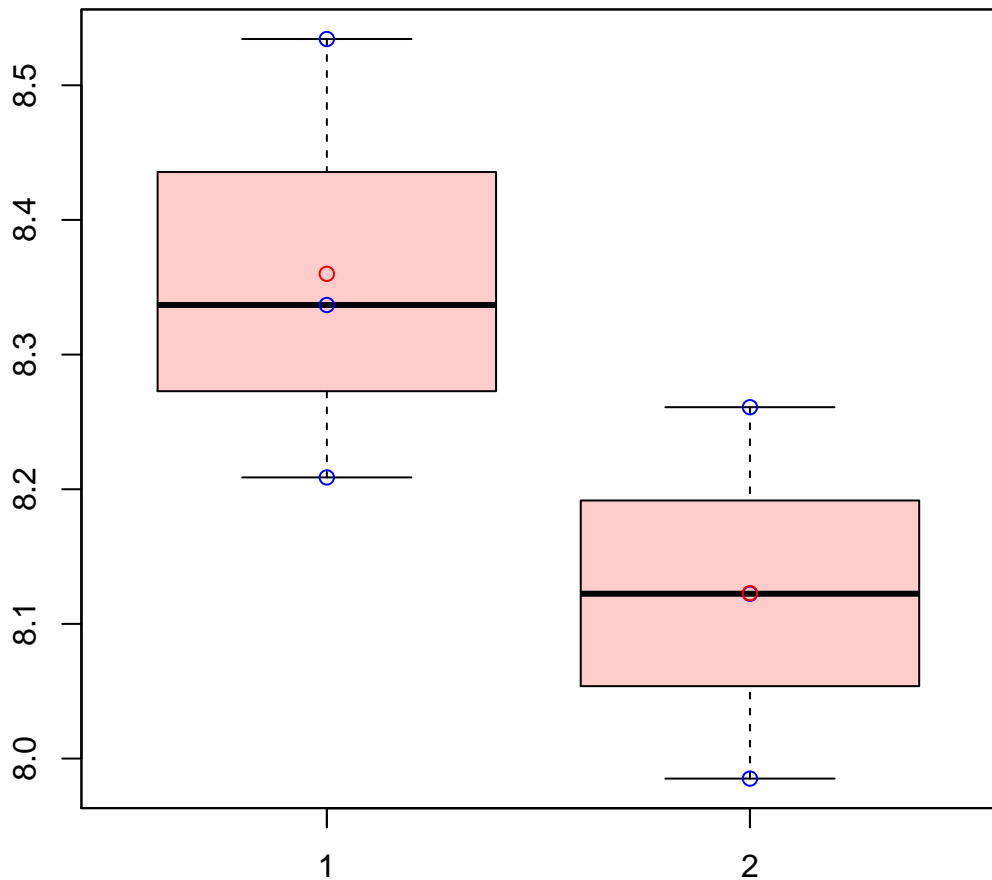

t-Test: p-value = 0.13



# CL155Contig29|CL155Contig29

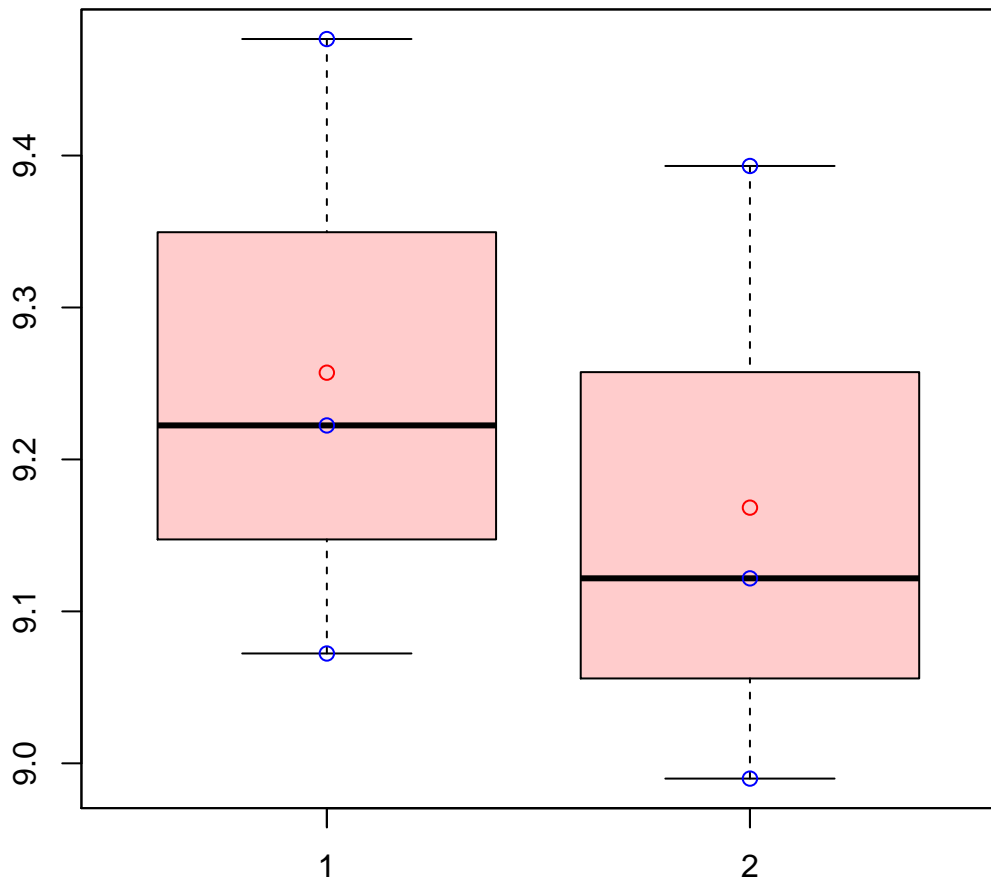

t-Test: p-value = 0.62

# CL155Contig6|CL155Contig6

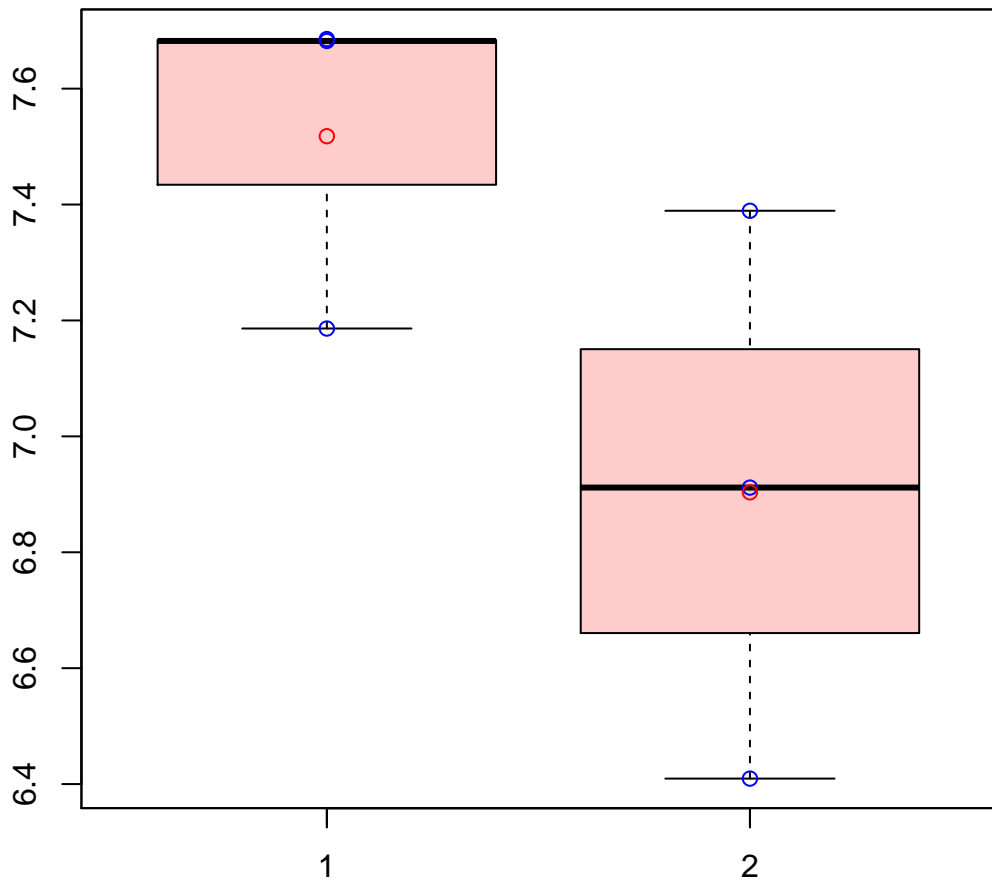

t-Test: p-value = 0.15

# CL1567Contig1|CL1567Contig1

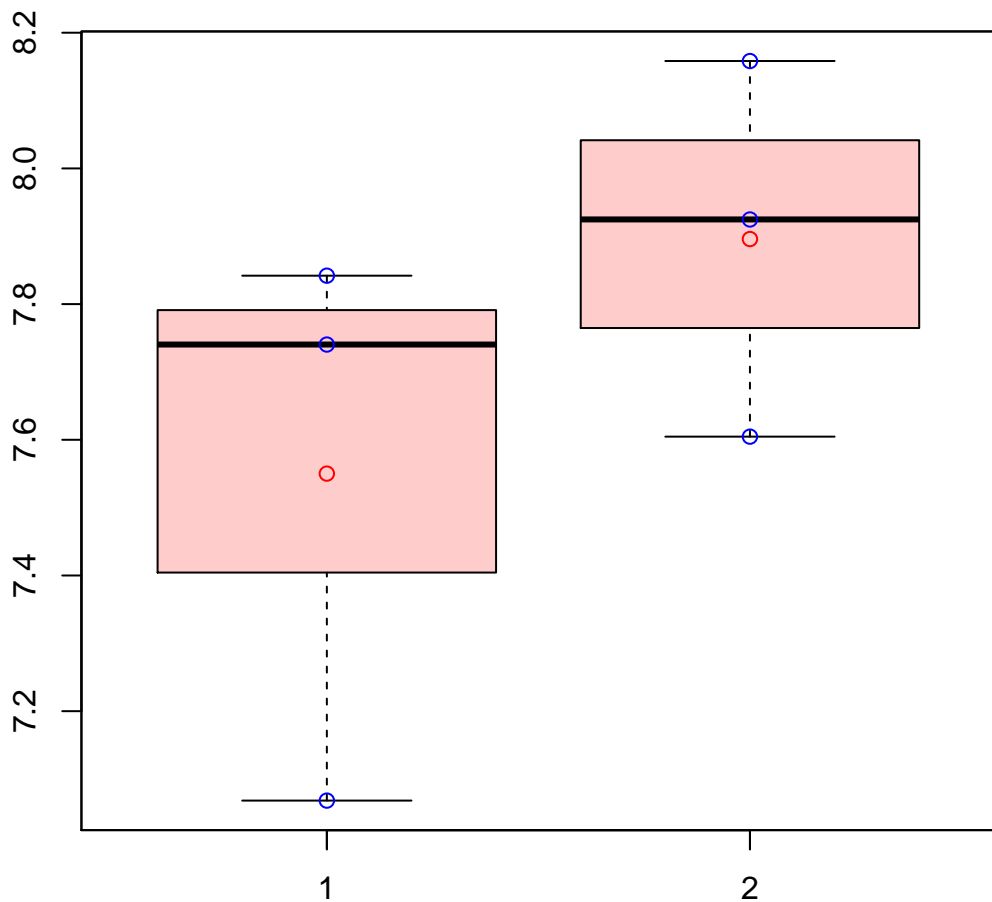

t-Test: p-value = 0.31

# CL1568Contig11|CL1568Contig11

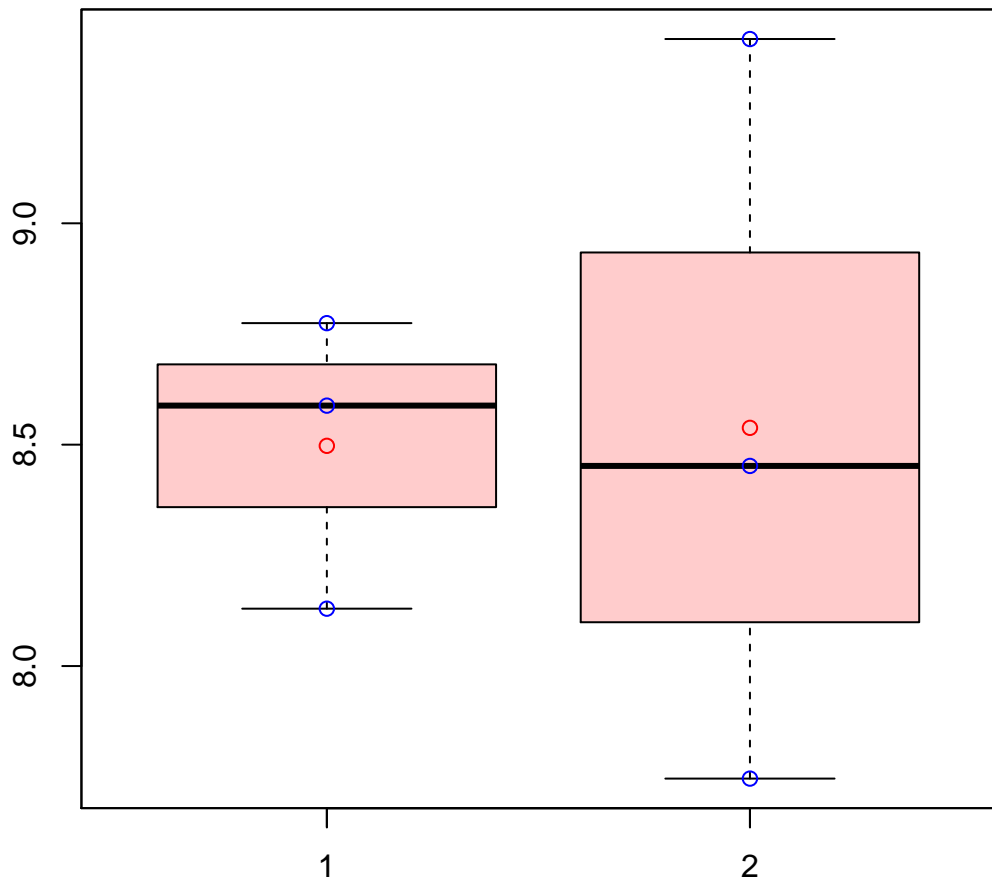

t-Test: p-value = 0.94

# CL1569Contig2|CL1569Contig2

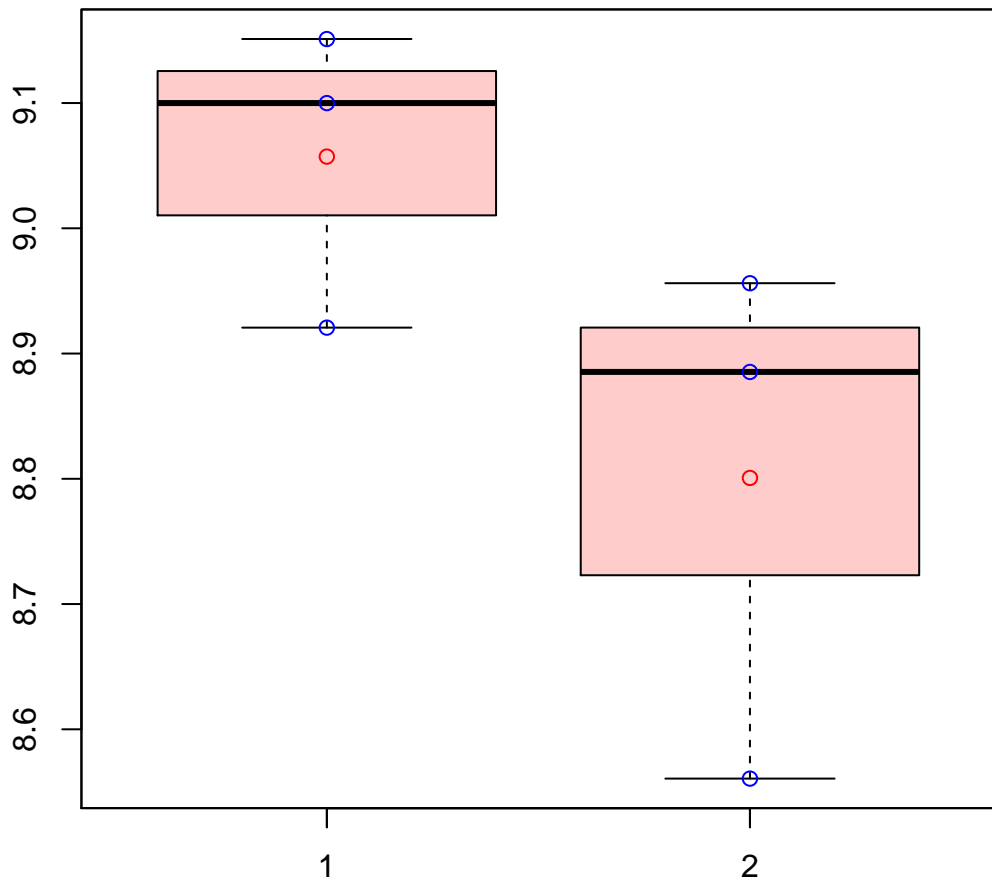

t-Test: p-value = 0.16

# CL1569Contig3|CL1569Contig3

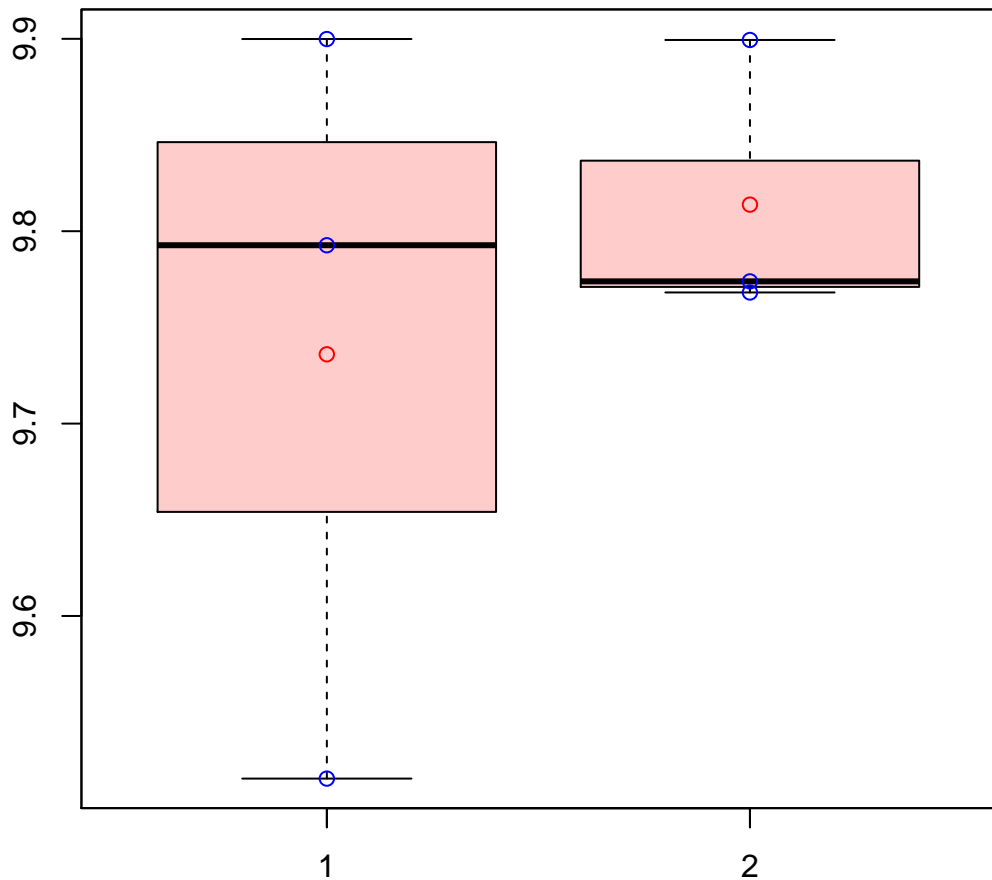

t-Test: p-value = 0.58

# CL1571Contig5|CL1571Contig5

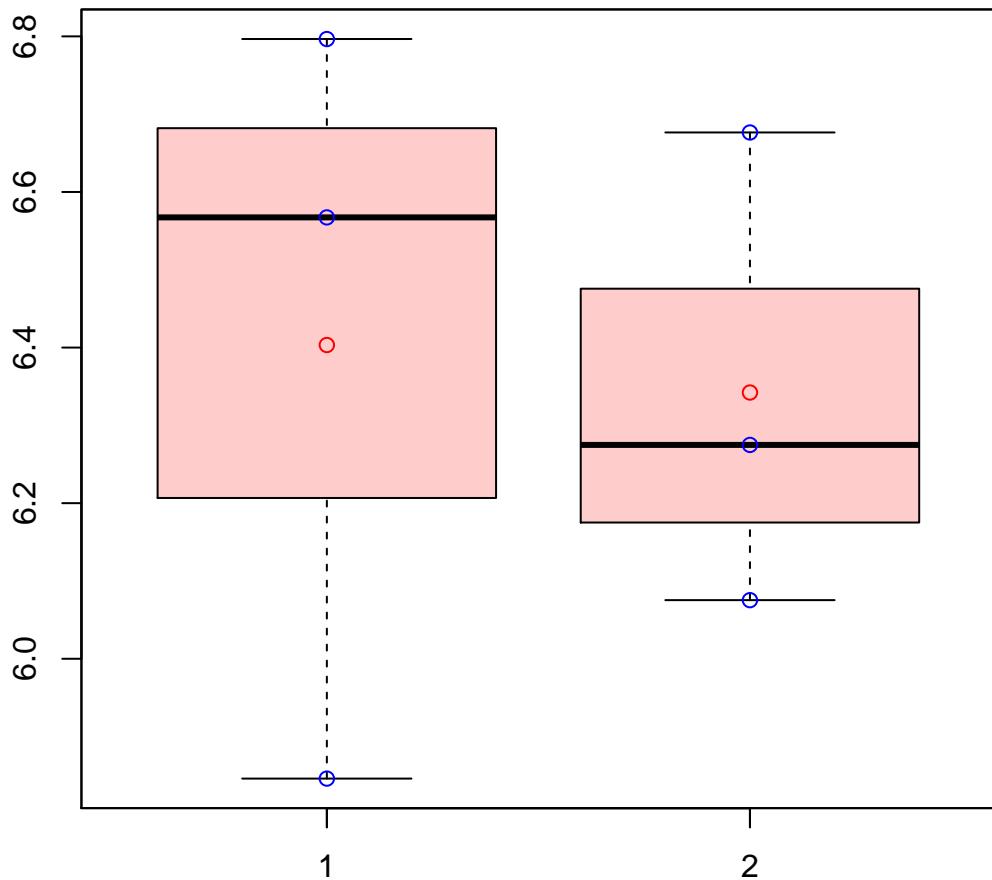

t-Test: p-value = 0.87

# CL15738Contig1|CL15738Contig1

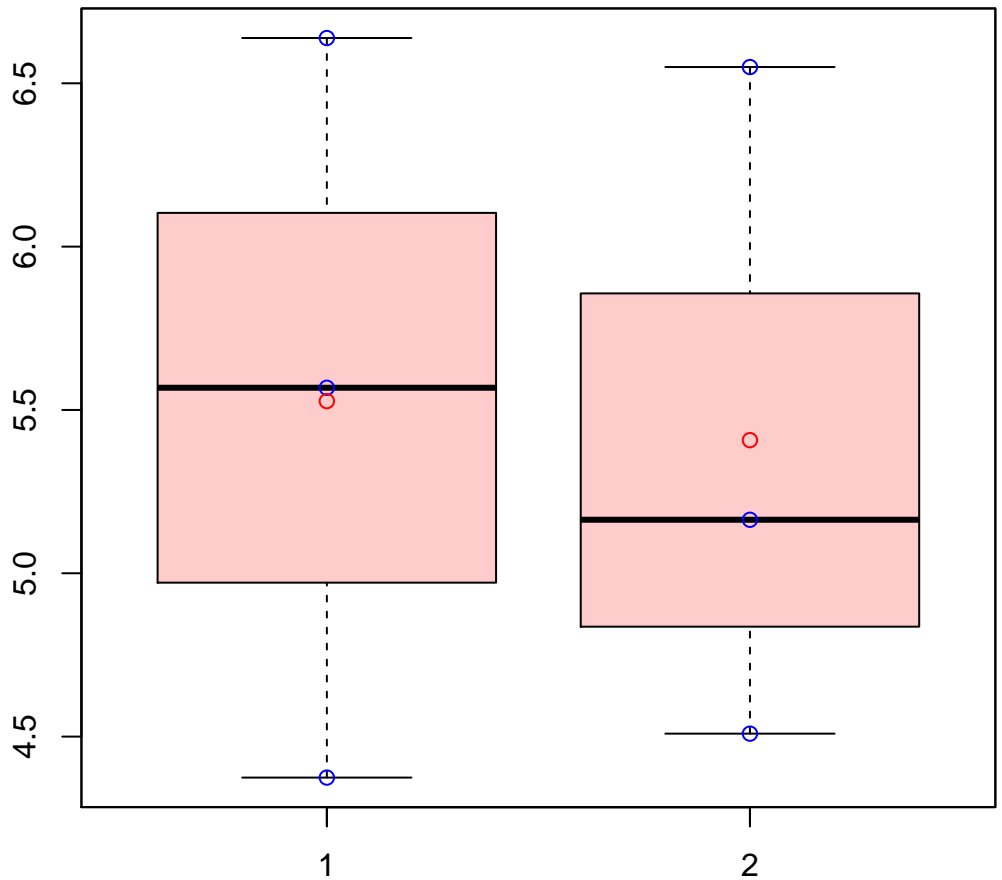

t-Test: p-value = 0.9



# CL157Contig4|CL157Contig4

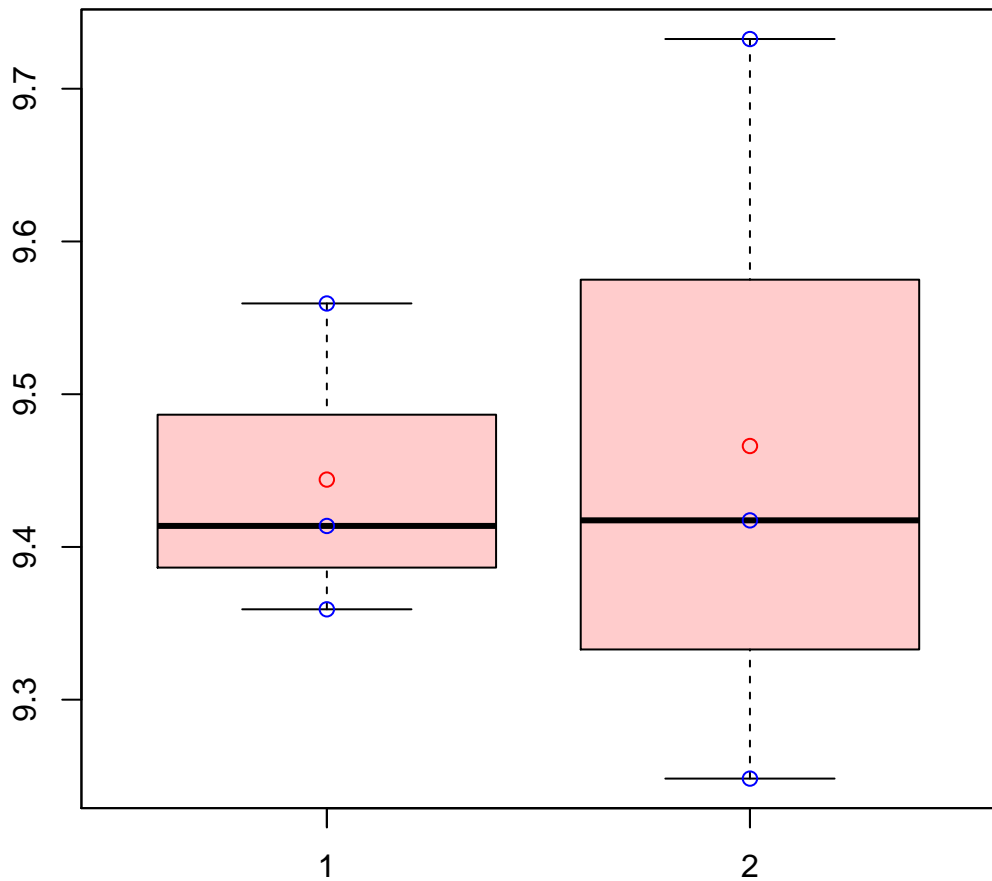

t-Test: p-value = 0.9

# CL1580Contig2|CL1580Contig2

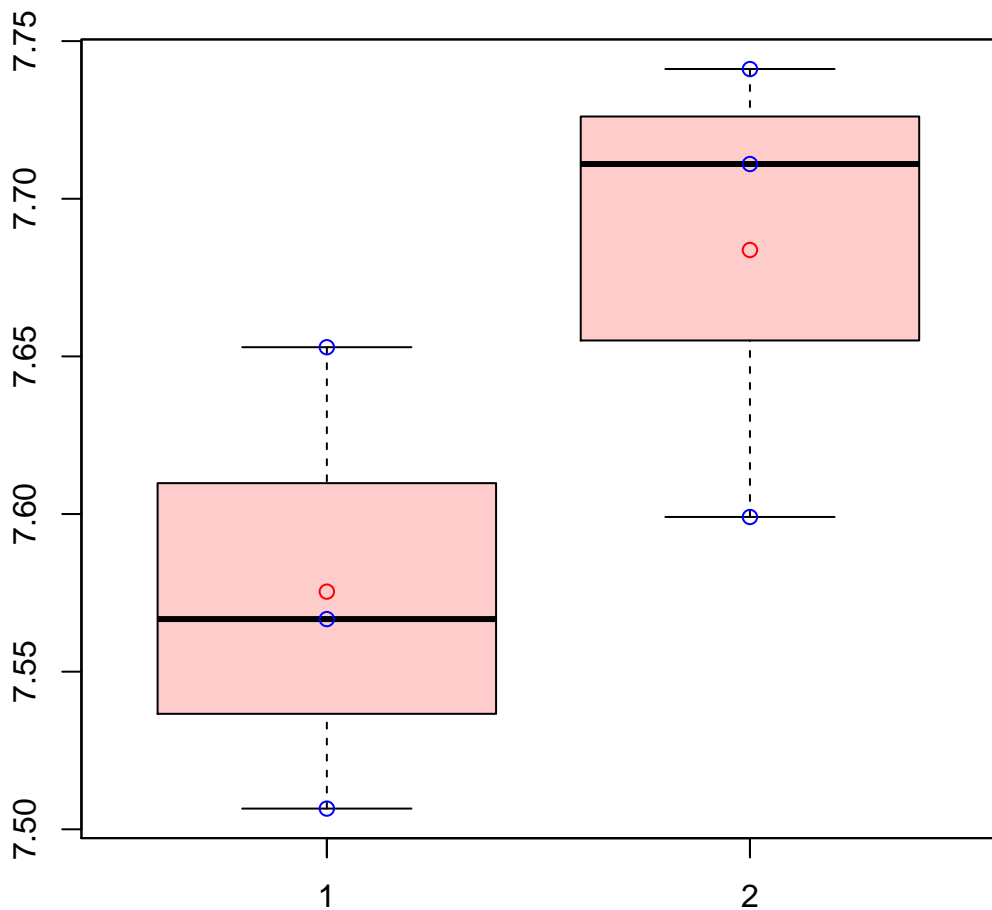

t-Test: p-value = 0.15

# CL1584Contig5|CL1584Contig5

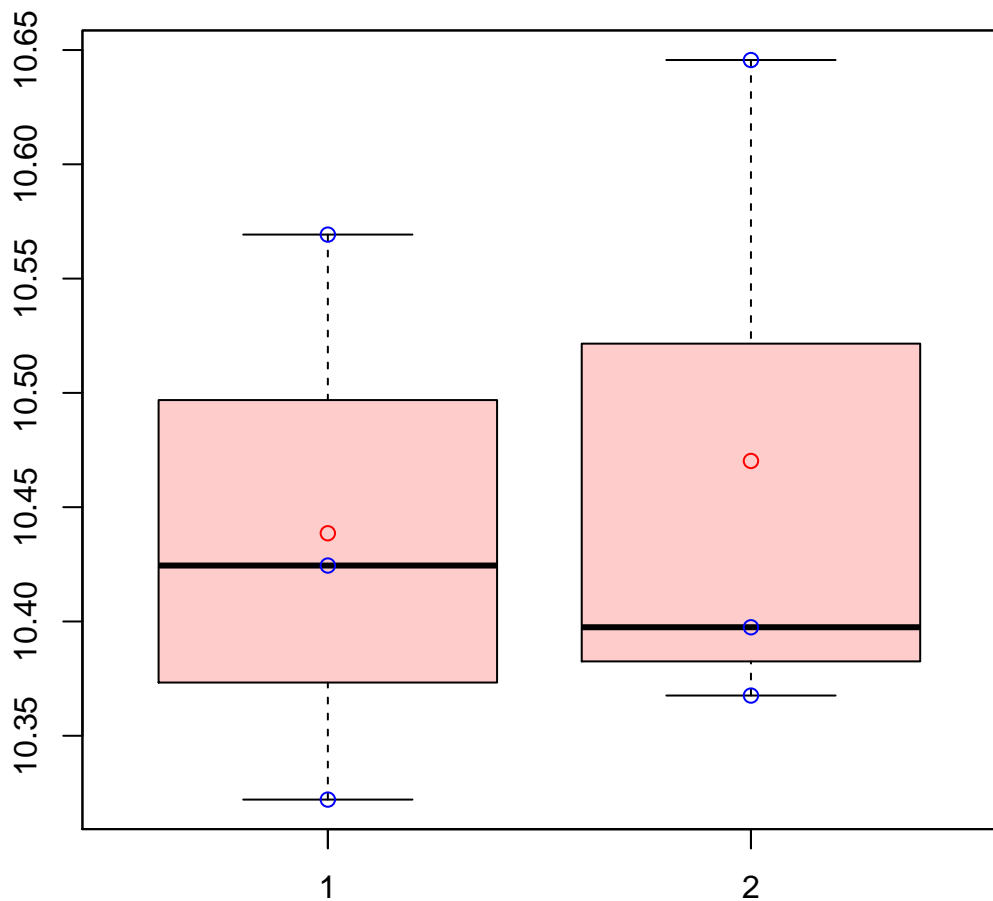

t-Test: p-value = 0.8

# CL1588Contig1|CL1588Contig1

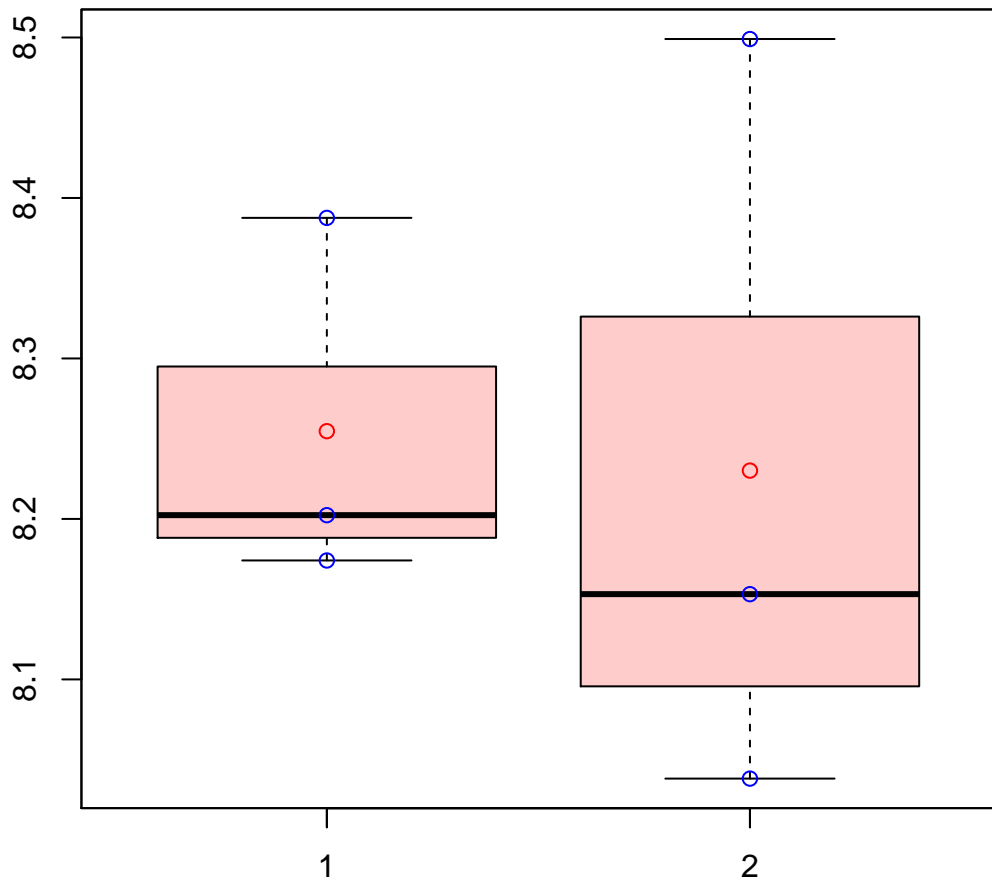

t-Test: p-value = 0.88

# CL1589Contig3|CL1589Contig3

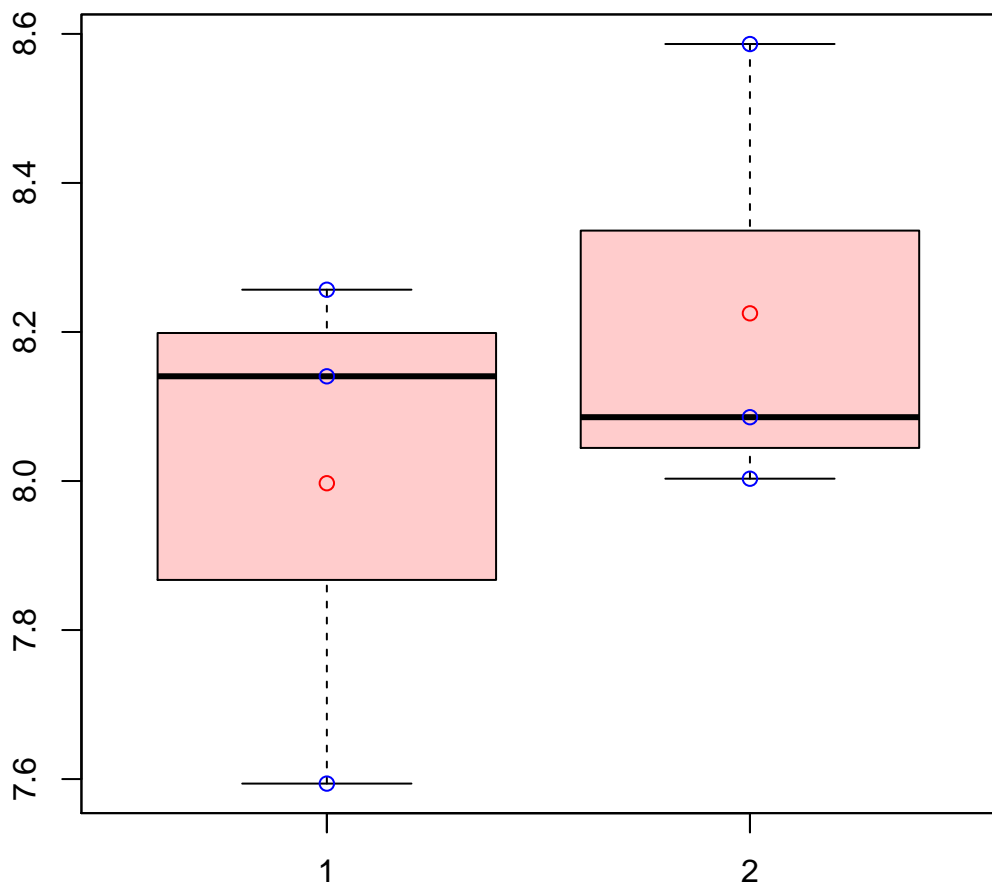

t-Test: p-value = 0.45

# CL1594Contig2|CL1594Contig2

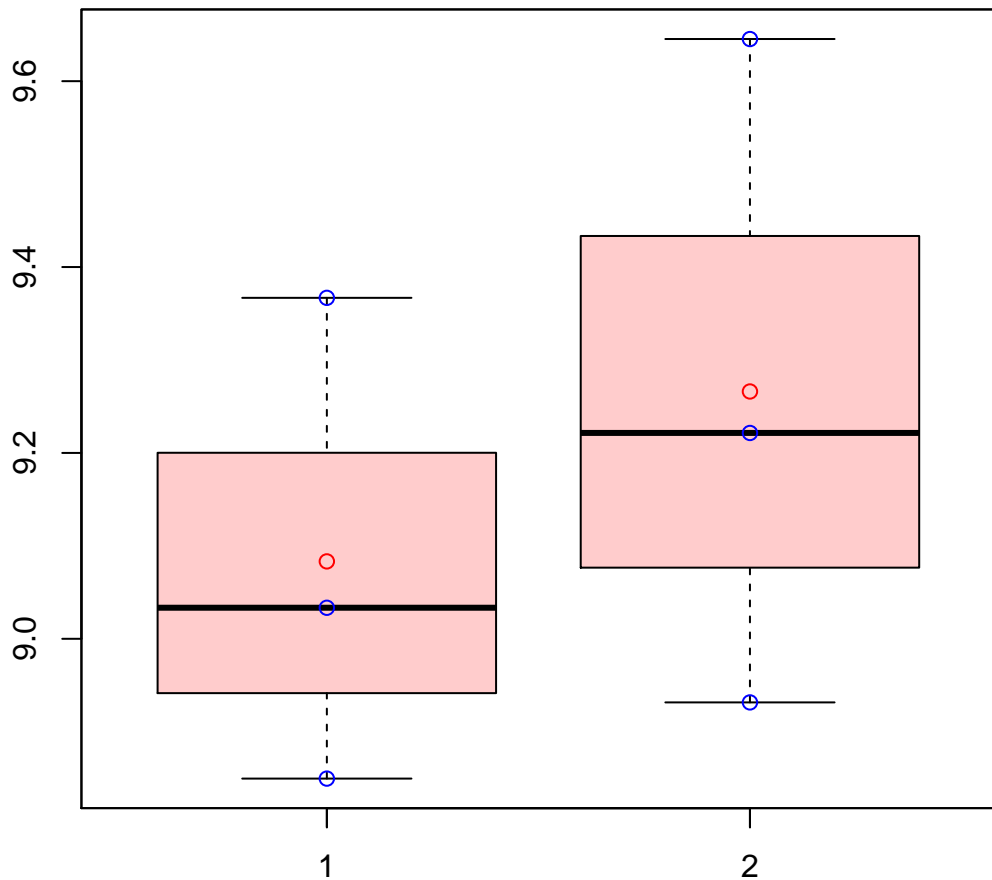

t-Test: p-value = 0.52

# CL1596Contig3|CL1596Contig3

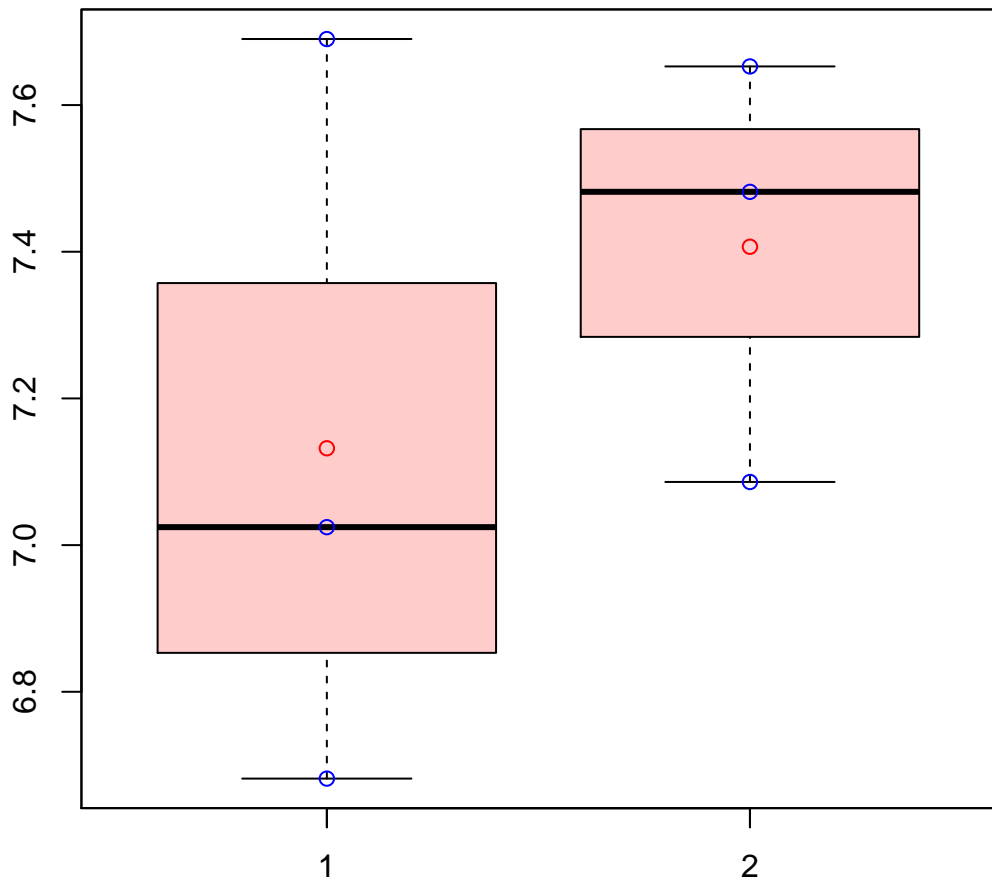

t-Test: p-value = 0.48

# CL15Contig21|CL15Contig21

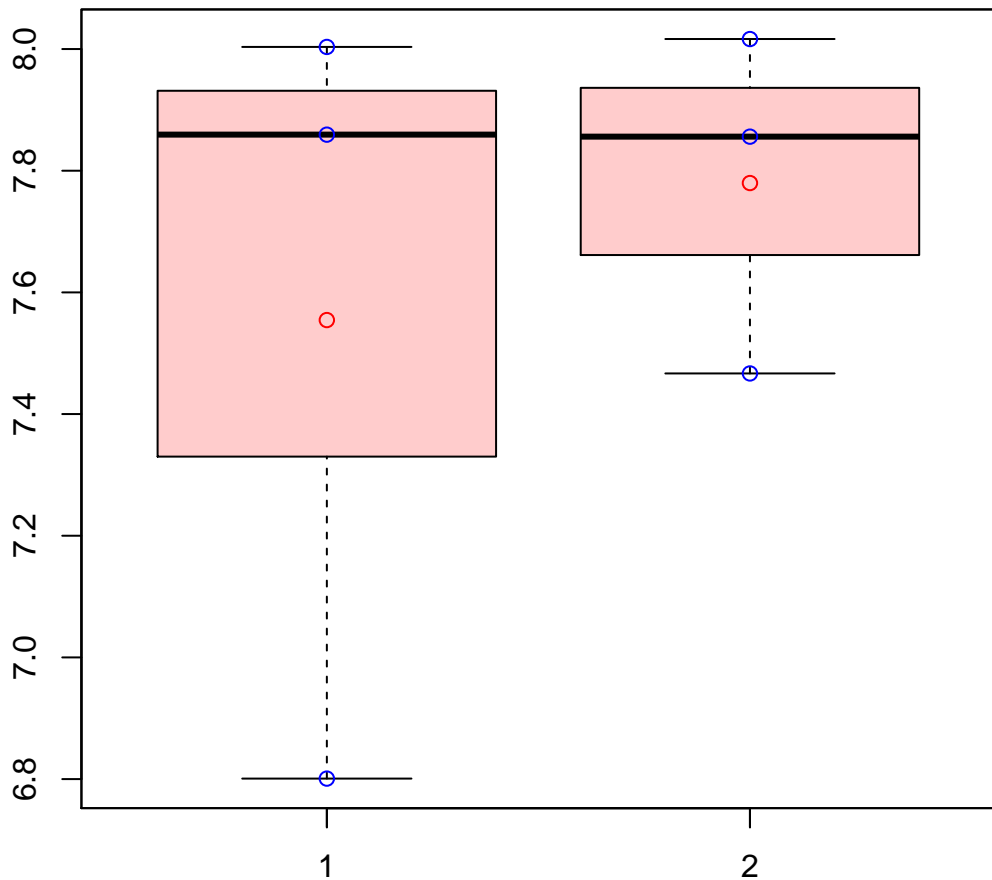

t-Test: p-value = 0.63



# CL15Contig32|CL15Contig32

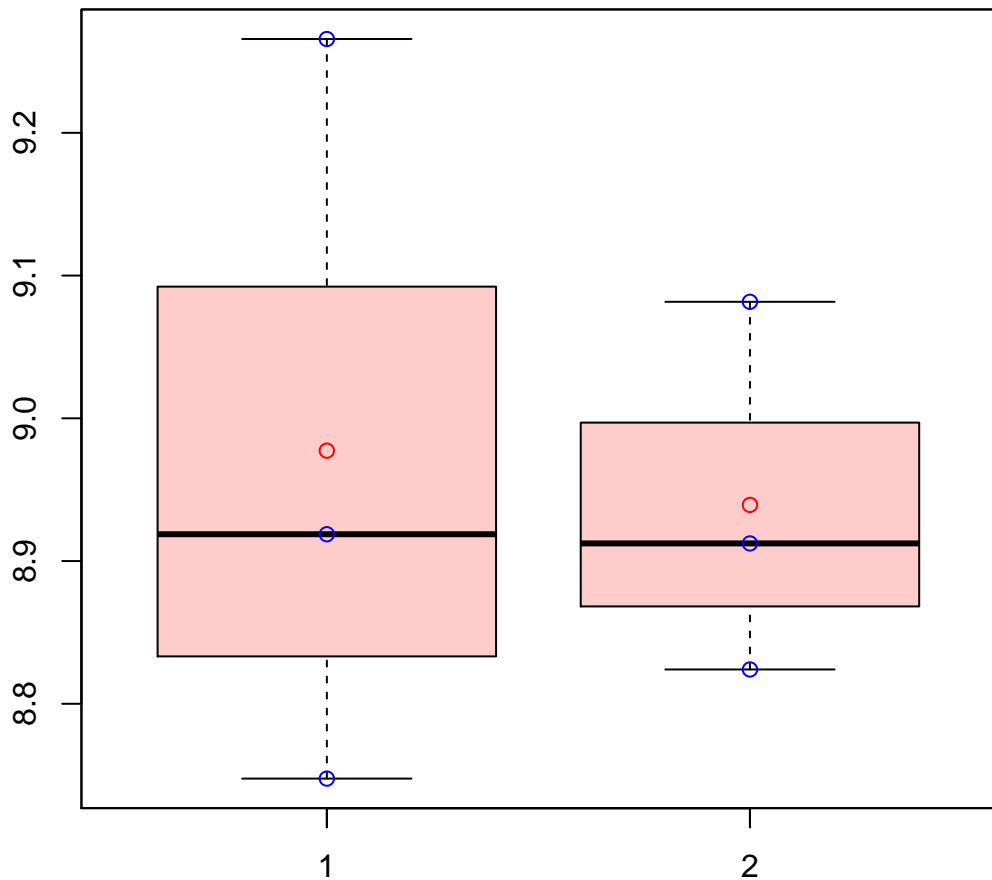

t-Test: p-value = 0.84

# CL1600Contig4|CL1600Contig4

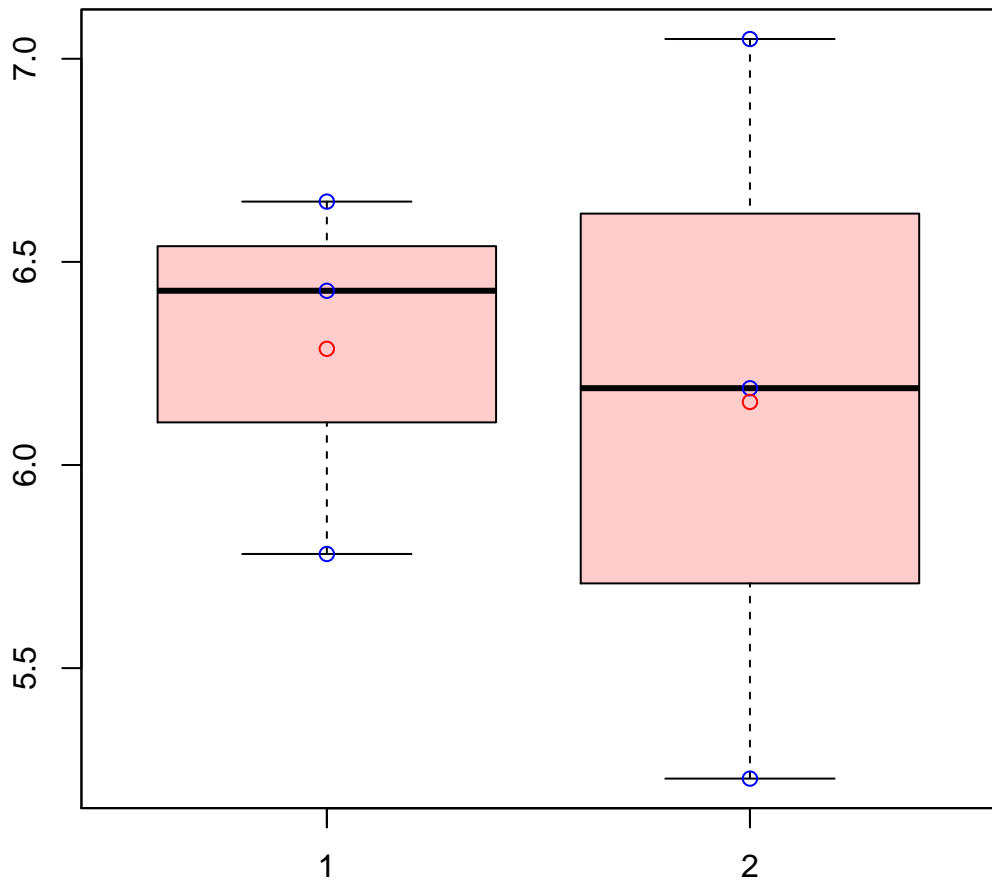

t-Test: p-value = 0.84

# CL1601Contig2|CL1601Contig2

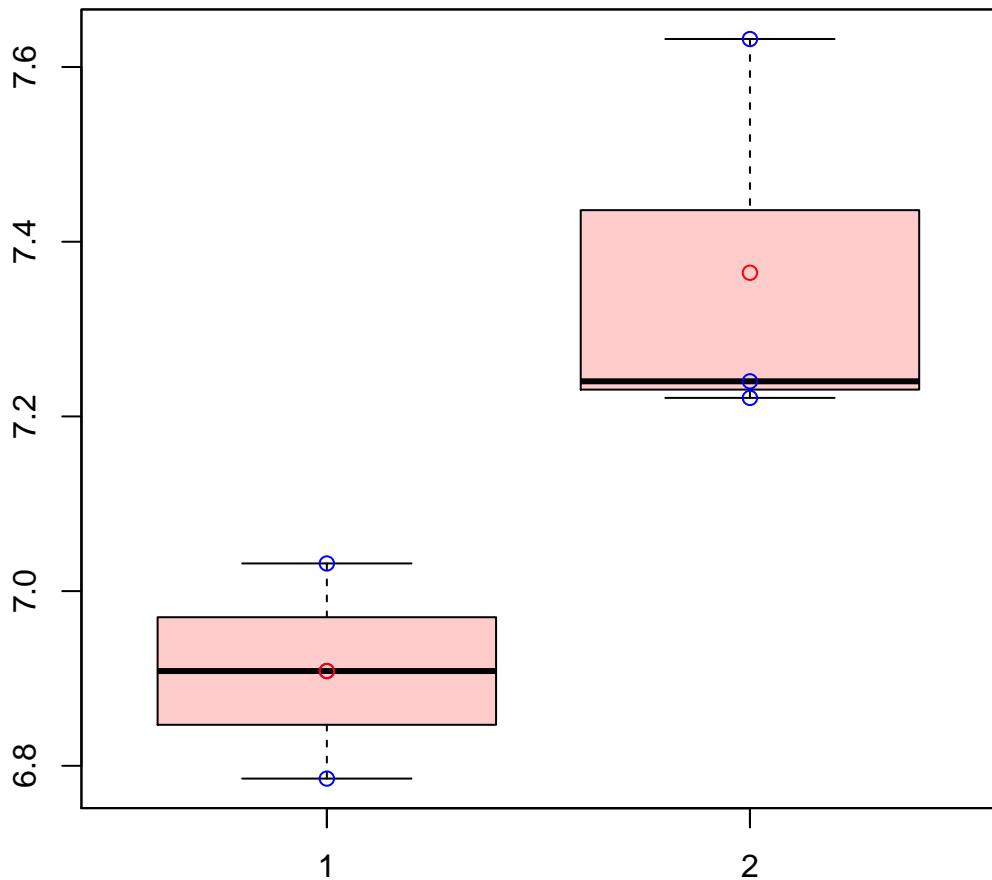

t-Test: p-value = 0.06

# CL1603Contig5|CL1603Contig5

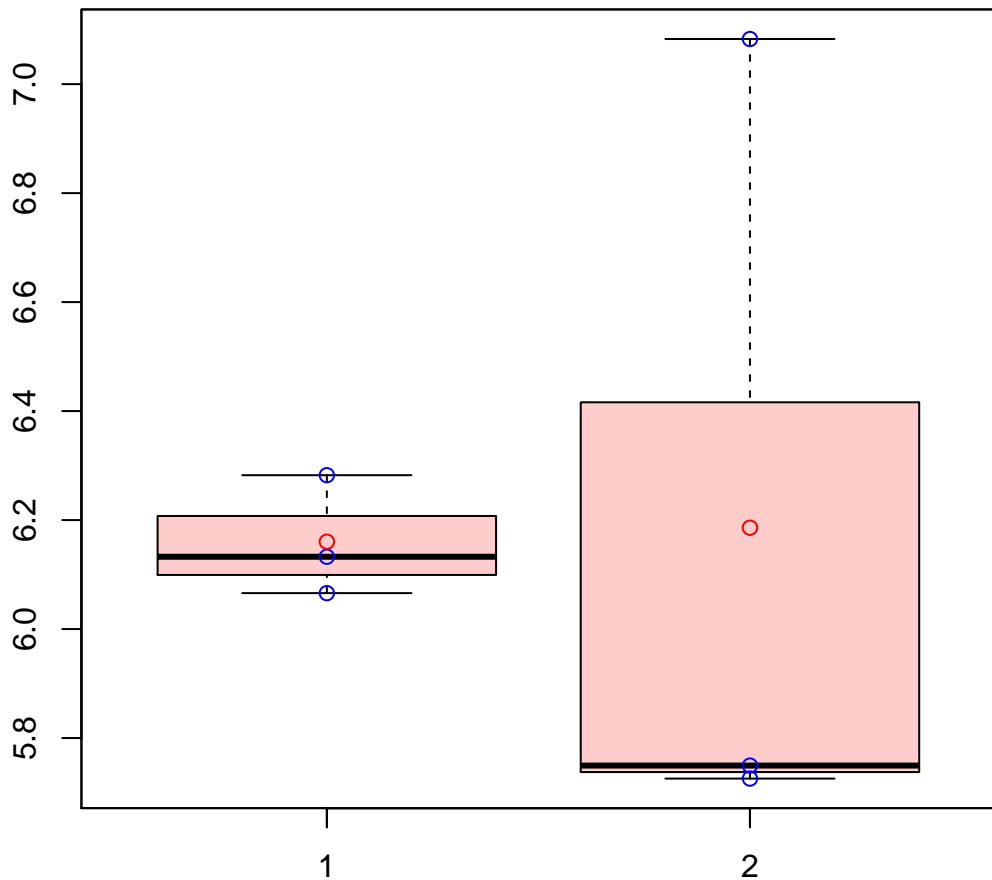

t-Test: p-value = 0.96

# CL1603Contig6|CL1603Contig6

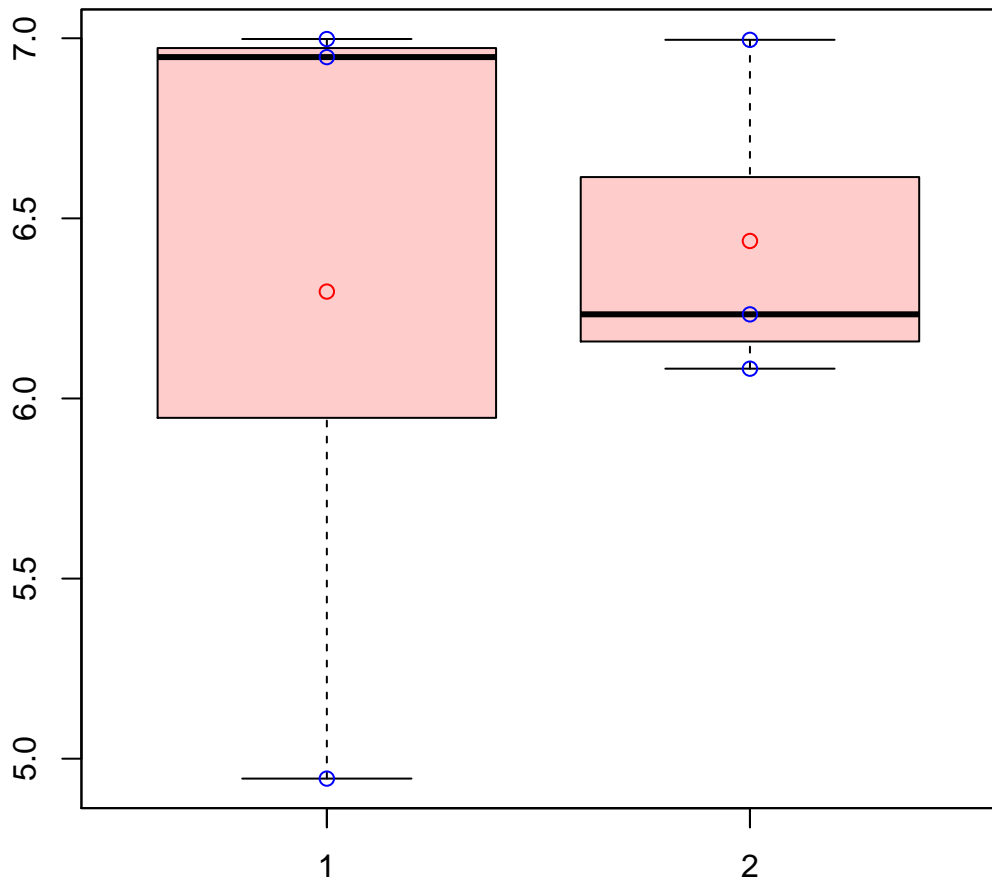

t-Test: p-value = 0.86

# CL16095Contig1|CL16095Contig1

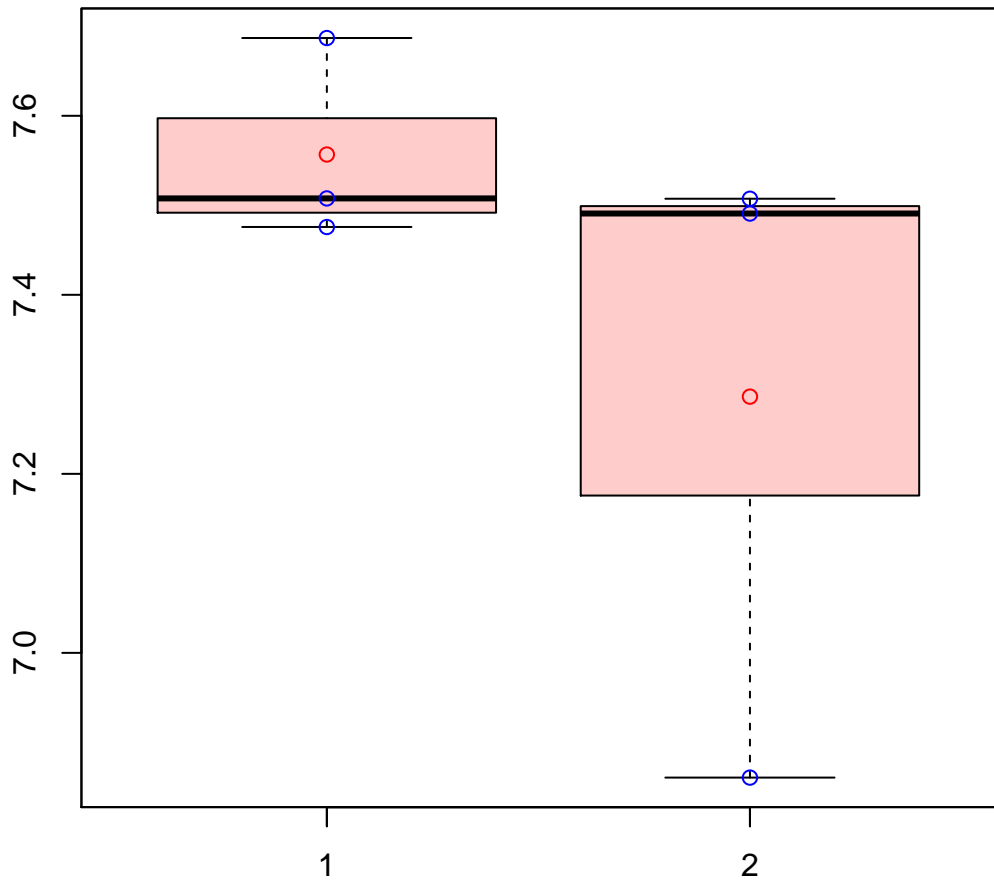

t-Test: p-value = 0.33

# CL16110Contig1|CL16110Contig1

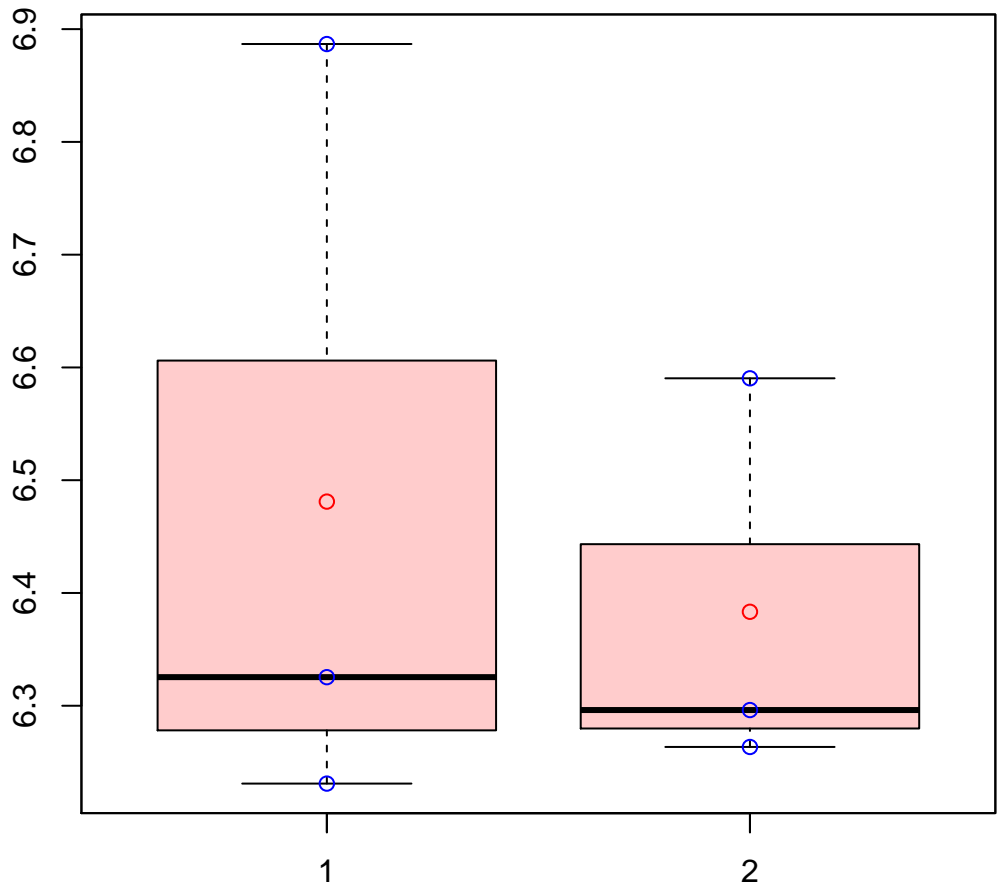

t-Test: p-value = 0.7

# CL16118Contig1|CL16118Contig1

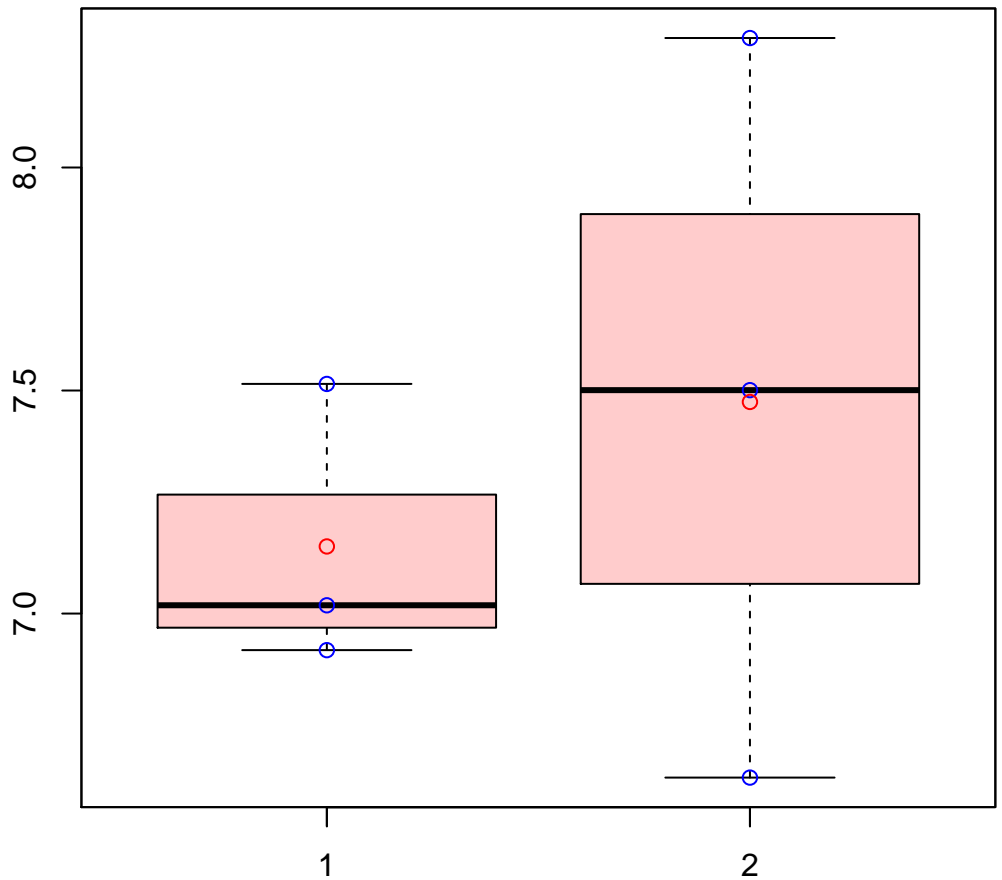

t-Test: p-value = 0.58



# CL16120Contig1|CL16120Contig1

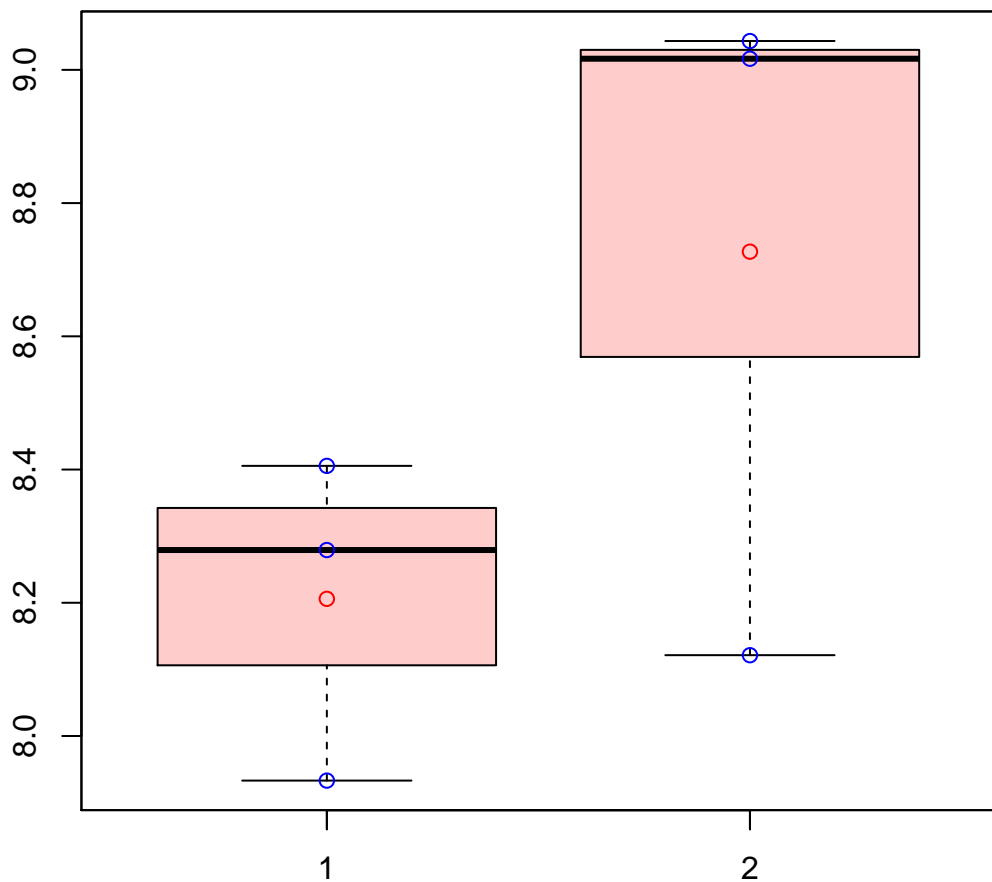

t-Test: p-value = 0.22

# CL16131Contig1|CL16131Contig1

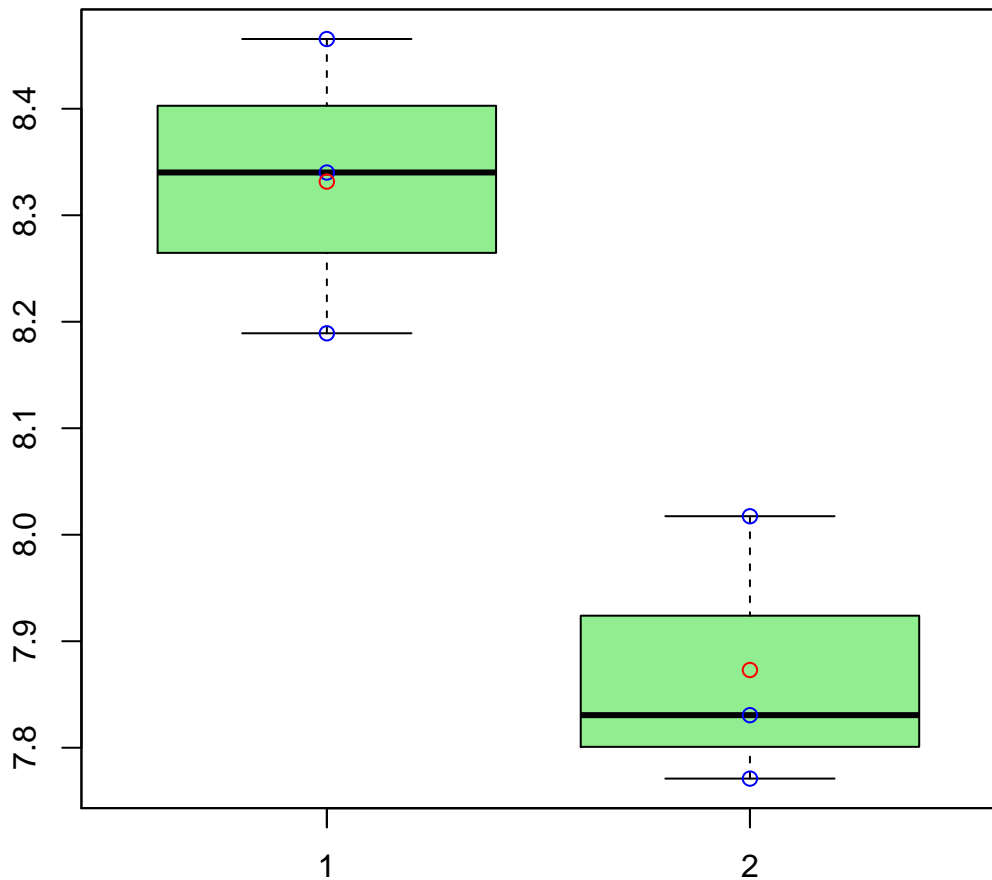

t-Test: p-value = 0.01

# CL161Contig10|CL161Contig10

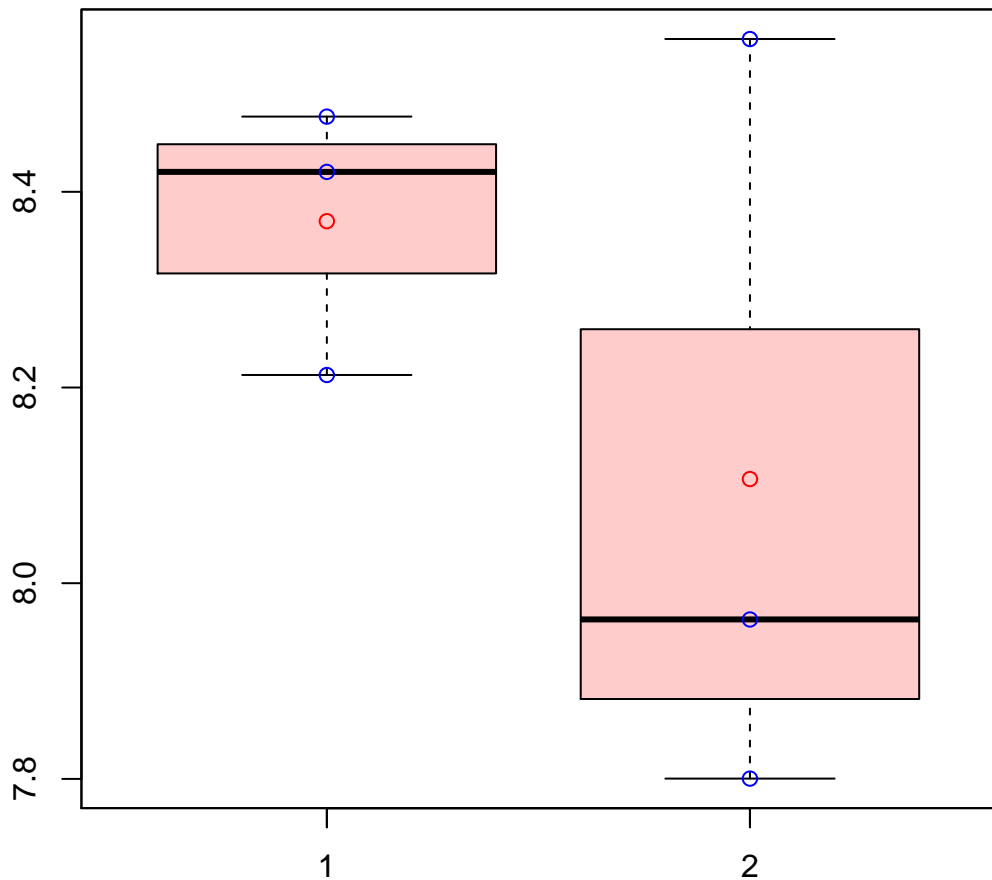

t-Test: p-value = 0.37

# CL1620Contig1|CL1620Contig1

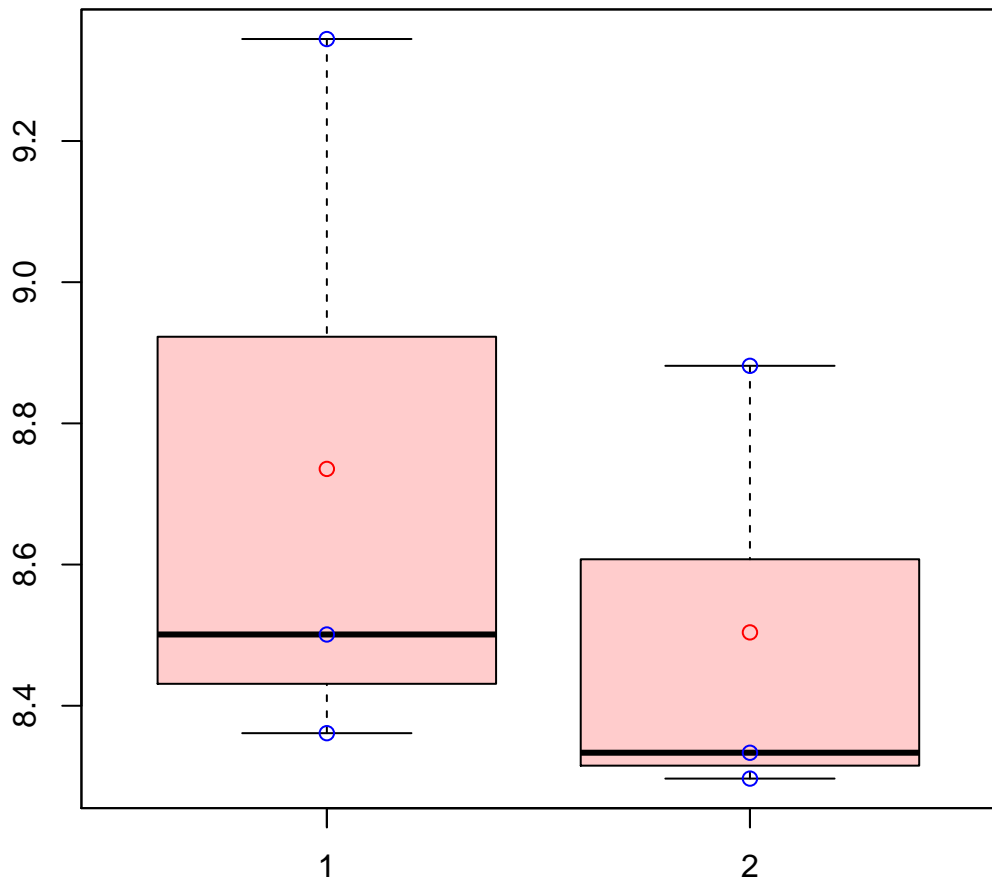

t-Test: p-value = 0.56

# CL1629Contig1|CL1629Contig1

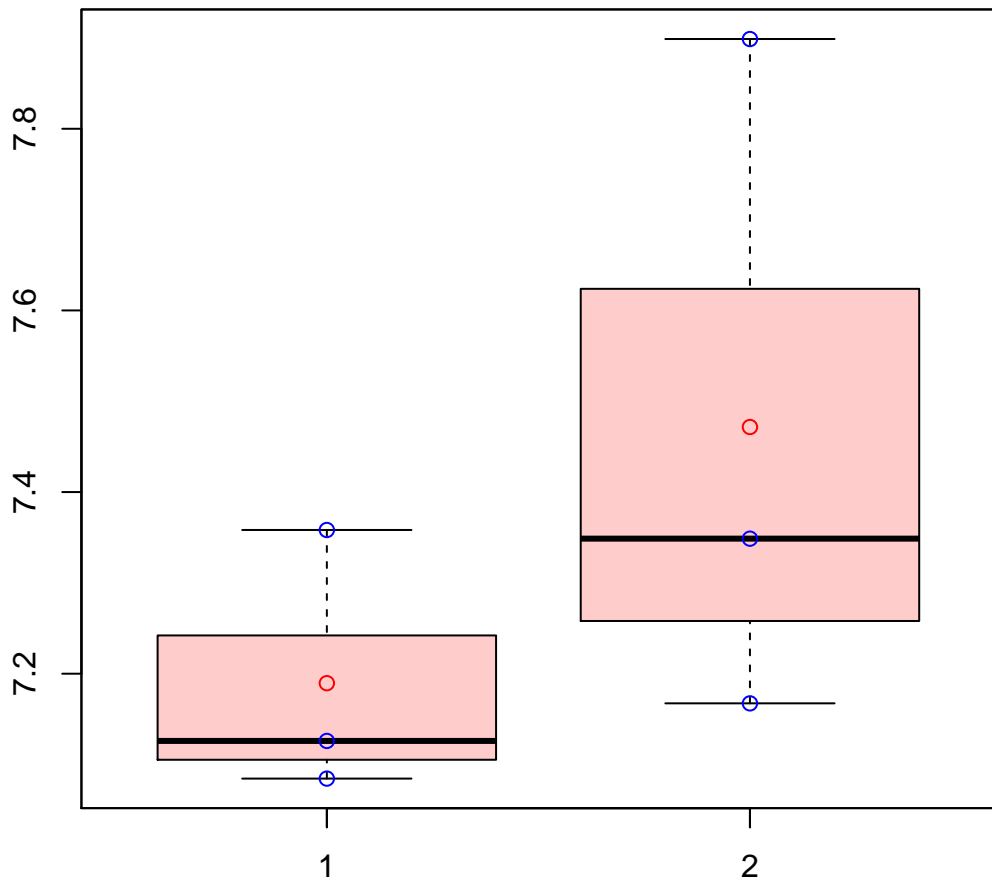

t-Test: p-value = 0.33

# CL1629Contig5|CL1629Contig5

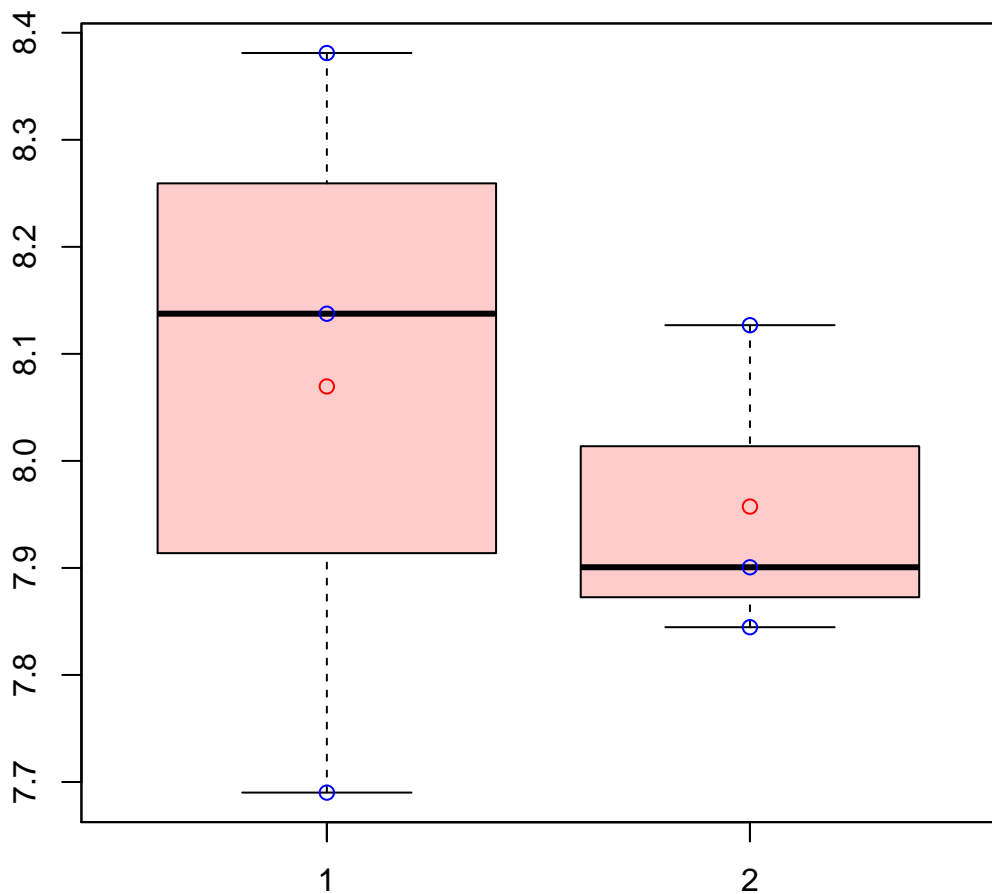

t-Test: p-value = 0.65

# CL1629Contig7|CL1629Contig7

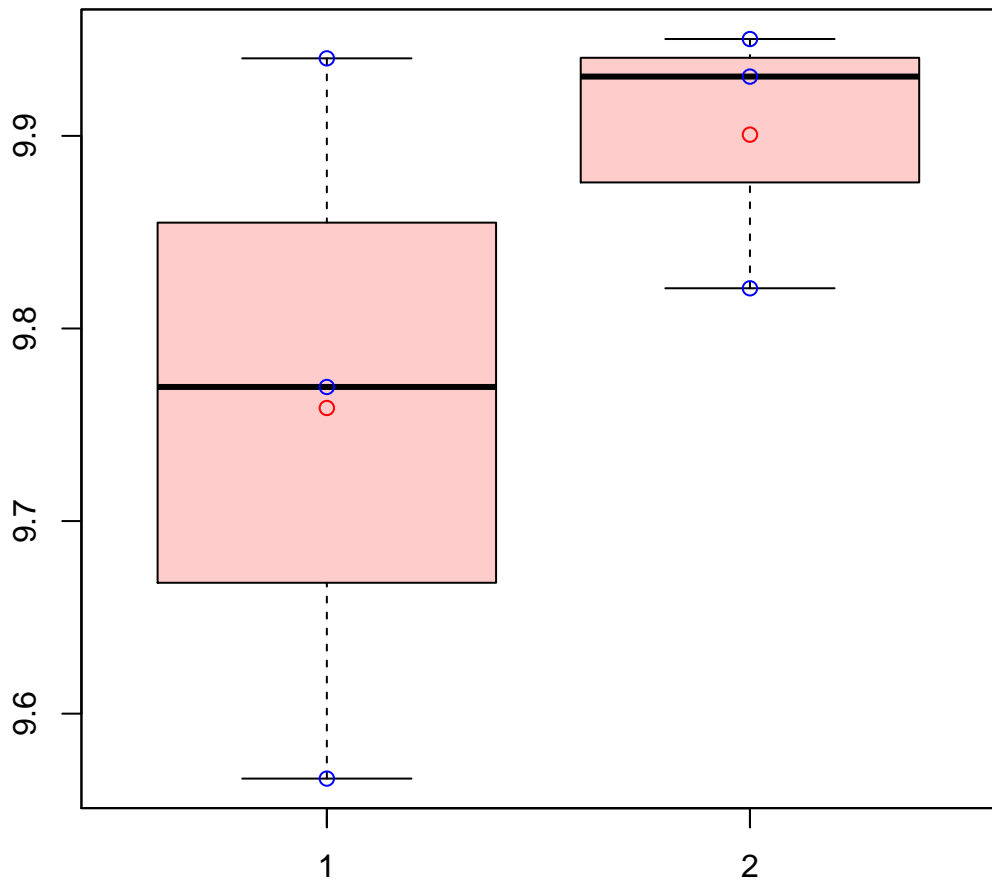

t-Test: p-value = 0.32

# CL1629Contig9|CL1629Contig9

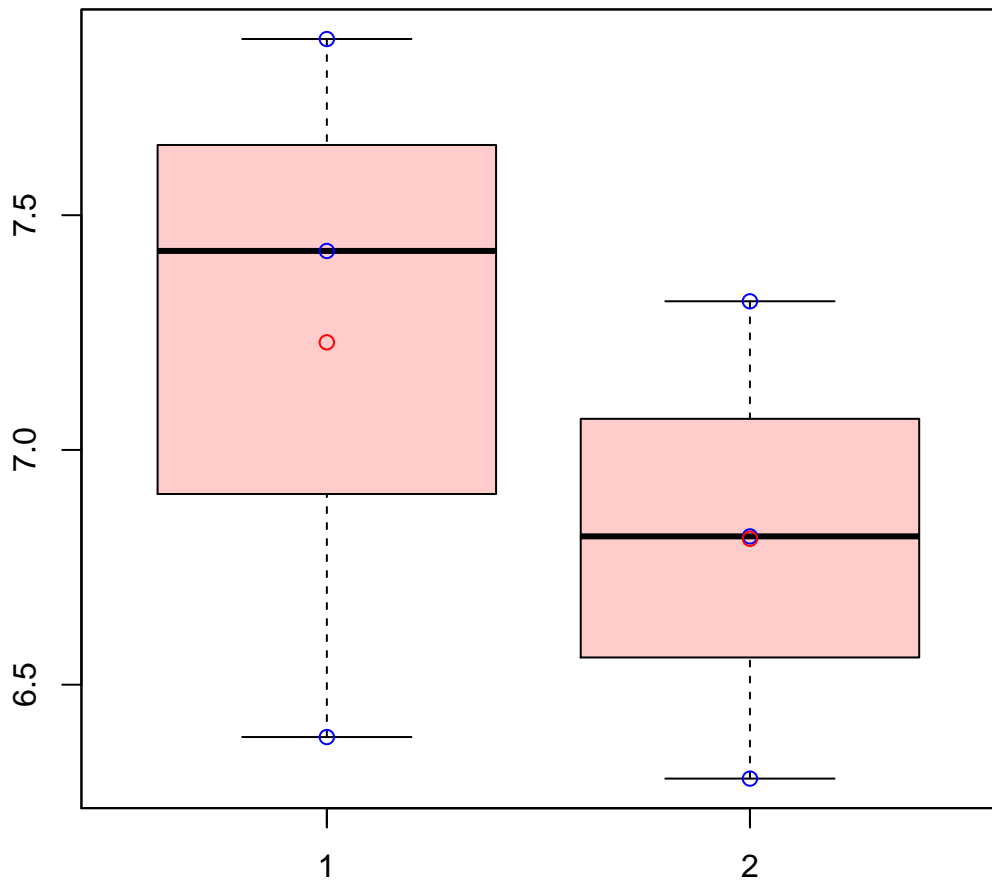

t-Test: p-value = 0.48



# CL162Contig12|CL162Contig12

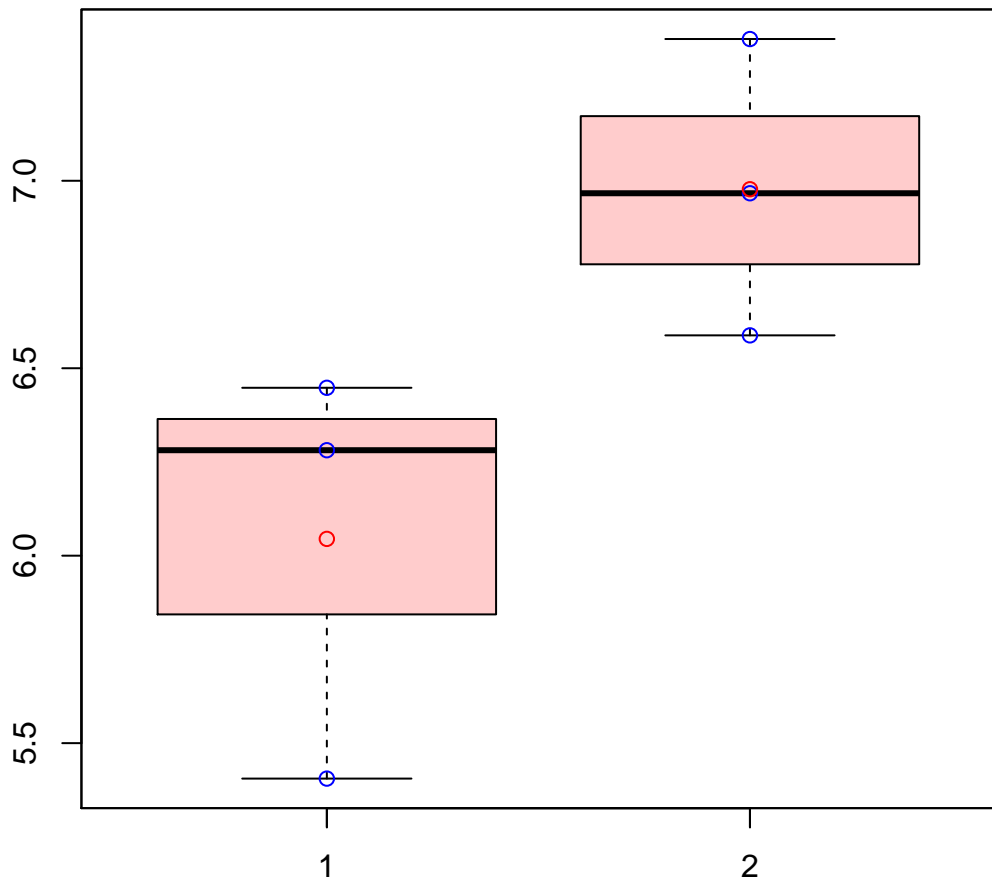

t-Test: p-value = 0.09

# CL162Contig2|CL162Contig2

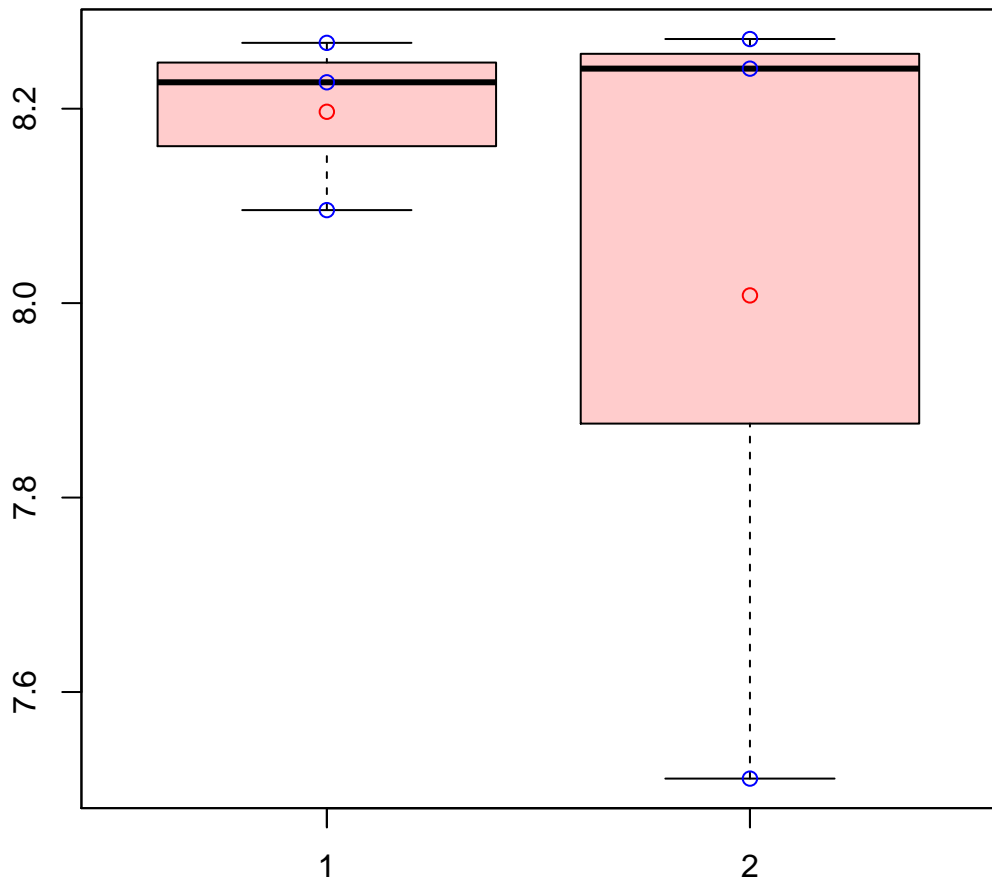

t-Test: p-value = 0.53

# CL1630Contig2|CL1630Contig2

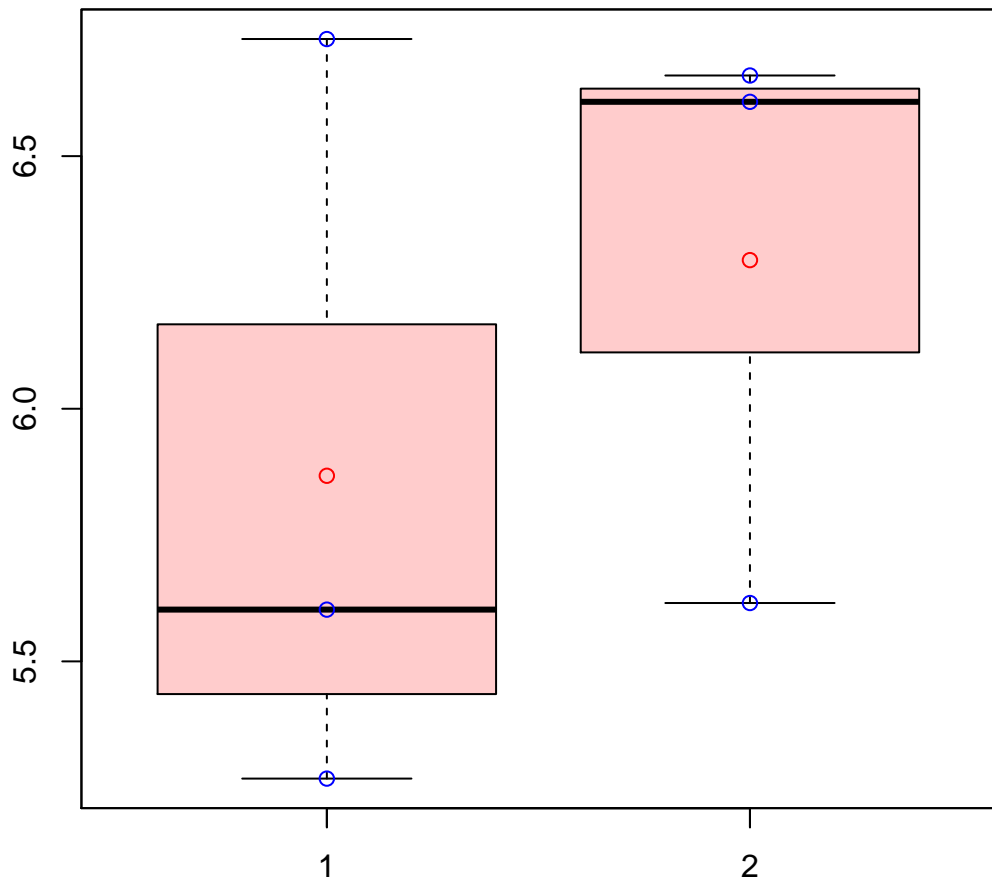

t-Test: p-value = 0.49

# CL1630Contig4|CL1630Contig4

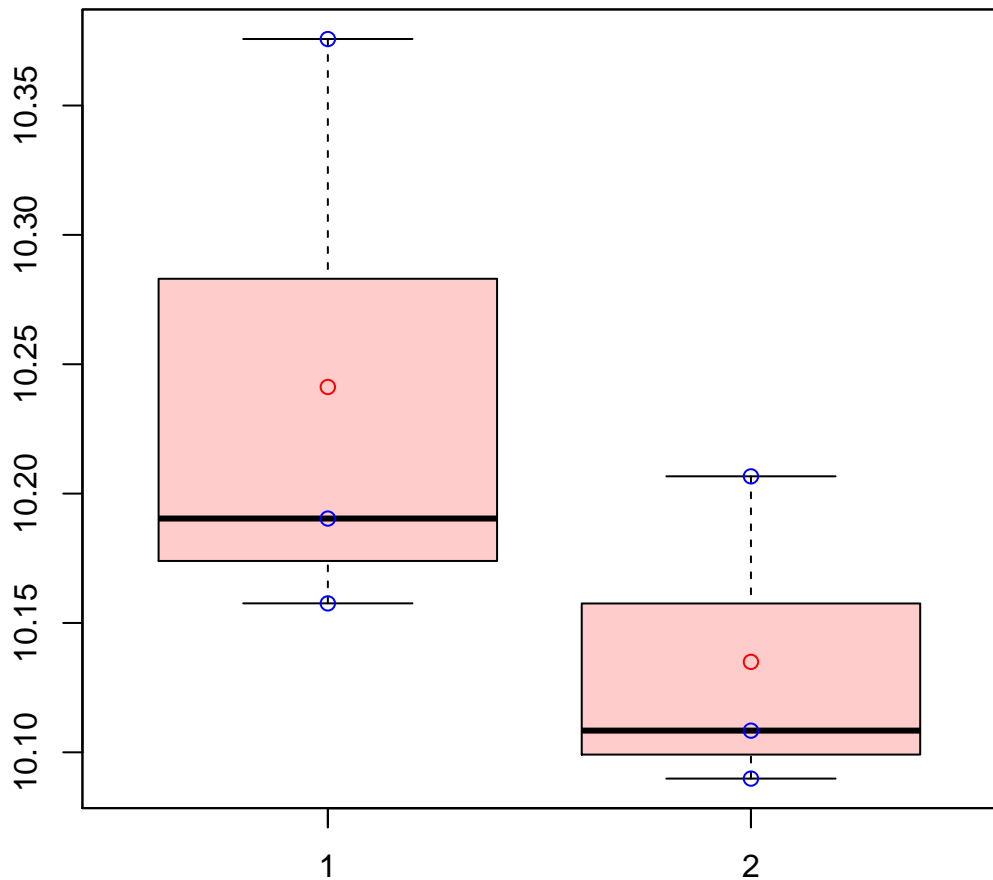

t-Test: p-value = 0.26

# CL1631Contig2|CL1631Contig2

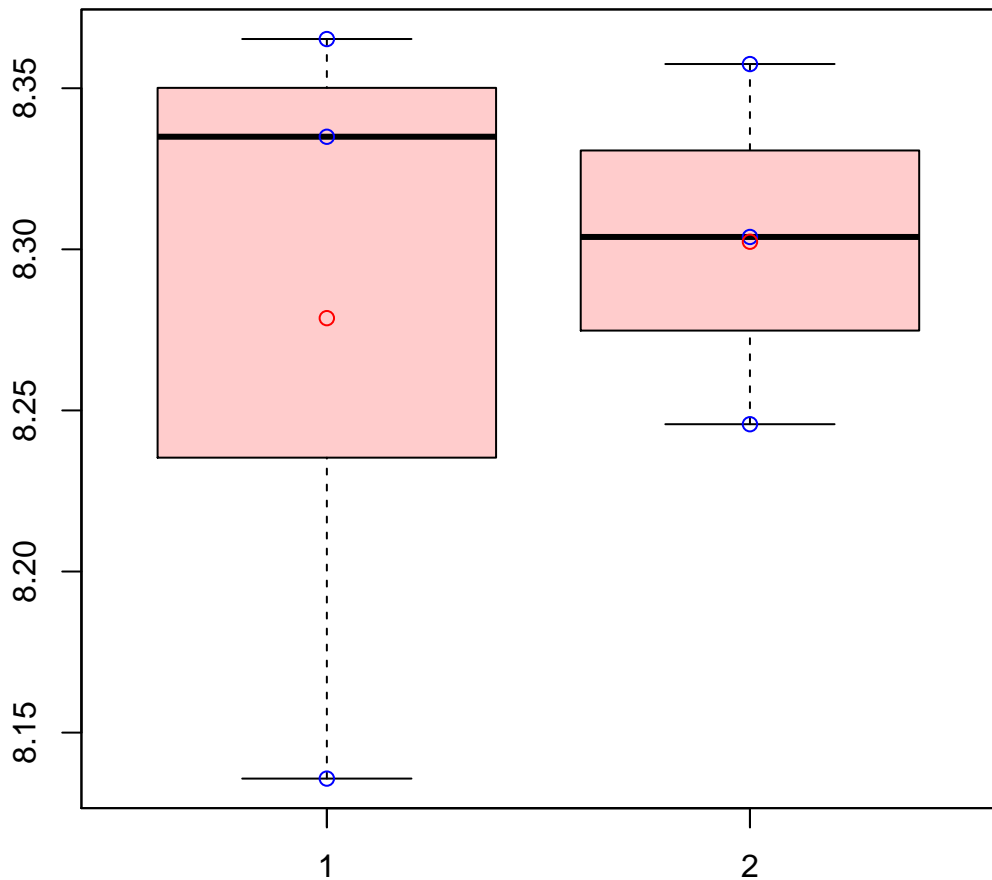

t-Test: p-value = 0.78

# CL1636Contig2|CL1636Contig2

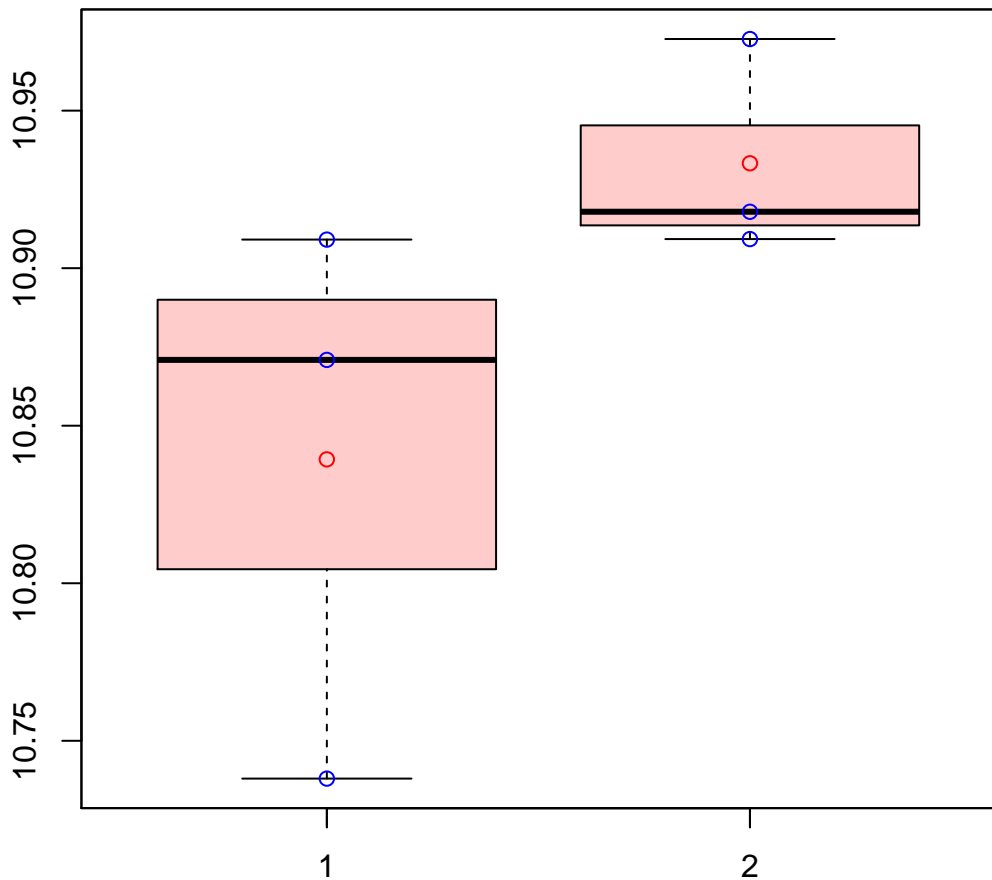

t-Test: p-value = 0.2

# CL1637Contig4|CL1637Contig4

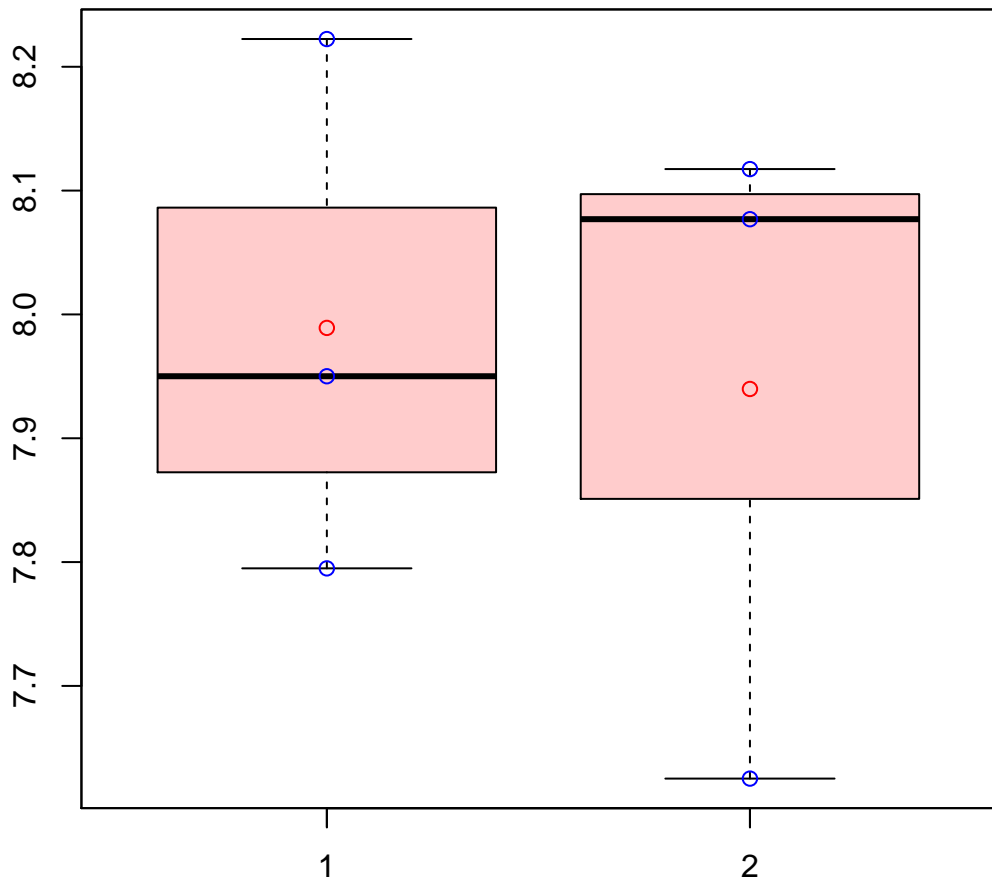

t-Test: p-value = 0.82

# CL1655Contig2|CL1655Contig2

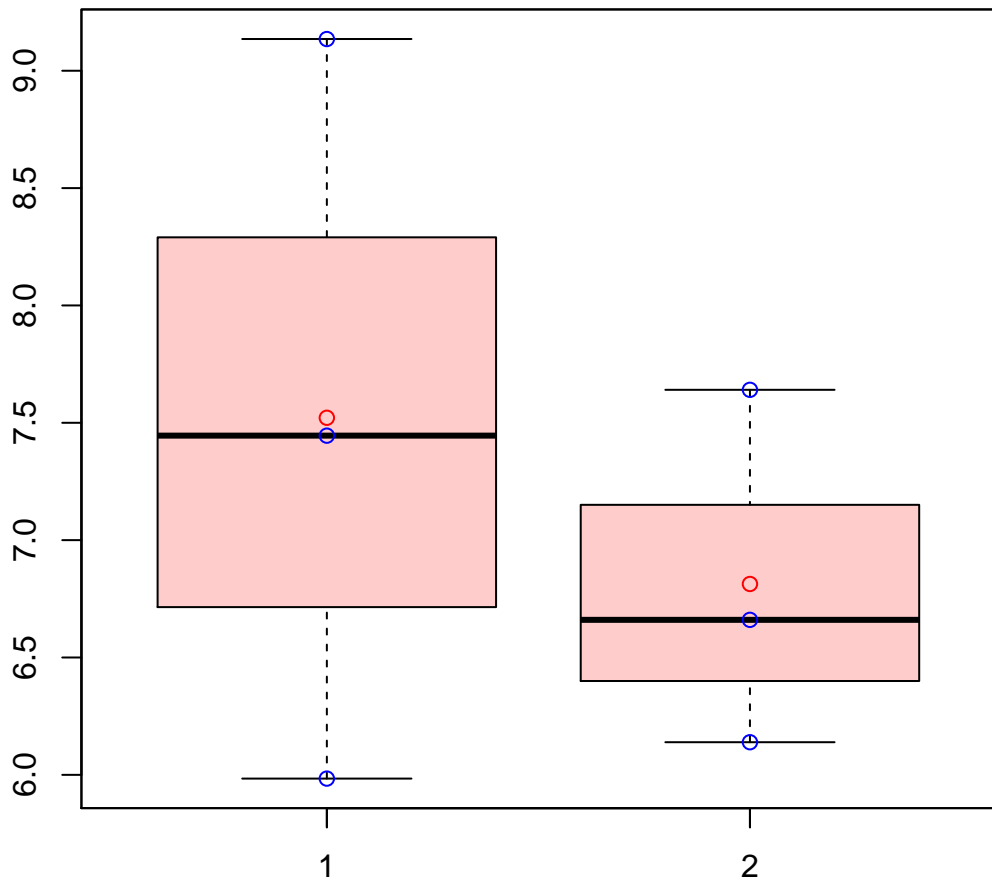

t-Test: p-value = 0.54



# CL1656Contig7|CL1656Contig7

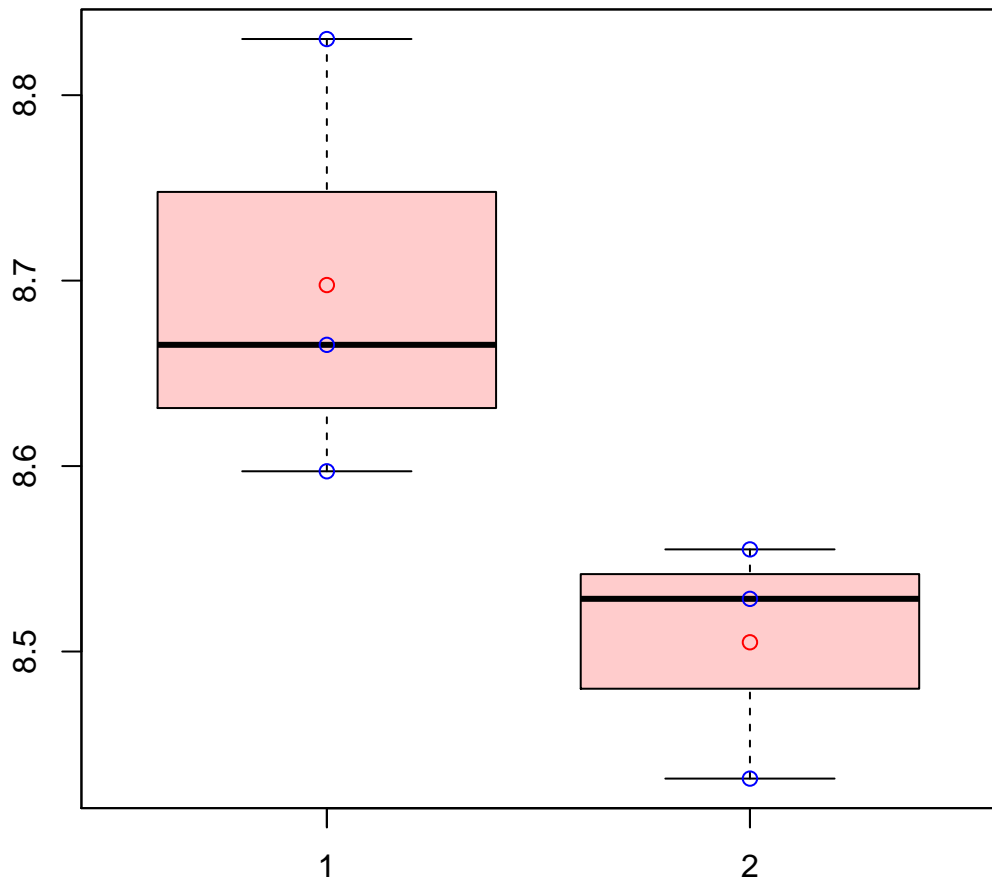

t-Test: p-value = 0.09

# CL1658Contig10|CL1658Contig10

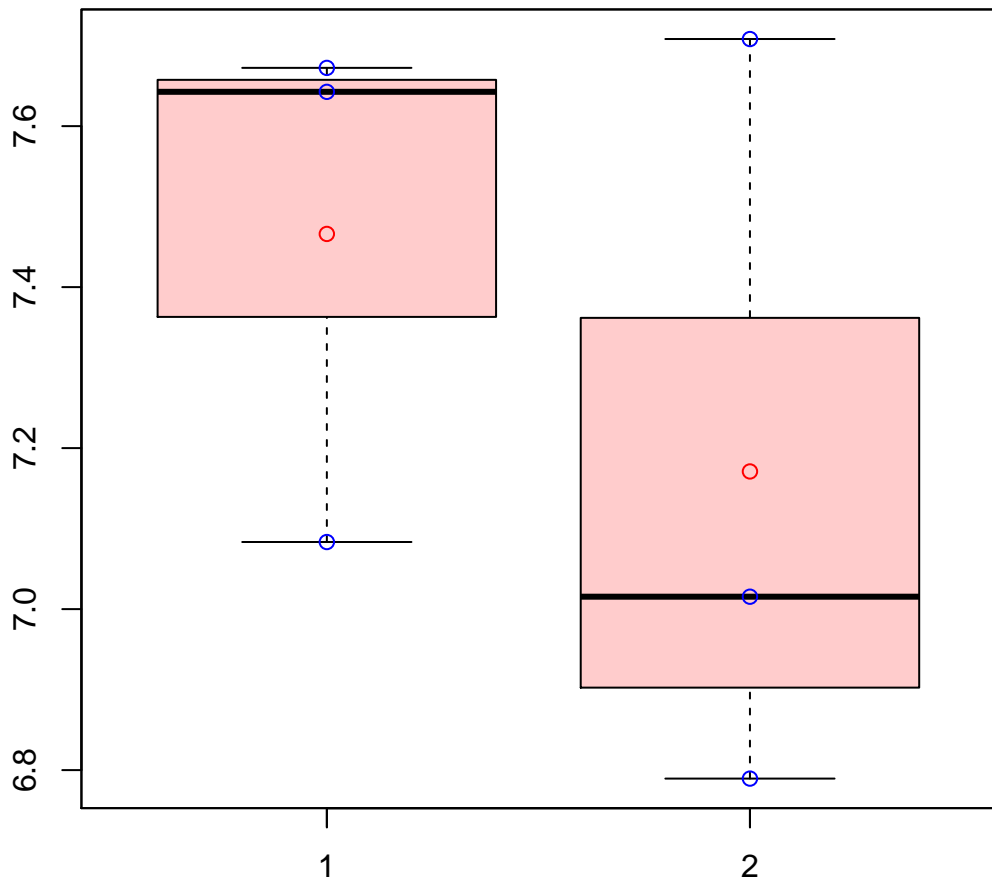

t-Test: p-value = 0.44

# CL1658Contig13|CL1658Contig13

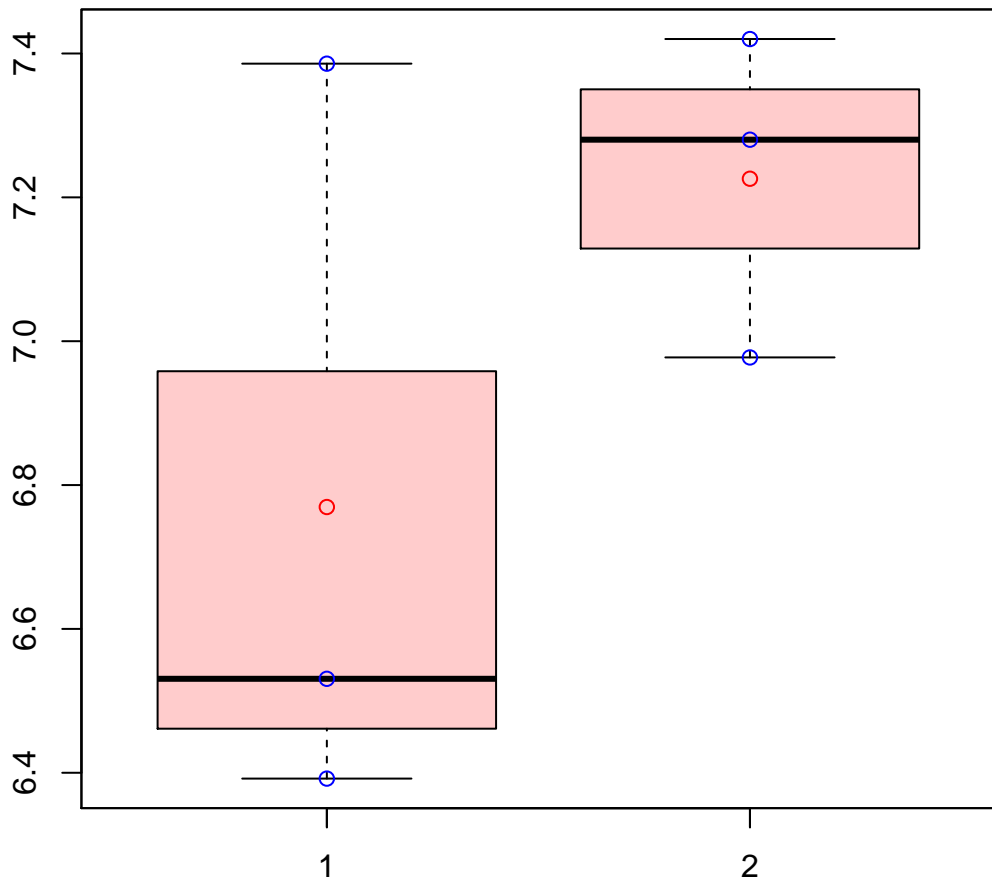

t-Test: p-value = 0.28

# CL1658Contig8|CL1658Contig8

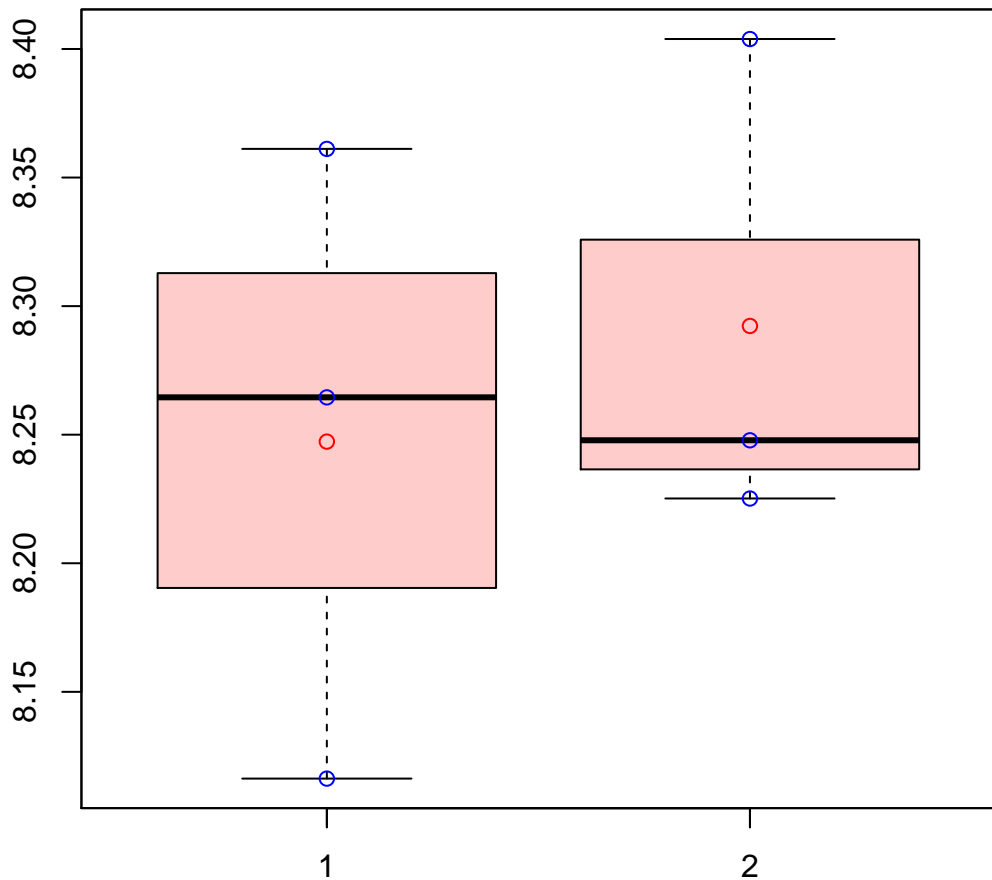

t-Test: p-value = 0.65

# CL1662Contig3|CL1662Contig3

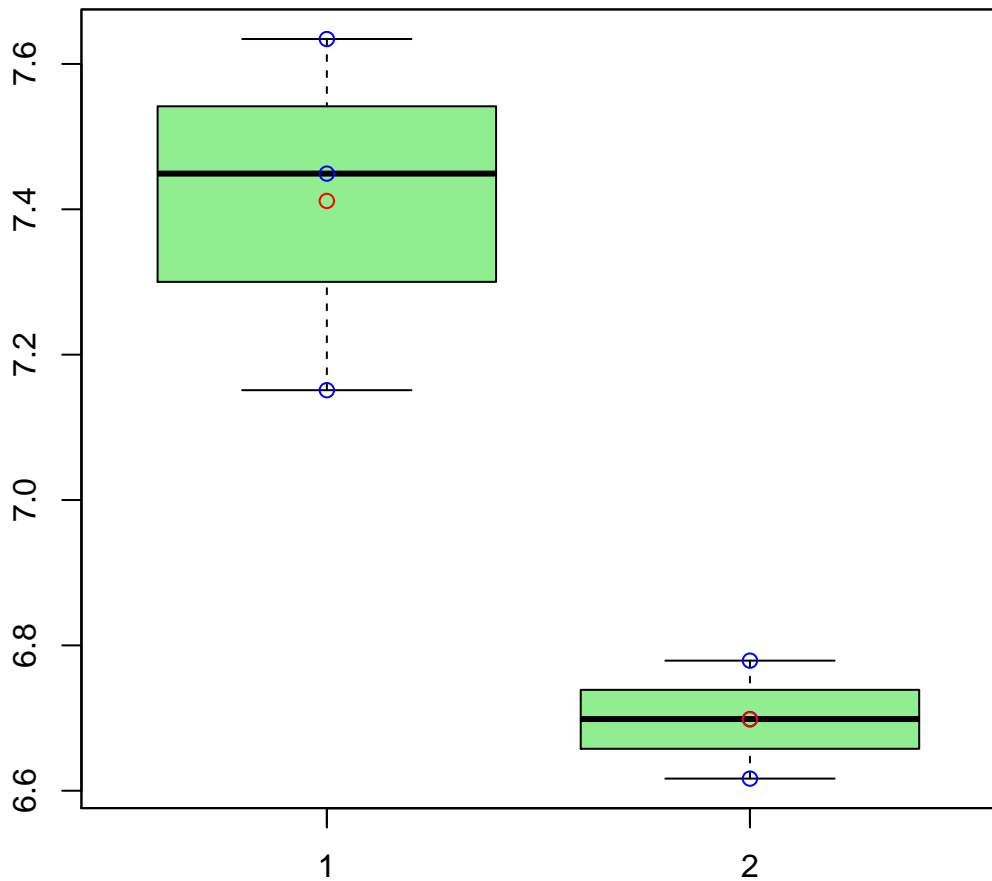

t-Test: p-value = 0.03

# CL1665Contig5|CL1665Contig5

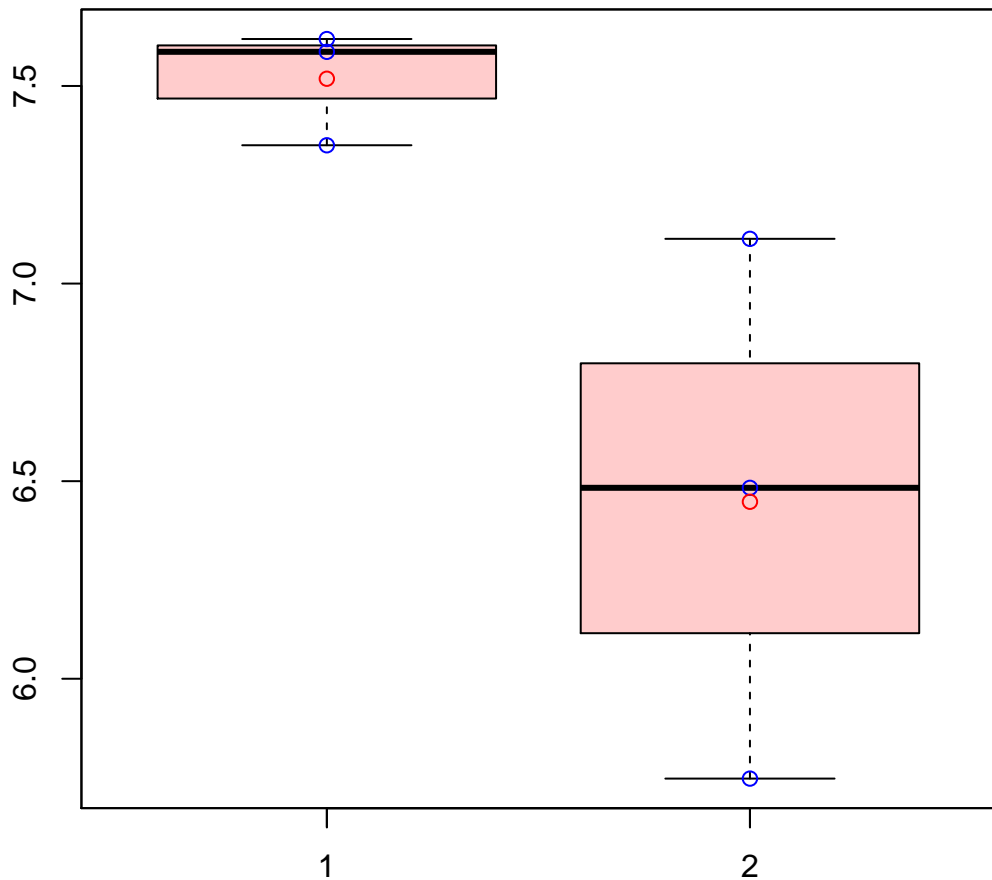

t-Test: p-value = 0.11

# CL1665Contig8|CL1665Contig8

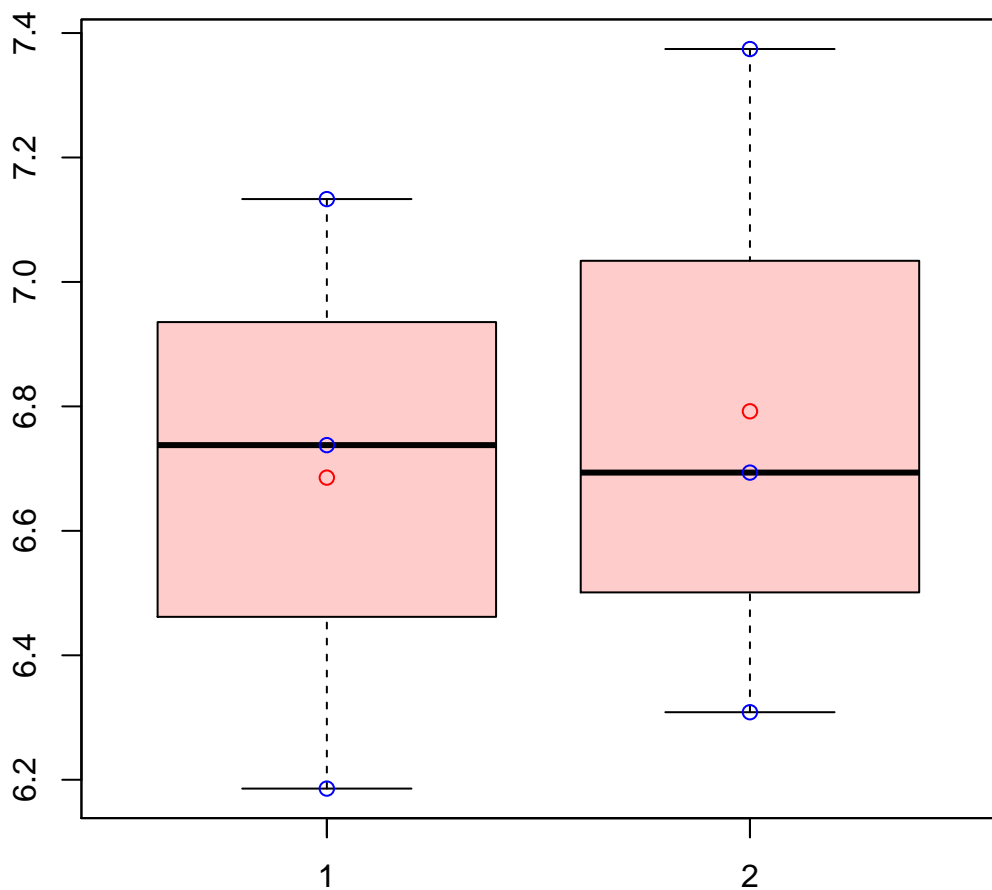

t-Test: p-value = 0.81

# CL1666Contig7|CL1666Contig7

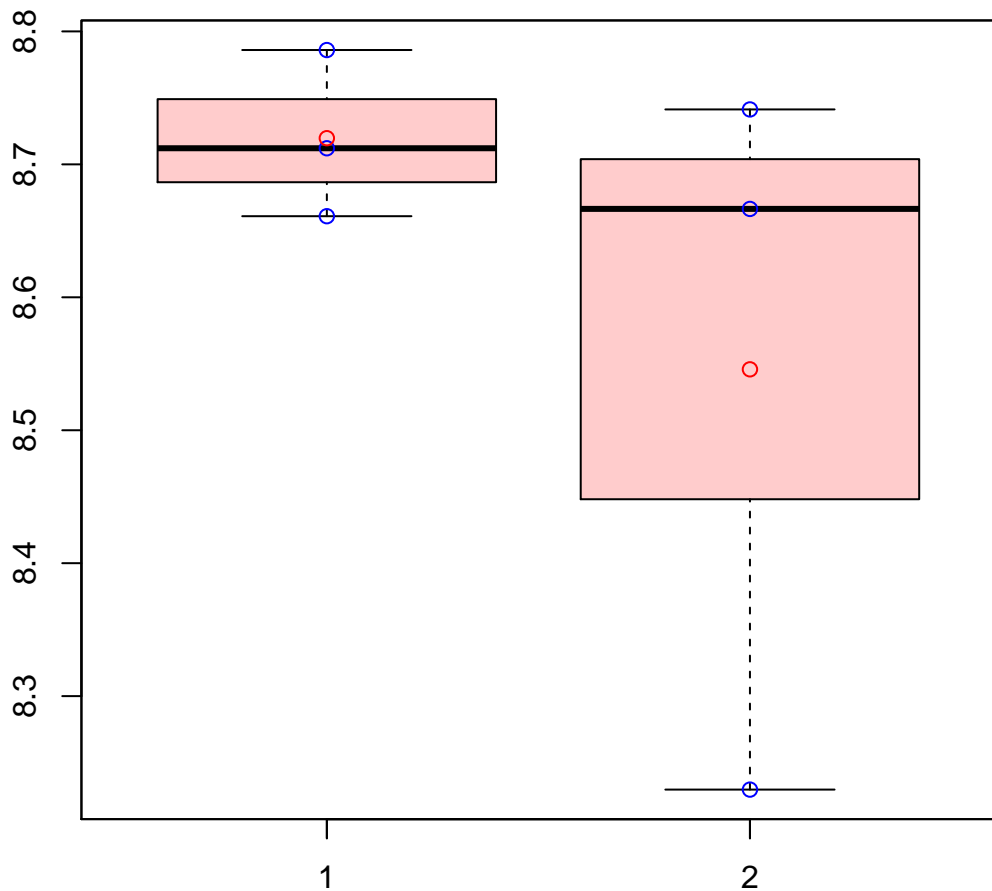

t-Test: p-value = 0.39



# CL16703Contig1|CL16703Contig1

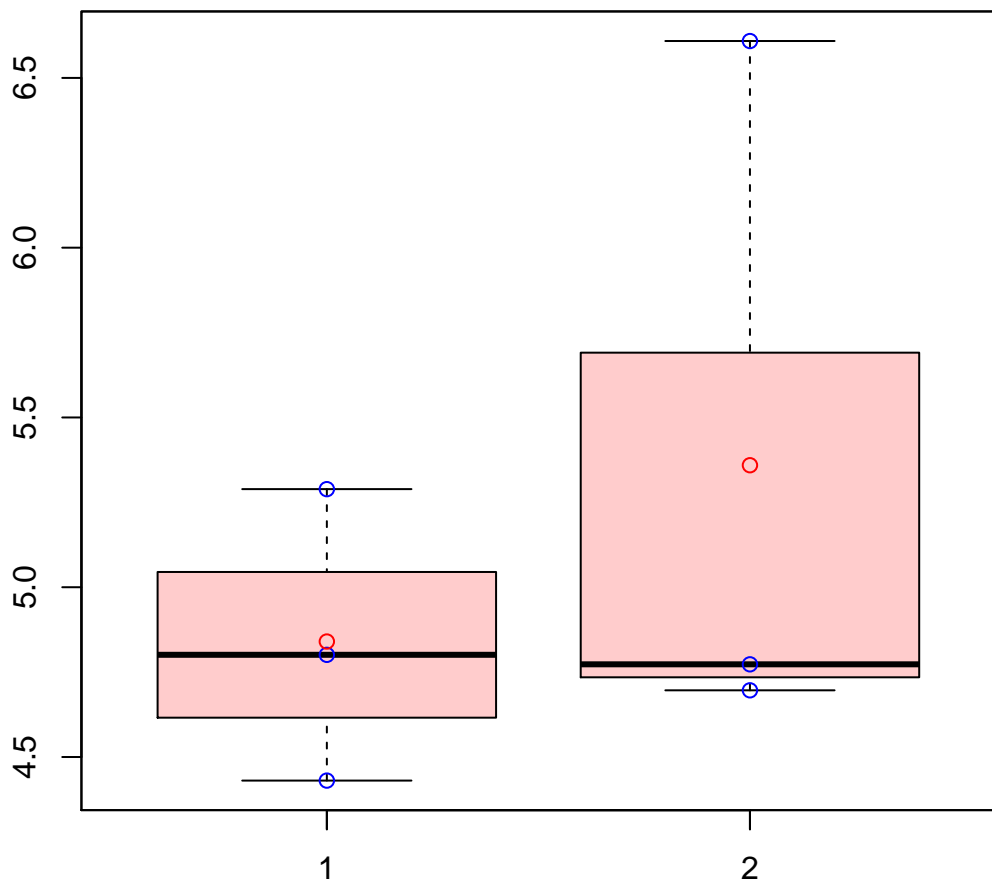

t-Test: p-value = 0.5

# CL1670Contig2|CL1670Contig2

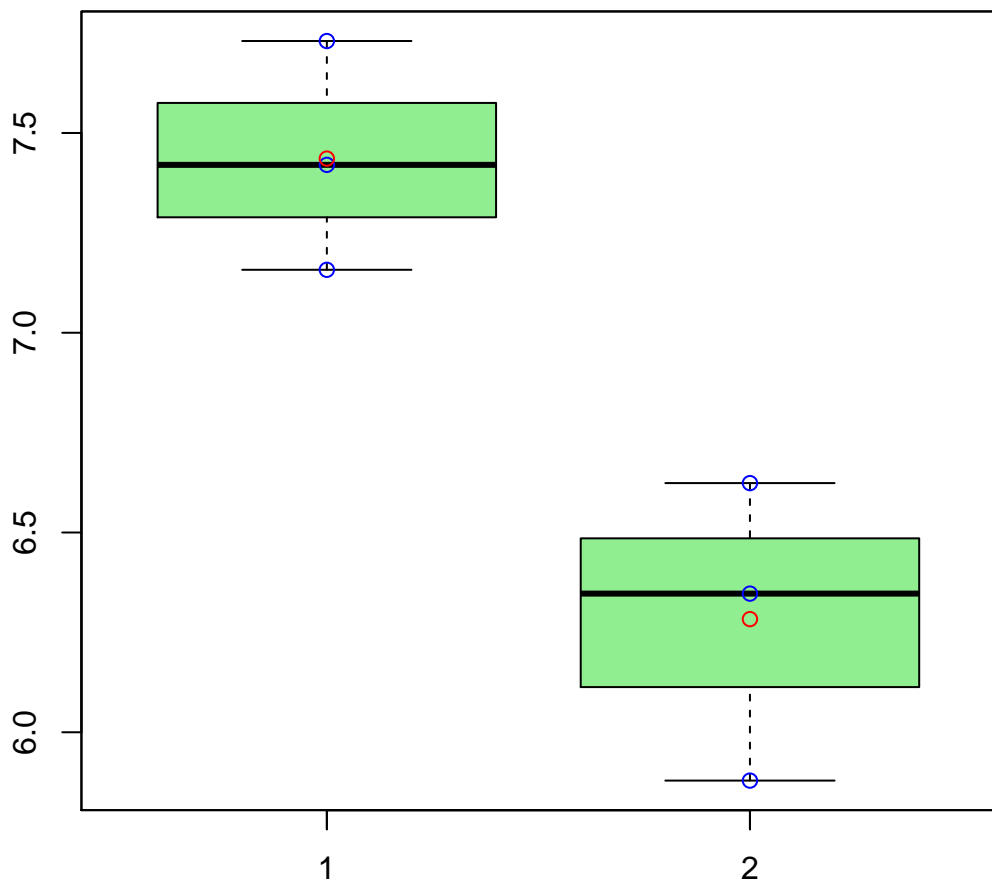

t-Test: p-value = 0.02

# CL1674Contig1|CL1674Contig1

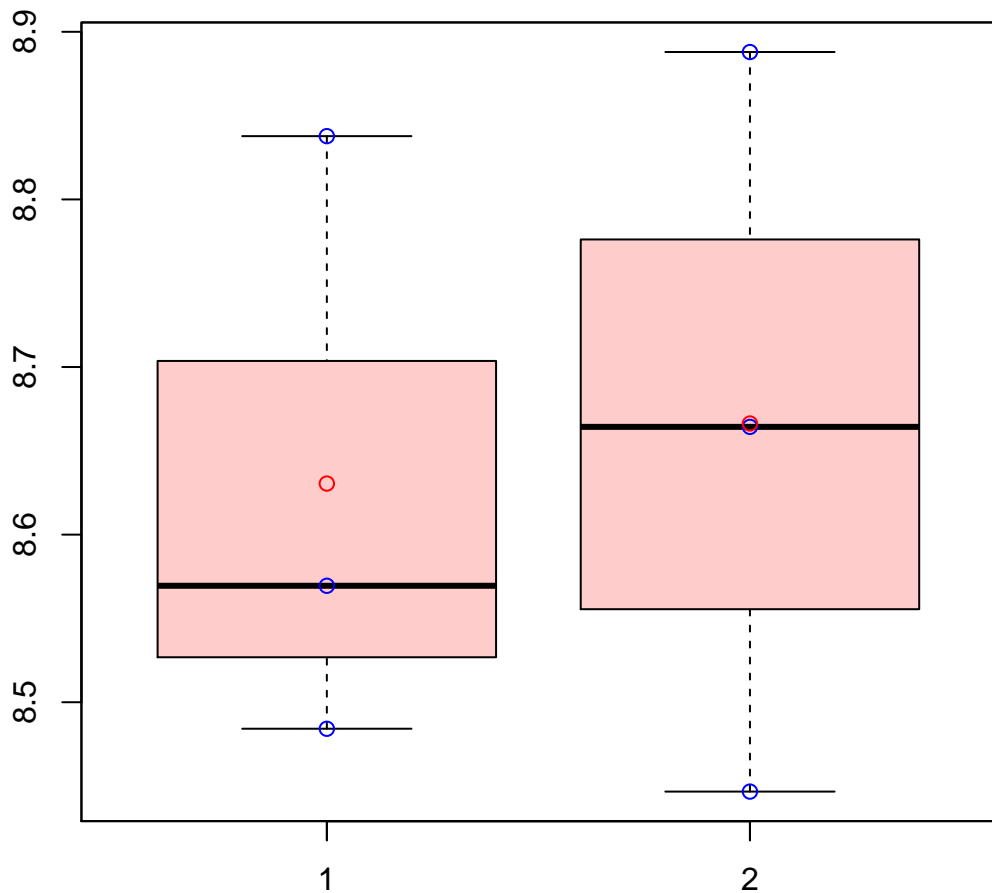

t-Test: p-value = 0.84

# CL1674Contig3|CL1674Contig3

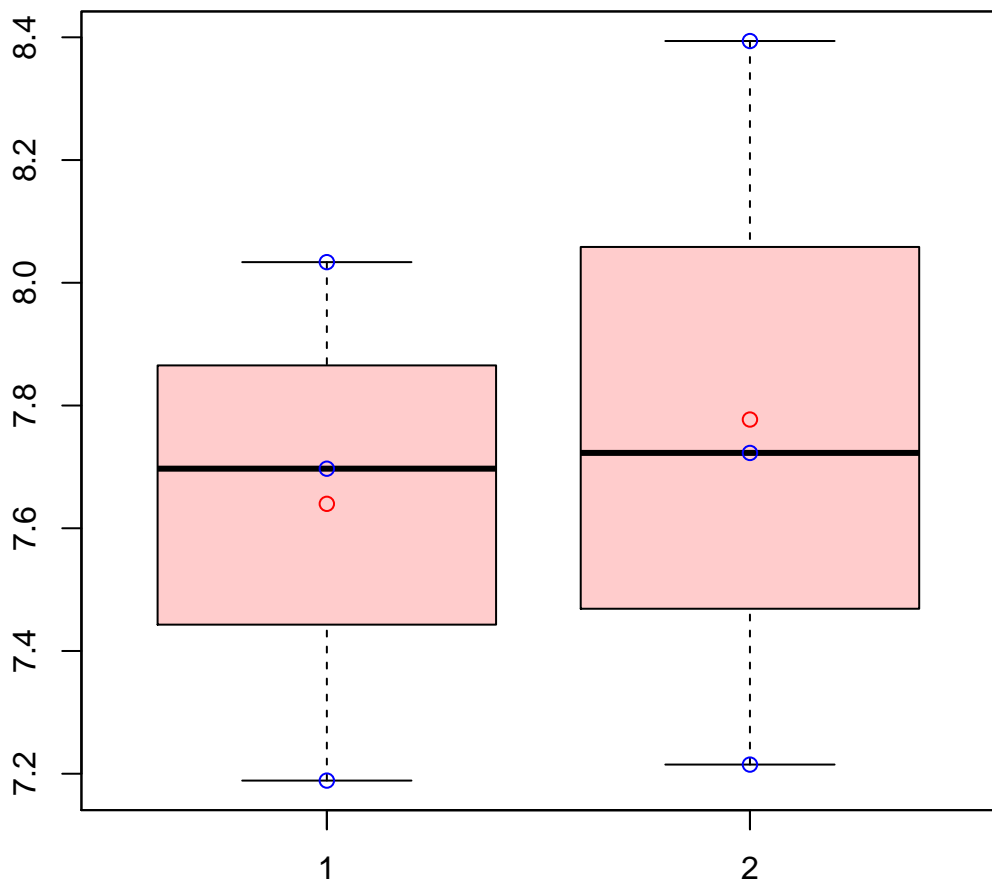

t-Test: p-value = 0.76

# CL1676Contig8|CL1676Contig8

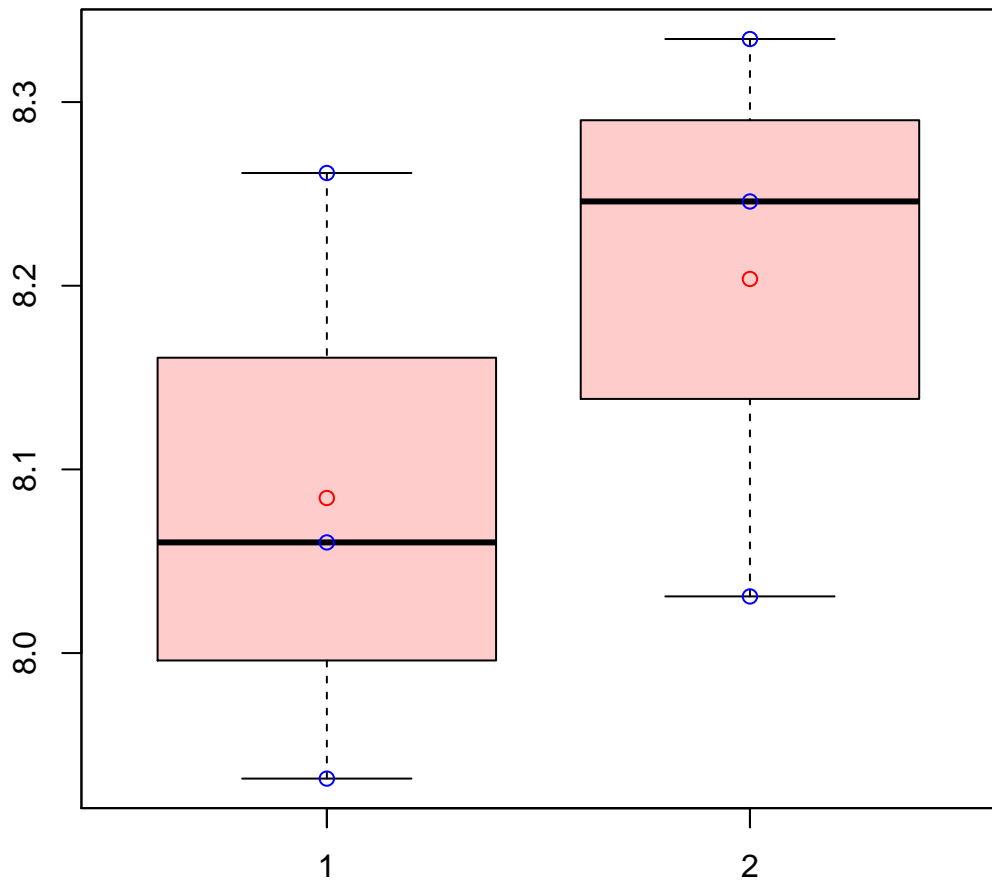

t-Test: p-value = 0.42

# CL1678Contig3|CL1678Contig3

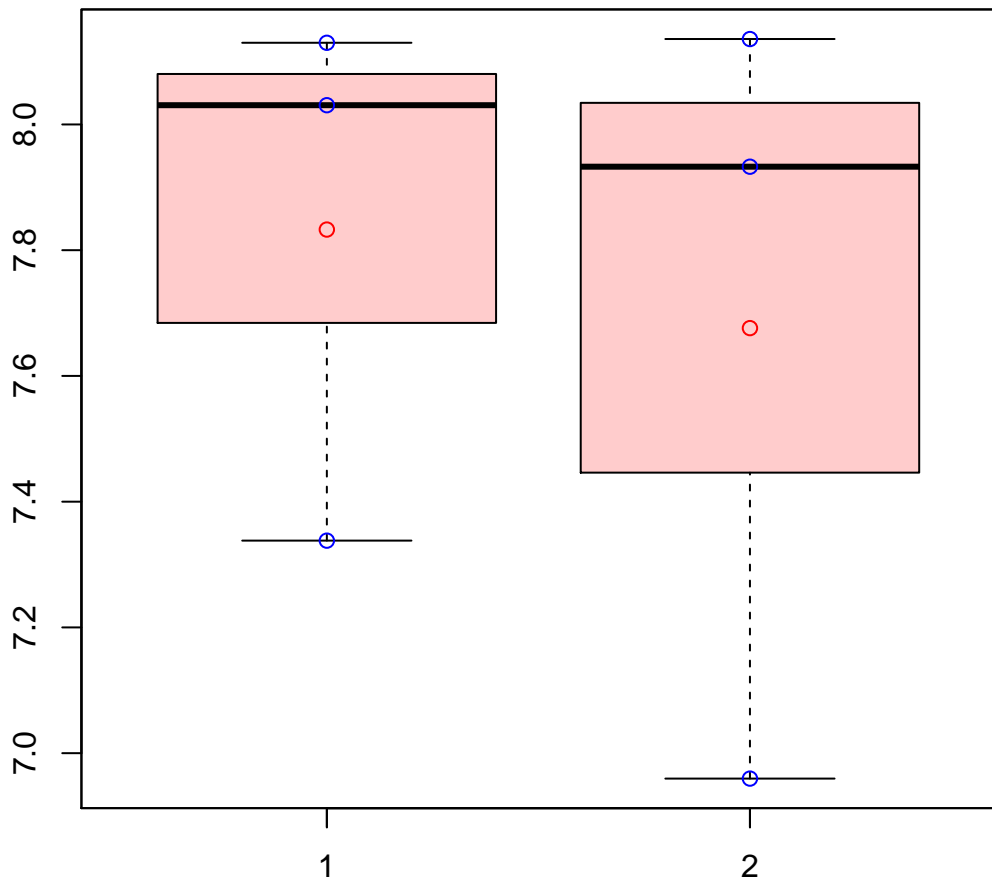

t-Test: p-value = 0.74

# CL1679Contig2|CL1679Contig2

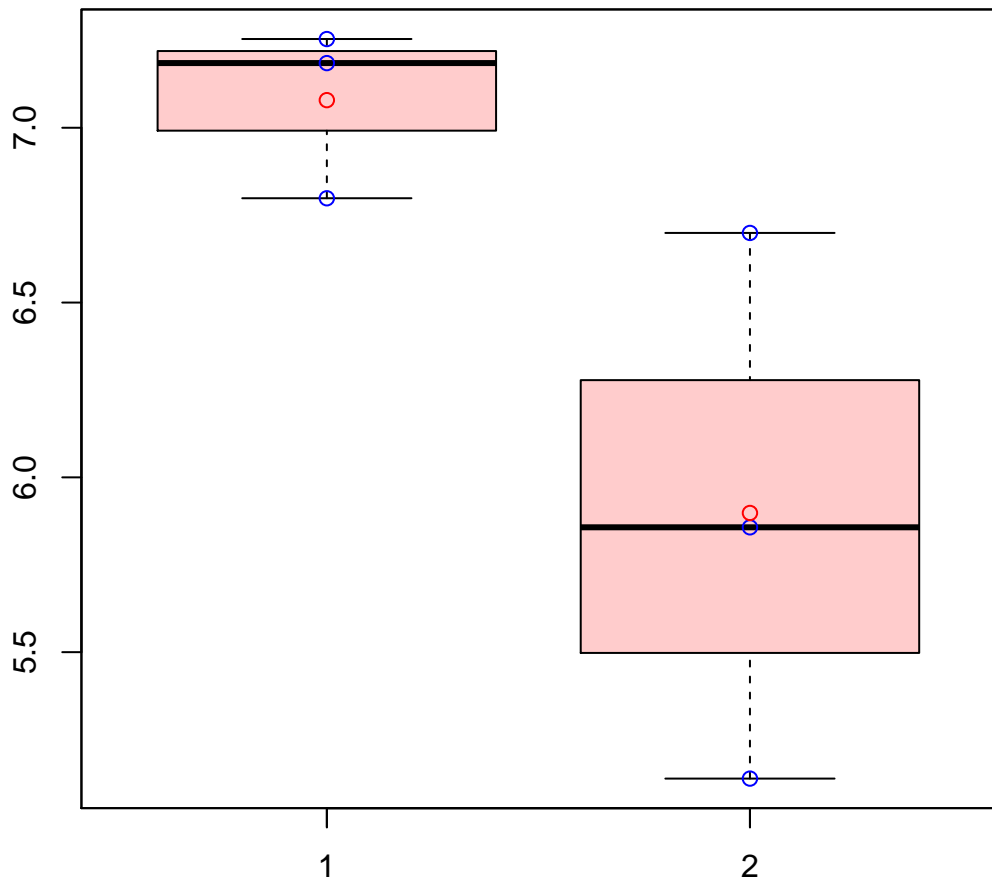

t-Test: p-value = 0.11

# CL1679Contig3|CL1679Contig3

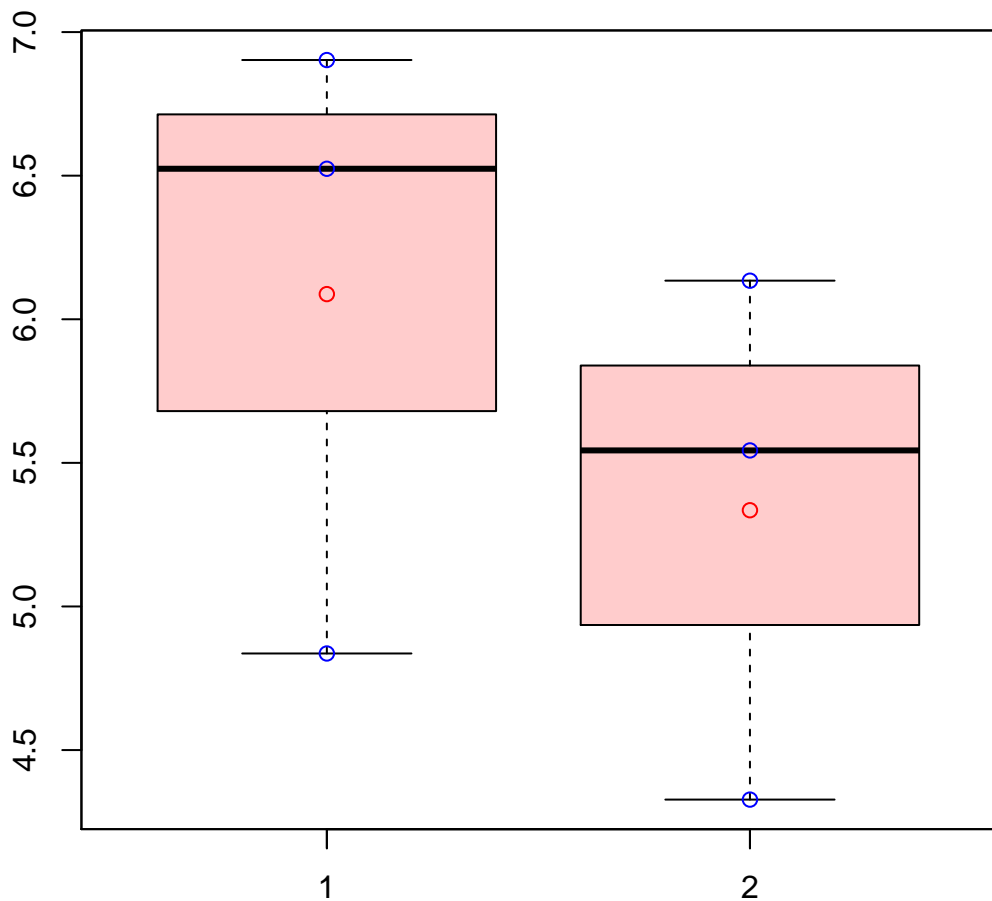

t-Test: p-value = 0.42



# CL1681Contig2|CL1681Contig2

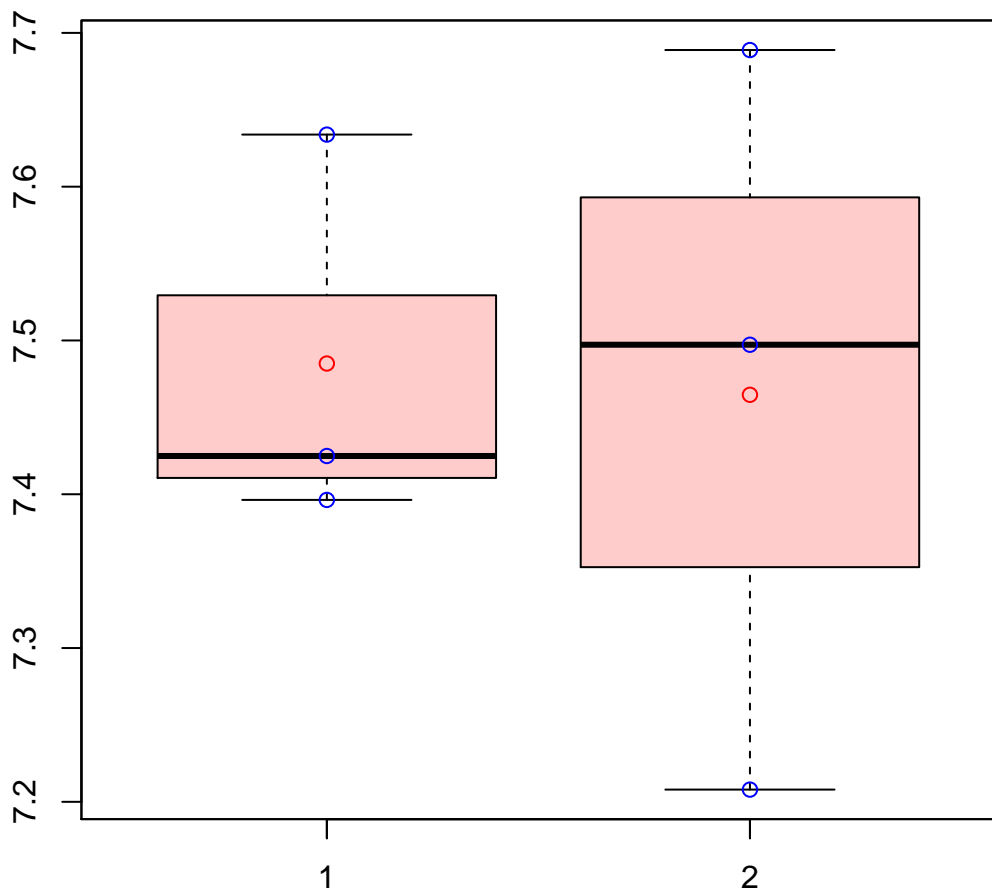

t-Test: p-value = 0.91

# CL1685Contig1|CL1685Contig1

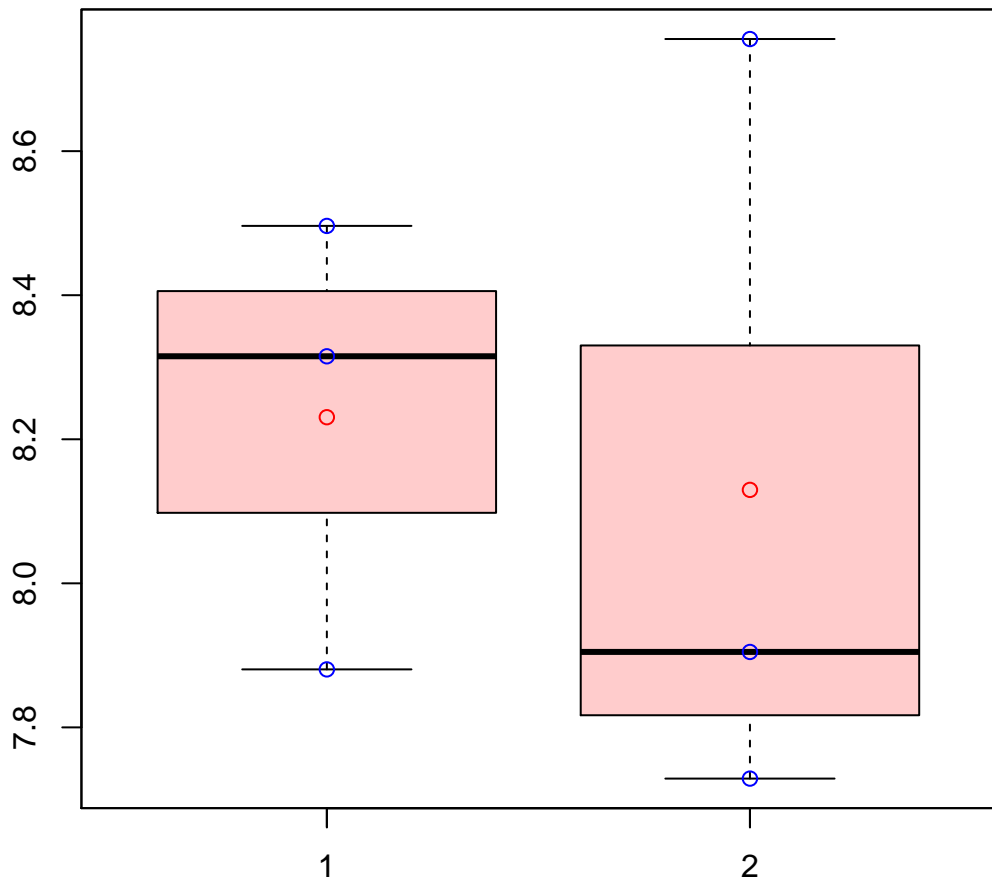

t-Test: p-value = 0.8

# CL168Contig6|CL168Contig6

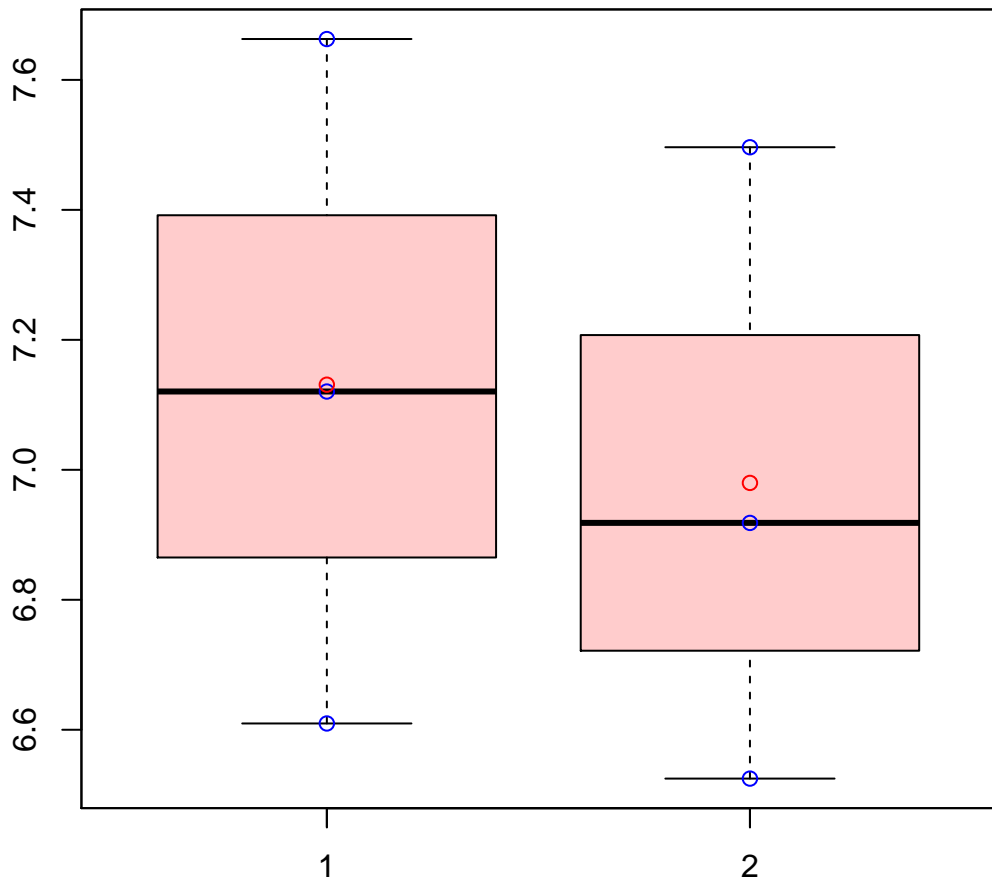

t-Test: p-value = 0.73

# CL16903Contig1|CL16903Contig1

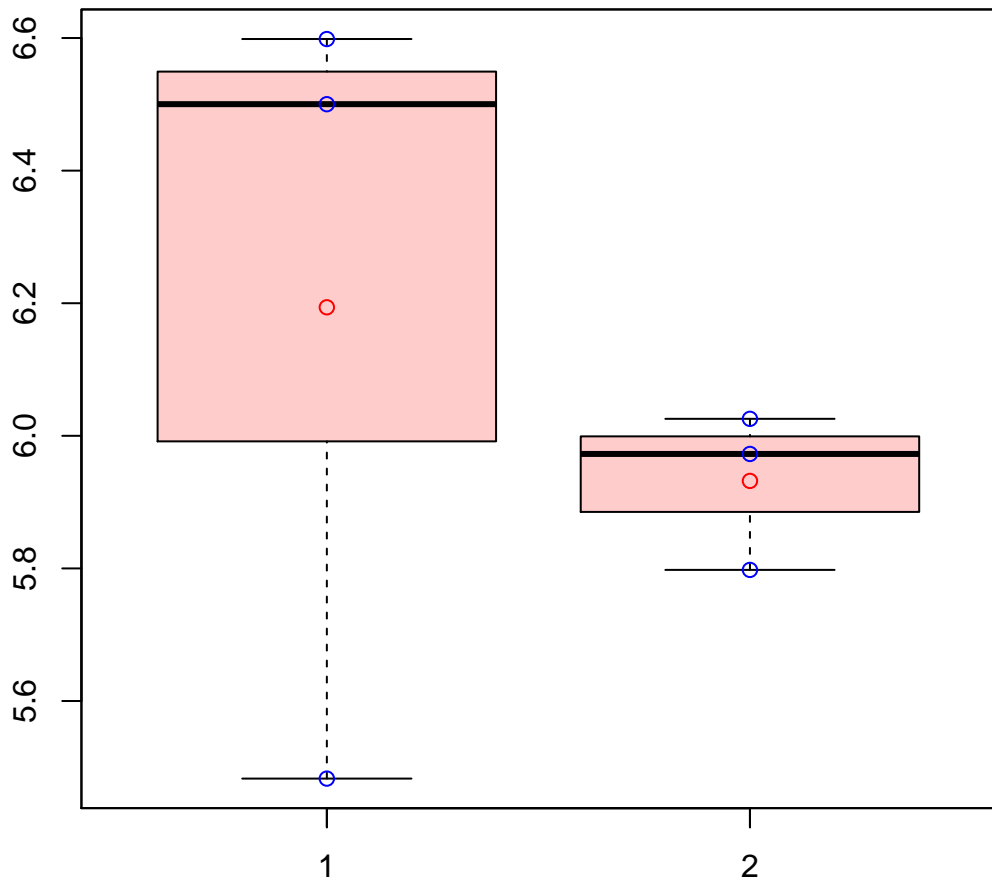

t-Test: p-value = 0.54

# CL16961Contig1|CL16961Contig1

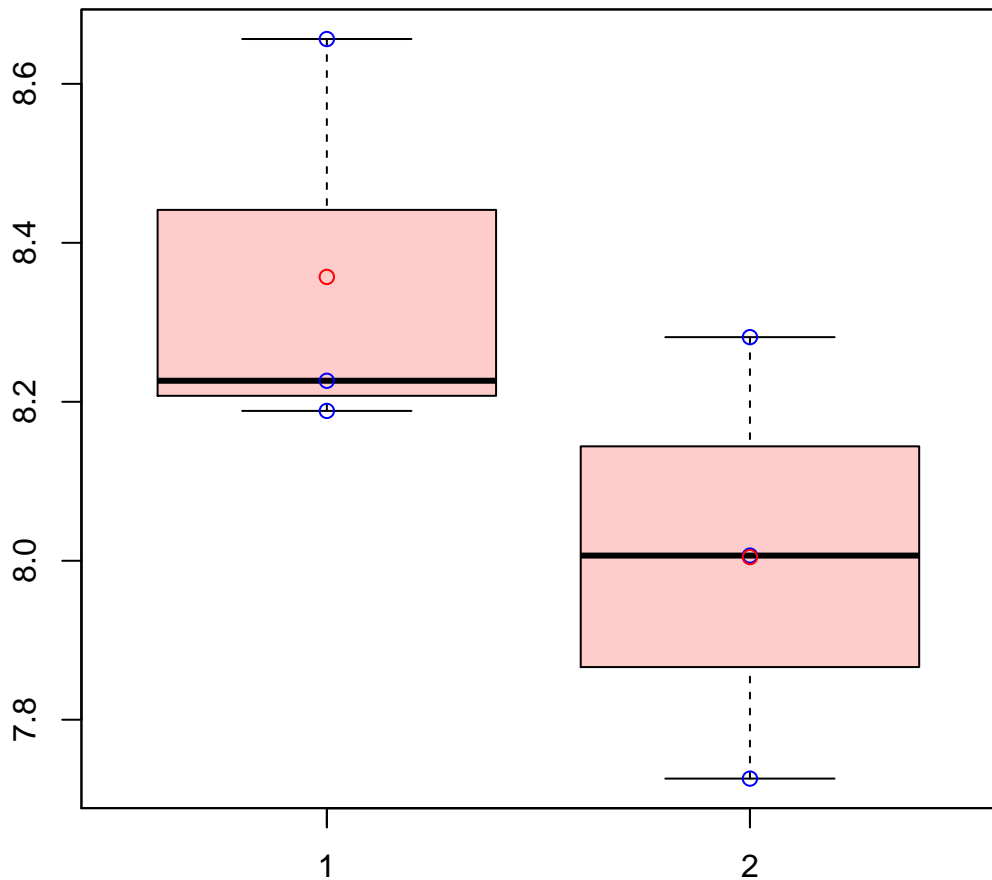

t-Test: p-value = 0.18

# CL169Contig11|CL169Contig11

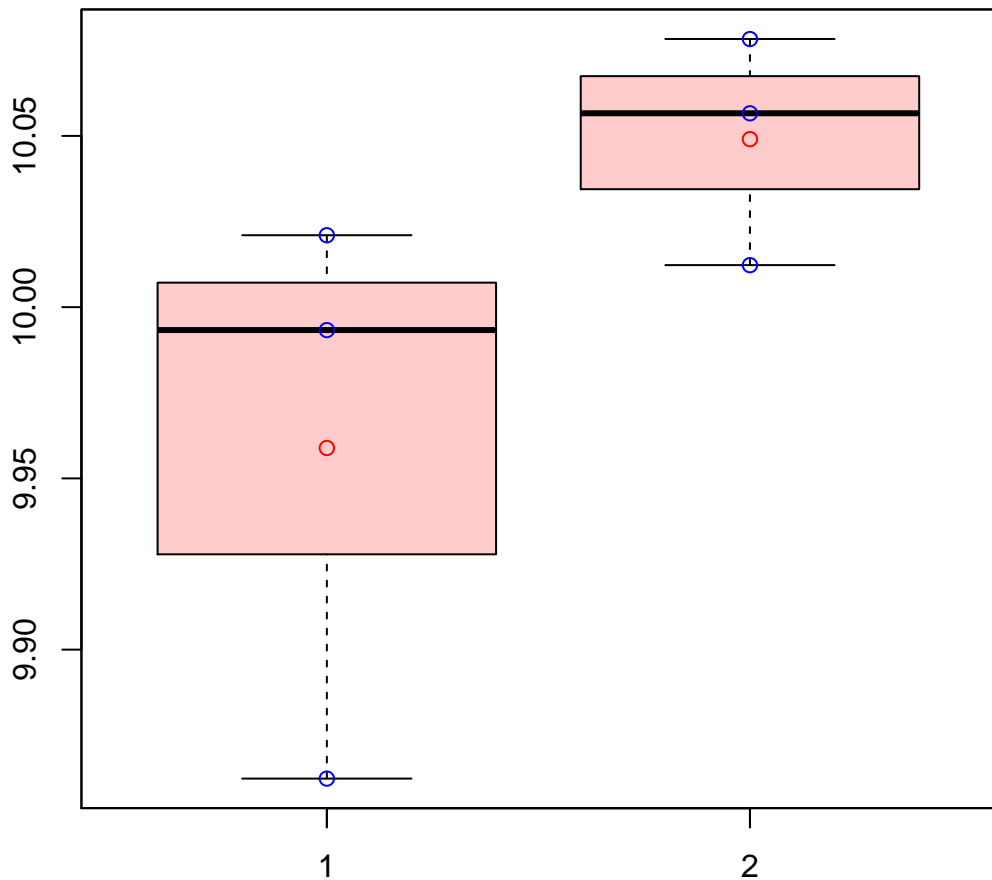

t-Test: p-value = 0.2

# CL16Contig23|CL16Contig23

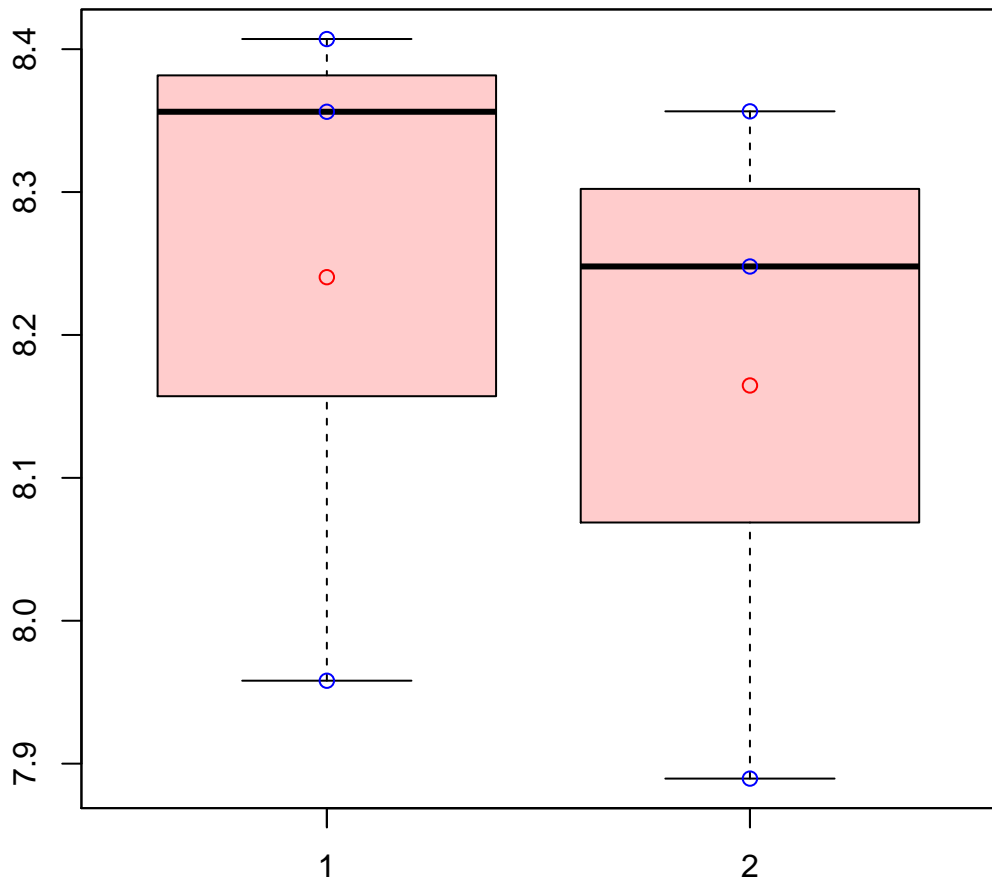

t-Test: p-value = 0.72

# CL1701Contig2|CL1701Contig2

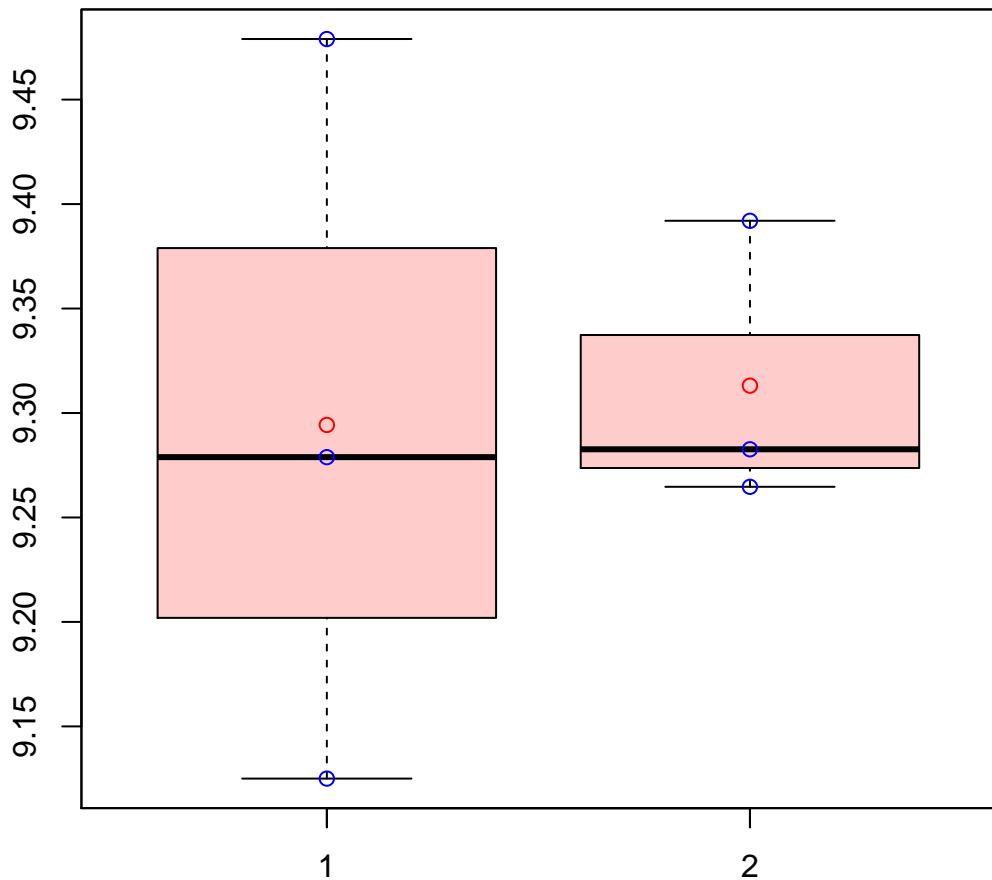

t-Test: p-value = 0.88



# CL17087Contig1|CL17087Contig1

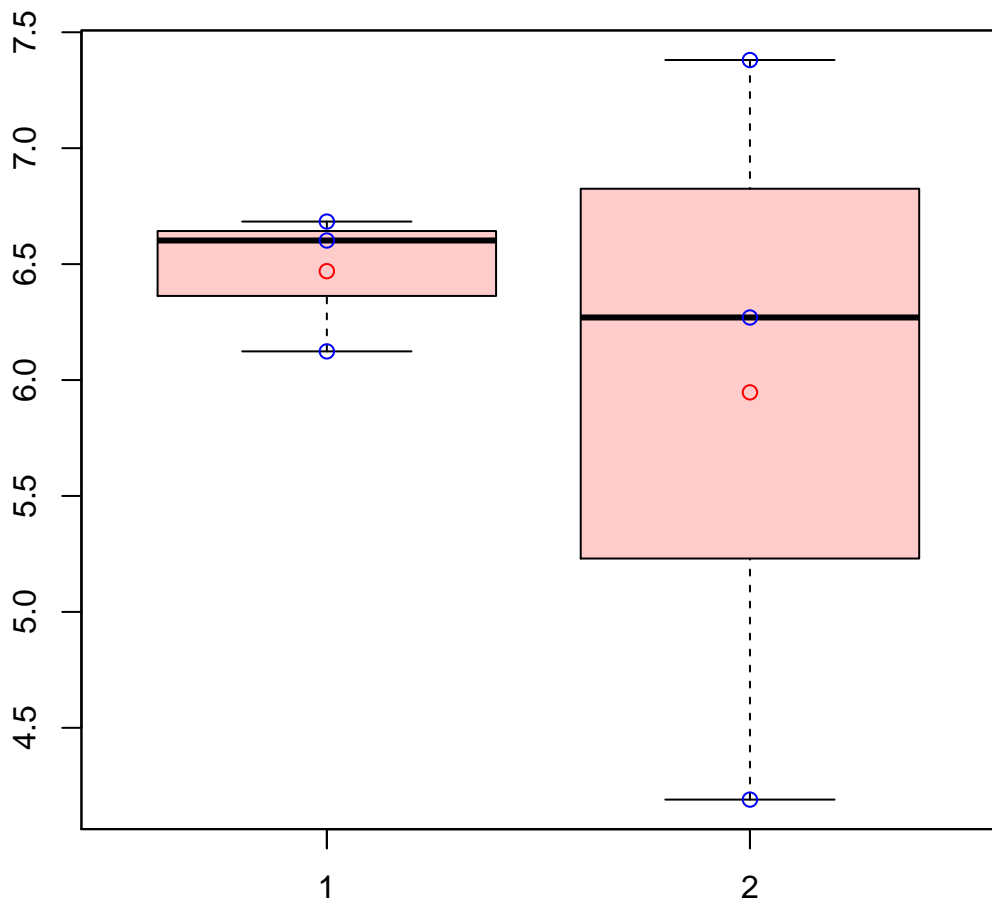

t-Test: p-value = 0.63

# CL1710Contig3|CL1710Contig3

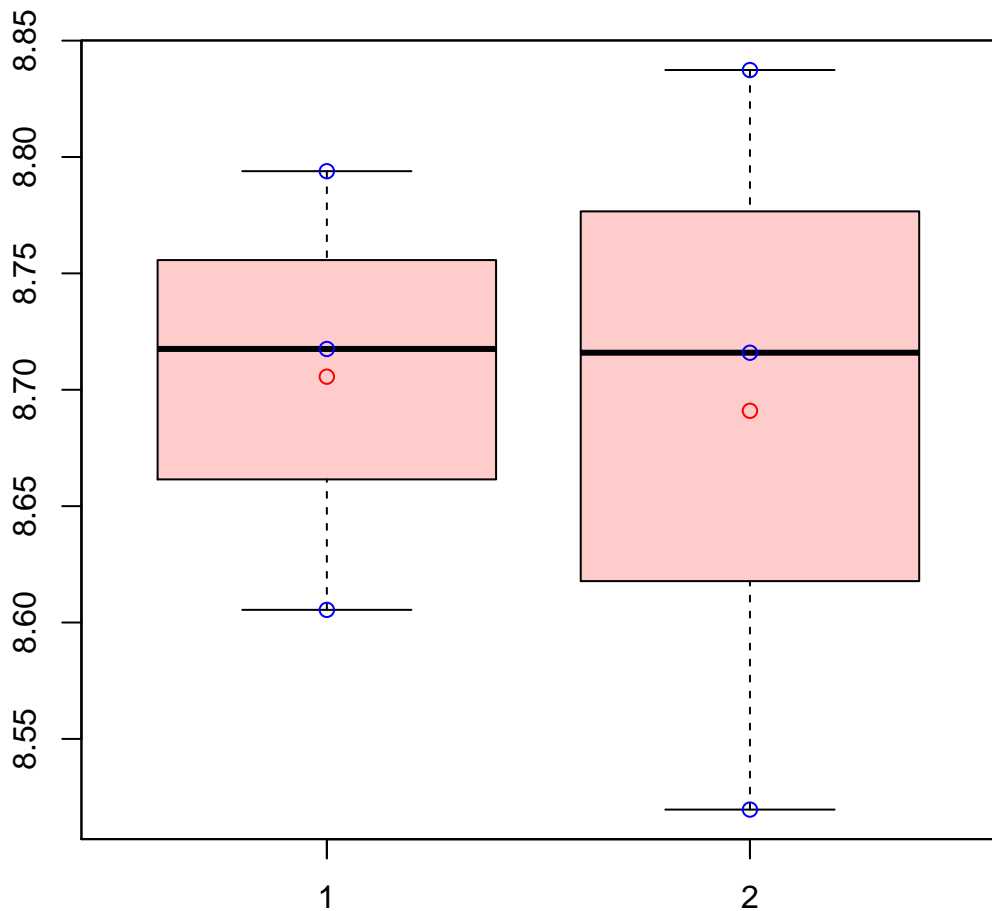

t-Test: p-value = 0.9

# CL1711Contig10|CL1711Contig10

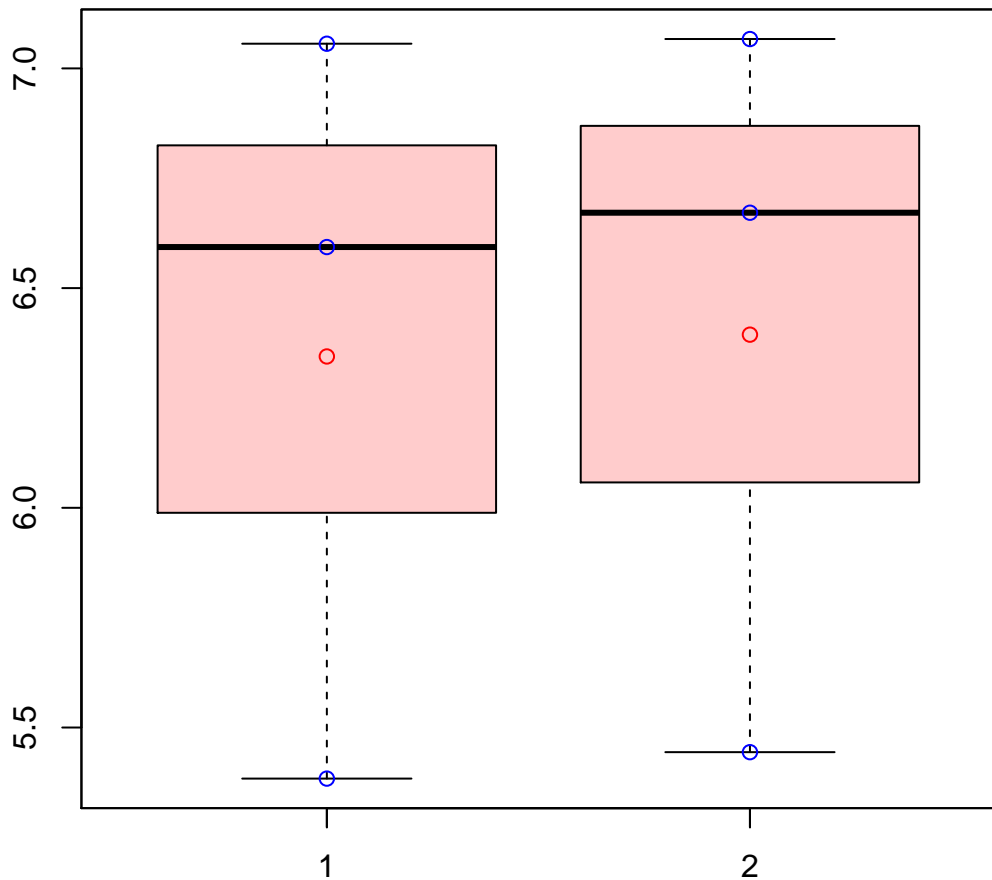

t-Test: p-value = 0.95

# CL1712Contig1|CL1712Contig1

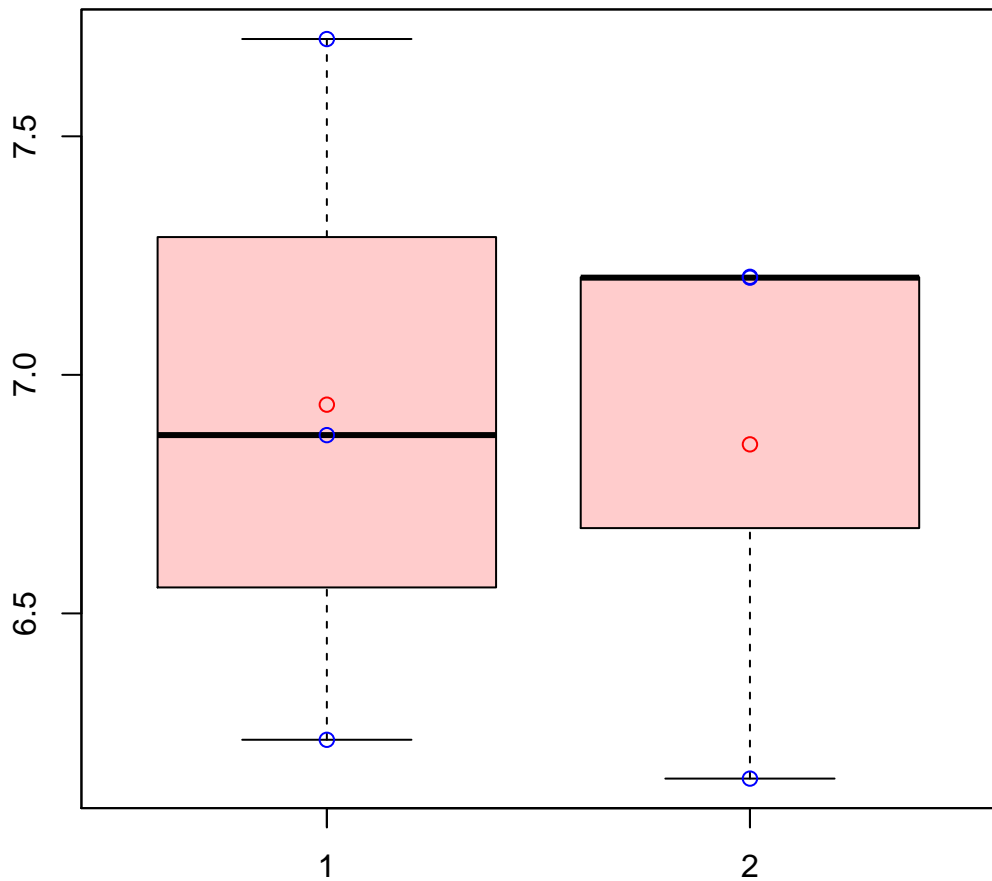

t-Test: p-value = 0.89

# CL1722Contig3|CL1722Contig3

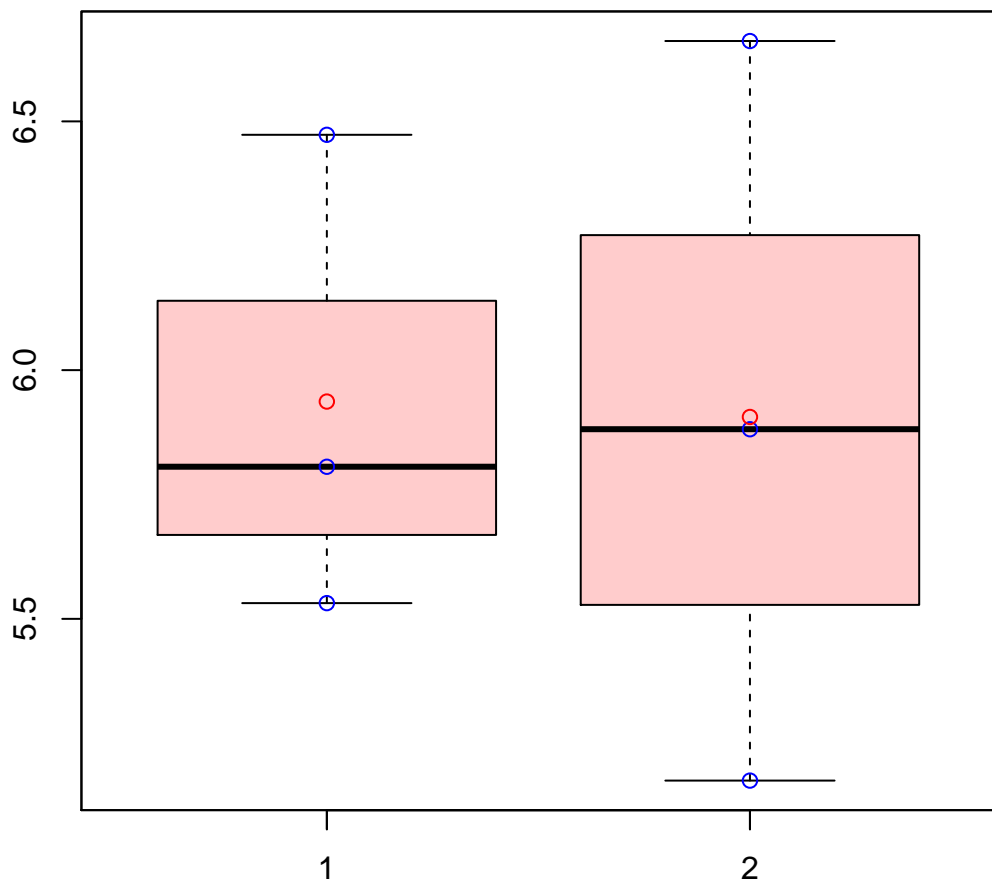

t-Test: p-value = 0.96

# CL1723Contig5|CL1723Contig5

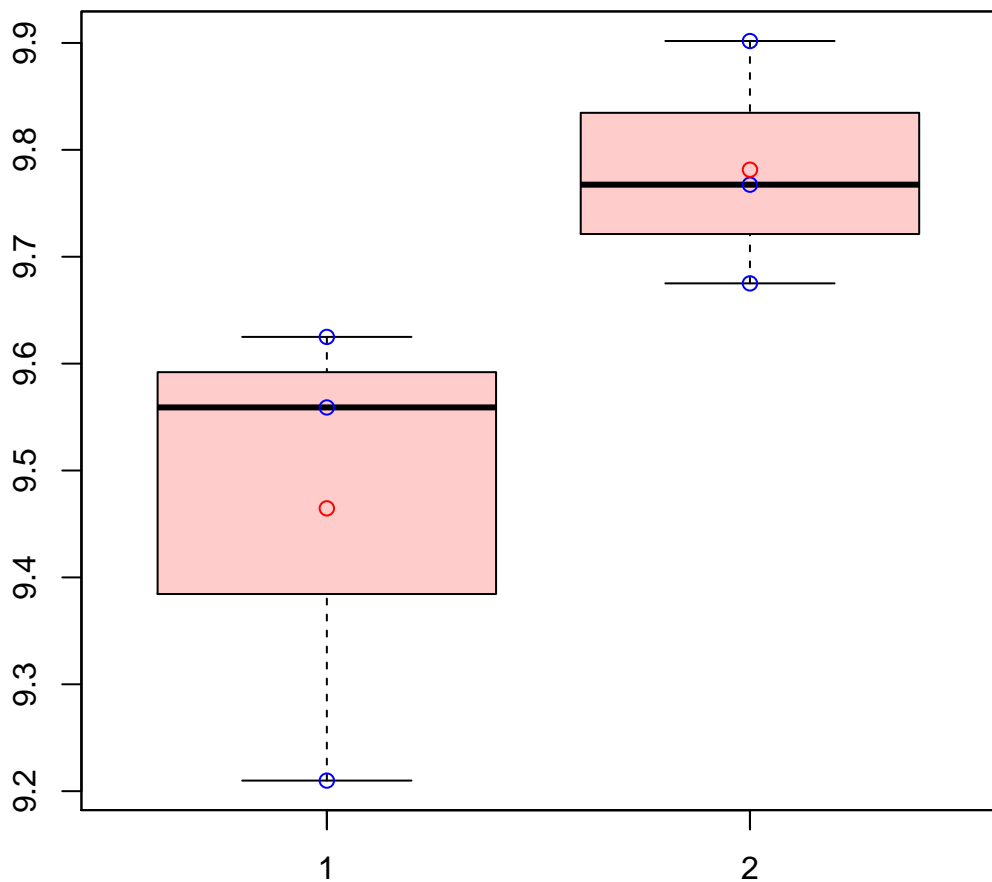

t-Test: p-value = 0.12

# CL1723Contig8|CL1723Contig8

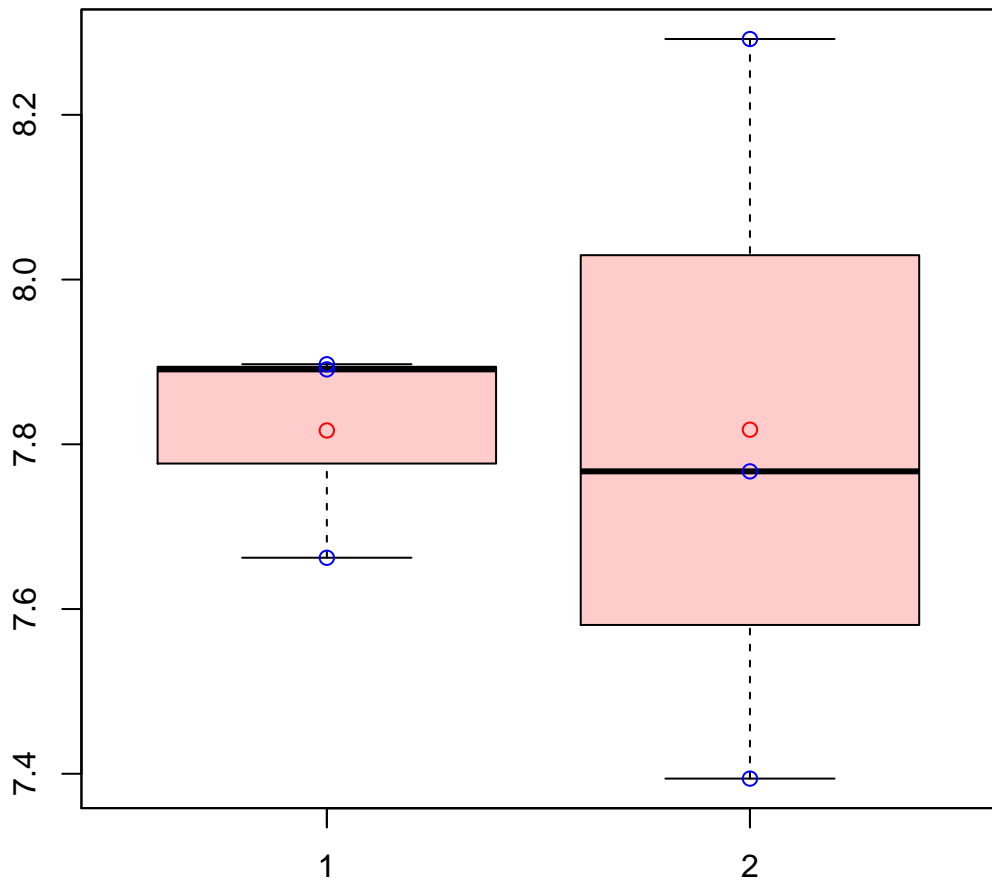

t-Test: p-value = 1

# CL1725Contig2|CL1725Contig2

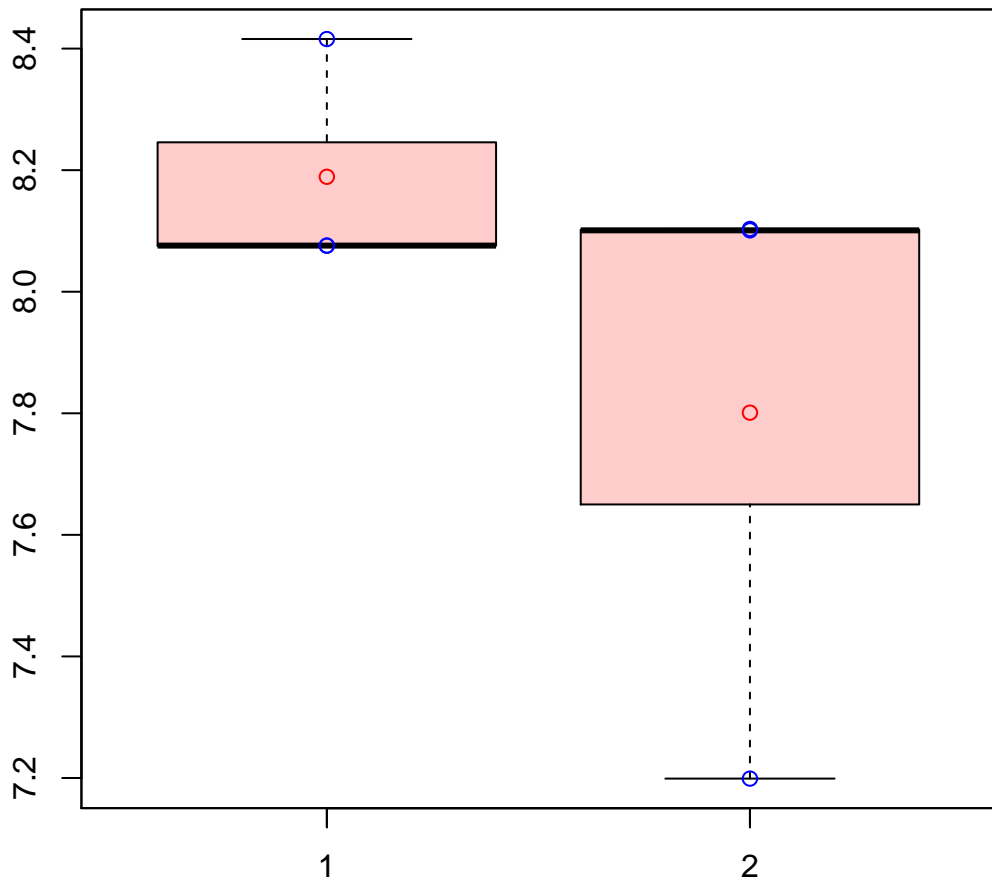

t-Test: p-value = 0.33



# CL172Contig3|CL172Contig3

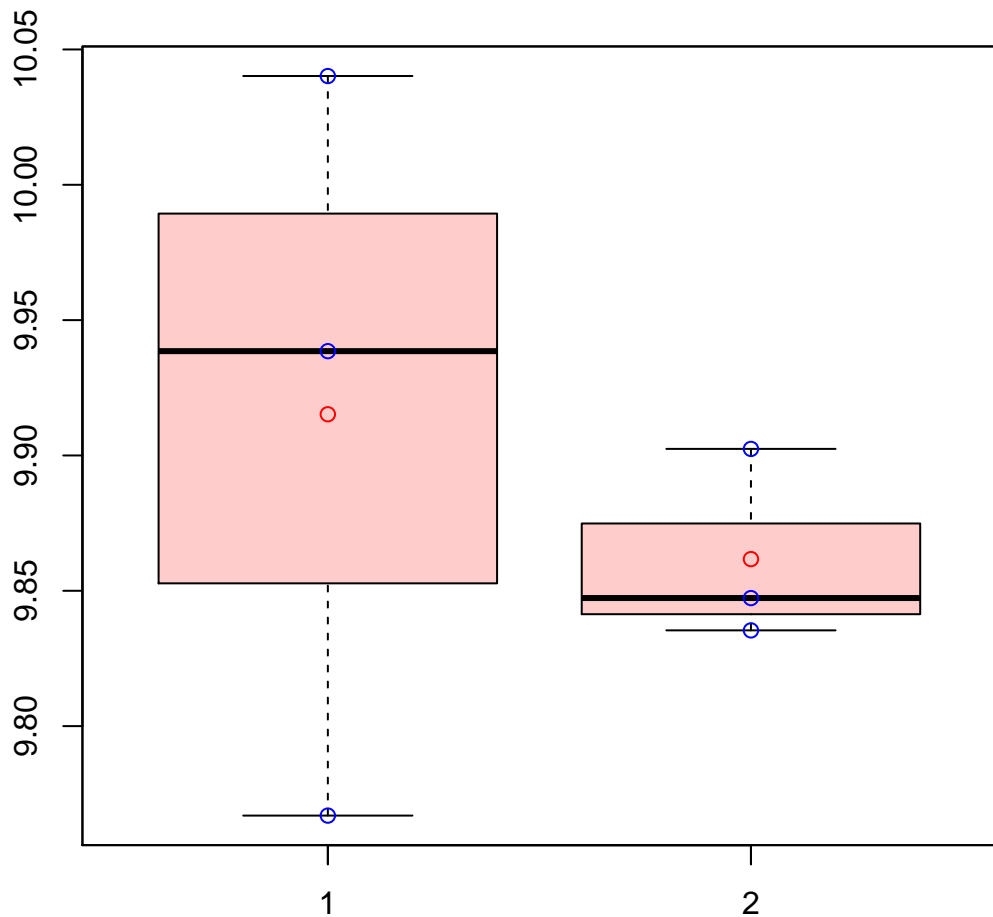

t-Test: p-value = 0.58

# CL172Contig9|CL172Contig9

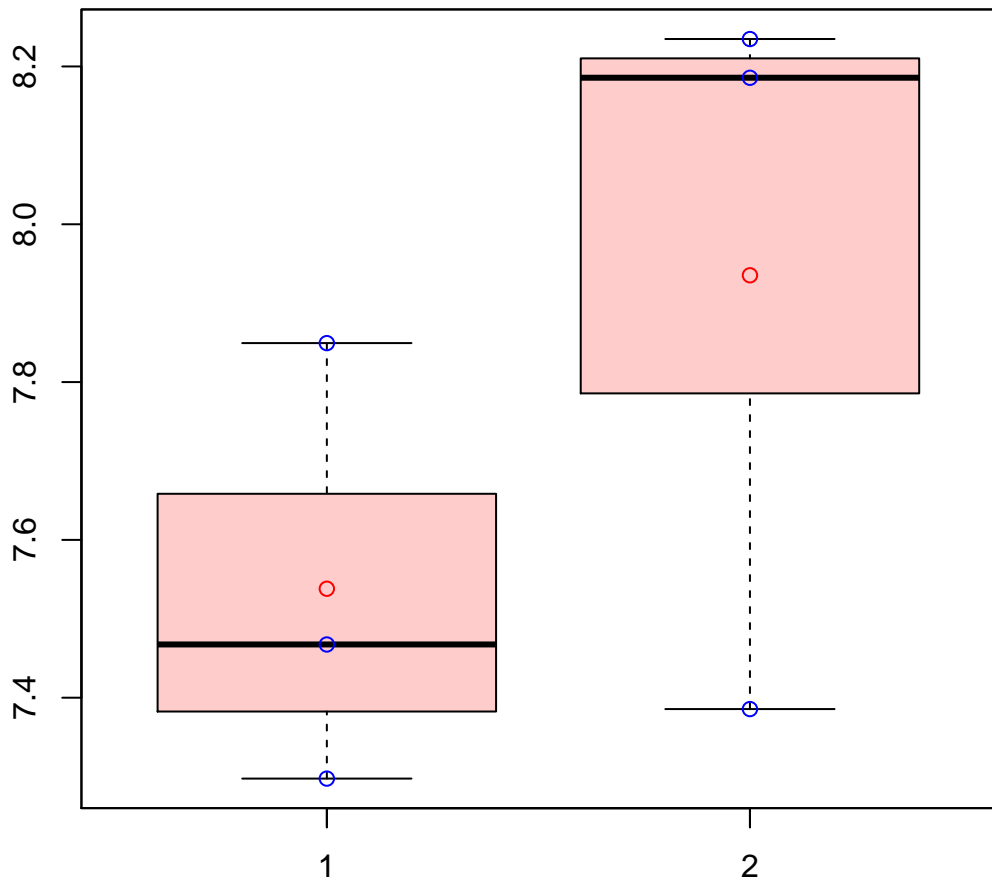

t-Test: p-value = 0.3

# CL1731Contig1|CL1731Contig1

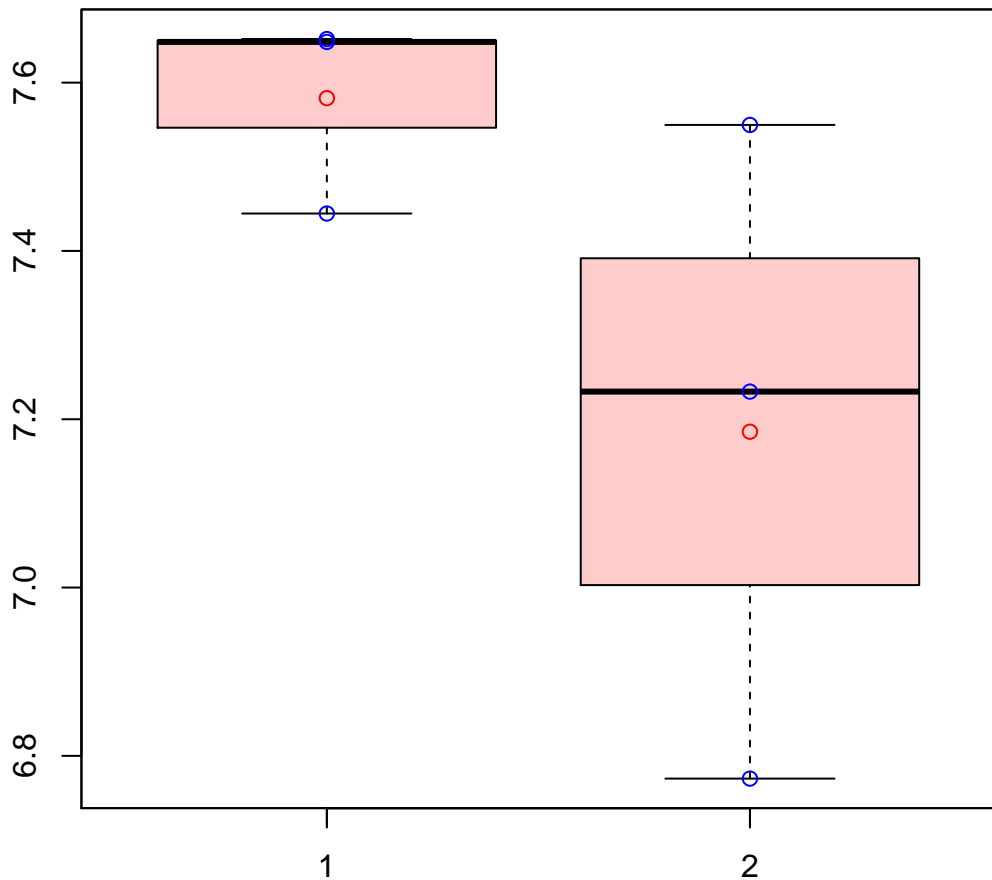

t-Test: p-value = 0.21

# CL1734Contig4|CL1734Contig4

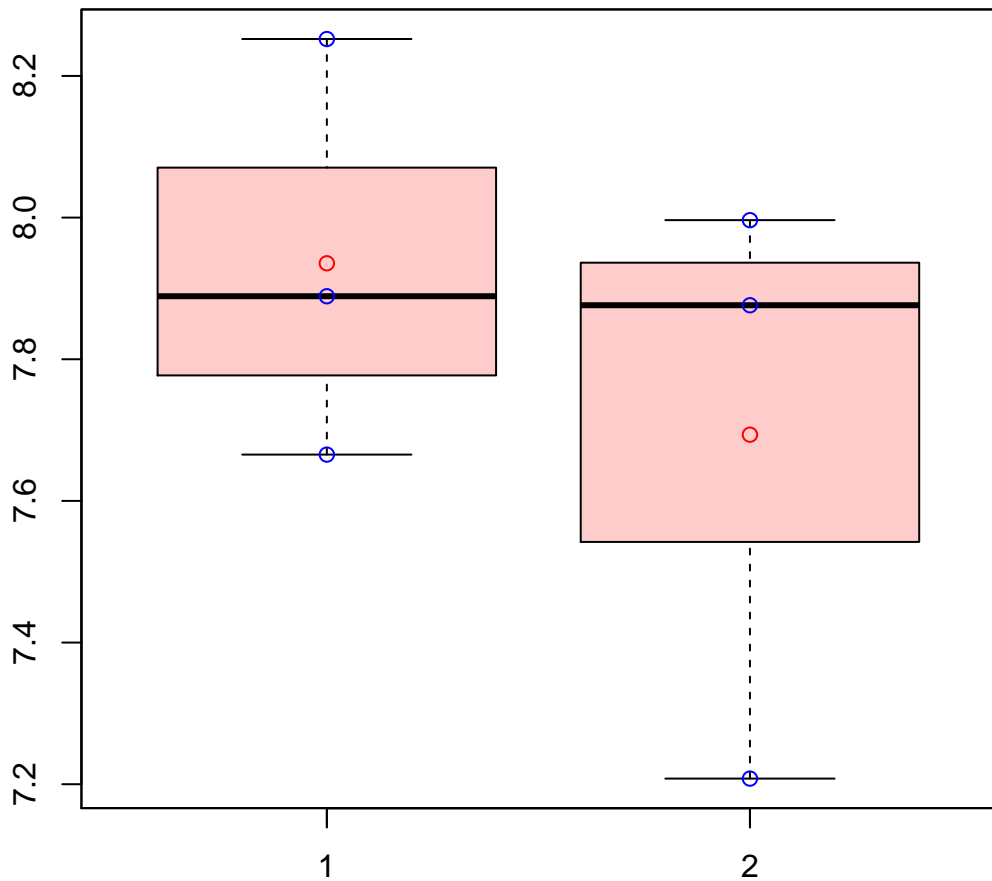

t-Test: p-value = 0.47

# CL1736Contig3|CL1736Contig3

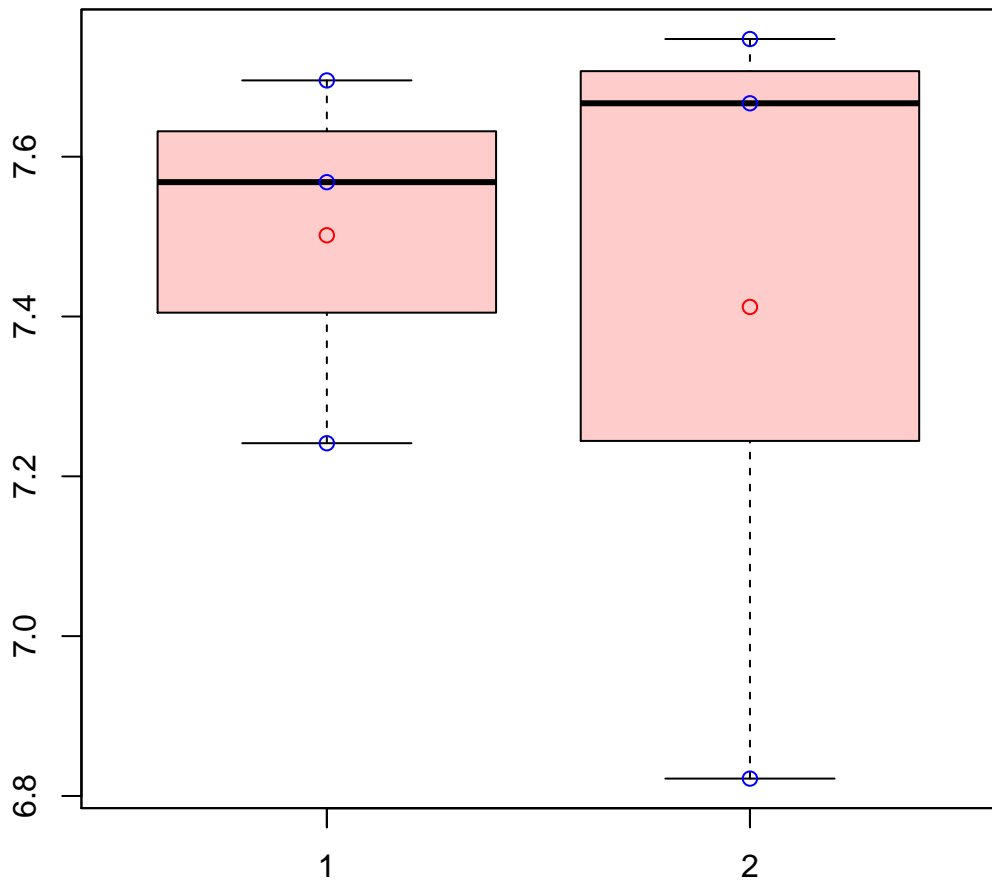

t-Test: p-value = 0.8

# CL1739Contig2|CL1739Contig2

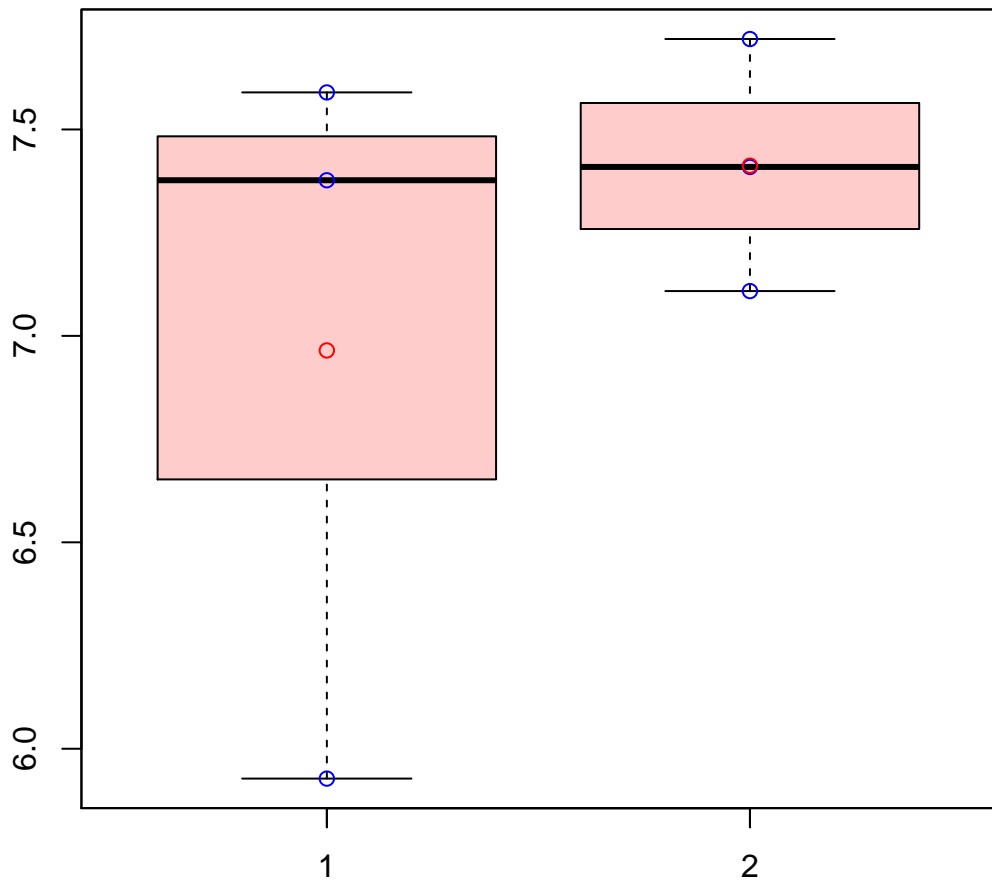

t-Test: p-value = 0.49

# CL1742Contig1|CL1742Contig1

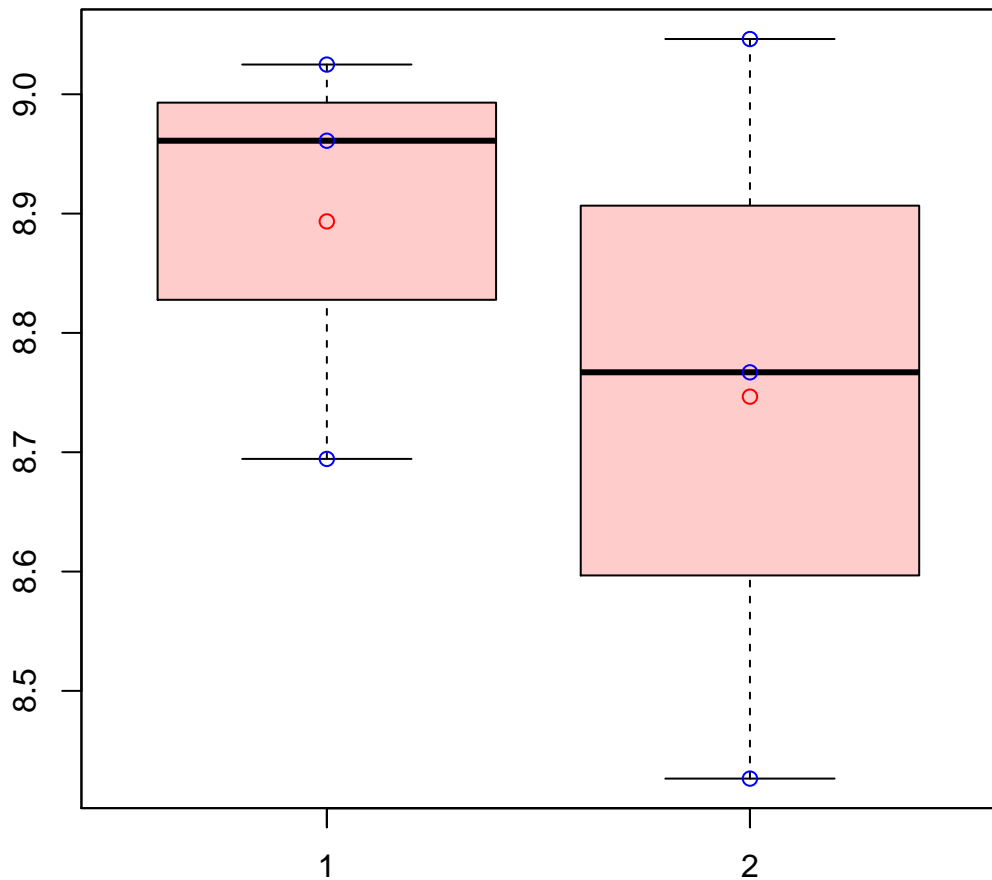

t-Test: p-value = 0.52

# CL1747Contig6|CL1747Contig6

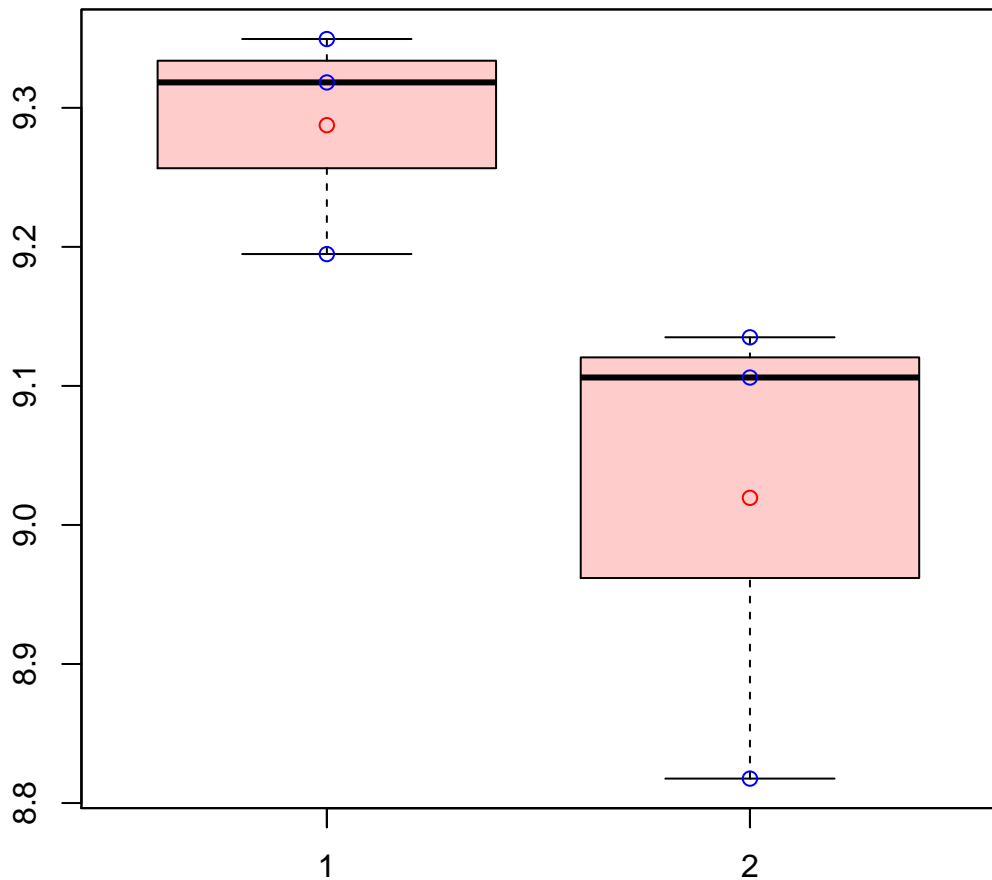

t-Test: p-value = 0.1



# CL174Contig19|CL174Contig19

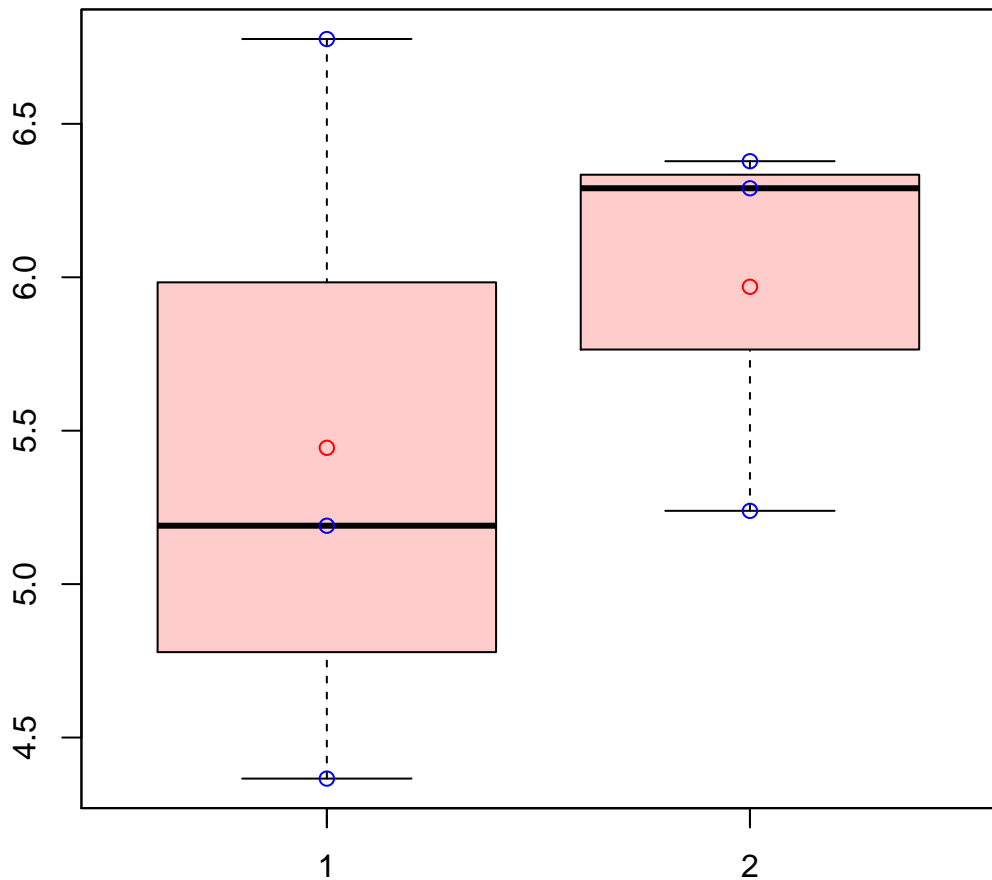

t-Test: p-value = 0.56

# CL174Contig20|CL174Contig20

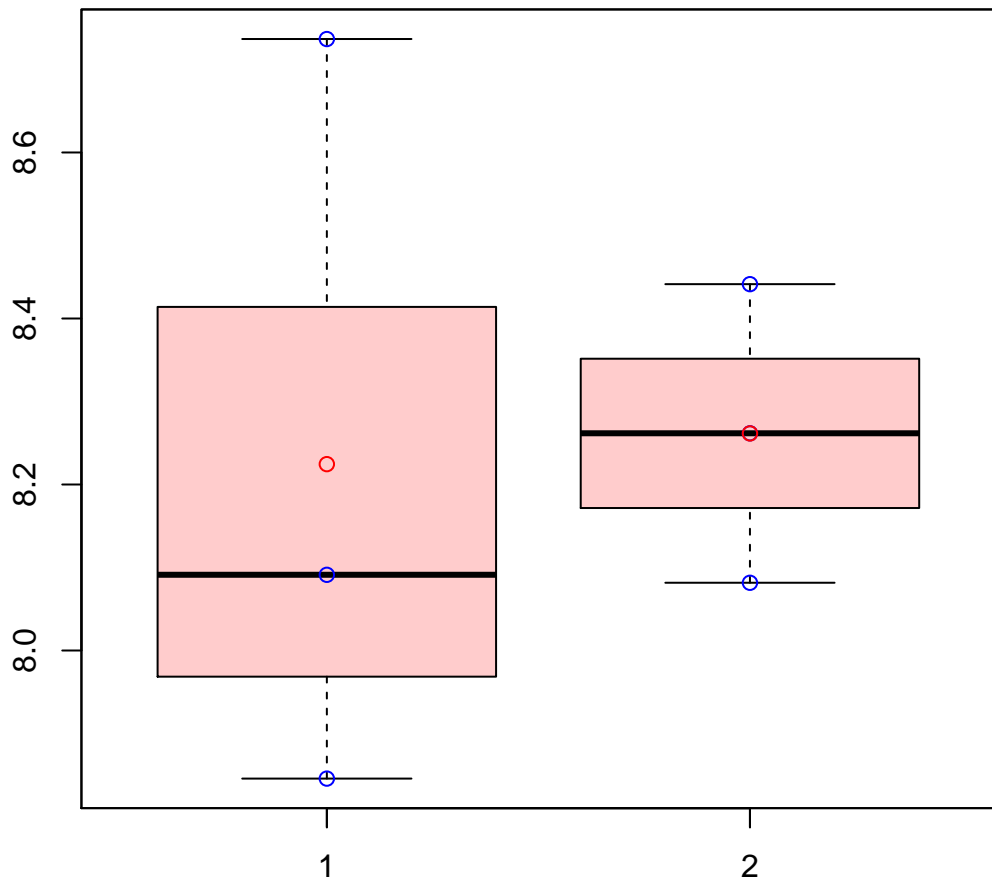

t-Test: p-value = 0.91

# CL17541Contig1|CL17541Contig1

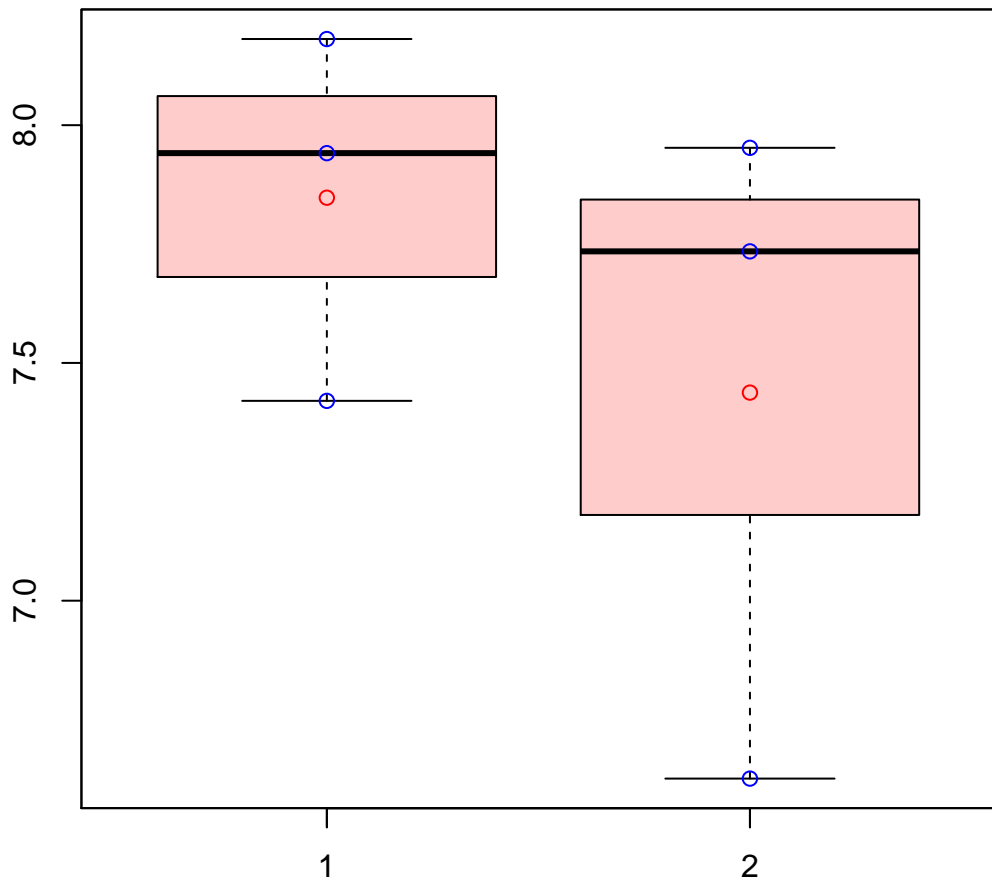

t-Test: p-value = 0.44

# CL1758Contig2|CL1758Contig2

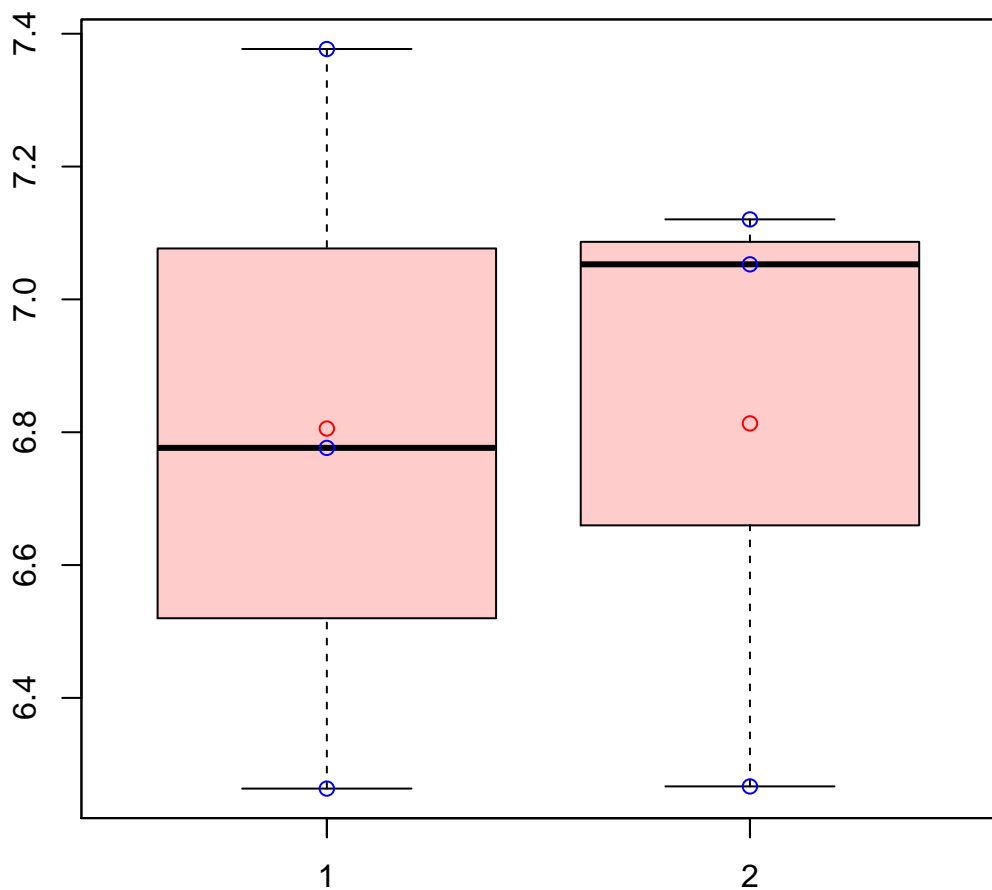

t-Test: p-value = 0.99

# CL1758Contig4|CL1758Contig4

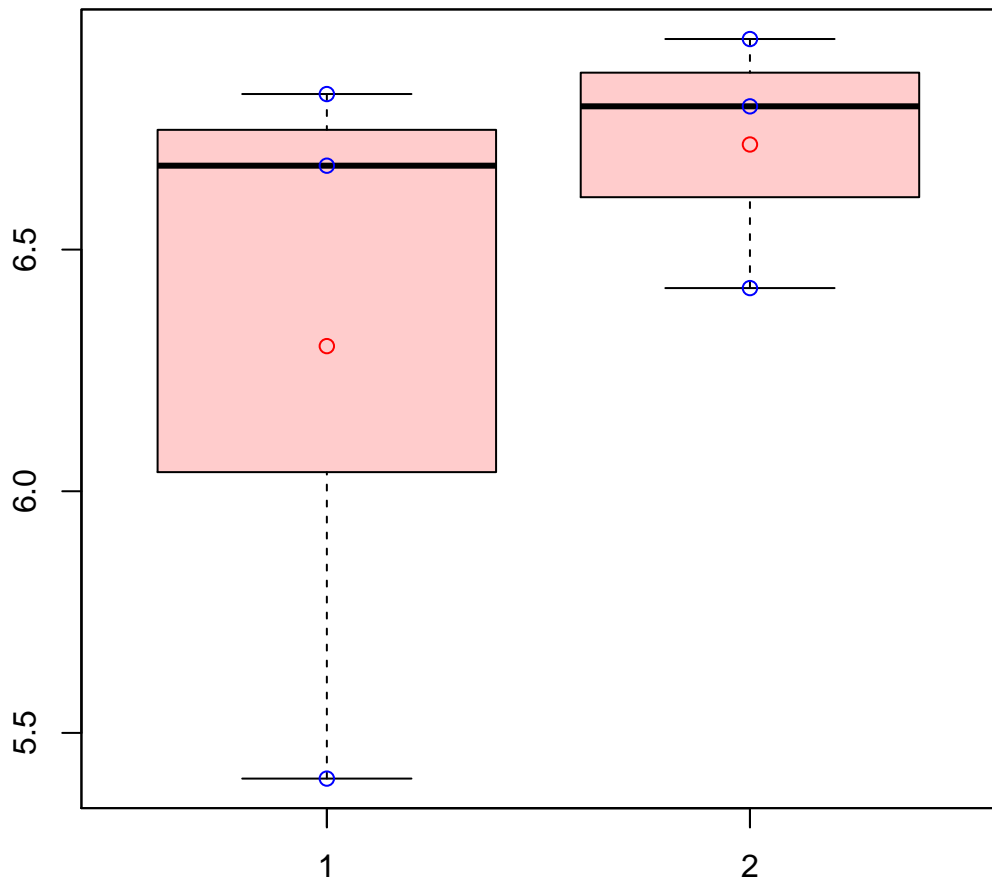

t-Test: p-value = 0.46

# CL1759Contig3|CL1759Contig3

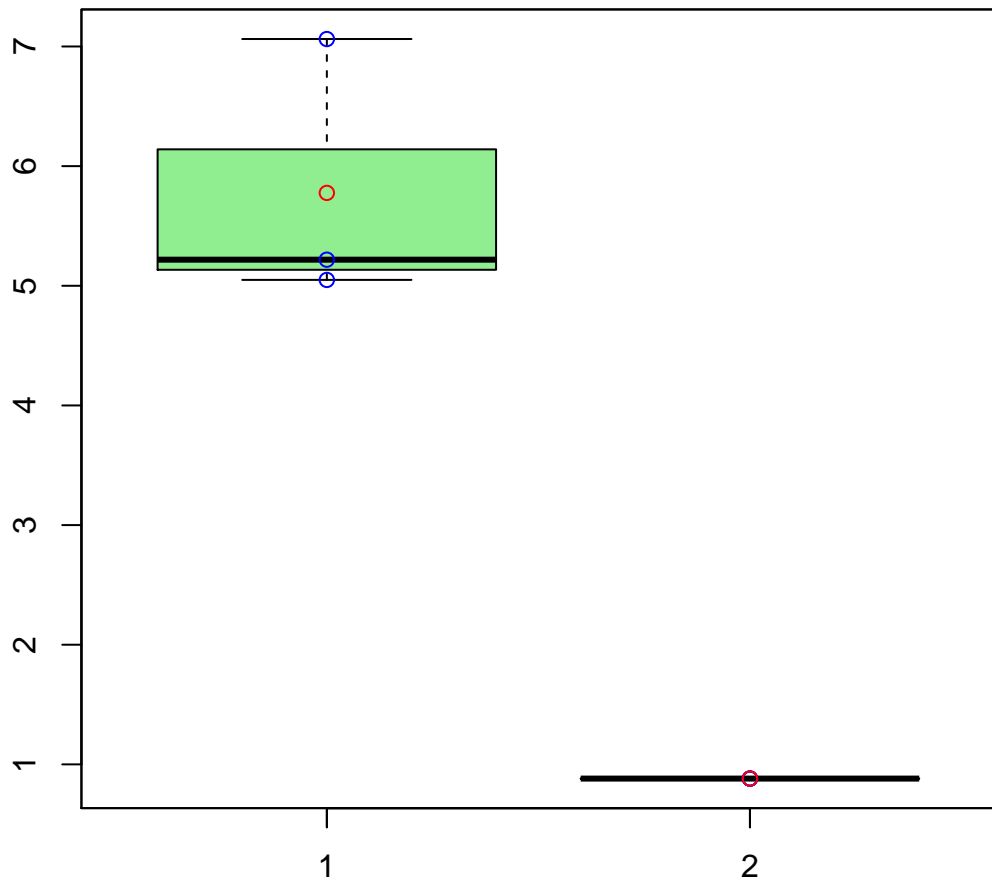

t-Test: p-value = 0.02

# CL175Contig13|CL175Contig13

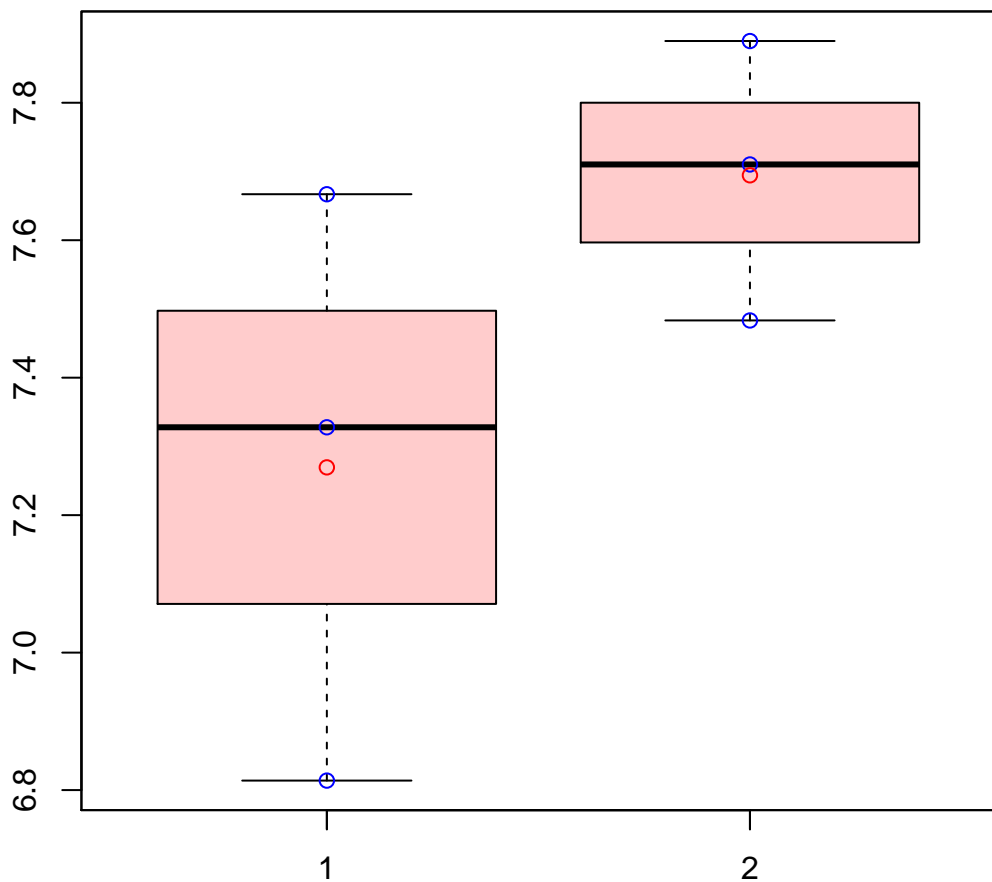

t-Test: p-value = 0.22

# CL175Contig4|CL175Contig4

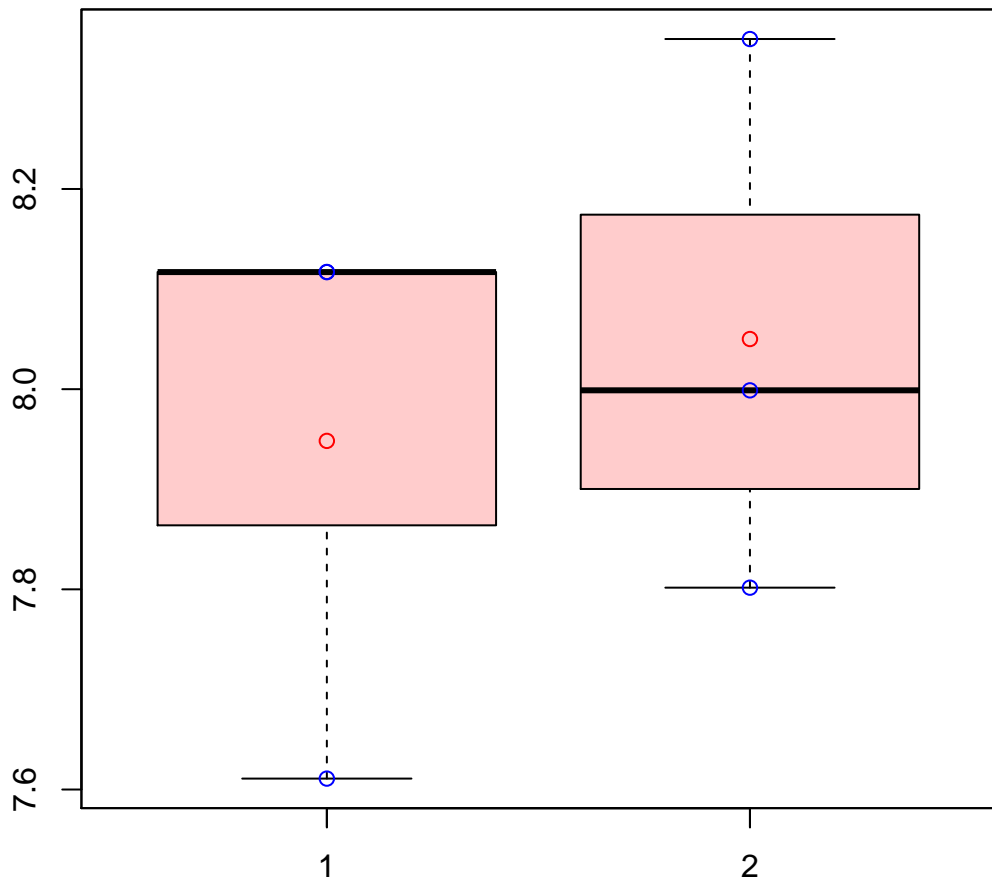

t-Test: p-value = 0.68



# CL1772Contig1|CL1772Contig1

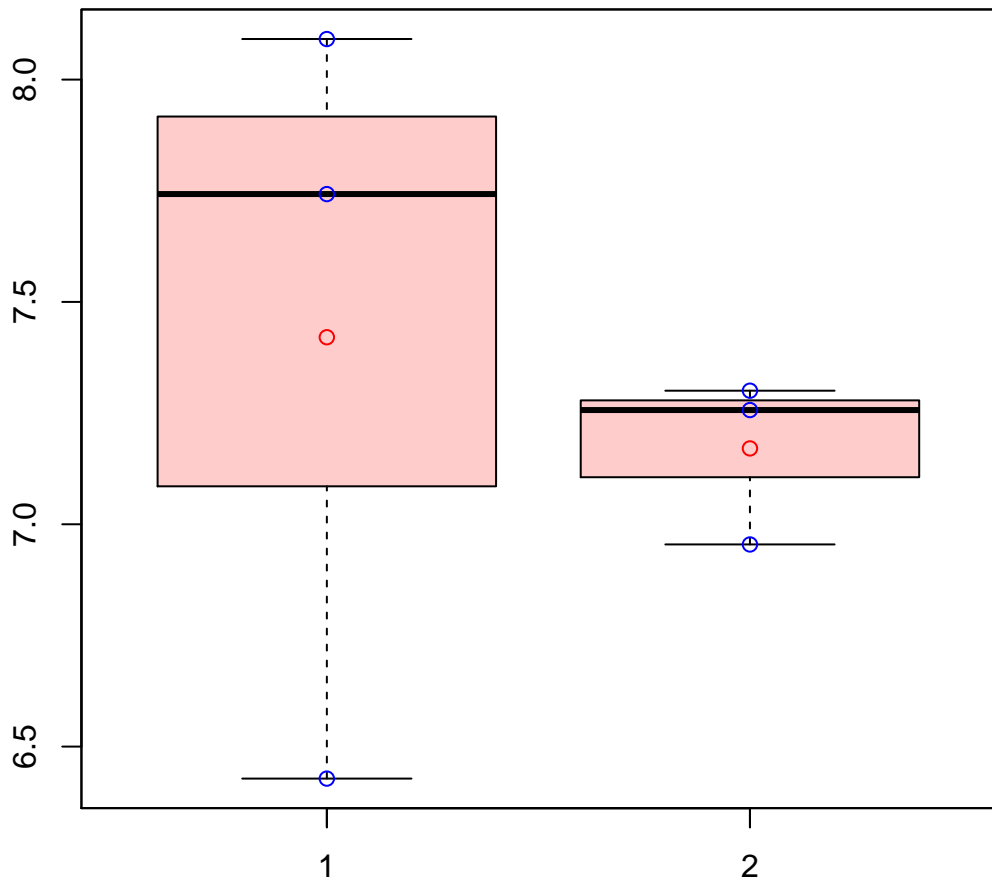

t-Test: p-value = 0.67

# CL1772Contig7|CL1772Contig7

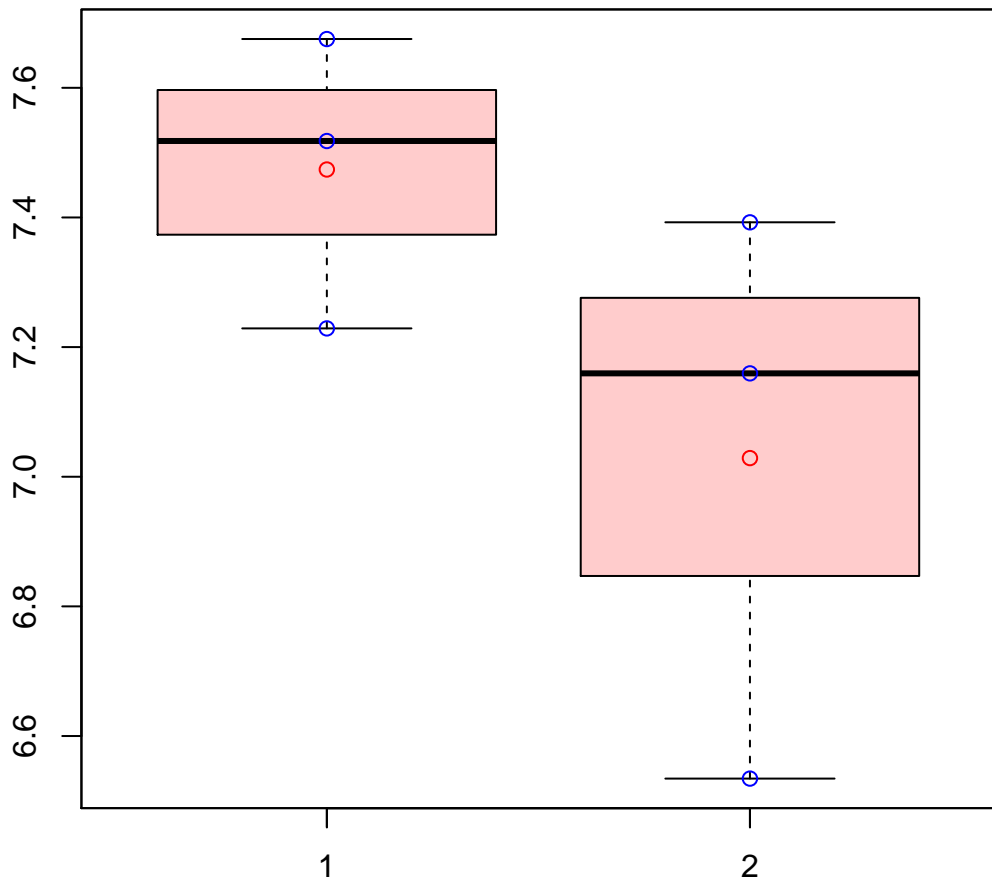

t-Test: p-value = 0.22

# CL1774Contig1|CL1774Contig1

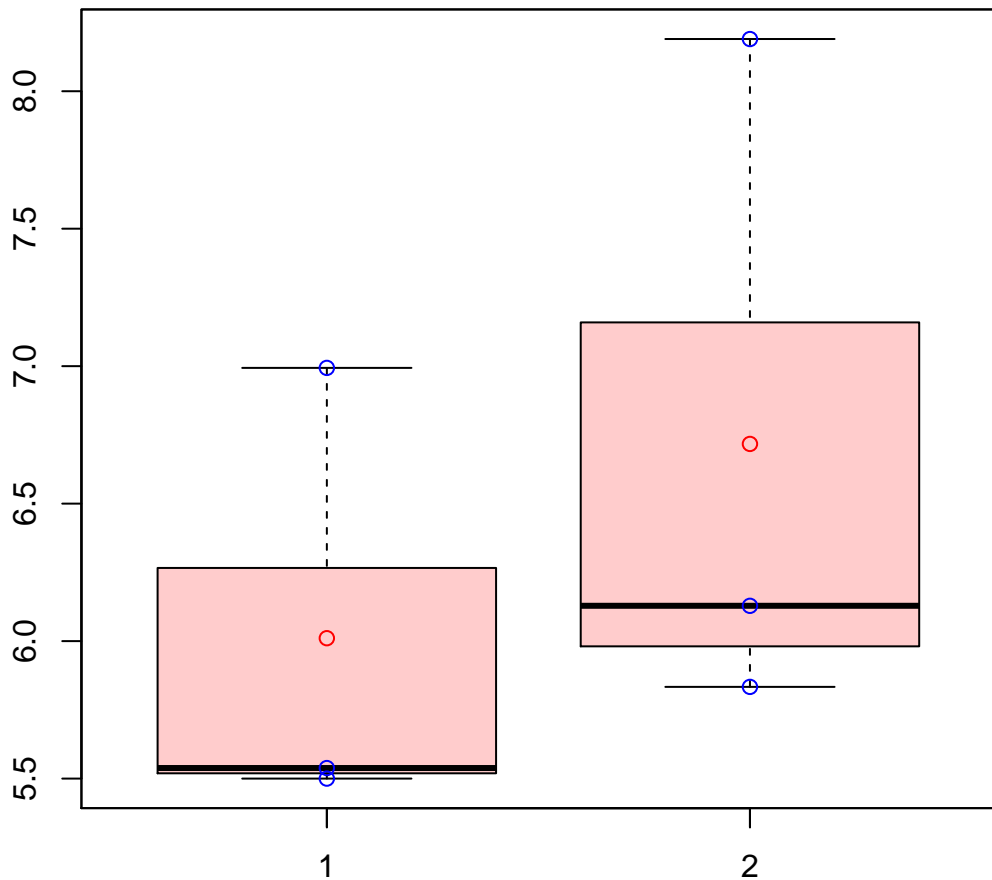

t-Test: p-value = 0.48

# CL1785Contig3|CL1785Contig3

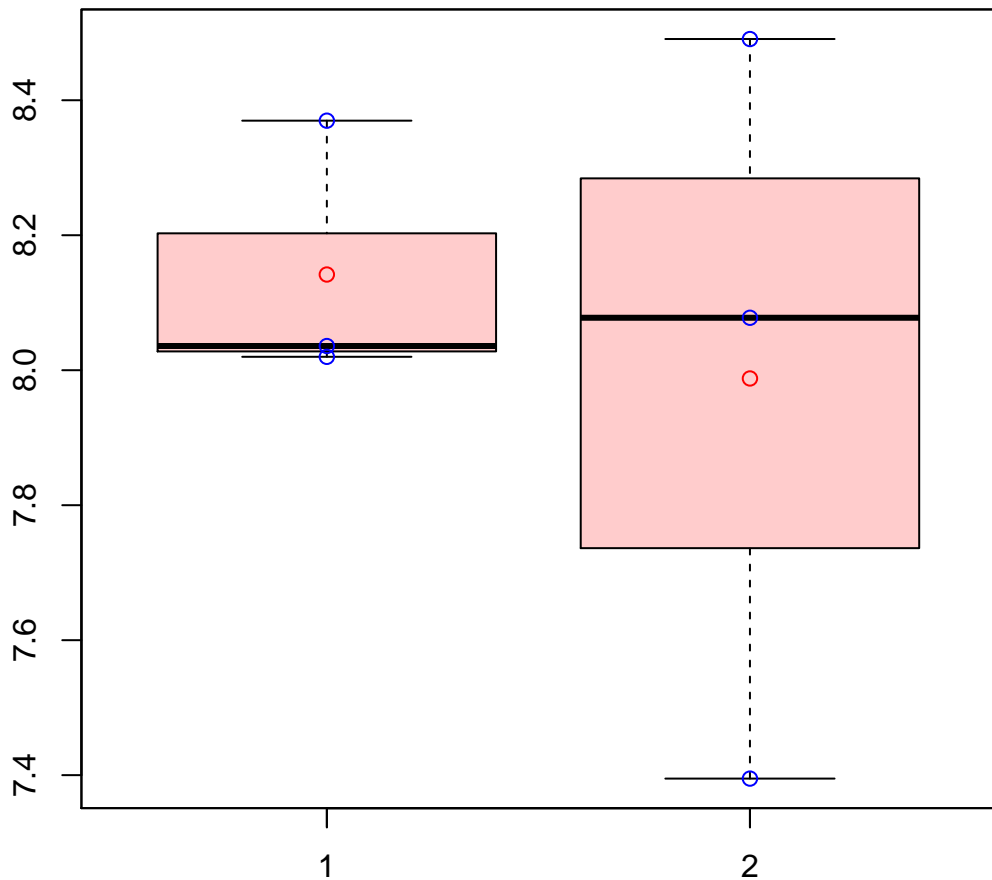

t-Test: p-value = 0.69

# CL1785Contig4|CL1785Contig4

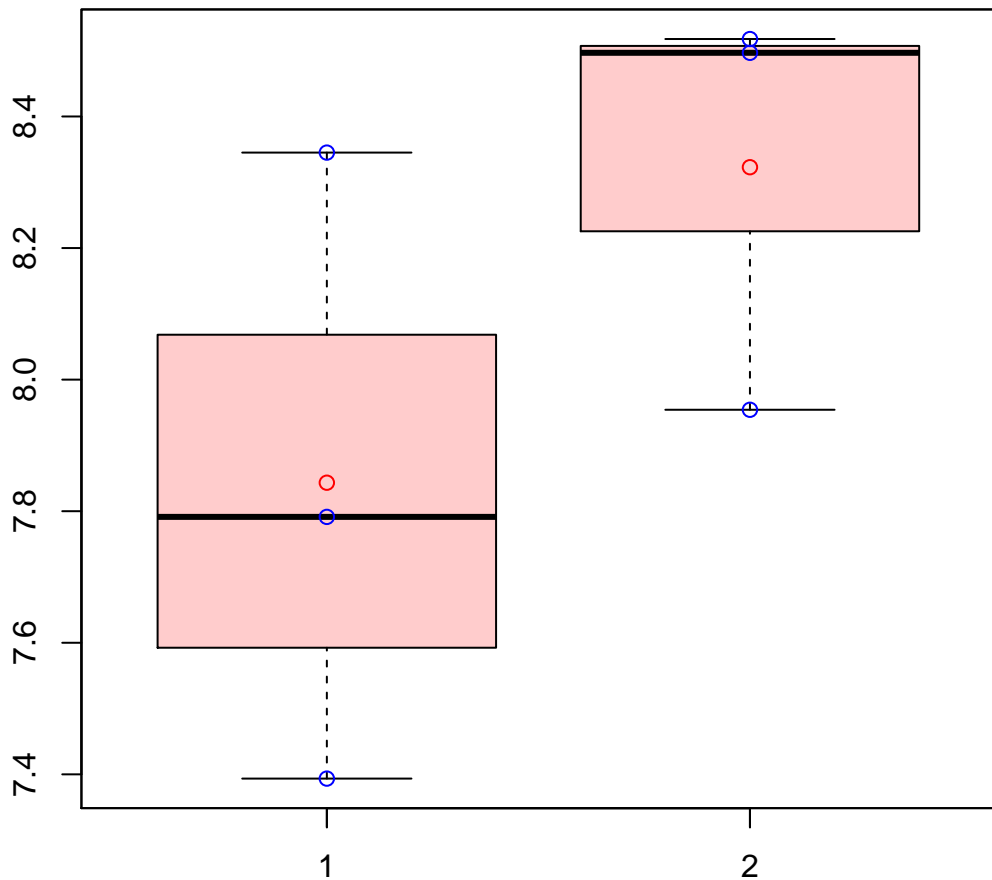

t-Test: p-value = 0.23

# CL1787Contig2|CL1787Contig2

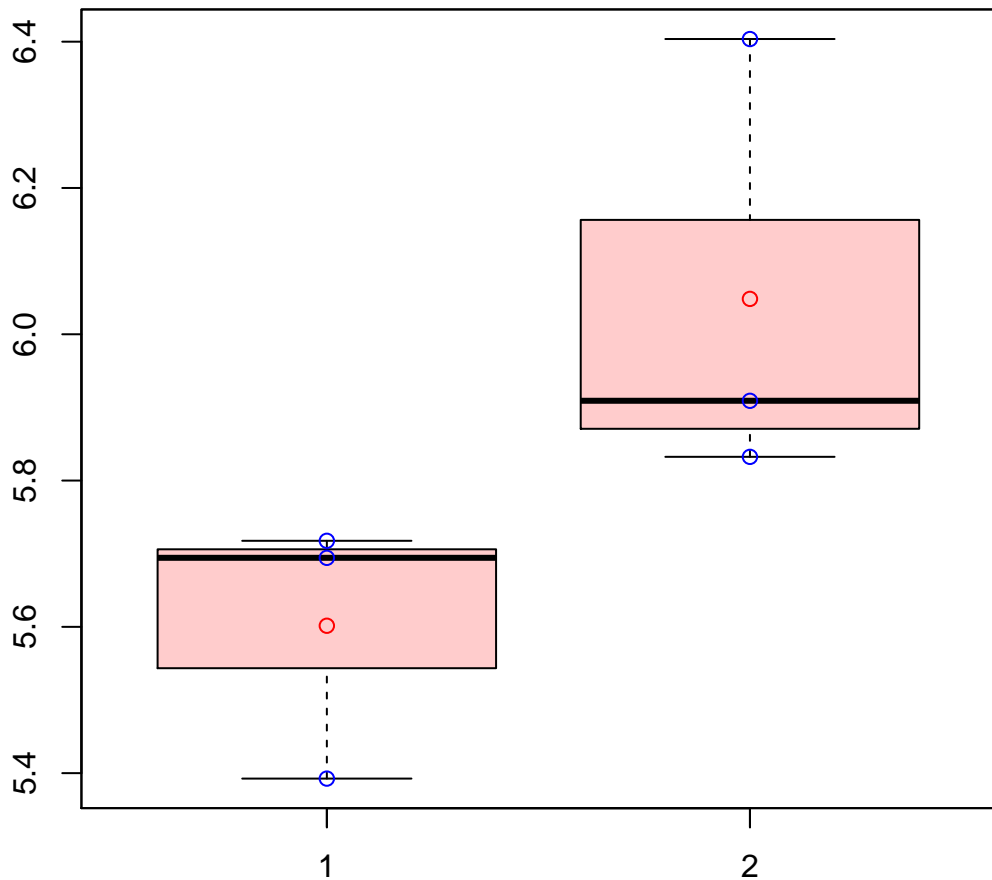

t-Test: p-value = 0.11

# CL1798Contig1|CL1798Contig1

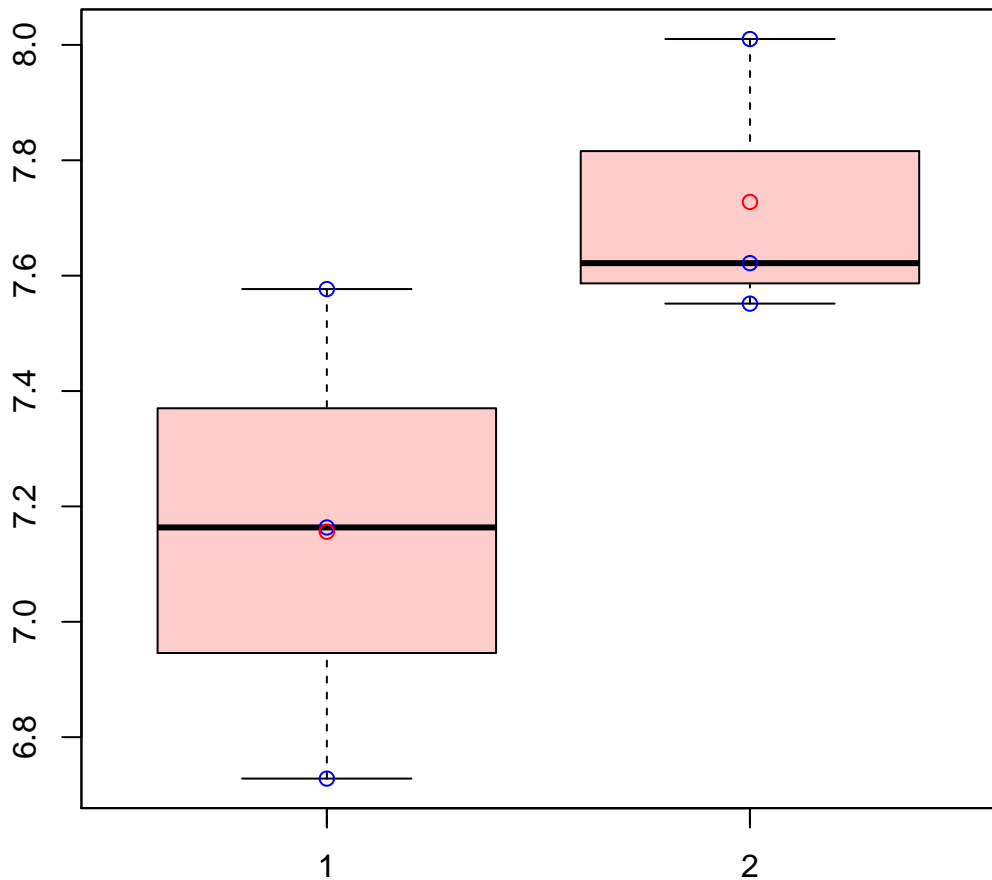

t-Test: p-value = 0.13

# CL17Contig1|CL17Contig1

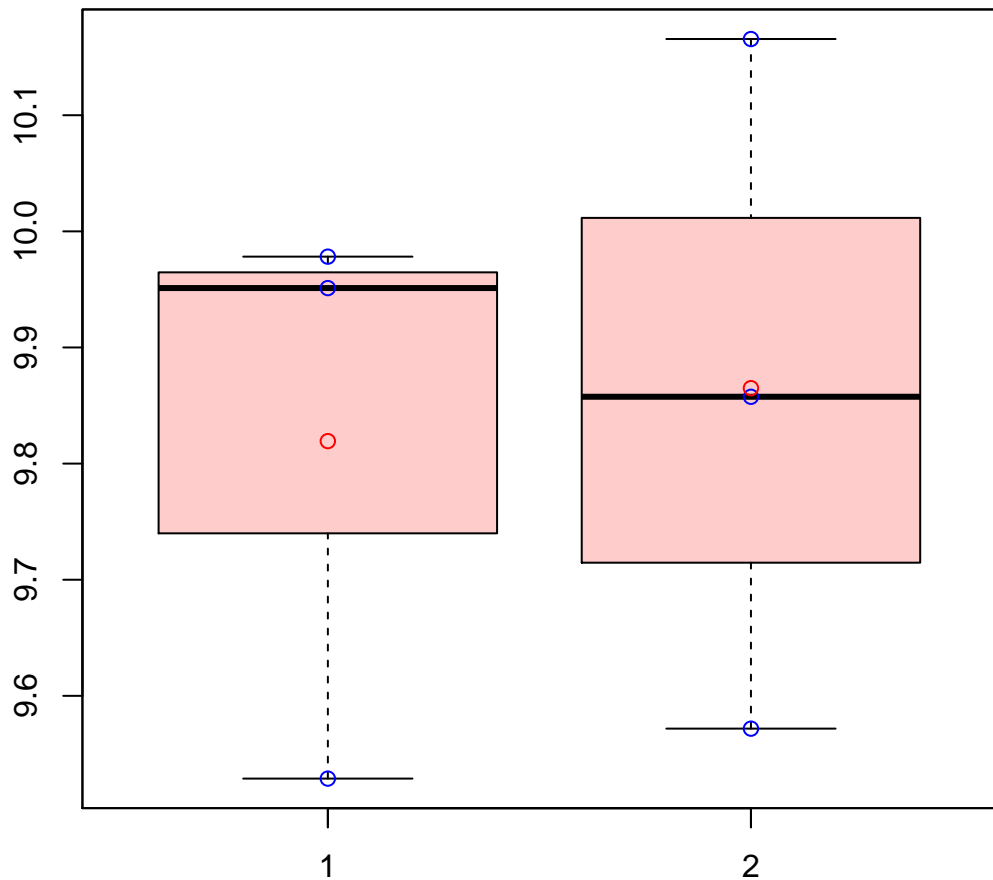

t-Test: p-value = 0.85



# CL1800Contig1|CL1800Contig1

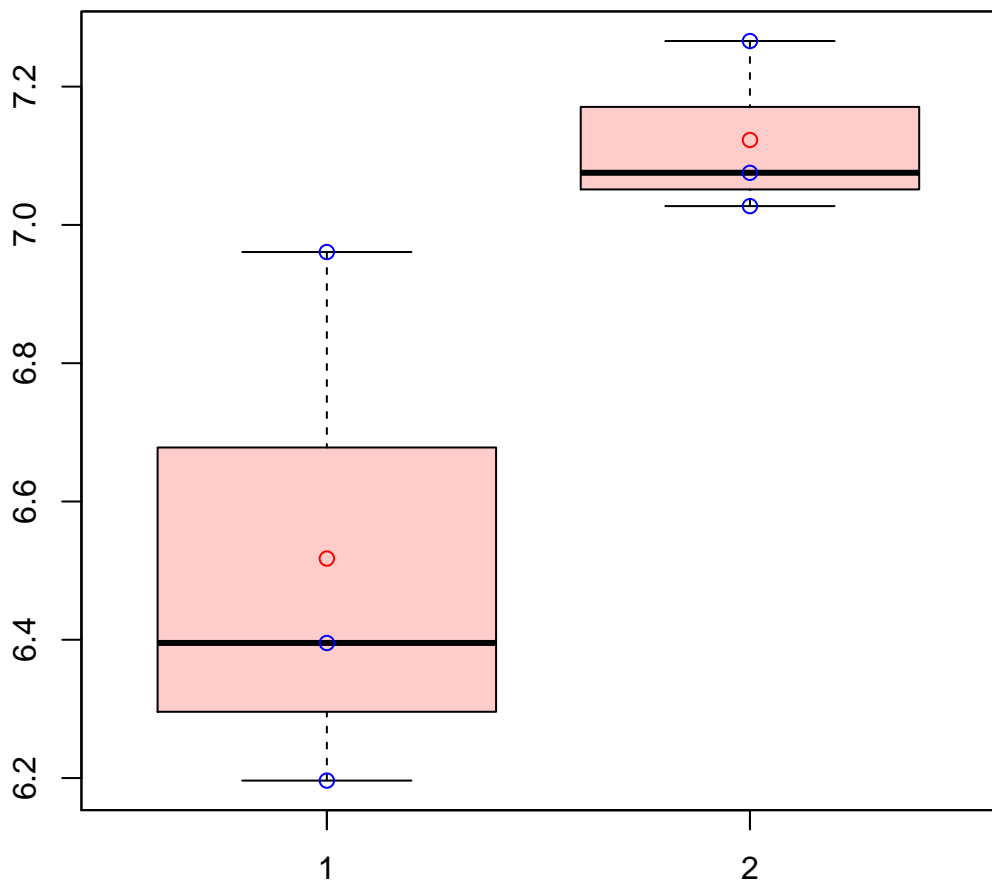

t-Test: p-value = 0.11

# CL1800Contig6|CL1800Contig6

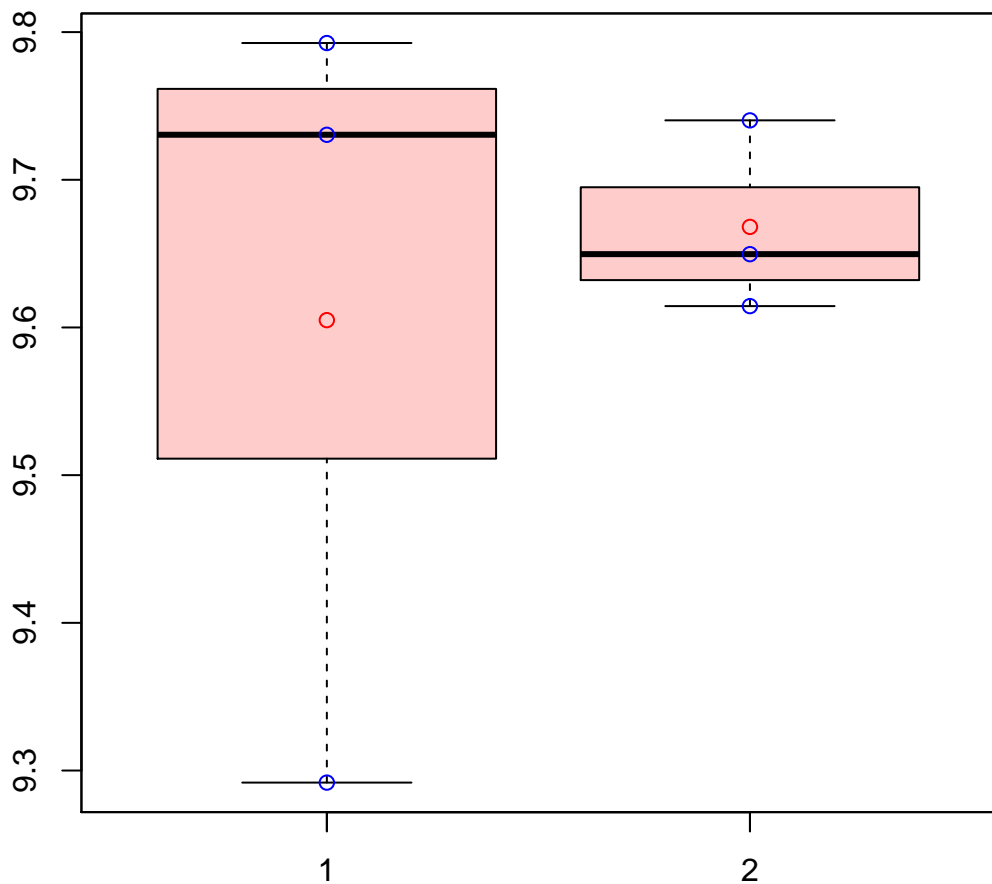

t-Test: p-value = 0.73

# CL1802Contig13|CL1802Contig13

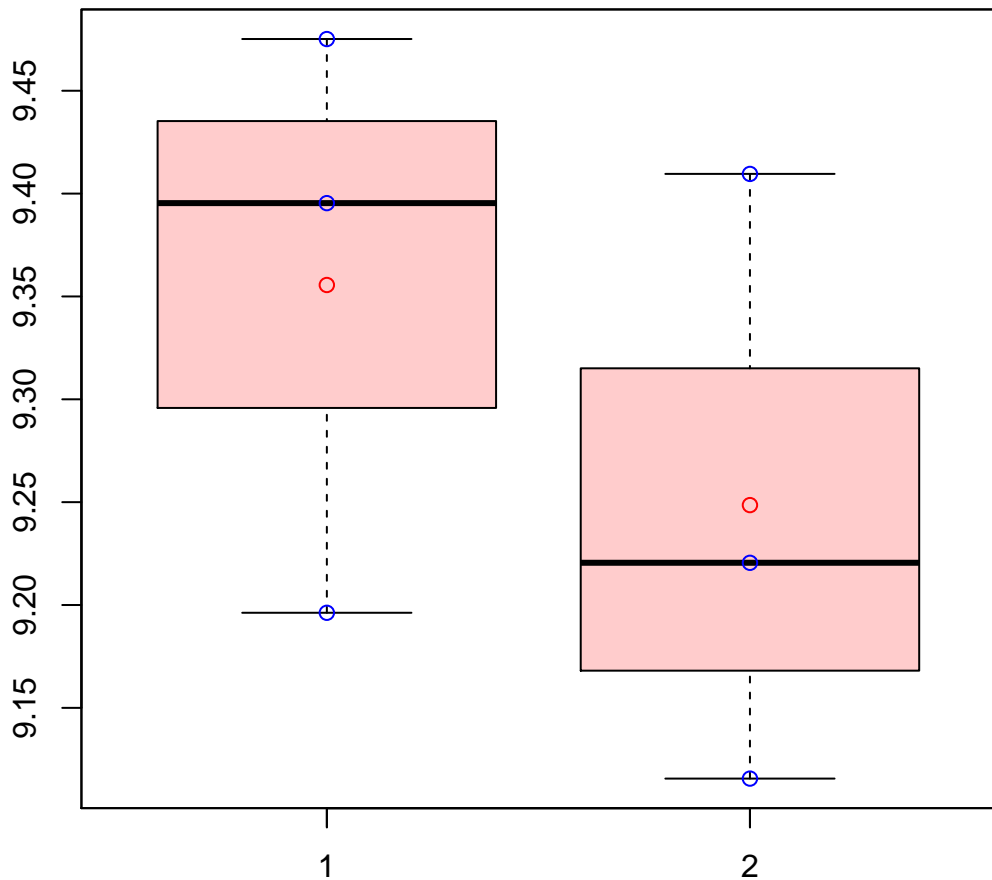

t-Test: p-value = 0.42

# CL1802Contig1|CL1802Contig1

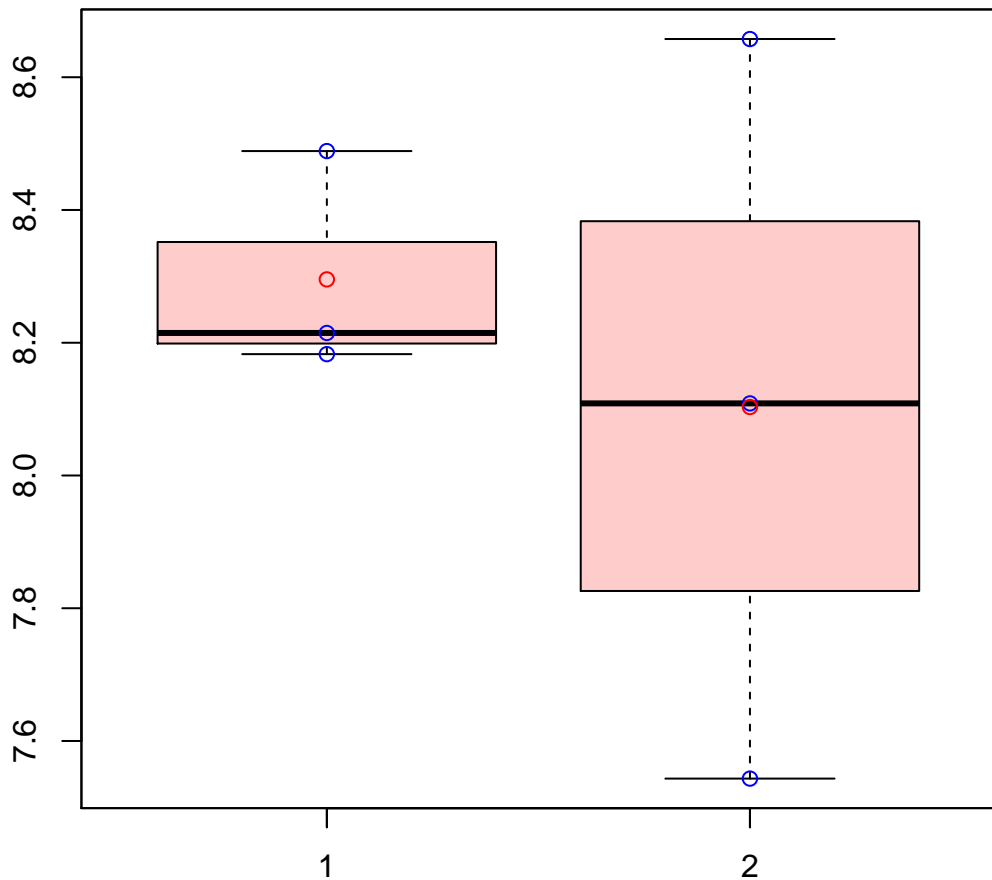

t-Test: p-value = 0.62

# CL1805Contig1|CL1805Contig1

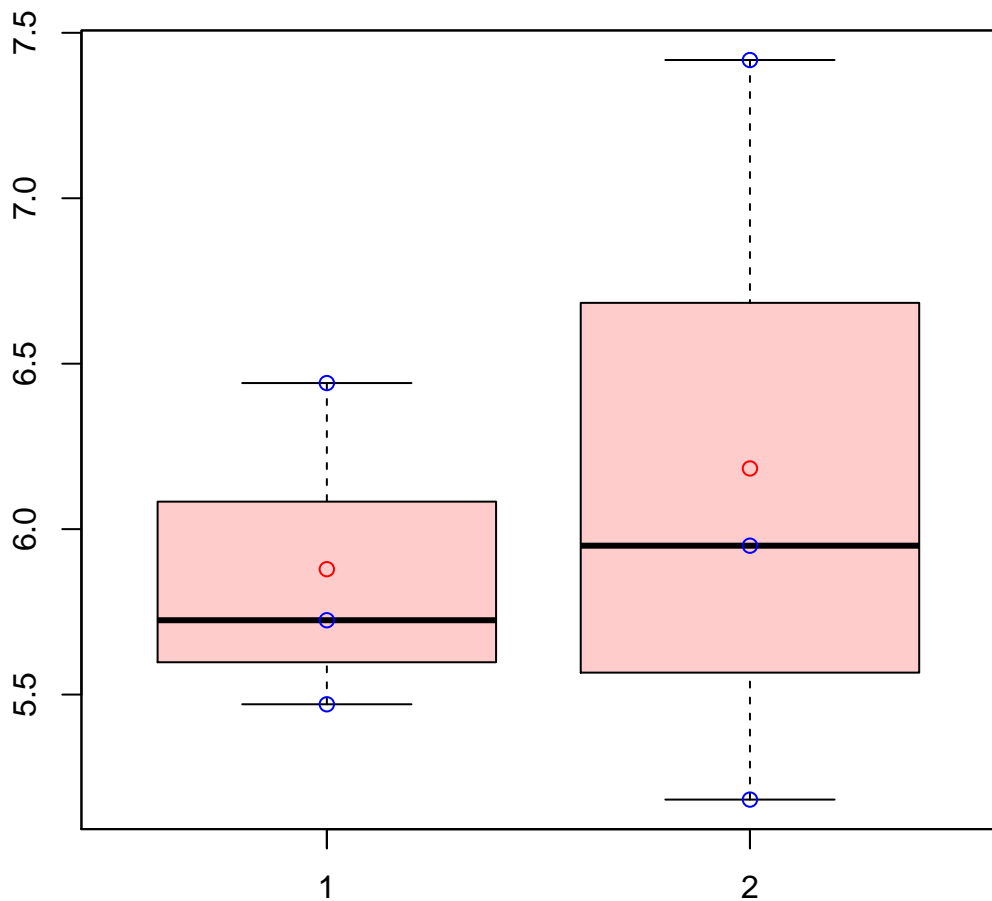

t-Test: p-value = 0.7

# CL1805Contig7|CL1805Contig7

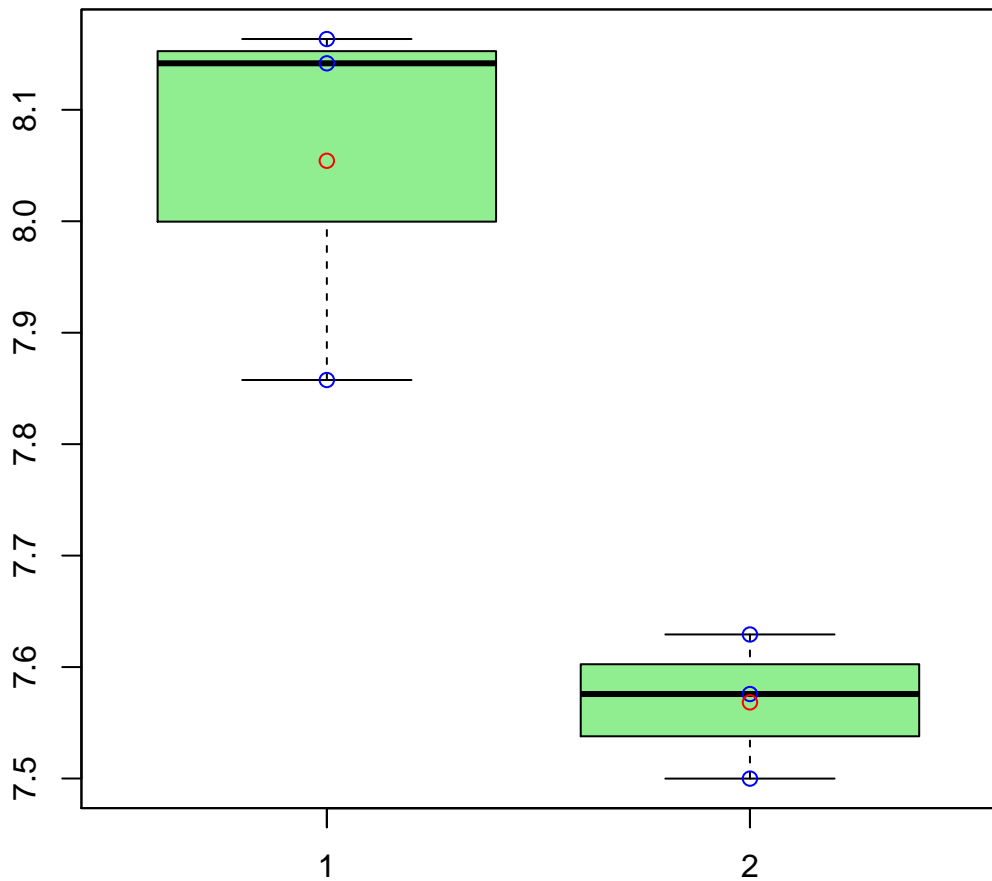

t-Test: p-value = 0.03

# CL1808Contig1|CL1808Contig1

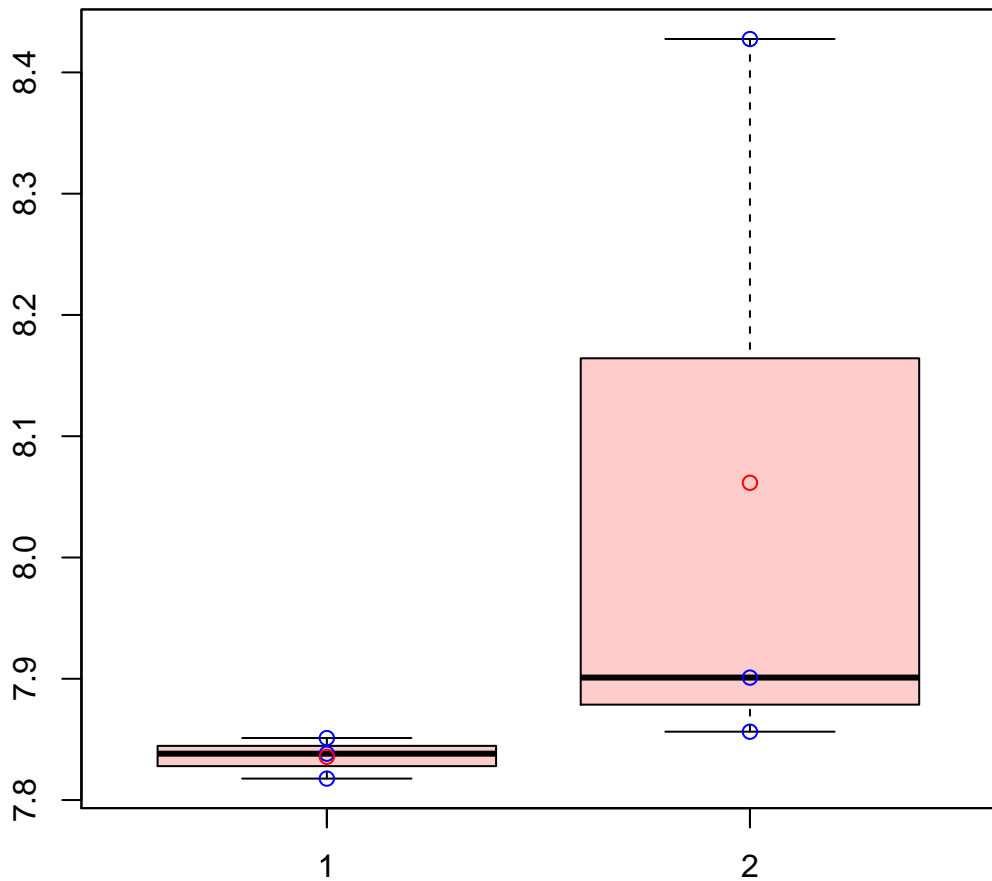

t-Test: p-value = 0.34

# CL18099Contig1|CL18099Contig1

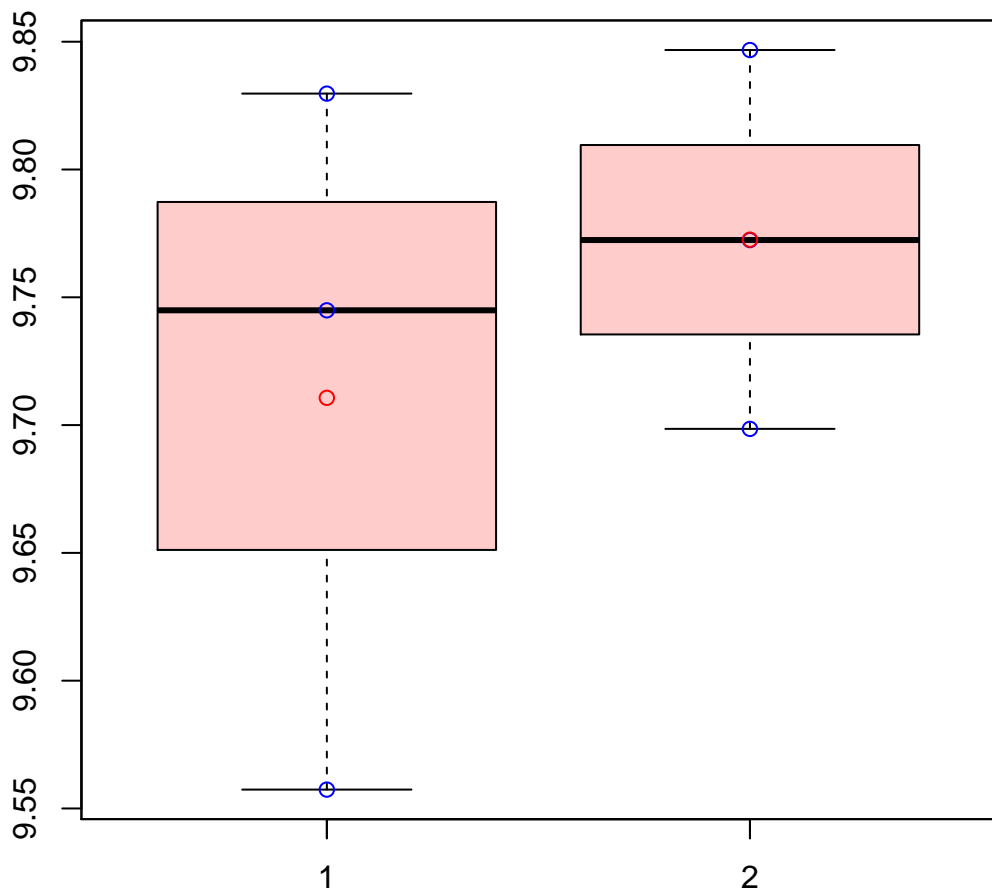

t-Test: p-value = 0.55



# CL180Contig23|CL180Contig23

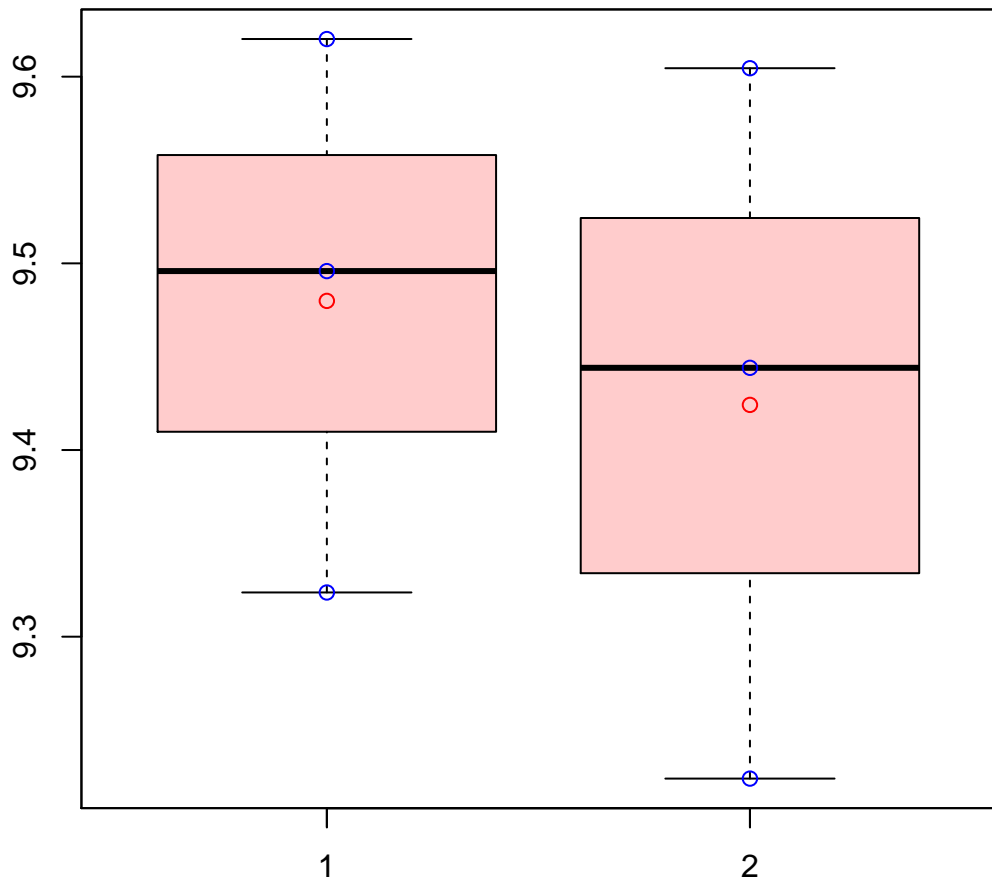

t-Test: p-value = 0.71

# CL180Contig9|CL180Contig9

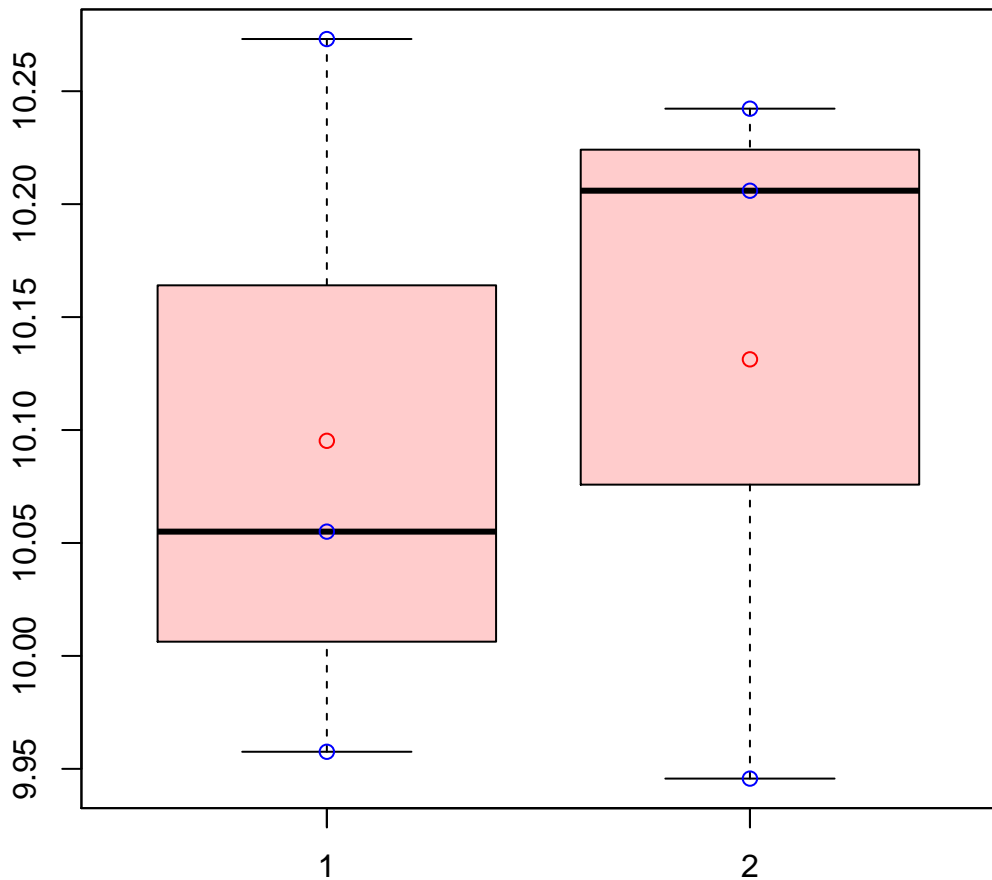

t-Test: p-value = 0.8

# CL1814Contig1|CL1814Contig1

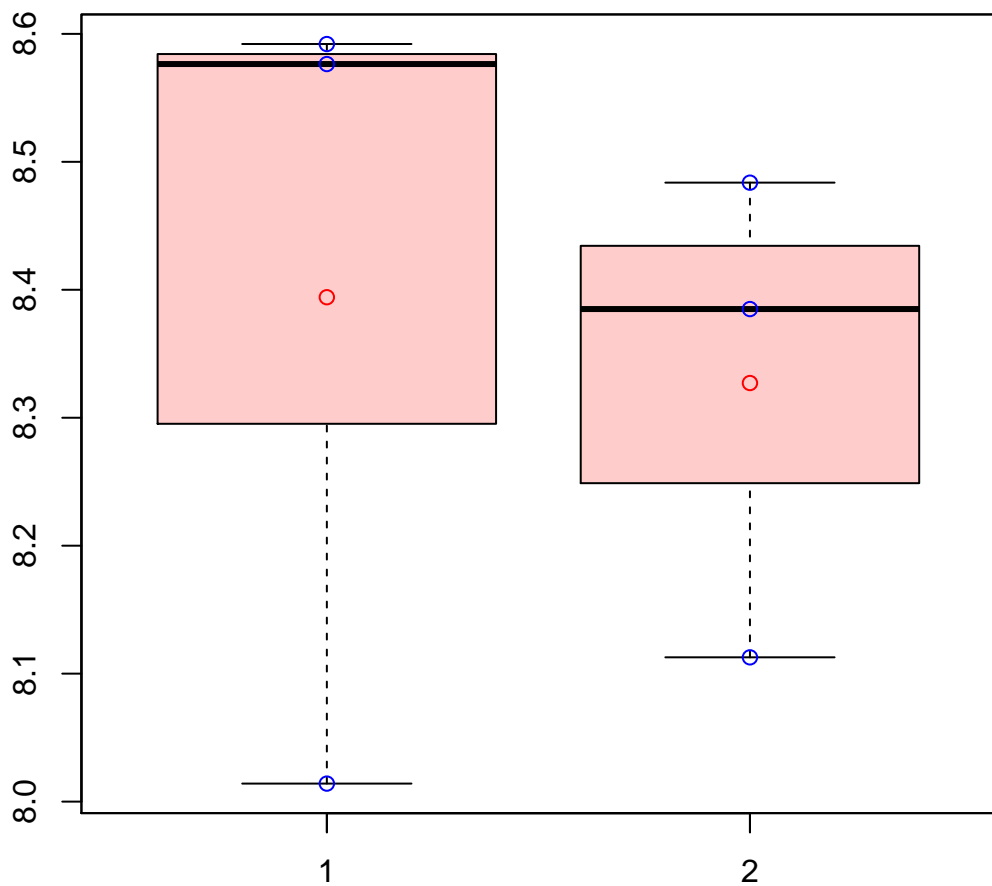

t-Test: p-value = 0.78

# CL1825Contig1|CL1825Contig1

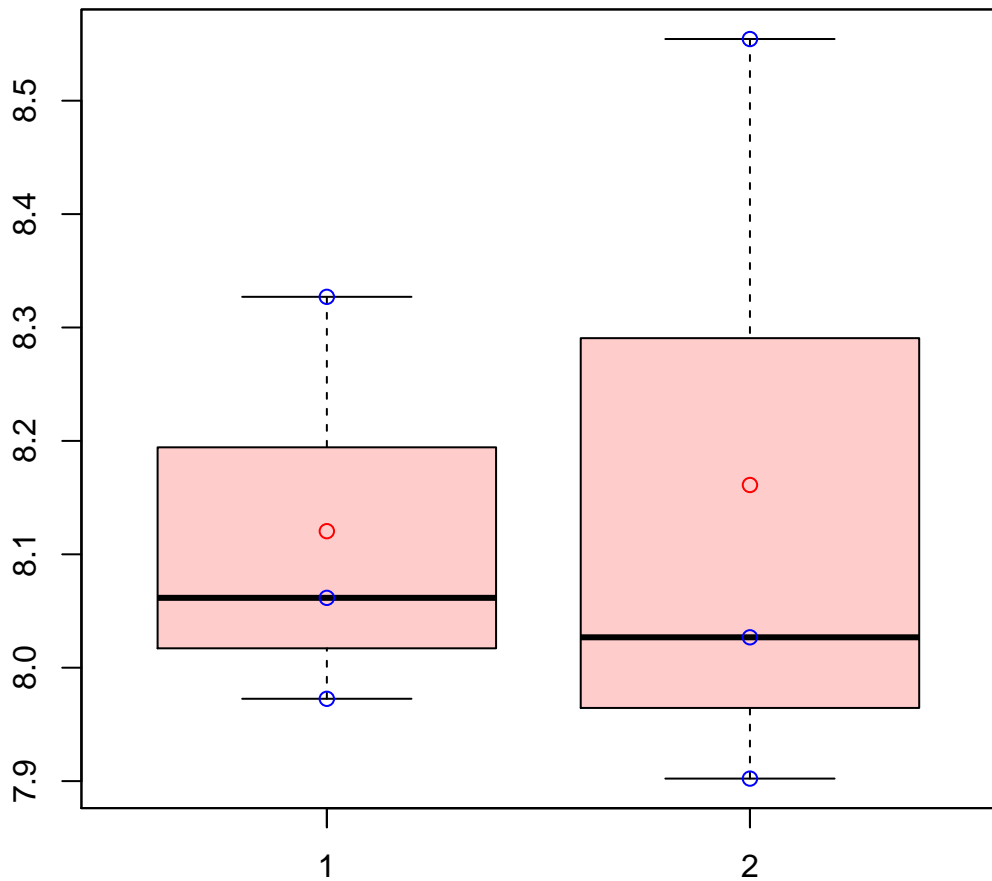

t-Test: p-value = 0.87

# CL1827Contig2|CL1827Contig2

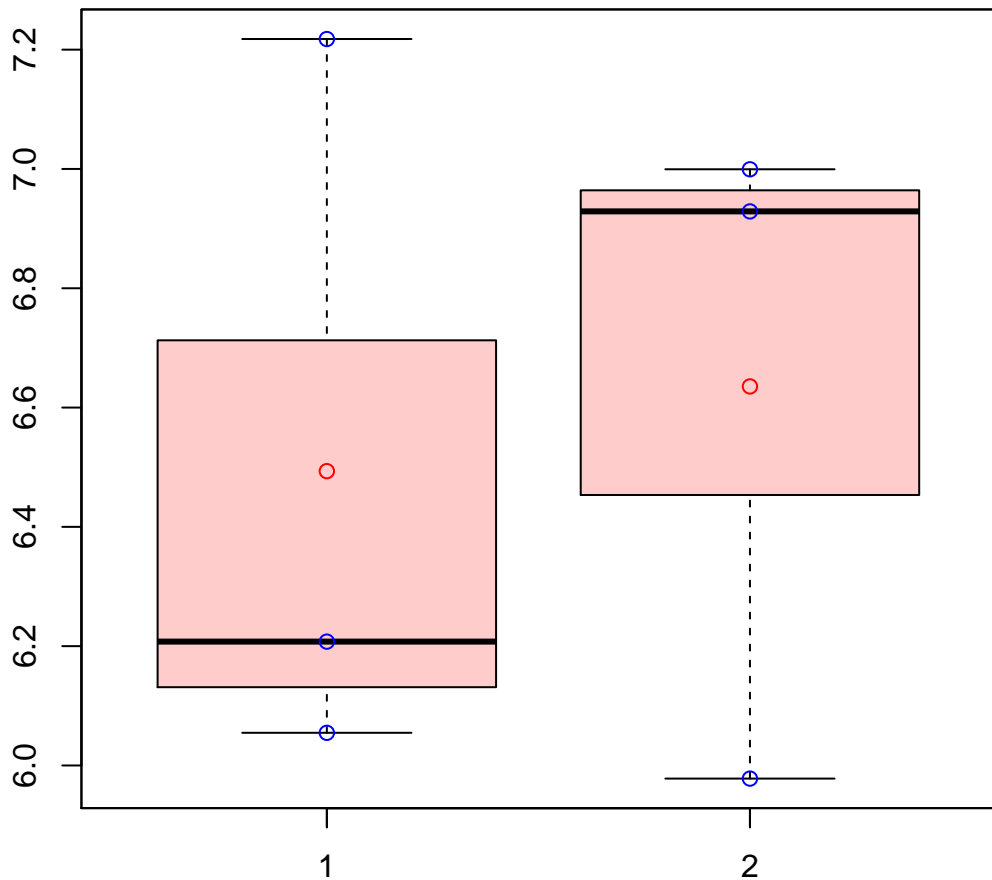

t-Test: p-value = 0.79

# CL182Contig4|CL182Contig4

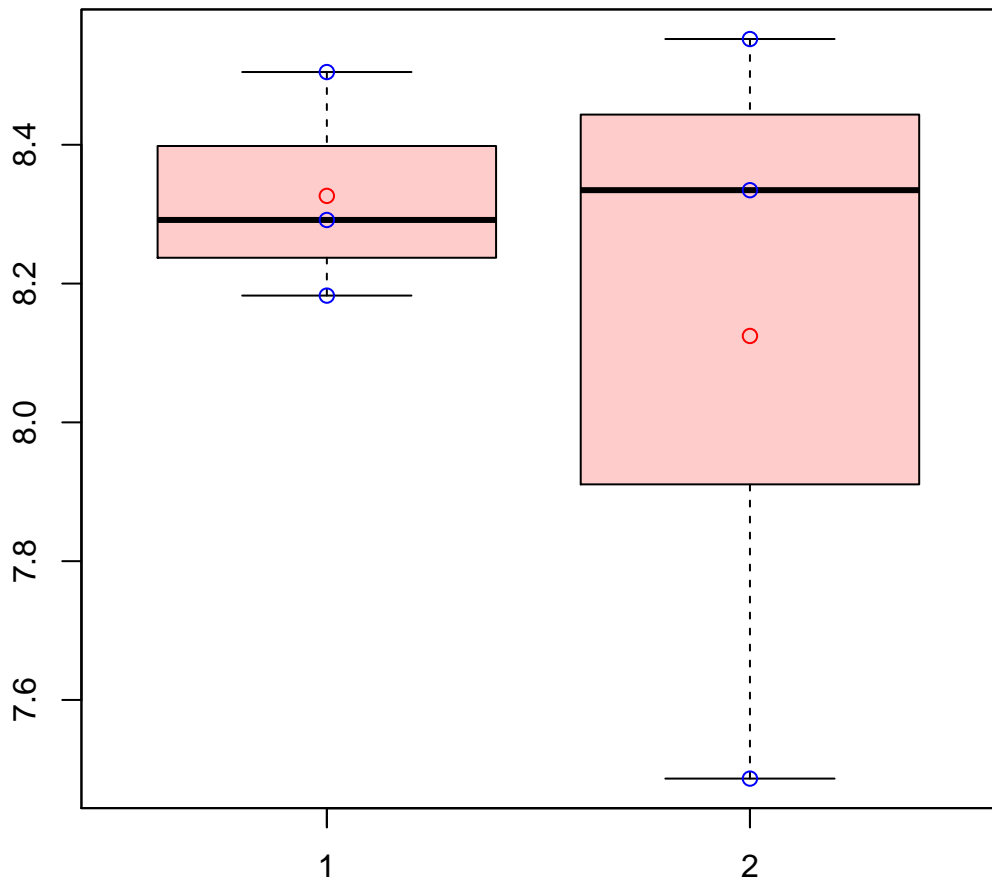

t-Test: p-value = 0.6

# CL1830Contig7|CL1830Contig7

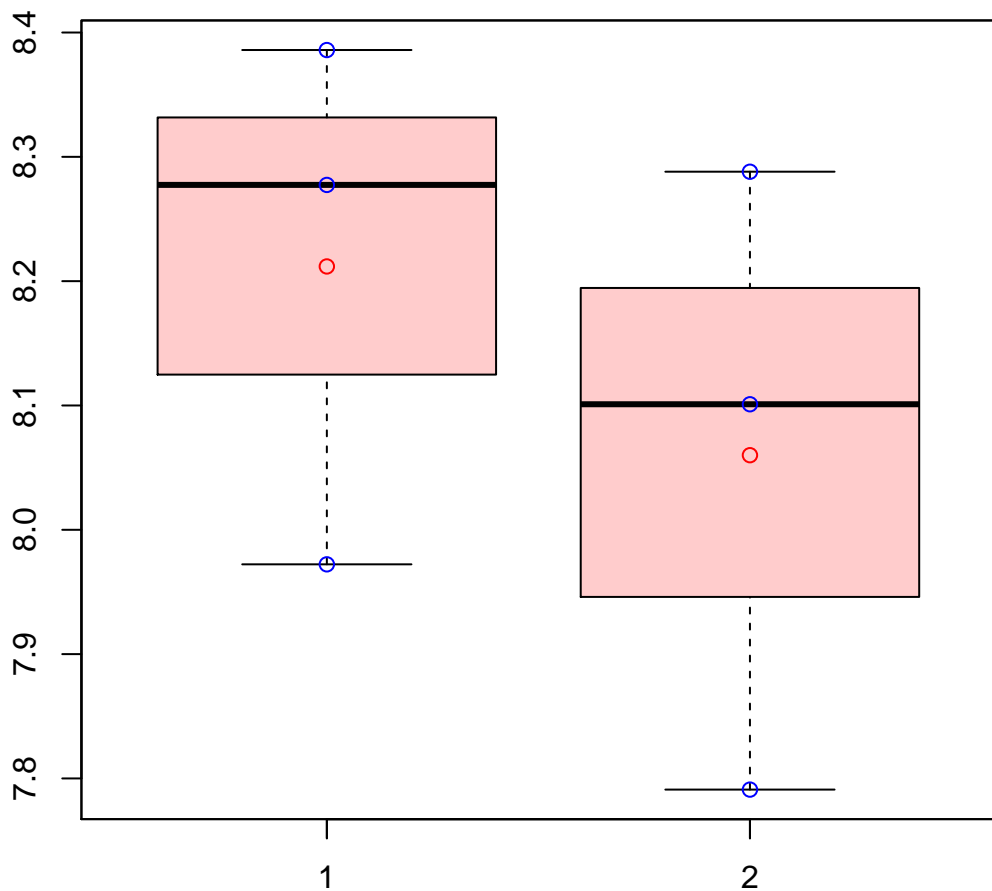

t-Test: p-value = 0.47

# CL18333Contig1|CL18333Contig1

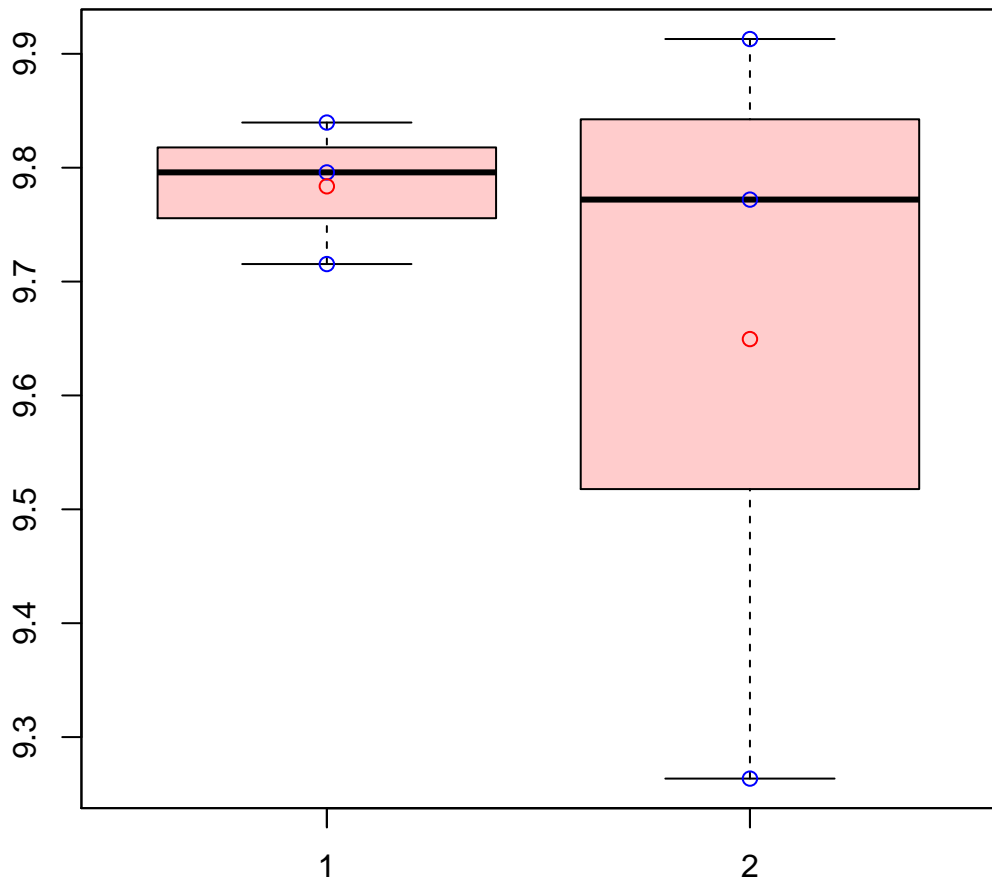

t-Test: p-value = 0.57



# CL1839Contig1|CL1839Contig1

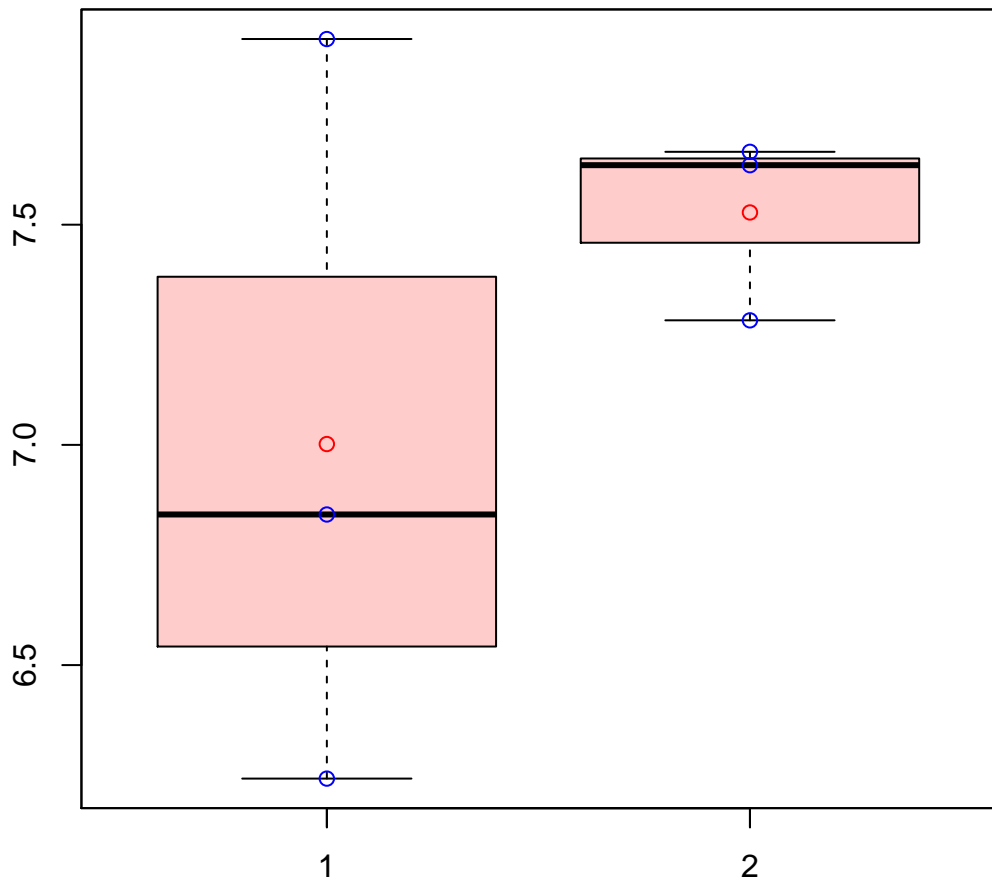

t-Test: p-value = 0.4

# CL183Contig14|CL183Contig14

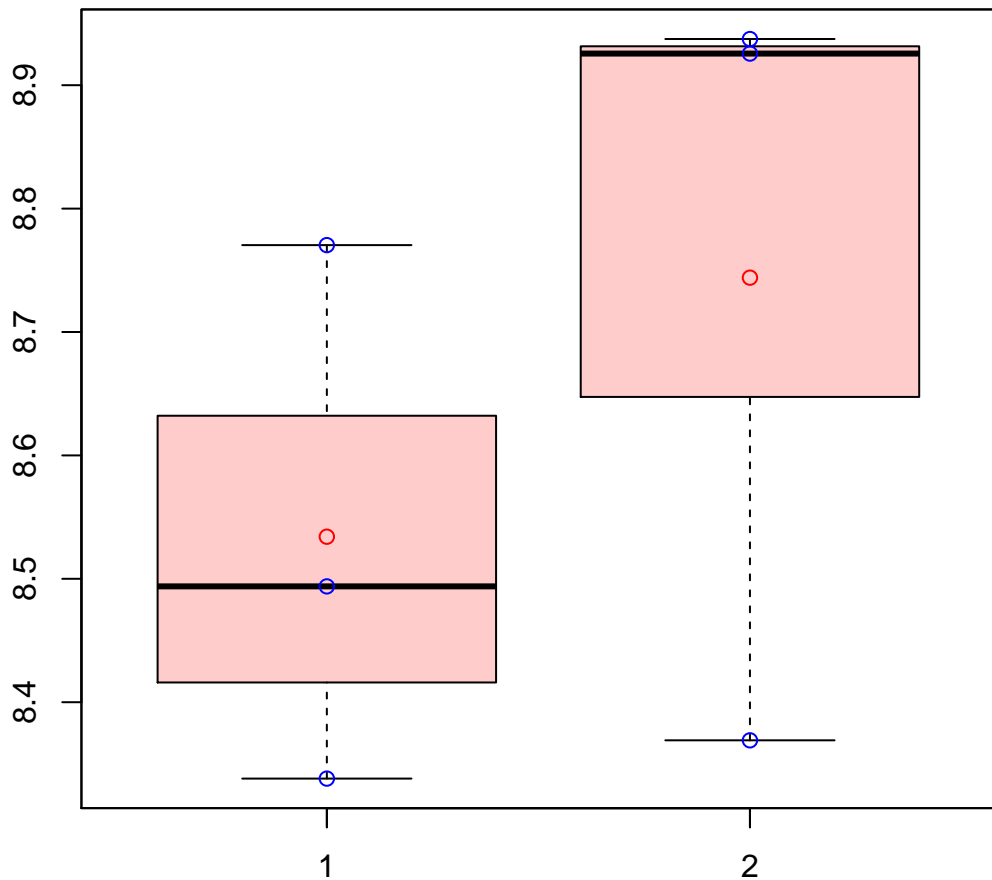

t-Test: p-value = 0.41

# CL183Contig5|CL183Contig5

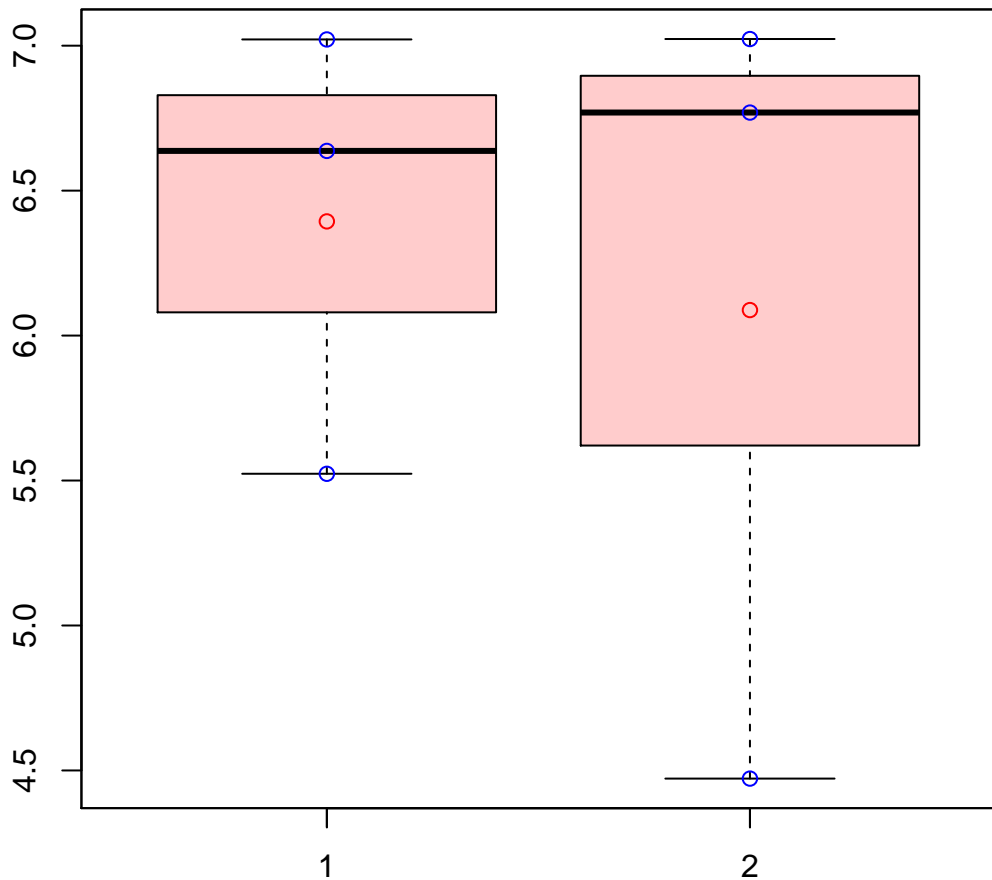

t-Test: p-value = 0.76

# CL18426Contig1|CL18426Contig1

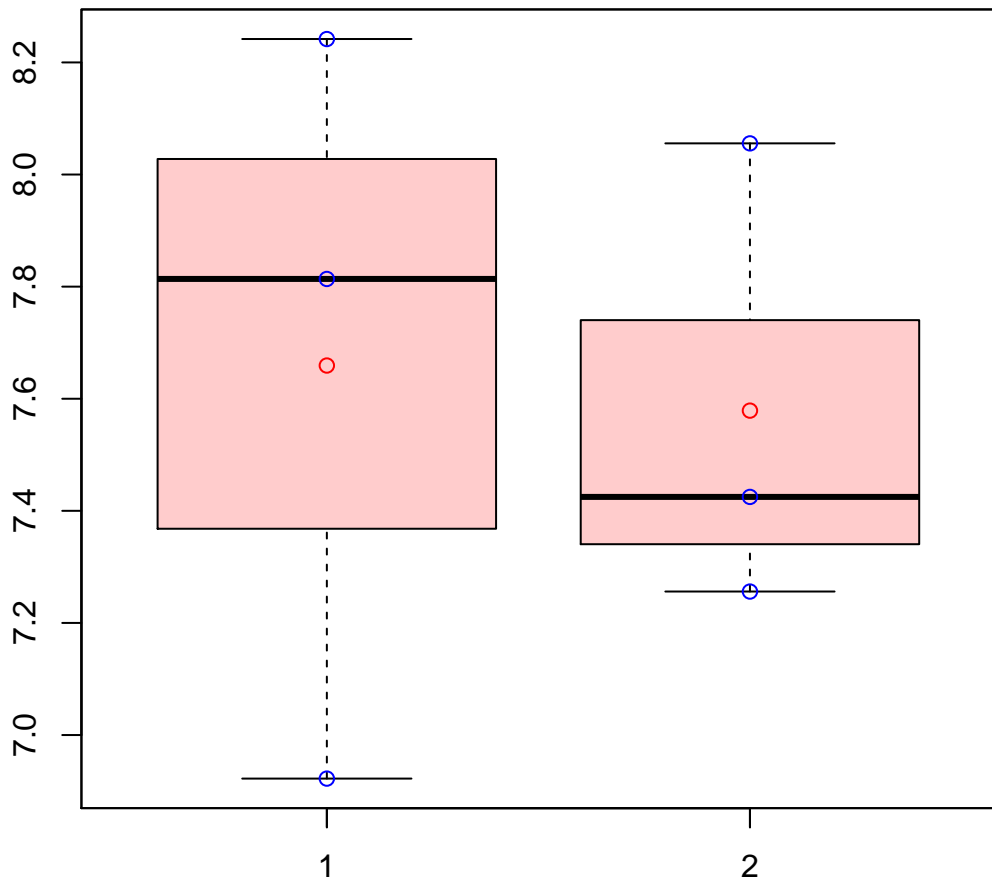

t-Test: p-value = 0.87

# CL1847Contig1|CL1847Contig1

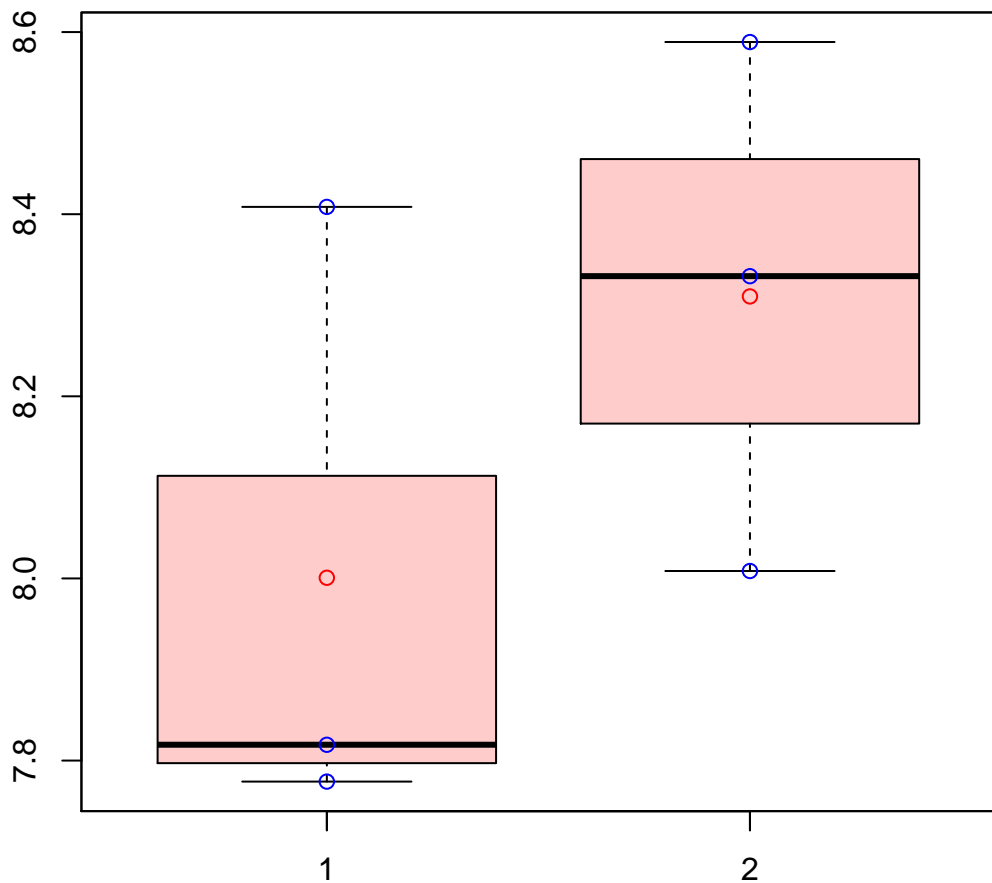

t-Test: p-value = 0.31

# CL184Contig7|CL184Contig7

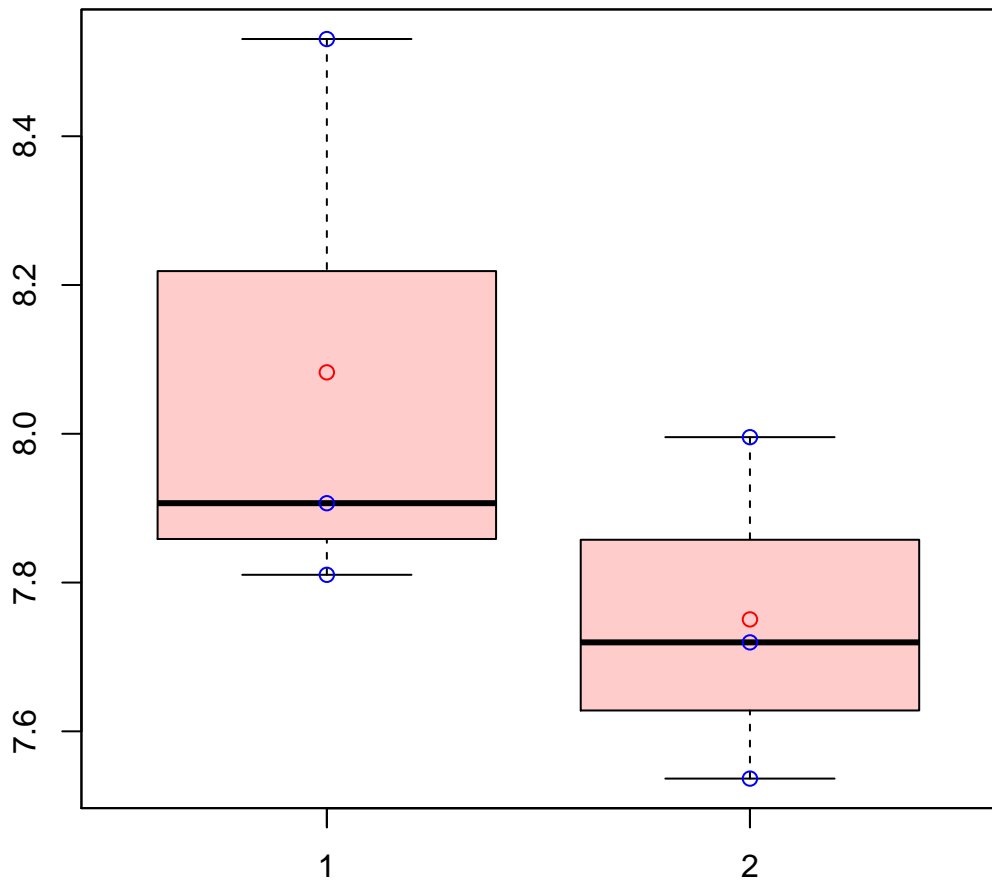

t-Test: p-value = 0.29

# CL18501Contig1|CL18501Contig1

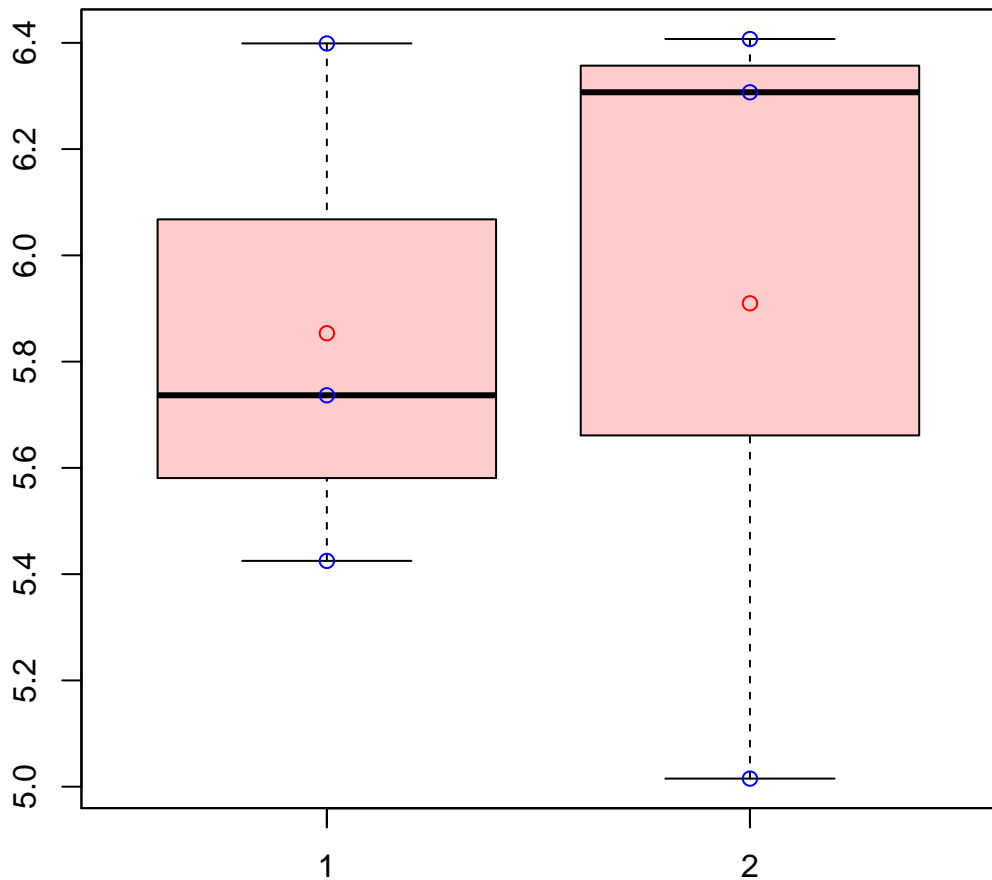

t-Test: p-value = 0.92

# CL1851Contig1|CL1851Contig1

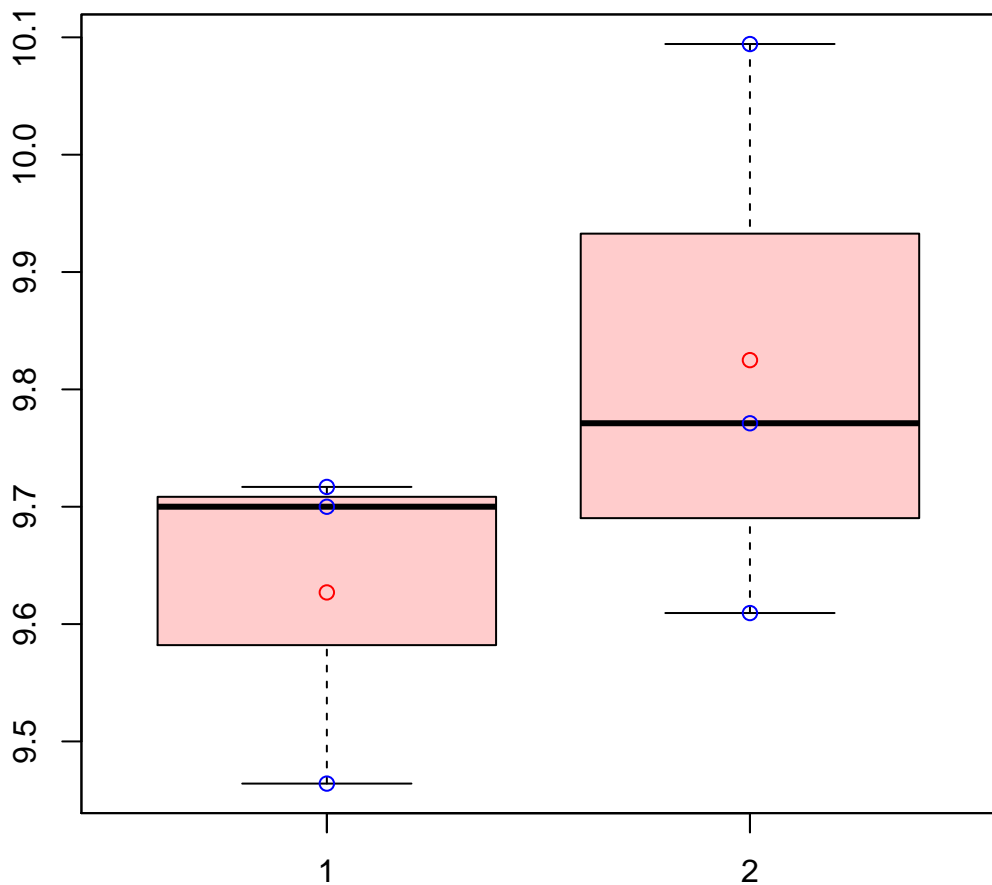

t-Test: p-value = 0.31



# CL1852Contig1|CL1852Contig1

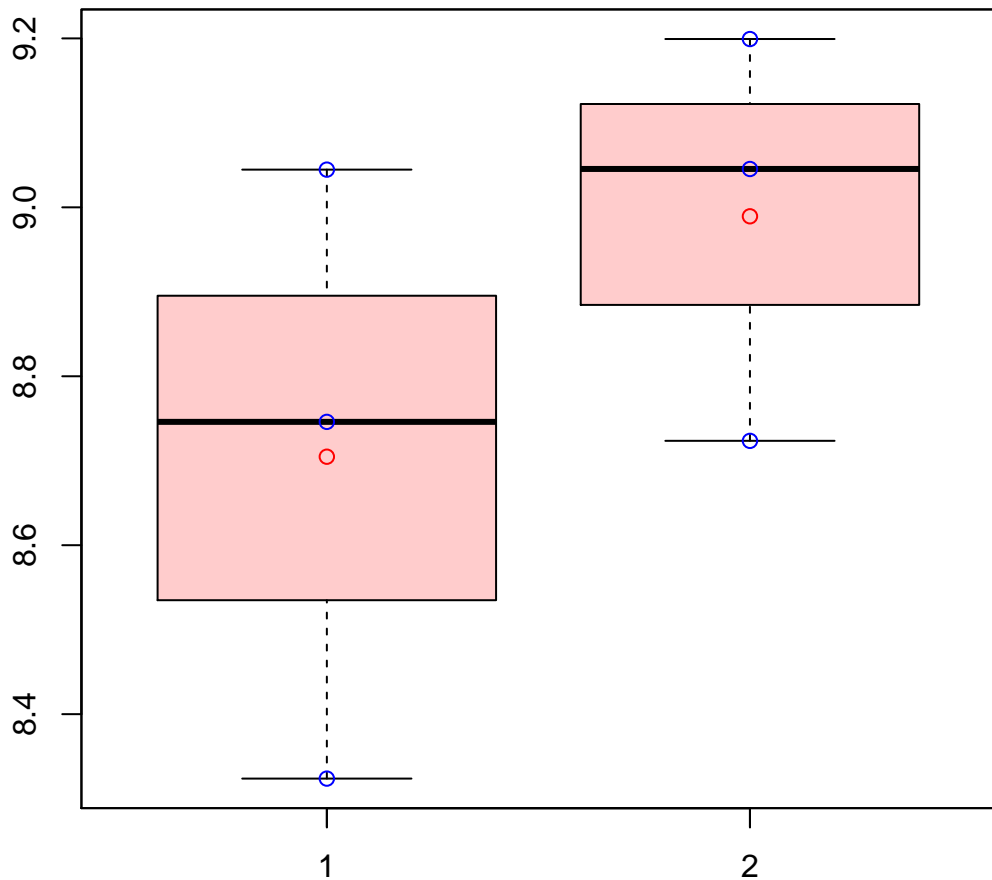

t-Test: p-value = 0.33

# CL1853Contig1|CL1853Contig1

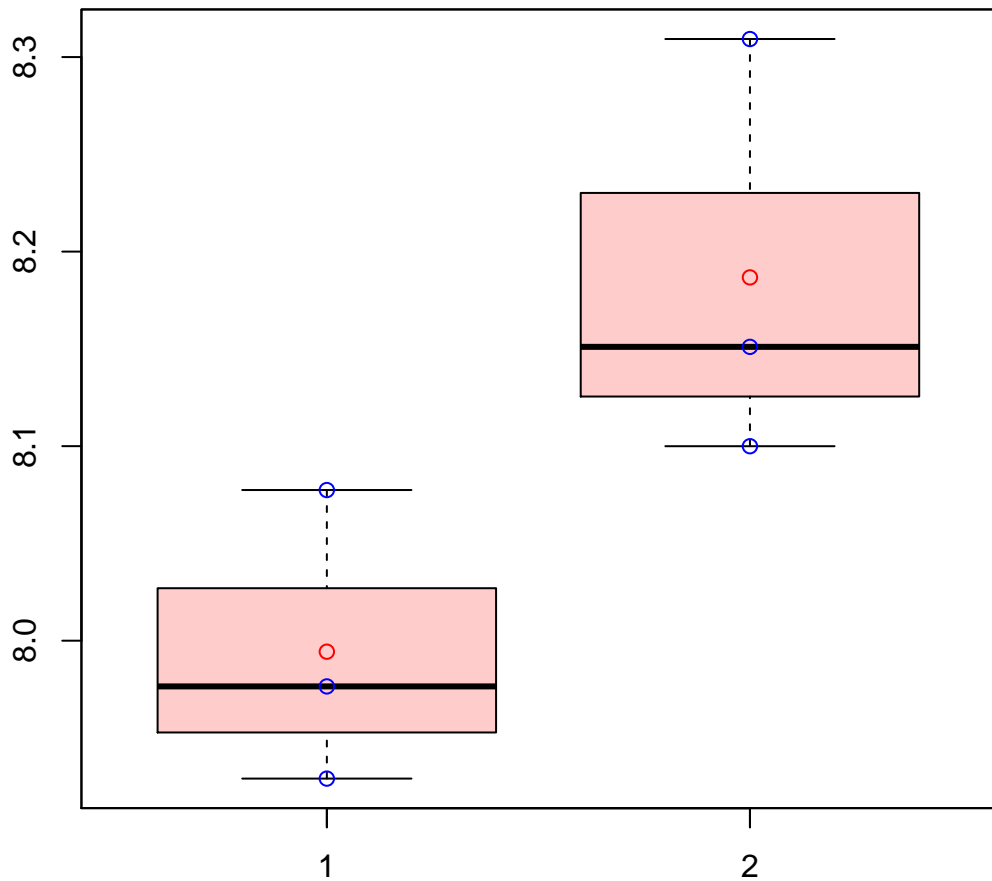

t-Test: p-value = 0.07

# CL18569Contig1|CL18569Contig1

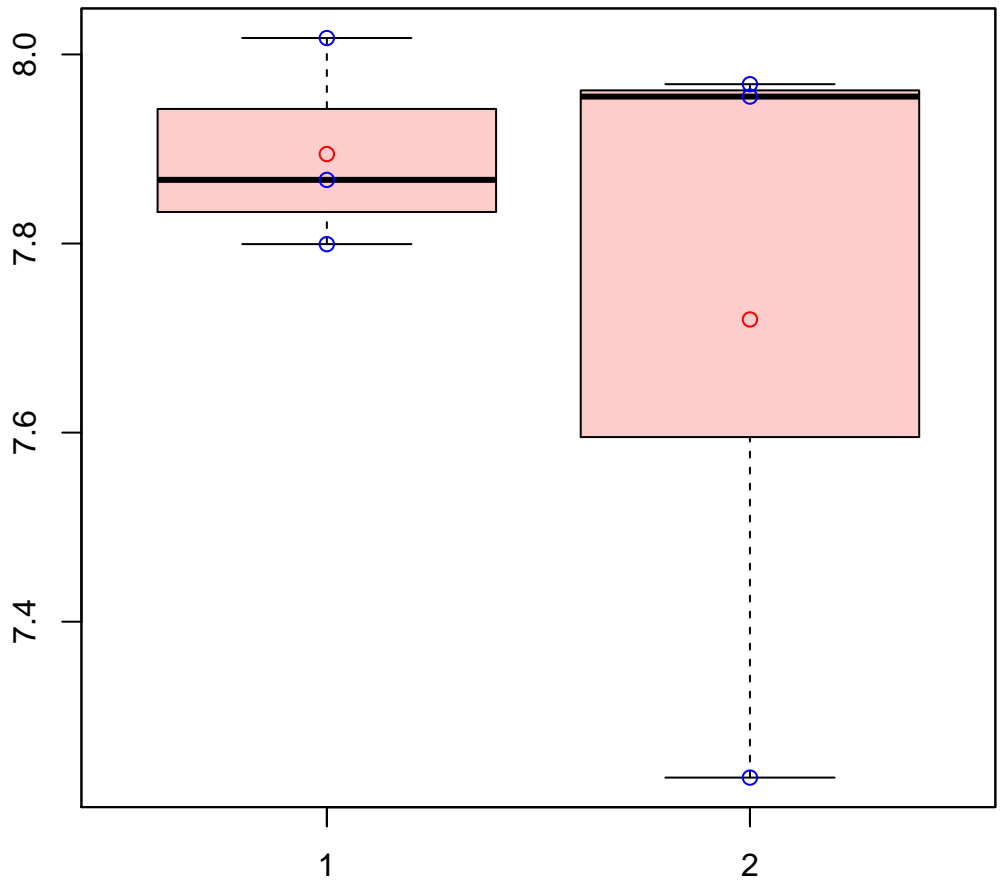

t-Test: p-value = 0.55

# CL1860Contig3|CL1860Contig3

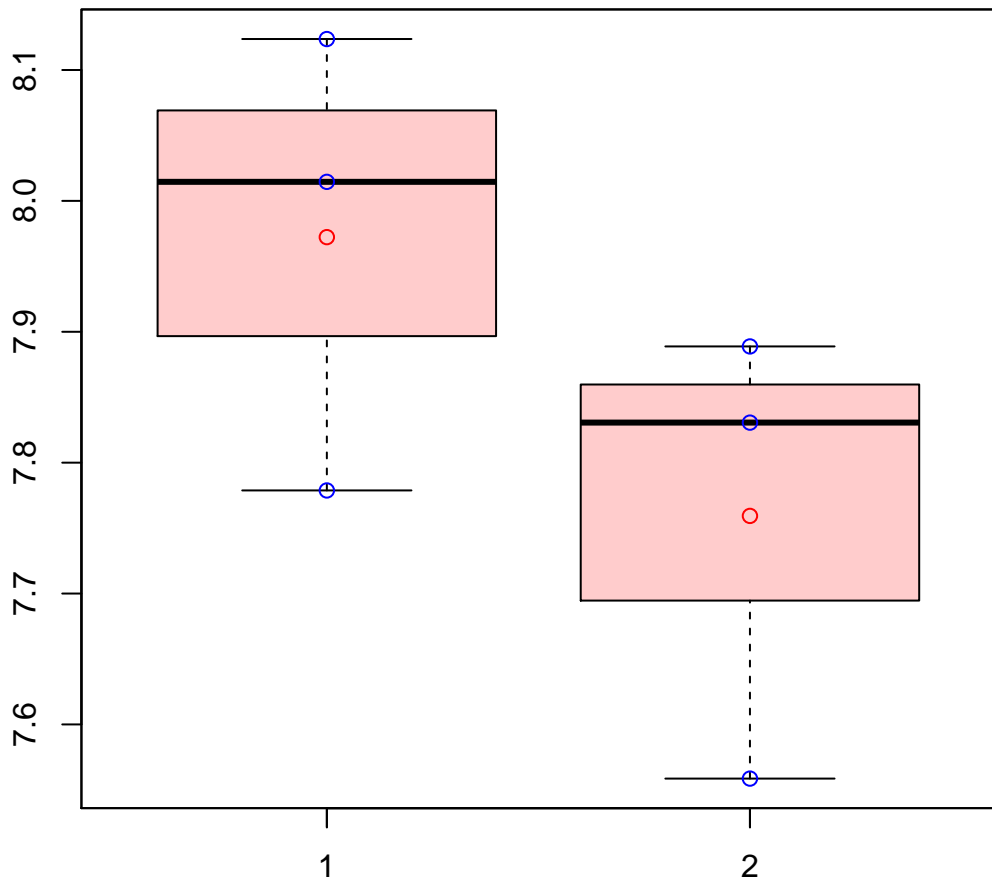

t-Test: p-value = 0.21

# CL1861Contig11|CL1861Contig11

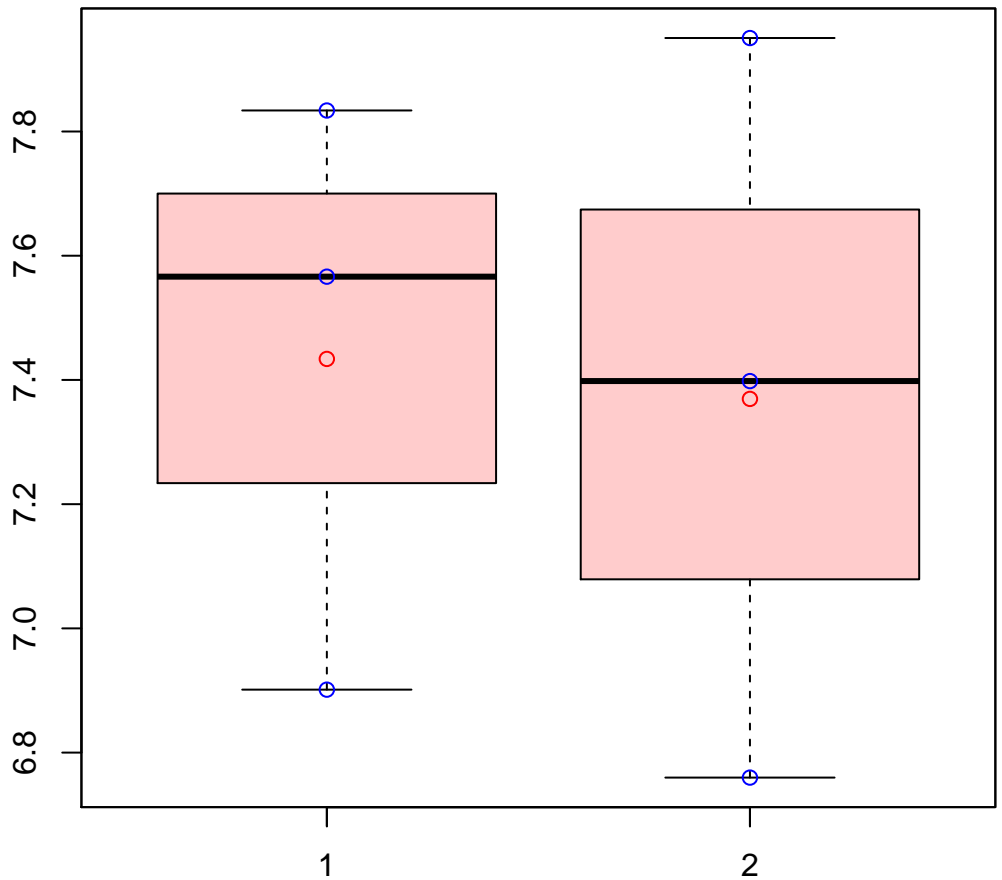

t-Test: p-value = 0.89

# CL1861Contig5|CL1861Contig5

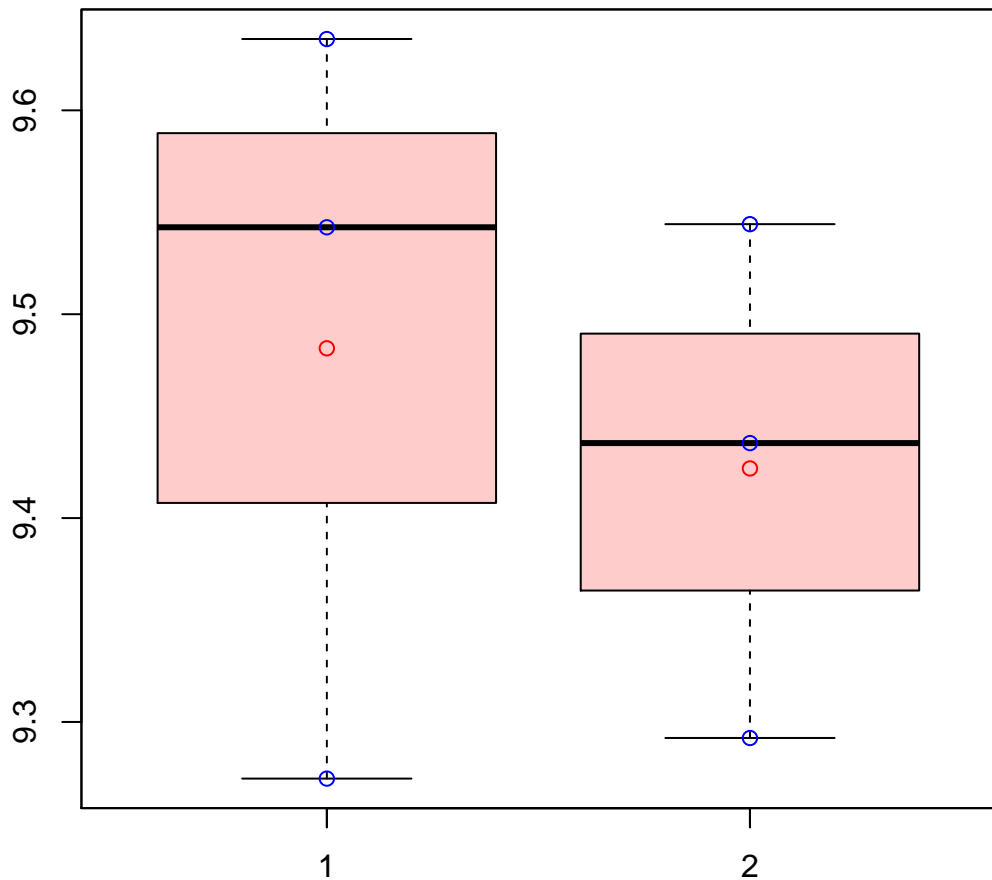

t-Test: p-value = 0.68

# CL1862Contig1|CL1862Contig1

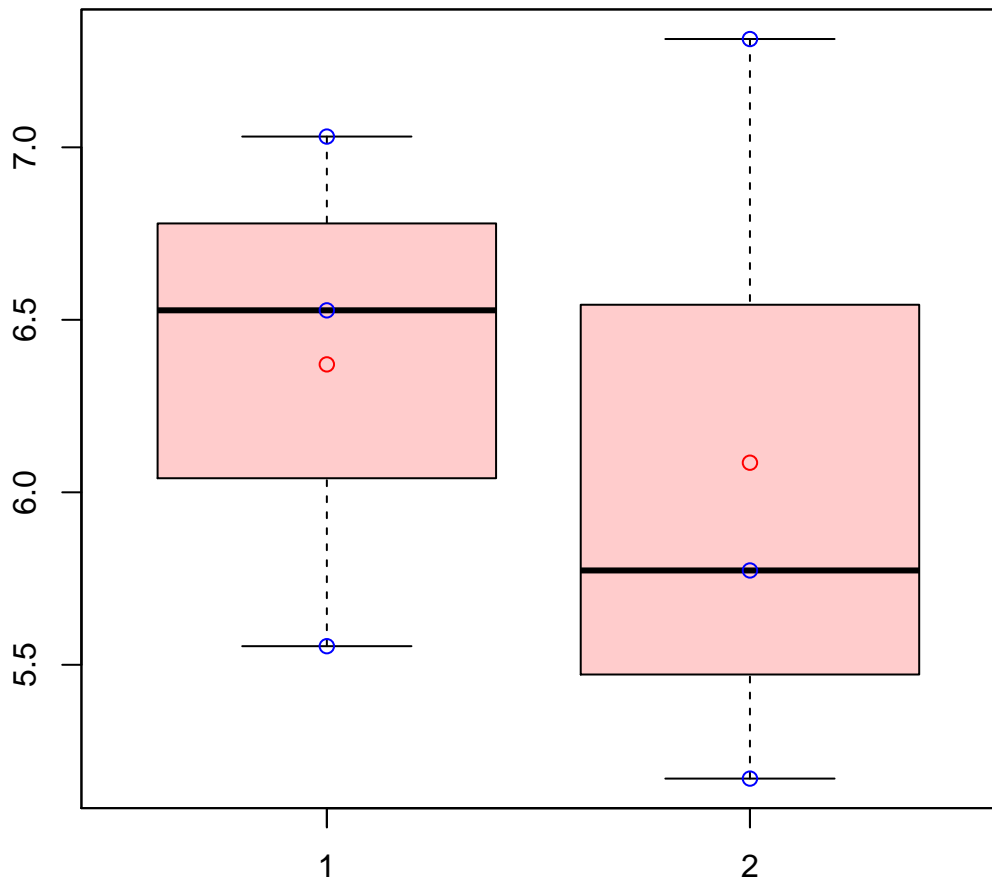

t-Test: p-value = 0.73

# CL1862Contig2|CL1862Contig2

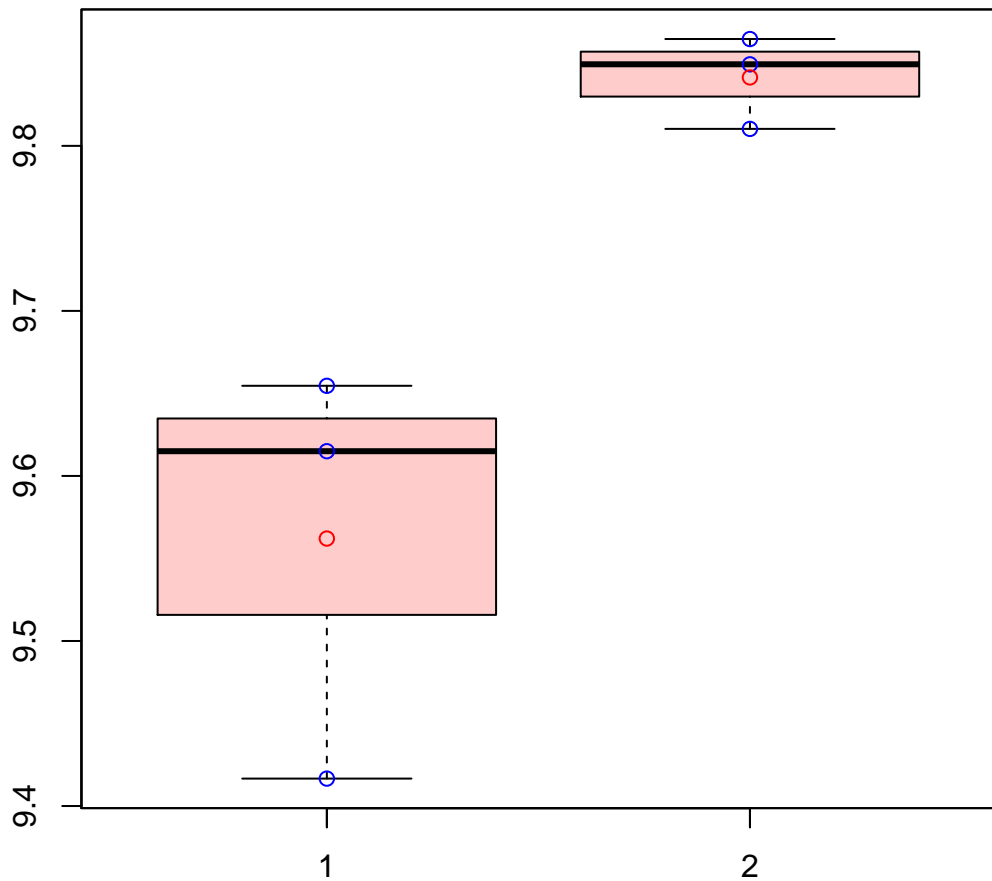

t-Test: p-value = 0.06



# CL1865Contig3|CL1865Contig3

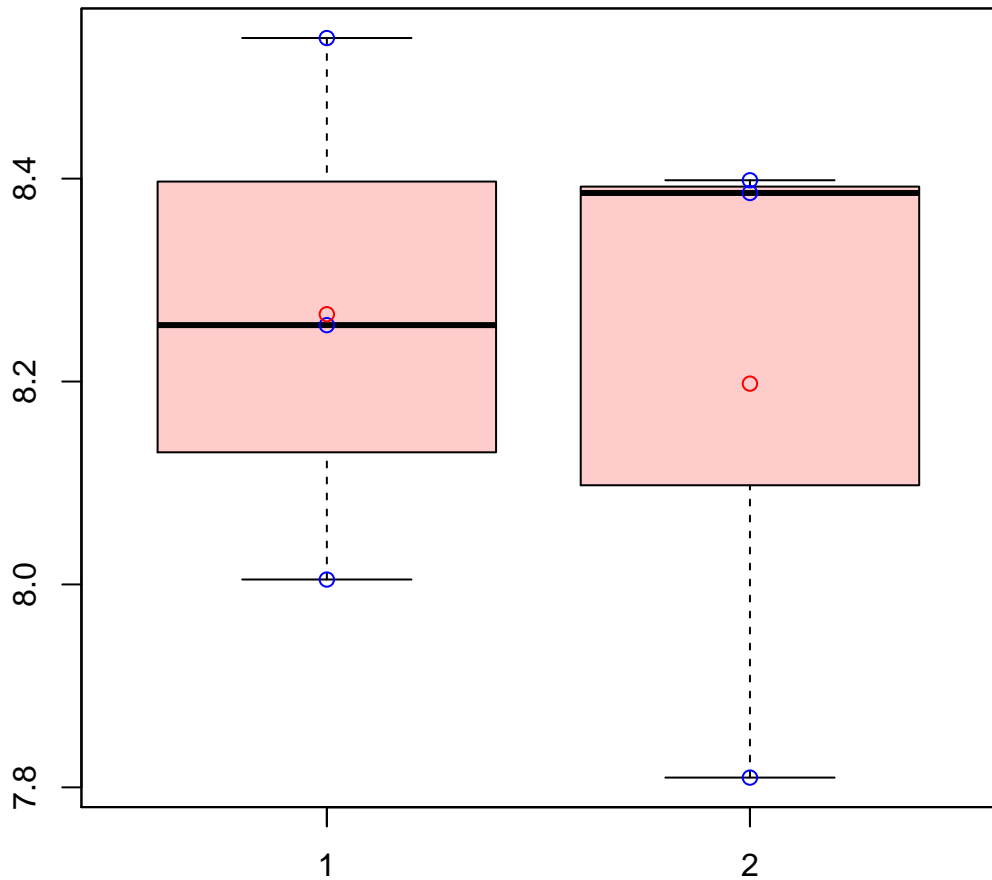

t-Test: p-value = 0.8

# CL1867Contig1|CL1867Contig1

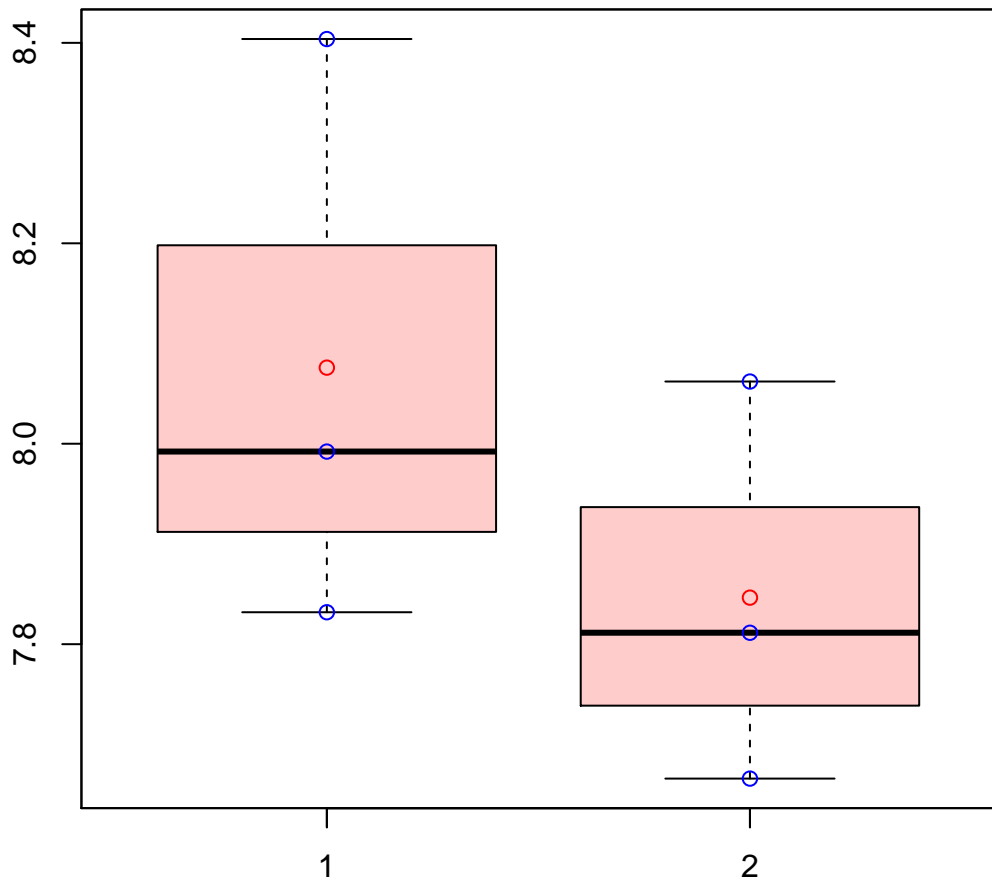

t-Test: p-value = 0.34

# CL1868Contig5|CL1868Contig5

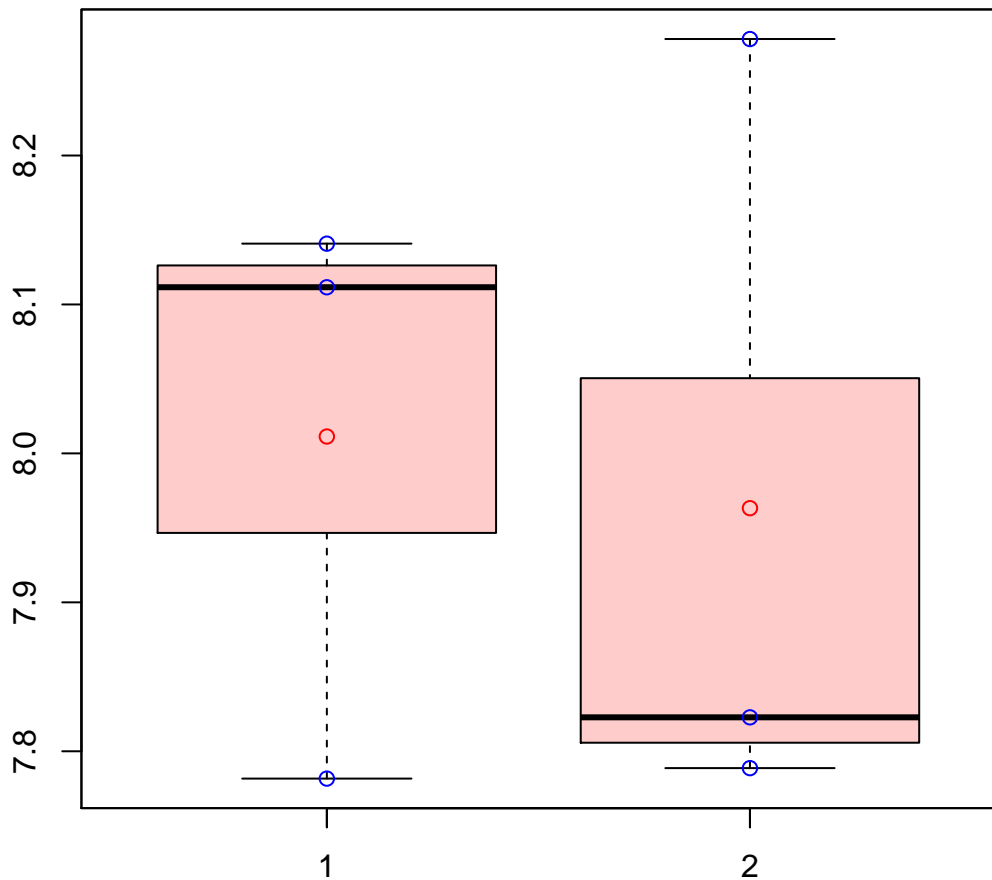

t-Test: p-value = 0.82

# CL186Contig6|CL186Contig6

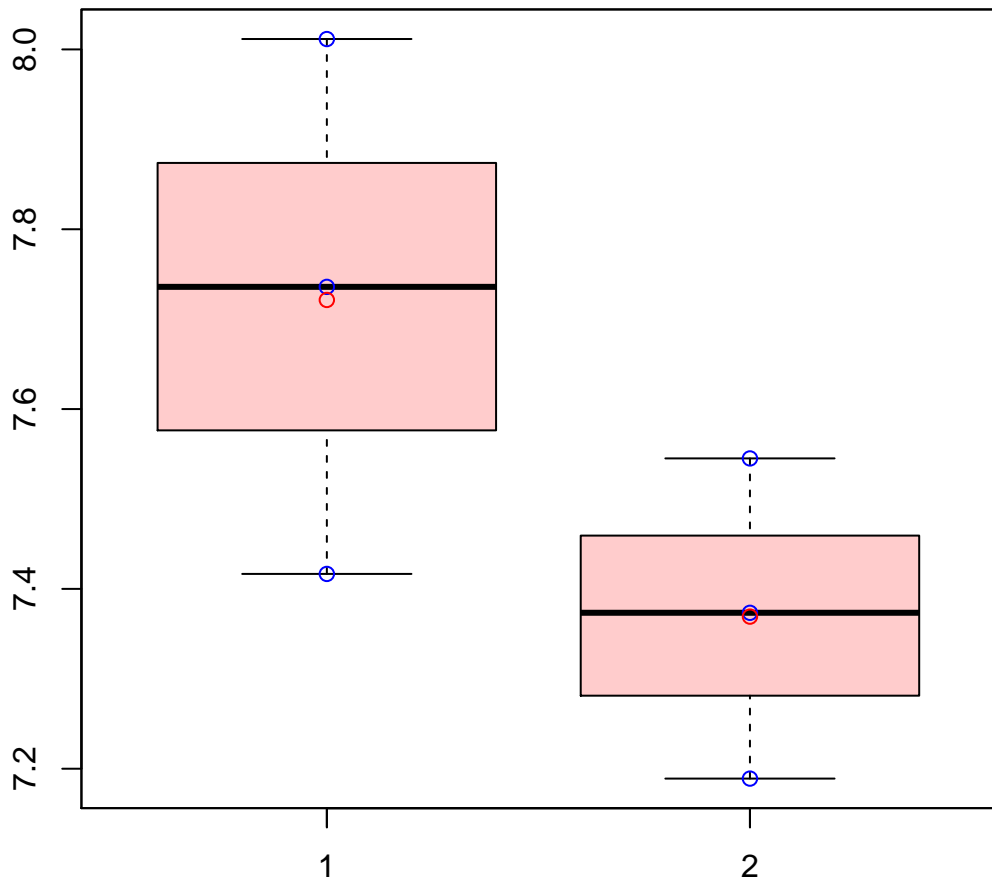

t-Test: p-value = 0.17

# CL1871Contig4|CL1871Contig4

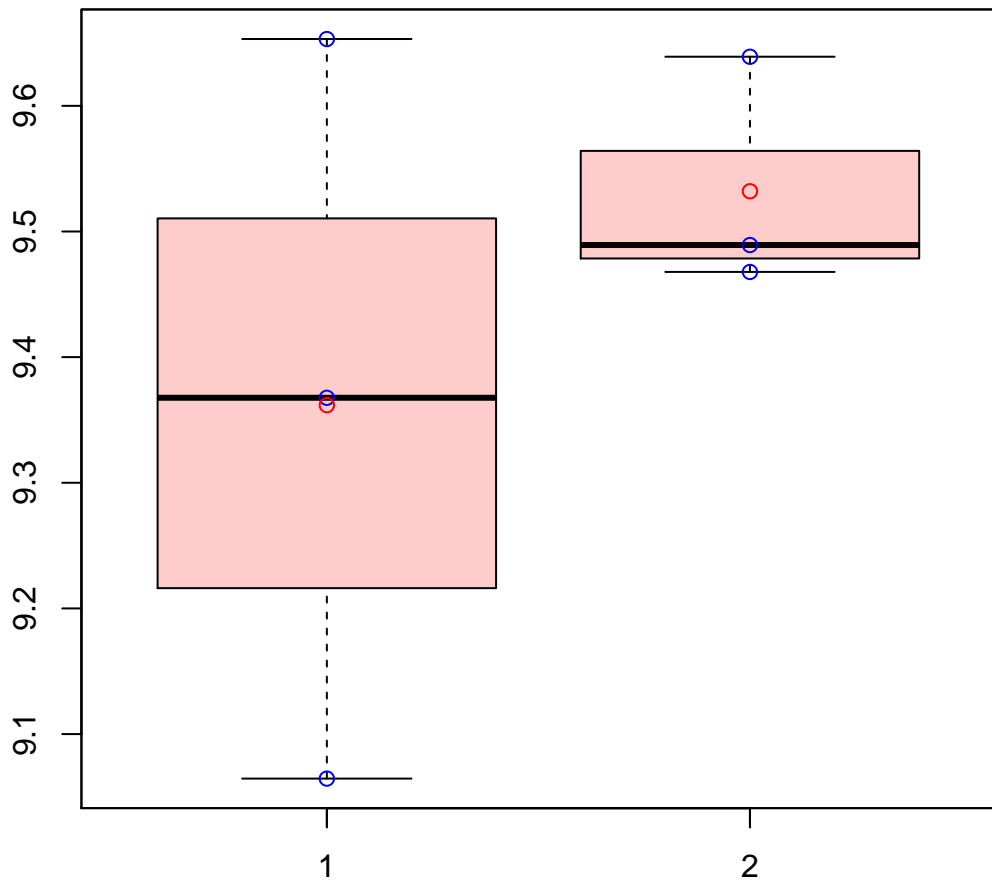

t-Test: p-value = 0.43

# CL1878Contig4|CL1878Contig4

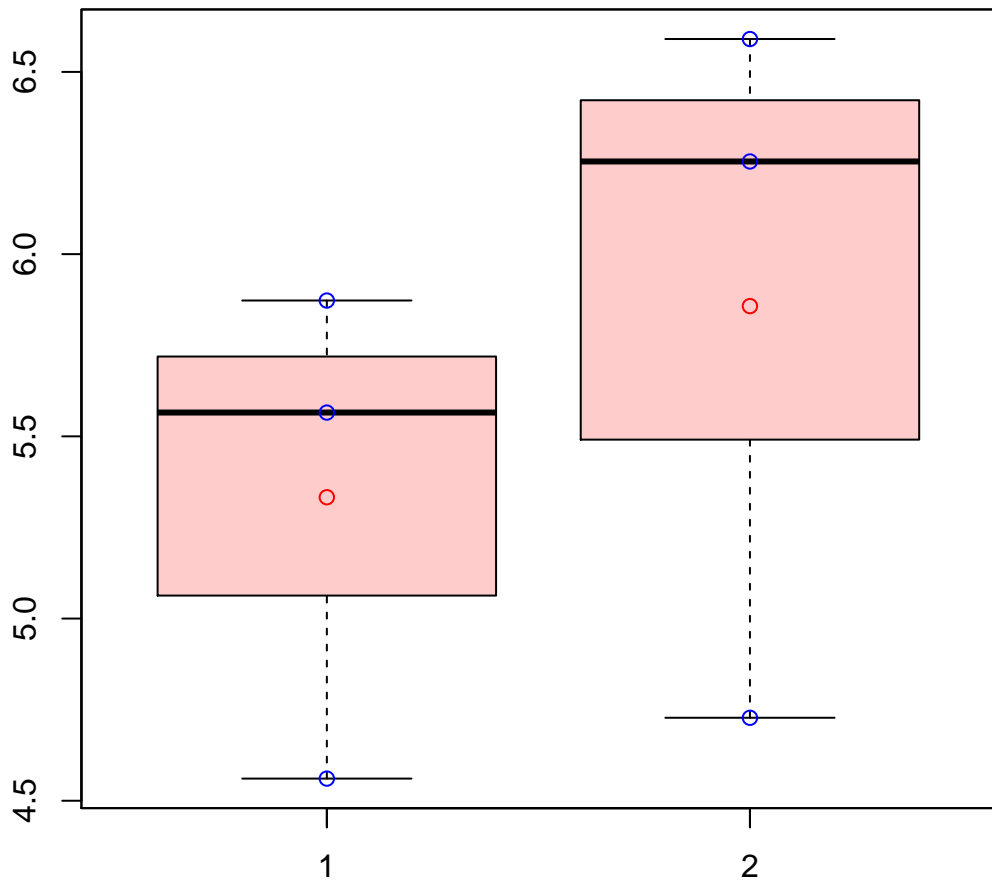

t-Test: p-value = 0.5

# CL1879Contig1|CL1879Contig1

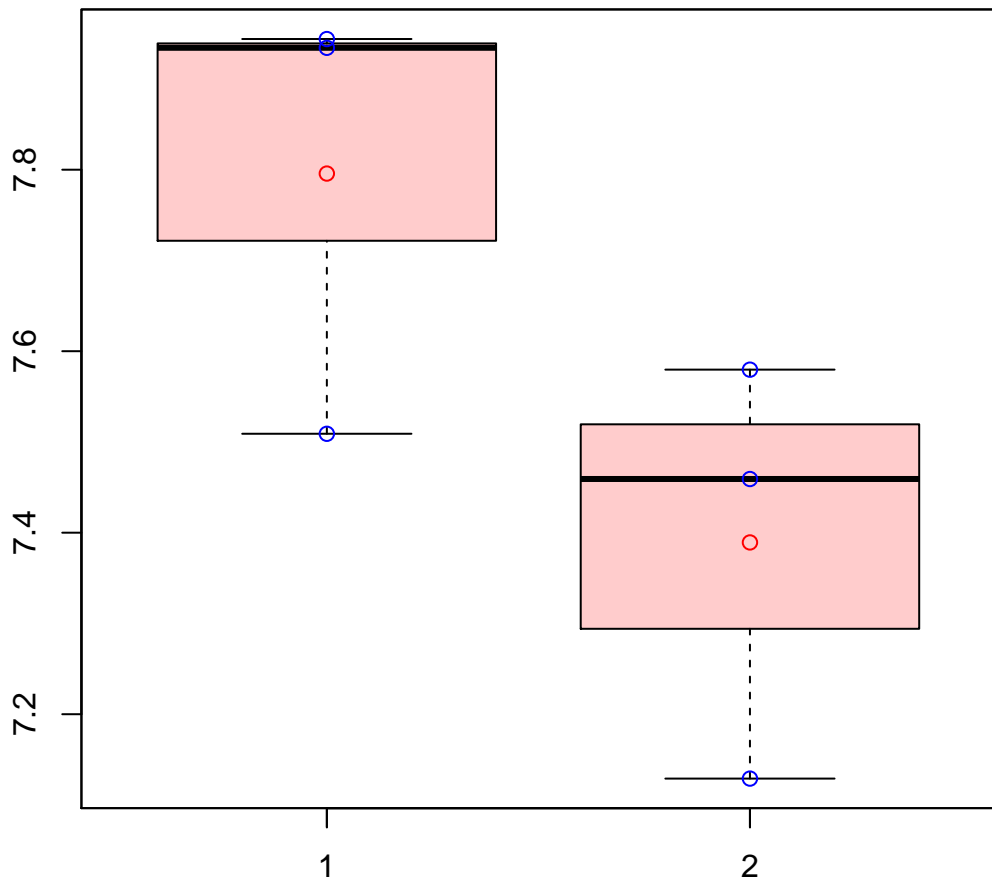

t-Test: p-value = 0.11

# CL187Contig12|CL187Contig12

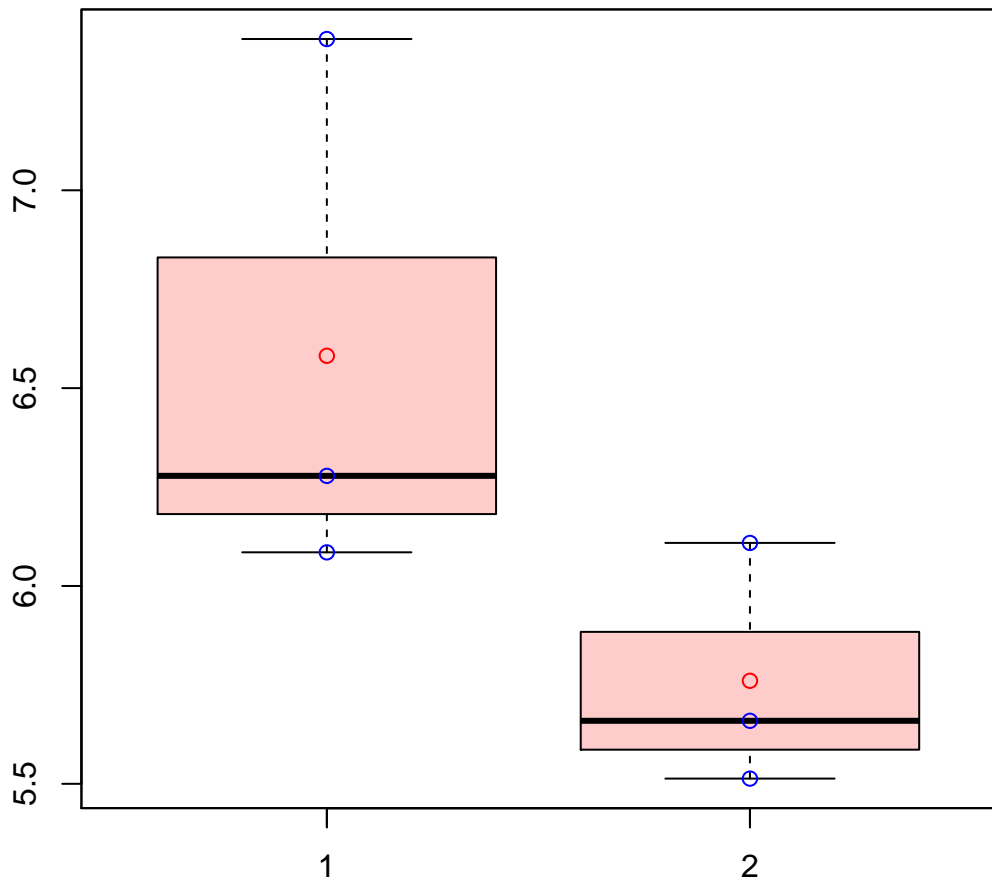

t-Test: p-value = 0.17



# CL187Contig7|CL187Contig7

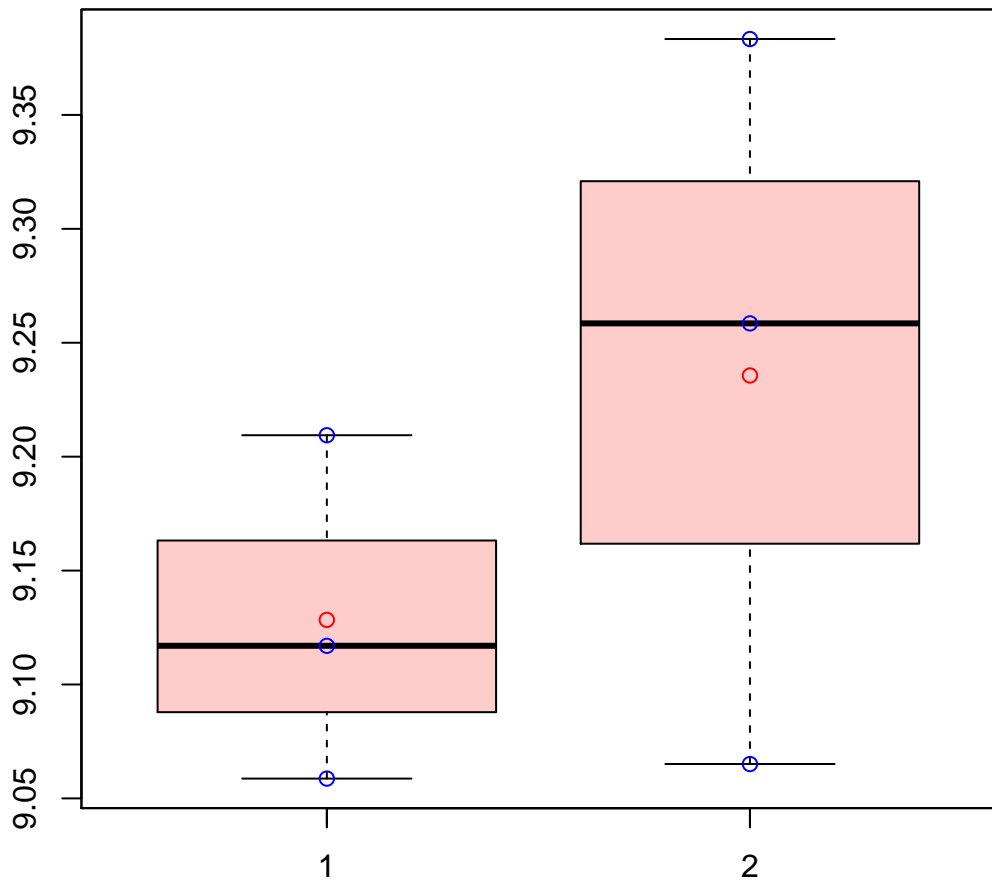

t-Test: p-value = 0.38

# CL1883Contig4|CL1883Contig4

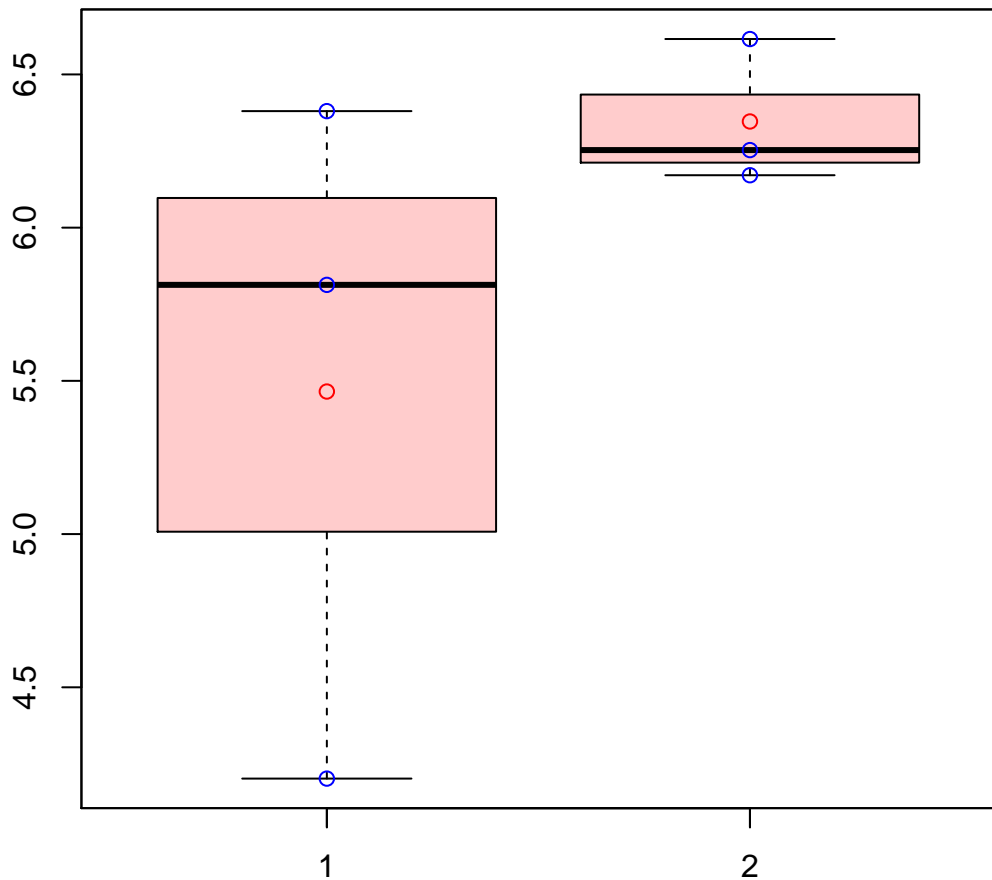

t-Test: p-value = 0.31

# CL1888Contig2|CL1888Contig2

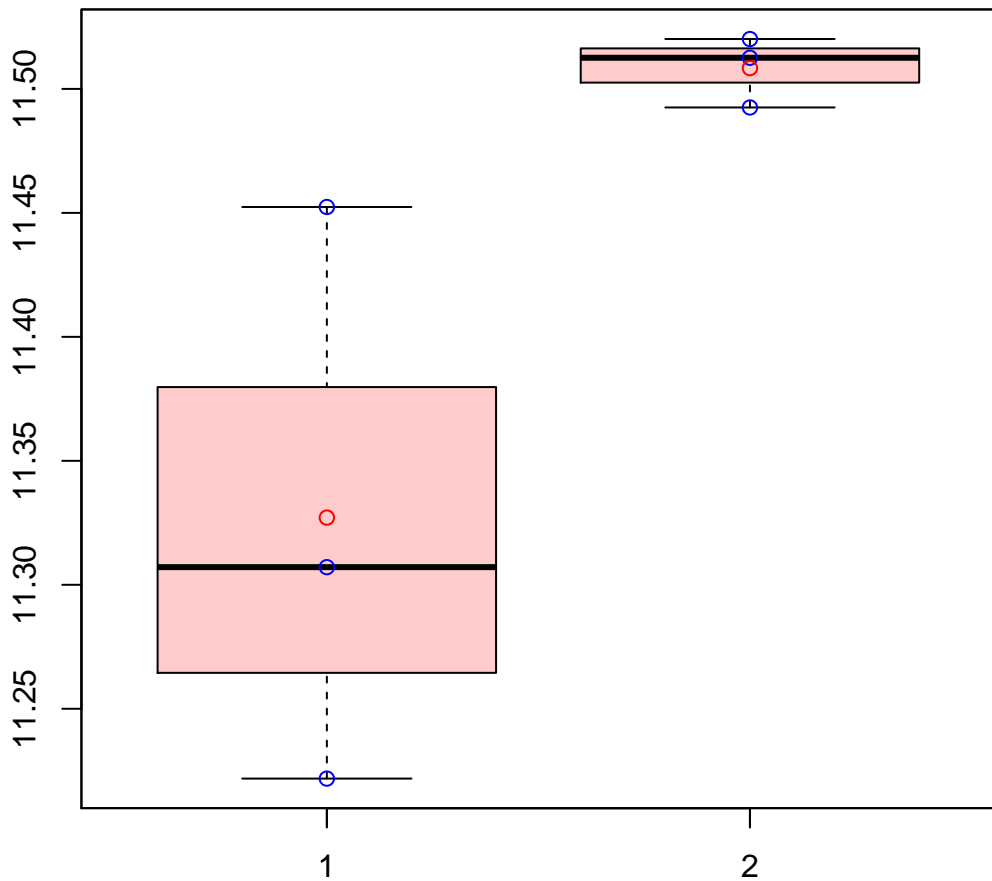

t-Test: p-value = 0.11

# CL1889Contig3|CL1889Contig3

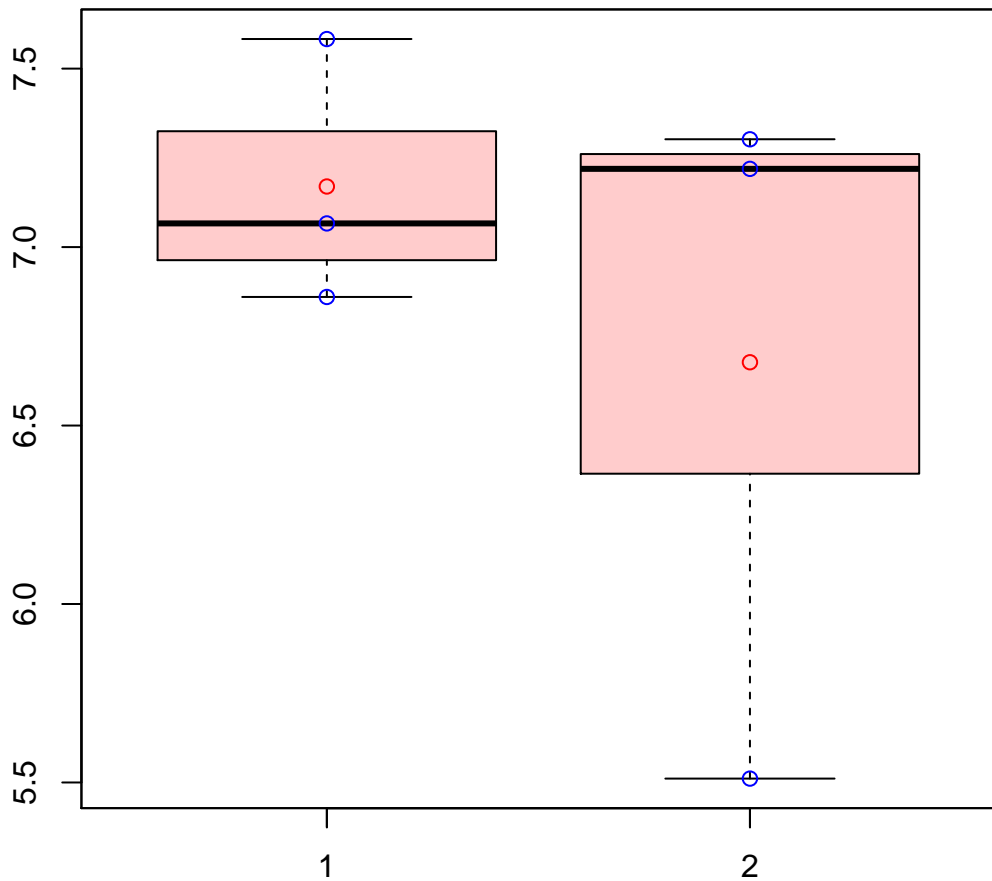

t-Test: p-value = 0.5

# CL1889Contig4|CL1889Contig4

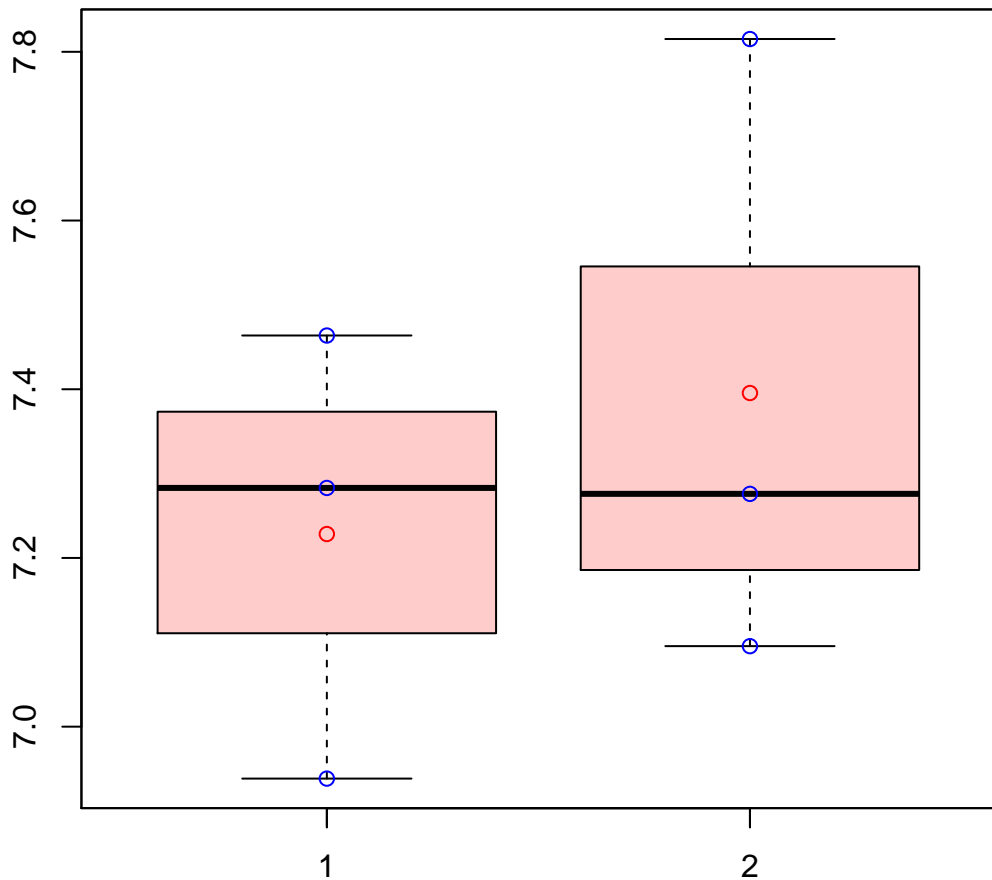

t-Test: p-value = 0.57

# CL1889Contig5|CL1889Contig5

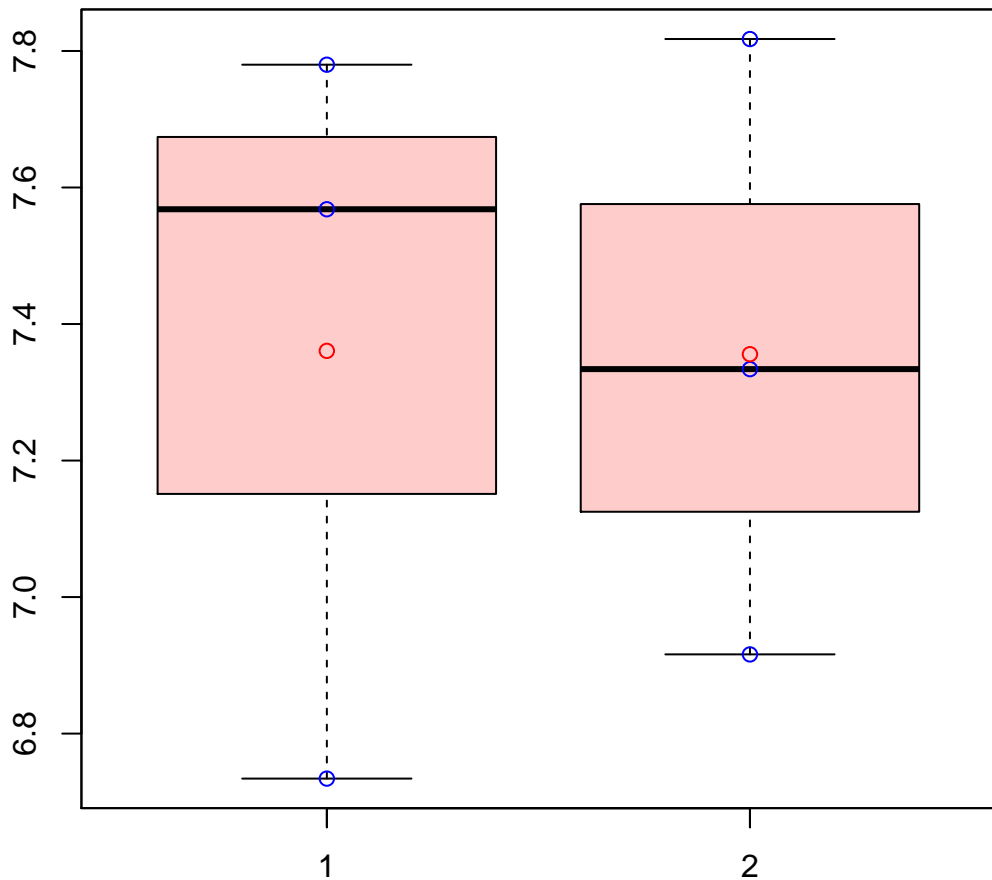

t-Test: p-value = 0.99

# CL1889Contig6|CL1889Contig6

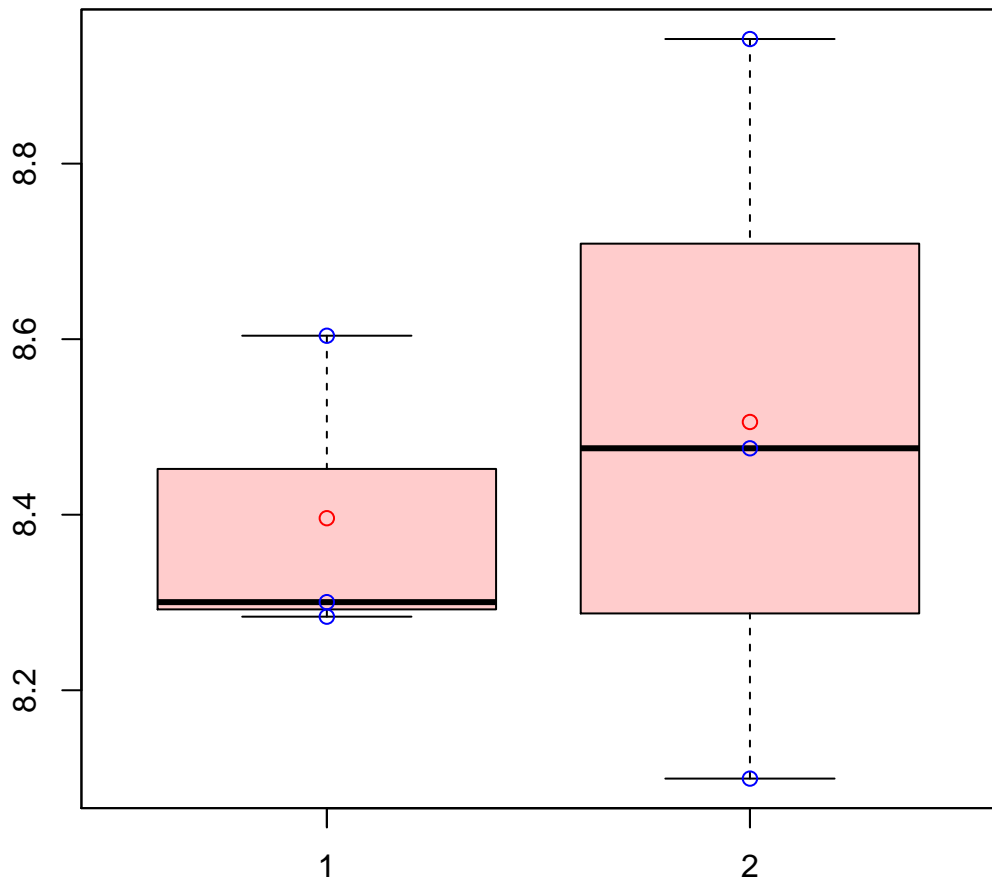

t-Test: p-value = 0.71

# CL1889Contig9|CL1889Contig9

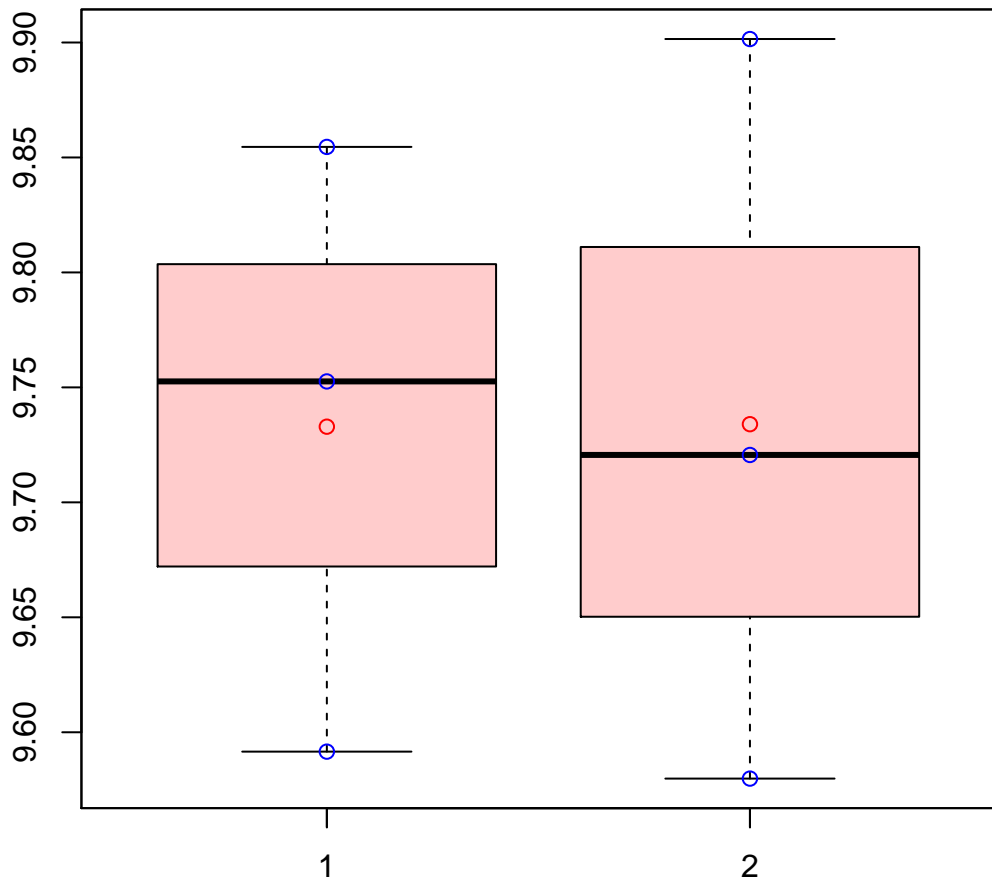

t-Test: p-value = 0.99



# CL188Contig21|CL188Contig21

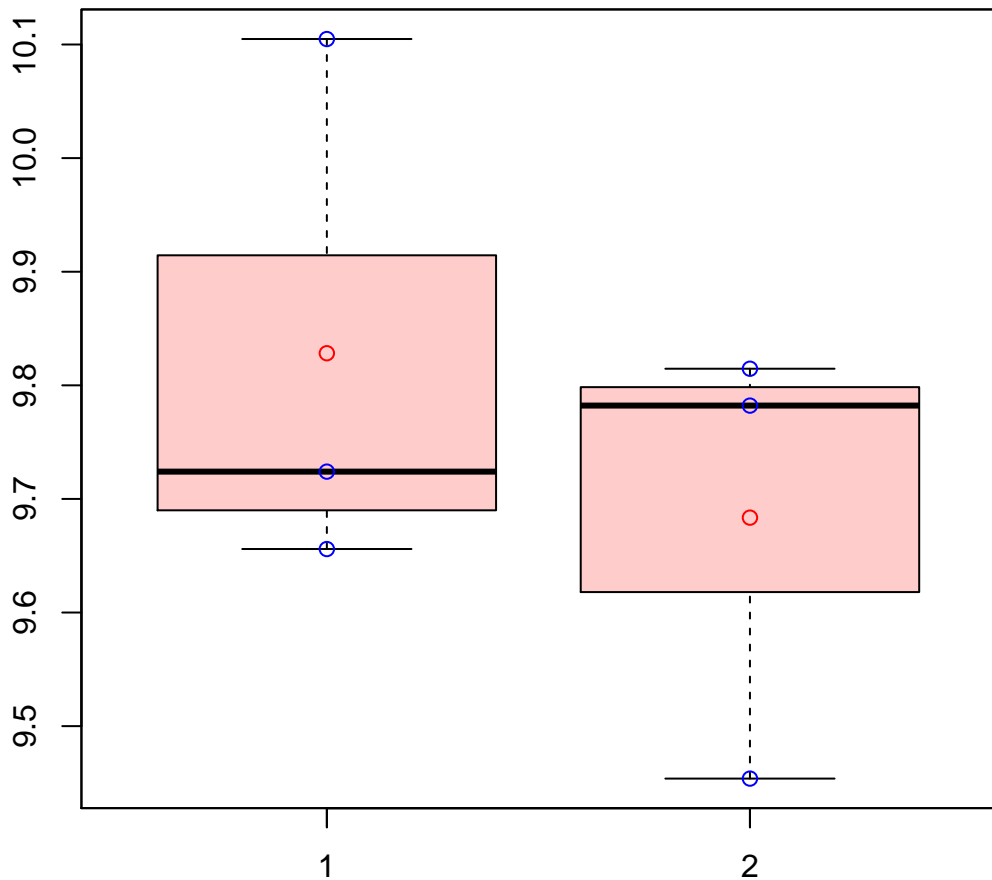

t-Test: p-value = 0.47

# CL189Contig9|CL189Contig9

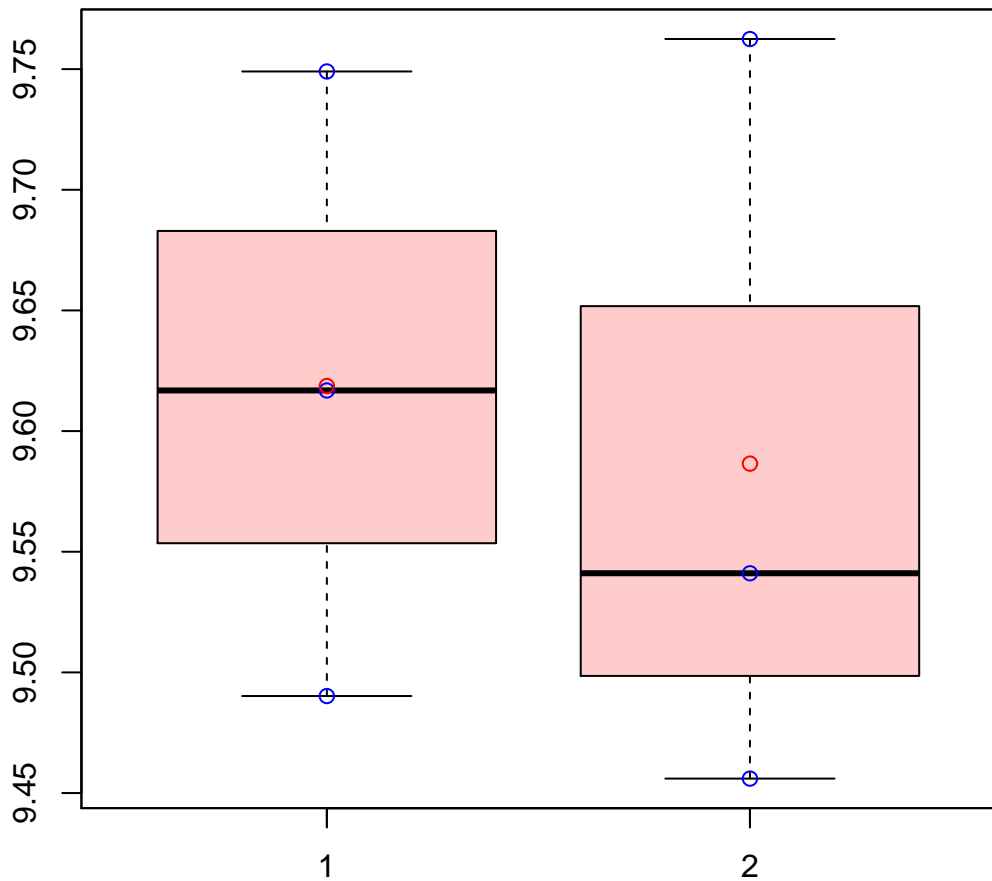

t-Test: p-value = 0.8

# CL18Contig23|CL18Contig23

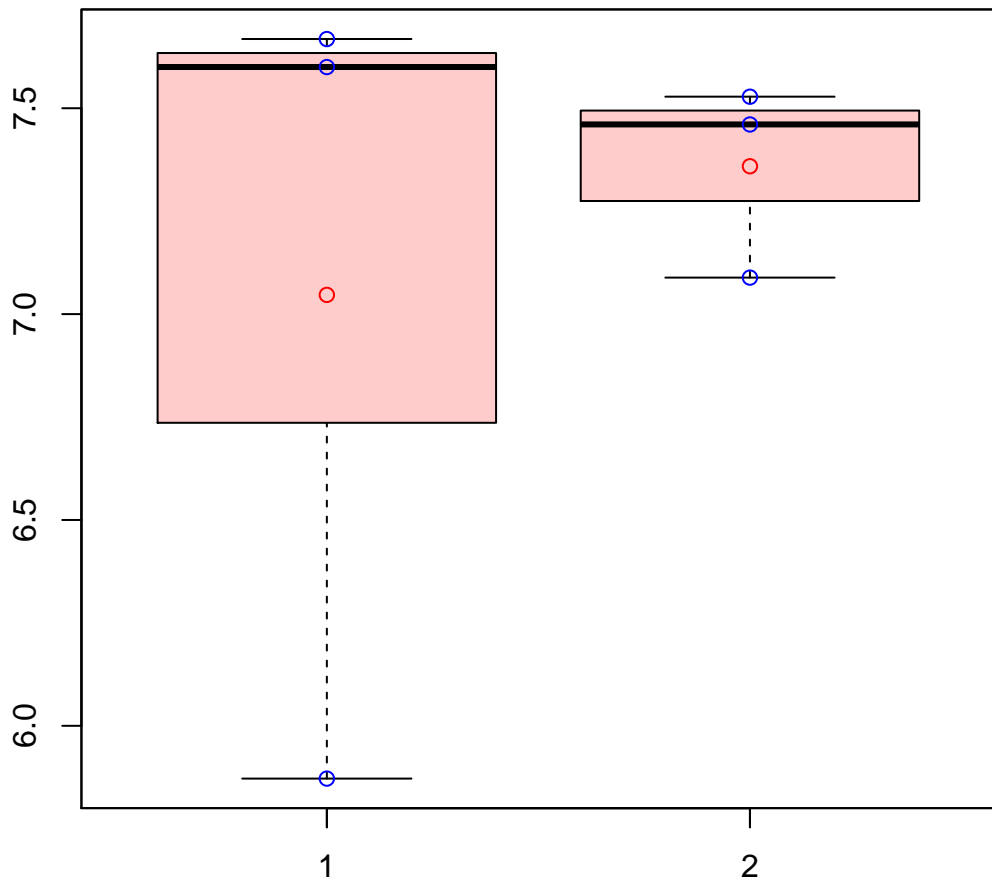

t-Test: p-value = 0.65

# CL1904Contig4|CL1904Contig4

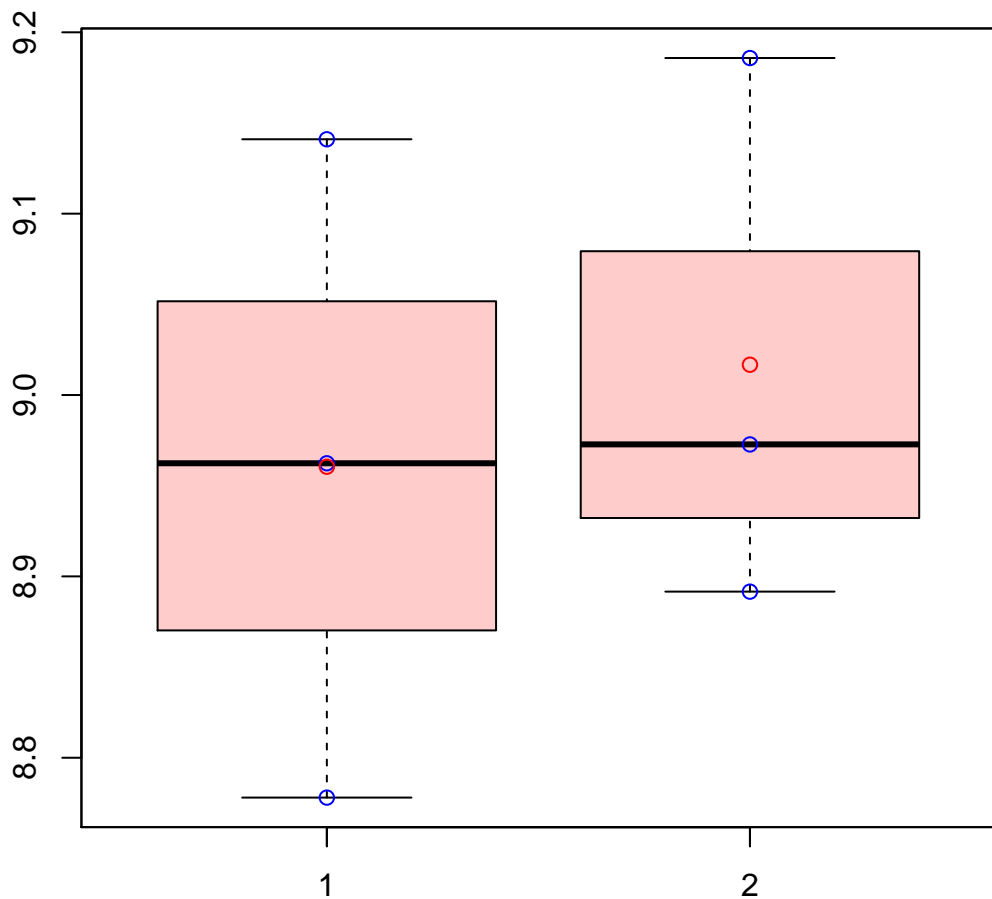

t-Test: p-value = 0.7

# CL190Contig21|CL190Contig21

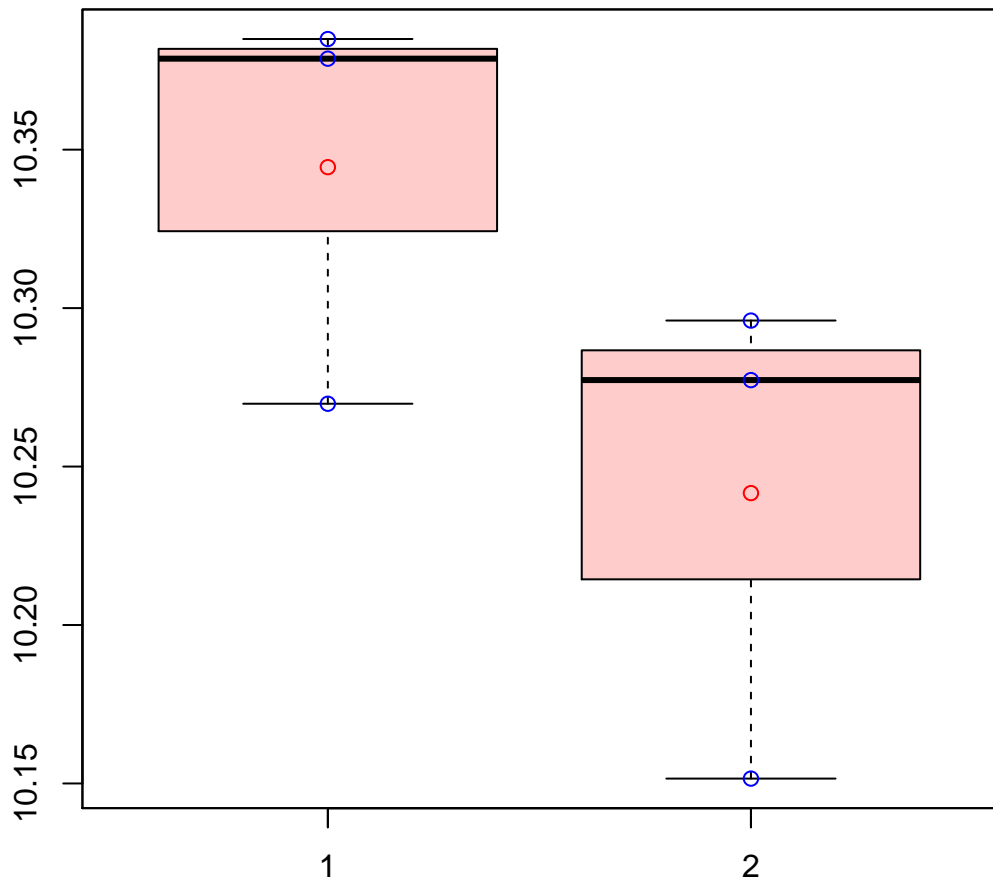

t-Test: p-value = 0.16

# CL190Contig3|CL190Contig3

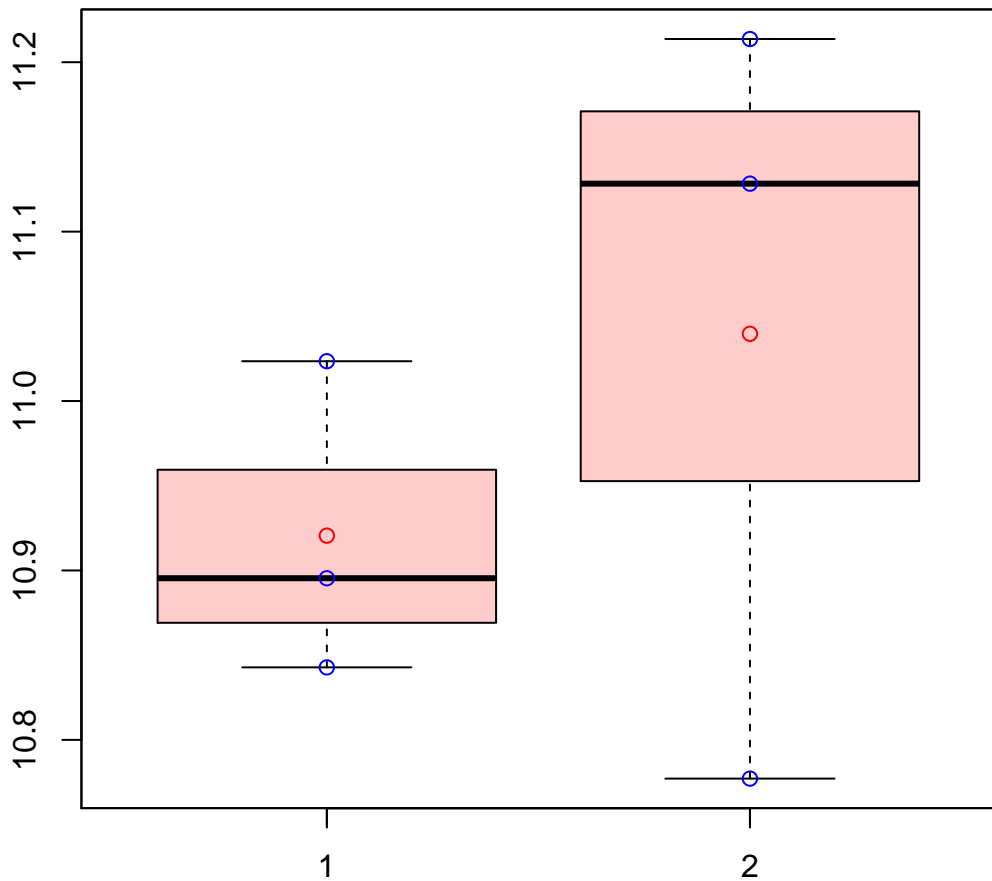

t-Test: p-value = 0.48

# CL1911Contig2|CL1911Contig2

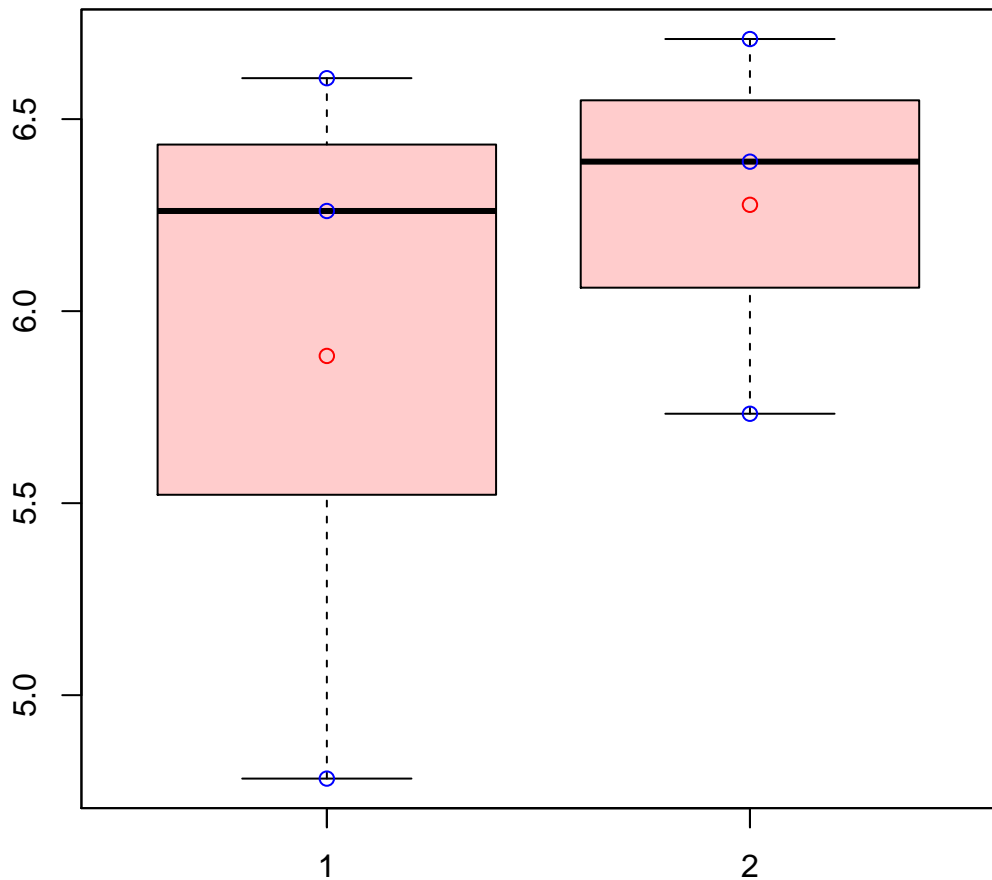

t-Test: p-value = 0.58

# CL1917Contig1|CL1917Contig1

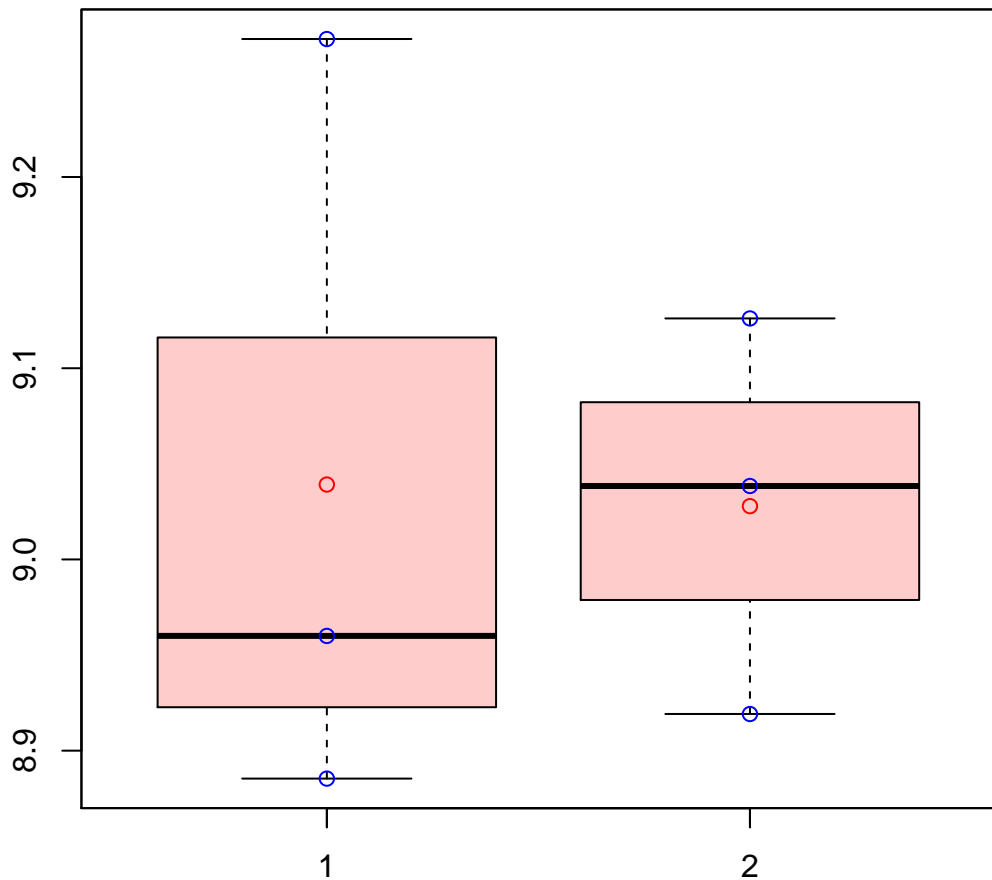

t-Test: p-value = 0.94



# CL1923Contig1|CL1923Contig1

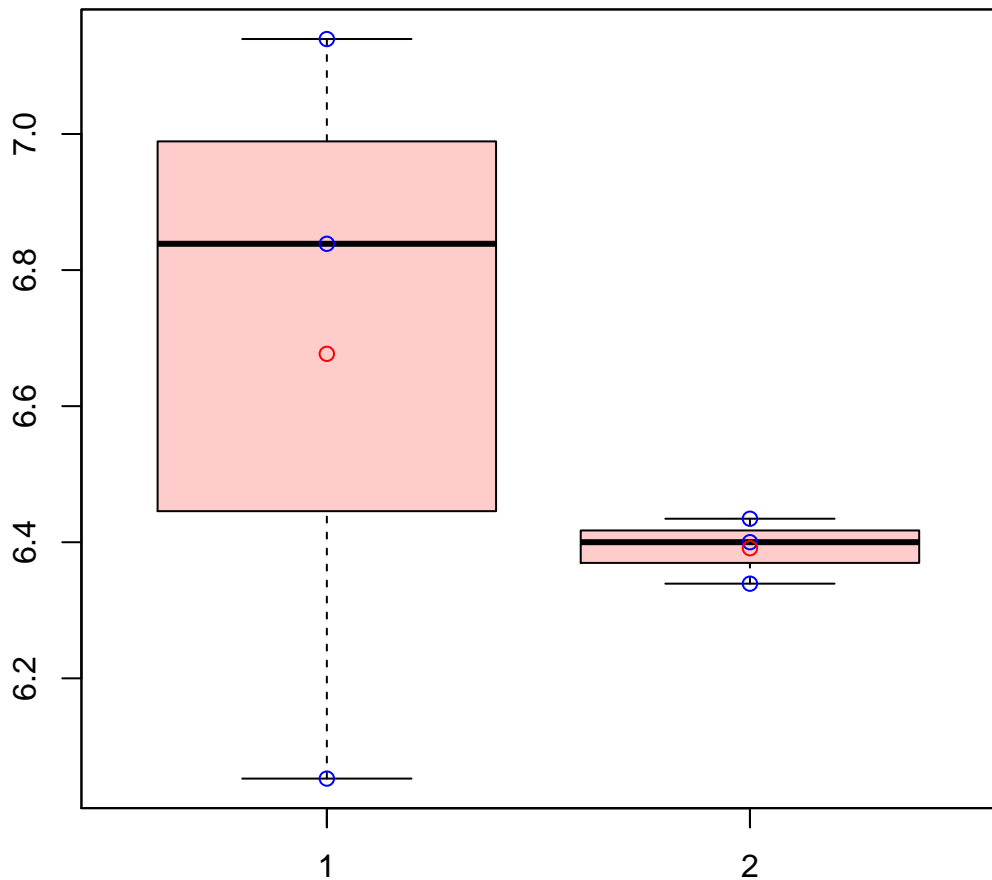

t-Test: p-value = 0.47

# CL1924Contig1|CL1924Contig1

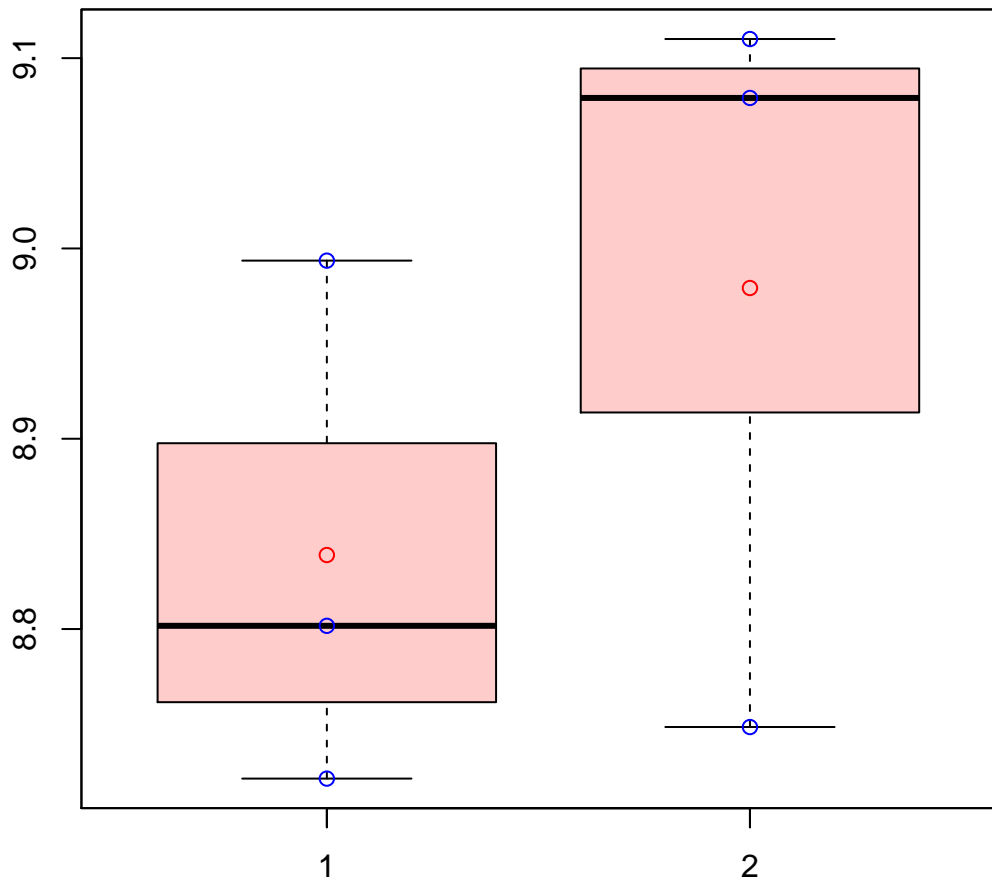

t-Test: p-value = 0.38

# CL1937Contig7|CL1937Contig7

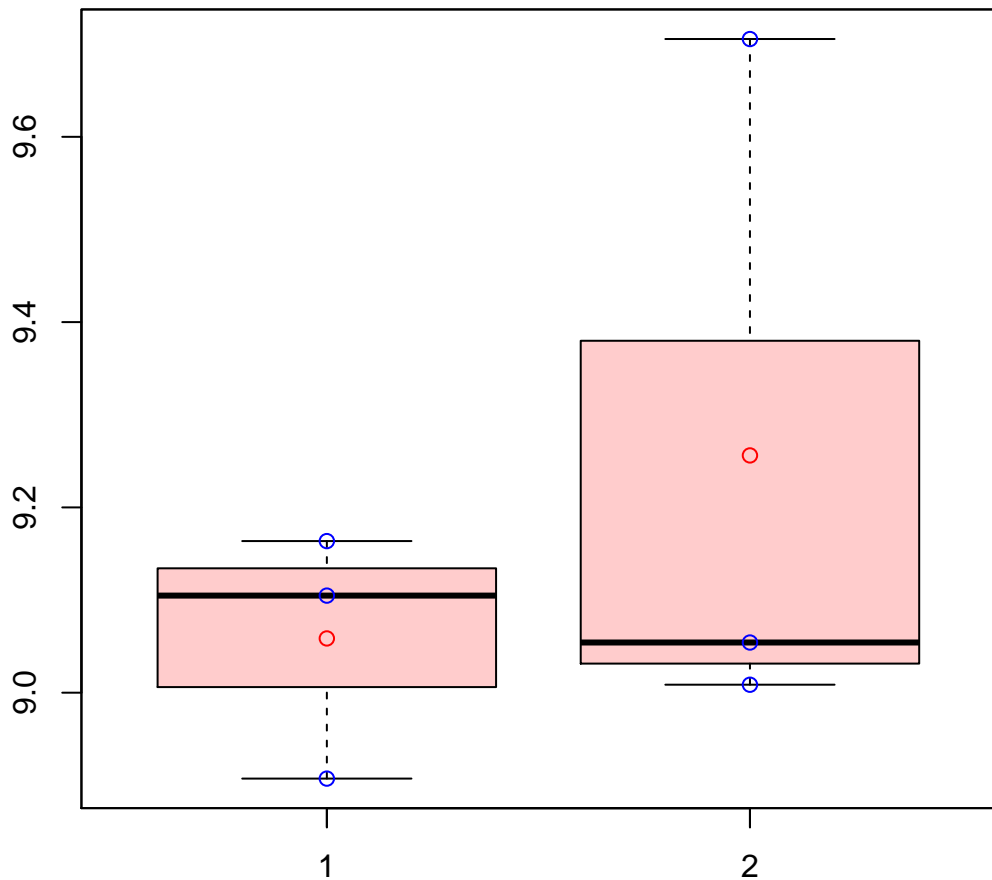

t-Test: p-value = 0.48

# CL1938Contig2|CL1938Contig2

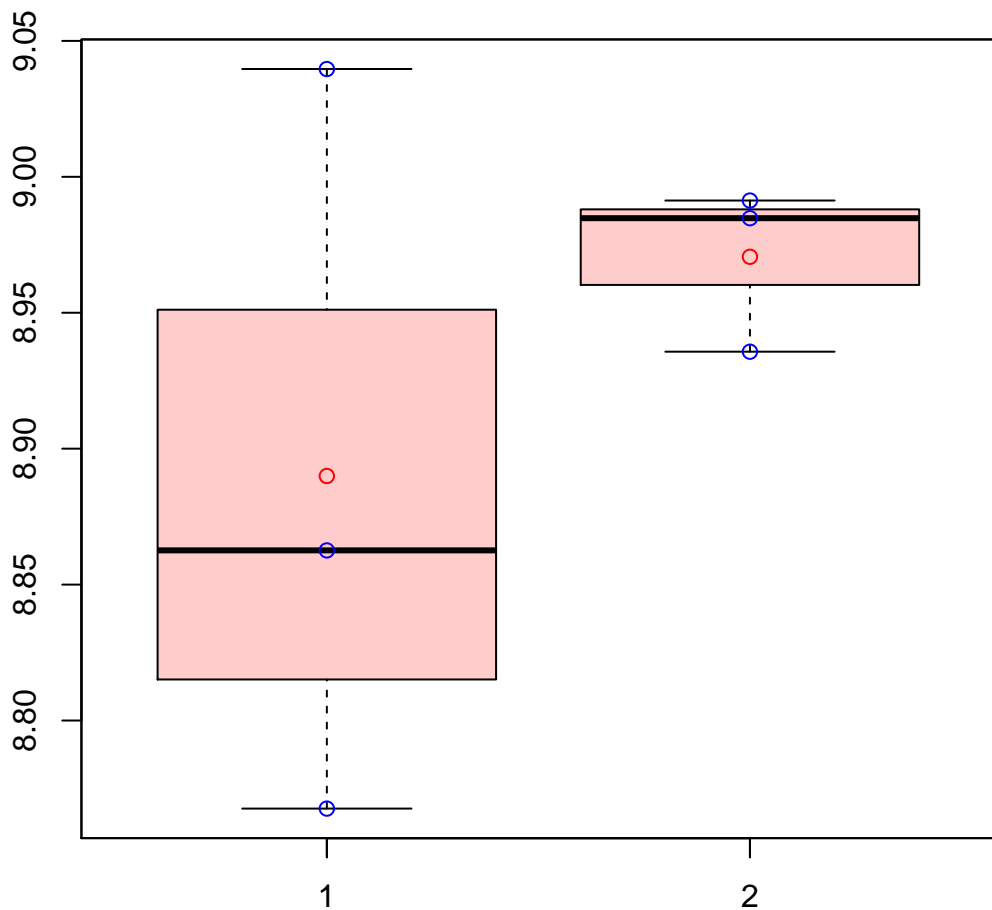

t-Test: p-value = 0.42

# CL1939Contig3|CL1939Contig3

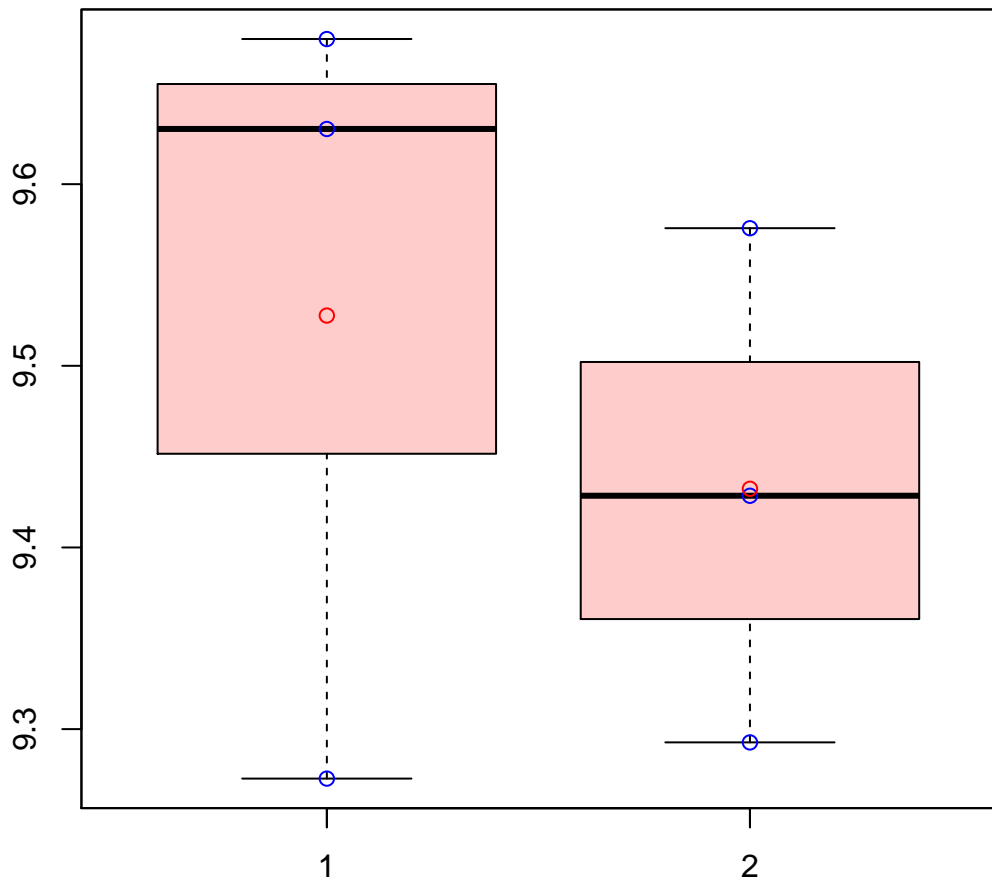

t-Test: p-value = 0.57

# CL1945Contig11|CL1945Contig11

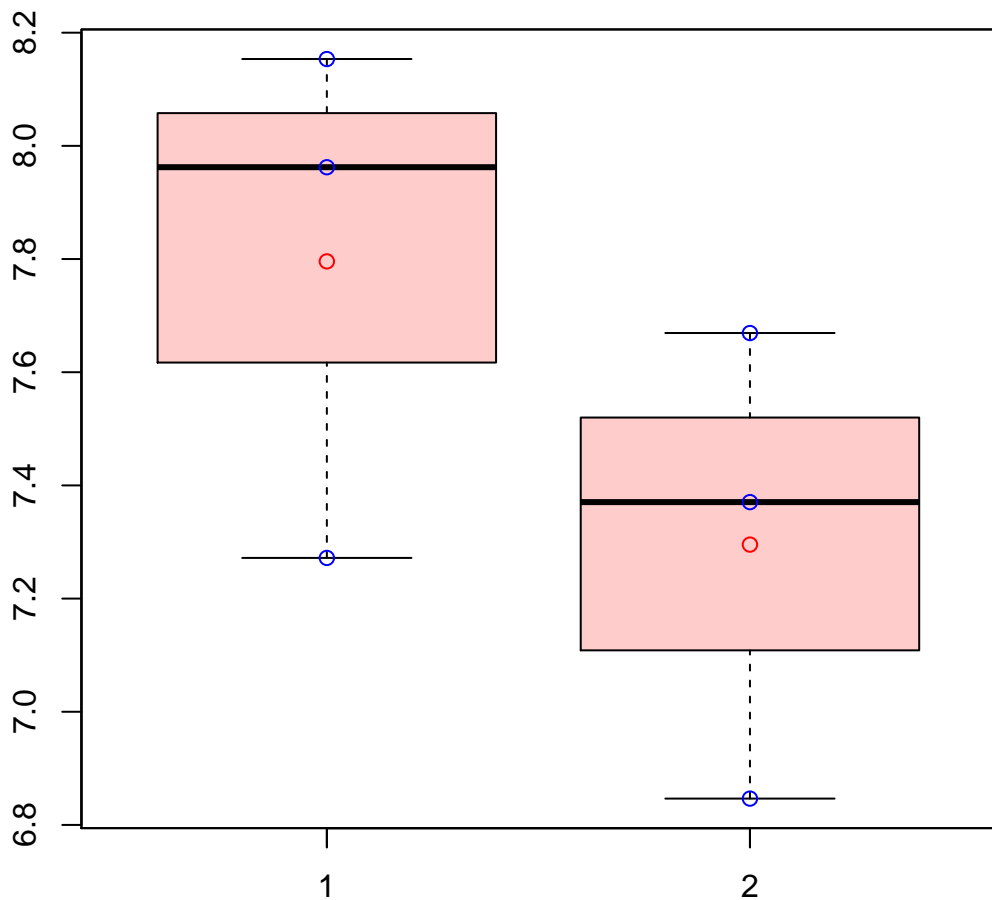

t-Test: p-value = 0.24

# CL1945Contig3|CL1945Contig3

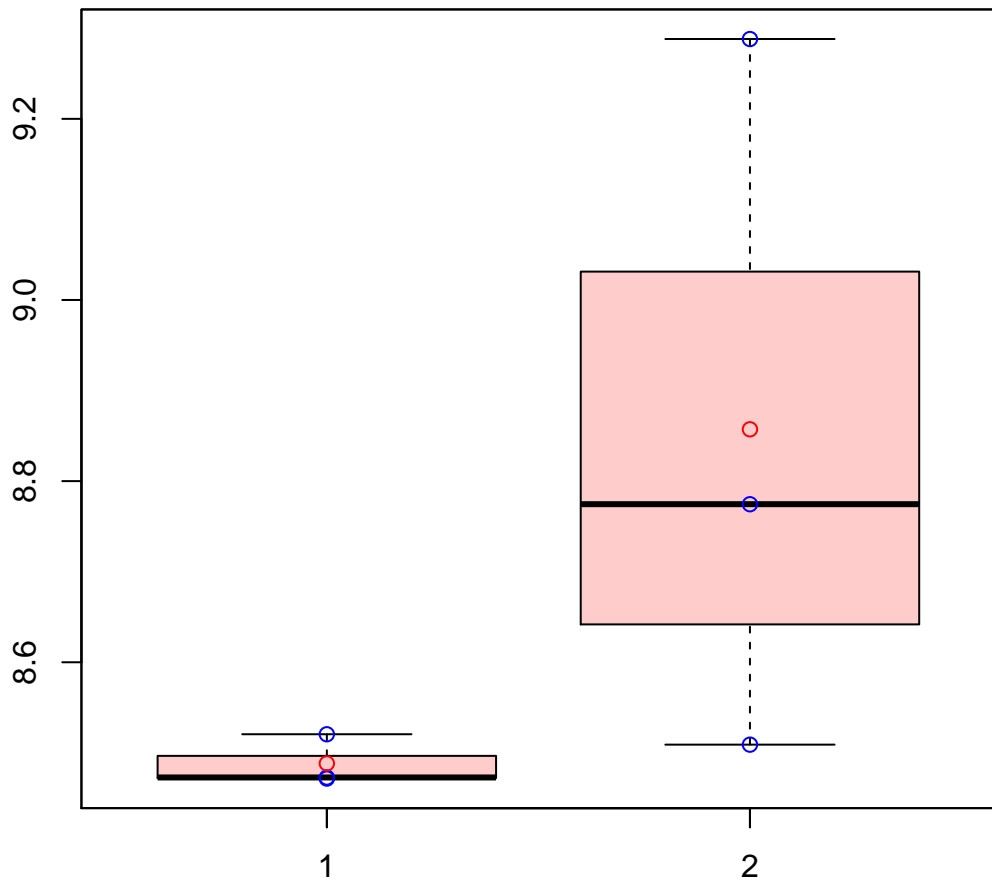

t-Test: p-value = 0.25

# CL1945Contig6|CL1945Contig6

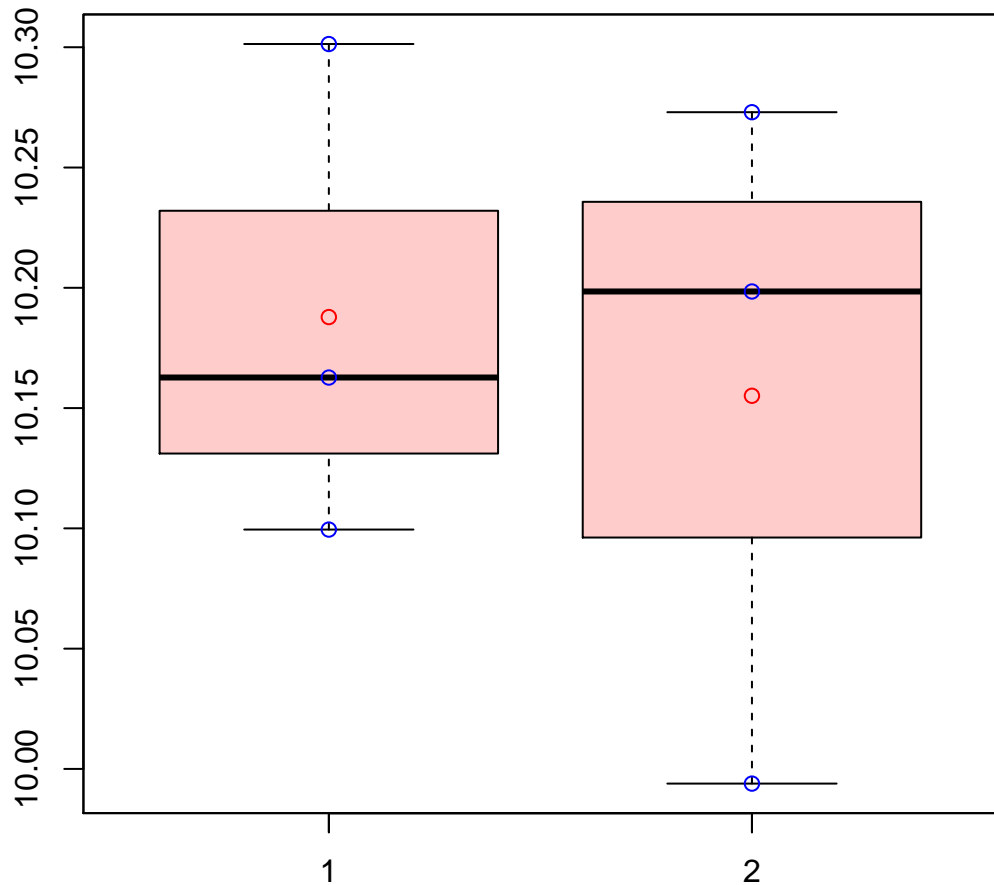

t-Test: p-value = 0.77



# CL194Contig12|CL194Contig12

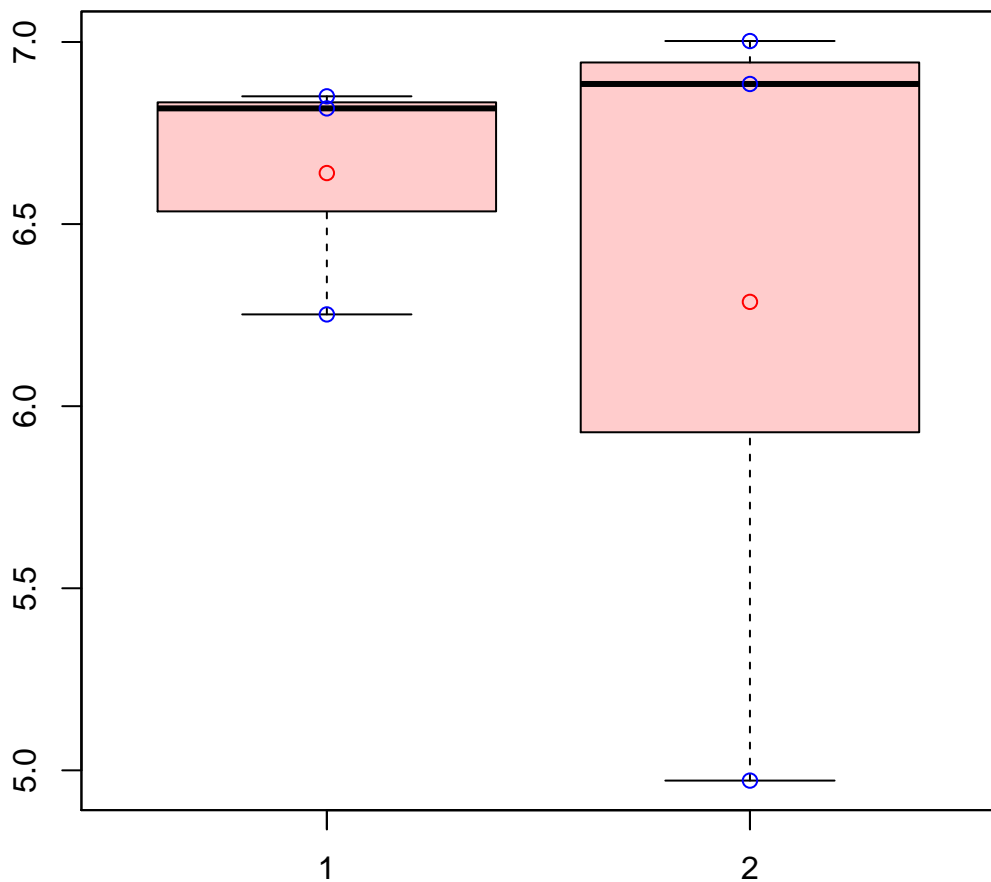

t-Test: p-value = 0.65

# CL194Contig7|CL194Contig7

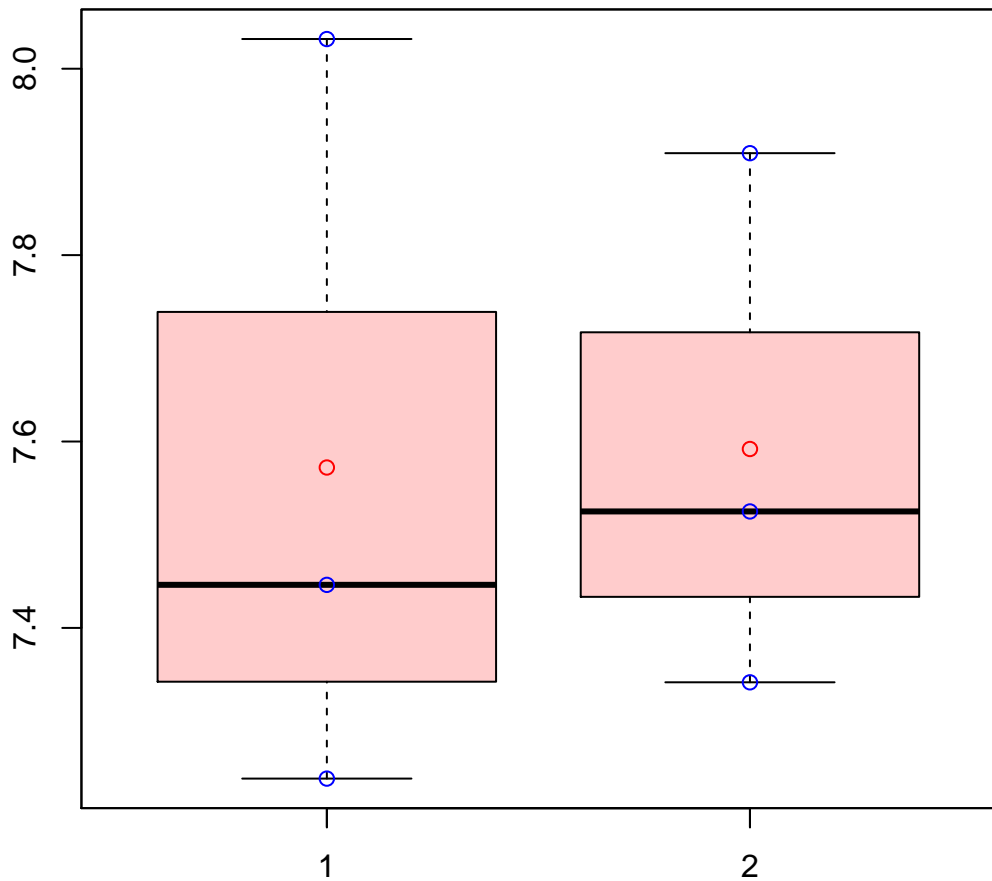

t-Test: p-value = 0.95

# CL1950Contig4|CL1950Contig4

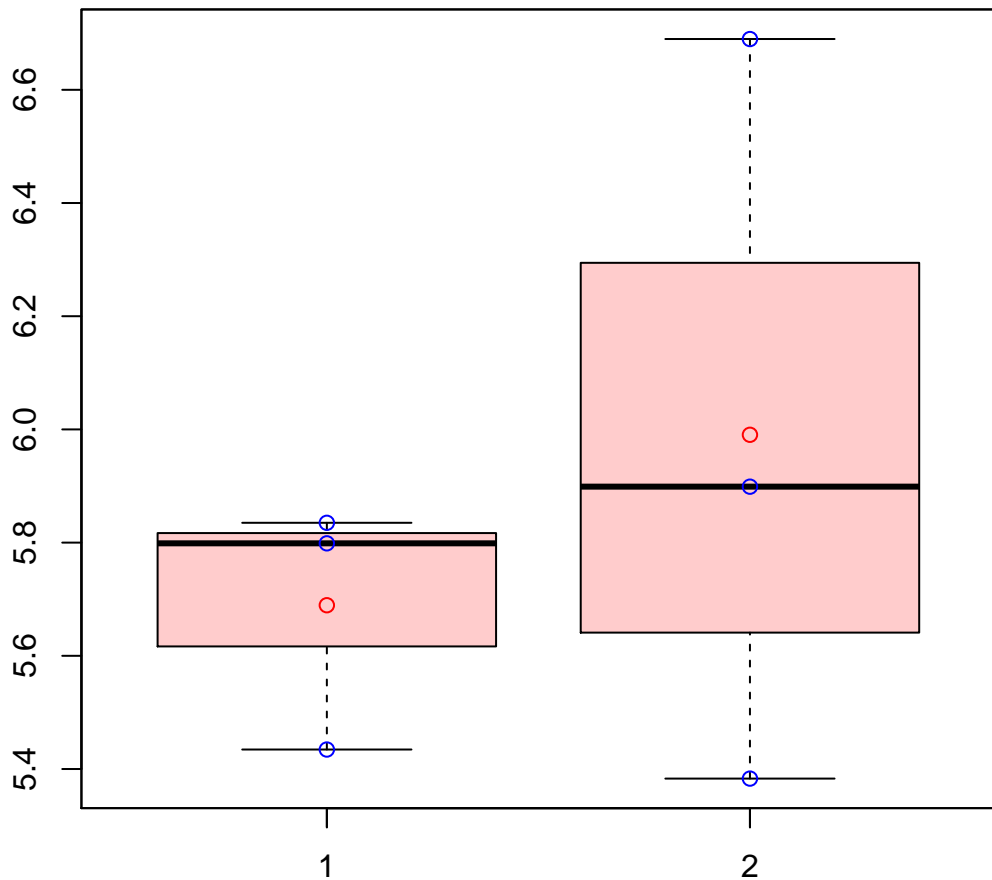

t-Test: p-value = 0.52

# CL1953Contig2|CL1953Contig2

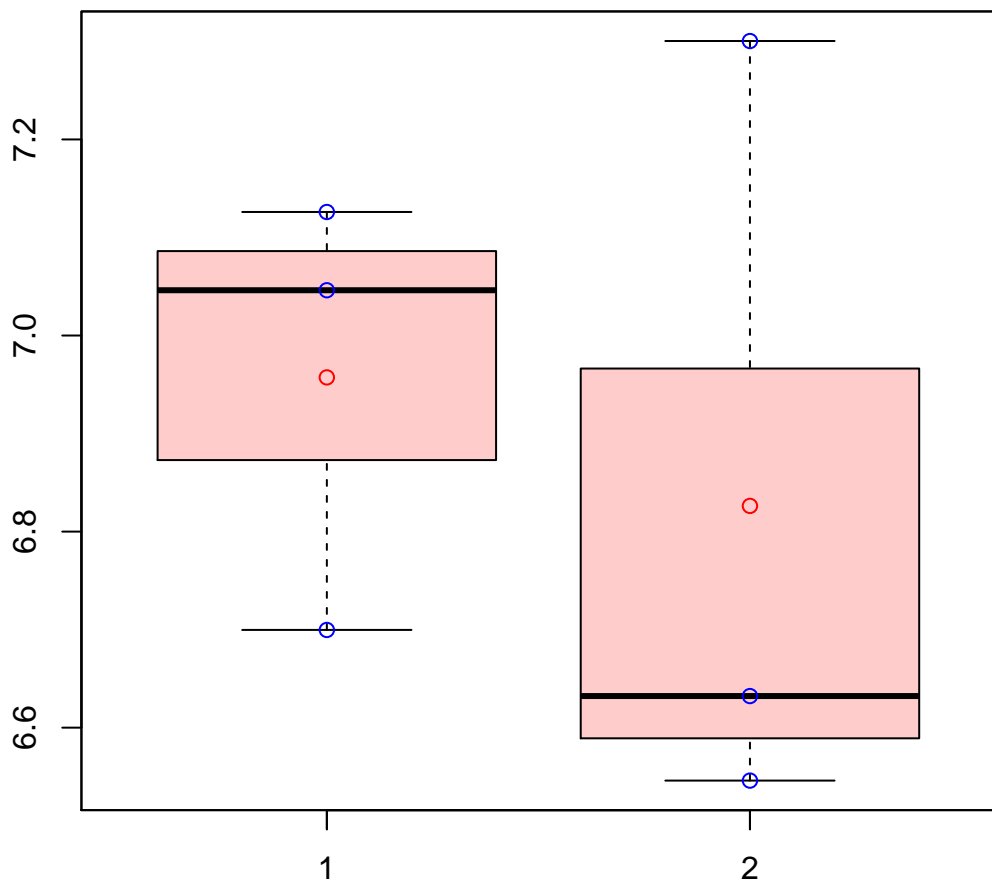

t-Test: p-value = 0.66

# CL19554Contig1|CL19554Contig1

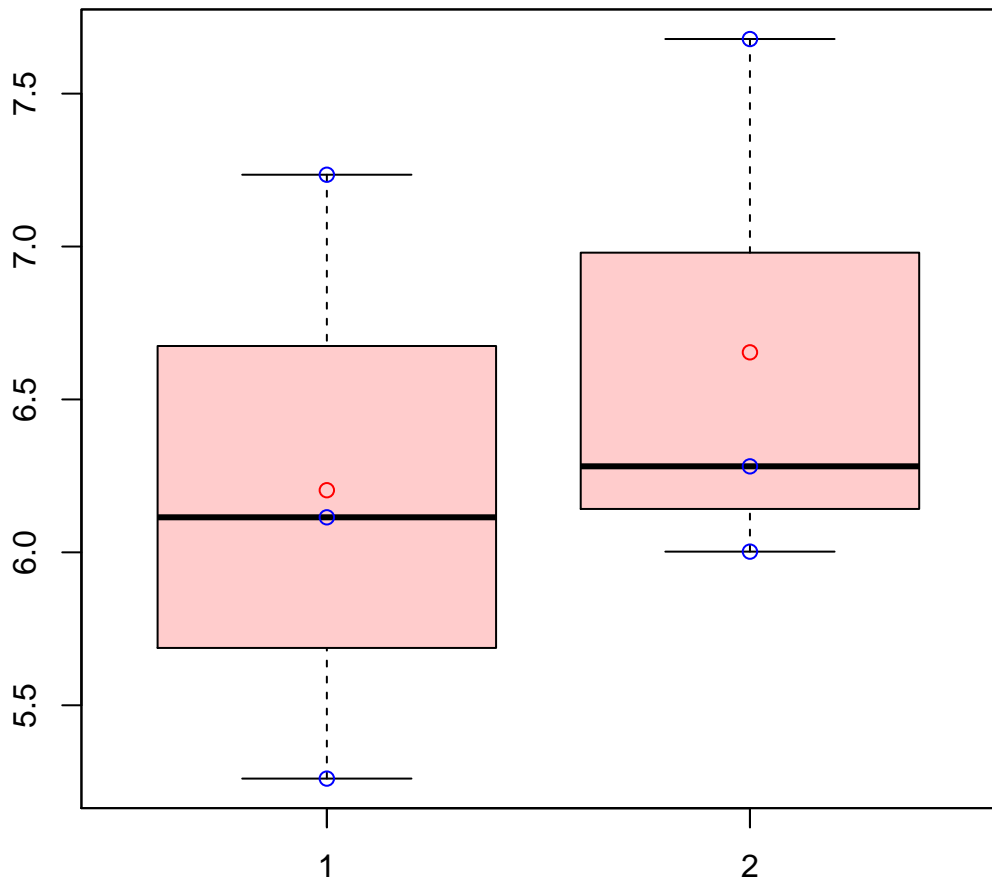

t-Test: p-value = 0.59

# CL1971Contig7|CL1971Contig7

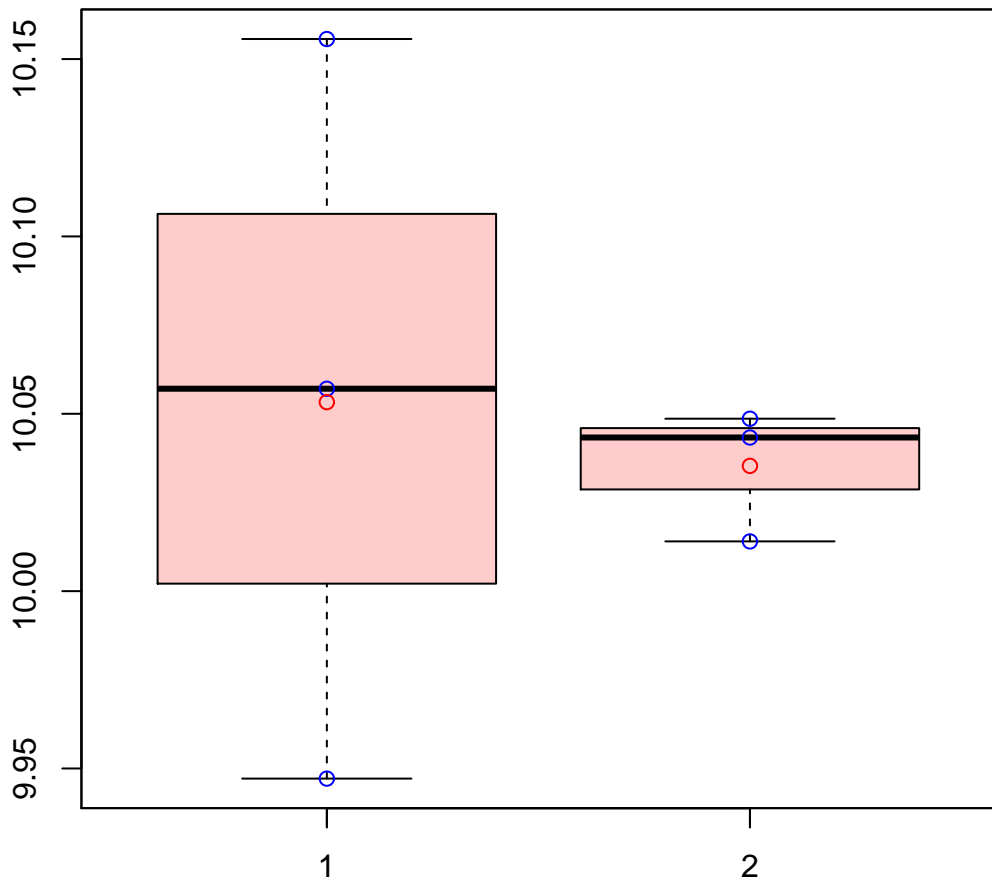

t-Test: p-value = 0.8

# CL1973Contig4|CL1973Contig4

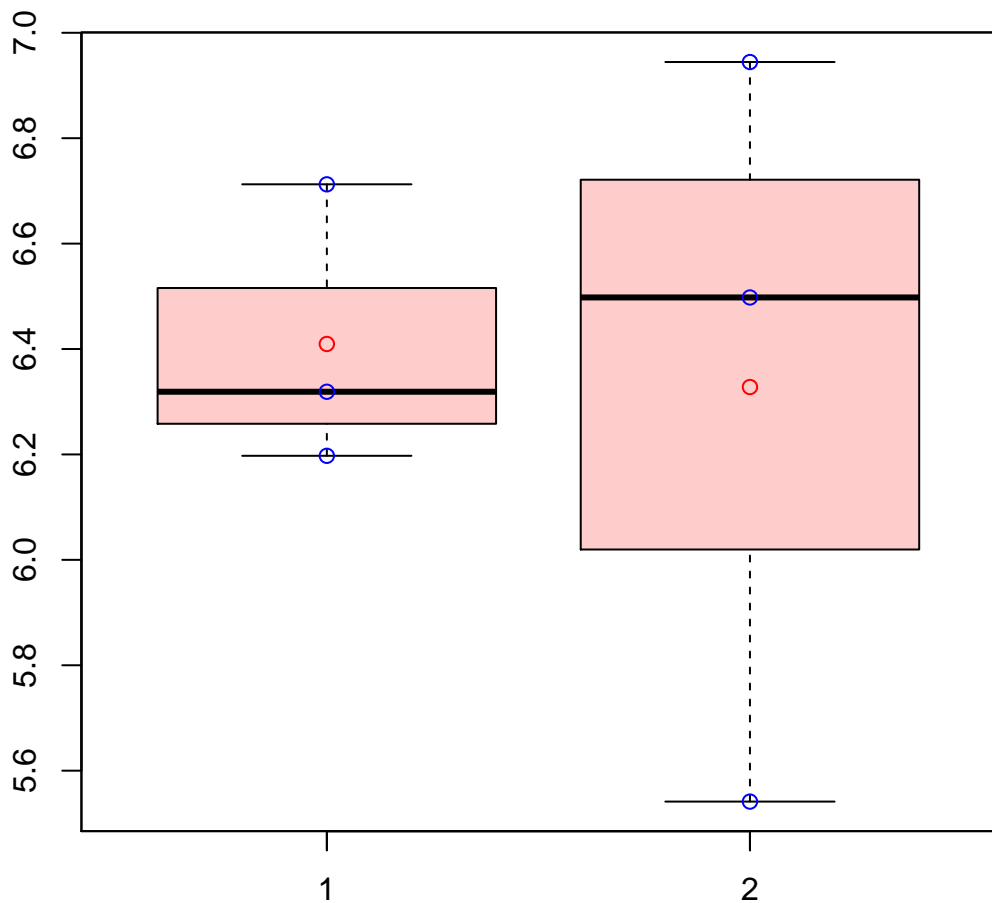

t-Test: p-value = 0.87

# CL1976Contig2|CL1976Contig2

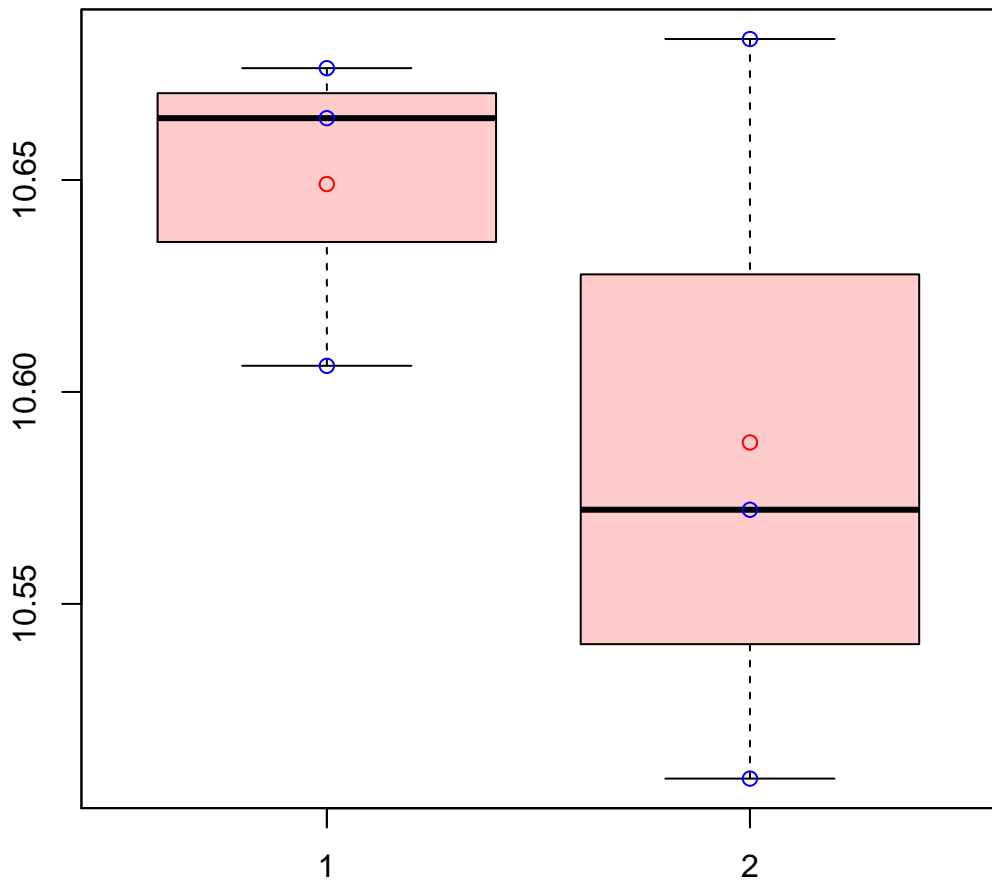

t-Test: p-value = 0.36



# CL1980Contig1|CL1980Contig1

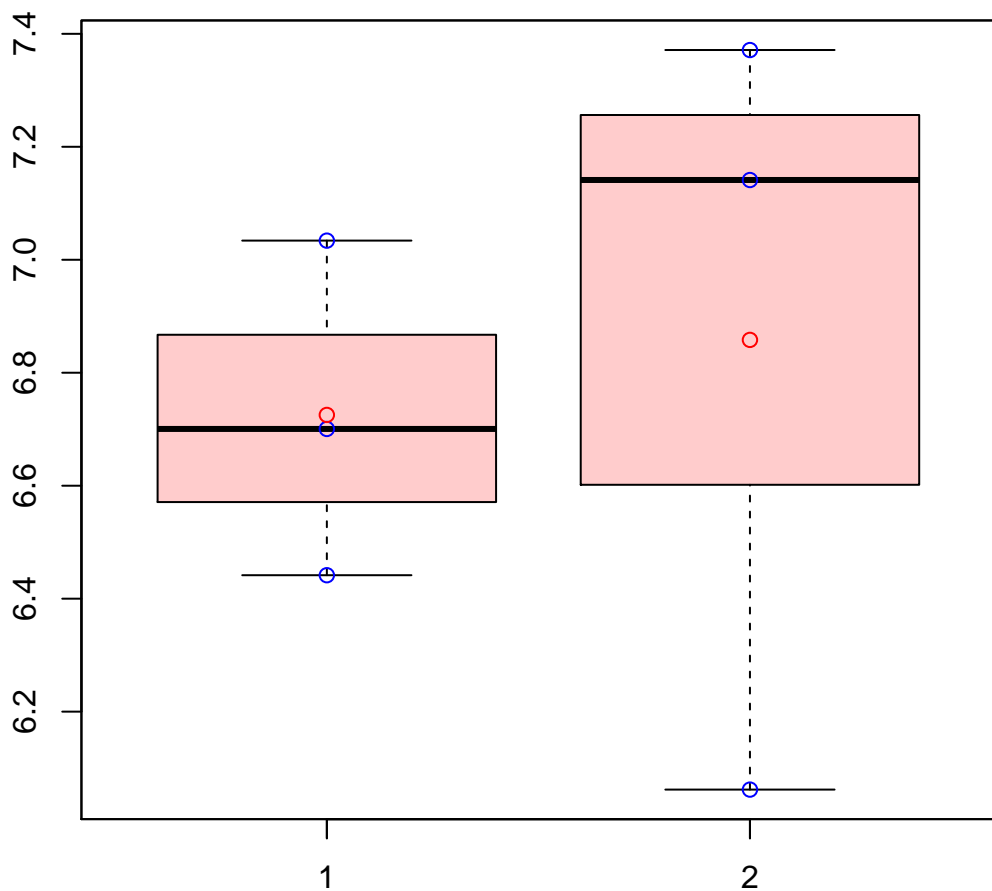

t-Test: p-value = 0.78

# CL1981Contig1|CL1981Contig1

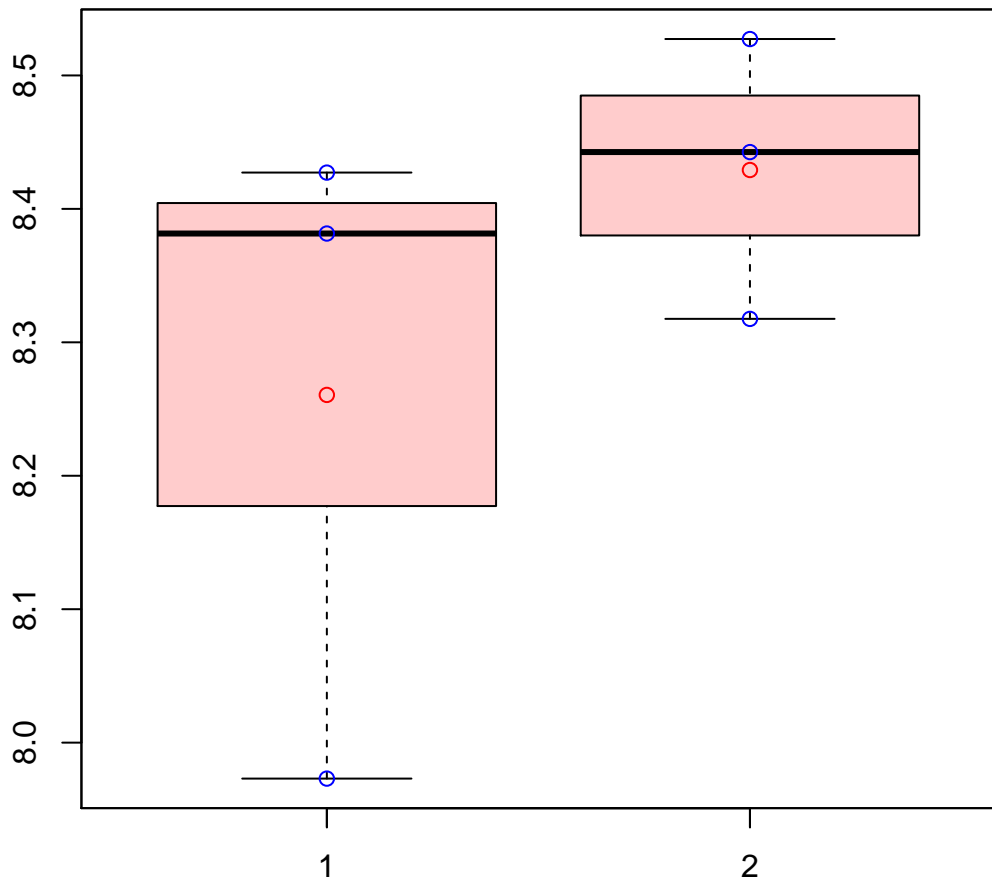

t-Test: p-value = 0.37

# CL1982Contig3|CL1982Contig3

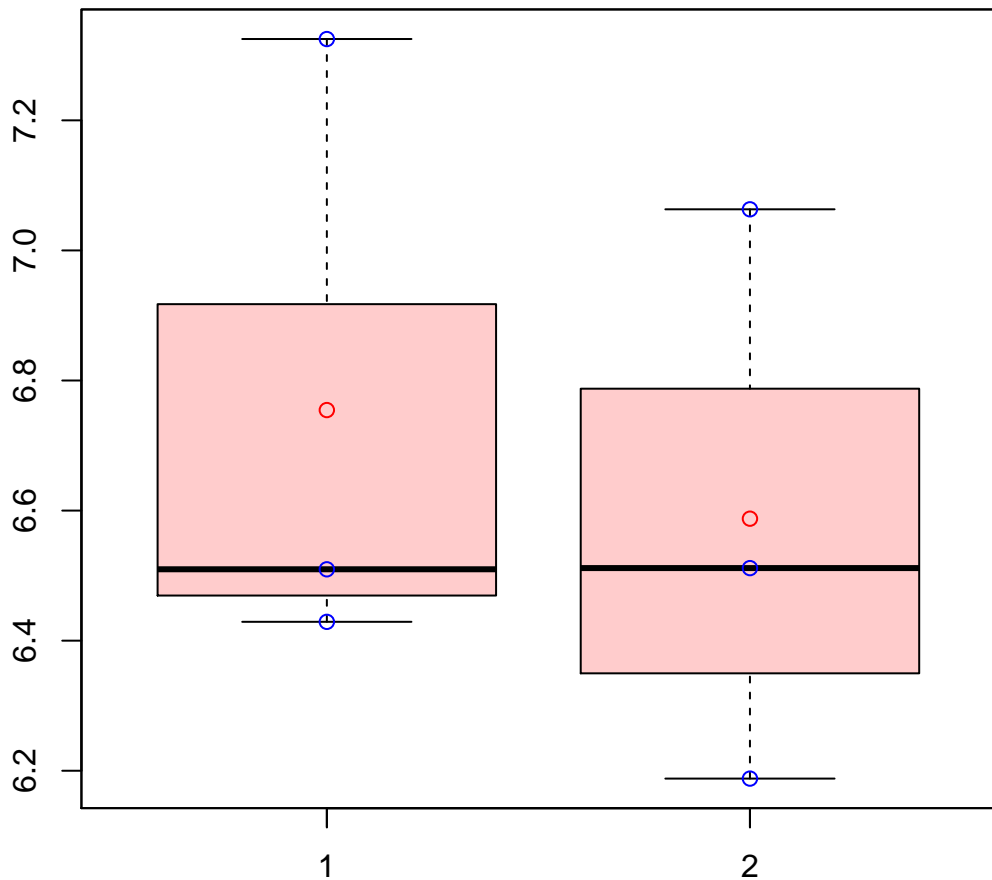

t-Test: p-value = 0.69

# CL1984Contig1|CL1984Contig1

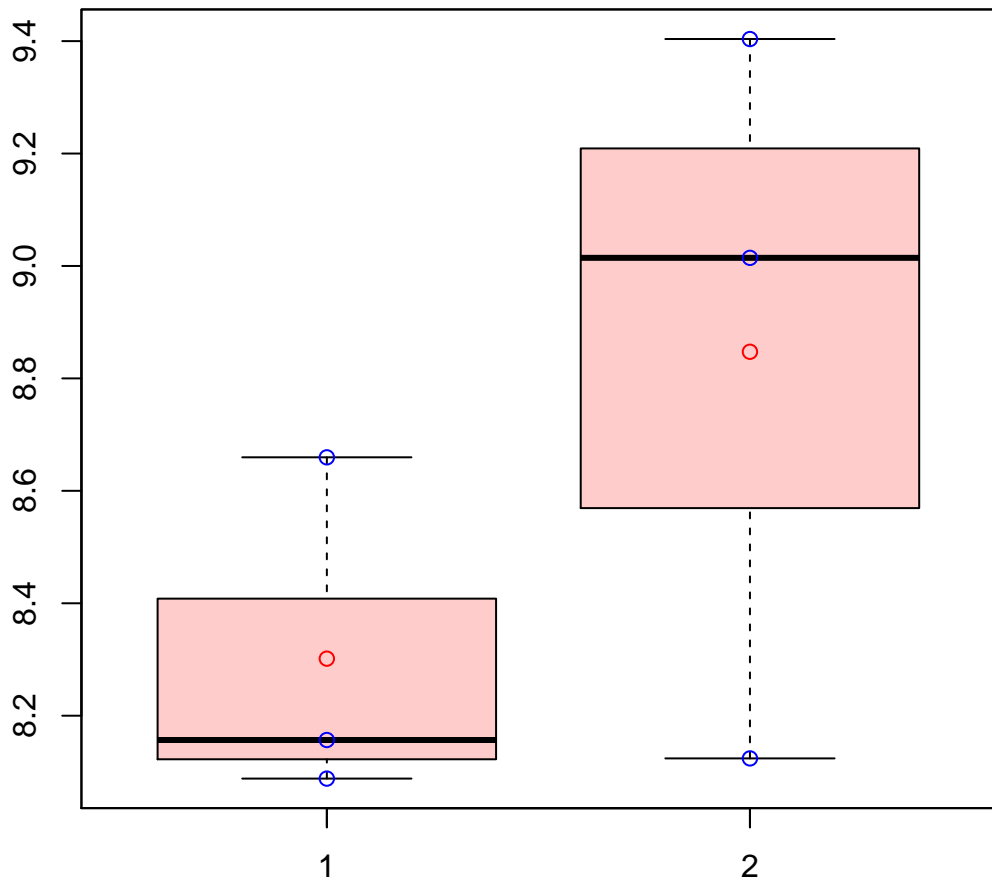

t-Test: p-value = 0.29

# CL1984Contig3|CL1984Contig3

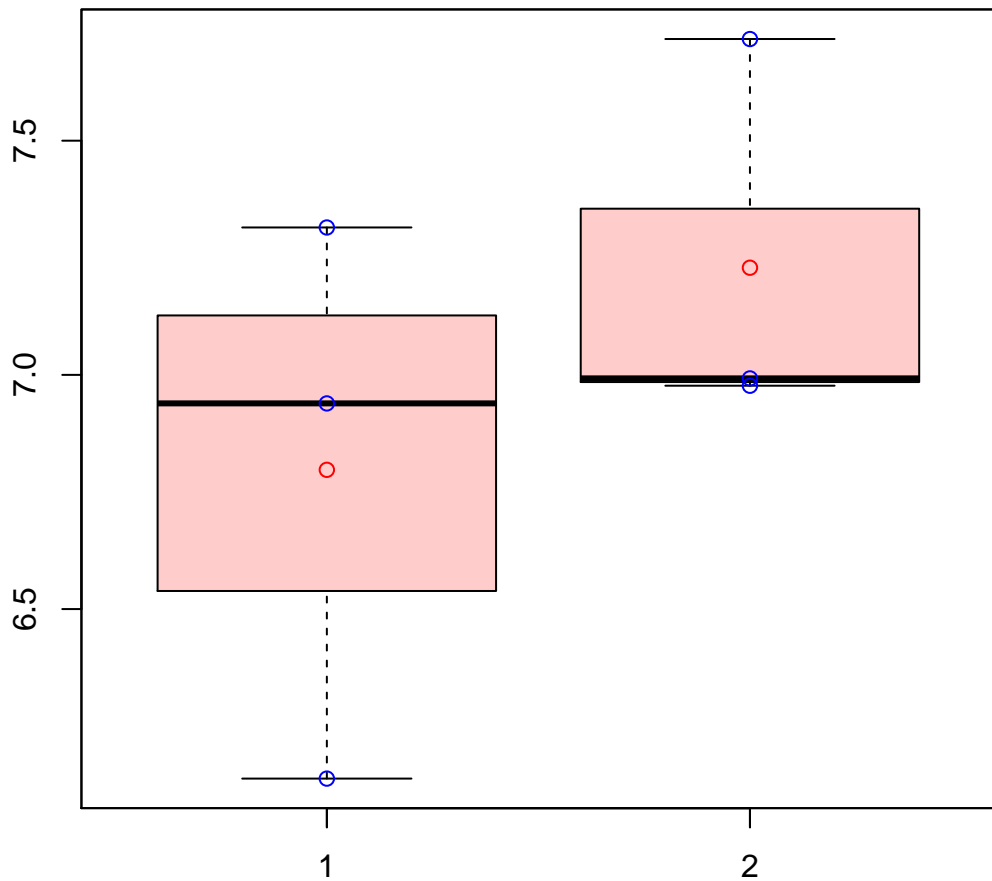

t-Test: p-value = 0.37

# CL1984Contig4|CL1984Contig4

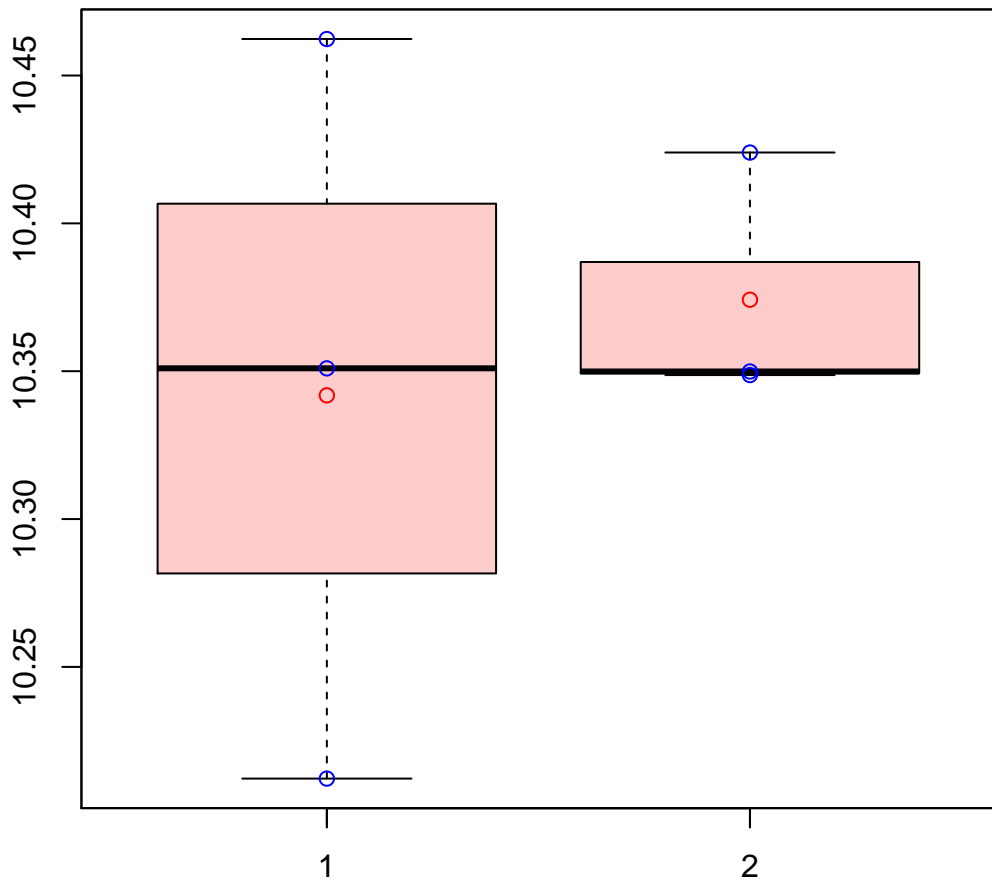

t-Test: p-value = 0.71

# CL19885Contig1|CL19885Contig1

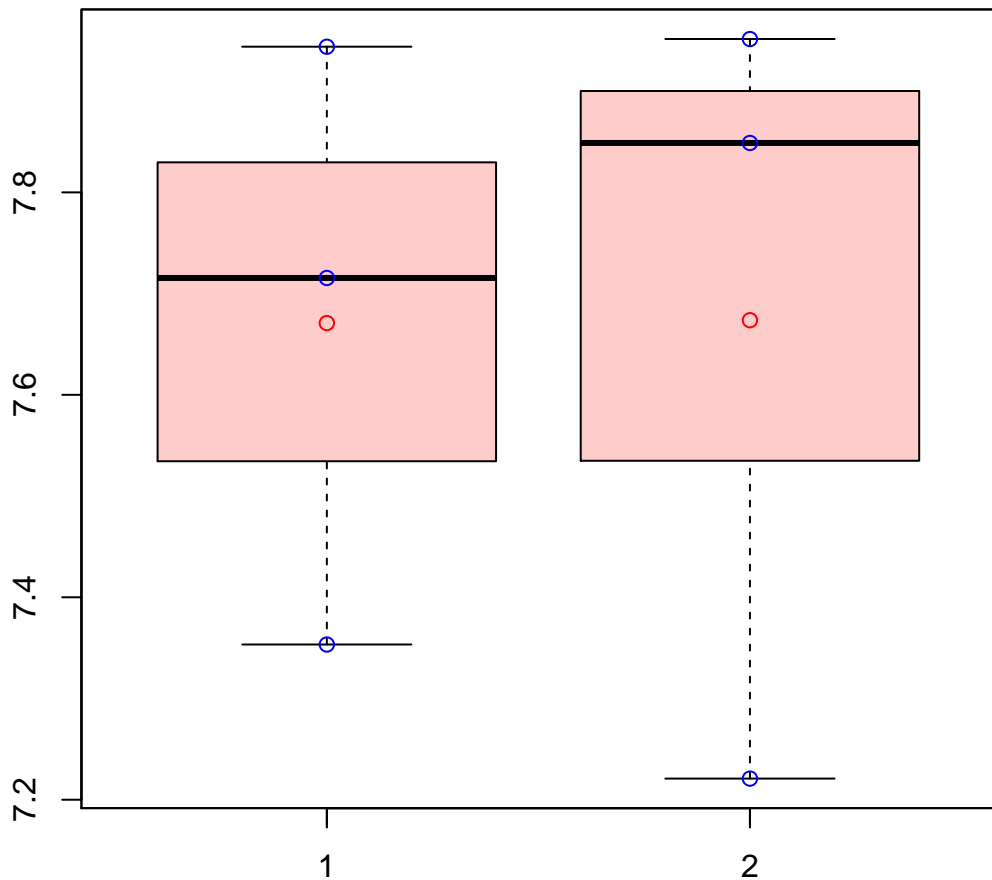

t-Test: p-value = 0.99

# CL19943Contig1|CL19943Contig1

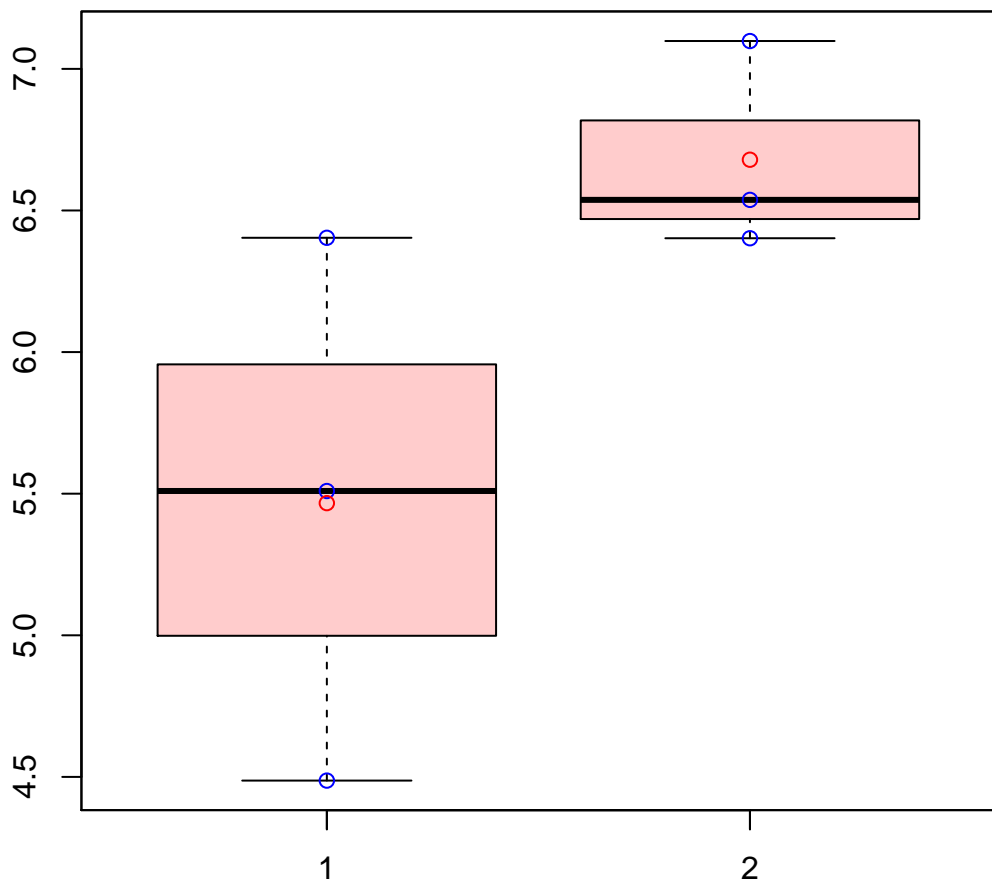

t-Test: p-value = 0.15



# CL1994Contig1|CL1994Contig1

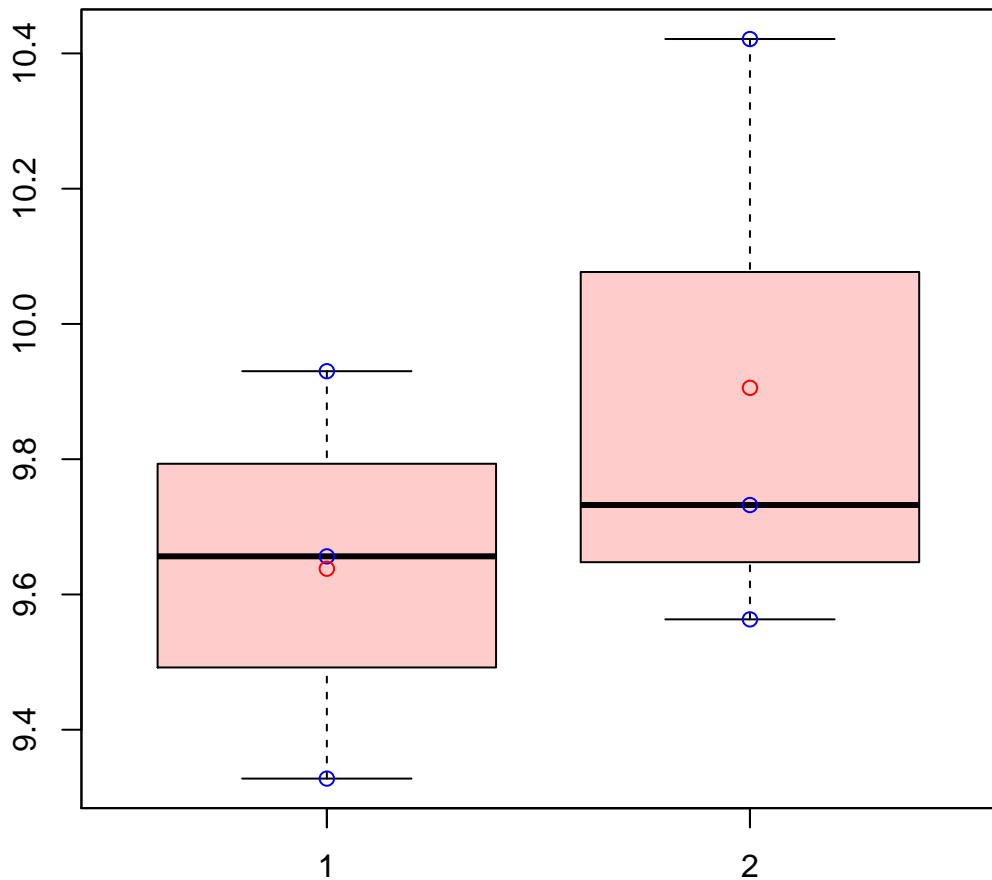

t-Test: p-value = 0.45

# CL1995Contig2|CL1995Contig2

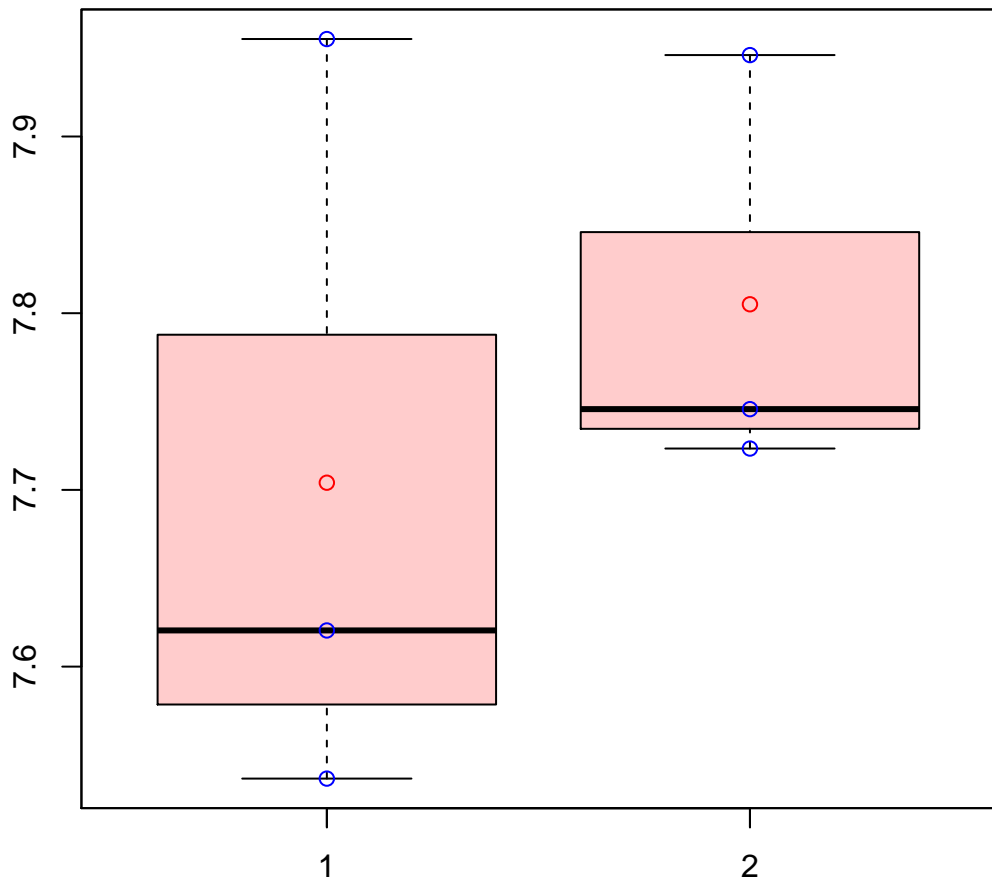

t-Test: p-value = 0.54

# CL1996Contig1|CL1996Contig1

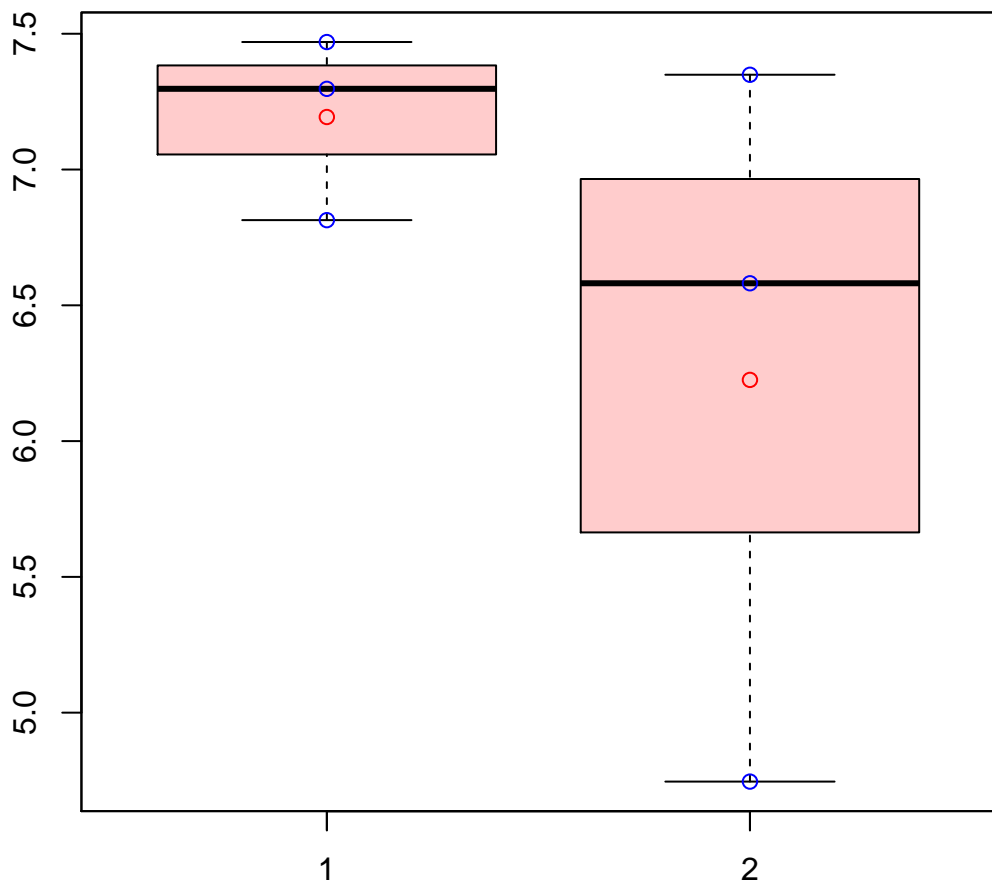

t-Test: p-value = 0.34

# CL1997Contig8|CL1997Contig8

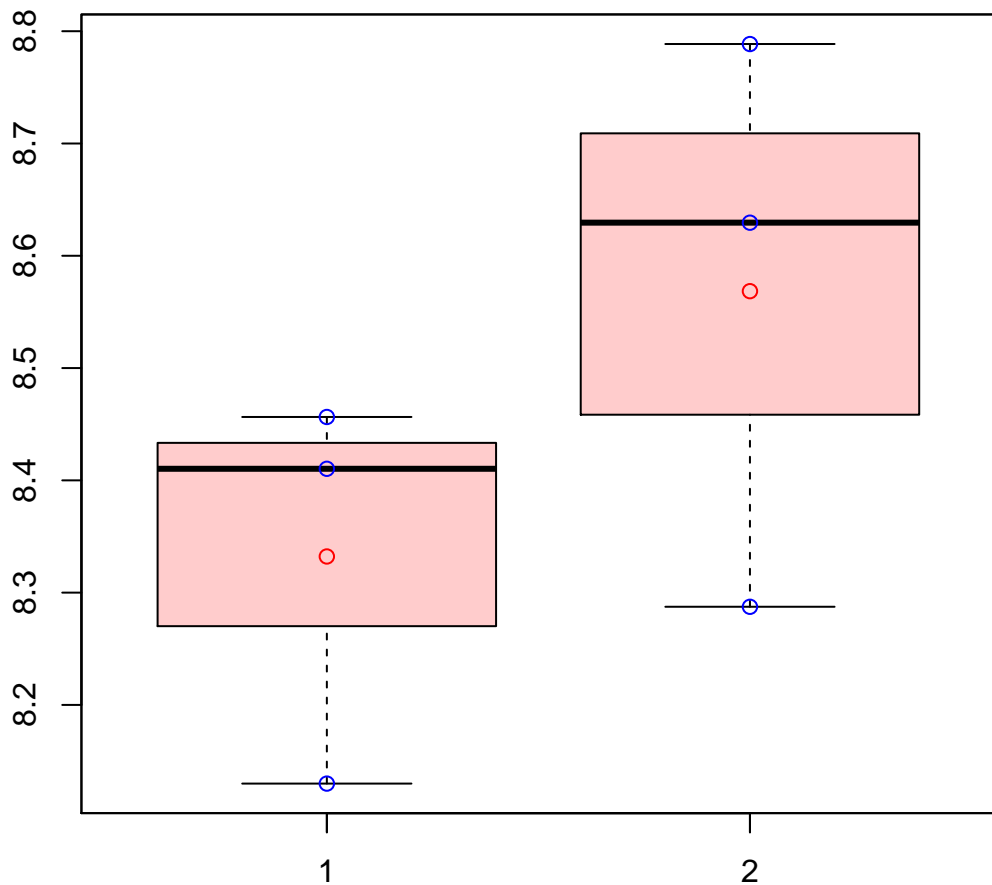

t-Test: p-value = 0.27

# CL199Contig3|CL199Contig3

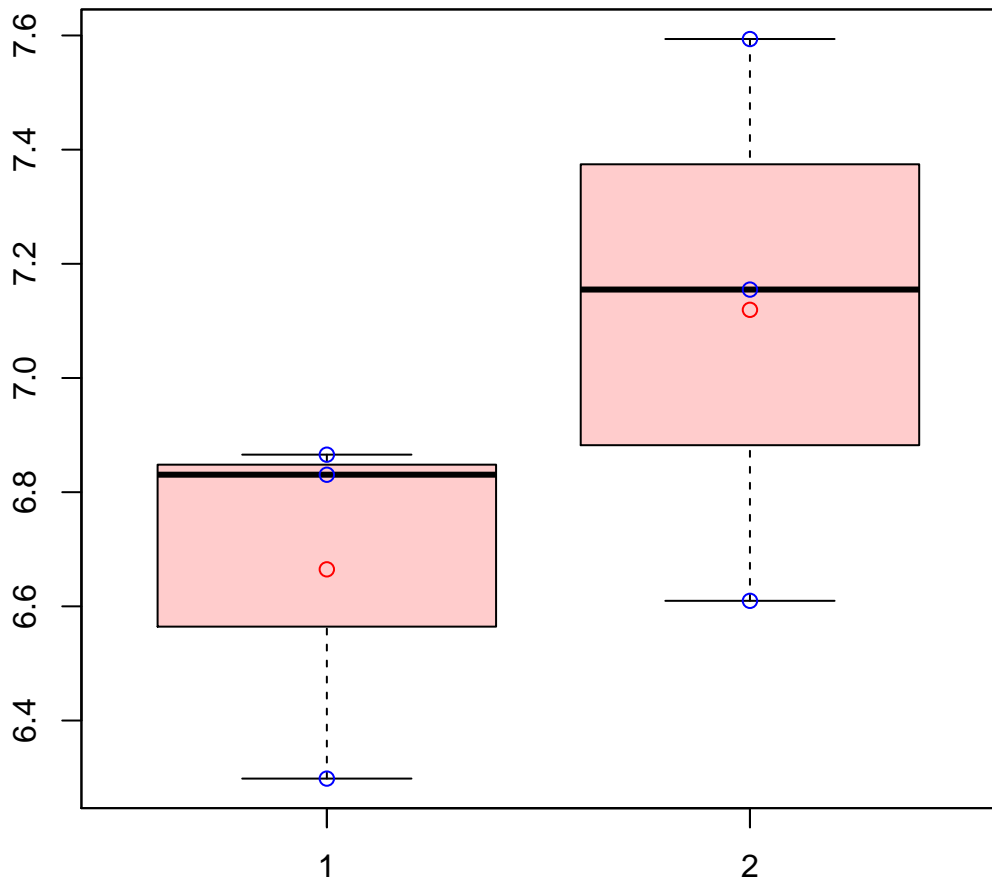

t-Test: p-value = 0.26

# CL1Contig1002|CL1Contig1002

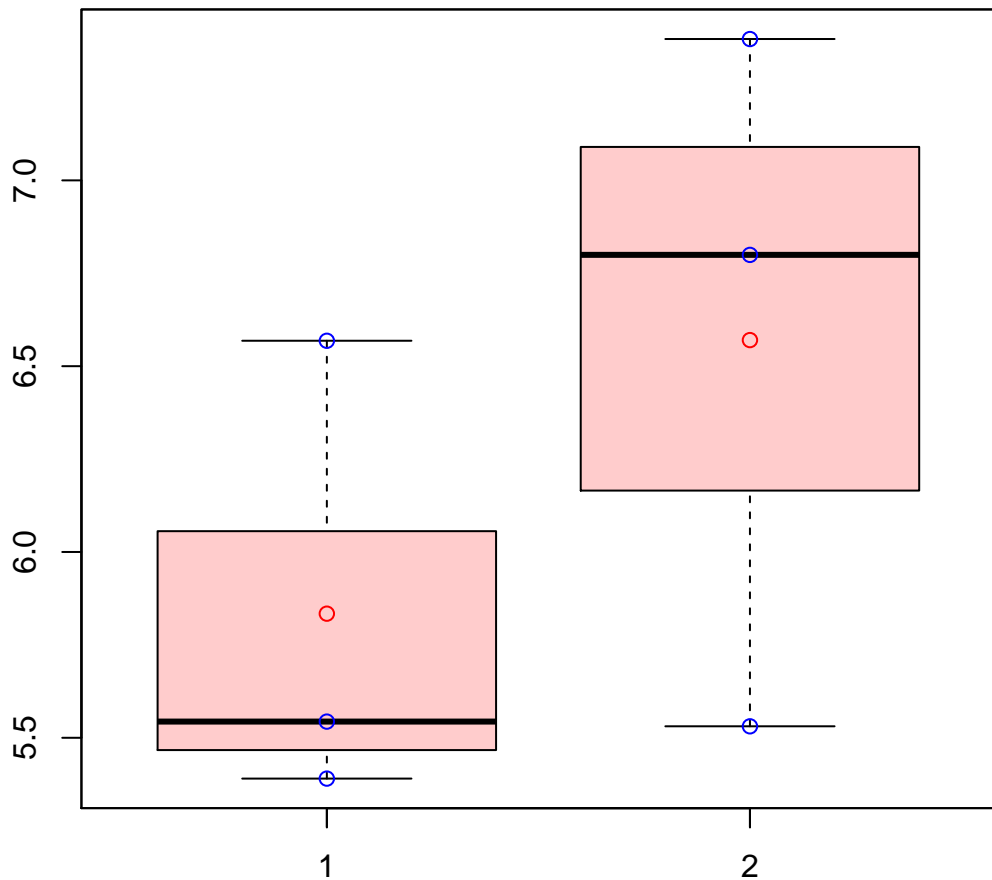

t-Test: p-value = 0.33

# CL1Contig10090|CL1Contig10090

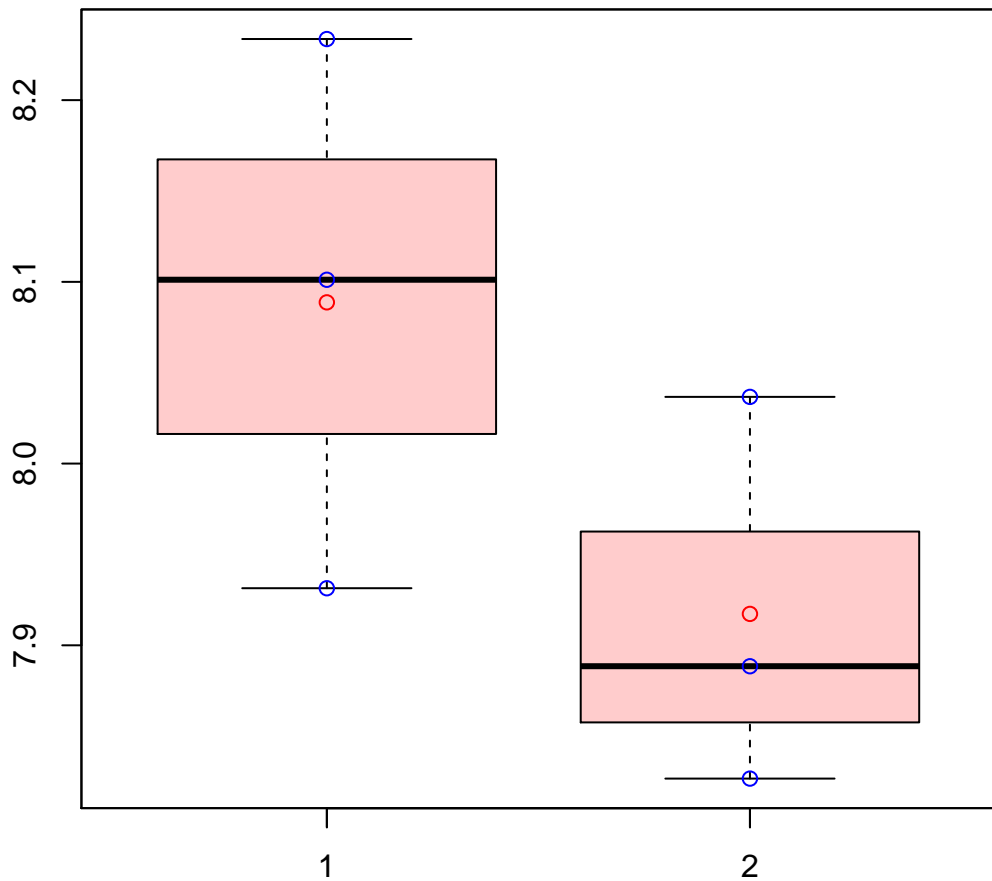

t-Test: p-value = 0.19

# CL1Contig10114|CL1Contig10114

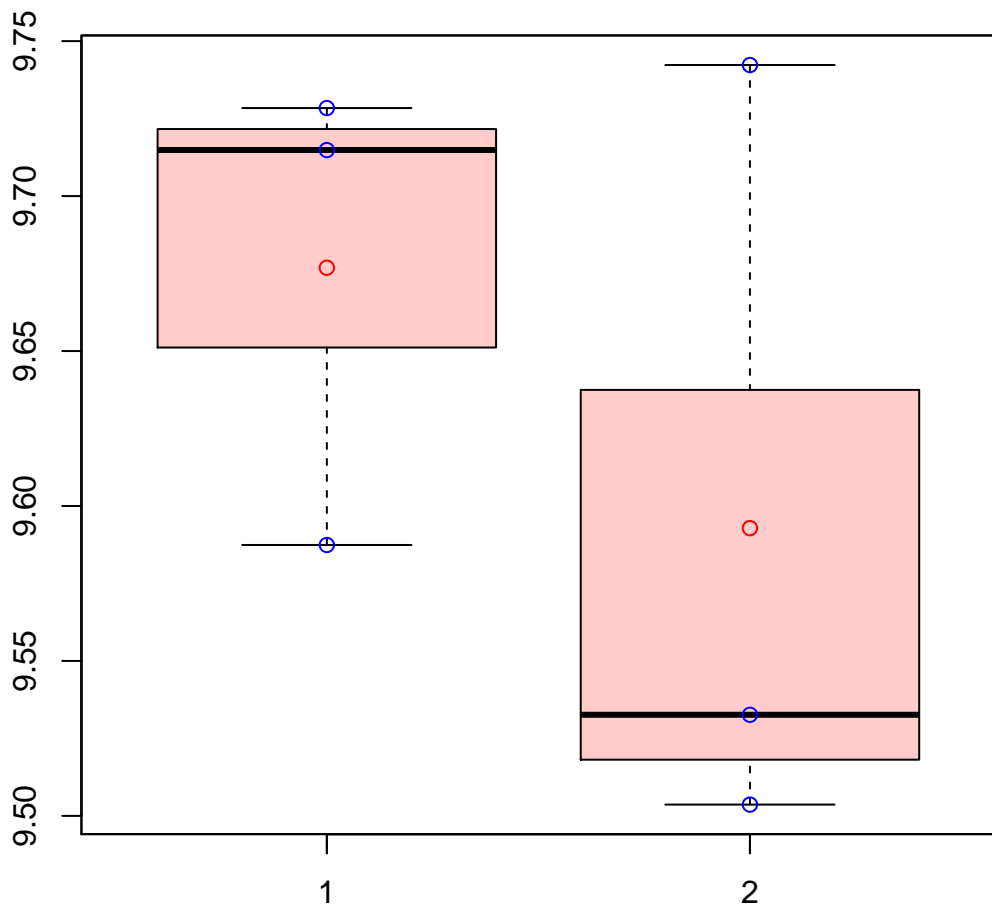

t-Test: p-value = 0.4



# CL1Contig10150|CL1Contig10150

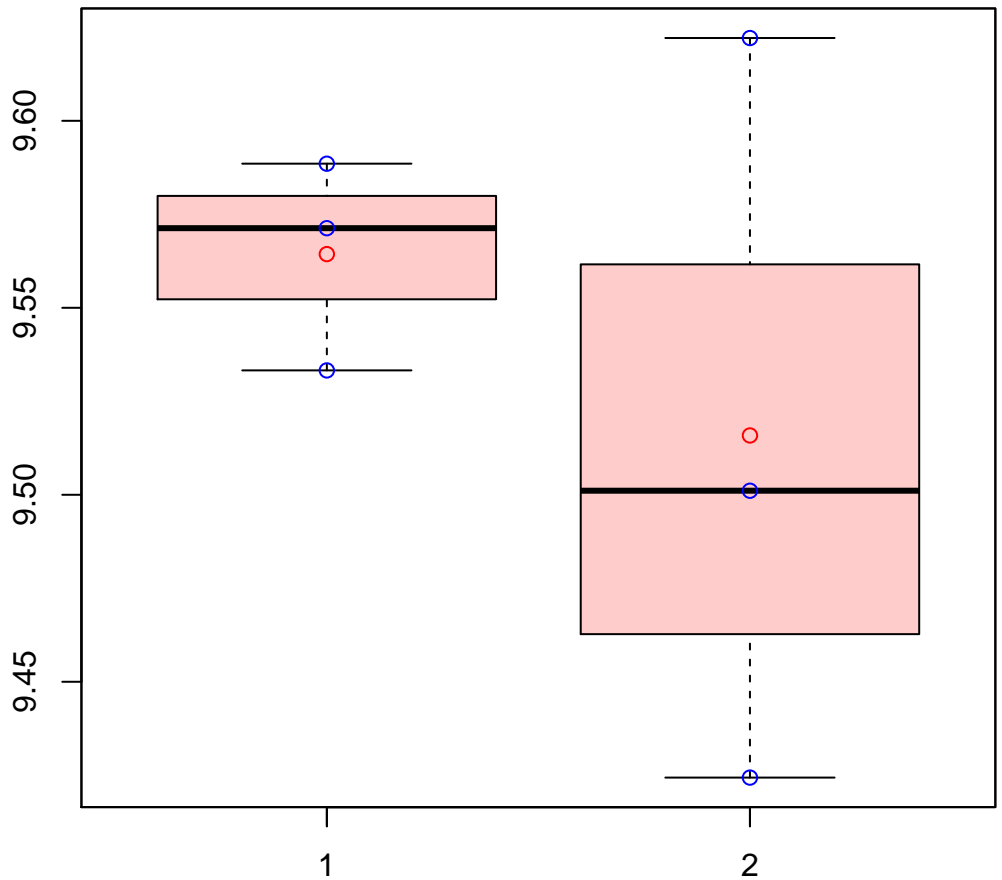

t-Test: p-value = 0.49

# CL1Contig10194|CL1Contig10194

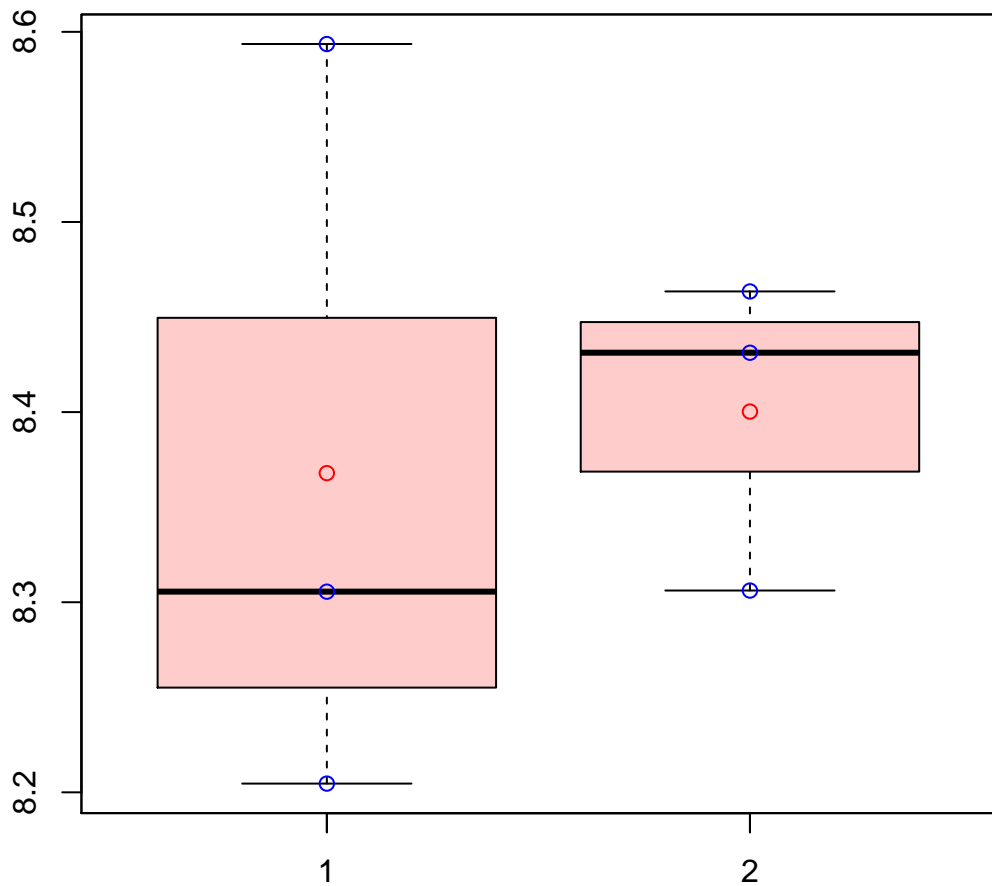

t-Test: p-value = 0.82

# CL1Contig10228|CL1Contig10228

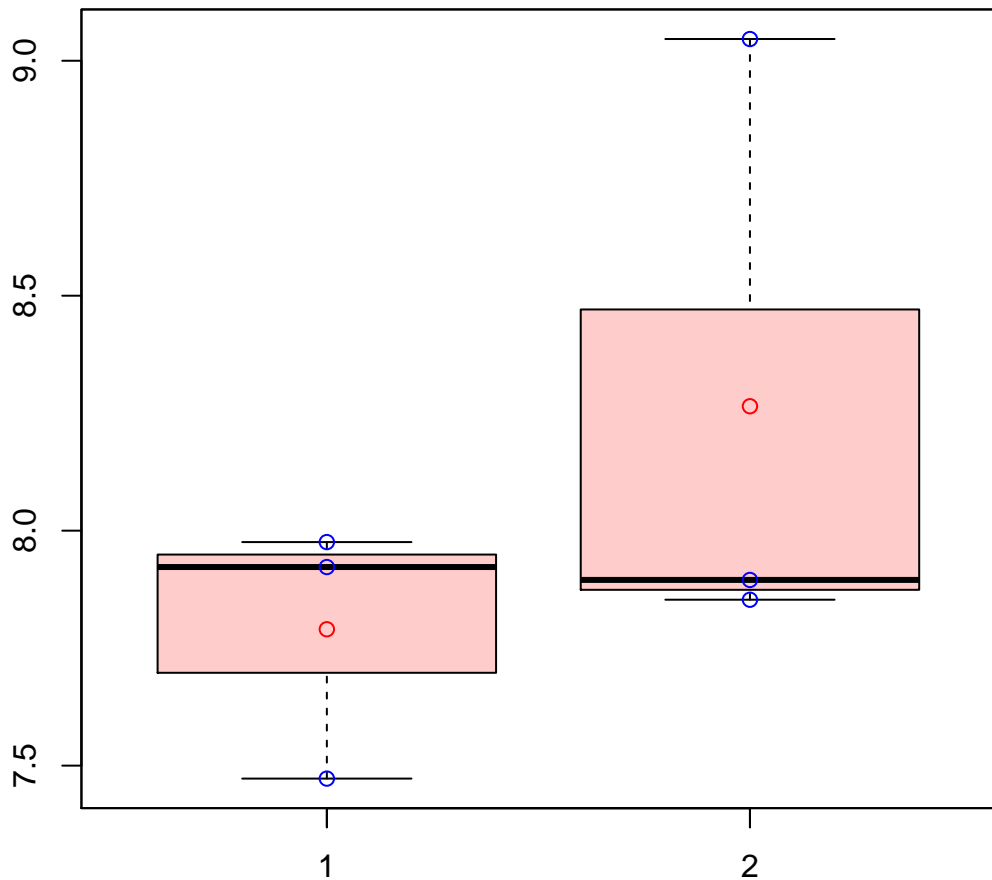

t-Test: p-value = 0.35

# CL1Contig1029|CL1Contig1029

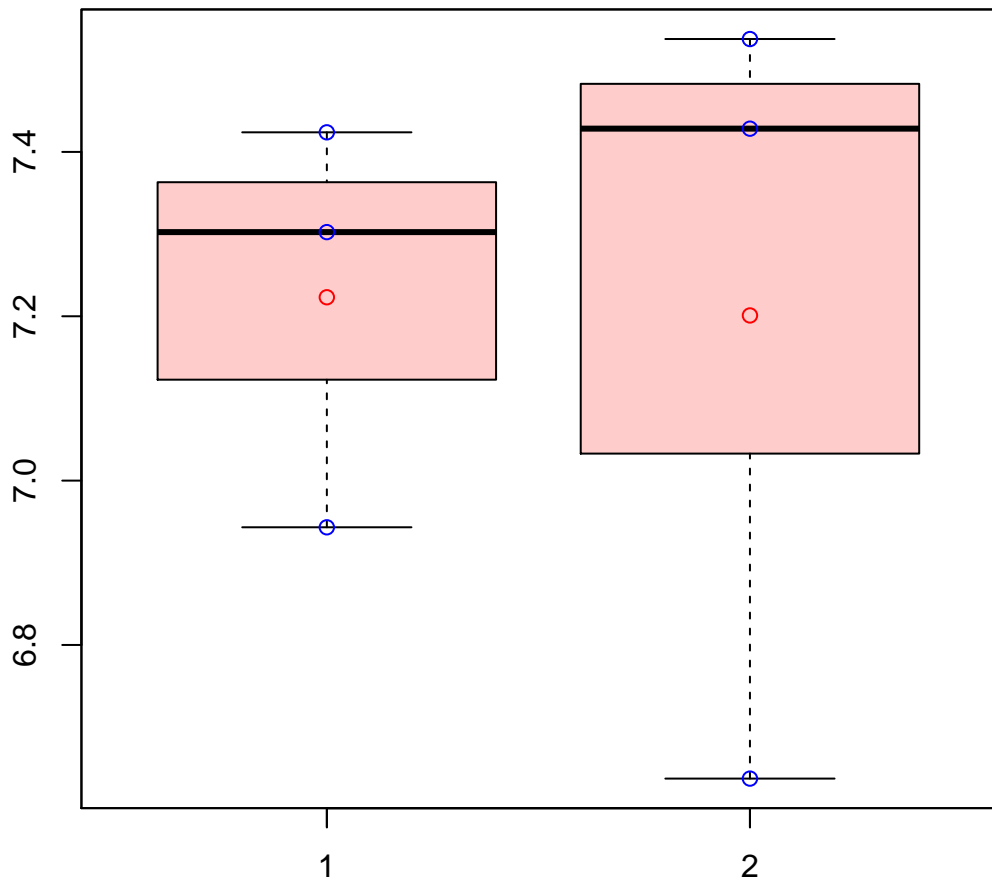

t-Test: p-value = 0.95

# CL1Contig10324|CL1Contig10324

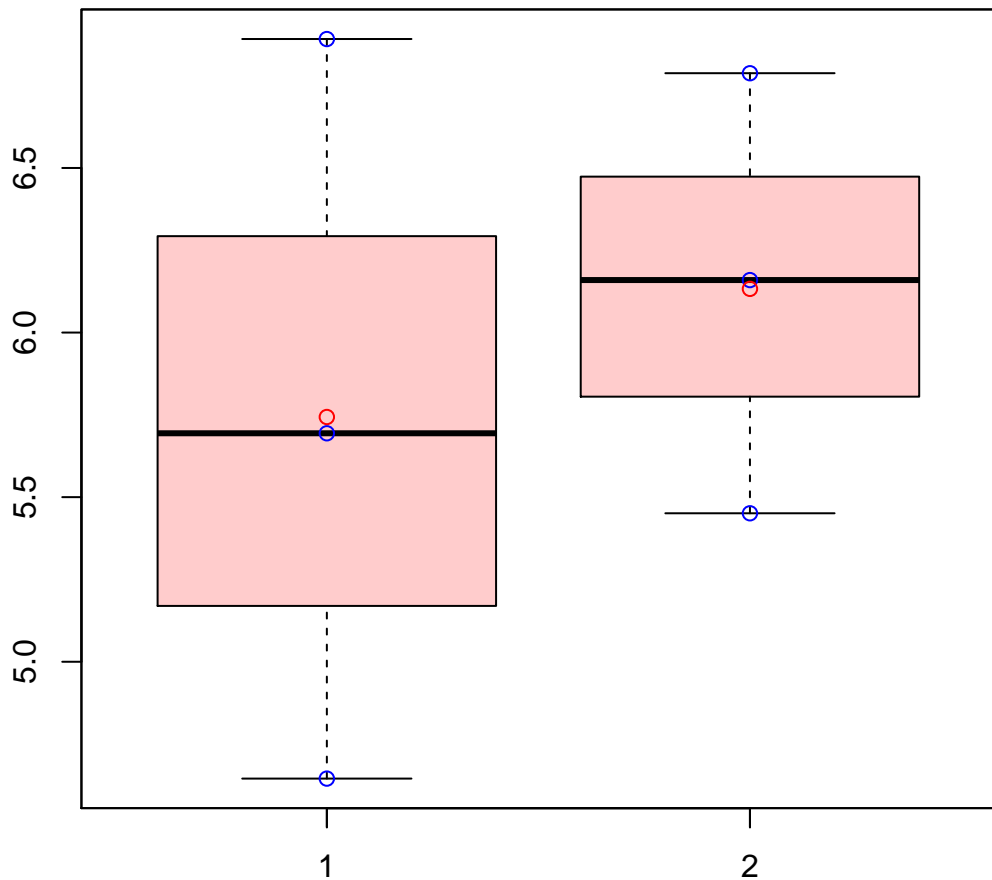

t-Test: p-value = 0.64

# CL1Contig10334|CL1Contig10334

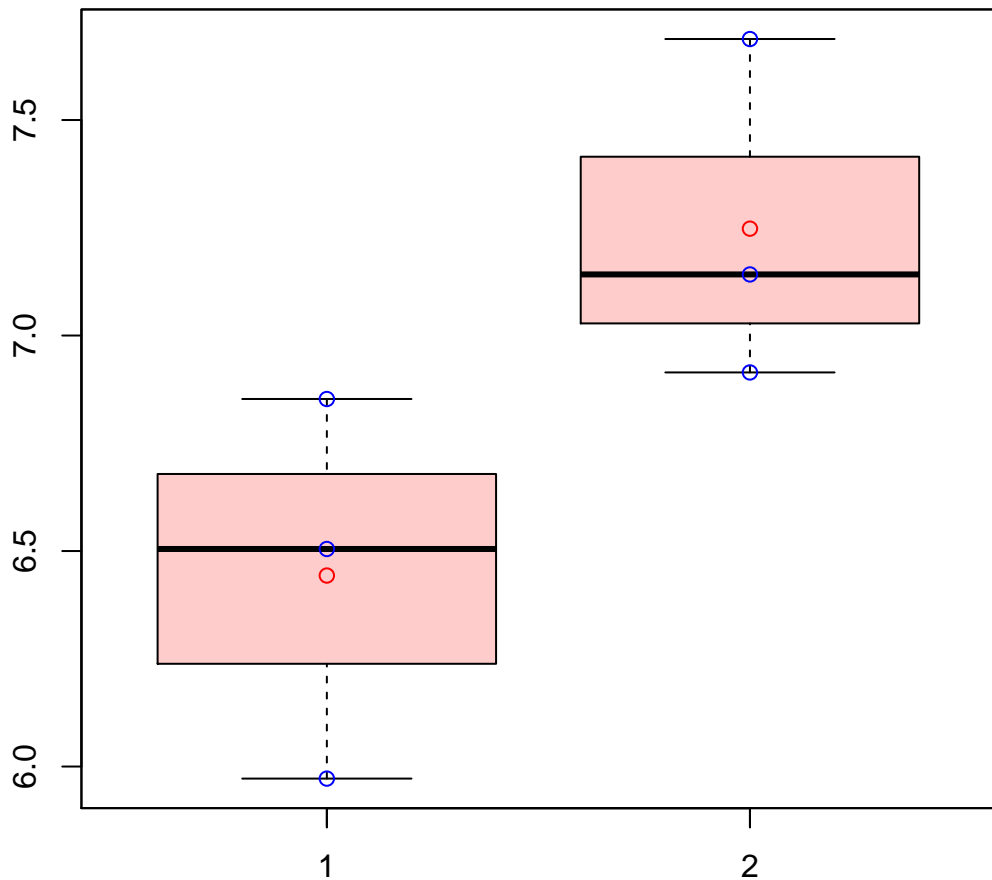

t-Test: p-value = 0.08

# CL1Contig10368|CL1Contig10368

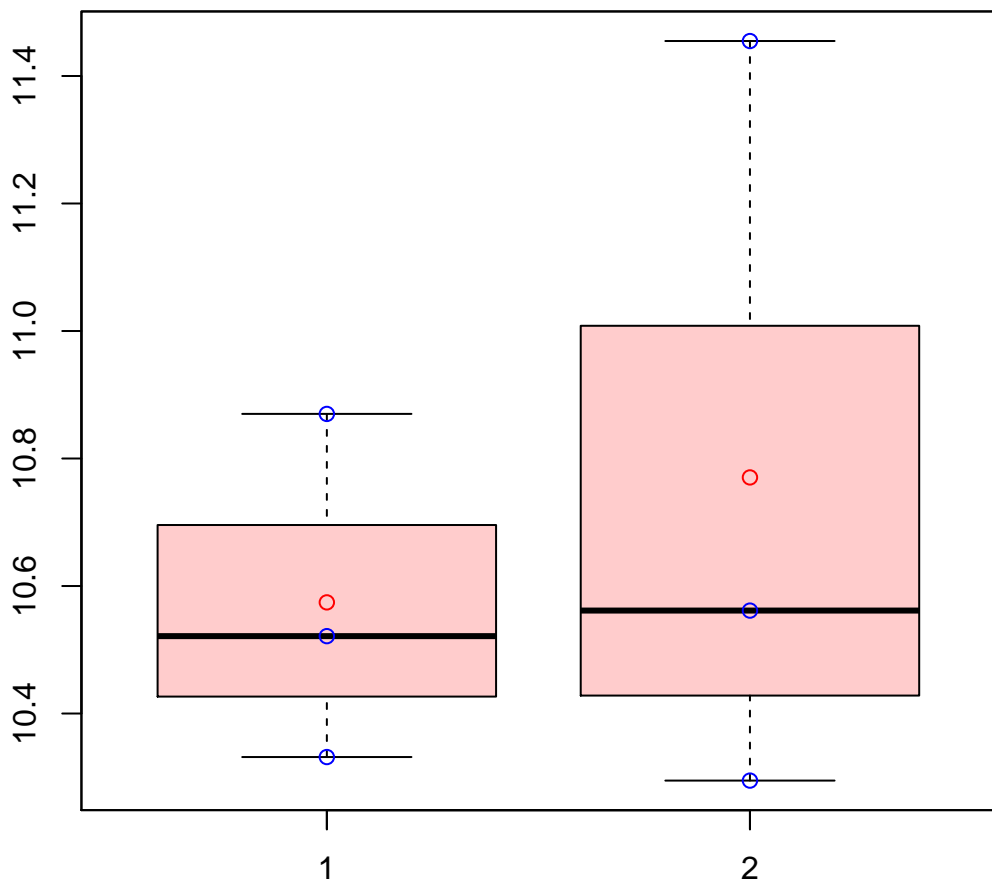

t-Test: p-value = 0.65

# CL1Contig10380|CL1Contig10380

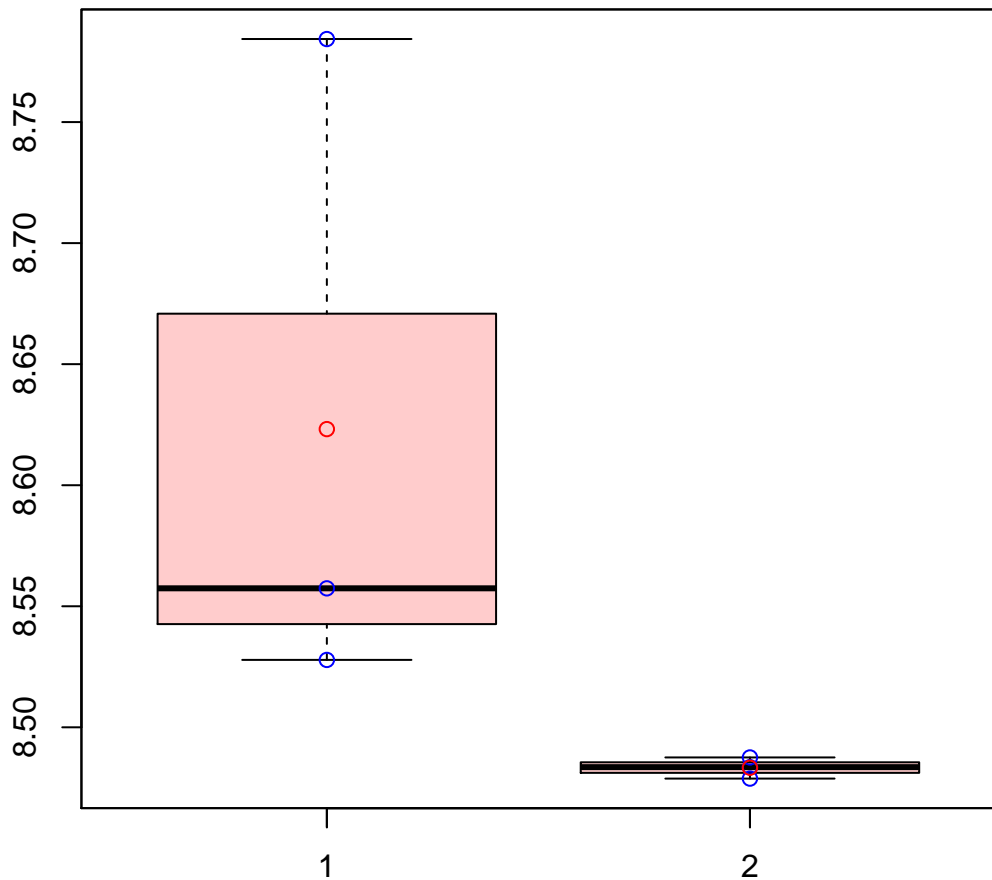

t-Test: p-value = 0.23



# CL1Contig1039|CL1Contig1039

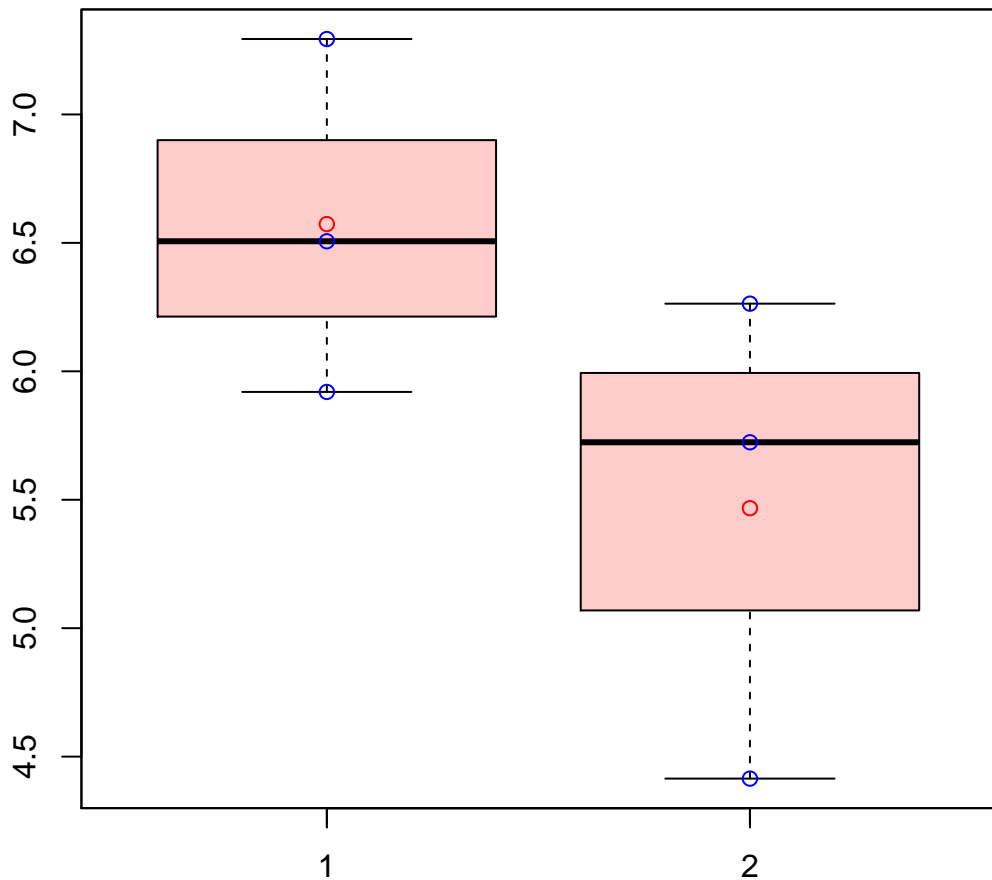

t-Test: p-value = 0.19

# CL1Contig1041|CL1Contig1041

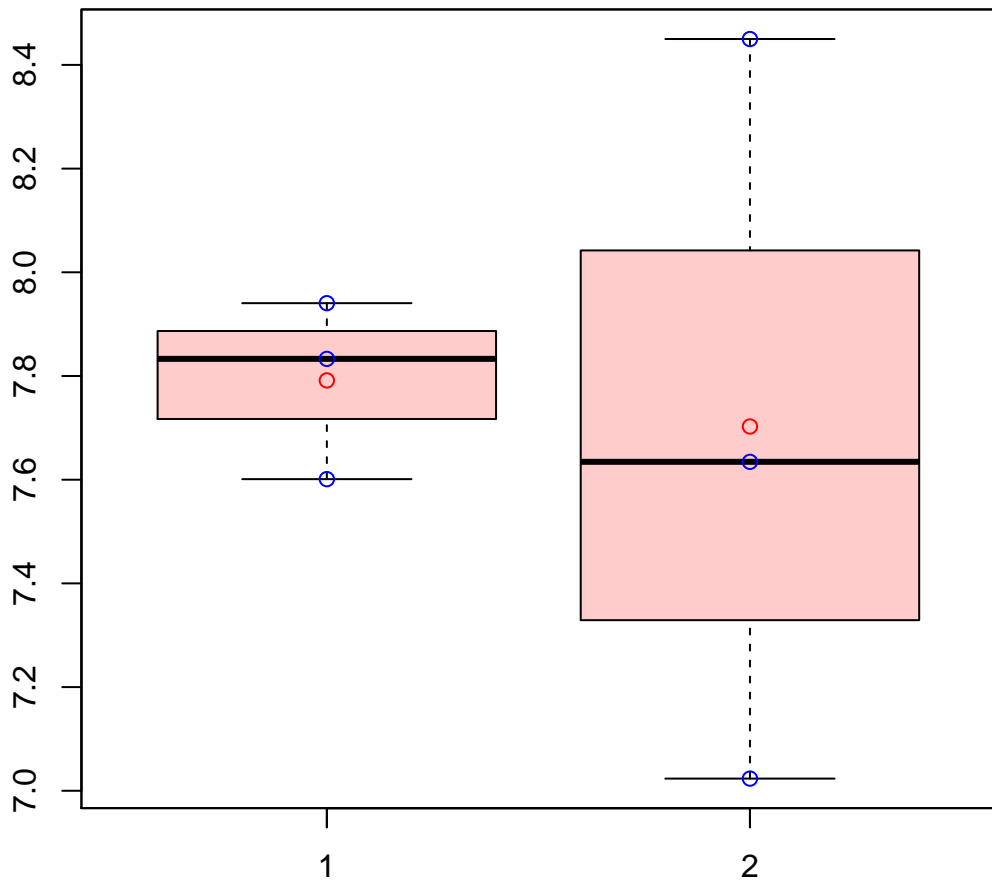

t-Test: p-value = 0.85

# CL1Contig1042|CL1Contig1042

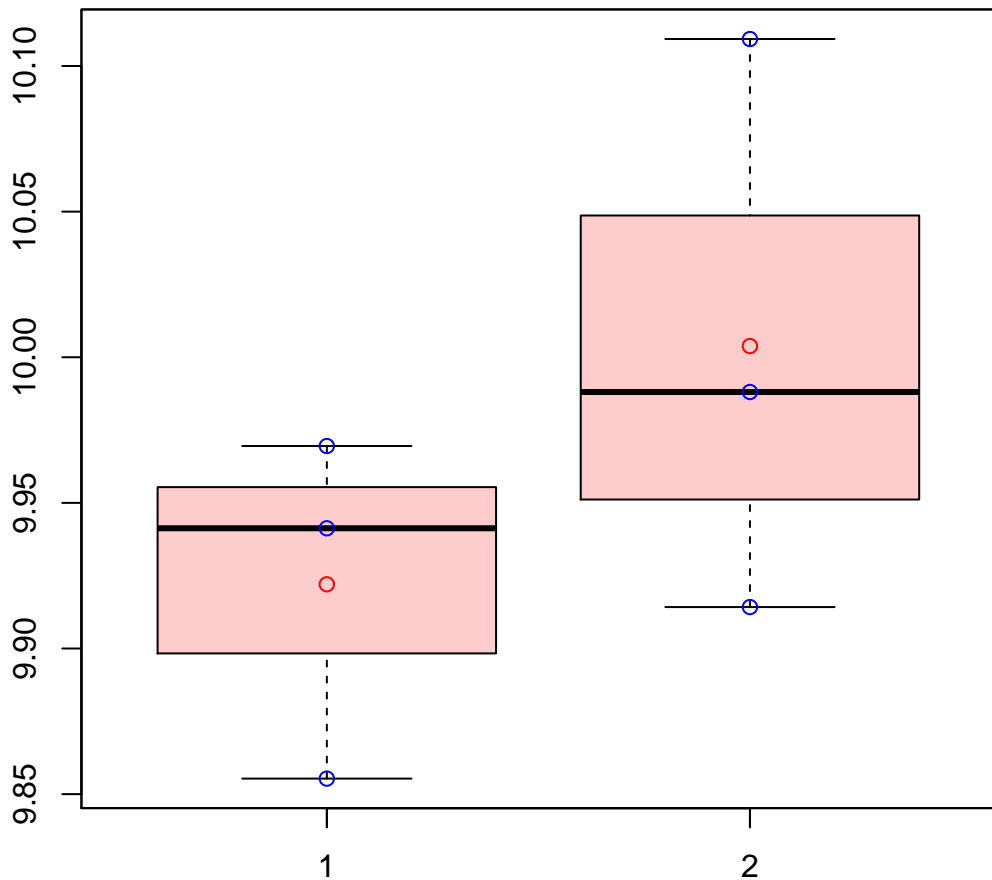

t-Test: p-value = 0.3

# CL1Contig1044|CL1Contig1044

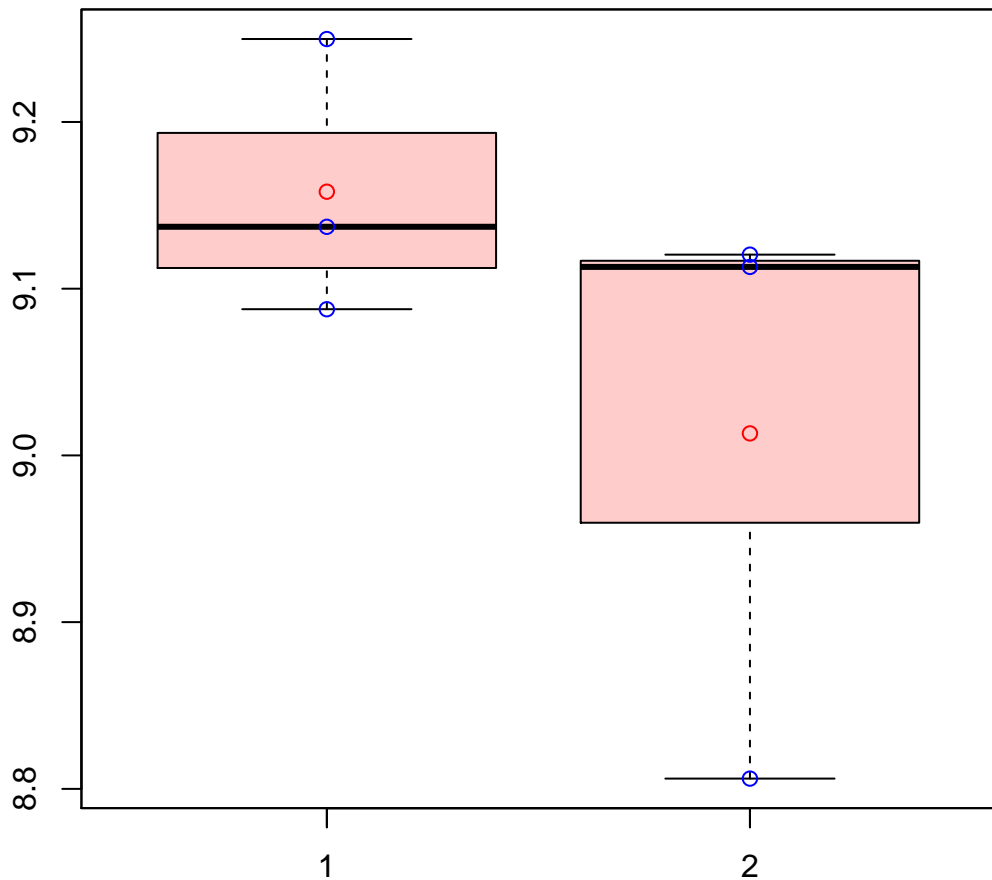

t-Test: p-value = 0.3

# CL1Contig1045|CL1Contig1045

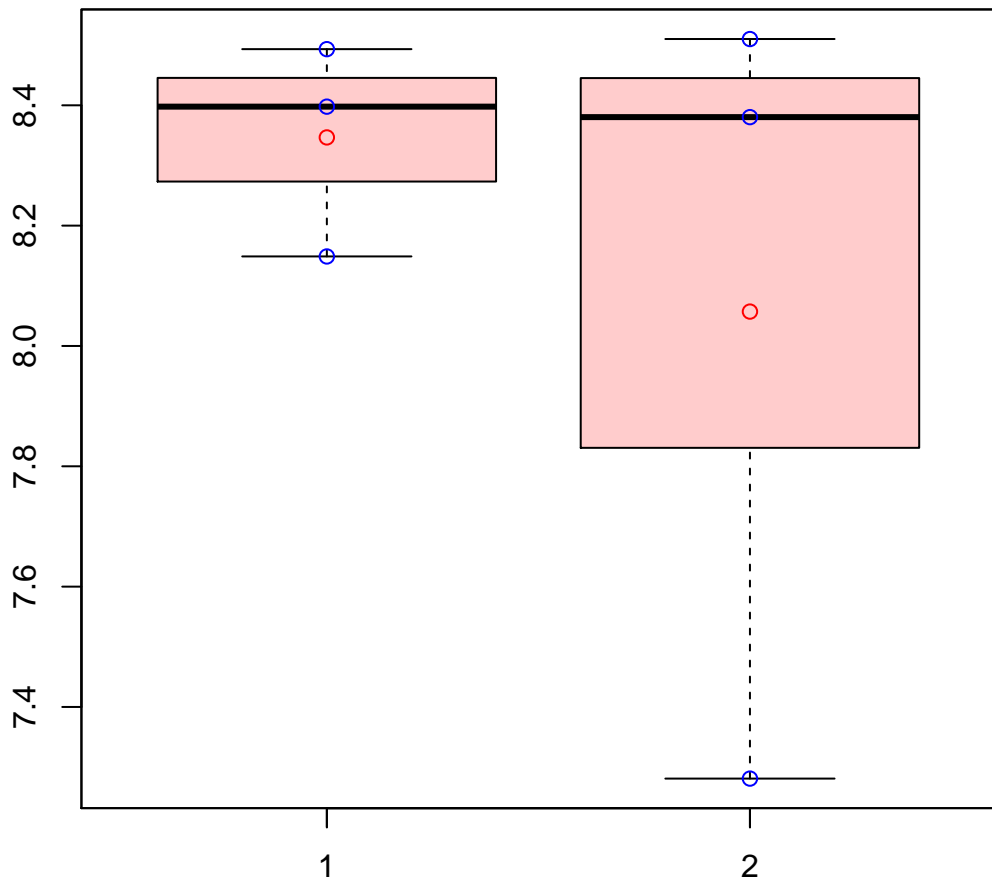

t-Test: p-value = 0.54

# CL1Contig10463|CL1Contig10463

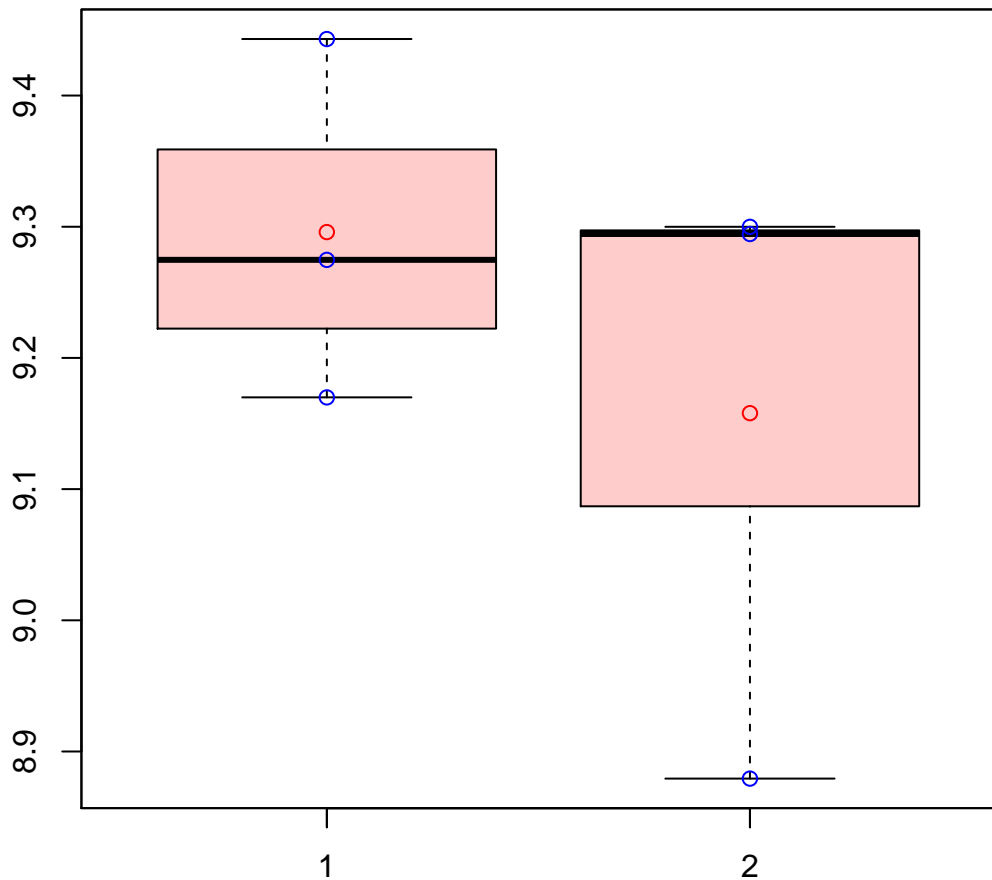

t-Test: p-value = 0.45

# CL1Contig10495|CL1Contig10495

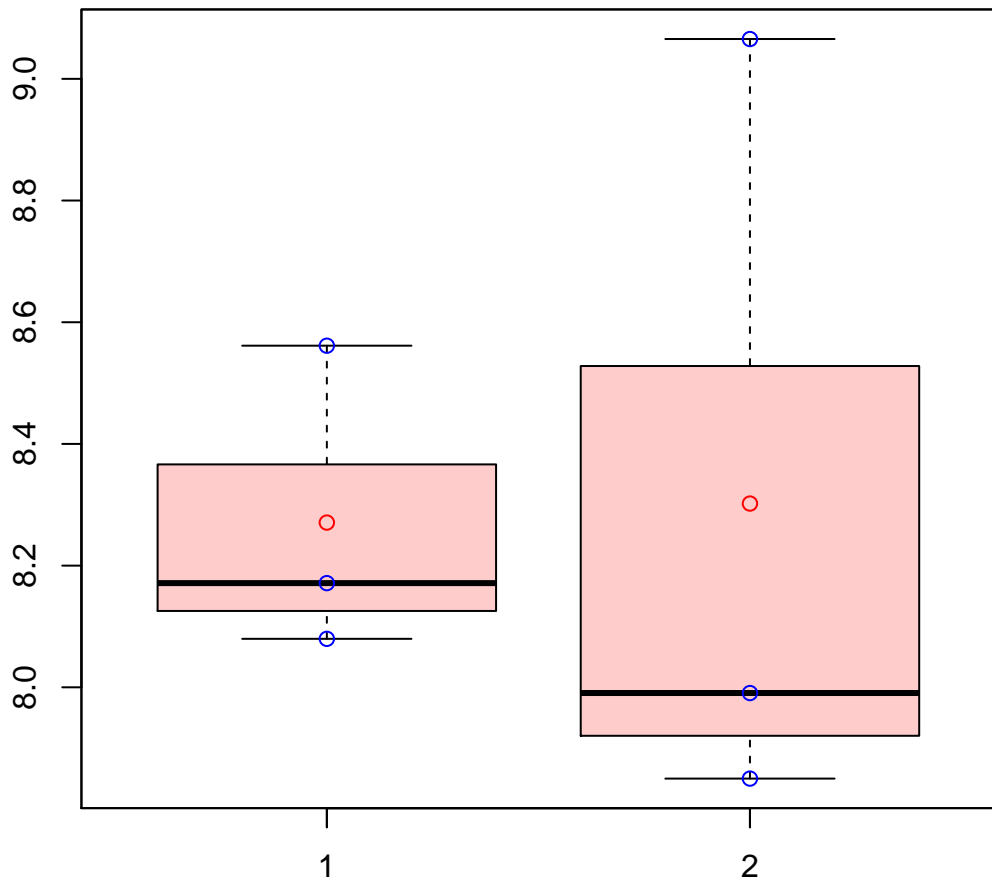

t-Test: p-value = 0.94

# CL1Contig10521|CL1Contig10521

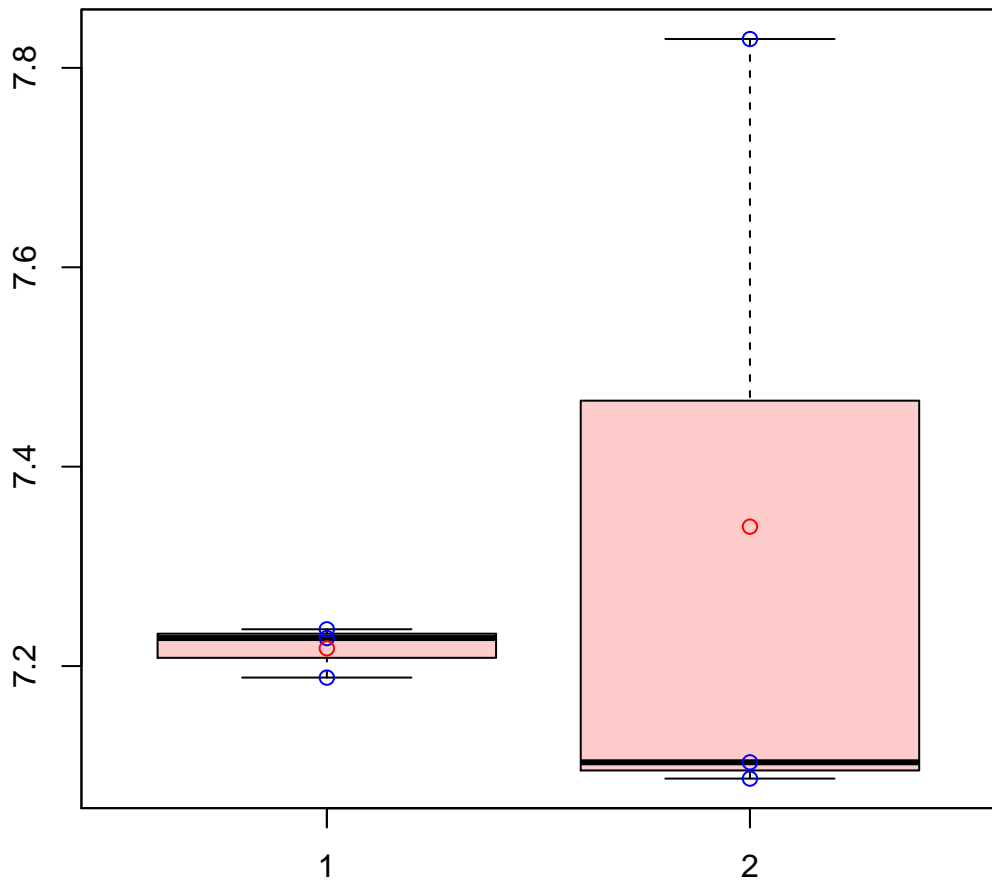

t-Test: p-value = 0.67



# CL1Contig10599|CL1Contig10599

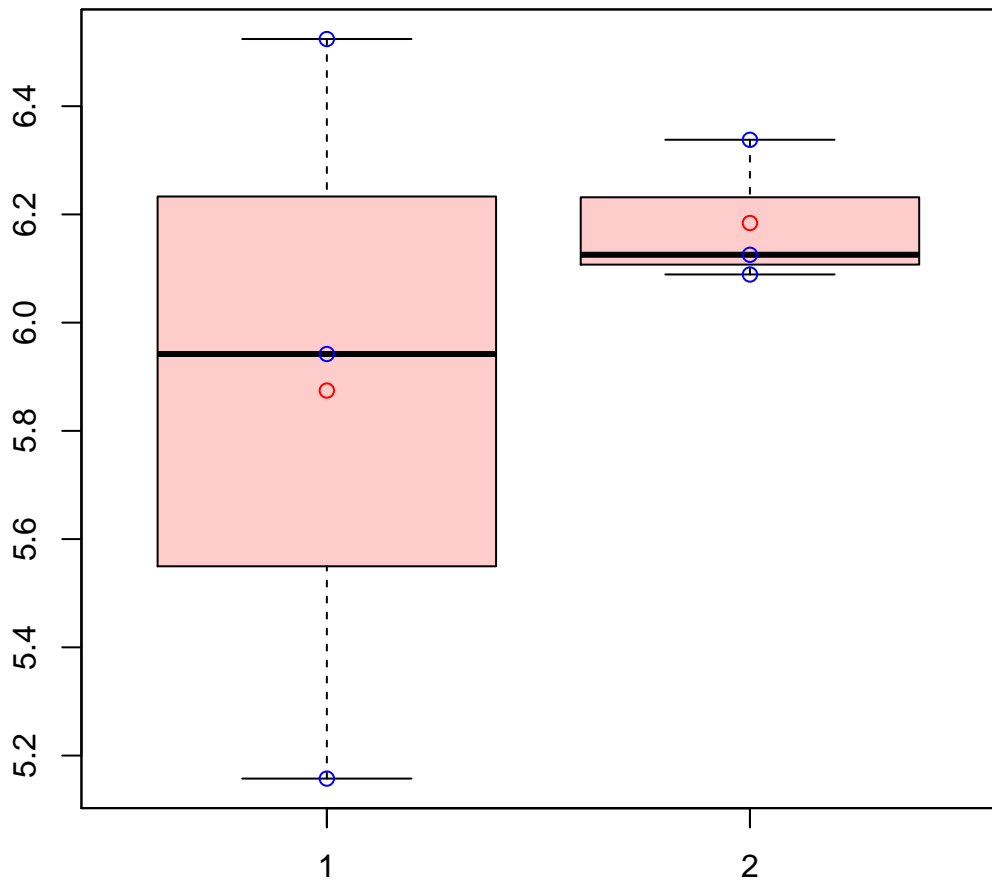

t-Test: p-value = 0.52

# CL1Contig10616|CL1Contig10616

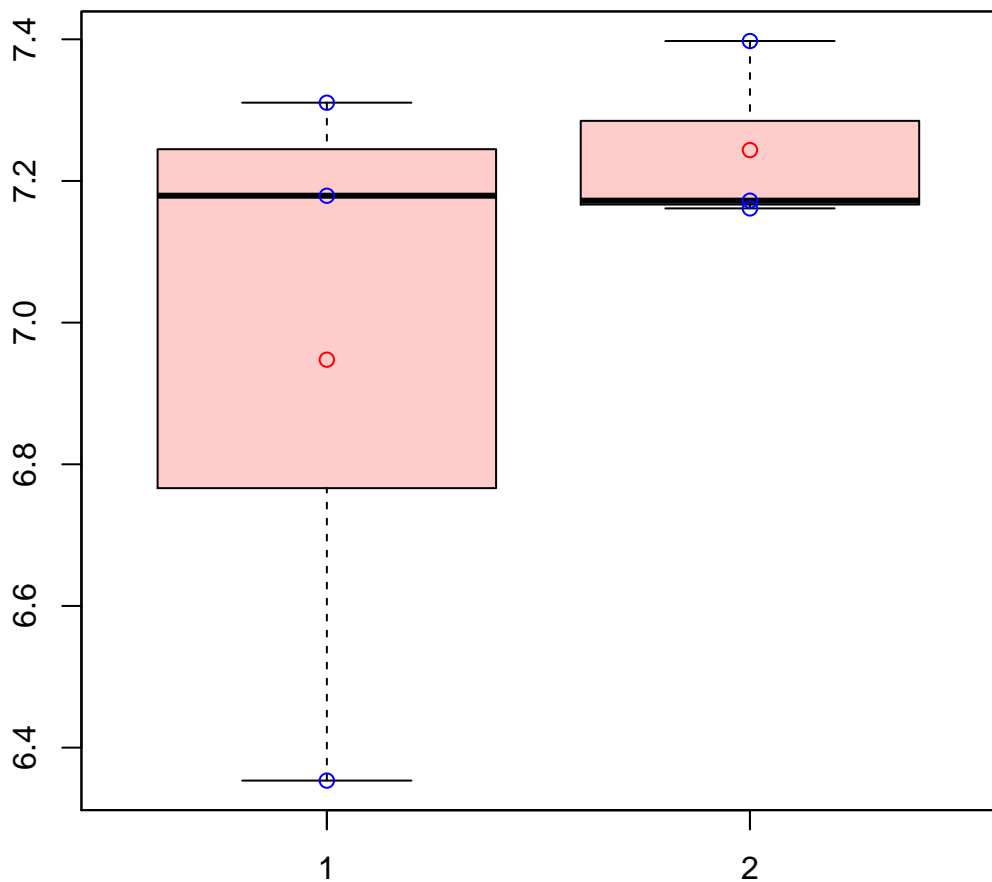

t-Test: p-value = 0.43

# CL1Contig1061|CL1Contig1061

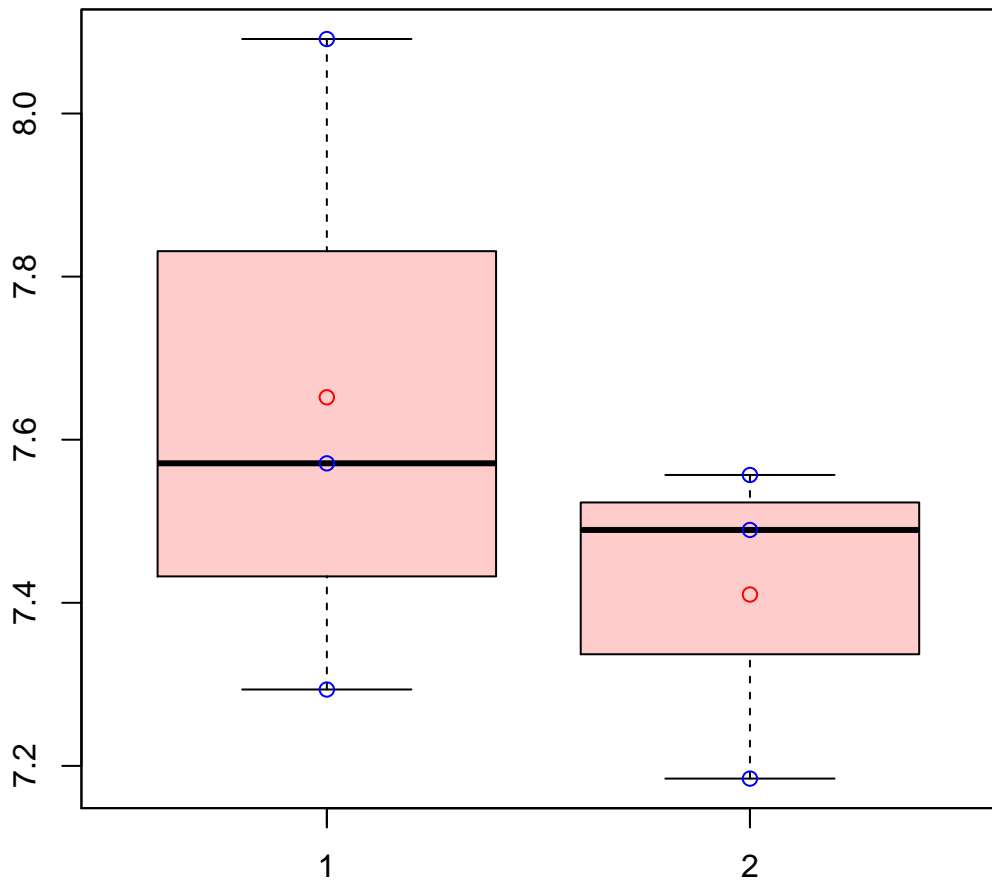

t-Test: p-value = 0.42

# CL1Contig10638|CL1Contig10638

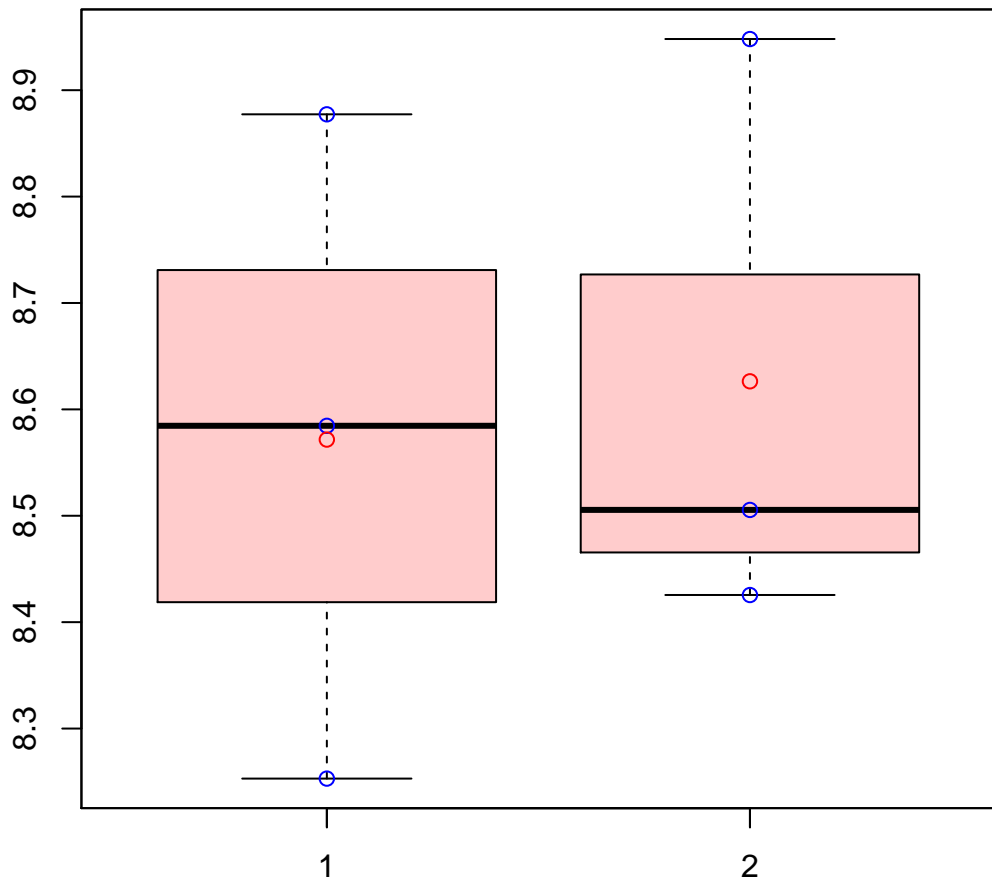

t-Test: p-value = 0.83

# CL1Contig10662|CL1Contig10662

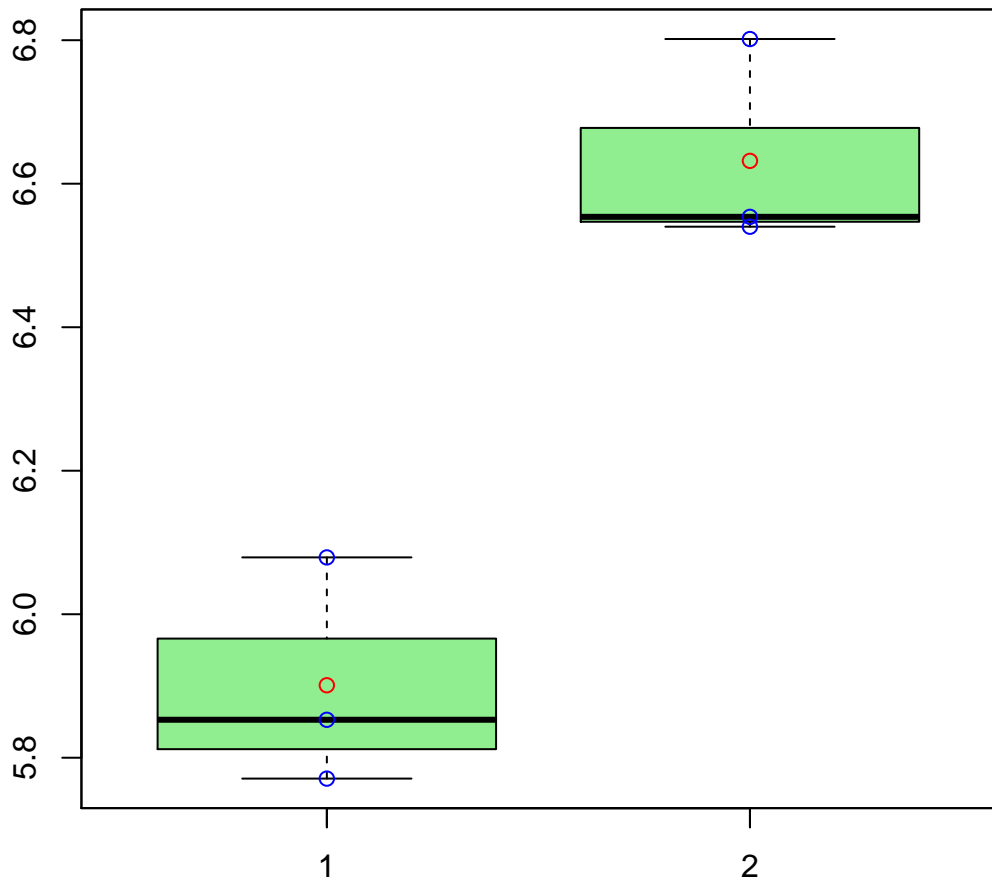

t-Test: p-value = 0

# CL1Contig10673|CL1Contig10673

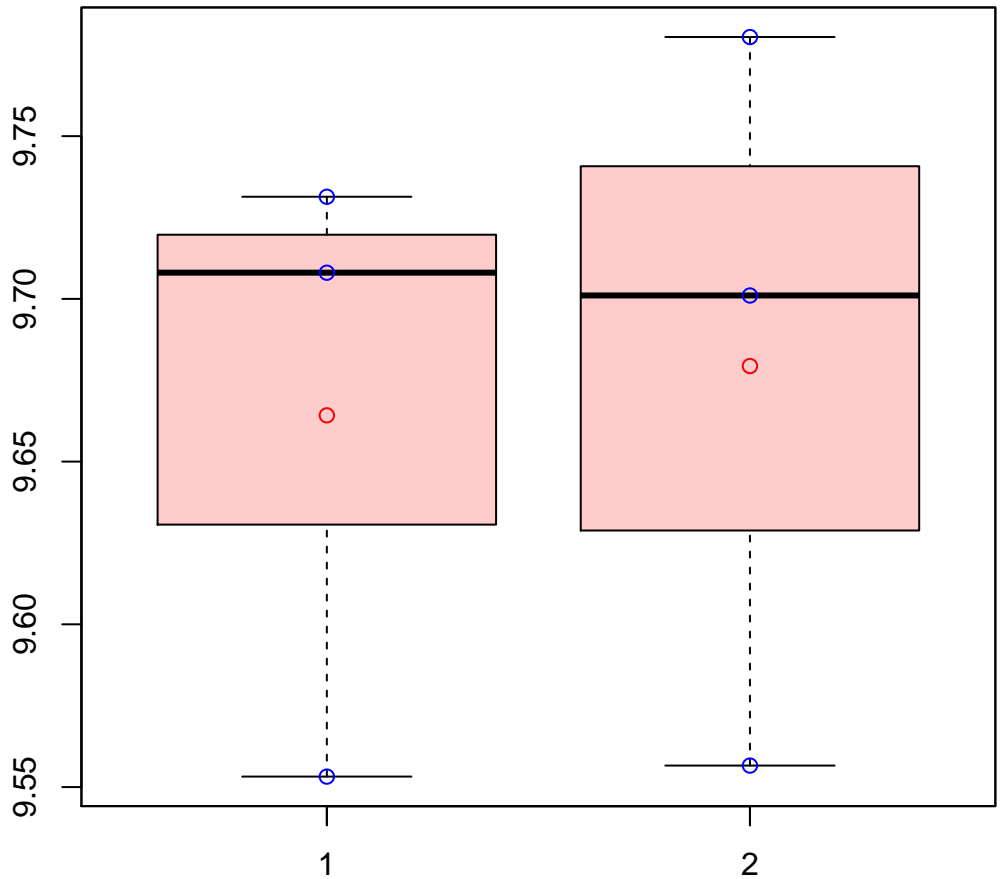

t-Test: p-value = 0.87

# CL1Contig10682|CL1Contig10682

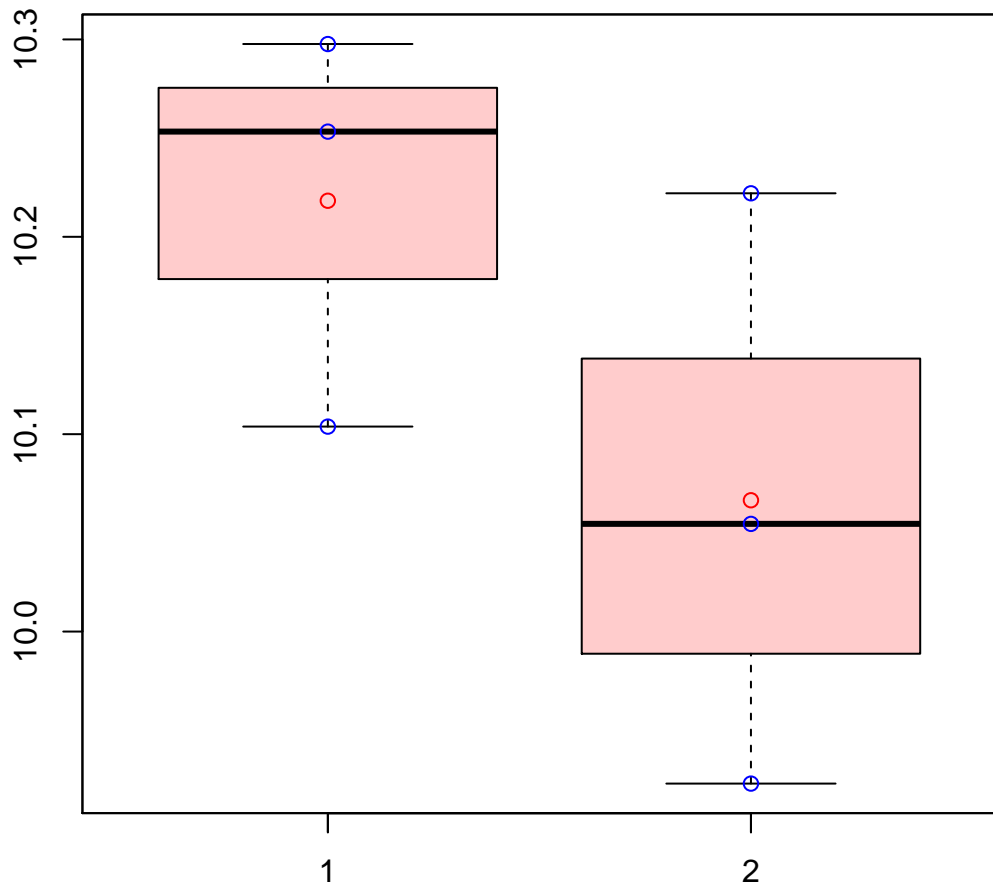

t-Test: p-value = 0.23

# CL1Contig10683|CL1Contig10683

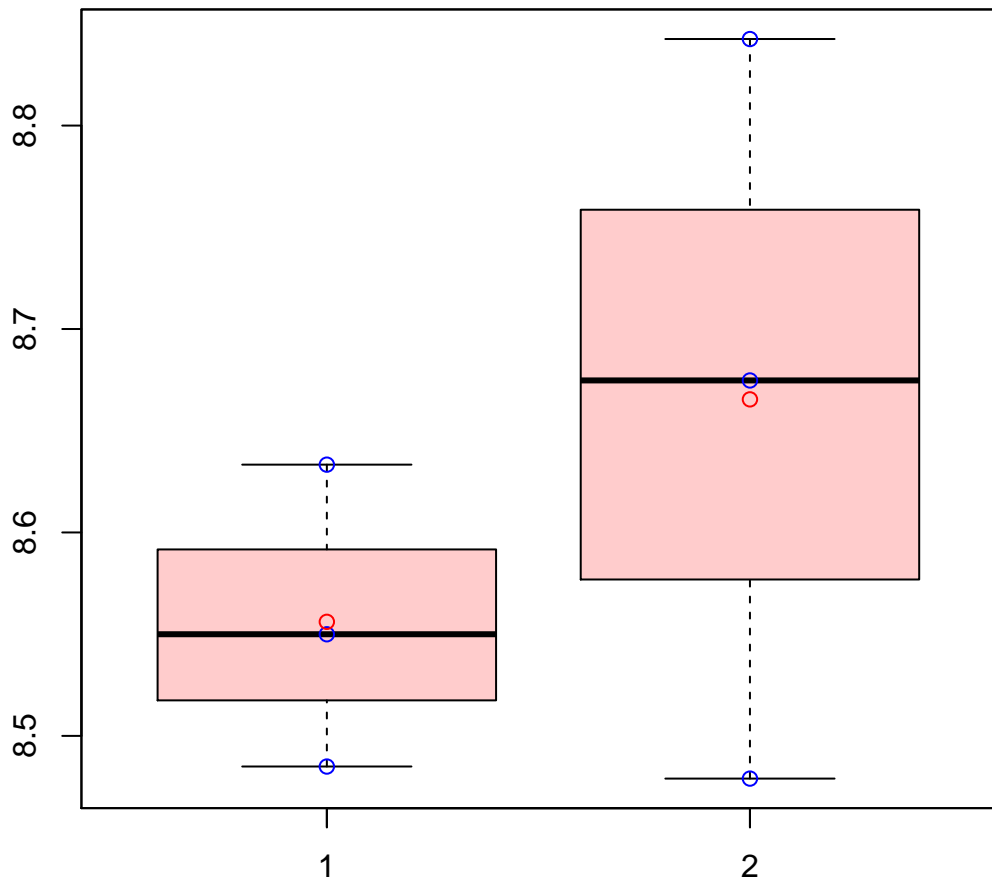

t-Test: p-value = 0.41



# CL1Contig10707|CL1Contig10707

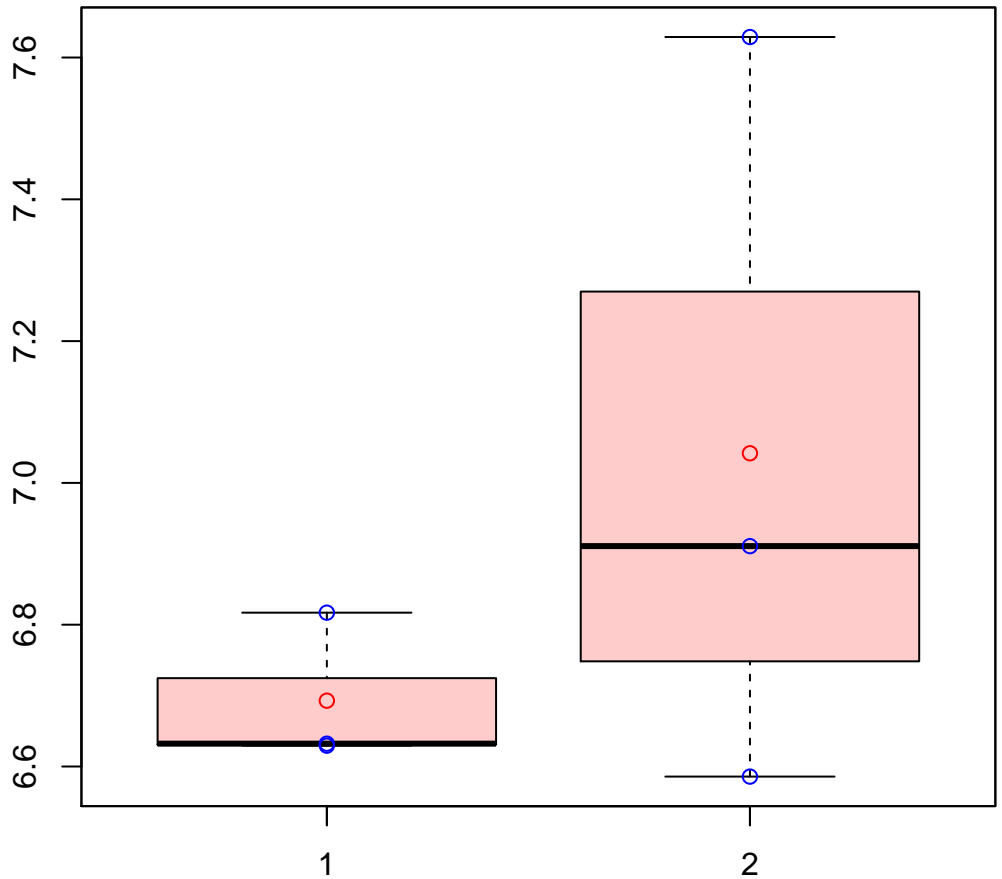

t-Test: p-value = 0.38

# CL1Contig10729|CL1Contig10729

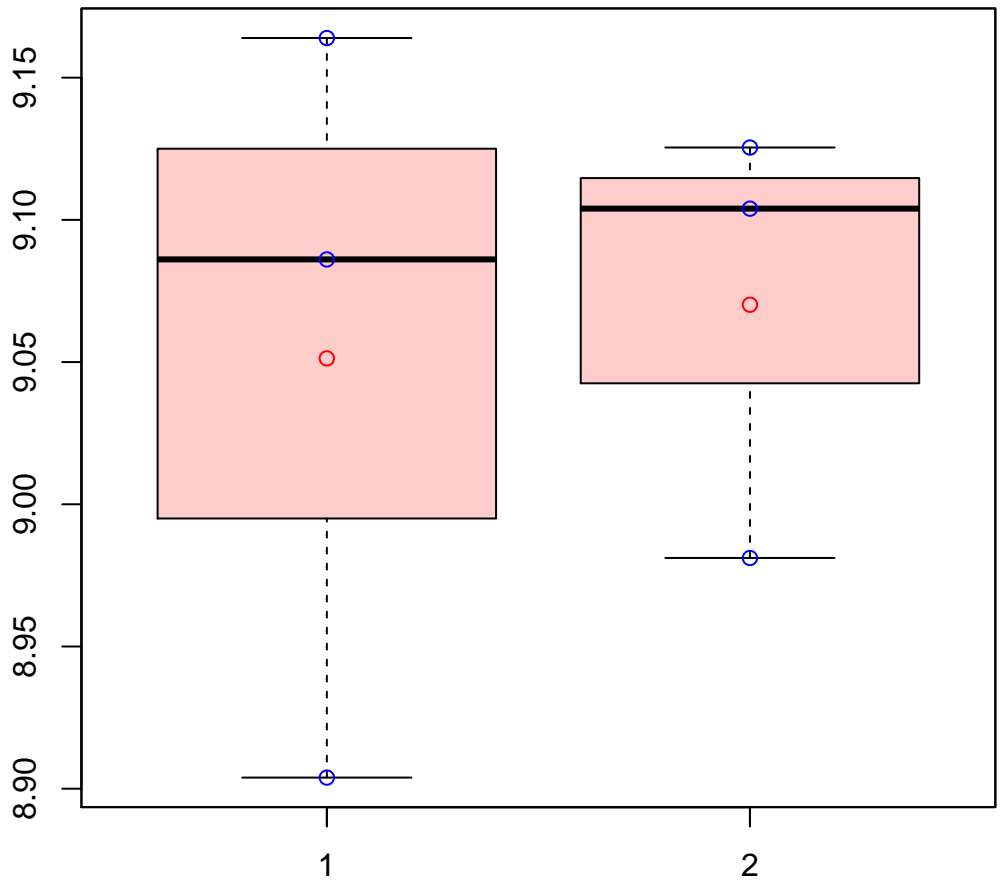

t-Test: p-value = 0.85

# CL1Contig10732|CL1Contig10732

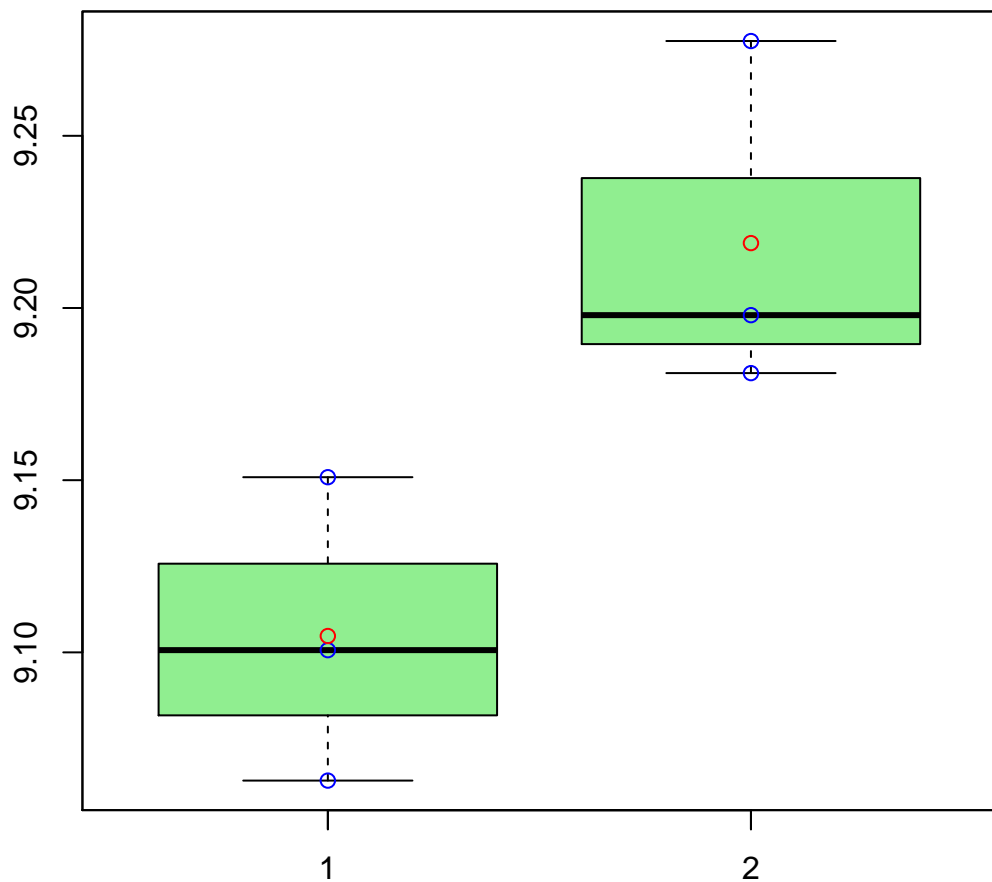

t-Test: p-value = 0.04

# CL1Contig1082|CL1Contig1082

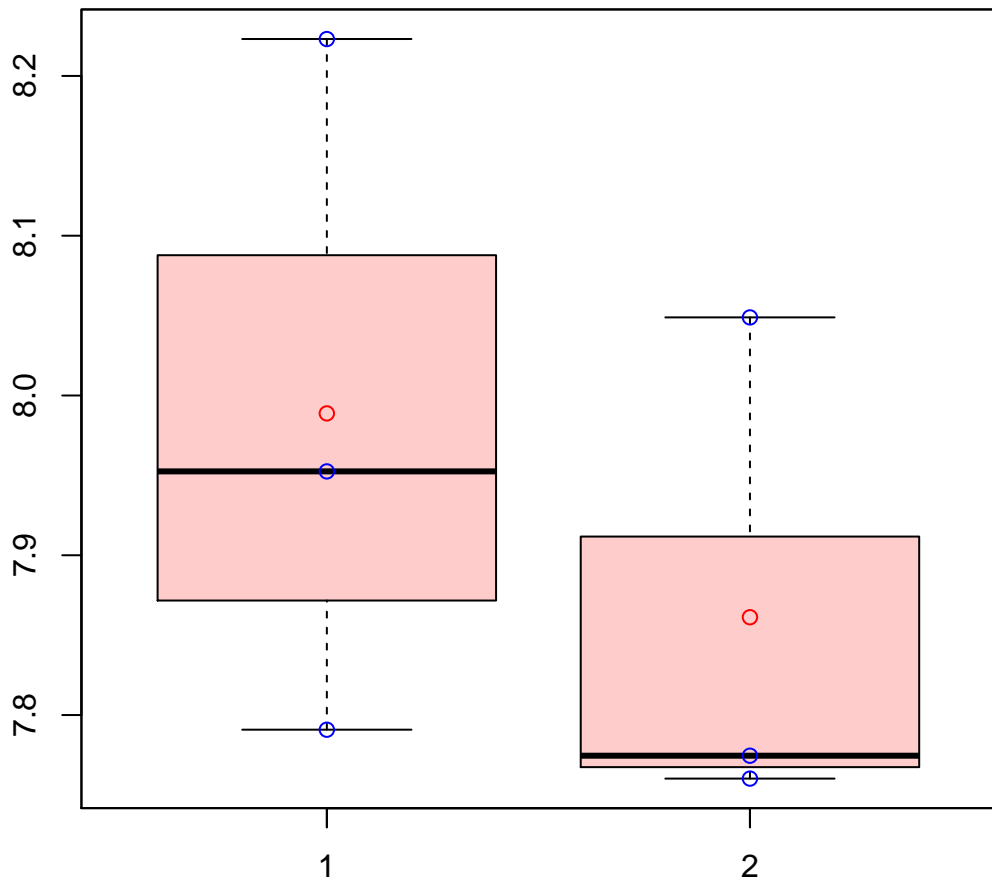

t-Test: p-value = 0.47

# CL1Contig1125|CL1Contig1125

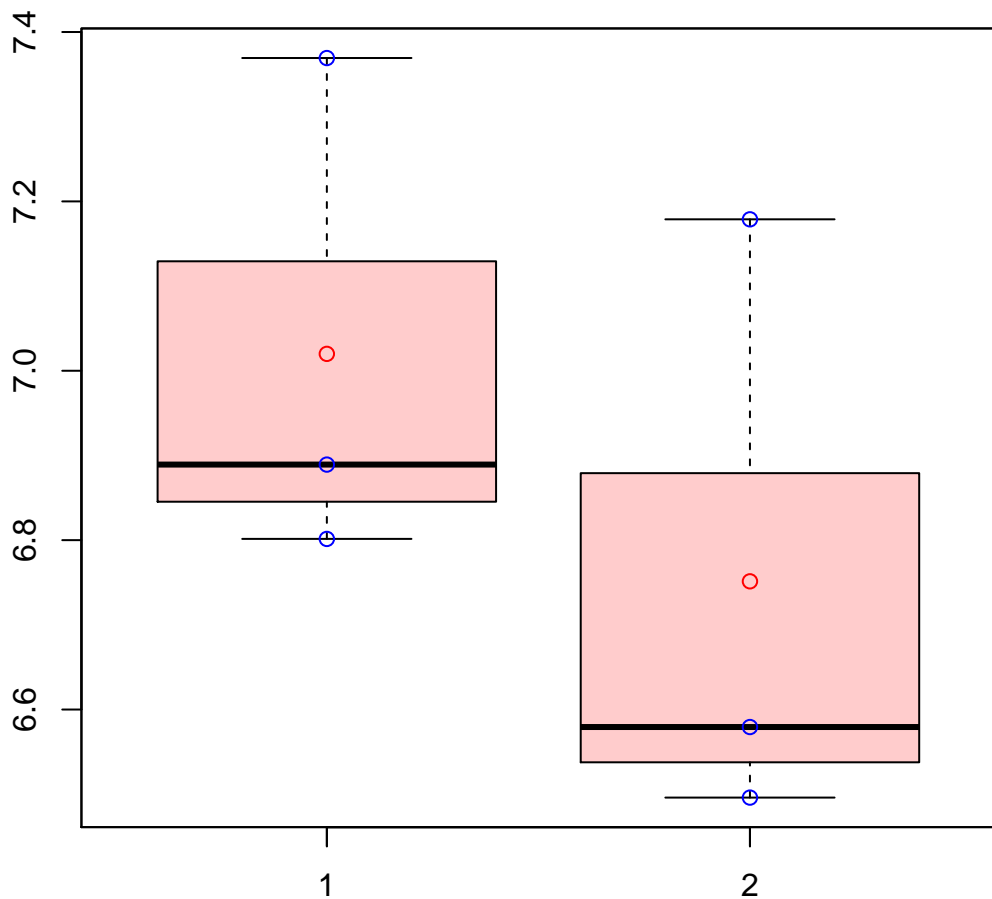

t-Test: p-value = 0.39

# CL1Contig1151|CL1Contig1151

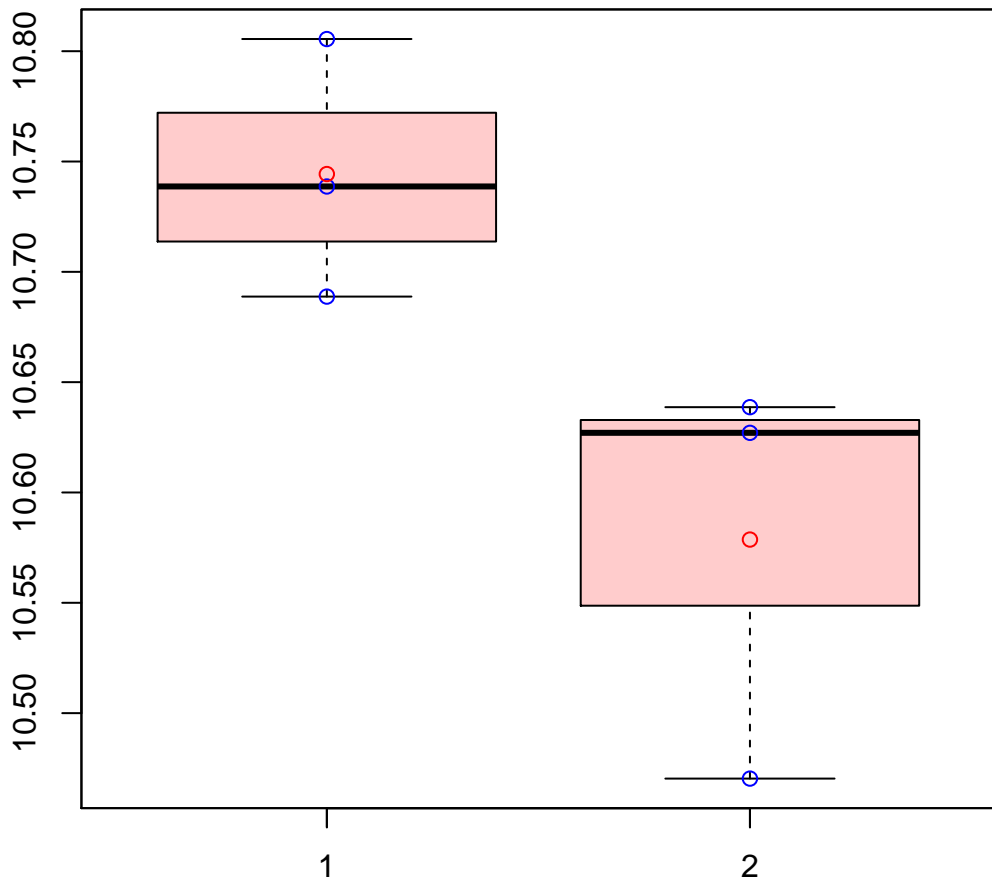

t-Test: p-value = 0.07

# CL1Contig1165|CL1Contig1165

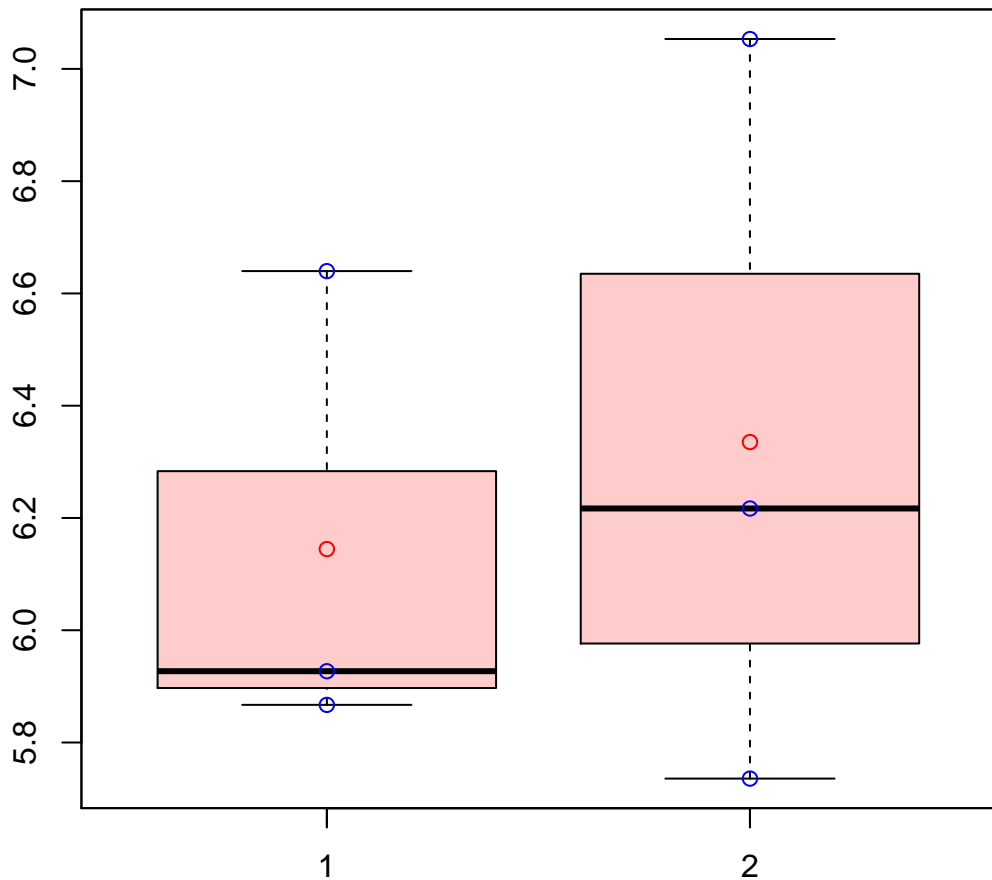

t-Test: p-value = 0.7

# CL1Contig1174|CL1Contig1174

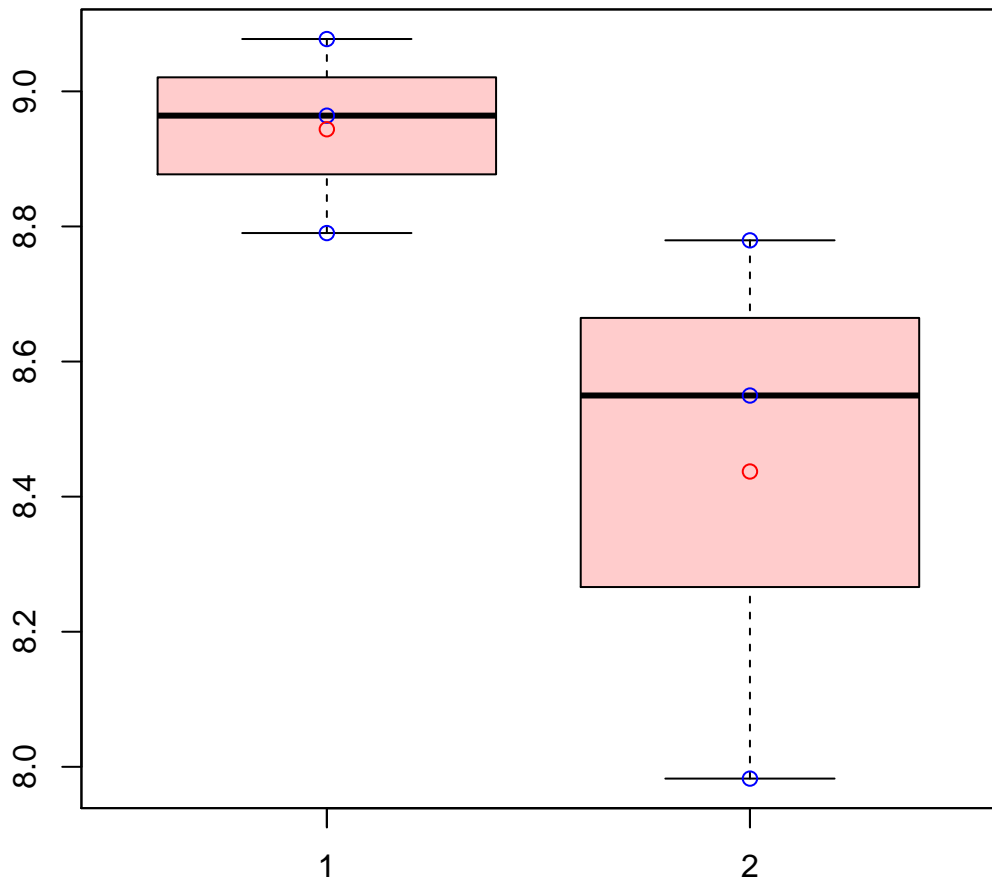

t-Test: p-value = 0.16



# CL1Contig1184|CL1Contig1184

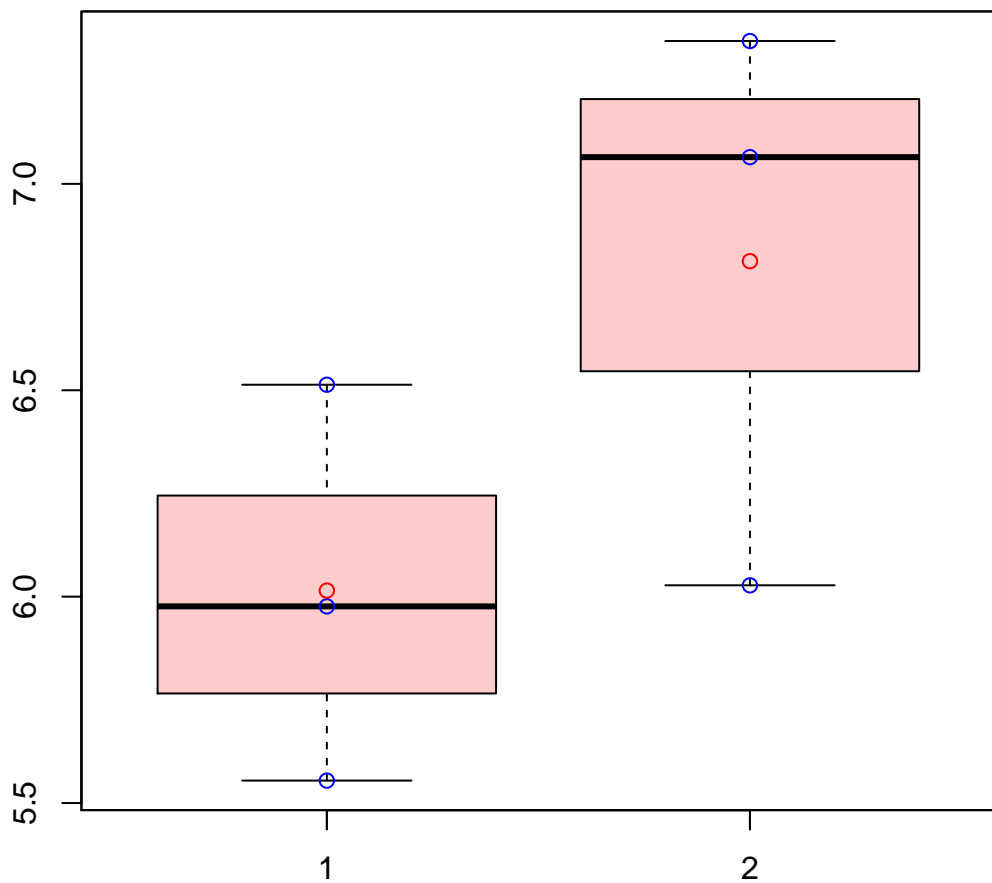

t-Test: p-value = 0.19

# CL1Contig1272|CL1Contig1272

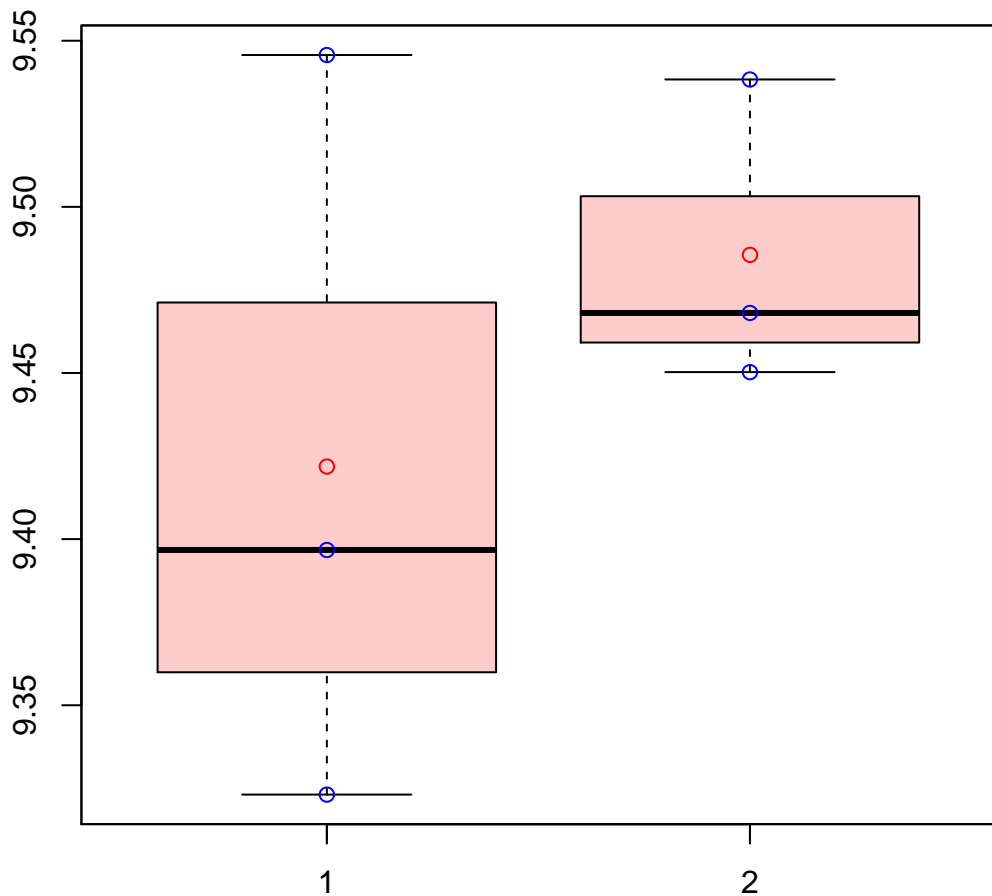

t-Test: p-value = 0.44

# CL1Contig1301|CL1Contig1301

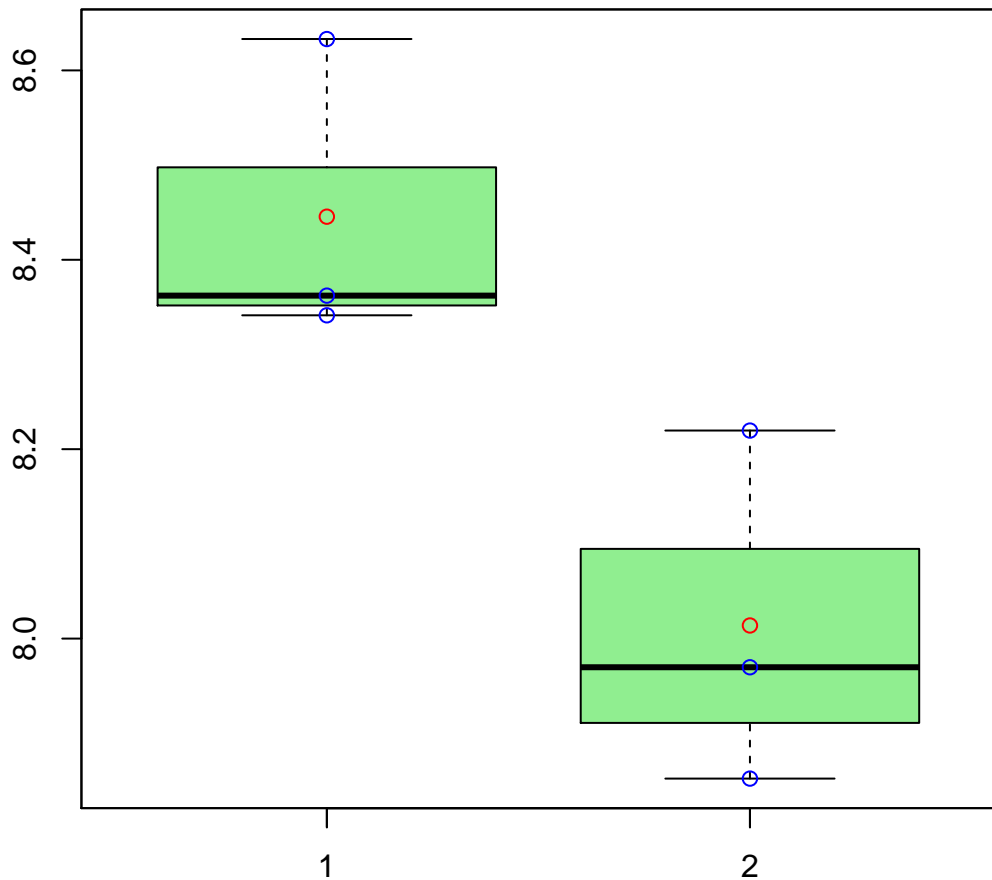

t-Test: p-value = 0.04

# CL1Contig1382|CL1Contig1382

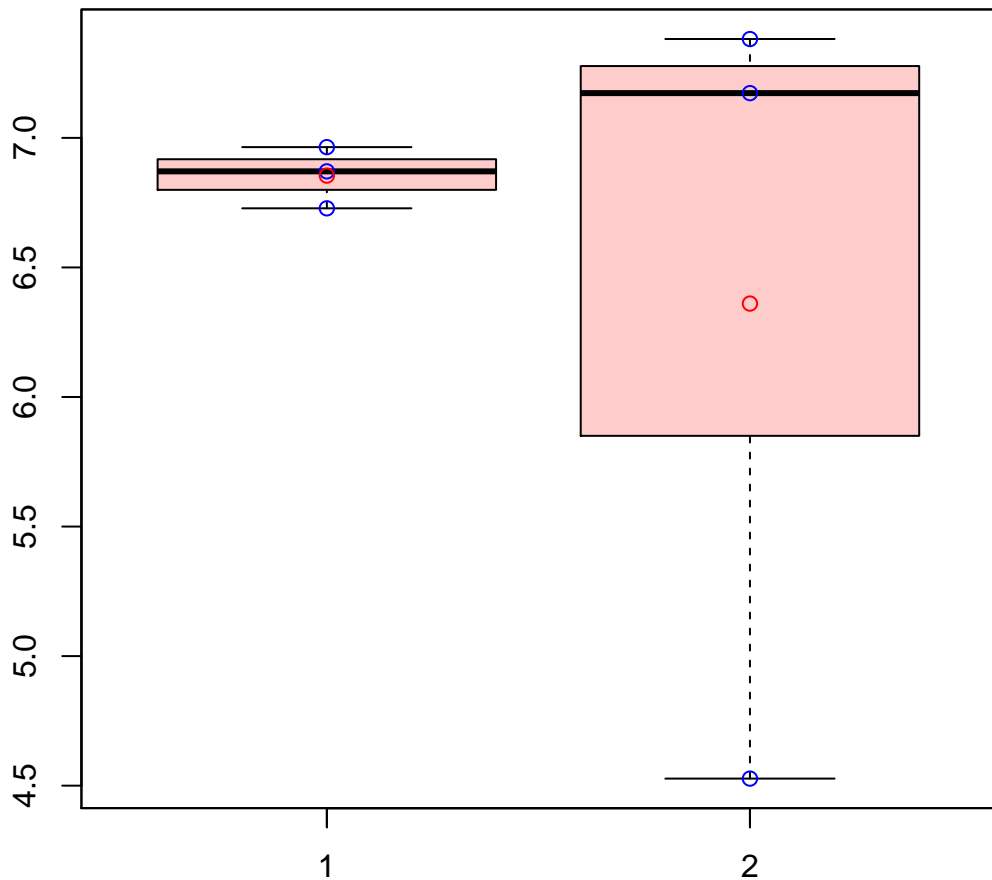

t-Test: p-value = 0.64

# CL1Contig1458|CL1Contig1458

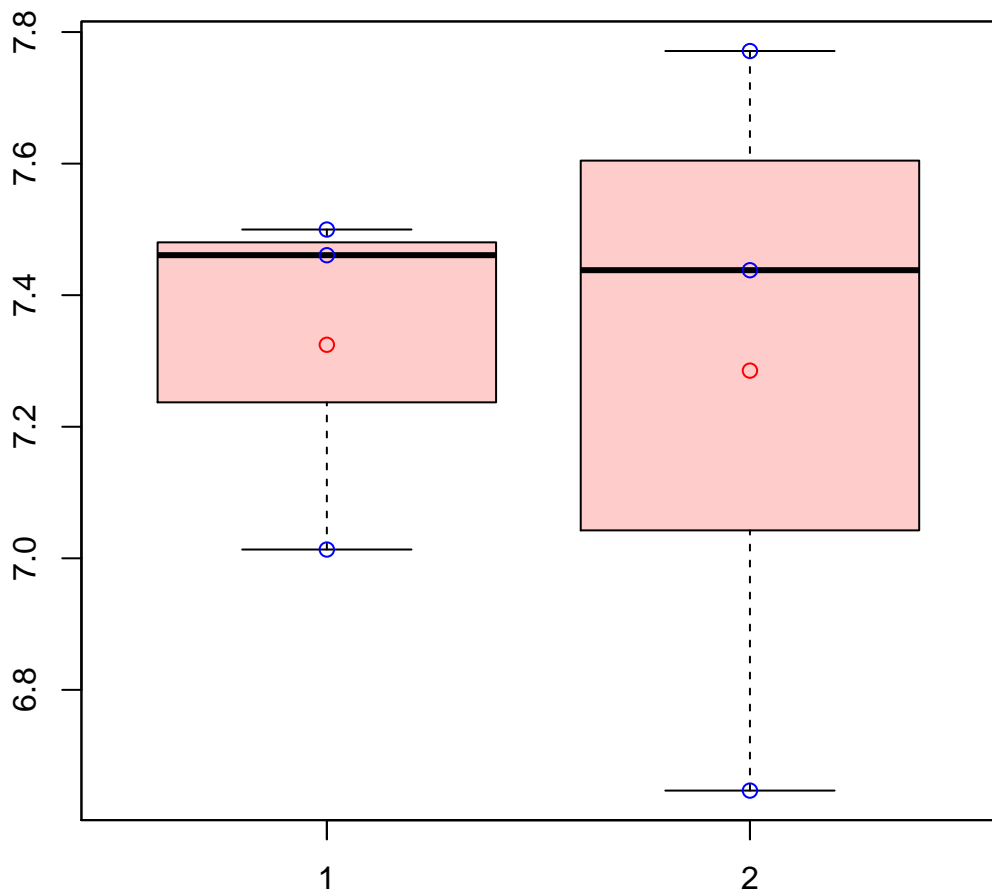

t-Test: p-value = 0.92

# CL1Contig152|CL1Contig152

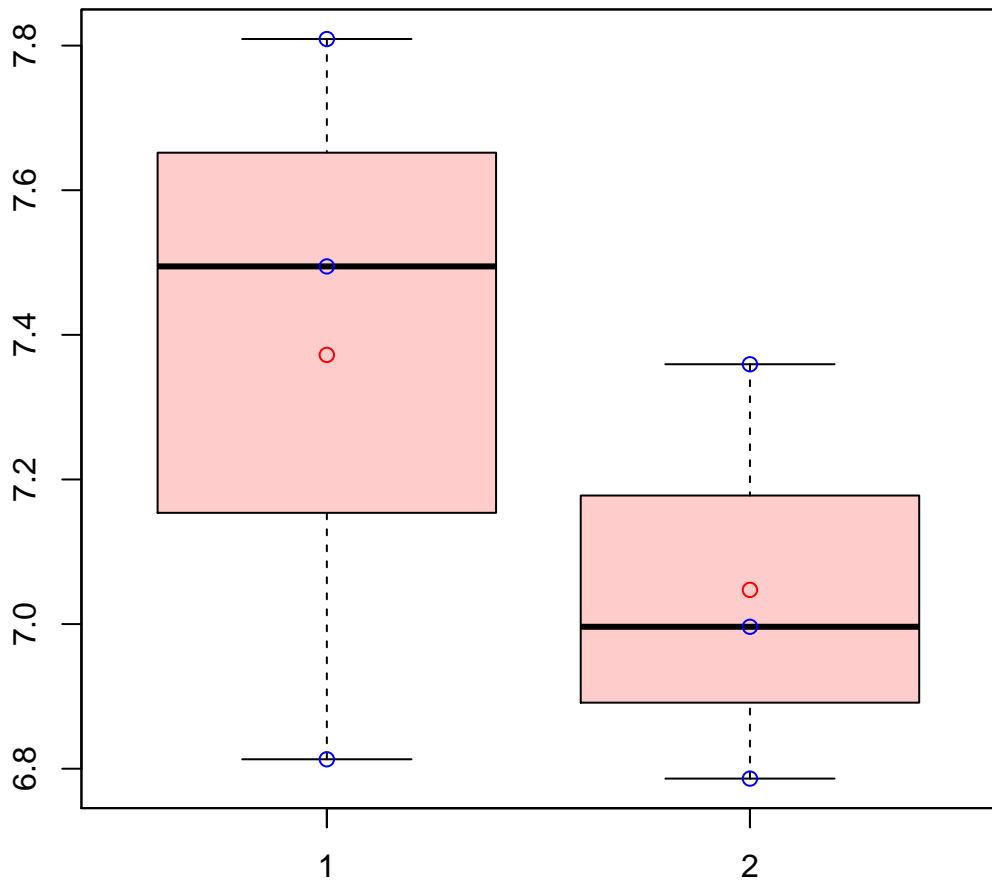

t-Test: p-value = 0.4

# CL1Contig1541|CL1Contig1541

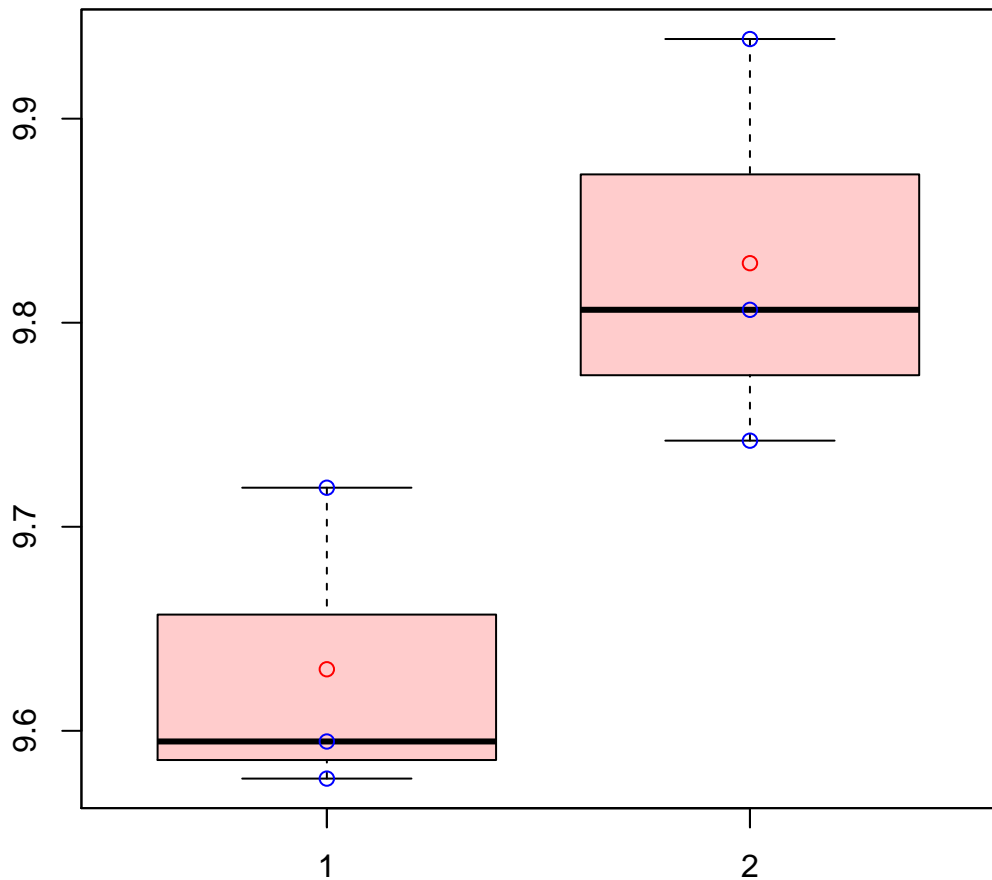

t-Test: p-value = 0.06

# CL1Contig1641|CL1Contig1641

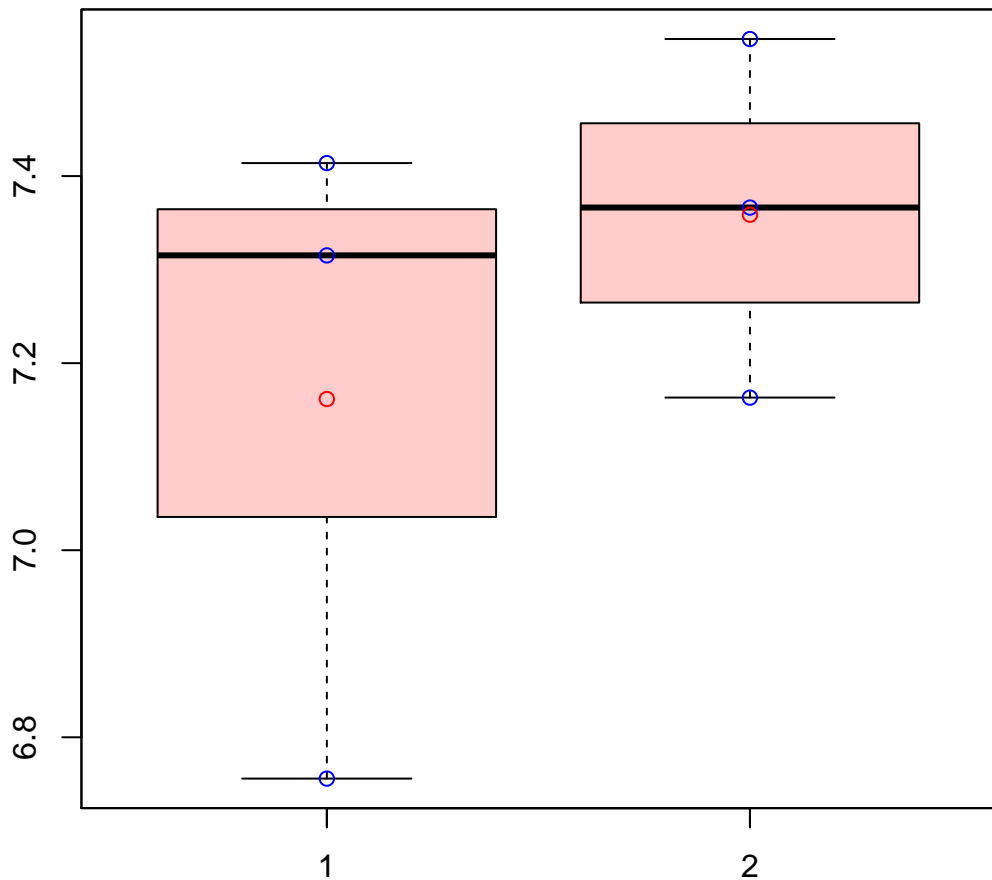

t-Test: p-value = 0.46



# CL1Contig1644|CL1Contig1644

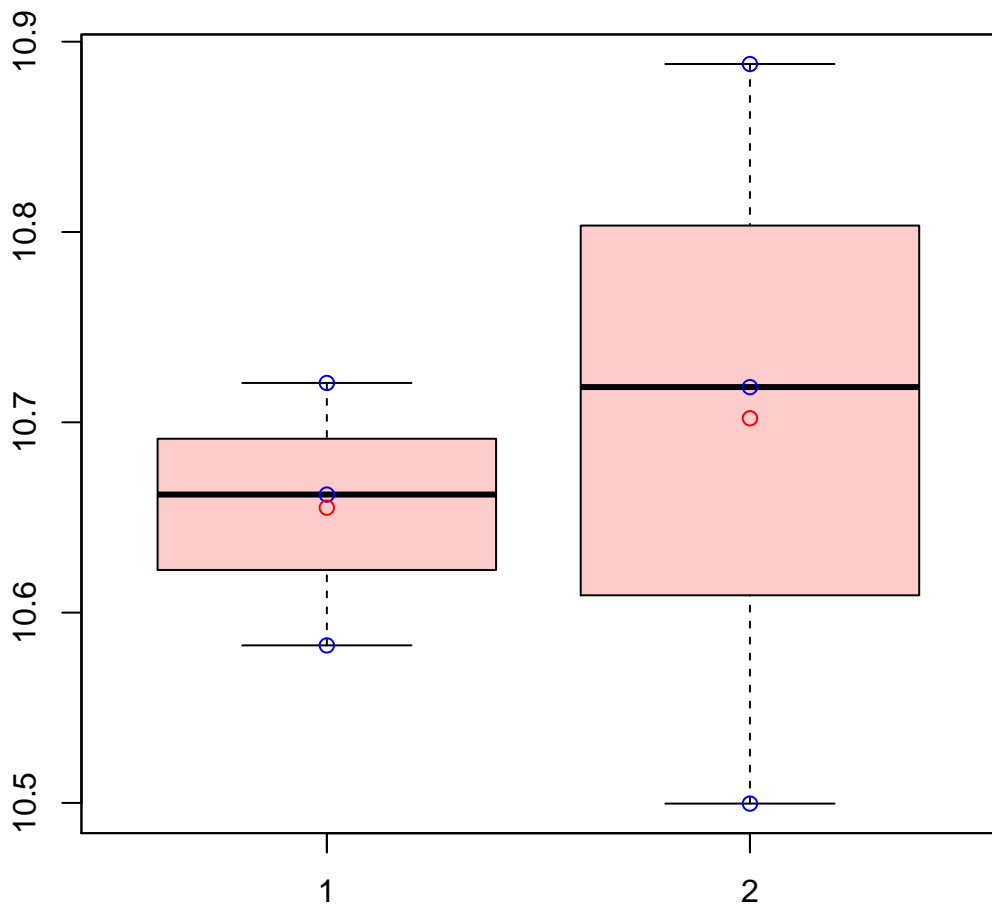

t-Test: p-value = 0.73

# CL1Contig1664|CL1Contig1664

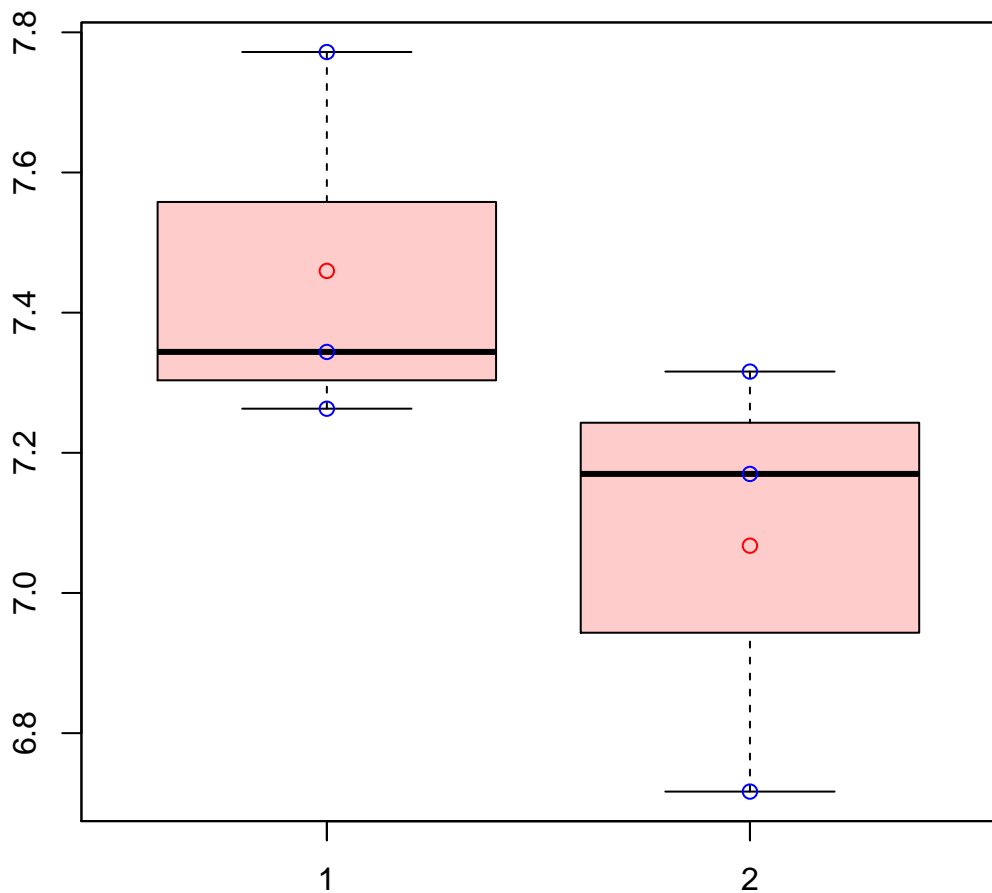

t-Test: p-value = 0.18

# CL1Contig1673|CL1Contig1673

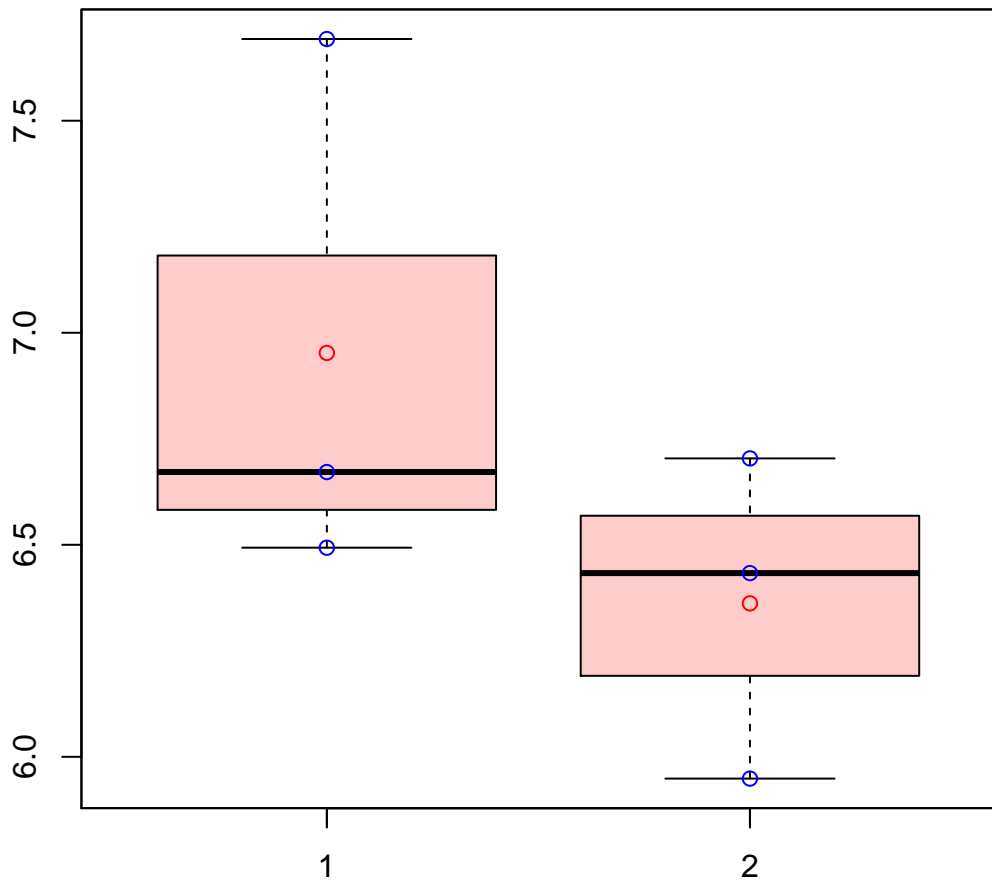

t-Test: p-value = 0.26

# CL1Contig167|CL1Contig167

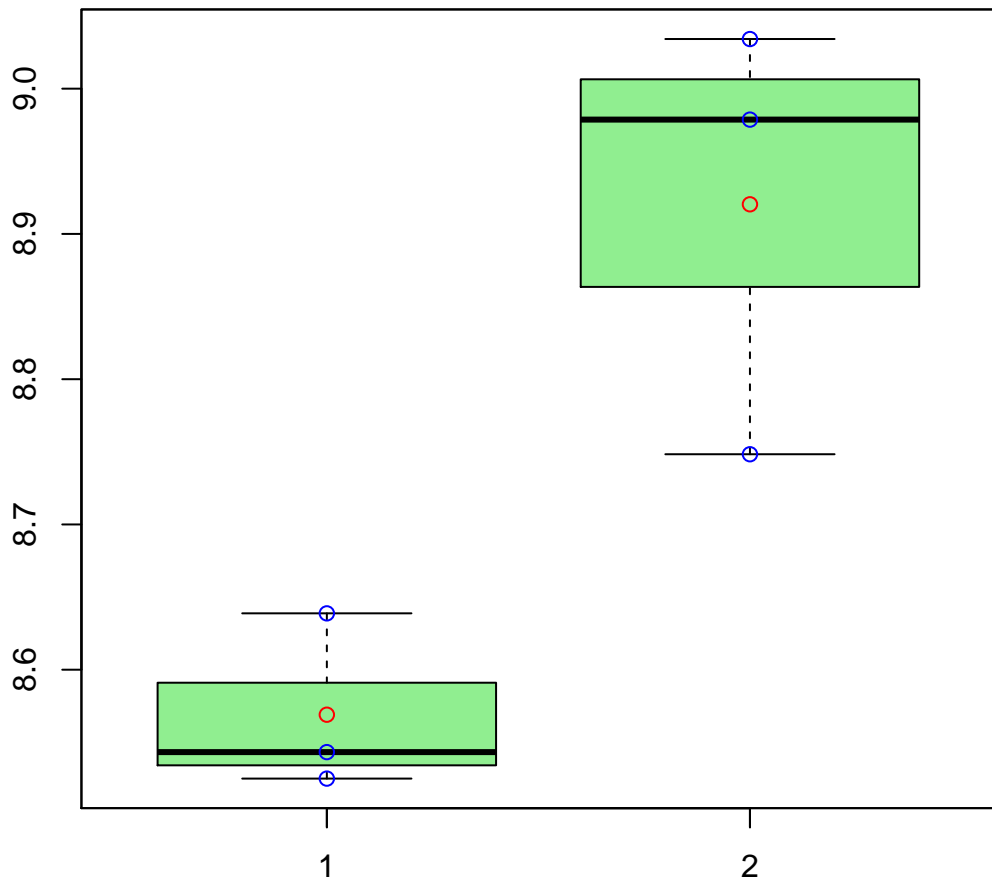

t-Test: p-value = 0.04

# CL1Contig1692|CL1Contig1692

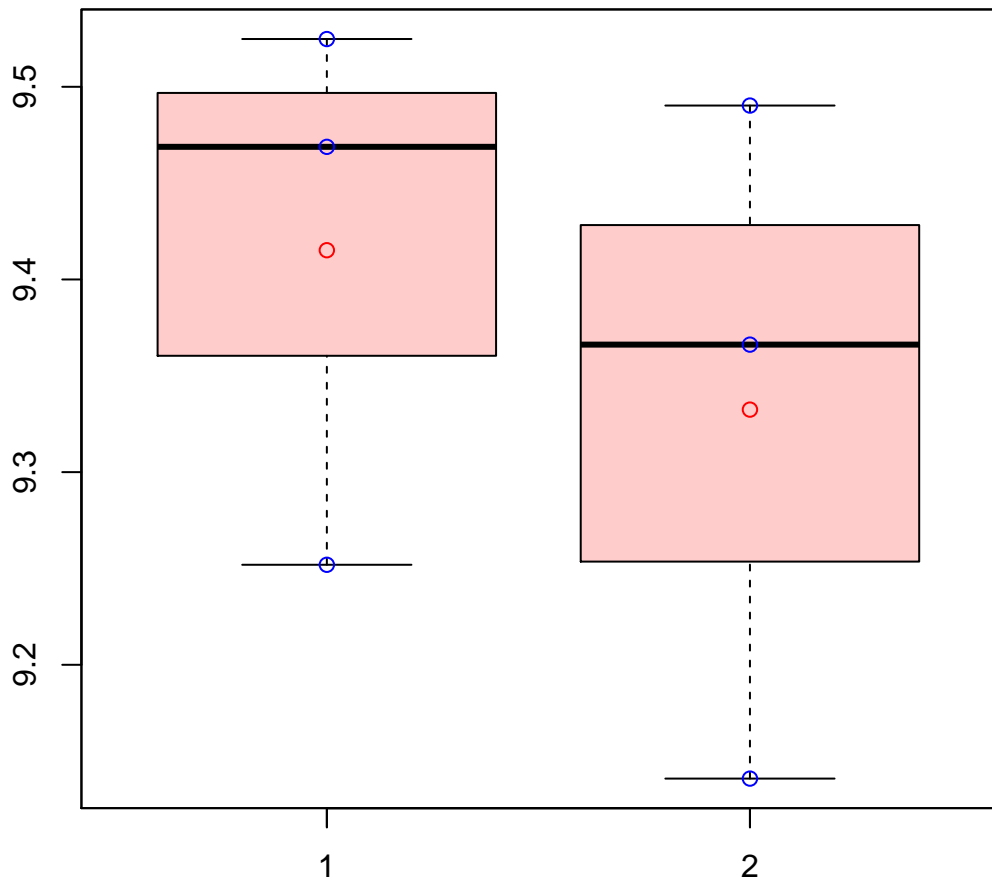

t-Test: p-value = 0.57

# CL1Contig1710|CL1Contig1710

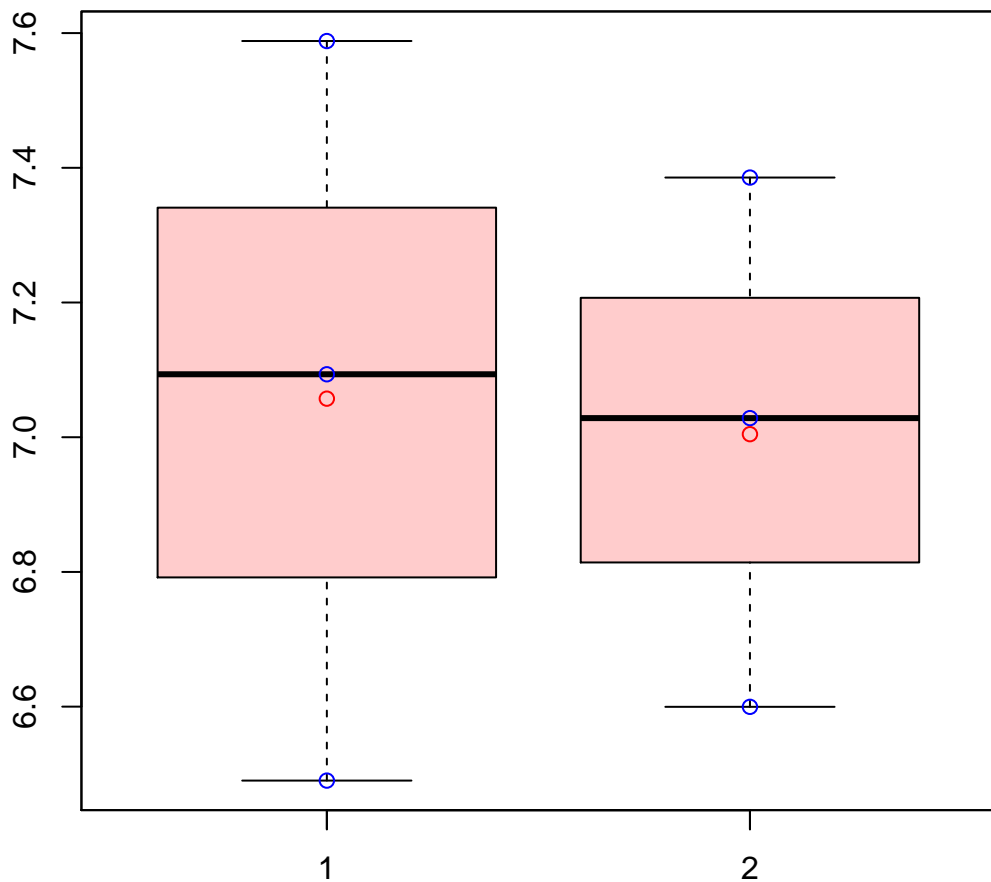

t-Test: p-value = 0.9

# CL1Contig1720|CL1Contig1720

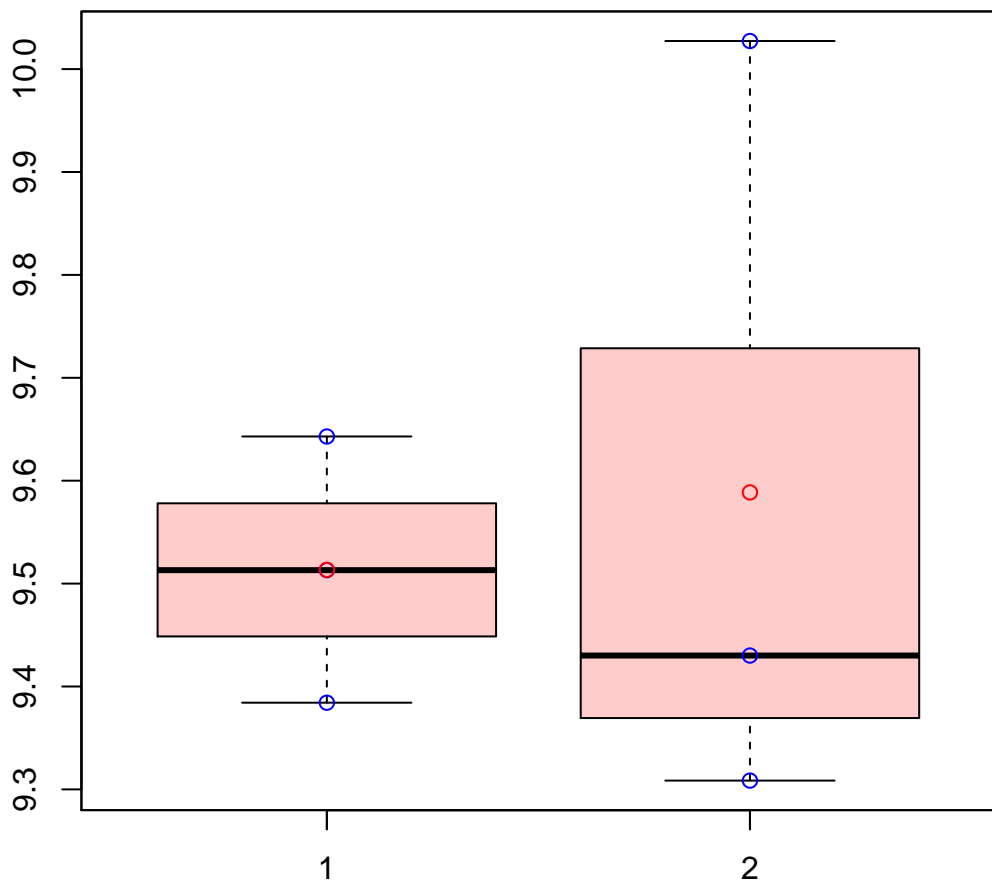

t-Test: p-value = 0.77

# CL1Contig1769|CL1Contig1769

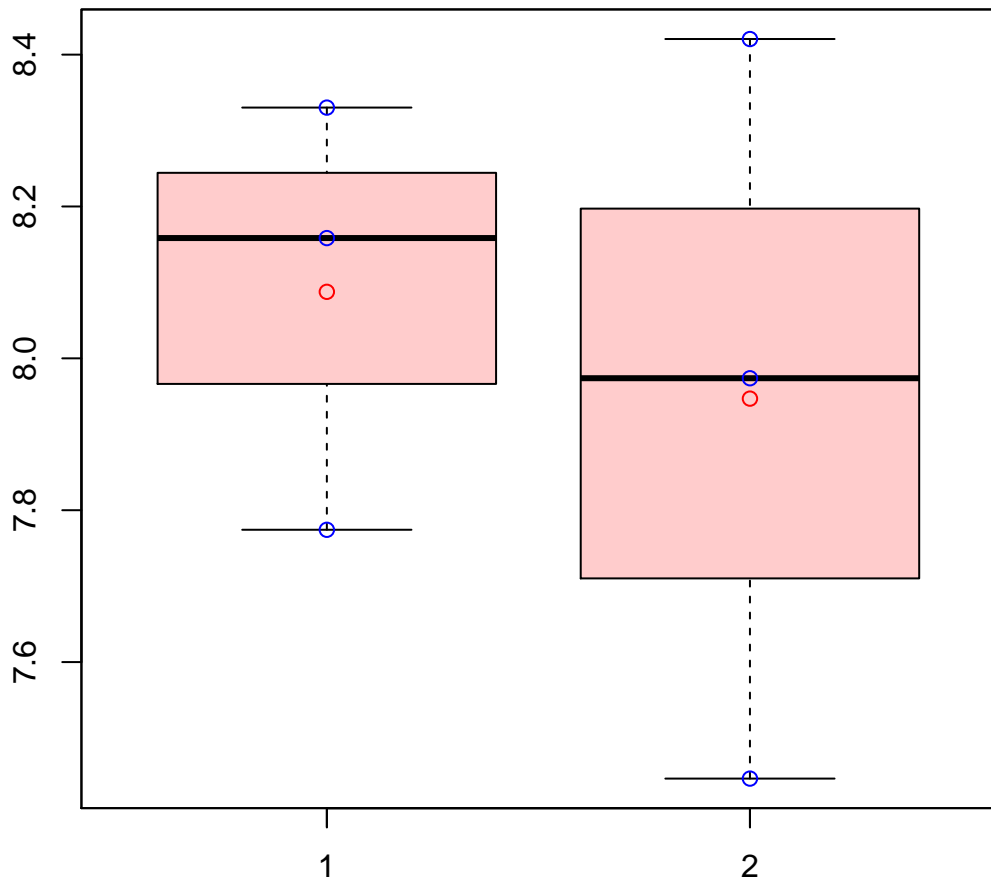

t-Test: p-value = 0.69



# CL1Contig178|CL1Contig178

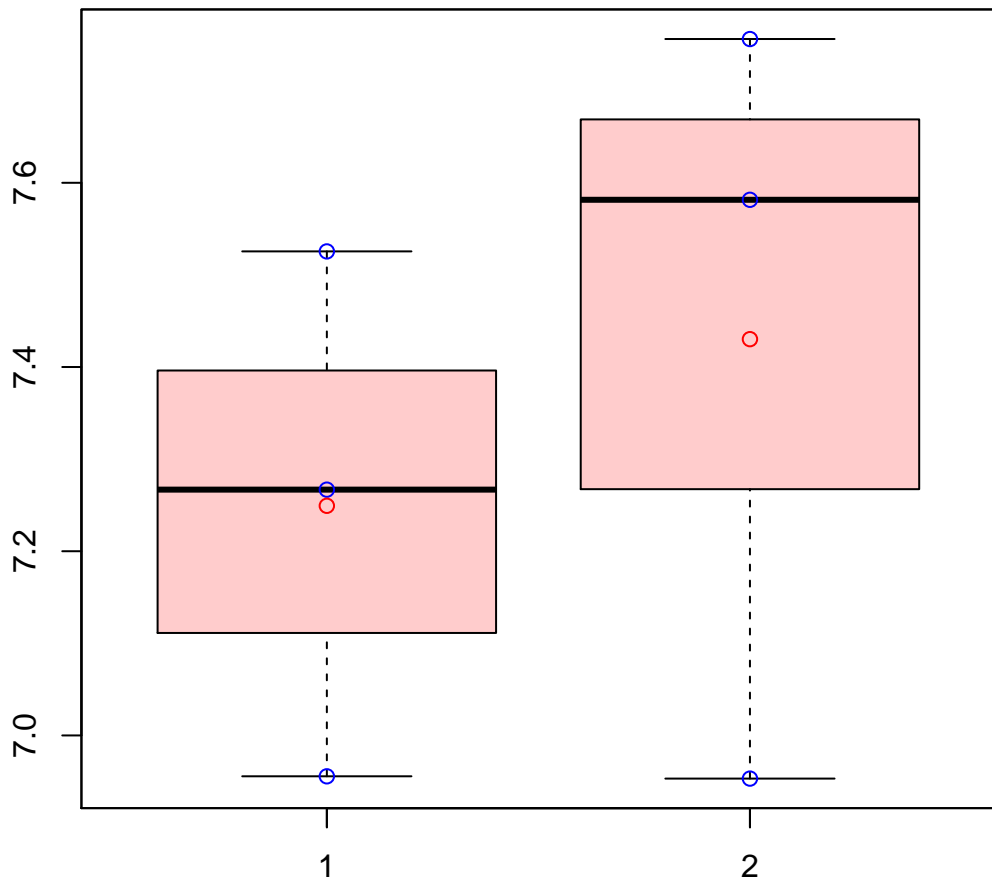

t-Test: p-value = 0.58

# CL1Contig1833|CL1Contig1833

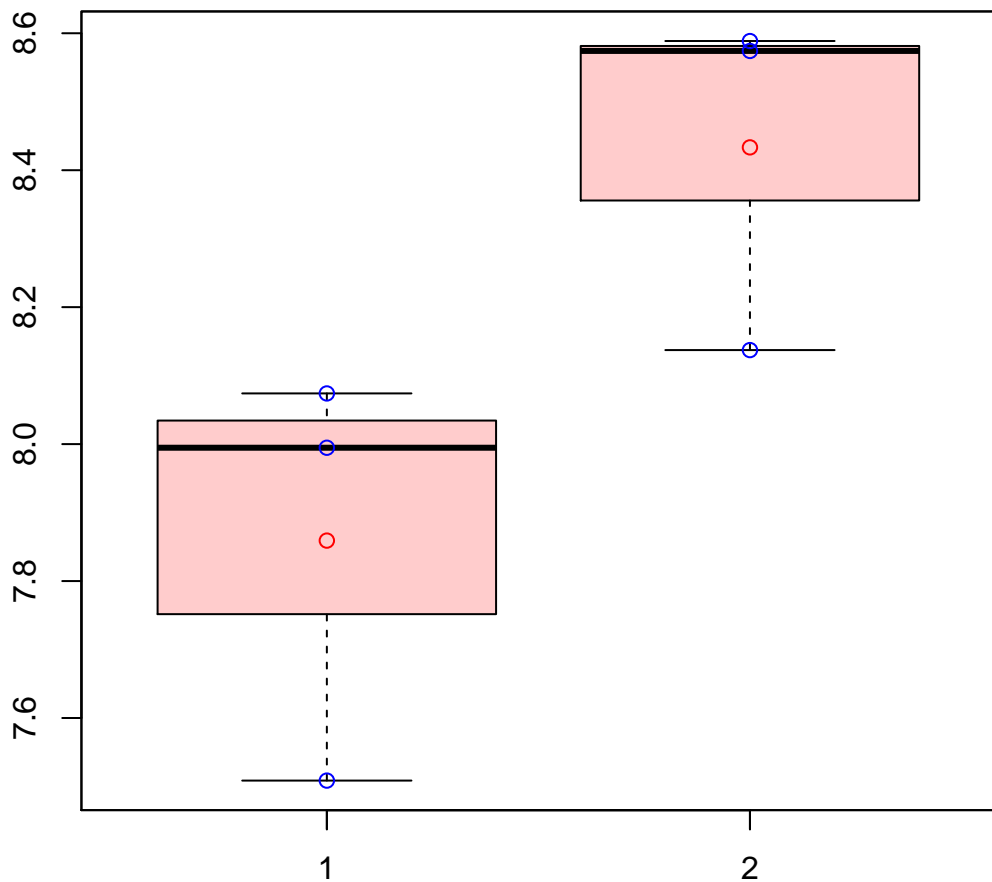

t-Test: p-value = 0.07

# CL1Contig1892|CL1Contig1892

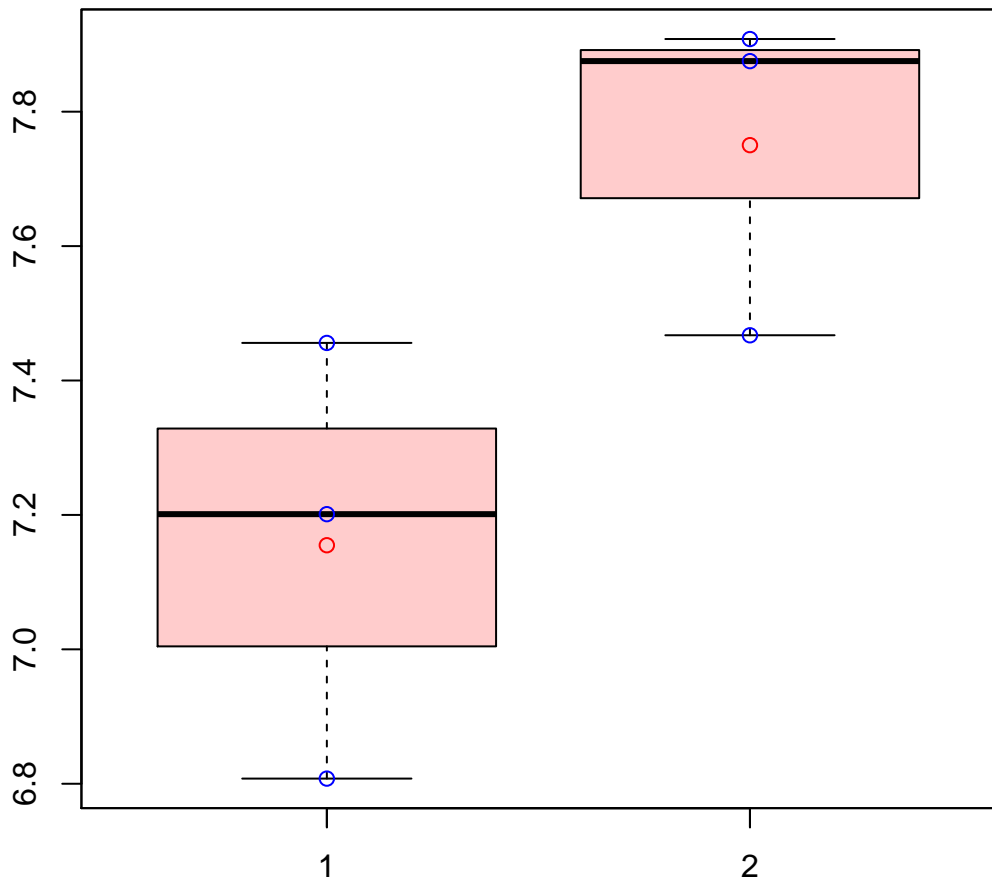

t-Test: p-value = 0.07

# CL1Contig1915|CL1Contig1915

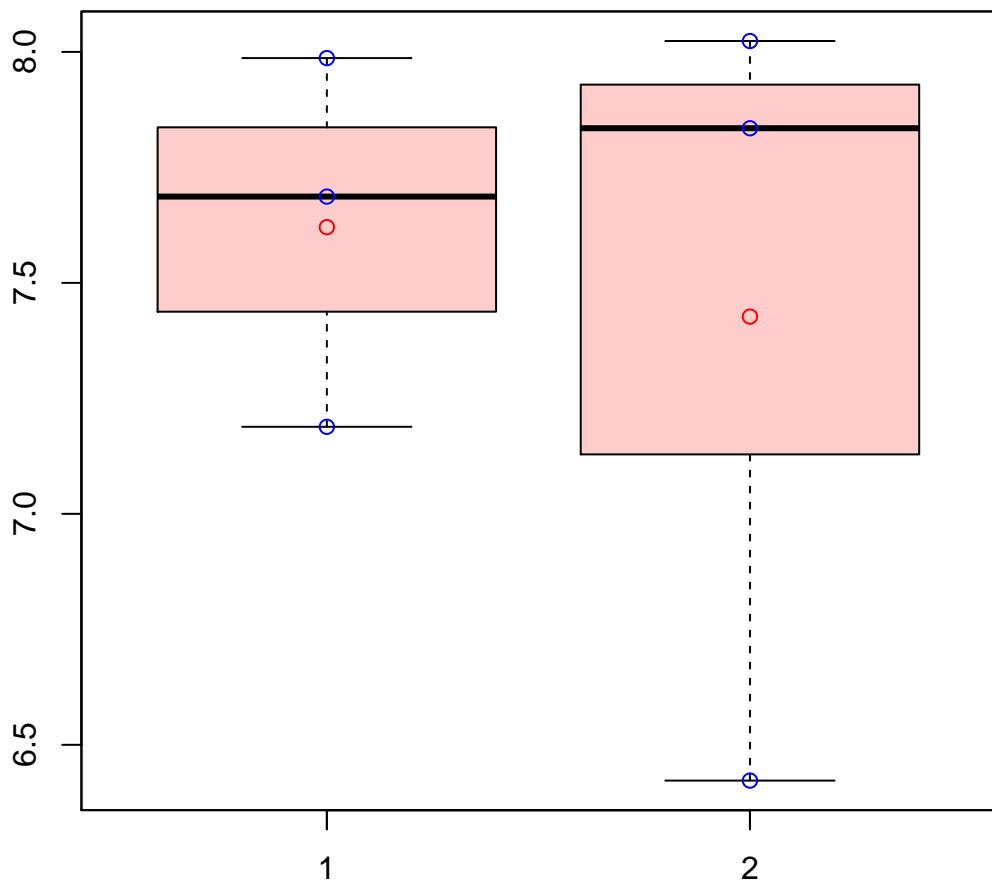

t-Test: p-value = 0.75

# CL1Contig1926|CL1Contig1926

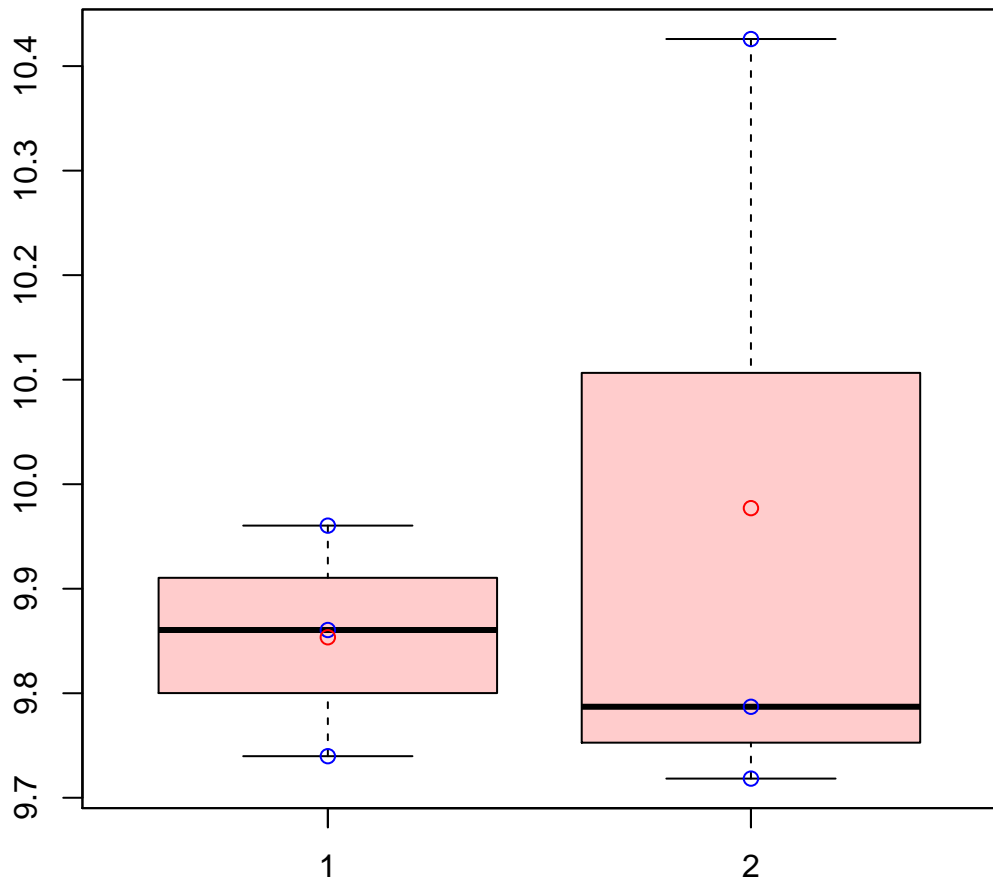

t-Test: p-value = 0.64

# CL1Contig192|CL1Contig192

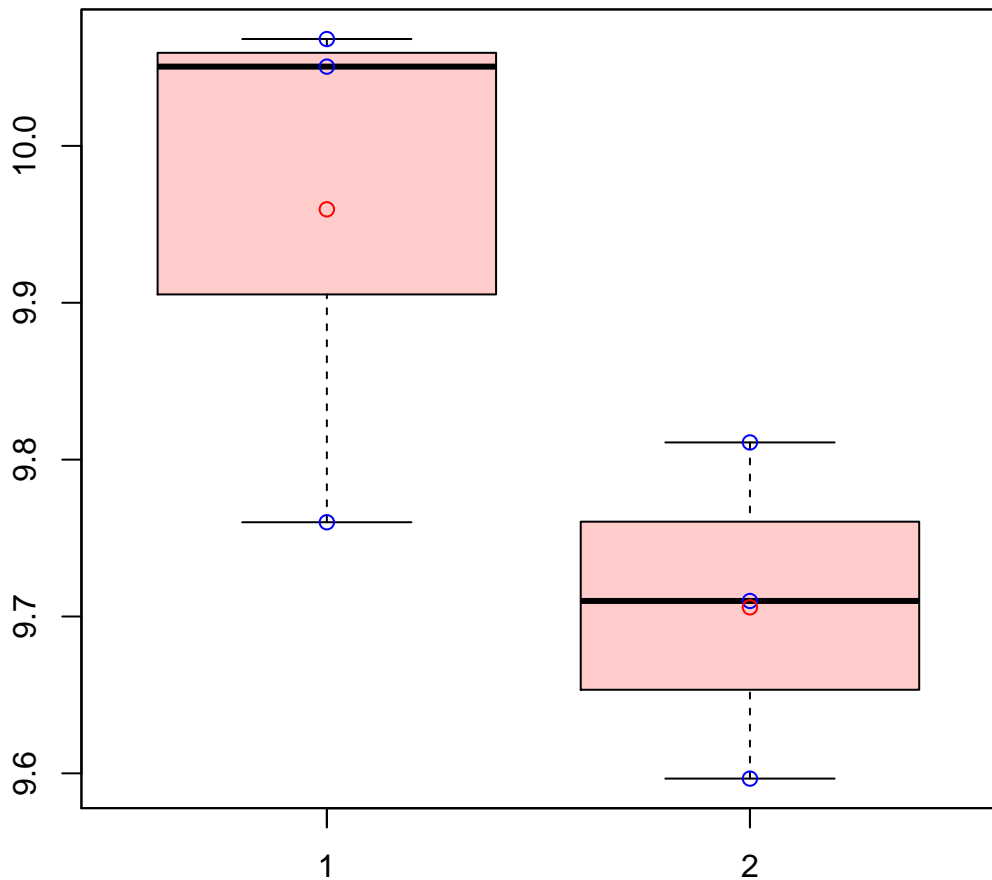

t-Test: p-value = 0.11

# CL1Contig1993|CL1Contig1993

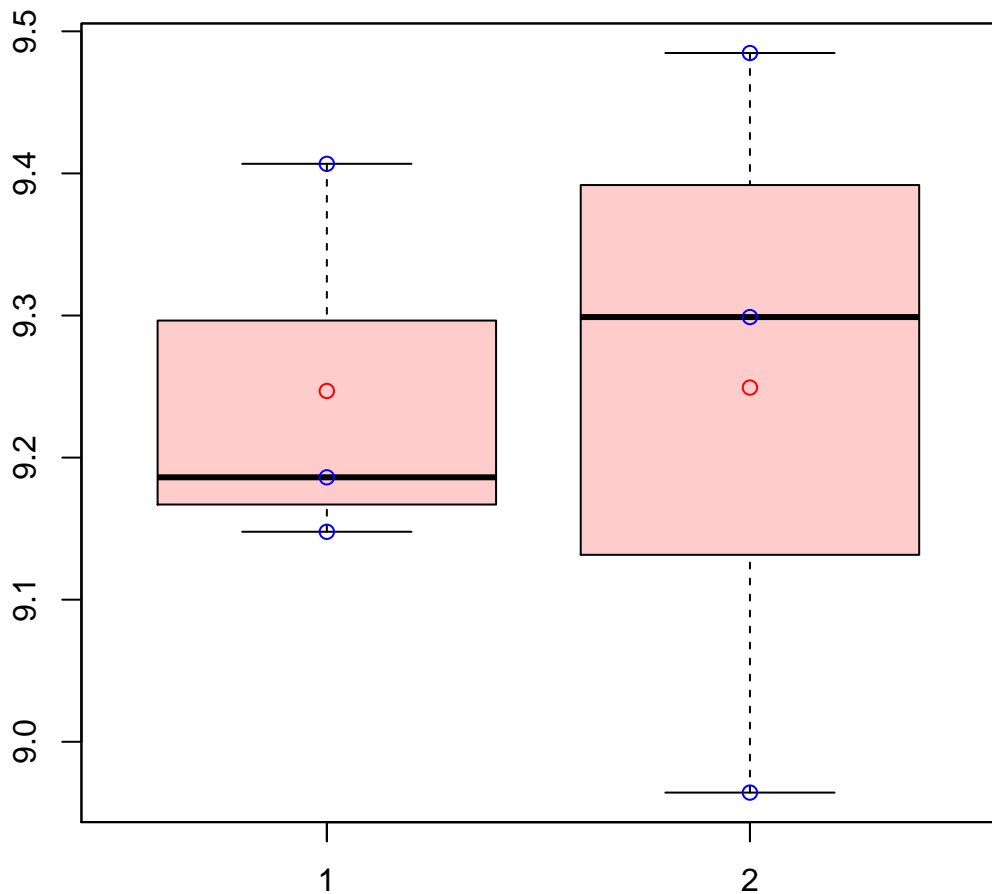

t-Test: p-value = 0.99

# CL1Contig1997|CL1Contig1997

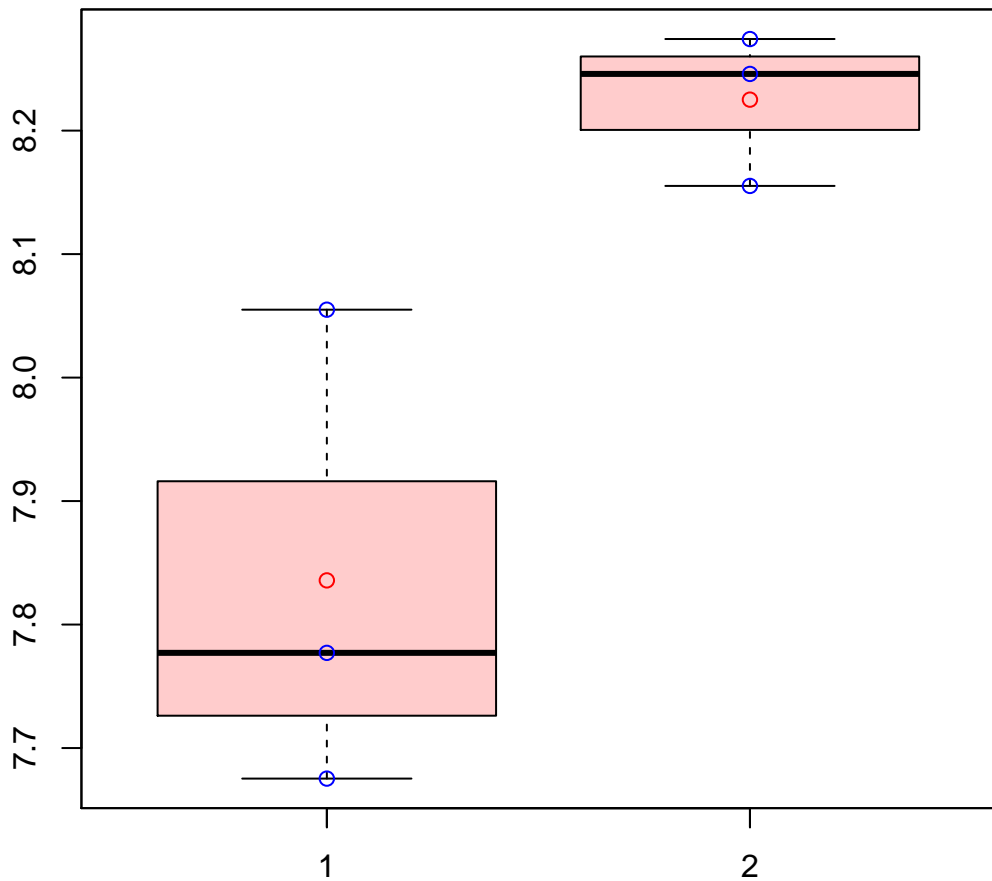

t-Test: p-value = 0.06



# CL1Contig2108|CL1Contig2108

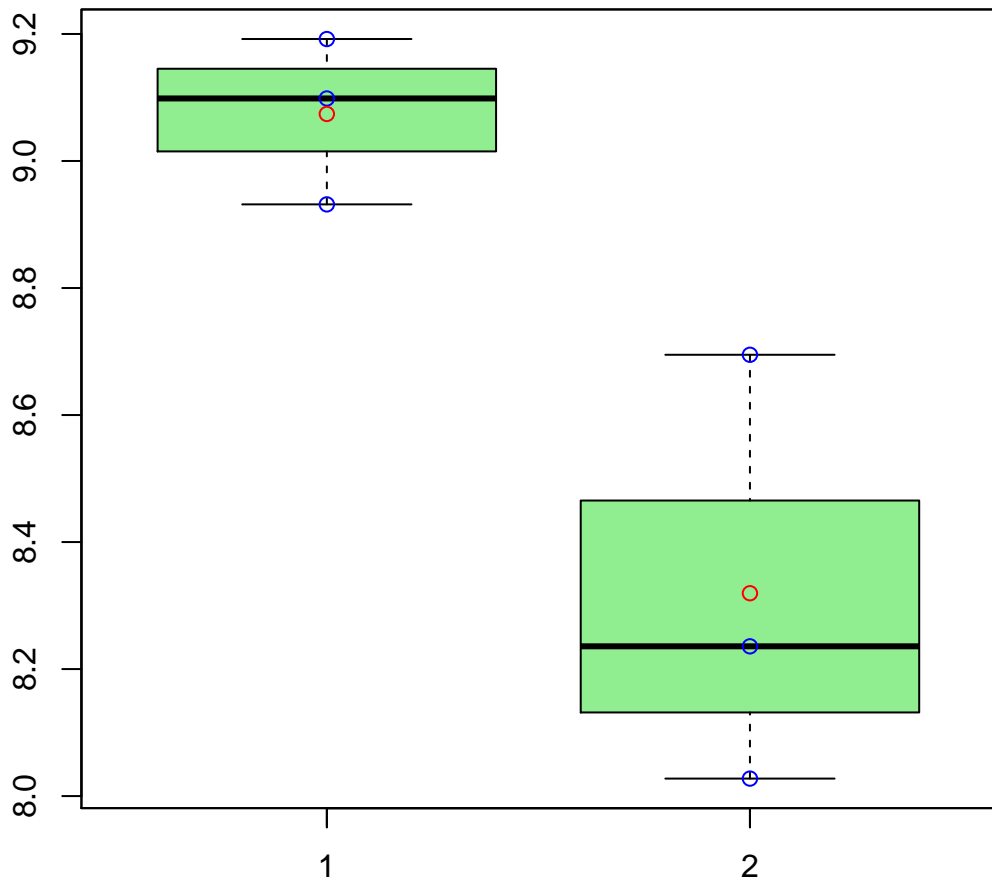

t-Test: p-value = 0.05

# CL1Contig2154|CL1Contig2154

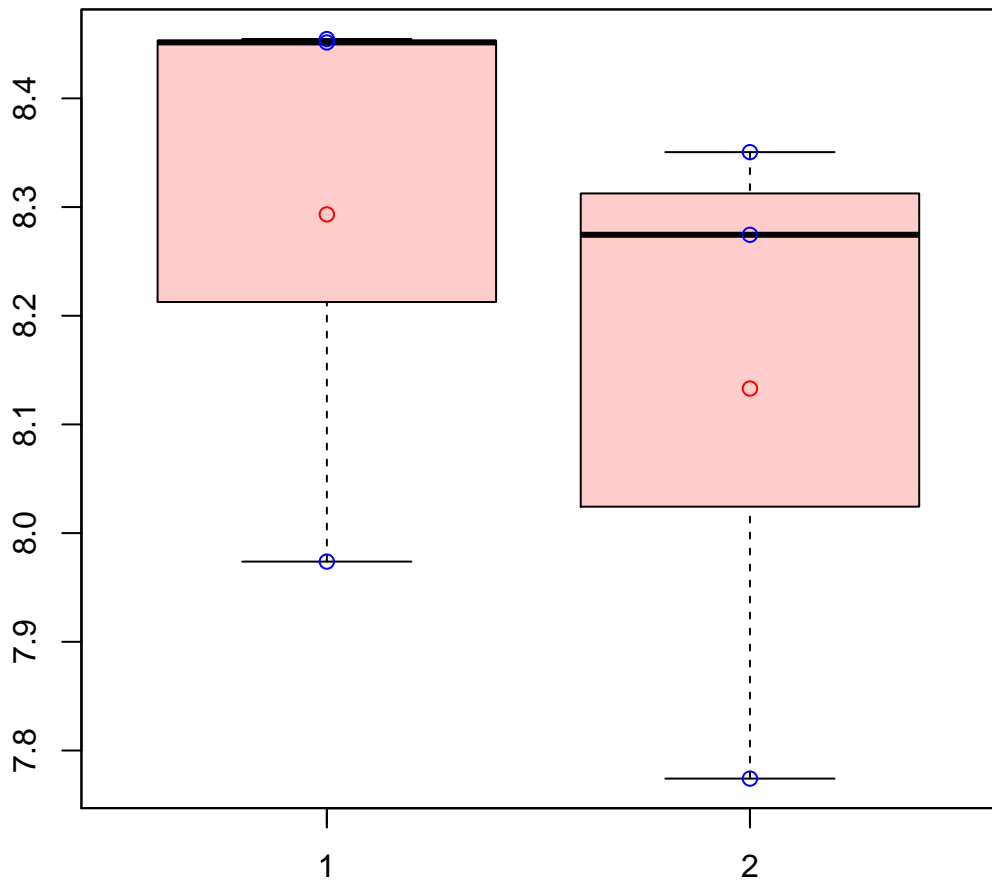

t-Test: p-value = 0.54

# CL1Contig2179|CL1Contig2179

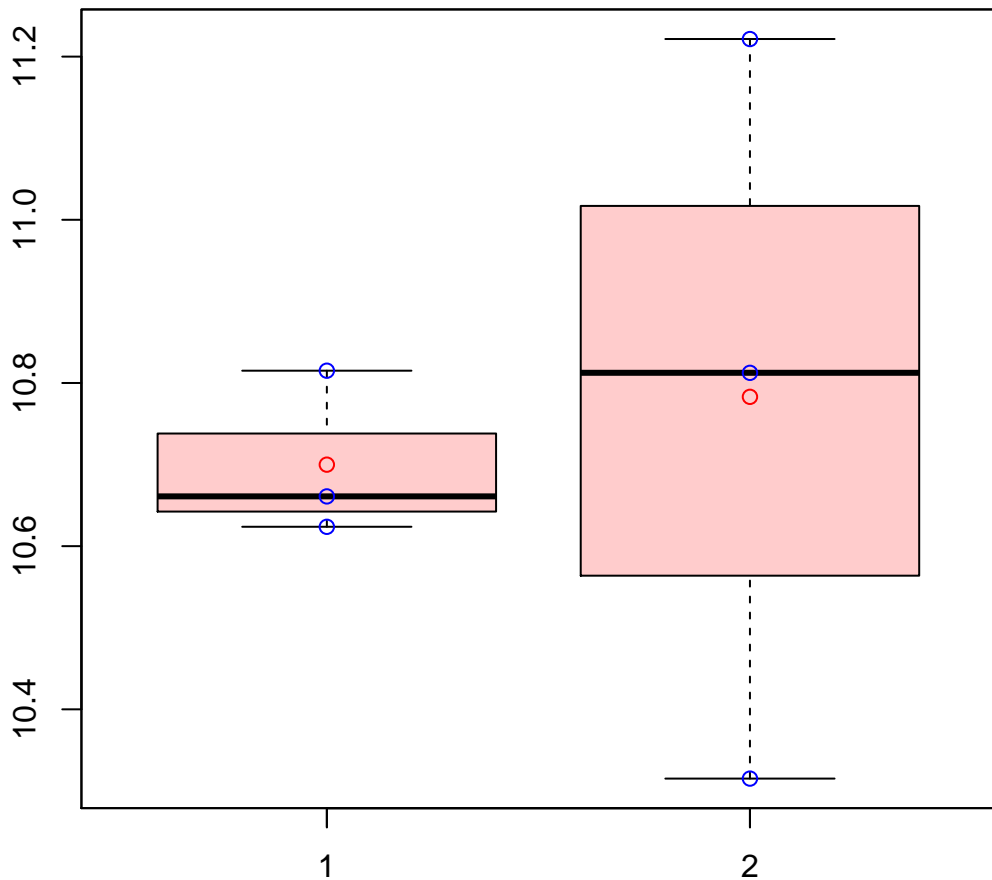

t-Test: p-value = 0.78

# CL1Contig2203|CL1Contig2203

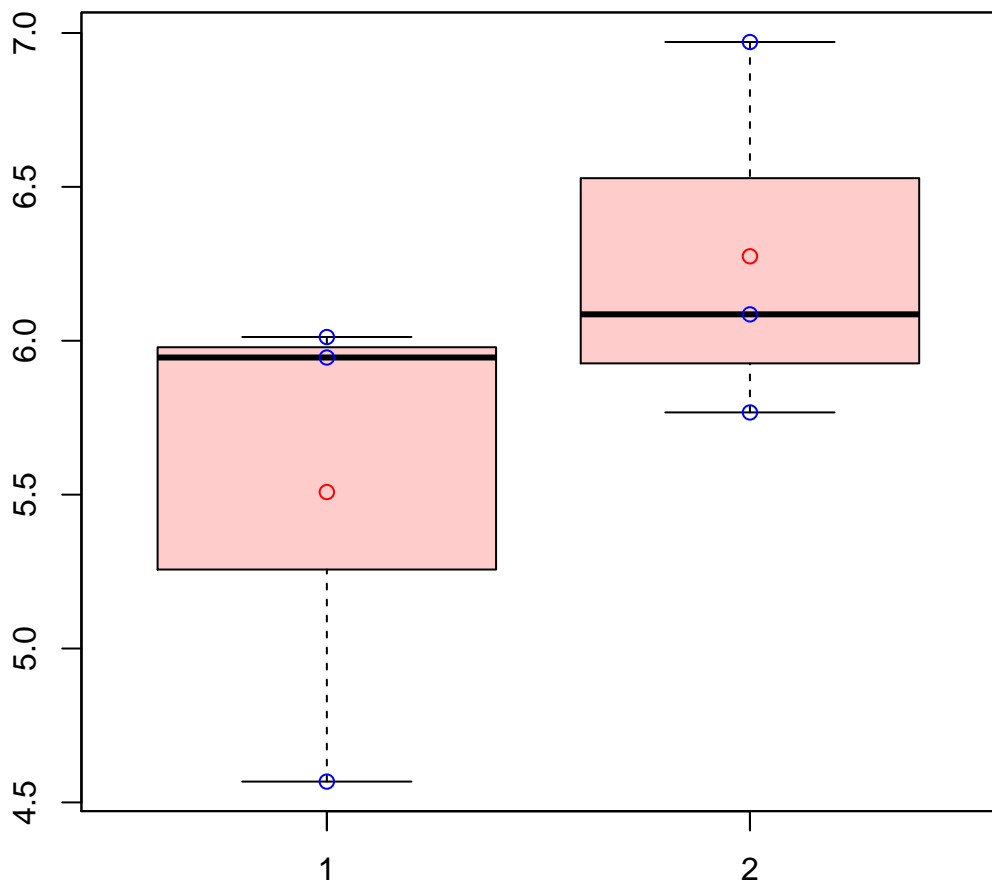

t-Test: p-value = 0.27

# CL1Contig2253|CL1Contig2253

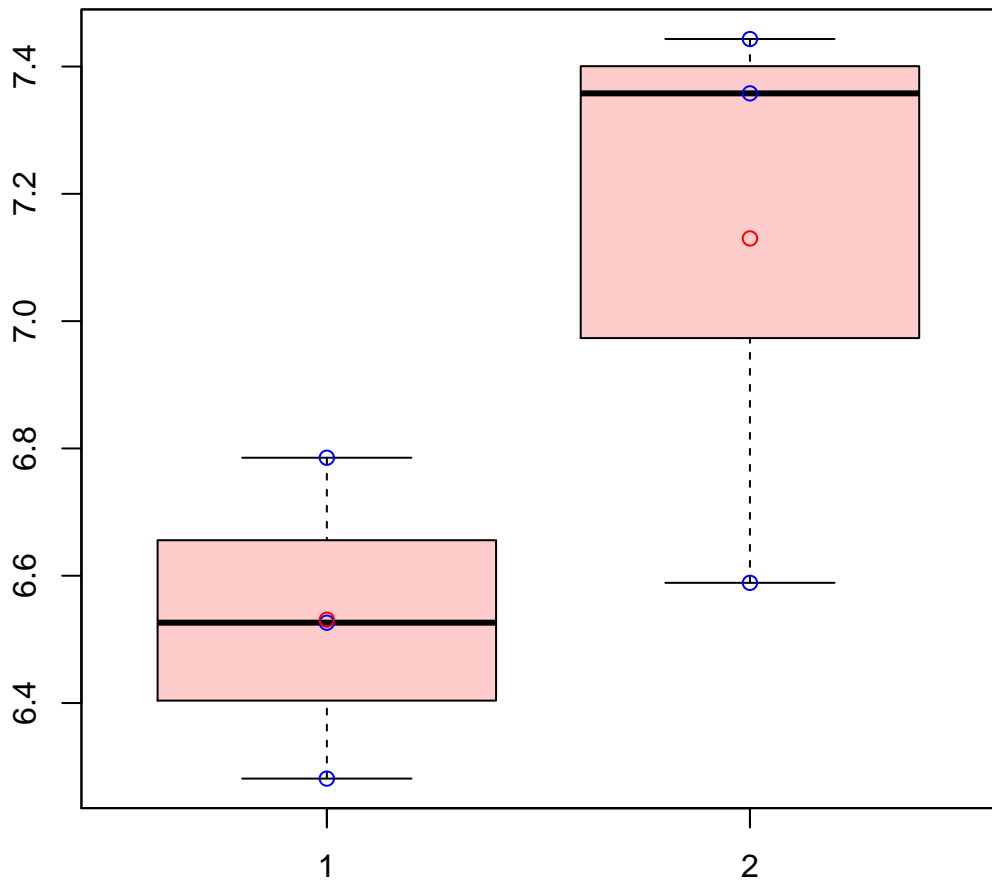

t-Test: p-value = 0.15

# CL1Contig2254|CL1Contig2254

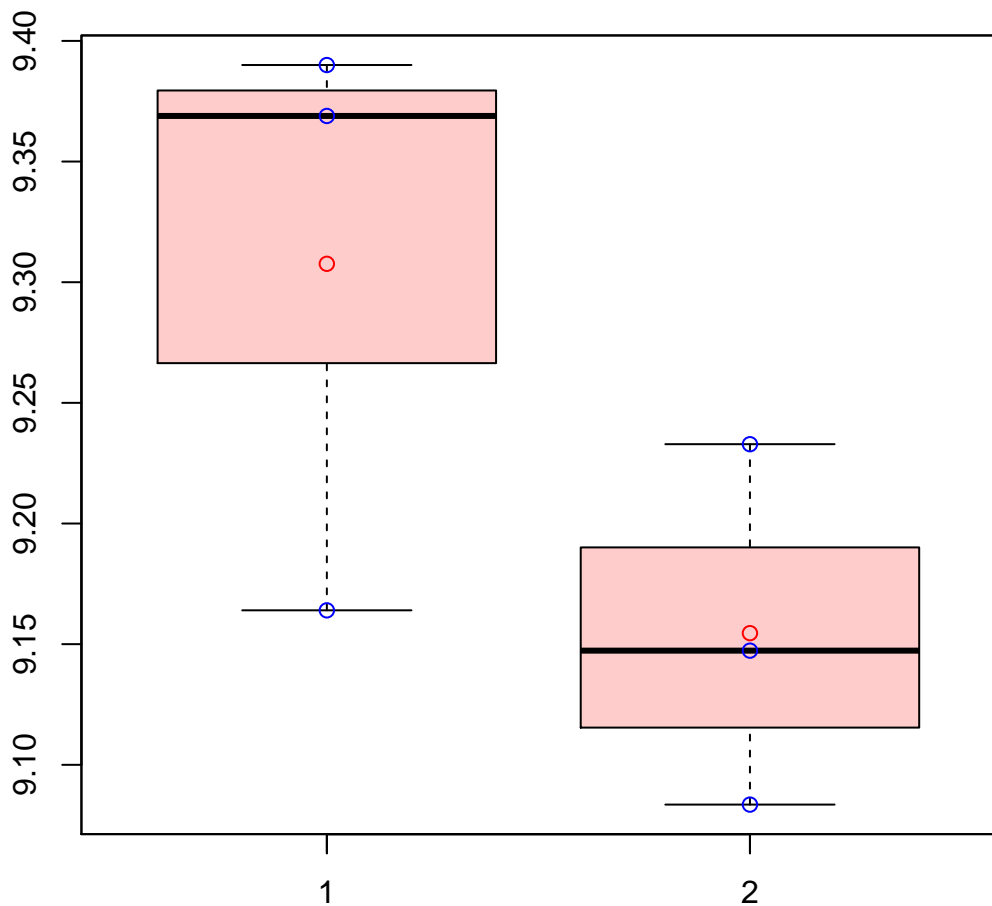

t-Test: p-value = 0.16

# CL1Contig229|CL1Contig229

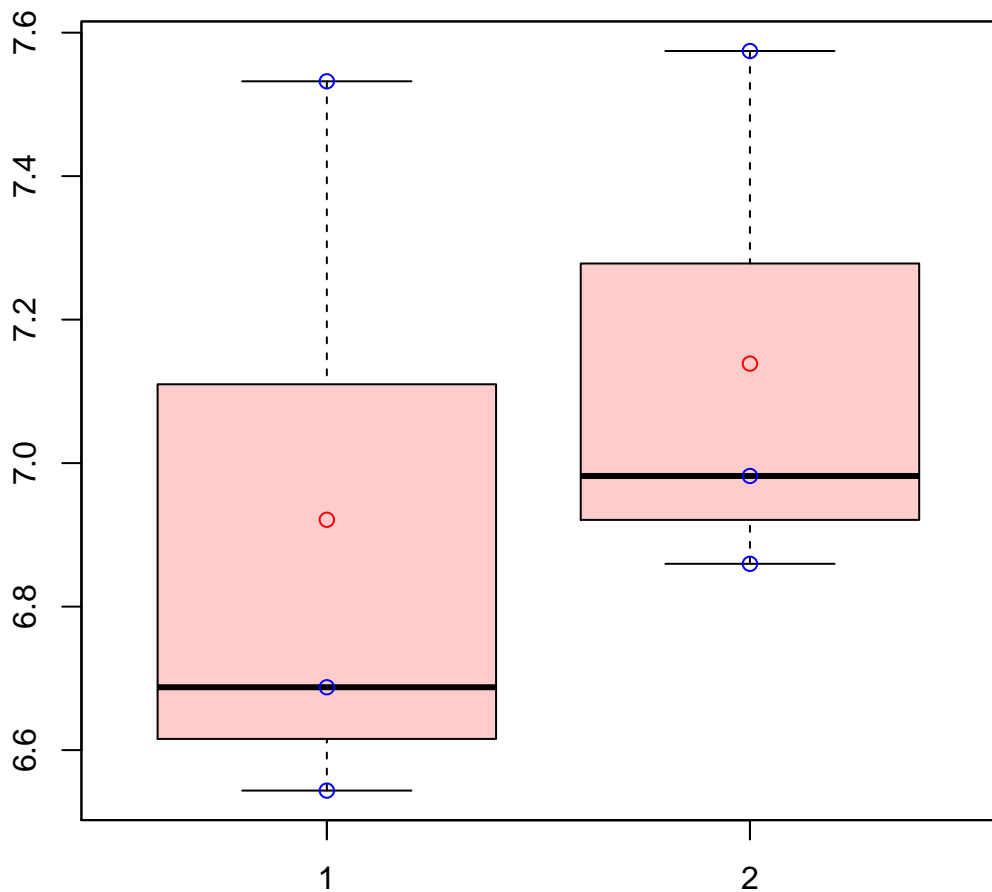

t-Test: p-value = 0.6

# CL1Contig2302|CL1Contig2302

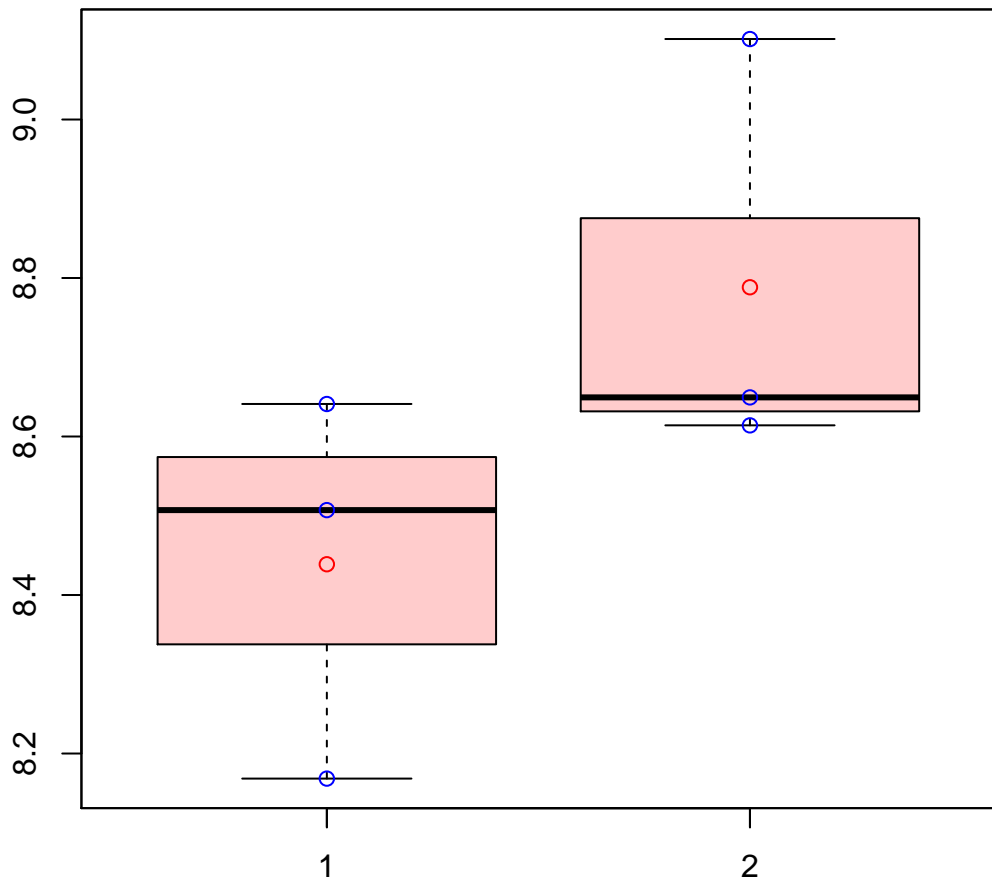

t-Test: p-value = 0.17



# CL1Contig2407|CL1Contig2407

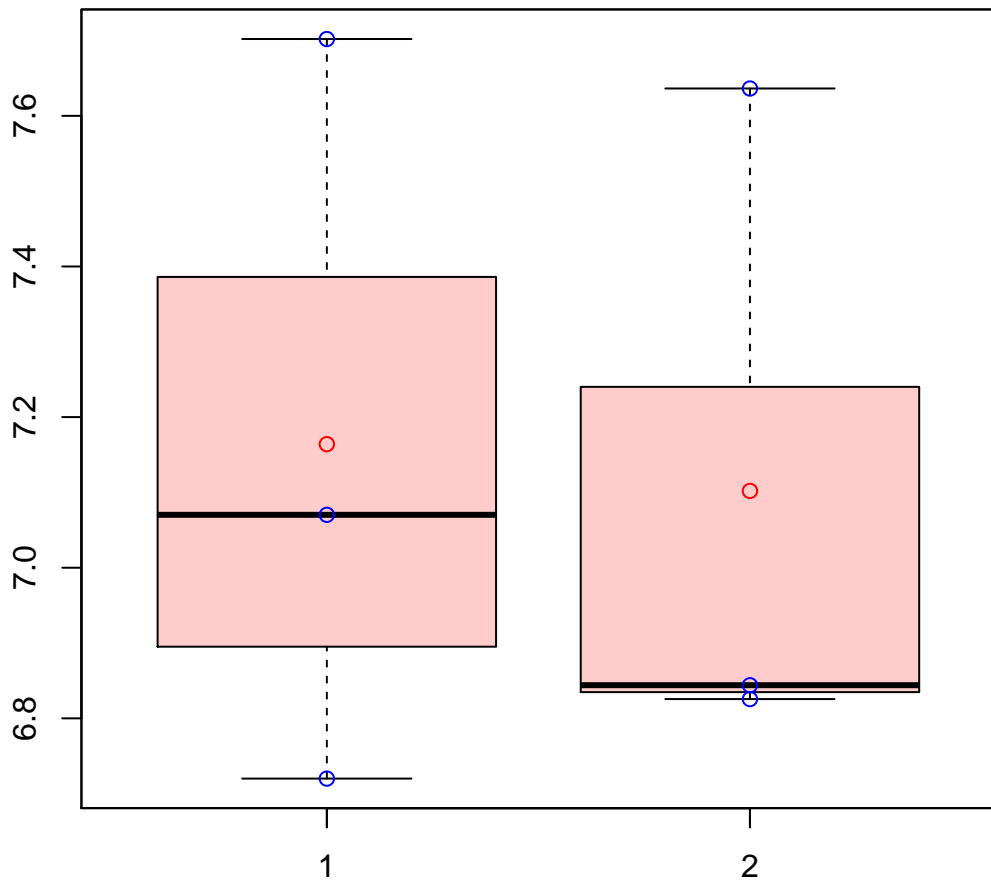

t-Test: p-value = 0.88

# CL1Contig240|CL1Contig240

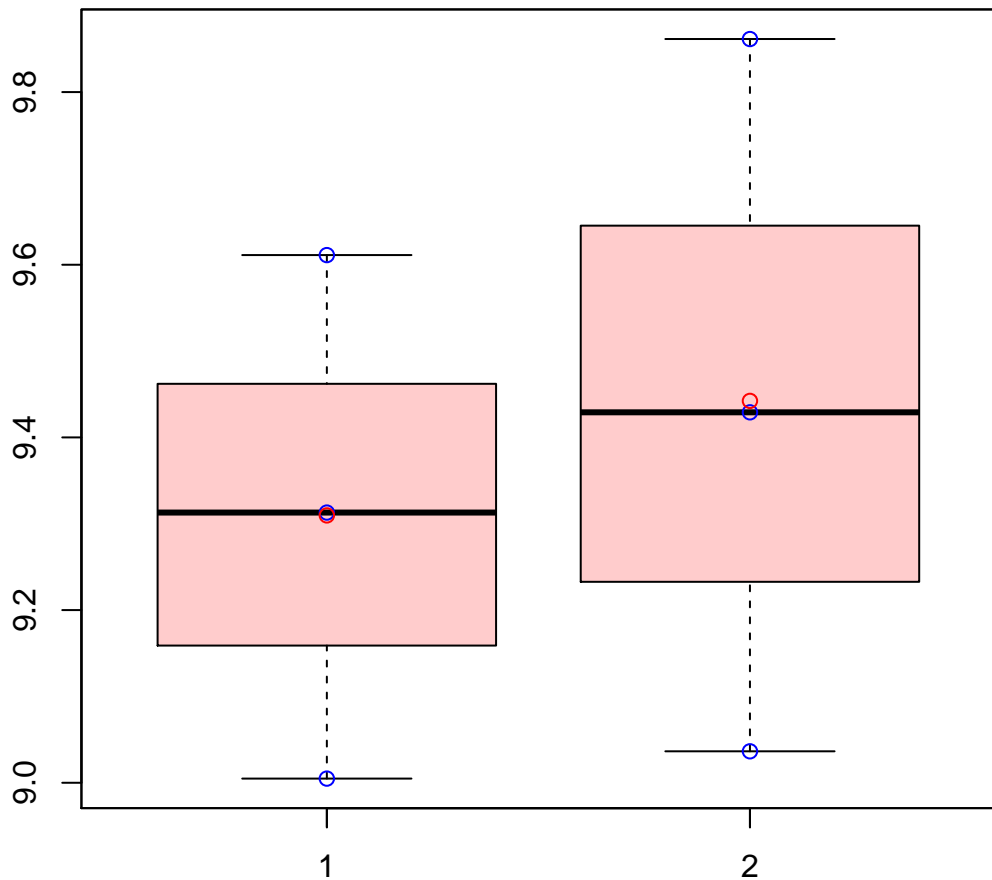

t-Test: p-value = 0.68

# CL1Contig2451|CL1Contig2451

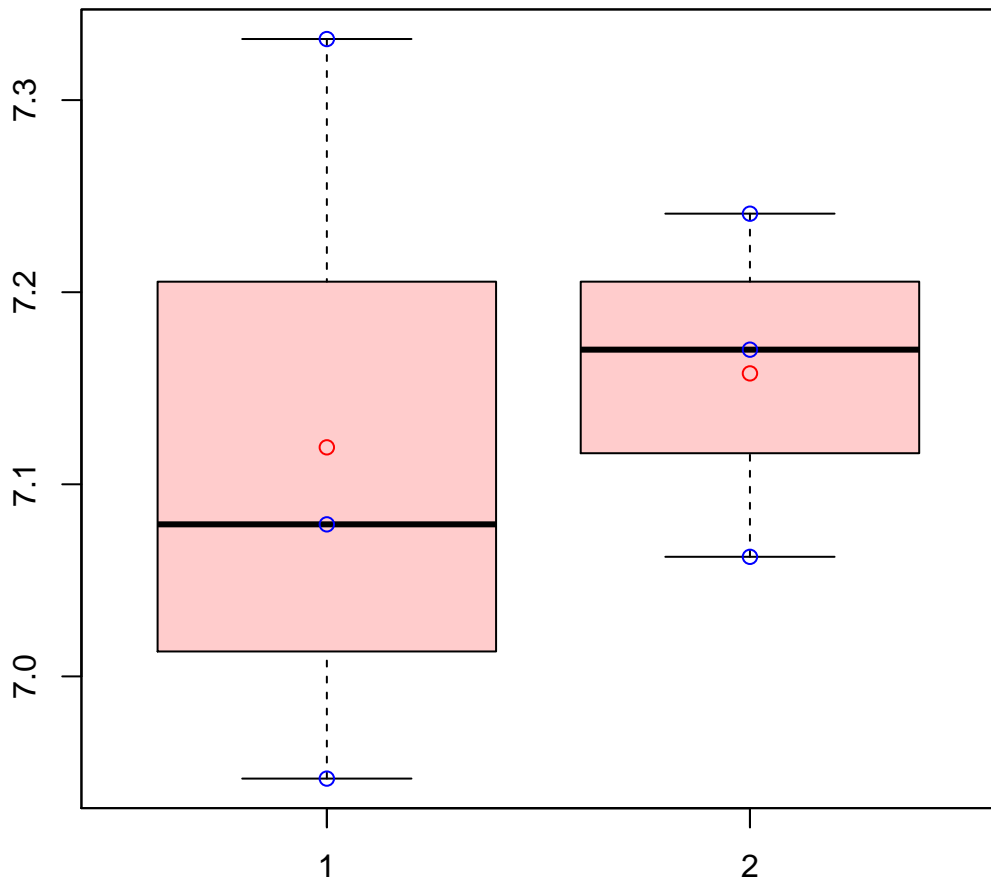

t-Test: p-value = 0.78

# CL1Contig249|CL1Contig249

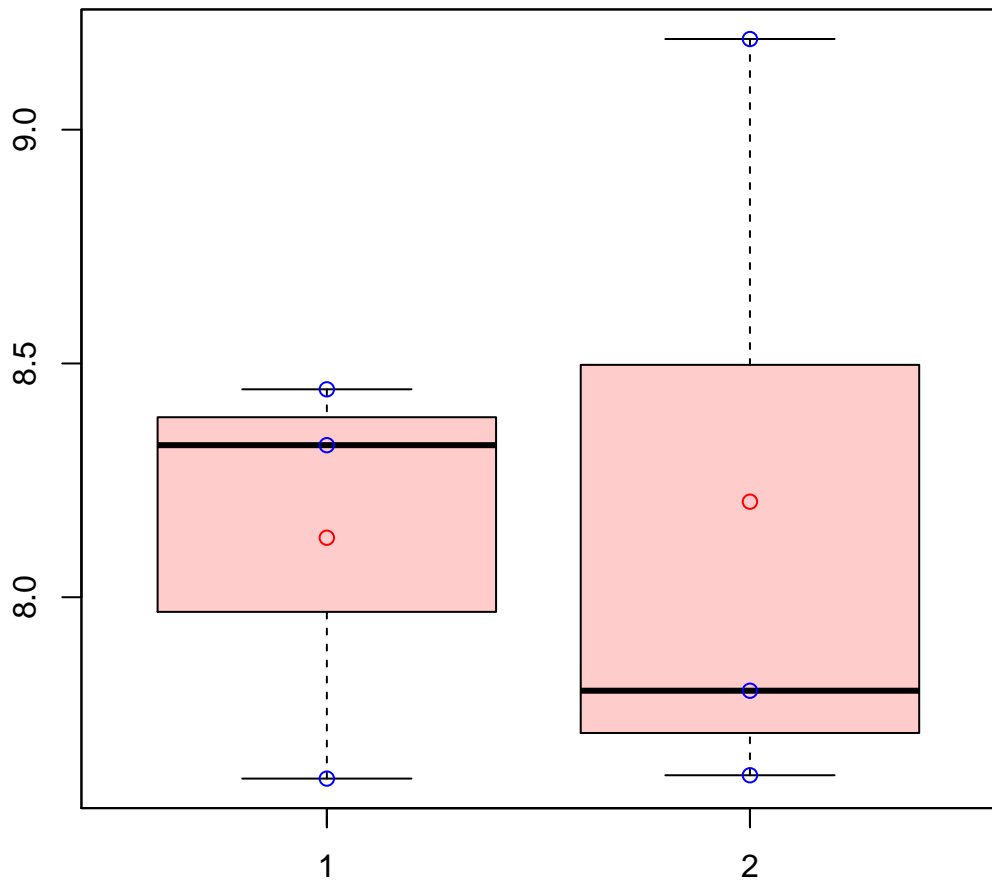

t-Test: p-value = 0.9

# CL1Contig2558|CL1Contig2558

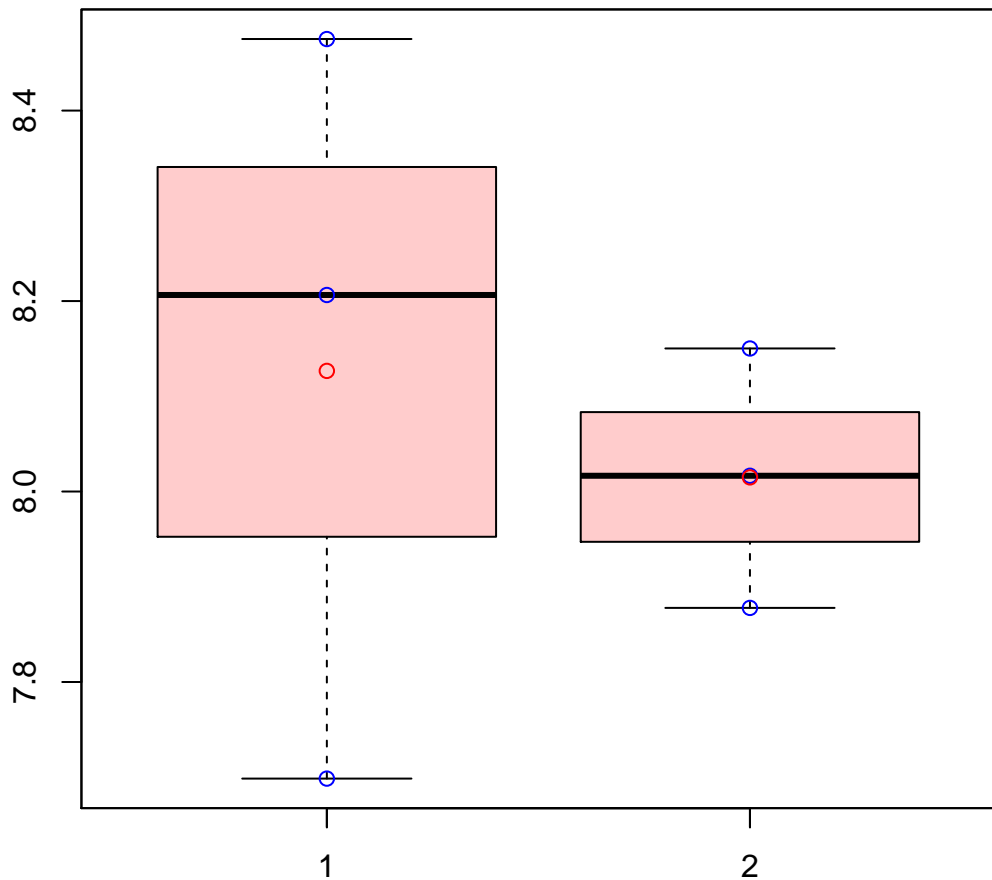

t-Test: p-value = 0.68

# CL1Contig2588|CL1Contig2588

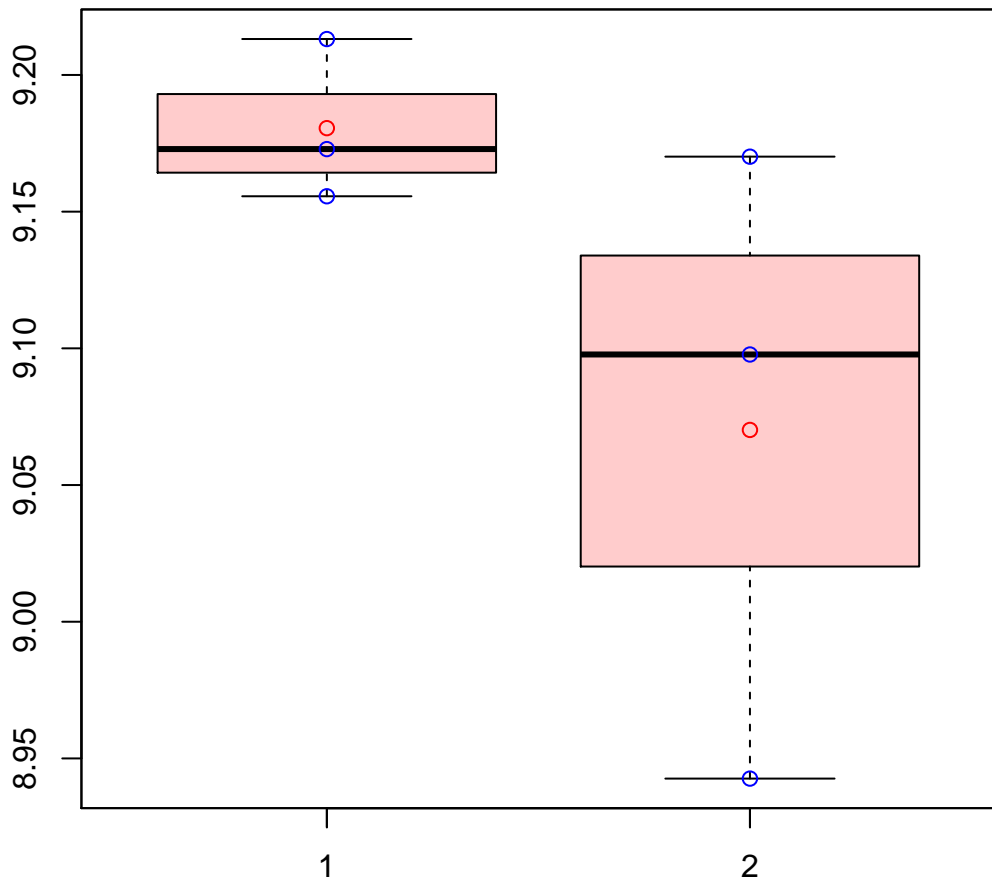

t-Test: p-value = 0.24

# CL1Contig2604|CL1Contig2604

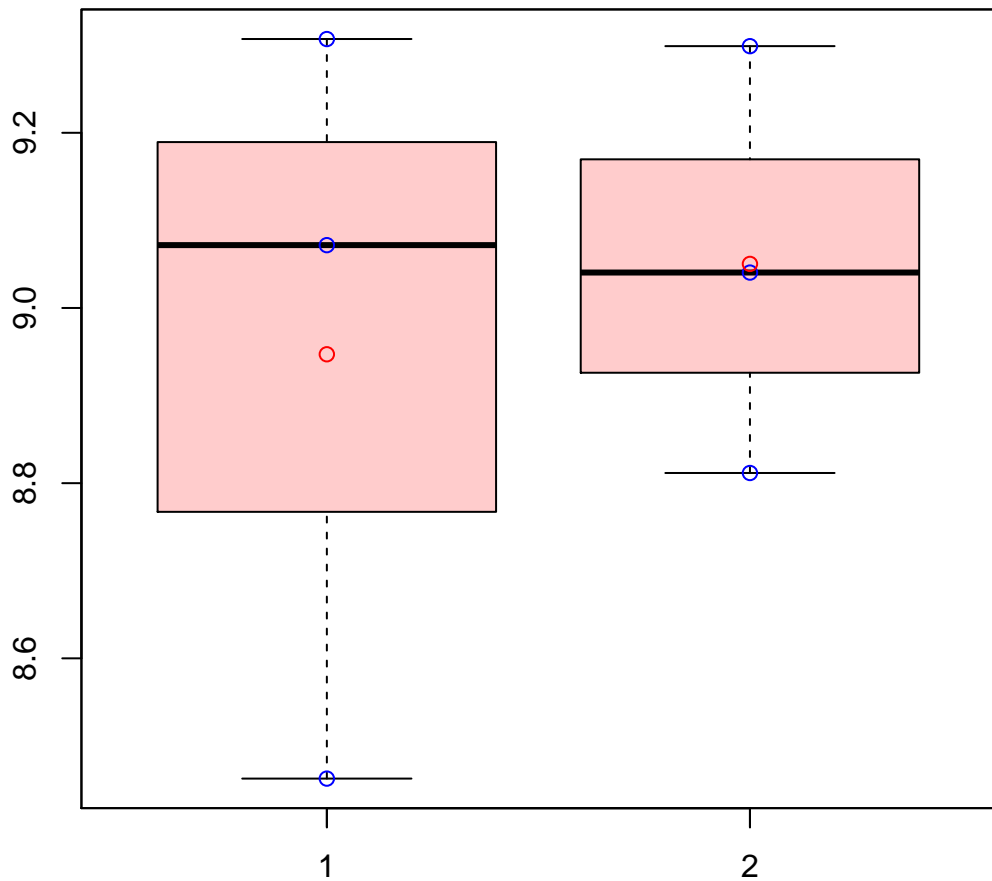

t-Test: p-value = 0.74

# CL1Contig2670|CL1Contig2670

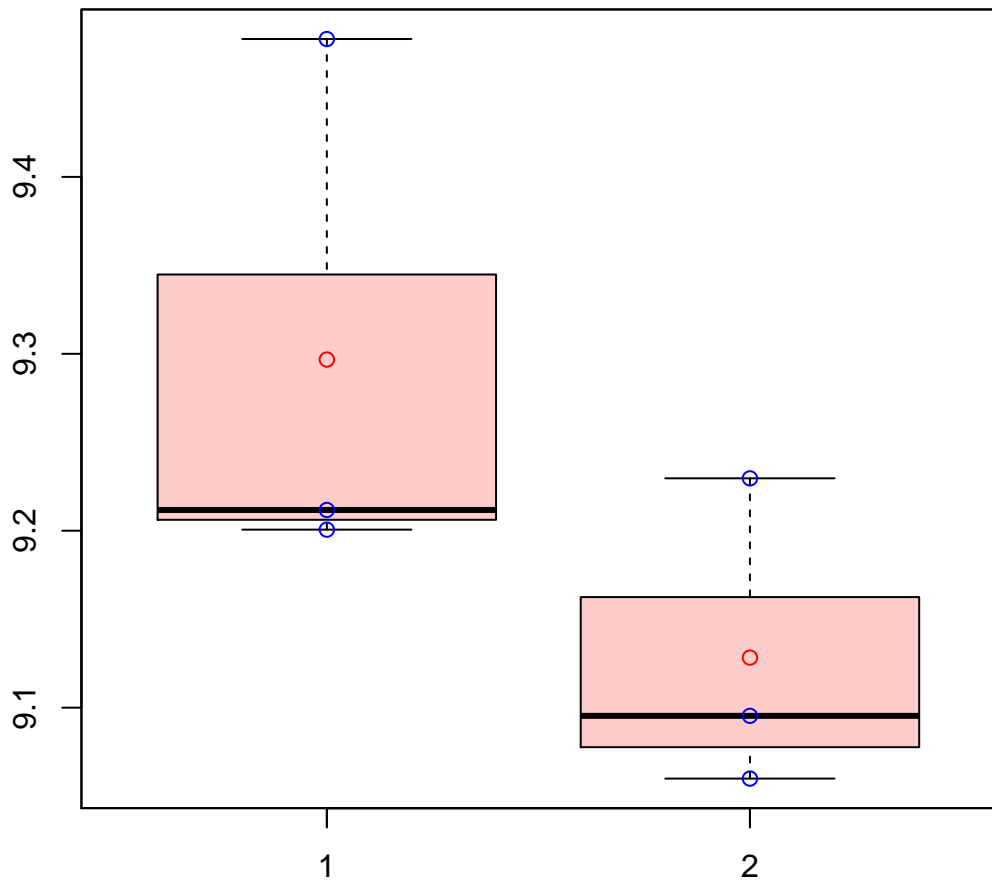

t-Test: p-value = 0.2



# CL1Contig2712|CL1Contig2712

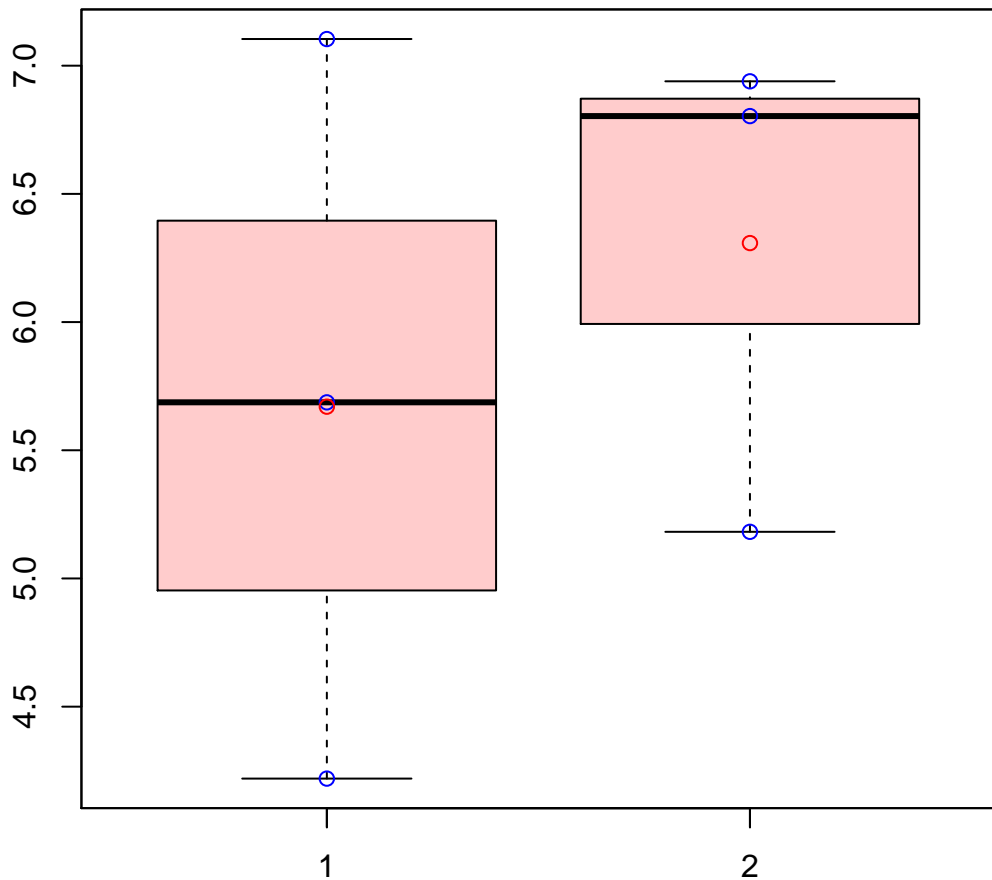

t-Test: p-value = 0.56

# CL1Contig2724|CL1Contig2724

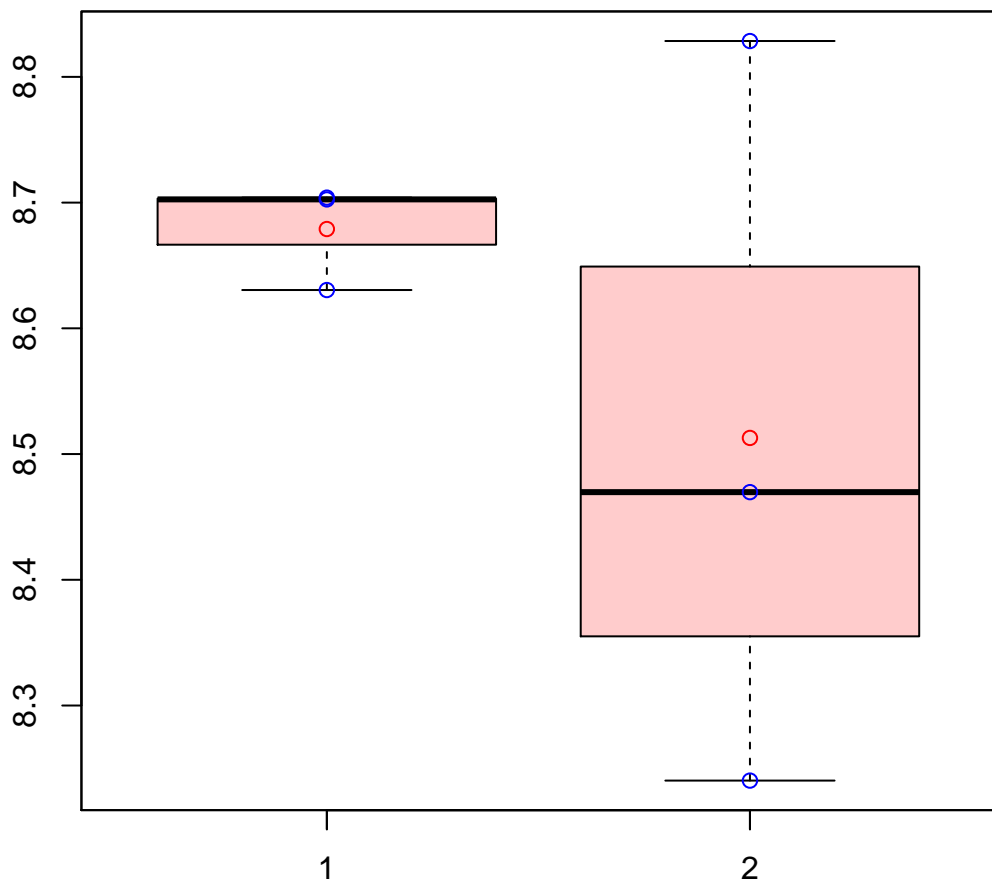

t-Test: p-value = 0.43

# CL1Contig2784|CL1Contig2784

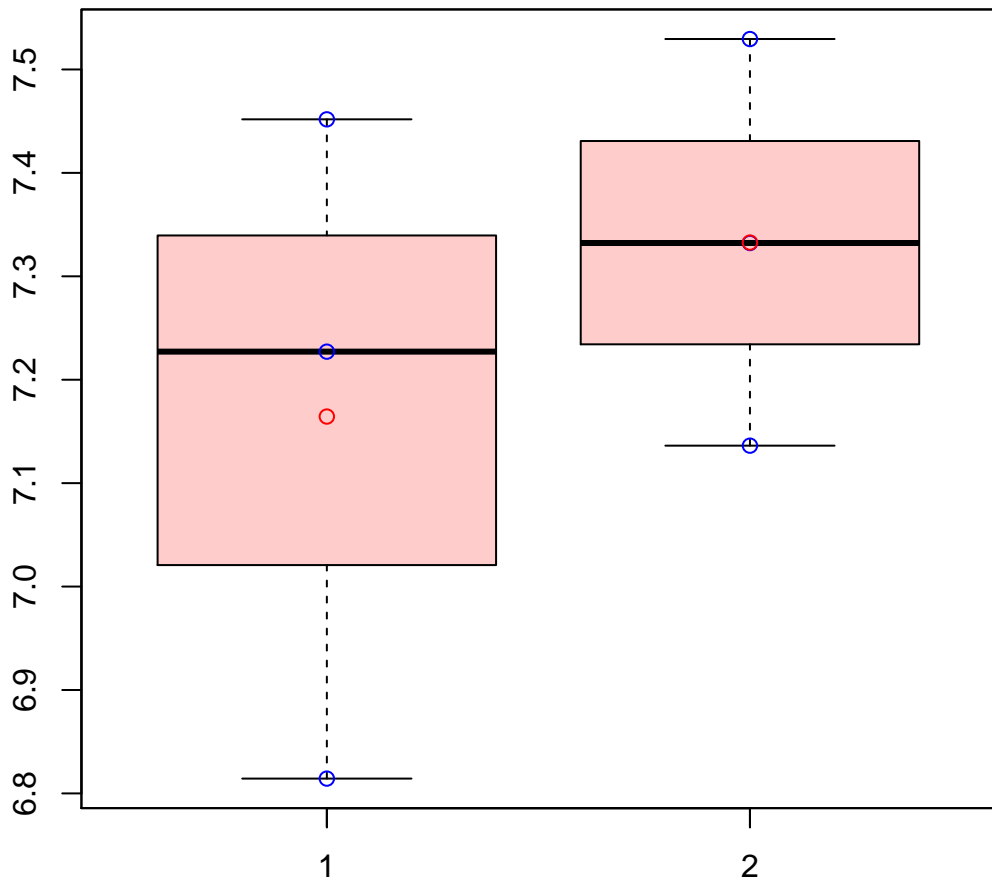

t-Test: p-value = 0.49

# CL1Contig280|CL1Contig280

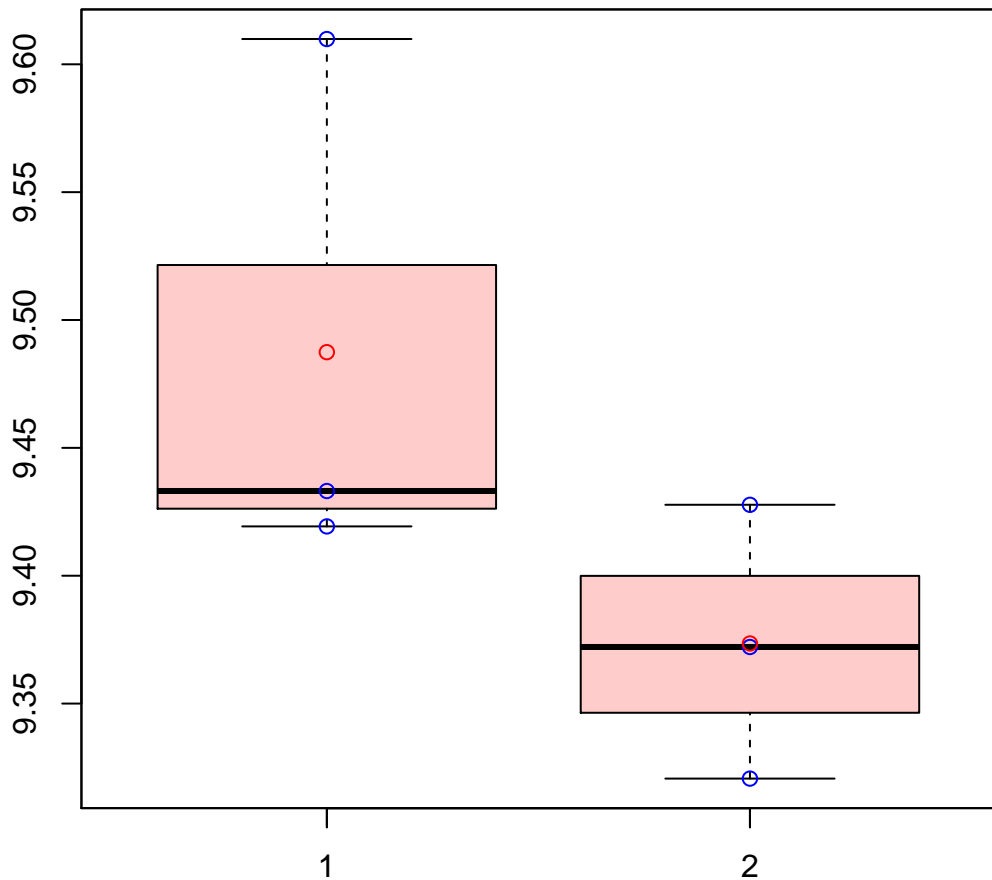

t-Test: p-value = 0.2

# CL1Contig2836|CL1Contig2836

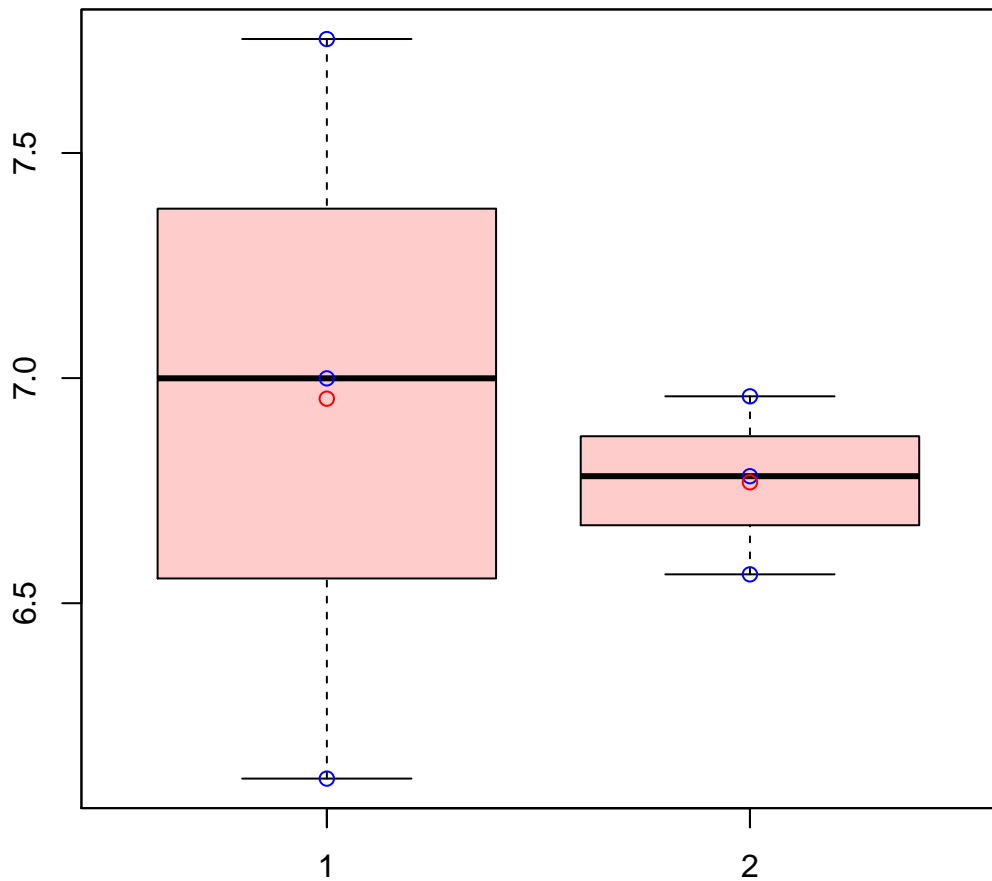

t-Test: p-value = 0.74

# CL1Contig2856|CL1Contig2856

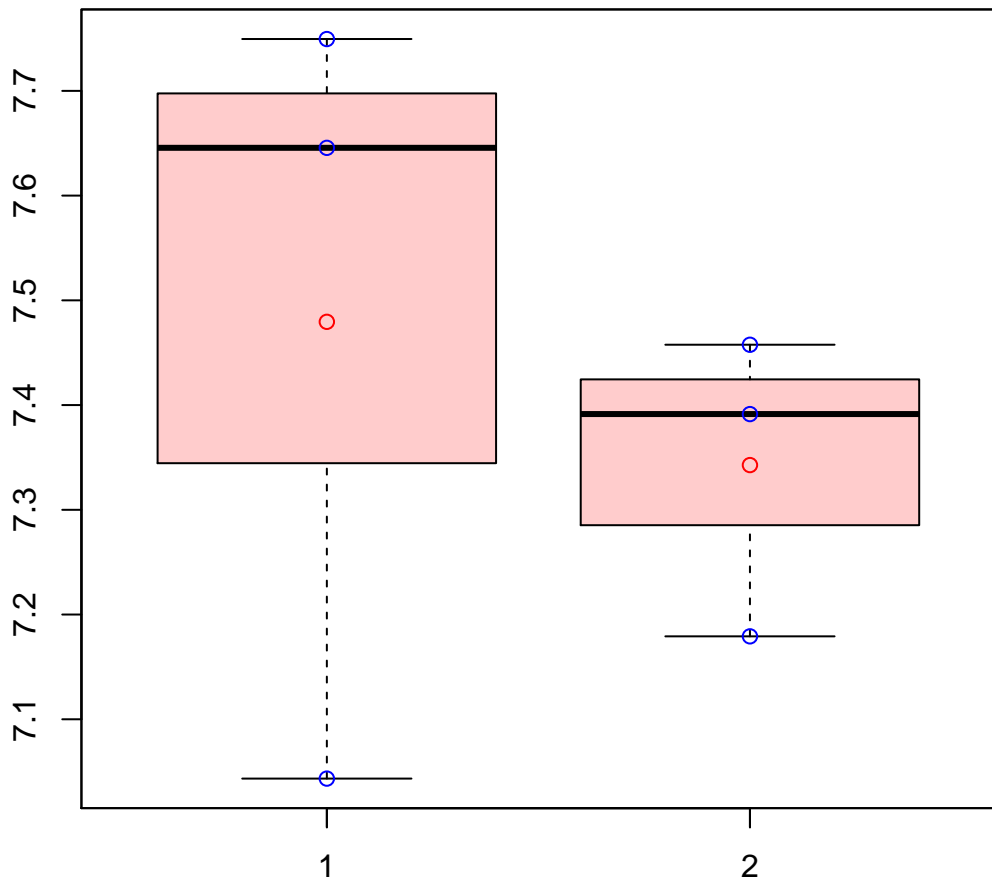

t-Test: p-value = 0.61

# CL1Contig2889|CL1Contig2889

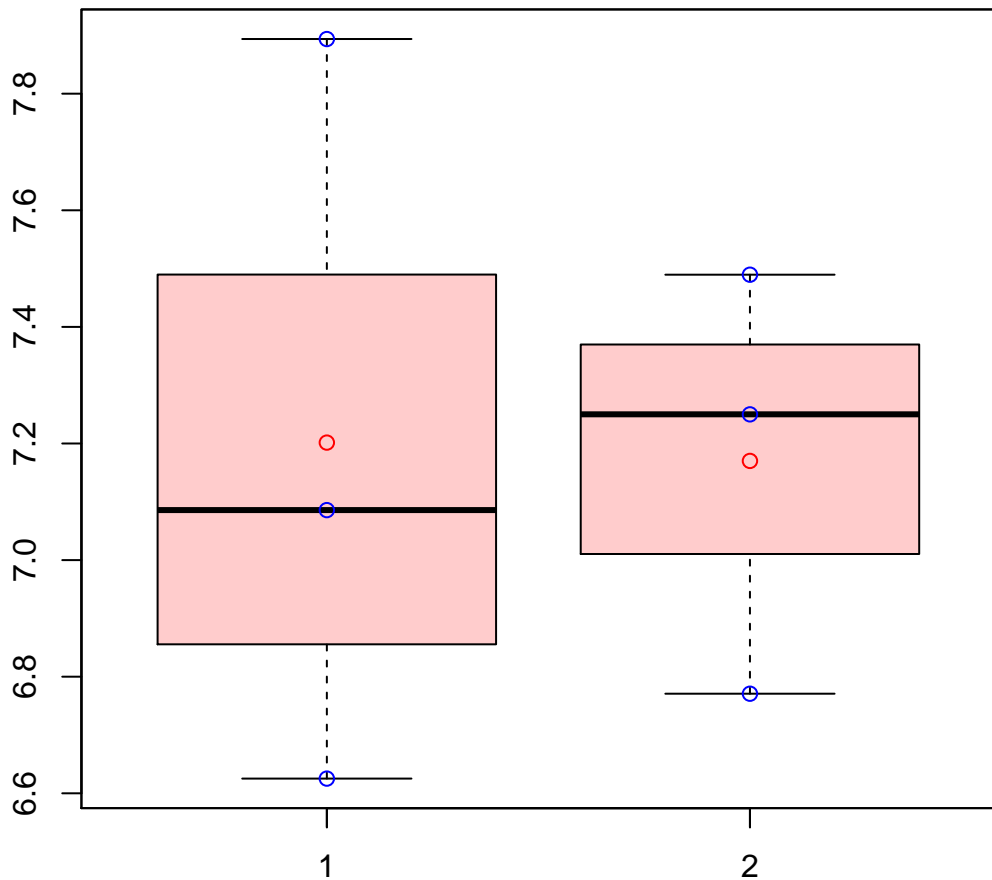

t-Test: p-value = 0.95

# CL1Contig293|CL1Contig293

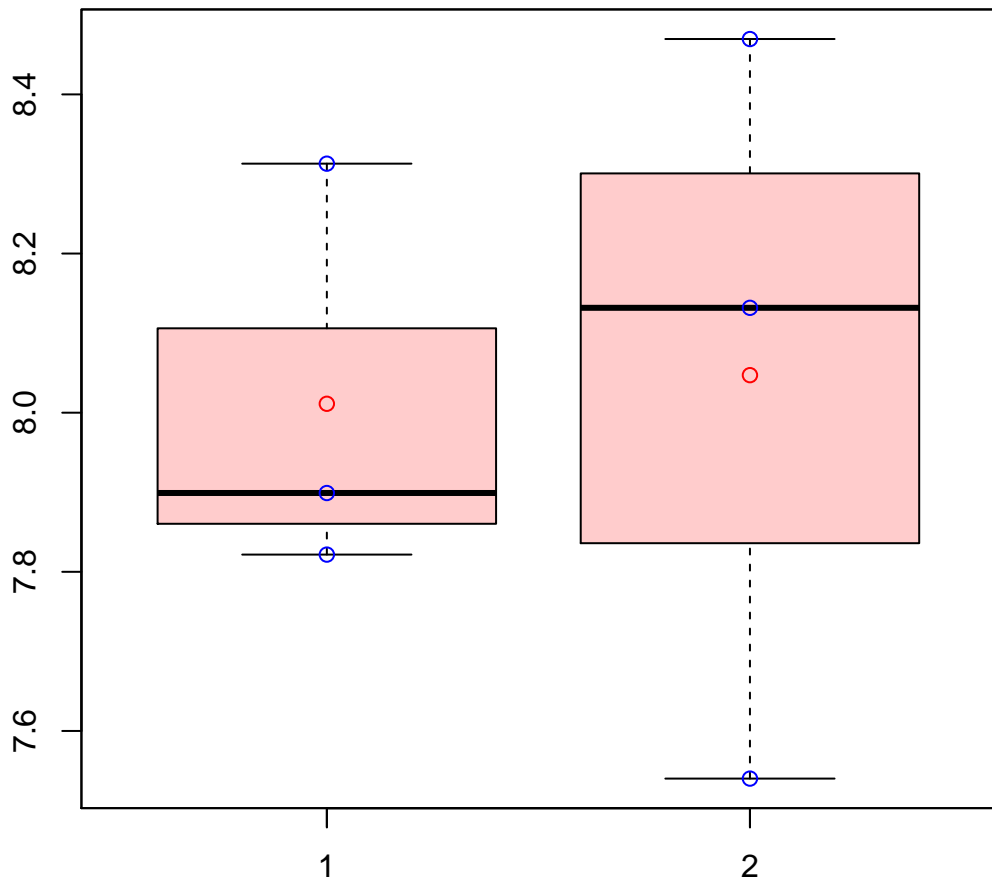

t-Test: p-value = 0.92



# CL1Contig294|CL1Contig294

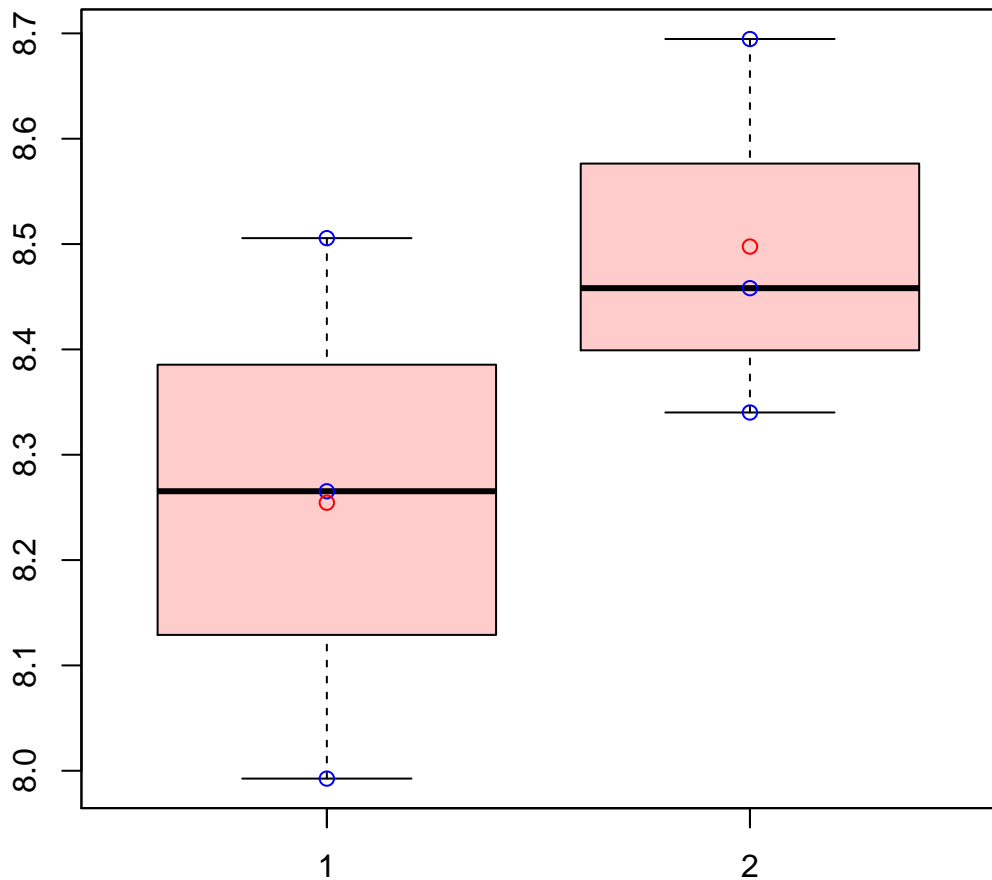

t-Test: p-value = 0.26

# CL1Contig2953|CL1Contig2953

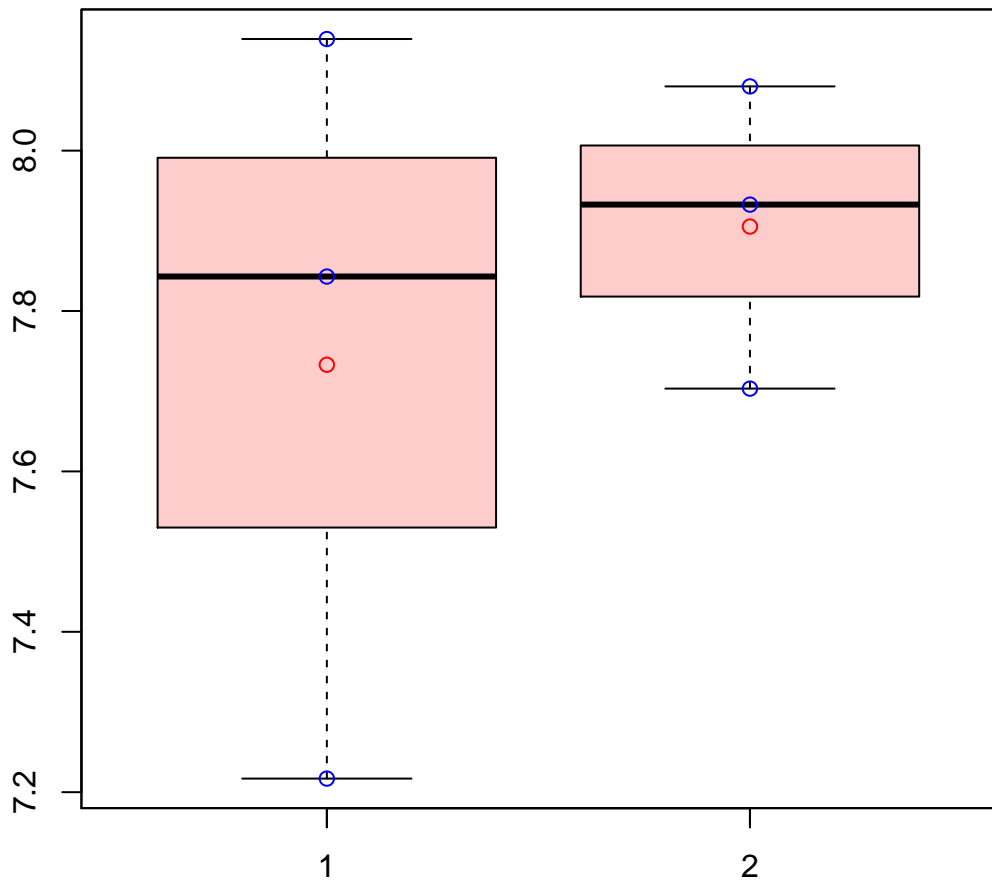

t-Test: p-value = 0.6

# CL1Contig2967|CL1Contig2967

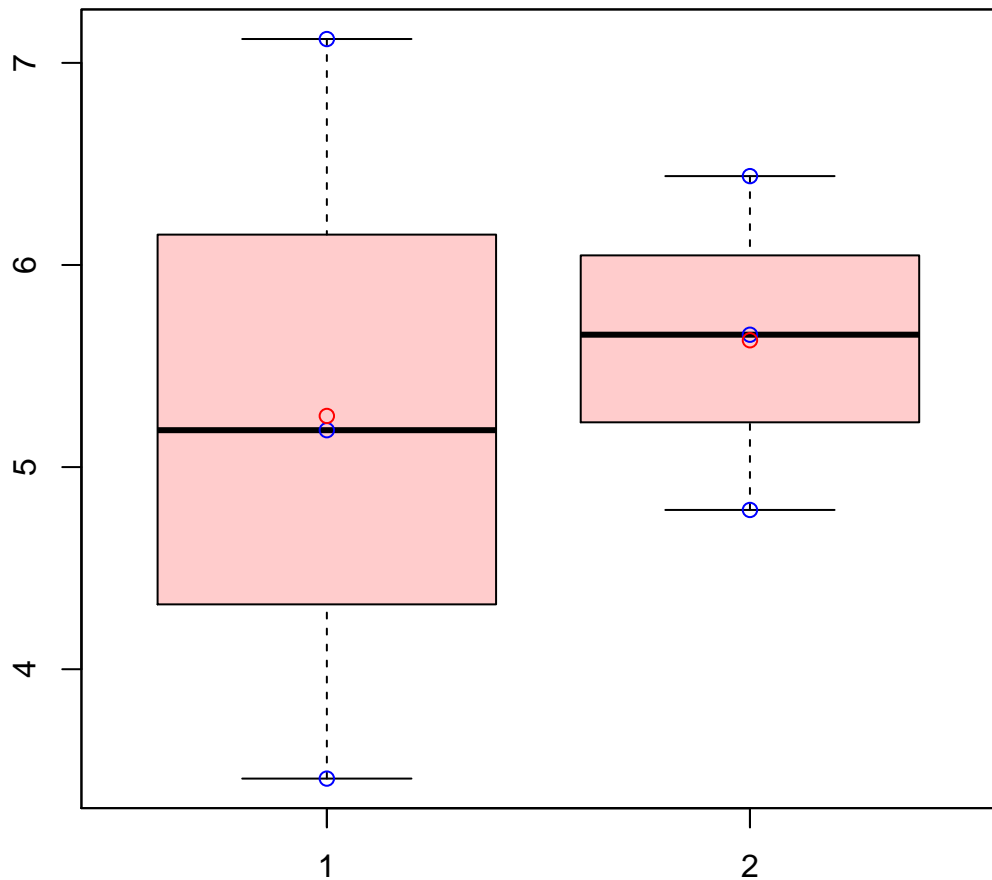

t-Test: p-value = 0.77

# CL1Contig2999|CL1Contig2999

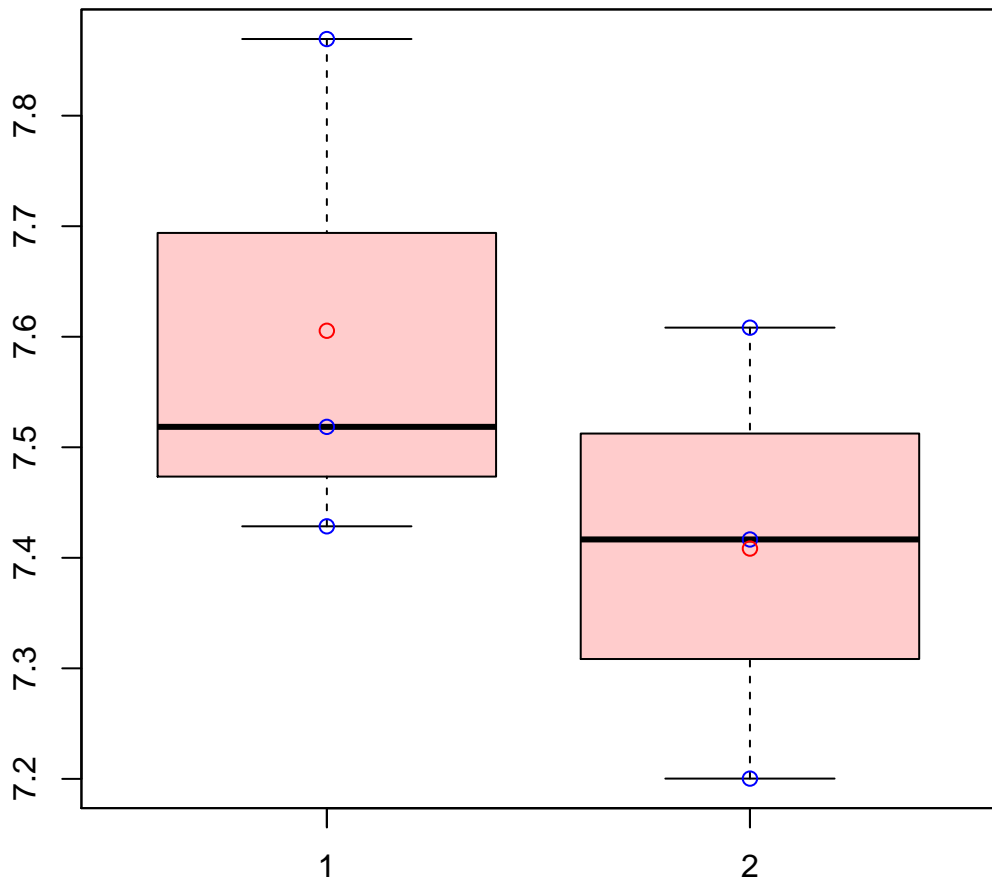

t-Test: p-value = 0.33

# CL1Contig3038|CL1Contig3038

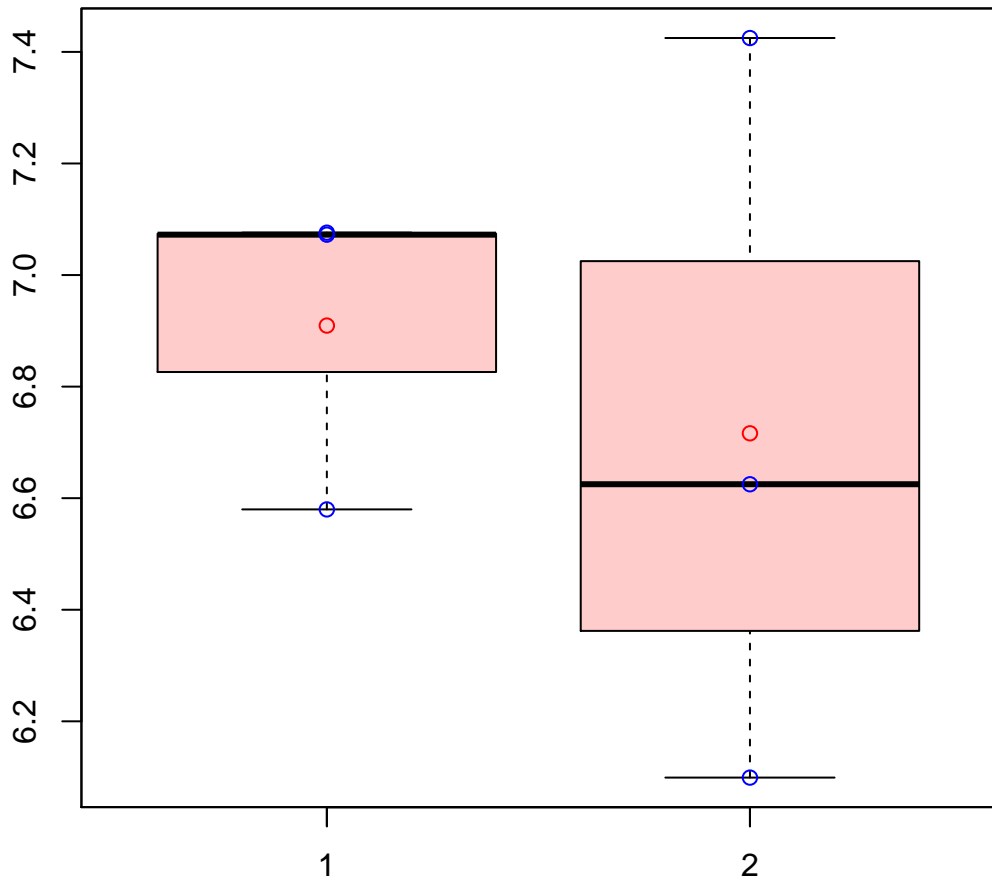

t-Test: p-value = 0.68

# CL1Contig3056|CL1Contig3056

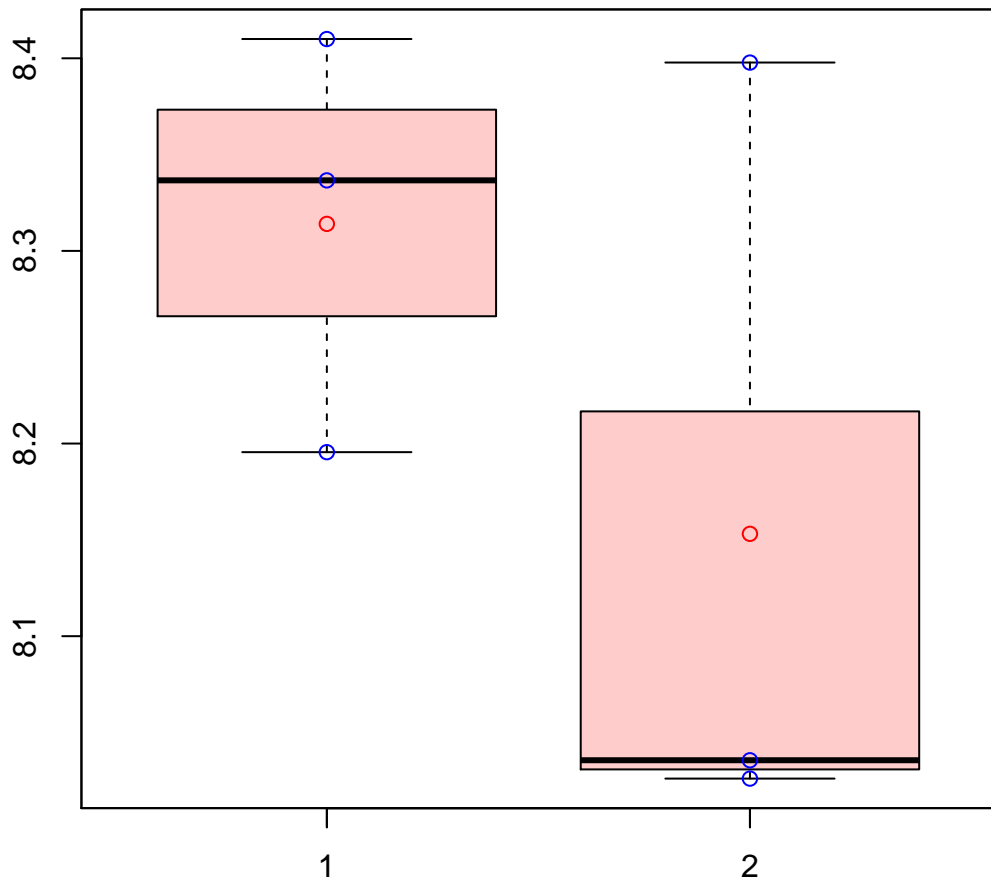

t-Test: p-value = 0.33

# CL1Contig3083|CL1Contig3083

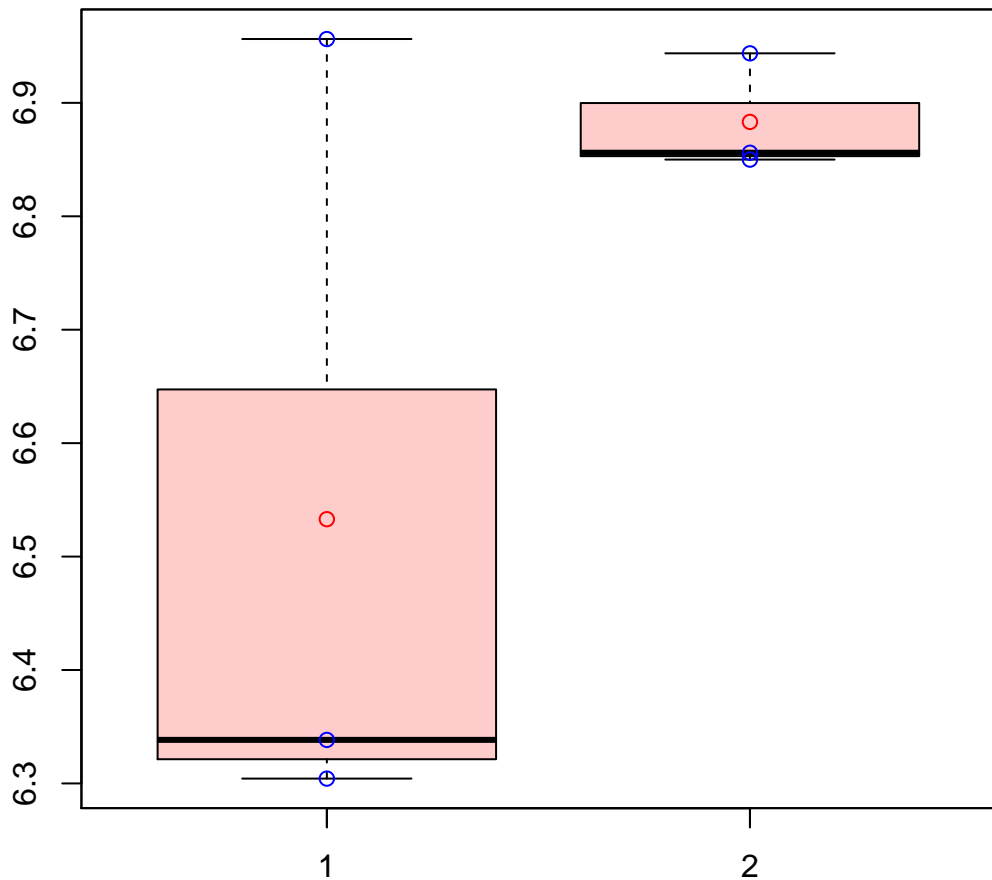

t-Test: p-value = 0.24

# CL1Contig30|CL1Contig30

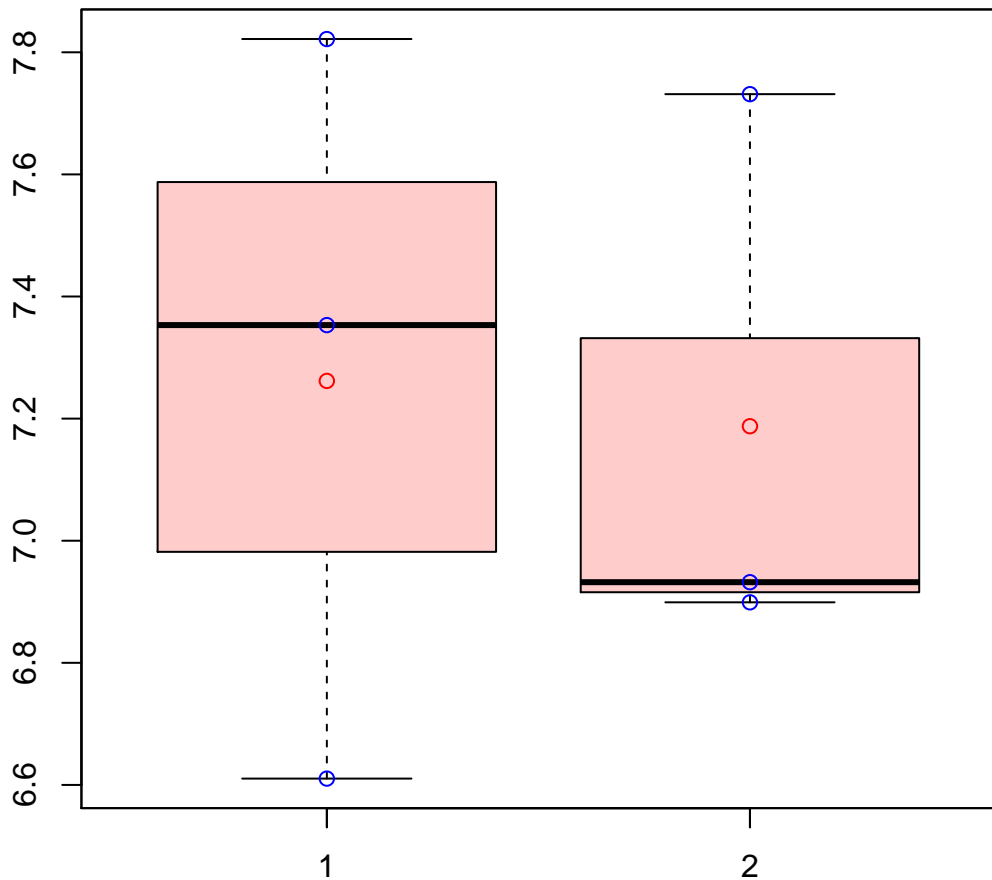

t-Test: p-value = 0.88



# CL1Contig3110|CL1Contig3110

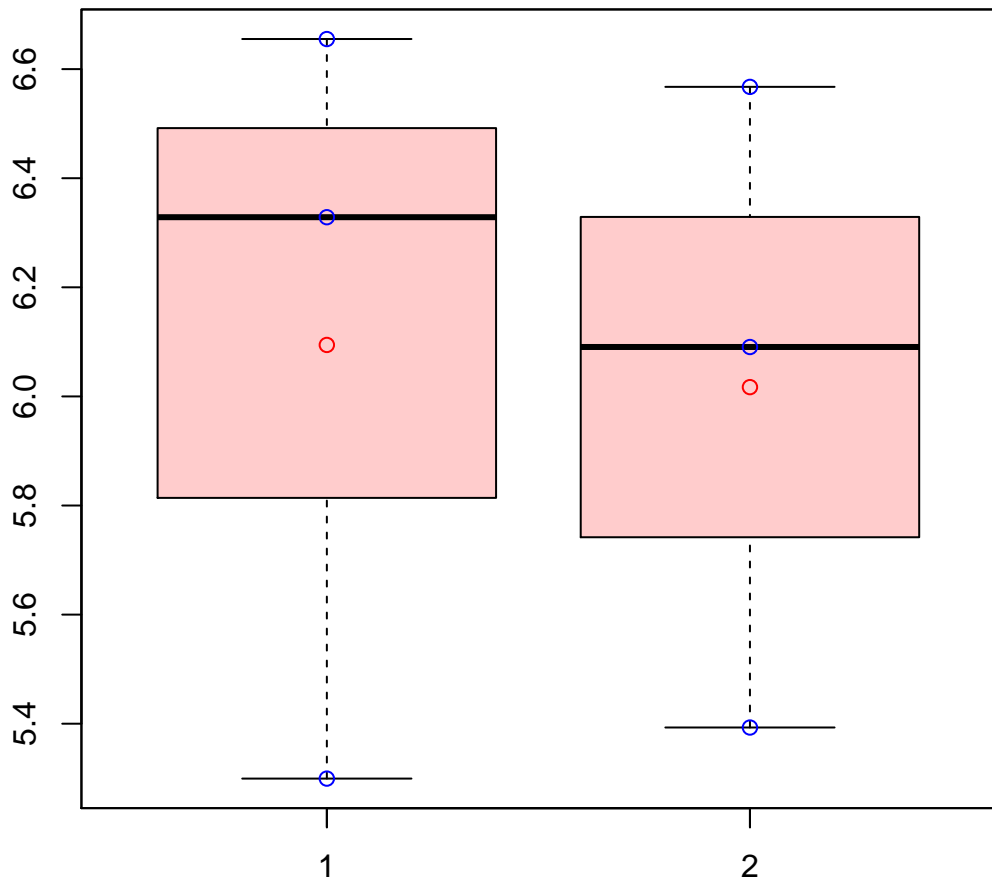

t-Test: p-value = 0.89

# CL1Contig313|CL1Contig313

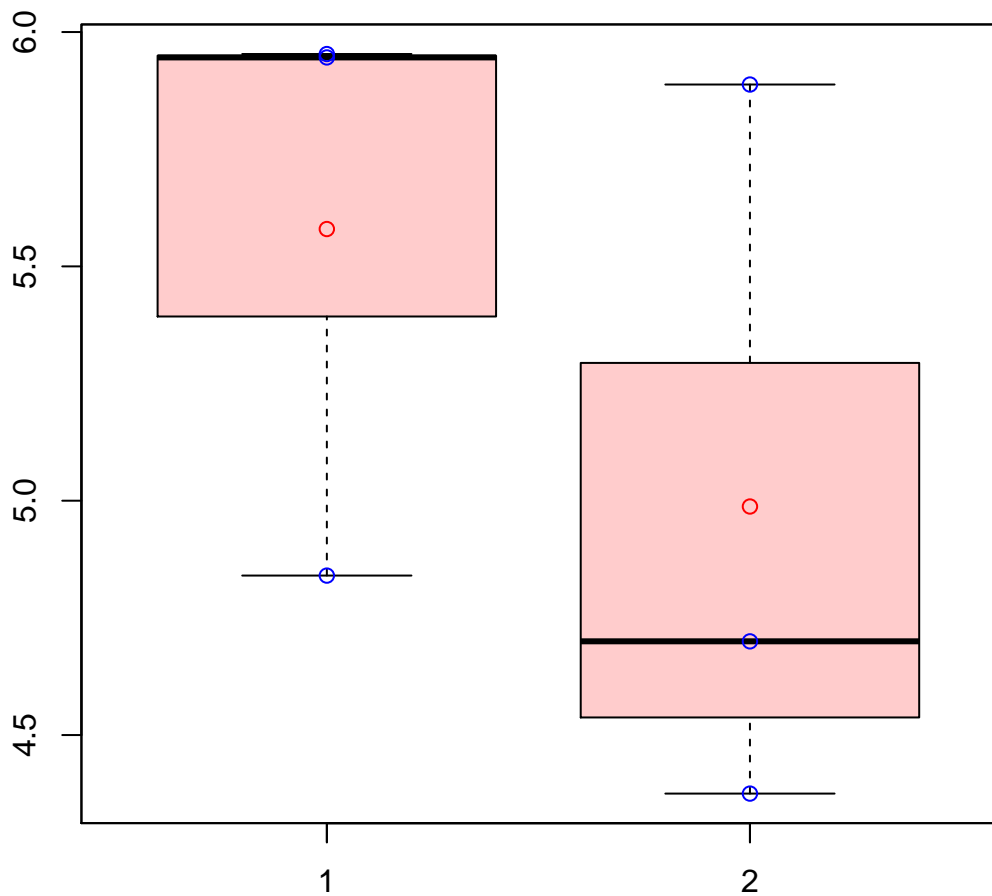

t-Test: p-value = 0.37

# CL1Contig3189|CL1Contig3189

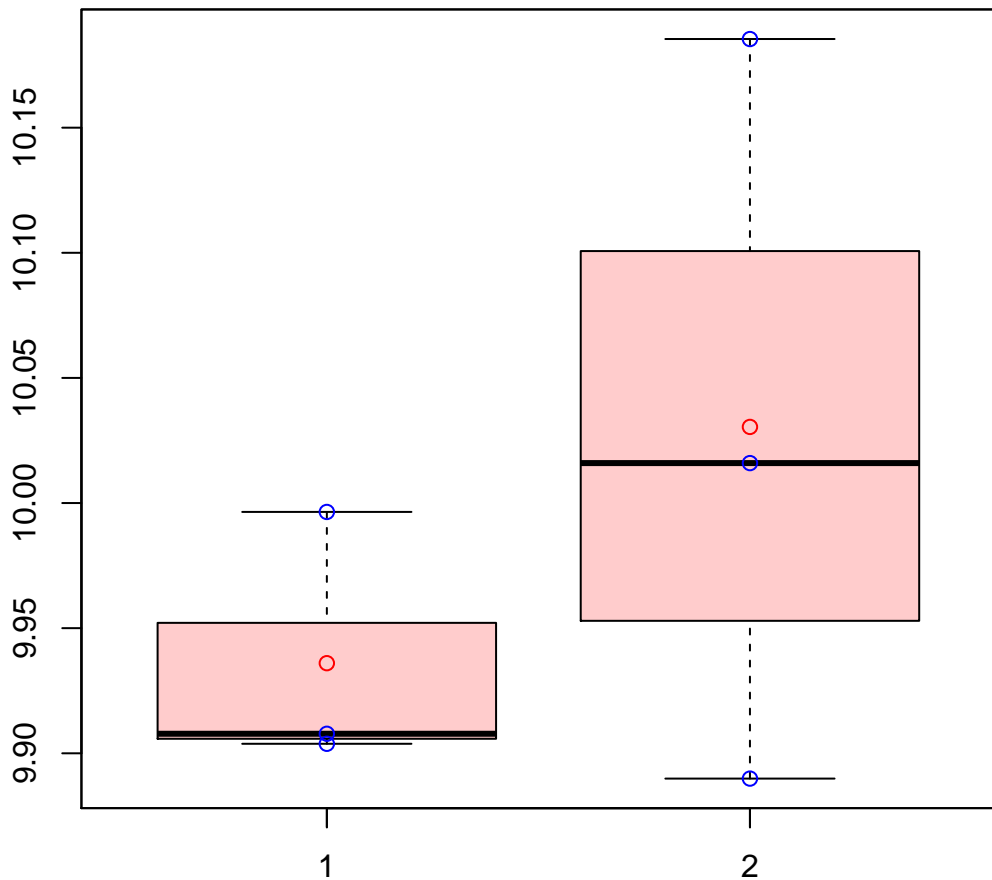

t-Test: p-value = 0.39

# CL1Contig3195|CL1Contig3195

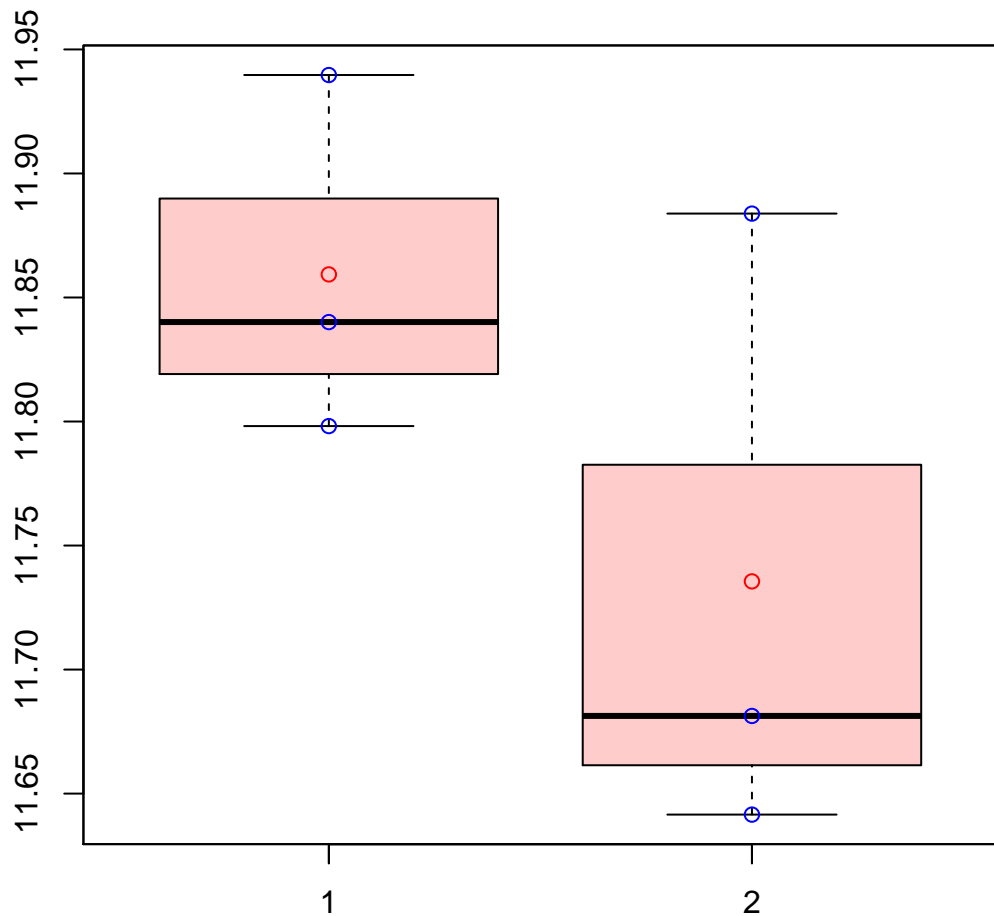

t-Test: p-value = 0.24

# CL1Contig31|CL1Contig31

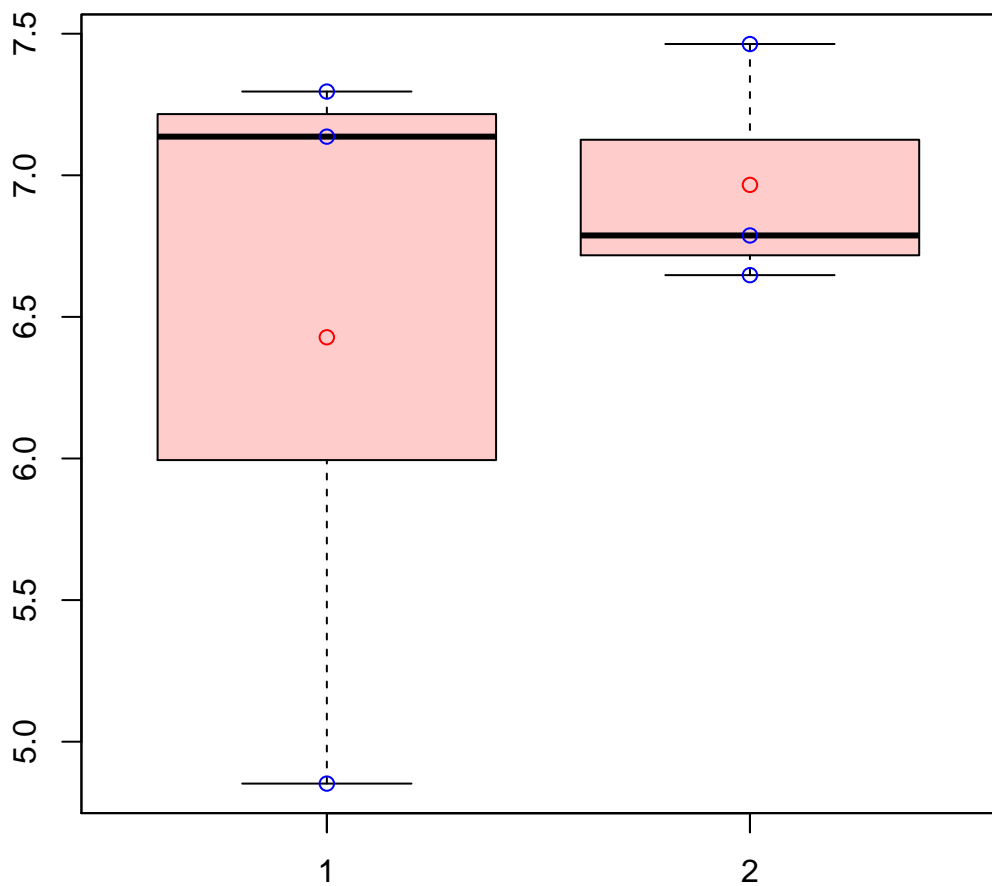

t-Test: p-value = 0.57

# CL1Contig3205|CL1Contig3205

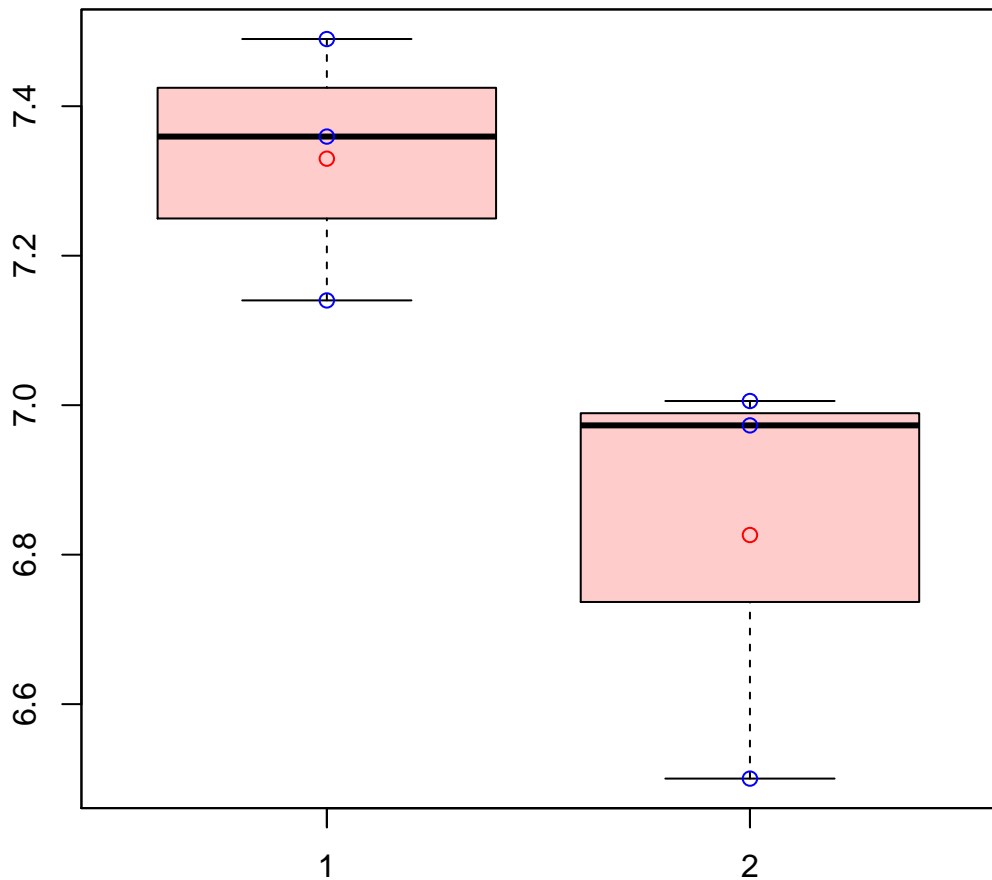

t-Test: p-value = 0.07

# CL1Contig3215|CL1Contig3215

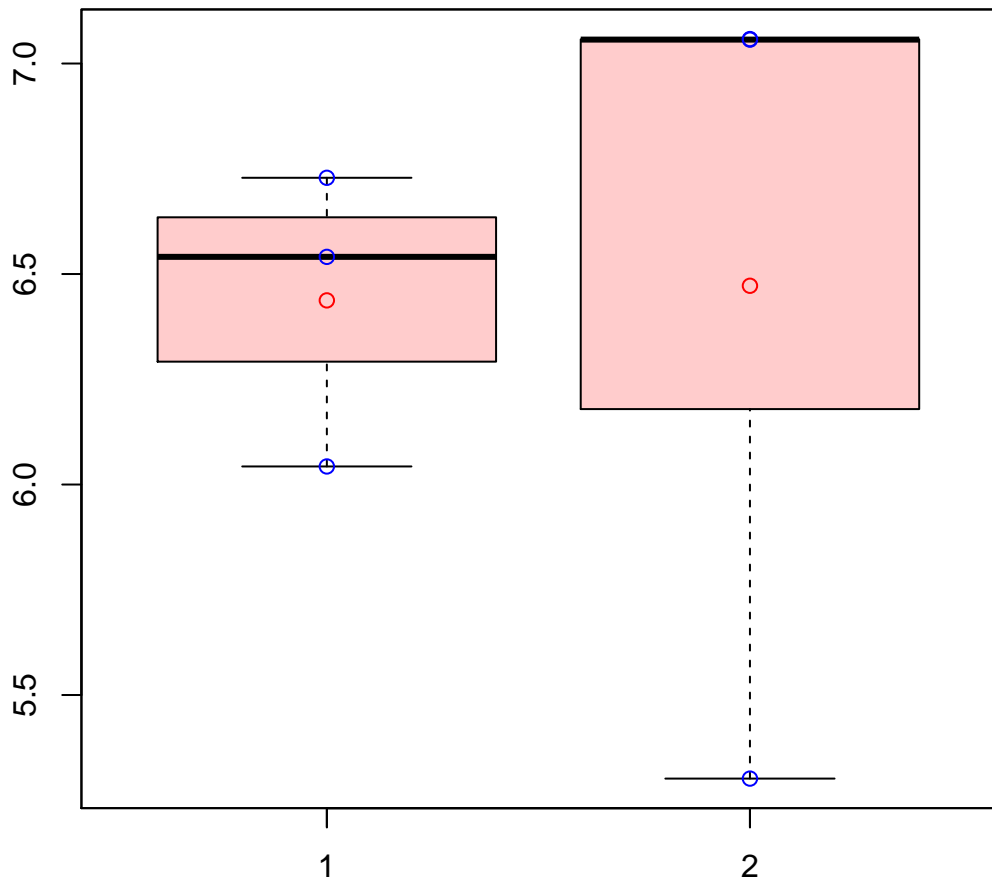

t-Test: p-value = 0.96

# CL1Contig3243|CL1Contig3243

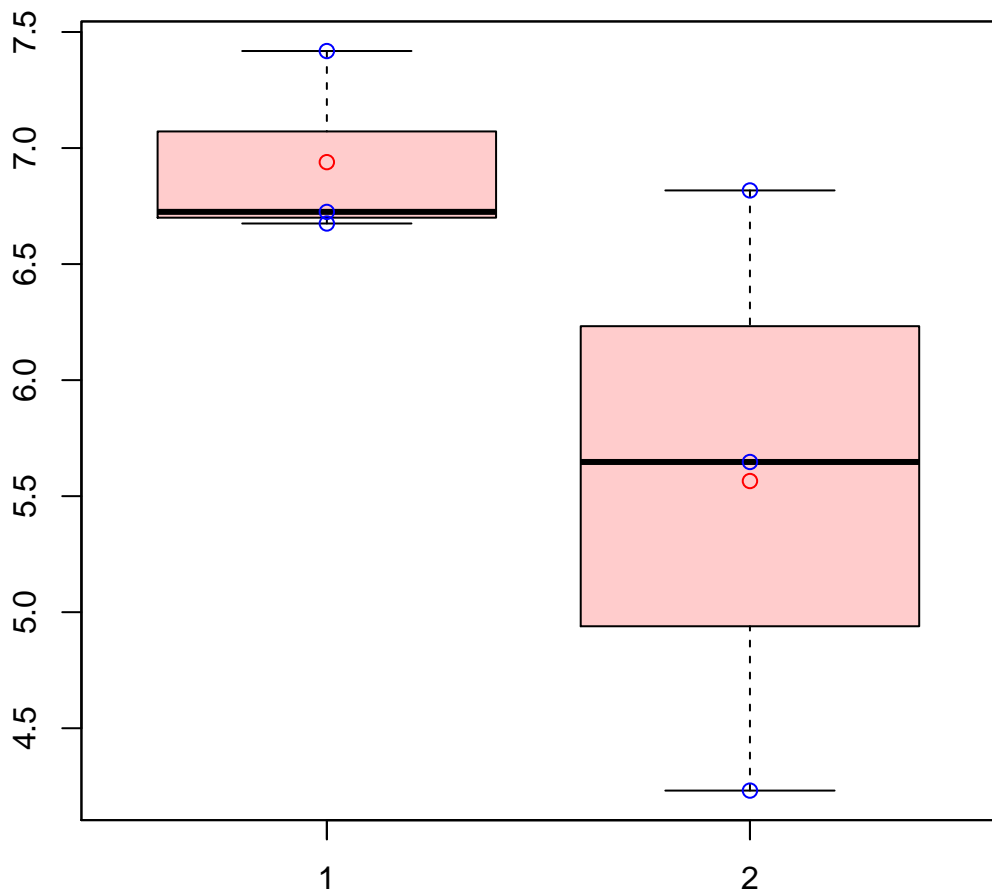

t-Test: p-value = 0.2



# CL1Contig3244|CL1Contig3244

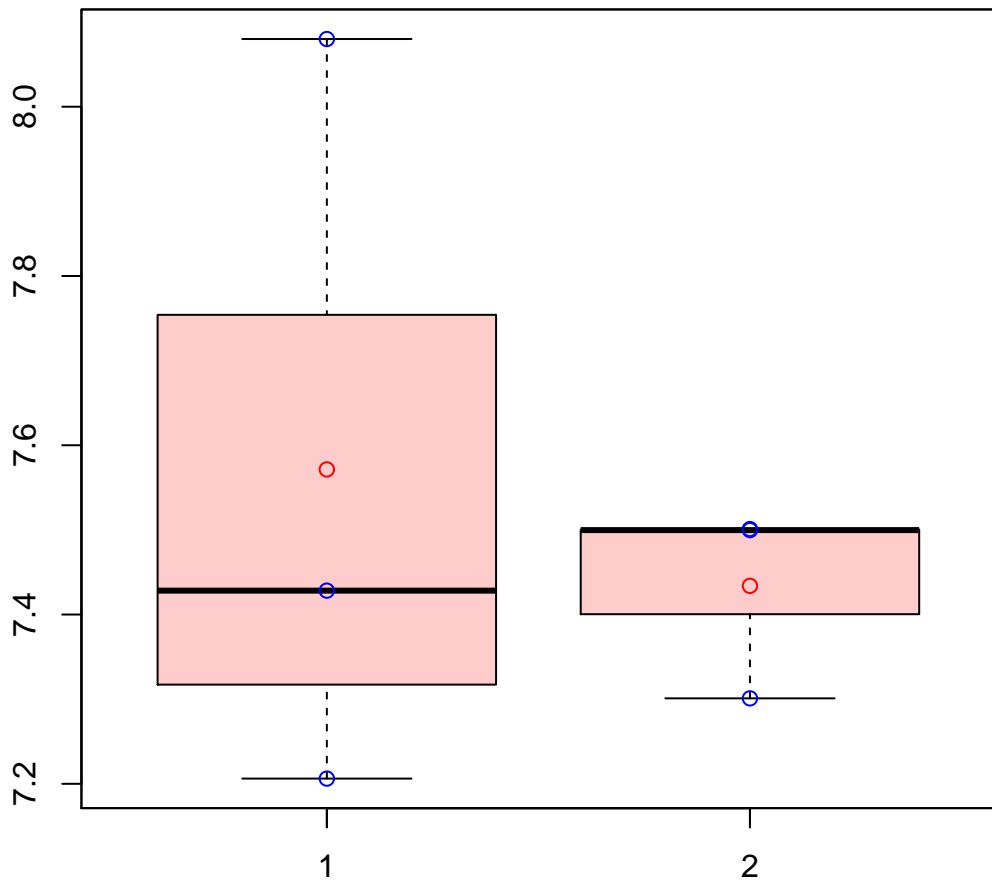

t-Test: p-value = 0.66

# CL1Contig3349|CL1Contig3349

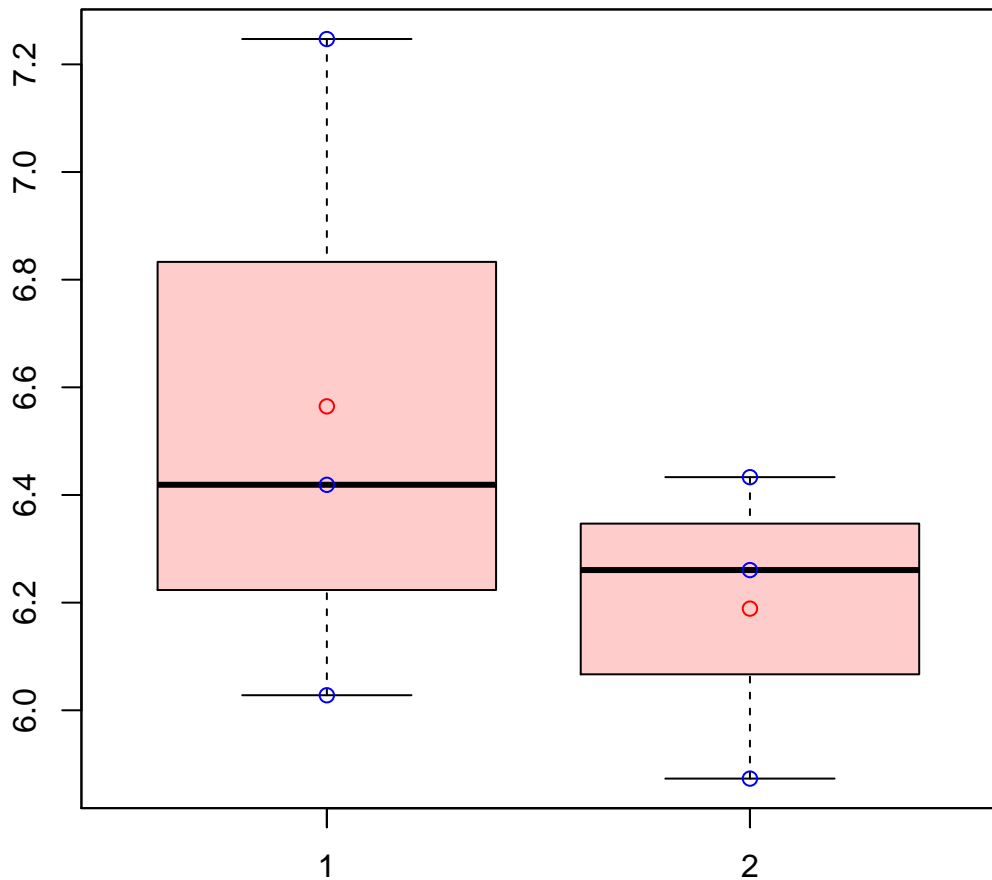

t-Test: p-value = 0.42

# CL1Contig3371|CL1Contig3371

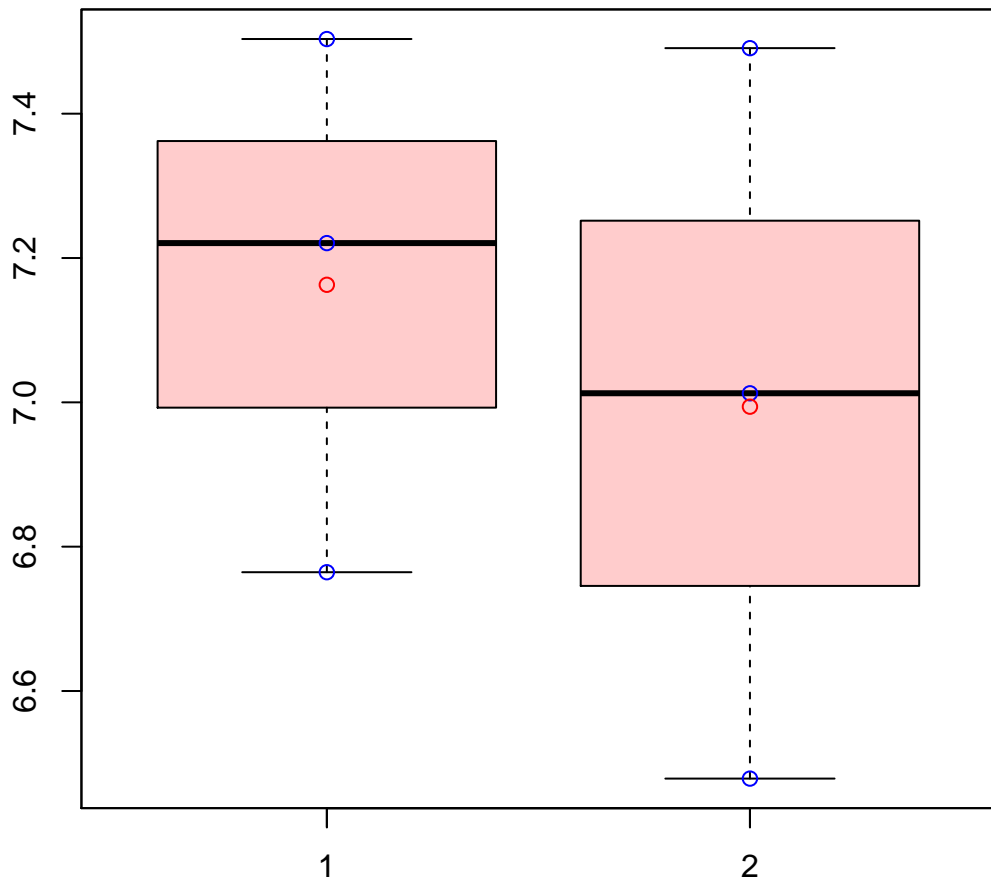

t-Test: p-value = 0.67

# CL1Contig3387|CL1Contig3387

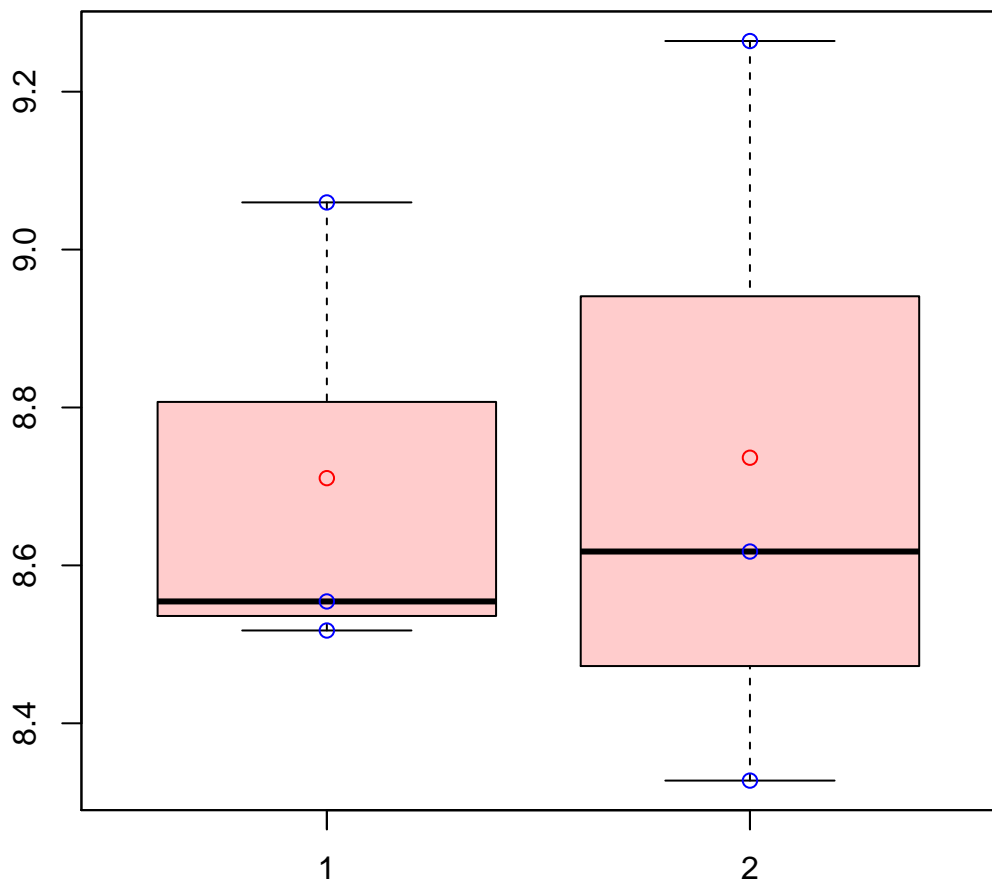

t-Test: p-value = 0.94

# CL1Contig3388|CL1Contig3388

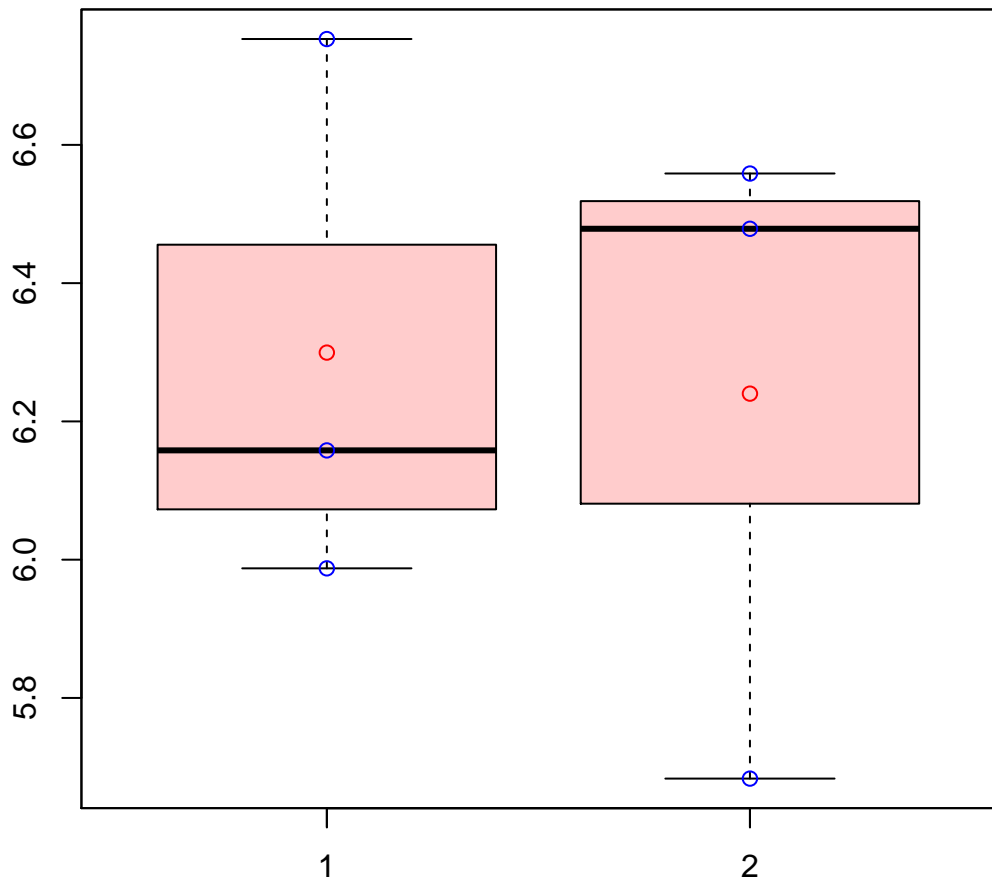

t-Test: p-value = 0.88

# CL1Contig3397|CL1Contig3397

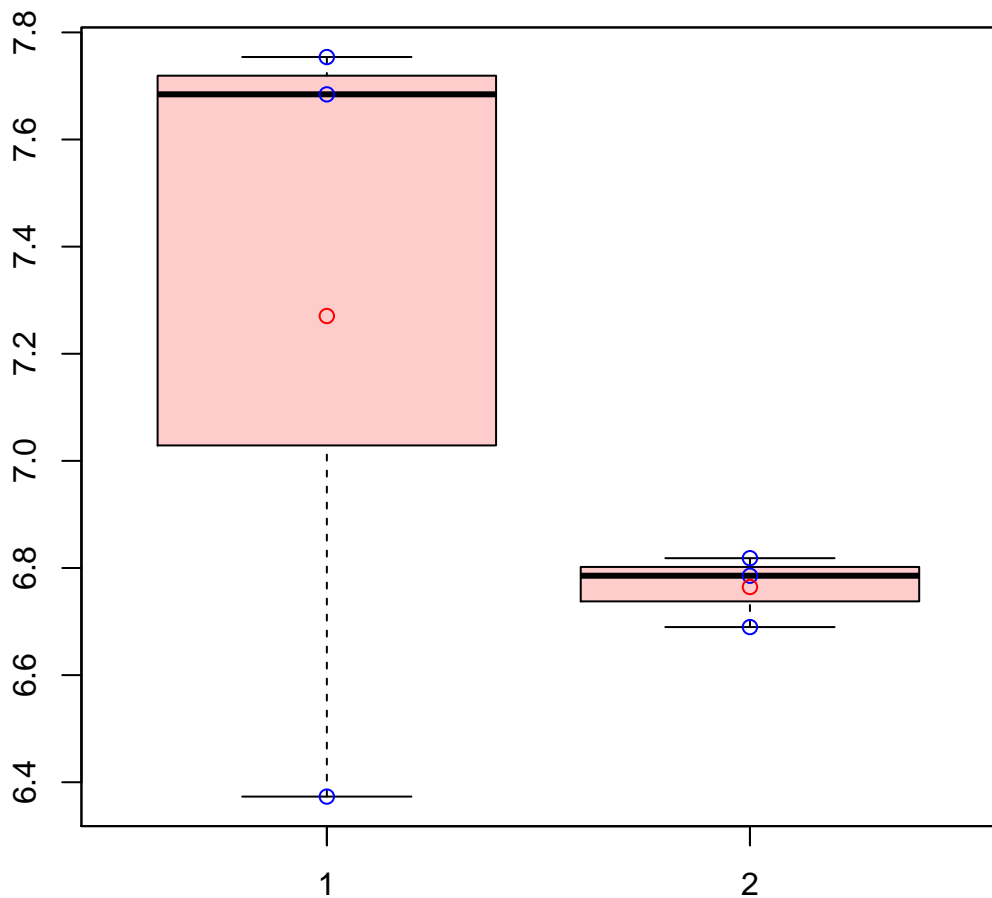

t-Test: p-value = 0.38

# CL1Contig3402|CL1Contig3402

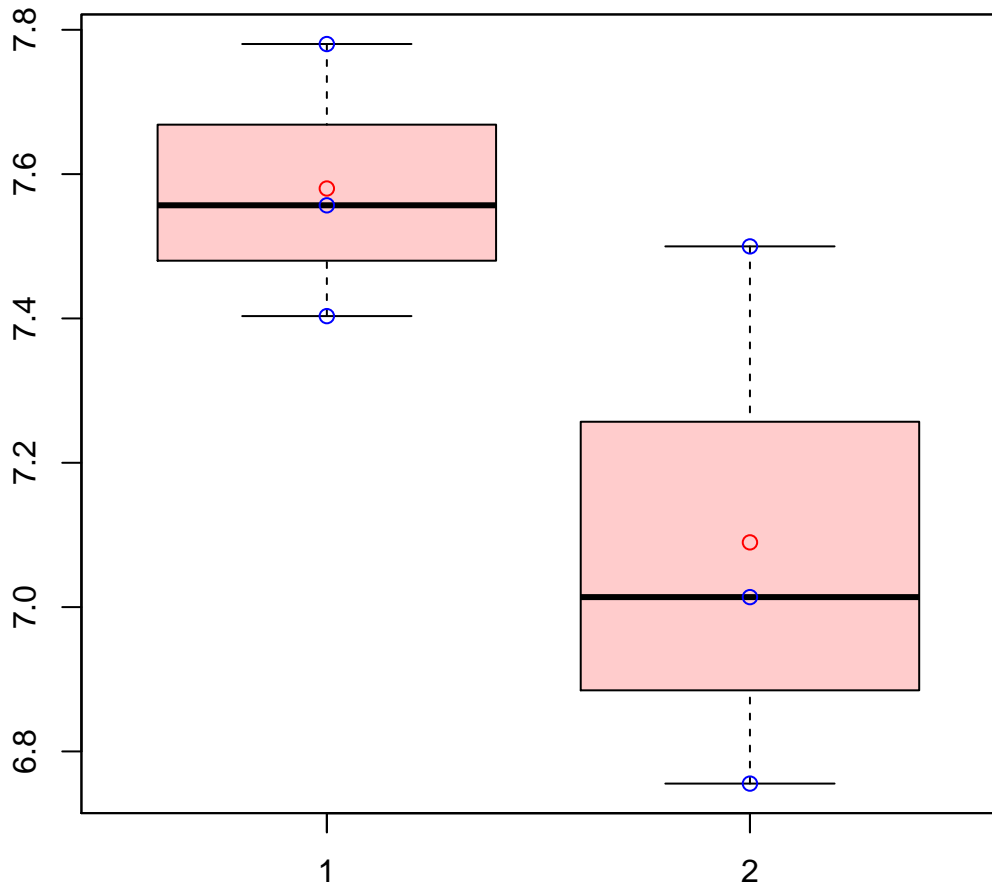

t-Test: p-value = 0.14

# CL1Contig3411|CL1Contig3411

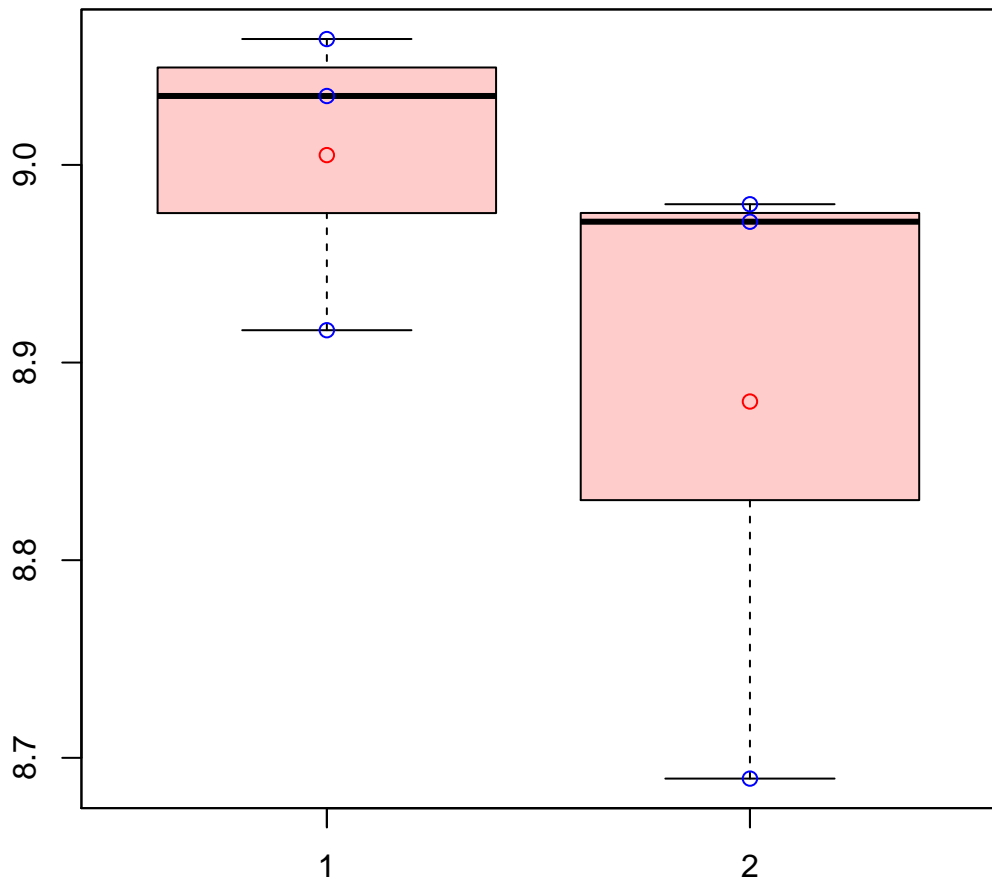

t-Test: p-value = 0.33



# CL1Contig3422|CL1Contig3422

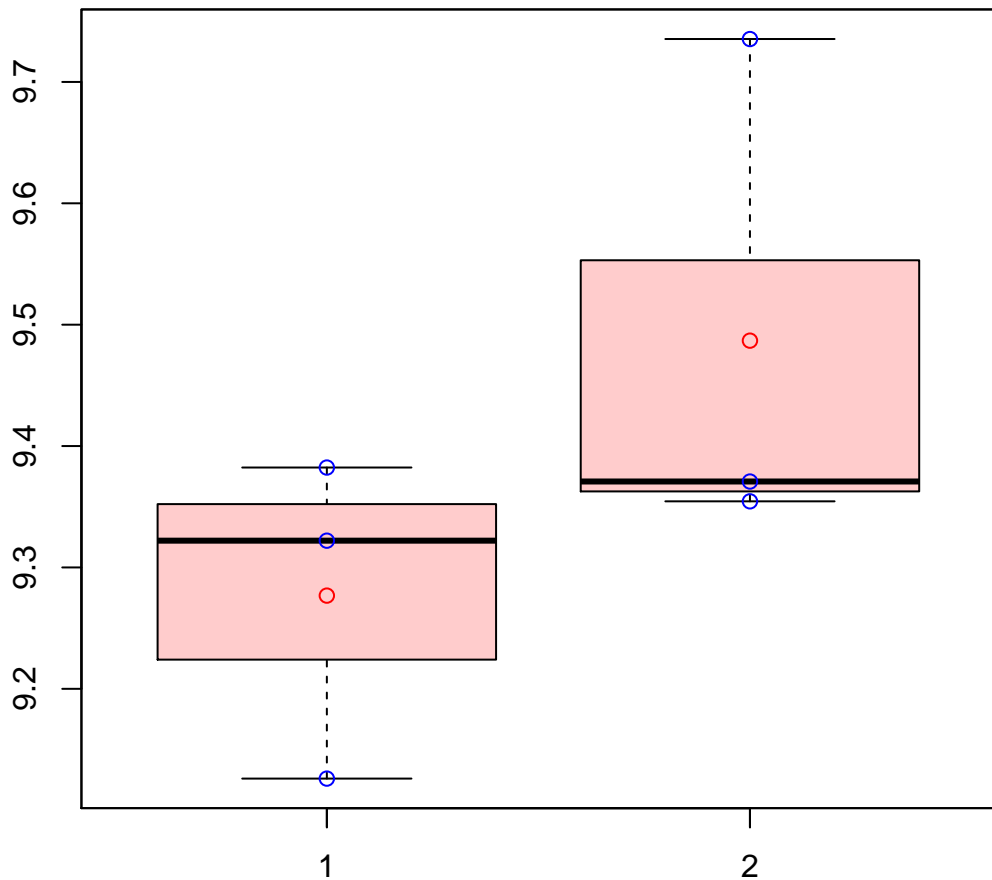

t-Test: p-value = 0.24

# CL1Contig3480|CL1Contig3480

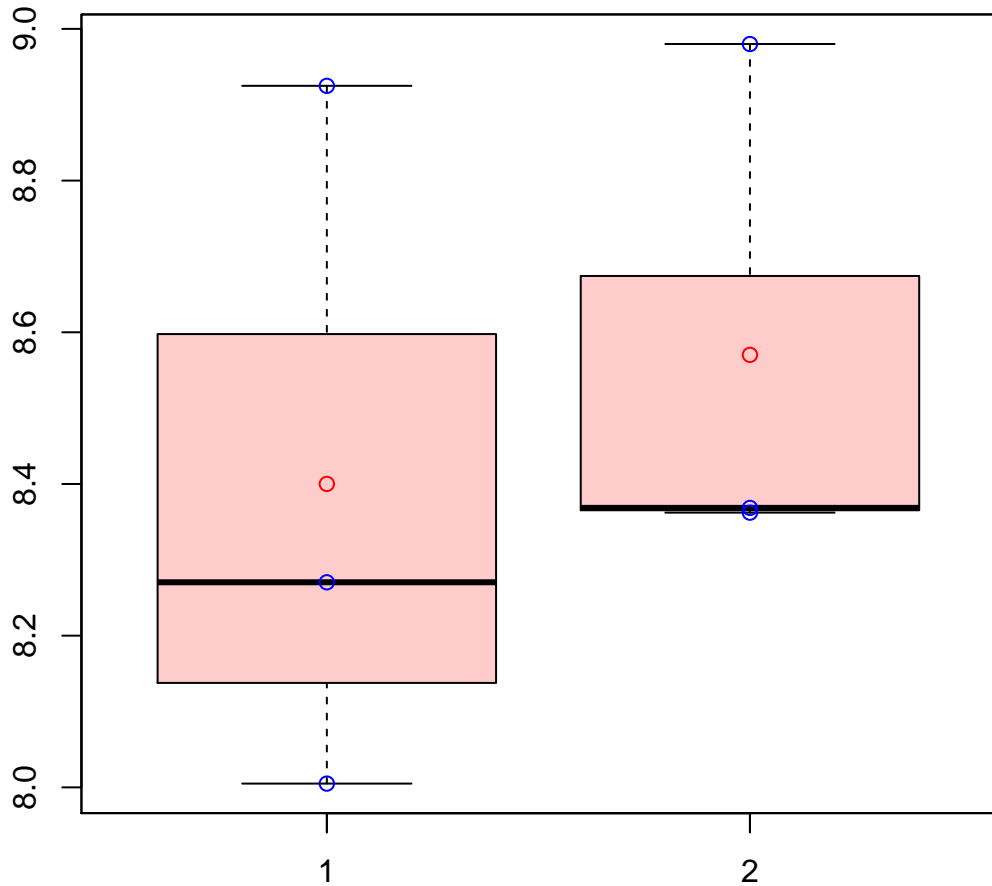

t-Test: p-value = 0.65

# CL1Contig3490|CL1Contig3490

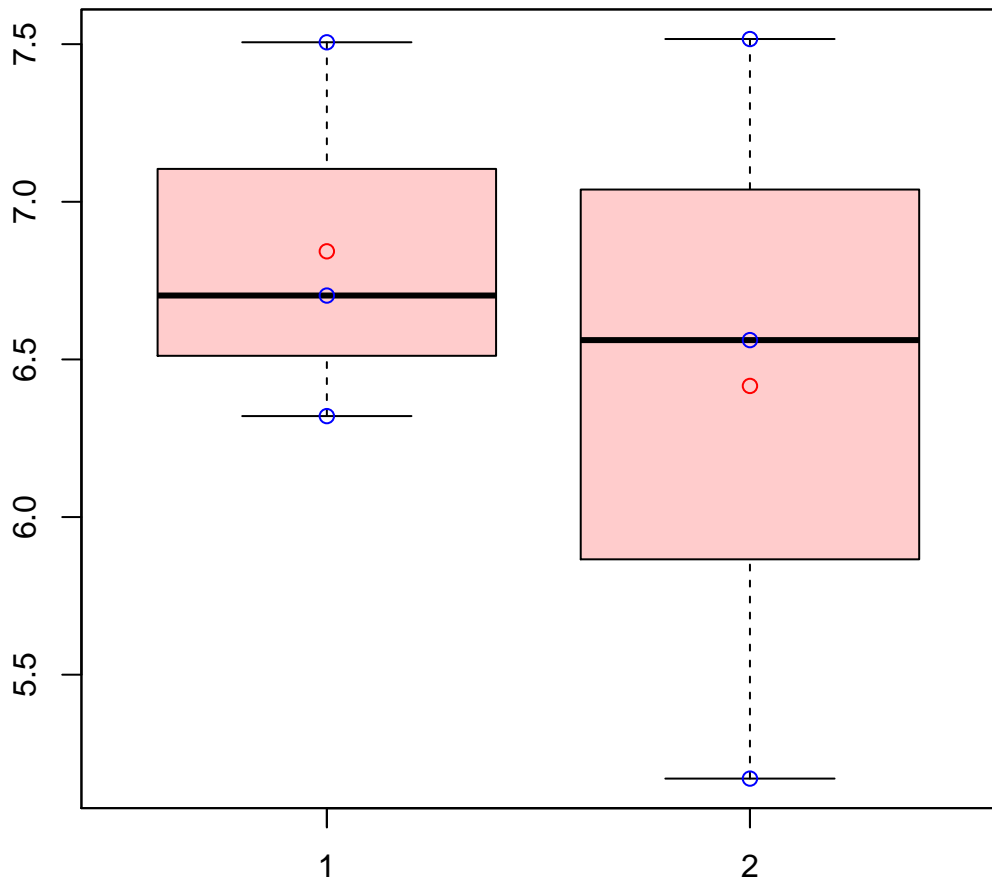

t-Test: p-value = 0.62

# CL1Contig3516|CL1Contig3516

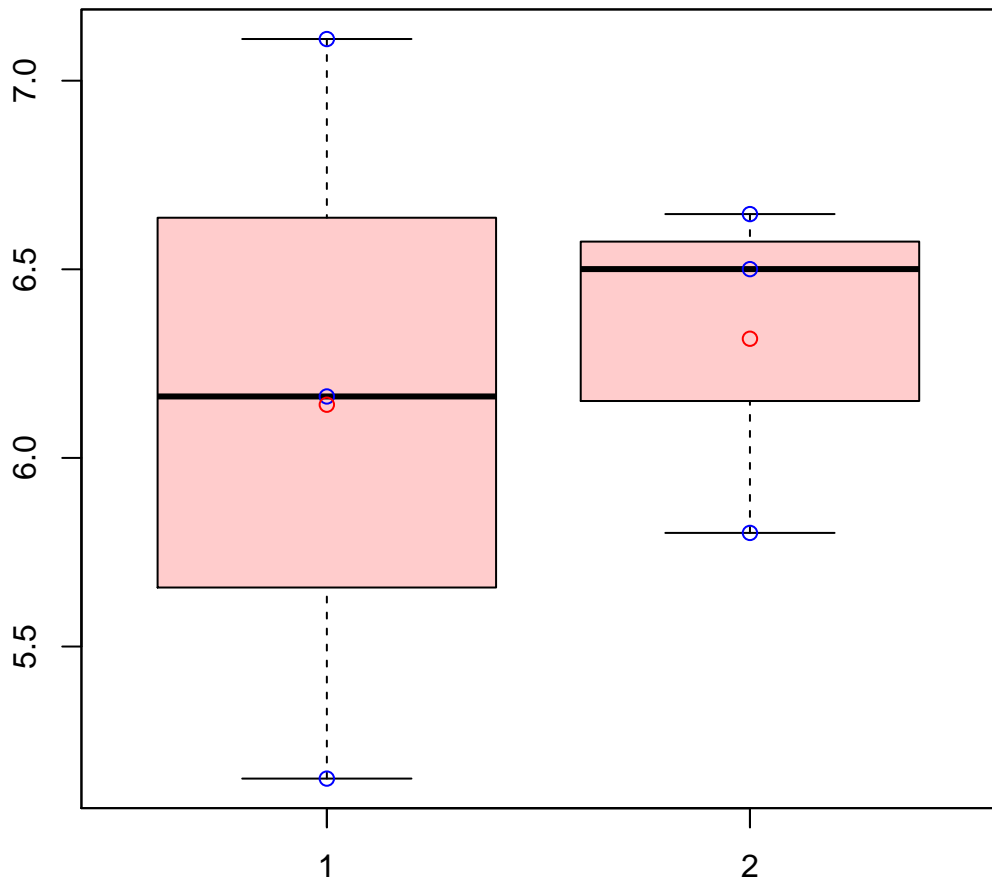

t-Test: p-value = 0.8

# CL1Contig3533|CL1Contig3533

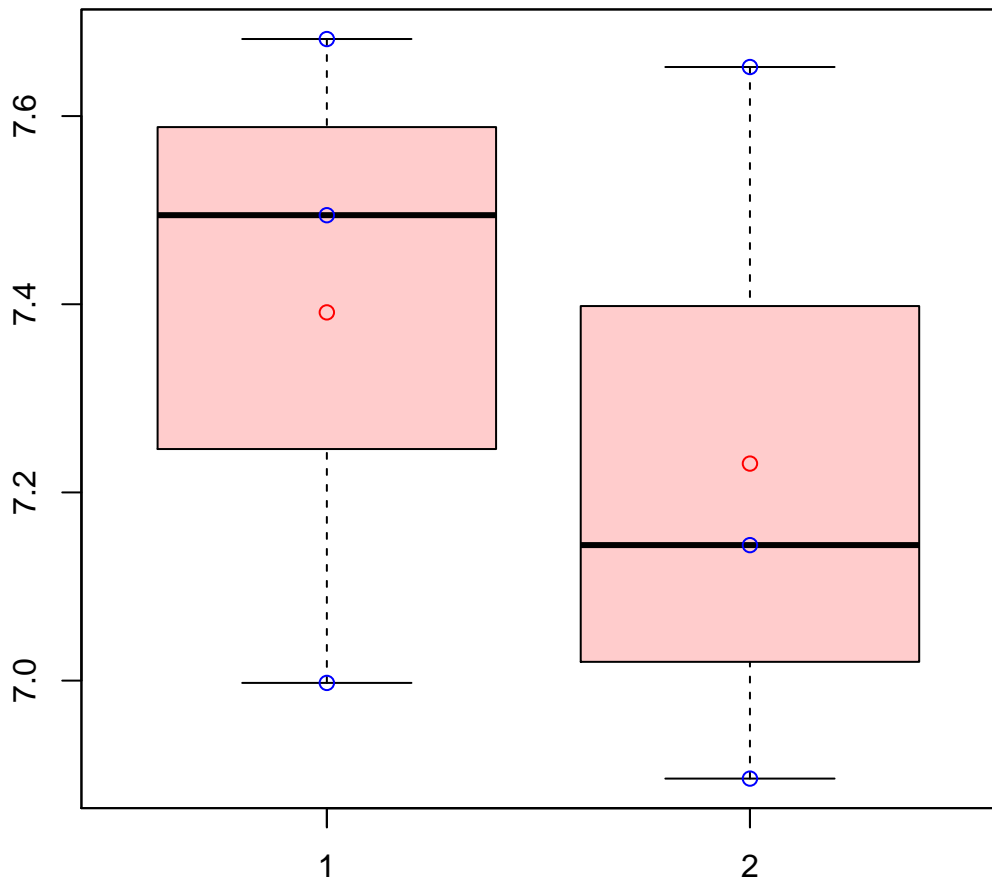

t-Test: p-value = 0.62

# CL1Contig3535|CL1Contig3535

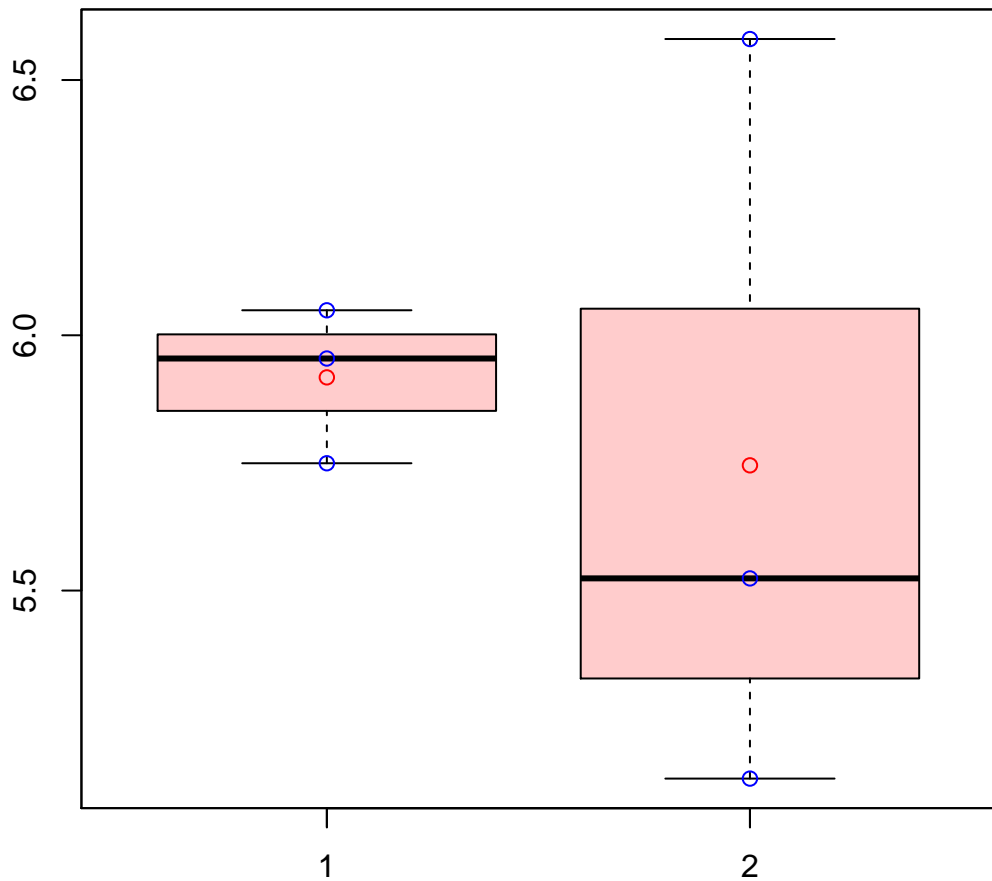

t-Test: p-value = 0.73

# CL1Contig3542|CL1Contig3542

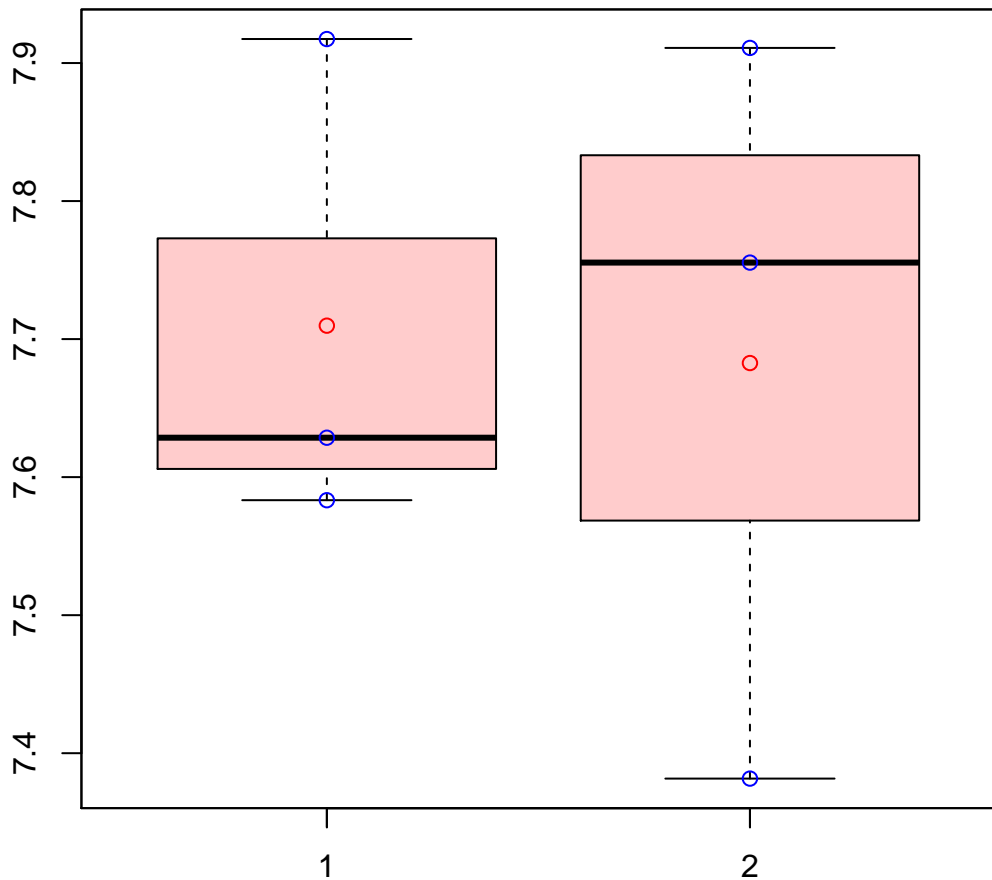

t-Test: p-value = 0.89

# CL1Contig3562|CL1Contig3562

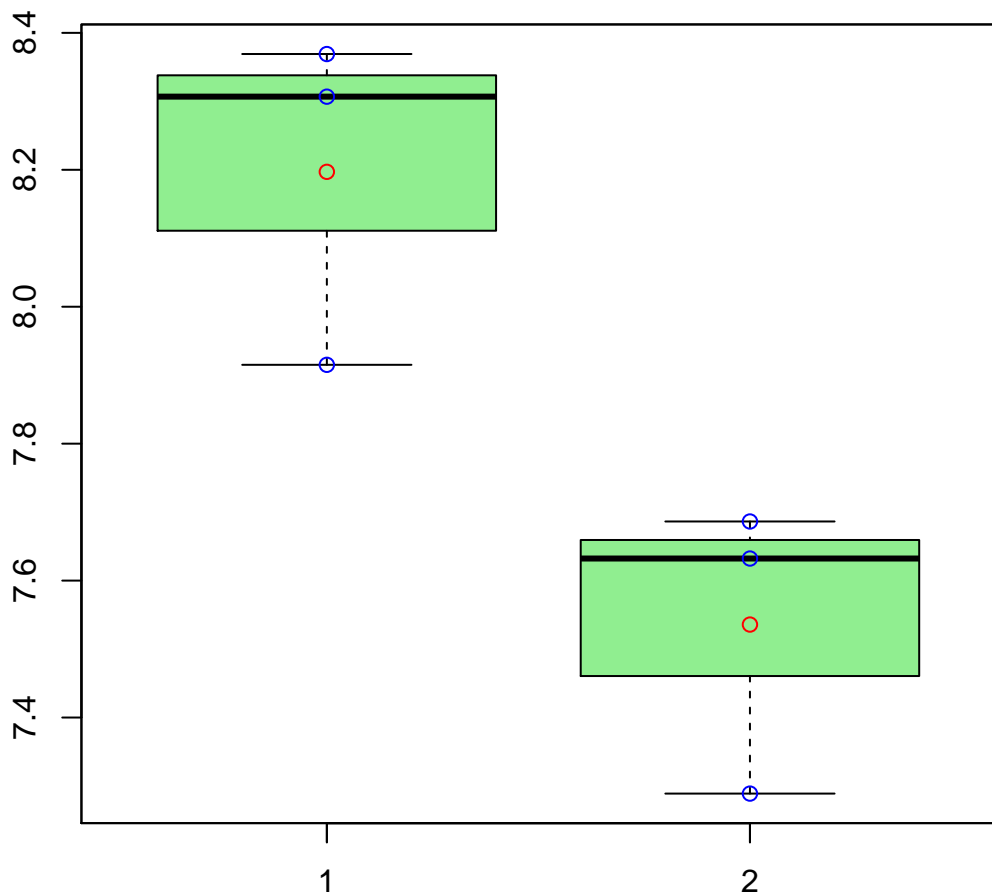

t-Test: p-value = 0.03



# CL1Contig3612|CL1Contig3612

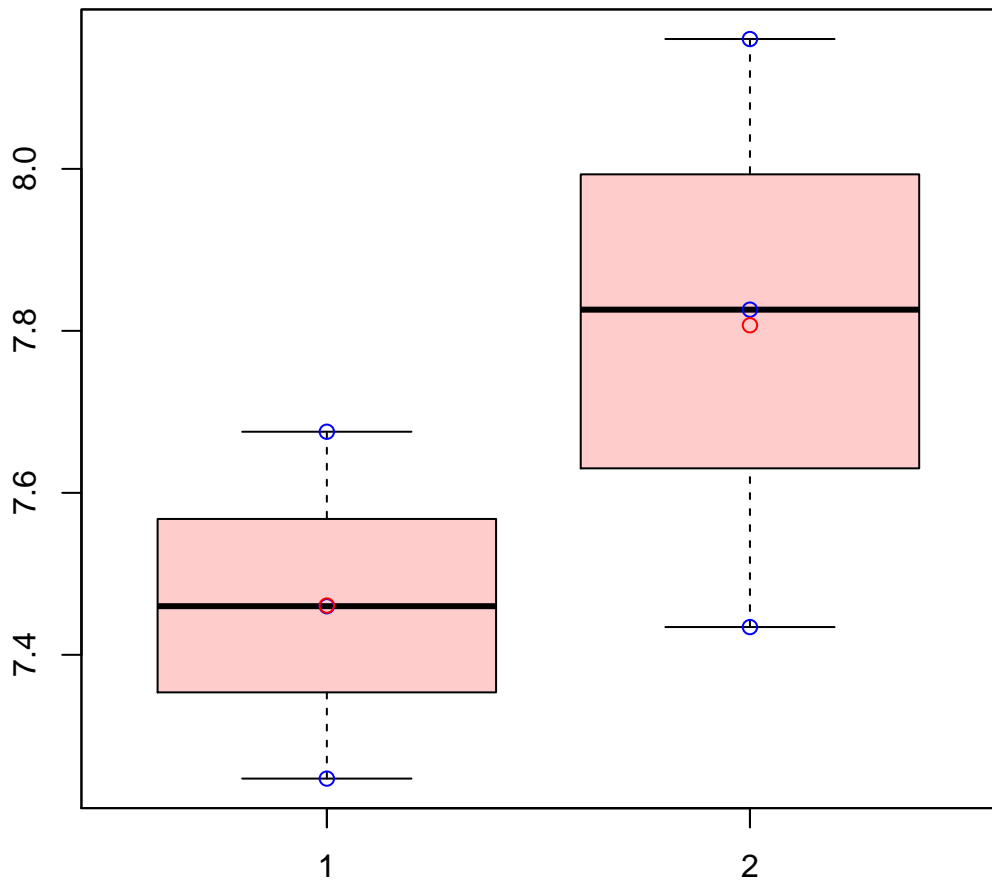

t-Test: p-value = 0.24

# CL1Contig3640|CL1Contig3640

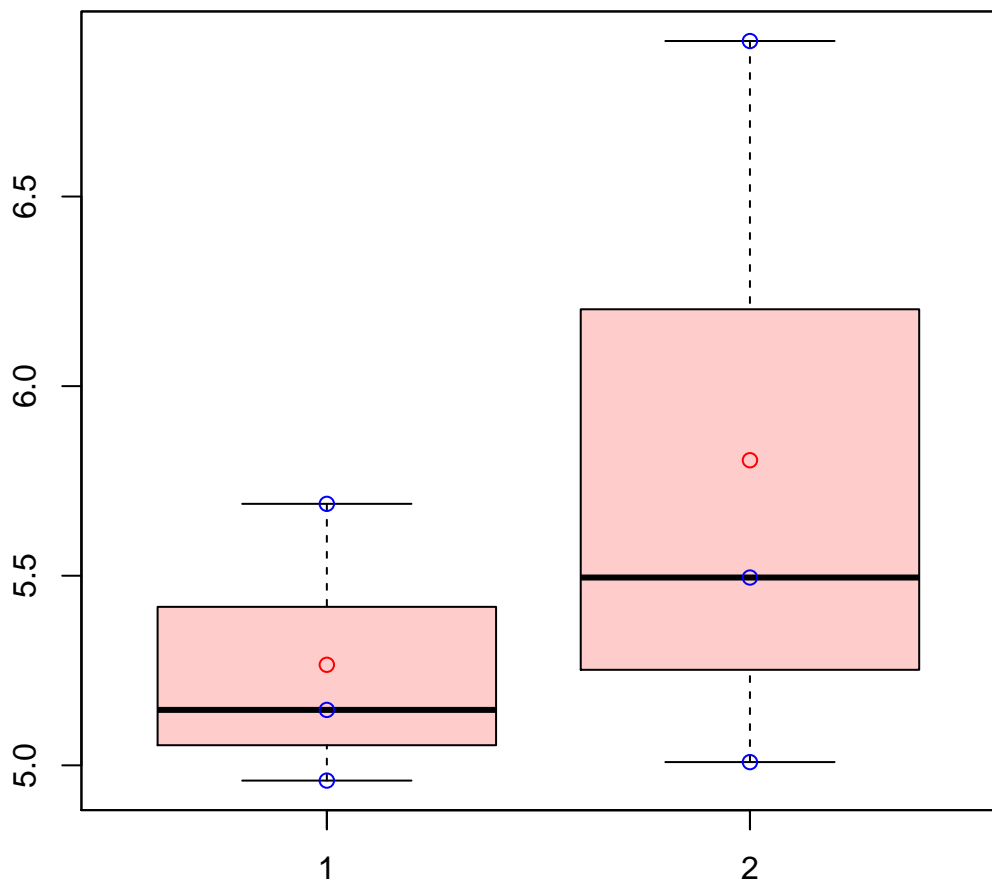

t-Test: p-value = 0.45

# CL1Contig3657|CL1Contig3657

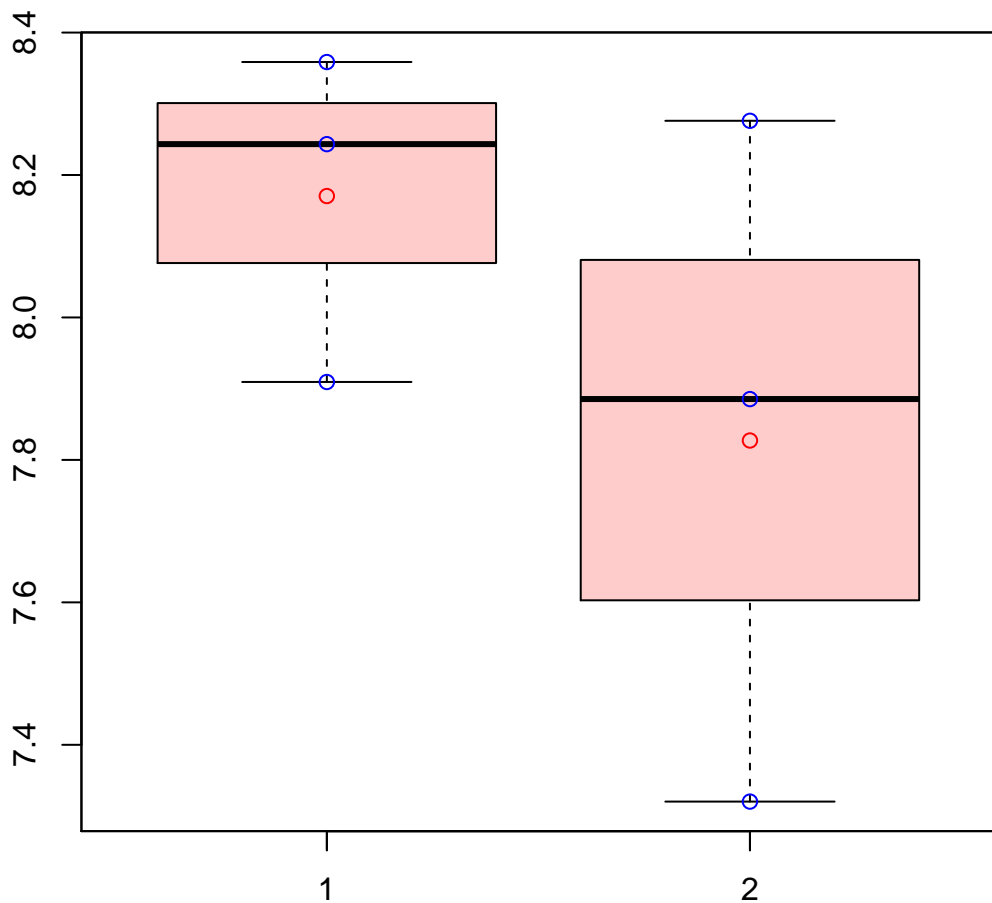

t-Test: p-value = 0.35

# CL1Contig3694|CL1Contig3694

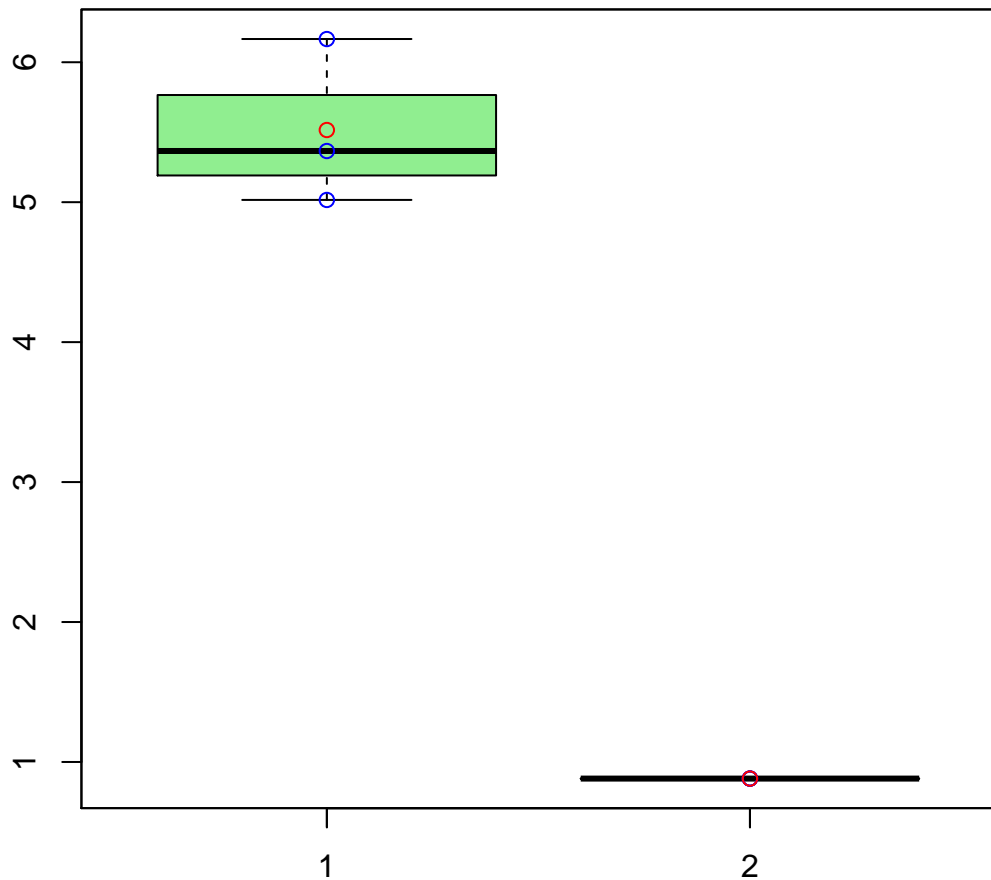

t-Test: p-value = 0.01

# CL1Contig36|CL1Contig36

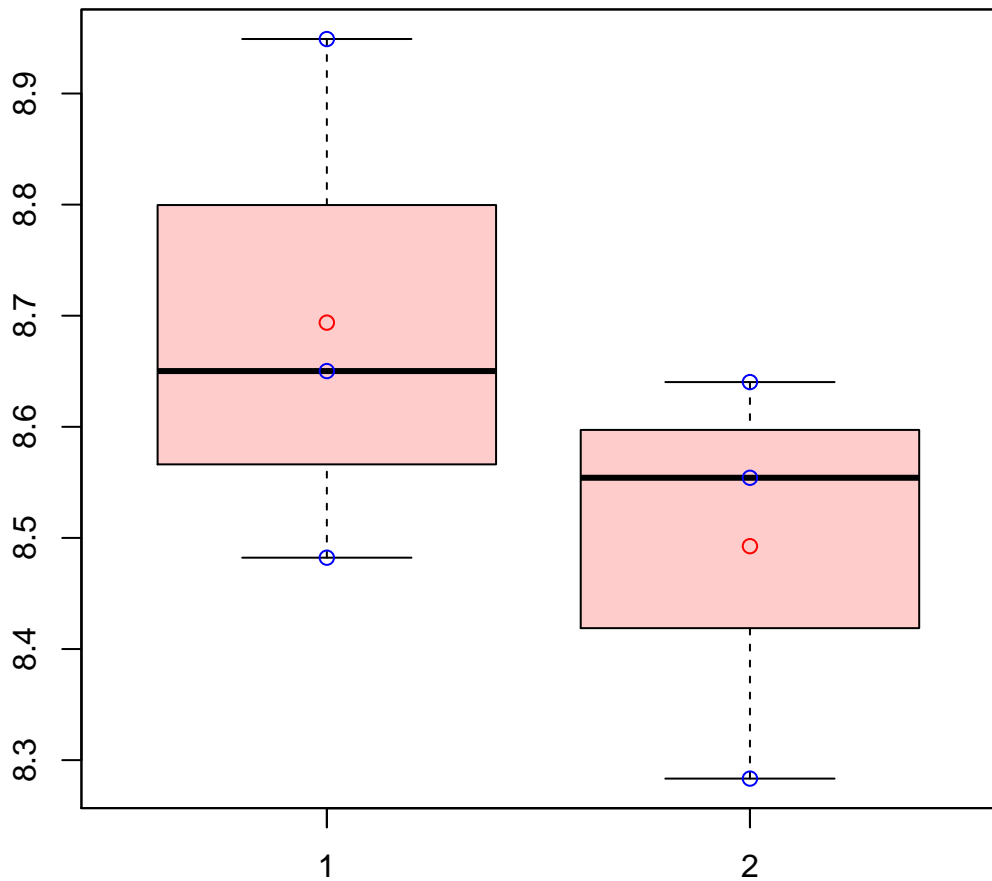

t-Test: p-value = 0.31

# CL1Contig3715|CL1Contig3715

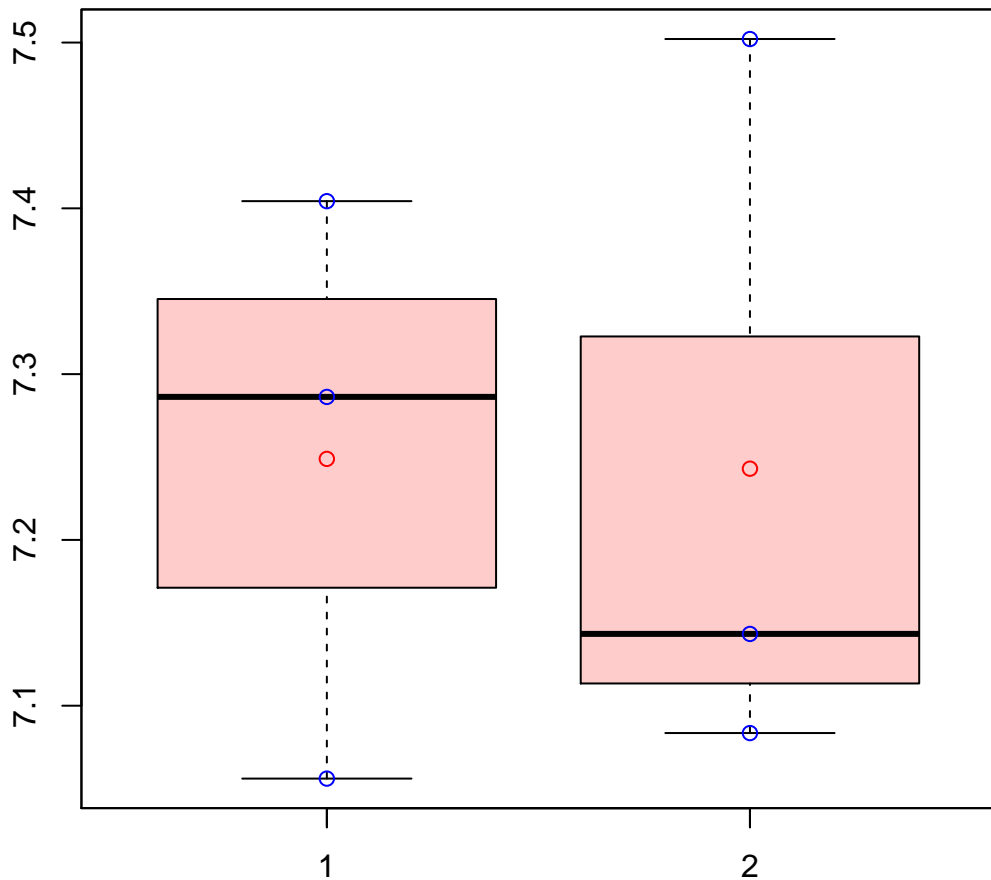

t-Test: p-value = 0.97

# CL1Contig3719|CL1Contig3719

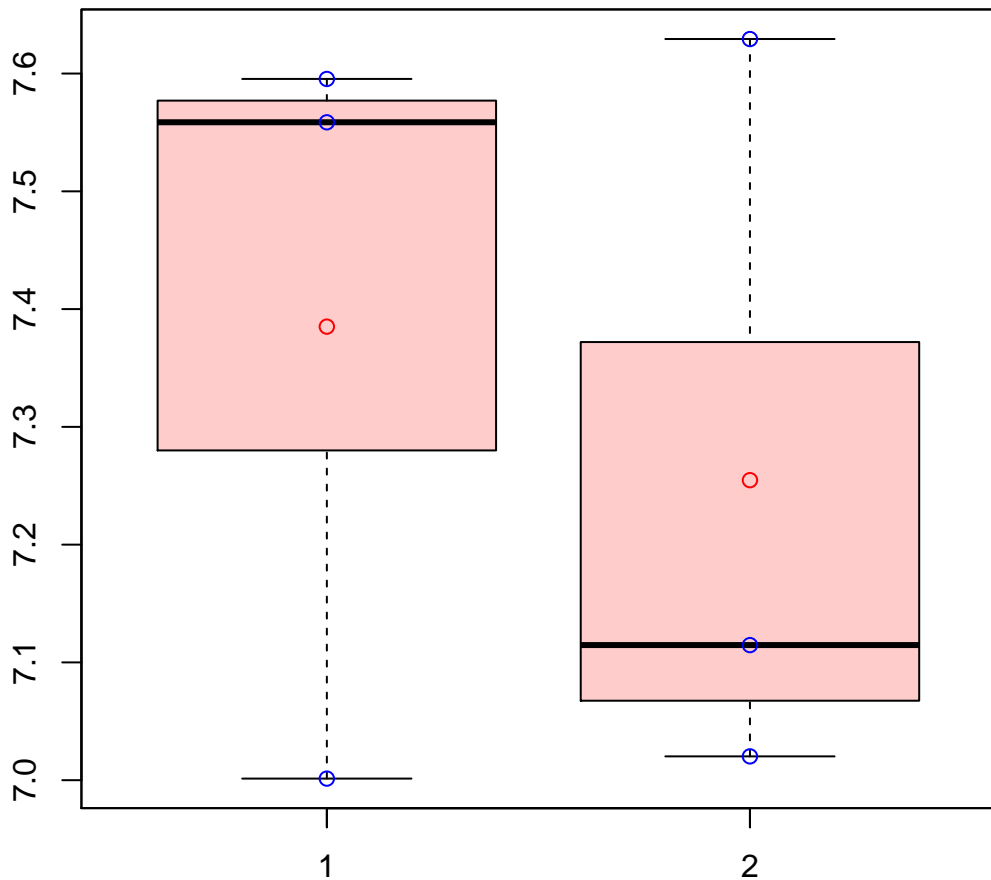

t-Test: p-value = 0.65

# CL1Contig3737|CL1Contig3737

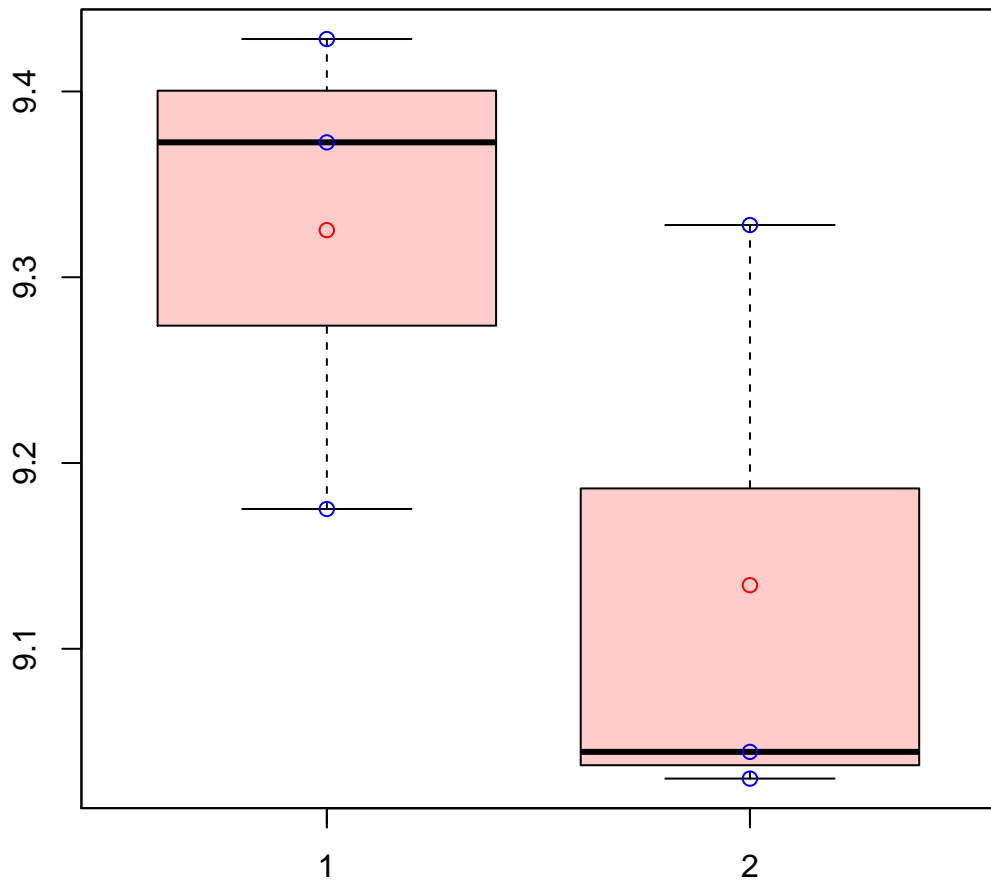

t-Test: p-value = 0.2



# CL1Contig3740|CL1Contig3740

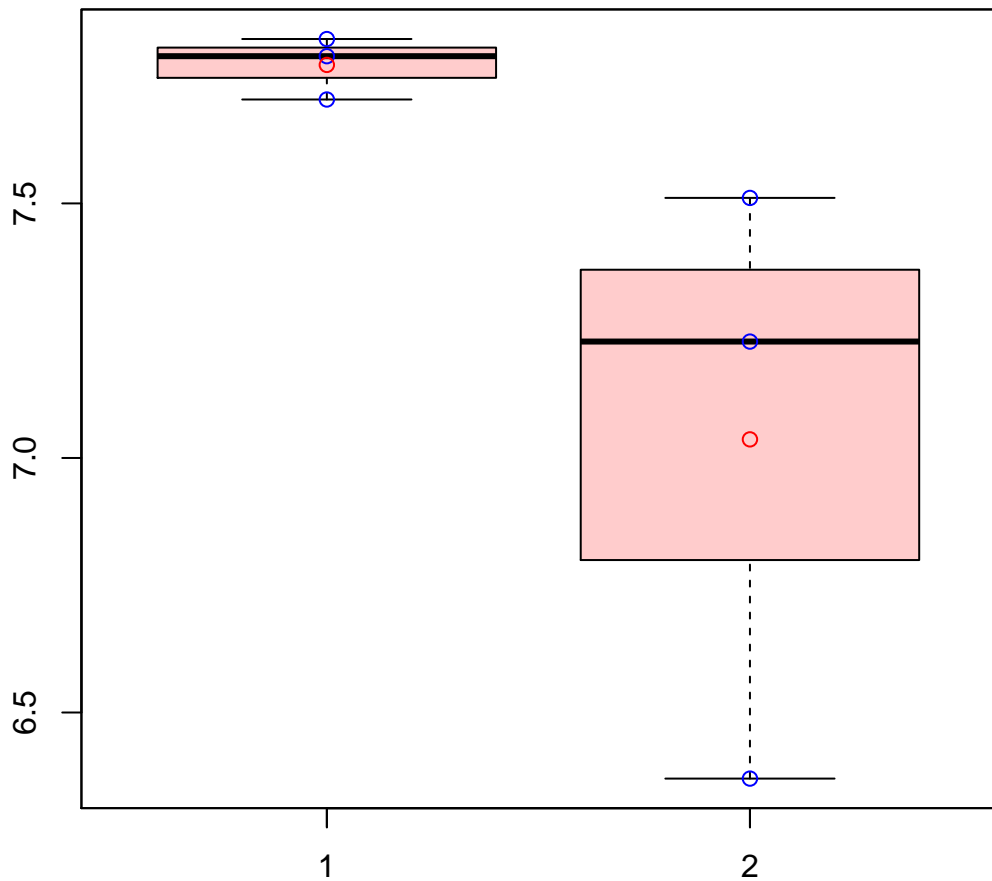

t-Test: p-value = 0.16

# CL1Contig3755|CL1Contig3755

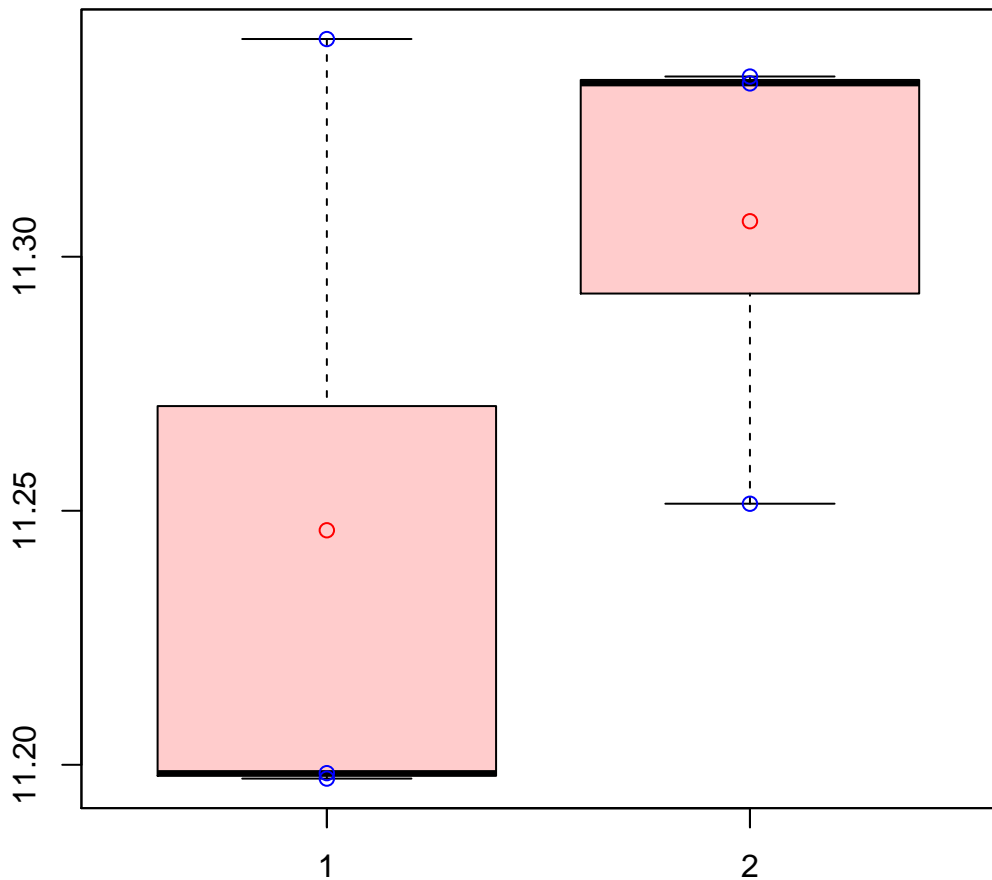

t-Test: p-value = 0.35

# CL1Contig3763|CL1Contig3763

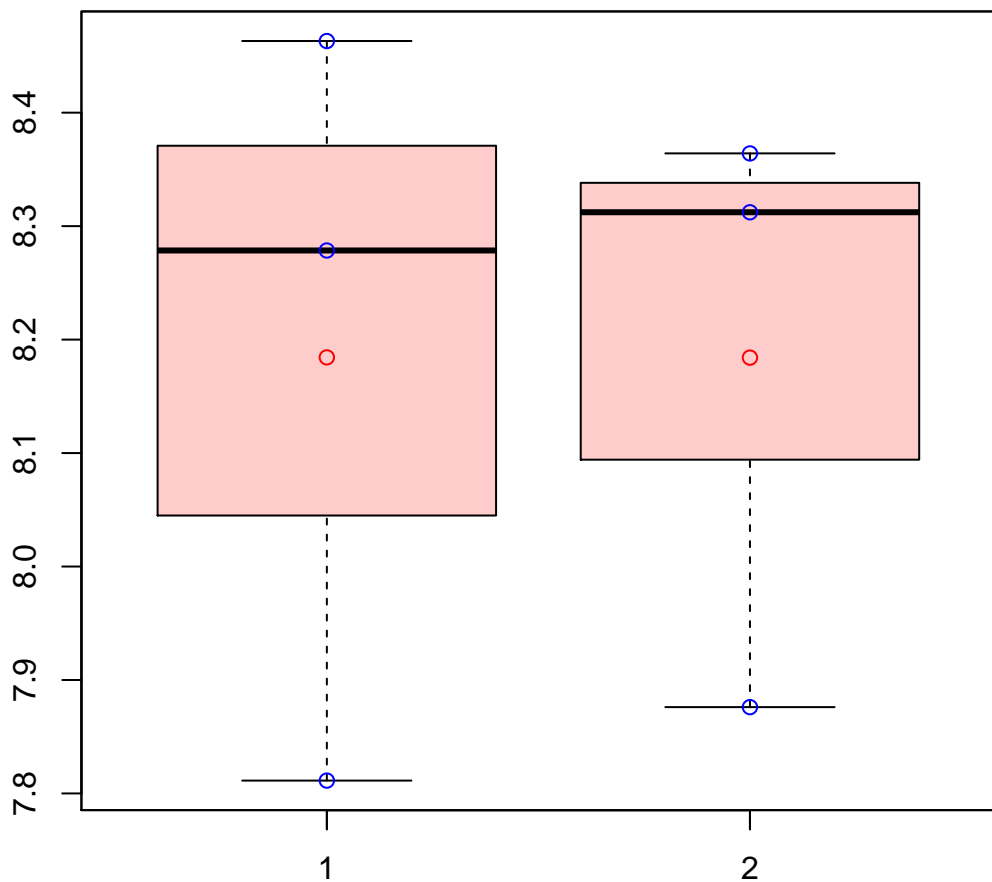

t-Test: p-value = 1

# CL1Contig3882|CL1Contig3882

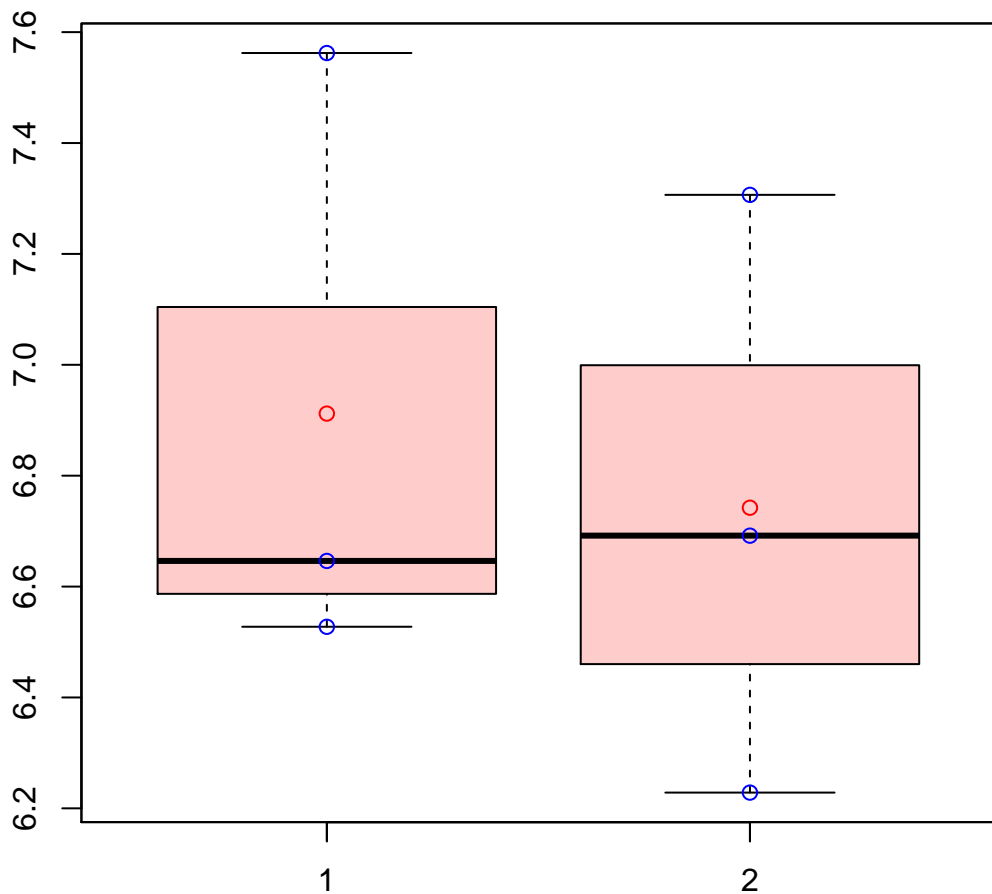

t-Test: p-value = 0.73

# CL1Contig3898|CL1Contig3898

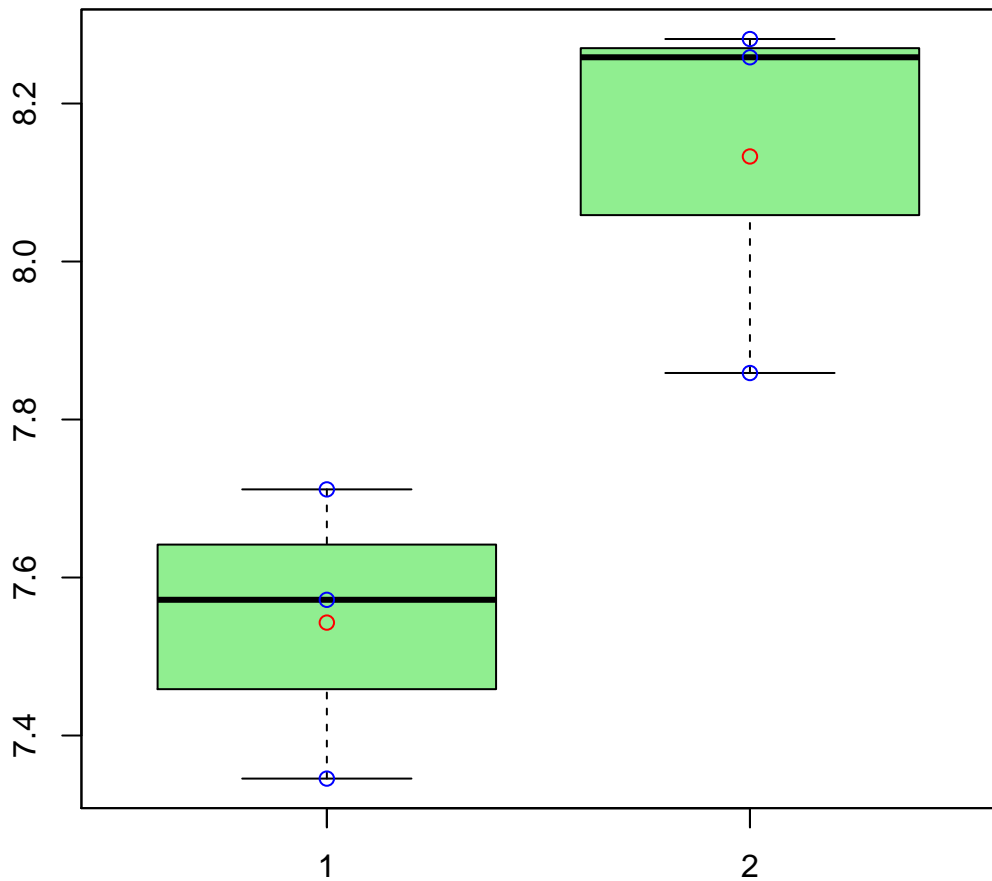

t-Test: p-value = 0.03

# CL1Contig3901|CL1Contig3901

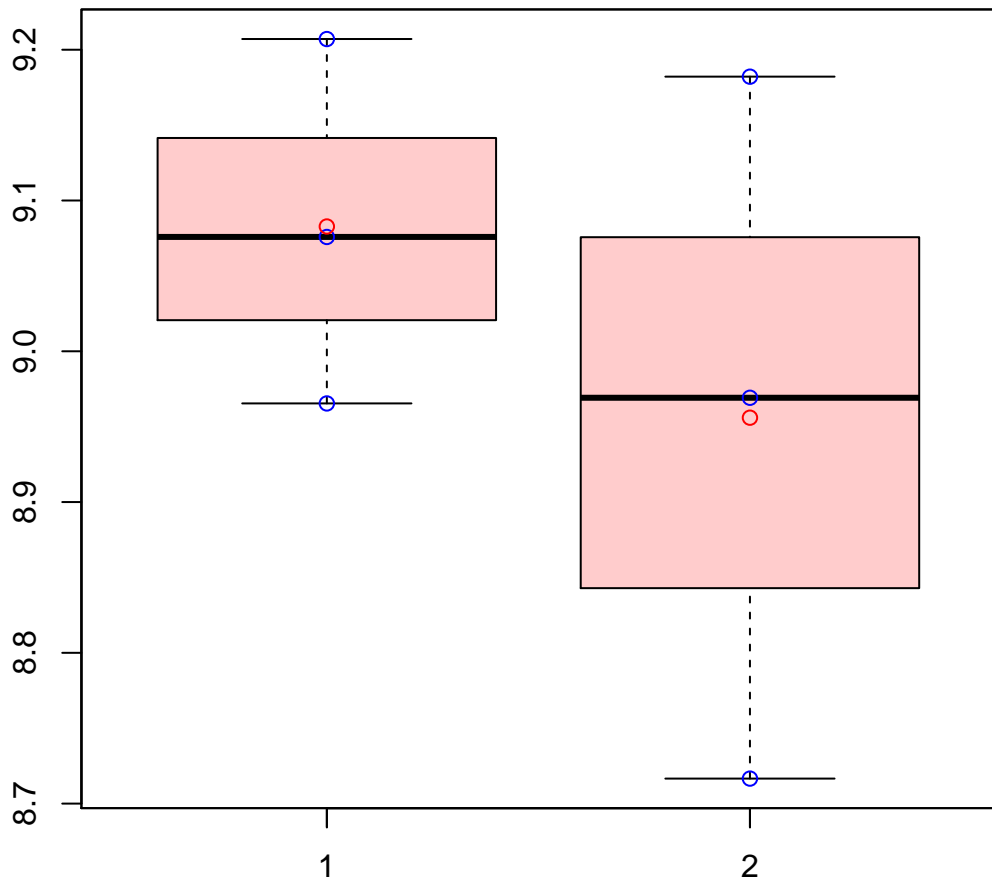

t-Test: p-value = 0.46

# CL1Contig3904|CL1Contig3904

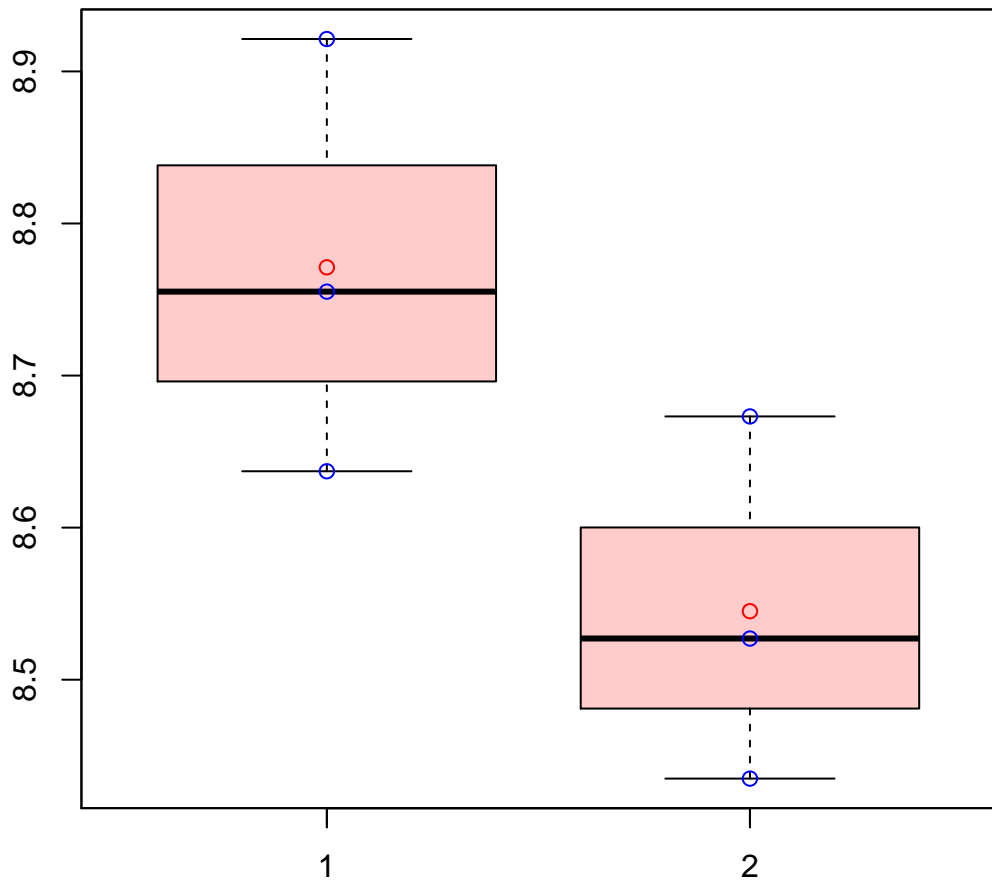

t-Test: p-value = 0.11

# CL1Contig3953|CL1Contig3953

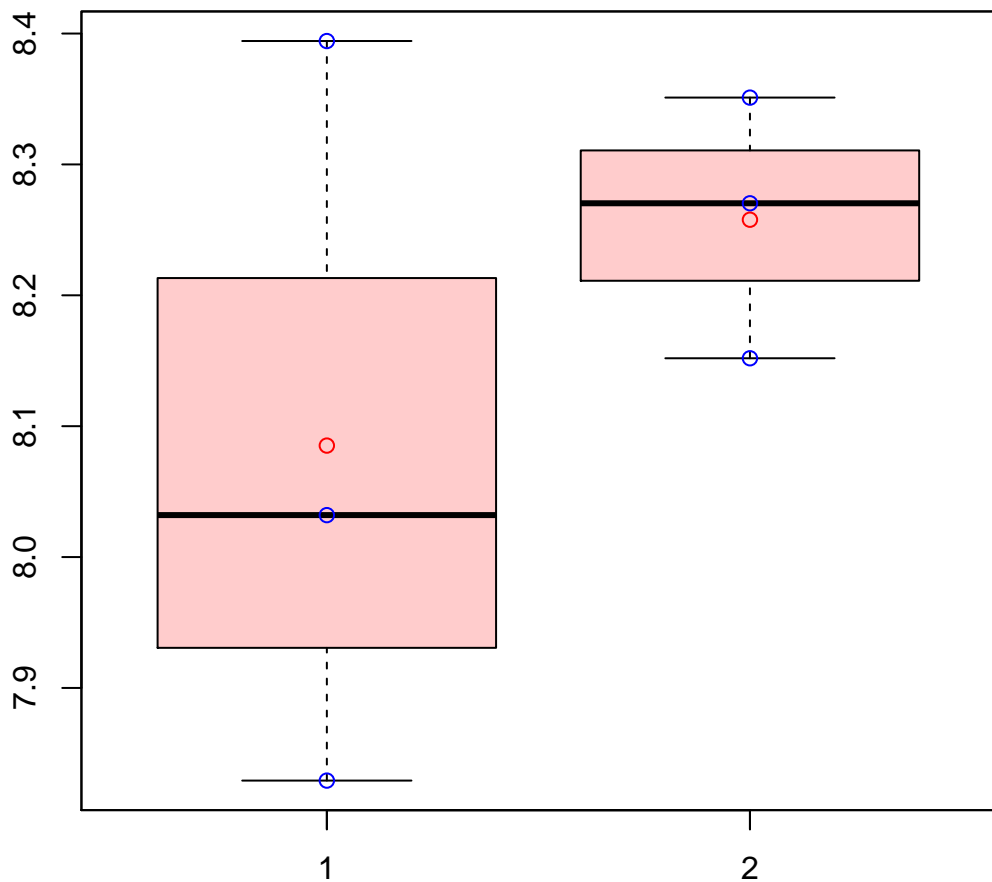

t-Test: p-value = 0.41



# CL1Contig3997|CL1Contig3997

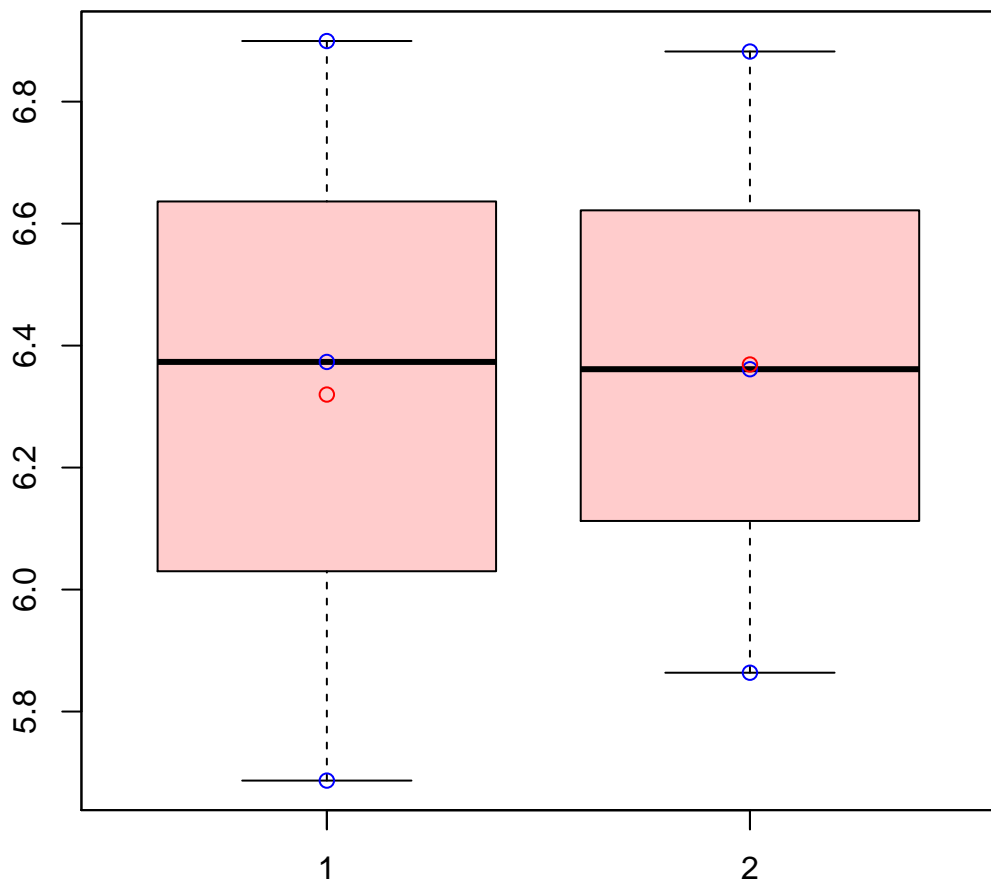

t-Test: p-value = 0.92

# CL1Contig4018|CL1Contig4018

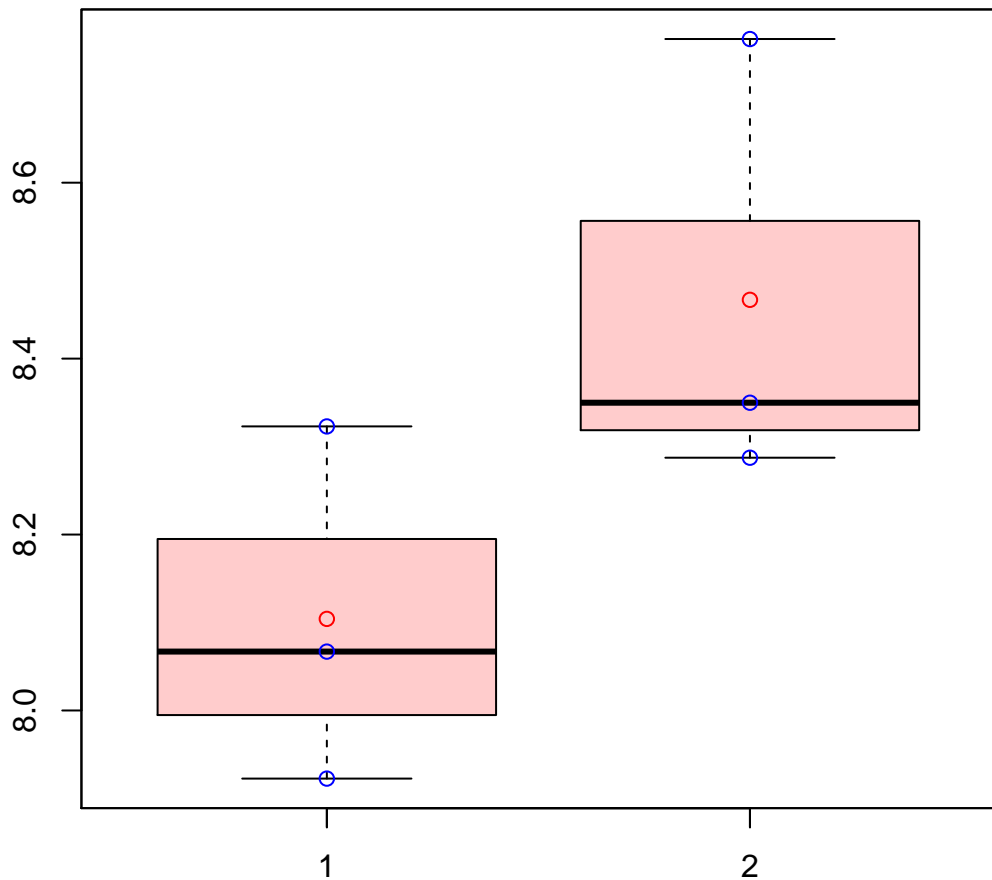

t-Test: p-value = 0.13

# CL1Contig4020|CL1Contig4020

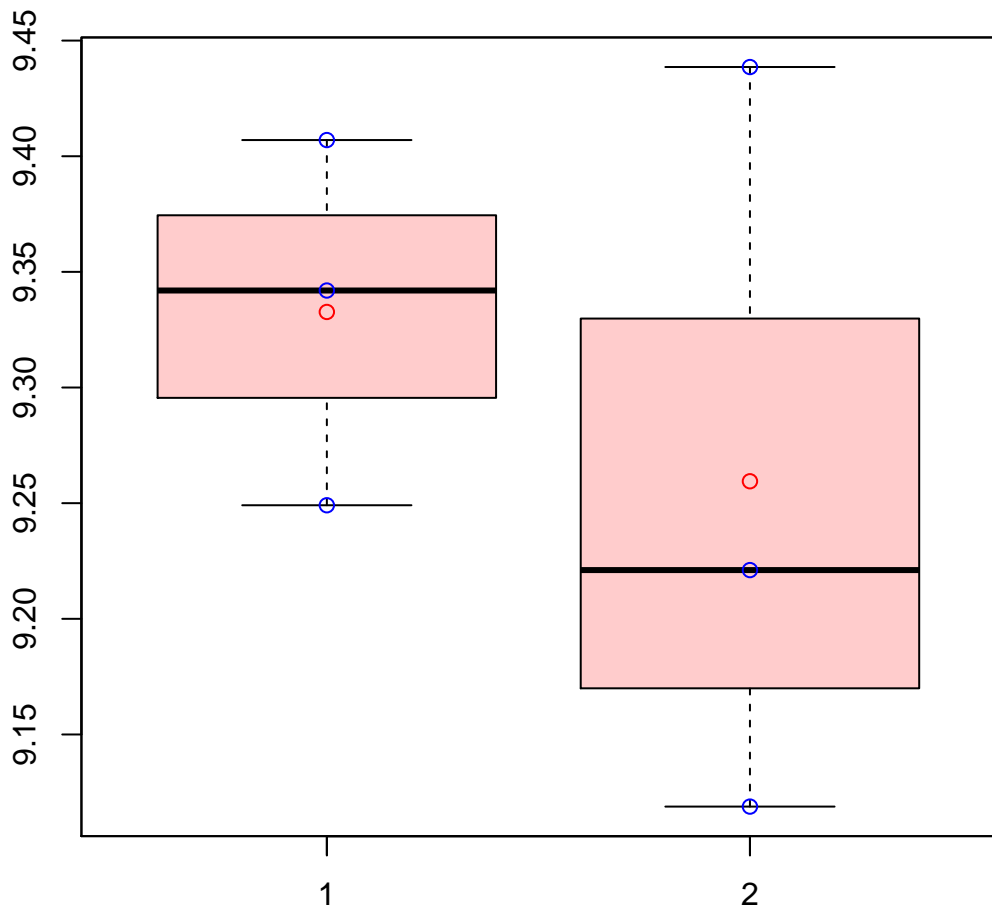

t-Test: p-value = 0.54

# CL1Contig4041|CL1Contig4041

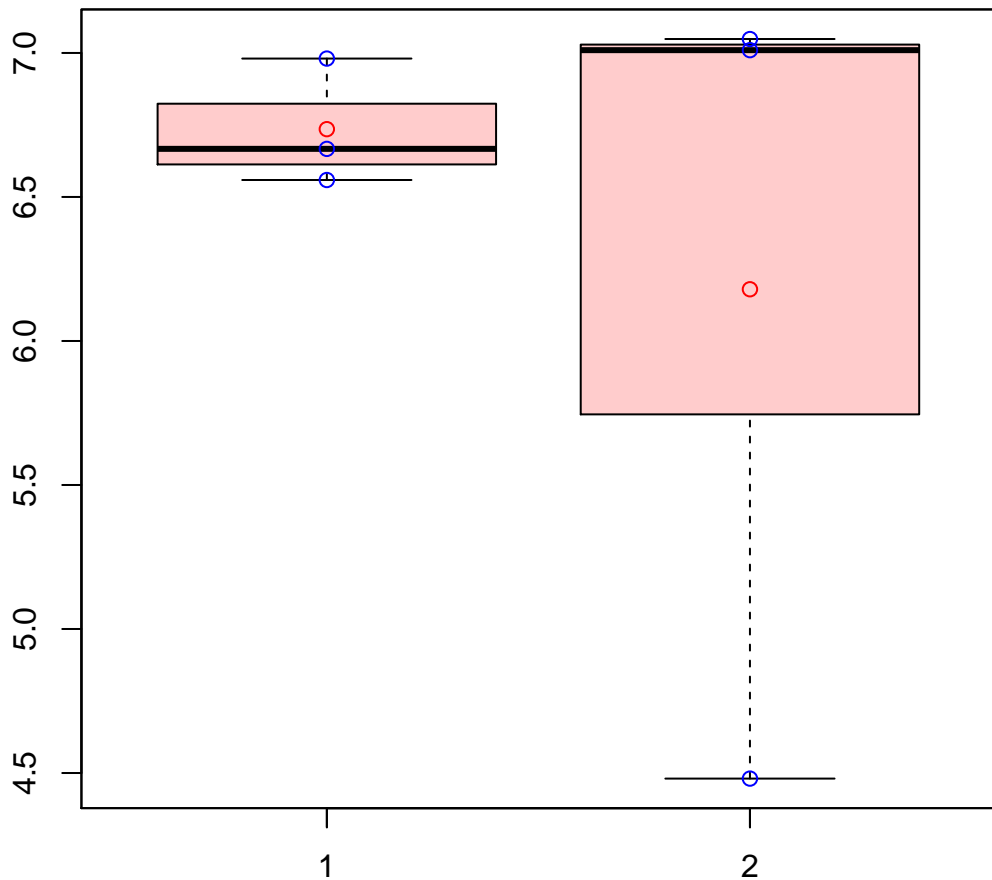

t-Test: p-value = 0.58

# CL1Contig4078|CL1Contig4078

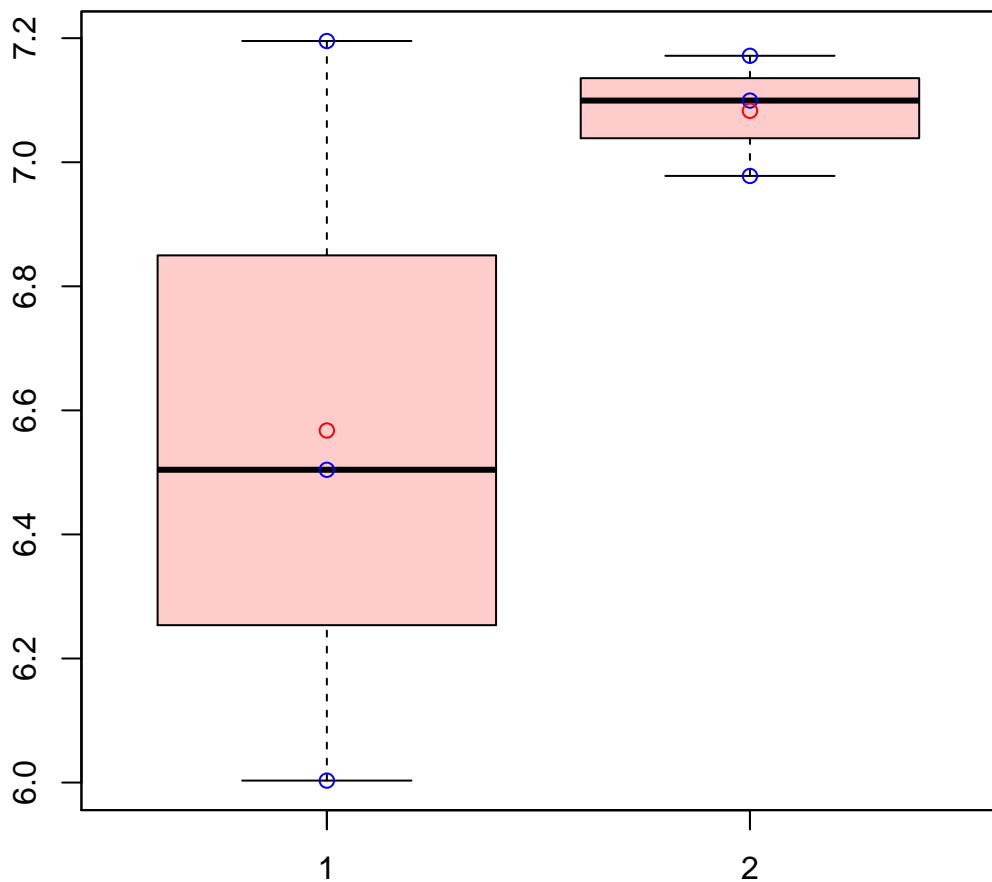

t-Test: p-value = 0.27

# CL1Contig4111|CL1Contig4111

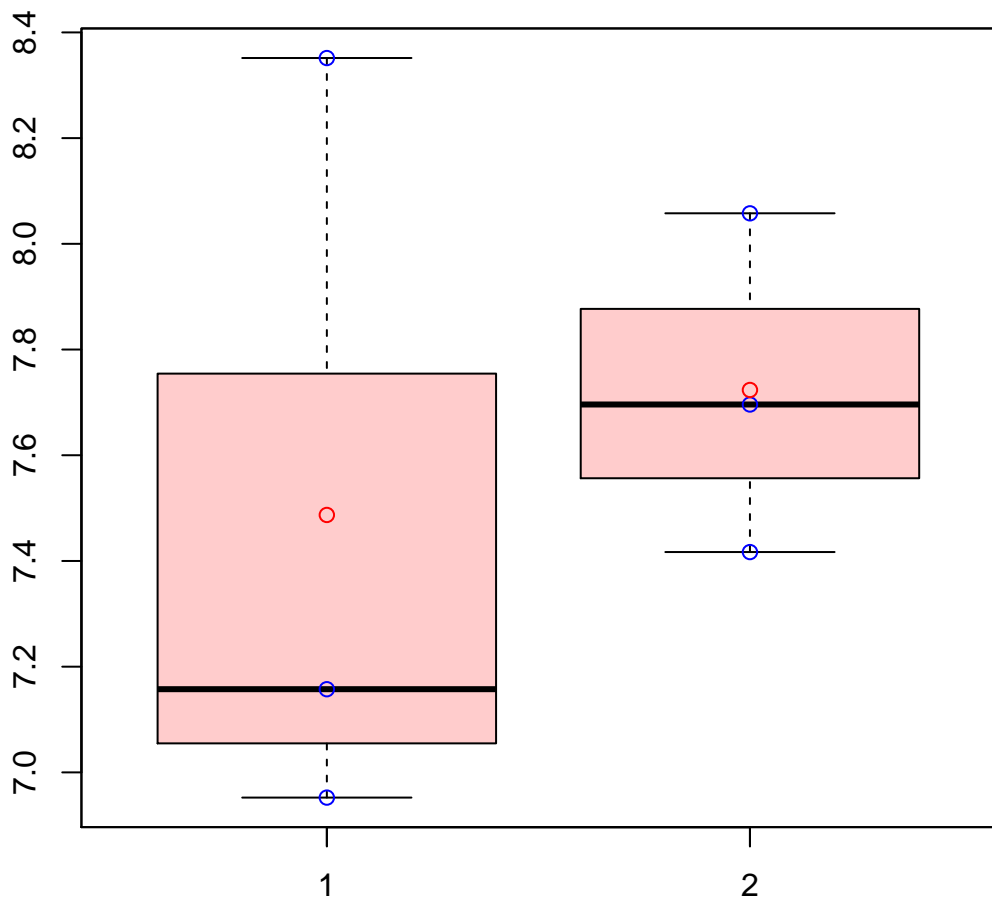

t-Test: p-value = 0.66

# CL1Contig4117|CL1Contig4117

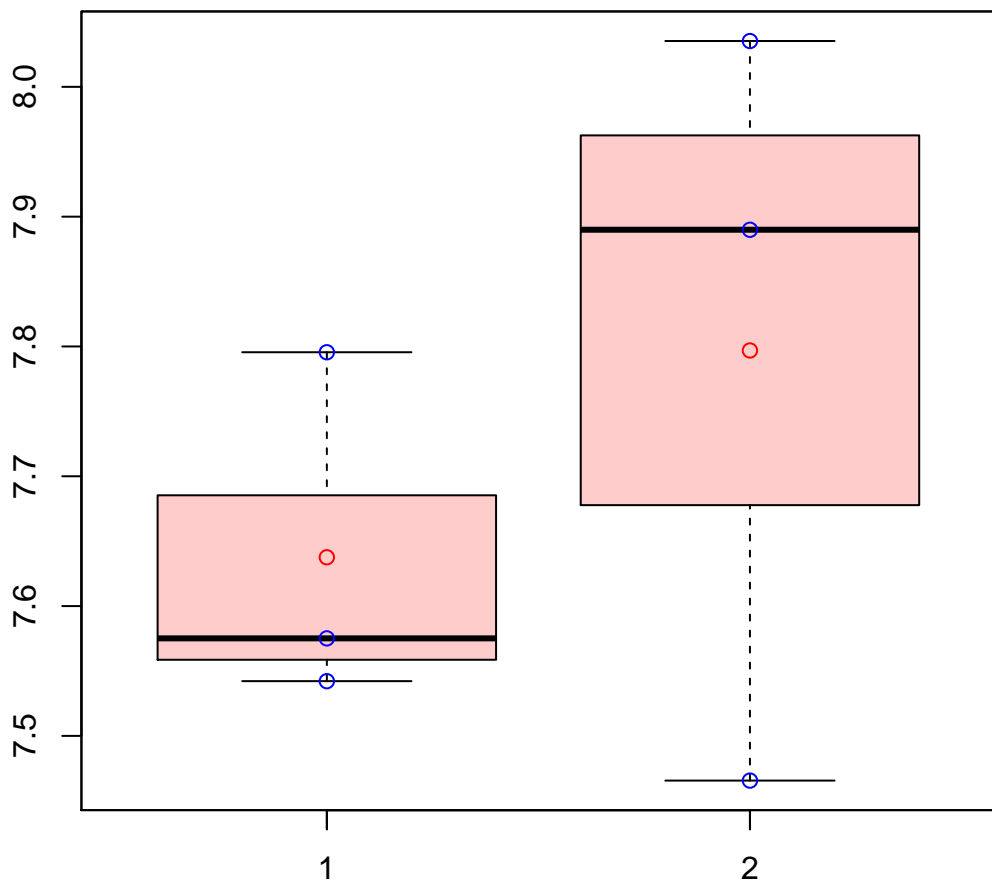

t-Test: p-value = 0.46

# CL1Contig414|CL1Contig414

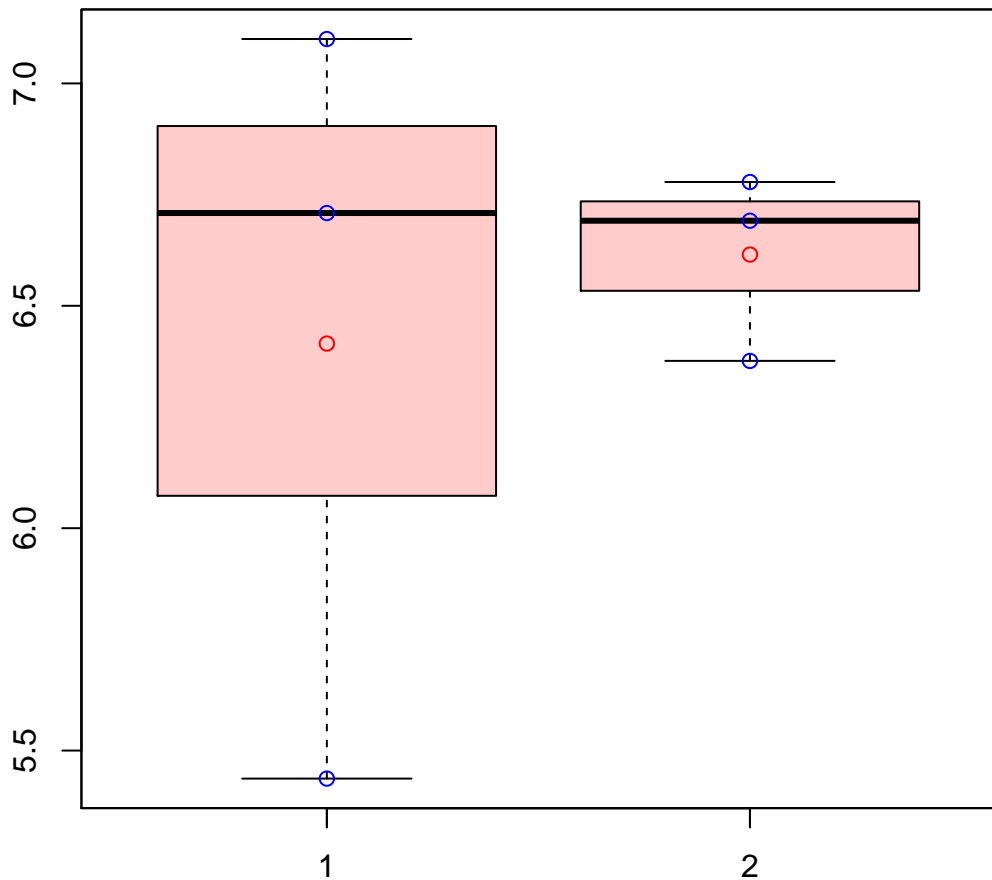

t-Test: p-value = 0.73



# CL1Contig4227|CL1Contig4227

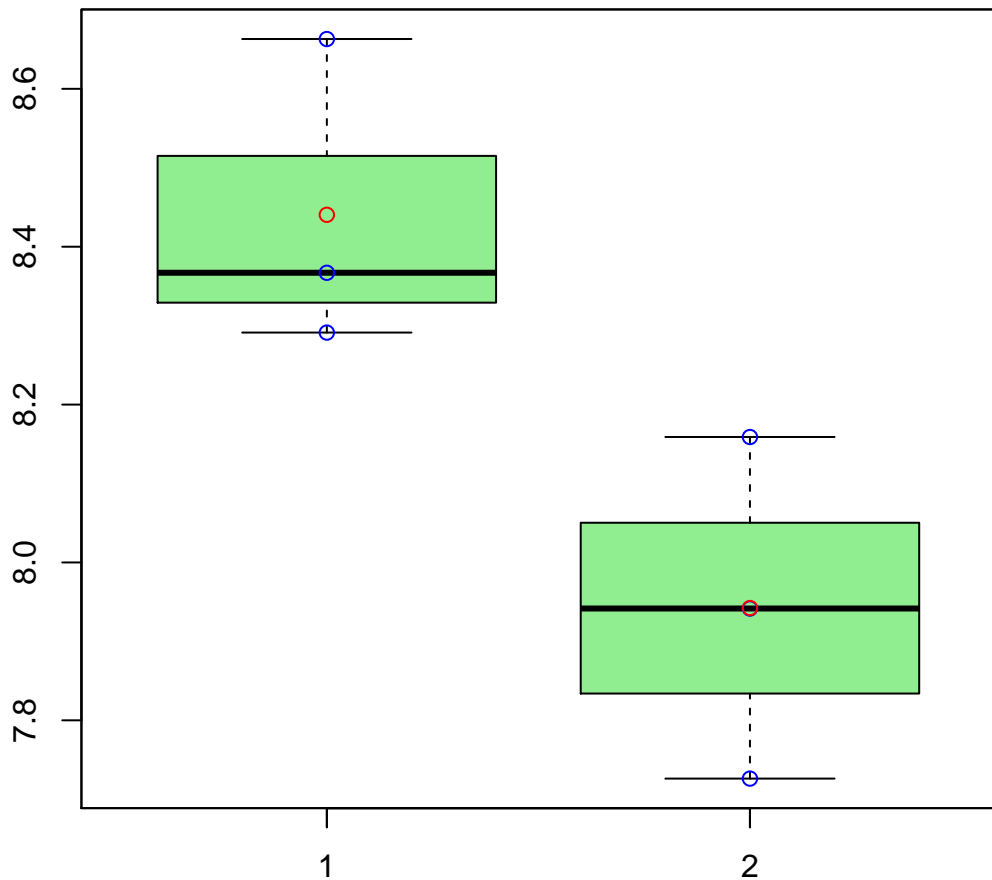

t-Test: p-value = 0.04

# CL1Contig4228|CL1Contig4228

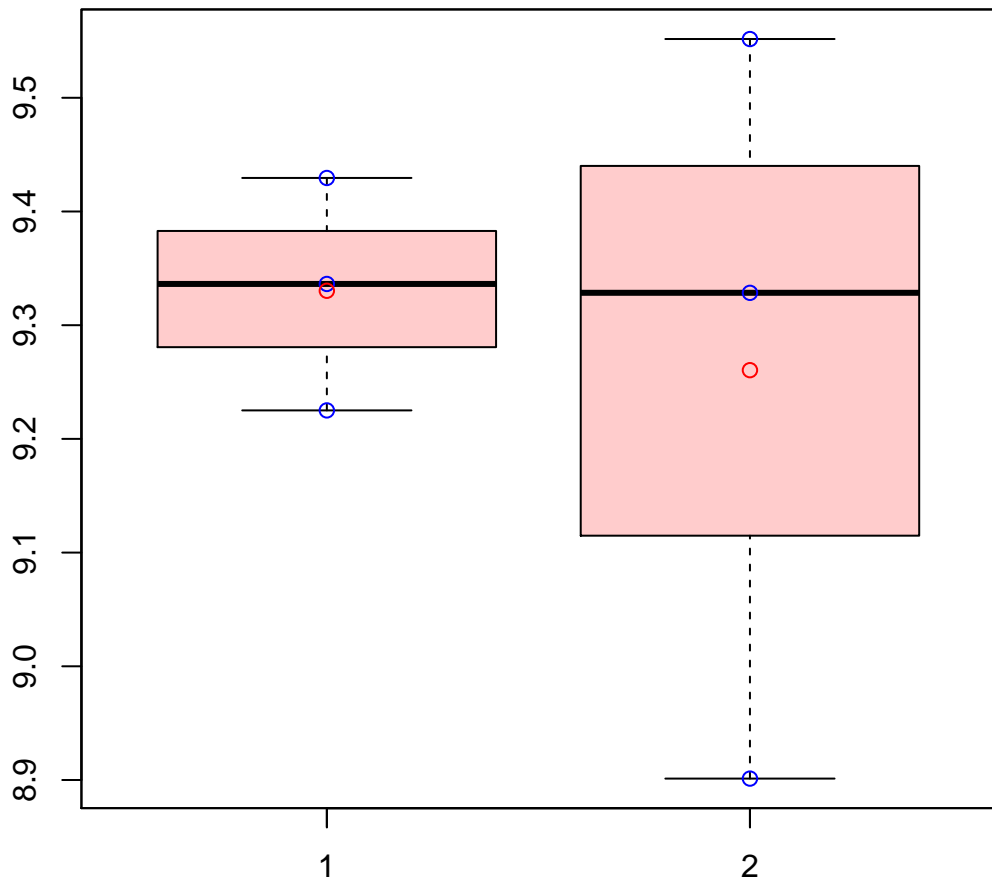

t-Test: p-value = 0.76

# CL1Contig4233|CL1Contig4233

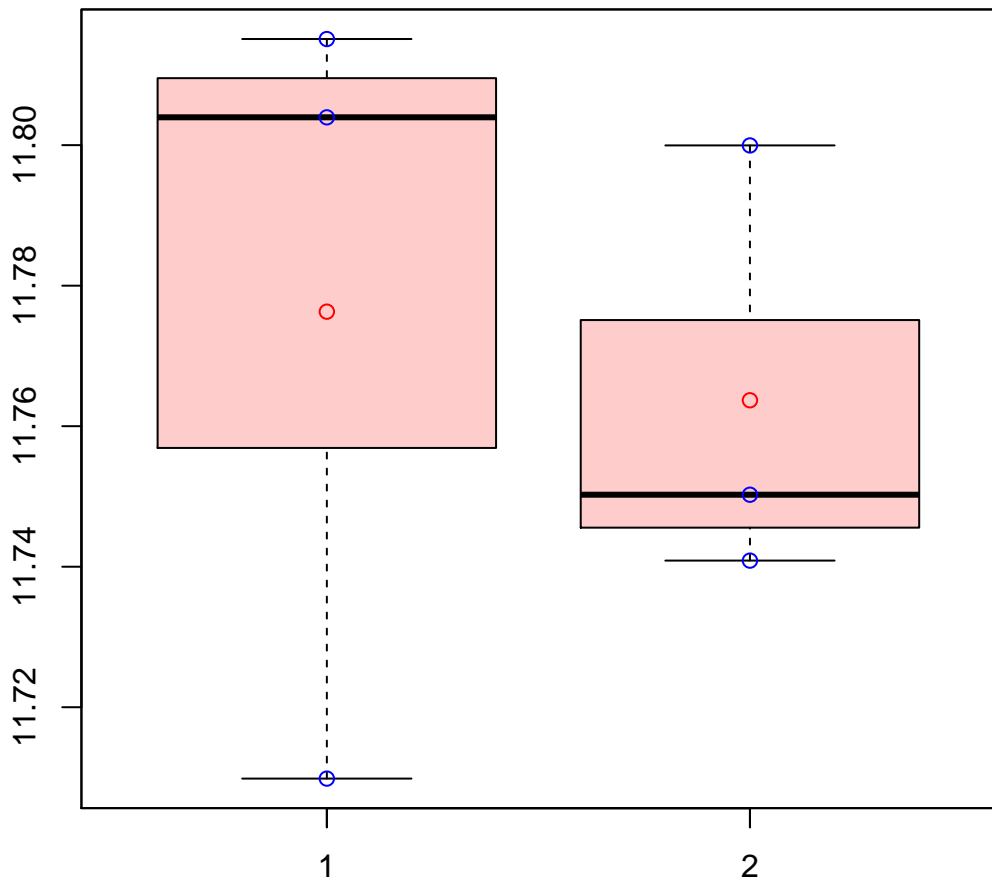

t-Test: p-value = 0.76

# CL1Contig423|CL1Contig423

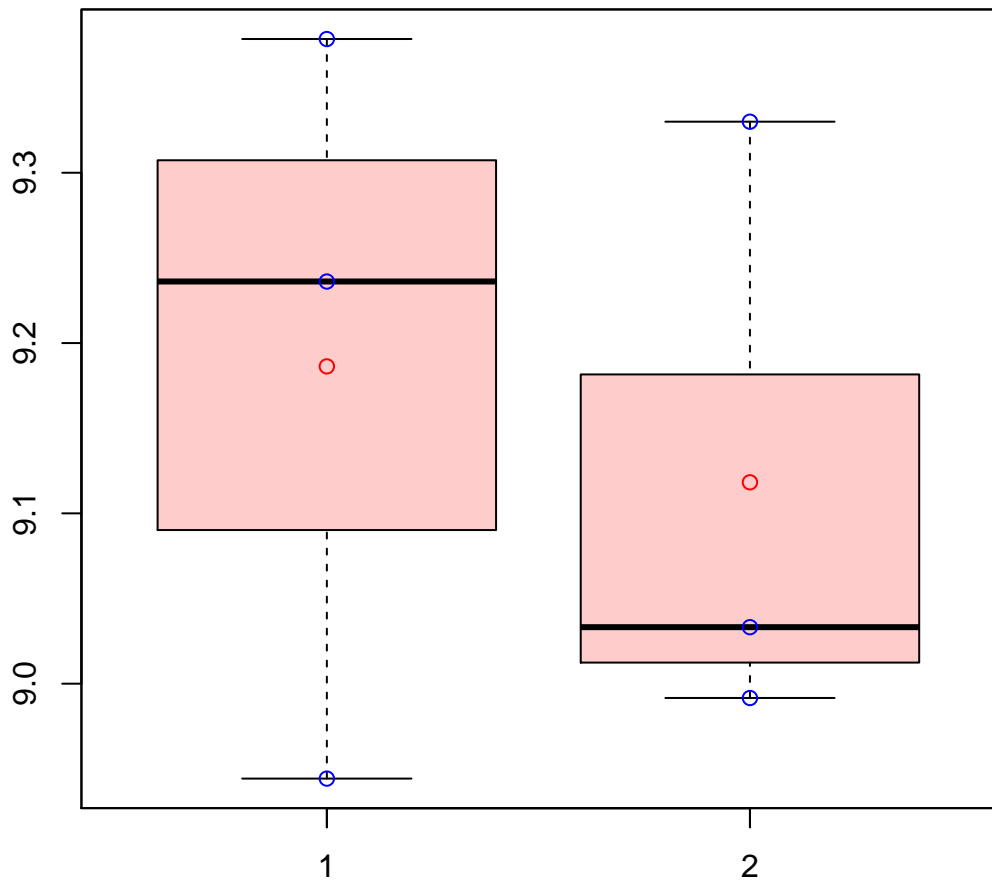

t-Test: p-value = 0.7

# CL1Contig4249|CL1Contig4249

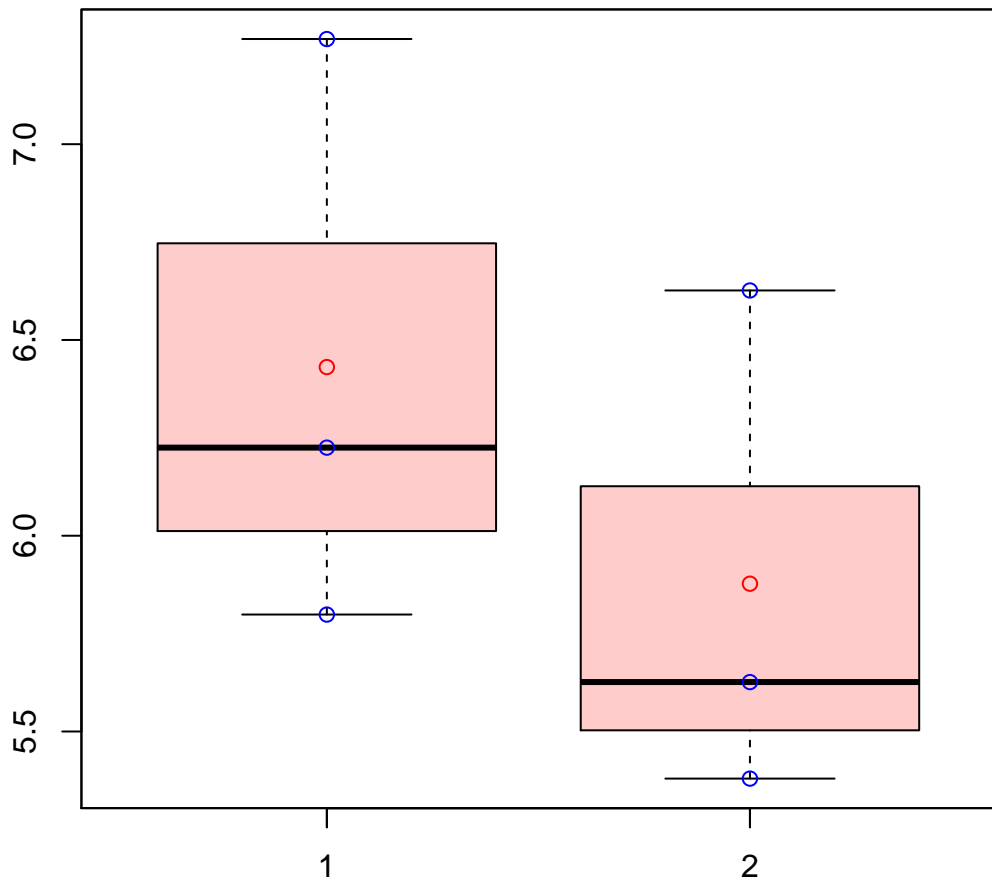

t-Test: p-value = 0.39

# CL1Contig4250|CL1Contig4250

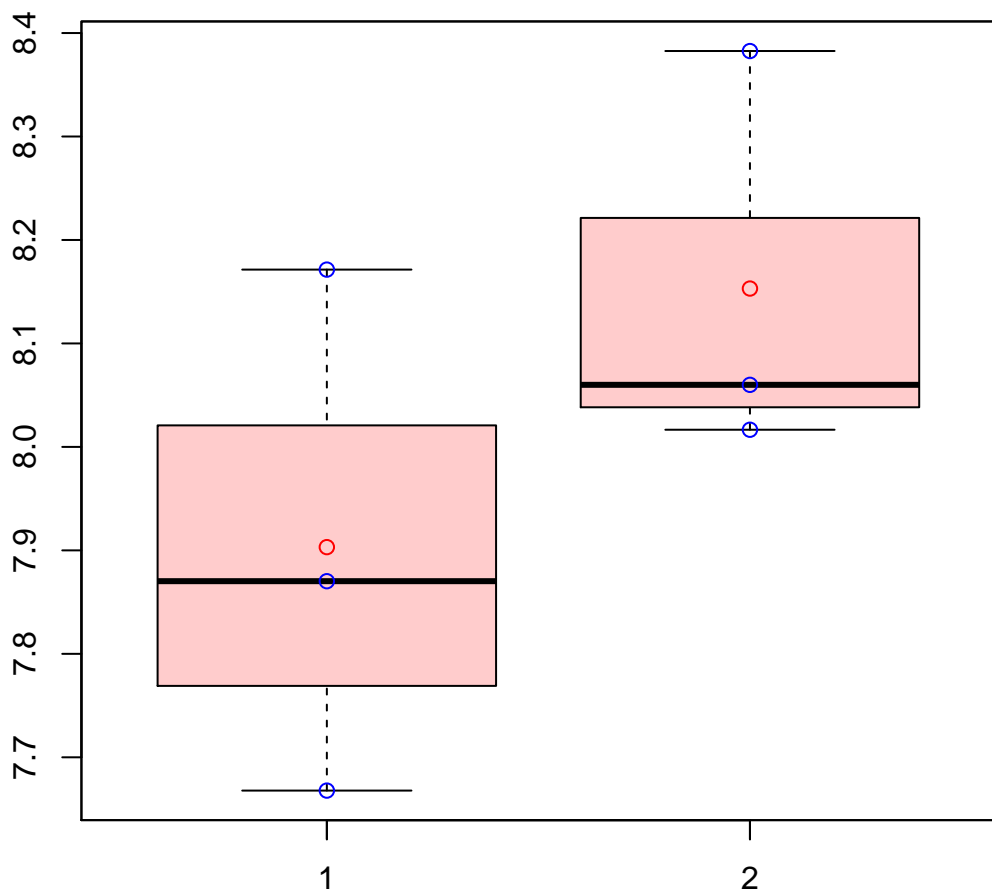

t-Test: p-value = 0.25

# CL1Contig4265|CL1Contig4265

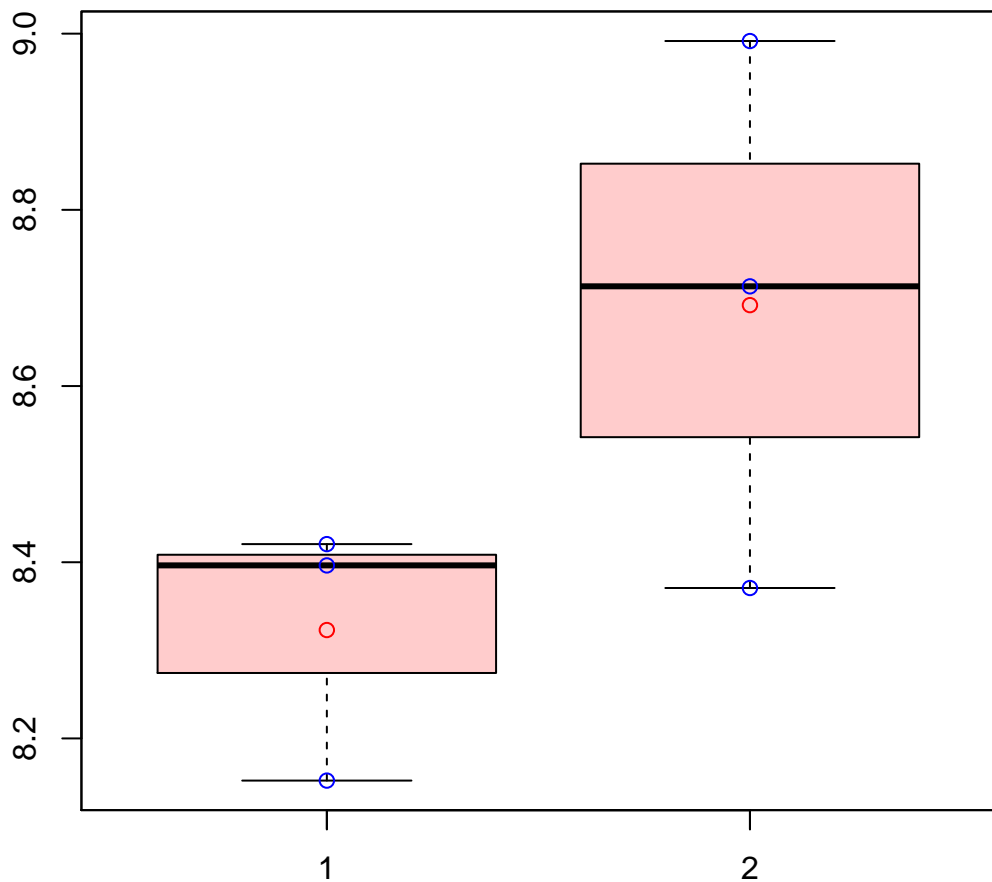

t-Test: p-value = 0.17

# CL1Contig4279|CL1Contig4279

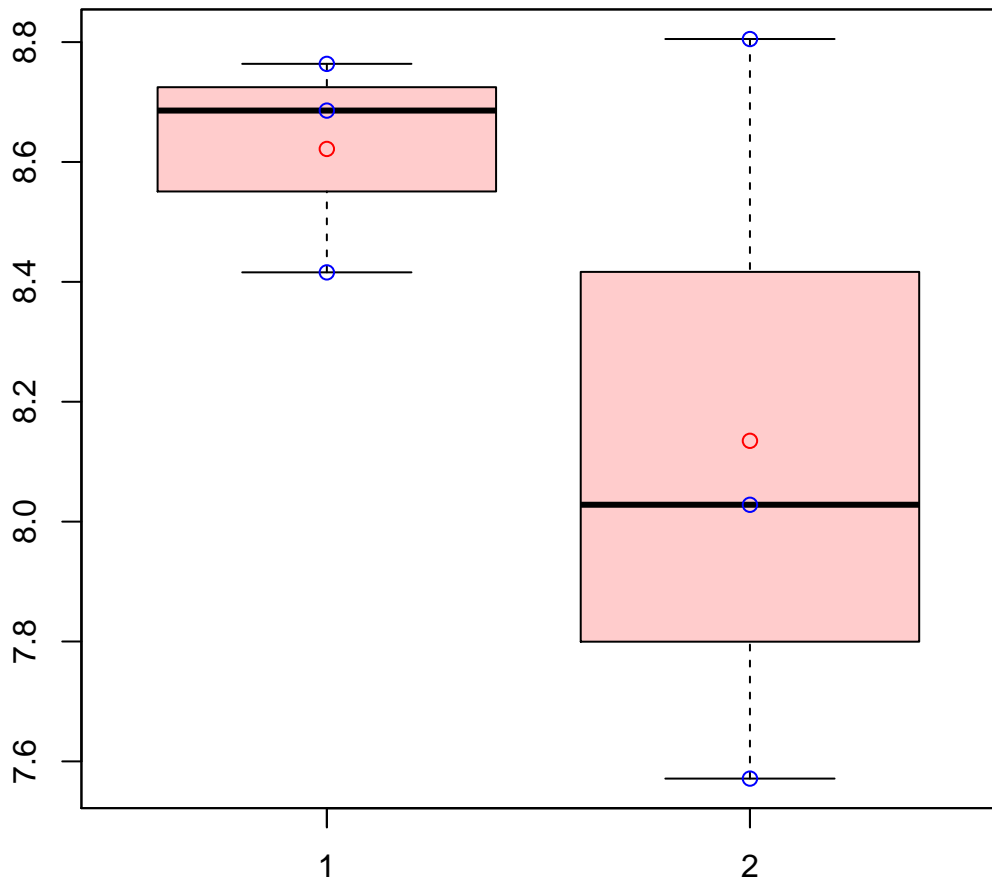

t-Test: p-value = 0.31



# CL1Contig4295|CL1Contig4295

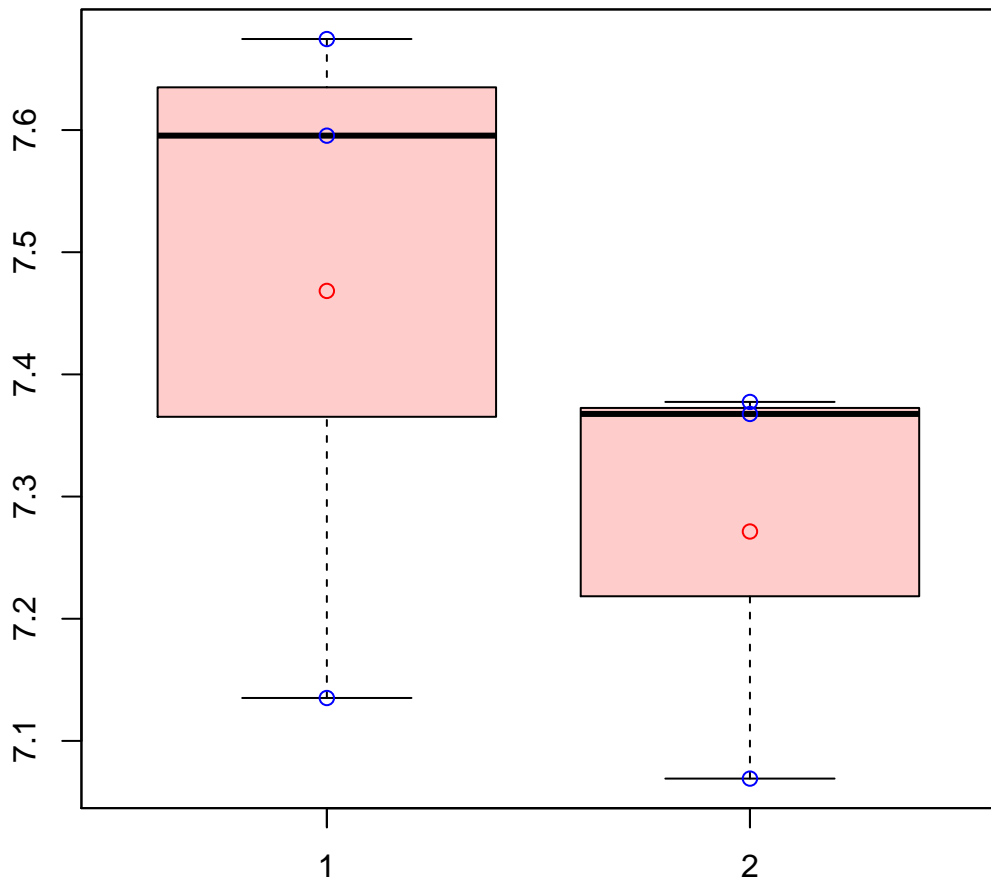

t-Test: p-value = 0.38

# CL1Contig4319|CL1Contig4319

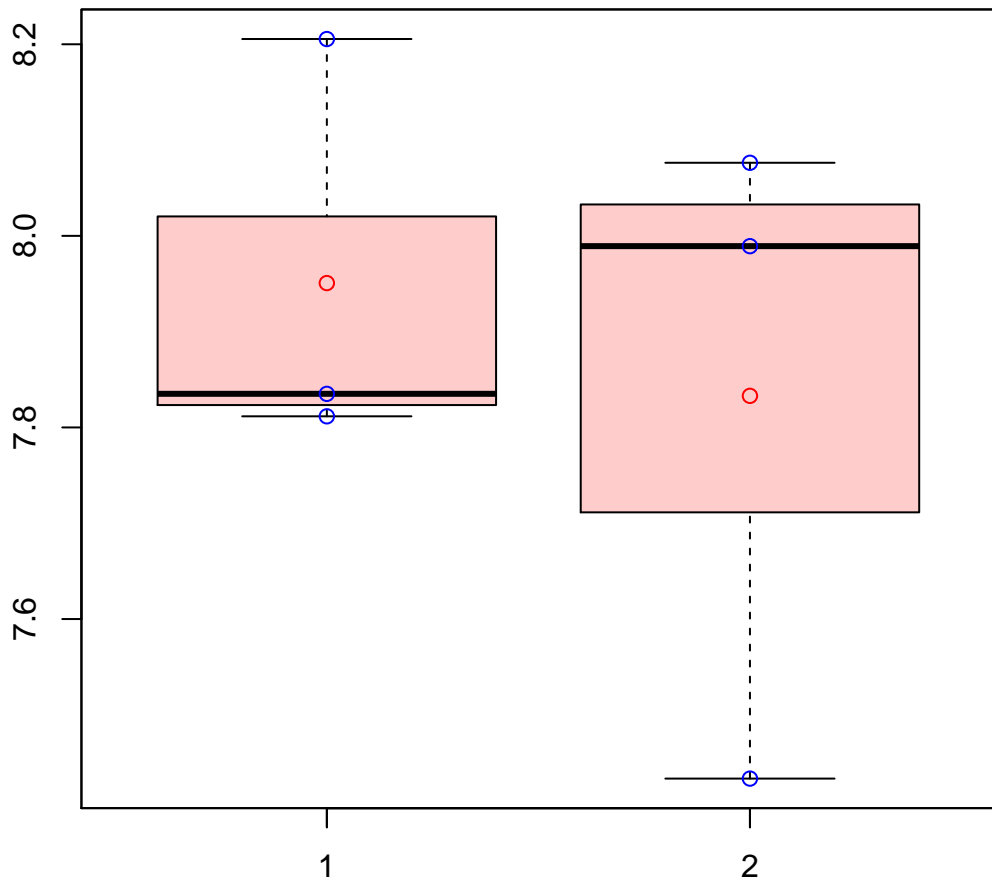

t-Test: p-value = 0.65

# CL1Contig4324|CL1Contig4324

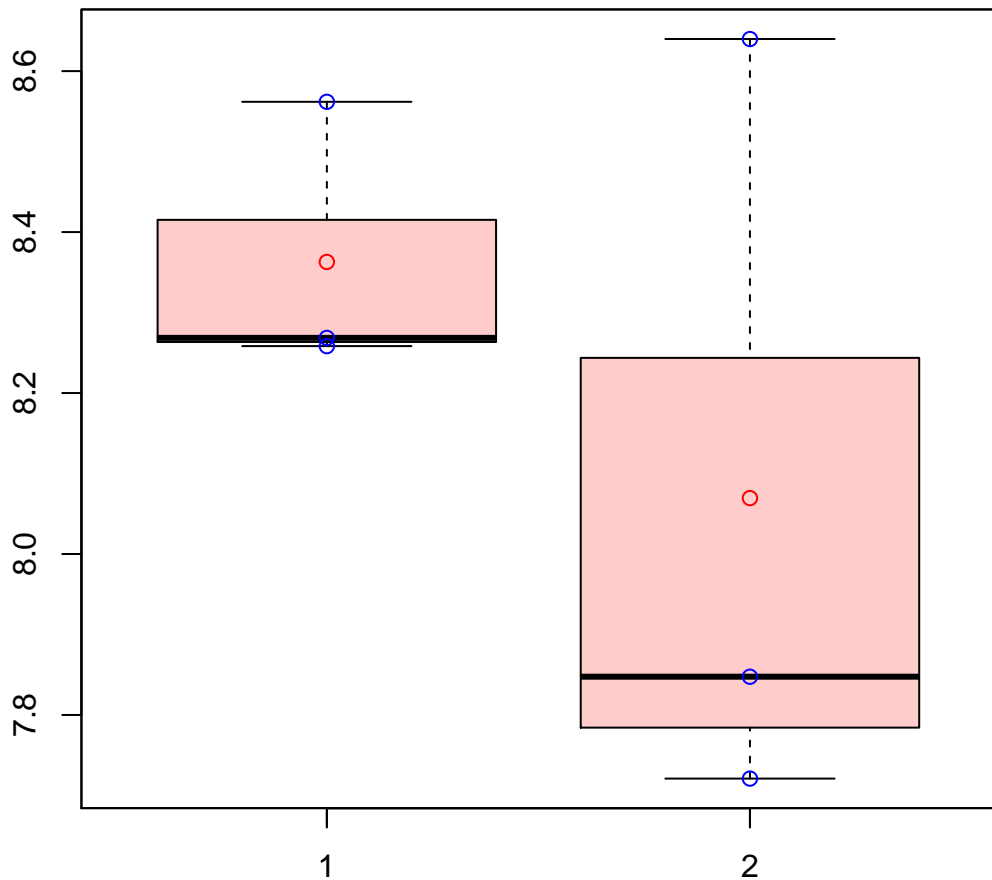

t-Test: p-value = 0.42

# CL1Contig4339|CL1Contig4339

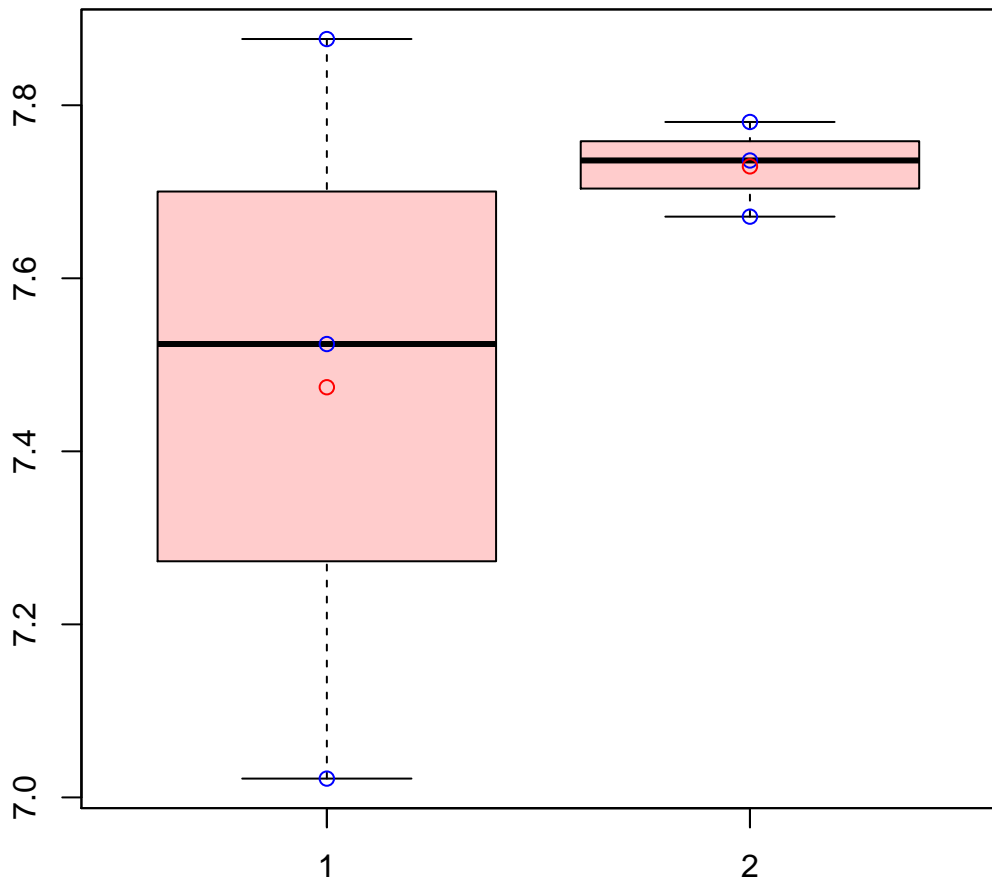

t-Test: p-value = 0.41

# CL1Contig4357|CL1Contig4357

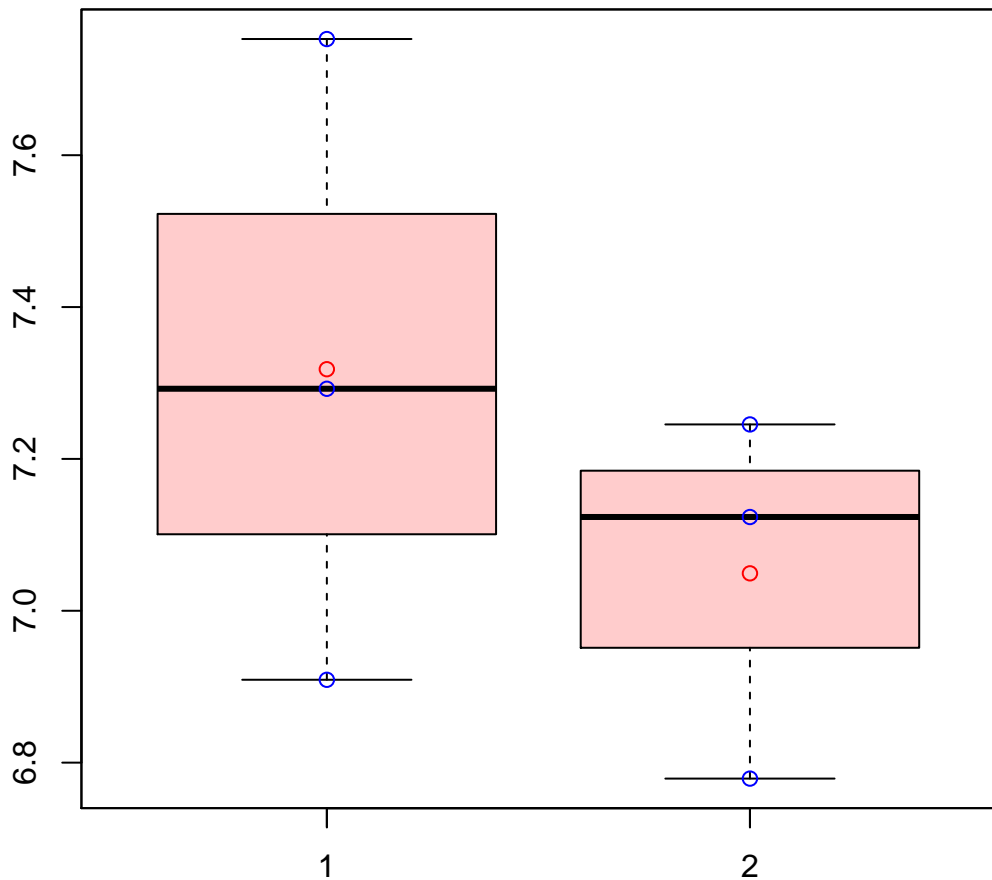

t-Test: p-value = 0.41

# CL1Contig4370|CL1Contig4370

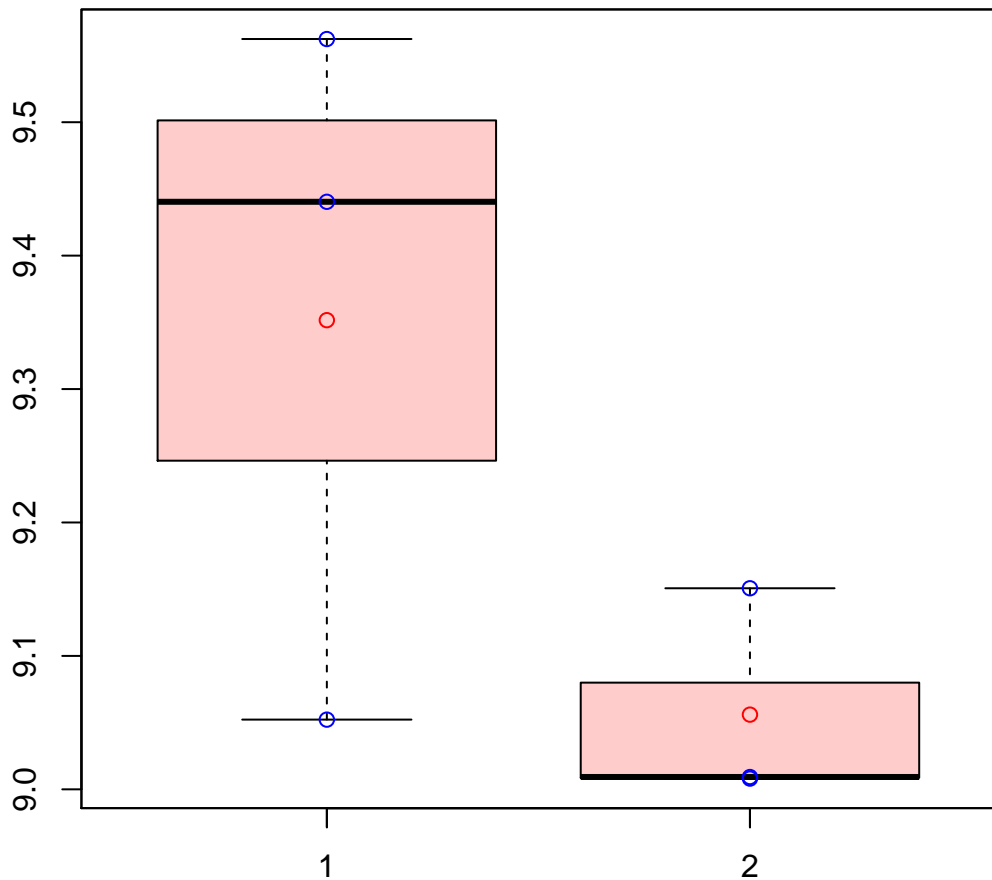

t-Test: p-value = 0.19

# CL1Contig4389|CL1Contig4389

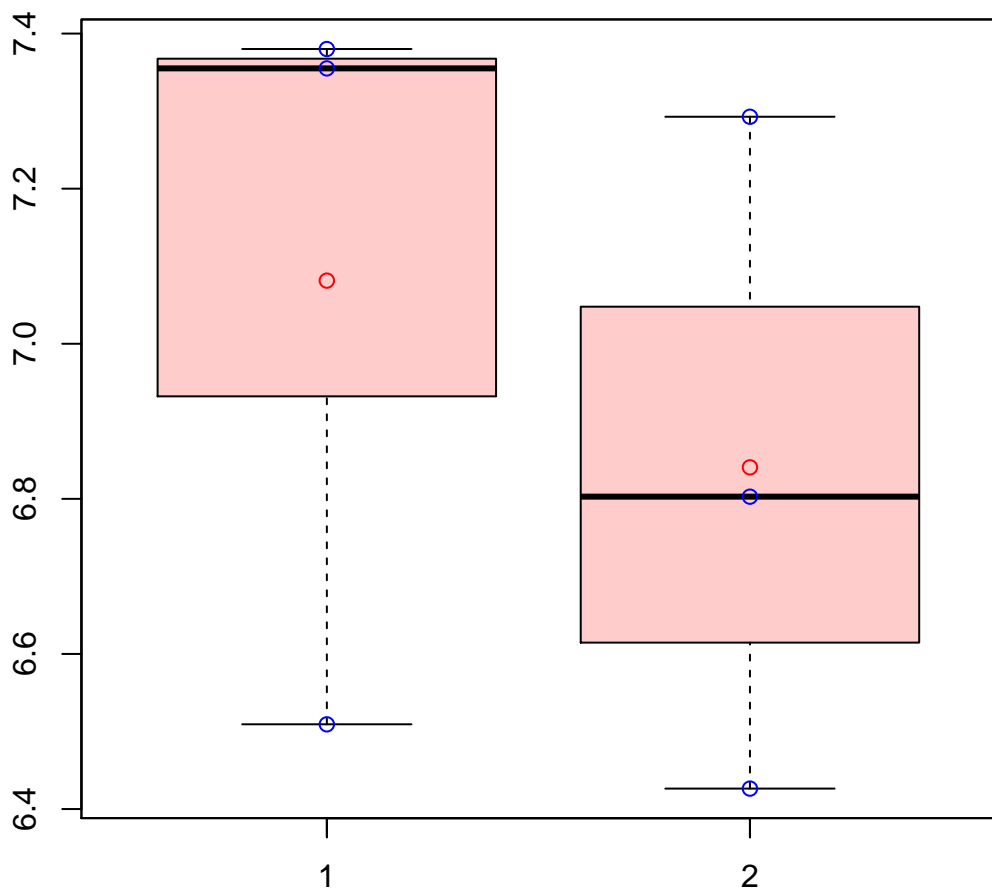

t-Test: p-value = 0.56

# CL1Contig4417|CL1Contig4417

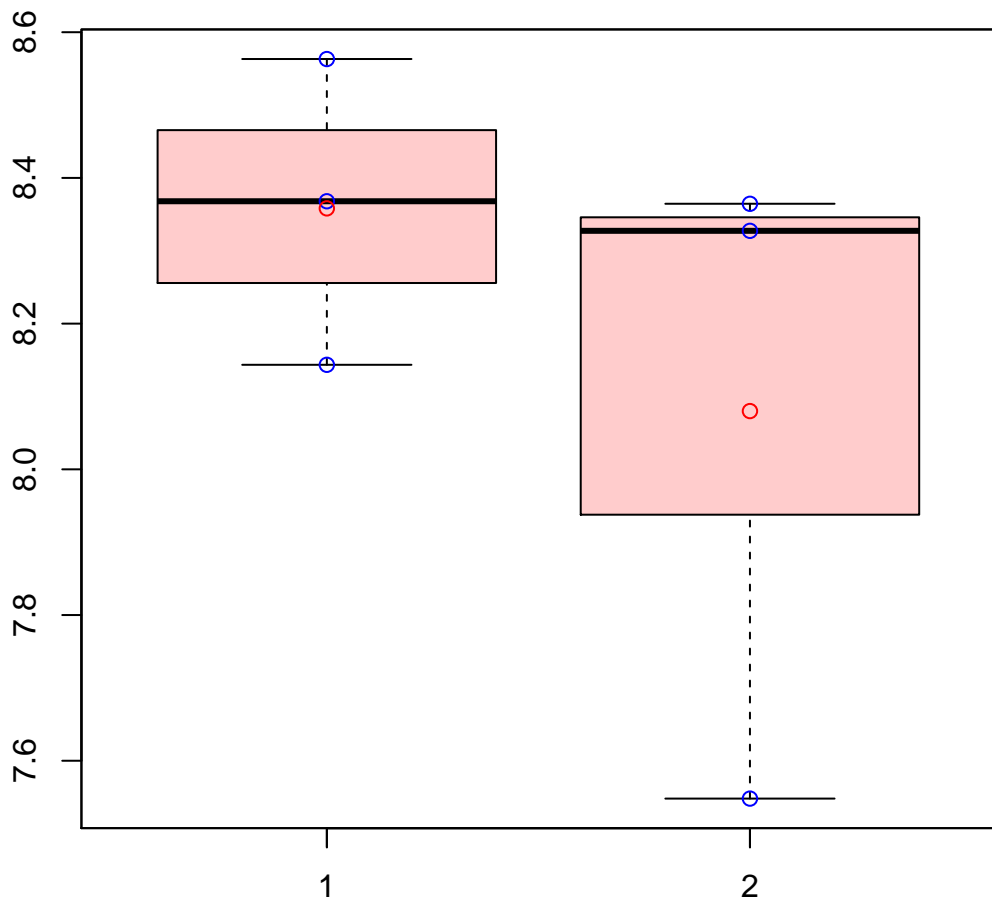

t-Test: p-value = 0.42



# CL1Contig4424|CL1Contig4424

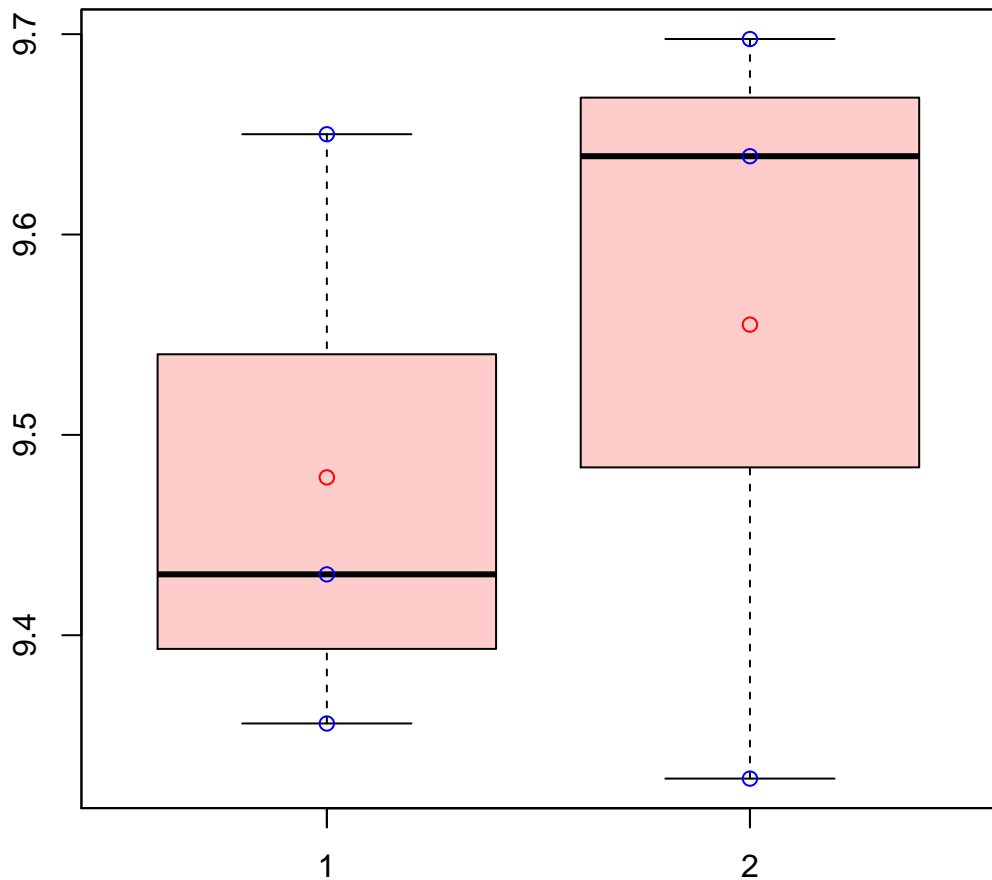

t-Test: p-value = 0.63

# CL1Contig4521|CL1Contig4521

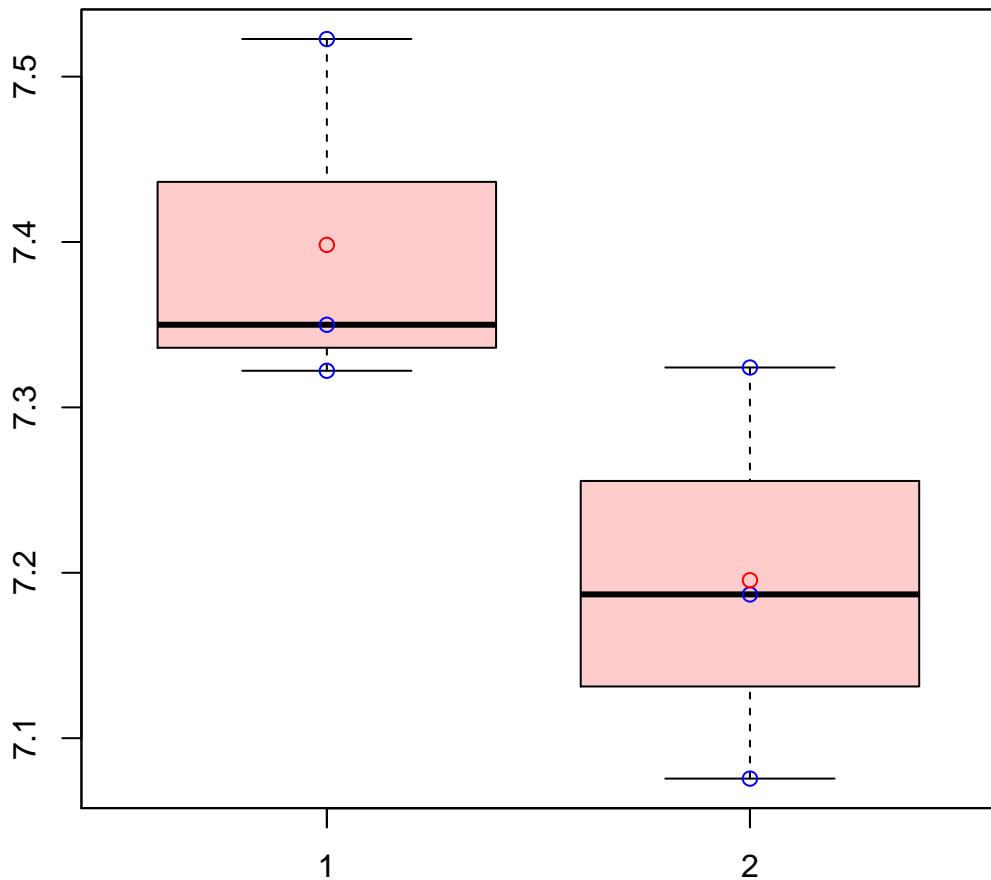

t-Test: p-value = 0.1

# CL1Contig4551|CL1Contig4551

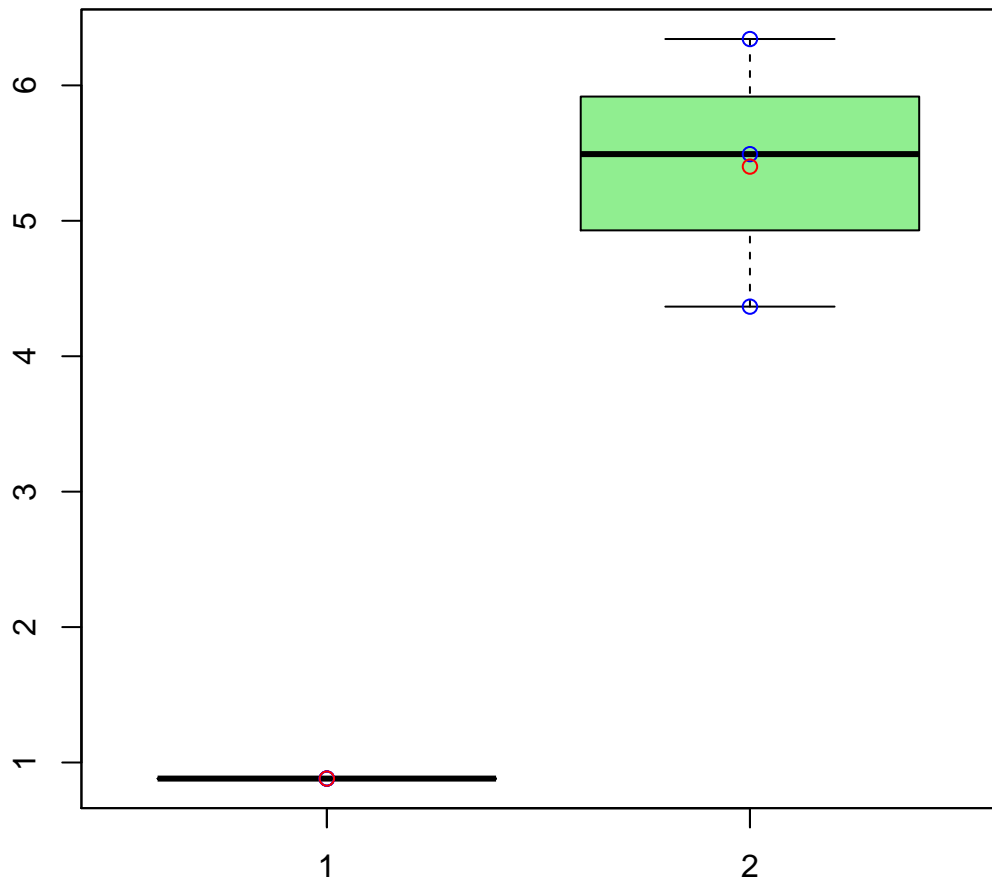

t-Test: p-value = 0.02

# CL1Contig4553|CL1Contig4553

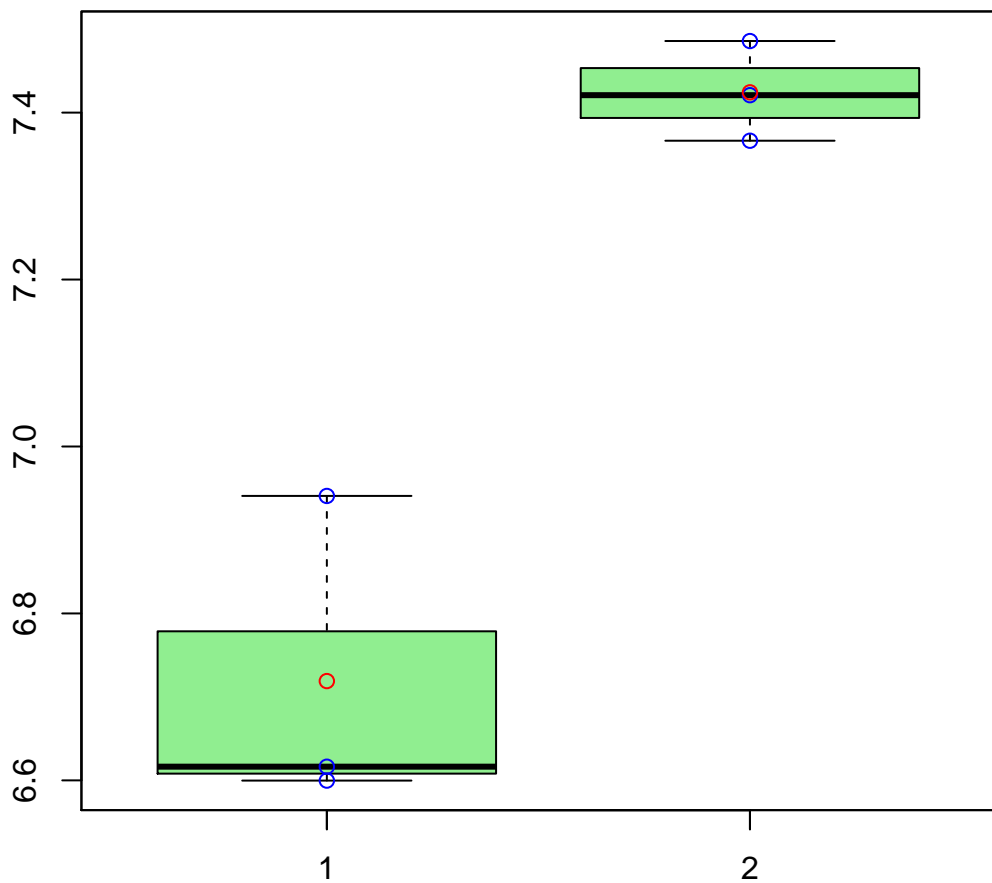

t-Test: p-value = 0.02

# CL1Contig458|CL1Contig458

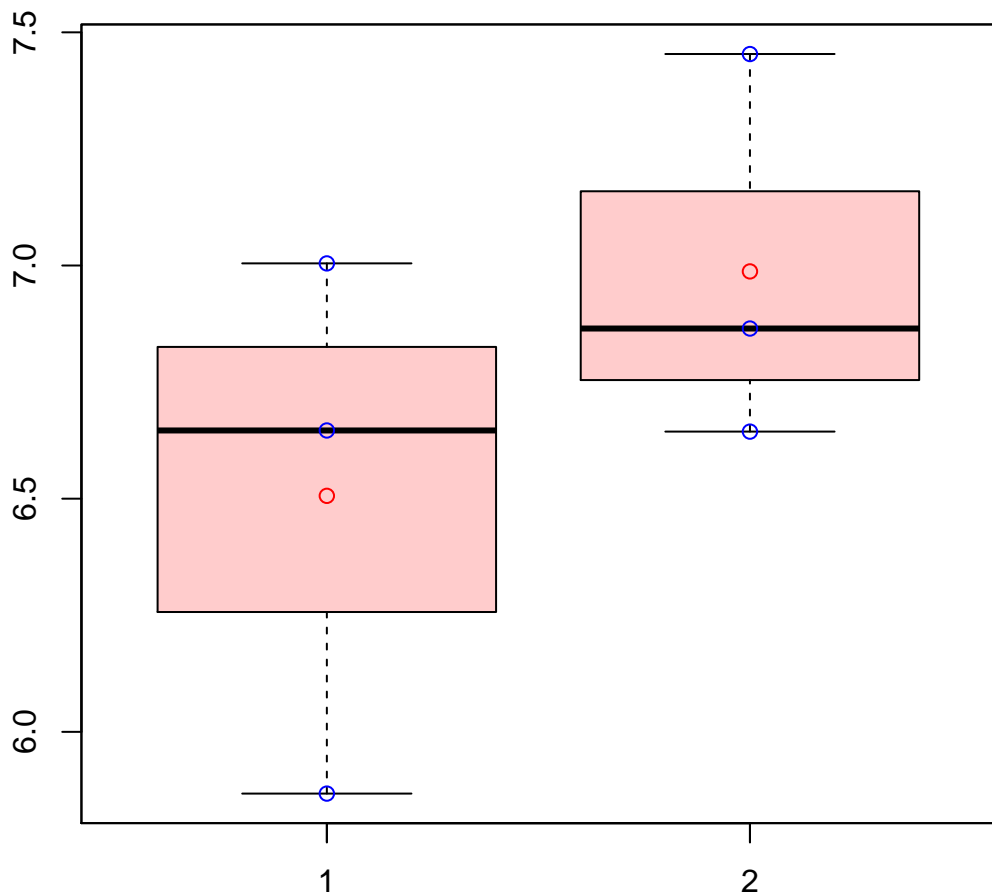

t-Test: p-value = 0.32

# CL1Contig45|CL1Contig45

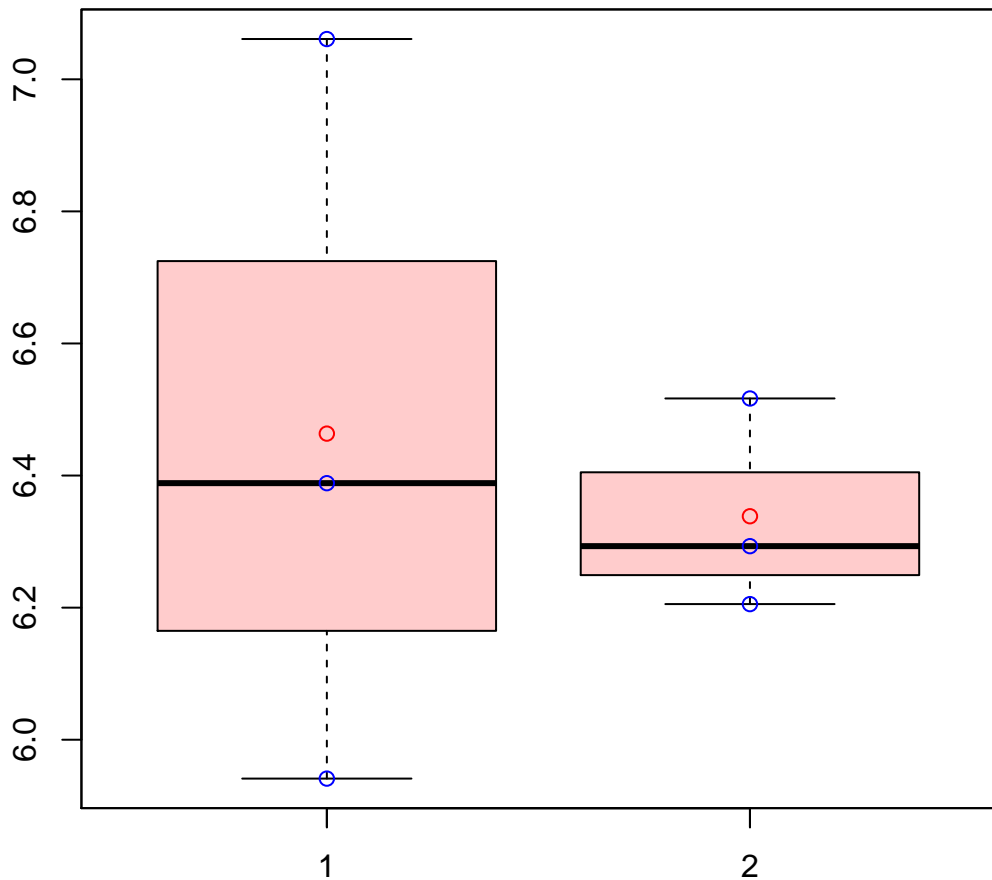

t-Test: p-value = 0.74

# CL1Contig4611|CL1Contig4611

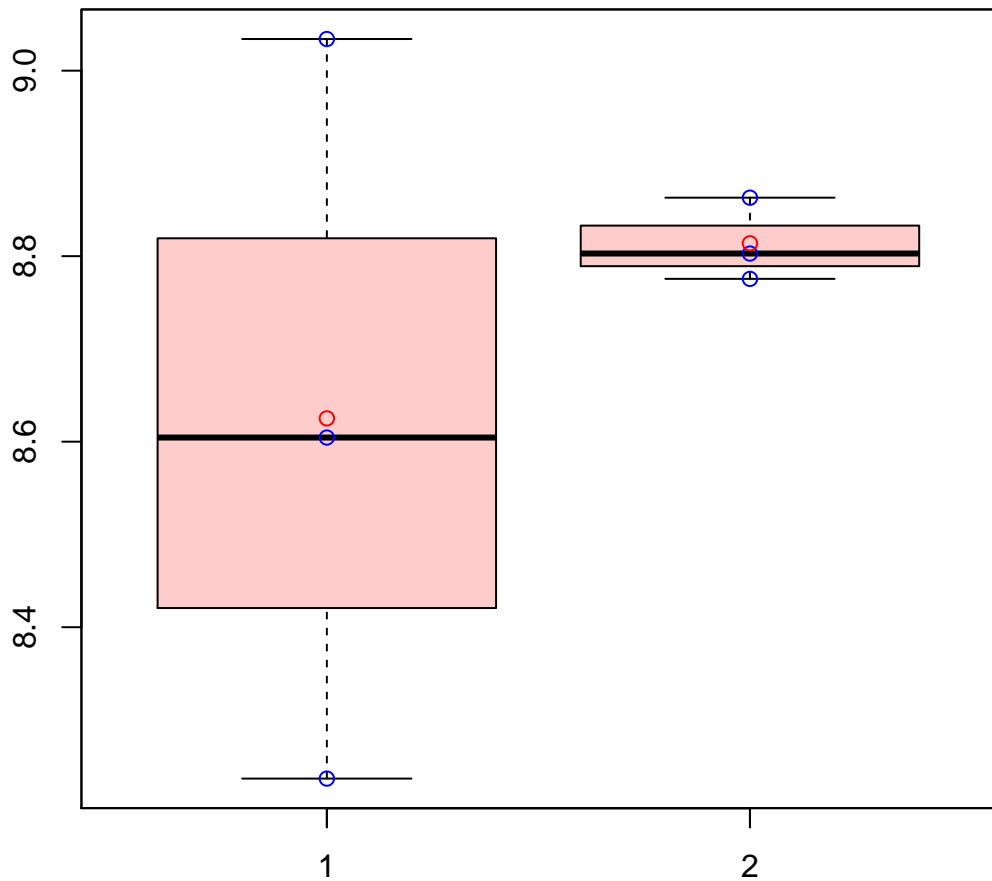

t-Test: p-value = 0.5

# CL1Contig462|CL1Contig462

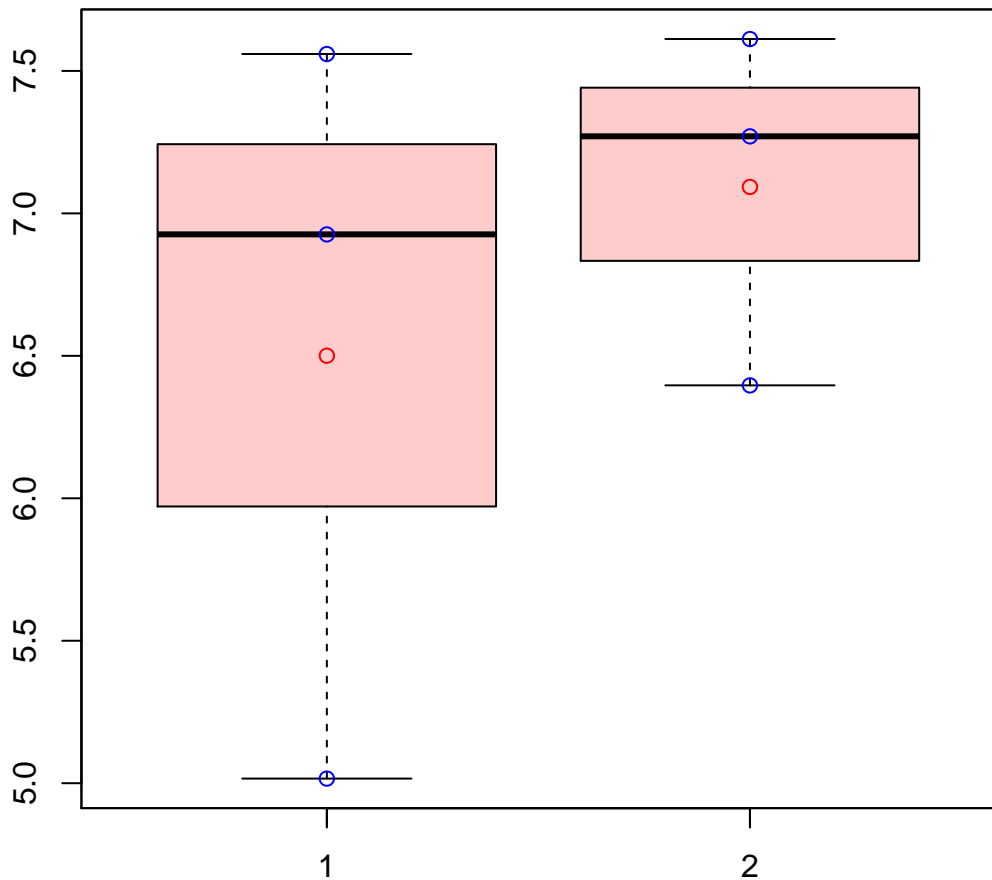

t-Test: p-value = 0.54



# CL1Contig4635|CL1Contig4635

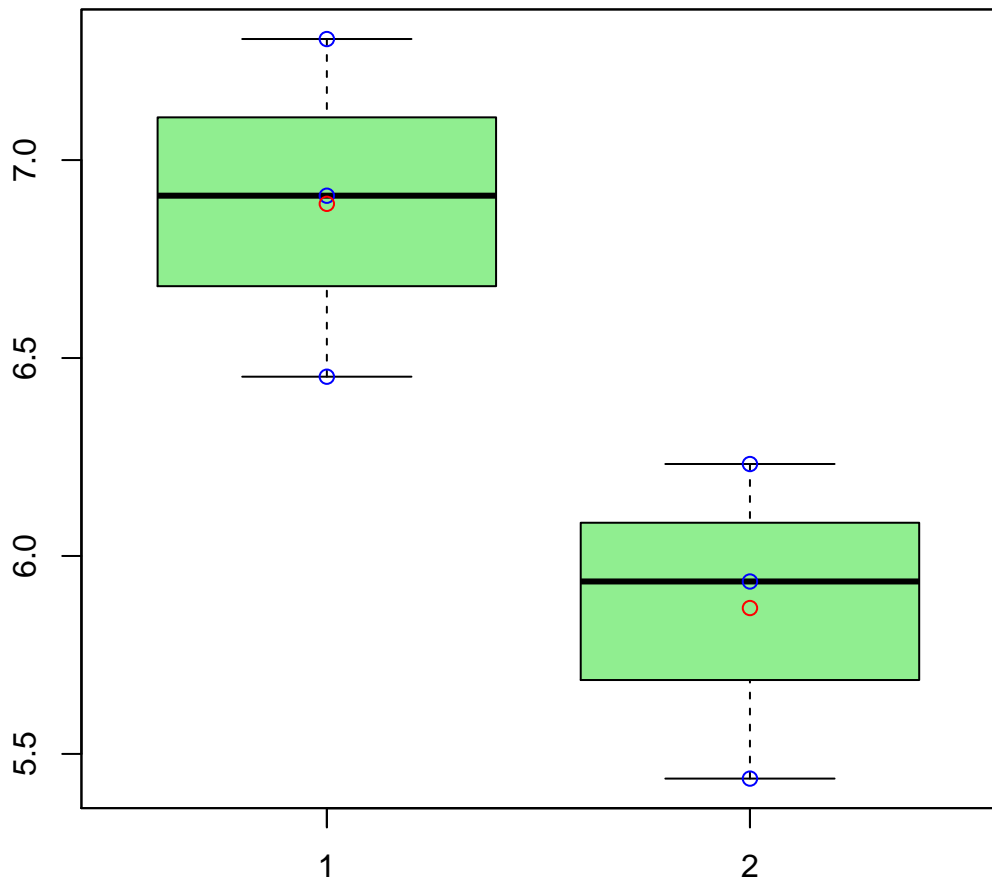

t-Test: p-value = 0.04

# CL1Contig4654|CL1Contig4654

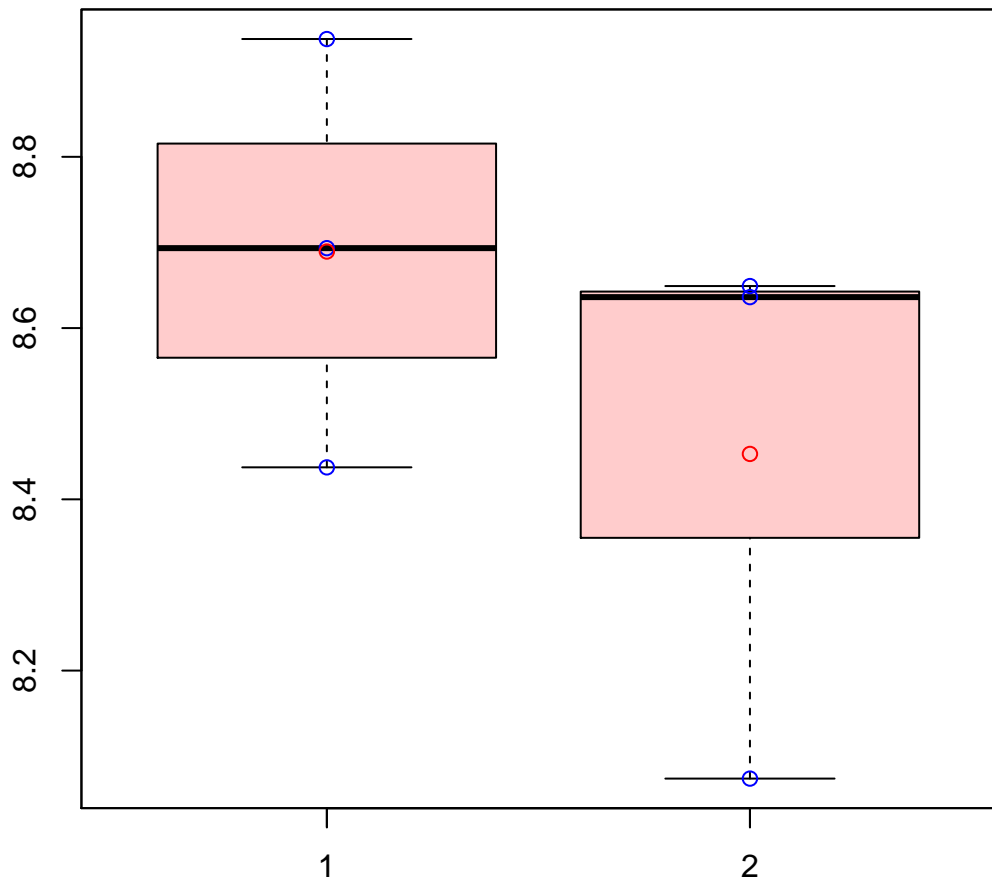

t-Test: p-value = 0.38

# CL1Contig472|CL1Contig472

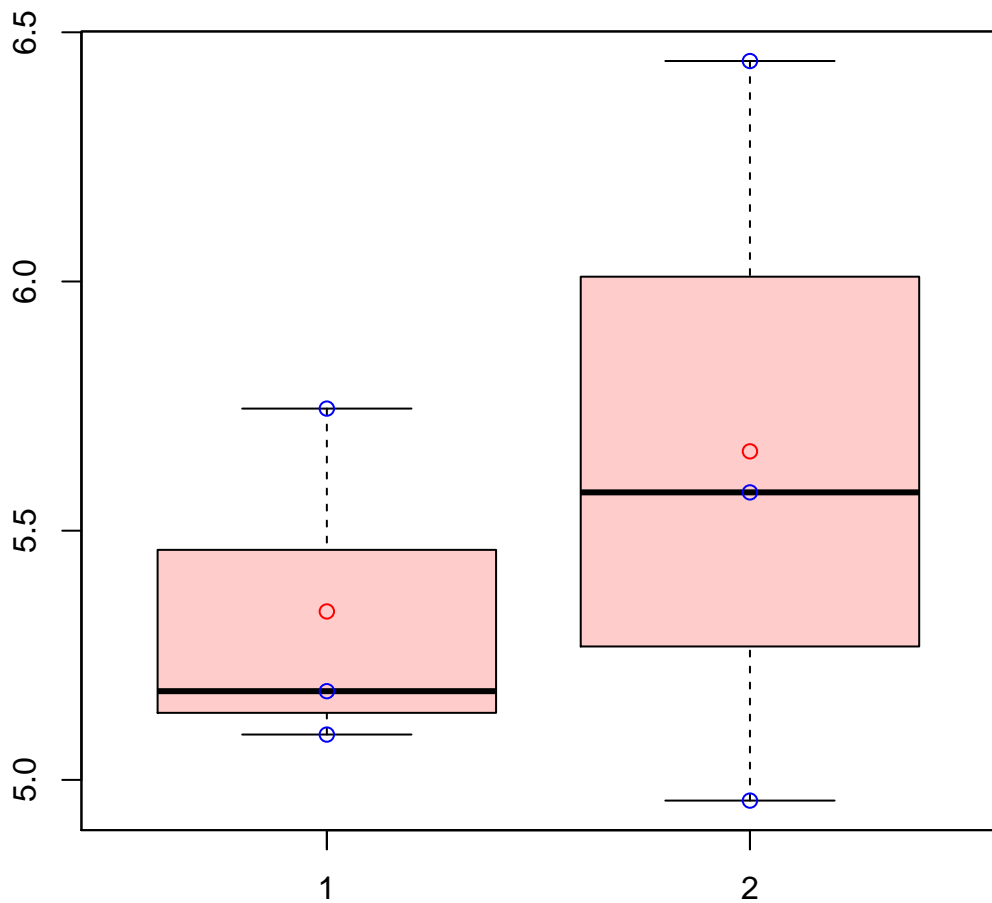

t-Test: p-value = 0.55

# CL1Contig4777|CL1Contig4777

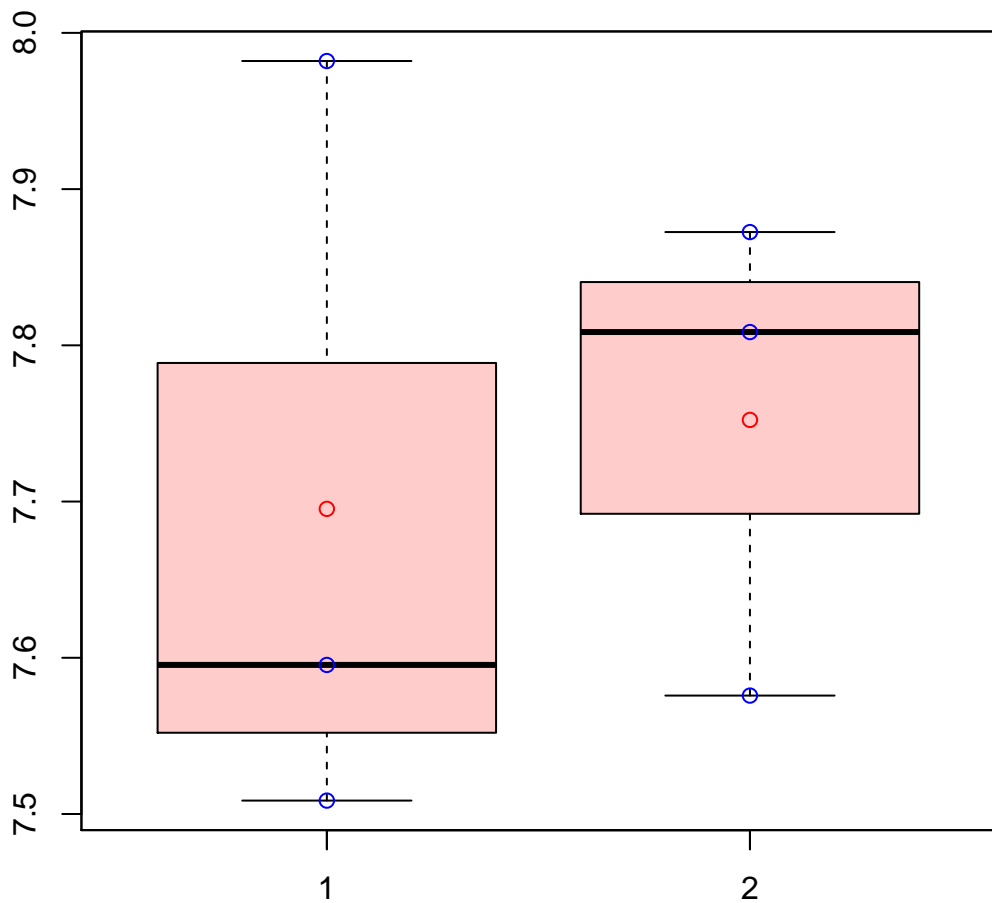

t-Test: p-value = 0.76

# CL1Contig4807|CL1Contig4807

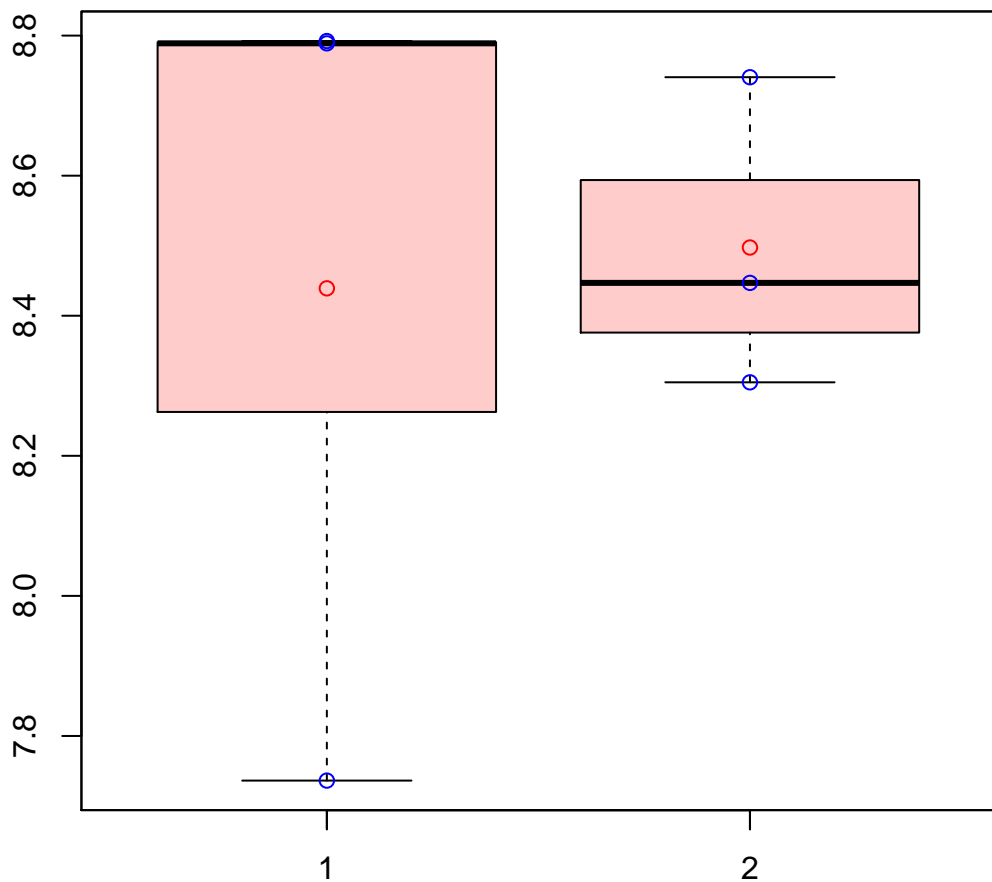

t-Test: p-value = 0.89

# CL1Contig4811|CL1Contig4811

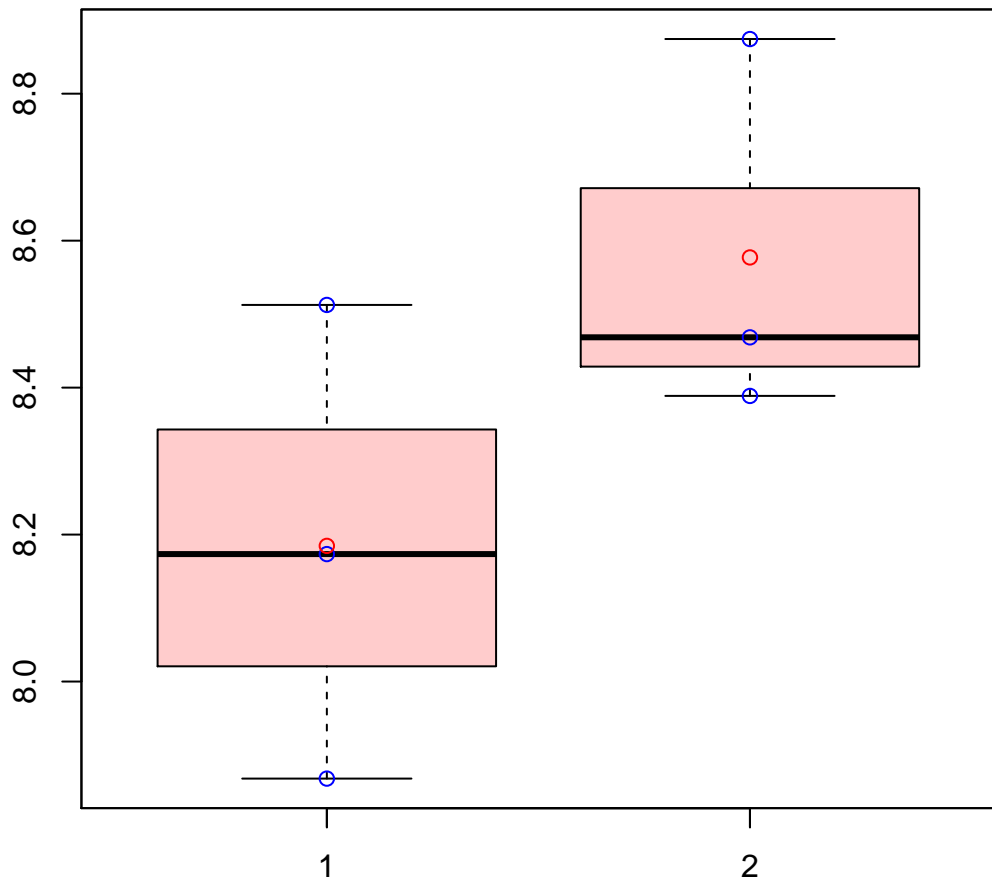

t-Test: p-value = 0.18

# CL1Contig4834|CL1Contig4834

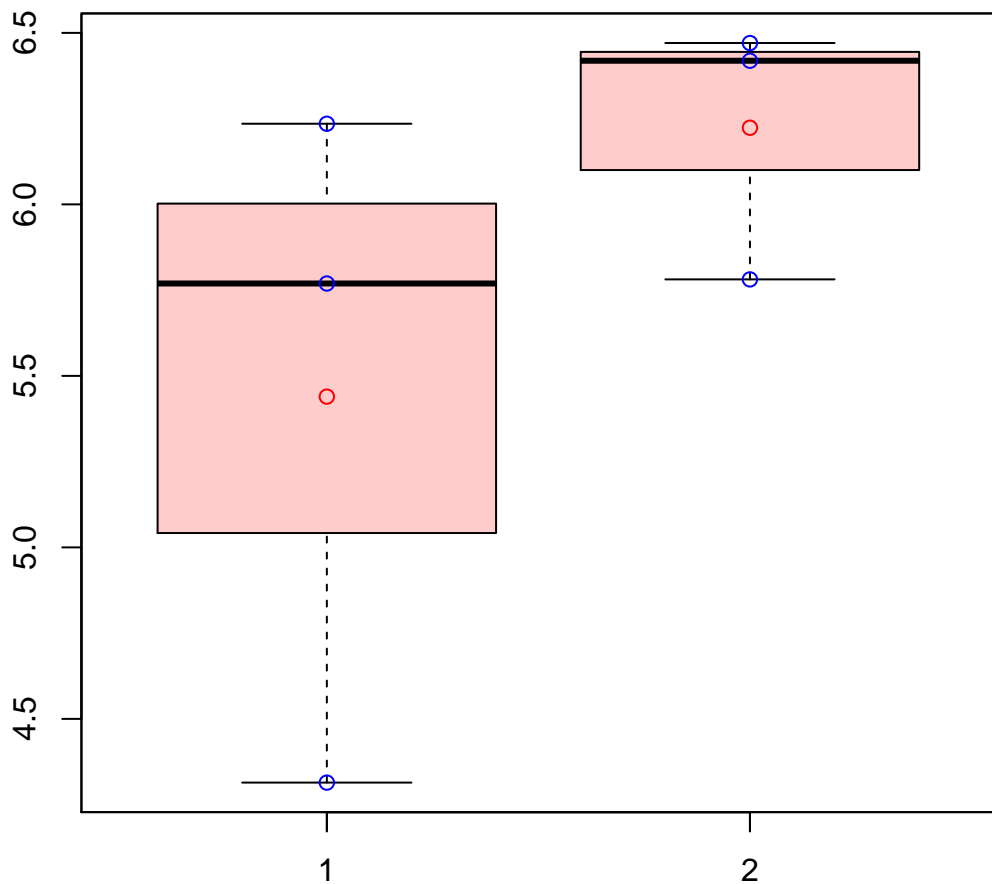

t-Test: p-value = 0.31

# CL1Contig4836|CL1Contig4836

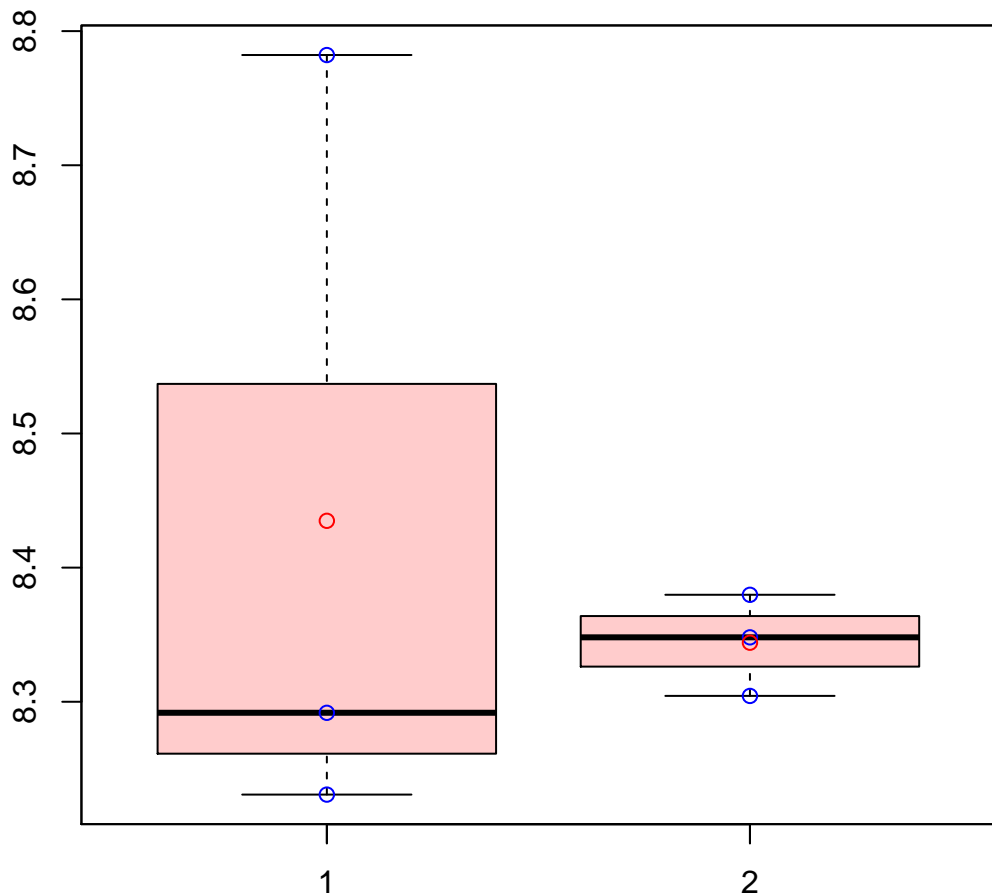

t-Test: p-value = 0.66



# CL1Contig4859|CL1Contig4859

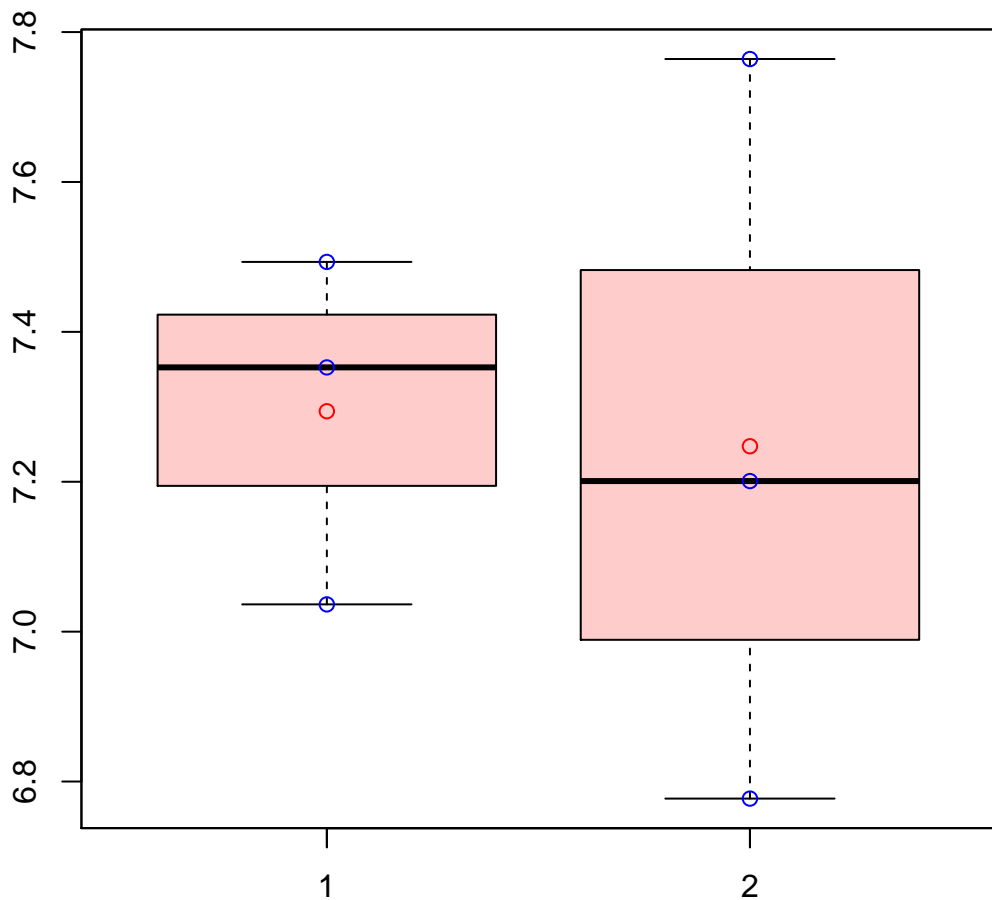

t-Test: p-value = 0.89

# CL1Contig4865|CL1Contig4865

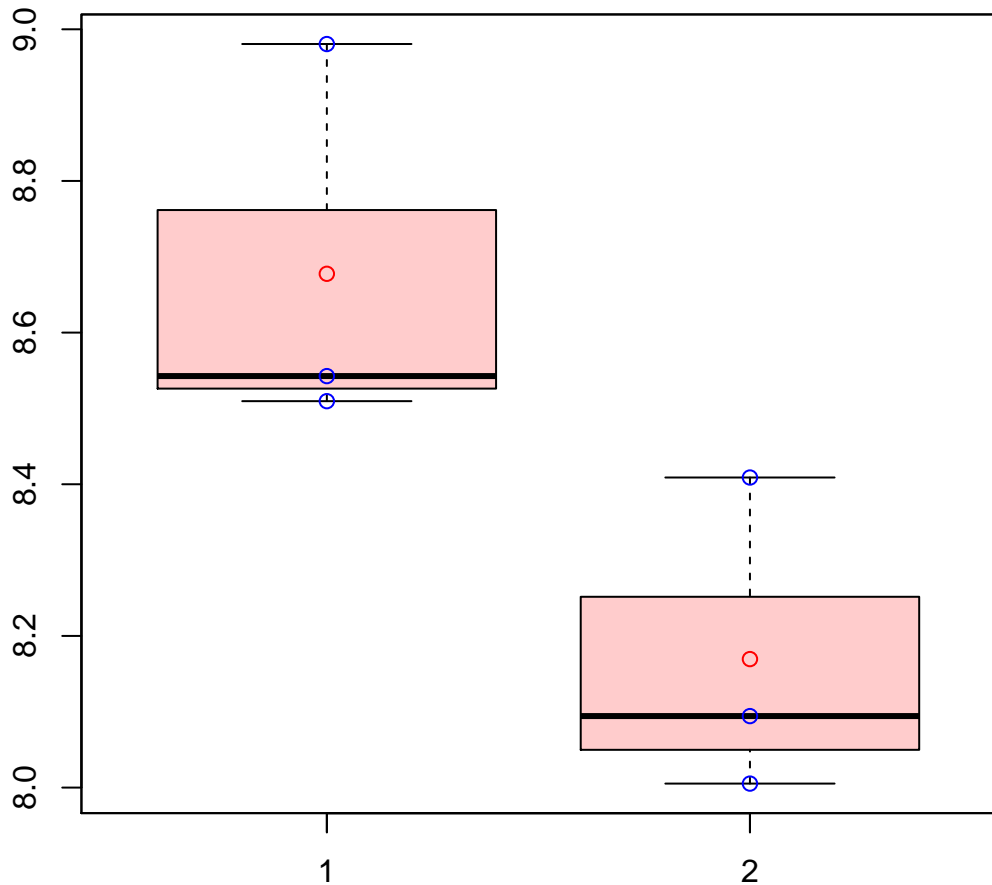

t-Test: p-value = 0.06

# CL1Contig4896|CL1Contig4896

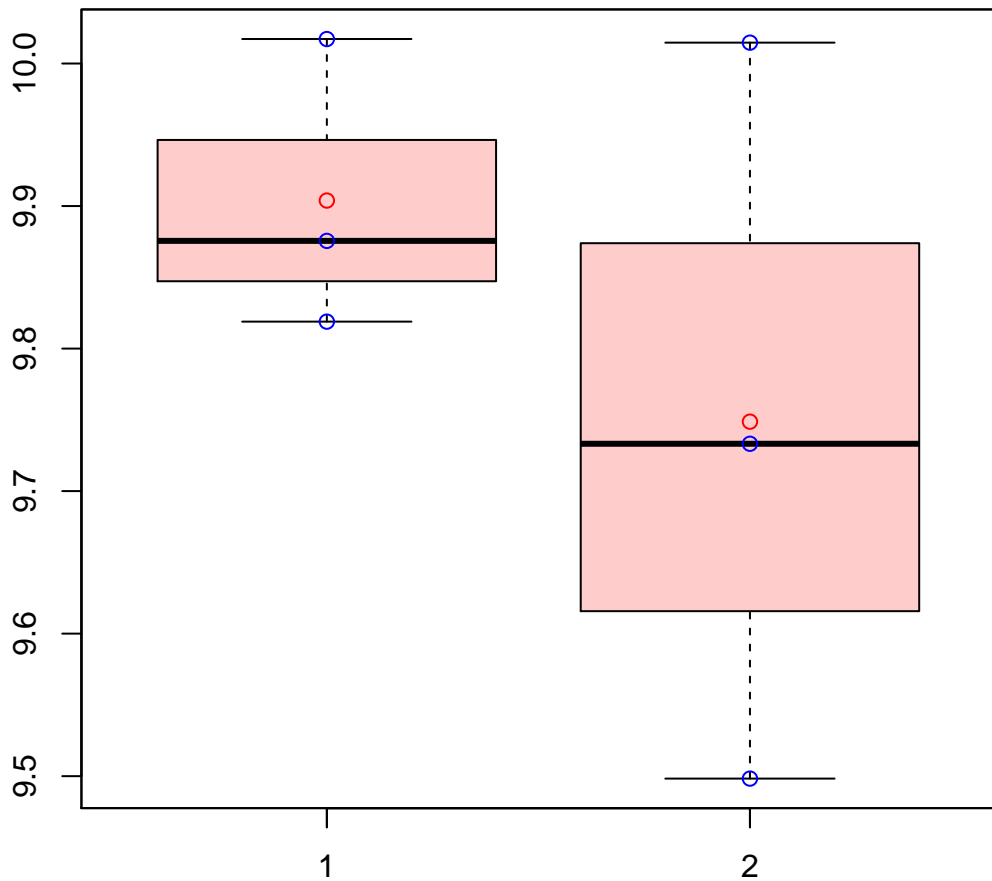

t-Test: p-value = 0.41

# CL1Contig4897|CL1Contig4897

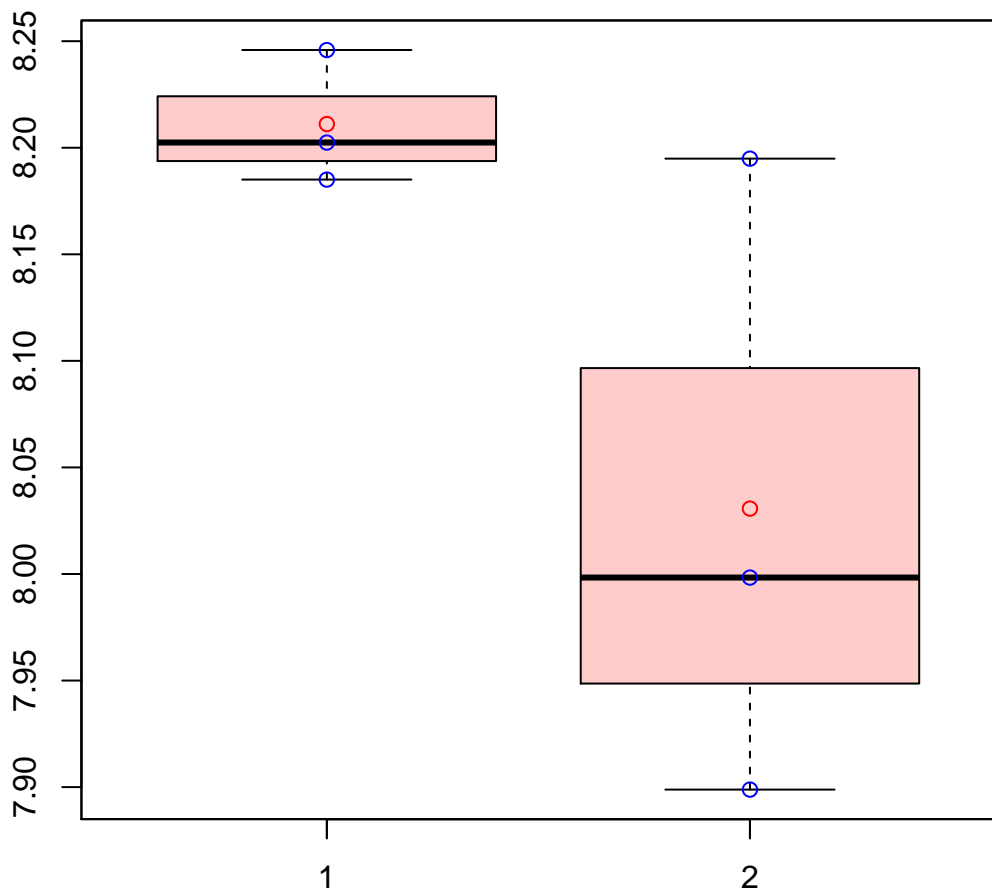

t-Test: p-value = 0.17

# CL1Contig4948|CL1Contig4948

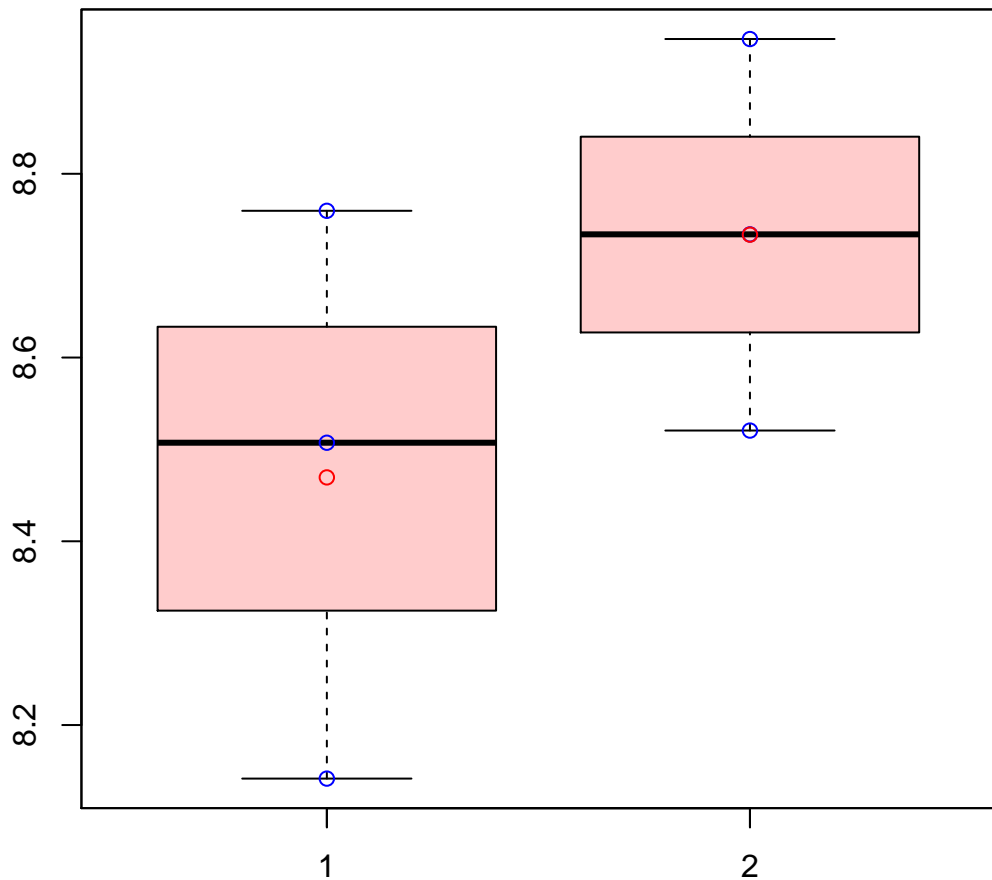

t-Test: p-value = 0.3

# CL1Contig5004|CL1Contig5004

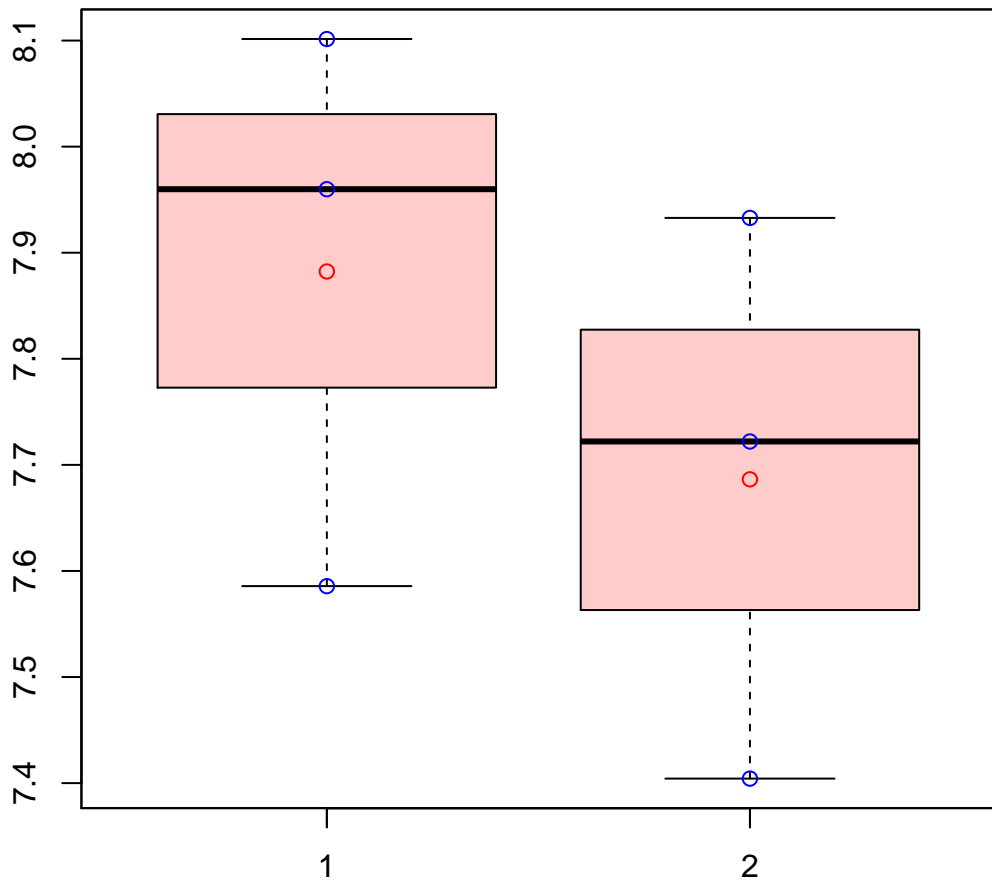

t-Test: p-value = 0.42

# CL1Contig5106|CL1Contig5106

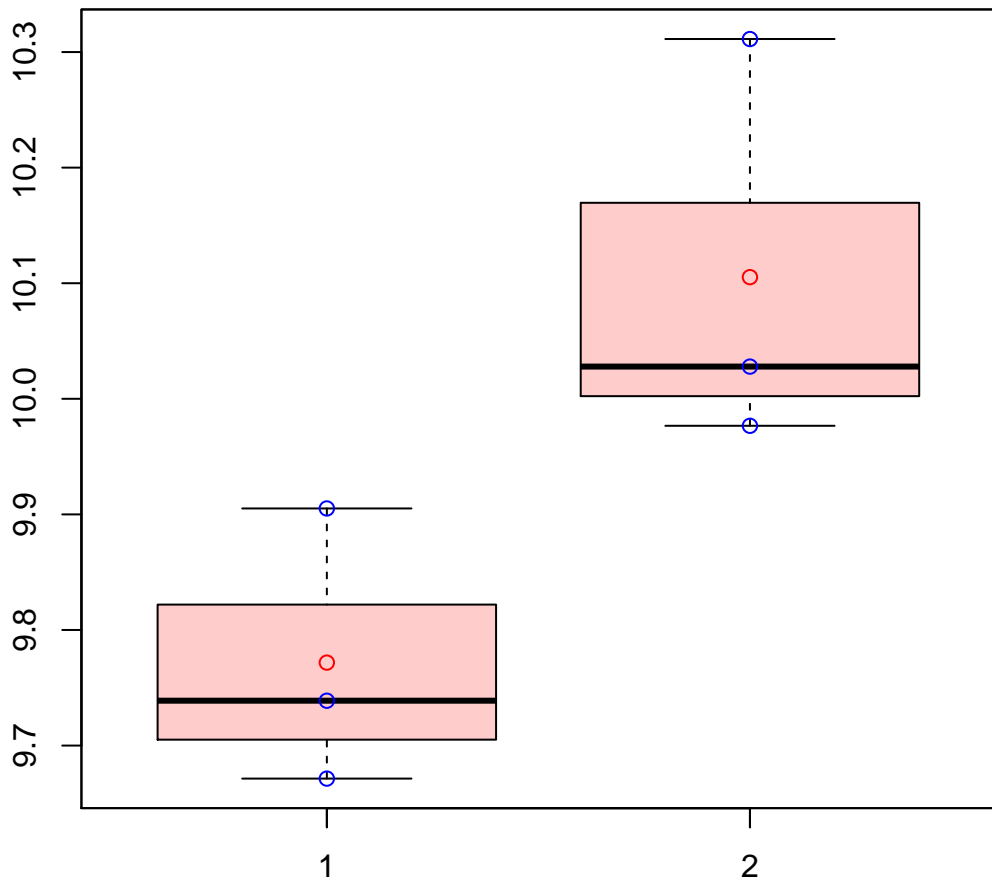

t-Test: p-value = 0.06

# CL1Contig5168|CL1Contig5168

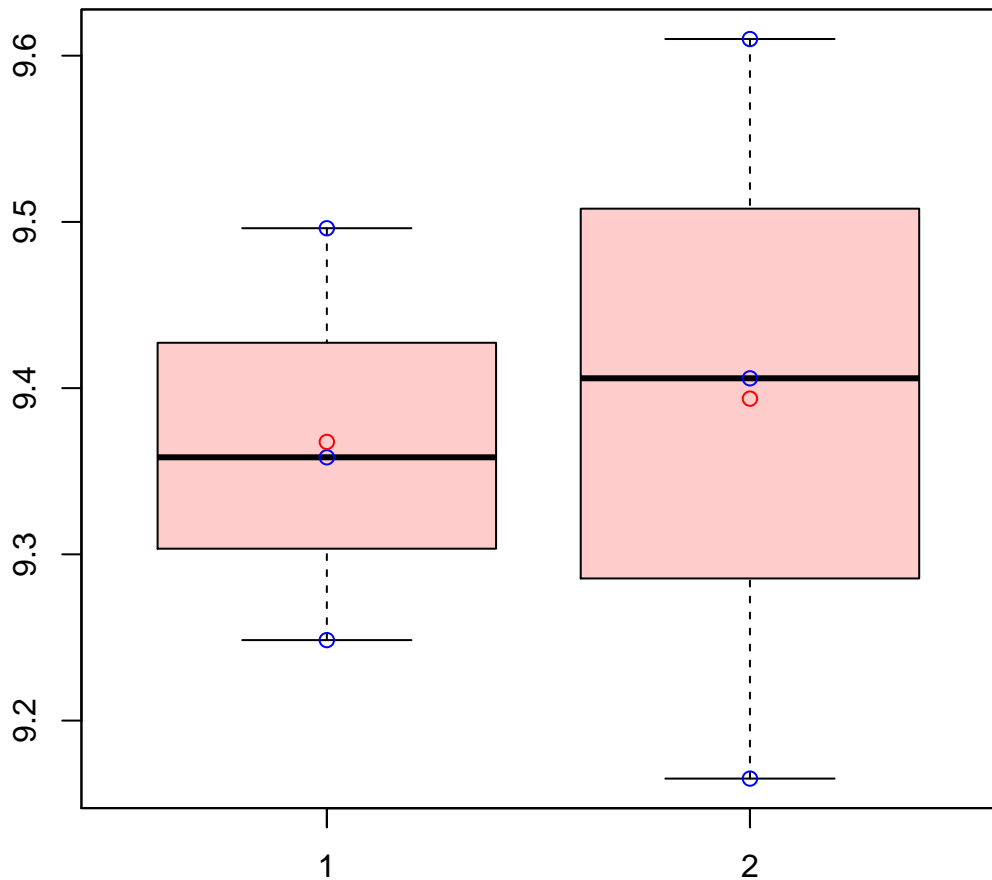

t-Test: p-value = 0.87



# CL1Contig5173|CL1Contig5173

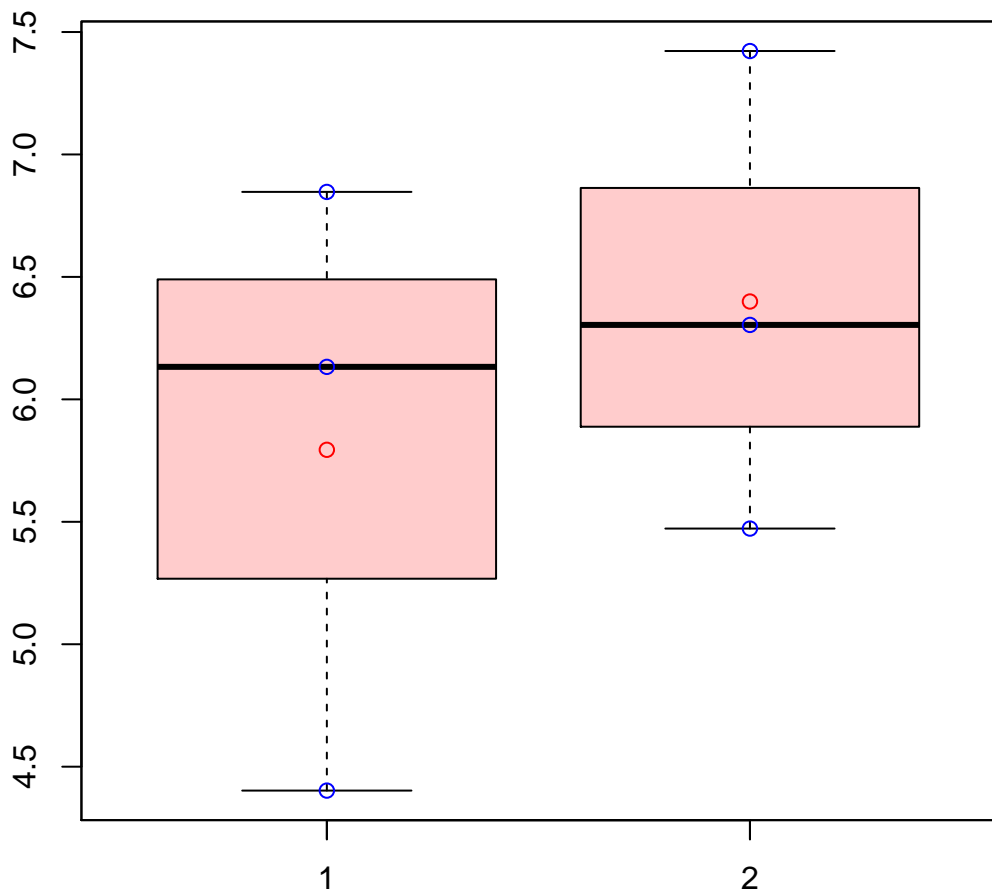

t-Test: p-value = 0.55

# CL1Contig5183|CL1Contig5183

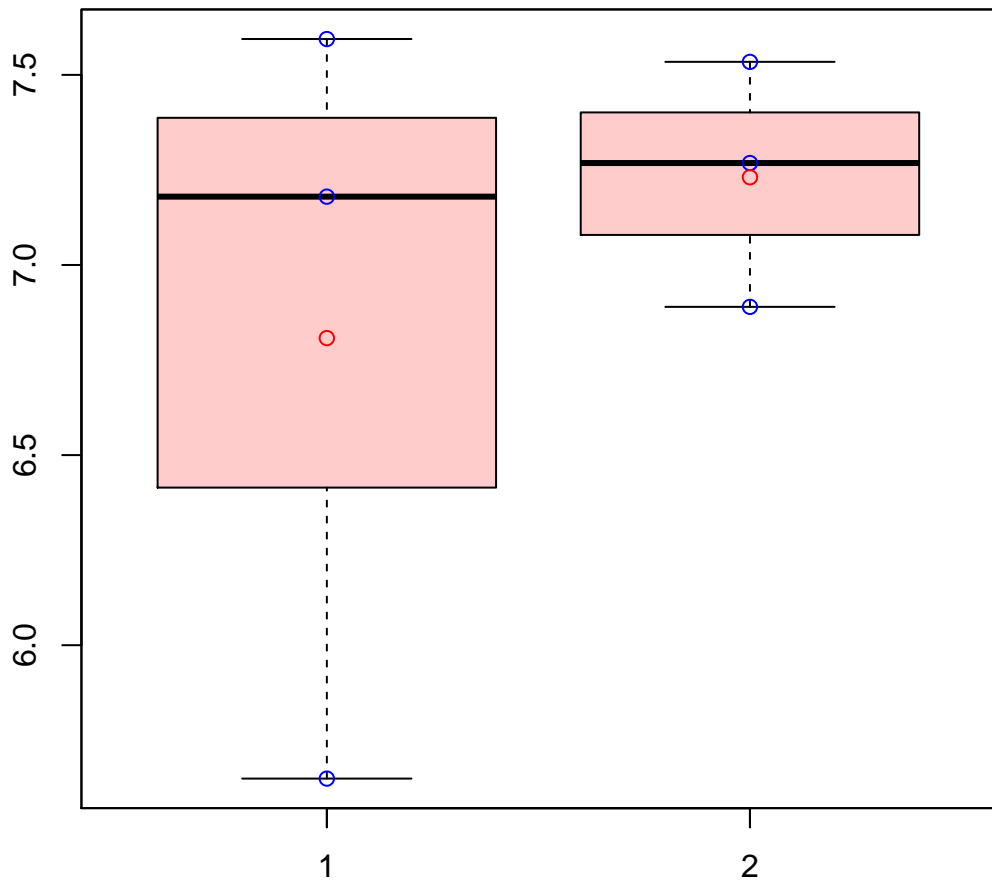

t-Test: p-value = 0.56

# CL1Contig5189|CL1Contig5189

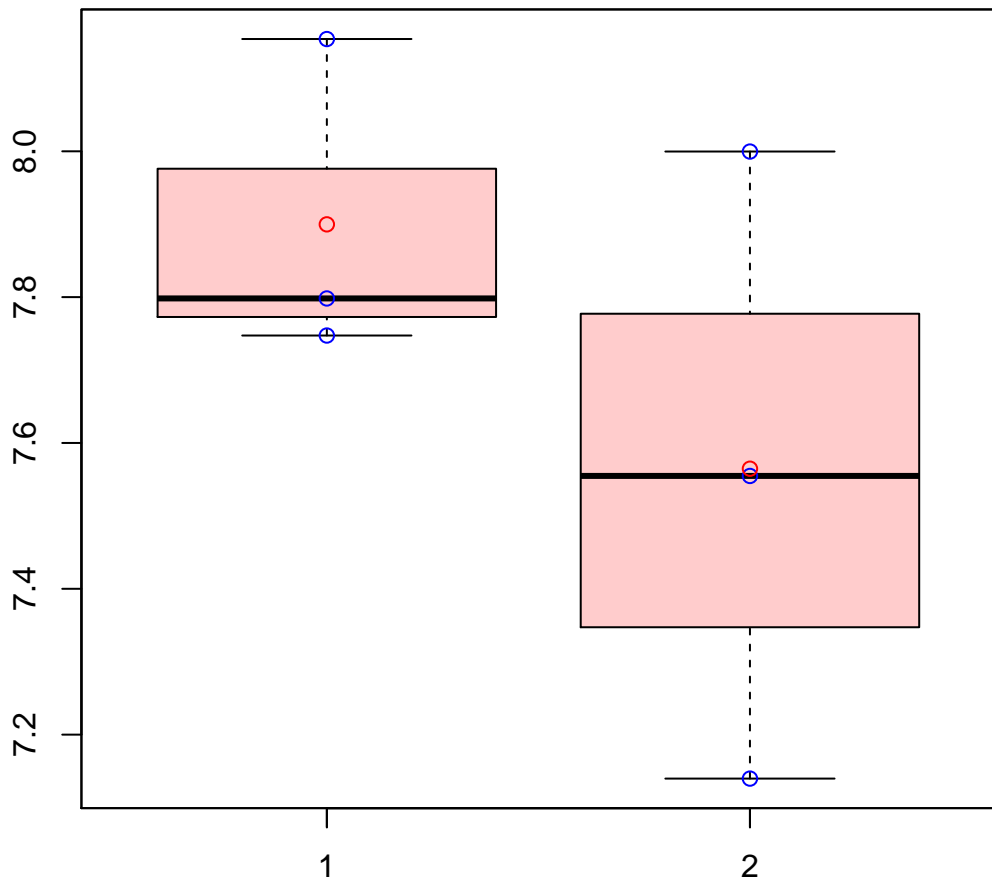

t-Test: p-value = 0.32

# CL1Contig518|CL1Contig518

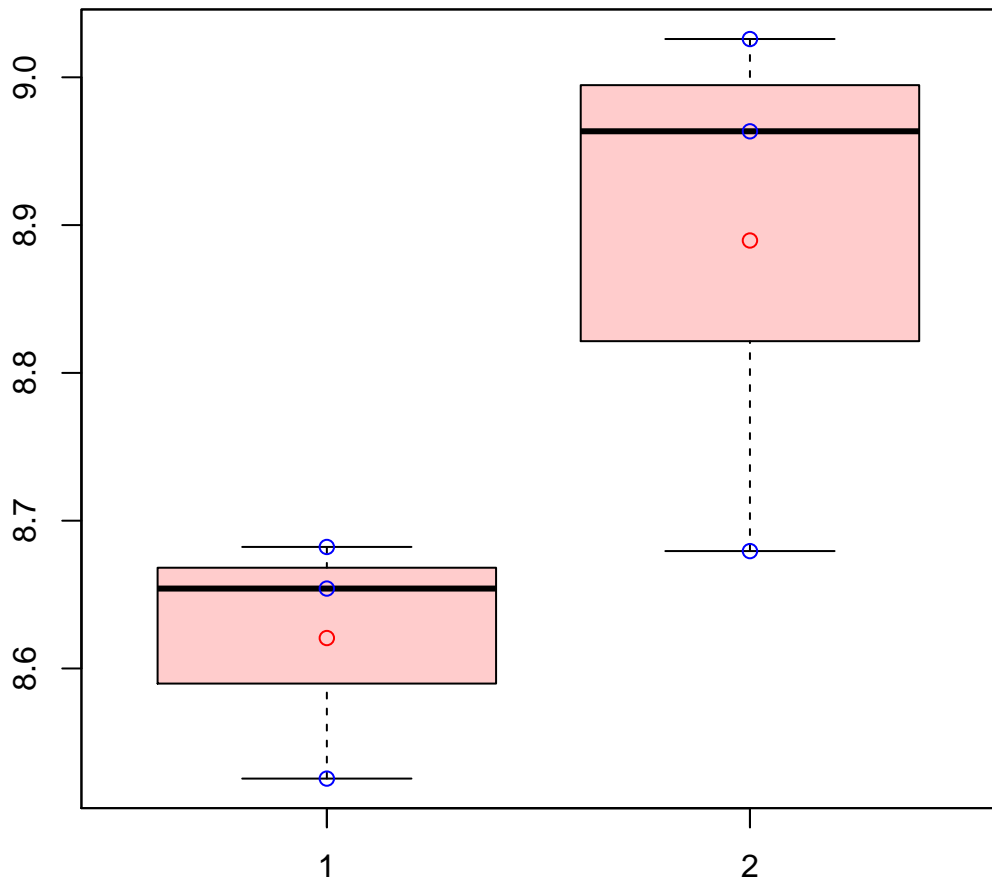

t-Test: p-value = 0.11

# CL1Contig5222|CL1Contig5222

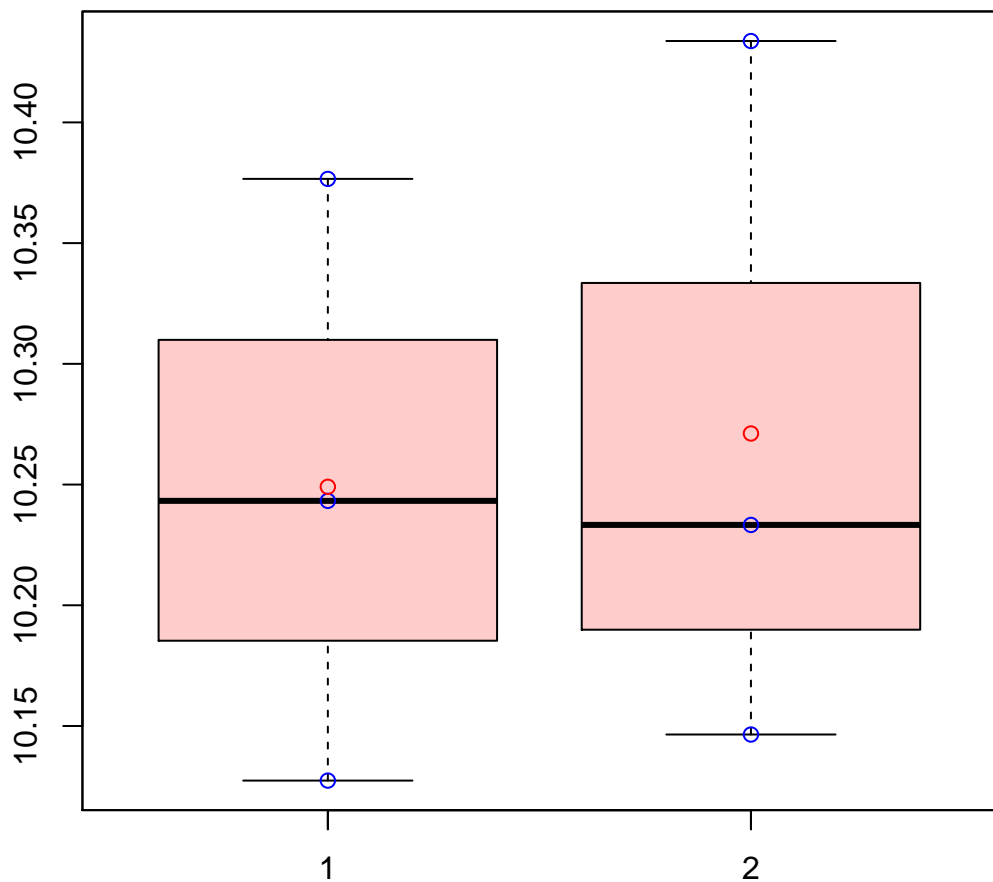

t-Test: p-value = 0.85

# CL1Contig5223|CL1Contig5223

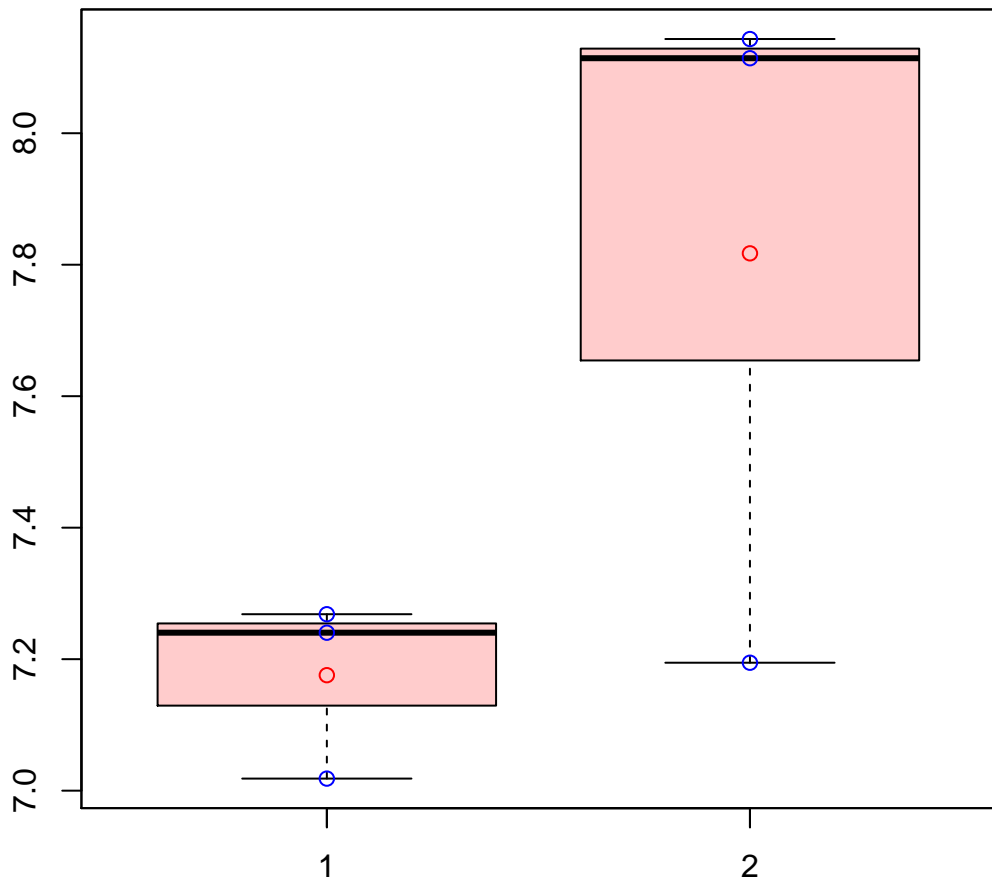

t-Test: p-value = 0.17

# CL1Contig526|CL1Contig526

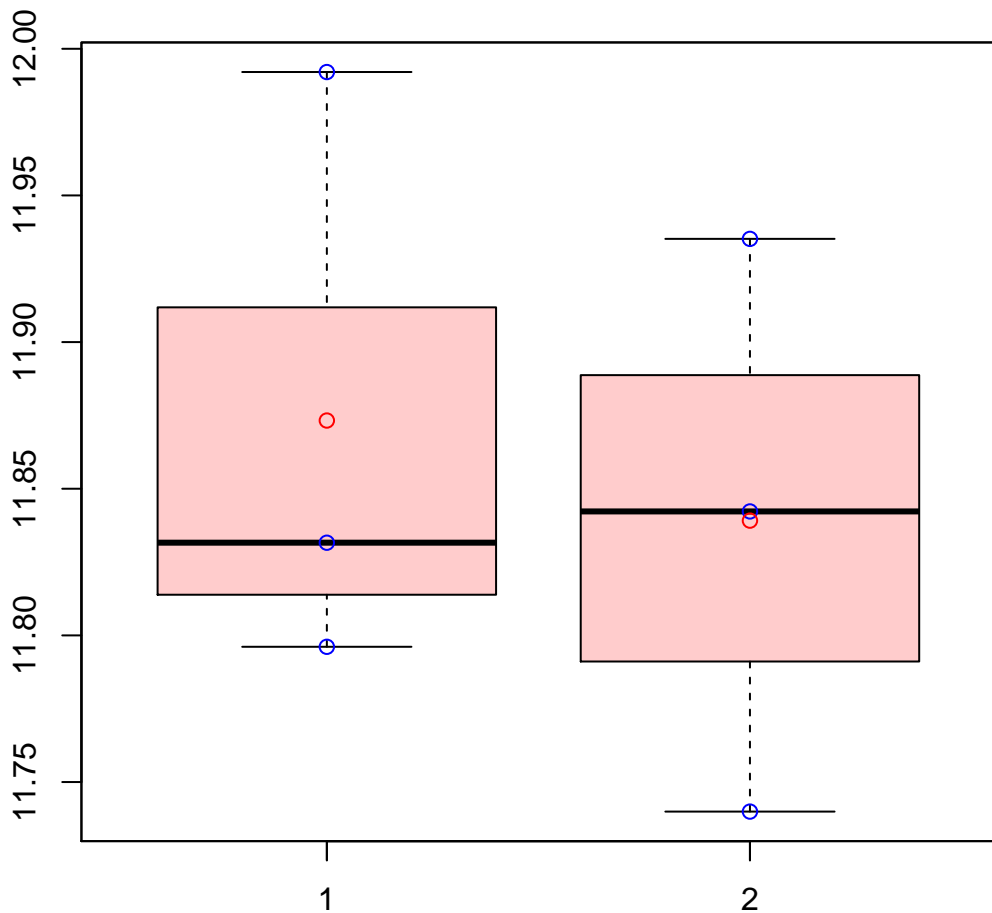

t-Test: p-value = 0.7

# CL1Contig5313|CL1Contig5313

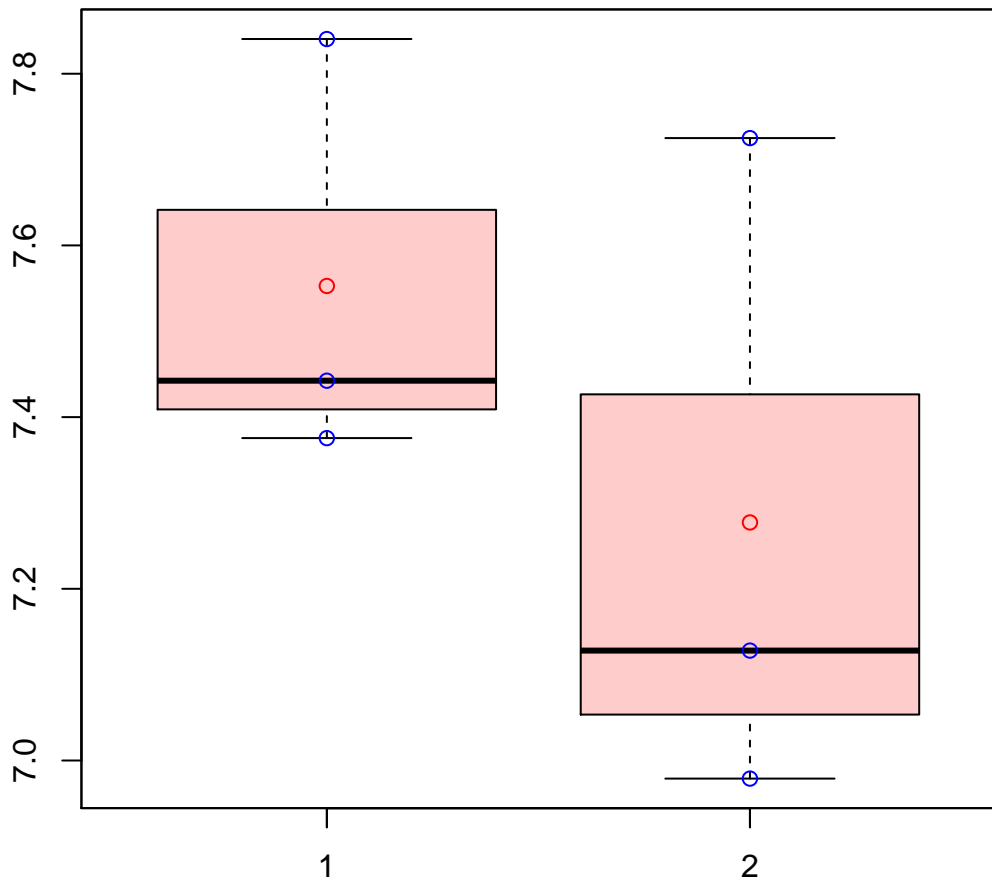

t-Test: p-value = 0.38



# CL1Contig5337|CL1Contig5337

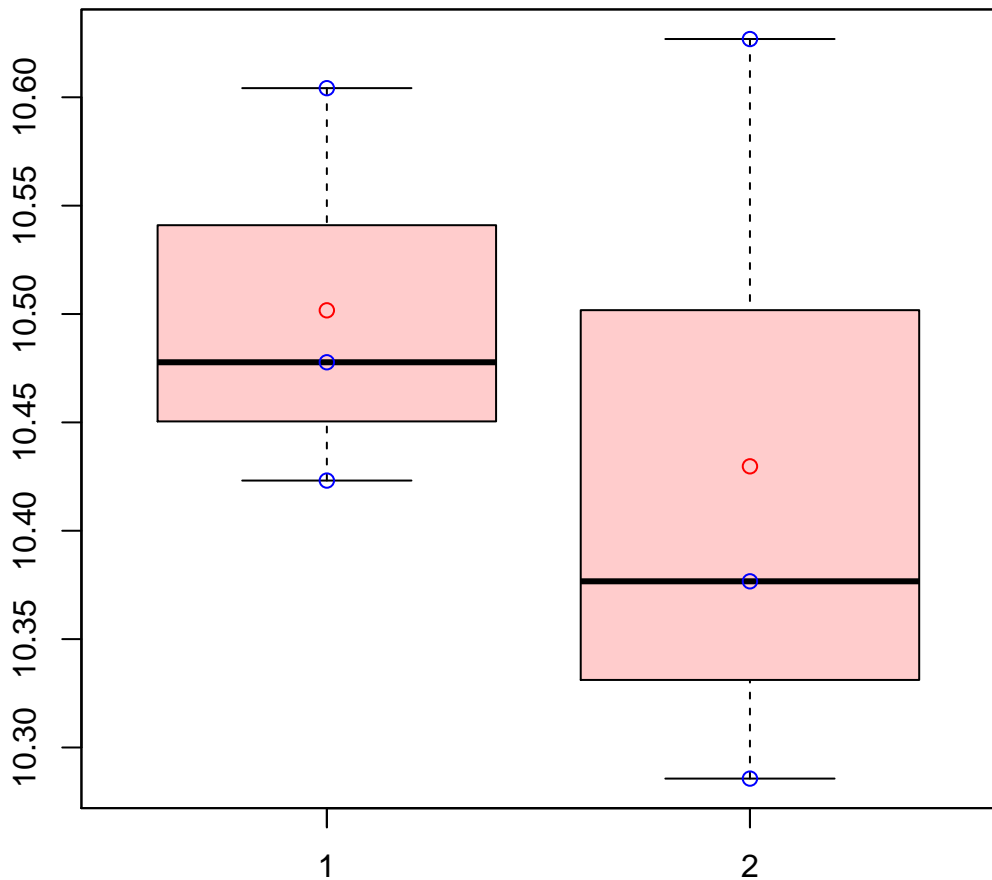

t-Test: p-value = 0.58

# CL1Contig5367|CL1Contig5367

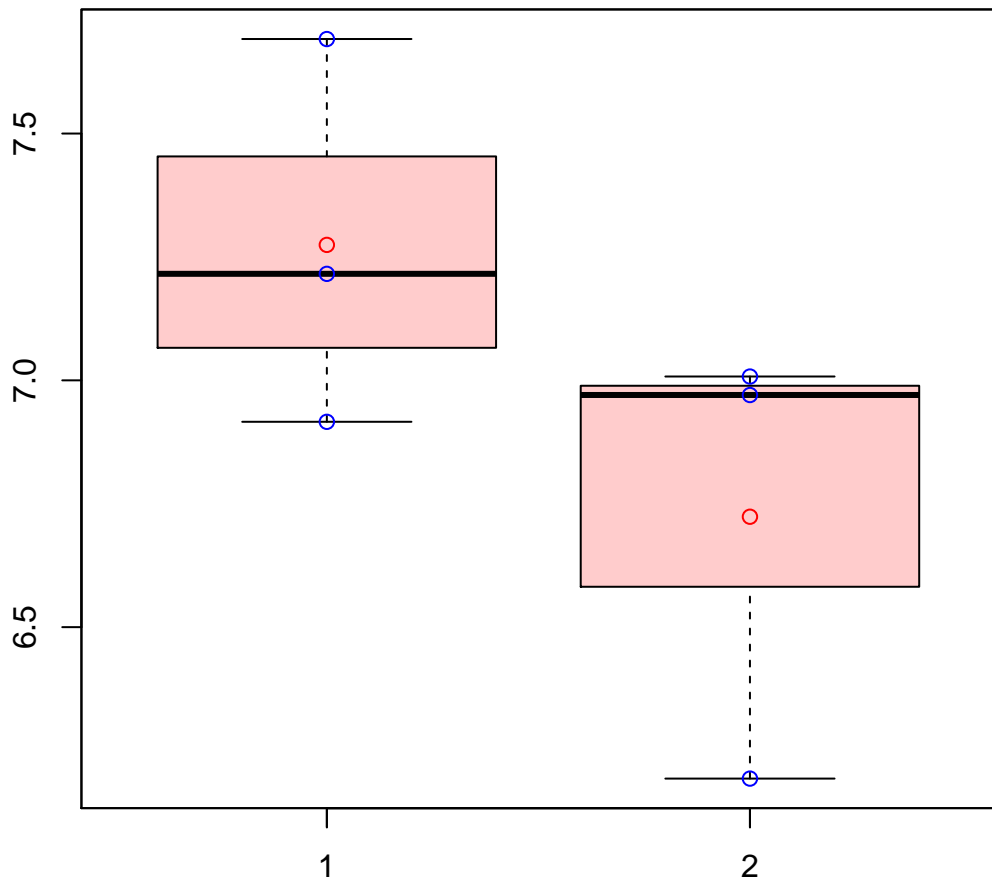

t-Test: p-value = 0.19

# CL1Contig538|CL1Contig538

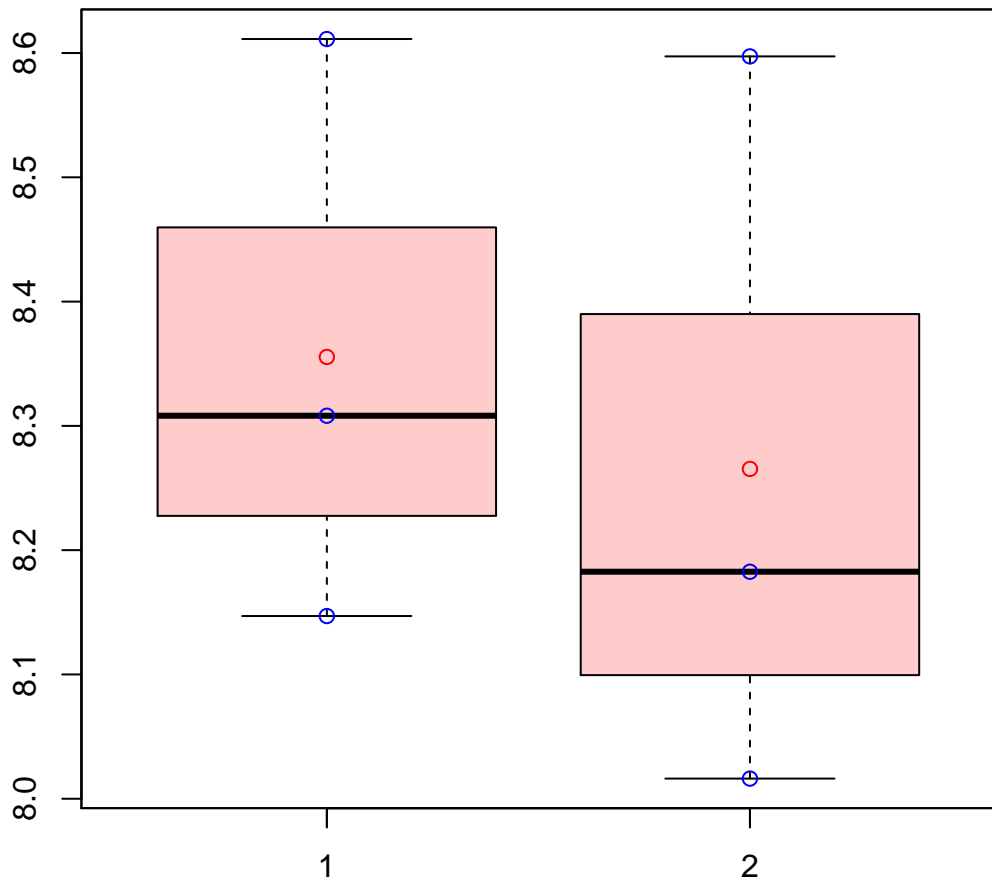

t-Test: p-value = 0.7

# CL1Contig5400|CL1Contig5400

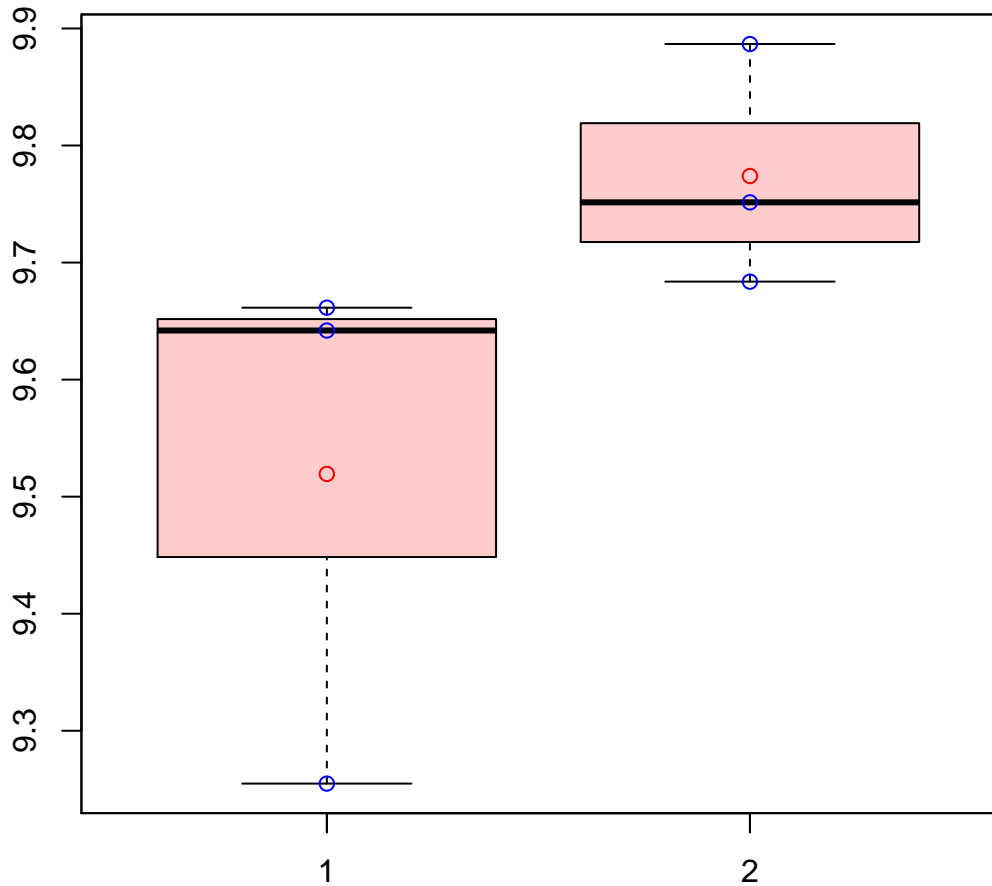

t-Test: p-value = 0.19

# CL1Contig5434|CL1Contig5434

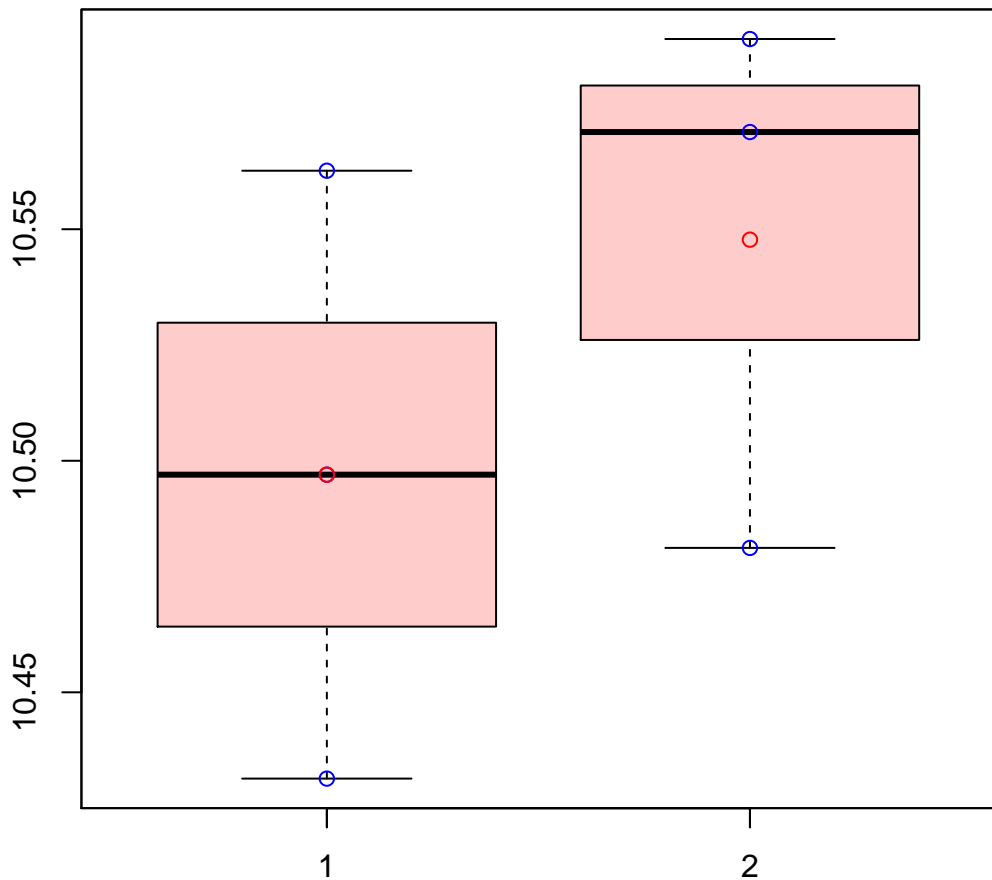

t-Test: p-value = 0.37

# CL1Contig5461|CL1Contig5461

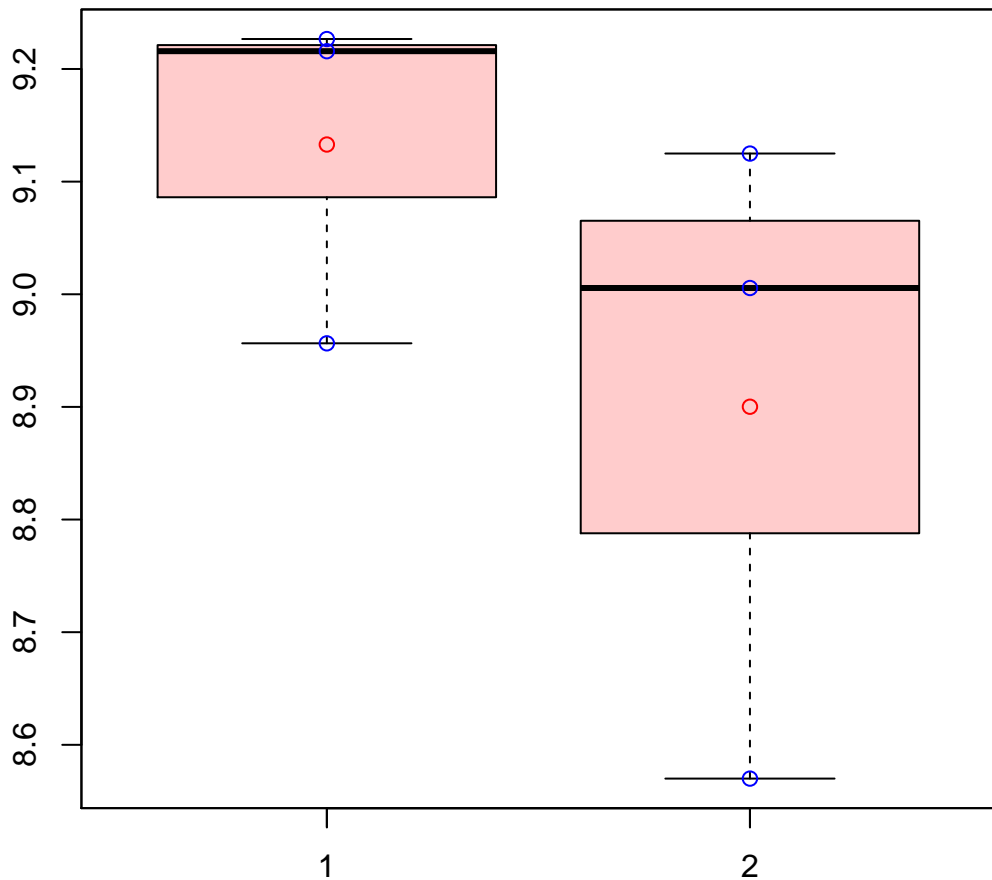

t-Test: p-value = 0.31

# CL1Contig5466|CL1Contig5466

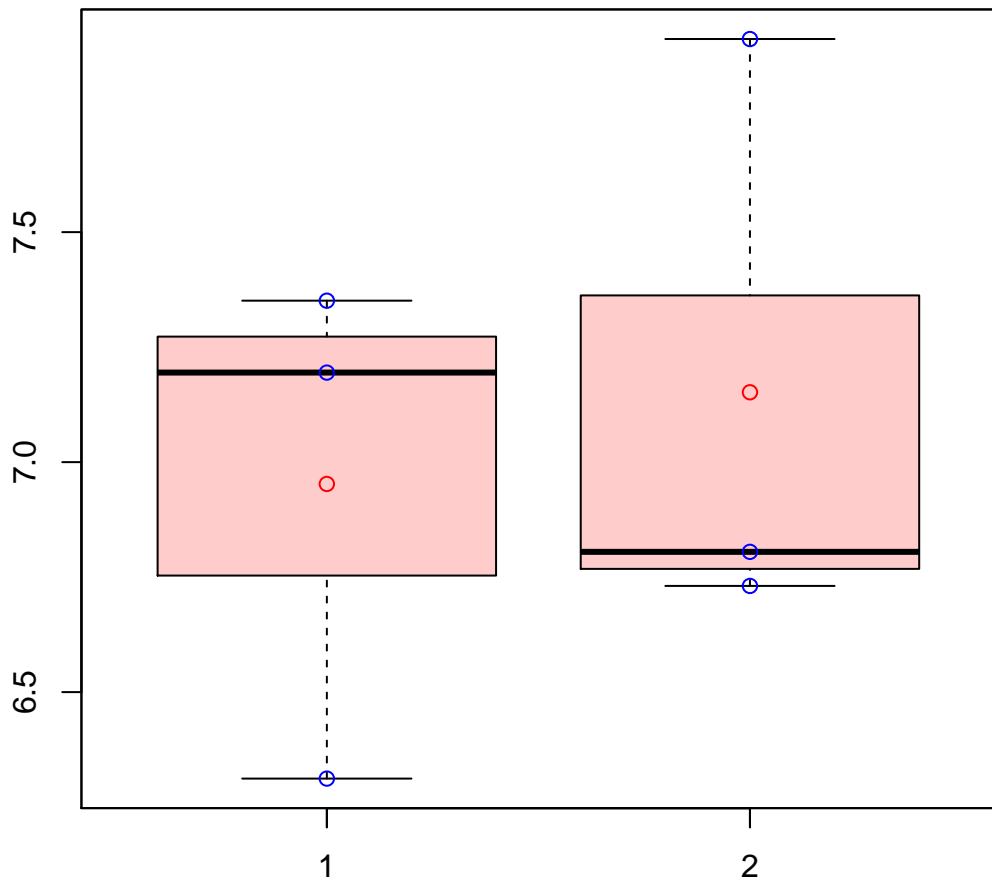

t-Test: p-value = 0.71

# CL1Contig5476|CL1Contig5476

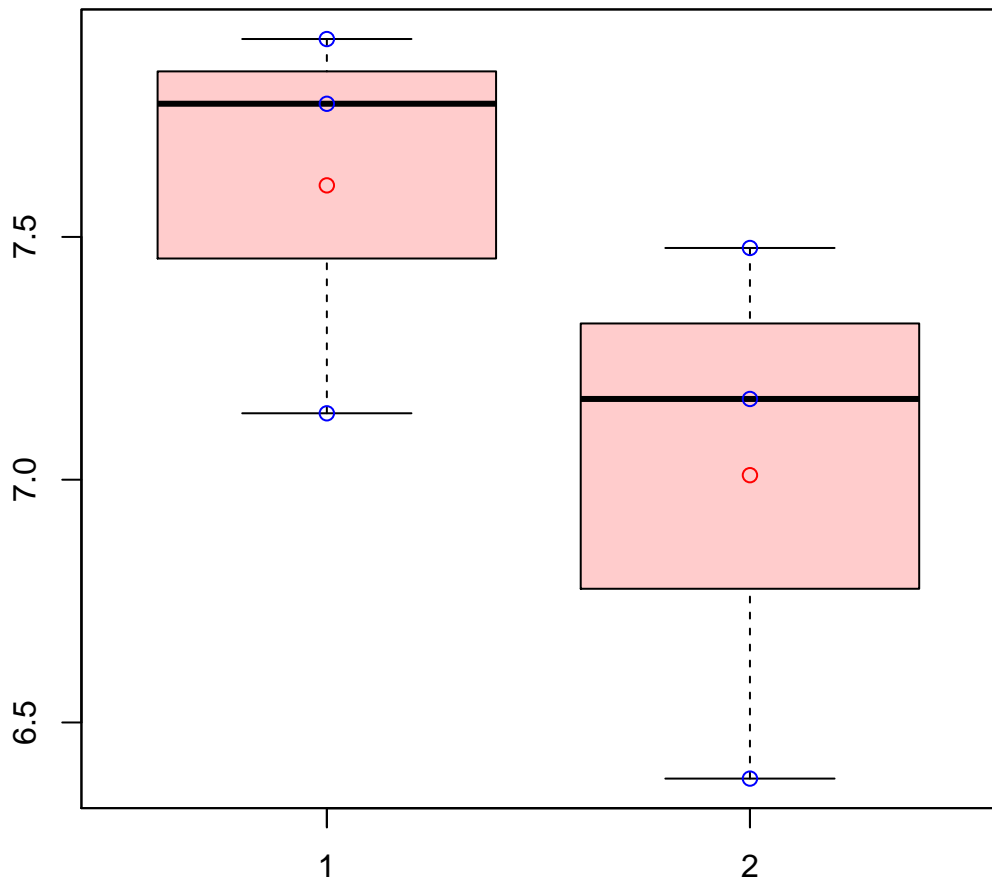

t-Test: p-value = 0.22



# CL1Contig5494|CL1Contig5494

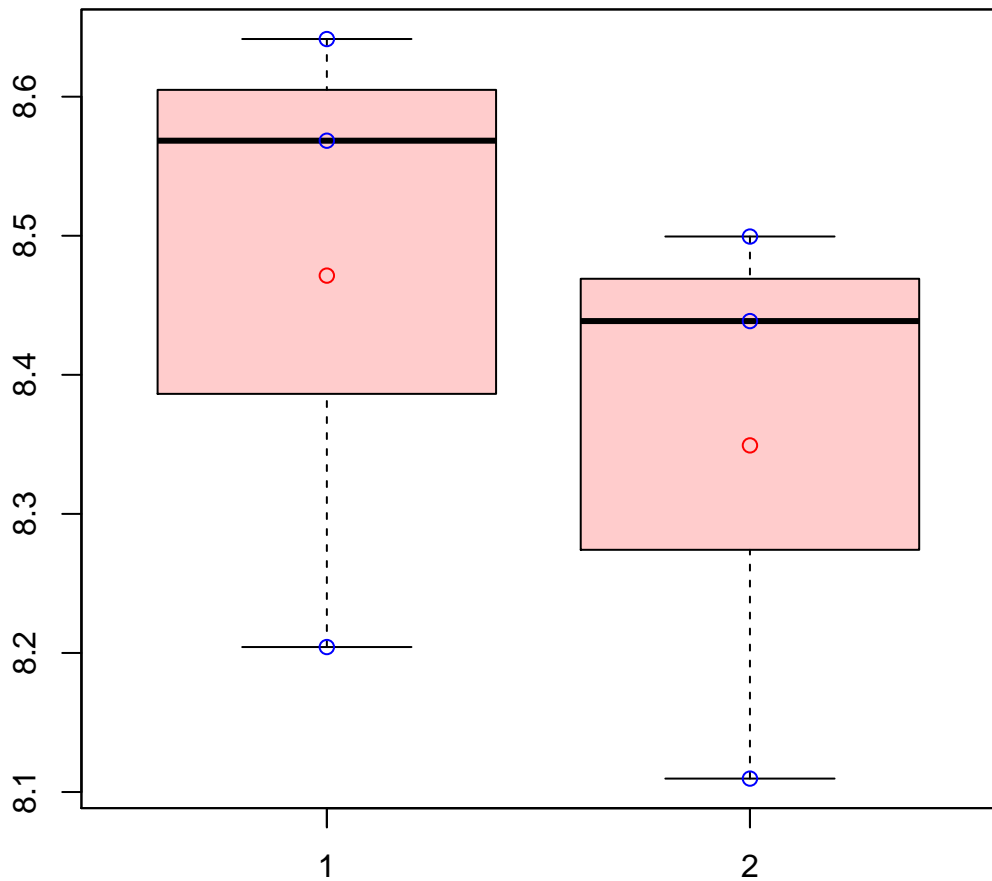

t-Test: p-value = 0.54

# CL1Contig5500|CL1Contig5500

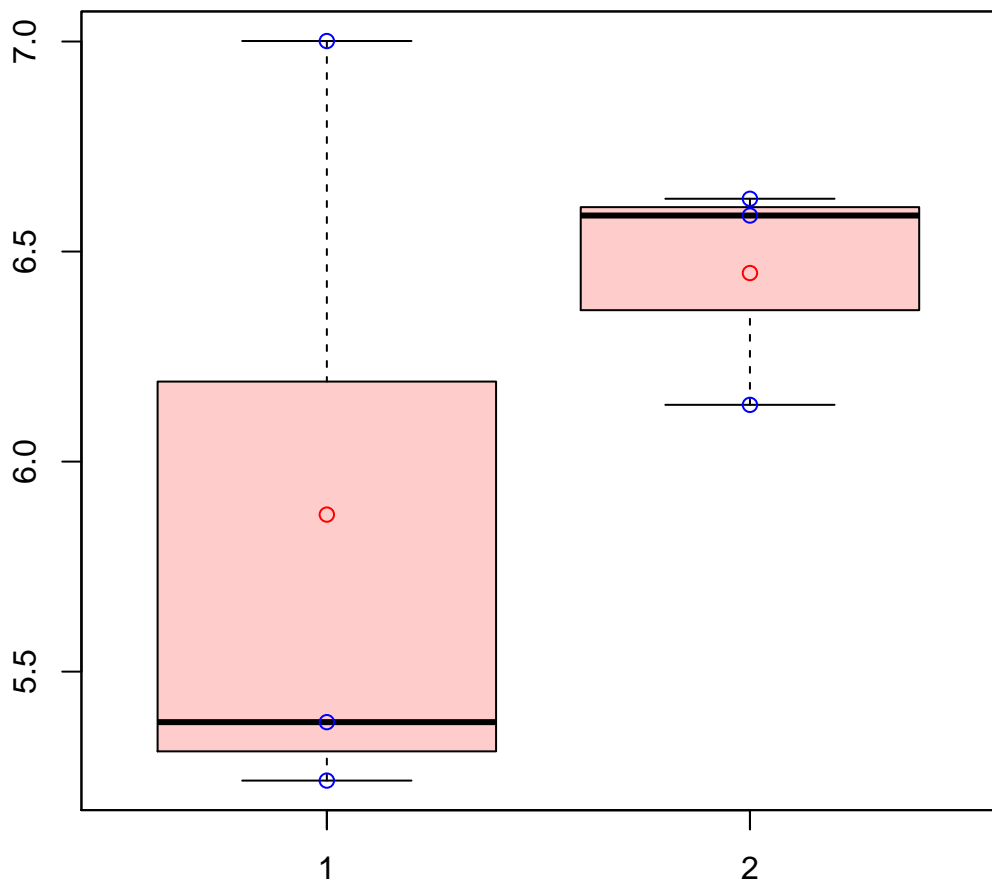

t-Test: p-value = 0.42

# CL1Contig5507|CL1Contig5507

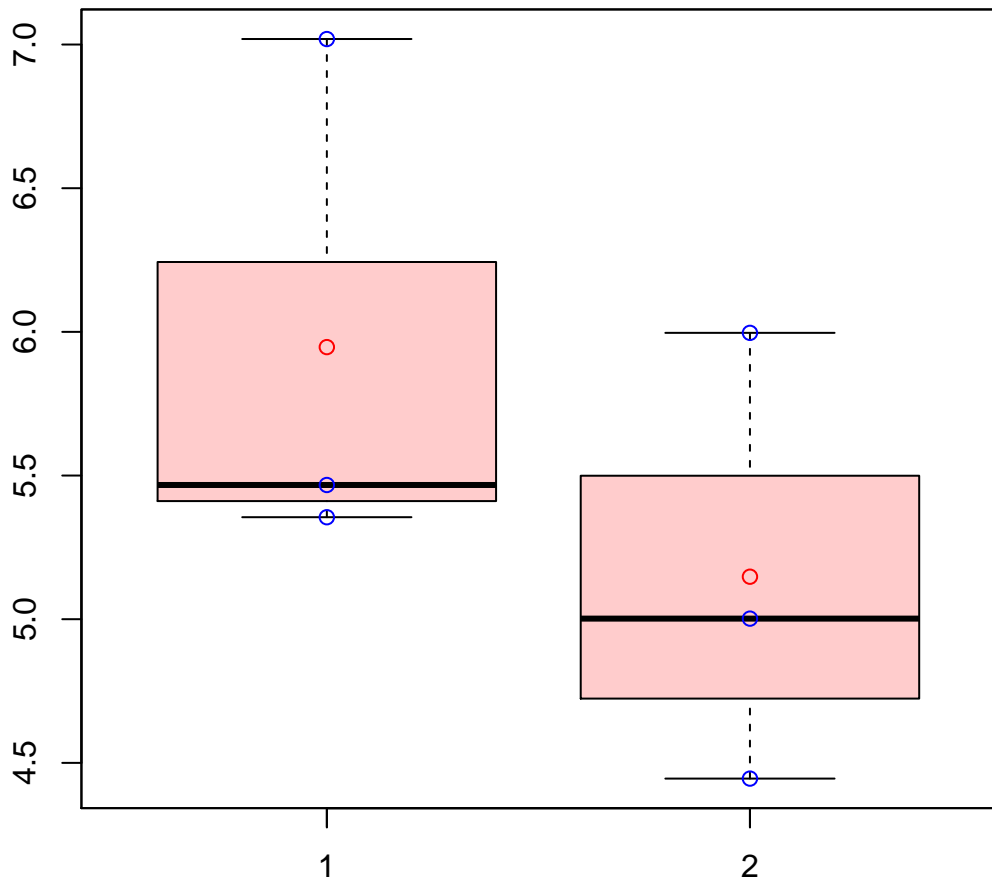

t-Test: p-value = 0.32

# CL1Contig5570|CL1Contig5570

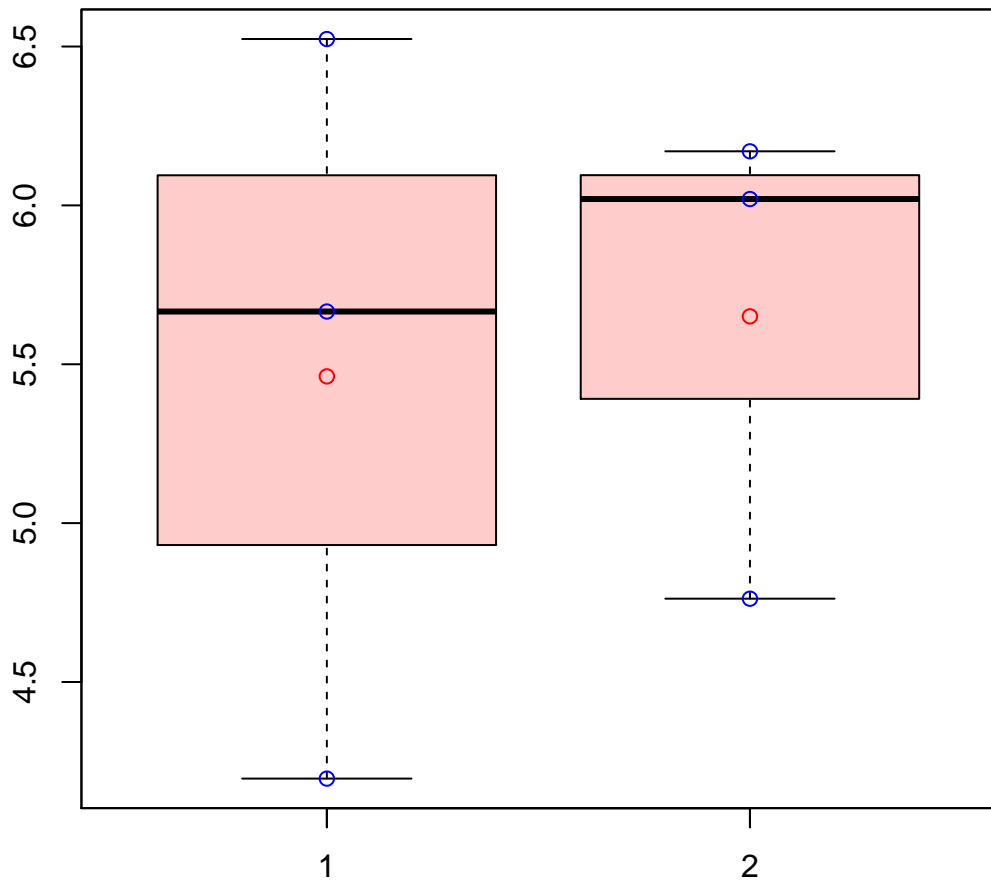

t-Test: p-value = 0.83

# CL1Contig5582|CL1Contig5582

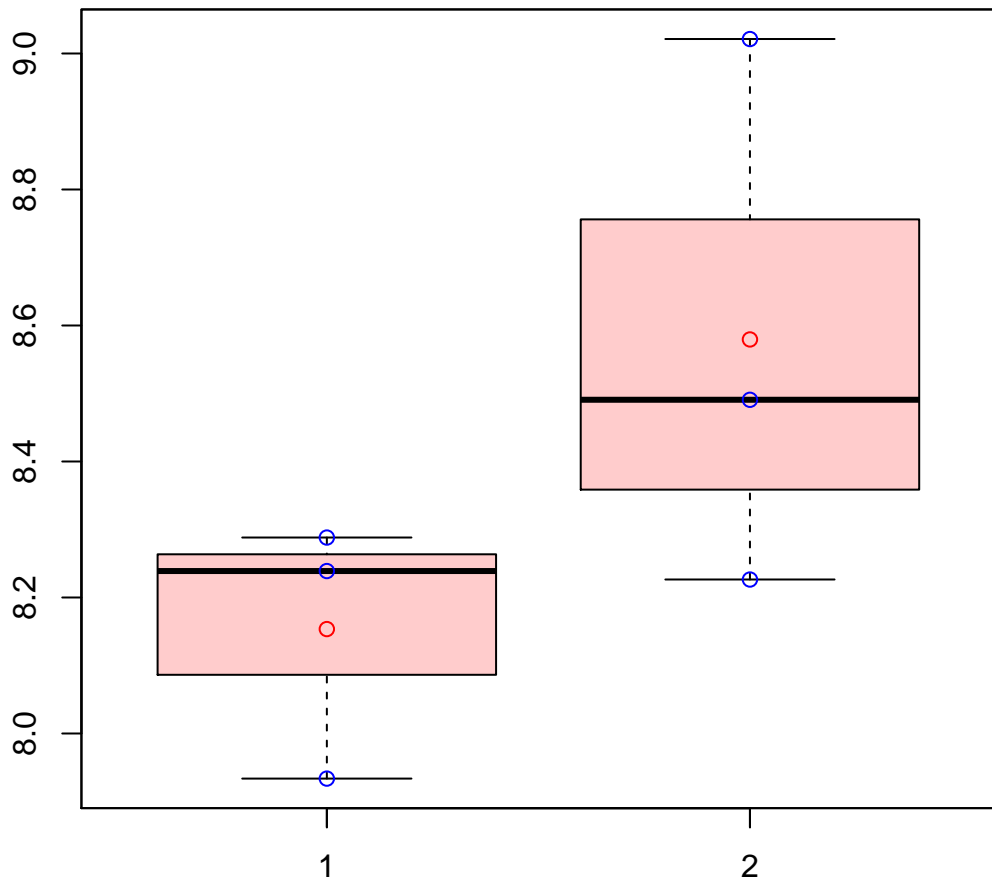

t-Test: p-value = 0.2

# CL1Contig5659|CL1Contig5659

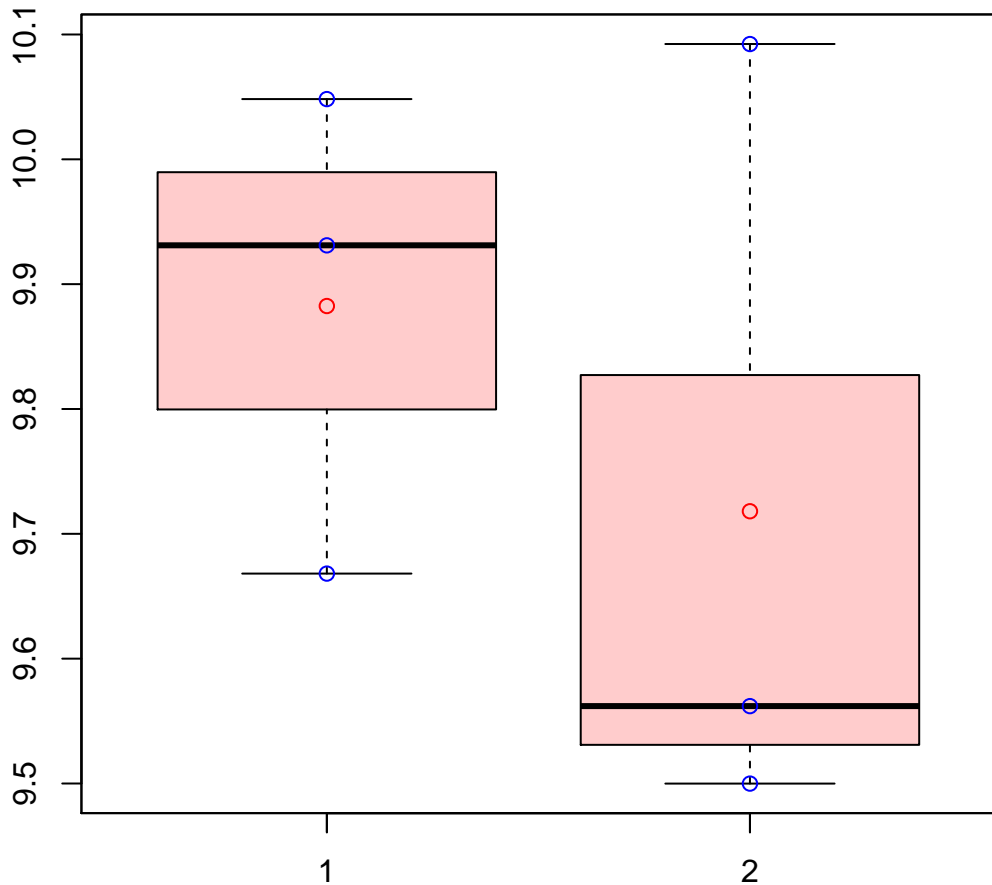

t-Test: p-value = 0.5

# CL1Contig5674|CL1Contig5674

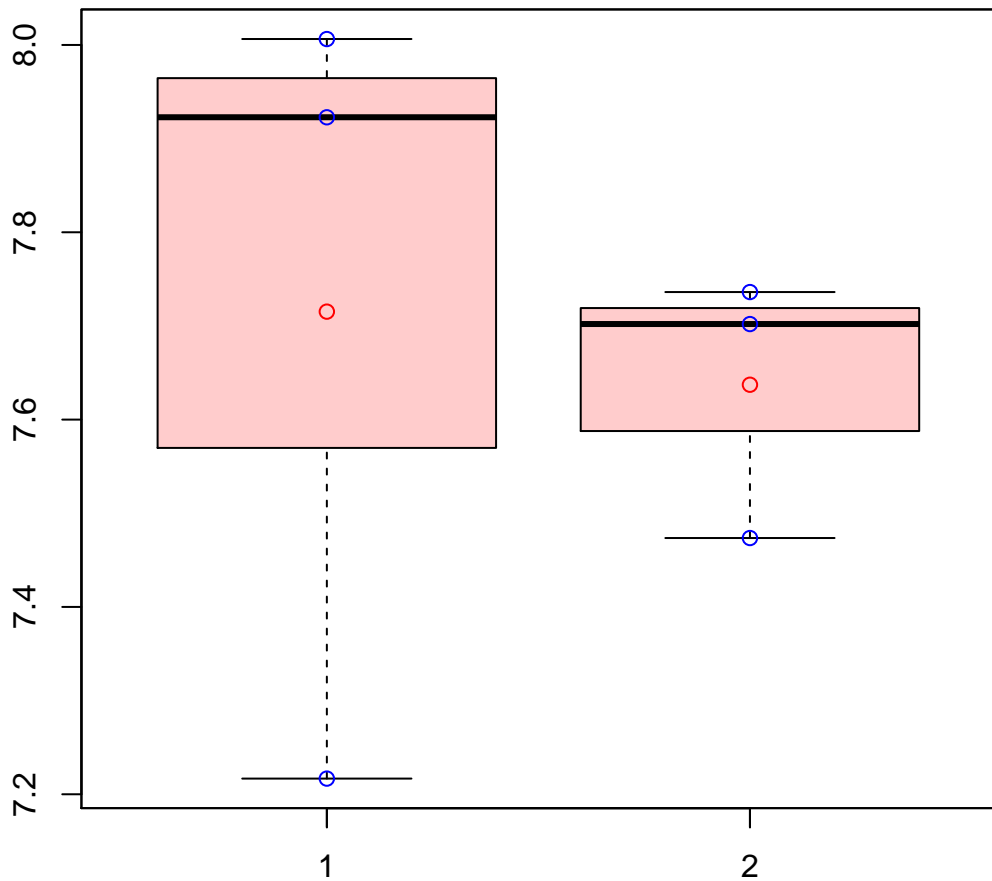

t-Test: p-value = 0.79

# CL1Contig5722|CL1Contig5722

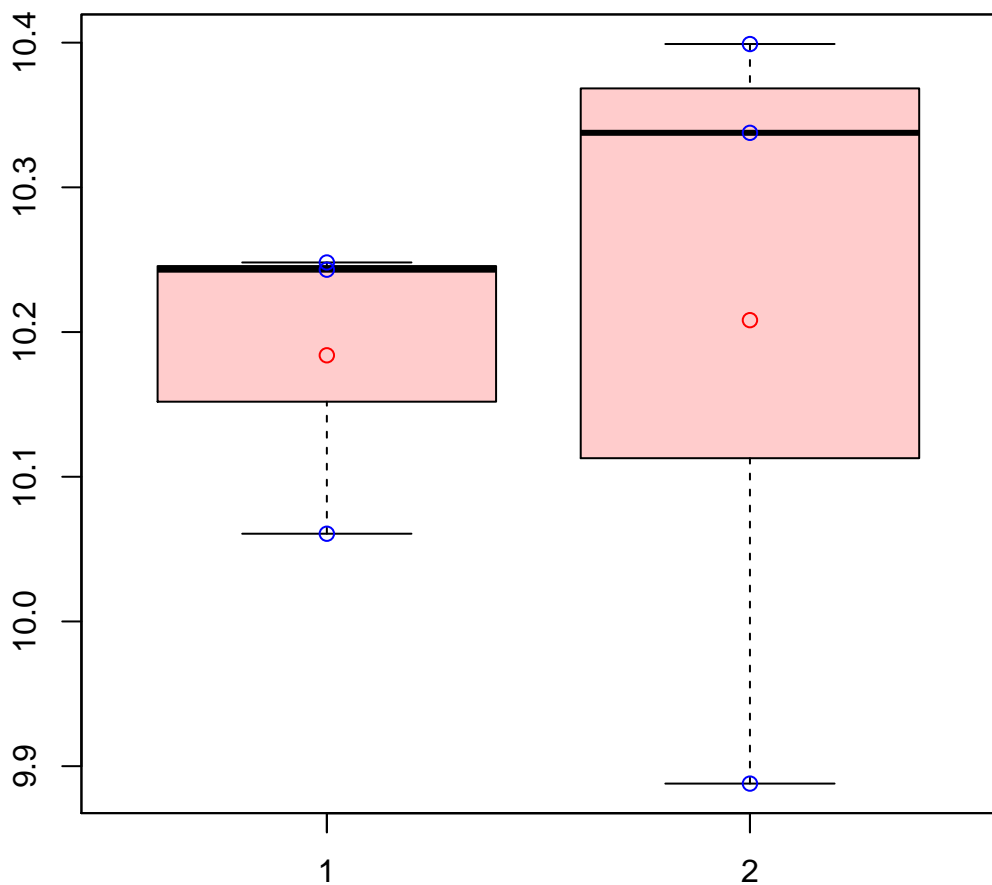

t-Test: p-value = 0.9



# CL1Contig5742|CL1Contig5742

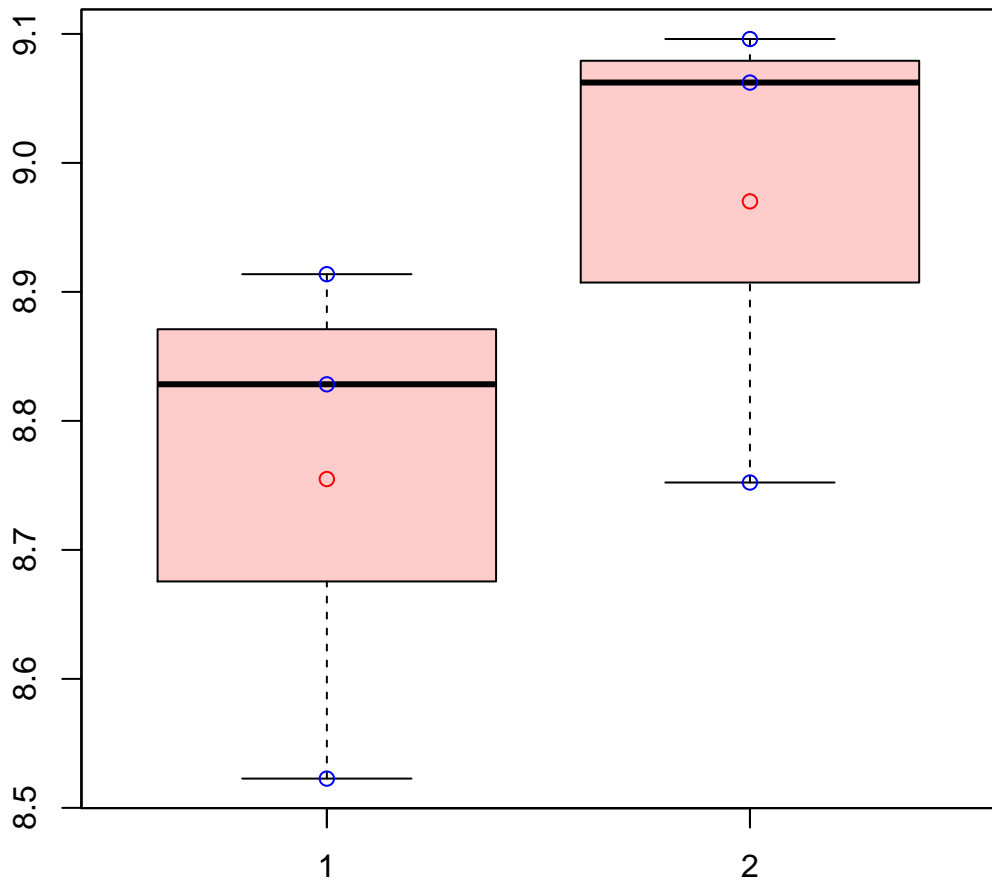

t-Test: p-value = 0.25

# CL1Contig5791|CL1Contig5791

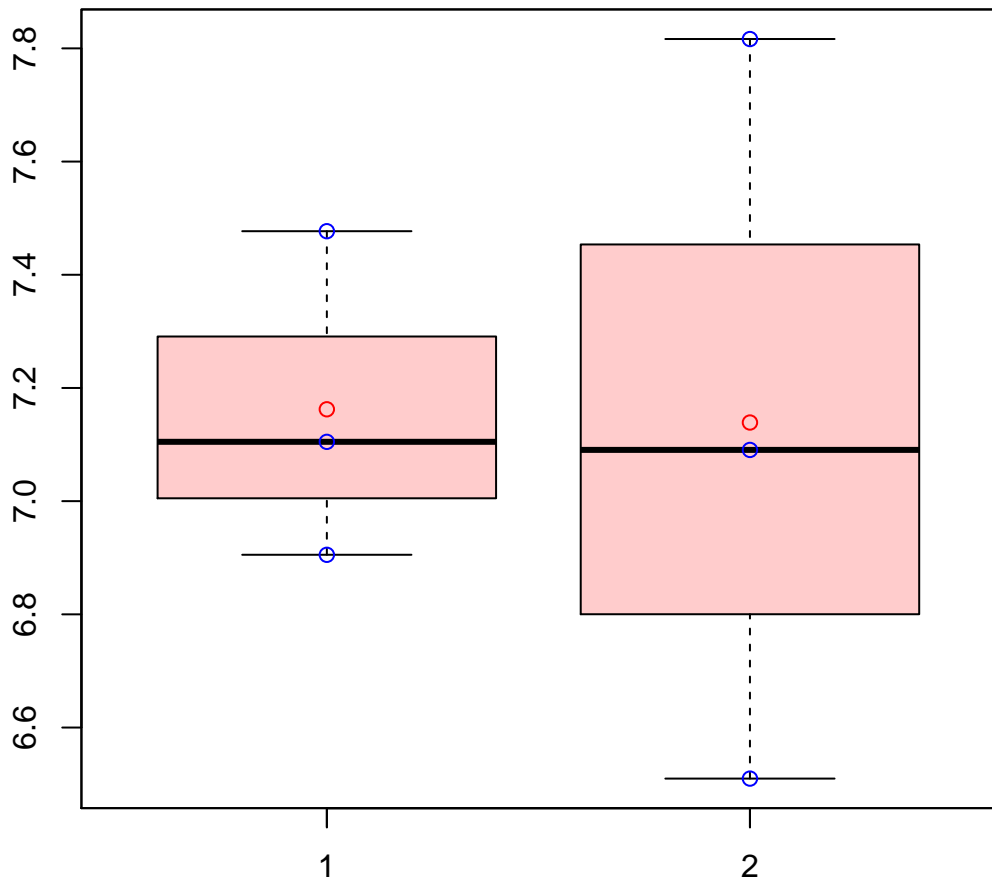

t-Test: p-value = 0.96

# CL1Contig5803|CL1Contig5803

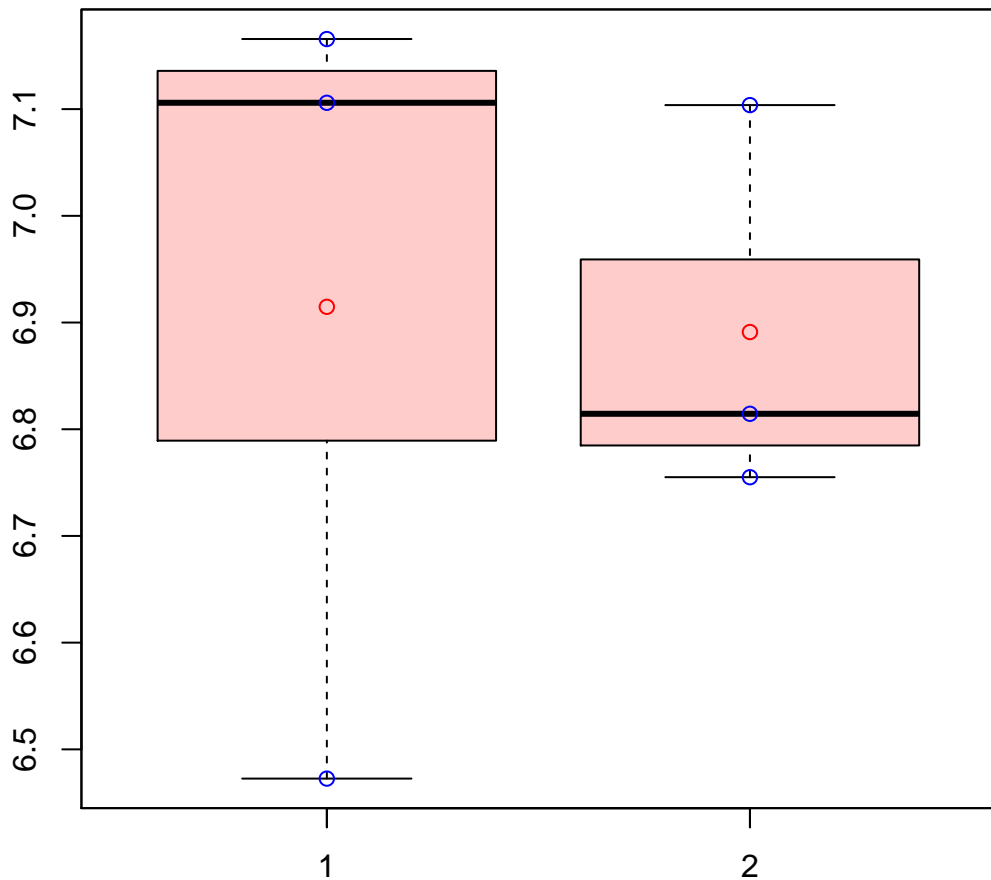

t-Test: p-value = 0.93

# CL1Contig5815|CL1Contig5815

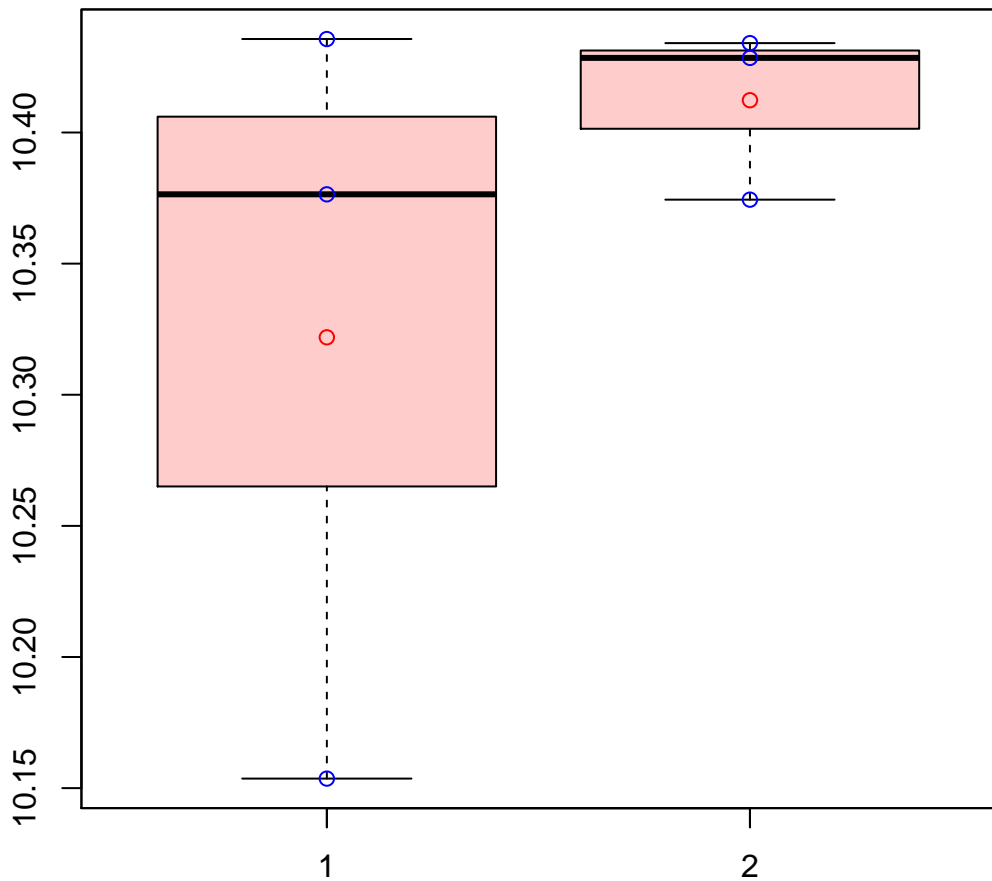

t-Test: p-value = 0.4

# CL1Contig5847|CL1Contig5847

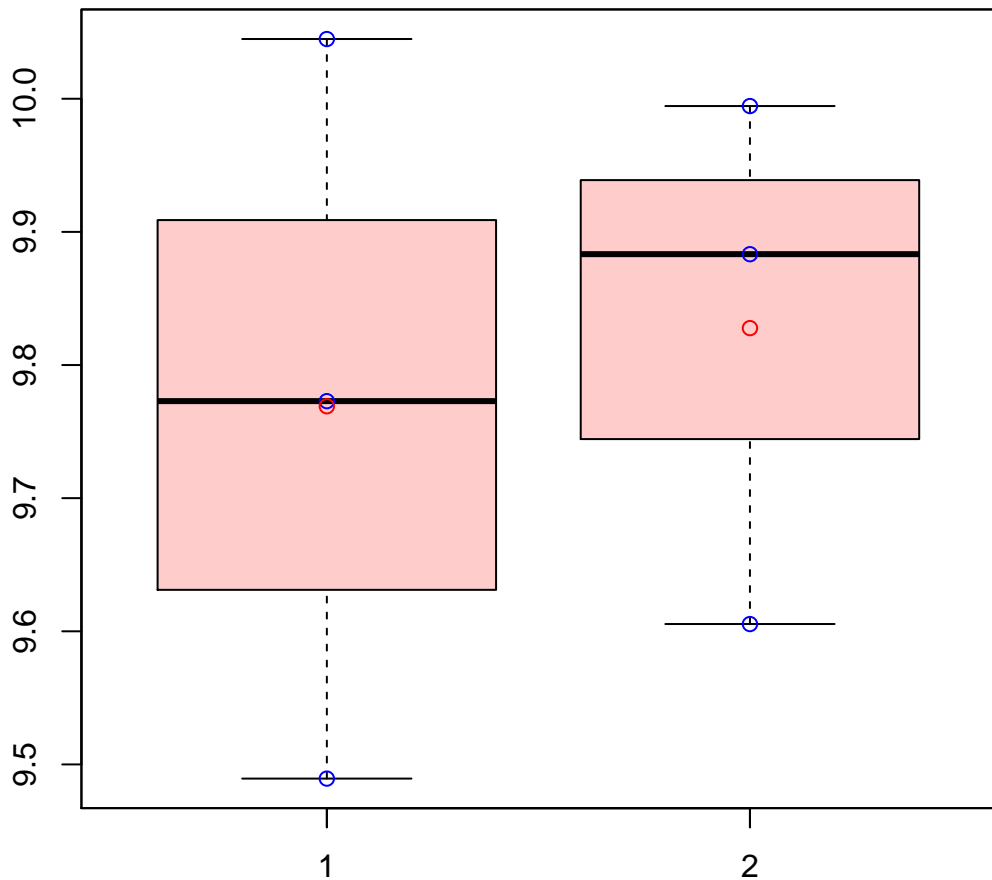

t-Test: p-value = 0.78

# CL1Contig5860|CL1Contig5860

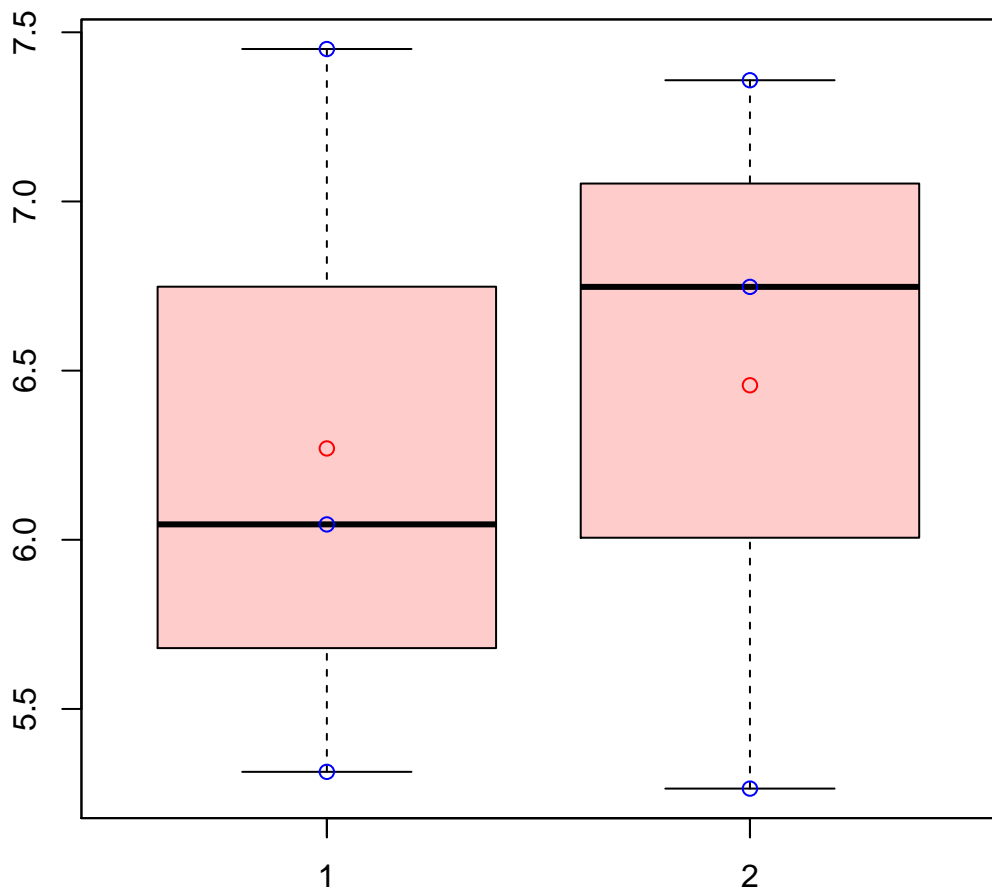

t-Test: p-value = 0.84

# CL1Contig5876|CL1Contig5876

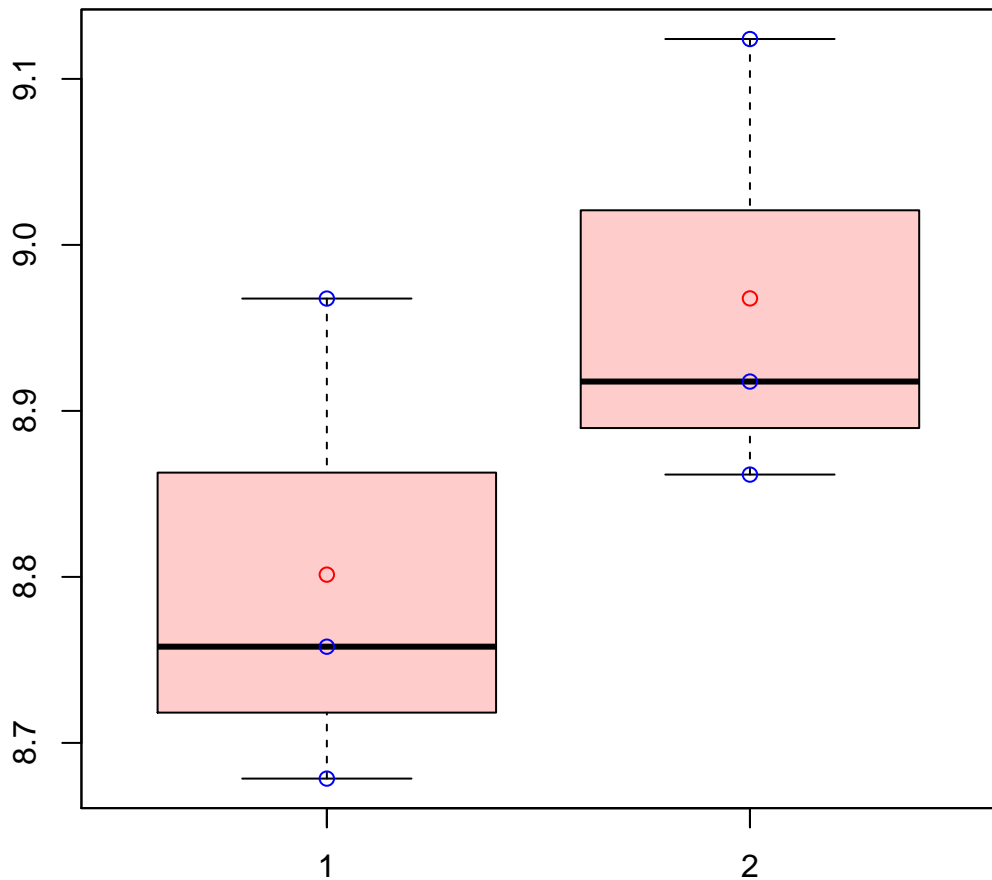

t-Test: p-value = 0.23

# CL1Contig590|CL1Contig590

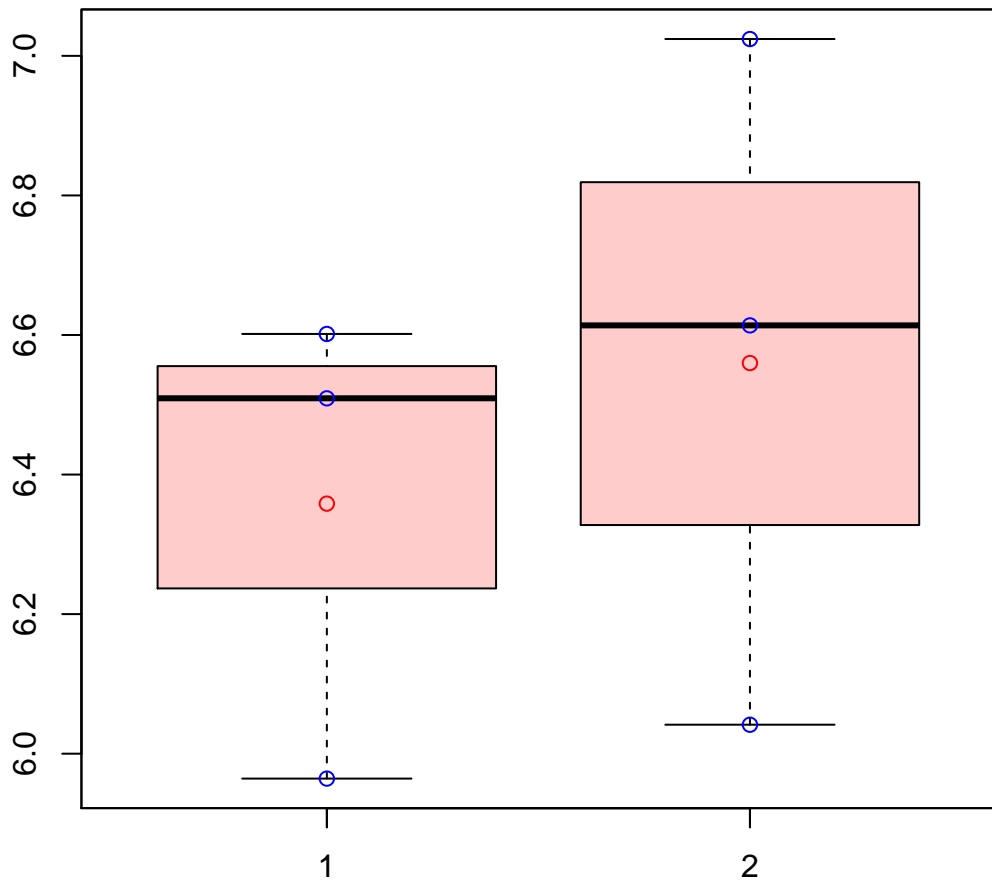

t-Test: p-value = 0.6



# CL1Contig5923|CL1Contig5923

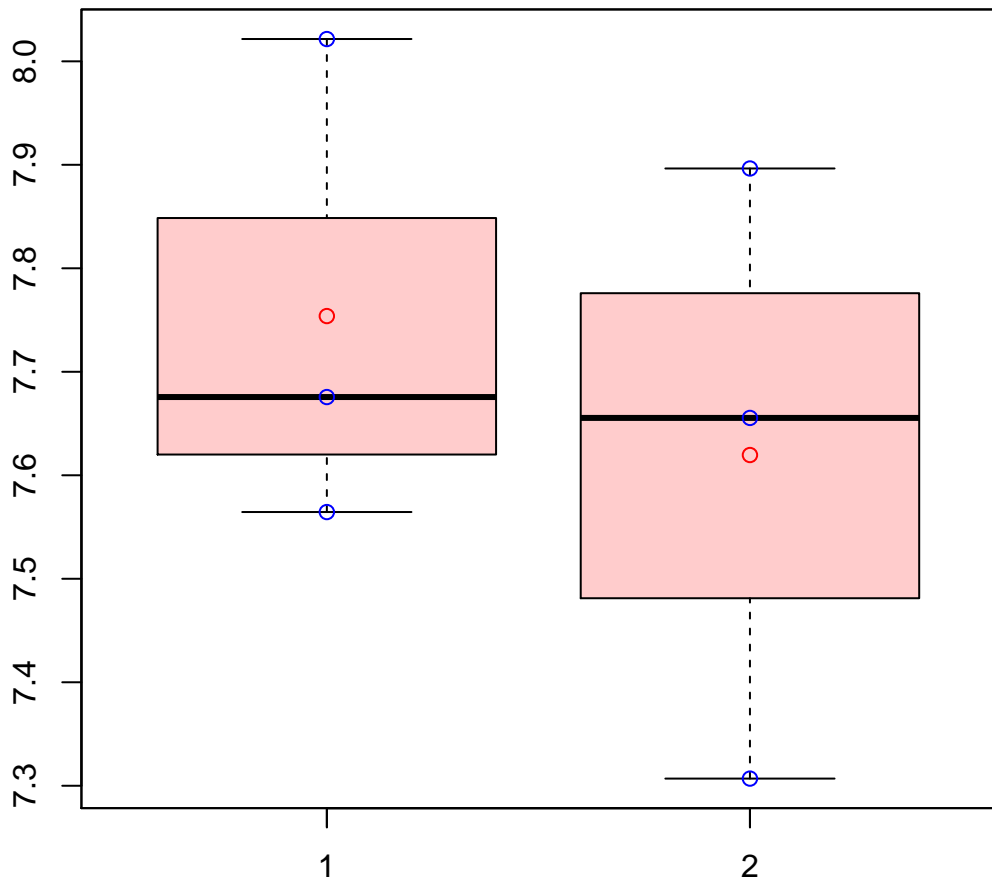

t-Test: p-value = 0.58

# CL1Contig5950|CL1Contig5950

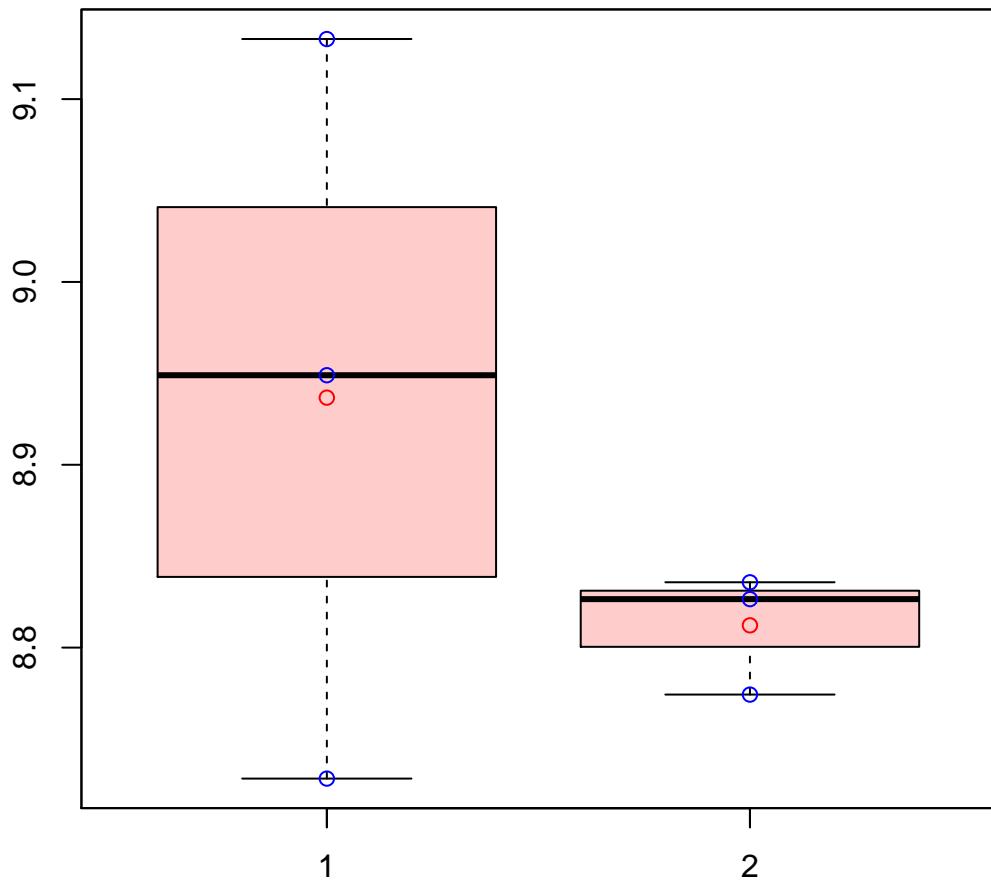

t-Test: p-value = 0.4

# CL1Contig5972|CL1Contig5972

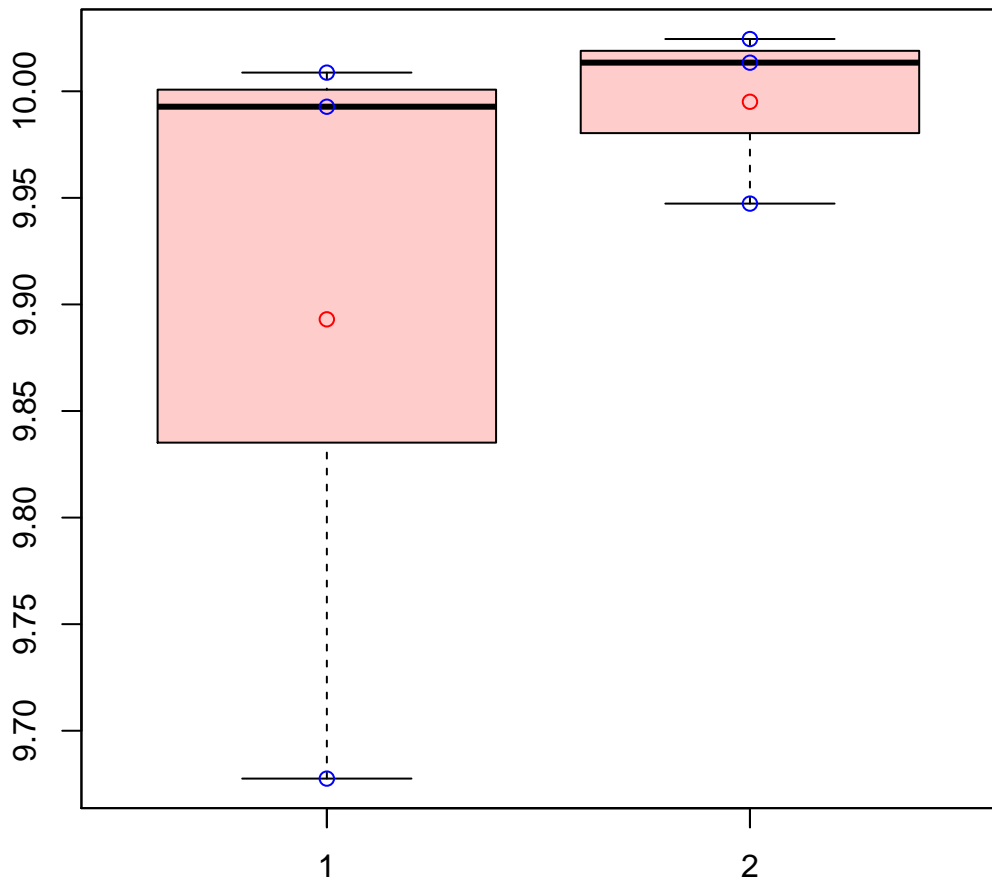

t-Test: p-value = 0.45

# CL1Contig6054|CL1Contig6054

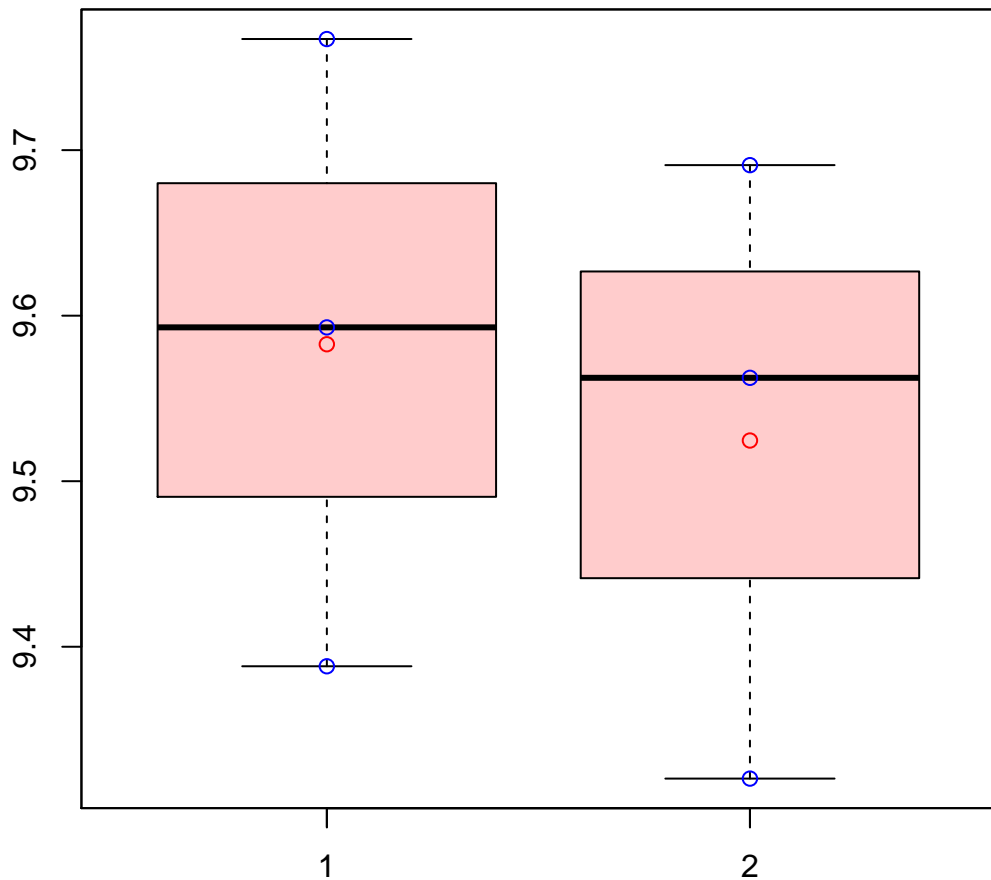

t-Test: p-value = 0.73

# CL1Contig6129|CL1Contig6129

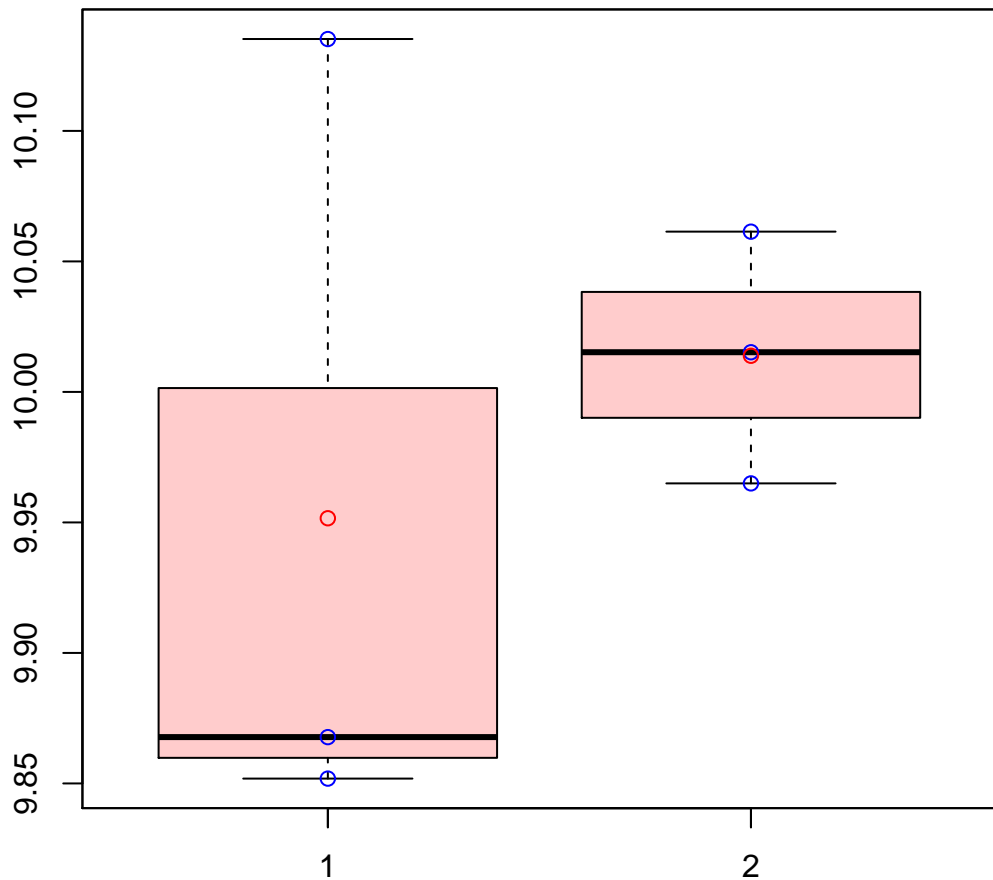

t-Test: p-value = 0.57

# CL1Contig6172|CL1Contig6172

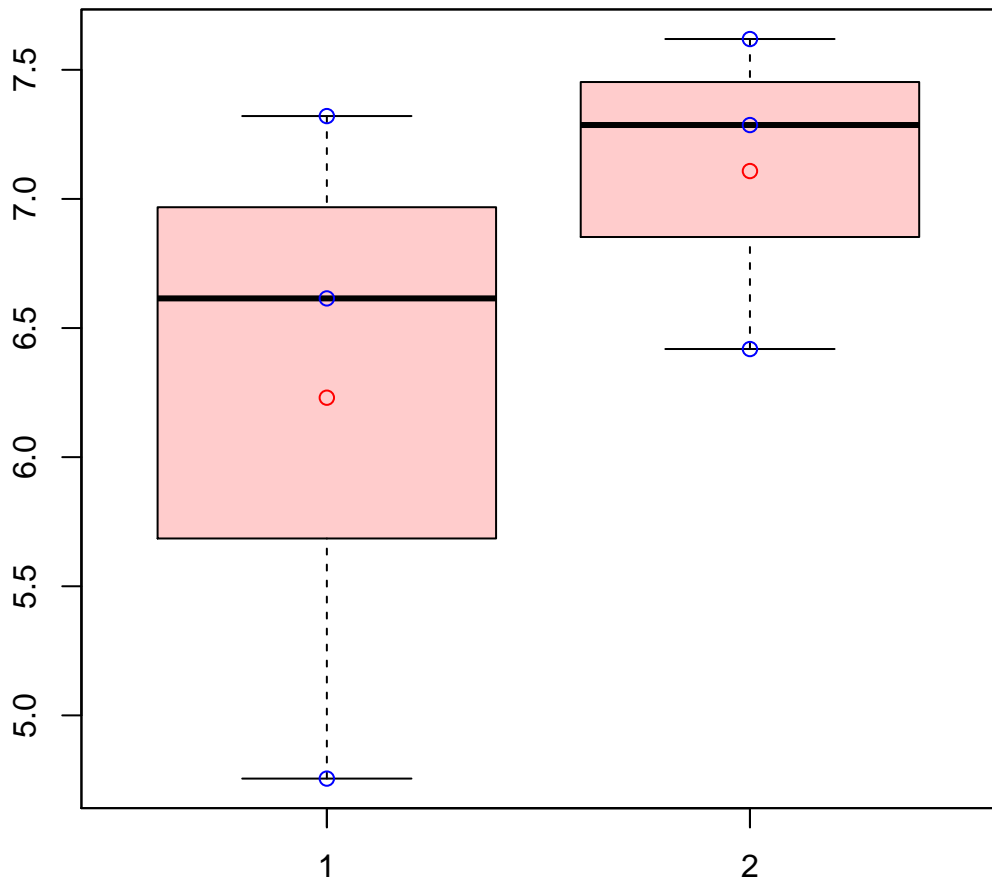

t-Test: p-value = 0.38

# CL1Contig6177|CL1Contig6177

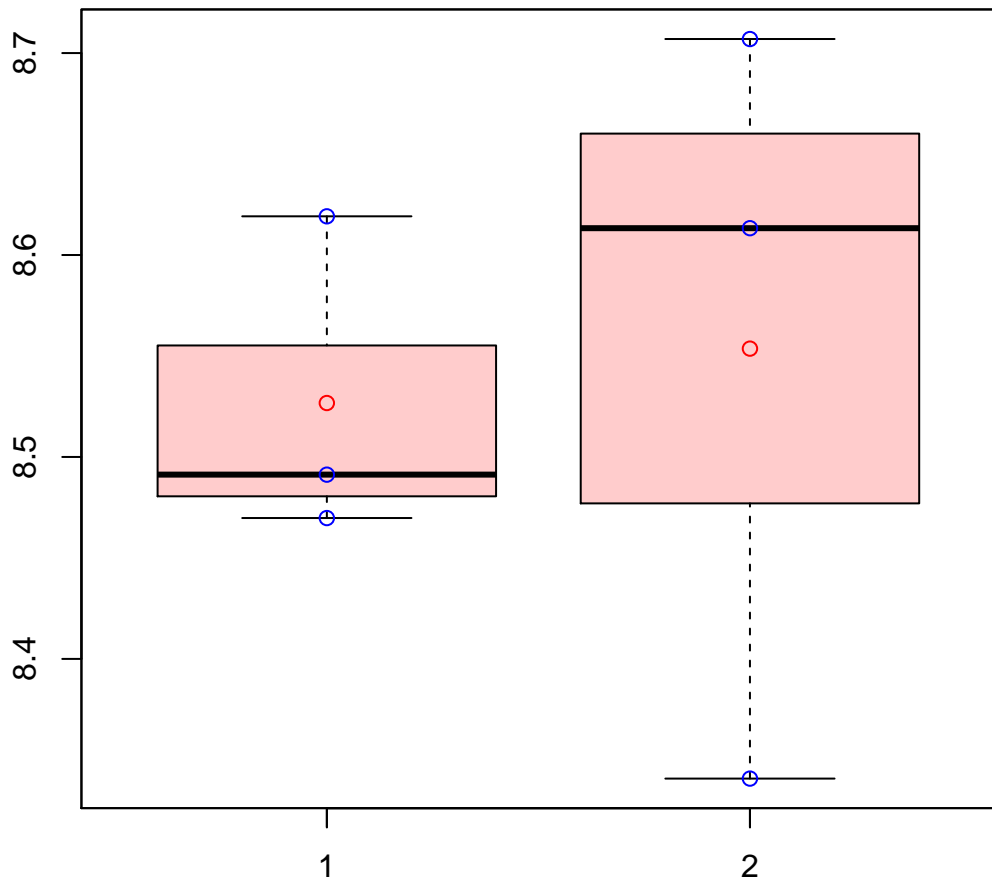

t-Test: p-value = 0.84

# CL1Contig6220|CL1Contig6220

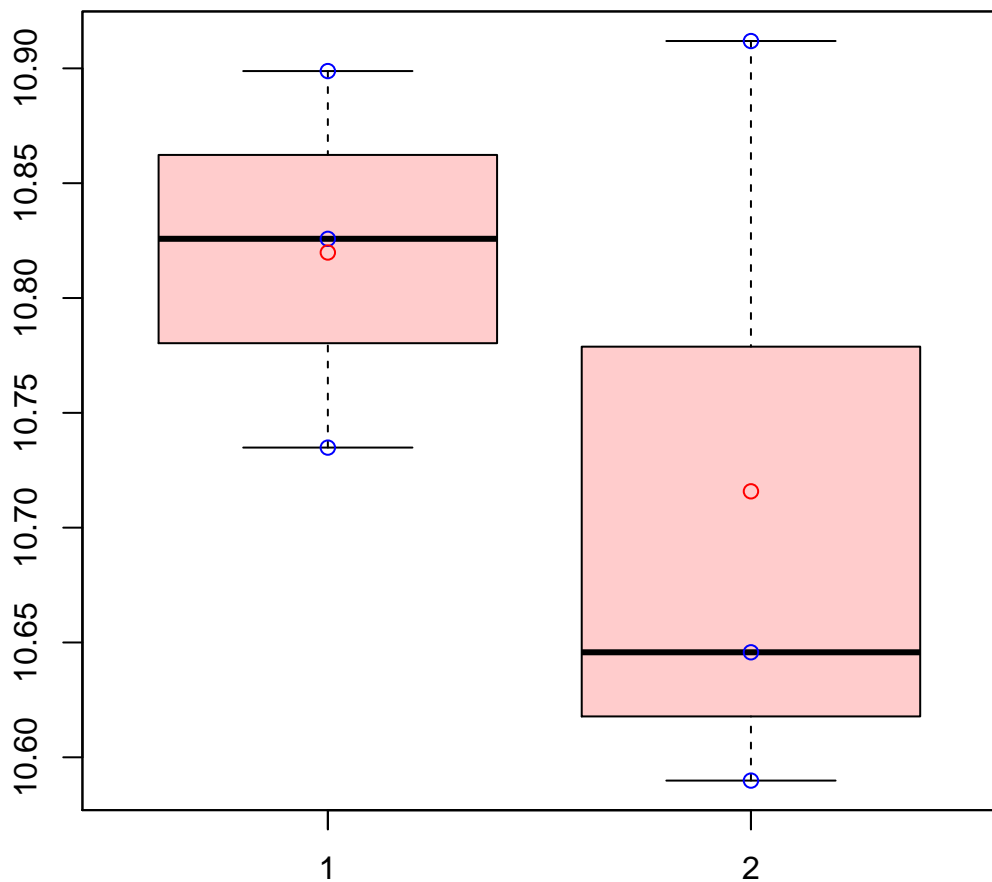

t-Test: p-value = 0.42



# CL1Contig6238|CL1Contig6238

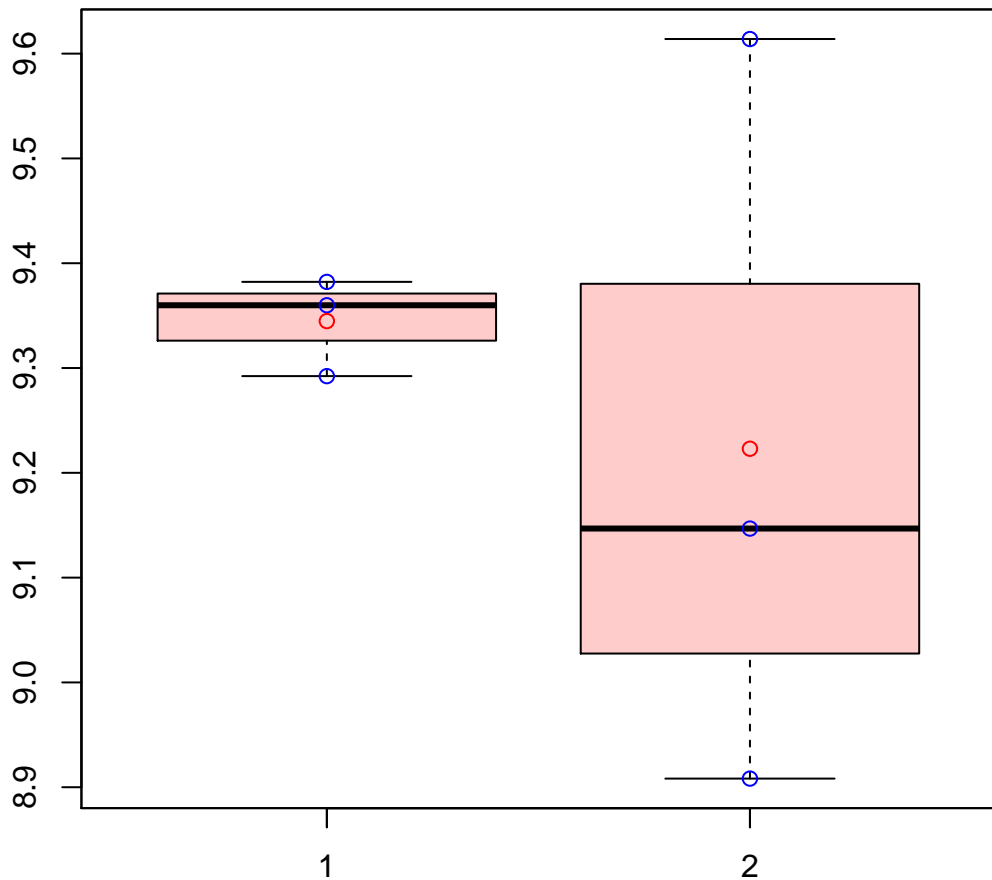

t-Test: p-value = 0.62

# CL1Contig6304|CL1Contig6304

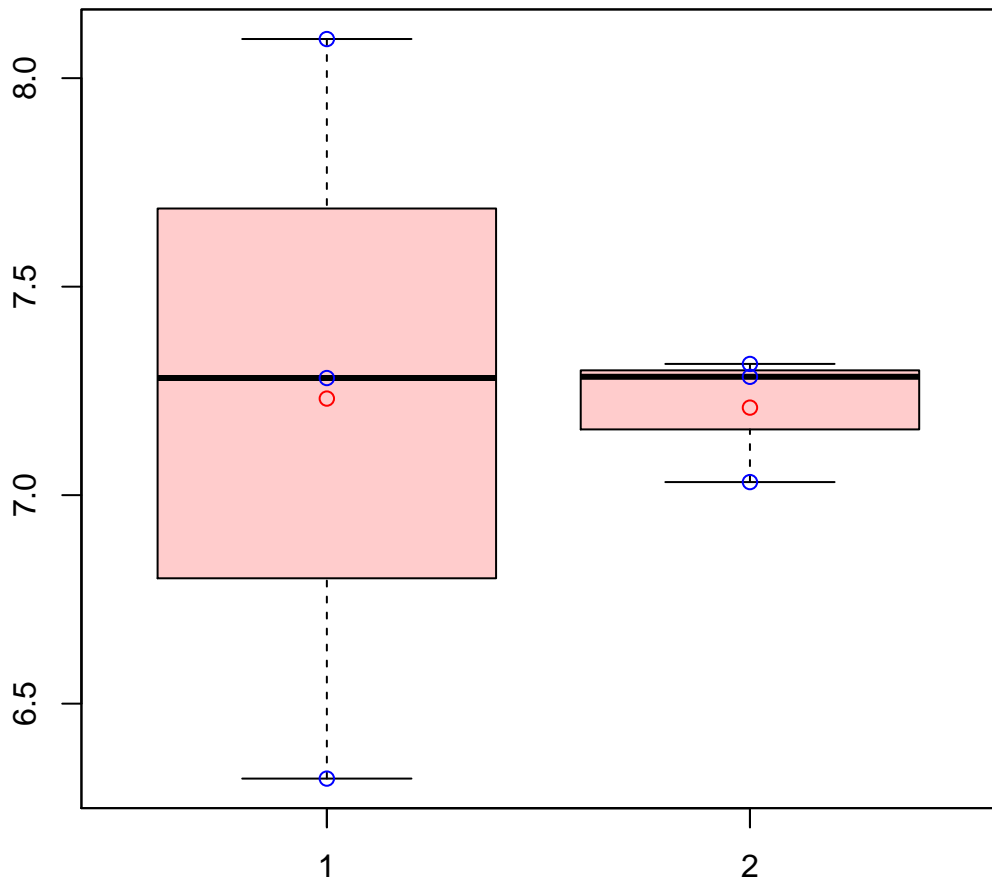

t-Test: p-value = 0.97

# CL1Contig6426|CL1Contig6426

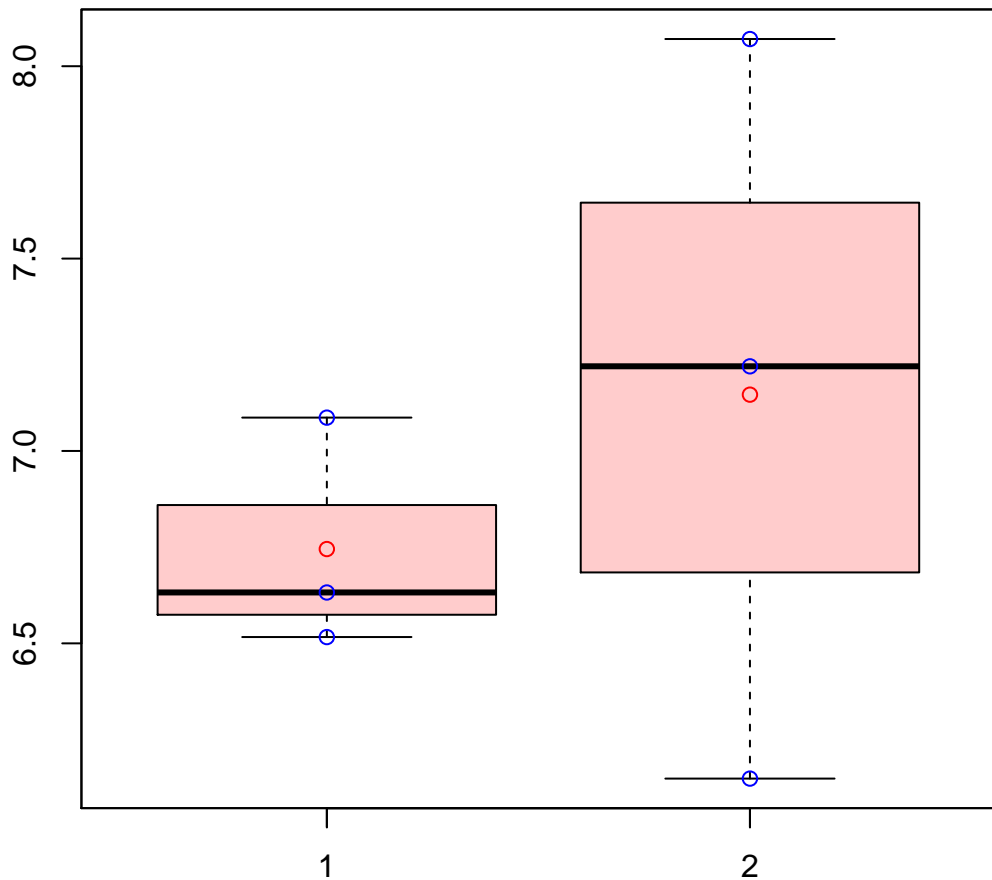

t-Test: p-value = 0.55

# CL1Contig6495|CL1Contig6495

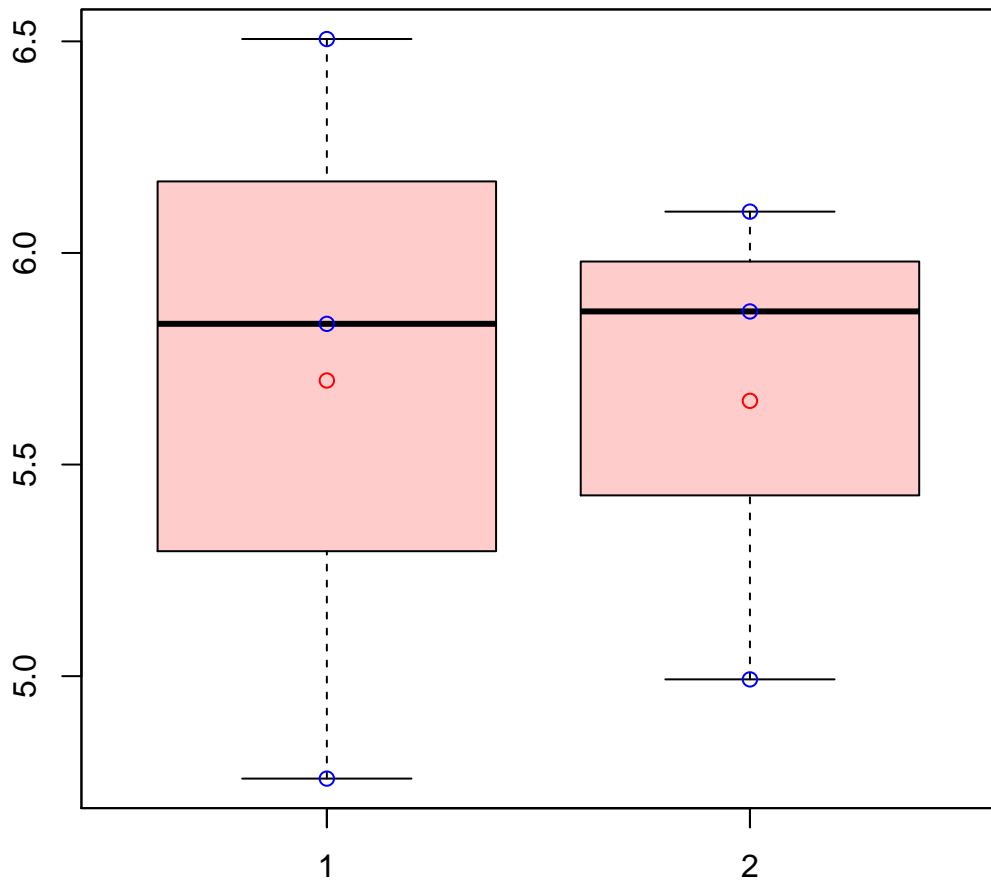

t-Test: p-value = 0.94

# CL1Contig653|CL1Contig653

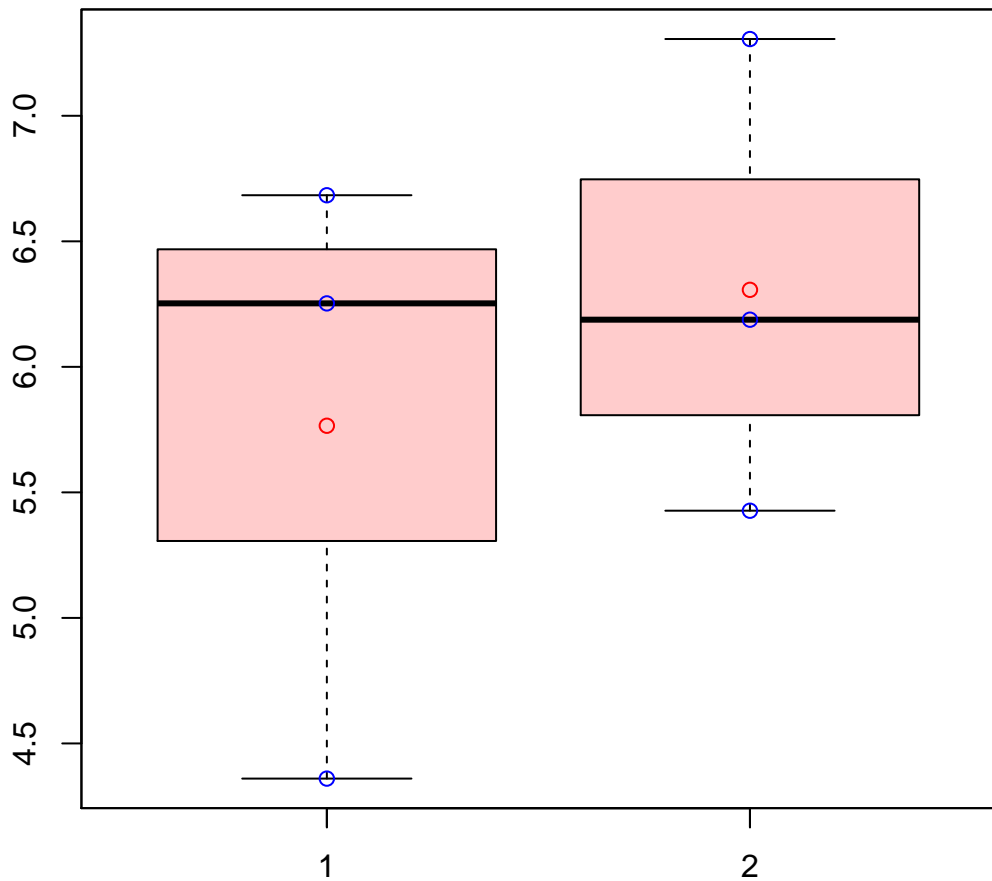

t-Test: p-value = 0.58

# CL1Contig6583|CL1Contig6583

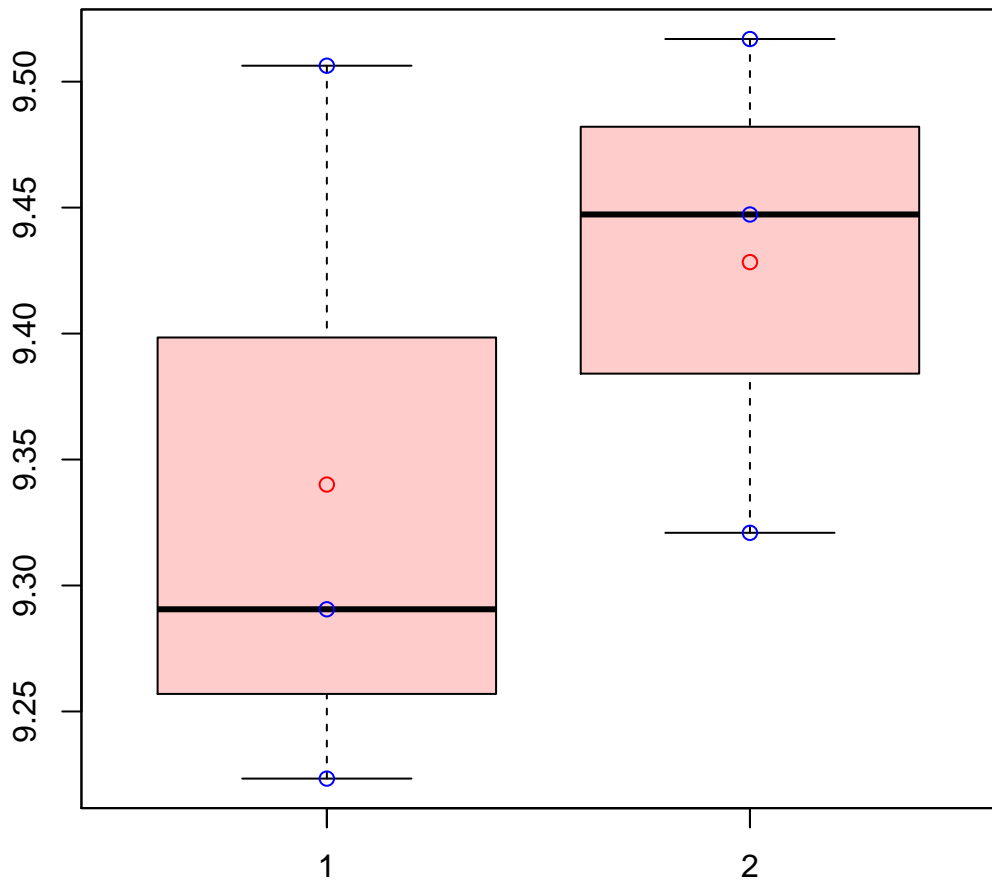

t-Test: p-value = 0.45

# CL1Contig6610|CL1Contig6610

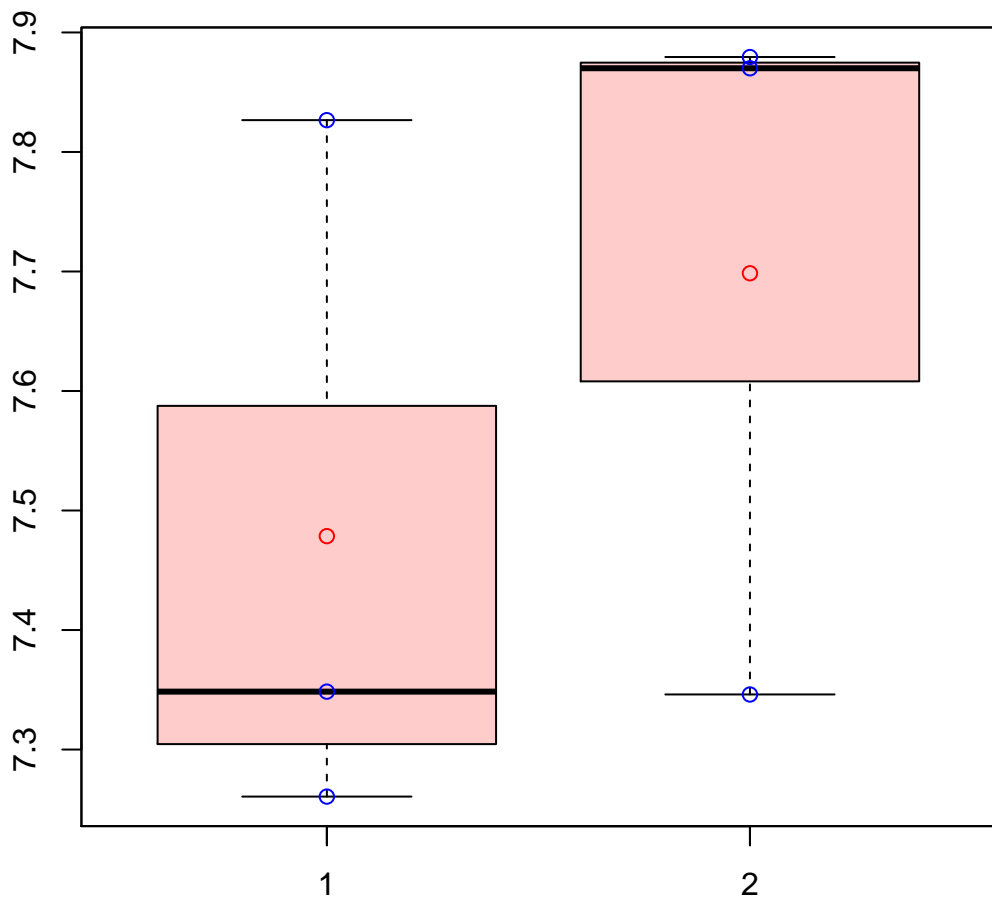

t-Test: p-value = 0.43

# CL1Contig6718|CL1Contig6718

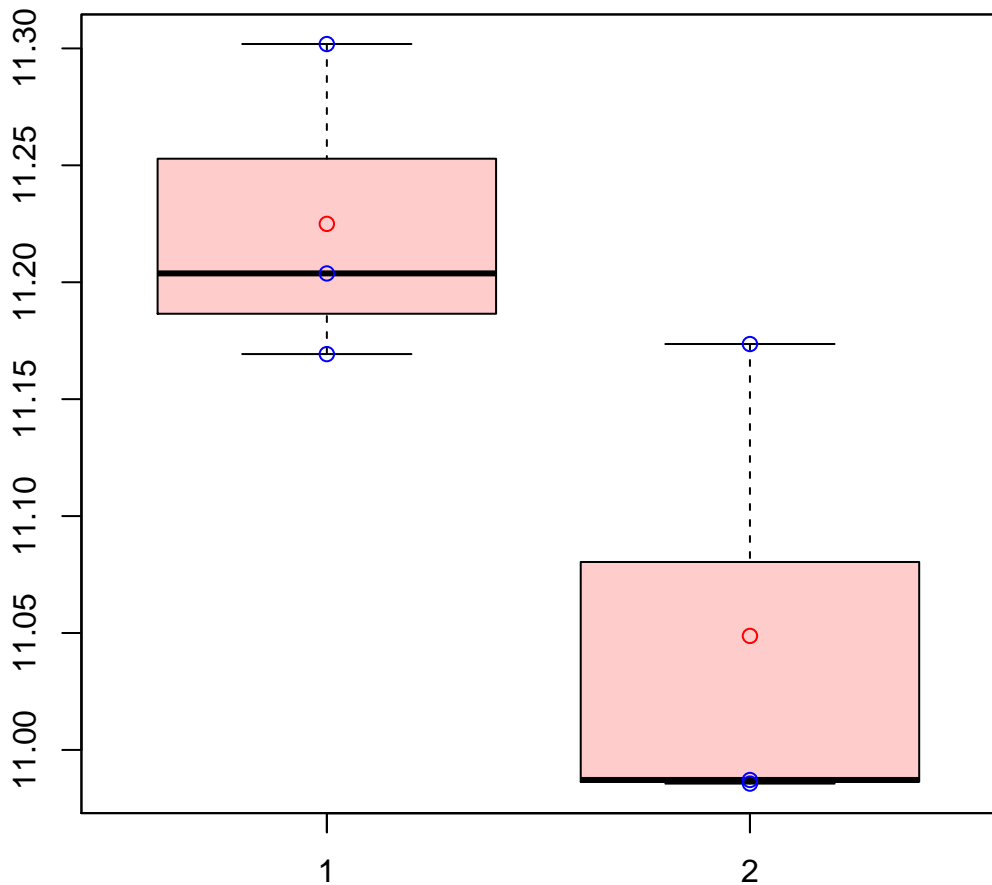

t-Test: p-value = 0.09



# CL1Contig6720|CL1Contig6720

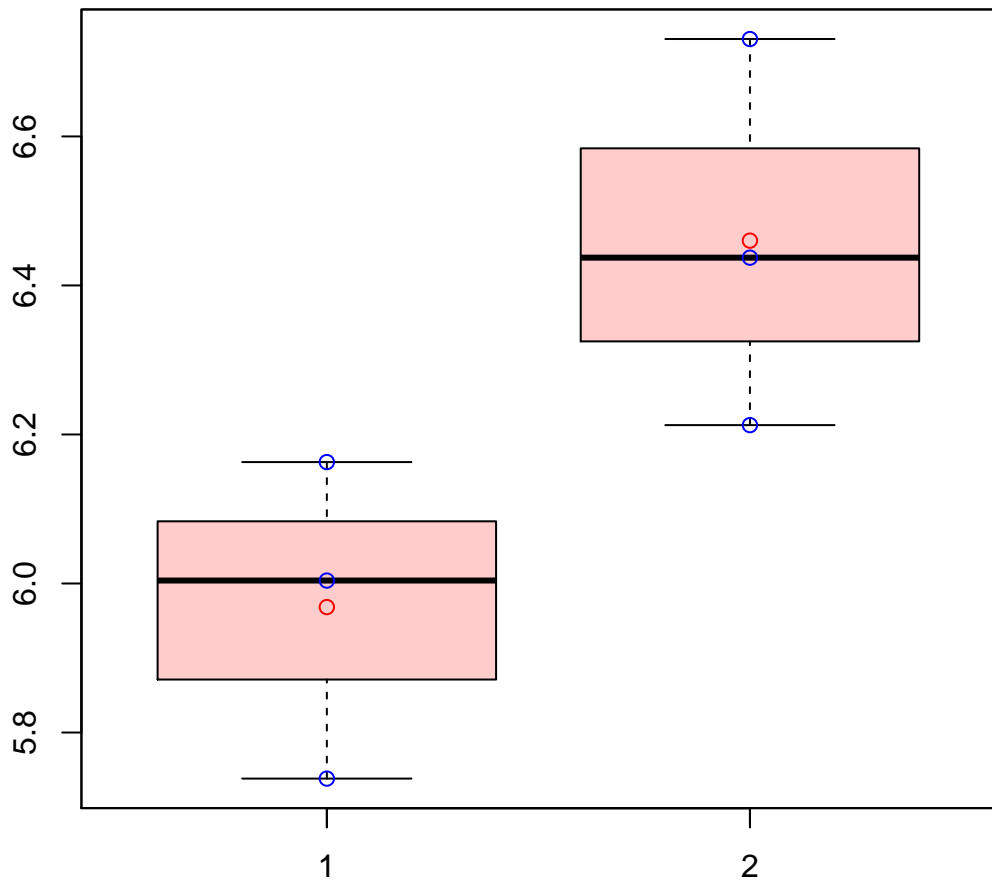

t-Test: p-value = 0.07

# CL1Contig6728|CL1Contig6728

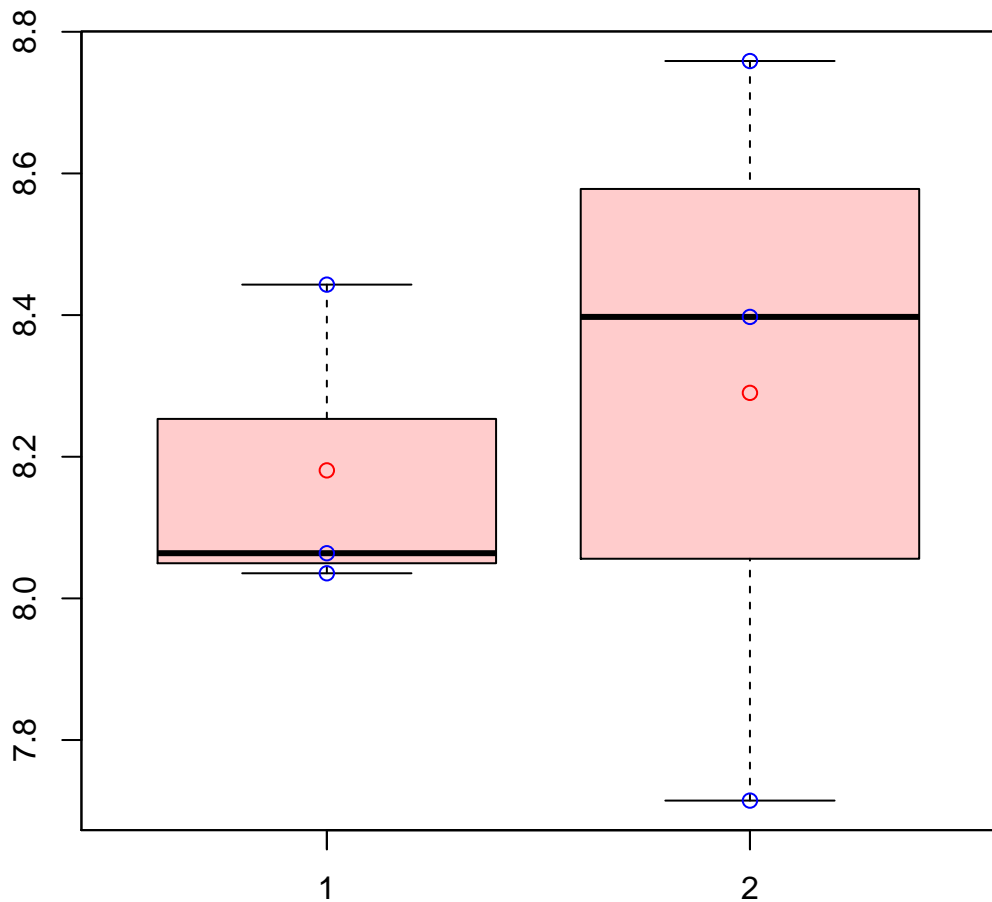

t-Test: p-value = 0.77

# CL1Contig6731|CL1Contig6731

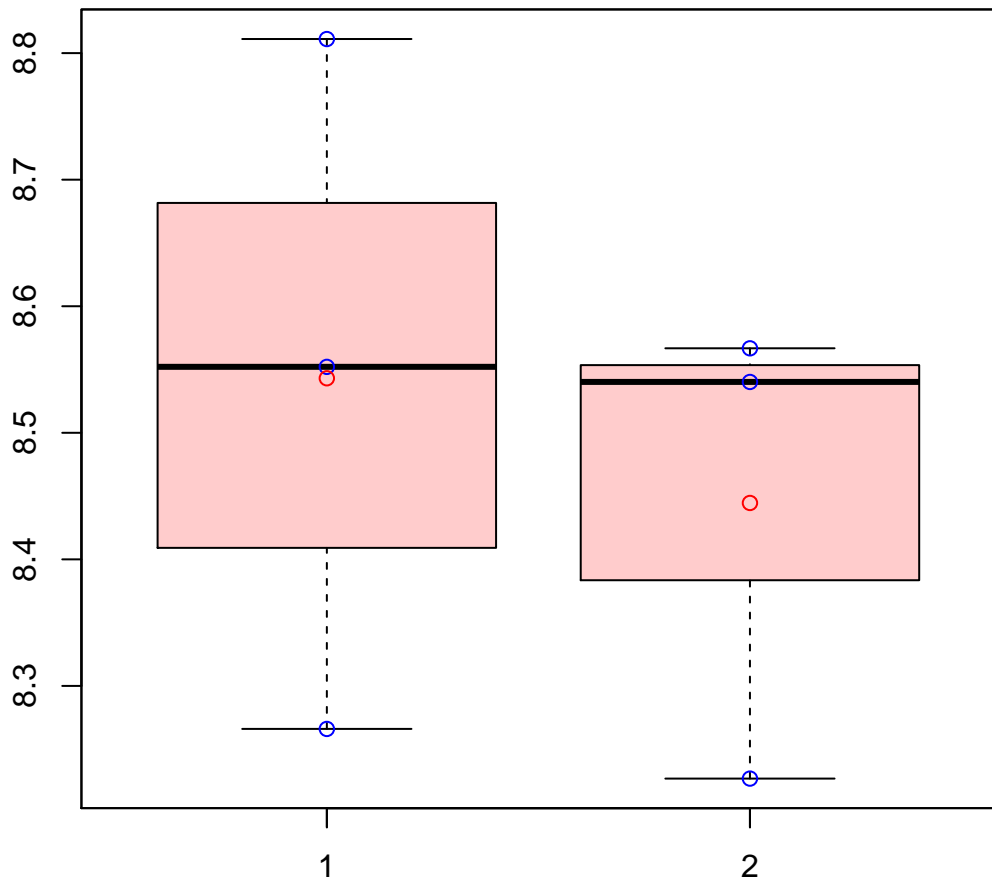

t-Test: p-value = 0.64

# CL1Contig6770|CL1Contig6770

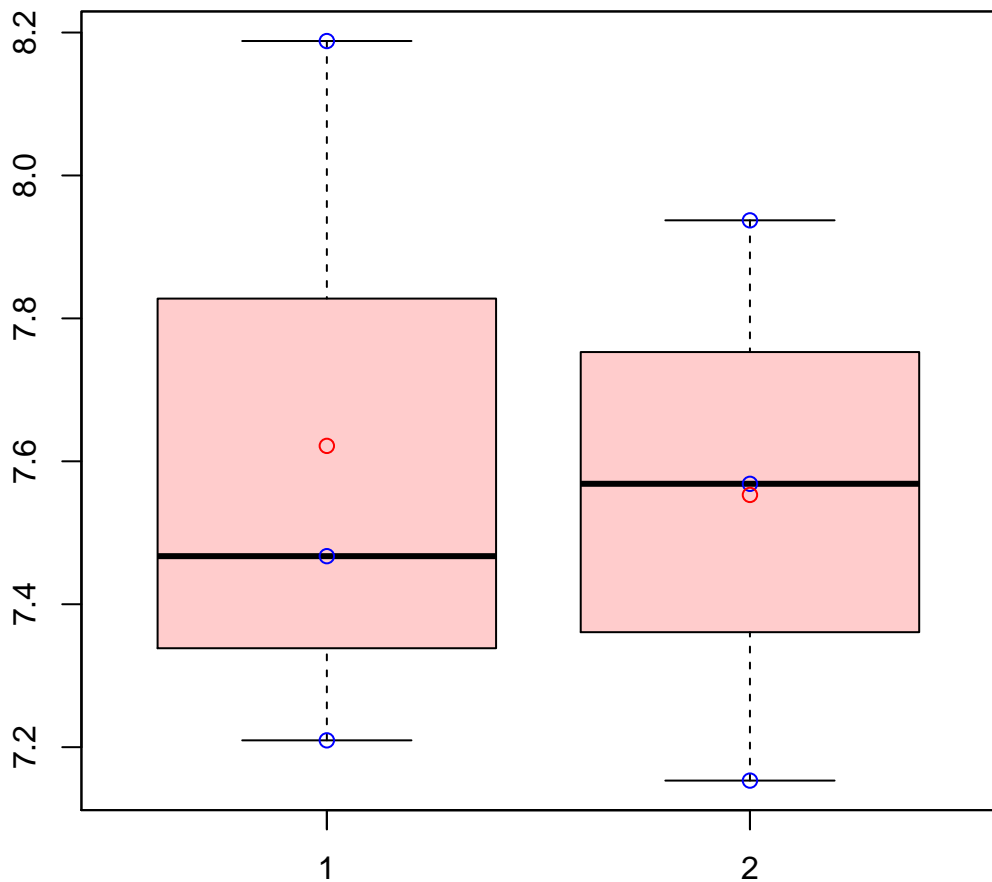

t-Test: p-value = 0.86

# CL1Contig6825|CL1Contig6825

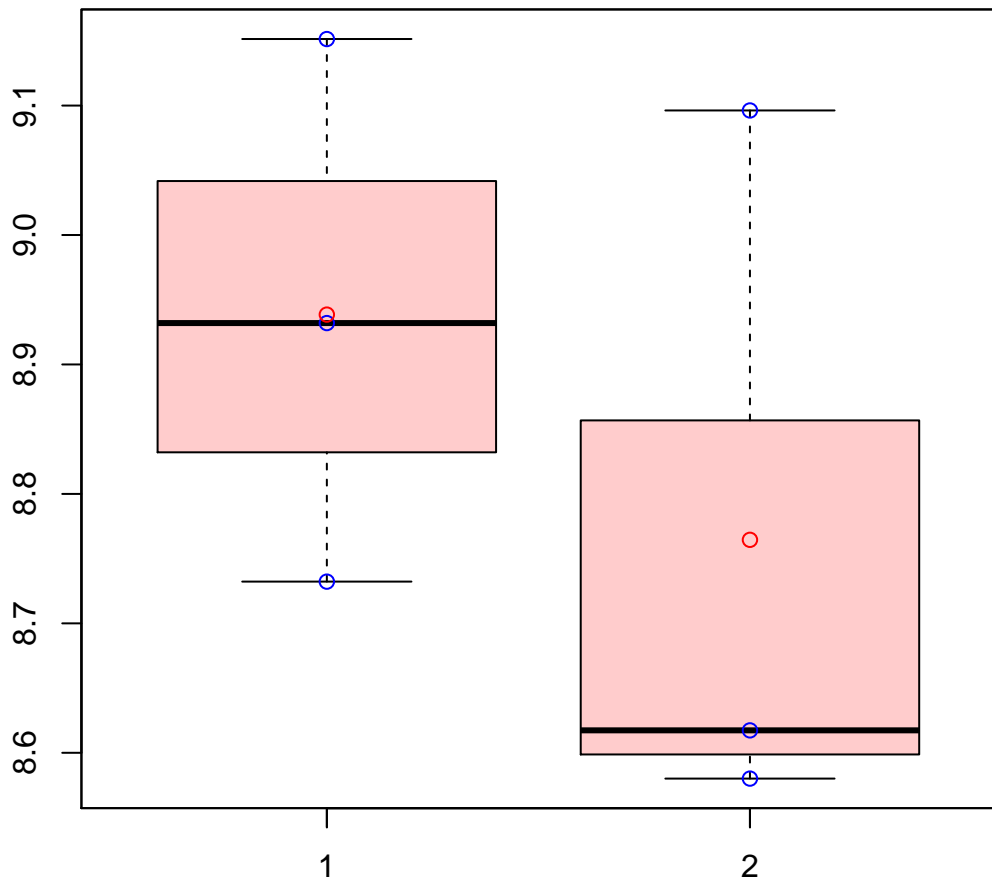

t-Test: p-value = 0.45

# CL1Contig693|CL1Contig693

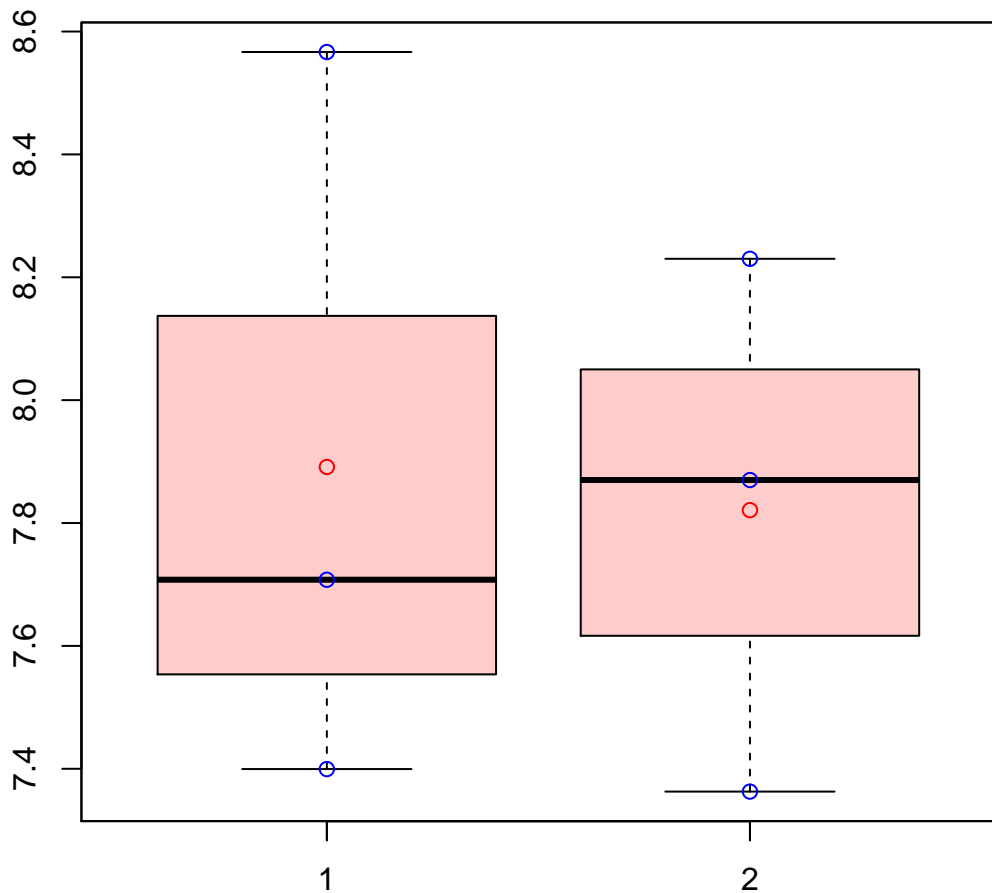

t-Test: p-value = 0.88

# CL1Contig69|CL1Contig69

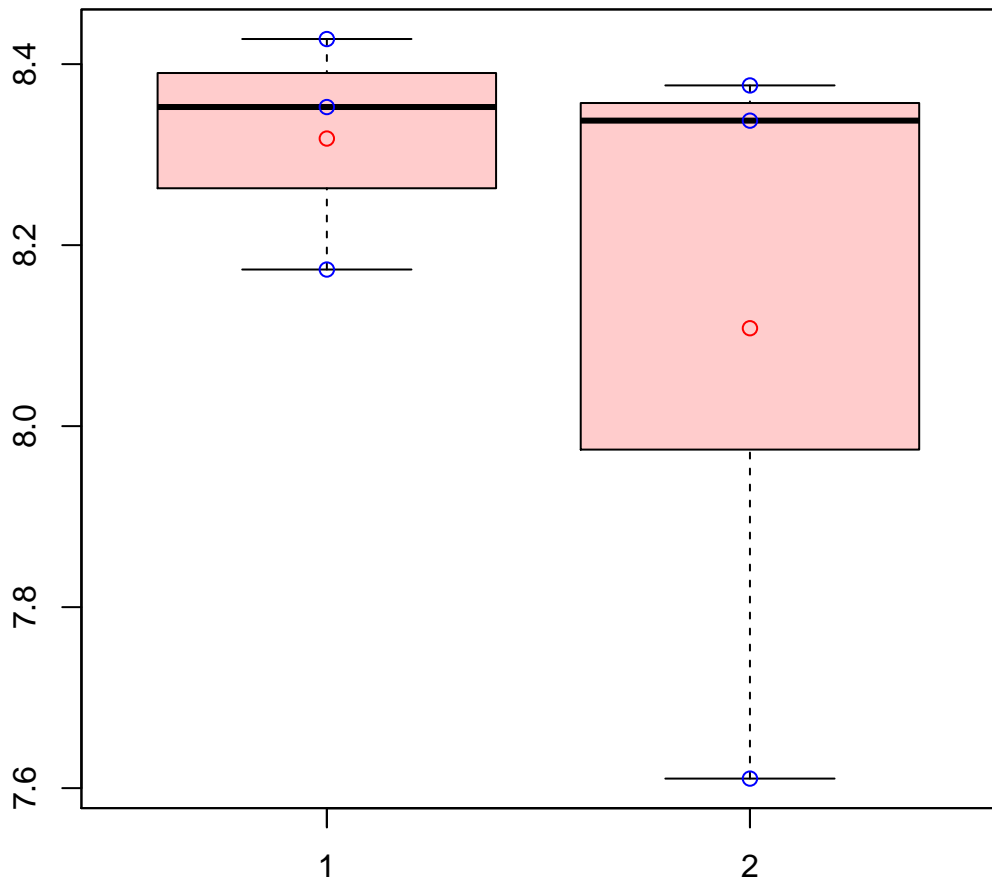

t-Test: p-value = 0.49

# CL1Contig7029|CL1Contig7029

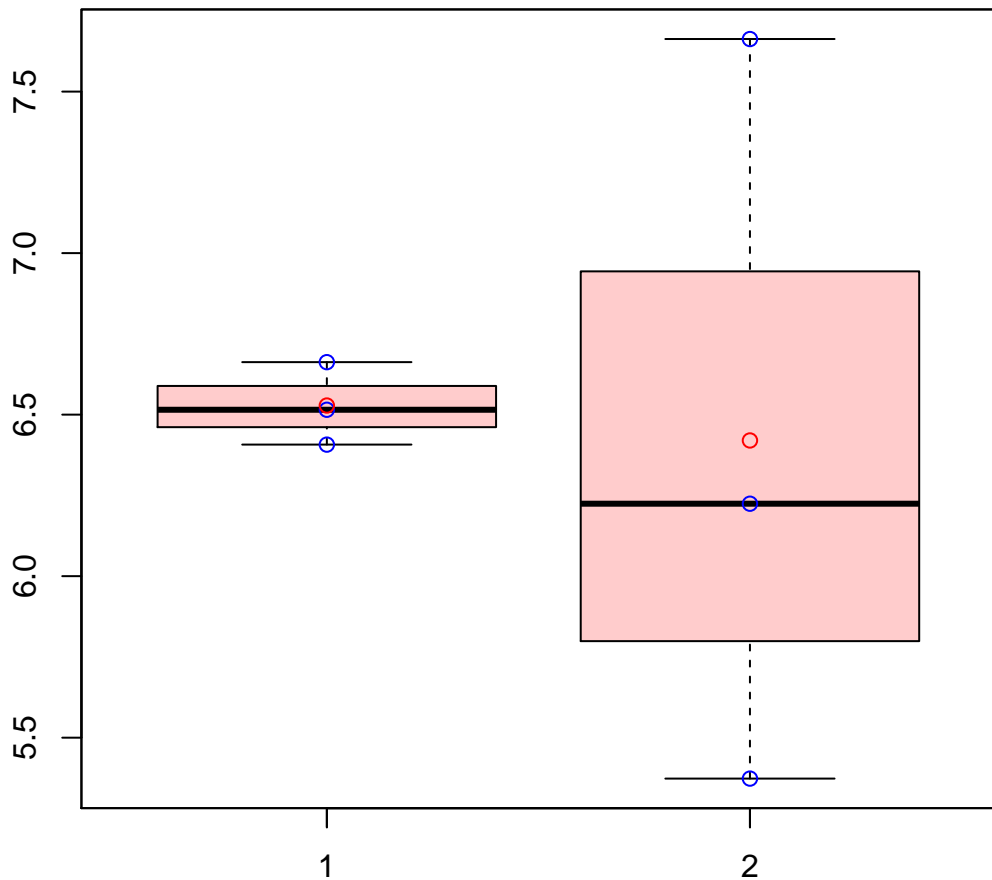

t-Test: p-value = 0.89



# CL1Contig7080|CL1Contig7080

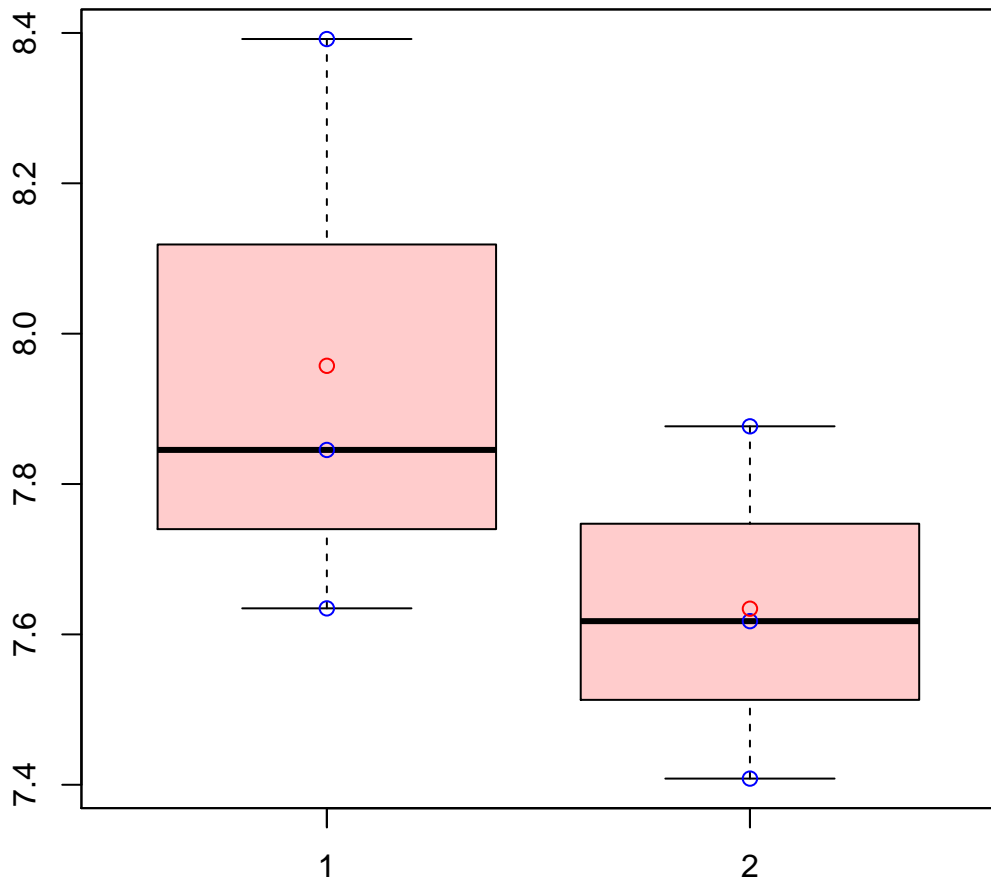

t-Test: p-value = 0.3

# CL1Contig7165|CL1Contig7165

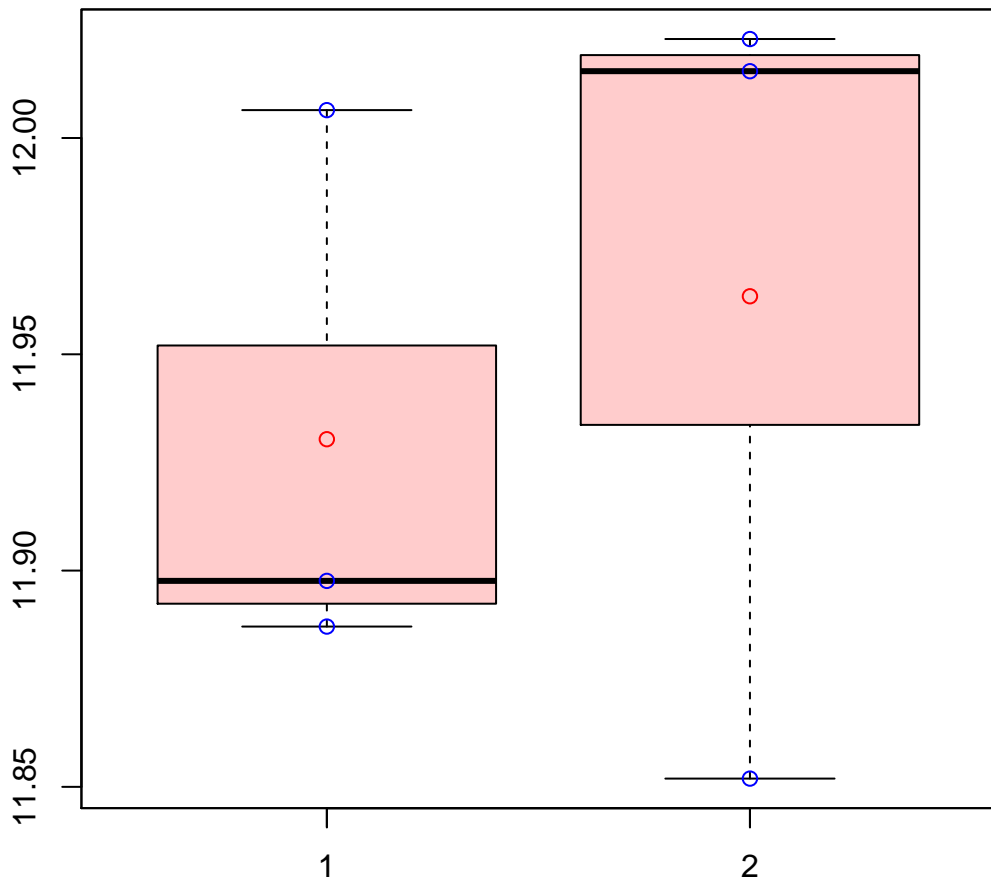

t-Test: p-value = 0.65

# CL1Contig7168|CL1Contig7168

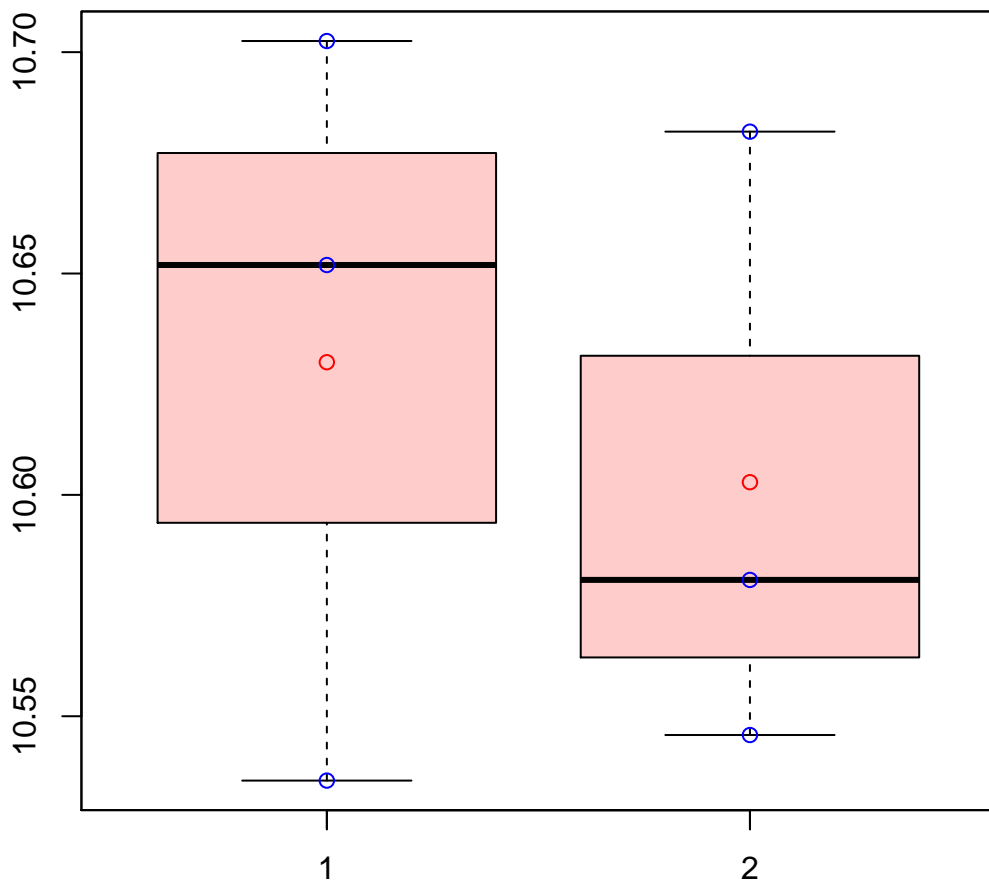

t-Test: p-value = 0.7

# CL1Contig7241|CL1Contig7241

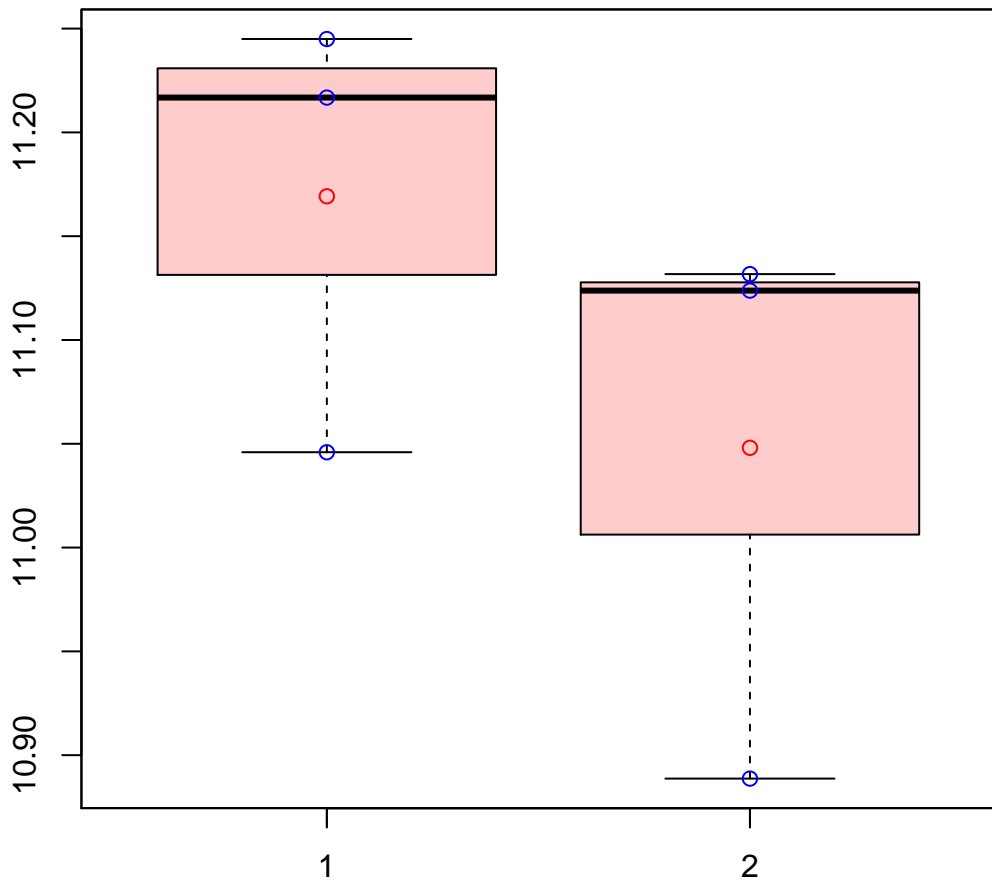

t-Test: p-value = 0.3

# CL1Contig7306|CL1Contig7306

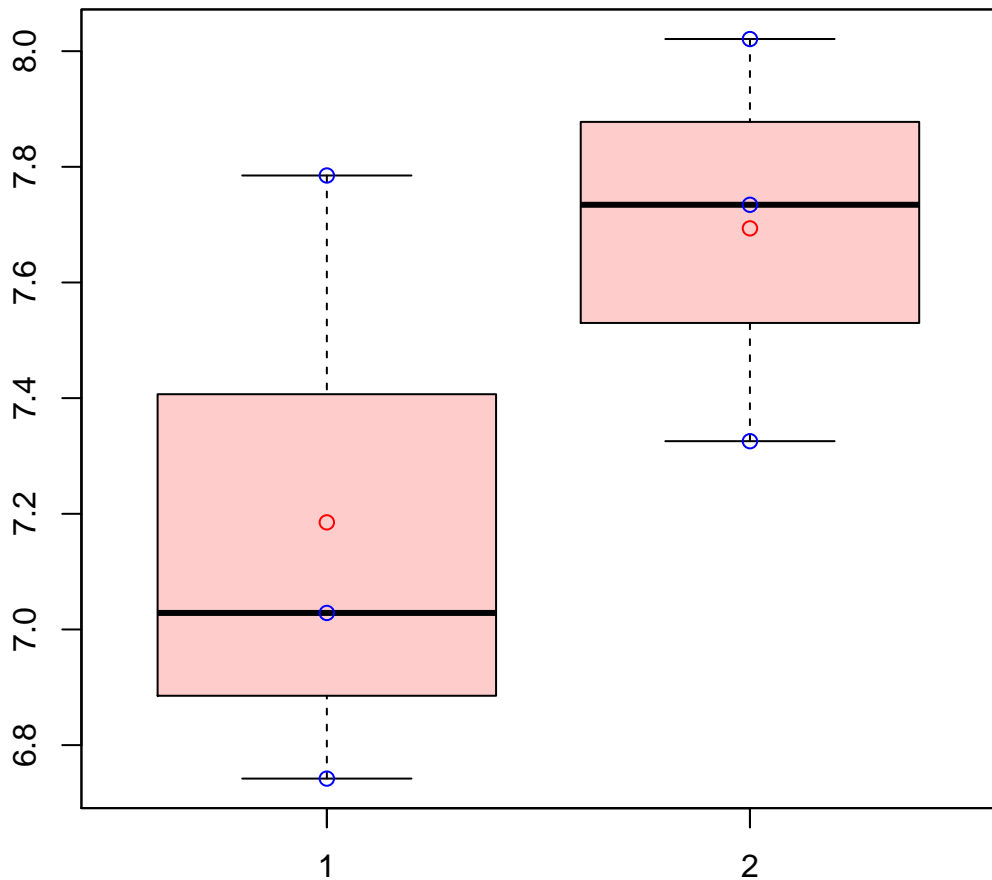

t-Test: p-value = 0.25

# CL1Contig7383|CL1Contig7383

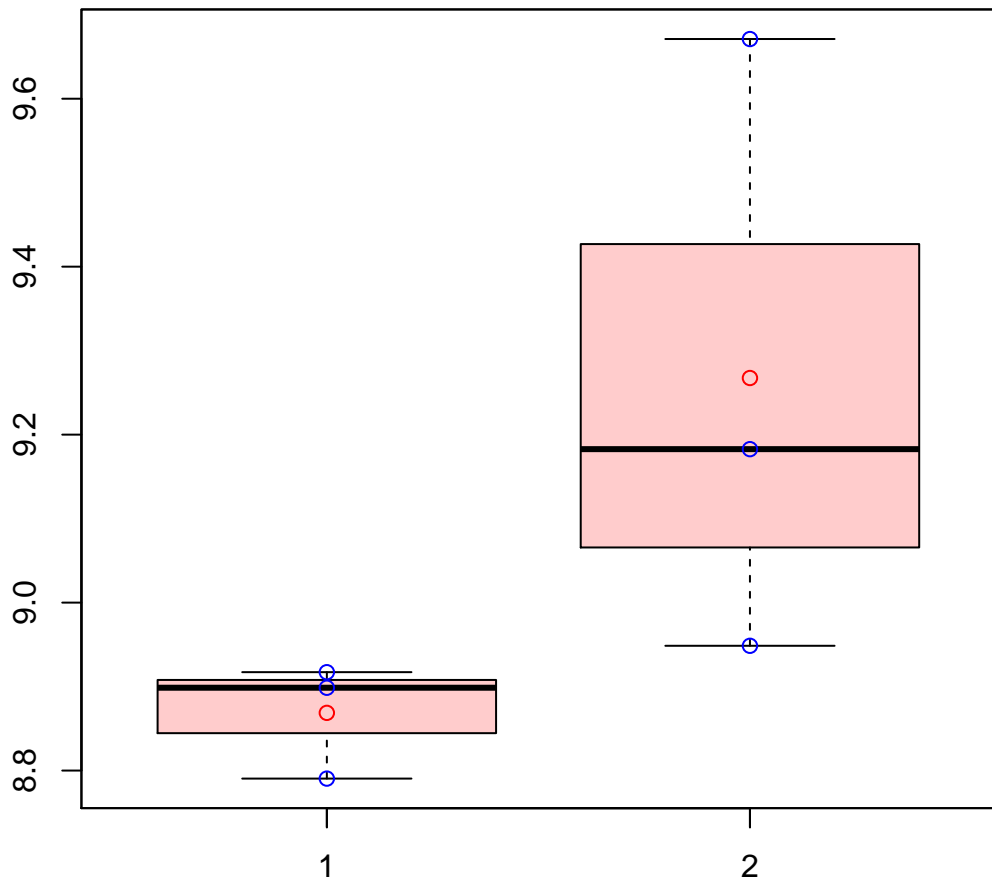

t-Test: p-value = 0.2

# CL1Contig7392|CL1Contig7392

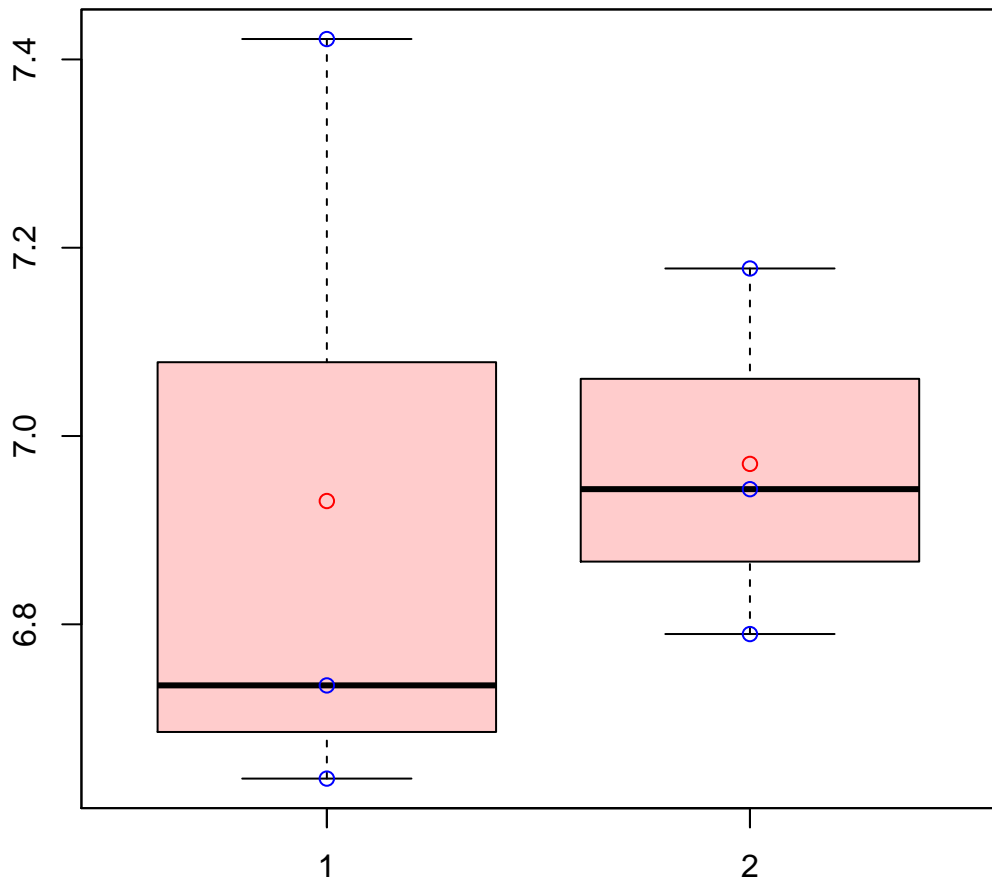

t-Test: p-value = 0.89

# CL1Contig7438|CL1Contig7438

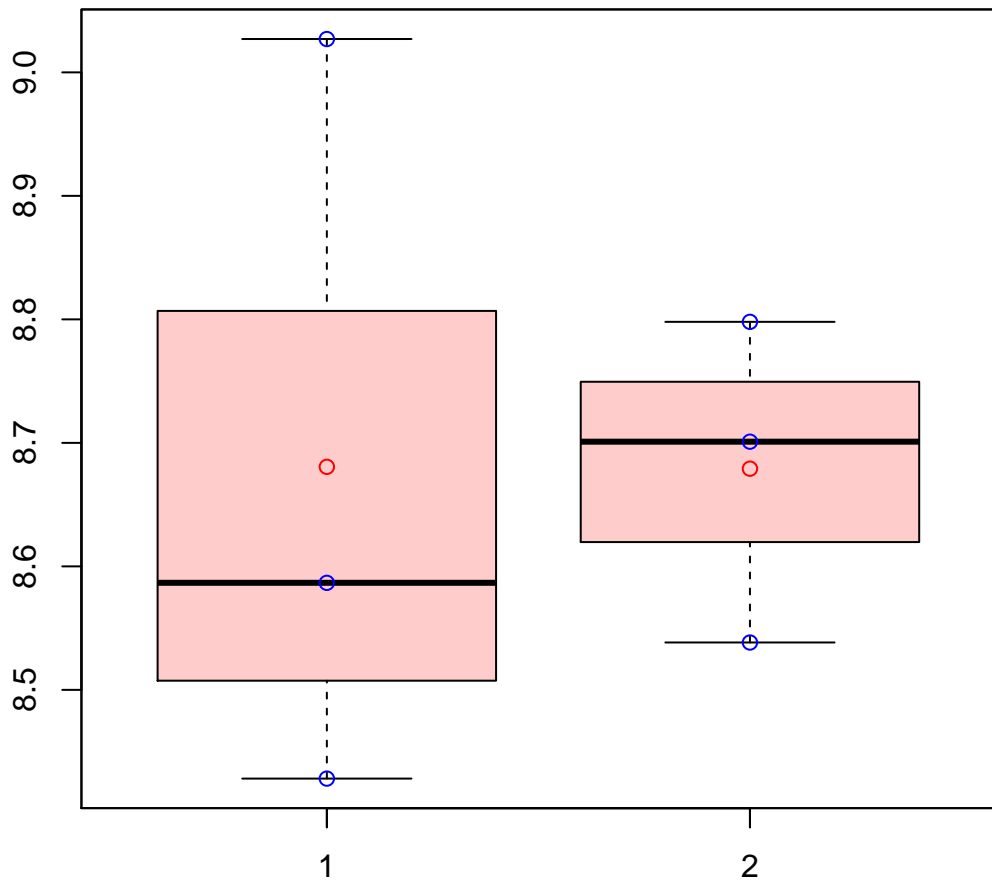

t-Test: p-value = 0.99



# CL1Contig7467|CL1Contig7467

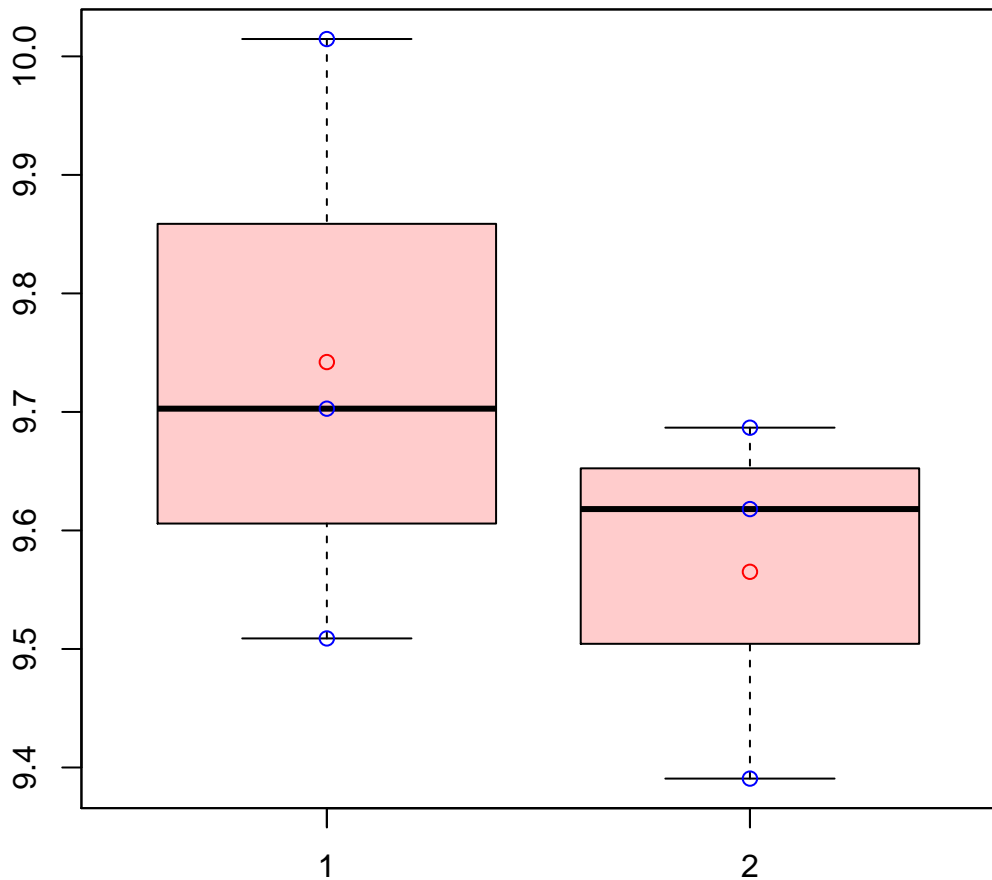

t-Test: p-value = 0.37

# CL1Contig7472|CL1Contig7472

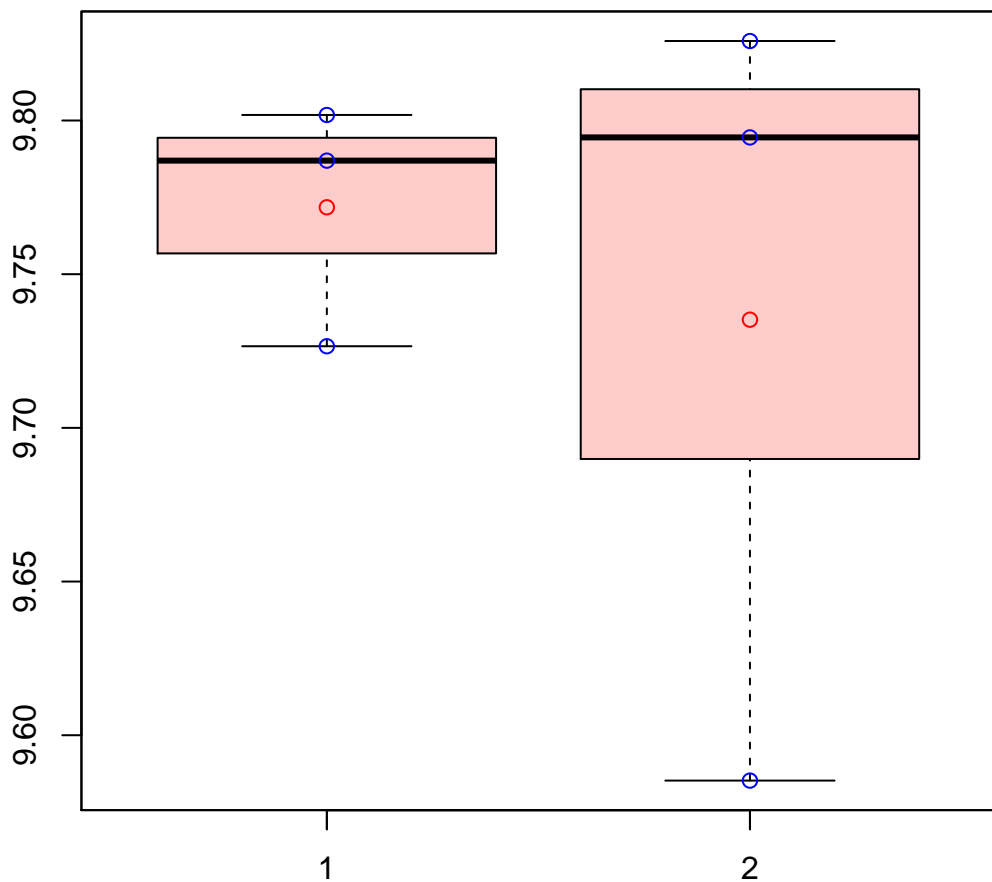

t-Test: p-value = 0.68

# CL1Contig7473|CL1Contig7473

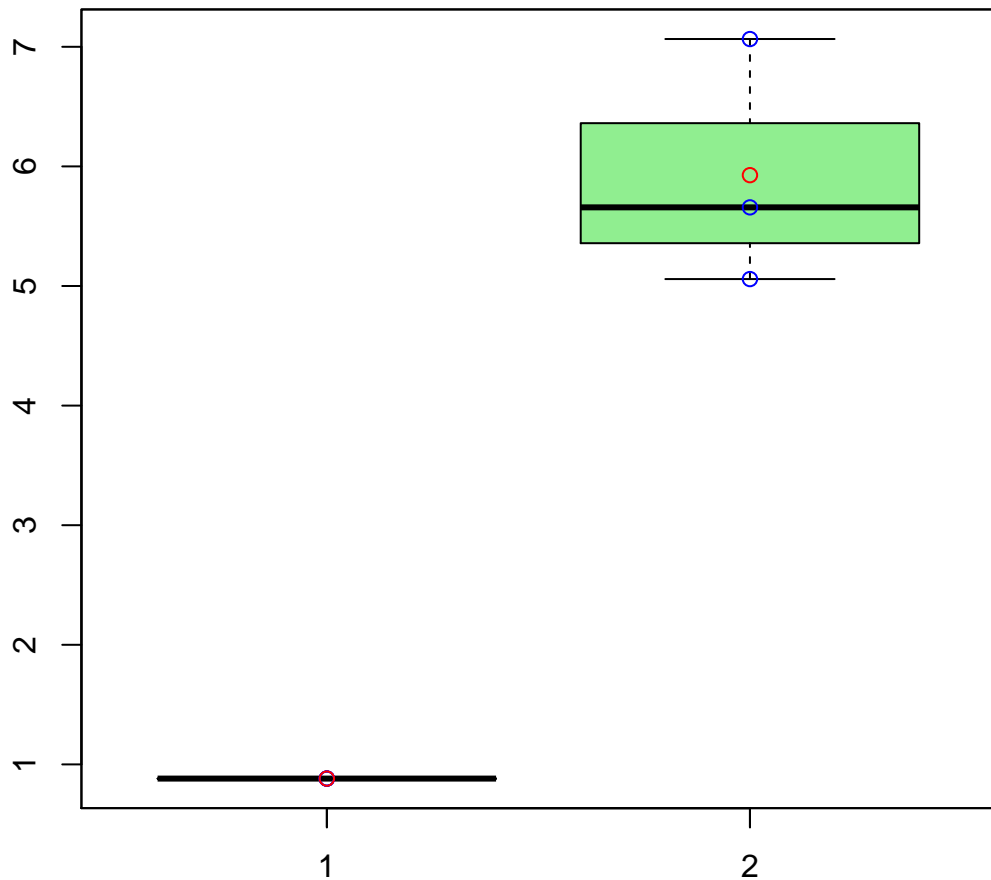

t-Test: p-value = 0.01

# CL1Contig749|CL1Contig749

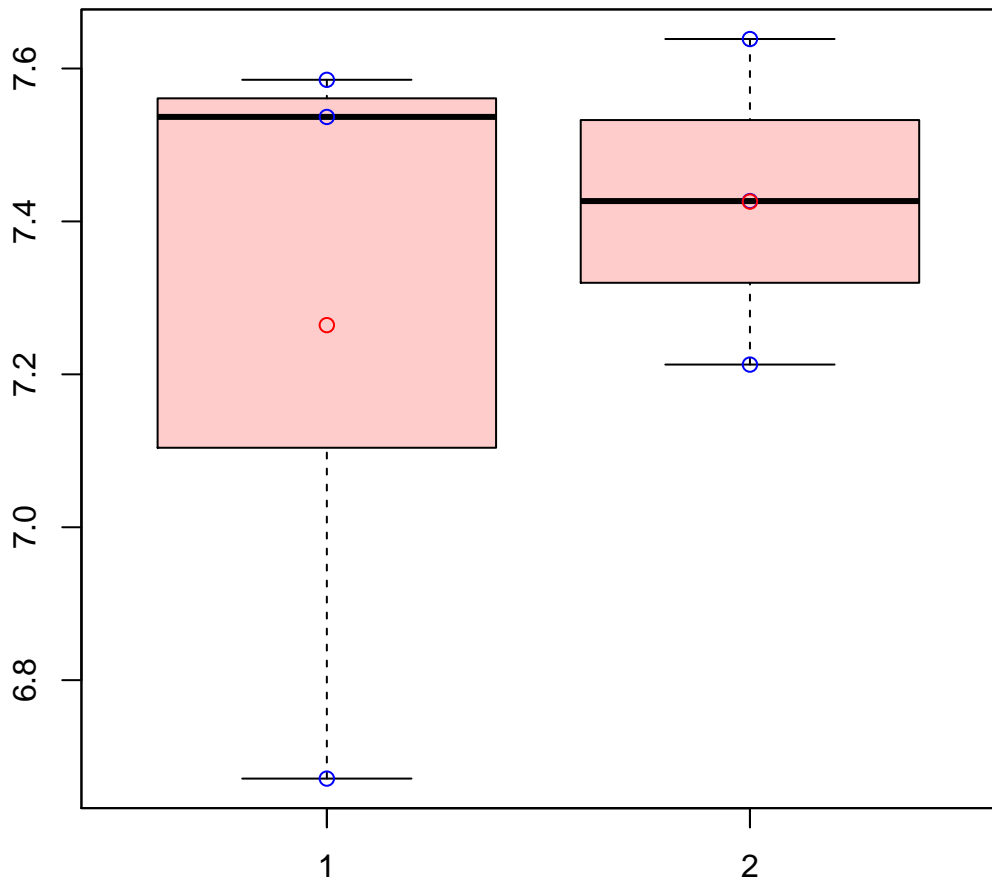

t-Test: p-value = 0.65

# CL1Contig7578|CL1Contig7578

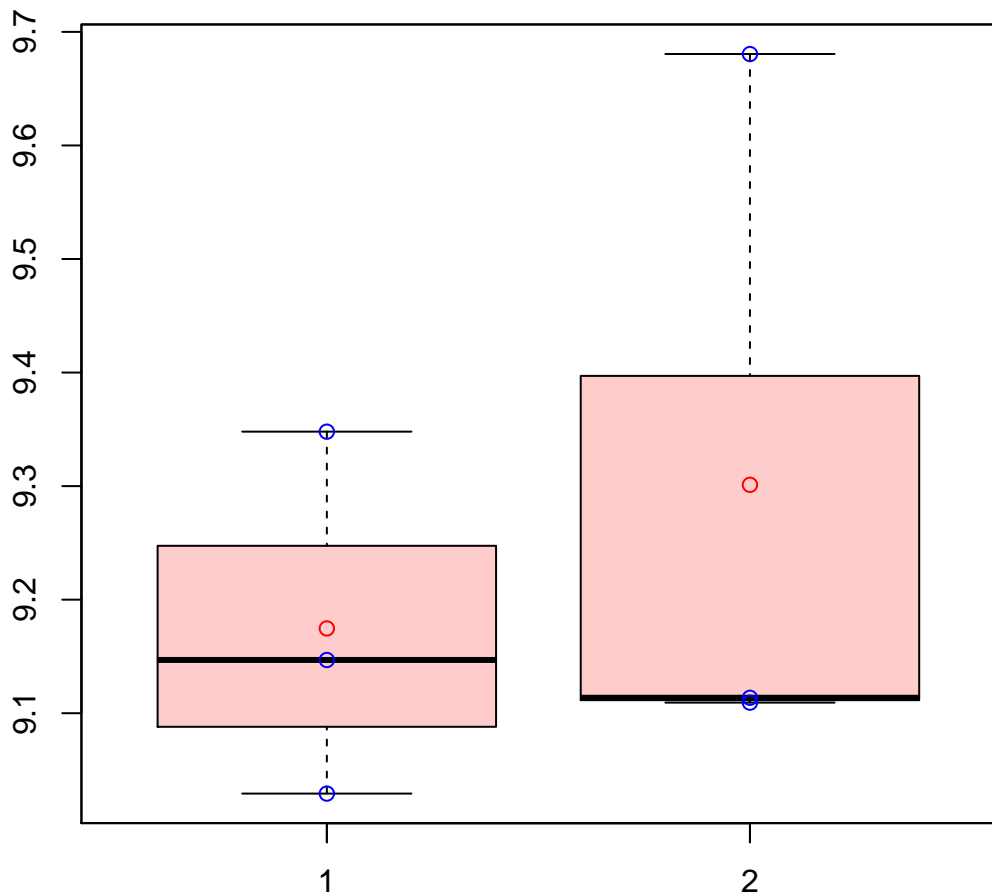

t-Test: p-value = 0.59

# CL1Contig7611|CL1Contig7611

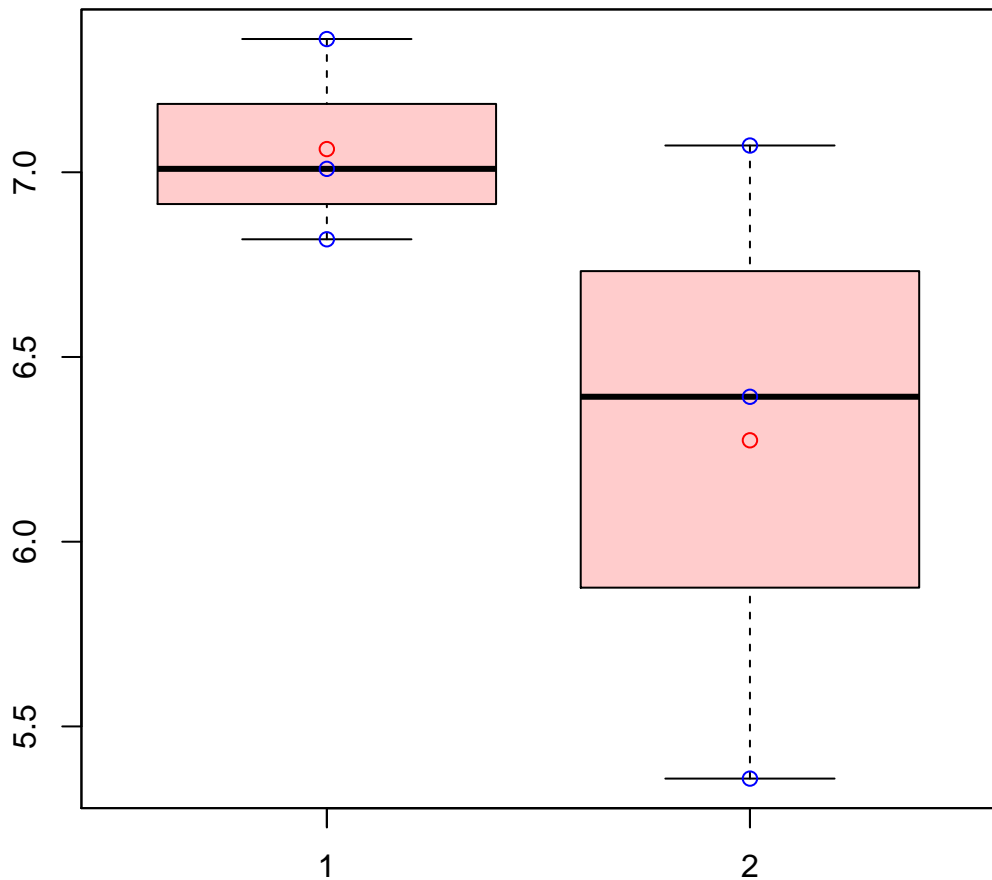

t-Test: p-value = 0.25

# CL1Contig7659|CL1Contig7659

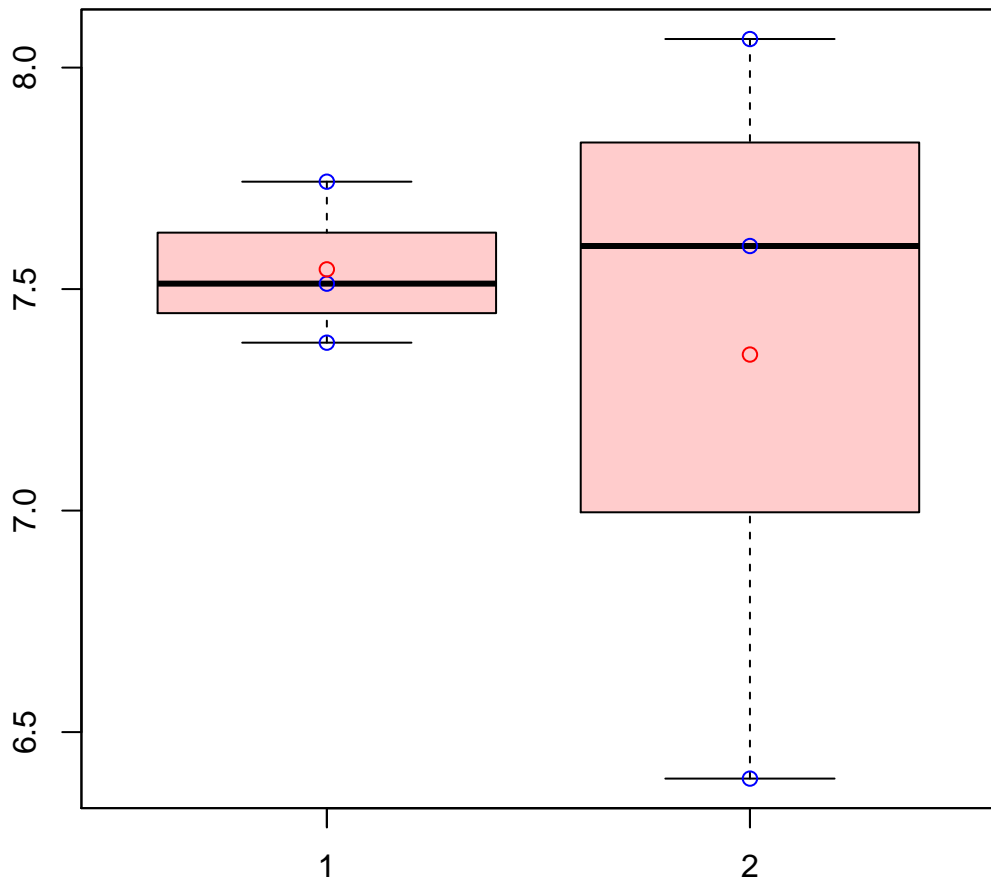

t-Test: p-value = 0.74

# CL1Contig7667|CL1Contig7667

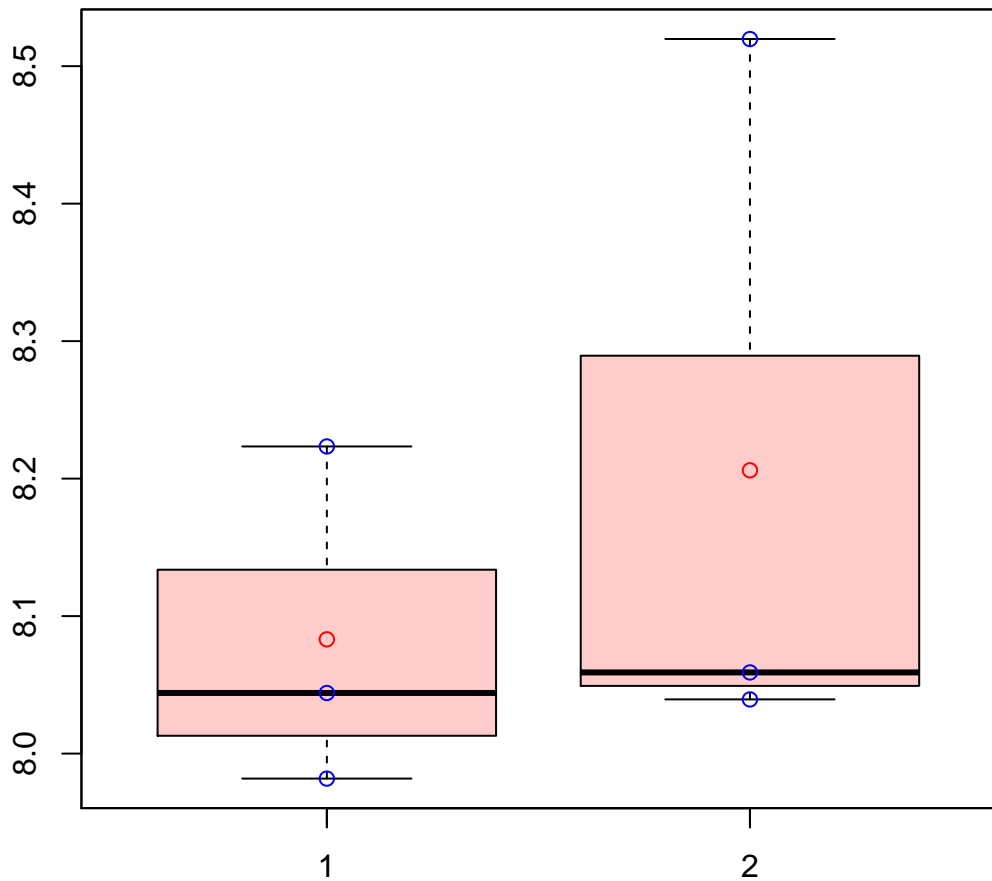

t-Test: p-value = 0.53



# CL1Contig769|CL1Contig769

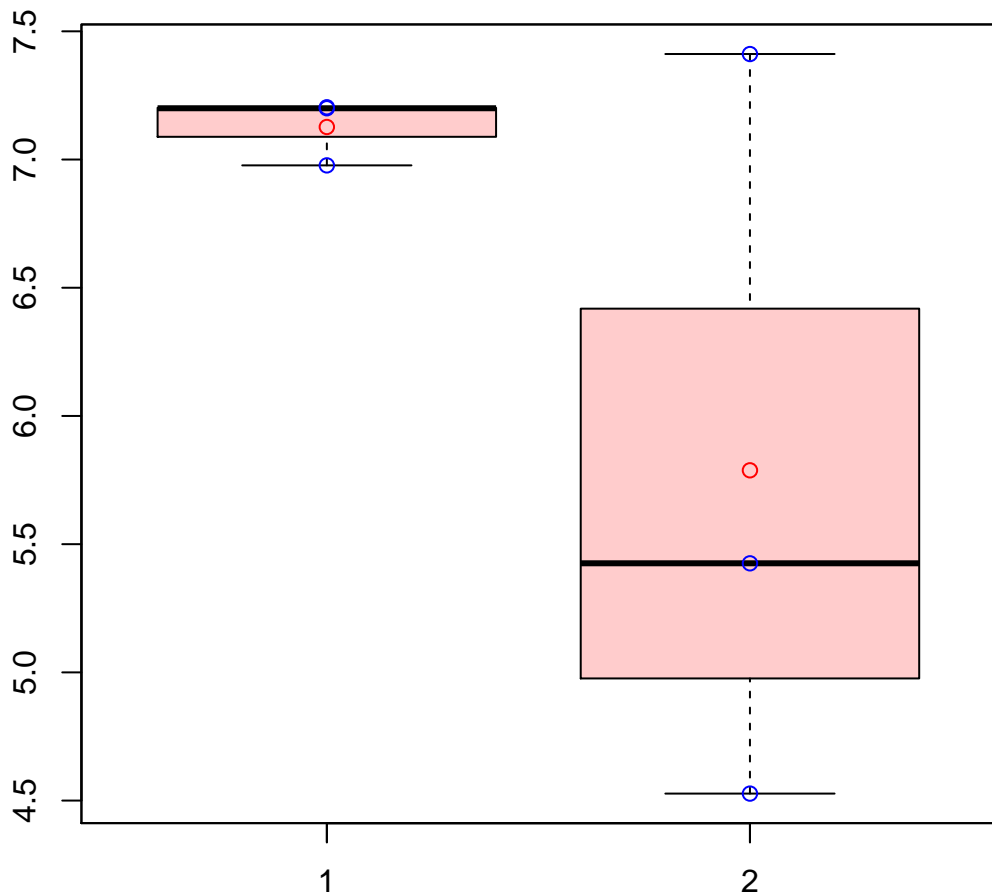

t-Test: p-value = 0.26

# CL1Contig7722|CL1Contig7722

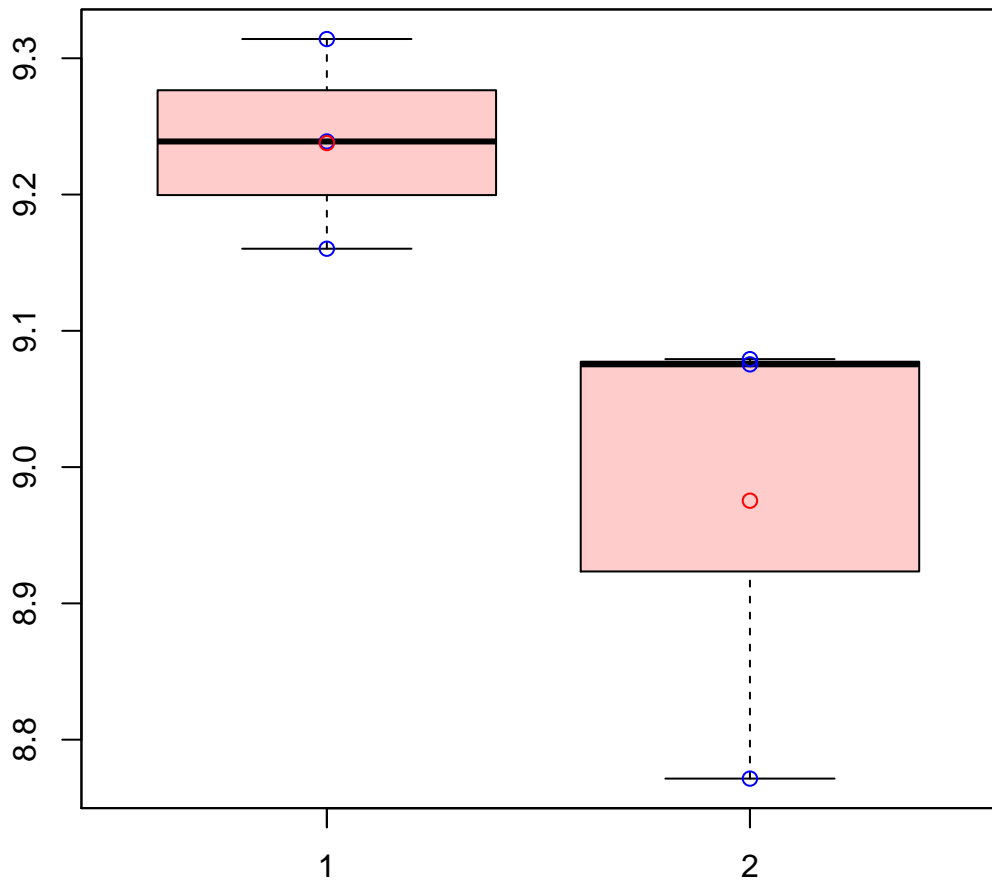

t-Test: p-value = 0.11

# CL1Contig772|CL1Contig772

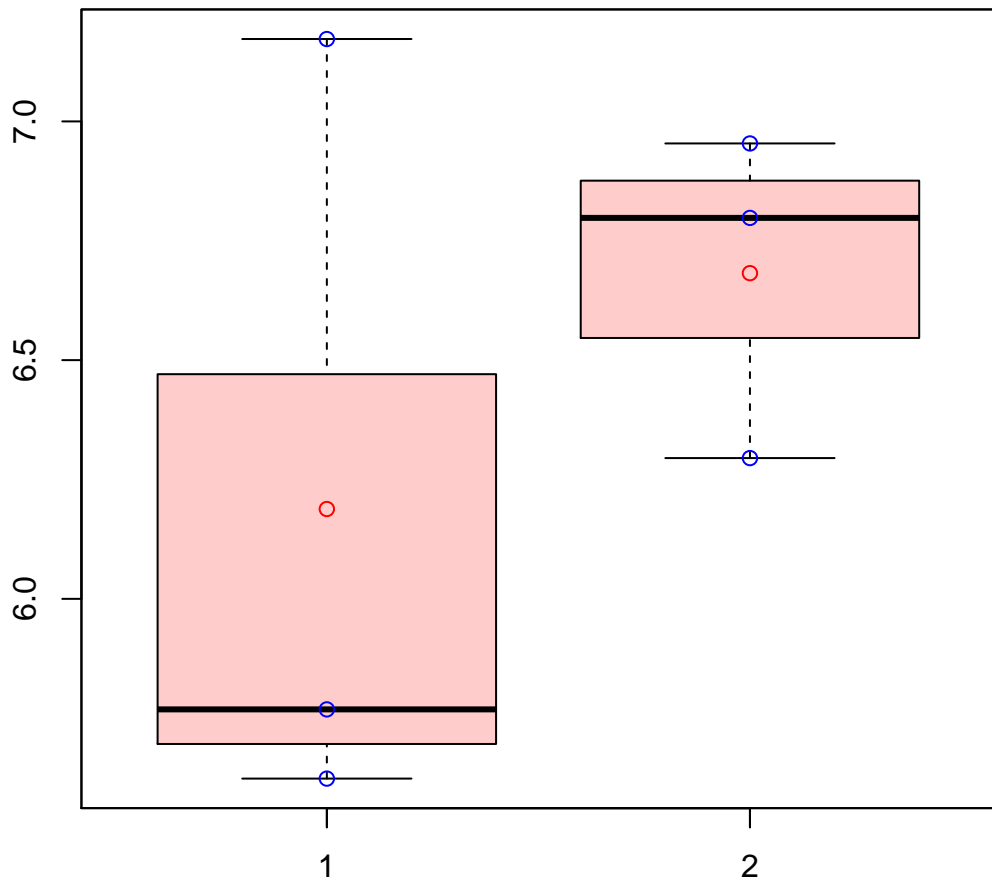

t-Test: p-value = 0.43

# CL1Contig7756|CL1Contig7756

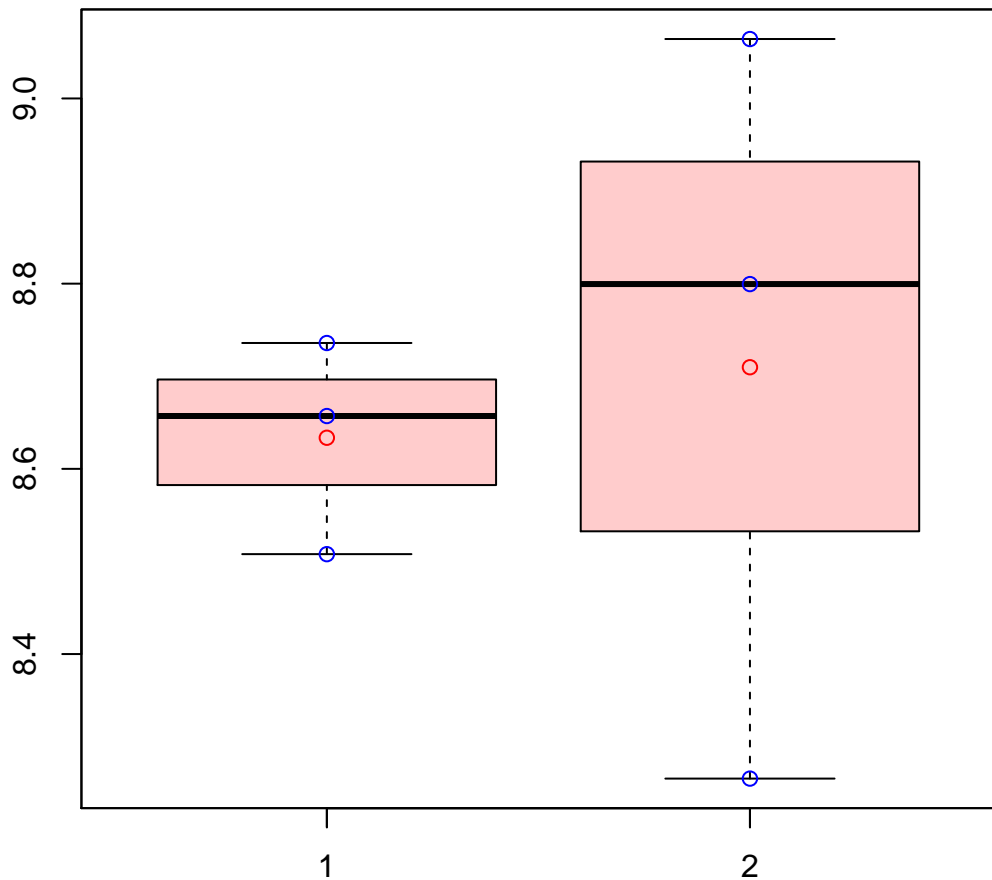

t-Test: p-value = 0.78

# CL1Contig7776|CL1Contig7776

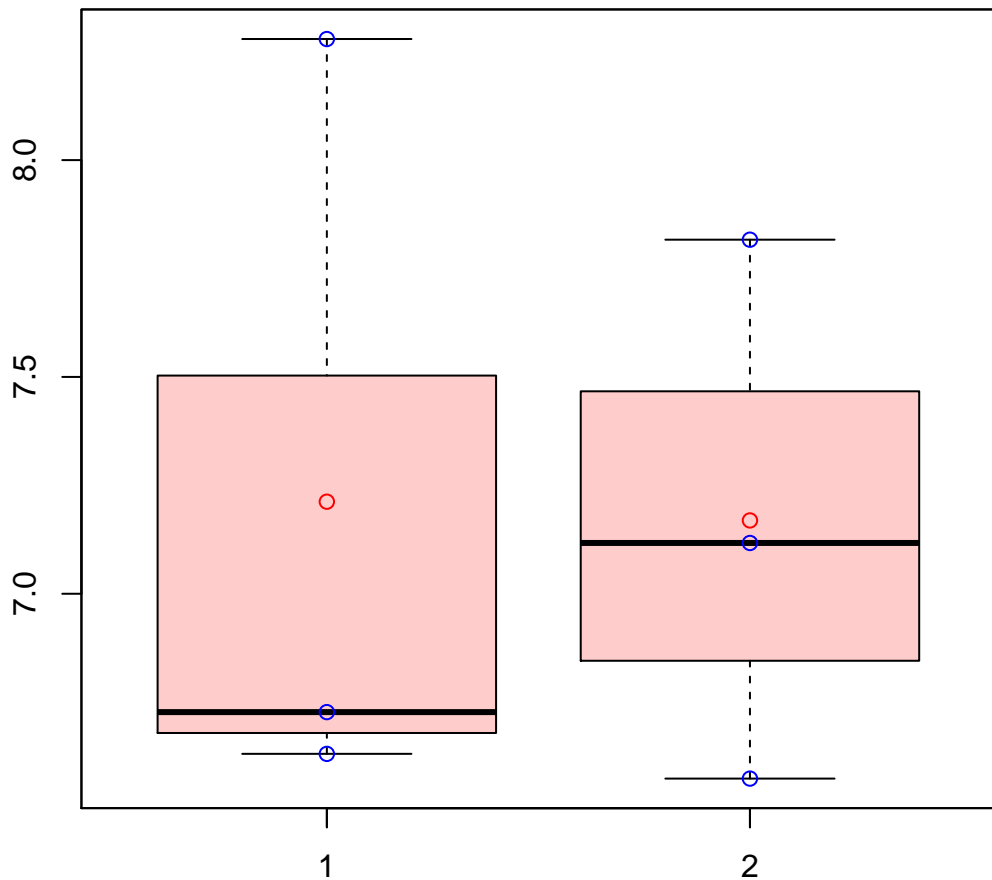

t-Test: p-value = 0.95

# CL1Contig7806|CL1Contig7806

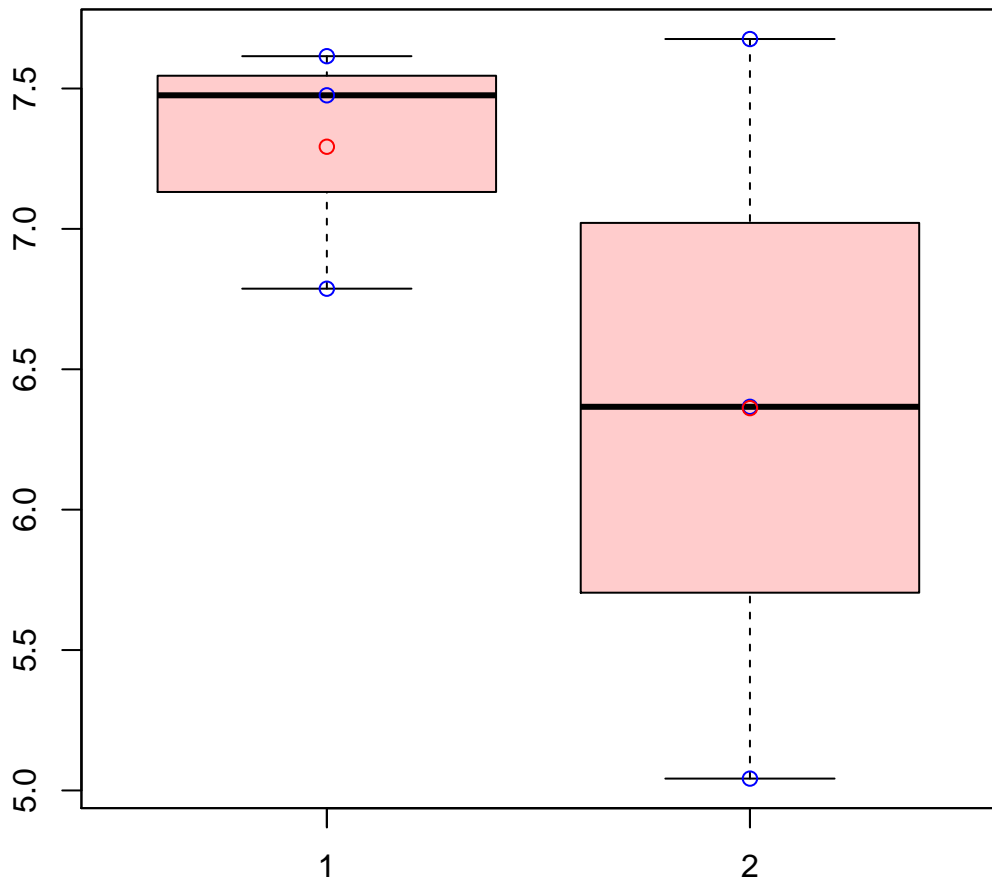

t-Test: p-value = 0.35

# CL1Contig7807|CL1Contig7807

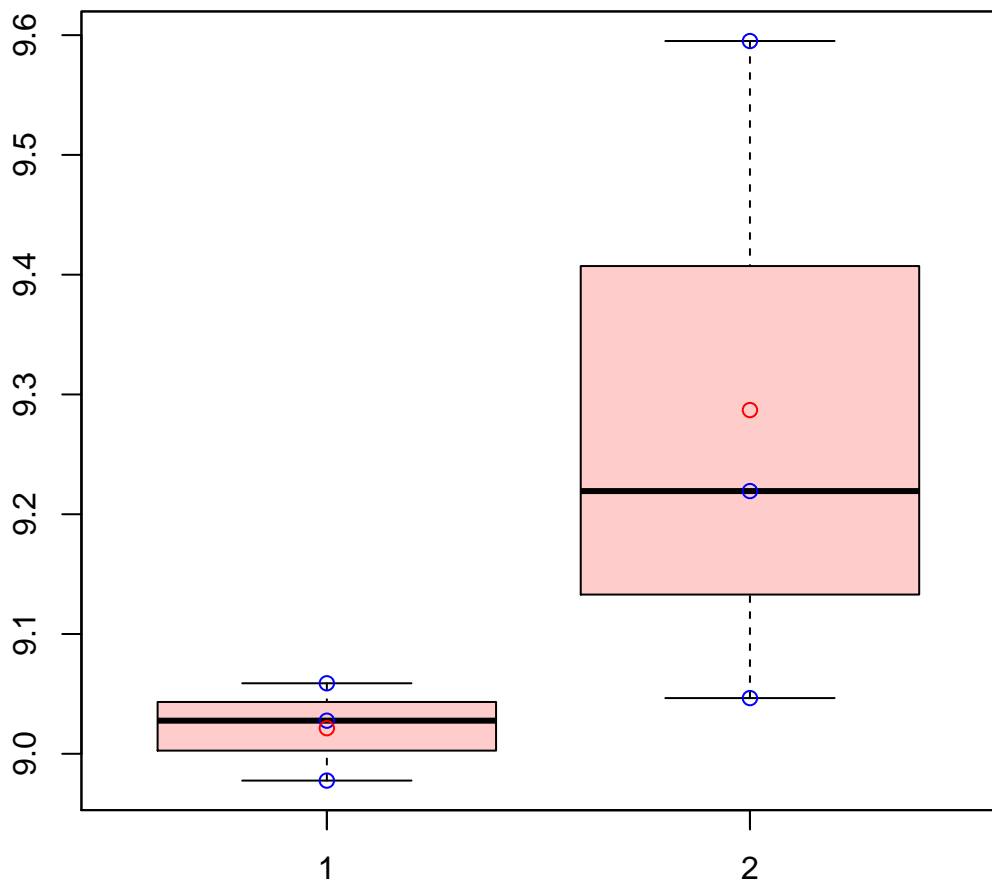

t-Test: p-value = 0.24

# CL1Contig7829|CL1Contig7829

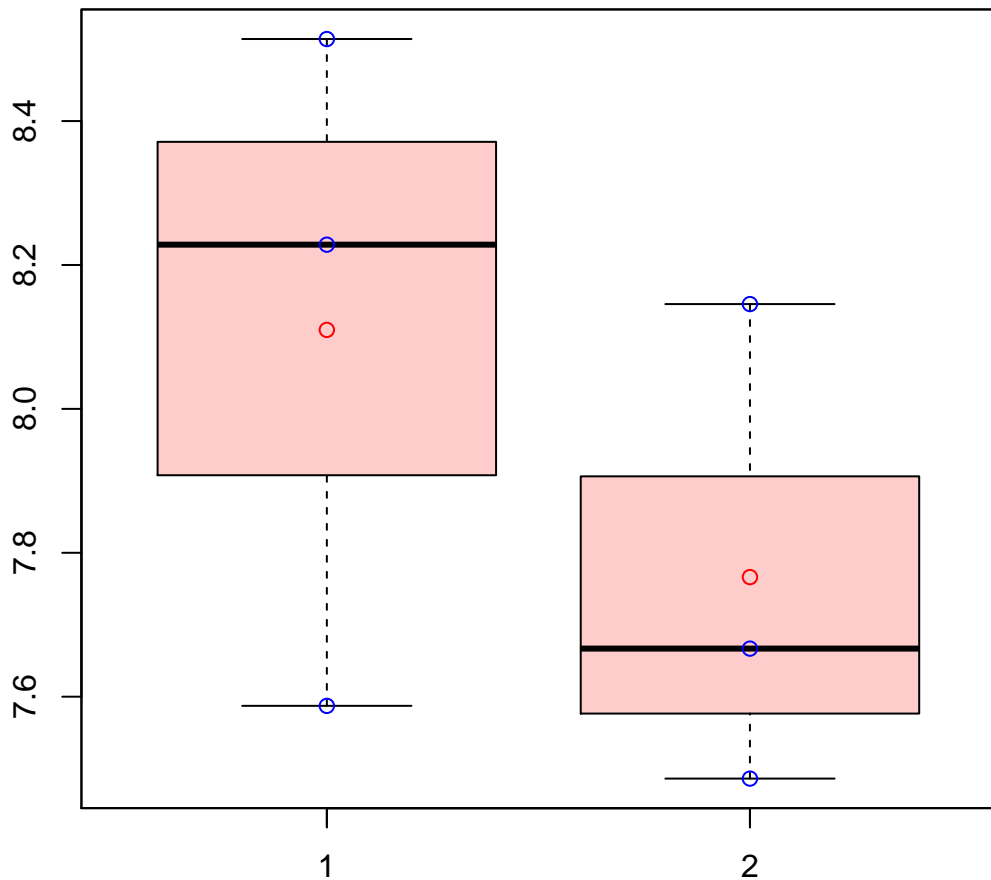

t-Test: p-value = 0.37



# CL1Contig7868|CL1Contig7868

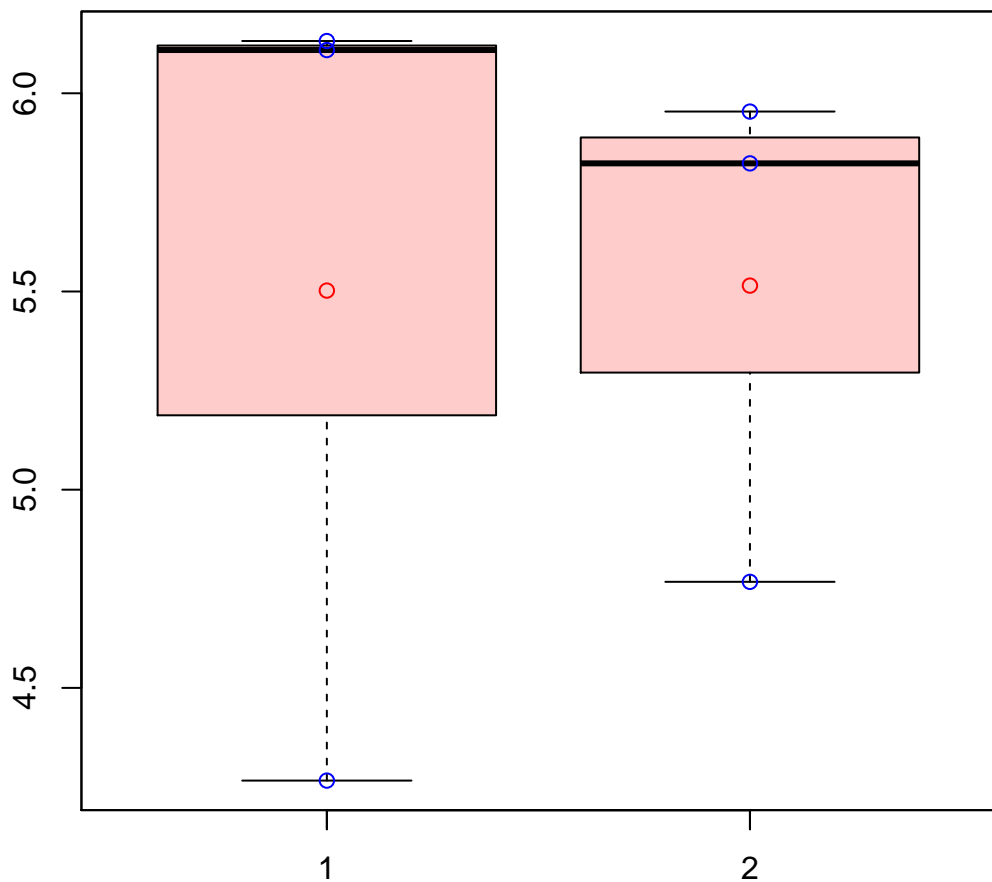

t-Test: p-value = 0.99

# CL1Contig7889|CL1Contig7889

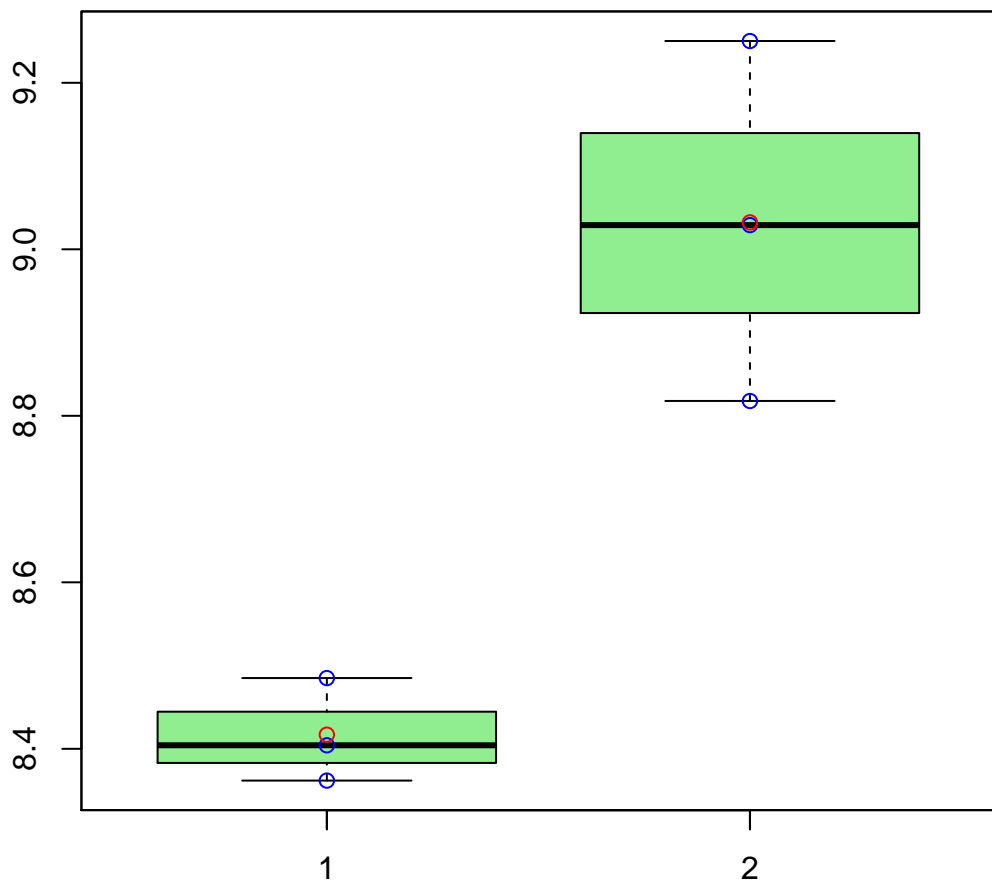

t-Test: p-value = 0.03

# CL1Contig7924|CL1Contig7924

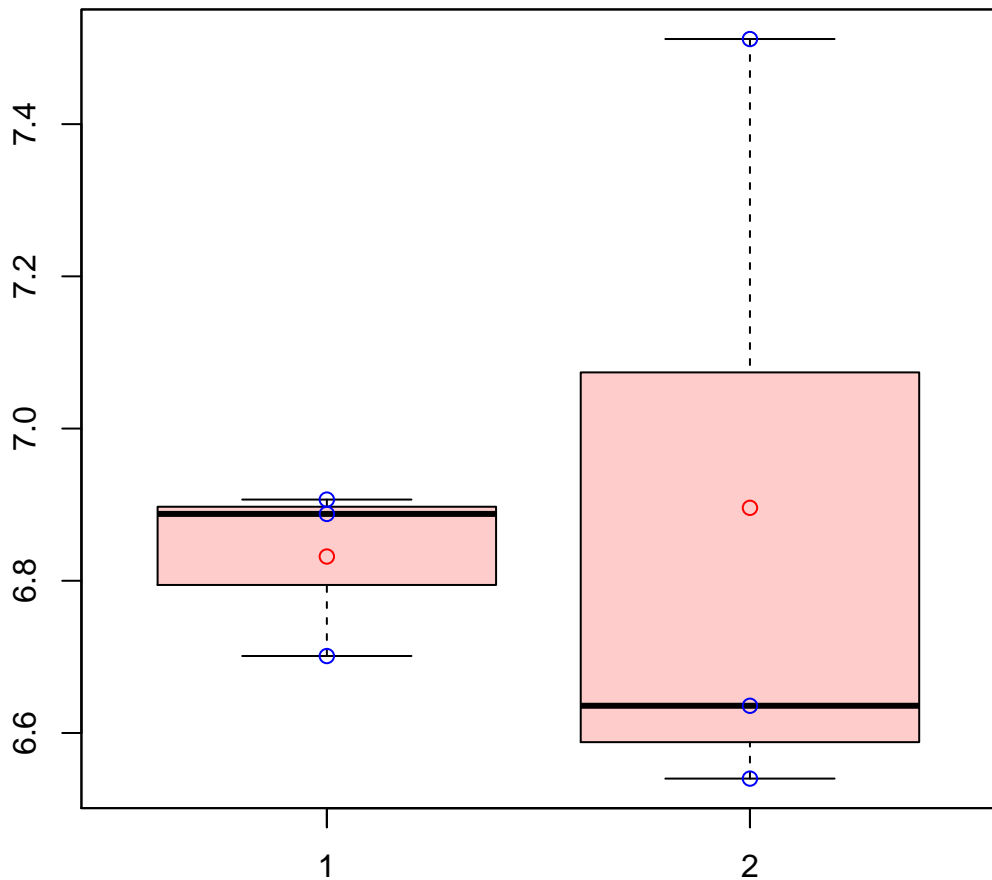

t-Test: p-value = 0.86

# CL1Contig7948|CL1Contig7948

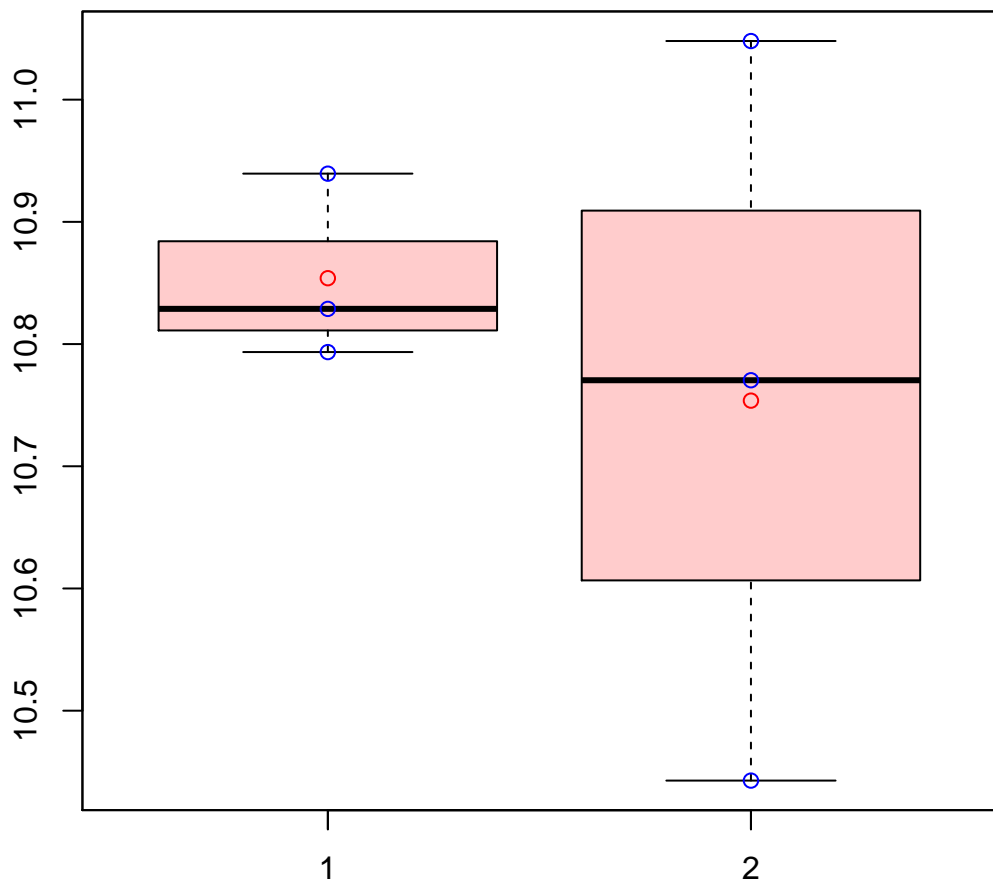

t-Test: p-value = 0.63

# CL1Contig8014|CL1Contig8014

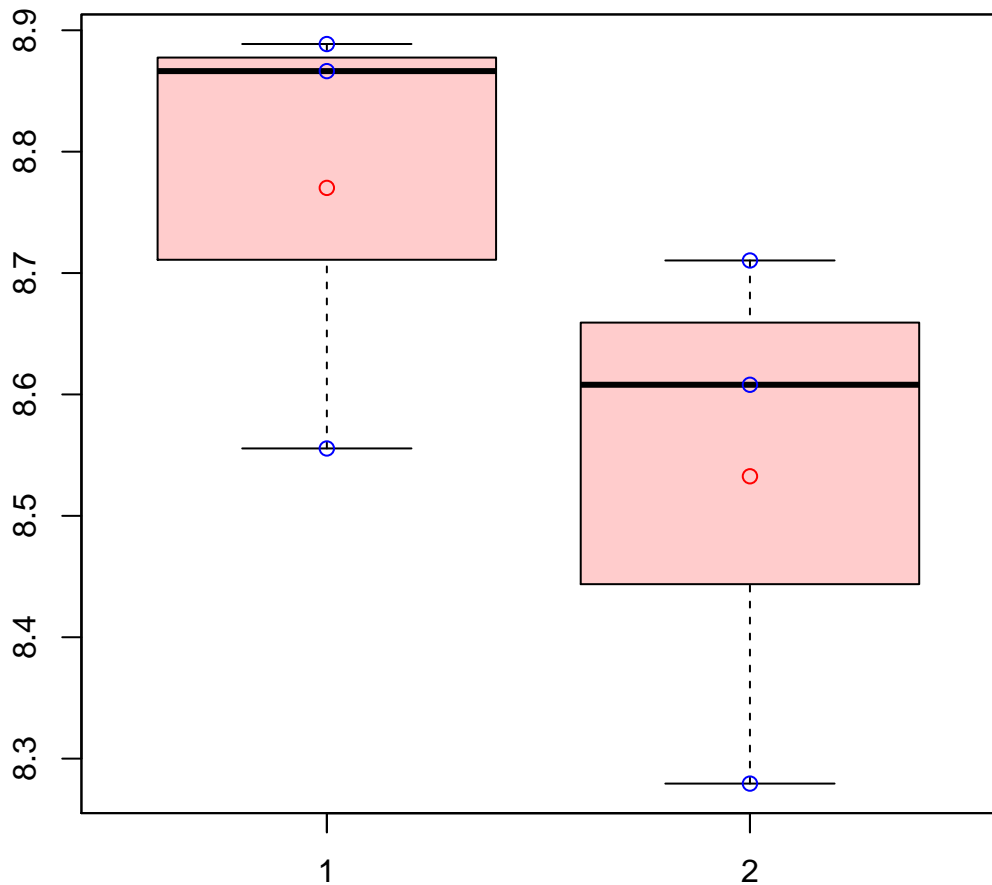

t-Test: p-value = 0.23

# CL1Contig8022|CL1Contig8022

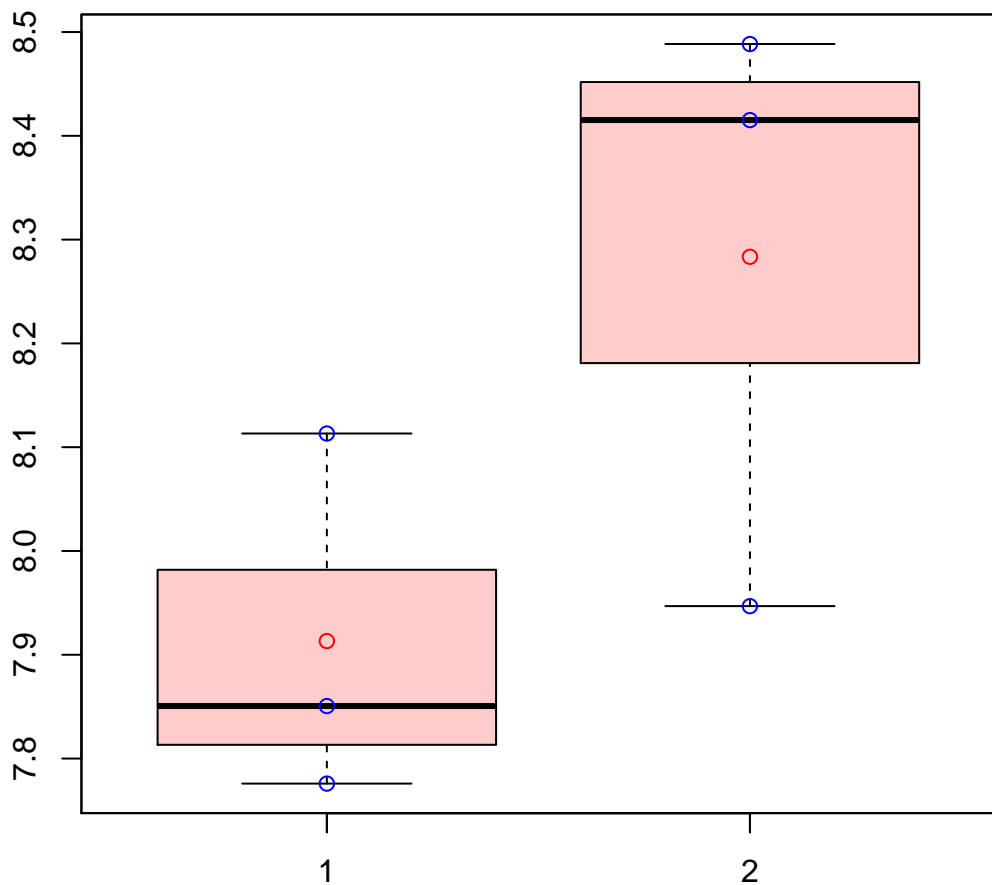

t-Test: p-value = 0.15

# CL1Contig8025|CL1Contig8025

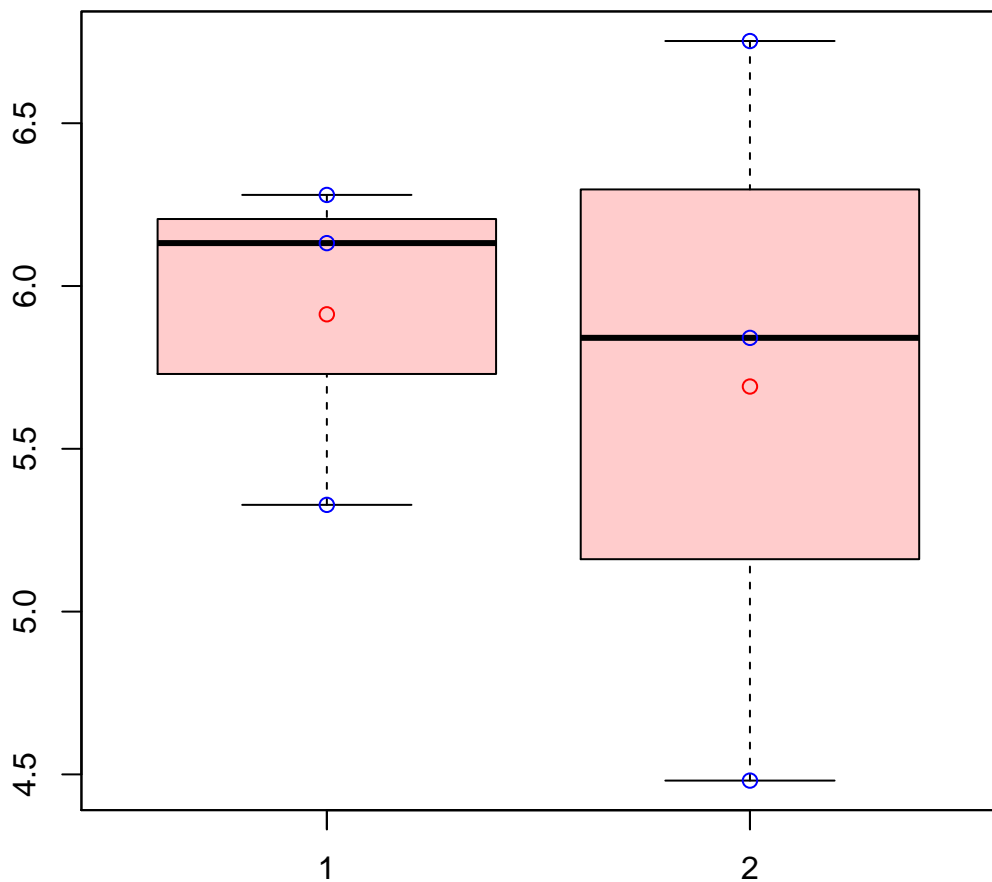

t-Test: p-value = 0.78

# CL1Contig805|CL1Contig805

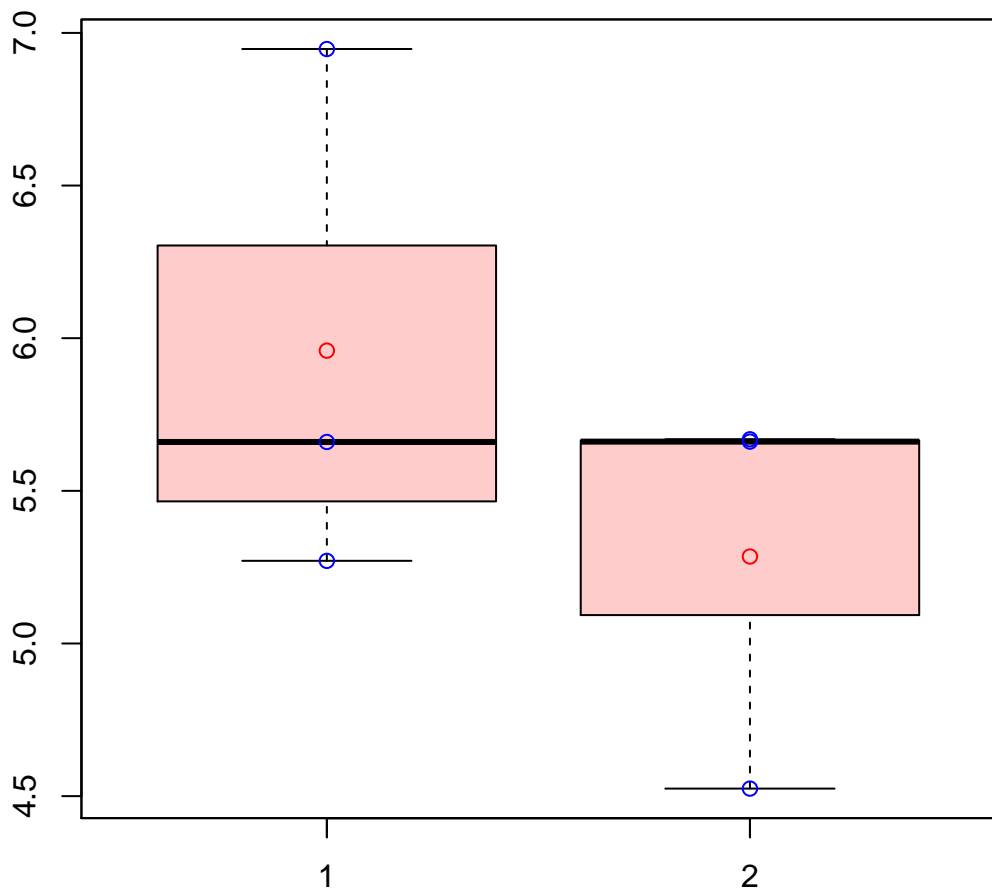

t-Test: p-value = 0.35



# CL1Contig8083|CL1Contig8083

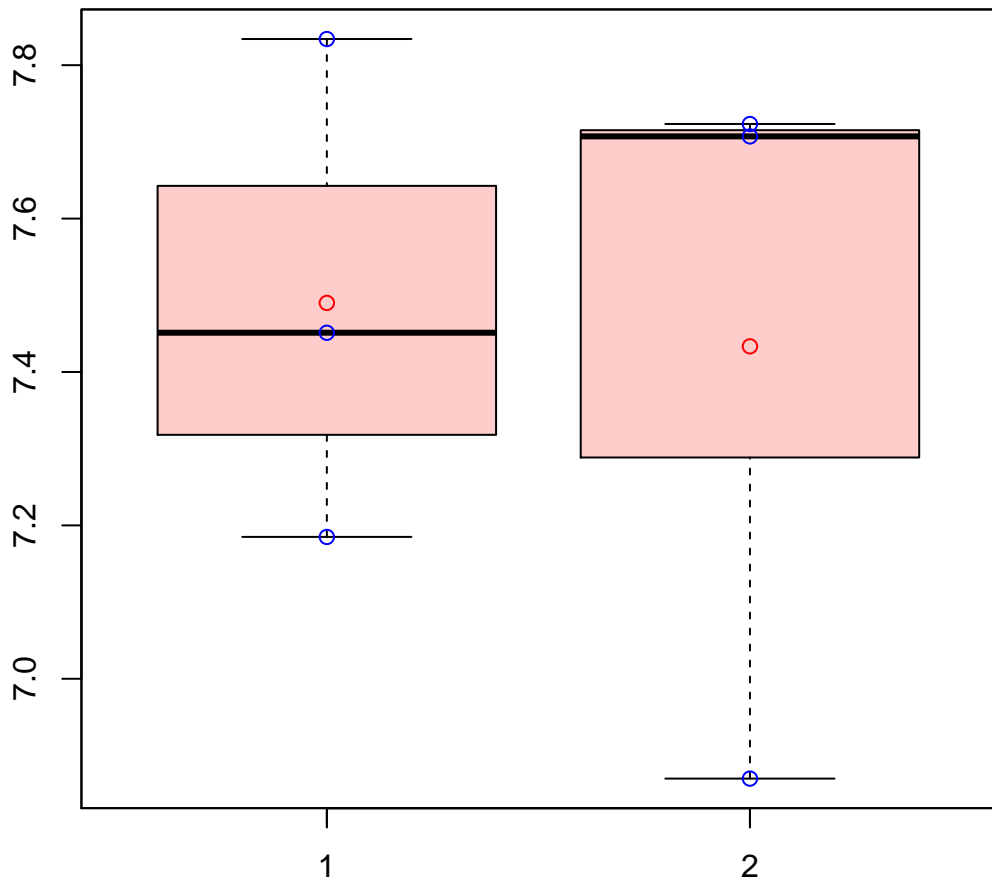

t-Test: p-value = 0.88

# CL1Contig8103|CL1Contig8103

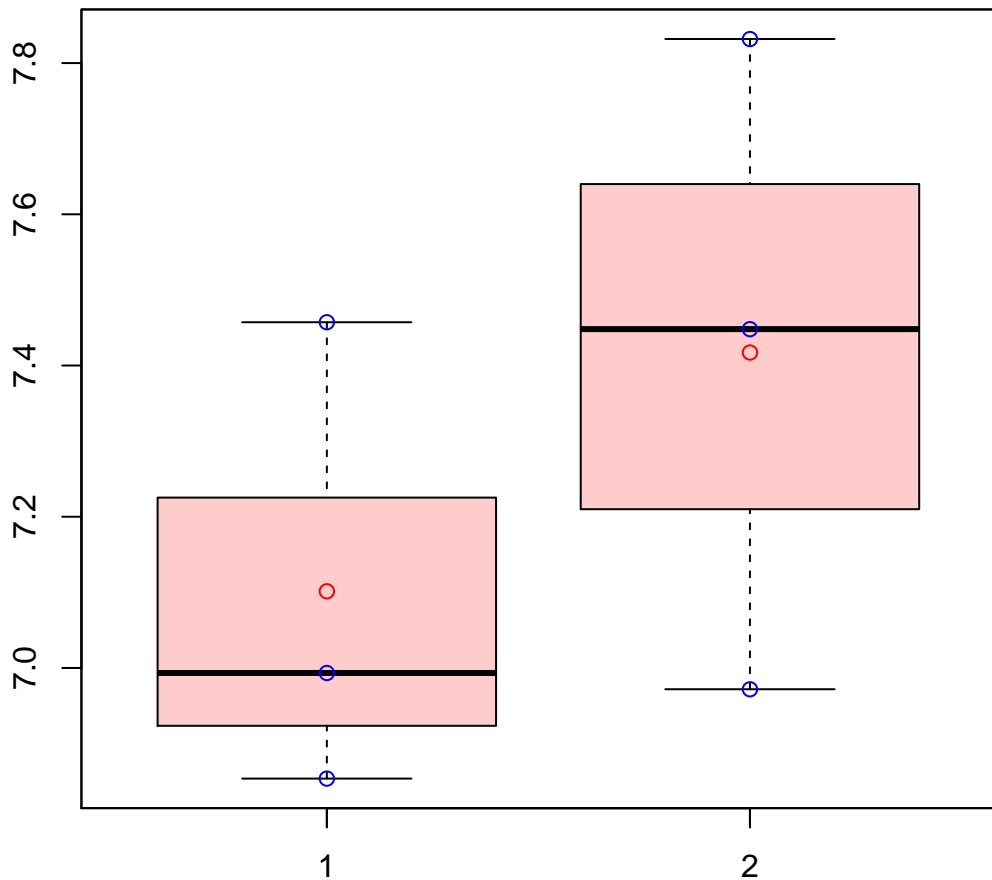

t-Test: p-value = 0.37

# CL1Contig8142|CL1Contig8142

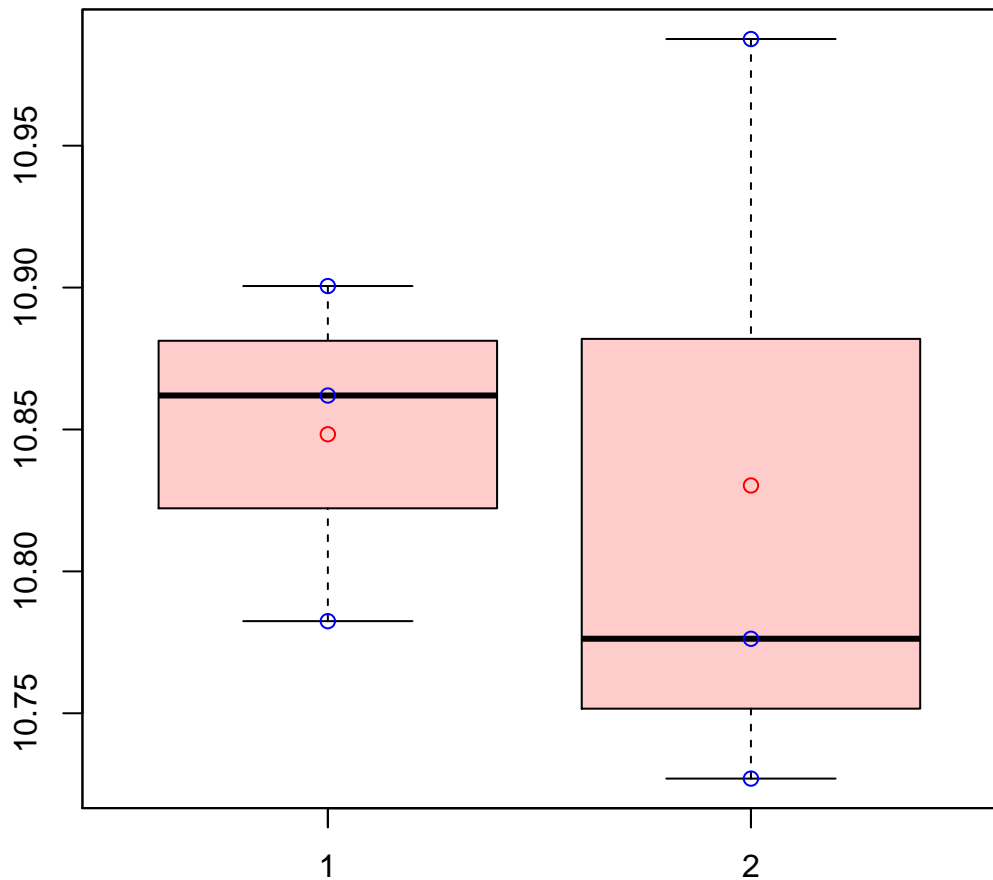

t-Test: p-value = 0.85

# CL1Contig8163|CL1Contig8163

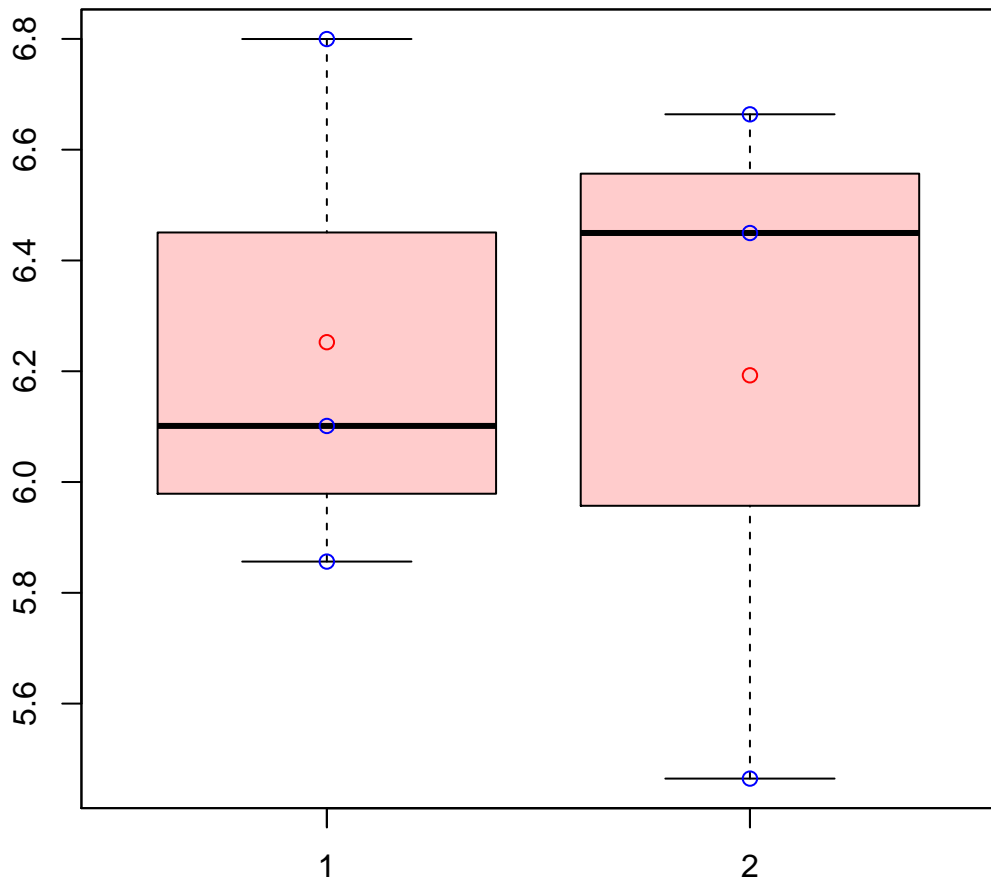

t-Test: p-value = 0.9

# CL1Contig8164|CL1Contig8164

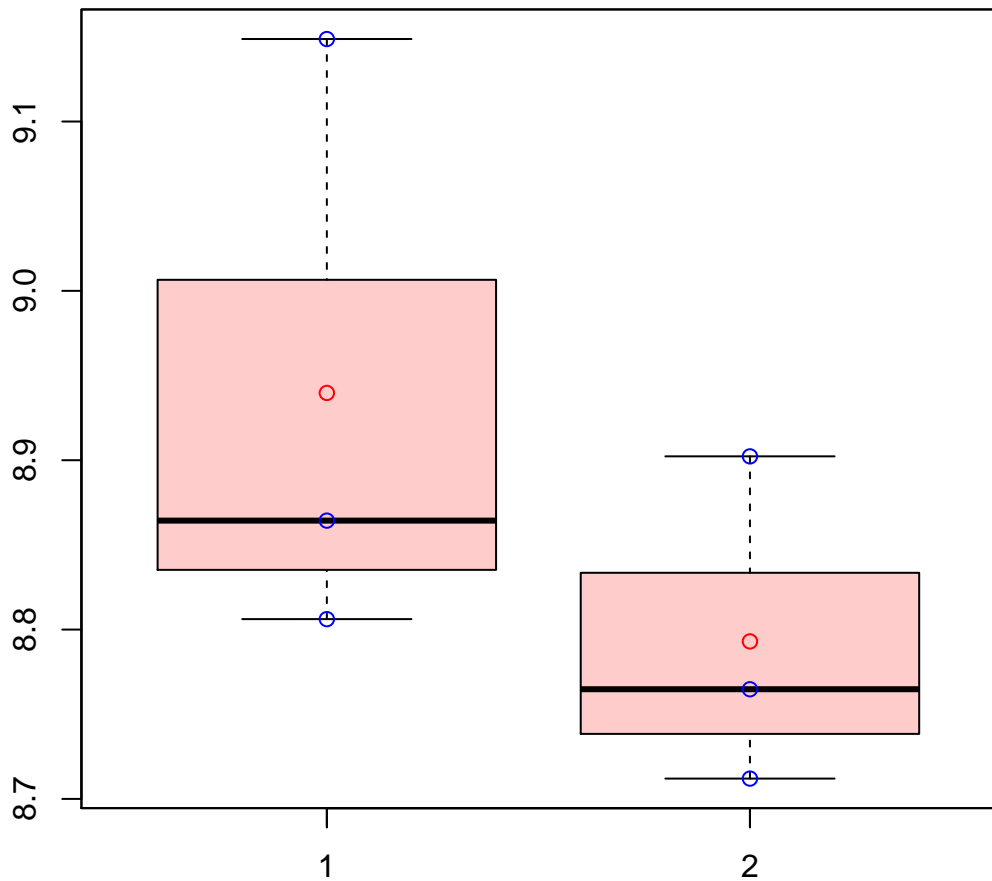

t-Test: p-value = 0.31

# CL1Contig8167|CL1Contig8167

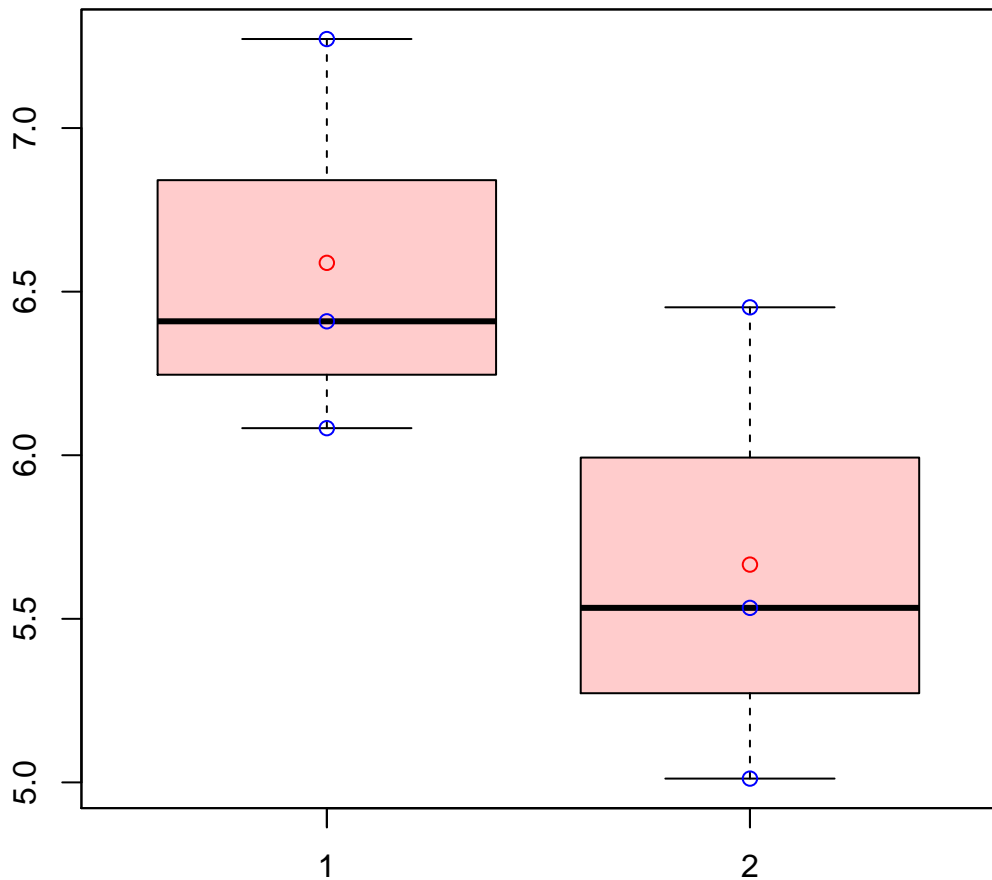

t-Test: p-value = 0.17

# CL1Contig8182|CL1Contig8182

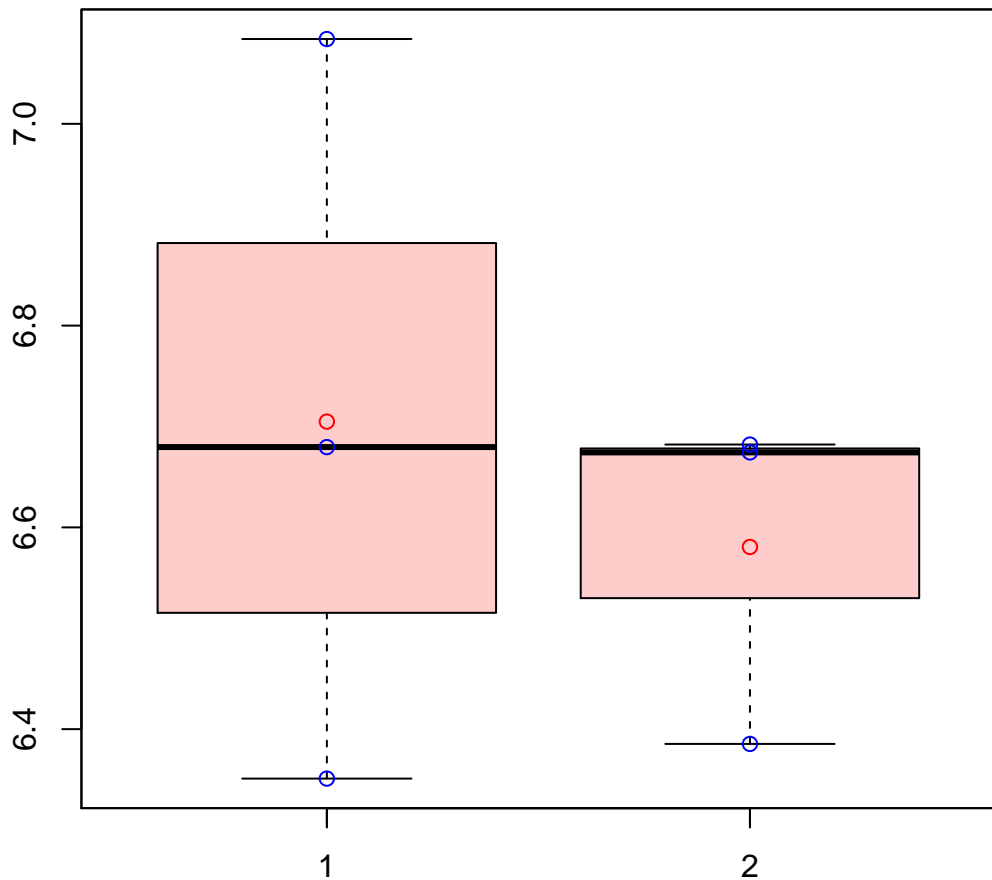

t-Test: p-value = 0.63

# CL1Contig8189|CL1Contig8189

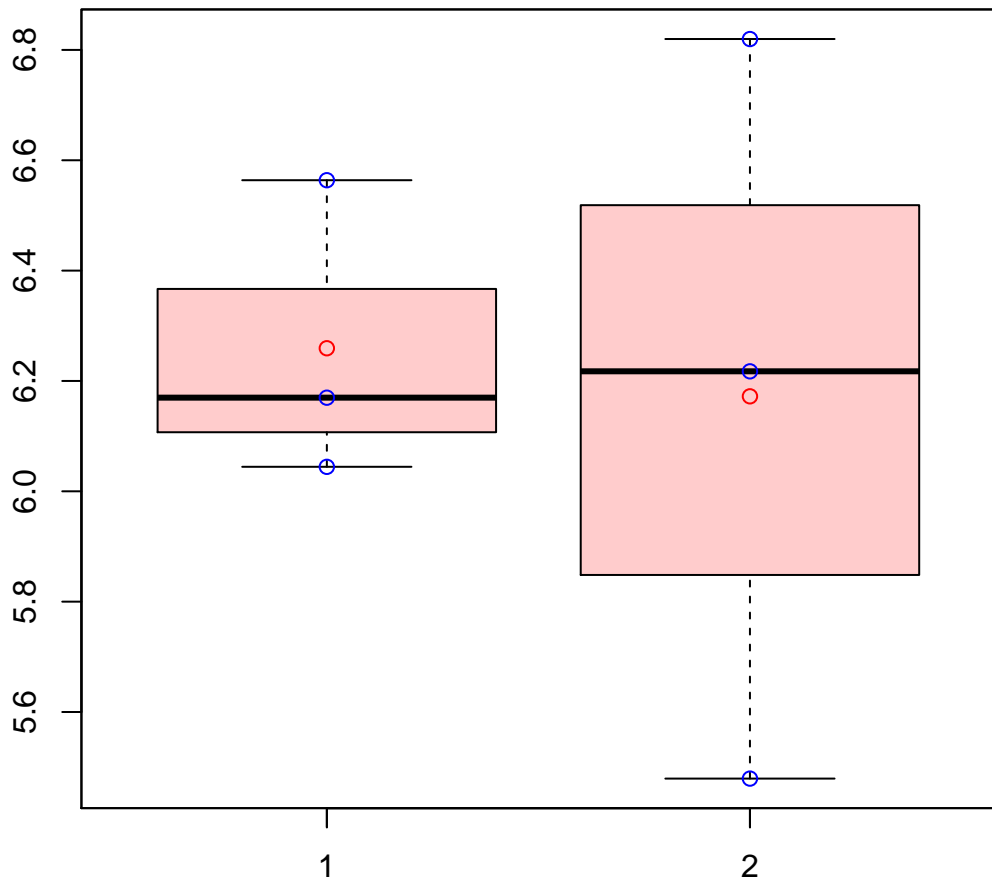

t-Test: p-value = 0.85



# CL1Contig8222|CL1Contig8222

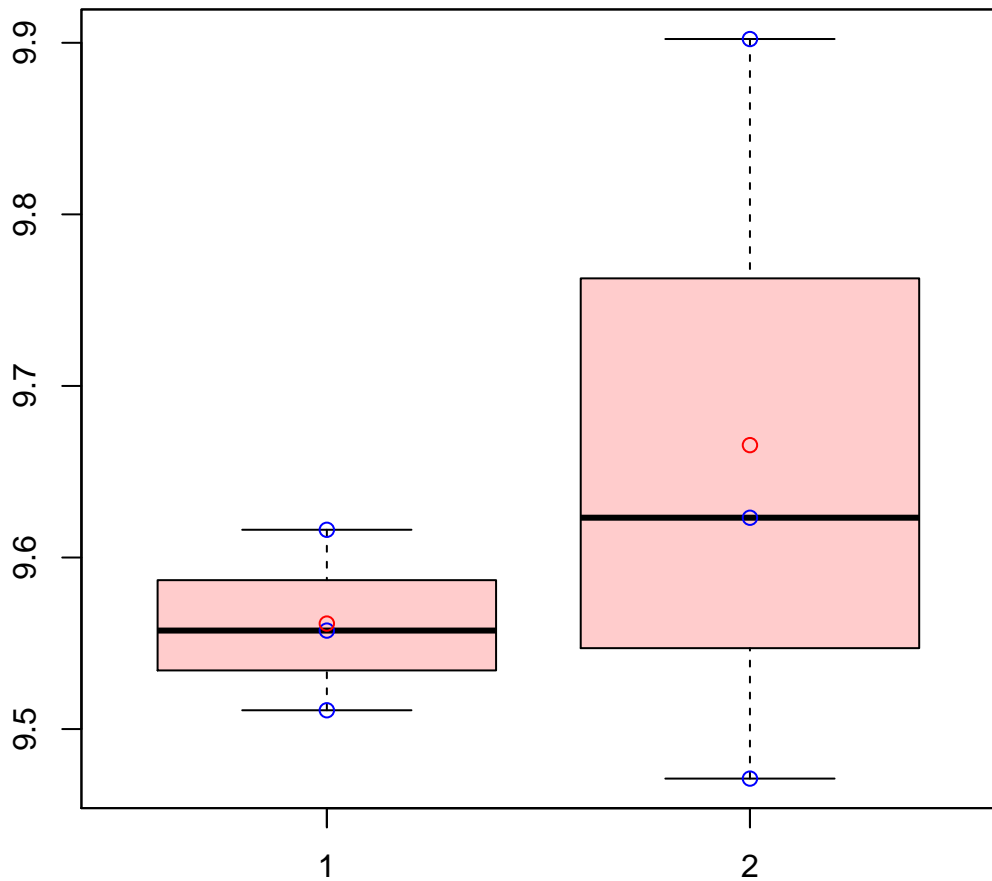

t-Test: p-value = 0.5

# CL1Contig8308|CL1Contig8308

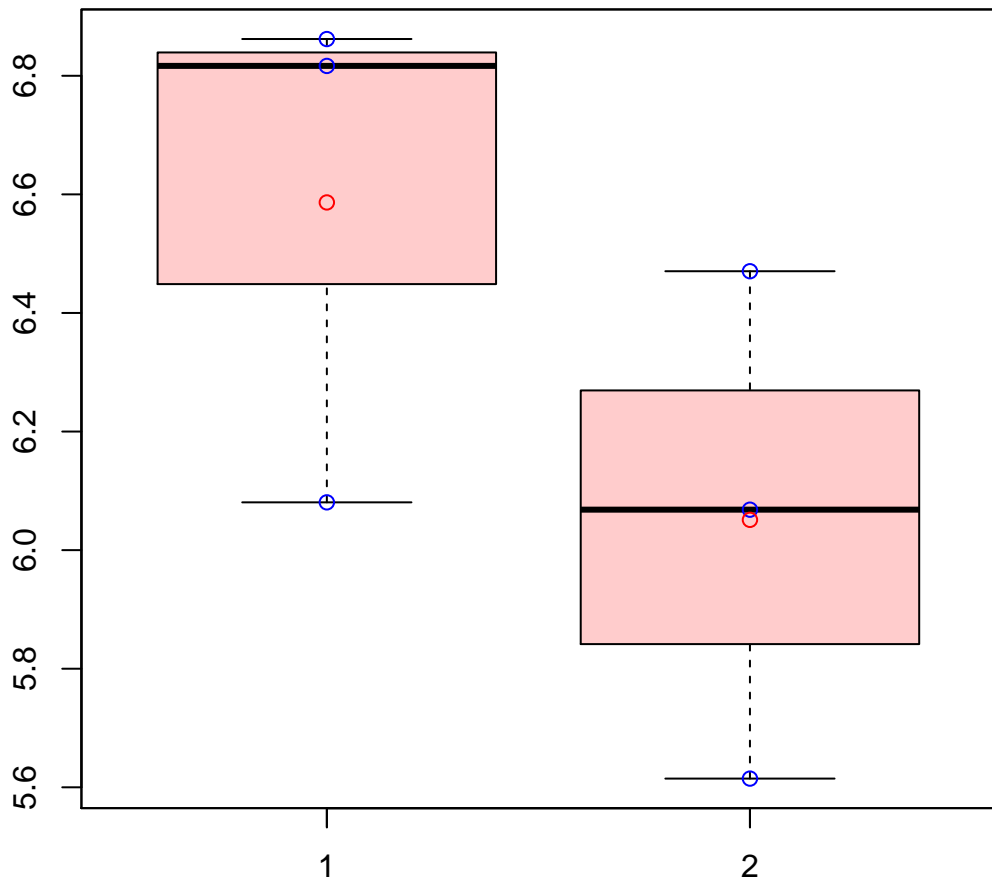

t-Test: p-value = 0.2

# CL1Contig8329|CL1Contig8329

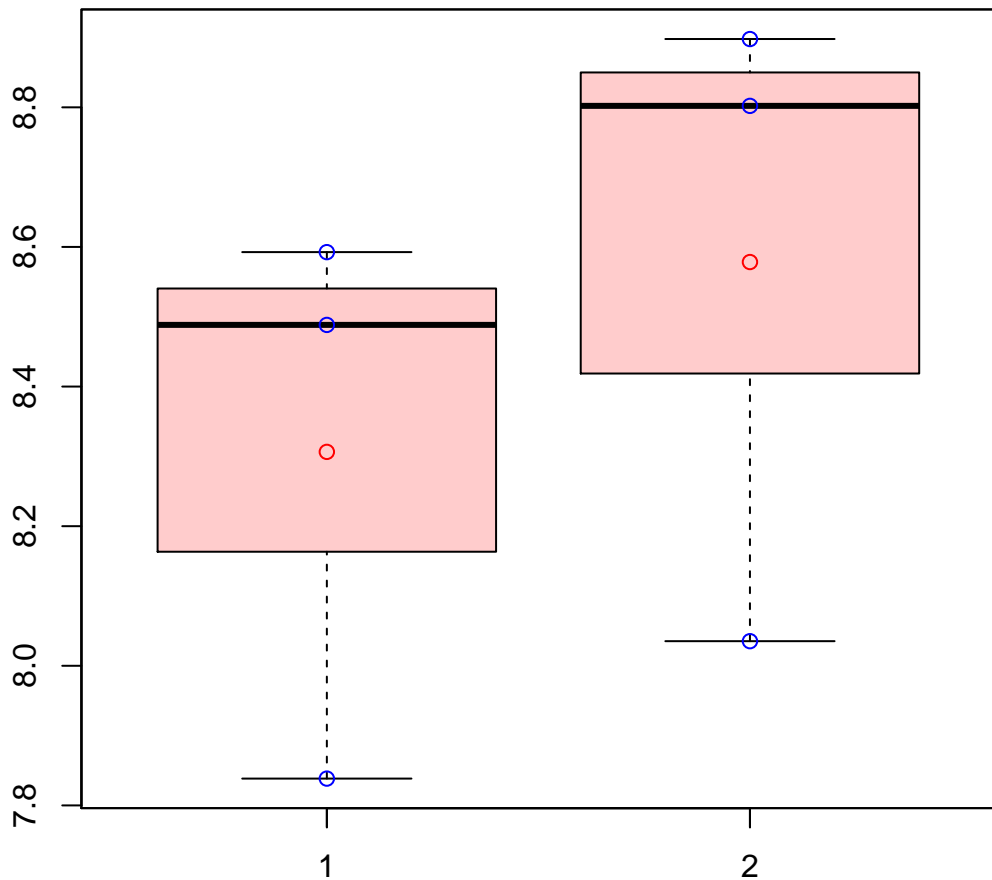

t-Test: p-value = 0.49

# CL1Contig8366|CL1Contig8366

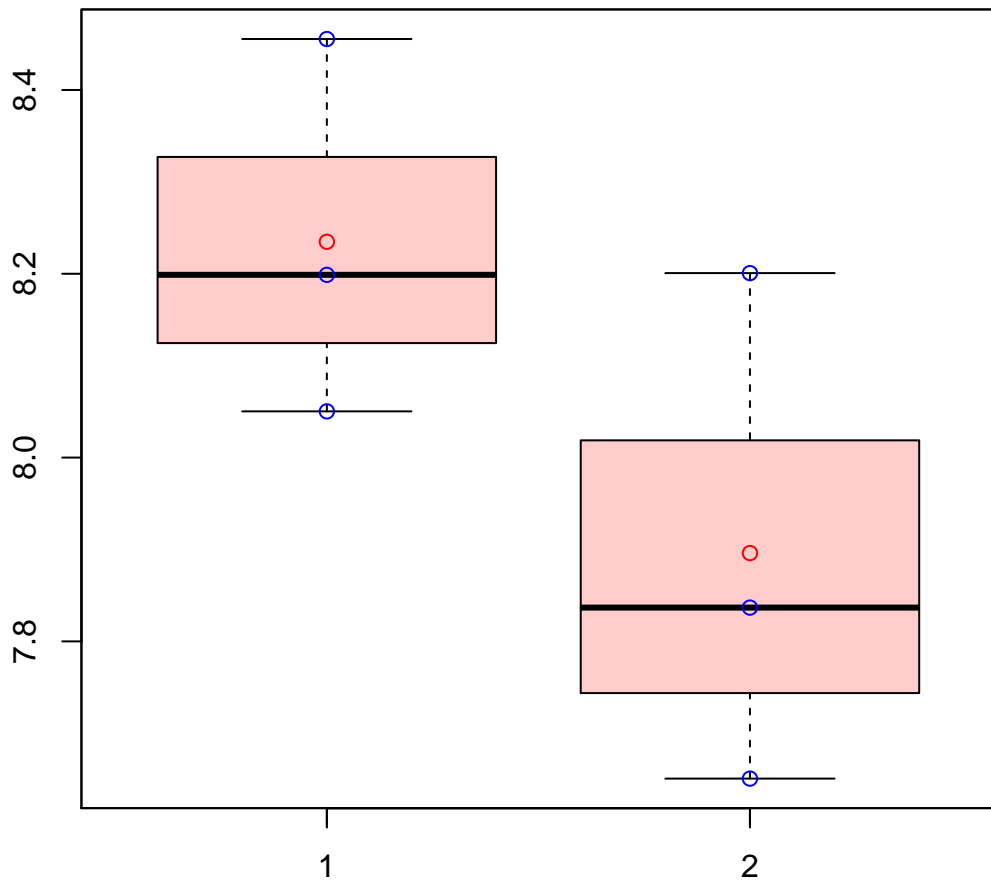

t-Test: p-value = 0.17

# CL1Contig8421|CL1Contig8421

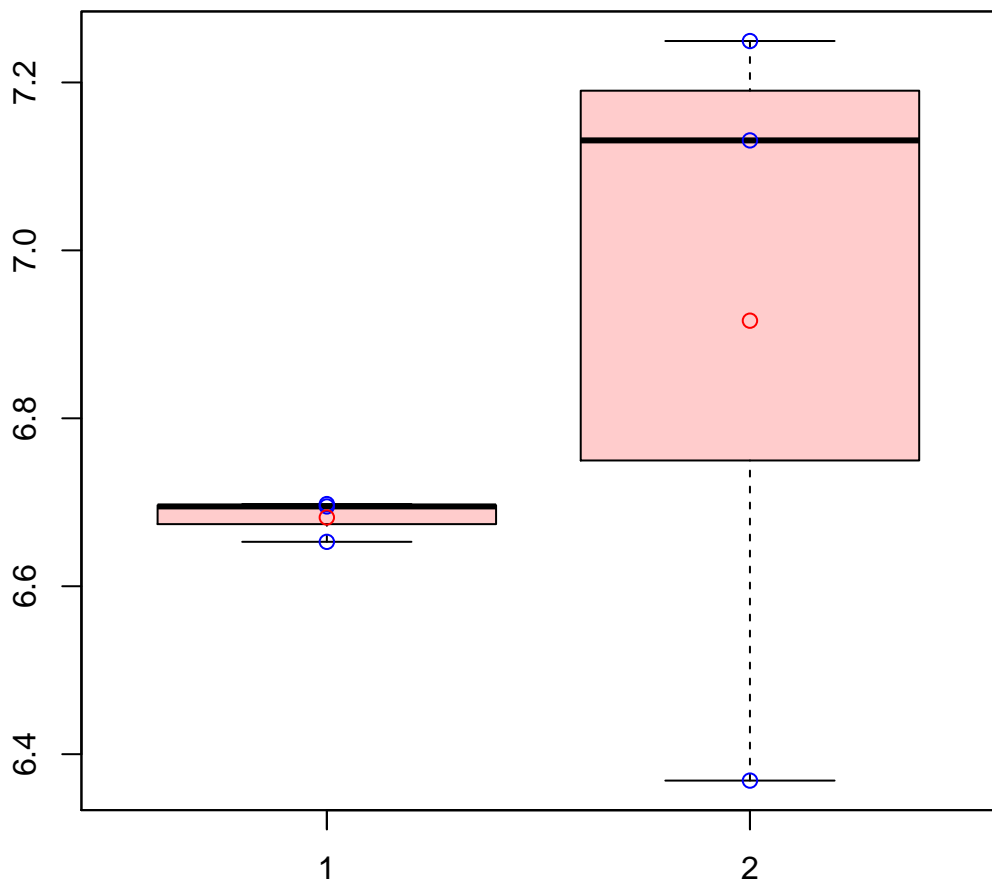

t-Test: p-value = 0.49

# CL1Contig8436|CL1Contig8436

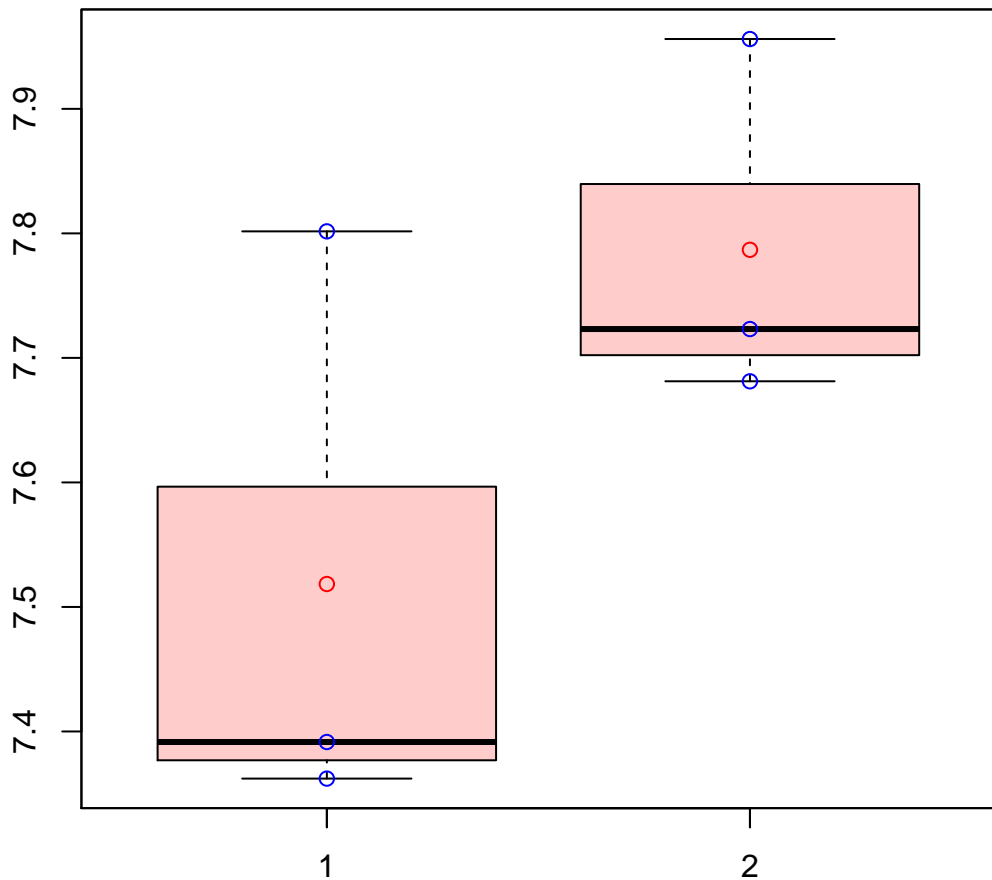

t-Test: p-value = 0.2

# CL1Contig8483|CL1Contig8483

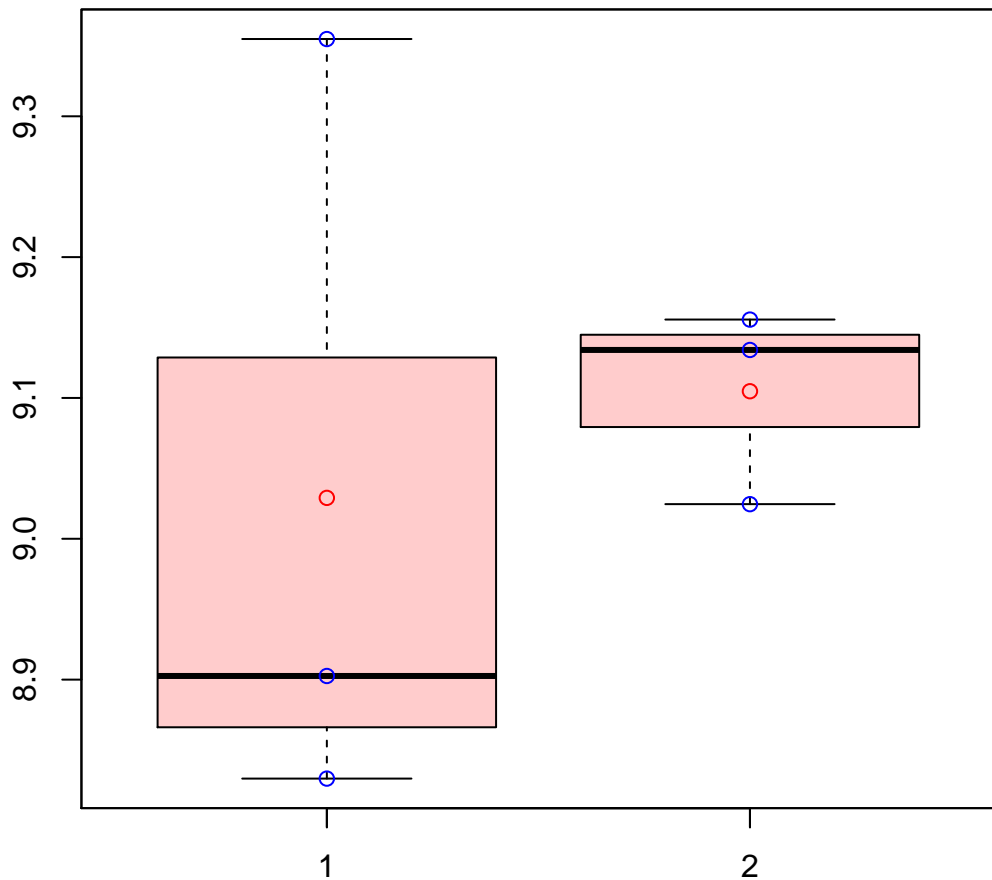

t-Test: p-value = 0.69

# CL1Contig849|CL1Contig849

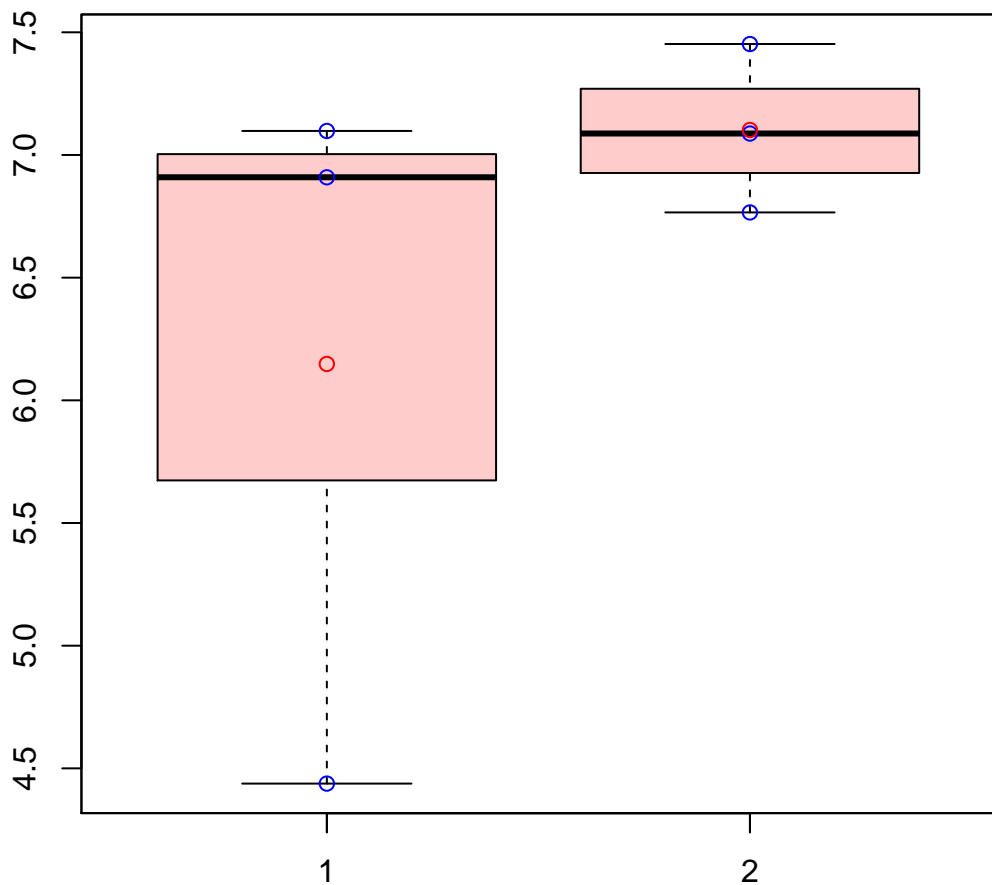

t-Test: p-value = 0.38



# CL1Contig8536|CL1Contig8536

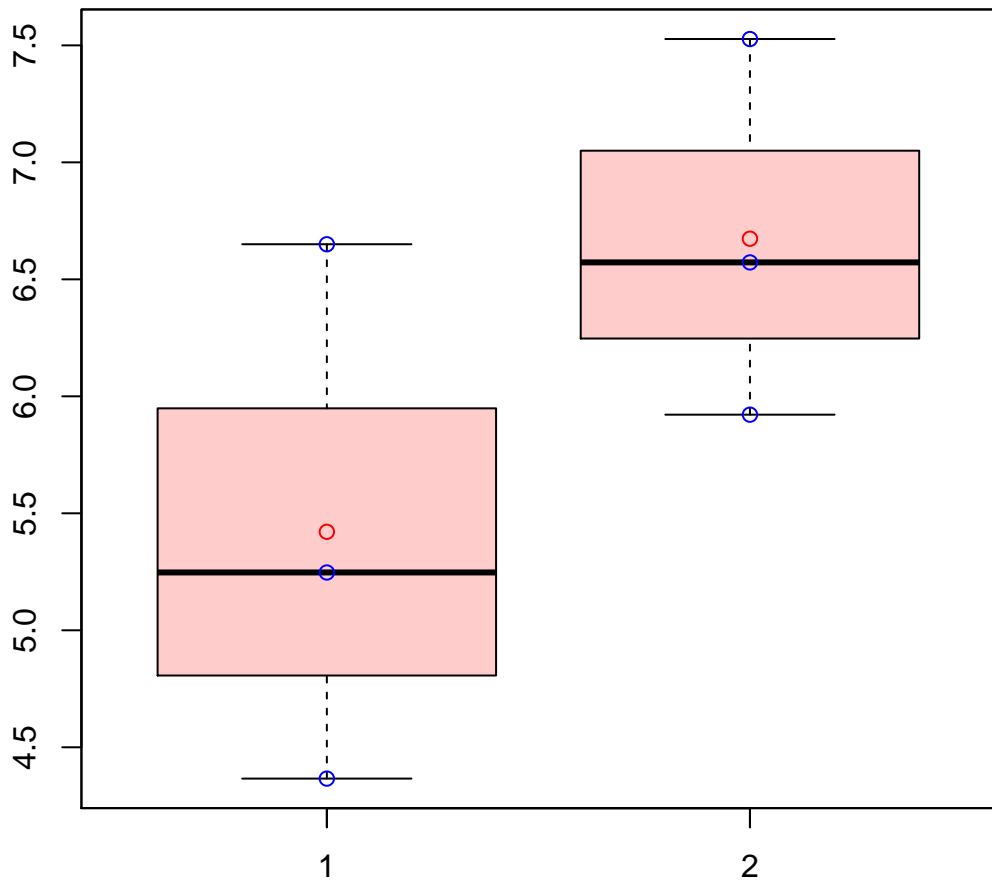

t-Test: p-value = 0.21

# CL1Contig8539|CL1Contig8539

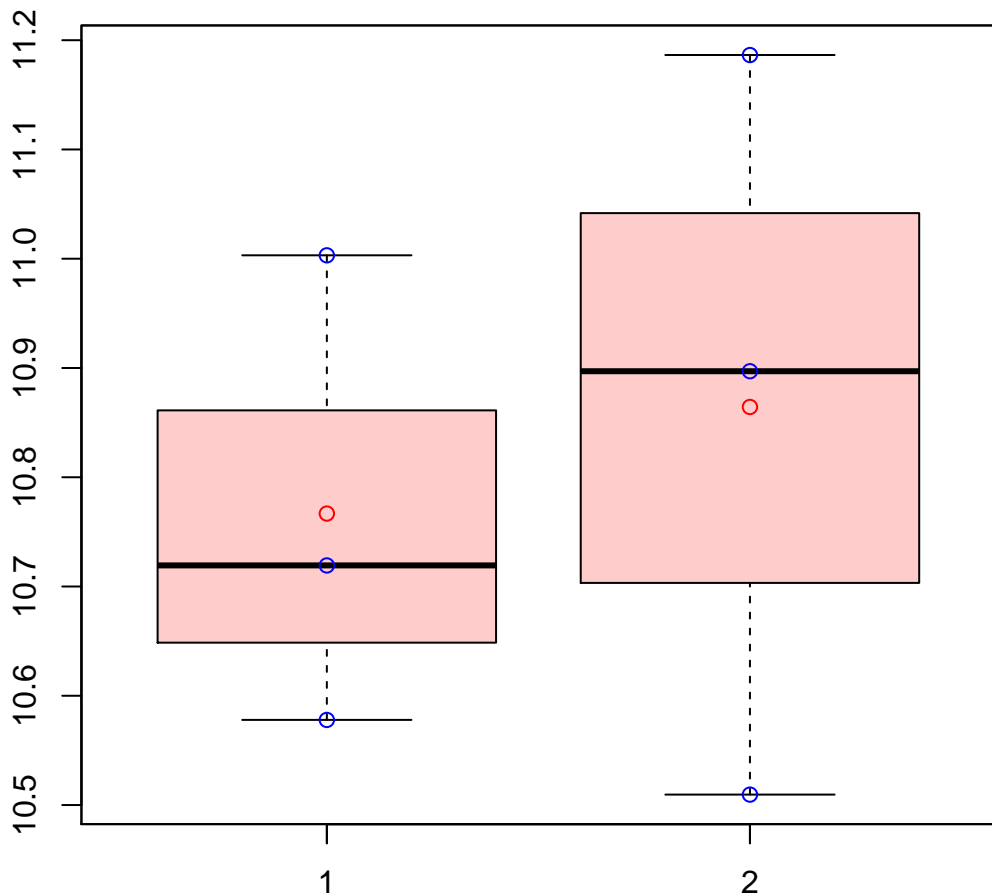

t-Test: p-value = 0.7

# CL1Contig8571|CL1Contig8571

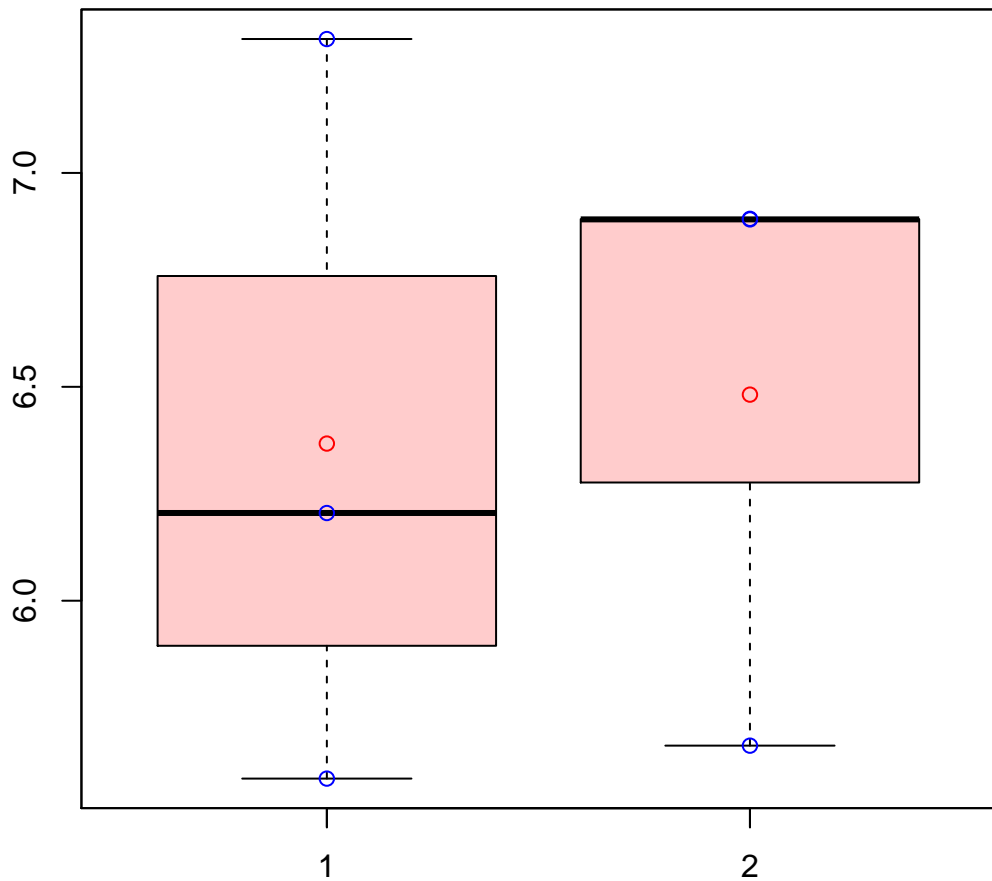

t-Test: p-value = 0.87

# CL1Contig8575|CL1Contig8575

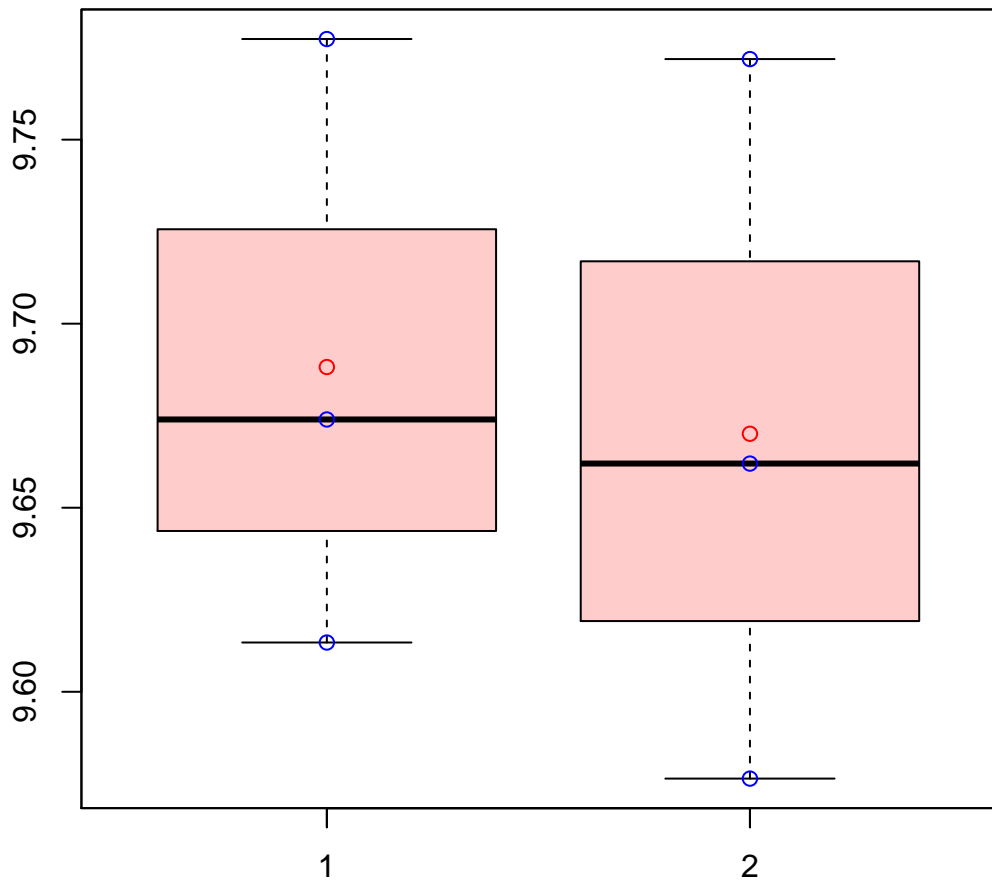

t-Test: p-value = 0.82

# CL1Contig8577|CL1Contig8577

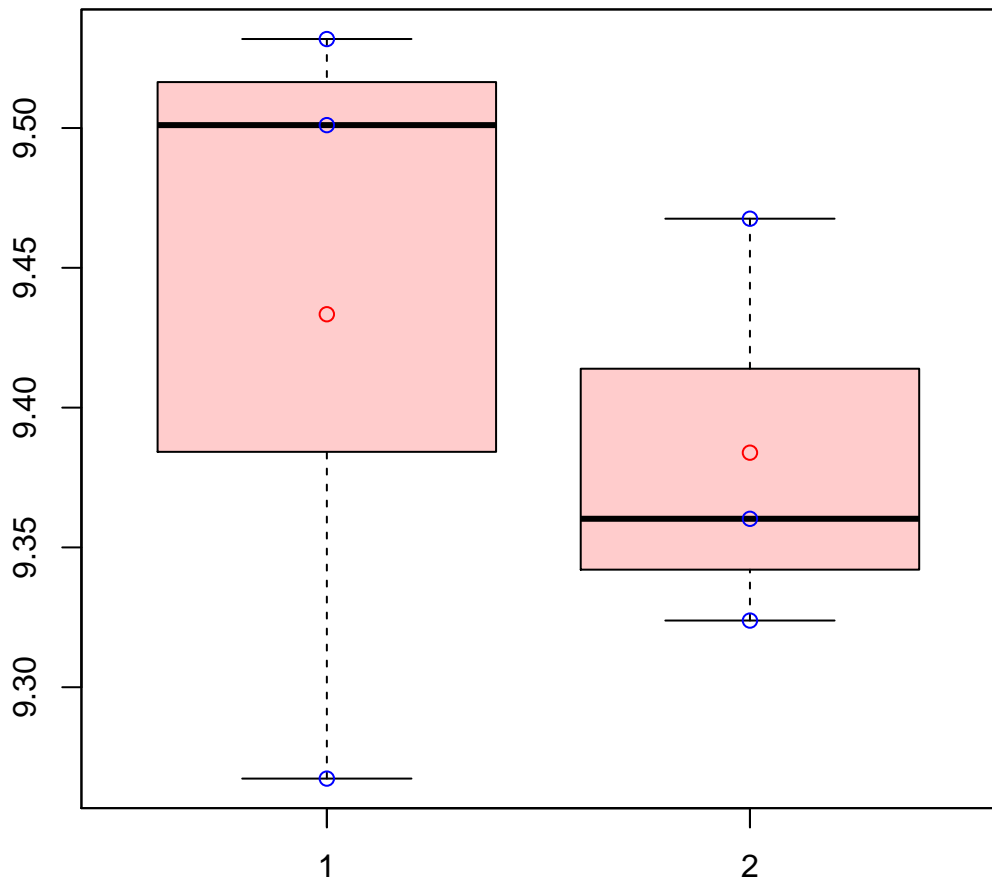

t-Test: p-value = 0.63

# CL1Contig8595|CL1Contig8595

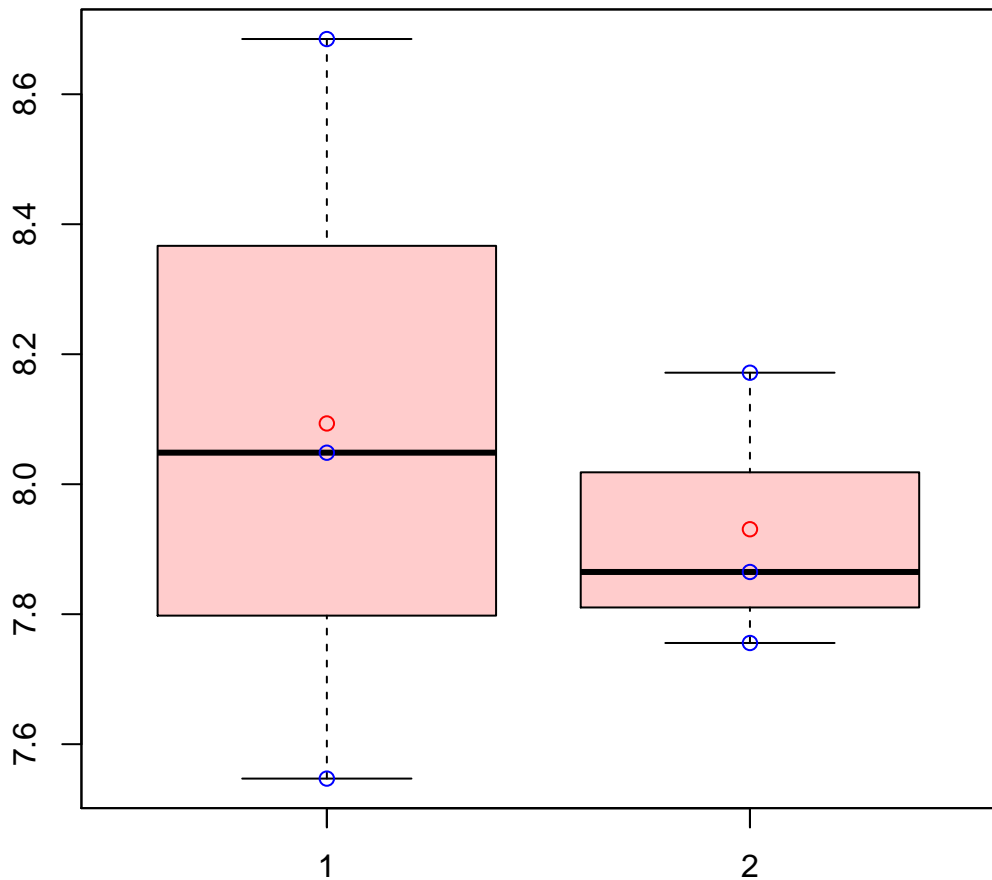

t-Test: p-value = 0.68

# CL1Contig8602|CL1Contig8602

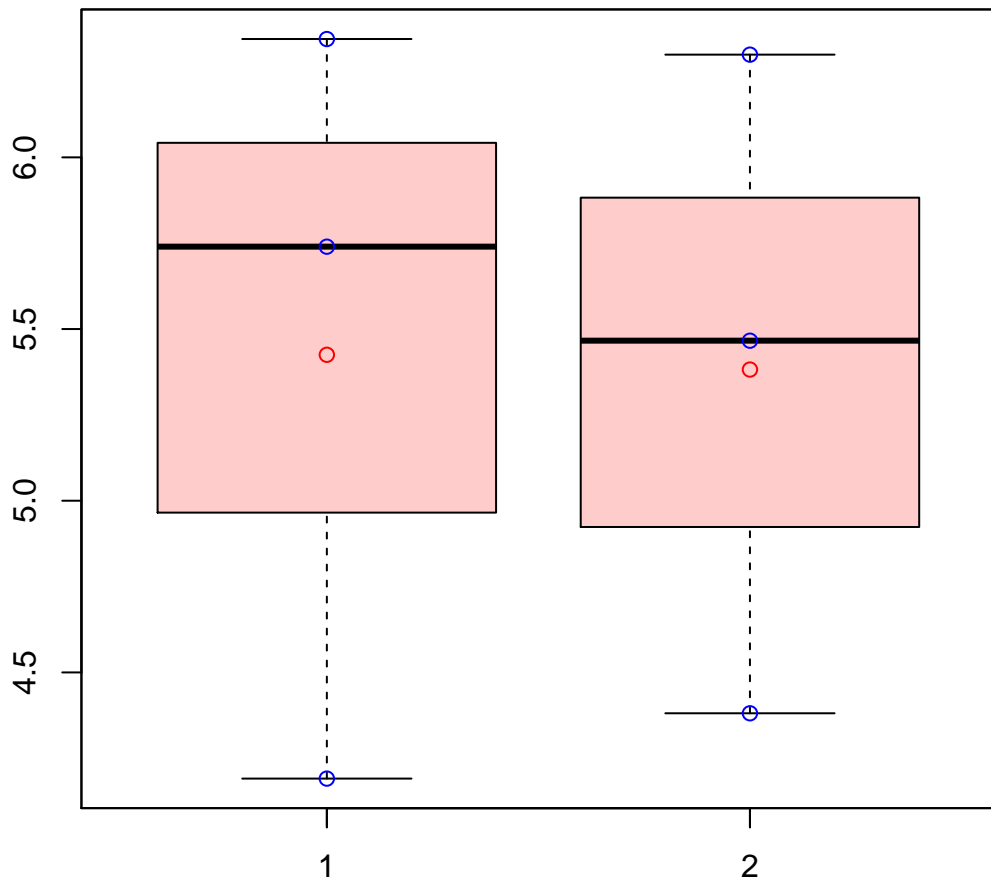

t-Test: p-value = 0.96

# CL1Contig8605|CL1Contig8605

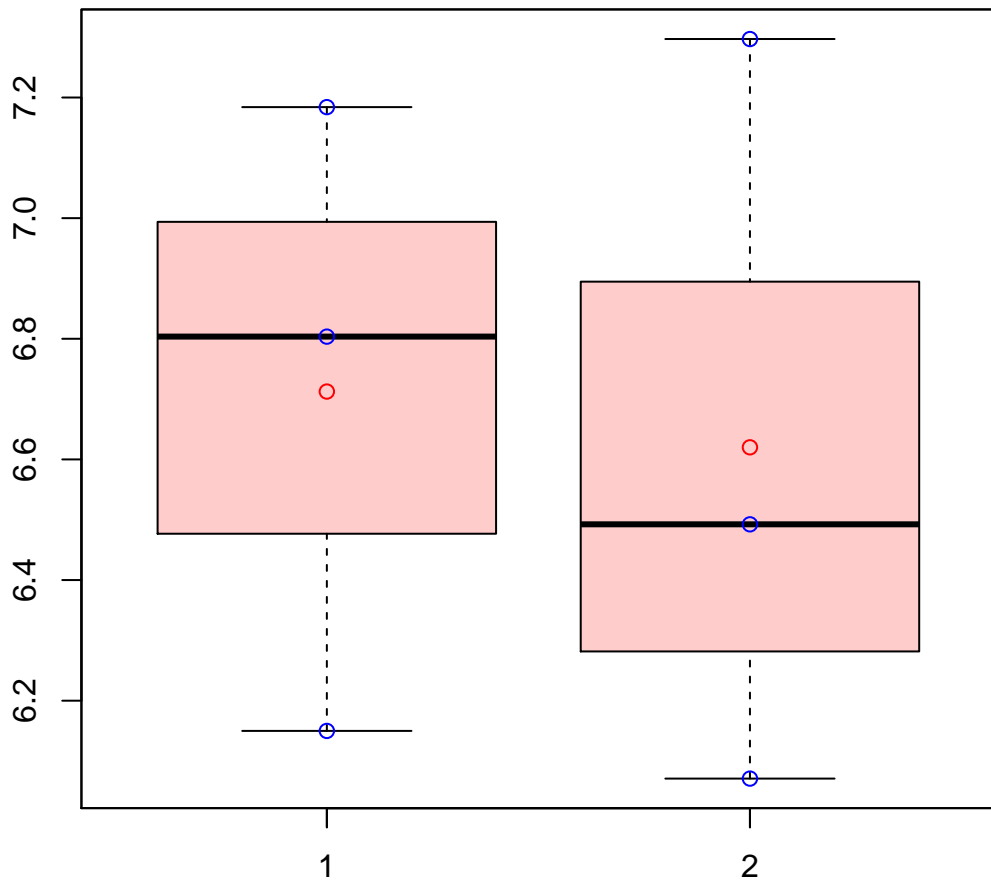

t-Test: p-value = 0.85



# CL1Contig8606|CL1Contig8606

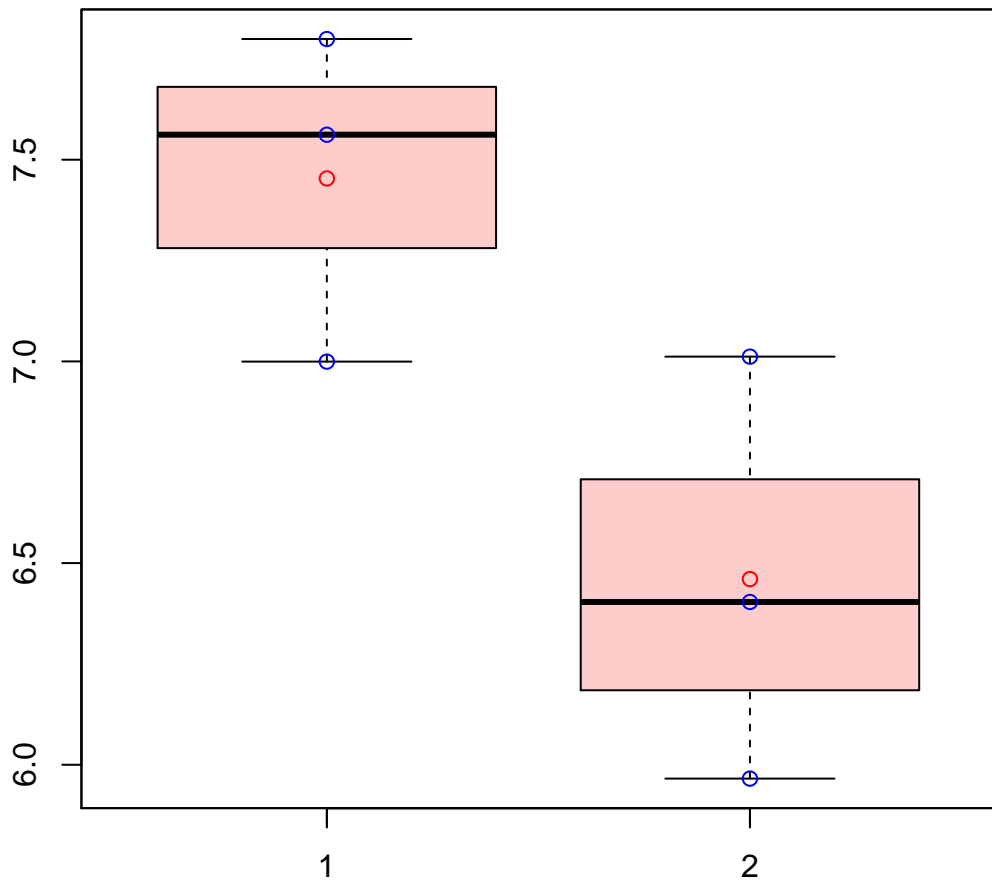

t-Test: p-value = 0.06

# CL1Contig8614|CL1Contig8614

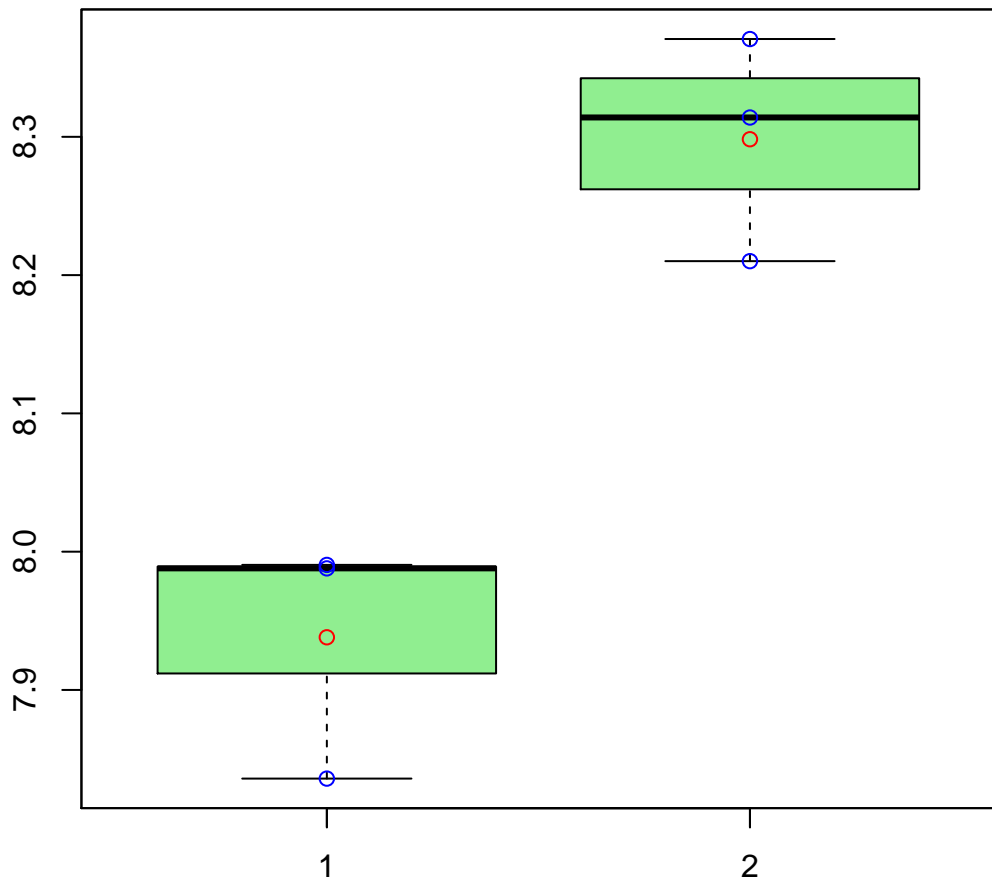

t-Test: p-value = 0.01

# CL1Contig8620|CL1Contig8620

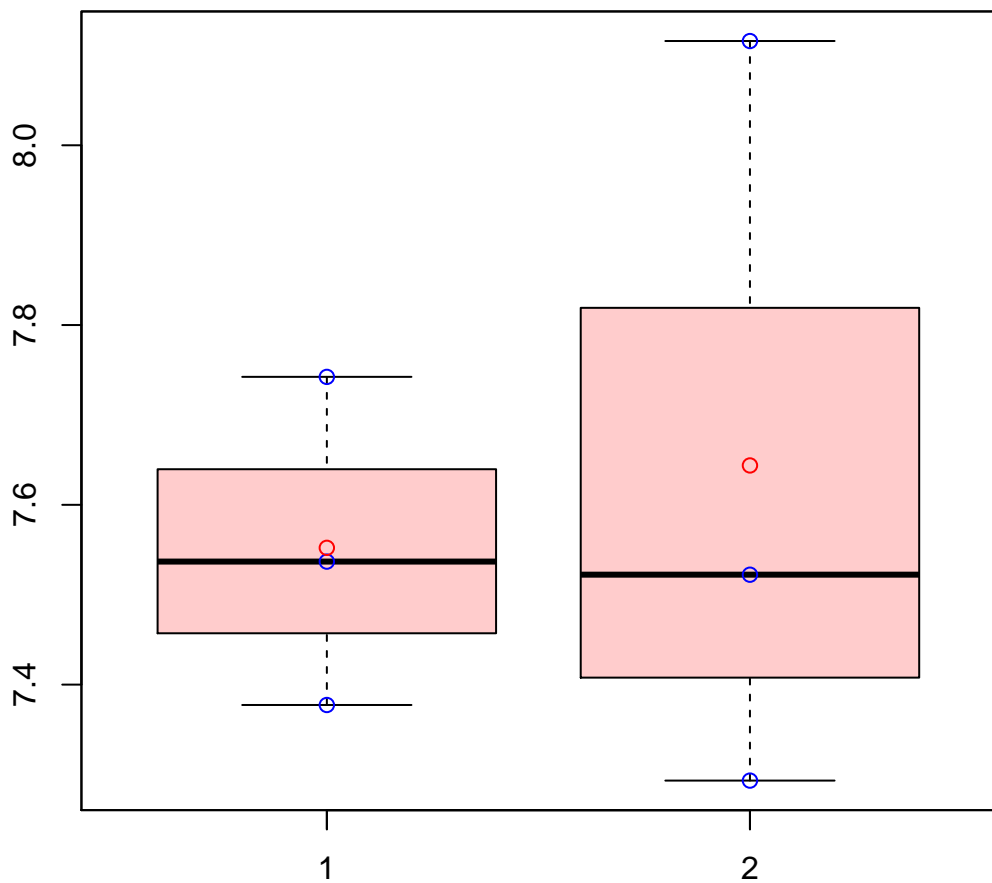

t-Test: p-value = 0.76

# CL1Contig8622|CL1Contig8622

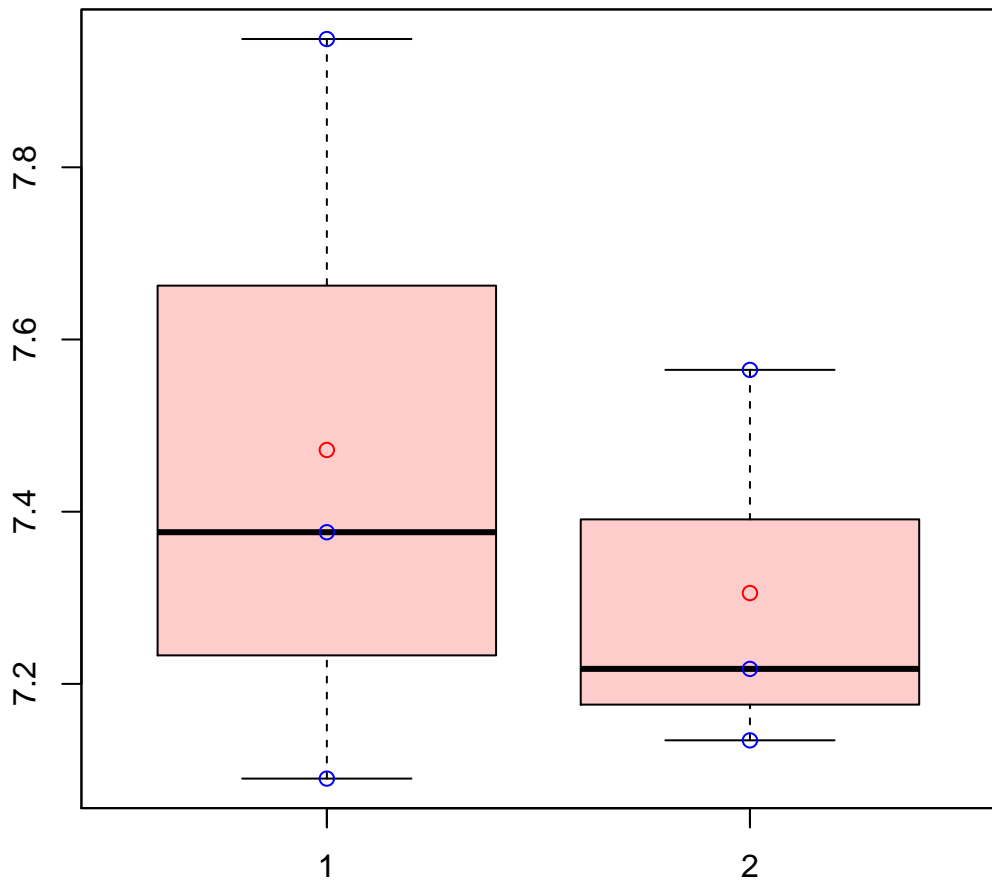

t-Test: p-value = 0.6

# CL1Contig8626|CL1Contig8626

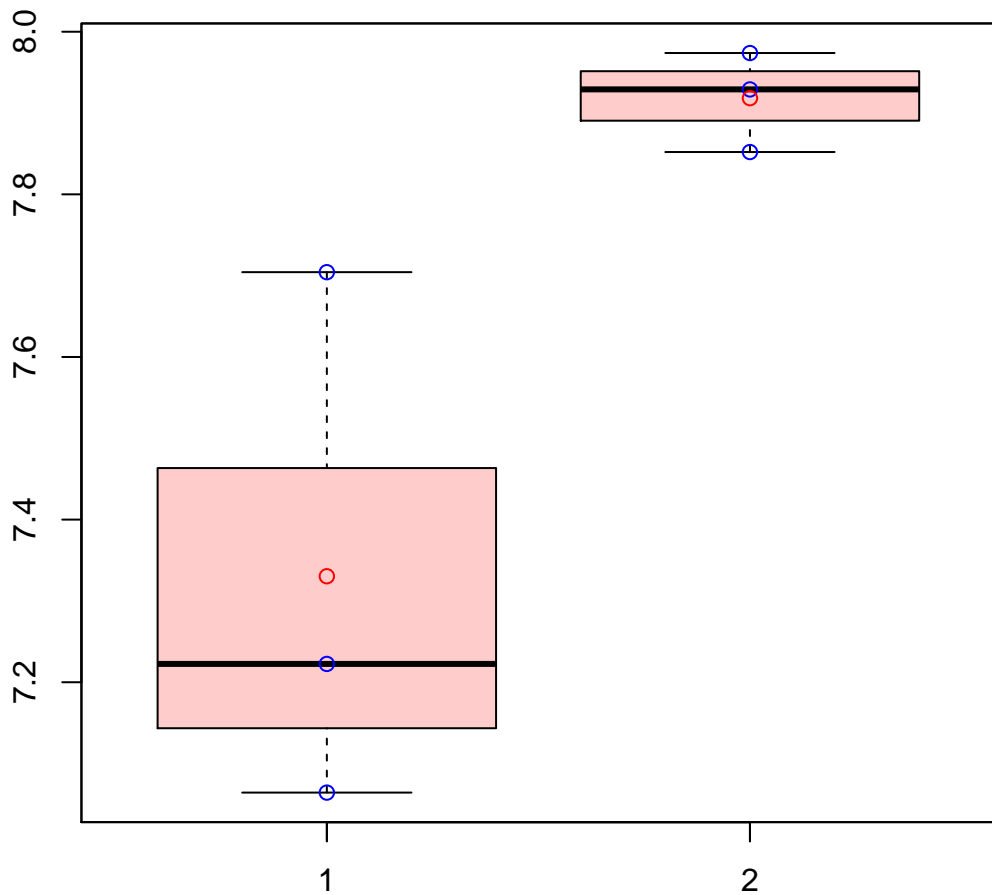

t-Test: p-value = 0.09

# CL1Contig8632|CL1Contig8632

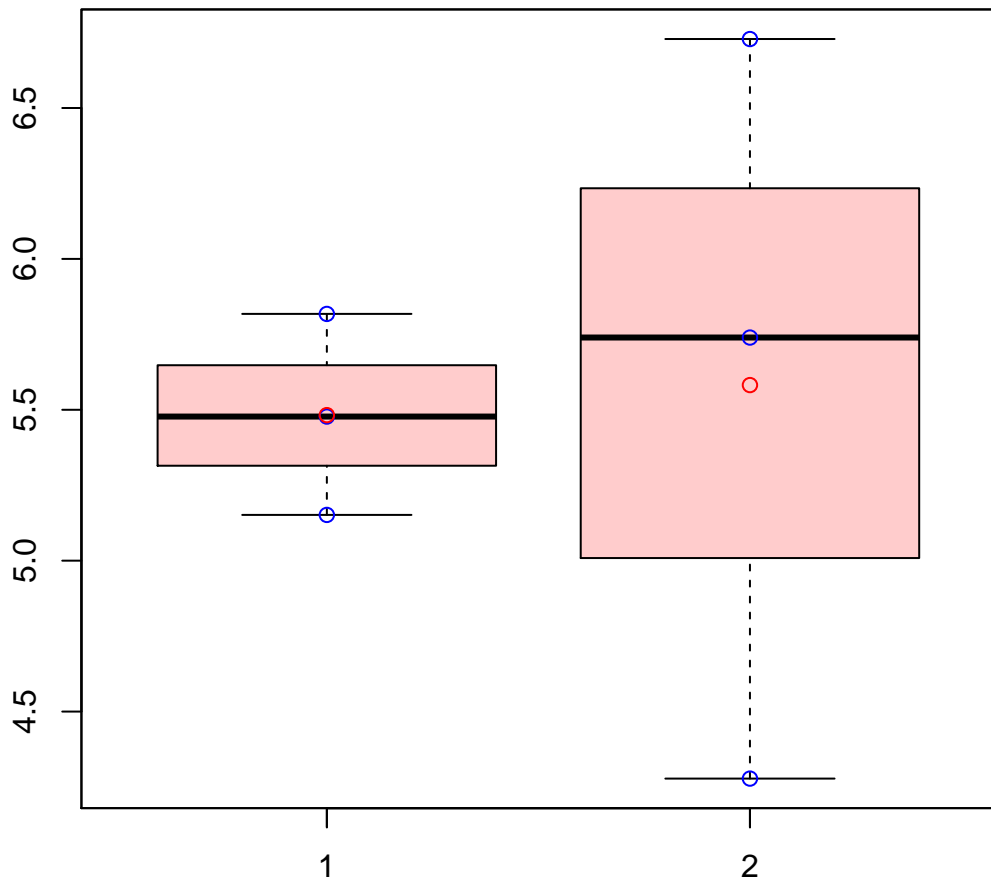

t-Test: p-value = 0.9

# CL1Contig8636|CL1Contig8636

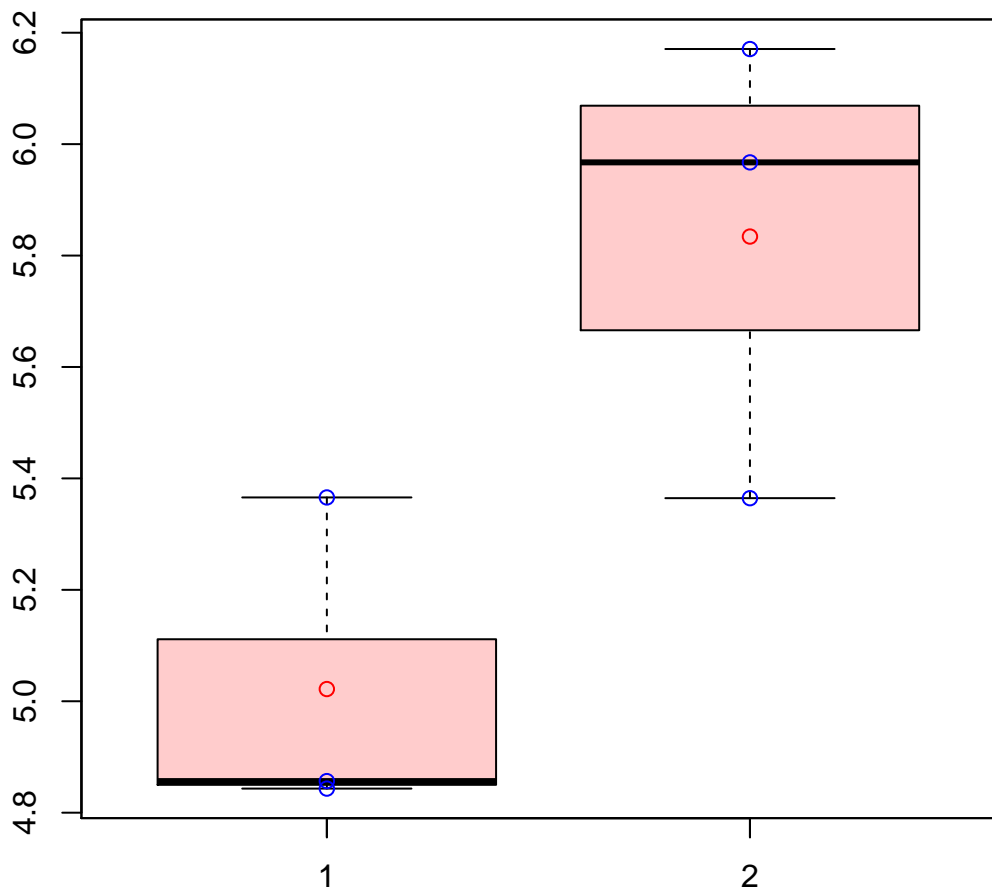

t-Test: p-value = 0.06

# CL1Contig8638|CL1Contig8638

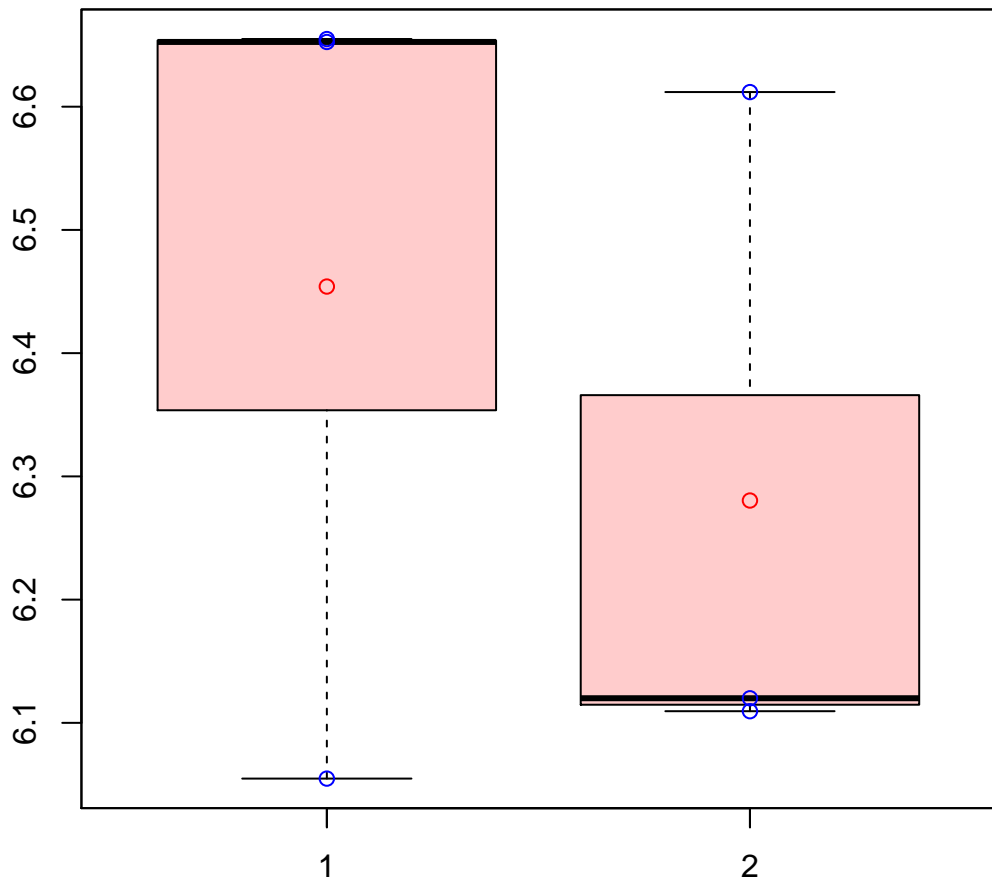

t-Test: p-value = 0.54



# CL1Contig8683|CL1Contig8683

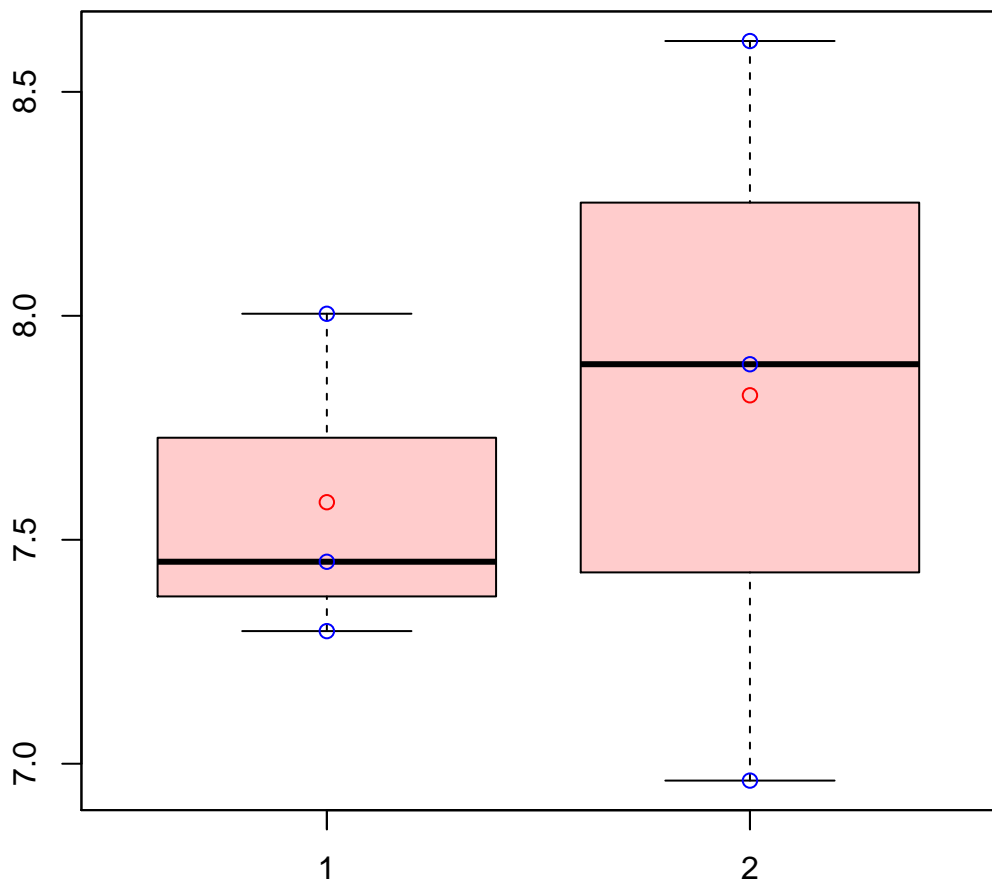

t-Test: p-value = 0.68

# CL1Contig8722|CL1Contig8722

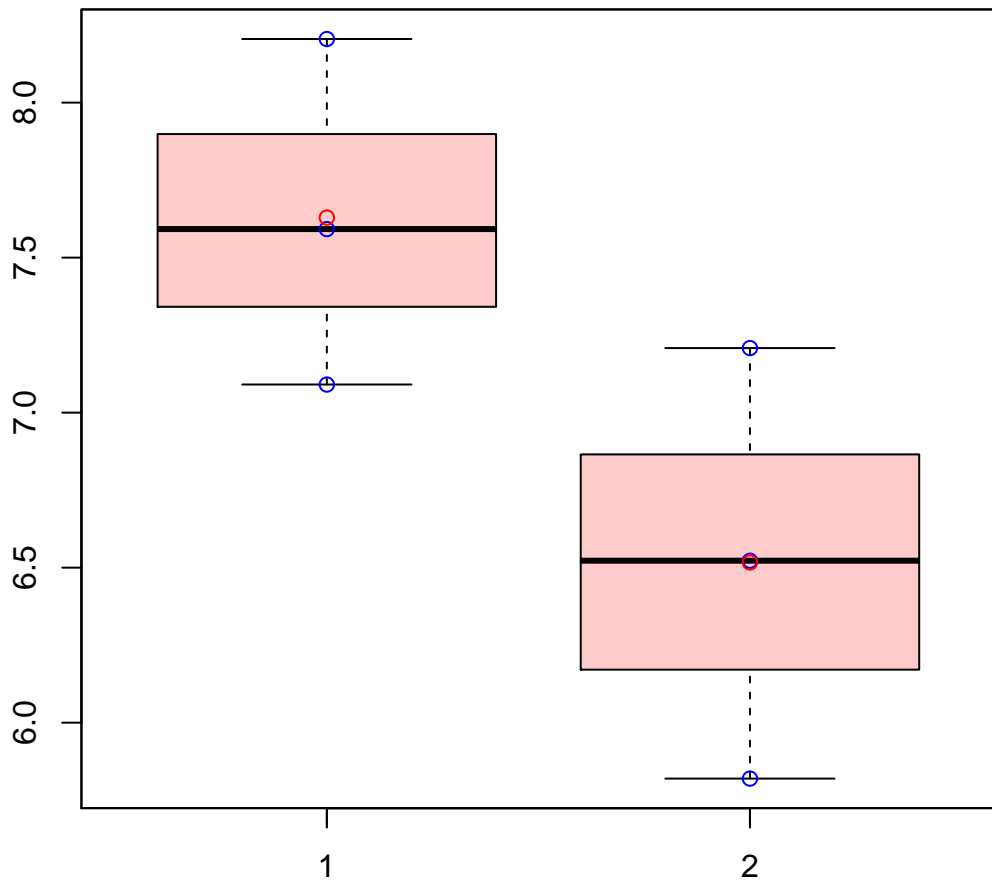

t-Test: p-value = 0.1

# CL1Contig8732|CL1Contig8732

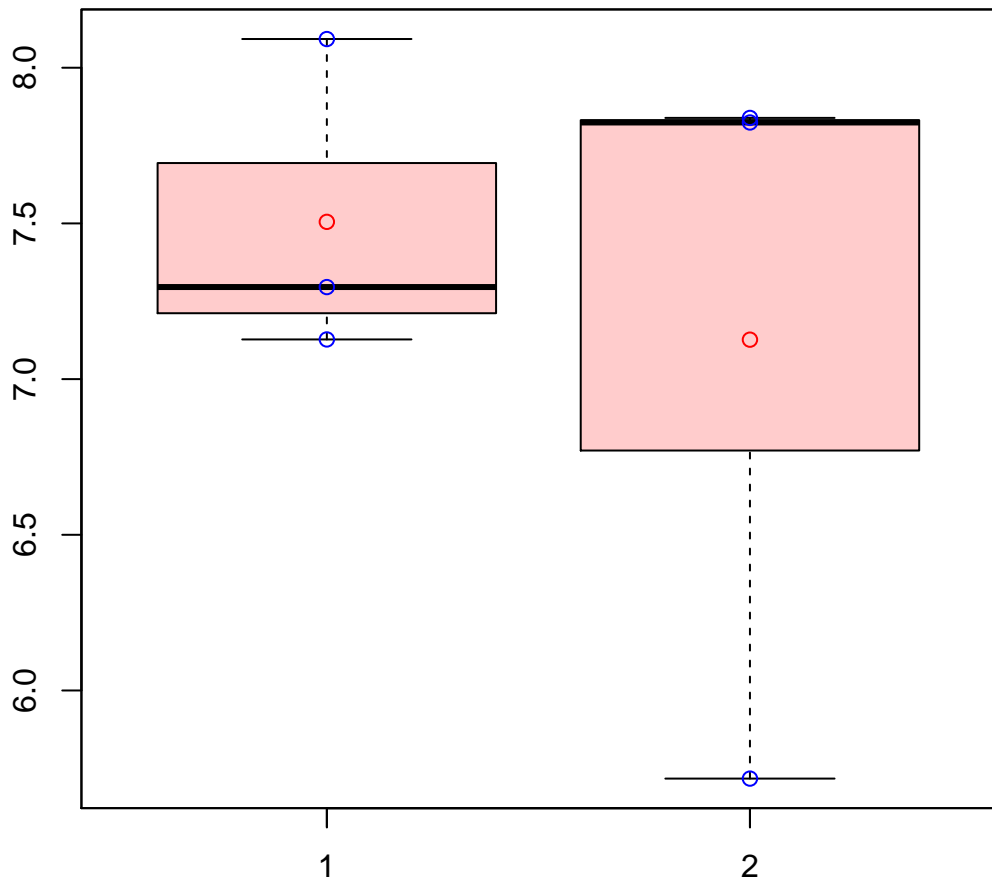

t-Test: p-value = 0.66

# CL1Contig873|CL1Contig873

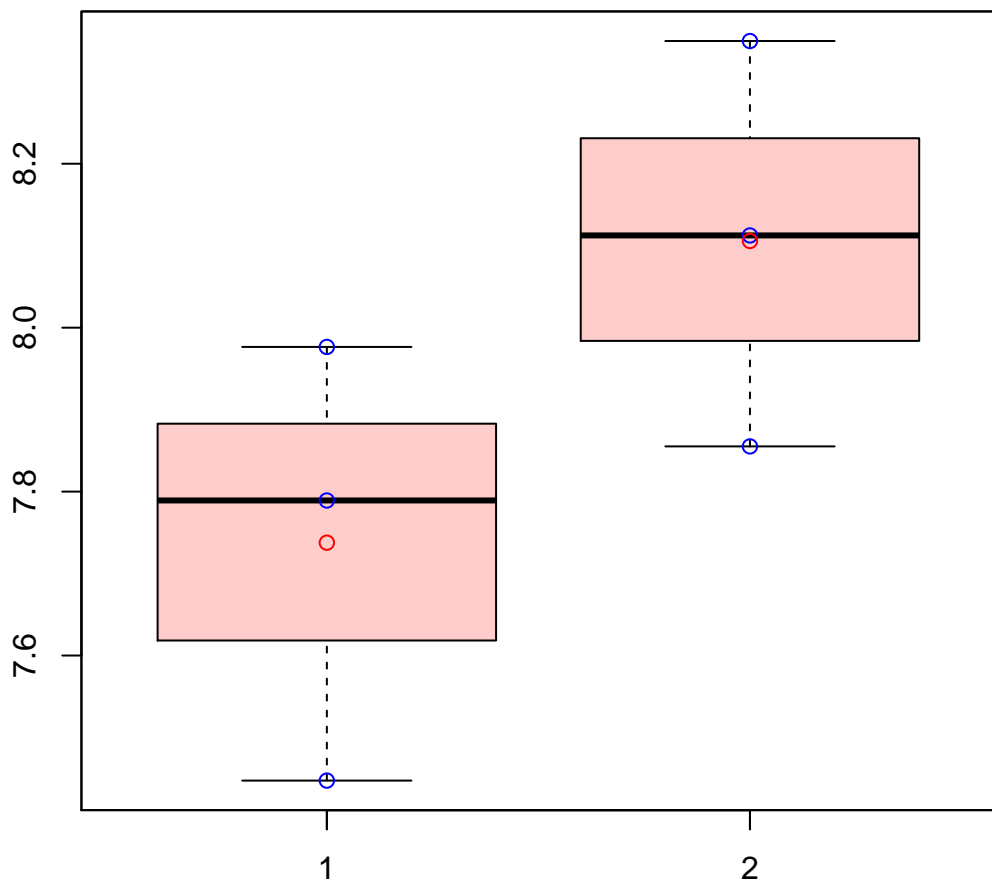

t-Test: p-value = 0.16

# CL1Contig874|CL1Contig874

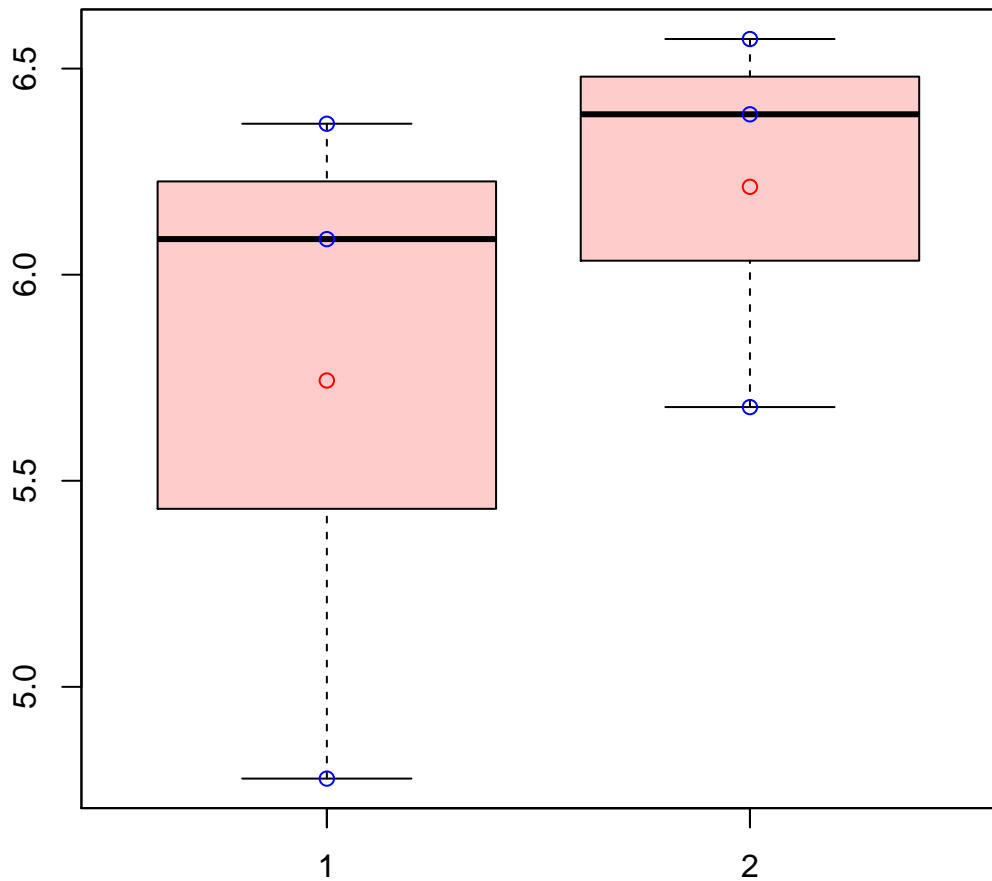

t-Test: p-value = 0.46

# CL1Contig8766|CL1Contig8766

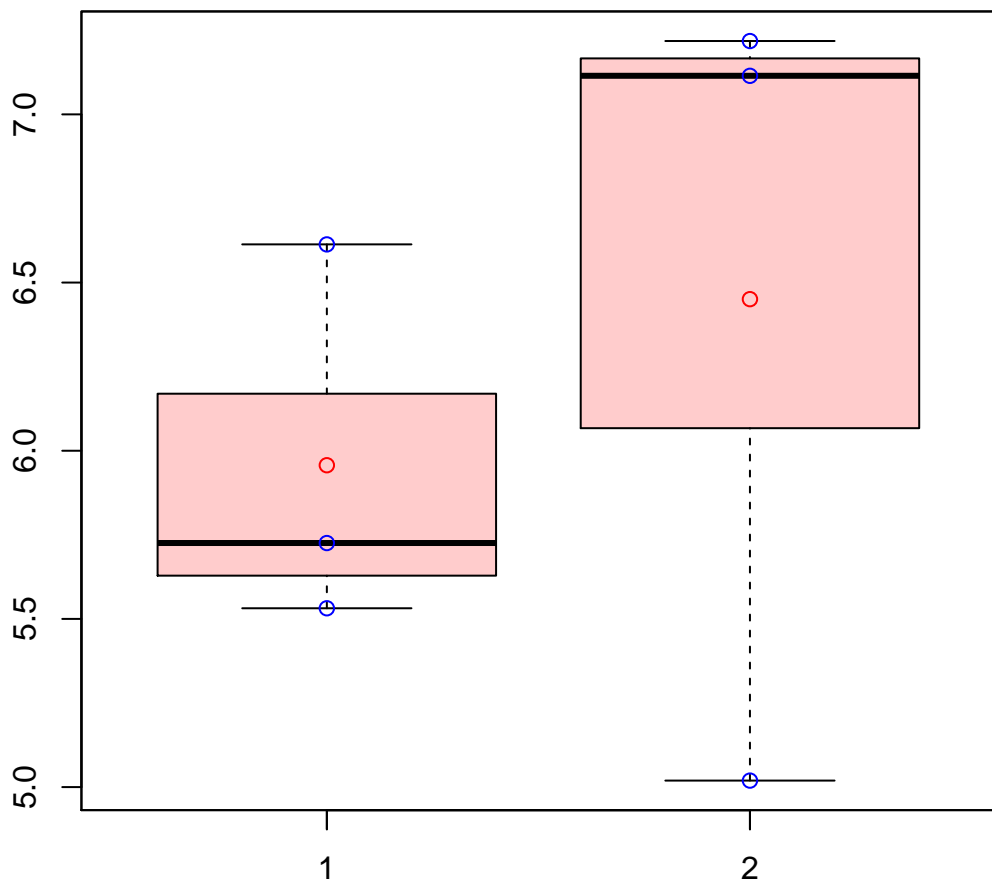

t-Test: p-value = 0.58

# CL1Contig8928|CL1Contig8928

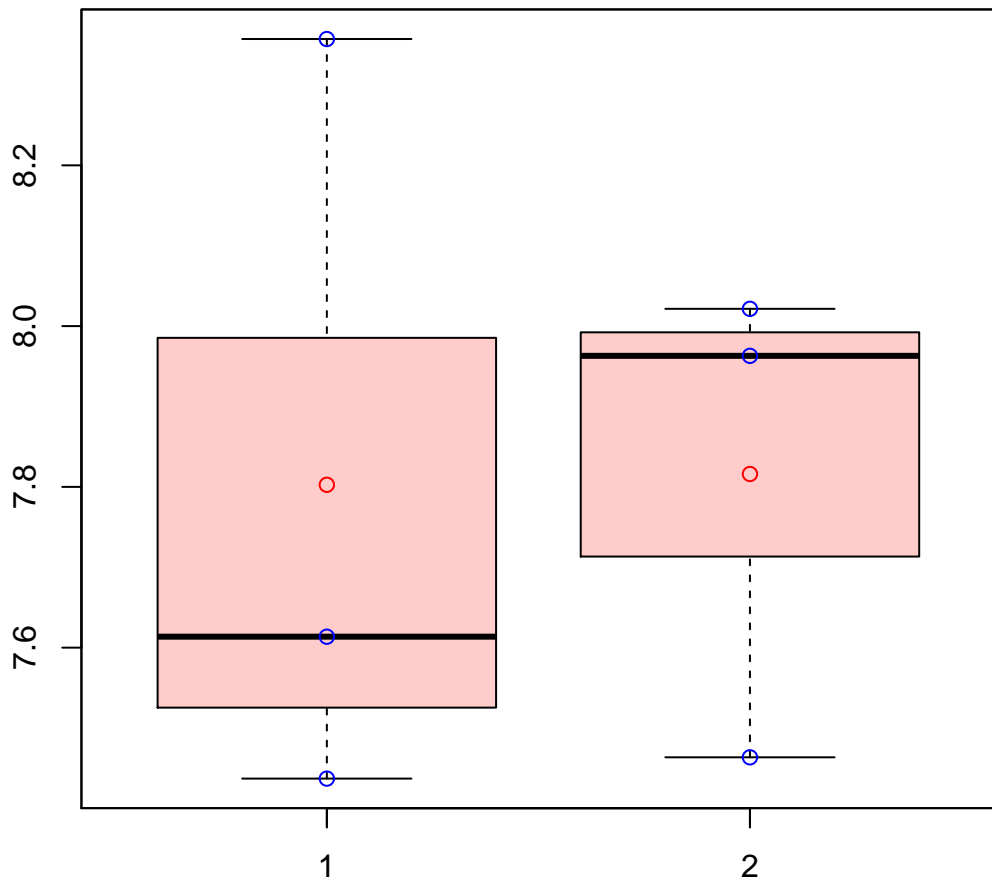

t-Test: p-value = 0.97

# CL1Contig8936|CL1Contig8936

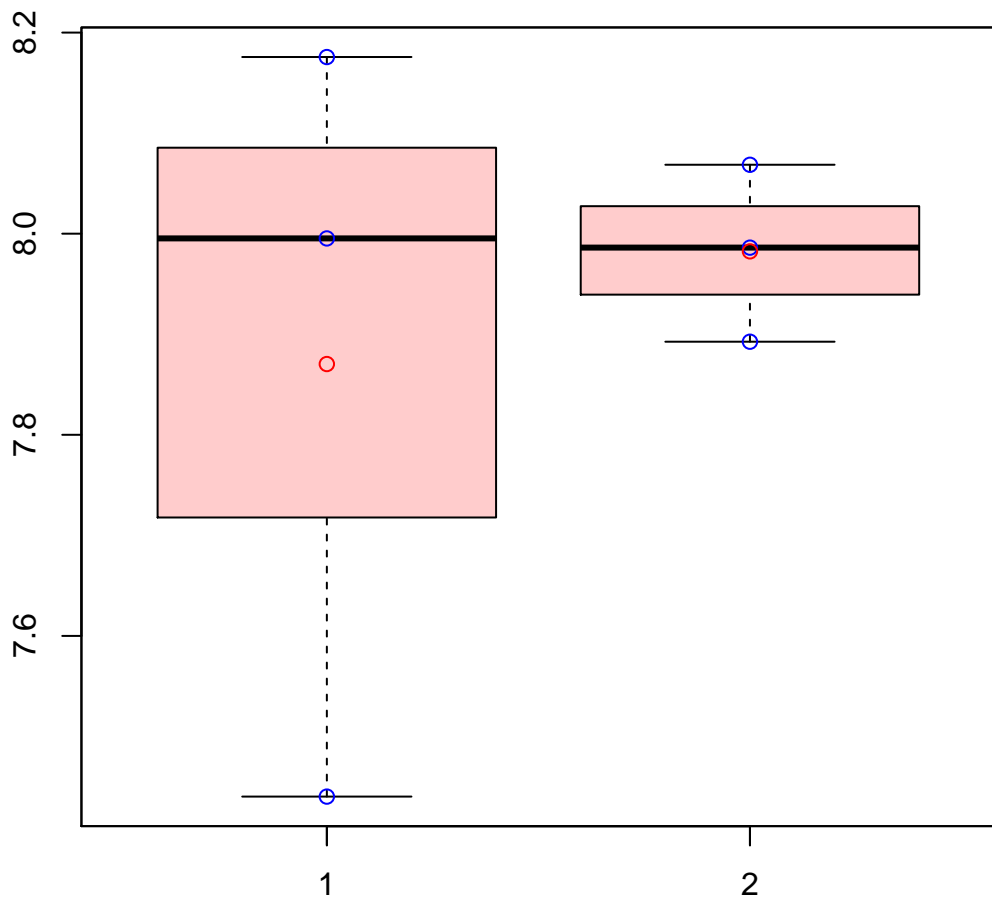

t-Test: p-value = 0.67



# CL1Contig8937|CL1Contig8937

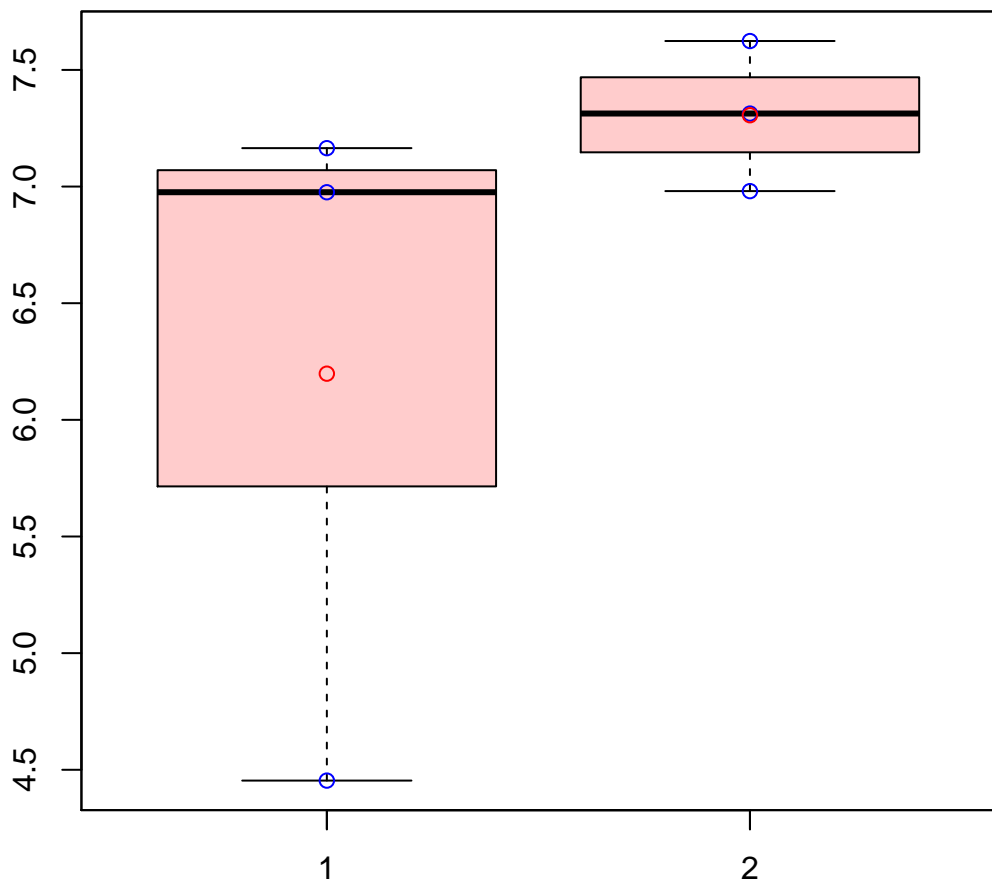

t-Test: p-value = 0.33

# CL1Contig8954|CL1Contig8954

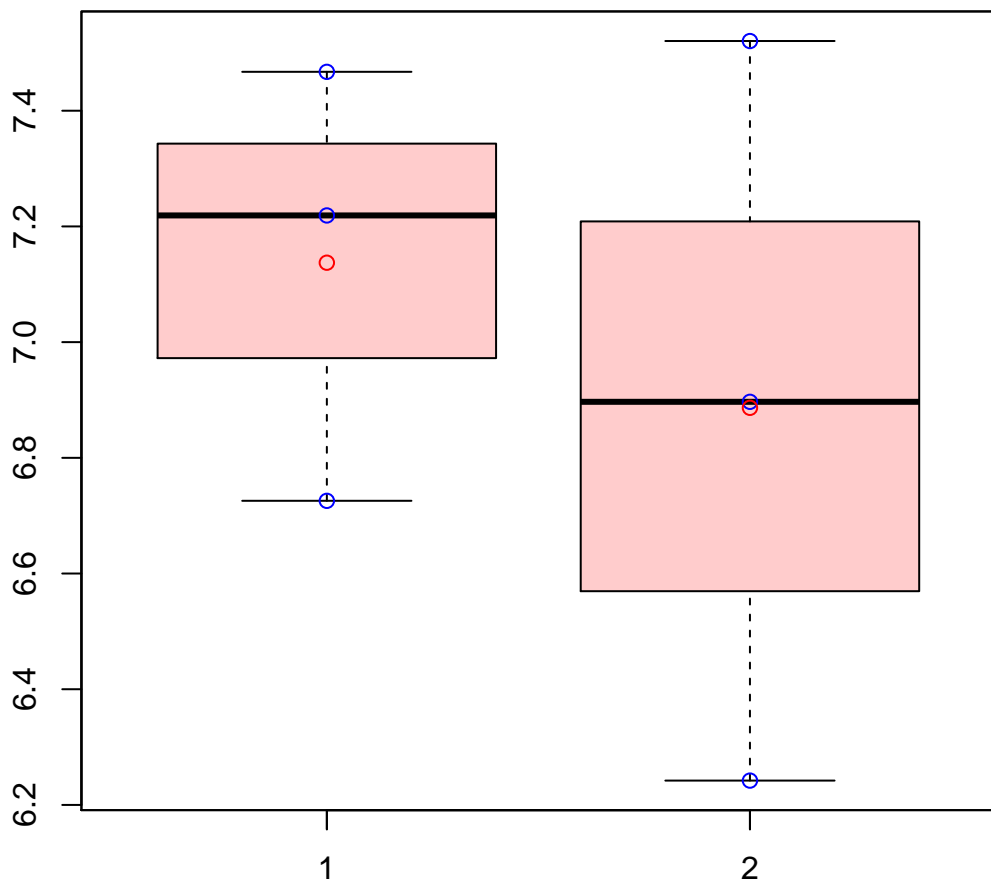

t-Test: p-value = 0.6

# CL1Contig8961|CL1Contig8961

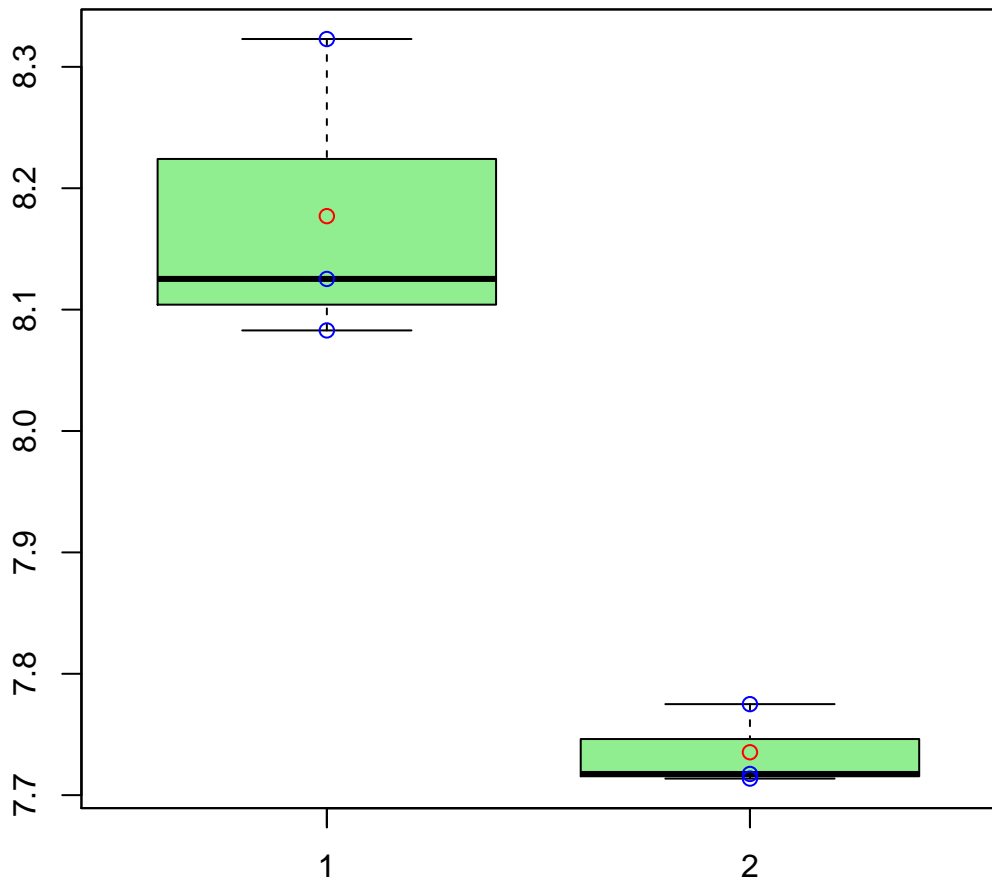

t-Test: p-value = 0.02

# CL1Contig8969|CL1Contig8969

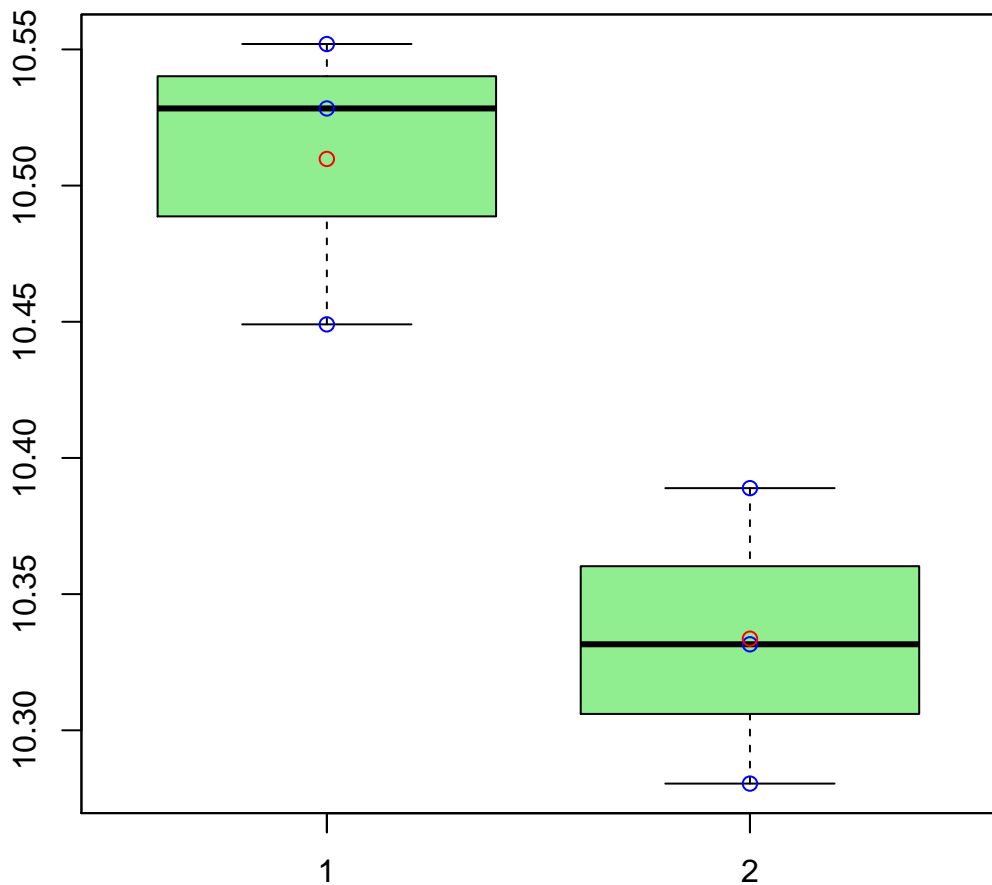

t-Test: p-value = 0.02

# CL1Contig8980|CL1Contig8980

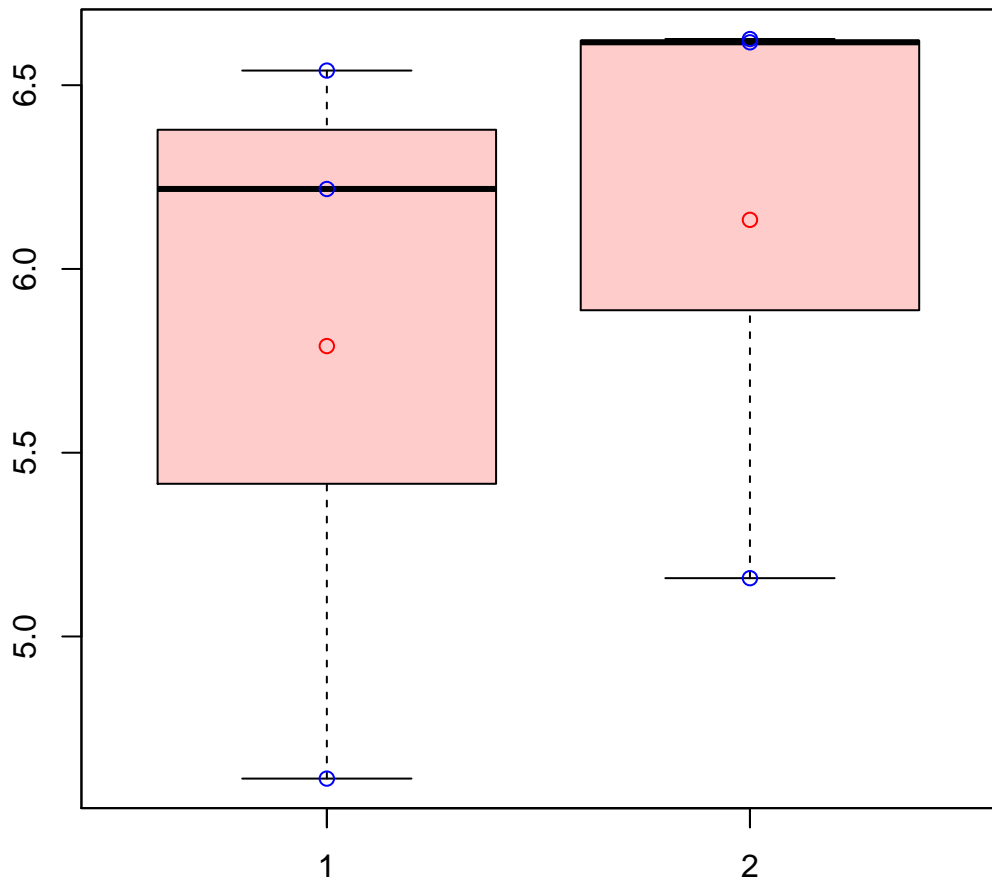

t-Test: p-value = 0.68

# CL1Contig899|CL1Contig899

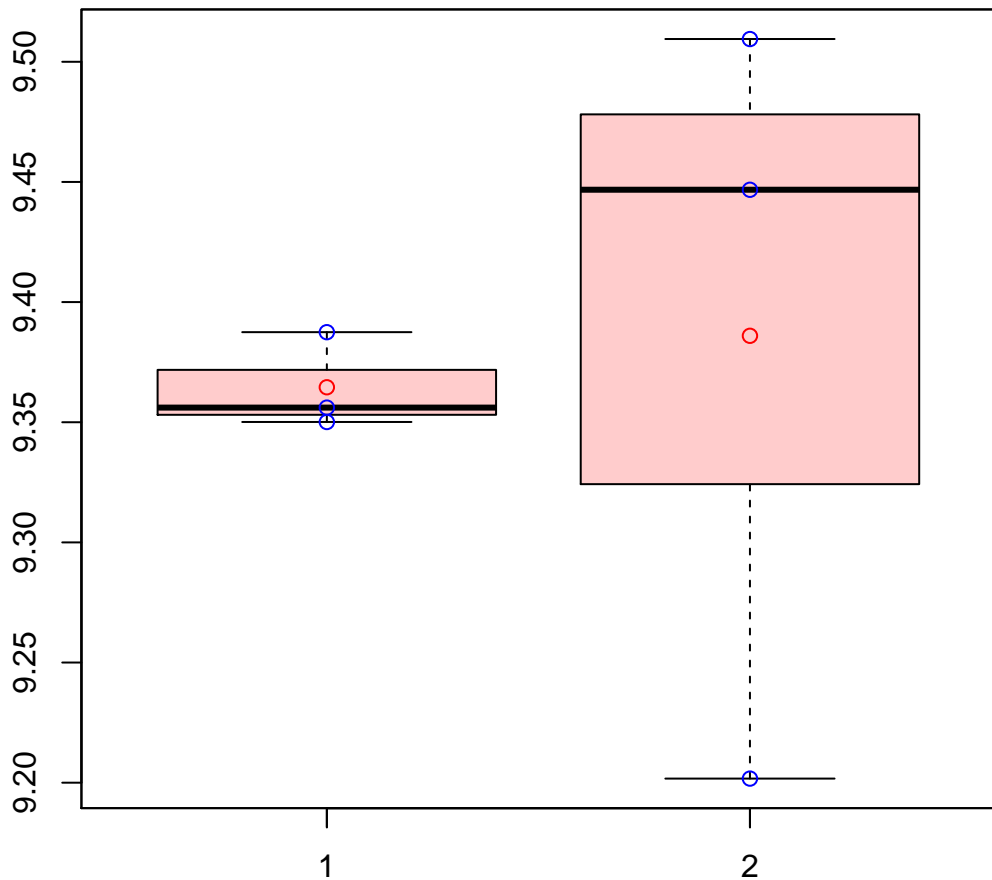

t-Test: p-value = 0.84

# CL1Contig9017|CL1Contig9017

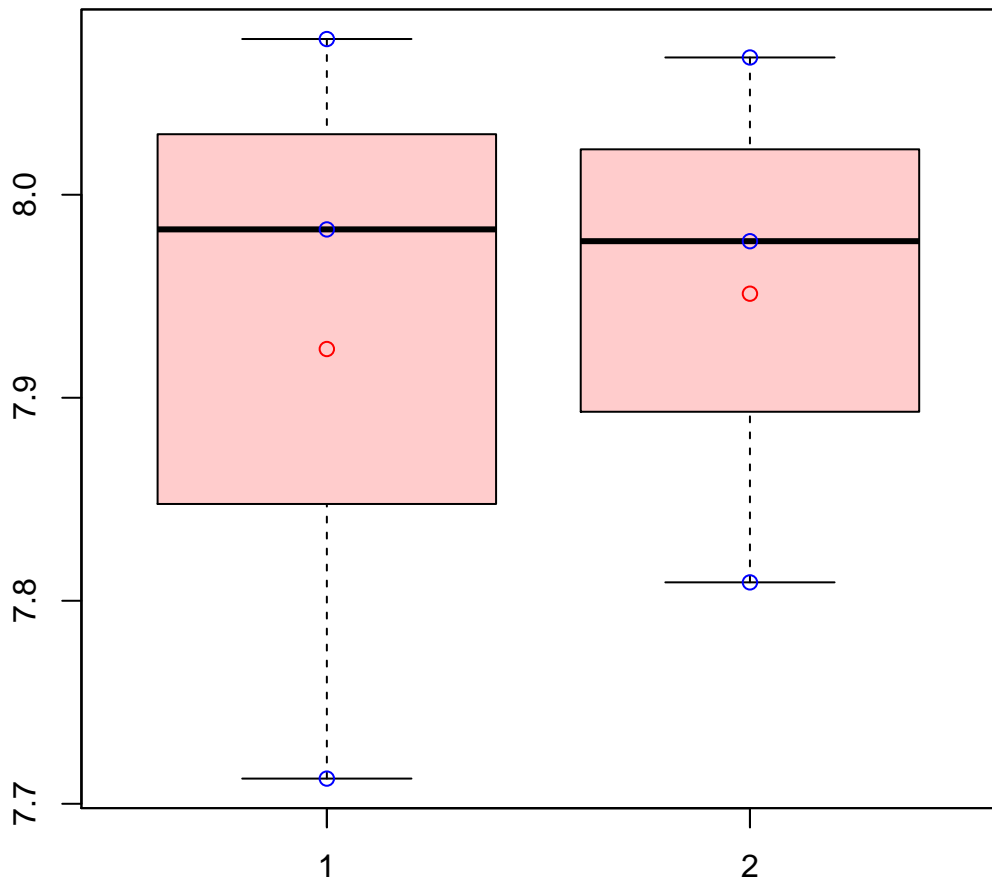

t-Test: p-value = 0.85

# CL1Contig906|CL1Contig906

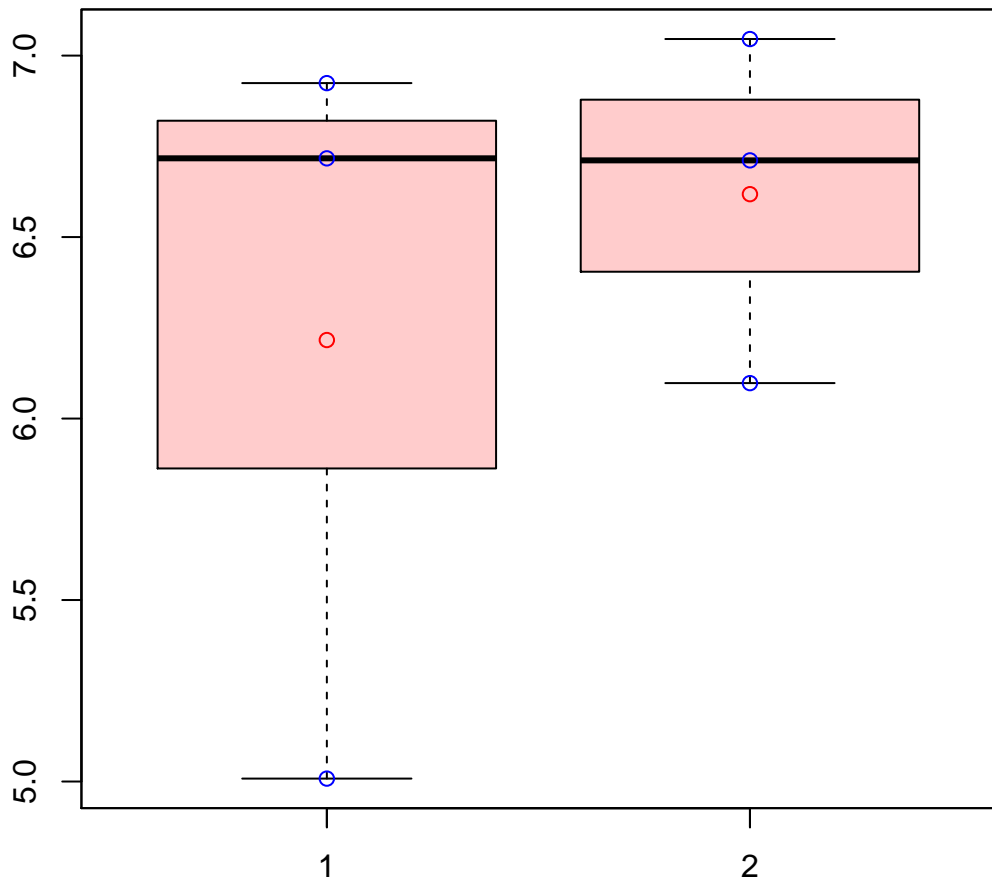

t-Test: p-value = 0.59



# CL1Contig9083|CL1Contig9083

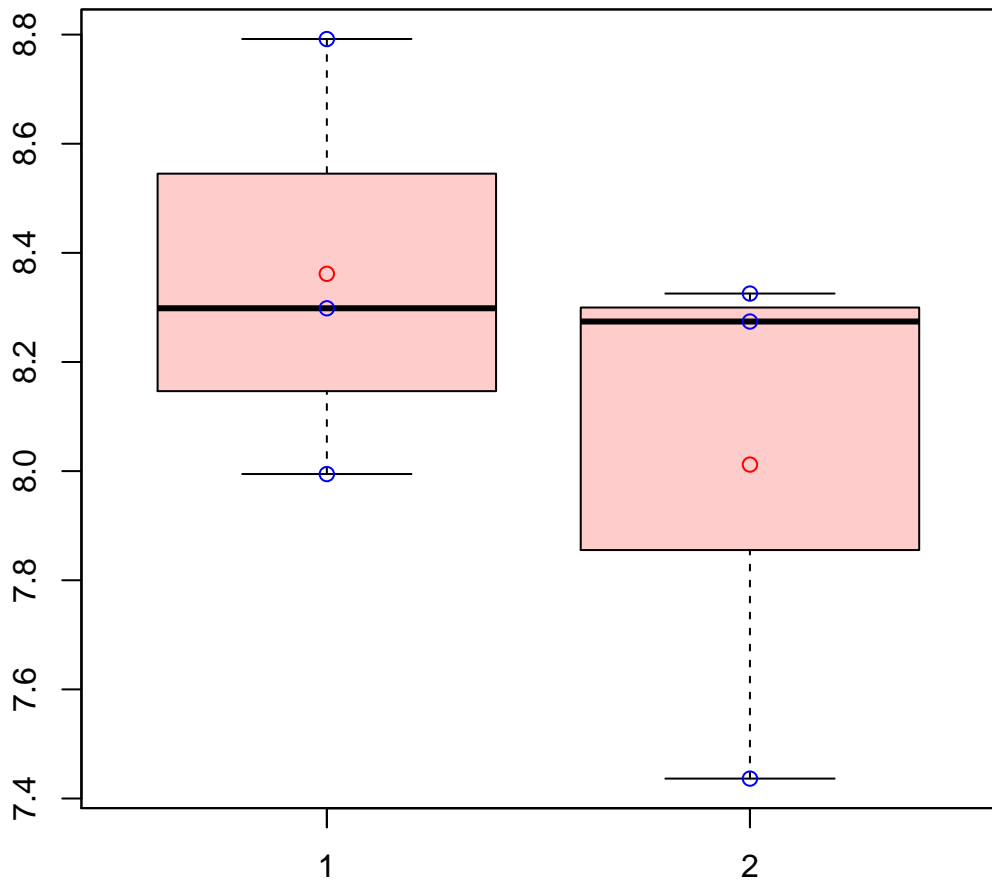

t-Test: p-value = 0.4

# CL1Contig9096|CL1Contig9096

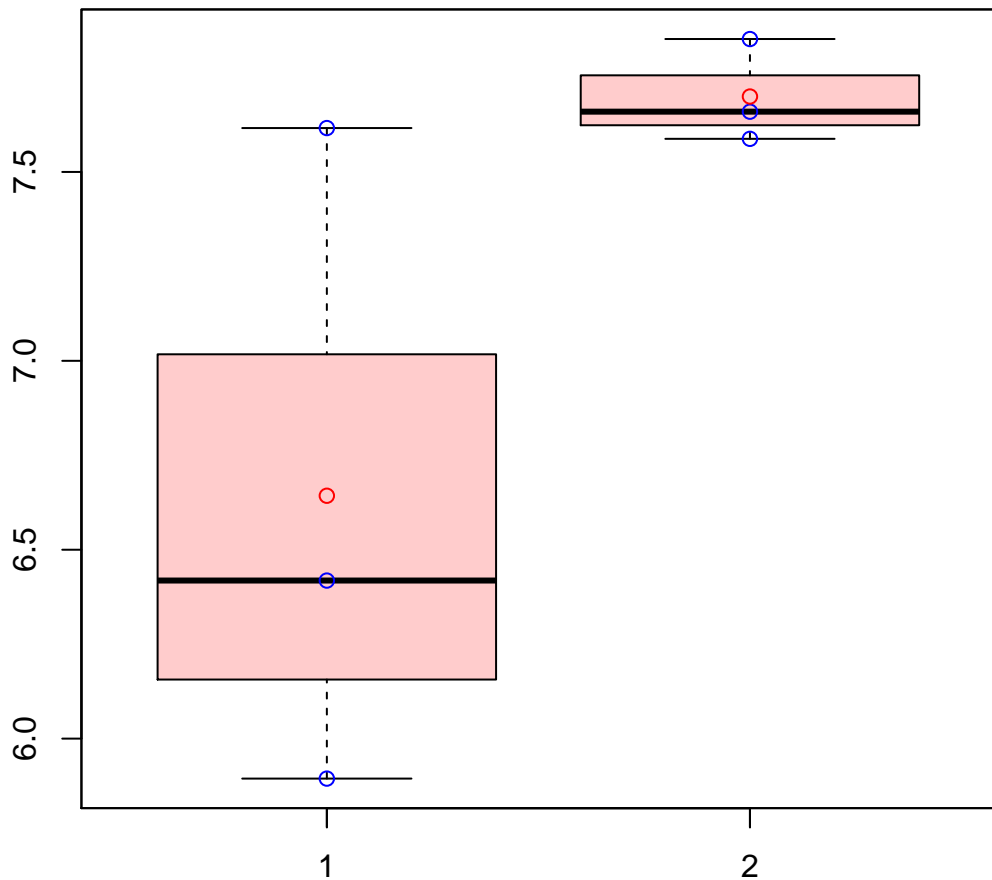

t-Test: p-value = 0.17

# CL1Contig9107|CL1Contig9107

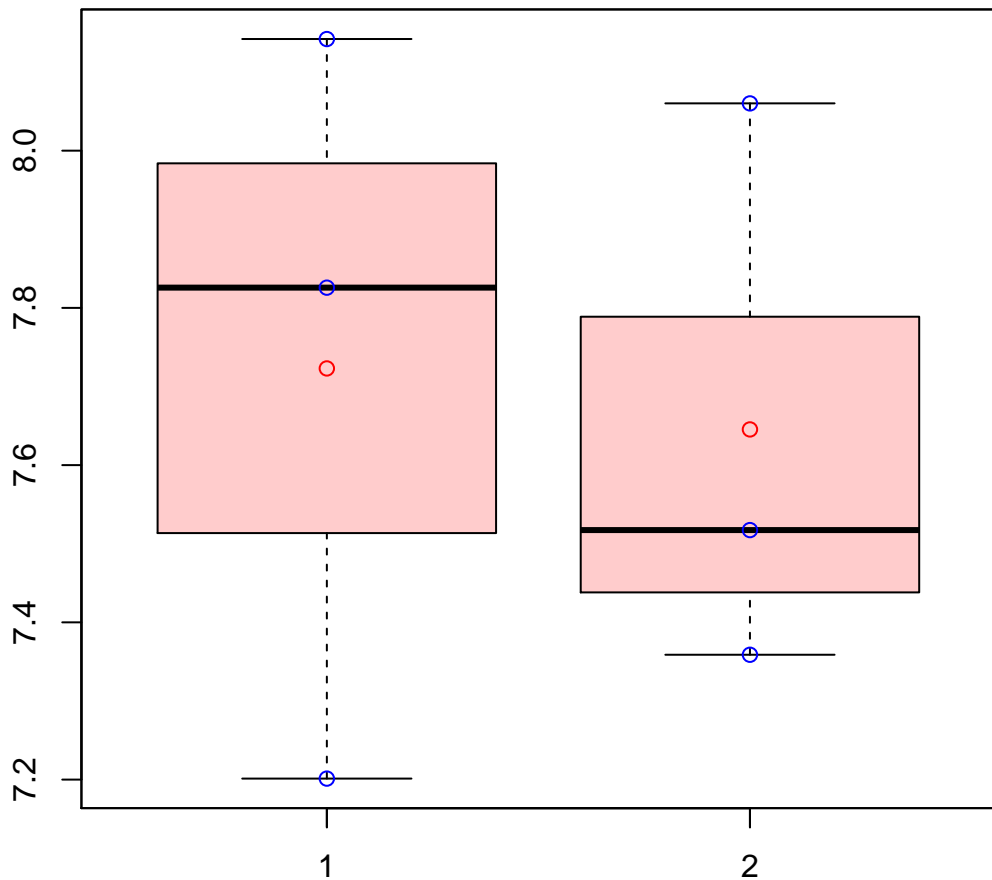

t-Test: p-value = 0.84

# CL1Contig9148|CL1Contig9148

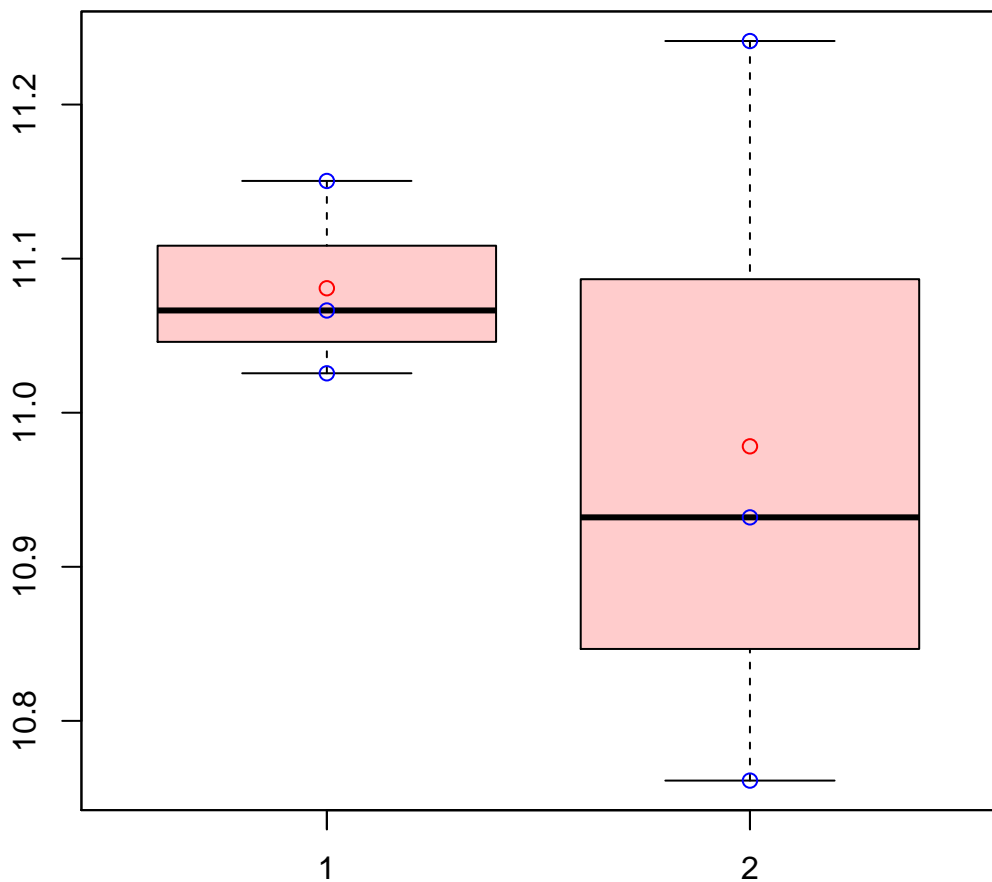

t-Test: p-value = 0.55

# CL1Contig9182|CL1Contig9182

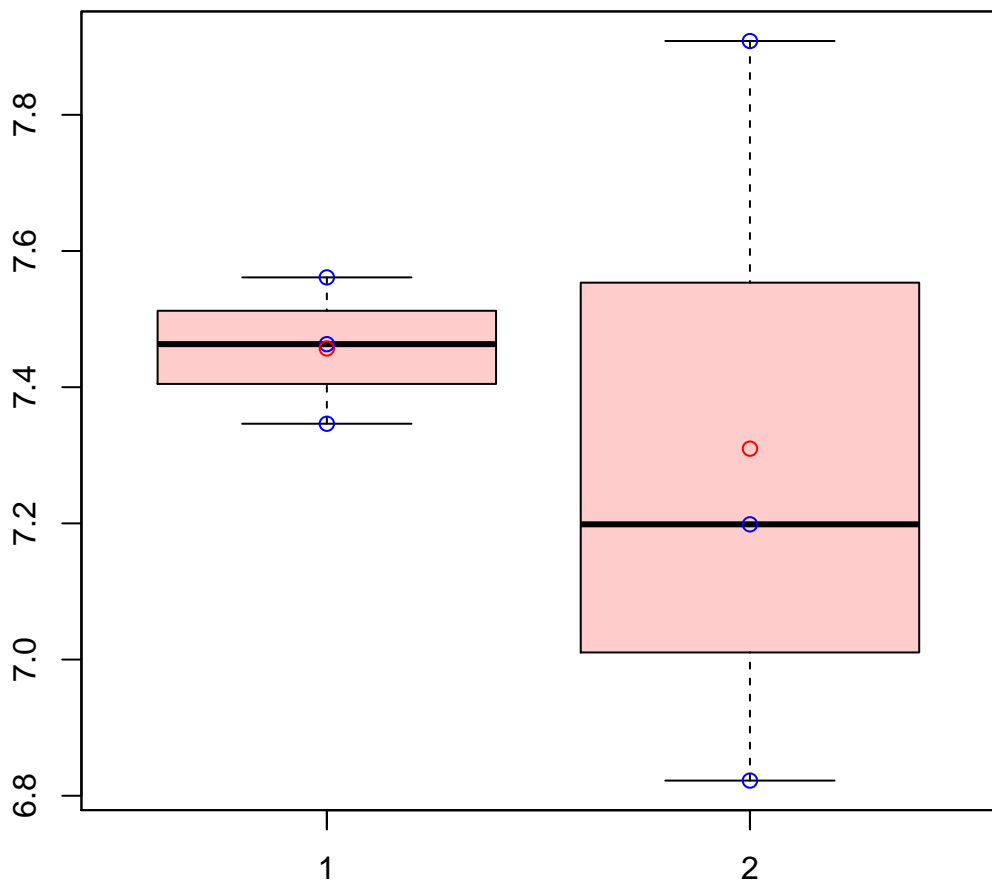

t-Test: p-value = 0.69

# CL1Contig9204|CL1Contig9204

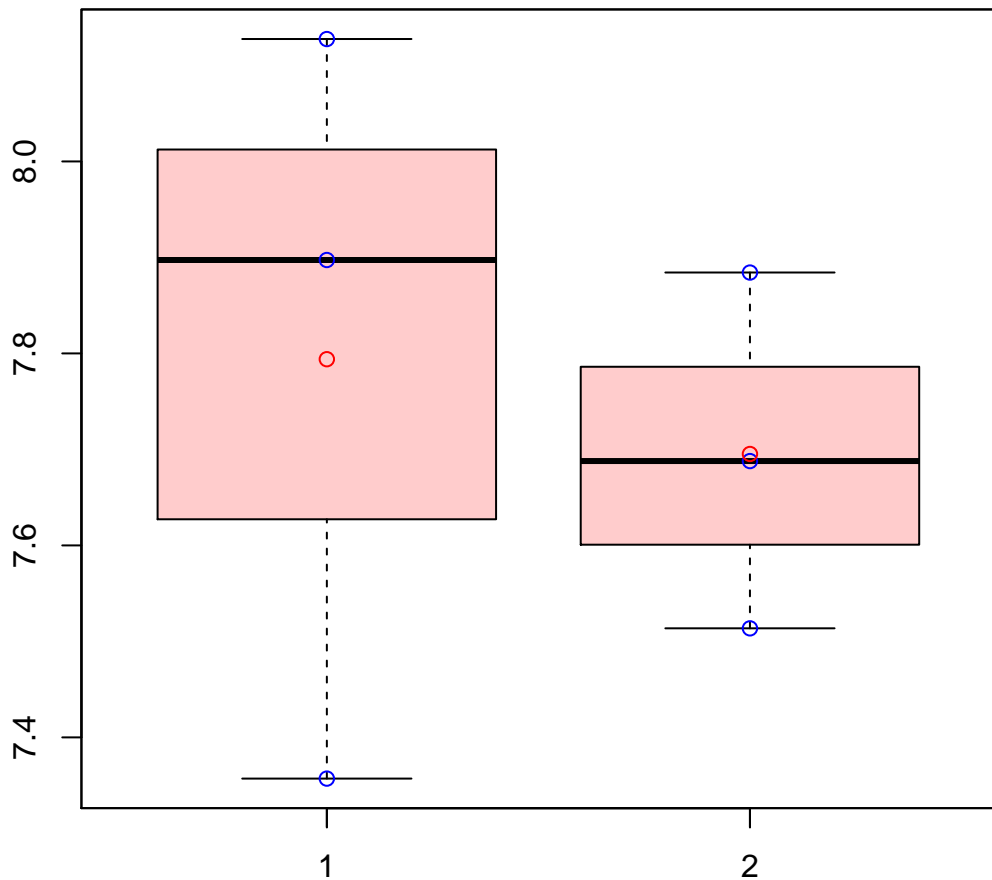

t-Test: p-value = 0.72

# CL1Contig9208|CL1Contig9208

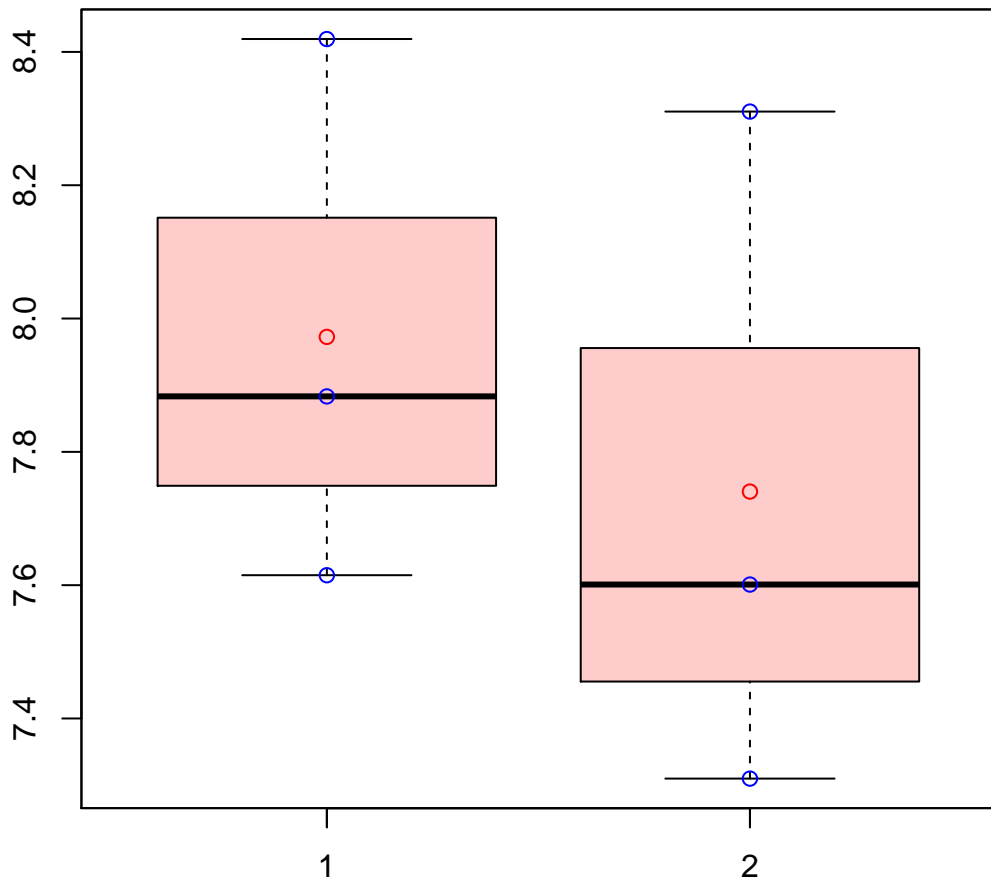

t-Test: p-value = 0.58

# CL1Contig9221|CL1Contig9221

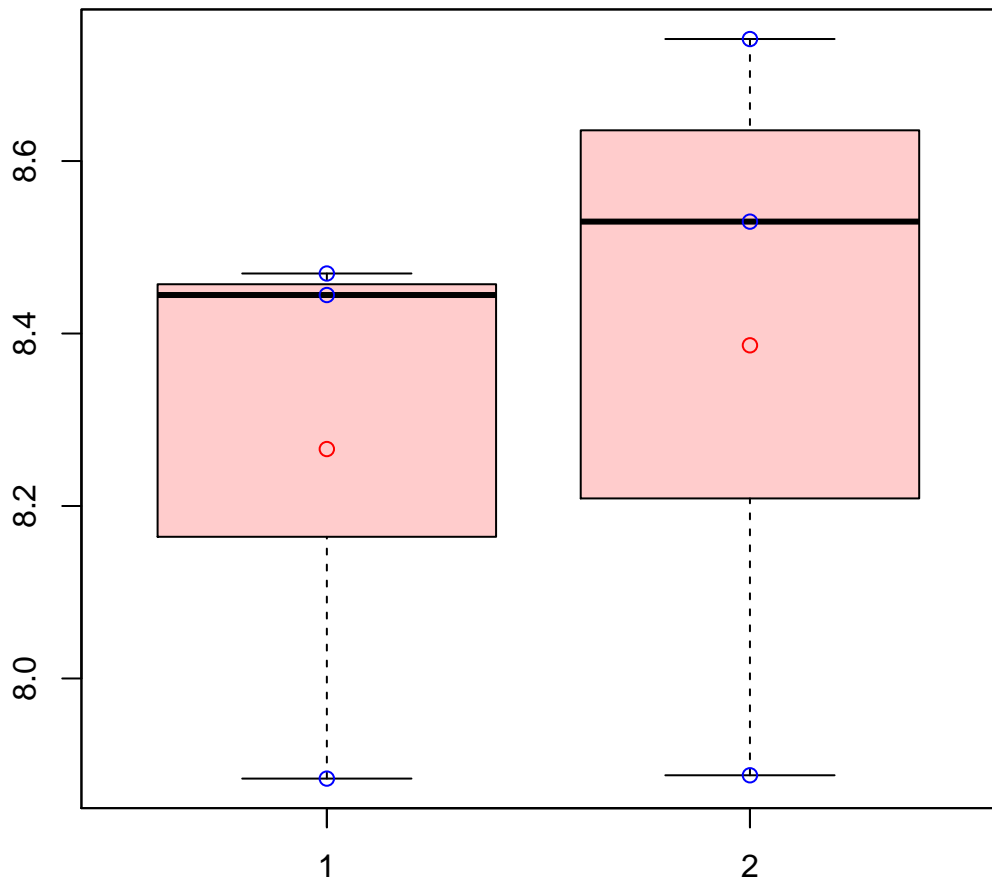

t-Test: p-value = 0.73



# CL1Contig9226|CL1Contig9226

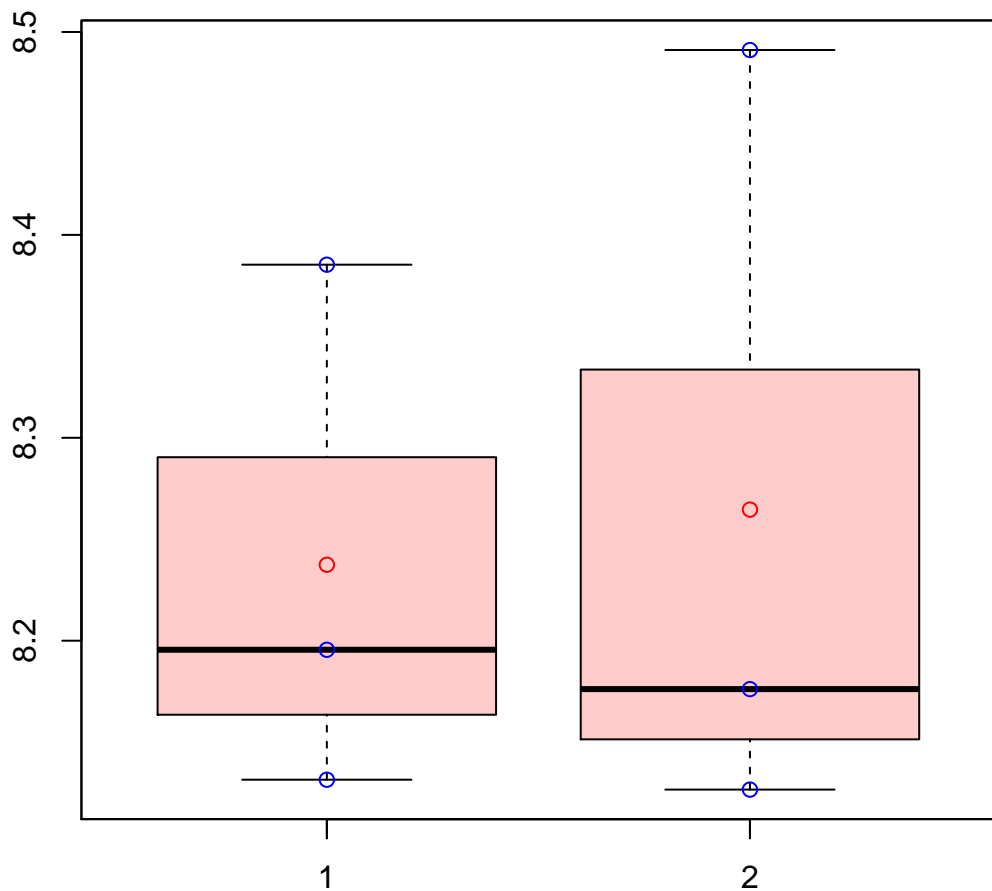

t-Test: p-value = 0.85

# CL1Contig9227|CL1Contig9227

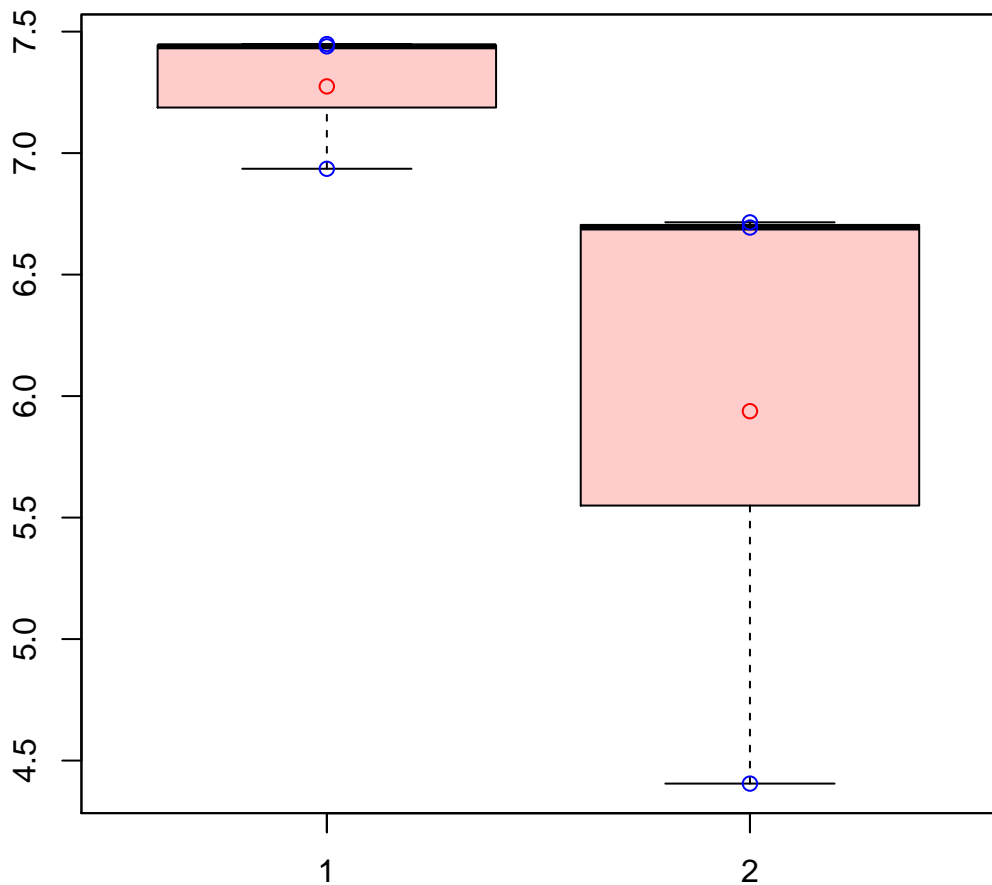

t-Test: p-value = 0.22

# CL1Contig9243|CL1Contig9243

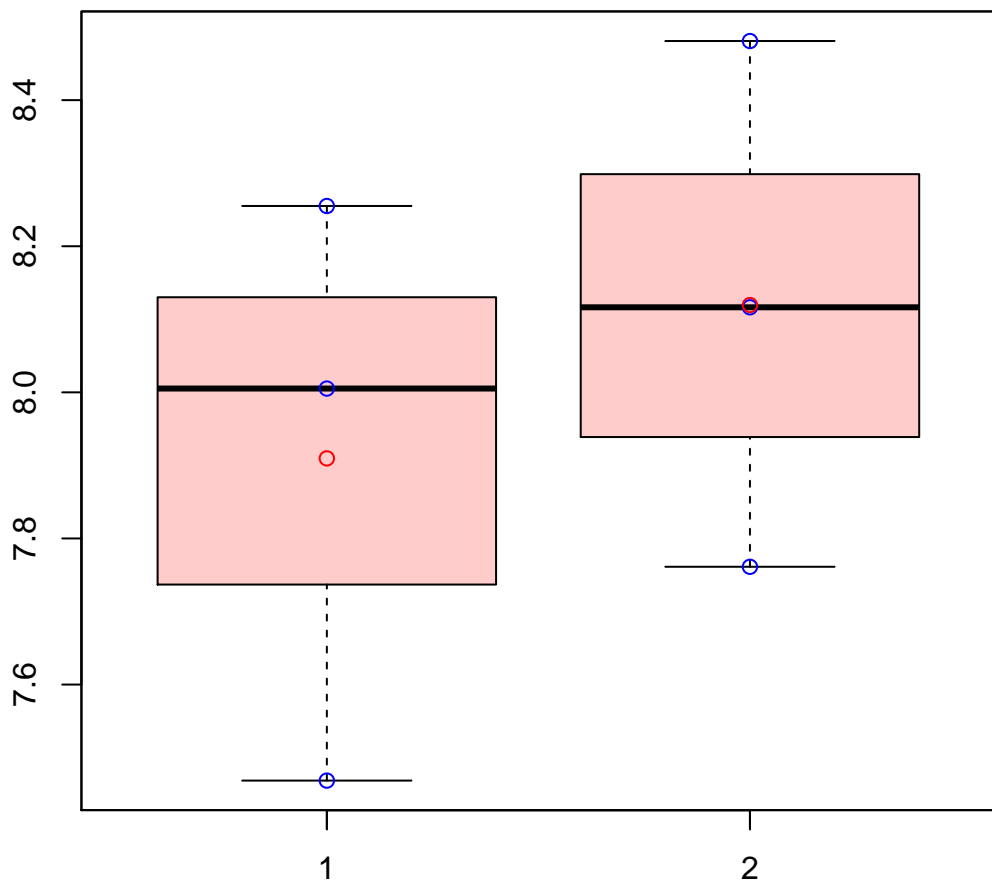

t-Test: p-value = 0.54

# CL1Contig9286|CL1Contig9286

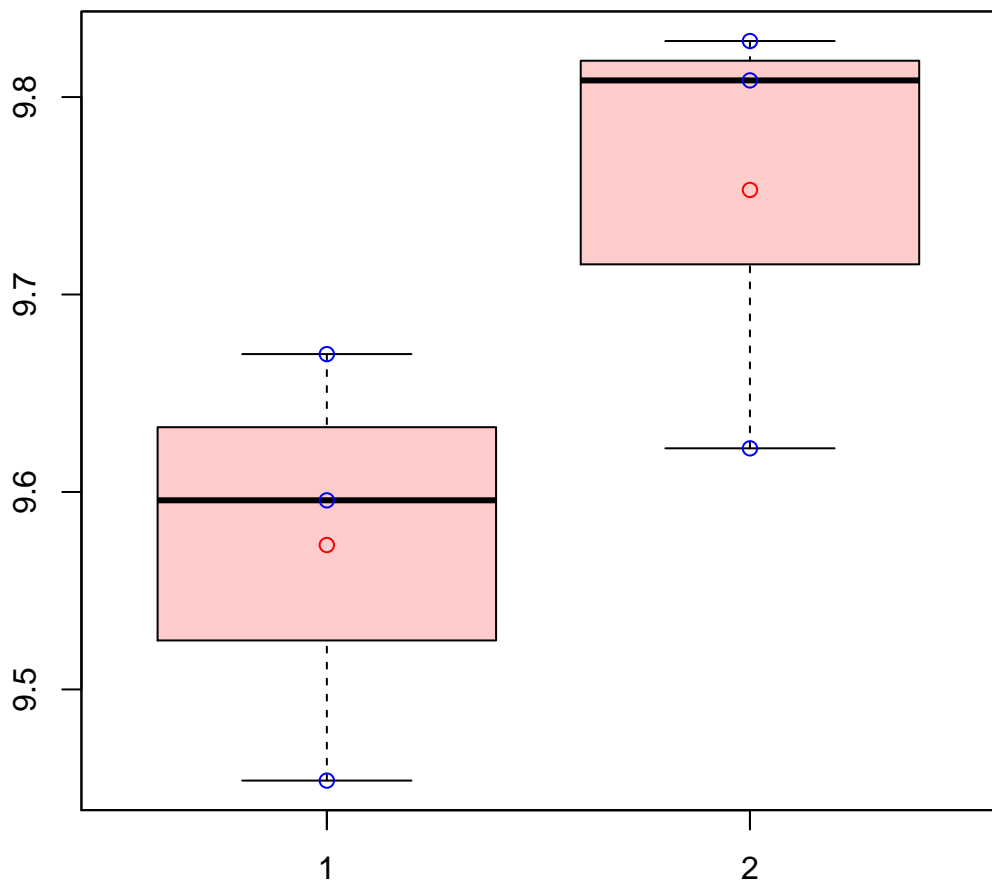

t-Test: p-value = 0.12

# CL1Contig9289|CL1Contig9289

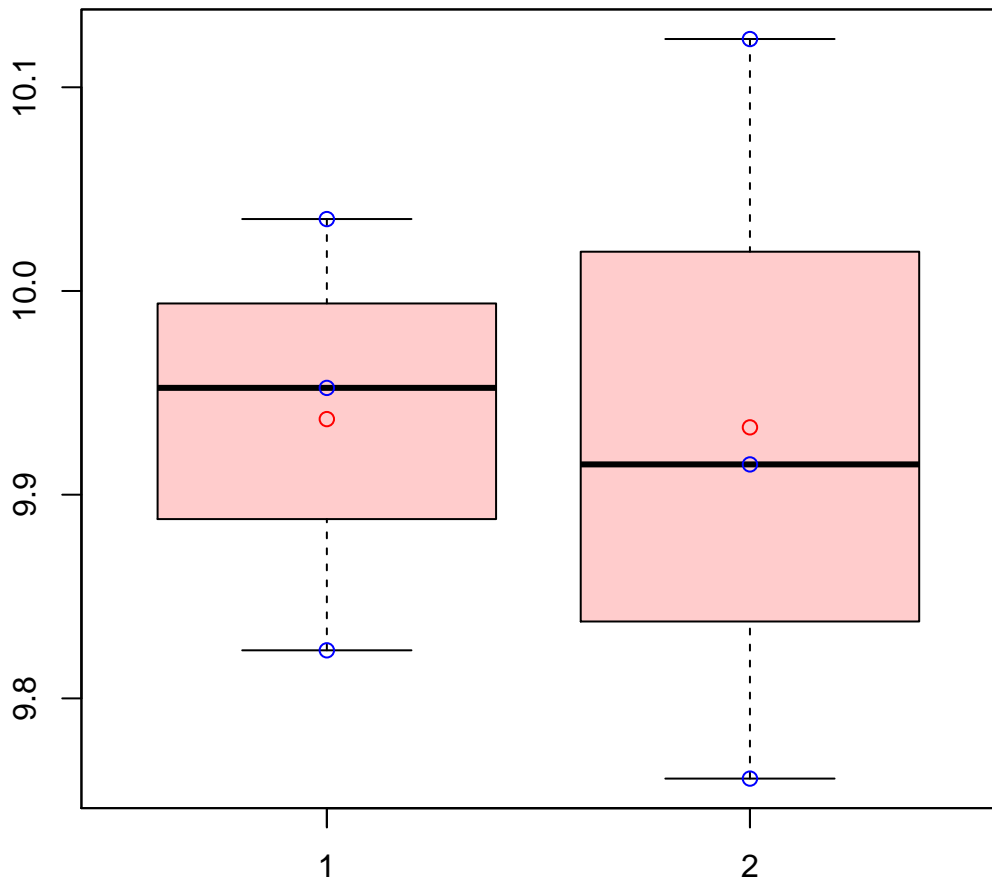

t-Test: p-value = 0.98

# CL1Contig929|CL1Contig929

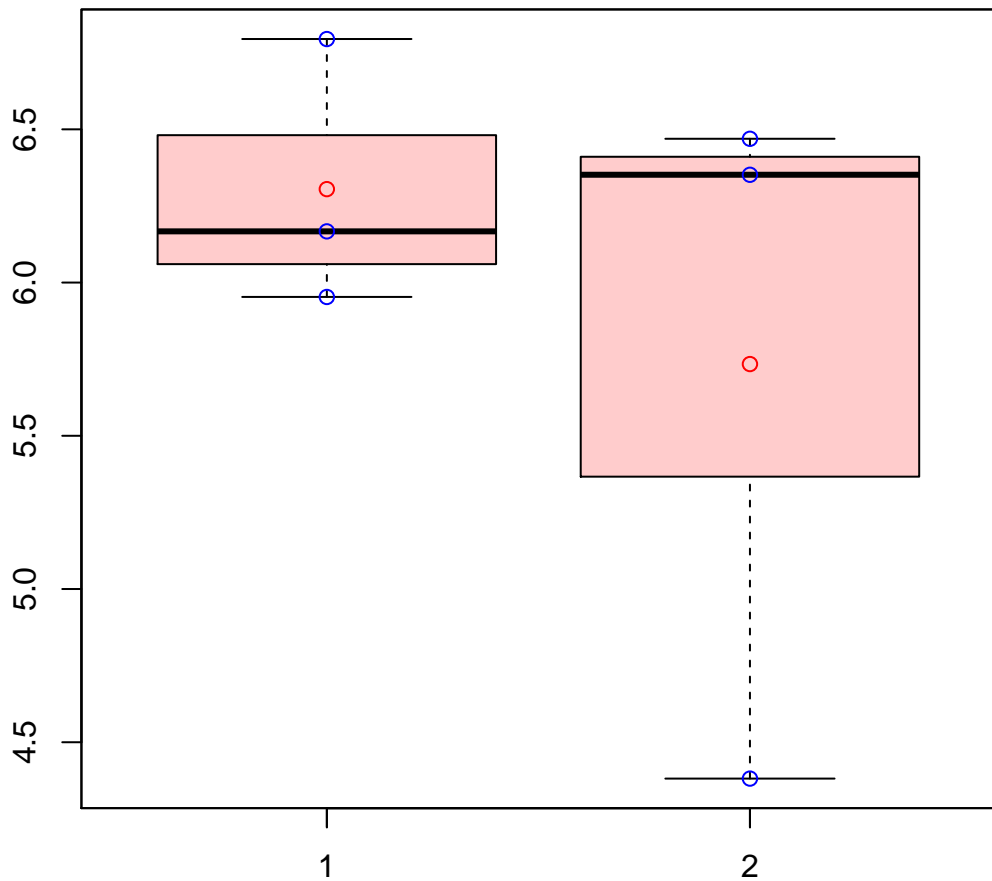

t-Test: p-value = 0.5

# CL1Contig9325|CL1Contig9325

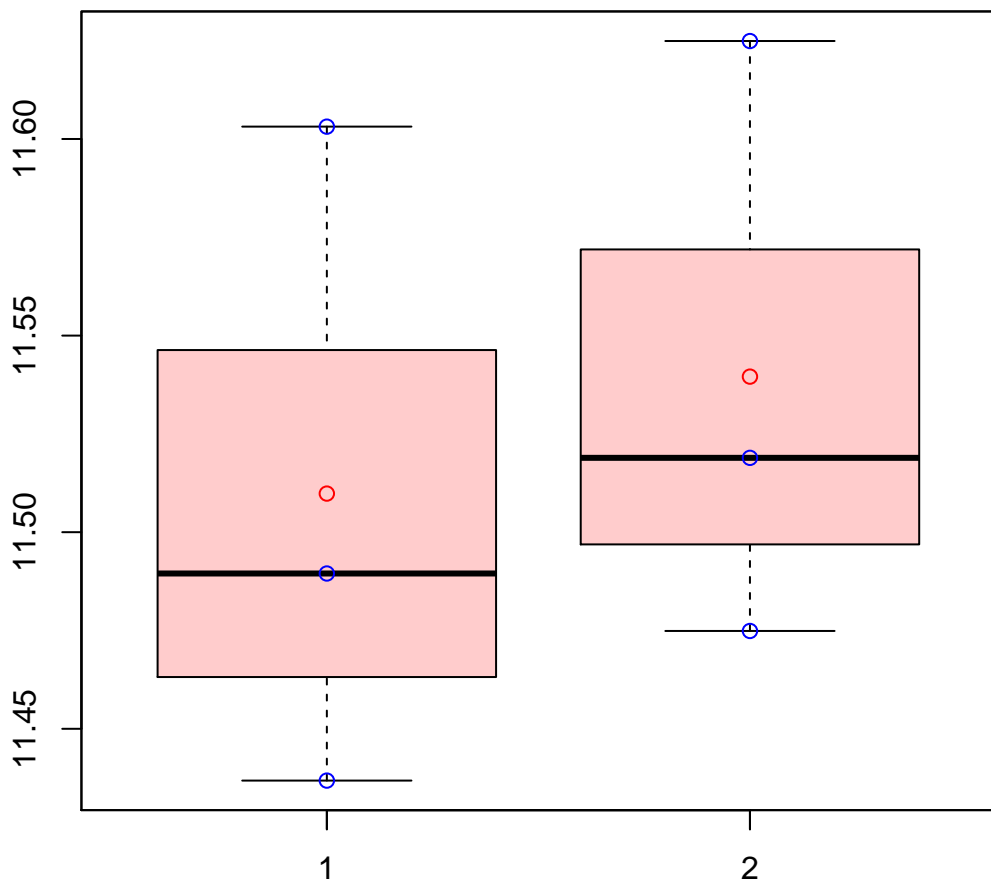

t-Test: p-value = 0.68

# CL1Contig9347|CL1Contig9347

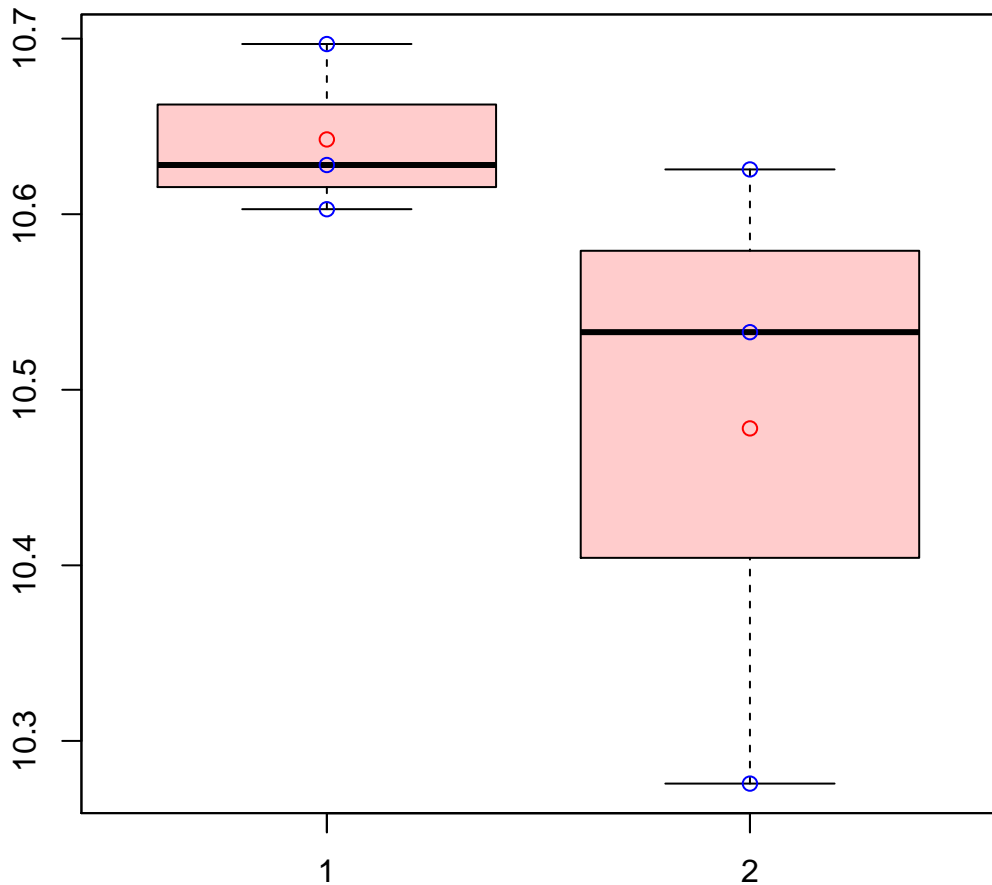

t-Test: p-value = 0.25



# CL1Contig936|CL1Contig936

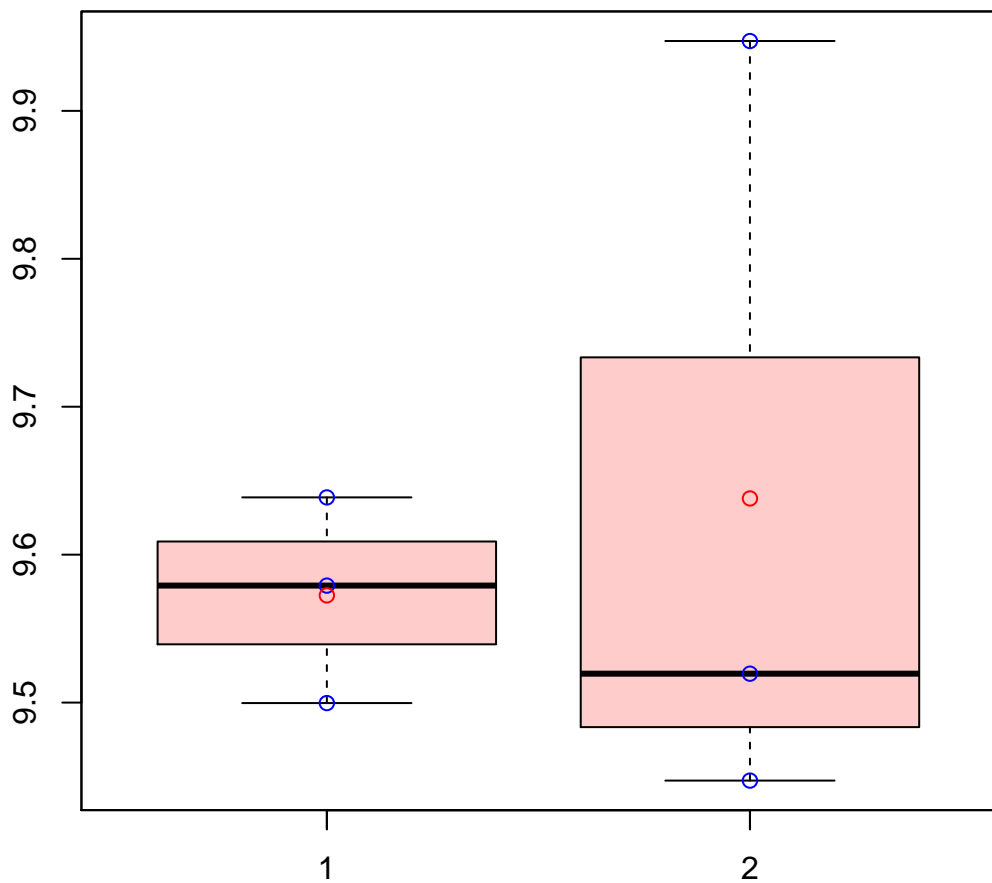

t-Test: p-value = 0.72

# CL1Contig9432|CL1Contig9432

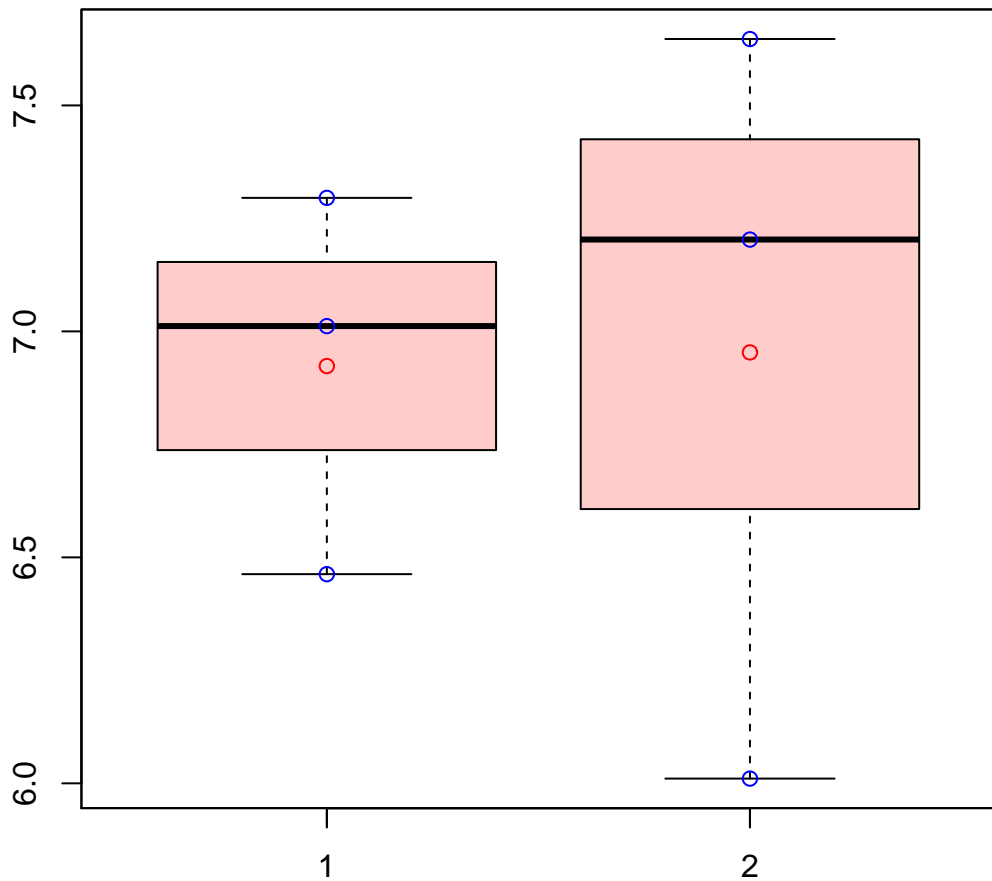

t-Test: p-value = 0.96

# CL1Contig9442|CL1Contig9442

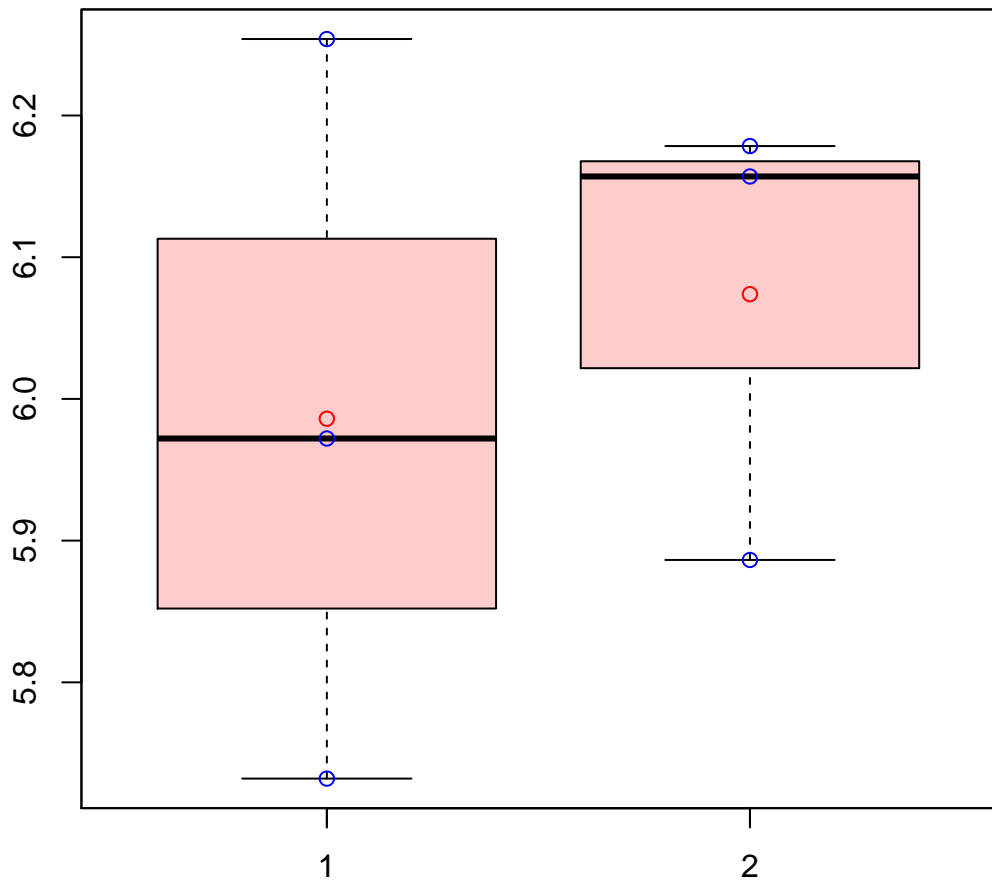

t-Test: p-value = 0.65

# CL1Contig9464|CL1Contig9464

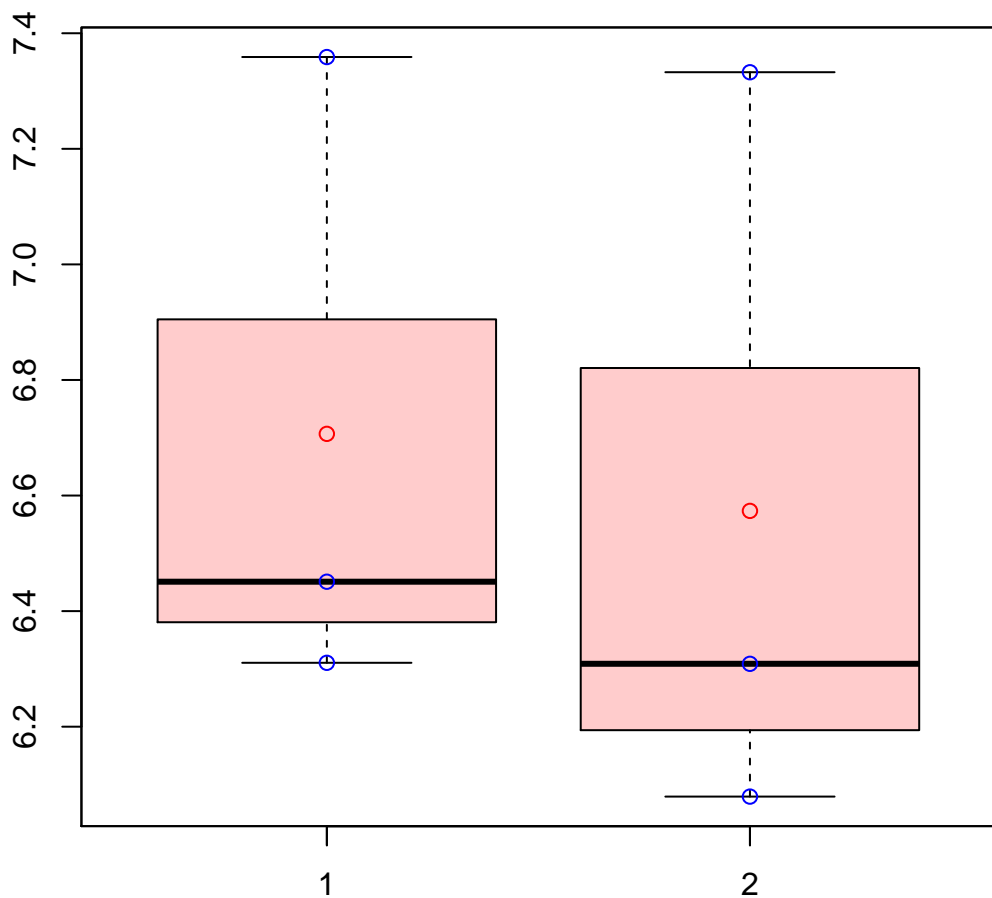

t-Test: p-value = 0.81

# CL1Contig950|CL1Contig950

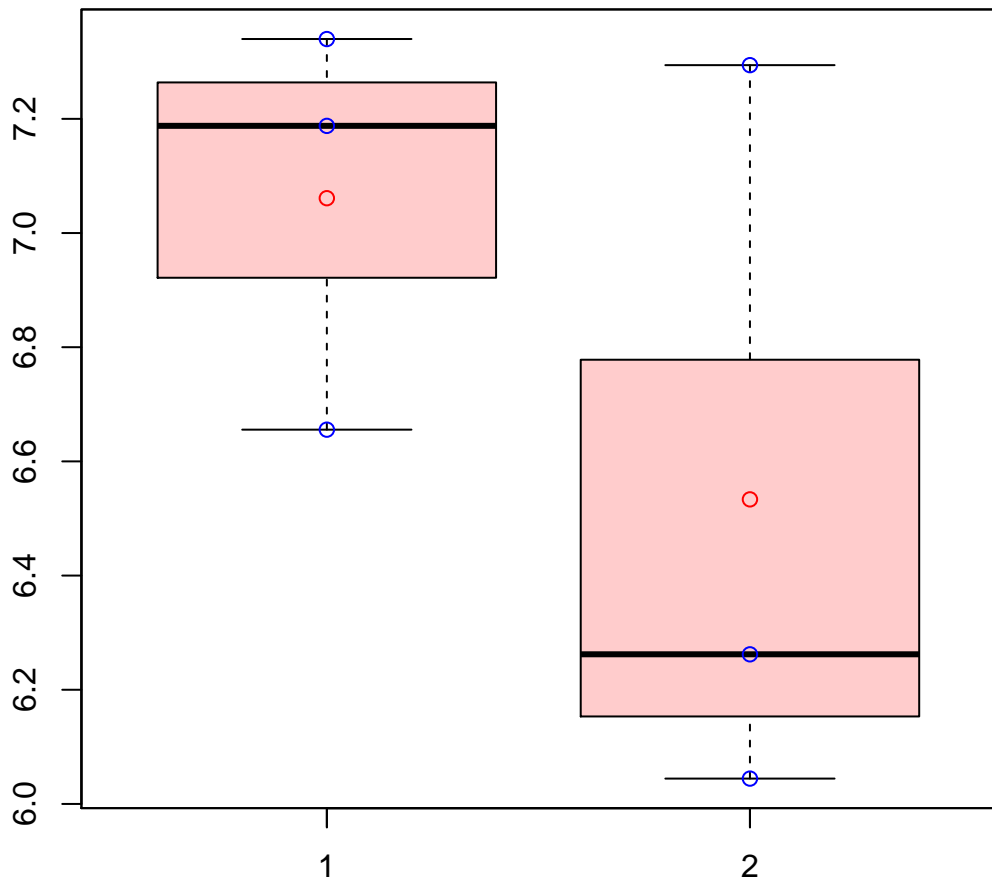

t-Test: p-value = 0.31

# CL1Contig9531|CL1Contig9531

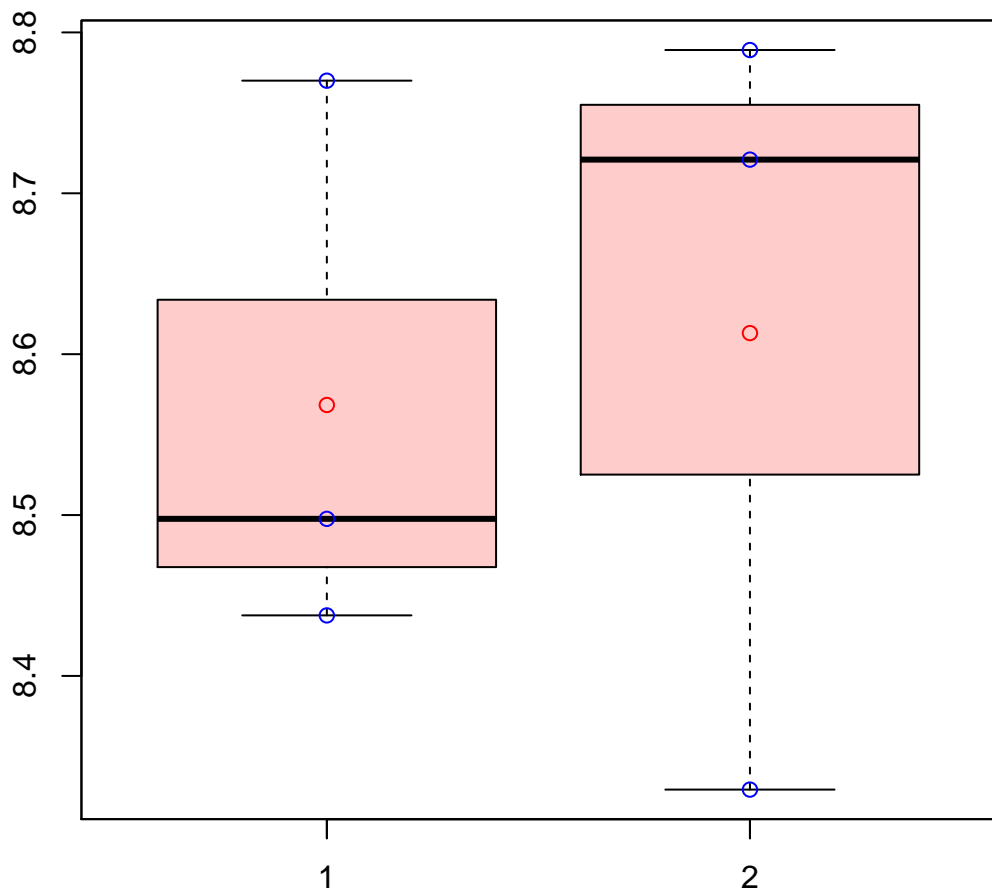

t-Test: p-value = 0.81

# CL1Contig955|CL1Contig955

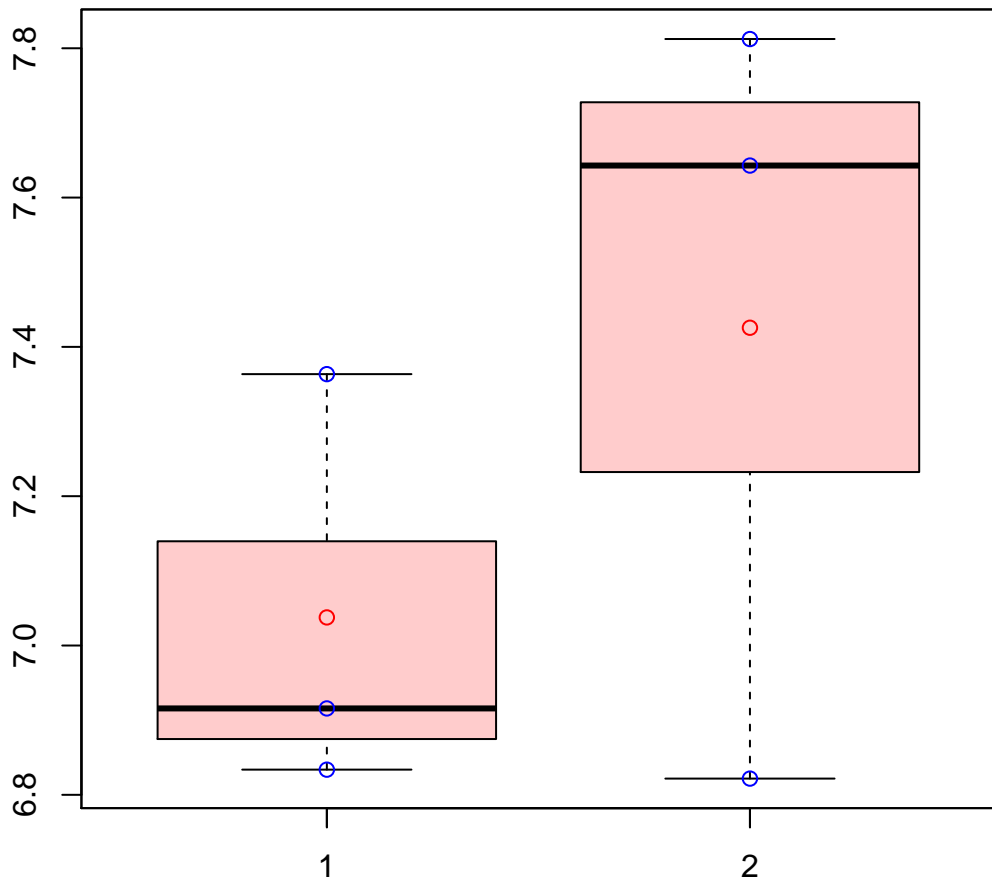

t-Test: p-value = 0.34

# CL1Contig9587|CL1Contig9587

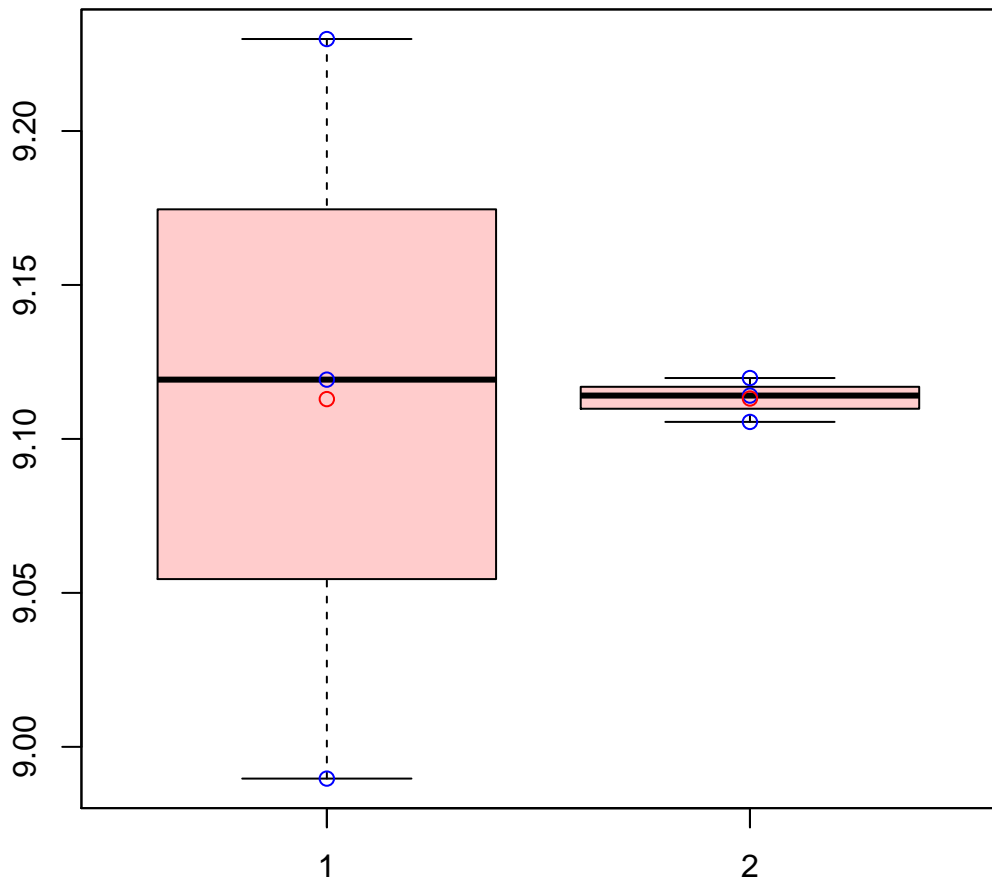

t-Test: p-value = 1



# CL1Contig962|CL1Contig962

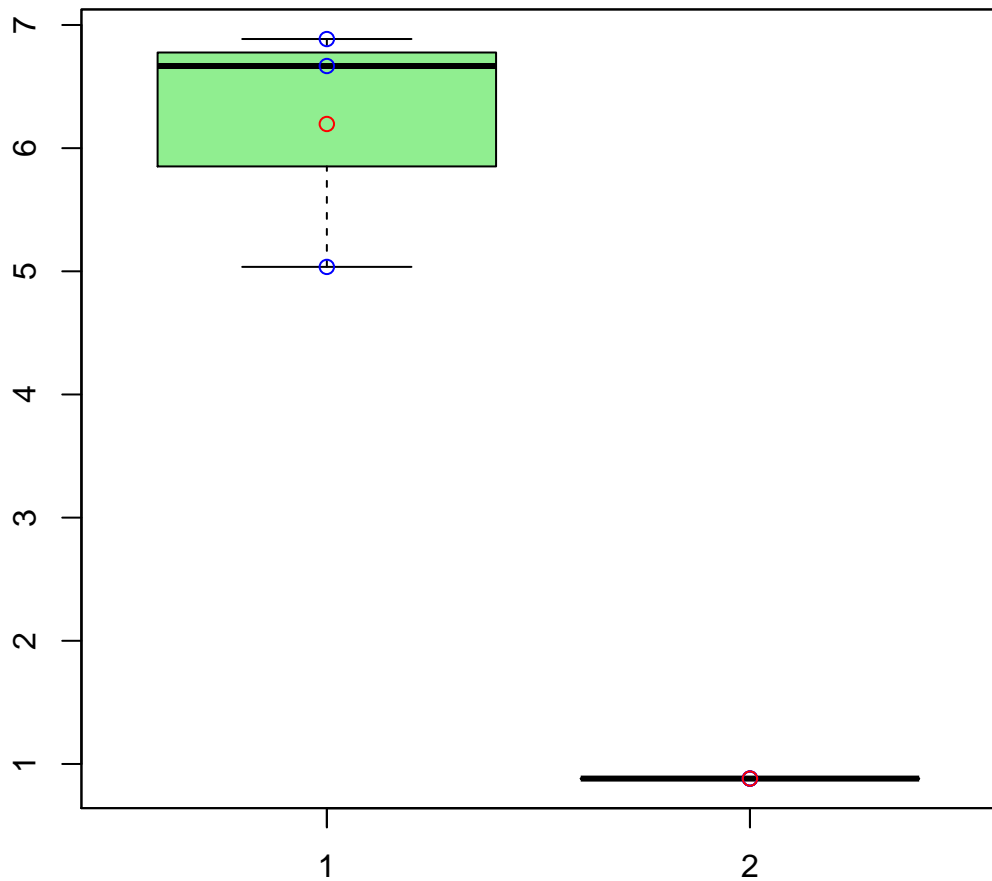

t-Test: p-value = 0.01

# CL1Contig9639|CL1Contig9639

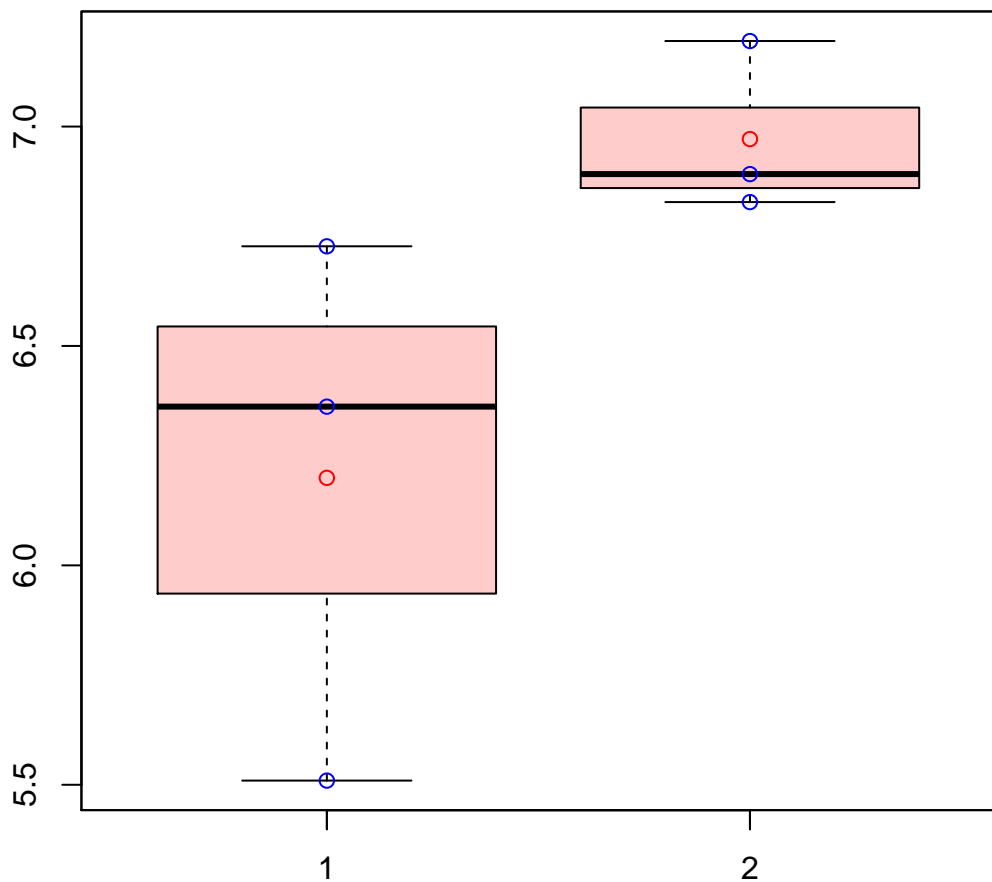

t-Test: p-value = 0.16

# CL1Contig9677|CL1Contig9677

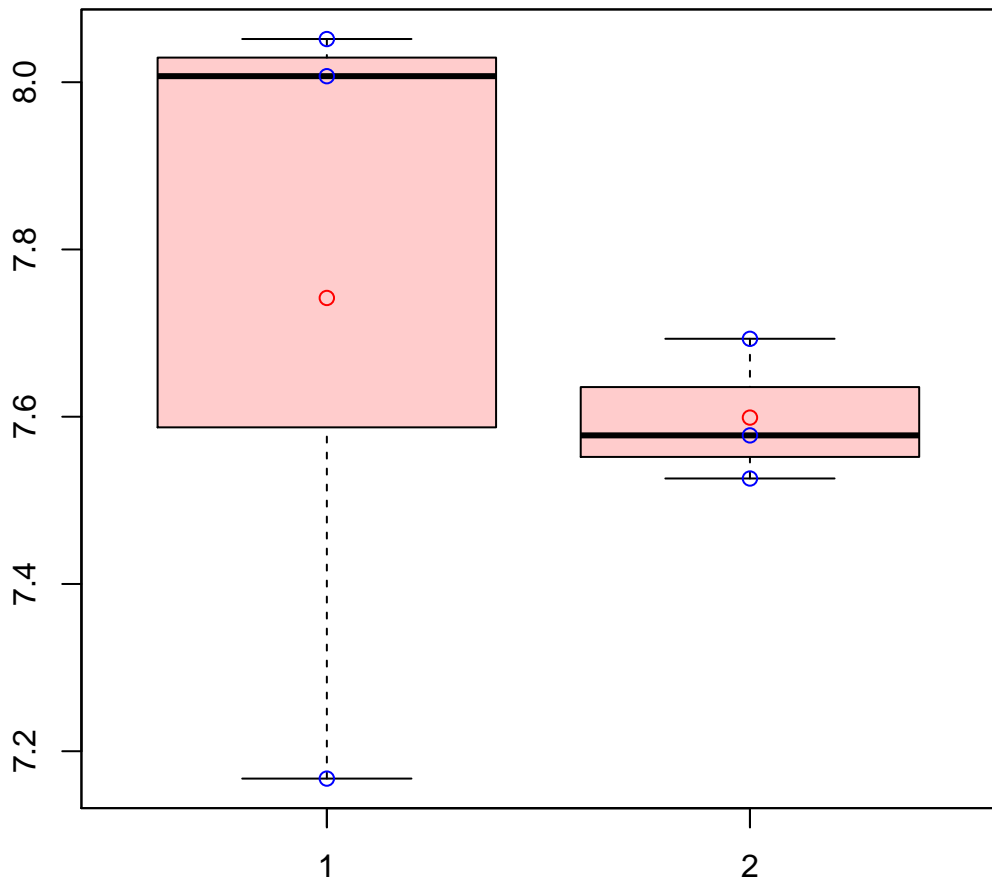

t-Test: p-value = 0.67

# CL1Contig9810|CL1Contig9810

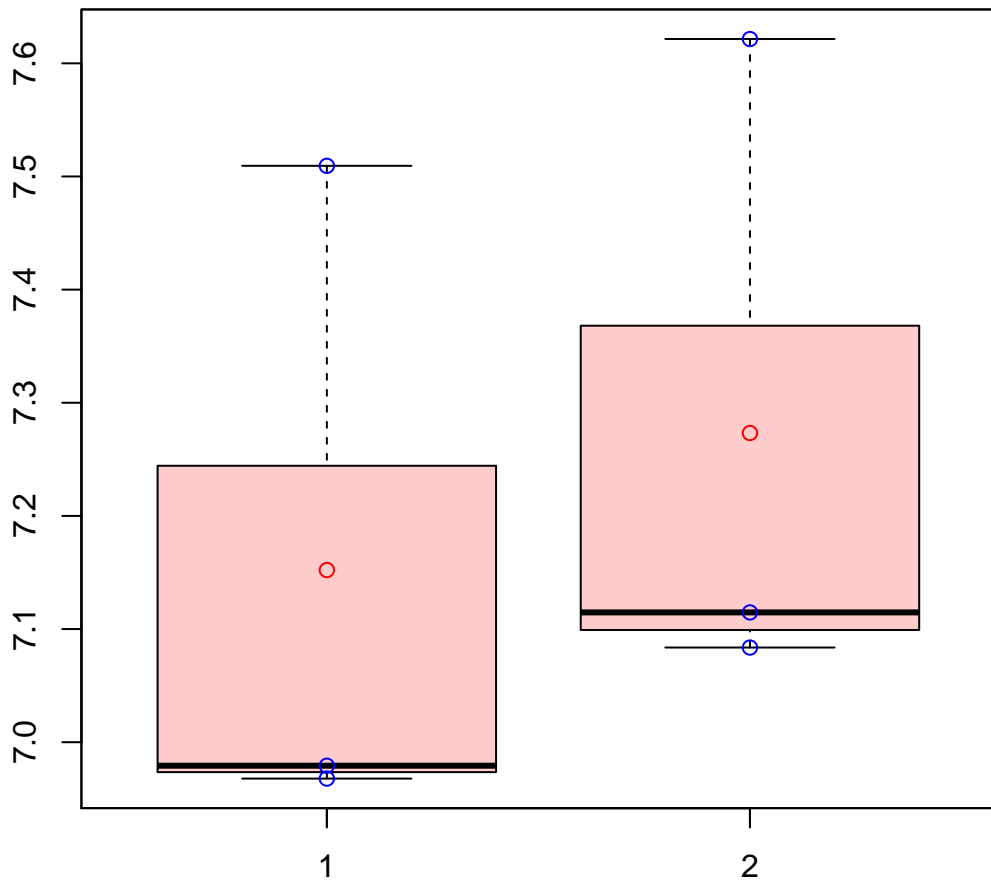

t-Test: p-value = 0.65

# CL1Contig991|CL1Contig991

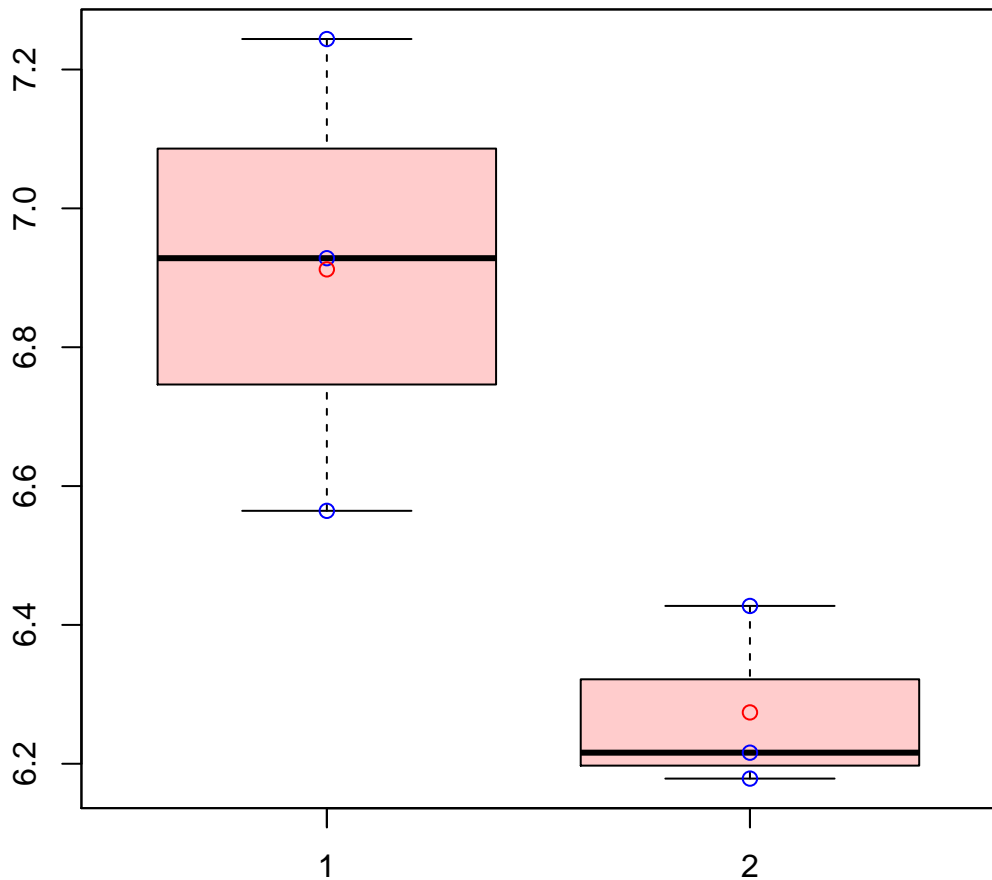

t-Test: p-value = 0.07

# CL1Contig9949|CL1Contig9949

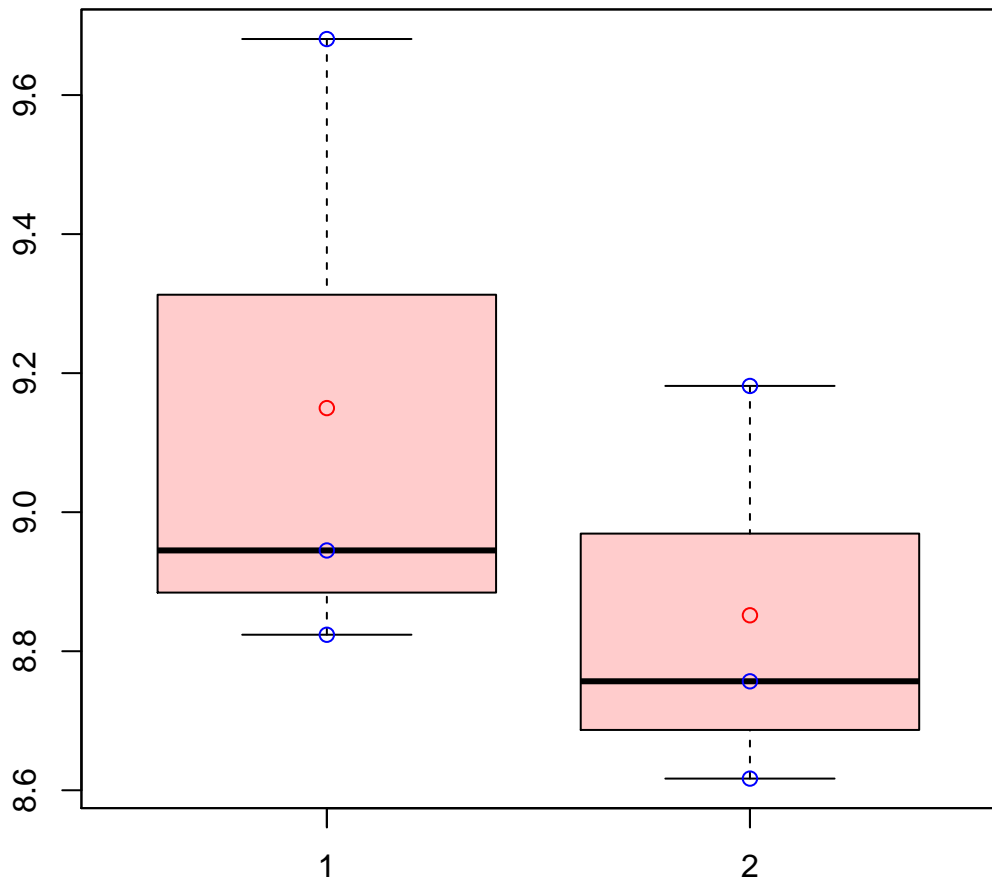

t-Test: p-value = 0.41

# CL1Contig9973|CL1Contig9973

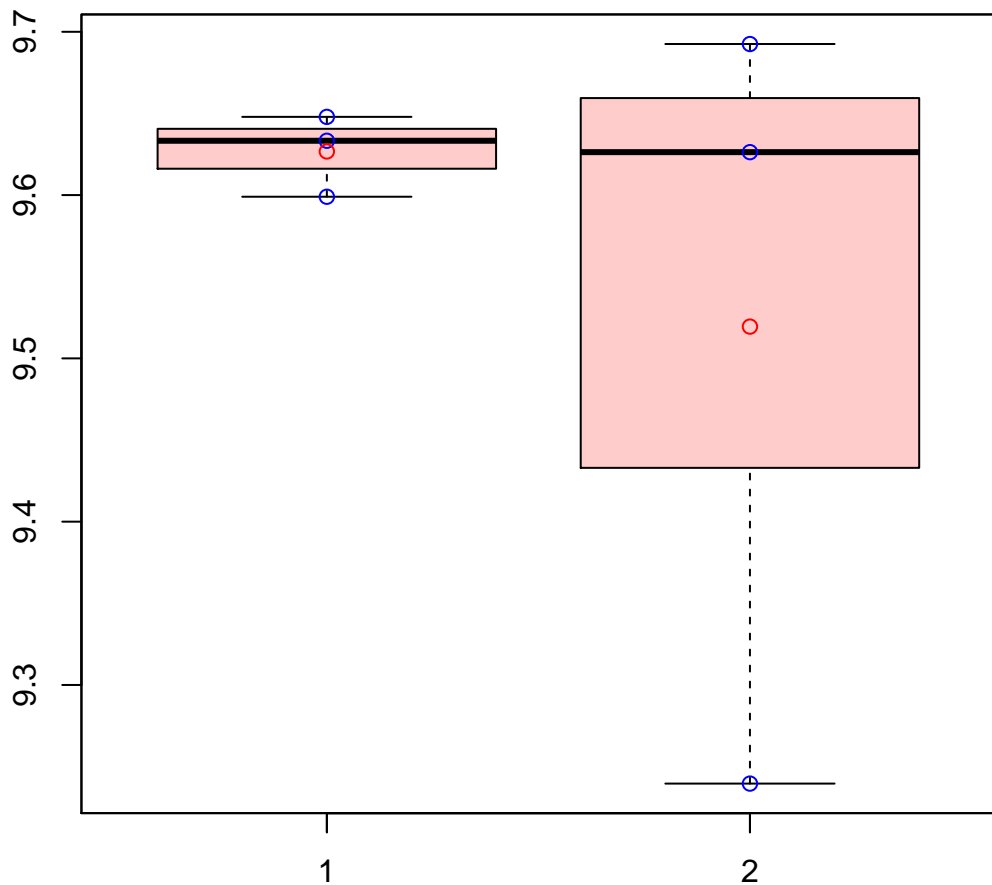

t-Test: p-value = 0.53

# CL1Contig9976|CL1Contig9976

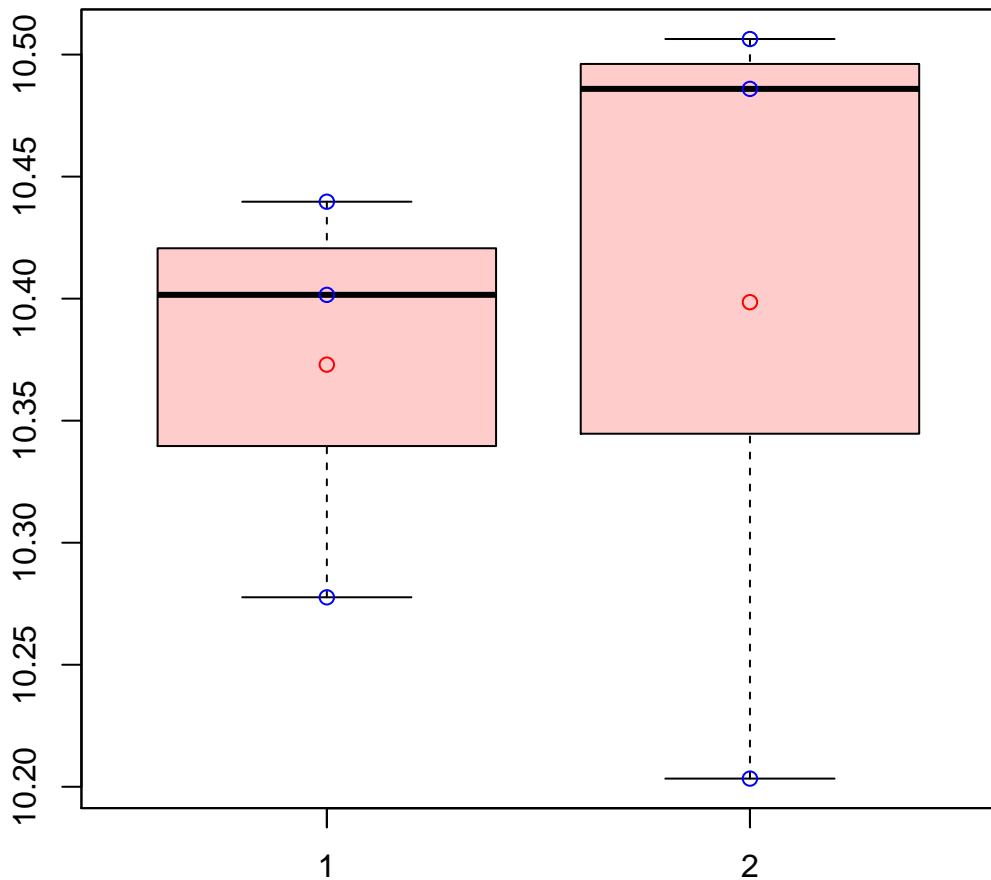

t-Test: p-value = 0.83



# CL2004Contig6|CL2004Contig6

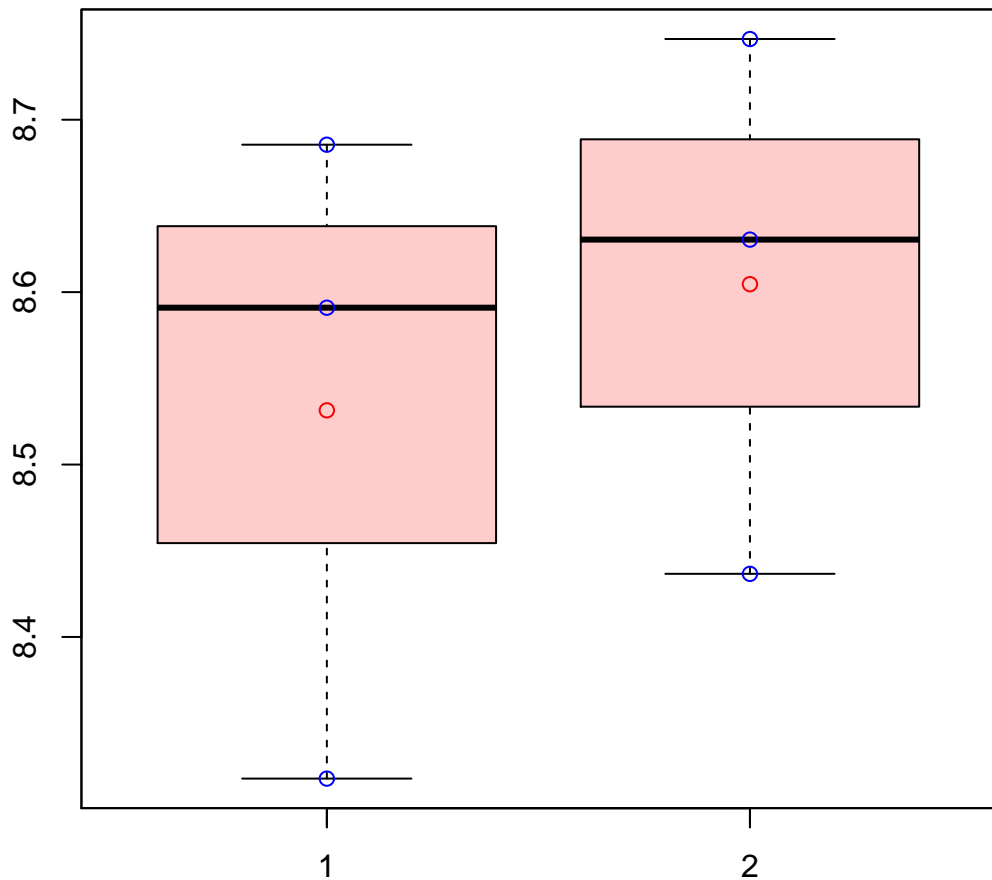

t-Test: p-value = 0.64

# CL2006Contig1|CL2006Contig1

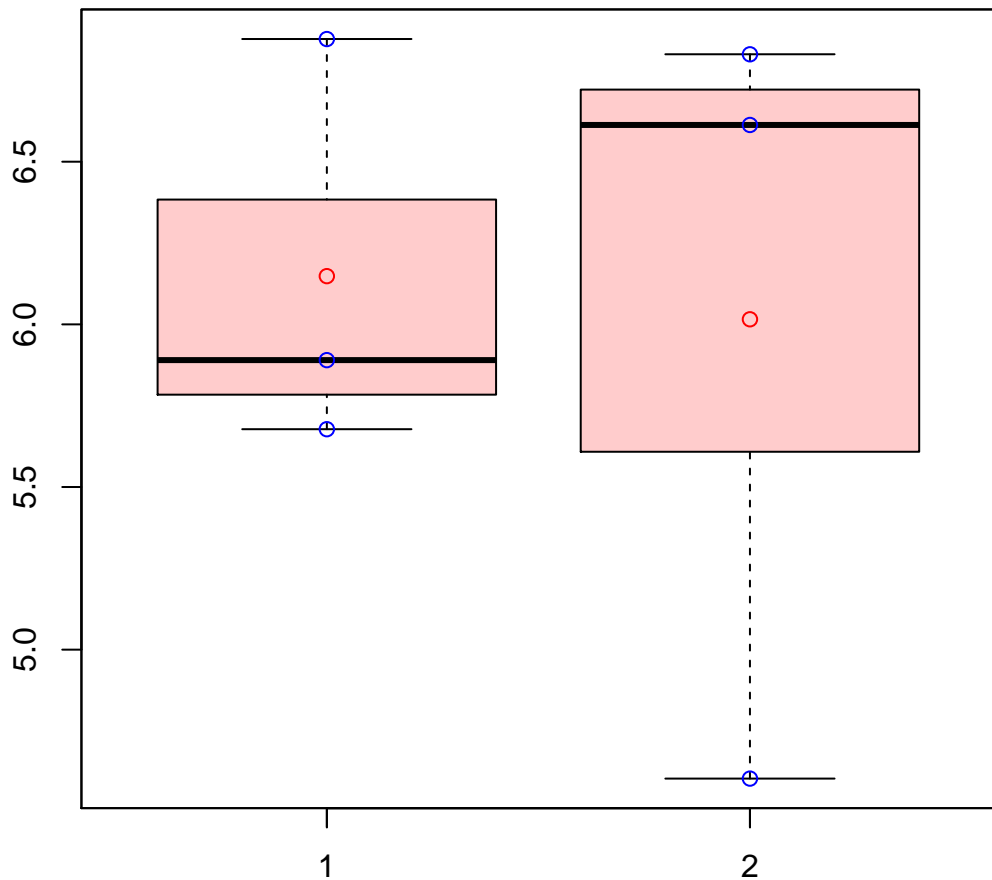

t-Test: p-value = 0.88

# CL200Contig7|CL200Contig7

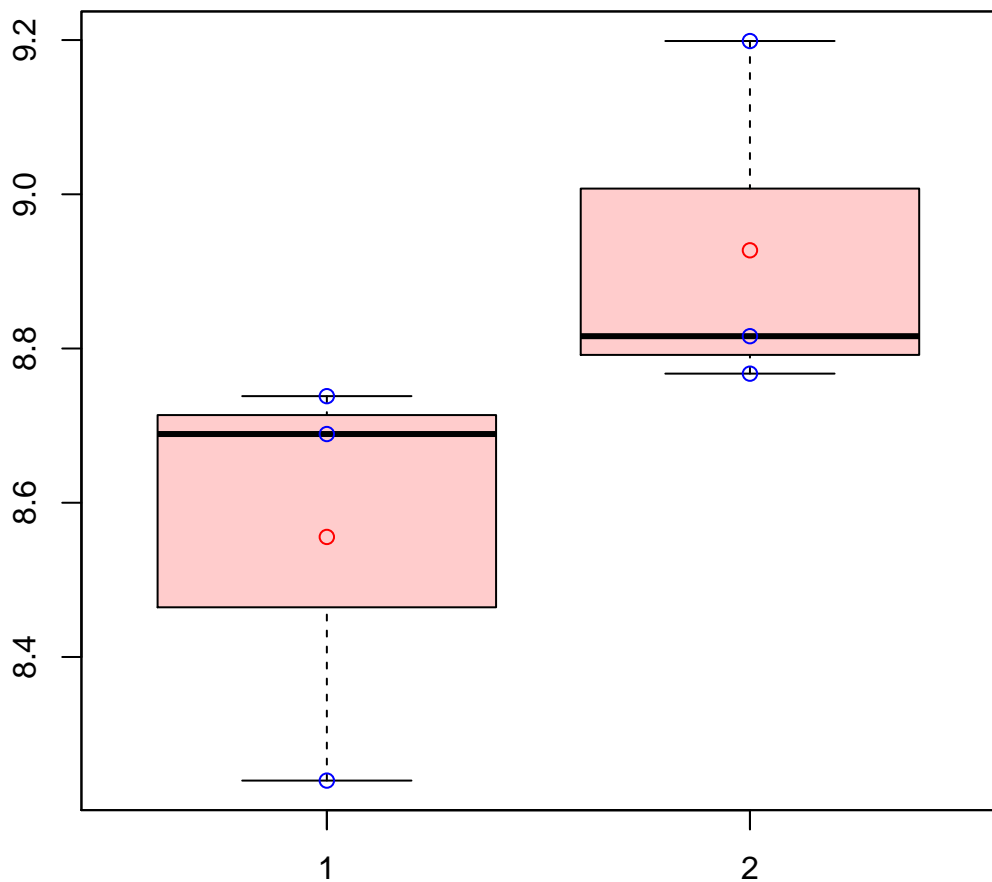

t-Test: p-value = 0.15

## CL2013Contig2|CL2013Contig2

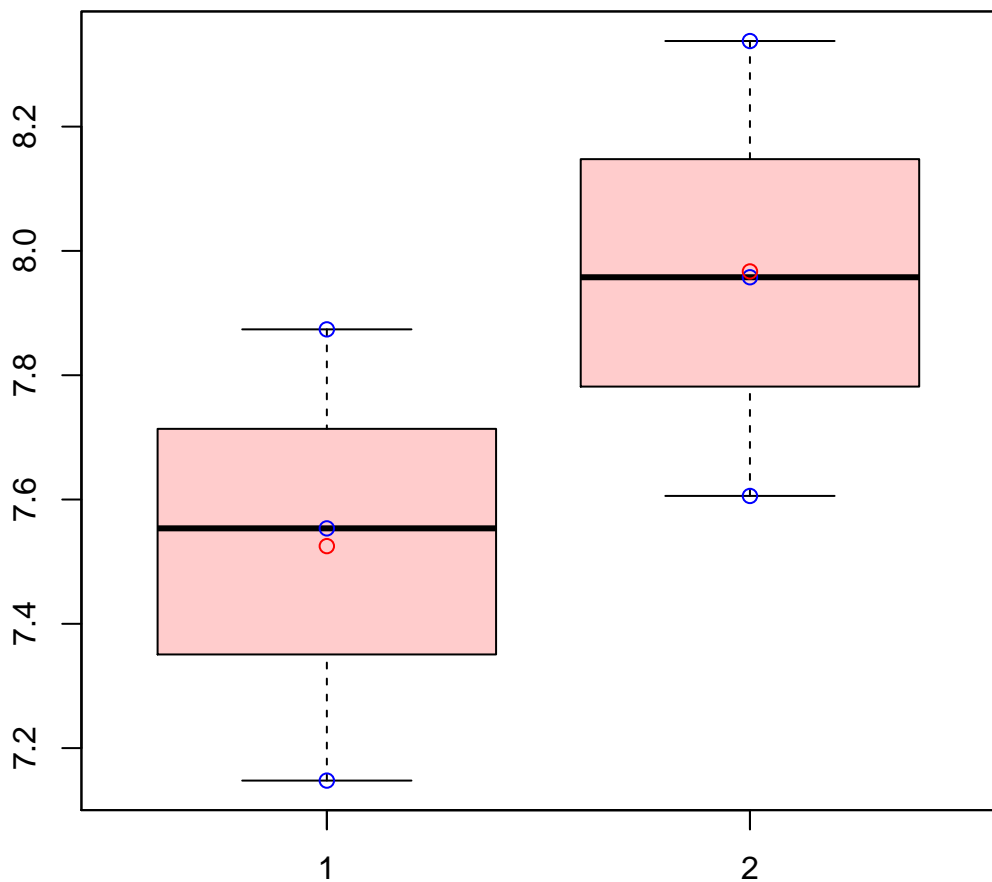

t-Test: p-value = 0.21

# CL2014Contig4|CL2014Contig4

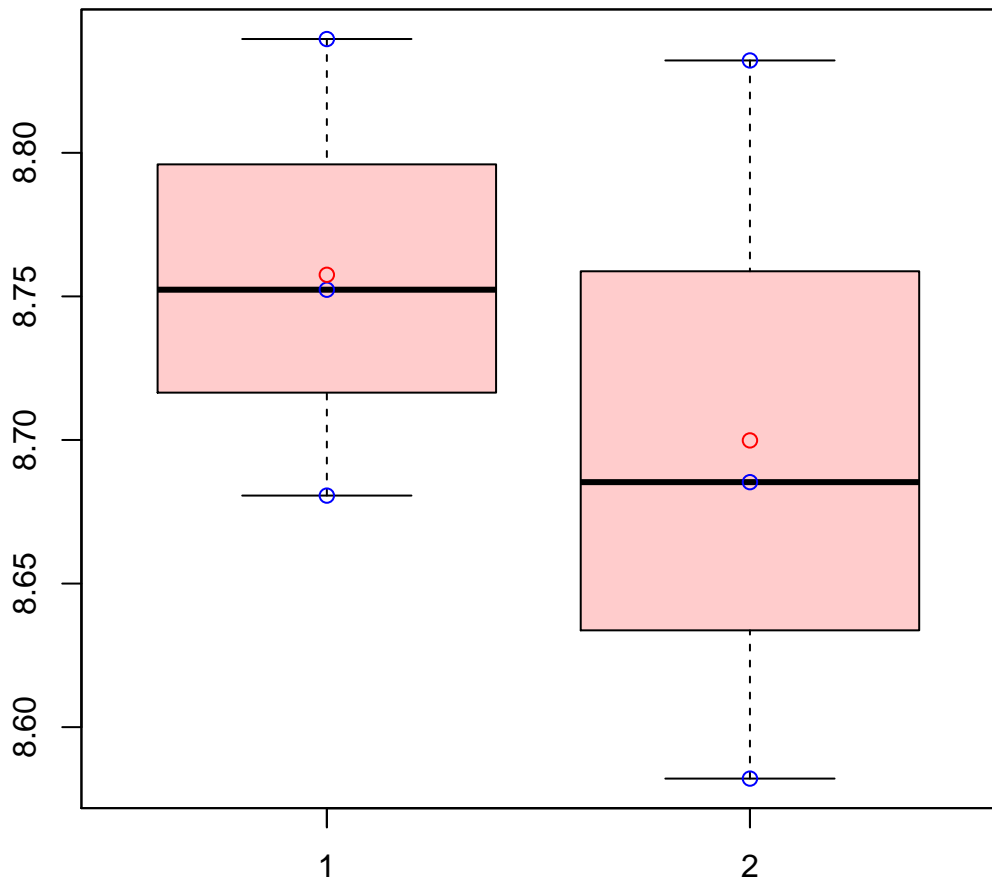

t-Test: p-value = 0.54

# CL2016Contig2|CL2016Contig2

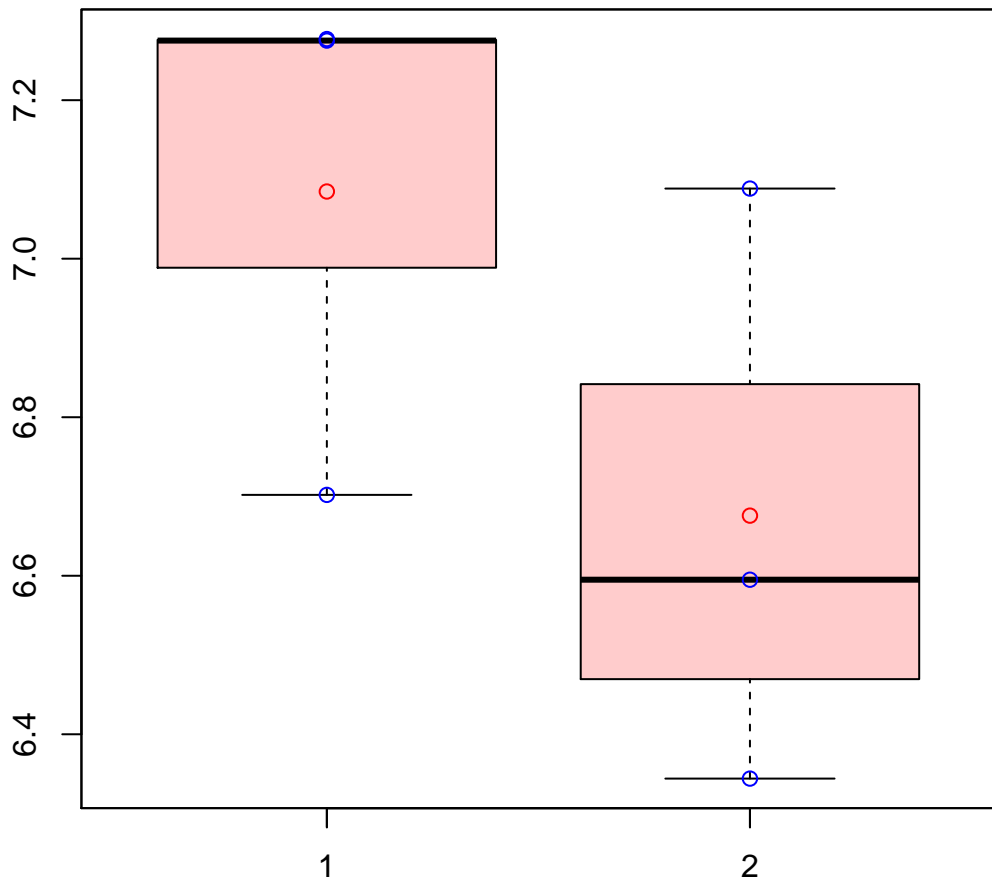

t-Test: p-value = 0.23

# CL20178Contig1|CL20178Contig1

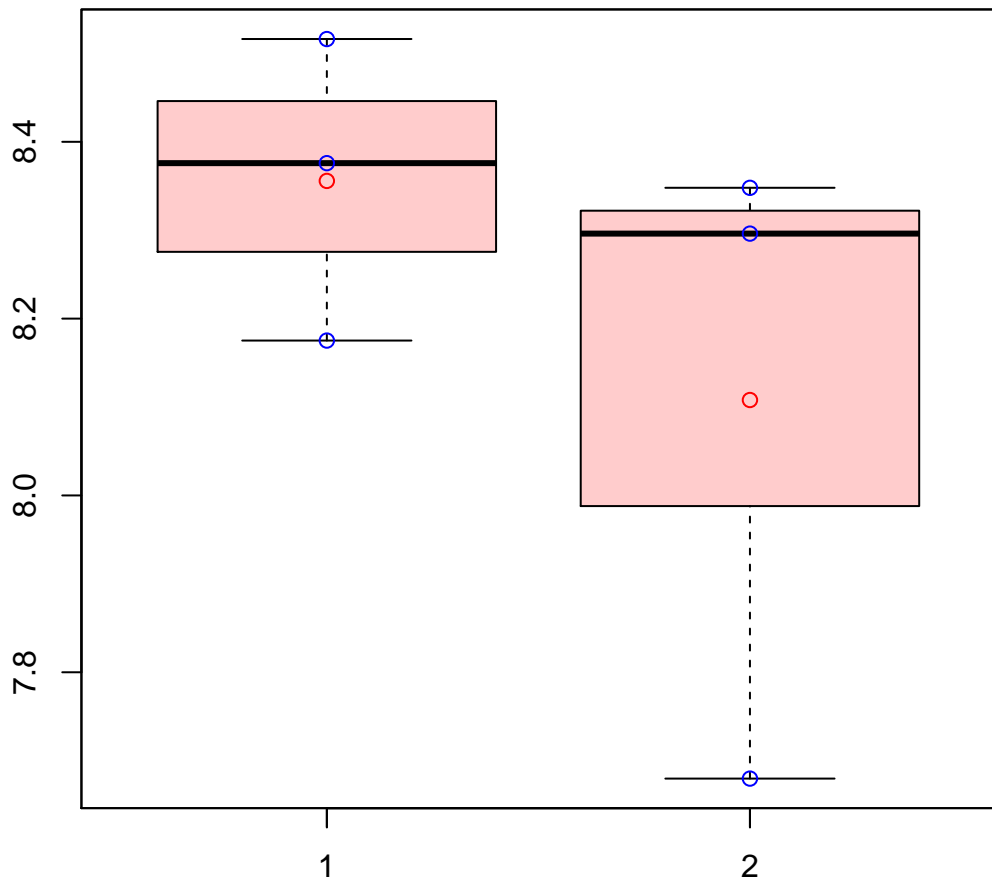

t-Test: p-value = 0.38

# CL2017Contig1|CL2017Contig1

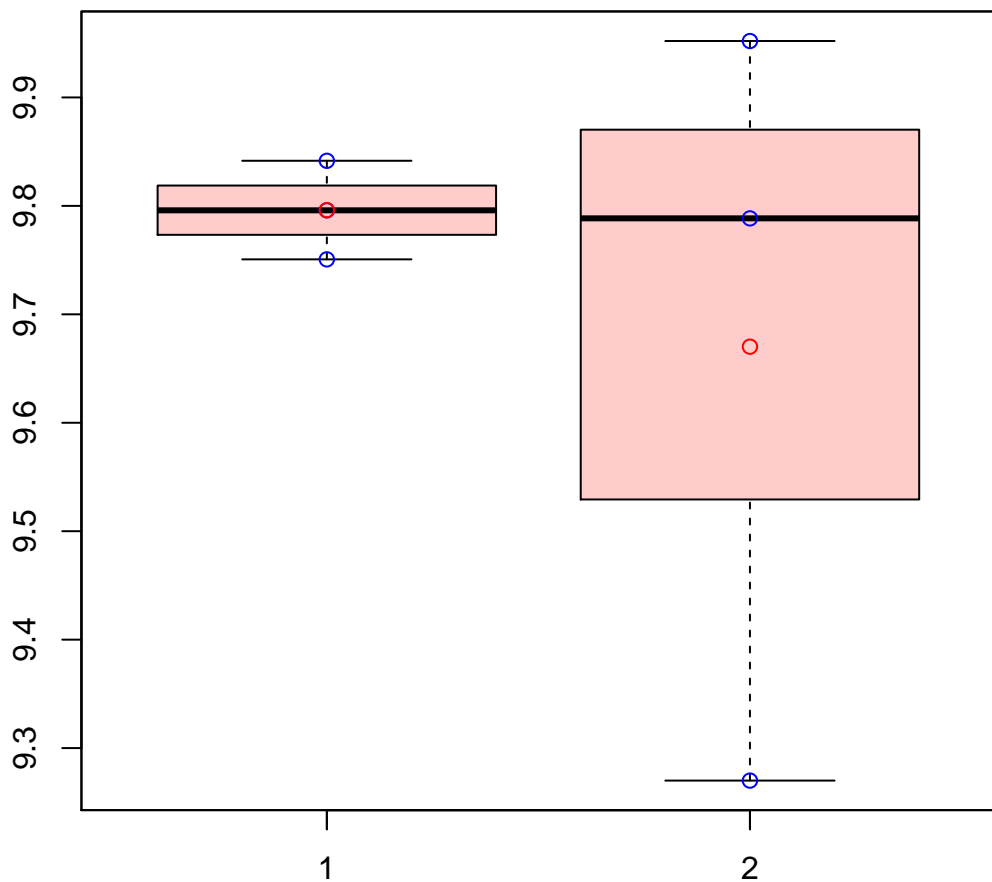

t-Test: p-value = 0.6



# CL2017Contig4|CL2017Contig4

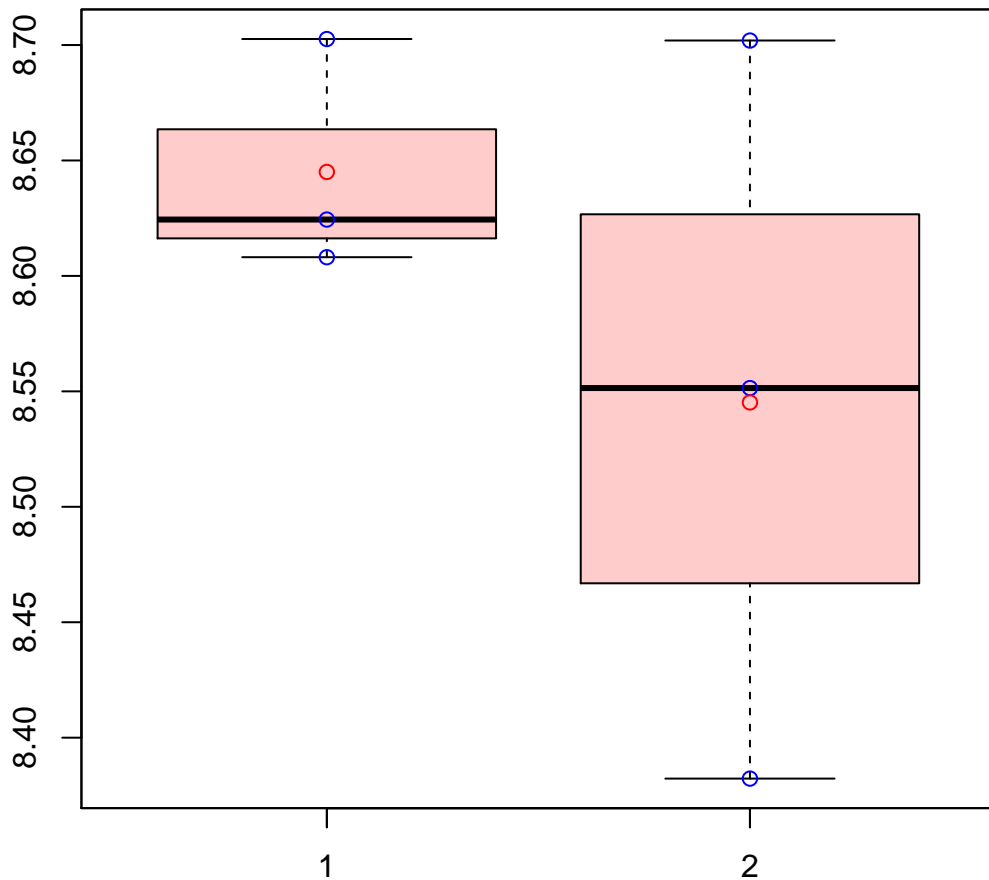

t-Test: p-value = 0.4

# CL201Contig7|CL201Contig7

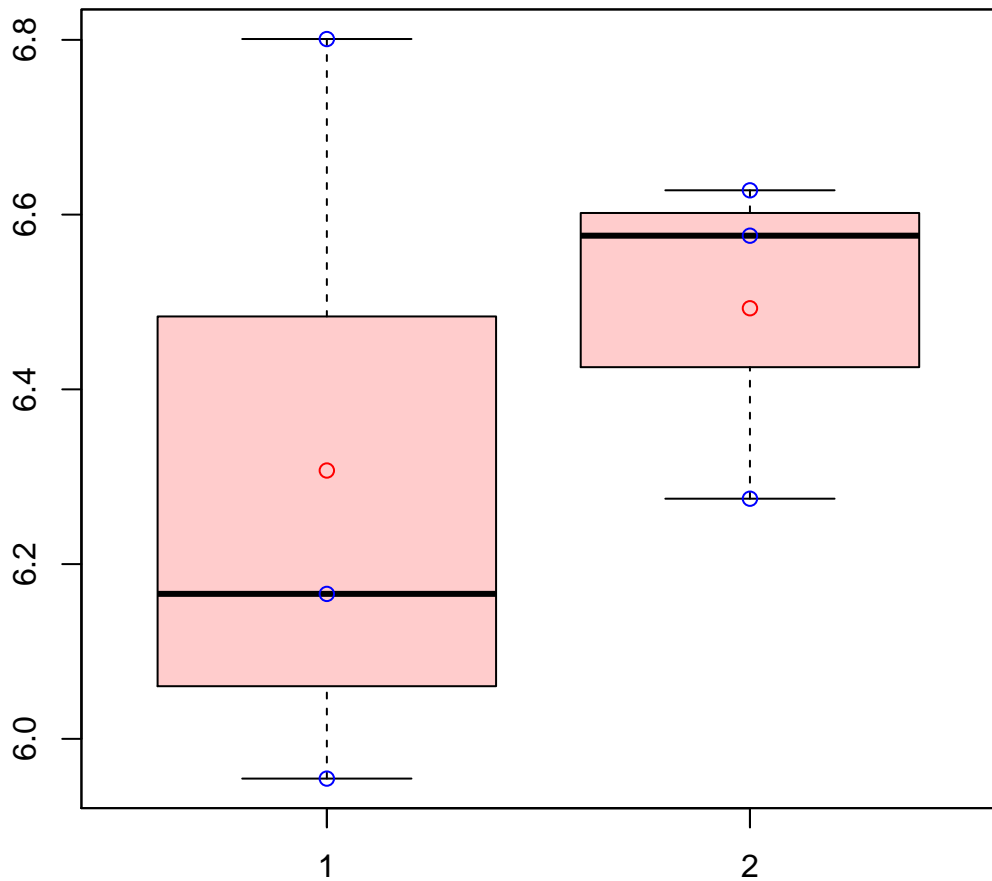

t-Test: p-value = 0.56

# CL2026Contig3|CL2026Contig3

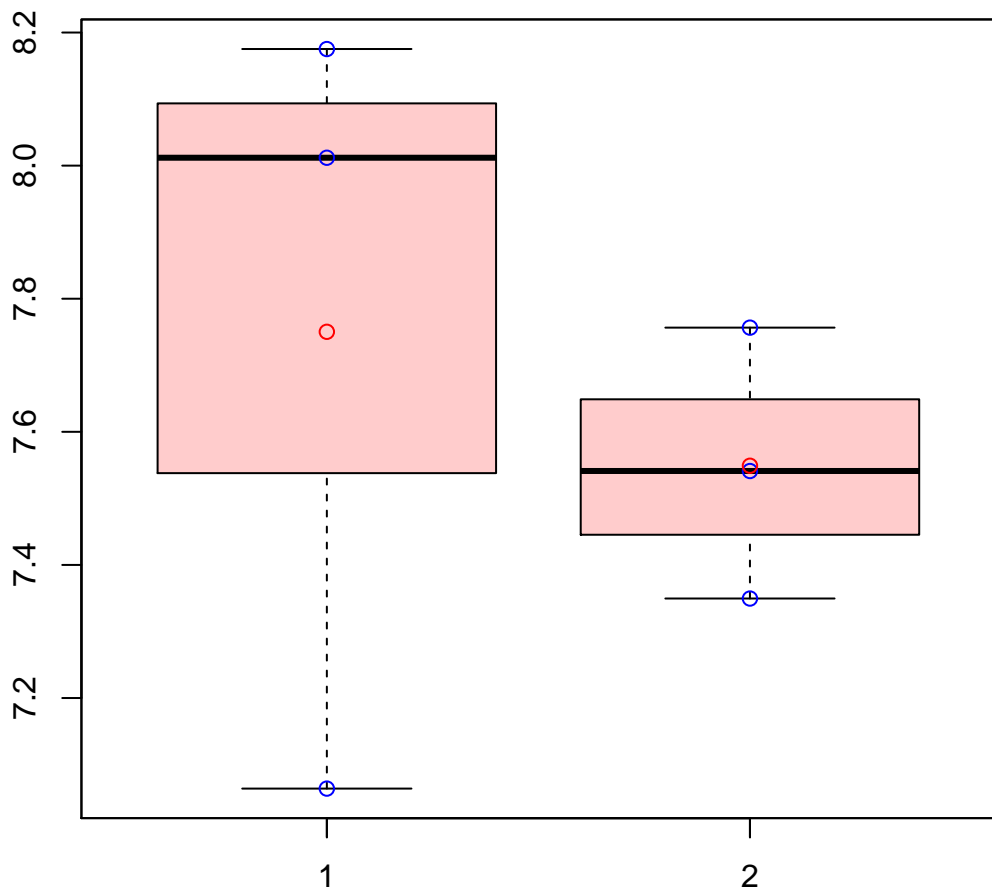

t-Test: p-value = 0.63

# CL2026Contig5|CL2026Contig5

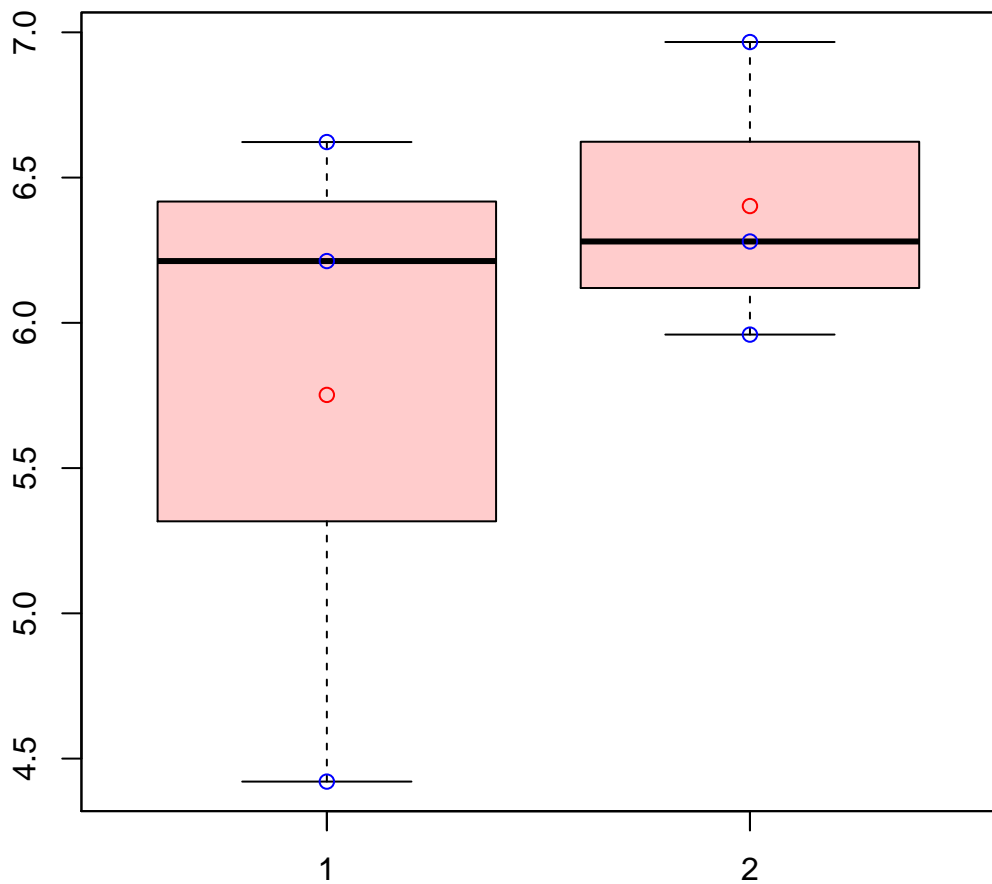

t-Test: p-value = 0.45

# CL2026Contig8|CL2026Contig8

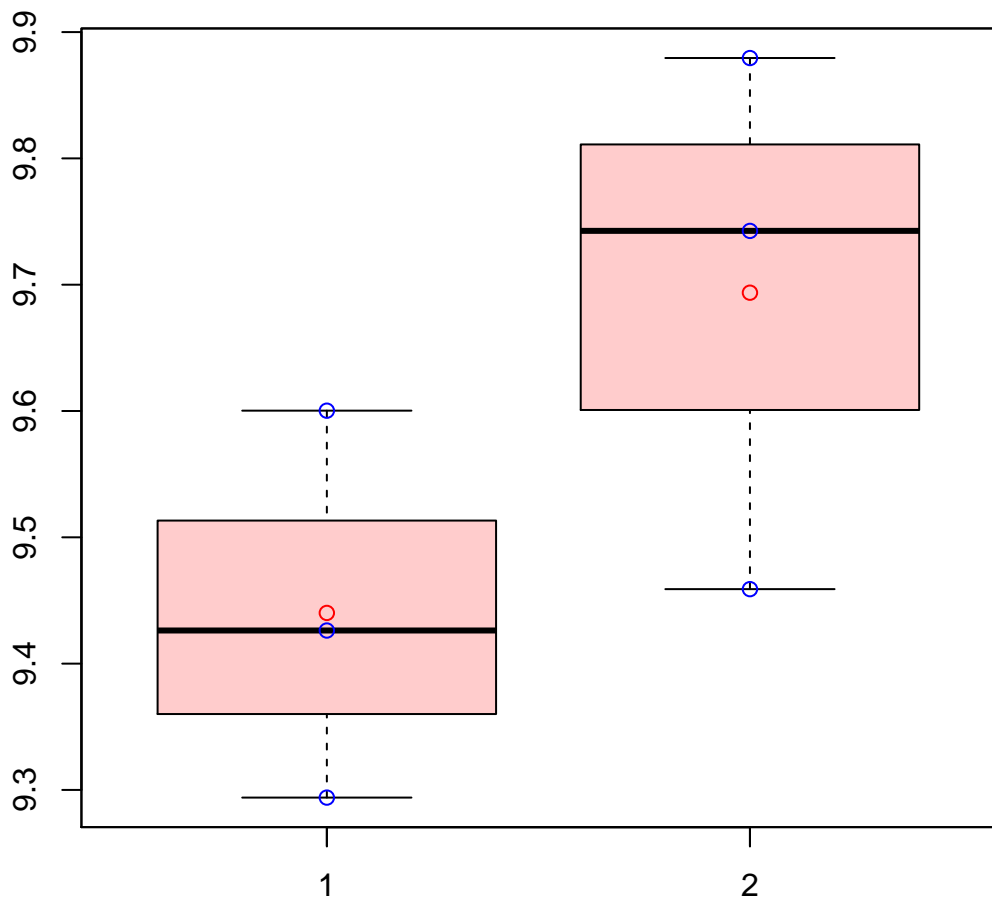

t-Test: p-value = 0.18

# CL2031Contig4|CL2031Contig4

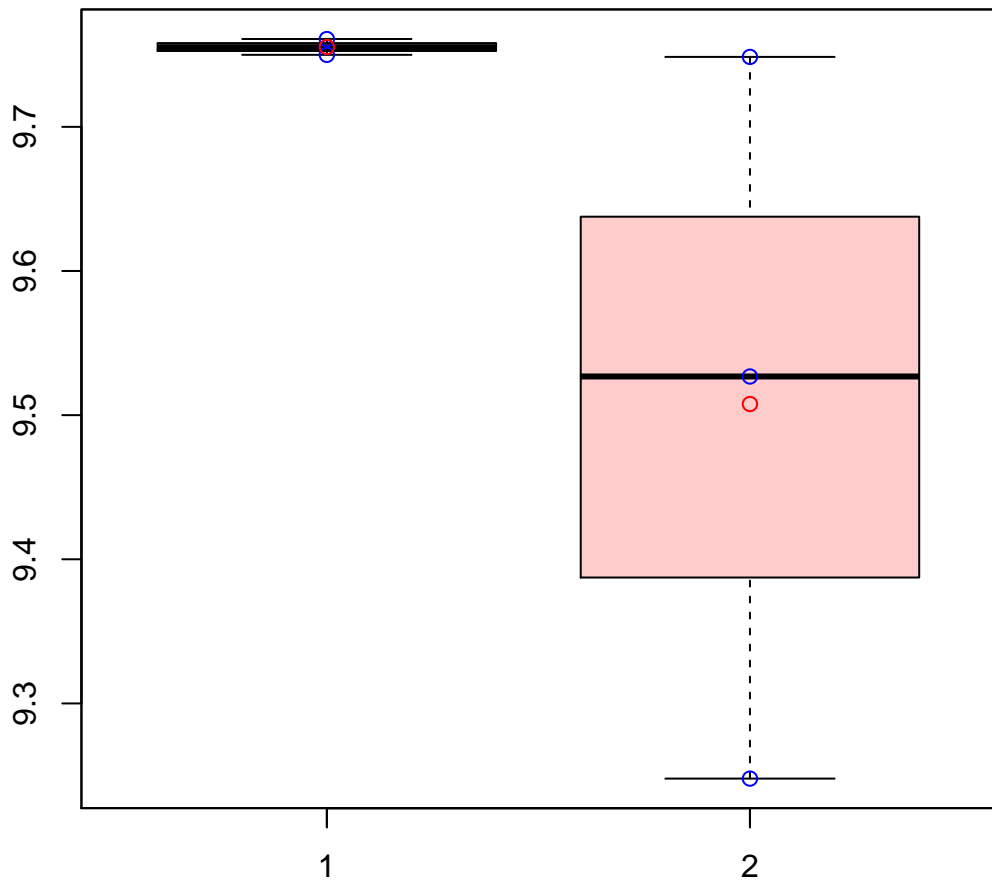

t-Test: p-value = 0.23

# CL2031Contig5|CL2031Contig5

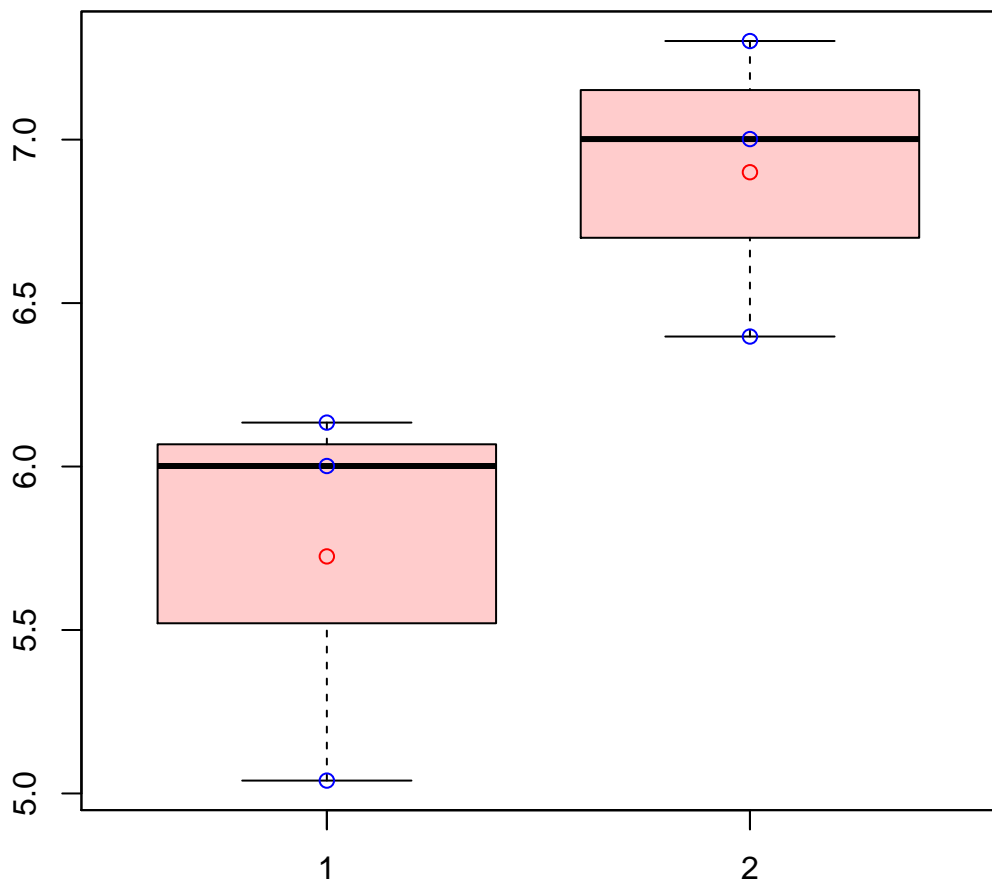

t-Test: p-value = 0.06

# CL2032Contig1|CL2032Contig1

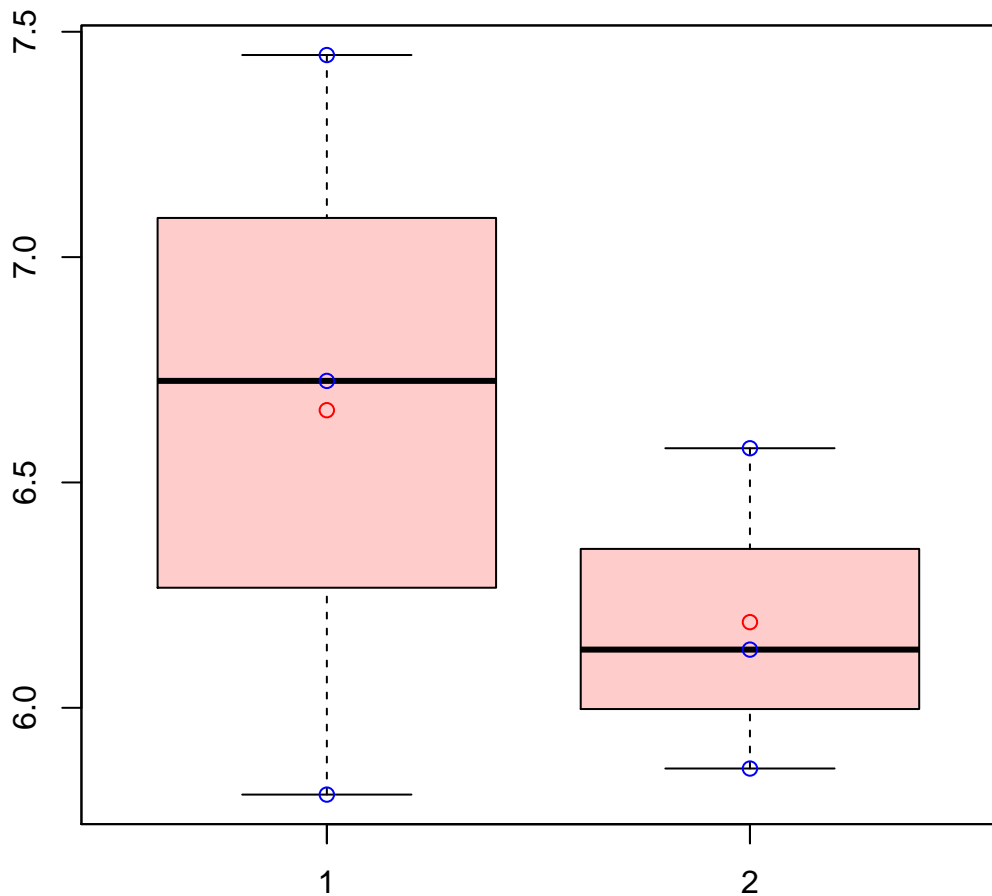

t-Test: p-value = 0.44



# CL2033Contig4|CL2033Contig4

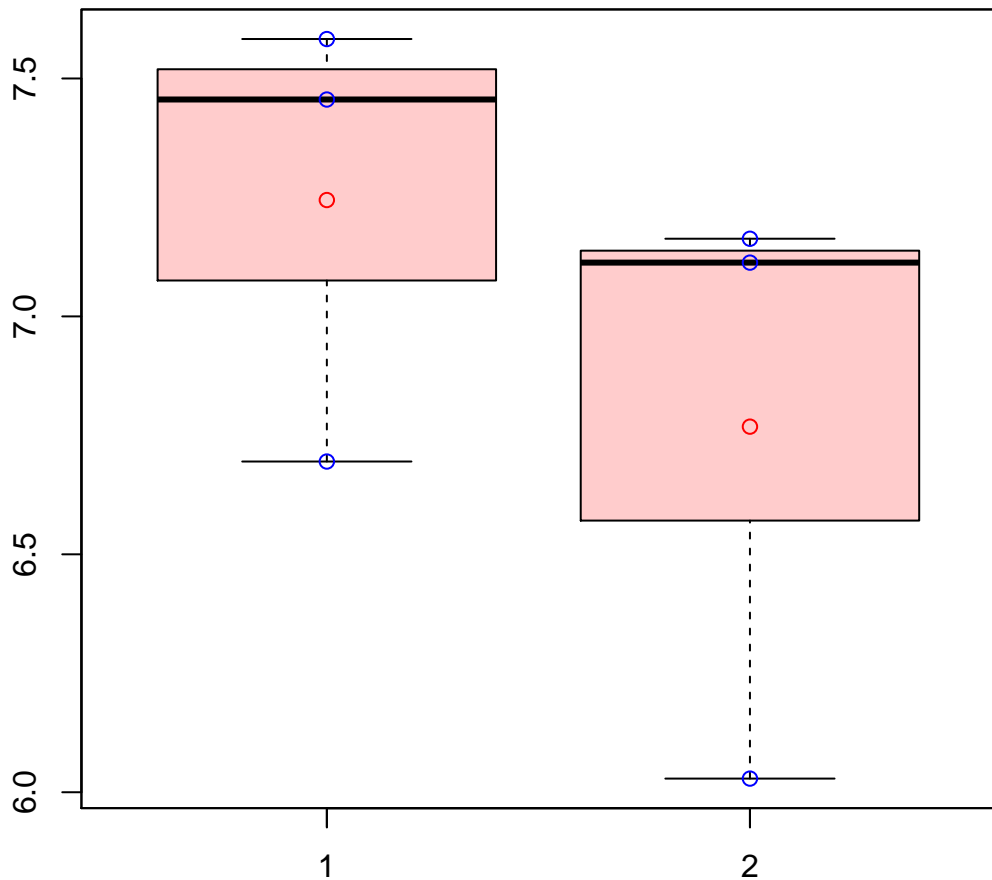

t-Test: p-value = 0.37

# CL2033Contig5|CL2033Contig5

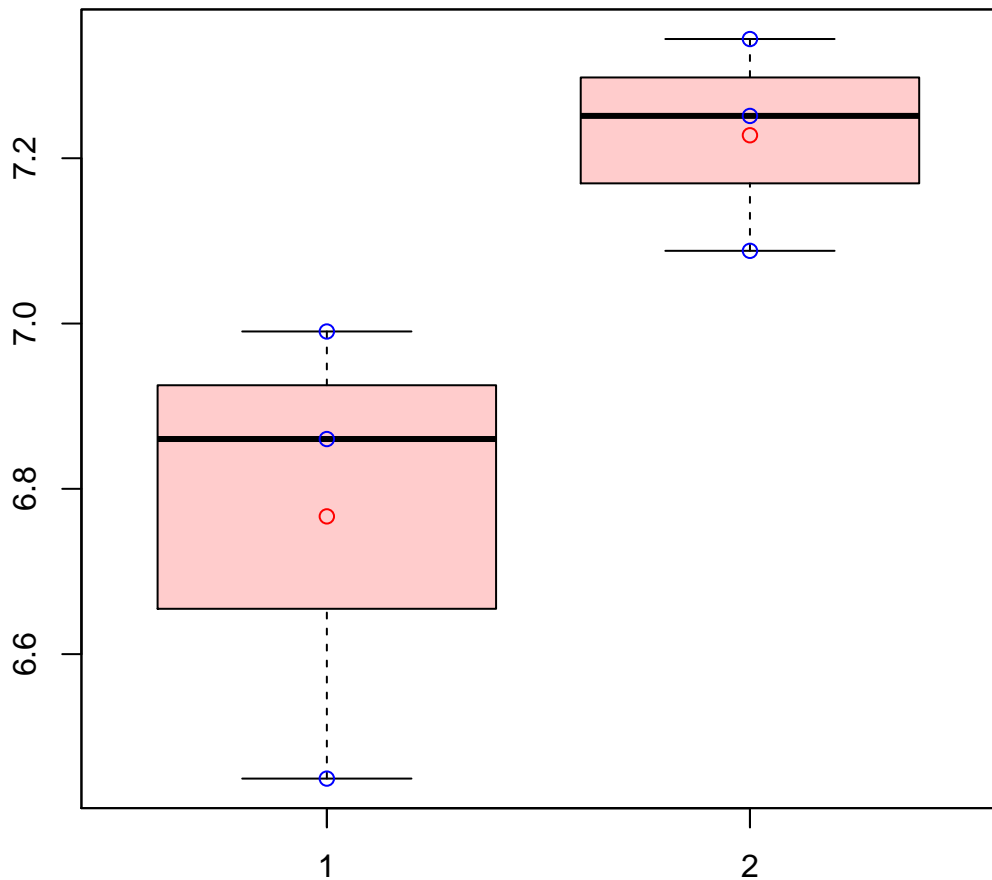

t-Test: p-value = 0.09

# CL2034Contig1|CL2034Contig1

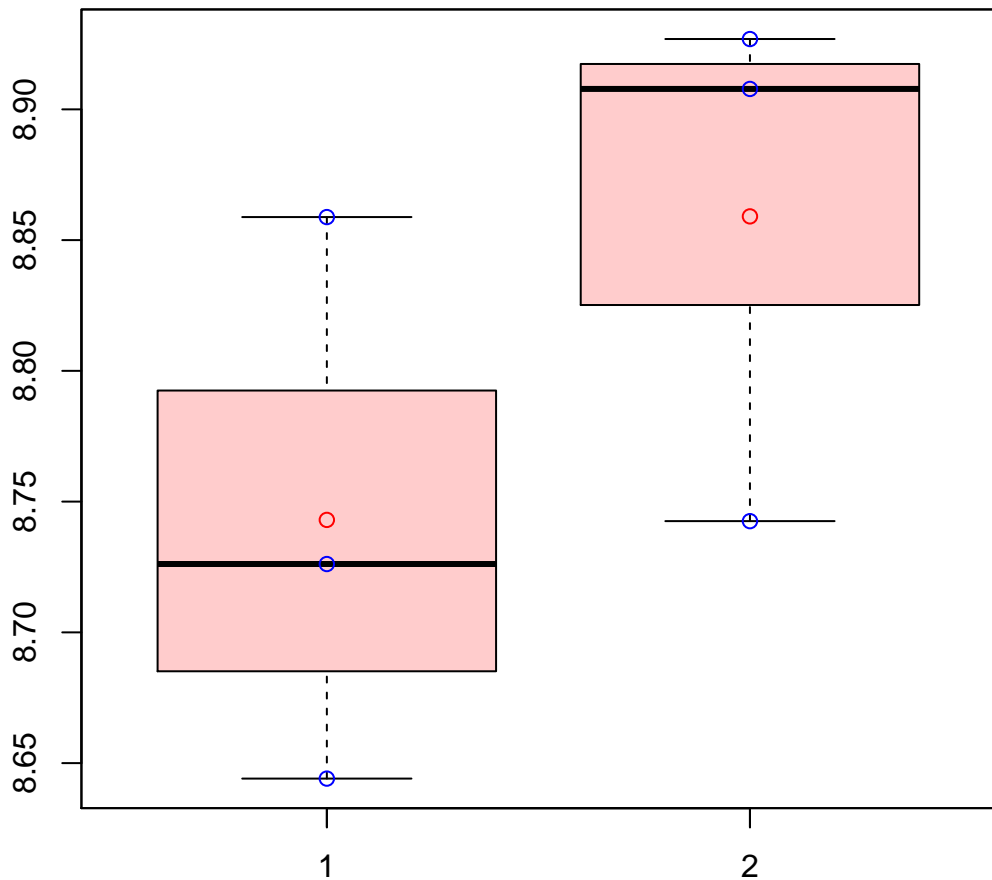

t-Test: p-value = 0.25

# CL2037Contig6|CL2037Contig6

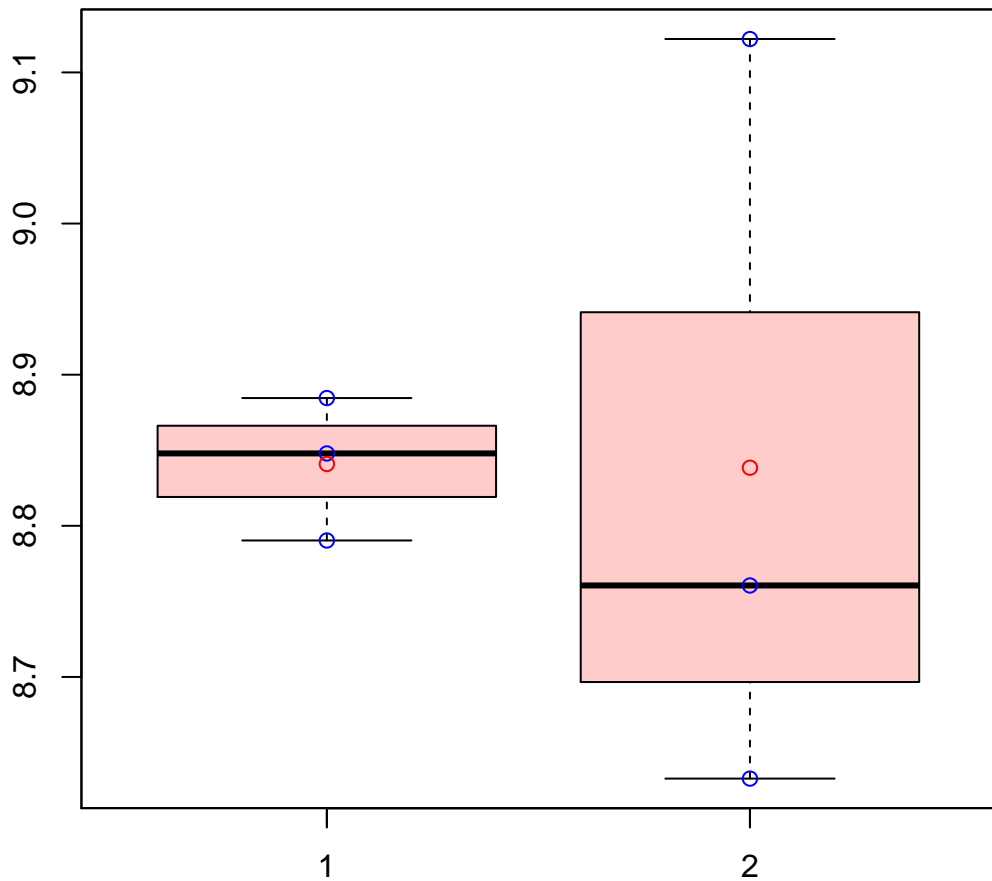

t-Test: p-value = 0.99

# CL20396Contig1|CL20396Contig1

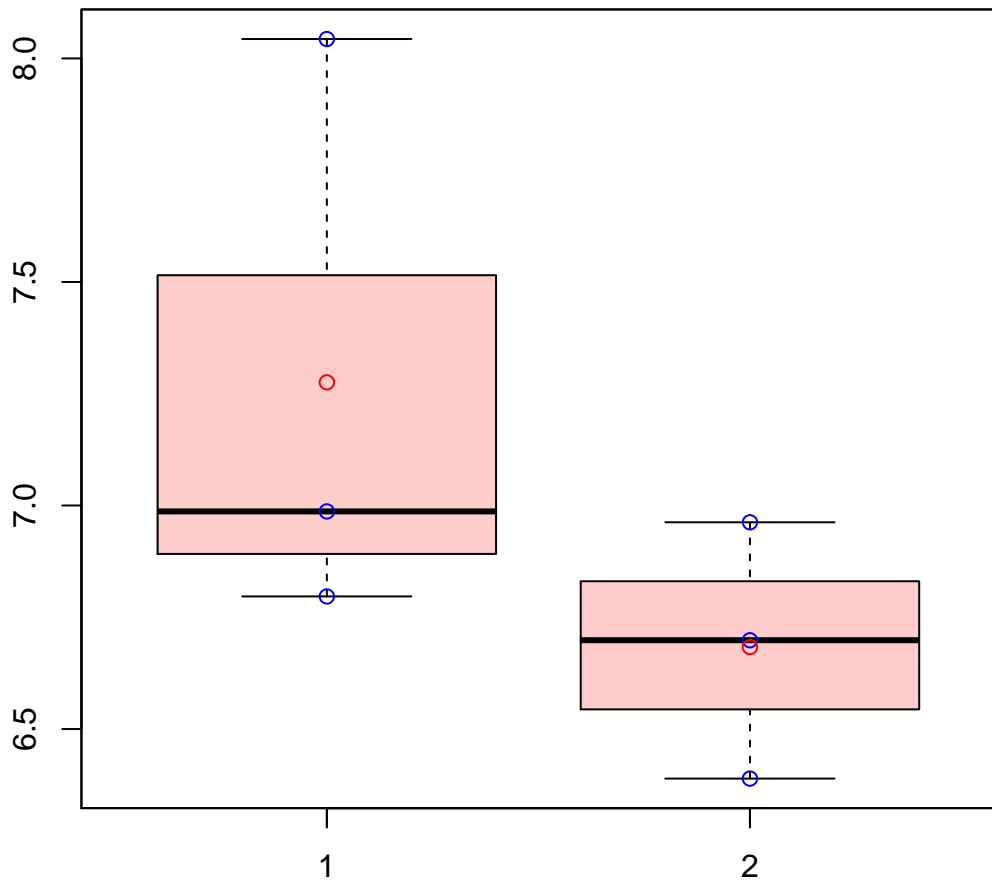

t-Test: p-value = 0.26

# CL2047Contig1|CL2047Contig1

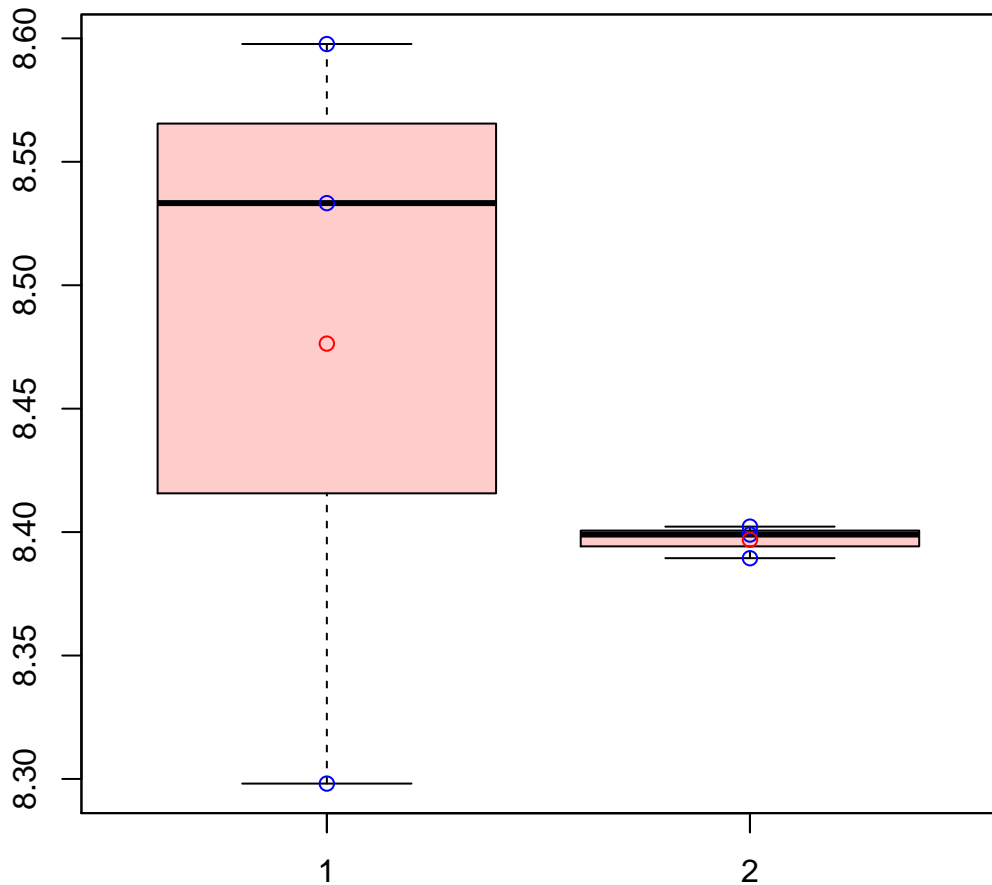

t-Test: p-value = 0.47

# CL2055Contig4|CL2055Contig4

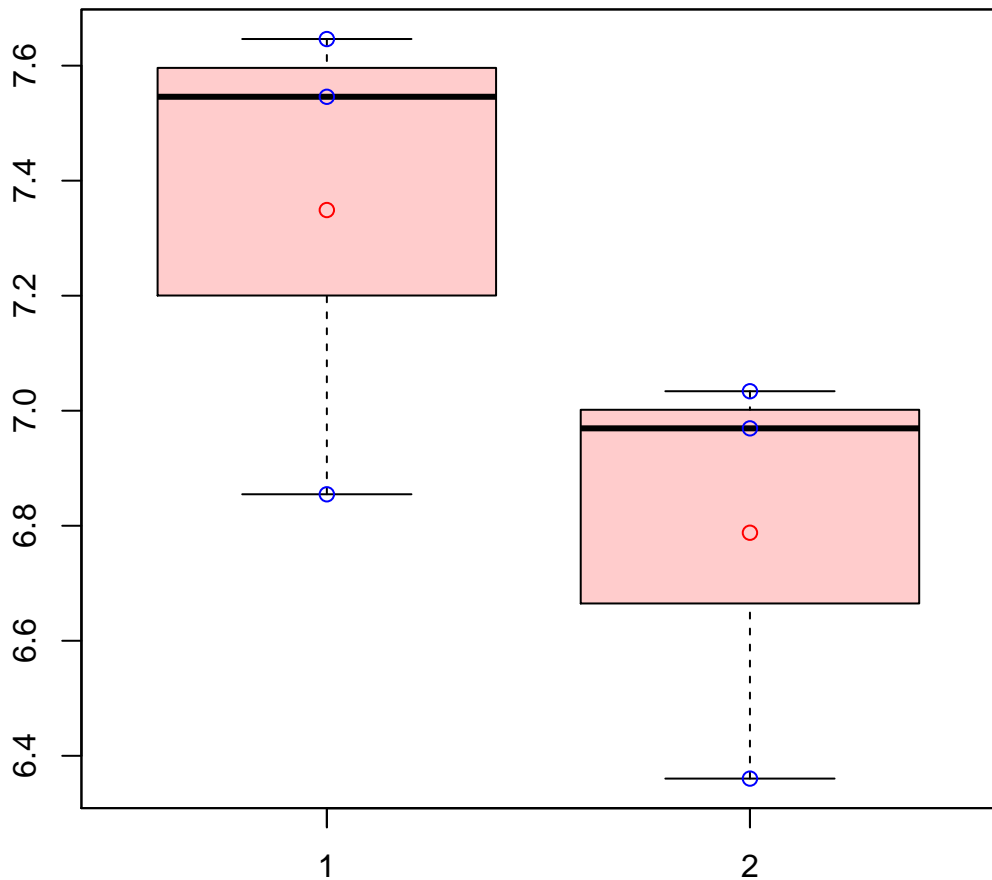

t-Test: p-value = 0.16

# CL2058Contig6|CL2058Contig6

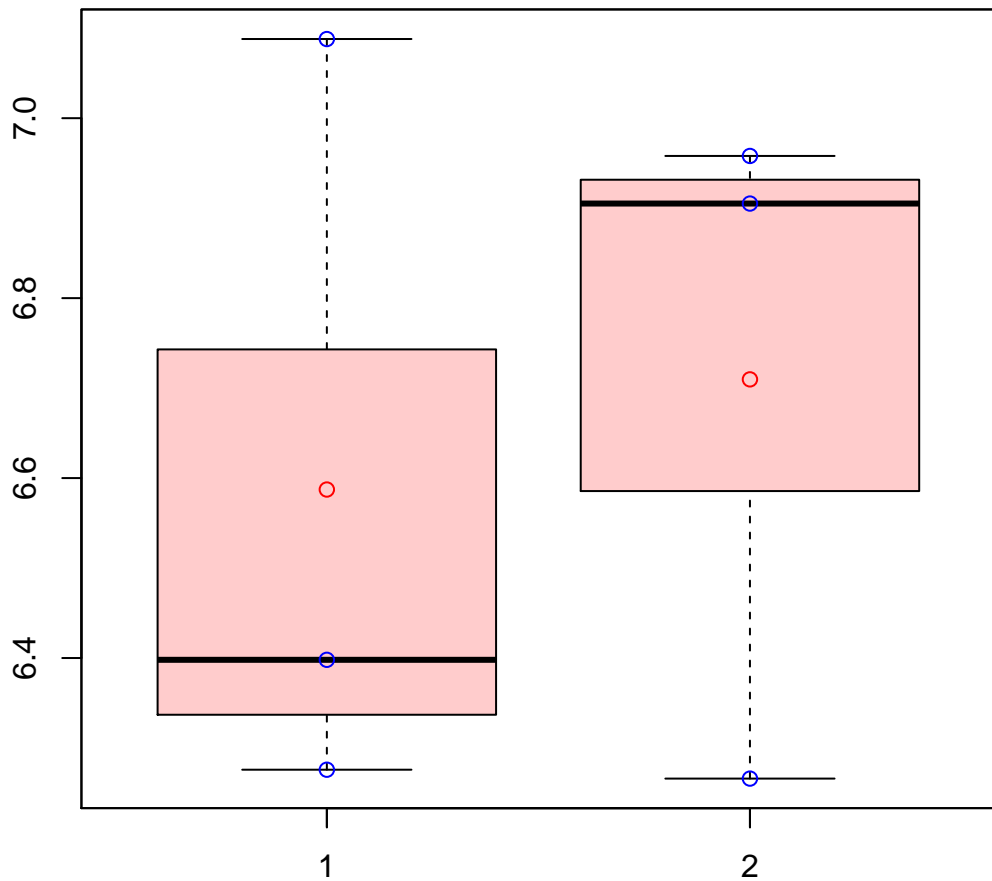

t-Test: p-value = 0.73



# CL2060Contig1|CL2060Contig1

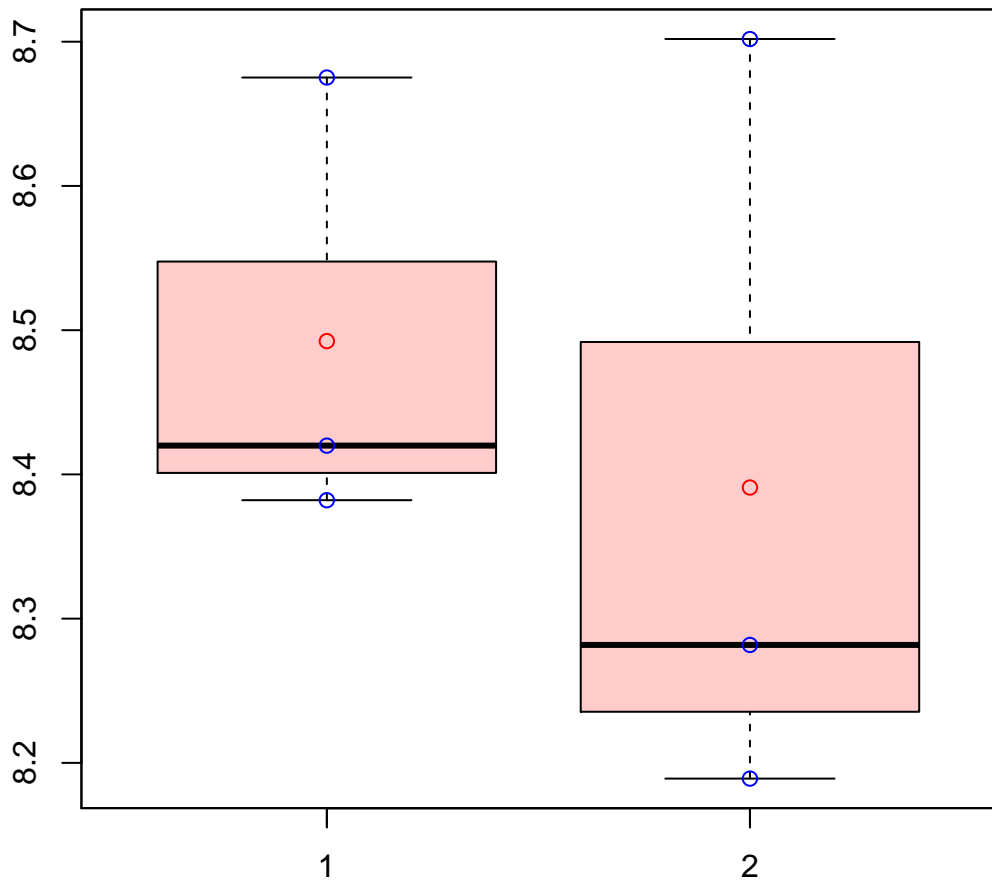

t-Test: p-value = 0.61

# CL2060Contig3|CL2060Contig3

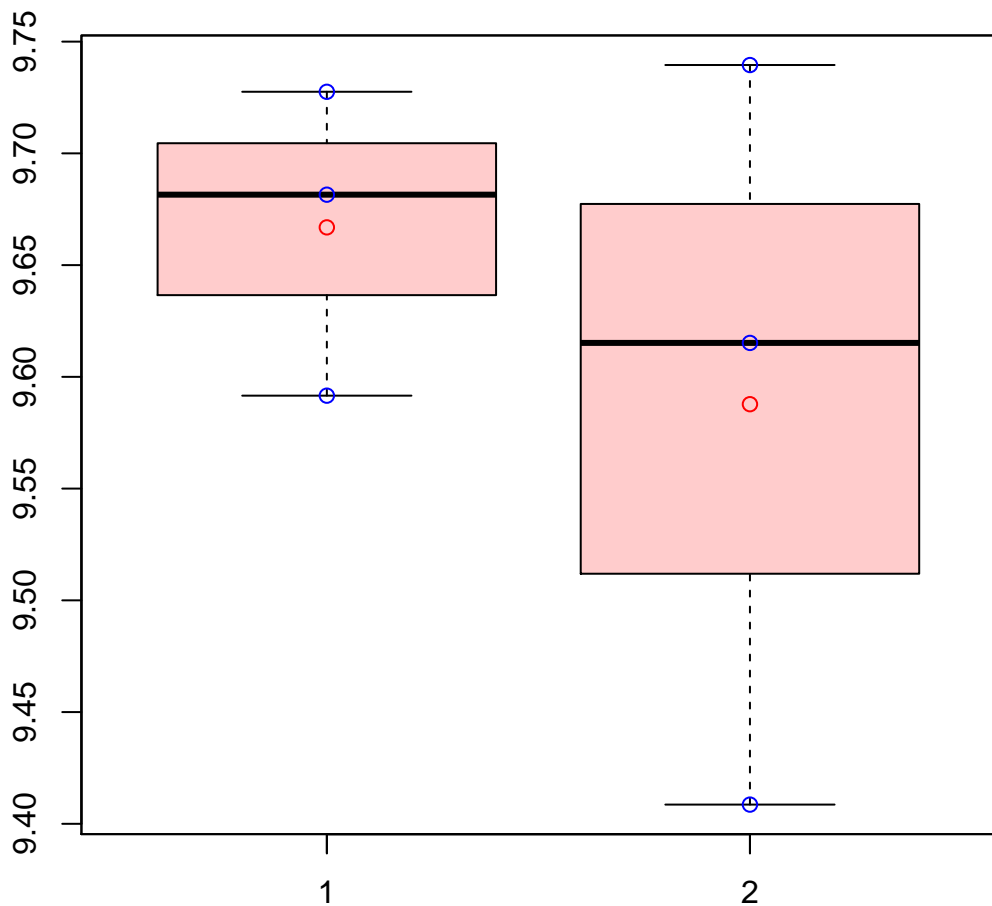

t-Test: p-value = 0.51

# CL20644Contig1|CL20644Contig1

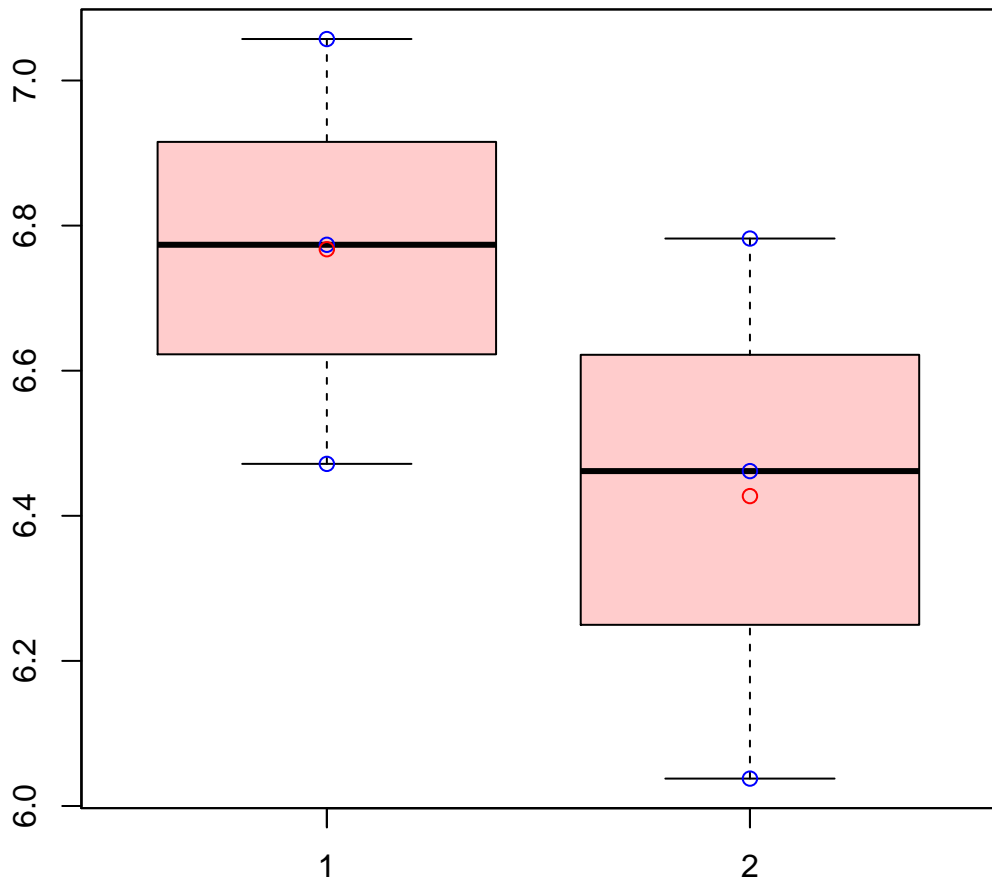

t-Test: p-value = 0.29

# CL2064Contig2|CL2064Contig2

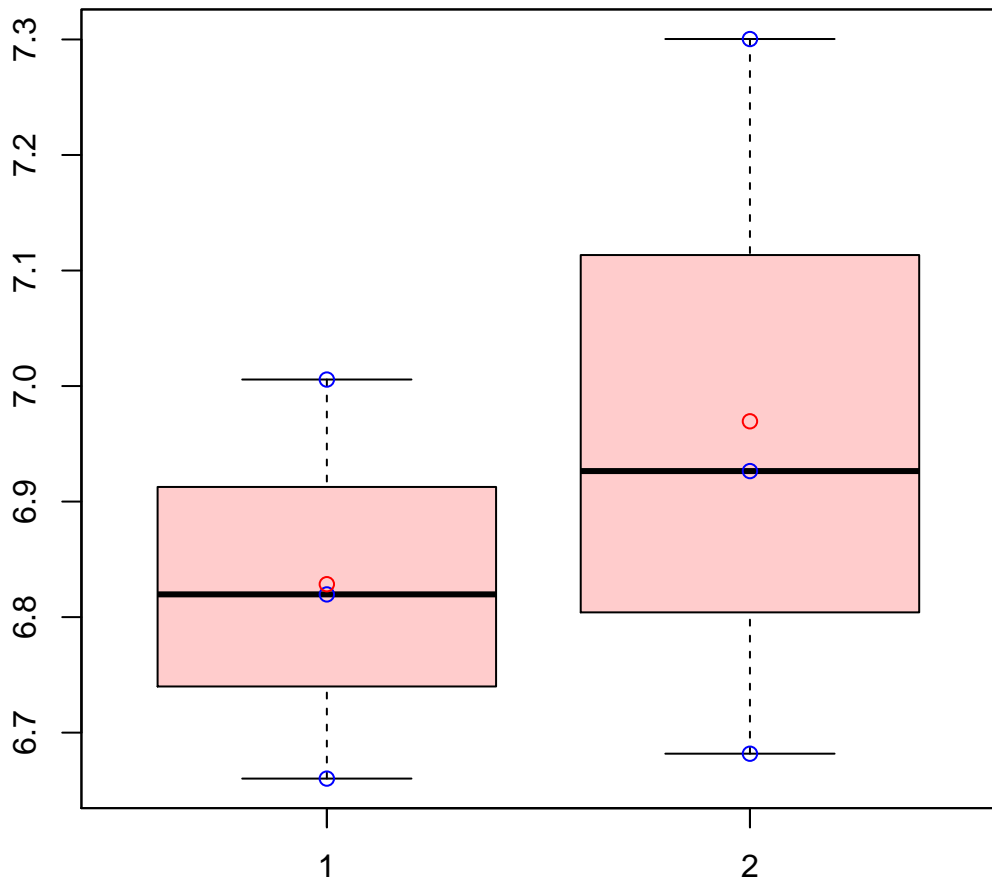

t-Test: p-value = 0.54

# CL2064Contig7|CL2064Contig7

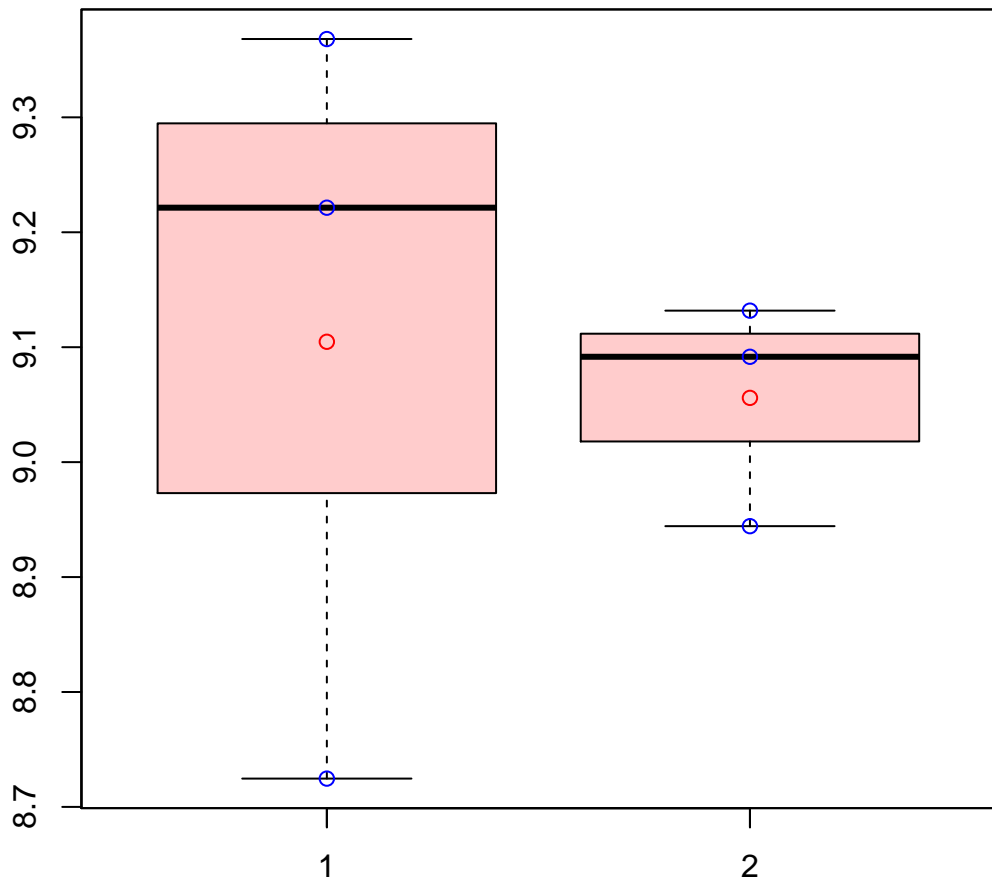

t-Test: p-value = 0.83

# CL2067Contig3|CL2067Contig3

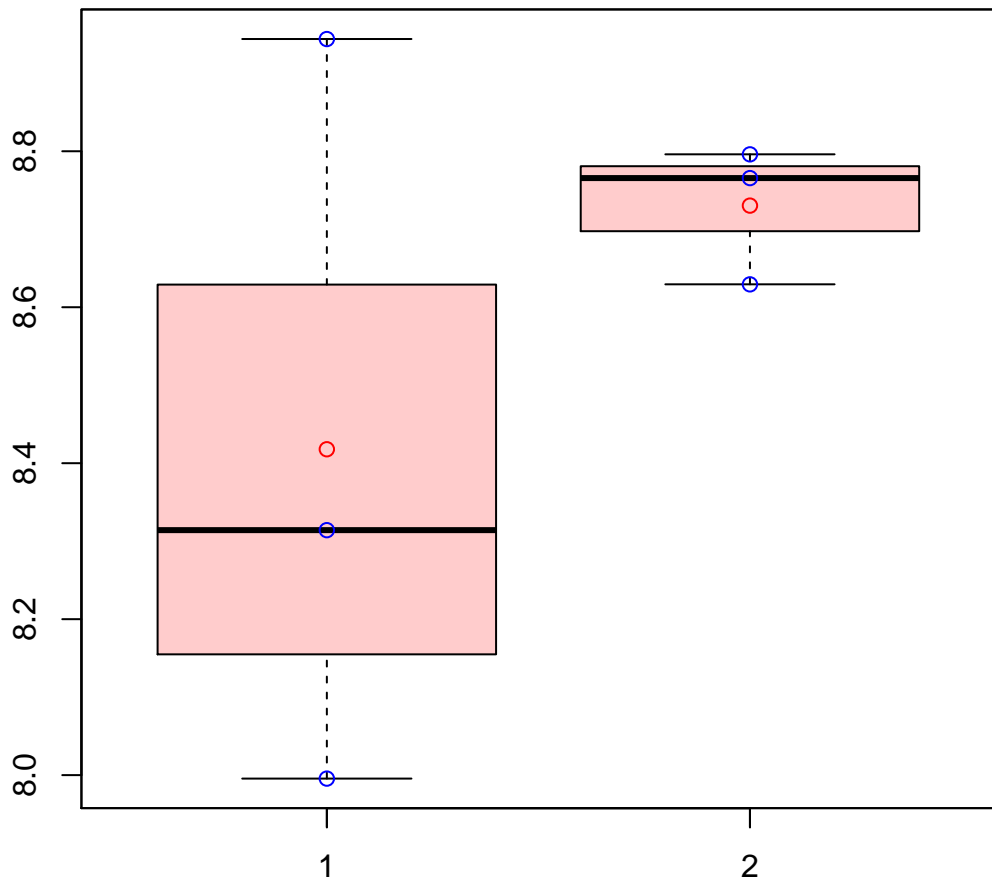

t-Test: p-value = 0.38

# CL206Contig8|CL206Contig8

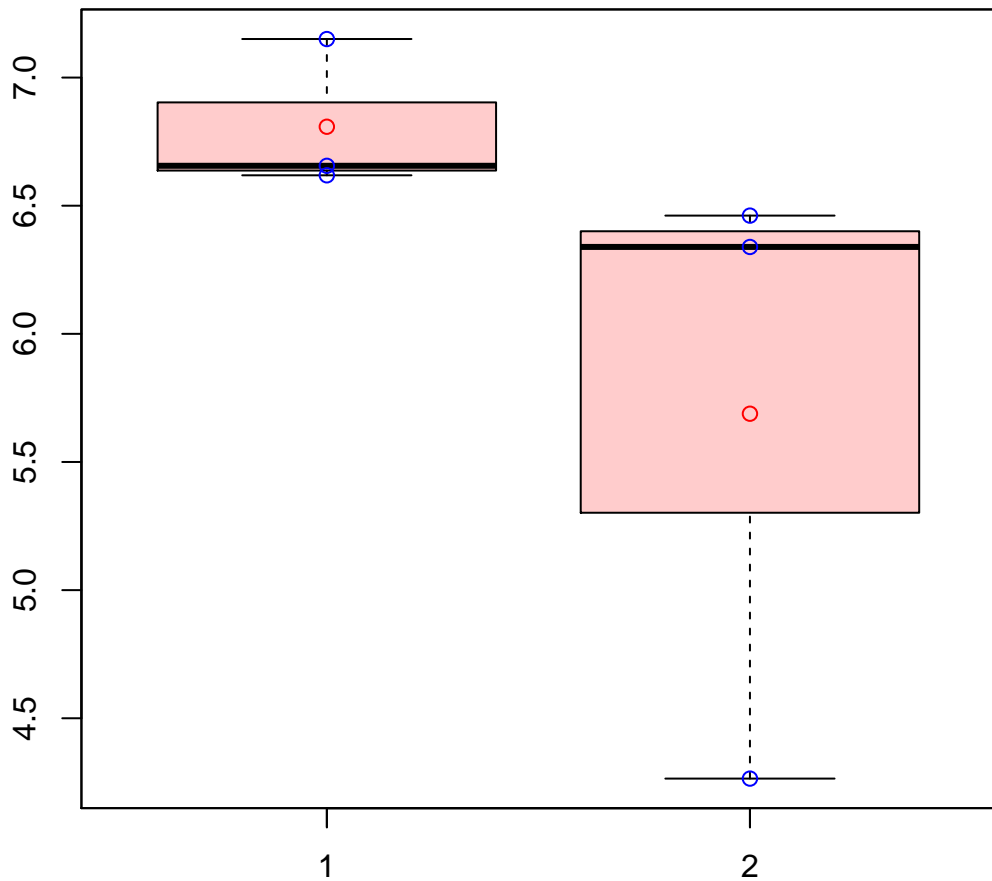

t-Test: p-value = 0.25

# CL2077Contig3|CL2077Contig3

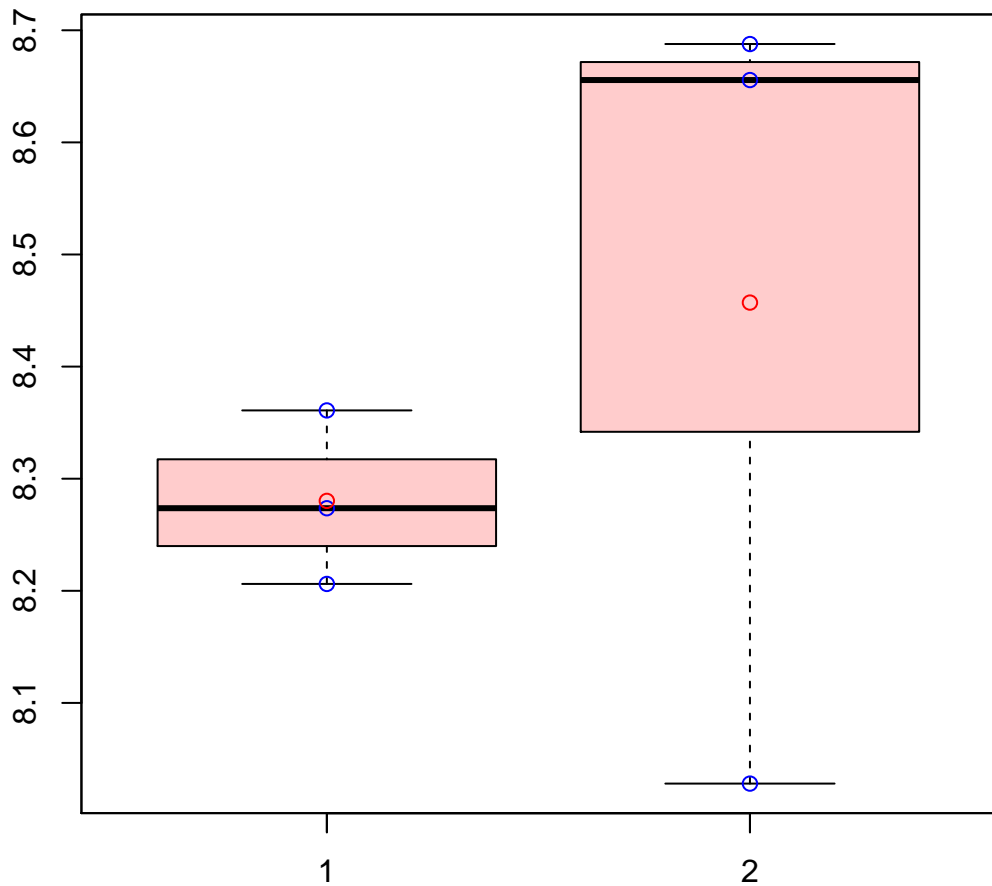

t-Test: p-value = 0.5



# CL2095Contig2|CL2095Contig2

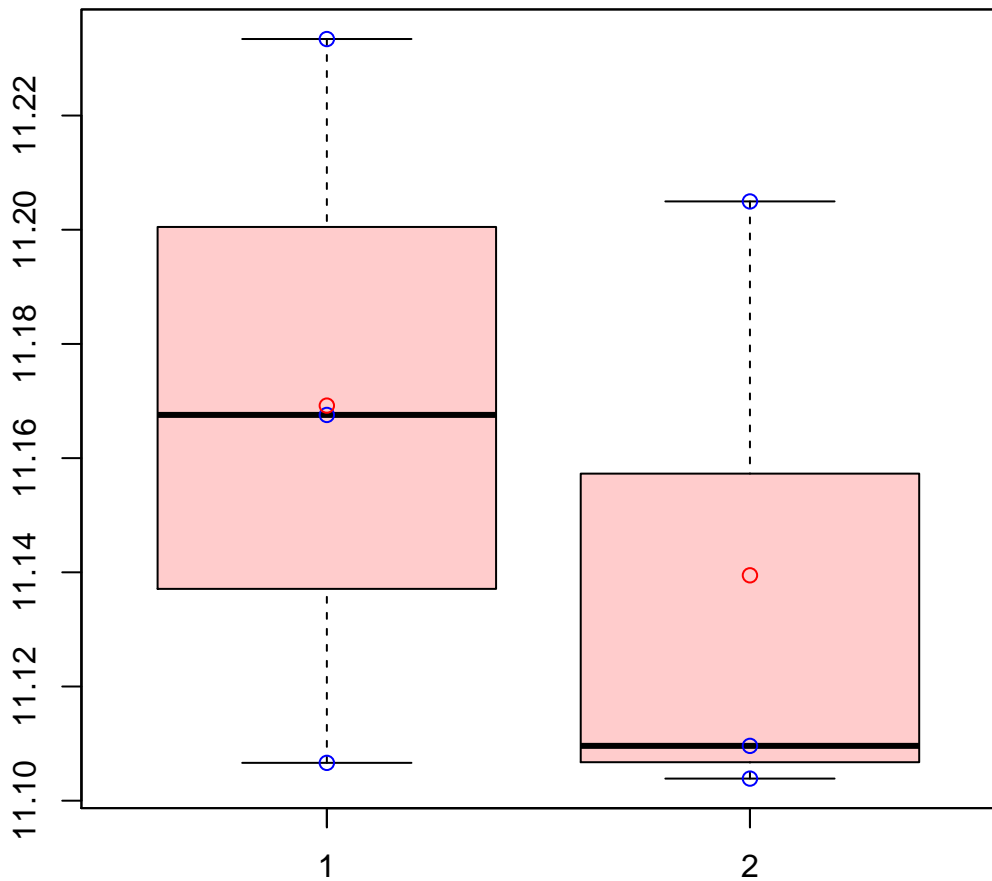

t-Test: p-value = 0.58

# CL2096Contig3|CL2096Contig3

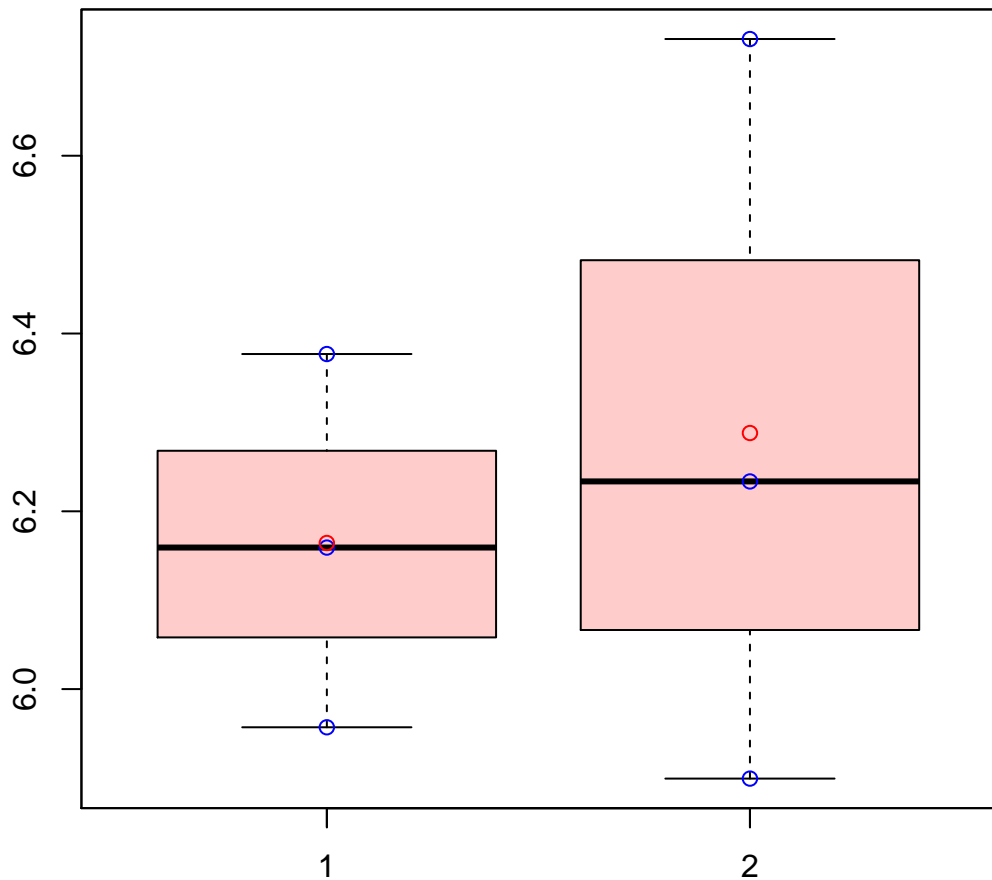

t-Test: p-value = 0.68

# CL20Contig1|CL20Contig1

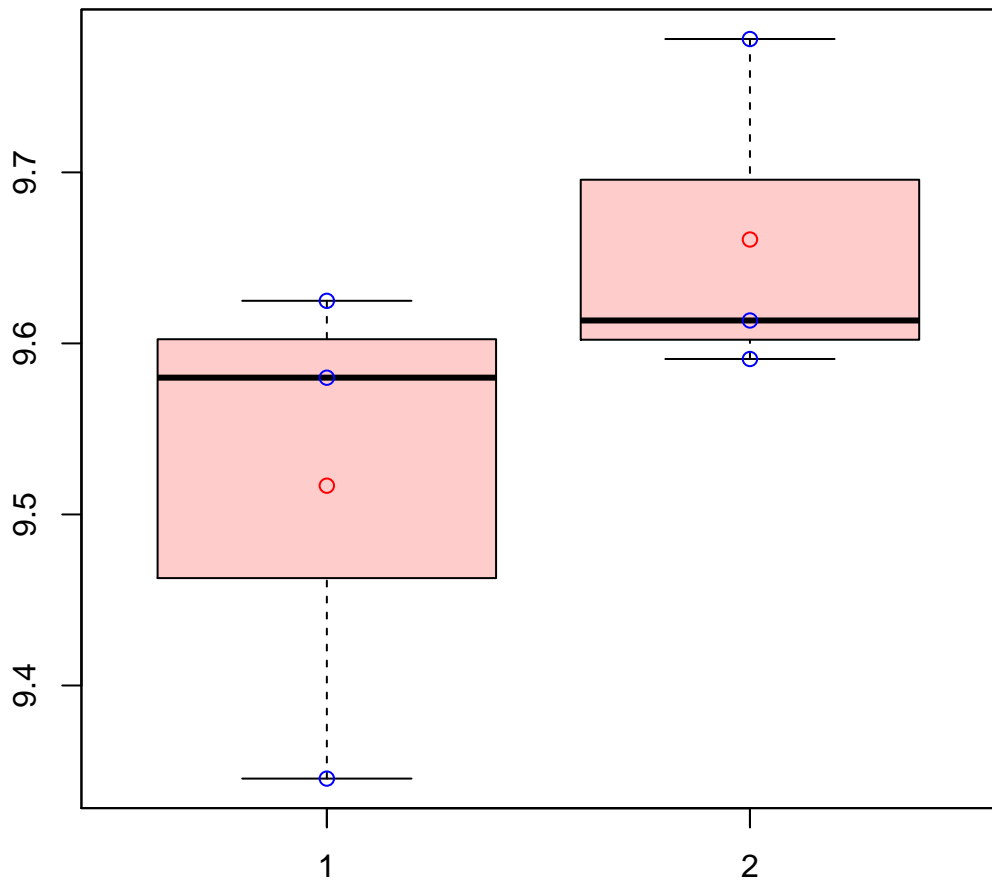

t-Test: p-value = 0.25

# CL20Contig4|CL20Contig4

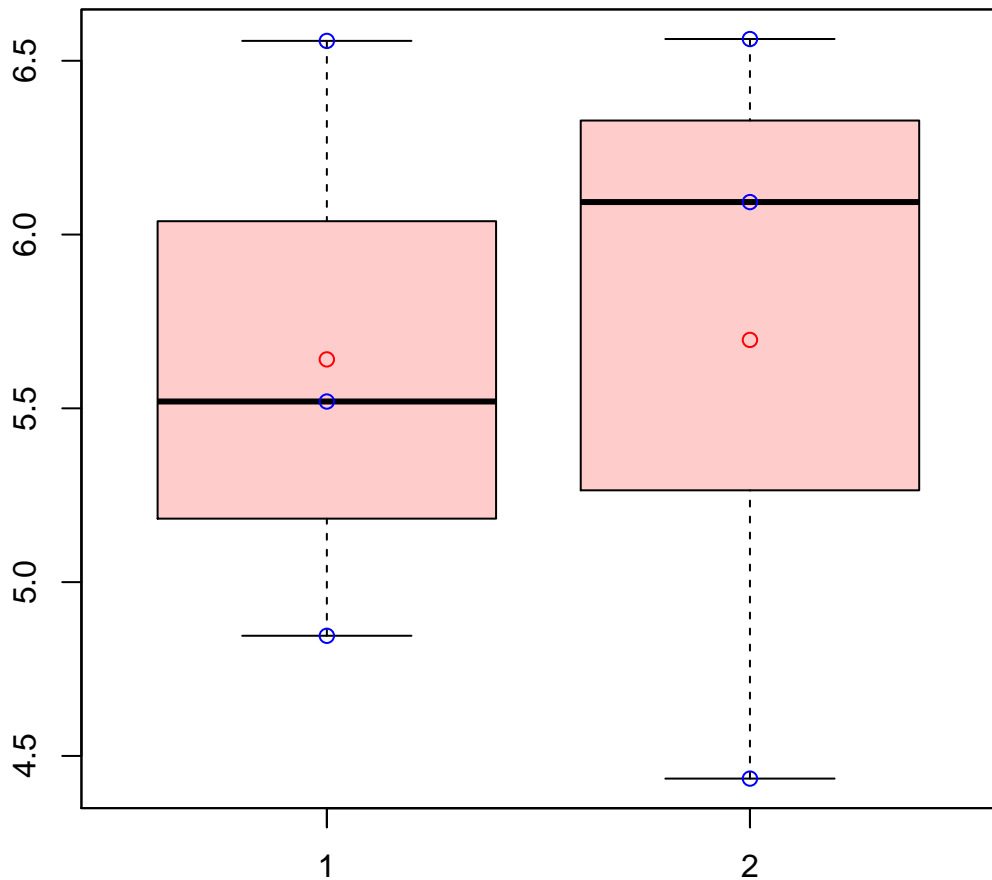

t-Test: p-value = 0.95

# CL2102Contig2|CL2102Contig2

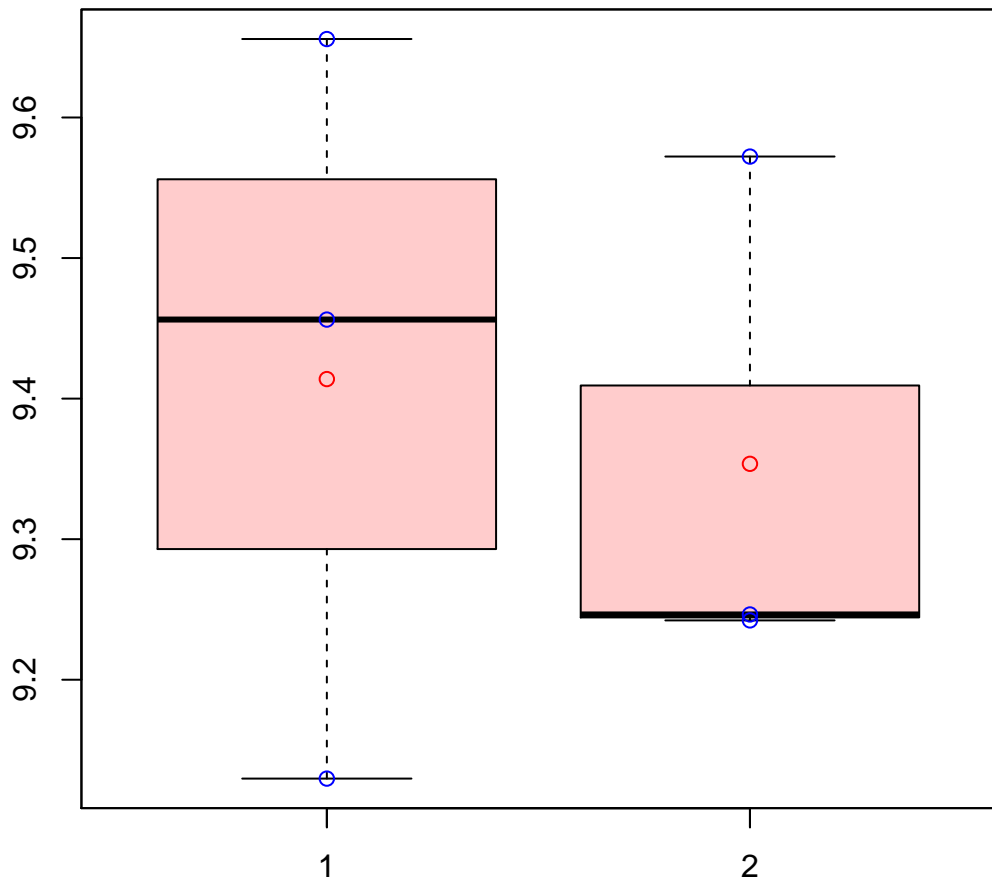

t-Test: p-value = 0.77

# CL2102Contig3|CL2102Contig3

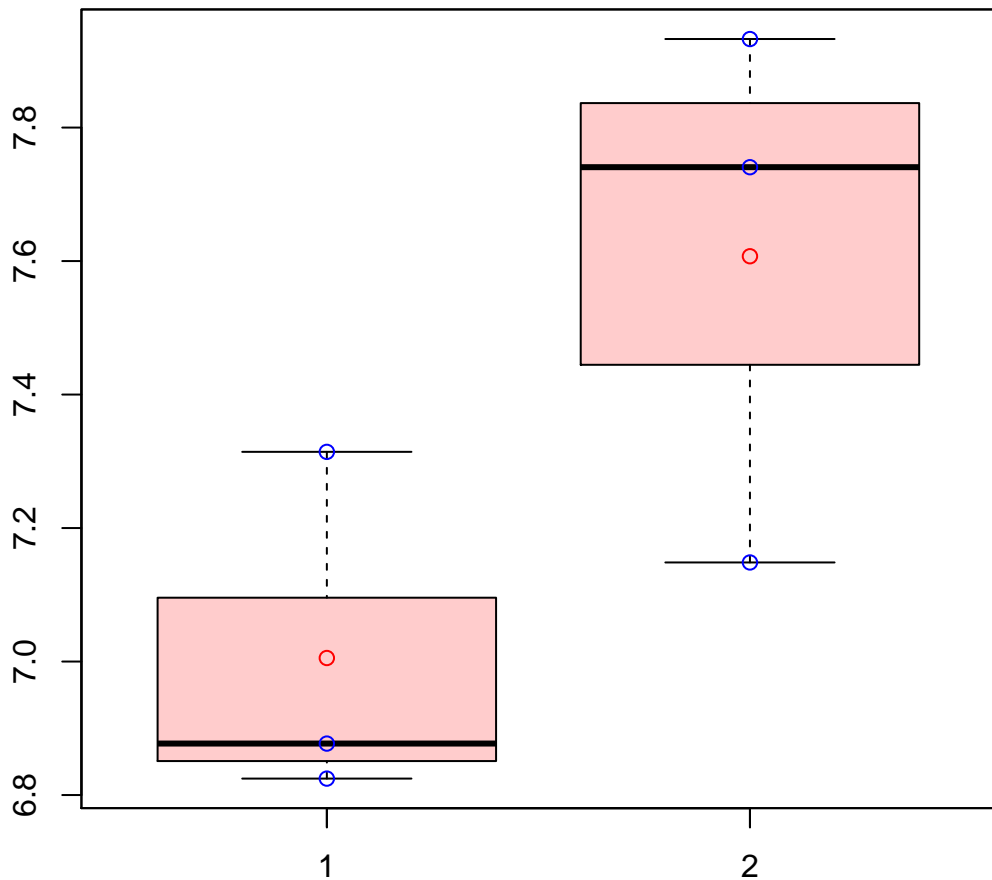

t-Test: p-value = 0.11

# CL2104Contig1|CL2104Contig1

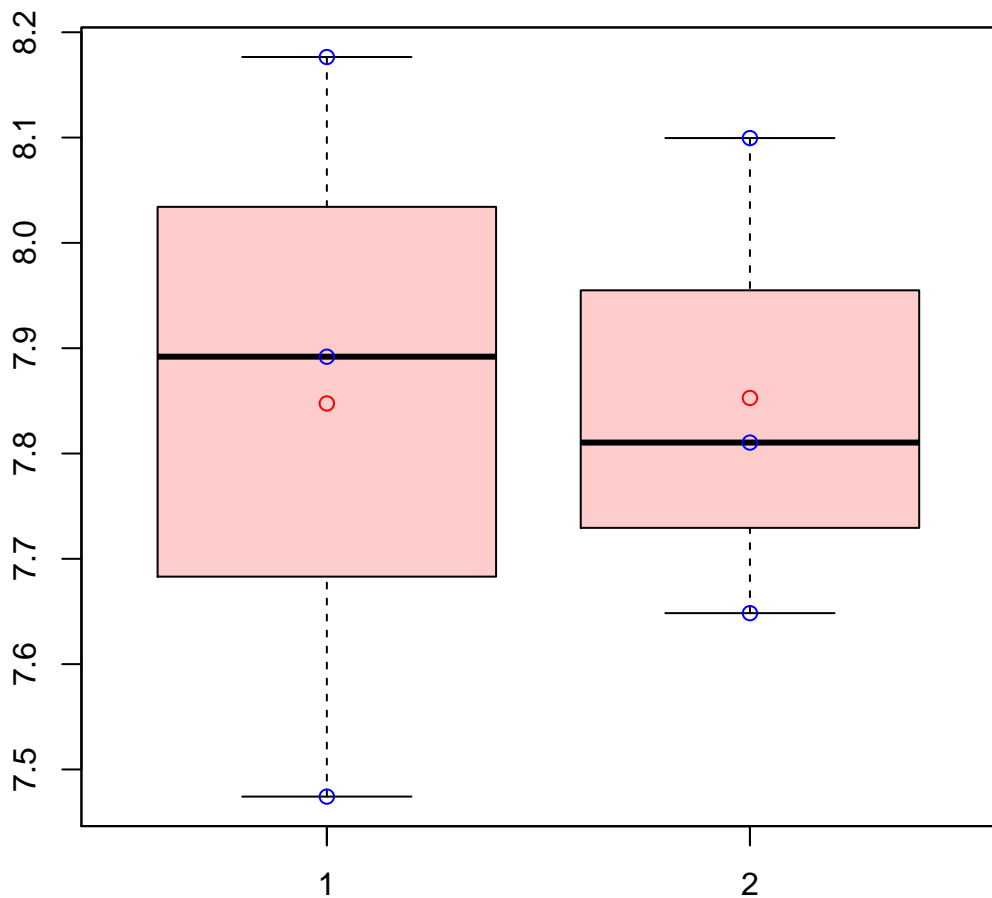

t-Test: p-value = 0.98

# CL210Contig12|CL210Contig12

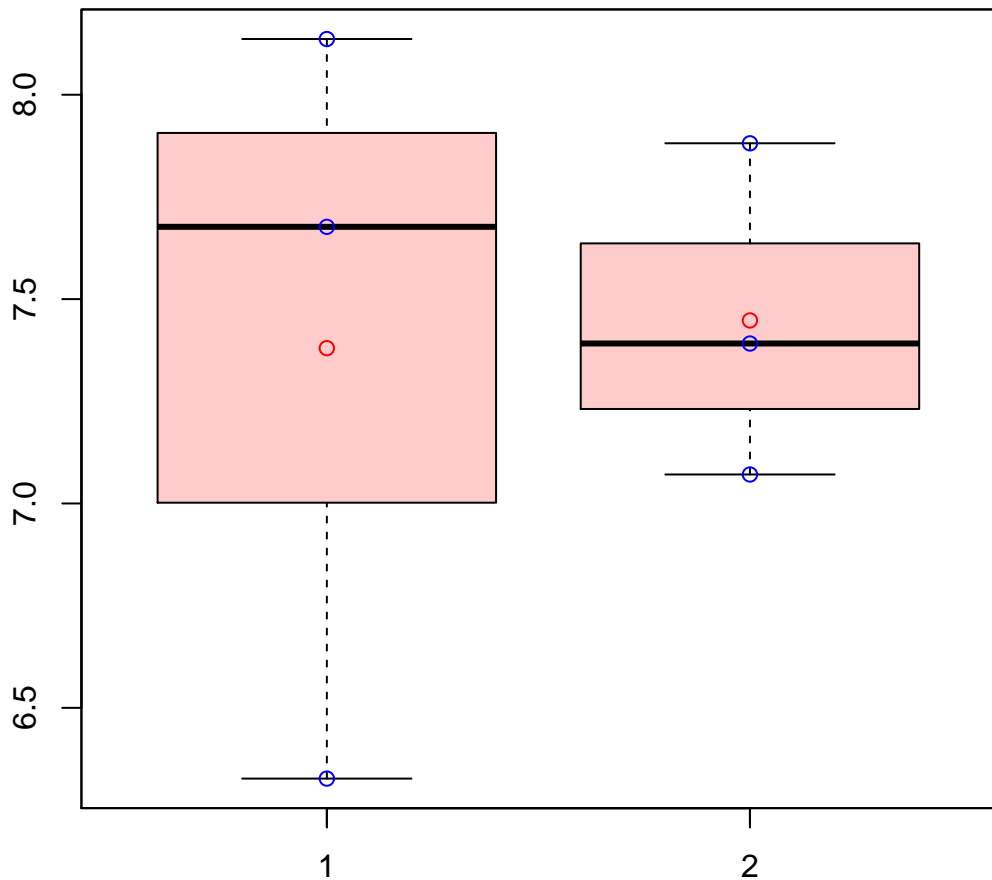

t-Test: p-value = 0.92



# CL210Contig7|CL210Contig7

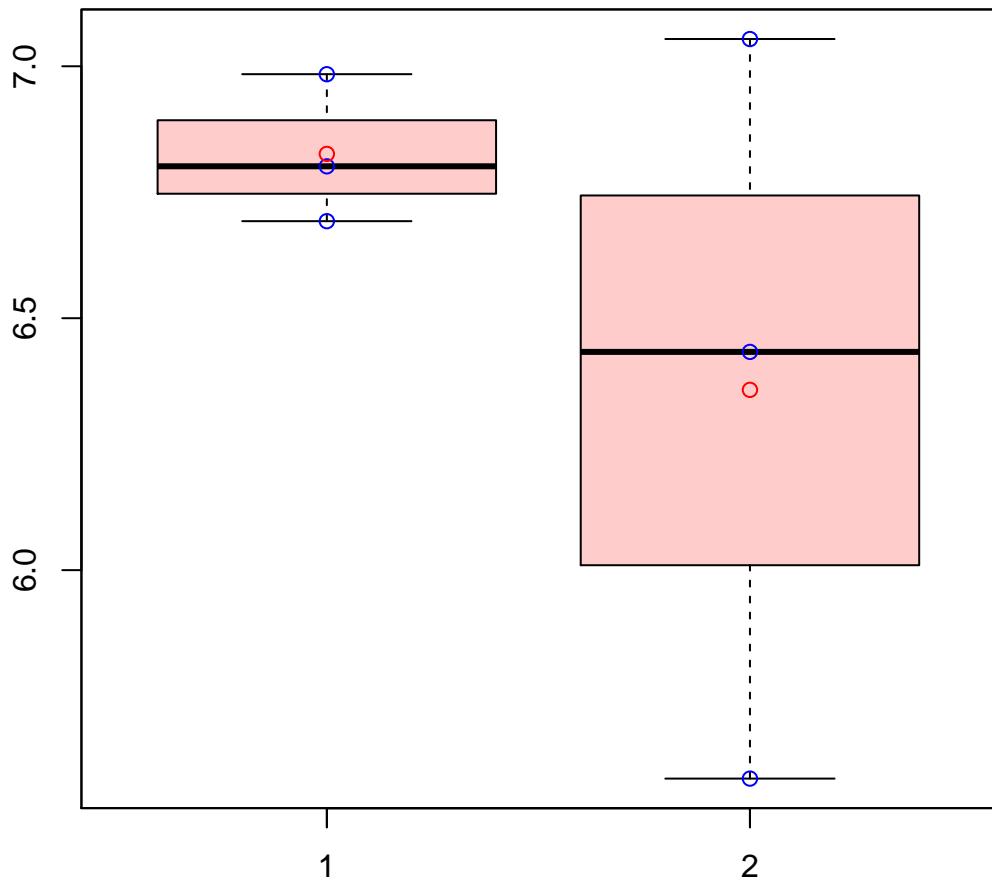

t-Test: p-value = 0.39

# CL2110Contig5|CL2110Contig5

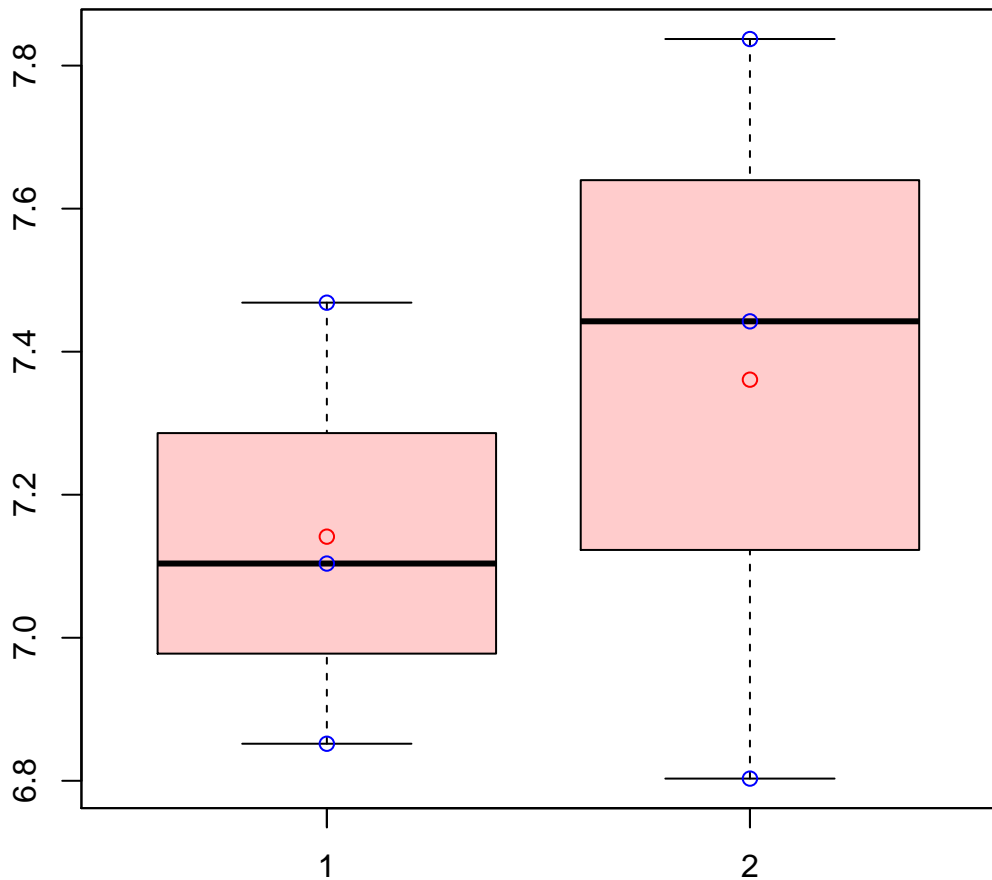

t-Test: p-value = 0.57

# CL2114Contig2|CL2114Contig2

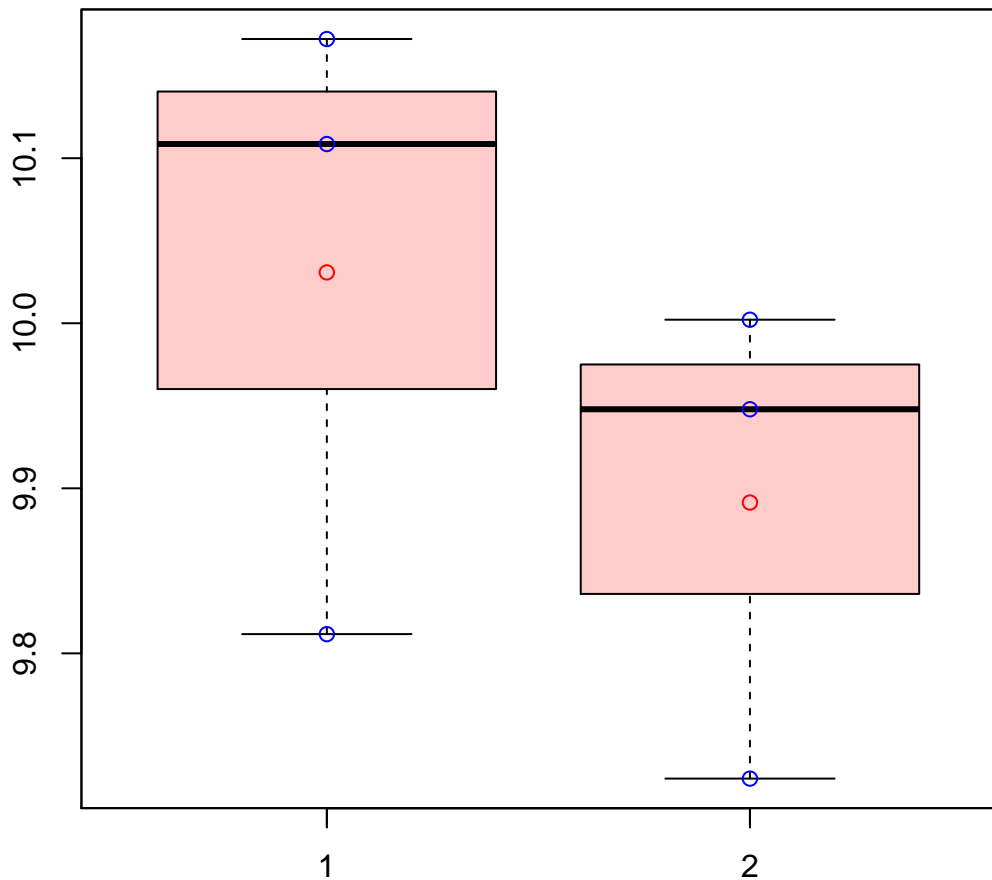

t-Test: p-value = 0.38

# CL2115Contig3|CL2115Contig3

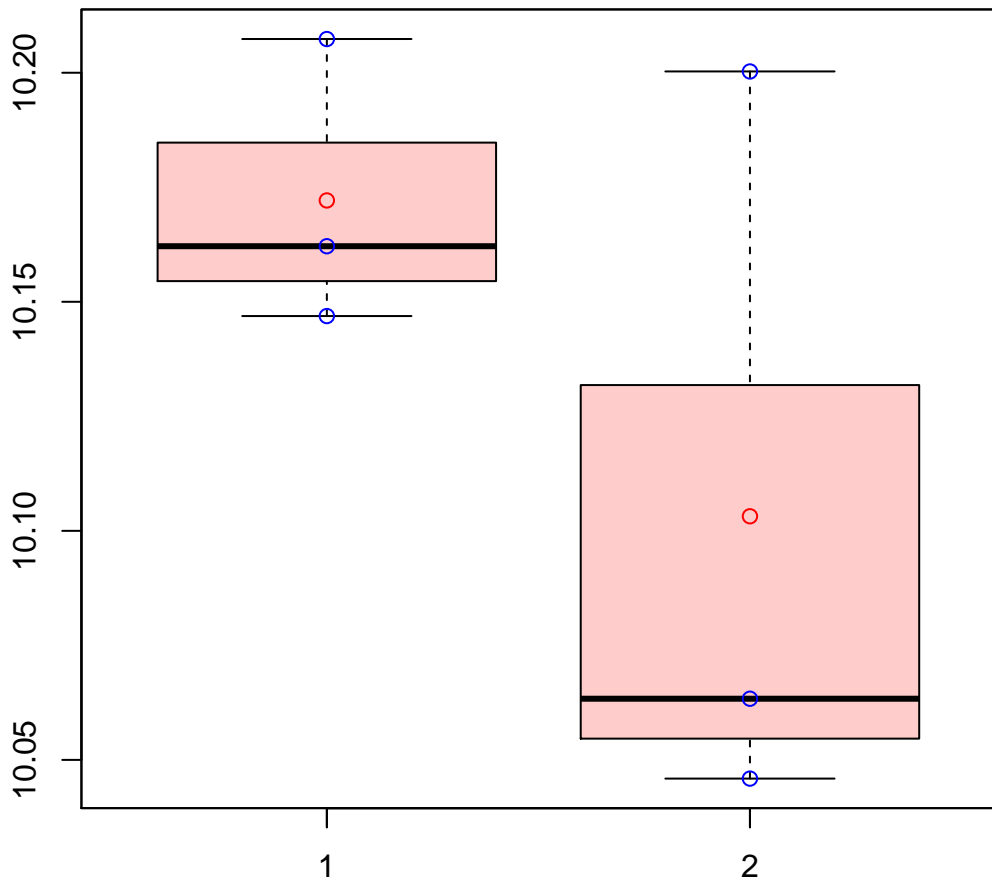

t-Test: p-value = 0.29

# CL211Contig3|CL211Contig3

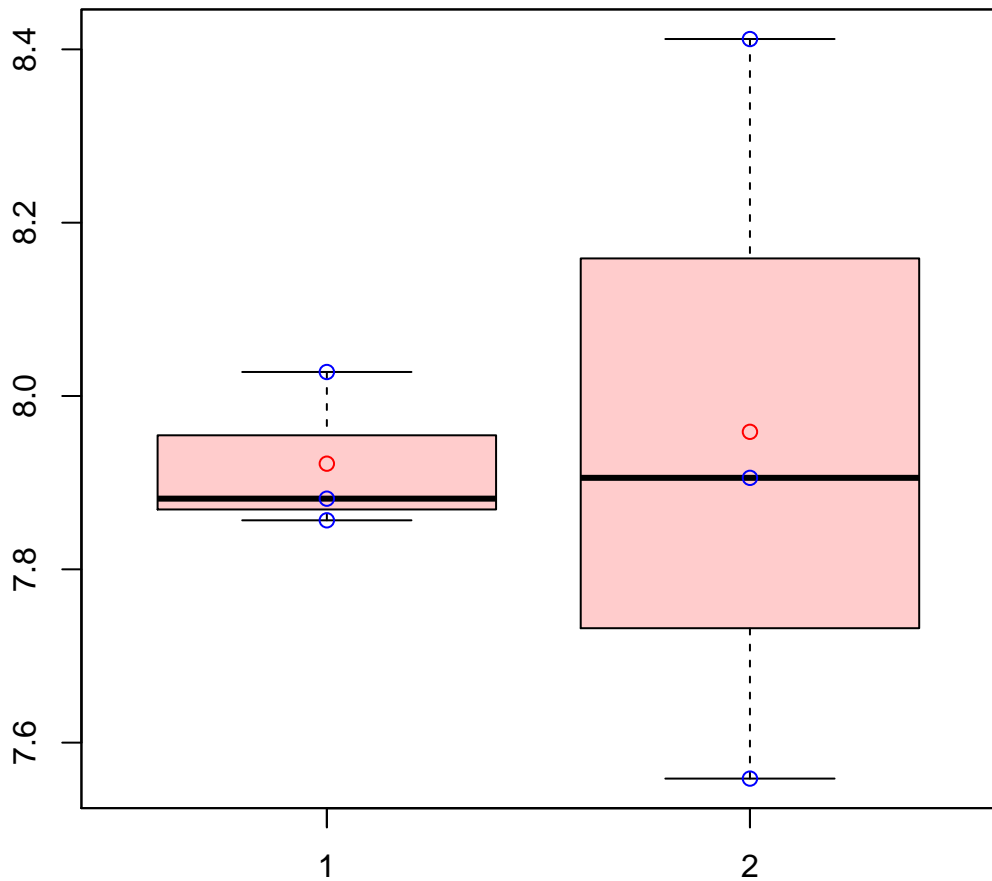

t-Test: p-value = 0.9

# CL211Contig5|CL211Contig5

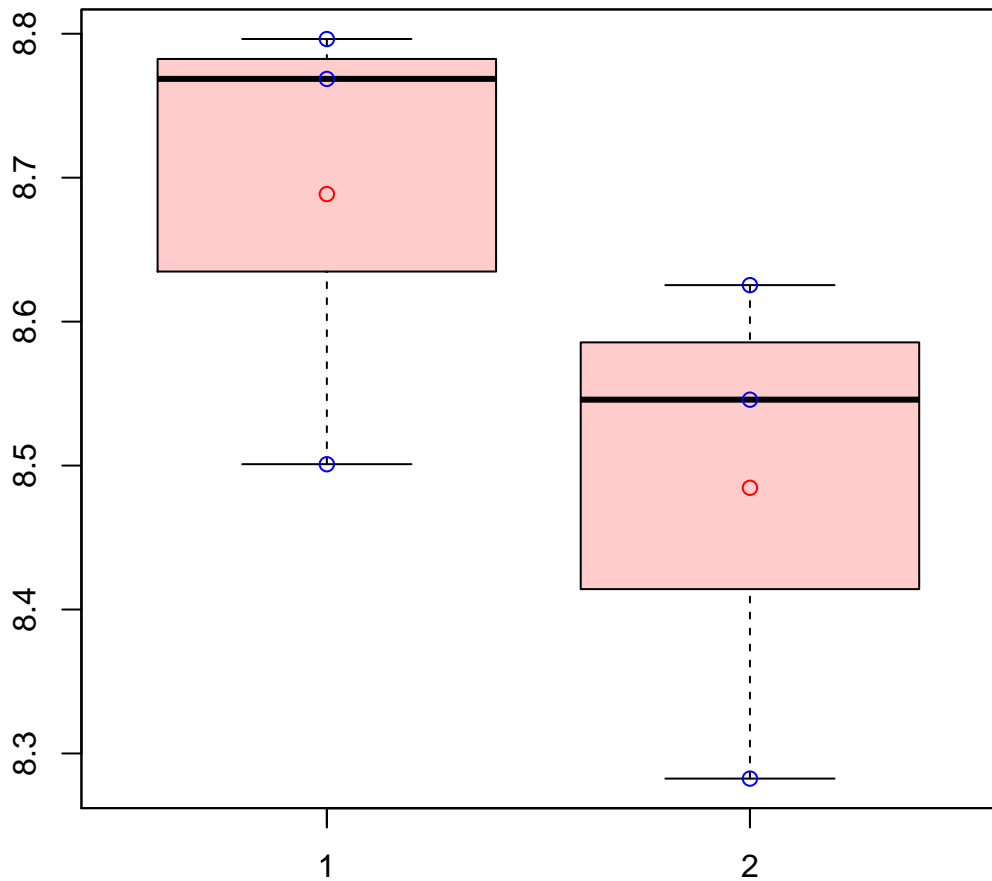

t-Test: p-value = 0.22

# CL2122Contig3|CL2122Contig3

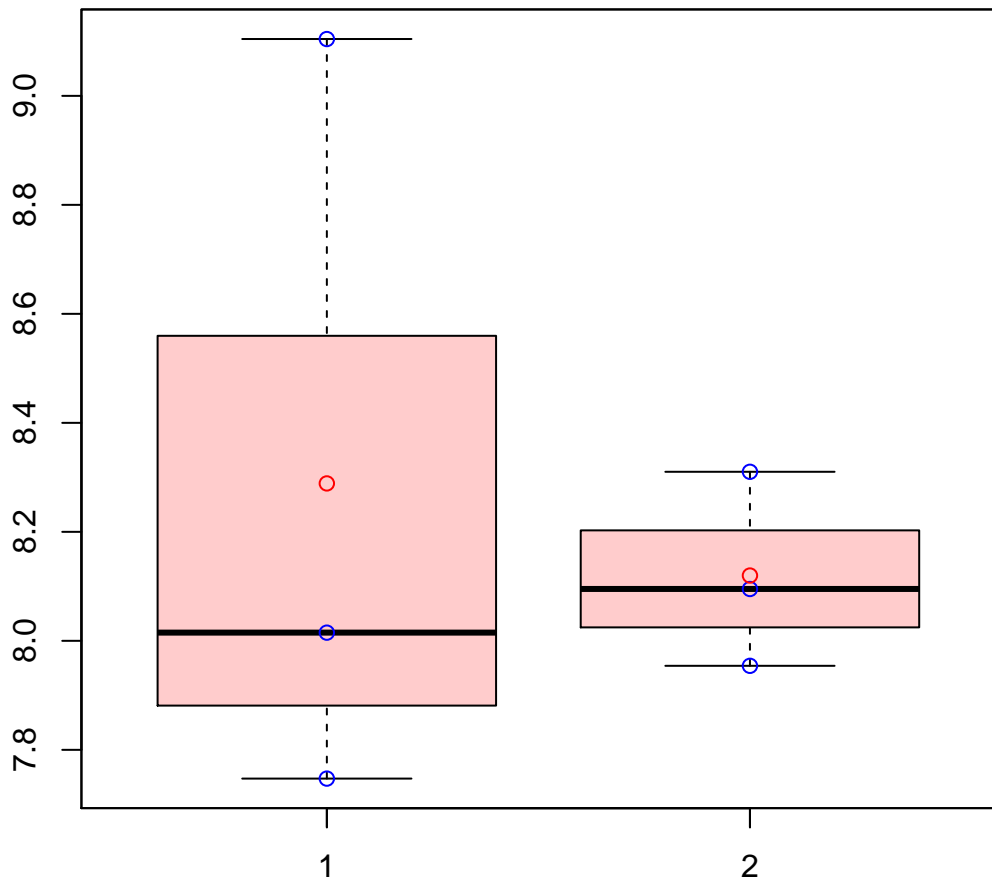

t-Test: p-value = 0.73

# CL2126Contig1|CL2126Contig1

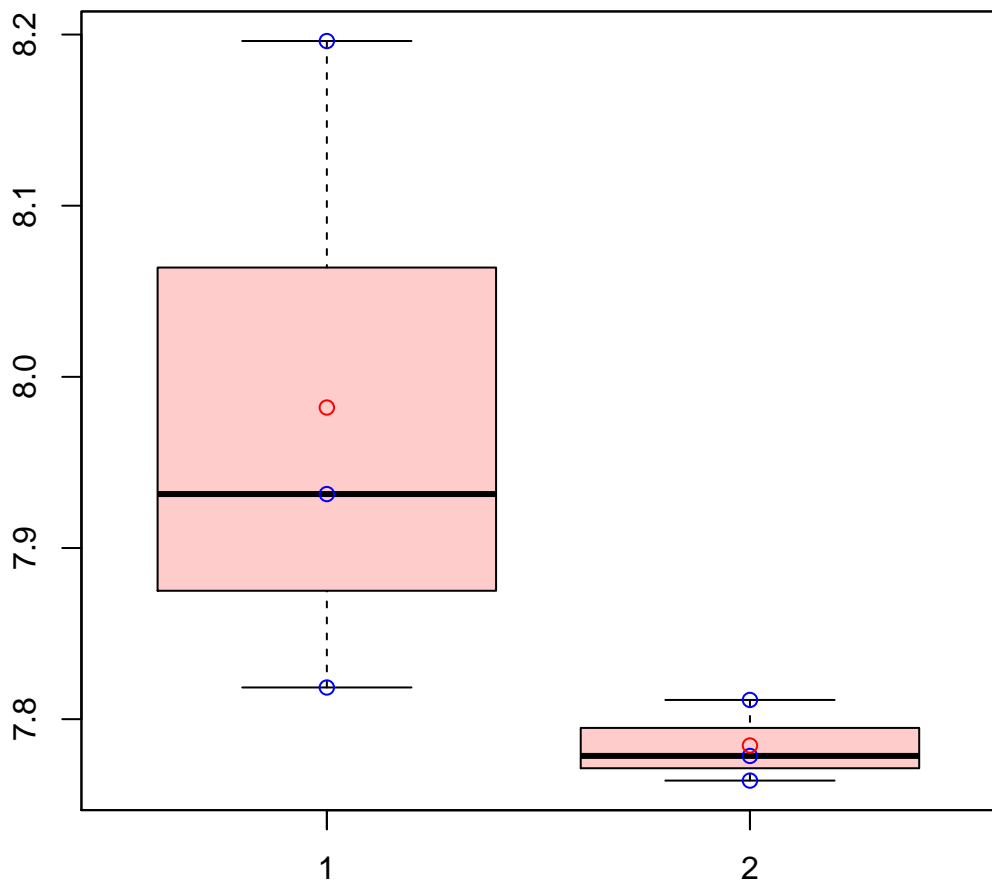

t-Test: p-value = 0.22



# CL2128Contig2|CL2128Contig2

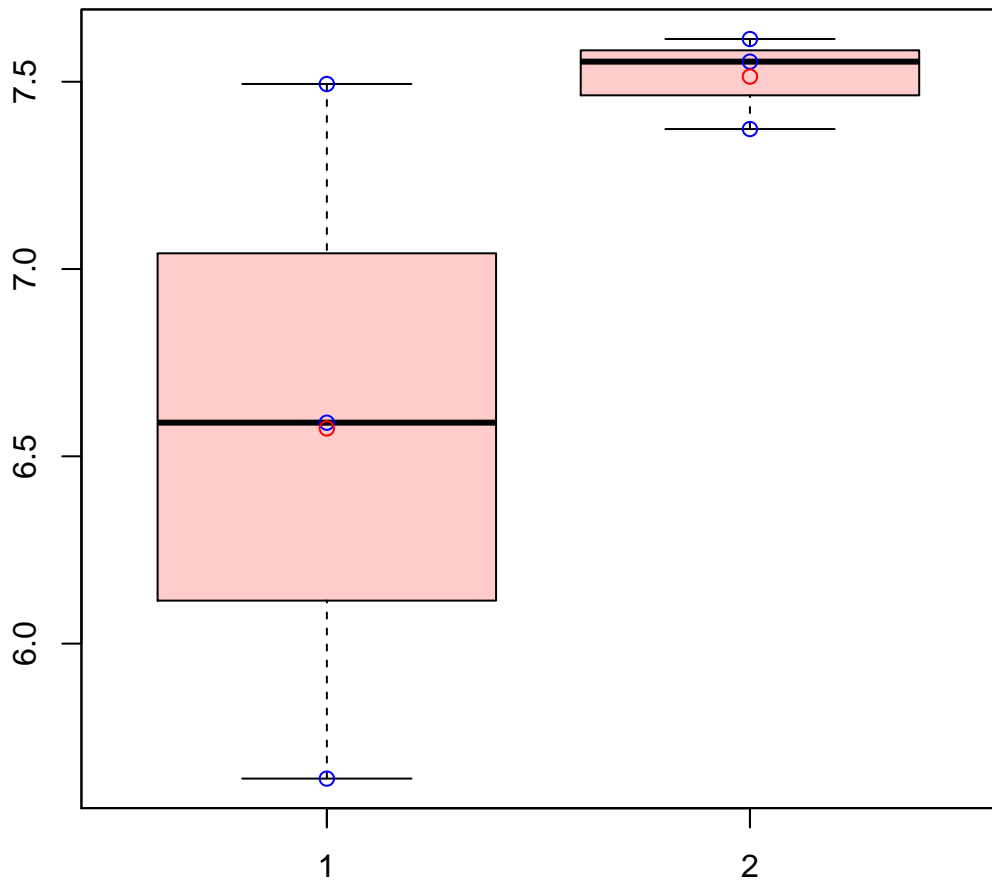

t-Test: p-value = 0.22

# CL21379Contig1|CL21379Contig1

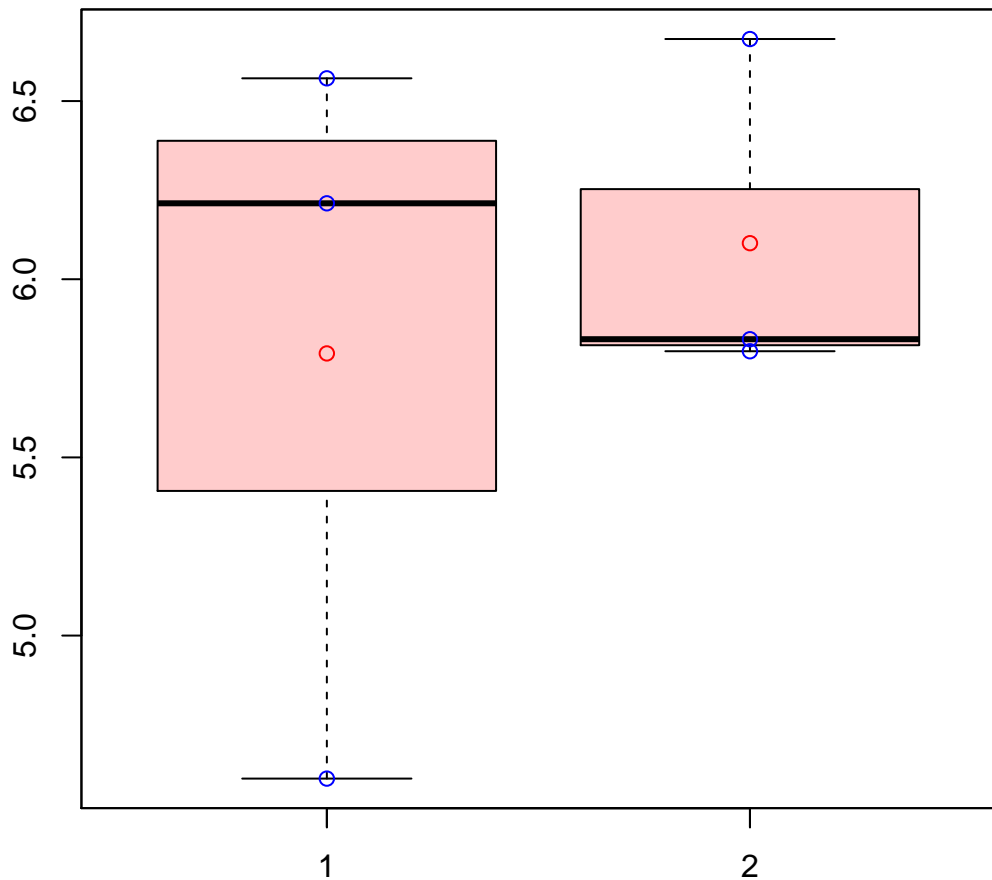

t-Test: p-value = 0.68

# CL213Contig1|CL213Contig1

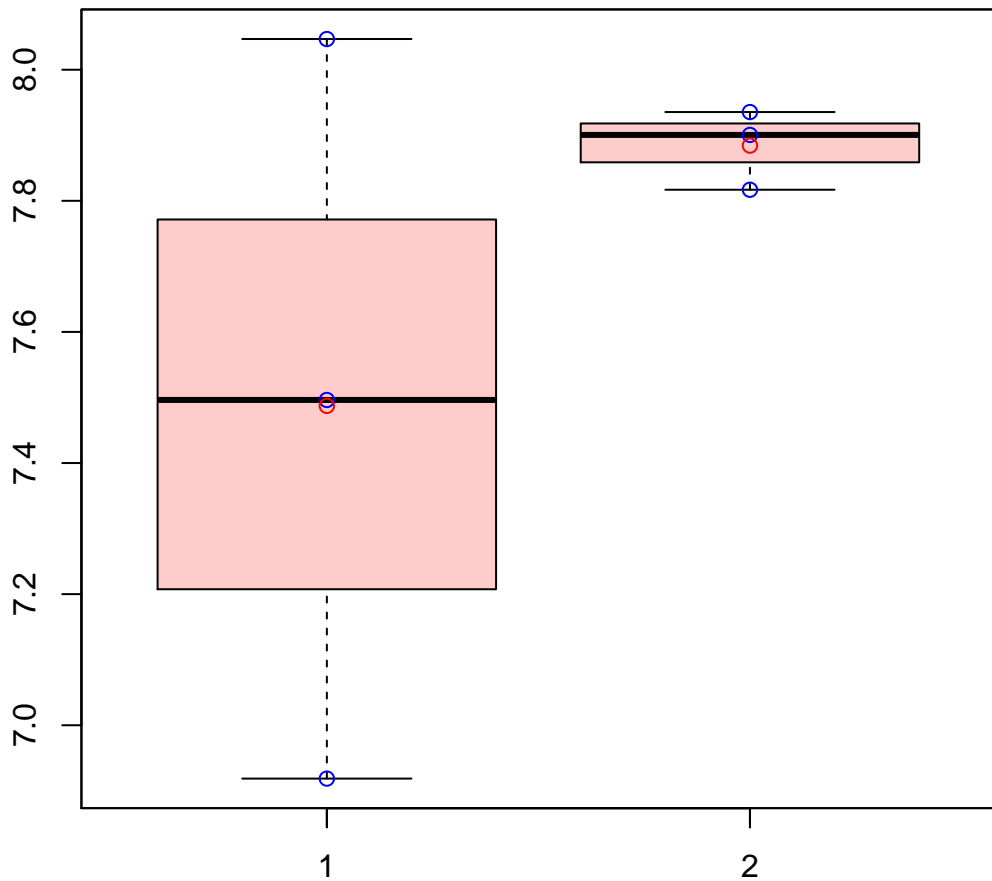

t-Test: p-value = 0.35

# CL2140Contig2|CL2140Contig2

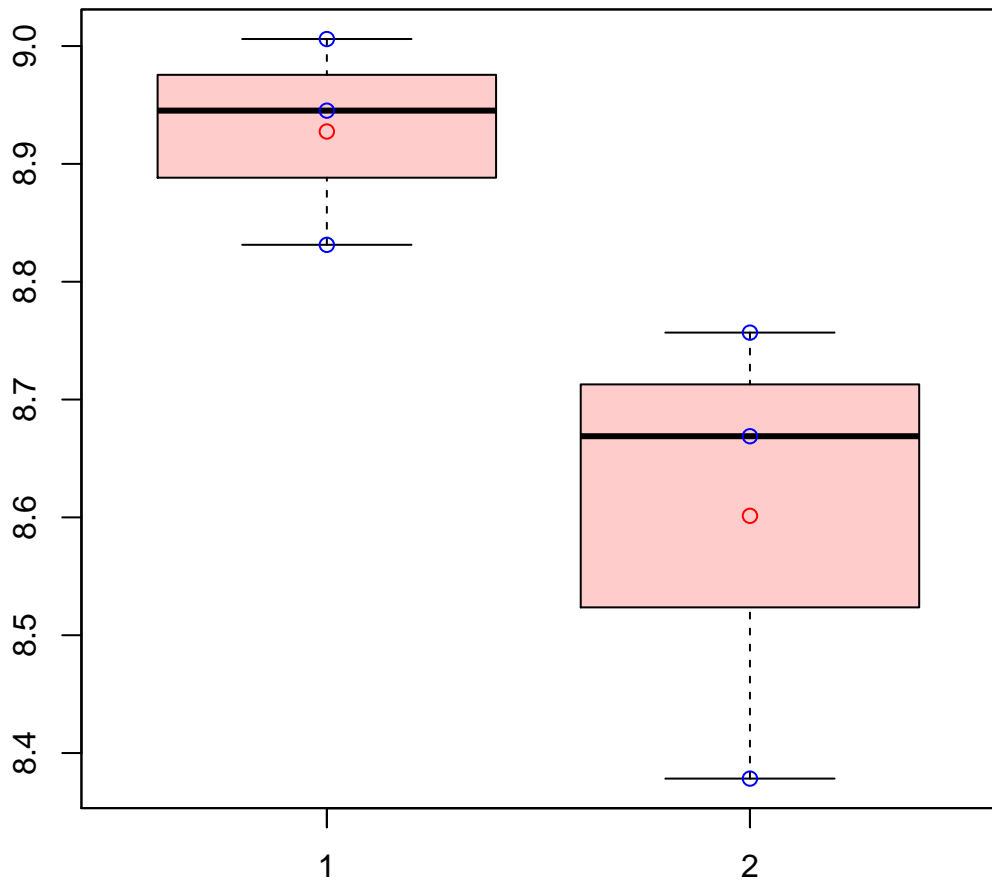

t-Test: p-value = 0.09

# CL2146Contig2|CL2146Contig2

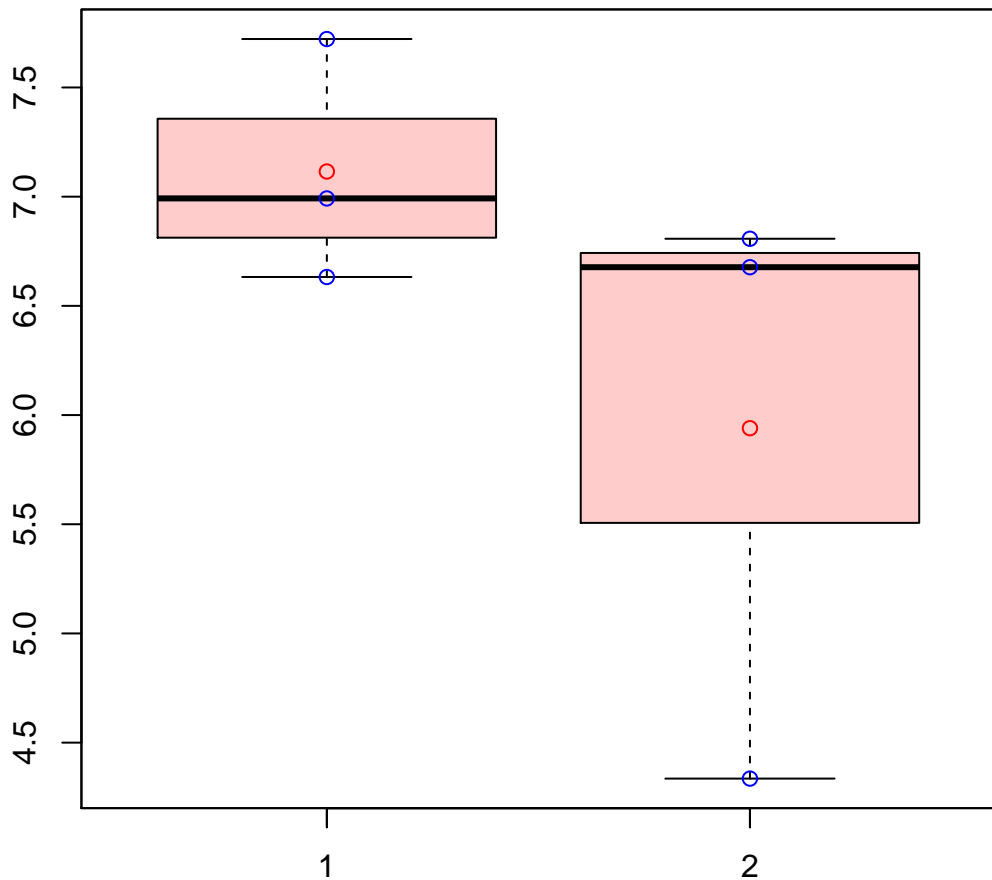

t-Test: p-value = 0.28

# CL215Contig6|CL215Contig6

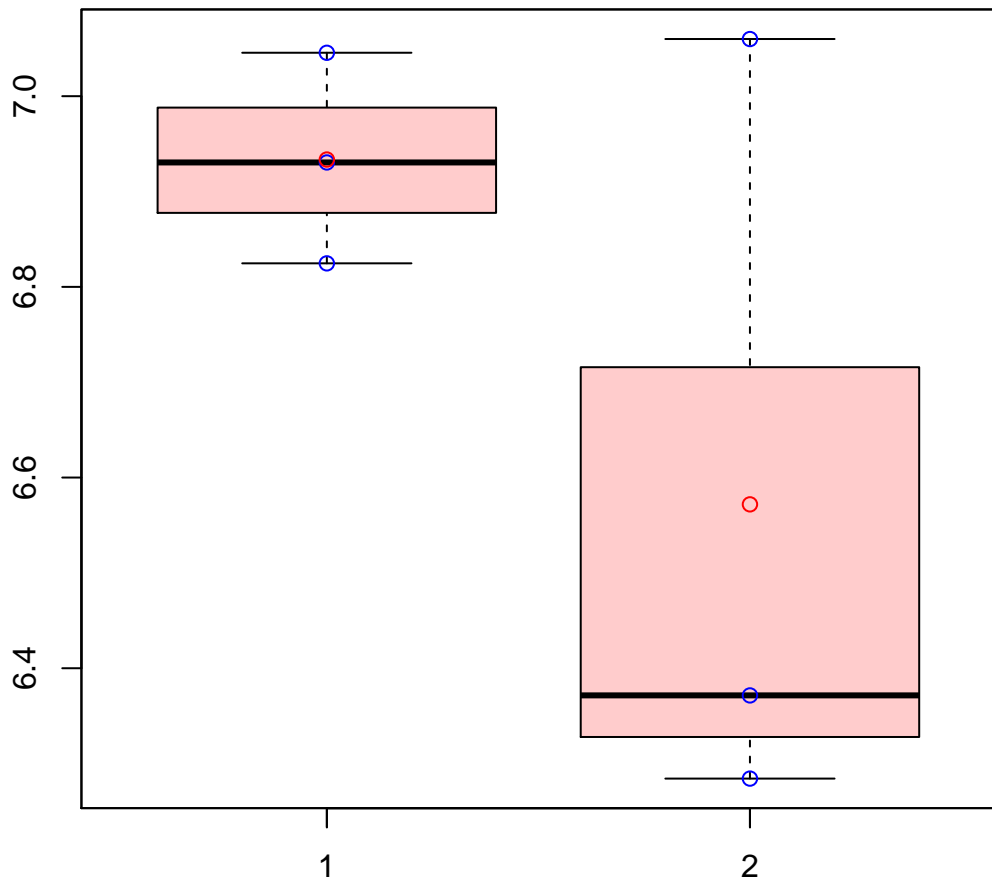

t-Test: p-value = 0.28

# CL2160Contig2|CL2160Contig2

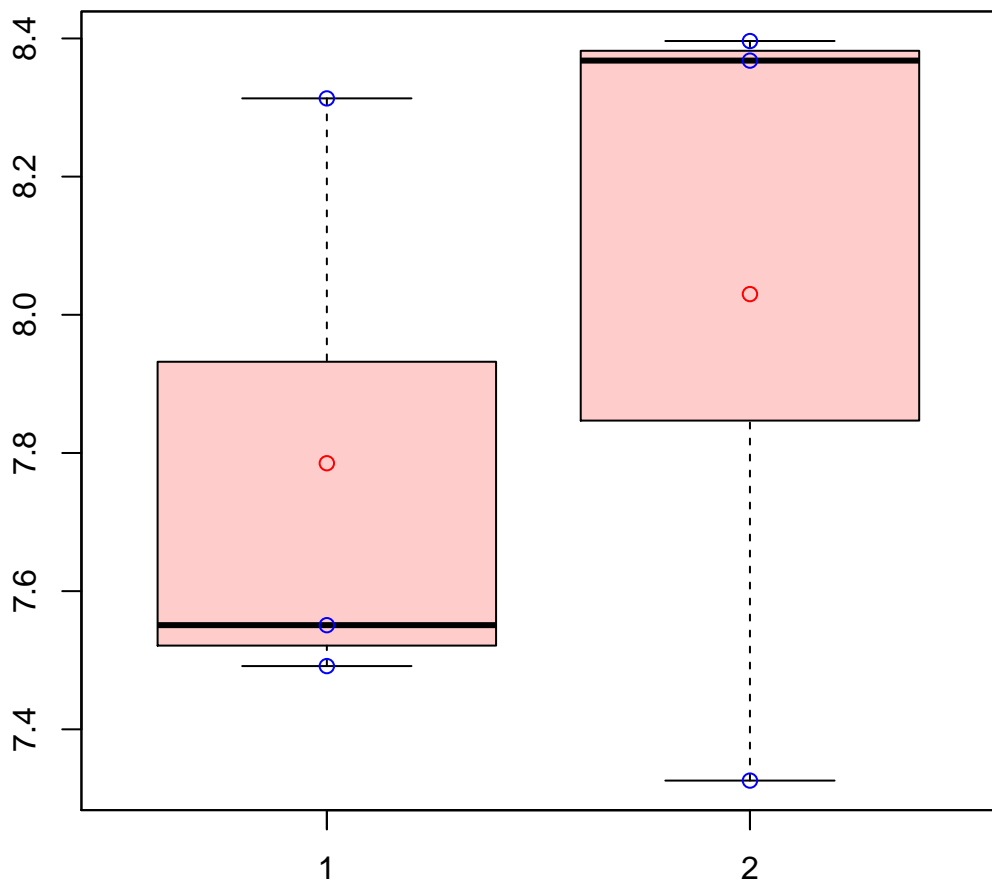

t-Test: p-value = 0.61

# CL2160Contig4|CL2160Contig4

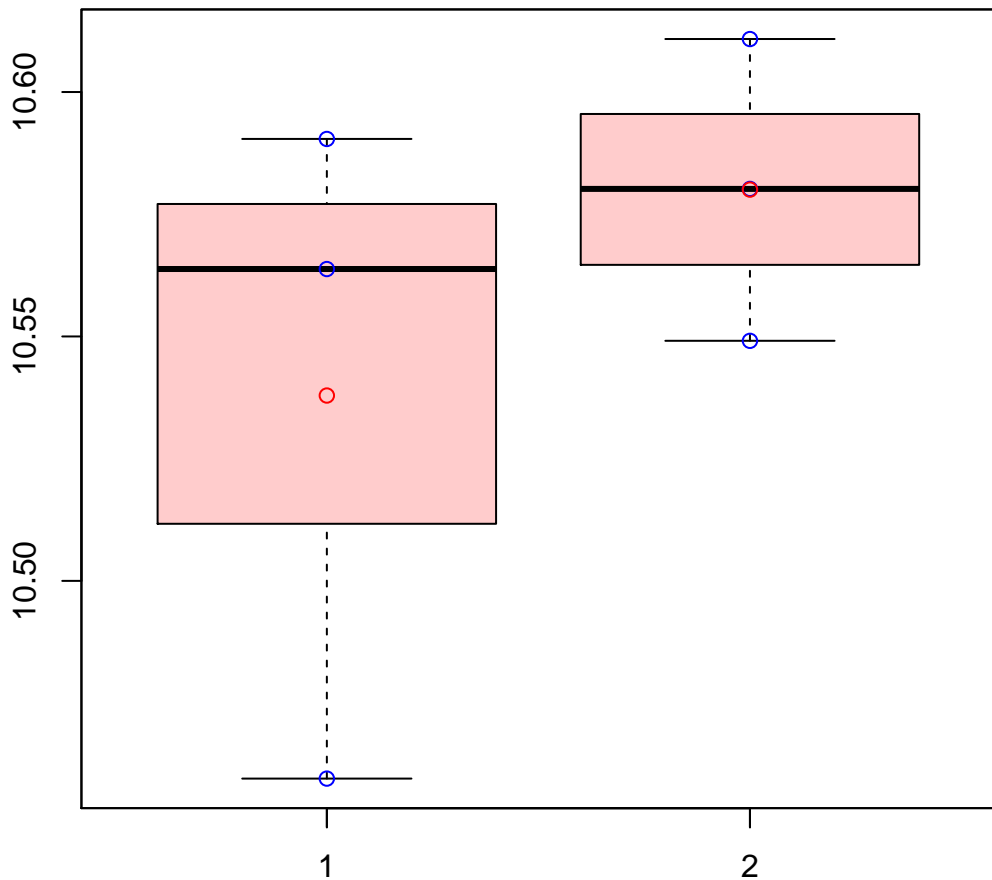

t-Test: p-value = 0.41



# CL2164Contig1|CL2164Contig1

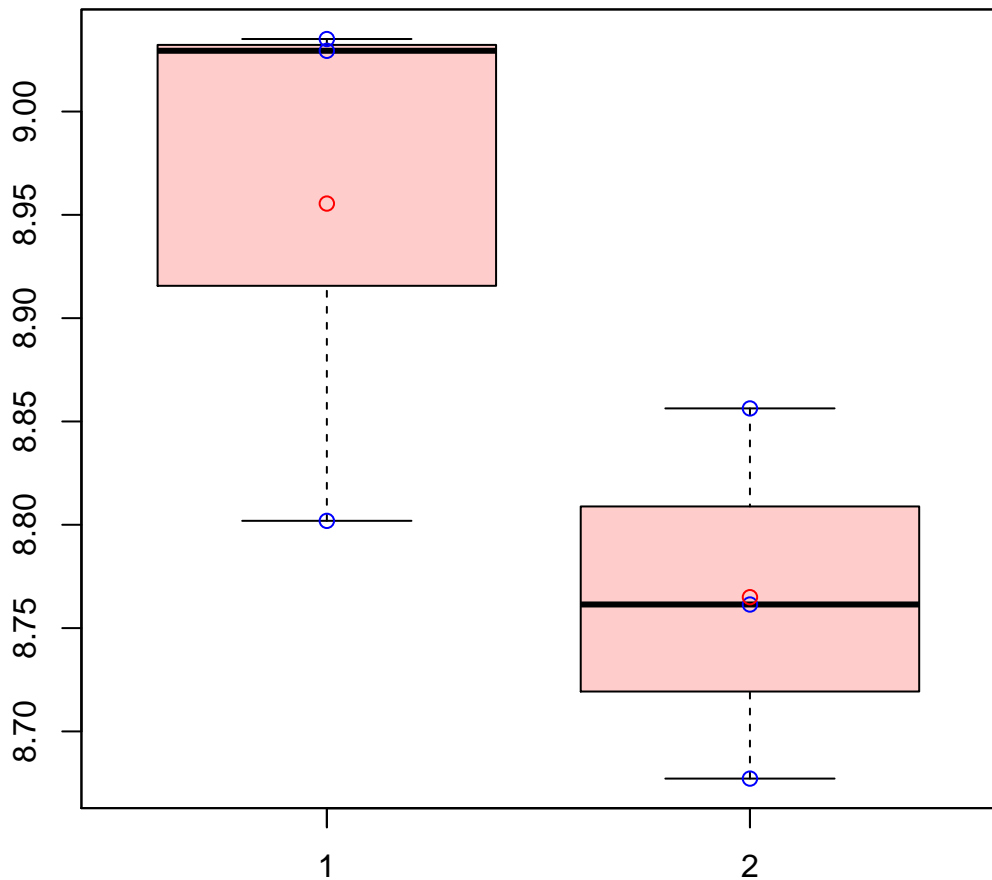

t-Test: p-value = 0.12

# CL2164Contig2|CL2164Contig2

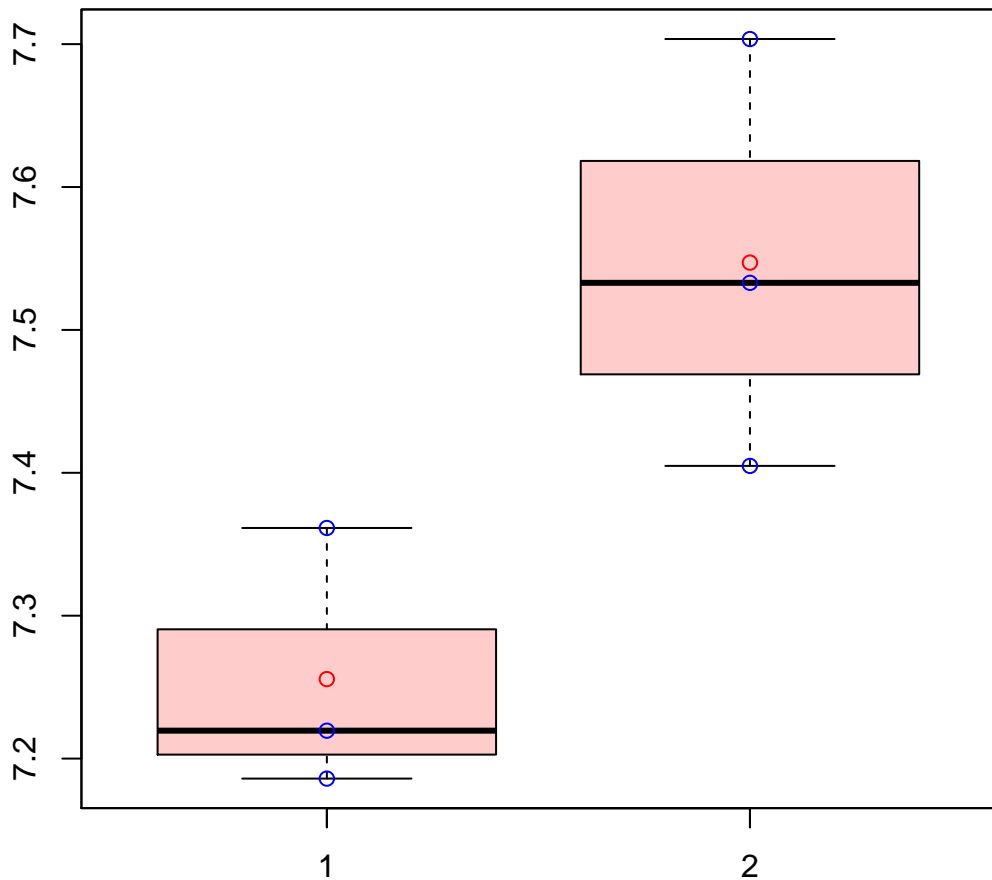

t-Test: p-value = 0.06

# CL21697Contig1|CL21697Contig1

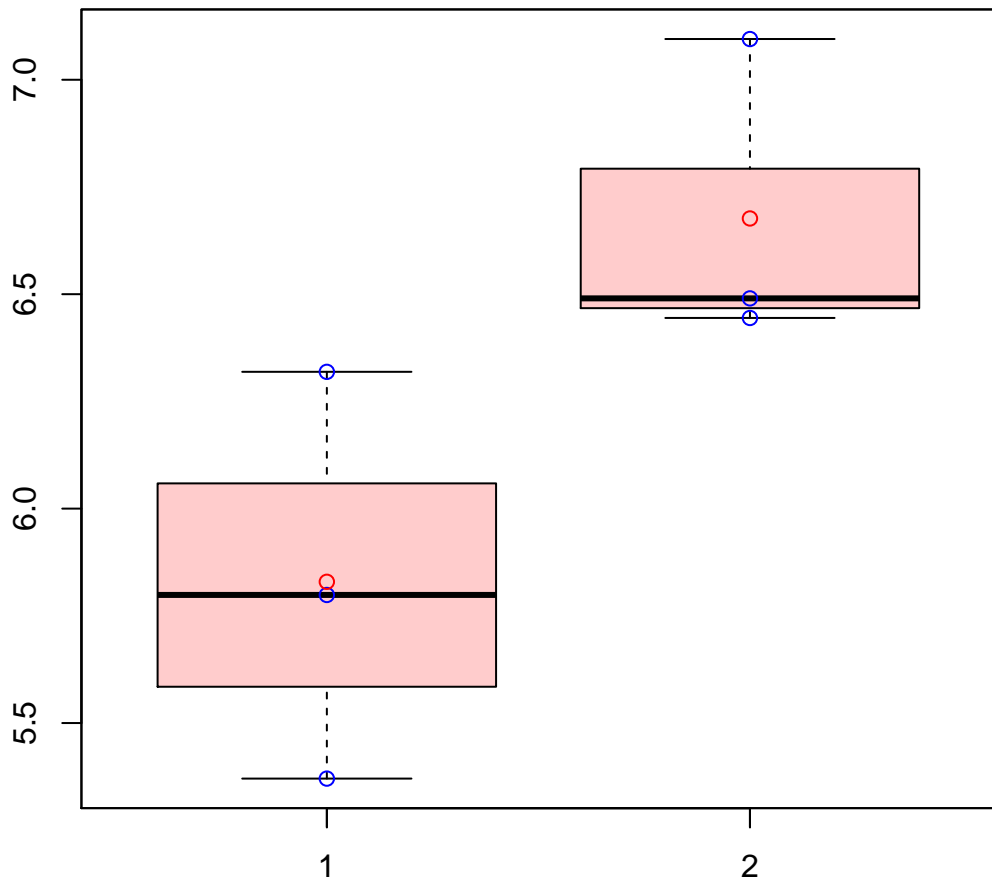

t-Test: p-value = 0.07

# CL2169Contig5|CL2169Contig5

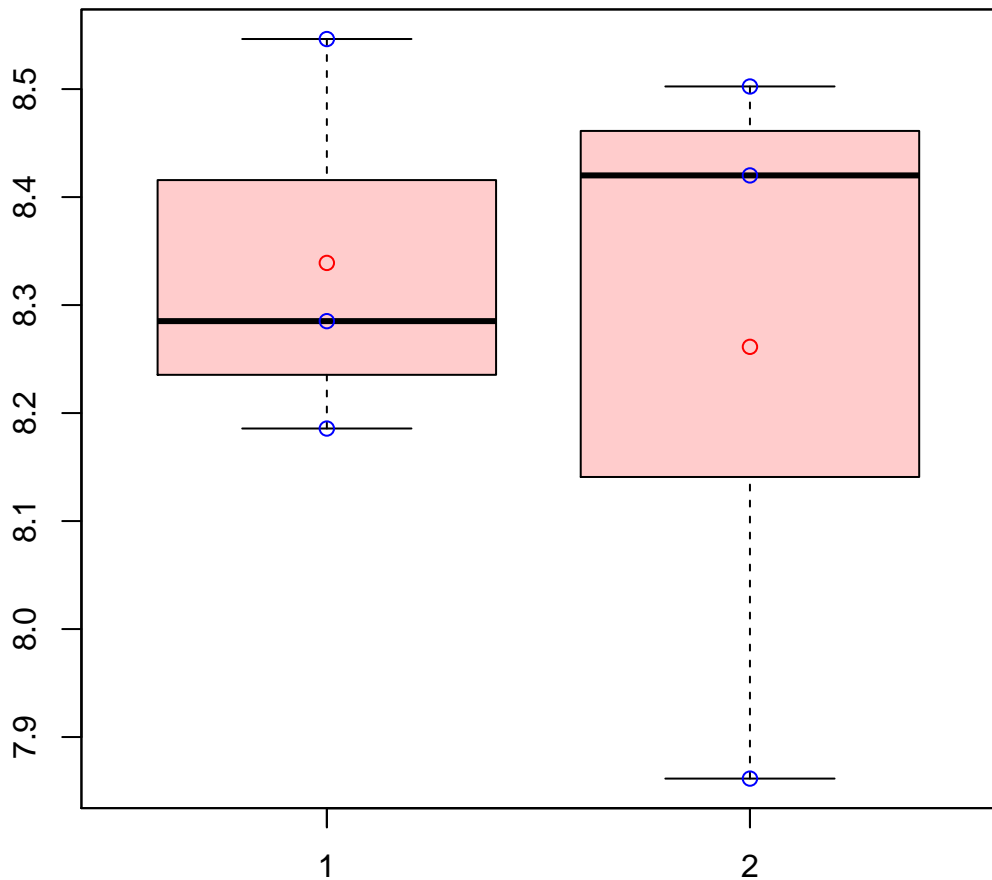

t-Test: p-value = 0.76

# CL2170Contig1|CL2170Contig1

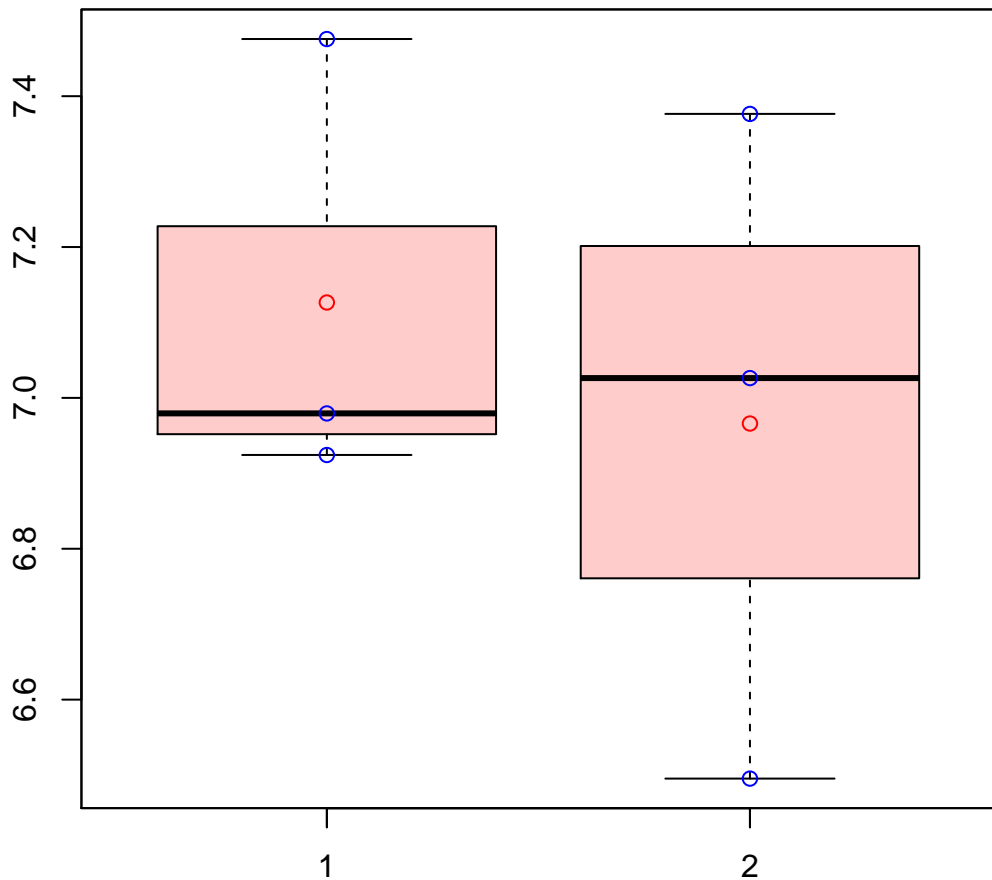

t-Test: p-value = 0.64

# CL2172Contig10|CL2172Contig10

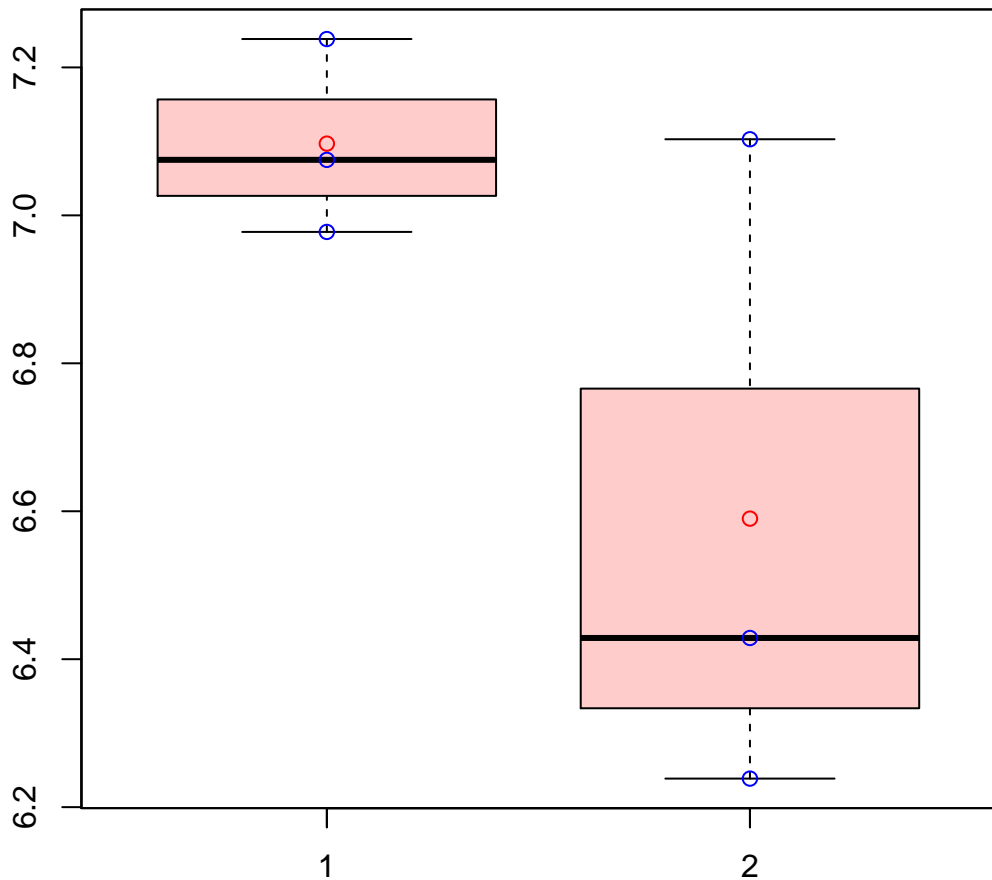

t-Test: p-value = 0.19

# CL2172Contig3|CL2172Contig3

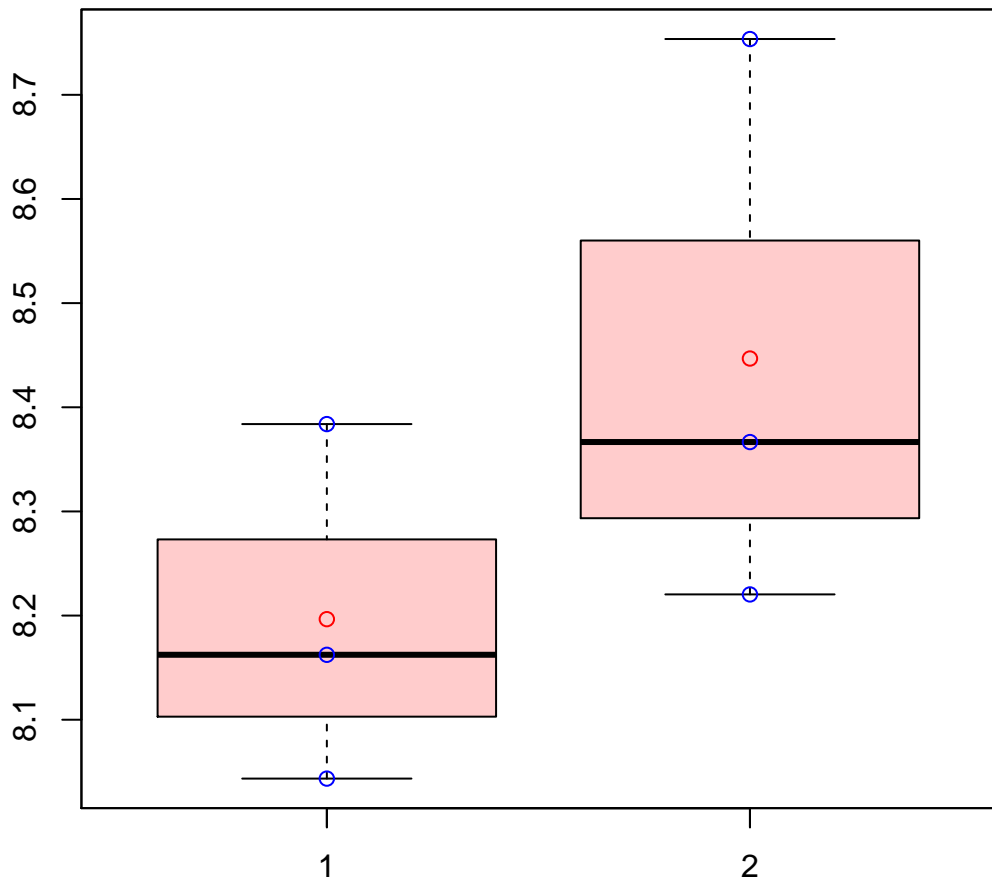

t-Test: p-value = 0.27

# CL2186Contig8|CL2186Contig8

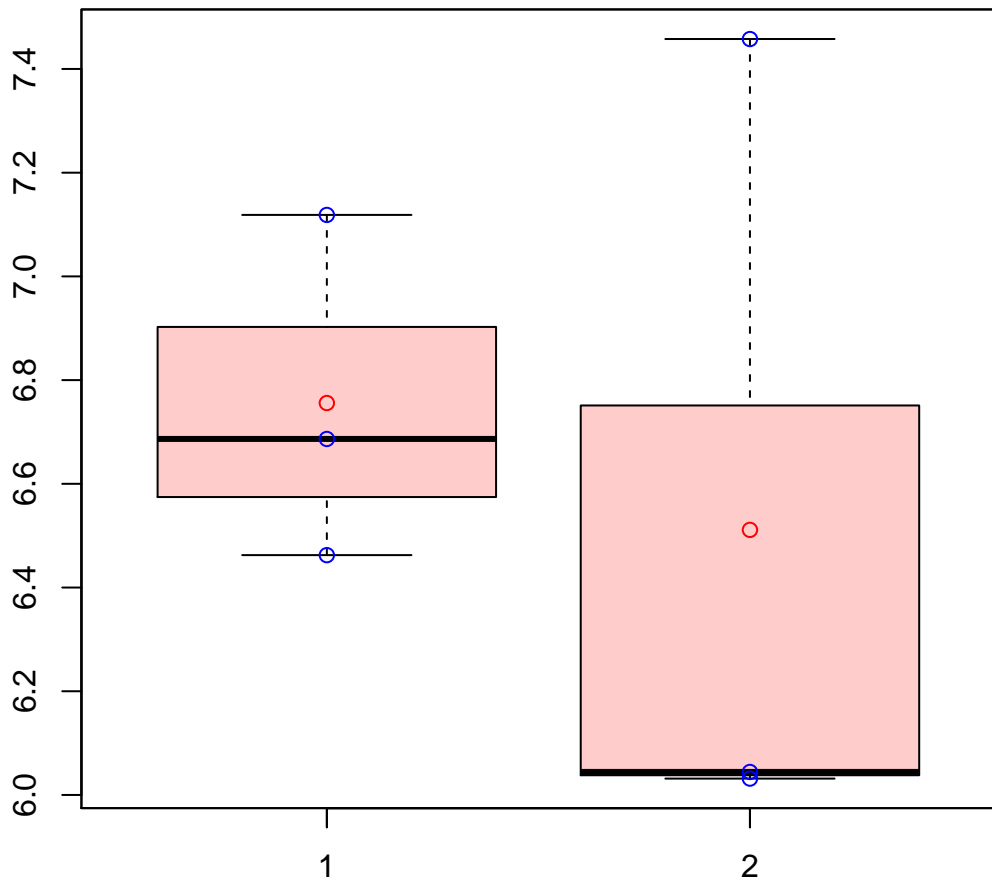

t-Test: p-value = 0.67



# CL2195Contig1|CL2195Contig1

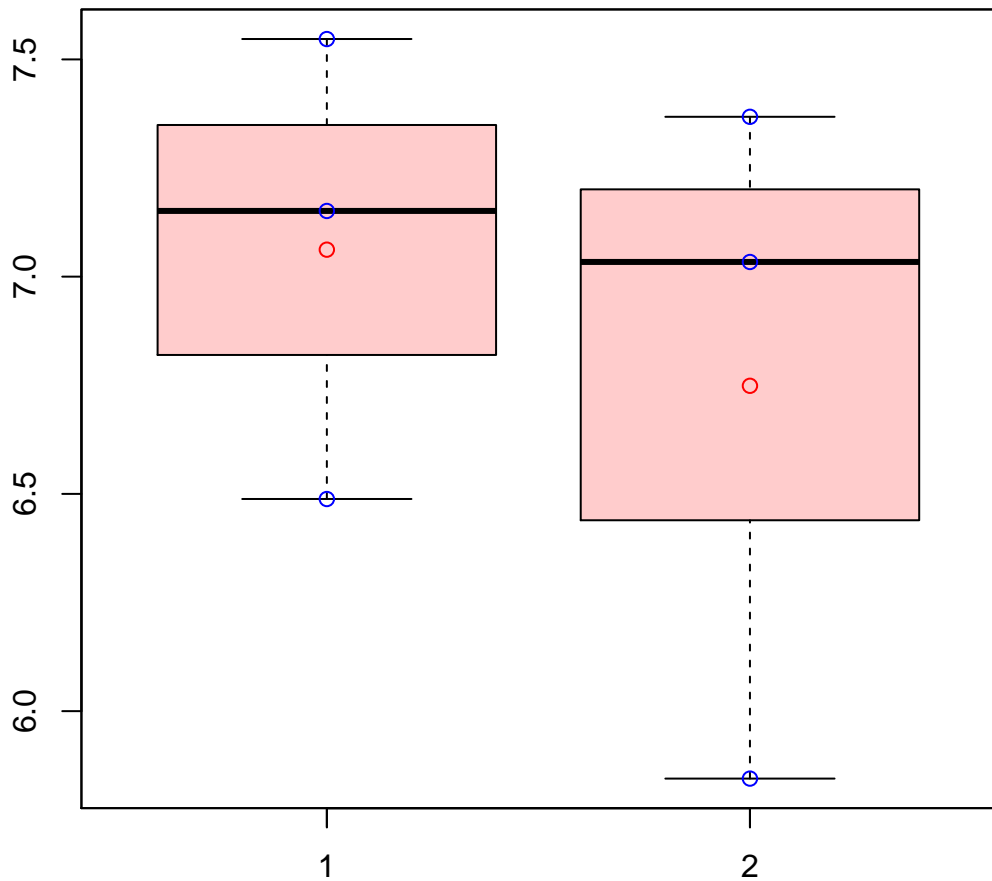

t-Test: p-value = 0.61

# CL21Contig15|CL21Contig15

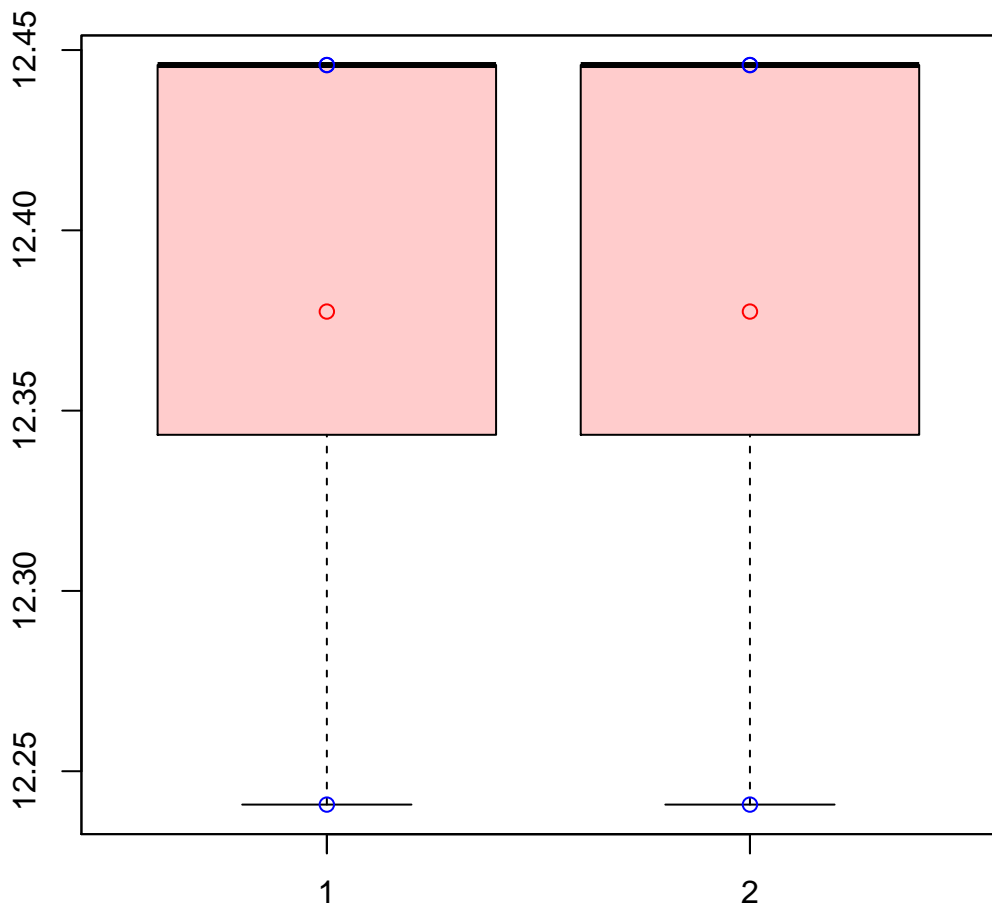

t-Test: p-value = 1

# CL21Contig27|CL21Contig27

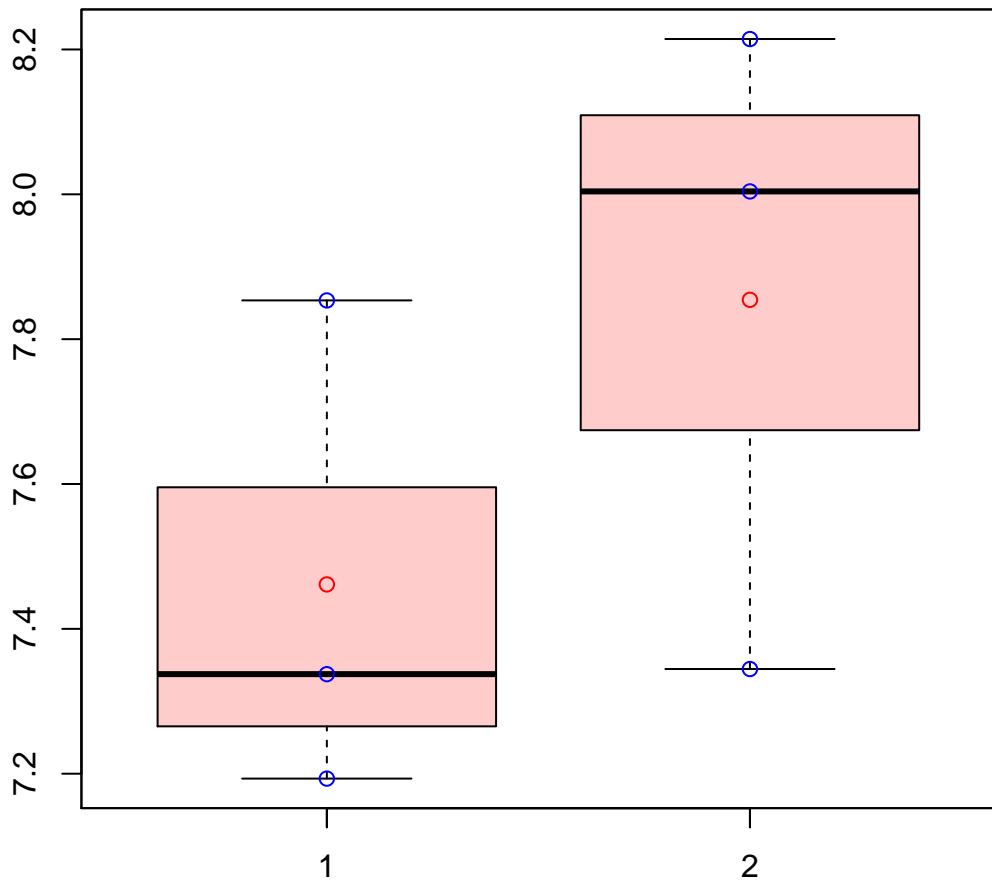

t-Test: p-value = 0.3

# CL2200Contig4|CL2200Contig4

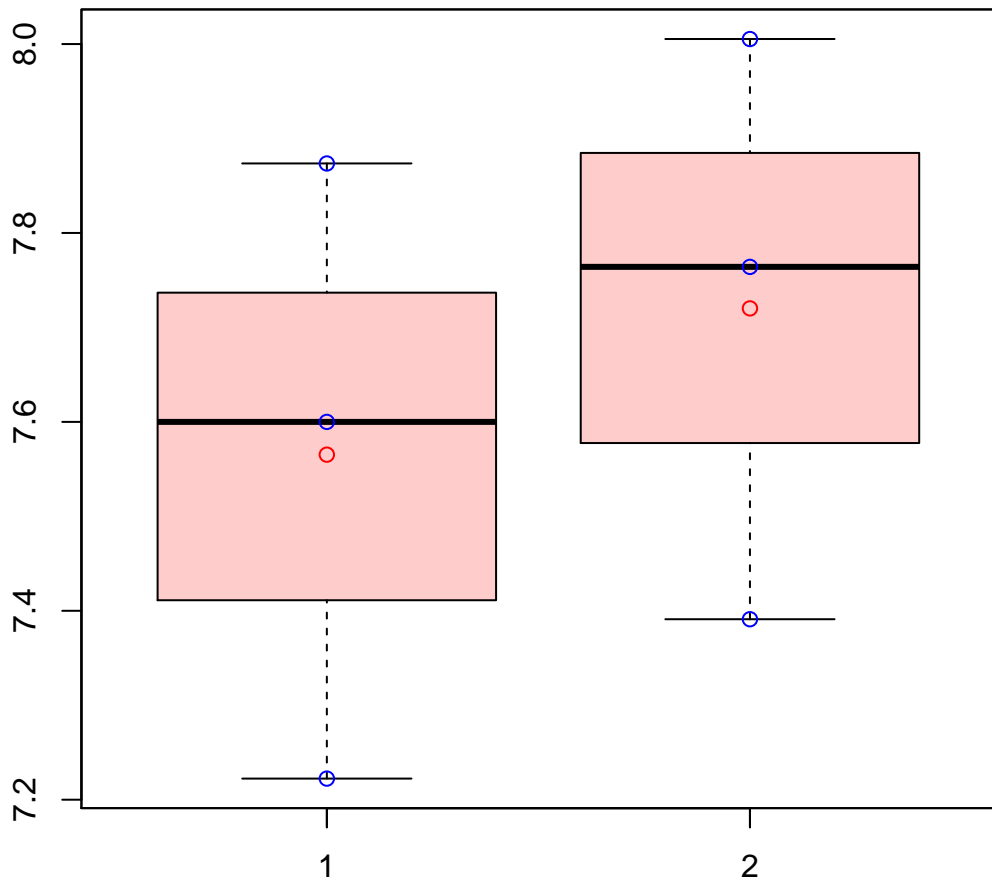

t-Test: p-value = 0.58

# CL2206Contig4|CL2206Contig4

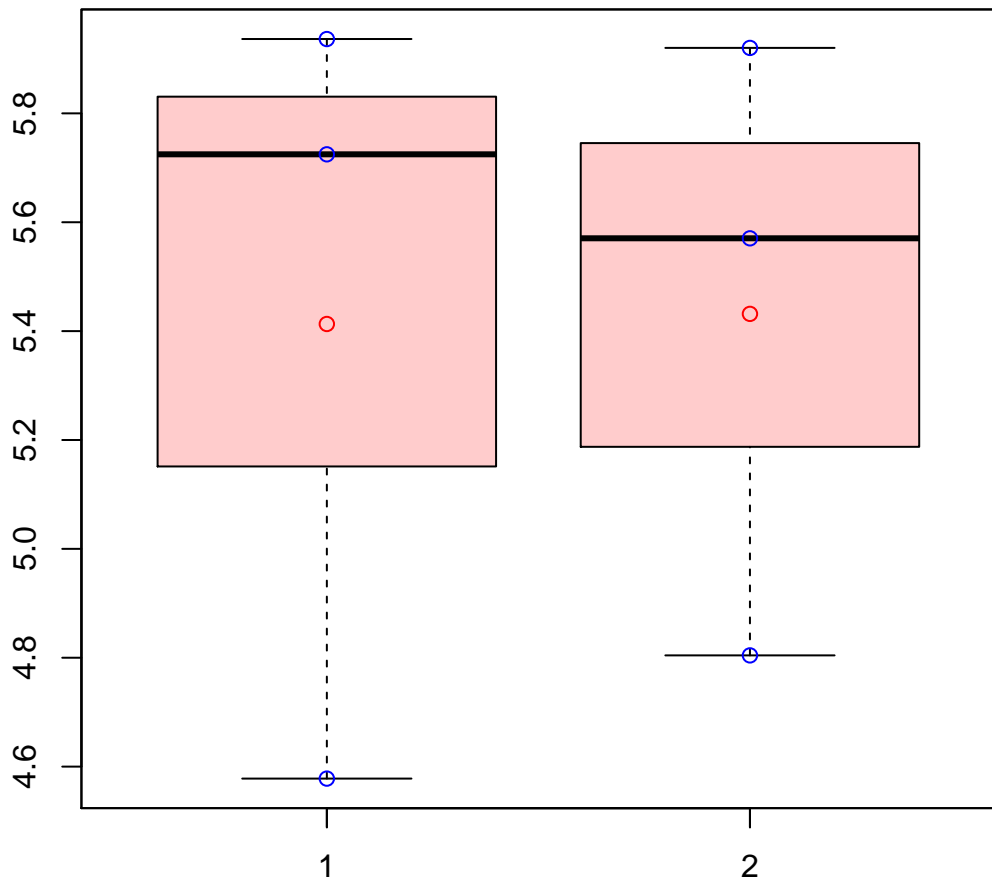

t-Test: p-value = 0.97

# CL2209Contig4|CL2209Contig4

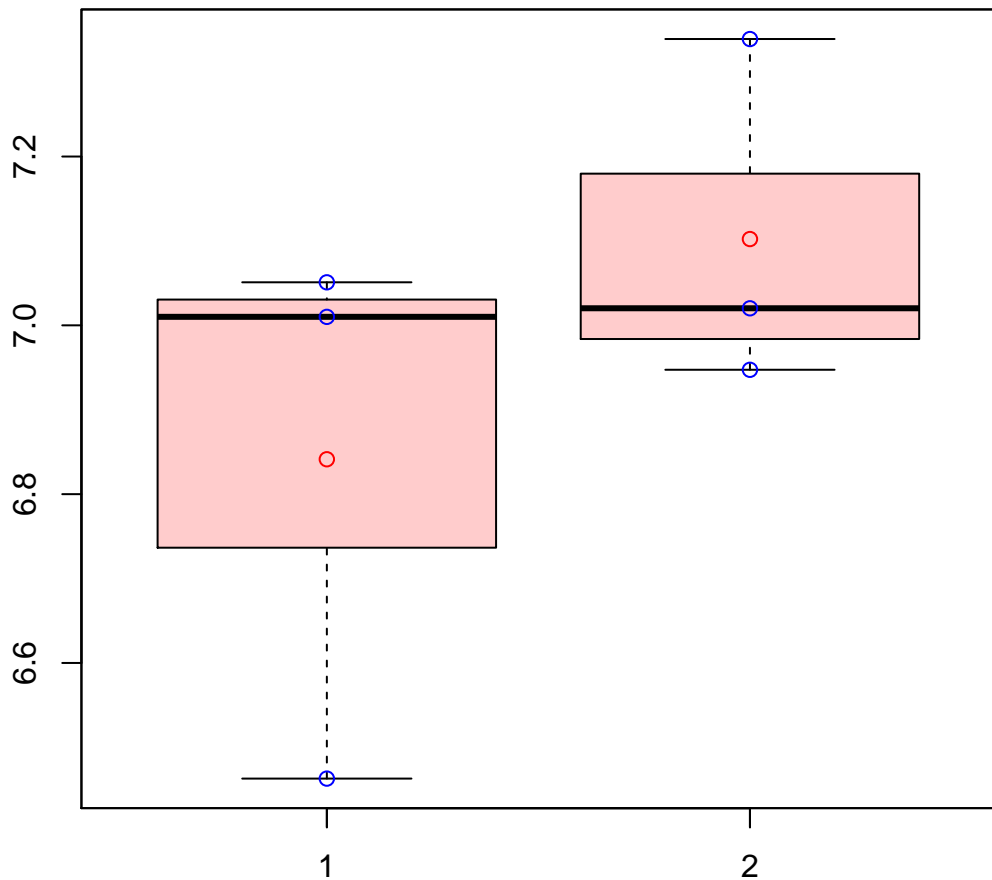

t-Test: p-value = 0.32

# CL220Contig7|CL220Contig7

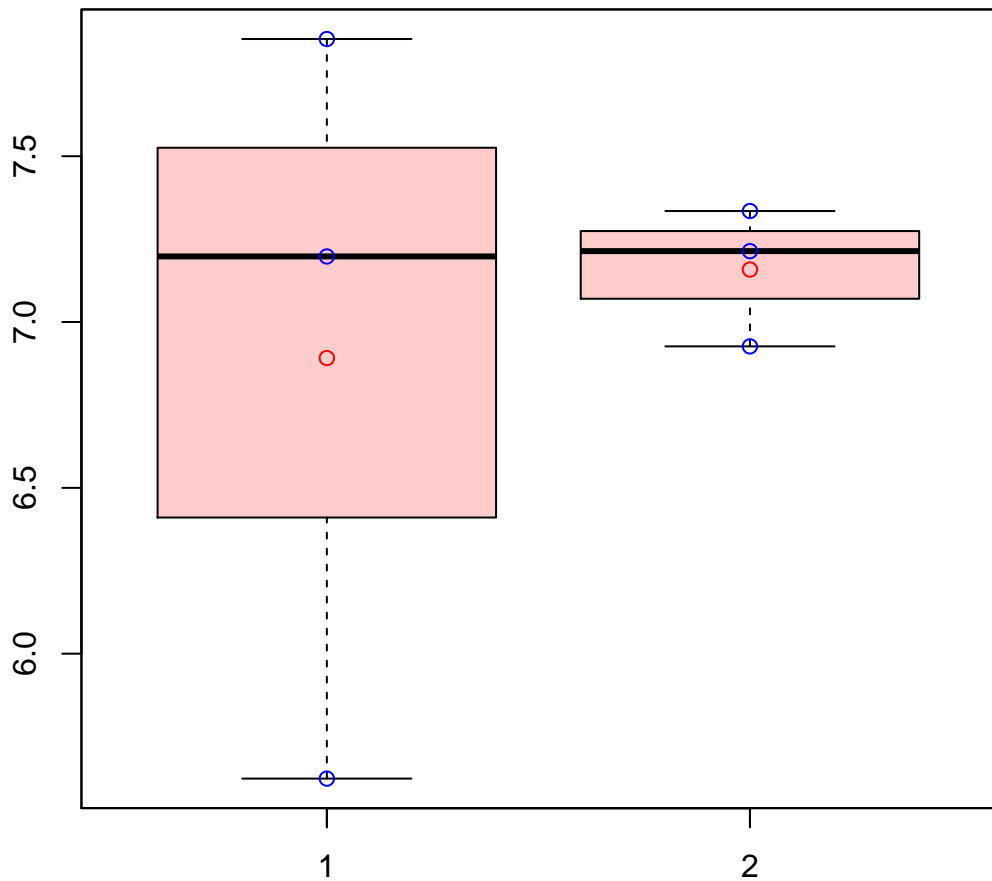

t-Test: p-value = 0.73

# CL2214Contig2|CL2214Contig2

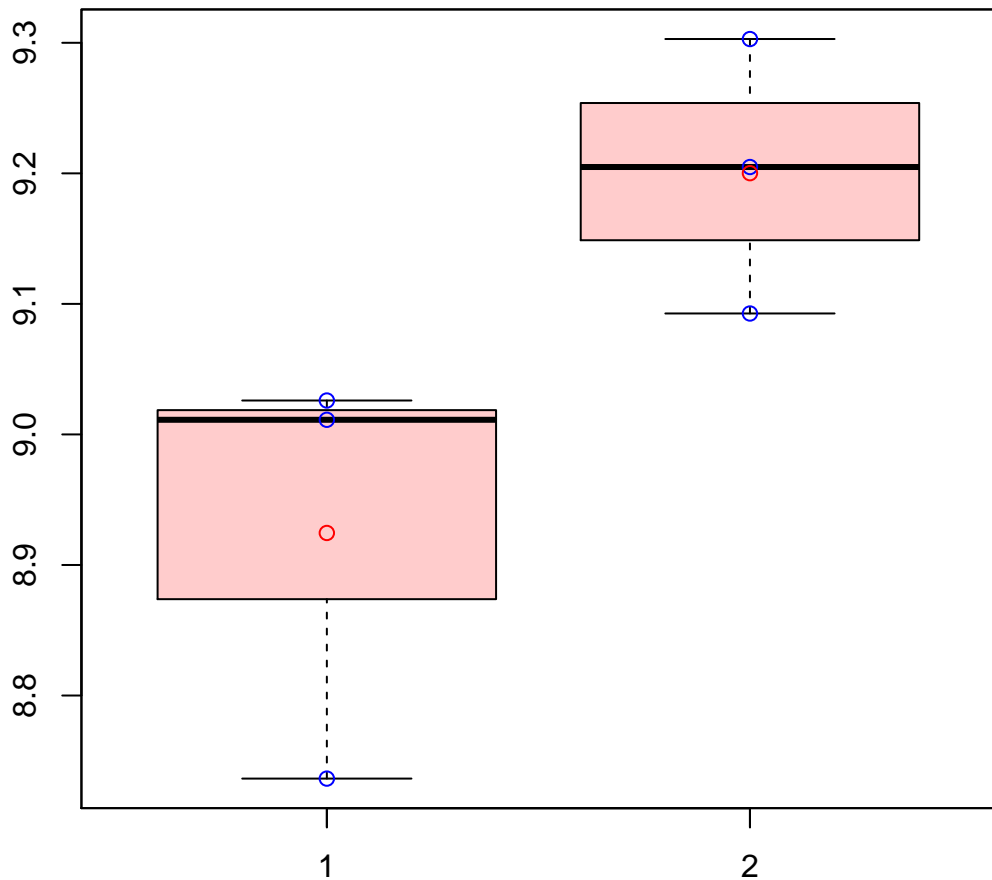

t-Test: p-value = 0.08



# CL2217Contig2|CL2217Contig2

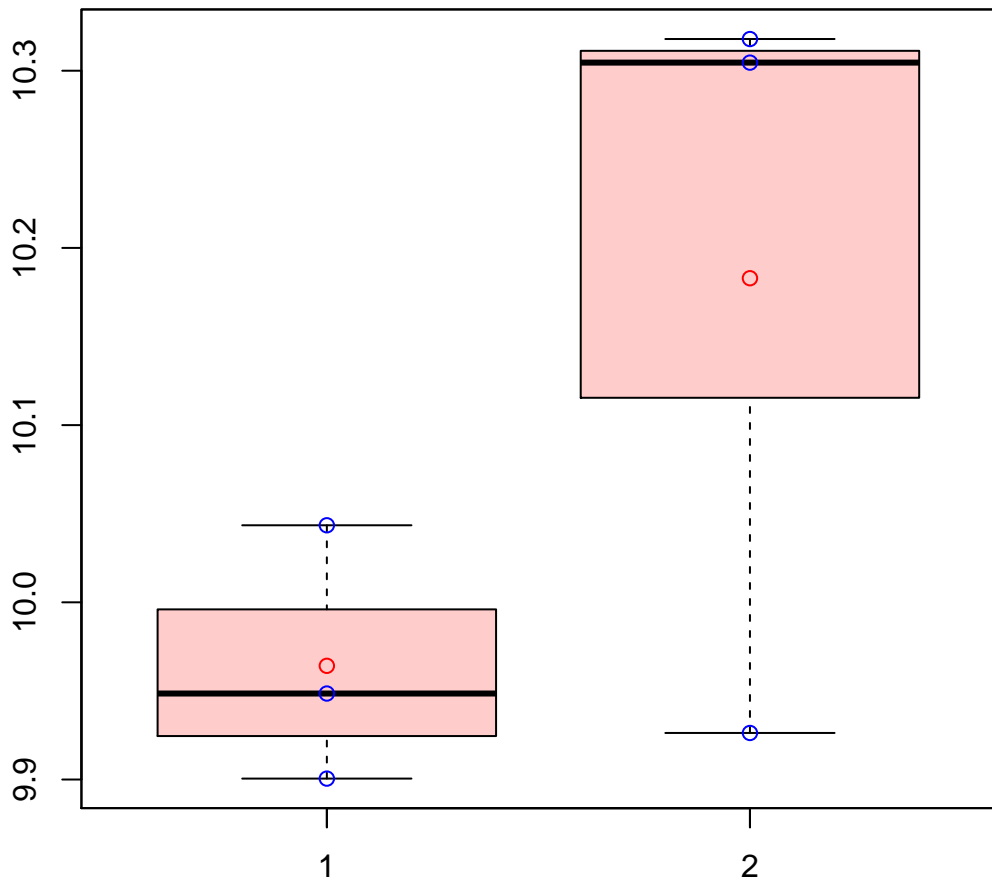

t-Test: p-value = 0.22

# CL2222Contig1|CL2222Contig1

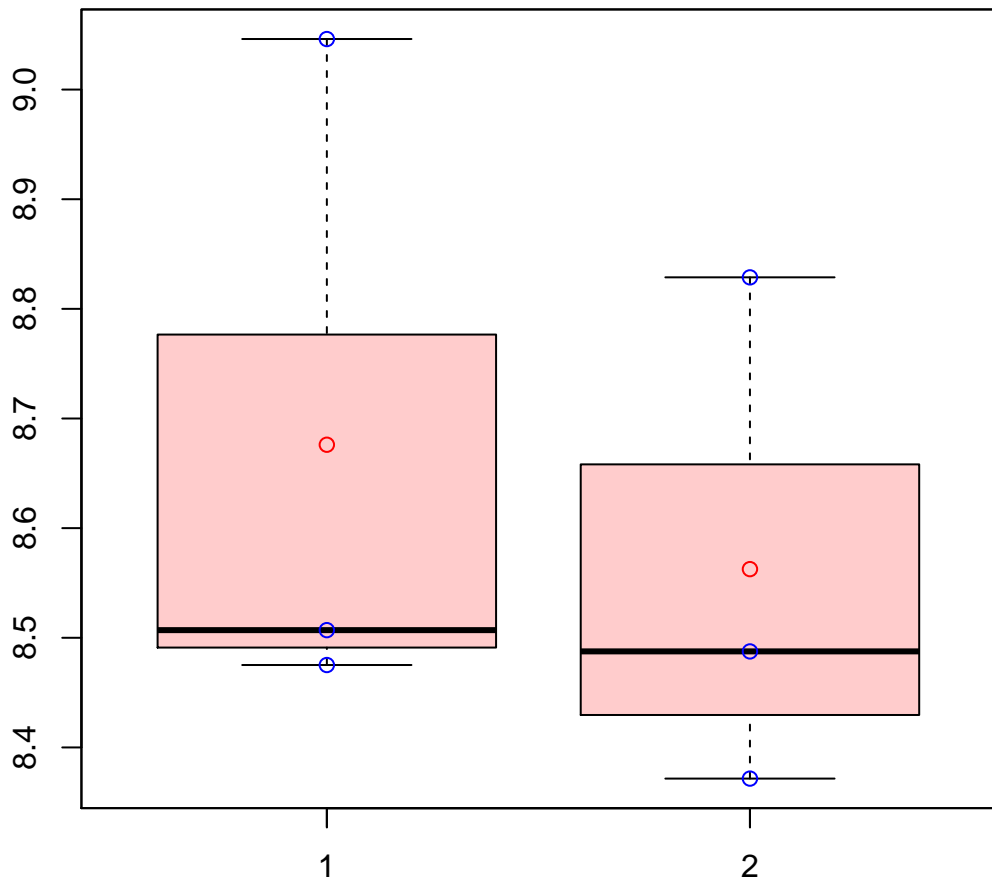

t-Test: p-value = 0.65

# CL2228Contig1|CL2228Contig1

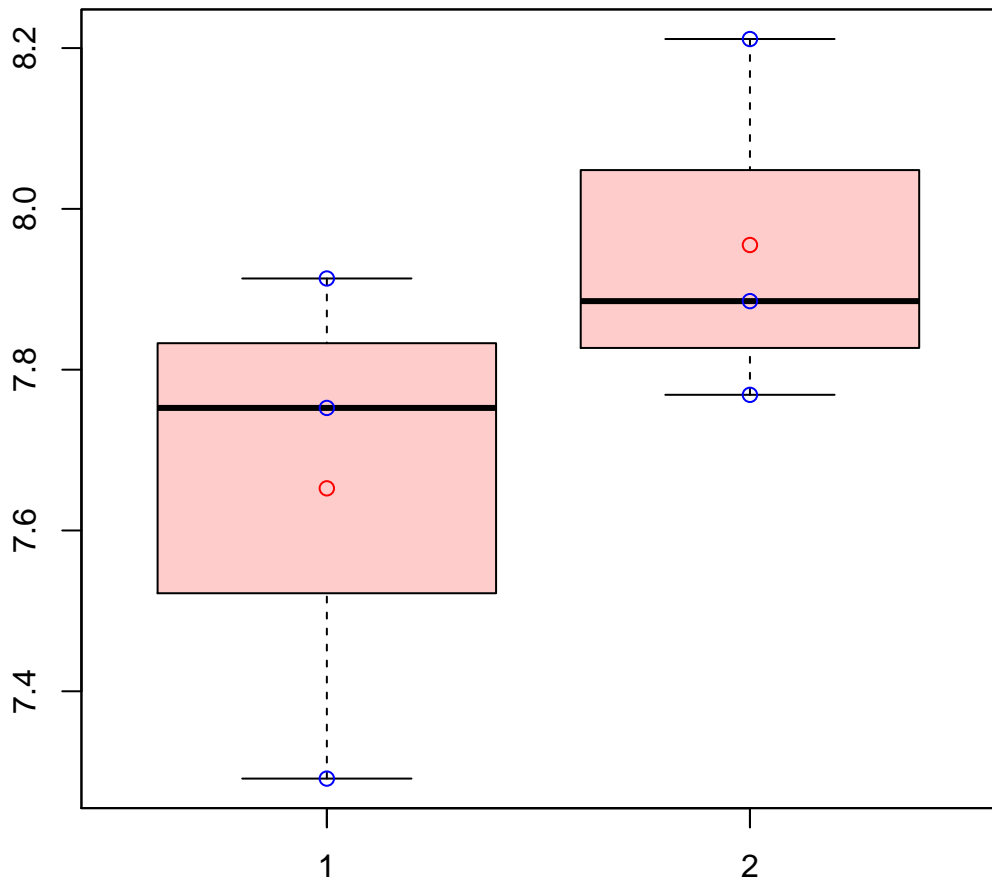

t-Test: p-value = 0.26

# CL222Contig13|CL222Contig13

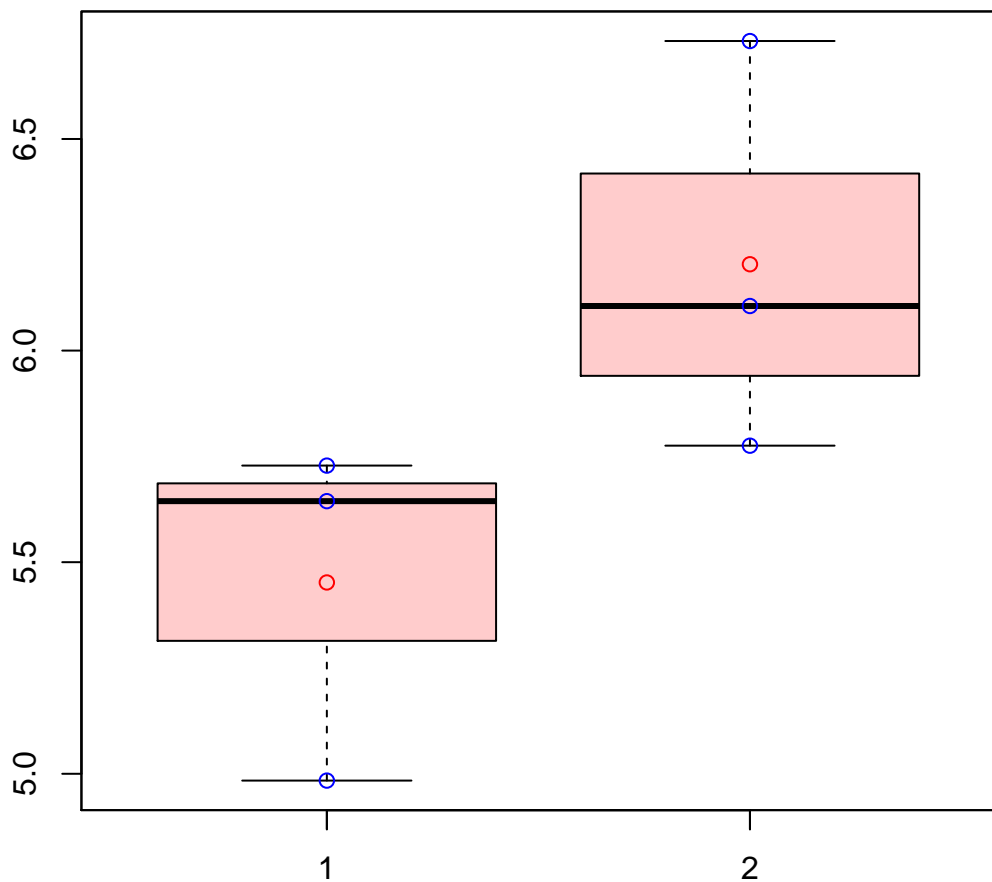

t-Test: p-value = 0.11

# CL2230Contig4|CL2230Contig4

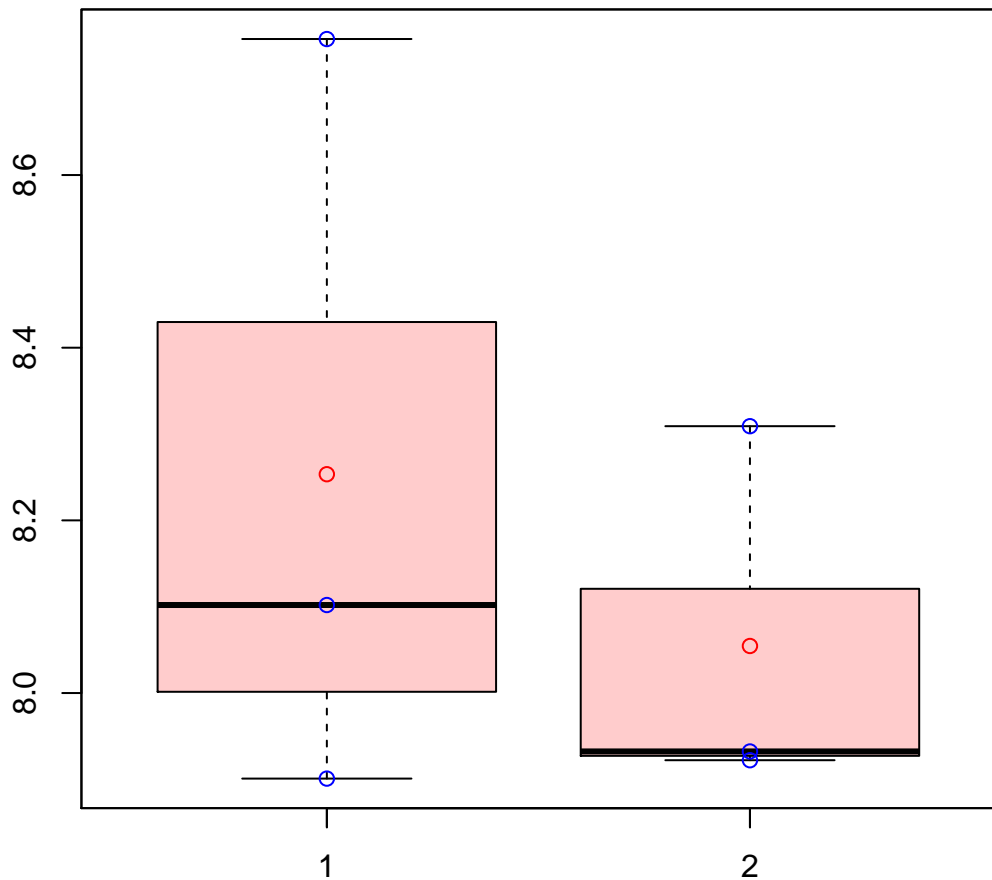

t-Test: p-value = 0.54

# CL22334Contig1|CL22334Contig1

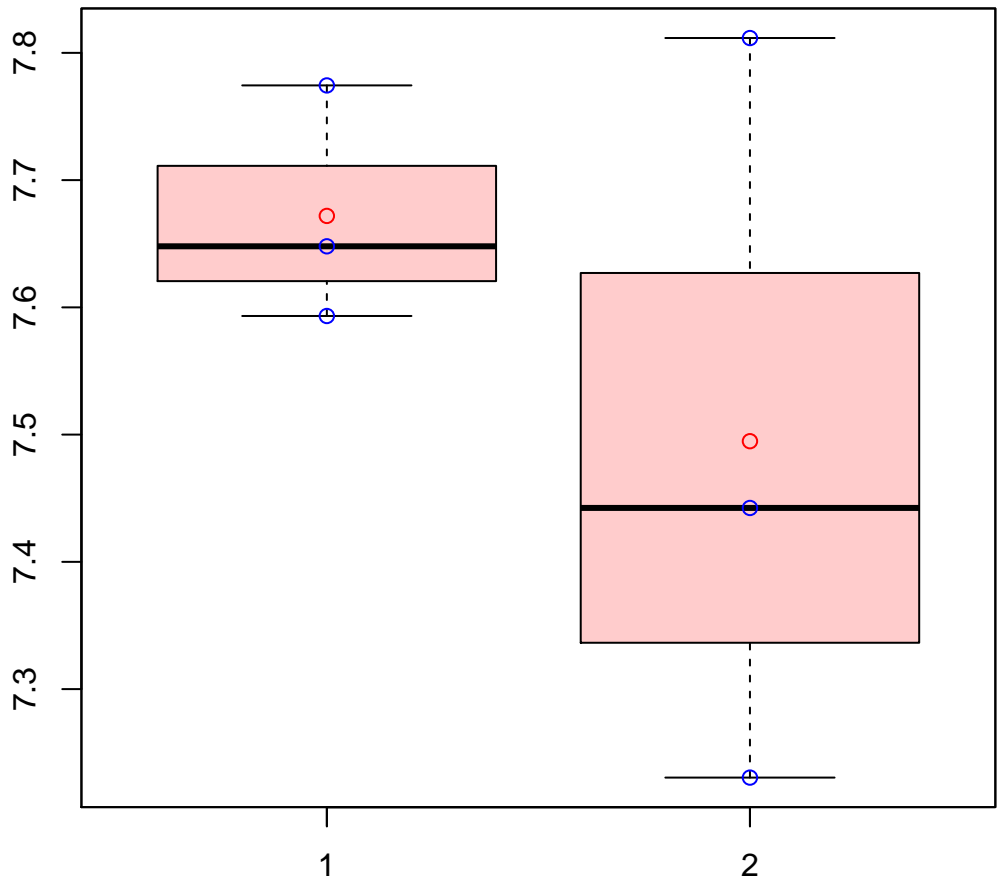

t-Test: p-value = 0.41

## CL2237Contig2|CL2237Contig2

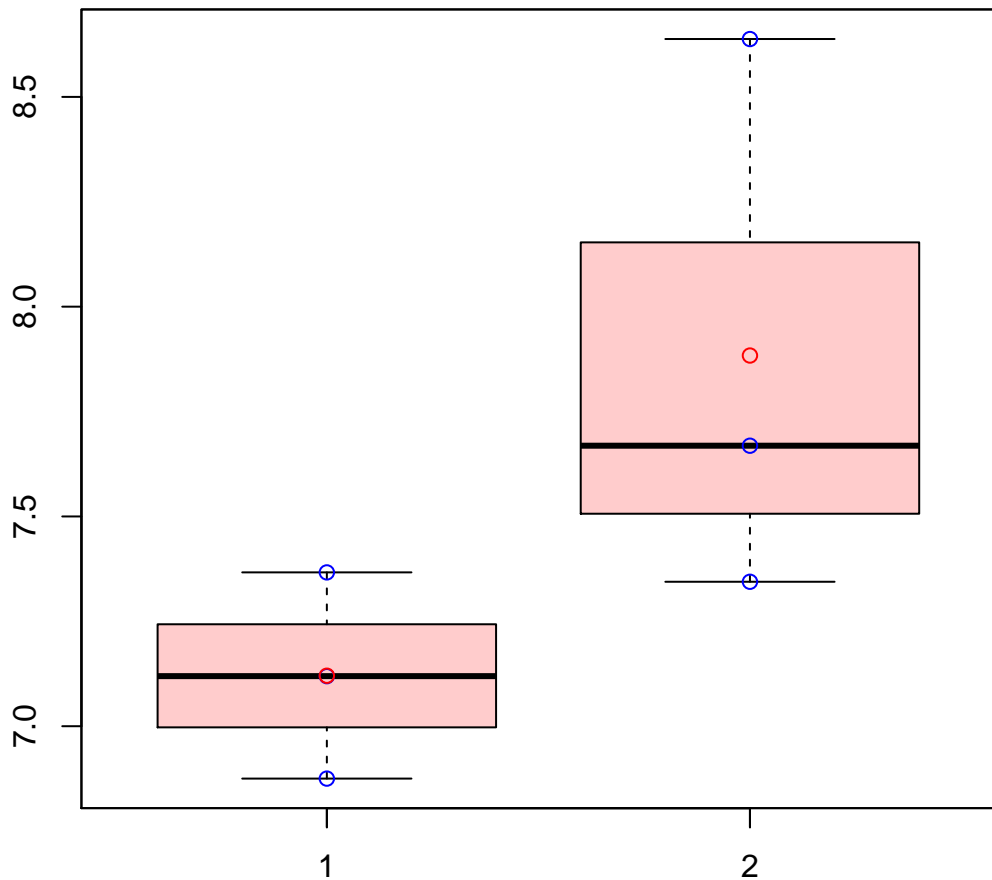

t-Test: p-value = 0.18

# CL2238Contig8|CL2238Contig8

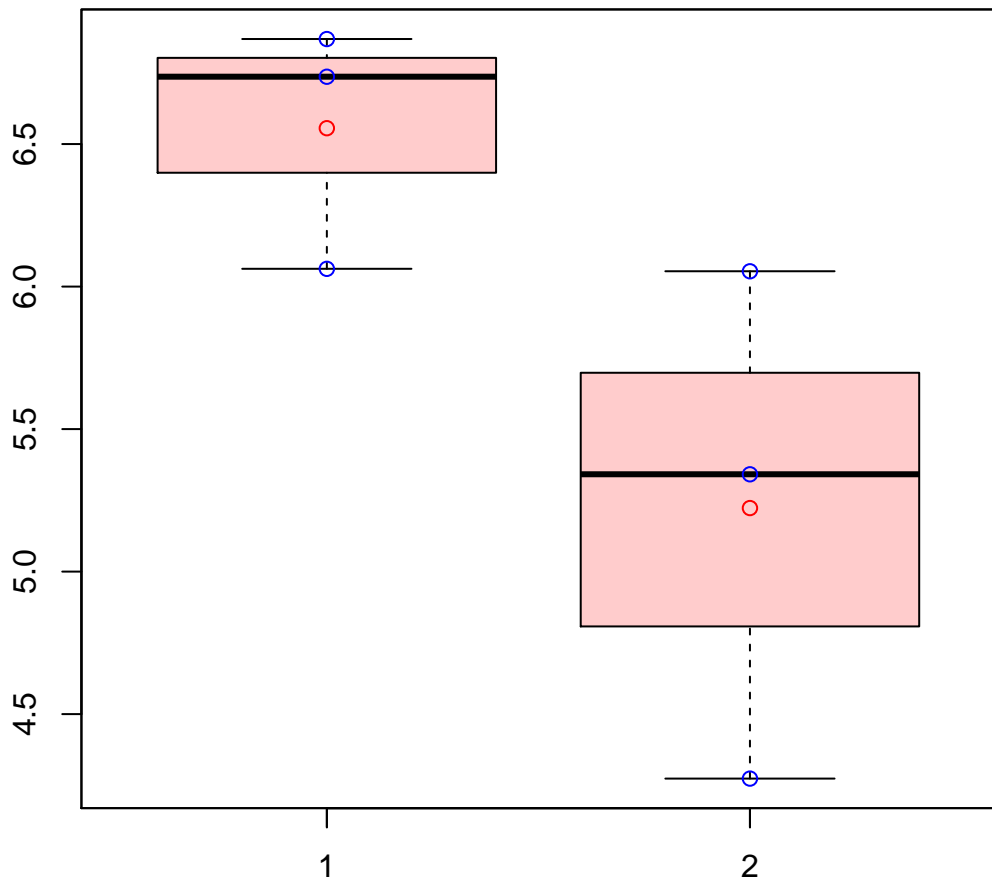

t-Test: p-value = 0.11



# CL2238Contig9|CL2238Contig9

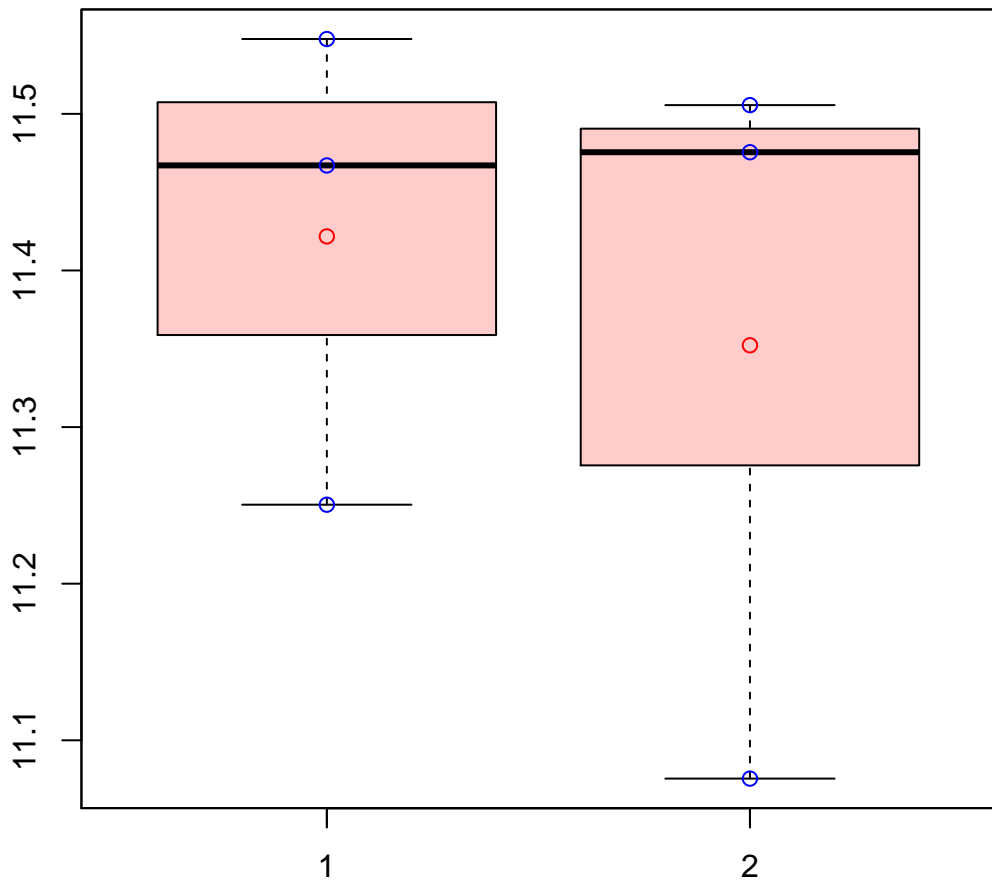

t-Test: p-value = 0.7

# CL2242Contig8|CL2242Contig8

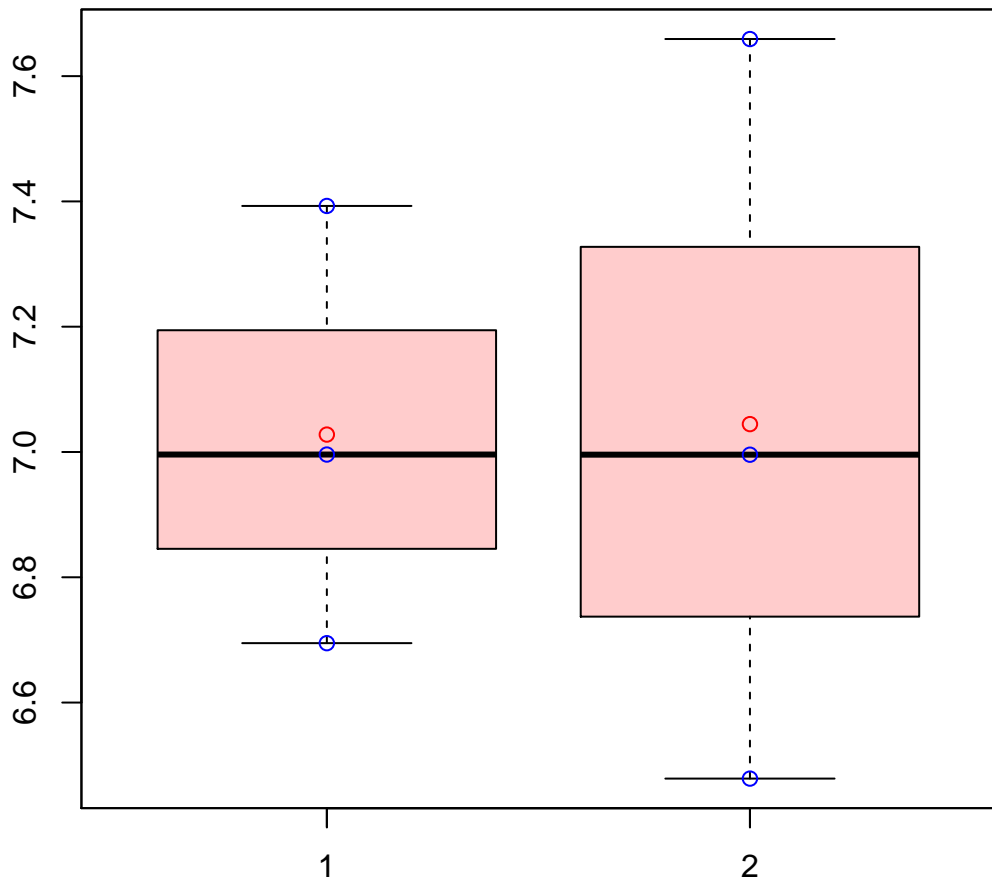

t-Test: p-value = 0.97

# CL2252Contig2|CL2252Contig2

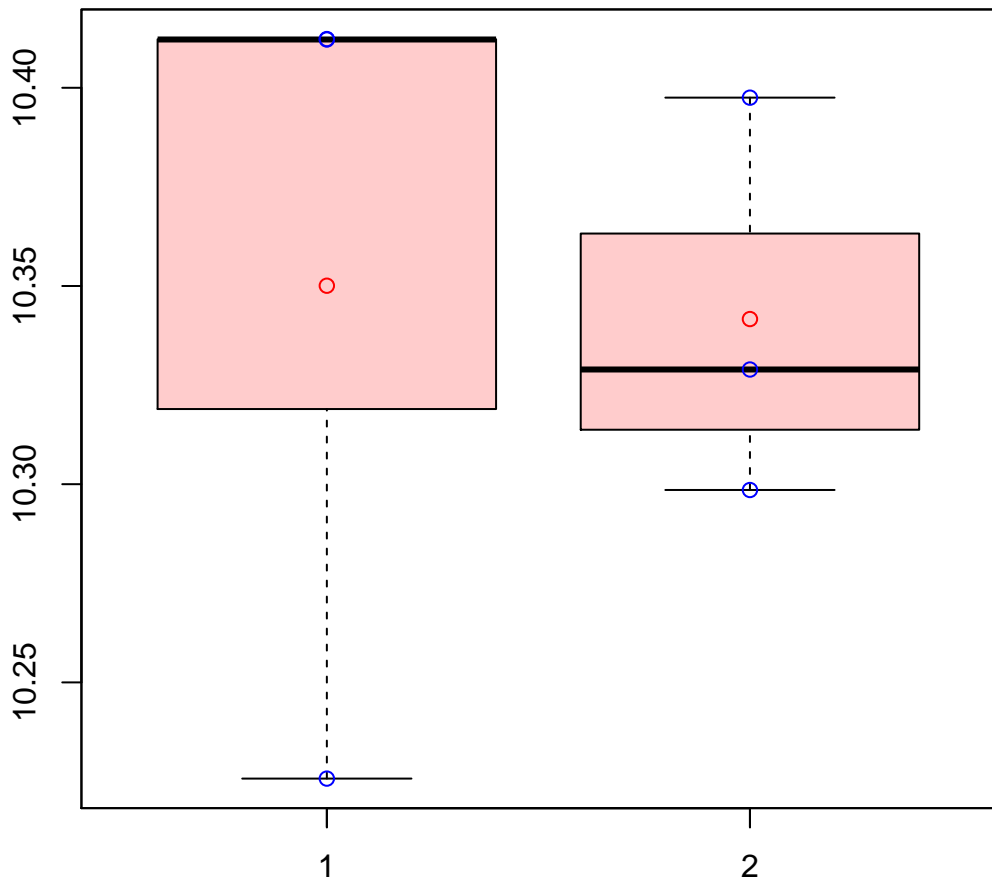

t-Test: p-value = 0.91

# CL2252Contig4|CL2252Contig4

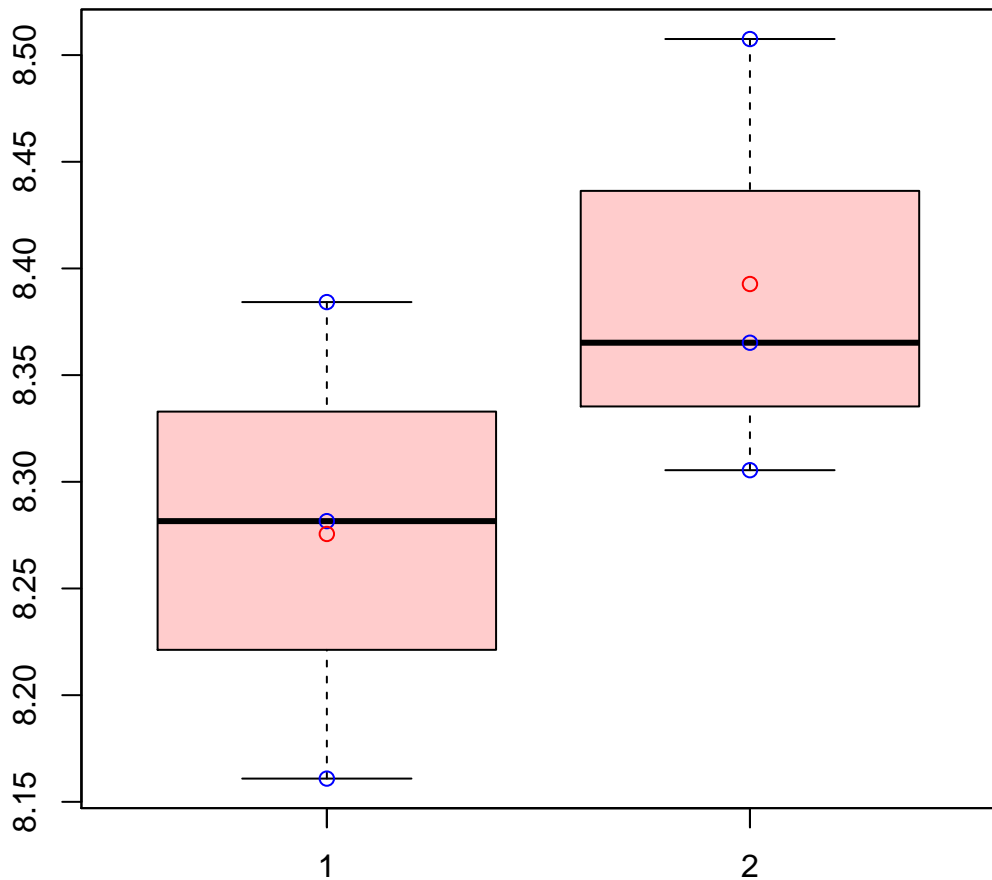

t-Test: p-value = 0.25

# CL2256Contig6|CL2256Contig6

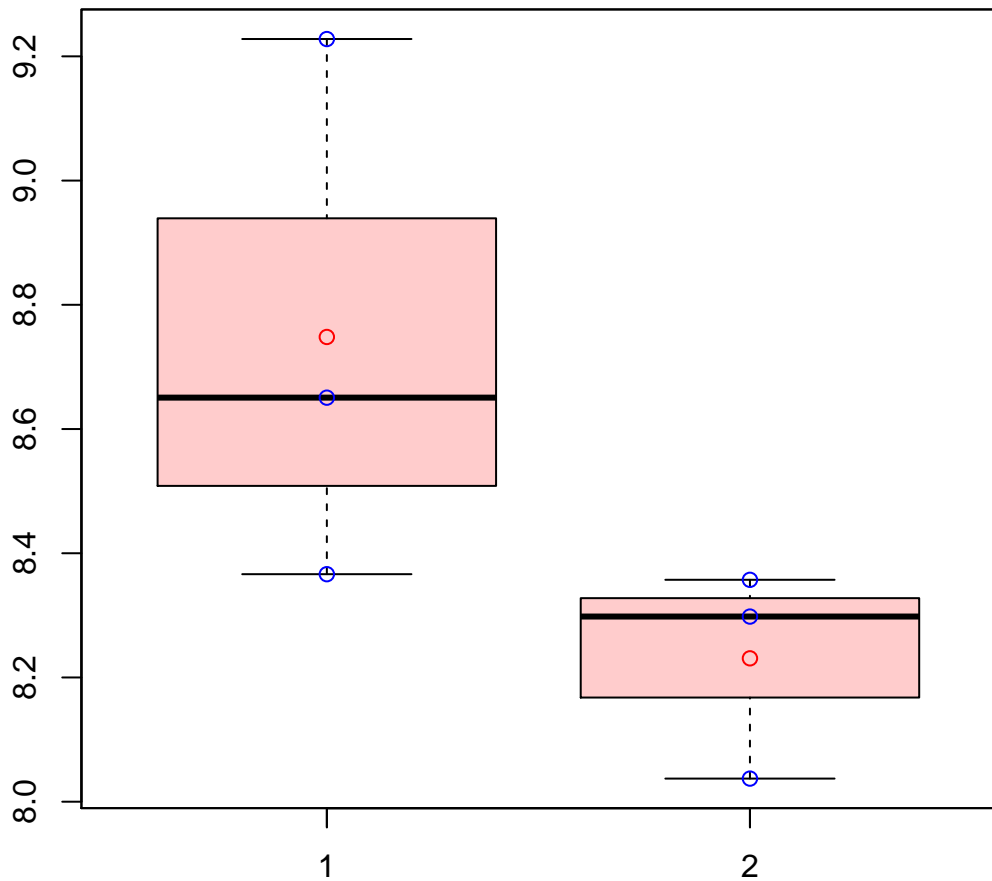

t-Test: p-value = 0.17

# CL22596Contig1|CL22596Contig1

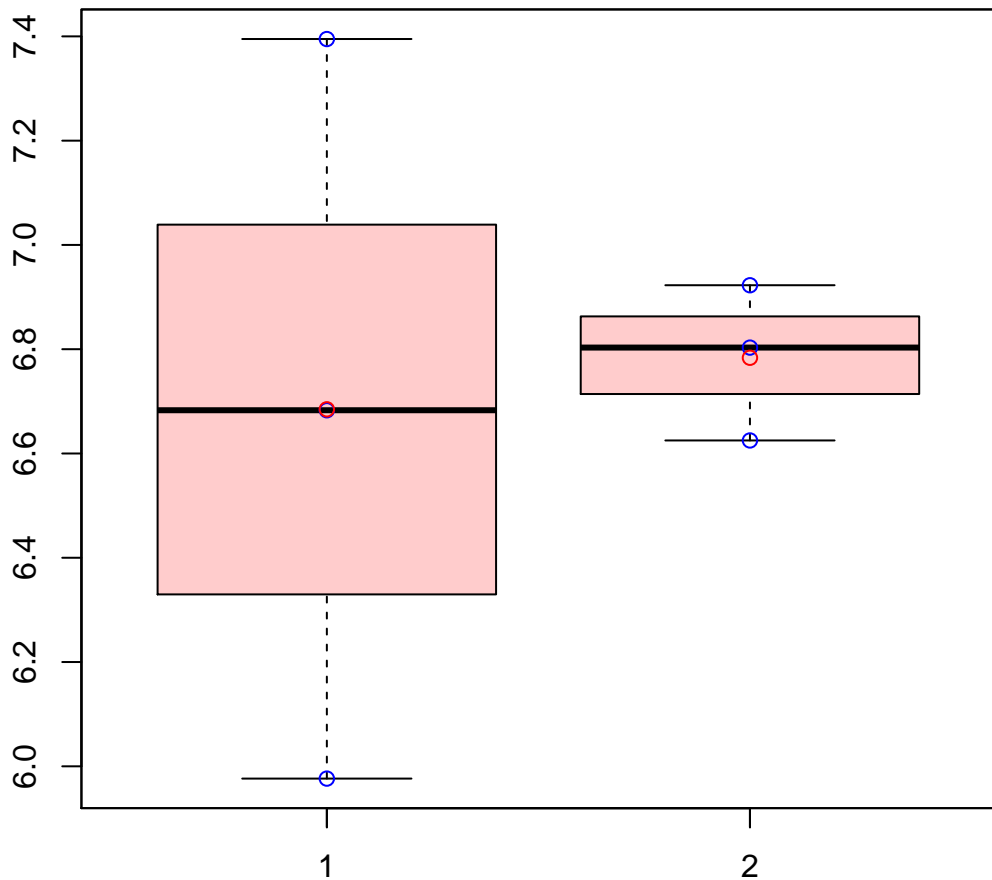

t-Test: p-value = 0.83

# CL2259Contig1|CL2259Contig1

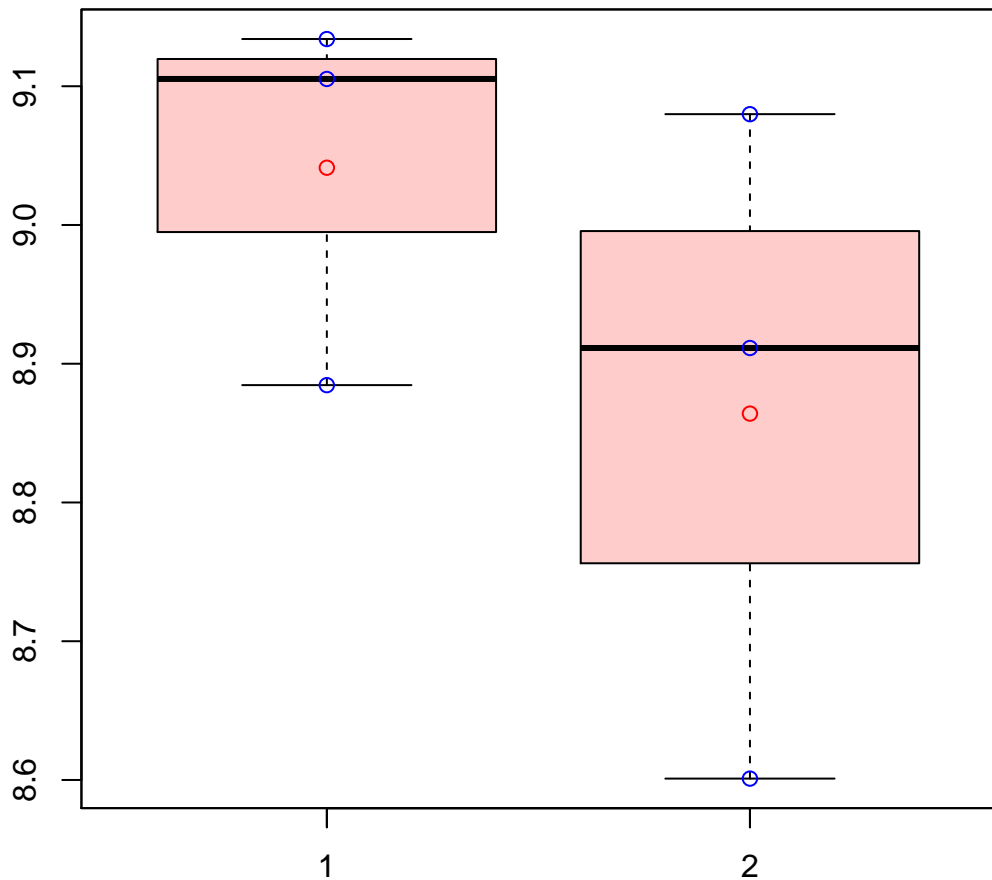

t-Test: p-value = 0.35

# CL2259Contig2|CL2259Contig2

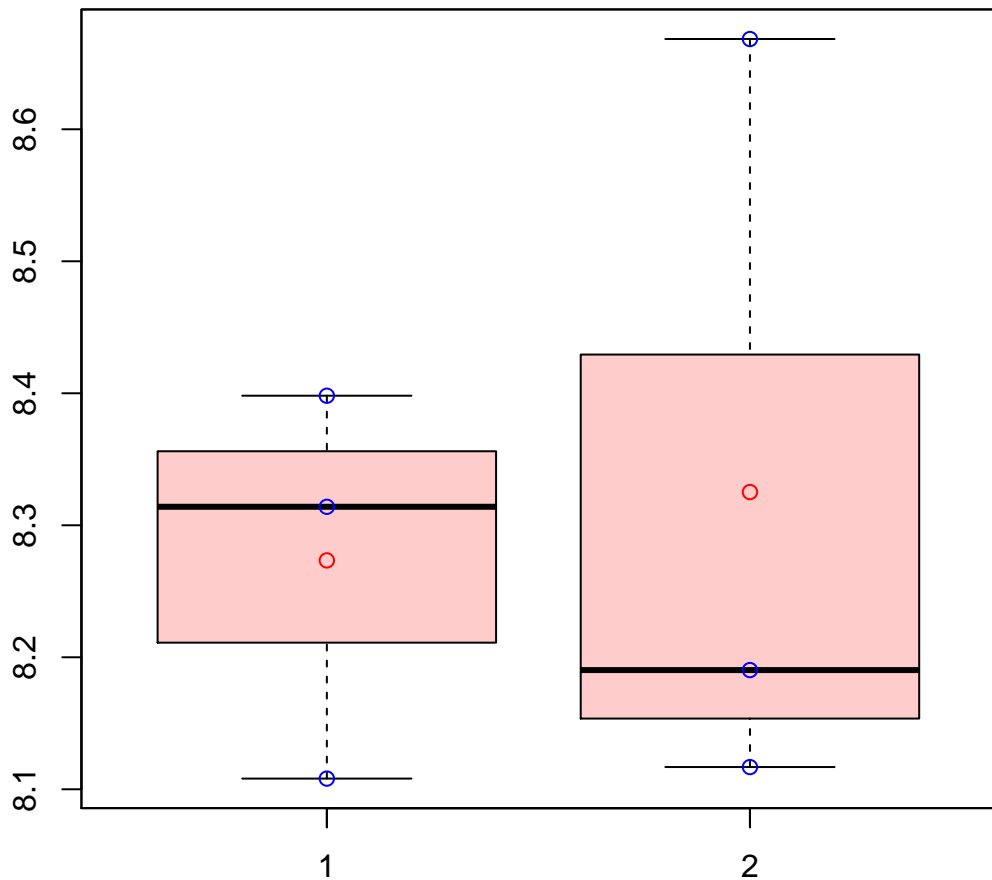

t-Test: p-value = 0.81



# CL2267Contig4|CL2267Contig4

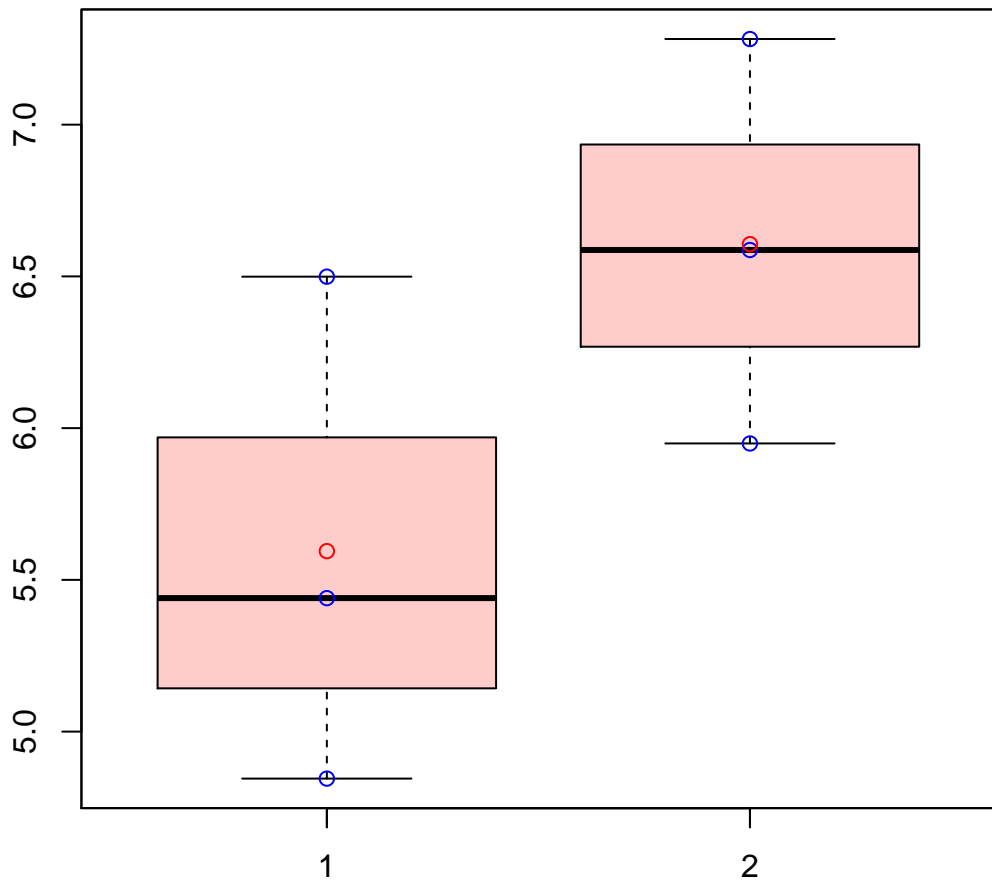

t-Test: p-value = 0.18

# CL2268Contig1|CL2268Contig1

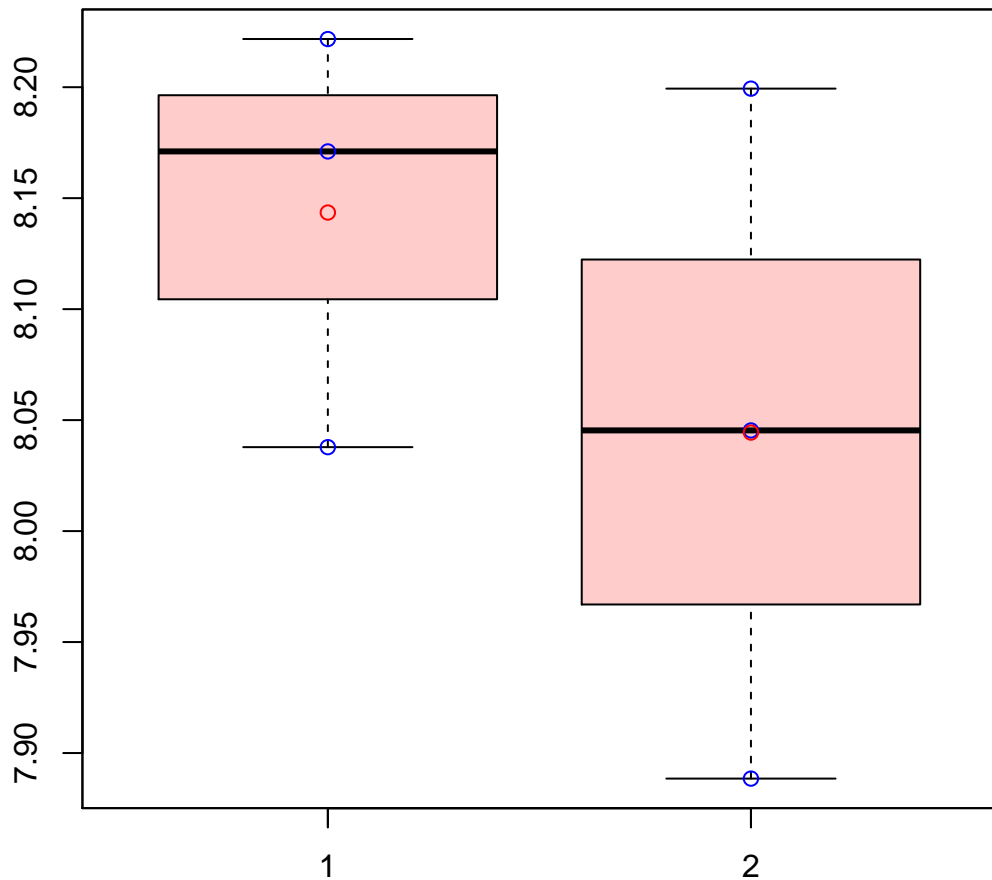

t-Test: p-value = 0.41

# CL226Contig3|CL226Contig3

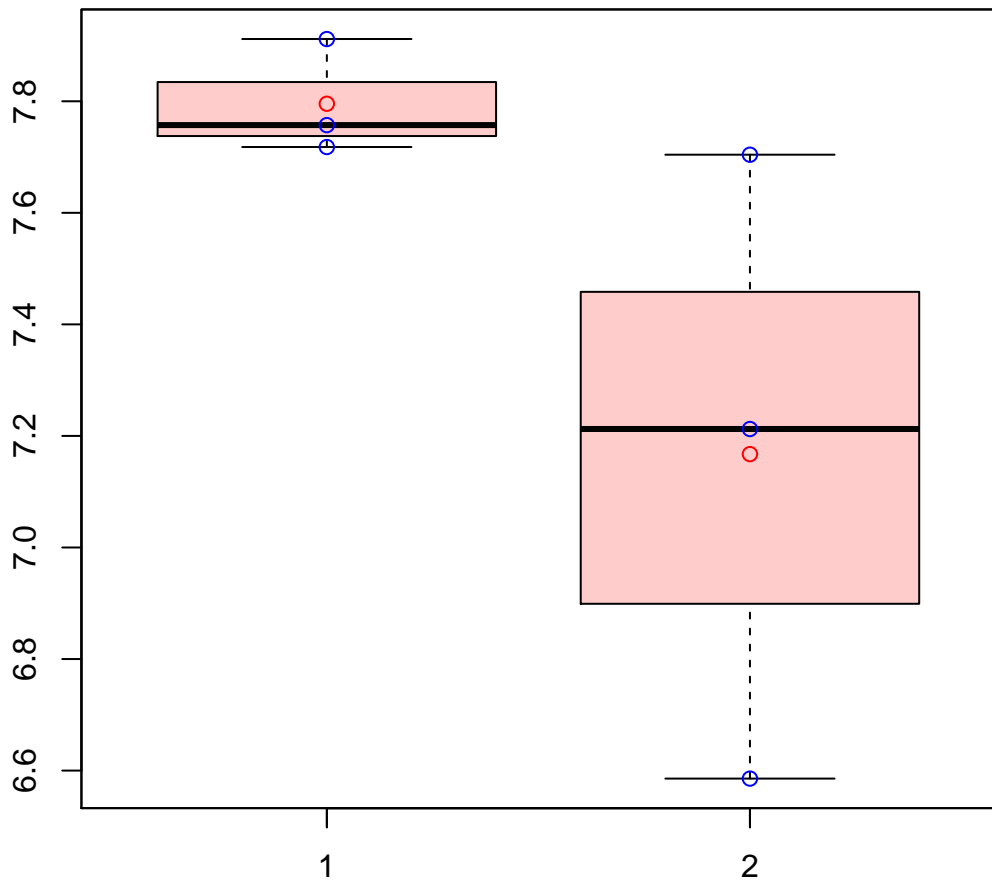

t-Test: p-value = 0.19

# CL2275Contig2|CL2275Contig2

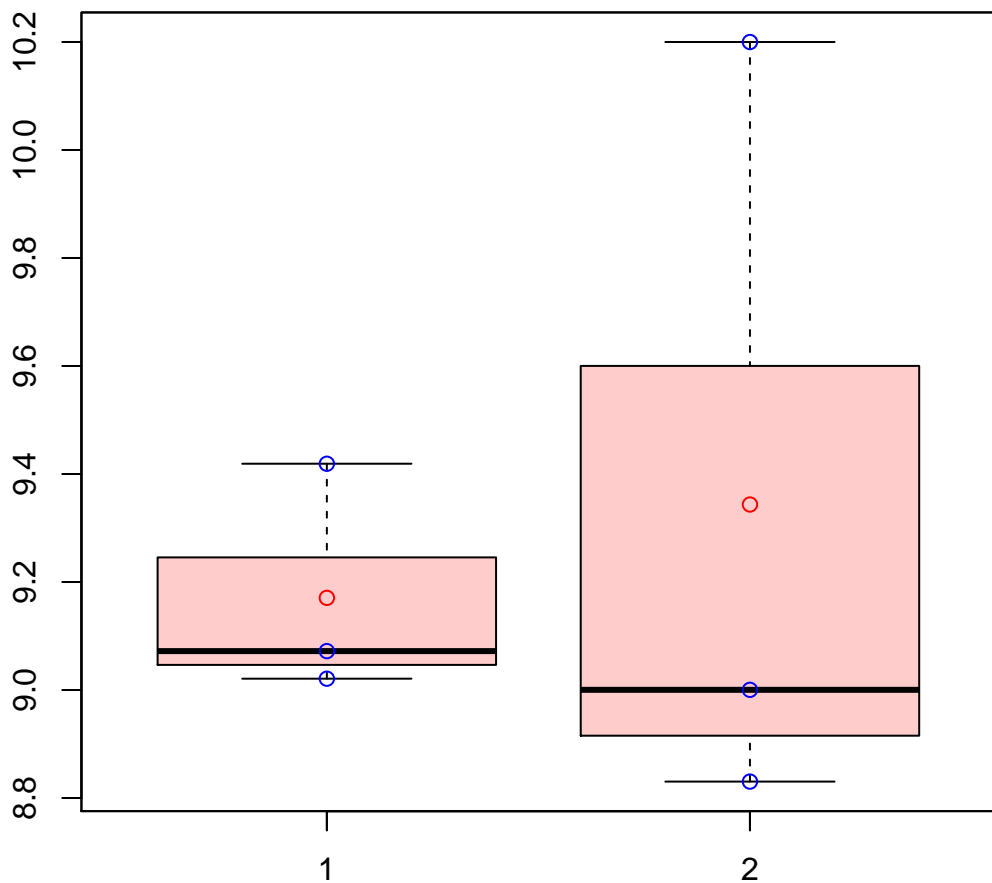

t-Test: p-value = 0.73

# CL2277Contig3|CL2277Contig3

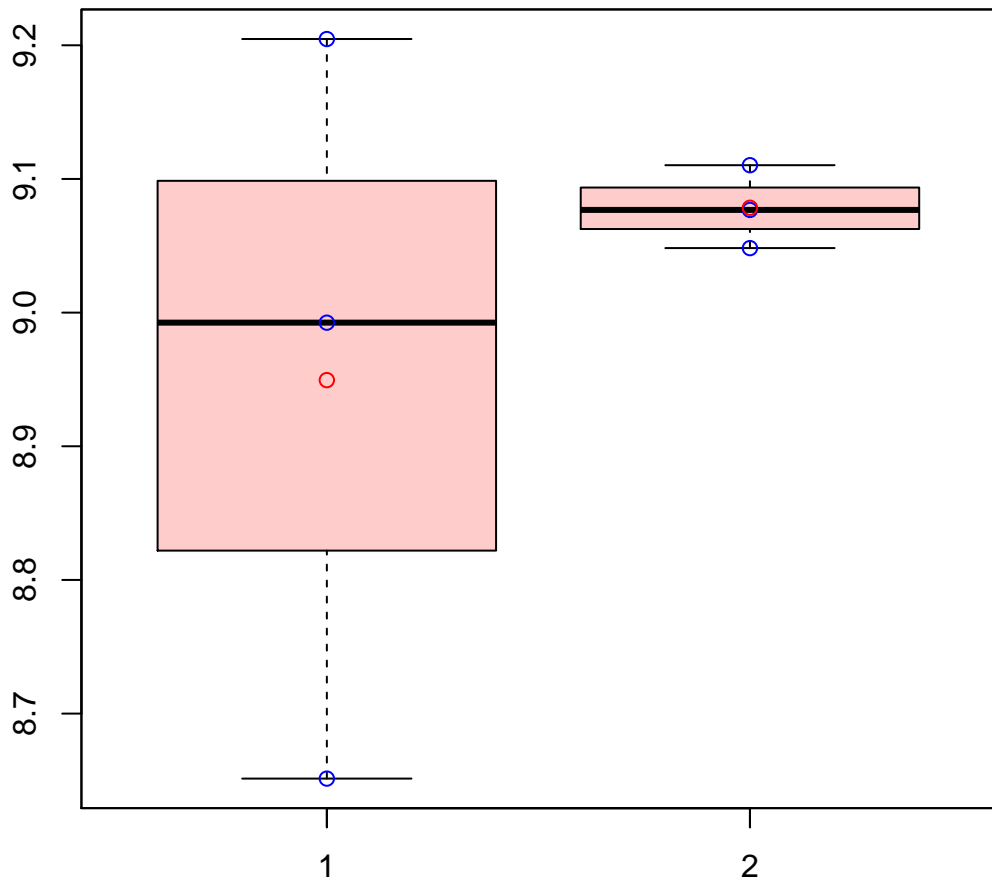

t-Test: p-value = 0.51

# CL22781Contig1|CL22781Contig1

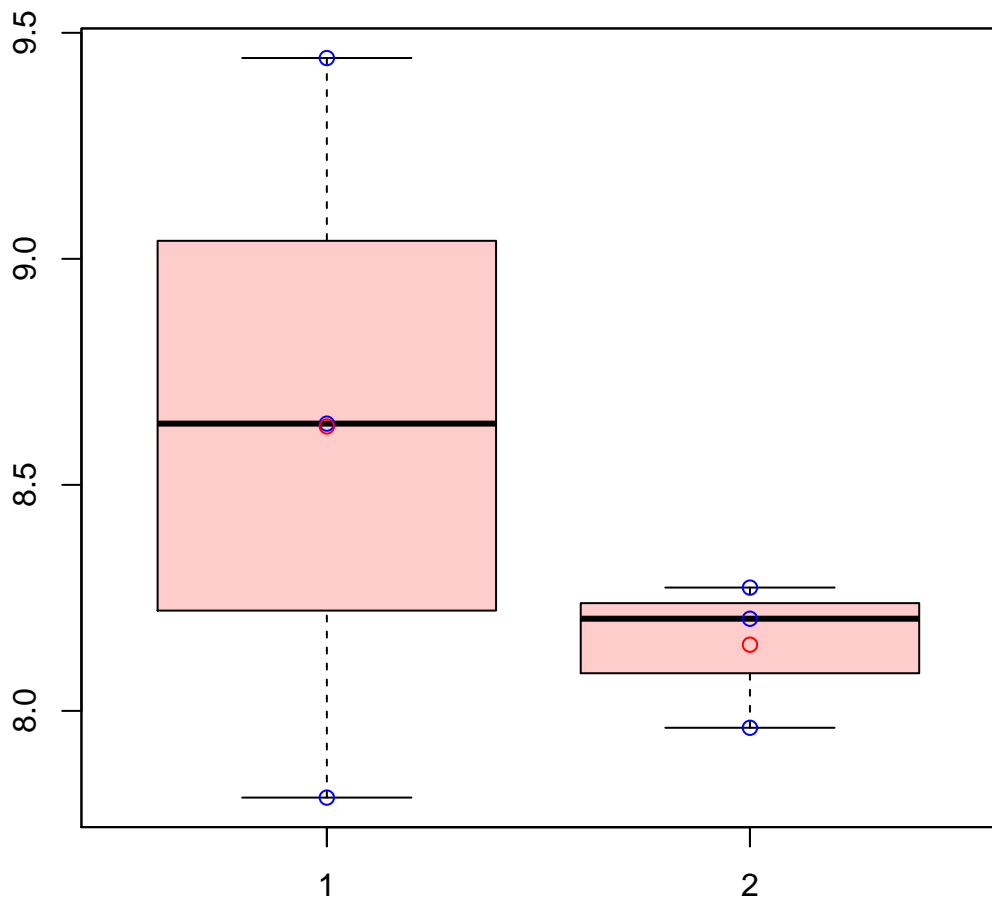

t-Test: p-value = 0.41

# CL227Contig12|CL227Contig12

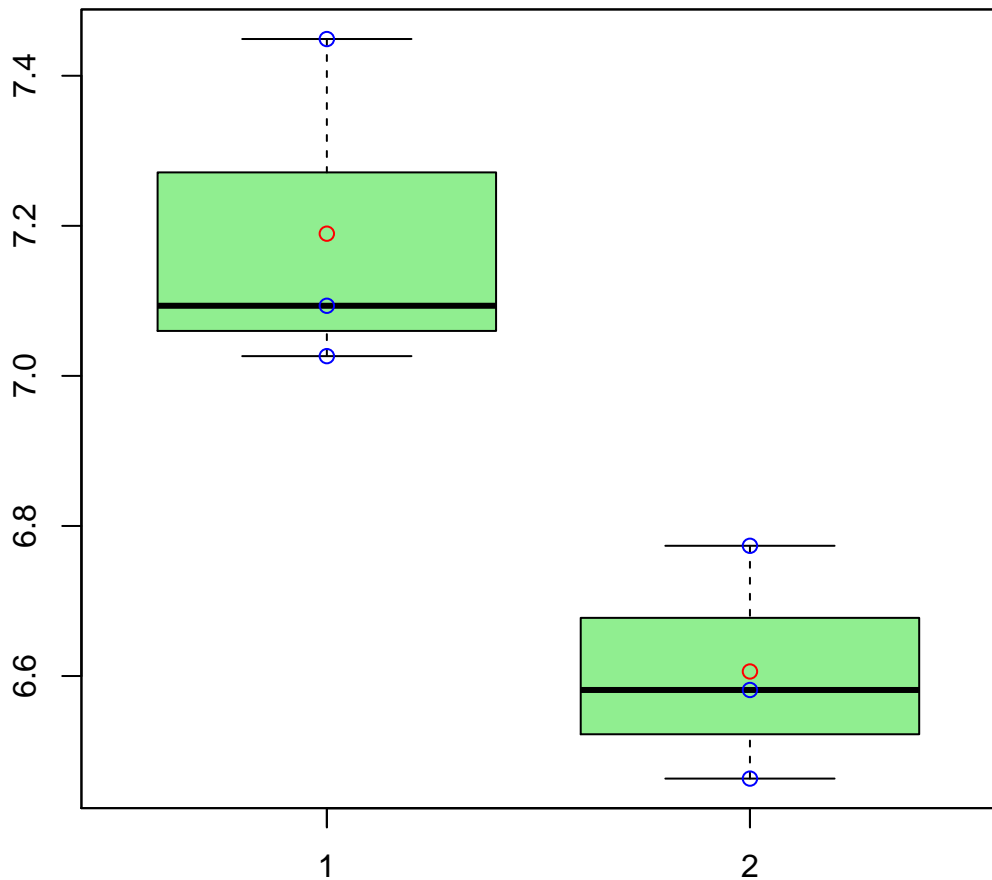

t-Test: p-value = 0.03

# CL2280Contig1|CL2280Contig1

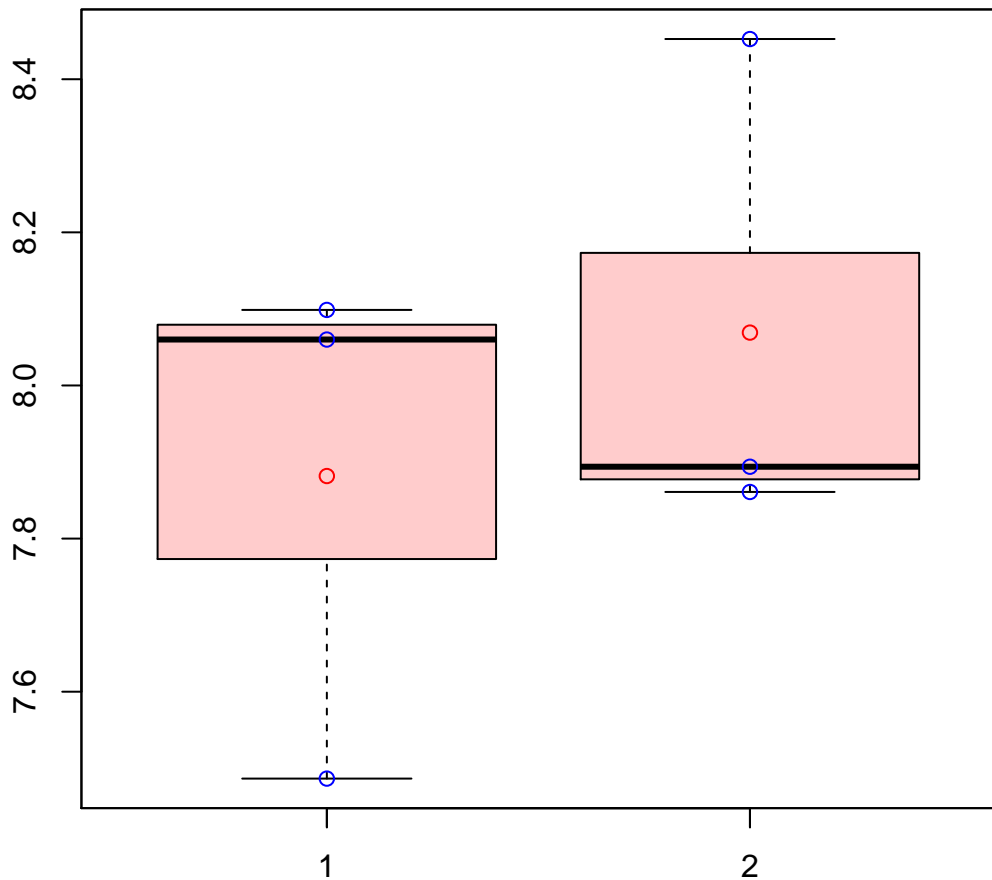

t-Test: p-value = 0.53



# CL2284Contig3|CL2284Contig3

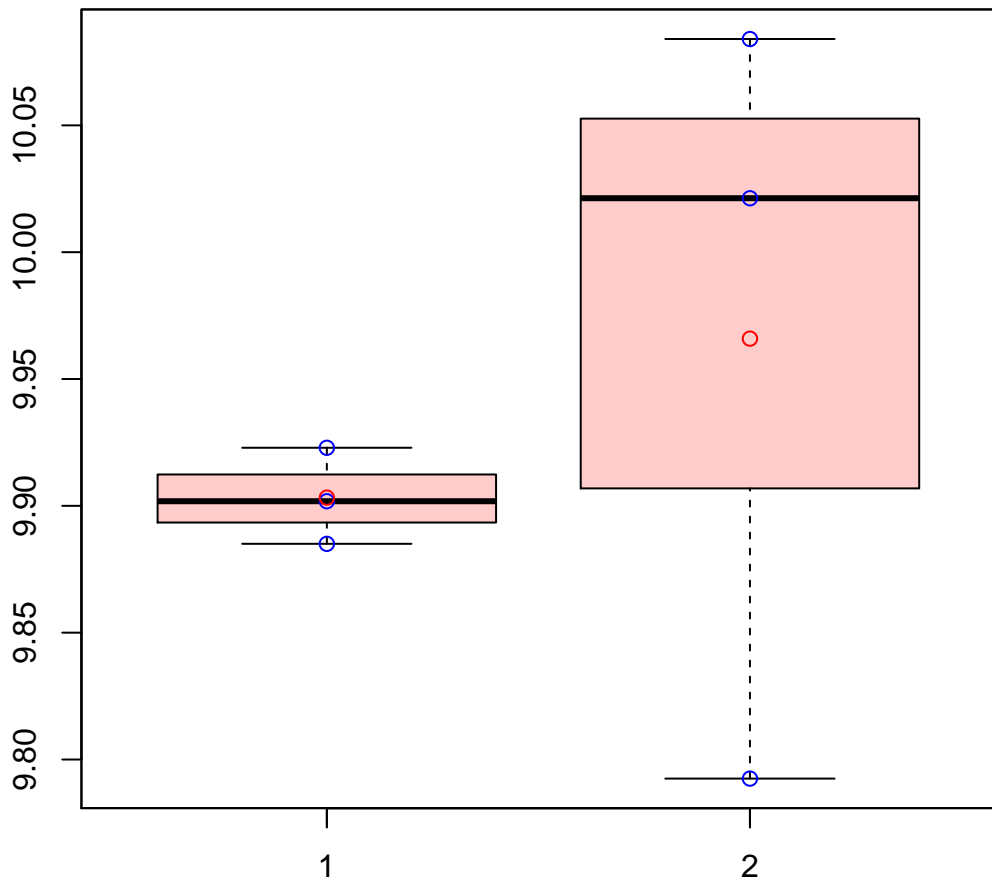

t-Test: p-value = 0.55

# CL22867Contig1|CL22867Contig1

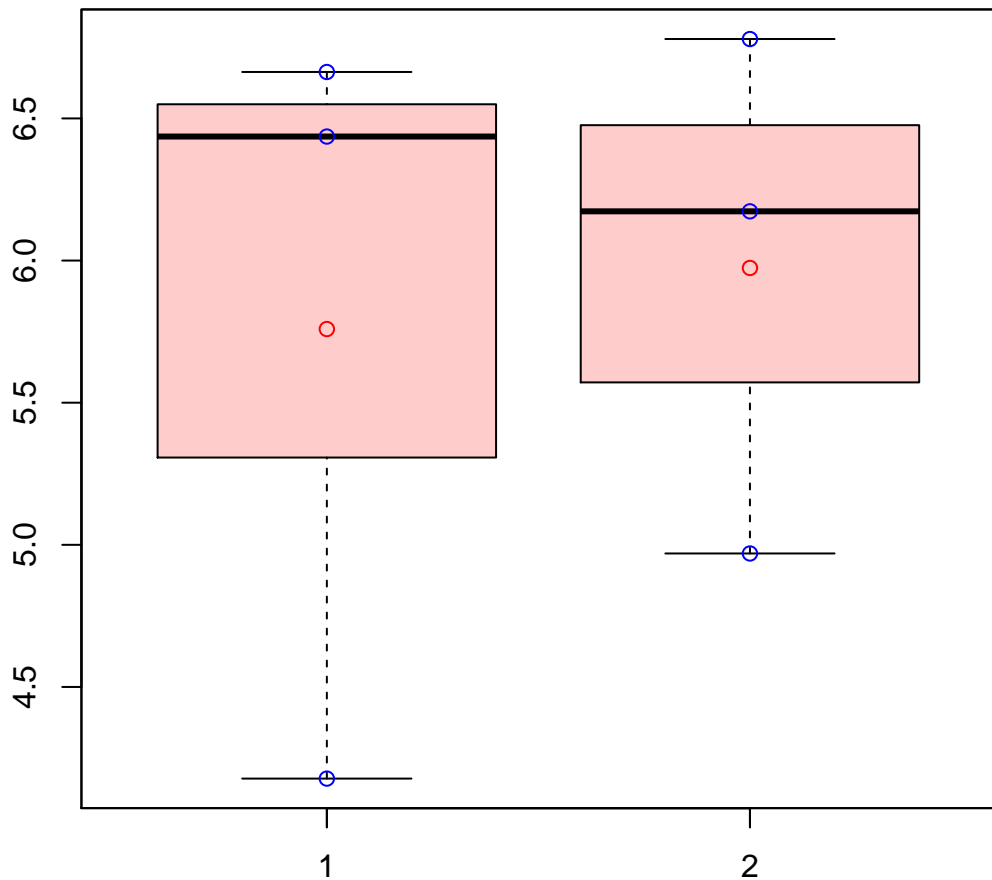

t-Test: p-value = 0.83

# CL2289Contig5|CL2289Contig5

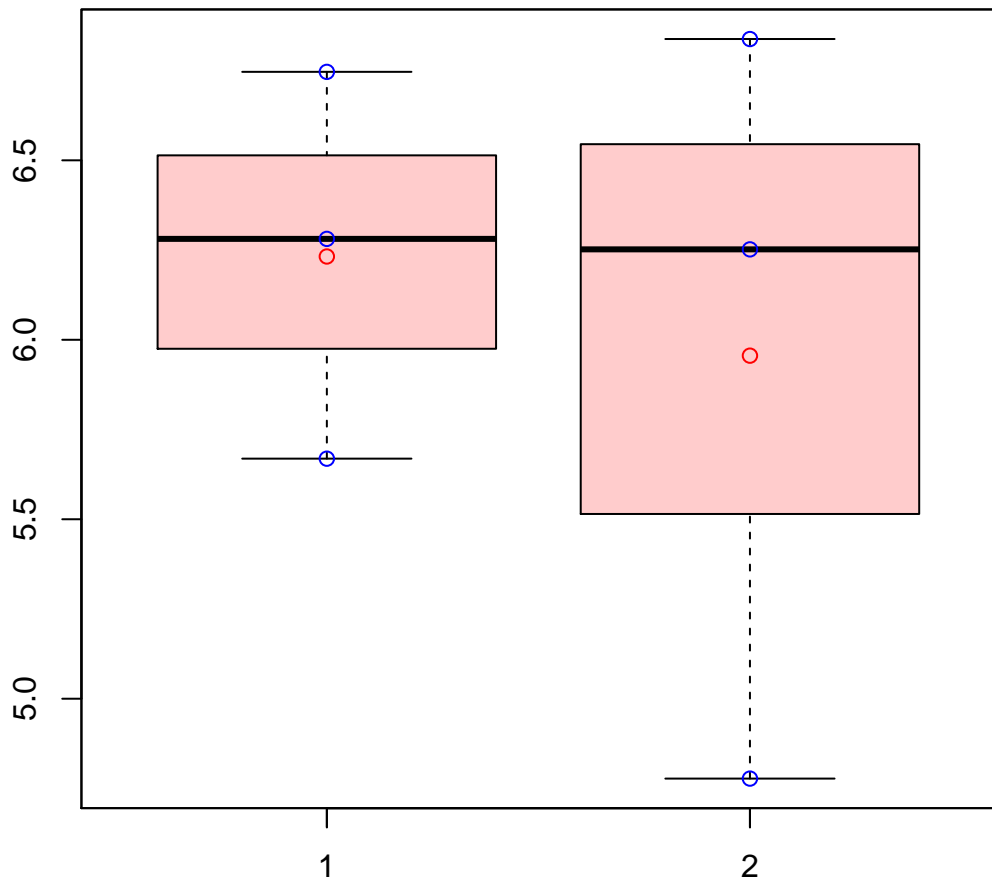

t-Test: p-value = 0.71

# CL22940Contig1|CL22940Contig1

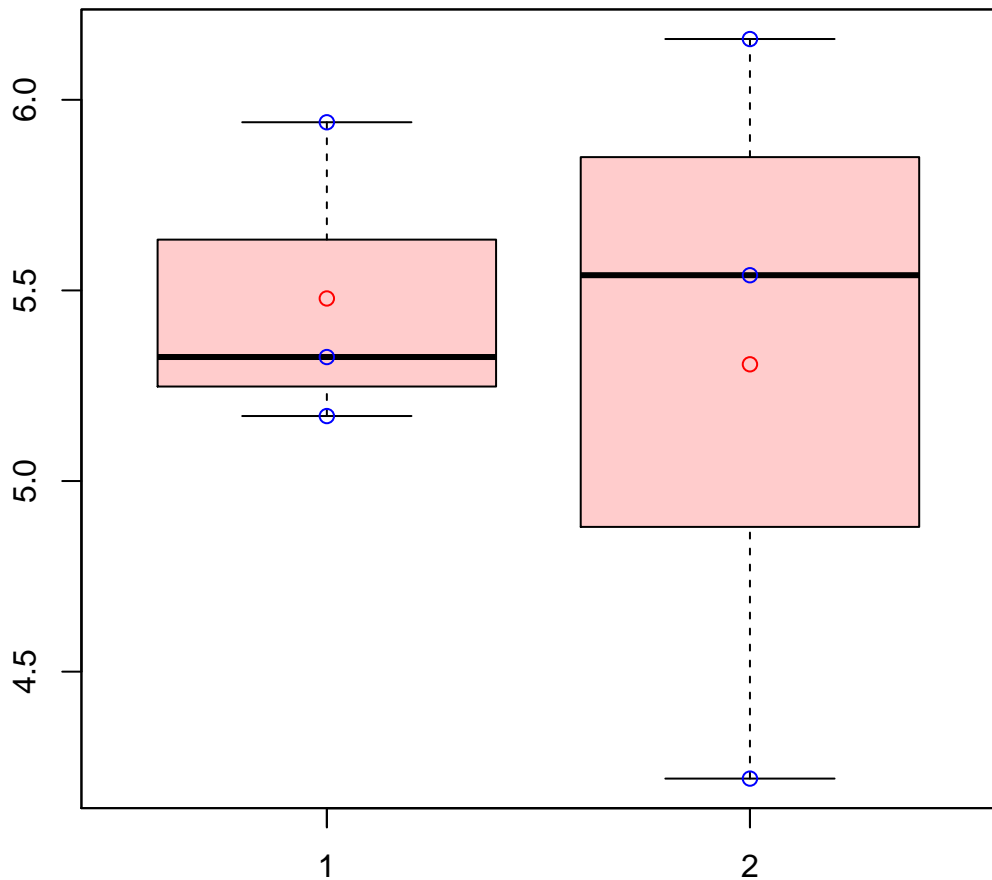

t-Test: p-value = 0.8

# CL23003Contig1|CL23003Contig1

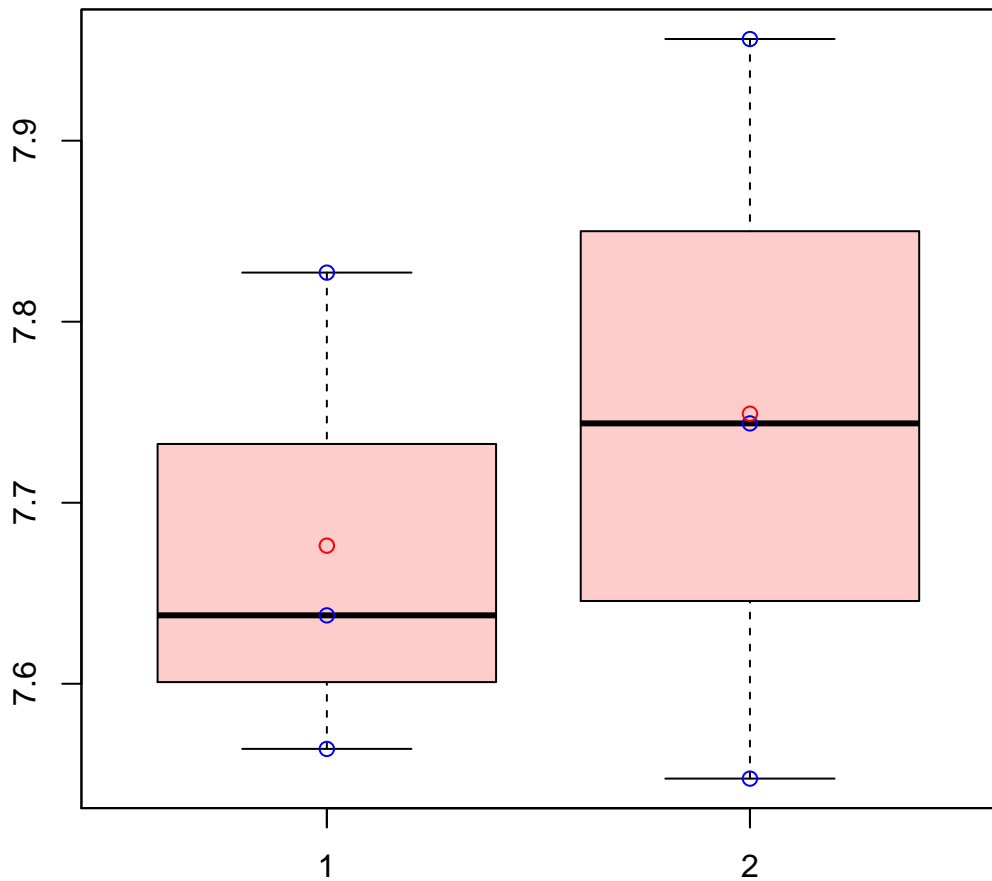

t-Test: p-value = 0.64

# CL2306Contig1|CL2306Contig1

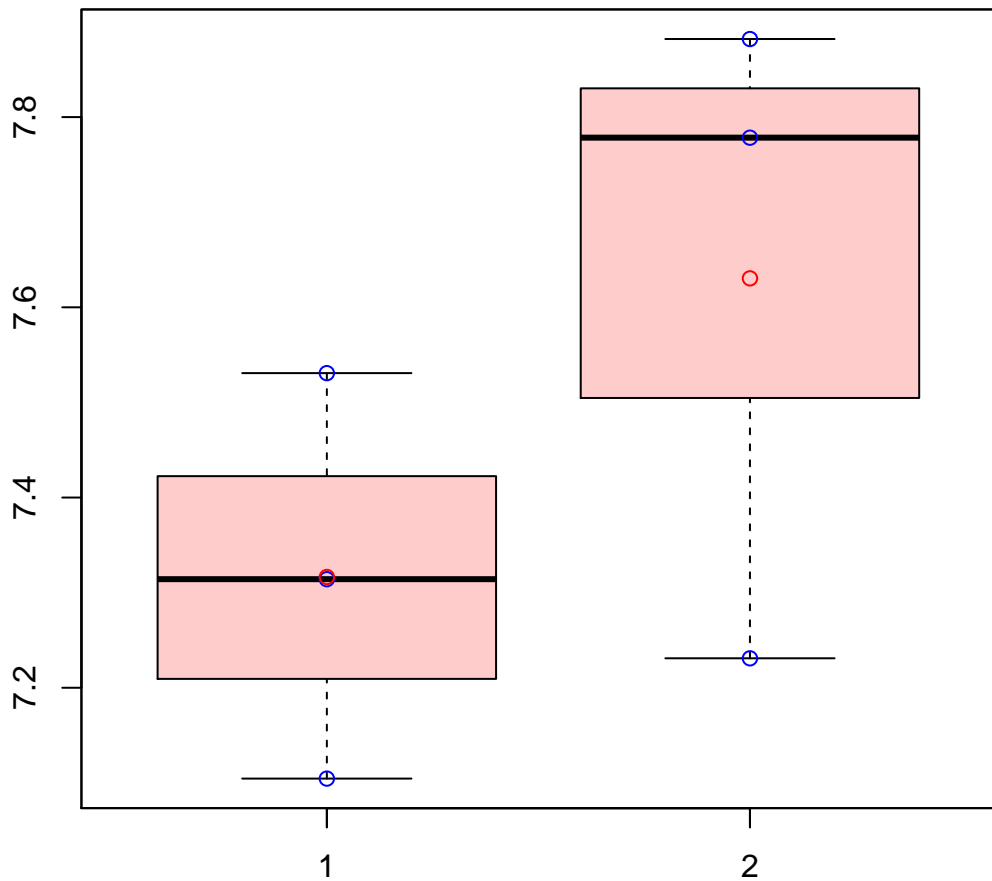

t-Test: p-value = 0.27

# CL230Contig4|CL230Contig4

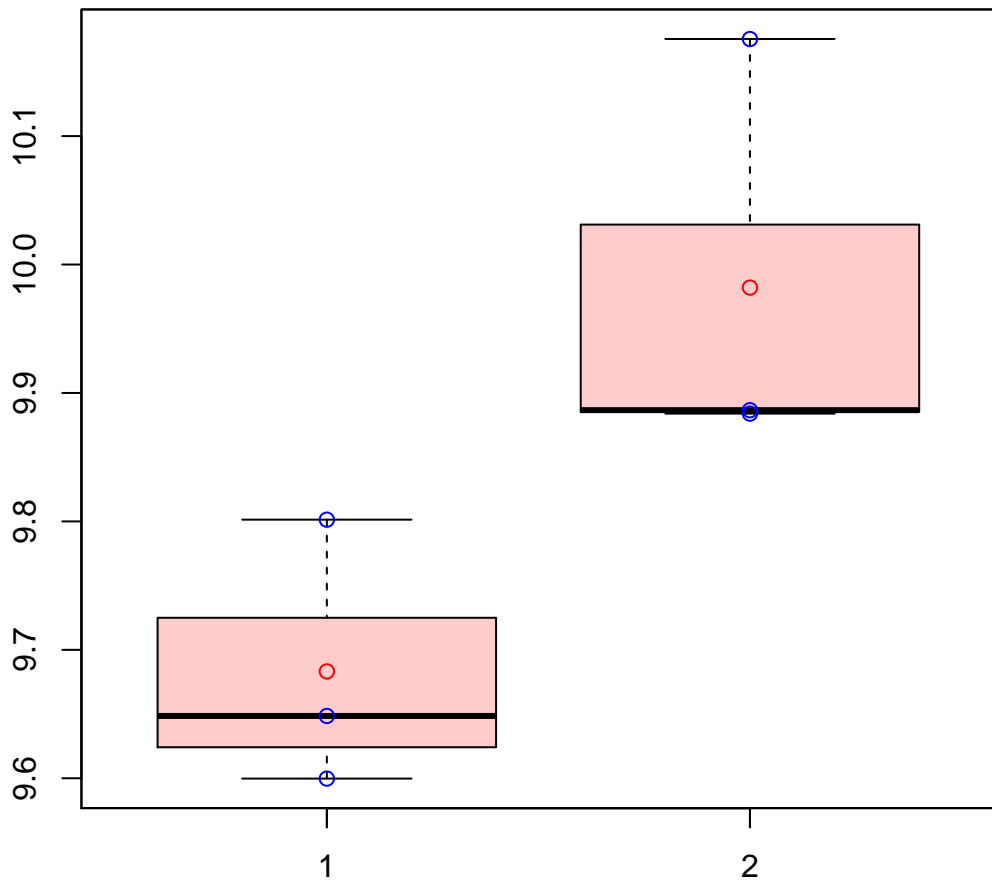

t-Test: p-value = 0.07

# CL2313Contig4|CL2313Contig4

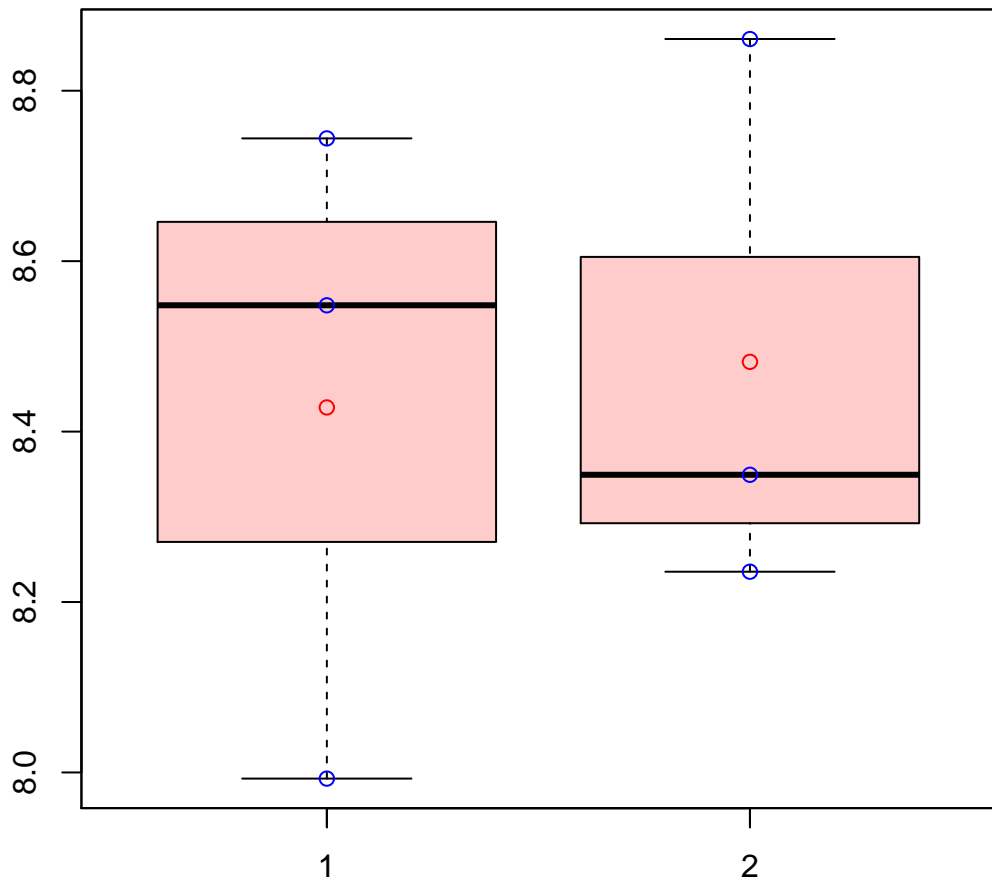

t-Test: p-value = 0.87



# CL2316Contig1|CL2316Contig1

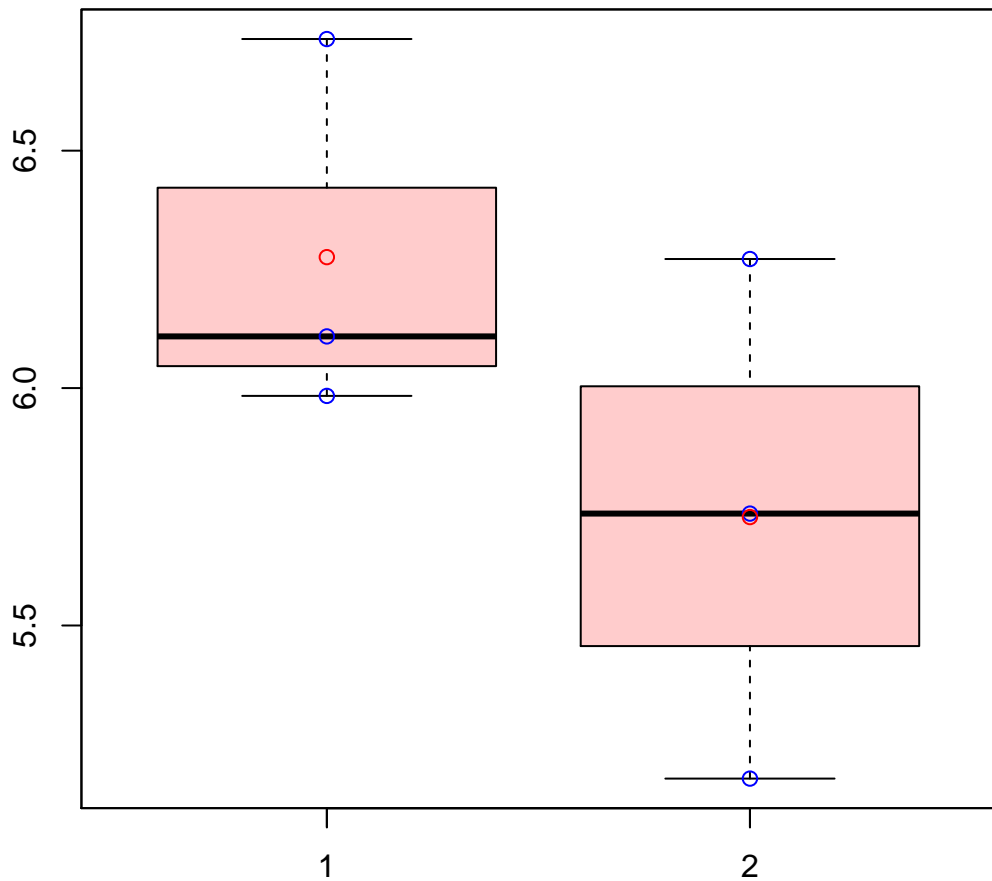

t-Test: p-value = 0.24

# CL2322Contig2|CL2322Contig2

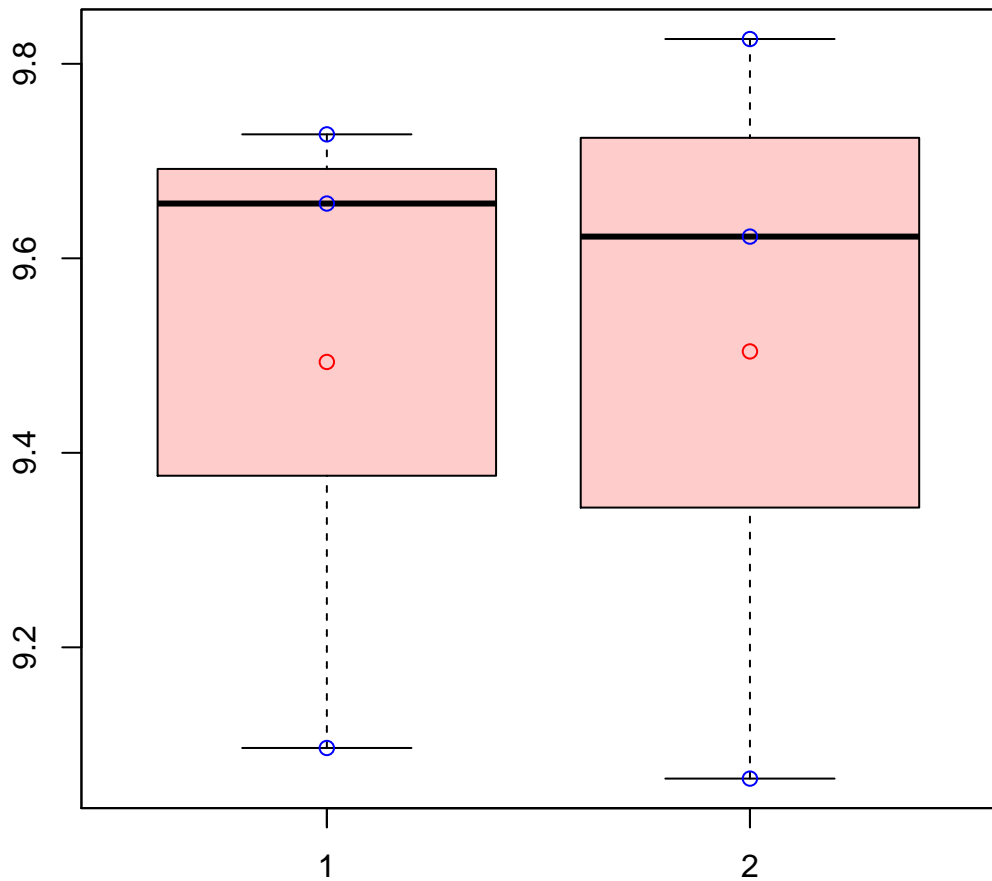

t-Test: p-value = 0.97

# CL2331Contig2|CL2331Contig2

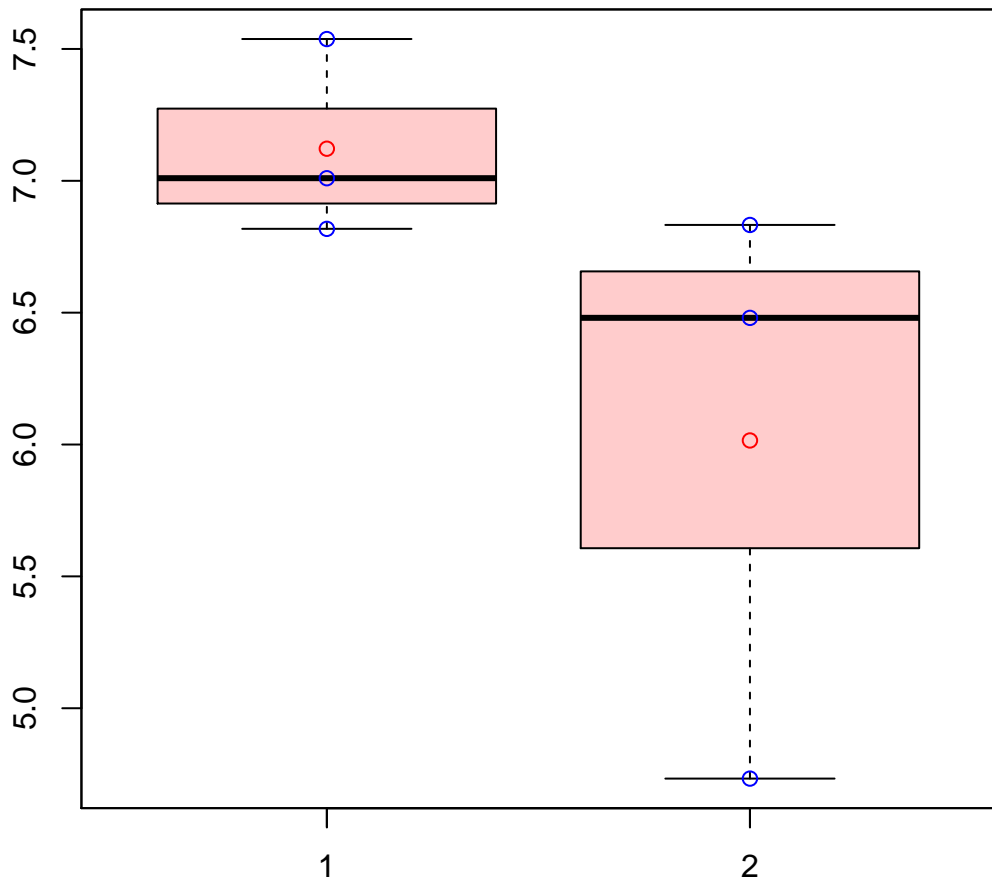

t-Test: p-value = 0.22

# CL2332Contig2|CL2332Contig2

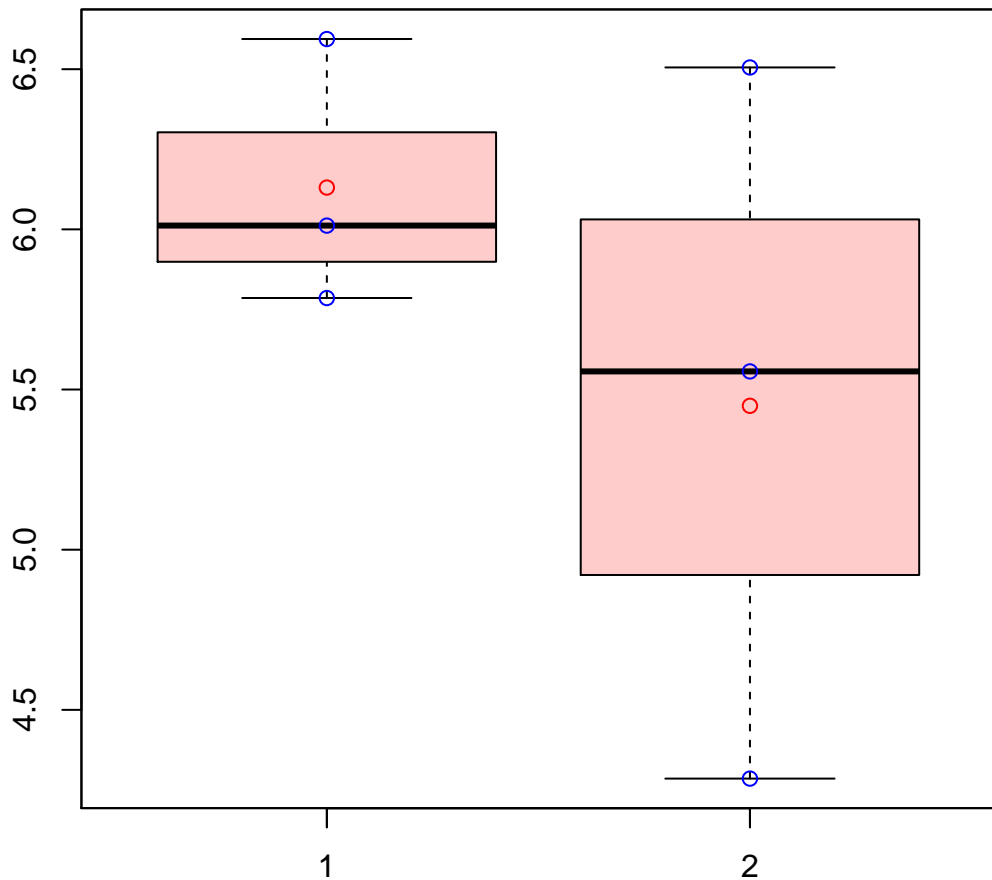

t-Test: p-value = 0.41

# CL2336Contig7|CL2336Contig7

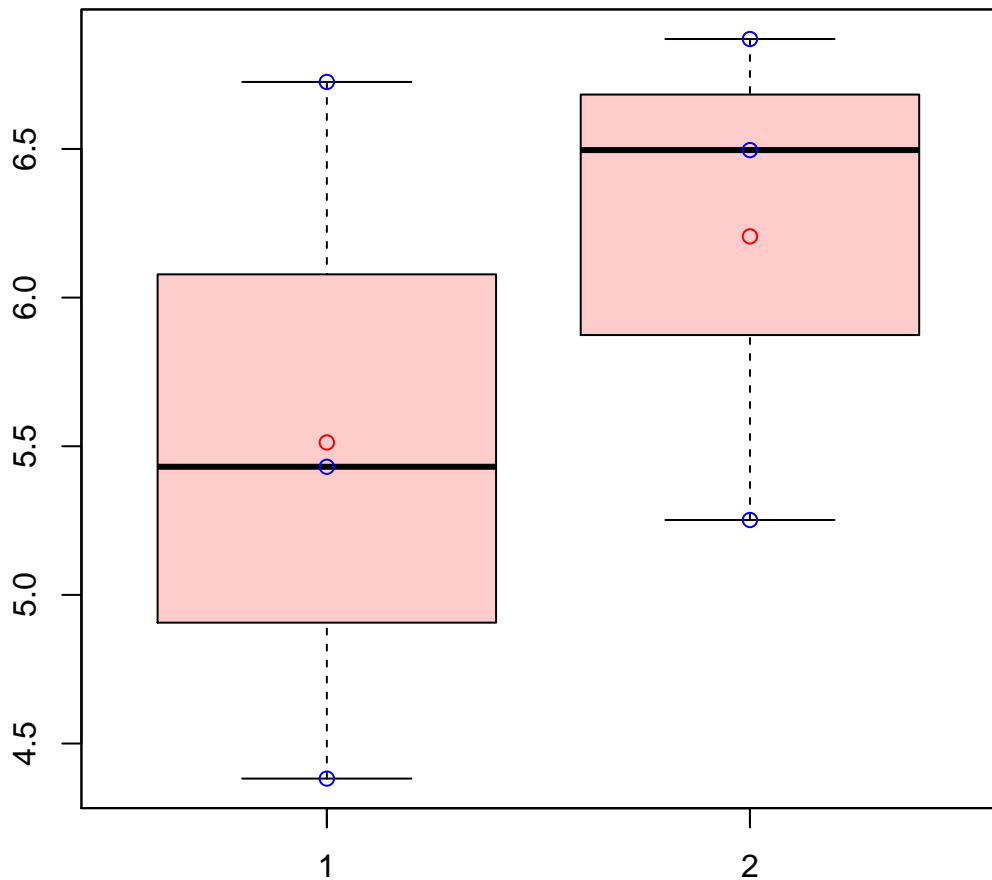

t-Test: p-value = 0.46

# CL233Contig18|CL233Contig18

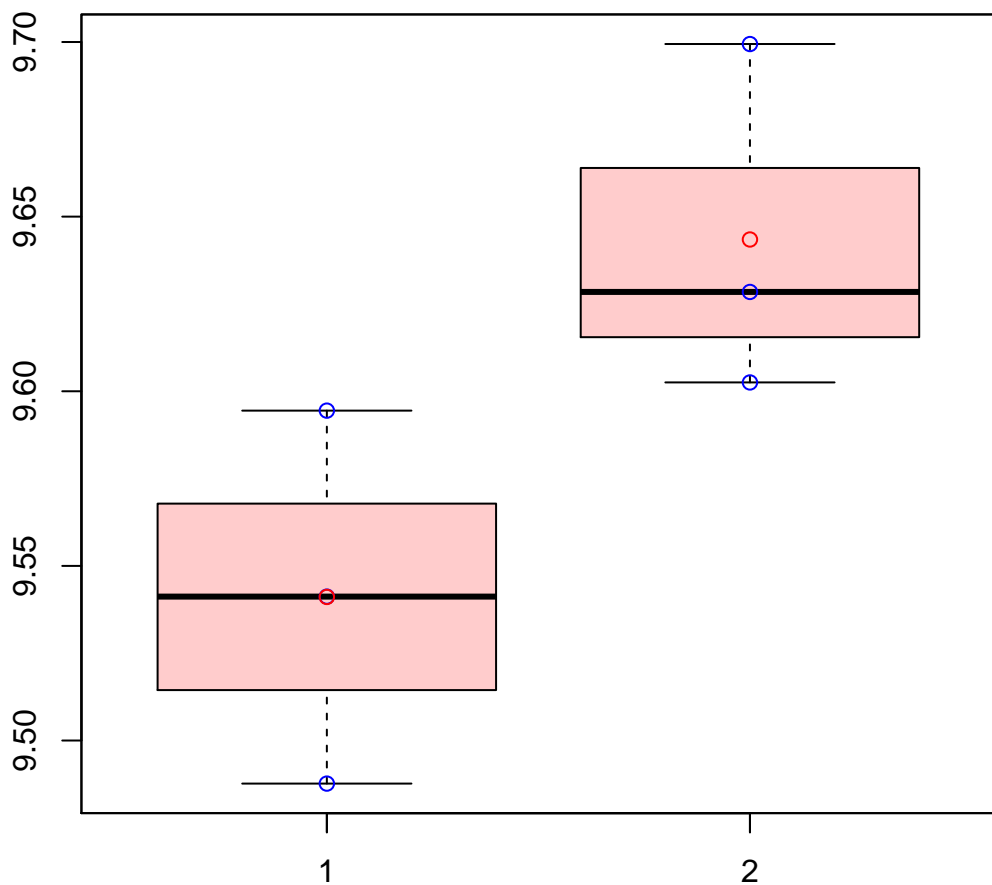

t-Test: p-value = 0.07

# CL233Contig4|CL233Contig4

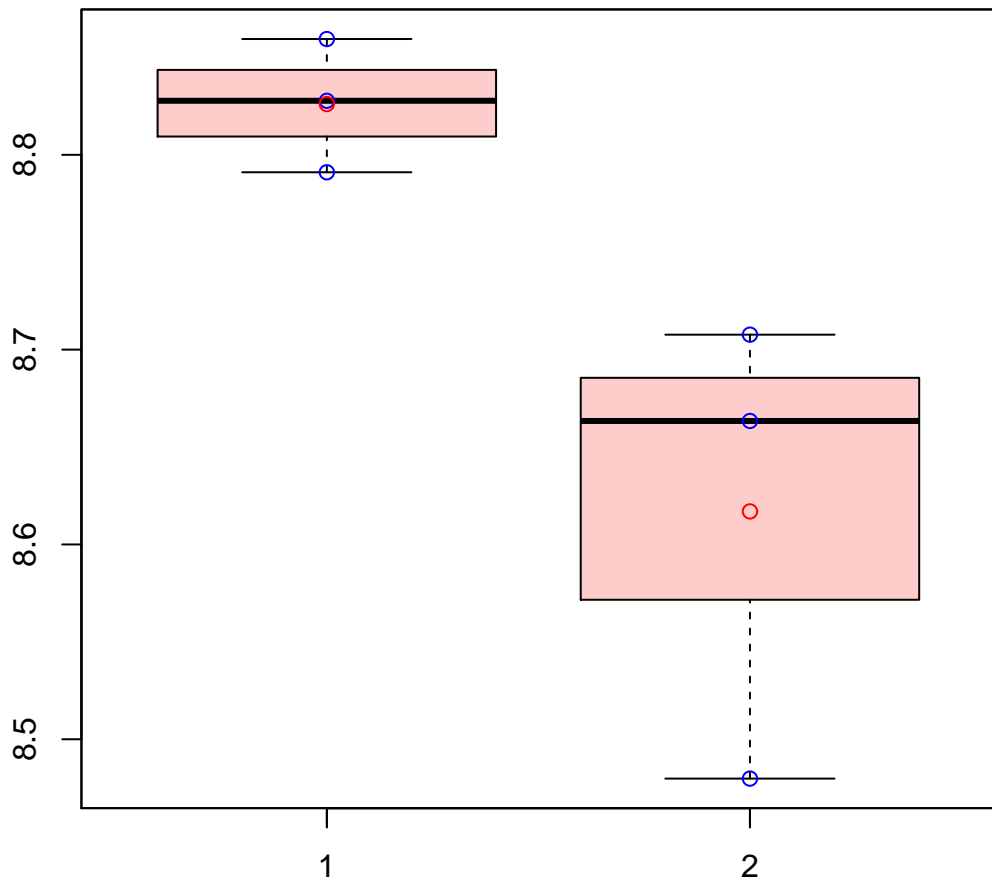

t-Test: p-value = 0.09

# CL233Contig7|CL233Contig7

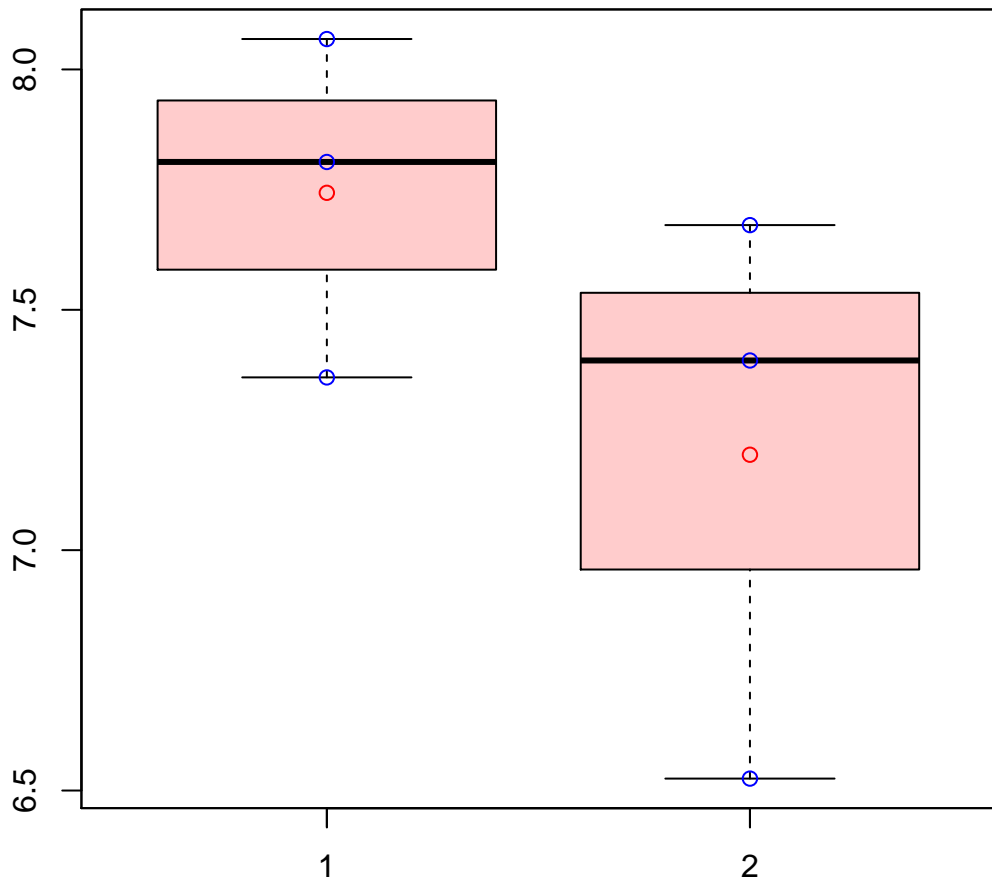

t-Test: p-value = 0.26



# CL2343Contig1|CL2343Contig1

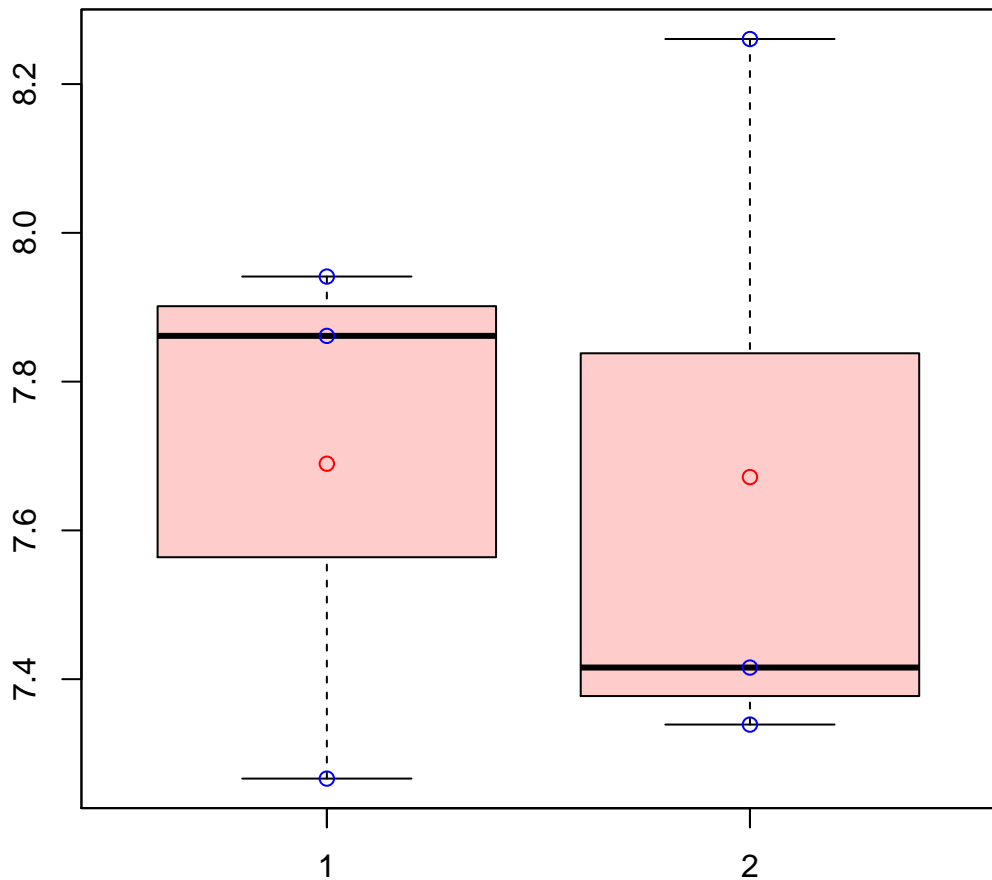

t-Test: p-value = 0.96

# CL2349Contig3|CL2349Contig3

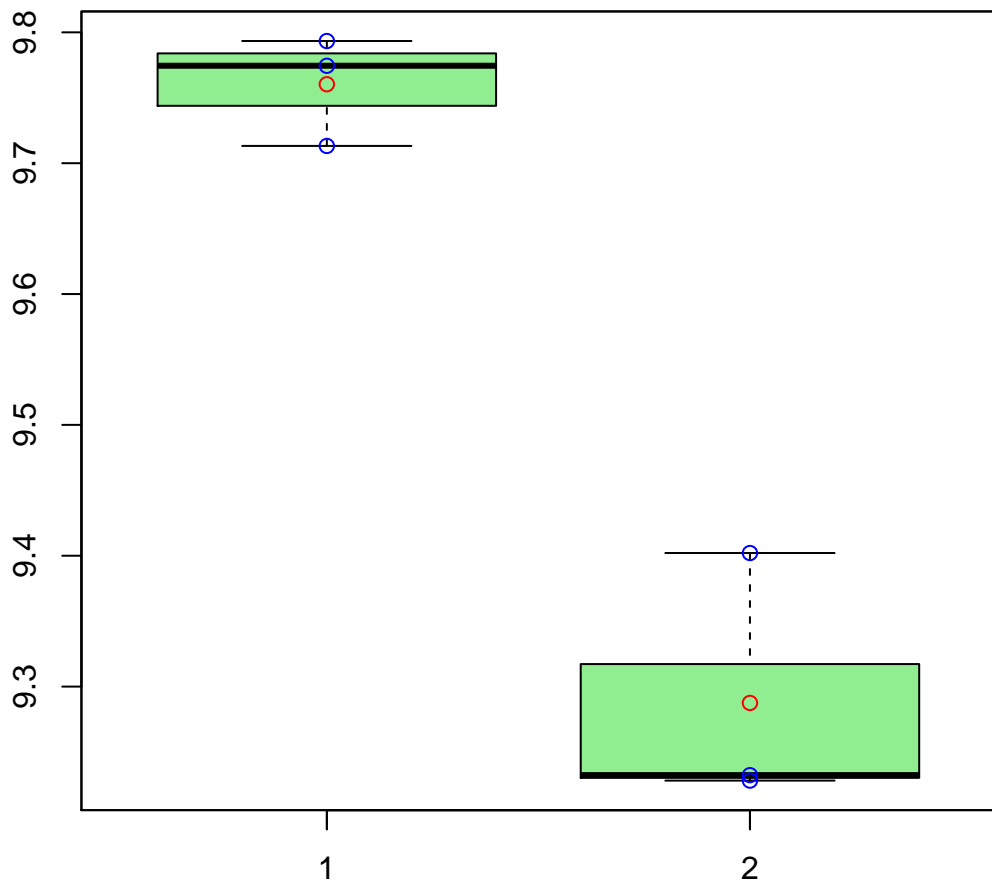

t-Test: p-value = 0.01

# CL234Contig1|CL234Contig1

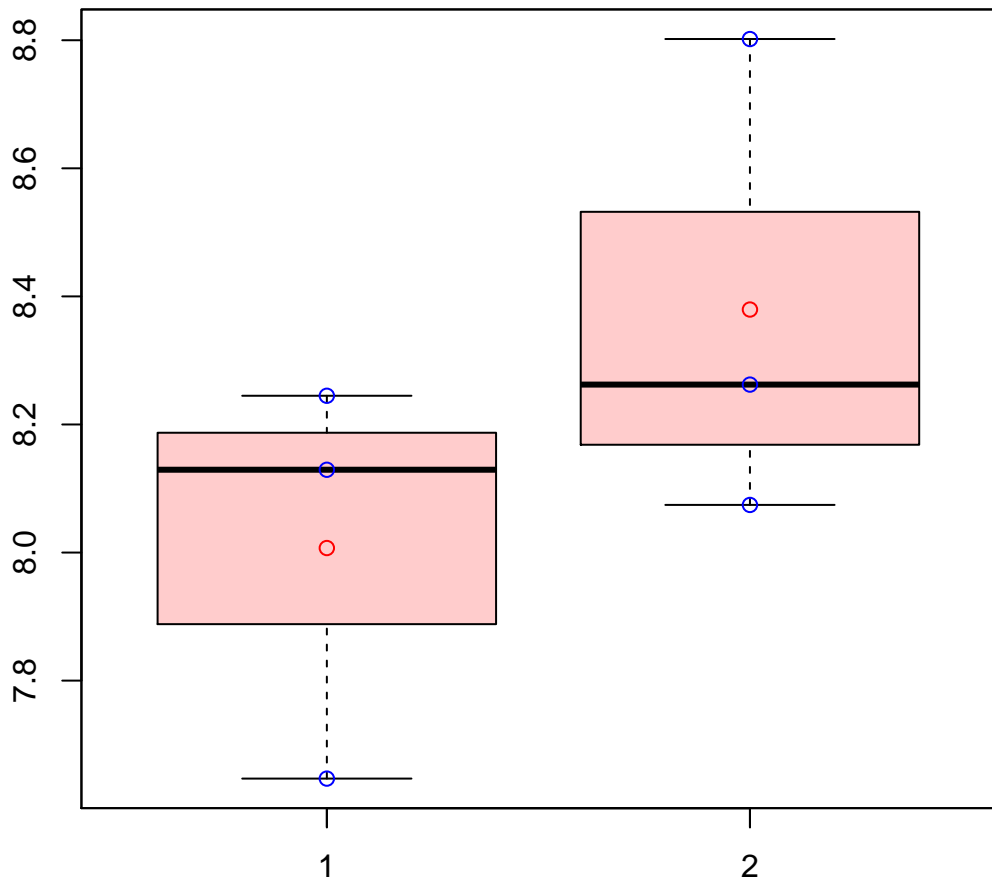

t-Test: p-value = 0.26

# CL2351Contig4|CL2351Contig4

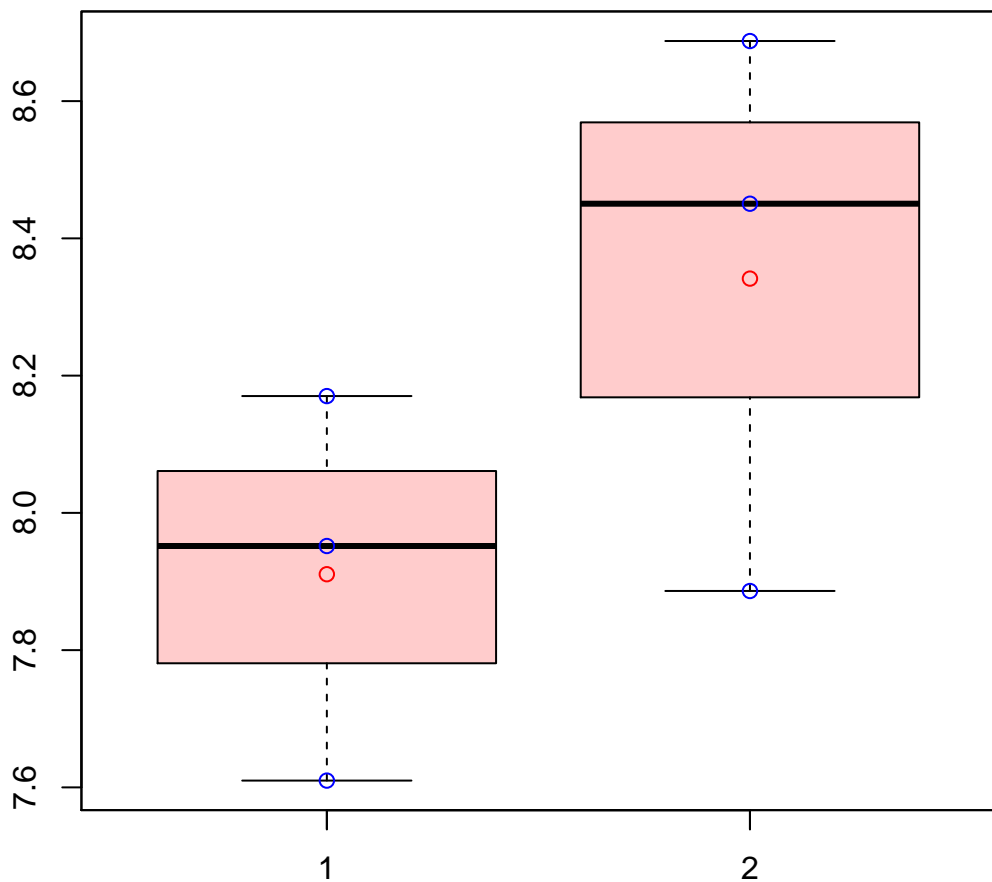

t-Test: p-value = 0.22

# CL2353Contig2|CL2353Contig2

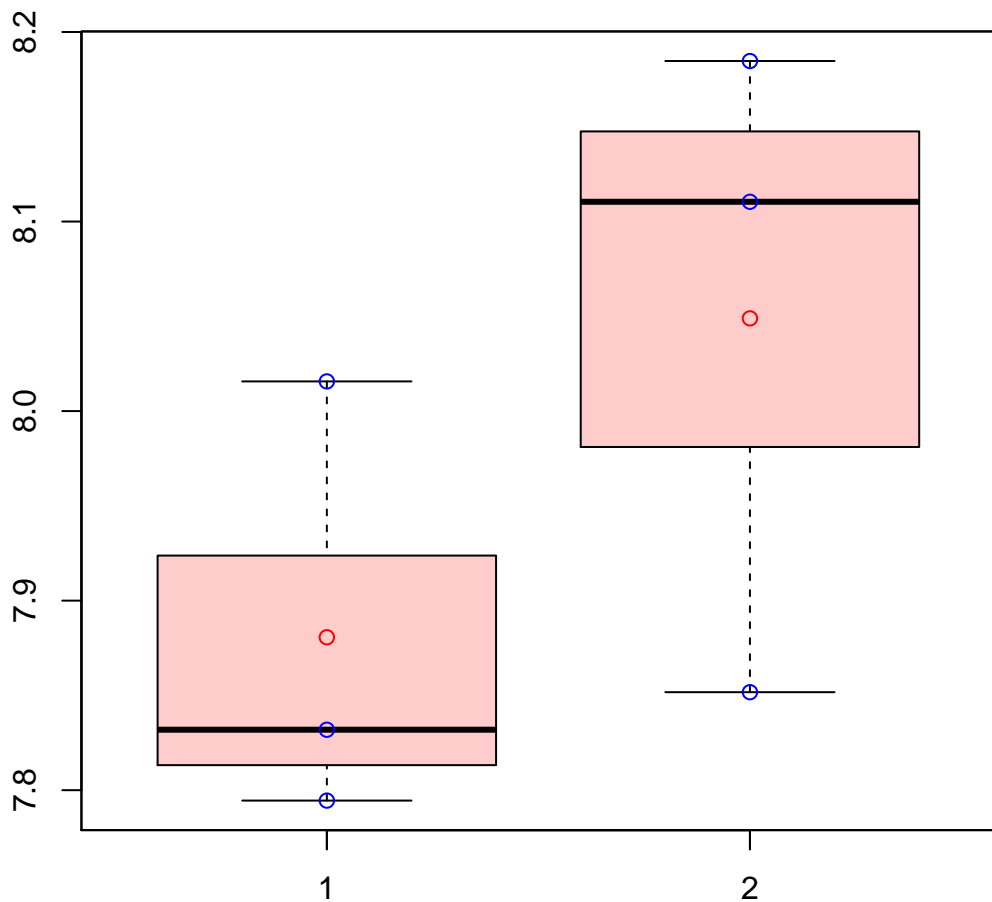

t-Test: p-value = 0.25

# CL2357Contig8|CL2357Contig8

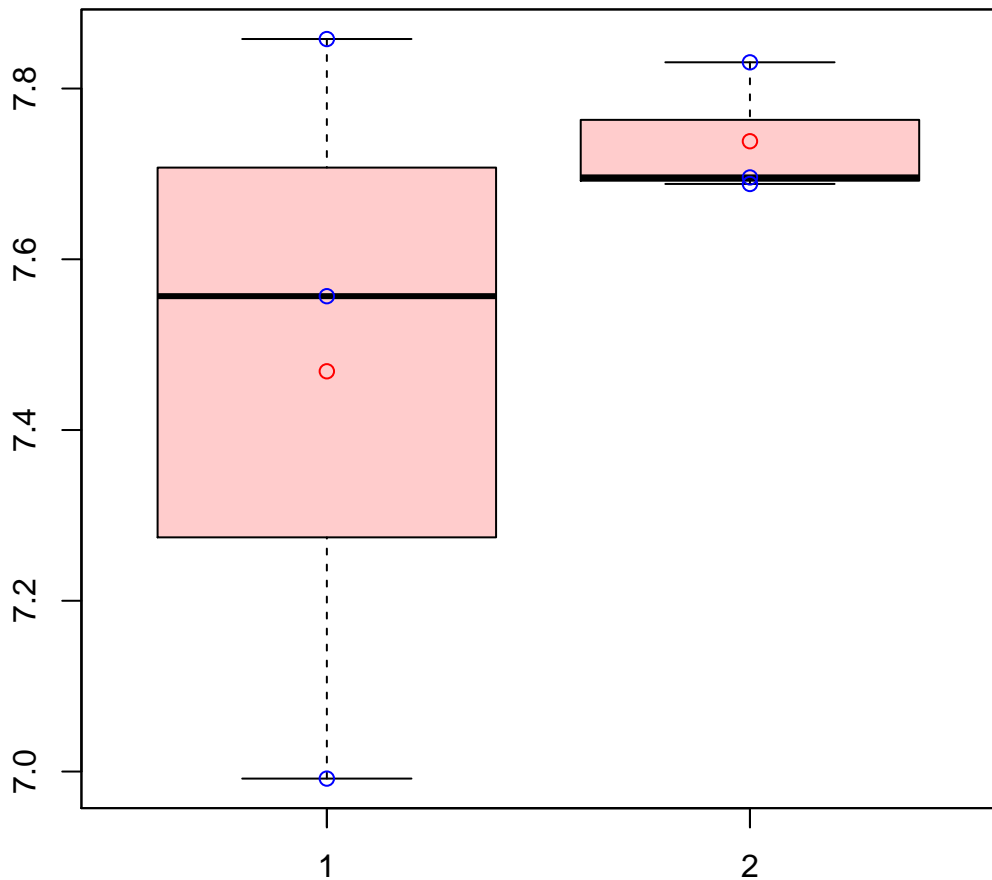

t-Test: p-value = 0.4

# CL23599Contig1|CL23599Contig1

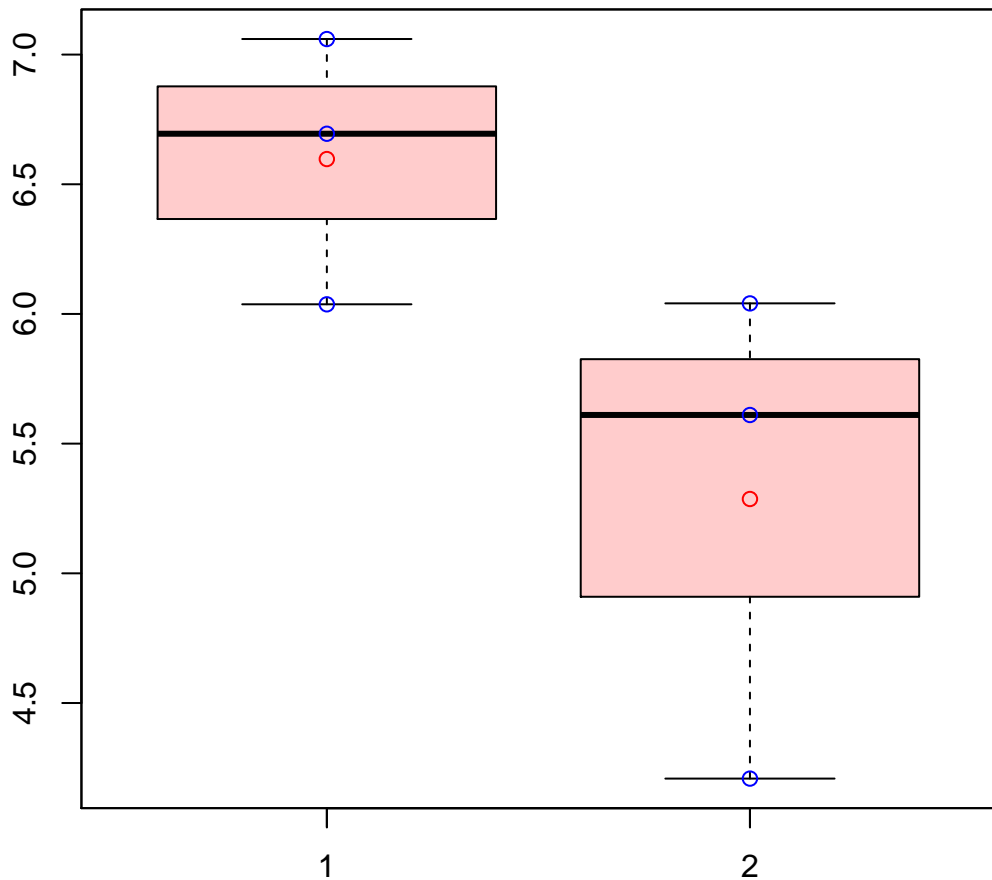

t-Test: p-value = 0.13

# CL2360Contig4|CL2360Contig4

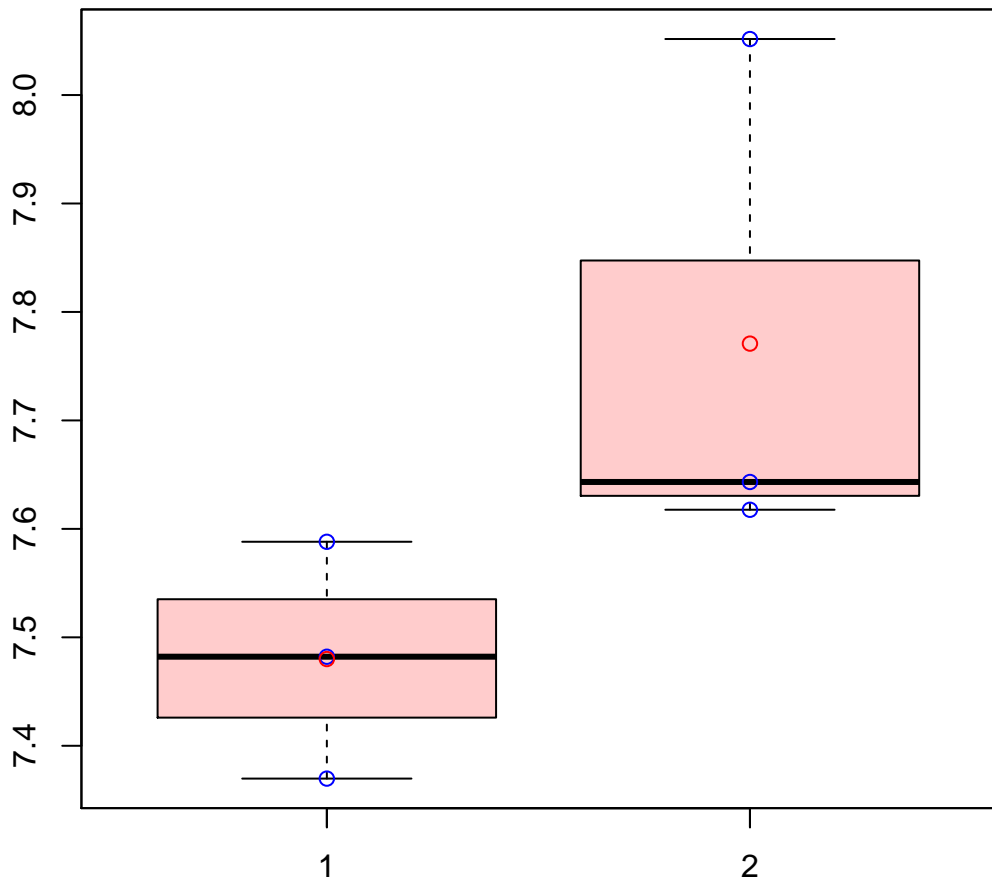

t-Test: p-value = 0.16



# CL2363Contig3|CL2363Contig3

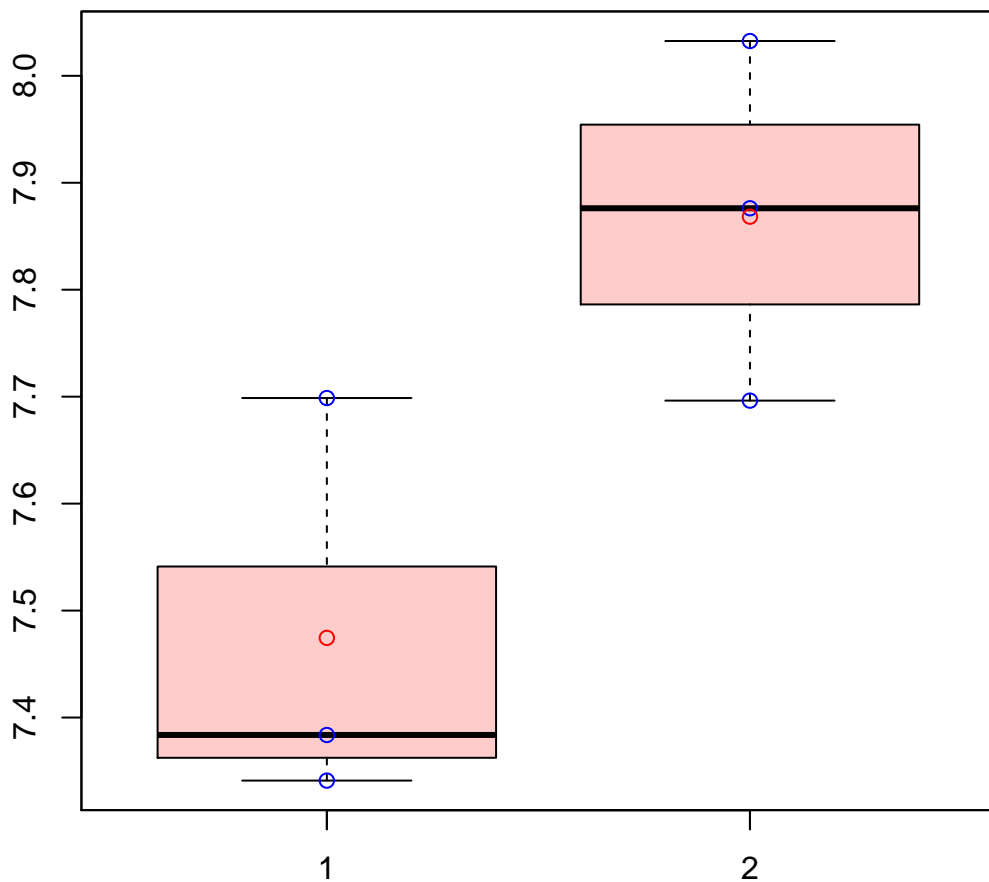

t-Test: p-value = 0.06

# CL236Contig5|CL236Contig5

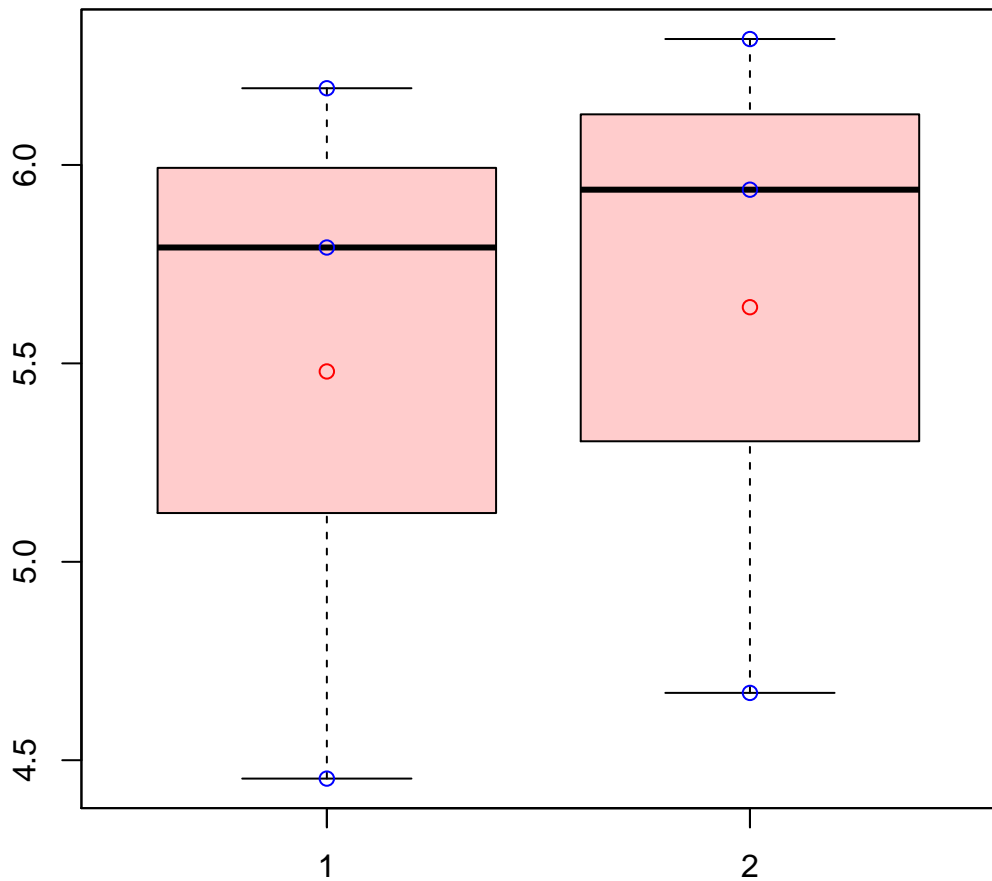

t-Test: p-value = 0.83

# CL2379Contig3|CL2379Contig3

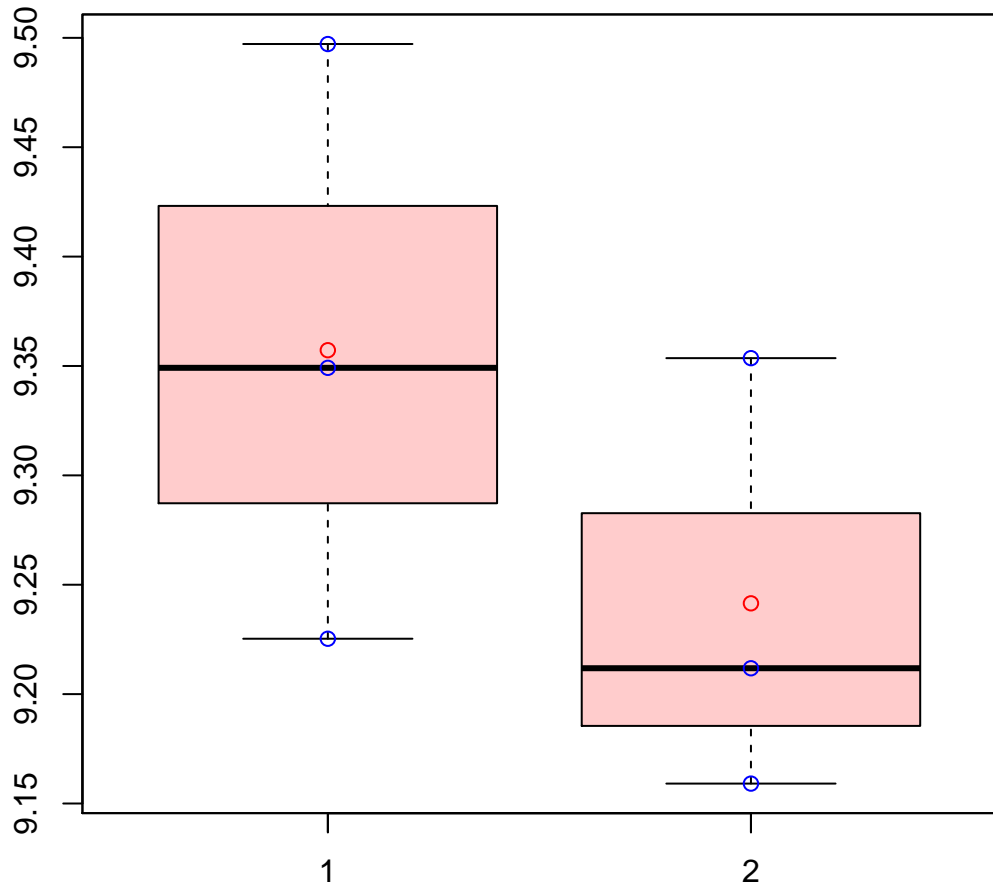

t-Test: p-value = 0.31

# CL2382Contig6|CL2382Contig6

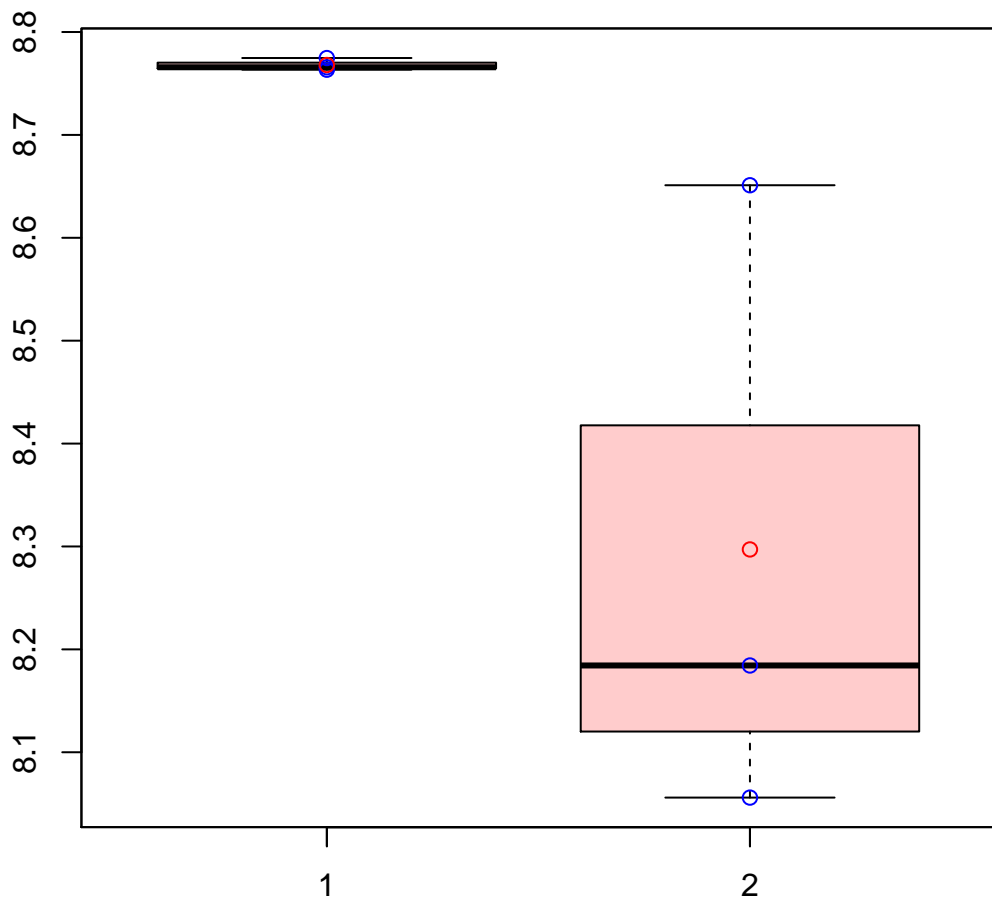

t-Test: p-value = 0.12

# CL2382Contig8|CL2382Contig8

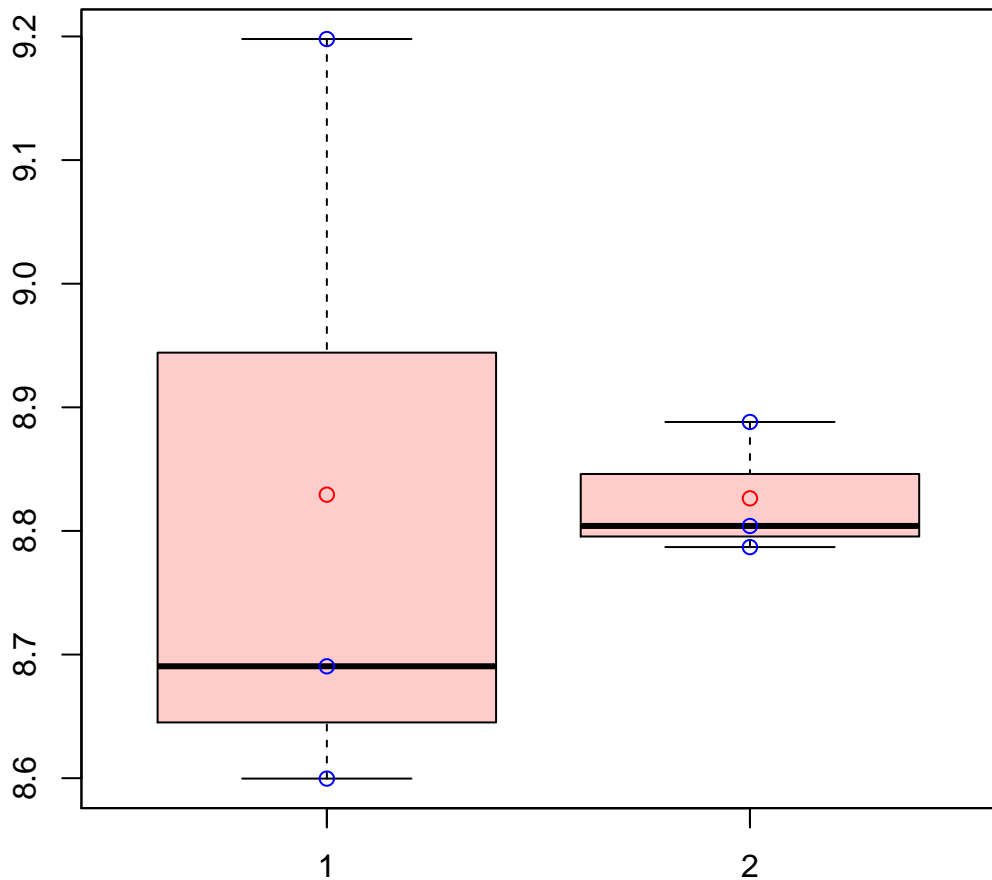

t-Test: p-value = 0.99

# CL2382Contig9|CL2382Contig9

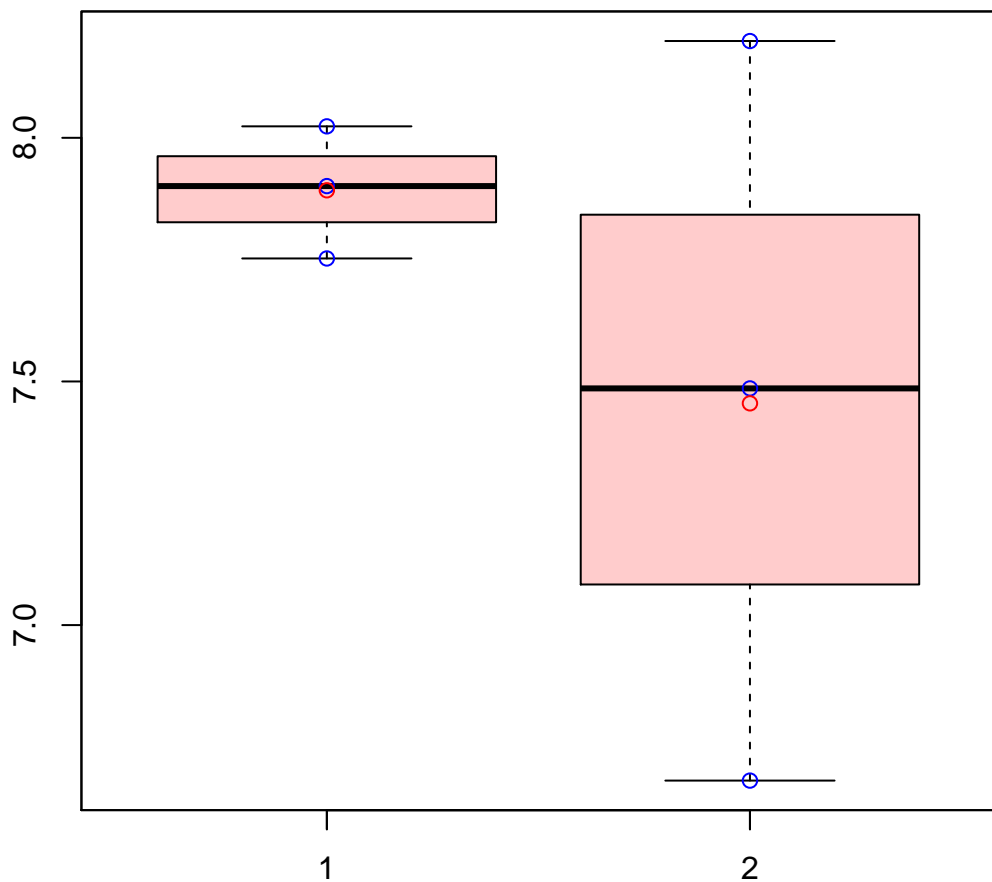

t-Test: p-value = 0.42

# CL2394Contig2|CL2394Contig2

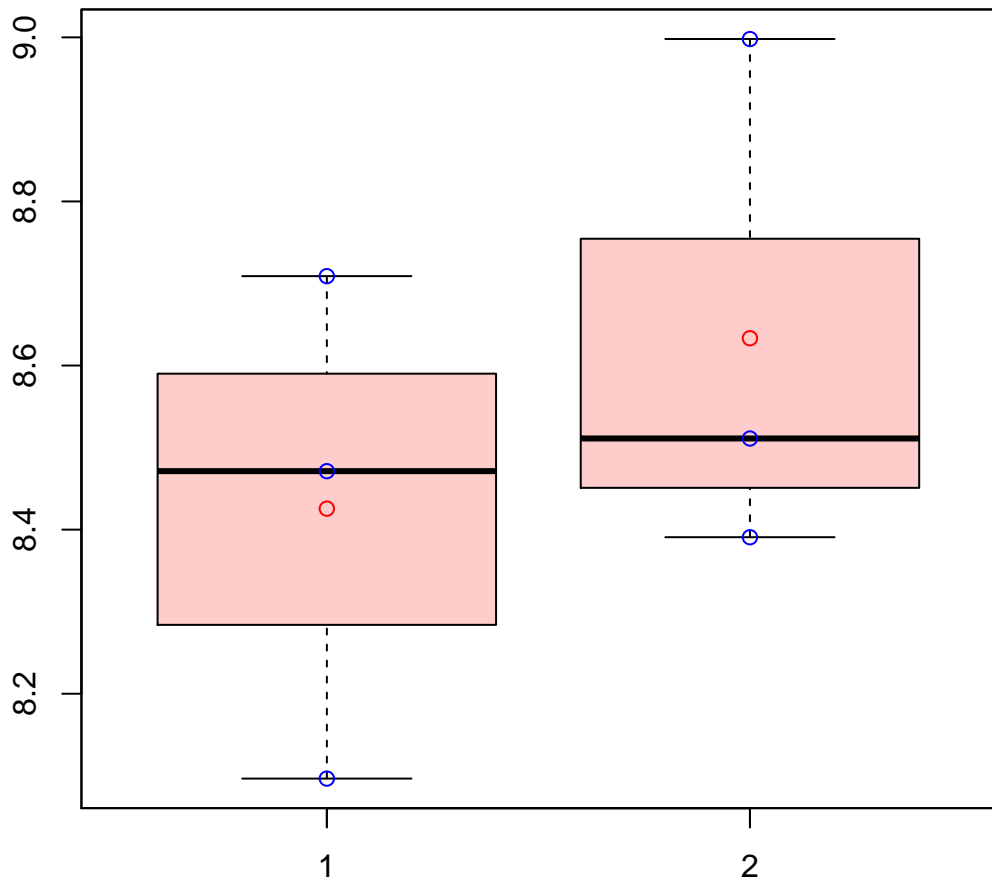

t-Test: p-value = 0.47

# CL2396Contig1|CL2396Contig1

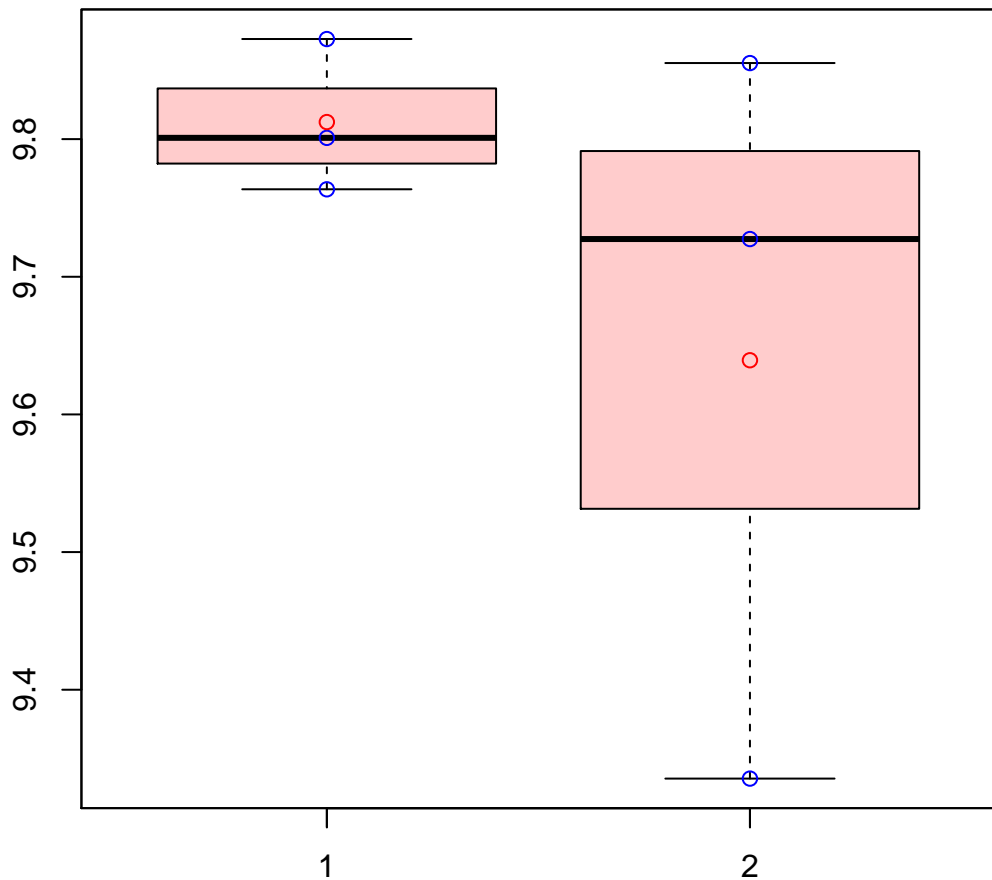

t-Test: p-value = 0.38



# CL2396Contig3|CL2396Contig3

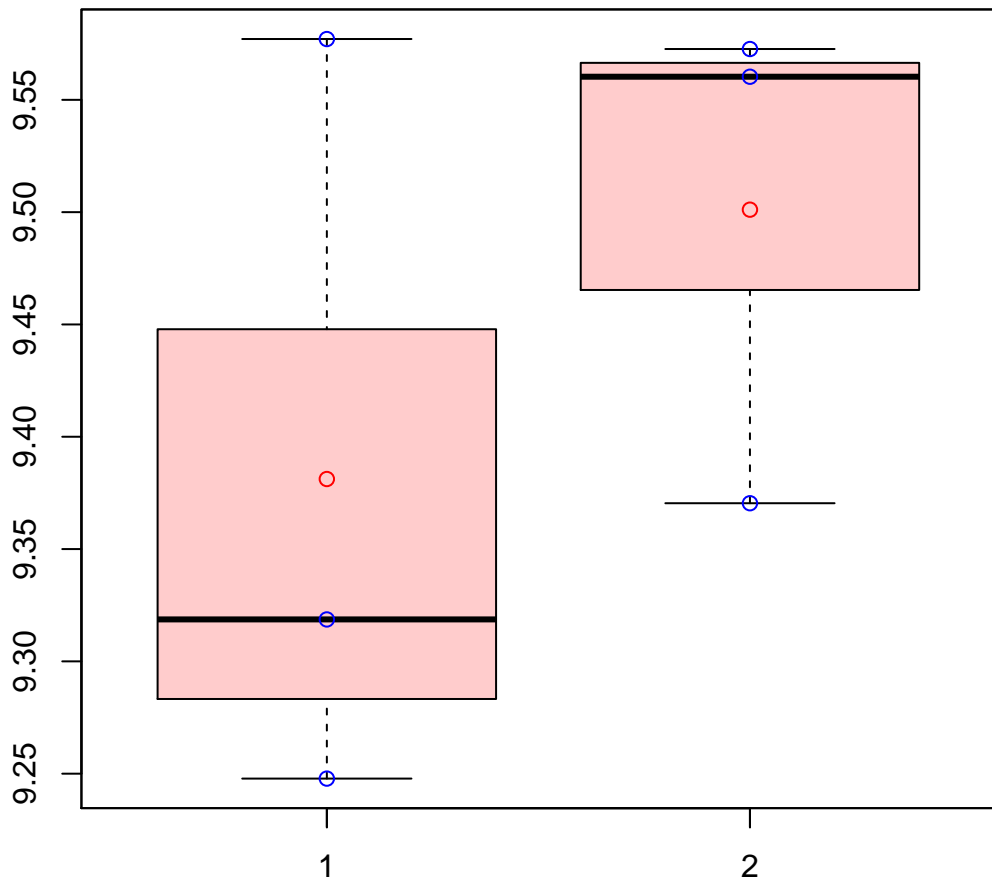

t-Test: p-value = 0.38

# CL2396Contig6|CL2396Contig6

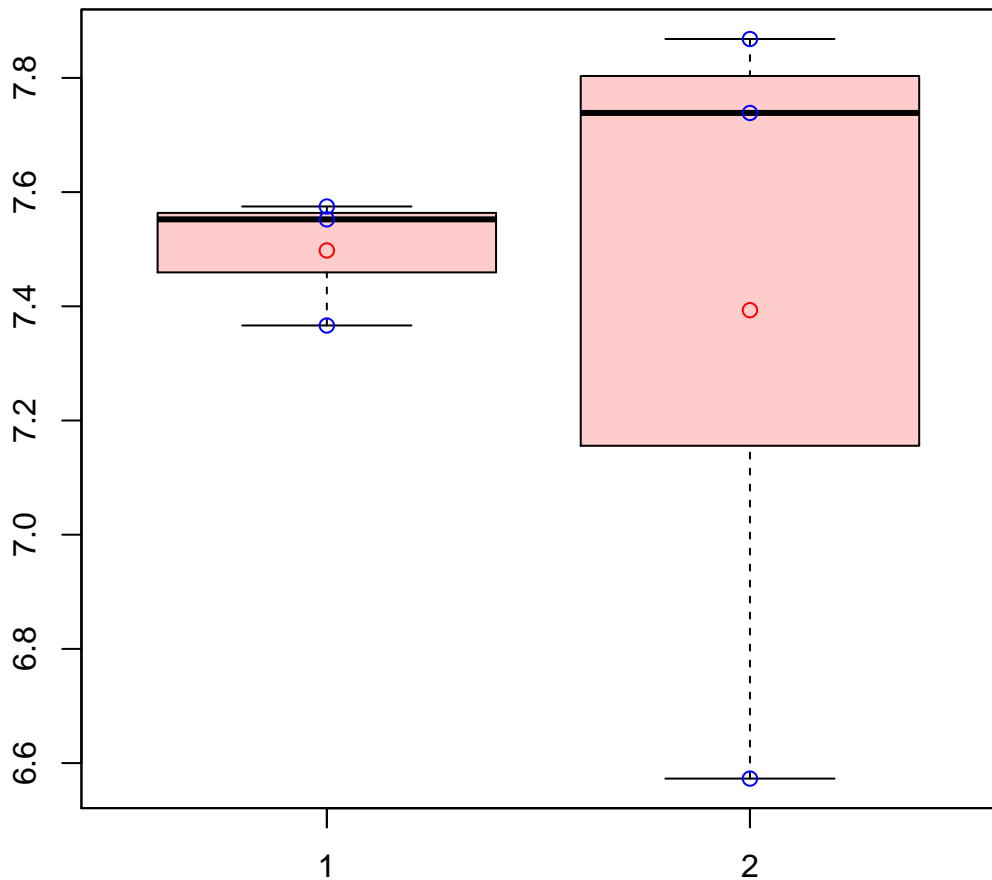

t-Test: p-value = 0.82

# CL2396Contig9|CL2396Contig9

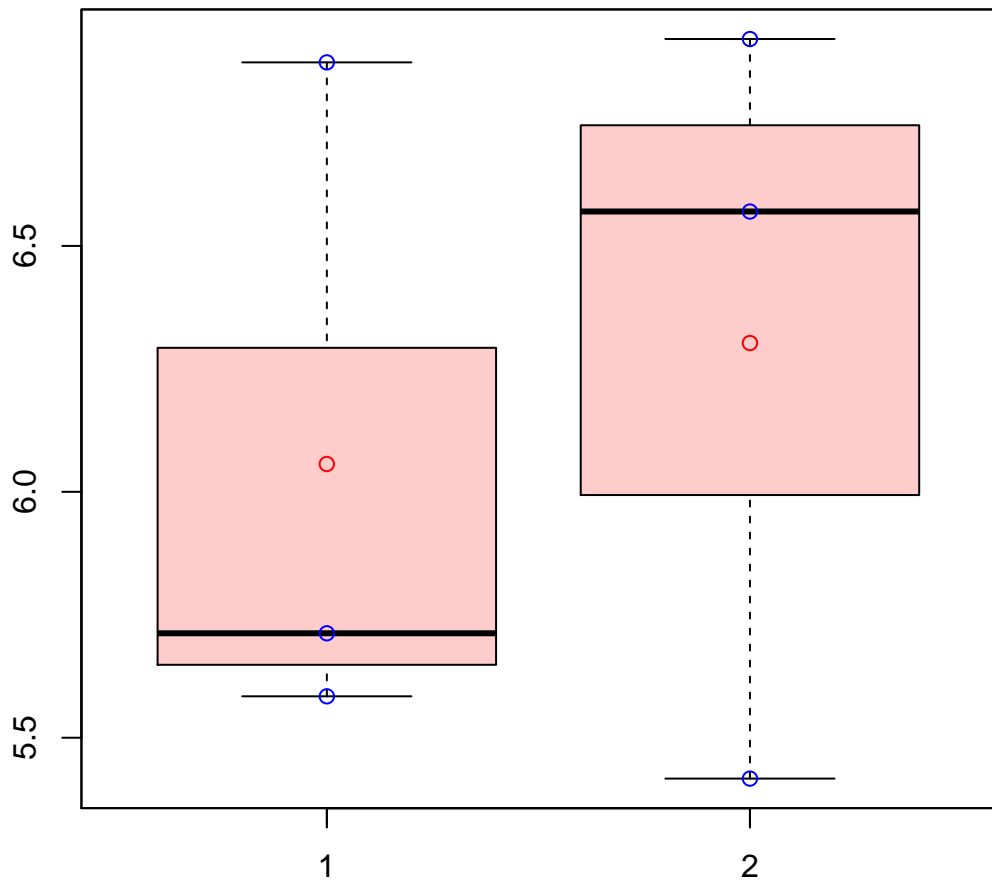

t-Test: p-value = 0.71

# CL23Contig27|CL23Contig27

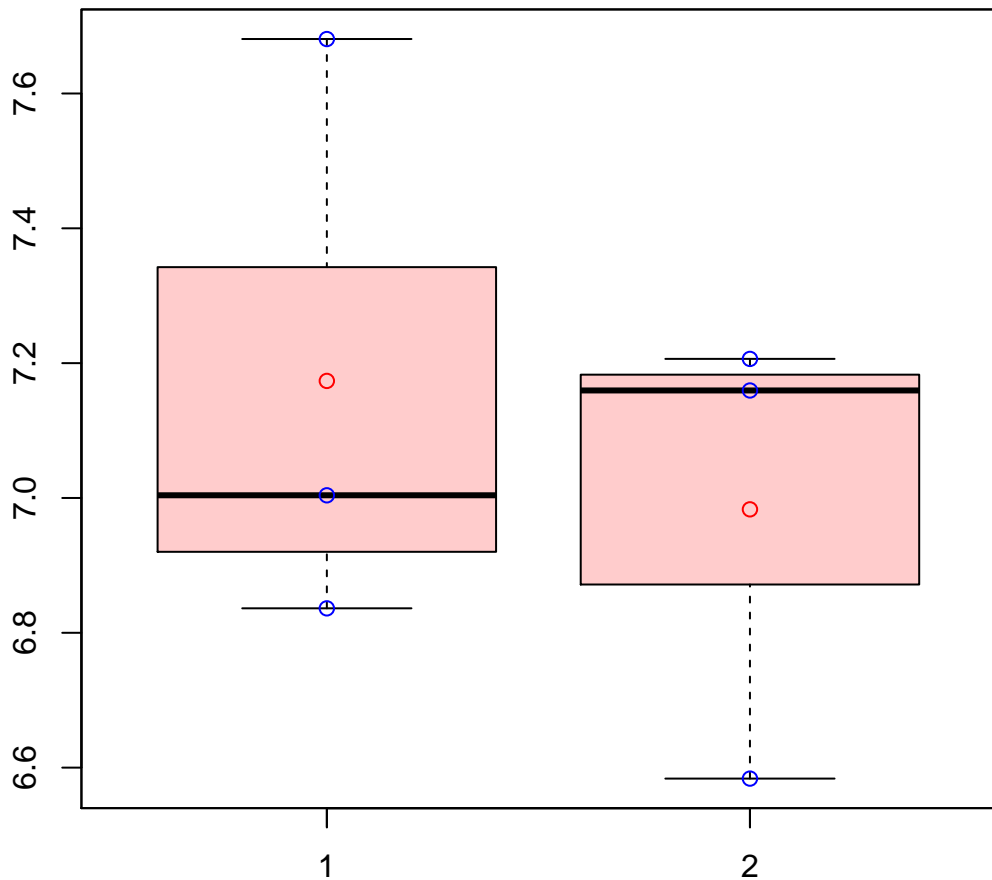

t-Test: p-value = 0.59

# CL23Contig30|CL23Contig30

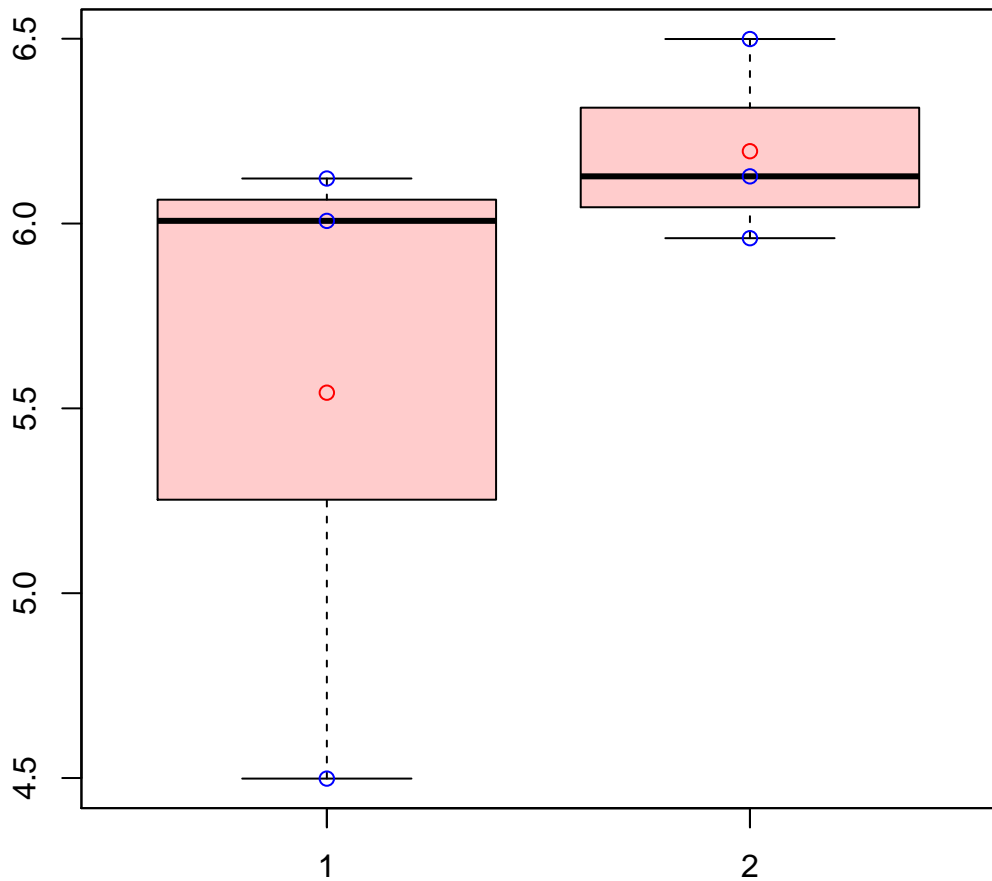

t-Test: p-value = 0.34

# CL2414Contig2|CL2414Contig2

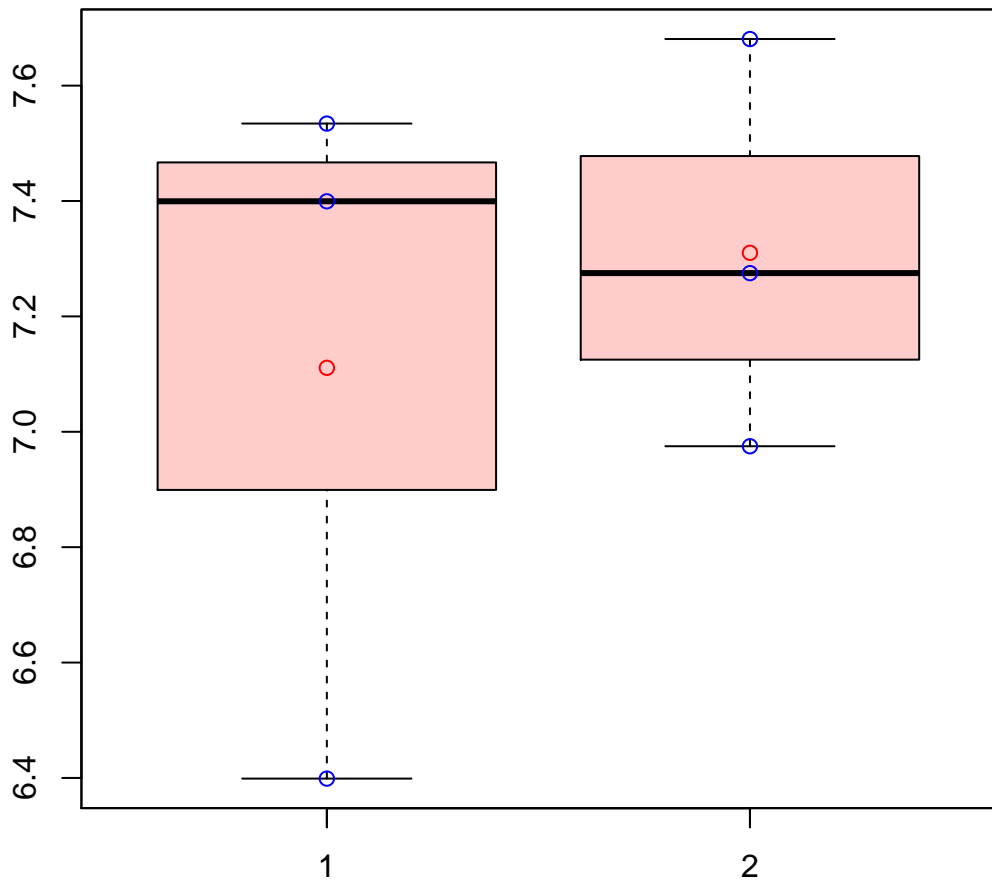

t-Test: p-value = 0.66

# CL2414Contig3|CL2414Contig3

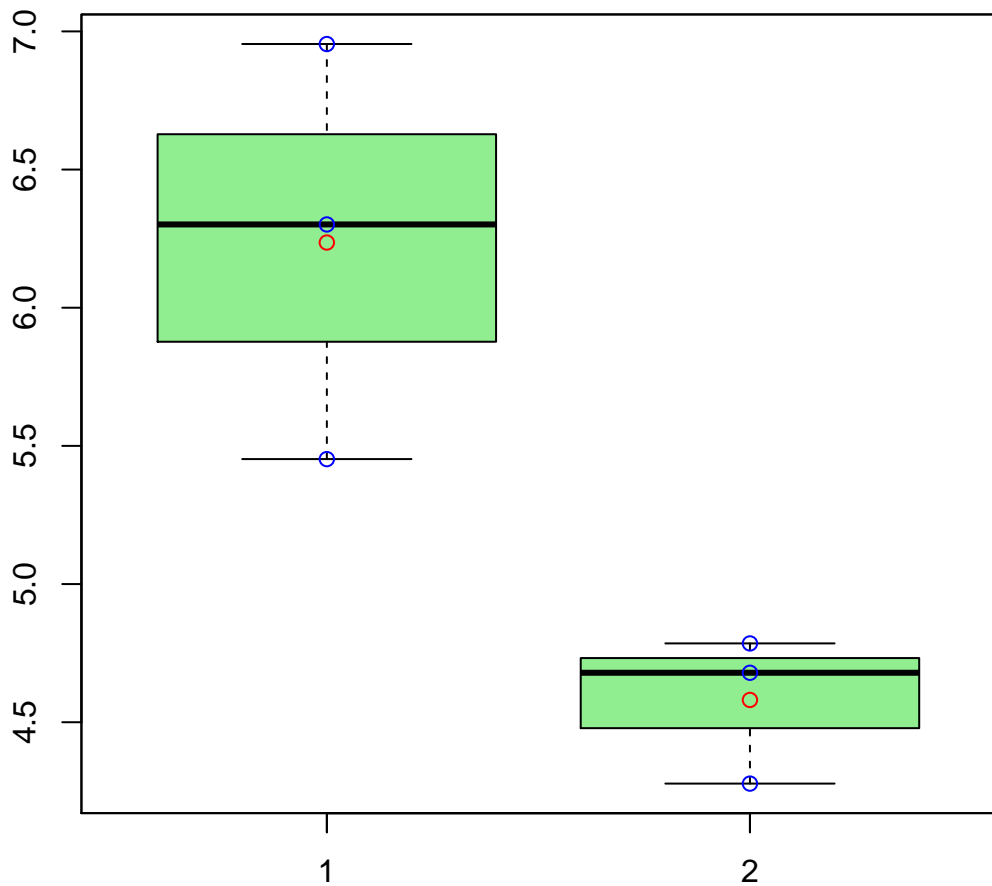

t-Test: p-value = 0.05

# CL2416Contig1|CL2416Contig1

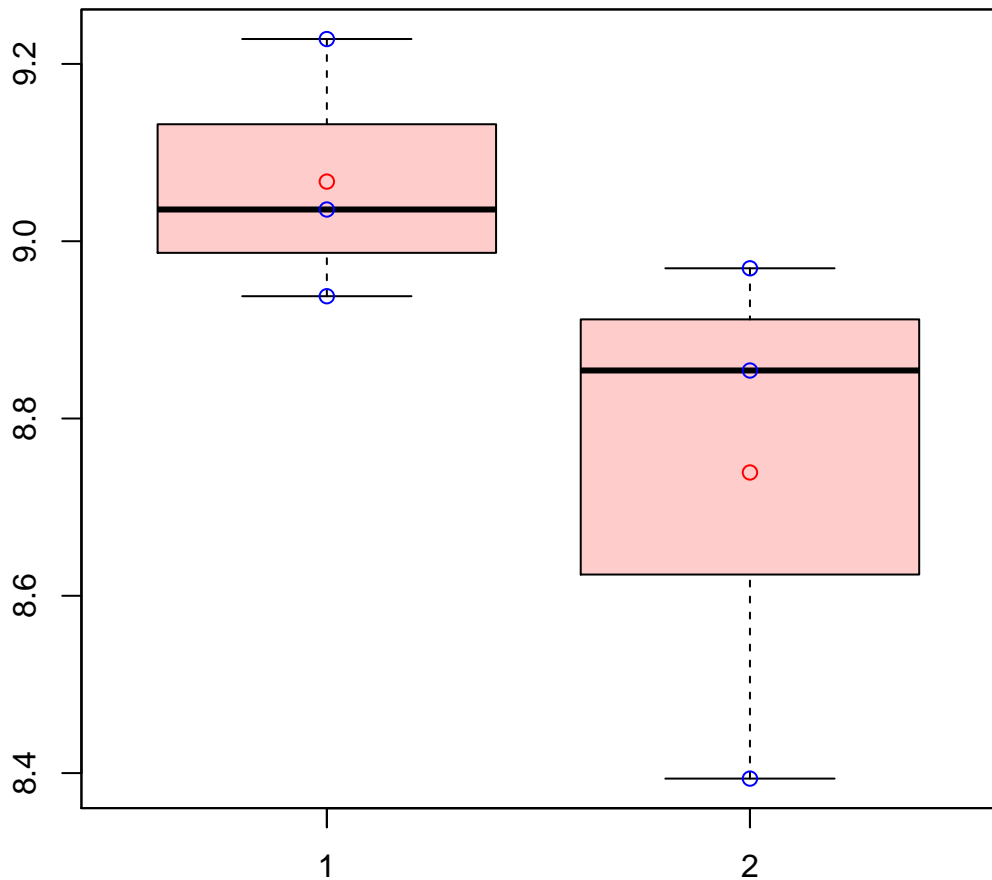

t-Test: p-value = 0.2



# CL2419Contig3|CL2419Contig3

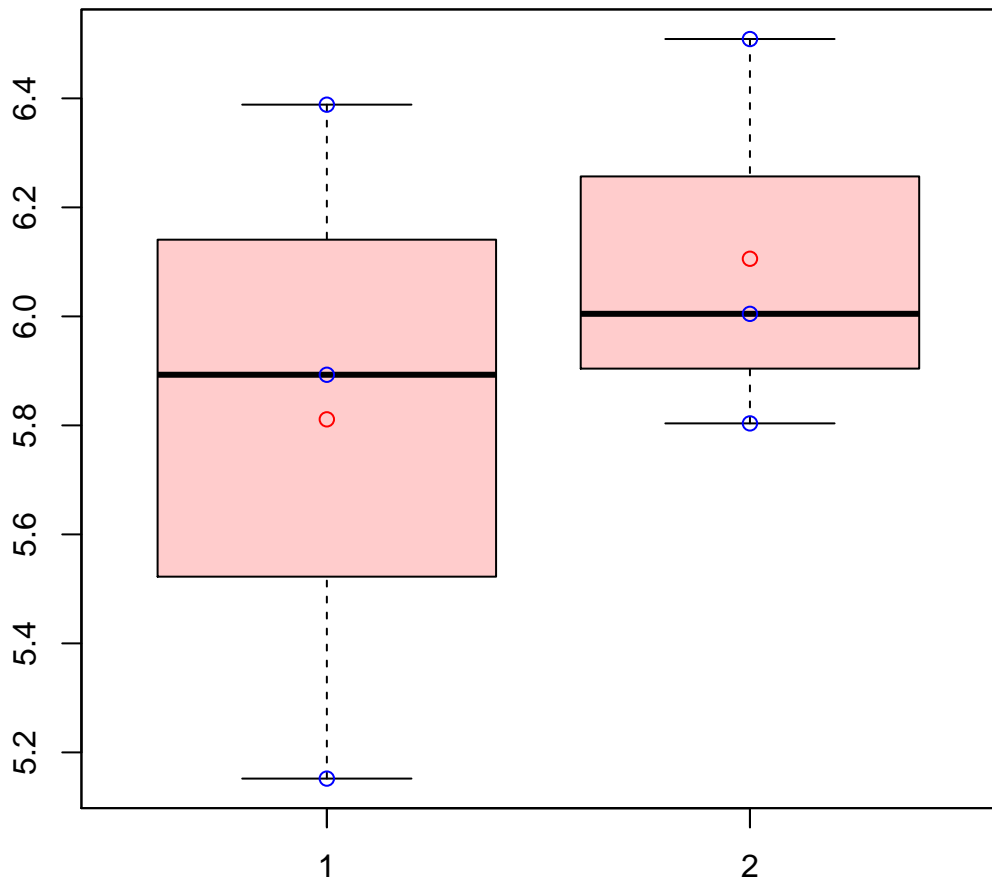

t-Test: p-value = 0.53

# CL2419Contig5|CL2419Contig5

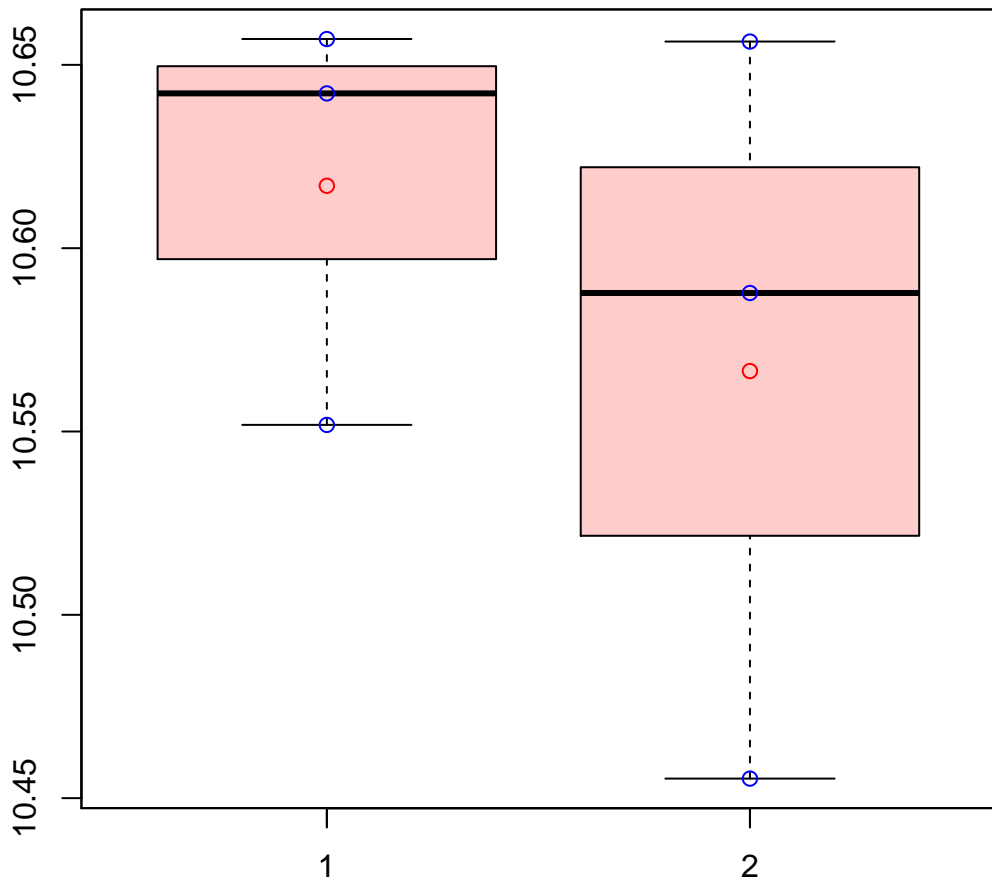

t-Test: p-value = 0.51

# CL2420Contig3|CL2420Contig3

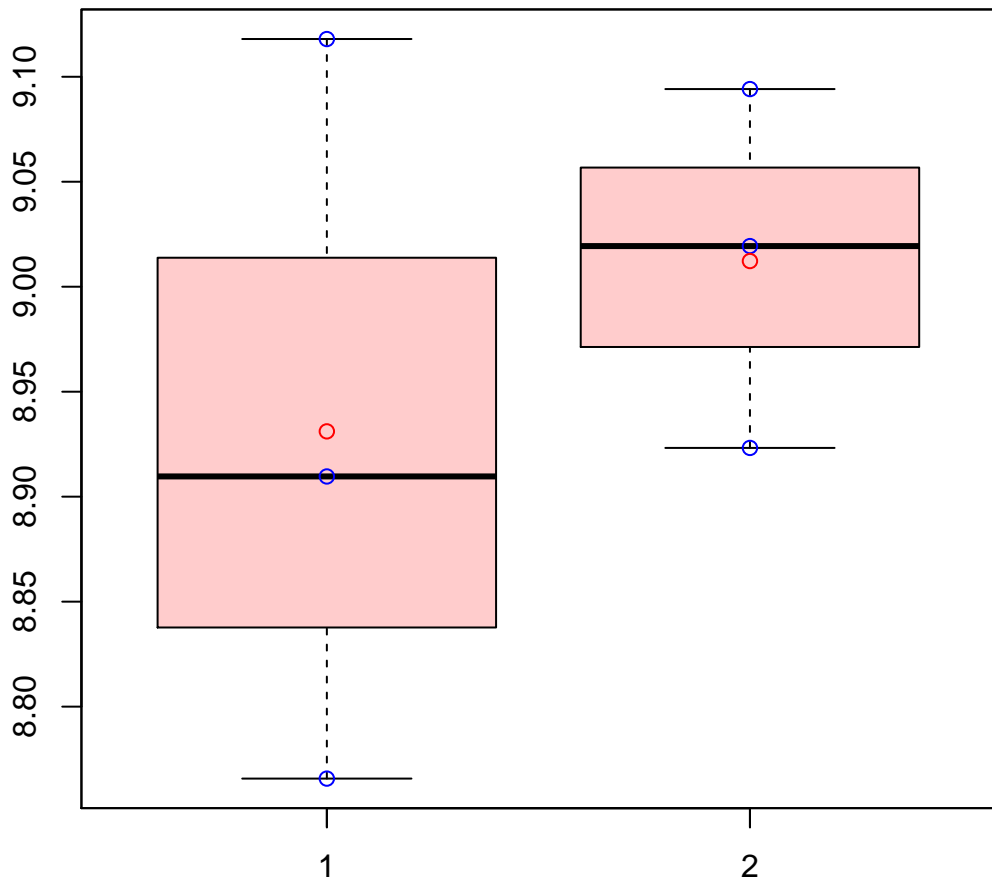

t-Test: p-value = 0.53

# CL2424Contig1|CL2424Contig1

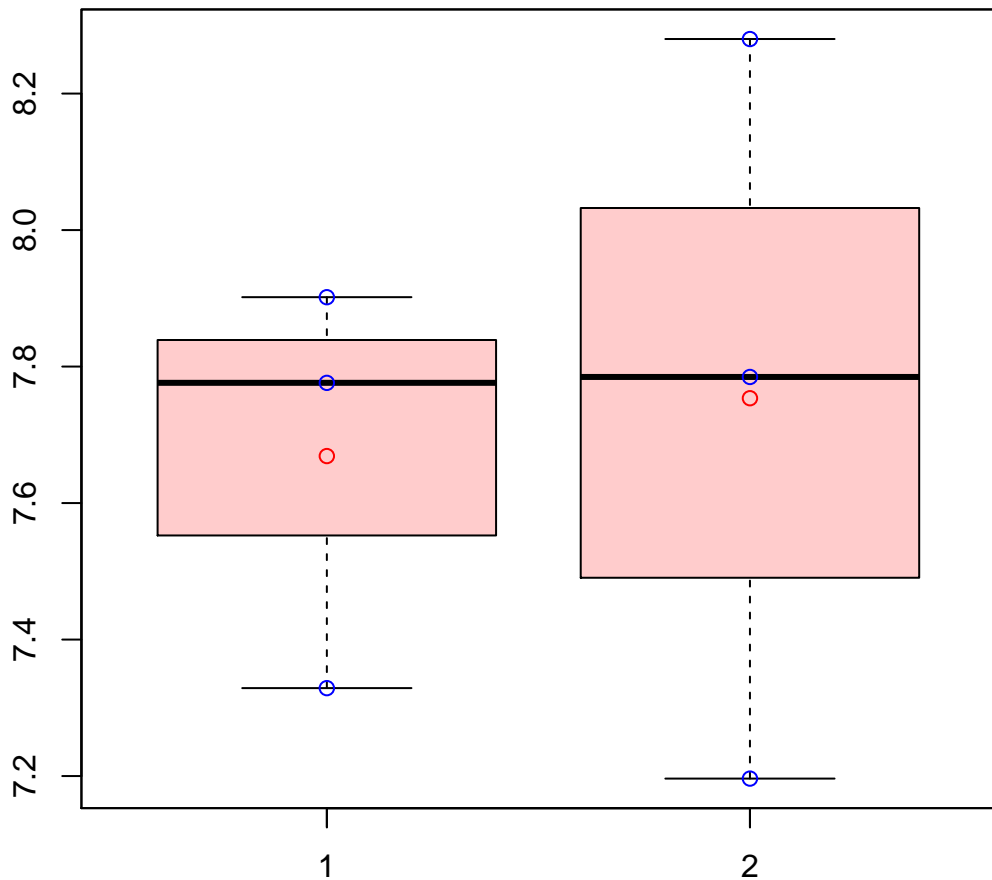

t-Test: p-value = 0.83

# CL2425Contig4|CL2425Contig4

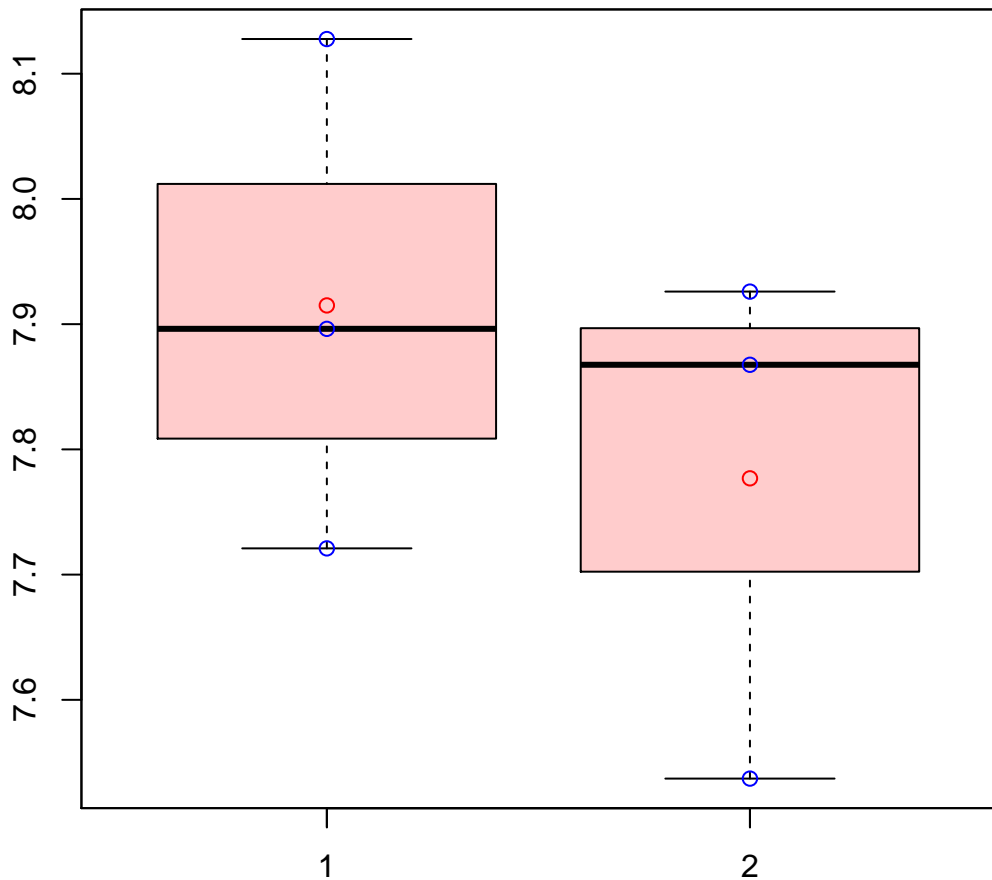

t-Test: p-value = 0.46

# CL2428Contig3|CL2428Contig3

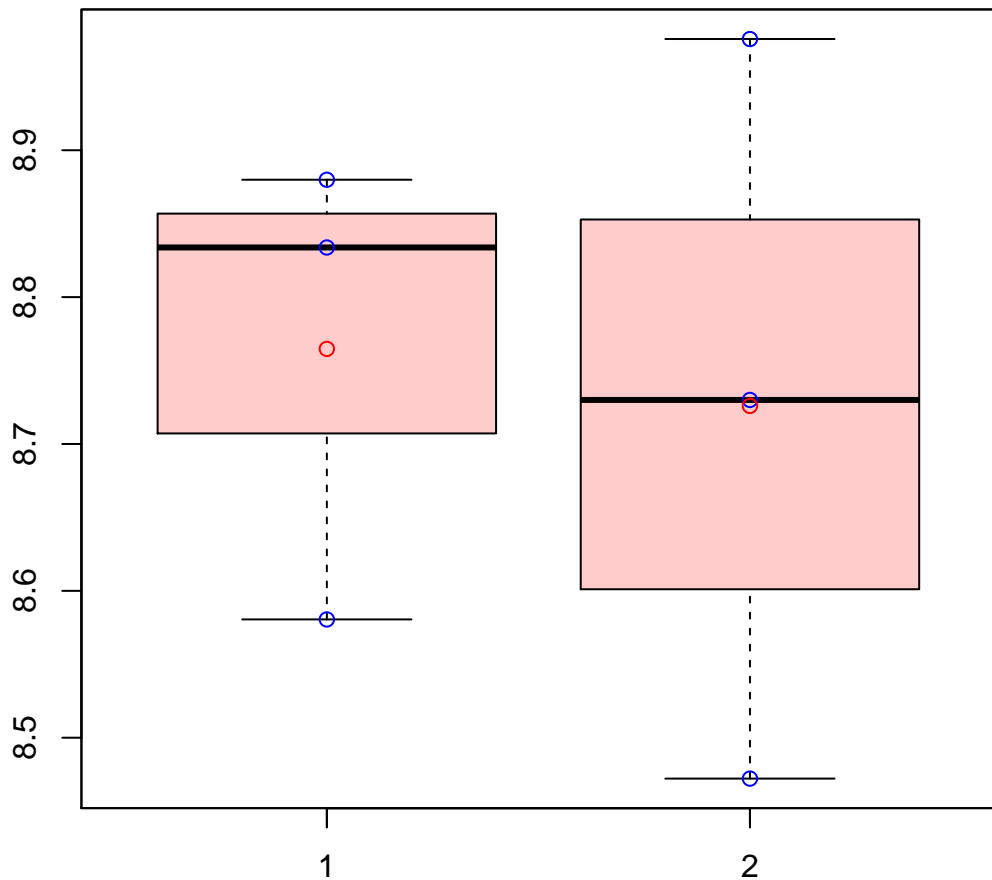

t-Test: p-value = 0.84

# CL242Contig13|CL242Contig13

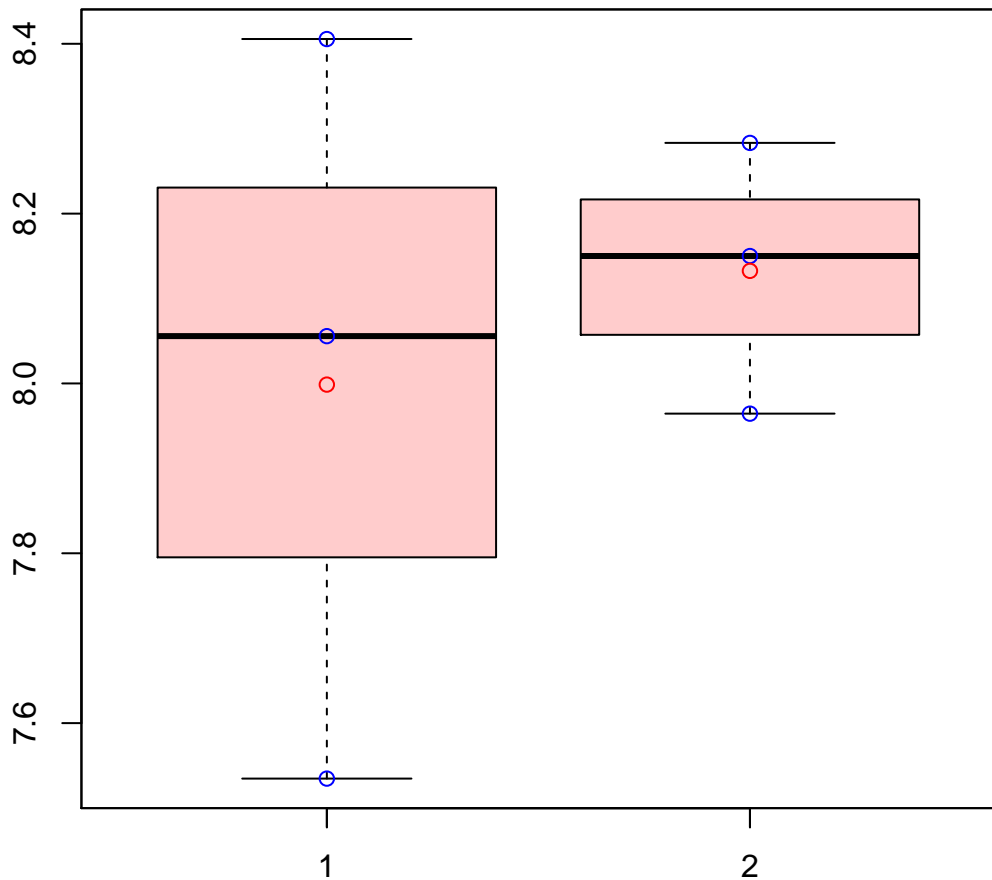

t-Test: p-value = 0.66

# CL243Contig5|CL243Contig5

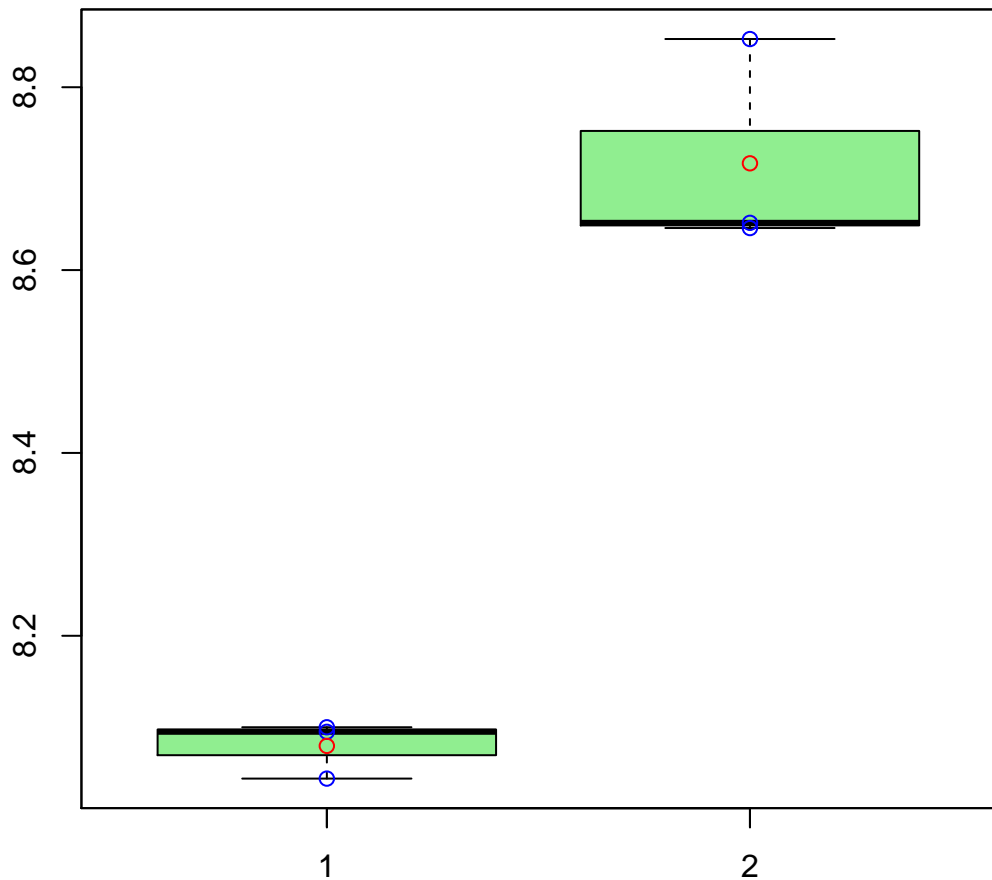

t-Test: p-value = 0.01



# CL2442Contig3|CL2442Contig3

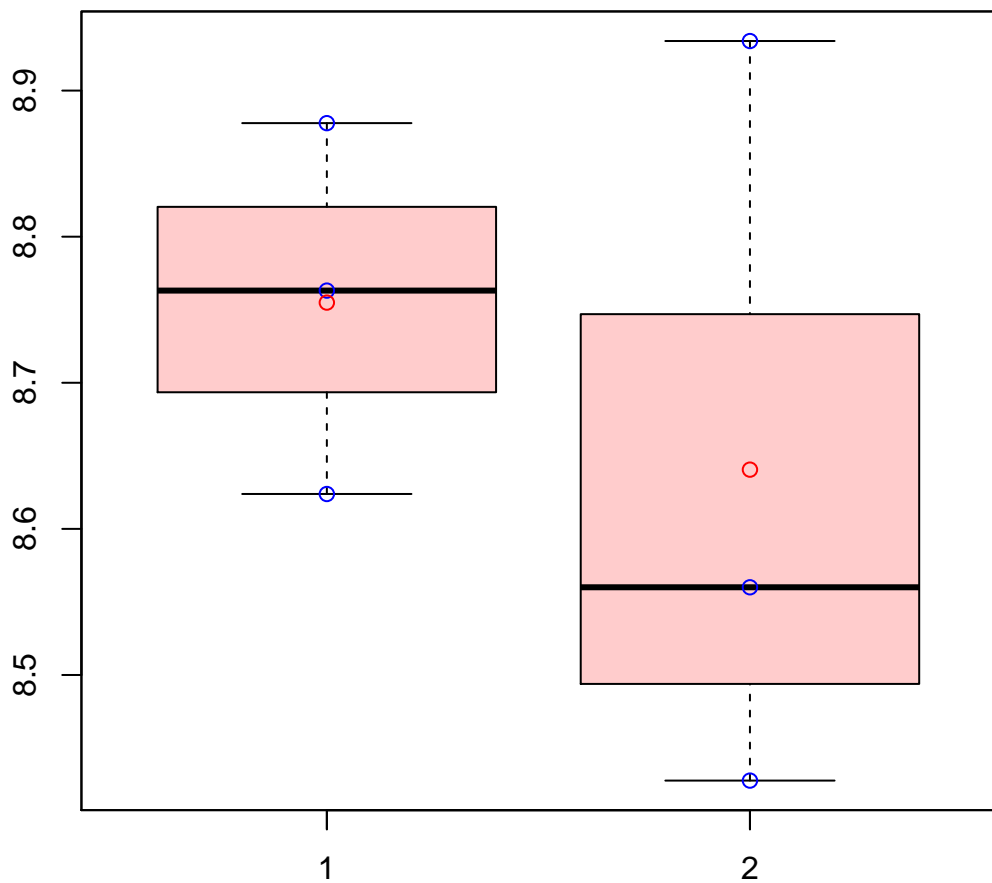

t-Test: p-value = 0.55

# CL2442Contig6|CL2442Contig6

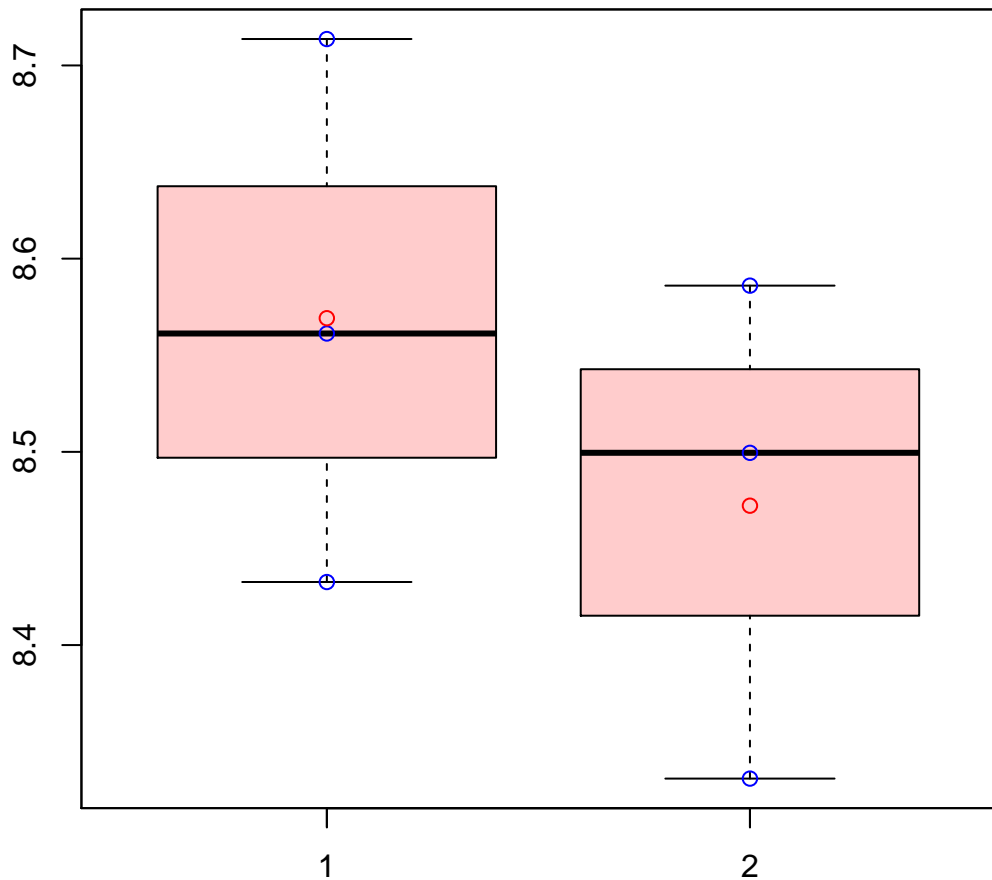

t-Test: p-value = 0.43

# CL2449Contig1|CL2449Contig1

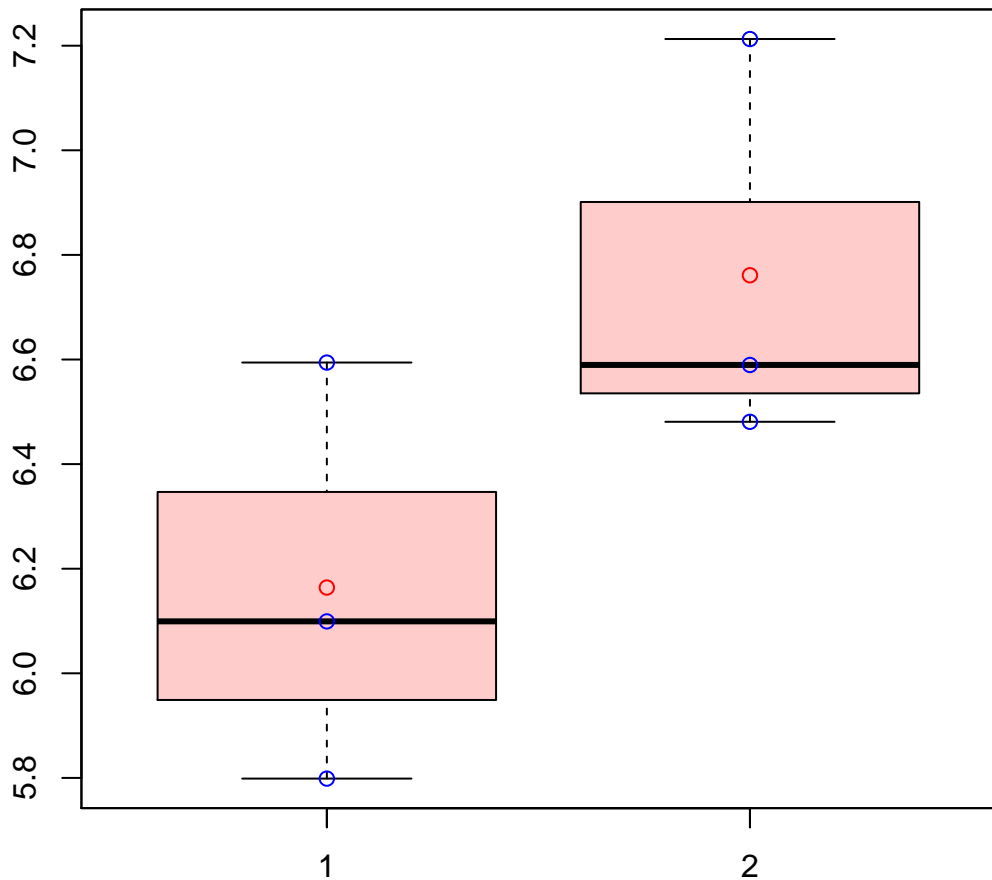

t-Test: p-value = 0.14

# CL244Contig9|CL244Contig9

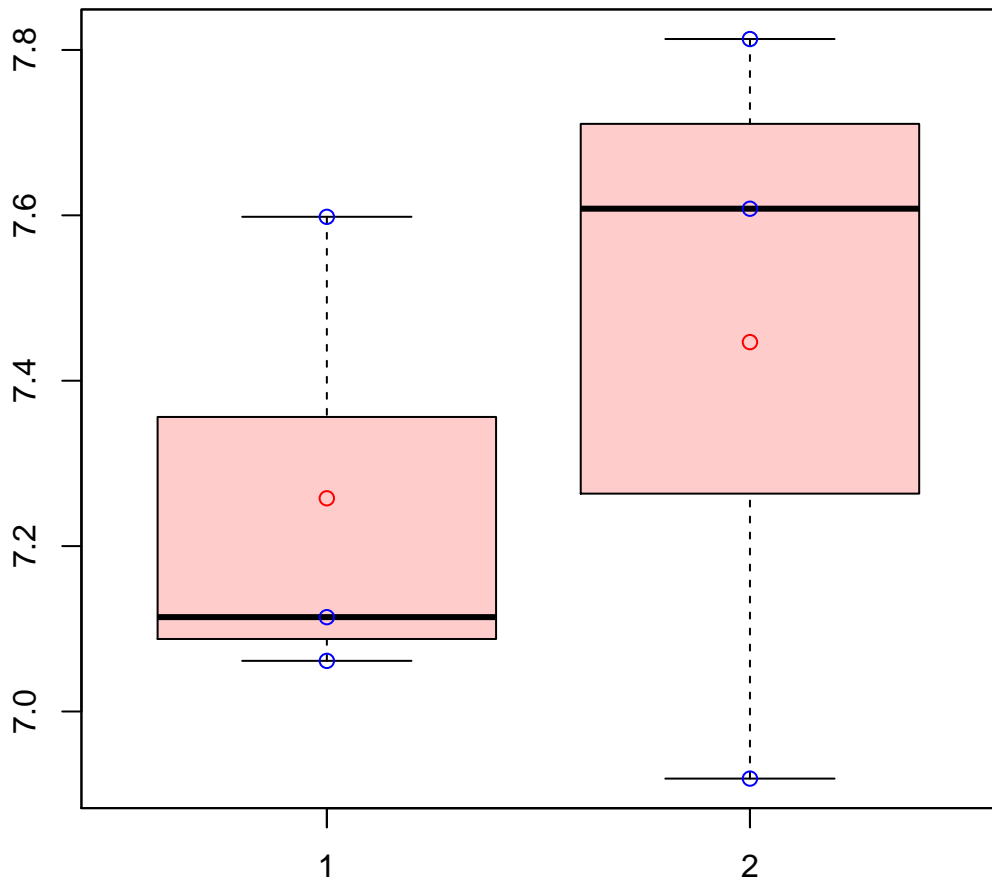

t-Test: p-value = 0.59

# CL2463Contig4|CL2463Contig4

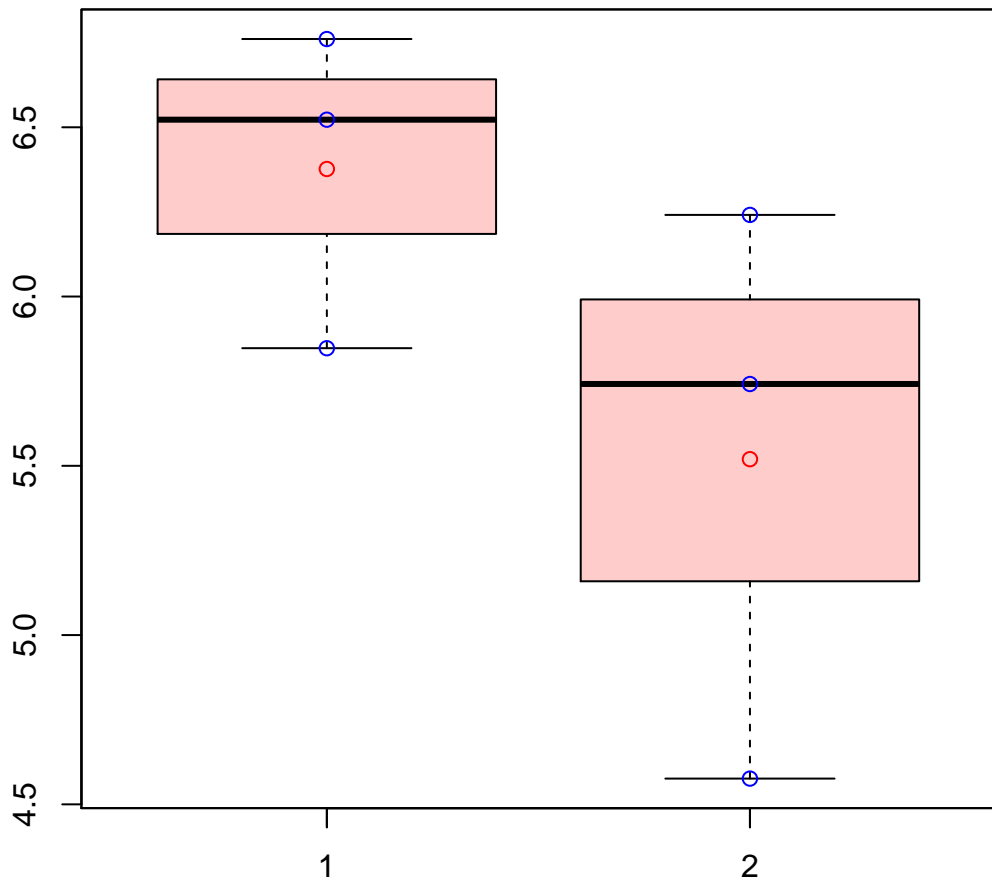

t-Test: p-value = 0.22

# CL2465Contig1|CL2465Contig1

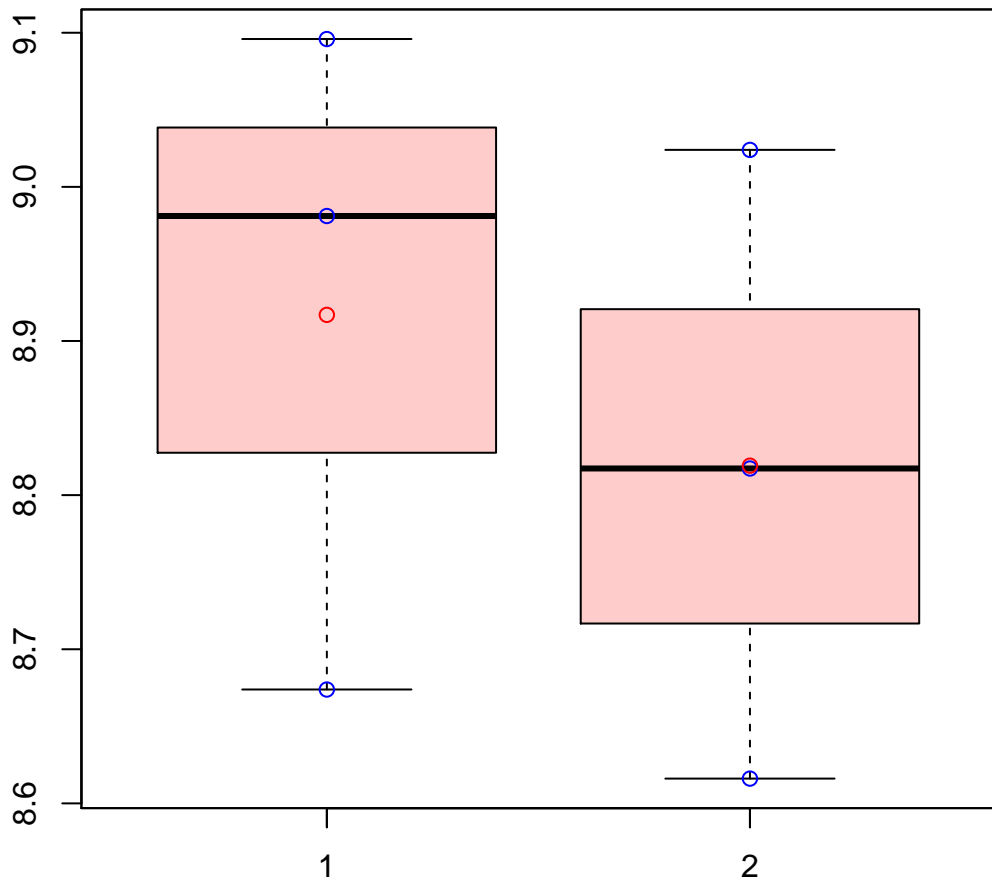

t-Test: p-value = 0.6

# CL2467Contig1|CL2467Contig1

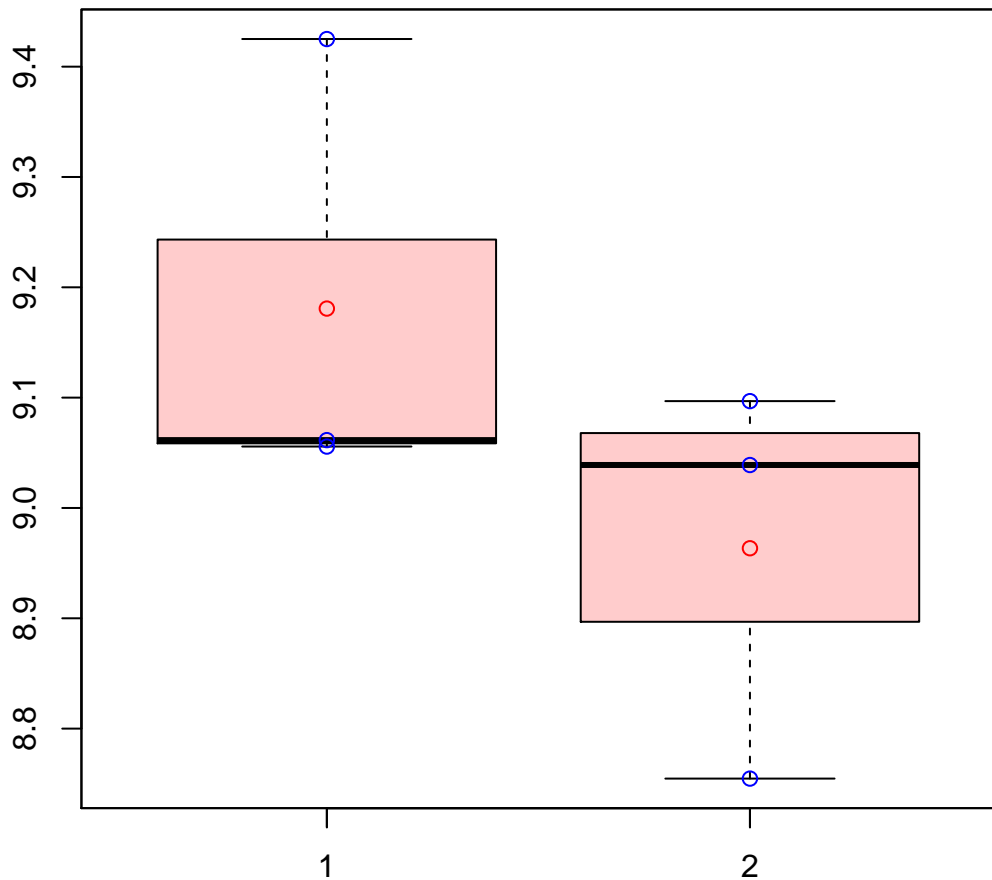

t-Test: p-value = 0.25

# CL2470Contig2|CL2470Contig2

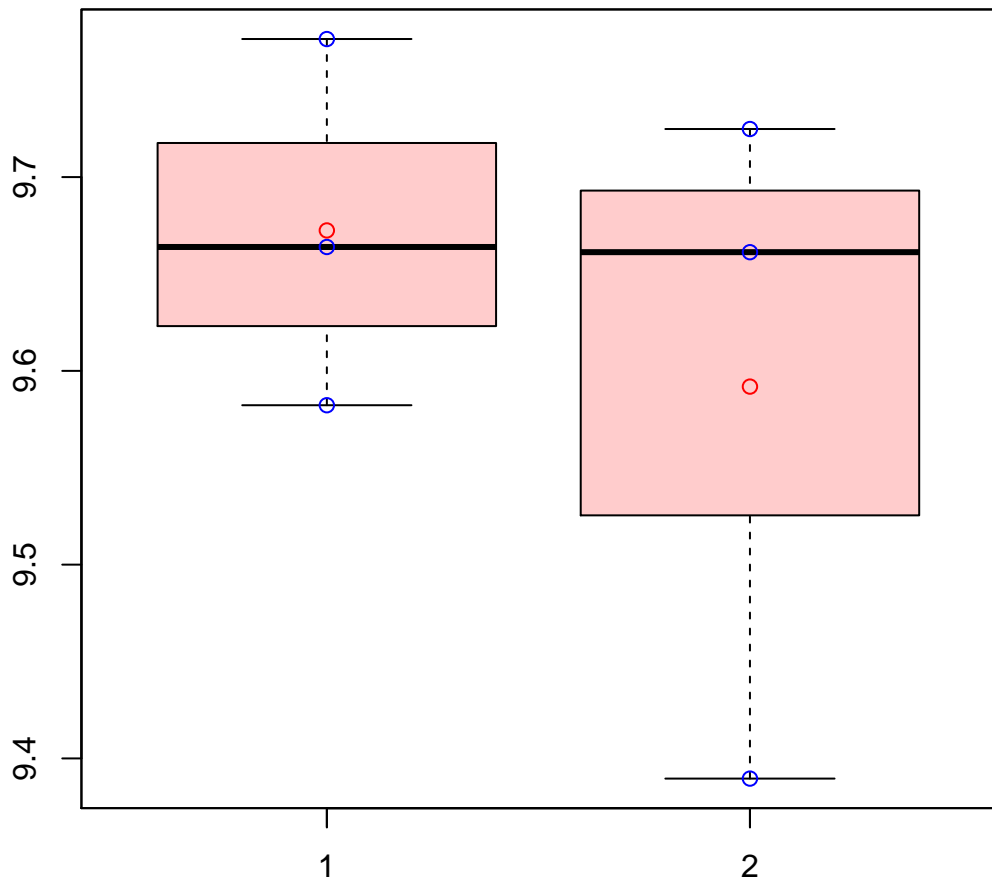

t-Test: p-value = 0.54



# CL2472Contig4|CL2472Contig4

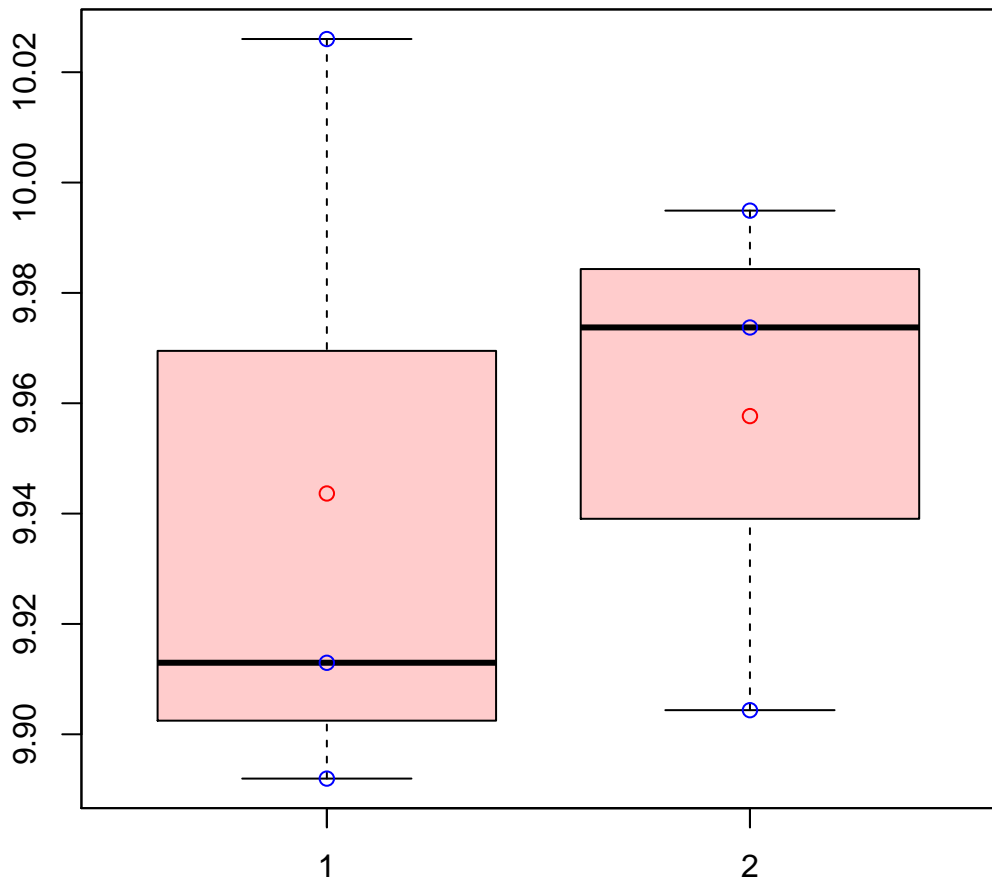

t-Test: p-value = 0.79

# CL2473Contig3|CL2473Contig3

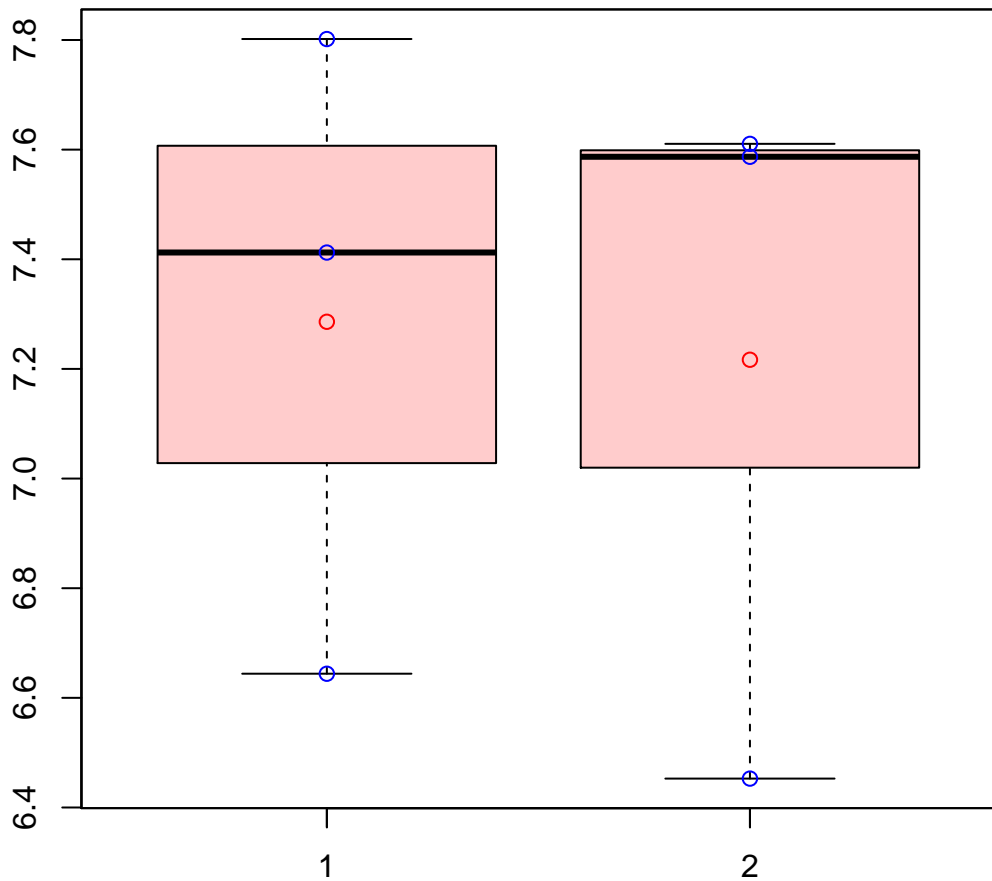

t-Test: p-value = 0.9

# CL2474Contig3|CL2474Contig3

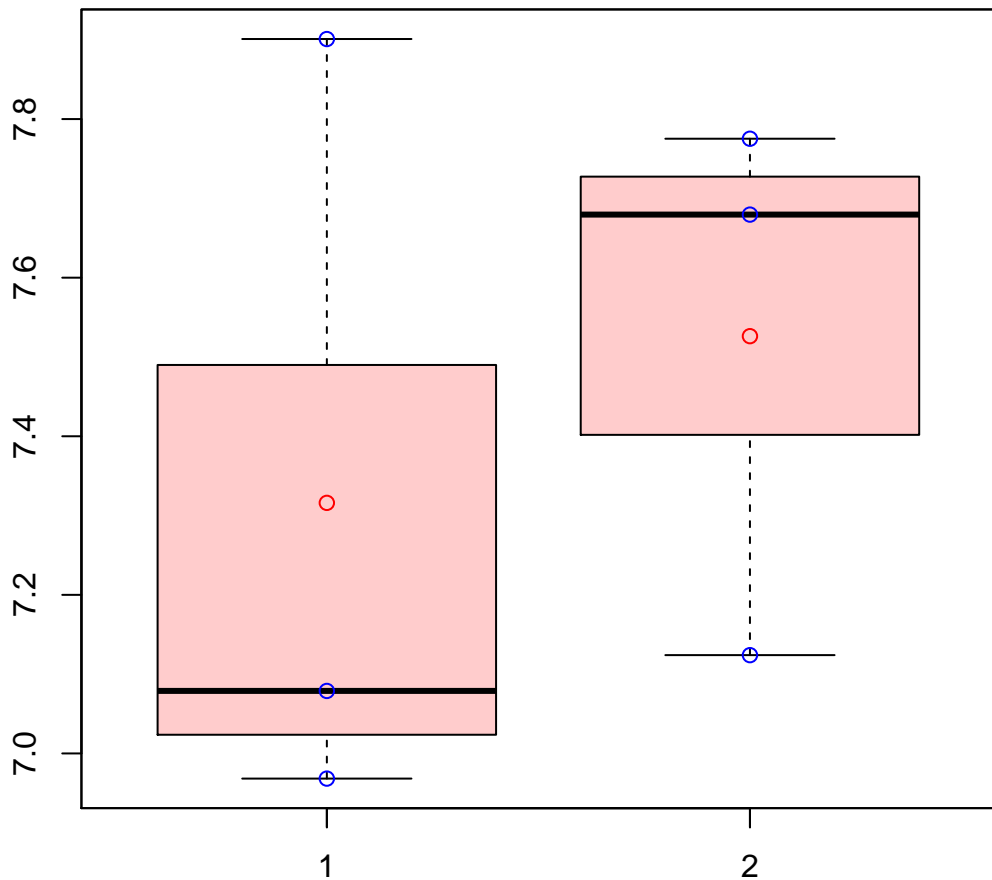

t-Test: p-value = 0.59

# CL24771Contig1|CL24771Contig1

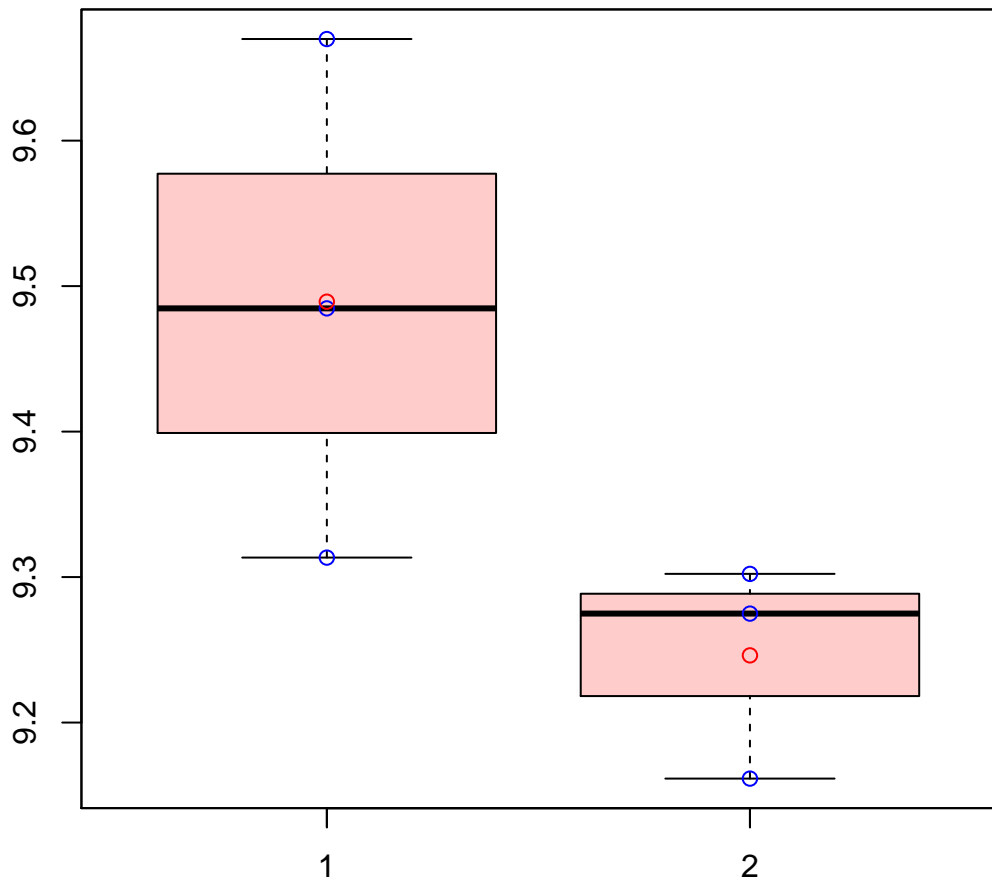

t-Test: p-value = 0.13

# CL2478Contig1|CL2478Contig1

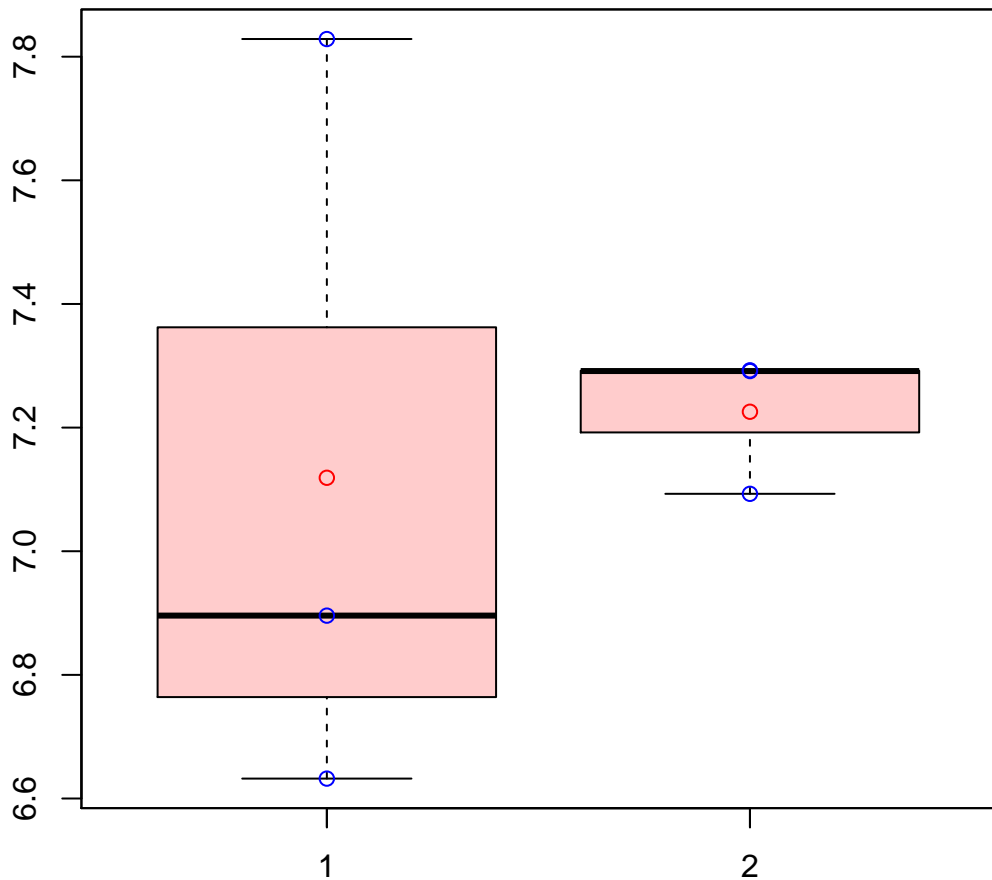

t-Test: p-value = 0.8

# CL2479Contig7|CL2479Contig7

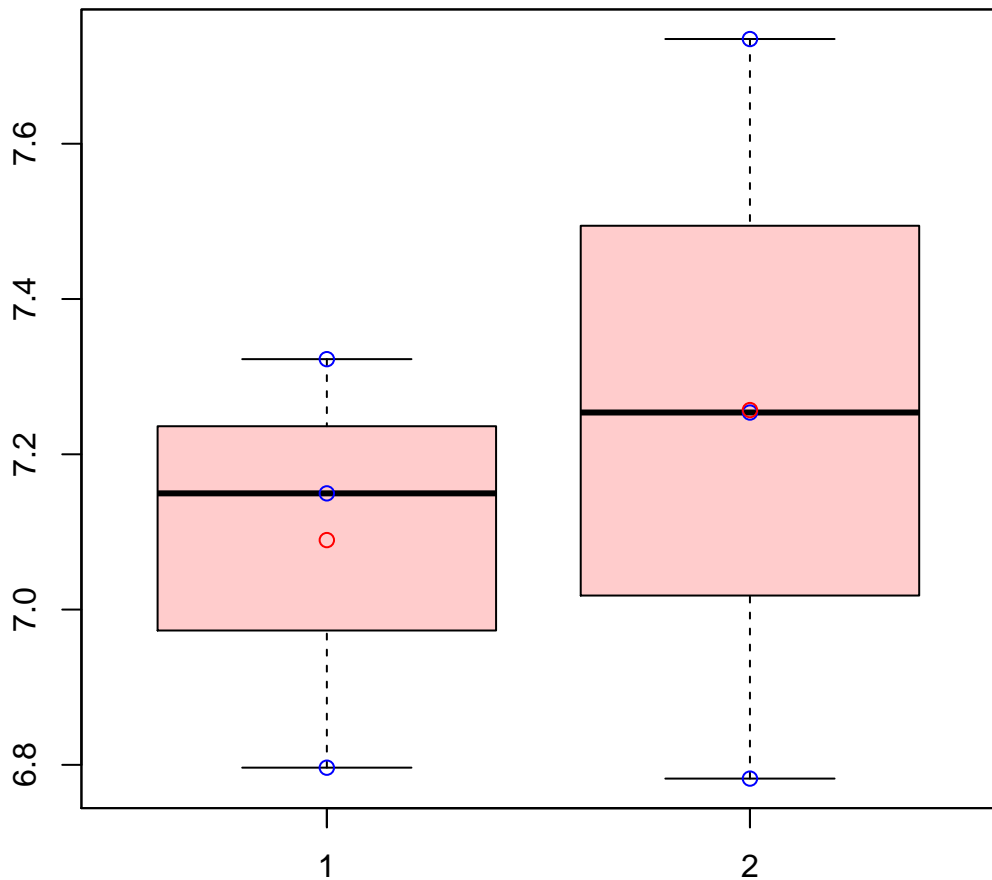

t-Test: p-value = 0.63

# CL247Contig1|CL247Contig1

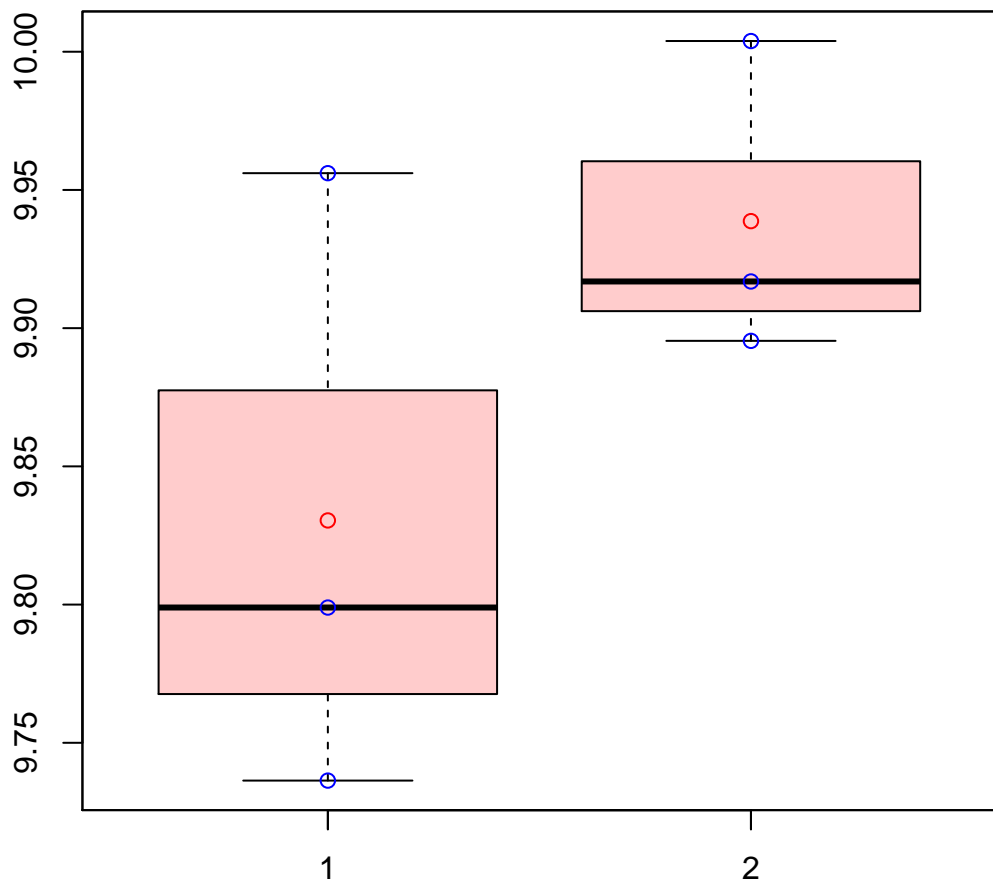

t-Test: p-value = 0.24

# CL24843Contig1|CL24843Contig1

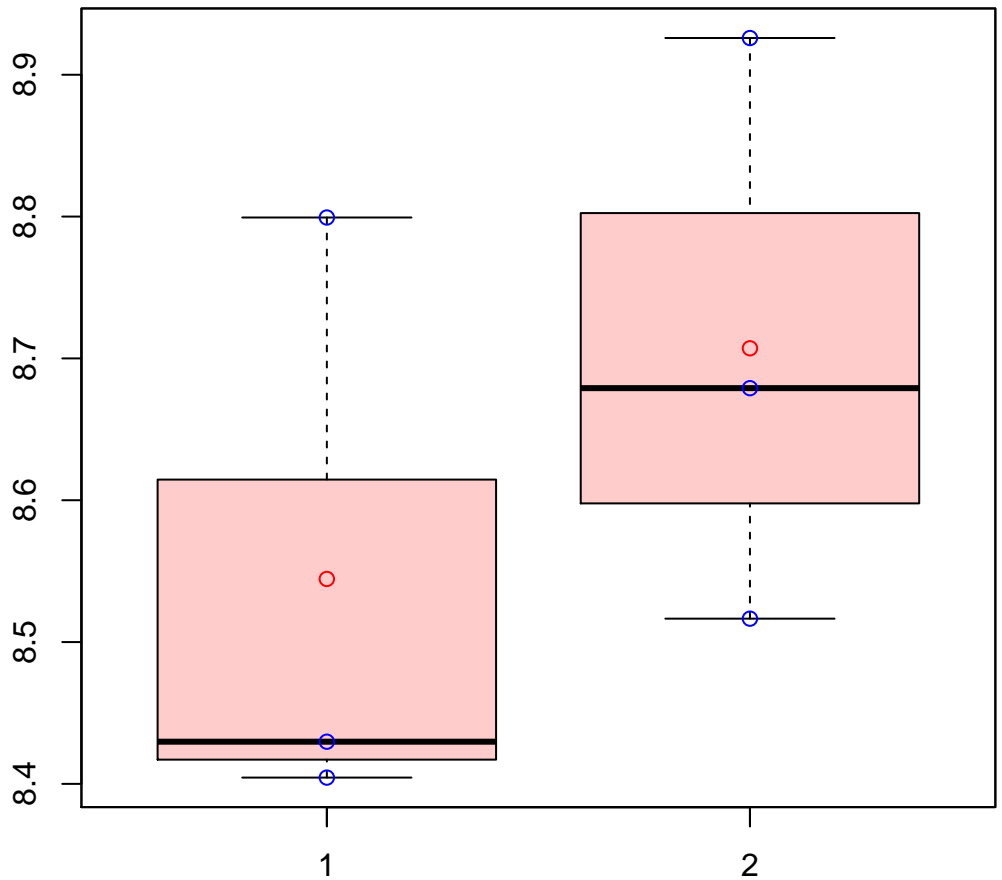

t-Test: p-value = 0.4



# CL2486Contig1|CL2486Contig1

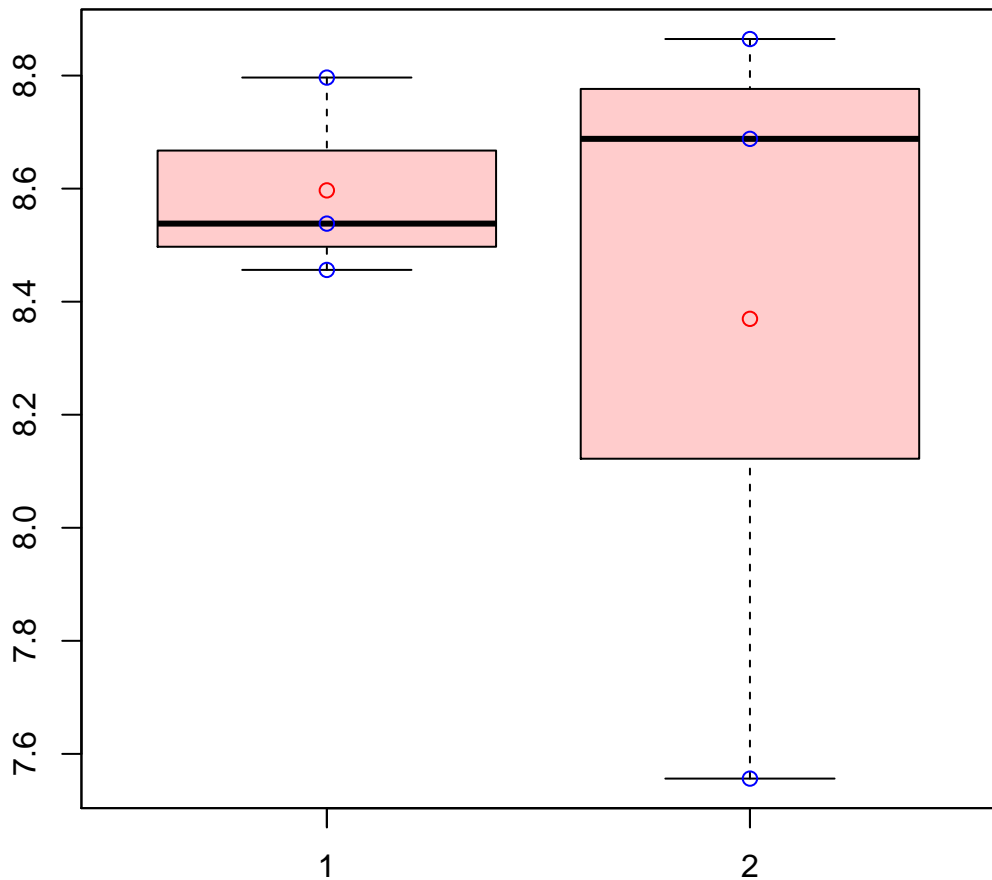

t-Test: p-value = 0.64

# CL24883Contig1|CL24883Contig1

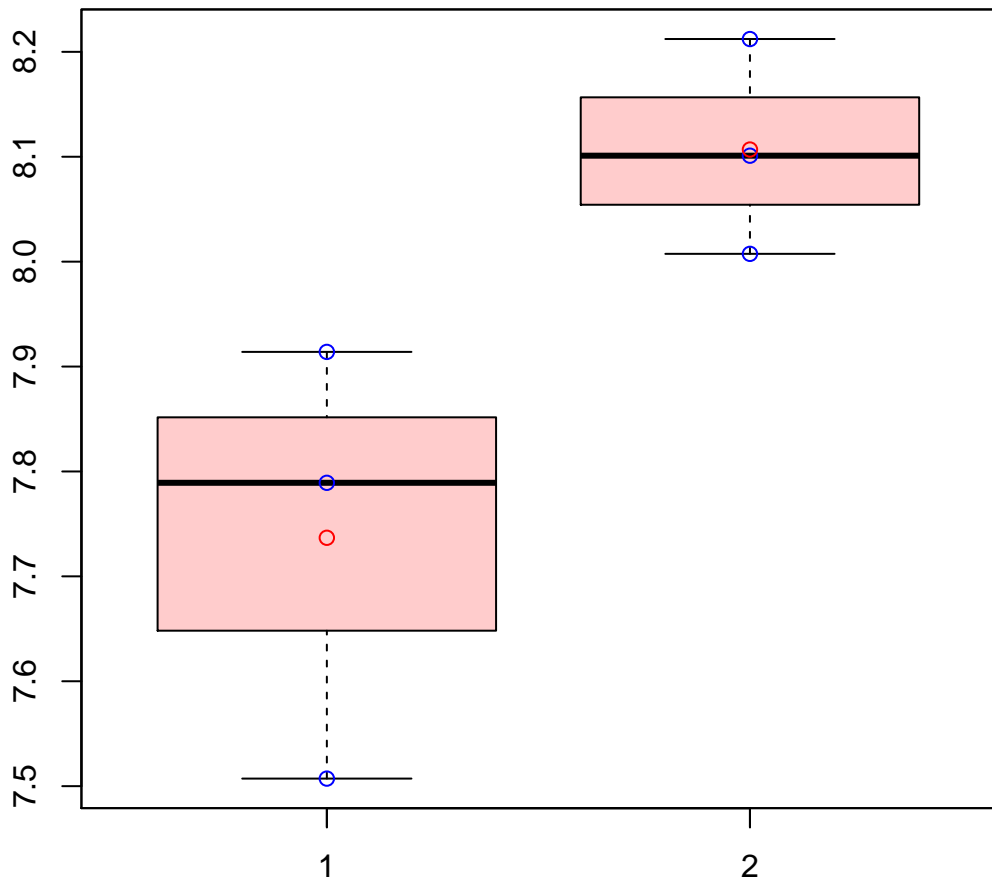

t-Test: p-value = 0.07

# CL248Contig2|CL248Contig2

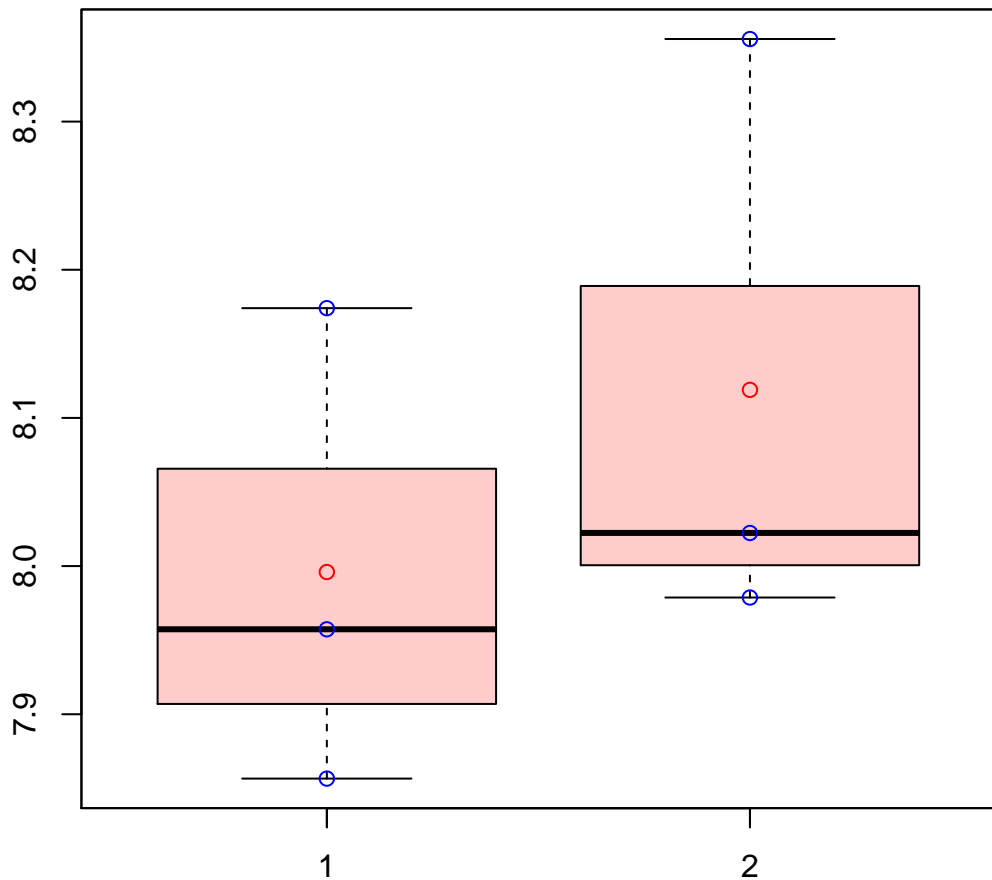

t-Test: p-value = 0.46

# CL2491Contig2|CL2491Contig2

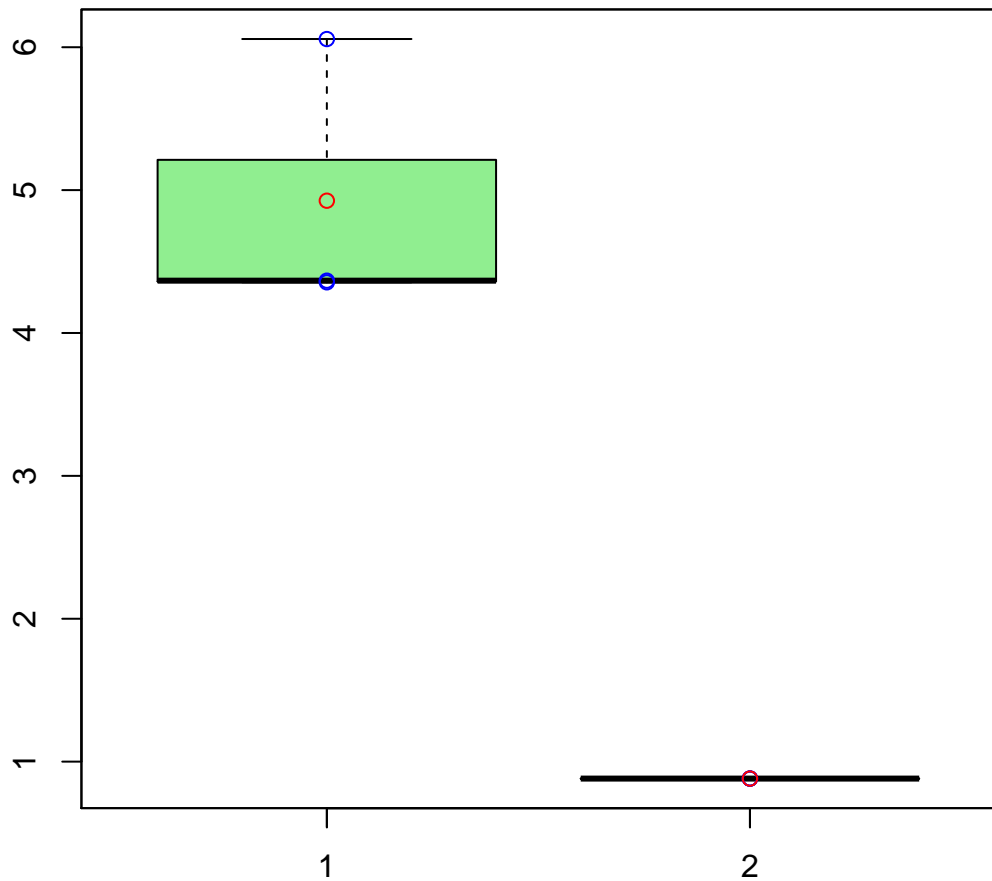

t-Test: p-value = 0.02

# CL2494Contig1|CL2494Contig1

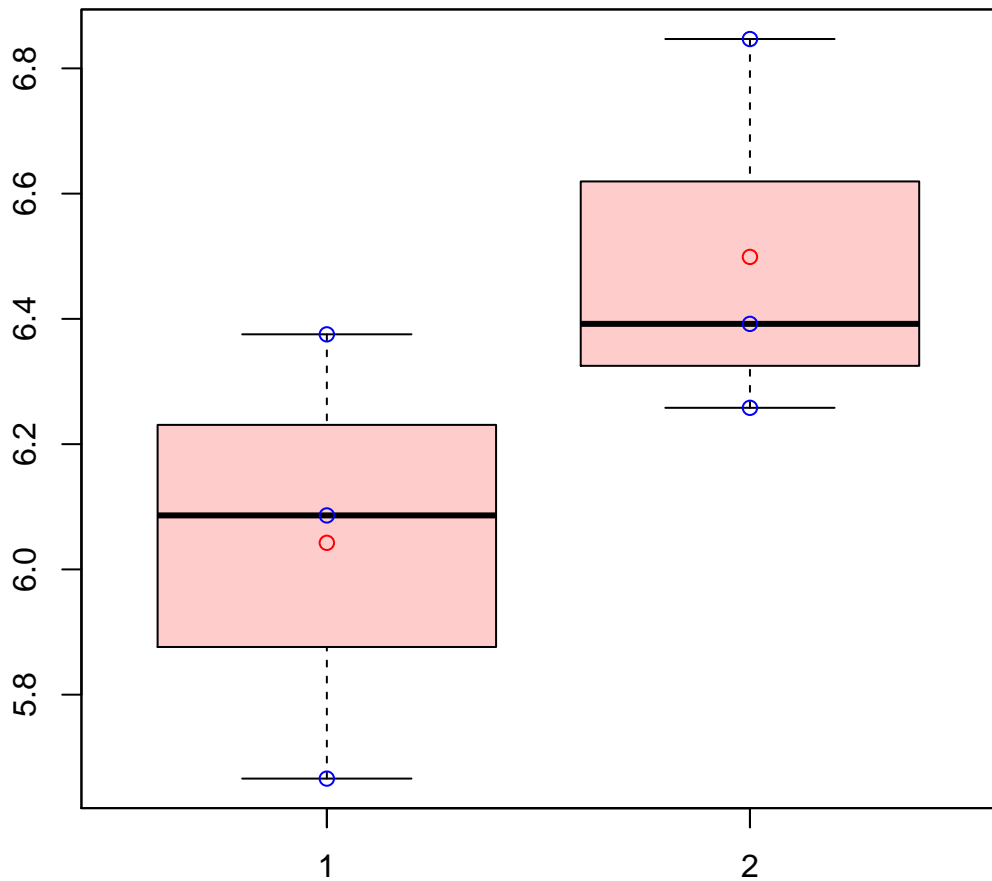

t-Test: p-value = 0.17

# CL24975Contig1|CL24975Contig1

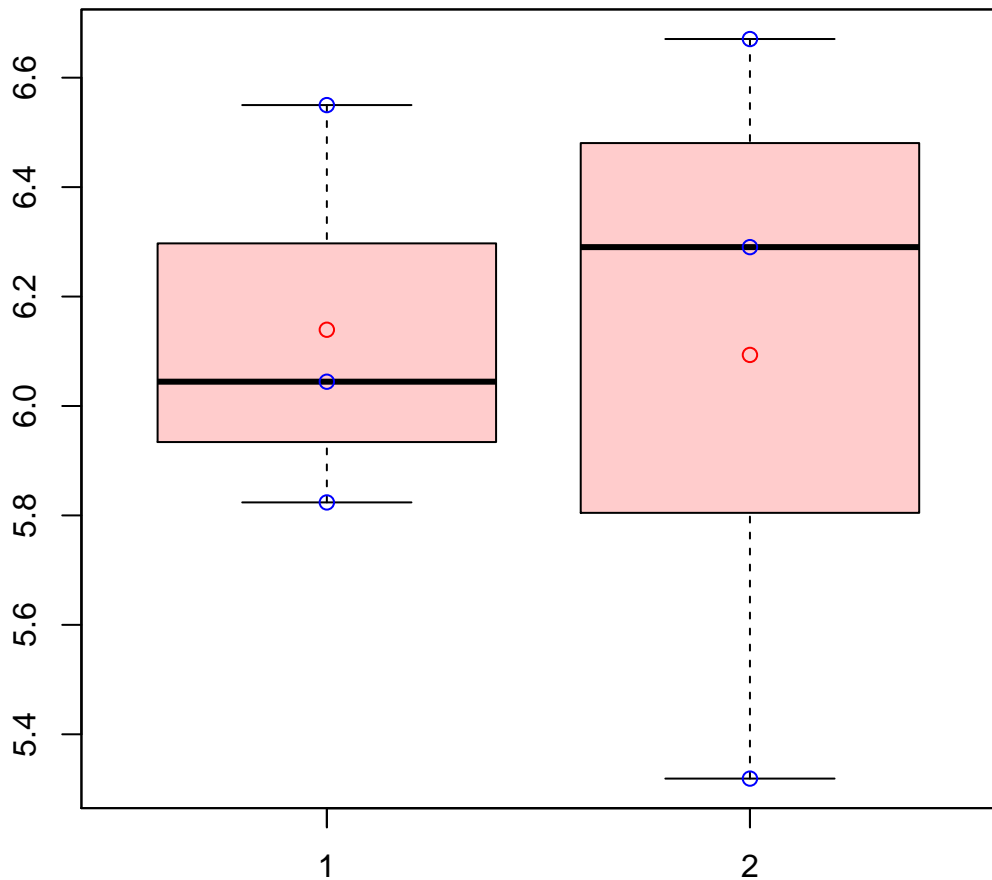

t-Test: p-value = 0.93

# CL24991Contig1|CL24991Contig1

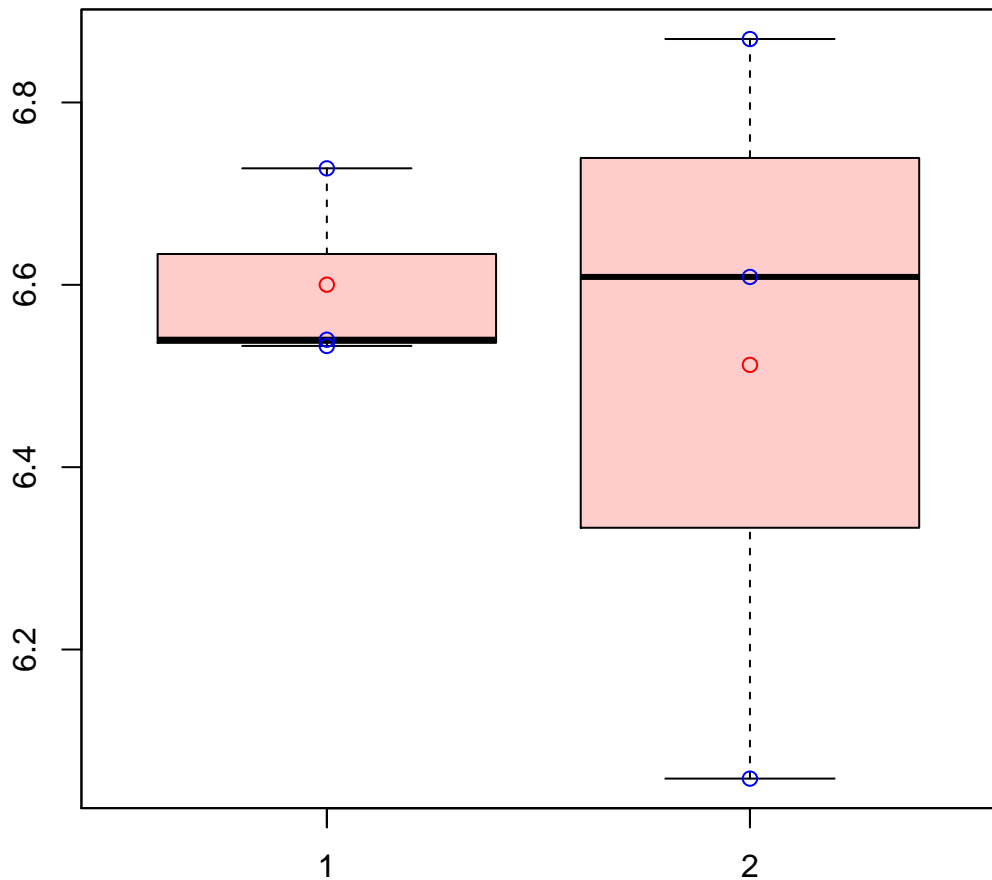

t-Test: p-value = 0.75

# CL24998Contig1|CL24998Contig1

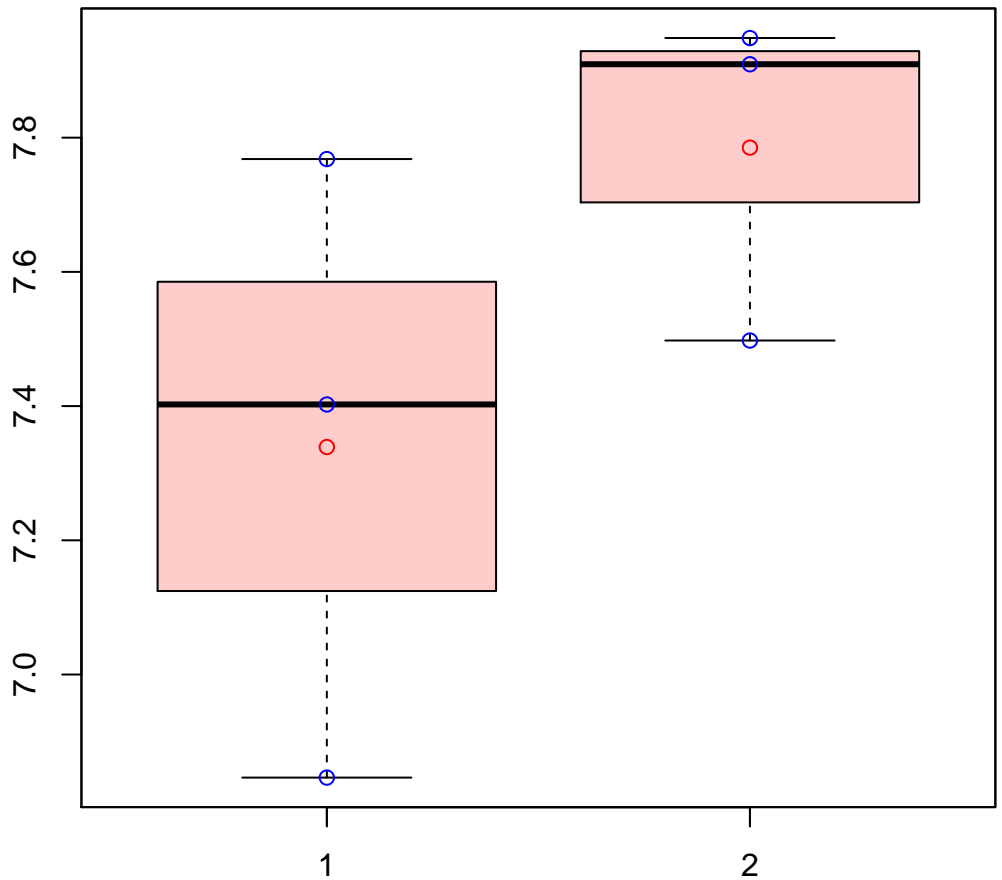

t-Test: p-value = 0.24



# CL24Contig15|CL24Contig15

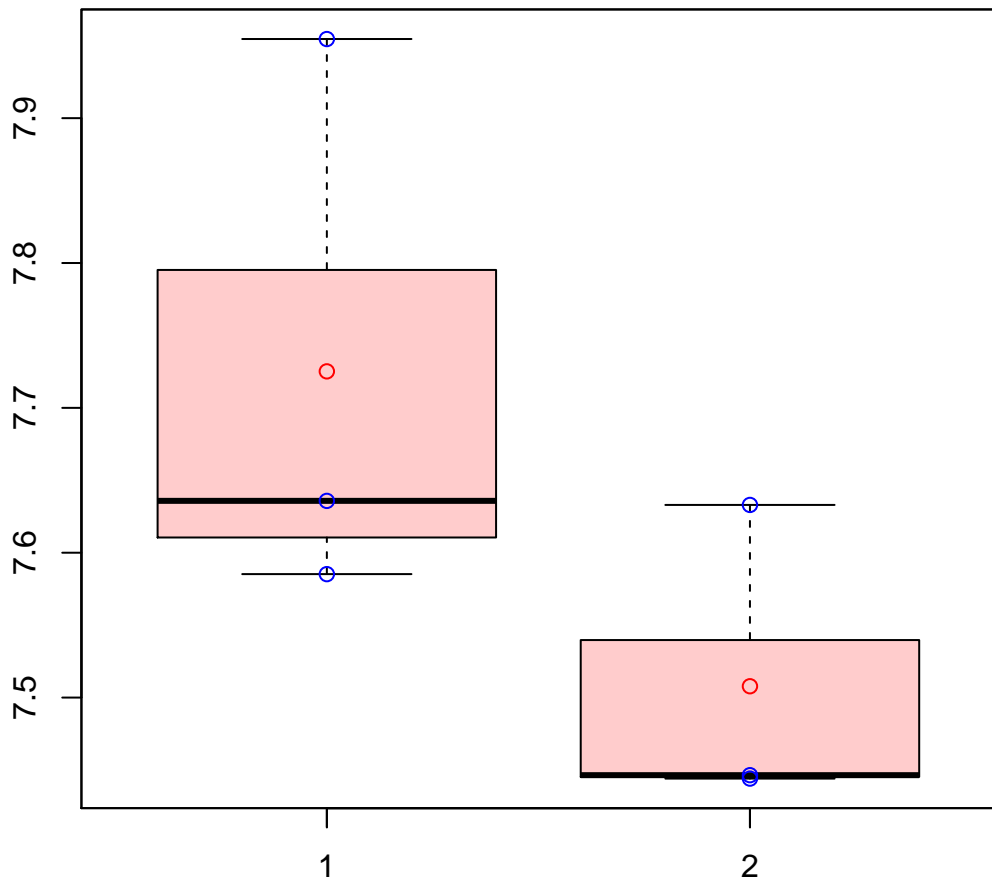

t-Test: p-value = 0.19

# CL25025Contig1|CL25025Contig1

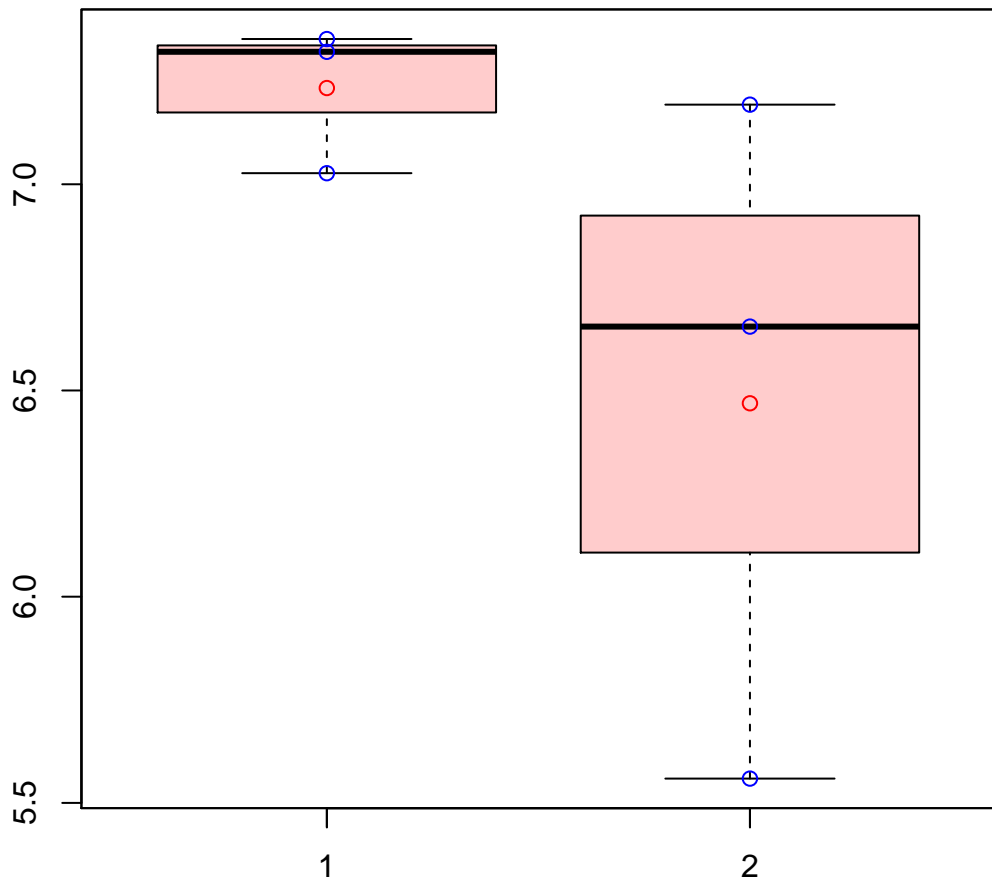

t-Test: p-value = 0.25

# CL2510Contig1|CL2510Contig1

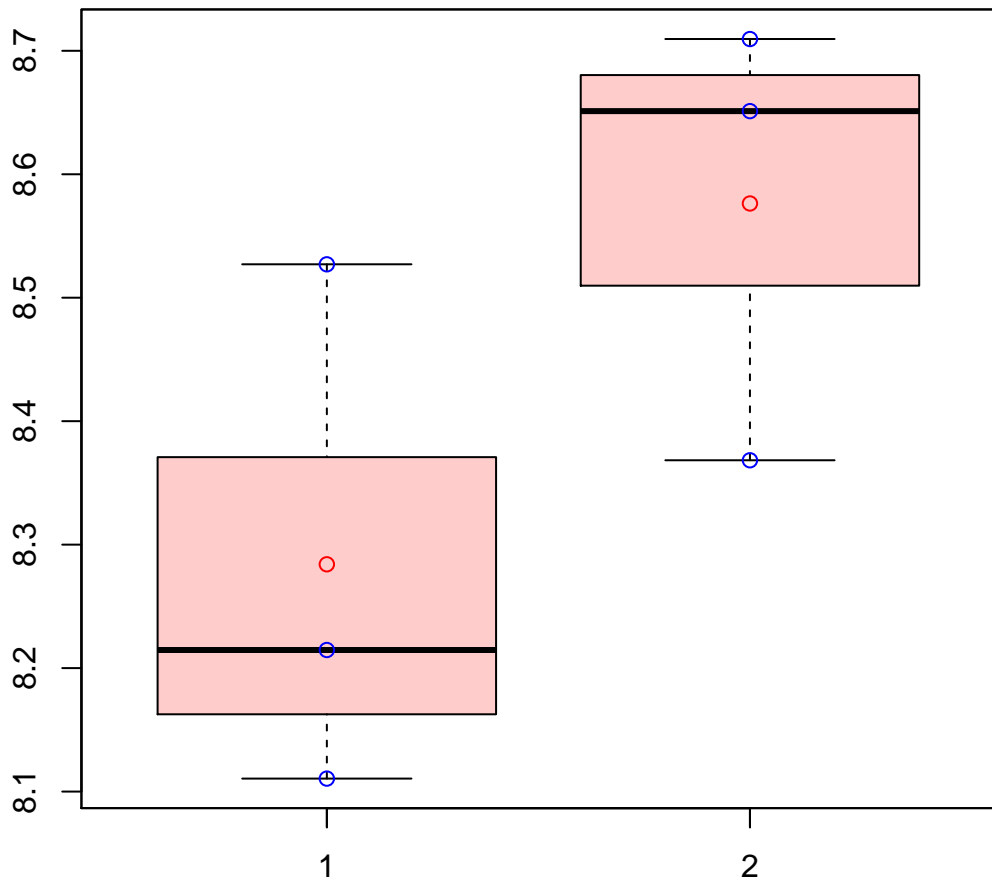

t-Test: p-value = 0.15

# CL2515Contig3|CL2515Contig3

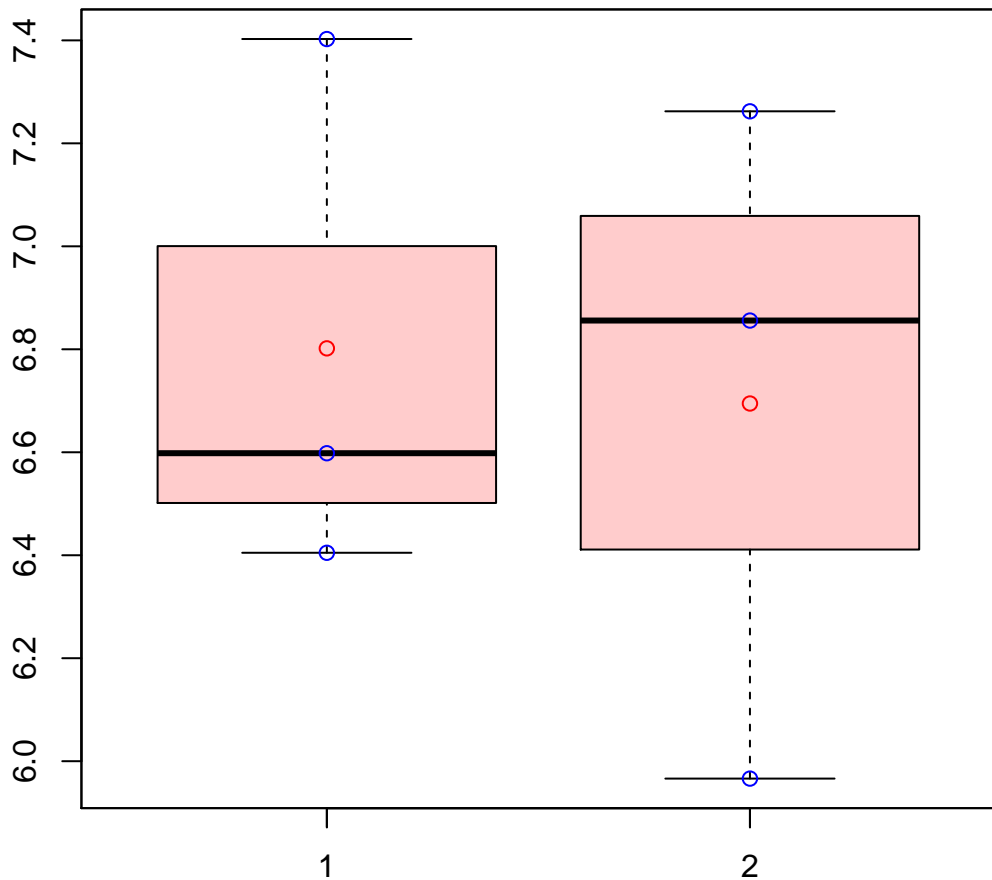

t-Test: p-value = 0.84

# CL2519Contig2|CL2519Contig2

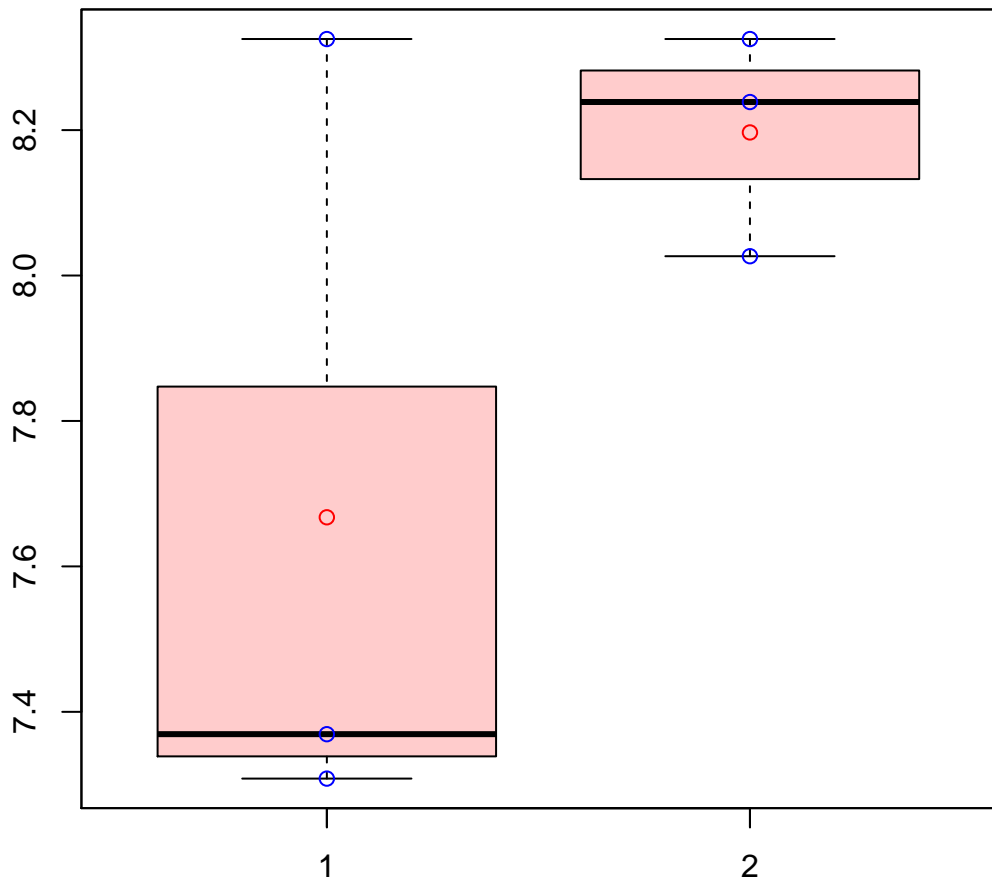

t-Test: p-value = 0.25

# CL251Contig8|CL251Contig8

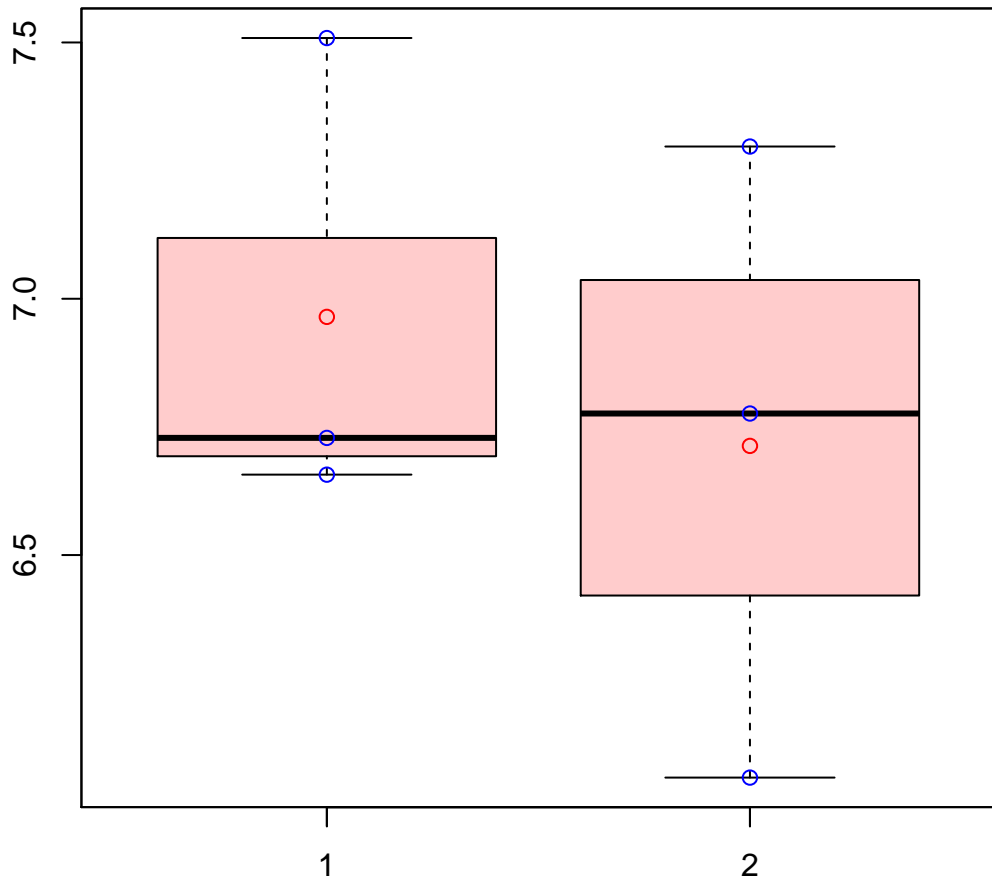

t-Test: p-value = 0.61

# CL2521Contig2|CL2521Contig2

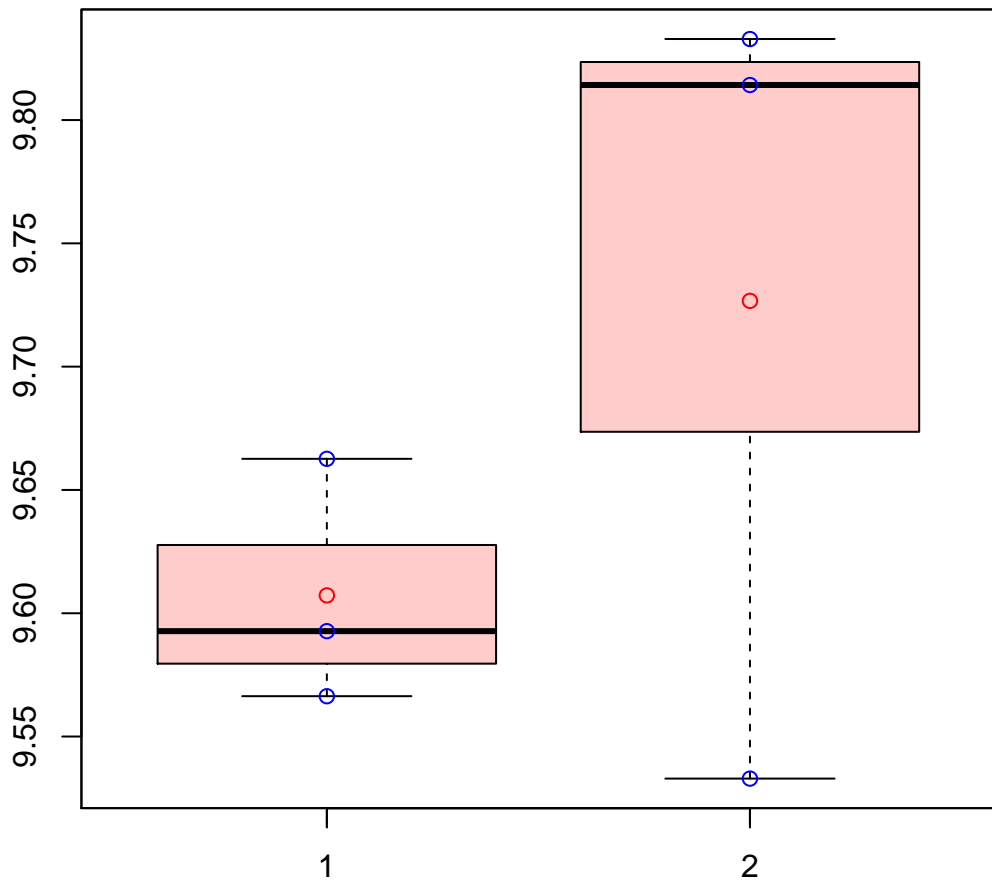

t-Test: p-value = 0.34

# CL2523Contig2|CL2523Contig2

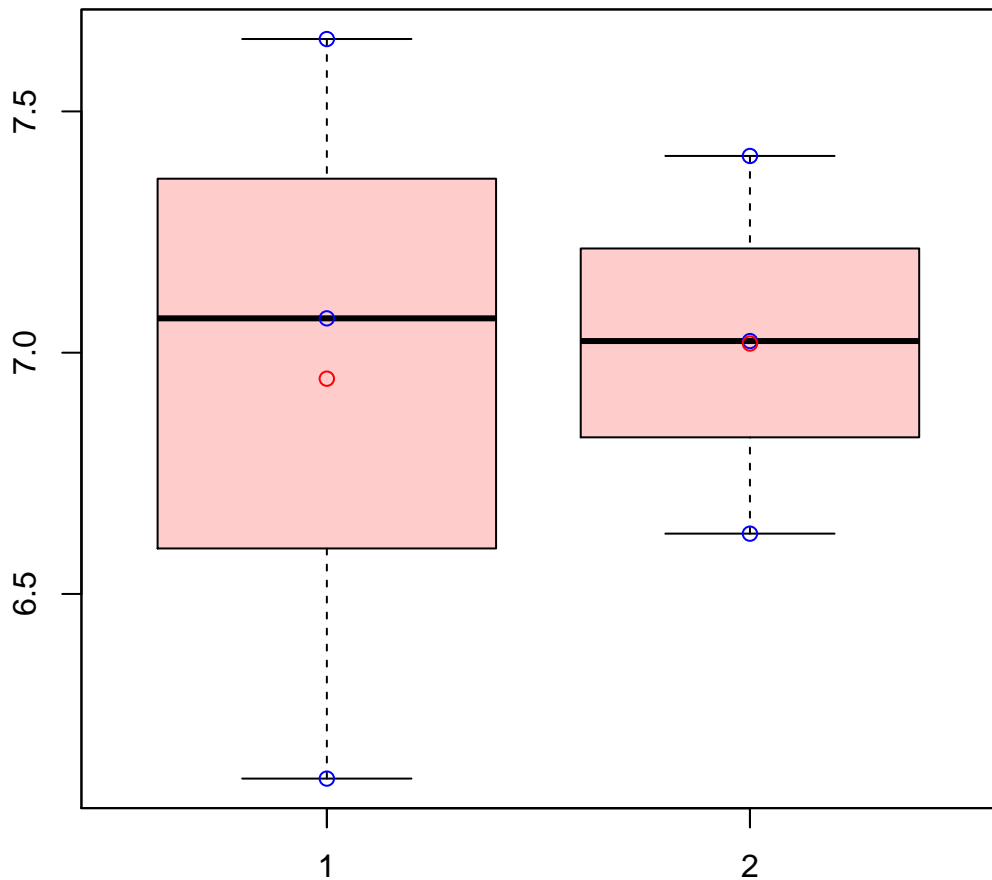

t-Test: p-value = 0.89



# CL2525Contig2|CL2525Contig2

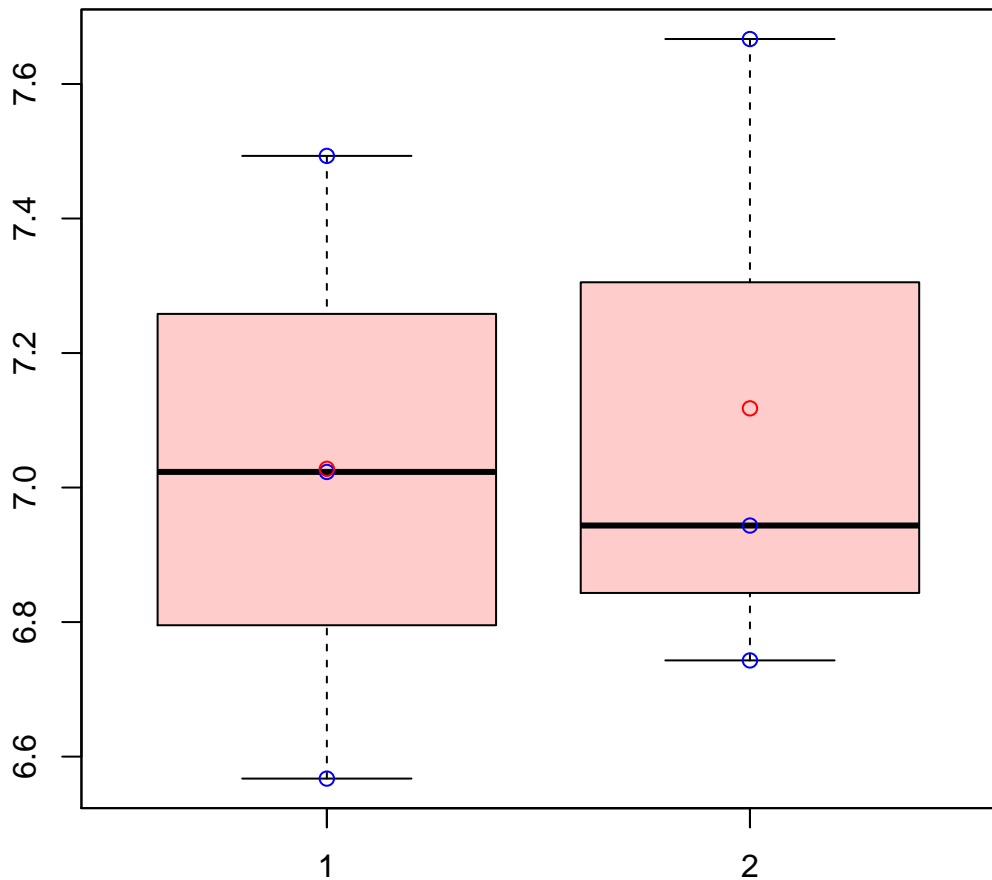

t-Test: p-value = 0.83

# CL2533Contig1|CL2533Contig1

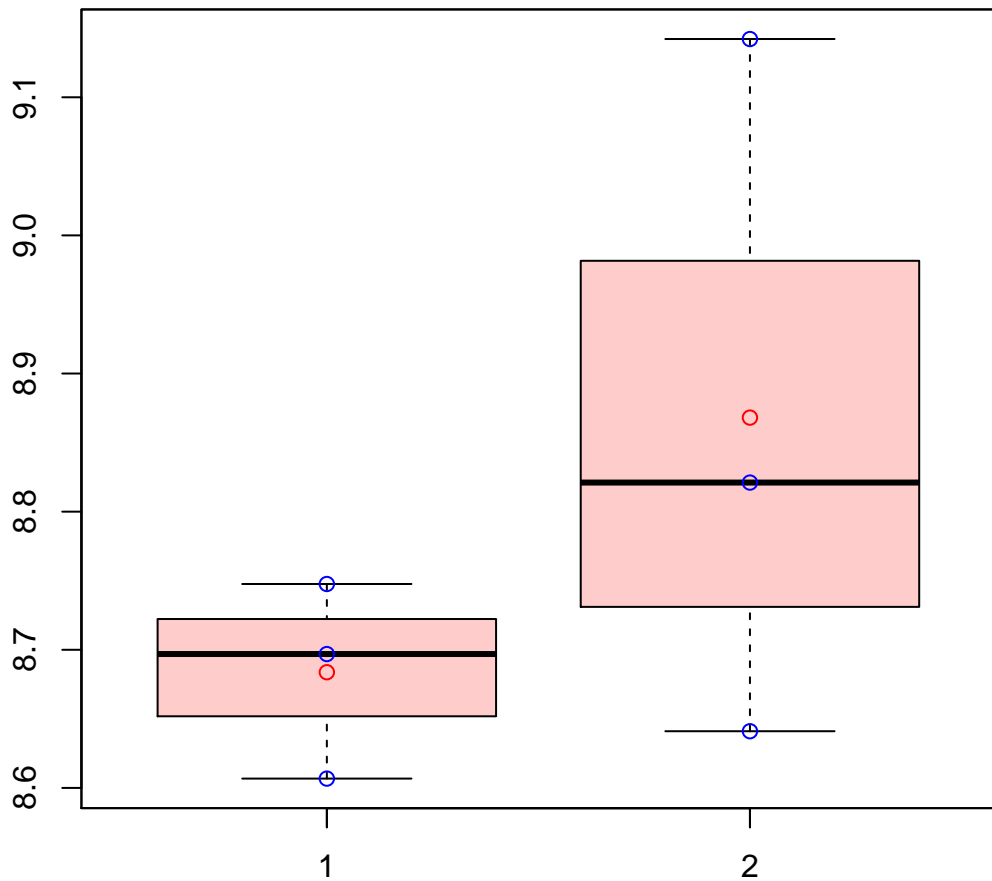

t-Test: p-value = 0.34

# CL2535Contig1|CL2535Contig1

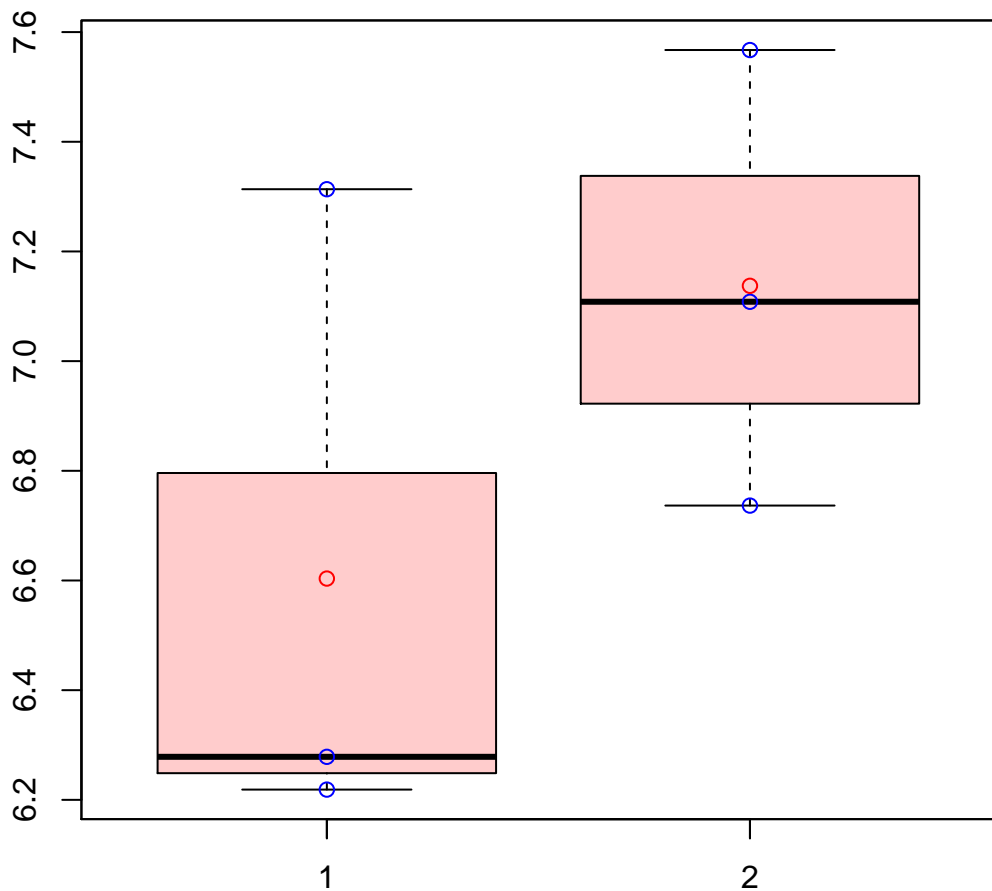

t-Test: p-value = 0.29

# CL253Contig1|CL253Contig1

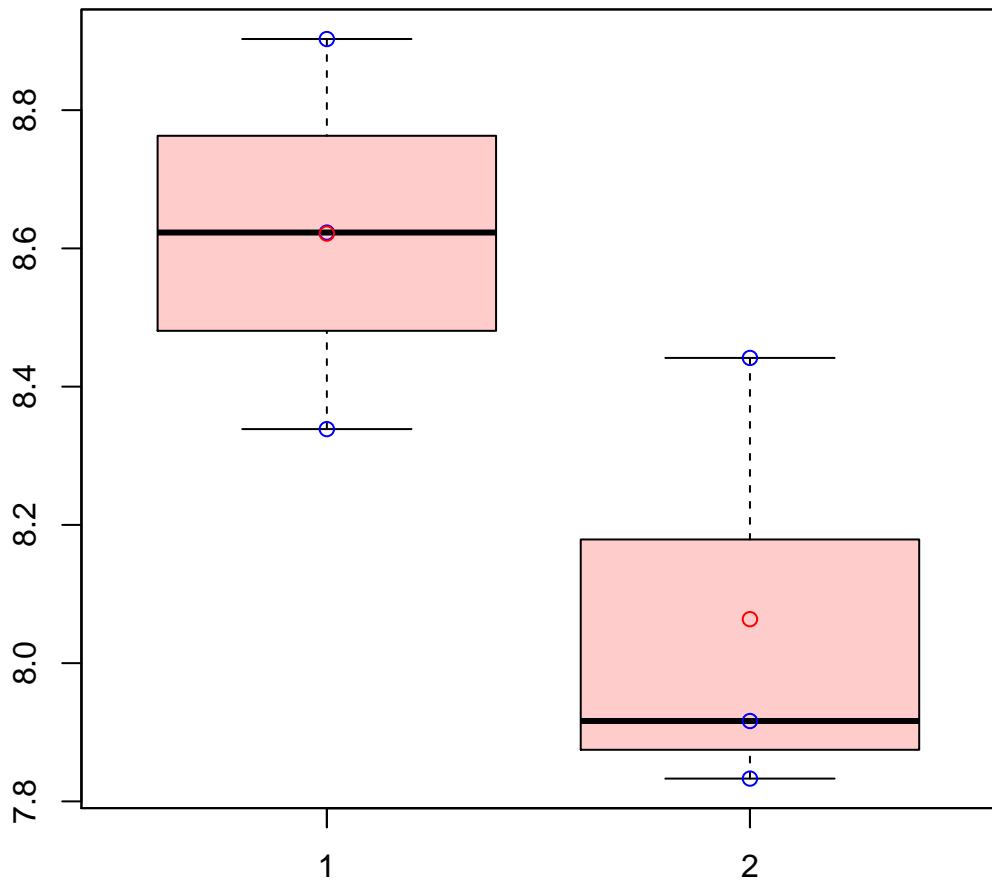

t-Test: p-value = 0.09

# CL253Contig5|CL253Contig5

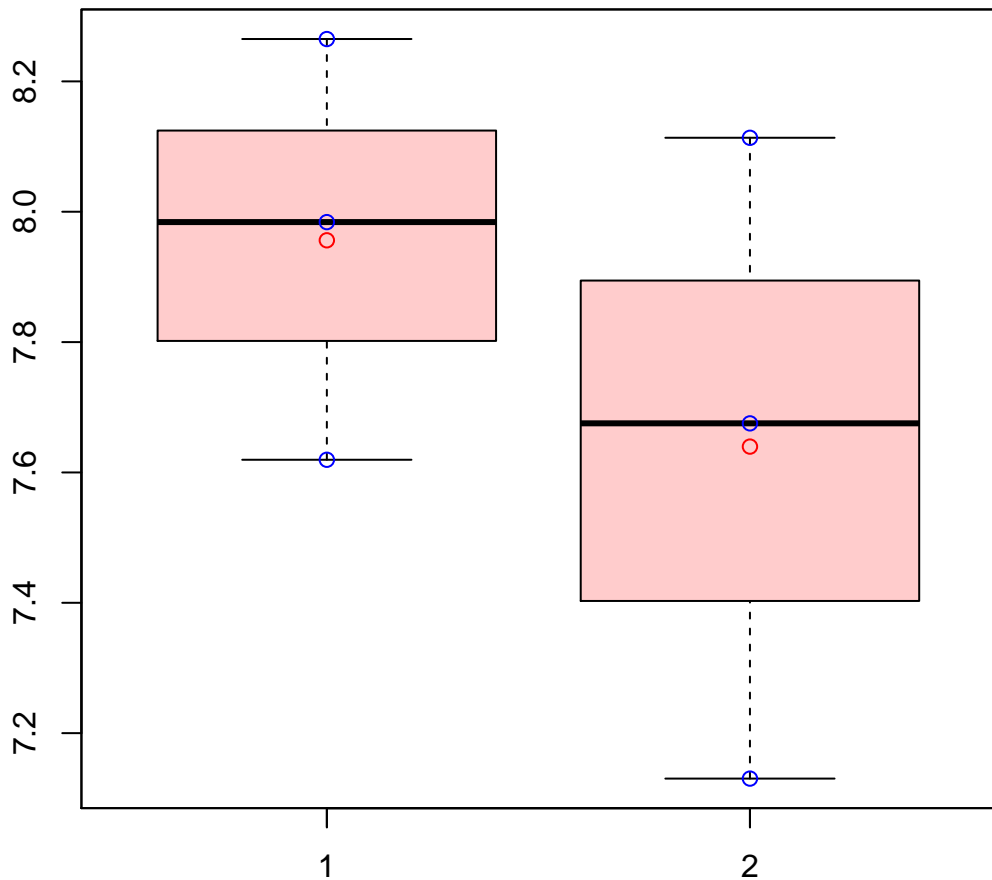

t-Test: p-value = 0.41

# CL2546Contig1|CL2546Contig1

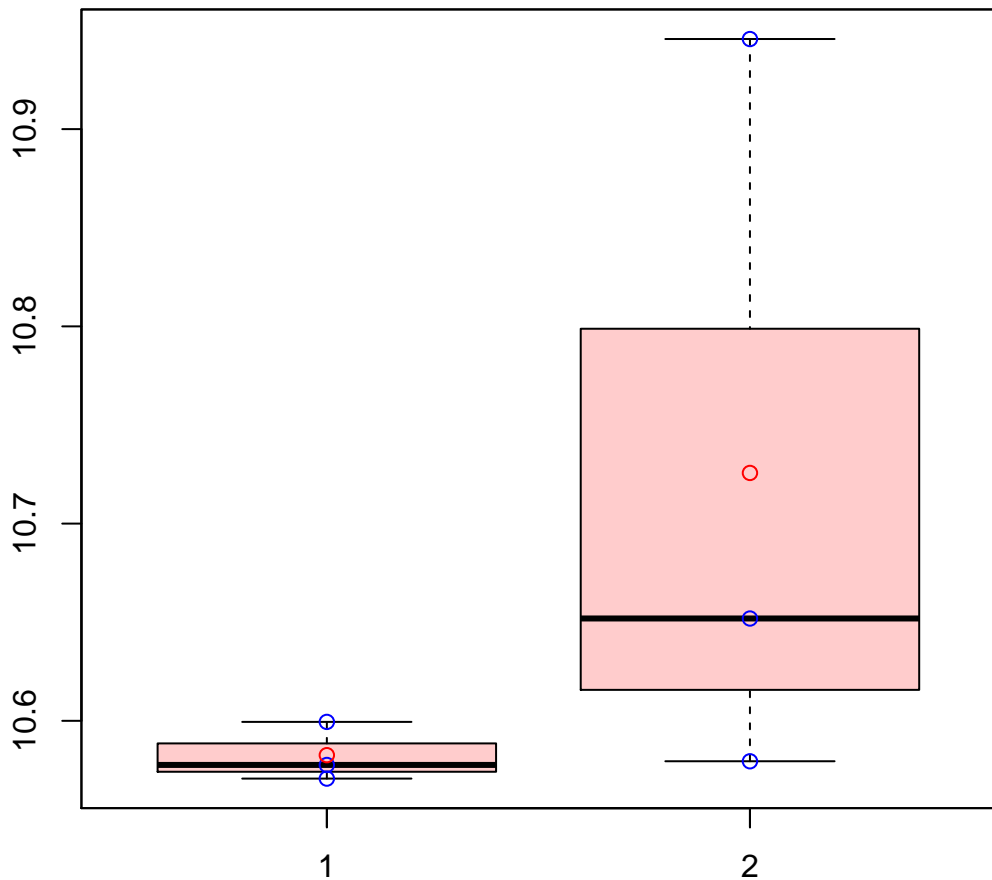

t-Test: p-value = 0.33

# CL2546Contig3|CL2546Contig3

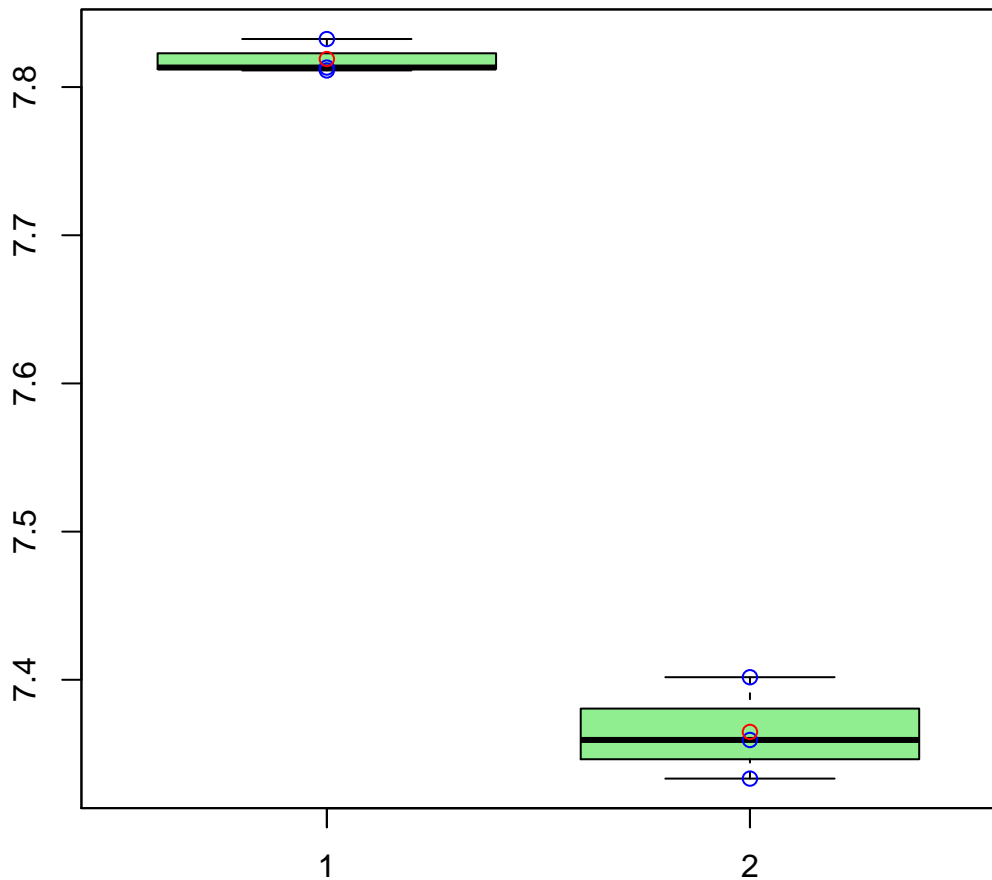

t-Test: p-value = 0

# CL2547Contig2|CL2547Contig2

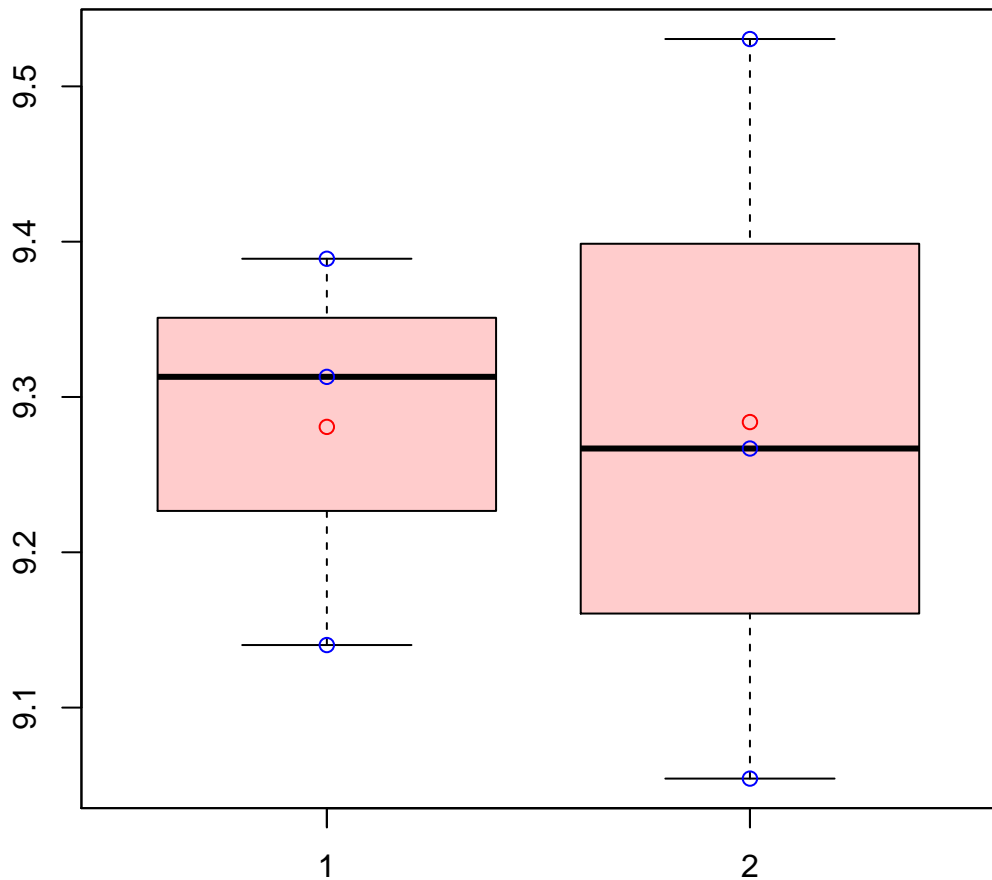

t-Test: p-value = 0.99



# CL25516Contig1|CL25516Contig1

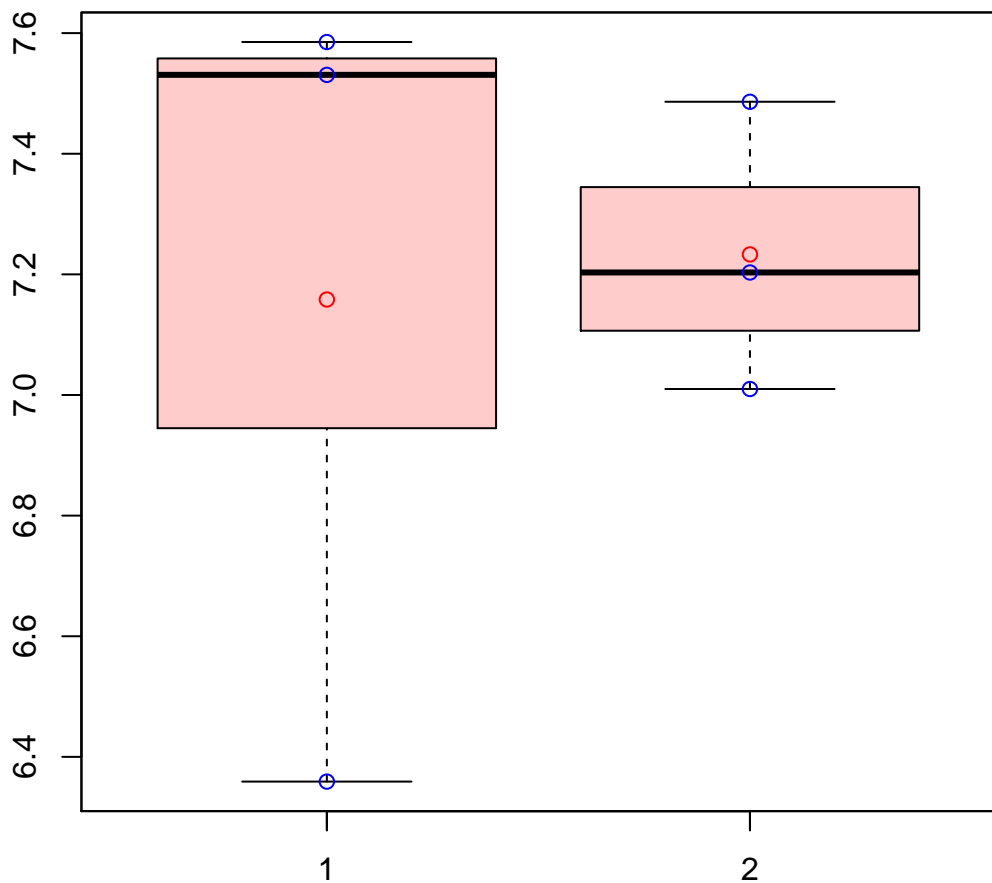

t-Test: p-value = 0.87

# CL255Contig3|CL255Contig3

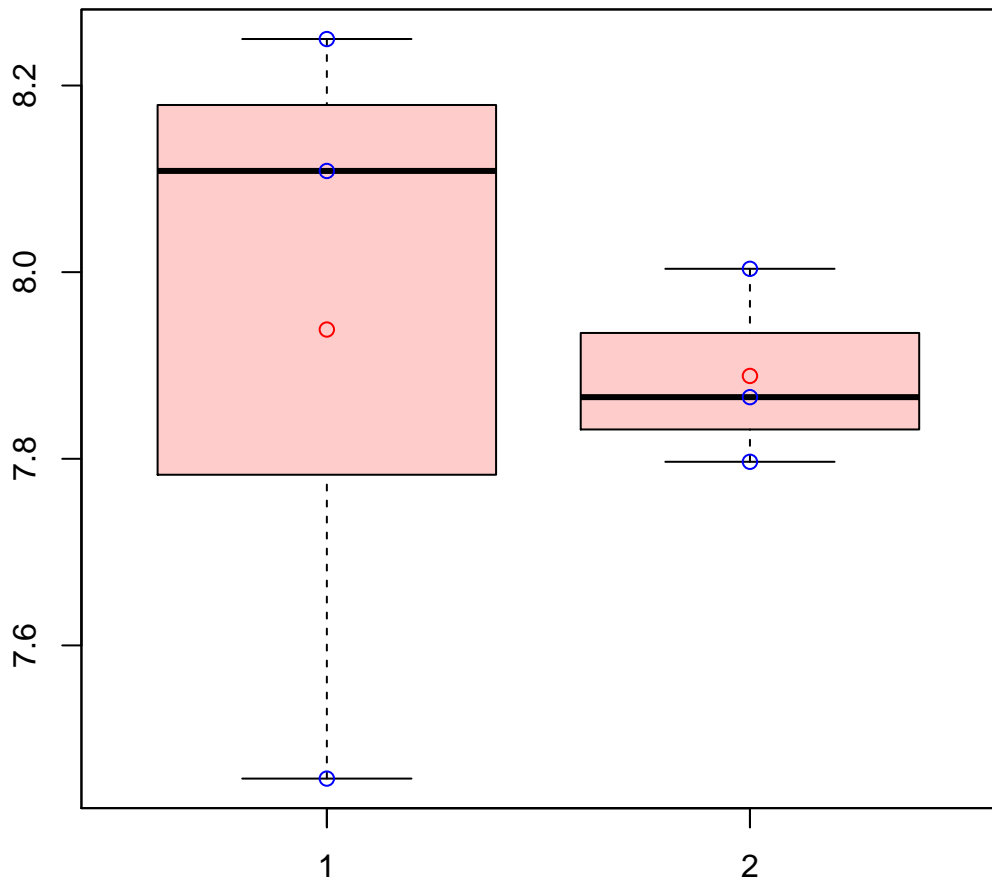

t-Test: p-value = 0.86

# CL255Contig7|CL255Contig7

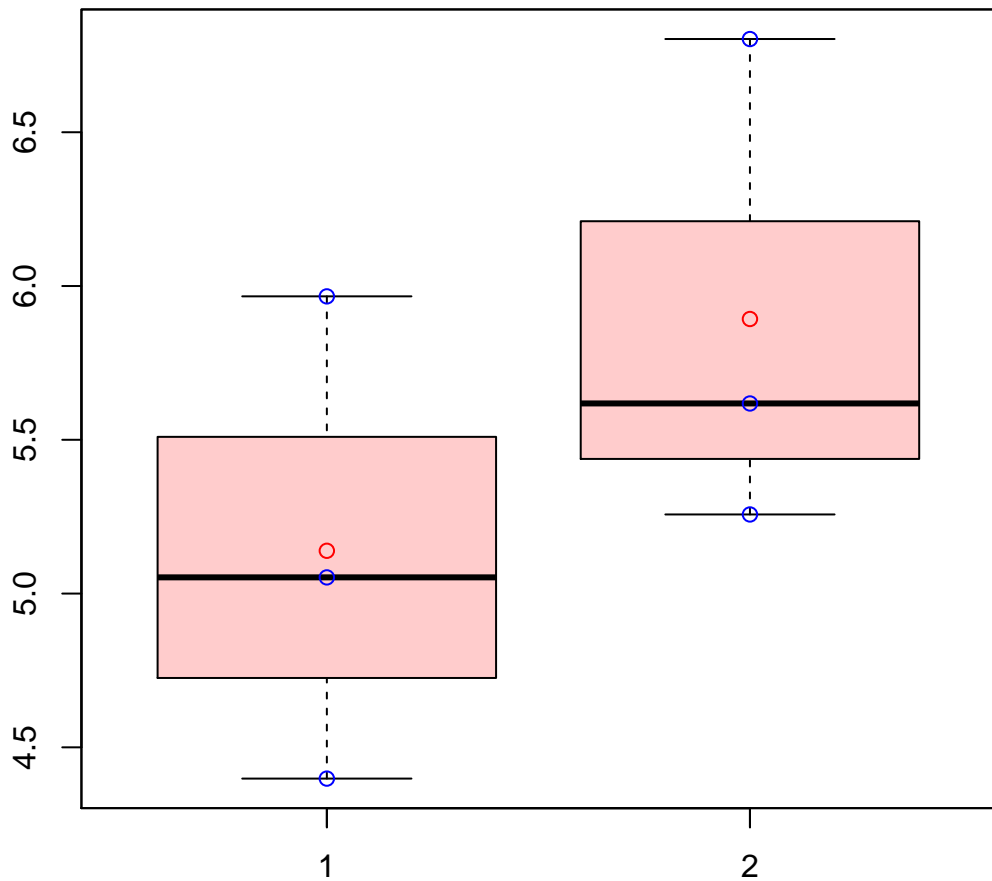

t-Test: p-value = 0.31

# CL256Contig12|CL256Contig12

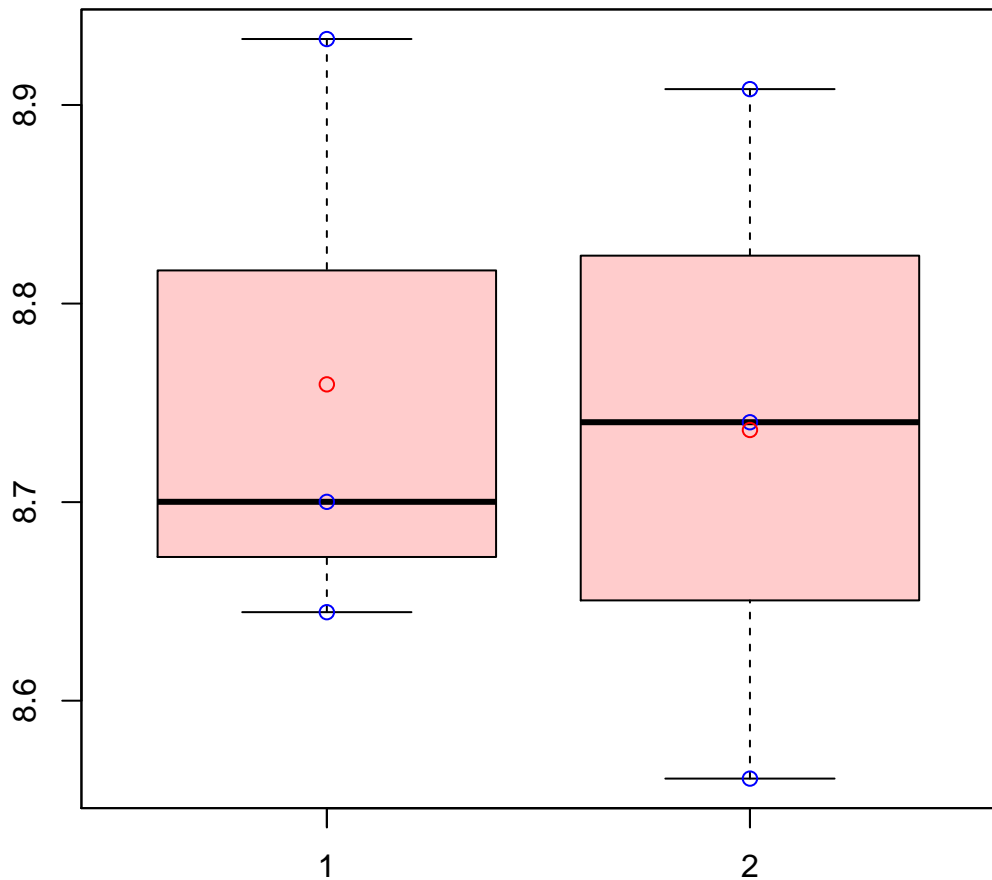

t-Test: p-value = 0.87

# CL2575Contig2|CL2575Contig2

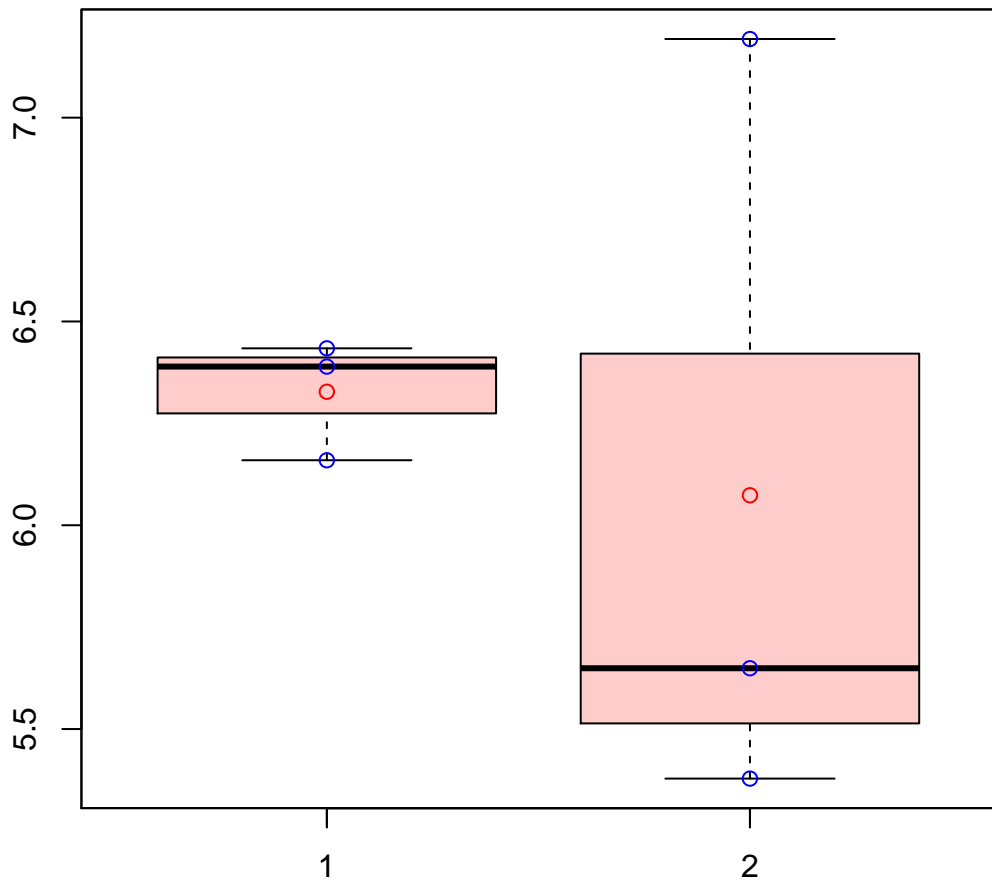

t-Test: p-value = 0.7

# CL257Contig7|CL257Contig7

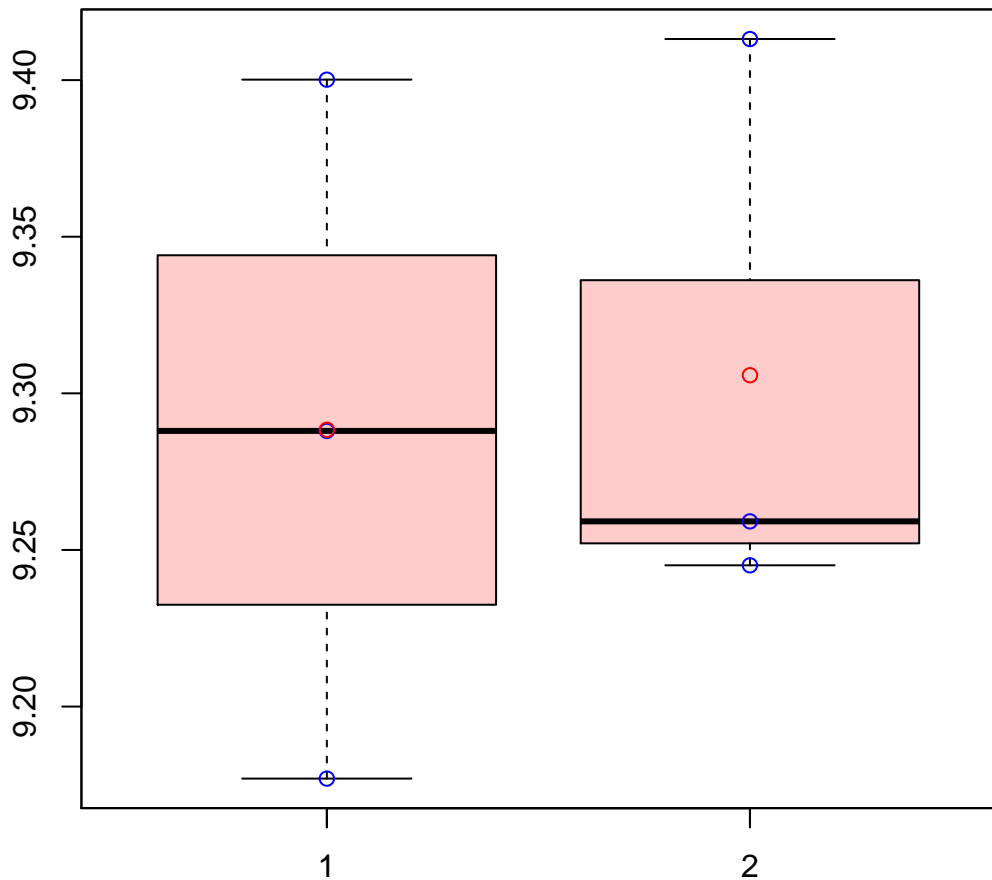

t-Test: p-value = 0.85

# CL259Contig3|CL259Contig3

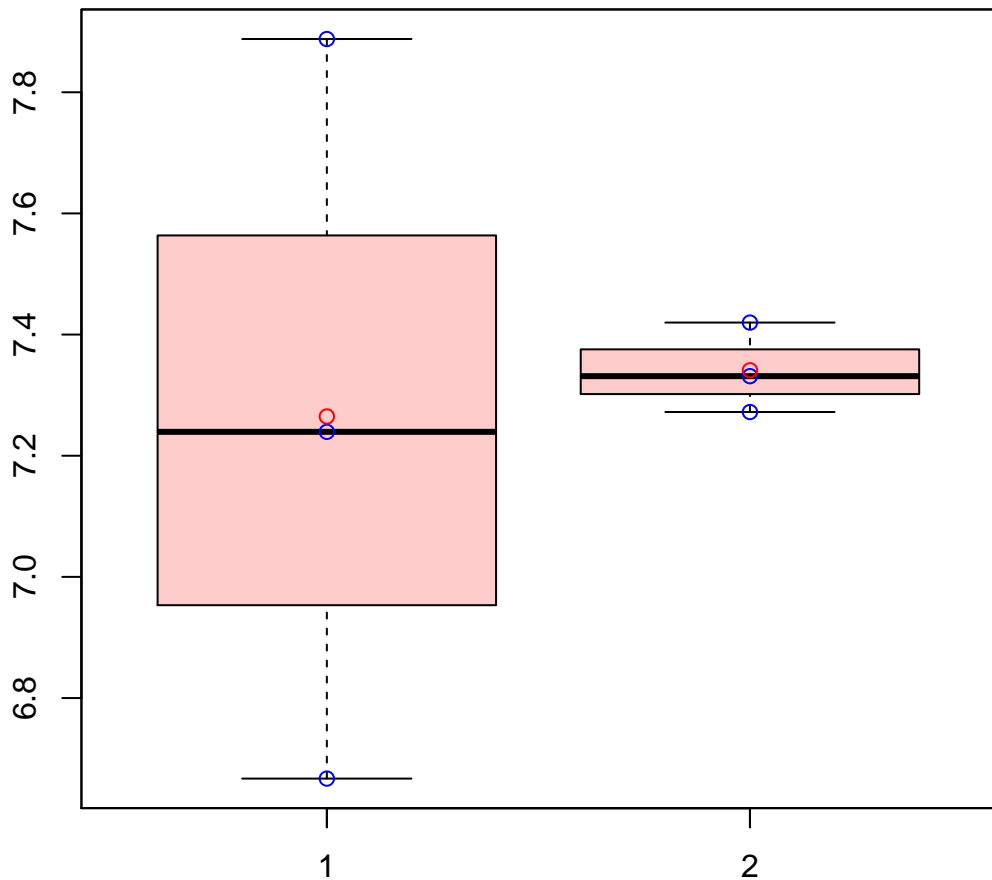

t-Test: p-value = 0.85

# CL2610Contig5|CL2610Contig5

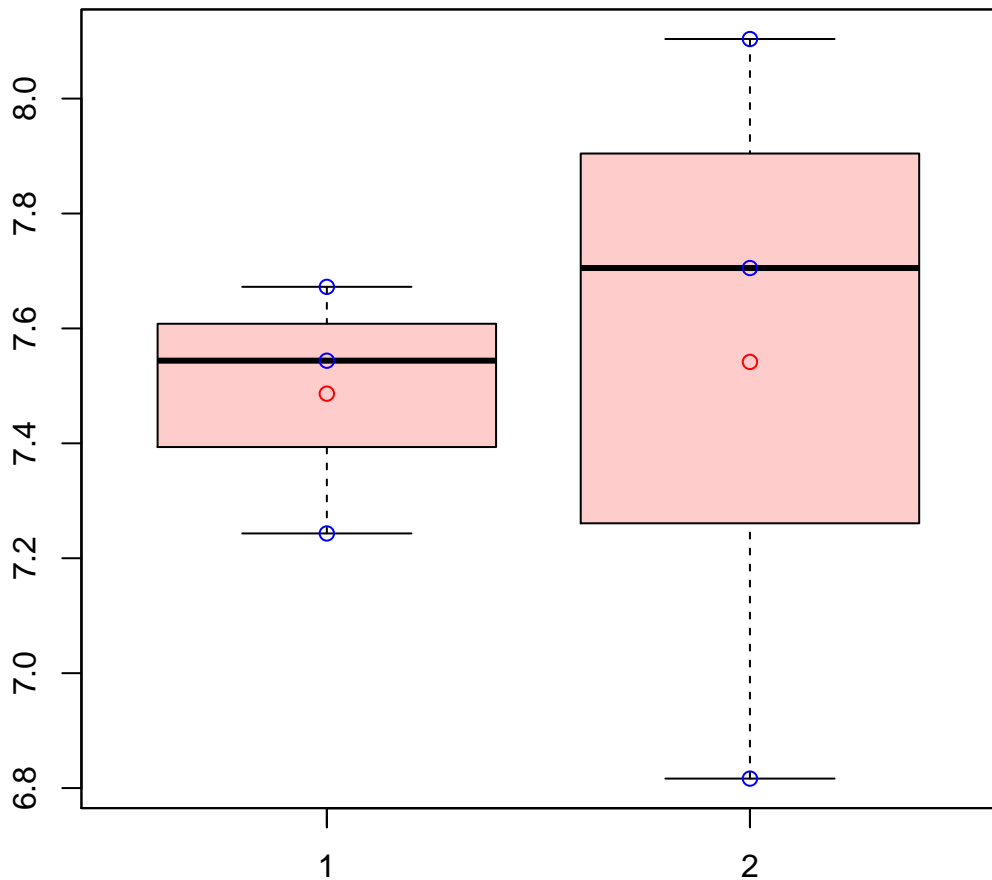

t-Test: p-value = 0.9



# CL2617Contig3|CL2617Contig3

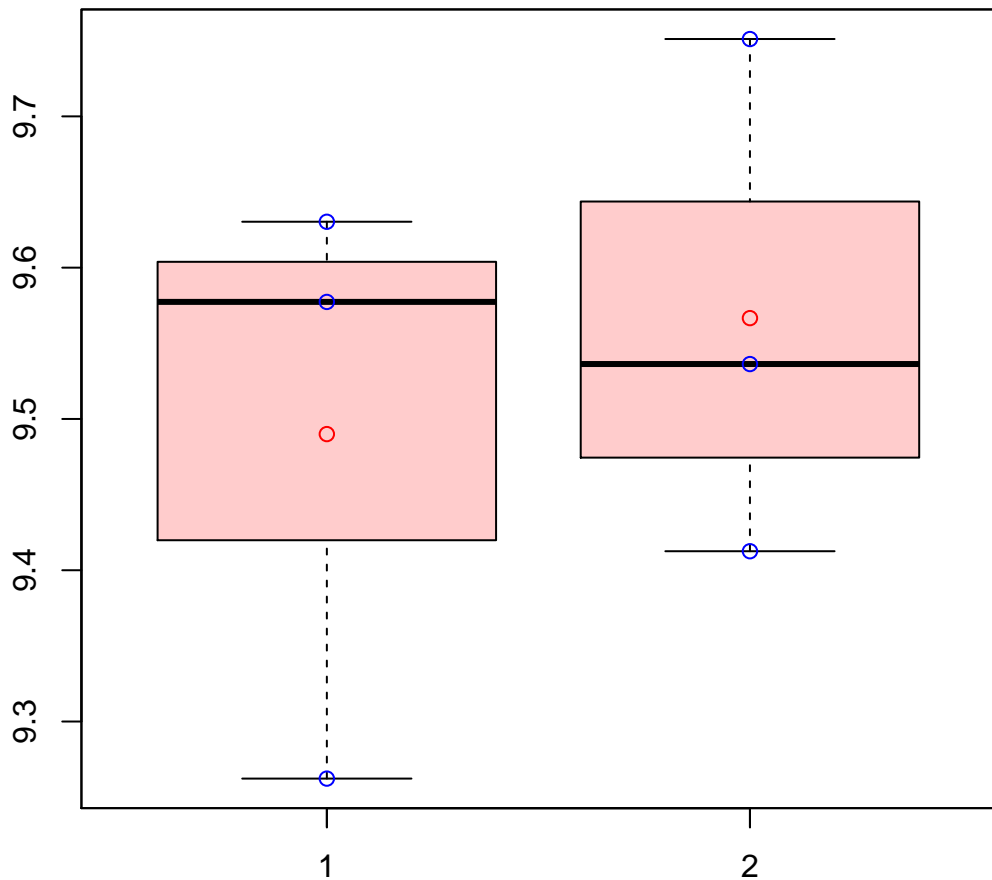

t-Test: p-value = 0.64

# CL2618Contig3|CL2618Contig3

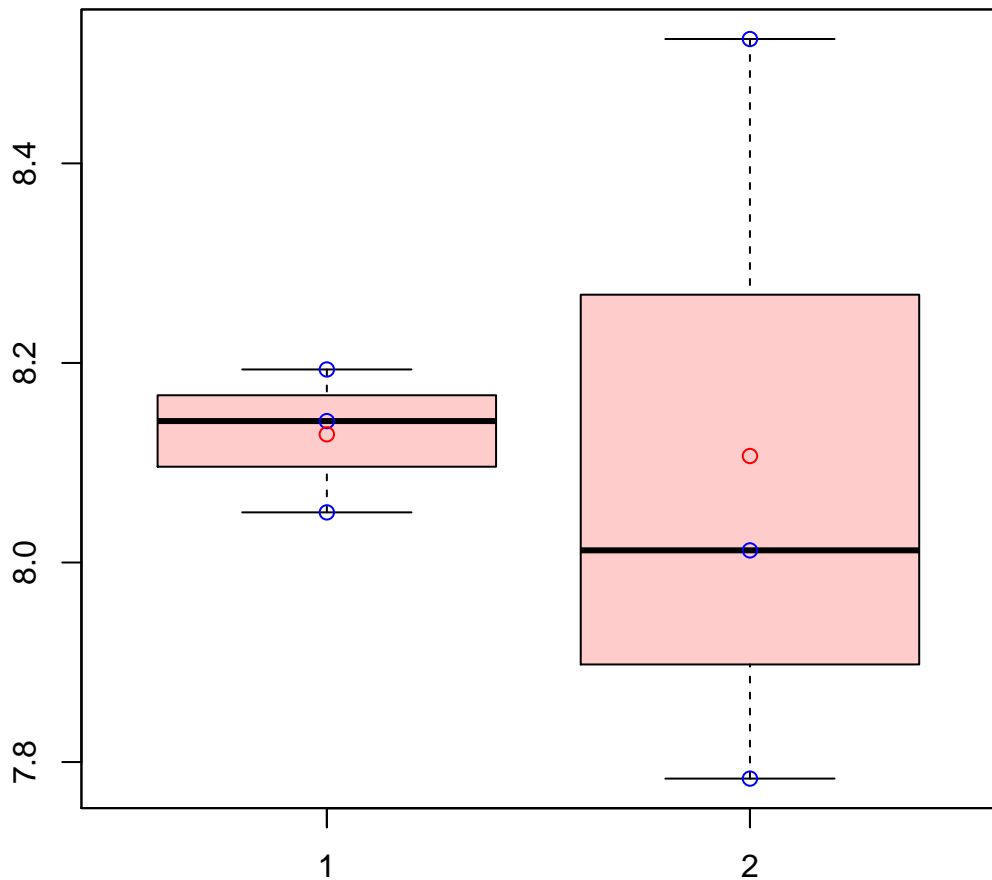

t-Test: p-value = 0.93

# CL261Contig1|CL261Contig1

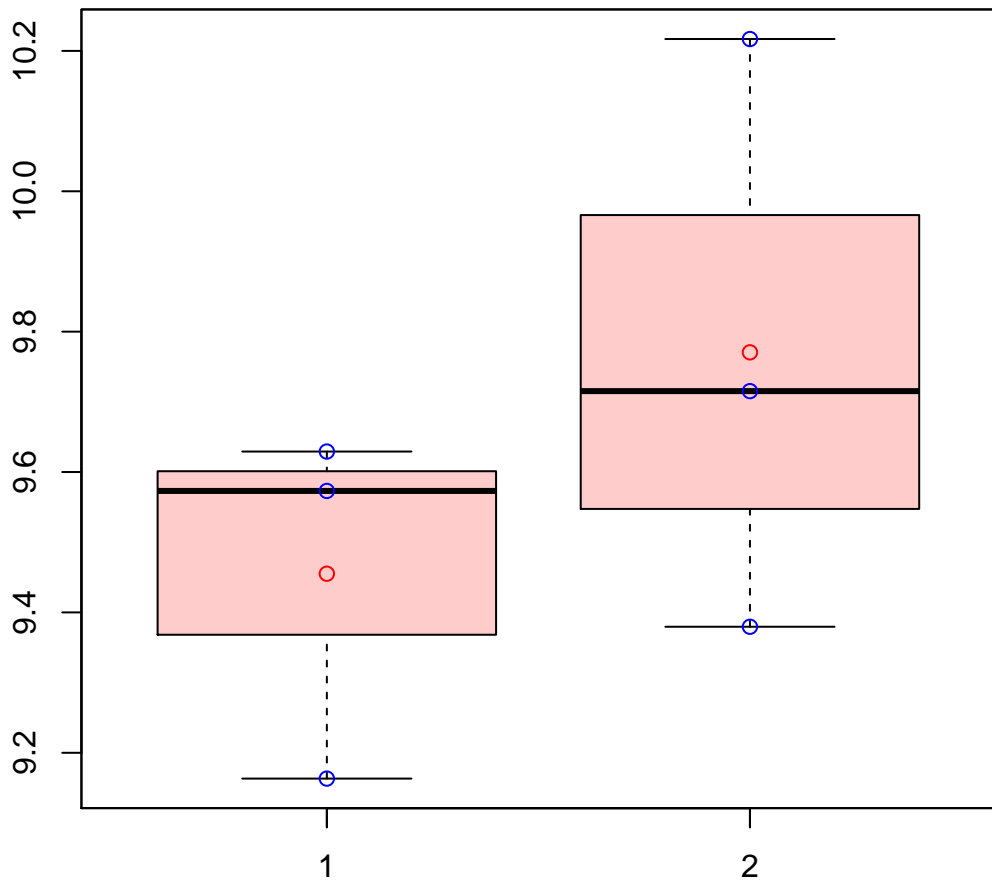

t-Test: p-value = 0.34

# CL2620Contig3|CL2620Contig3

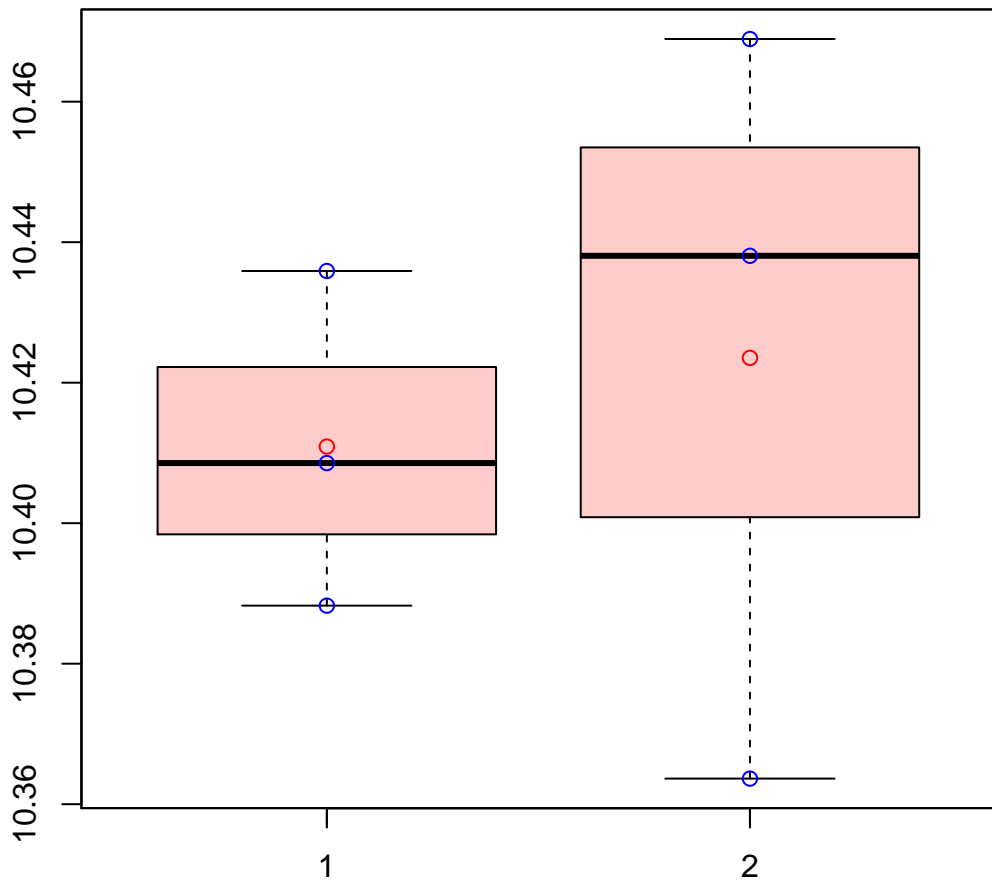

t-Test: p-value = 0.74

# CL2623Contig2|CL2623Contig2

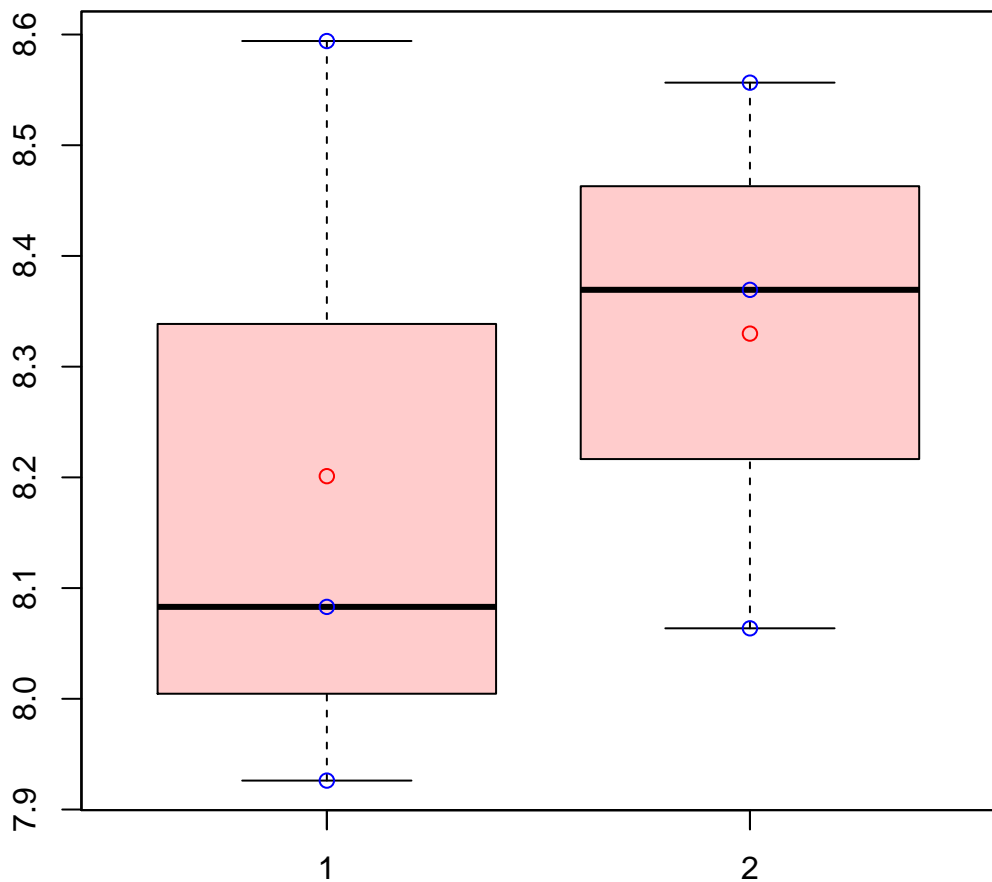

t-Test: p-value = 0.63

# CL26313Contig1|CL26313Contig1

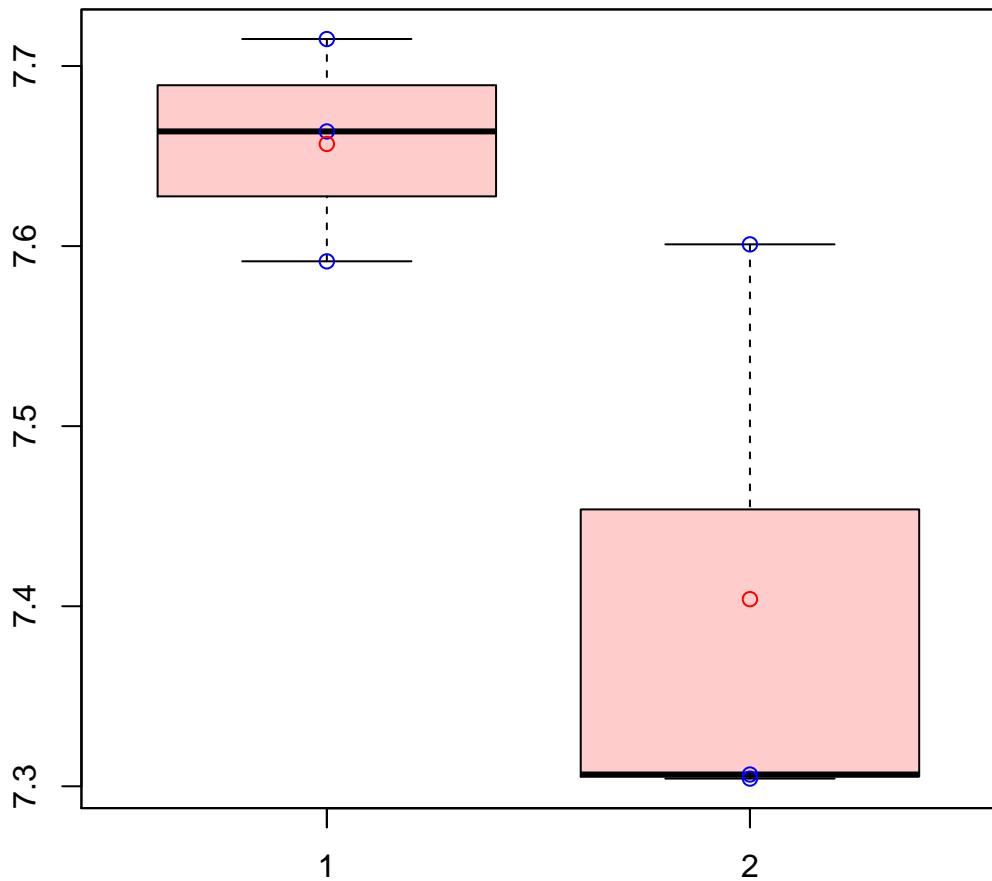

t-Test: p-value = 0.11

# CL2631Contig5|CL2631Contig5

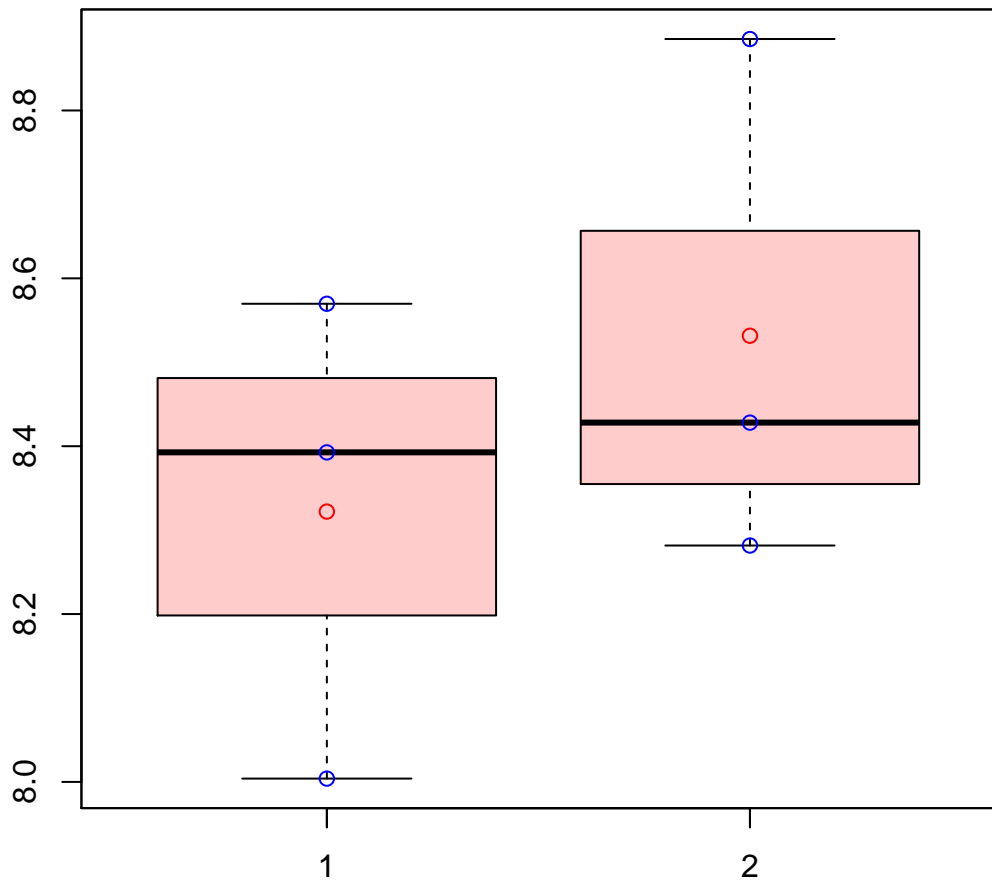

t-Test: p-value = 0.44

# CL2634Contig2|CL2634Contig2

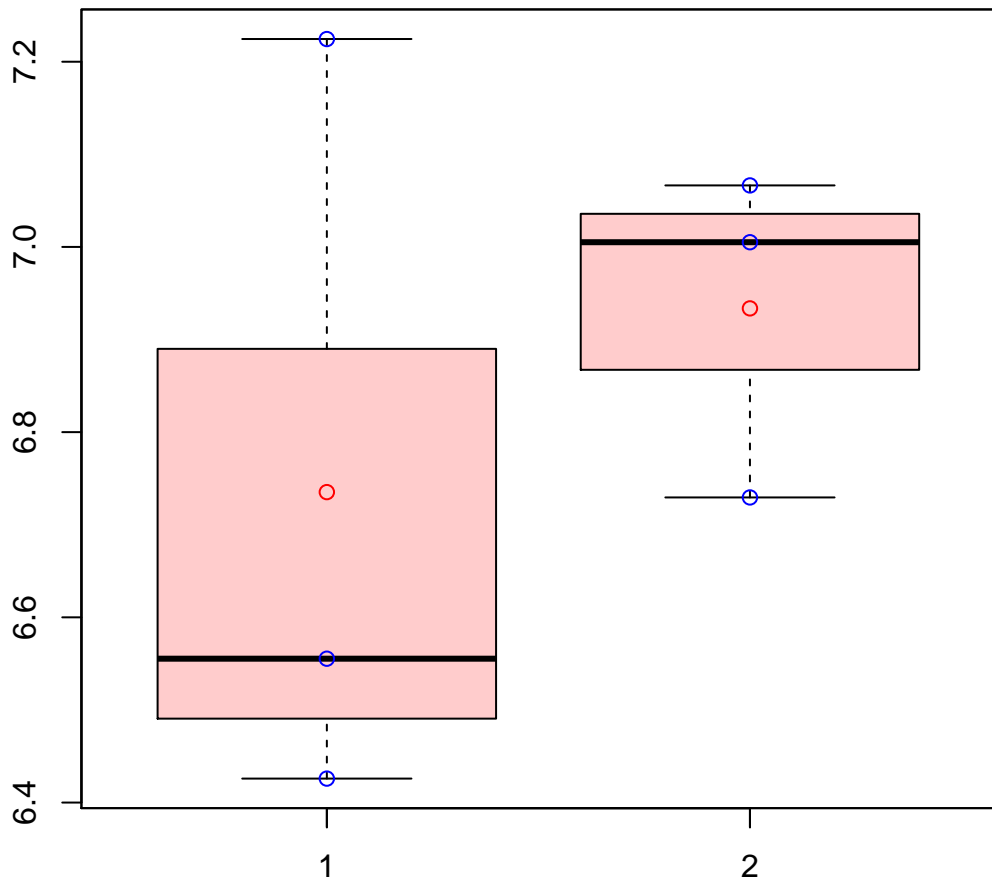

t-Test: p-value = 0.52



# CL2635Contig2|CL2635Contig2

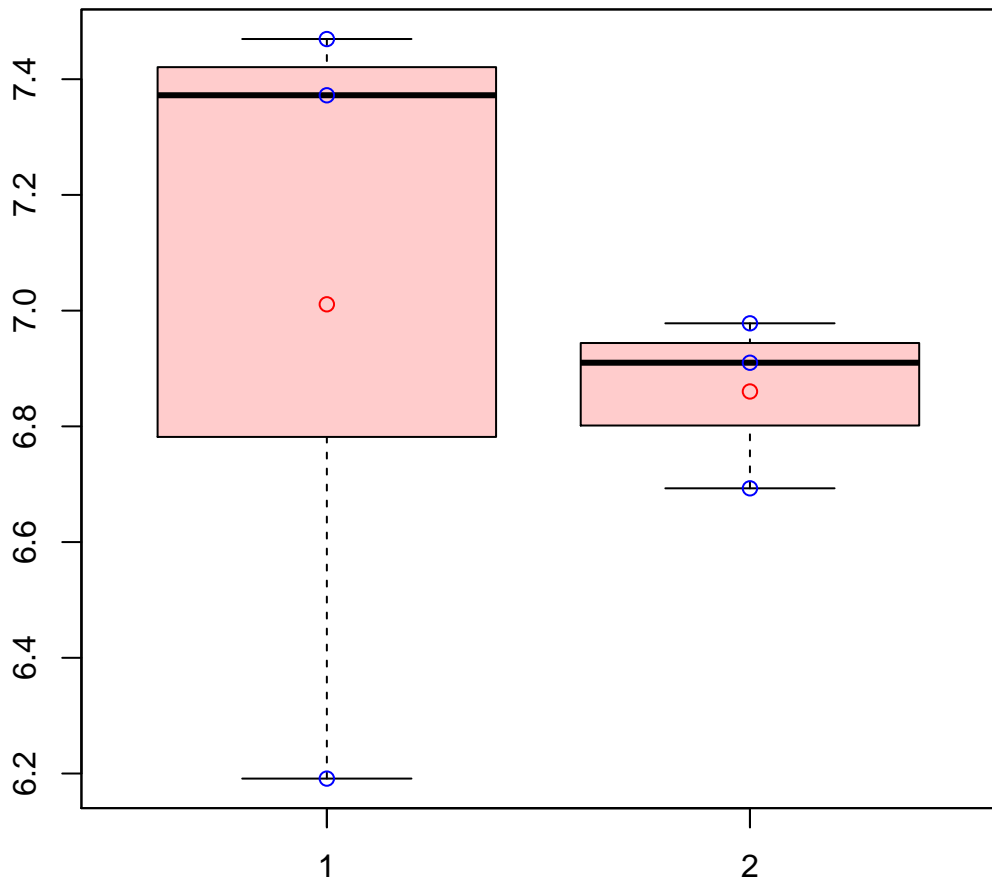

t-Test: p-value = 0.75

# CL2637Contig1|CL2637Contig1

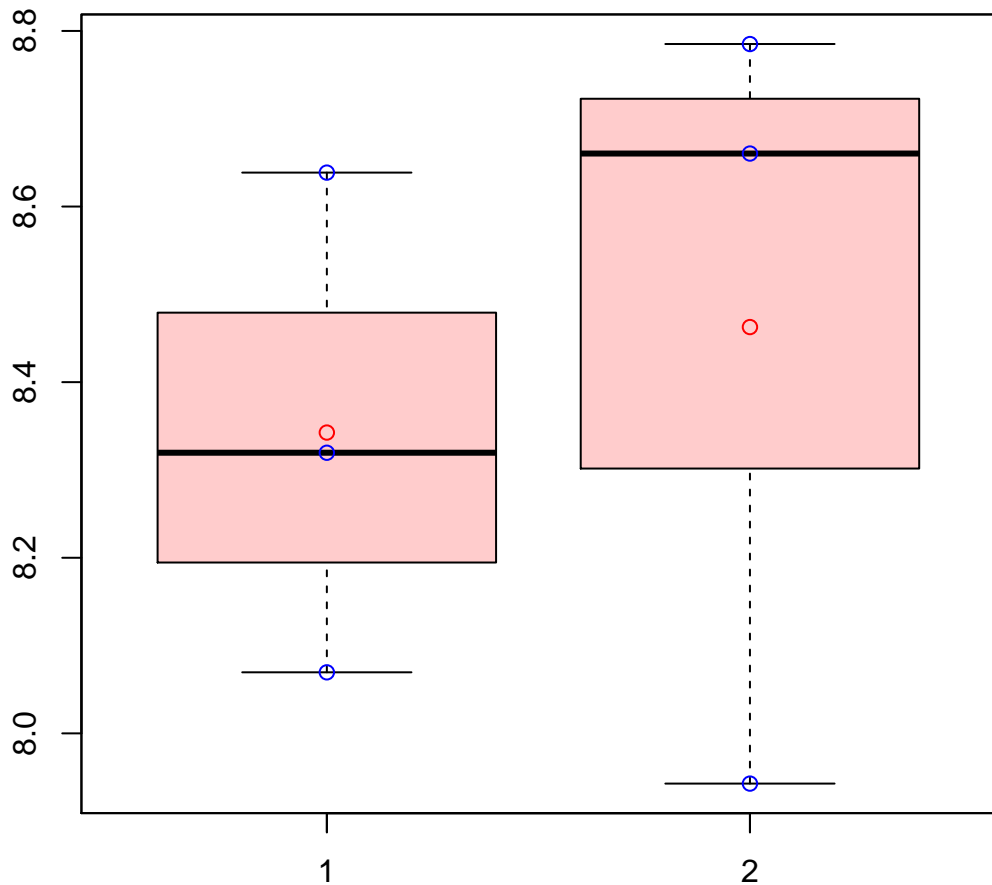

t-Test: p-value = 0.72

## CL2637Contig2|CL2637Contig2

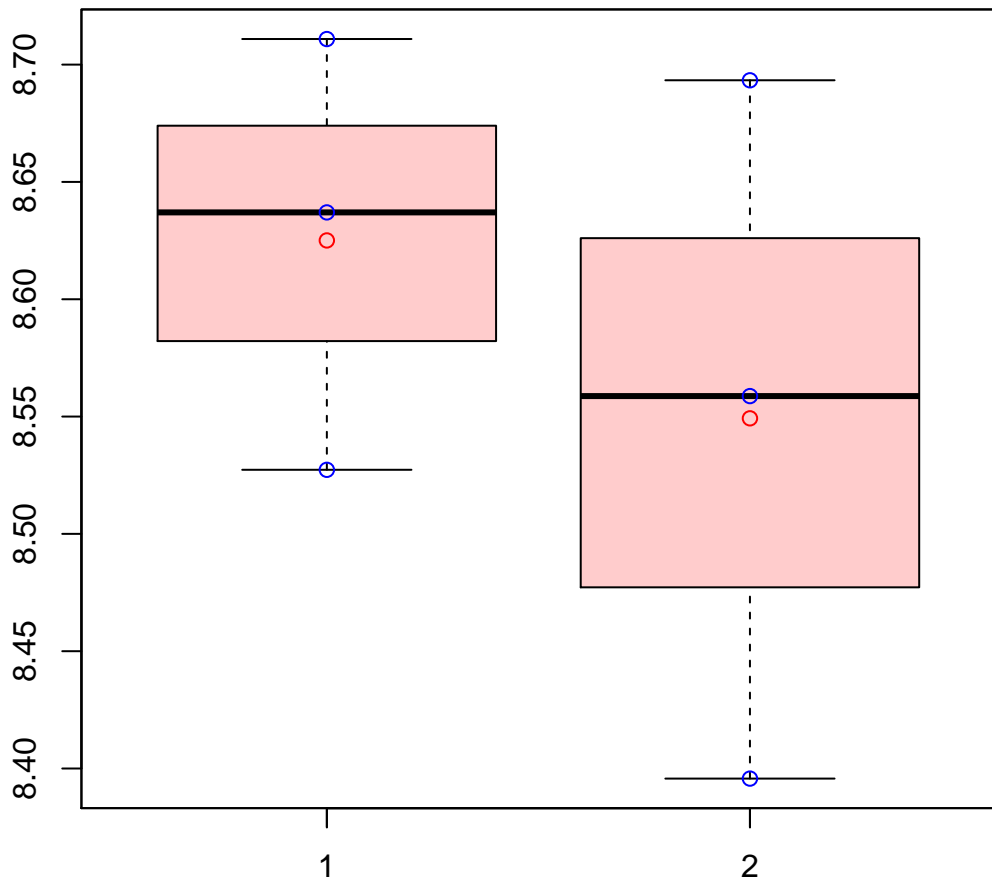

t-Test: p-value = 0.5

# CL2638Contig2|CL2638Contig2

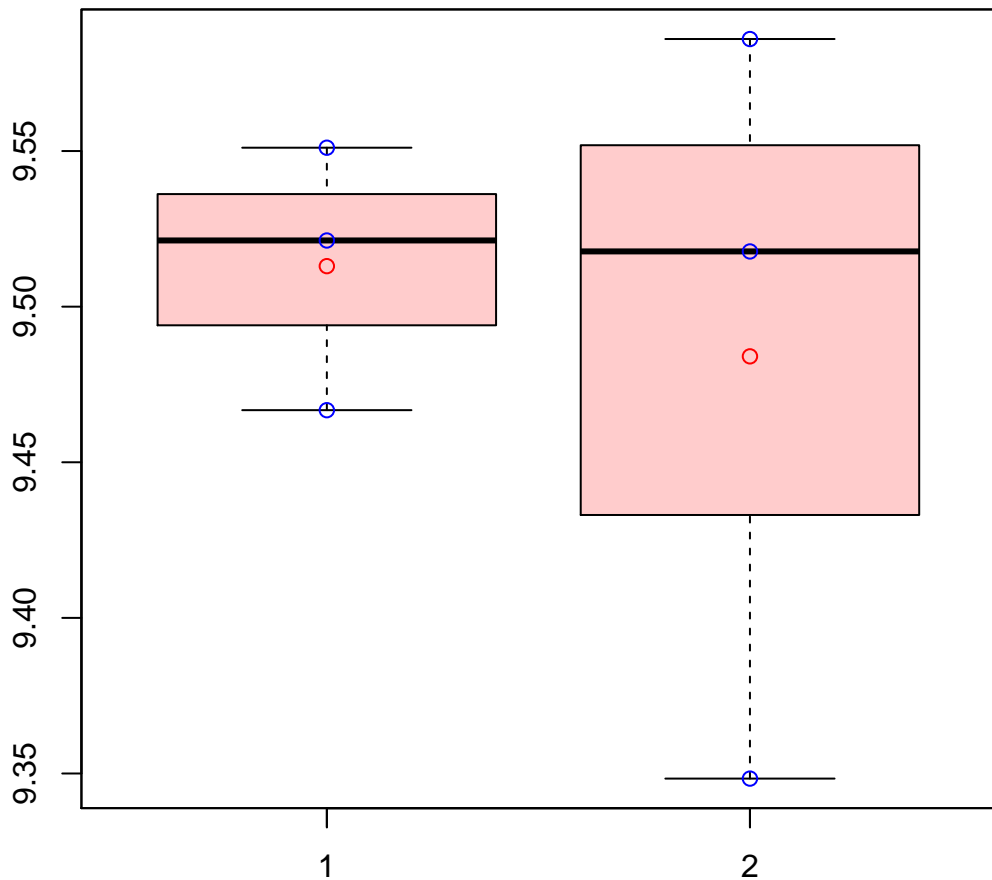

t-Test: p-value = 0.73

# CL2640Contig8|CL2640Contig8

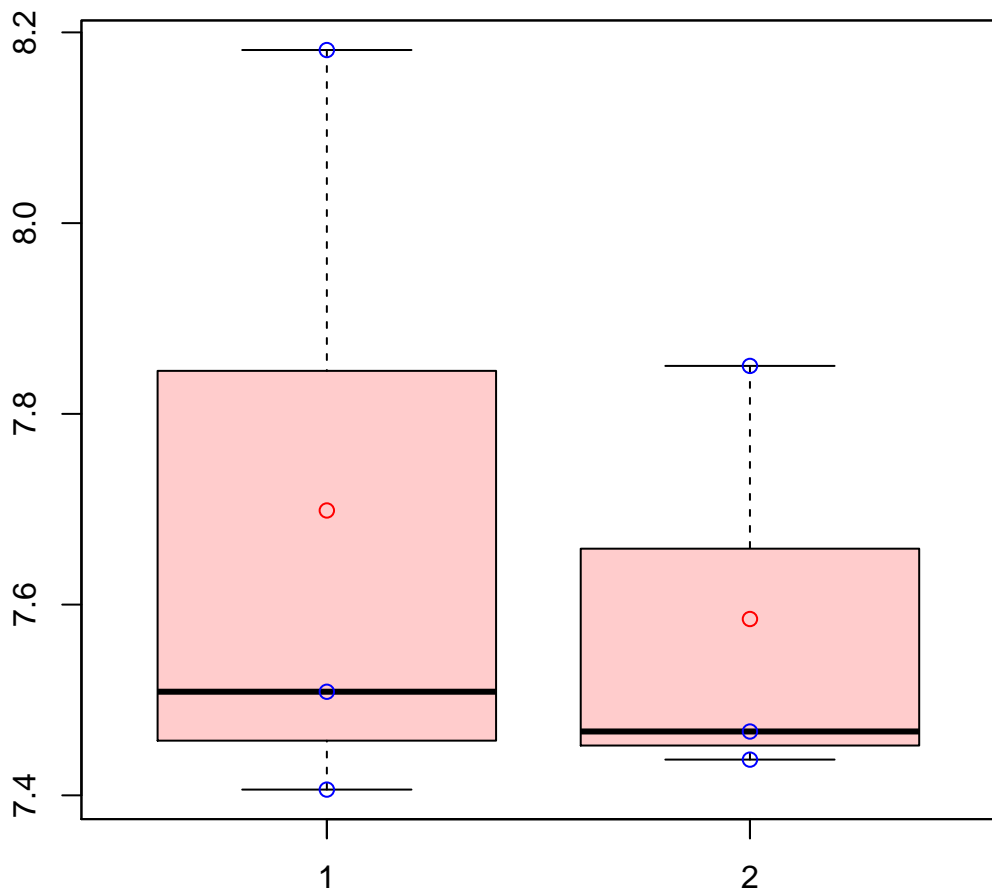

t-Test: p-value = 0.71

# CL2641Contig2|CL2641Contig2

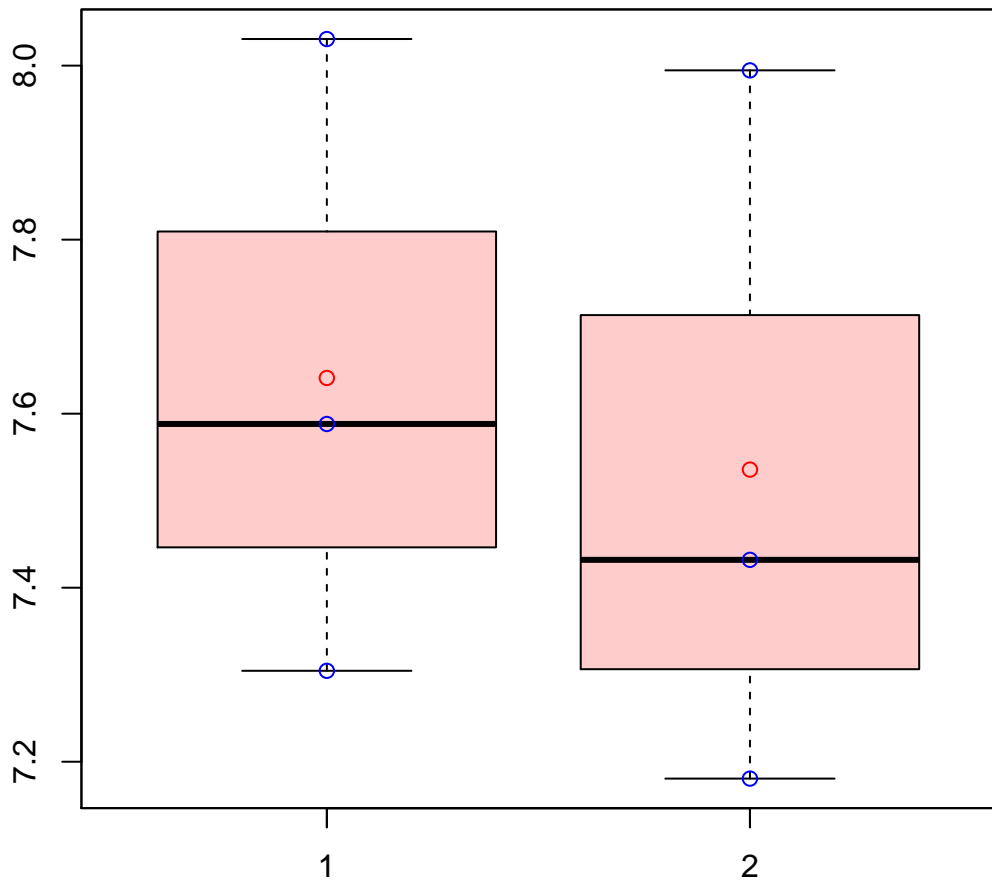

t-Test: p-value = 0.76

# CL264Contig10|CL264Contig10

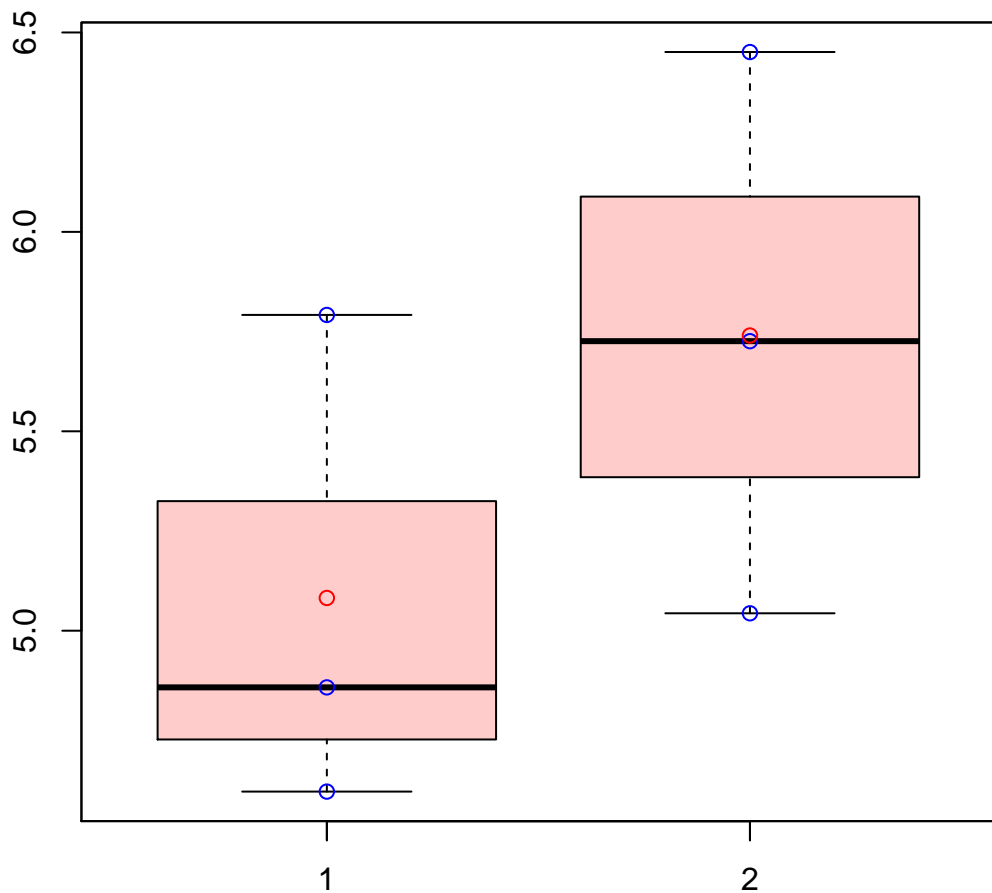

t-Test: p-value = 0.29

# CL266Contig11|CL266Contig11

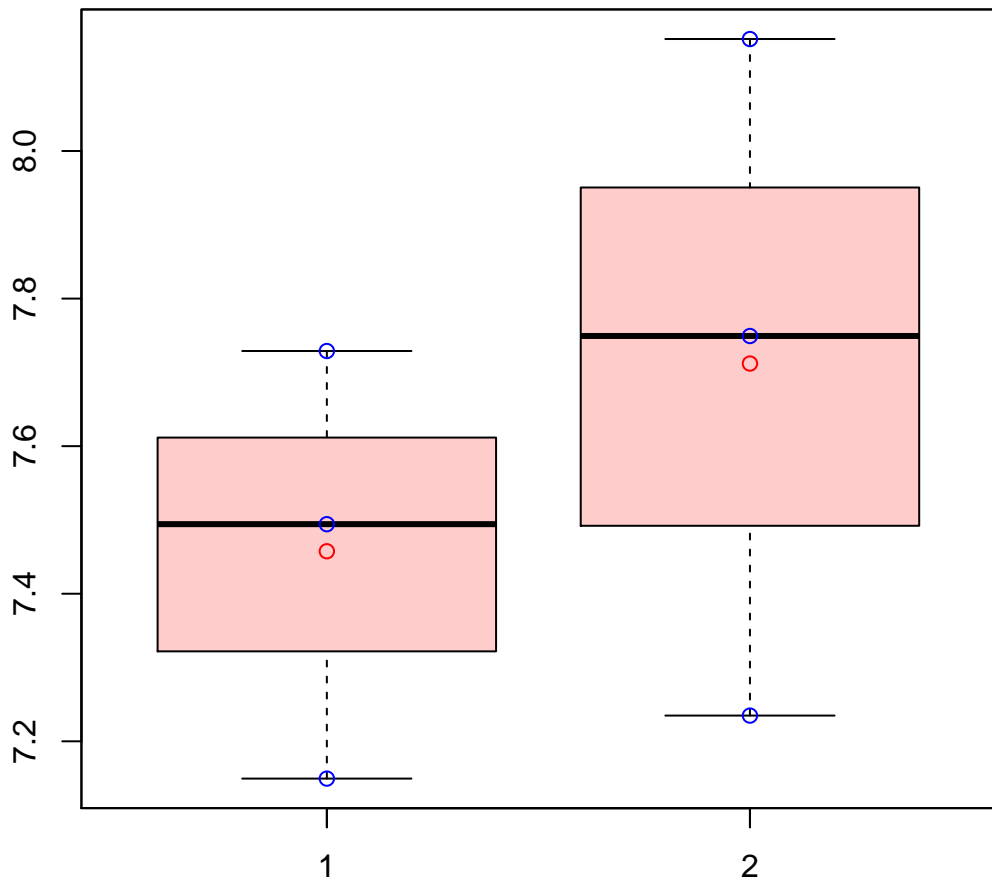

t-Test: p-value = 0.47



# CL26770Contig1|CL26770Contig1

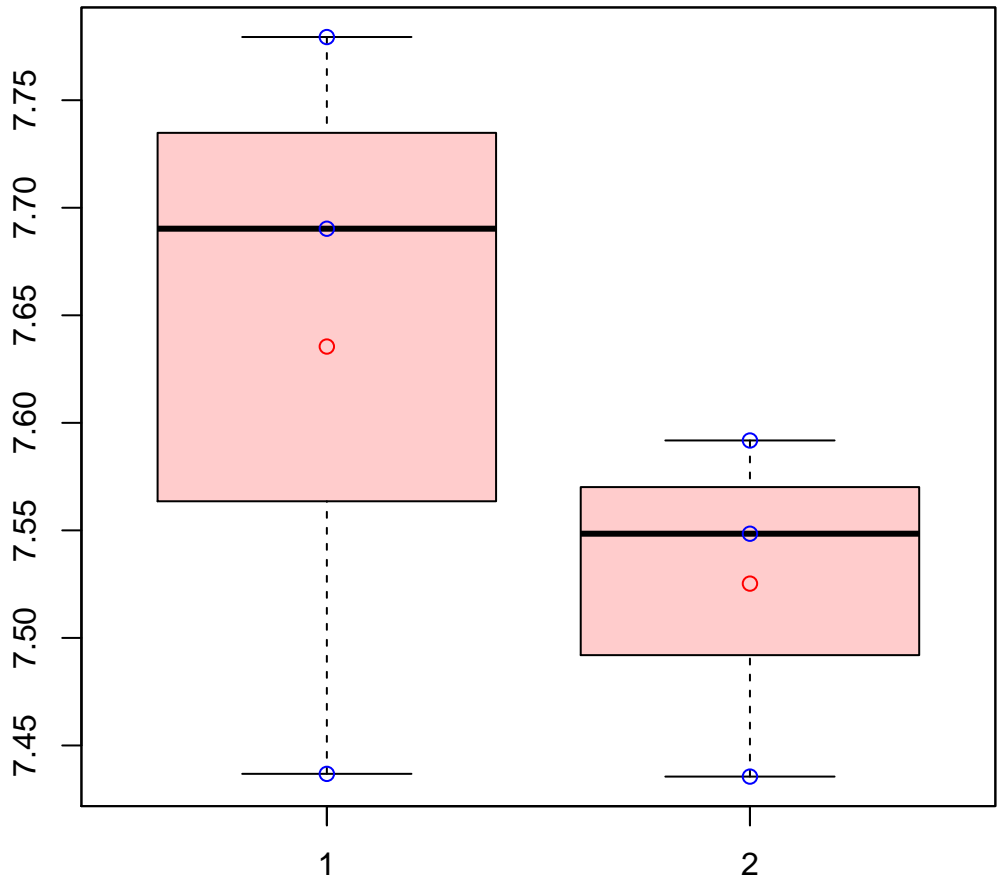

t-Test: p-value = 0.41

# CL2689Contig2|CL2689Contig2

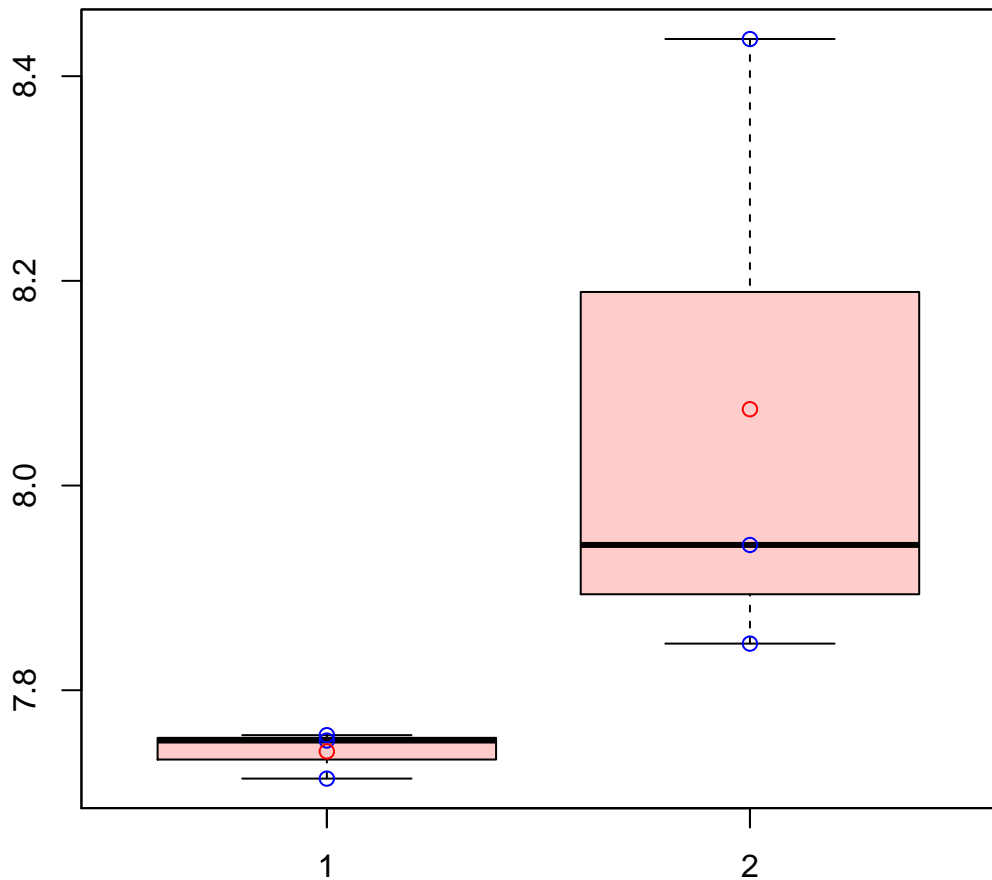

# CL2690Contig2|CL2690Contig2

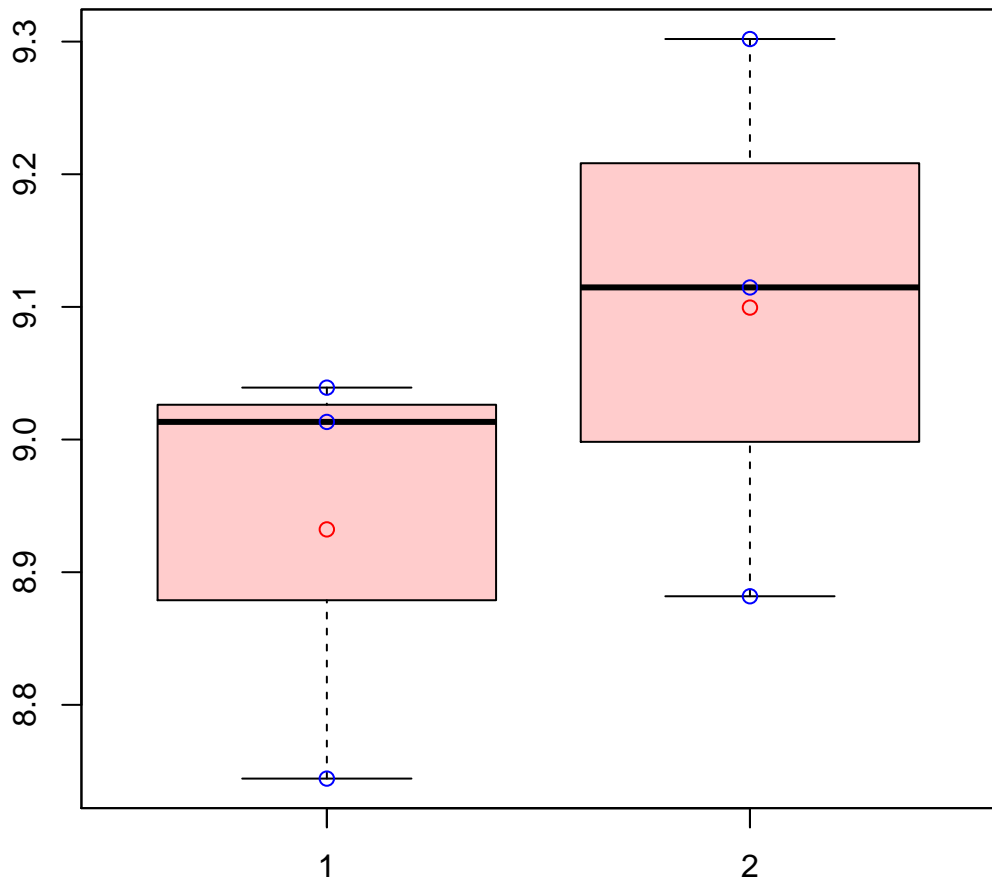

t-Test: p-value = 0.34

# CL2695Contig1|CL2695Contig1

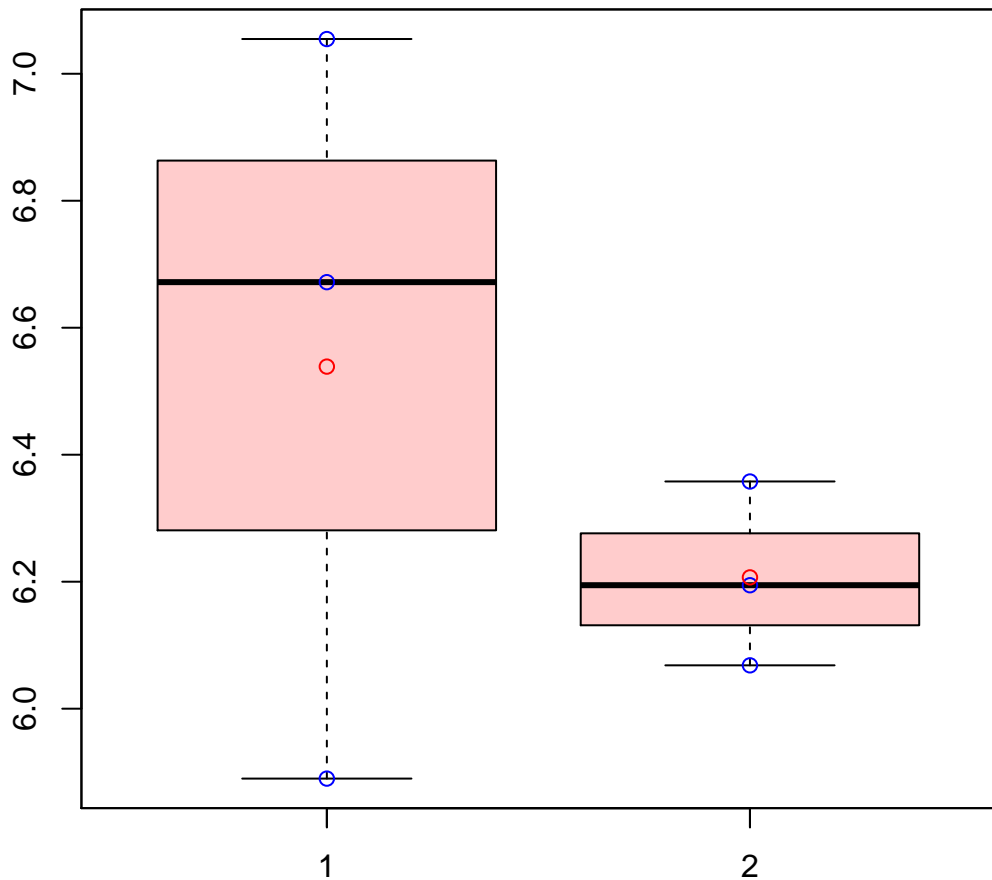

t-Test: p-value = 0.44

# CL2701Contig3|CL2701Contig3

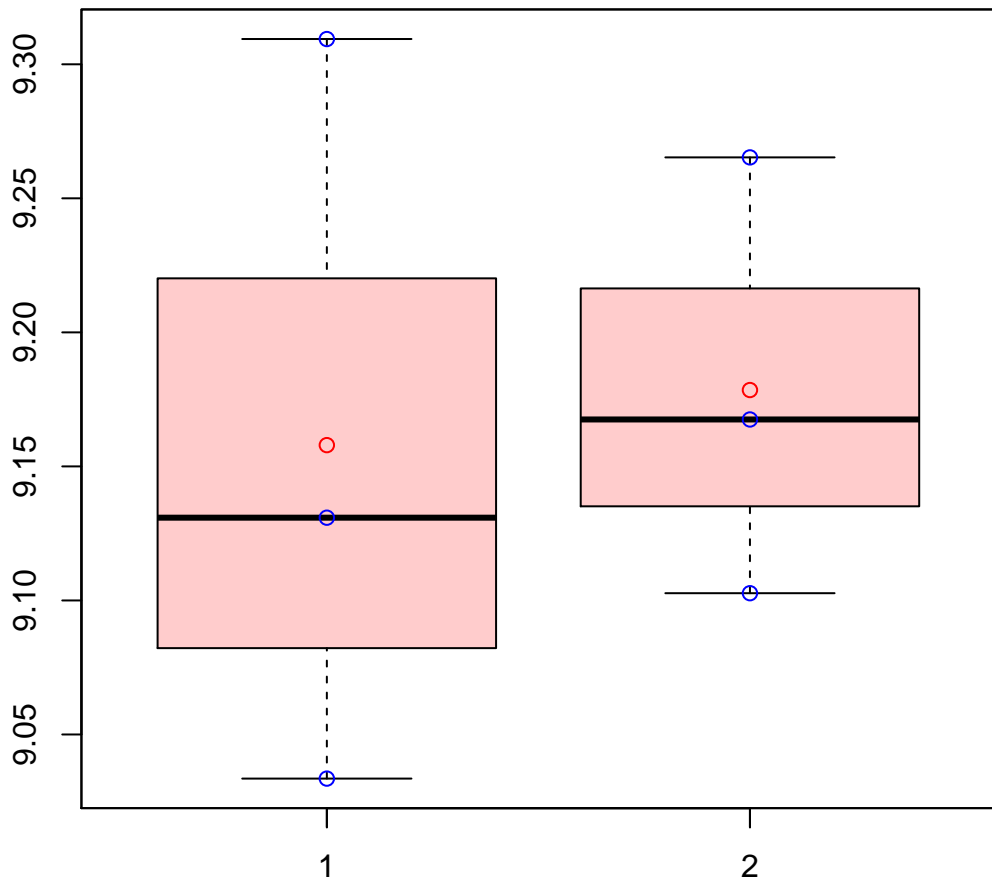

t-Test: p-value = 0.84

# CL2706Contig2|CL2706Contig2

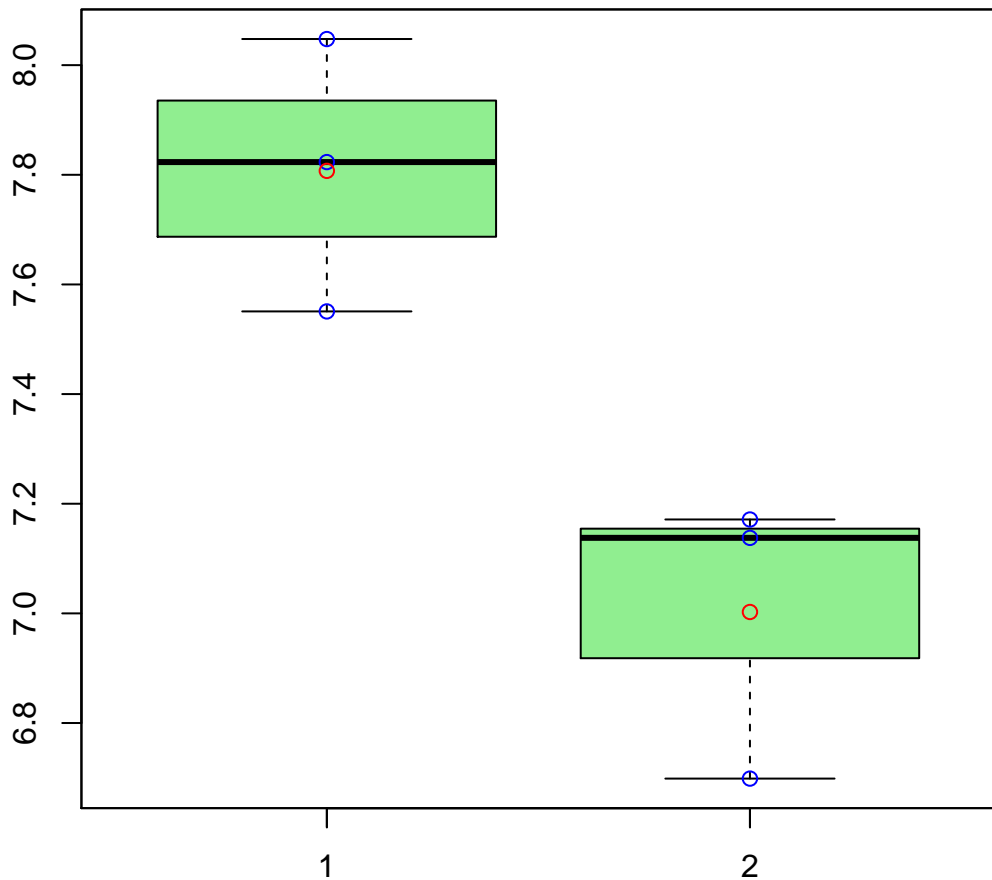

t-Test: p-value = 0.02

# CL2707Contig1|CL2707Contig1

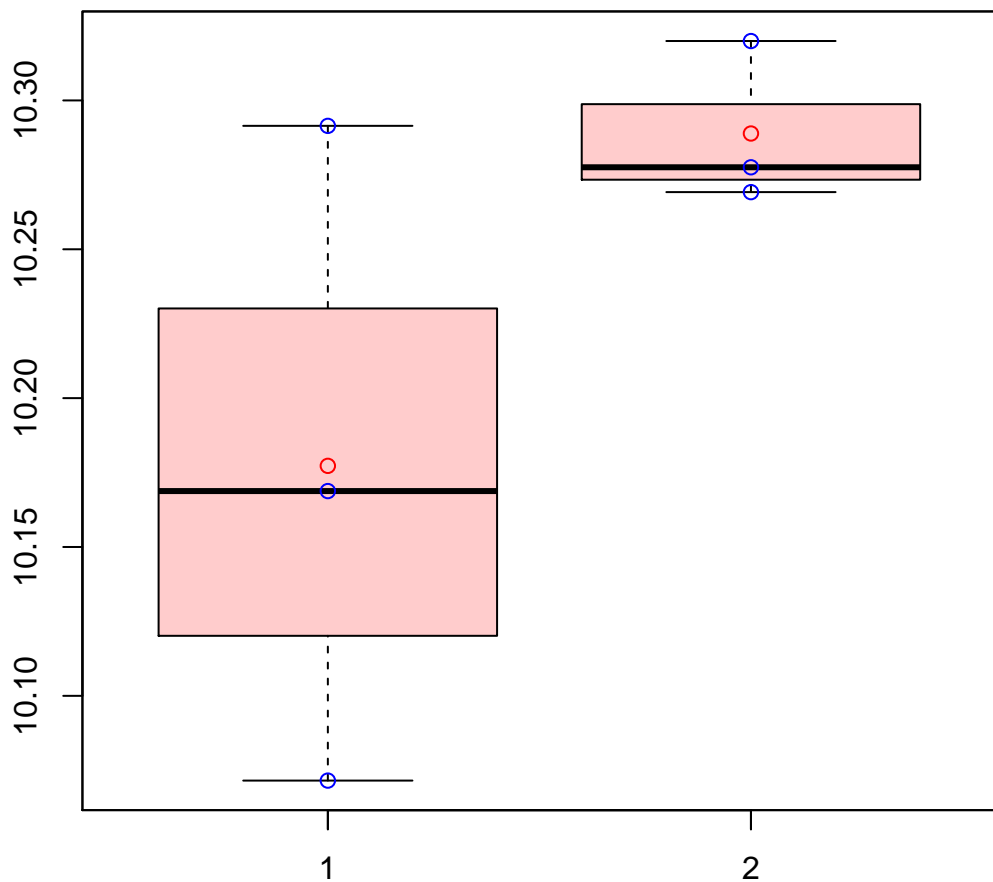

t-Test: p-value = 0.22

# CL2707Contig2|CL2707Contig2

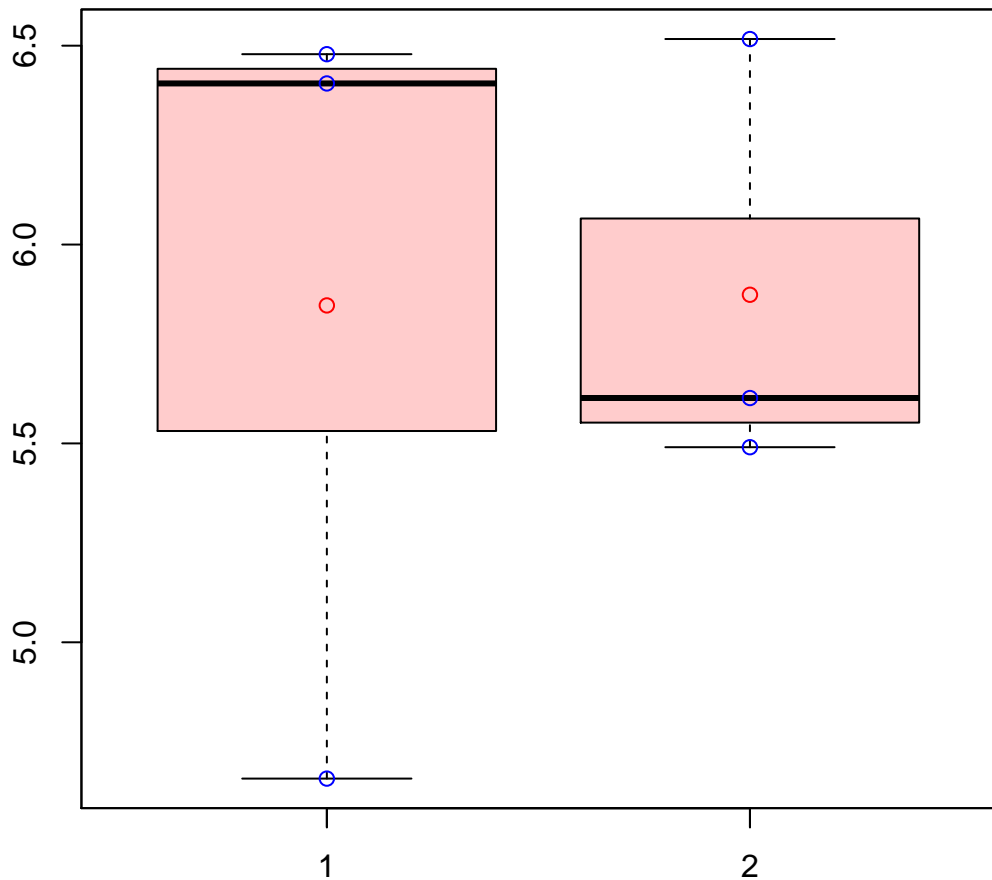

t-Test: p-value = 0.97



# CL2714Contig5|CL2714Contig5

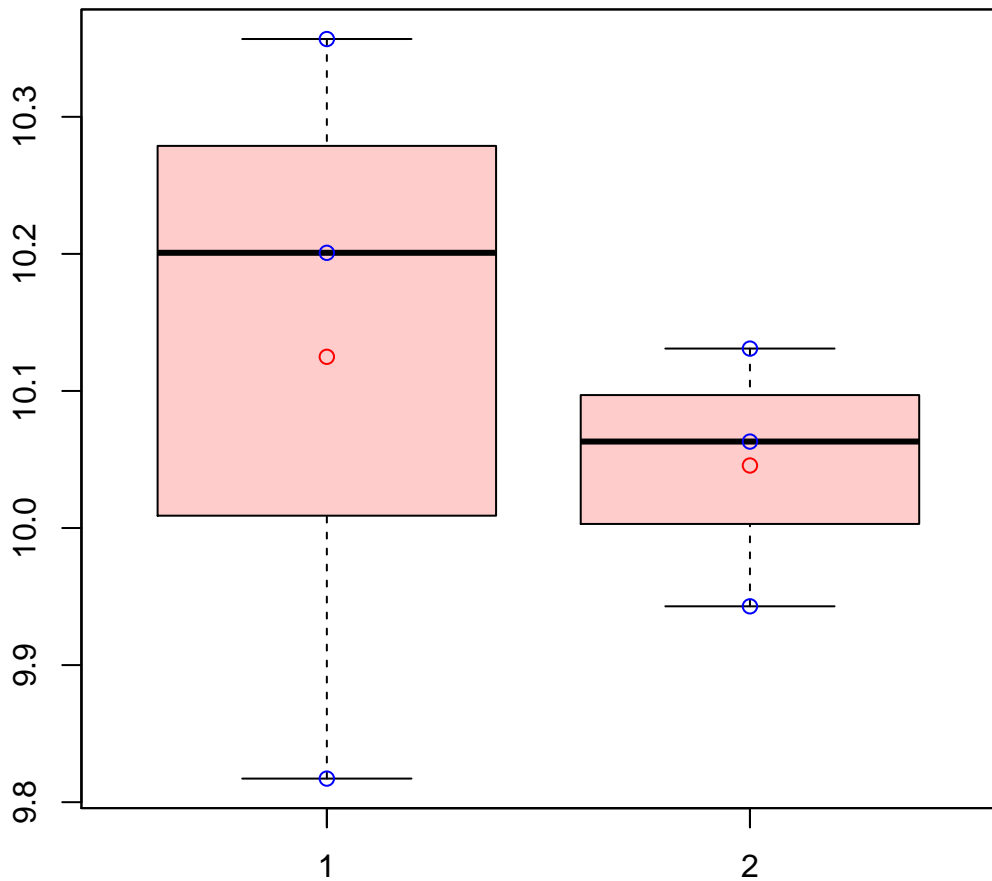

t-Test: p-value = 0.68

# CL2716Contig2|CL2716Contig2

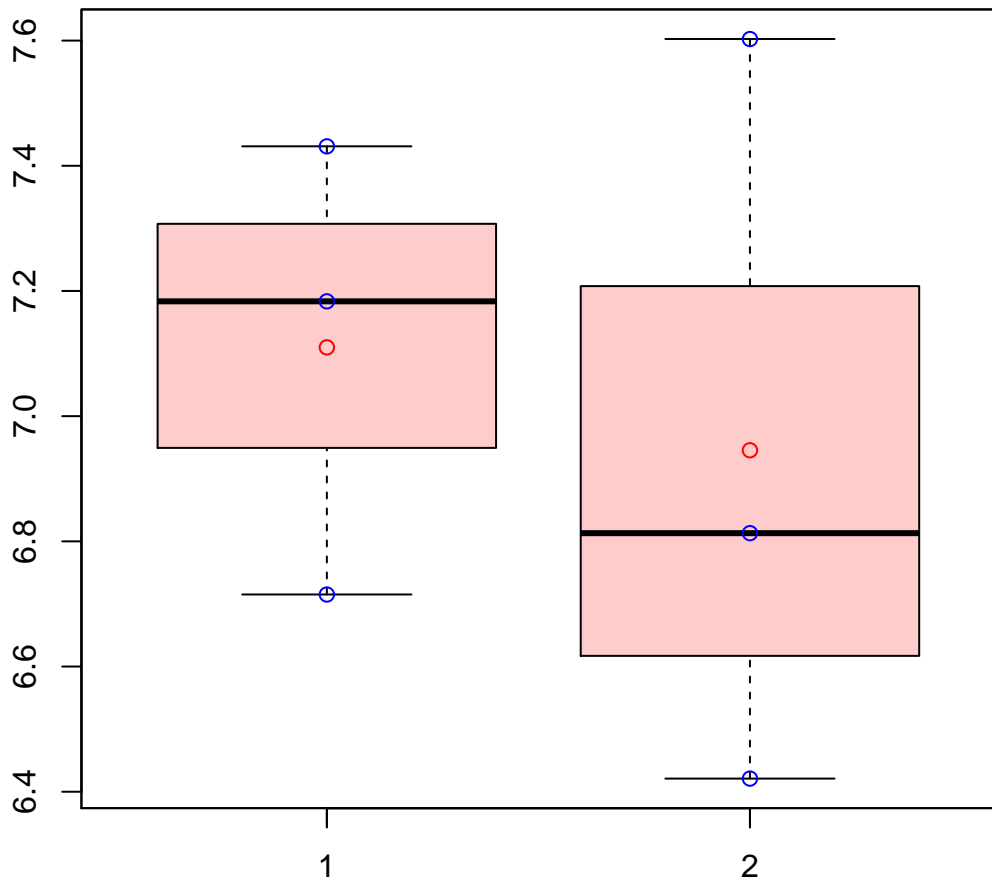

t-Test: p-value = 0.71

# CL271Contig23|CL271Contig23

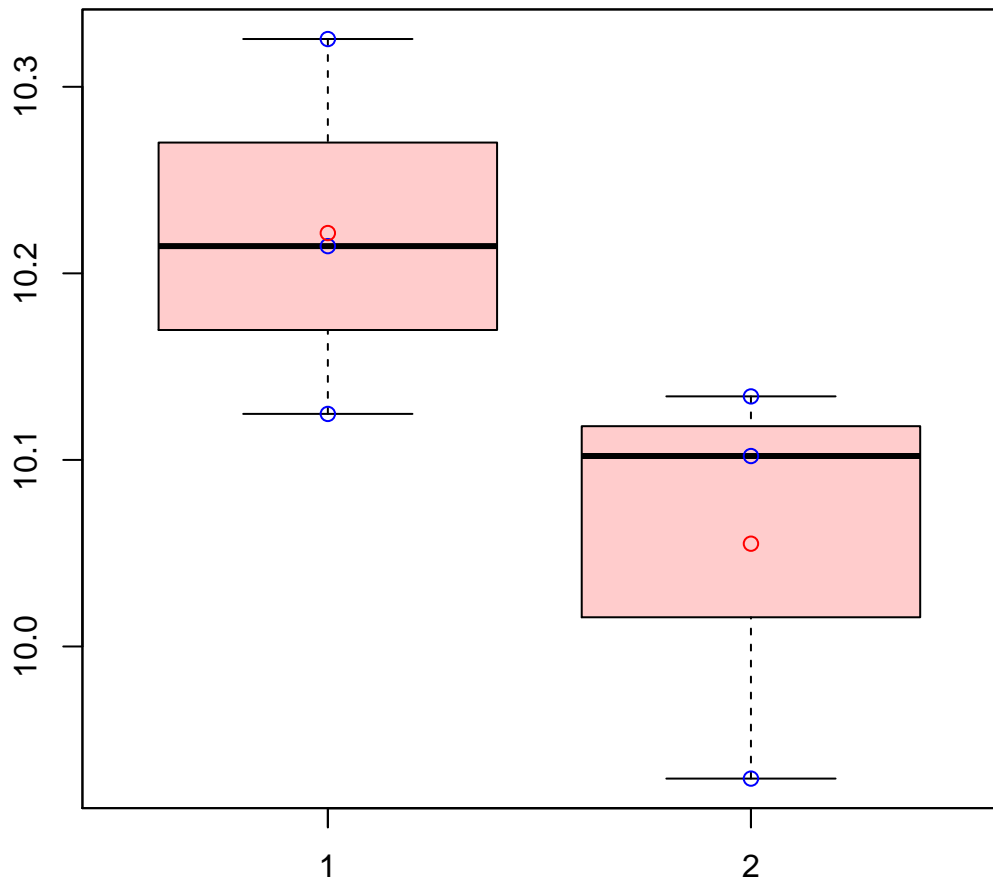

t-Test: p-value = 0.13

# CL27260Contig1|CL27260Contig1

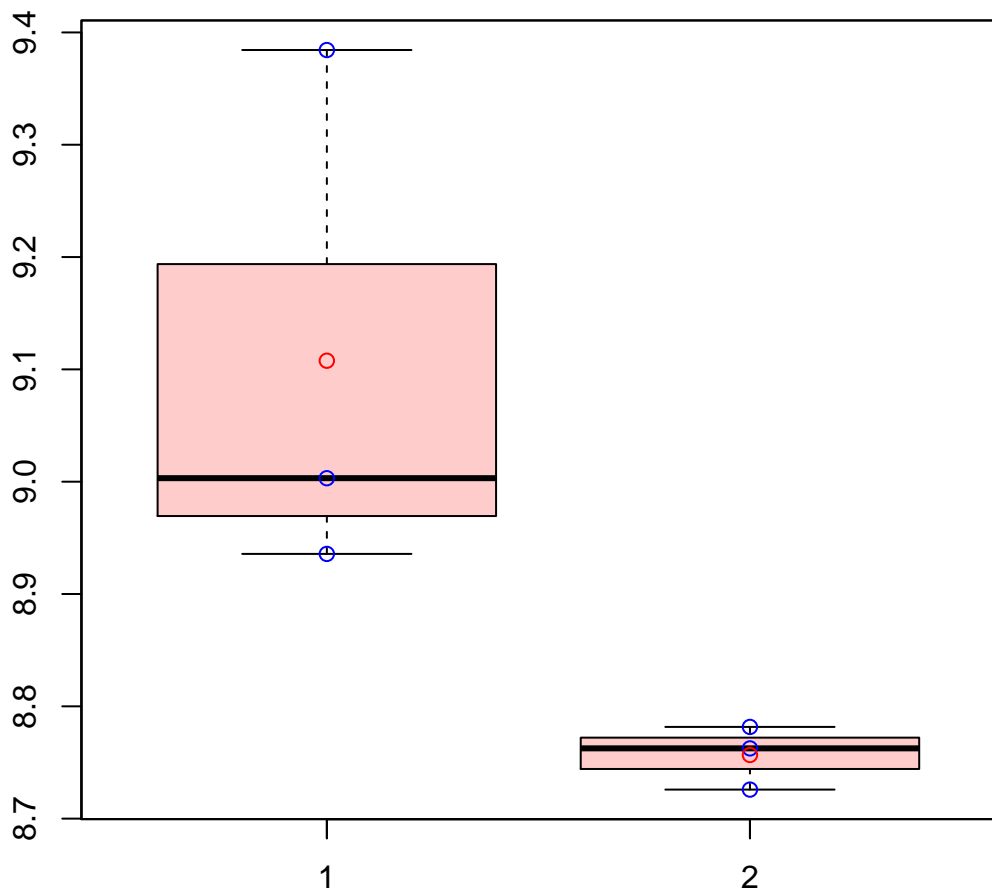

t-Test: p-value = 0.13

# CL2728Contig3|CL2728Contig3

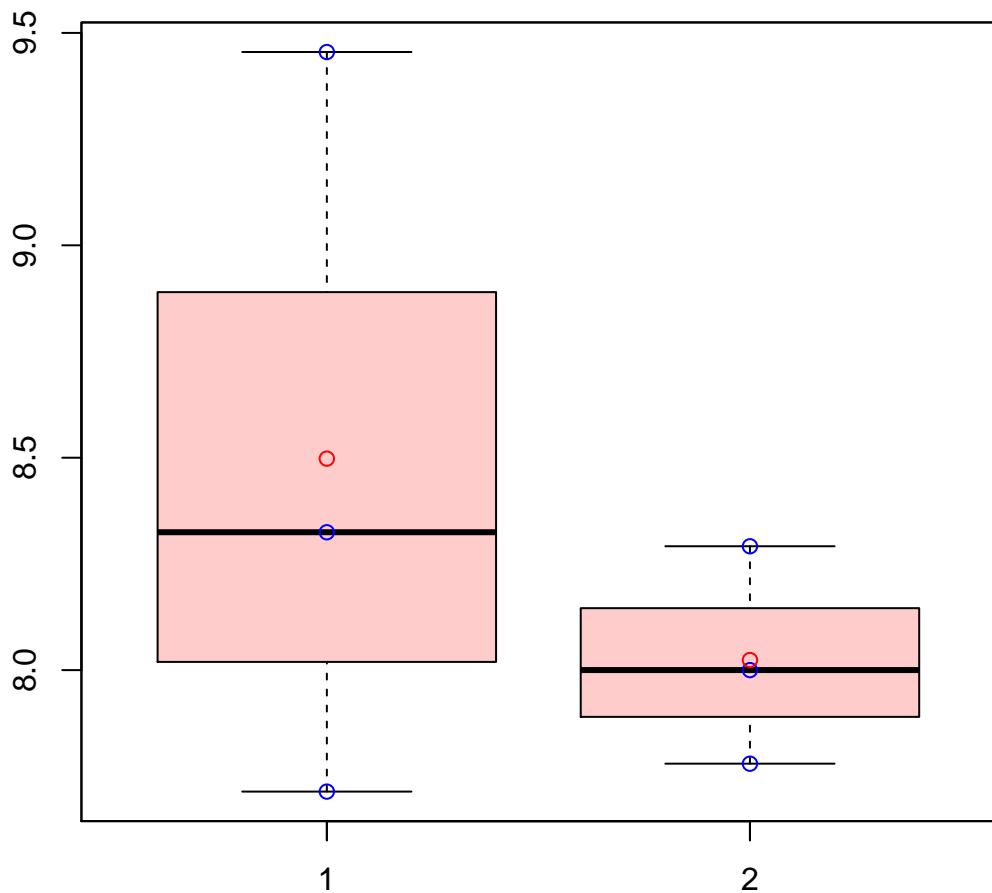

t-Test: p-value = 0.45

# CL272Contig20|CL272Contig20

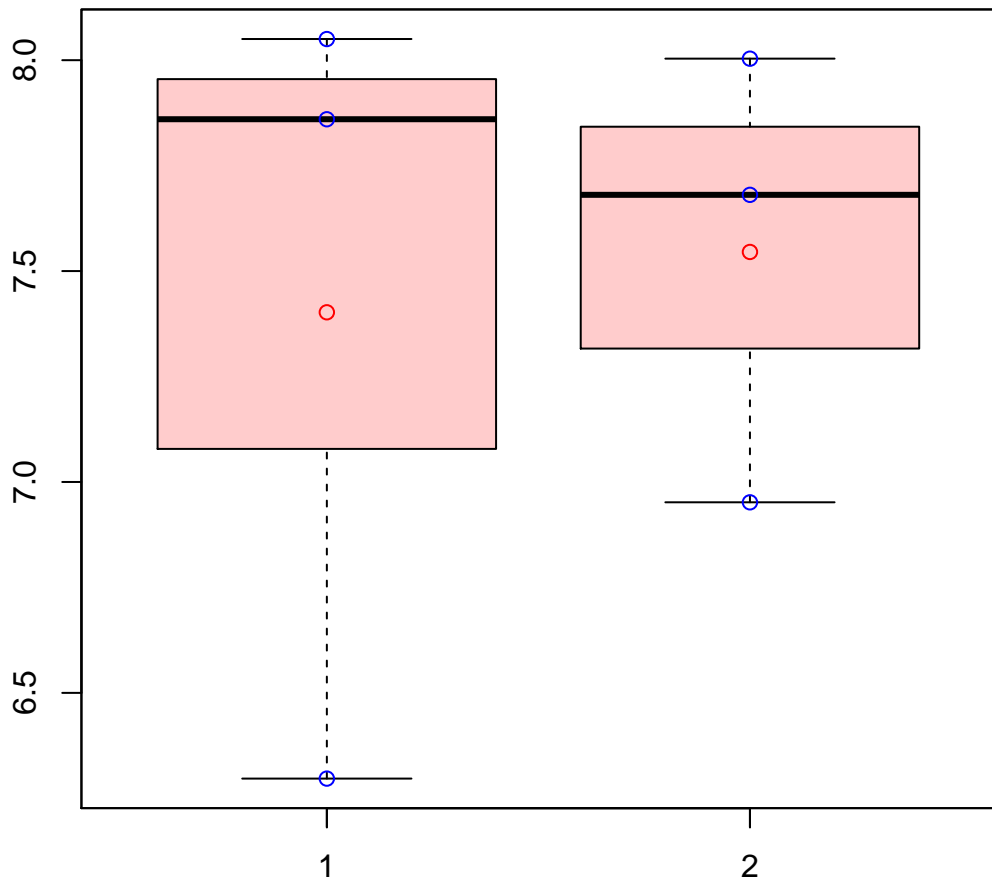

t-Test: p-value = 0.84

# CL2733Contig3|CL2733Contig3

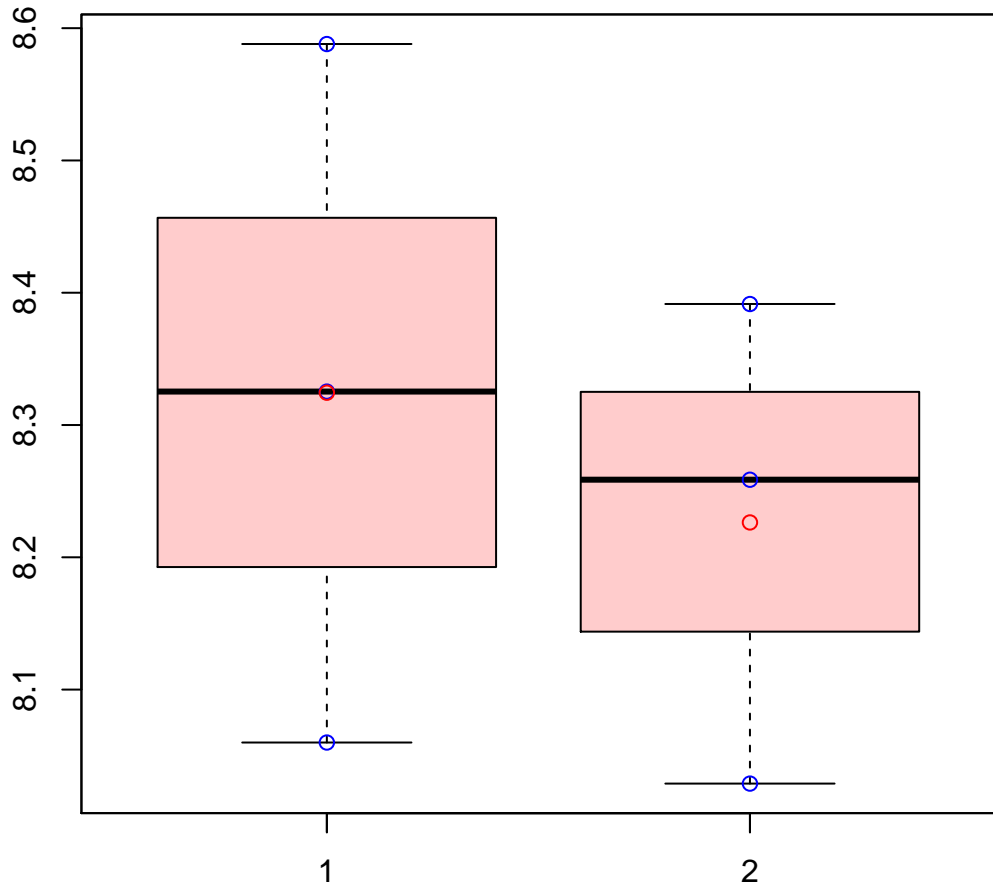

t-Test: p-value = 0.63

# CL2733Contig6|CL2733Contig6

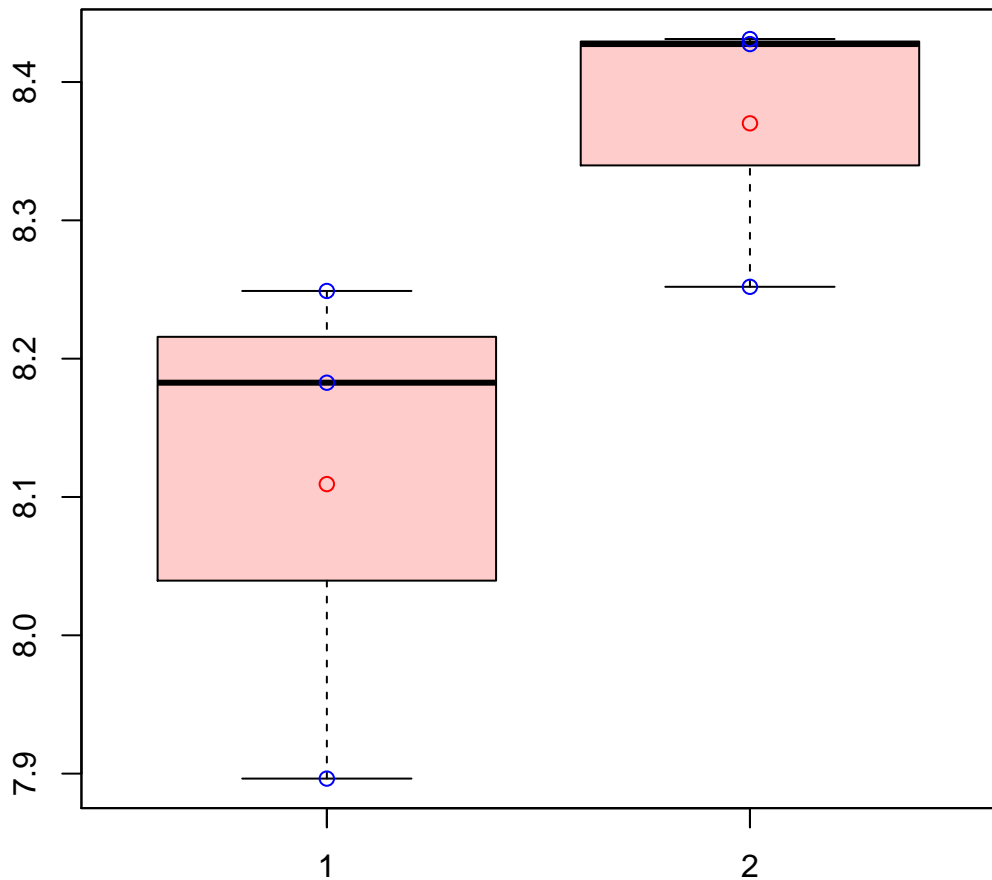

t-Test: p-value = 0.12



# CL2736Contig1|CL2736Contig1

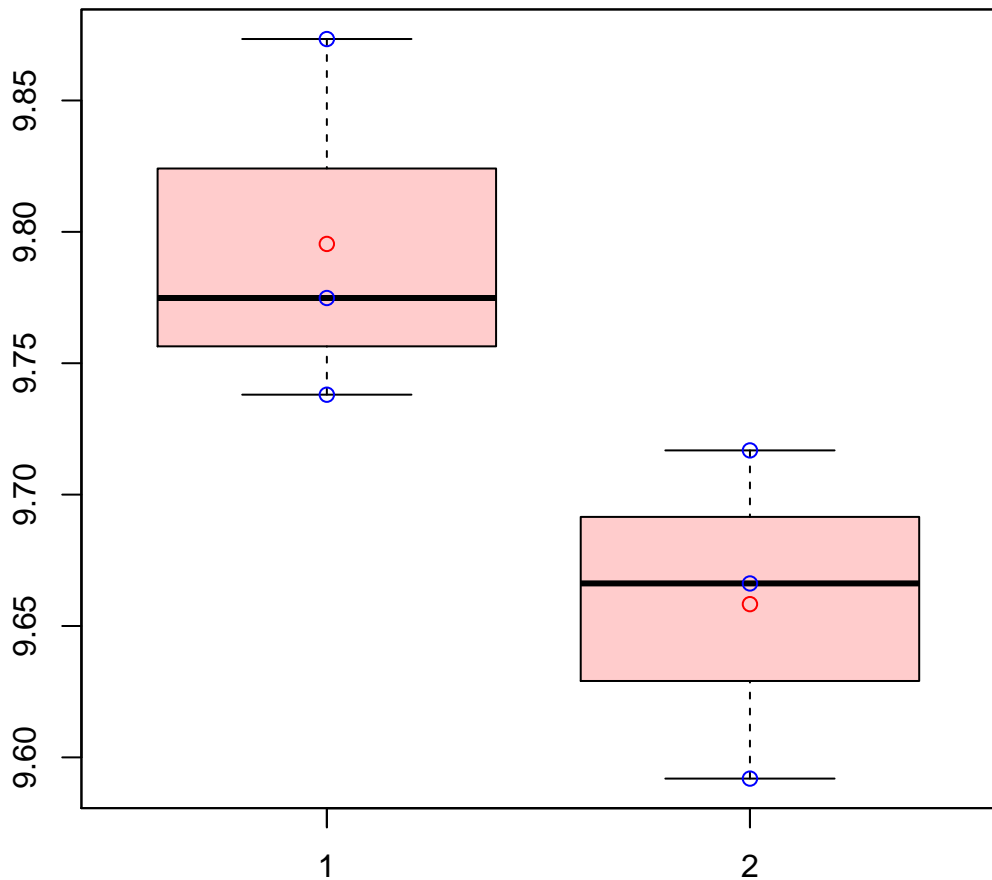

t-Test: p-value = 0.07

# CL2736Contig3|CL2736Contig3

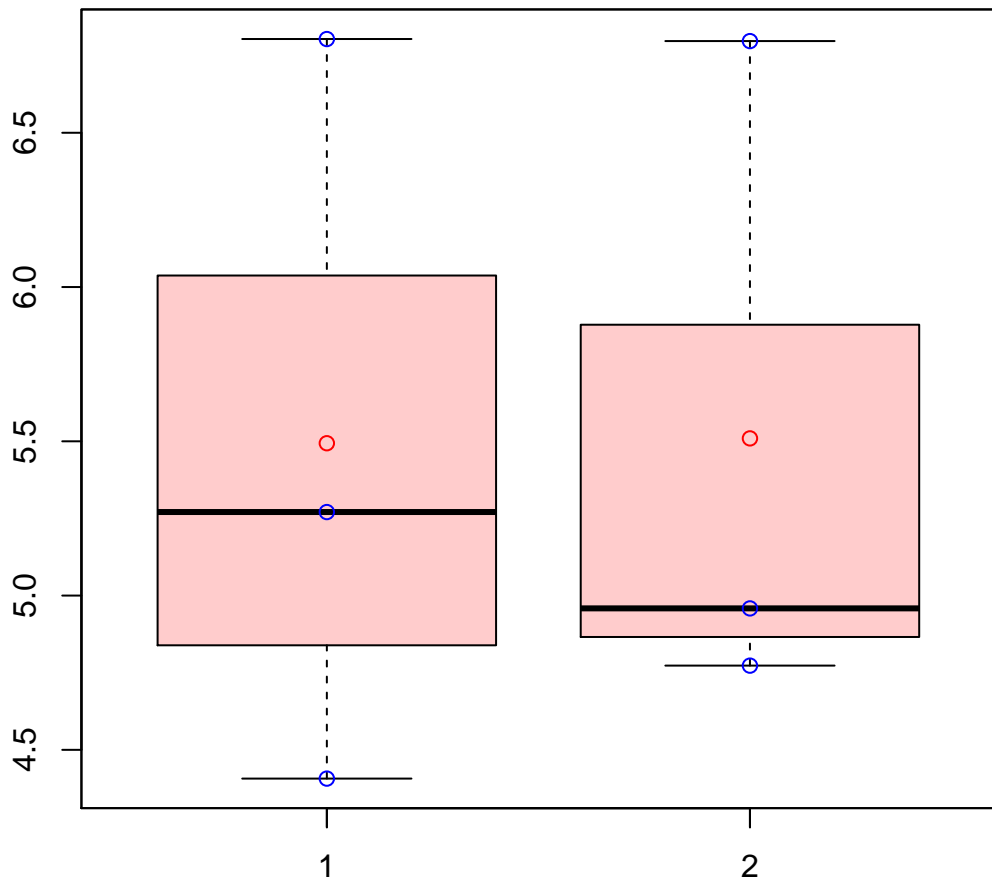

t-Test: p-value = 0.99

# CL2740Contig2|CL2740Contig2

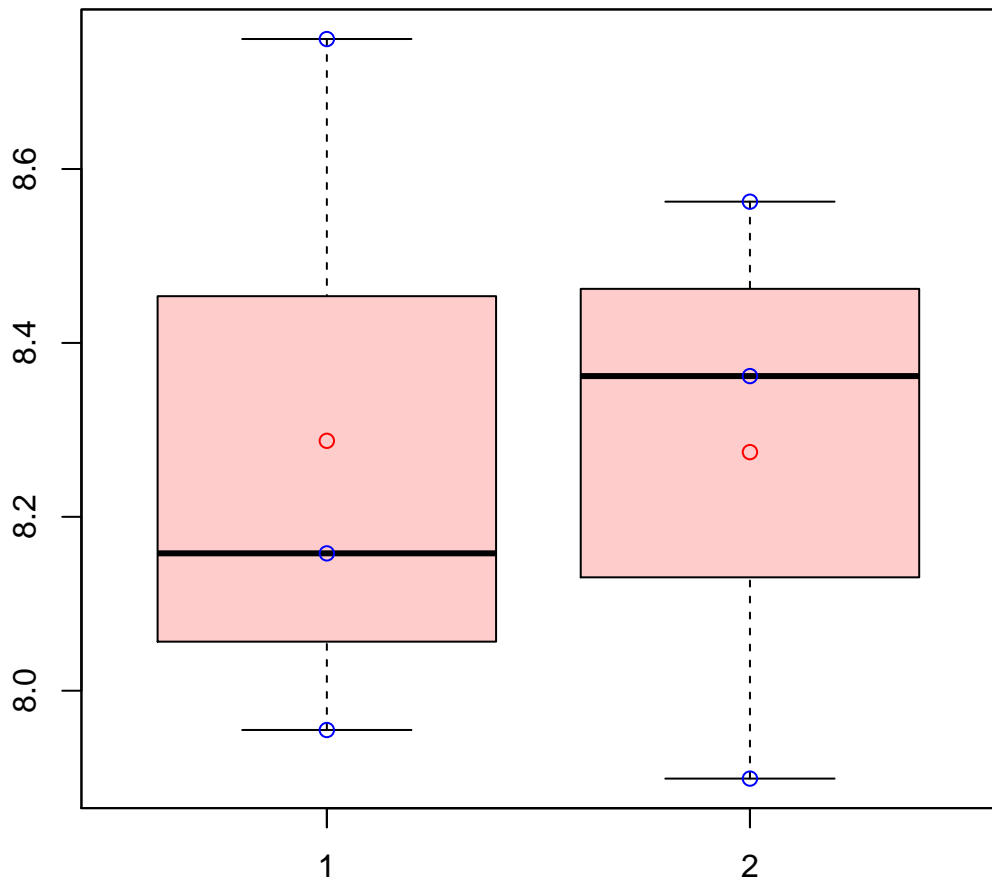

t-Test: p-value = 0.97

# CL2747Contig6|CL2747Contig6

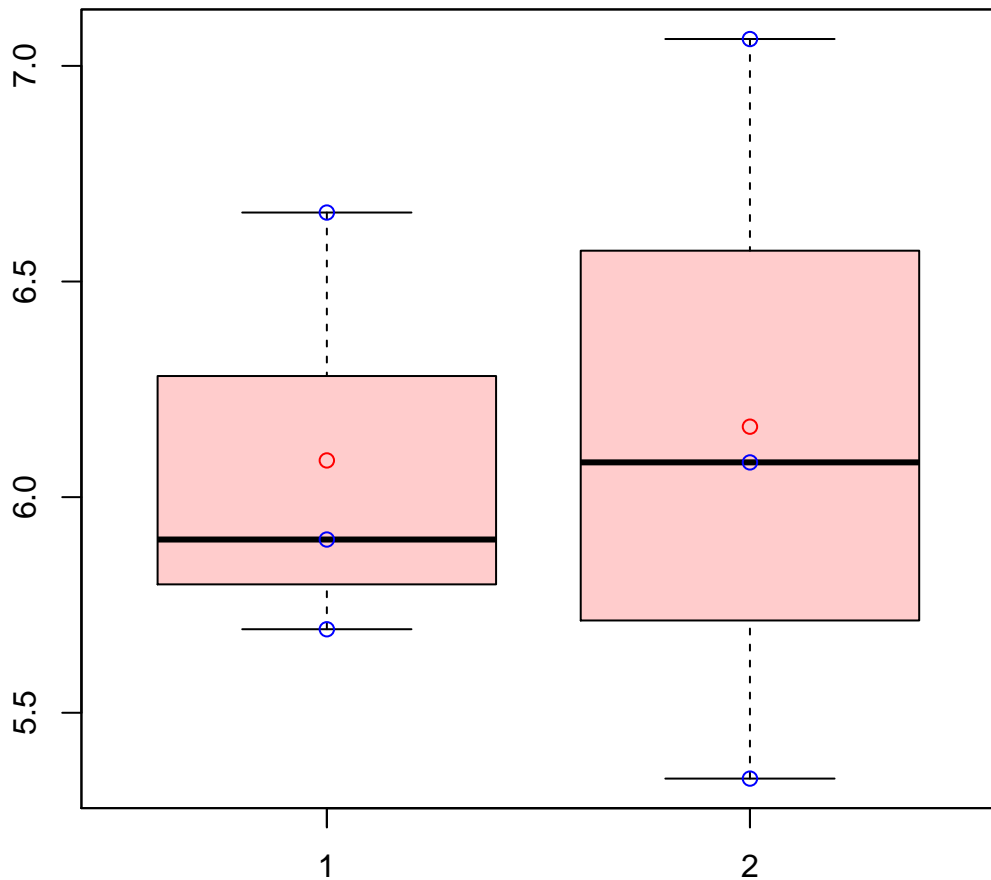

t-Test: p-value = 0.9

# CL274Contig7|CL274Contig7

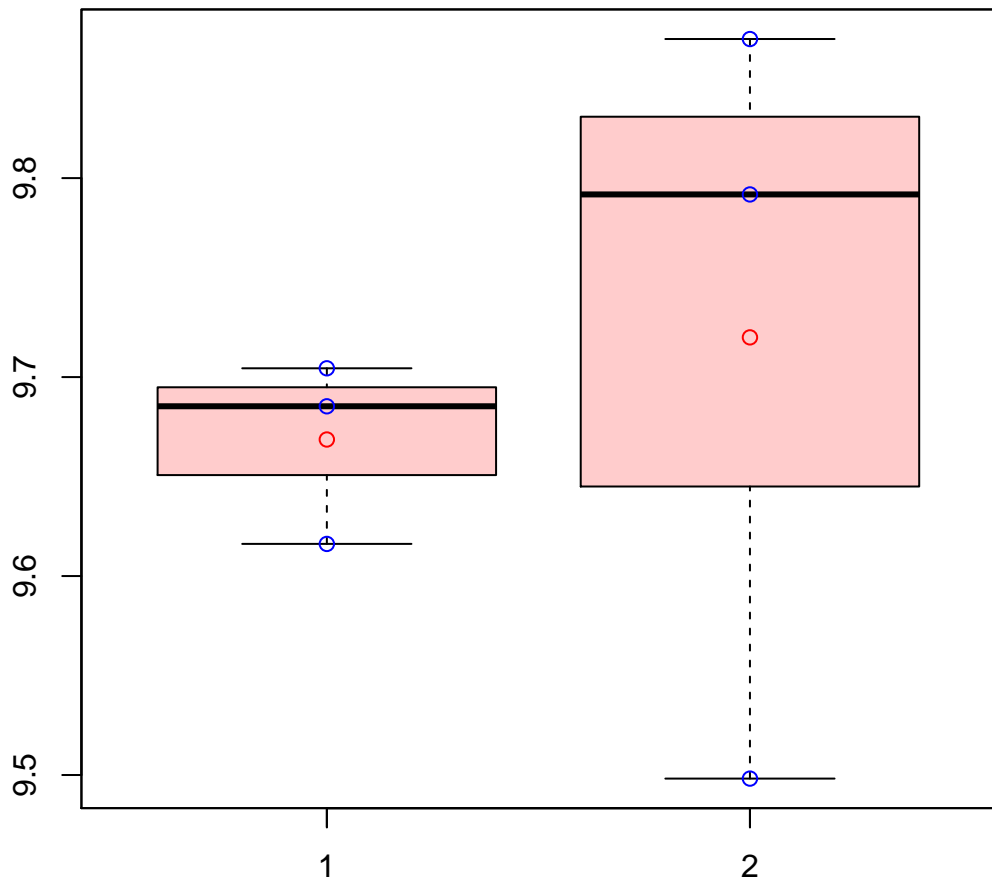

t-Test: p-value = 0.7

# CL2750Contig1|CL2750Contig1

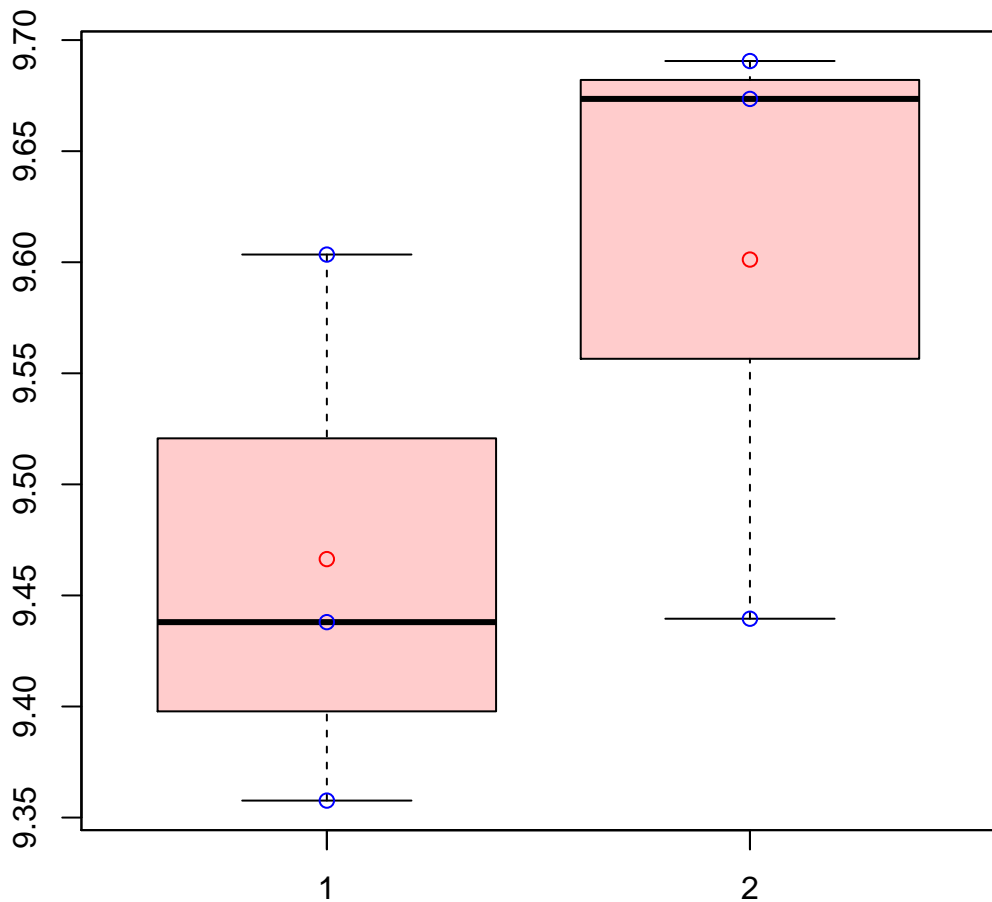

t-Test: p-value = 0.28

# CL2752Contig3|CL2752Contig3

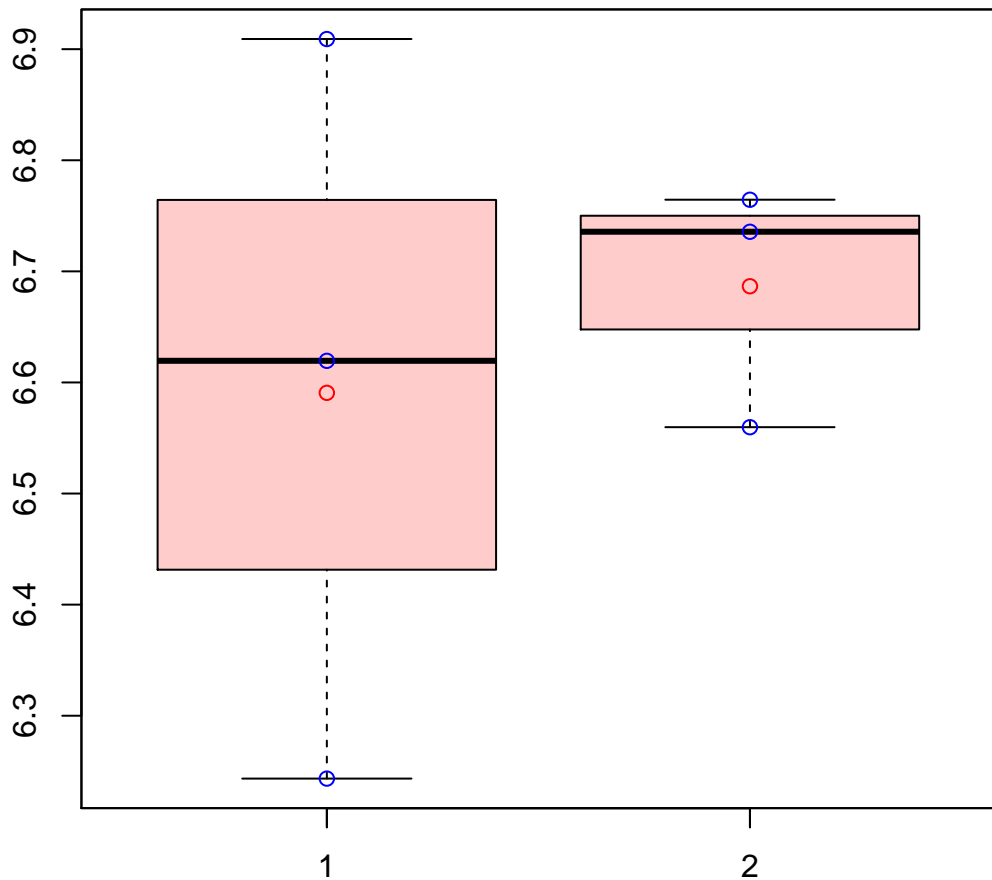

t-Test: p-value = 0.68

# CL2756Contig5|CL2756Contig5

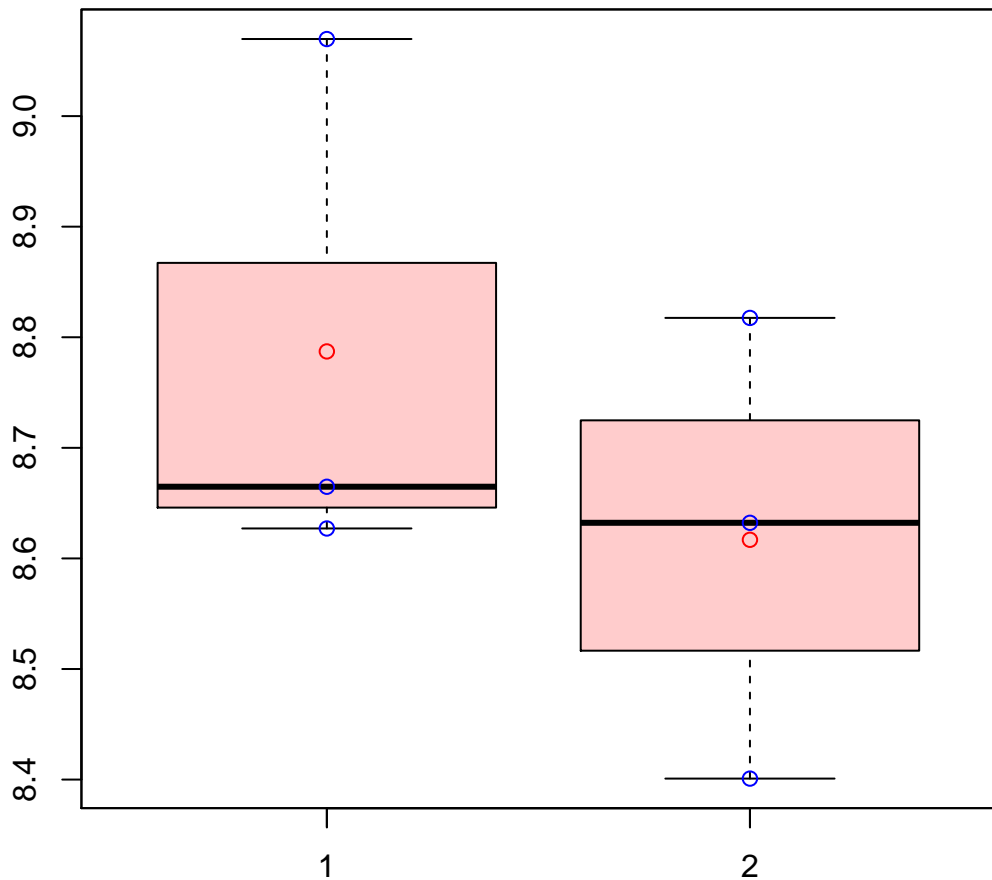

t-Test: p-value = 0.41



# CL2758Contig6|CL2758Contig6

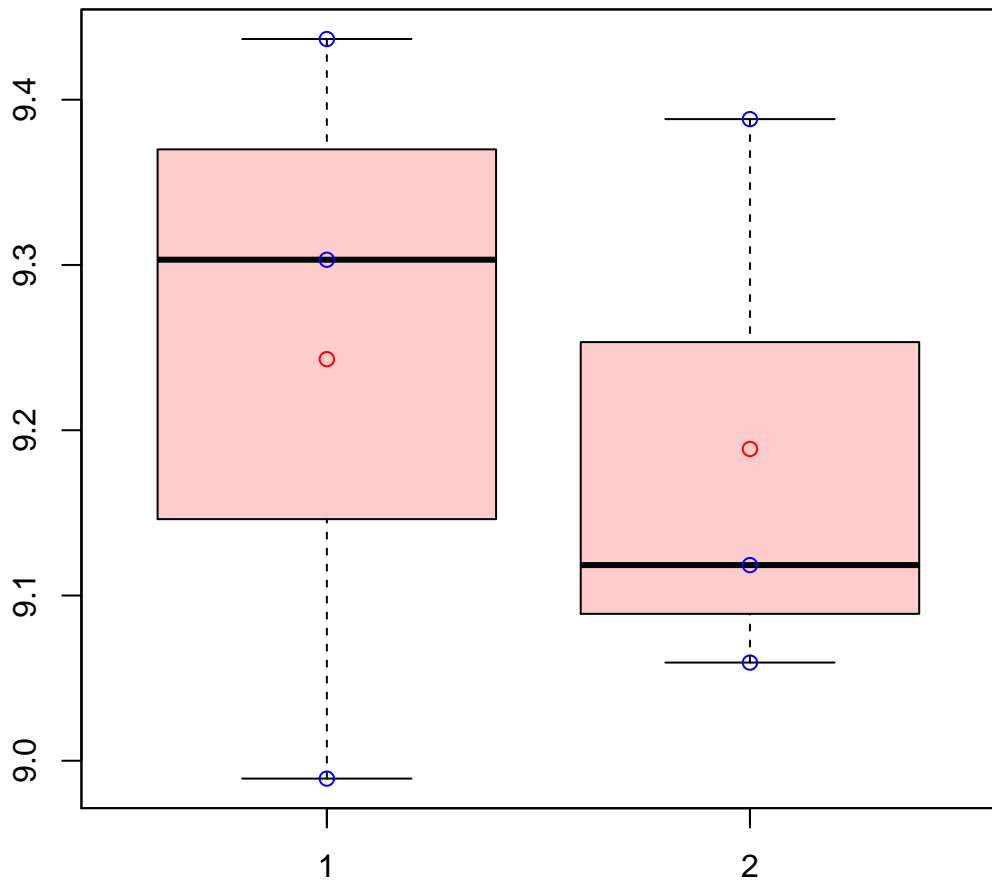

t-Test: p-value = 0.76

# CL2760Contig2|CL2760Contig2

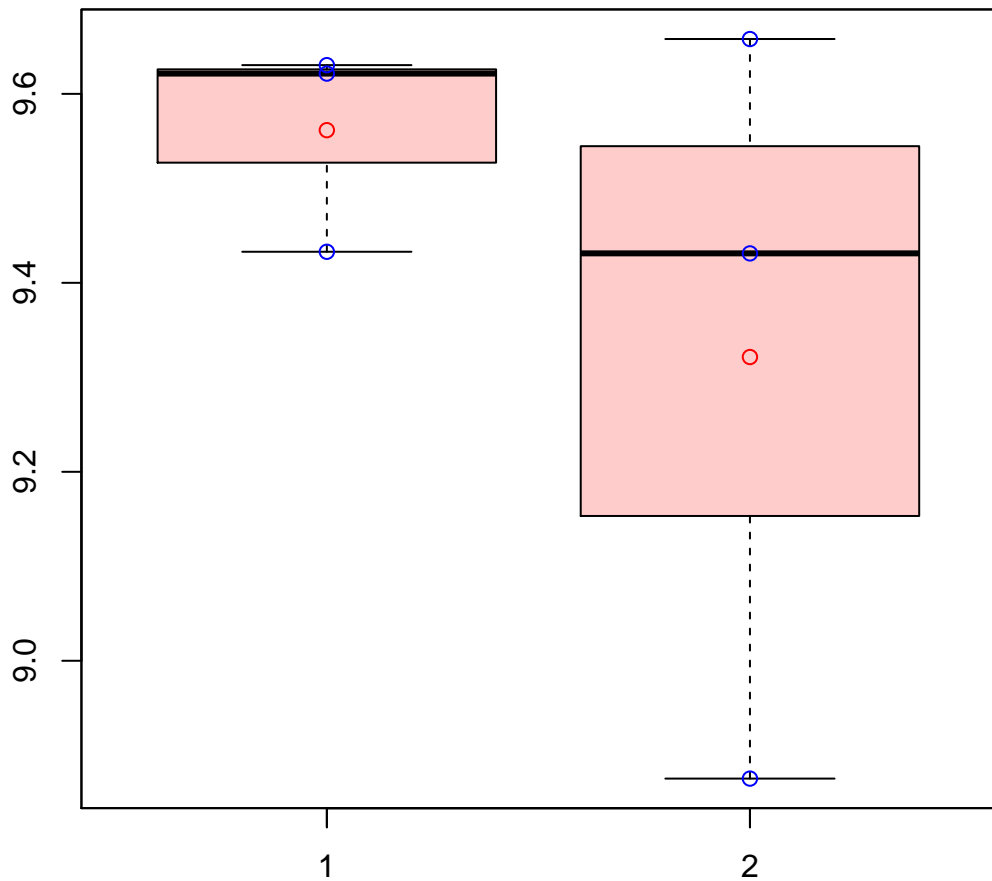

t-Test: p-value = 0.41

# CL2761Contig4|CL2761Contig4

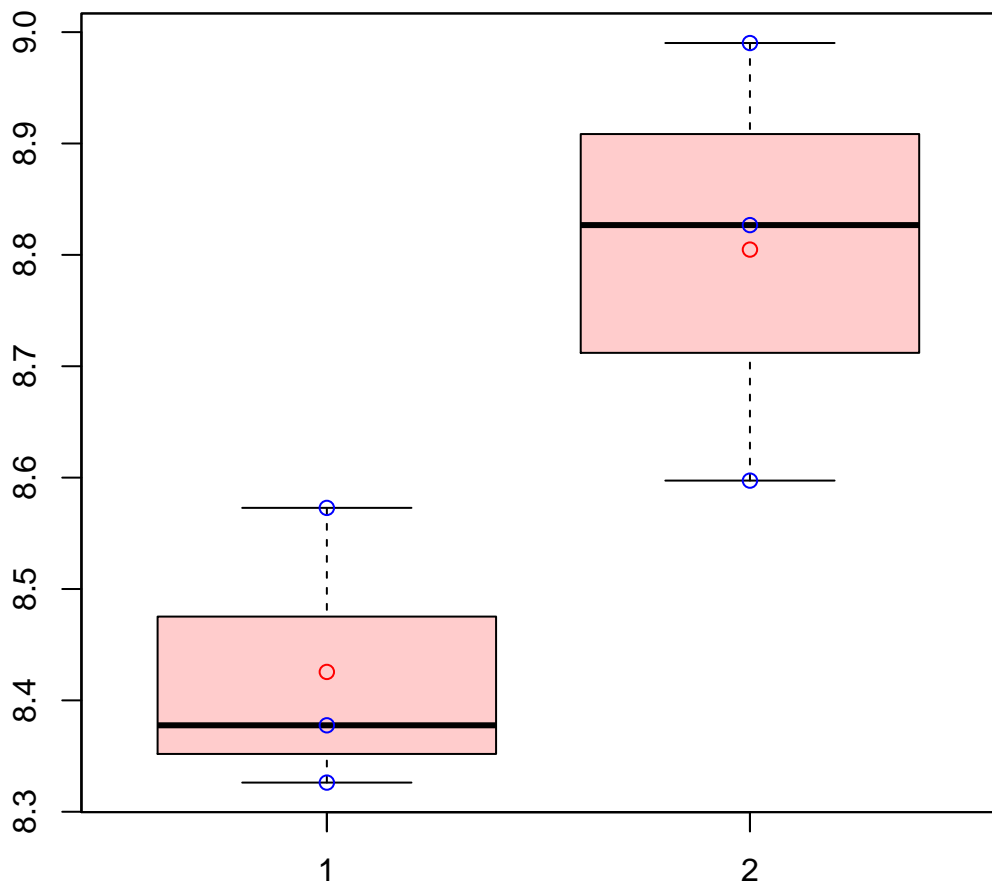

t-Test: p-value = 0.06

# CL2764Contig1|CL2764Contig1

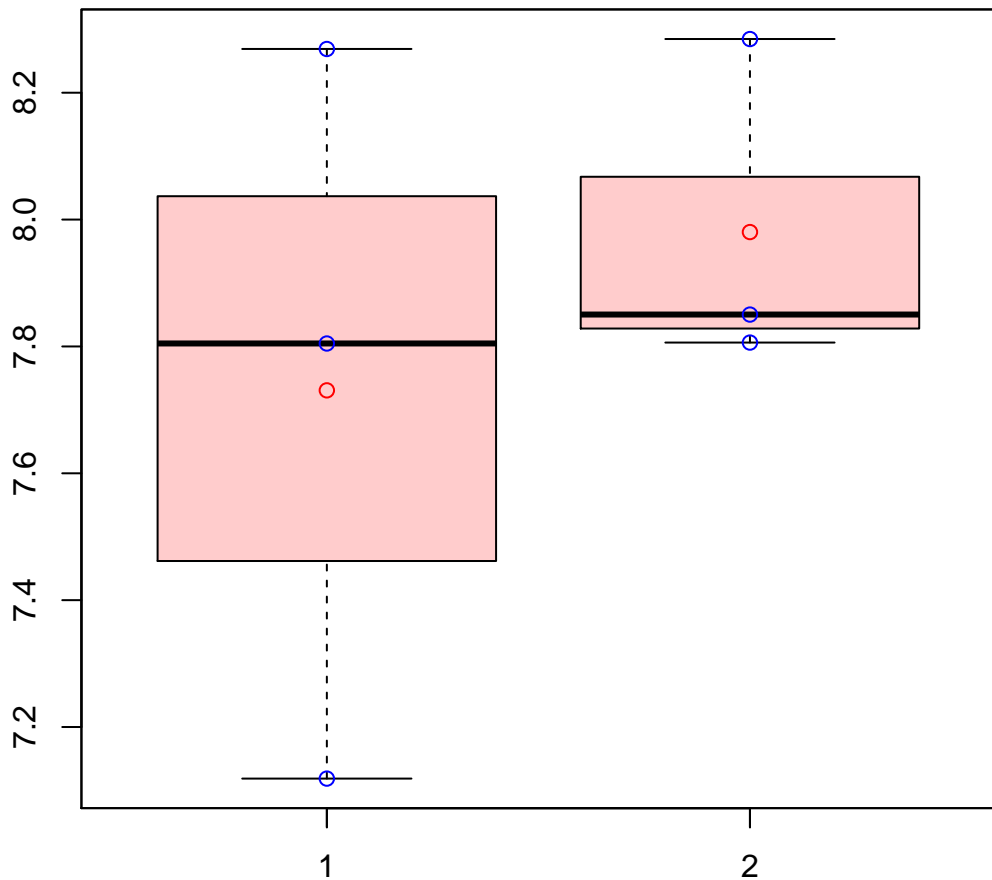

t-Test: p-value = 0.55

# CL2766Contig3|CL2766Contig3

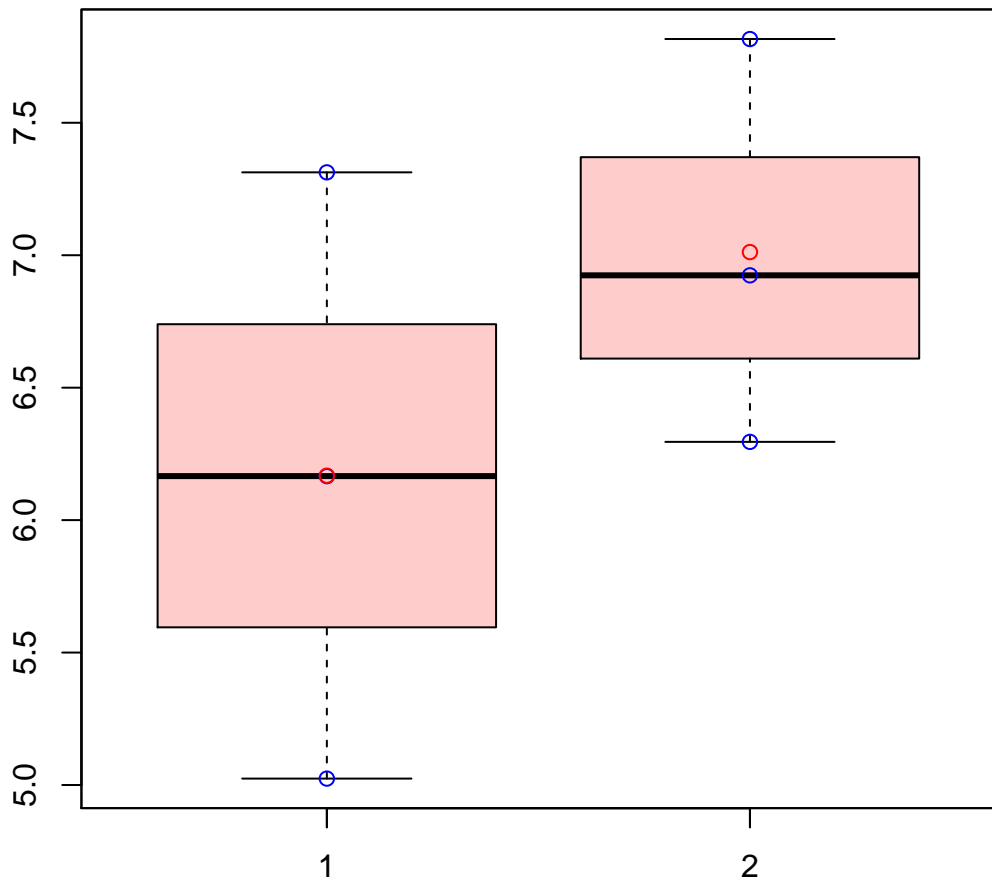

t-Test: p-value = 0.36

# CL2771Contig1|CL2771Contig1

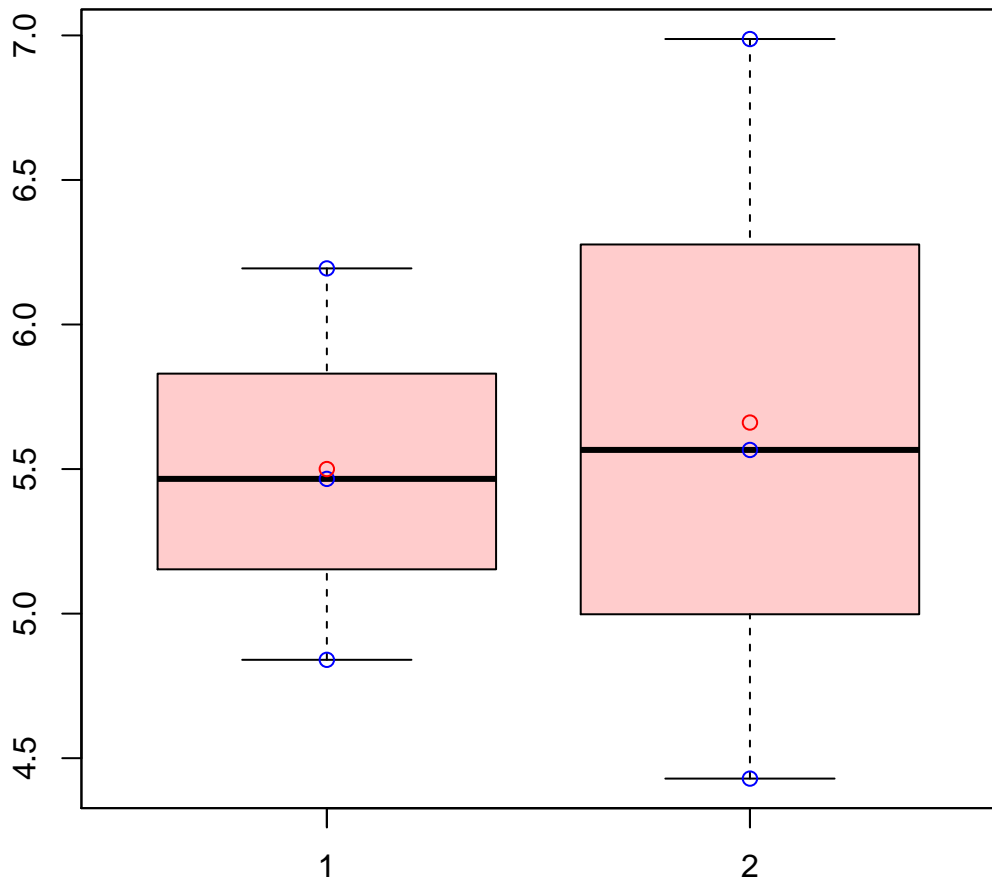

t-Test: p-value = 0.86

# CL27766Contig1|CL27766Contig1

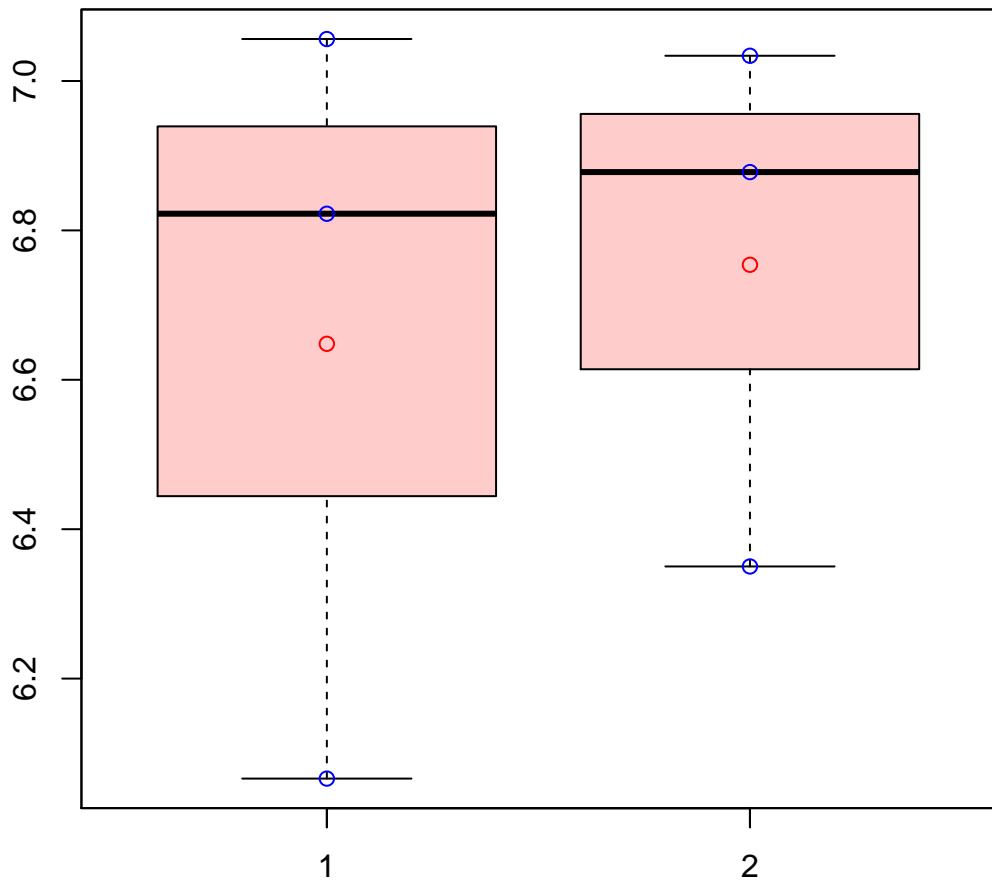

t-Test: p-value = 0.79

# CL2778Contig5|CL2778Contig5

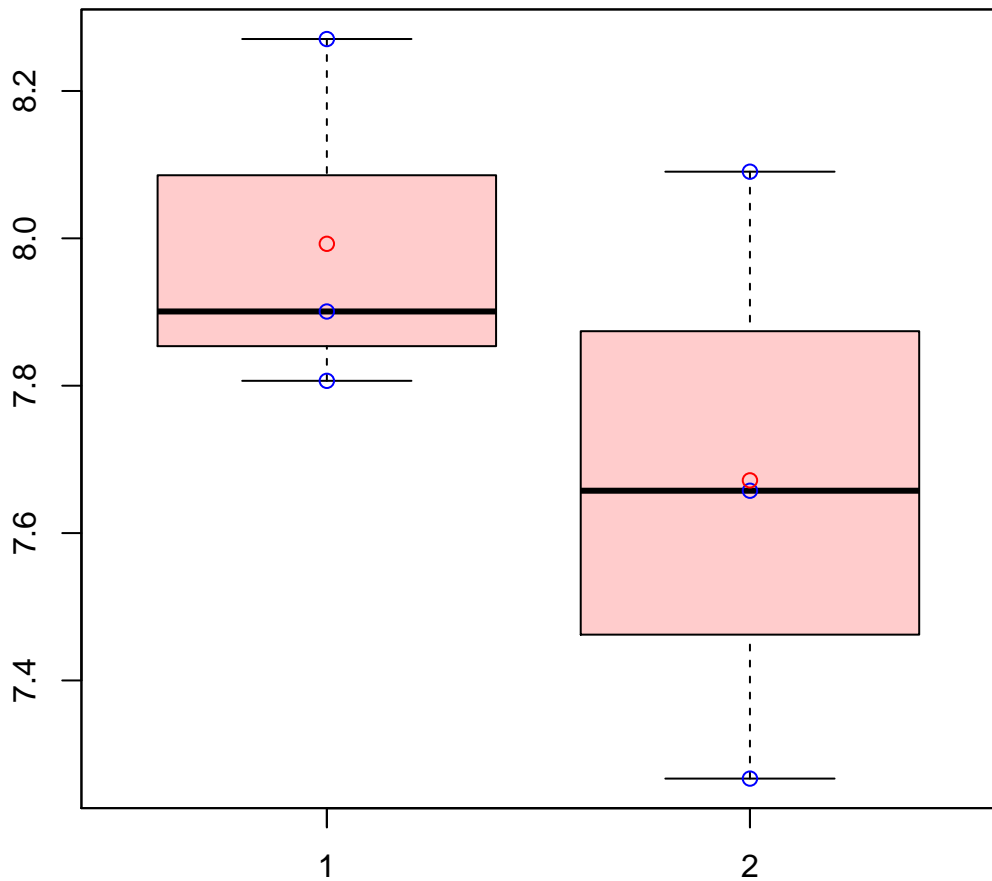

t-Test: p-value = 0.32



# CL2781Contig1|CL2781Contig1

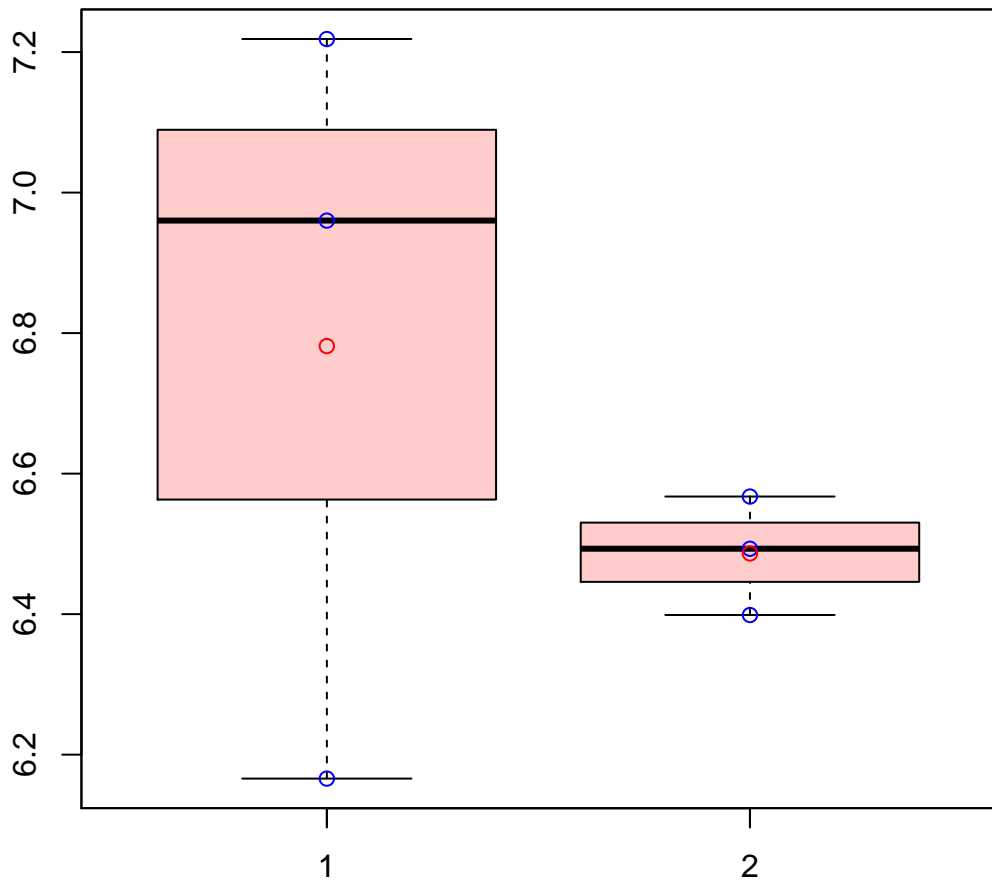

t-Test: p-value = 0.45

# CL27895Contig1|CL27895Contig1

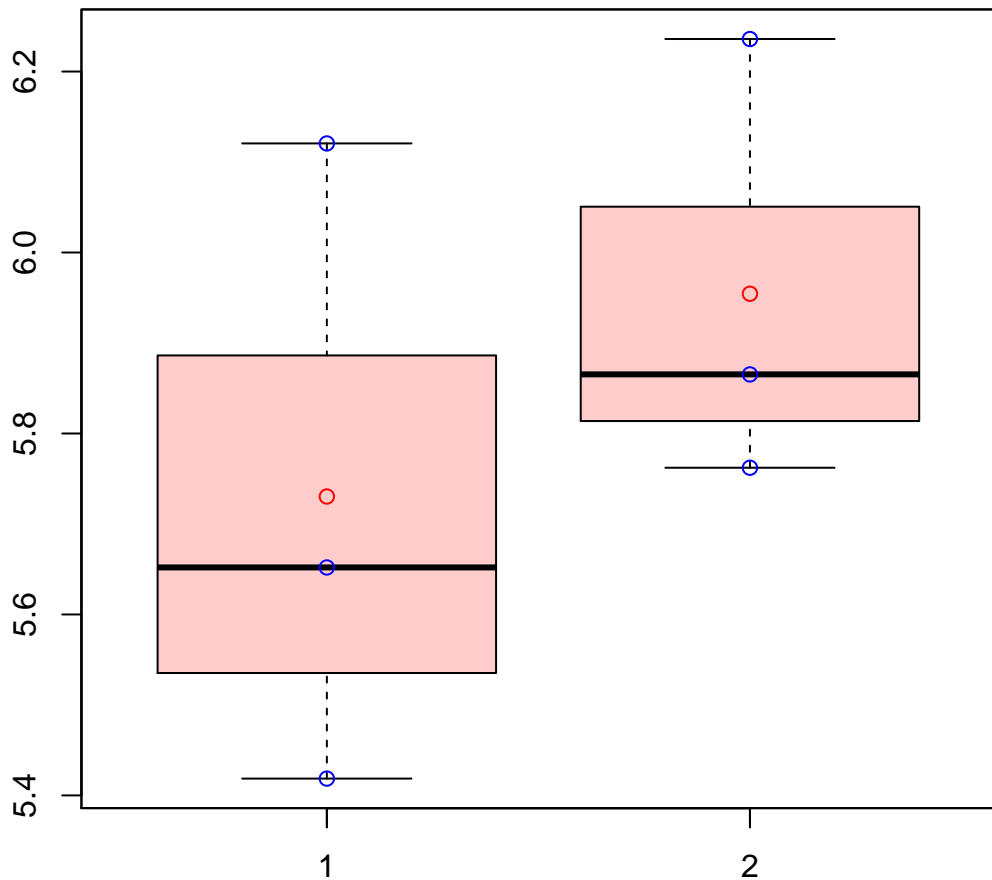

t-Test: p-value = 0.43

# CL2789Contig2|CL2789Contig2

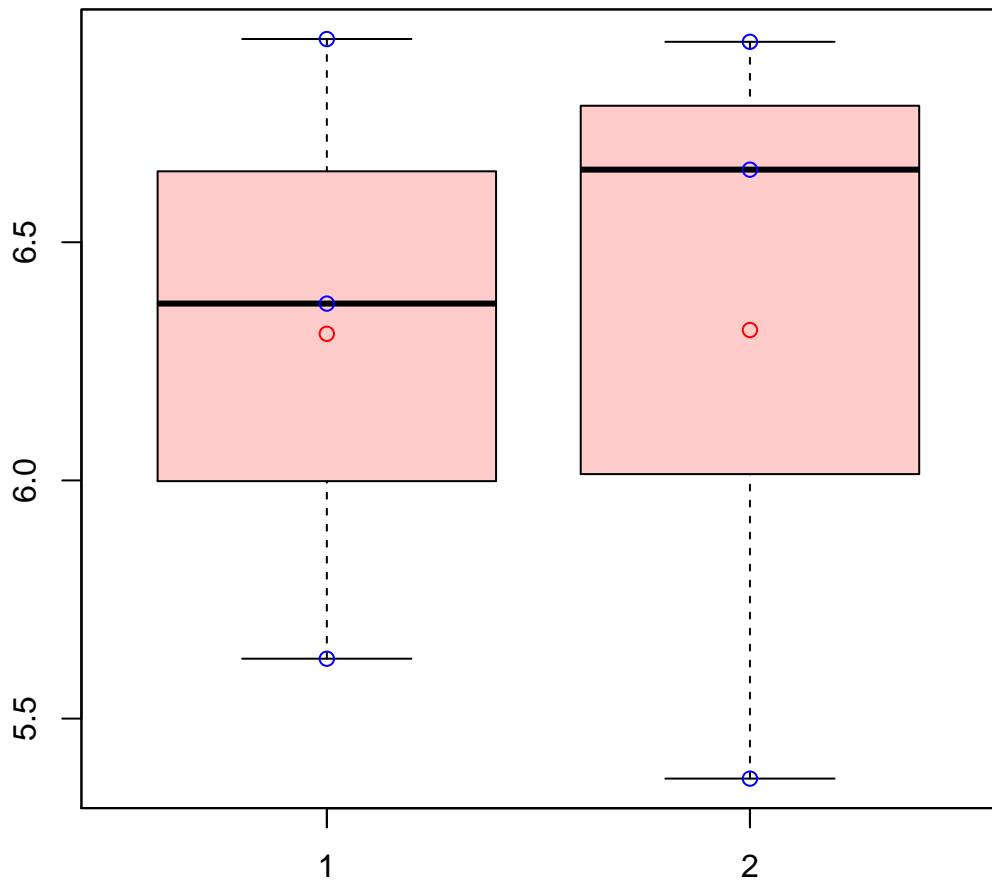

t-Test: p-value = 0.99

# CL278Contig2|CL278Contig2

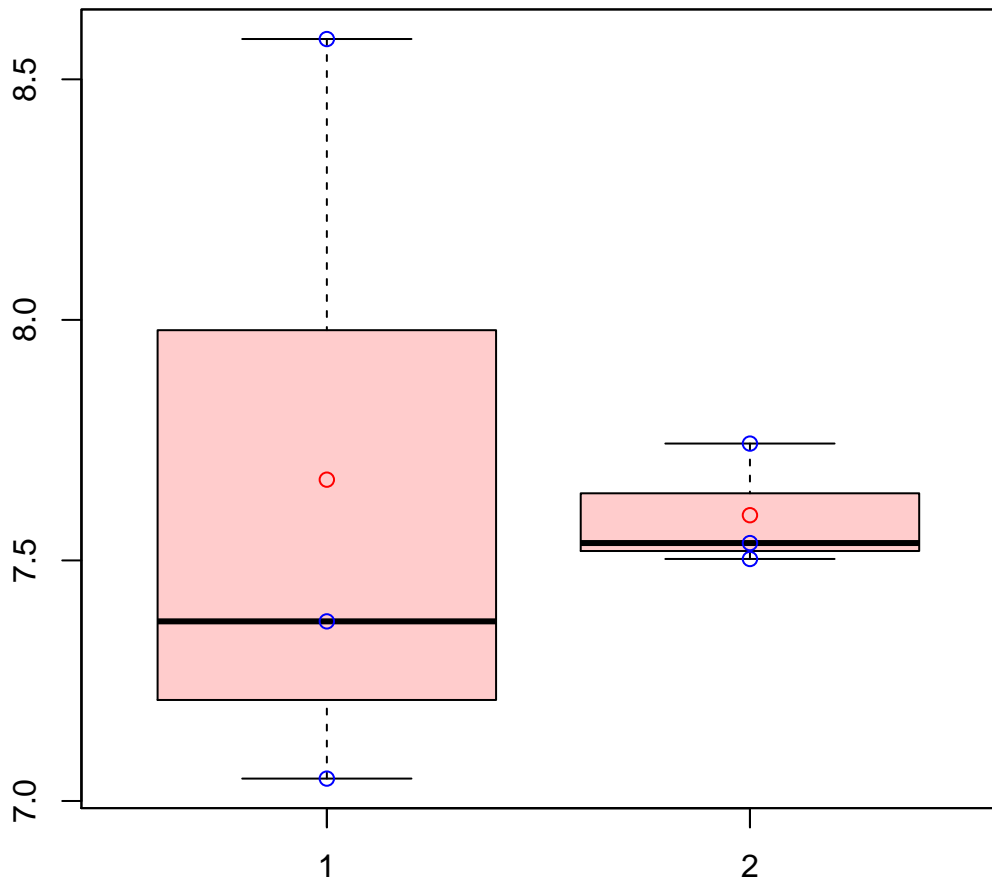

t-Test: p-value = 0.89

# CL2790Contig5|CL2790Contig5

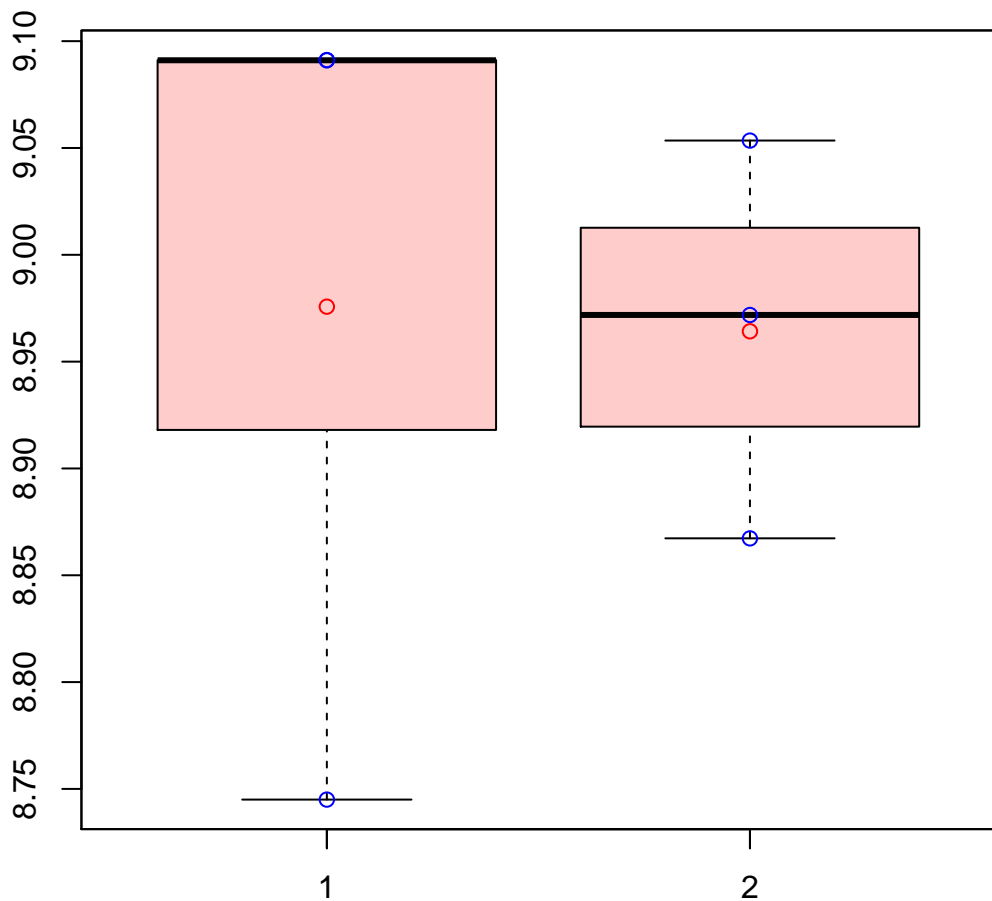

t-Test: p-value = 0.93

# CL279Contig4|CL279Contig4

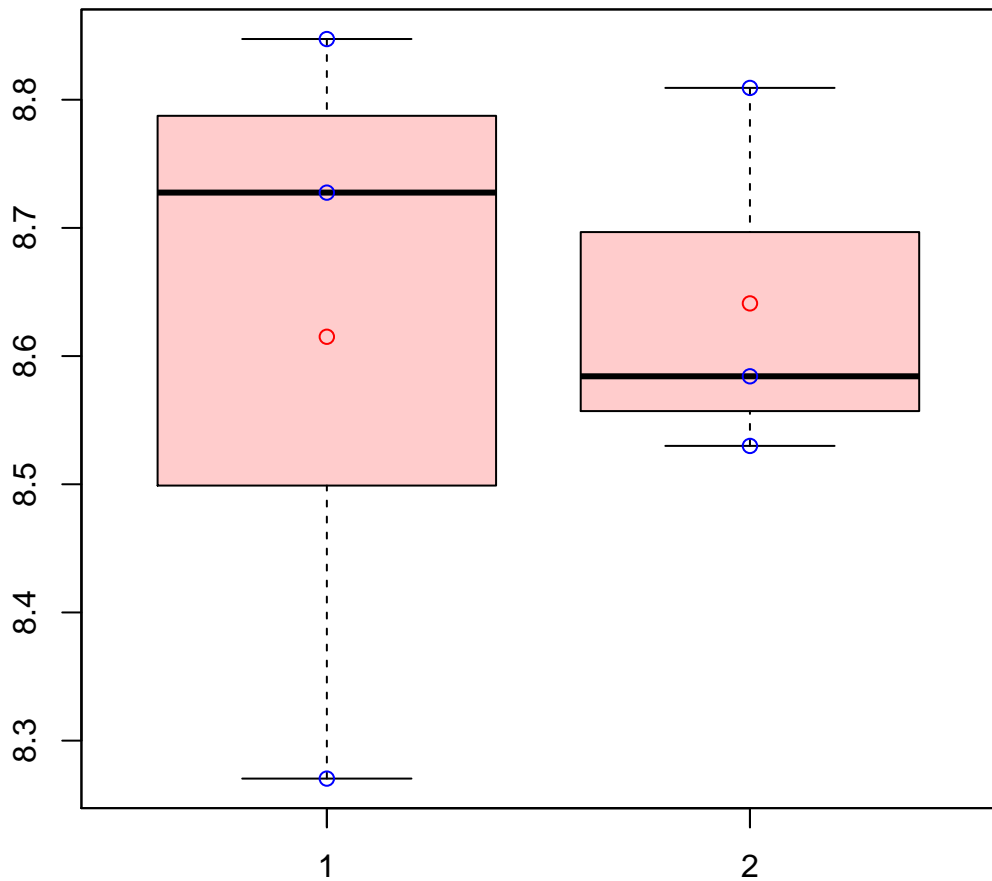

t-Test: p-value = 0.9

# CL27Contig20|CL27Contig20

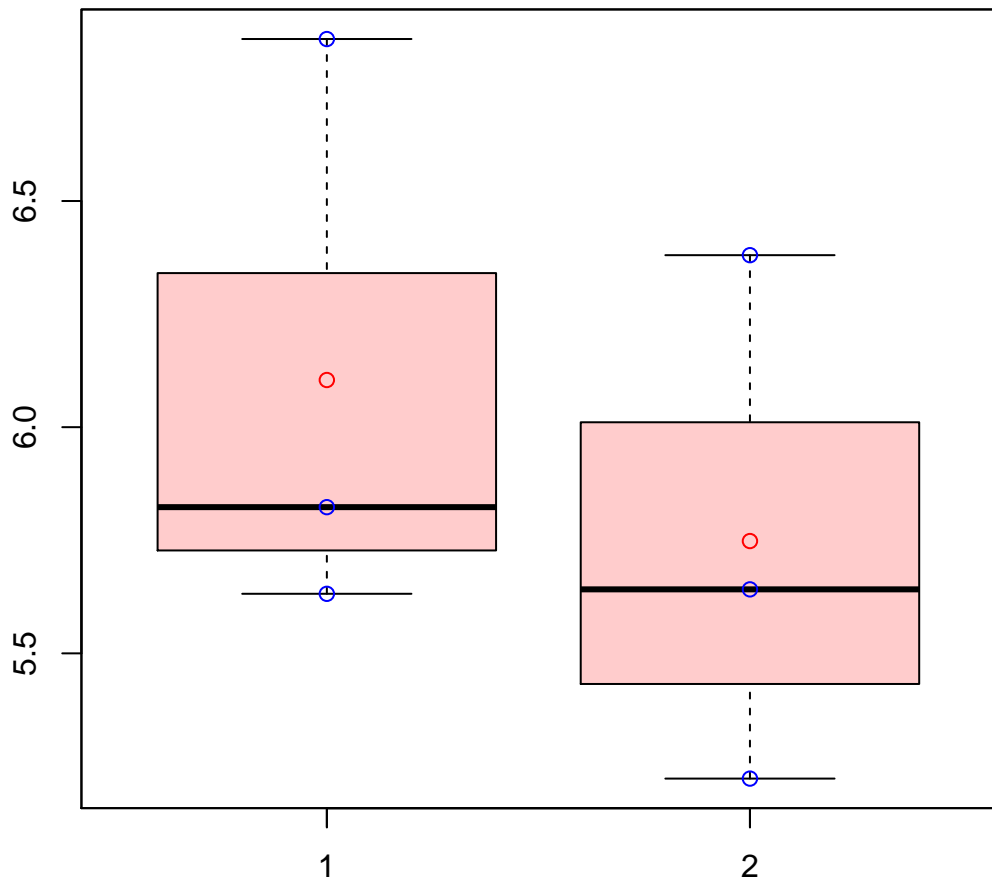

t-Test: p-value = 0.52

# CL2805Contig2|CL2805Contig2

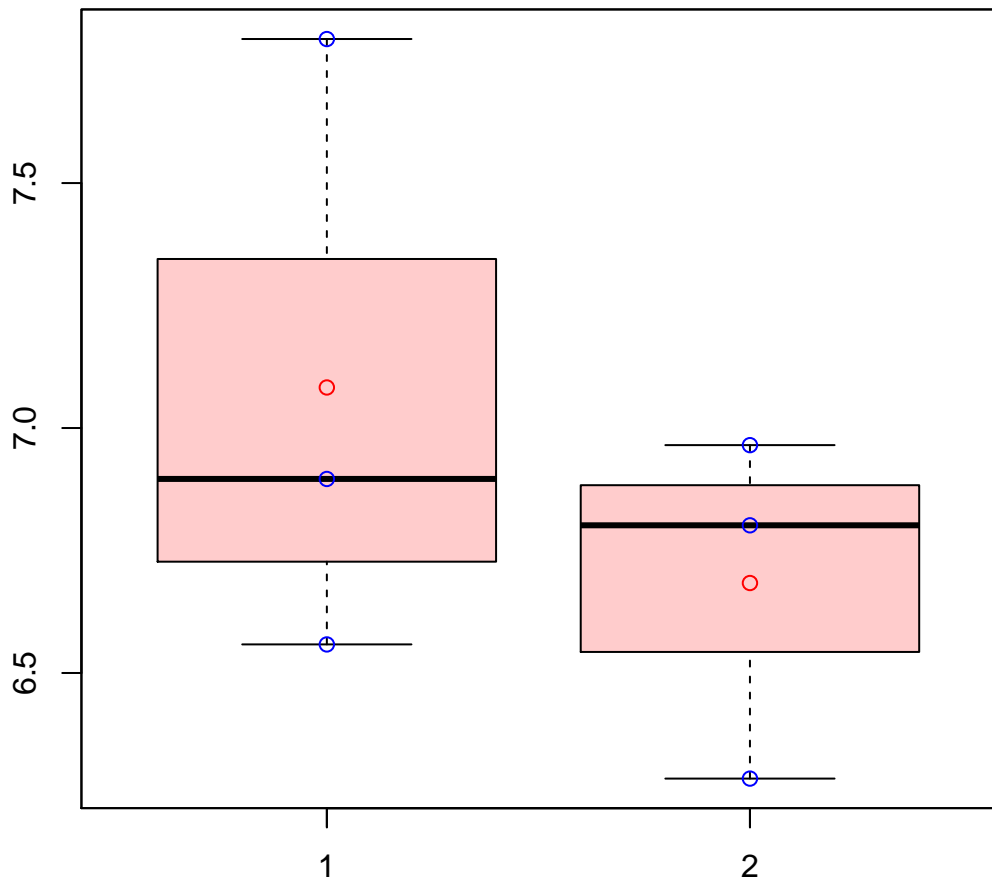

t-Test: p-value = 0.41



# CL2806Contig1|CL2806Contig1

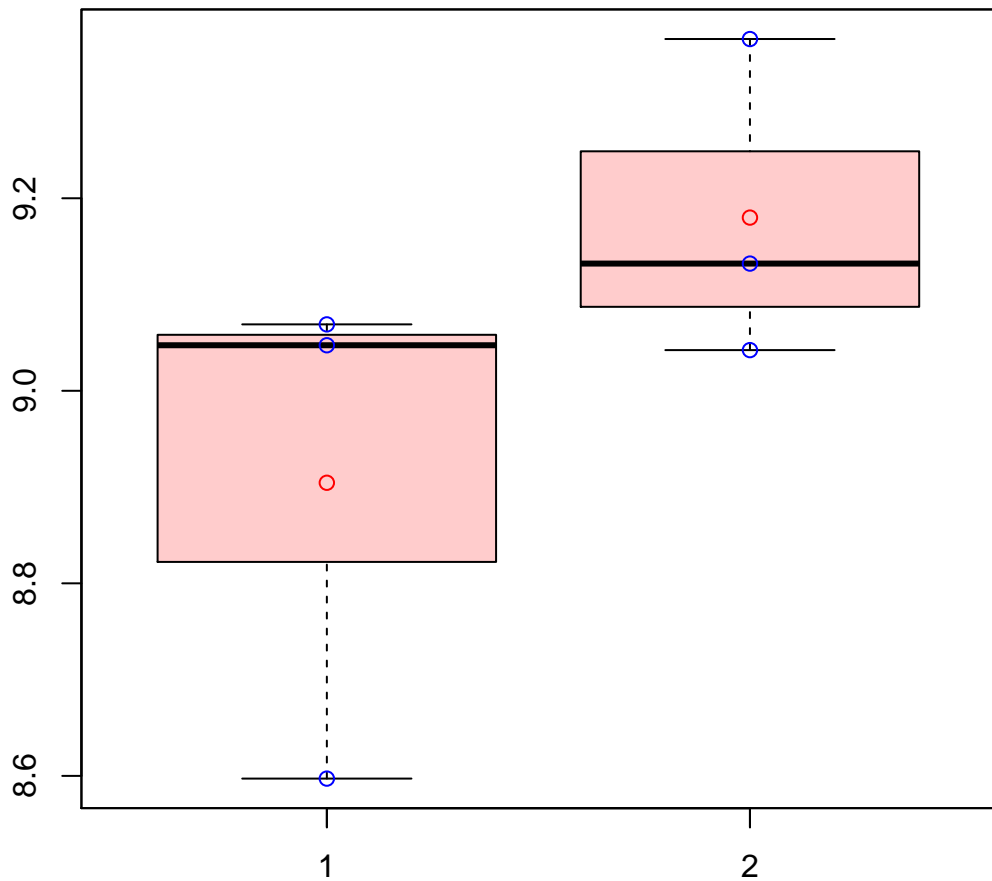

t-Test: p-value = 0.22

# CL280Contig12|CL280Contig12

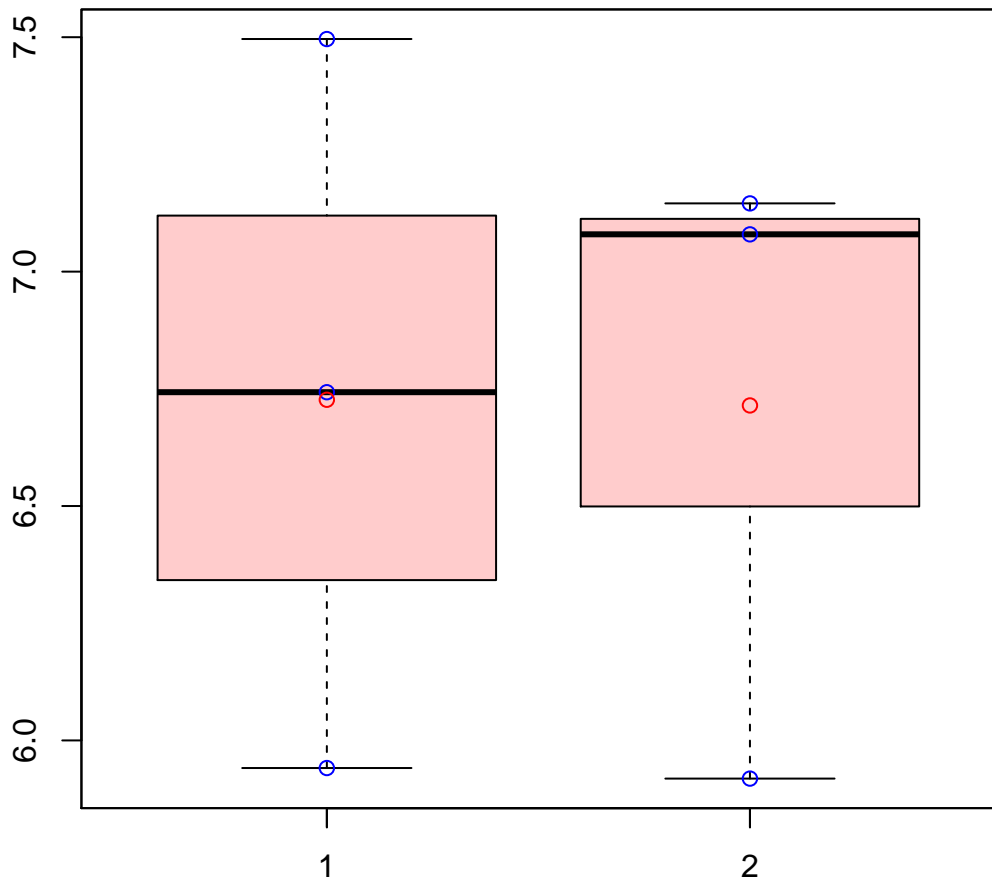

t-Test: p-value = 0.98

# CL280Contig14|CL280Contig14

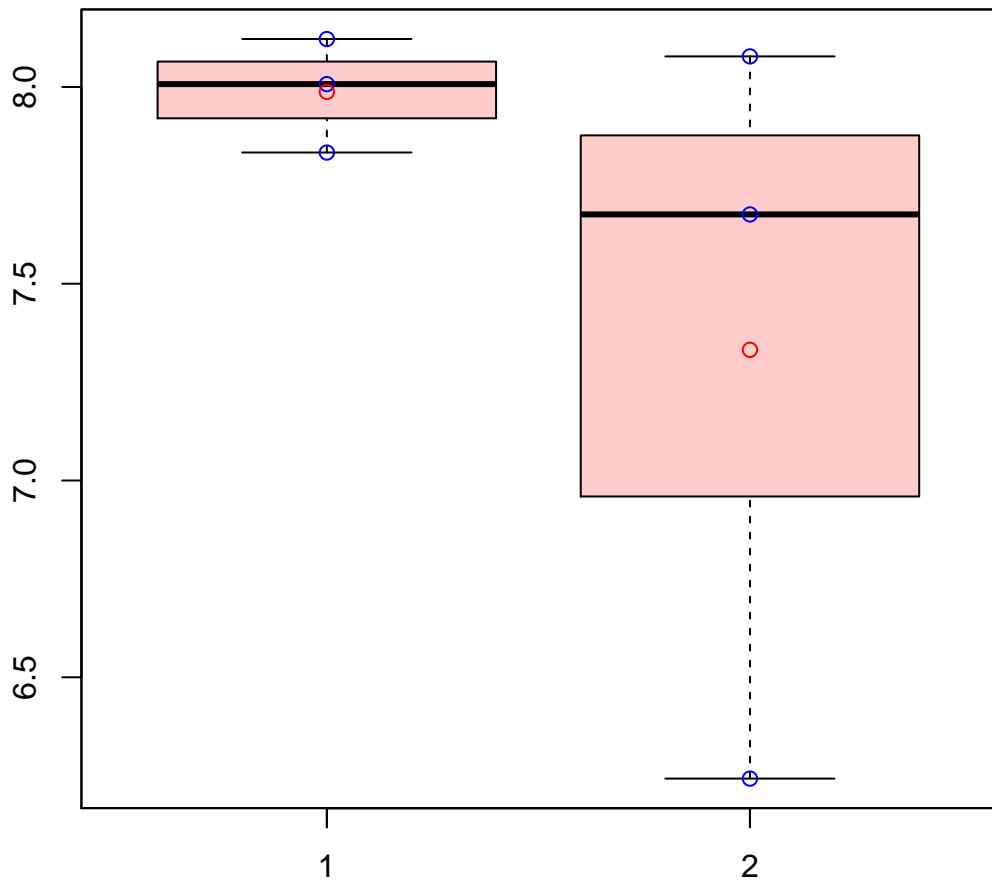

t-Test: p-value = 0.36

# CL280Contig16|CL280Contig16

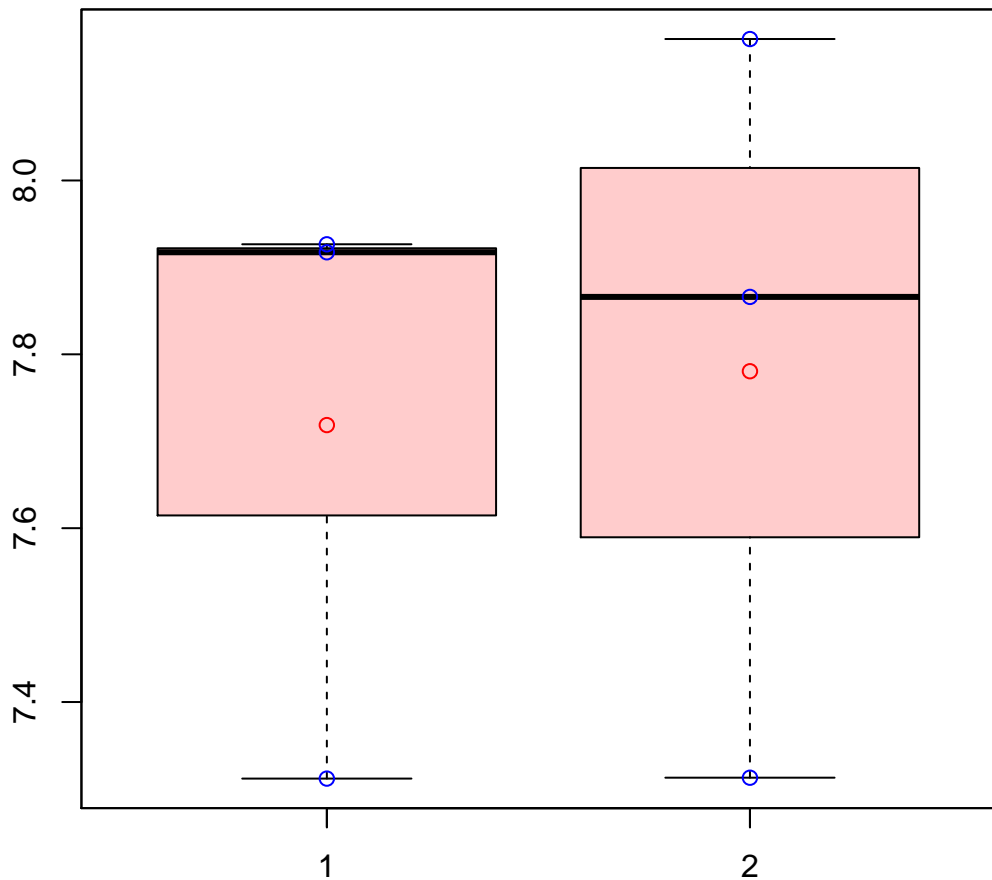

t-Test: p-value = 0.86

# CL280Contig21|CL280Contig21

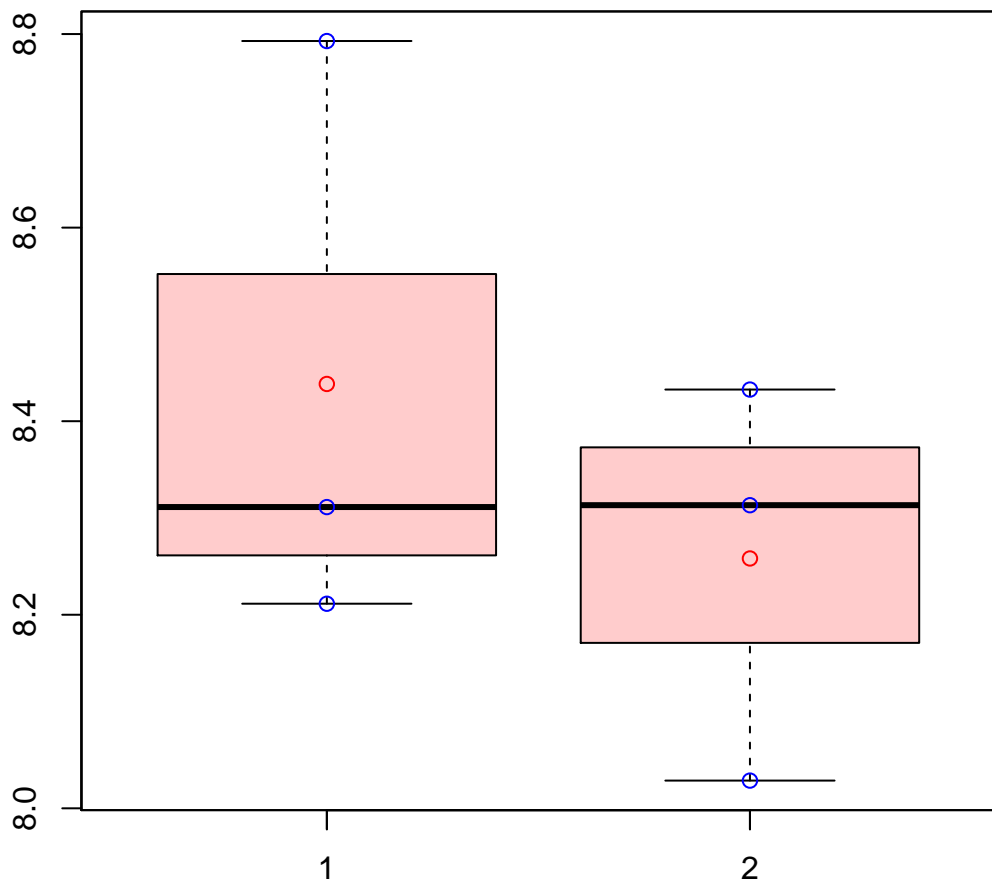

t-Test: p-value = 0.46

# CL280Contig22|CL280Contig22

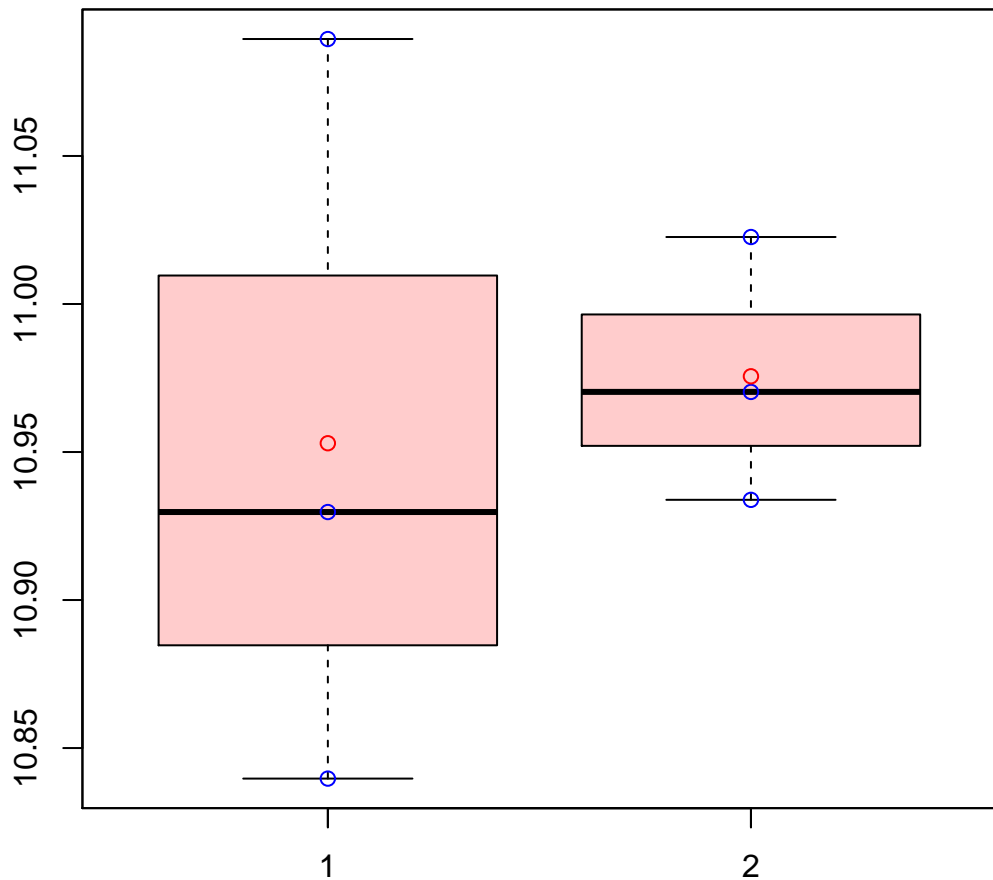

t-Test: p-value = 0.79

# CL280Contig2|CL280Contig2

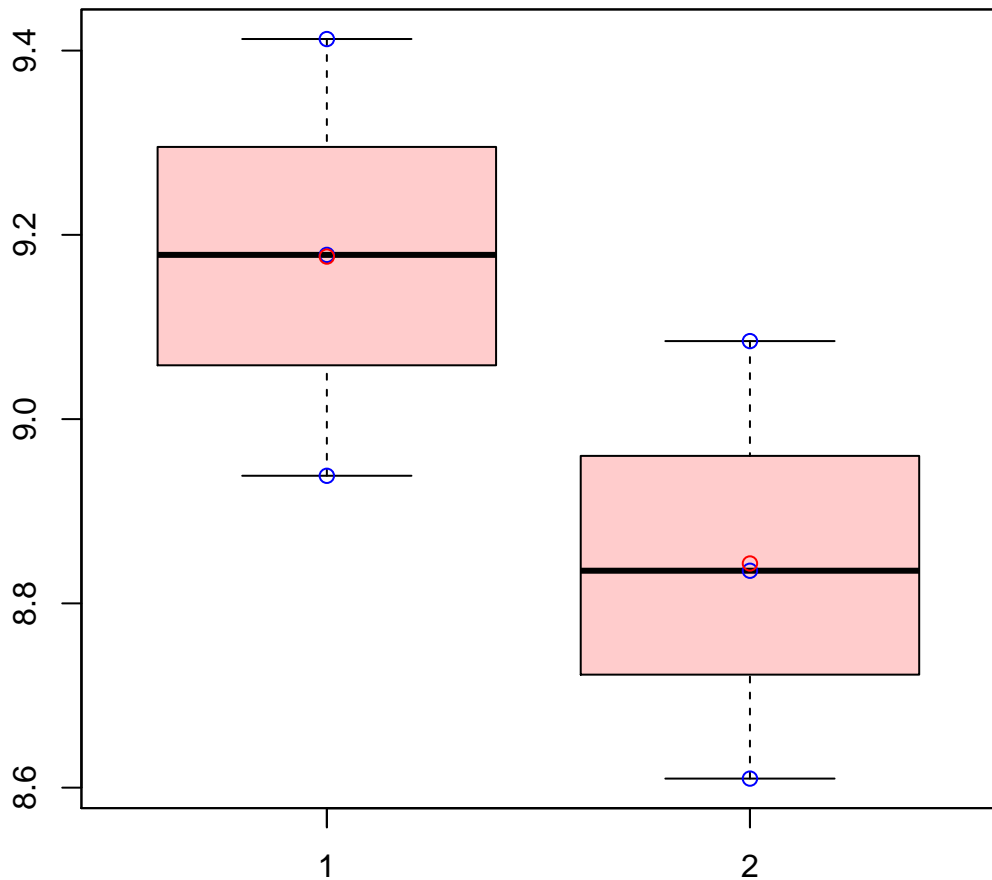

t-Test: p-value = 0.16

# CL280Contig3|CL280Contig3

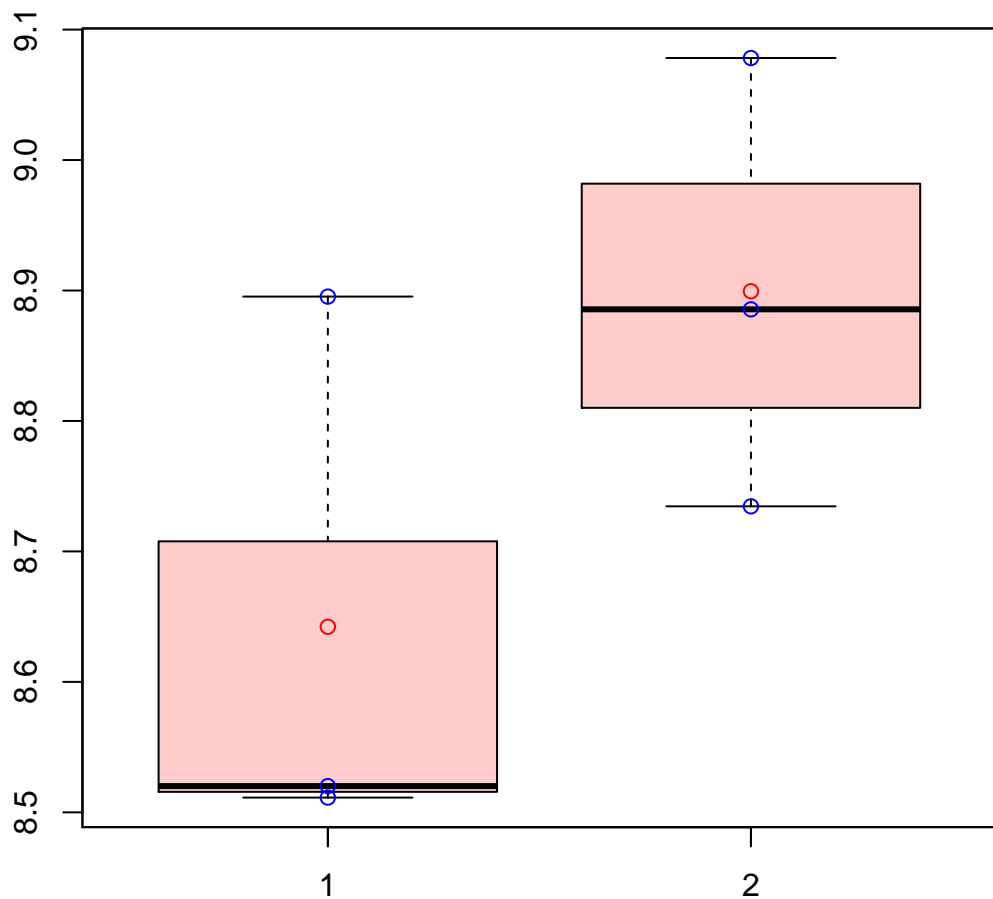

t-Test: p-value = 0.19



# CL280Contig6|CL280Contig6

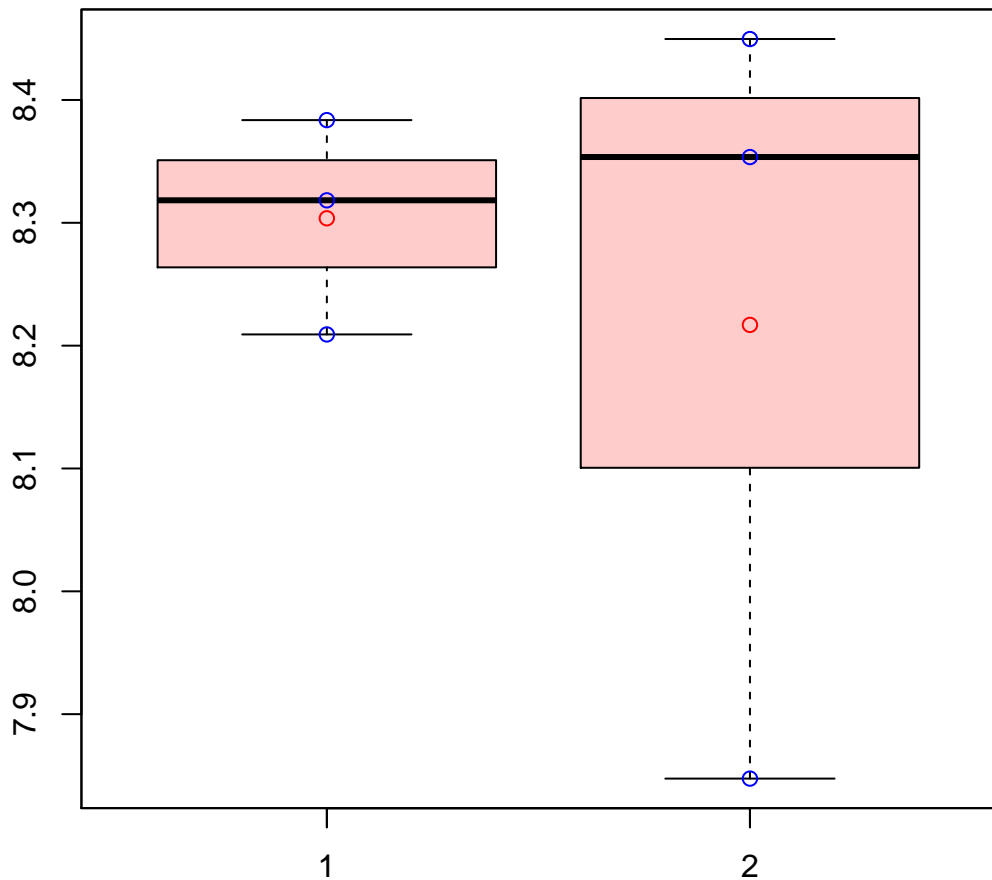

t-Test: p-value = 0.69

# CL280Contig8|CL280Contig8

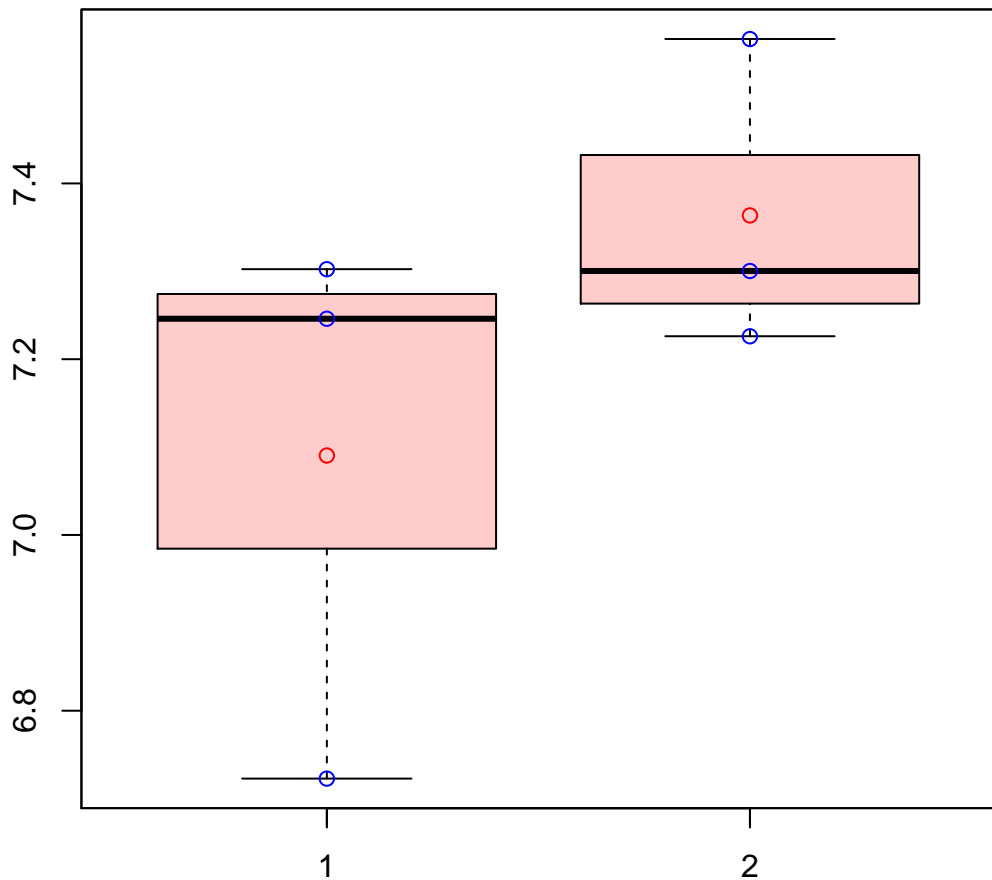

t-Test: p-value = 0.28

# CL2810Contig3|CL2810Contig3

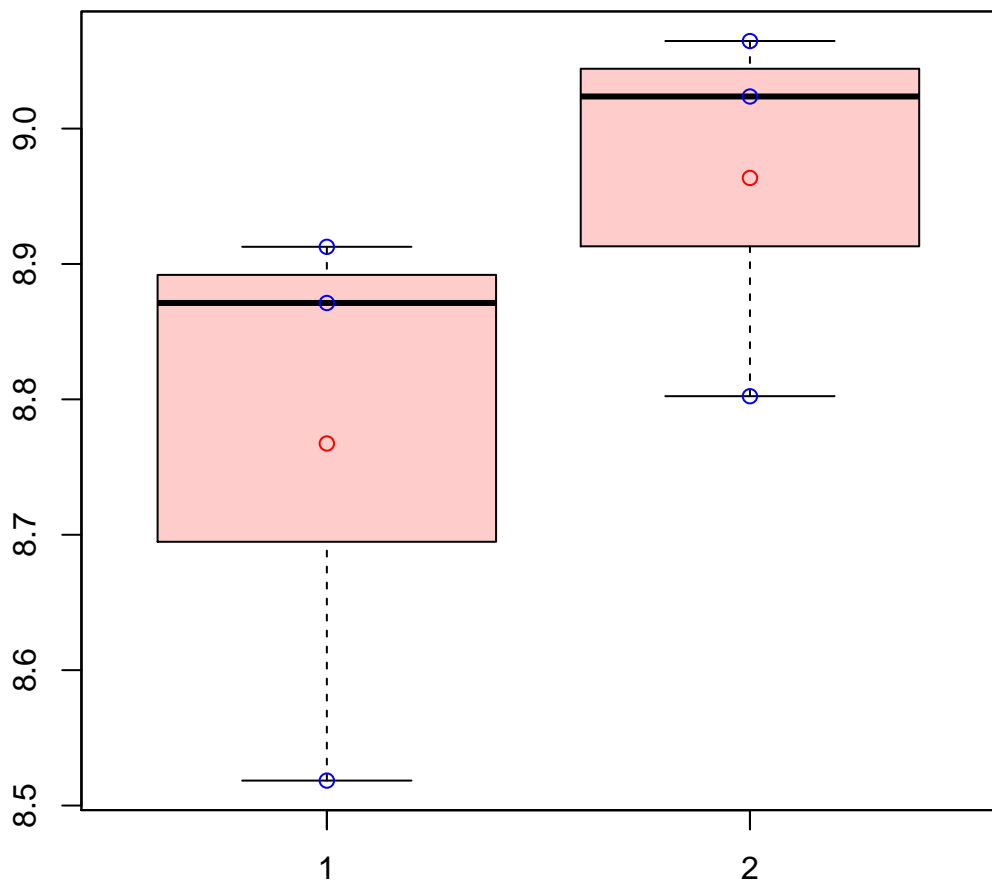

t-Test: p-value = 0.27

# CL2811Contig4|CL2811Contig4

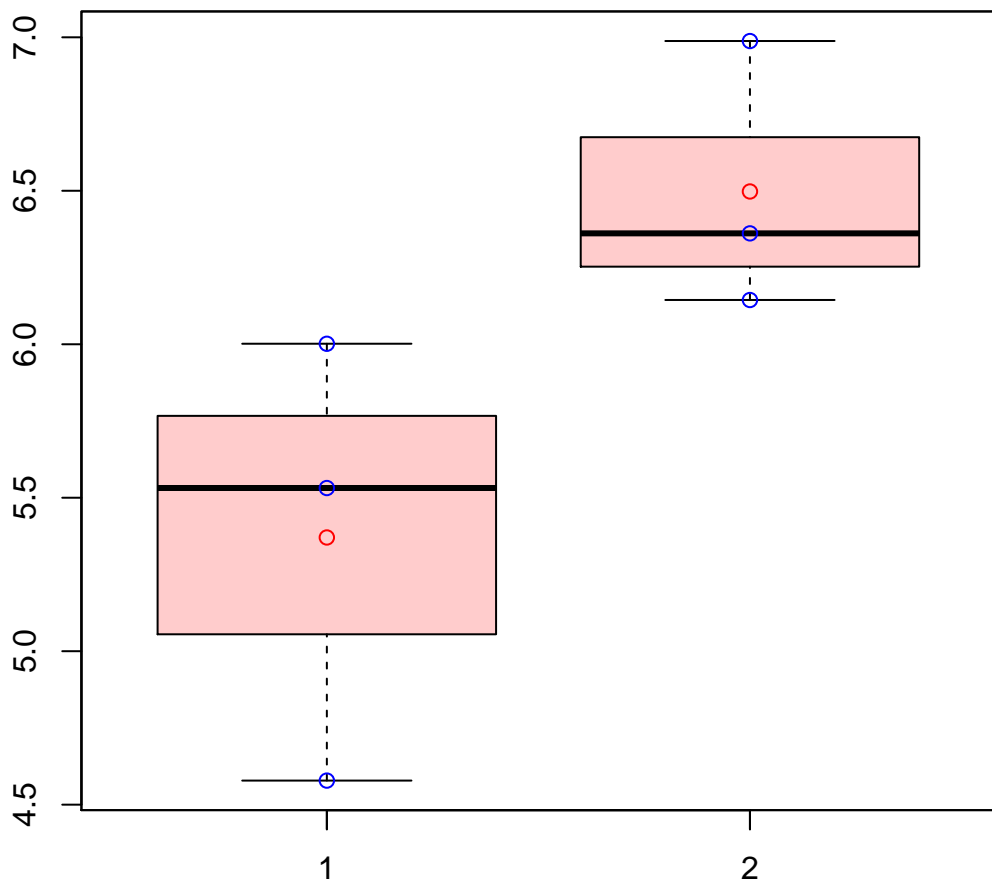

t-Test: p-value = 0.1

# CL2813Contig3|CL2813Contig3

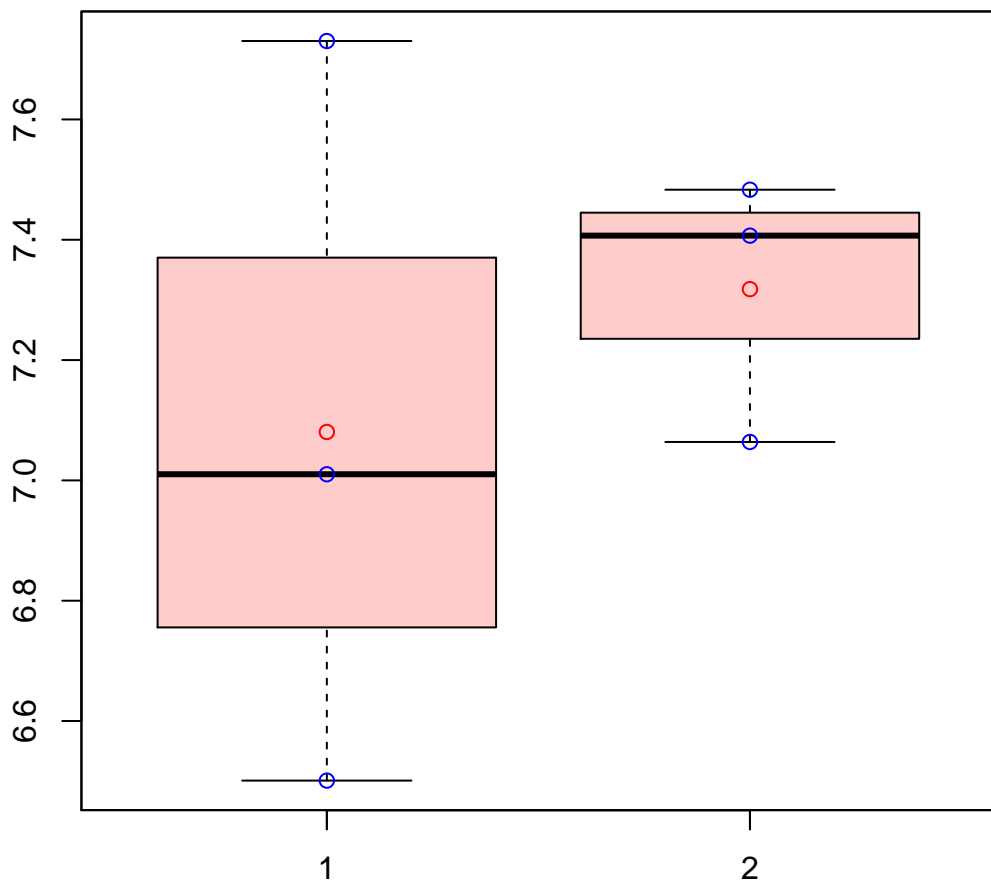

t-Test: p-value = 0.58

# CL2818Contig11|CL2818Contig11

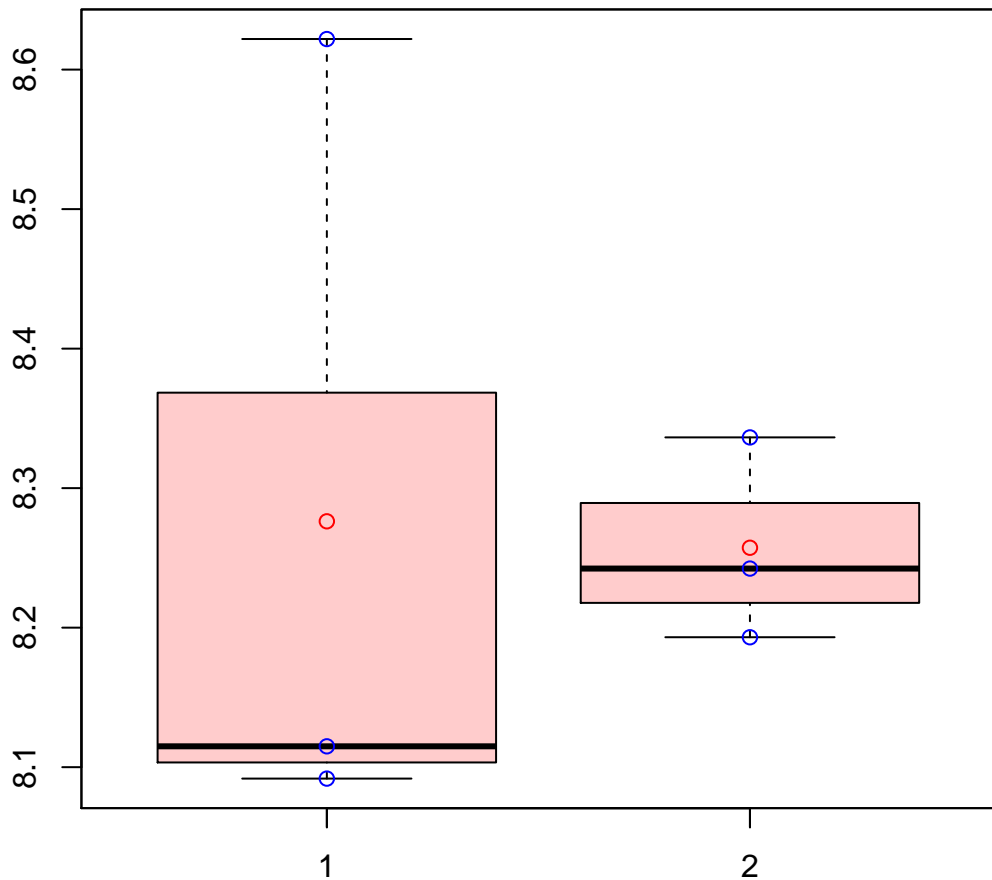

t-Test: p-value = 0.92

# CL2818Contig7|CL2818Contig7

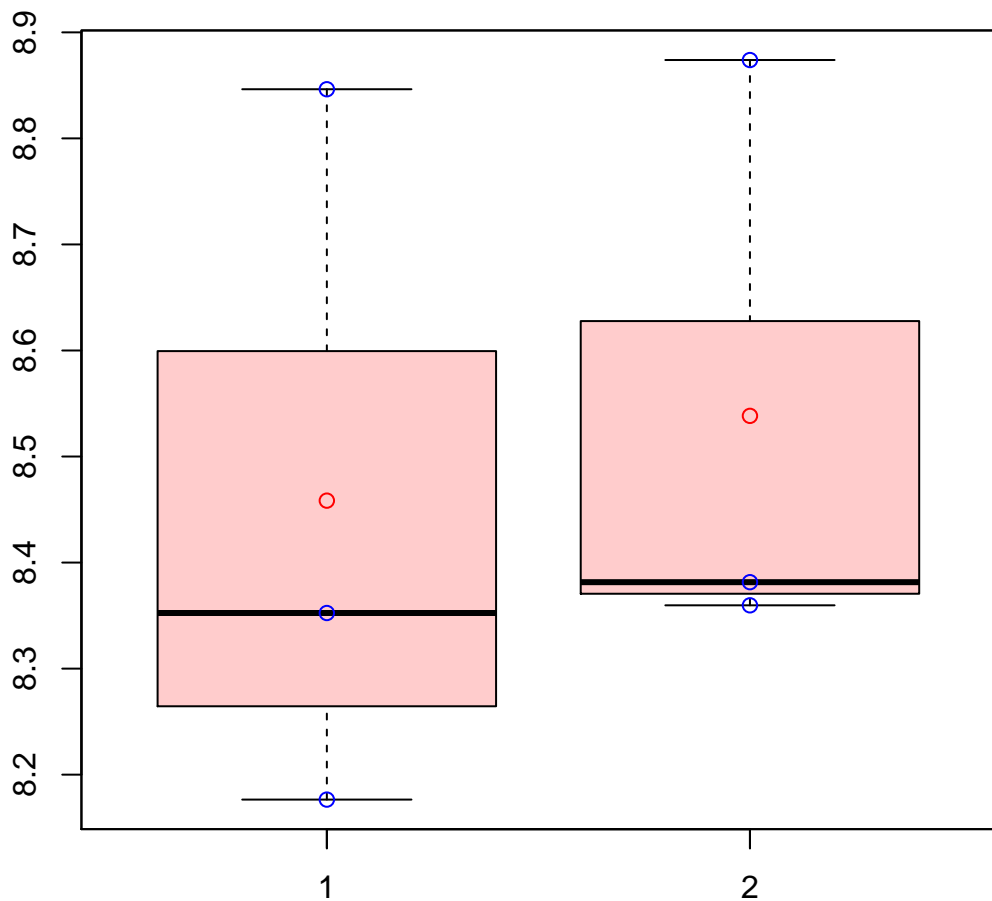

t-Test: p-value = 0.78

# CL2818Contig9|CL2818Contig9

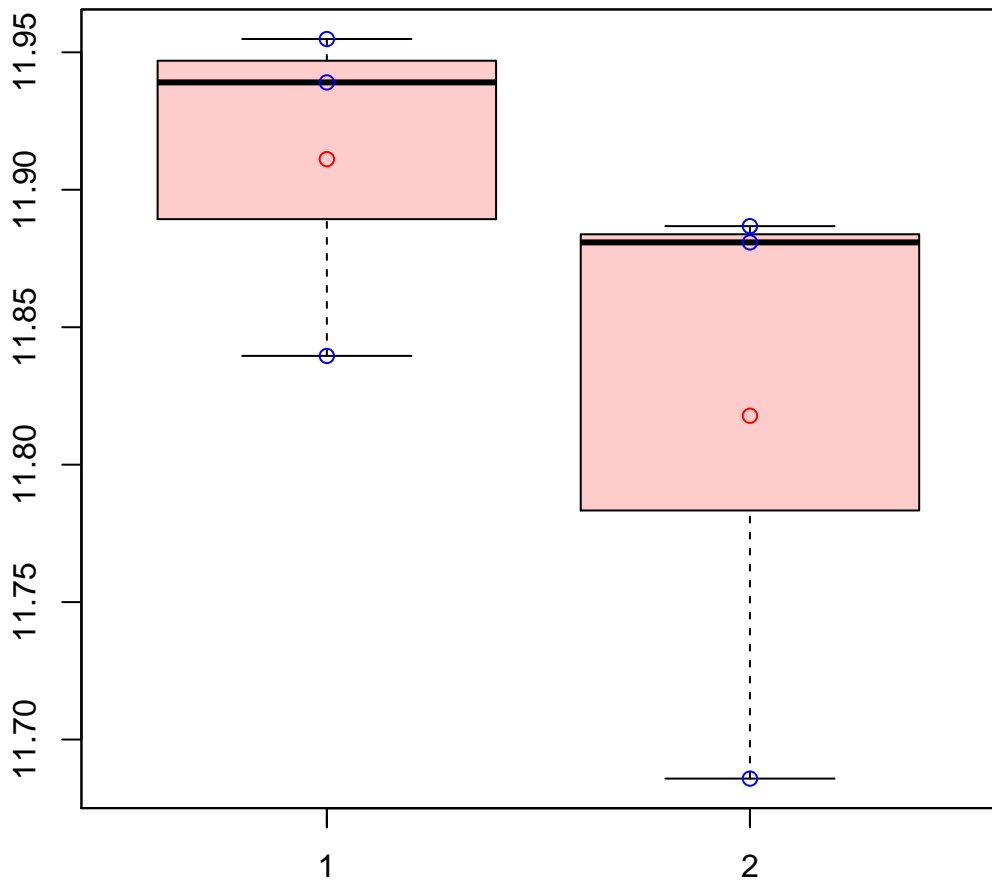

t-Test: p-value = 0.3



# CL2827Contig2|CL2827Contig2

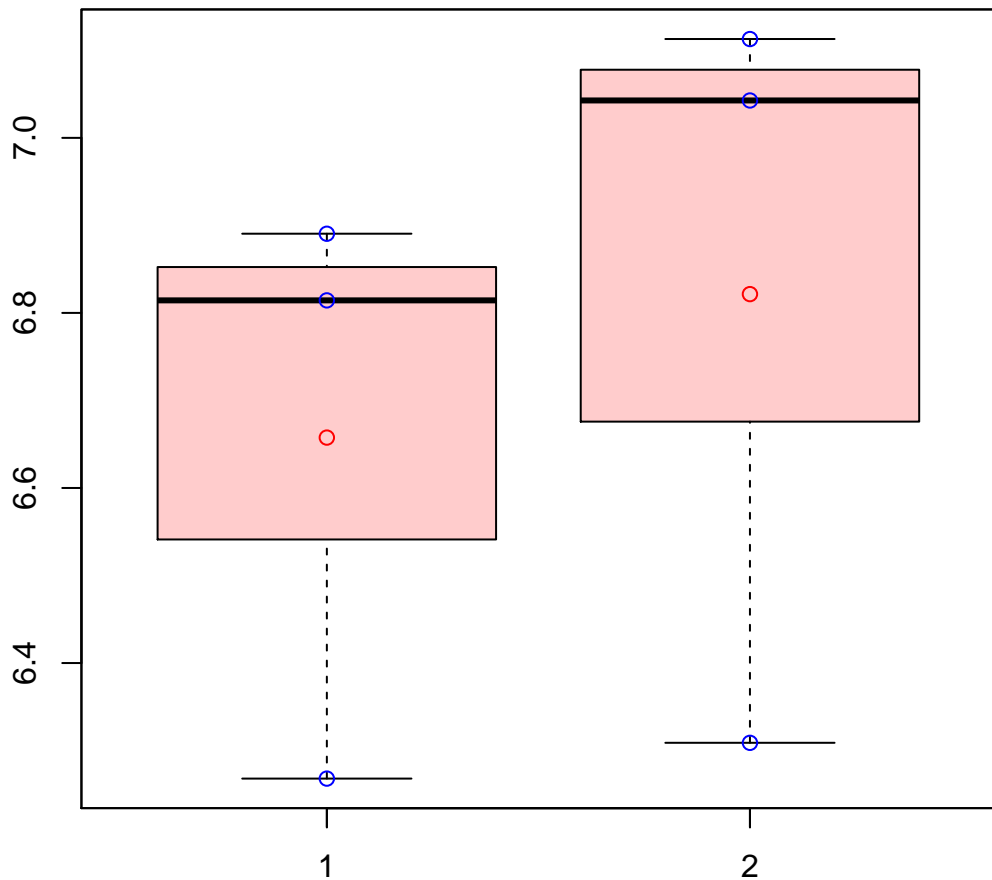

t-Test: p-value = 0.64

# CL2829Contig7|CL2829Contig7

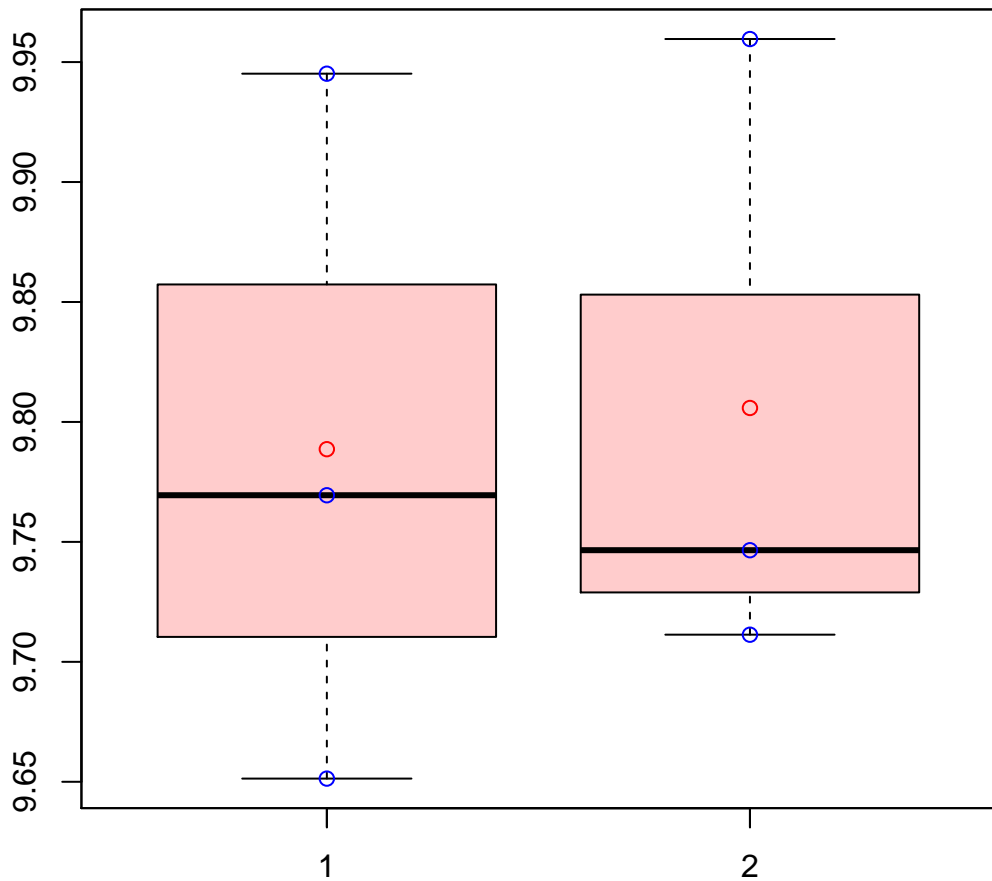

t-Test: p-value = 0.89

# CL2845Contig2|CL2845Contig2

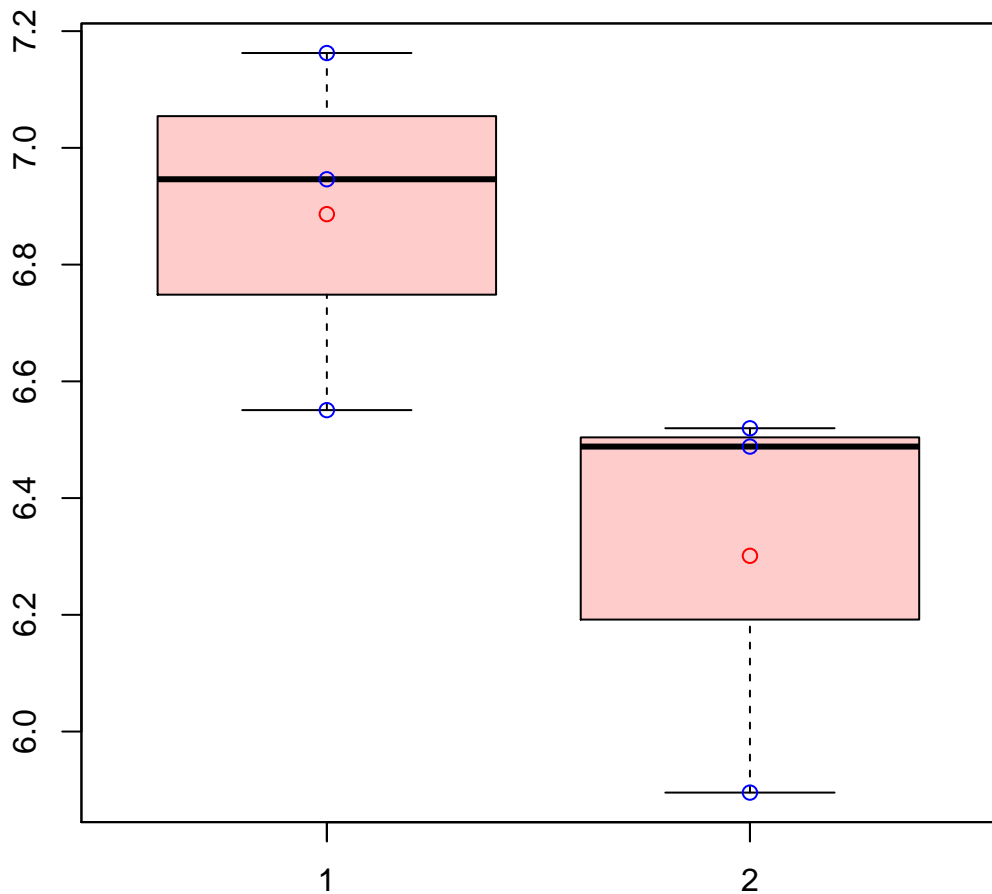

t-Test: p-value = 0.1

# CL2847Contig4|CL2847Contig4

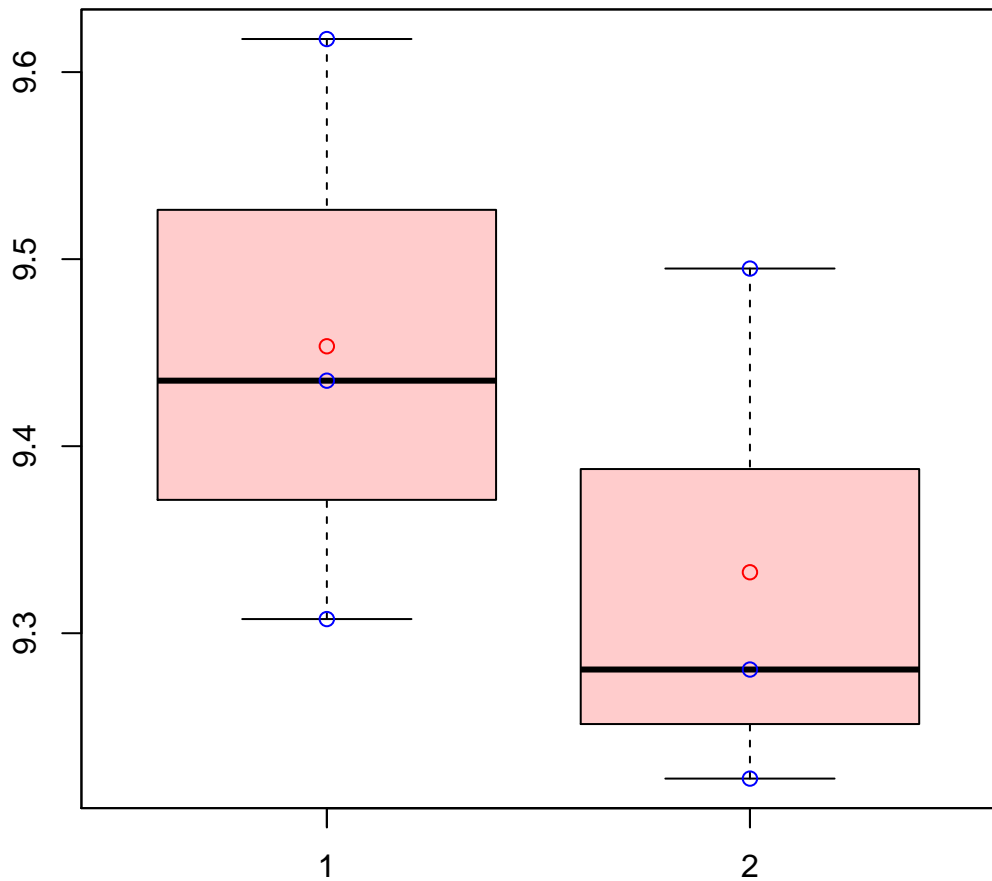

t-Test: p-value = 0.38

# CL2847Contig5|CL2847Contig5

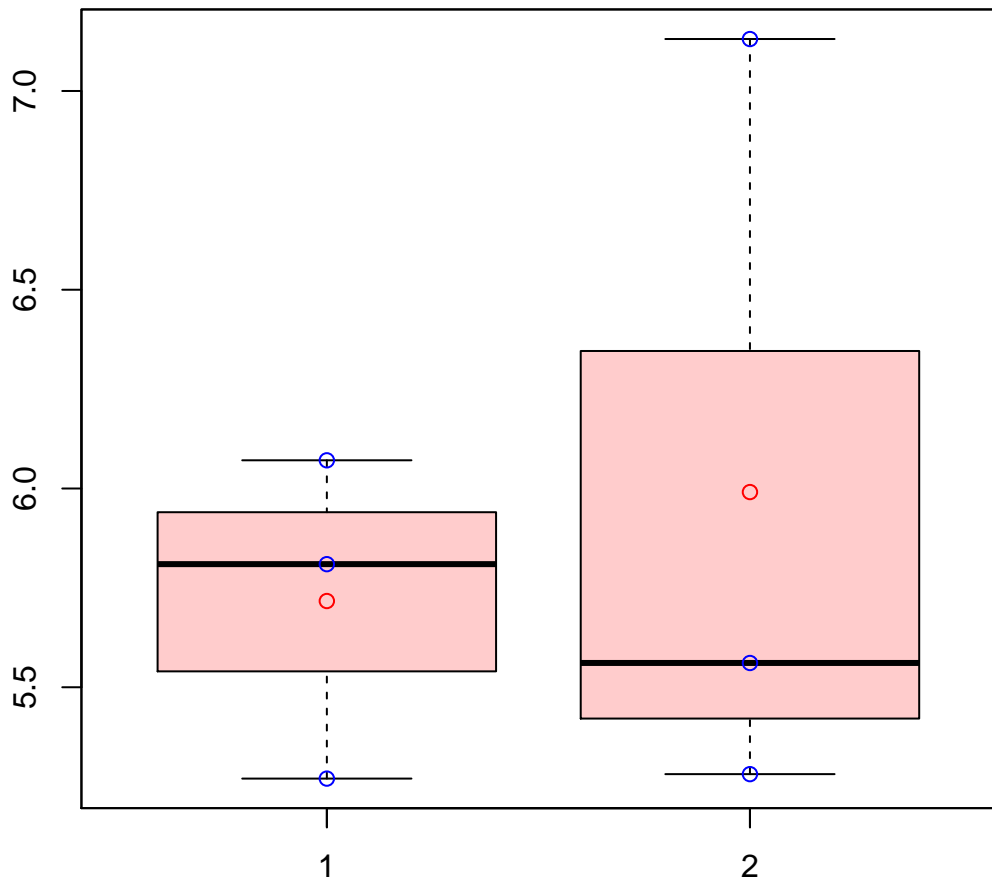

t-Test: p-value = 0.69

# CL2847Contig6|CL2847Contig6

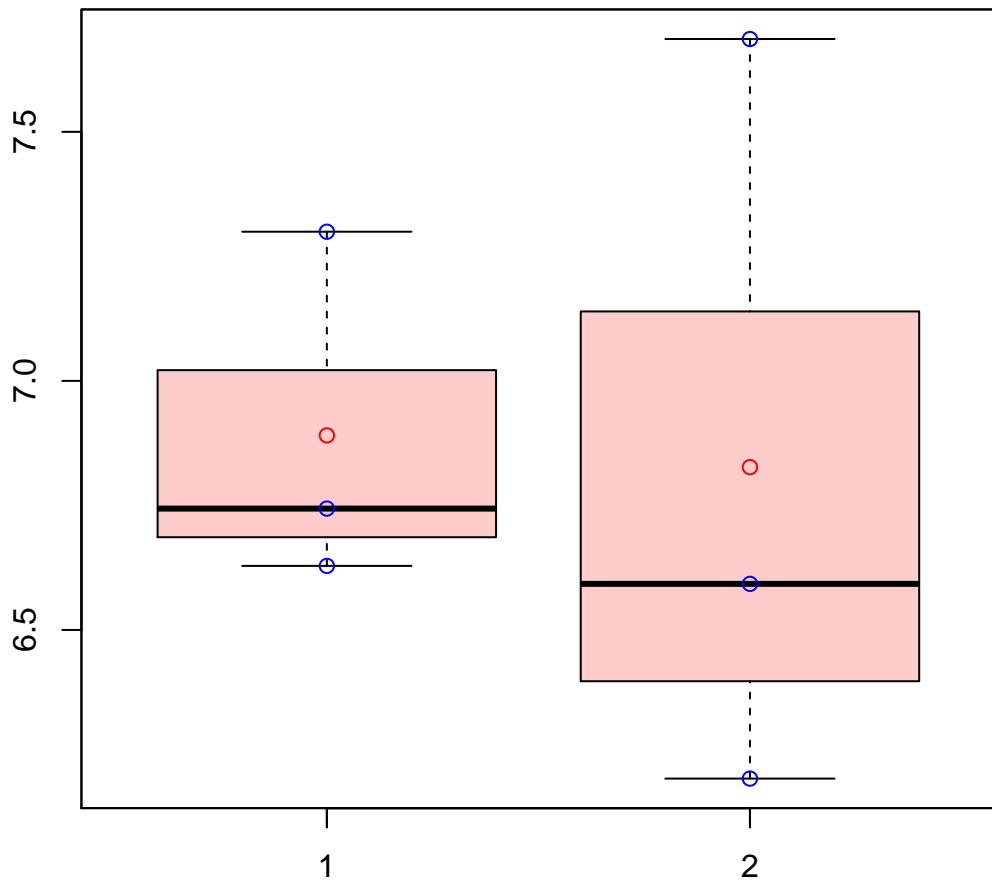

t-Test: p-value = 0.91

# CL2860Contig2|CL2860Contig2

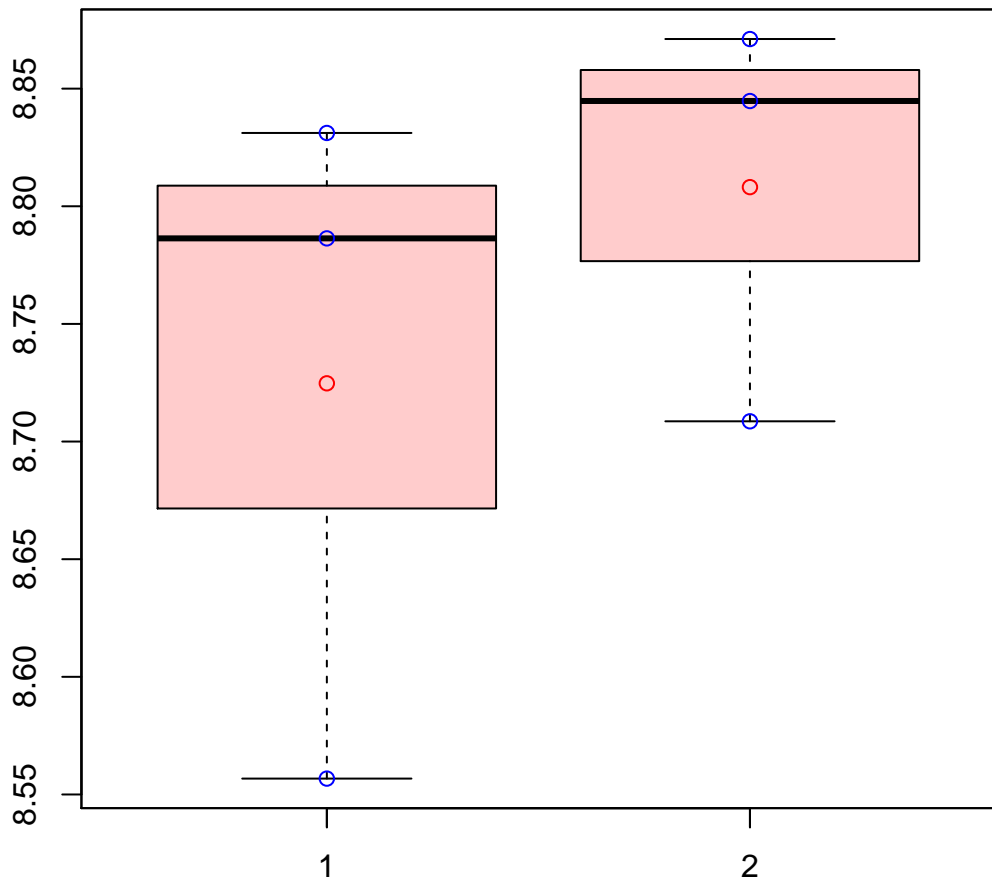

t-Test: p-value = 0.46

# CL2868Contig3|CL2868Contig3

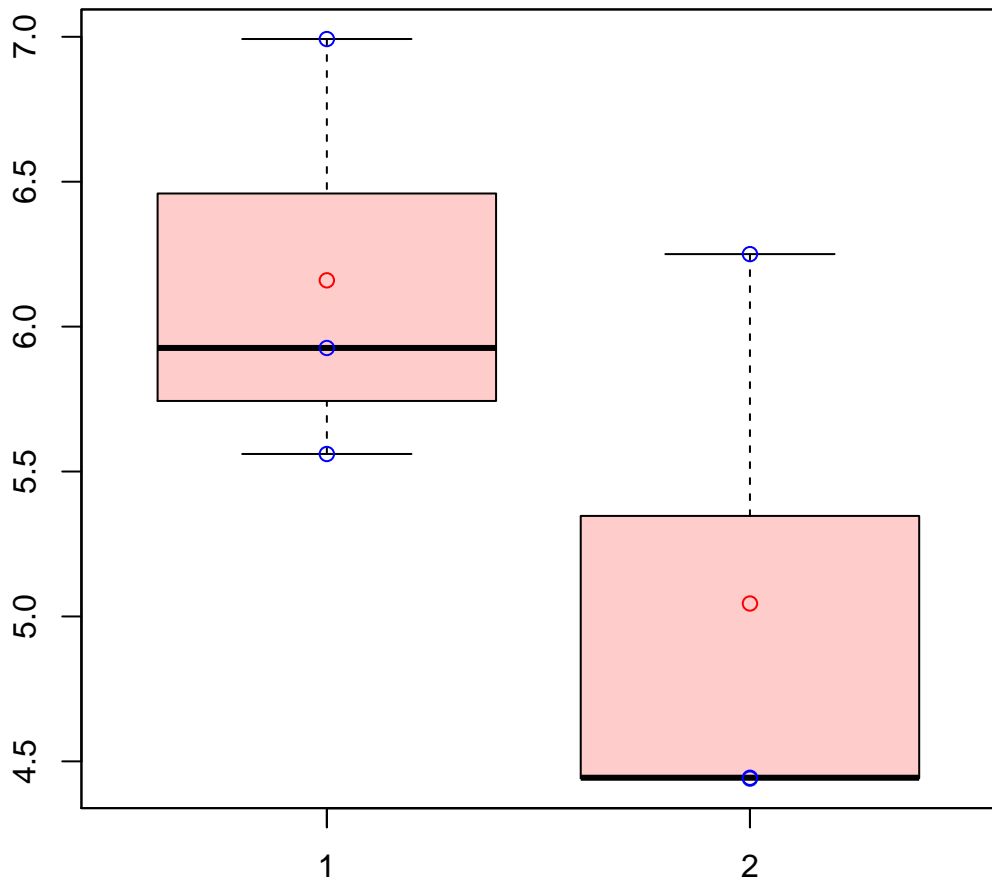

t-Test: p-value = 0.21



# CL2878Contig1|CL2878Contig1

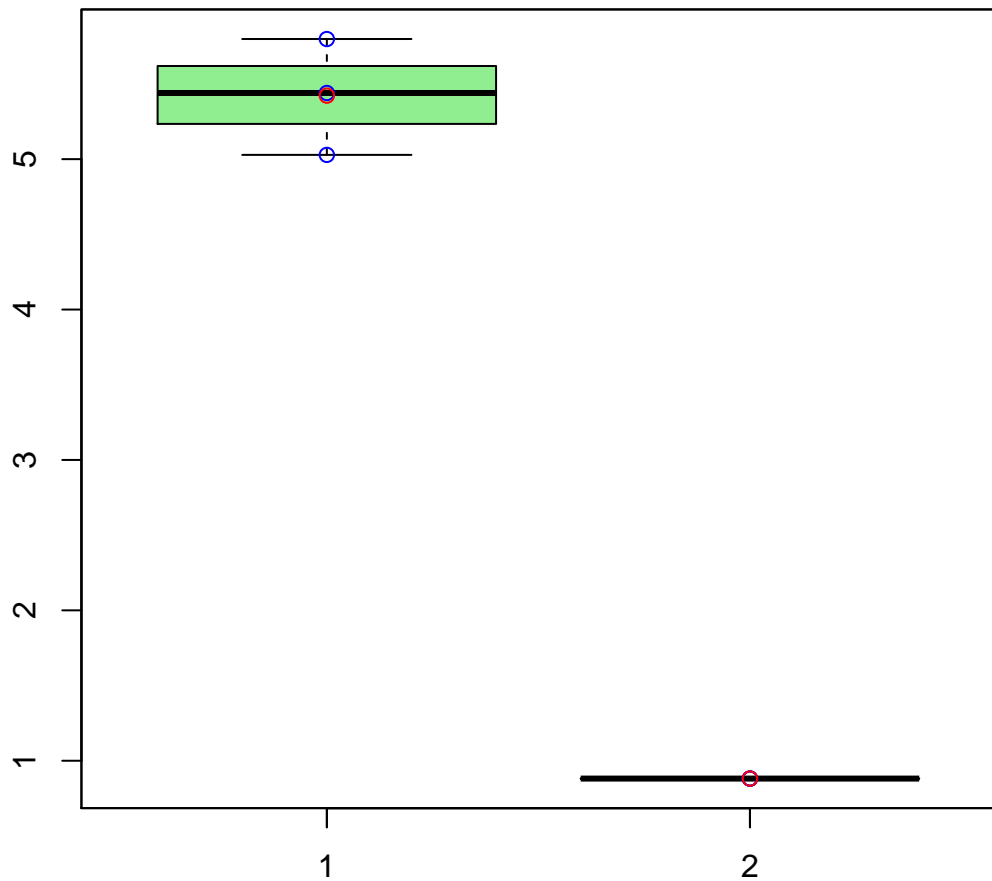

t-Test: p-value = 0

# CL287Contig5|CL287Contig5

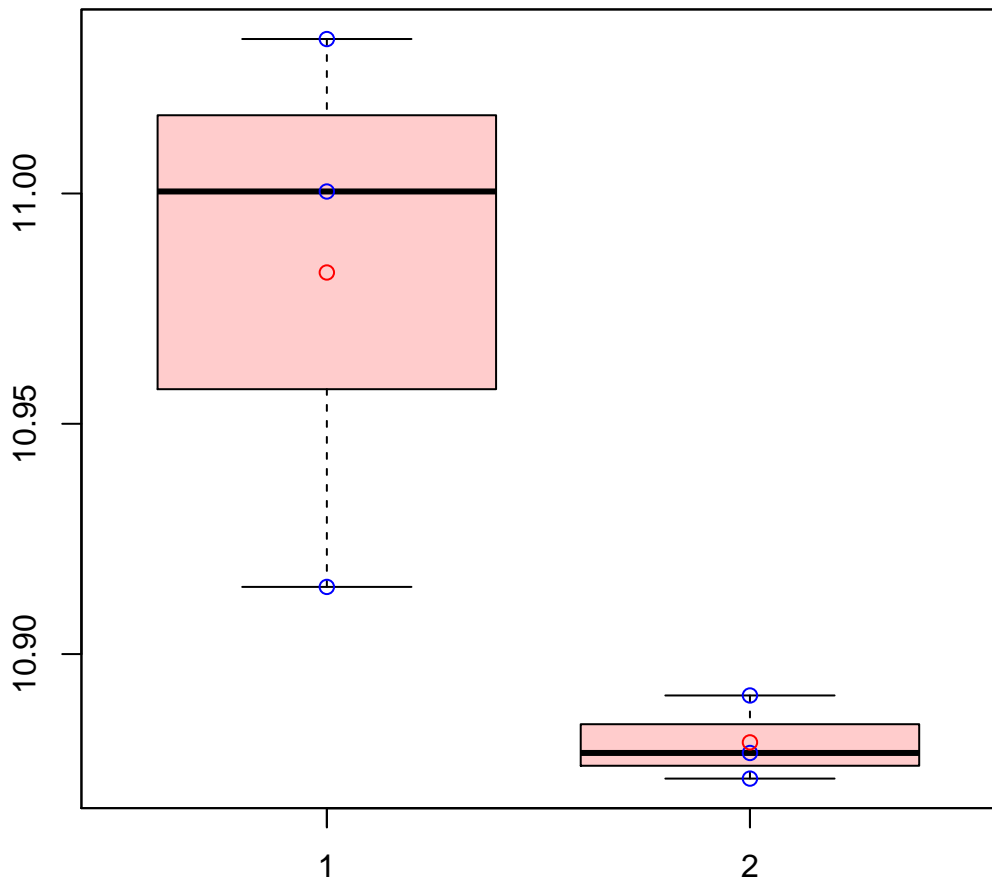

t-Test: p-value = 0.1

# CL2885Contig3|CL2885Contig3

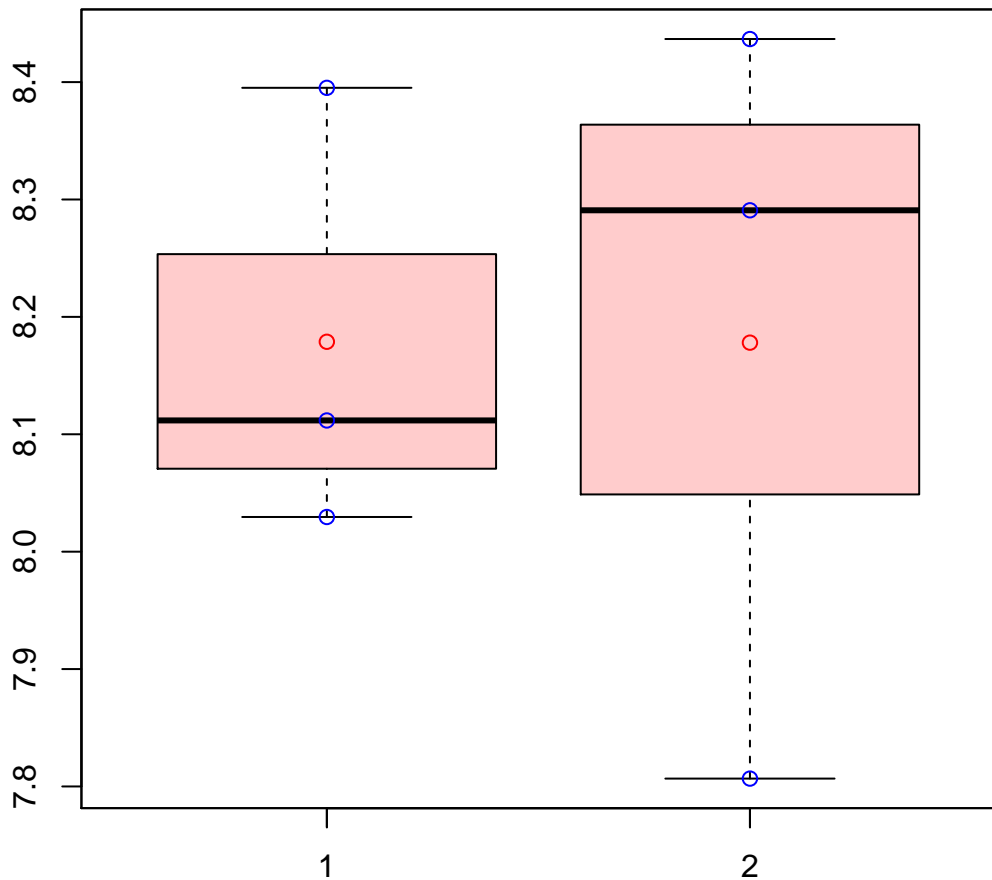

t-Test: p-value = 1

# CL2891Contig4|CL2891Contig4

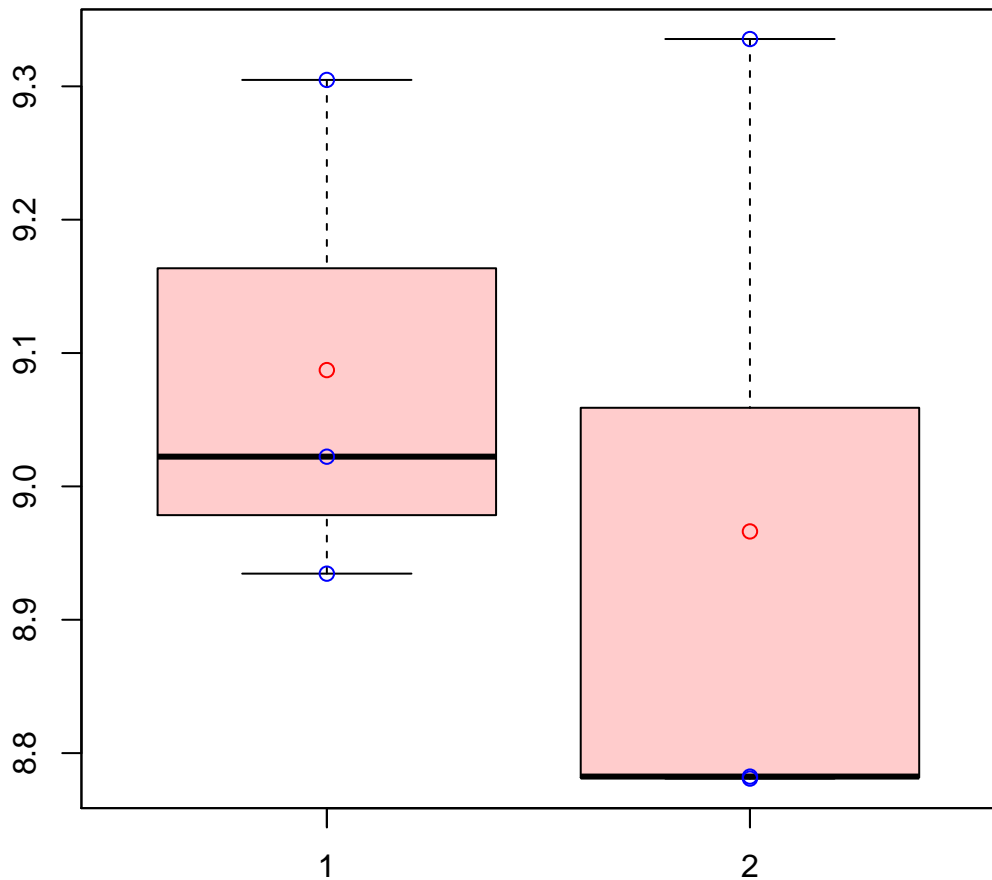

t-Test: p-value = 0.61

# CL2892Contig5|CL2892Contig5

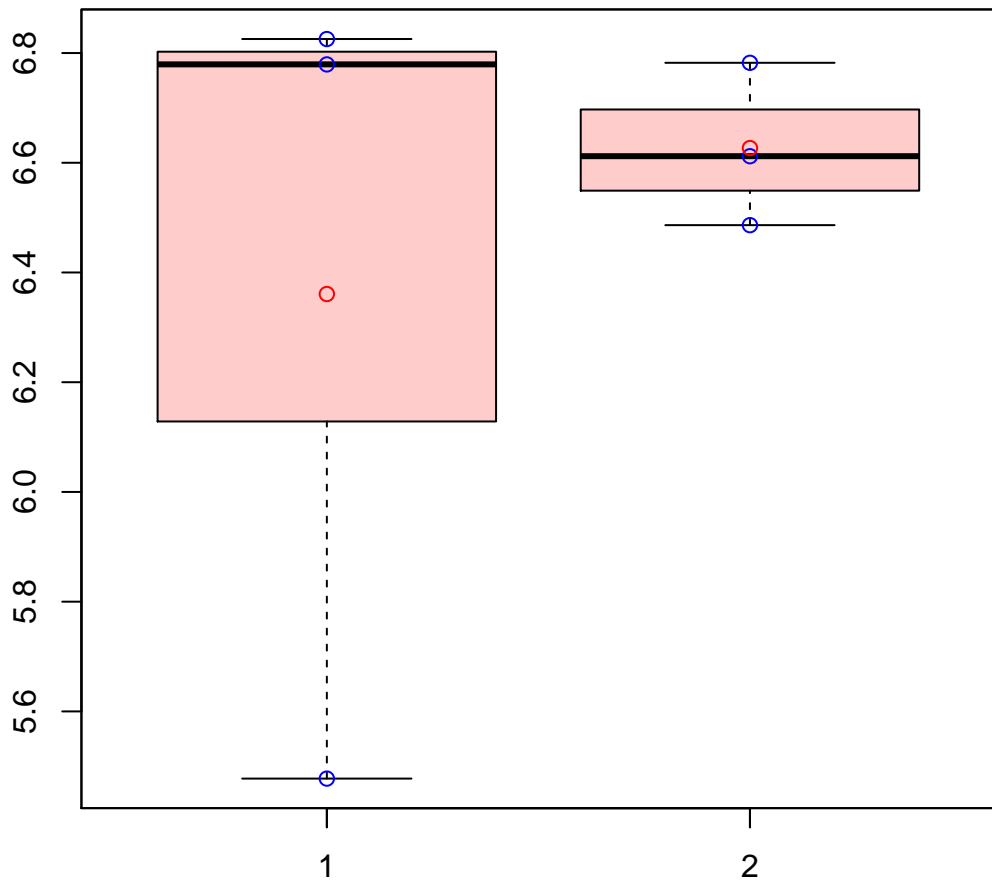

t-Test: p-value = 0.61

# CL289Contig4|CL289Contig4

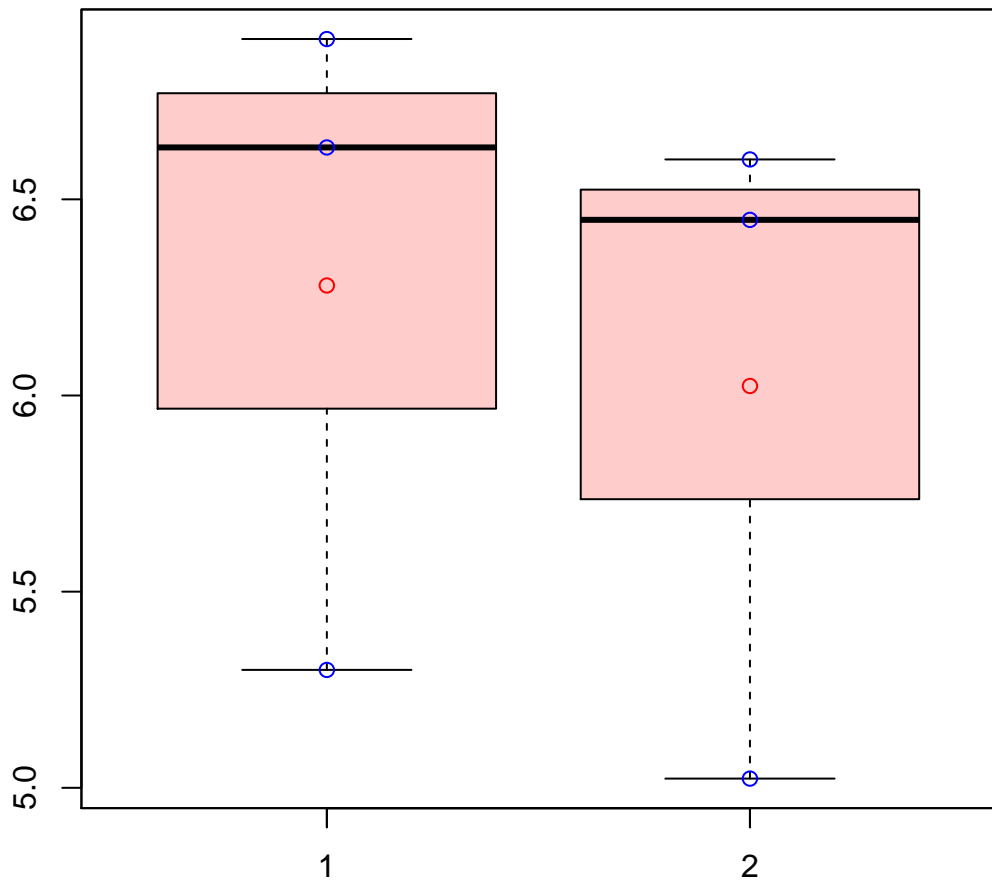

t-Test: p-value = 0.74

# CL28Contig15|CL28Contig15

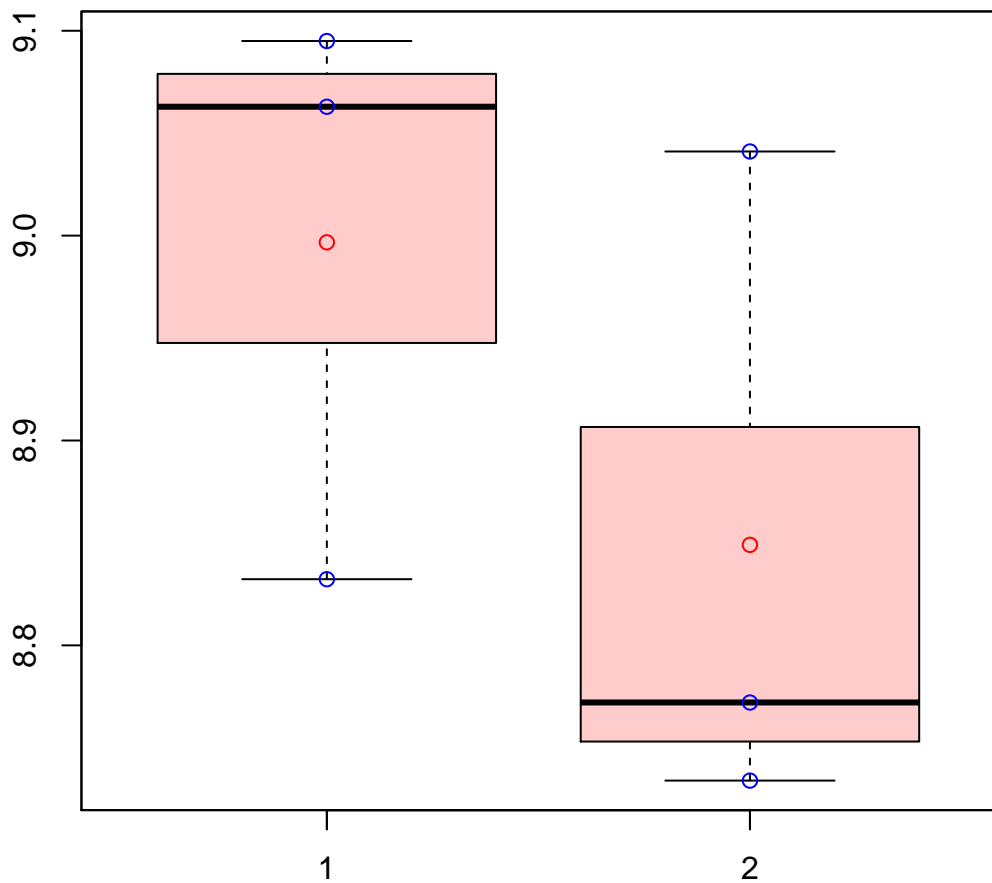

t-Test: p-value = 0.31

# CL28Contig17|CL28Contig17

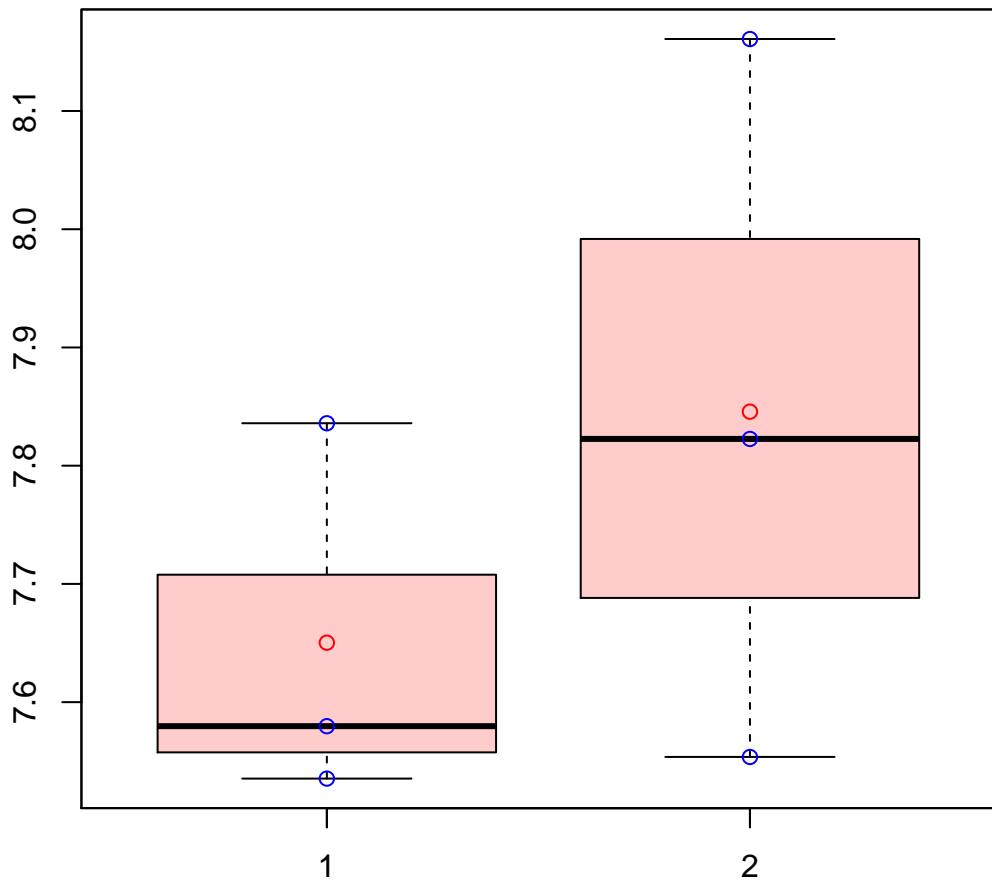

t-Test: p-value = 0.4



# CL28Contig29|CL28Contig29

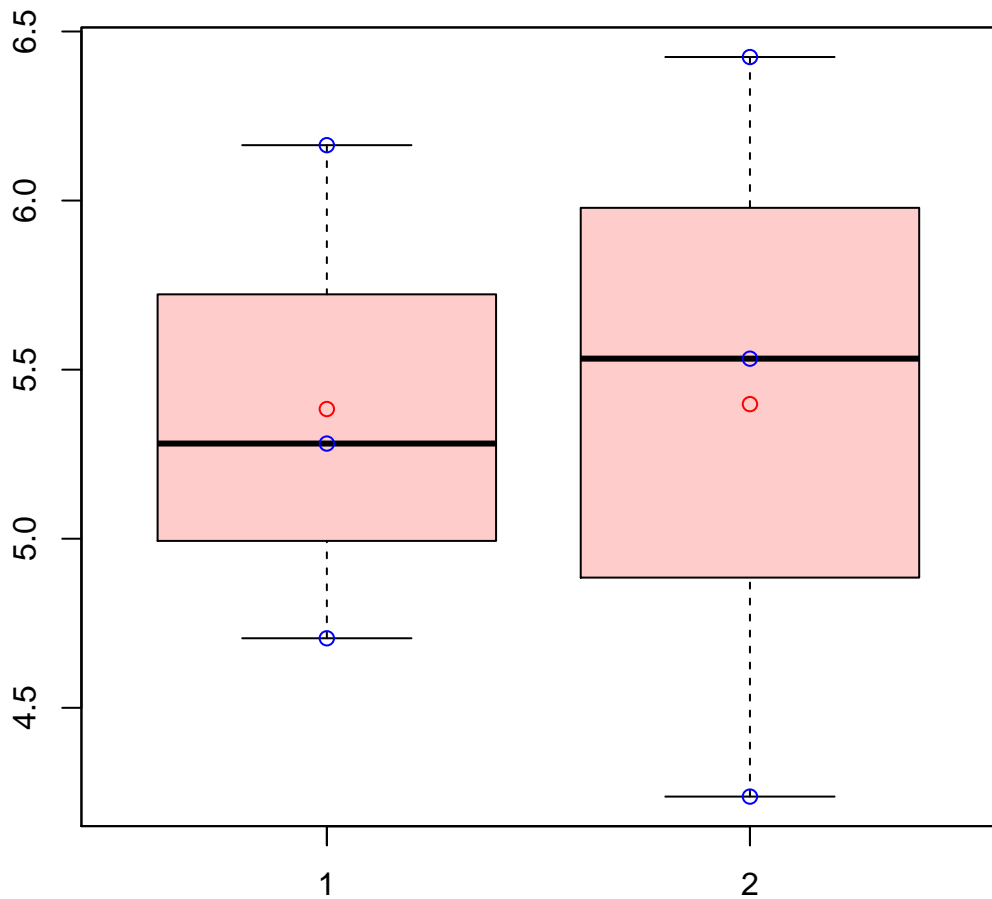

t-Test: p-value = 0.99

# CL2900Contig4|CL2900Contig4

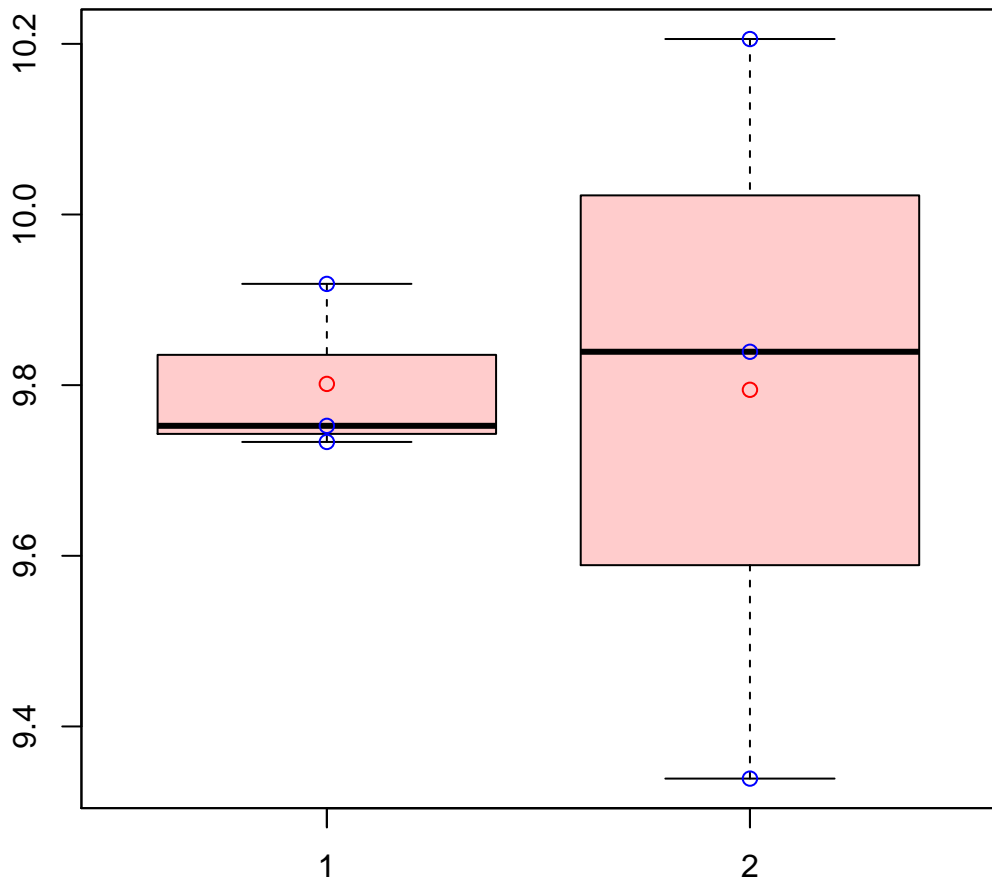

t-Test: p-value = 0.98

# CL2901Contig12|CL2901Contig12

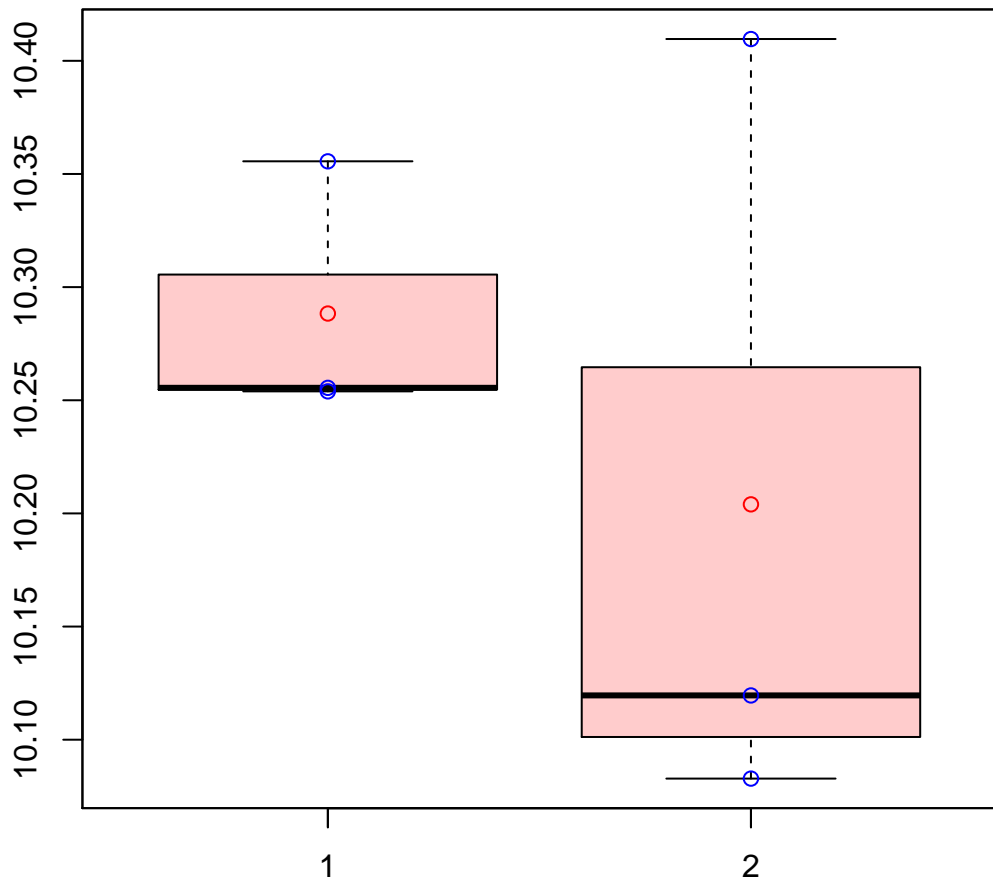

t-Test: p-value = 0.51

# CL2909Contig5|CL2909Contig5

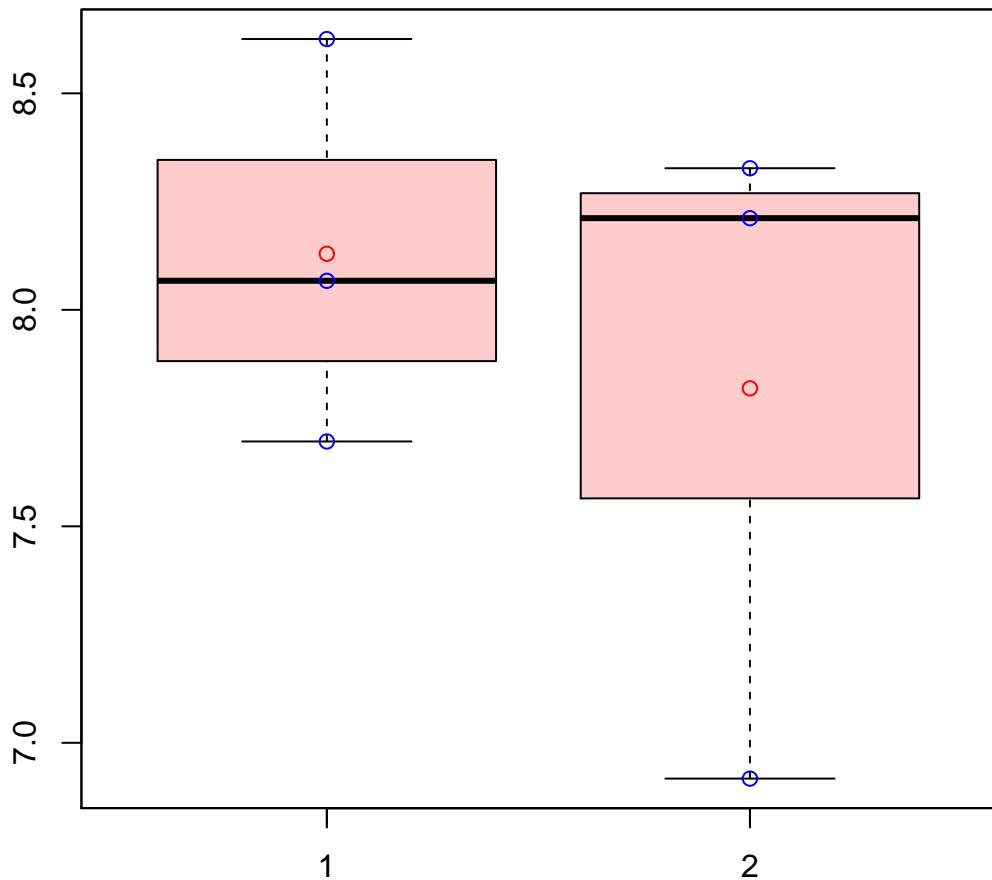

t-Test: p-value = 0.59

# CL2916Contig2|CL2916Contig2

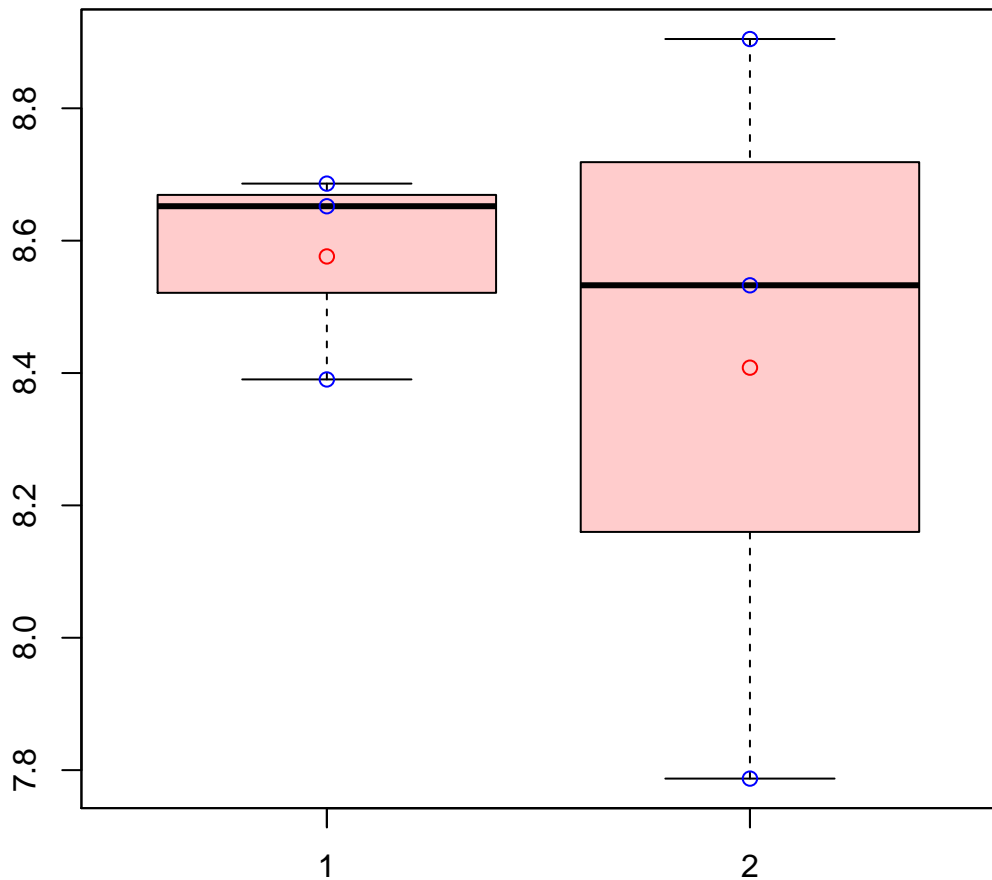

t-Test: p-value = 0.67

# CL291Contig6|CL291Contig6

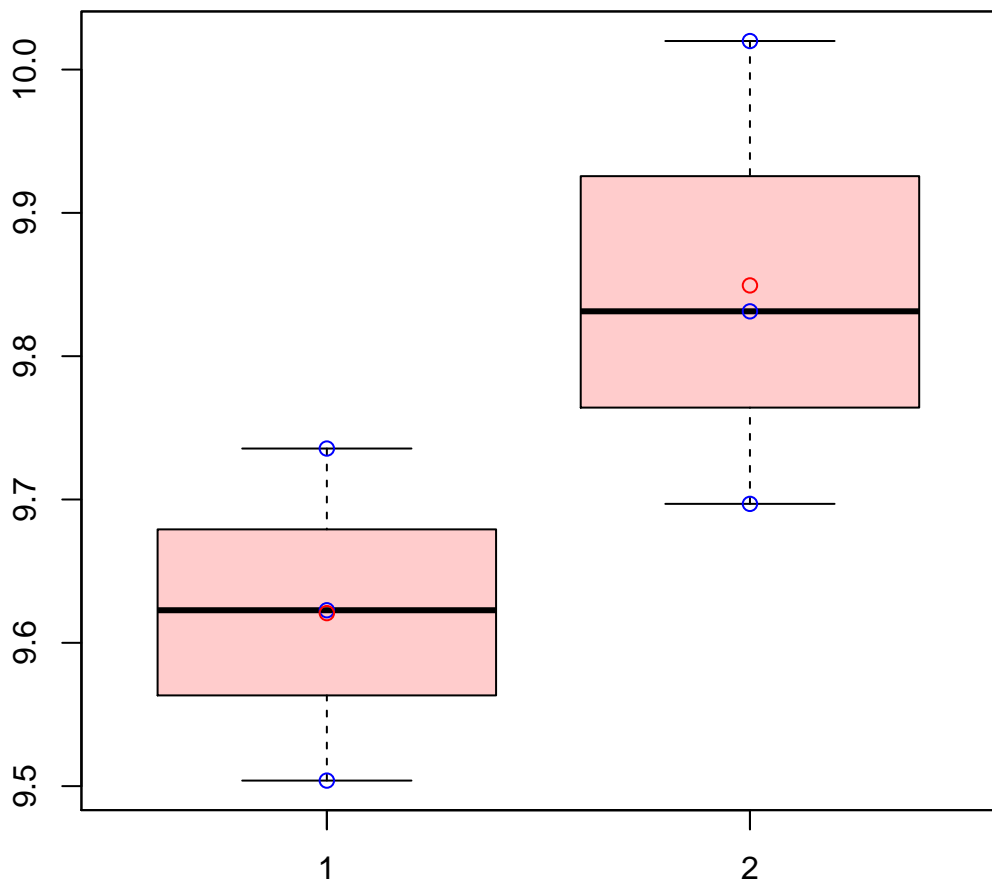

t-Test: p-value = 0.13

# CL292Contig4|CL292Contig4

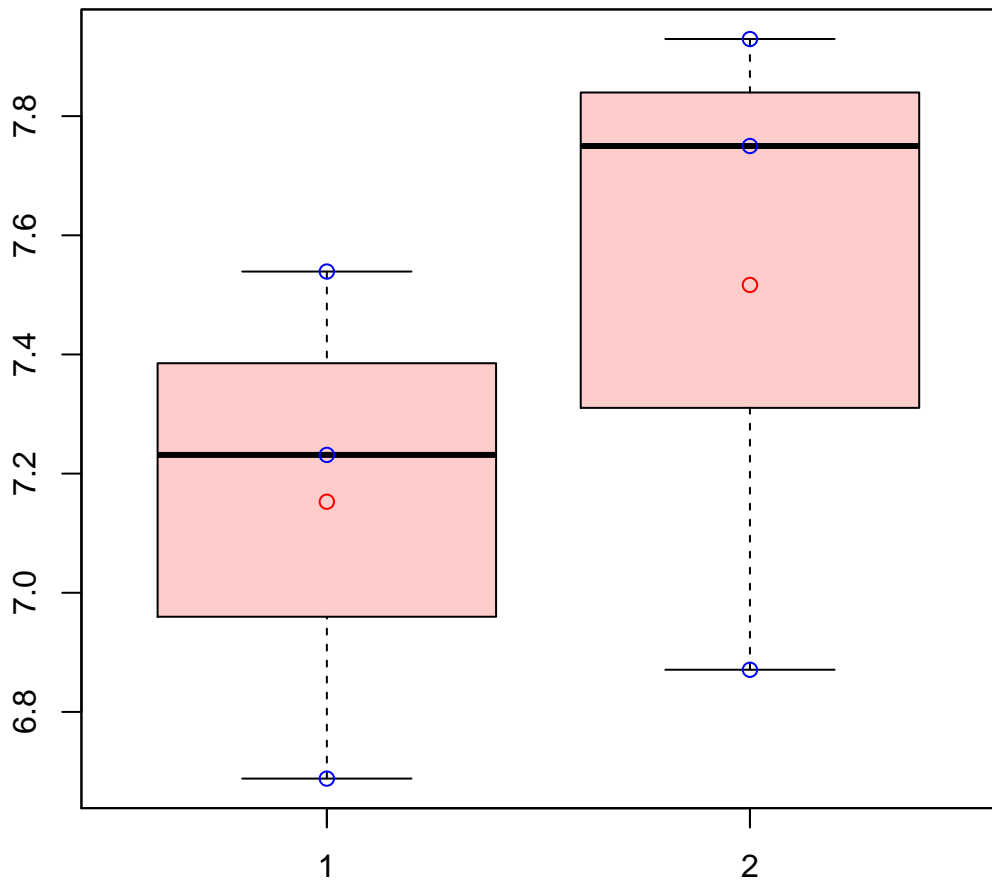

t-Test: p-value = 0.43

# CL2932Contig2|CL2932Contig2

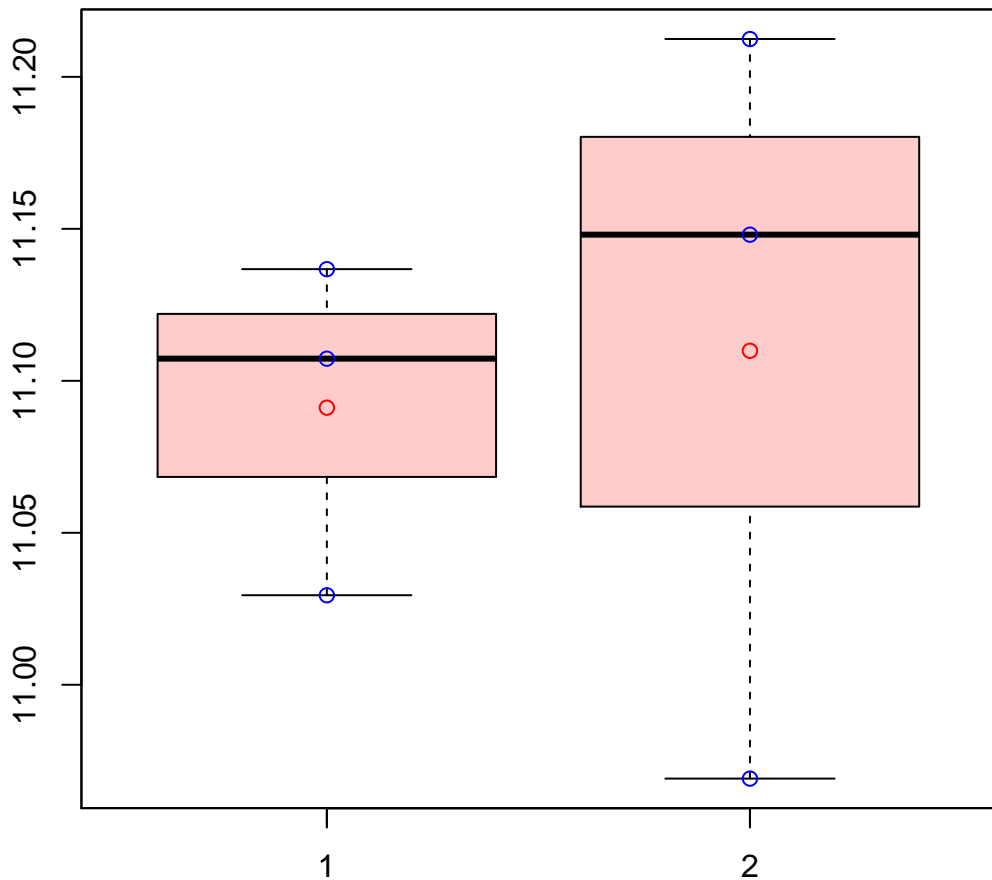

t-Test: p-value = 0.83



# CL2948Contig2|CL2948Contig2

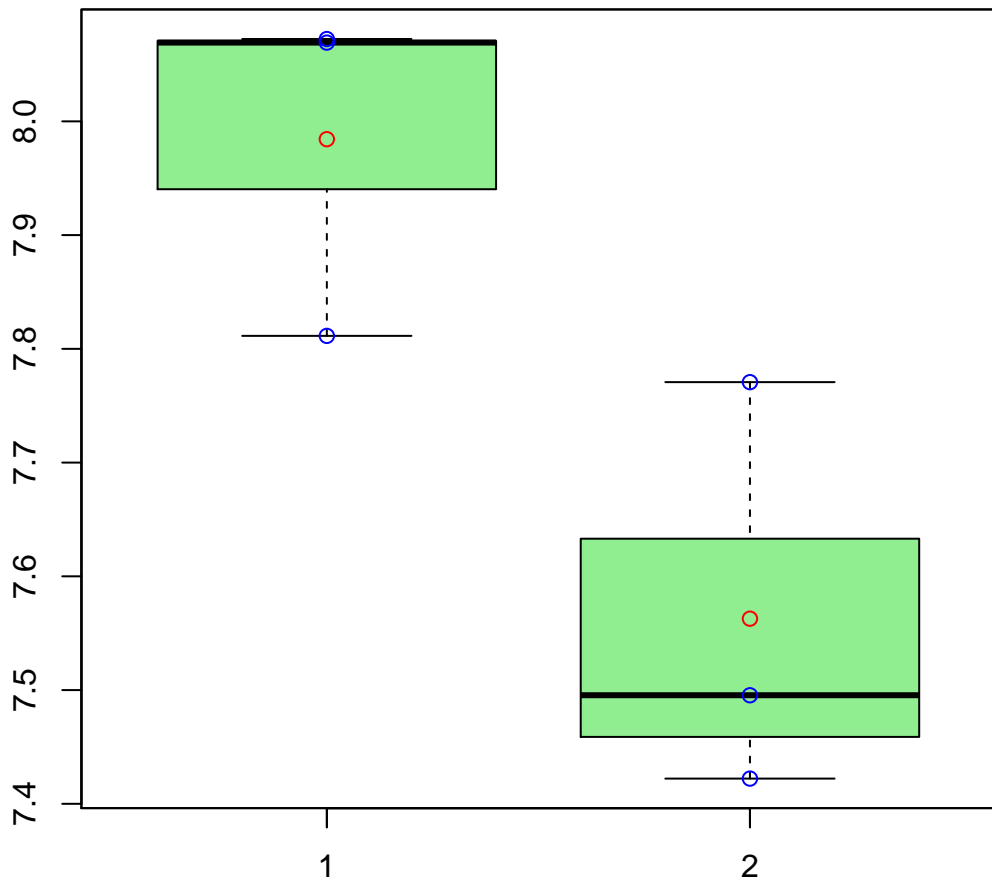

t-Test: p-value = 0.04

# CL2948Contig4|CL2948Contig4

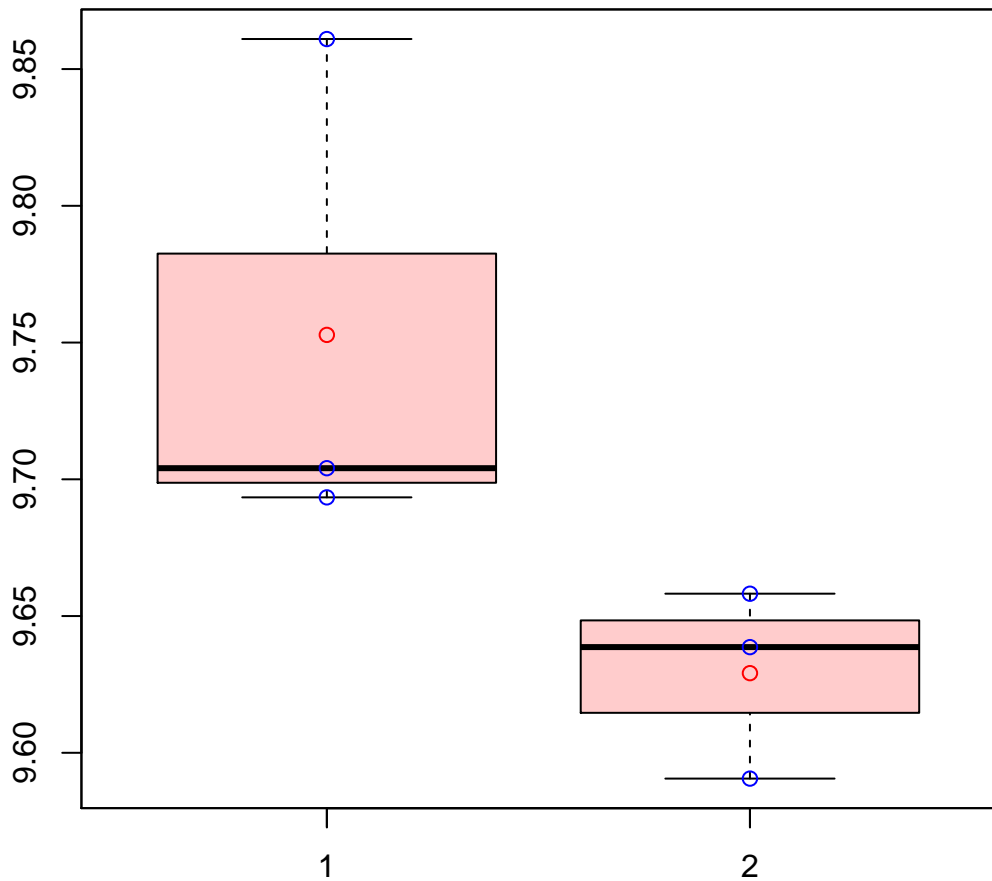

t-Test: p-value = 0.14

# CL2948Contig6|CL2948Contig6

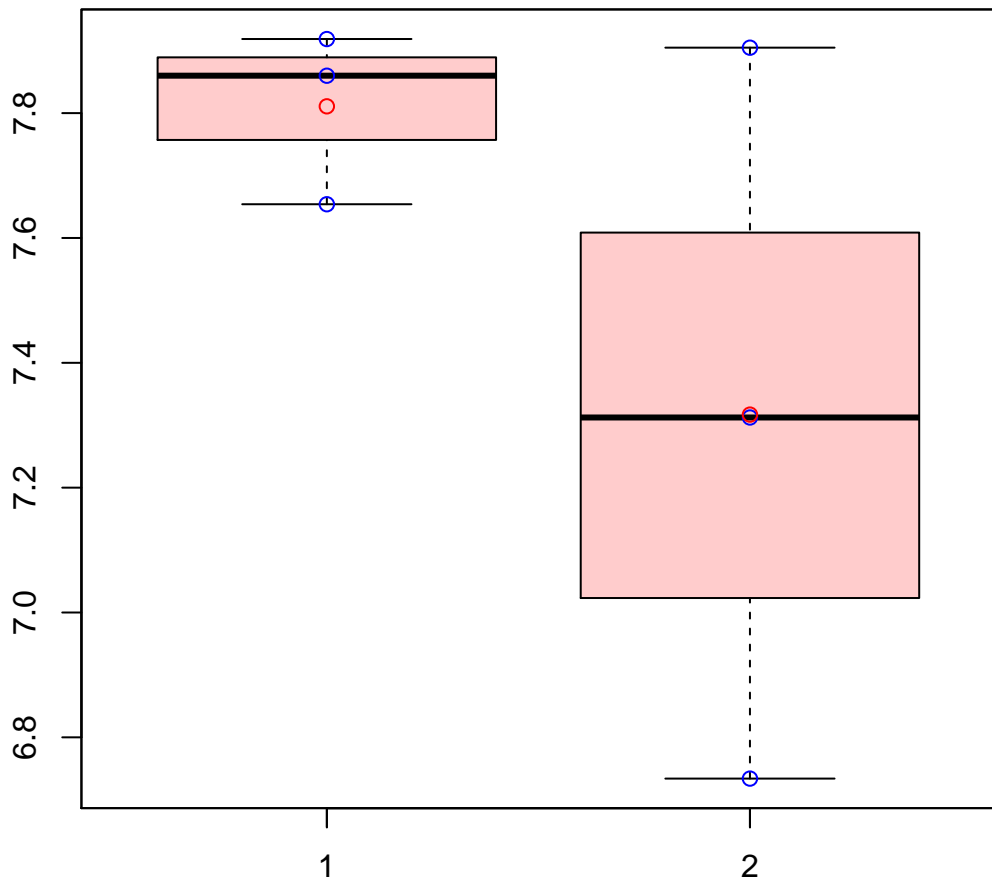

t-Test: p-value = 0.28

# CL2957Contig2|CL2957Contig2

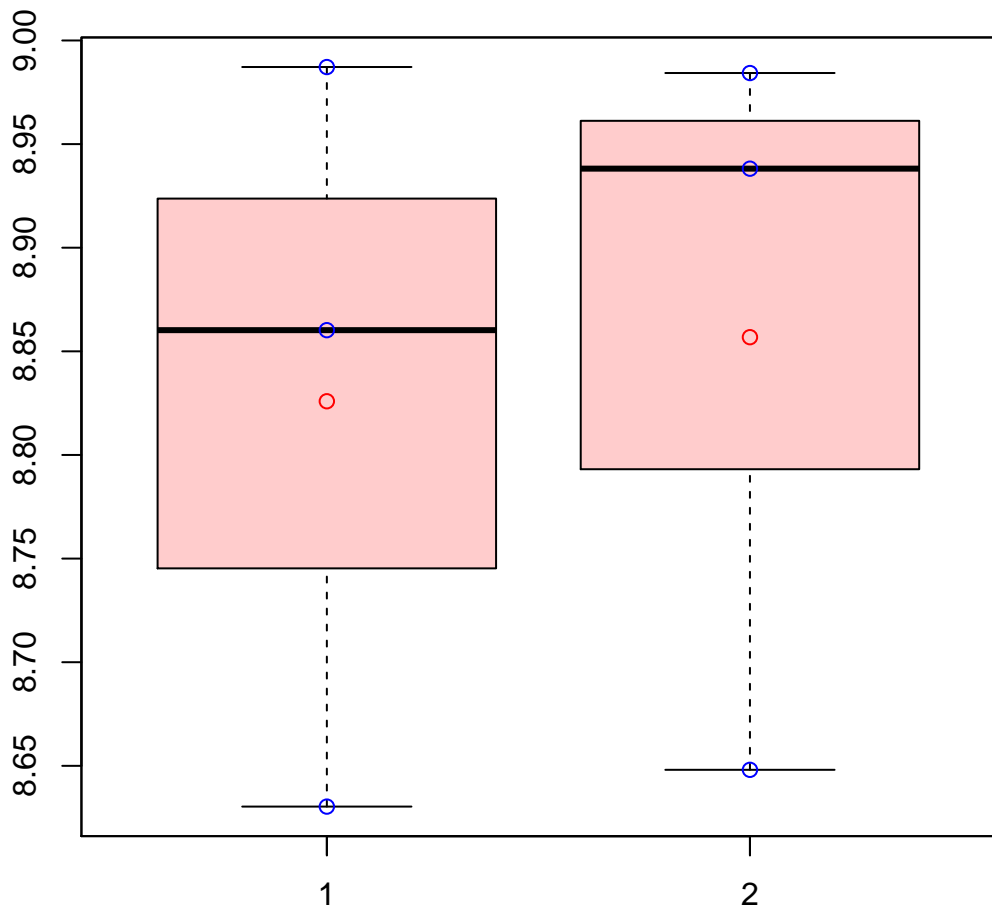

t-Test: p-value = 0.84

# CL2958Contig2|CL2958Contig2

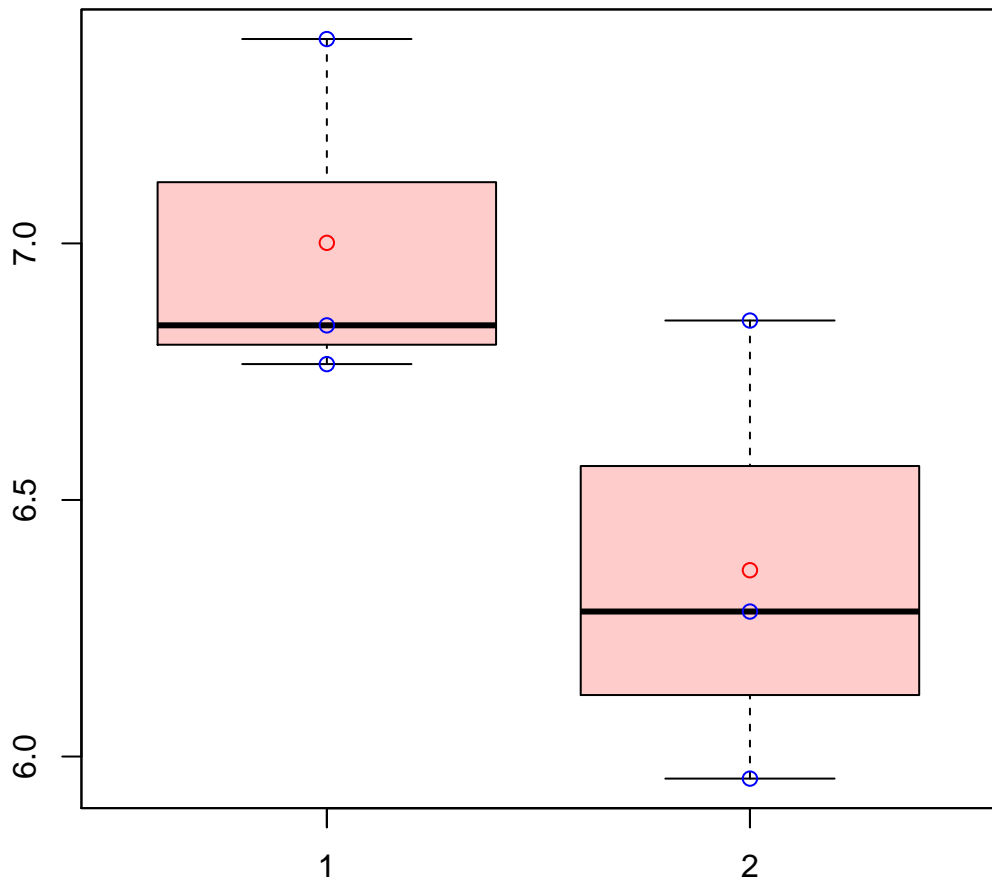

t-Test: p-value = 0.13

# CL2962Contig1|CL2962Contig1

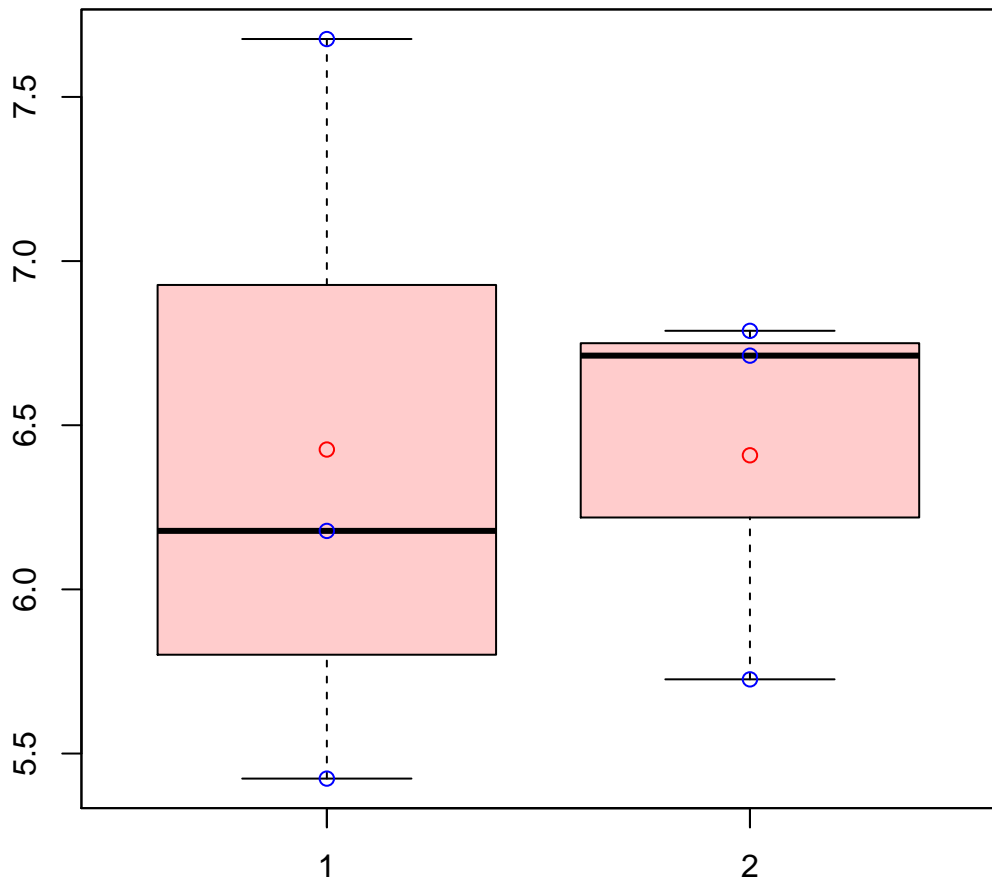

t-Test: p-value = 0.98

# CL2965Contig4|CL2965Contig4

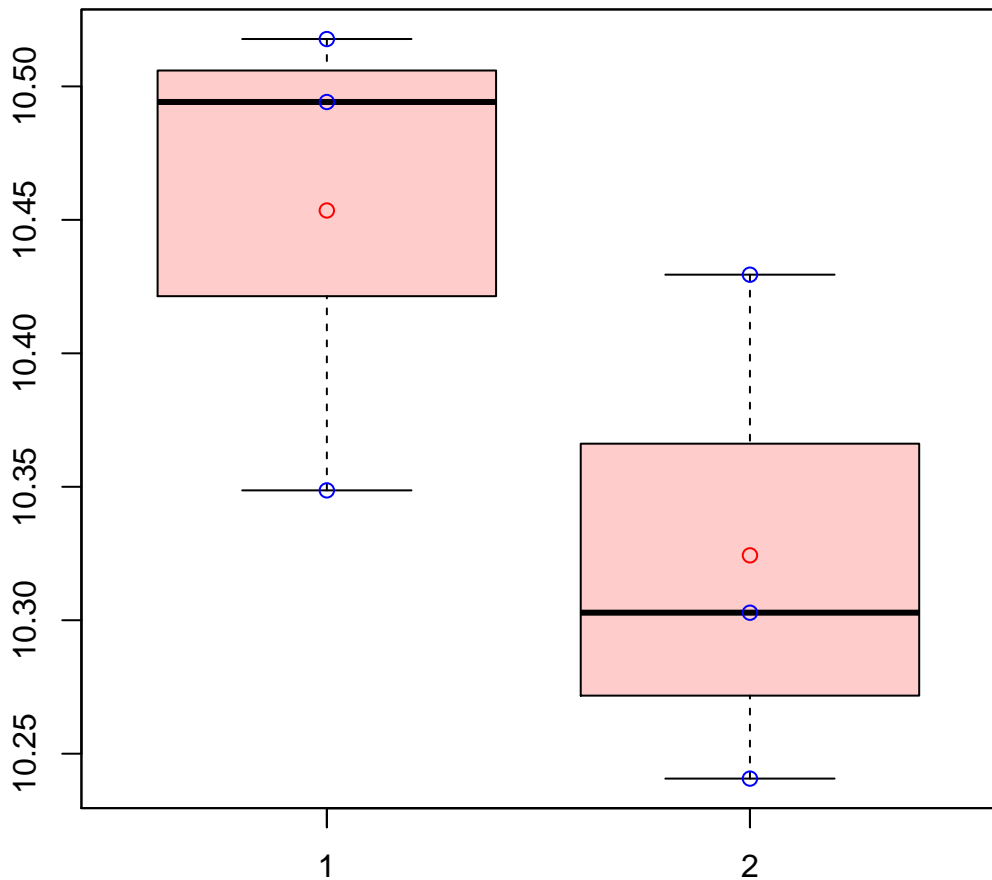

t-Test: p-value = 0.17

# CL296Contig2|CL296Contig2

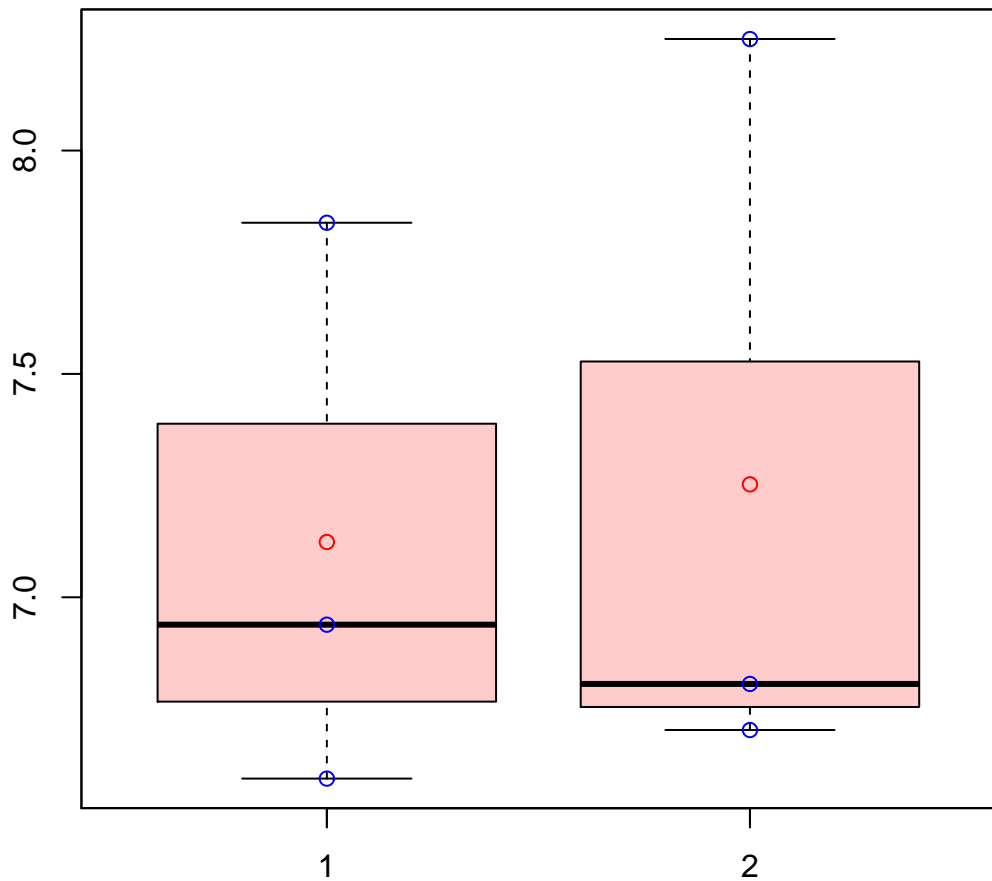

t-Test: p-value = 0.85



# CL2970Contig1|CL2970Contig1

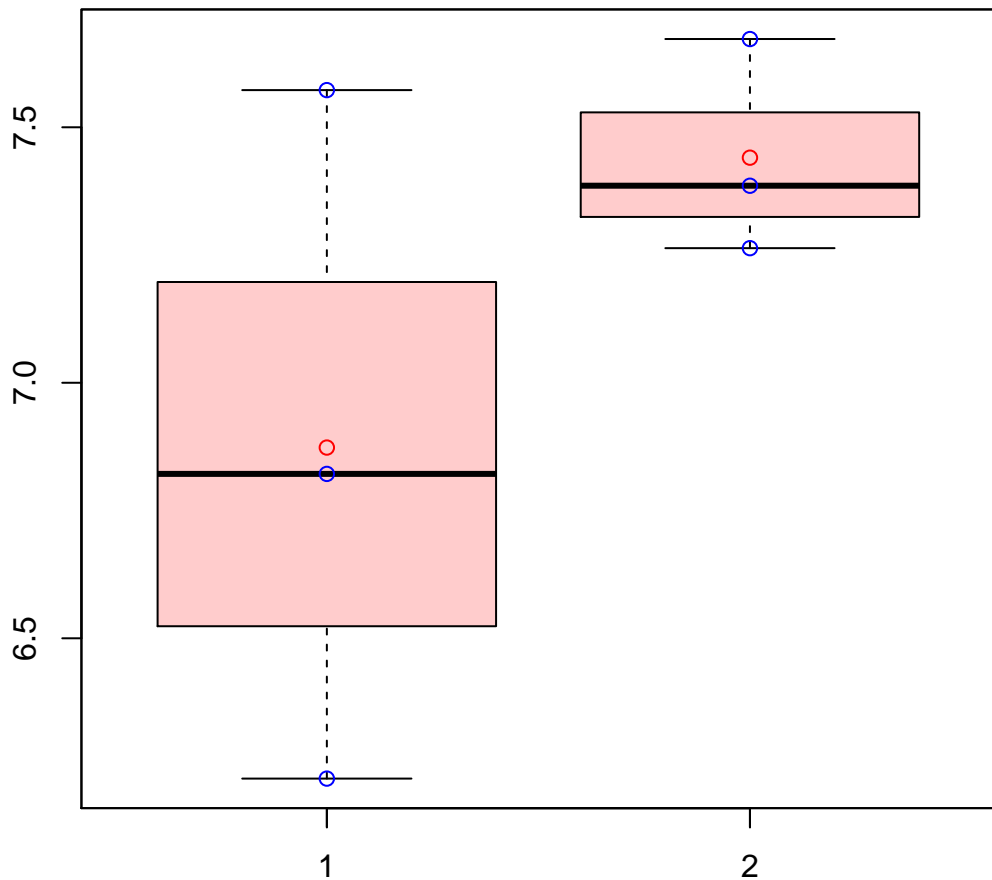

t-Test: p-value = 0.28

# CL2970Contig3|CL2970Contig3

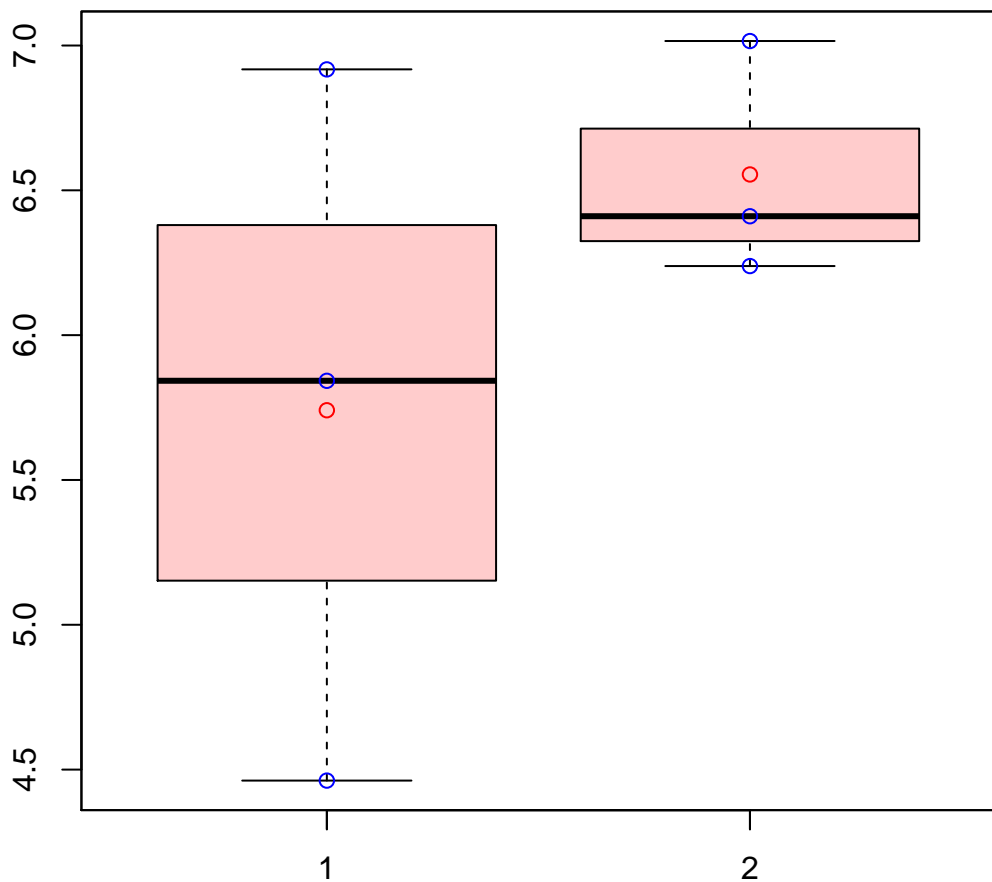

t-Test: p-value = 0.37

# CL2976Contig3|CL2976Contig3

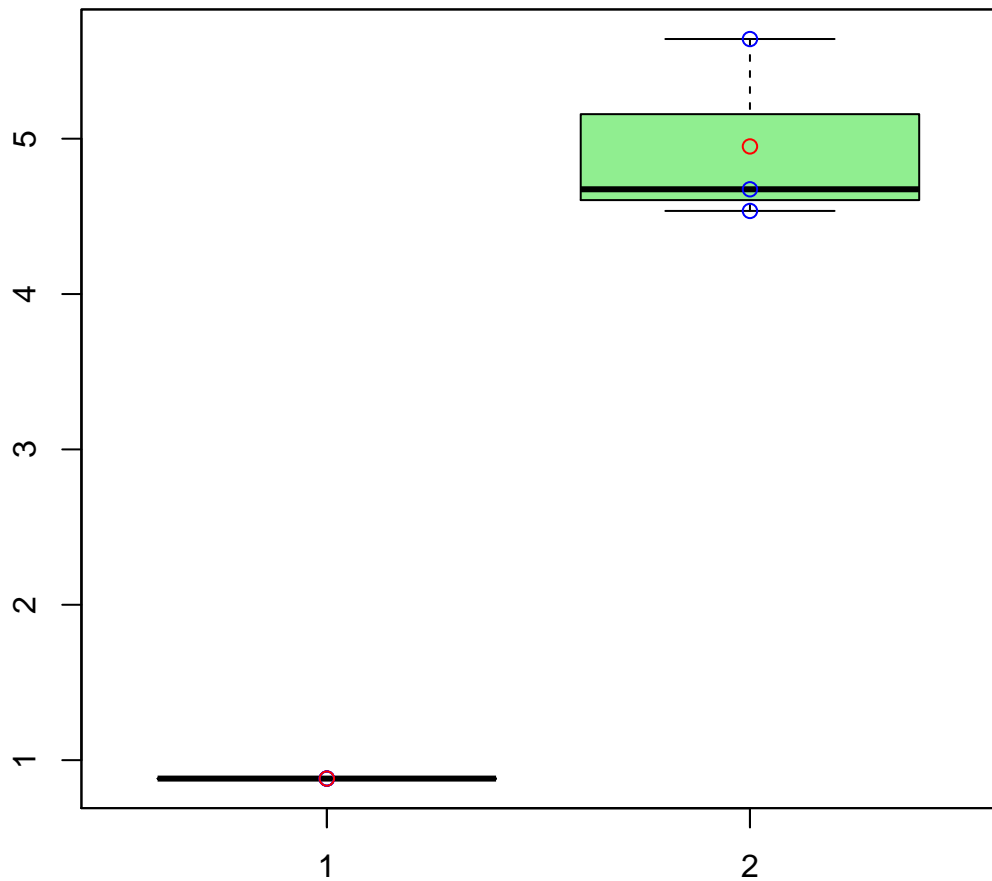

t-Test: p-value = 0.01

# CL2978Contig1|CL2978Contig1

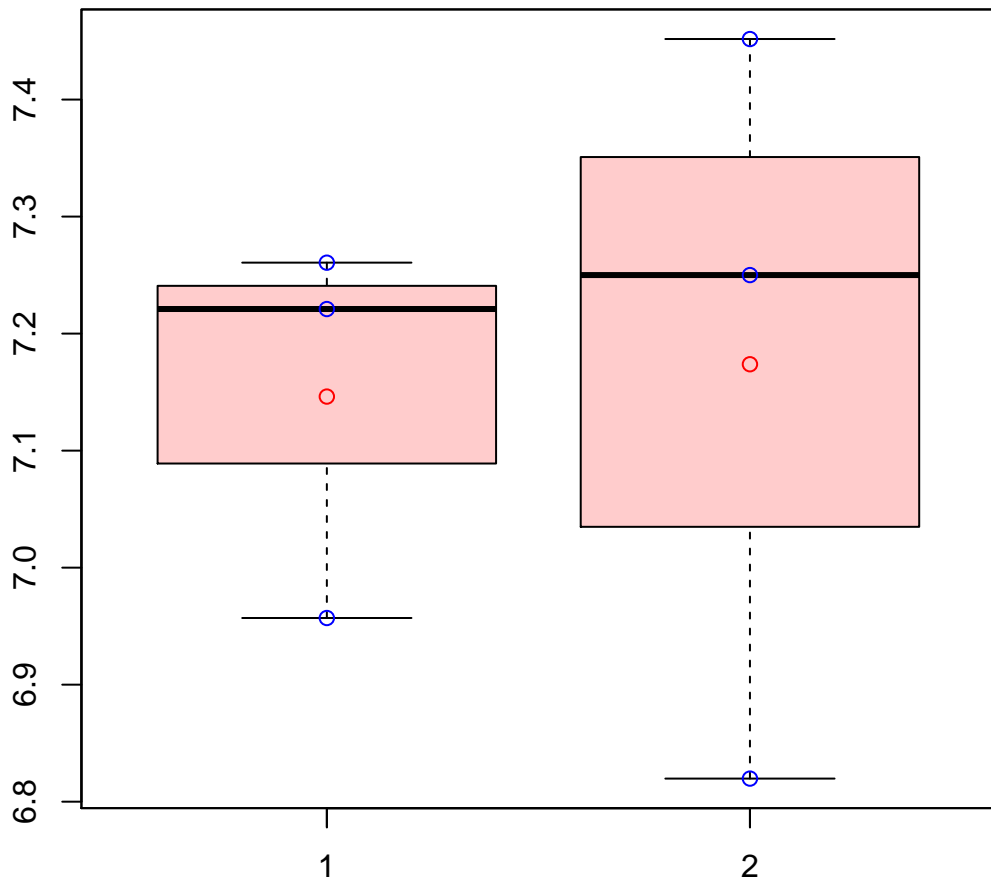

t-Test: p-value = 0.9

# CL297Contig14|CL297Contig14

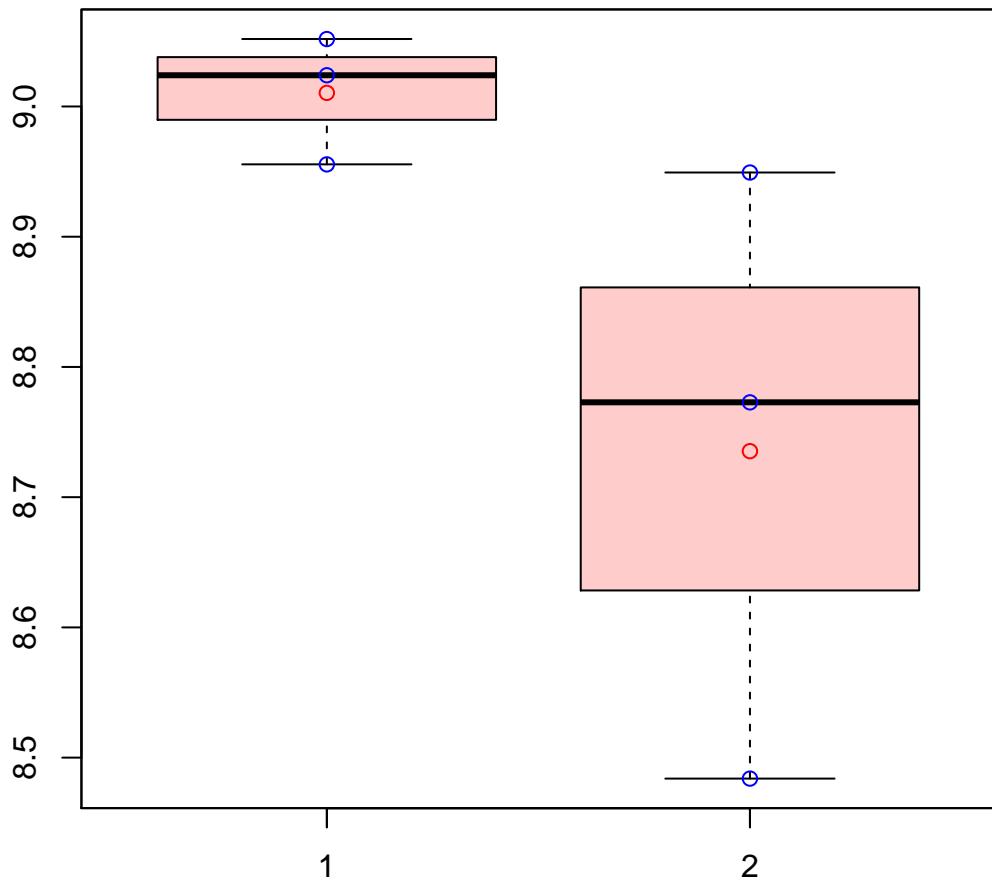

t-Test: p-value = 0.18

# CL298Contig4|CL298Contig4

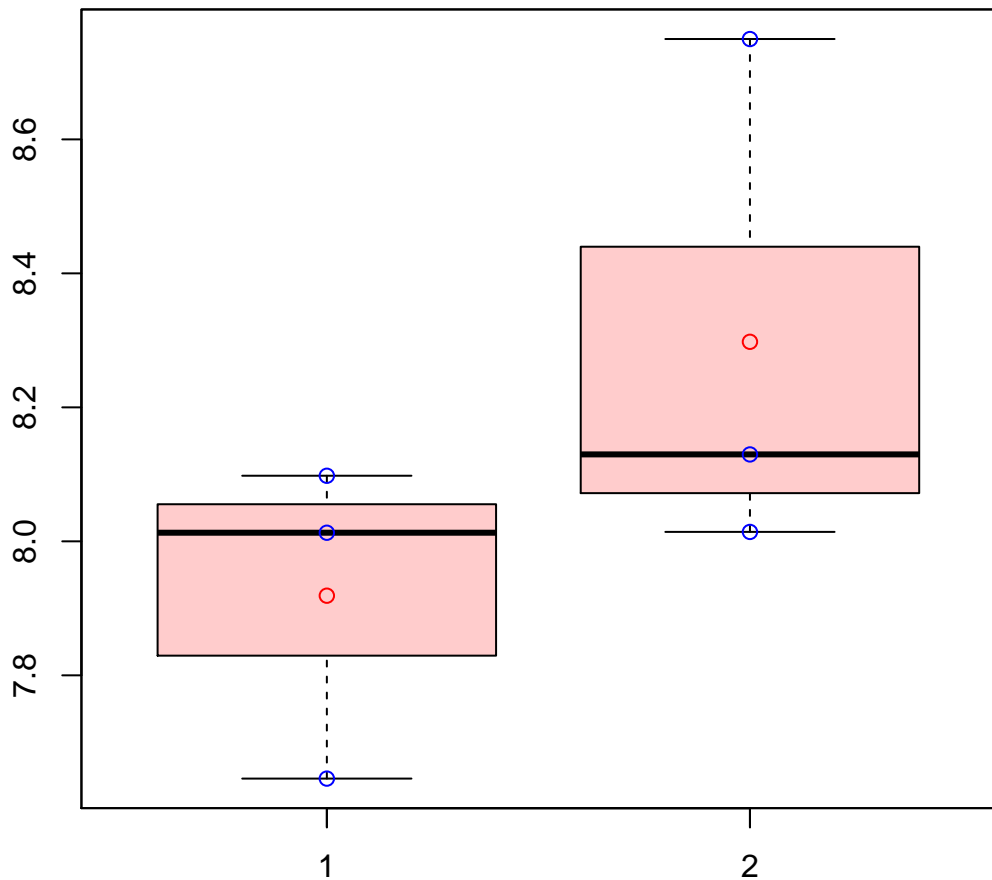

t-Test: p-value = 0.24

# CL2990Contig3|CL2990Contig3

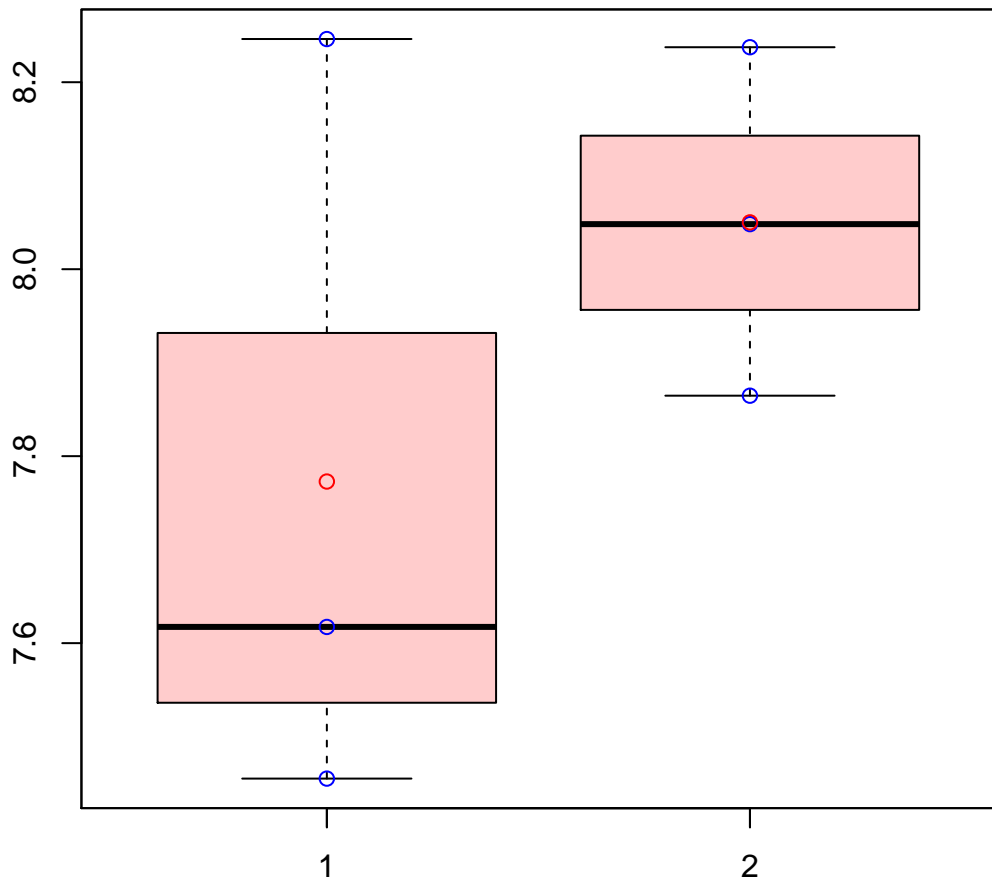

t-Test: p-value = 0.38

# CL2991Contig2|CL2991Contig2

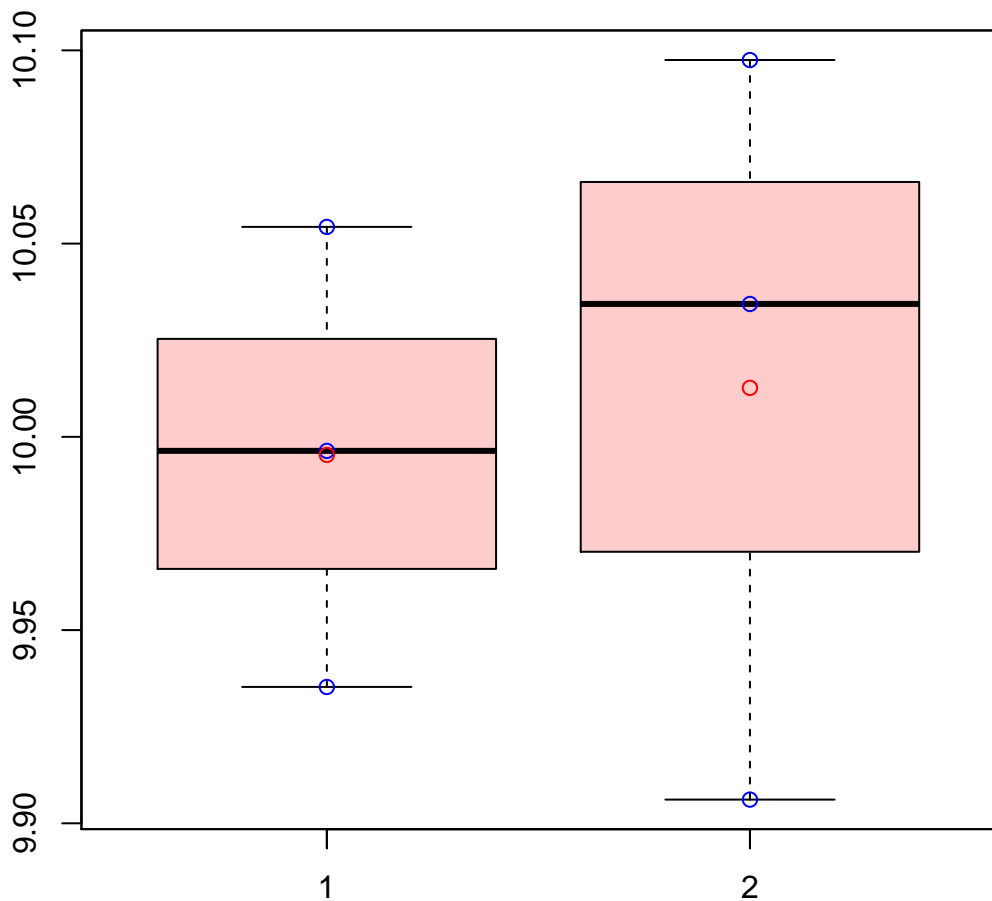

t-Test: p-value = 0.81



# CL2996Contig4|CL2996Contig4

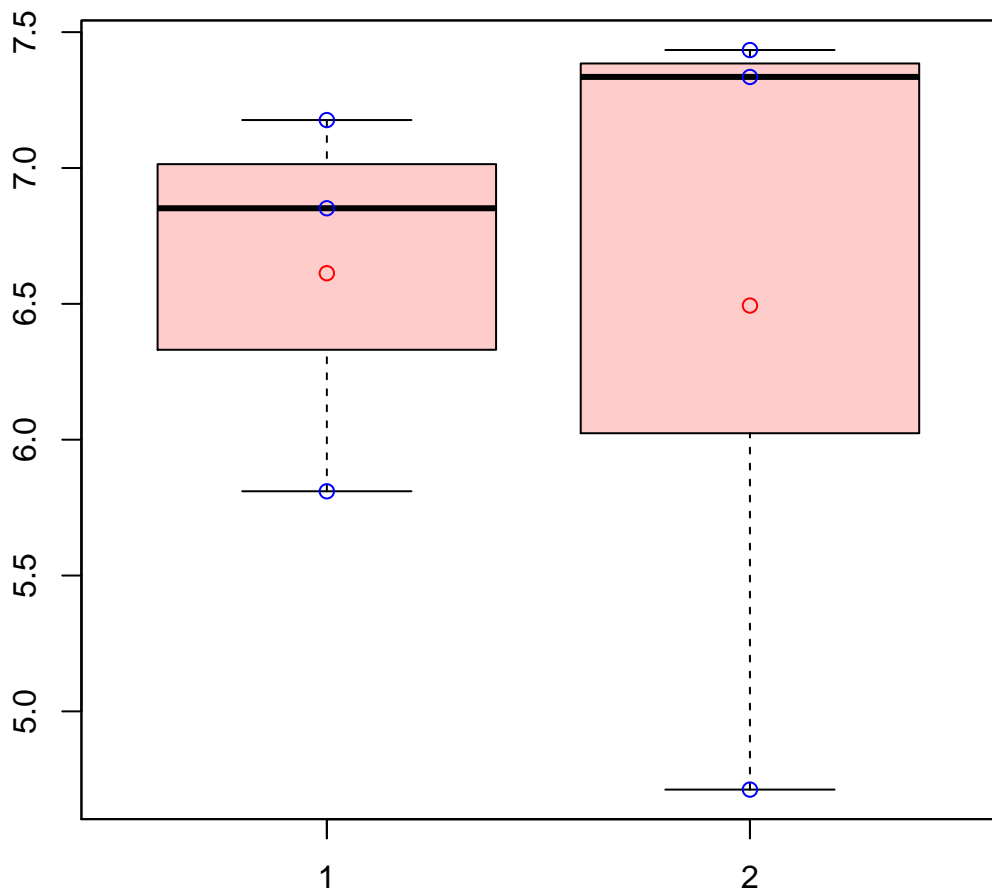

t-Test: p-value = 0.91

# CL2Contig104|CL2Contig104

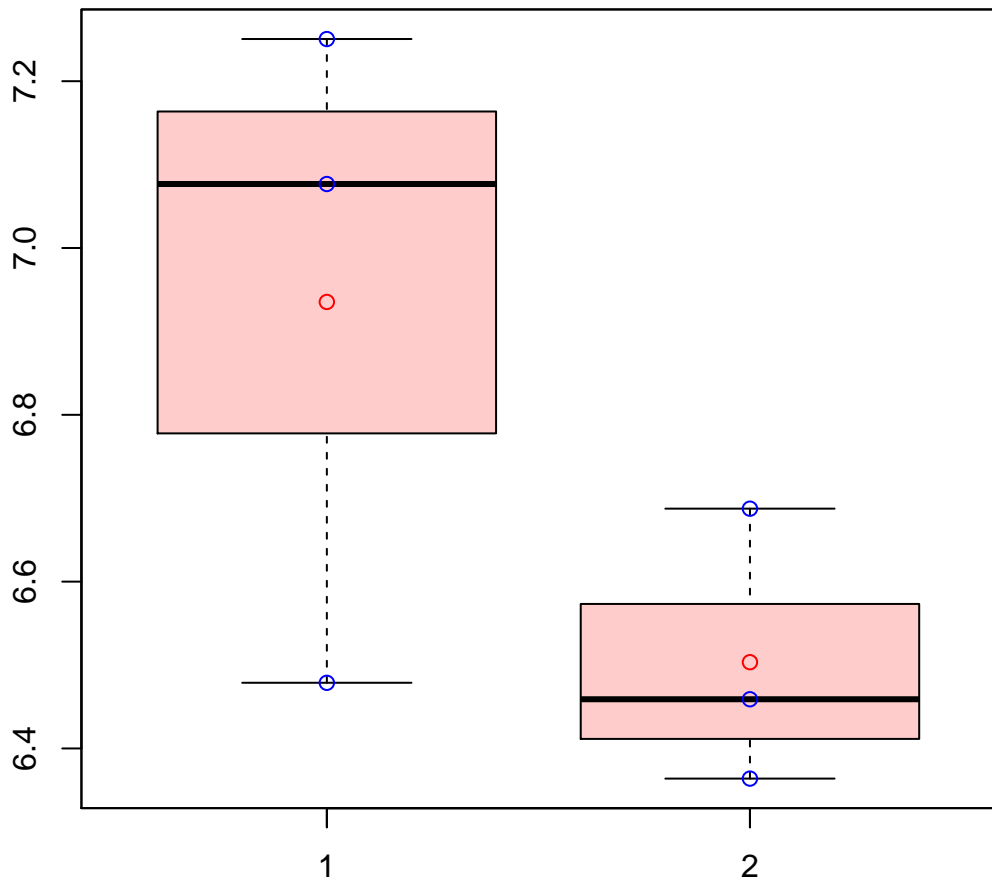

t-Test: p-value = 0.2

# CL2Contig108|CL2Contig108

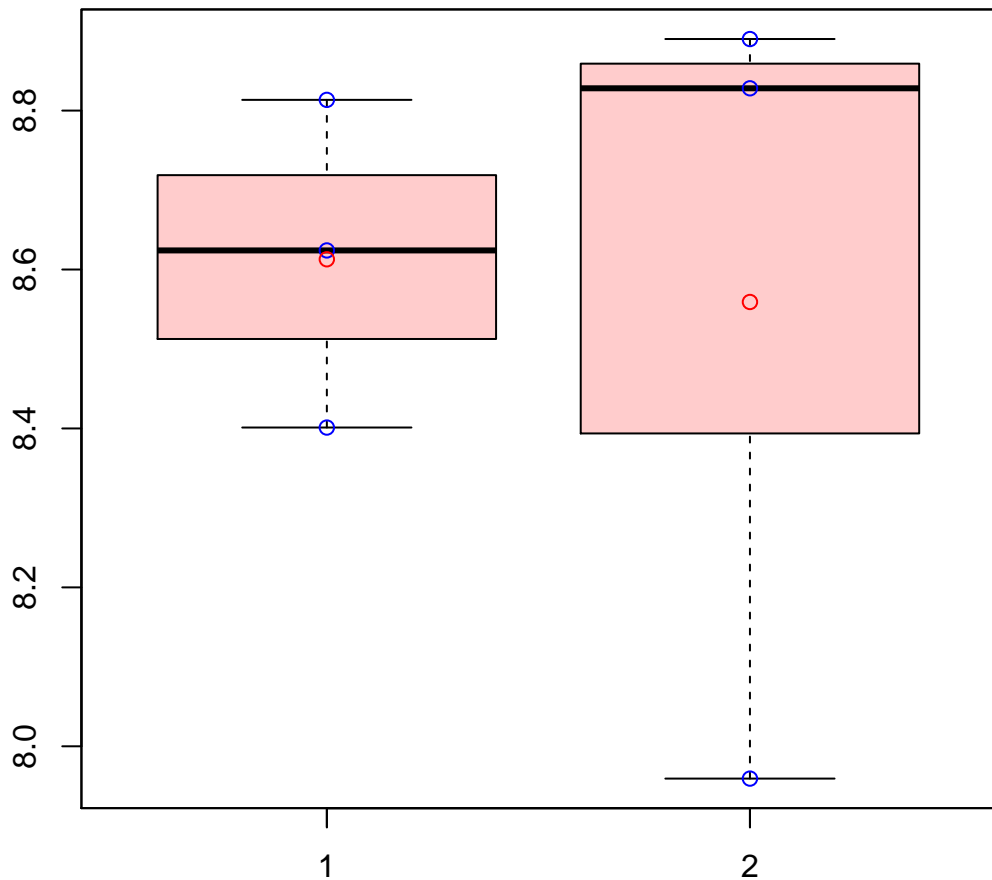

t-Test: p-value = 0.88

# CL2Contig153|CL2Contig153

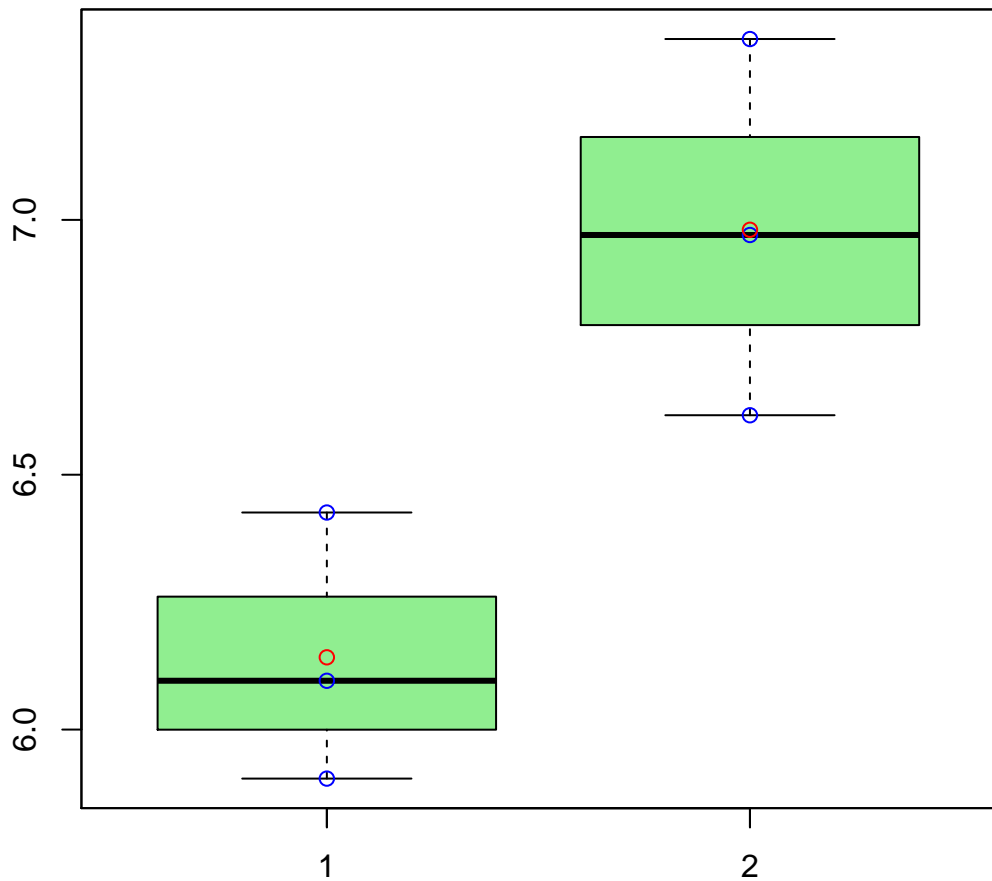

t-Test: p-value = 0.04

# CL2Contig165|CL2Contig165

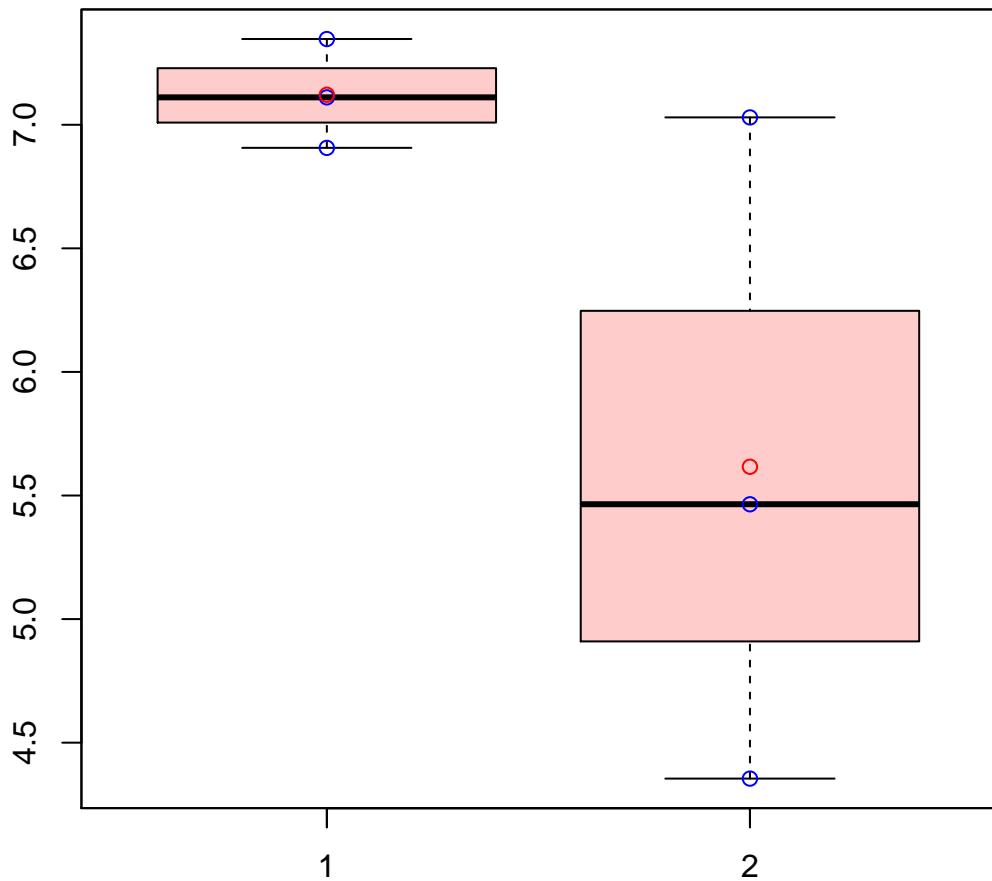

t-Test: p-value = 0.19

# CL2Contig166|CL2Contig166

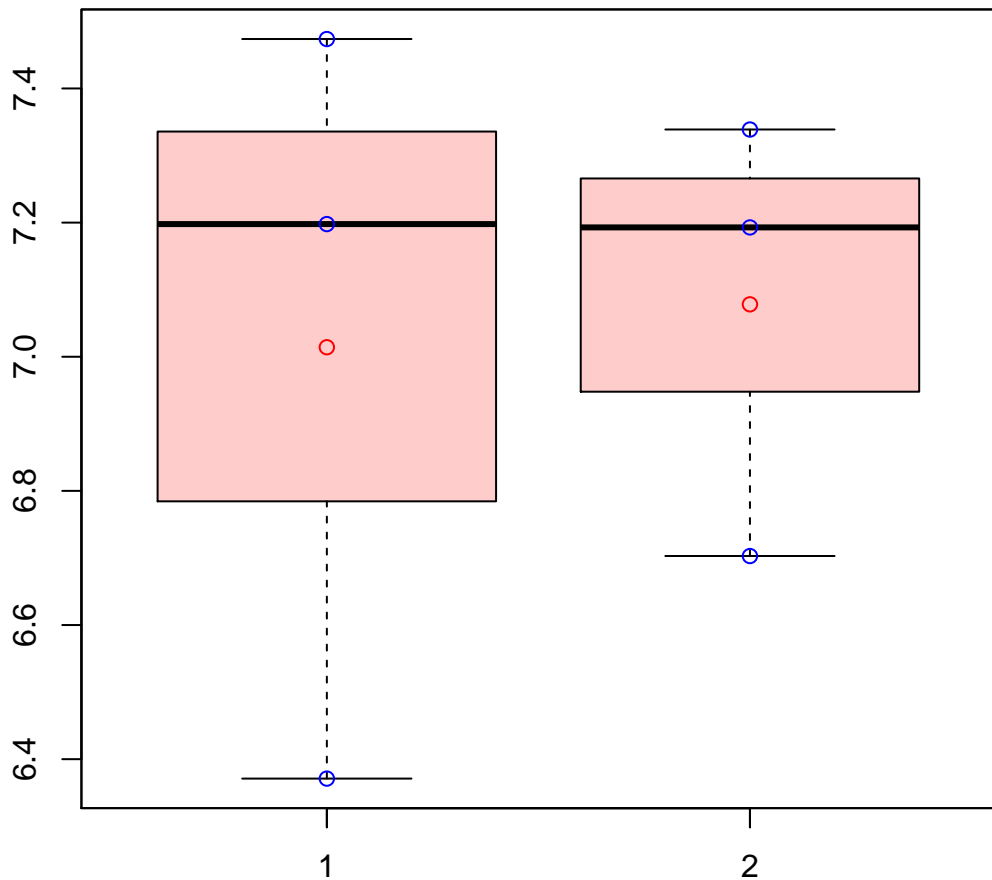

t-Test: p-value = 0.88

# CL2Contig170|CL2Contig170

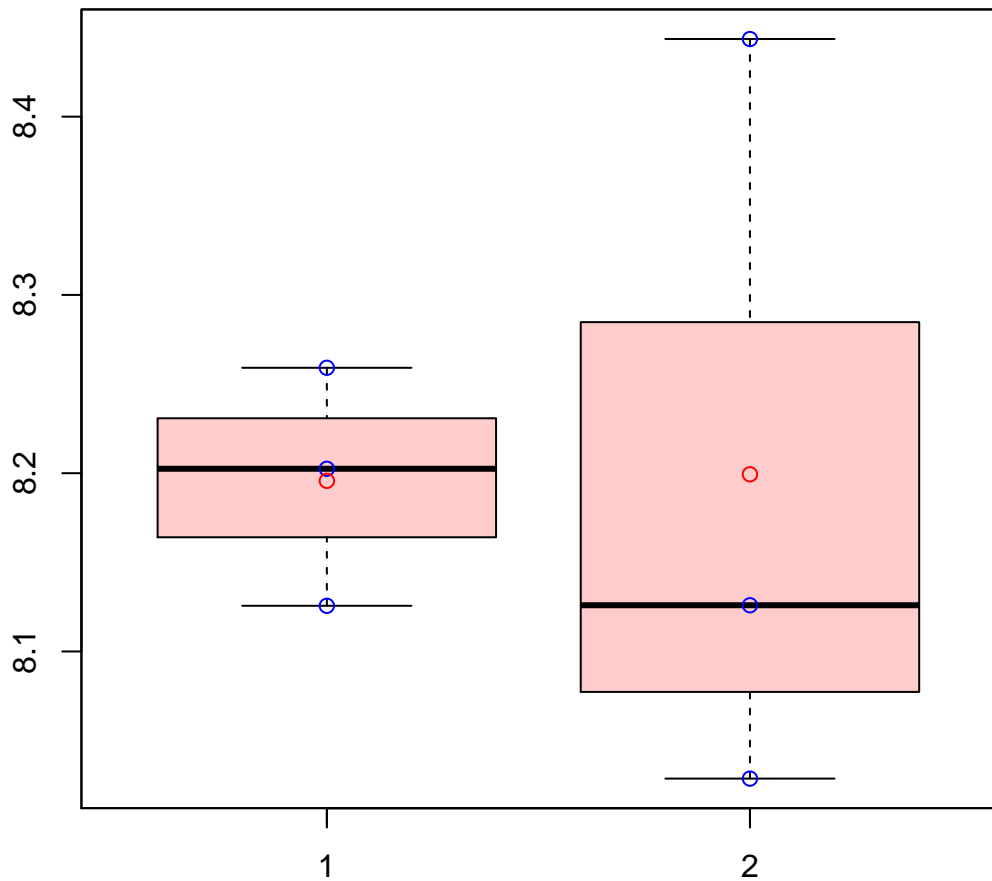

t-Test: p-value = 0.98

# CL2Contig29|CL2Contig29

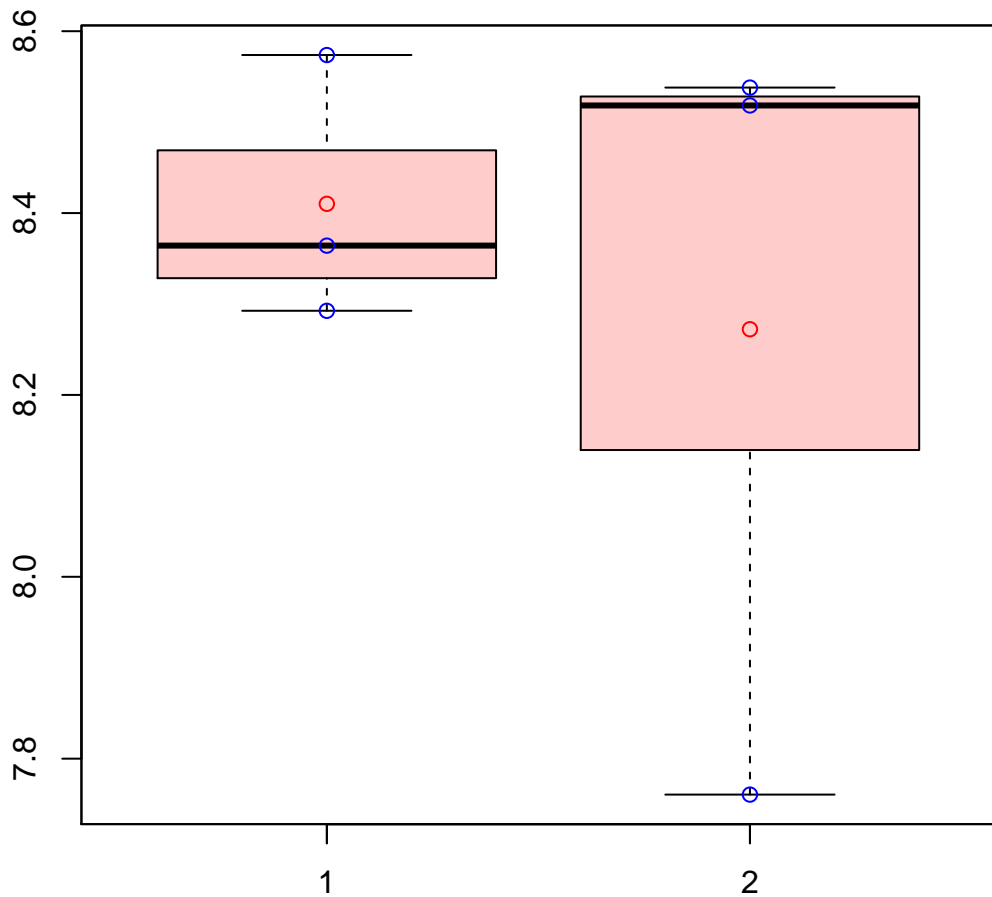

t-Test: p-value = 0.65



# CL2Contig37|CL2Contig37

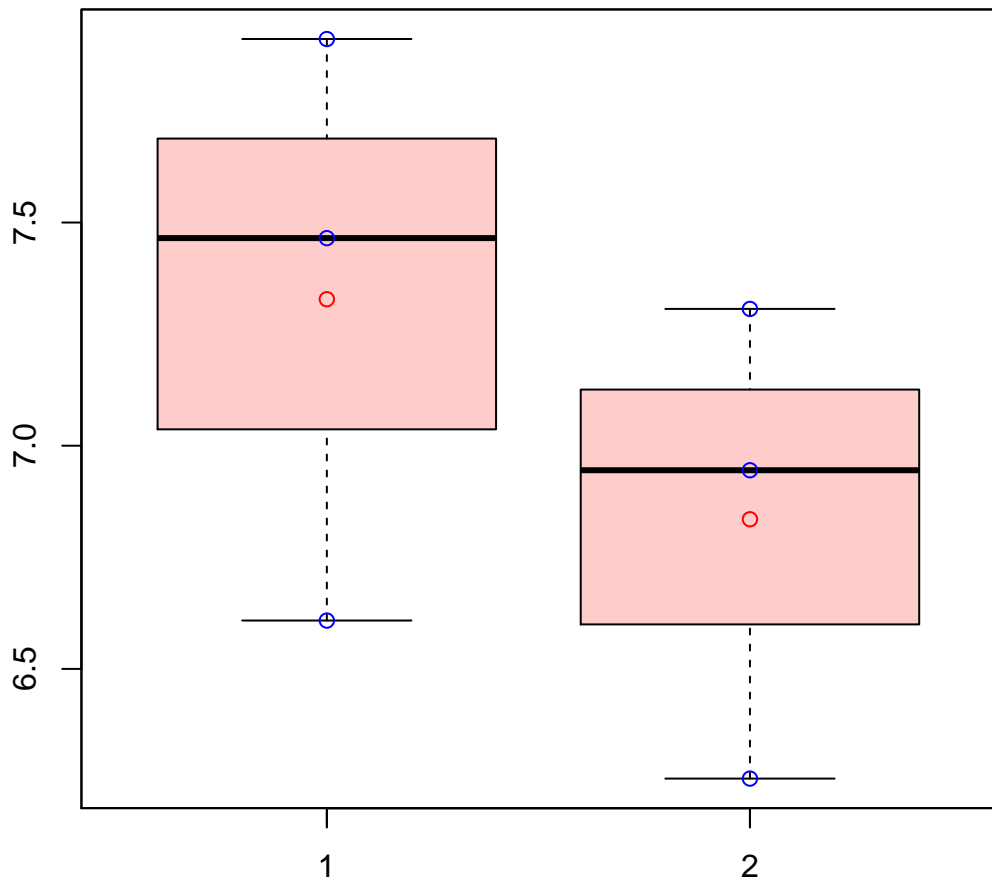

t-Test: p-value = 0.37

## CL2Contig5|CL2Contig5

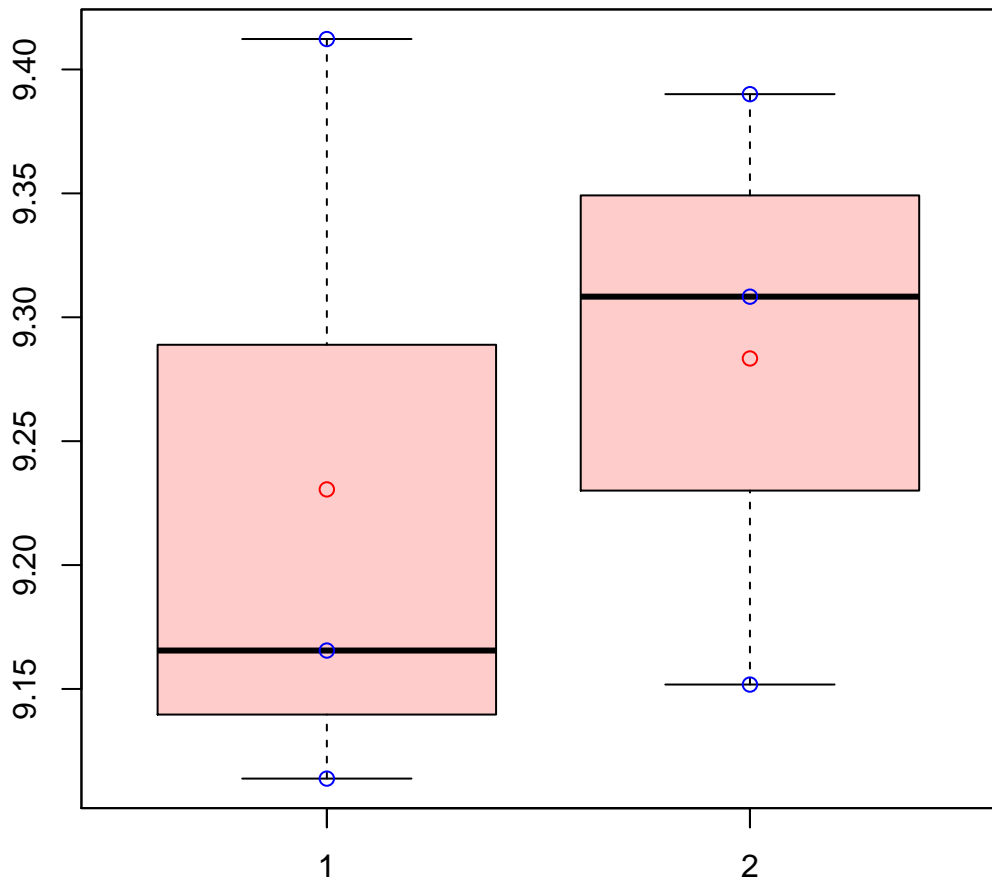

t-Test: p-value = 0.67

# CL2Contig9|CL2Contig9

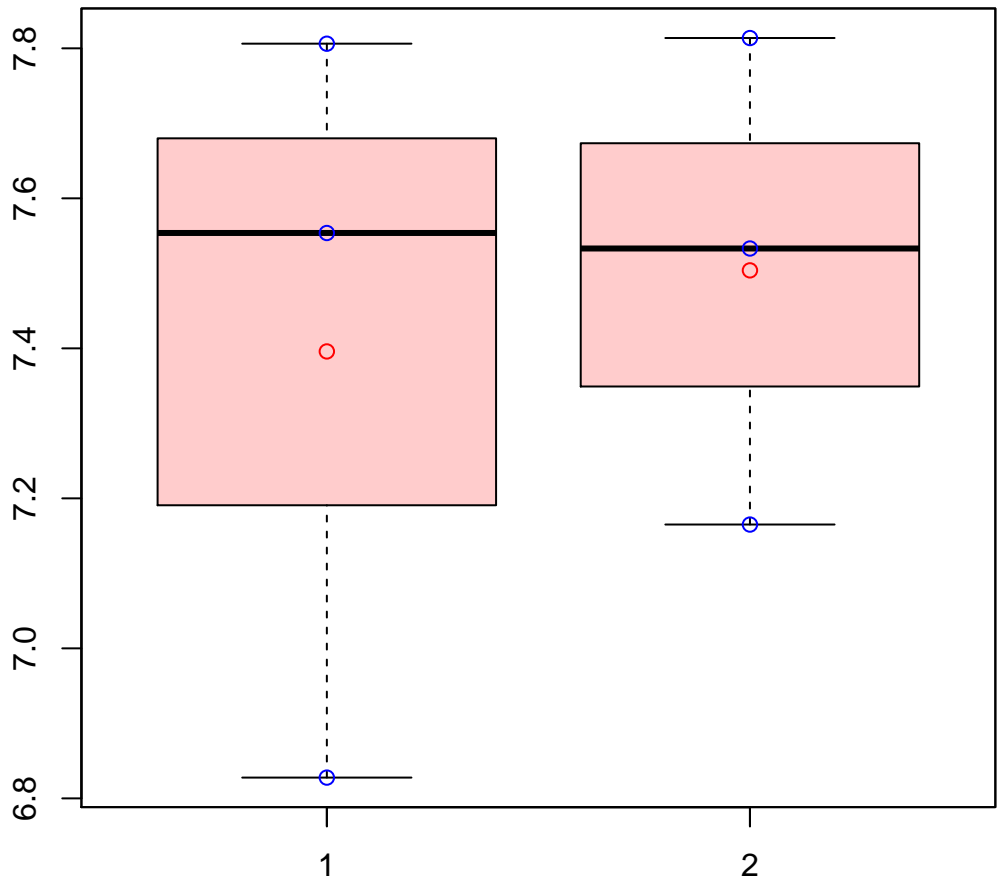

t-Test: p-value = 0.77

# CL3000Contig4|CL3000Contig4

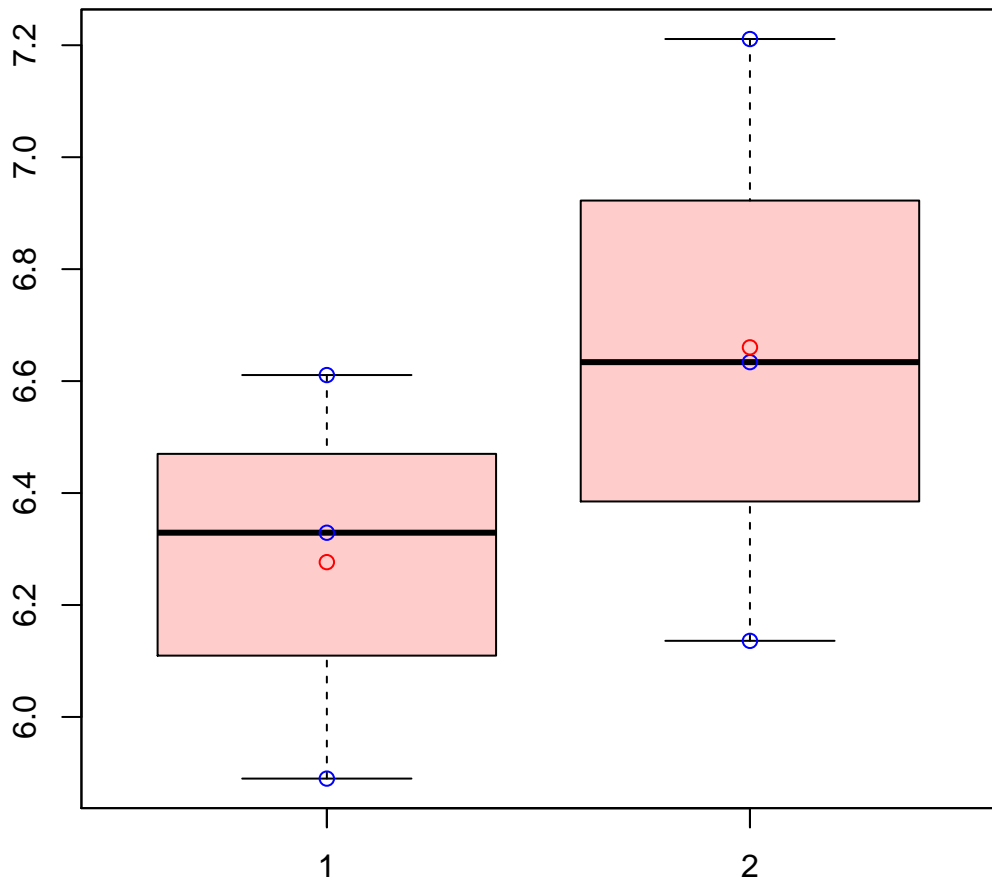

t-Test: p-value = 0.37

# CL3013Contig5|CL3013Contig5

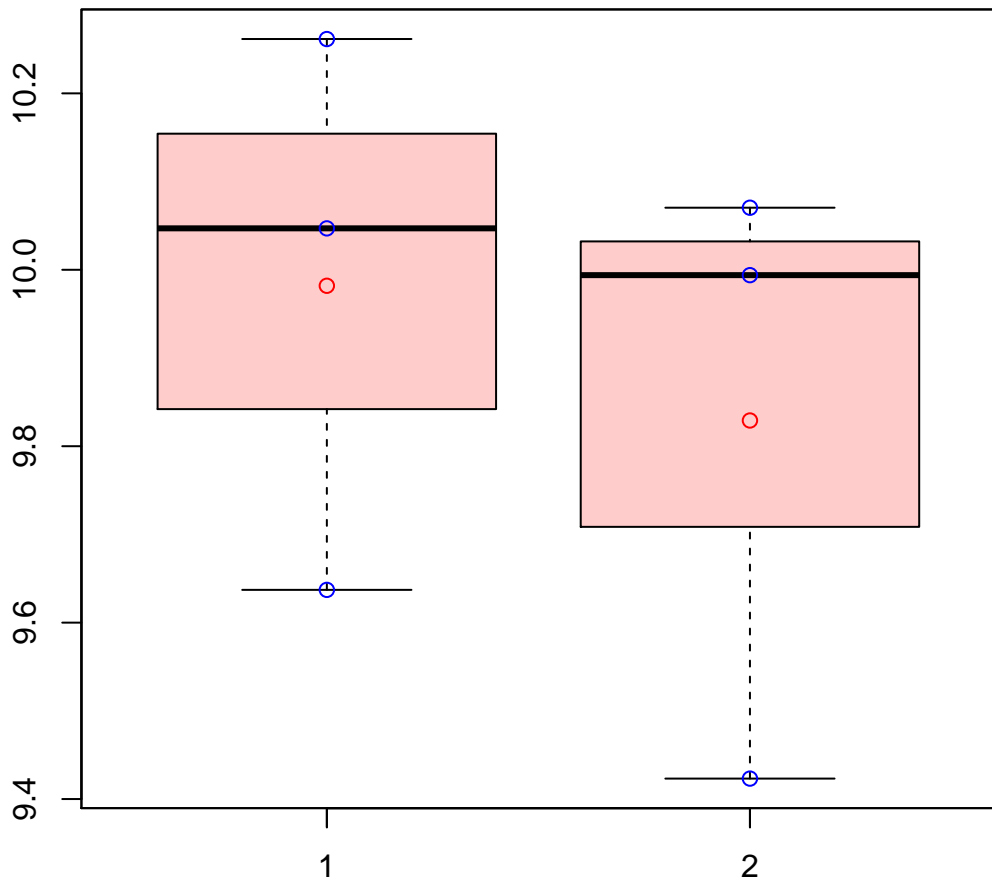

t-Test: p-value = 0.61

# CL3017Contig4|CL3017Contig4

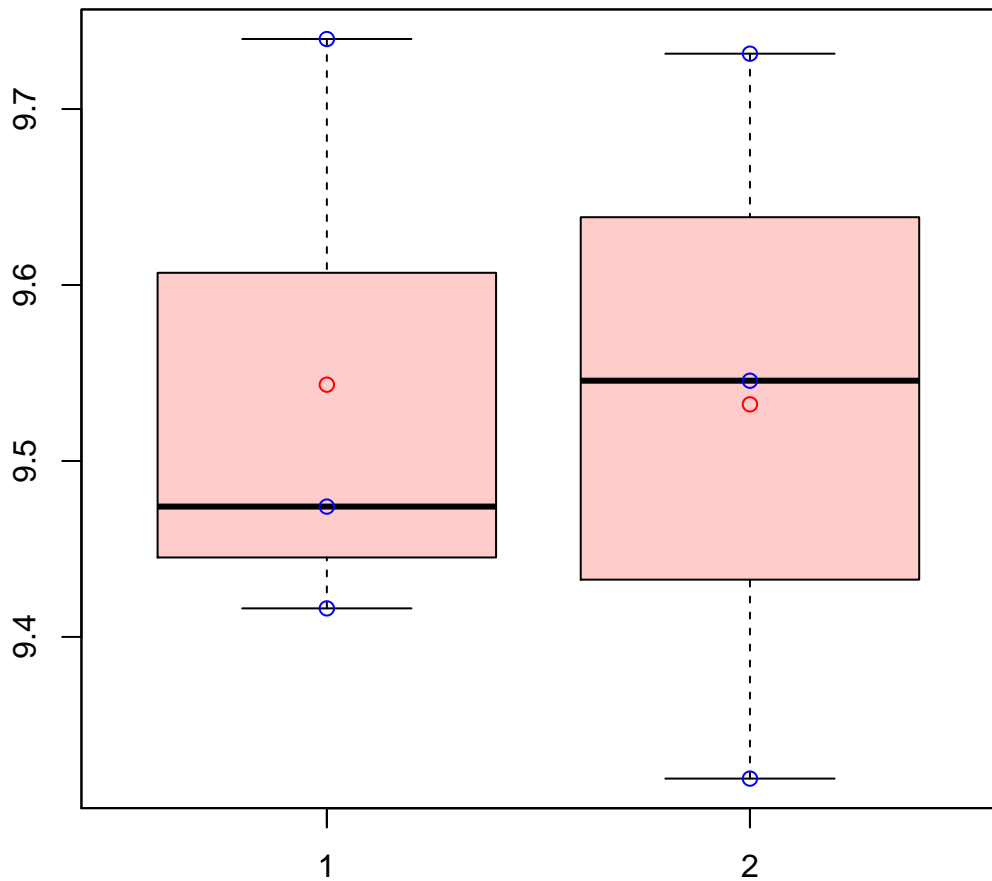

t-Test: p-value = 0.95

# CL3019Contig8|CL3019Contig8

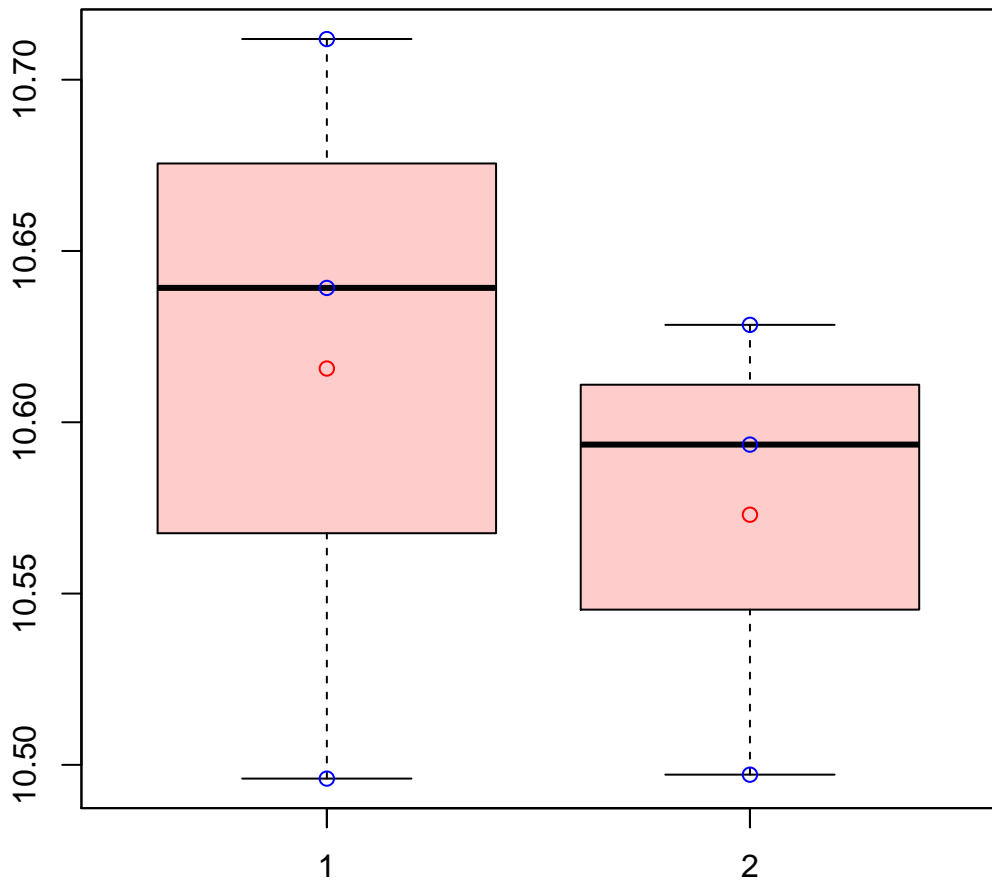

t-Test: p-value = 0.6

# CL3021Contig2|CL3021Contig2

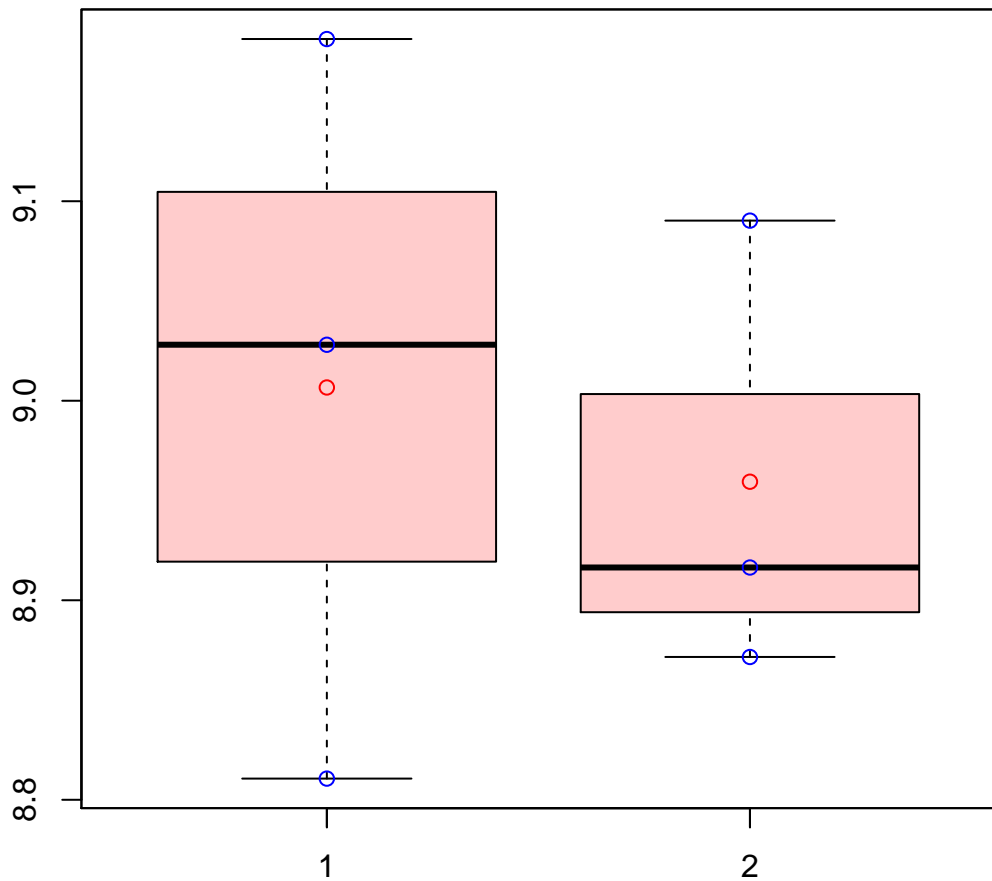

t-Test: p-value = 0.73



# CL3024Contig1|CL3024Contig1

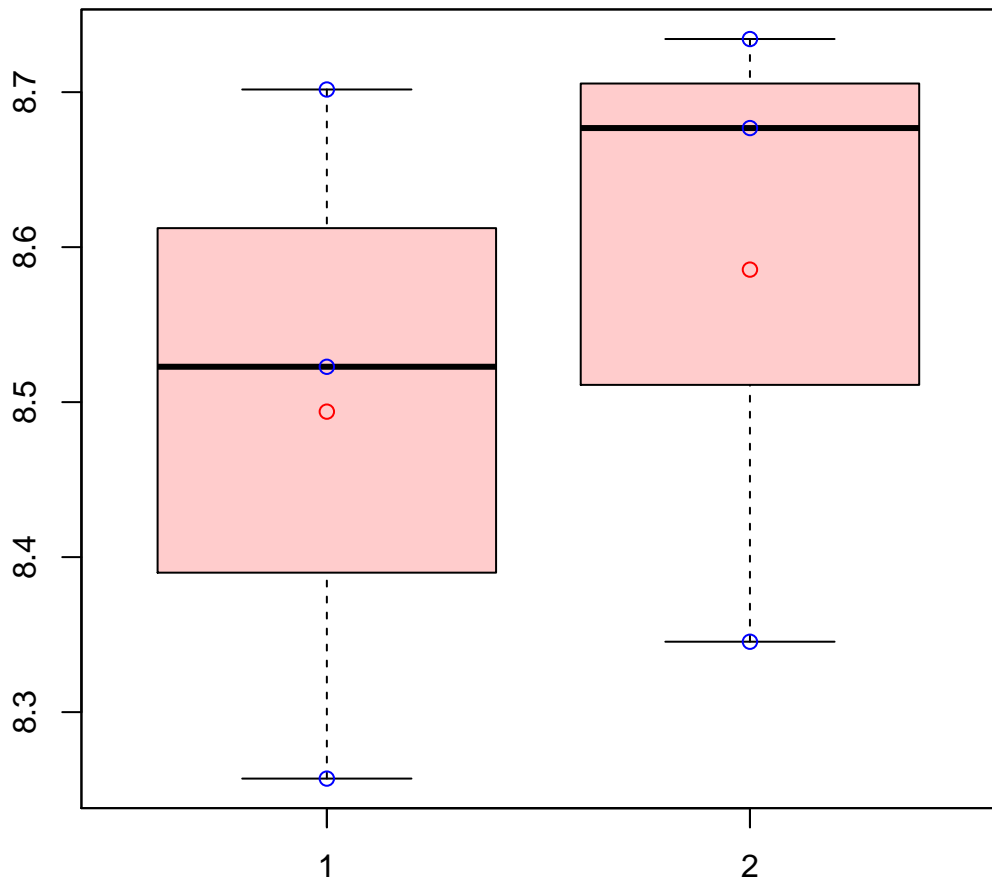

t-Test: p-value = 0.63

# CL3039Contig1|CL3039Contig1

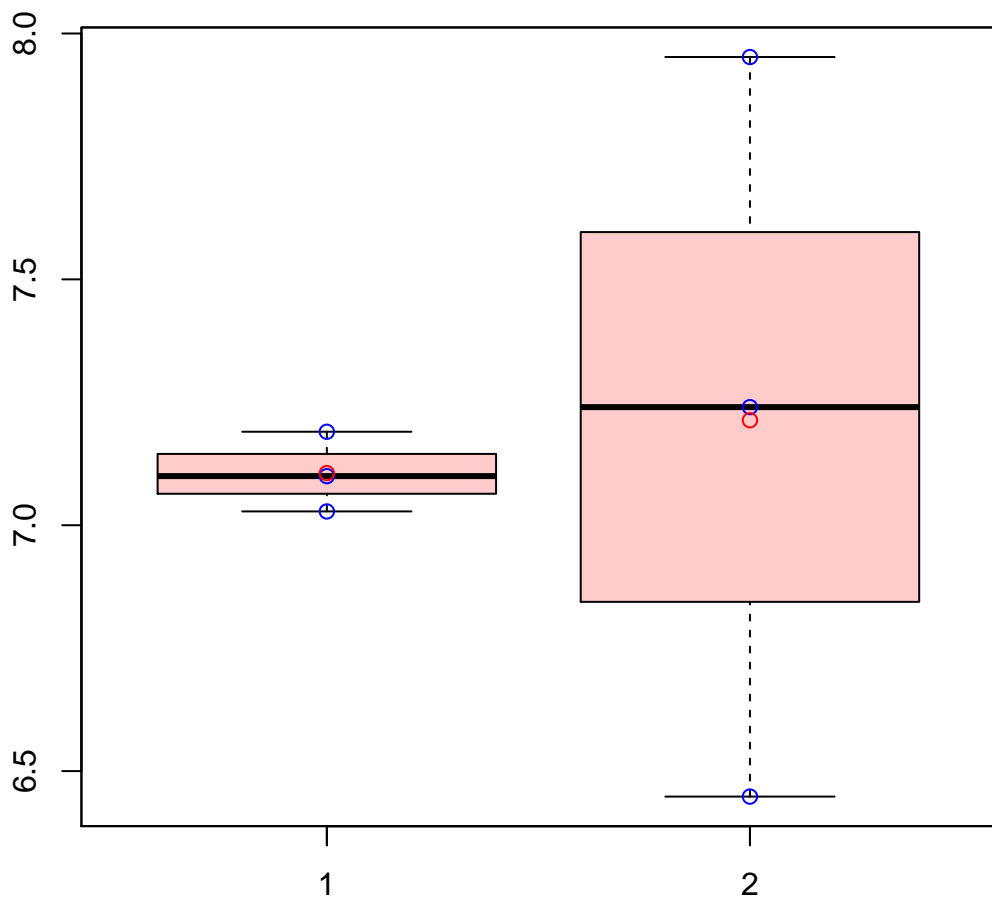

t-Test: p-value = 0.83

# CL3044Contig10|CL3044Contig10

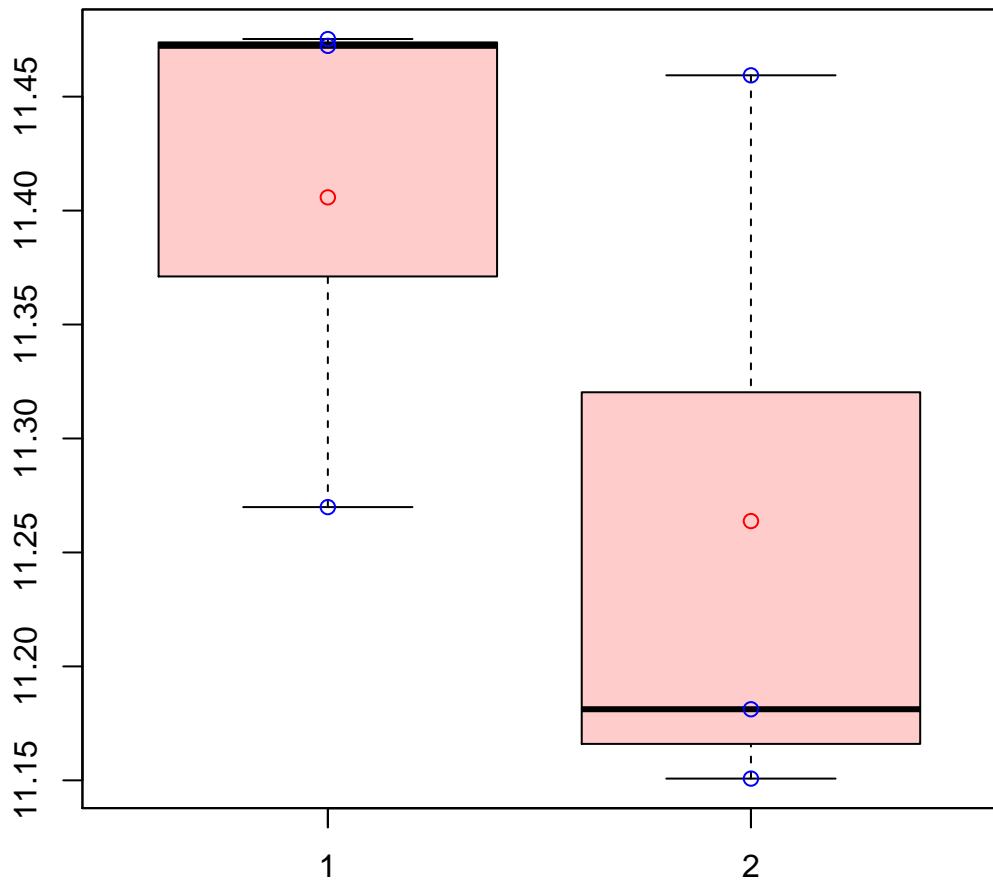

t-Test: p-value = 0.31

# CL3044Contig4|CL3044Contig4

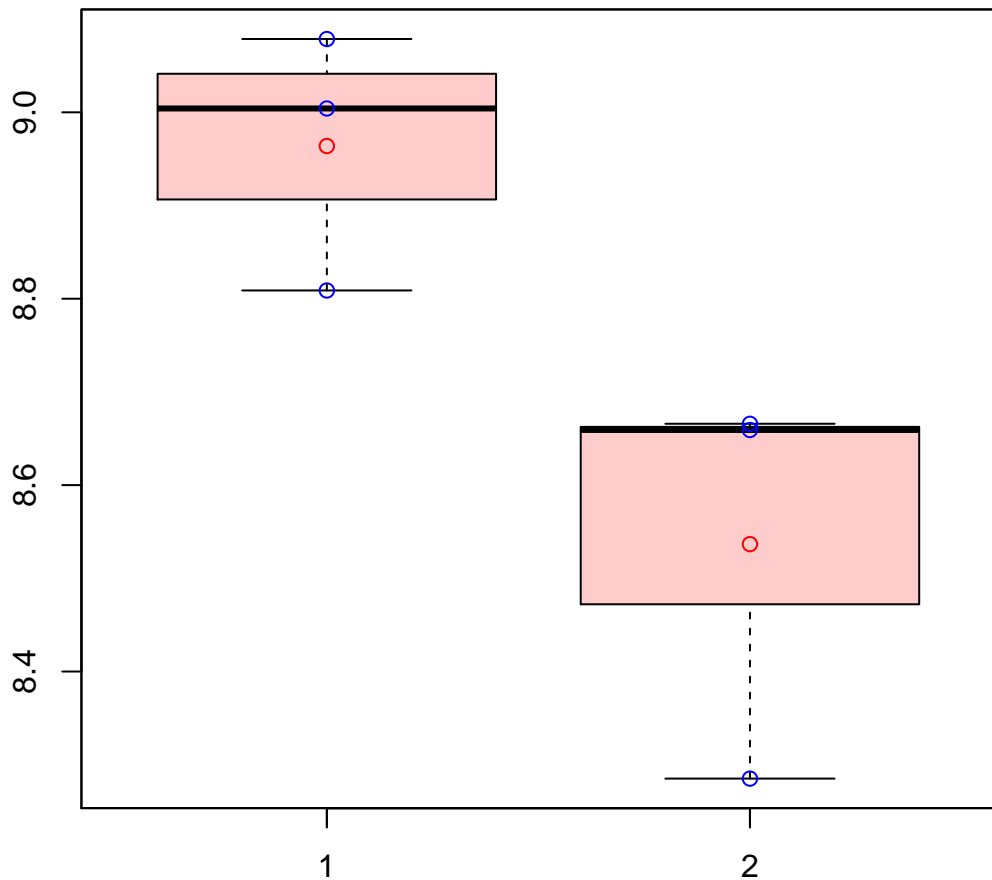

t-Test: p-value = 0.06

# CL3044Contig5|CL3044Contig5

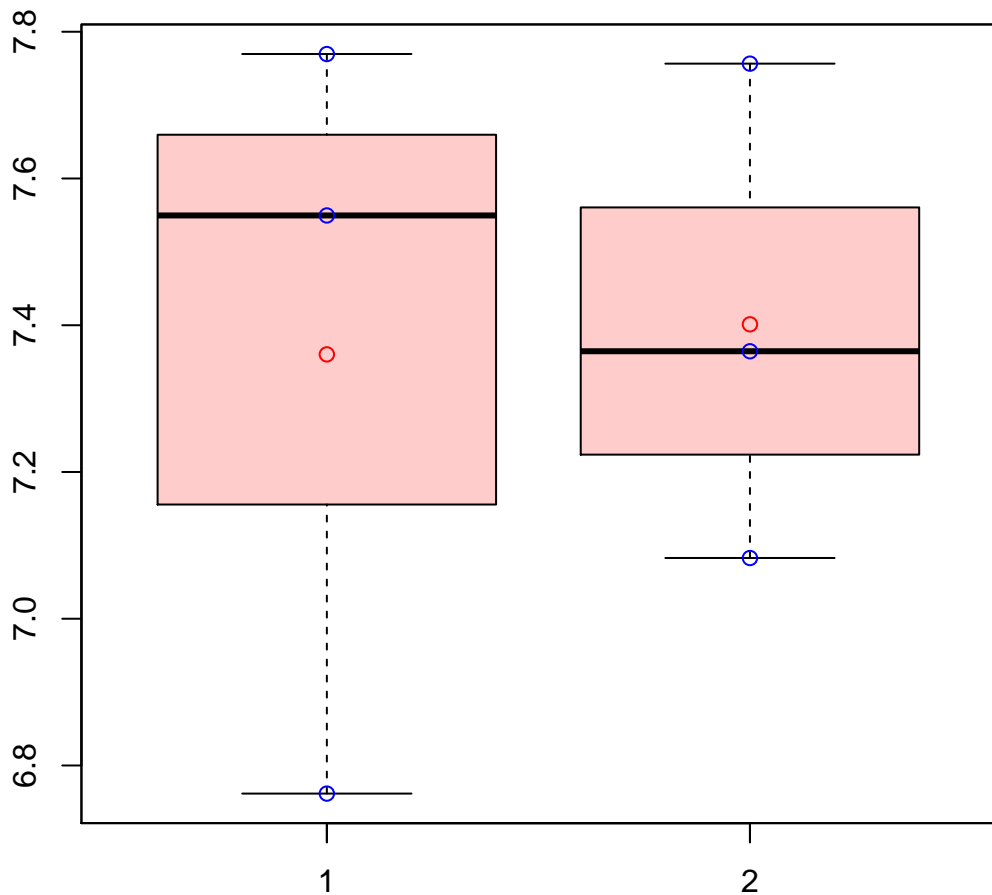

t-Test: p-value = 0.92

# CL3048Contig2|CL3048Contig2

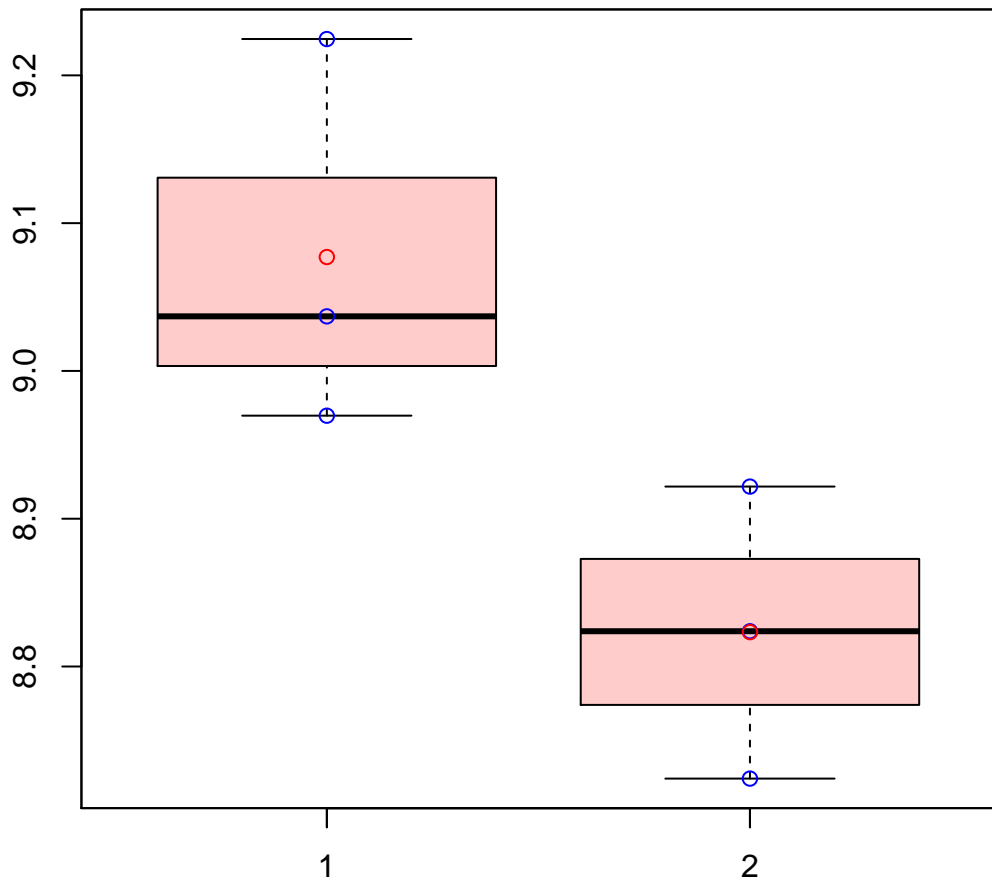

t-Test: p-value = 0.06

# CL304Contig9|CL304Contig9

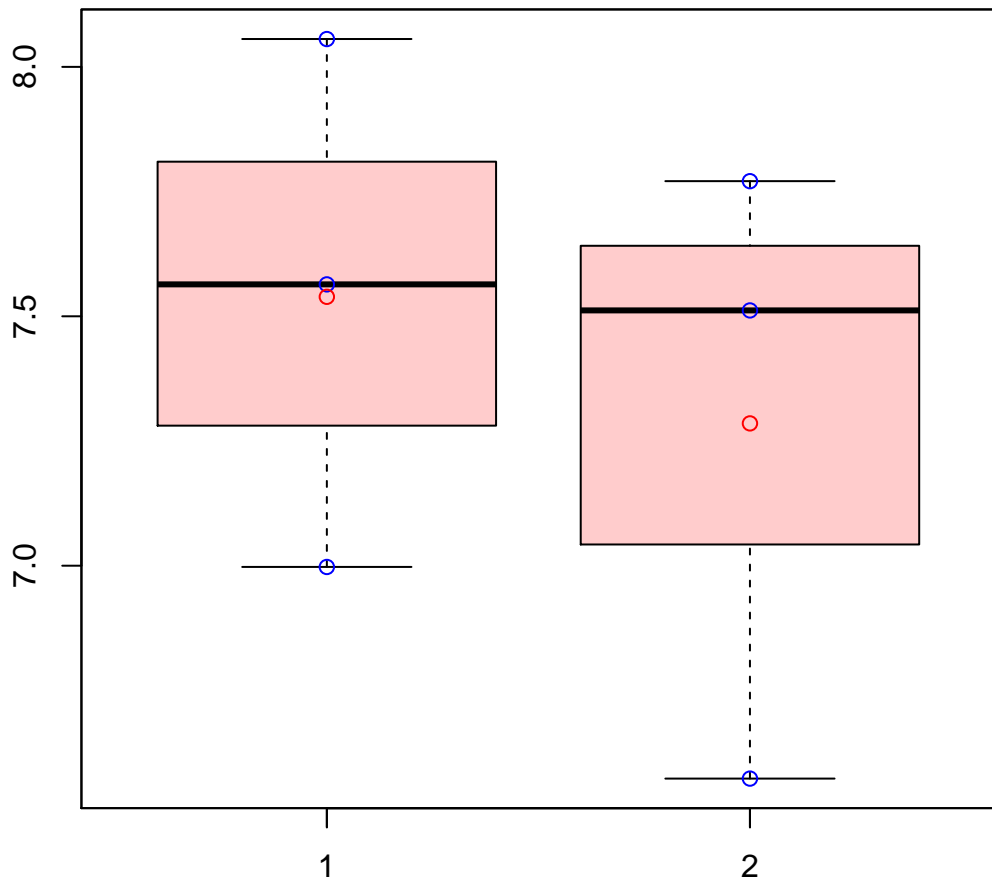

t-Test: p-value = 0.62

# CL305Contig3|CL305Contig3

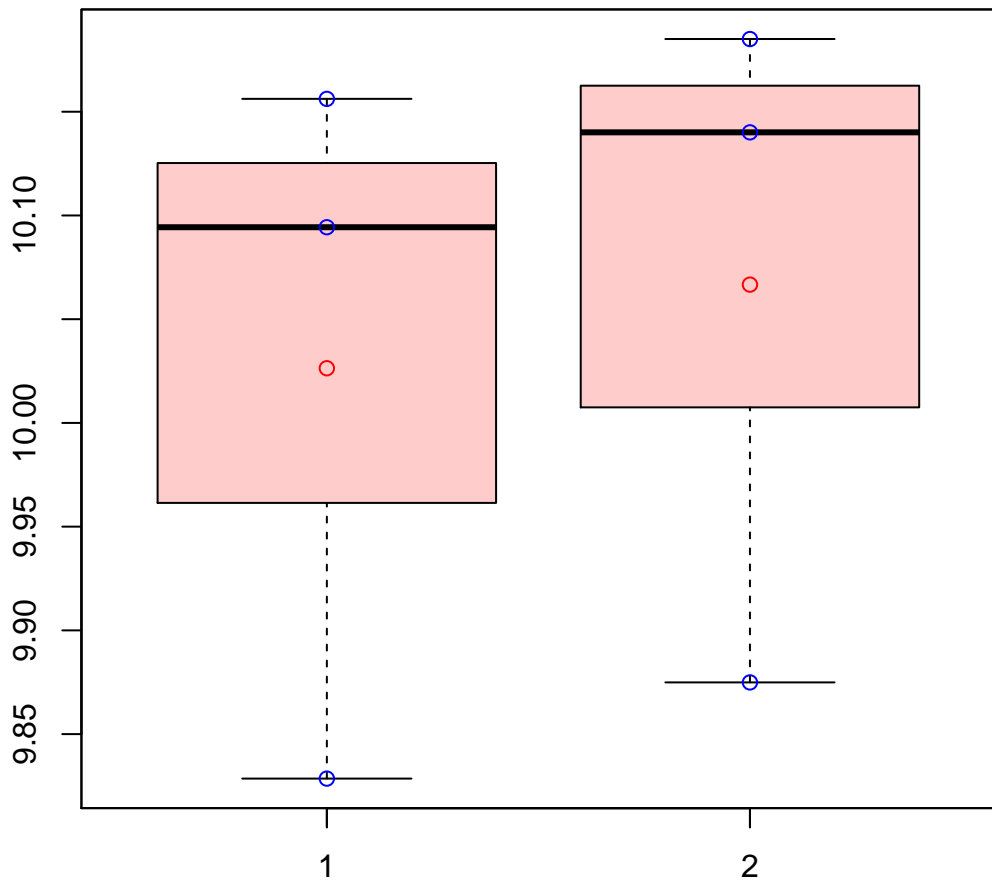

t-Test: p-value = 0.79



# CL3067Contig5|CL3067Contig5

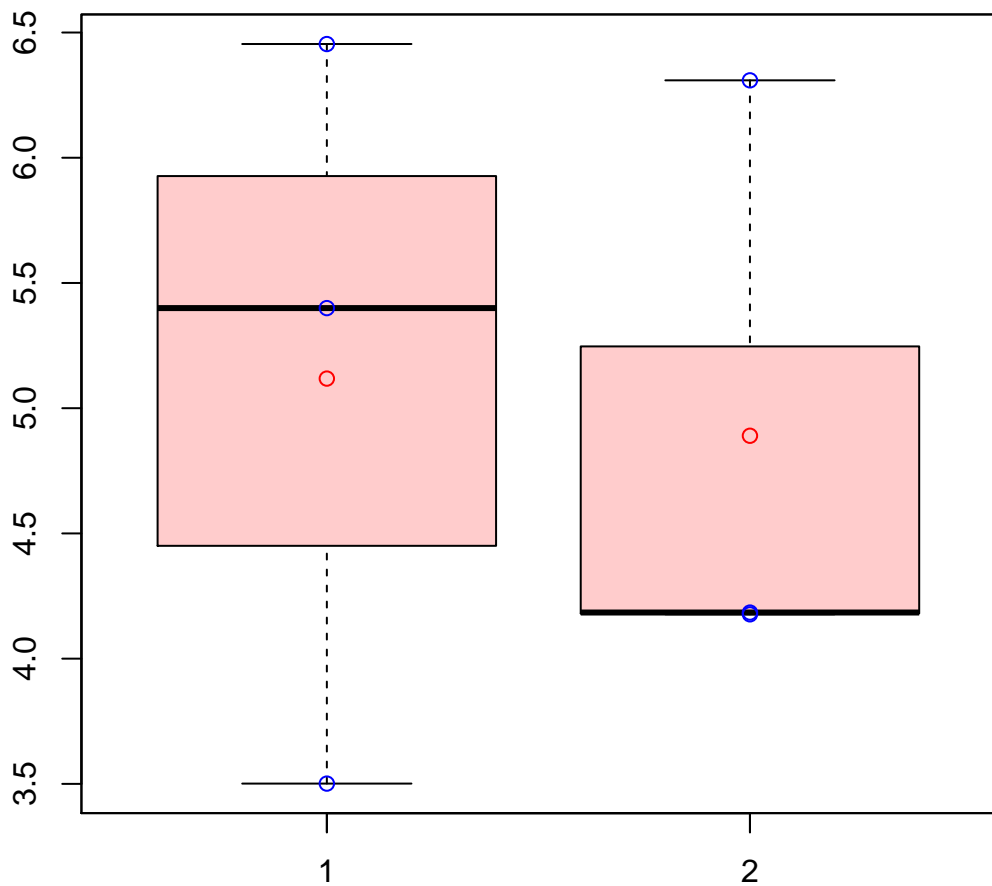

t-Test: p-value = 0.85

# CL3068Contig1|CL3068Contig1

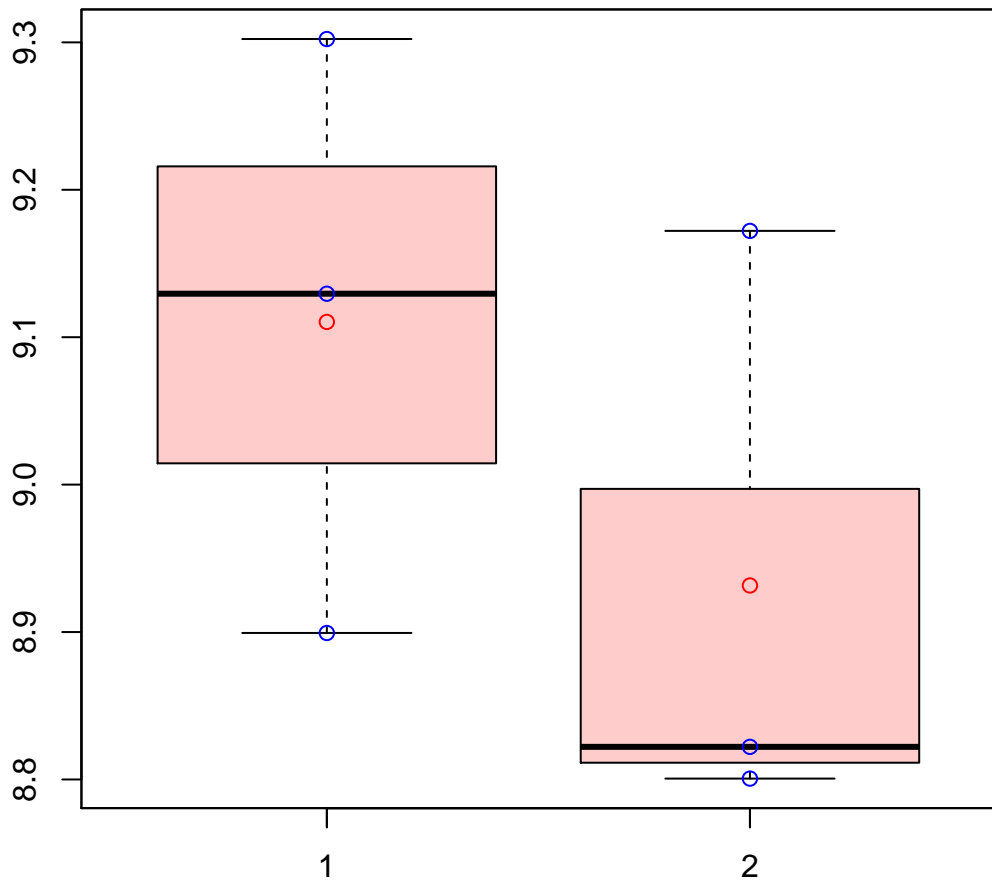

t-Test: p-value = 0.35

# CL3068Contig2|CL3068Contig2

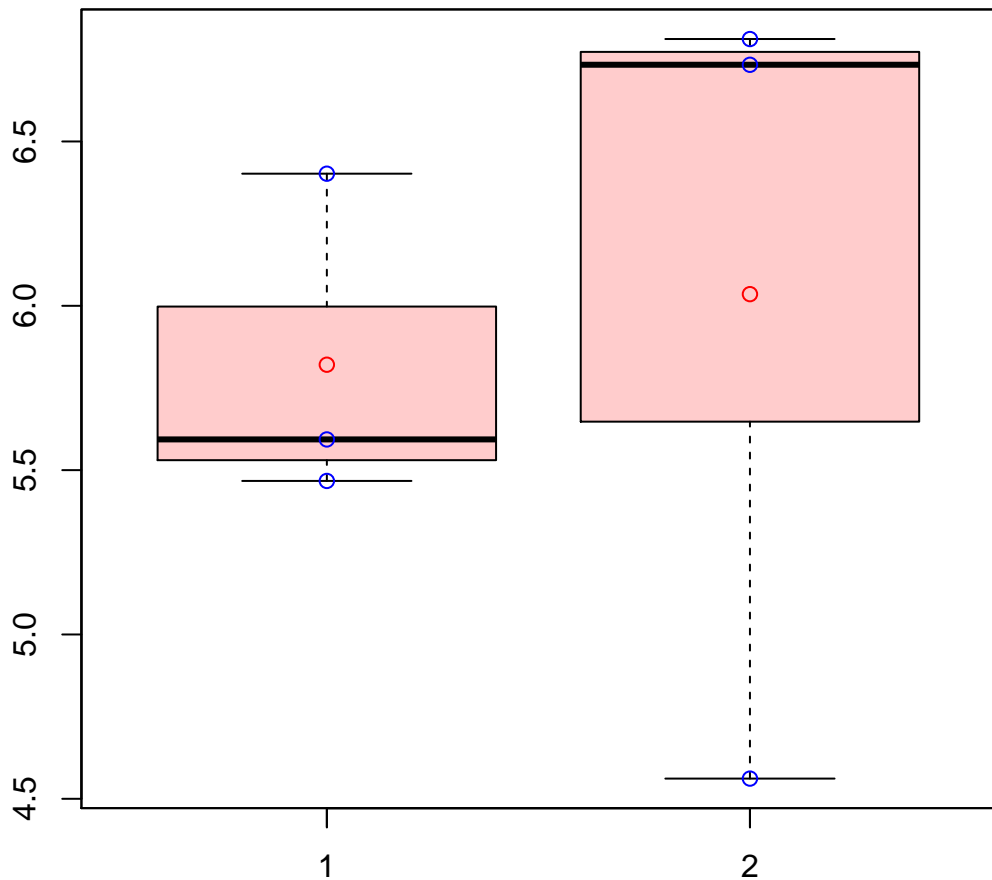

t-Test: p-value = 0.81

# CL3074Contig4|CL3074Contig4

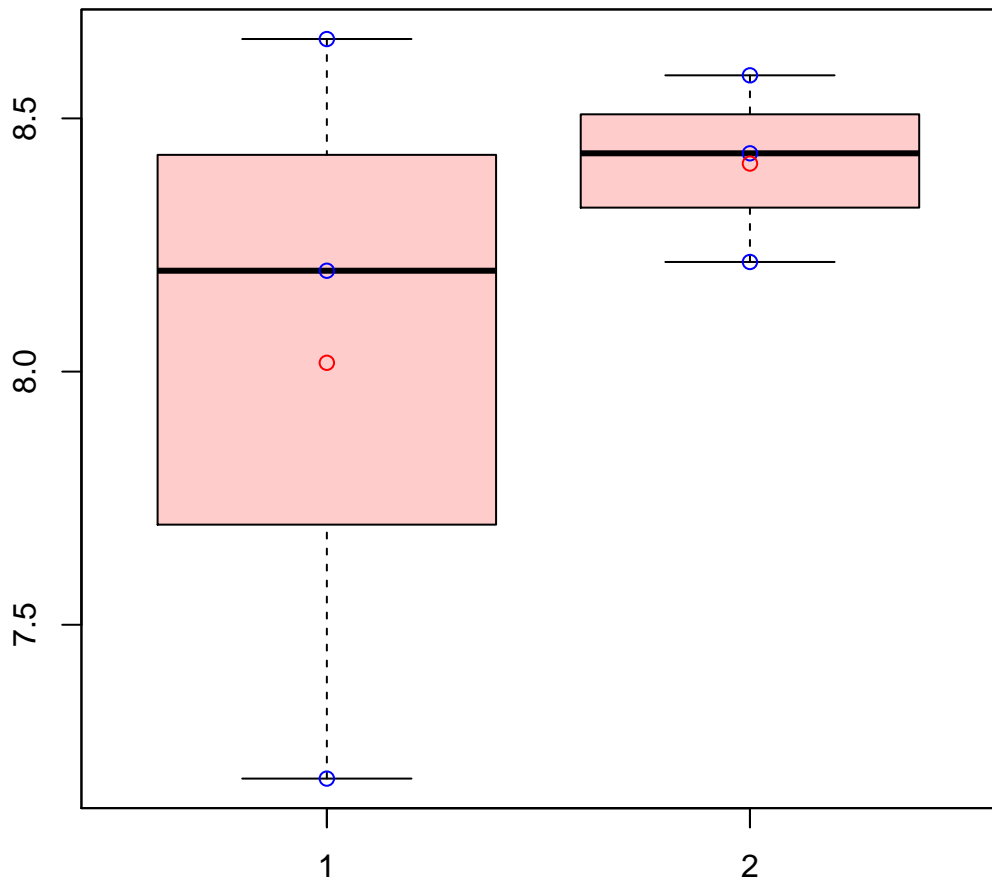

t-Test: p-value = 0.46

# CL3075Contig1|CL3075Contig1

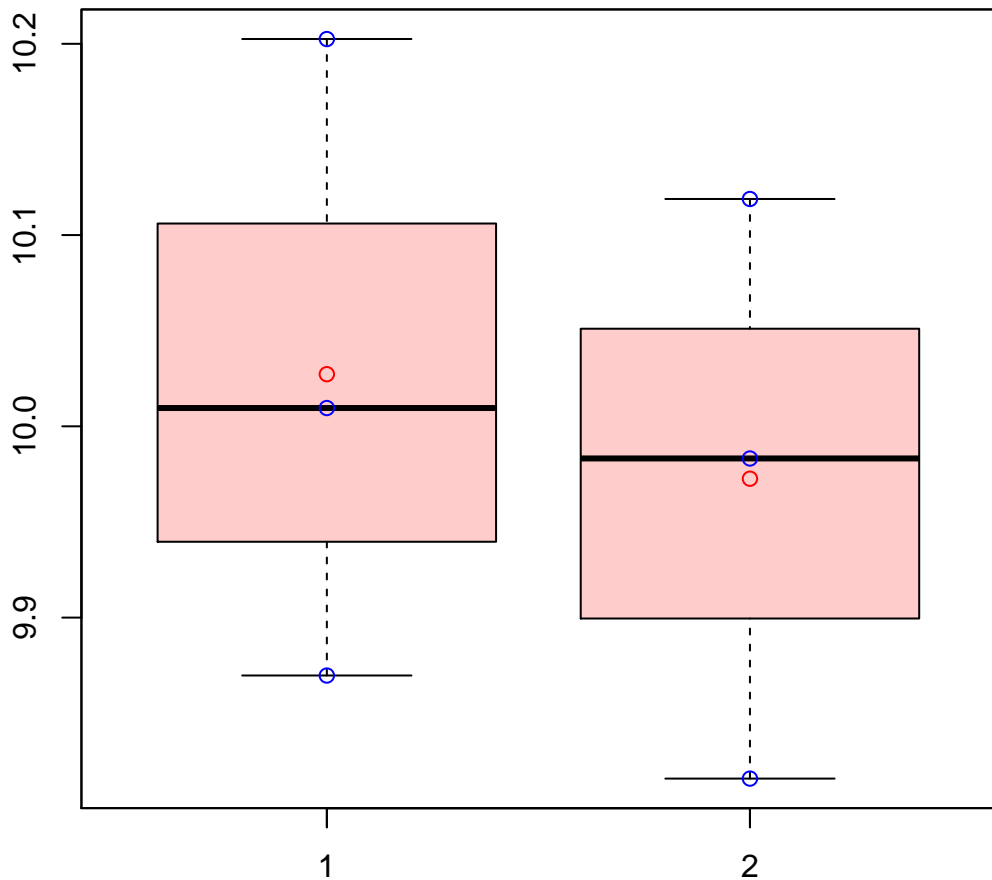

t-Test: p-value = 0.7

# CL307Contig6|CL307Contig6

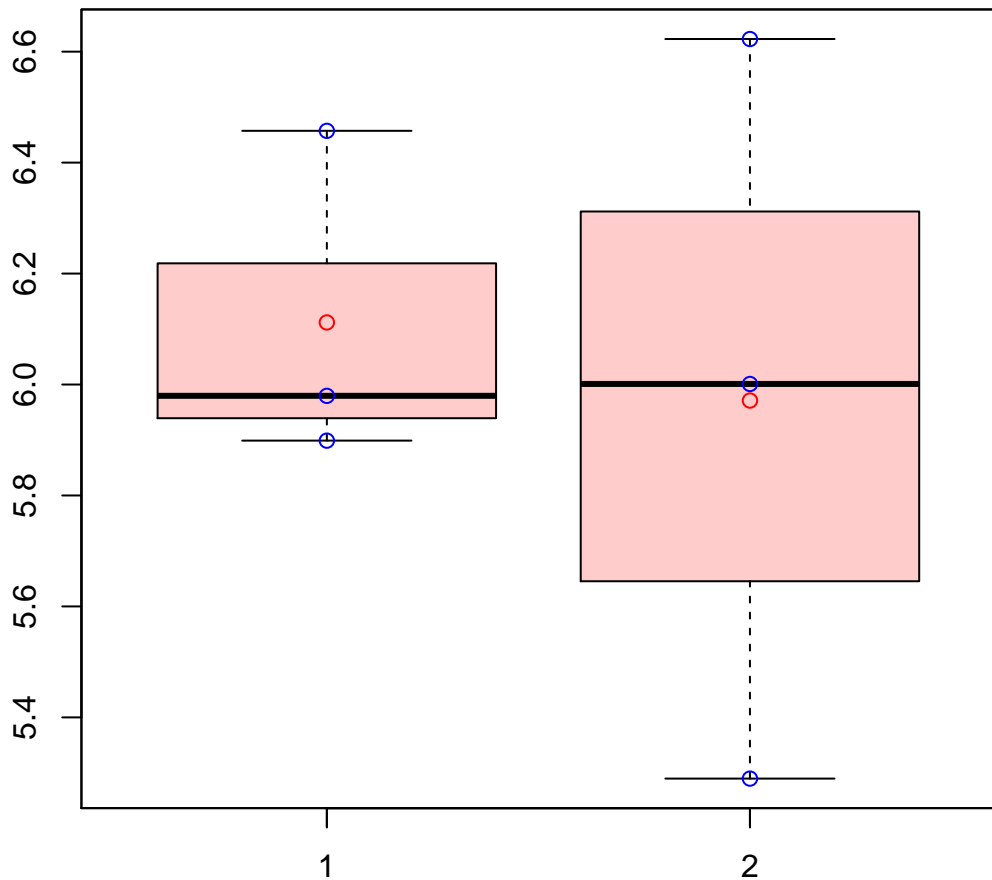

t-Test: p-value = 0.76

# CL3081Contig1|CL3081Contig1

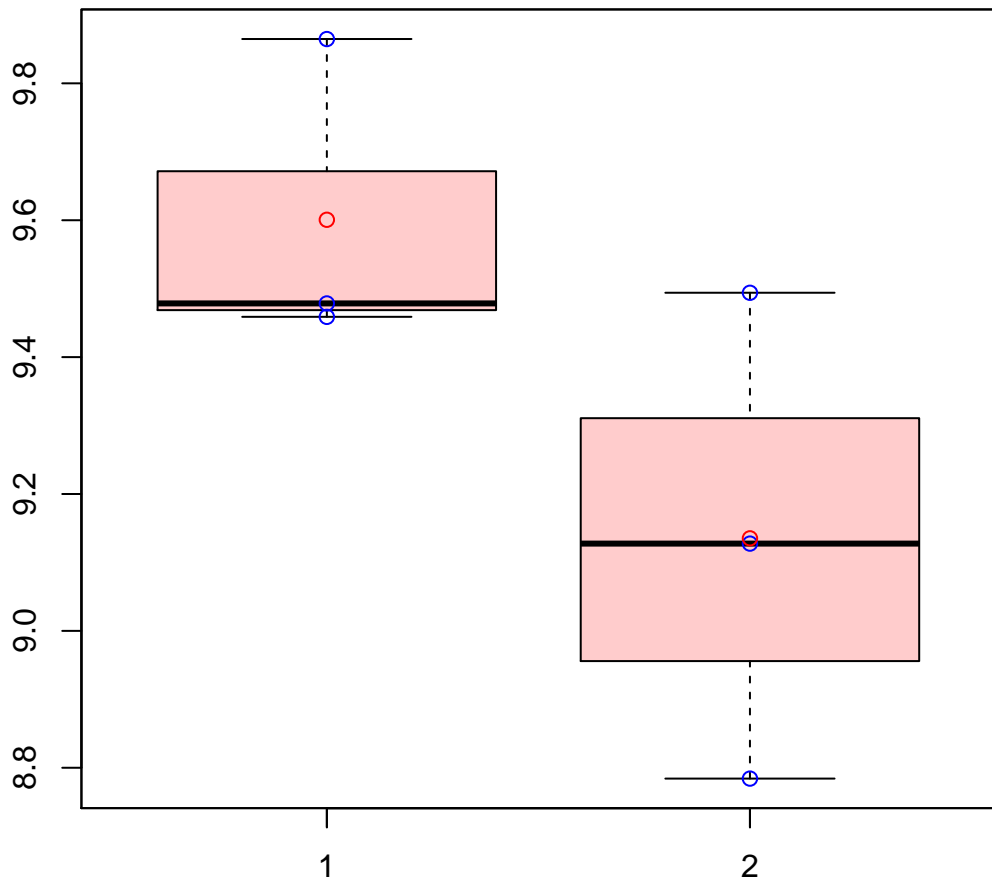

t-Test: p-value = 0.14

# CL3092Contig3|CL3092Contig3

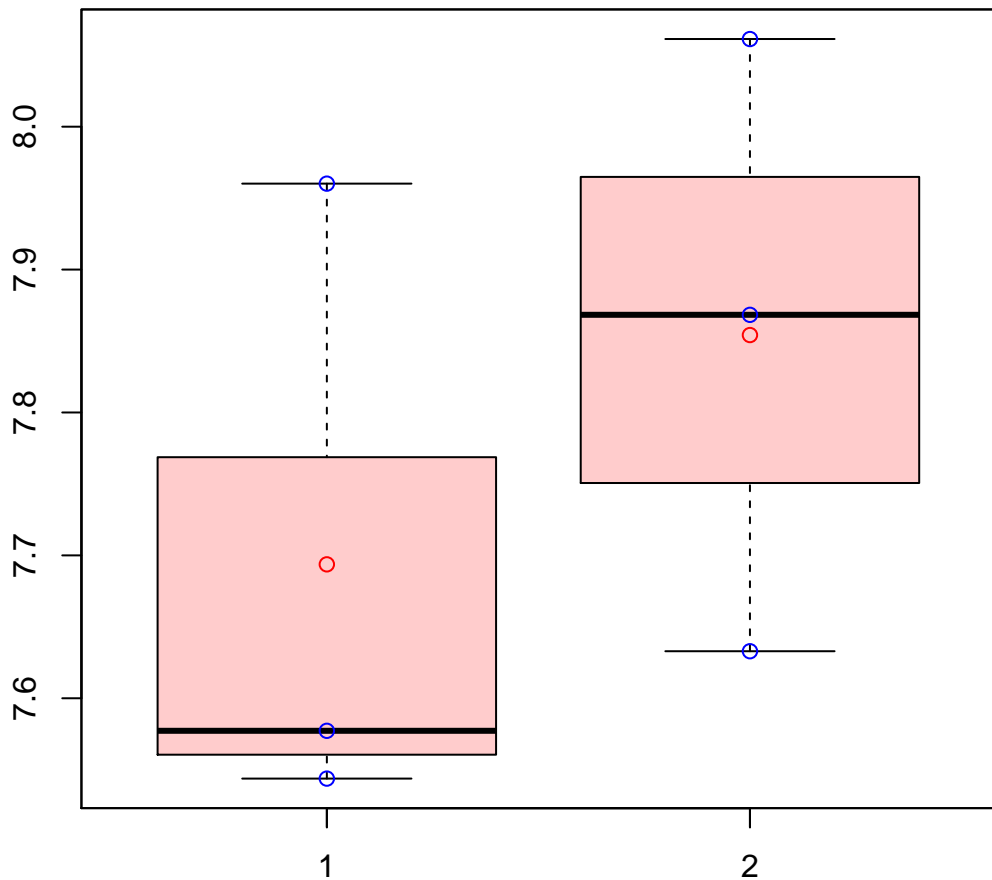

t-Test: p-value = 0.43



# CL3095Contig1|CL3095Contig1

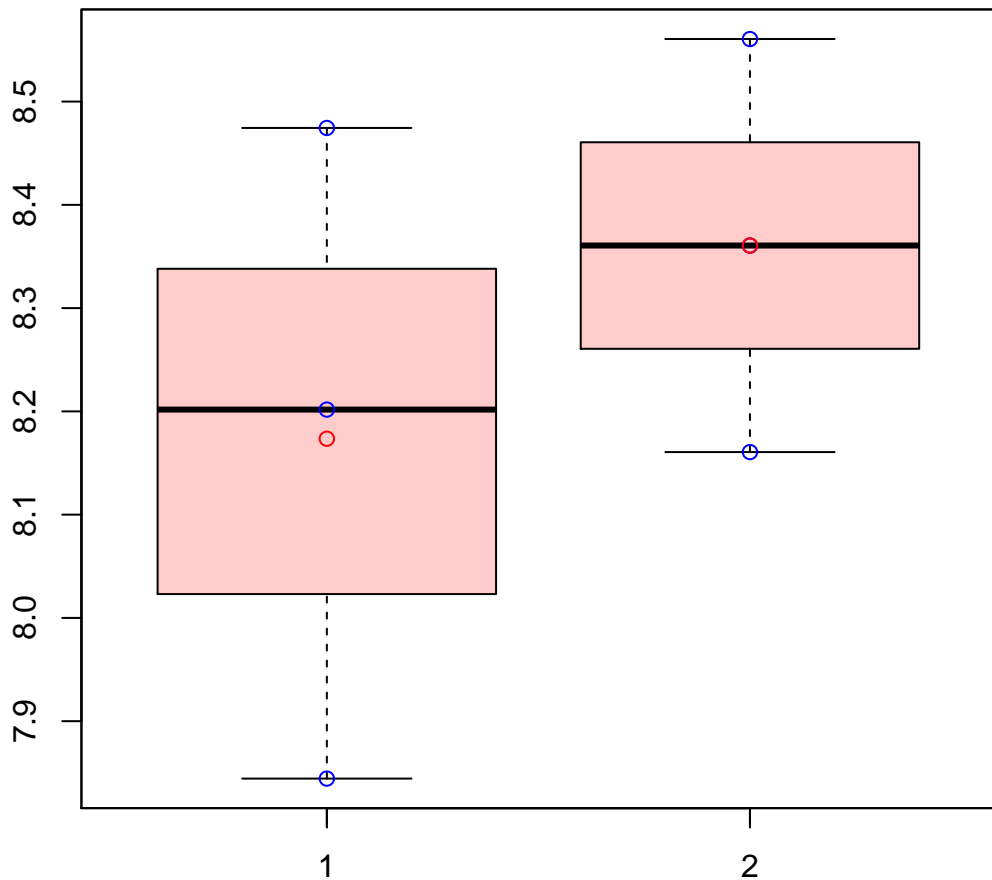

t-Test: p-value = 0.44

# CL309Contig8|CL309Contig8

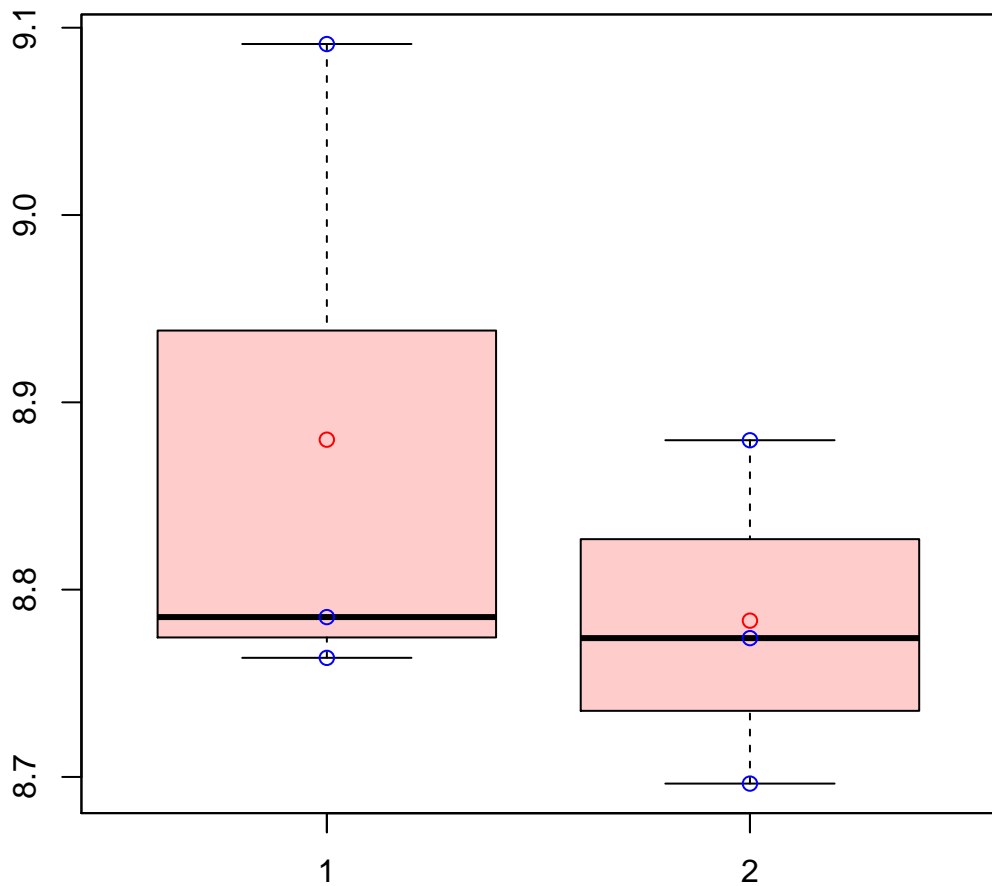

t-Test: p-value = 0.48

# CL30Contig20|CL30Contig20

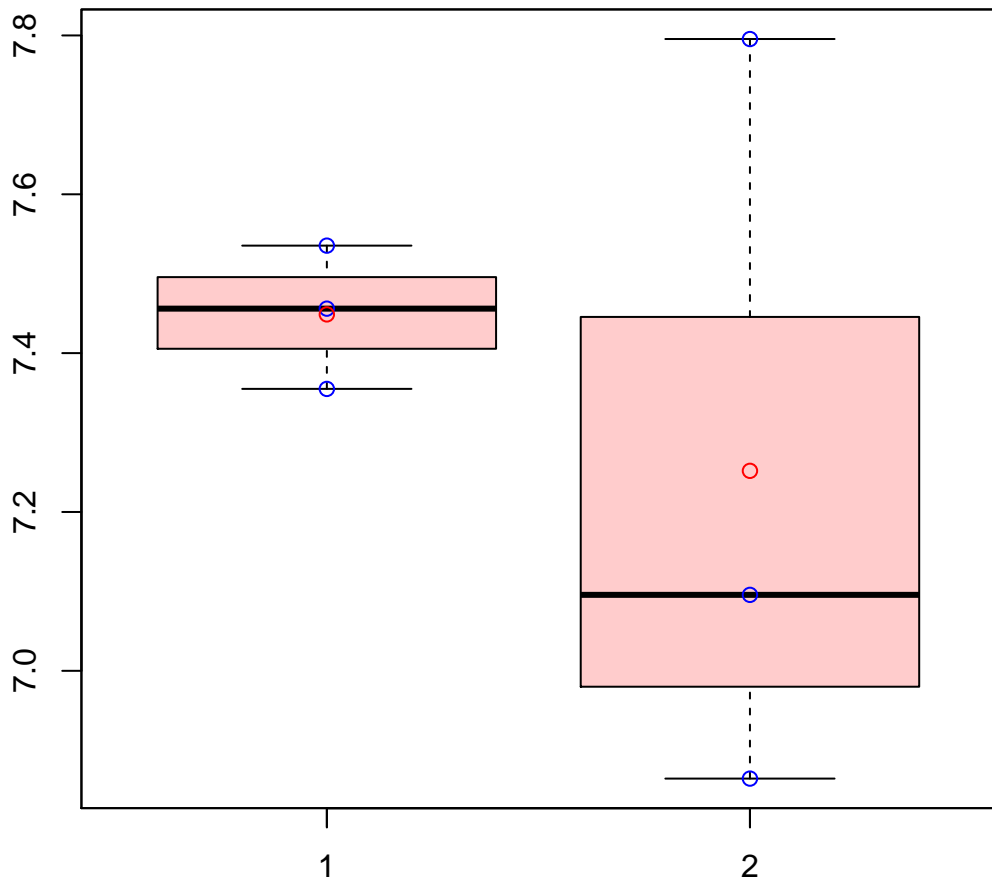

t-Test: p-value = 0.56

# CL3104Contig2|CL3104Contig2

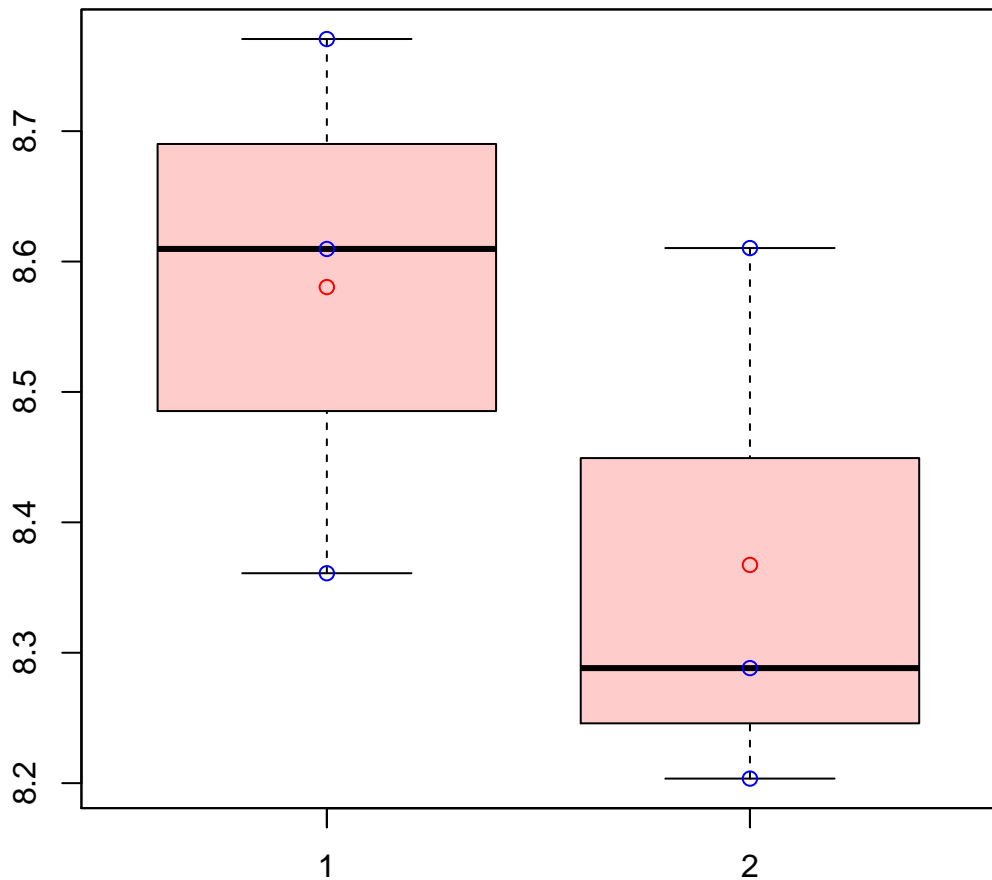

t-Test: p-value = 0.28

# CL3106Contig1|CL3106Contig1

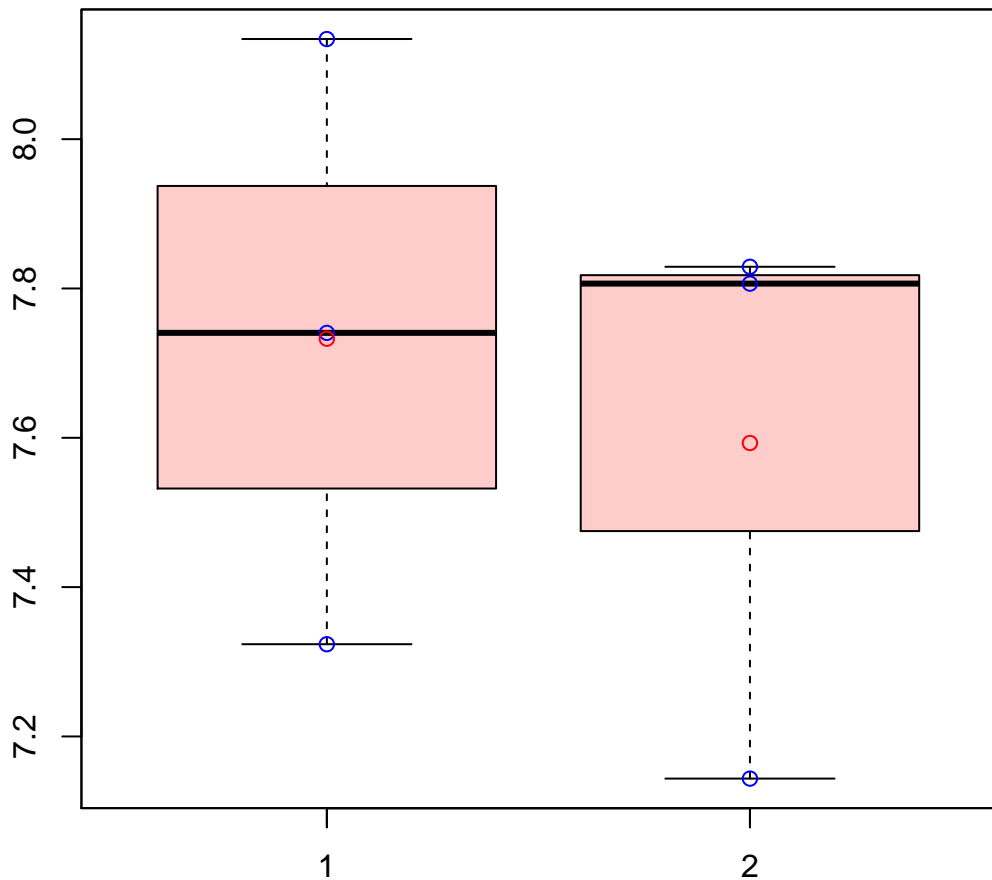

t-Test: p-value = 0.69

# CL310Contig6|CL310Contig6

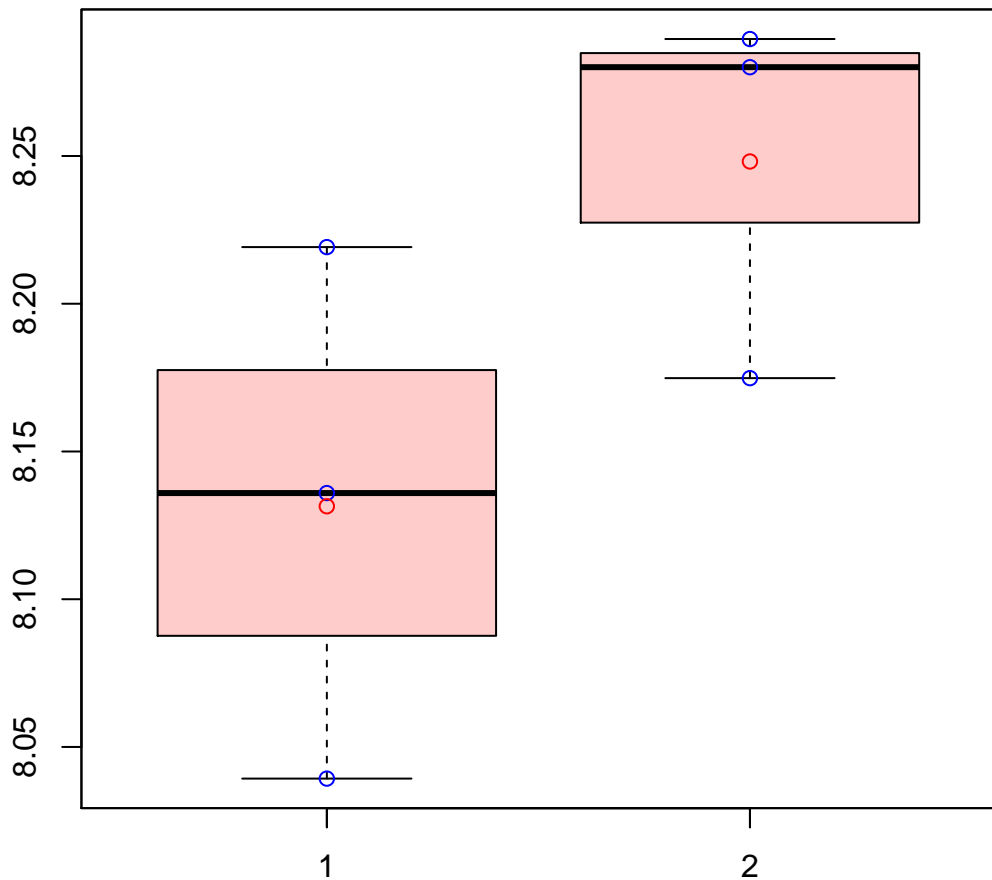

t-Test: p-value = 0.15

# CL3119Contig3|CL3119Contig3

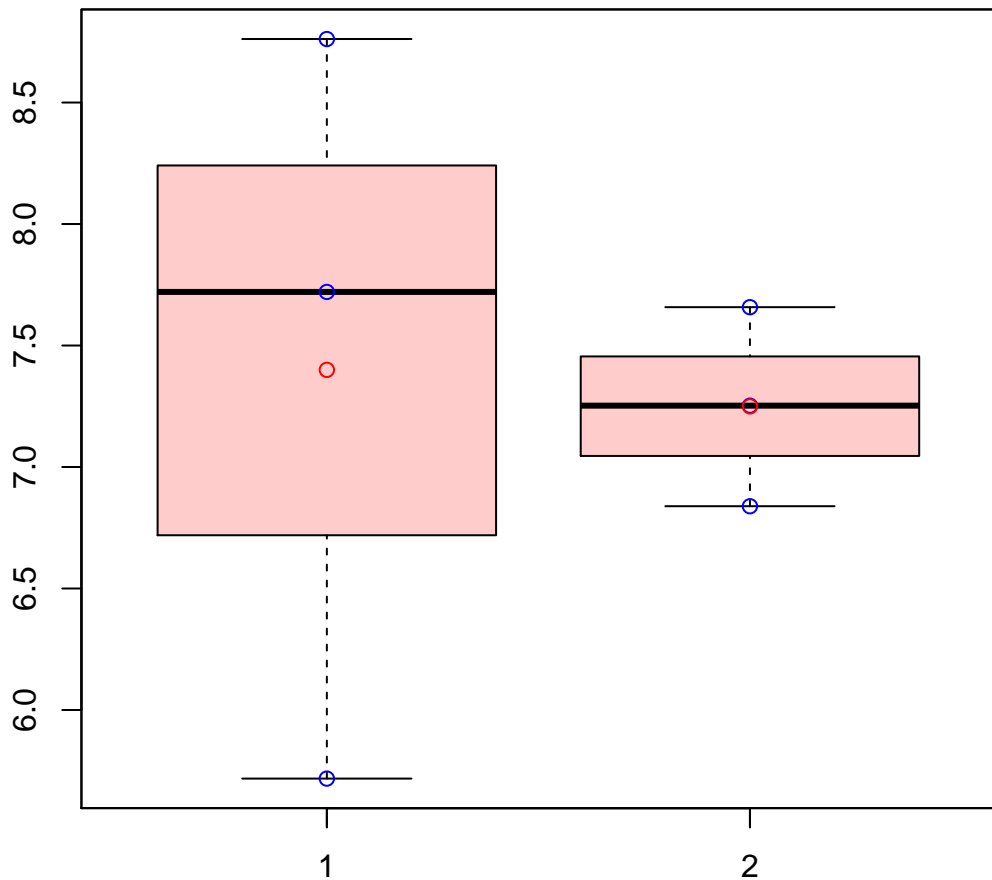

t-Test: p-value = 0.88

# CL3123Contig2|CL3123Contig2

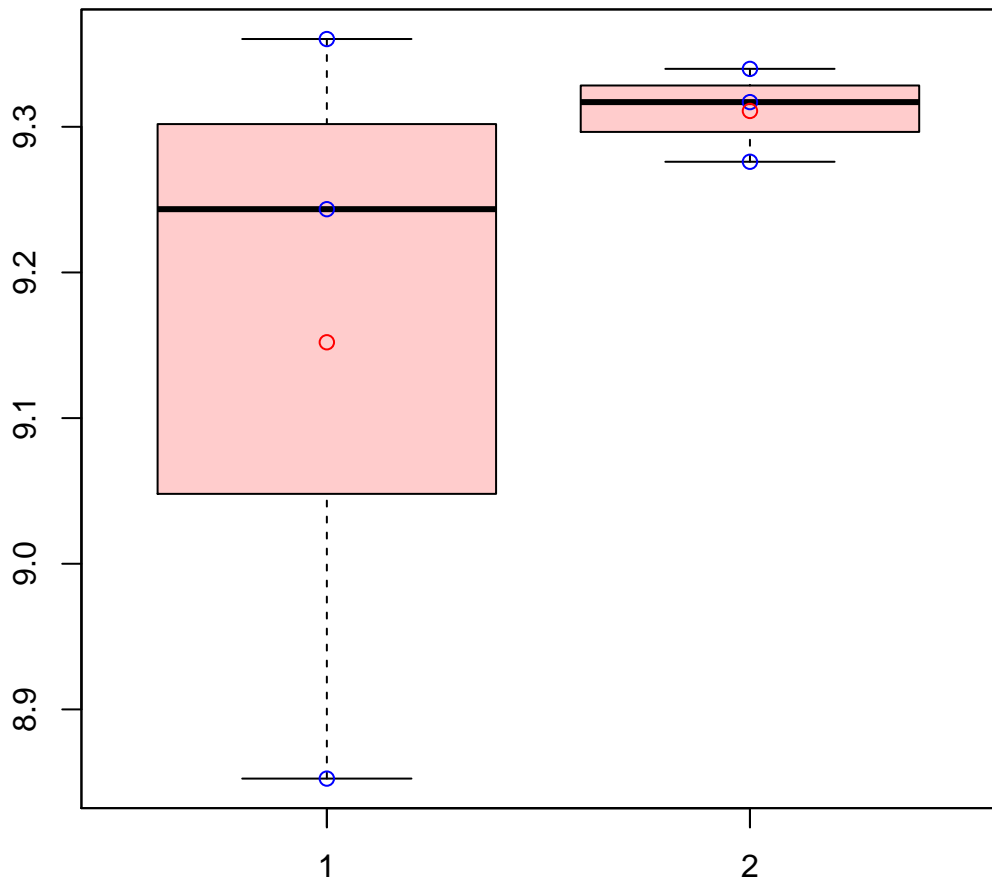

t-Test: p-value = 0.41



# CL3130Contig3|CL3130Contig3

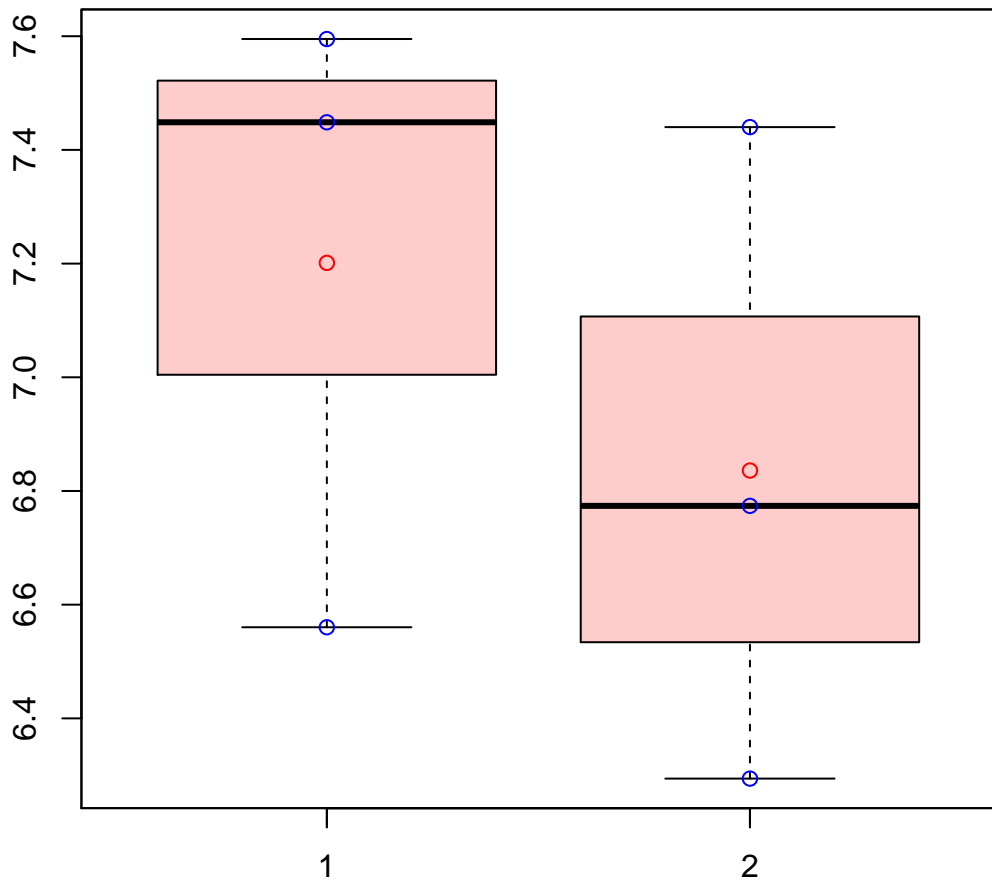

t-Test: p-value = 0.47

# CL3130Contig5|CL3130Contig5

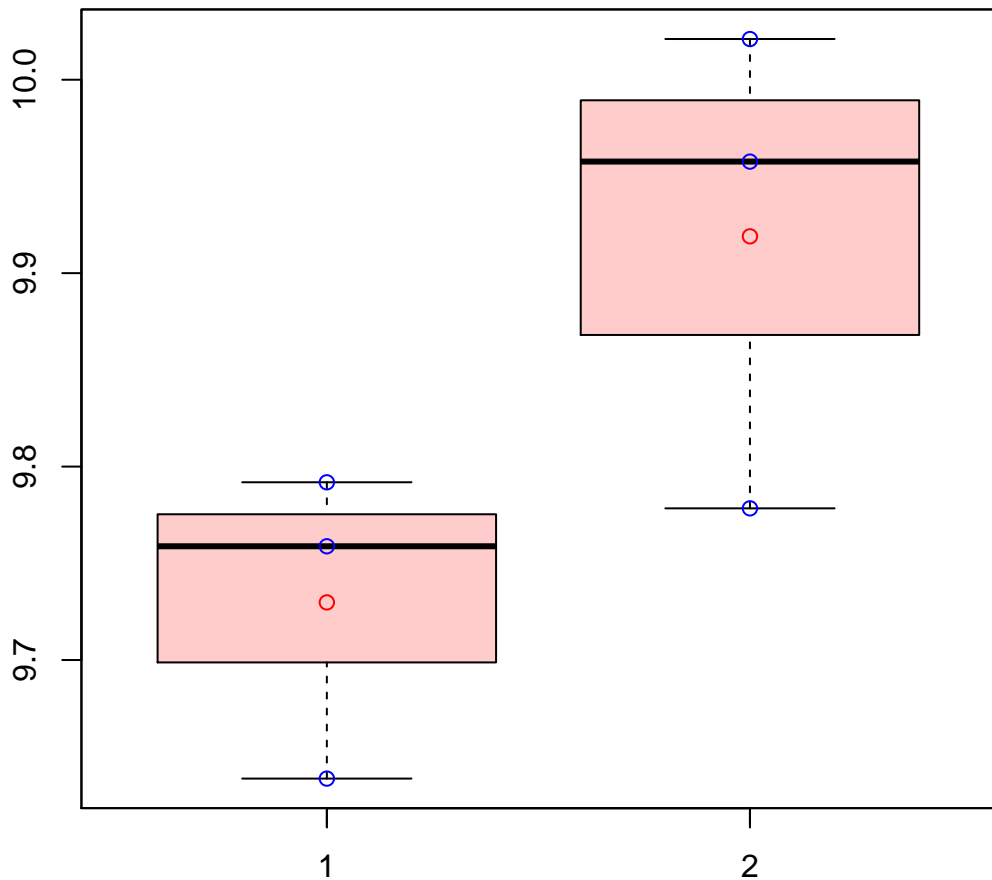

t-Test: p-value = 0.11

# CL3133Contig1|CL3133Contig1

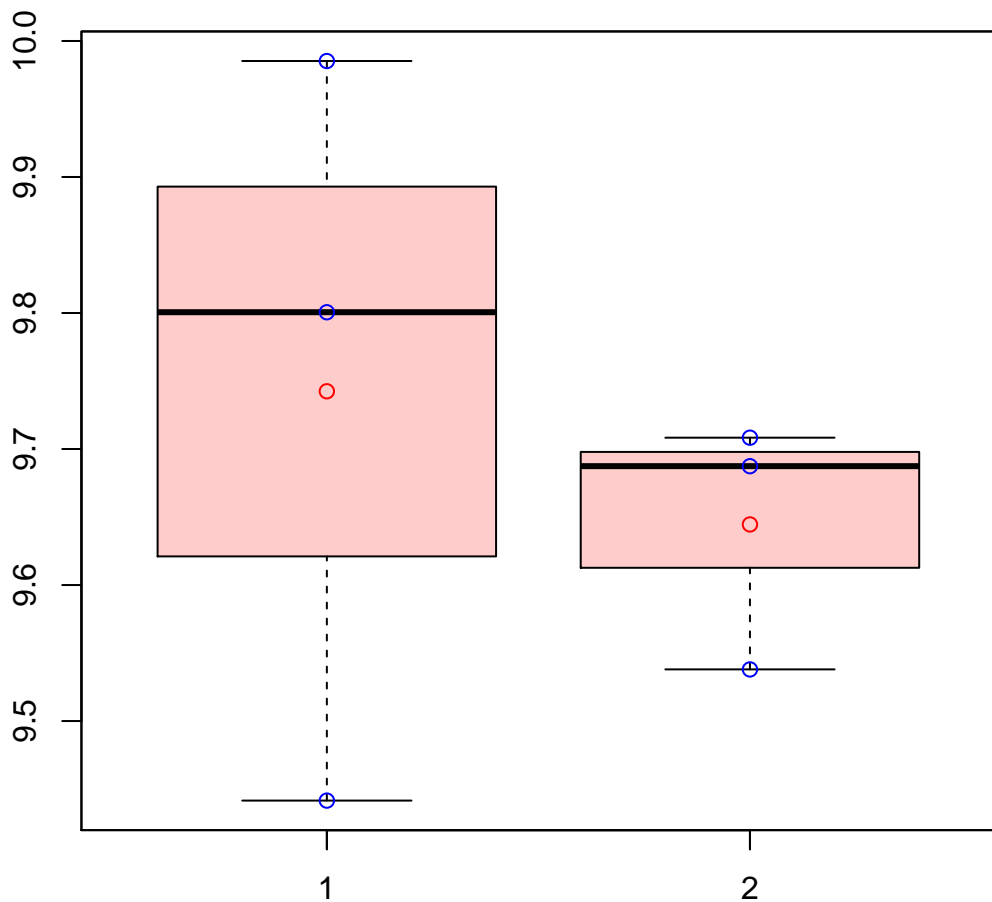

t-Test: p-value = 0.61

# CL3136Contig6|CL3136Contig6

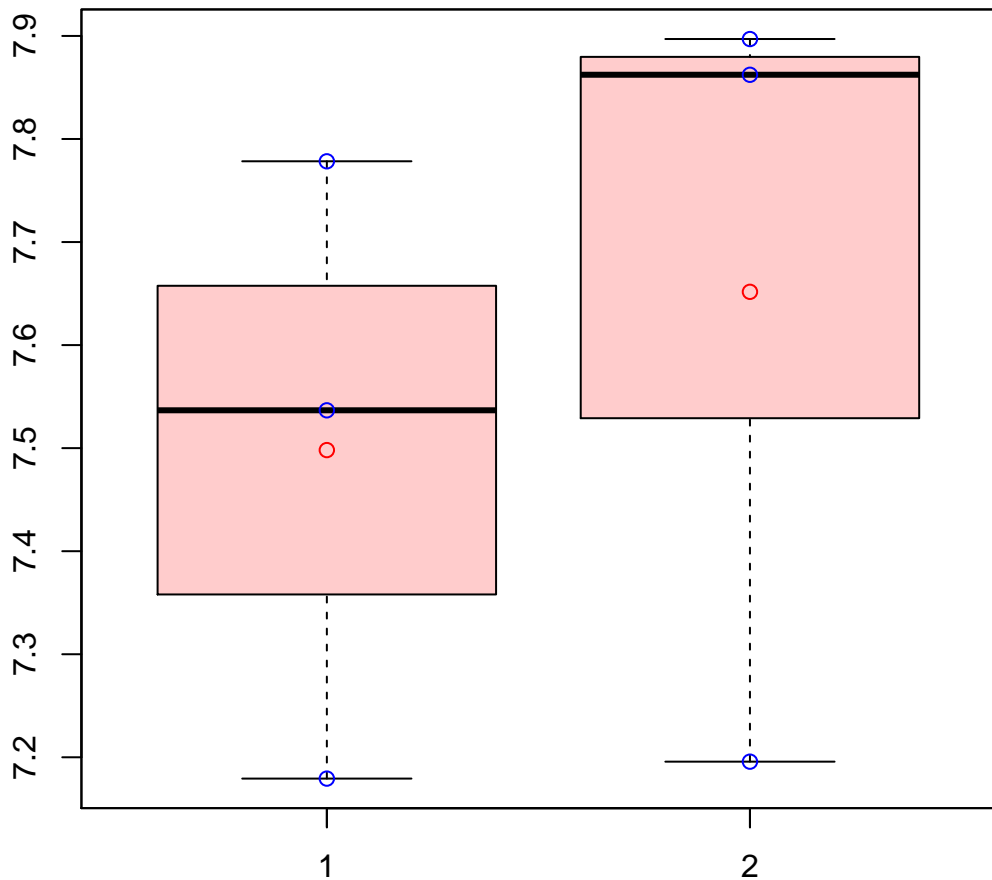

t-Test: p-value = 0.62

# CL3139Contig2|CL3139Contig2

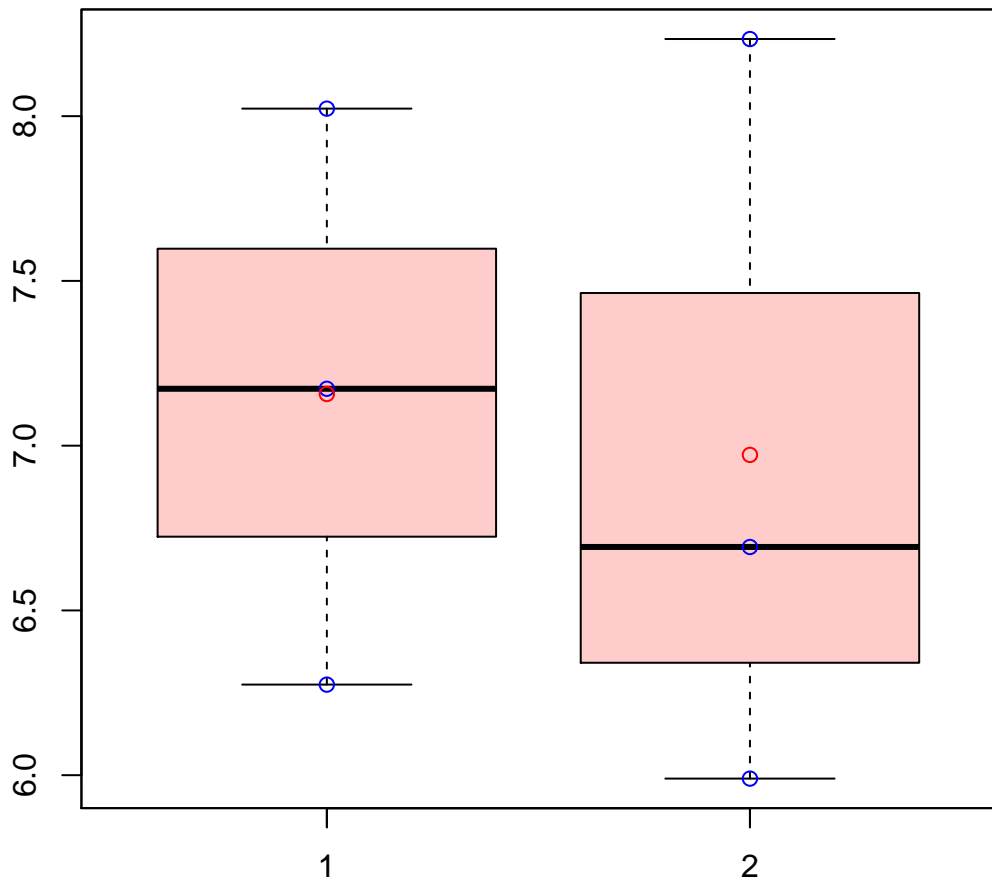

t-Test: p-value = 0.84

# CL3147Contig6|CL3147Contig6

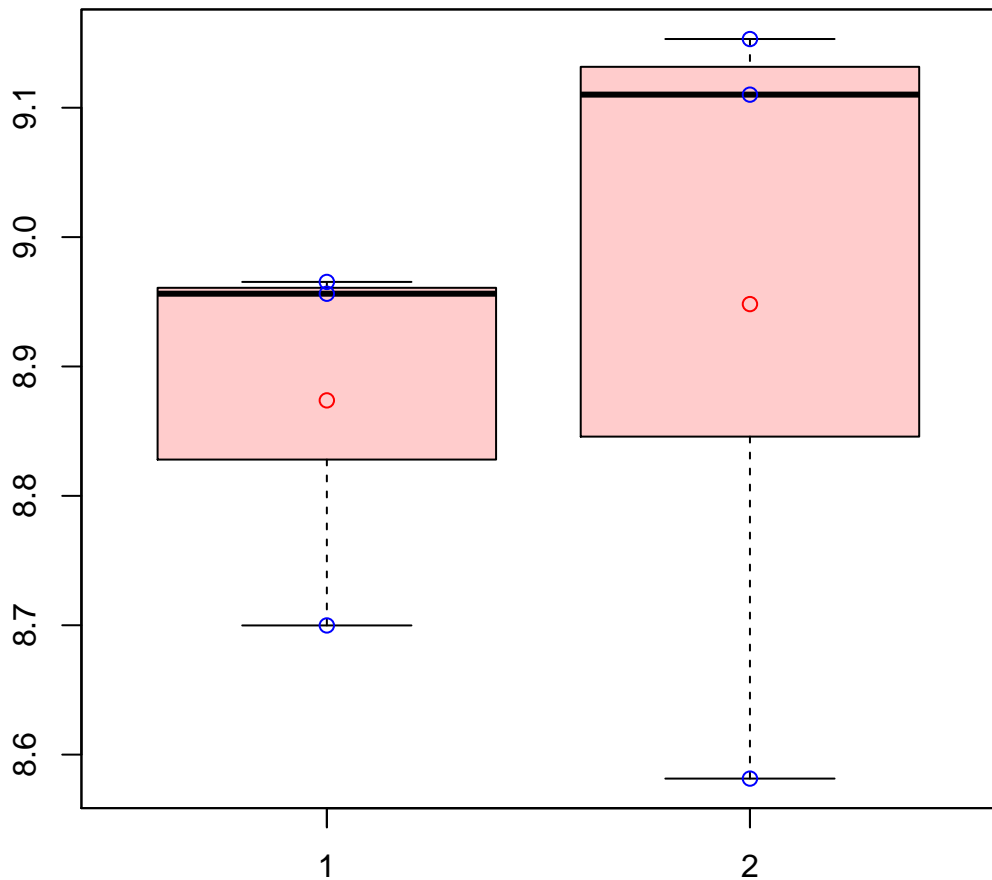

t-Test: p-value = 0.74

# CL3155Contig3|CL3155Contig3

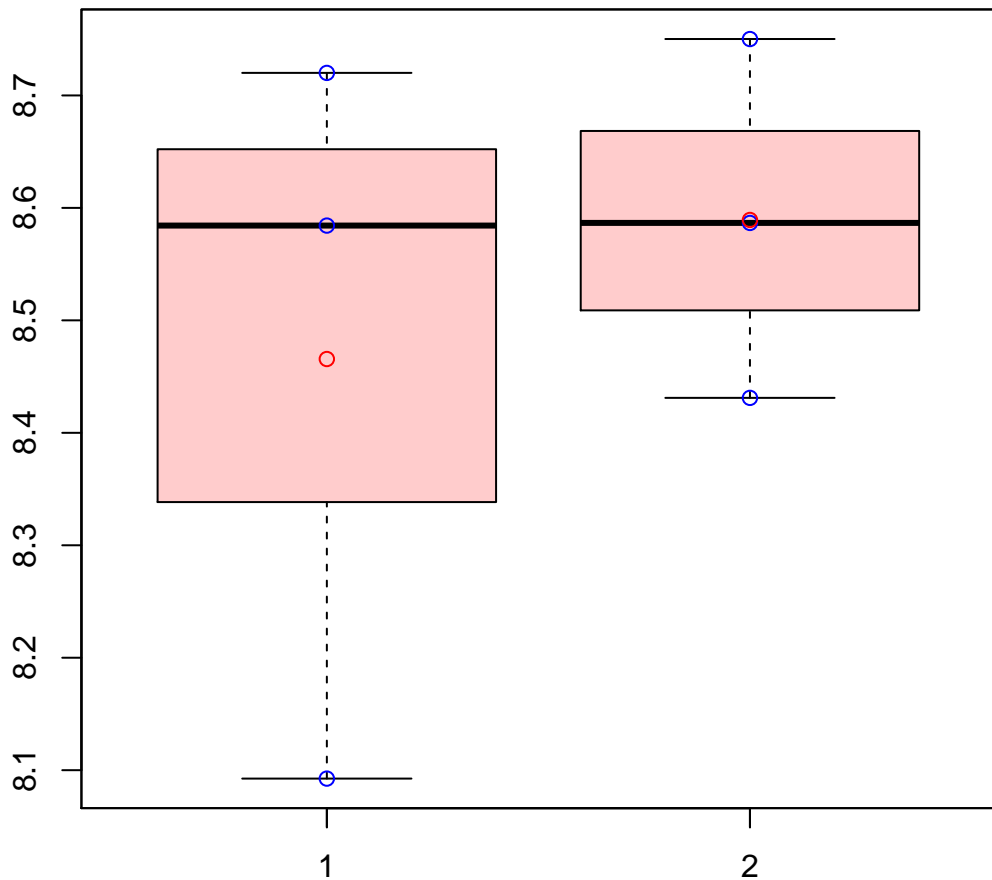

t-Test: p-value = 0.6

# CL3162Contig3|CL3162Contig3

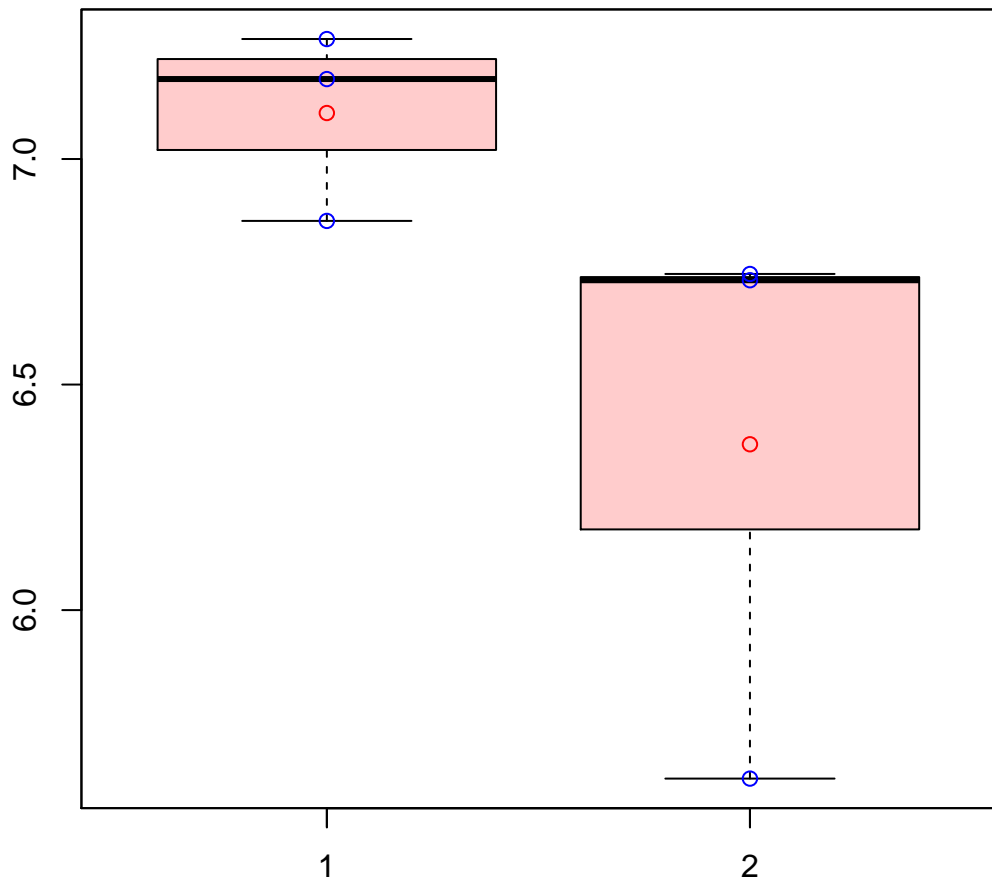

t-Test: p-value = 0.18



# CL3168Contig1|CL3168Contig1

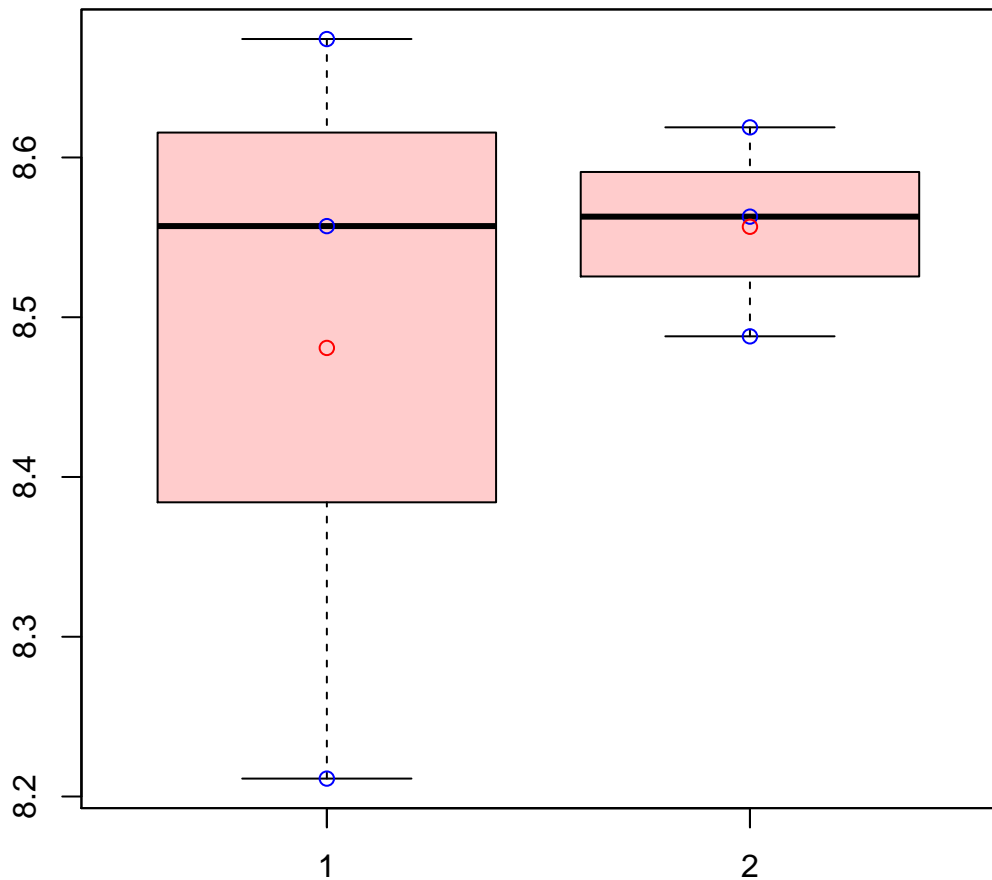

t-Test: p-value = 0.65

# CL3168Contig2|CL3168Contig2

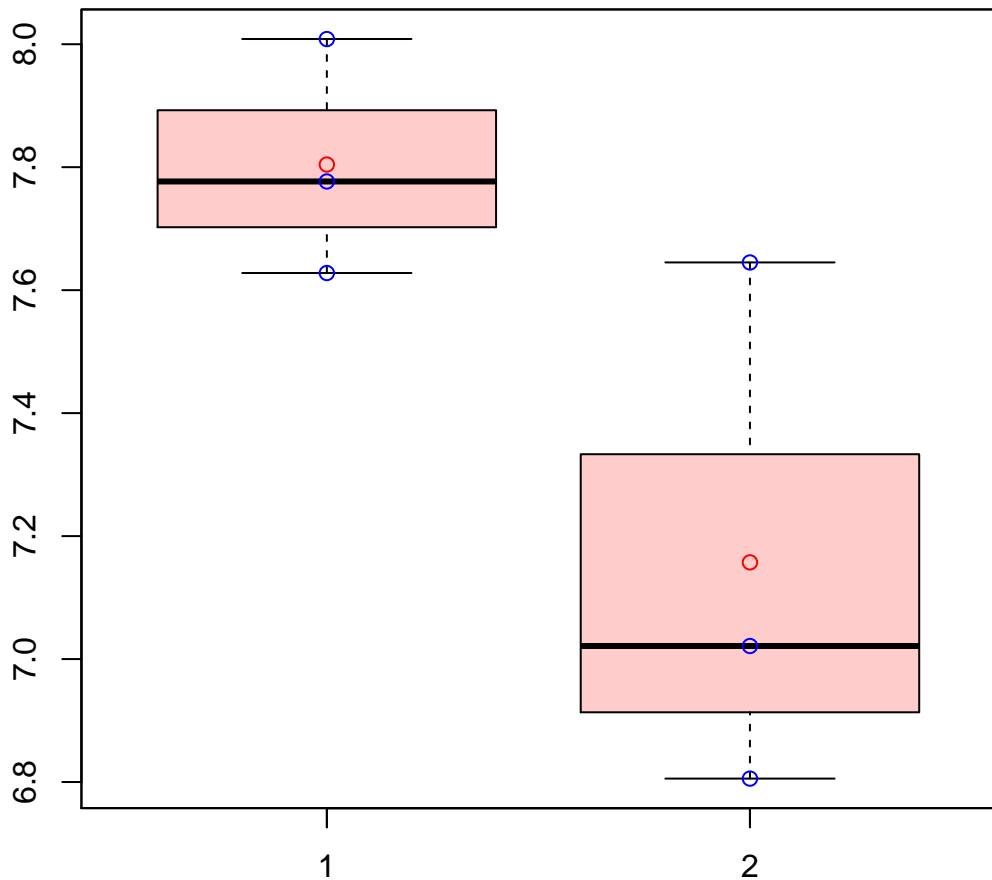

t-Test: p-value = 0.11

# CL316Contig2|CL316Contig2

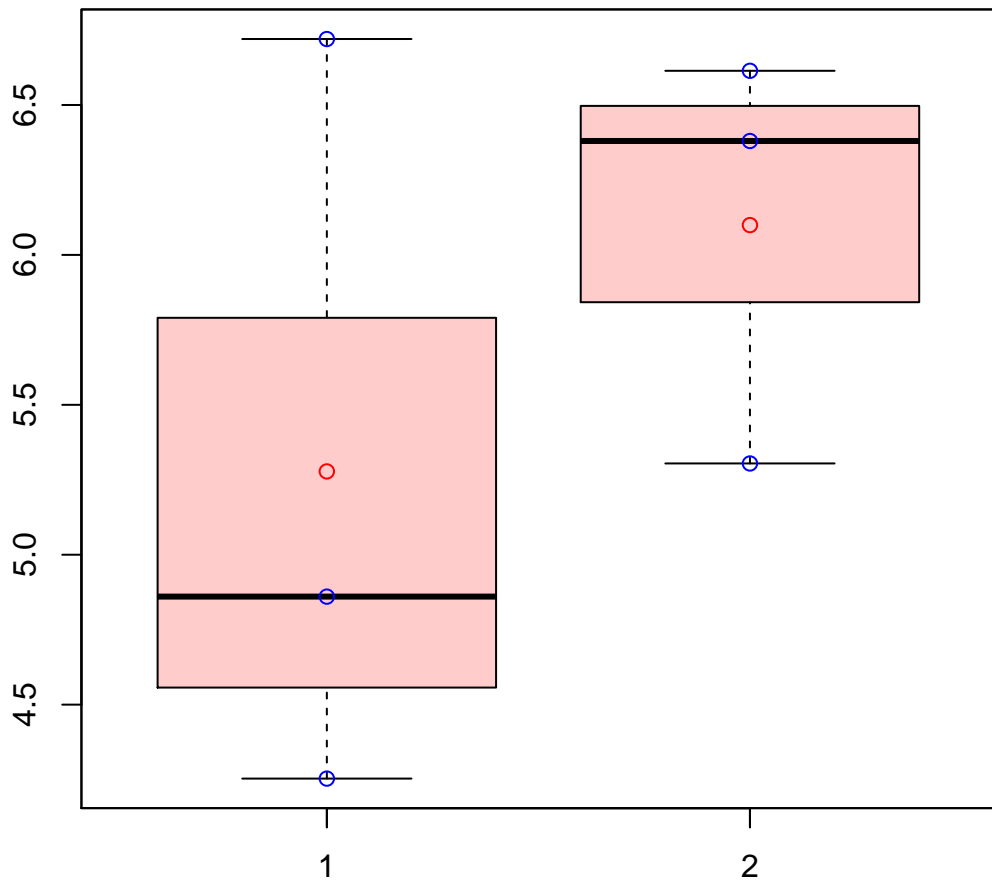

t-Test: p-value = 0.4

# CL316Contig3|CL316Contig3

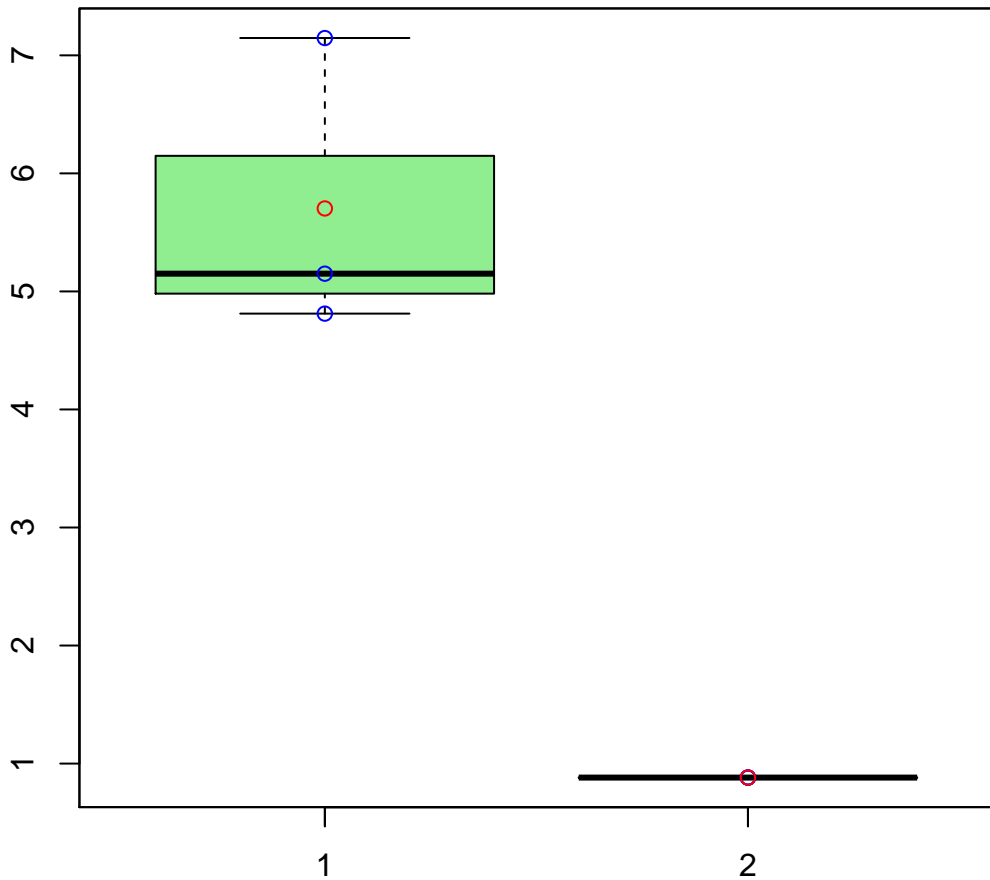

t-Test: p-value = 0.02

# CL317Contig14|CL317Contig14

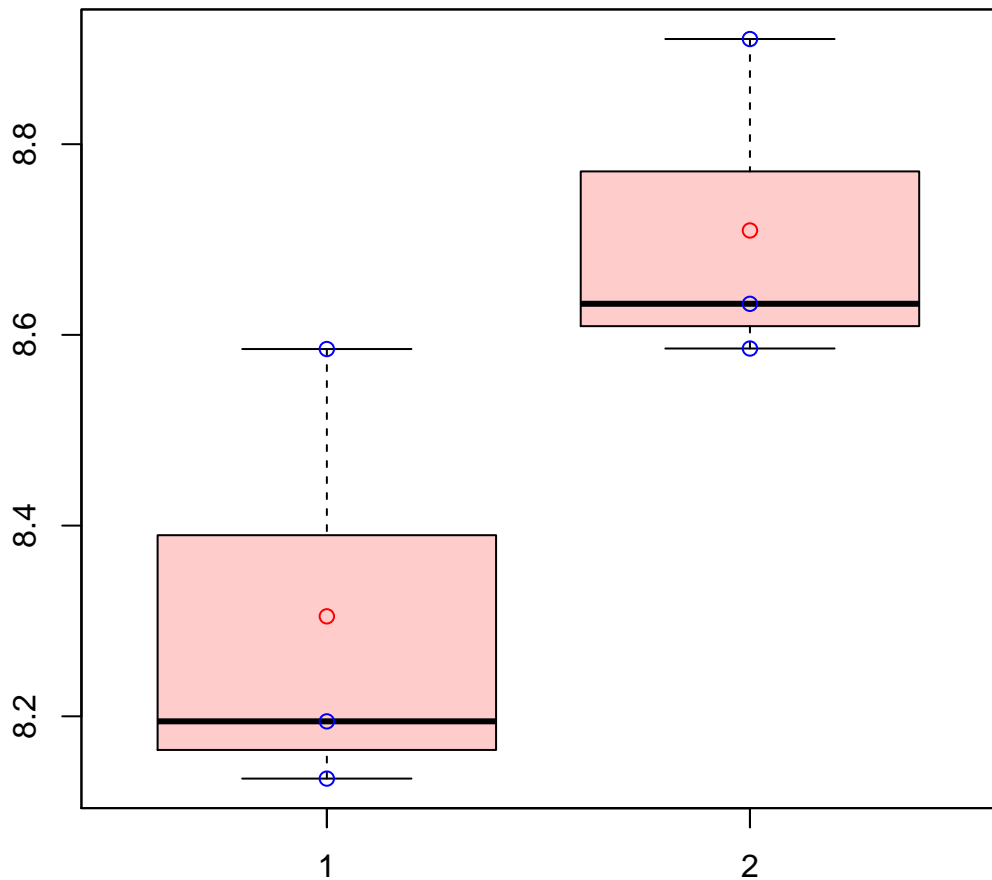

t-Test: p-value = 0.09

# CL319Contig2|CL319Contig2

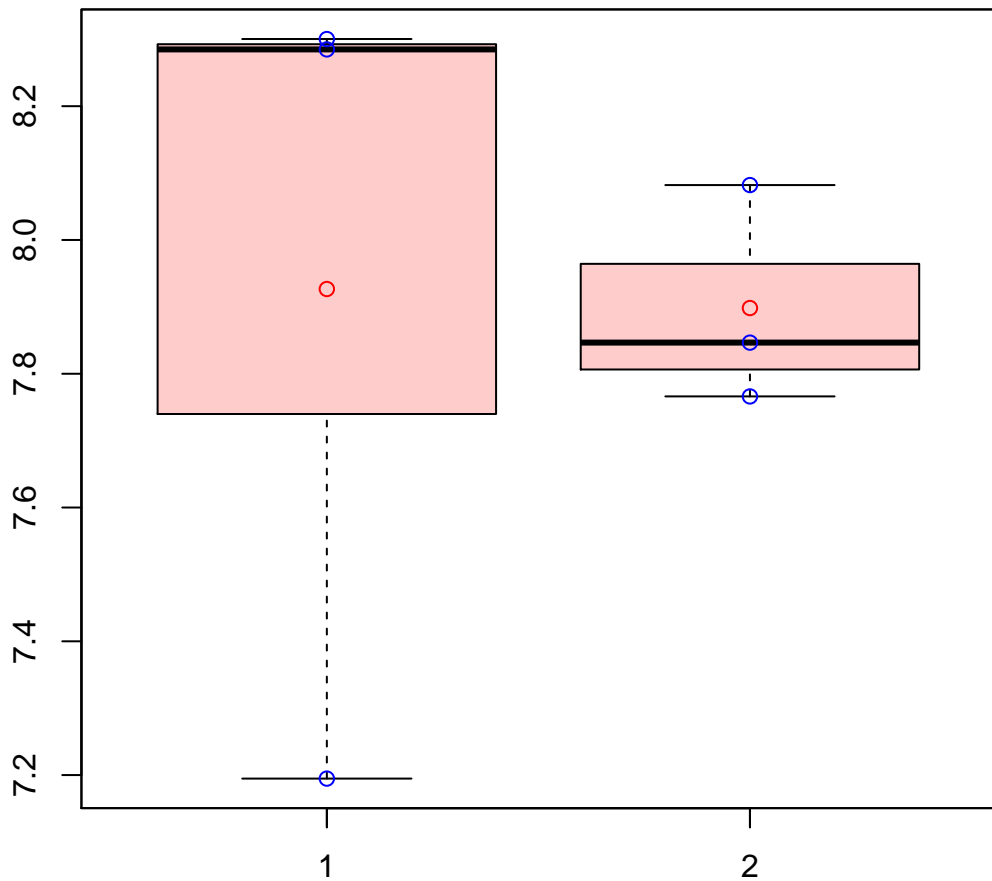

t-Test: p-value = 0.95

# CL3204Contig2|CL3204Contig2

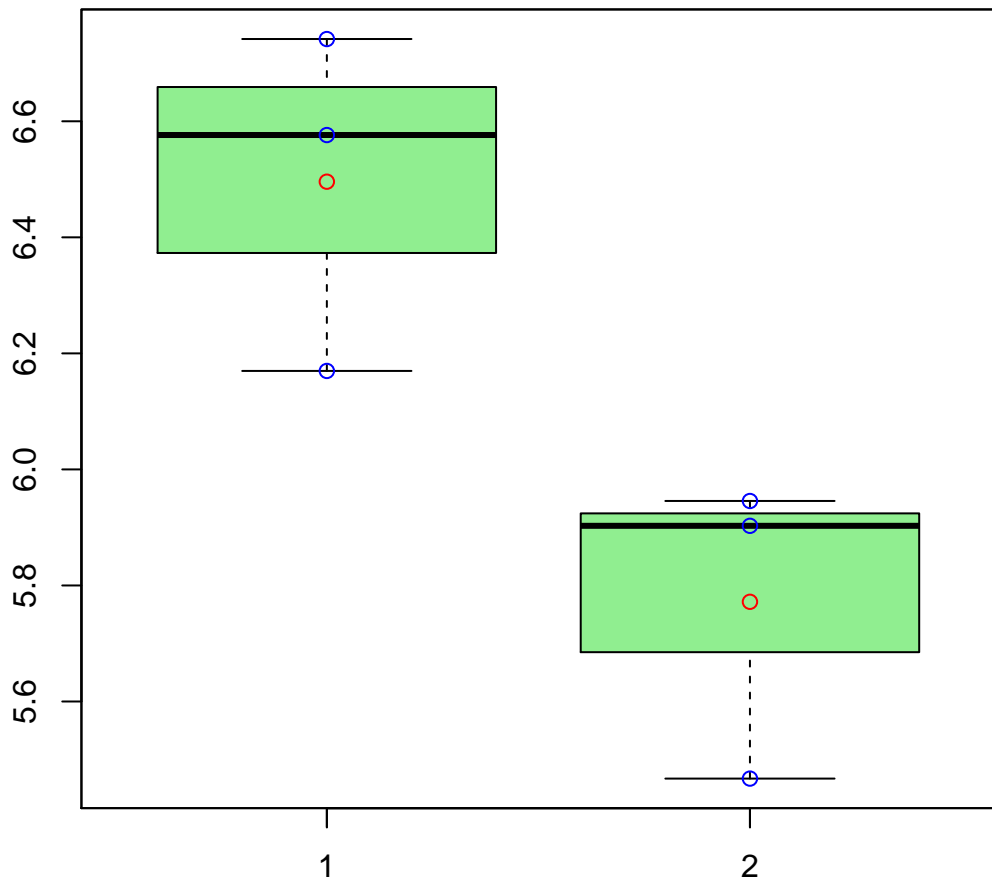

t-Test: p-value = 0.03

# CL320Contig1|CL320Contig1

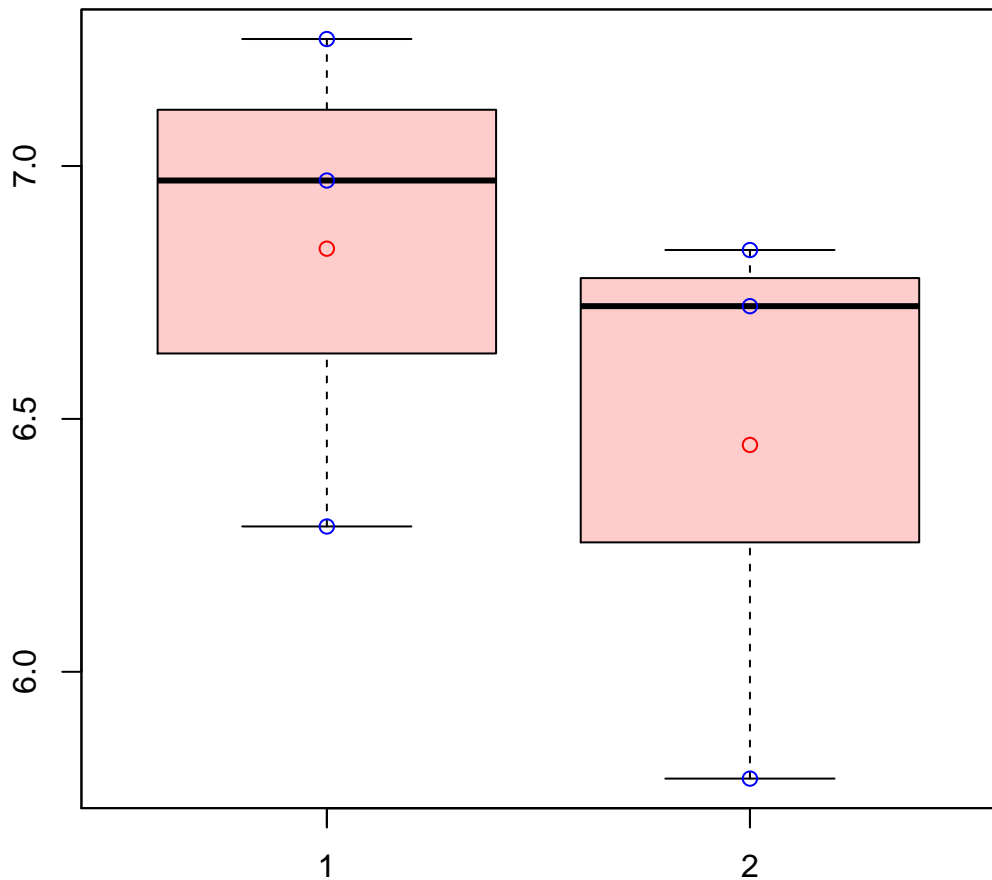

t-Test: p-value = 0.43



# CL320Contig3|CL320Contig3

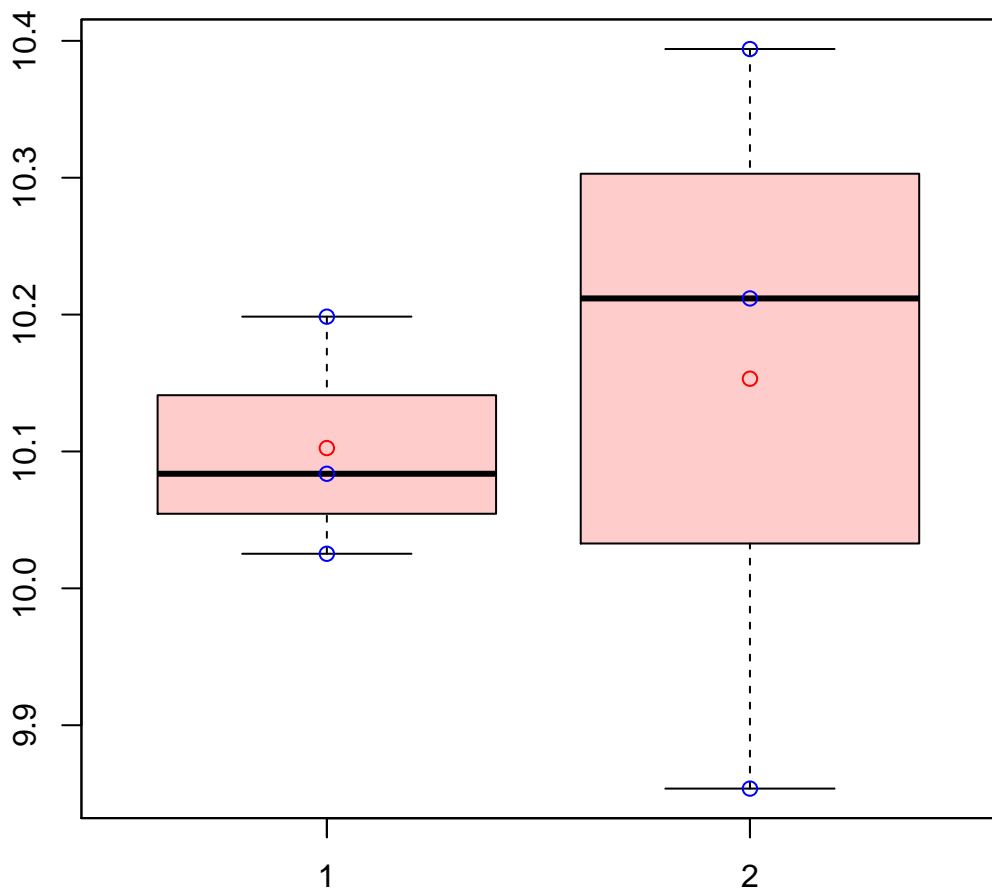

t-Test: p-value = 0.79

# CL3217Contig1|CL3217Contig1

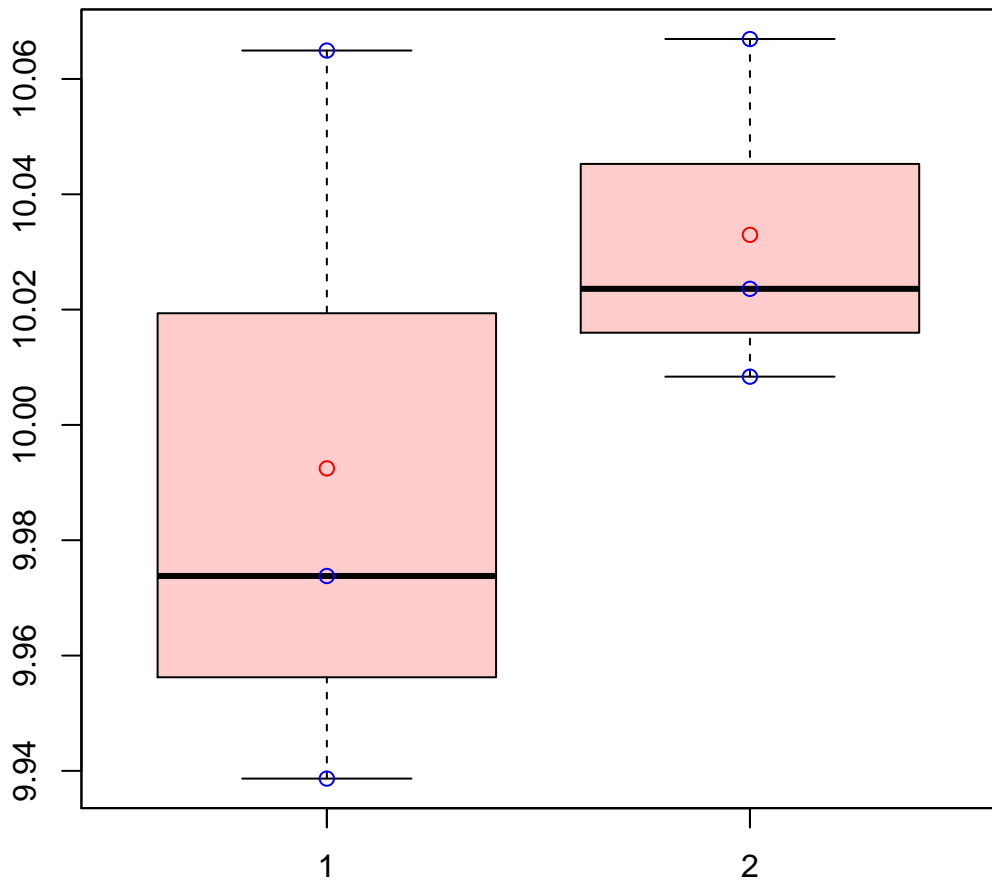

t-Test: p-value = 0.41

# CL321Contig12|CL321Contig12

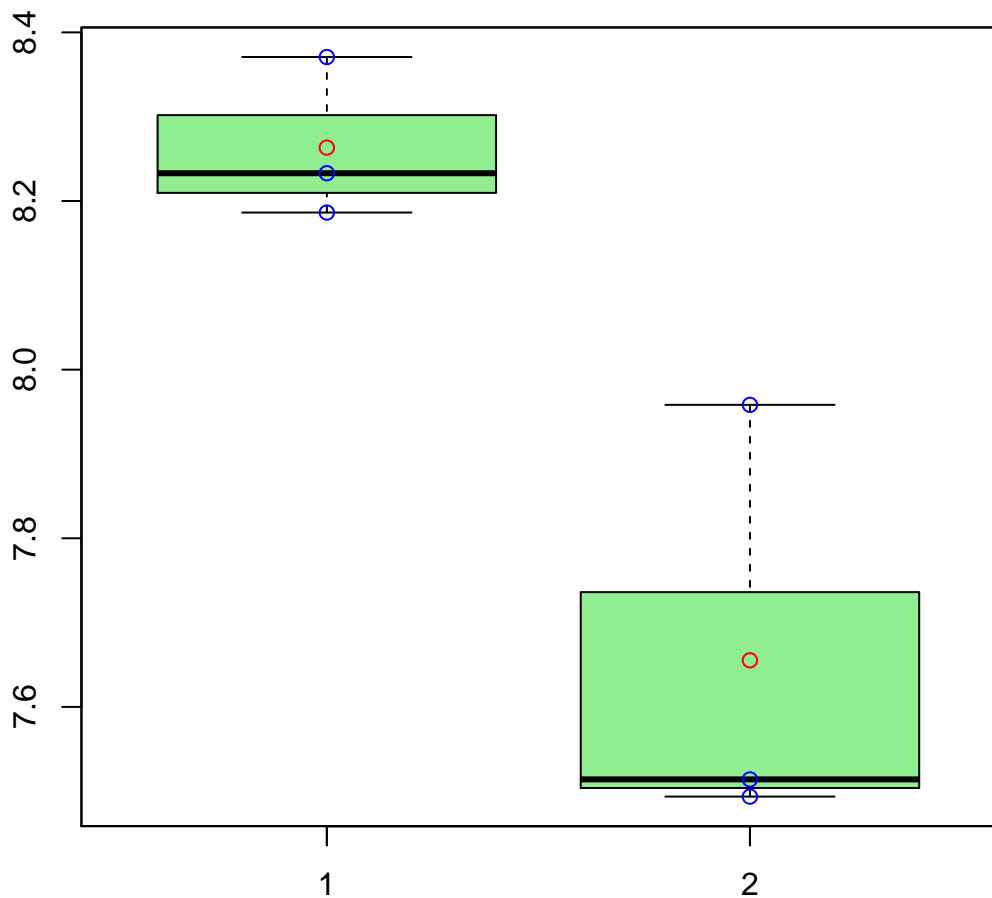

t-Test: p-value = 0.04

# CL321Contig14|CL321Contig14

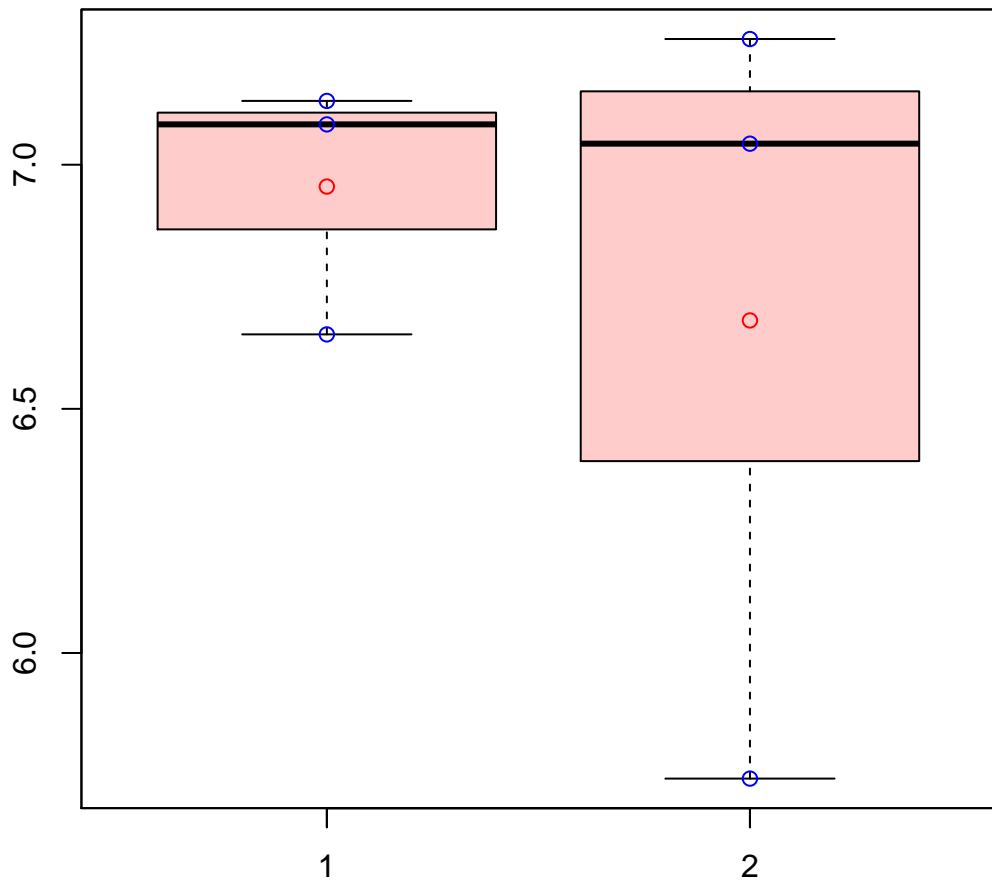

t-Test: p-value = 0.63

# CL322Contig2|CL322Contig2

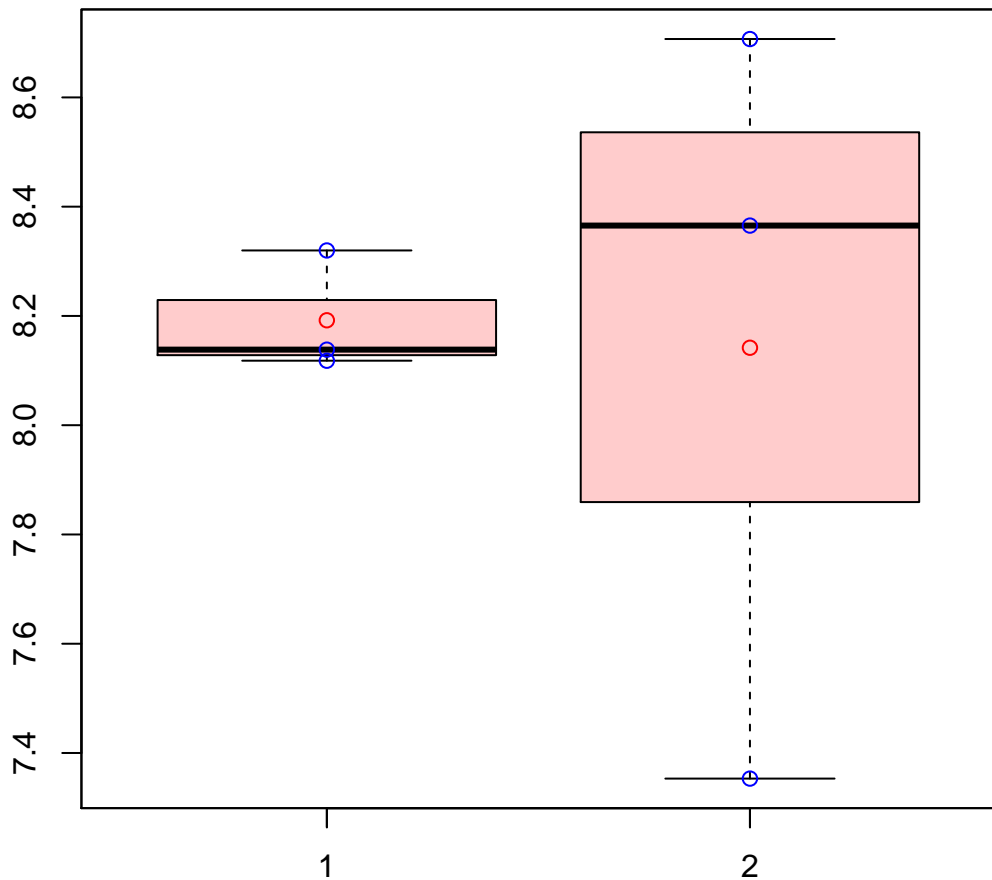

t-Test: p-value = 0.91

# CL3231Contig2|CL3231Contig2

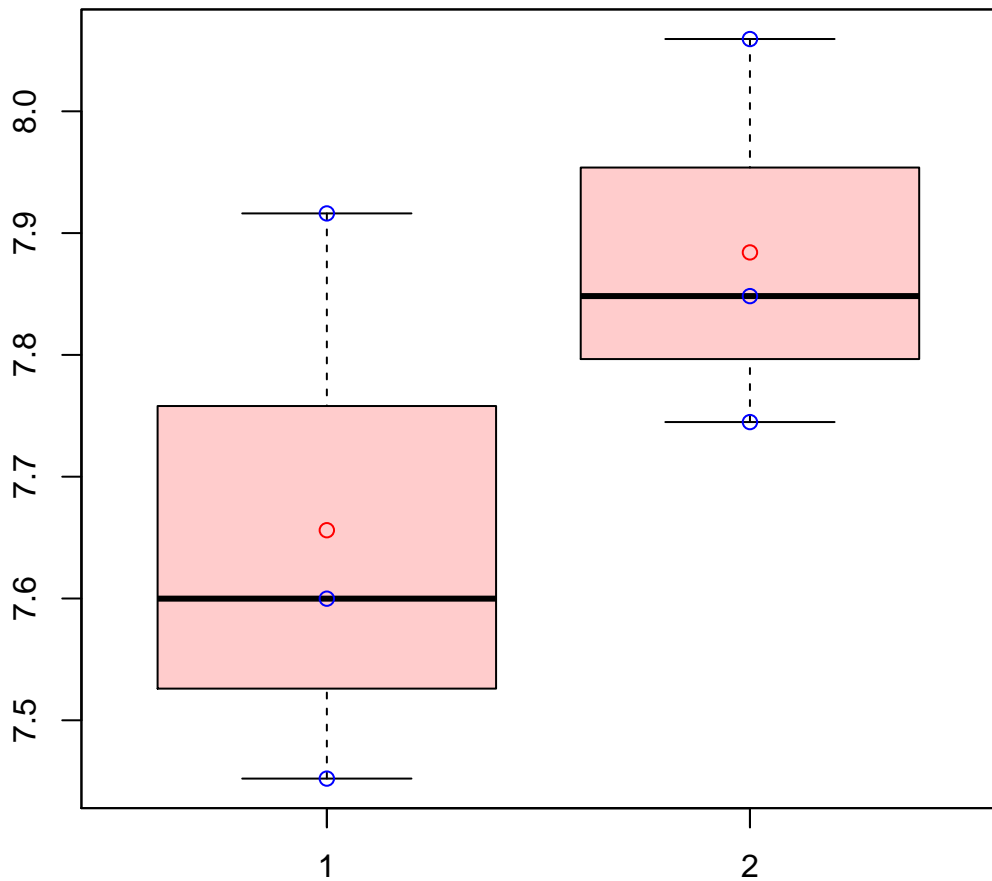

t-Test: p-value = 0.25

# CL3239Contig2|CL3239Contig2

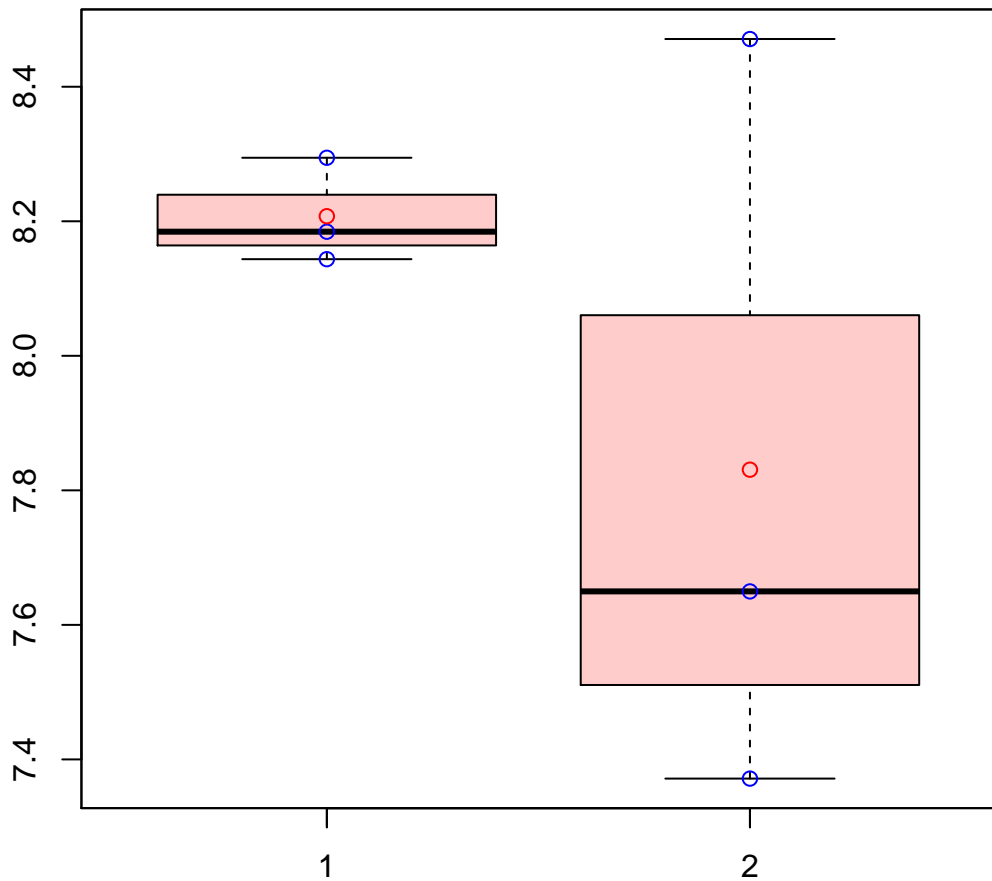

t-Test: p-value = 0.37

# CL323Contig2|CL323Contig2

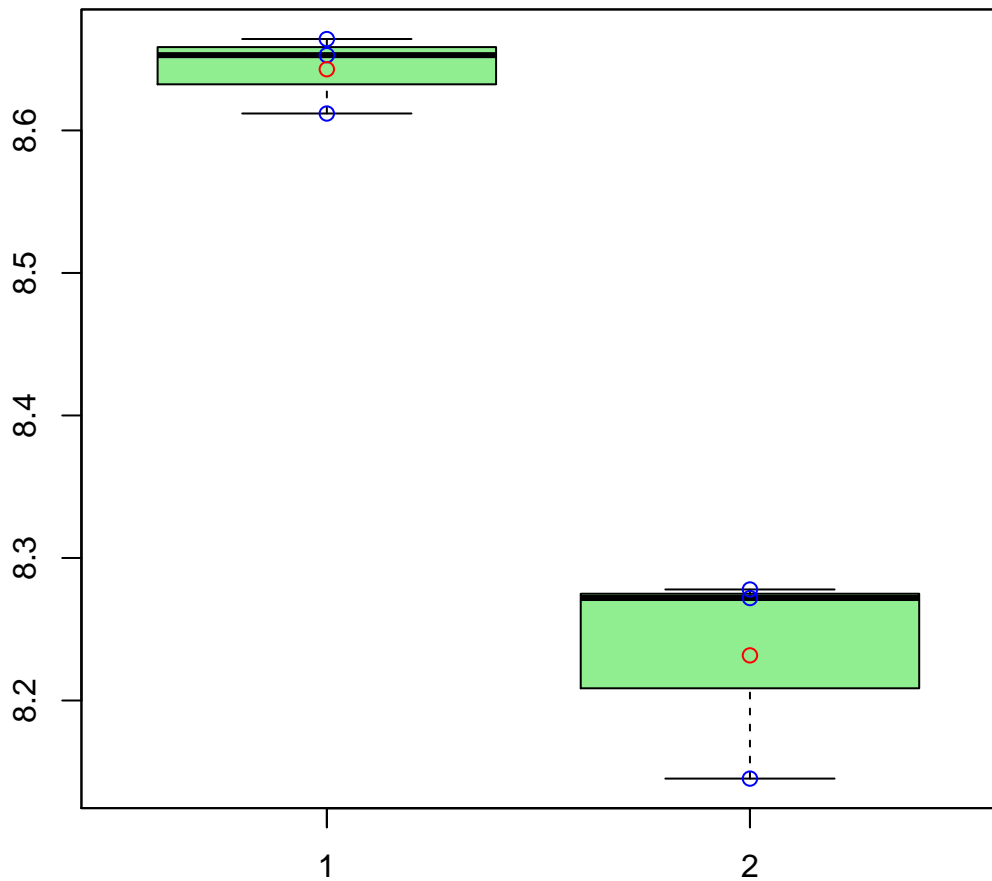

t-Test: p-value = 0.01



# CL3249Contig1|CL3249Contig1

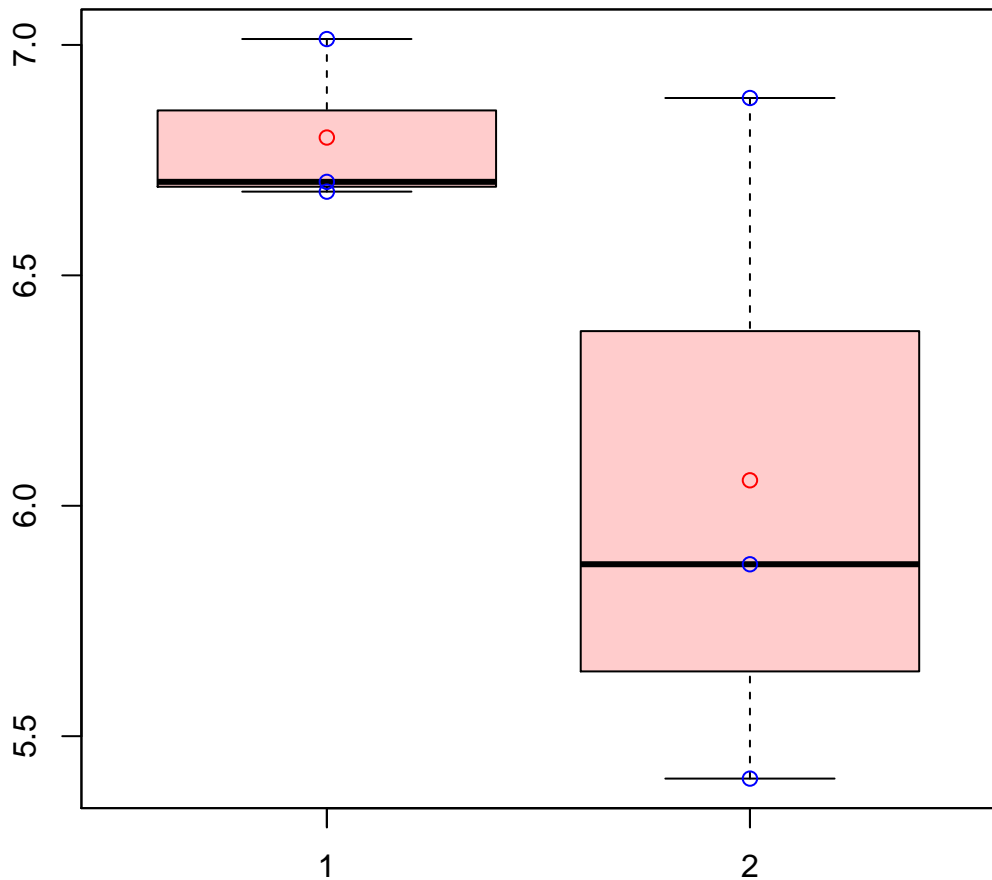

t-Test: p-value = 0.23

# CL3251Contig2|CL3251Contig2

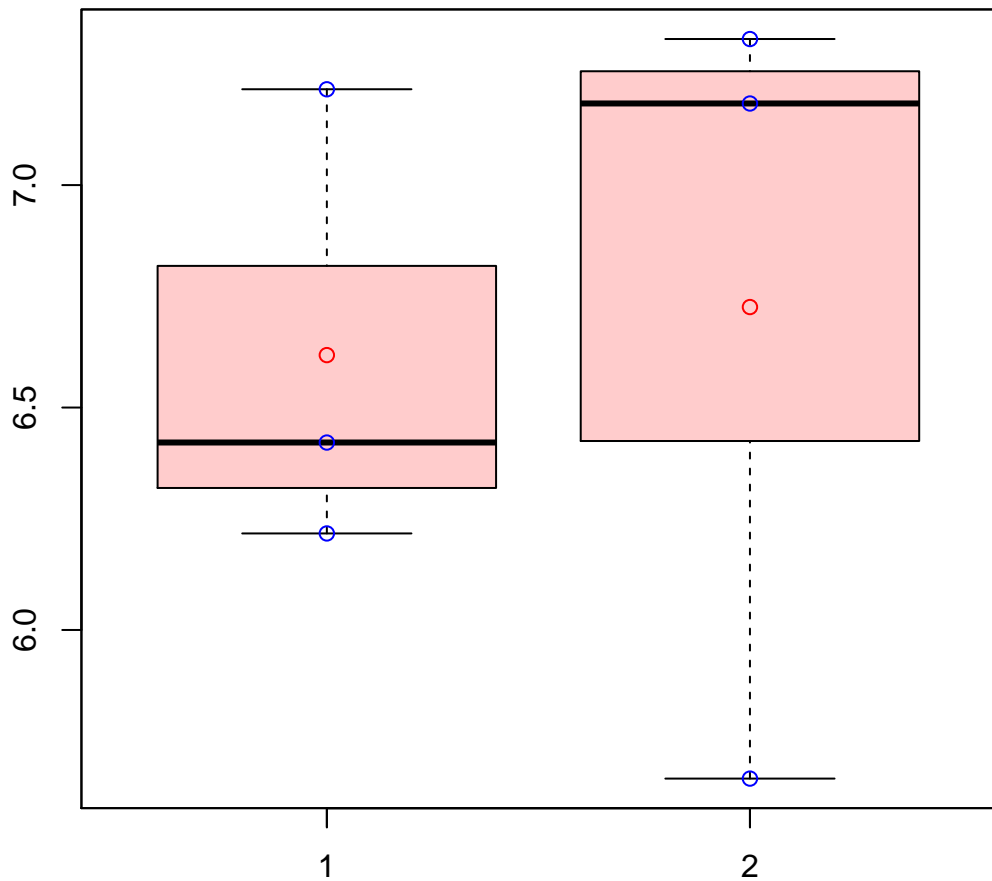

t-Test: p-value = 0.87

# CL325Contig1|CL325Contig1

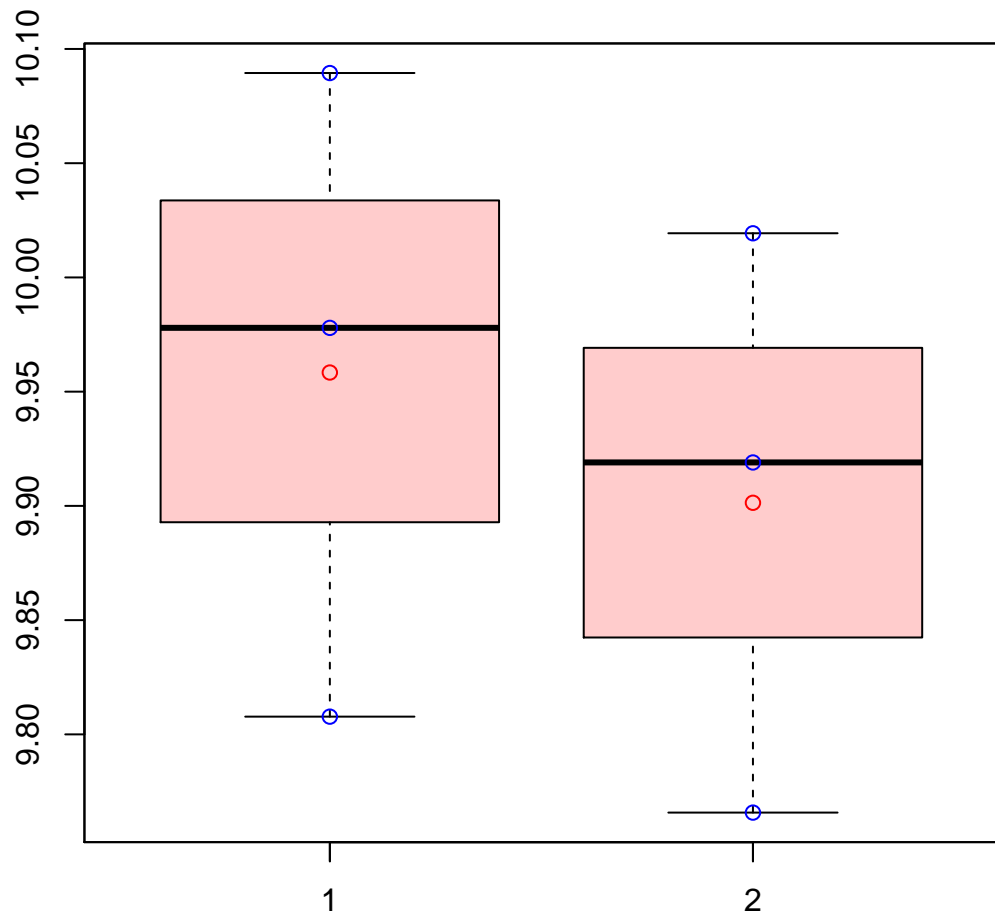

t-Test: p-value = 0.63

# CL3269Contig3|CL3269Contig3

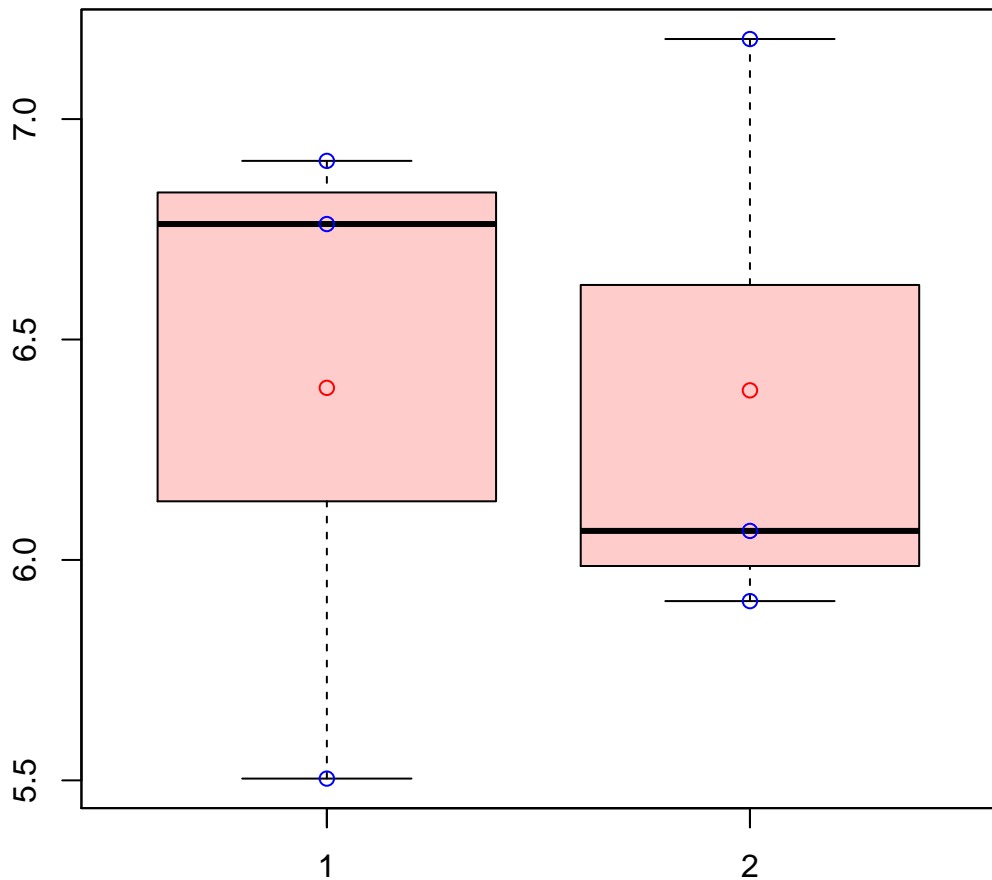

t-Test: p-value = 0.99

# CL326Contig2|CL326Contig2

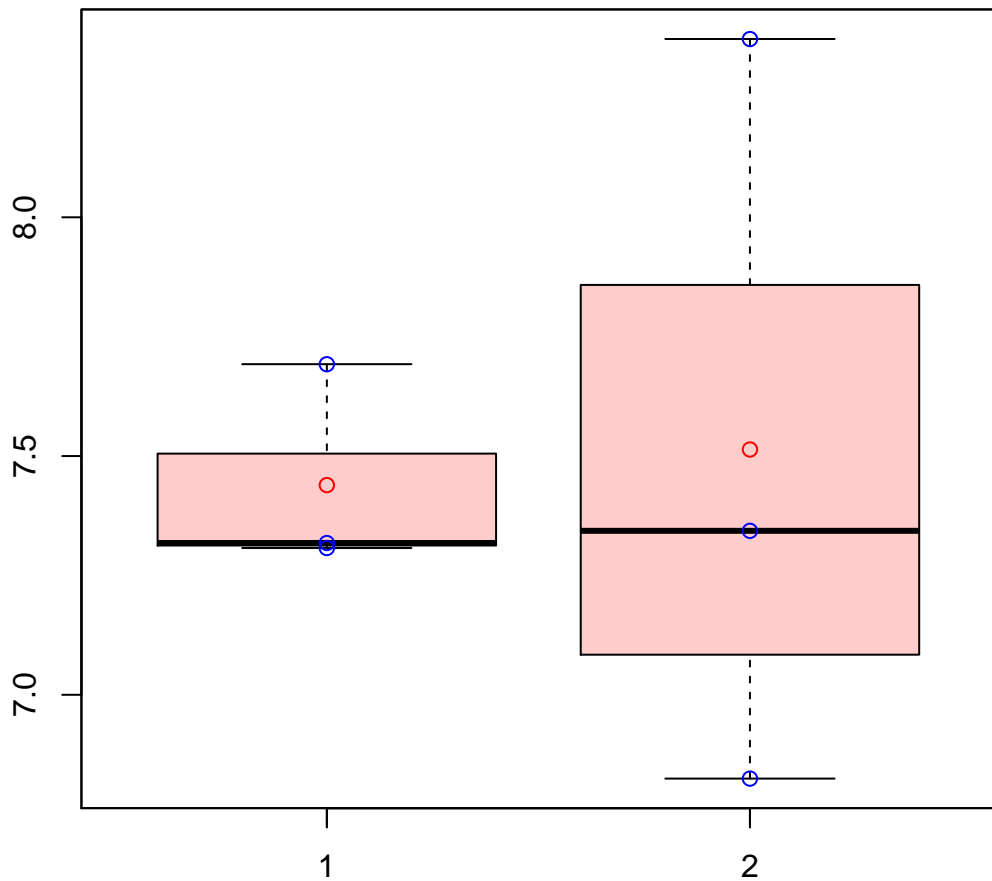

t-Test: p-value = 0.89

# CL3278Contig2|CL3278Contig2

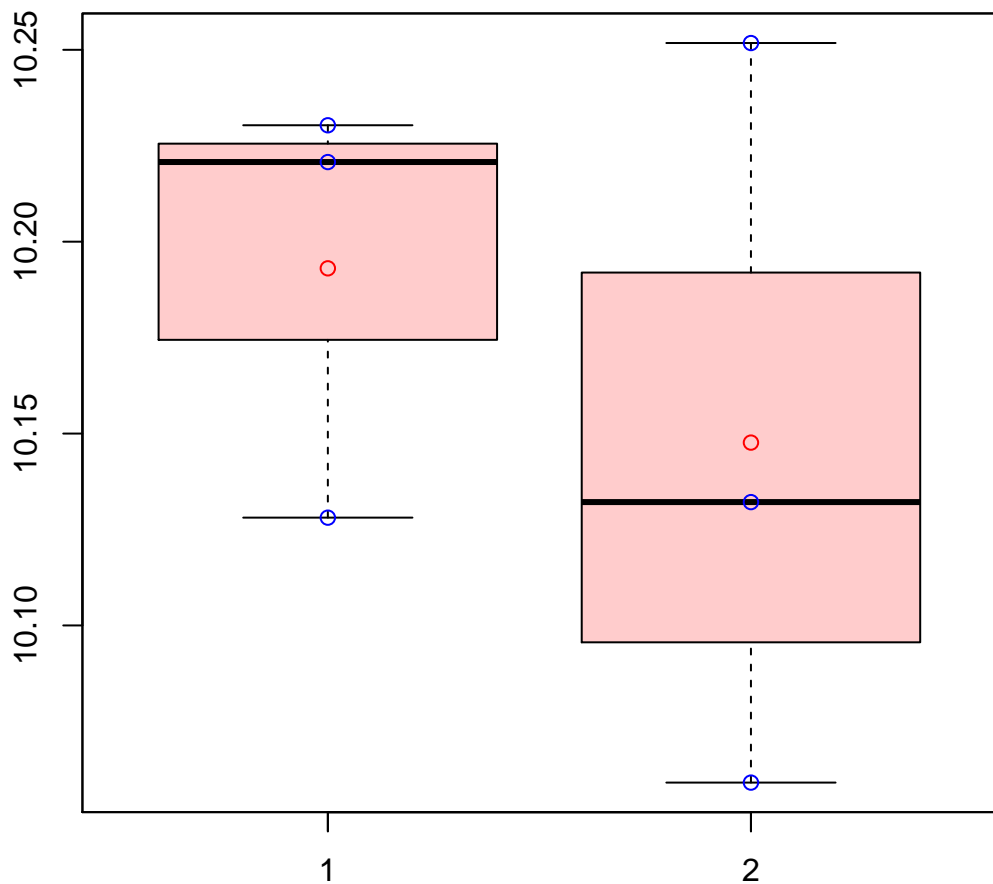

t-Test: p-value = 0.53

# CL3287Contig1|CL3287Contig1

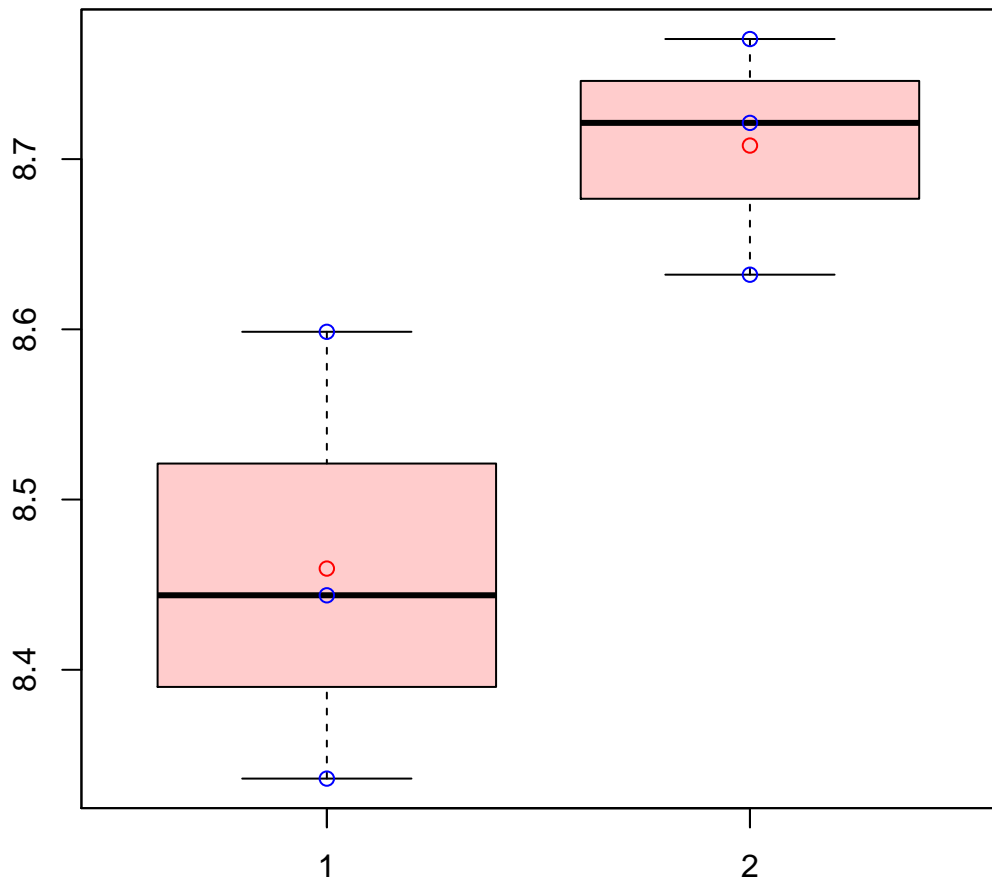

t-Test: p-value = 0.06

# CL328Contig6|CL328Contig6

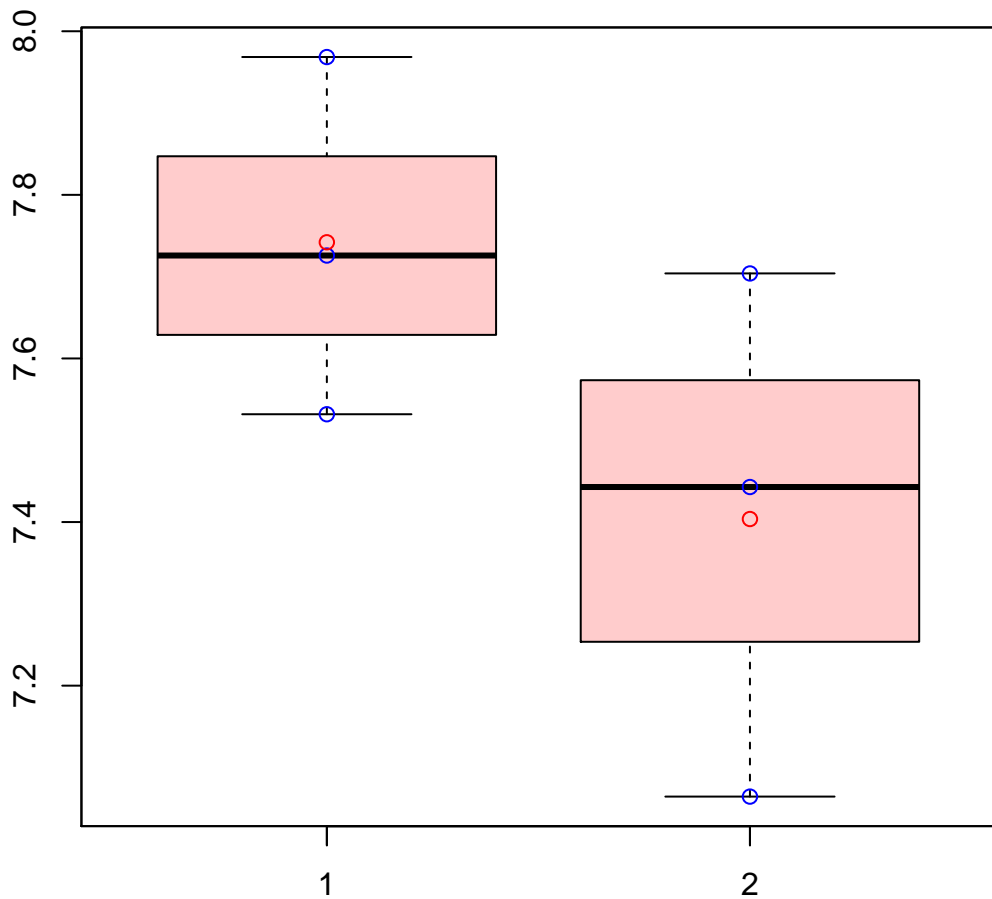

t-Test: p-value = 0.22



# CL3290Contig3|CL3290Contig3

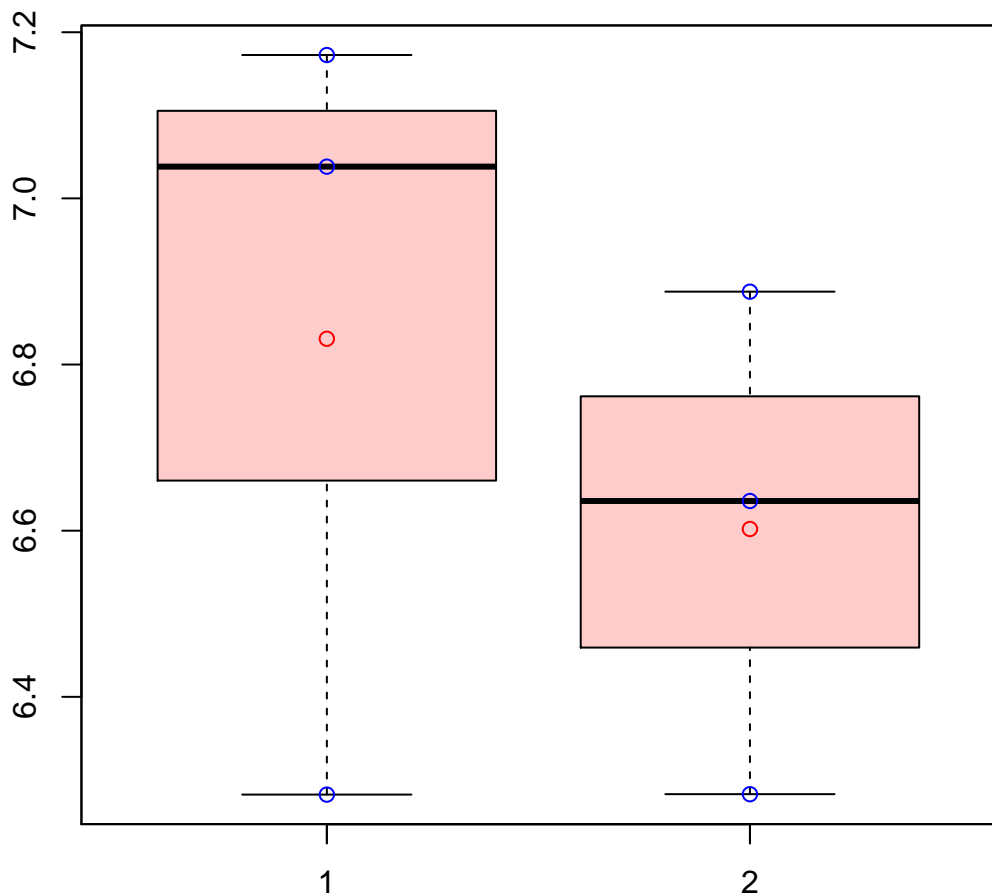

t-Test: p-value = 0.53

# CL3294Contig6|CL3294Contig6

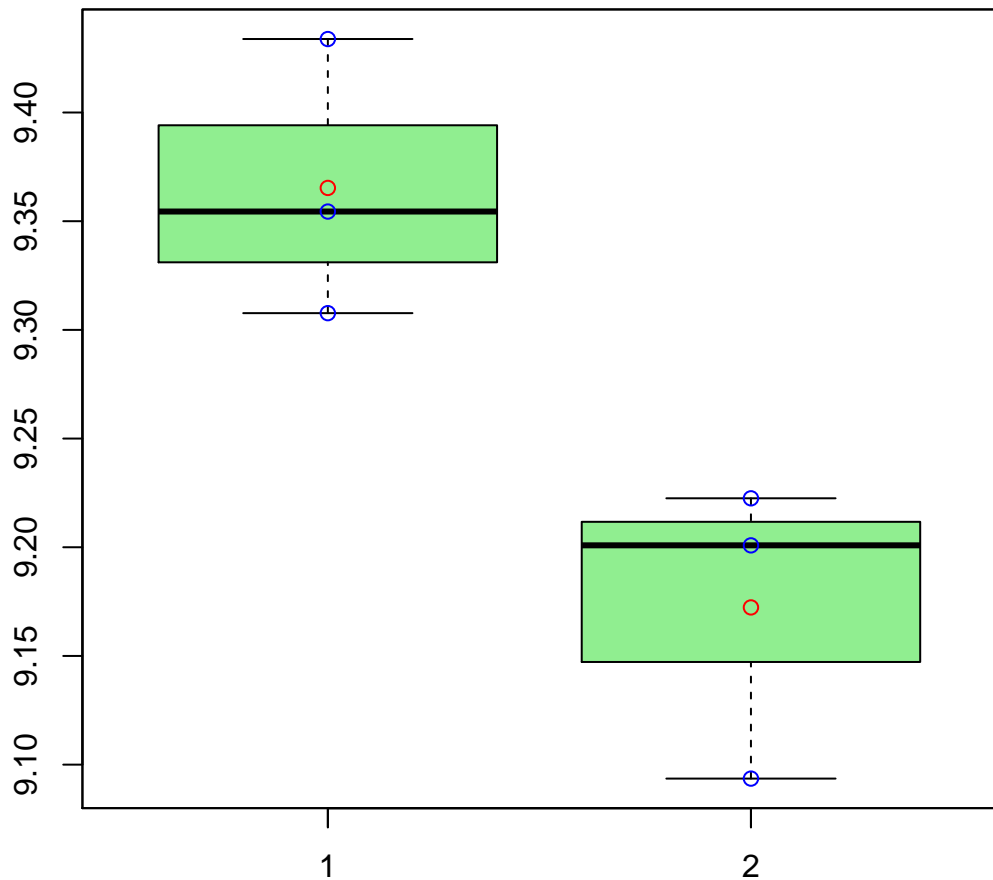

t-Test: p-value = 0.02

# CL3296Contig1|CL3296Contig1

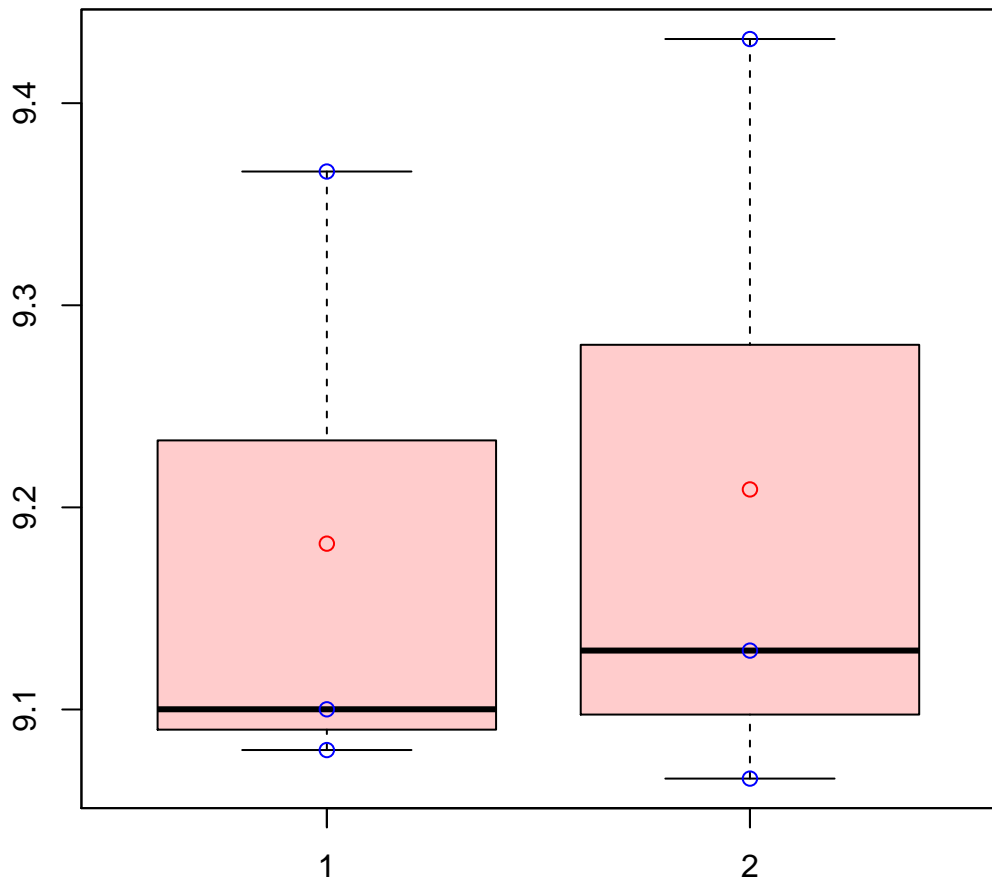

t-Test: p-value = 0.86

# CL3297Contig4|CL3297Contig4

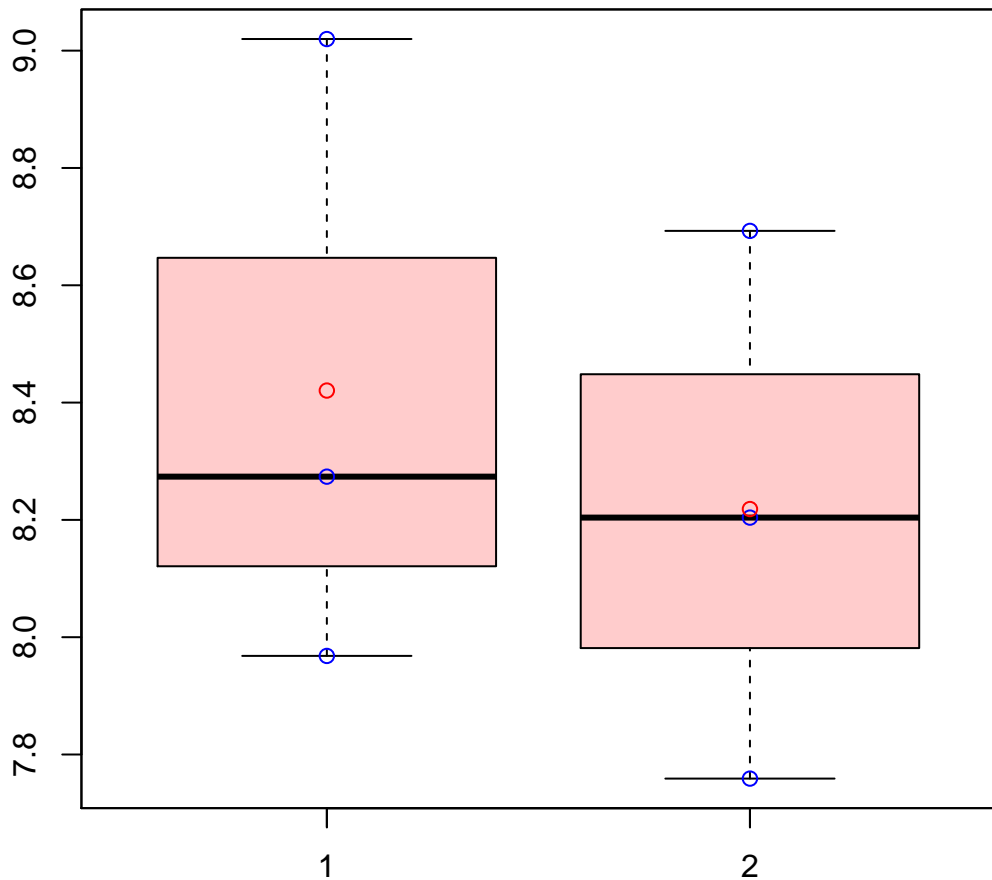

t-Test: p-value = 0.65

# CL32Contig12|CL32Contig12

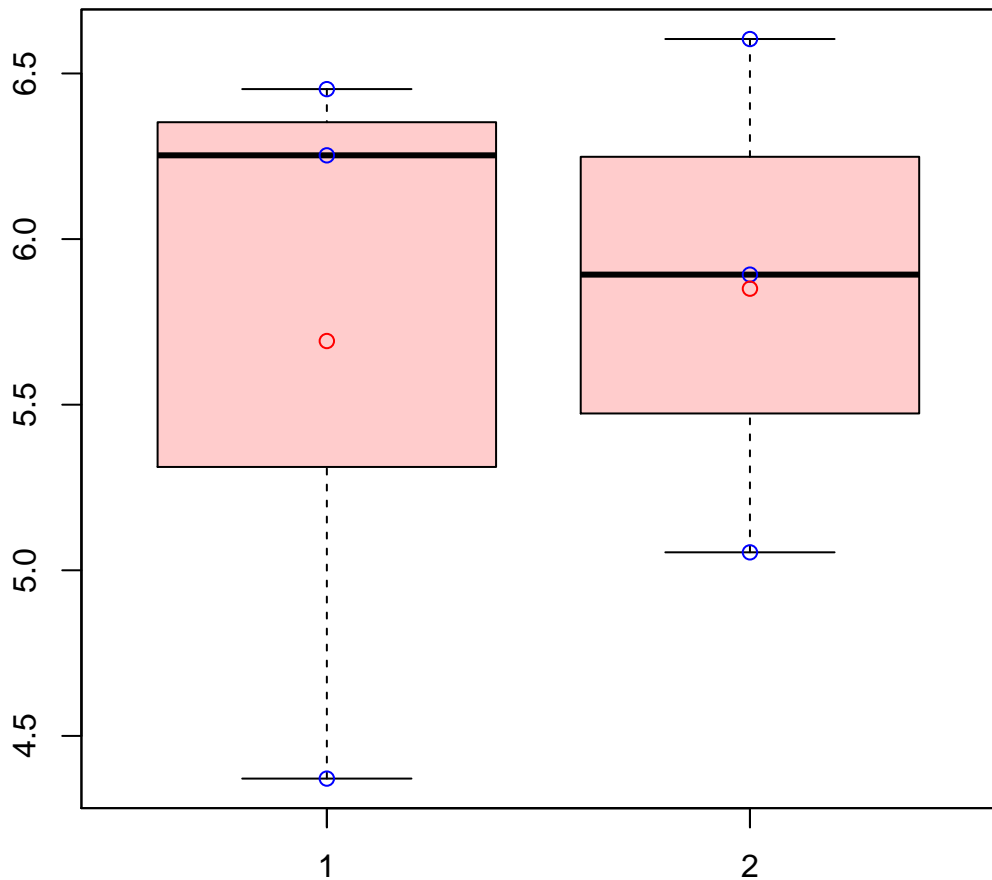

t-Test: p-value = 0.85

# CL32Contig17|CL32Contig17

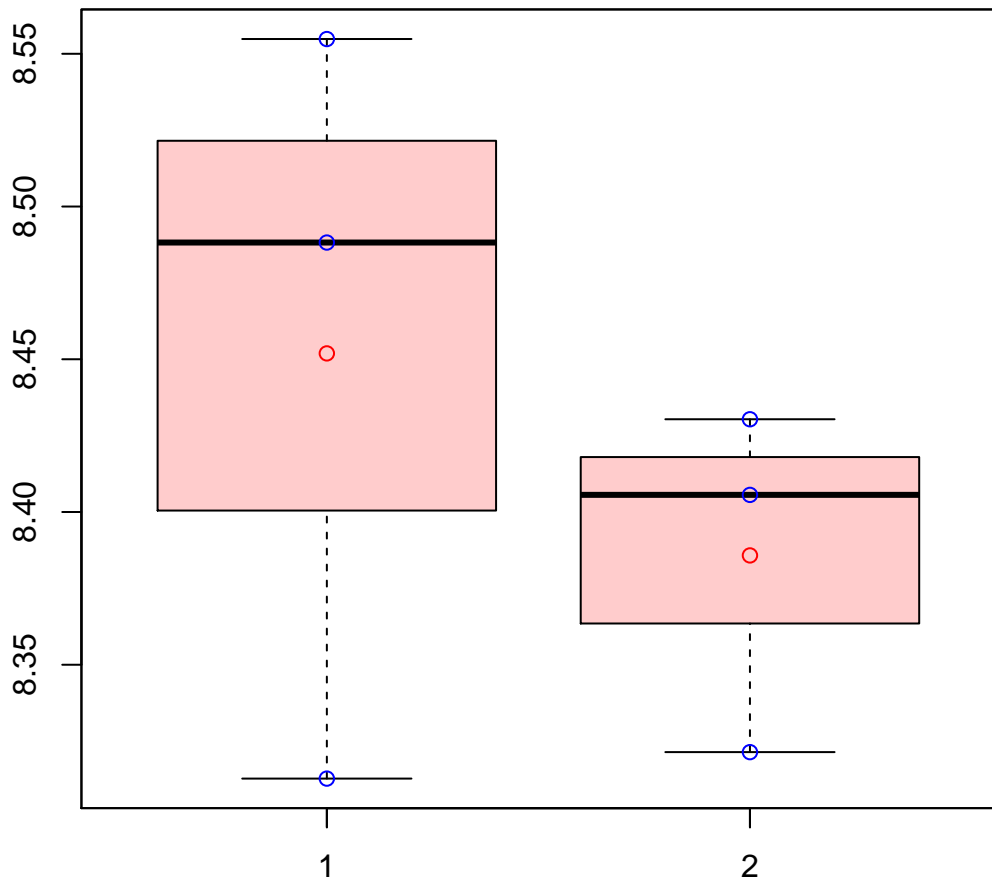

t-Test: p-value = 0.47

# CL32Contig1|CL32Contig1

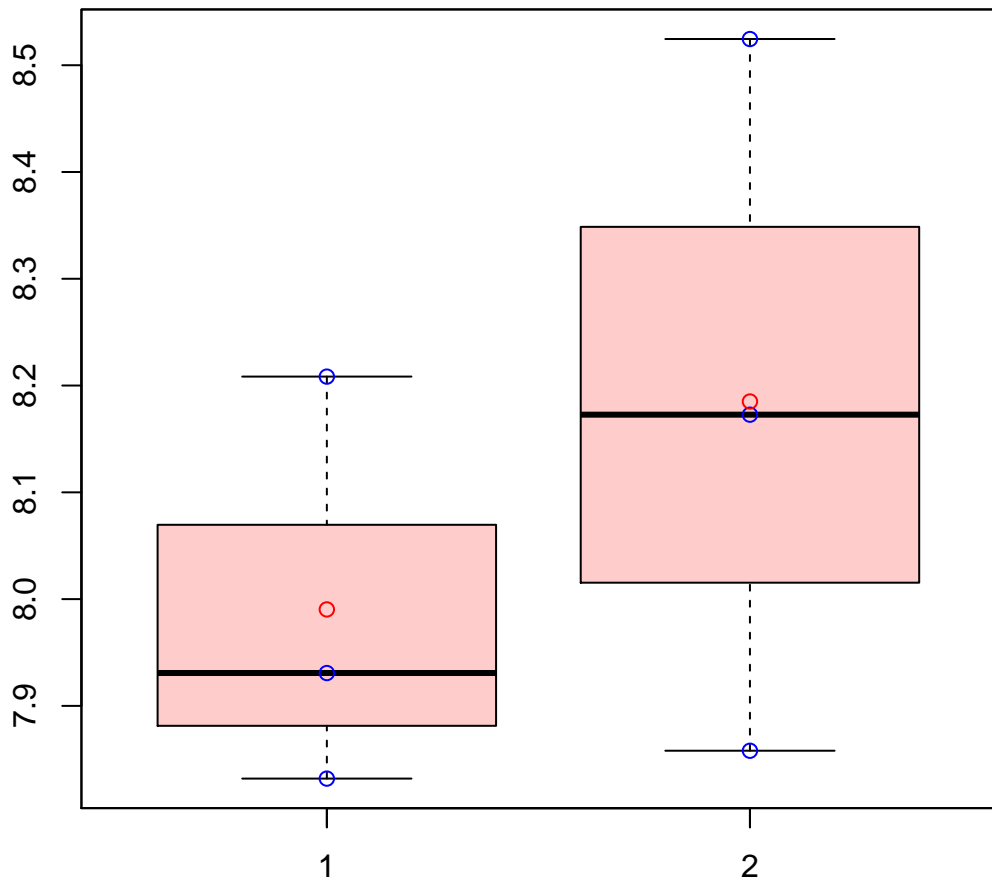

t-Test: p-value = 0.44

# CL32Contig4|CL32Contig4

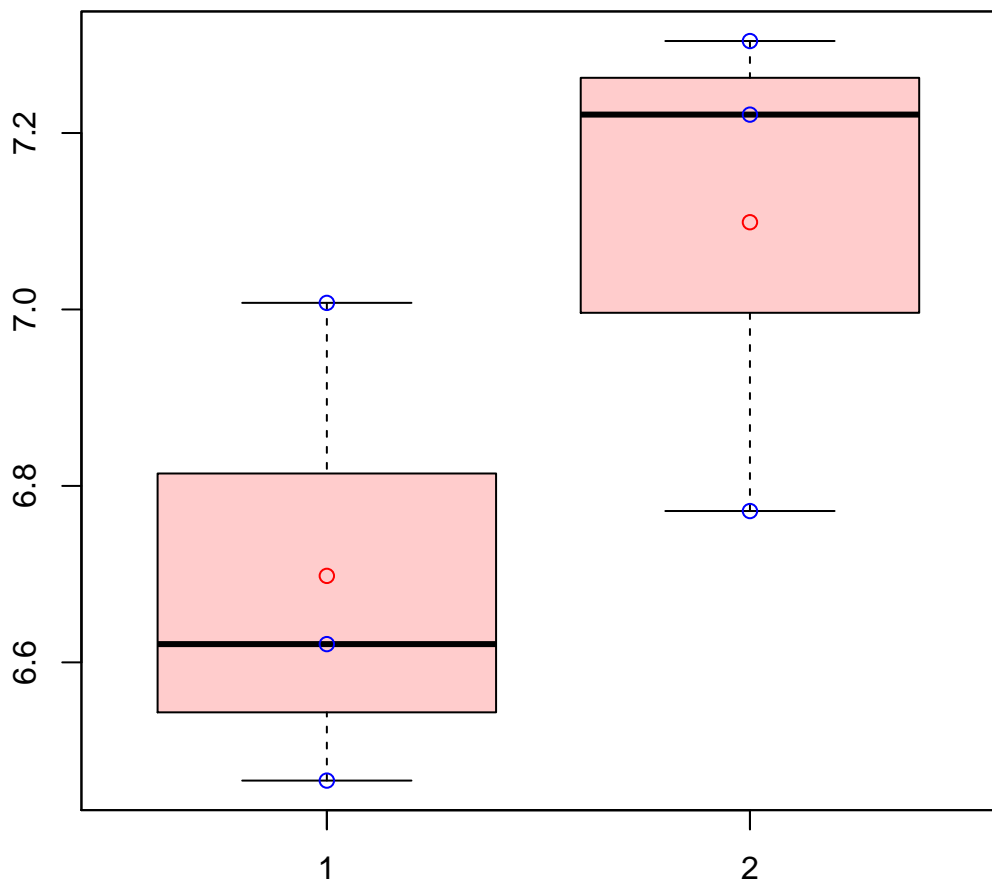

t-Test: p-value = 0.16



# CL32Contig8|CL32Contig8

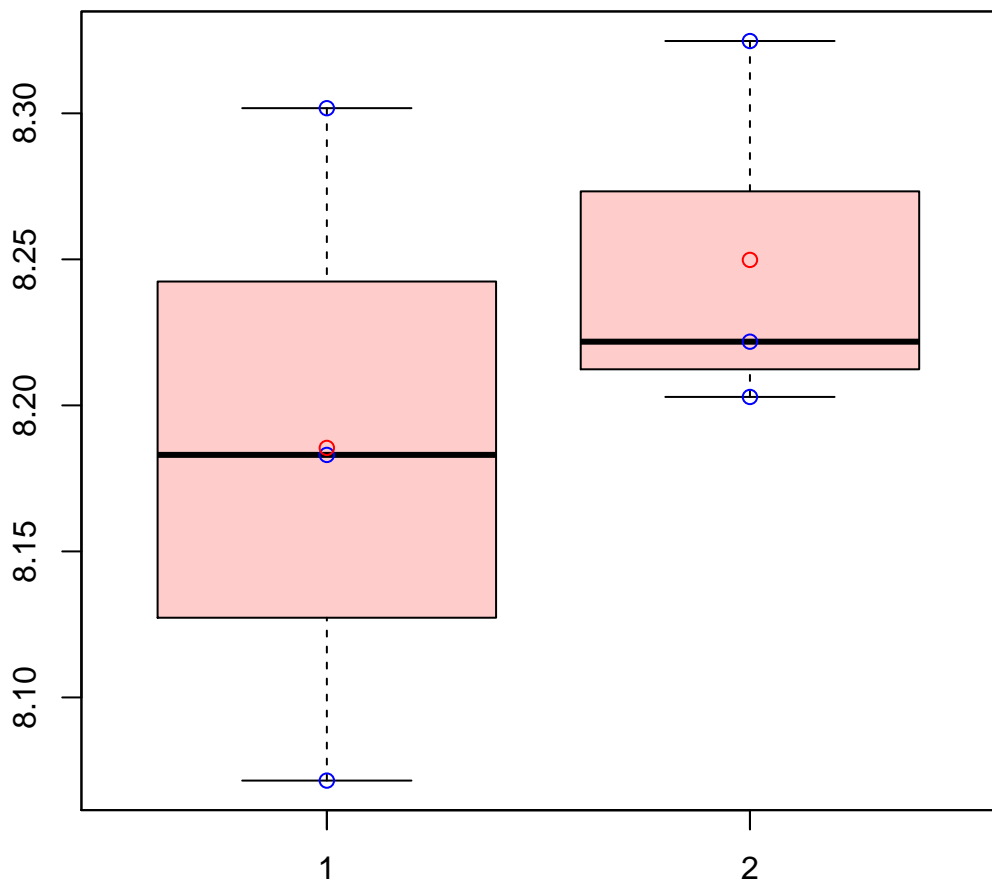

t-Test: p-value = 0.46

# CL3302Contig2|CL3302Contig2

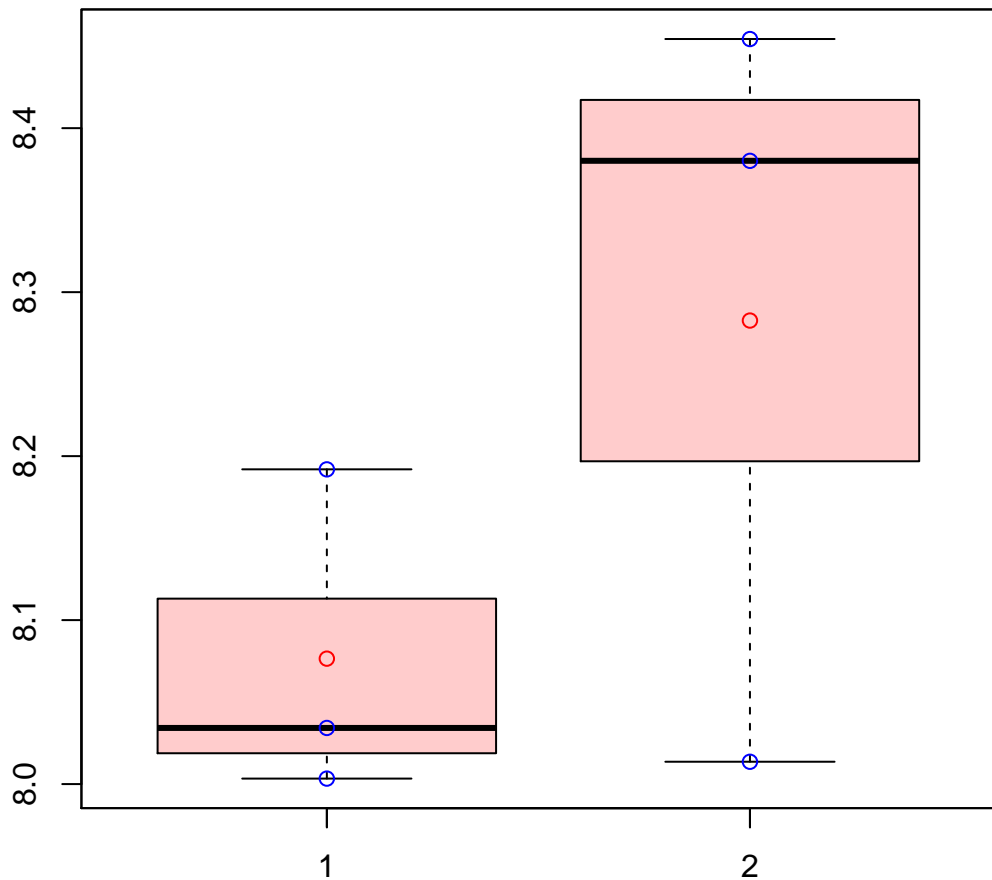

t-Test: p-value = 0.27

# CL3306Contig1|CL3306Contig1

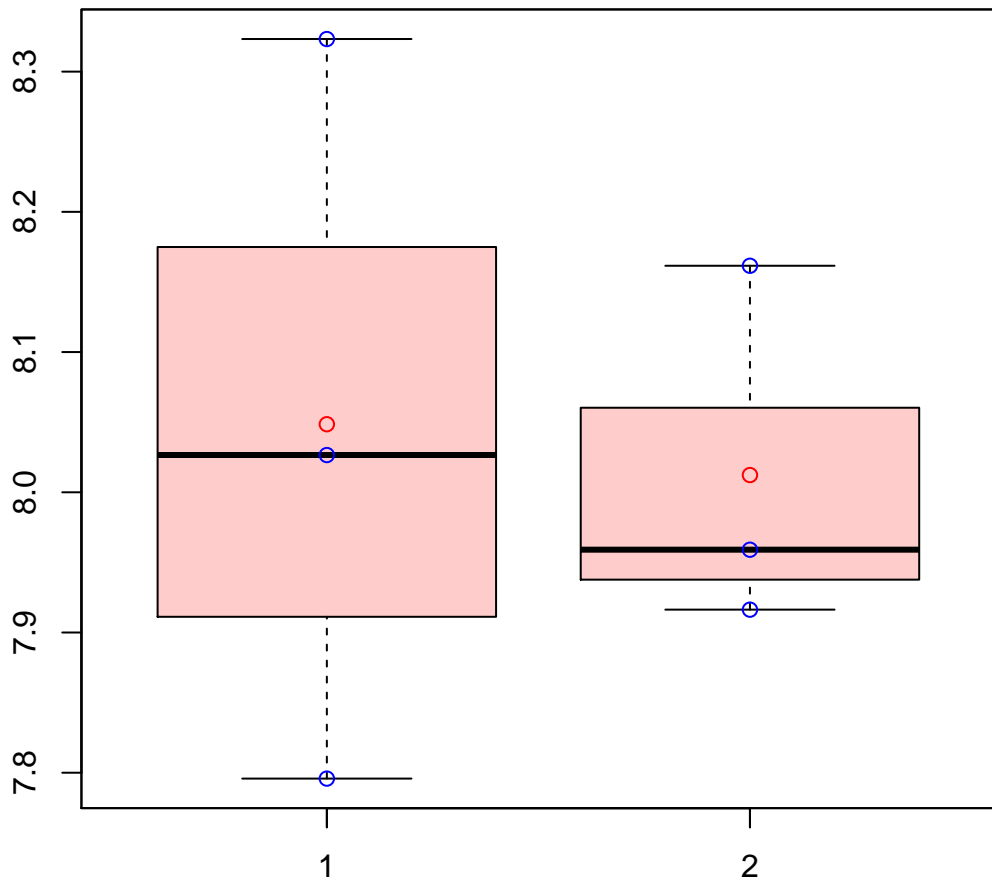

t-Test: p-value = 0.85

# CL3306Contig2|CL3306Contig2

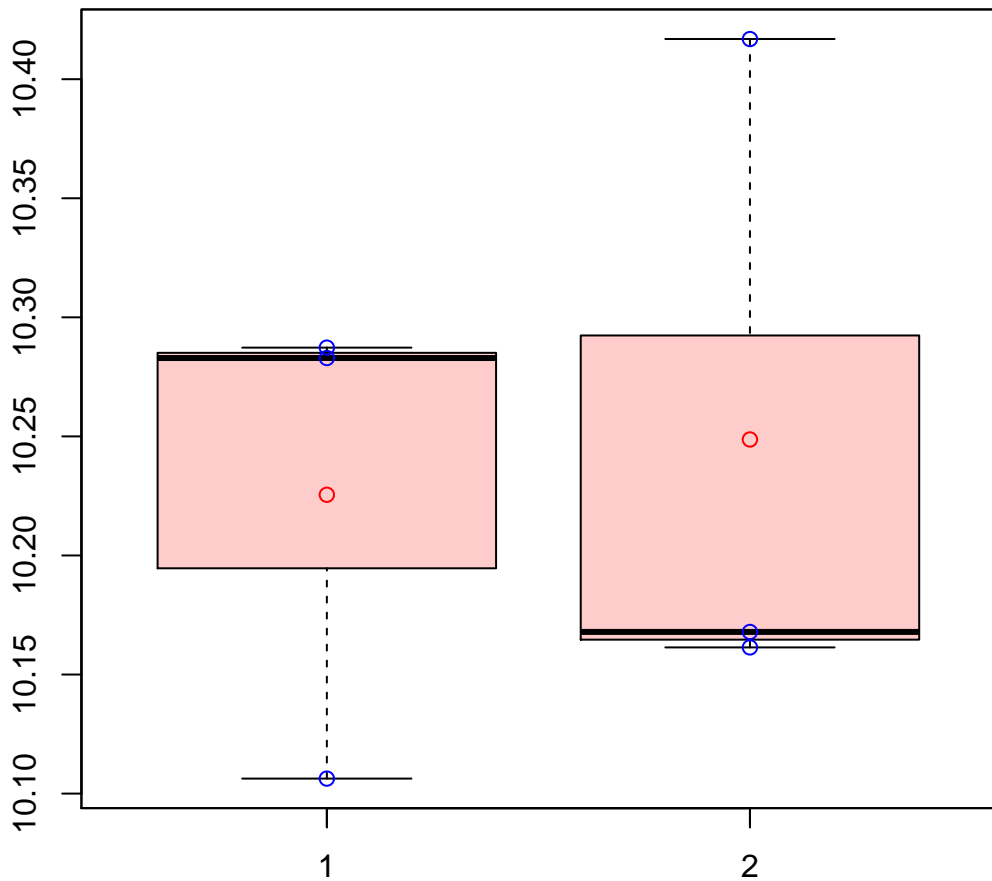

t-Test: p-value = 0.83

# CL3307Contig2|CL3307Contig2

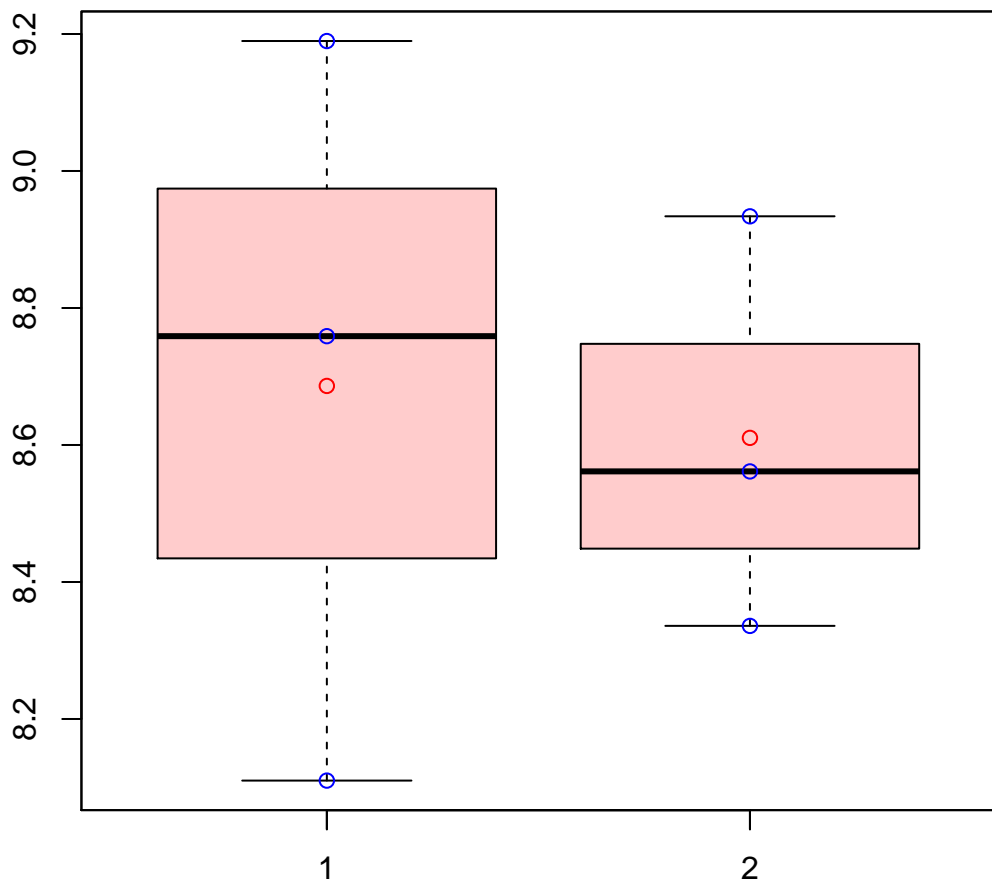

t-Test: p-value = 0.85

# CL330Contig5|CL330Contig5

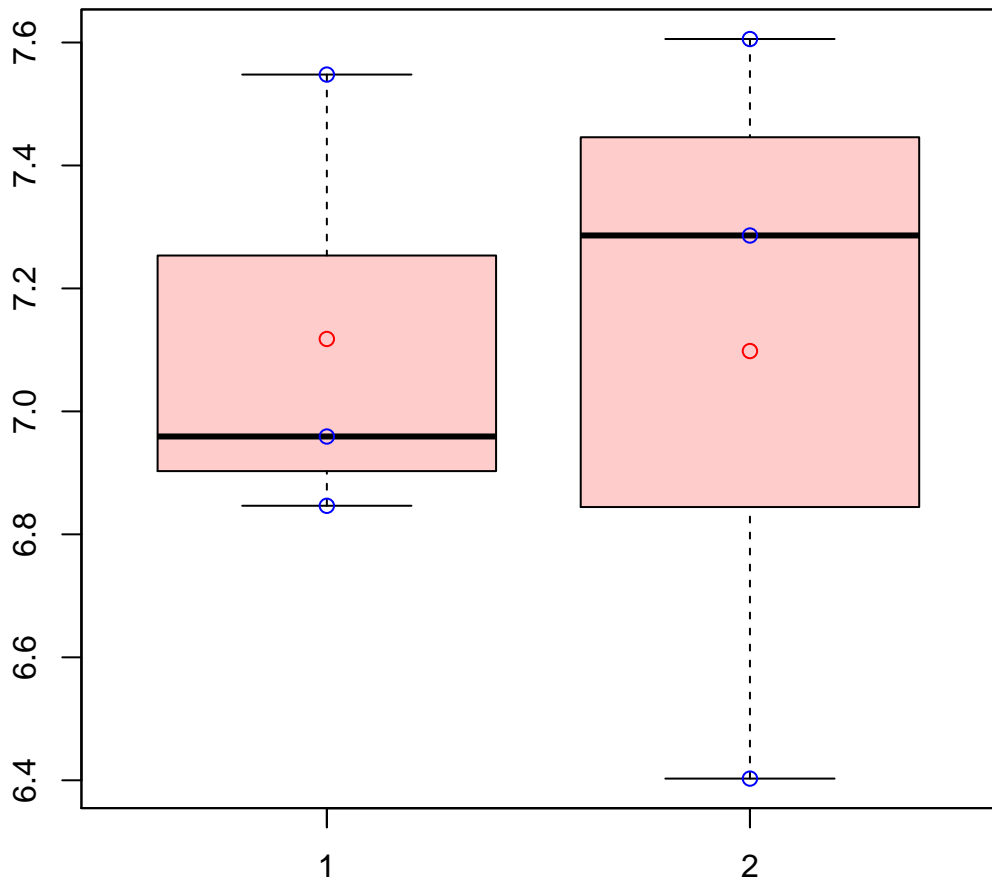

t-Test: p-value = 0.97

# CL3315Contig3|CL3315Contig3

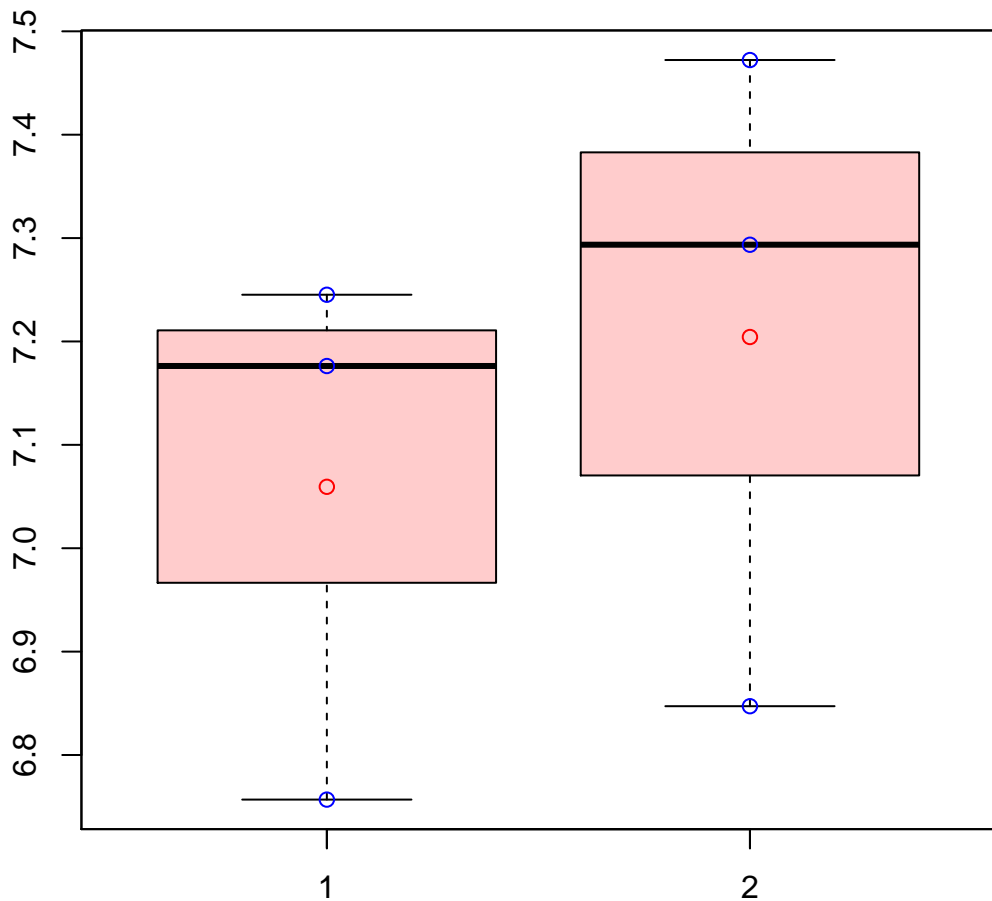

t-Test: p-value = 0.58

# CL3318Contig4|CL3318Contig4

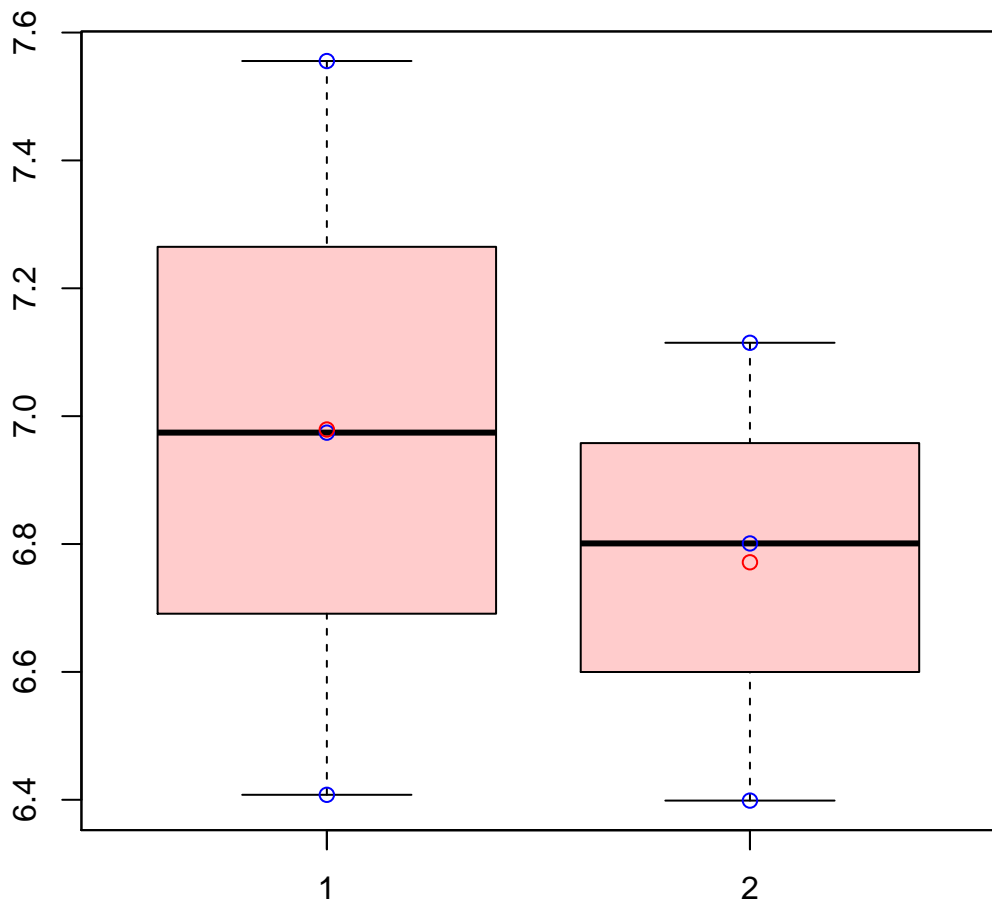

t-Test: p-value = 0.63



# CL332Contig2|CL332Contig2

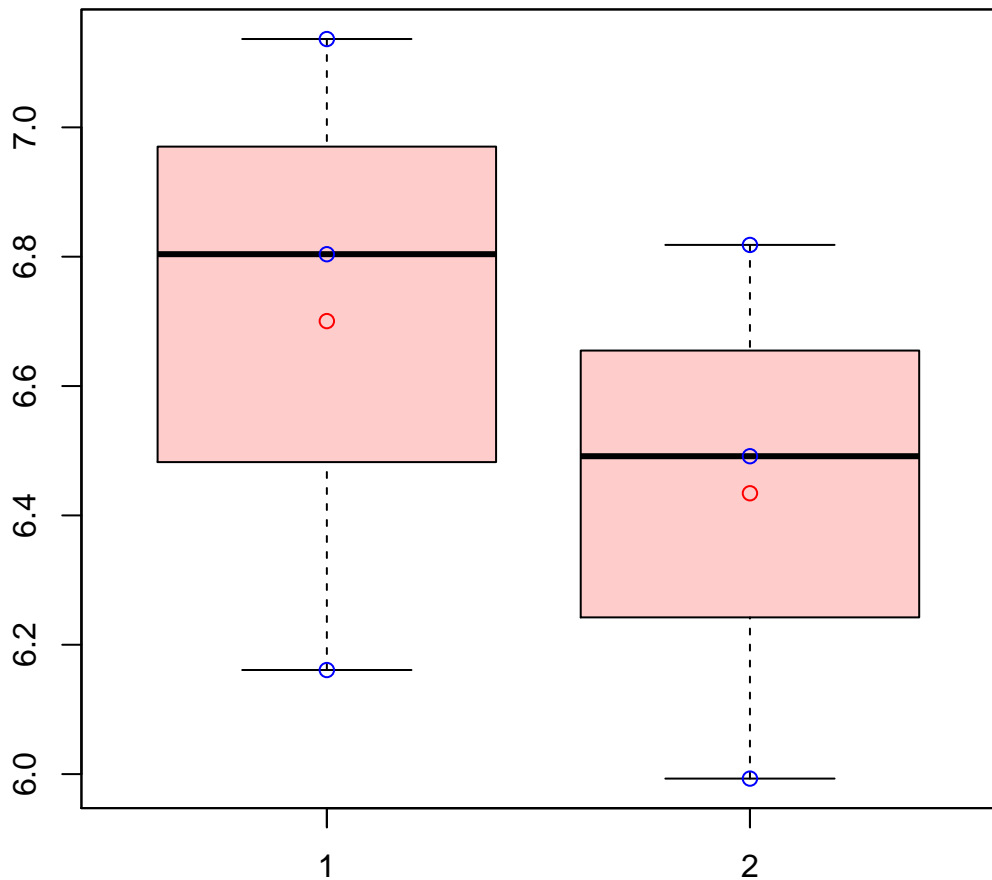

t-Test: p-value = 0.52

# CL3336Contig4|CL3336Contig4

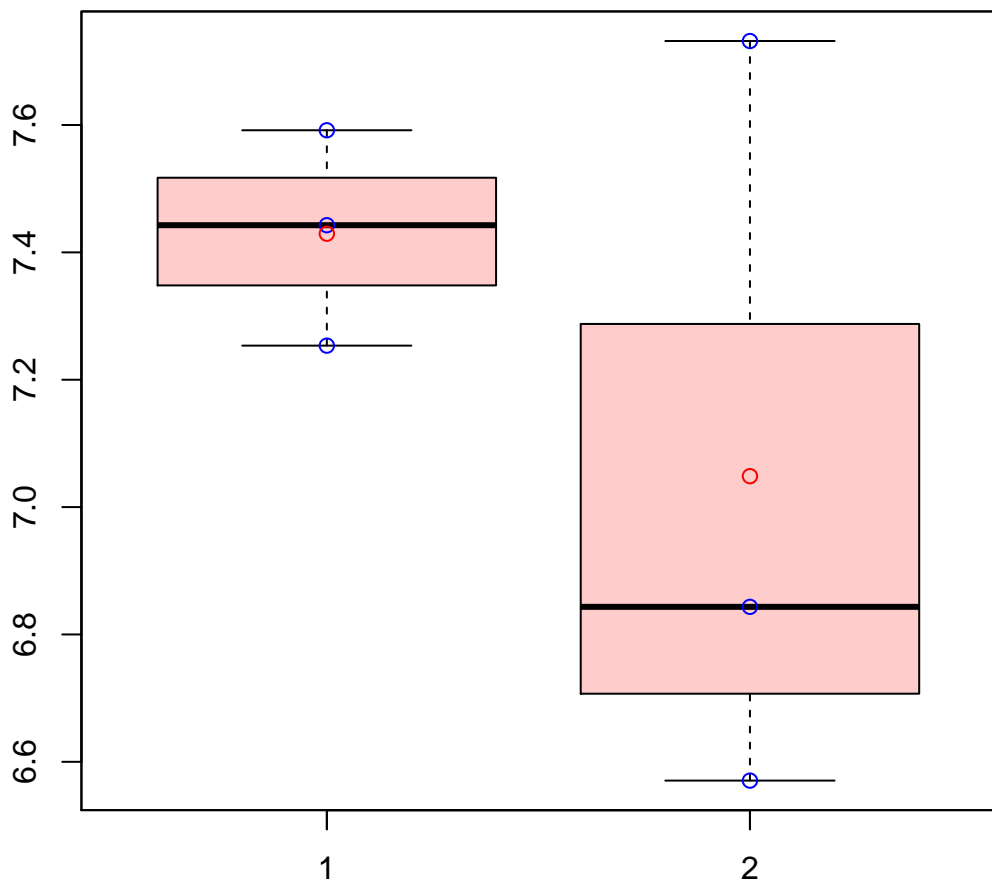

t-Test: p-value = 0.39

# CL3336Contig5|CL3336Contig5

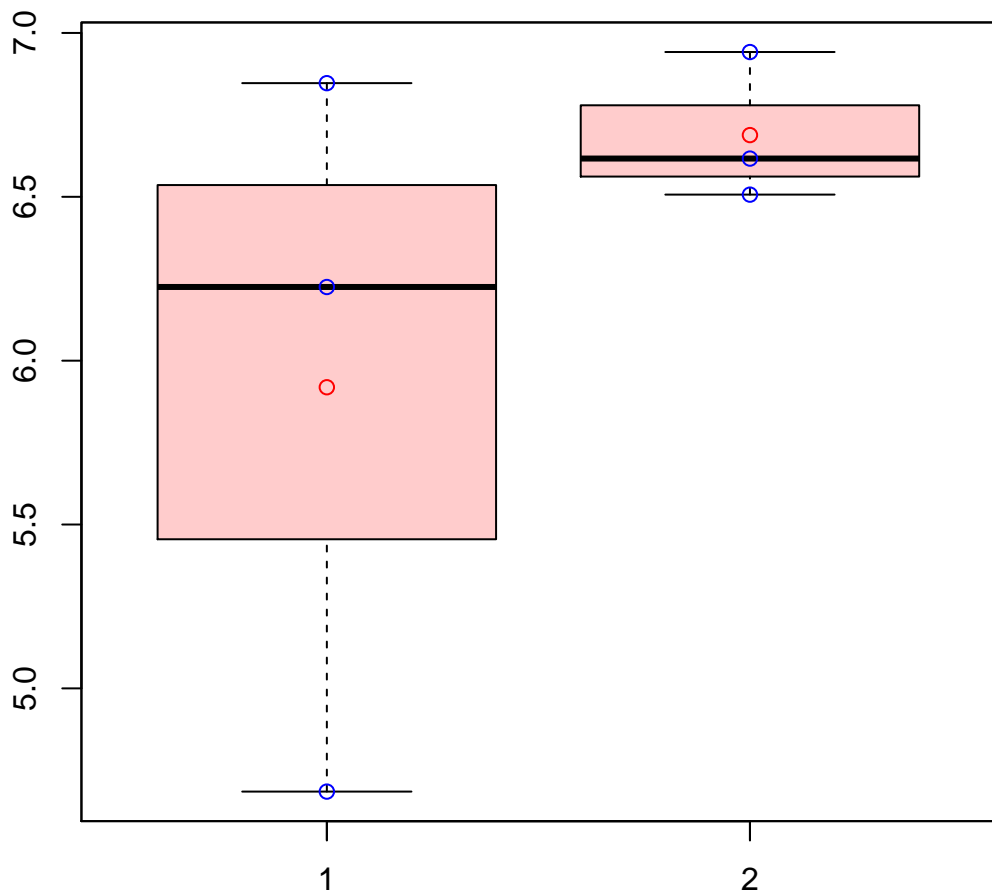

t-Test: p-value = 0.35

# CL333Contig12|CL333Contig12

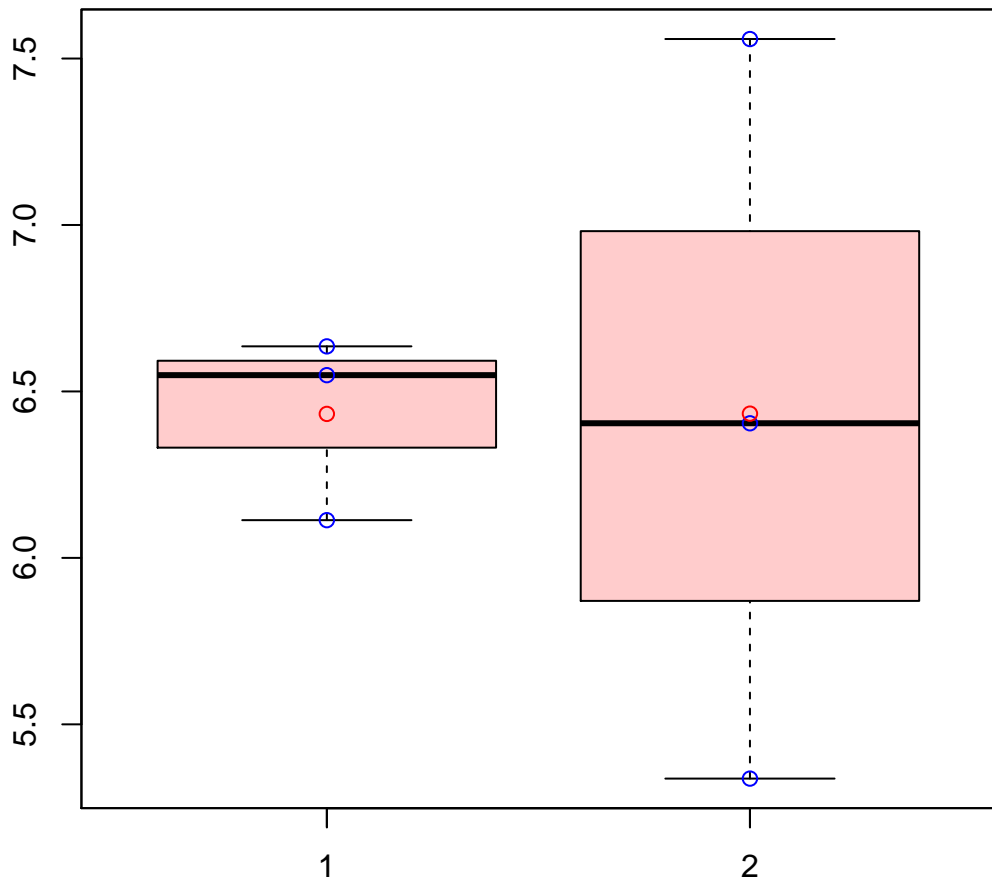

t-Test: p-value = 1

# CL333Contig13|CL333Contig13

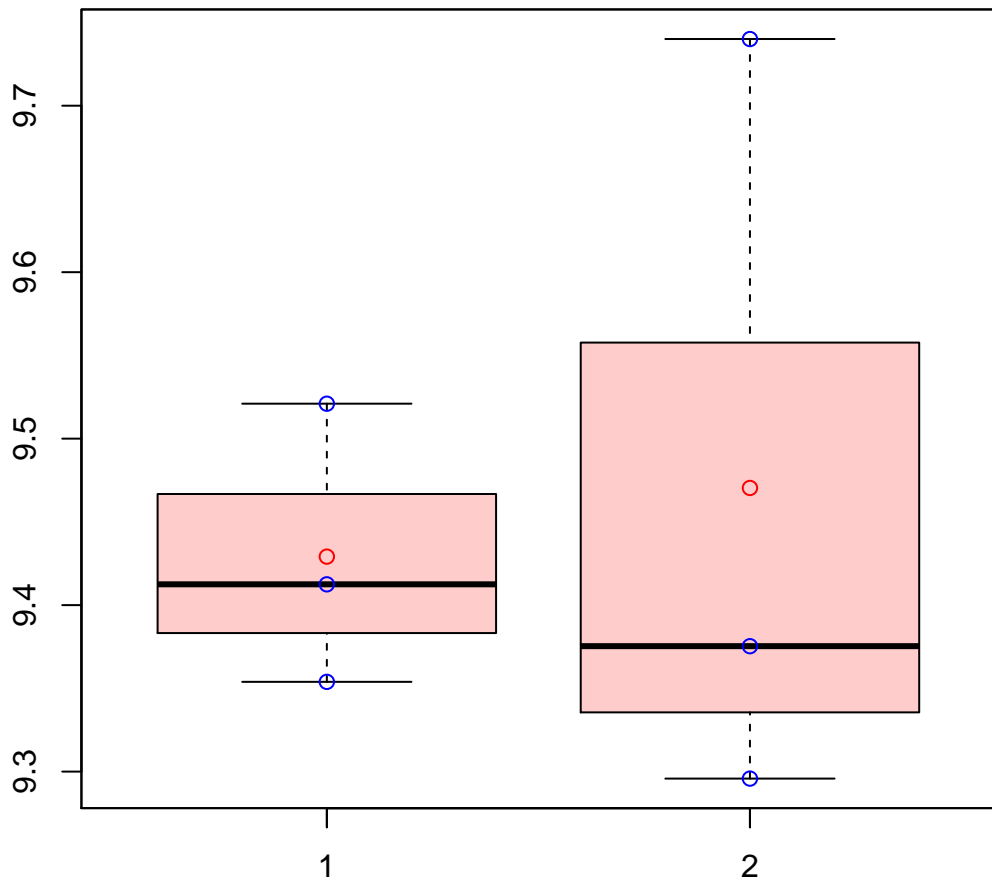

t-Test: p-value = 0.8

# CL3347Contig3|CL3347Contig3

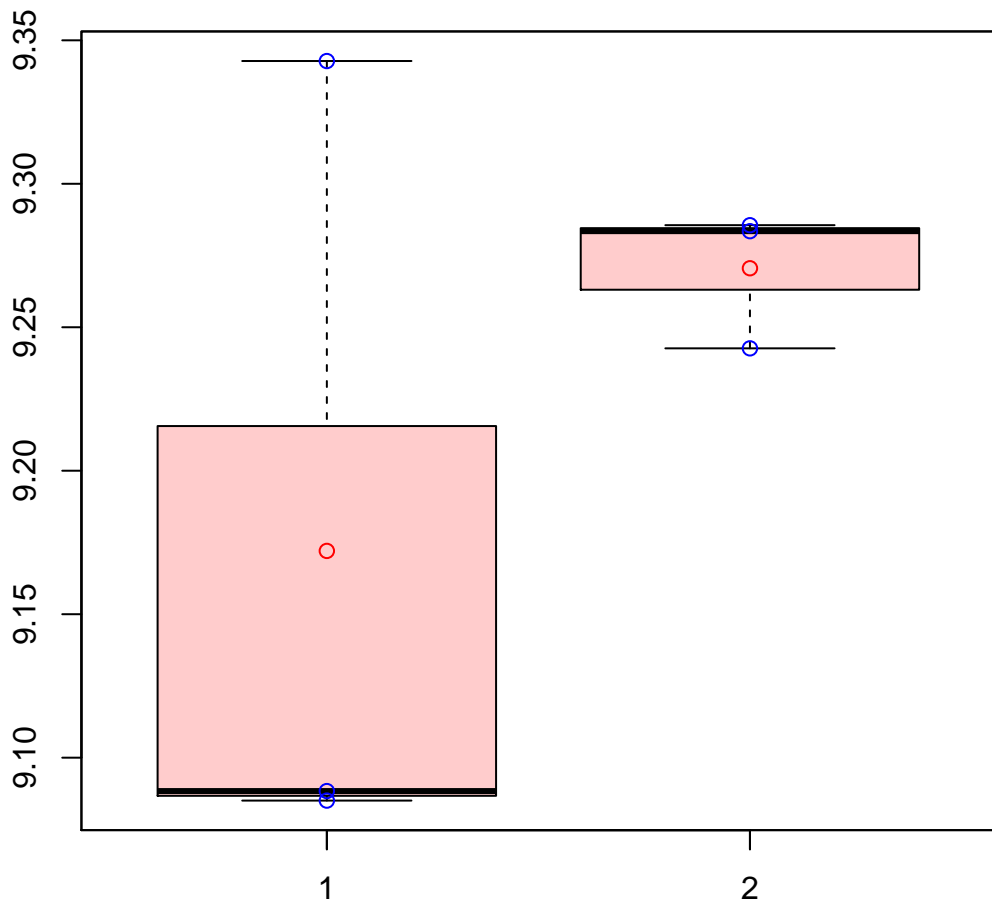

t-Test: p-value = 0.37

# CL3347Contig4|CL3347Contig4

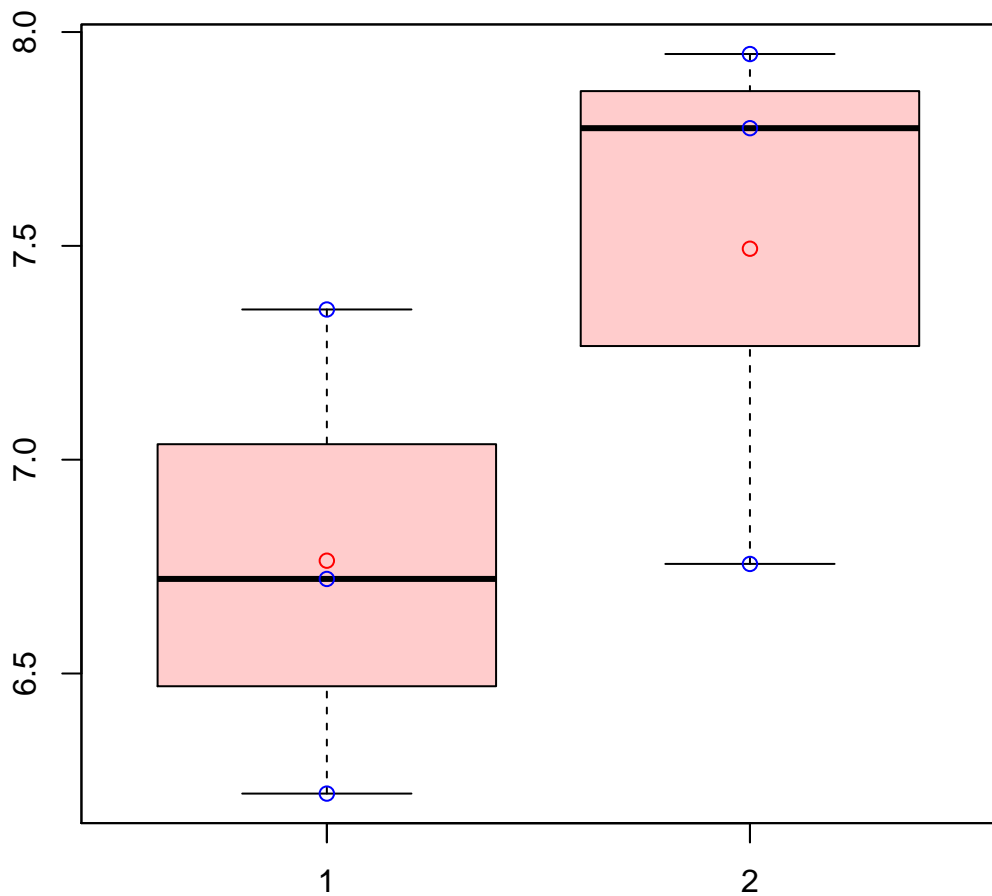

t-Test: p-value = 0.22

# CL3348Contig3|CL3348Contig3

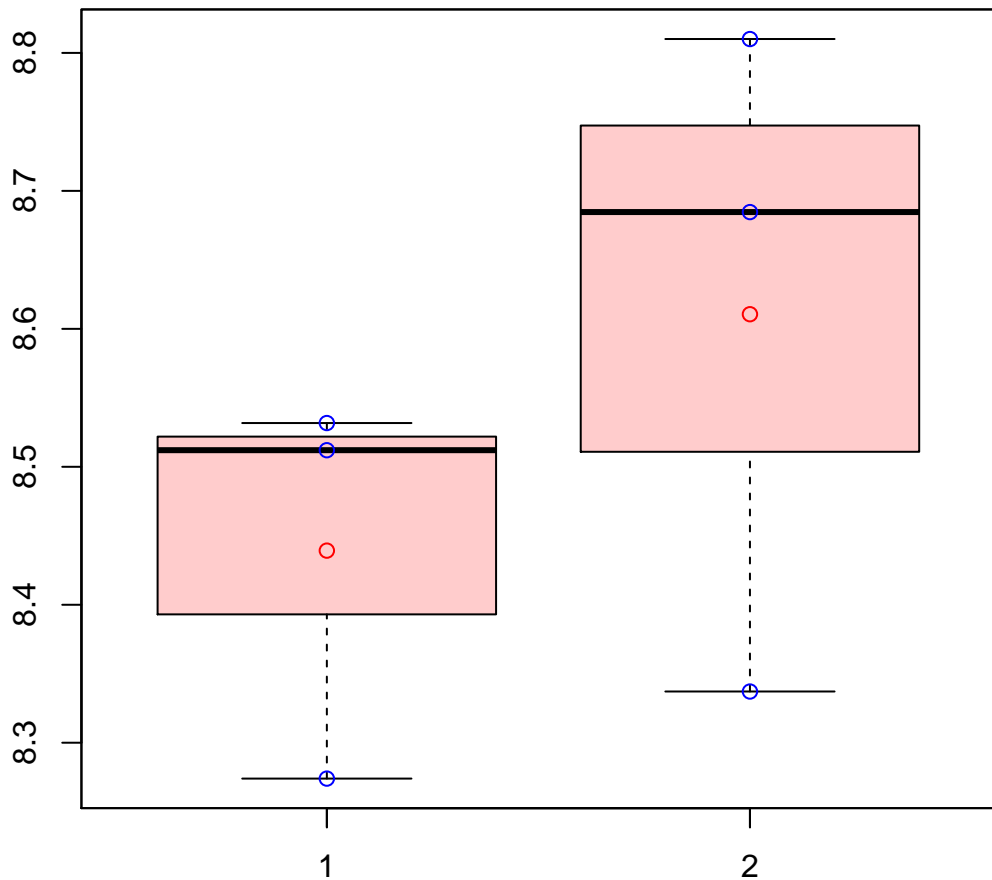

t-Test: p-value = 0.37



# CL3352Contig1|CL3352Contig1

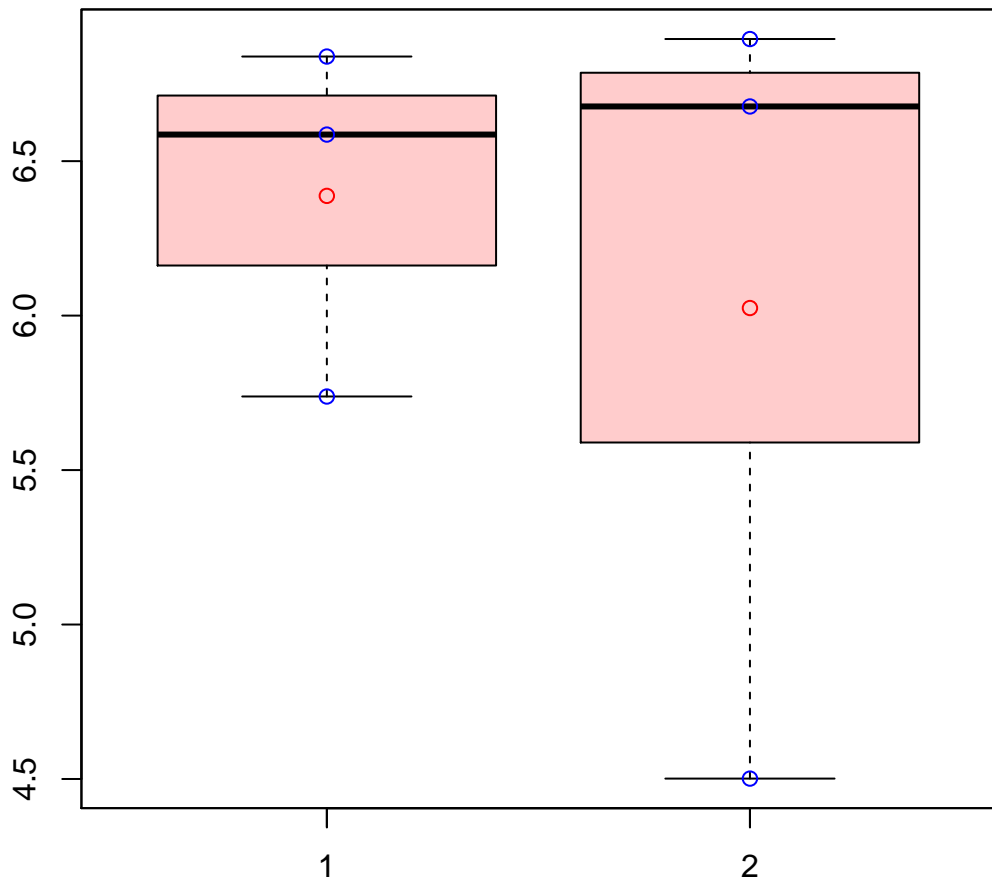

t-Test: p-value = 0.7

# CL335Contig5|CL335Contig5

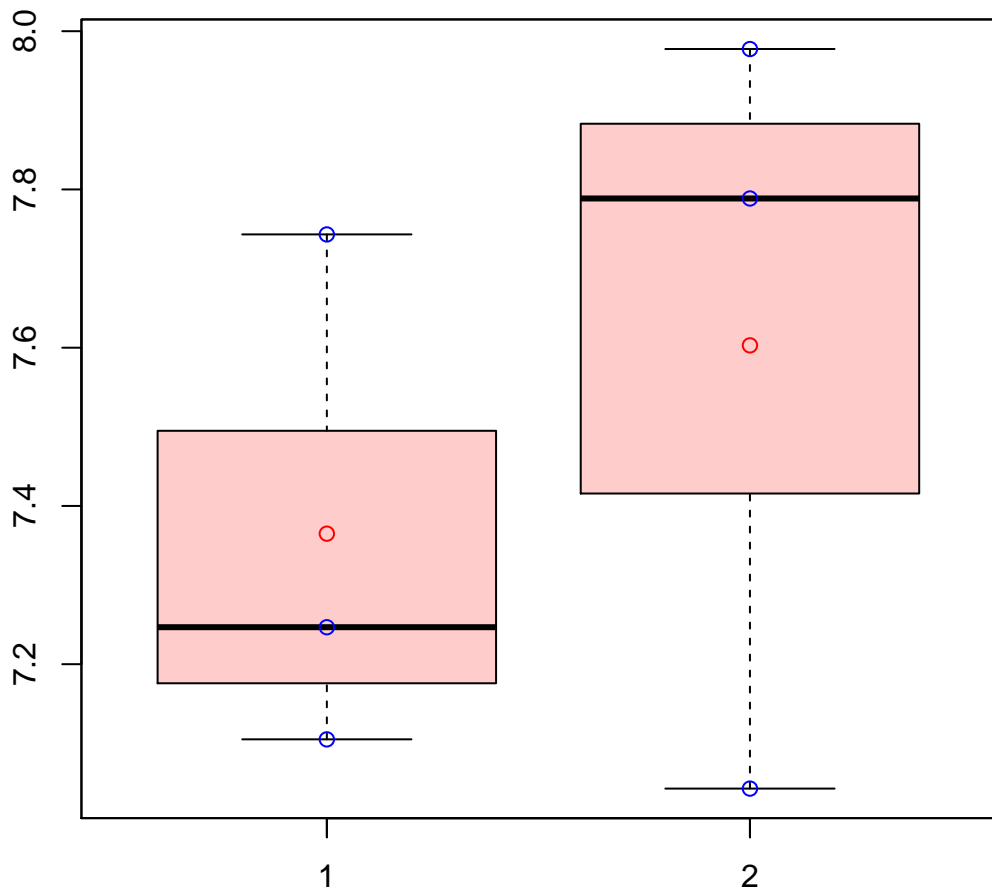

t-Test: p-value = 0.53

# CL337Contig7|CL337Contig7

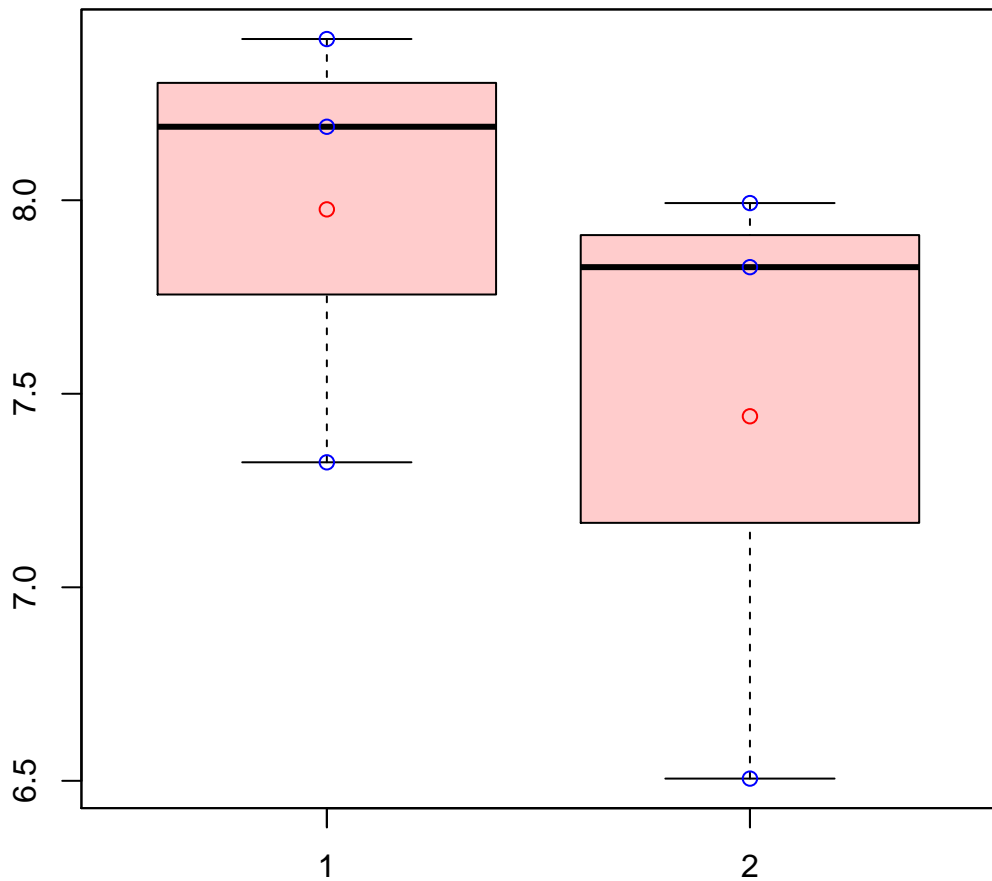

t-Test: p-value = 0.41

# CL3384Contig1|CL3384Contig1

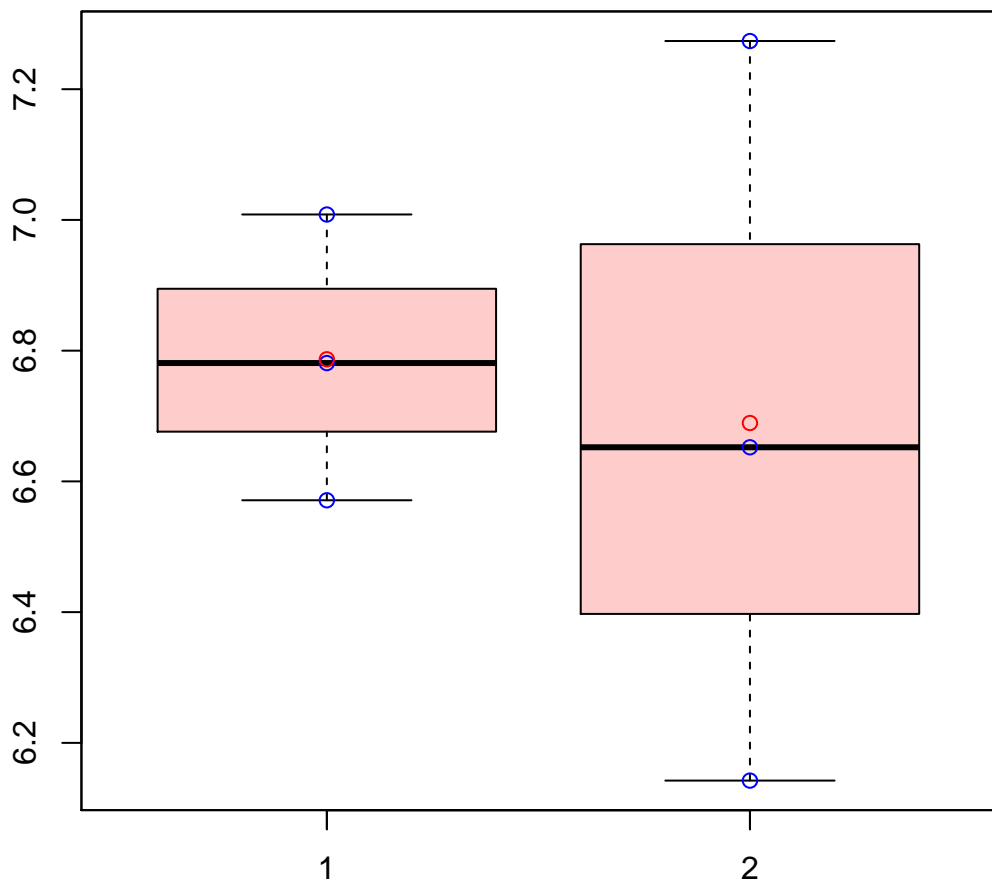

t-Test: p-value = 0.8

# CL3384Contig5|CL3384Contig5

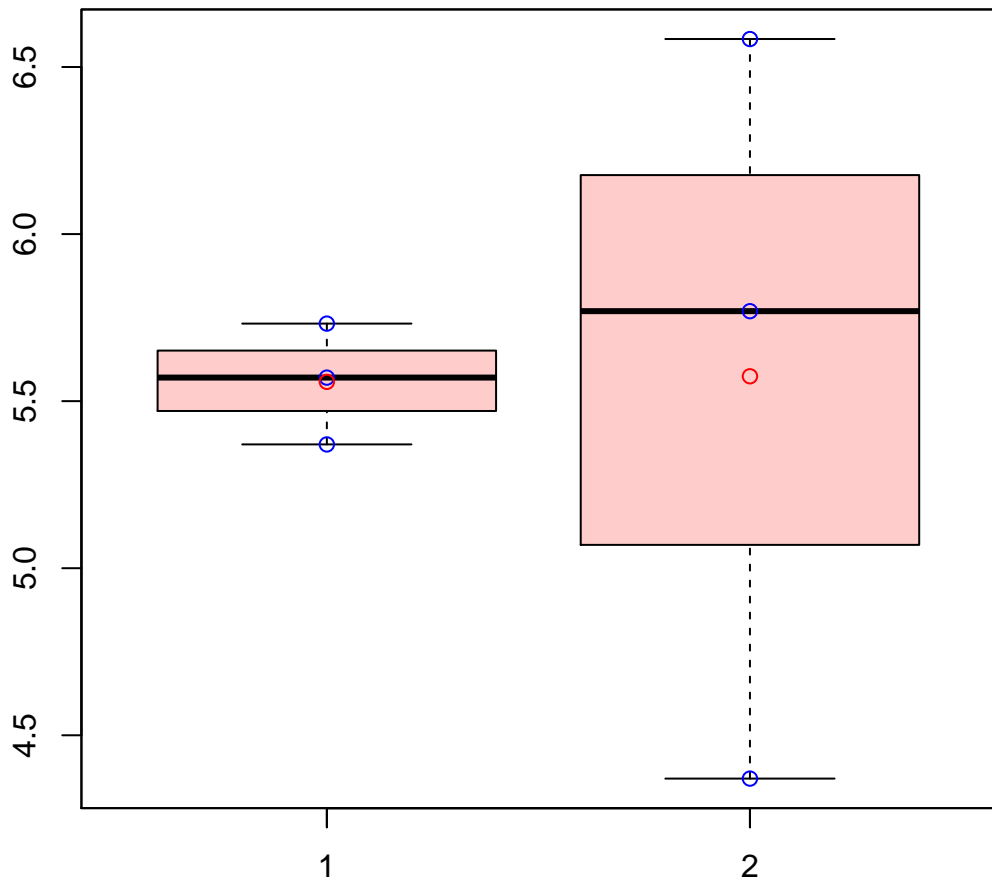

t-Test: p-value = 0.98

# CL338Contig6|CL338Contig6

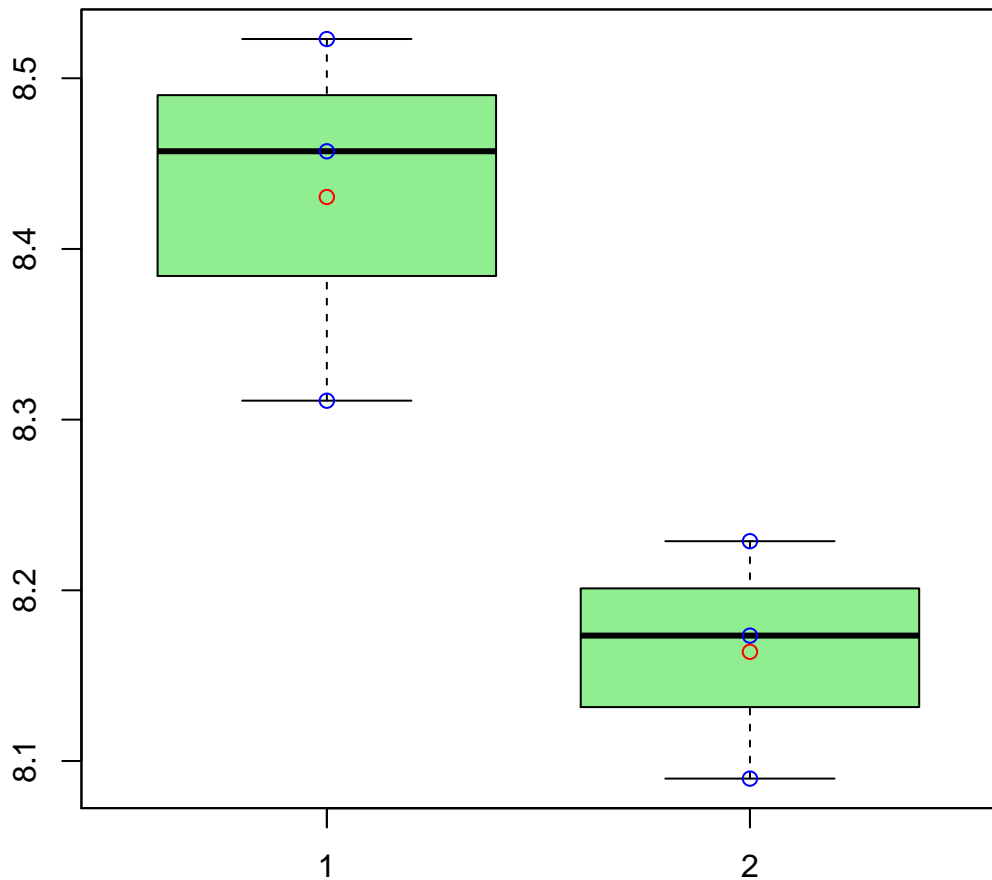

t-Test: p-value = 0.03

# CL3394Contig12|CL3394Contig12

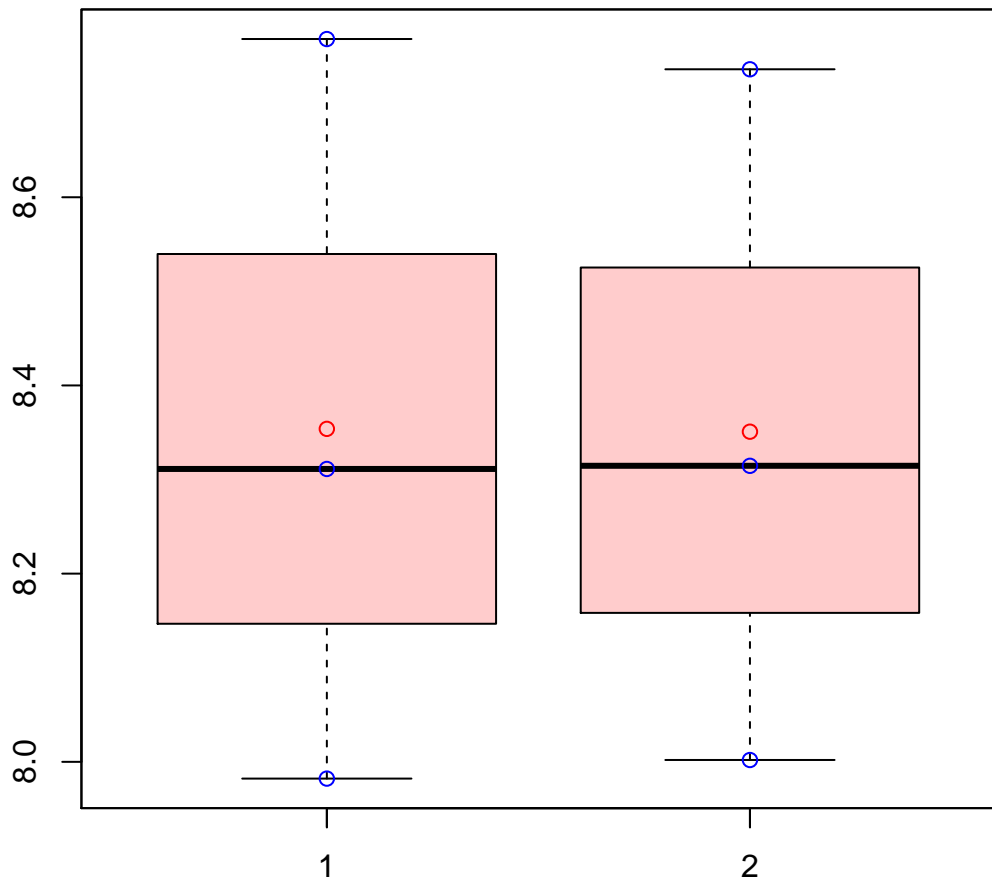

t-Test: p-value = 0.99

# CL3394Contig5|CL3394Contig5

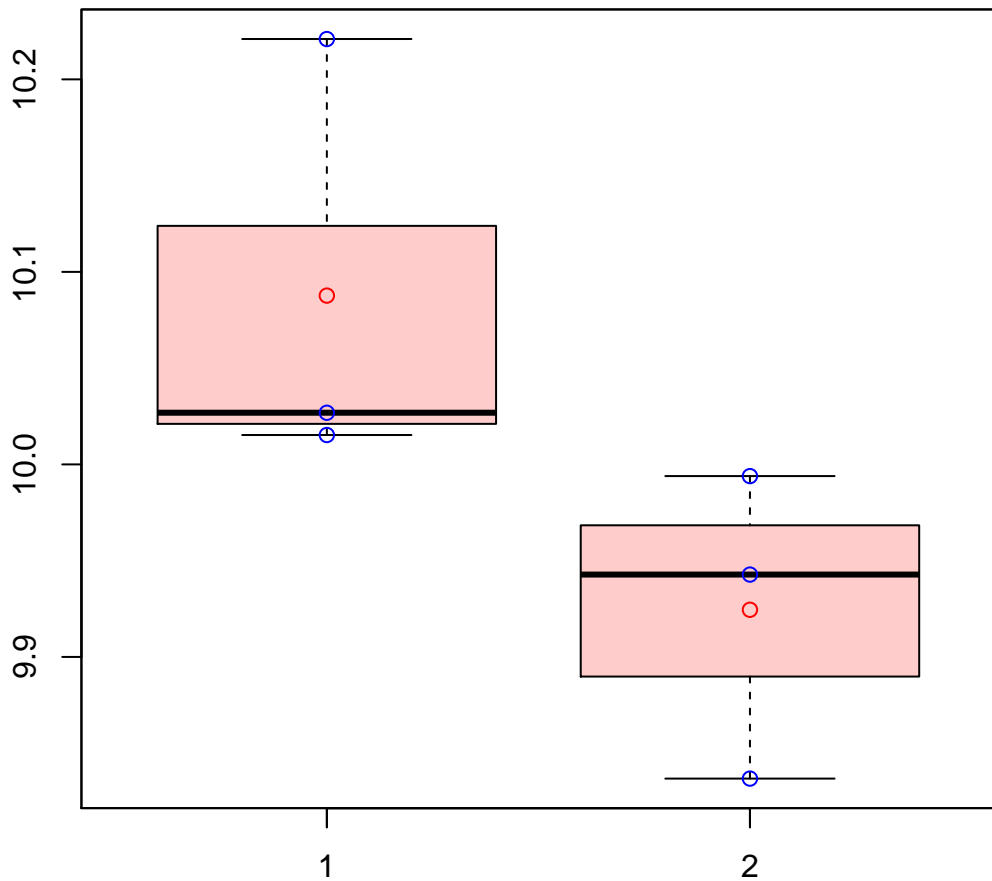

t-Test: p-value = 0.12



# CL3395Contig1|CL3395Contig1

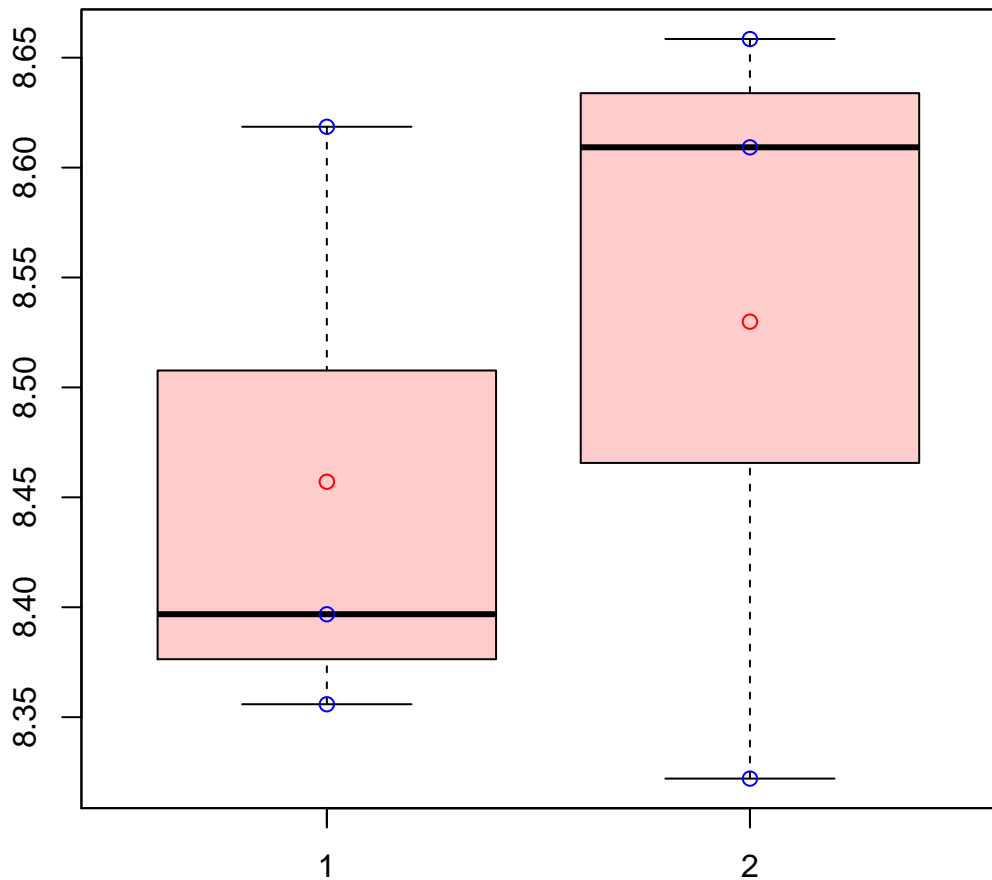

t-Test: p-value = 0.61

# CL339Contig2|CL339Contig2

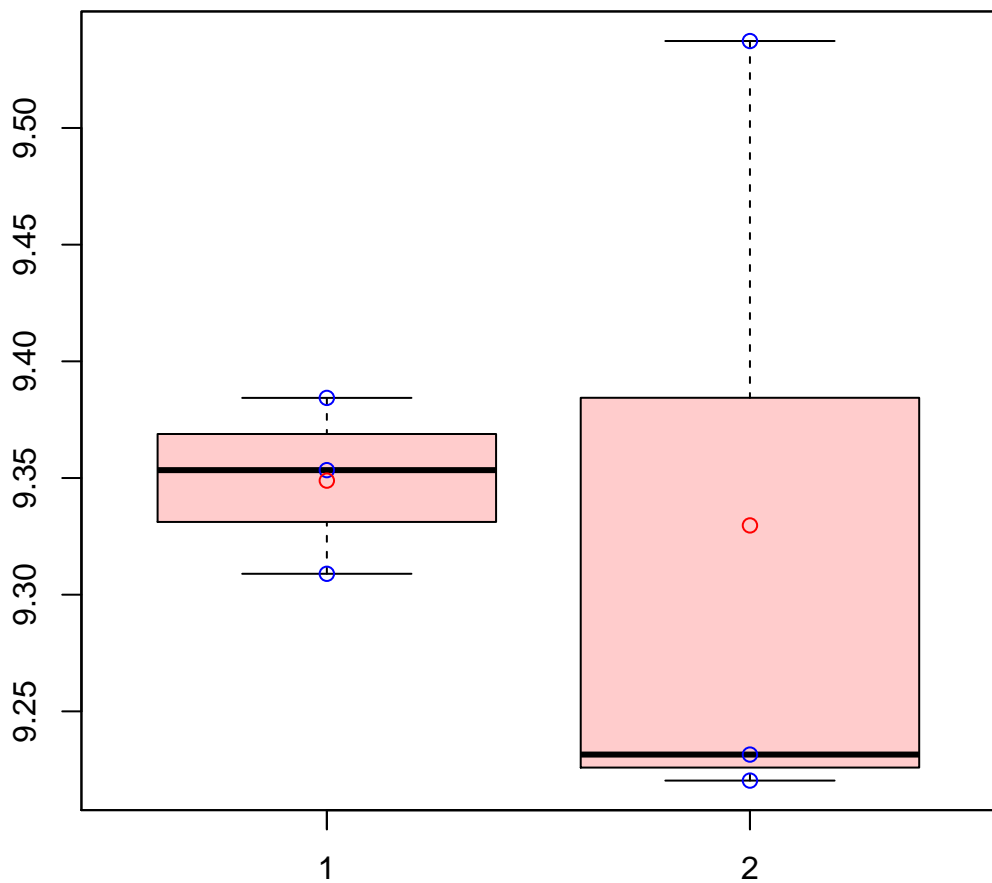

t-Test: p-value = 0.87

# CL339Contig4|CL339Contig4

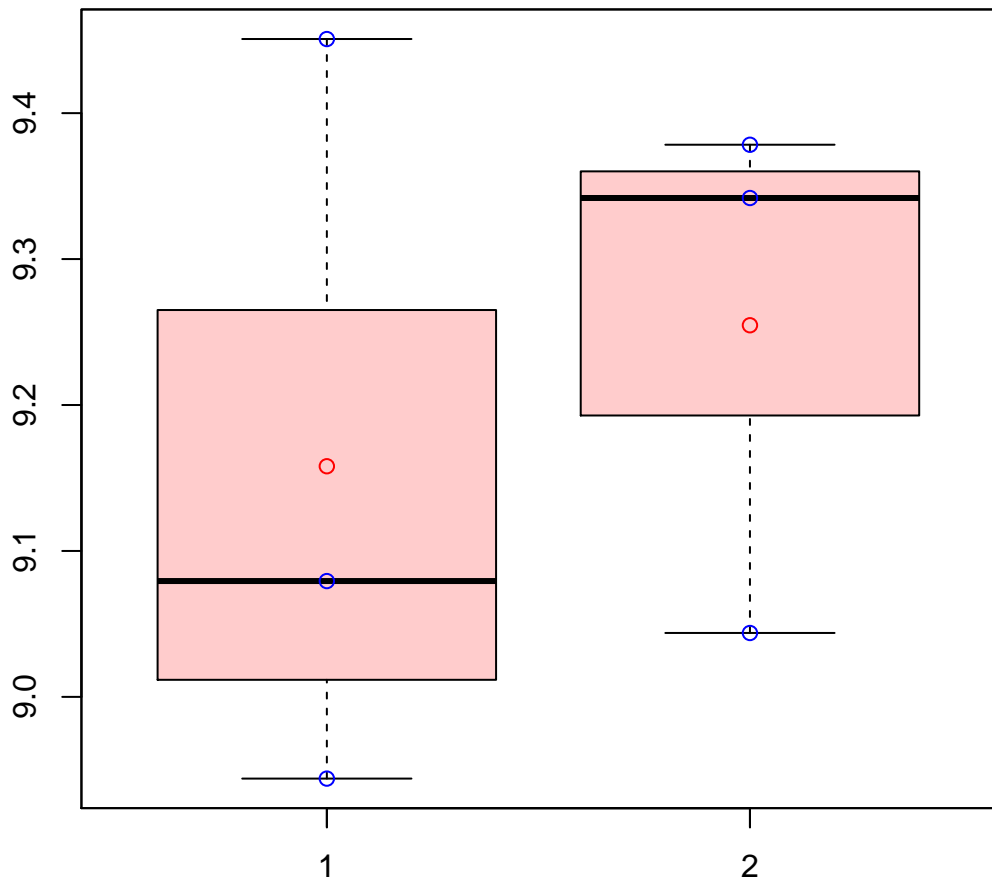

t-Test: p-value = 0.63

# CL33Contig26|CL33Contig26

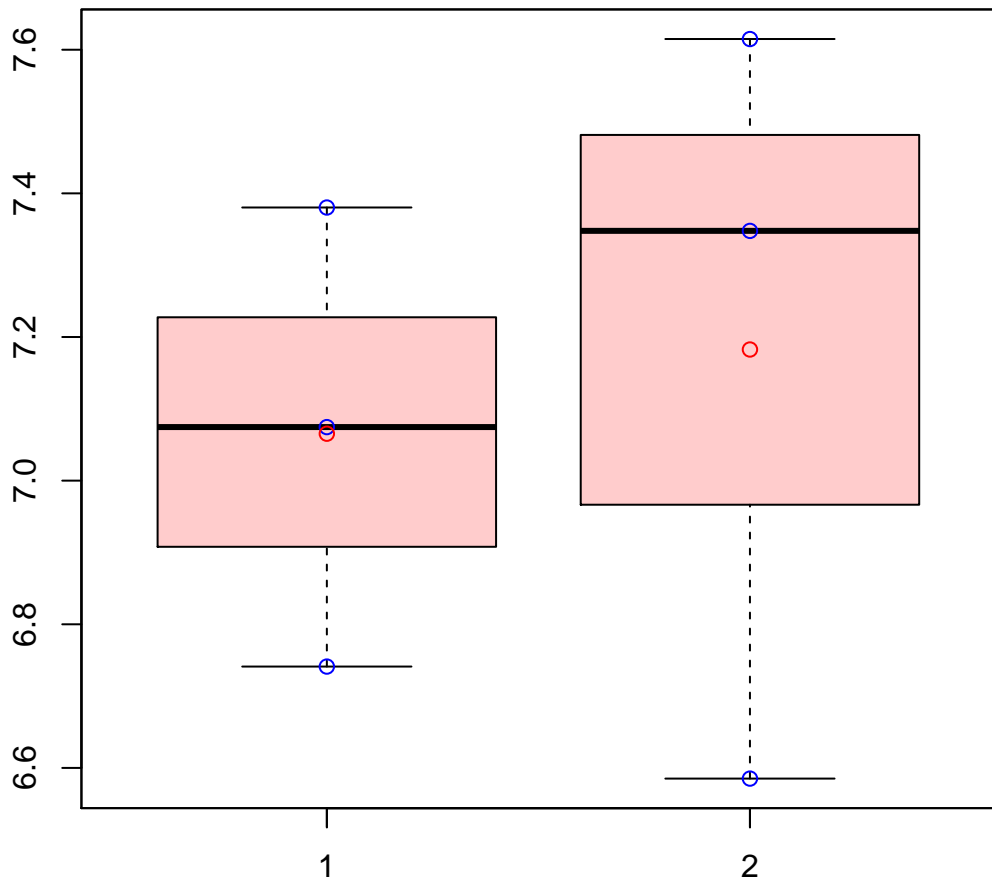

t-Test: p-value = 0.76

# CL33Contig28|CL33Contig28

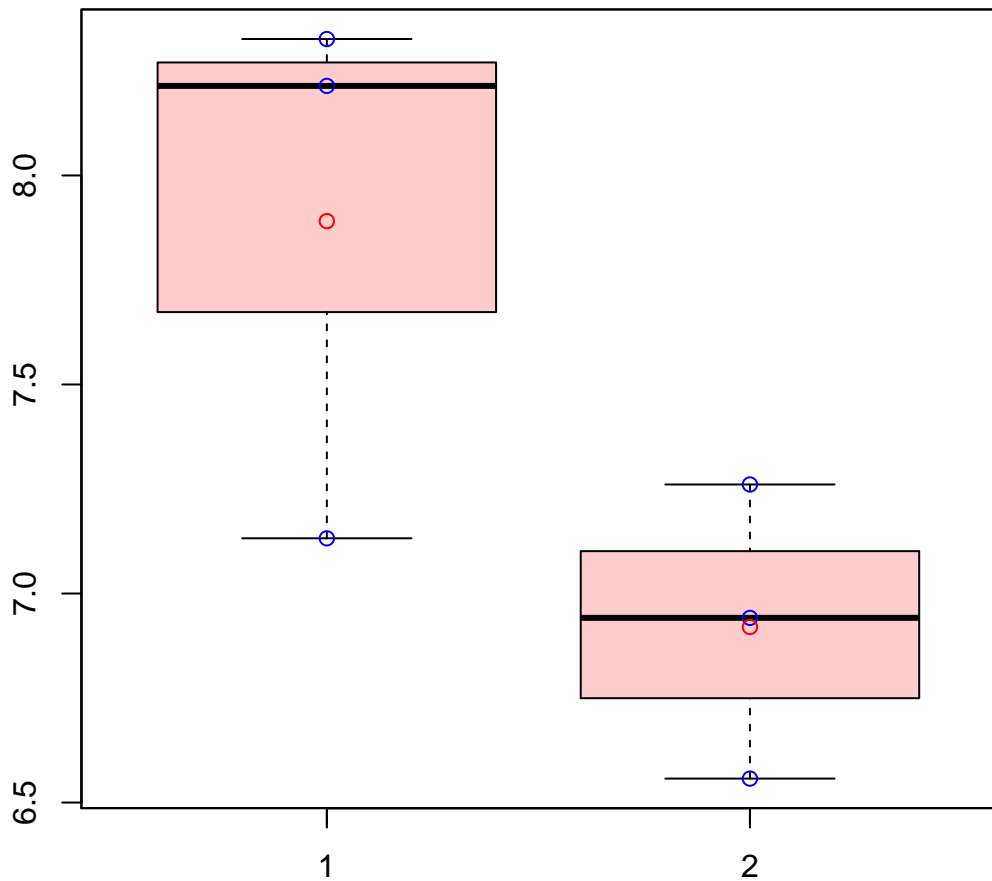

t-Test: p-value = 0.11

# CL3403Contig1|CL3403Contig1

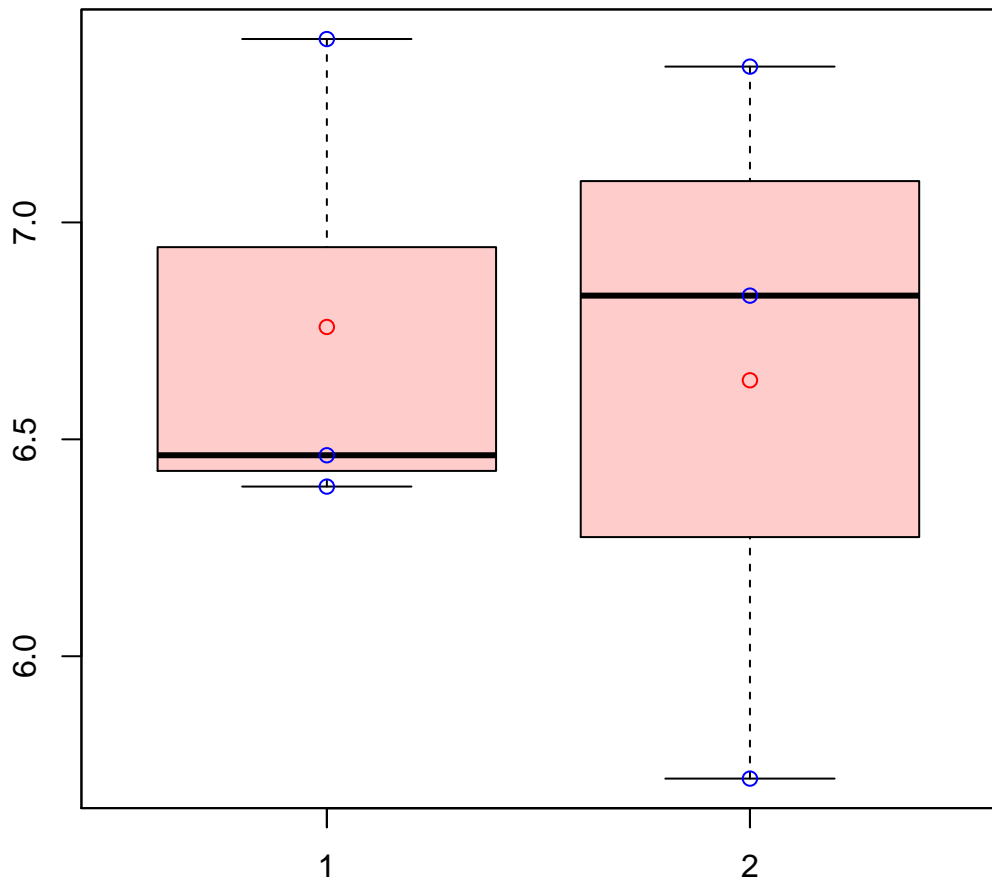

t-Test: p-value = 0.85

# CL3406Contig3|CL3406Contig3

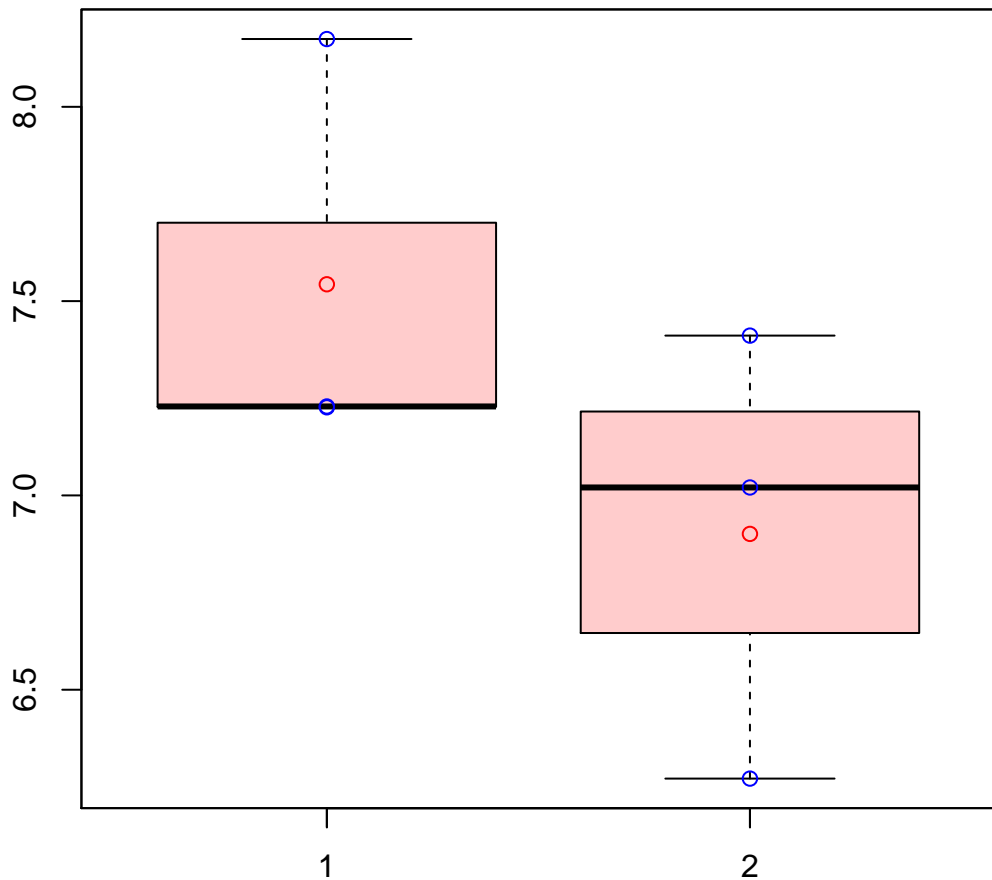

t-Test: p-value = 0.24

# CL3442Contig1|CL3442Contig1

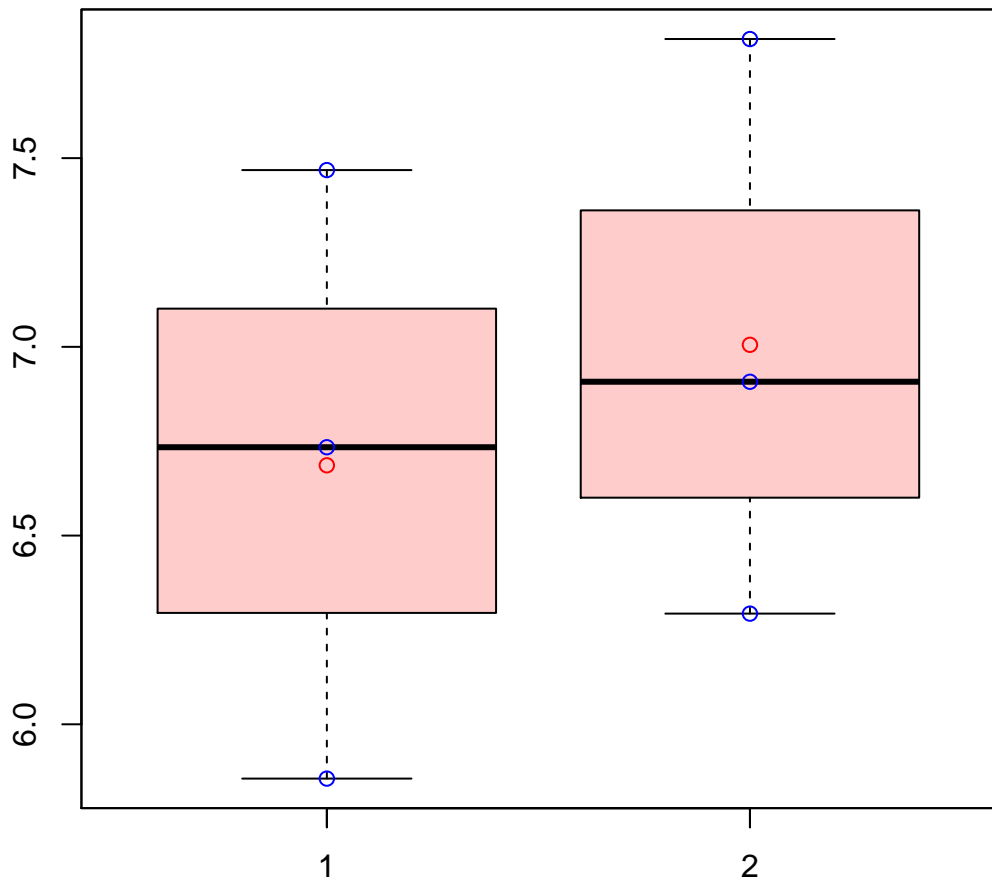

t-Test: p-value = 0.65



# CL3449Contig3|CL3449Contig3

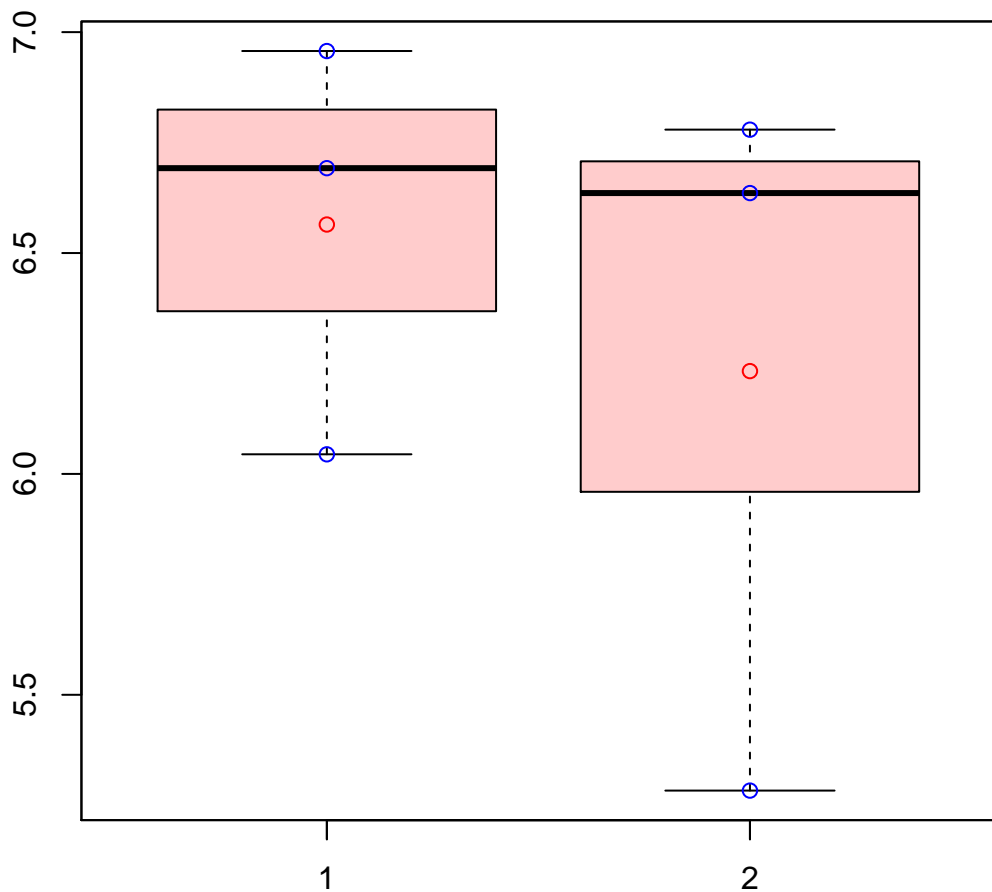

t-Test: p-value = 0.59

# CL3452Contig5|CL3452Contig5

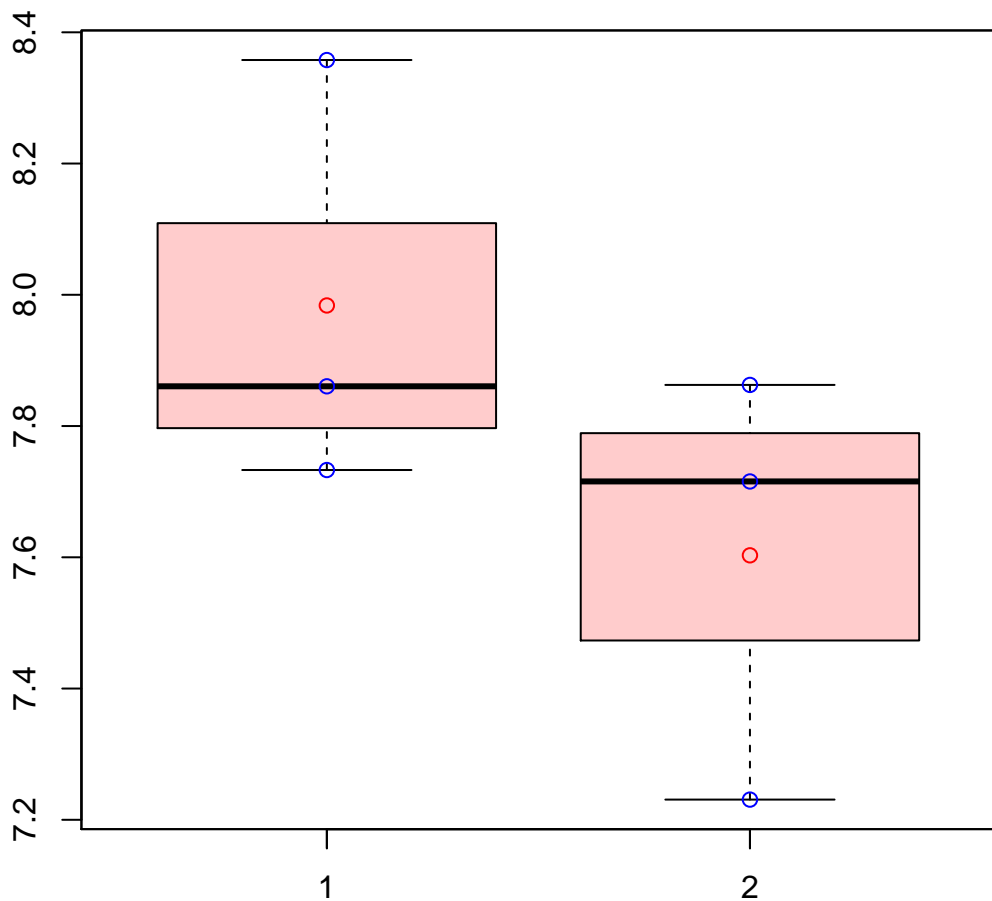

t-Test: p-value = 0.23

# CL3455Contig2|CL3455Contig2

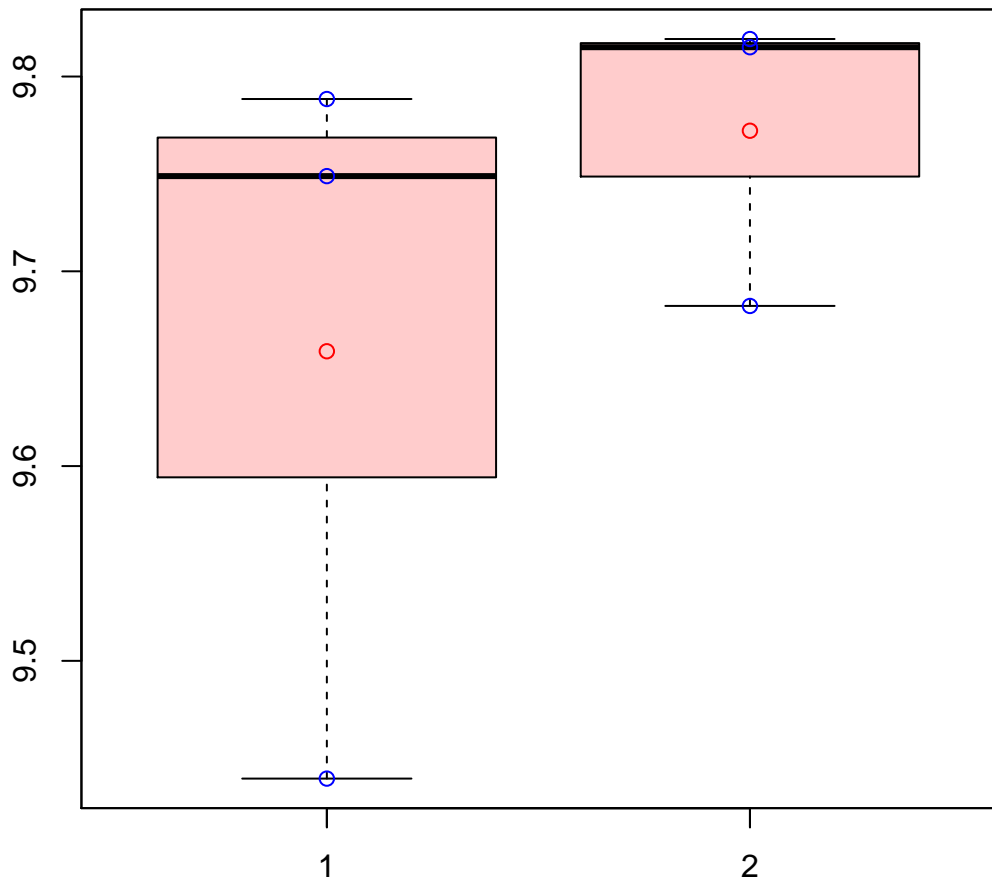

t-Test: p-value = 0.42

# CL3456Contig2|CL3456Contig2

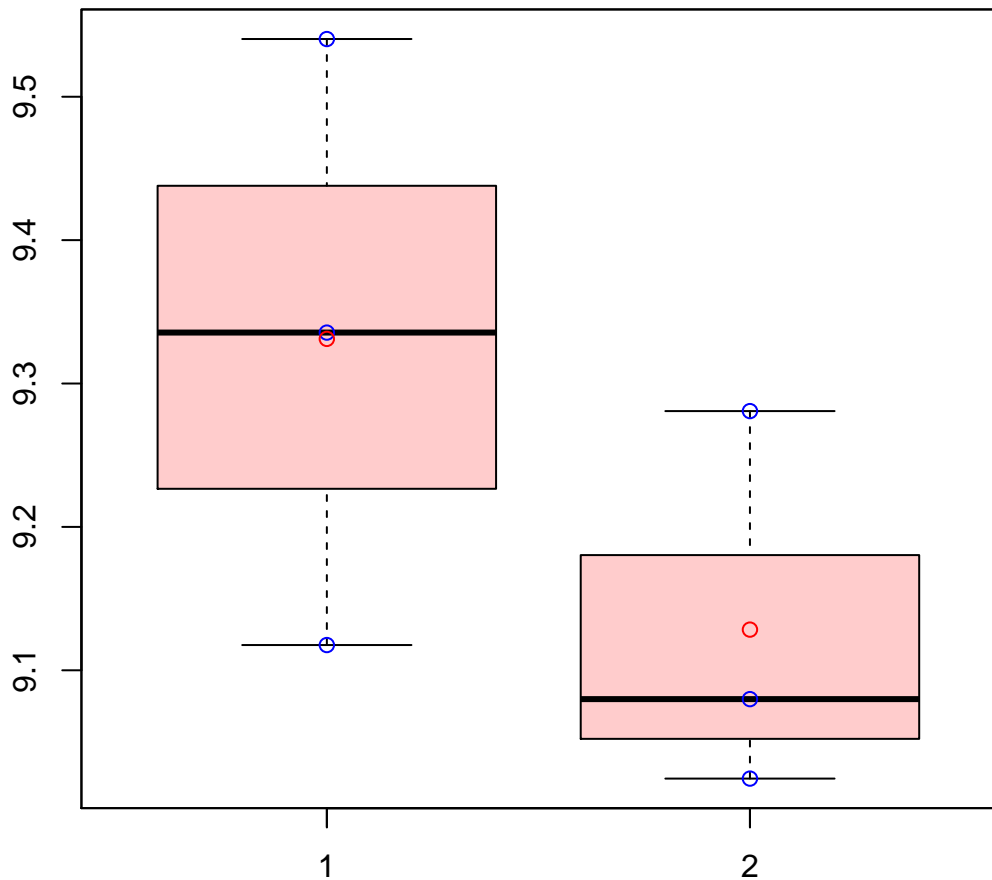

t-Test: p-value = 0.25

# CL3458Contig1|CL3458Contig1

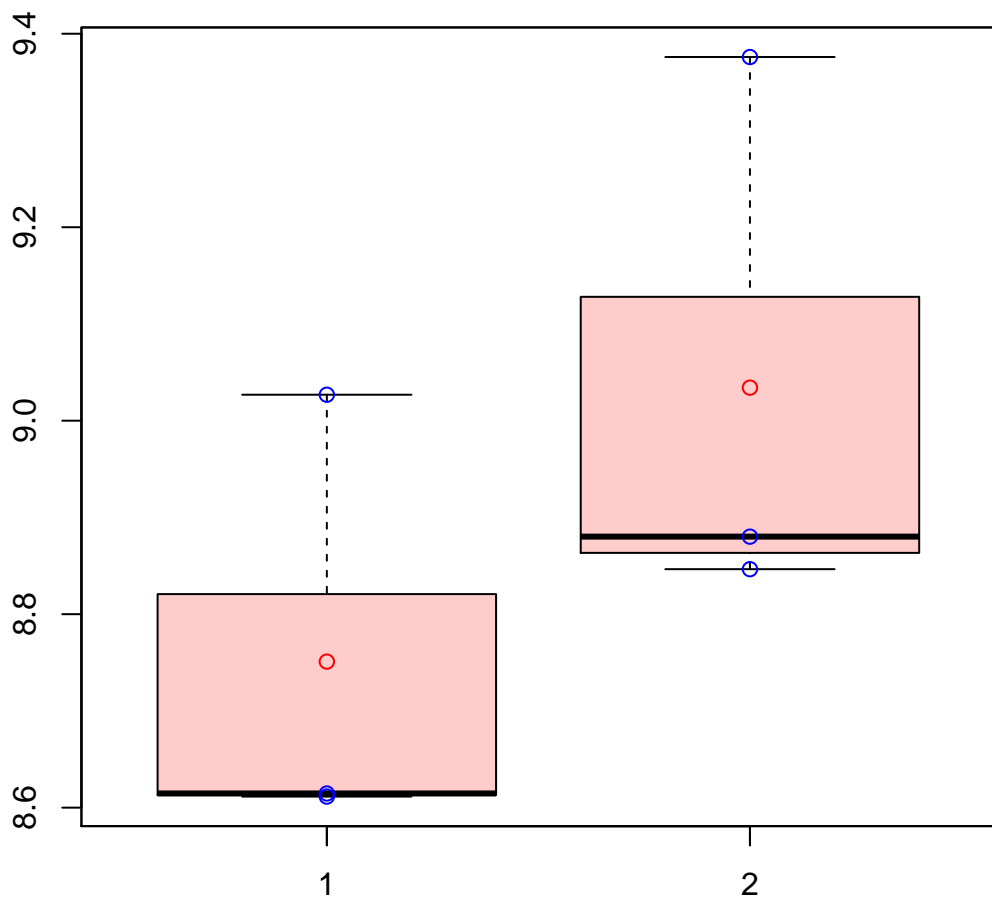

t-Test: p-value = 0.27

# CL3458Contig2|CL3458Contig2

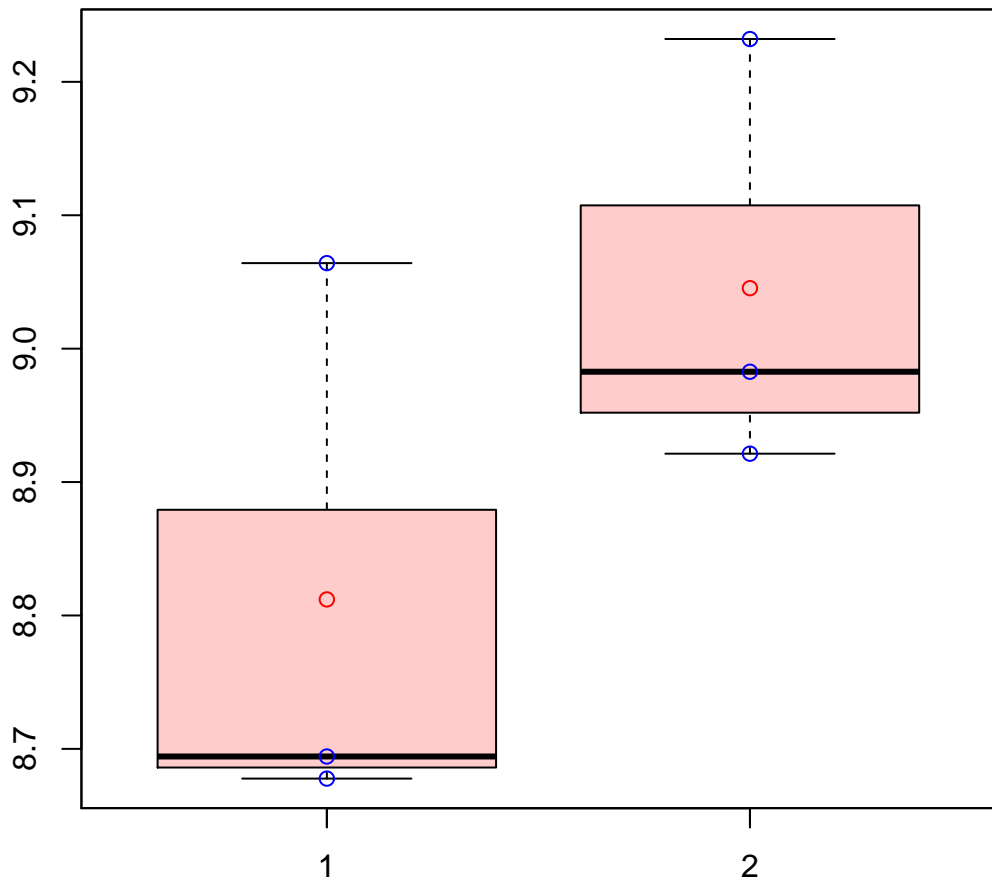

t-Test: p-value = 0.22

# CL3463Contig4|CL3463Contig4

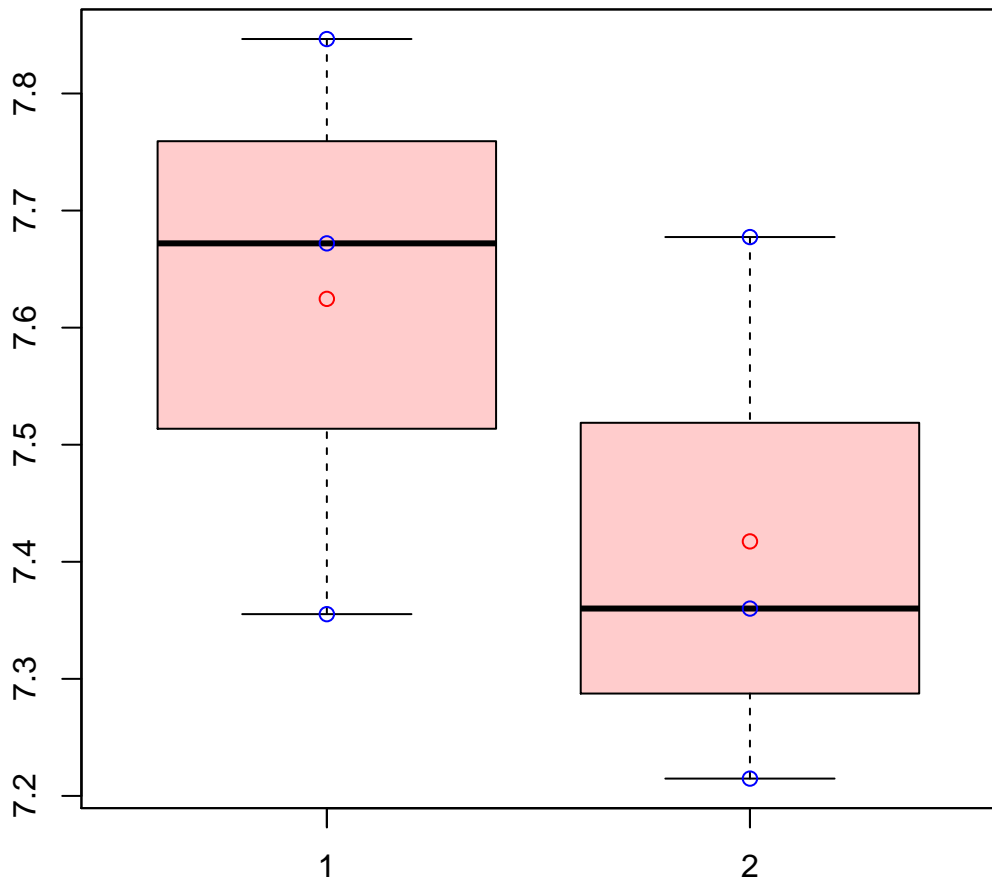

t-Test: p-value = 0.36

# CL3476Contig1|CL3476Contig1

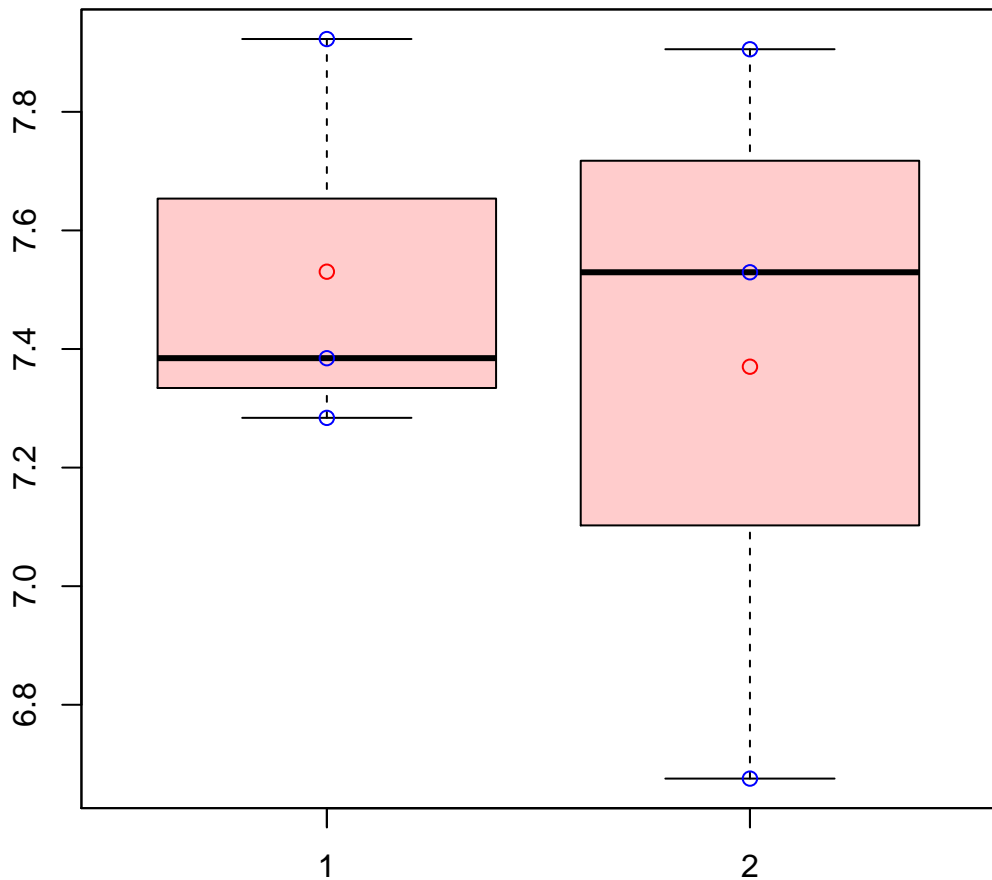

t-Test: p-value = 0.72



# CL3480Contig3|CL3480Contig3

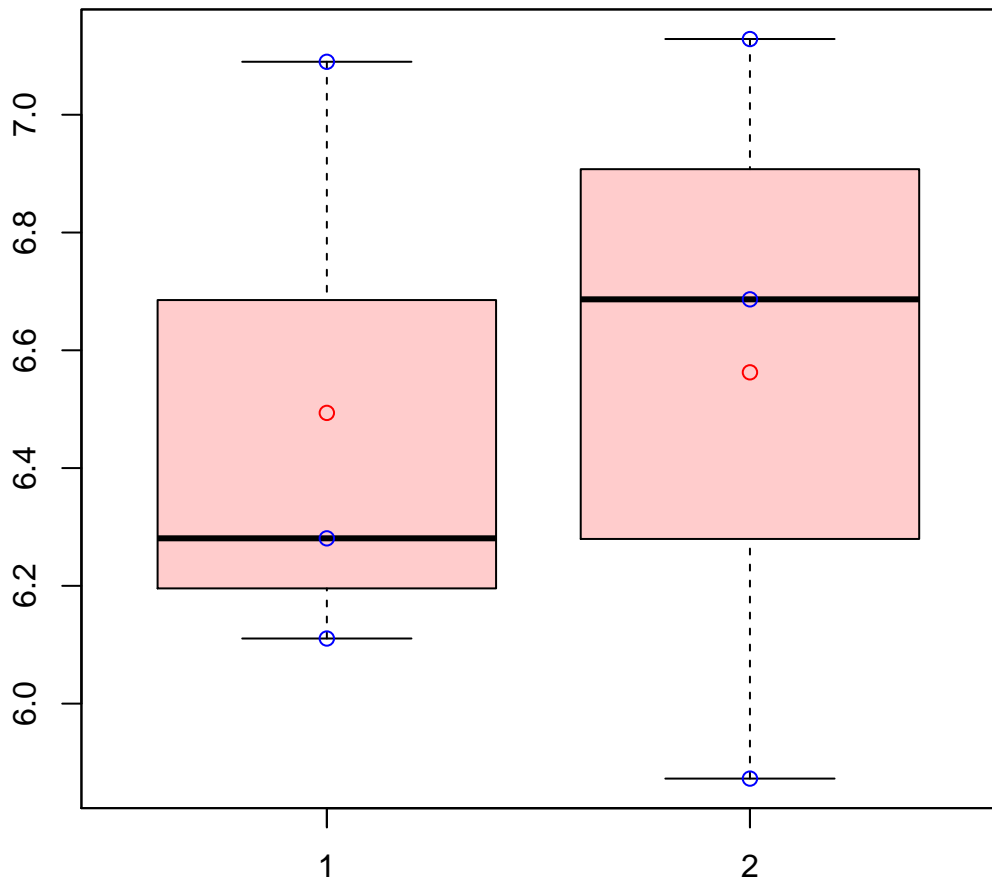

t-Test: p-value = 0.89

# CL3487Contig4|CL3487Contig4

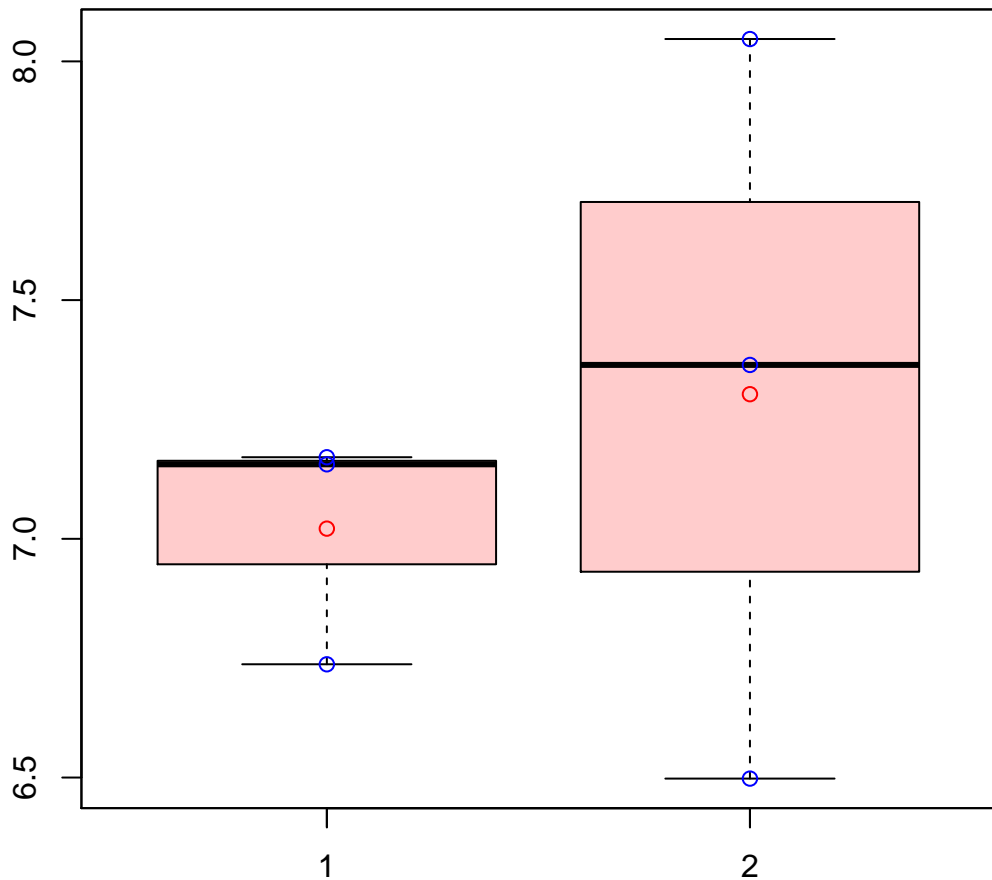

t-Test: p-value = 0.6

# CL3489Contig3|CL3489Contig3

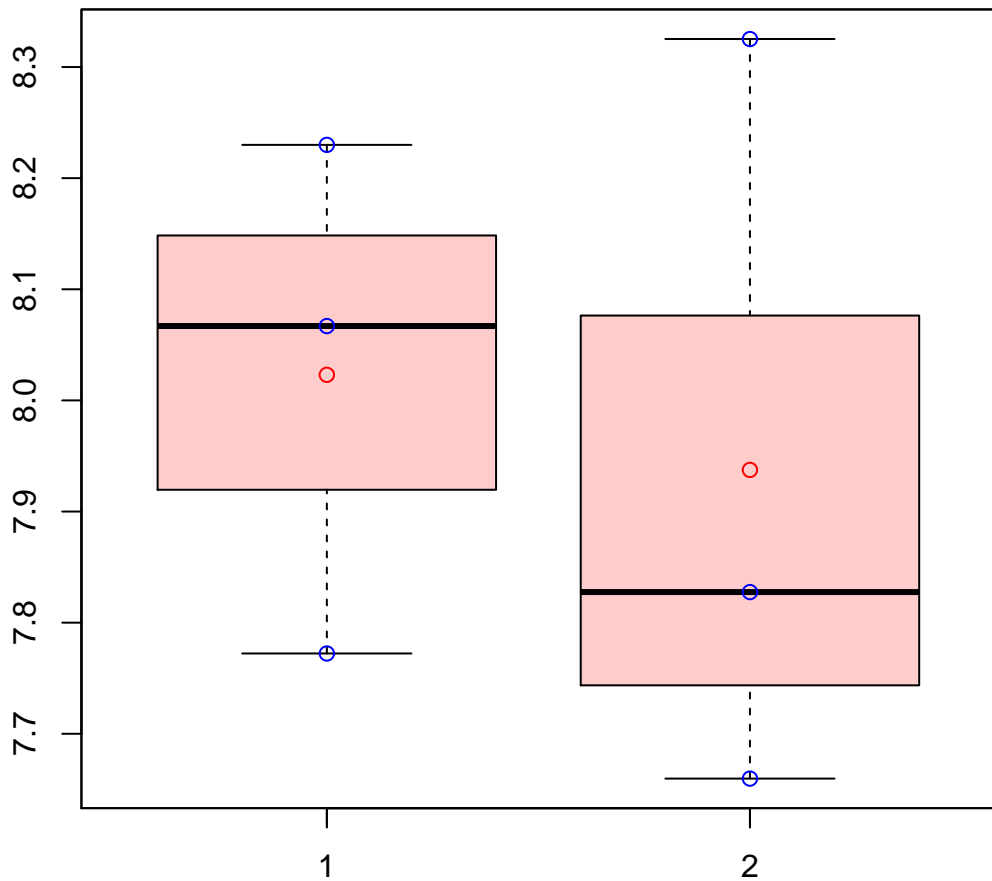

t-Test: p-value = 0.74

# CL3494Contig6|CL3494Contig6

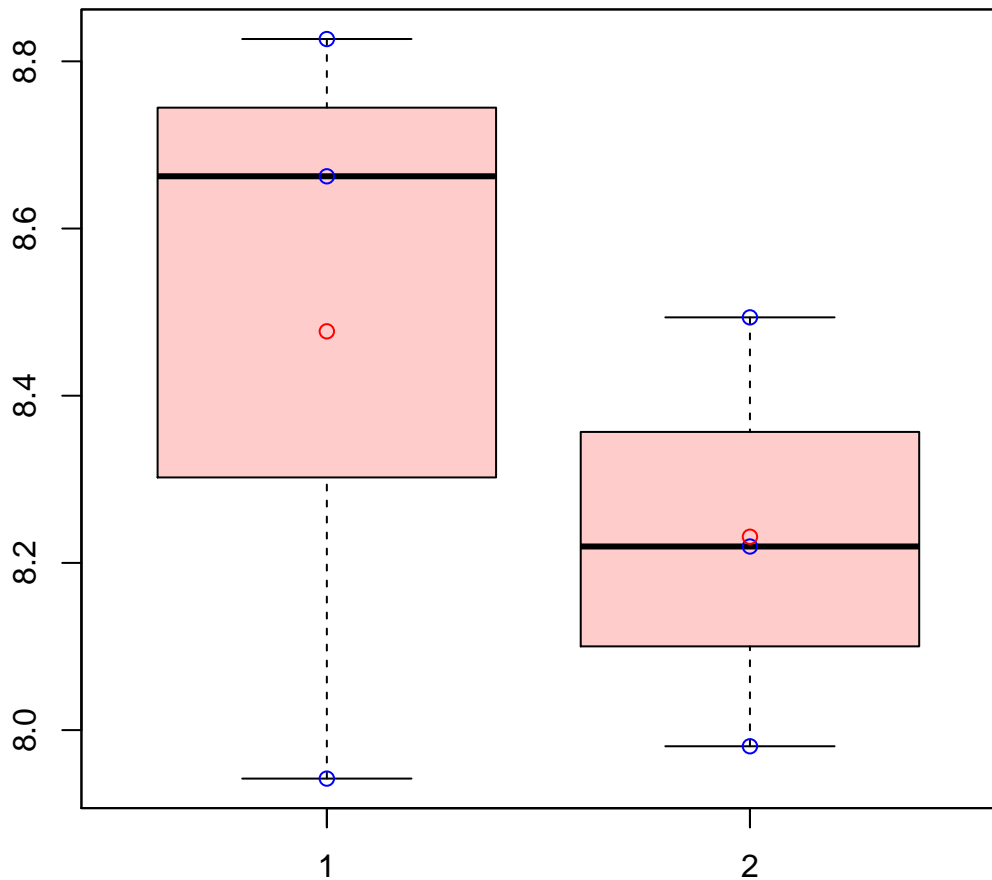

t-Test: p-value = 0.48

# CL3496Contig11|CL3496Contig11

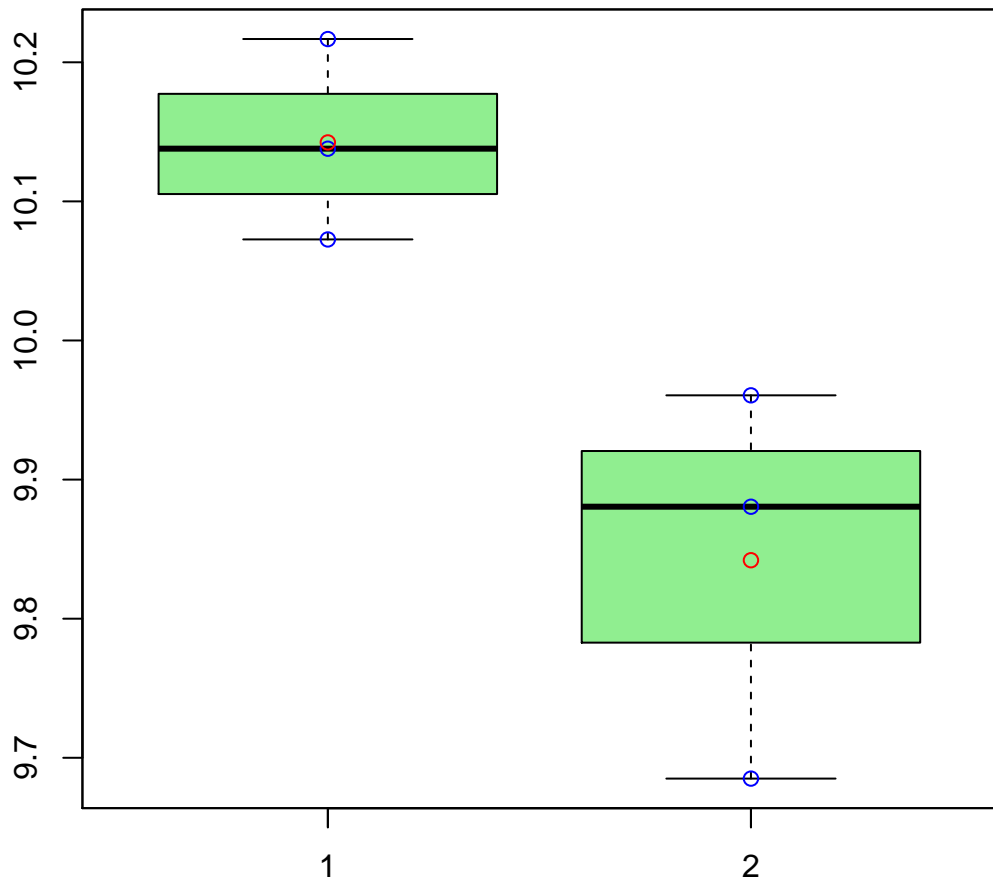

t-Test: p-value = 0.05

# CL3496Contig3|CL3496Contig3

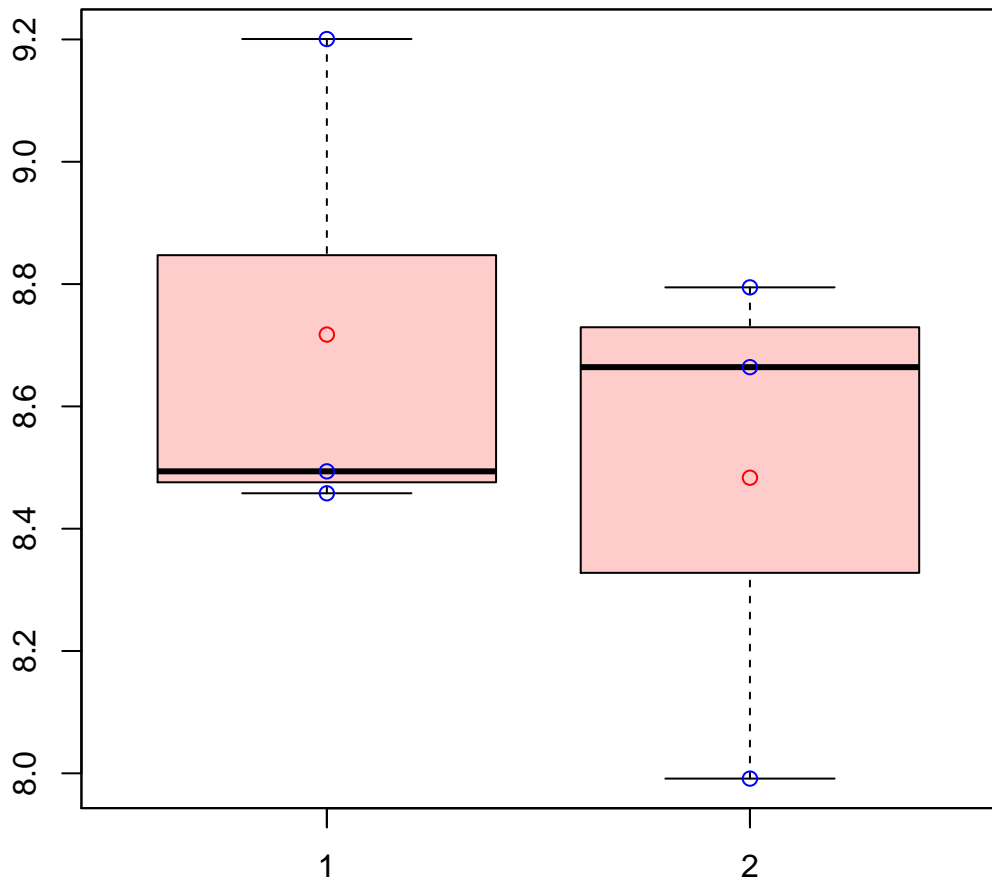

t-Test: p-value = 0.54

# CL3496Contig6|CL3496Contig6

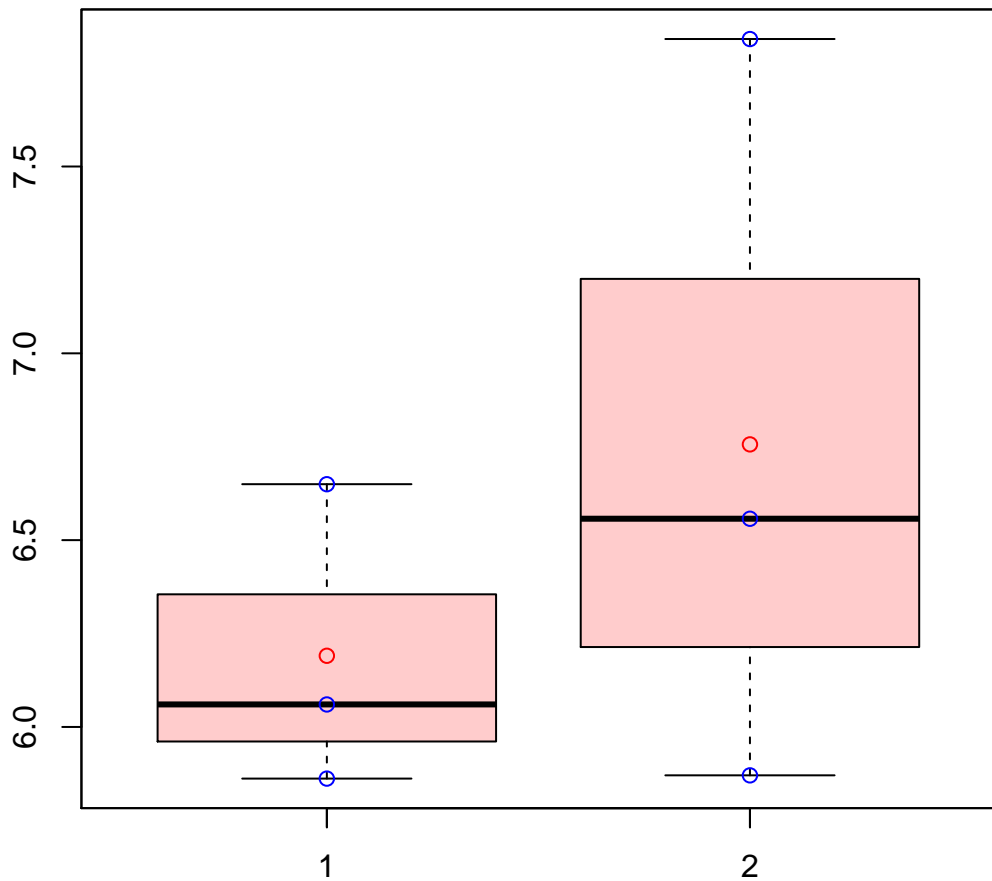

t-Test: p-value = 0.44

# CL3498Contig2|CL3498Contig2

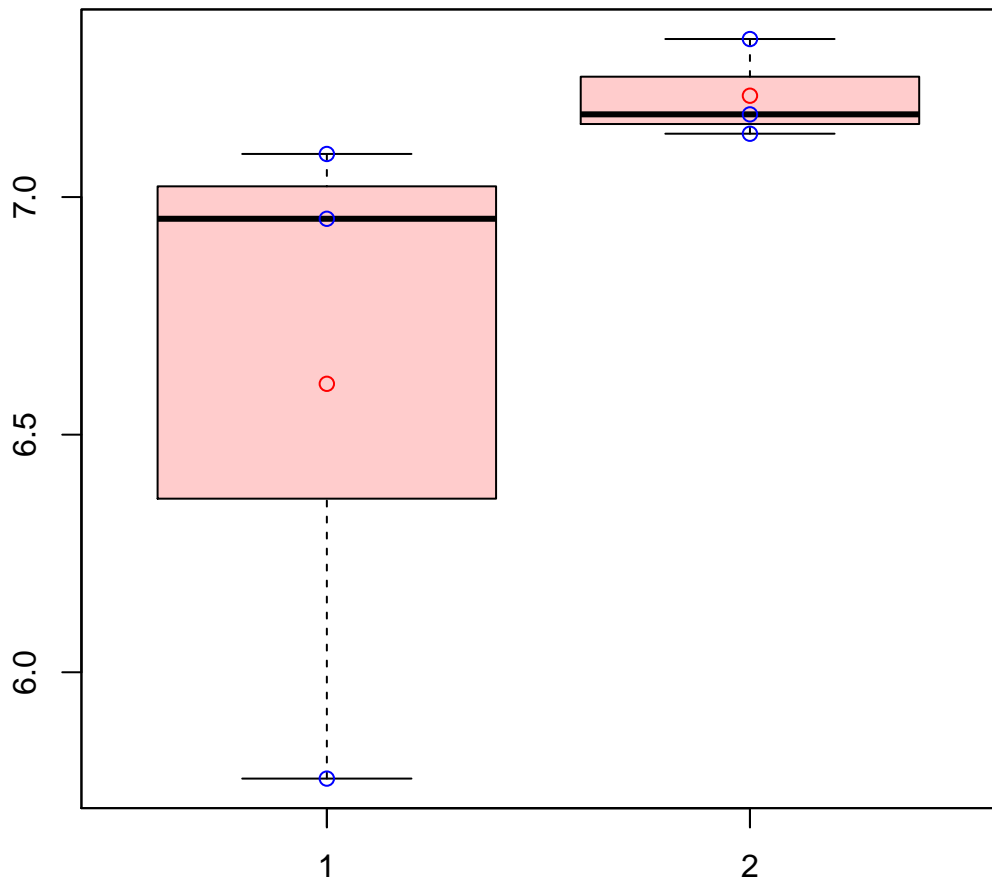

t-Test: p-value = 0.28



# CL34Contig20|CL34Contig20

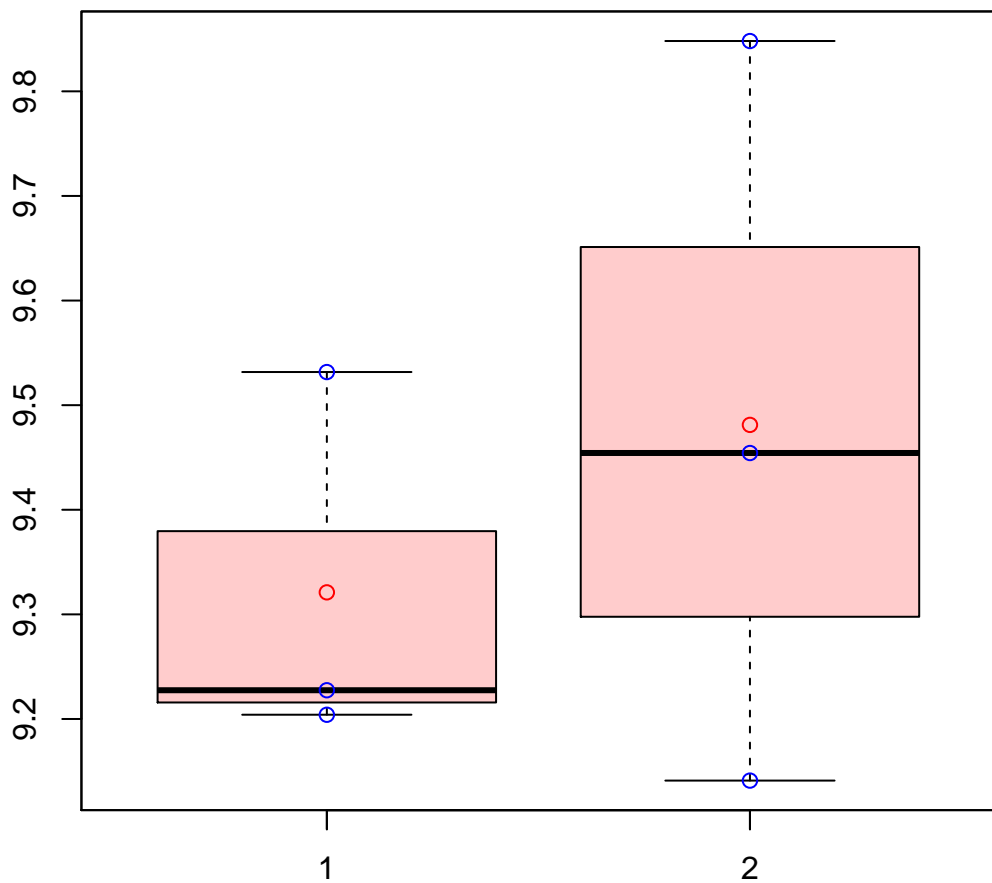

t-Test: p-value = 0.54

# CL34Contig30|CL34Contig30

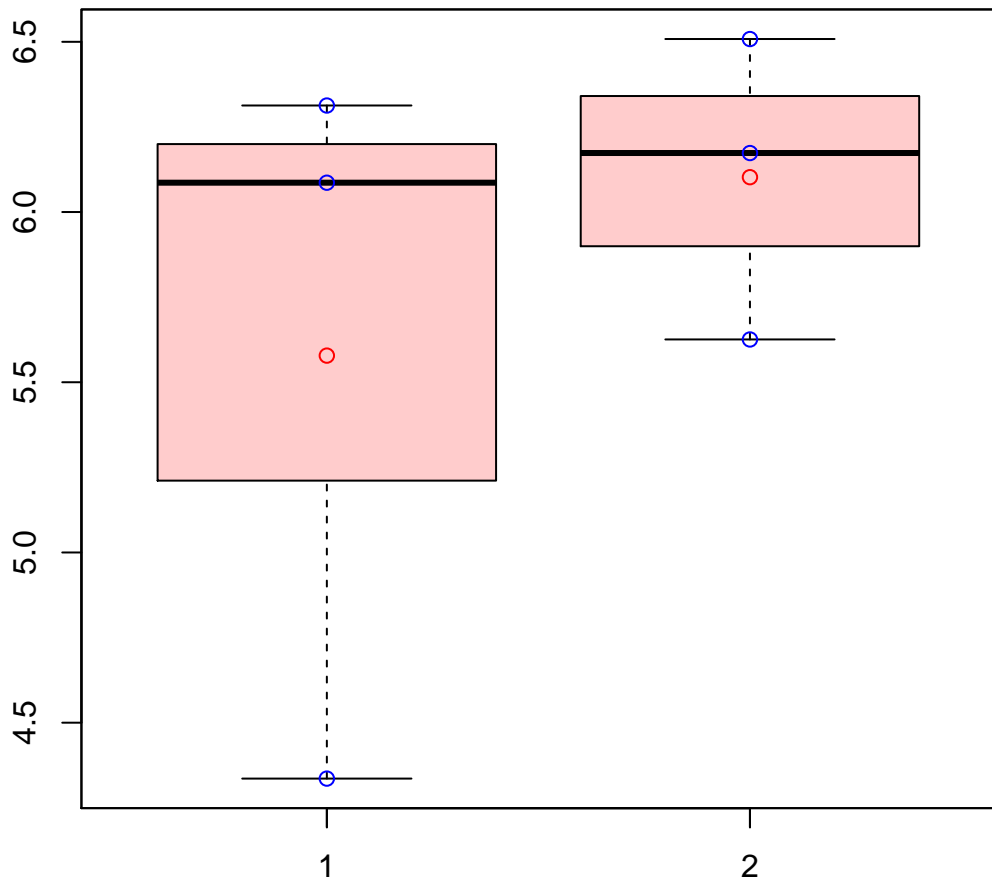

t-Test: p-value = 0.5

# CL3500Contig2|CL3500Contig2

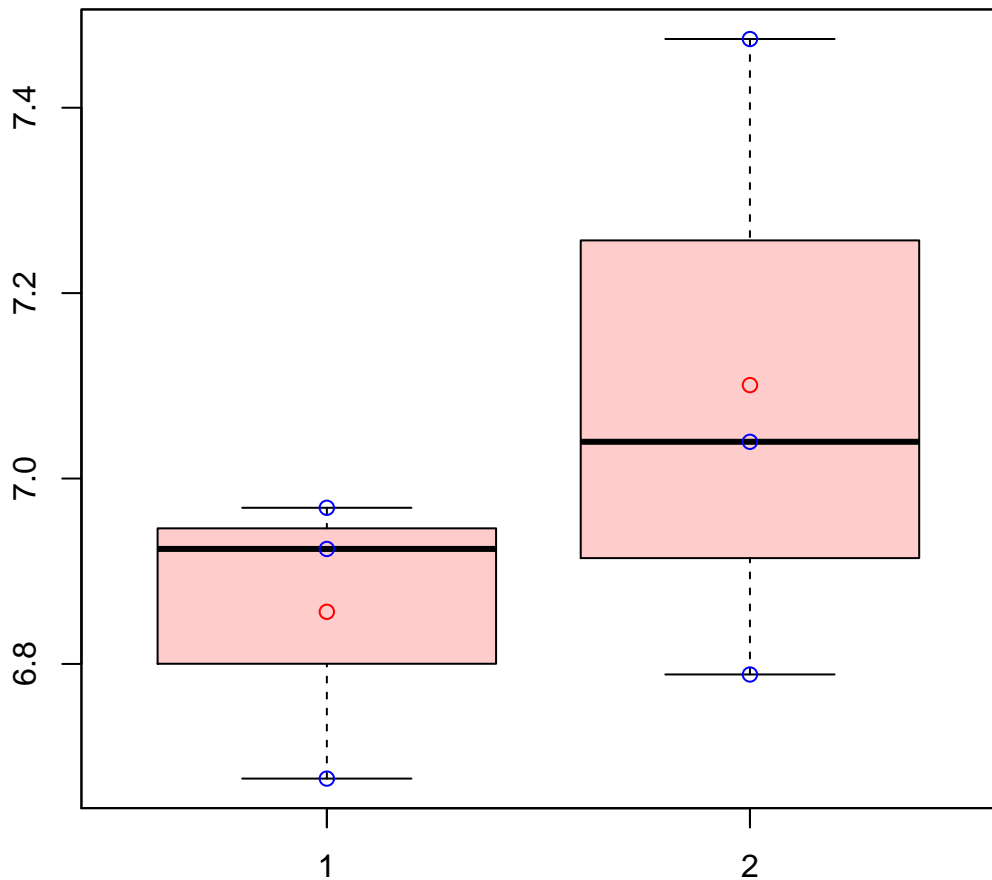

t-Test: p-value = 0.35

# CL3503Contig2|CL3503Contig2

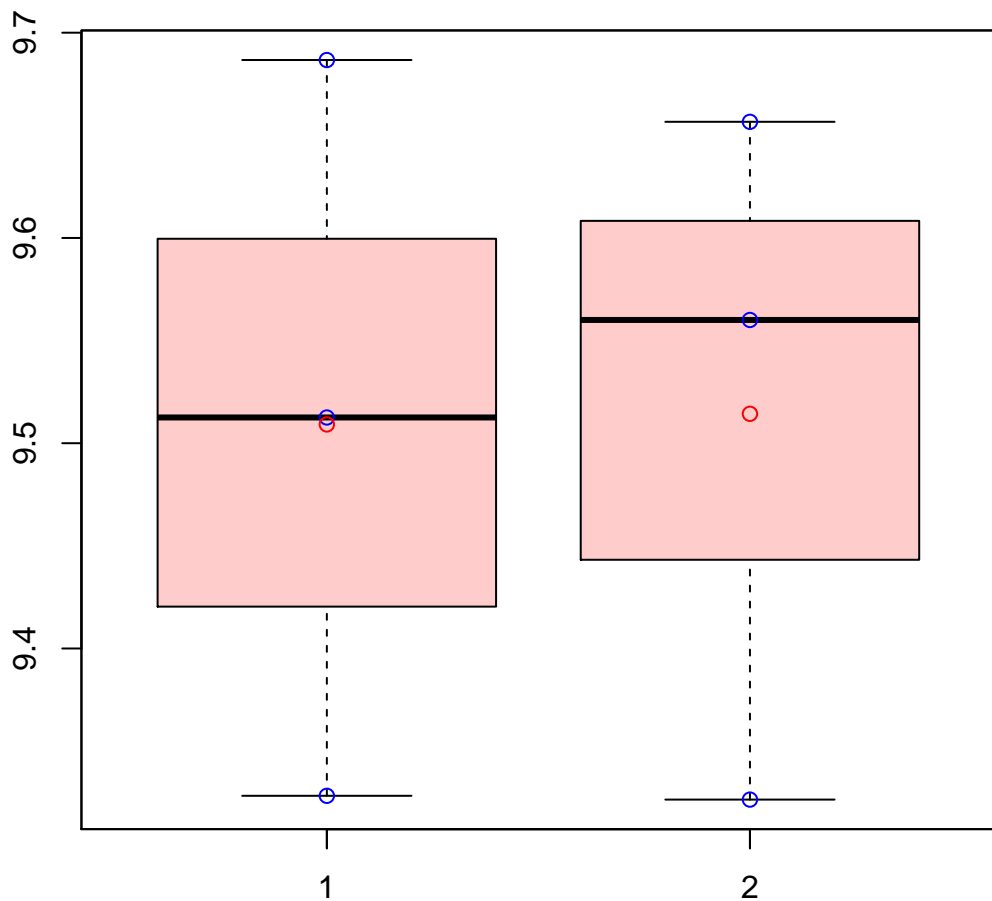

t-Test: p-value = 0.97

# CL3504Contig1|CL3504Contig1

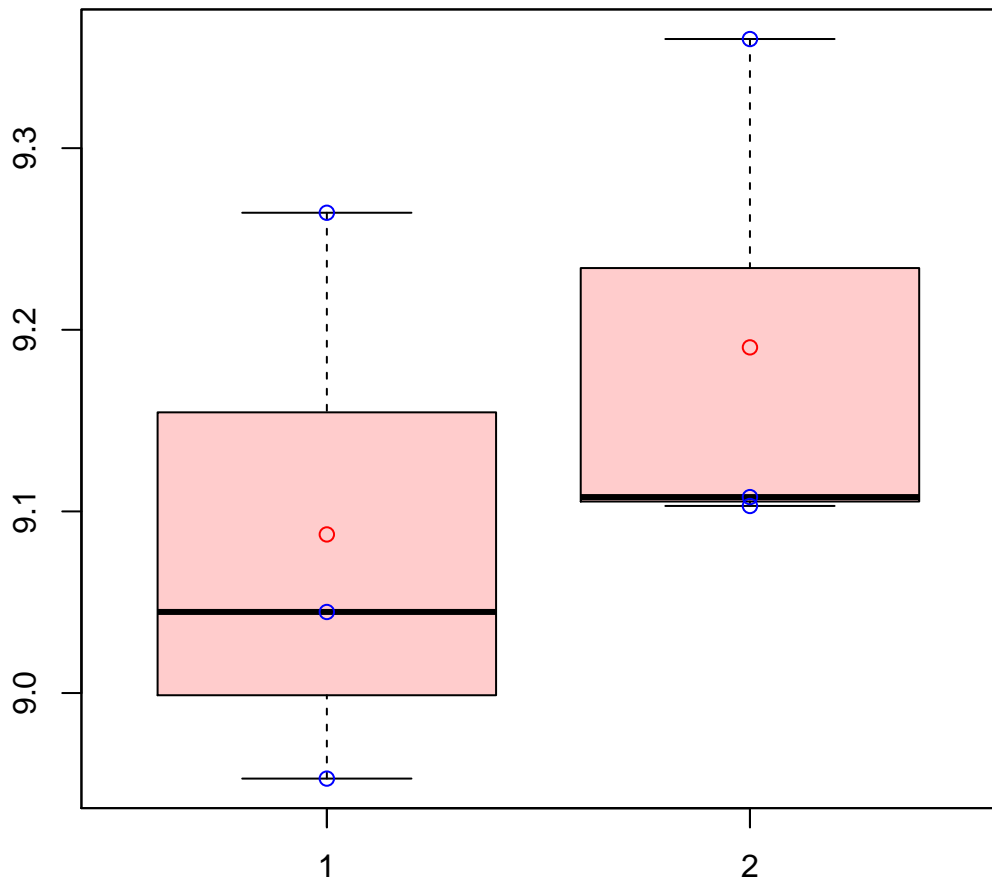

t-Test: p-value = 0.46

# CL3508Contig1|CL3508Contig1

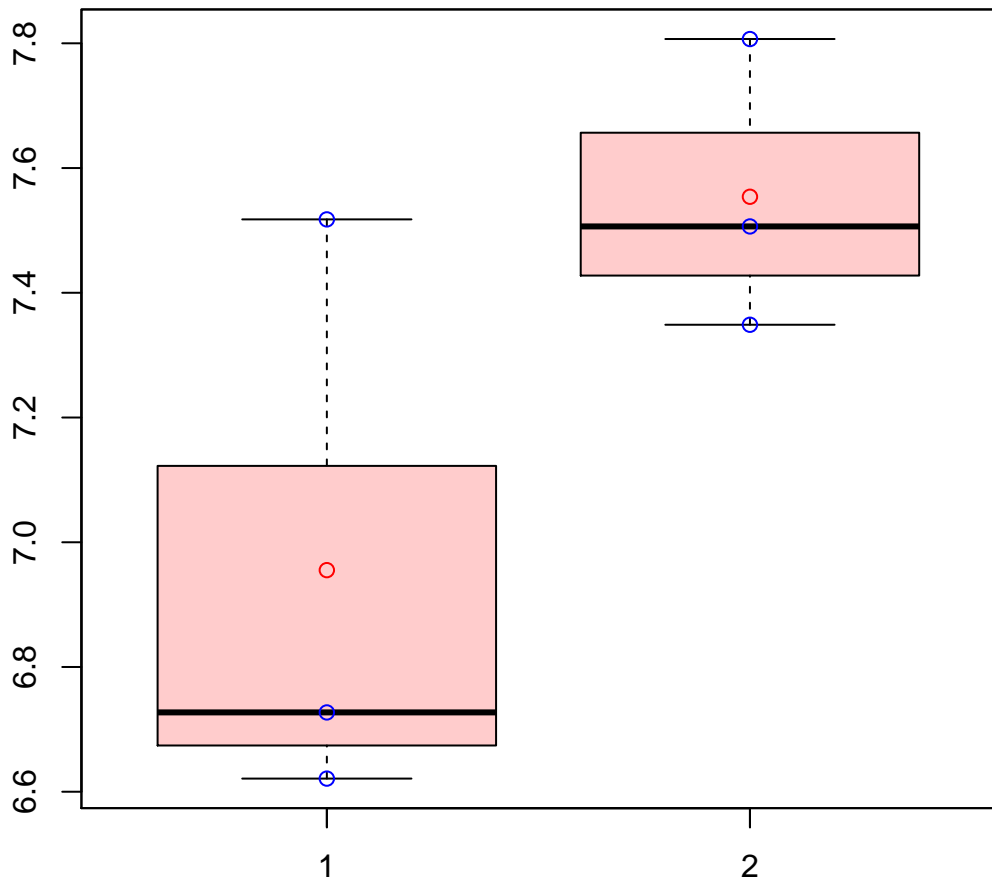

t-Test: p-value = 0.16

# CL3513Contig2|CL3513Contig2

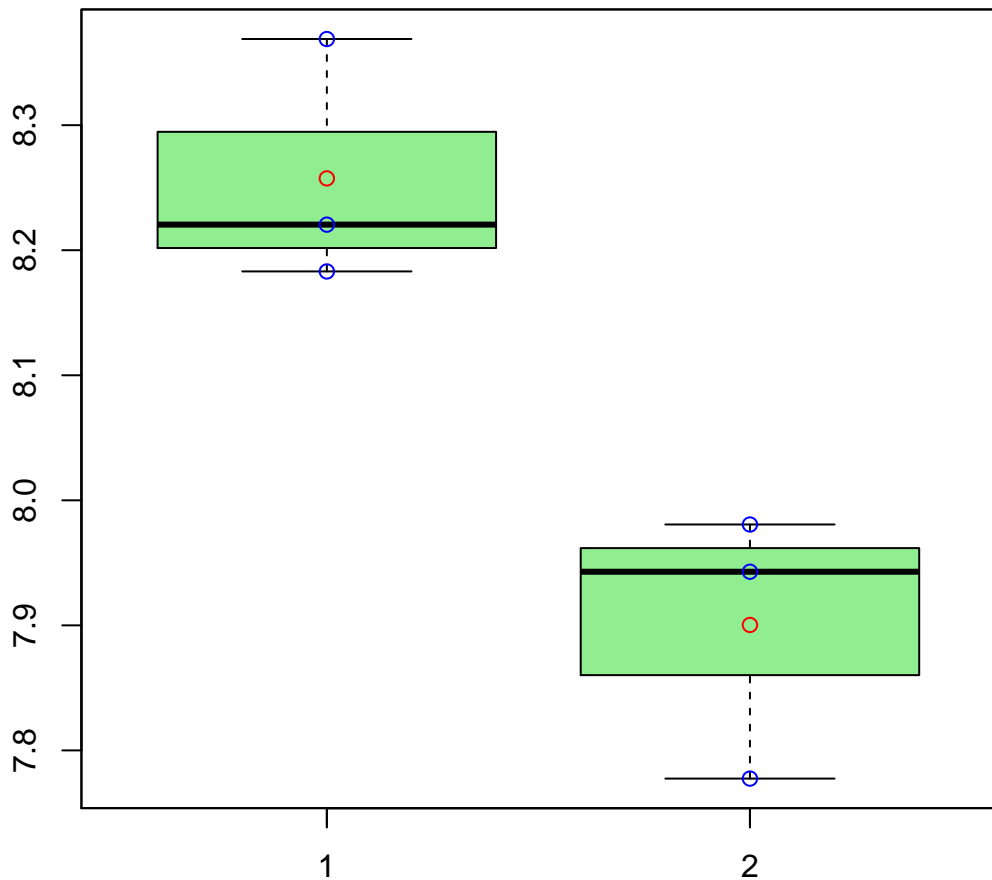

t-Test: p-value = 0.01

# CL351Contig1|CL351Contig1

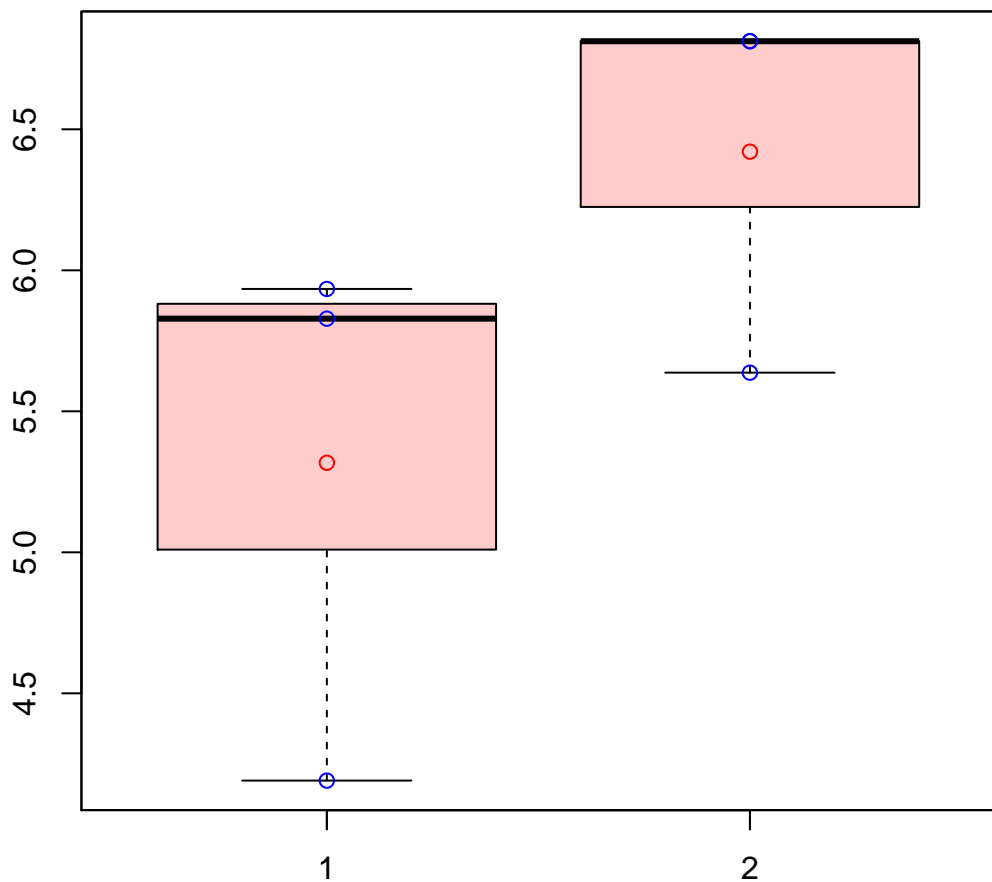

t-Test: p-value = 0.19



# CL3523Contig3|CL3523Contig3

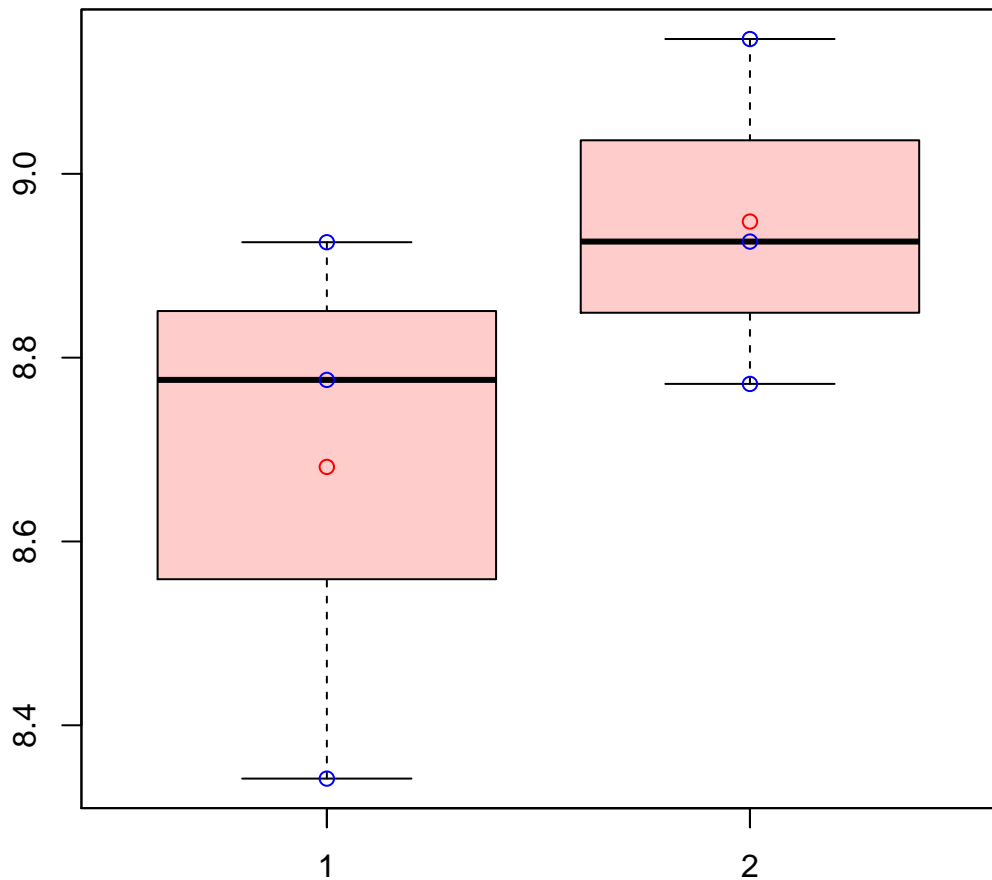

t-Test: p-value = 0.28

# CL3523Contig5|CL3523Contig5

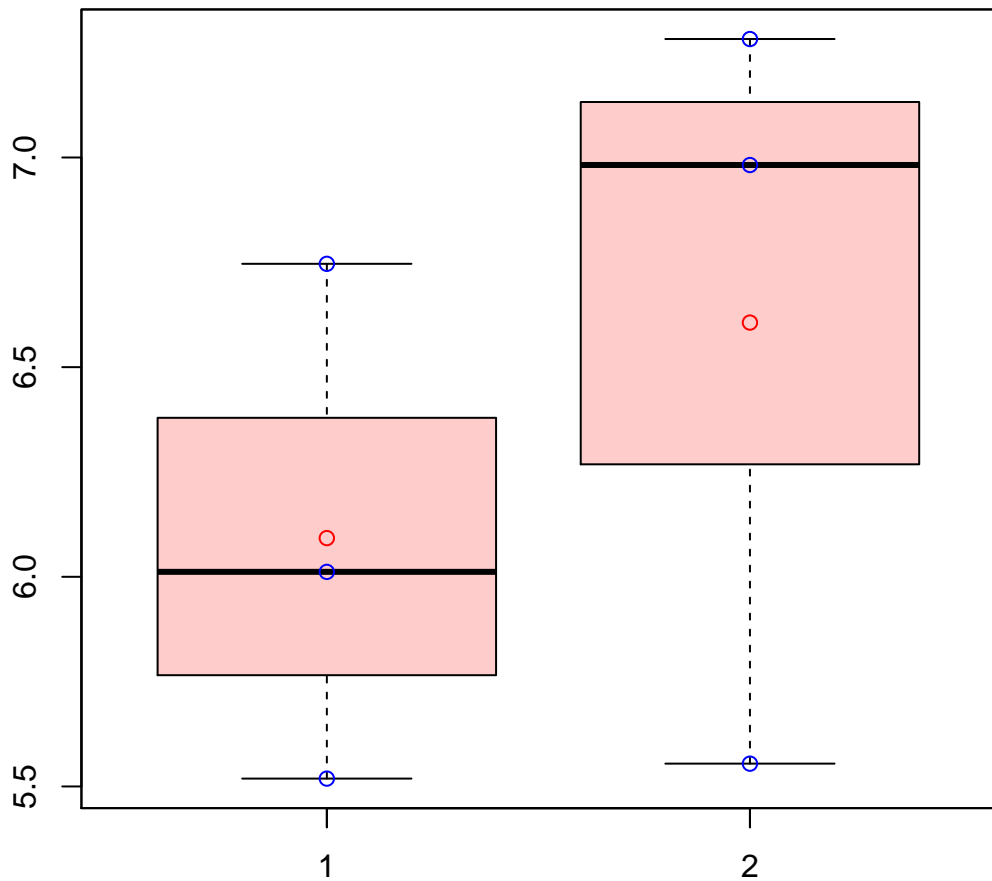

t-Test: p-value = 0.47

# CL3523Contig7|CL3523Contig7

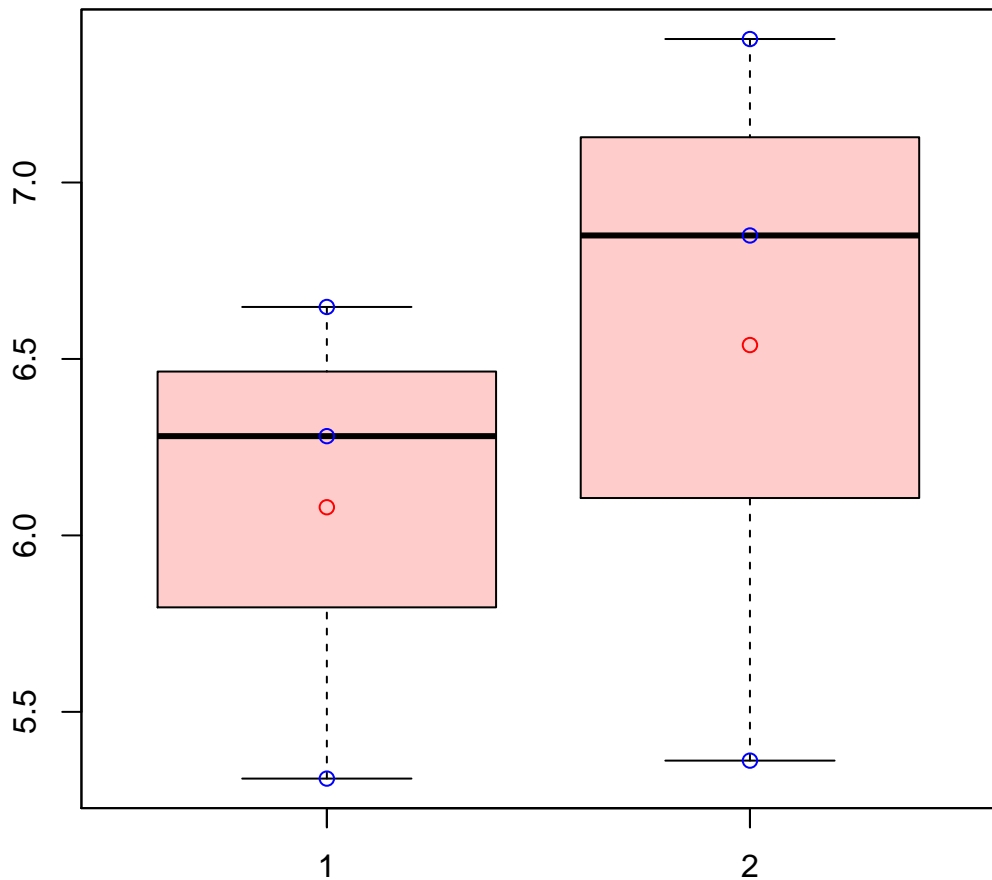

t-Test: p-value = 0.57

# CL3525Contig4|CL3525Contig4

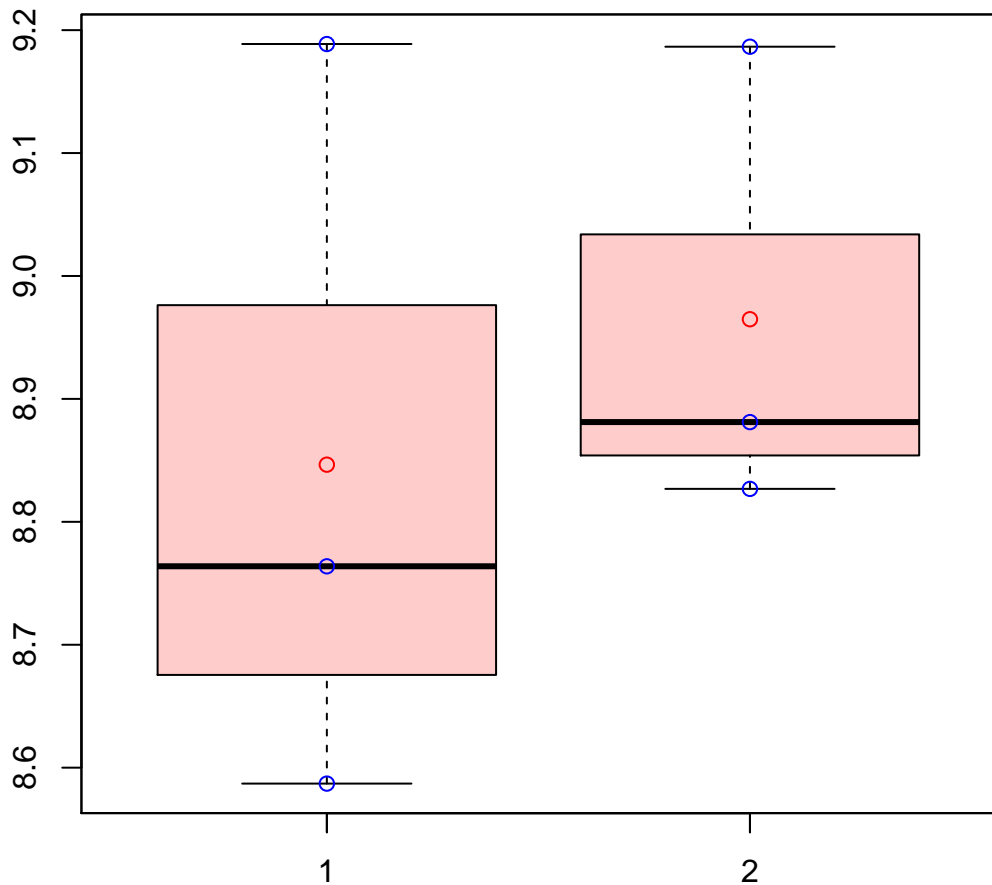

t-Test: p-value = 0.61

# CL3534Contig2|CL3534Contig2

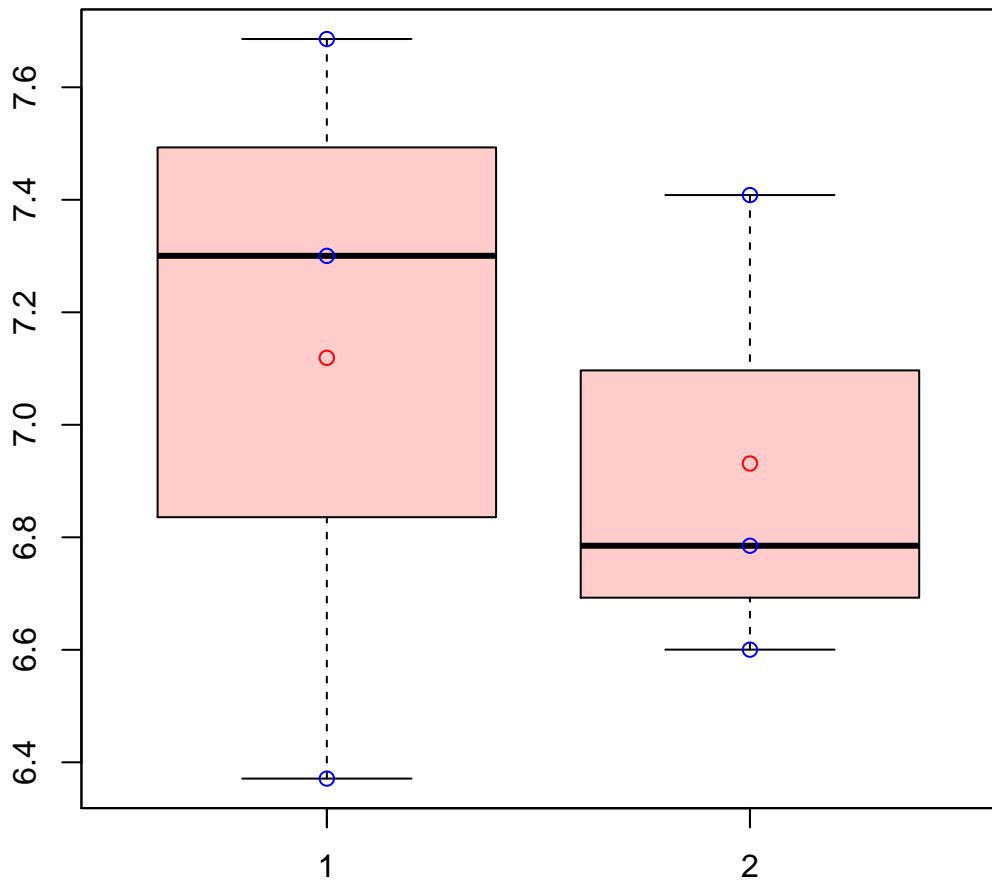

t-Test: p-value = 0.71

# CL3535Contig7|CL3535Contig7

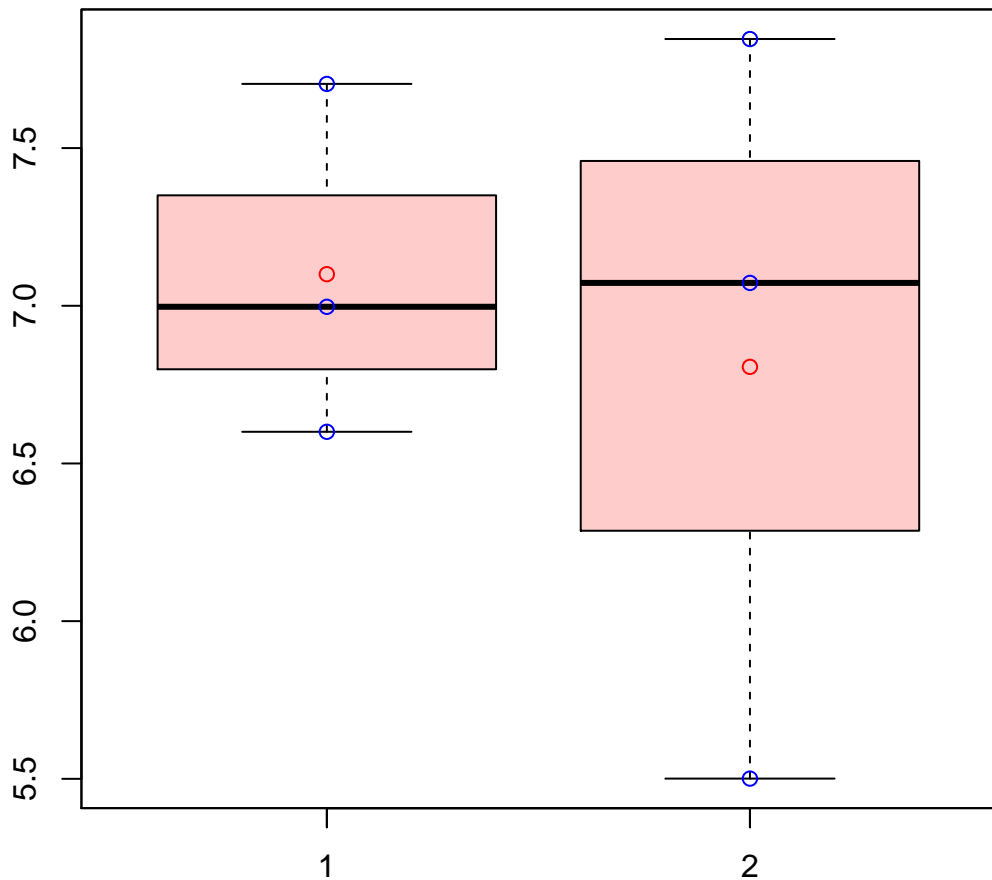

t-Test: p-value = 0.73

# CL3545Contig2|CL3545Contig2

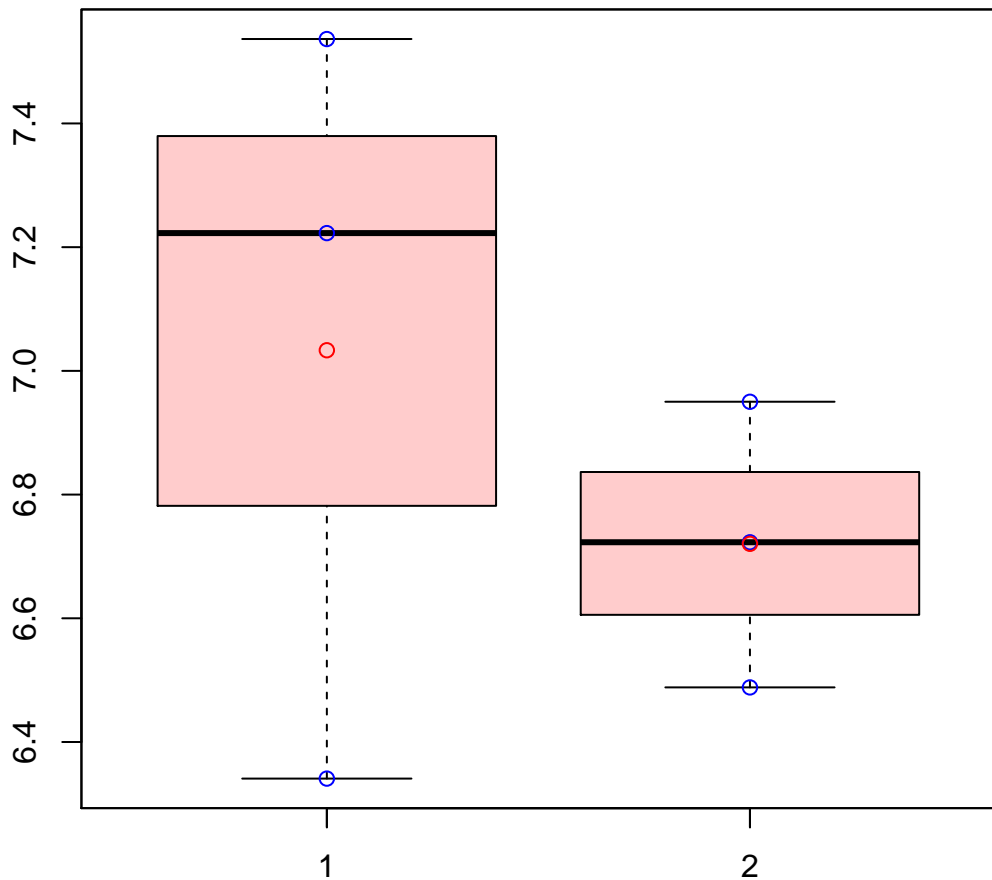

t-Test: p-value = 0.48

# CL354Contig2|CL354Contig2

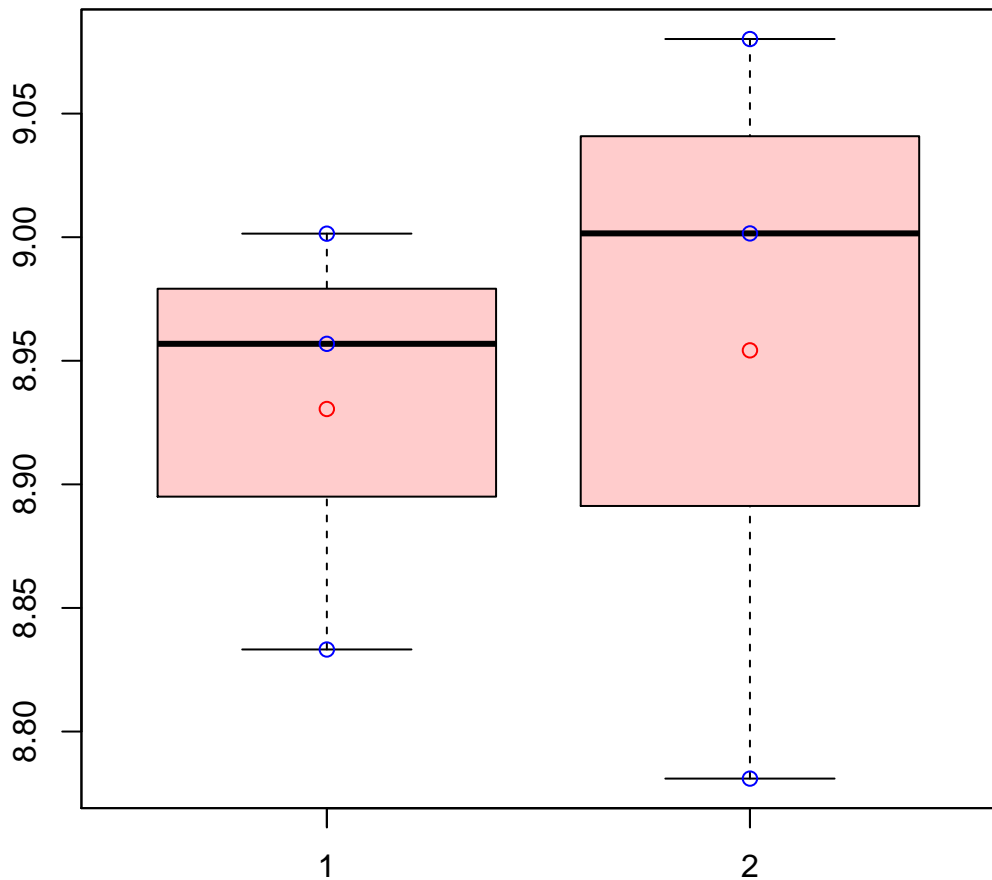

t-Test: p-value = 0.83



# CL3551Contig1|CL3551Contig1

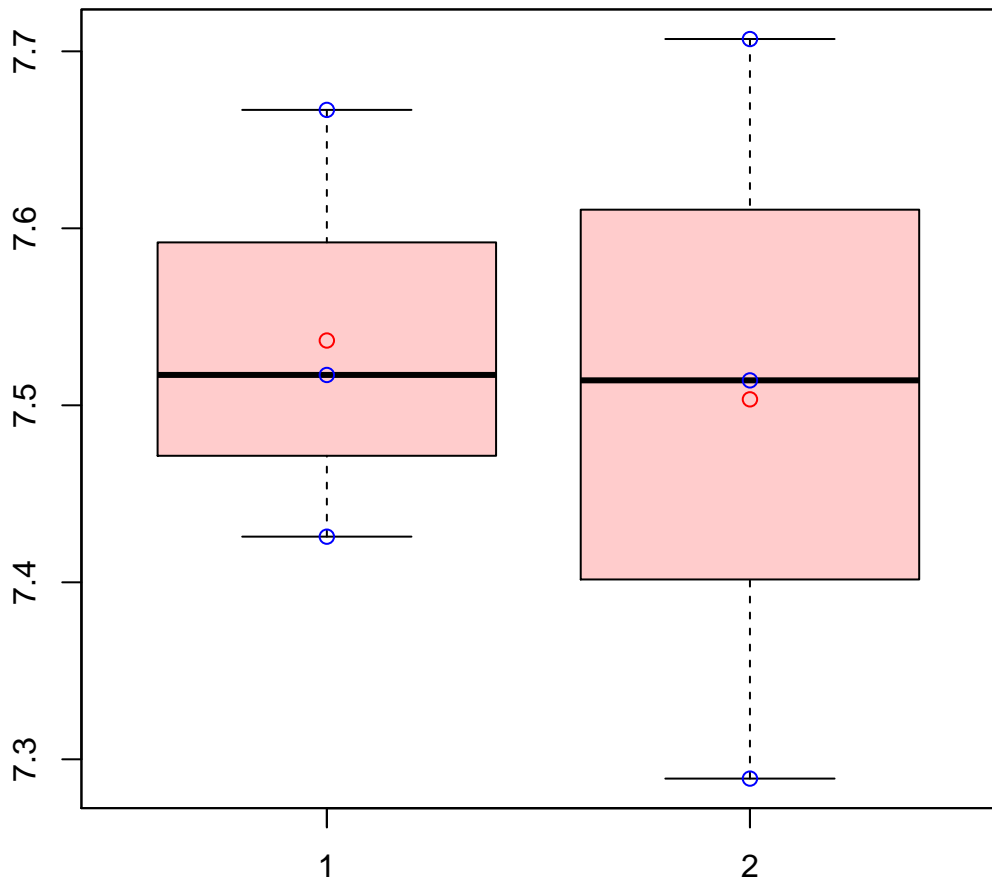

t-Test: p-value = 0.83

# CL3553Contig2|CL3553Contig2

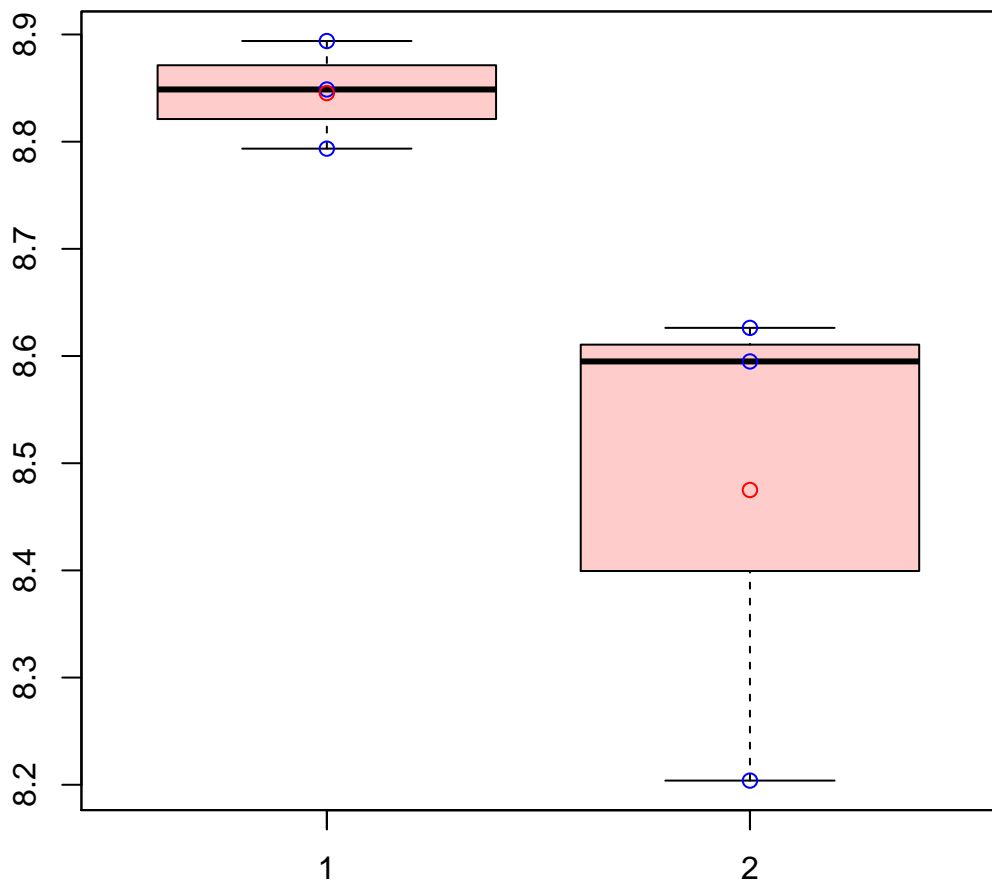

# CL3555Contig1|CL3555Contig1

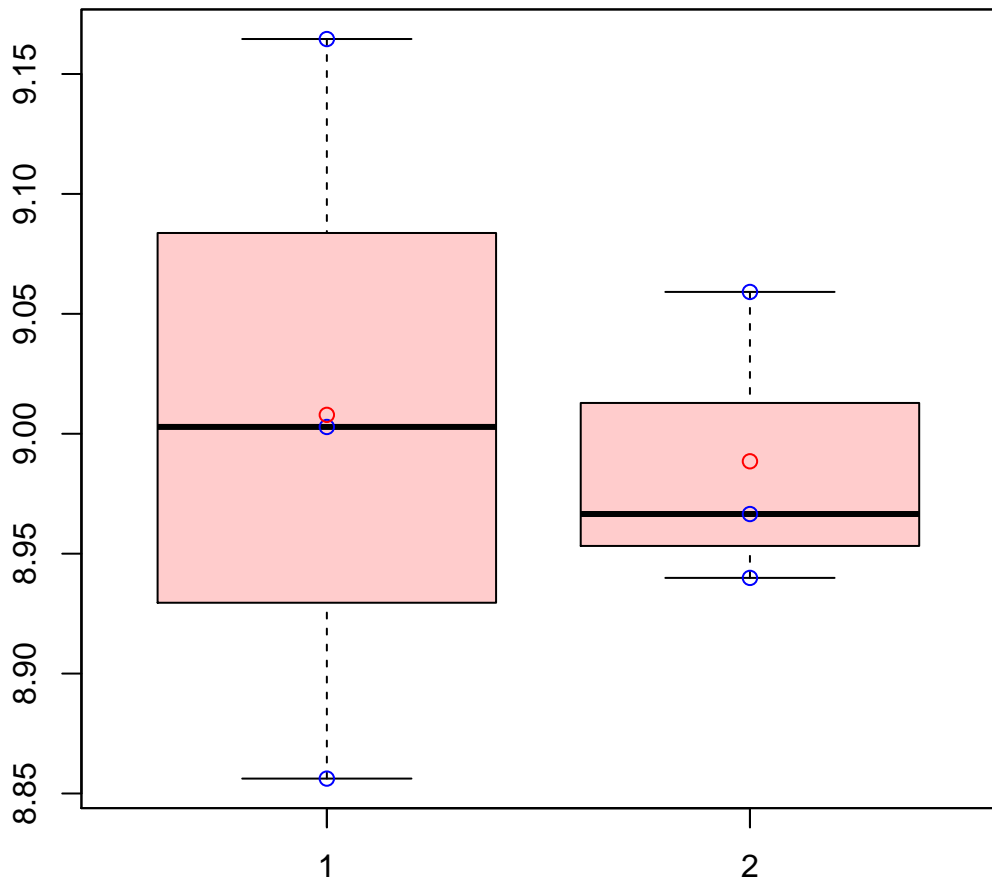

t-Test: p-value = 0.85

# CL3570Contig6|CL3570Contig6

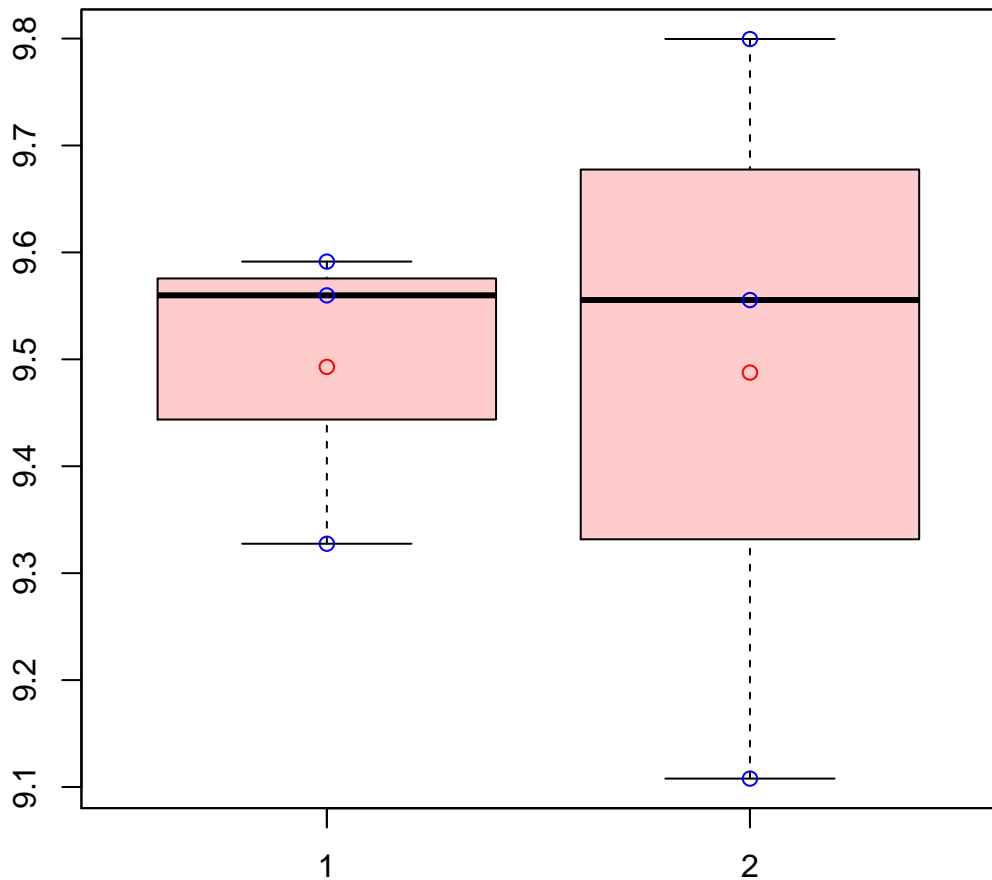

t-Test: p-value = 0.98

# CL3573Contig2|CL3573Contig2

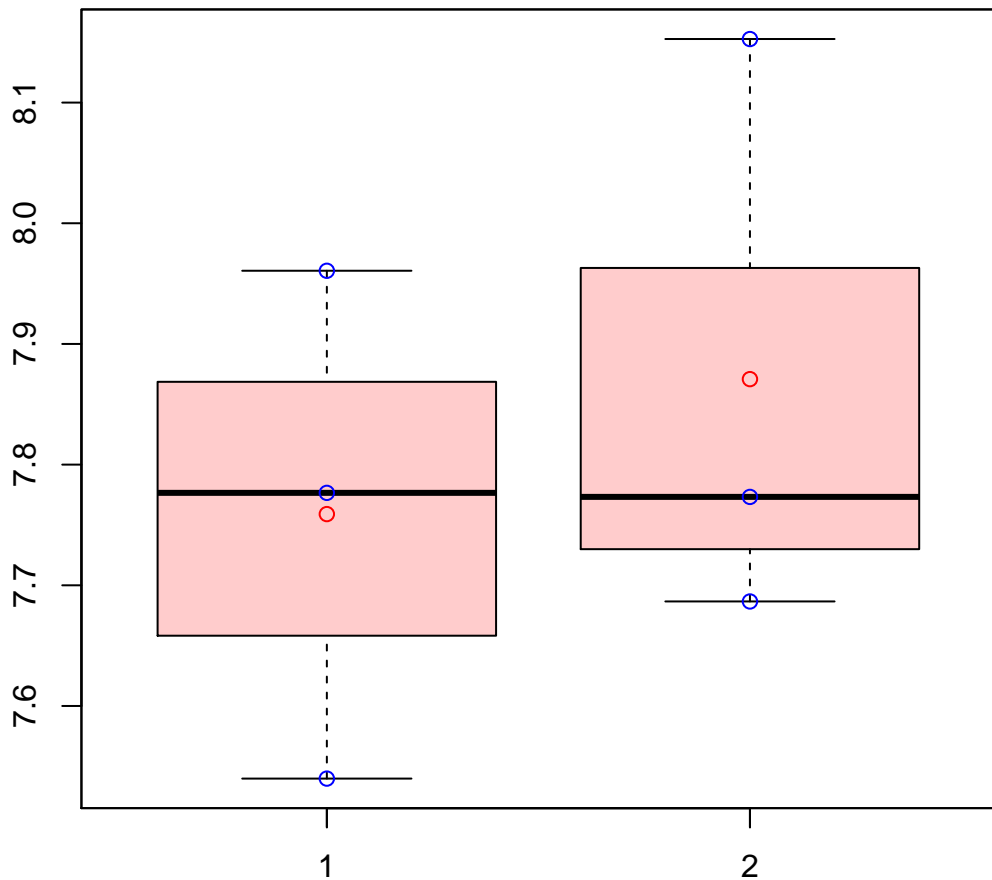

t-Test: p-value = 0.58

# CL3585Contig2|CL3585Contig2

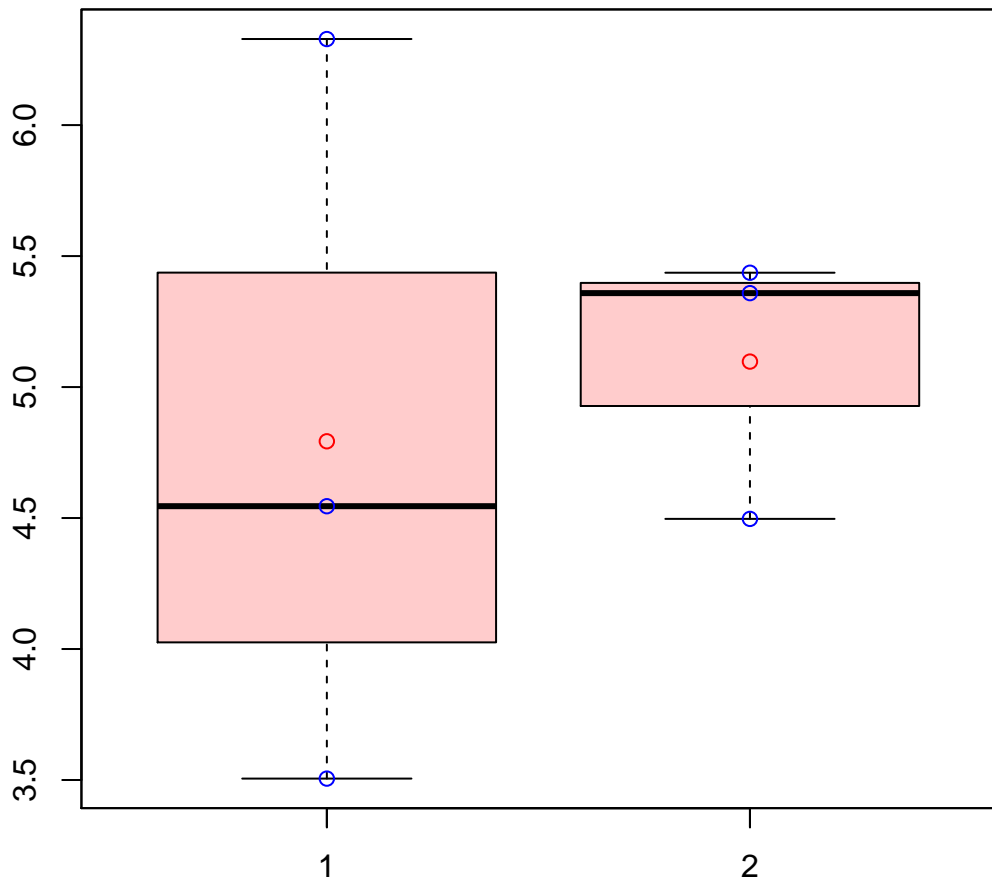

t-Test: p-value = 0.76

# CL3598Contig1|CL3598Contig1

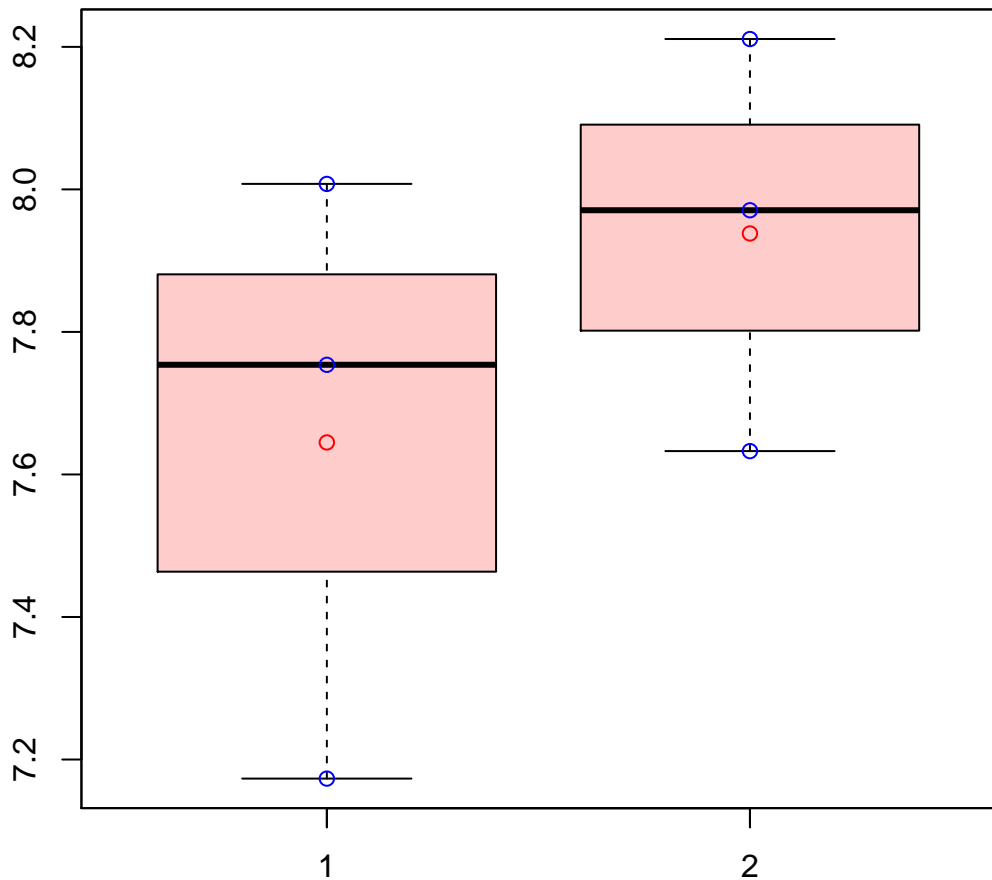

t-Test: p-value = 0.39

# CL35Contig17|CL35Contig17

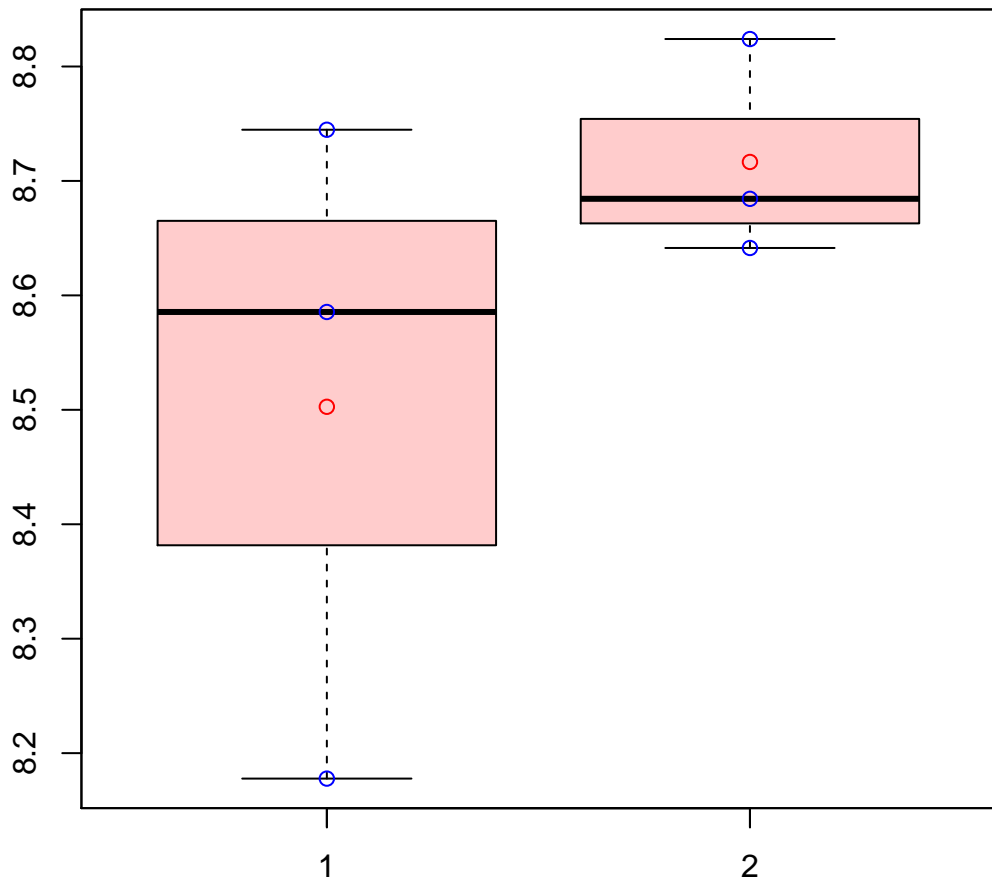

t-Test: p-value = 0.33



# CL35Contig7|CL35Contig7

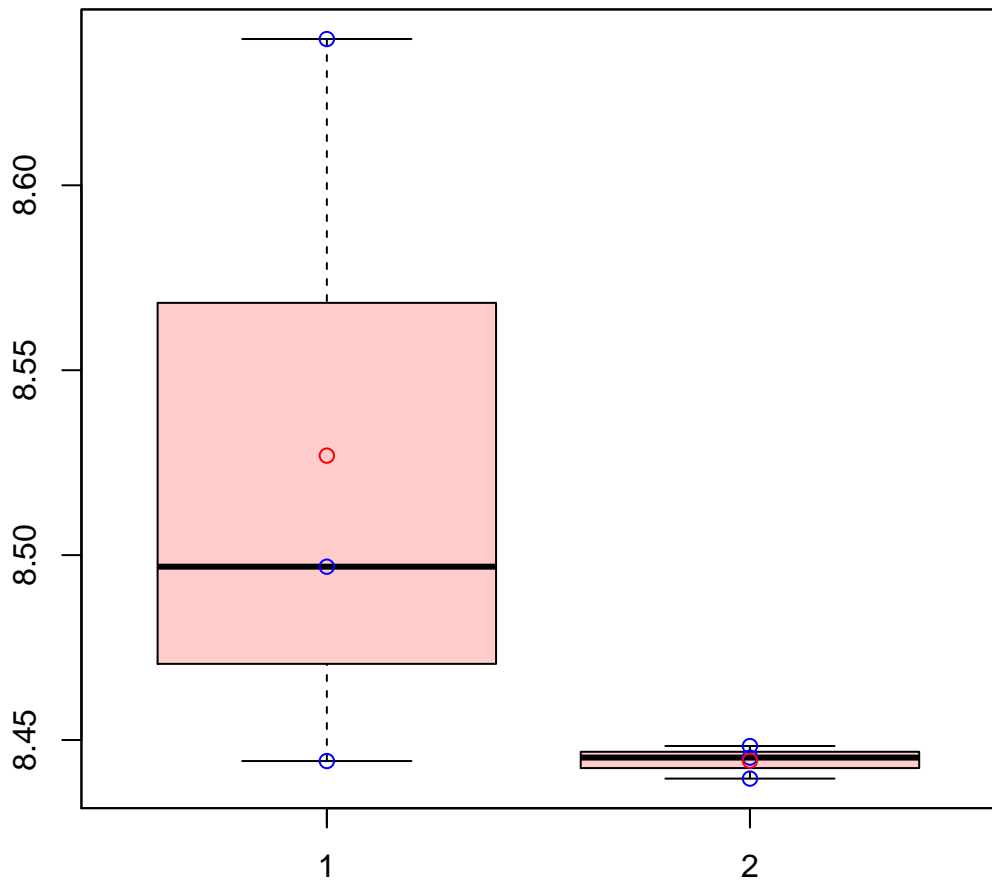

t-Test: p-value = 0.29

# CL3600Contig2|CL3600Contig2

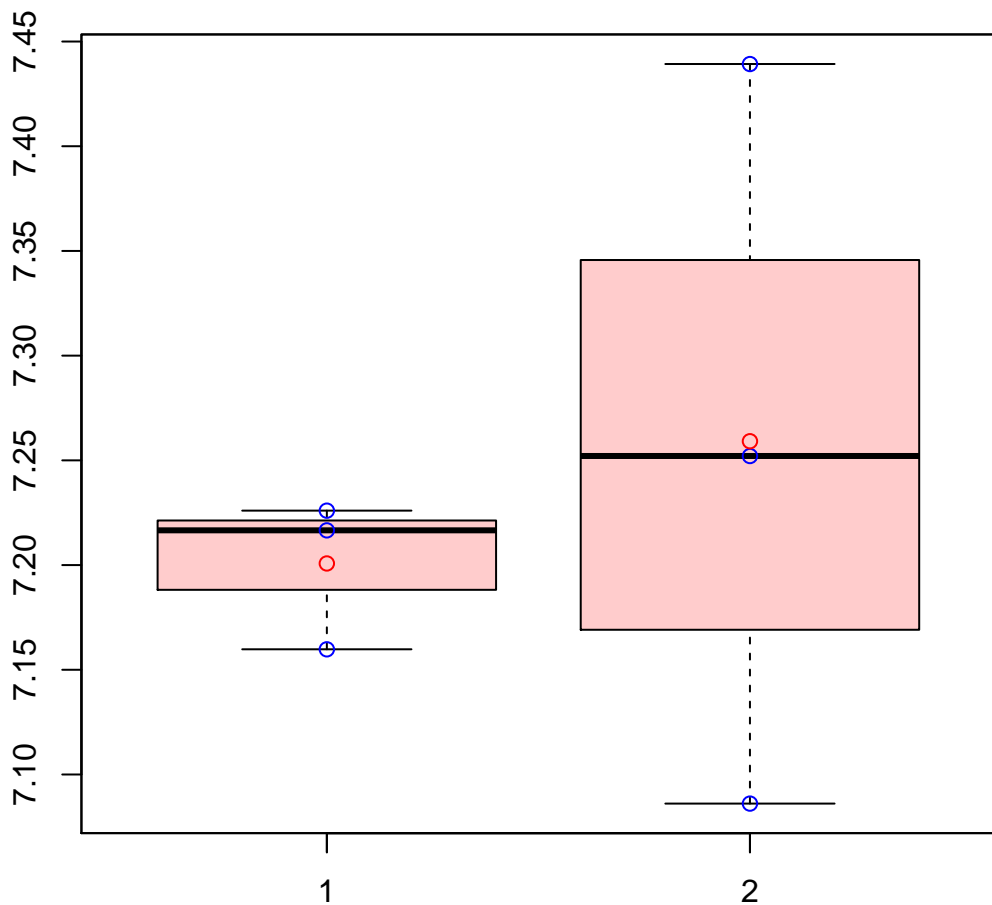

t-Test: p-value = 0.63

# CL360Contig2|CL360Contig2

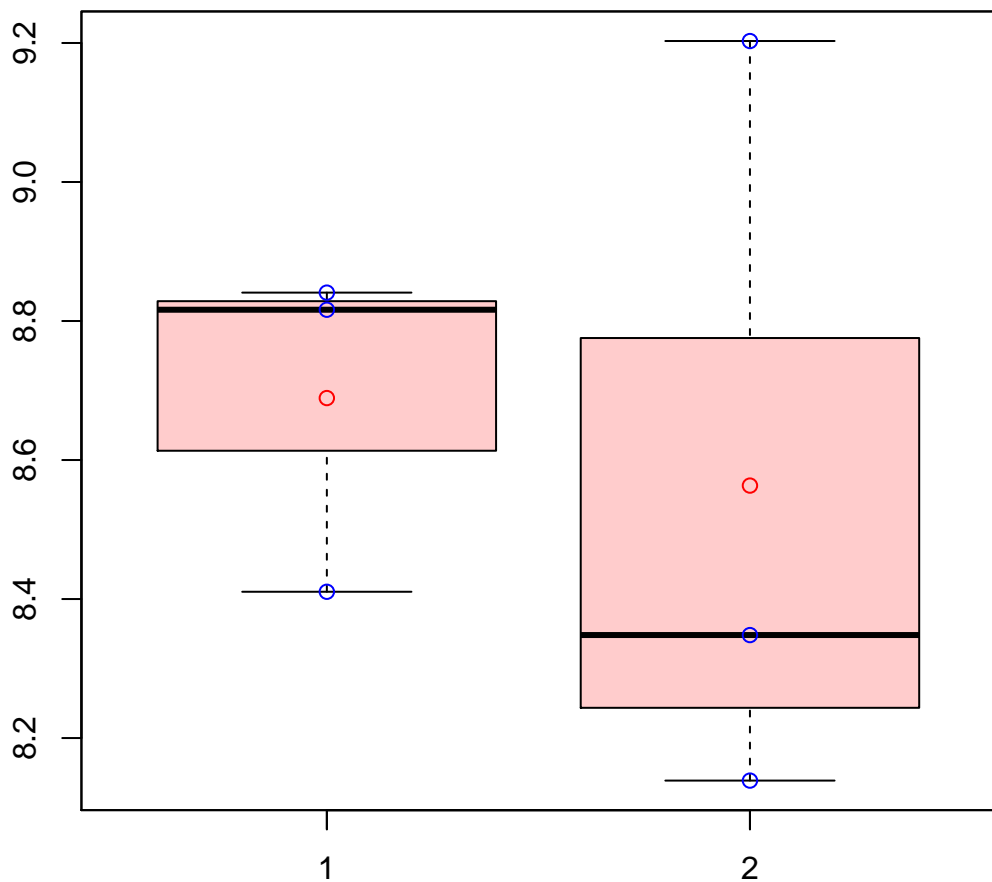

t-Test: p-value = 0.75

# CL360Contig5|CL360Contig5

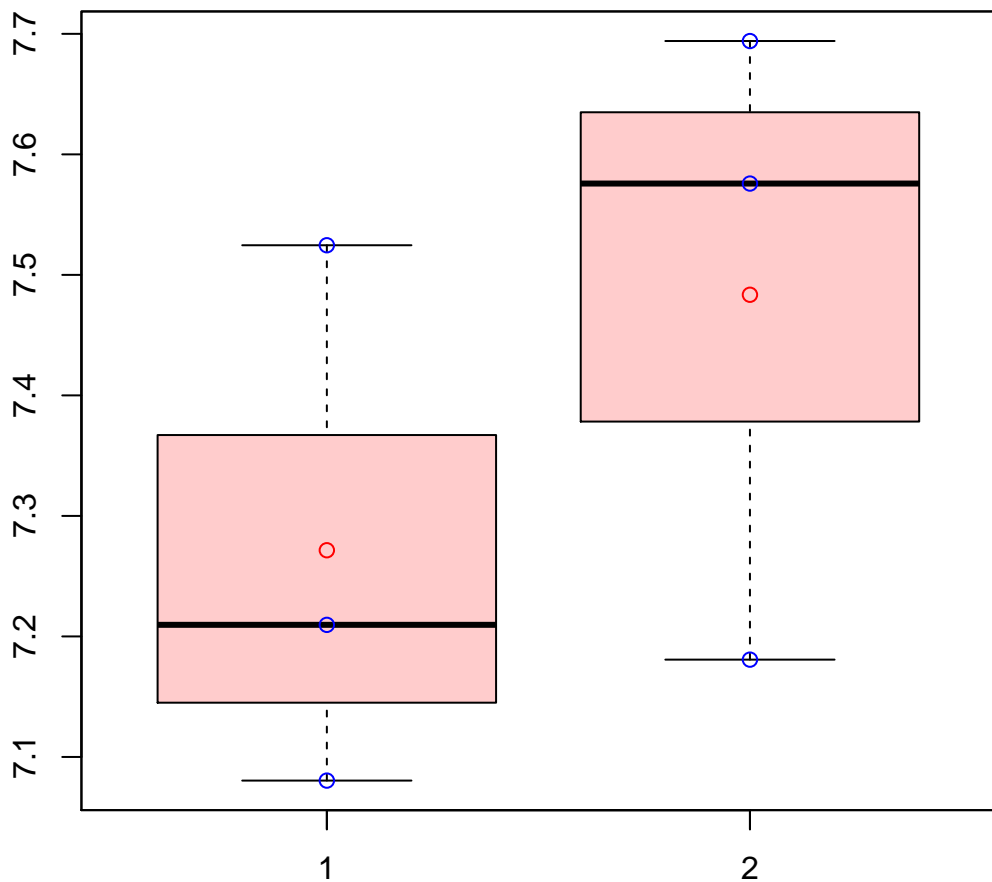

t-Test: p-value = 0.36

# CL360Contig6|CL360Contig6

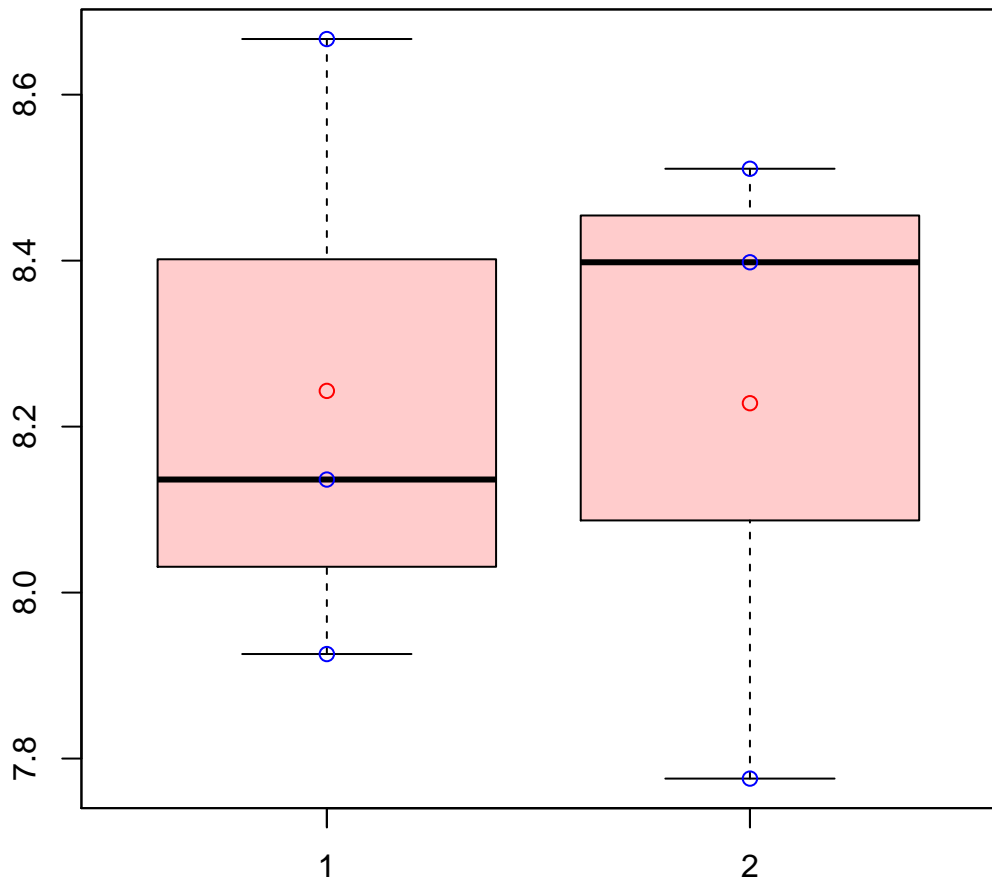

t-Test: p-value = 0.96

# CL360Contig9|CL360Contig9

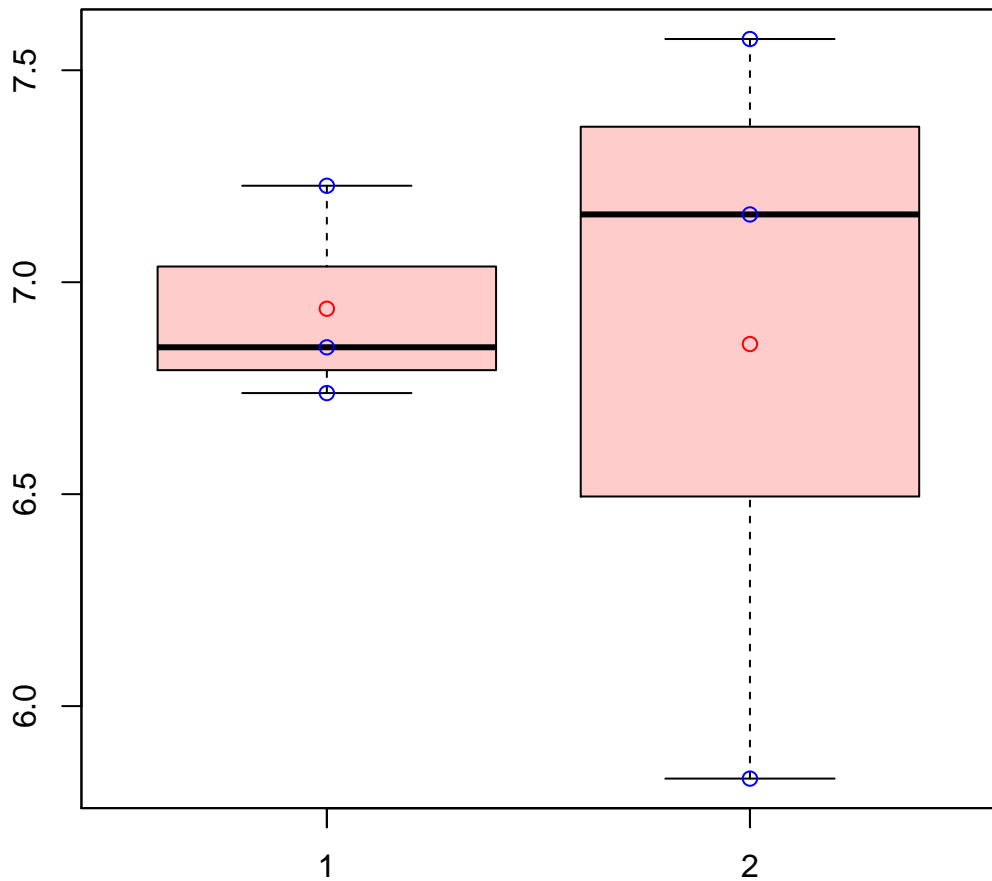

t-Test: p-value = 0.89

# CL3614Contig5|CL3614Contig5

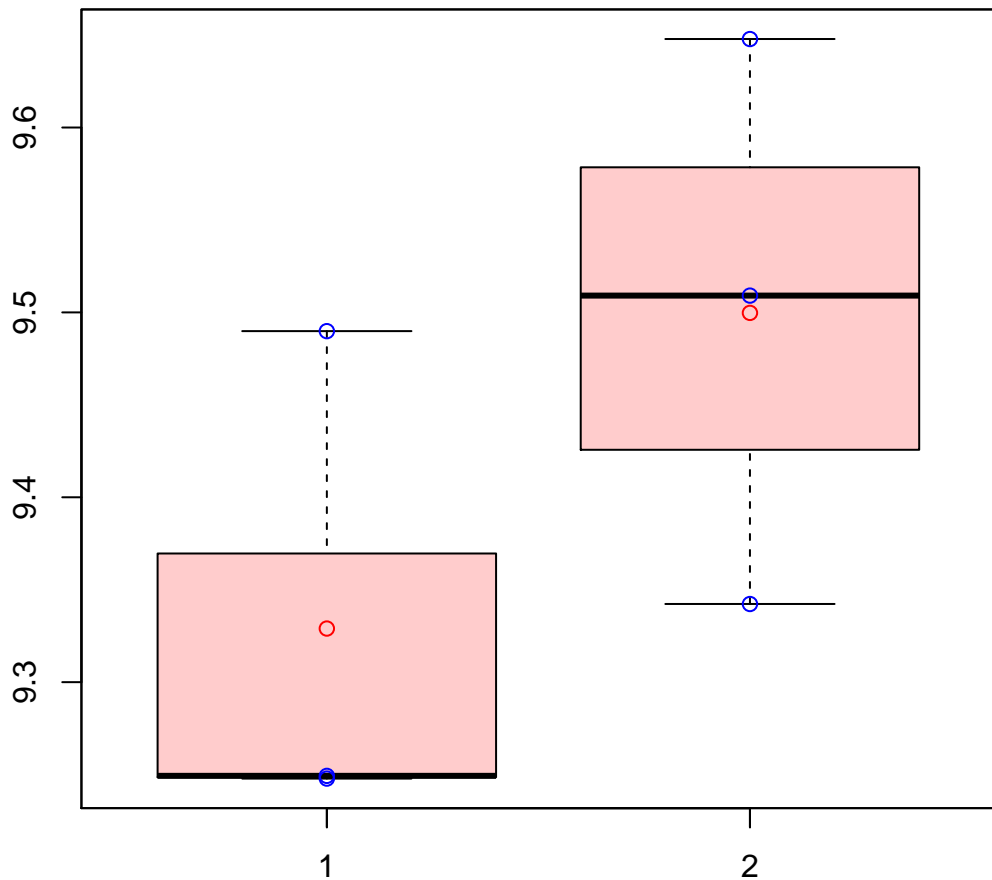

t-Test: p-value = 0.23

# CL3625Contig2|CL3625Contig2

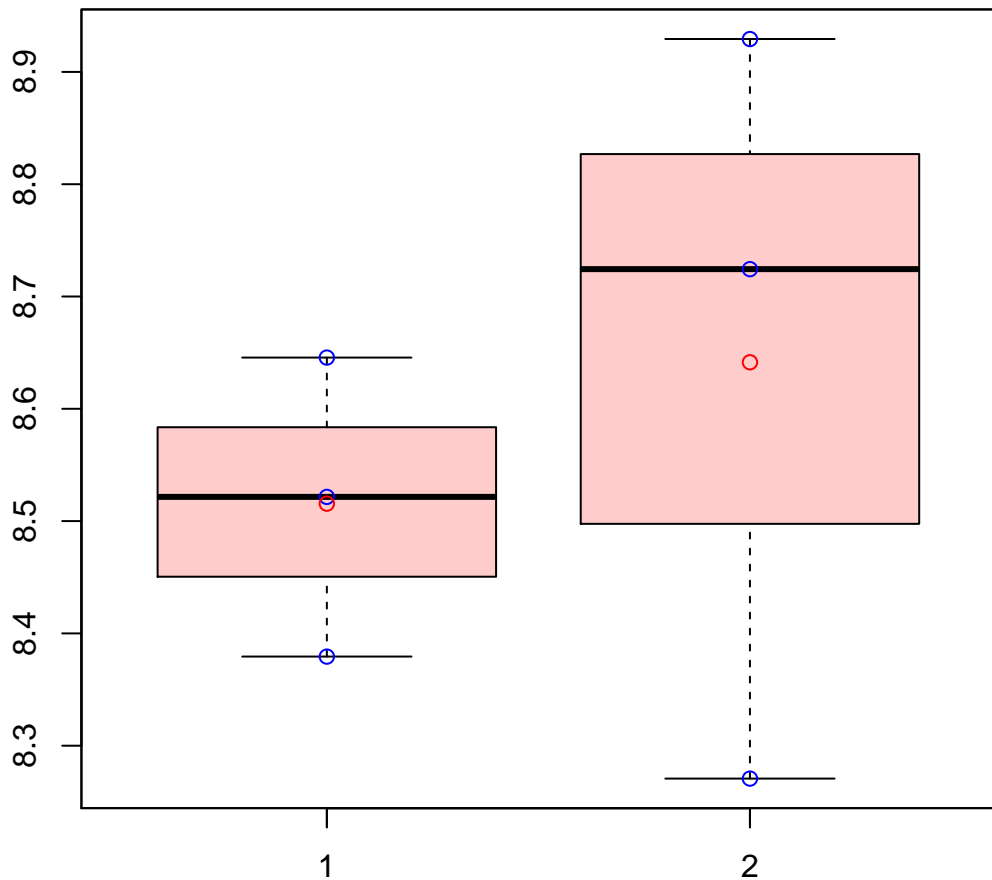

t-Test: p-value = 0.6



# CL362Contig10|CL362Contig10

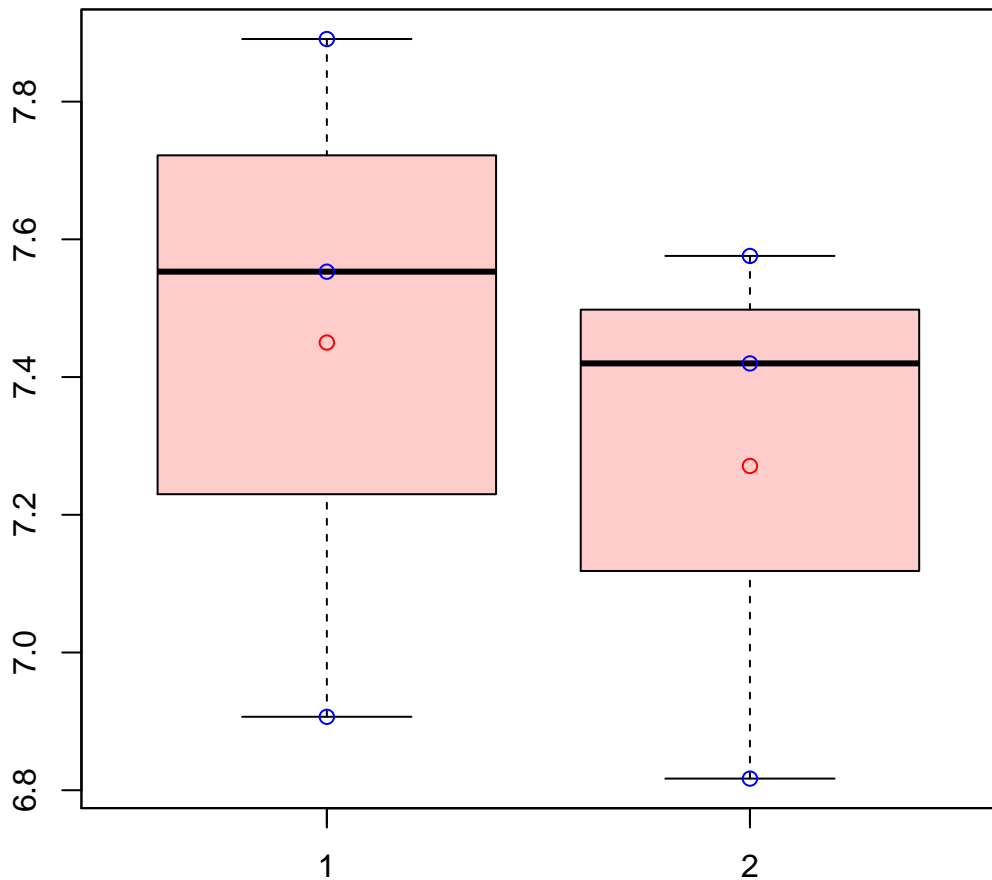

t-Test: p-value = 0.65

# CL3635Contig1|CL3635Contig1

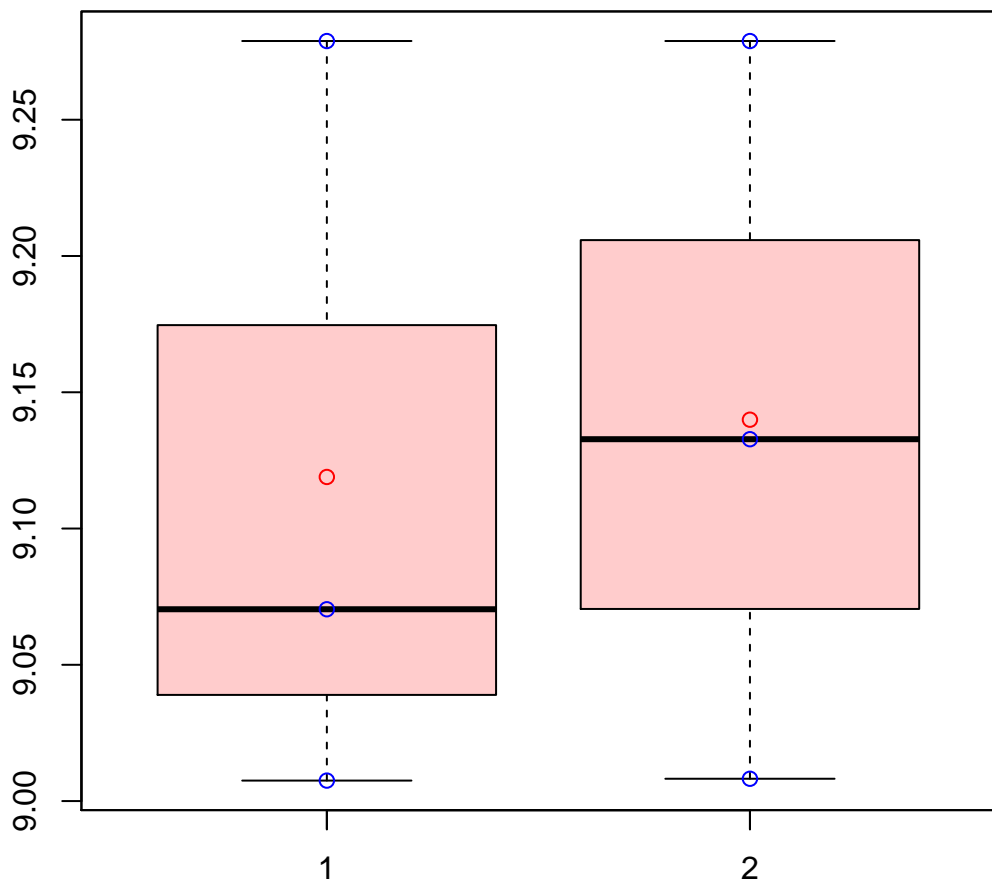

t-Test: p-value = 0.86

# CL363Contig4|CL363Contig4

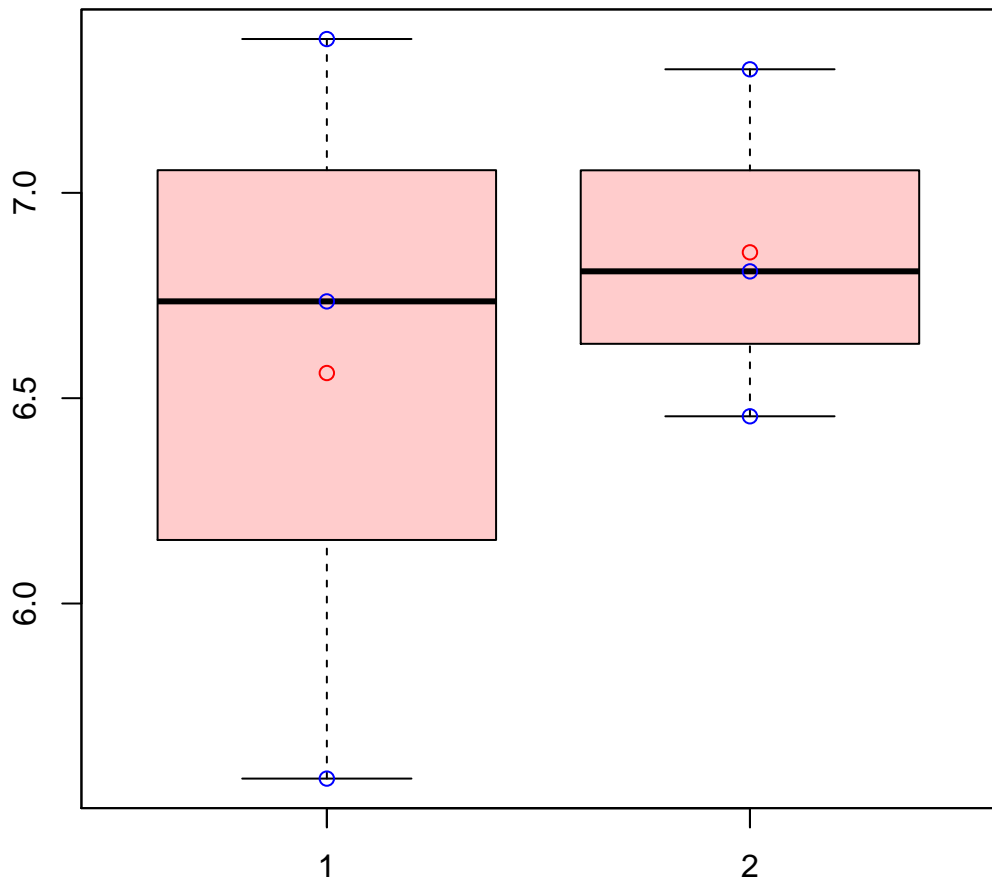

t-Test: p-value = 0.65

# CL3640Contig1|CL3640Contig1

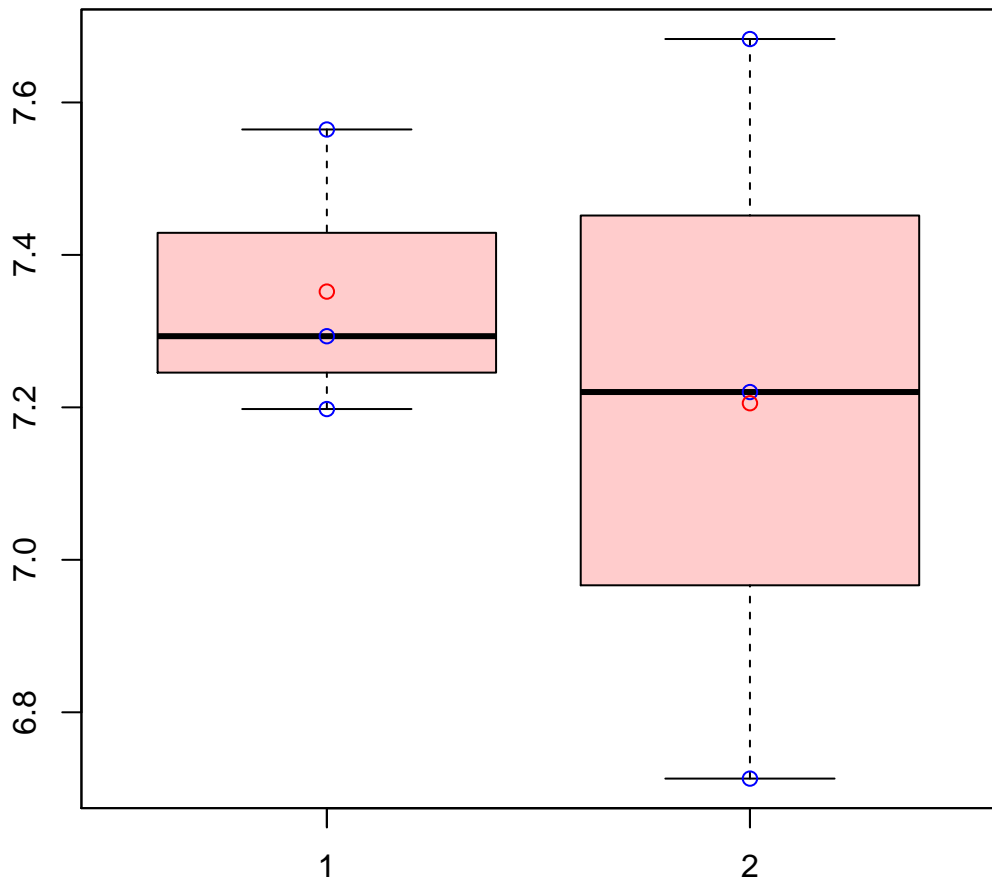

t-Test: p-value = 0.66

# CL3640Contig3|CL3640Contig3

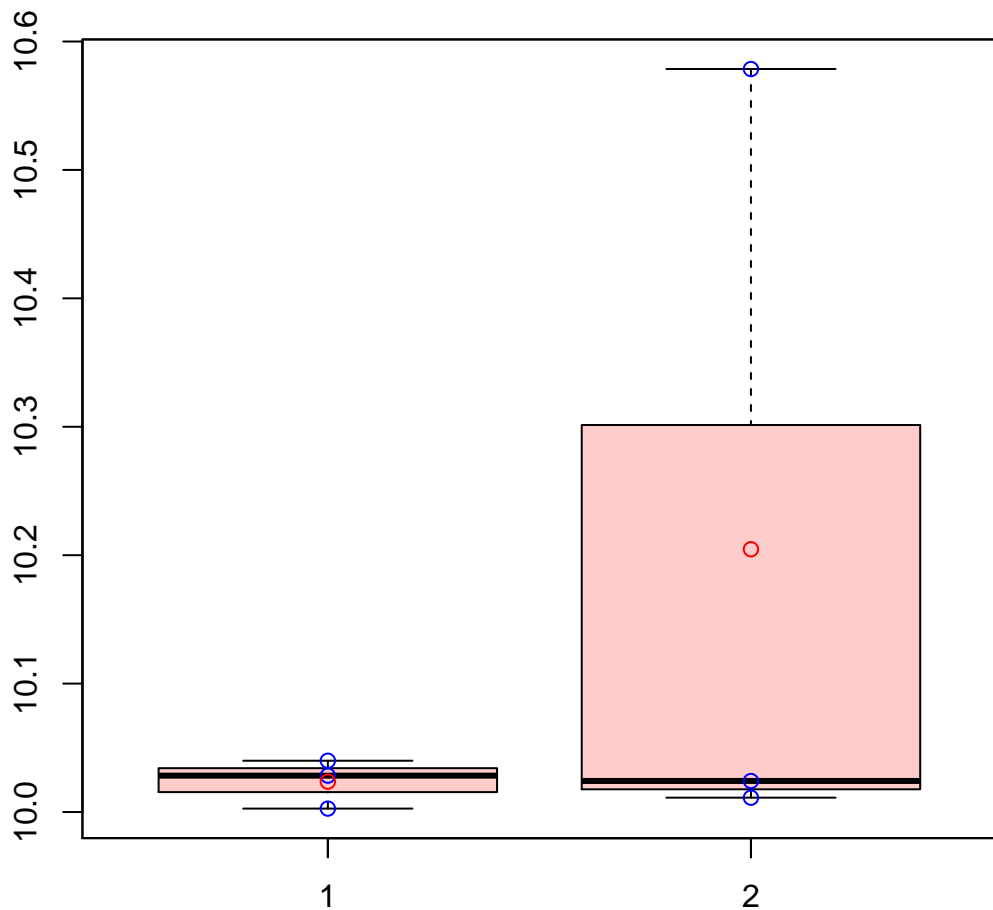

t-Test: p-value = 0.44

# CL3641Contig4|CL3641Contig4

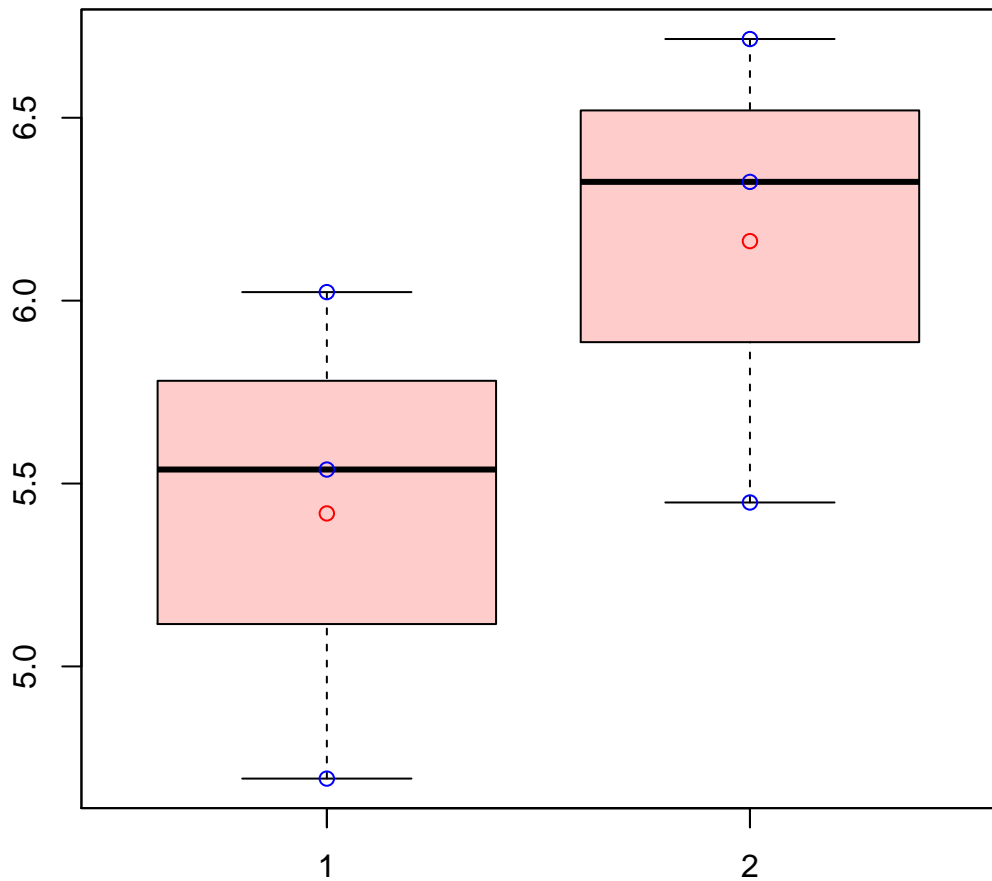

t-Test: p-value = 0.24

# CL3641Contig5|CL3641Contig5

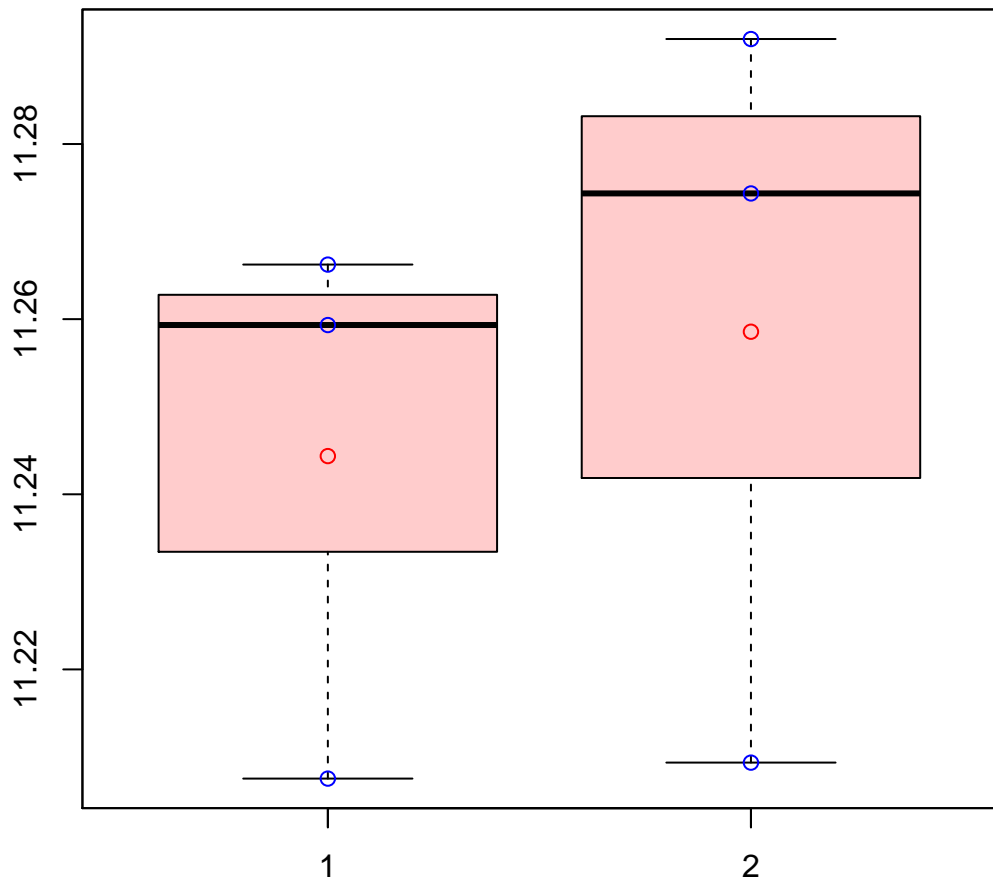

t-Test: p-value = 0.67

# CL3643Contig4|CL3643Contig4

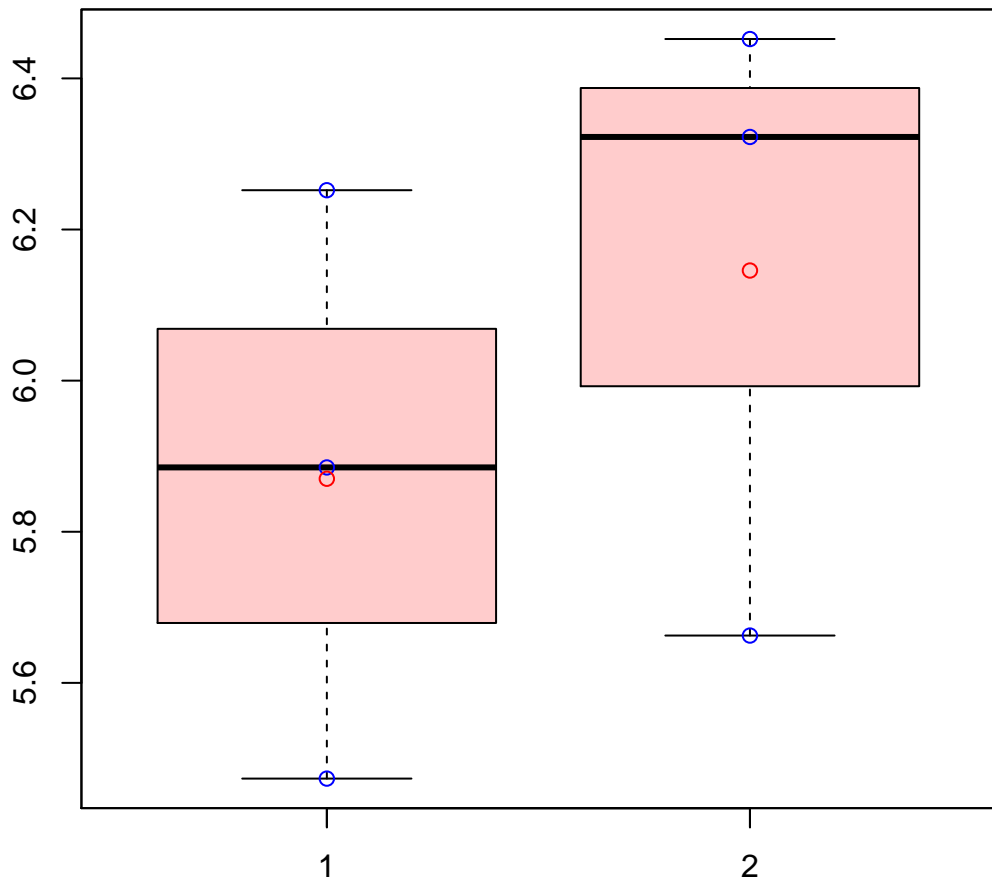

t-Test: p-value = 0.45



# CL3646Contig2|CL3646Contig2

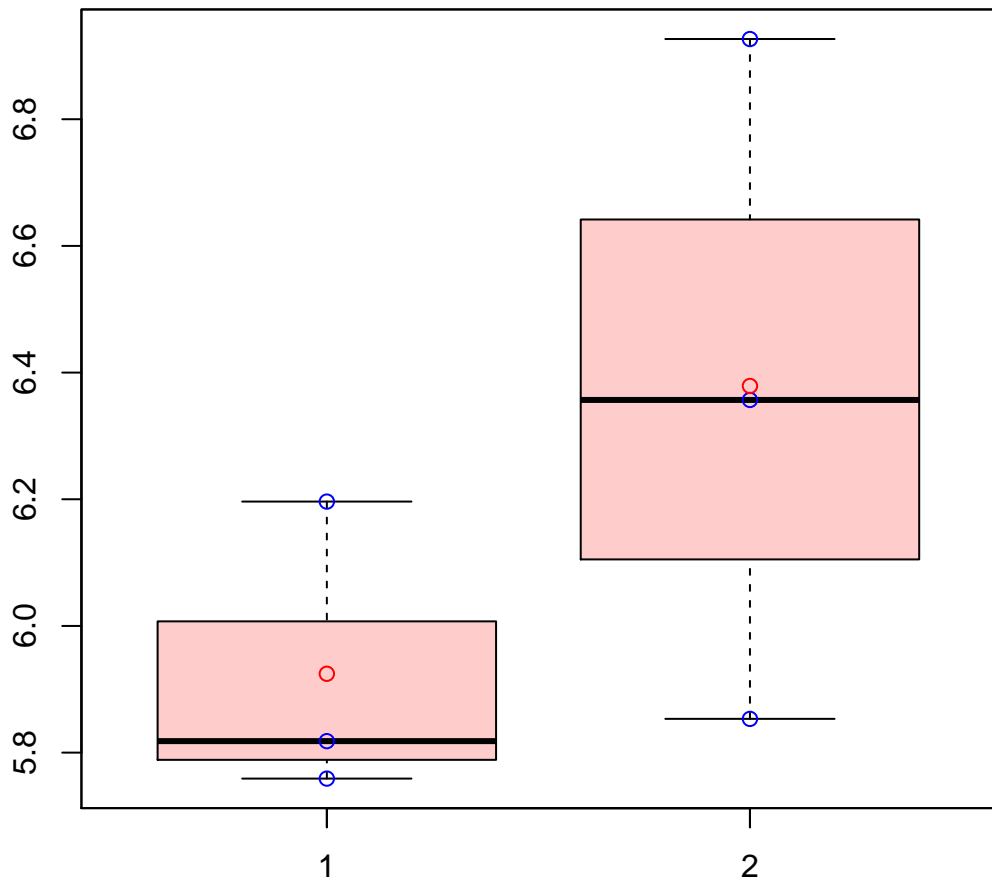

t-Test: p-value = 0.28

# CL3647Contig2|CL3647Contig2

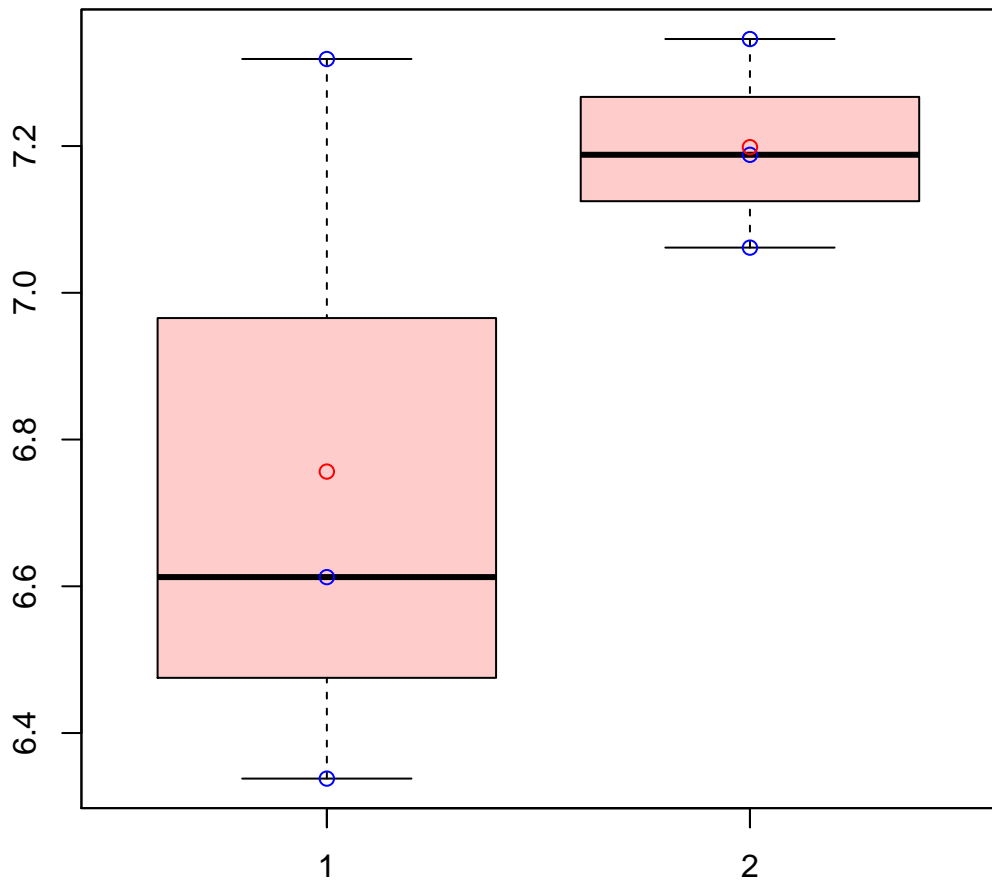

t-Test: p-value = 0.27

# CL3672Contig2|CL3672Contig2

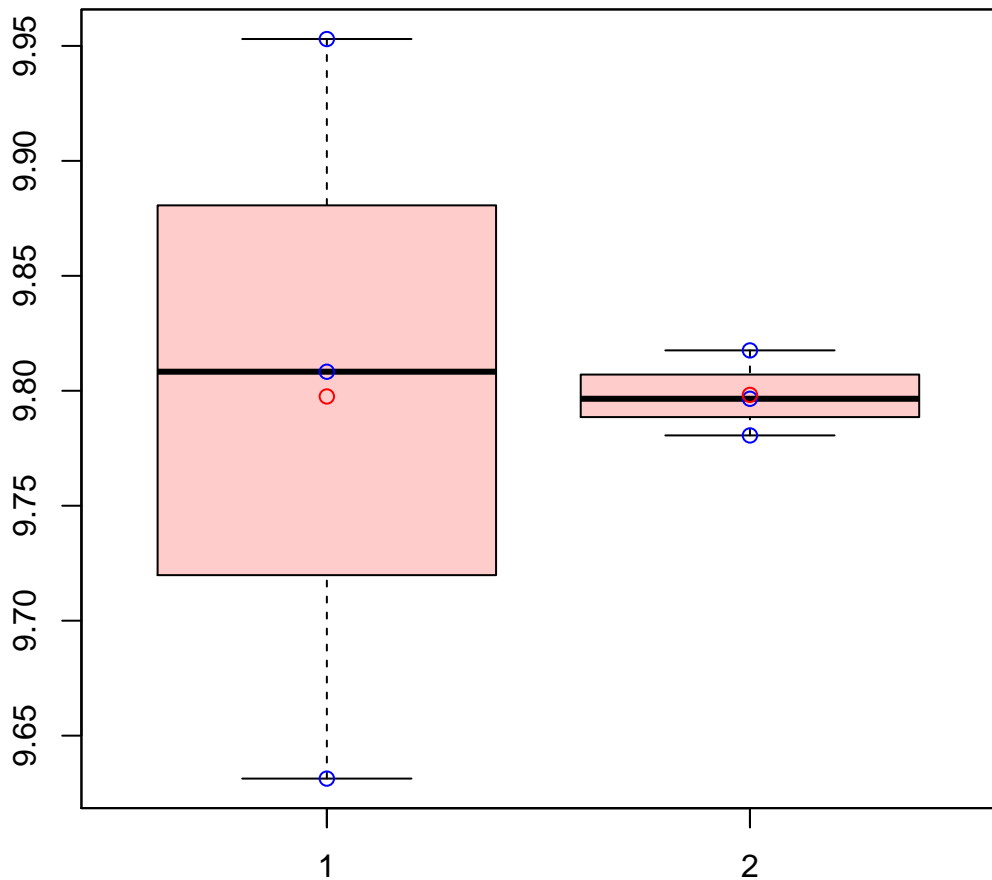

t-Test: p-value = 0.99

# CL367Contig10|CL367Contig10

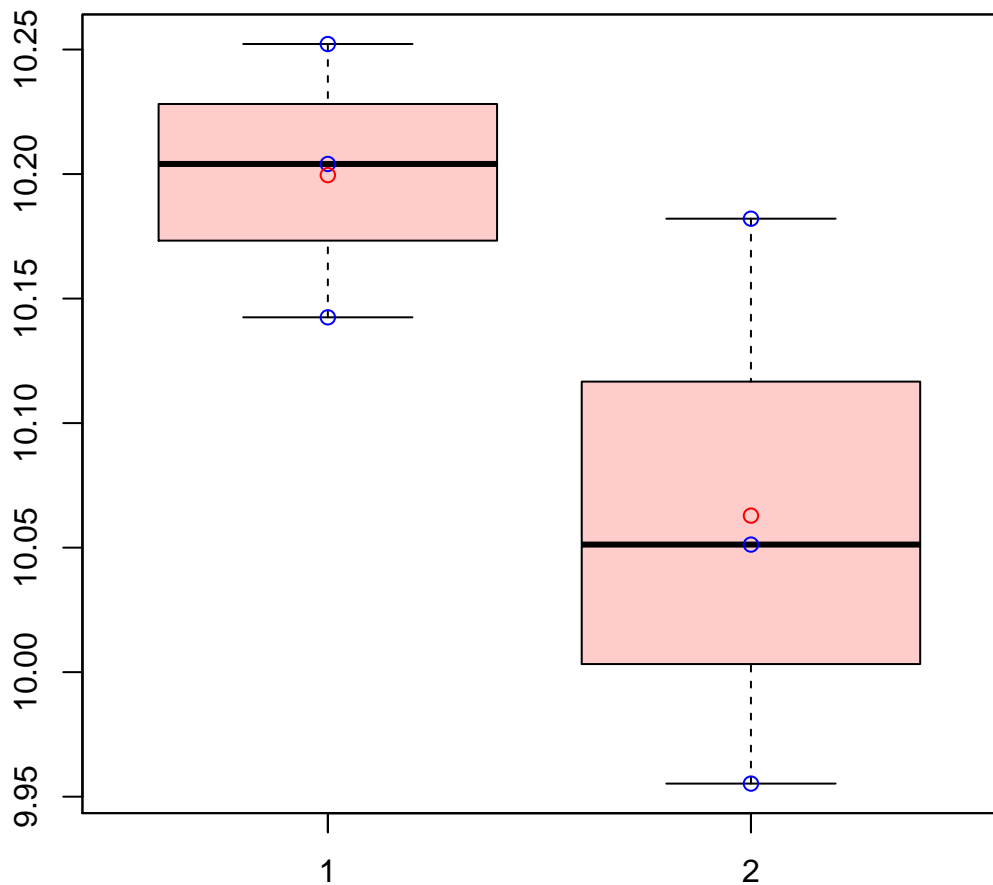

t-Test: p-value = 0.16

# CL367Contig22|CL367Contig22

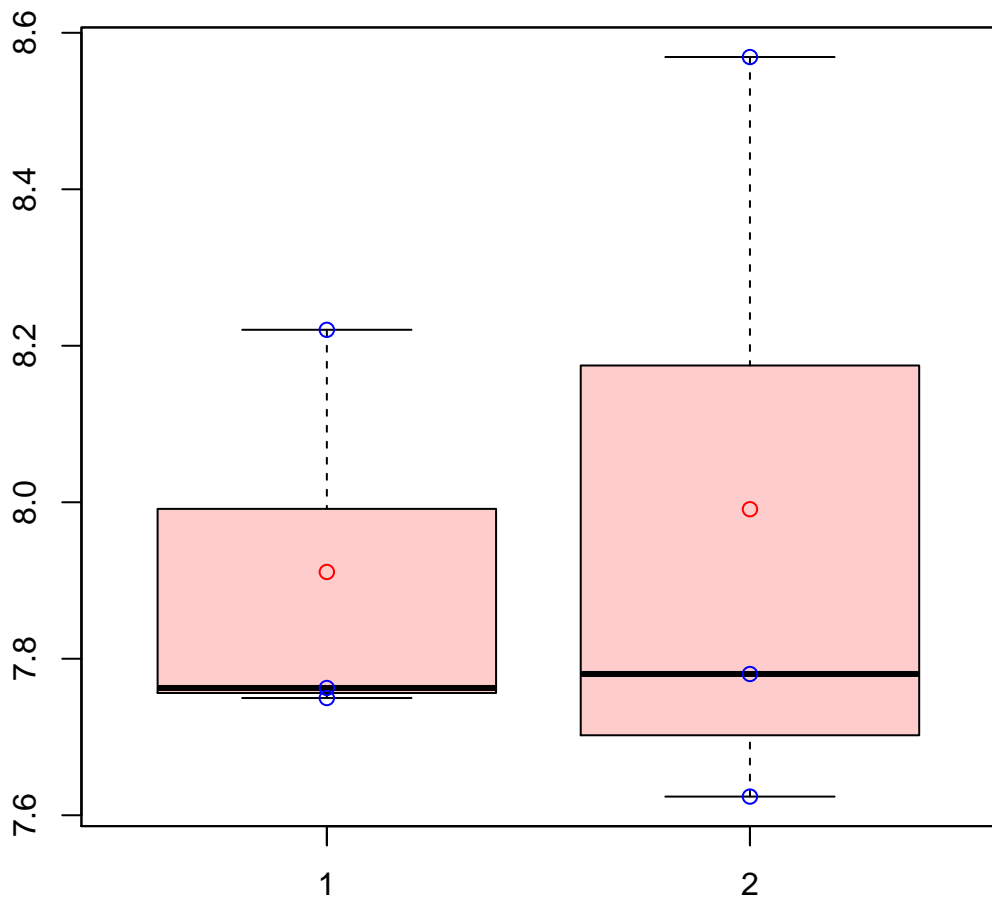

t-Test: p-value = 0.82

# CL367Contig23|CL367Contig23

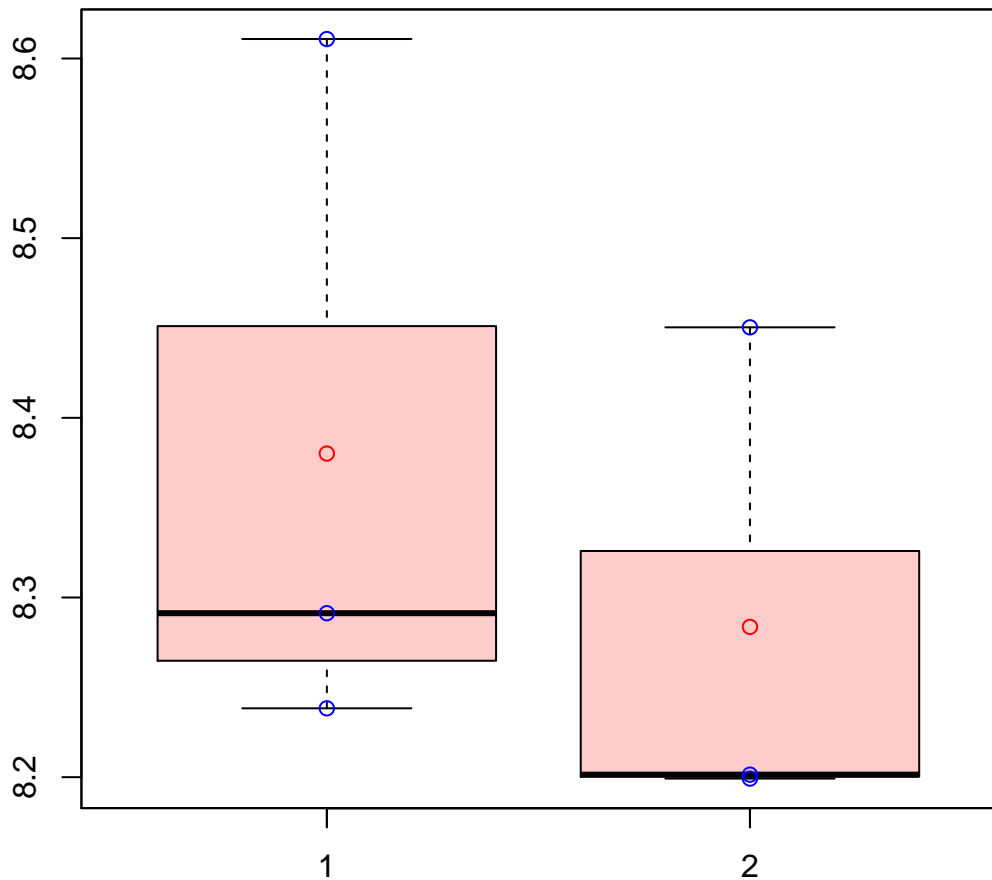

t-Test: p-value = 0.54

# CL367Contig2|CL367Contig2

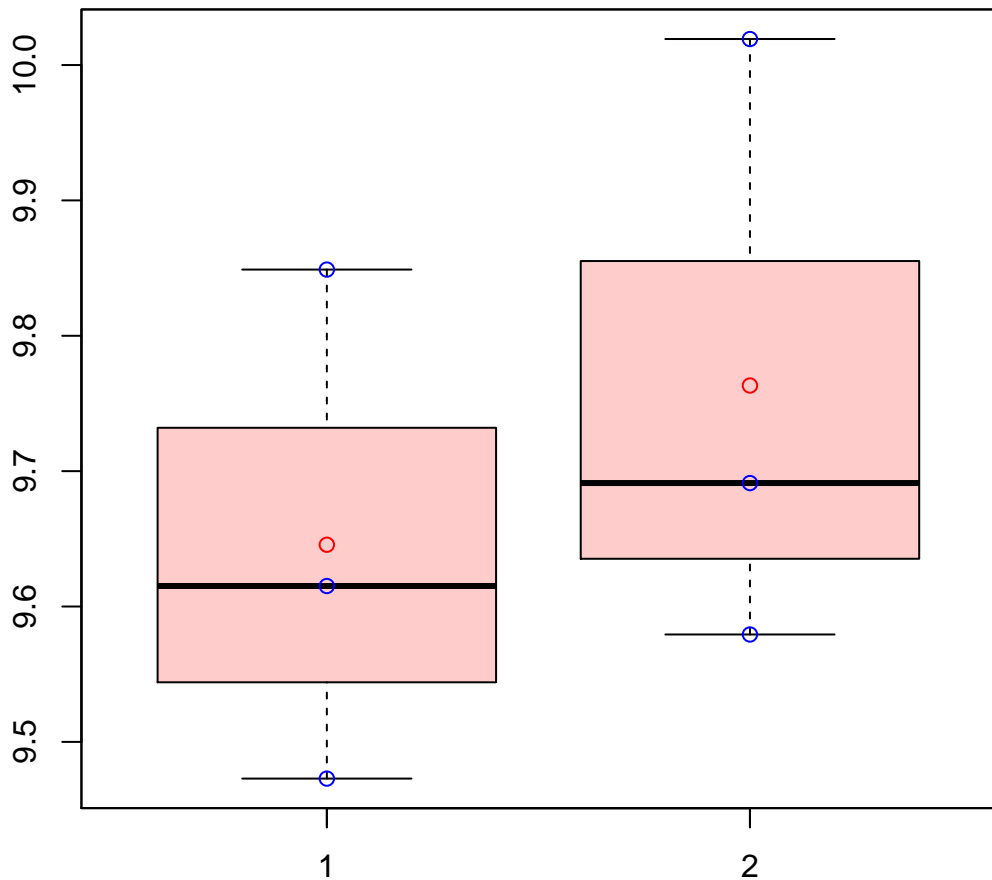

t-Test: p-value = 0.53

# CL367Contig32|CL367Contig32

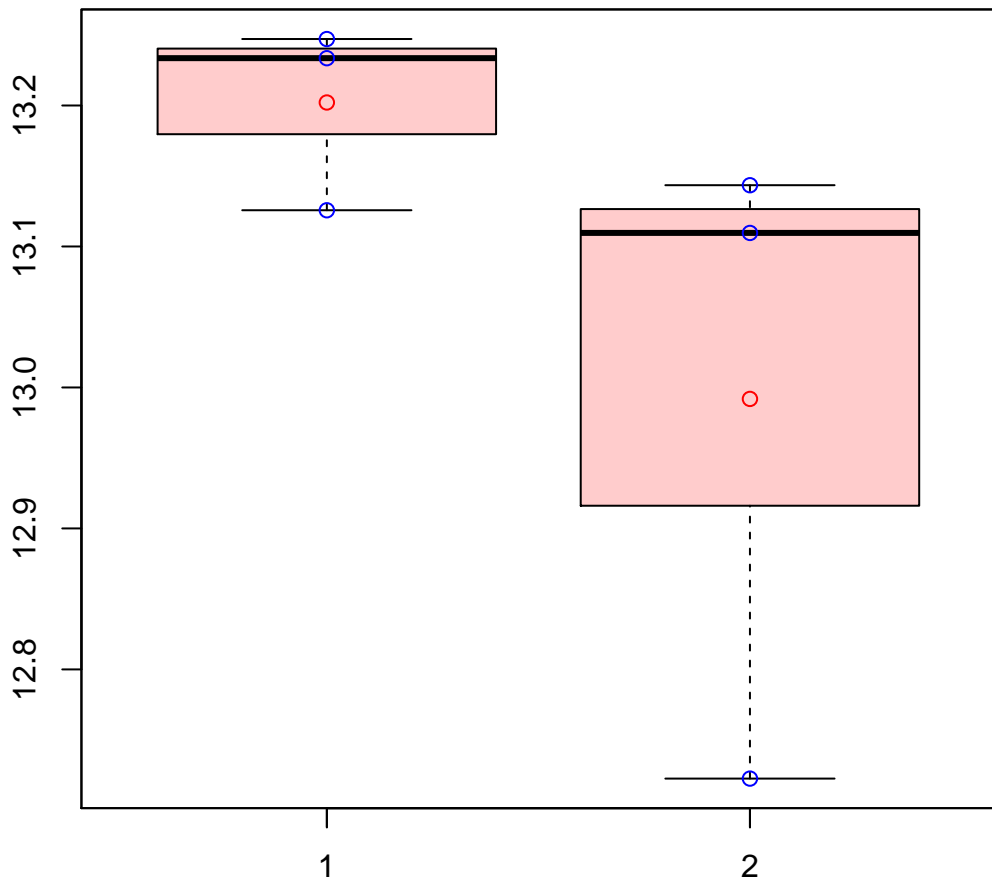

t-Test: p-value = 0.26



# CL367Contig7|CL367Contig7

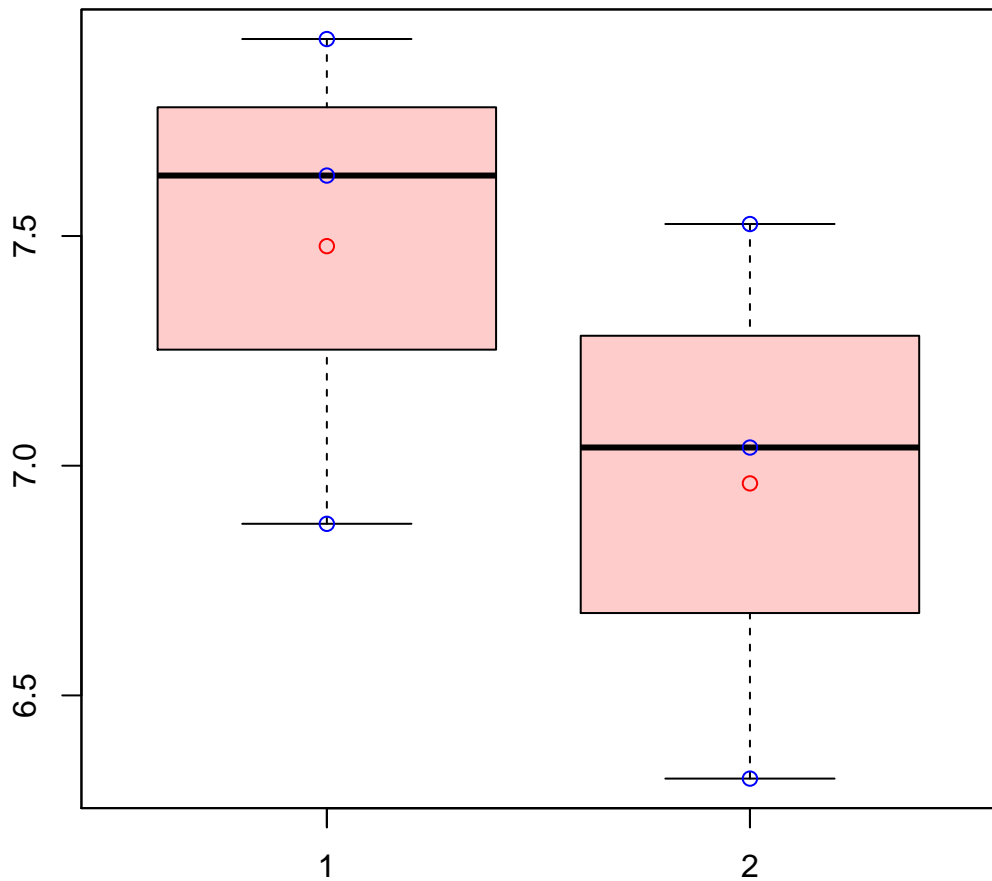

t-Test: p-value = 0.33

# CL368Contig5|CL368Contig5

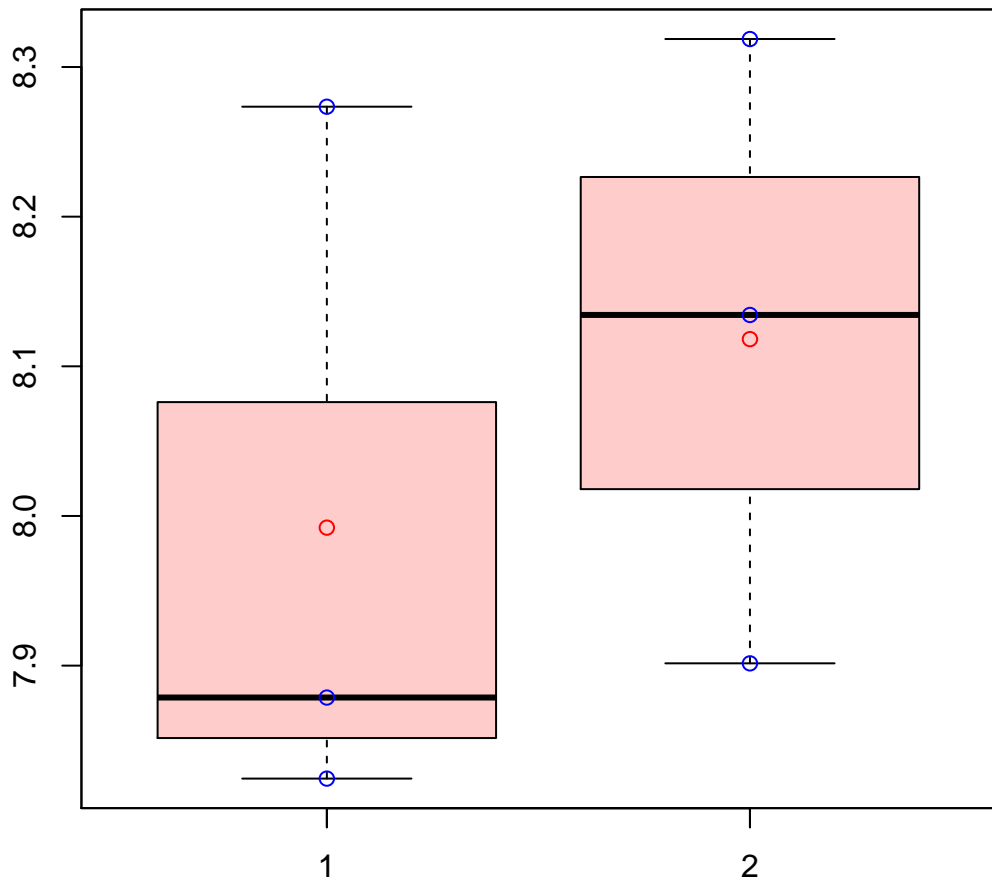

t-Test: p-value = 0.54

# CL3695Contig2|CL3695Contig2

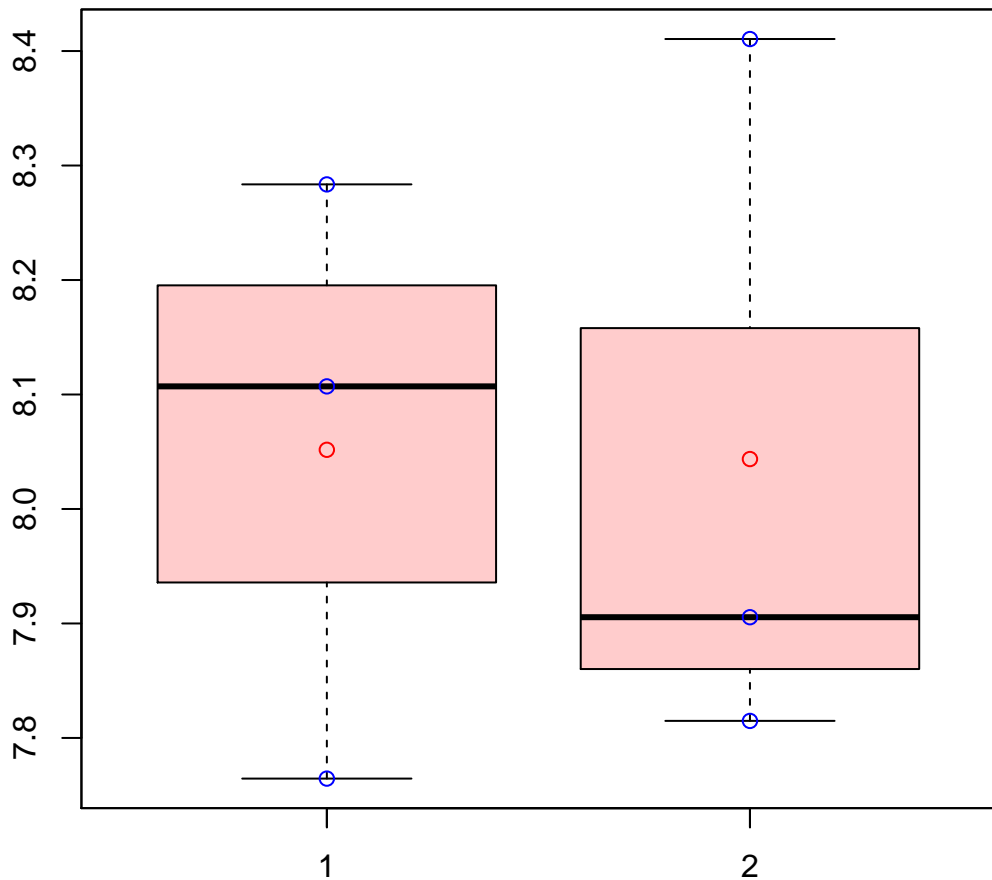

t-Test: p-value = 0.97

# CL3697Contig4|CL3697Contig4

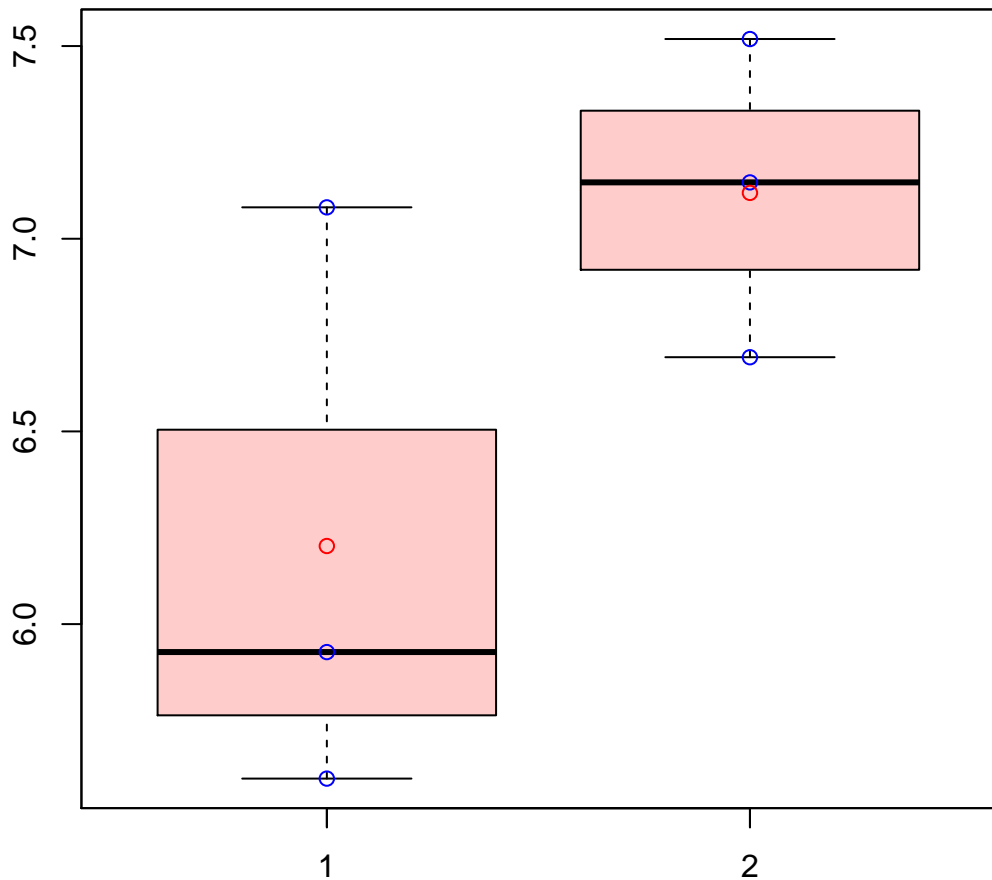

t-Test: p-value = 0.17

# CL3699Contig7|CL3699Contig7

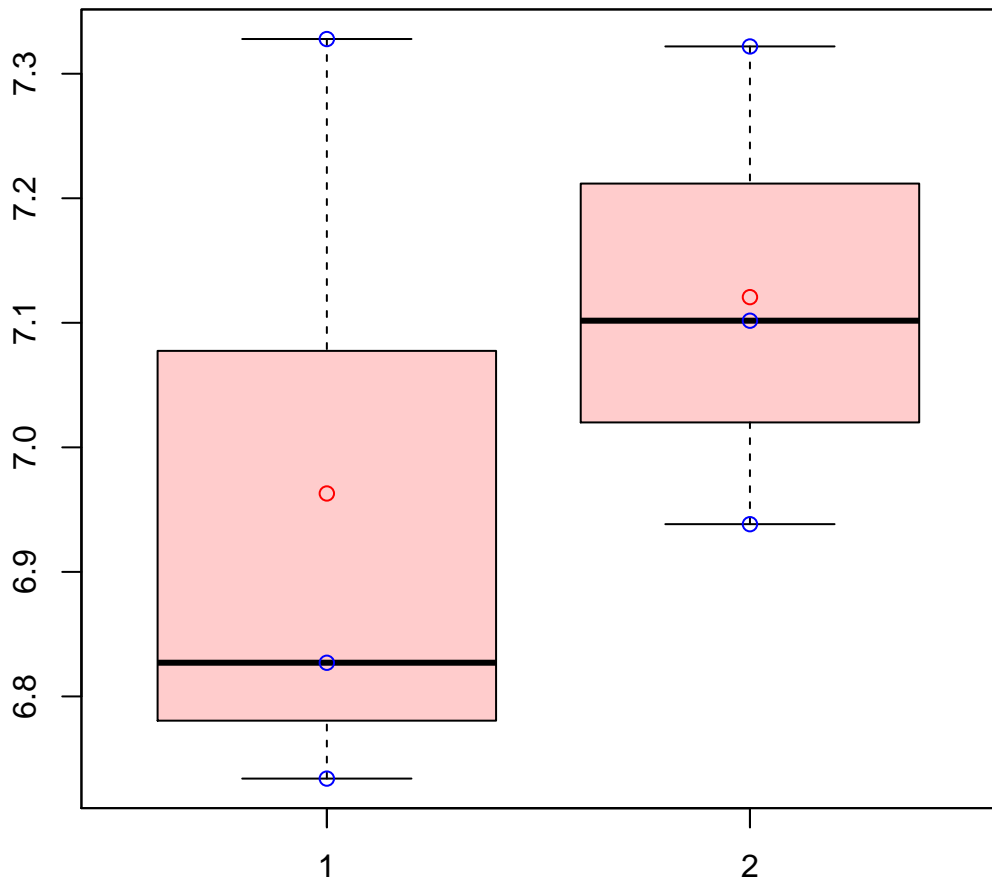

t-Test: p-value = 0.51

# CL36Contig11|CL36Contig11

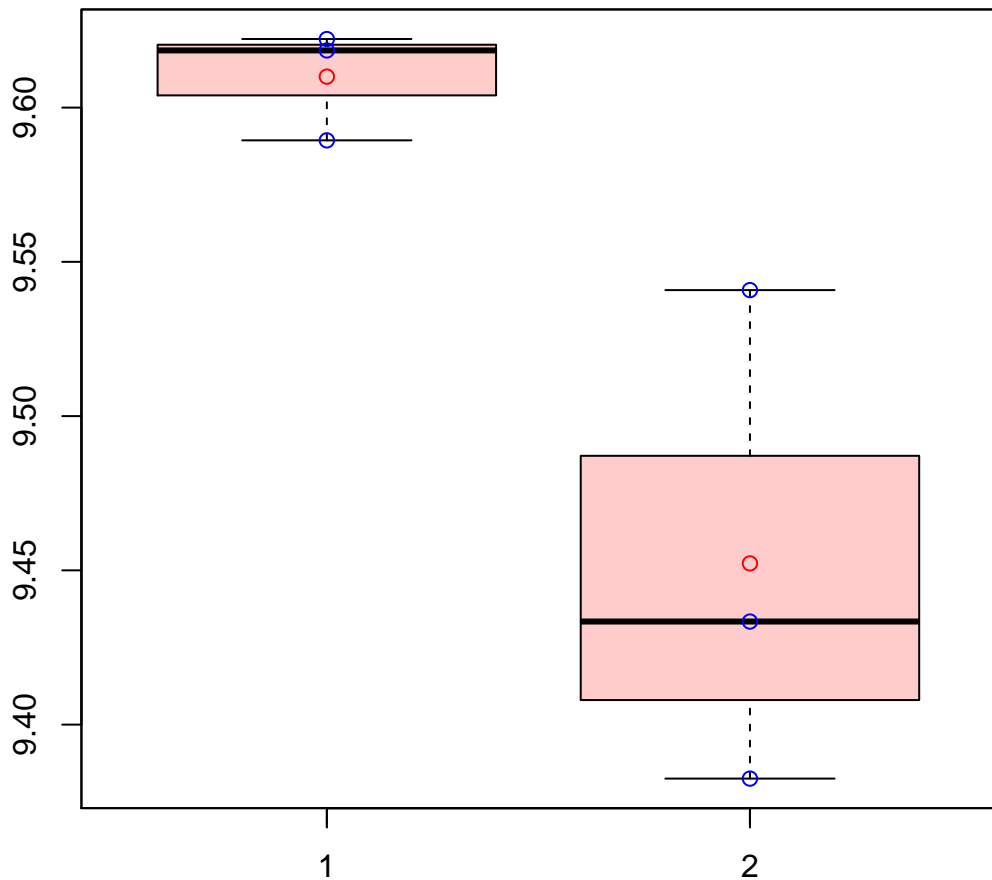

t-Test: p-value = 0.07

# CL36Contig12|CL36Contig12

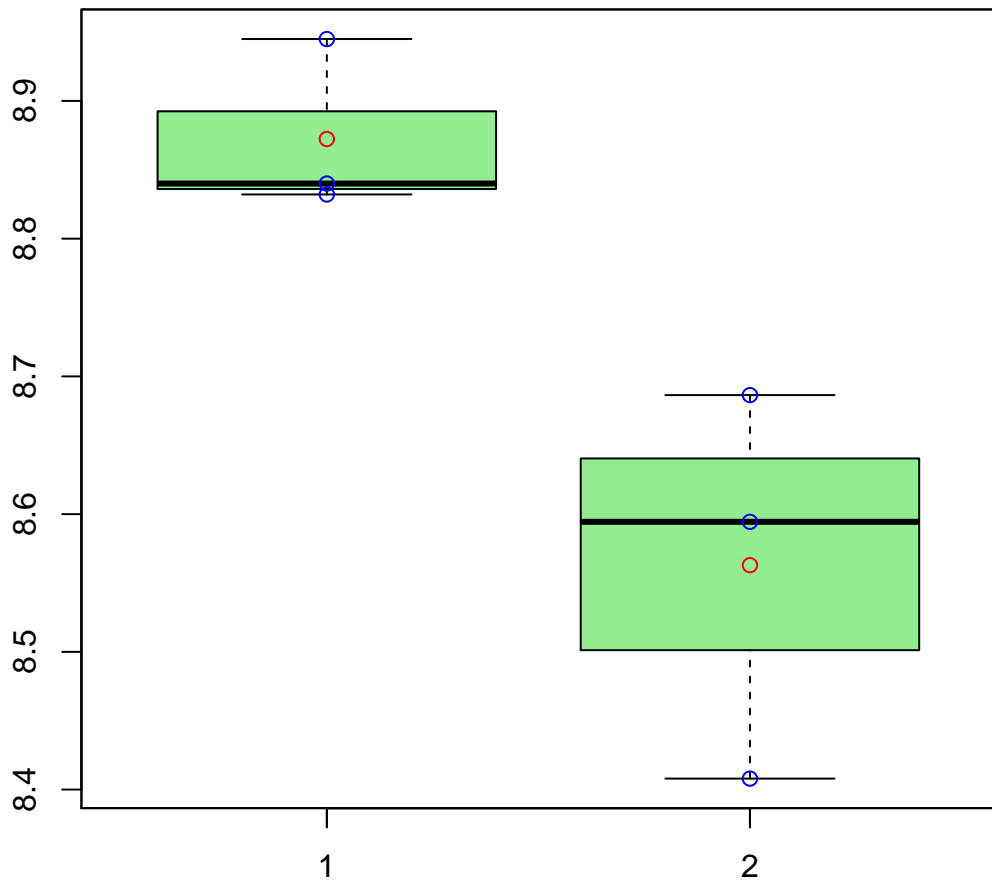

t-Test: p-value = 0.05

# CL36Contig36|CL36Contig36

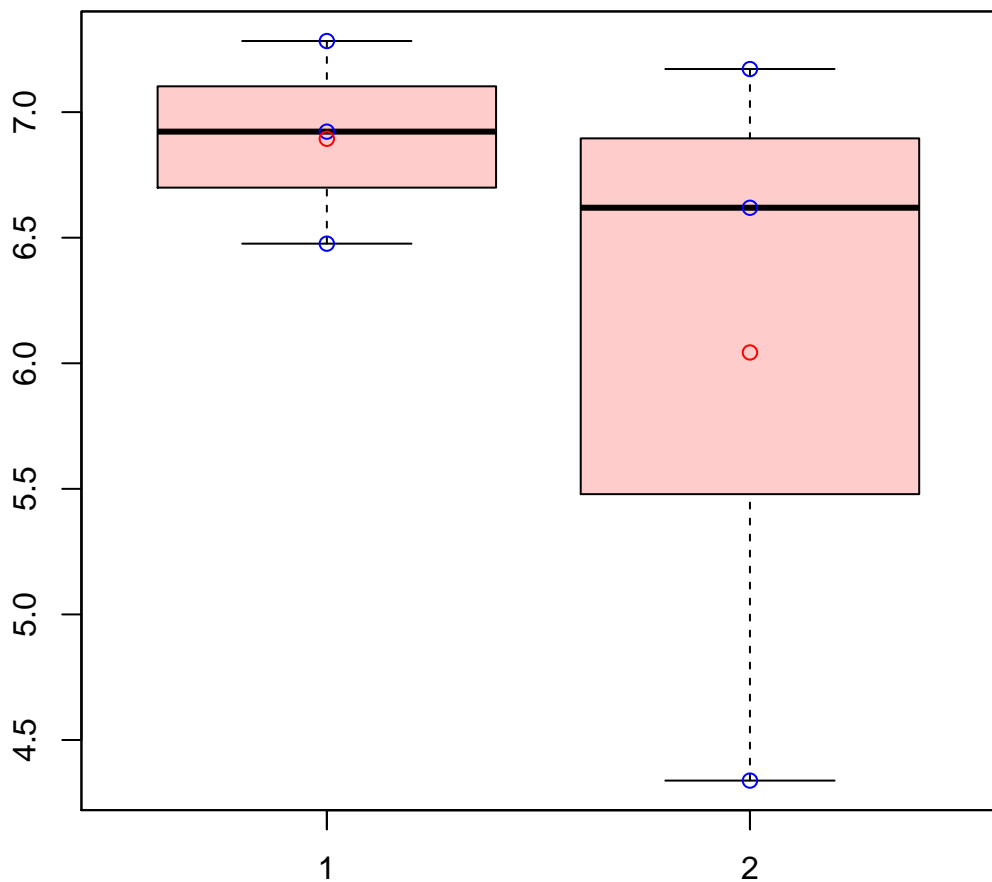

t-Test: p-value = 0.43



# CL36Contig37|CL36Contig37

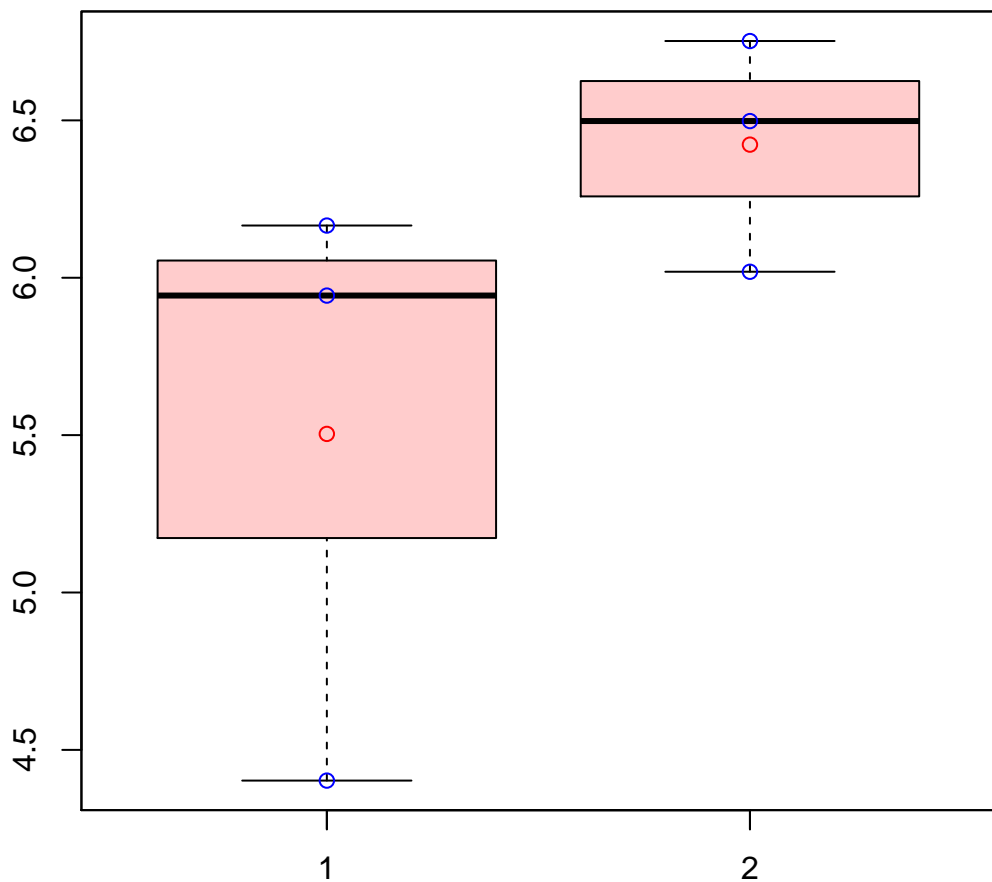

t-Test: p-value = 0.23

# CL36Contig40|CL36Contig40

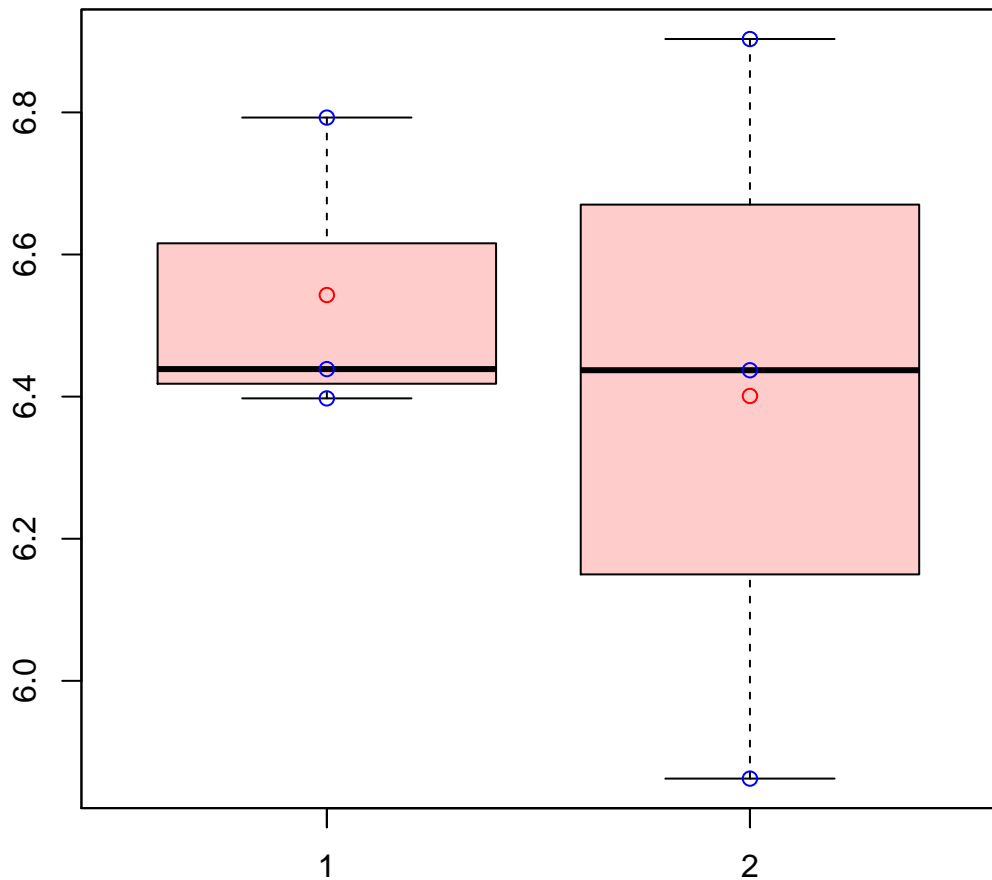

t-Test: p-value = 0.7

# CL36Contig7|CL36Contig7

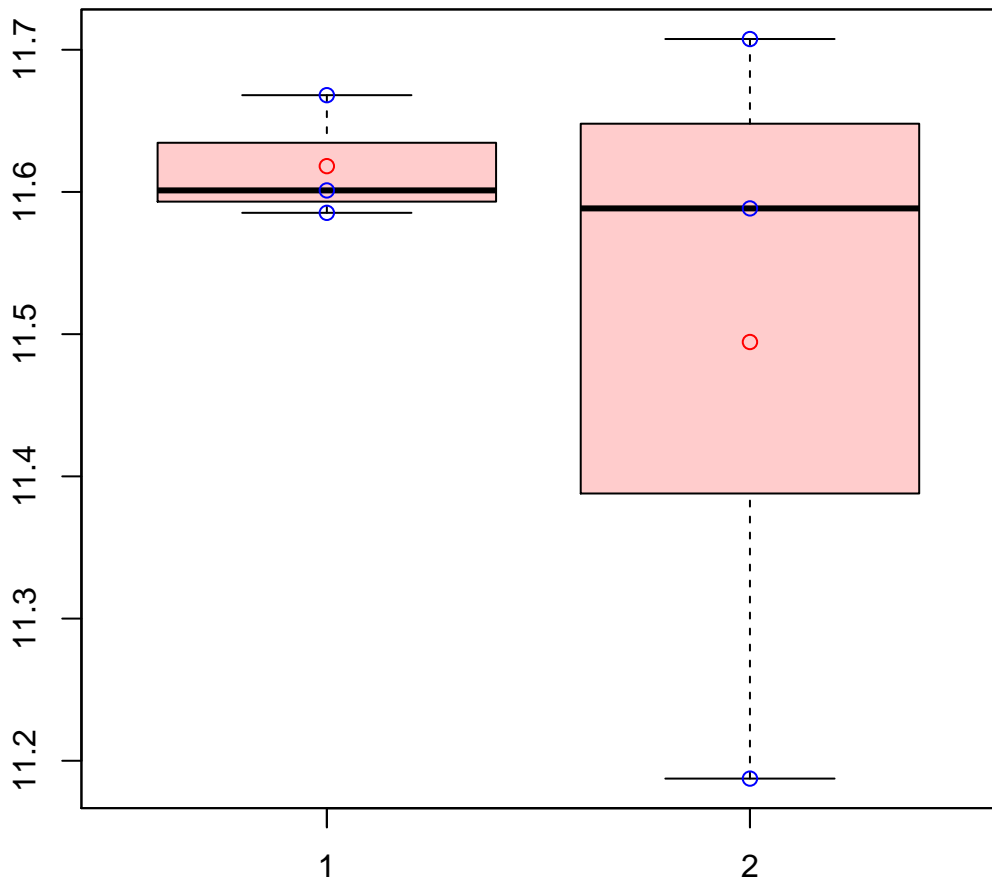

t-Test: p-value = 0.52

# CL3700Contig1|CL3700Contig1

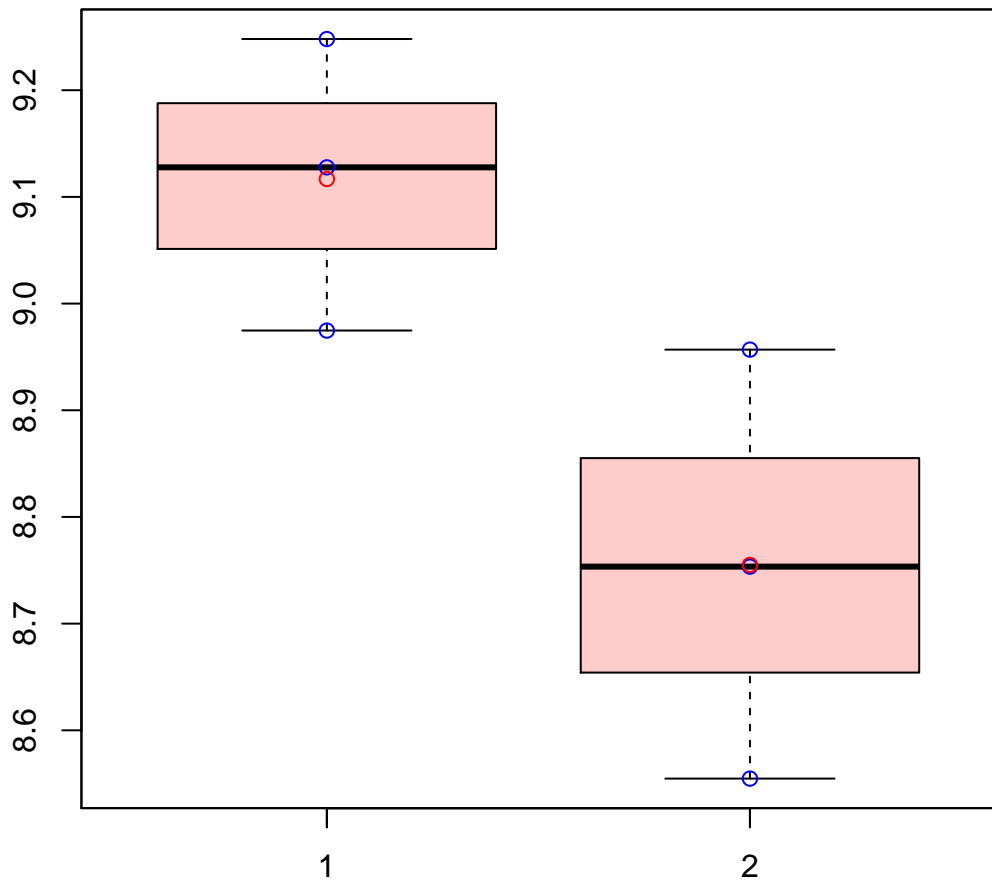

t-Test: p-value = 0.07

# CL370Contig5|CL370Contig5

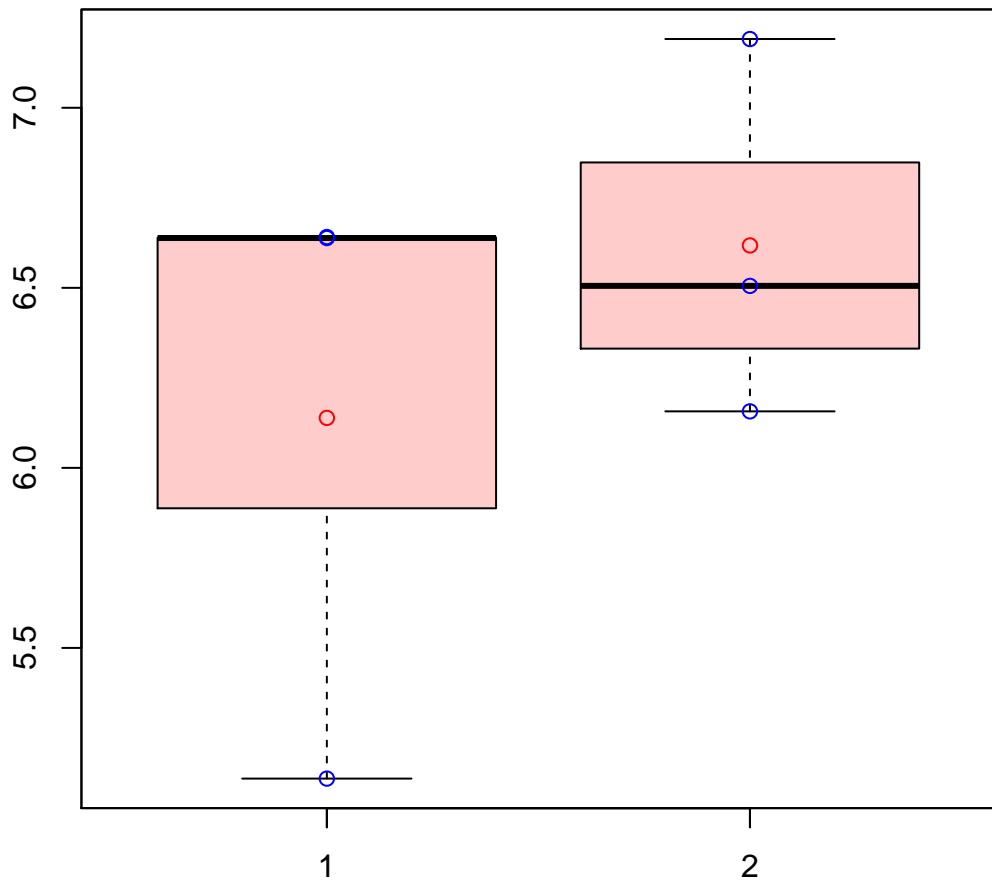

t-Test: p-value = 0.47

# CL3720Contig1|CL3720Contig1

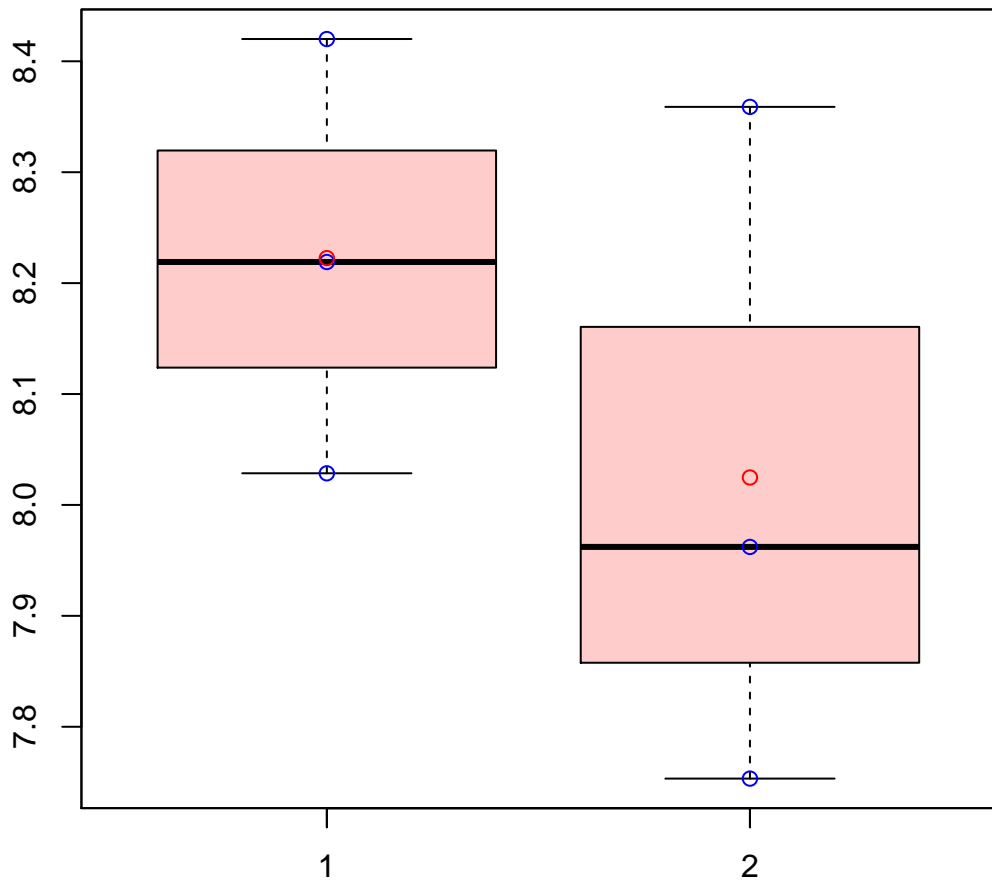

t-Test: p-value = 0.41

# CL3721Contig1|CL3721Contig1

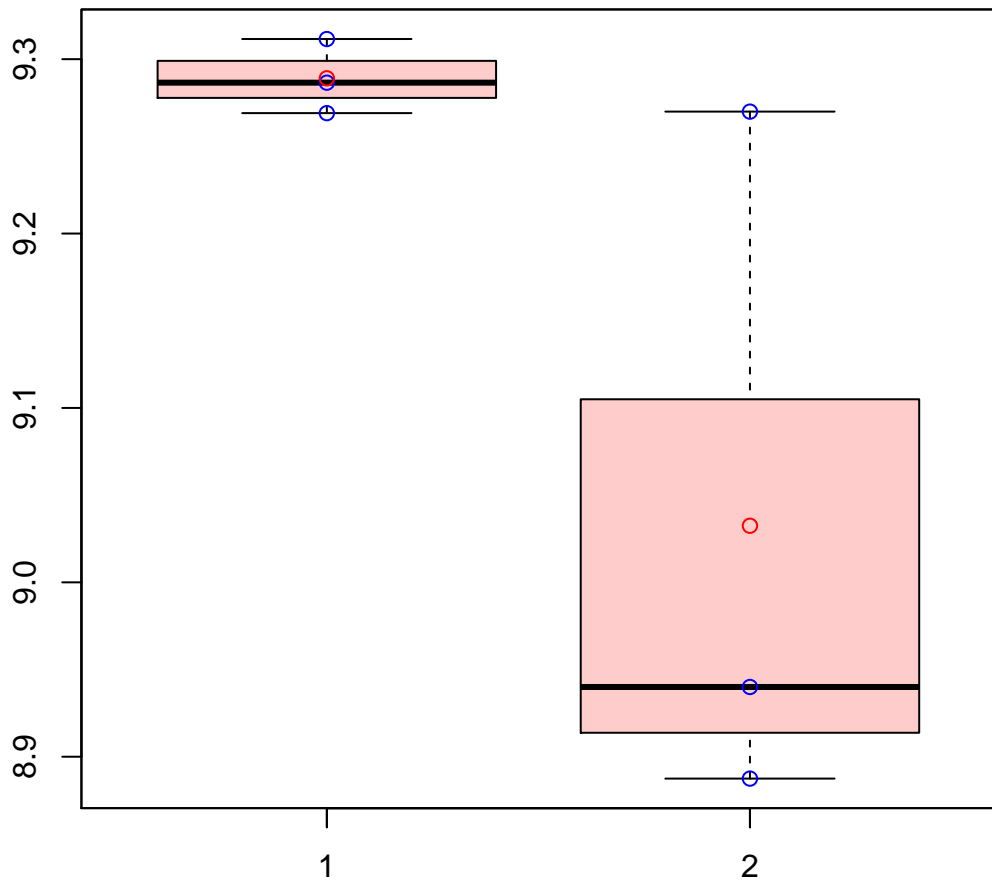

t-Test: p-value = 0.16

# CL3723Contig1|CL3723Contig1

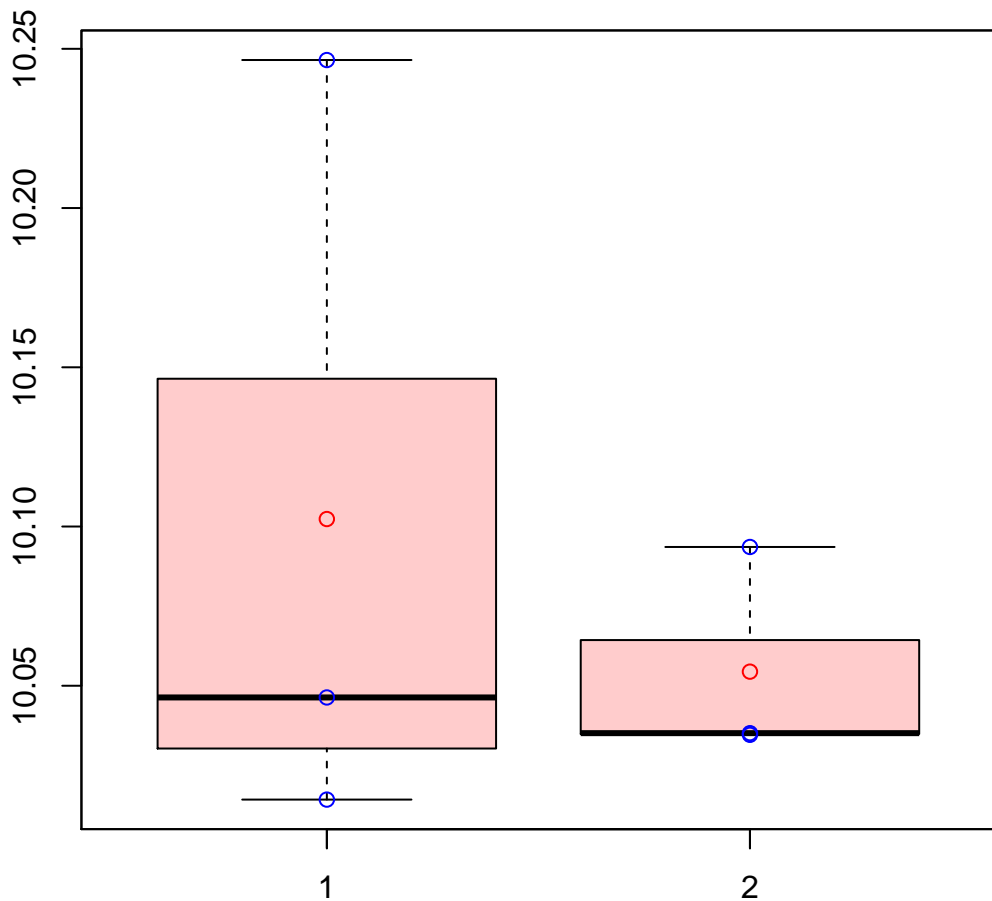

t-Test: p-value = 0.58



# CL372Contig1|CL372Contig1

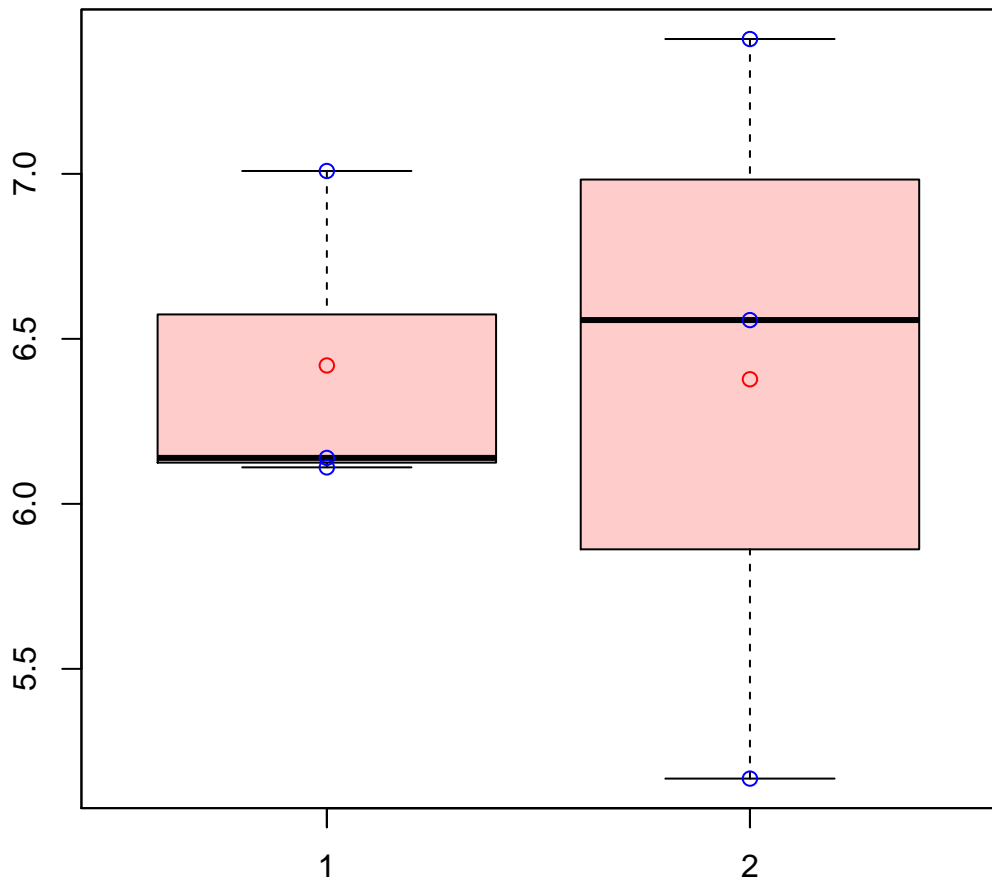

t-Test: p-value = 0.96

# CL3743Contig4|CL3743Contig4

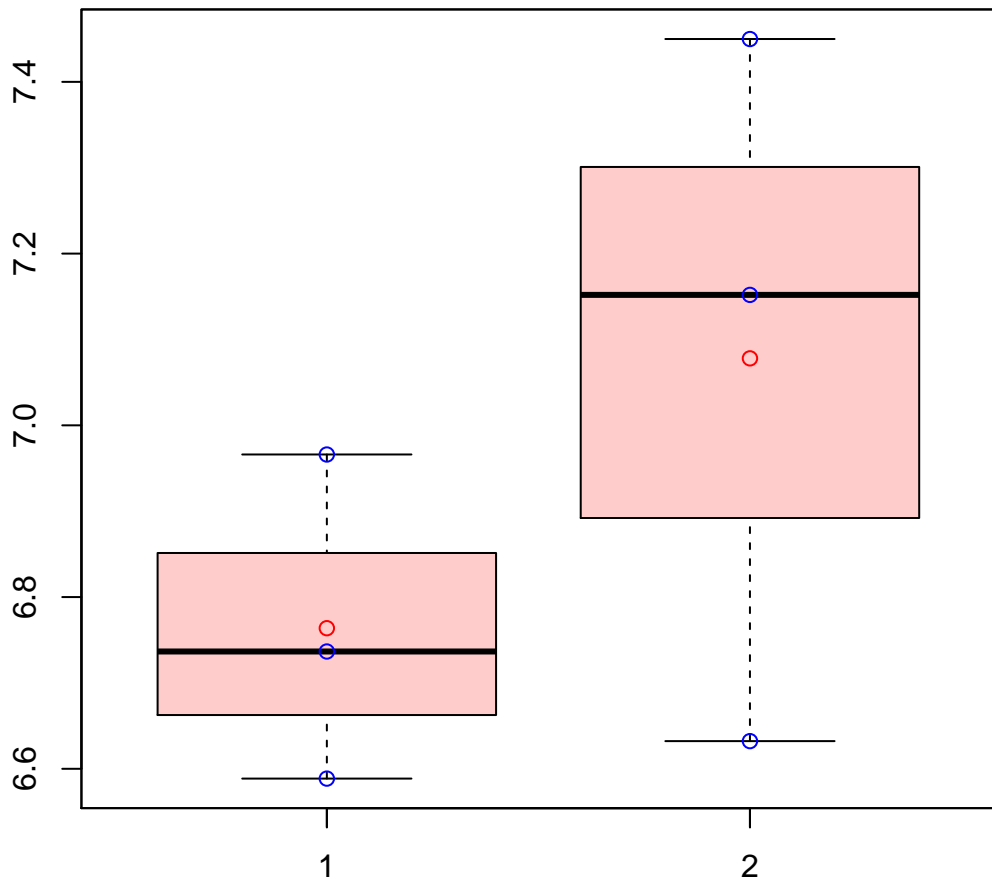

t-Test: p-value = 0.32

# CL374Contig2|CL374Contig2

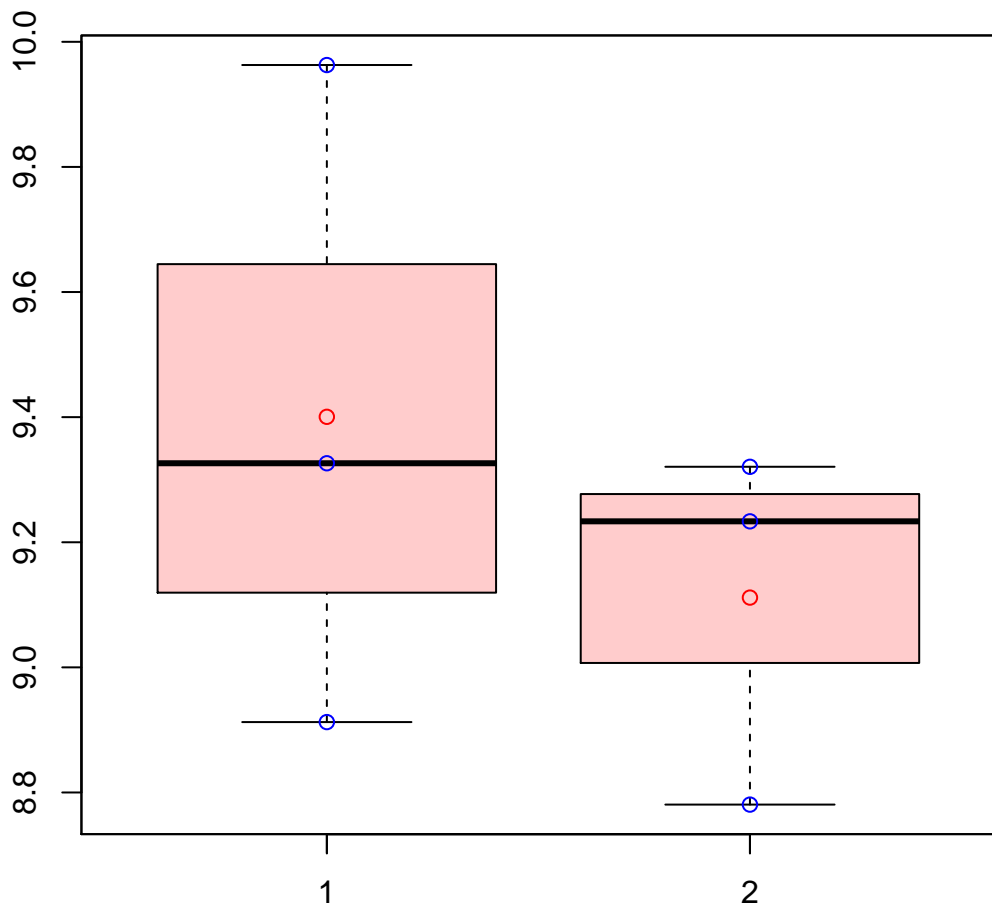

t-Test: p-value = 0.47

# CL374Contig4|CL374Contig4

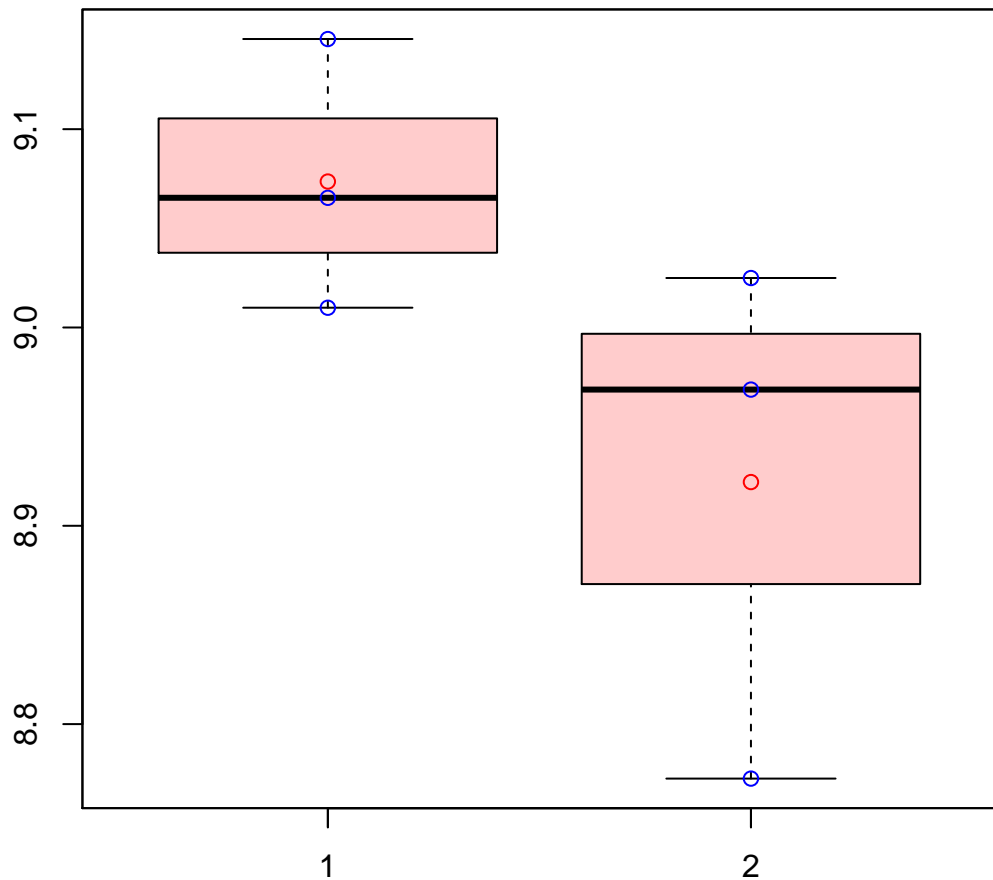

t-Test: p-value = 0.18

# CL3755Contig1|CL3755Contig1

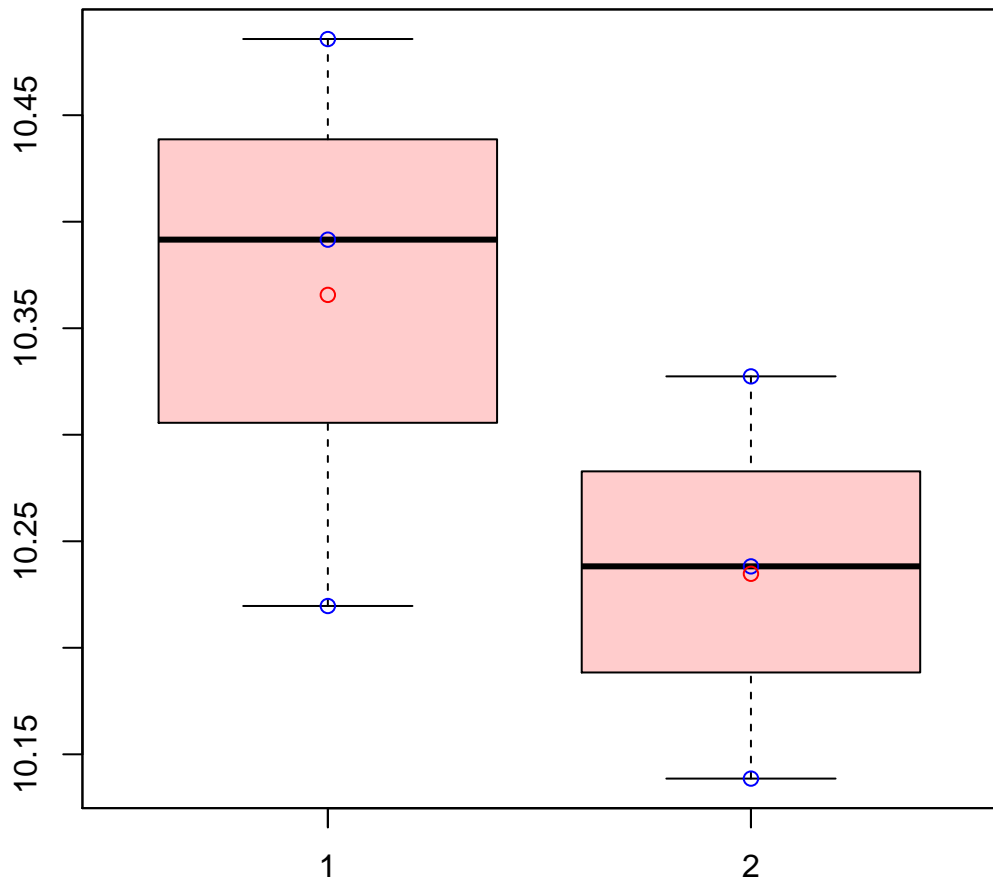

t-Test: p-value = 0.25

# CL3757Contig1|CL3757Contig1

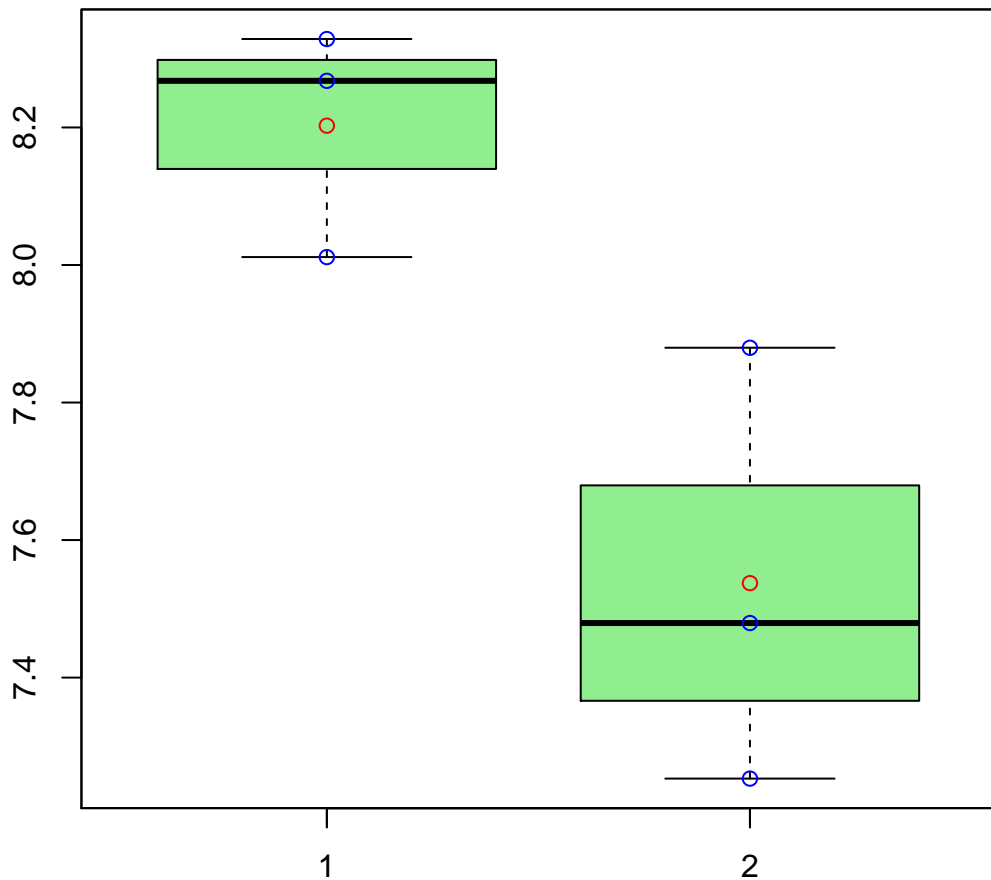

t-Test: p-value = 0.05

# CL3758Contig11|CL3758Contig11

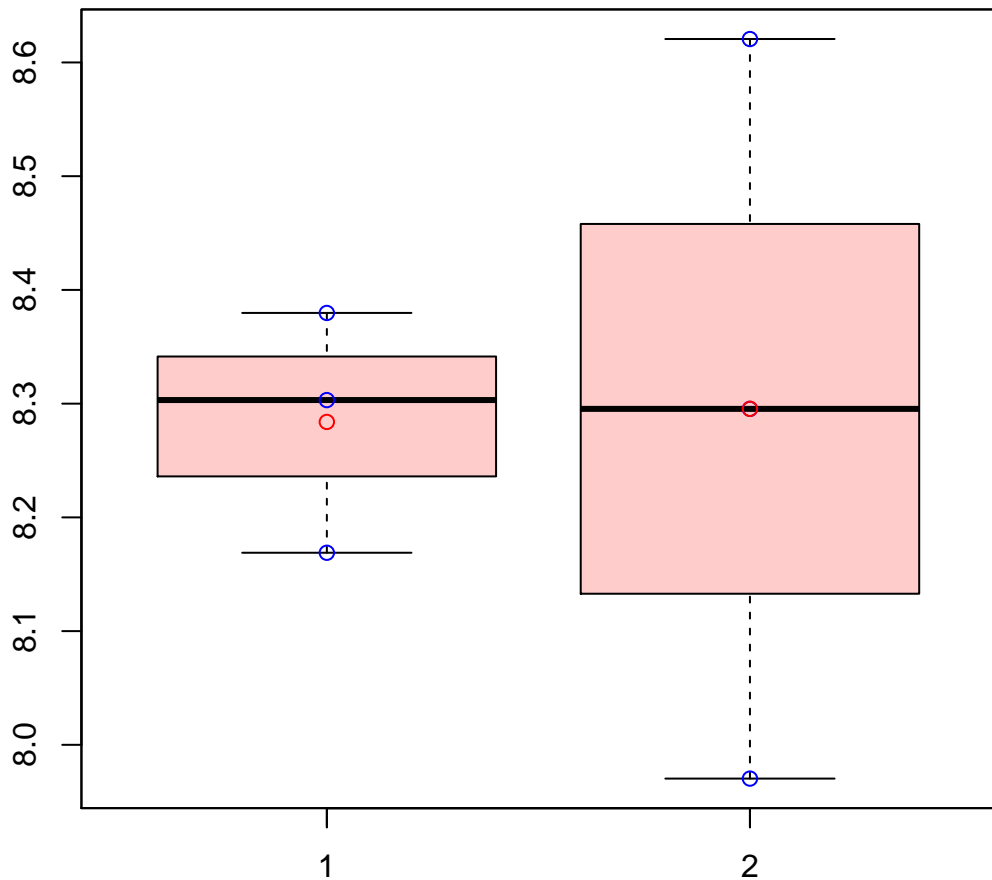

t-Test: p-value = 0.96

# CL3758Contig6|CL3758Contig6

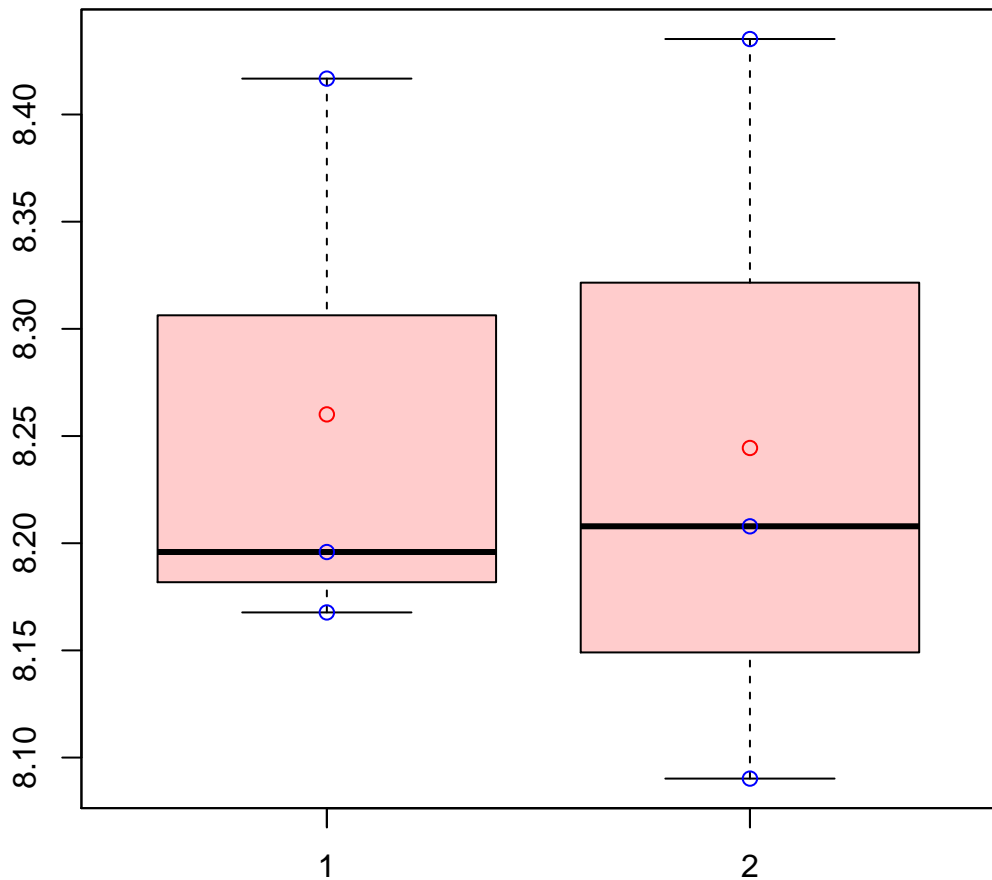

t-Test: p-value = 0.91



# CL3759Contig5|CL3759Contig5

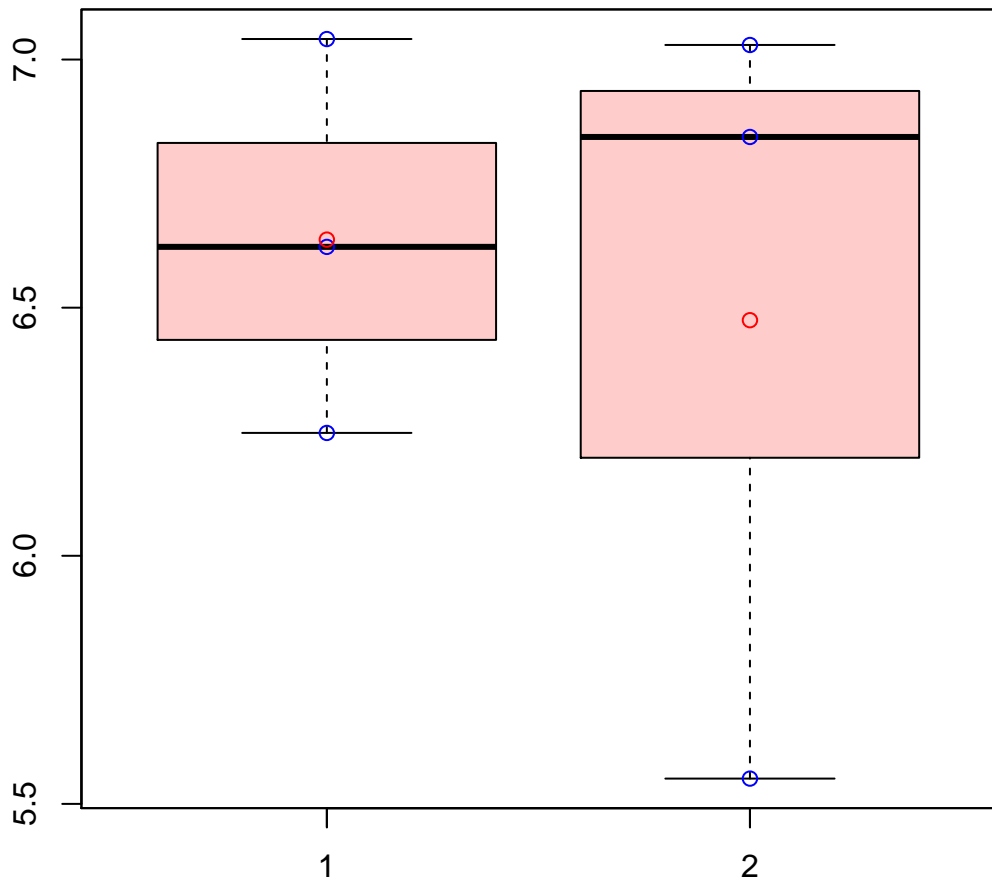

t-Test: p-value = 0.78

# CL376Contig15|CL376Contig15

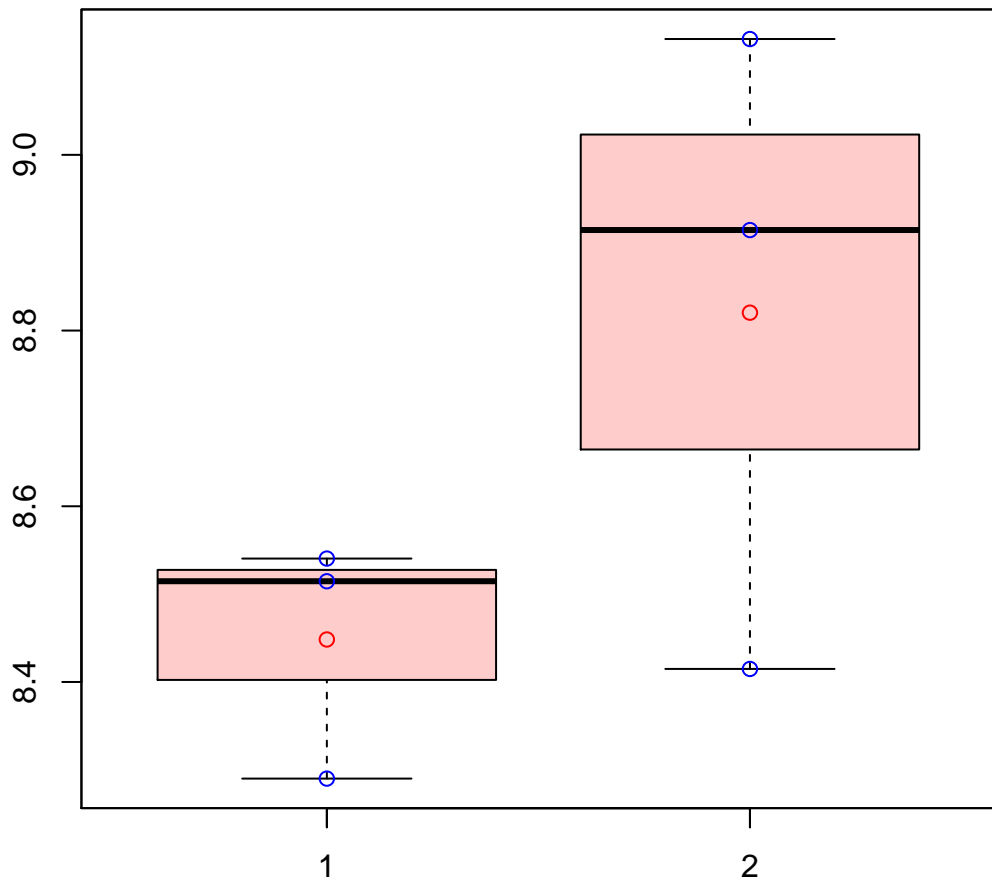

t-Test: p-value = 0.22

# CL376Contig3|CL376Contig3

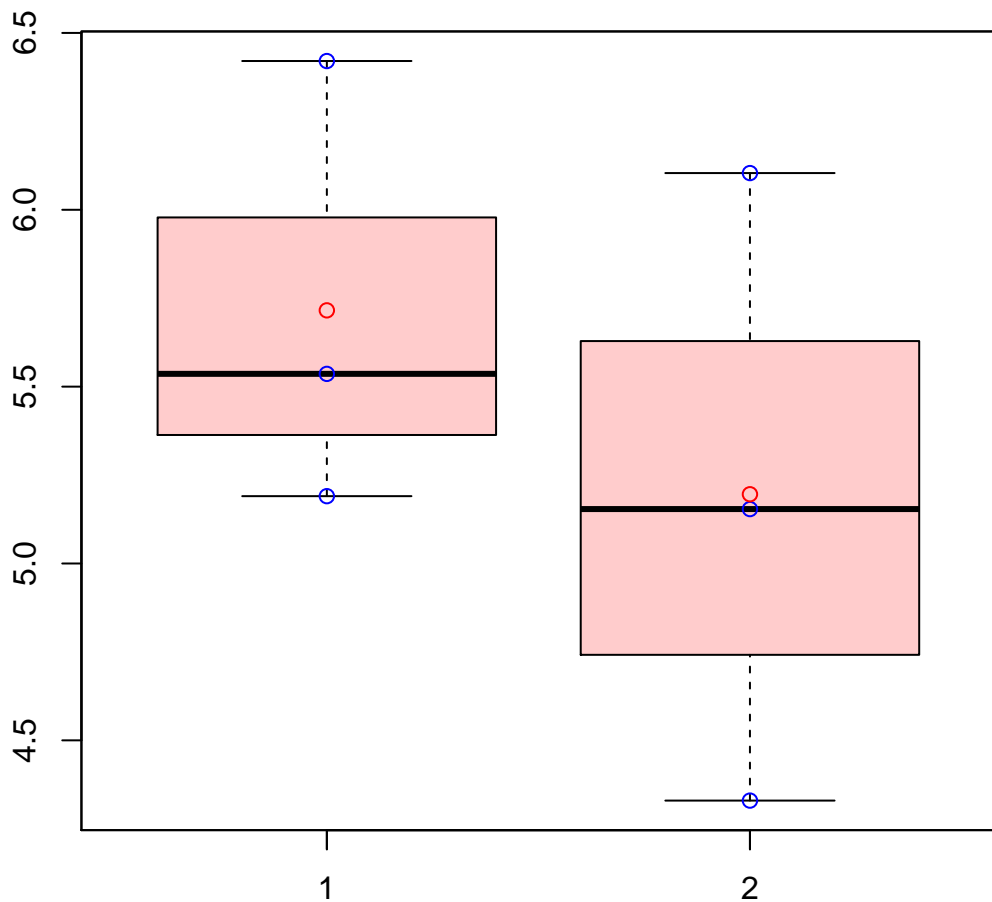

t-Test: p-value = 0.46

# CL3779Contig2|CL3779Contig2

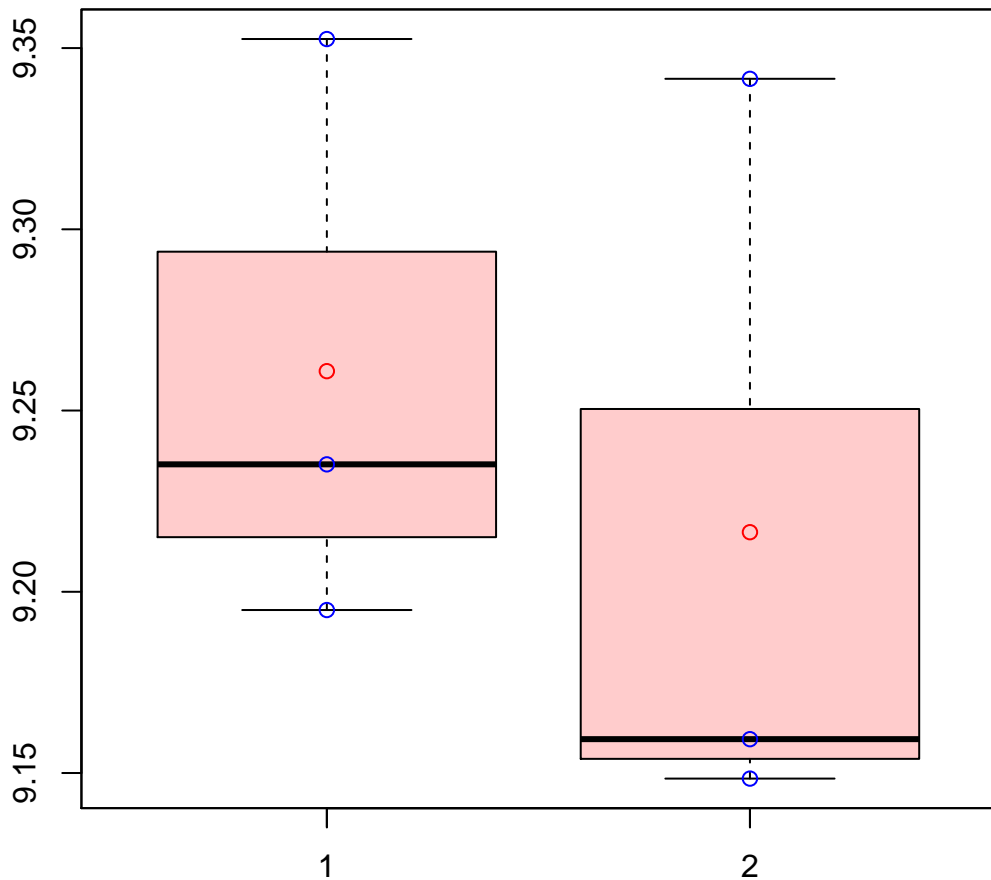

t-Test: p-value = 0.6

# CL3783Contig4|CL3783Contig4

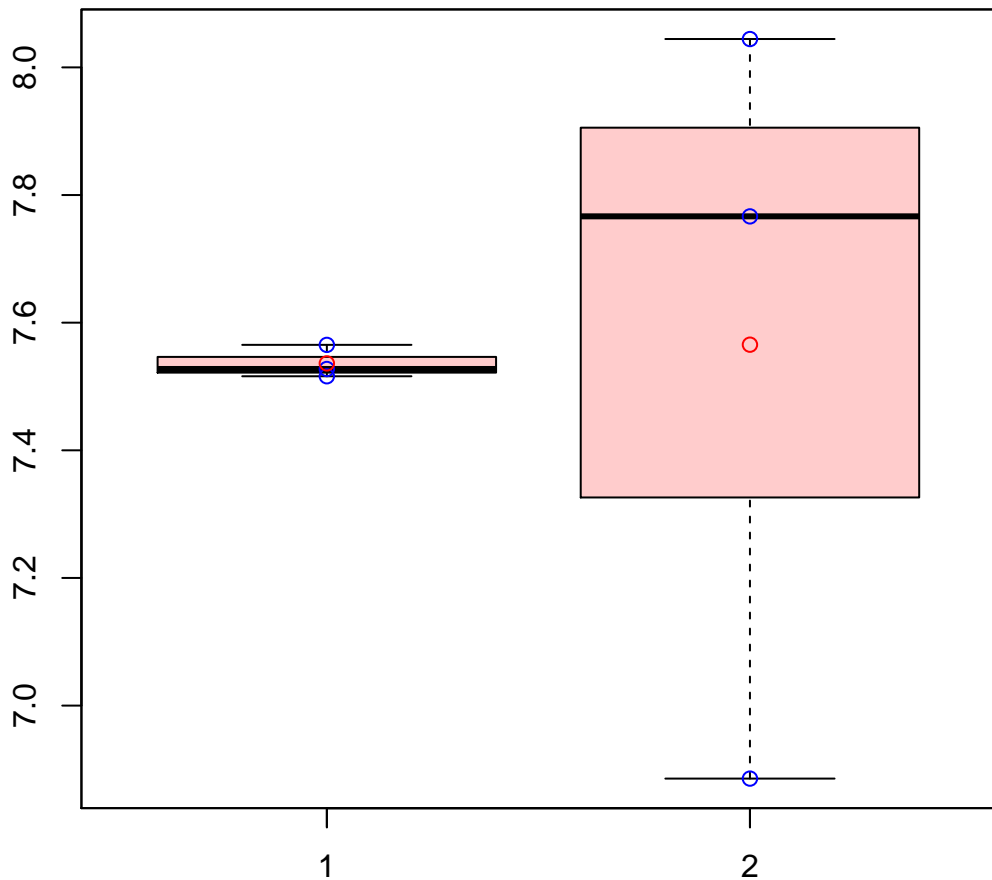

t-Test: p-value = 0.94

# CL3783Contig6|CL3783Contig6

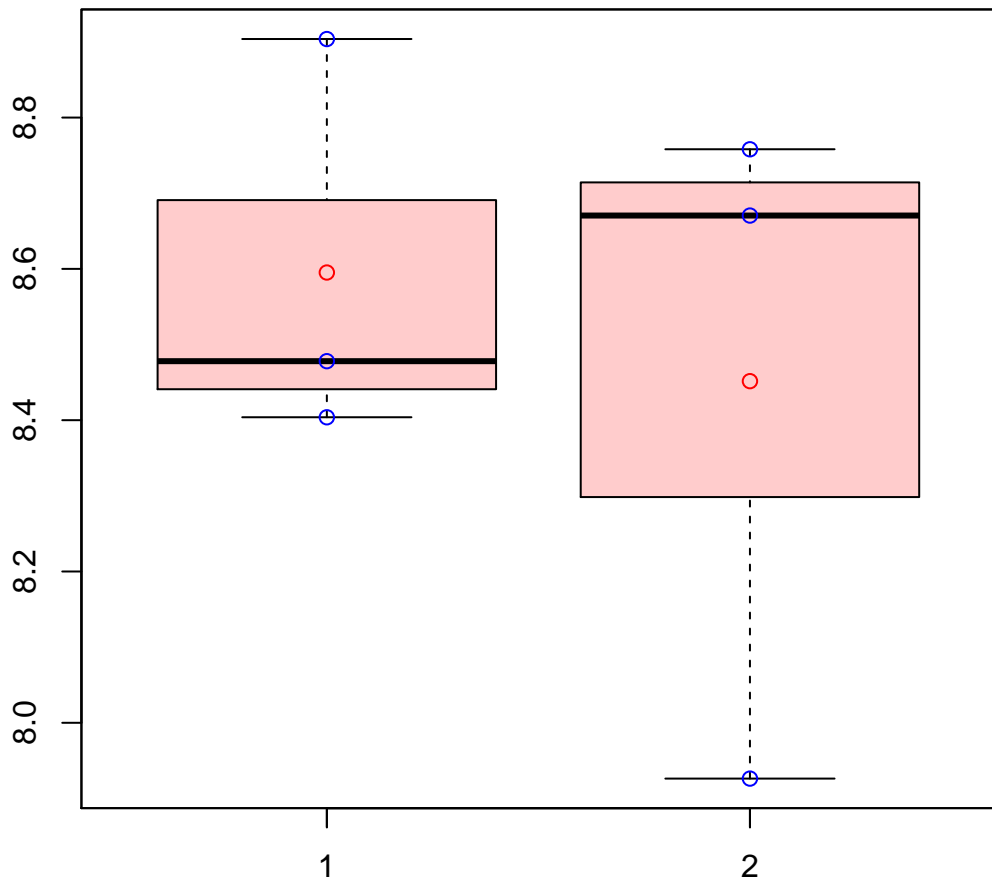

t-Test: p-value = 0.67

# CL3785Contig1|CL3785Contig1

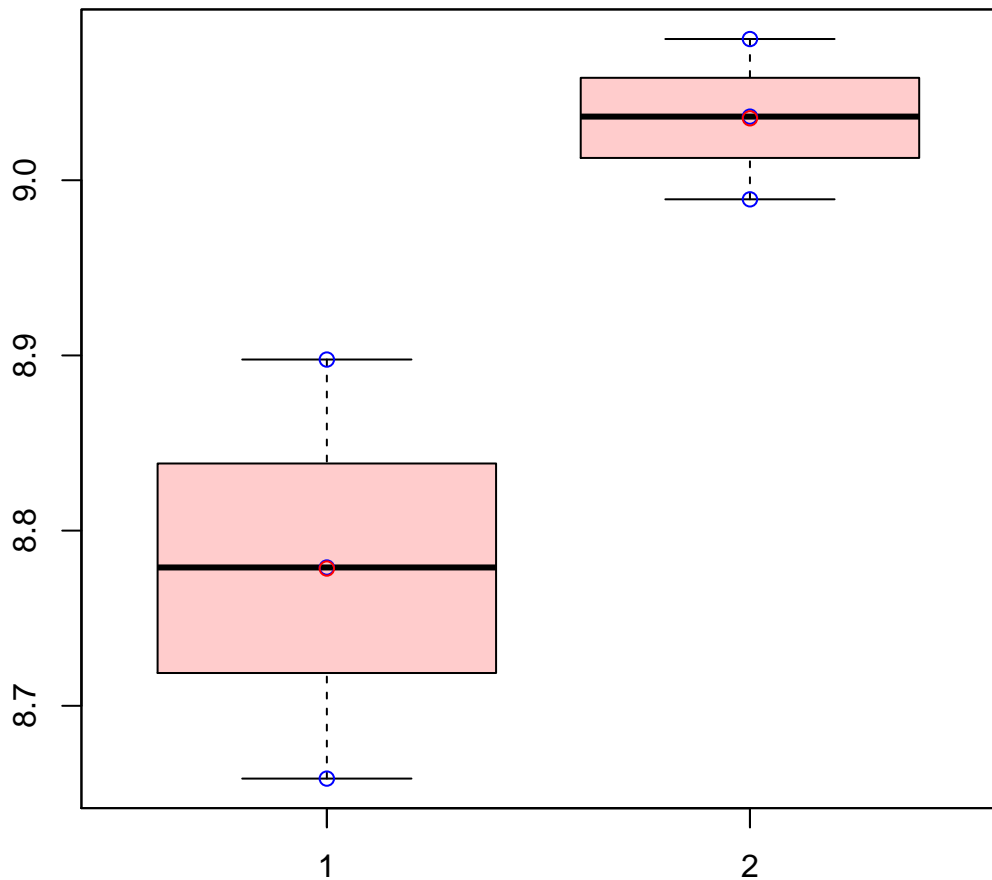

t-Test: p-value = 0.05

# CL3785Contig2|CL3785Contig2

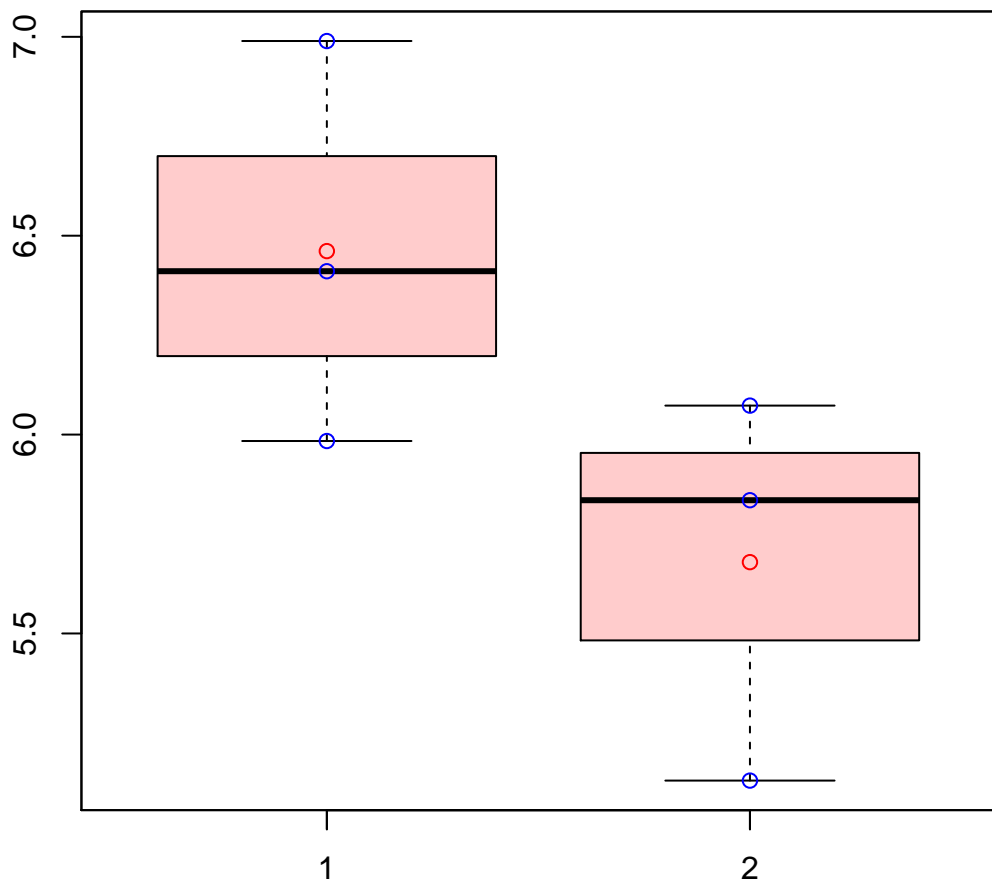

t-Test: p-value = 0.13



# CL3791Contig3|CL3791Contig3

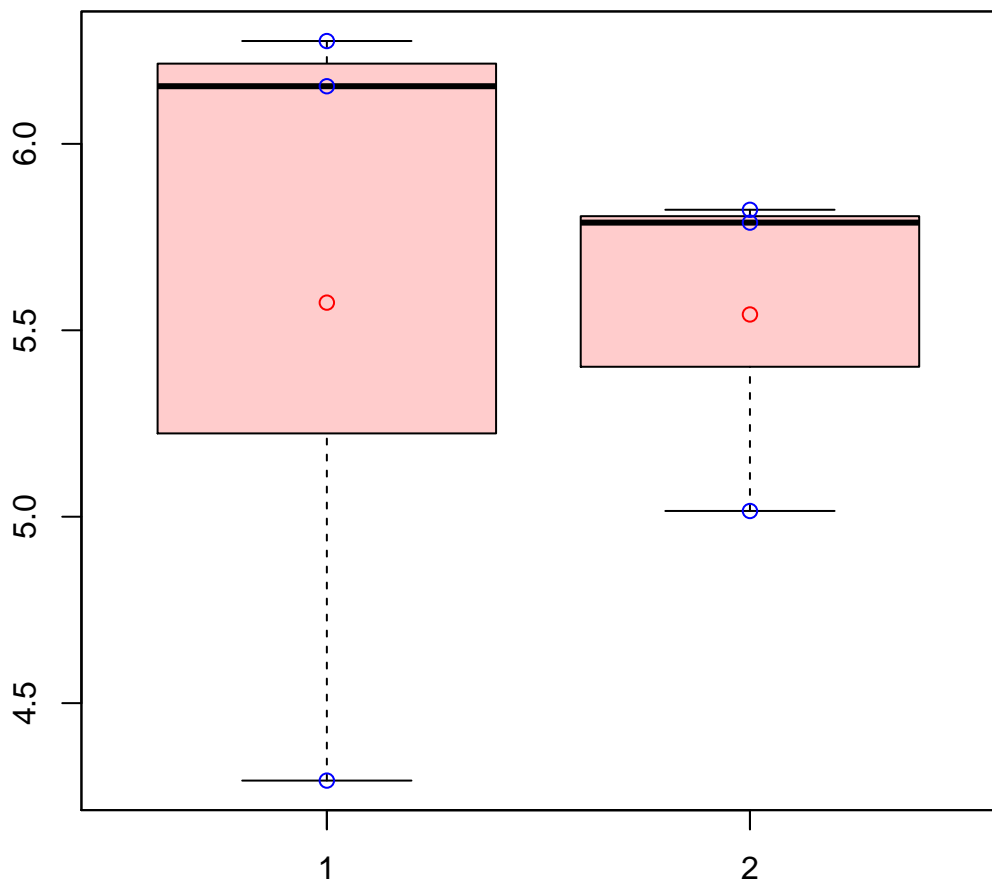

t-Test: p-value = 0.97

# CL379Contig2|CL379Contig2

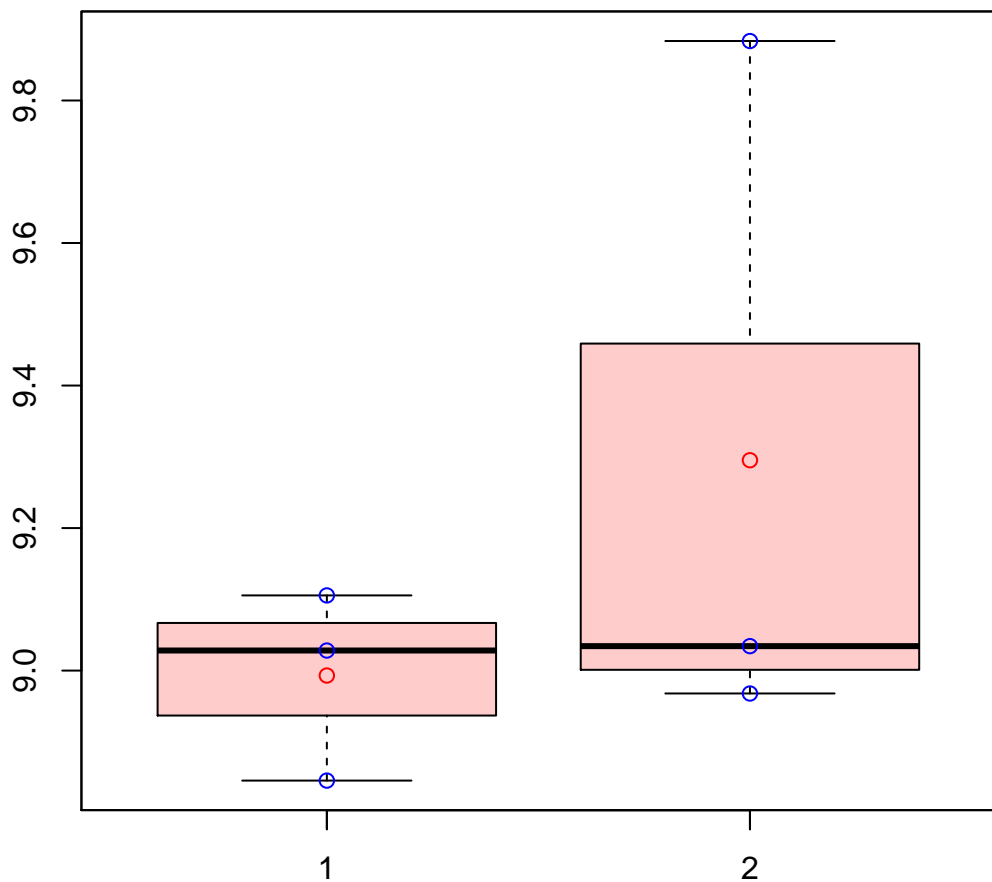

t-Test: p-value = 0.41

# CL3801Contig1|CL3801Contig1

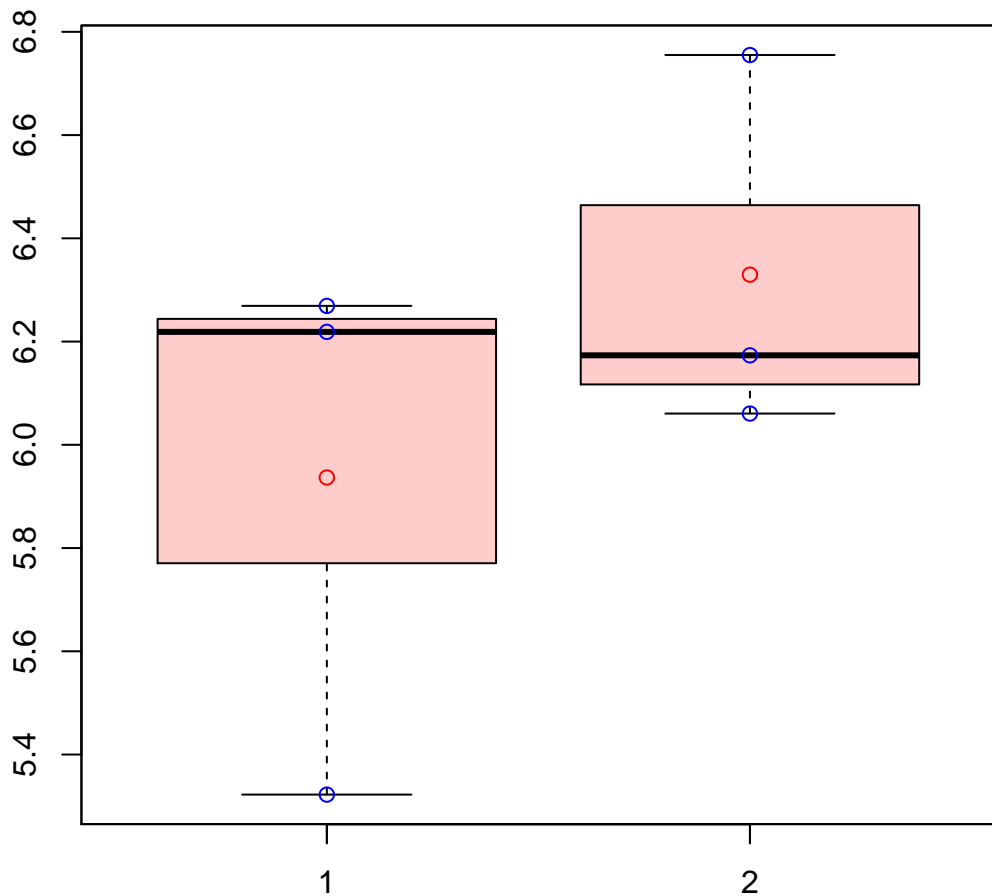

t-Test: p-value = 0.36

# CL3806Contig1|CL3806Contig1

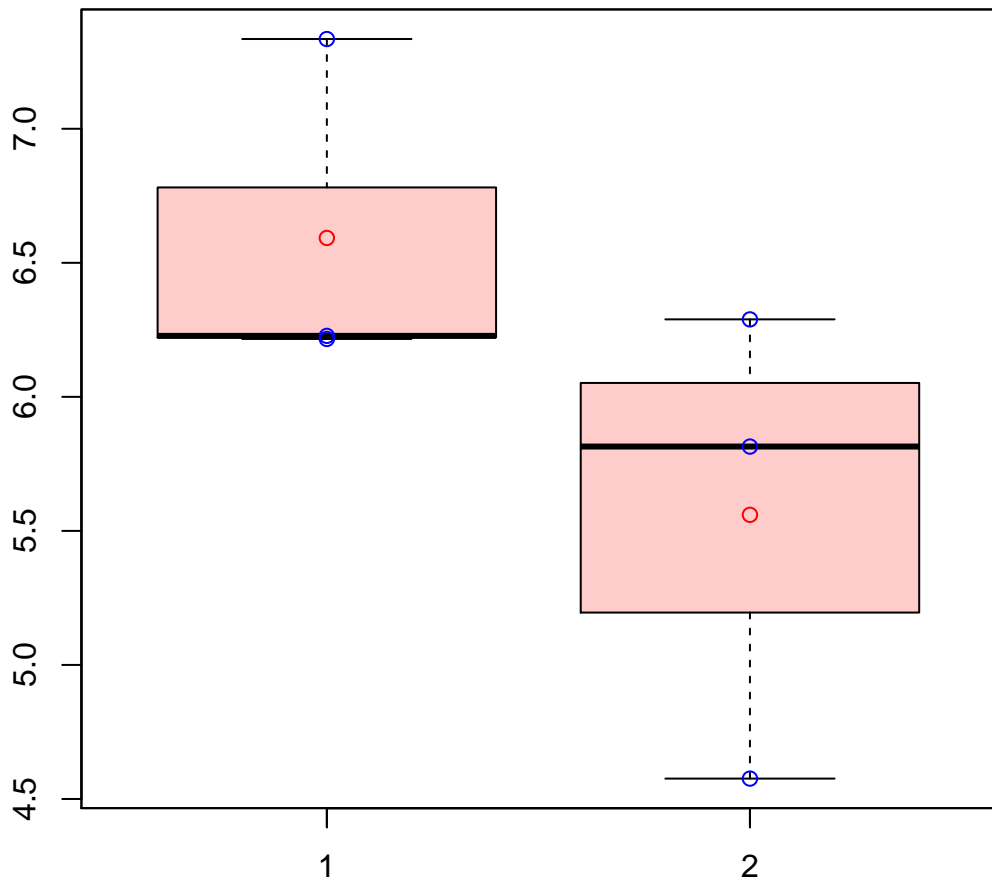

t-Test: p-value = 0.18

# CL3810Contig3|CL3810Contig3

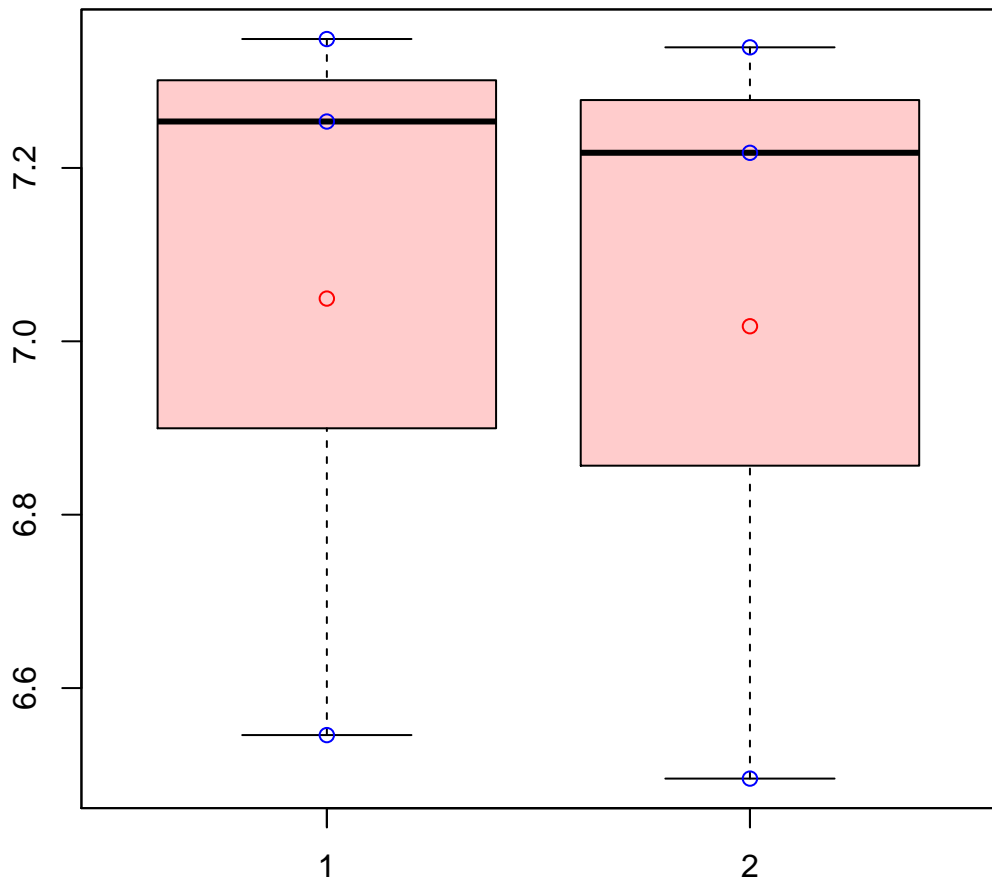

t-Test: p-value = 0.93

# CL3819Contig4|CL3819Contig4

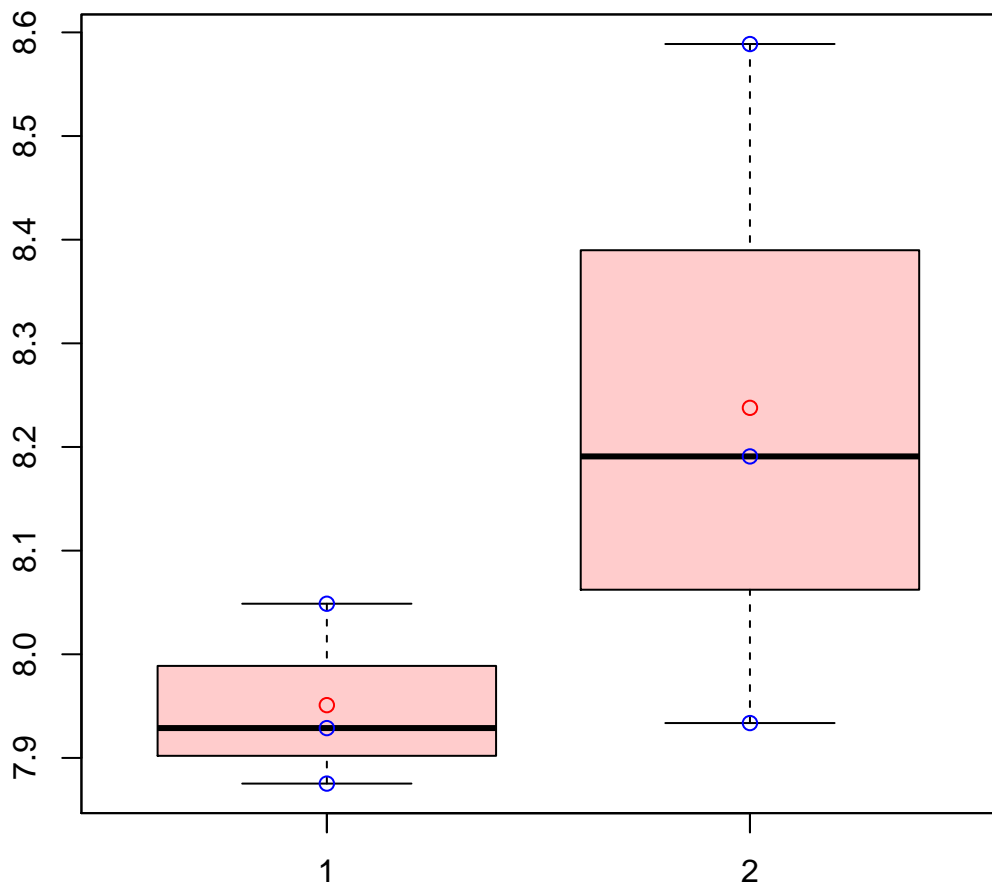

t-Test: p-value = 0.27

# CL381Contig12|CL381Contig12

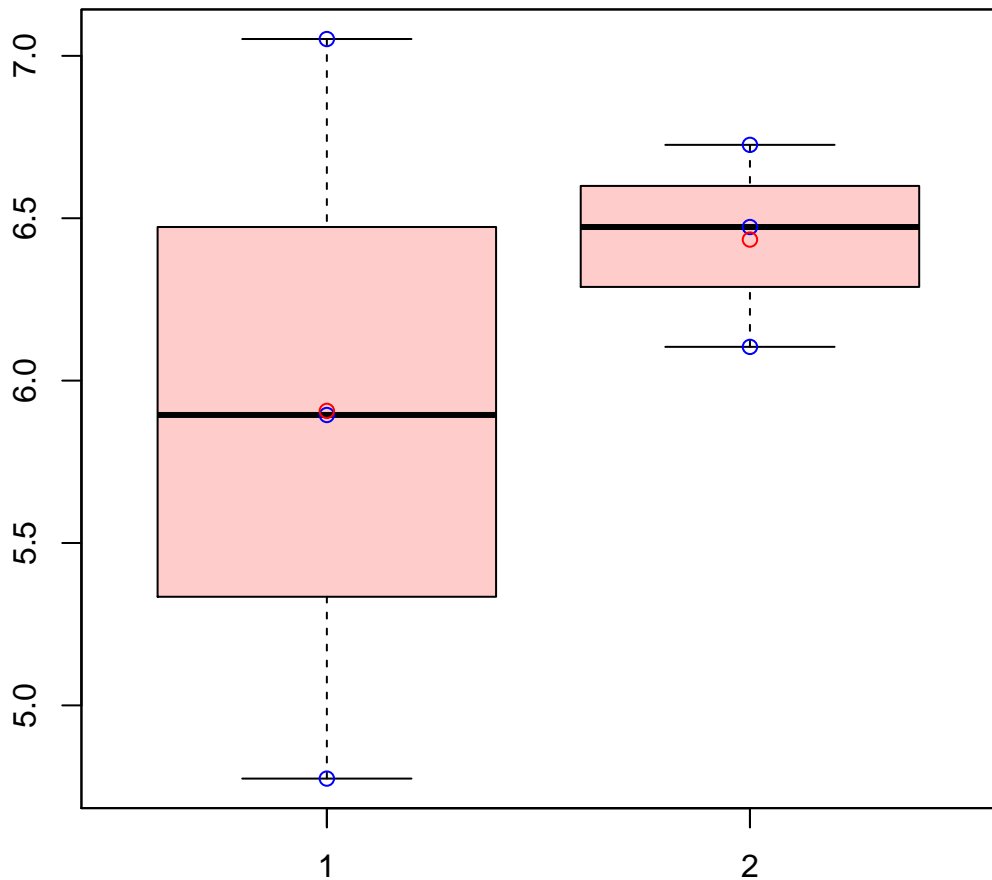

t-Test: p-value = 0.51

# CL3820Contig1|CL3820Contig1

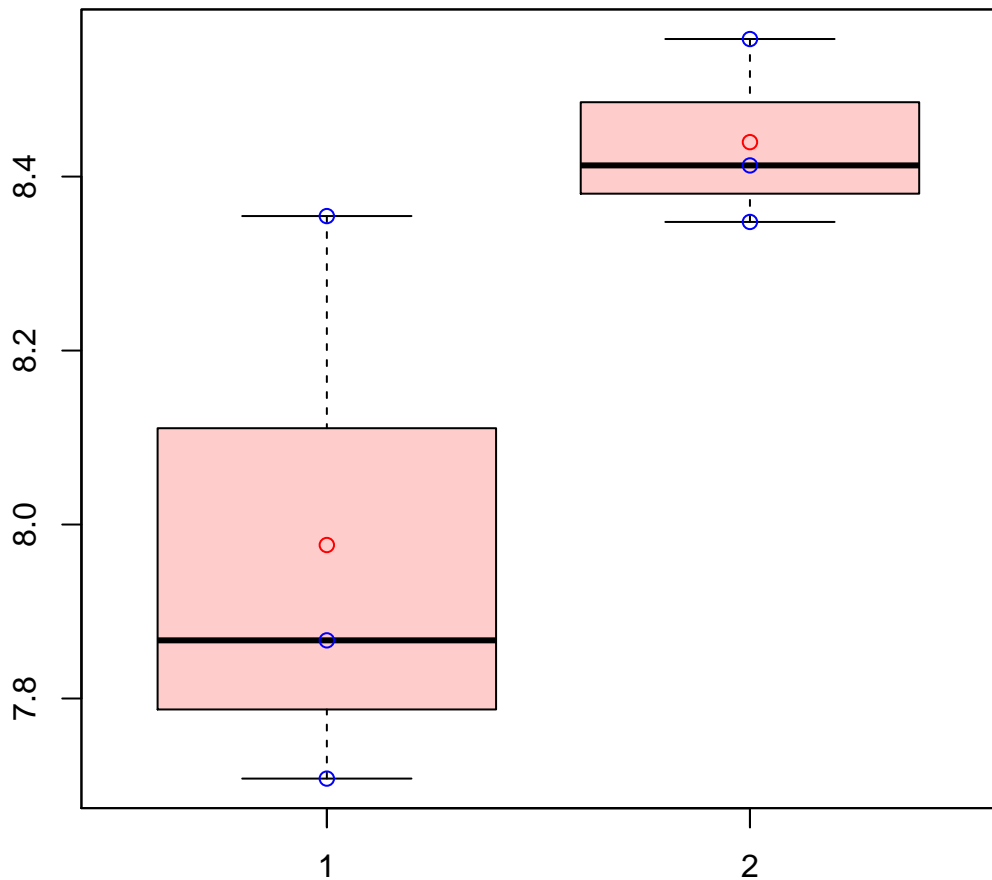

t-Test: p-value = 0.13



# CL3821Contig1|CL3821Contig1

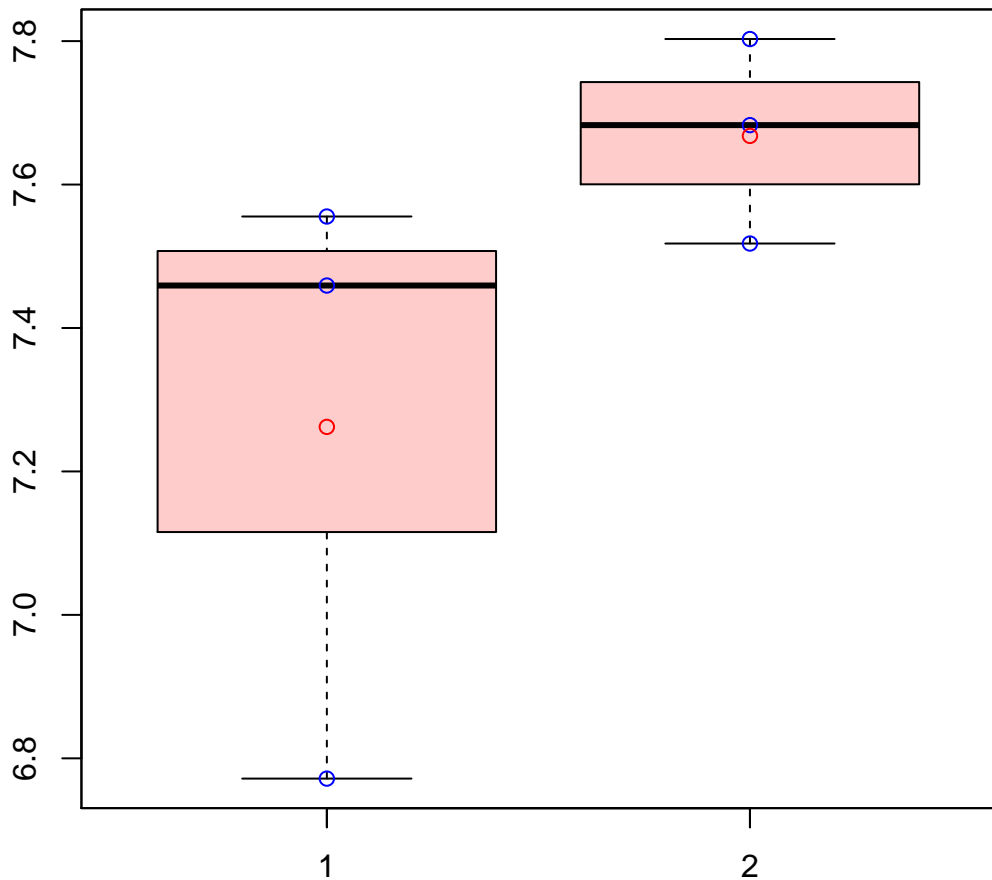

t-Test: p-value = 0.24

# CL382Contig4|CL382Contig4

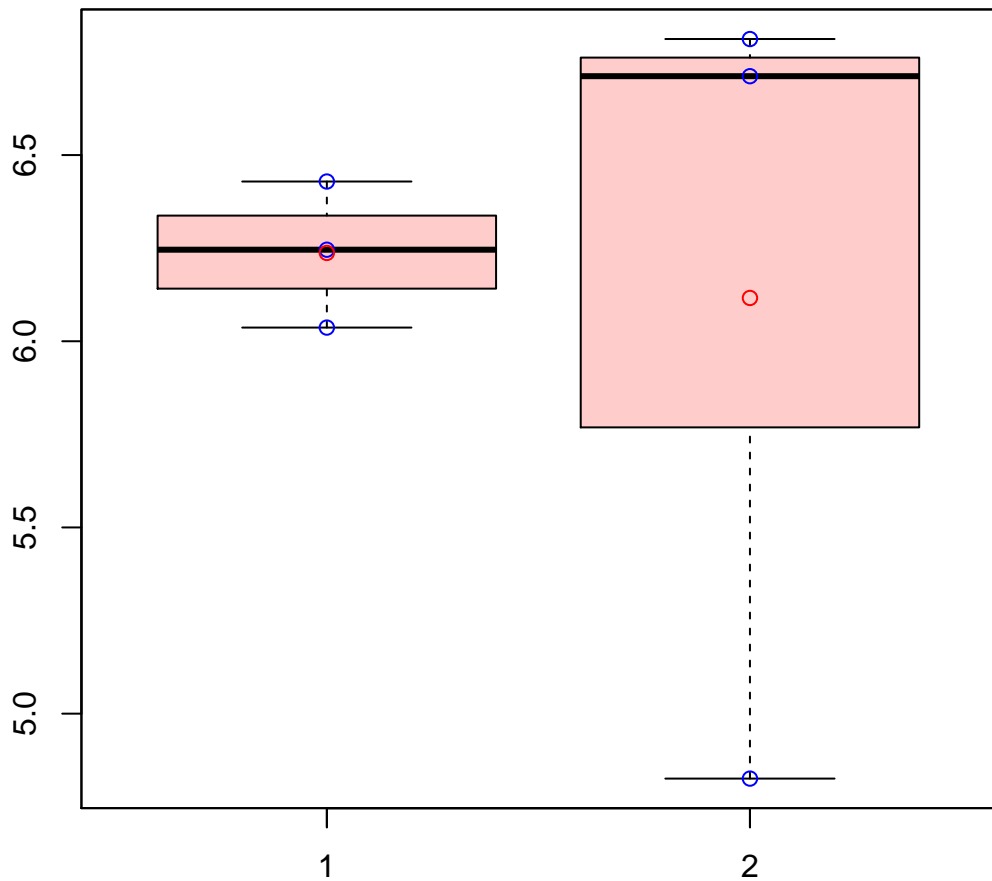

t-Test: p-value = 0.87

# CL382Contig7|CL382Contig7

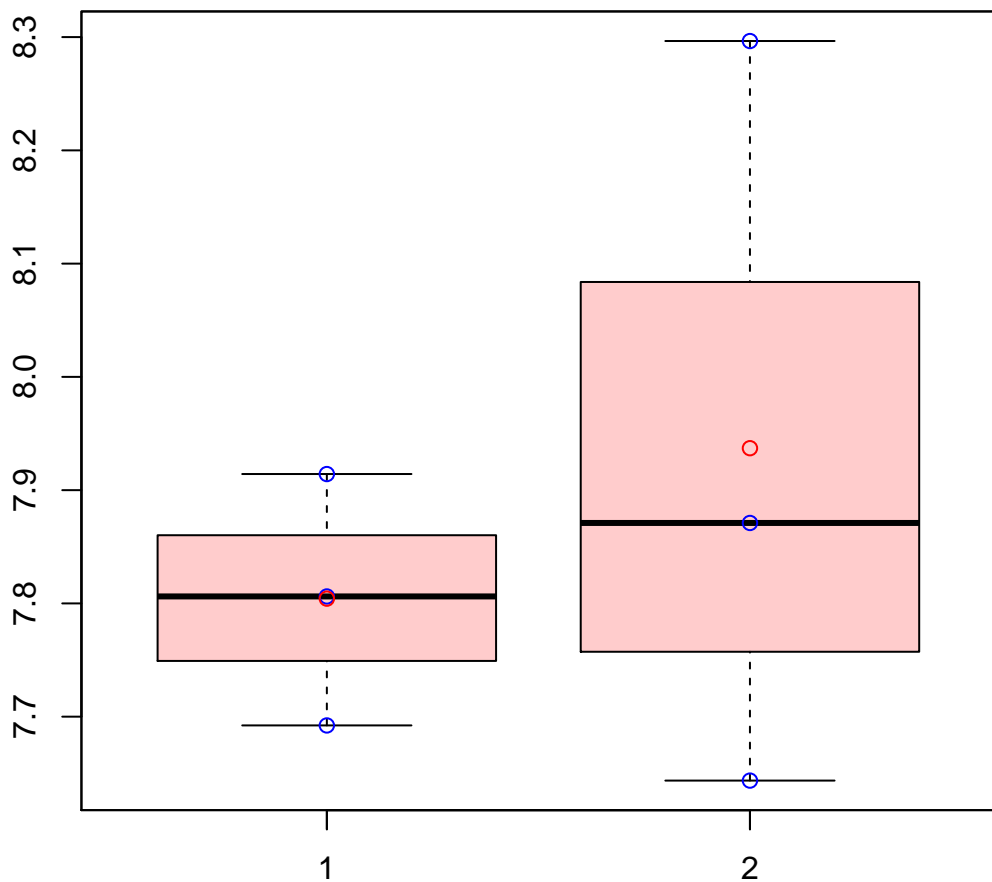

t-Test: p-value = 0.57

# CL3830Contig3|CL3830Contig3

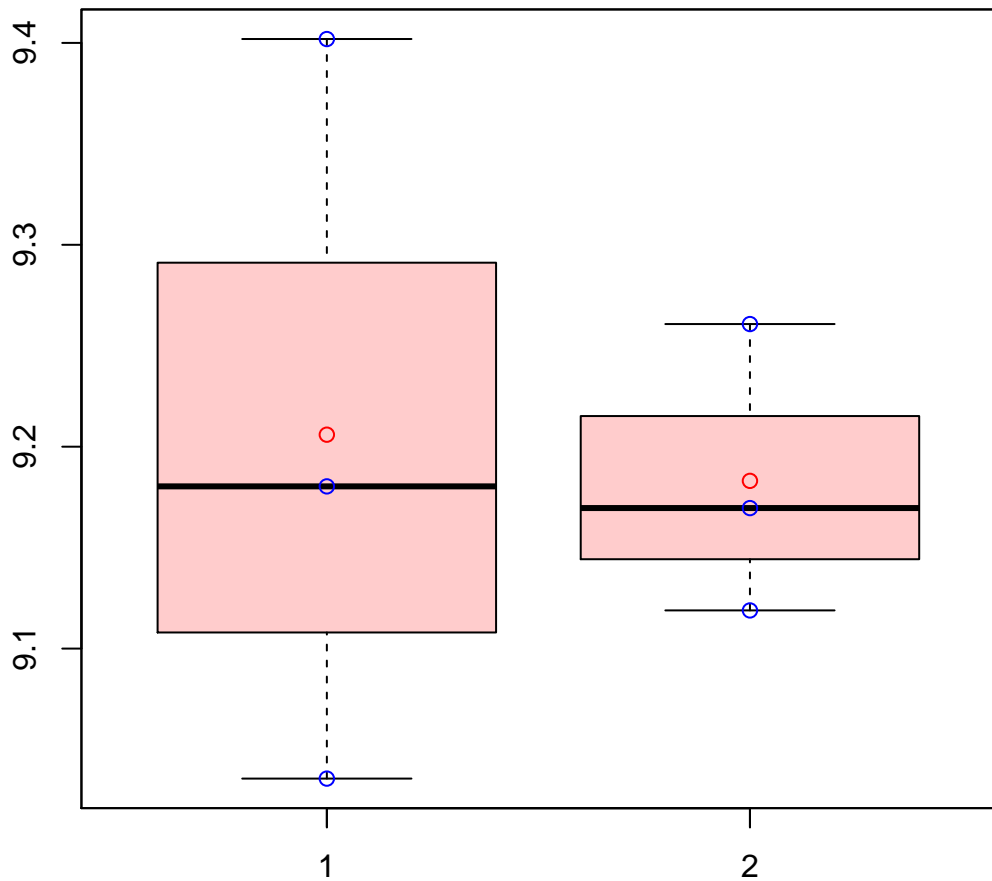

t-Test: p-value = 0.86

# CL3835Contig3|CL3835Contig3

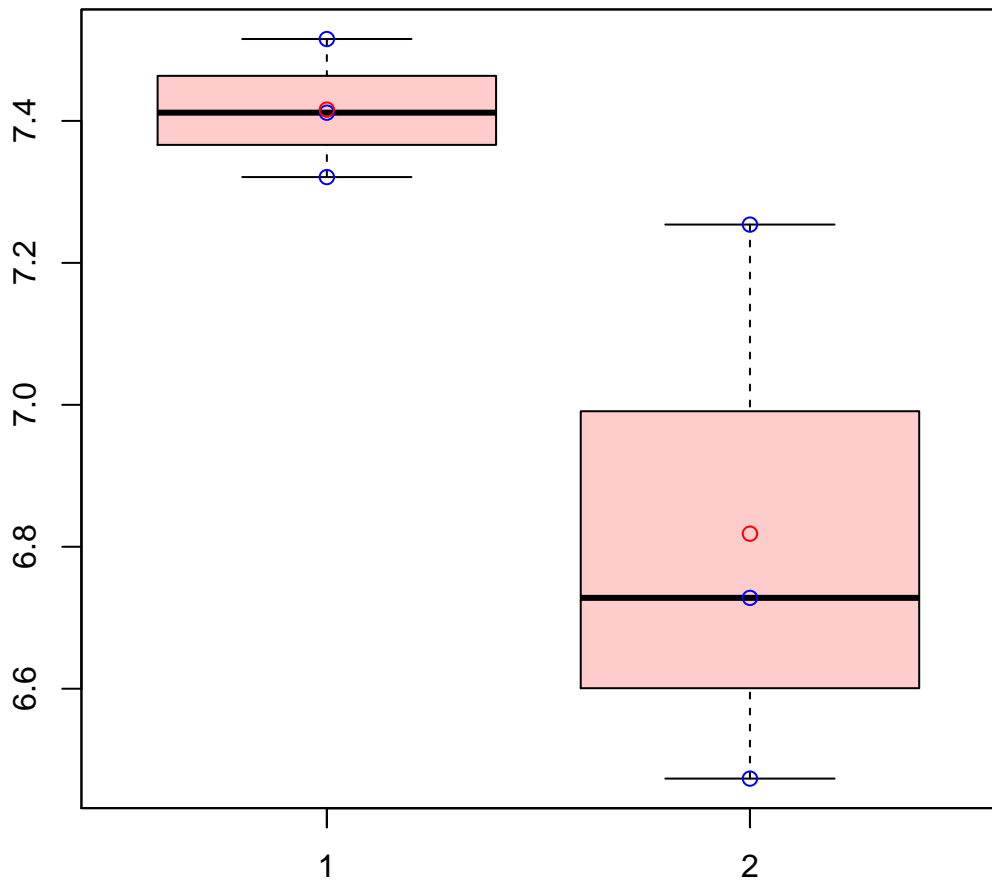

t-Test: p-value = 0.11

# CL3842Contig2|CL3842Contig2

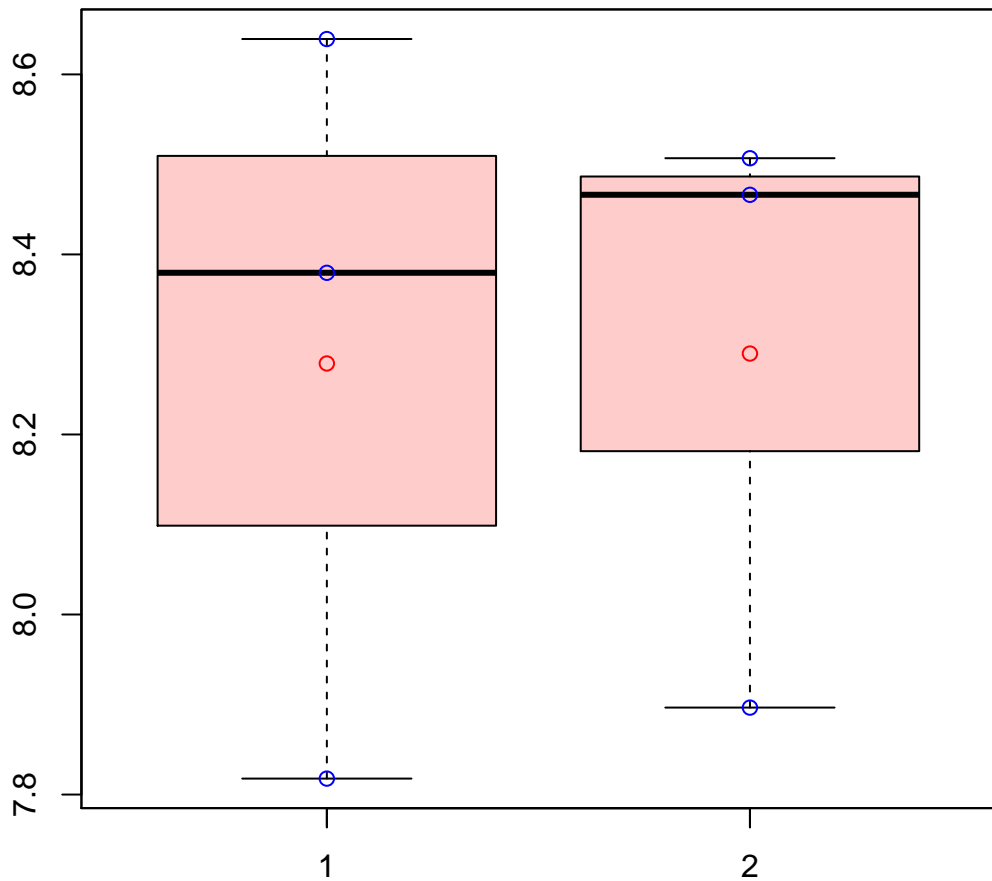

t-Test: p-value = 0.97

# CL3844Contig2|CL3844Contig2

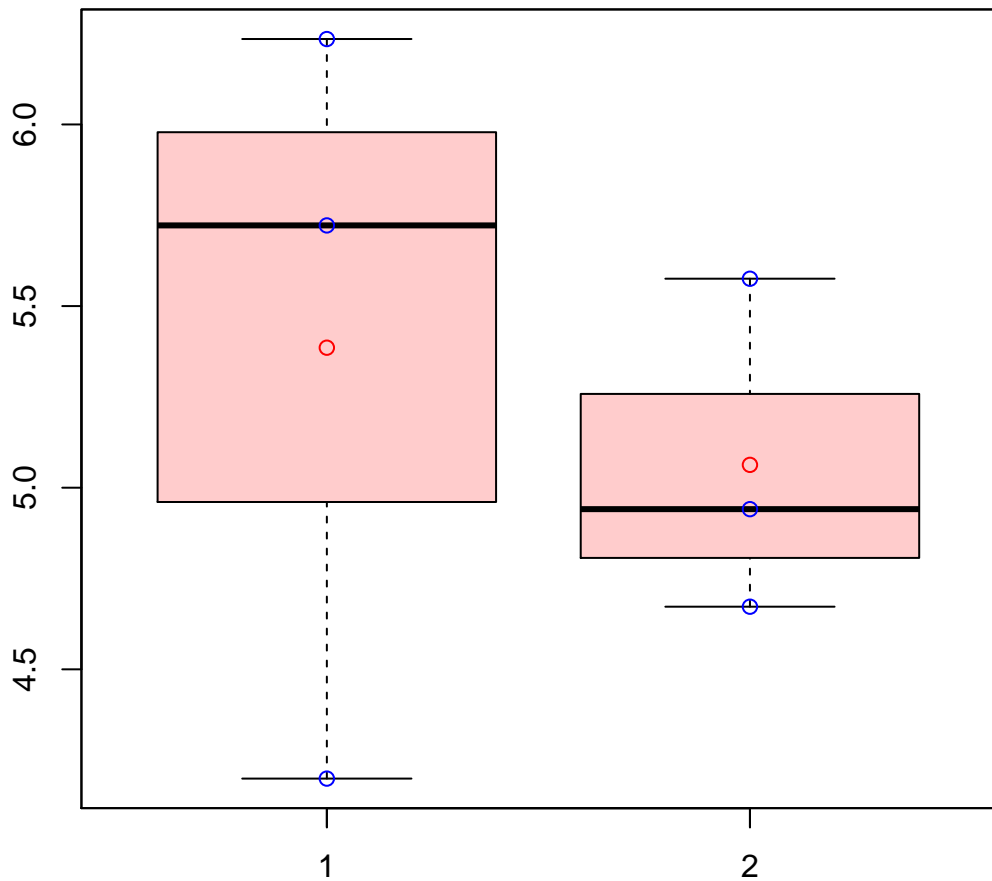

t-Test: p-value = 0.66

# CL3854Contig6|CL3854Contig6

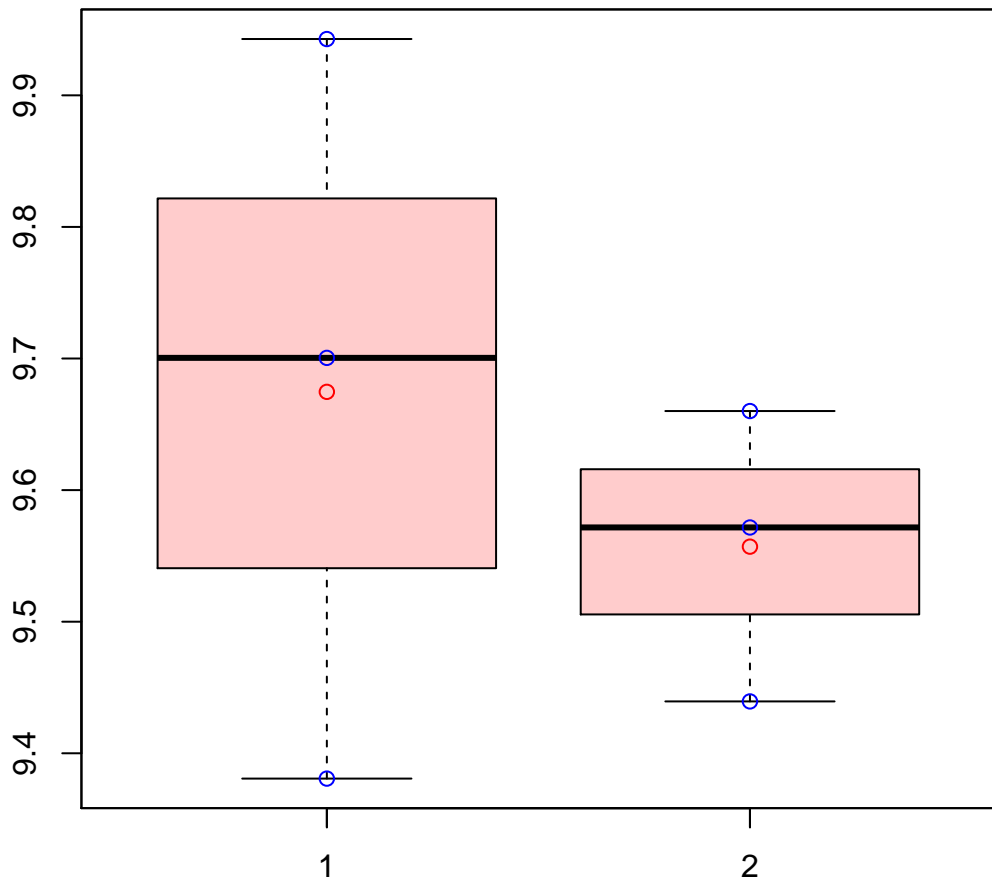

t-Test: p-value = 0.56



# CL3870Contig2|CL3870Contig2

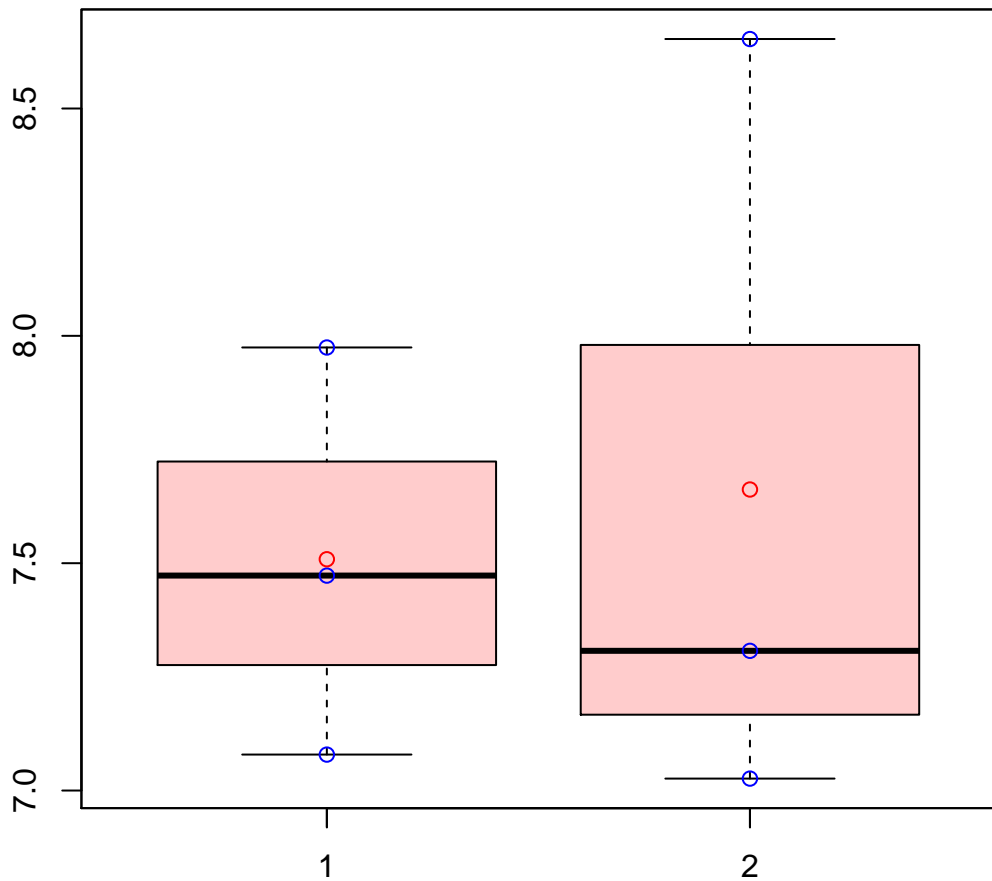

t-Test: p-value = 0.8

# CL3878Contig1|CL3878Contig1

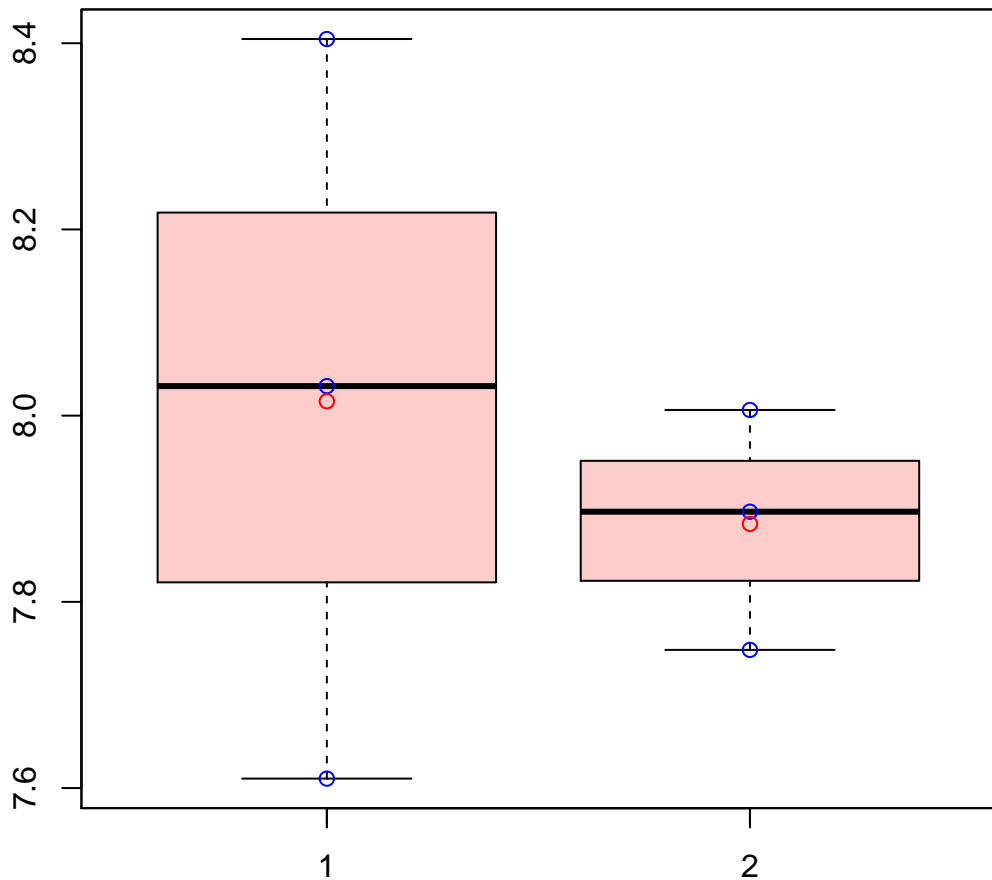

t-Test: p-value = 0.63

# CL387Contig18|CL387Contig18

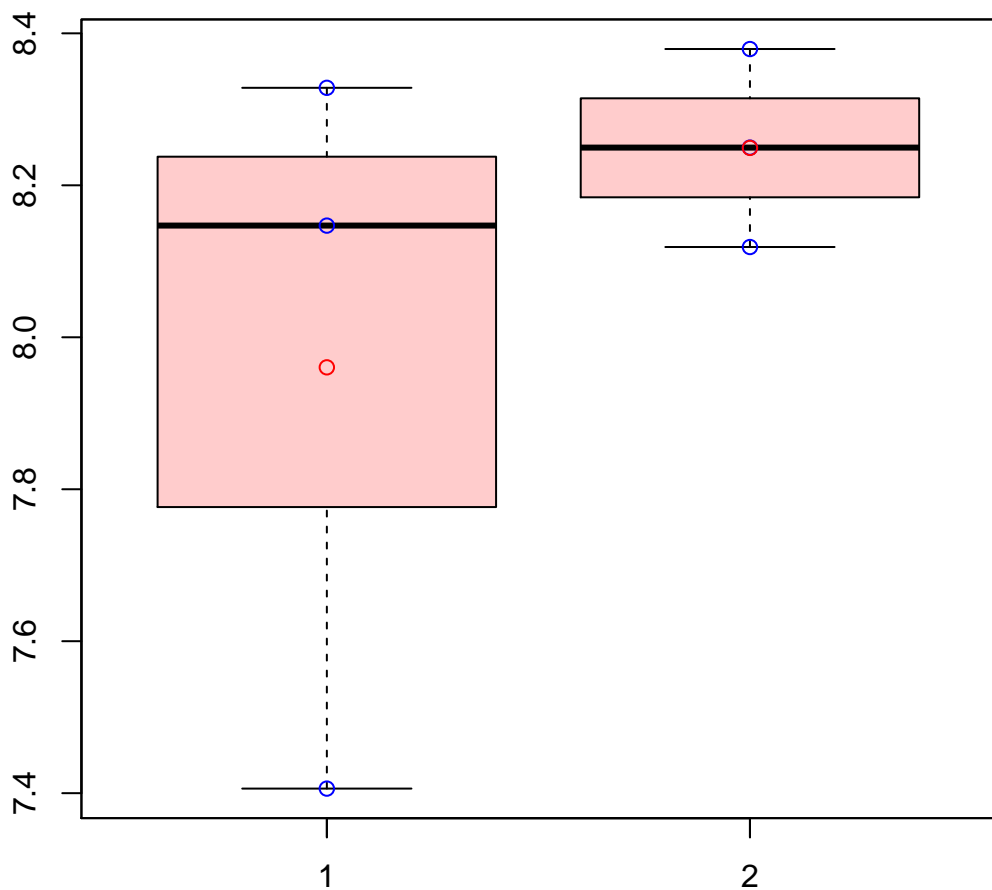

t-Test: p-value = 0.42

# CL3894Contig4|CL3894Contig4

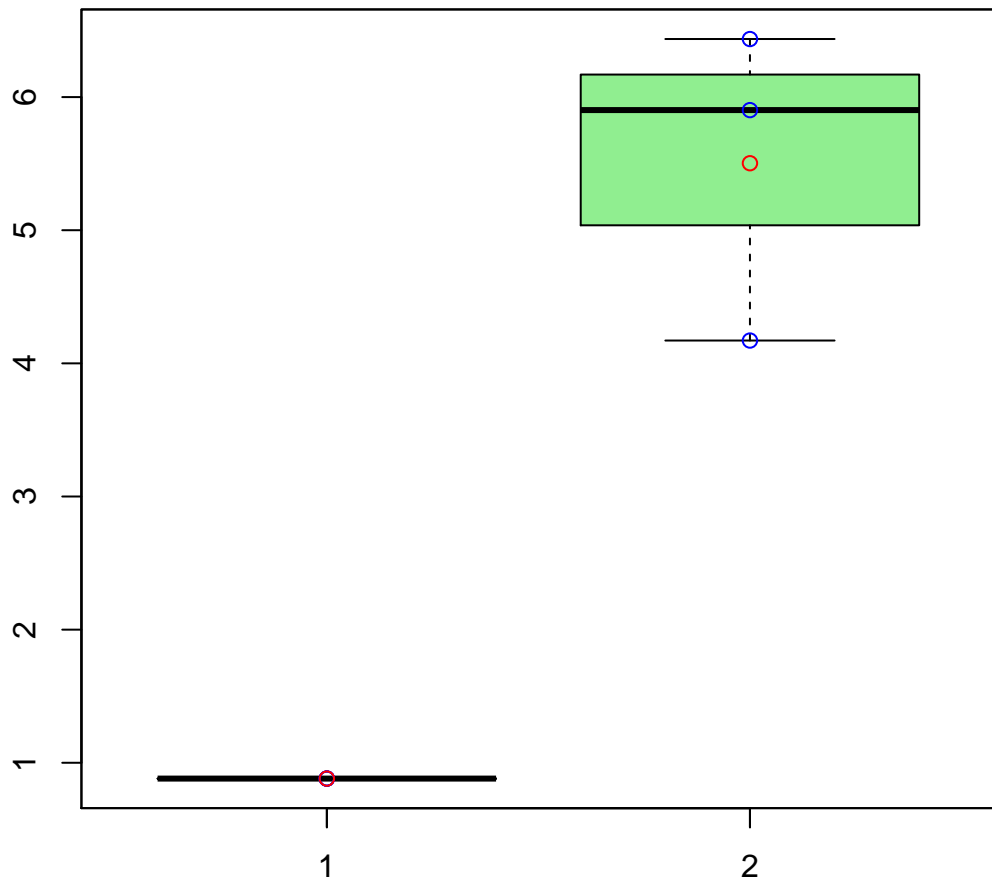

t-Test: p-value = 0.02

# CL3896Contig4|CL3896Contig4

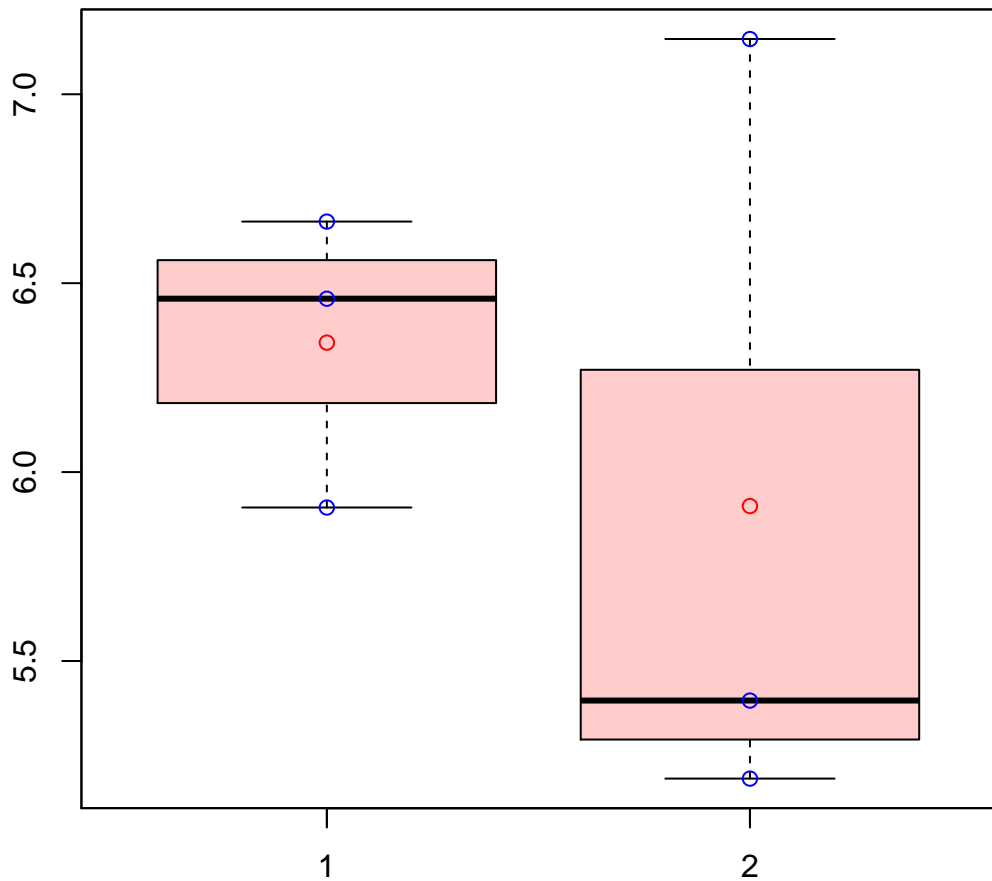

t-Test: p-value = 0.57

# CL38Contig39|CL38Contig39

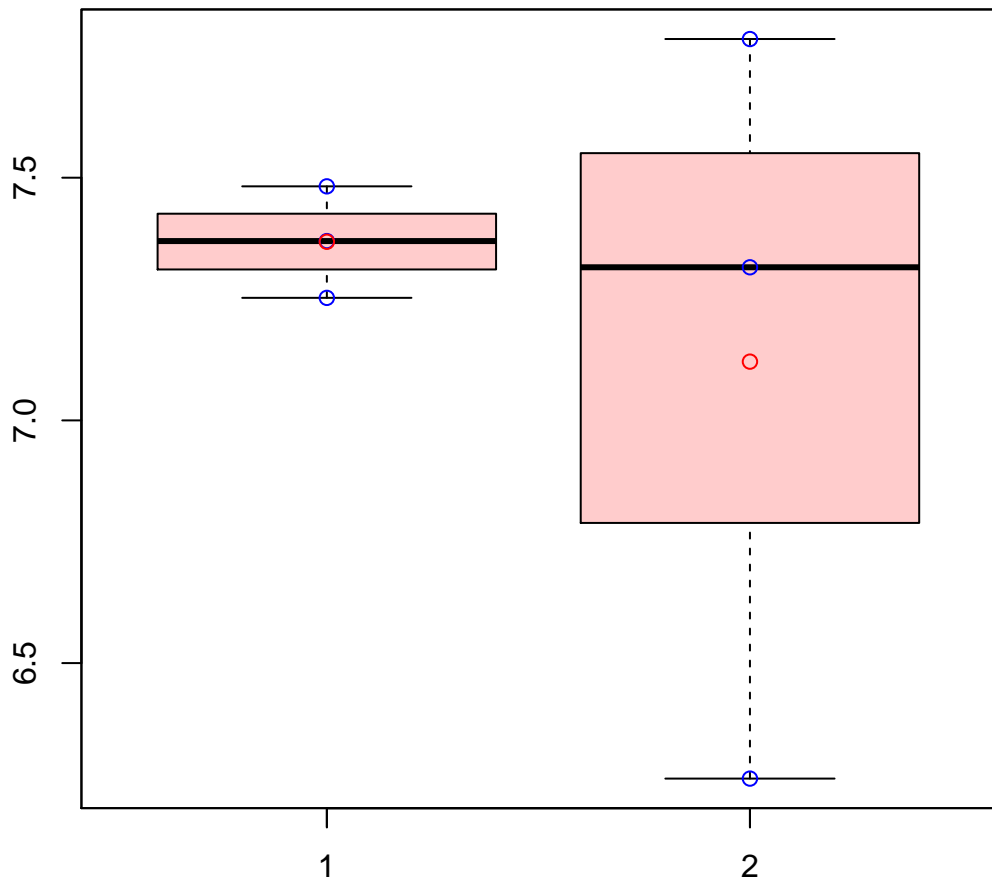

t-Test: p-value = 0.64

# CL38Contig44|CL38Contig44

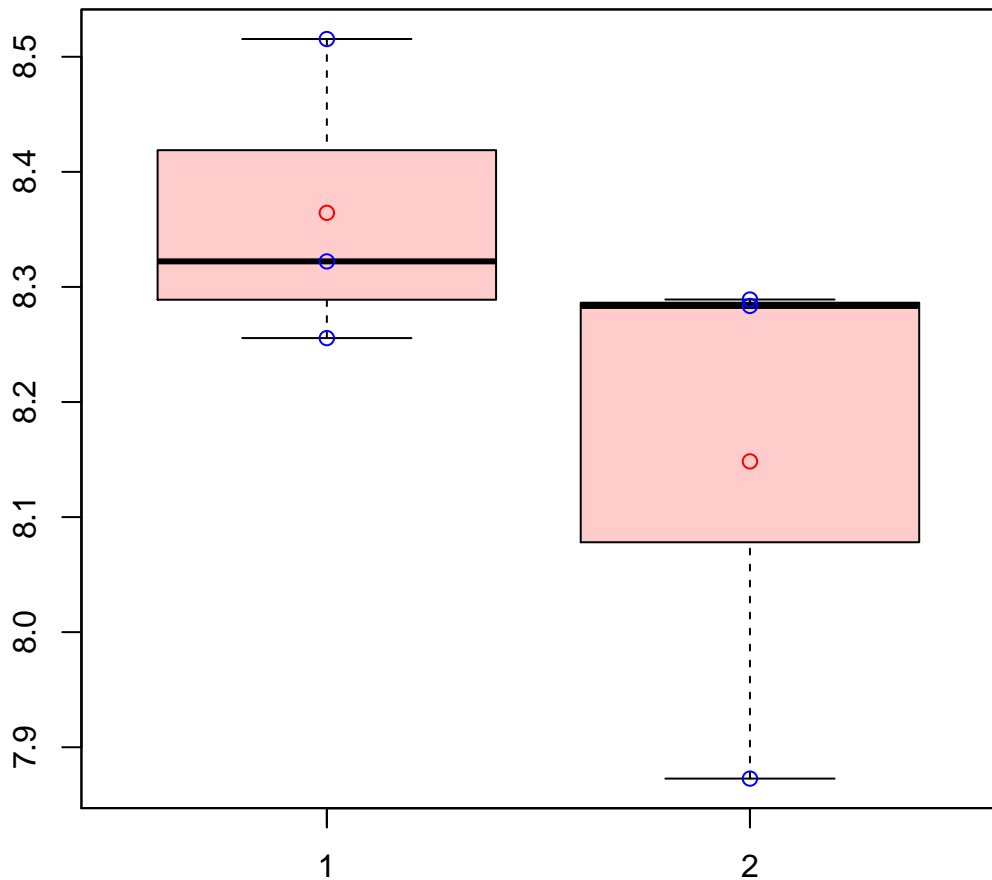

t-Test: p-value = 0.26

# CL3911Contig5|CL3911Contig5

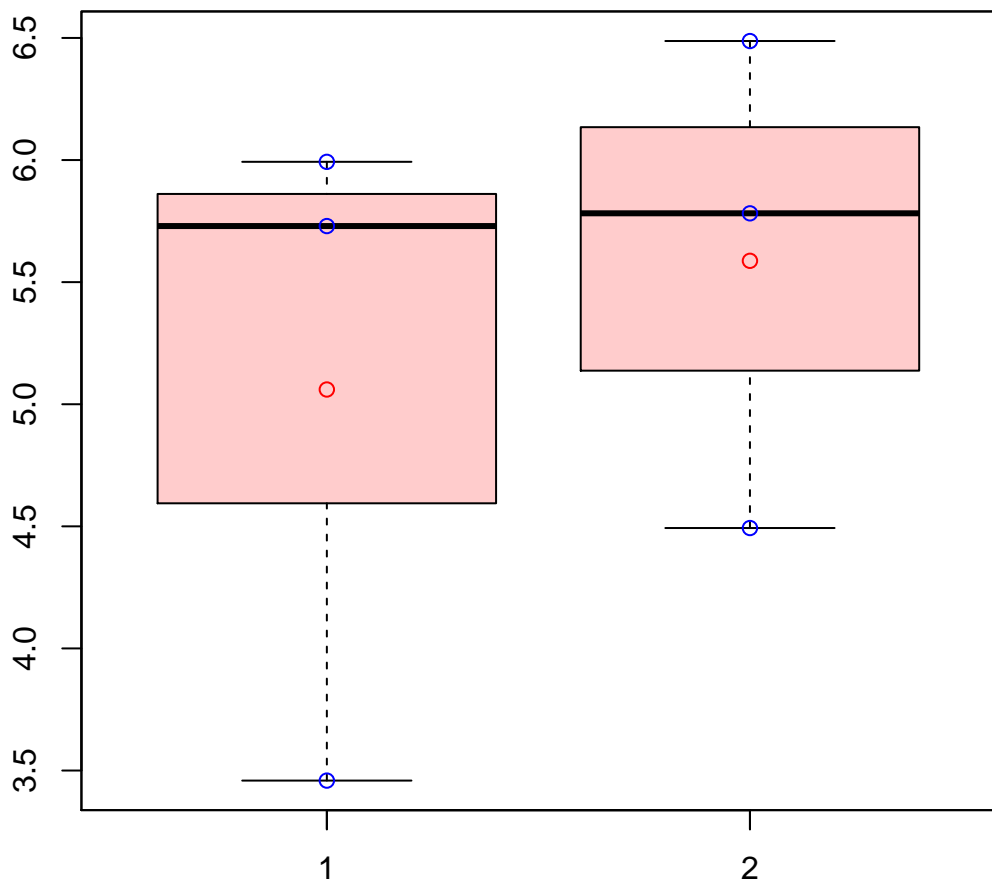

t-Test: p-value = 0.63



# CL3914Contig1|CL3914Contig1

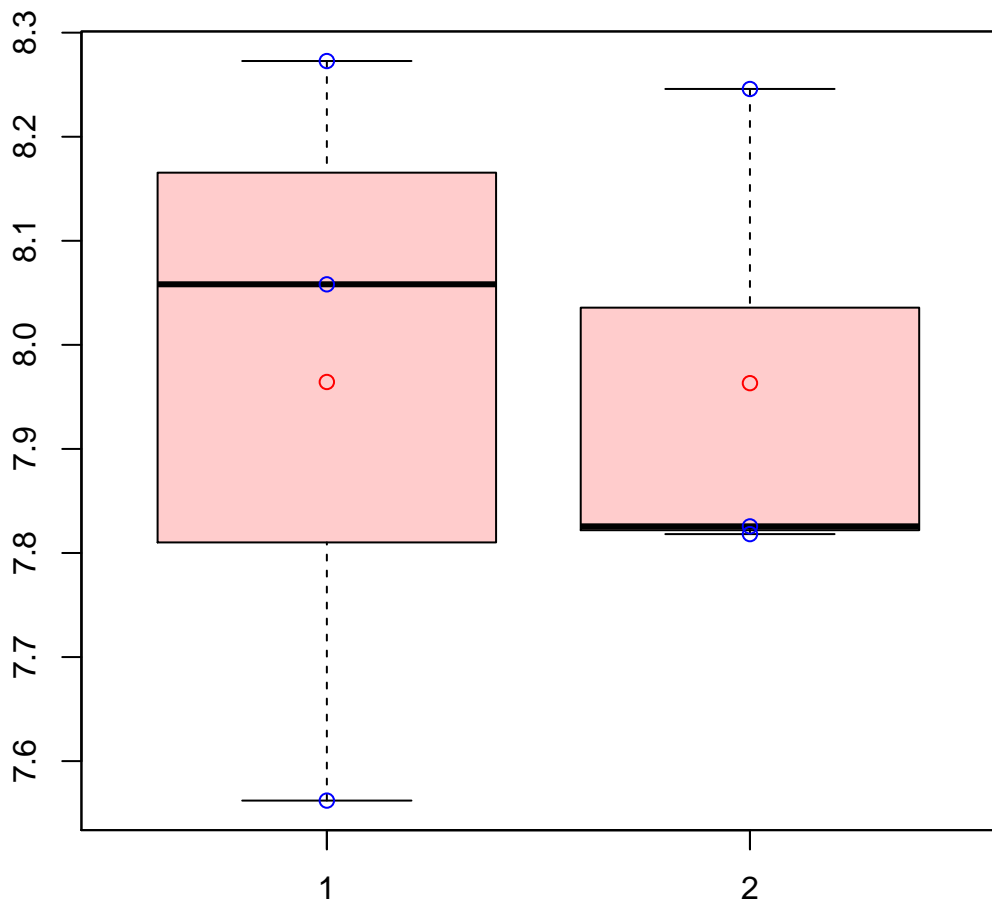

t-Test: p-value = 1

# CL3916Contig1|CL3916Contig1

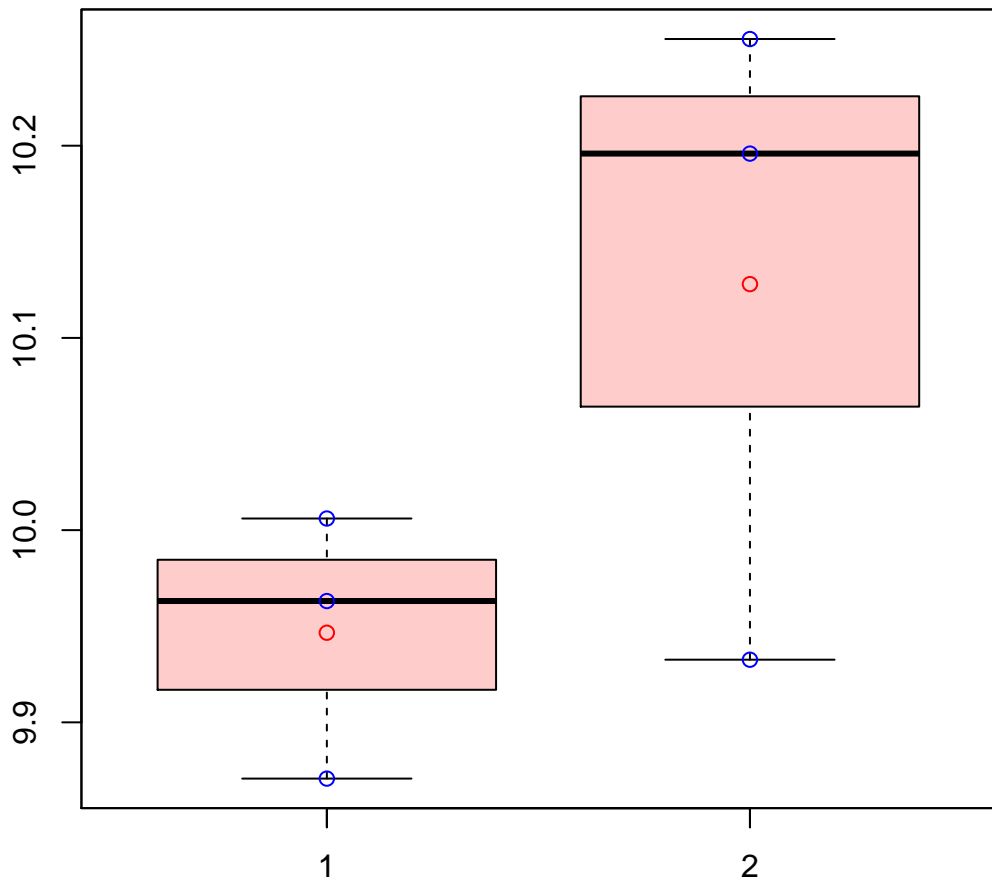

t-Test: p-value = 0.2

# CL3920Contig2|CL3920Contig2

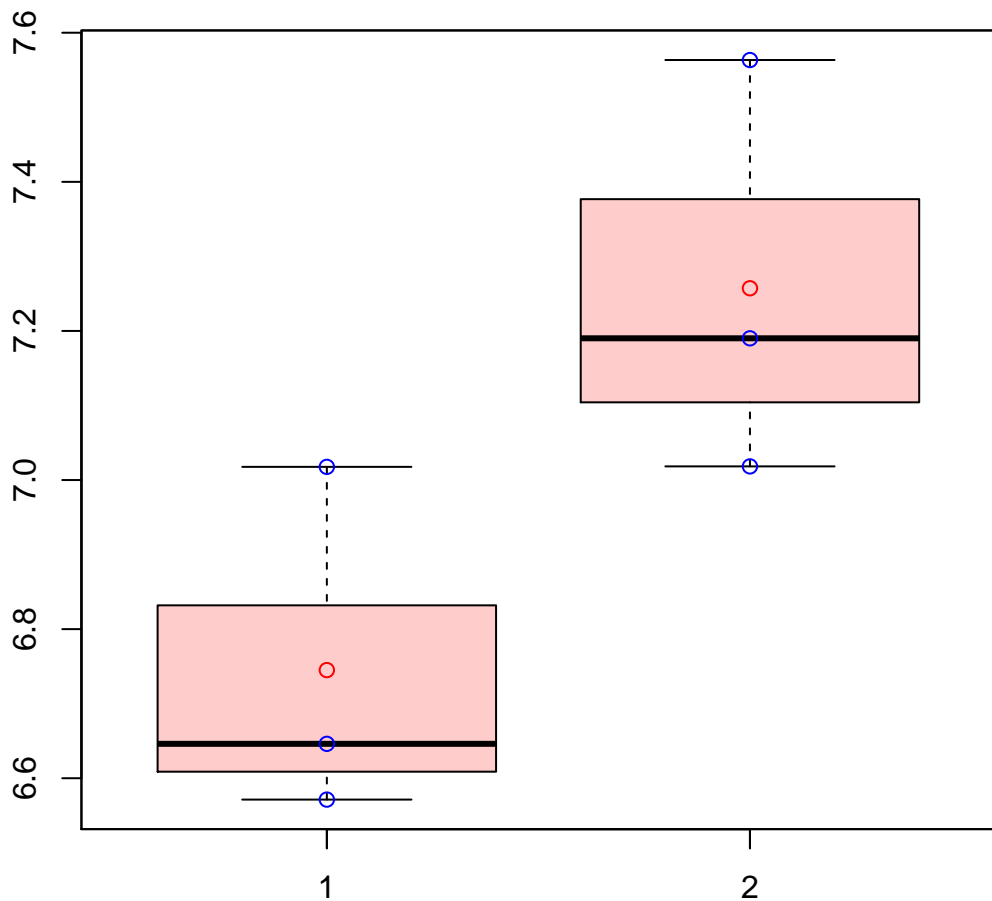

t-Test: p-value = 0.07

# CL393Contig3|CL393Contig3

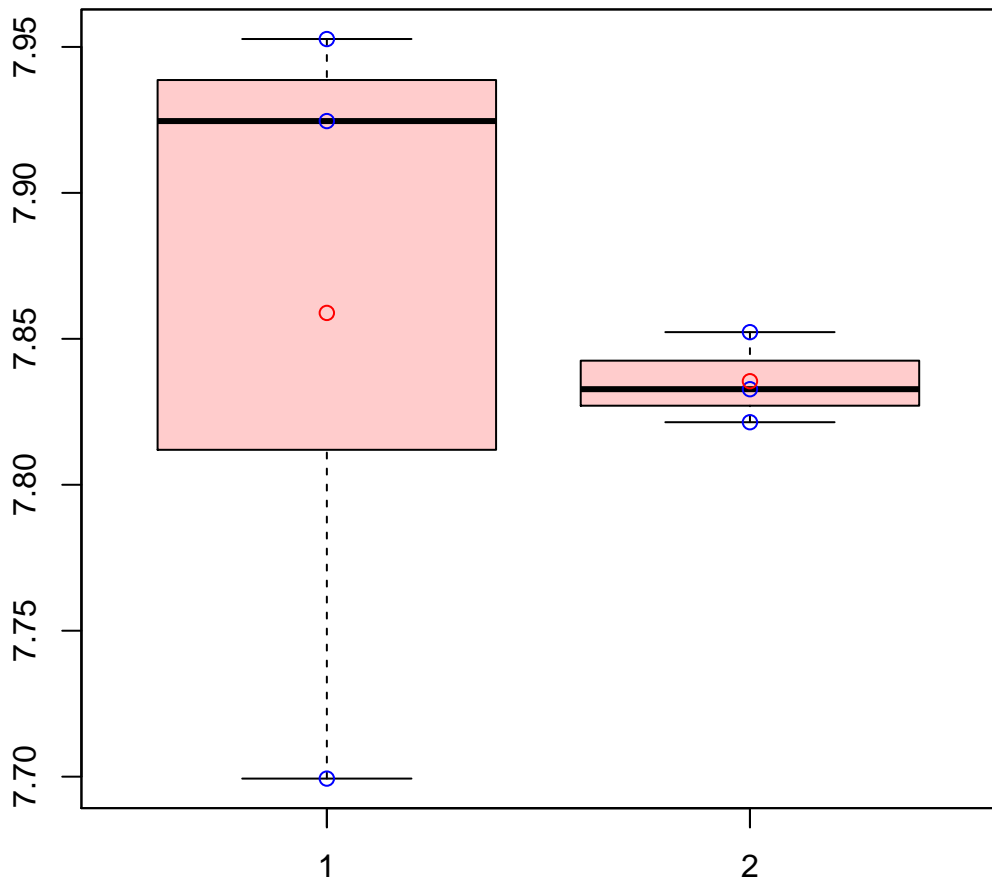

t-Test: p-value = 0.8

# CL393Contig4|CL393Contig4

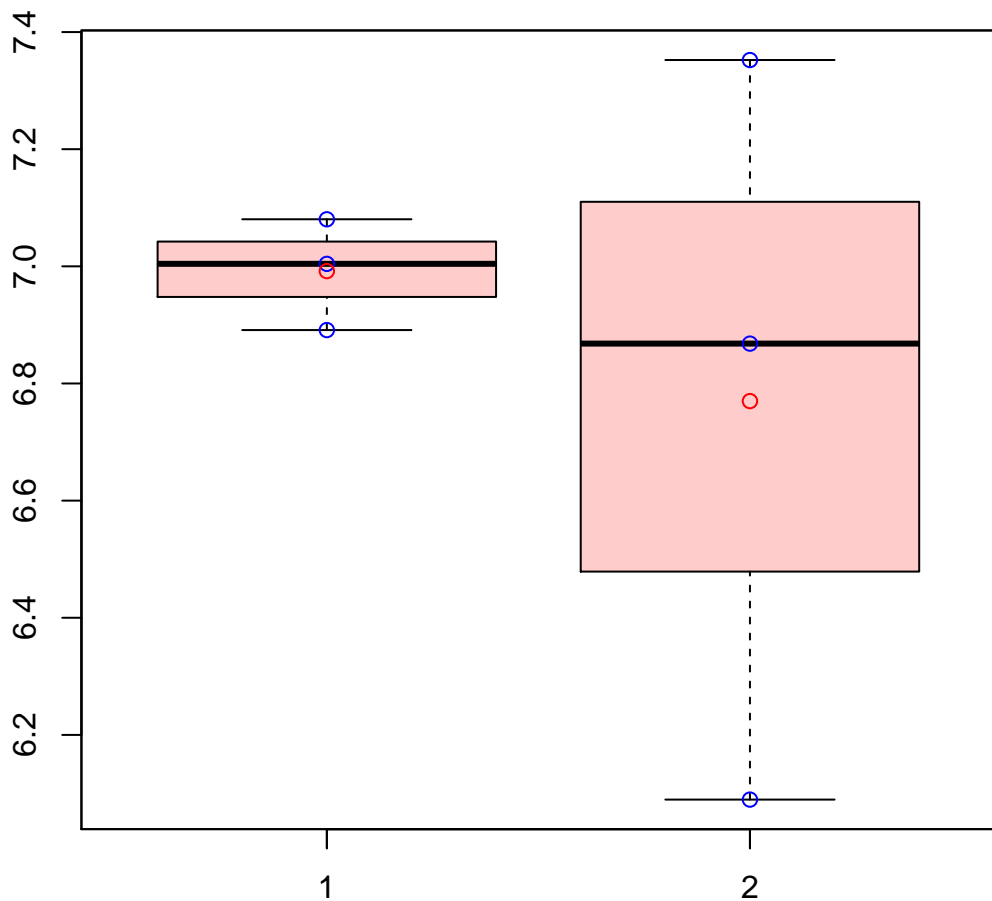

t-Test: p-value = 0.61

# CL3941Contig4|CL3941Contig4

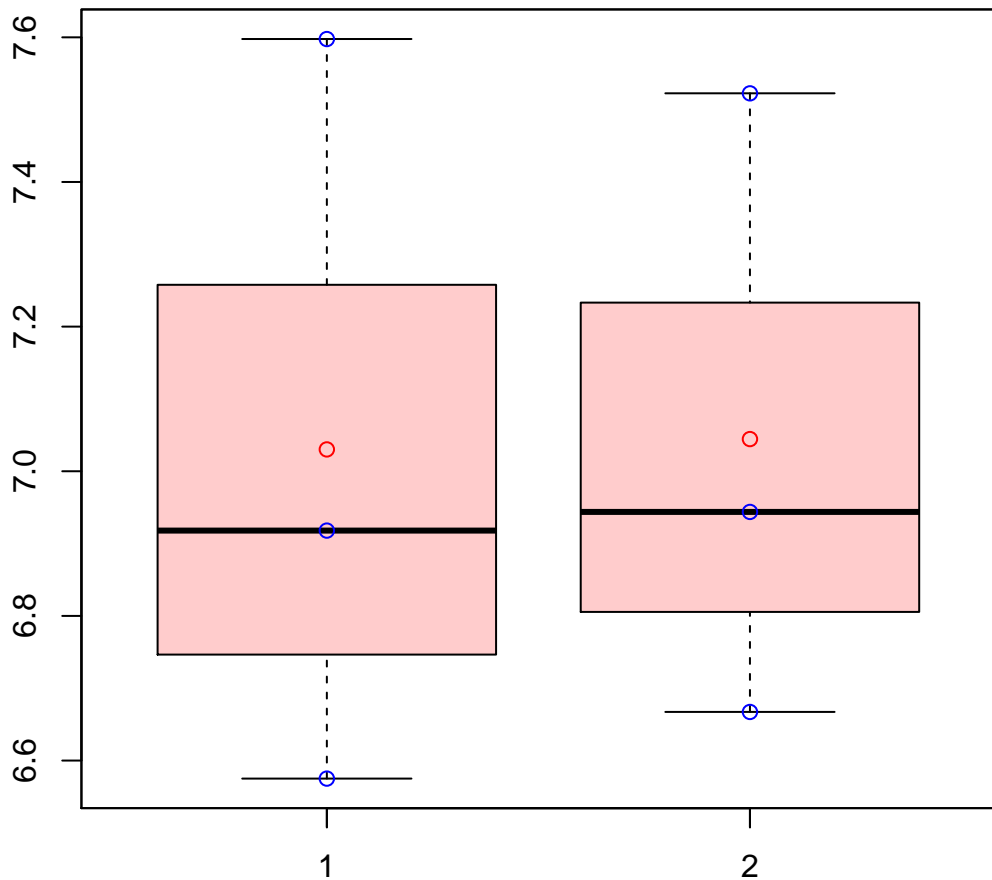

t-Test: p-value = 0.97

# CL3942Contig1|CL3942Contig1

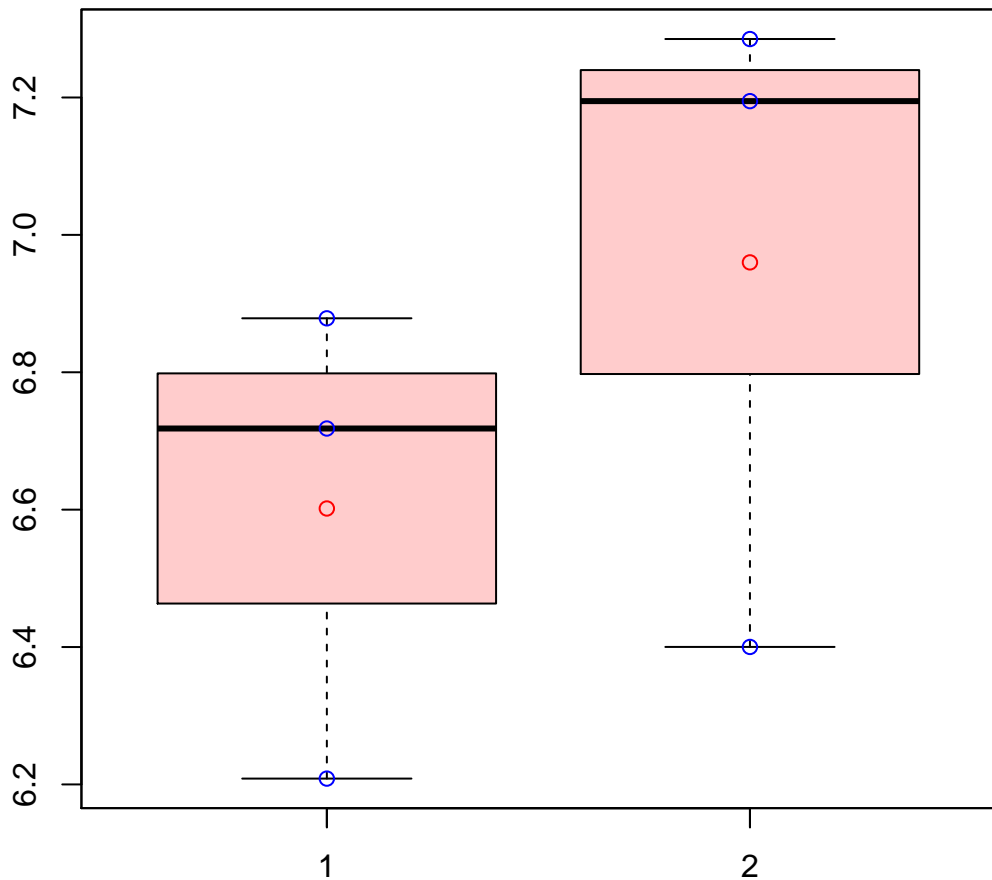

t-Test: p-value = 0.36

# CL3947Contig3|CL3947Contig3

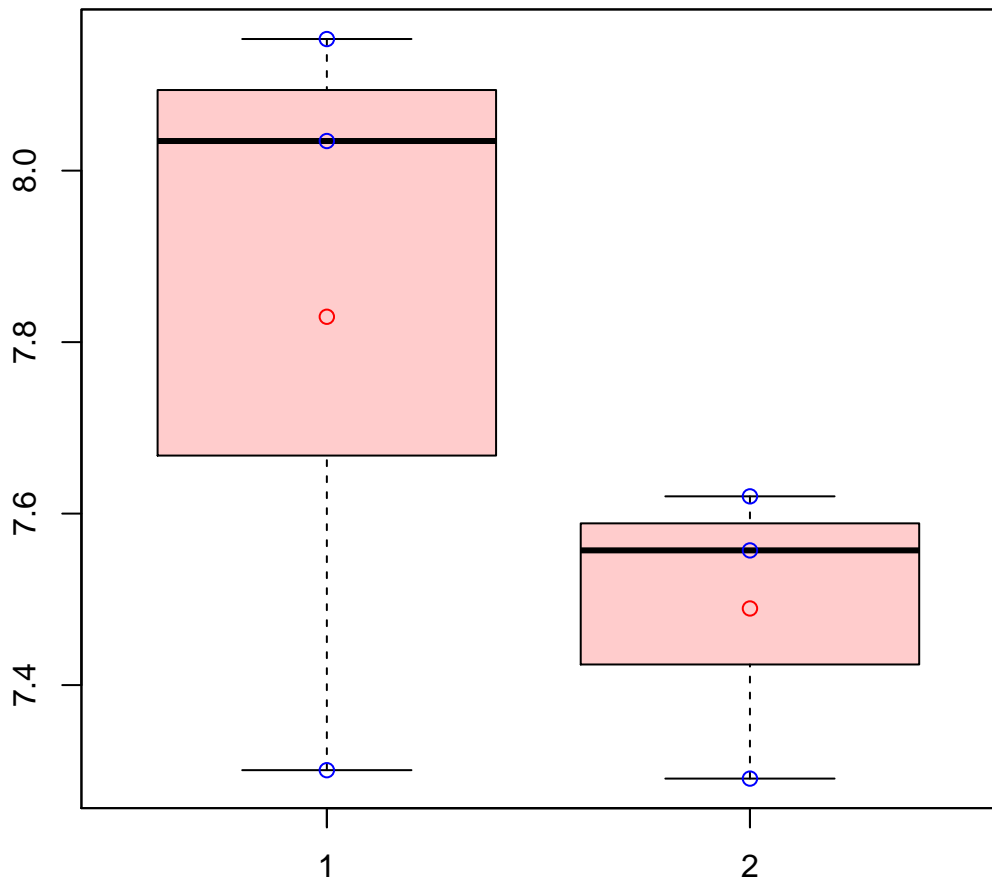

t-Test: p-value = 0.33



# CL394Contig12|CL394Contig12

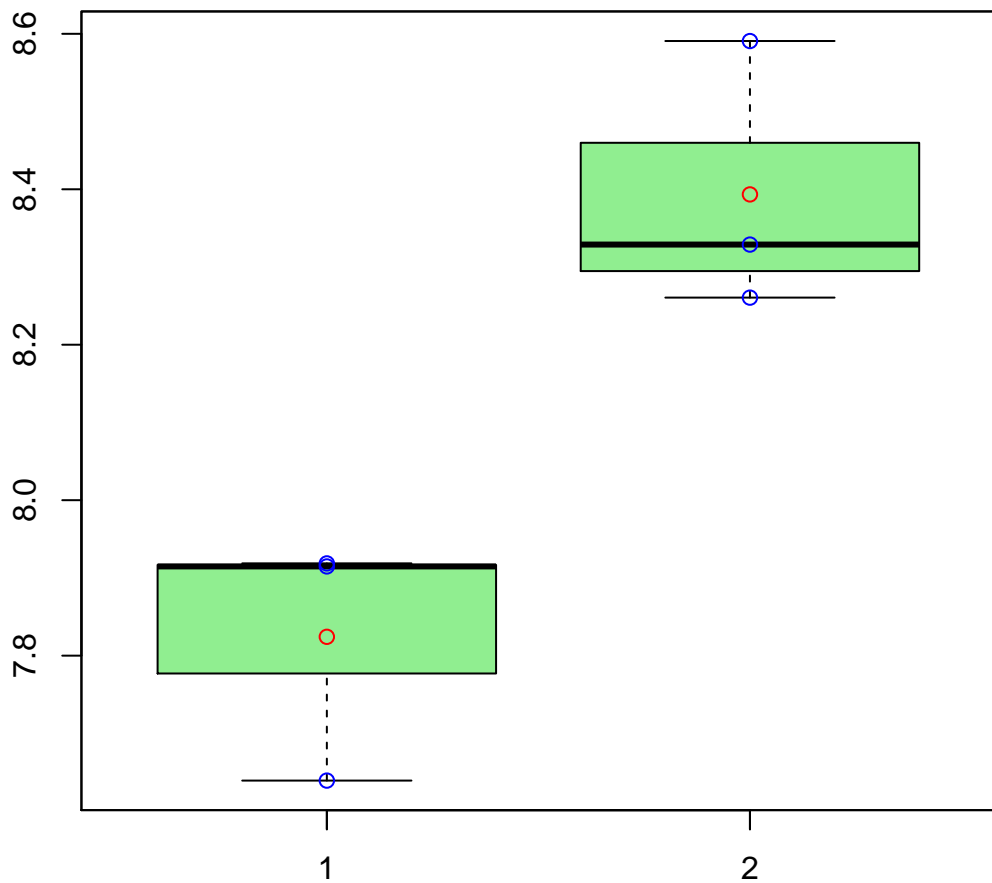

t-Test: p-value = 0.01

# CL394Contig2|CL394Contig2

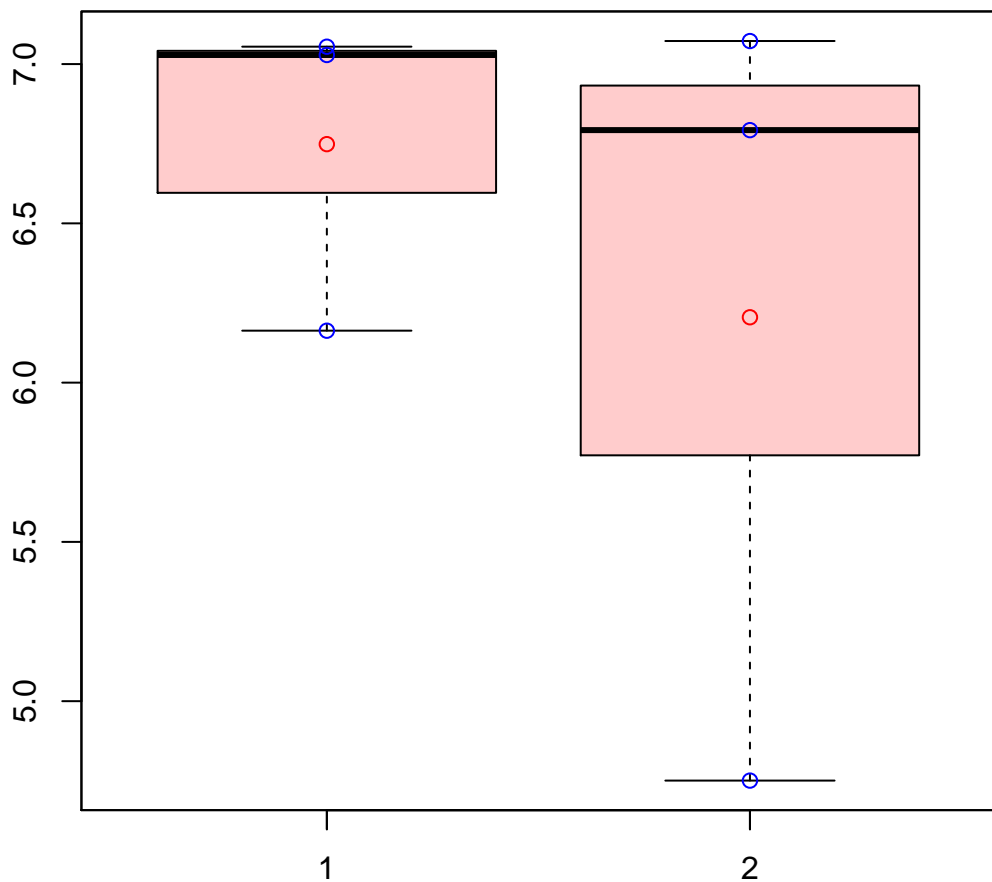

t-Test: p-value = 0.55

# CL396Contig7|CL396Contig7

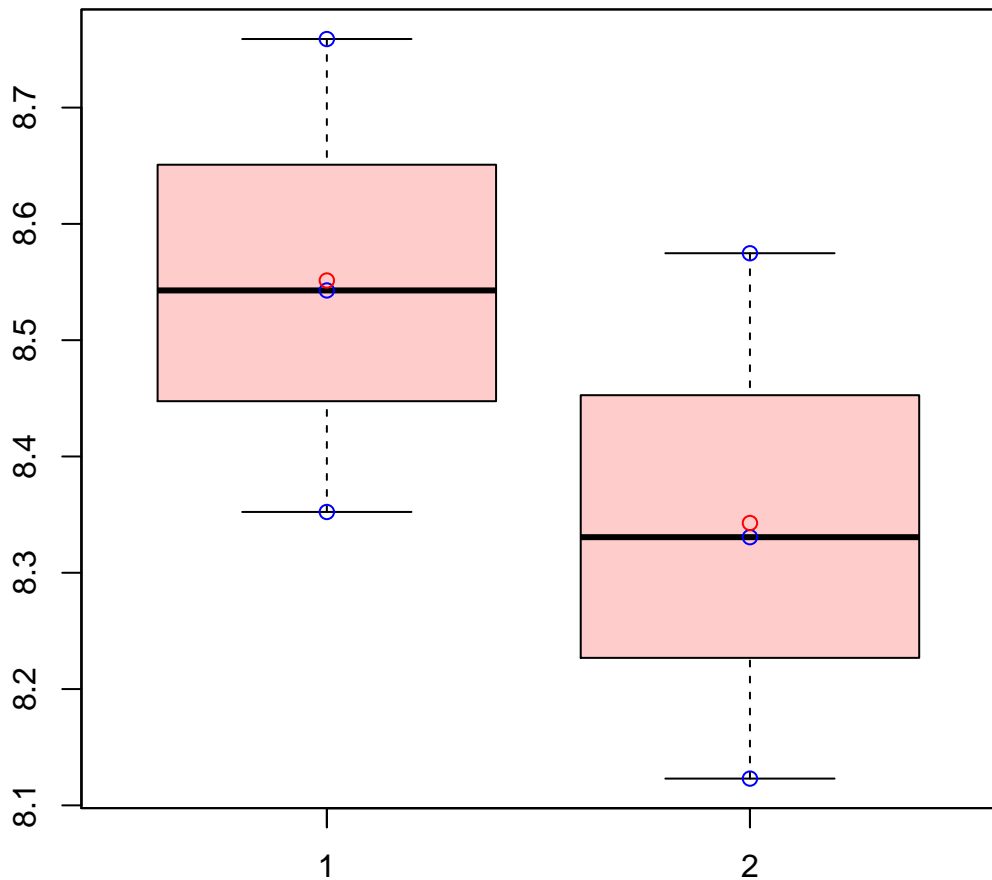

t-Test: p-value = 0.3

# CL3976Contig1|CL3976Contig1

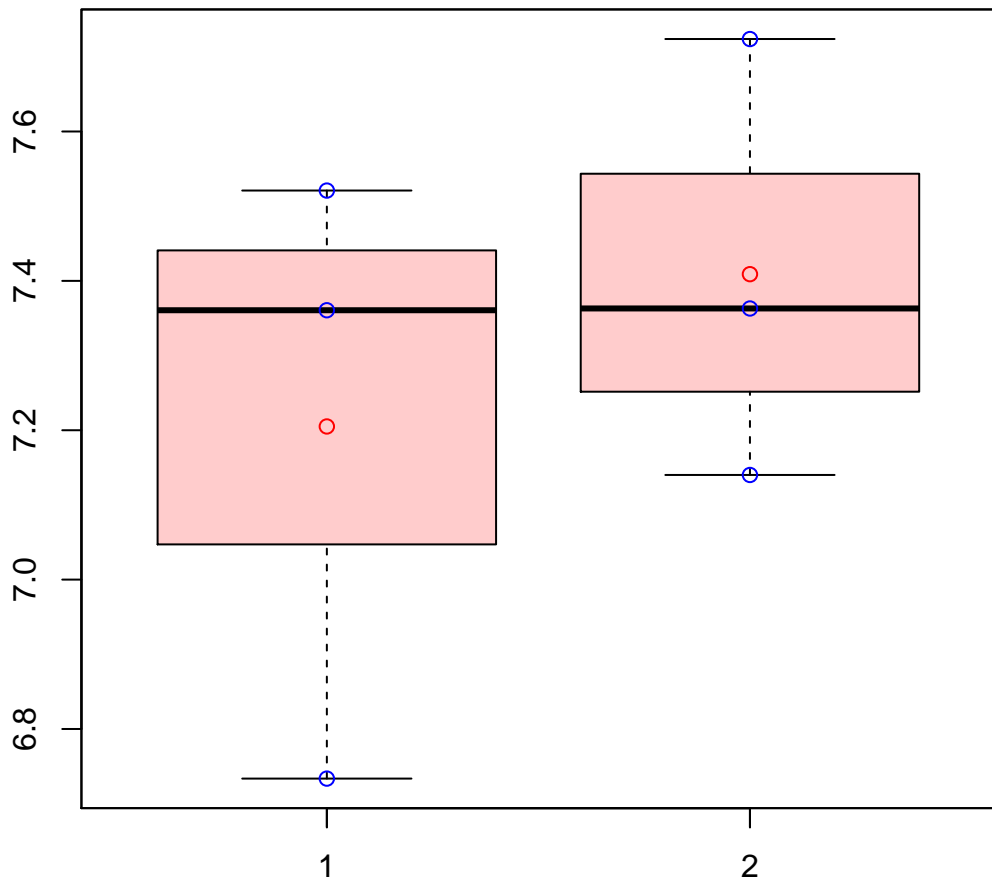

t-Test: p-value = 0.53

# CL3978Contig2|CL3978Contig2

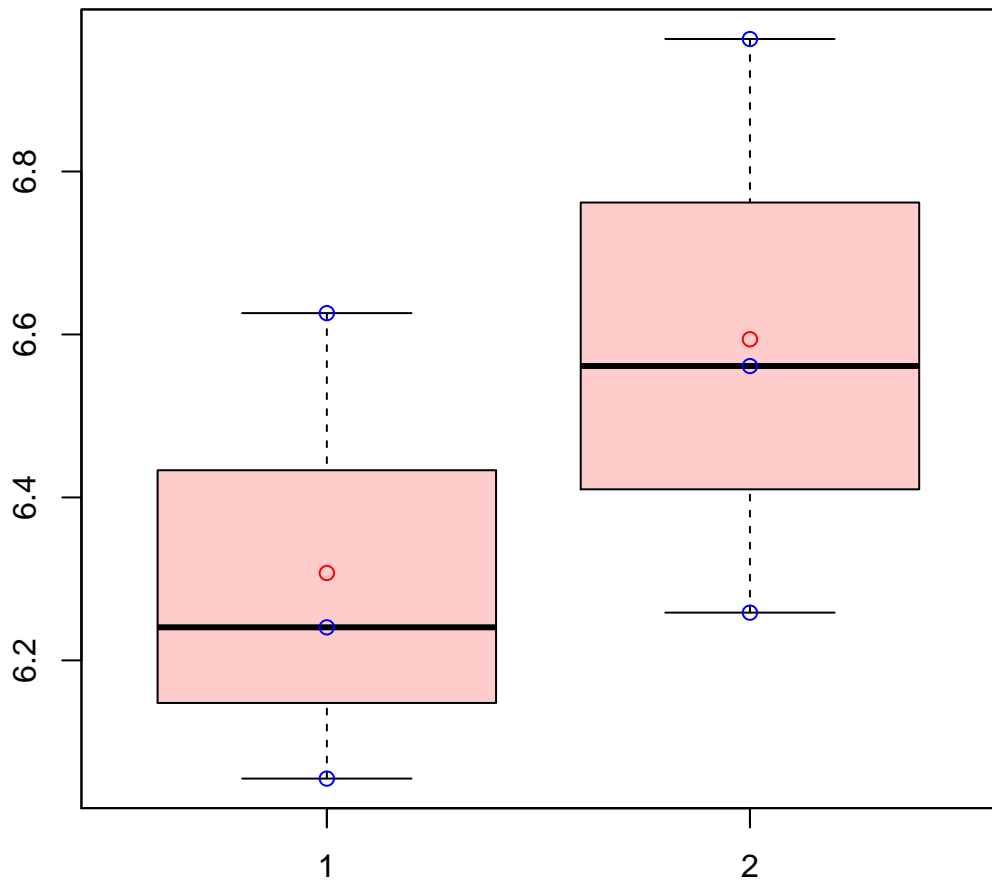

t-Test: p-value = 0.34

# CL397Contig7|CL397Contig7

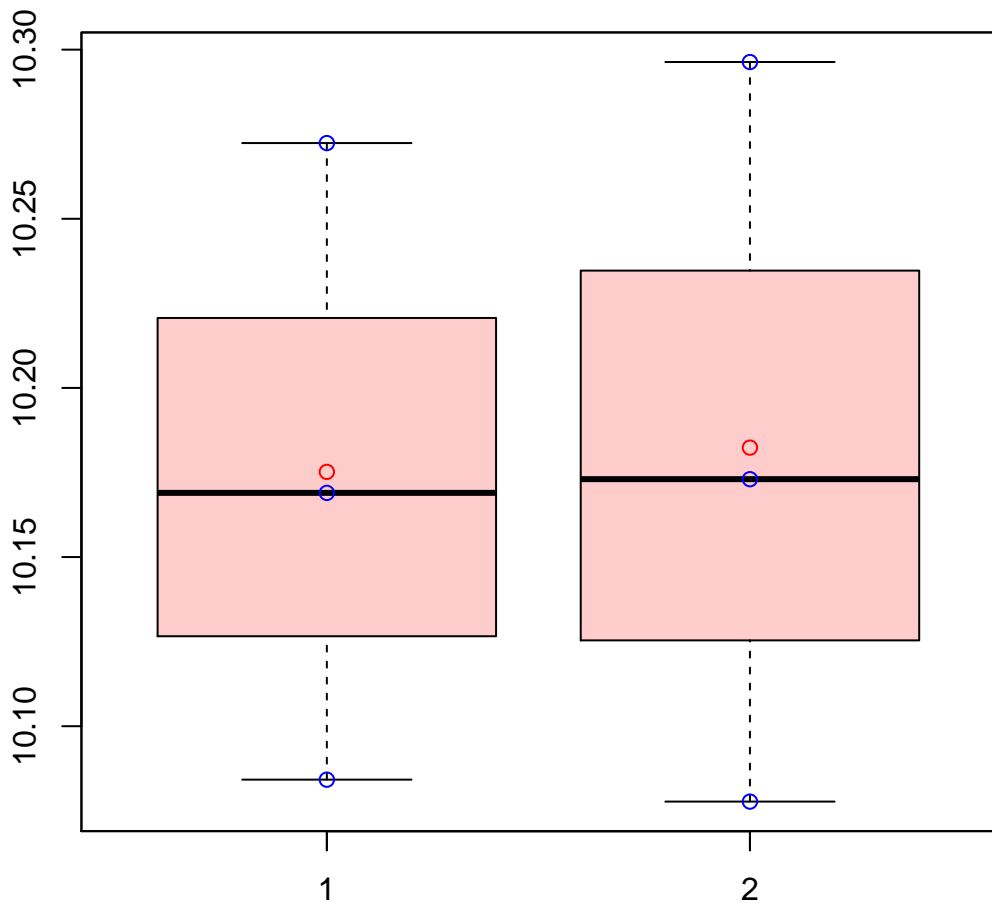

t-Test: p-value = 0.94

# CL397Contig8|CL397Contig8

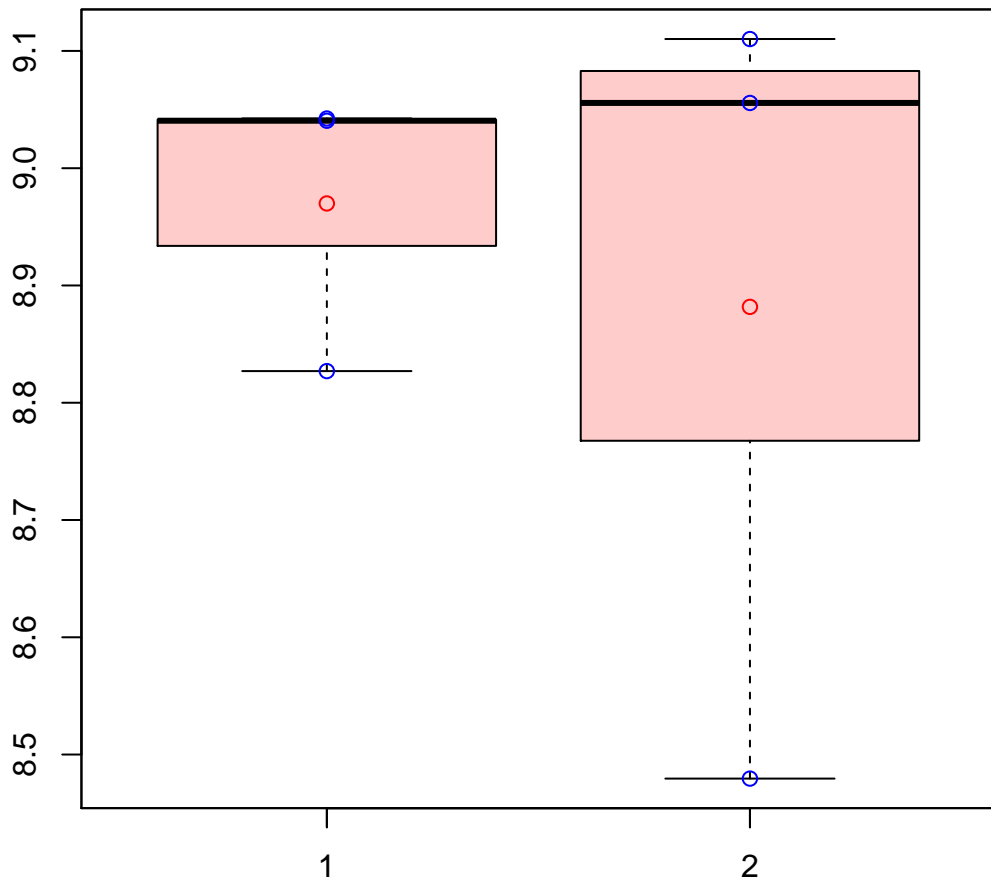

t-Test: p-value = 0.71

# CL3981Contig2|CL3981Contig2

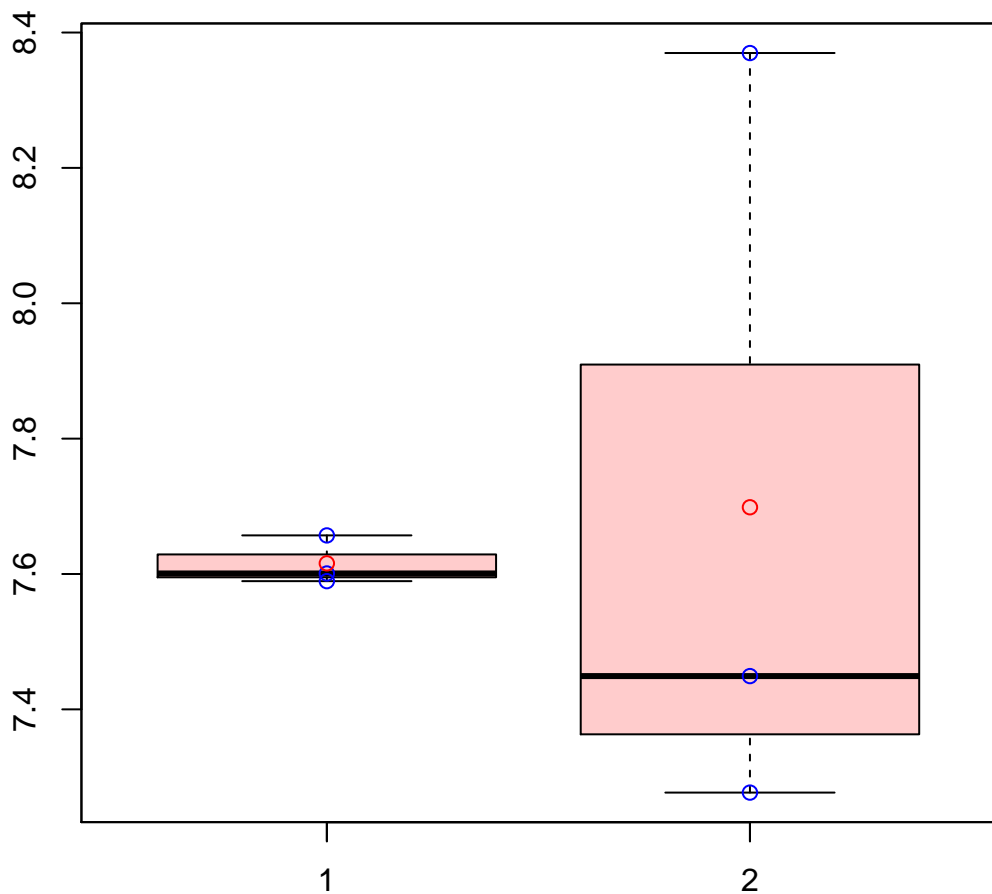

t-Test: p-value = 0.83



# CL3990Contig1|CL3990Contig1

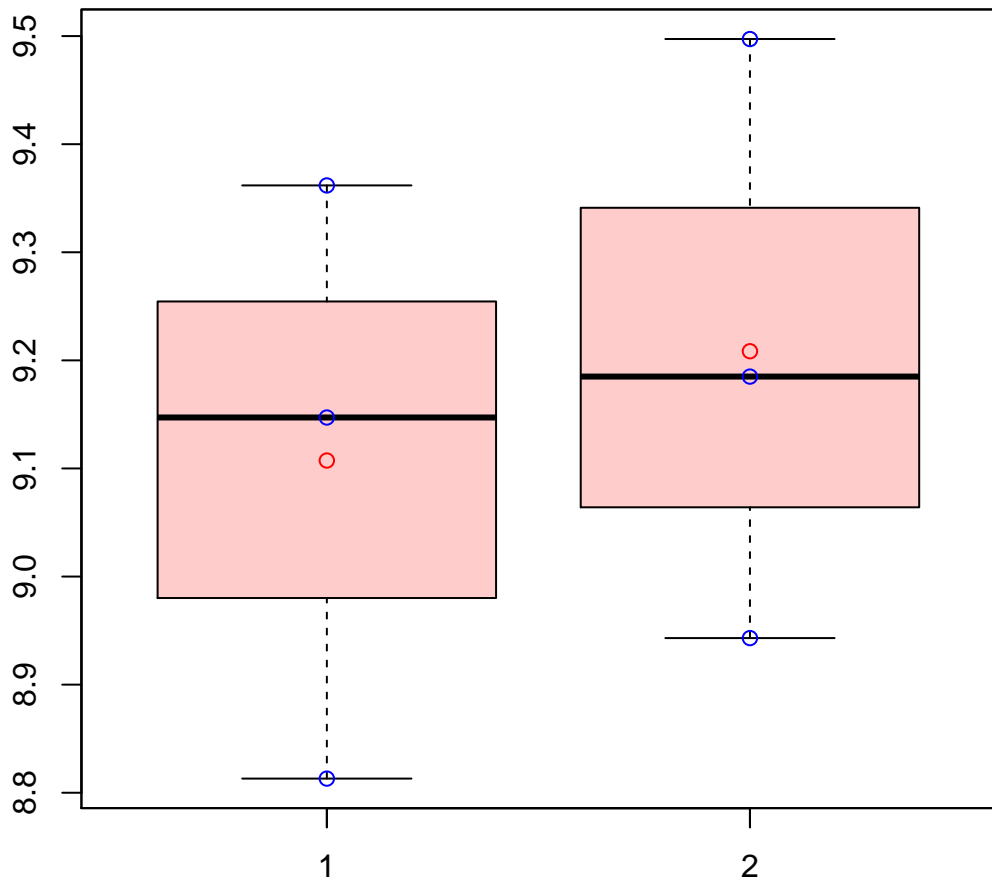

t-Test: p-value = 0.68

# CL3993Contig4|CL3993Contig4

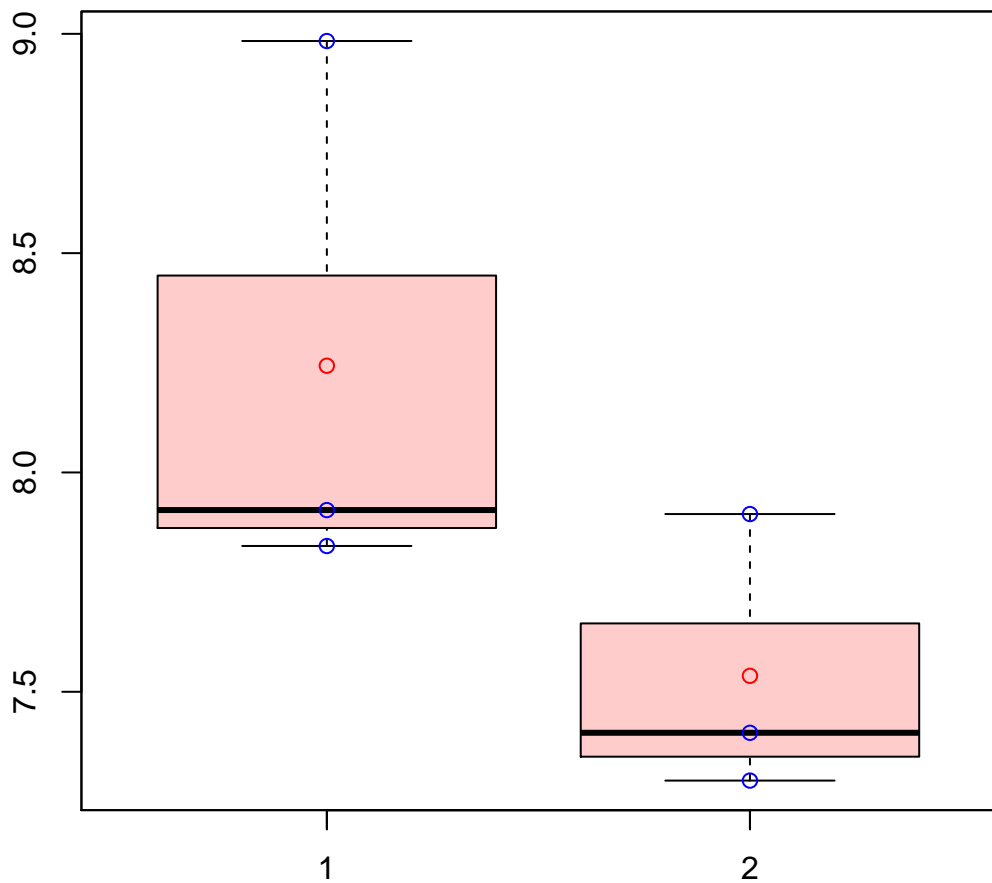

t-Test: p-value = 0.19

# CL3996Contig1|CL3996Contig1

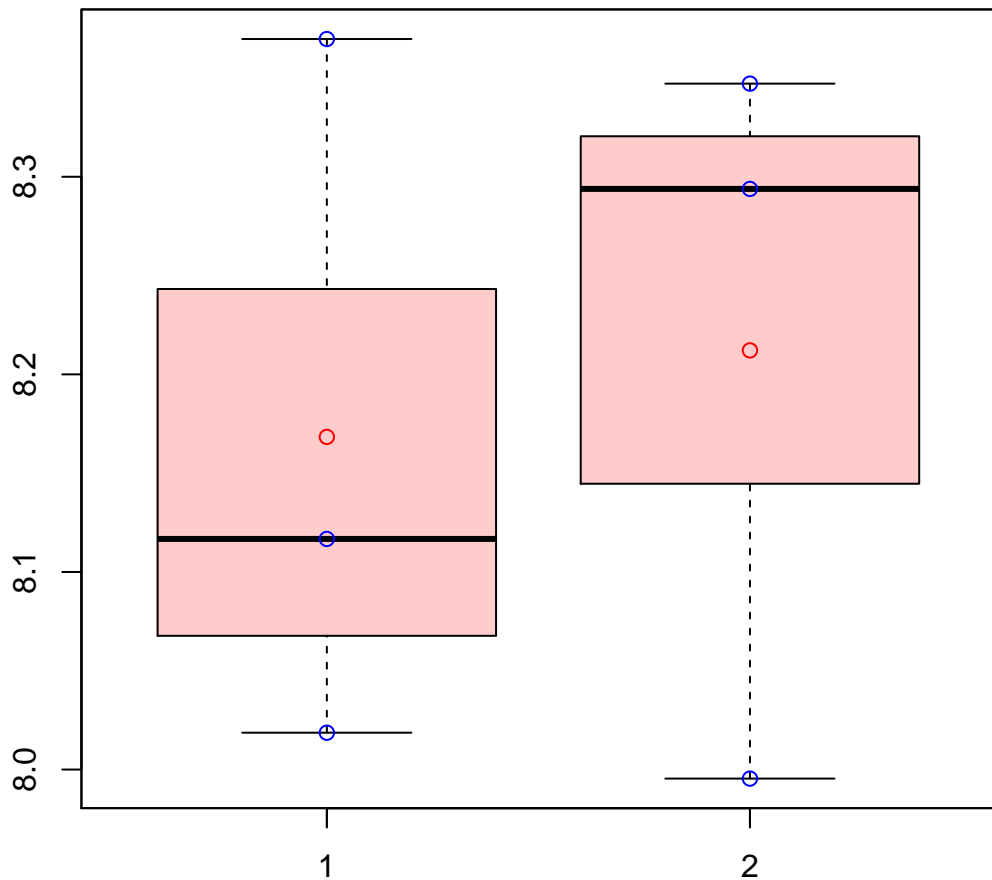

t-Test: p-value = 0.79

# CL3Contig20|CL3Contig20

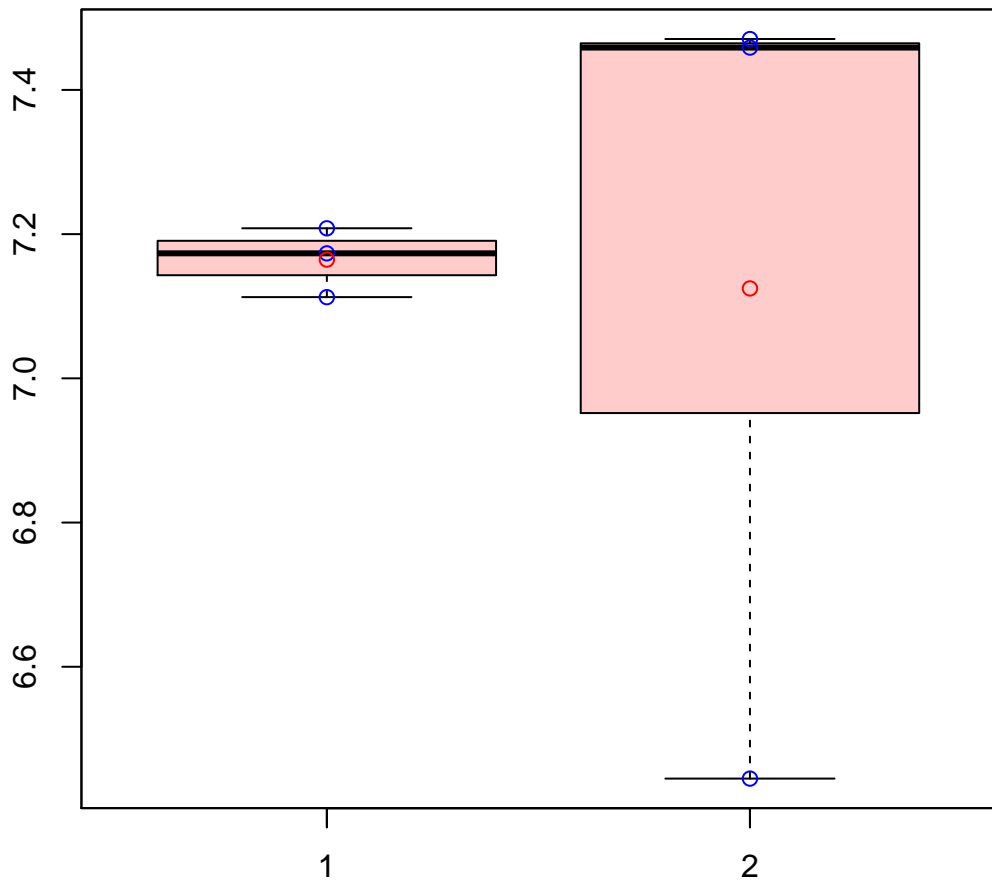

t-Test: p-value = 0.92

# CL4000Contig1|CL4000Contig1

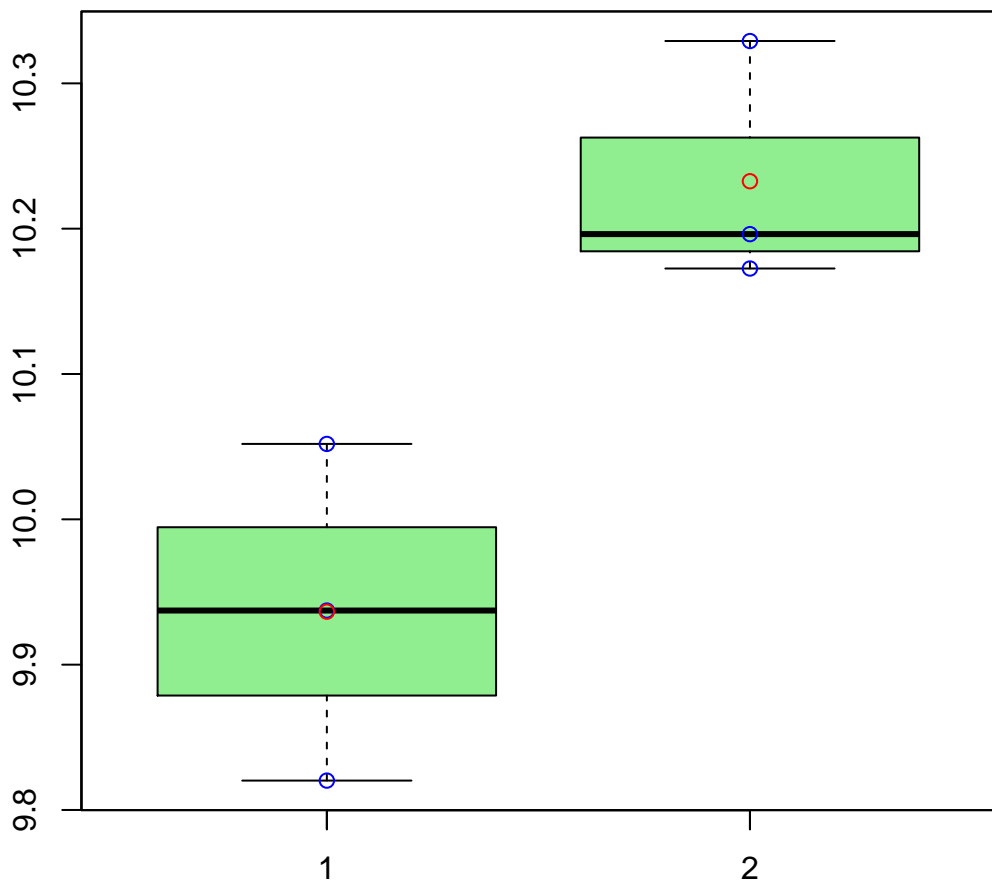

t-Test: p-value = 0.03

# CL400Contig10|CL400Contig10

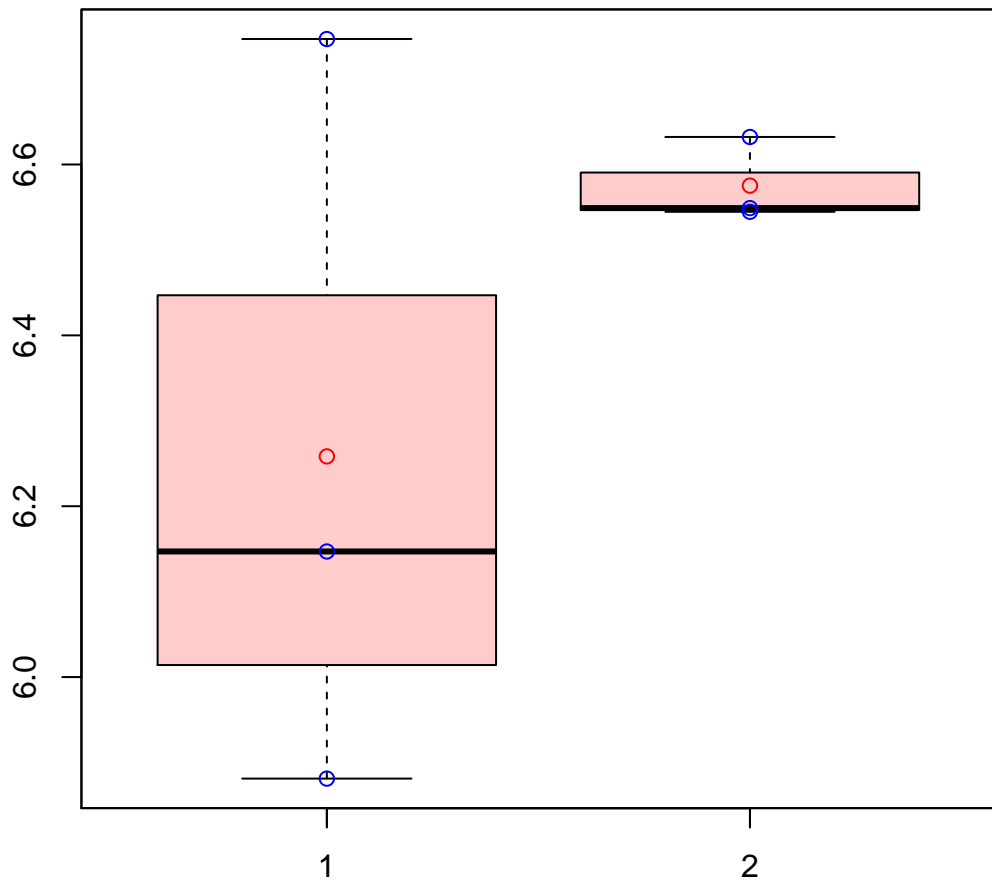

t-Test: p-value = 0.34

# CL4022Contig2|CL4022Contig2

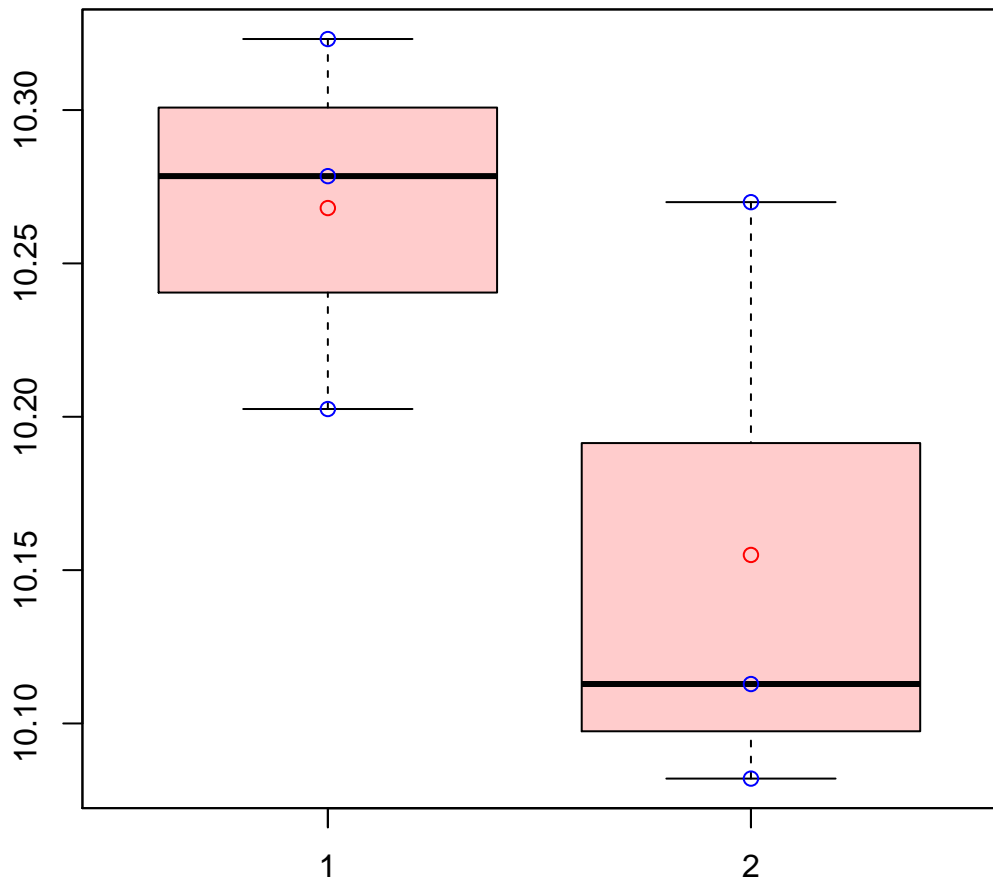

t-Test: p-value = 0.19

# CL4022Contig5|CL4022Contig5

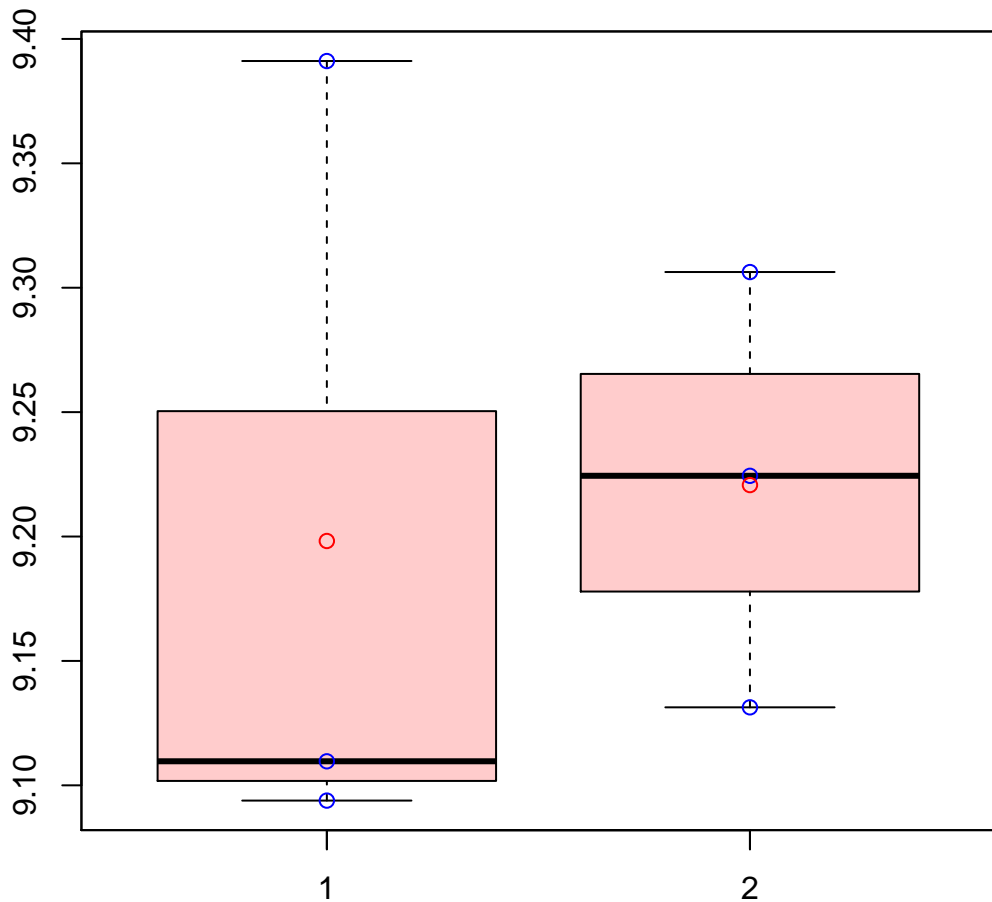

t-Test: p-value = 0.85



# CL4025Contig1|CL4025Contig1

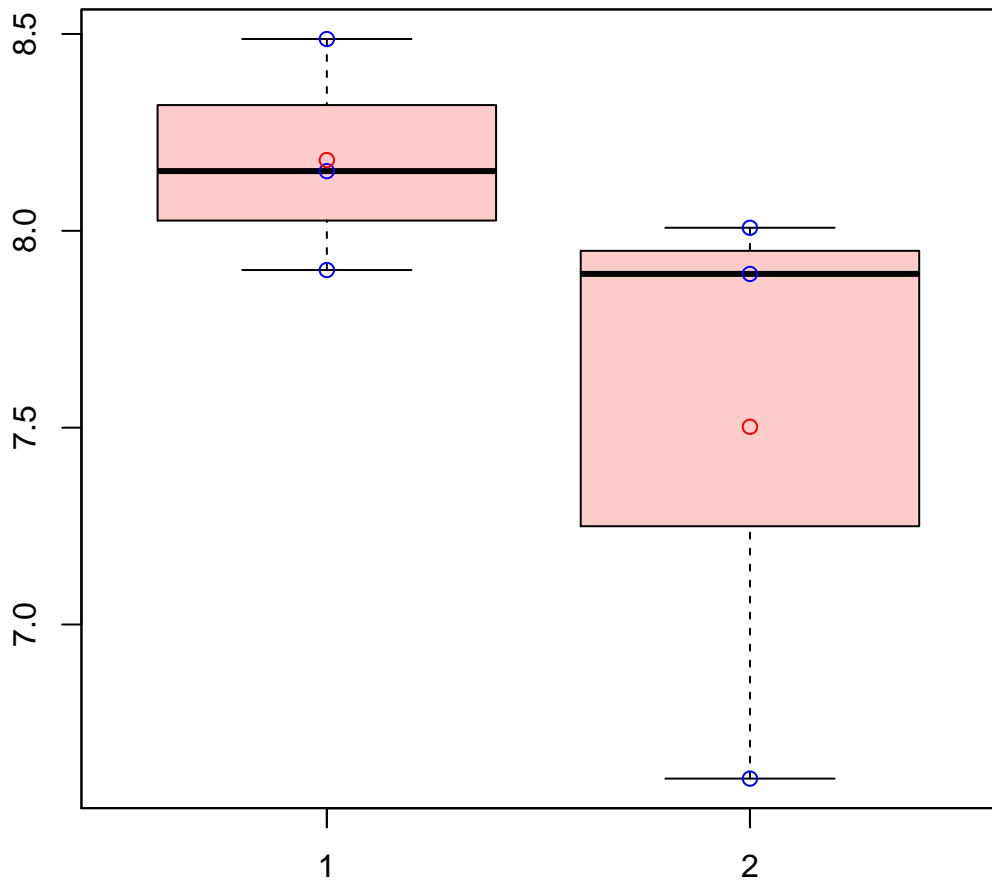

t-Test: p-value = 0.27

# CL4029Contig1|CL4029Contig1

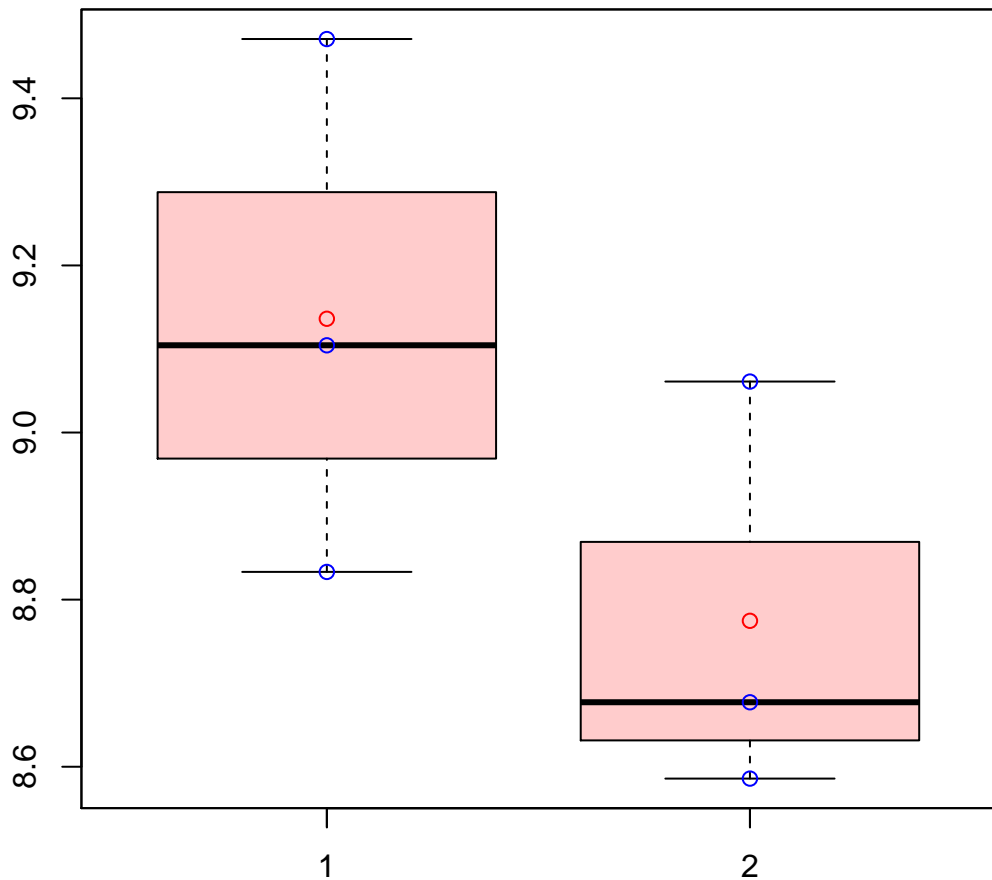

t-Test: p-value = 0.2

# CL402Contig2|CL402Contig2

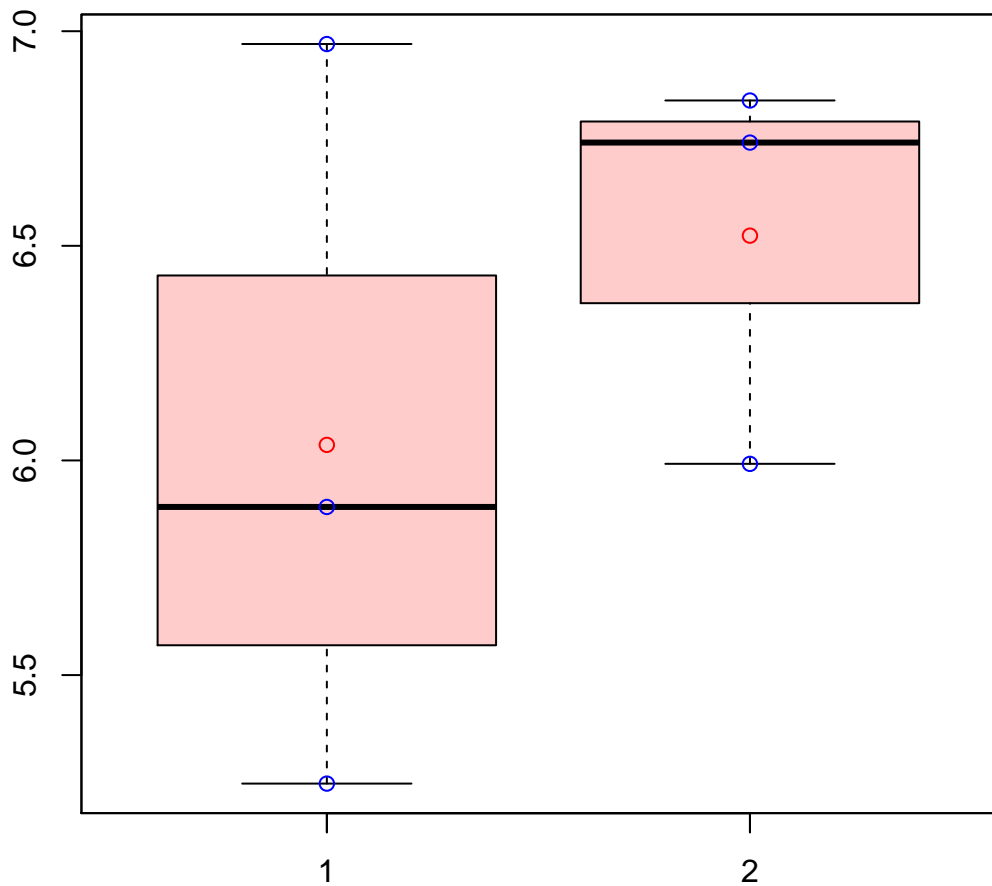

t-Test: p-value = 0.45

# CL4031Contig2|CL4031Contig2

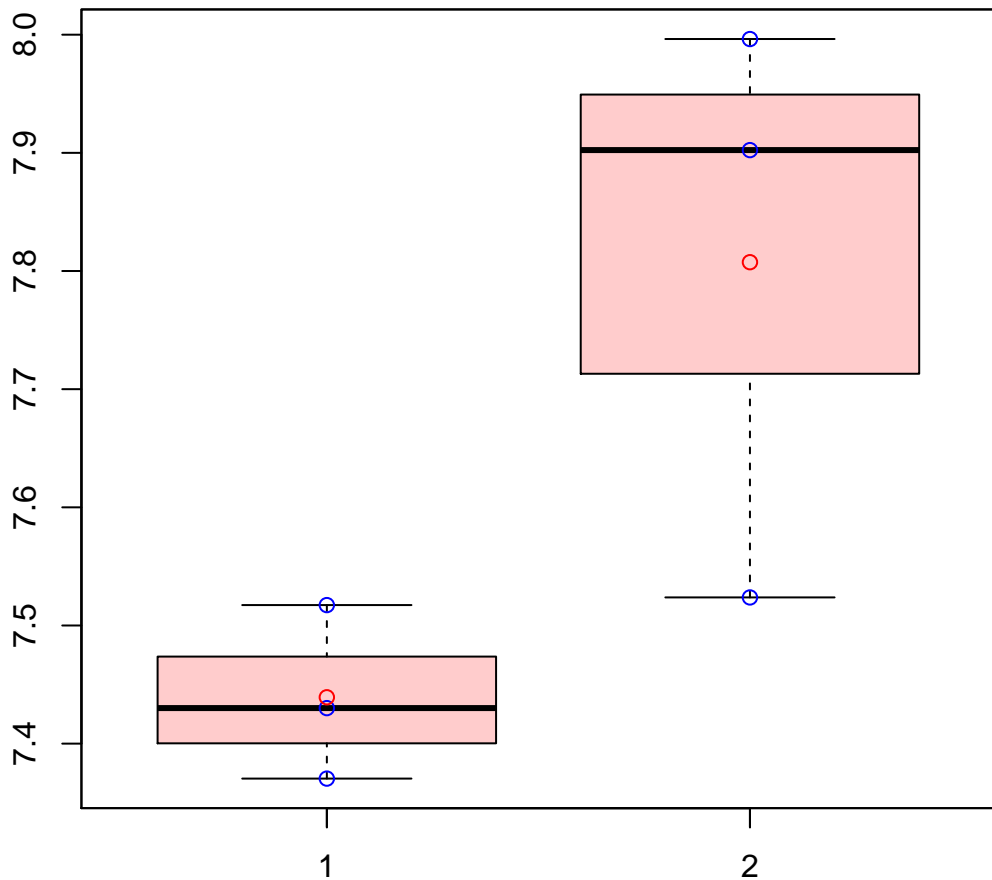

t-Test: p-value = 0.12

# CL4035Contig2|CL4035Contig2

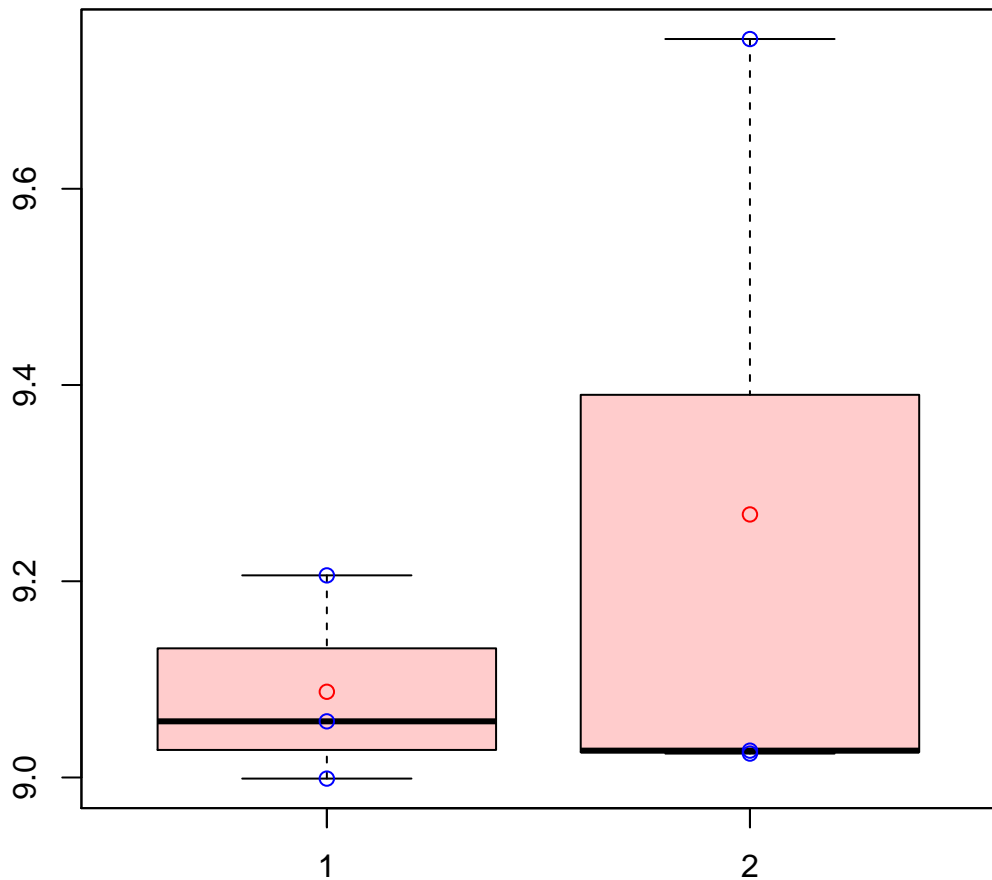

t-Test: p-value = 0.54

# CL405Contig6|CL405Contig6

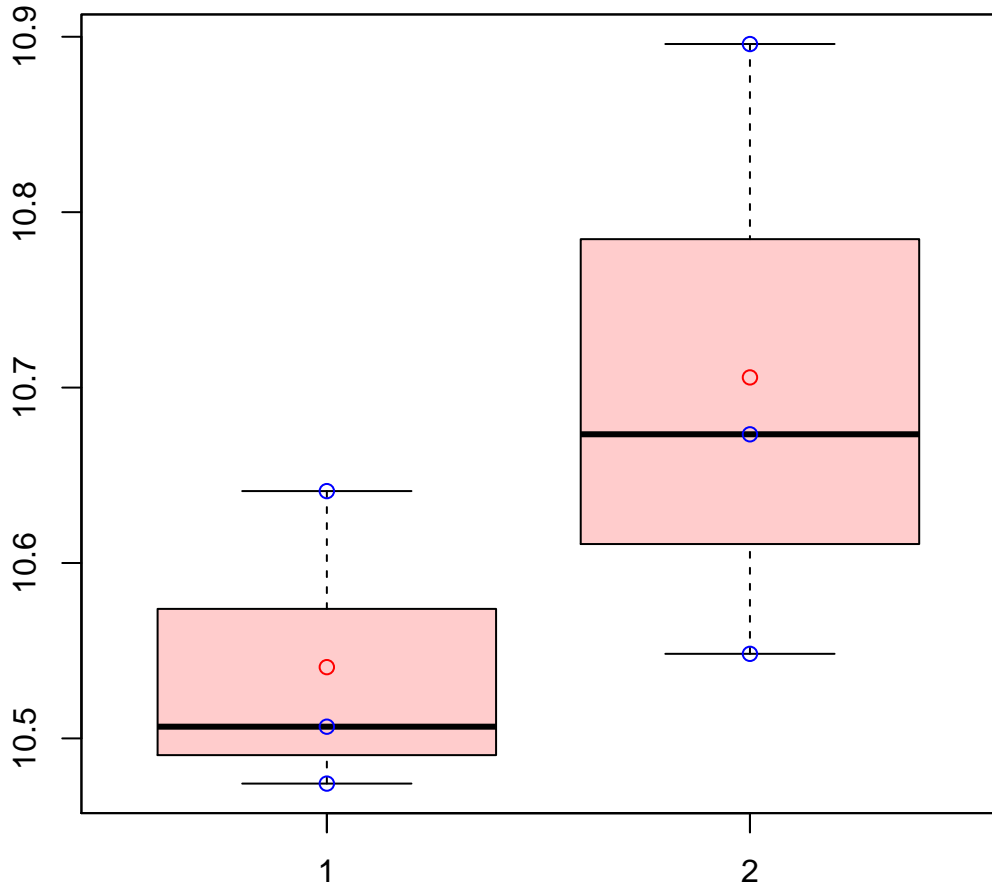

t-Test: p-value = 0.24

# CL4066Contig5|CL4066Contig5

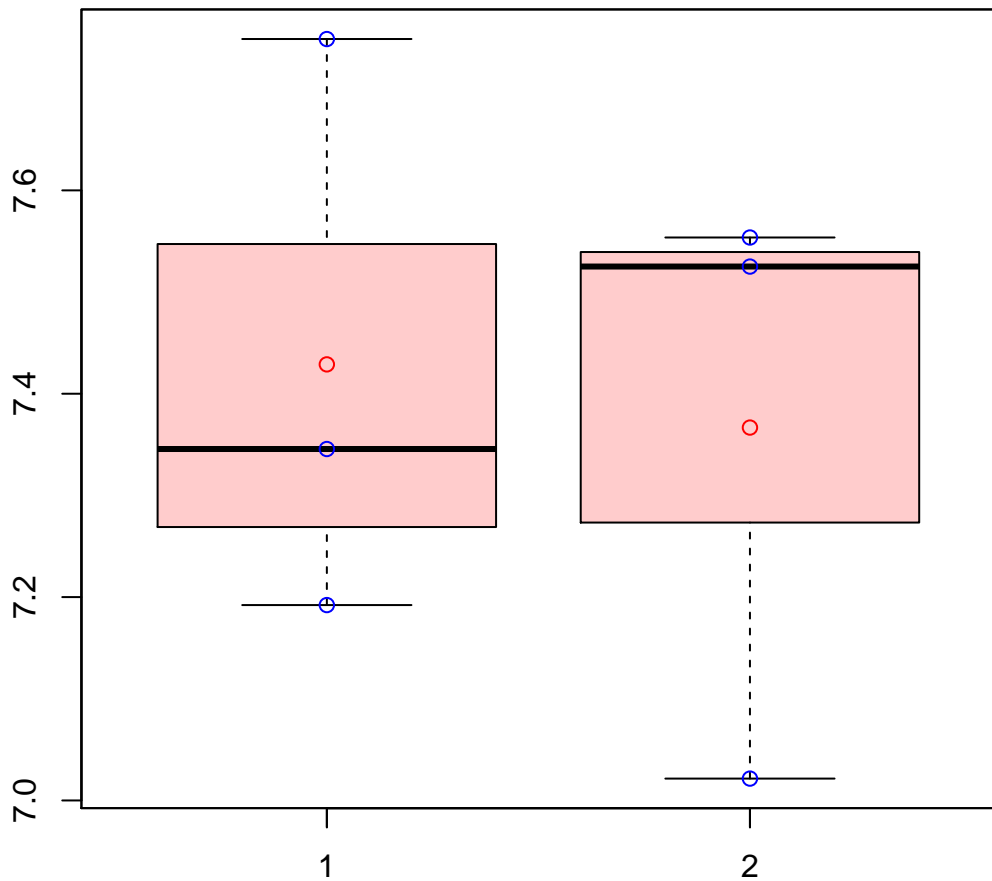

t-Test: p-value = 0.81

# CL4071Contig2|CL4071Contig2

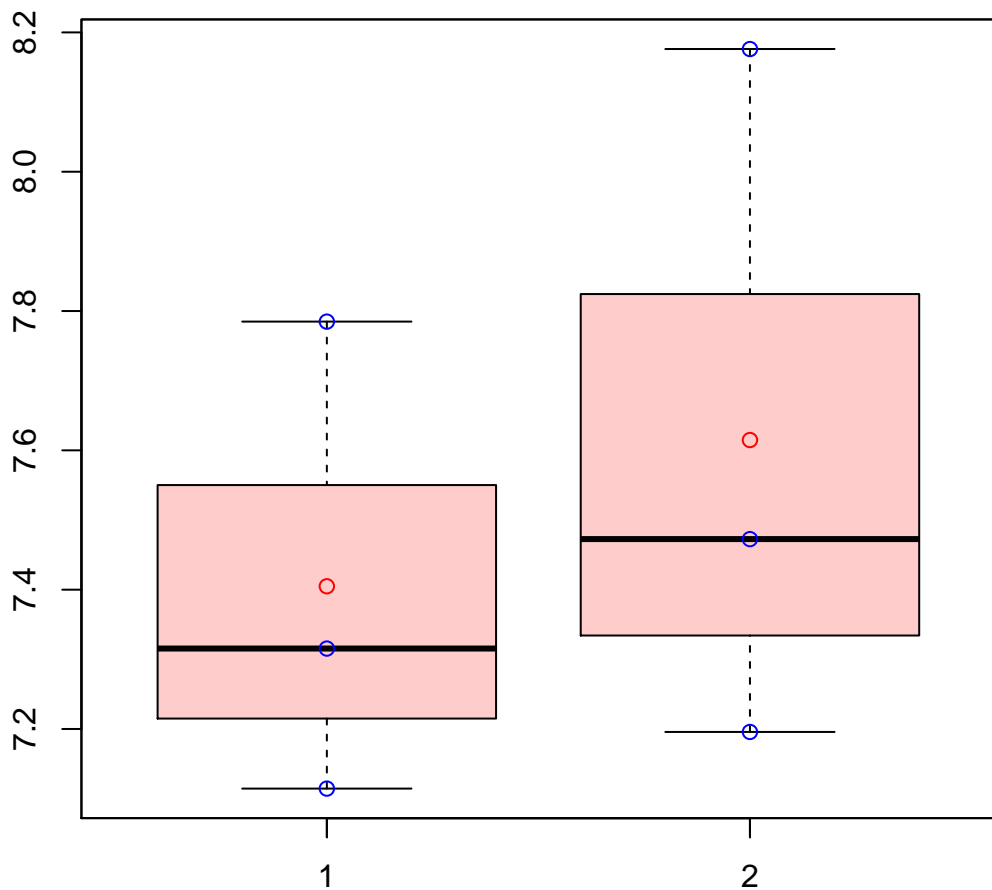

t-Test: p-value = 0.59



# CL4074Contig4|CL4074Contig4

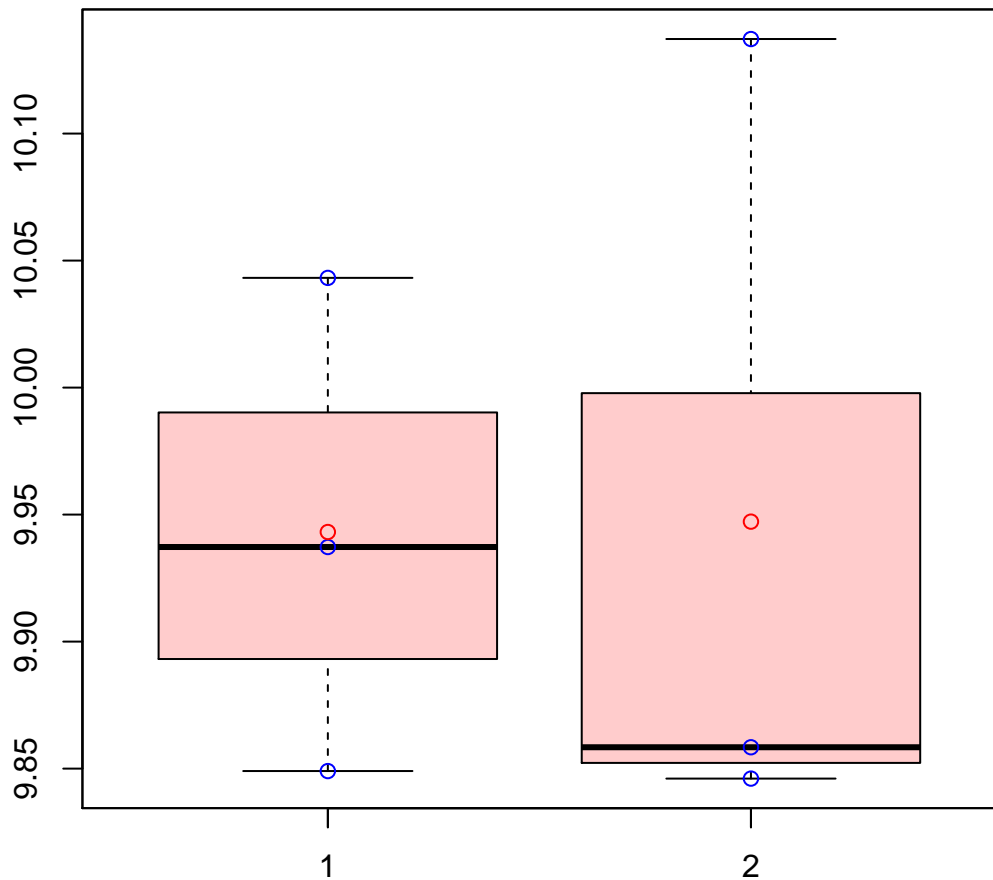

t-Test: p-value = 0.97

# CL4079Contig2|CL4079Contig2

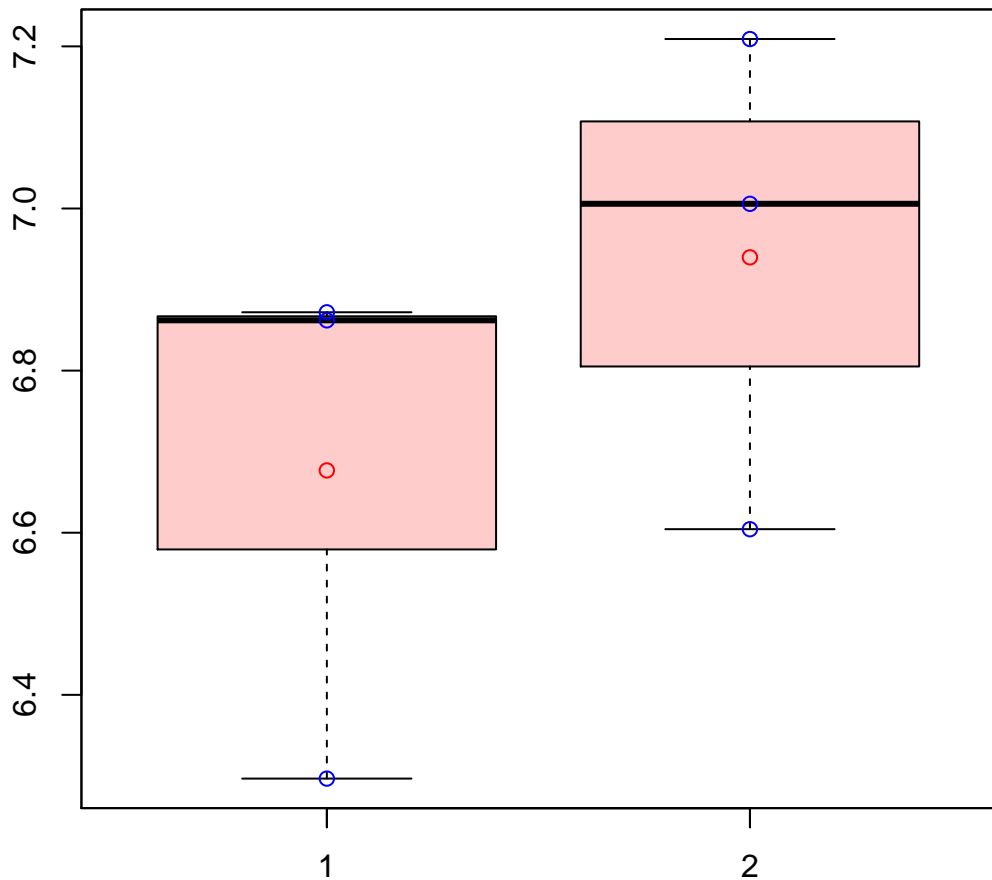

t-Test: p-value = 0.37

# CL4084Contig3|CL4084Contig3

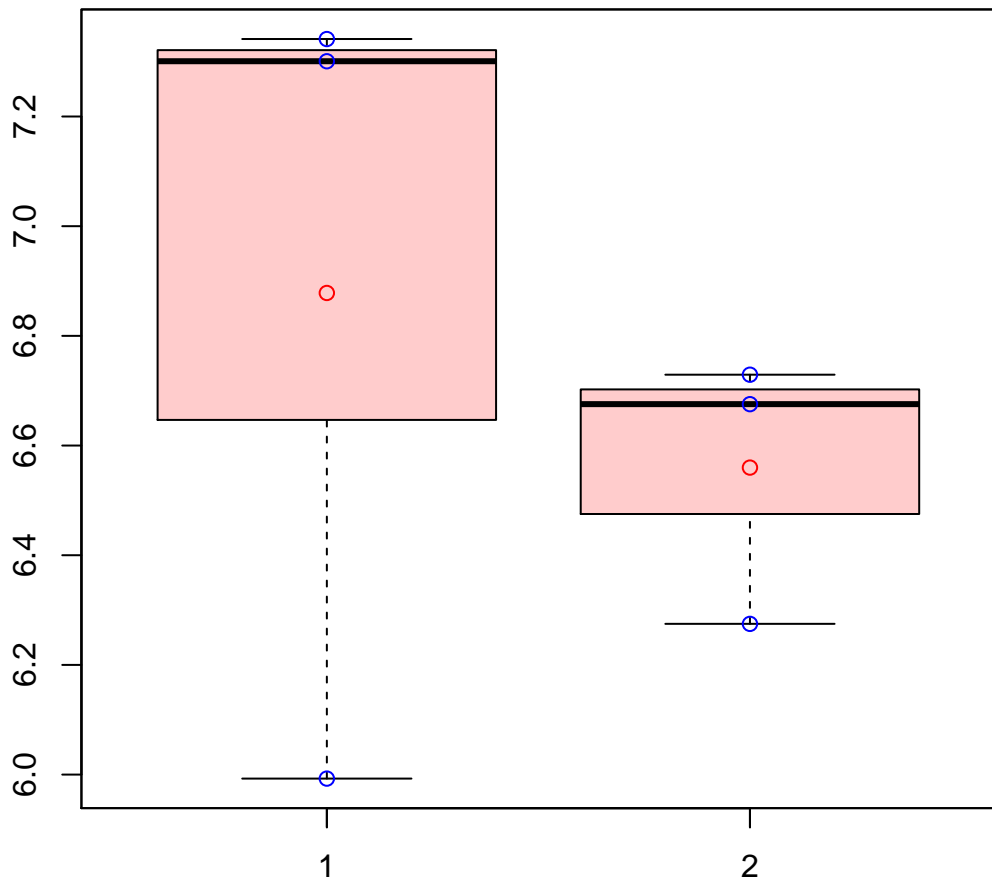

t-Test: p-value = 0.55

# CL408Contig3|CL408Contig3

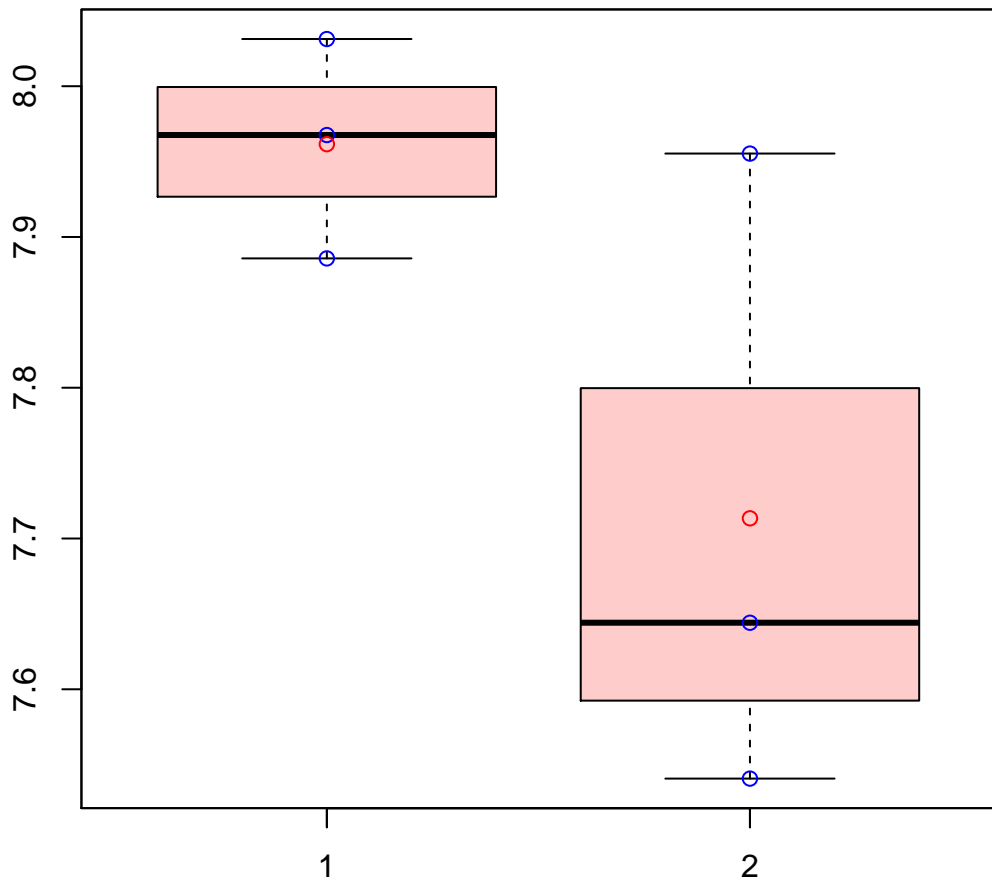

t-Test: p-value = 0.18

# CL4092Contig2|CL4092Contig2

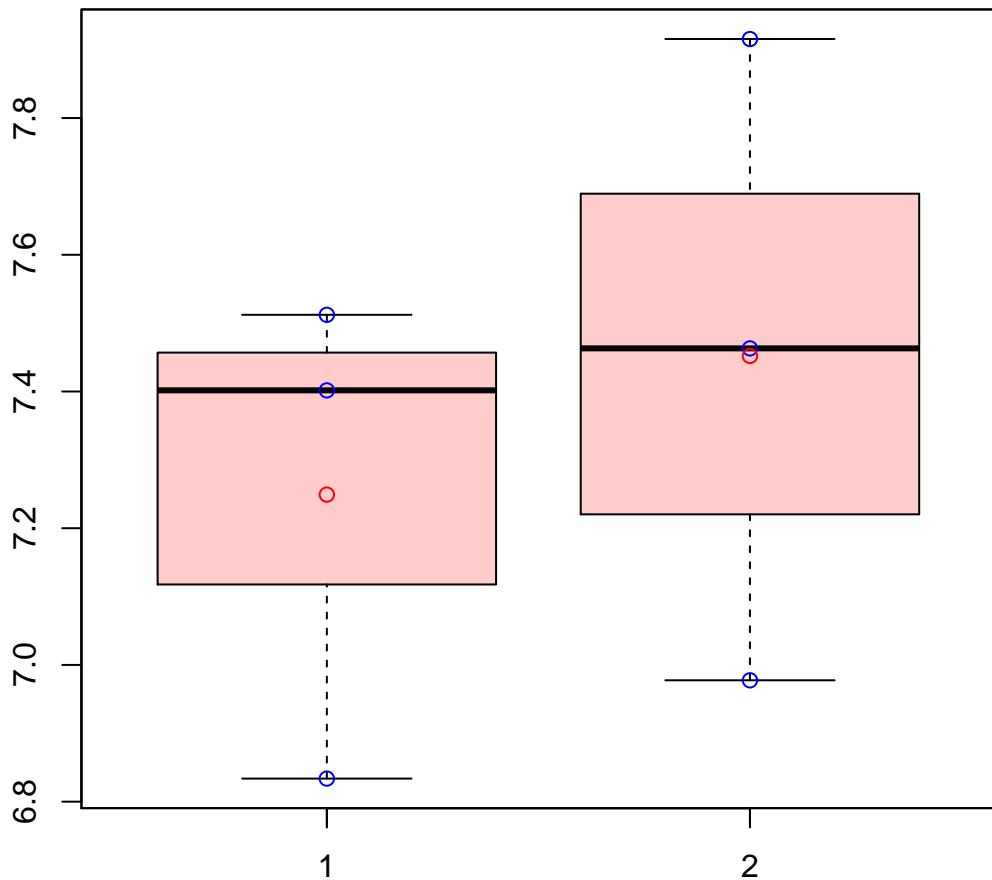

t-Test: p-value = 0.59

# CL409Contig20|CL409Contig20

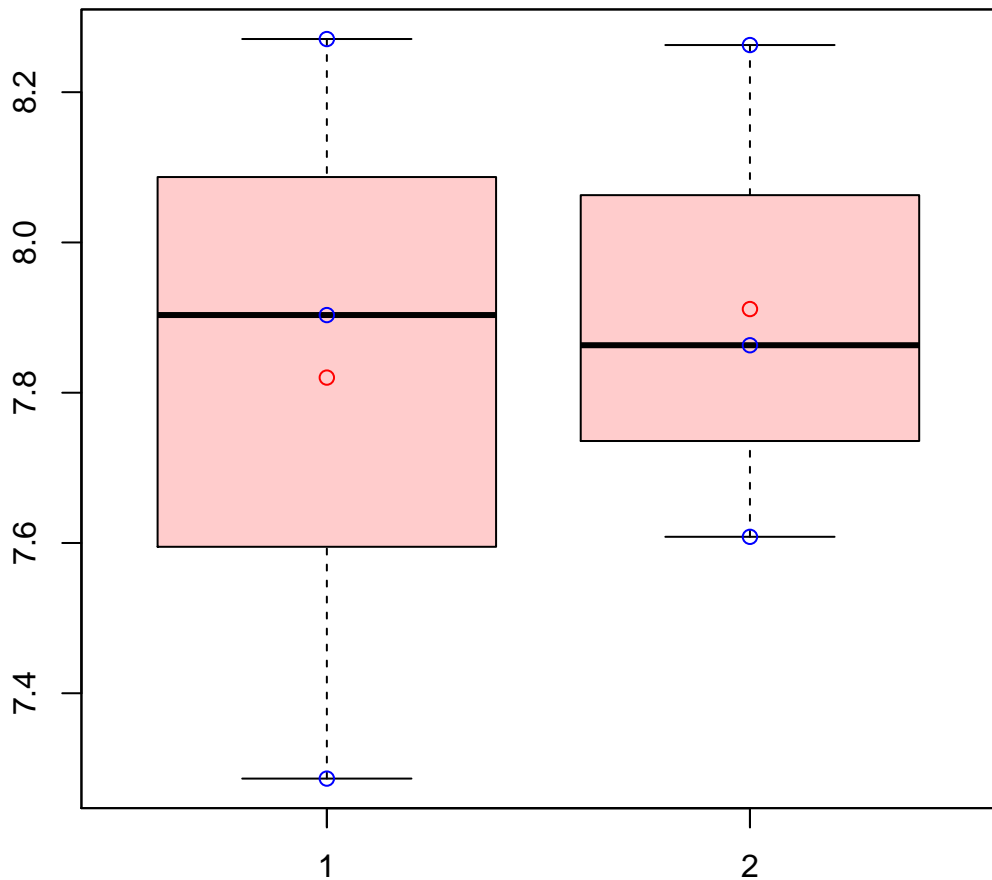

t-Test: p-value = 0.81

# CL4104Contig2|CL4104Contig2

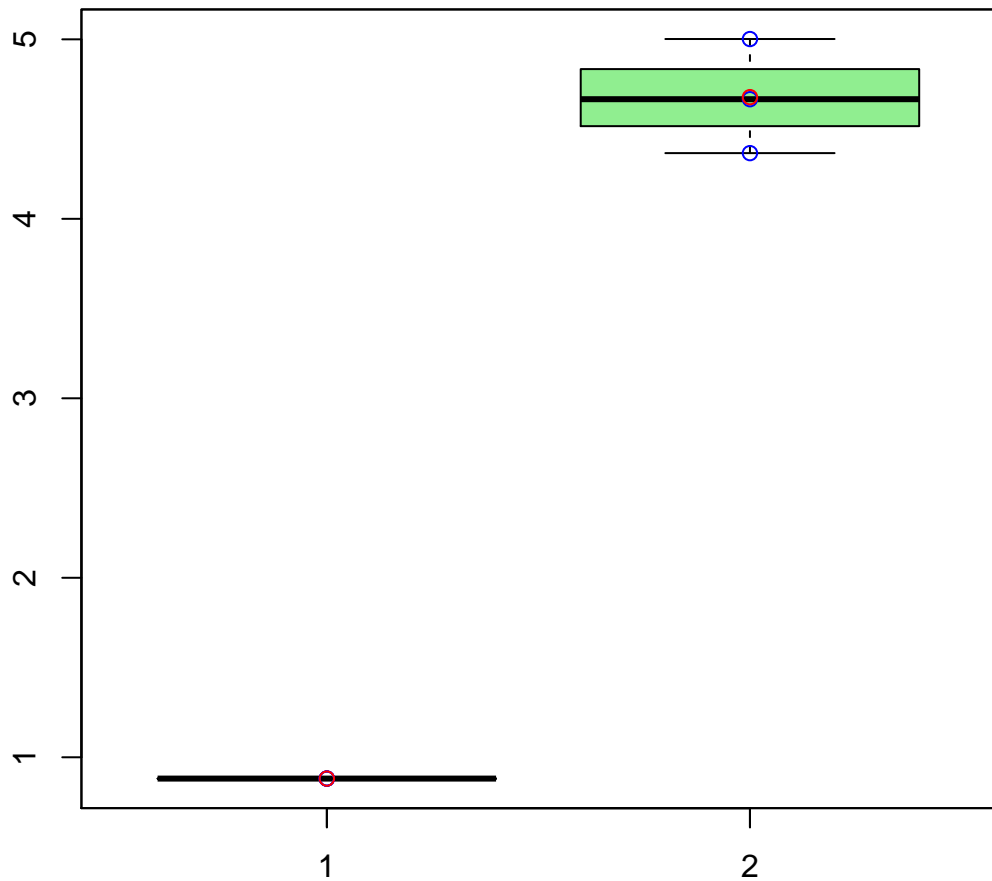

t-Test: p-value = 0

# CL4109Contig2|CL4109Contig2

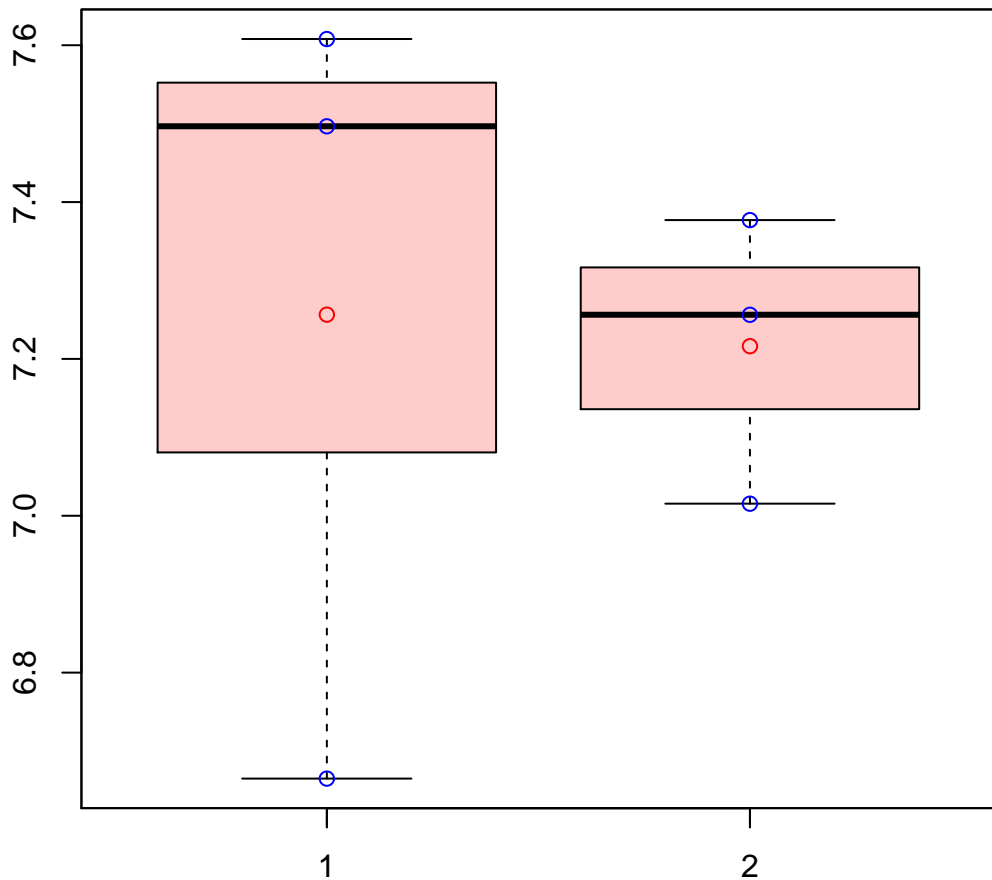

t-Test: p-value = 0.91



# CL410Contig15|CL410Contig15

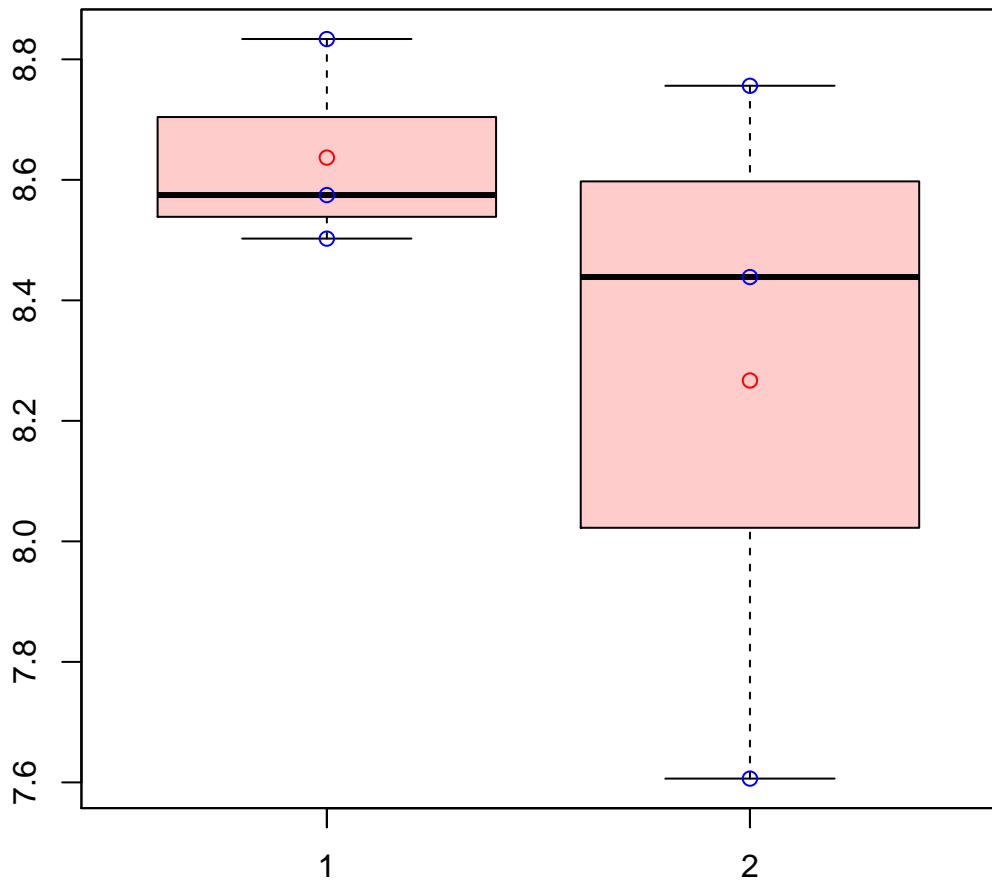

t-Test: p-value = 0.4

# CL410Contig2|CL410Contig2

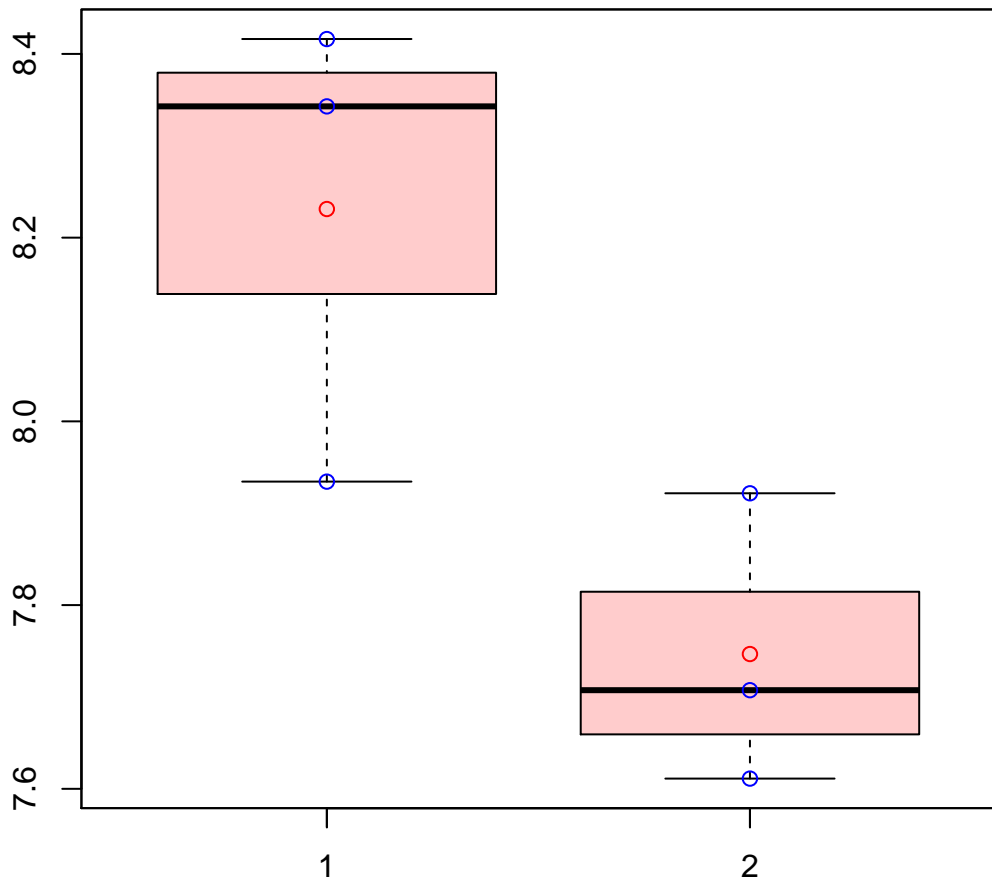

t-Test: p-value = 0.06

# CL4125Contig1|CL4125Contig1

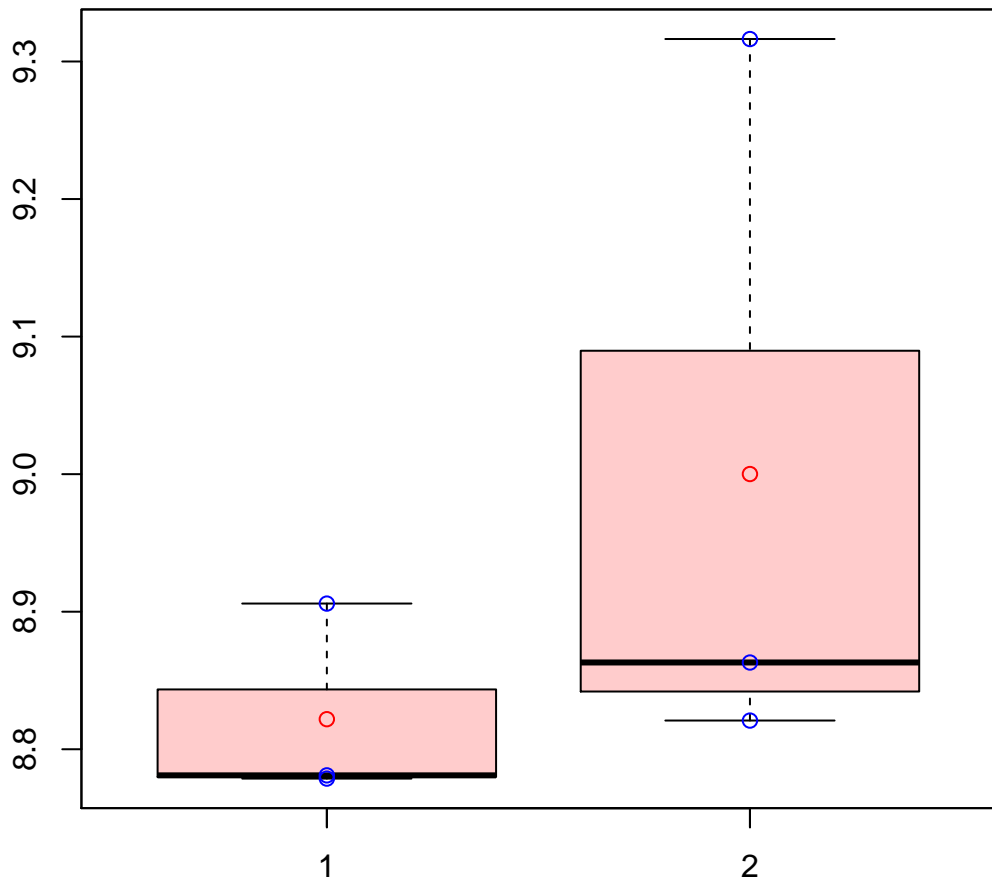

t-Test: p-value = 0.38

# CL413Contig11|CL413Contig11

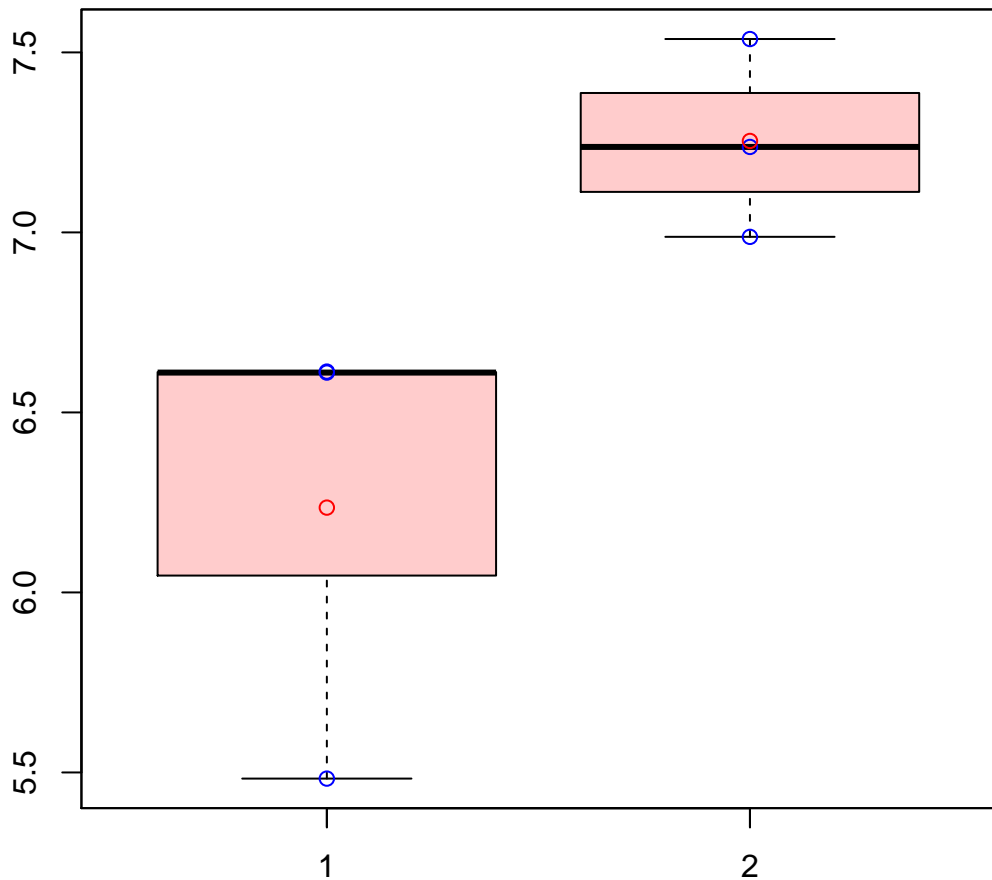

t-Test: p-value = 0.1

# CL413Contig9|CL413Contig9

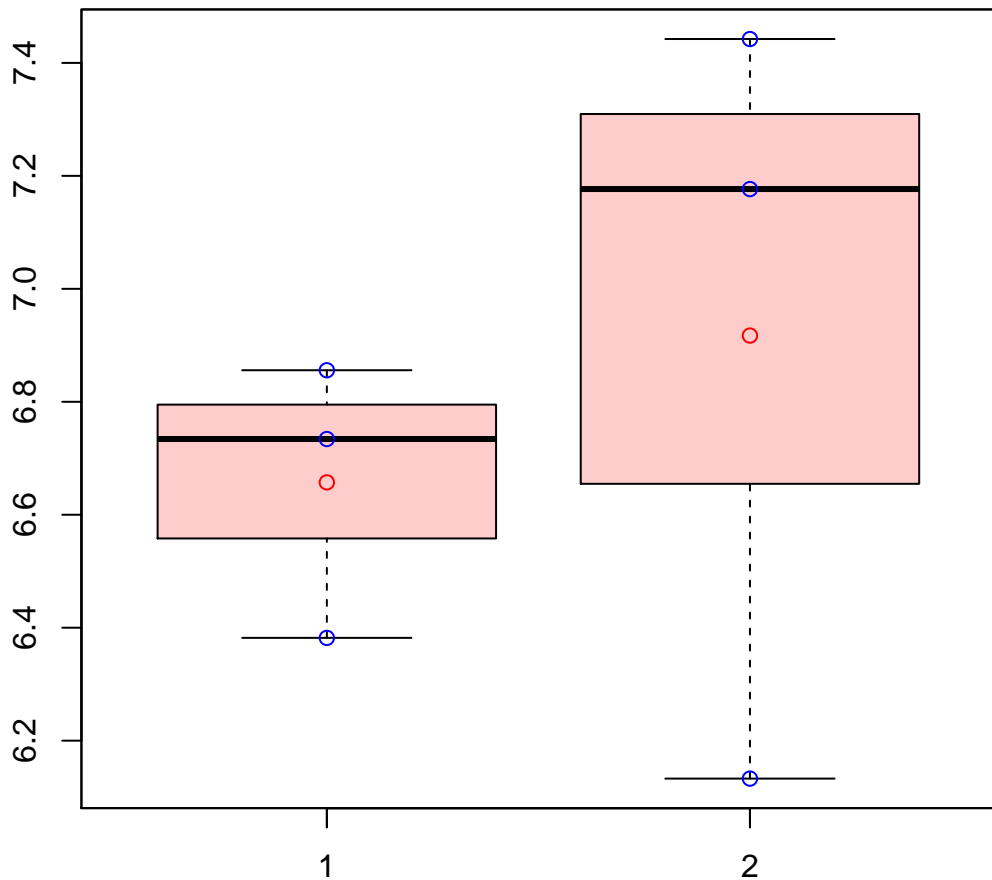

t-Test: p-value = 0.59

# CL4151Contig2|CL4151Contig2

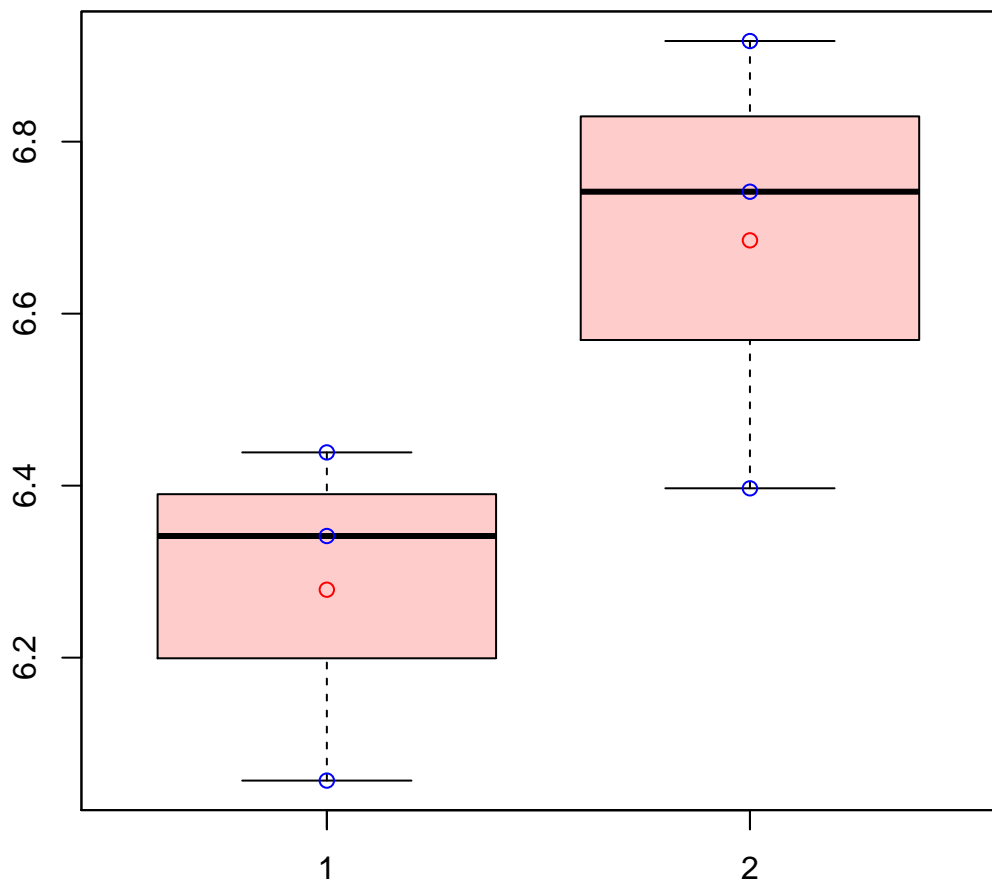

t-Test: p-value = 0.11

# CL4159Contig1|CL4159Contig1

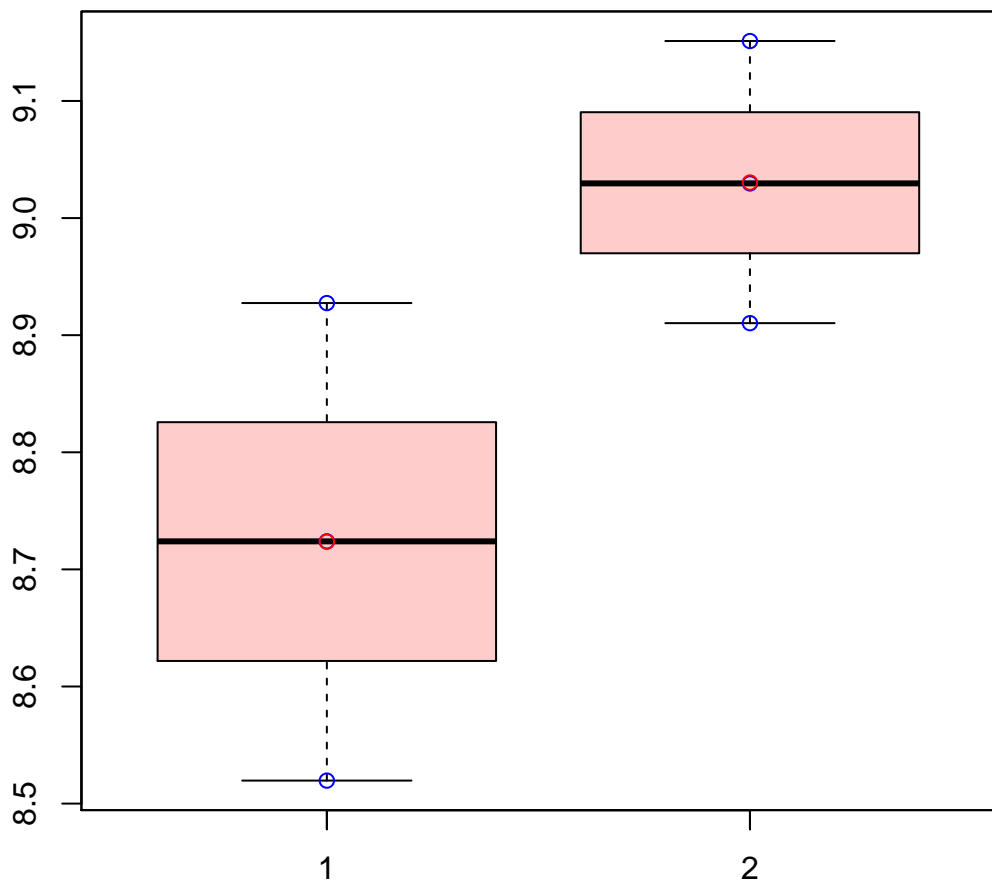

t-Test: p-value = 0.1

# CL4163Contig1|CL4163Contig1

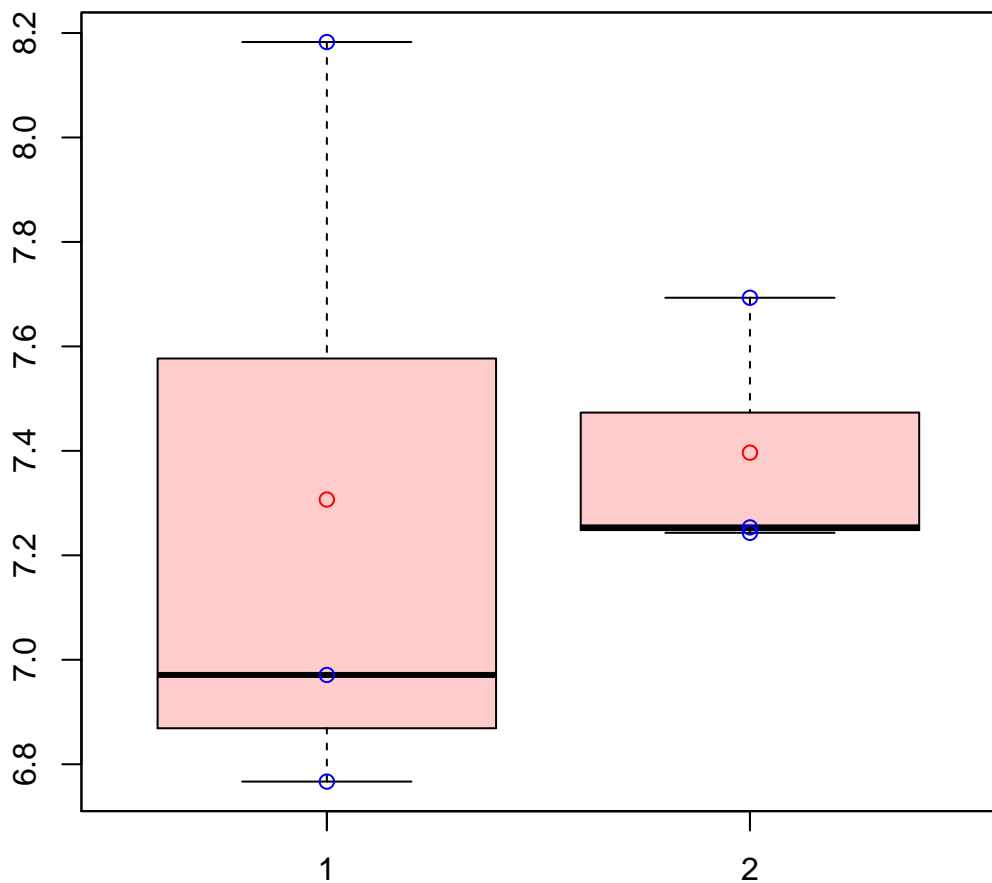

t-Test: p-value = 0.86



# CL4163Contig2|CL4163Contig2

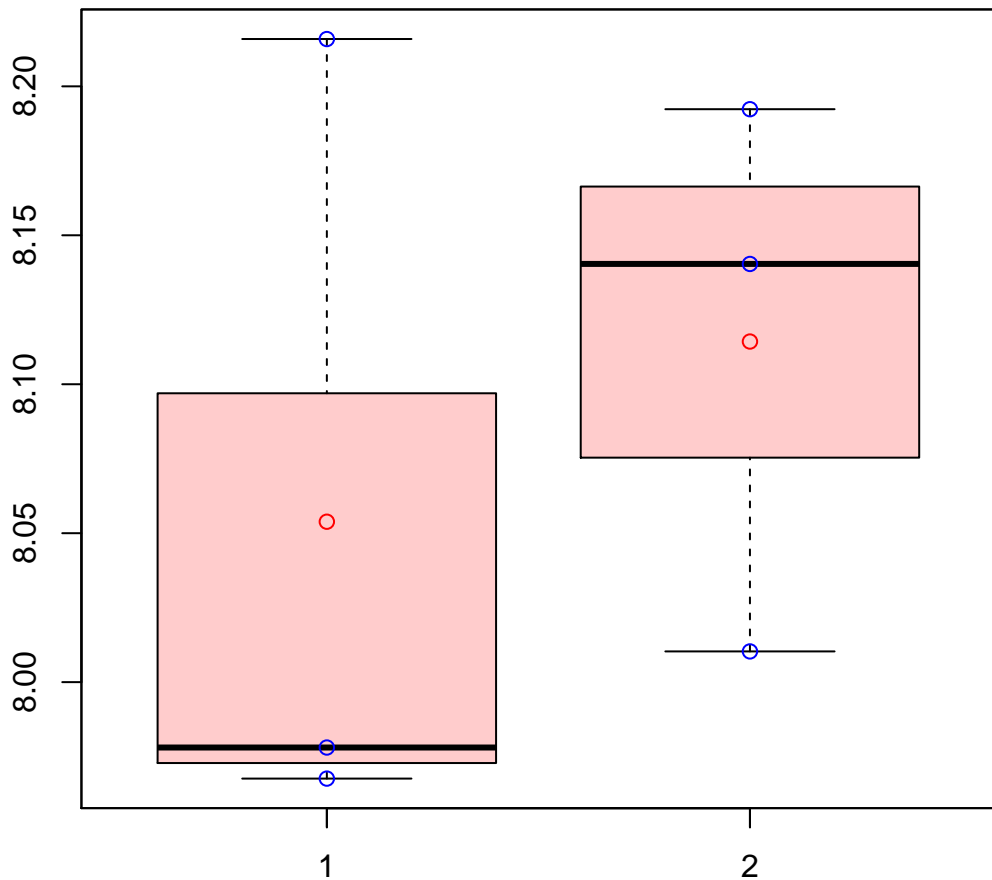

t-Test: p-value = 0.57

# CL4165Contig5|CL4165Contig5

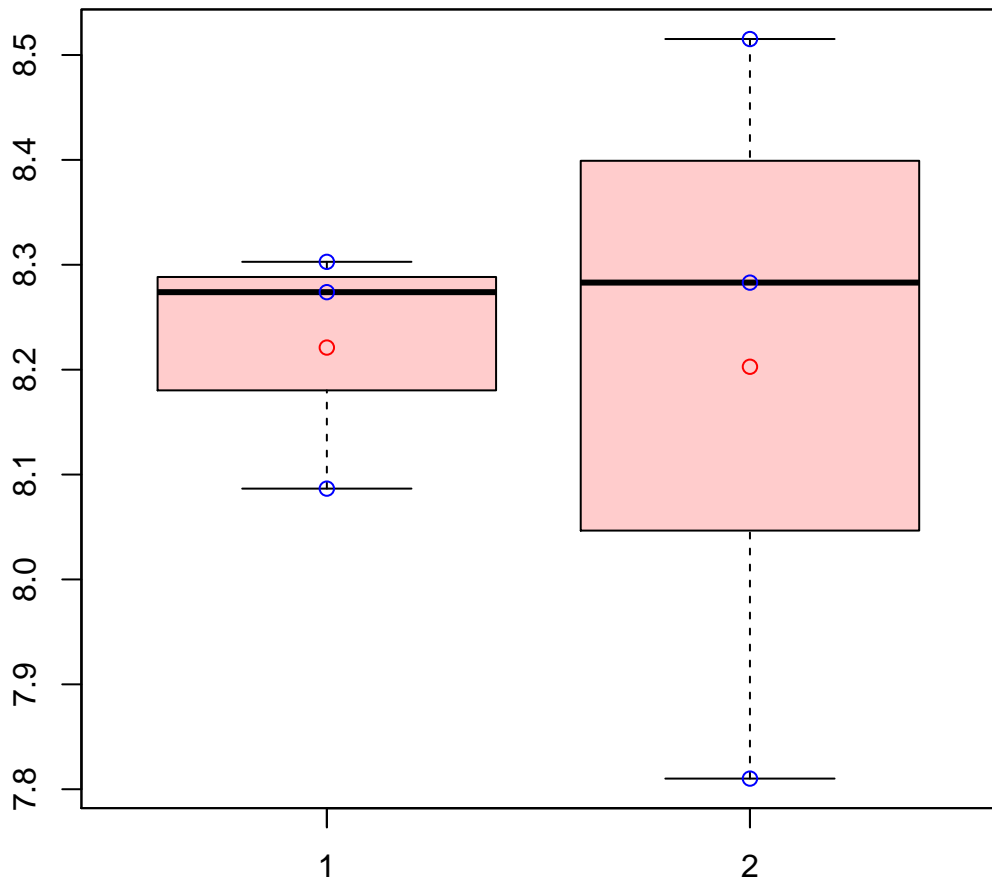

t-Test: p-value = 0.94

# CL4178Contig1|CL4178Contig1

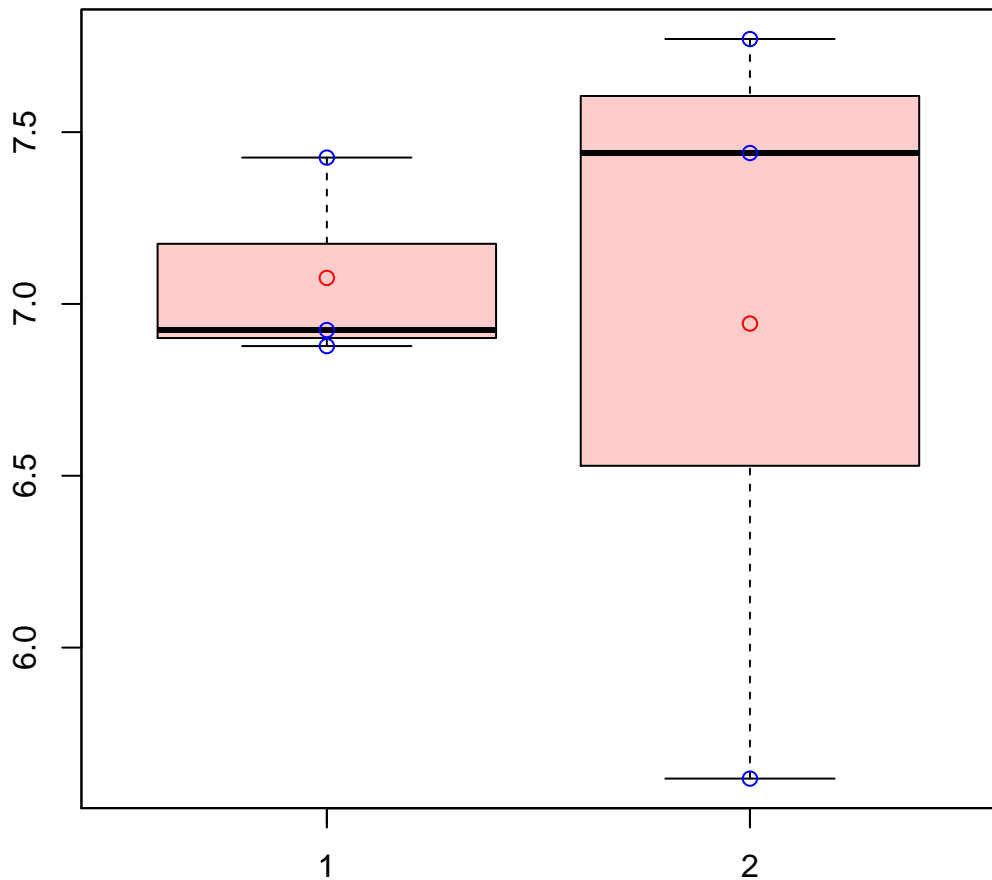

t-Test: p-value = 0.86

# CL417Contig5|CL417Contig5

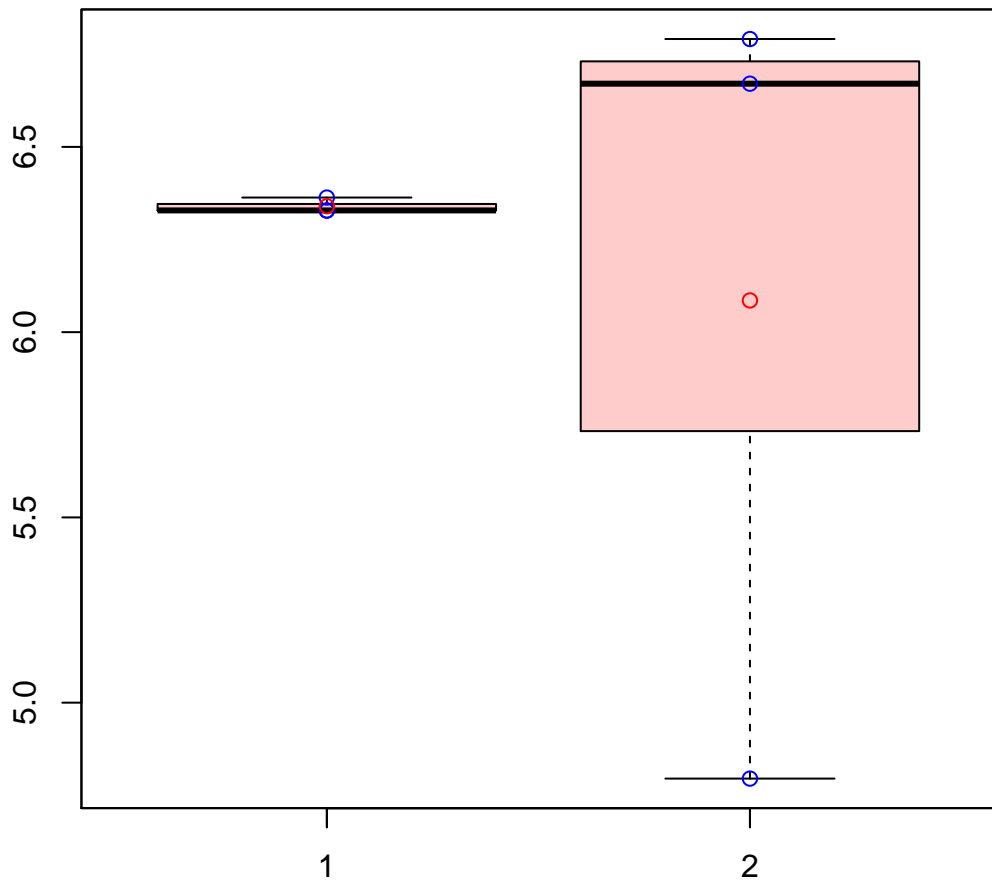

t-Test: p-value = 0.73

# CL418Contig9|CL418Contig9

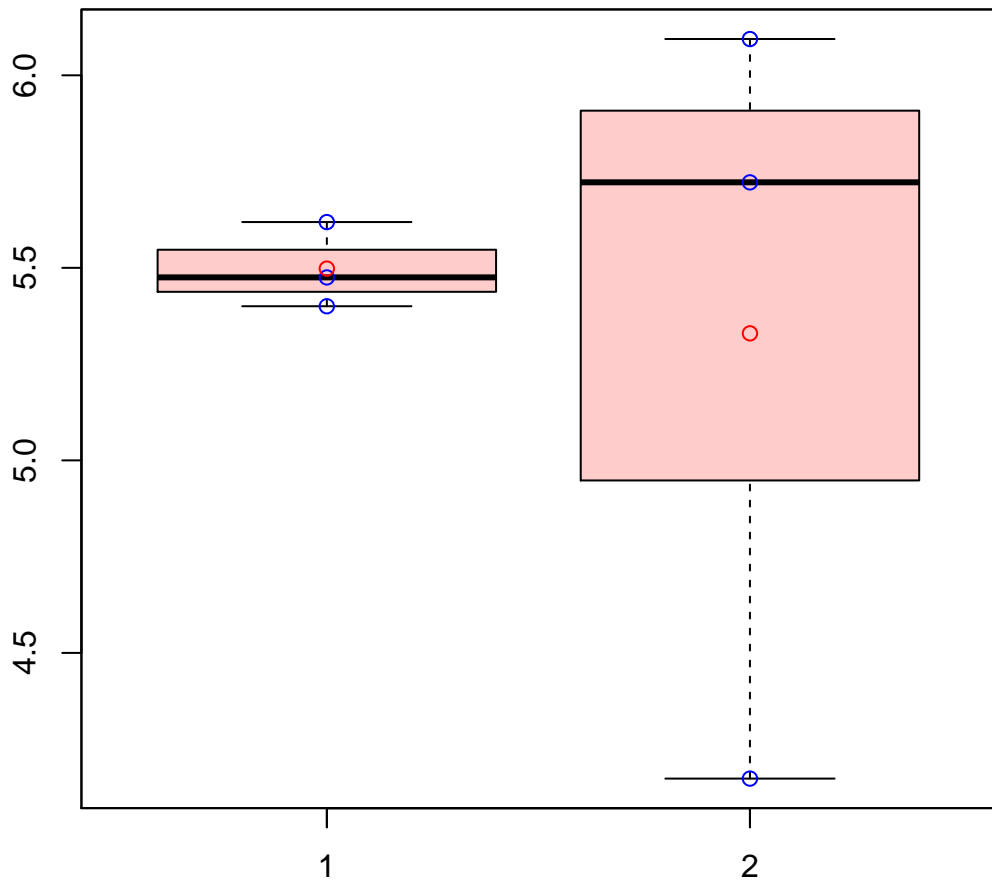

t-Test: p-value = 0.8

# CL41Contig27|CL41Contig27

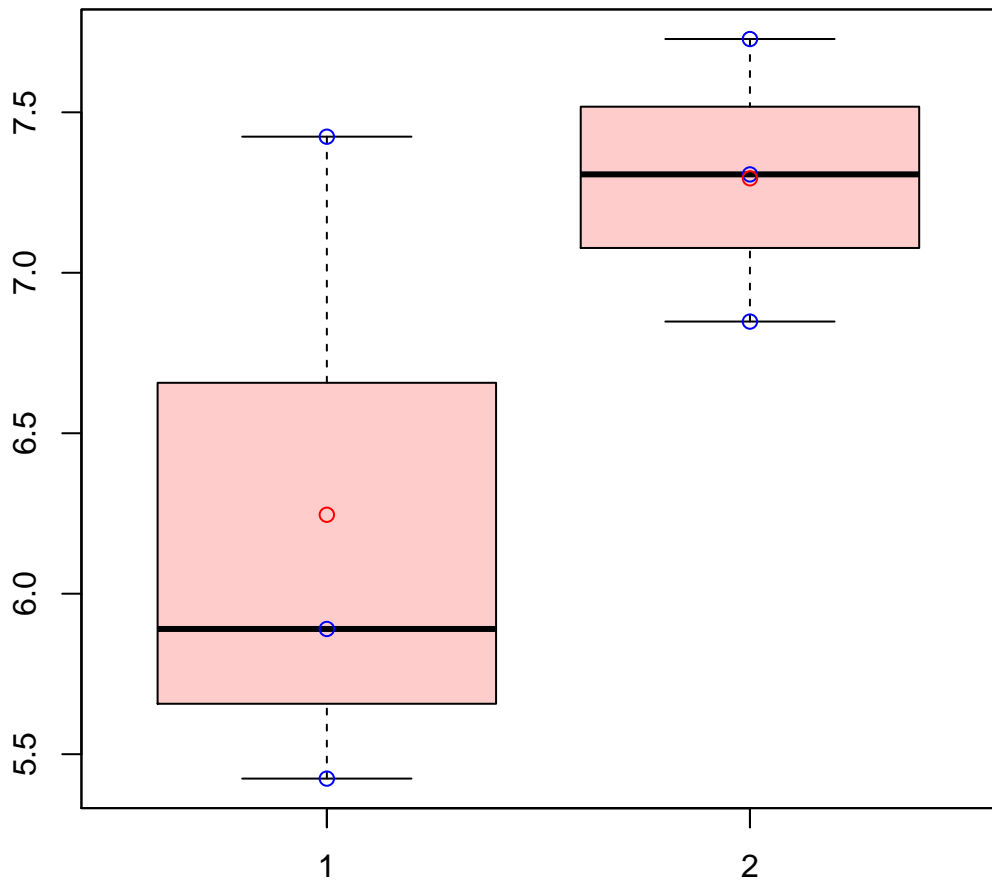

t-Test: p-value = 0.22

# CL41Contig5|CL41Contig5

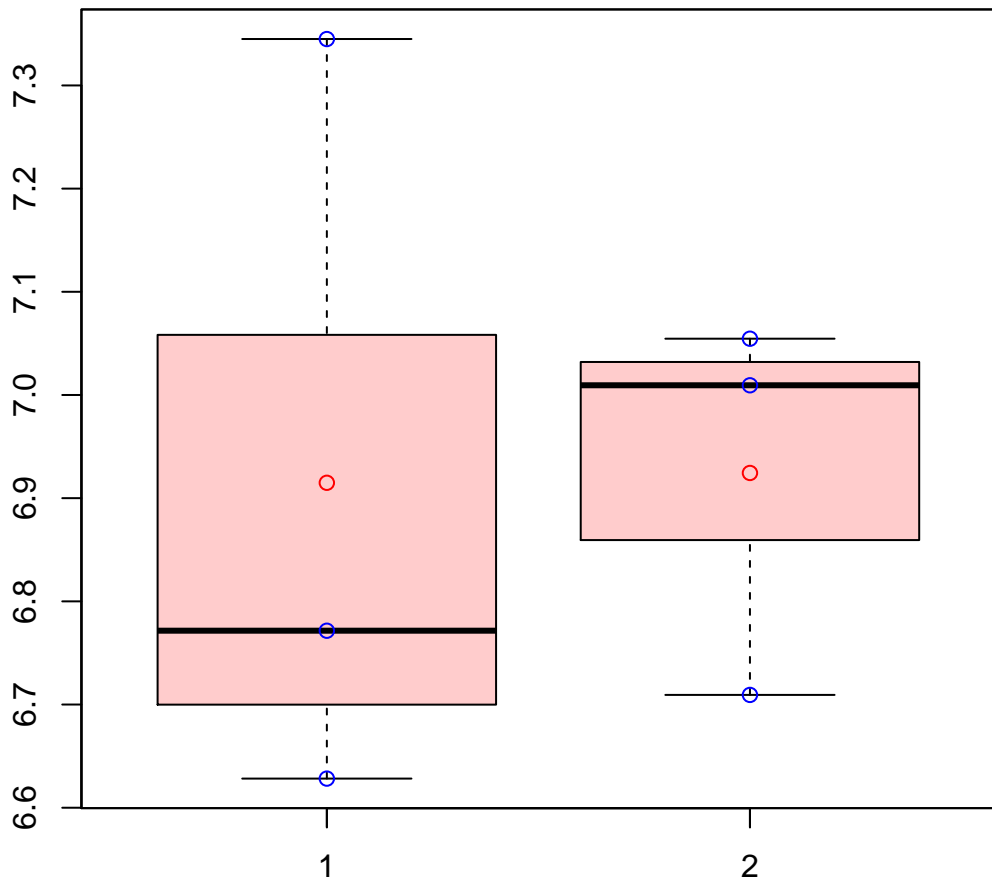

t-Test: p-value = 0.97

# CL4208Contig1|CL4208Contig1

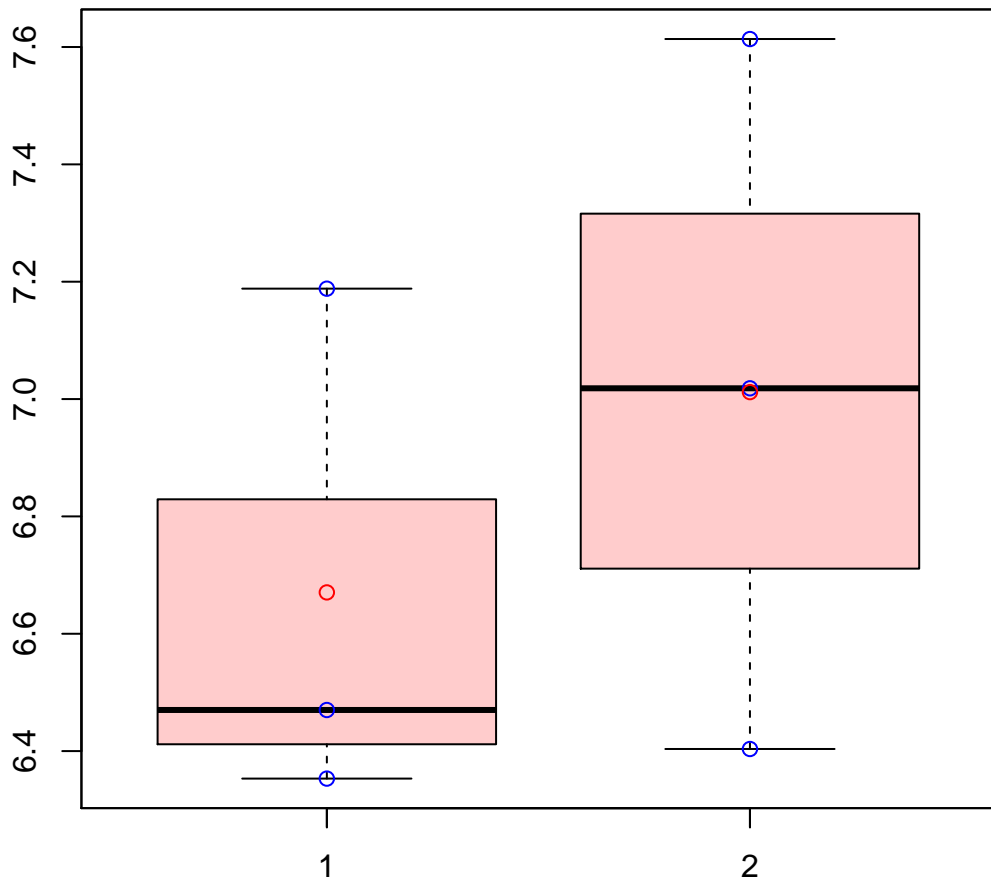

t-Test: p-value = 0.48



# CL420Contig11|CL420Contig11

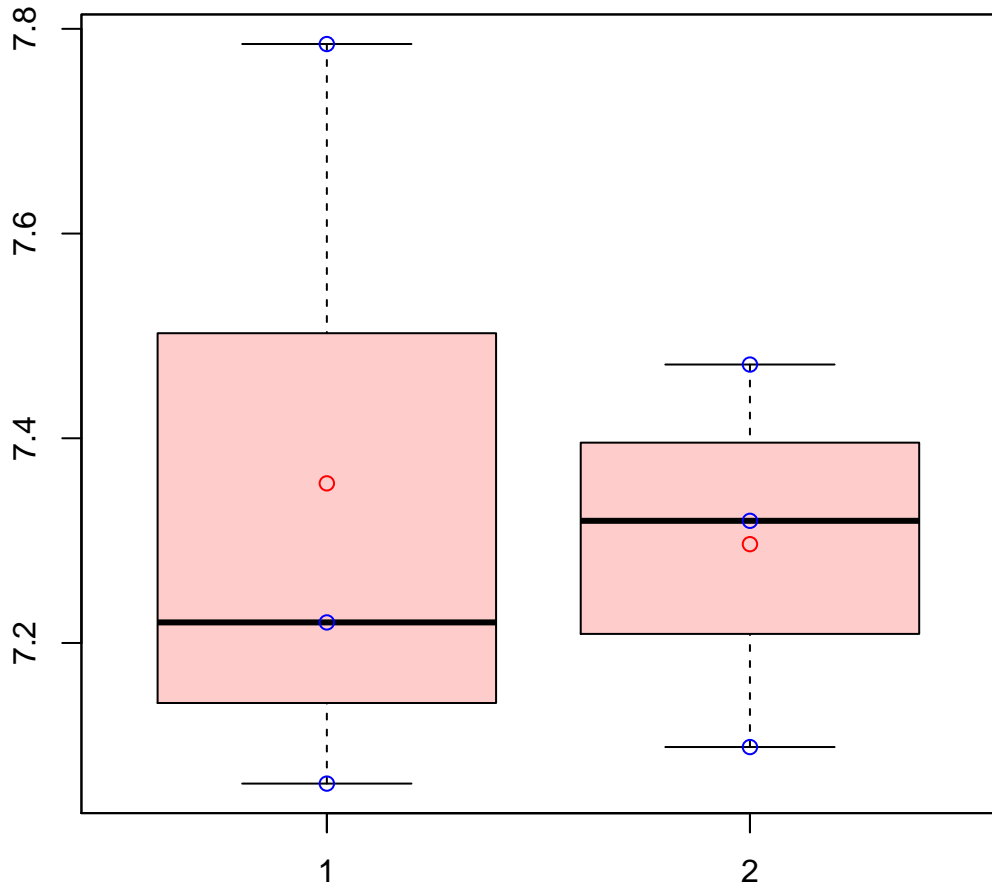

t-Test: p-value = 0.82

# CL4211Contig3|CL4211Contig3

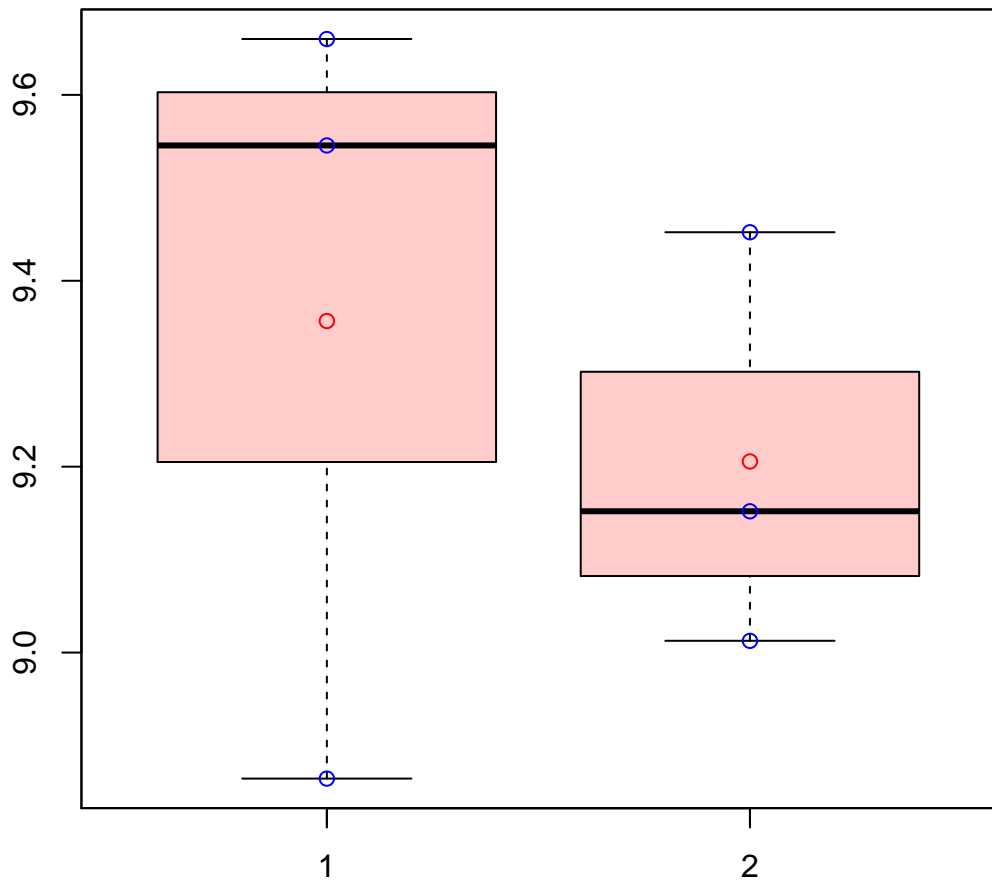

t-Test: p-value = 0.63

# CL4211Contig7|CL4211Contig7

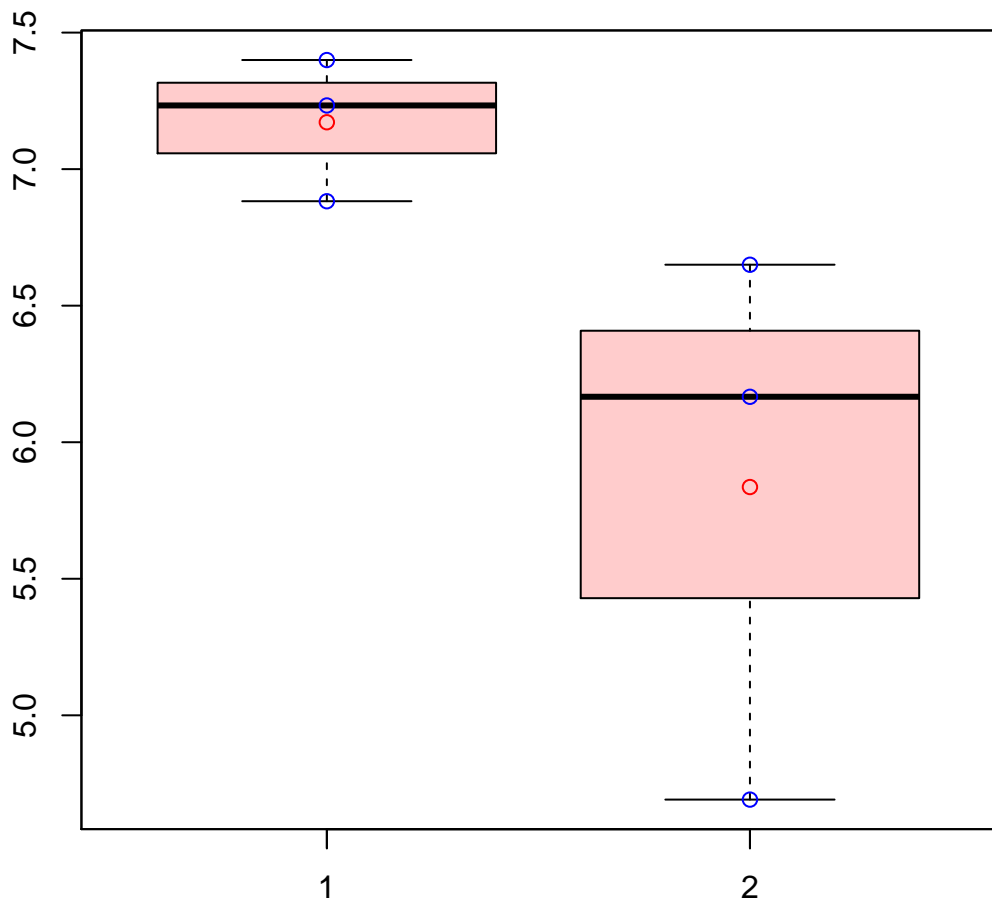

t-Test: p-value = 0.14

# CL4212Contig2|CL4212Contig2

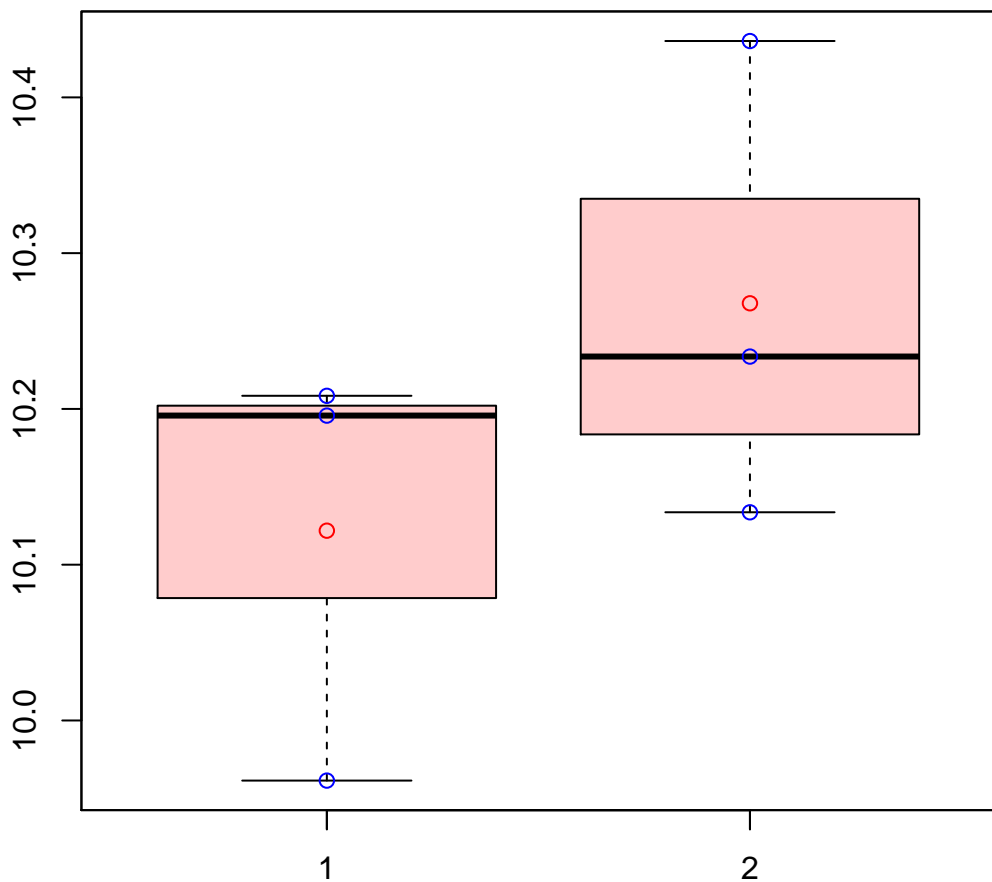

t-Test: p-value = 0.29

# CL4221Contig2|CL4221Contig2

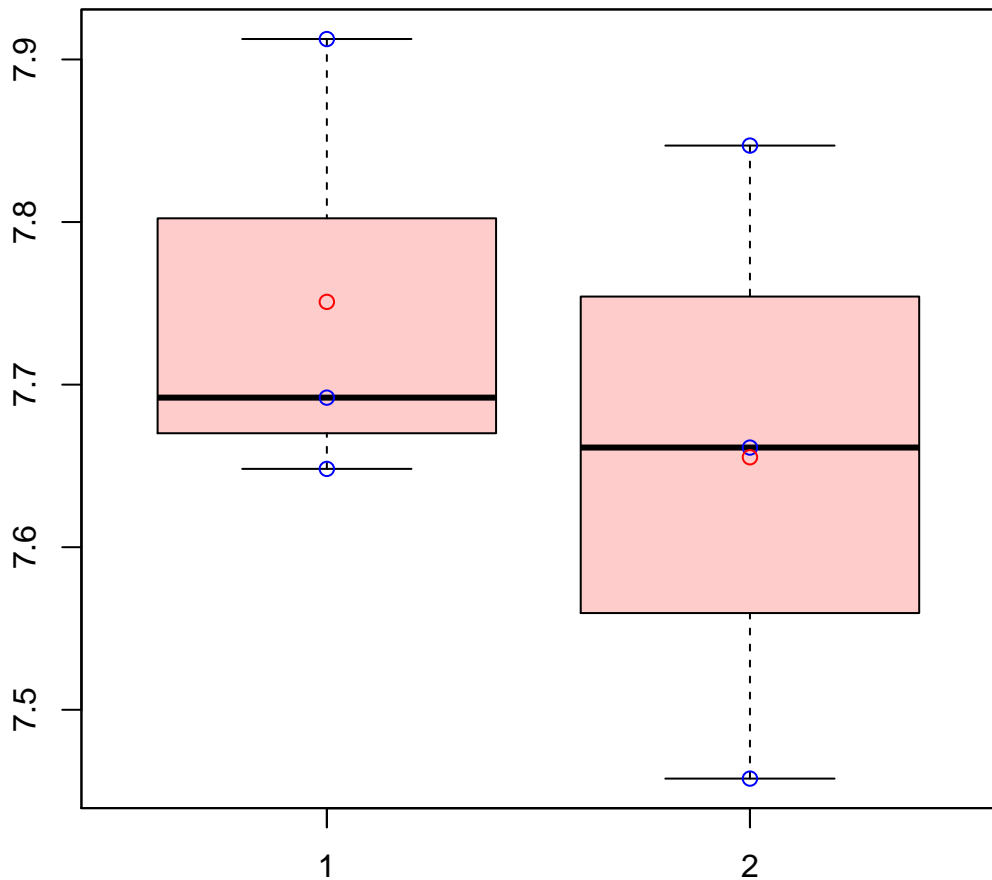

t-Test: p-value = 0.53

# CL4229Contig1|CL4229Contig1

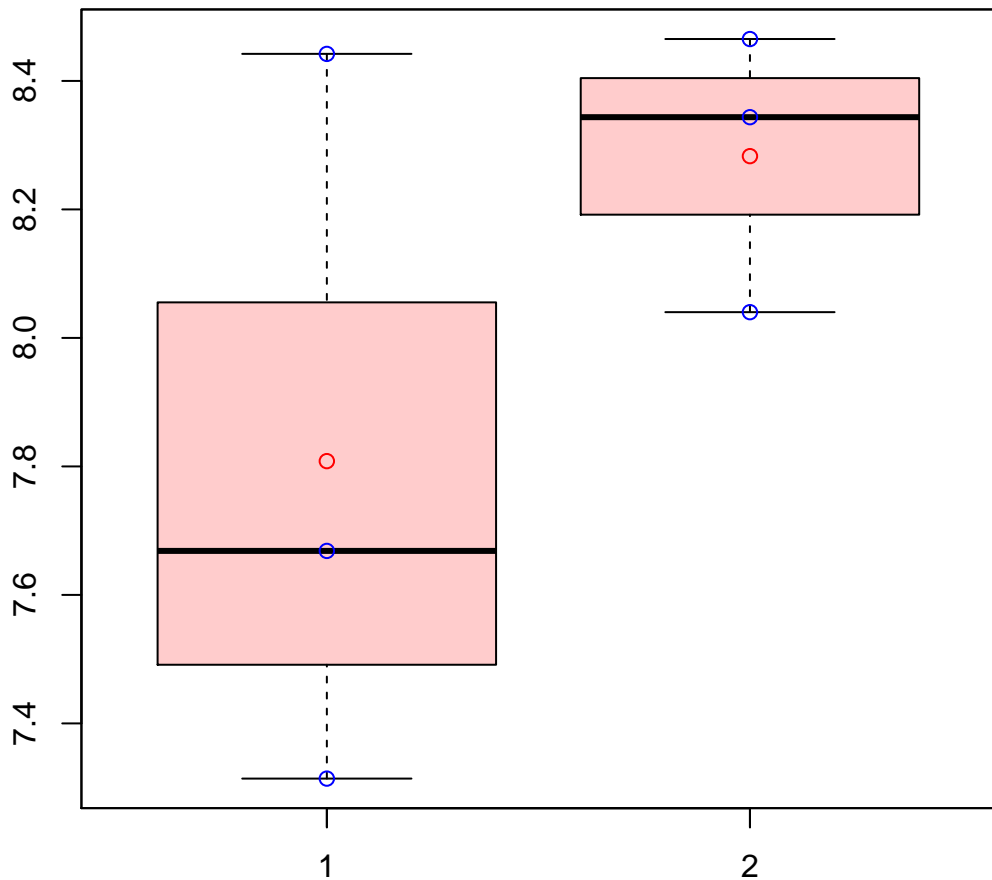

t-Test: p-value = 0.29

# CL424Contig8|CL424Contig8

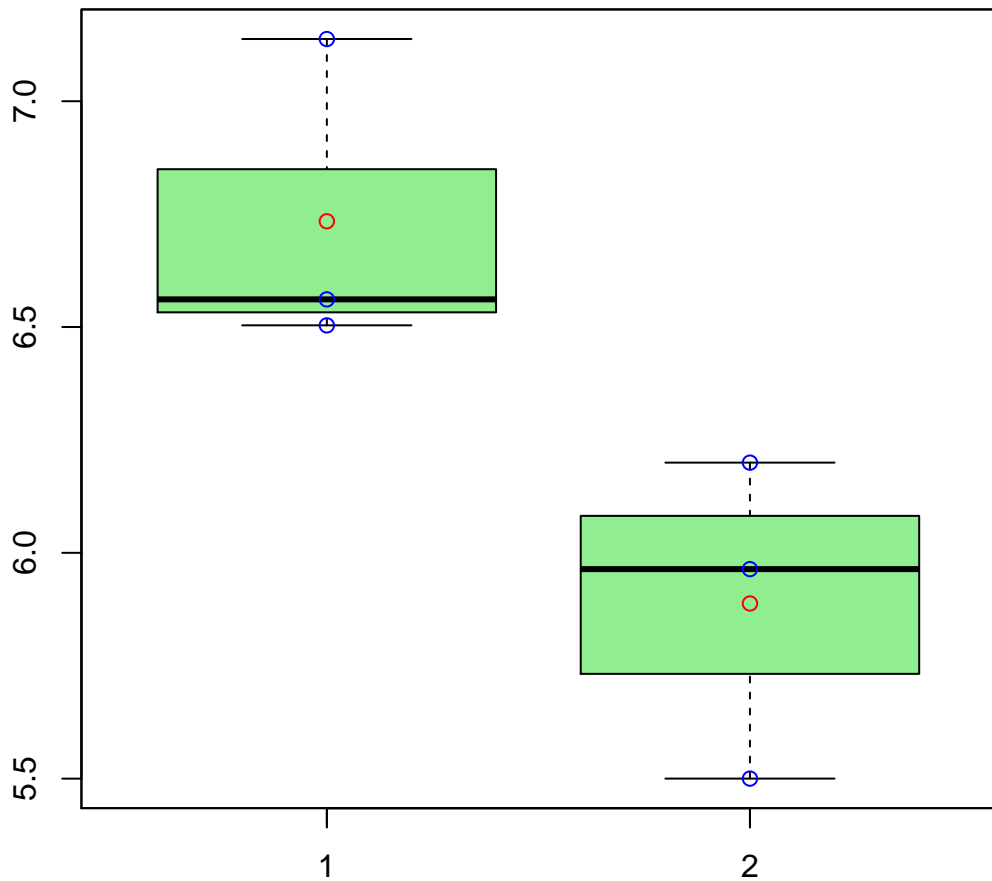

t-Test: p-value = 0.04

# CL4253Contig1|CL4253Contig1

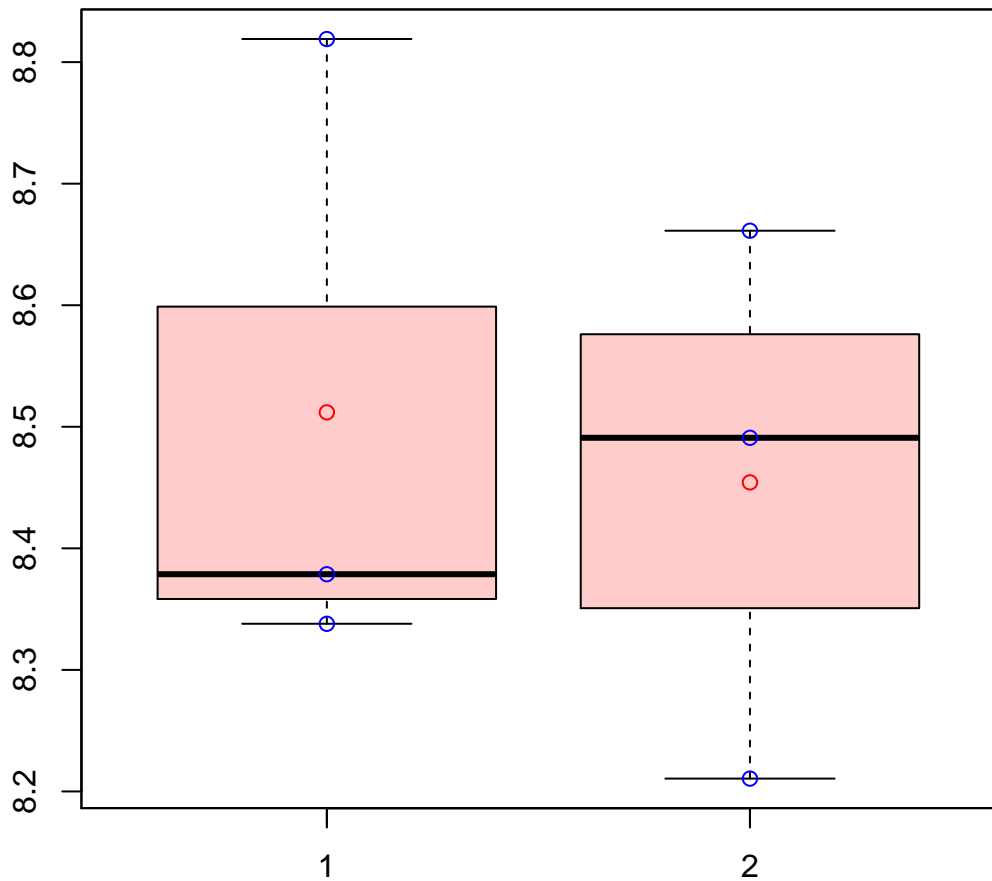

t-Test: p-value = 0.79



# CL4255Contig2|CL4255Contig2

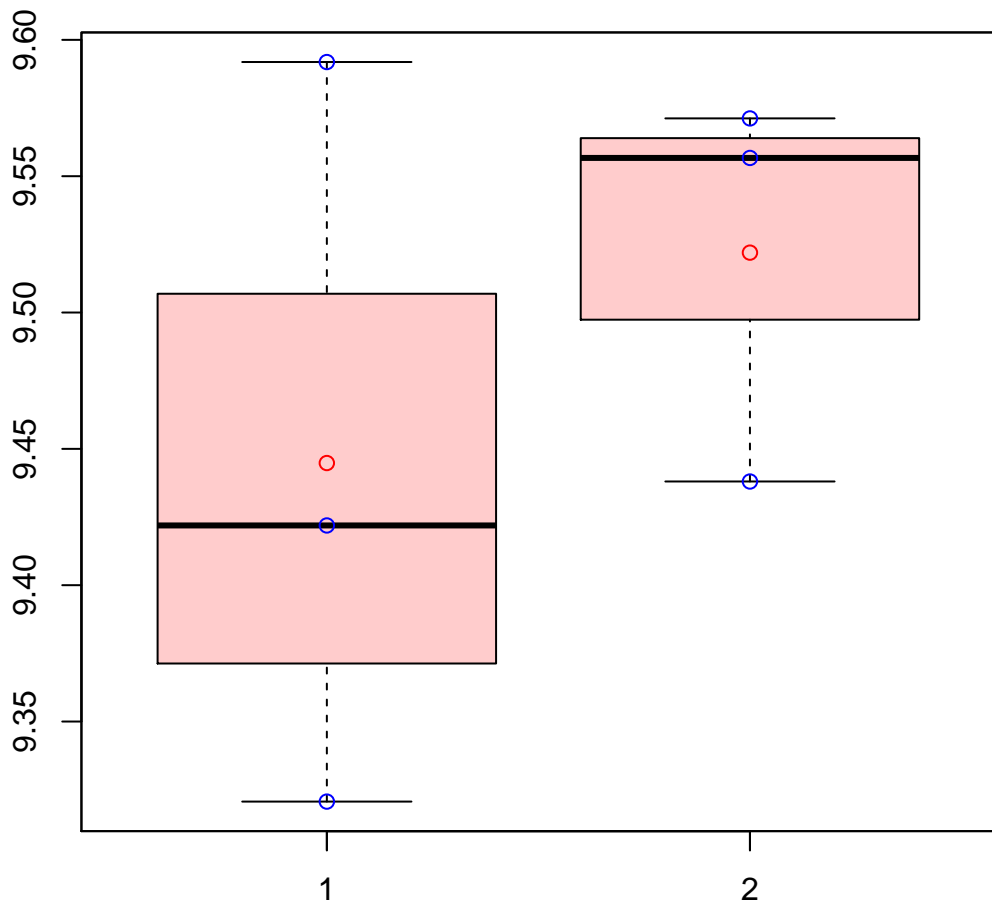

t-Test: p-value = 0.45

# CL425Contig6|CL425Contig6

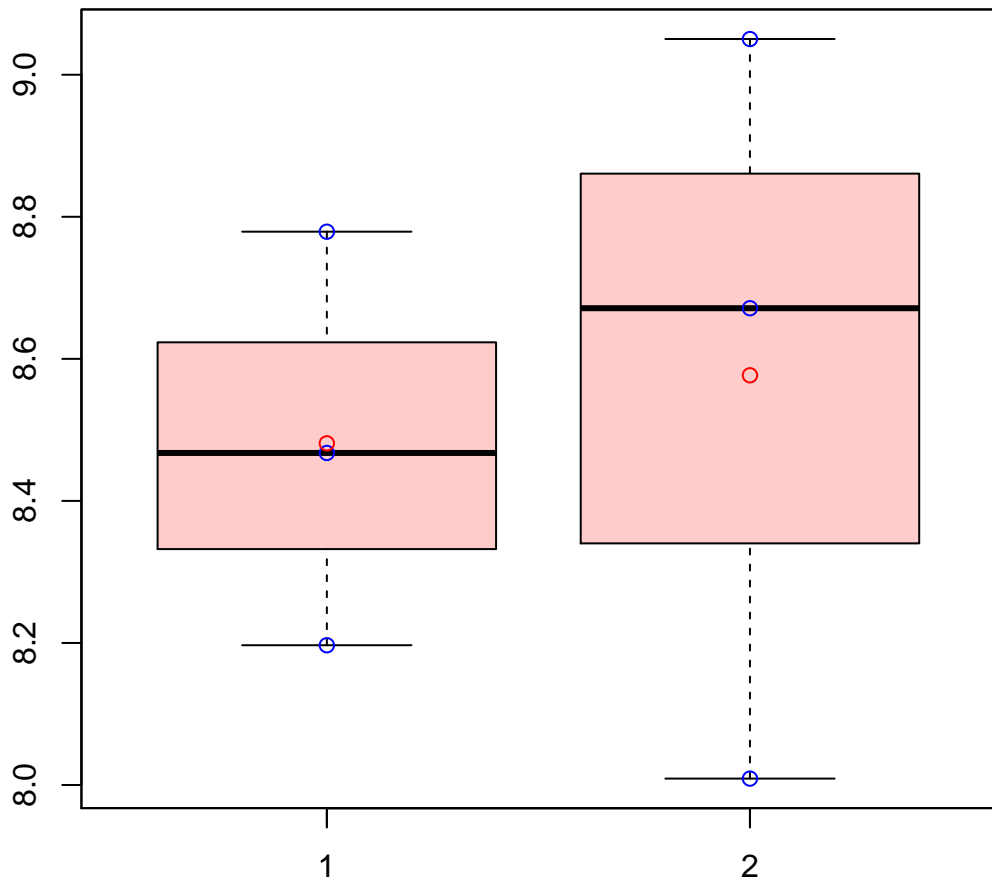

t-Test: p-value = 0.8

# CL426Contig5|CL426Contig5

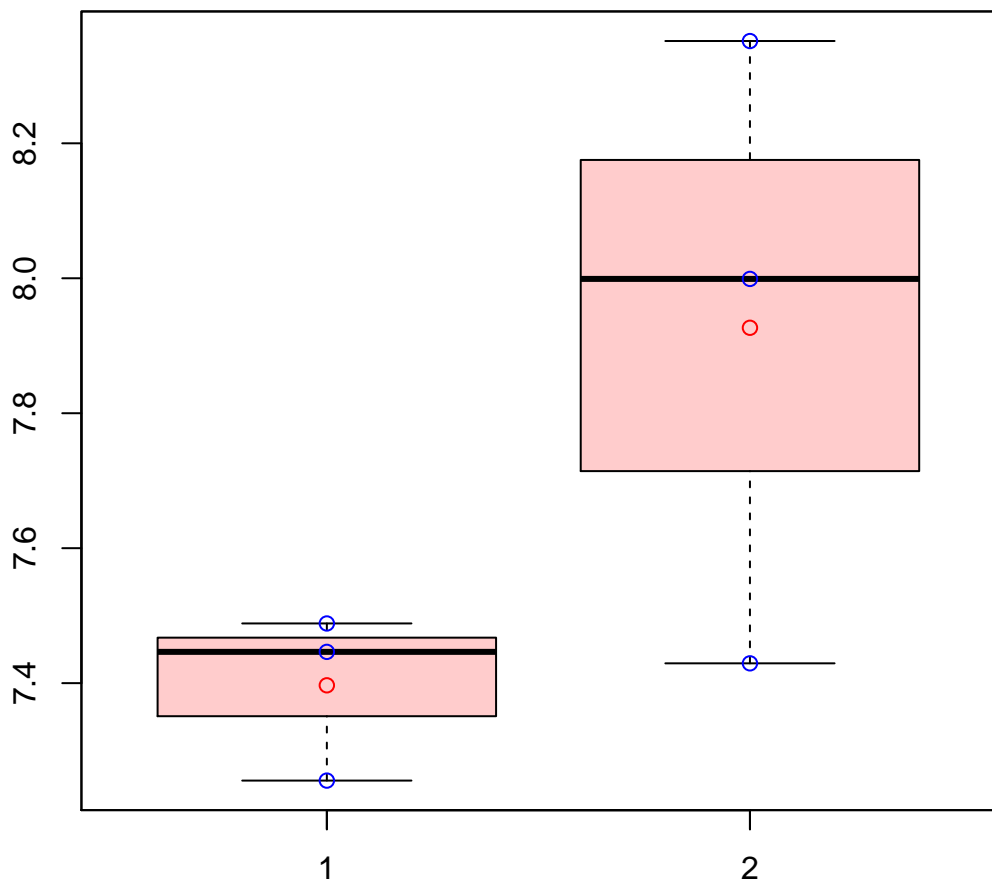

t-Test: p-value = 0.18

# CL4274Contig1|CL4274Contig1

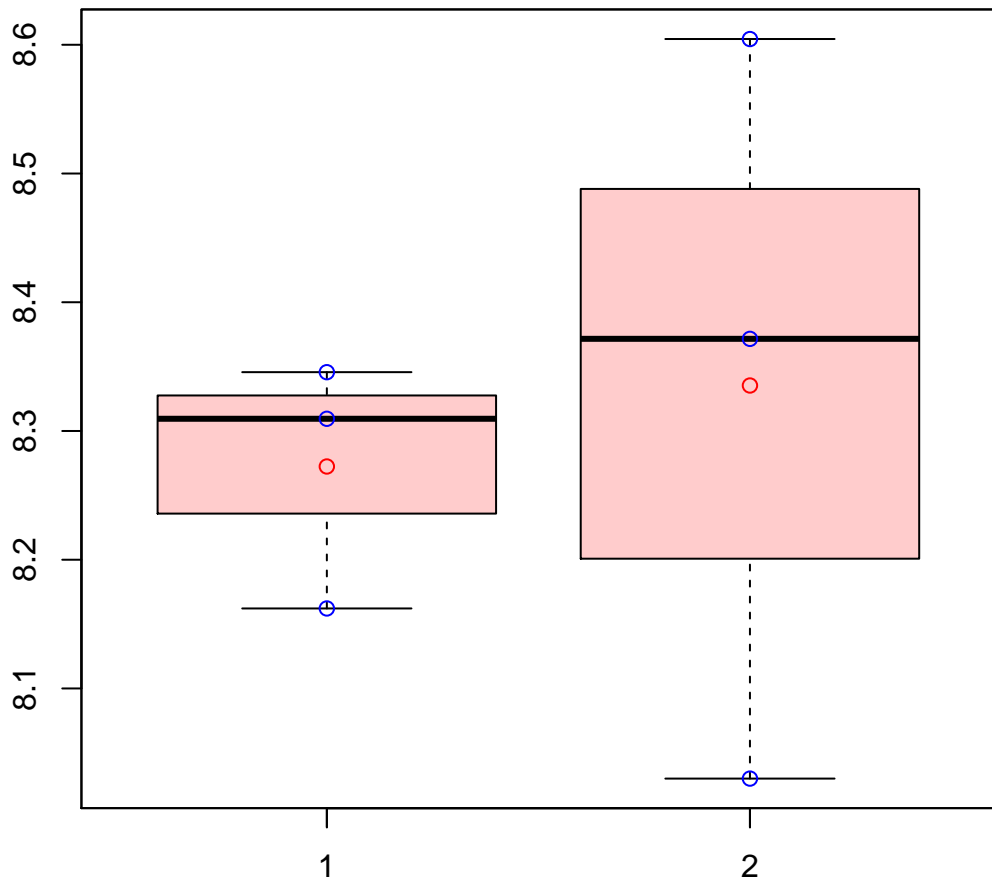

t-Test: p-value = 0.75

# CL4279Contig2|CL4279Contig2

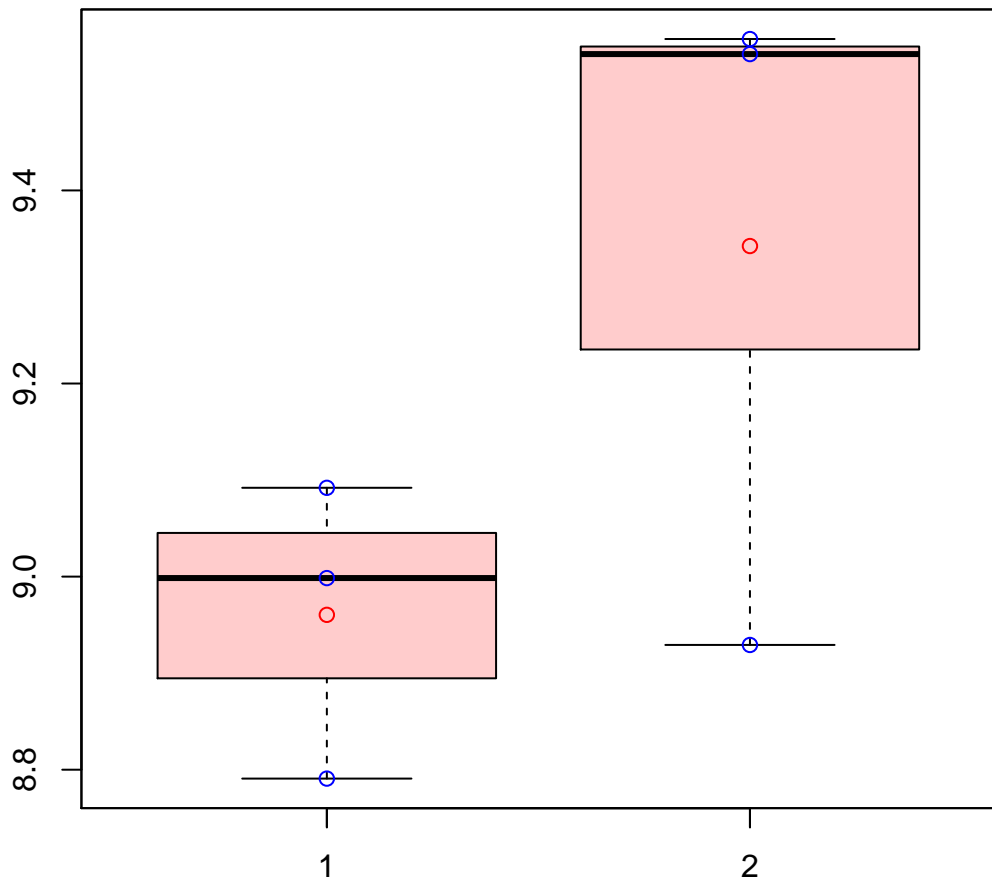

t-Test: p-value = 0.2

# CL4281Contig1|CL4281Contig1

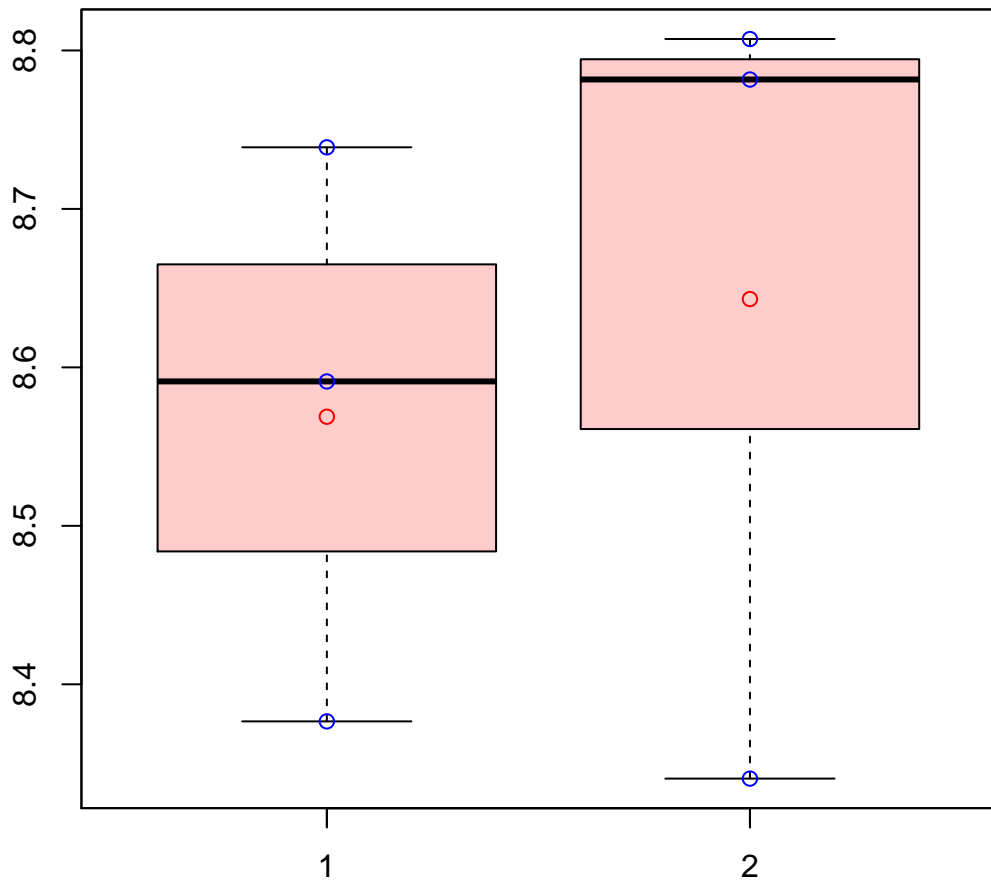

t-Test: p-value = 0.71

# CL4285Contig3|CL4285Contig3

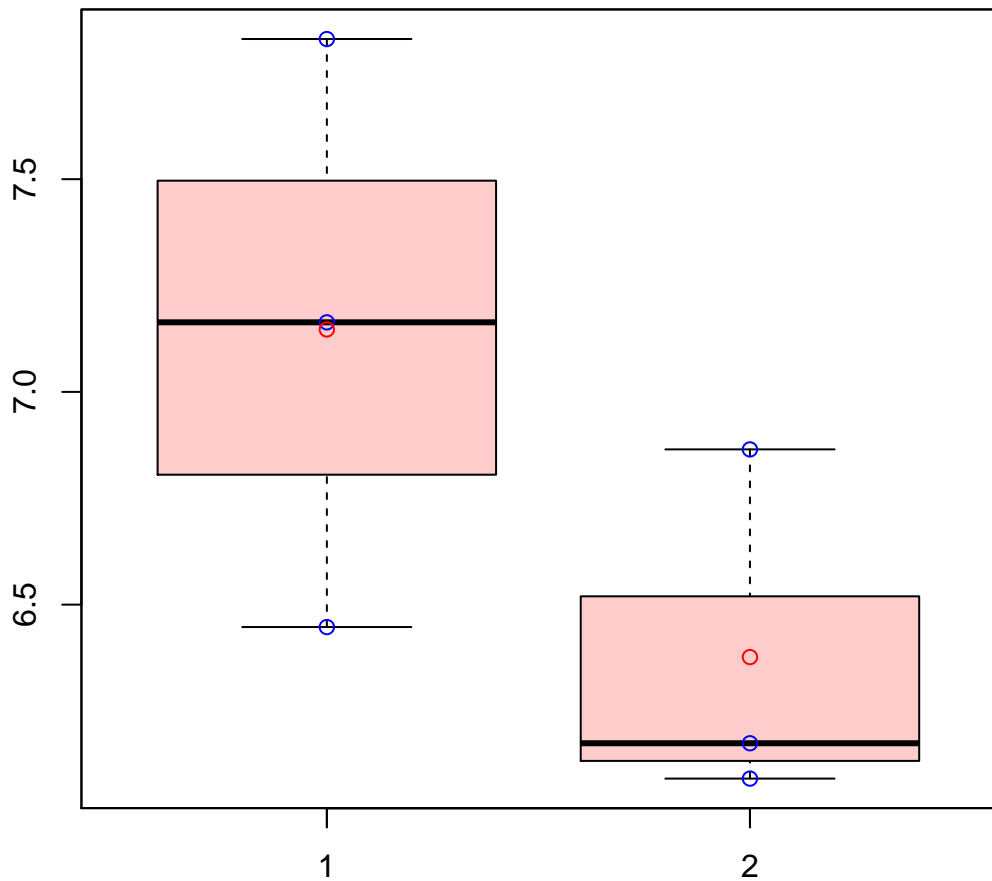

t-Test: p-value = 0.19

# CL42Contig15|CL42Contig15

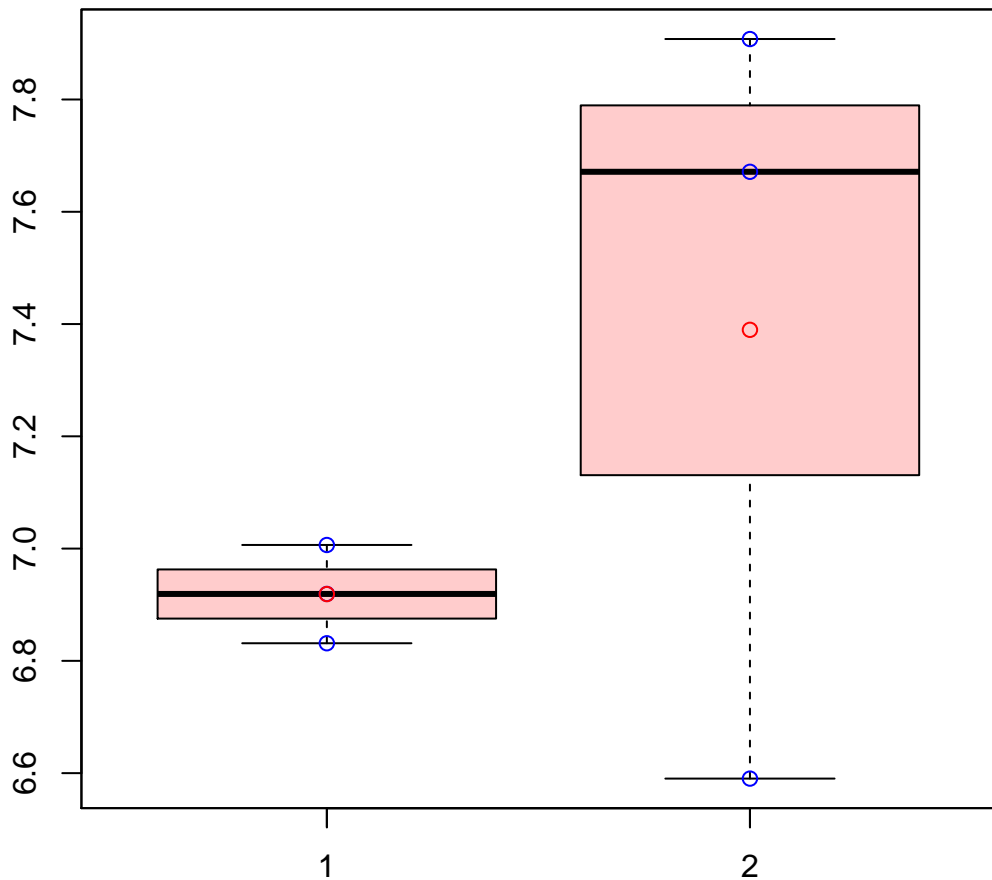

t-Test: p-value = 0.37



# CL42Contig7|CL42Contig7

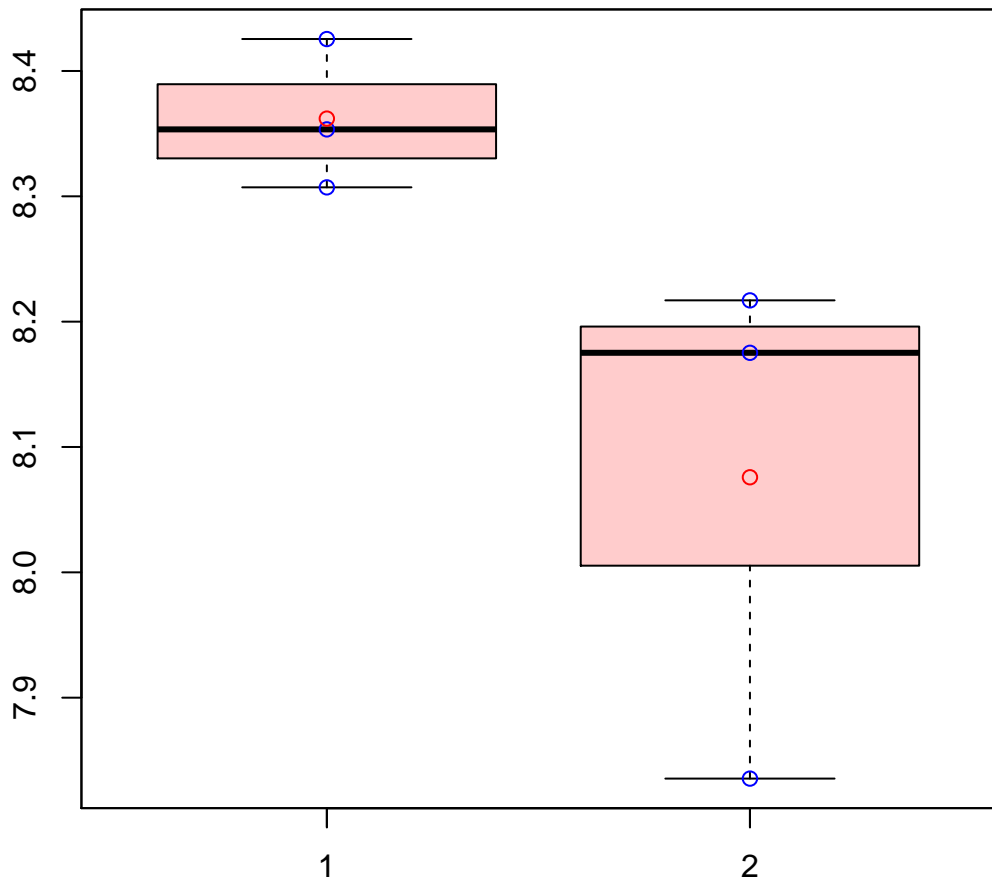

t-Test: p-value = 0.13

# CL42Contig9|CL42Contig9

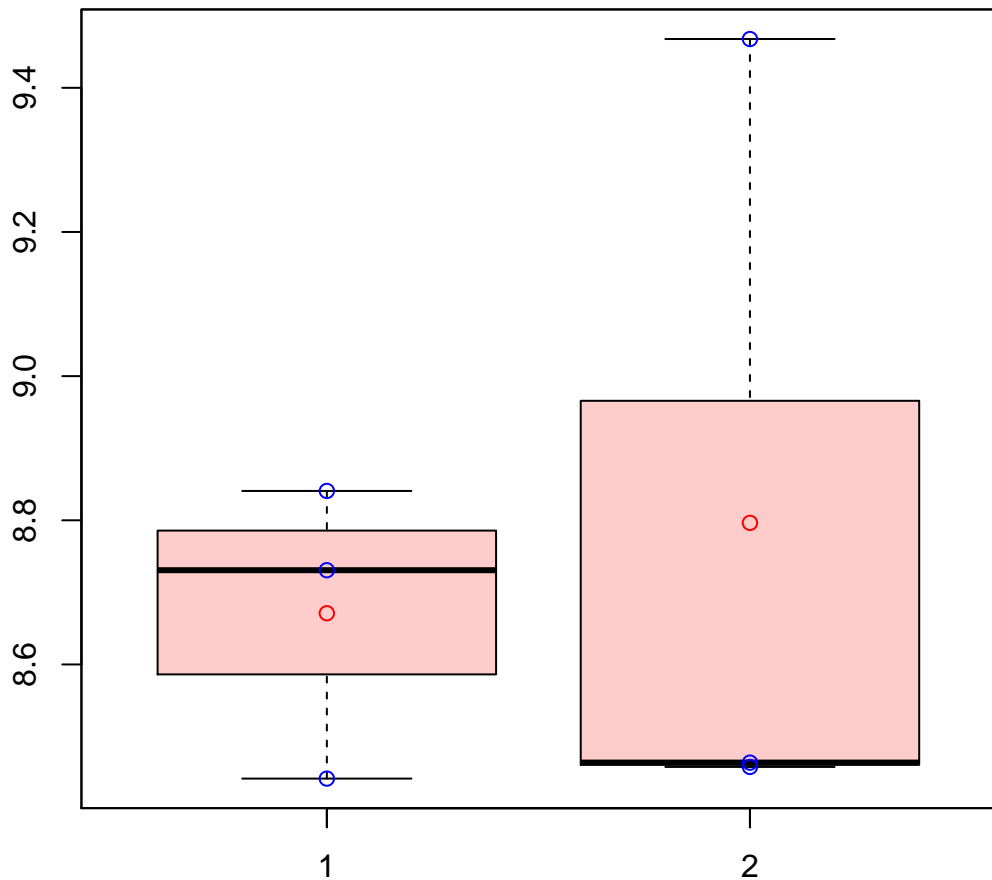

t-Test: p-value = 0.75

# CL430Contig10|CL430Contig10

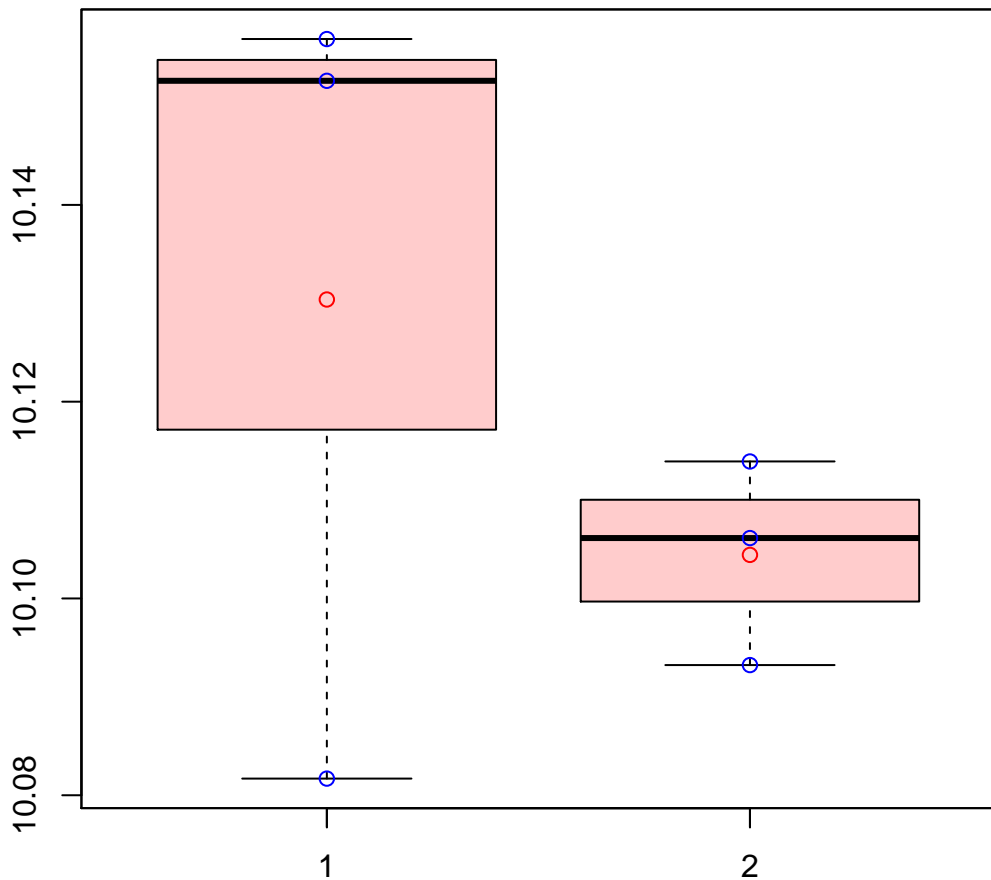

t-Test: p-value = 0.4

# CL430Contig11|CL430Contig11

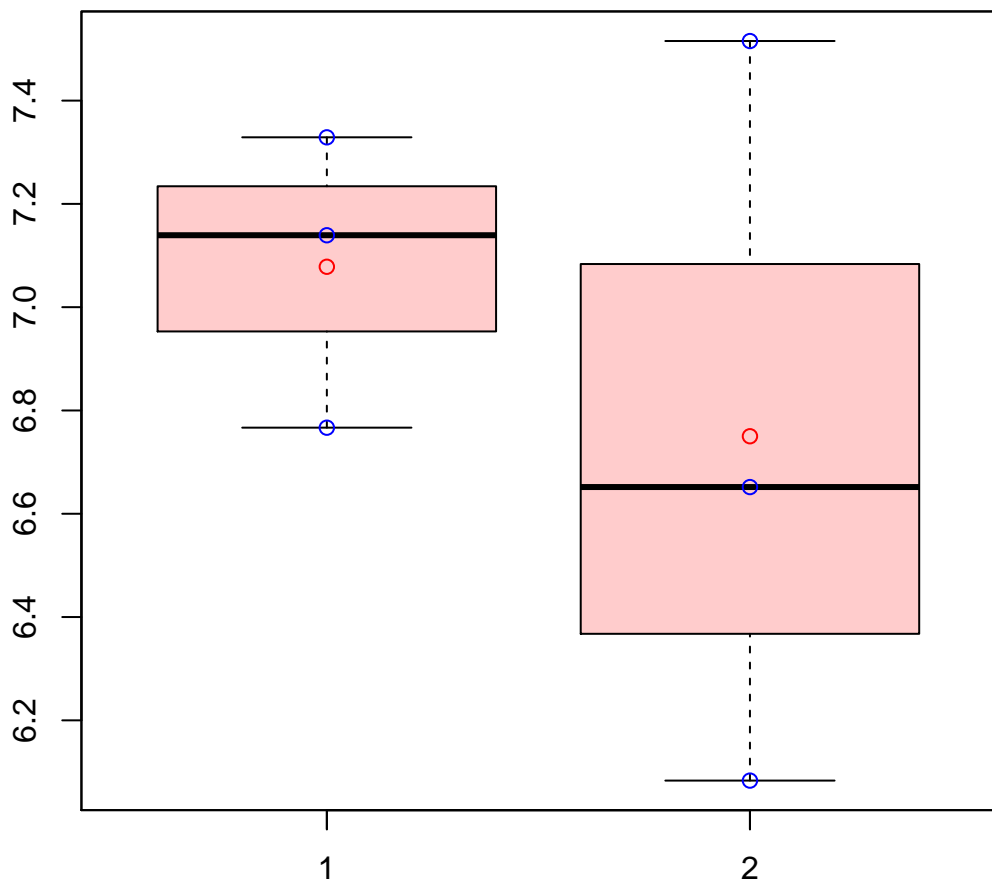

t-Test: p-value = 0.52

# CL430Contig2|CL430Contig2

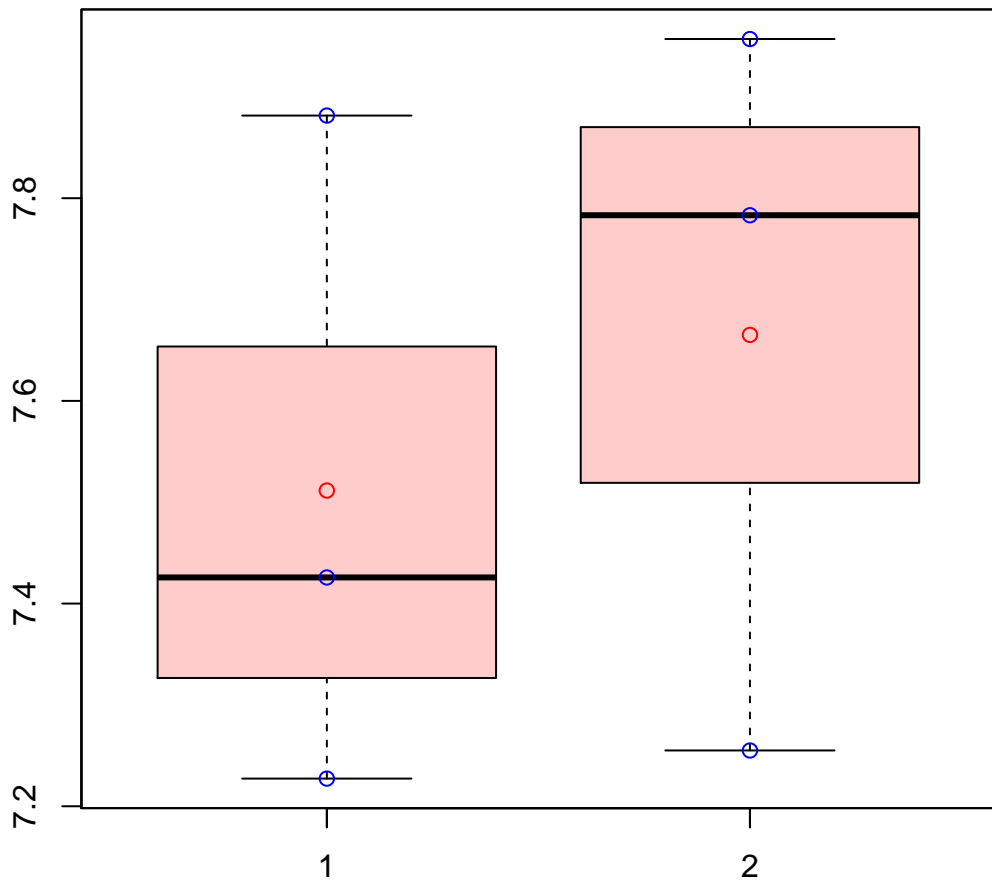

t-Test: p-value = 0.62

# CL4310Contig1|CL4310Contig1

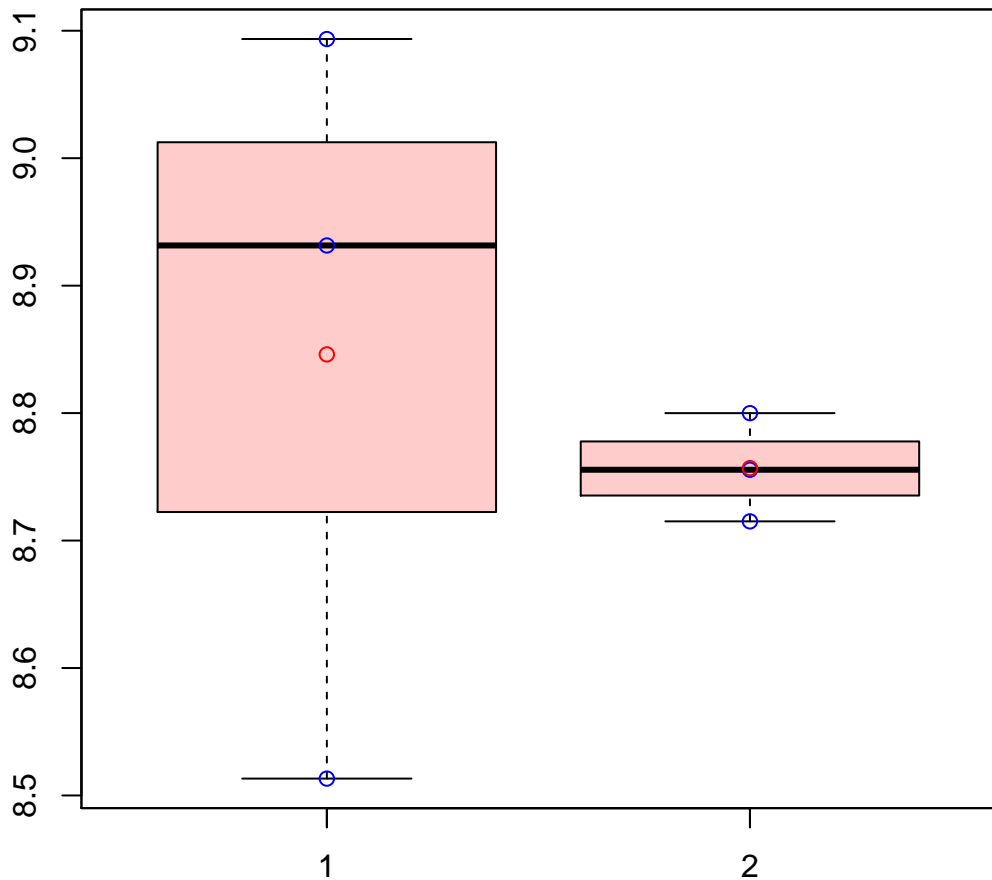

t-Test: p-value = 0.66

# CL4310Contig2|CL4310Contig2

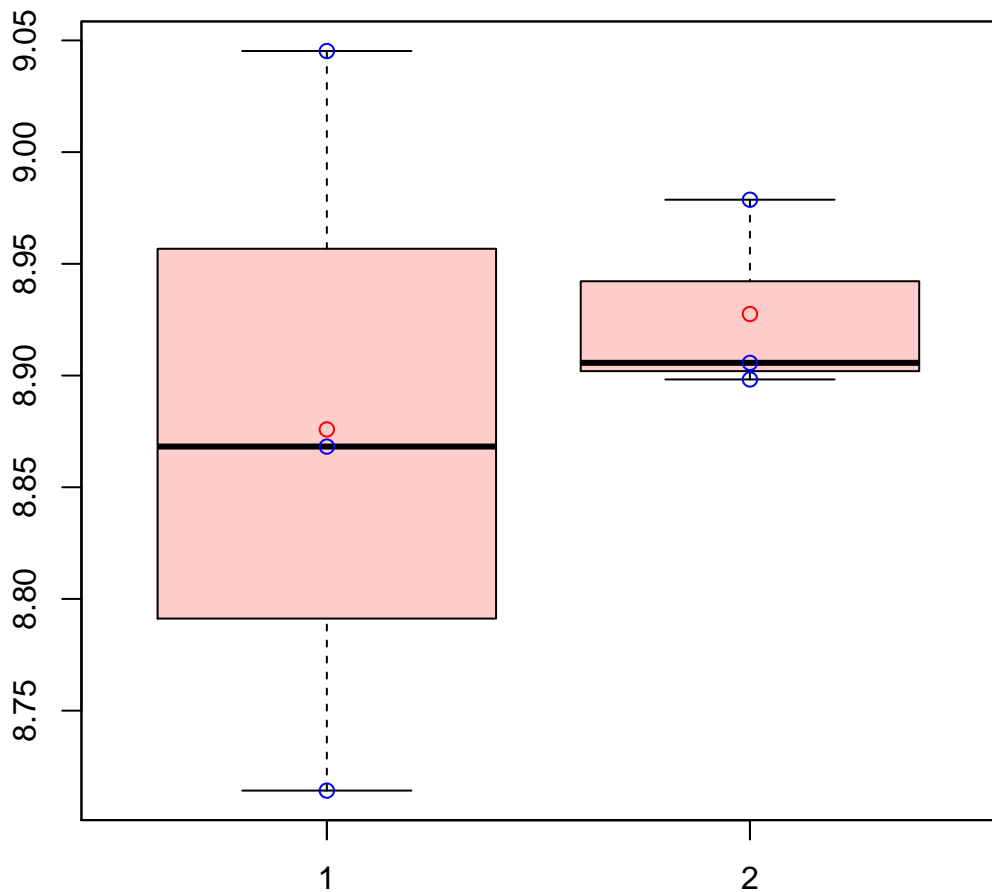

t-Test: p-value = 0.65

# CL4321Contig2|CL4321Contig2

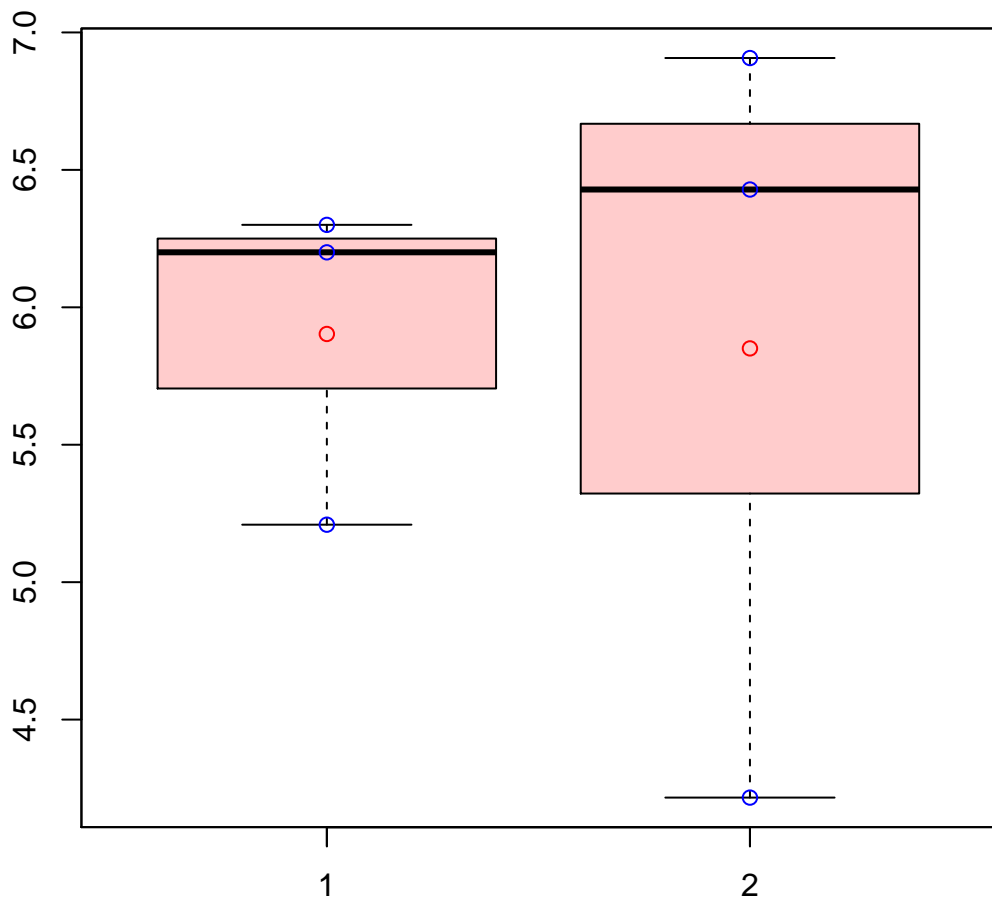

t-Test: p-value = 0.96



# CL4328Contig1|CL4328Contig1

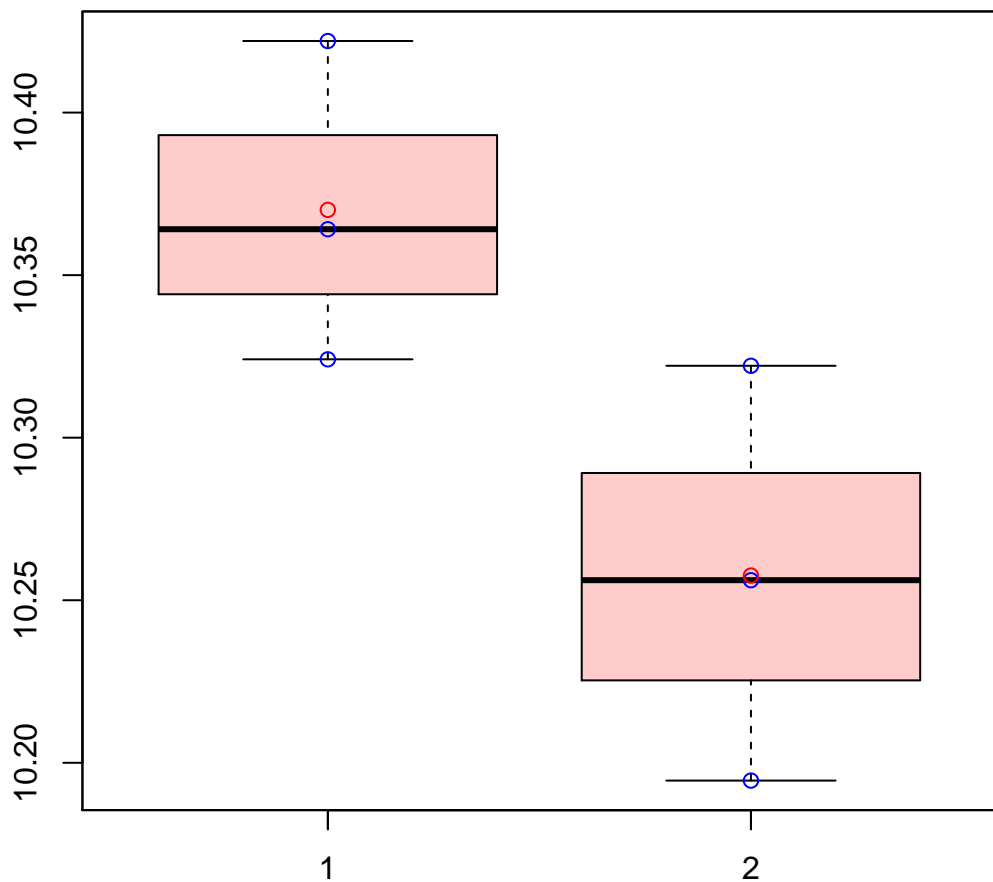

t-Test: p-value = 0.08

# CL432Contig5|CL432Contig5

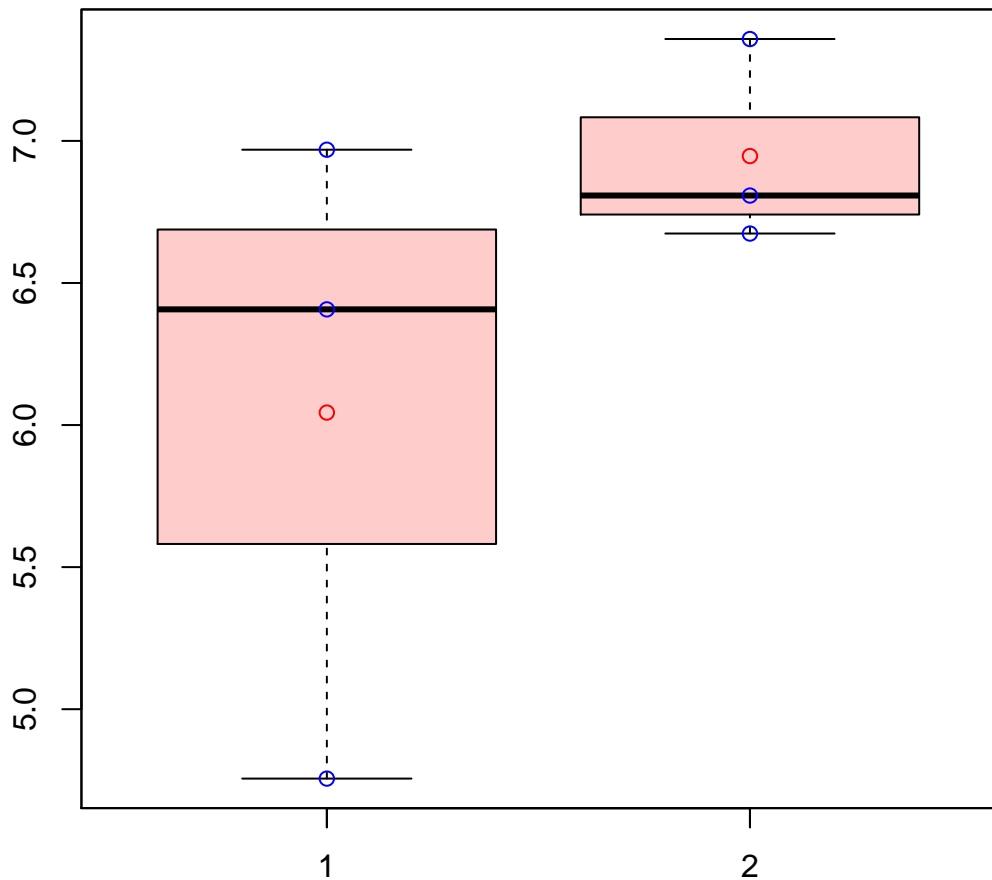

t-Test: p-value = 0.31

# CL4333Contig2|CL4333Contig2

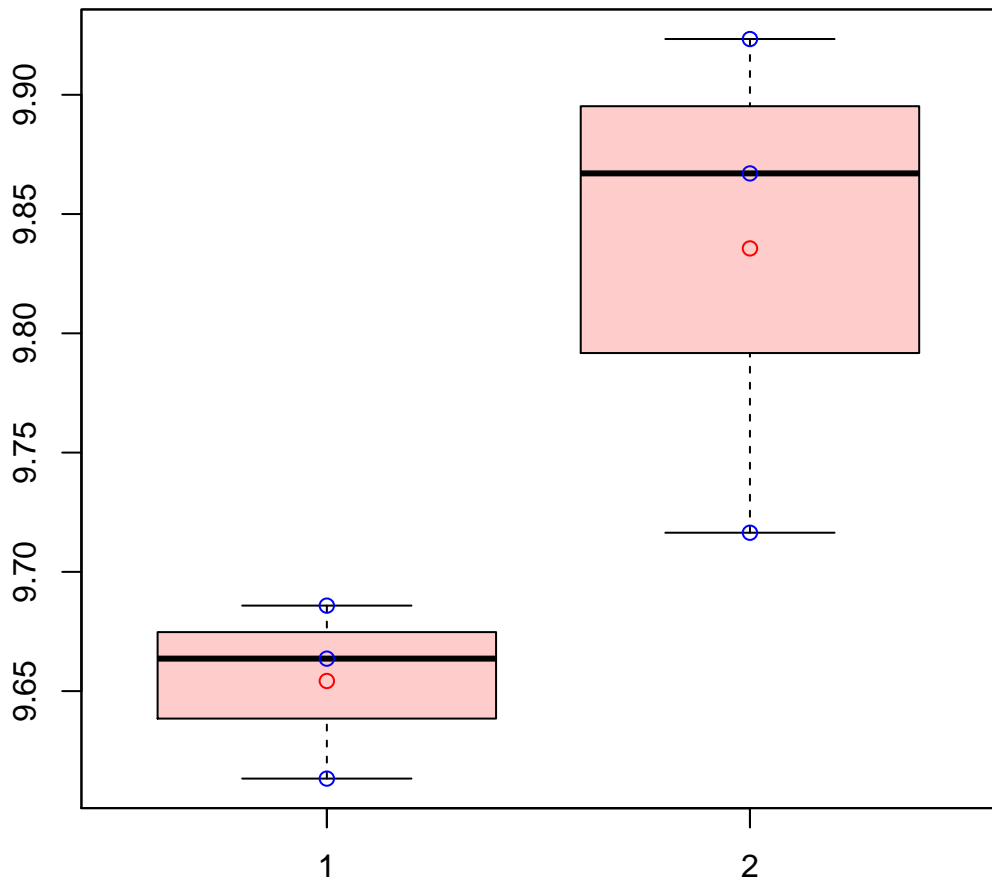

t-Test: p-value = 0.09

# CL433Contig1|CL433Contig1

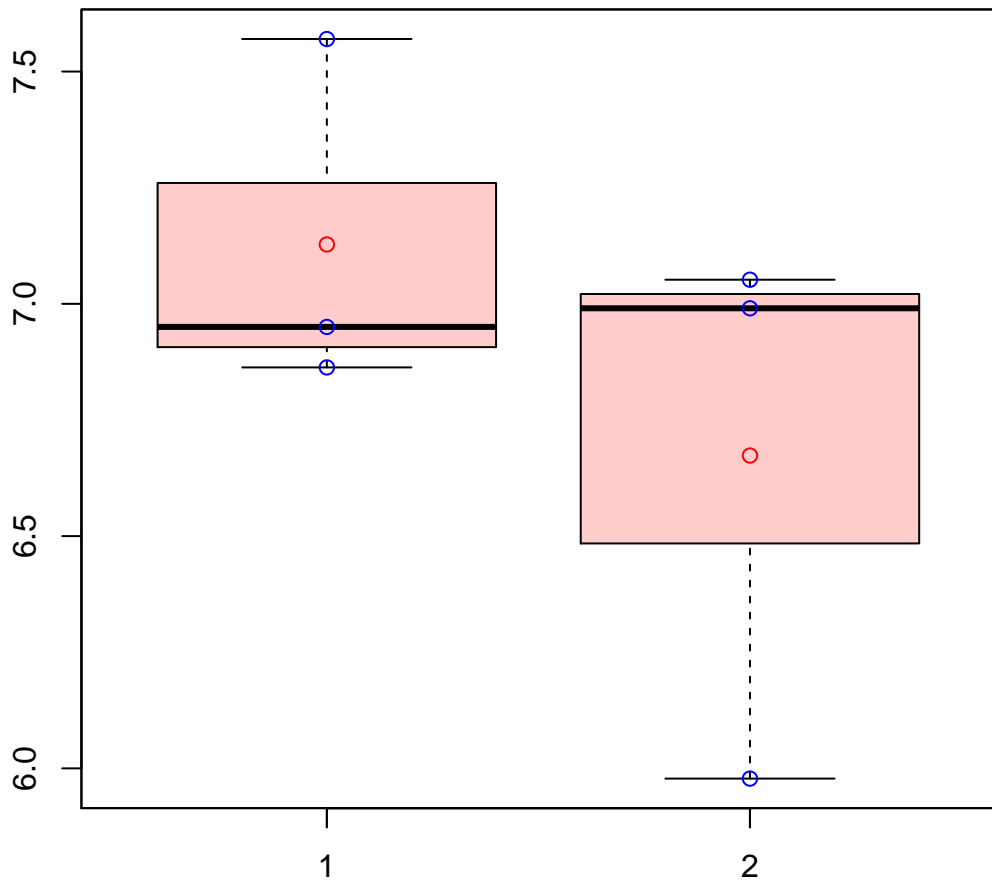

t-Test: p-value = 0.34

# CL433Contig3|CL433Contig3

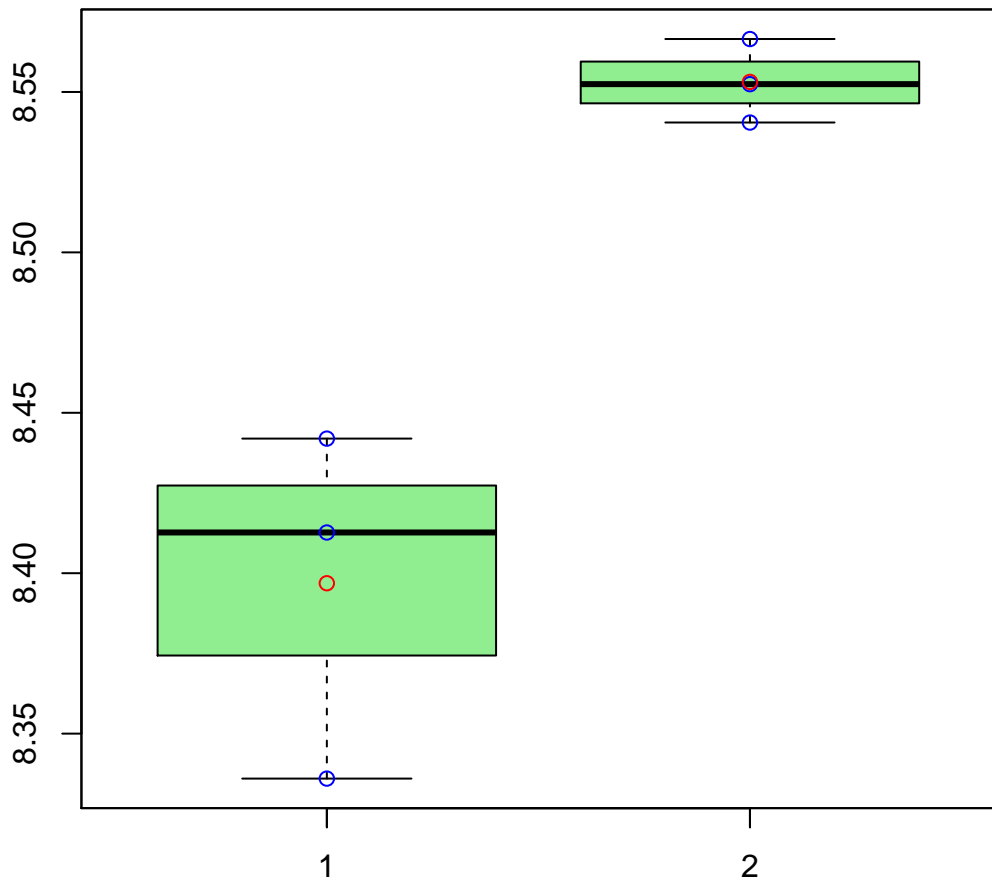

t-Test: p-value = 0.03

# CL4341Contig5|CL4341Contig5

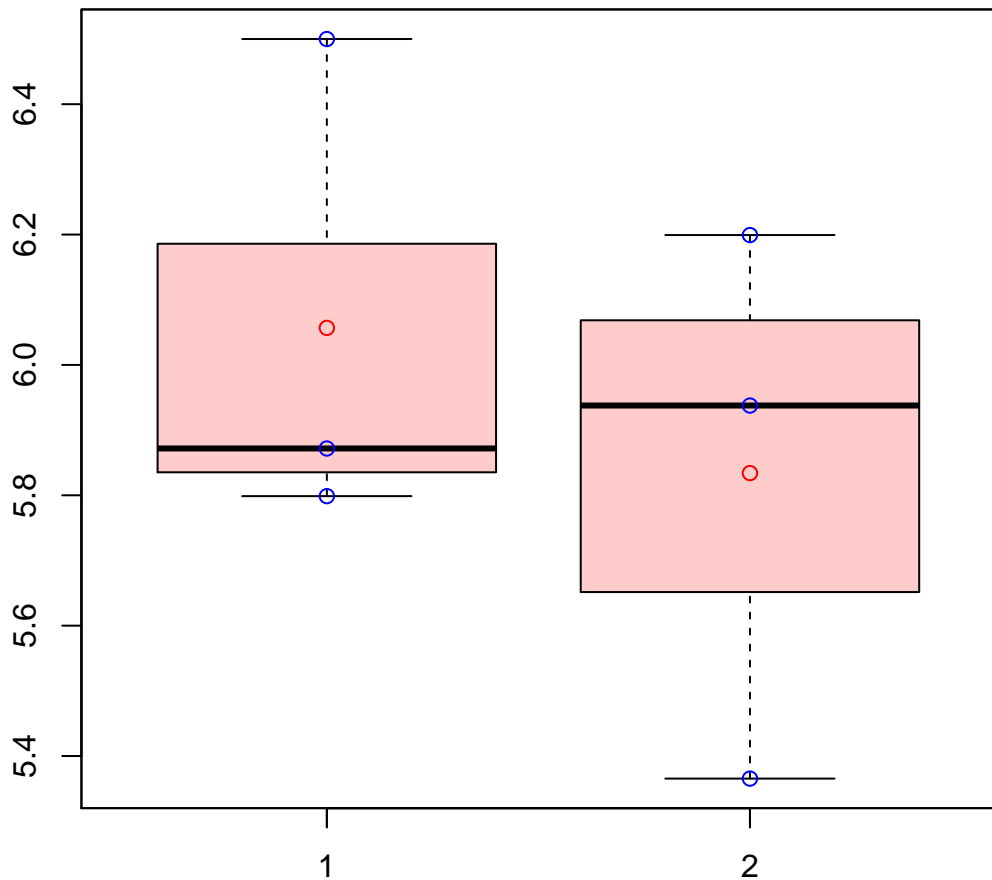

t-Test: p-value = 0.54

# CL434Contig1|CL434Contig1

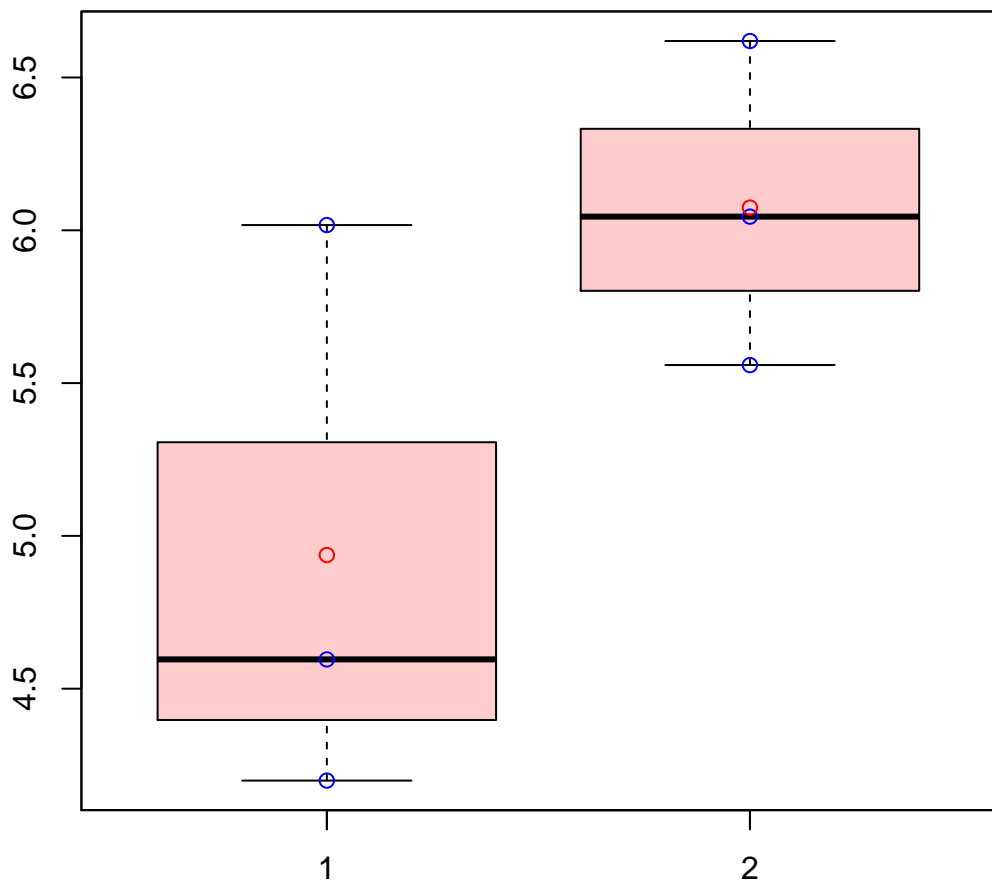

t-Test: p-value = 0.17

# CL434Contig3|CL434Contig3

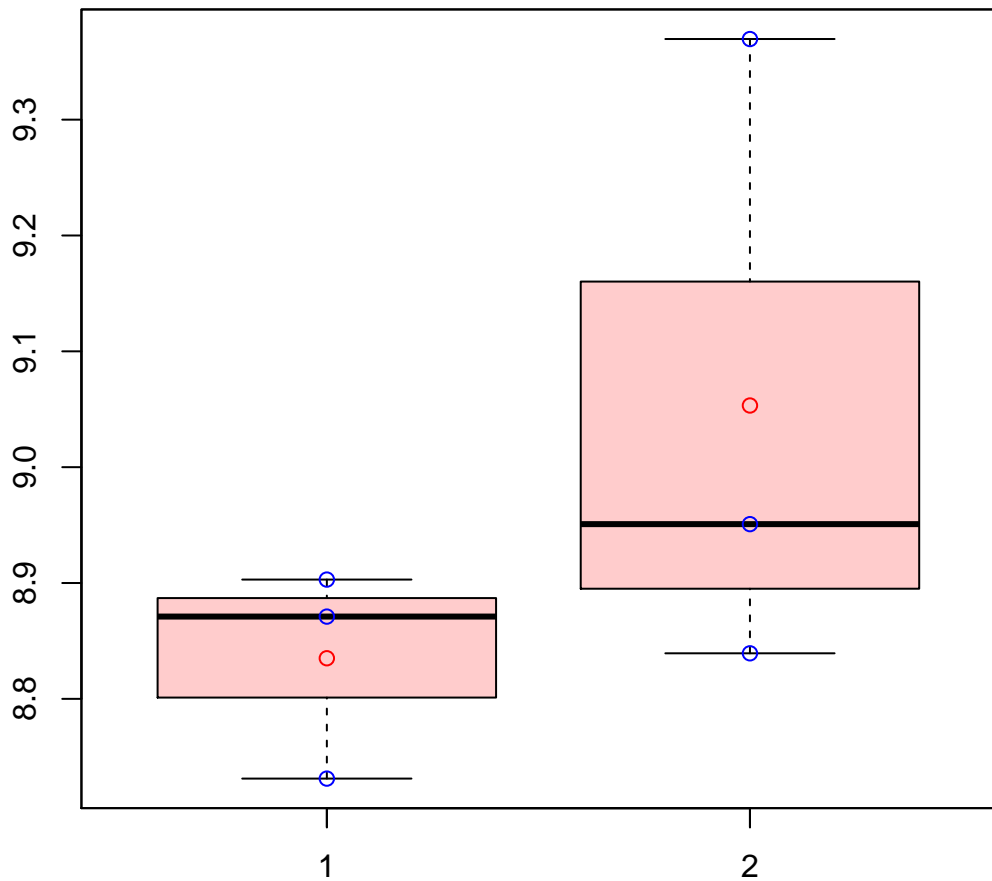

t-Test: p-value = 0.31



# CL4351Contig2|CL4351Contig2

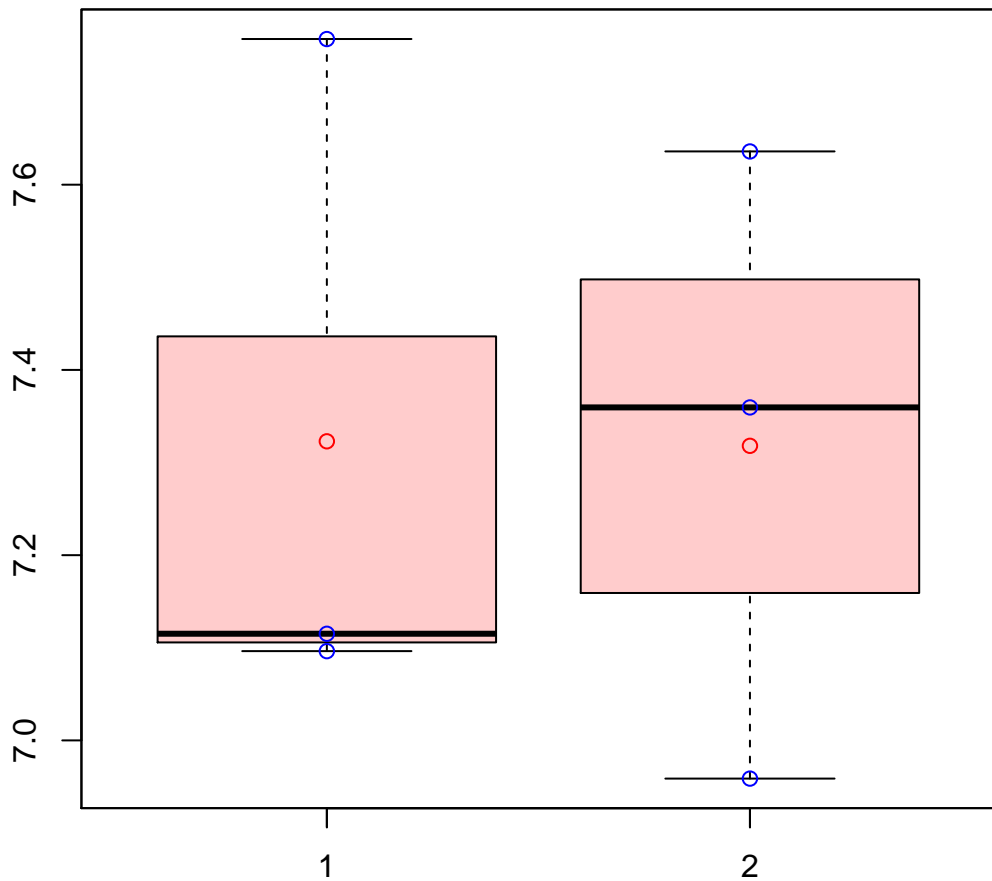

t-Test: p-value = 0.99

# CL4361Contig1|CL4361Contig1

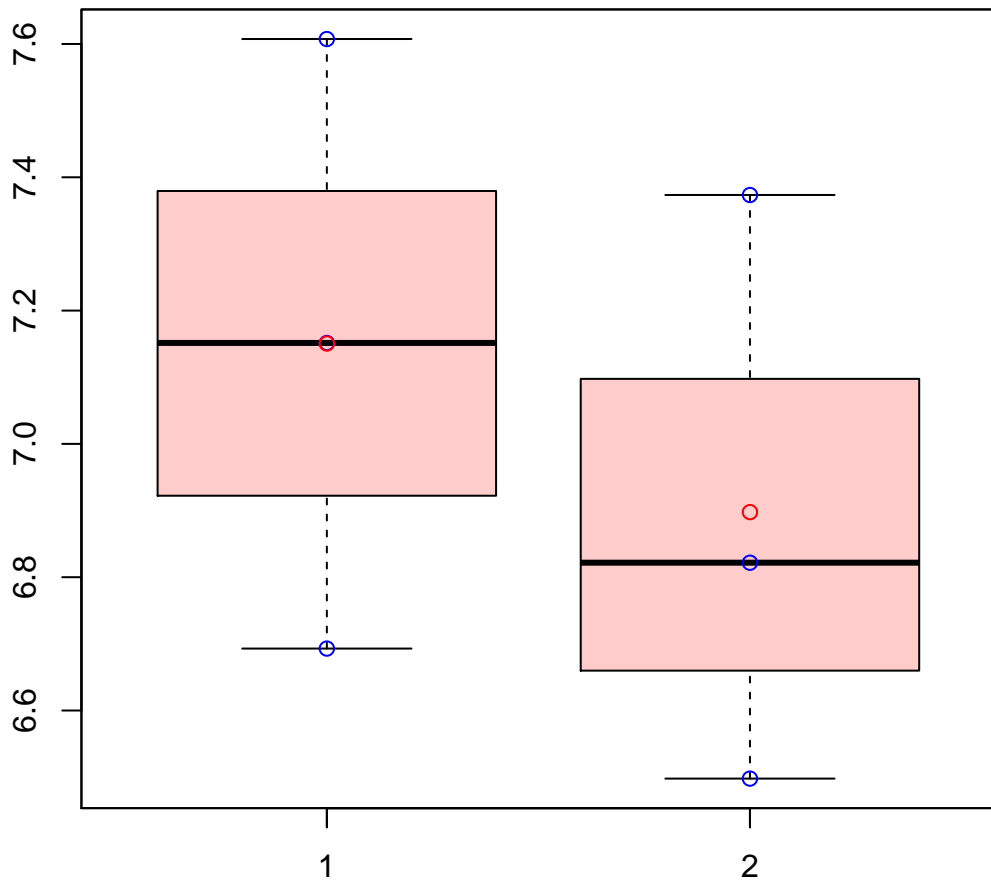

t-Test: p-value = 0.53

# CL4366Contig2|CL4366Contig2

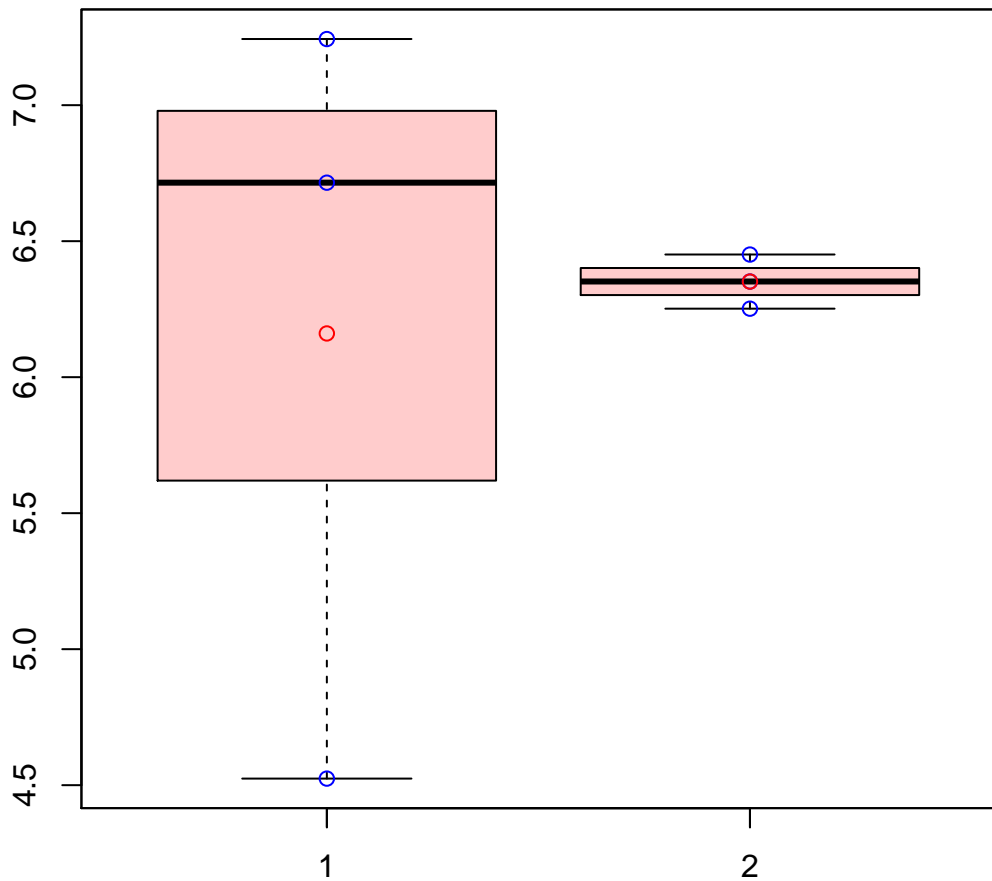

t-Test: p-value = 0.84

# CL4366Contig8|CL4366Contig8

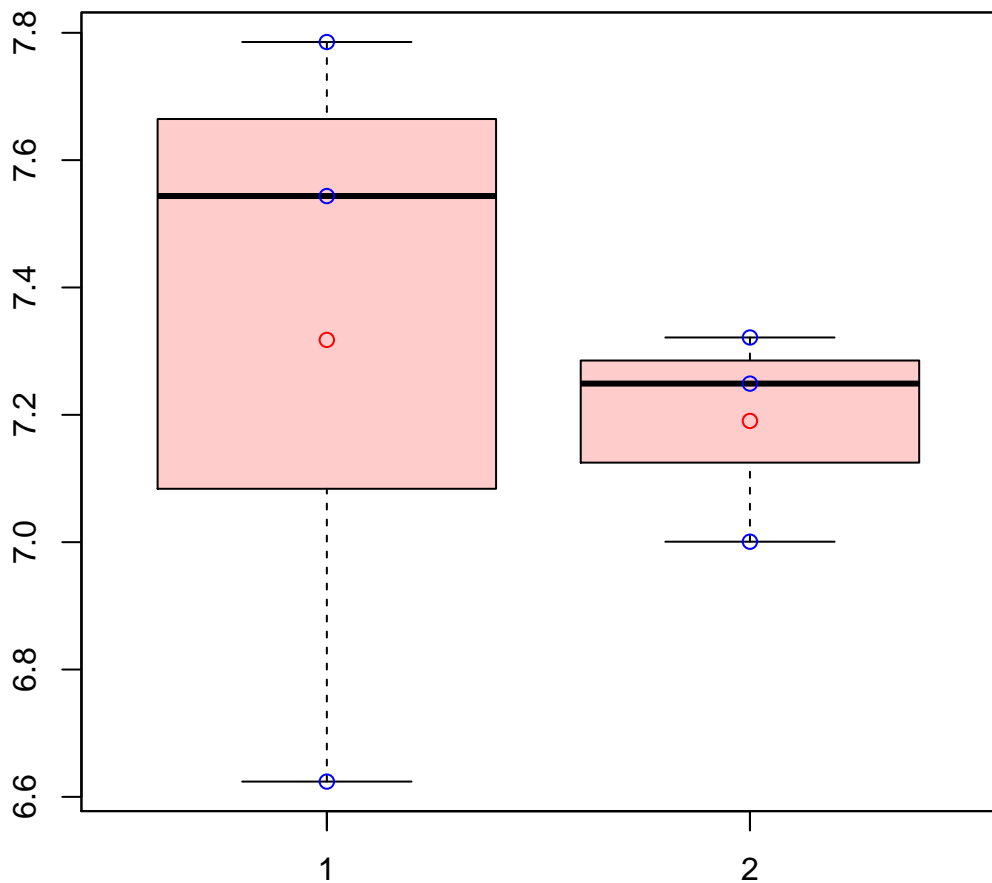

t-Test: p-value = 0.76

# CL4374Contig5|CL4374Contig5

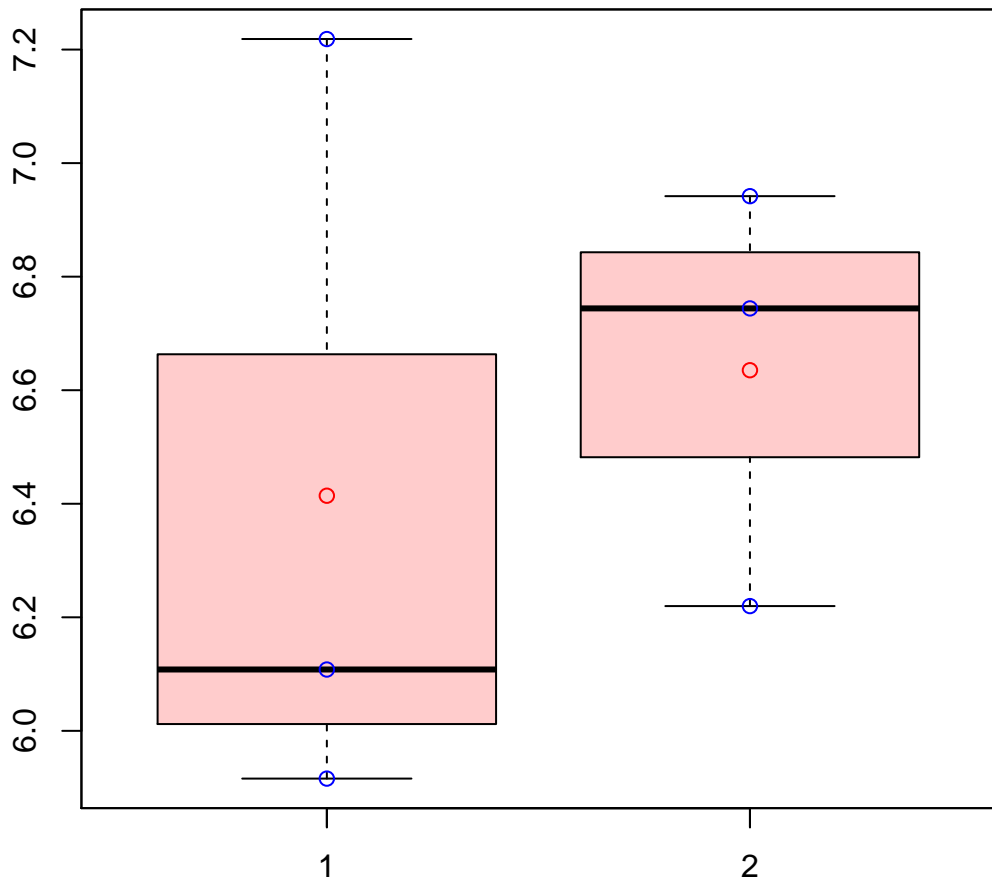

t-Test: p-value = 0.66

# CL4375Contig1|CL4375Contig1

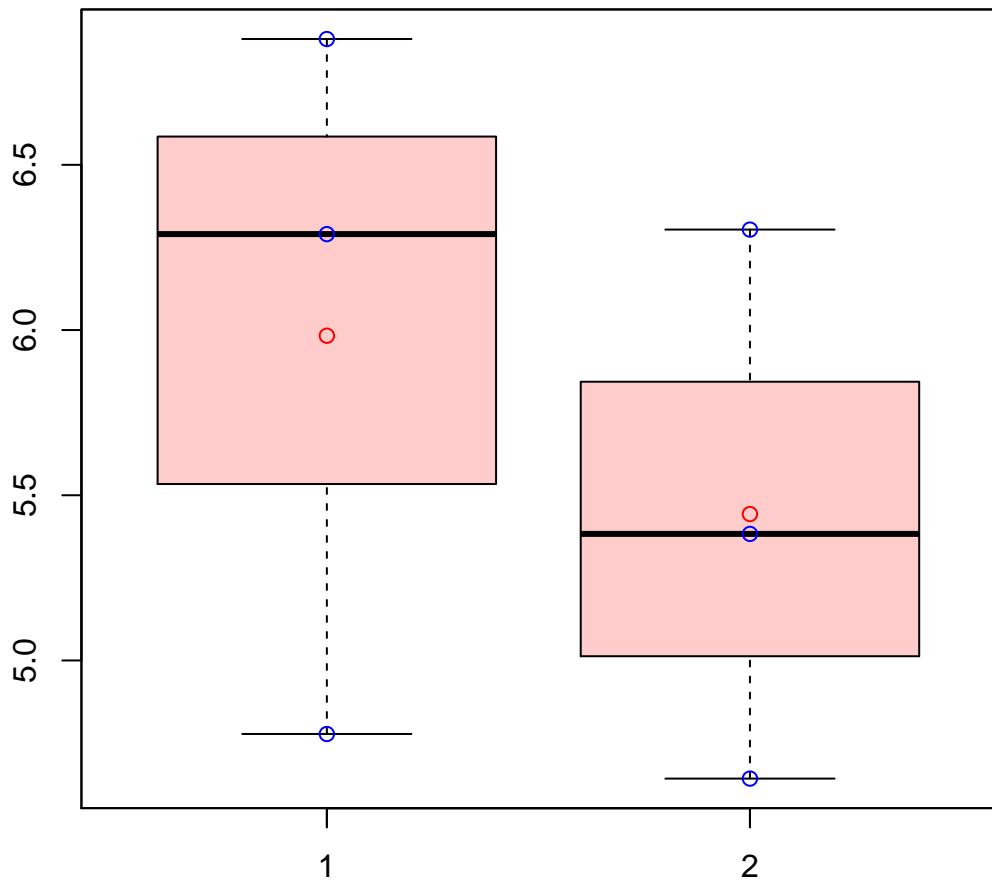

t-Test: p-value = 0.53

# CL4375Contig2|CL4375Contig2

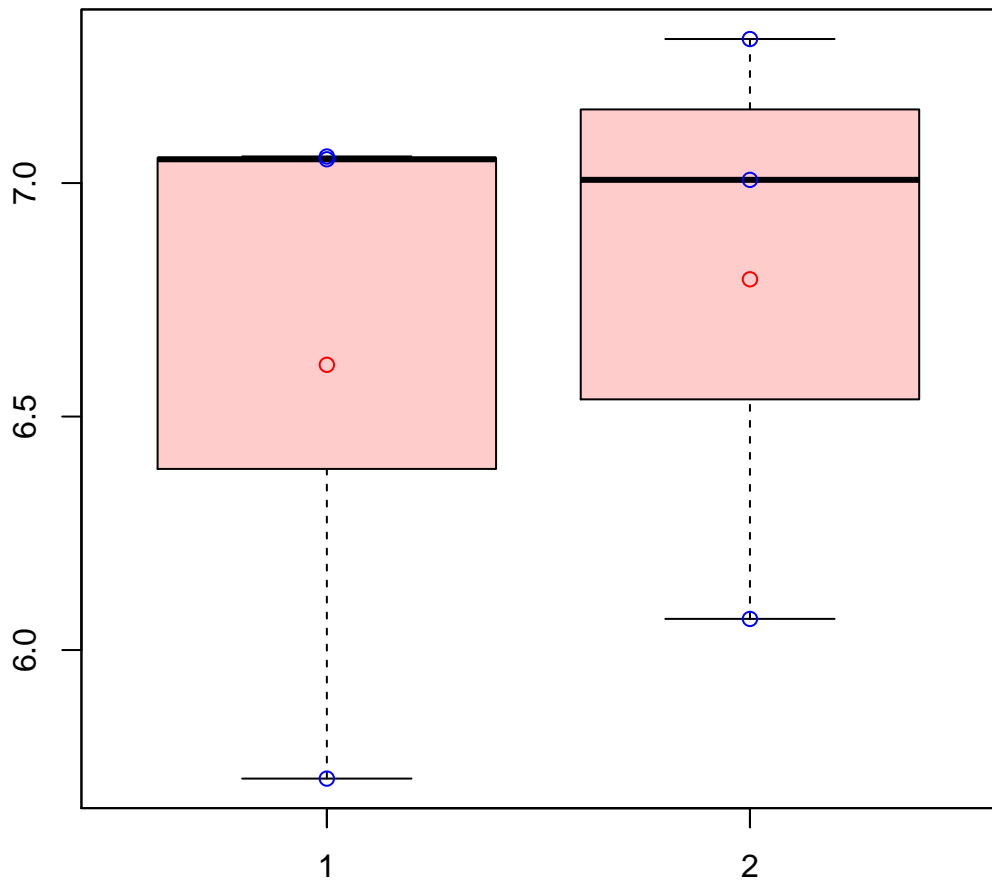

t-Test: p-value = 0.77

# CL437Contig6|CL437Contig6

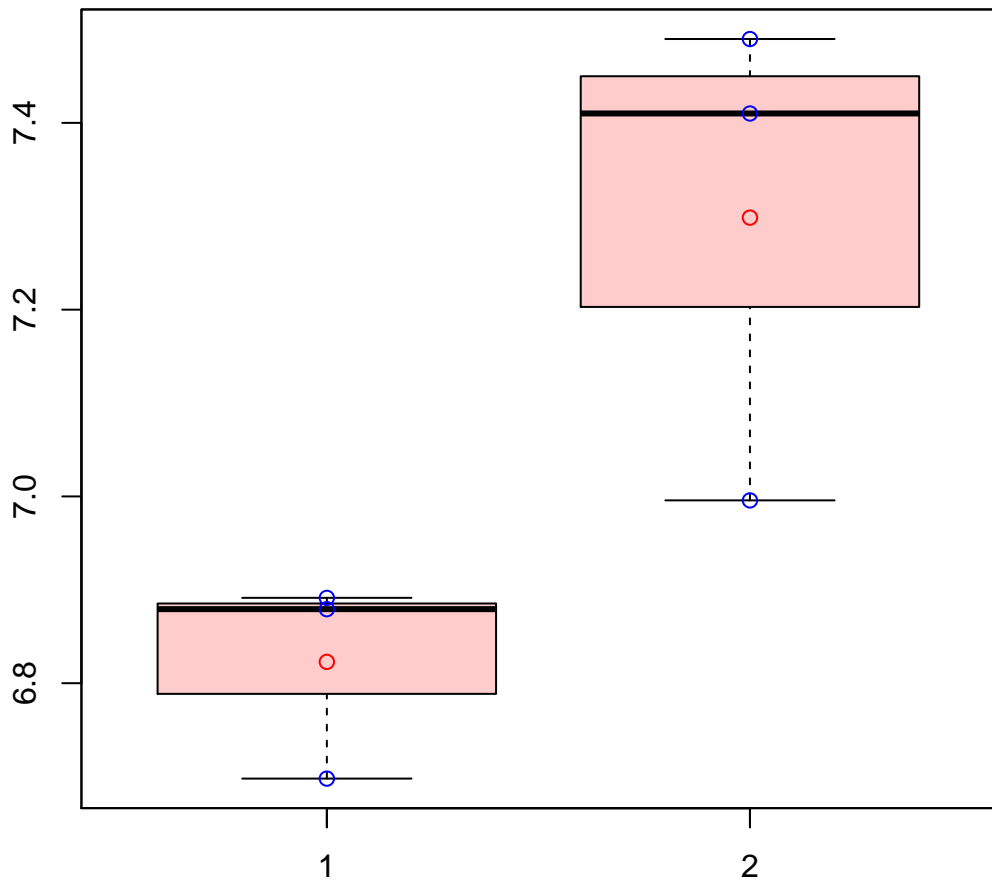

t-Test: p-value = 0.07



# CL4380Contig2|CL4380Contig2

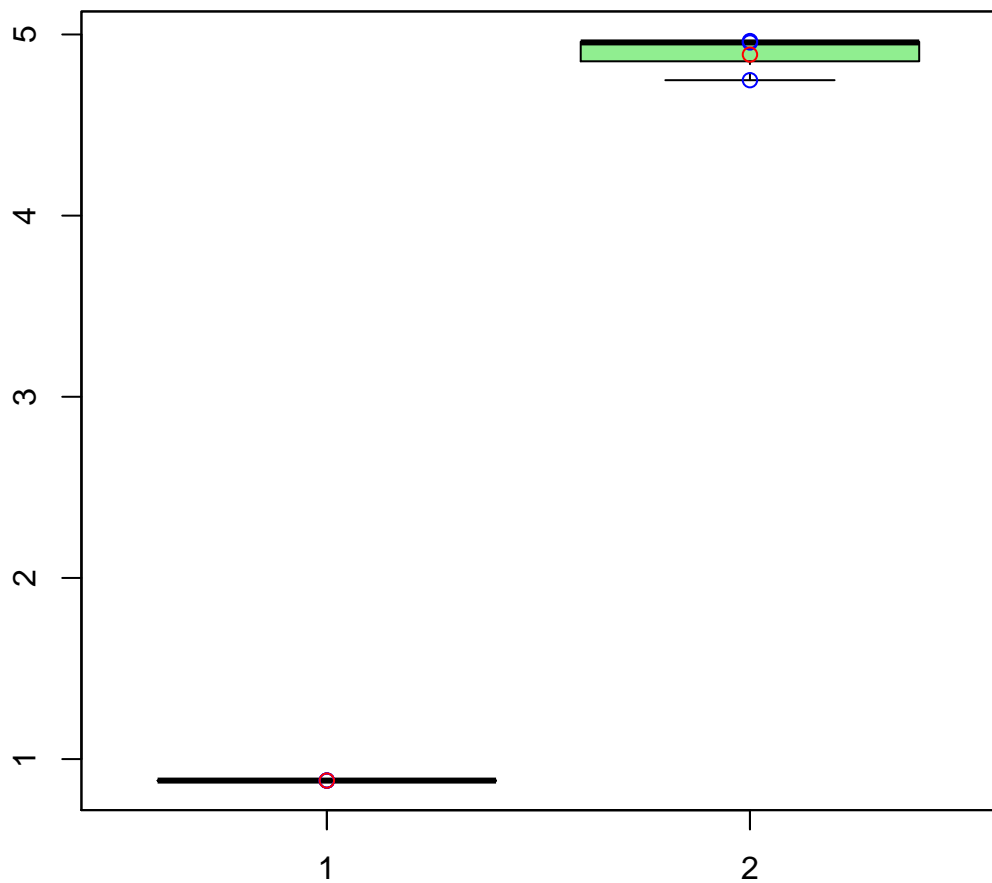

t-Test: p-value = 0

# CL43Contig11|CL43Contig11

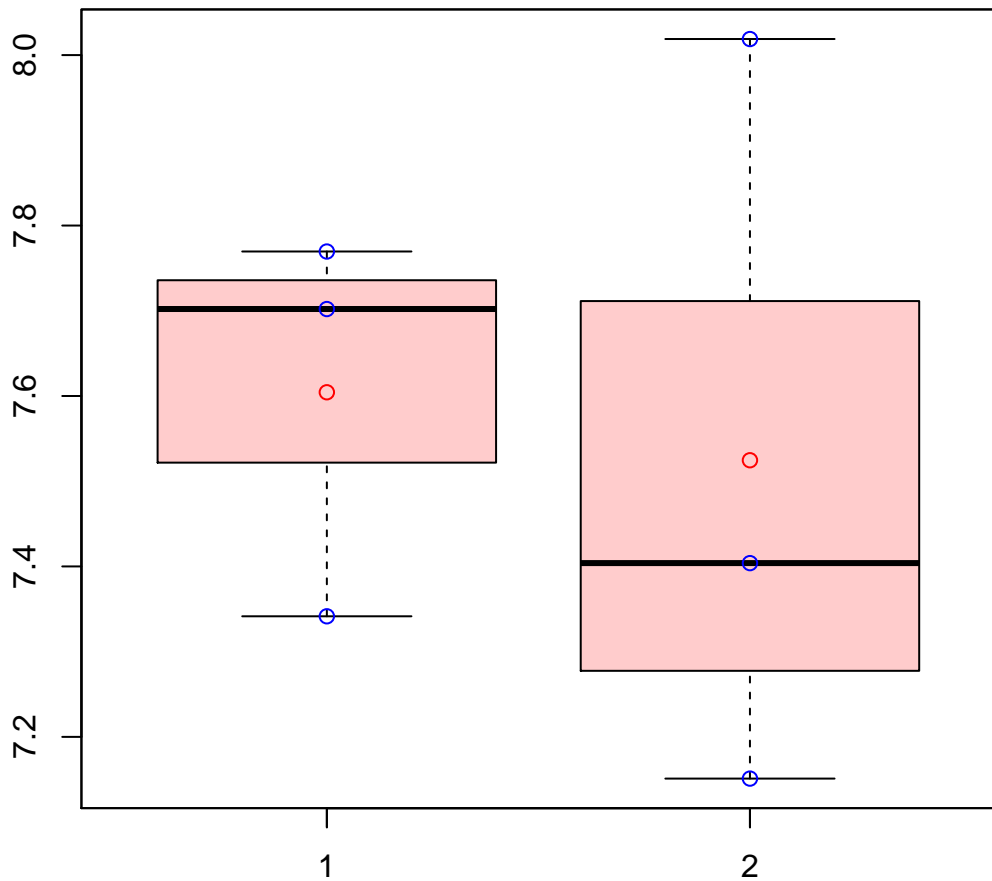

t-Test: p-value = 0.8

# CL43Contig13|CL43Contig13

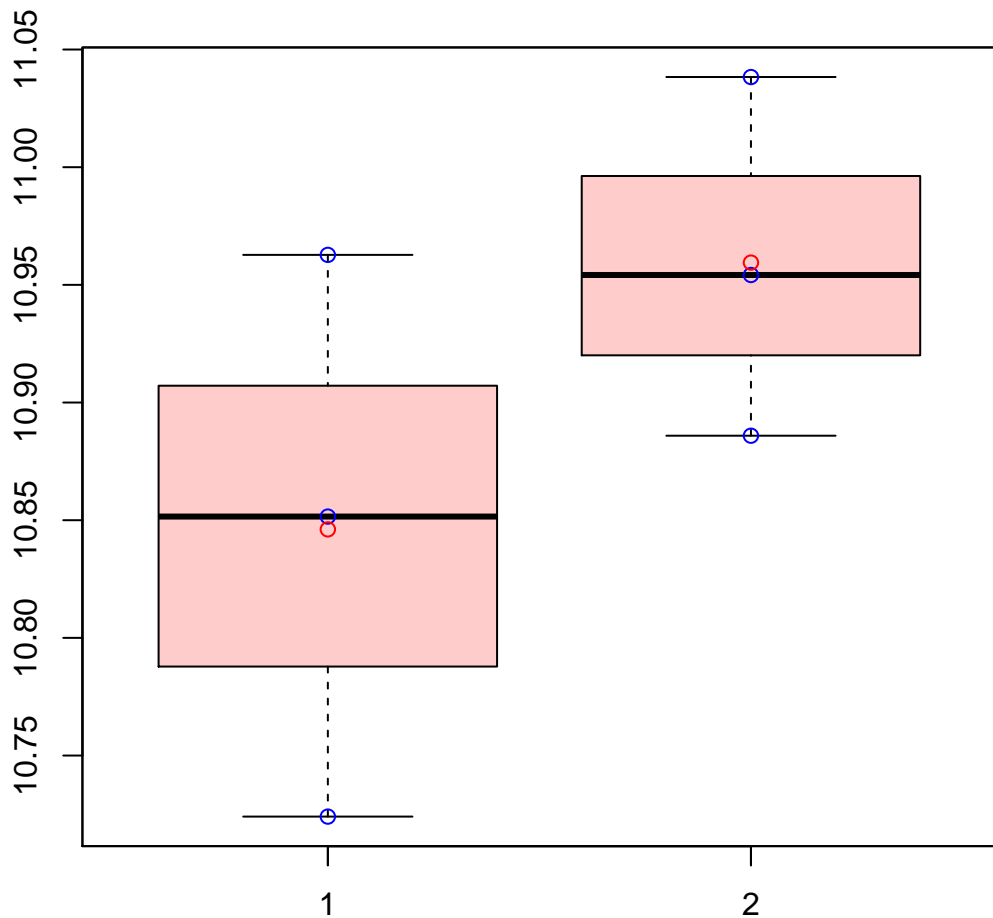

t-Test: p-value = 0.25

# CL43Contig23|CL43Contig23

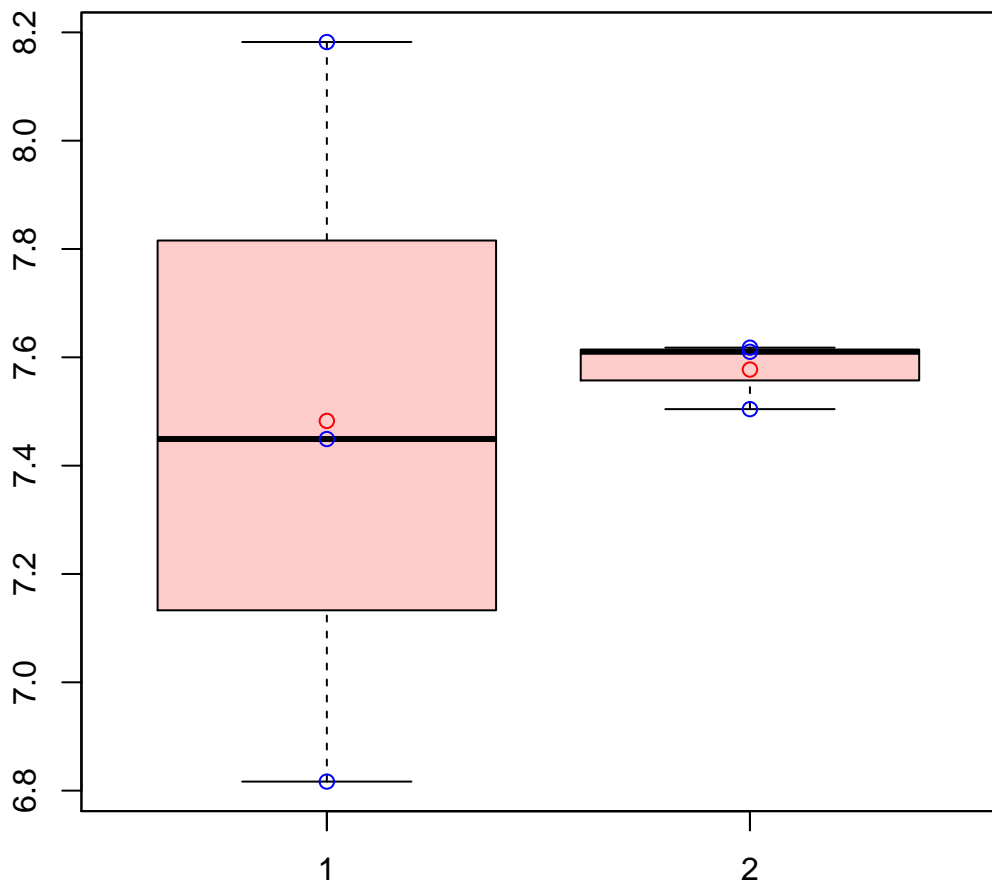

t-Test: p-value = 0.83

# CL4406Contig4|CL4406Contig4

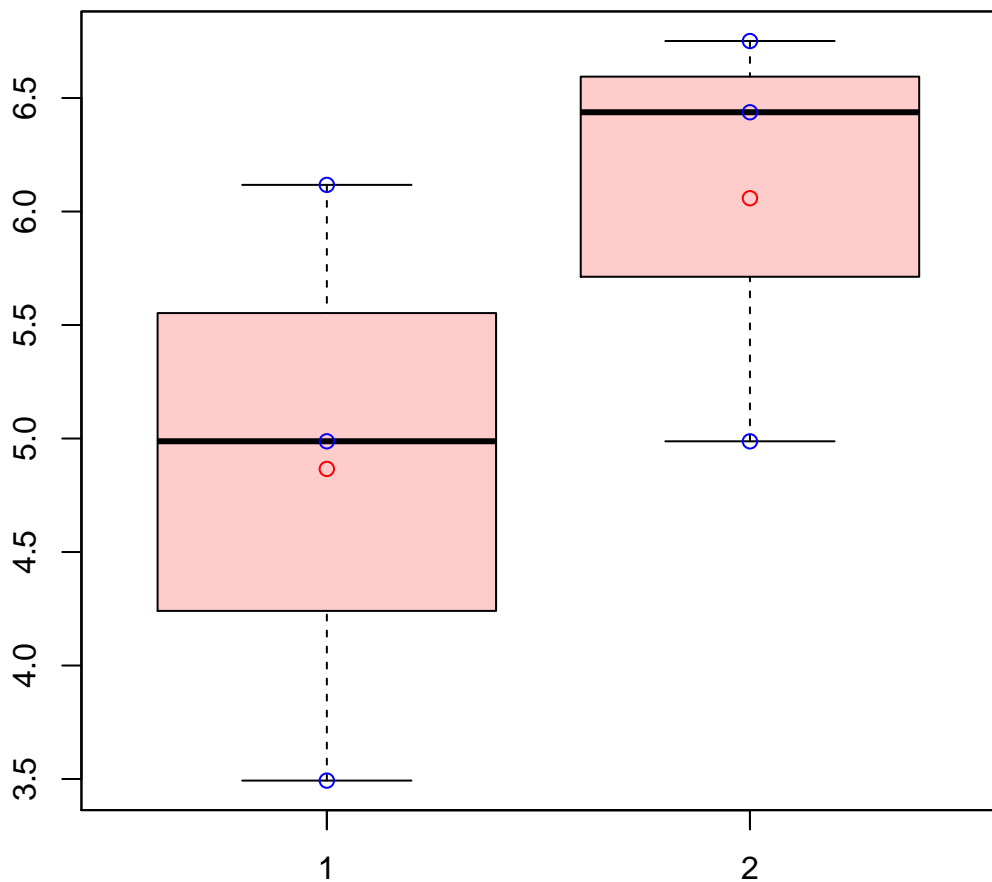

t-Test: p-value = 0.28

# CL4407Contig2|CL4407Contig2

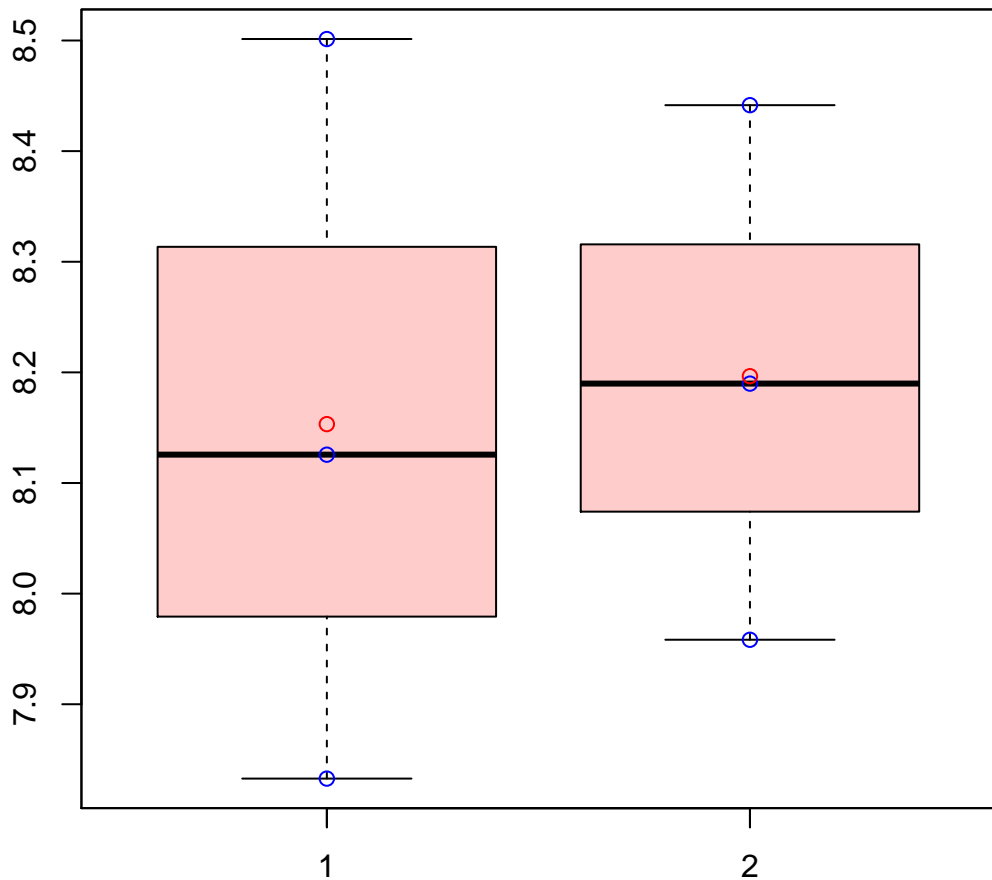

t-Test: p-value = 0.87

# CL440Contig6|CL440Contig6

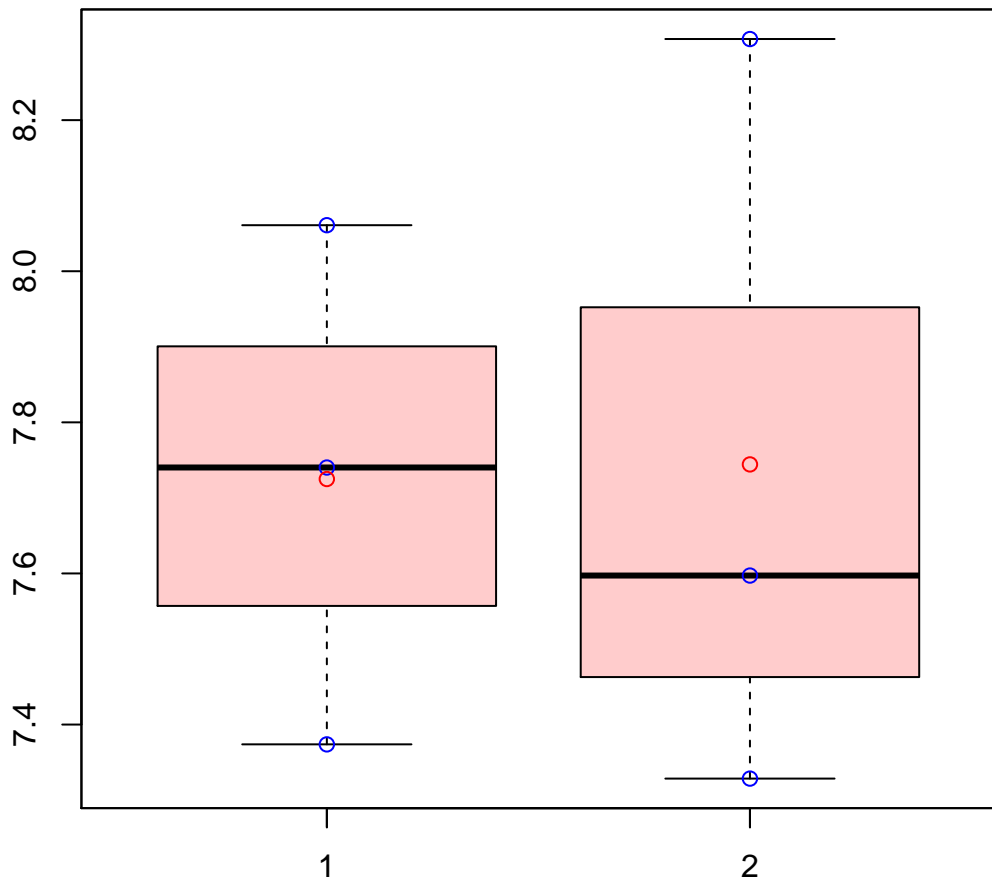

t-Test: p-value = 0.96

# CL4416Contig5|CL4416Contig5

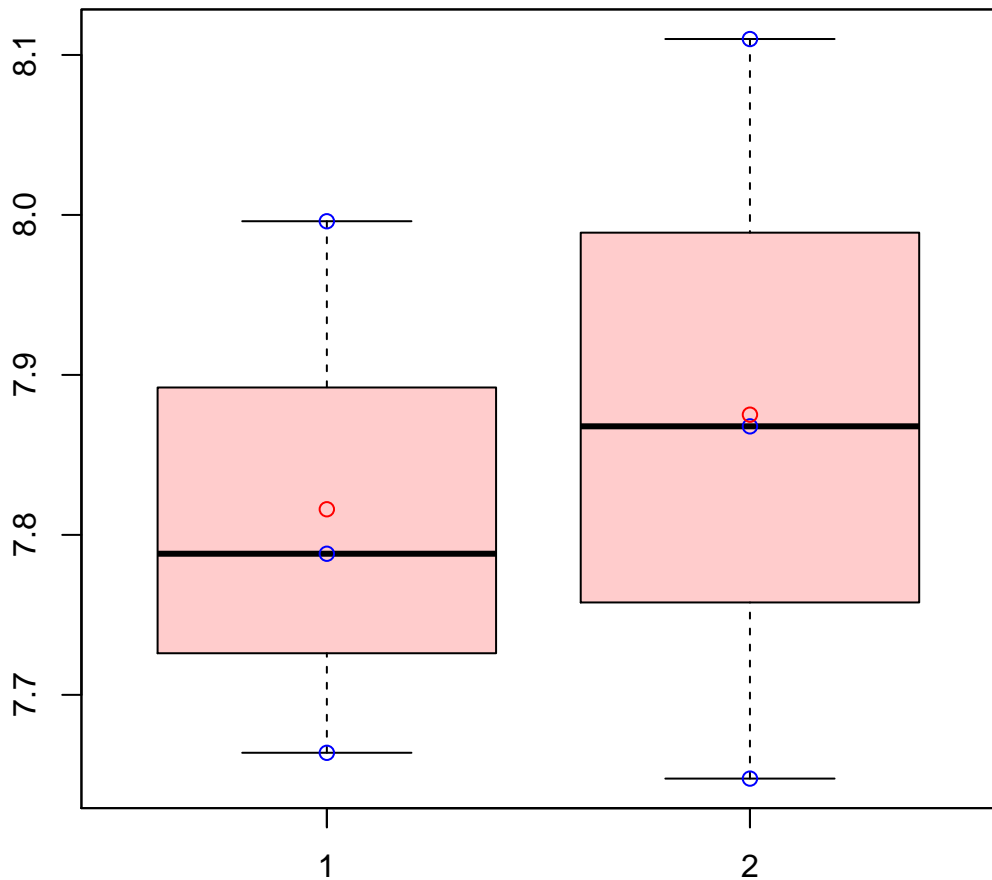

t-Test: p-value = 0.74



# CL4425Contig2|CL4425Contig2

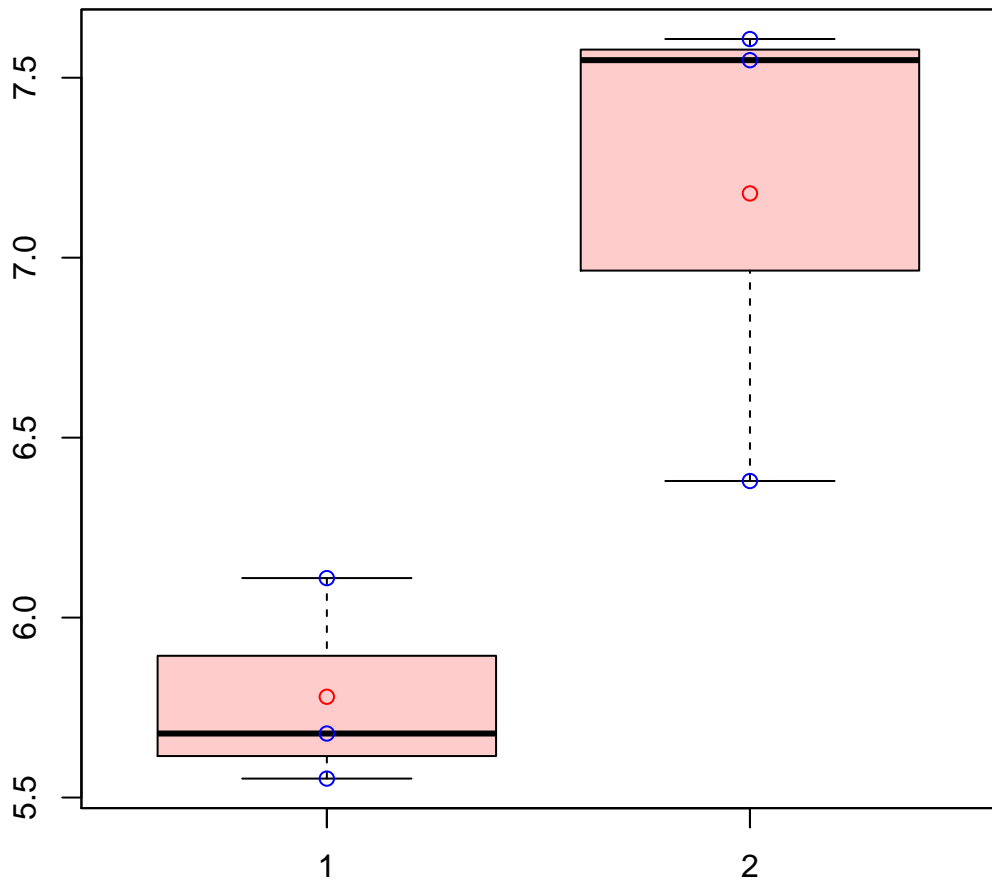

t-Test: p-value = 0.06

# CL4438Contig2|CL4438Contig2

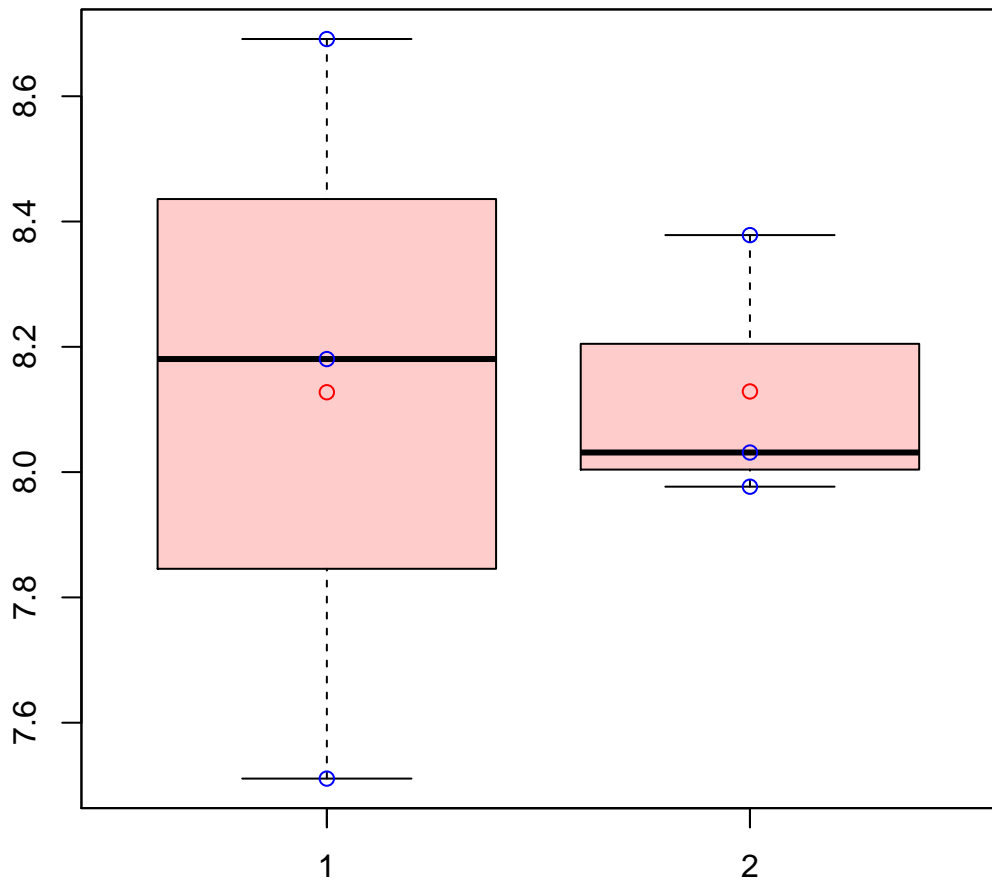

t-Test: p-value = 1

# CL443Contig10|CL443Contig10

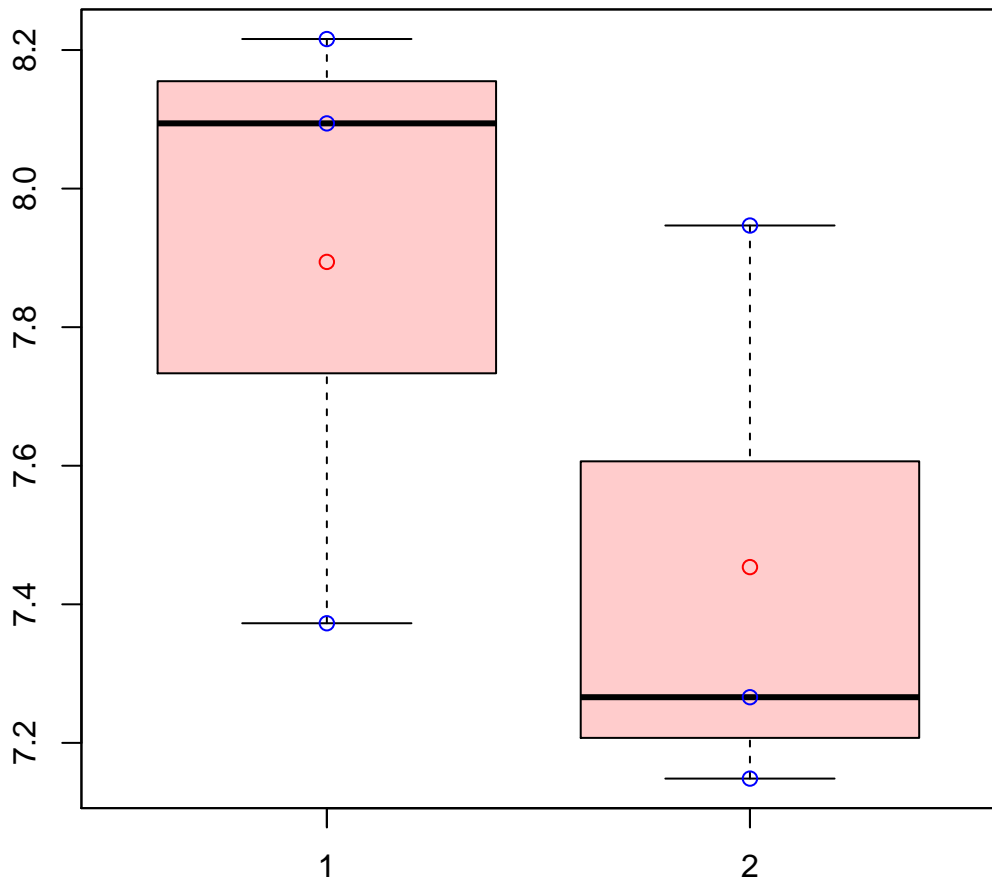

t-Test: p-value = 0.29

# CL4443Contig1|CL4443Contig1

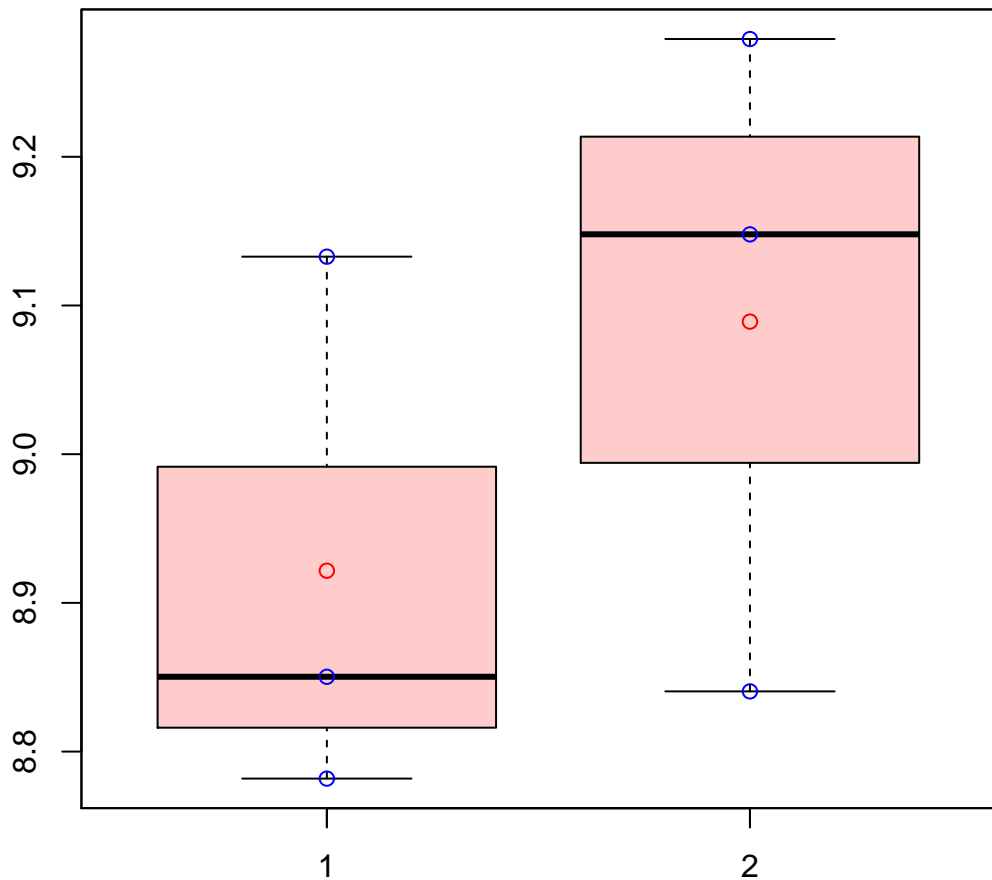

t-Test: p-value = 0.38

# CL4443Contig2|CL4443Contig2

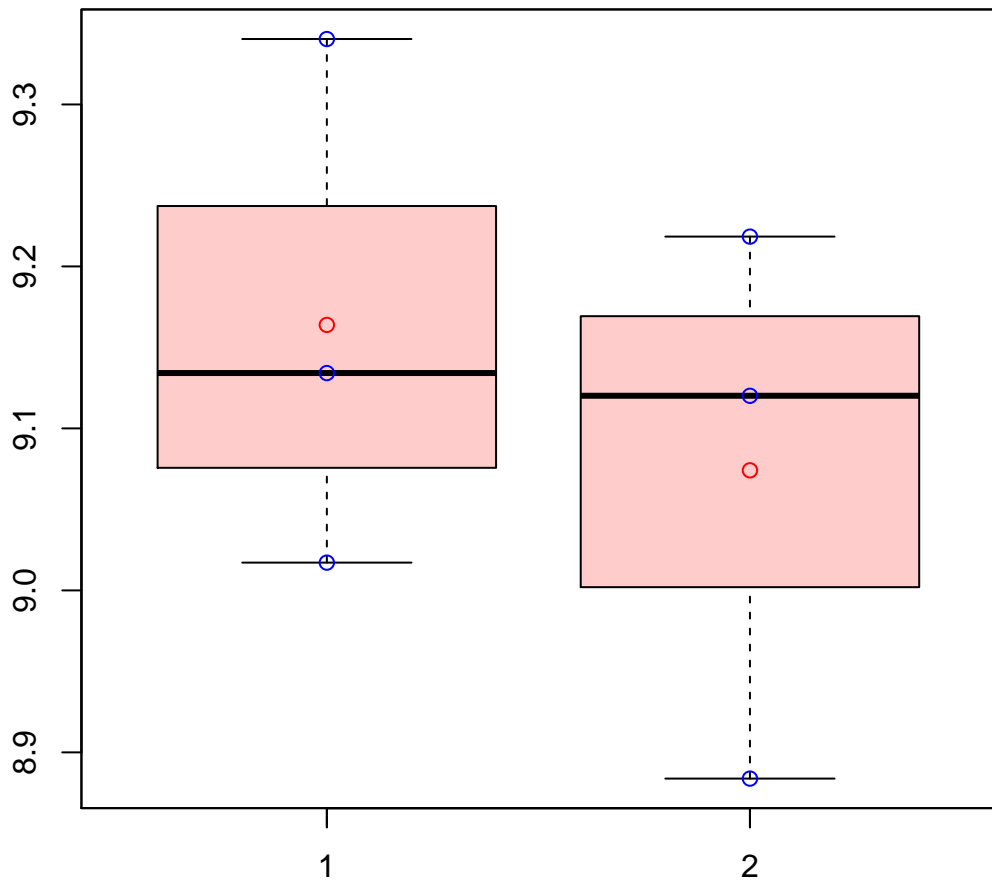

t-Test: p-value = 0.55

# CL4478Contig2|CL4478Contig2

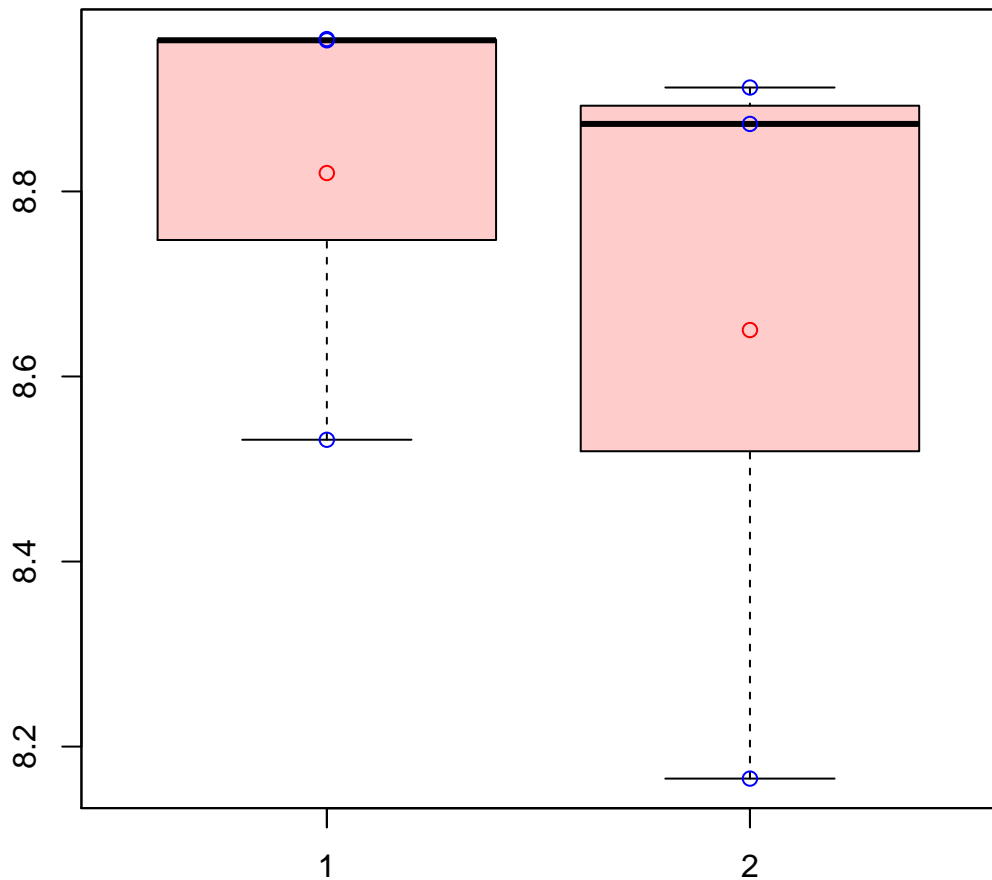

t-Test: p-value = 0.59

# CL448Contig7|CL448Contig7

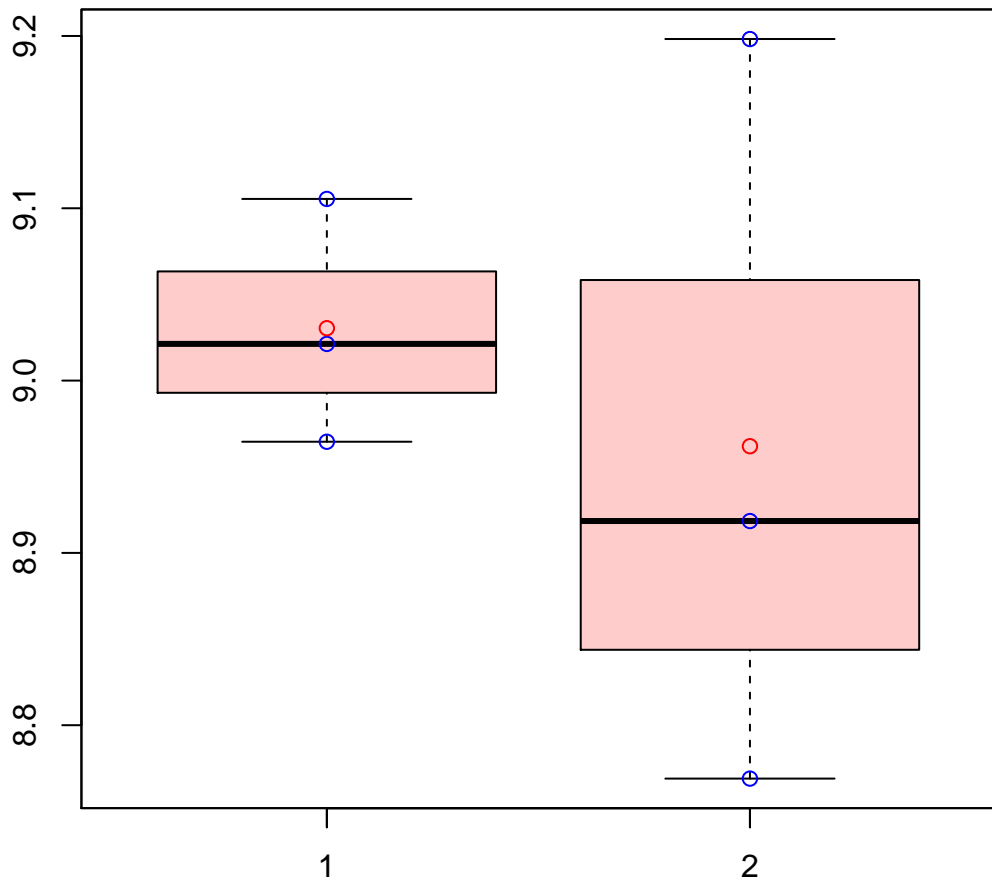

t-Test: p-value = 0.65

# CL4491Contig4|CL4491Contig4

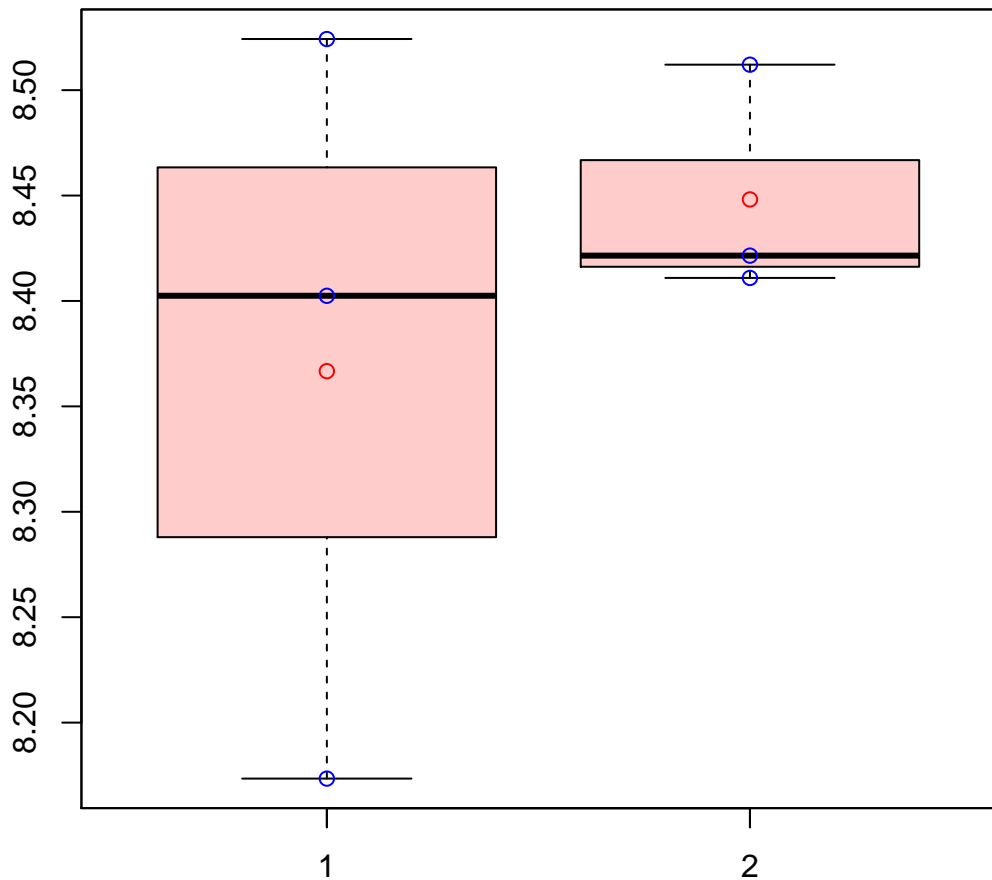

t-Test: p-value = 0.52



# CL4498Contig5|CL4498Contig5

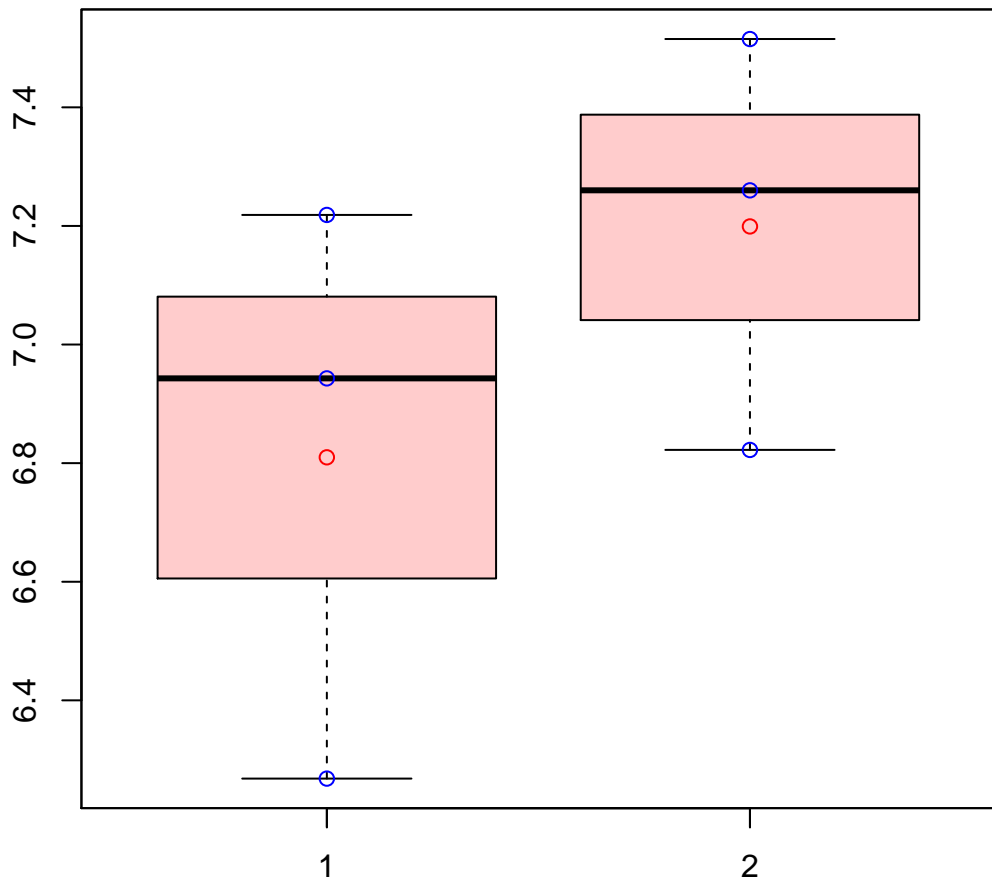

t-Test: p-value = 0.33

# CL4499Contig3|CL4499Contig3

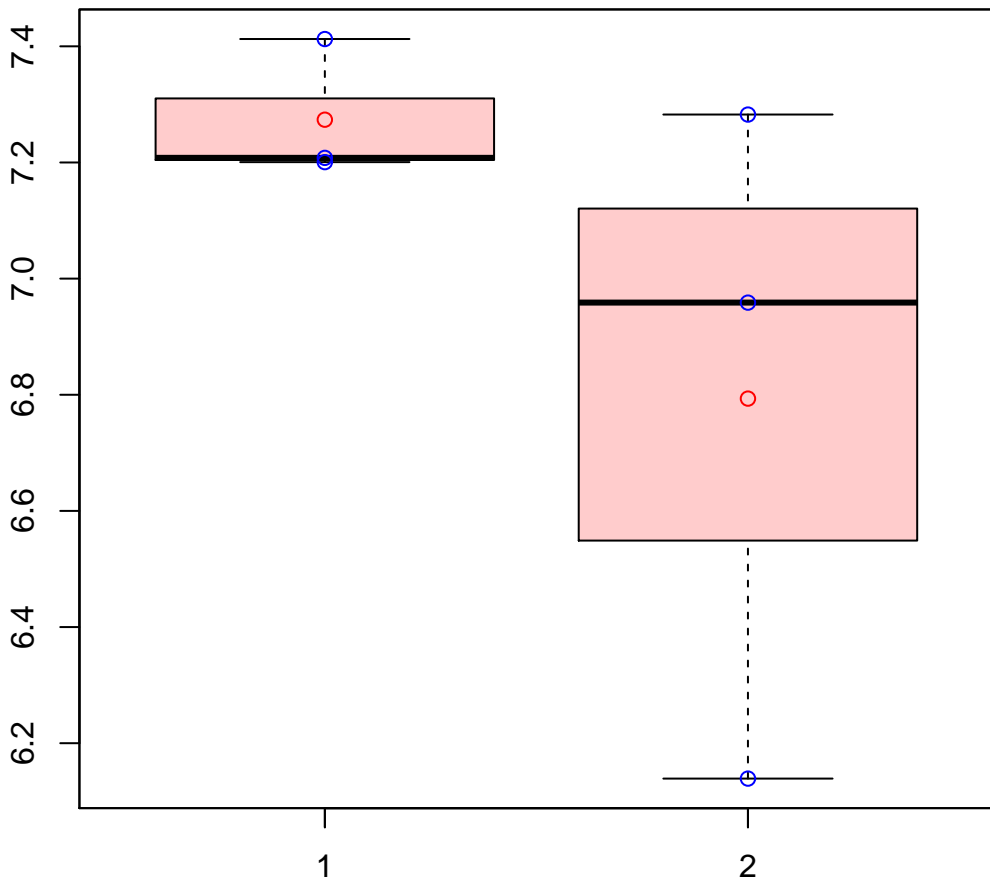

t-Test: p-value = 0.29

# CL44Contig17|CL44Contig17

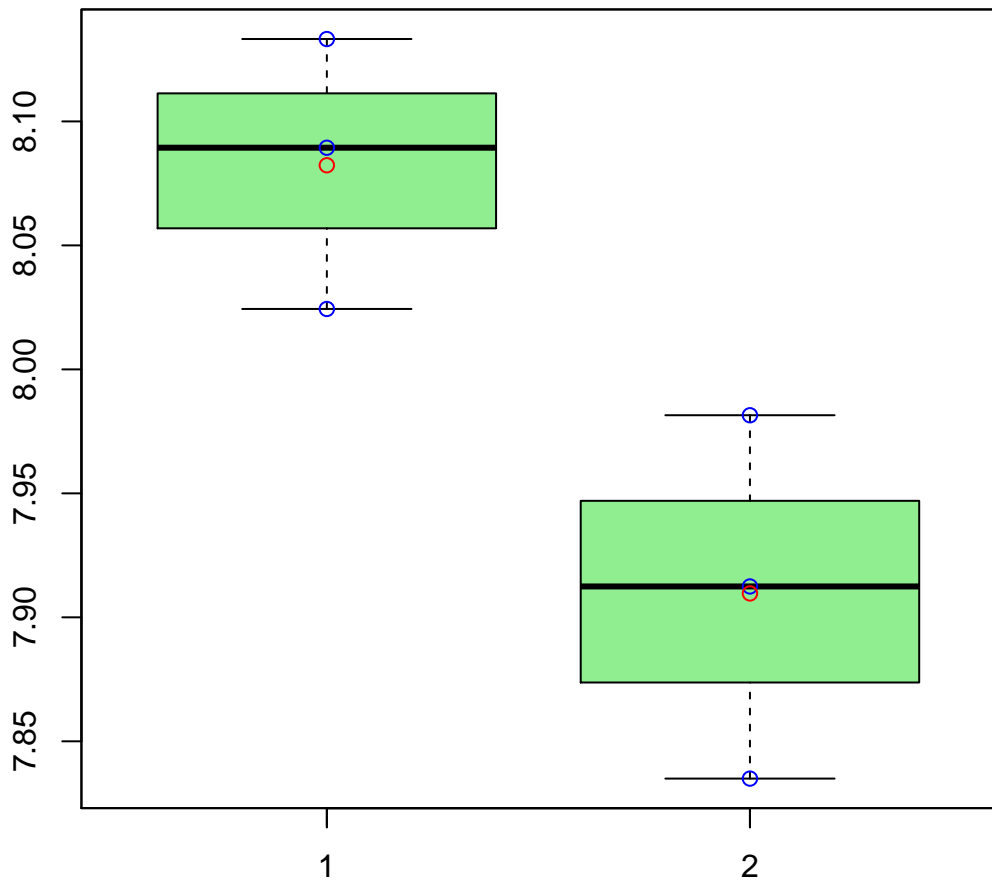

t-Test: p-value = 0.03

# CL44Contig24|CL44Contig24

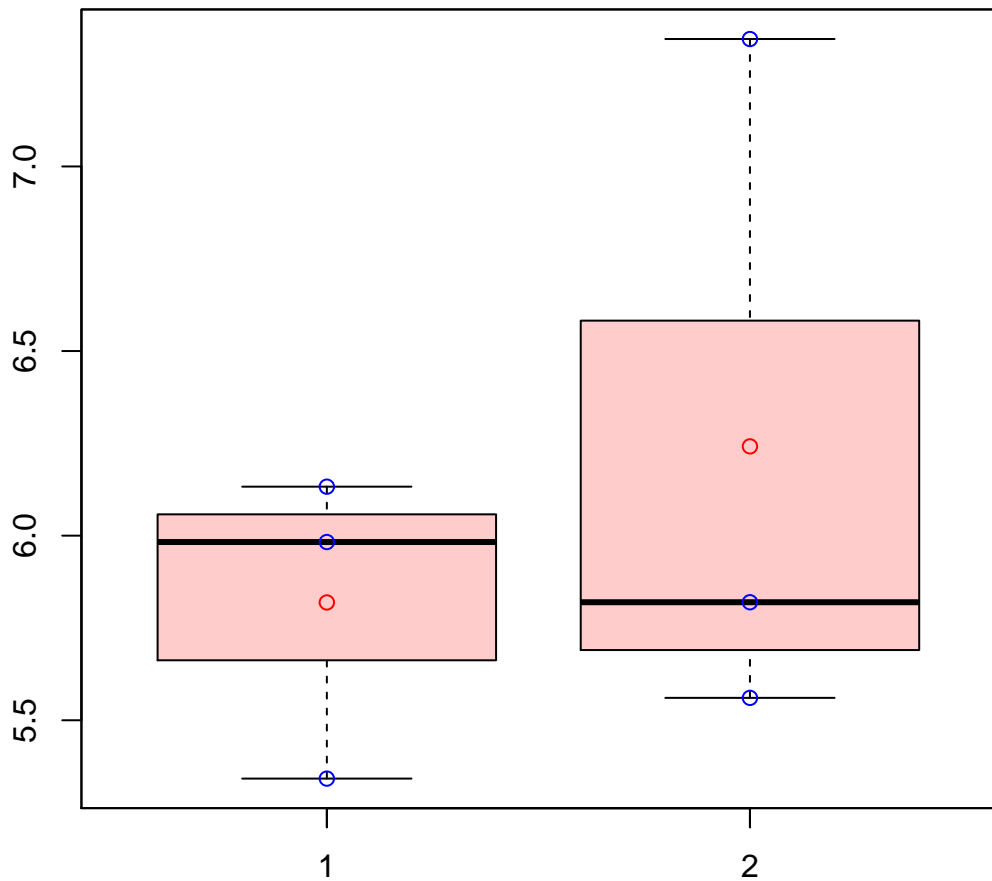

t-Test: p-value = 0.54

# CL44Contig31|CL44Contig31

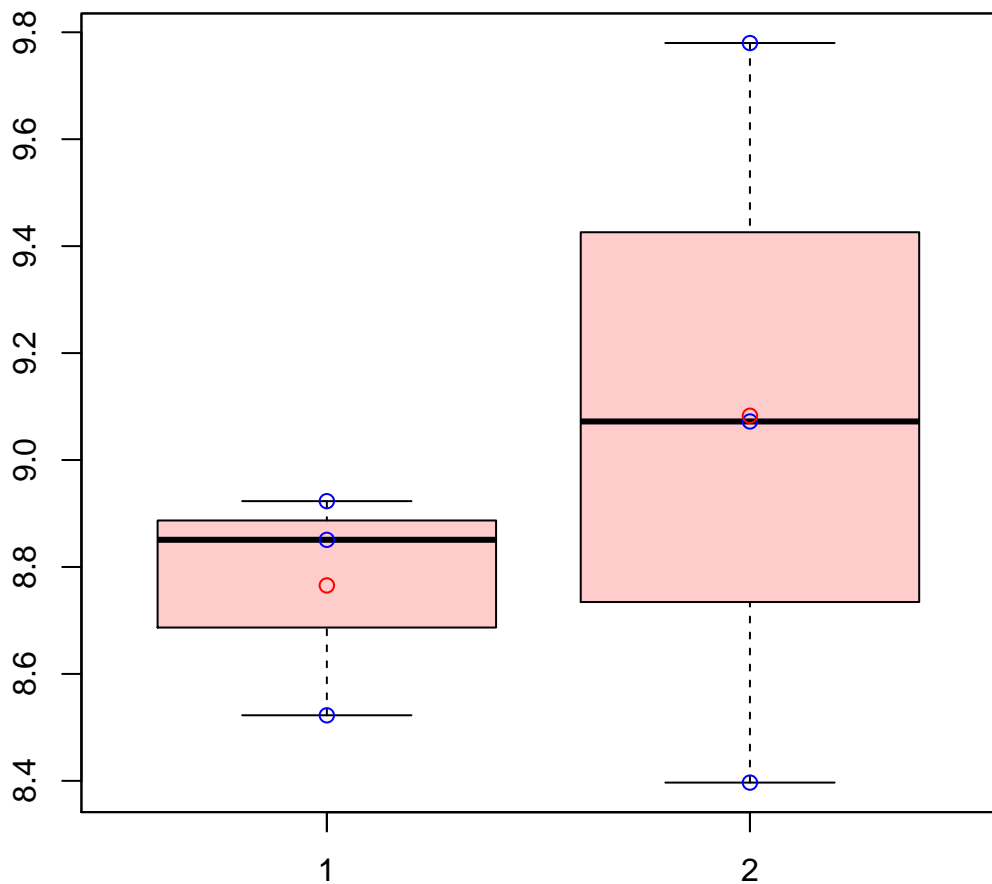

t-Test: p-value = 0.52

# CL4505Contig5|CL4505Contig5

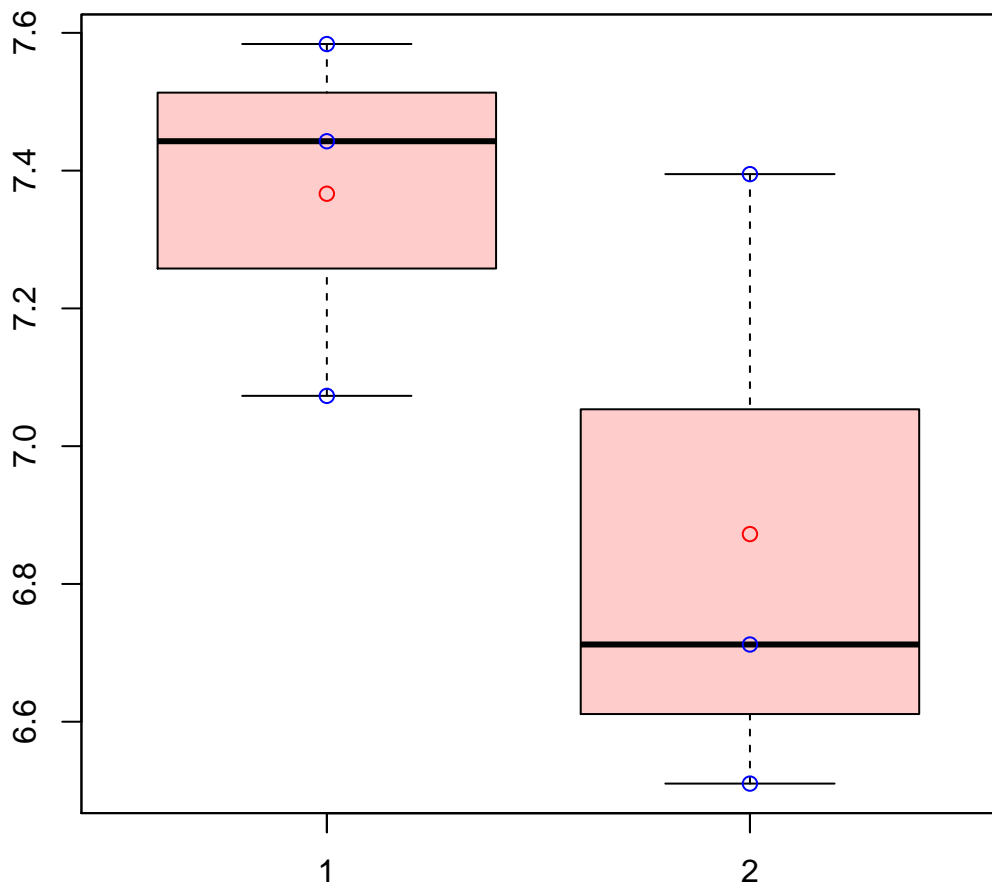

t-Test: p-value = 0.2

# CL4506Contig1|CL4506Contig1

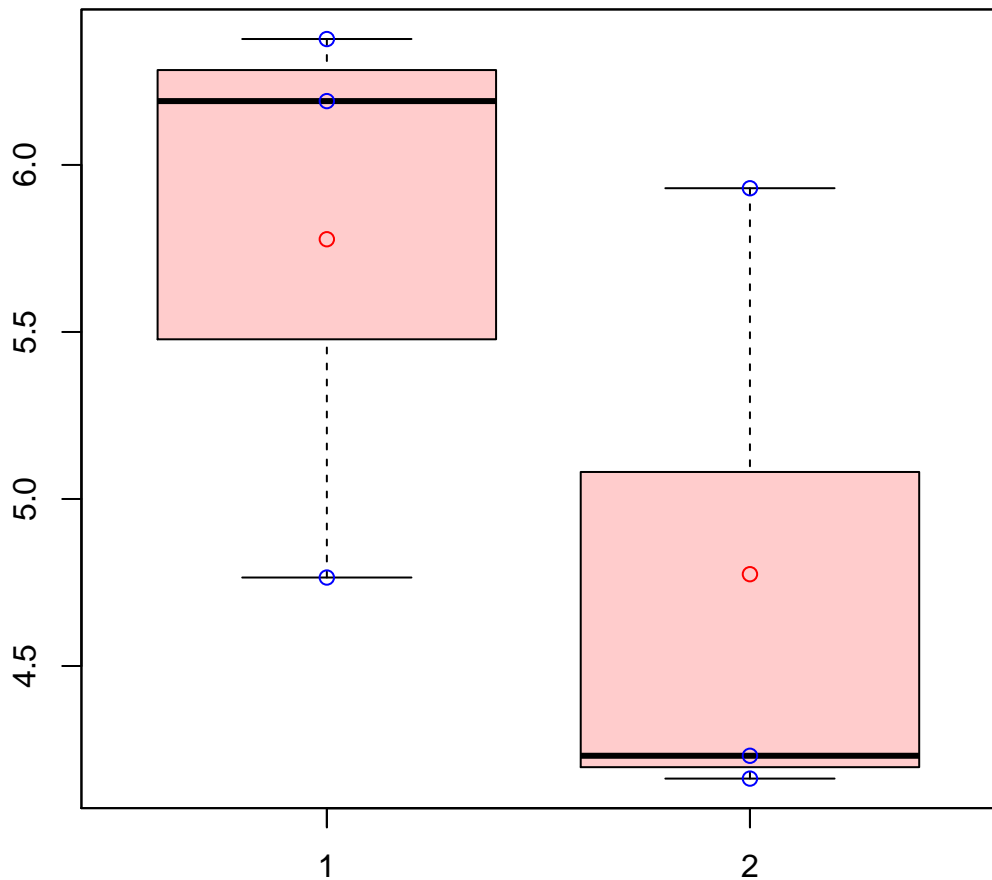

t-Test: p-value = 0.26

# CL4509Contig1|CL4509Contig1

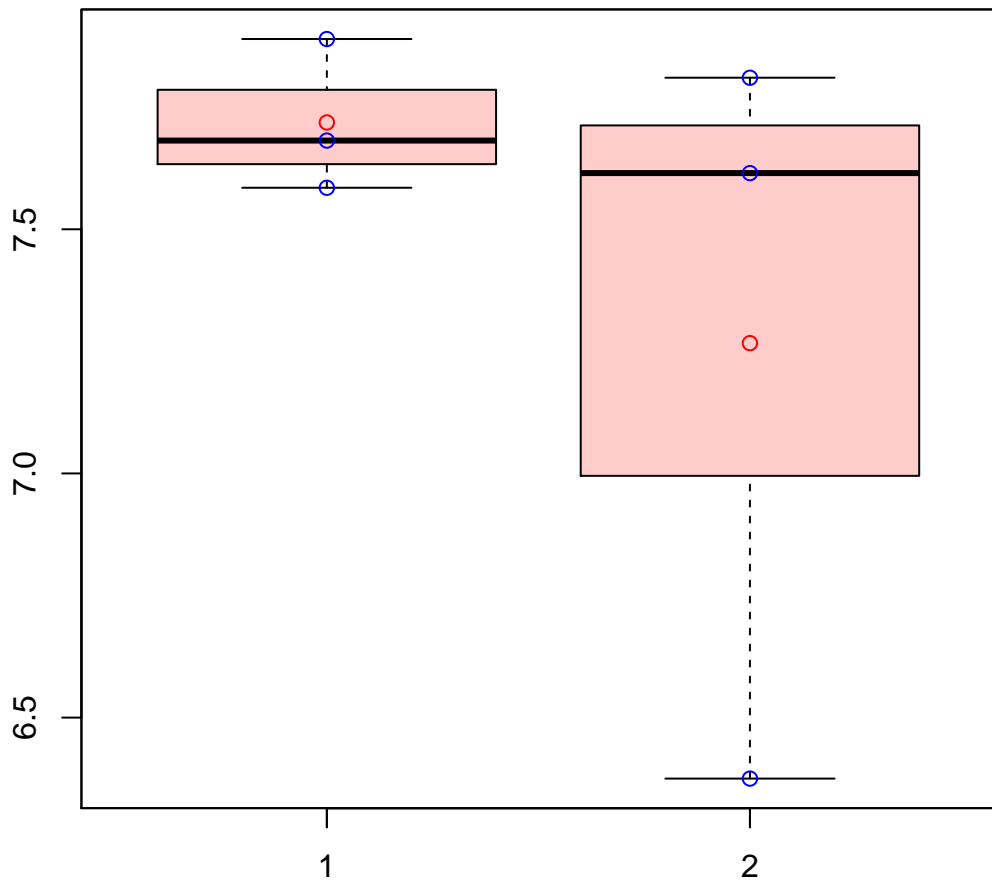

t-Test: p-value = 0.42



# CL450Contig17|CL450Contig17

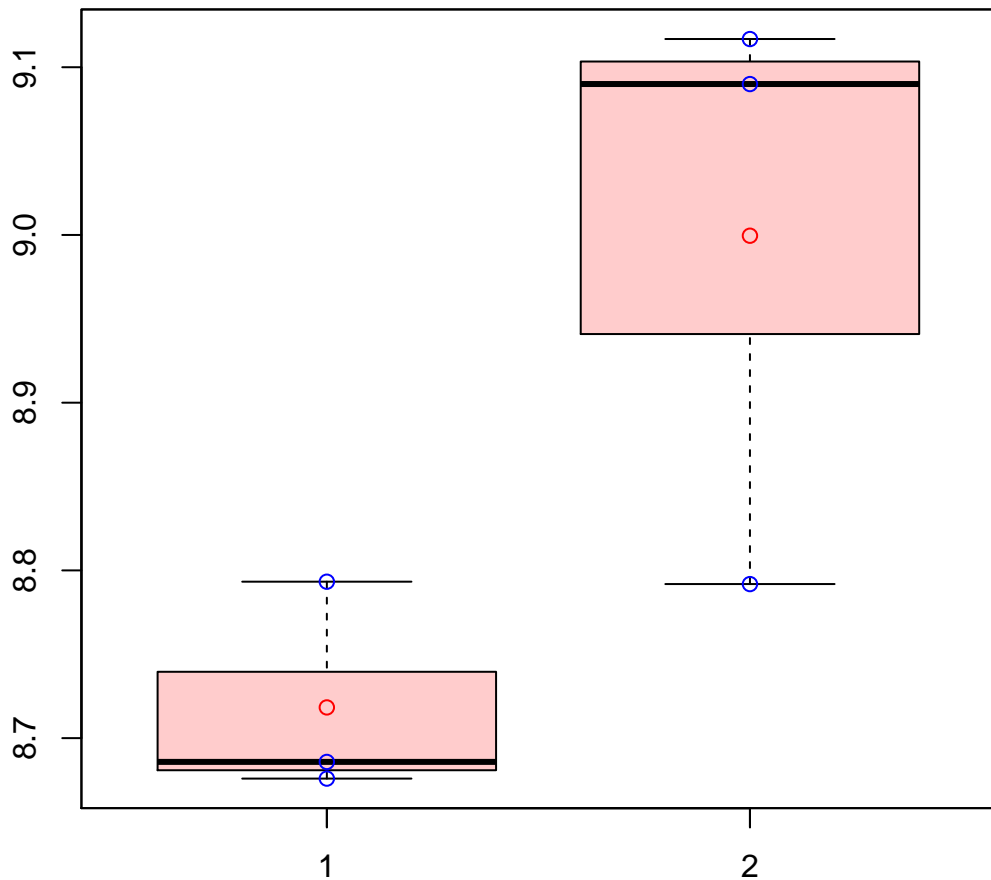

t-Test: p-value = 0.1

# CL4510Contig3|CL4510Contig3

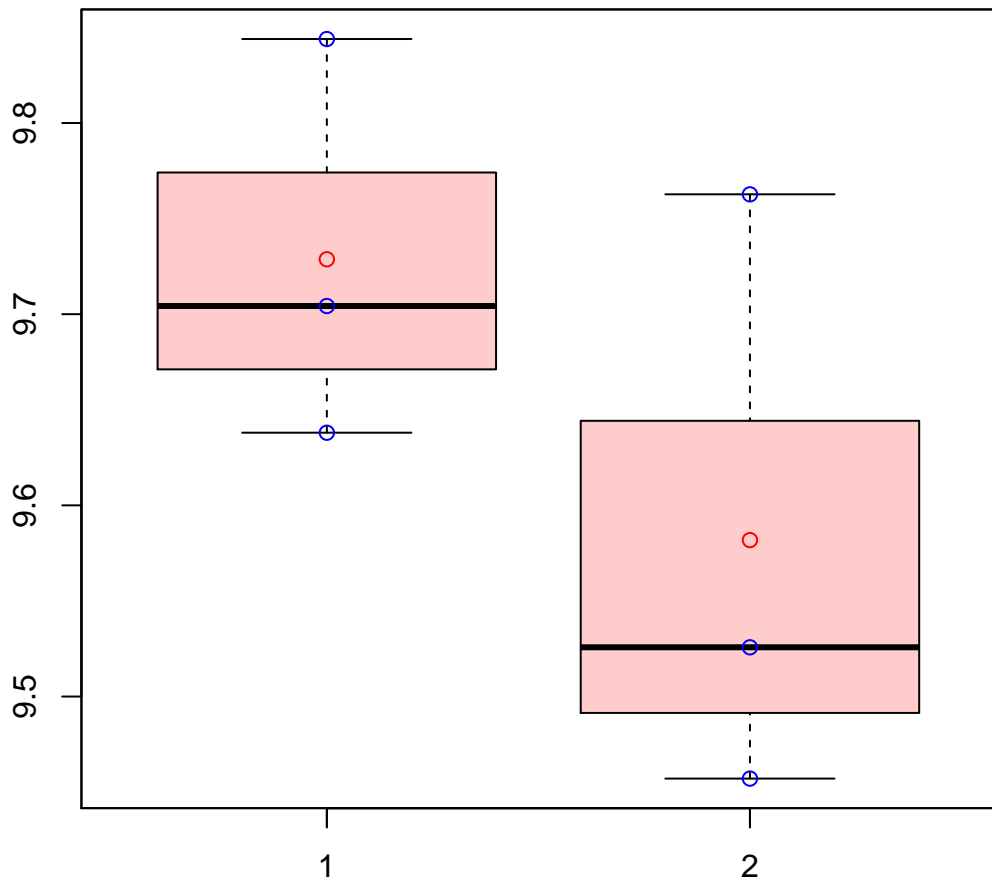

t-Test: p-value = 0.27

# CL4510Contig4|CL4510Contig4

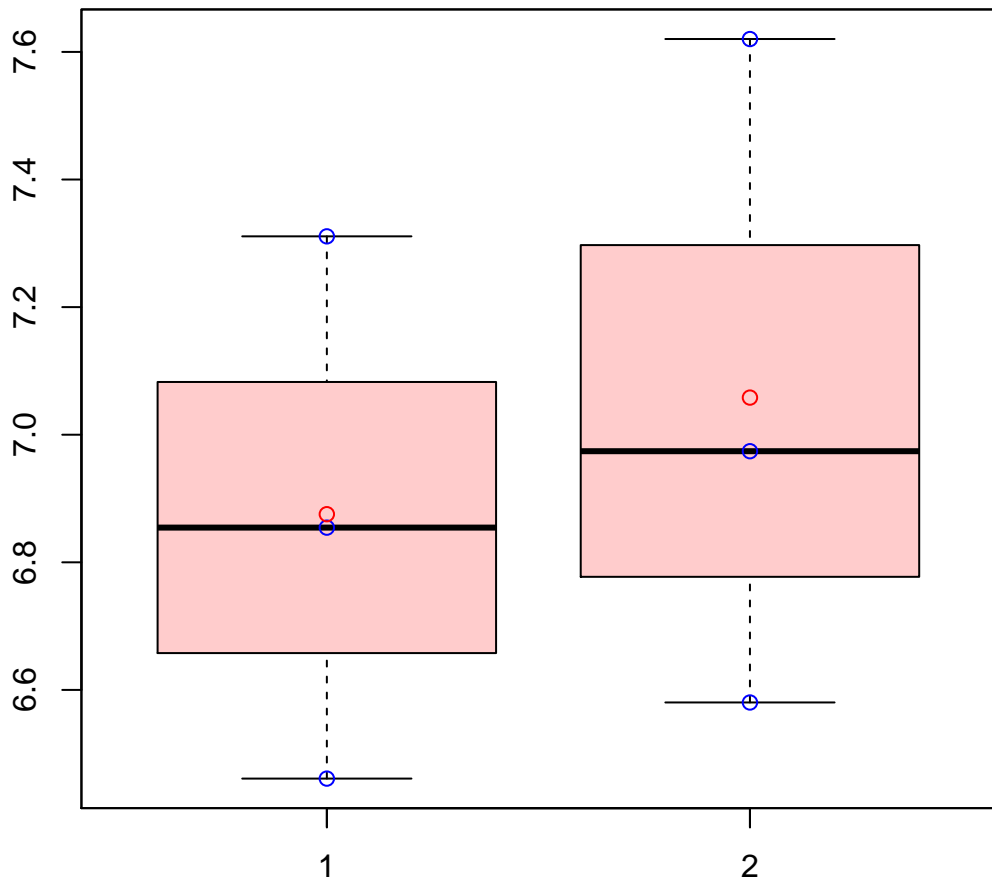

t-Test: p-value = 0.66

# CL4510Contig5|CL4510Contig5

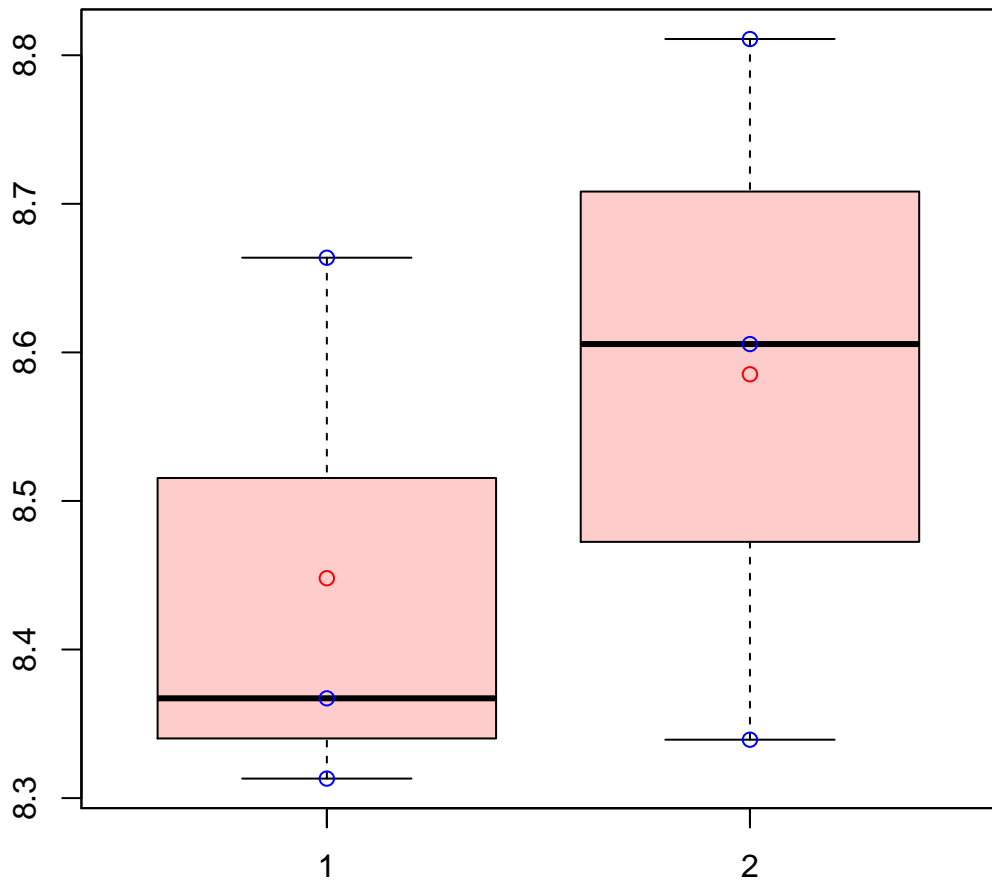

t-Test: p-value = 0.48

# CL4511Contig3|CL4511Contig3

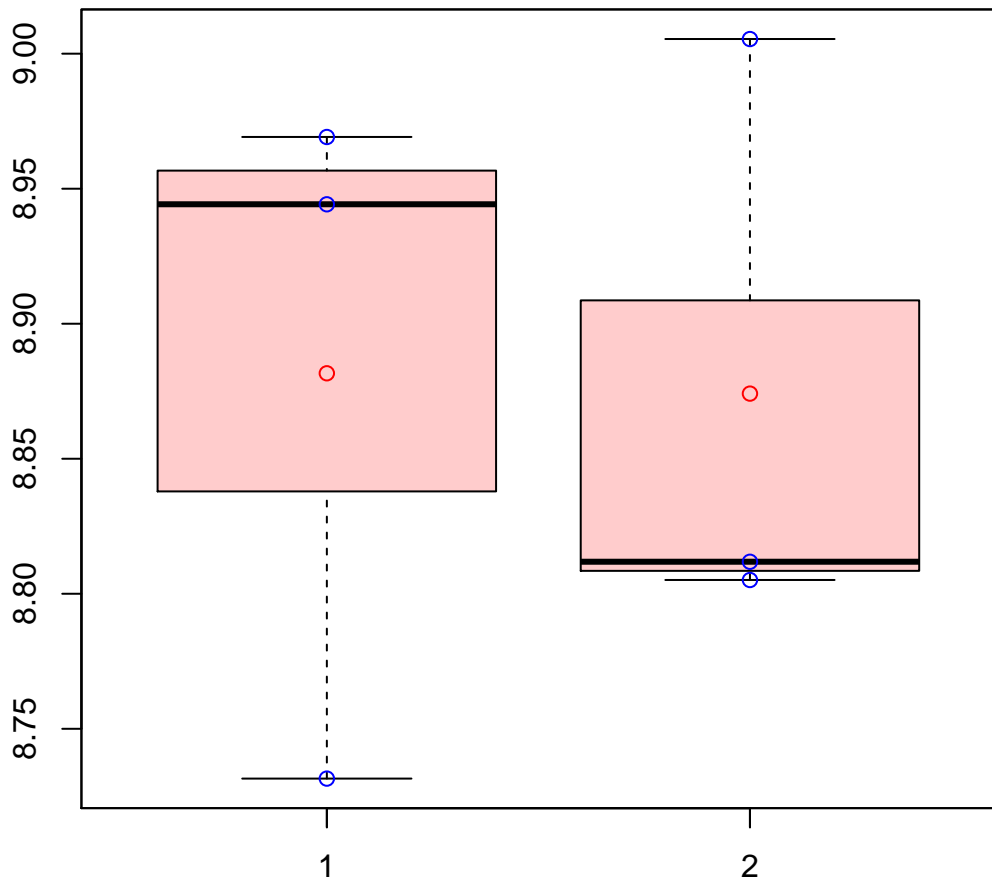

t-Test: p-value = 0.94

# CL4512Contig1|CL4512Contig1

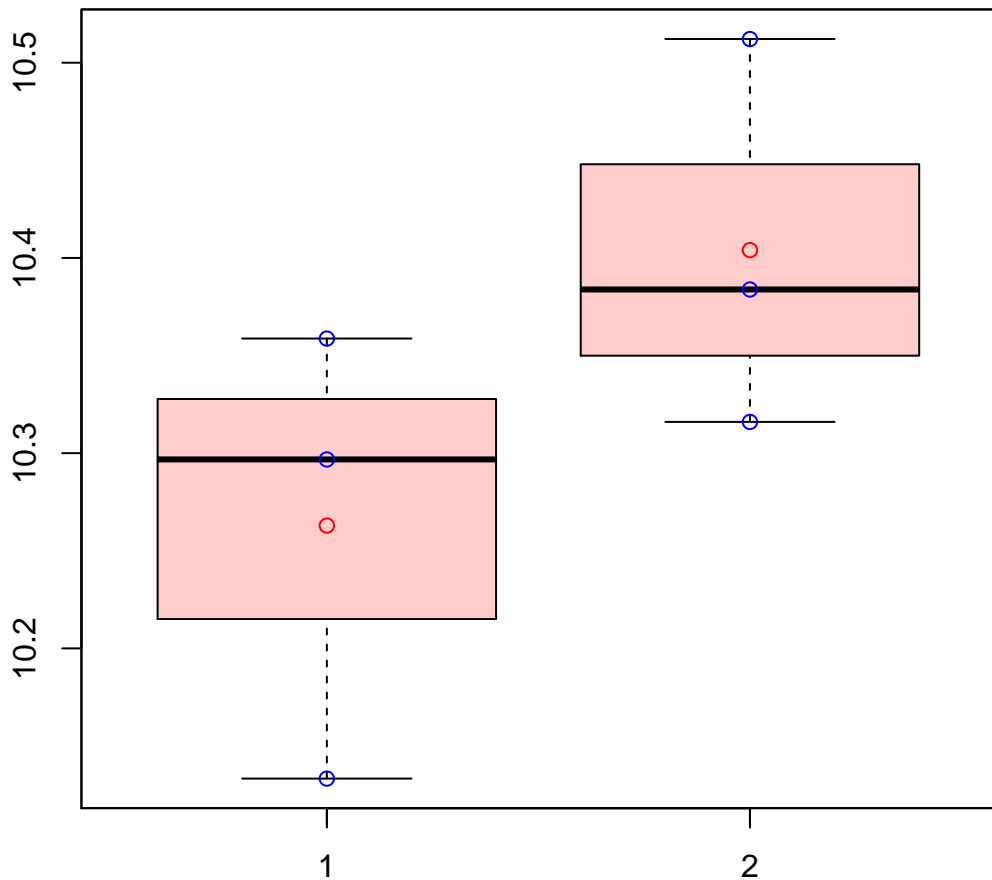

t-Test: p-value = 0.19

# CL451Contig7|CL451Contig7

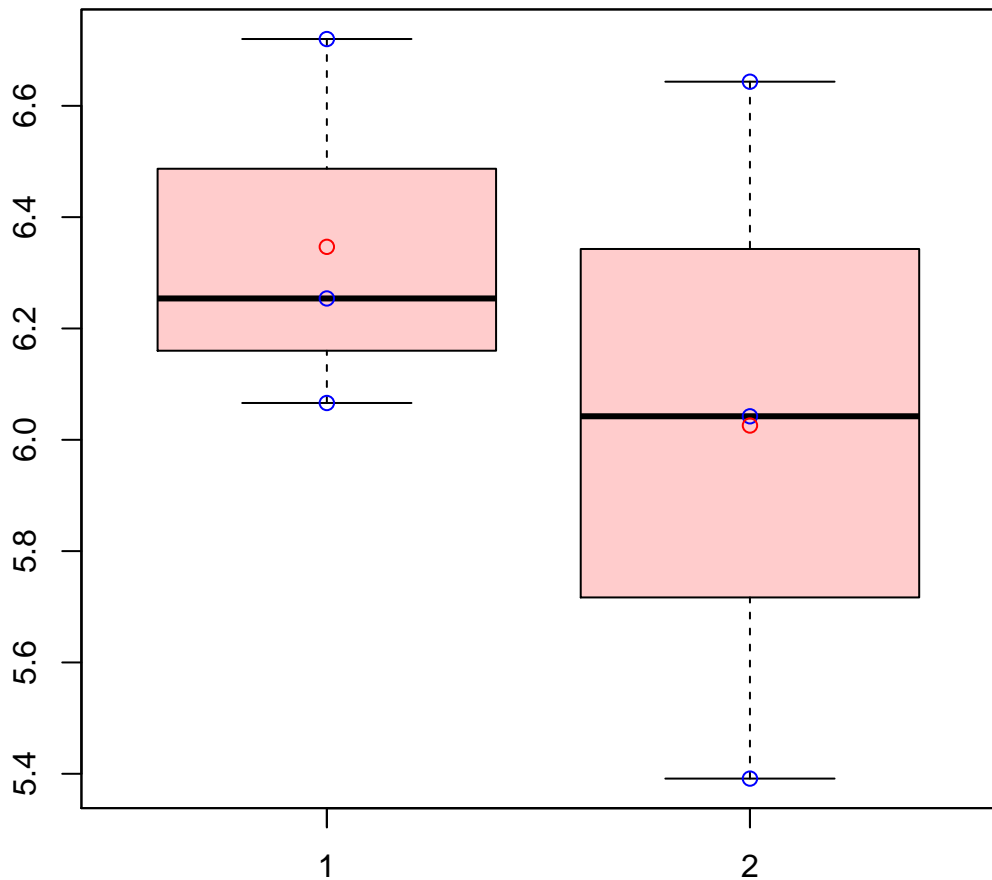

t-Test: p-value = 0.49

# CL4527Contig3|CL4527Contig3

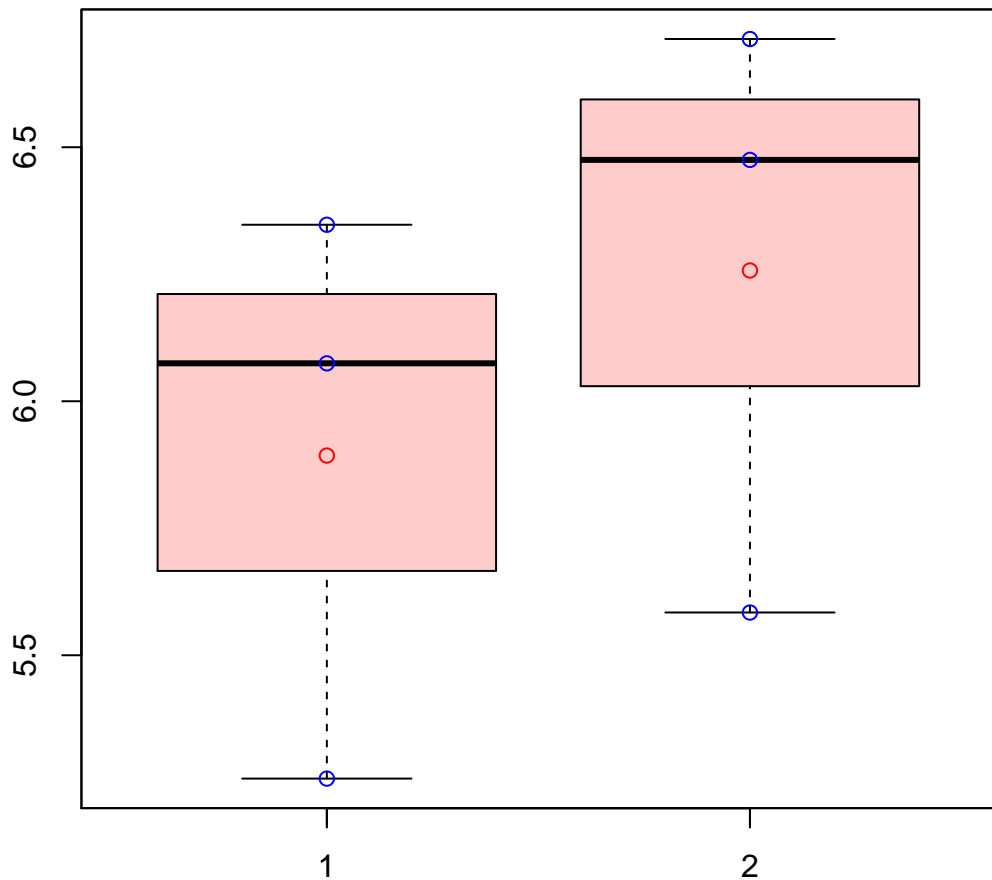

t-Test: p-value = 0.49



# CL4531Contig1|CL4531Contig1

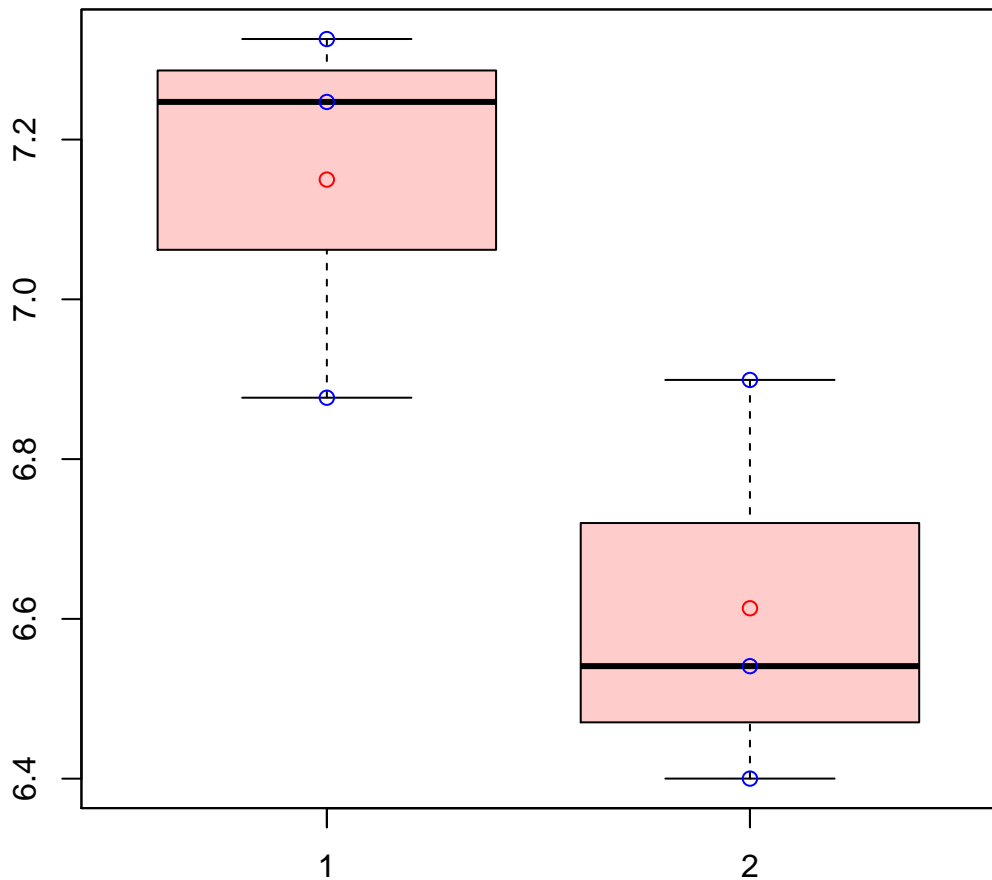

t-Test: p-value = 0.06

# CL4531Contig3|CL4531Contig3

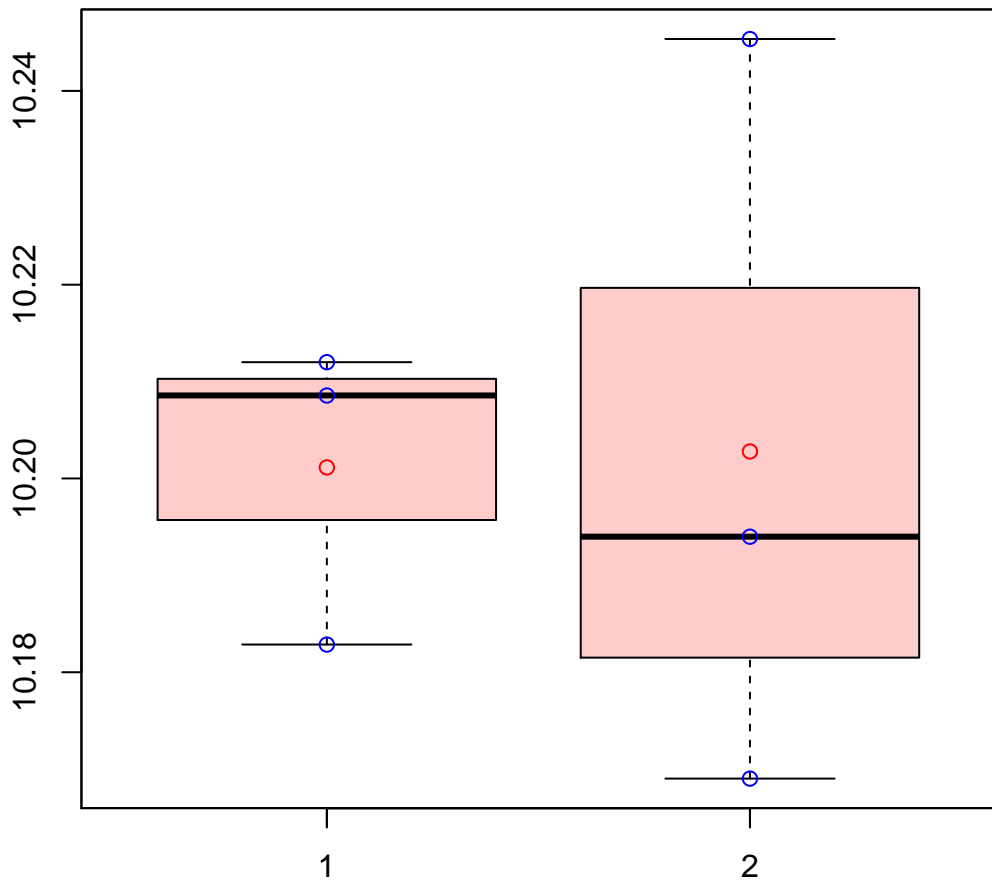

t-Test: p-value = 0.95

# CL4534Contig1|CL4534Contig1

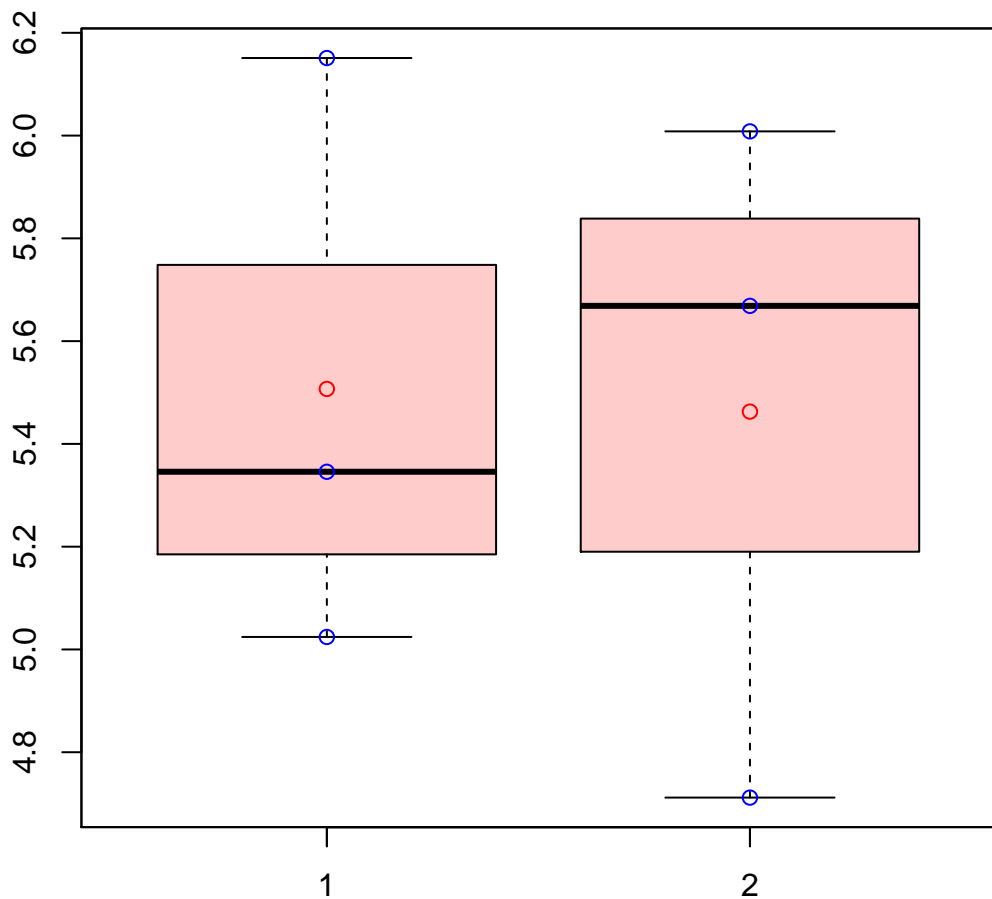

t-Test: p-value = 0.94

# CL4534Contig3|CL4534Contig3

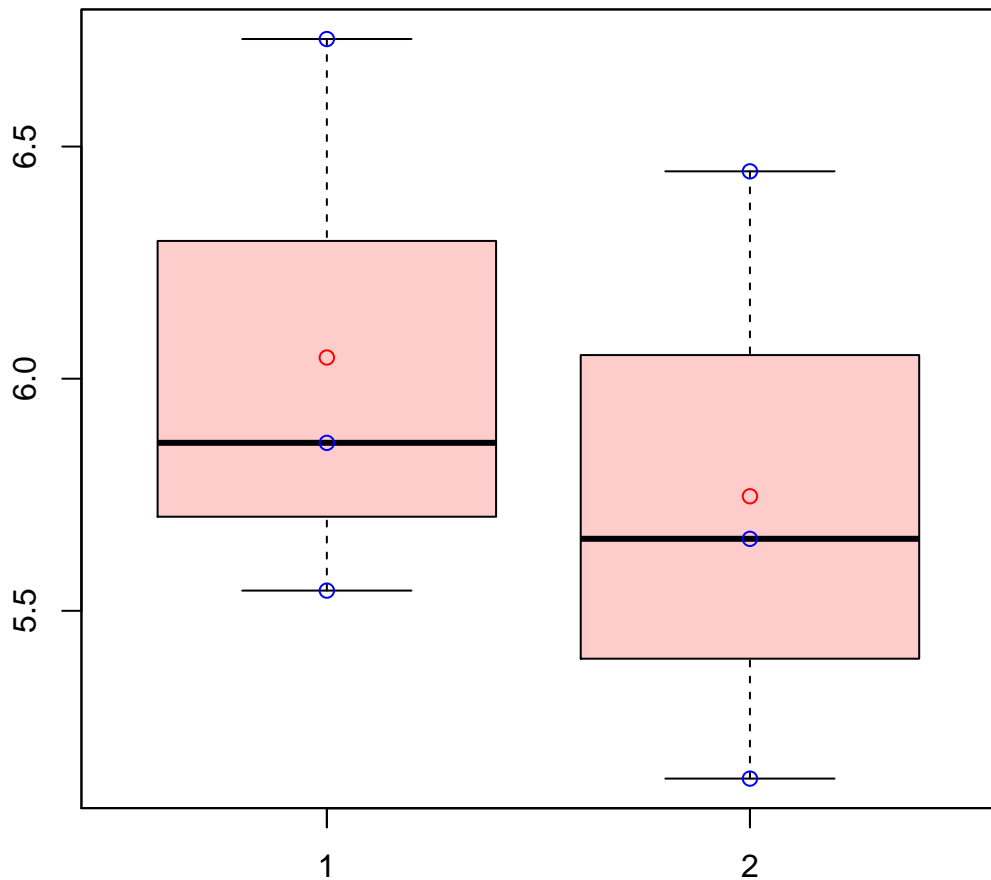

t-Test: p-value = 0.6

# CL4534Contig5|CL4534Contig5

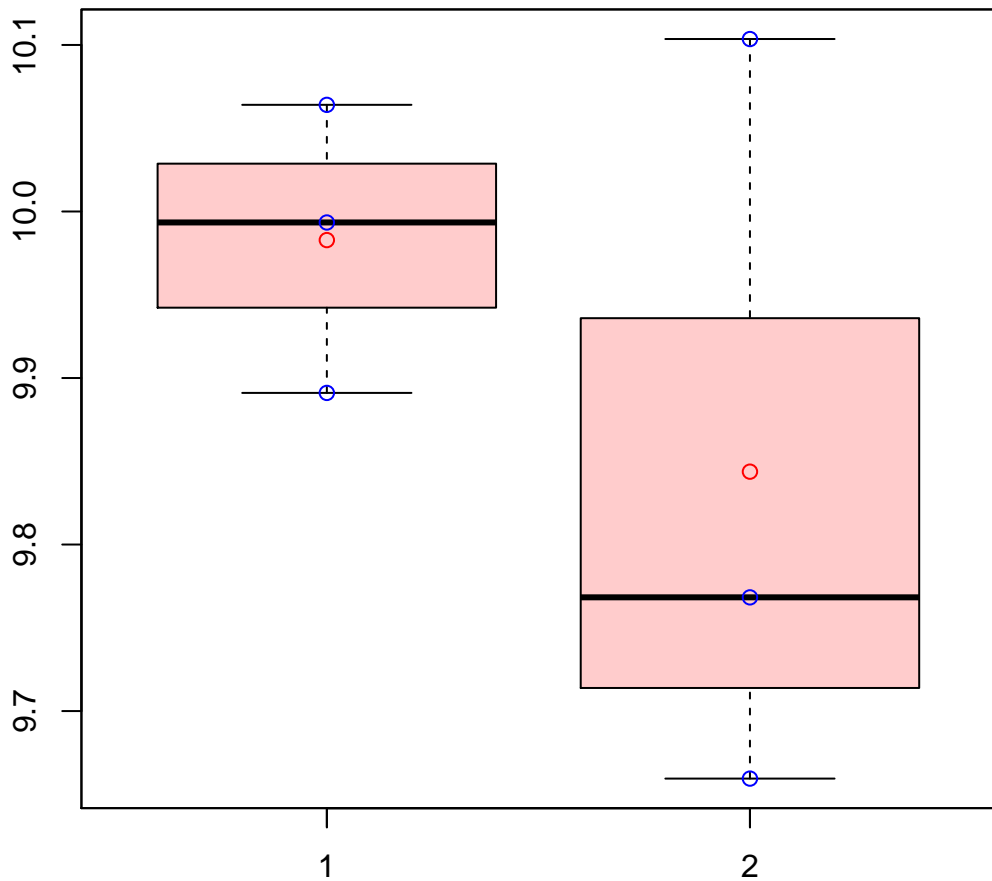

t-Test: p-value = 0.41

# CL4534Contig6|CL4534Contig6

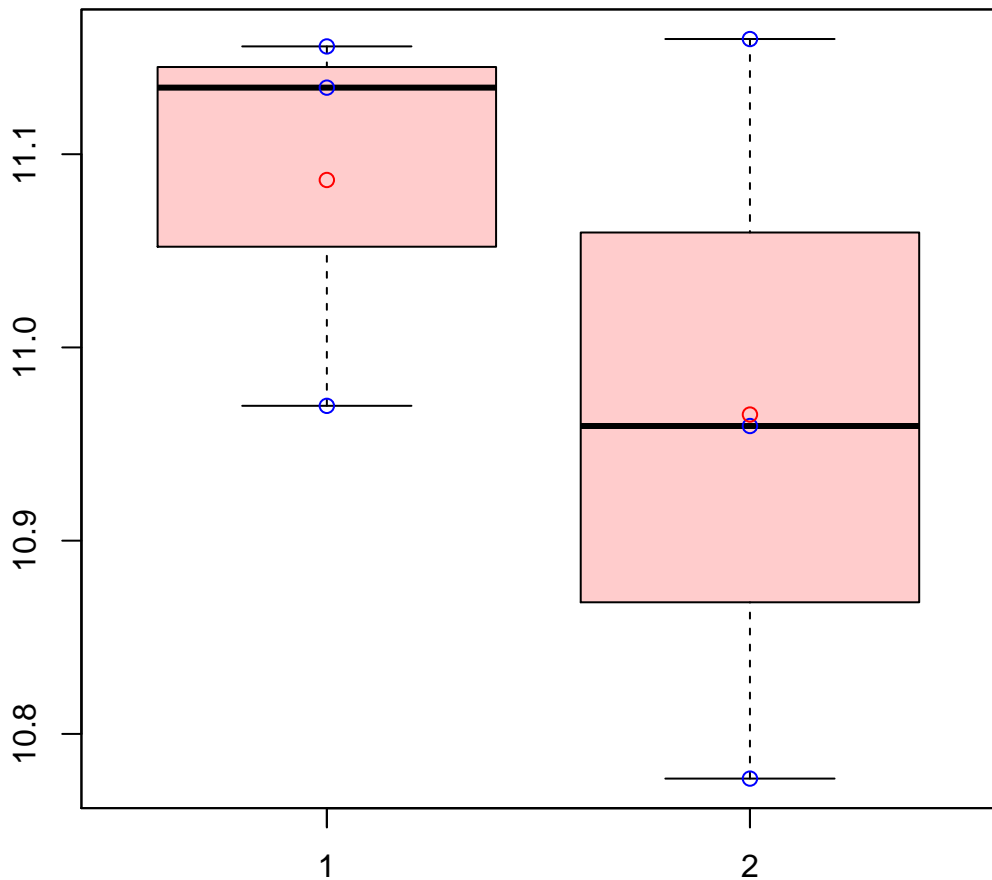

t-Test: p-value = 0.4

# CL4548Contig2|CL4548Contig2

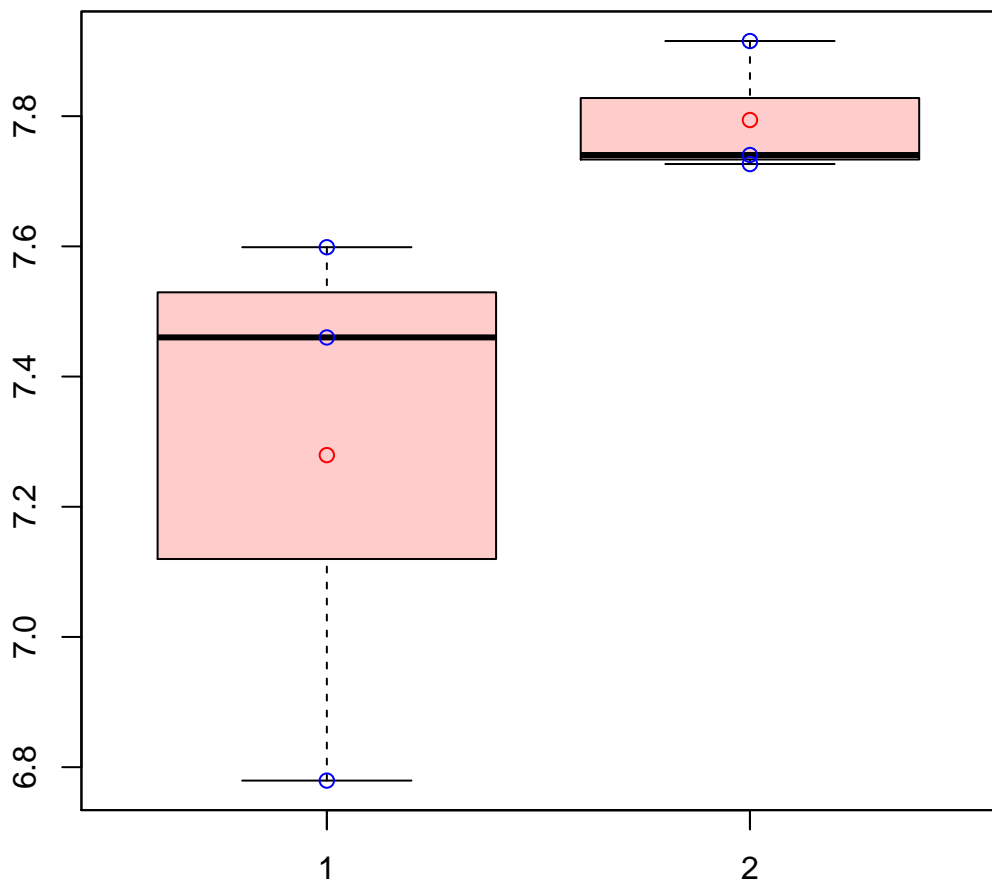

t-Test: p-value = 0.17

# CL4549Contig4|CL4549Contig4

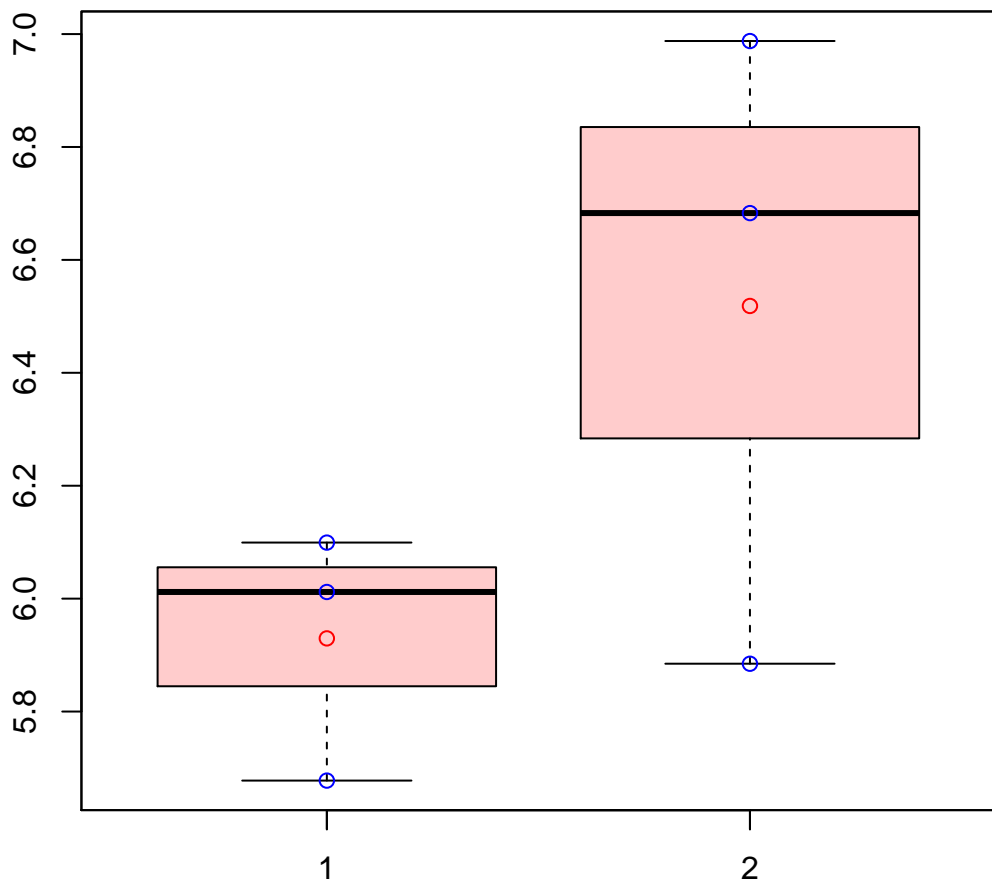

t-Test: p-value = 0.21



# CL454Contig4|CL454Contig4

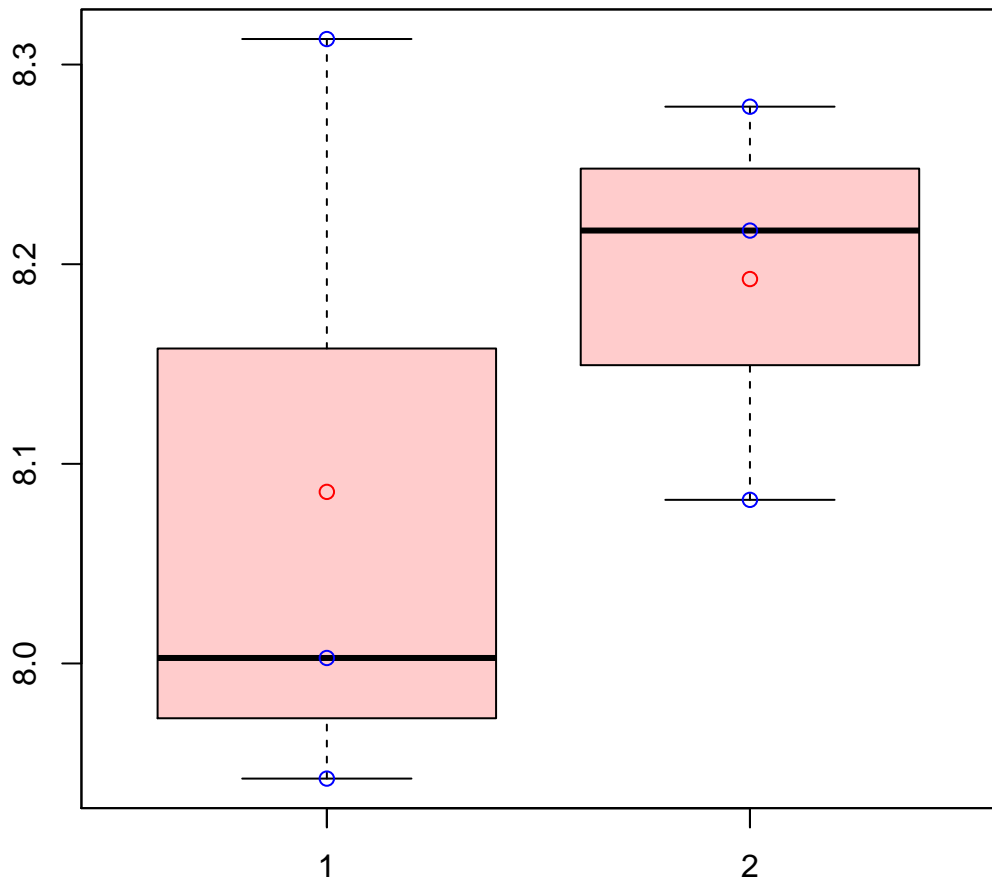

t-Test: p-value = 0.47

# CL454Contig8|CL454Contig8

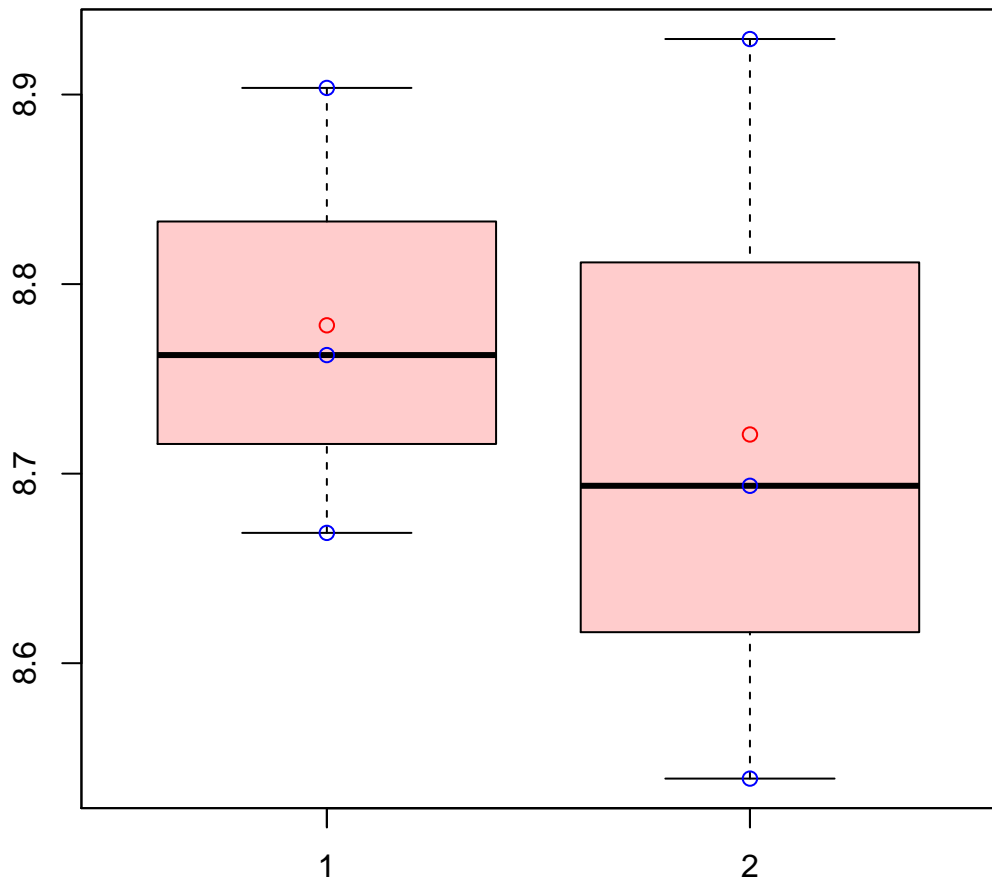

t-Test: p-value = 0.69

# CL4550Contig1|CL4550Contig1

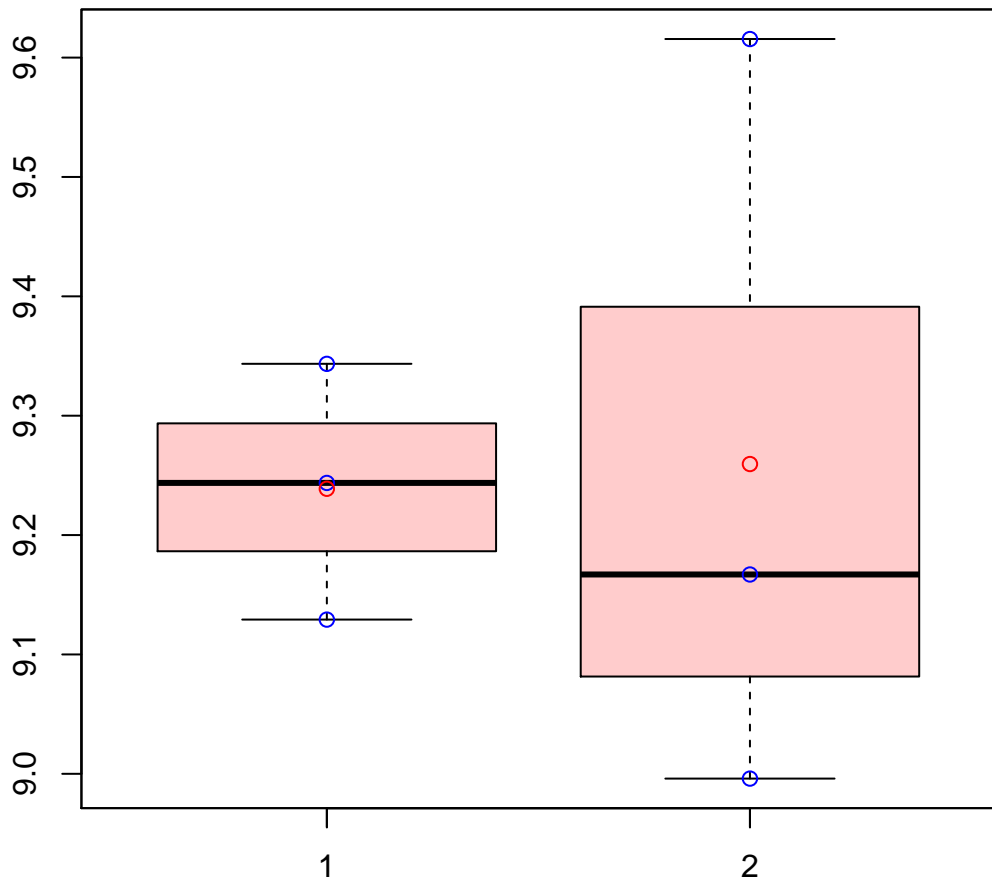

t-Test: p-value = 0.92

# CL4562Contig6|CL4562Contig6

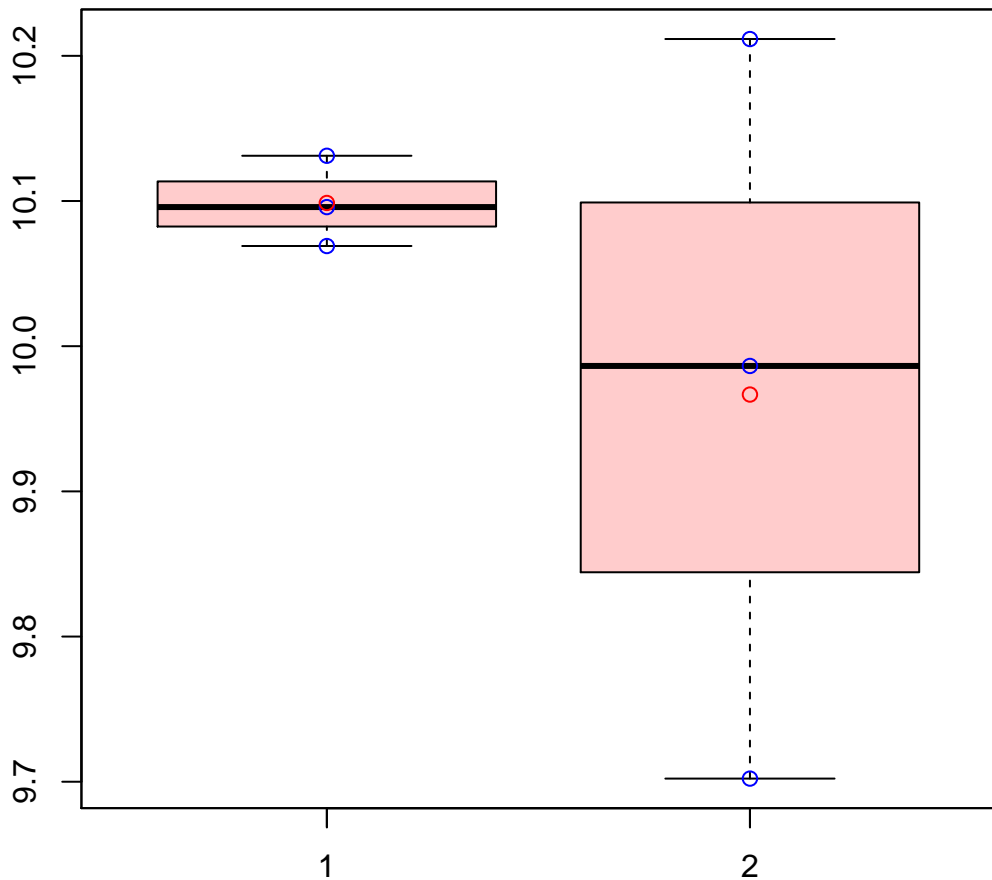

t-Test: p-value = 0.47

# CL4562Contig7|CL4562Contig7

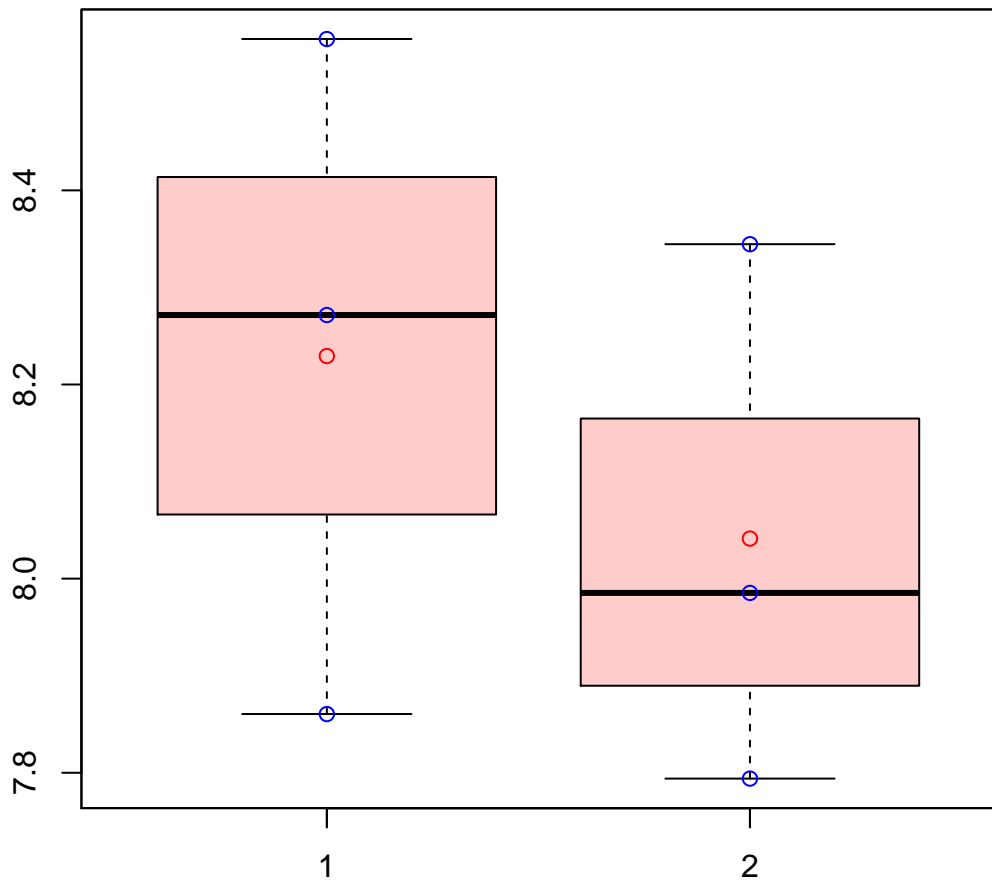

t-Test: p-value = 0.51

# CL456Contig5|CL456Contig5

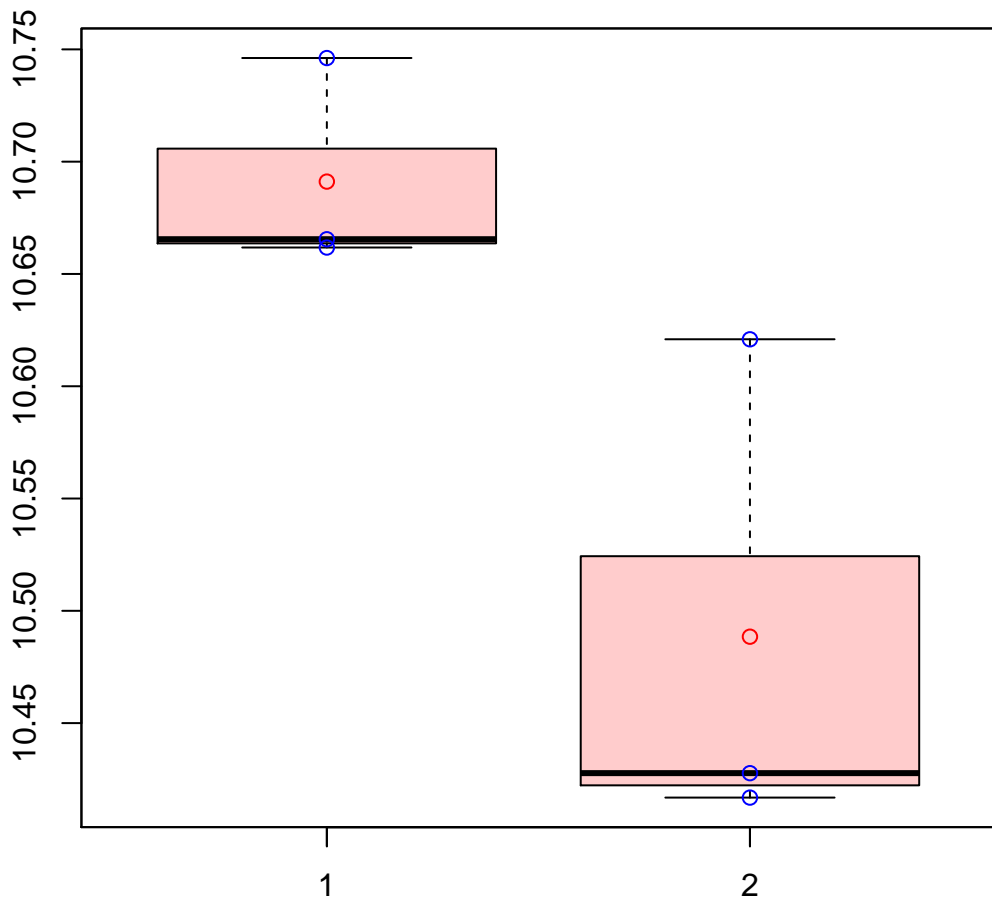

t-Test: p-value = 0.08

# CL4571Contig1|CL4571Contig1

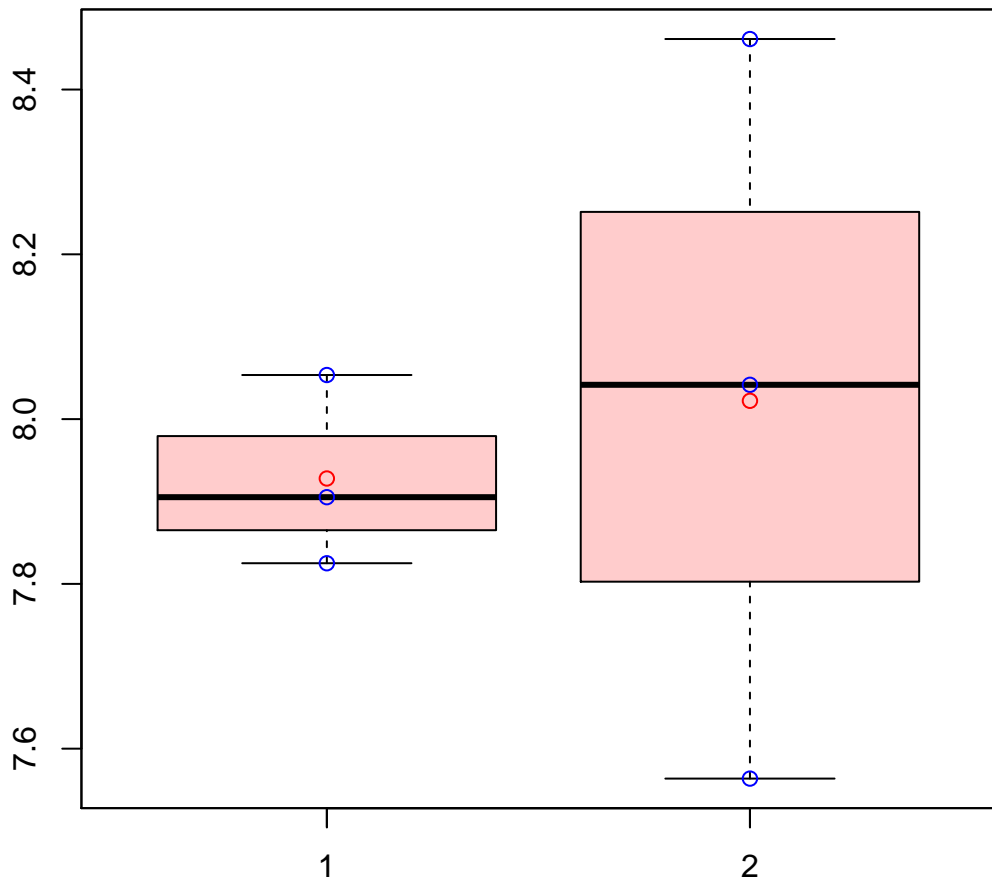

t-Test: p-value = 0.75

# CL4577Contig2|CL4577Contig2

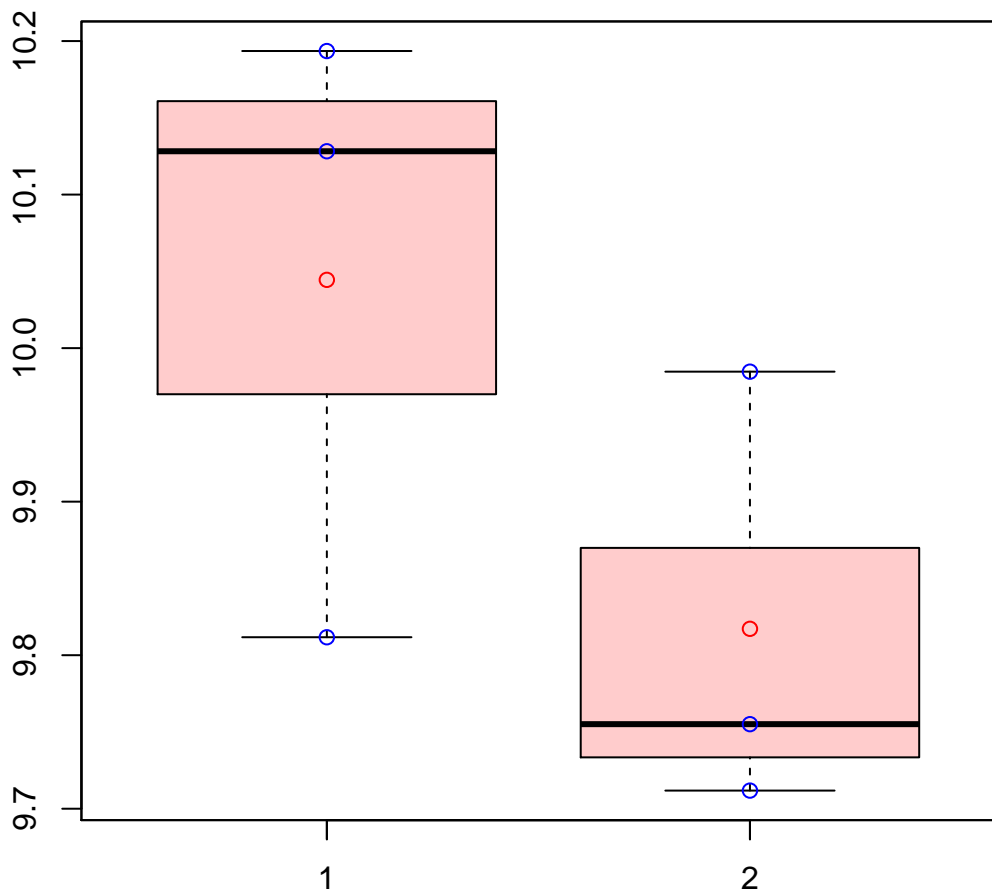

t-Test: p-value = 0.2



# CL4589Contig3|CL4589Contig3

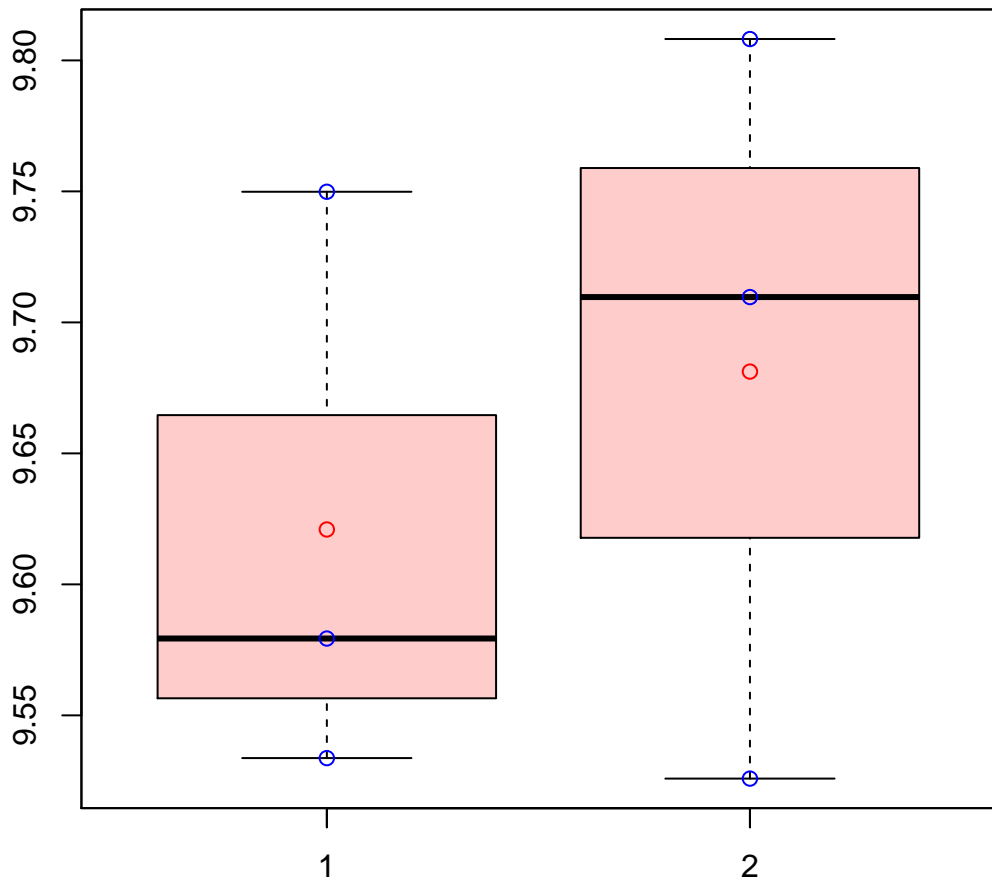

t-Test: p-value = 0.6

# CL4592Contig2|CL4592Contig2

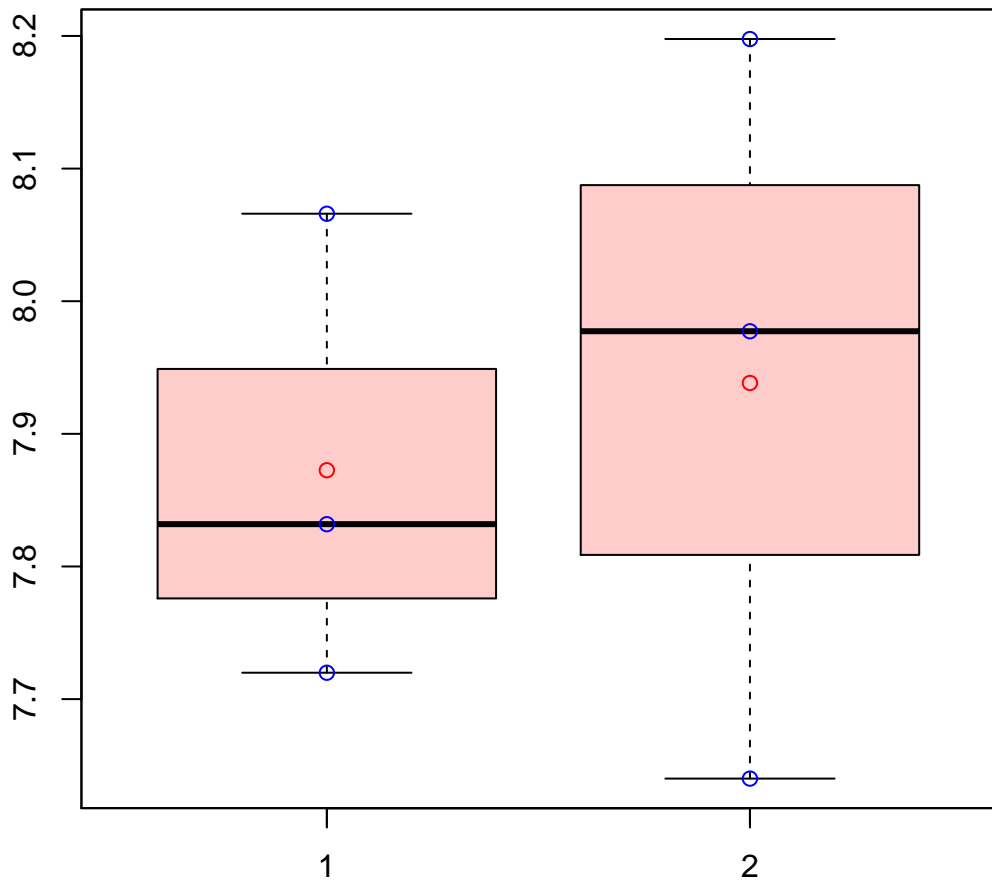

t-Test: p-value = 0.75

# CL4594Contig1|CL4594Contig1

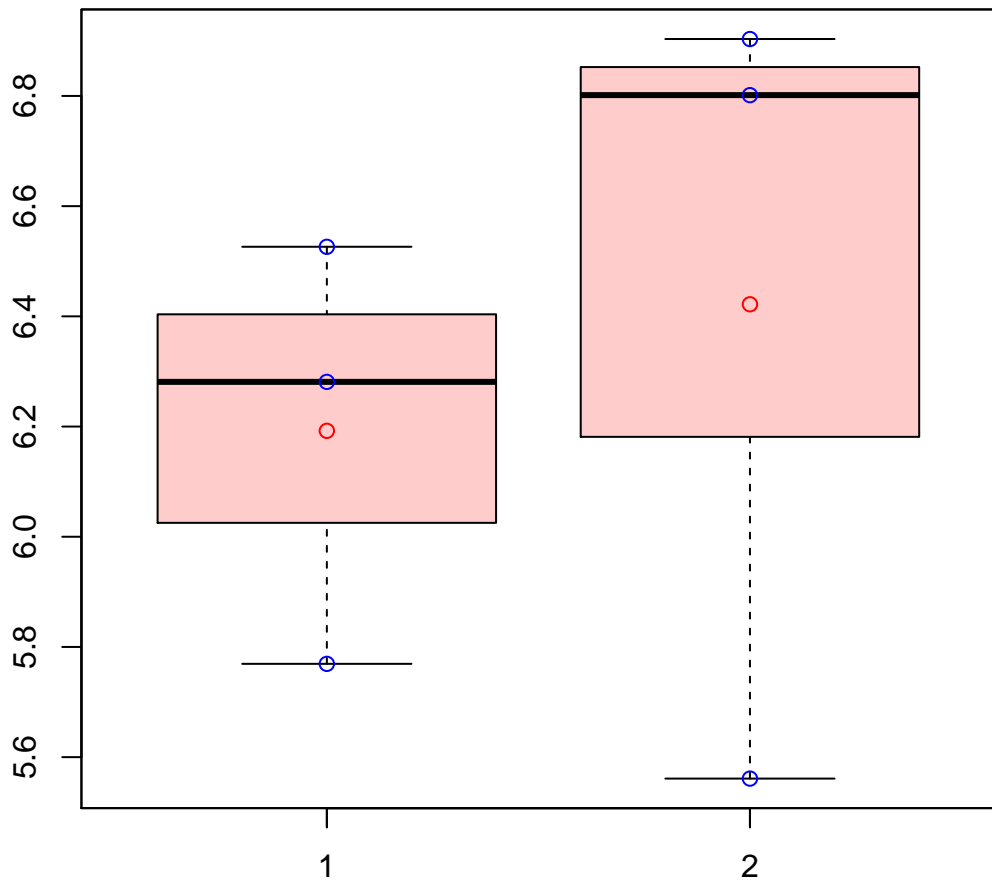

t-Test: p-value = 0.67

# CL4596Contig1|CL4596Contig1

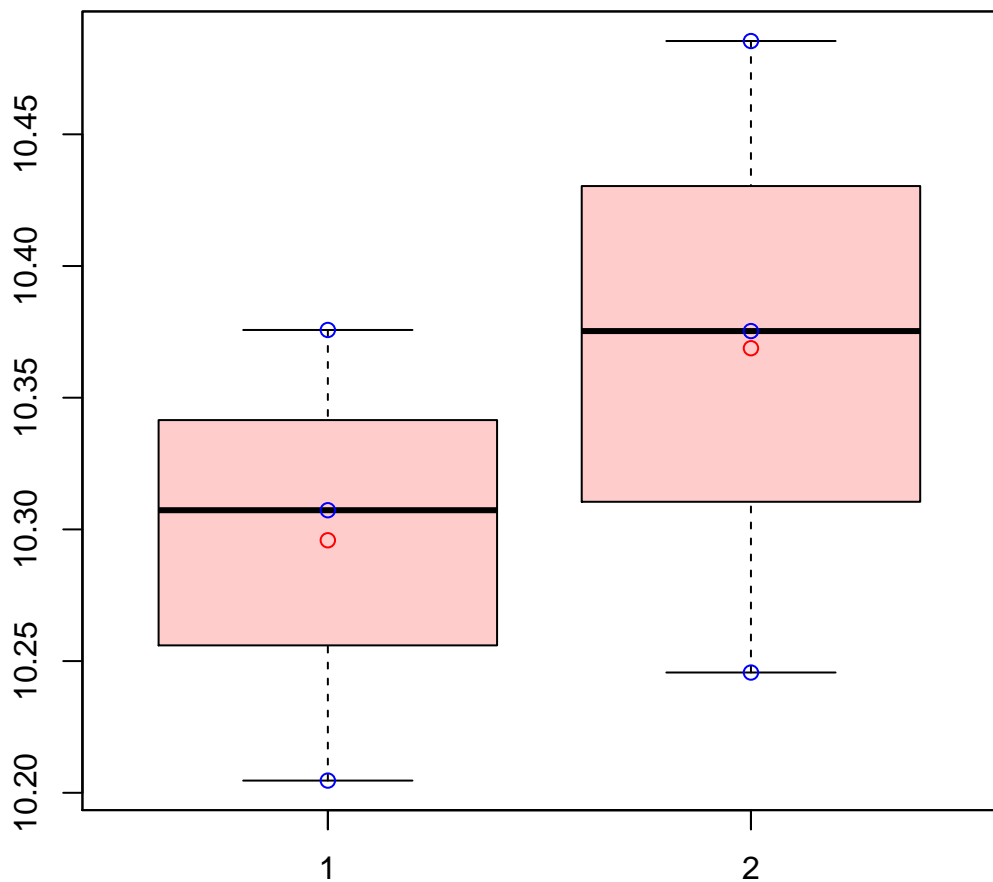

t-Test: p-value = 0.45

# CL4602Contig3|CL4602Contig3

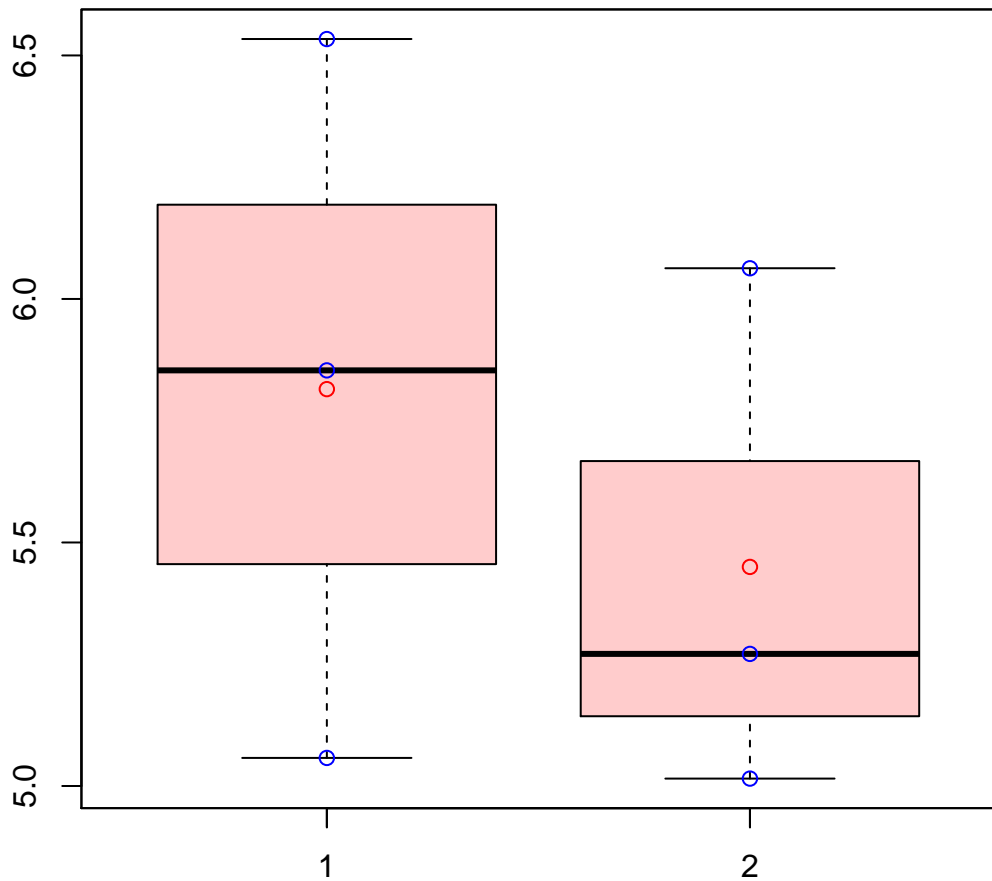

t-Test: p-value = 0.53

# CL460Contig3|CL460Contig3

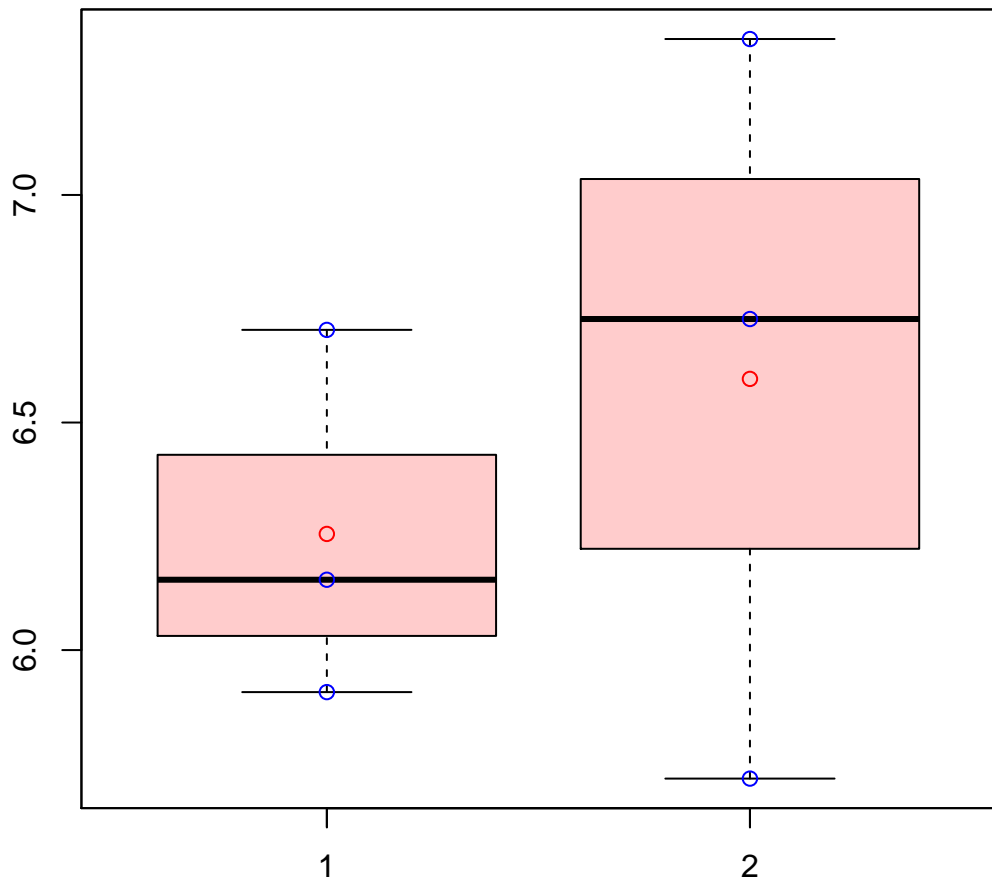

t-Test: p-value = 0.57

# CL4622Contig2|CL4622Contig2

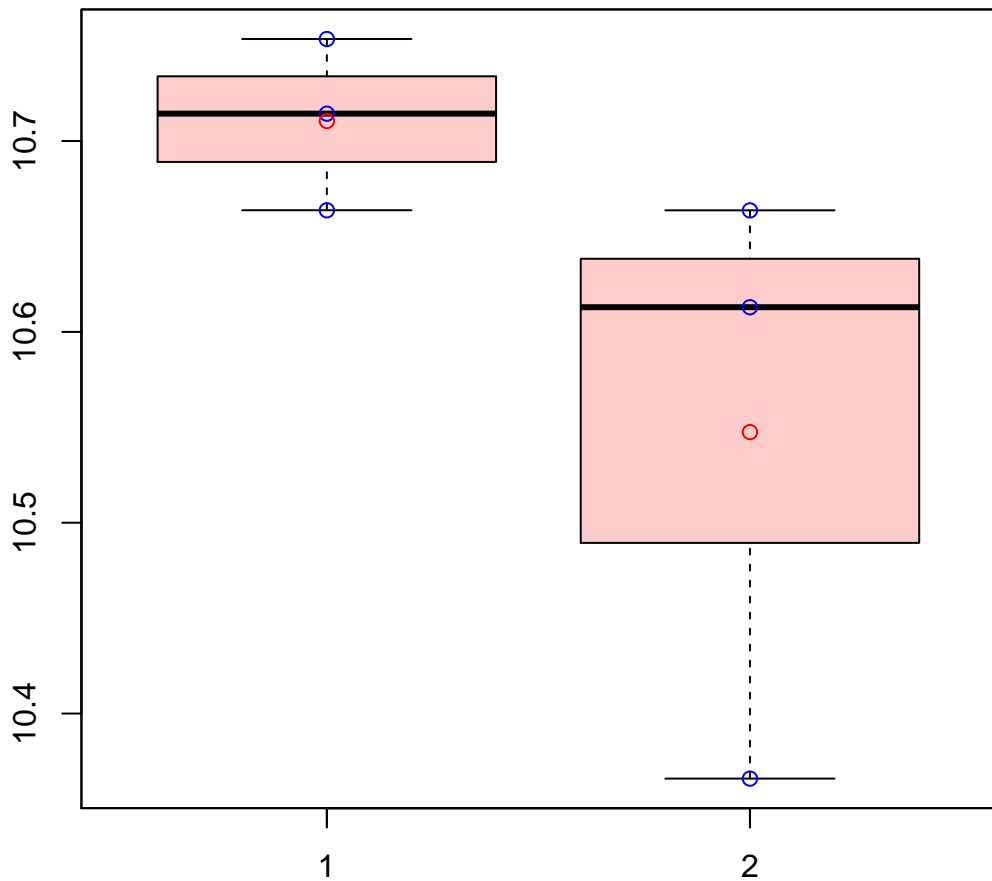

t-Test: p-value = 0.21

# CL4626Contig3|CL4626Contig3

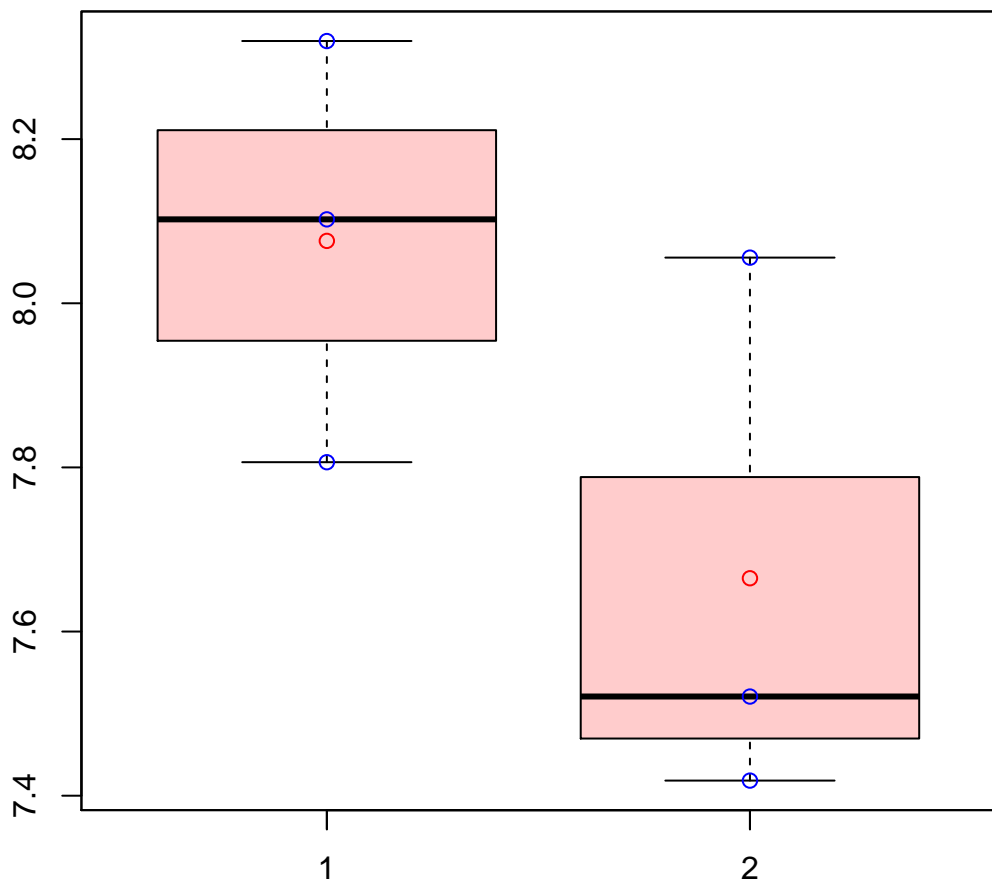

t-Test: p-value = 0.18



# CL4628Contig2|CL4628Contig2

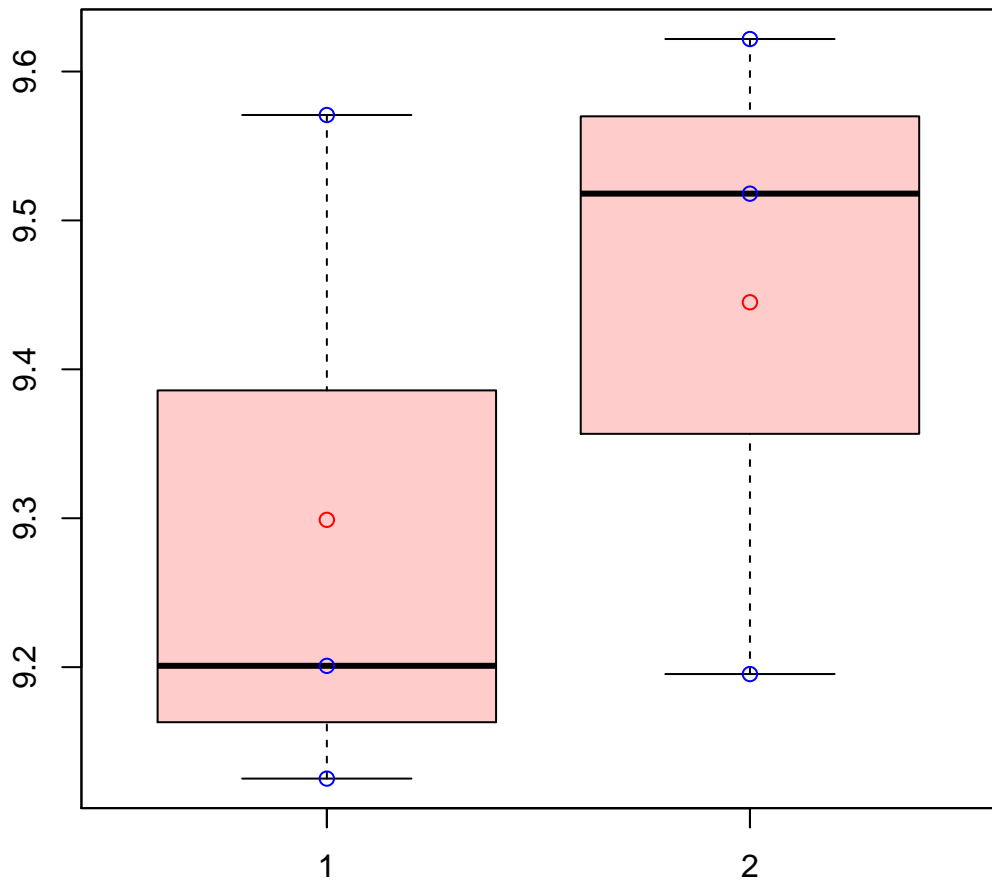

t-Test: p-value = 0.48

# CL4641Contig1|CL4641Contig1

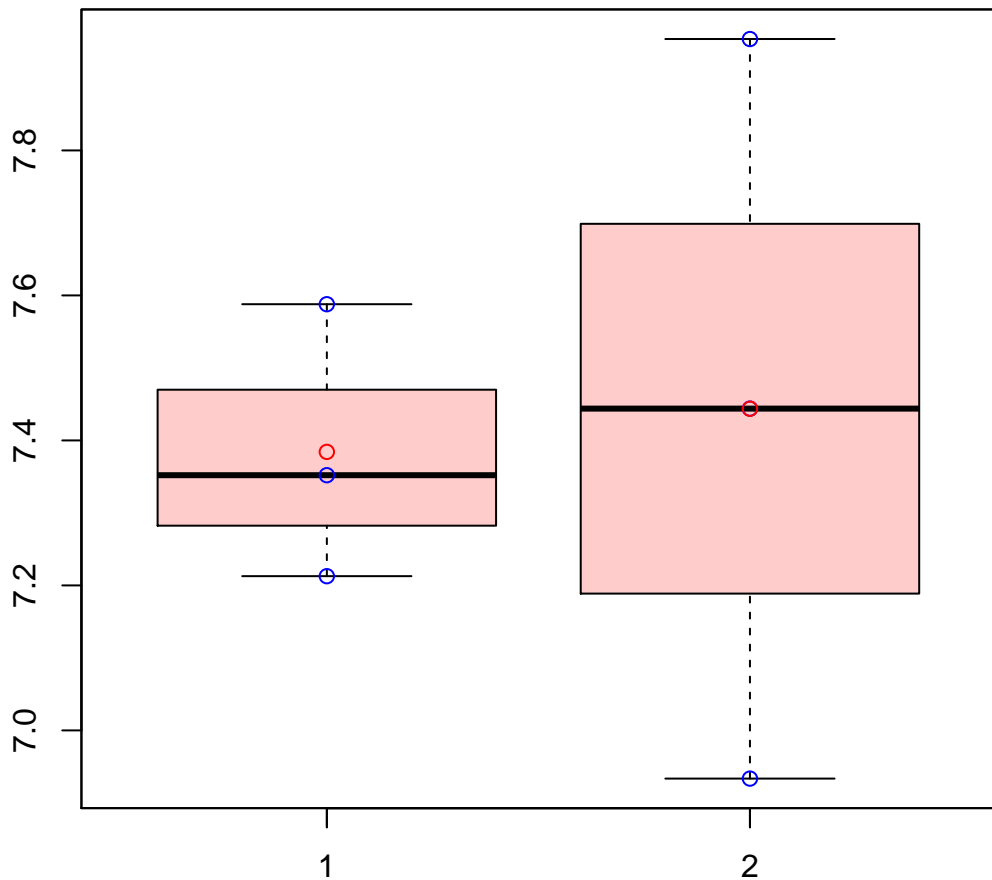

t-Test: p-value = 0.86

# CL4647Contig2|CL4647Contig2

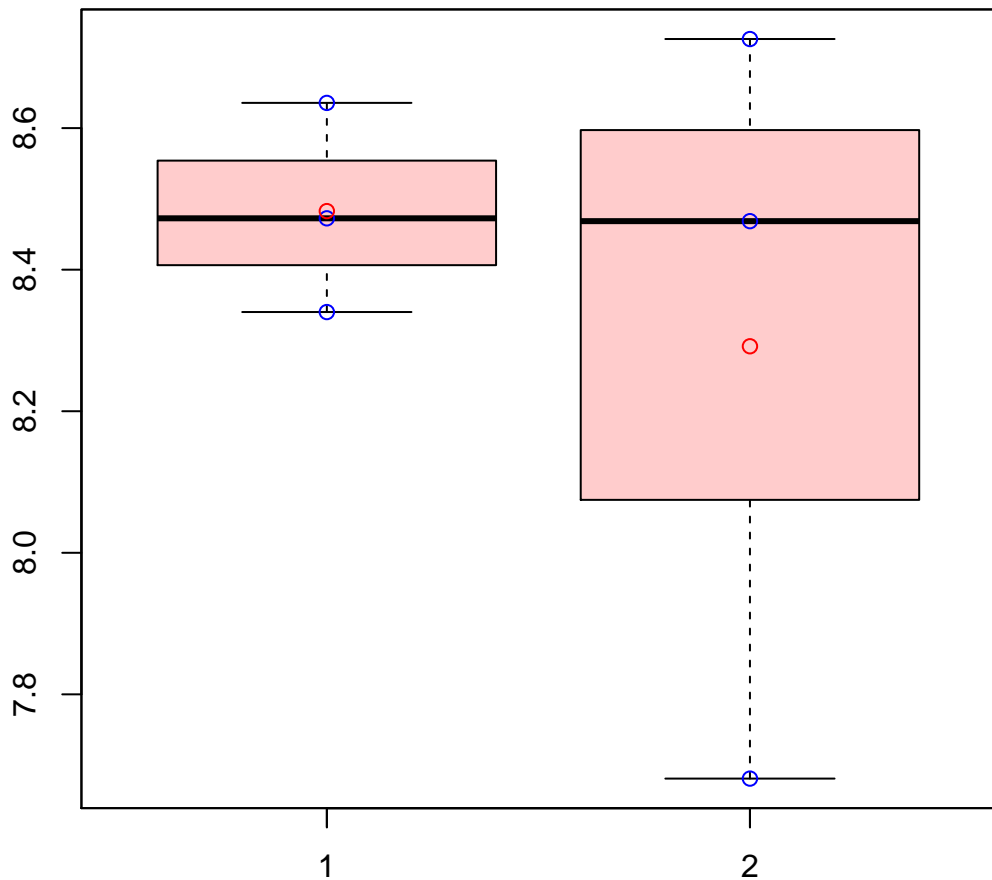

t-Test: p-value = 0.61

# CL4653Contig4|CL4653Contig4

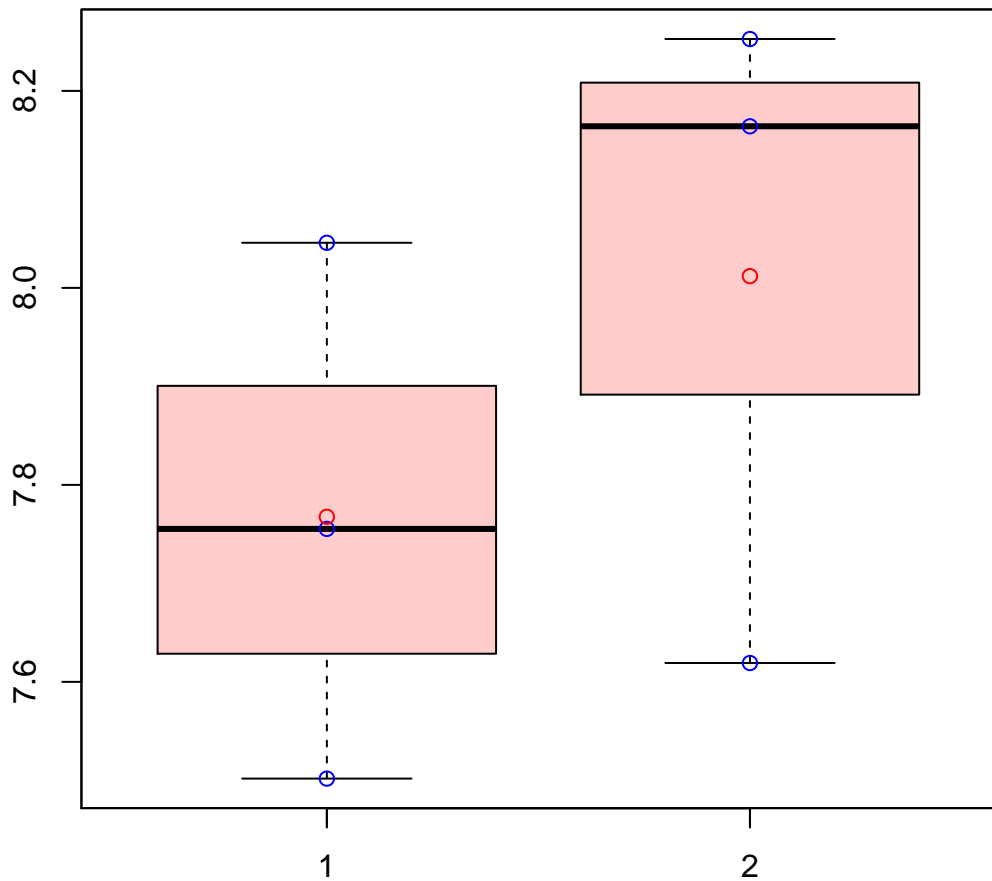

t-Test: p-value = 0.39

# CL4656Contig3|CL4656Contig3

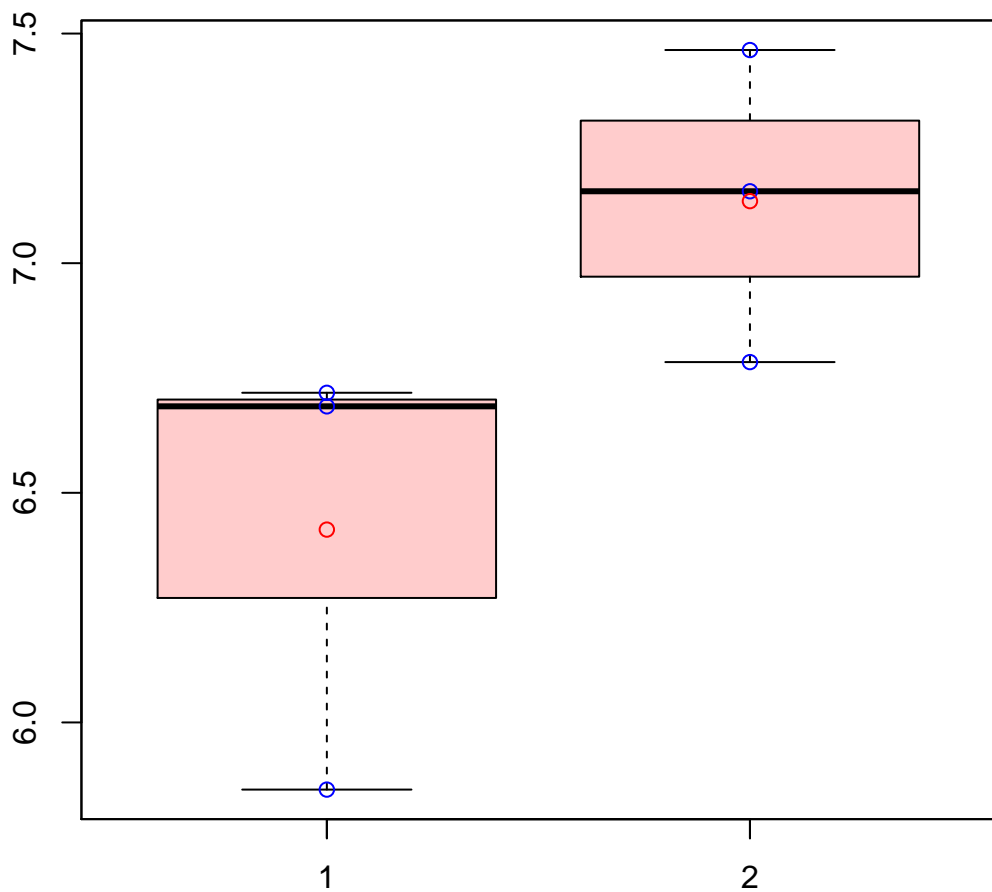

t-Test: p-value = 0.12

# CL465Contig6|CL465Contig6

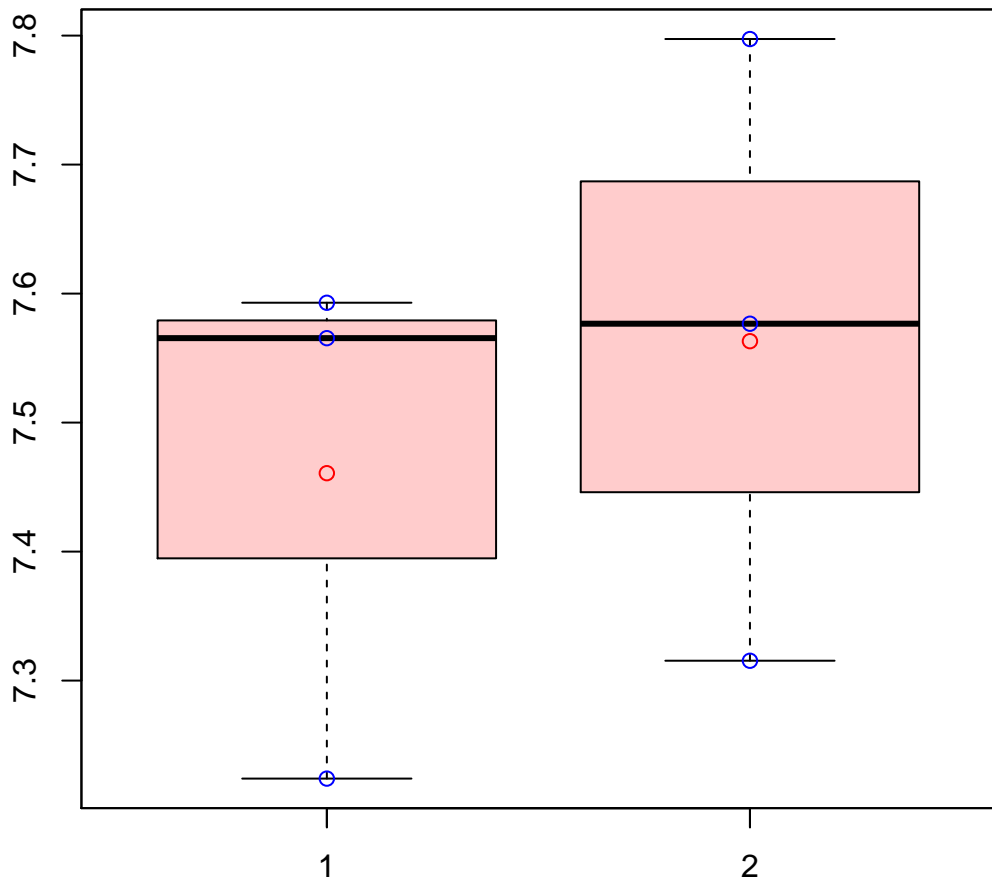

t-Test: p-value = 0.61

# CL4669Contig1|CL4669Contig1

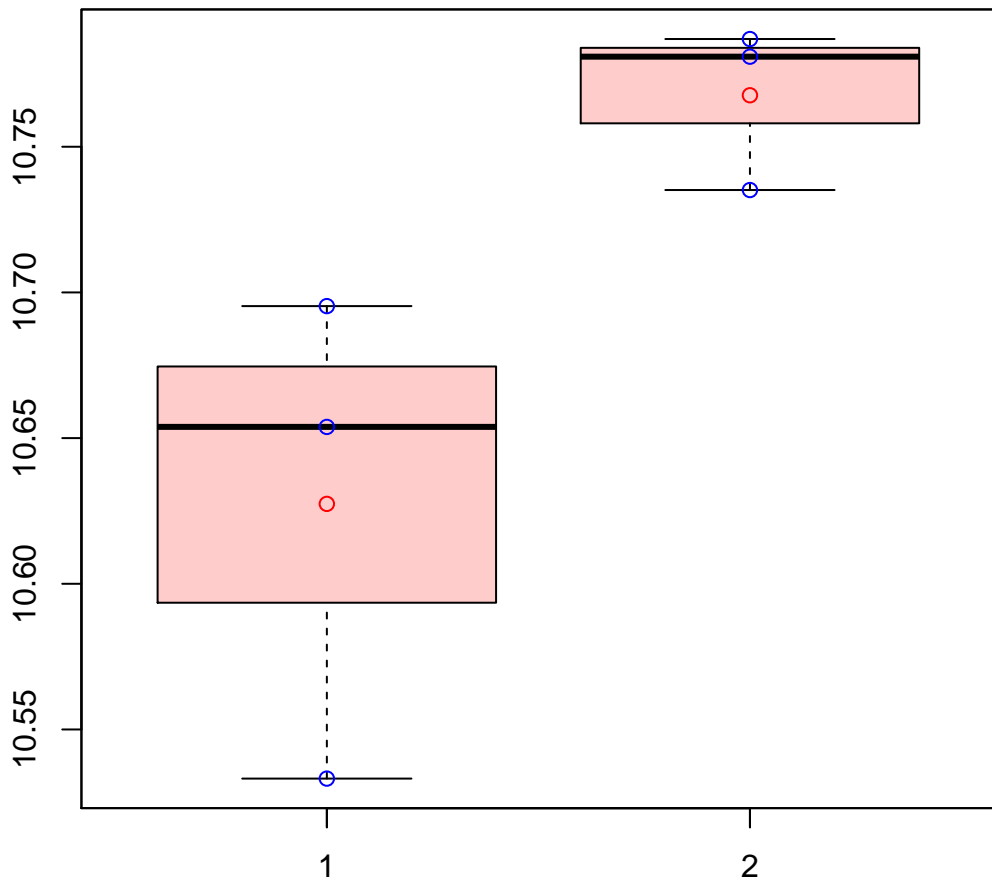

t-Test: p-value = 0.09

# CL4679Contig4|CL4679Contig4

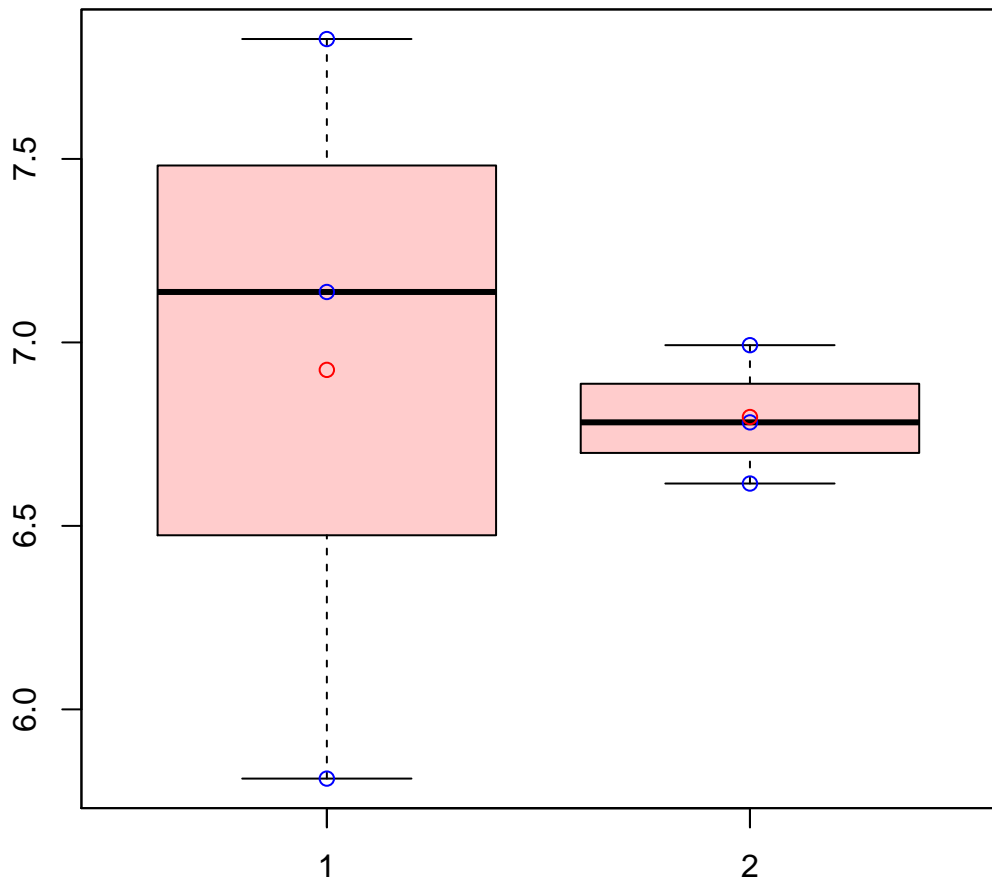

t-Test: p-value = 0.85



# CL4685Contig2|CL4685Contig2

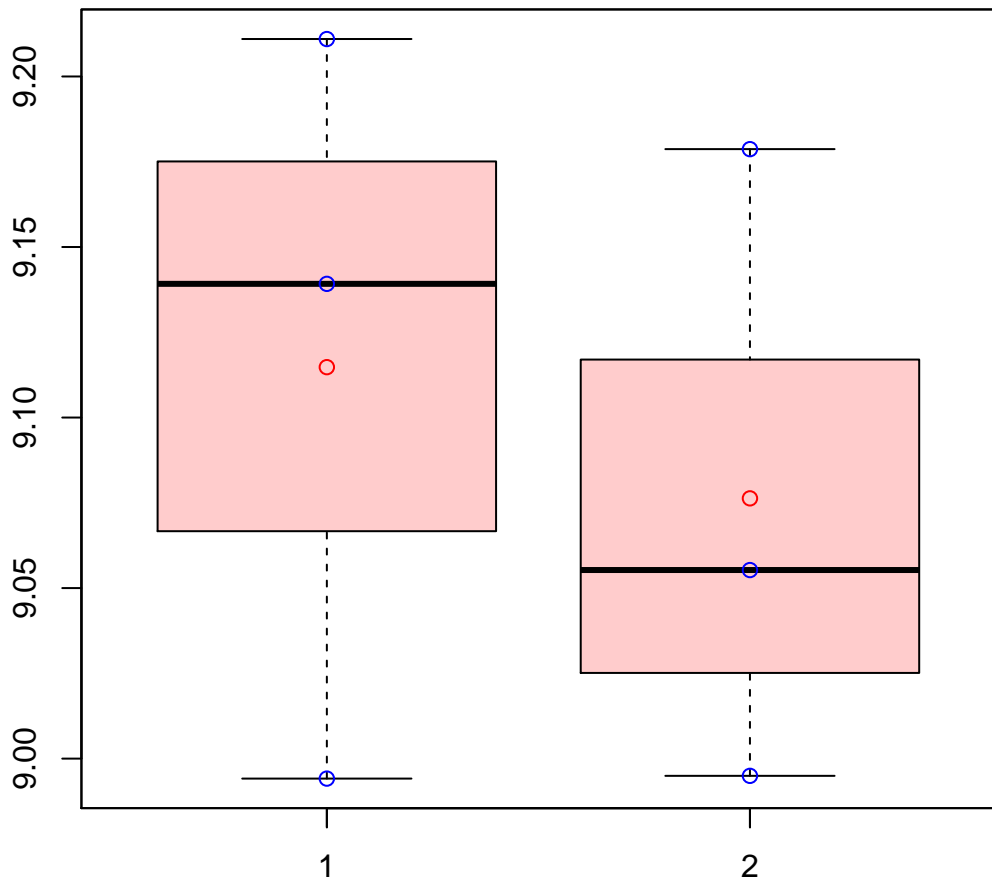

t-Test: p-value = 0.67

# CL4694Contig4|CL4694Contig4

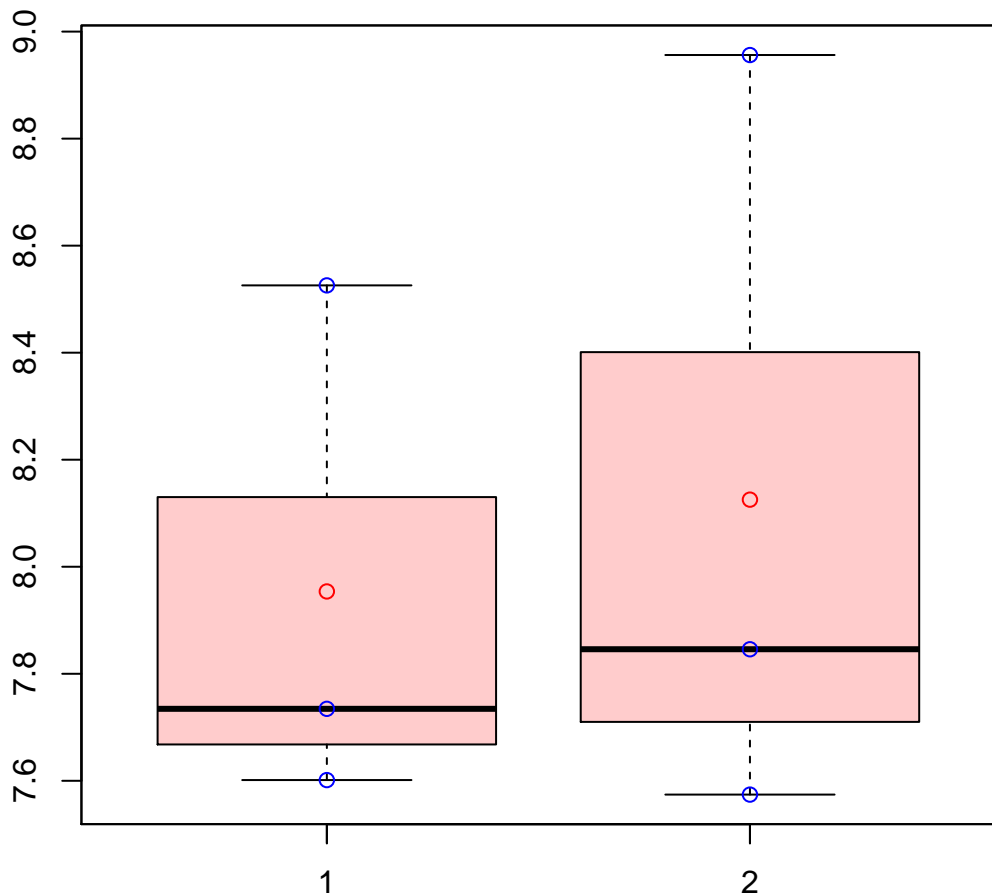

t-Test: p-value = 0.76

# CL4697Contig4|CL4697Contig4

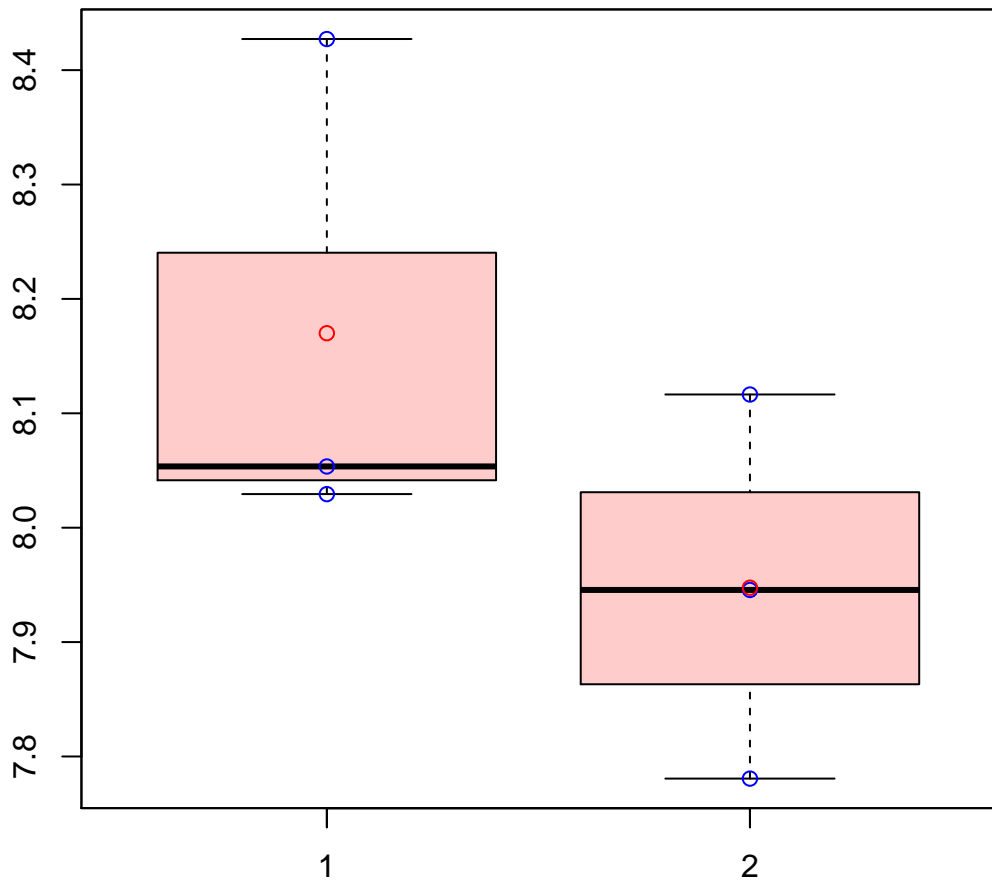

t-Test: p-value = 0.24

# CL46Contig19|CL46Contig19

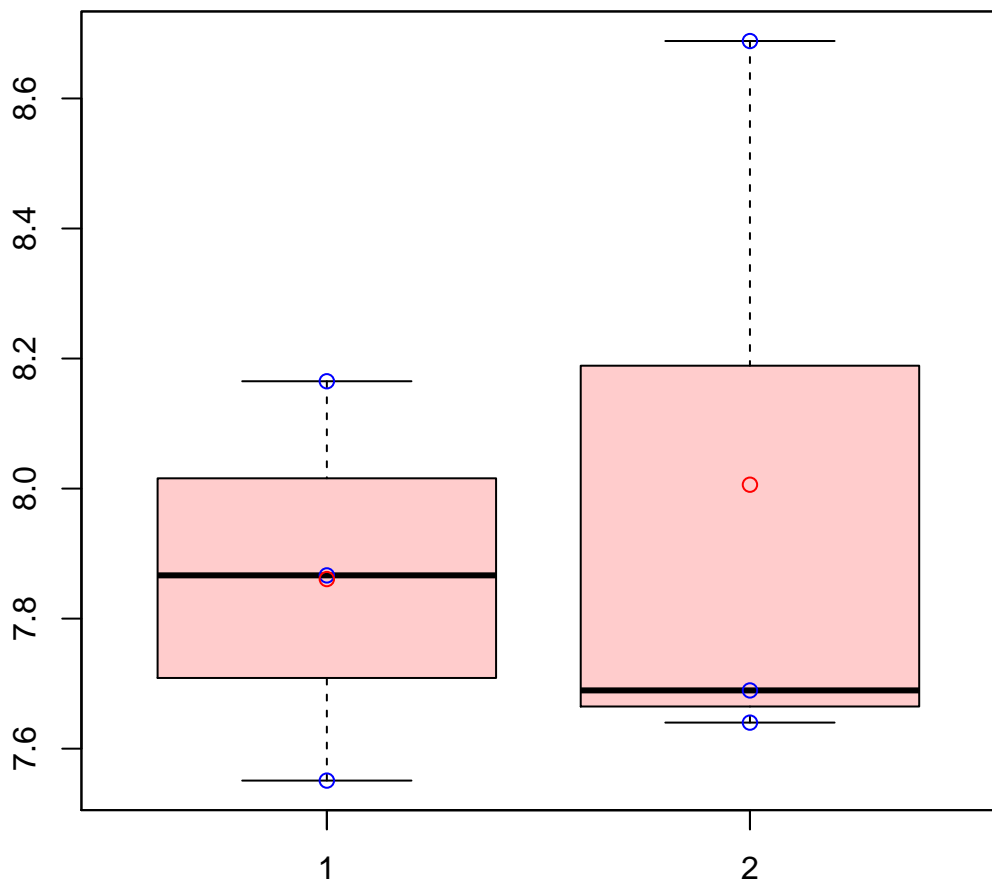

t-Test: p-value = 0.73

# CL4703Contig4|CL4703Contig4

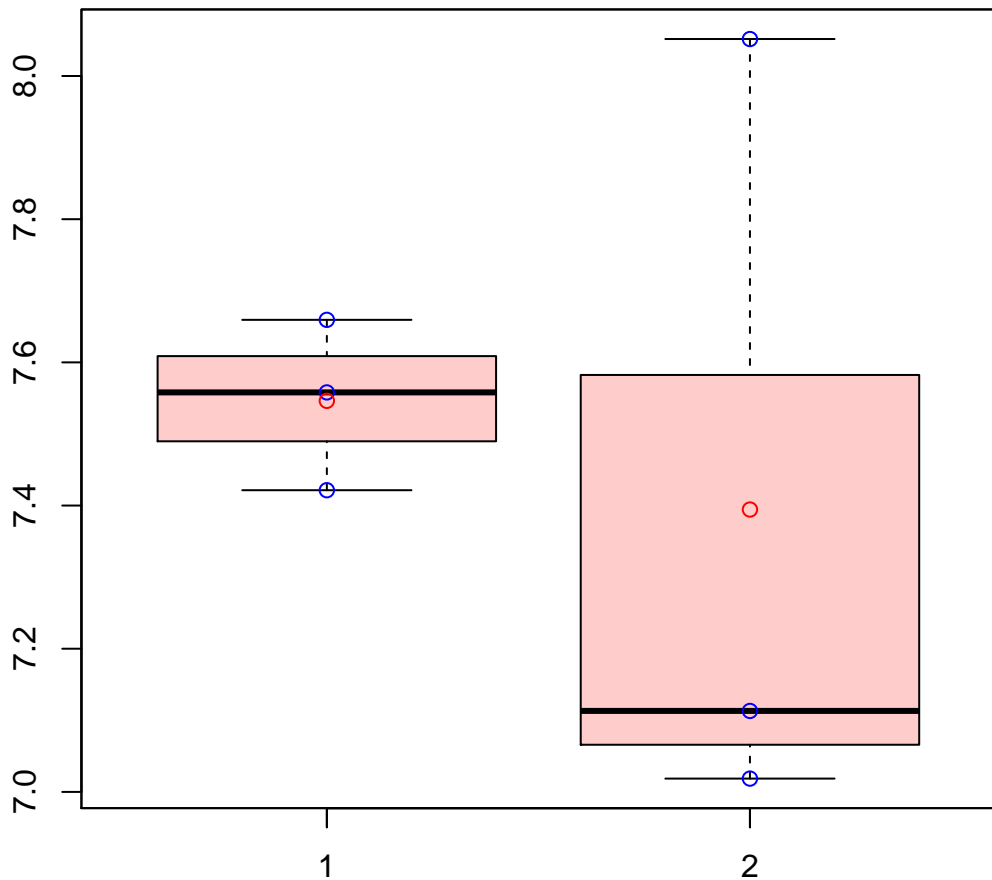

t-Test: p-value = 0.69

# CL4704Contig1|CL4704Contig1

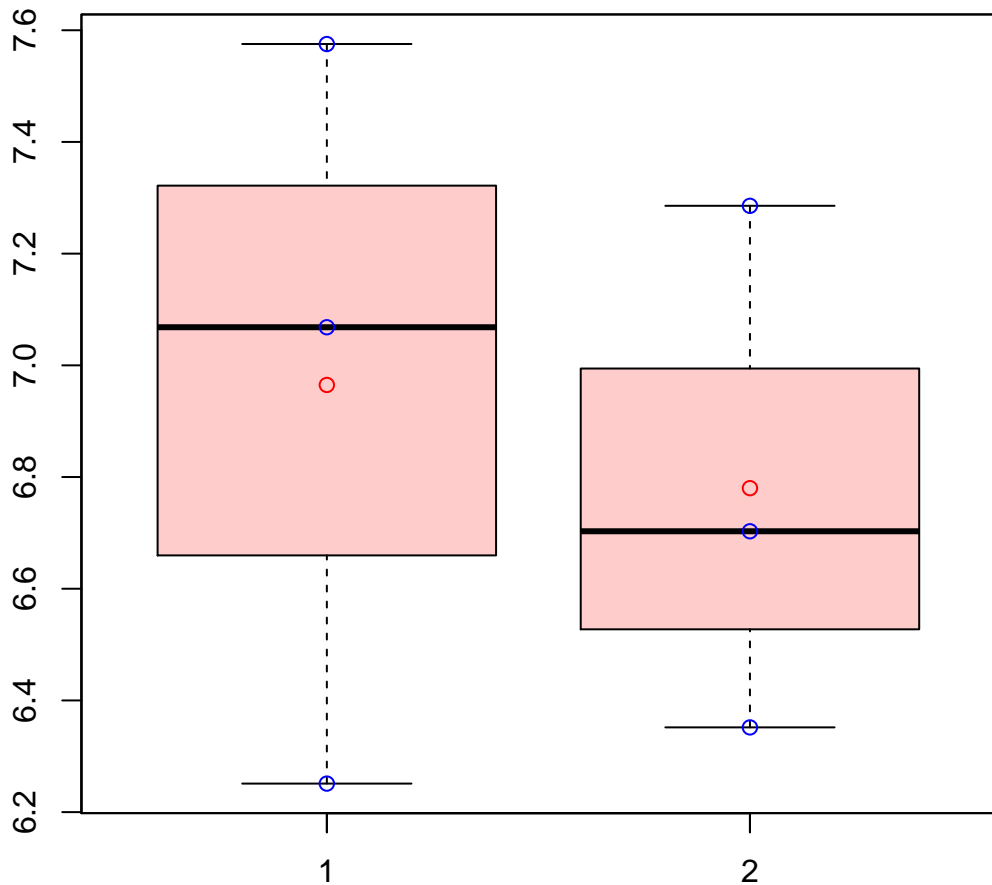

t-Test: p-value = 0.72

# CL4710Contig1|CL4710Contig1

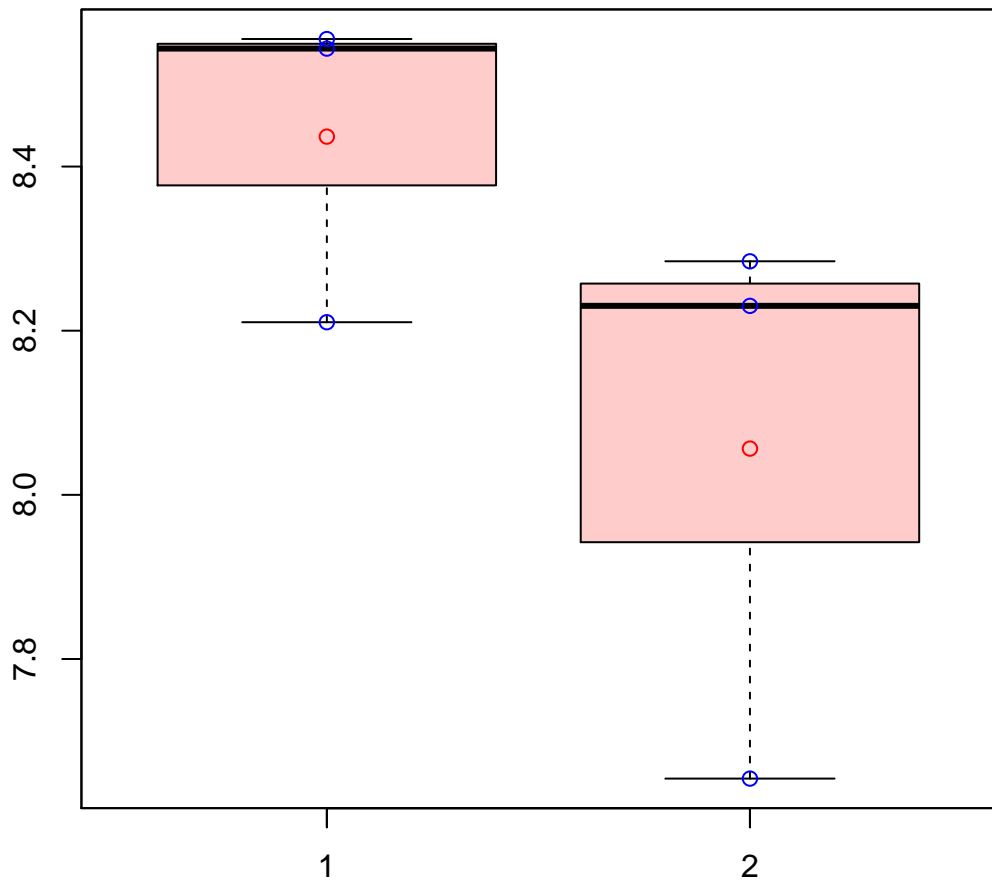

t-Test: p-value = 0.19

# CL4711Contig1|CL4711Contig1

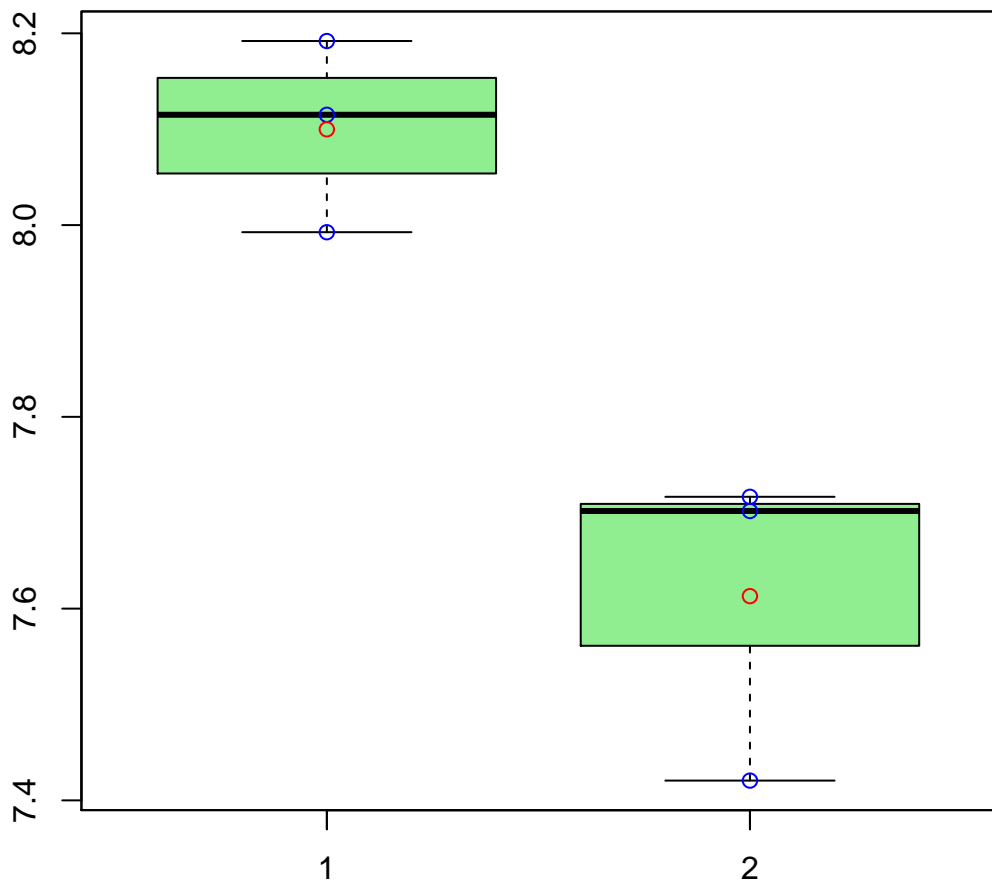

t-Test: p-value = 0.02



# CL471Contig1|CL471Contig1

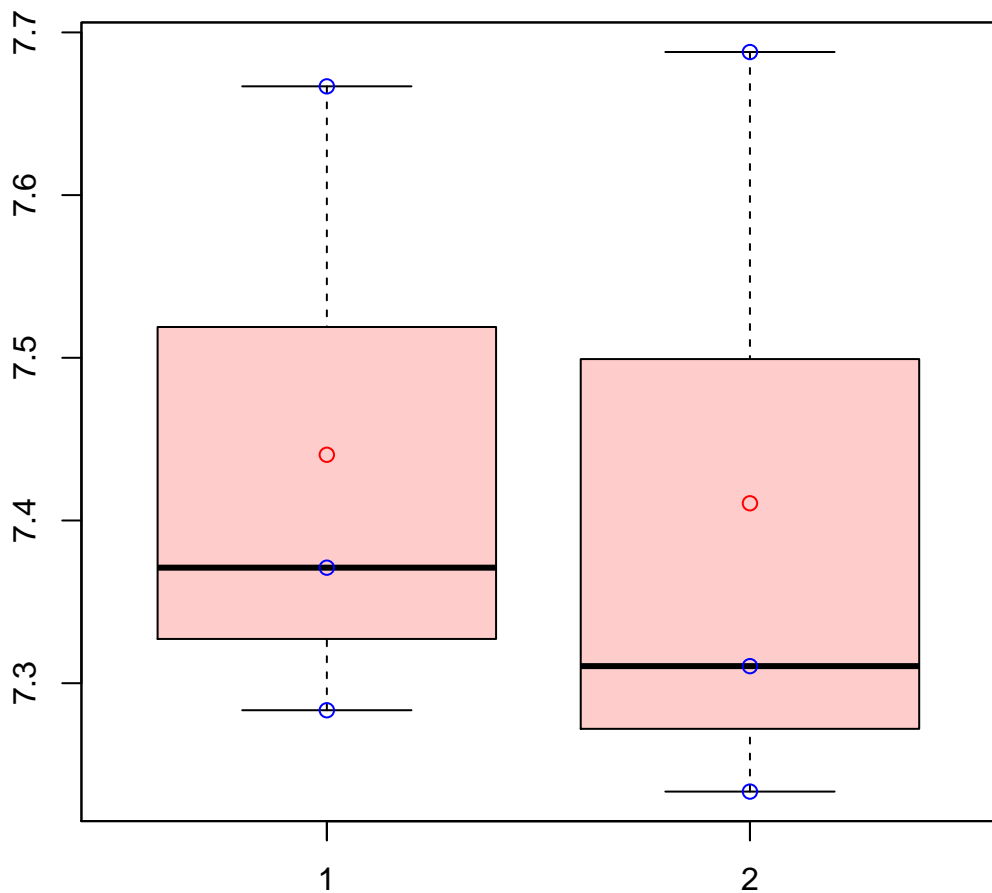

t-Test: p-value = 0.88

# CL471Contig6|CL471Contig6

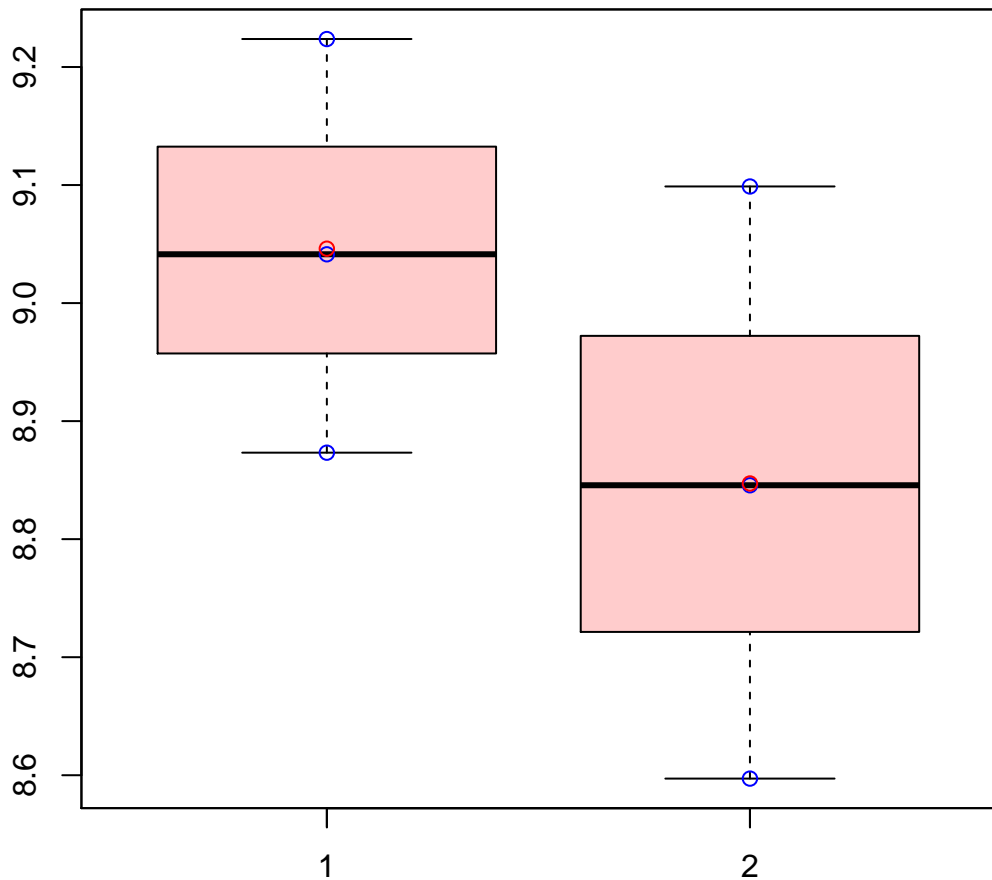

t-Test: p-value = 0.33

# CL471Contig7|CL471Contig7

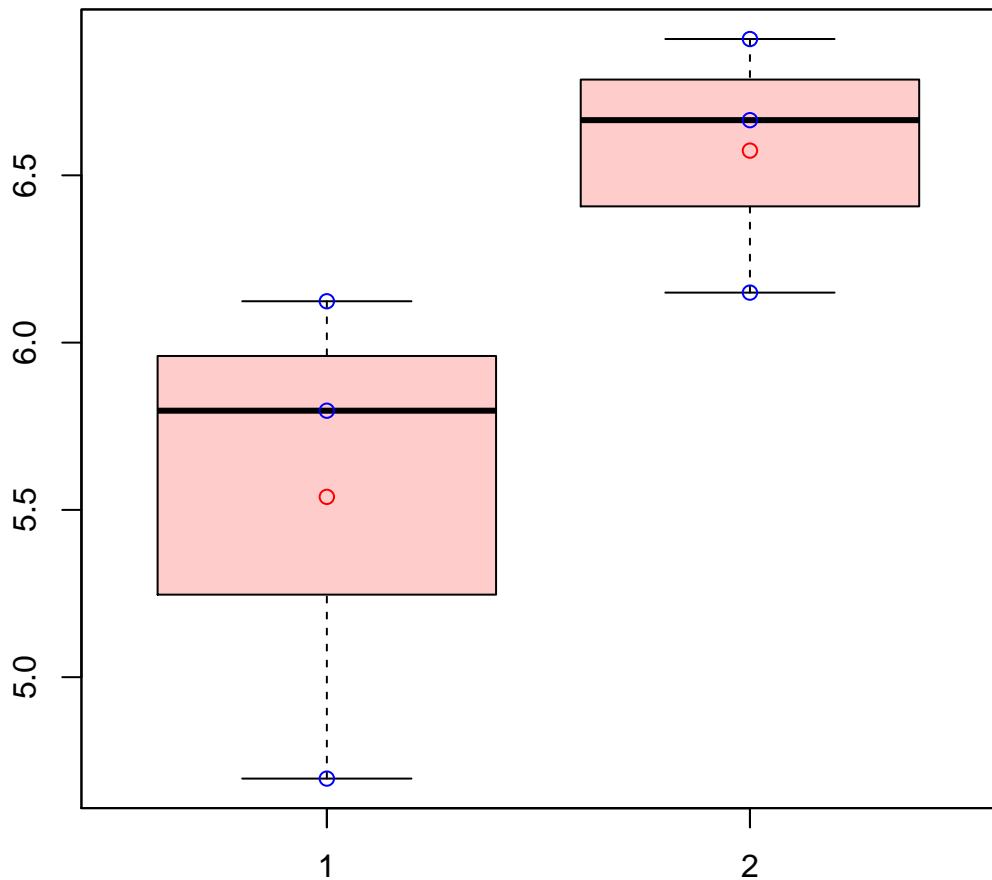

t-Test: p-value = 0.12

# CL4722Contig3|CL4722Contig3

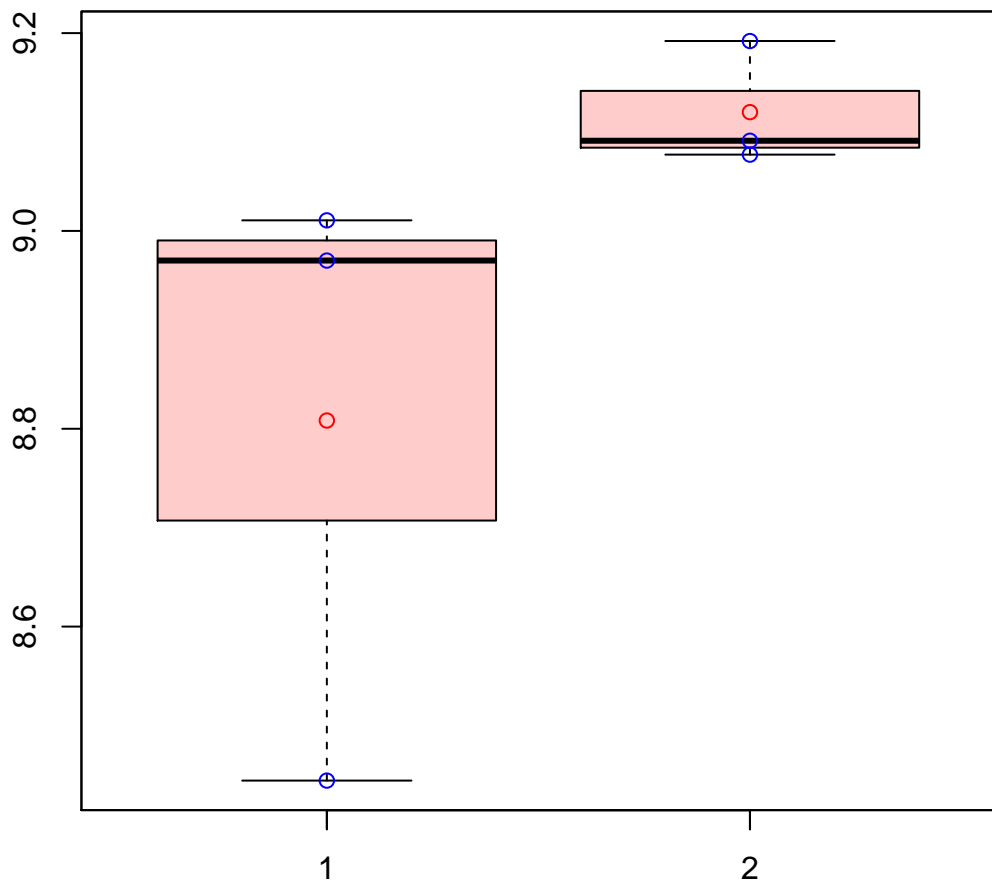

t-Test: p-value = 0.23

# CL4723Contig1|CL4723Contig1

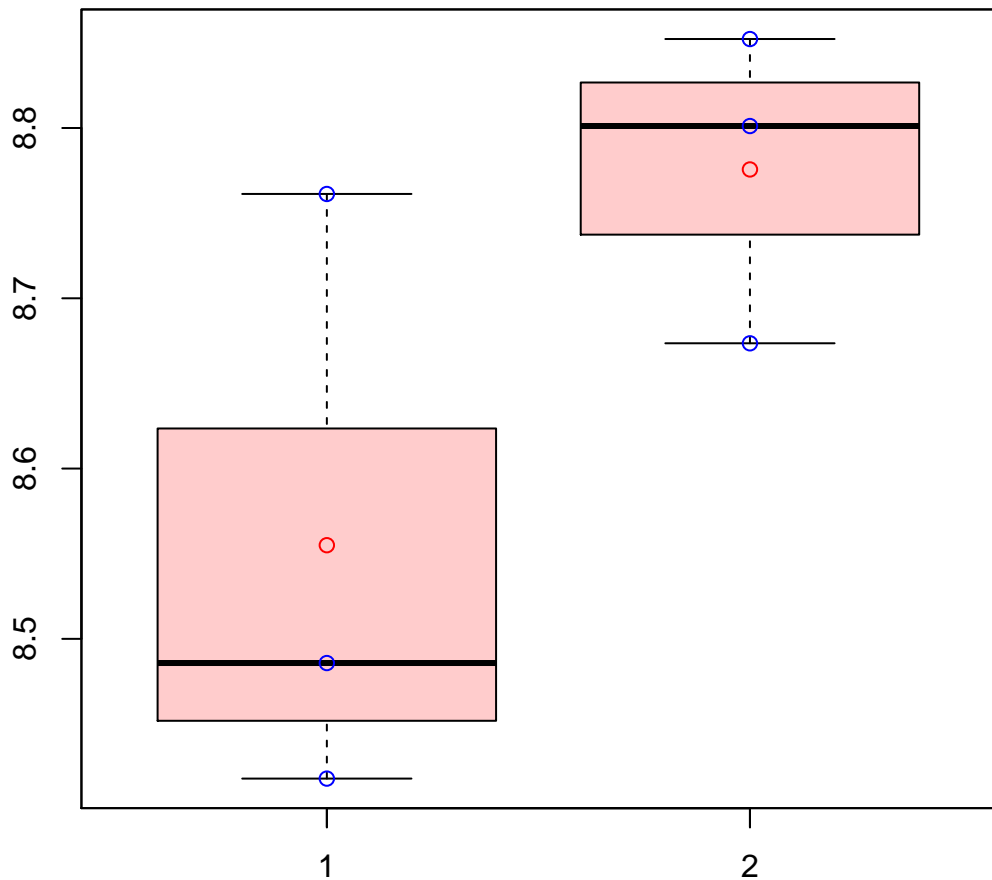

t-Test: p-value = 0.16

# CL4723Contig2|CL4723Contig2

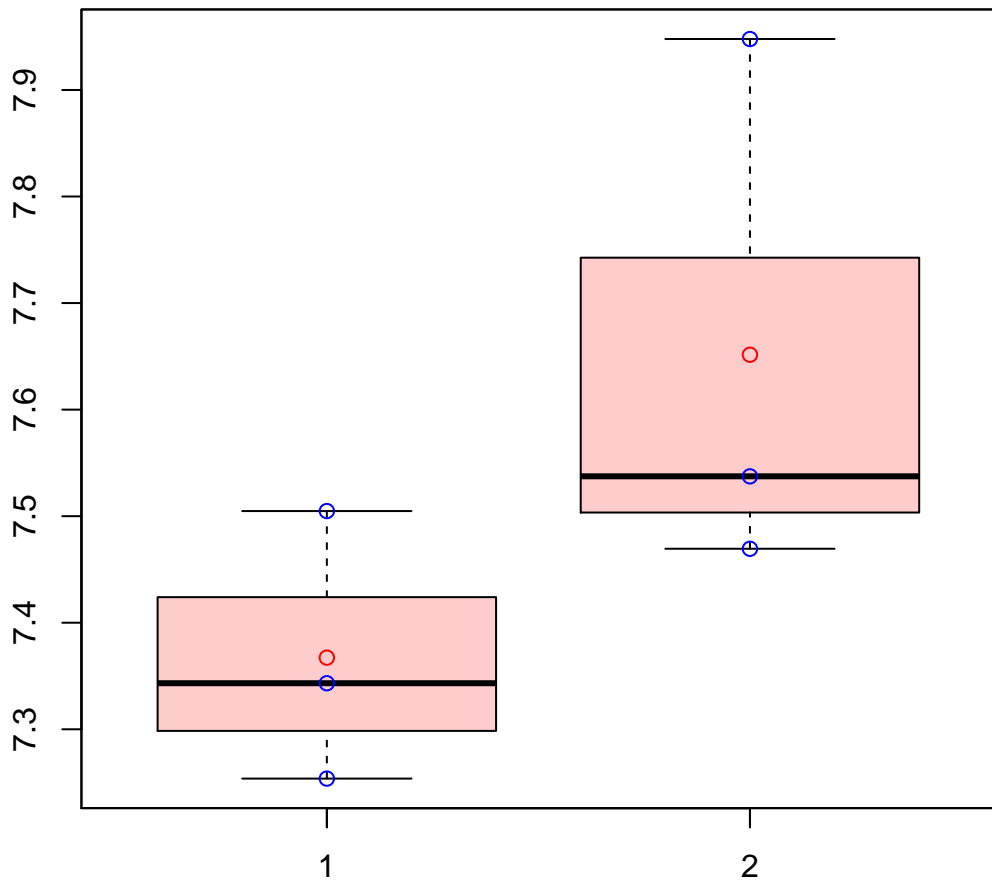

t-Test: p-value = 0.19

# CL4723Contig4|CL4723Contig4

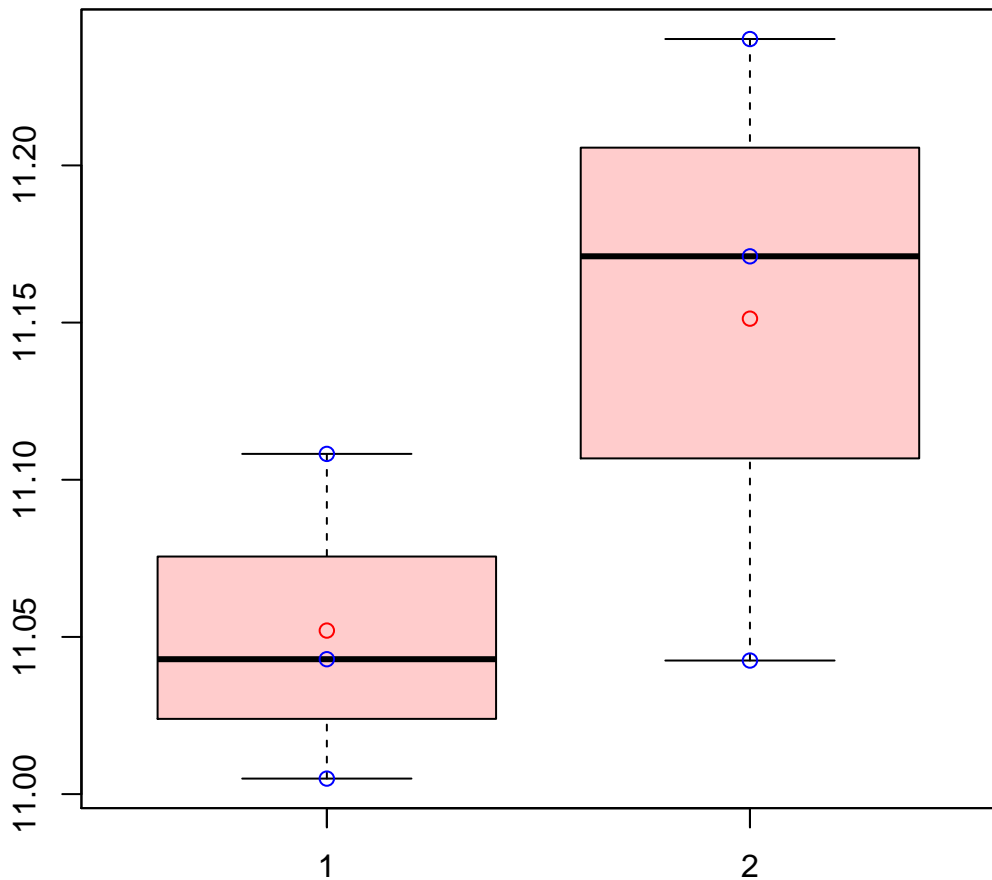

t-Test: p-value = 0.23

# CL4731Contig2|CL4731Contig2

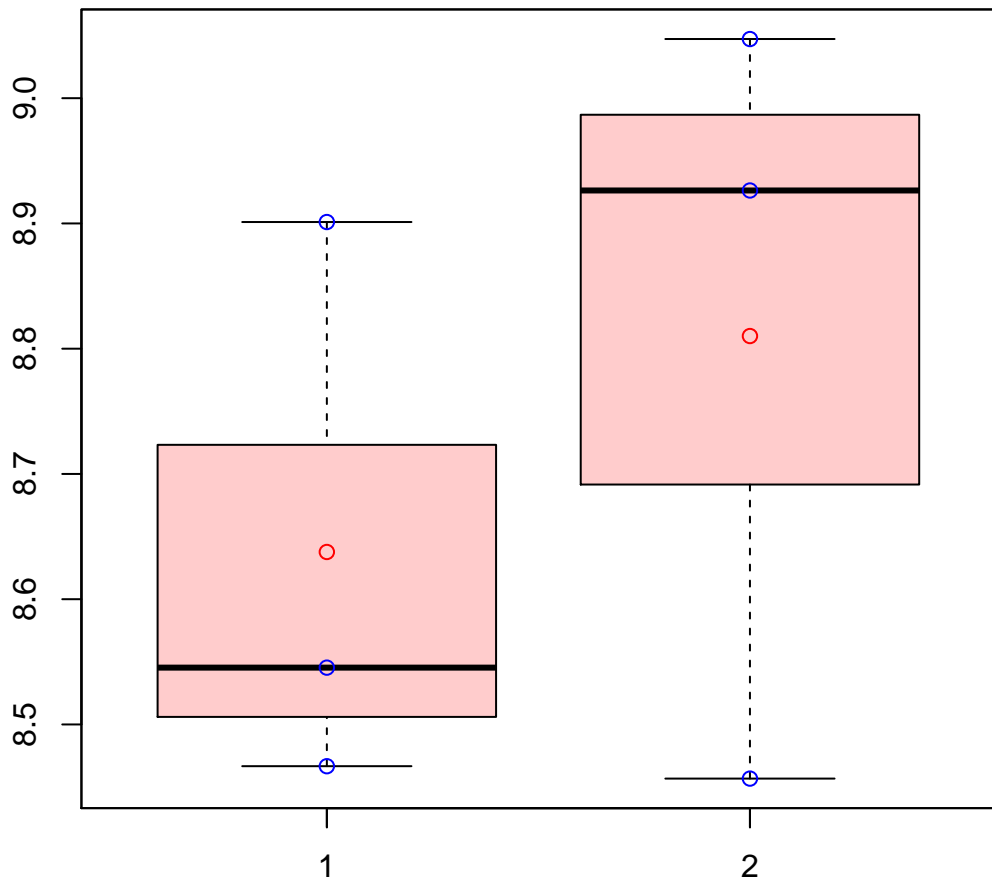

t-Test: p-value = 0.49



# CL4734Contig2|CL4734Contig2

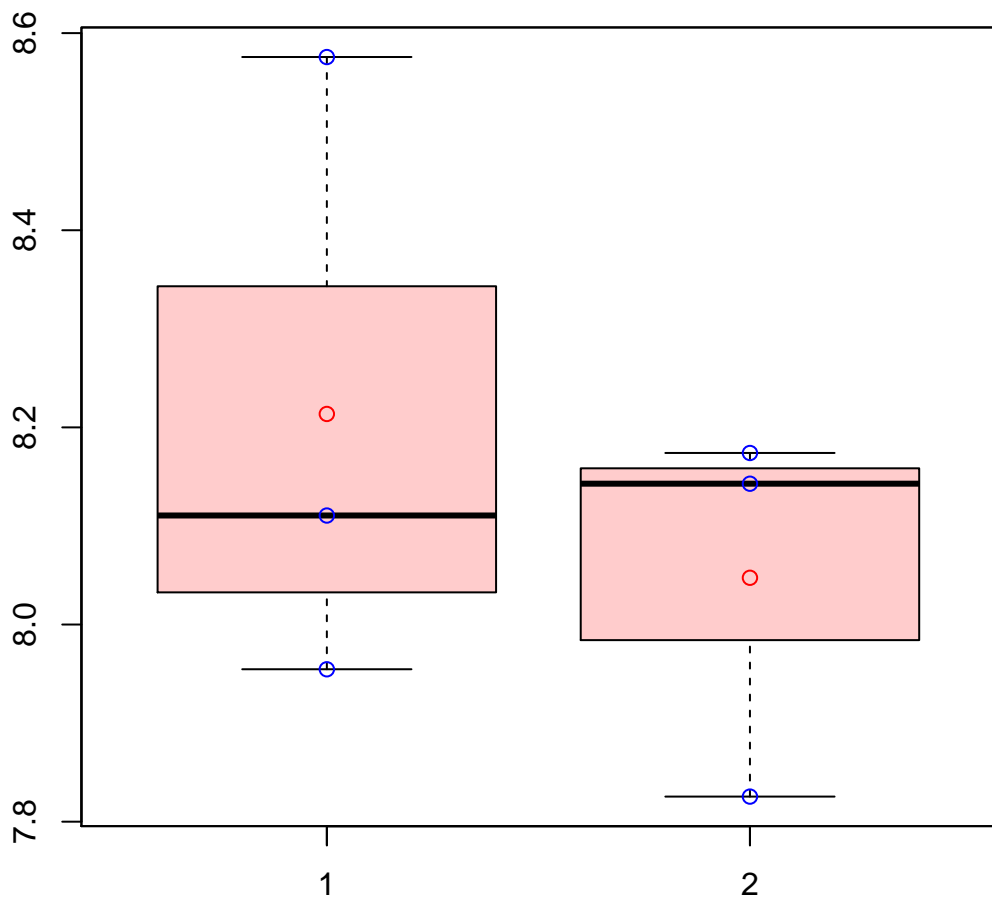

t-Test: p-value = 0.5

# CL4737Contig2|CL4737Contig2

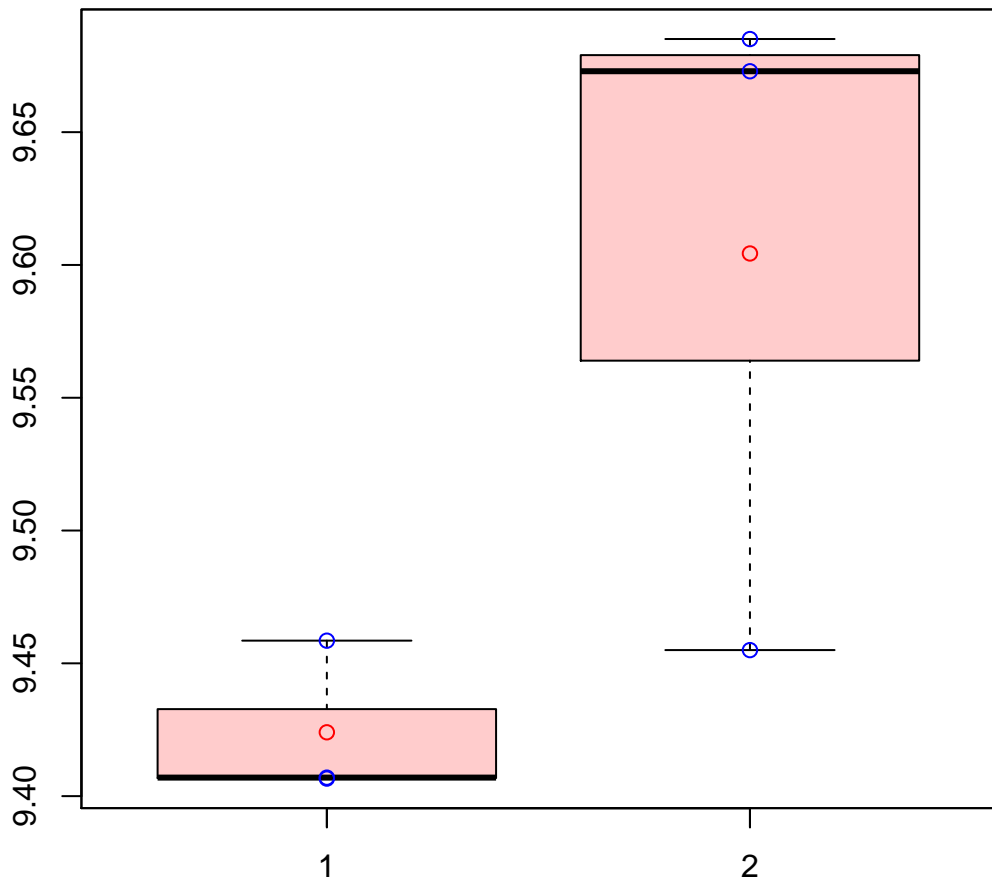

t-Test: p-value = 0.13

# CL474Contig3|CL474Contig3

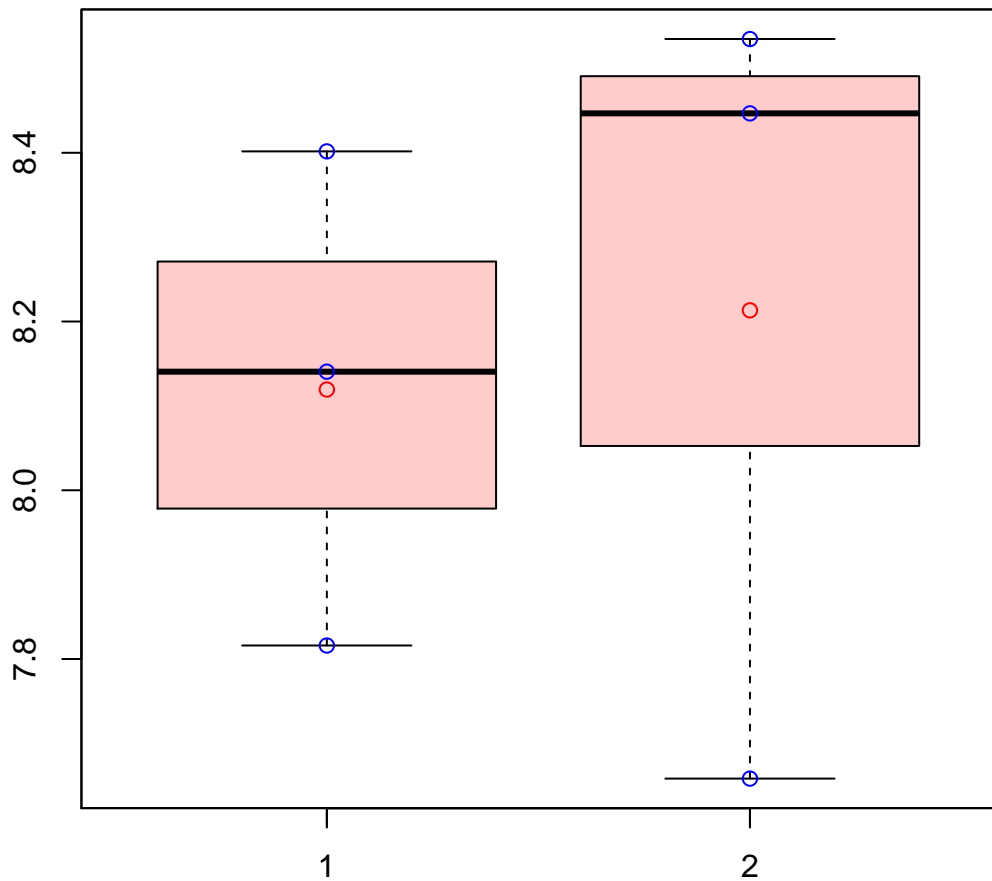

t-Test: p-value = 0.79

# CL4752Contig1|CL4752Contig1

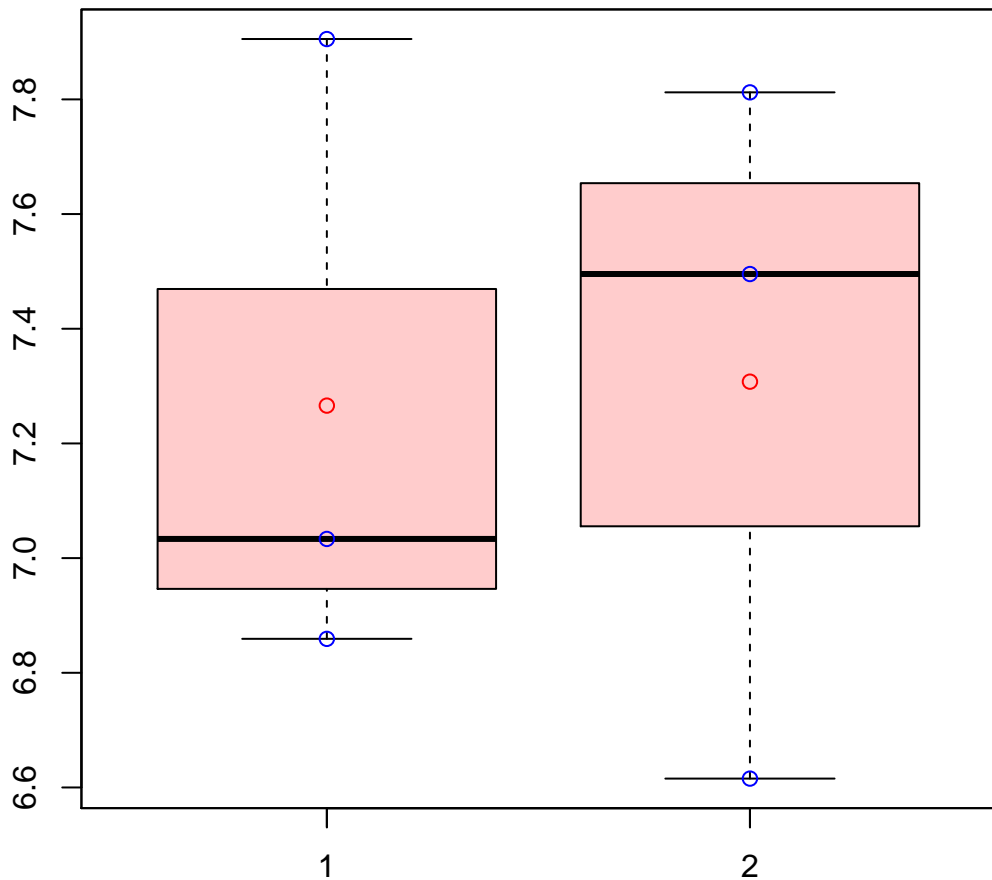

t-Test: p-value = 0.94

# CL475Contig8|CL475Contig8

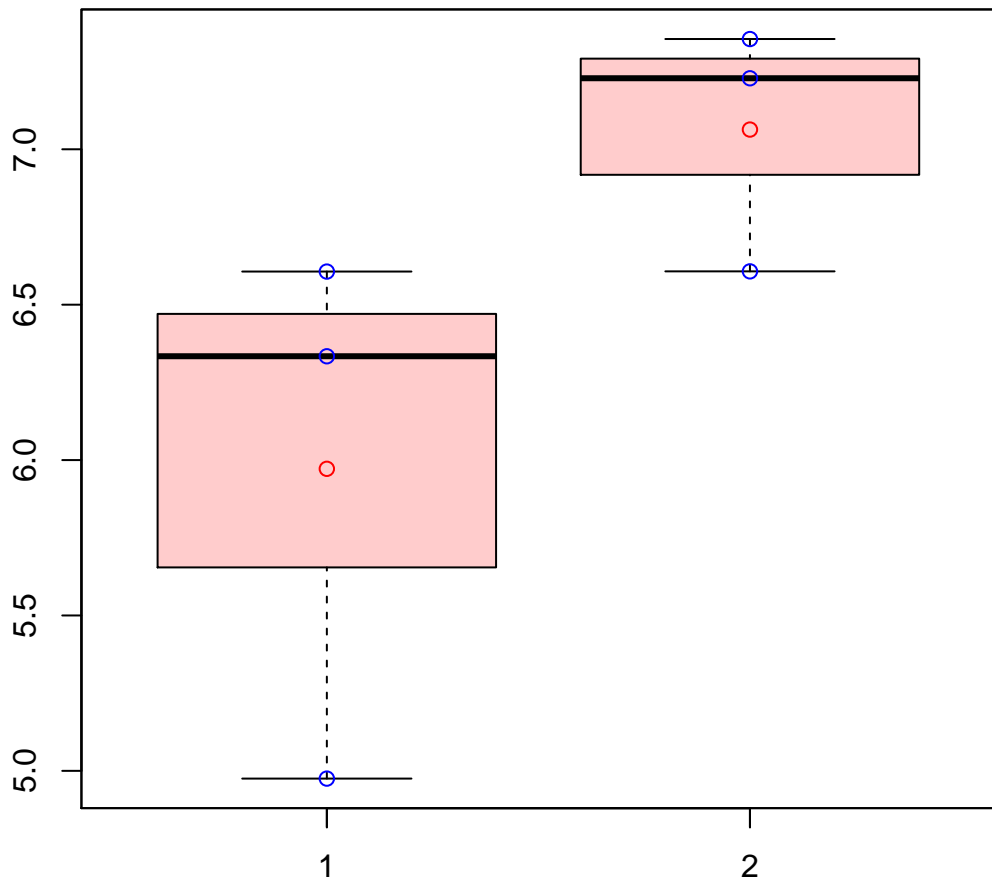

t-Test: p-value = 0.15

# CL4760Contig2|CL4760Contig2

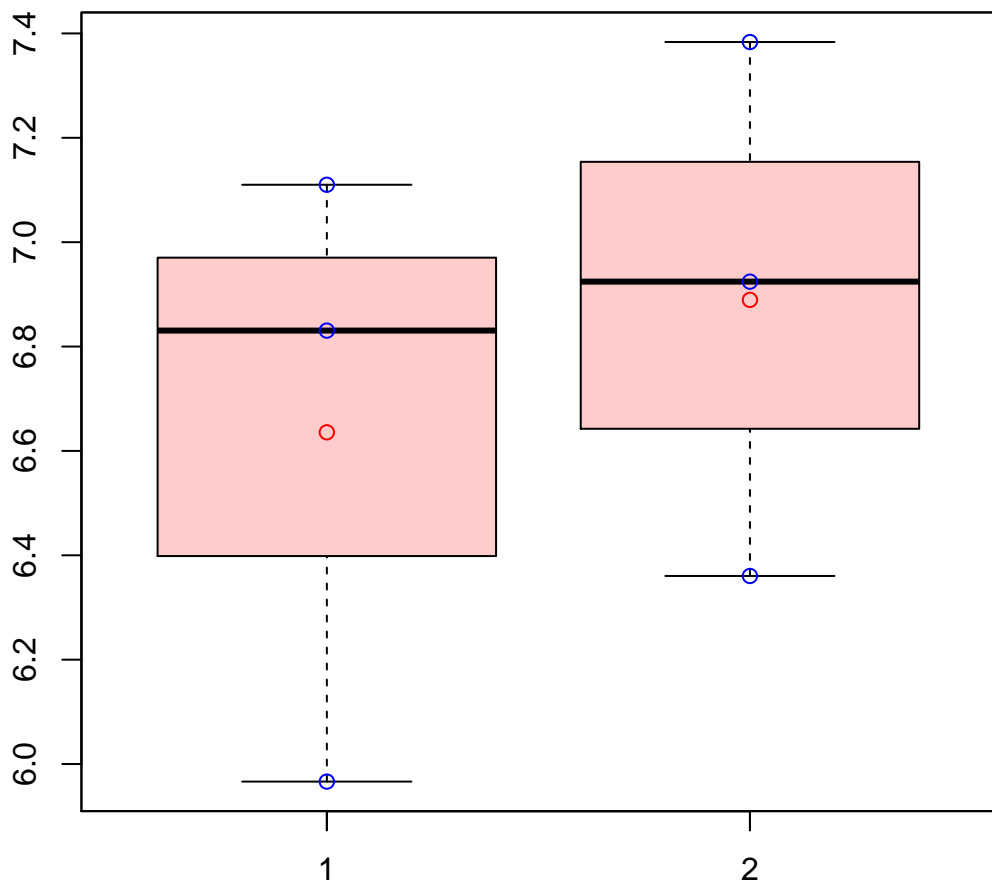

t-Test: p-value = 0.61

# CL4766Contig1|CL4766Contig1

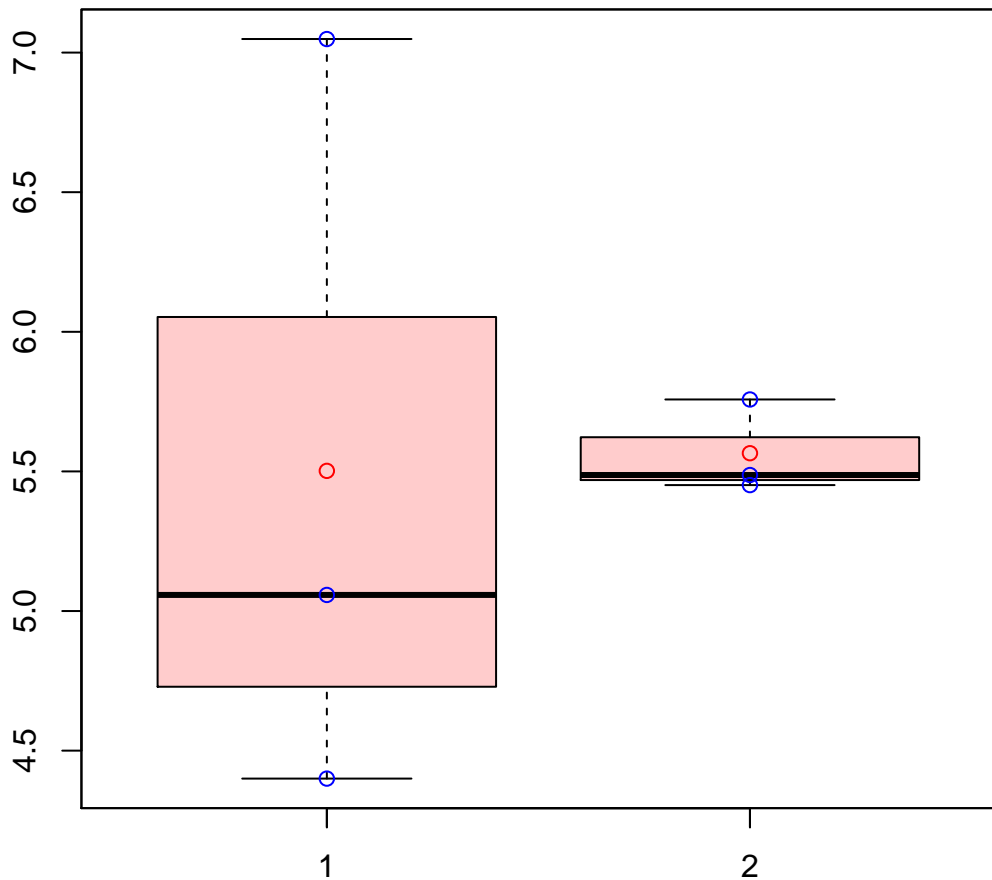

t-Test: p-value = 0.94

# CL476Contig8|CL476Contig8

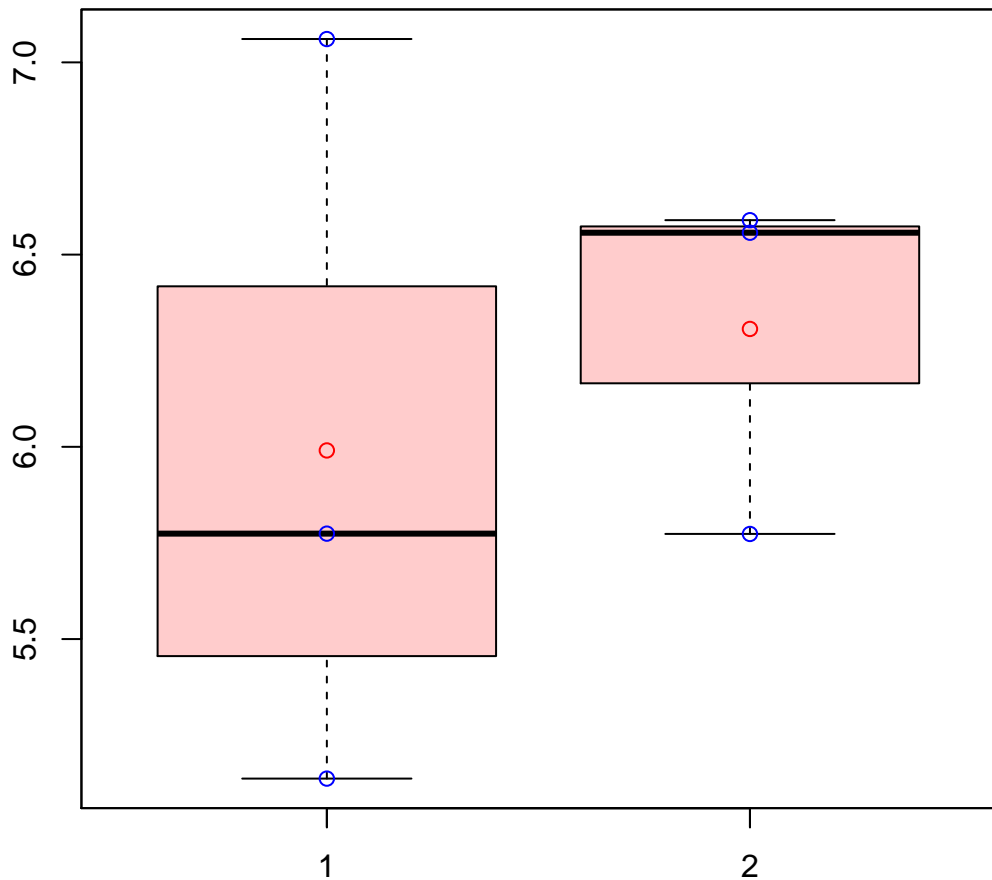

t-Test: p-value = 0.65



# CL477Contig1|CL477Contig1

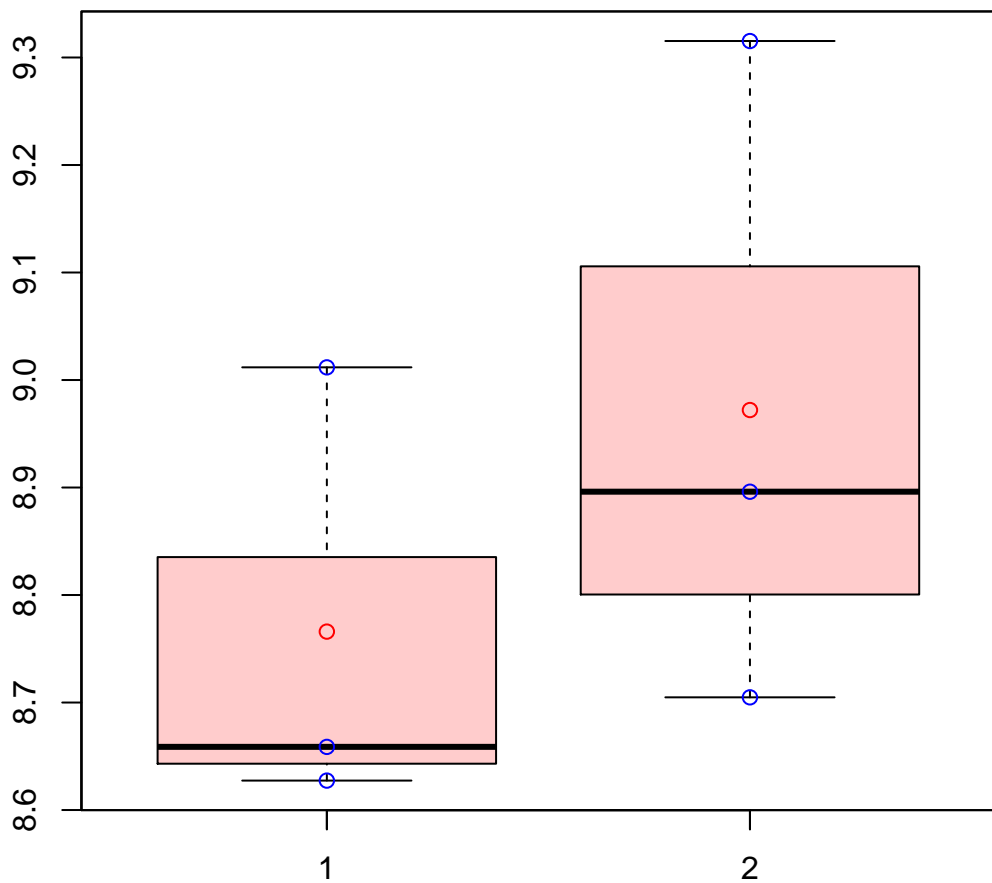

t-Test: p-value = 0.41

# CL478Contig1|CL478Contig1

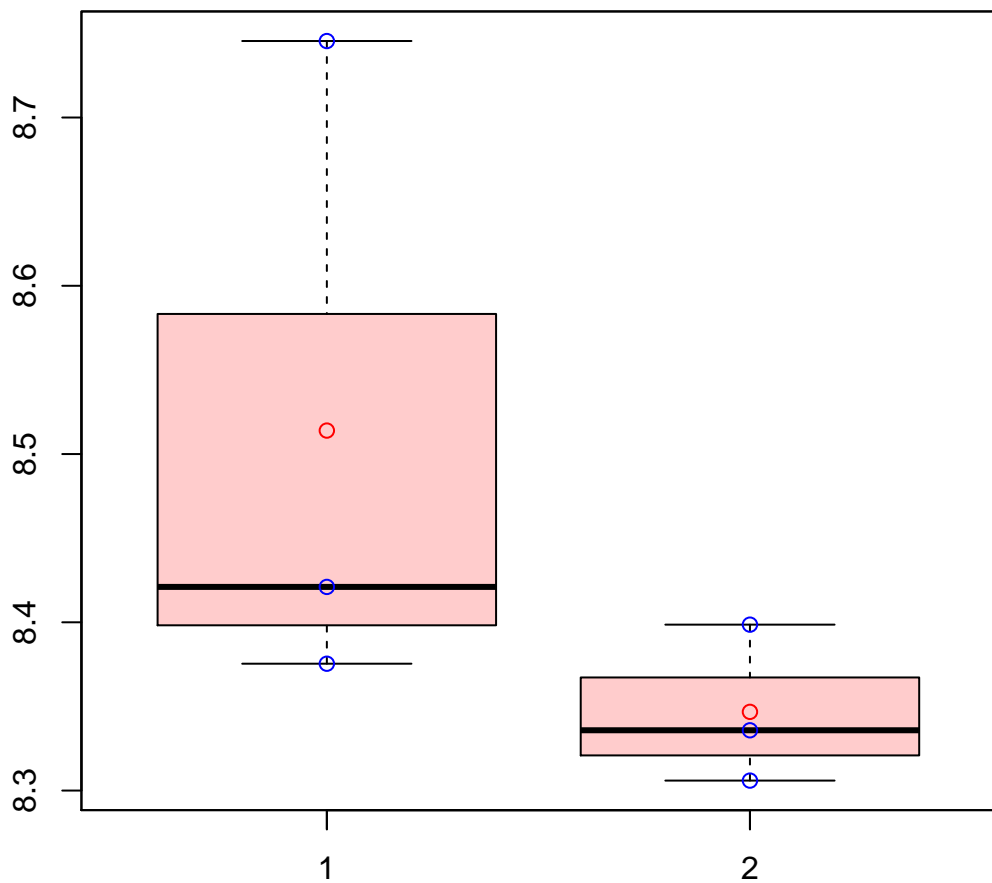

t-Test: p-value = 0.29

# CL478Contig2|CL478Contig2

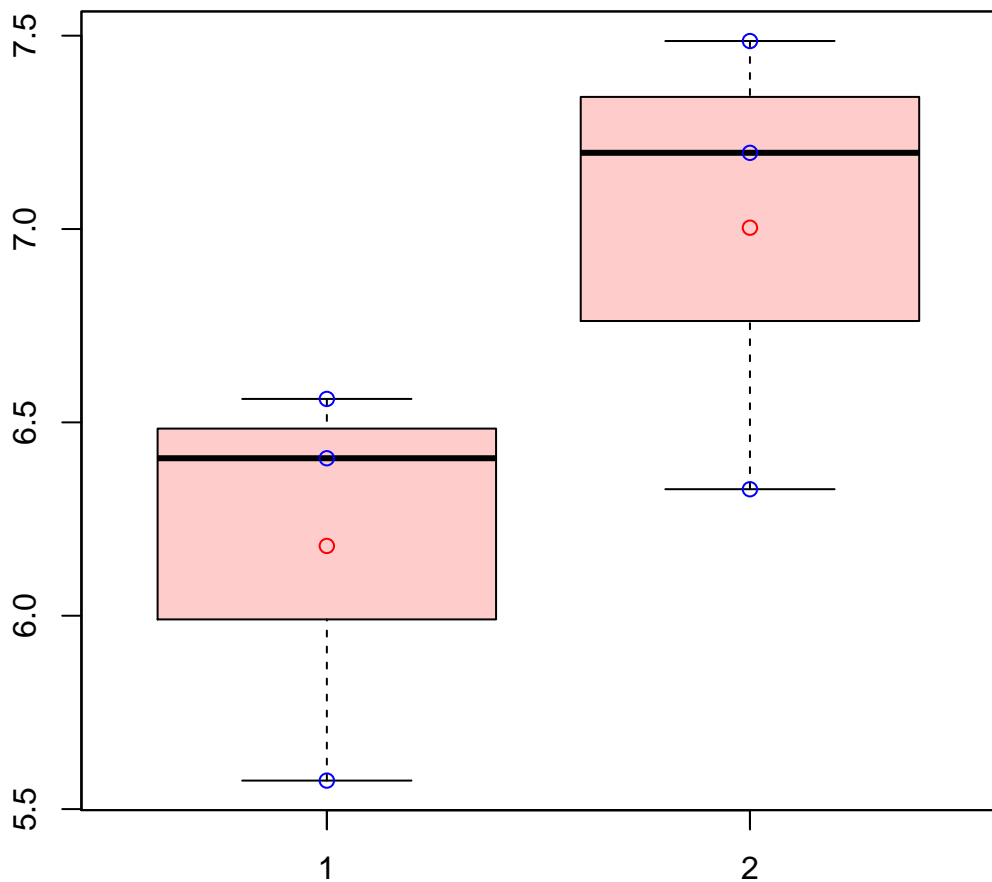

t-Test: p-value = 0.15

# CL4790Contig2|CL4790Contig2

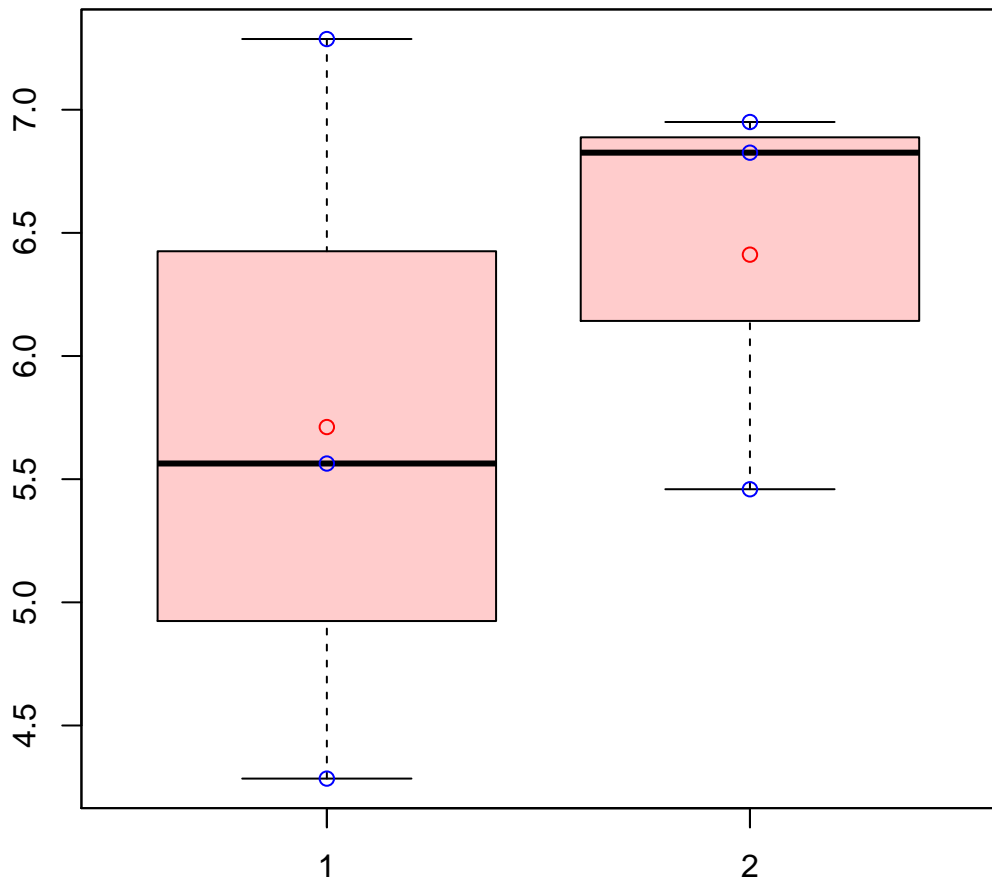

t-Test: p-value = 0.53

# CL4791Contig2|CL4791Contig2

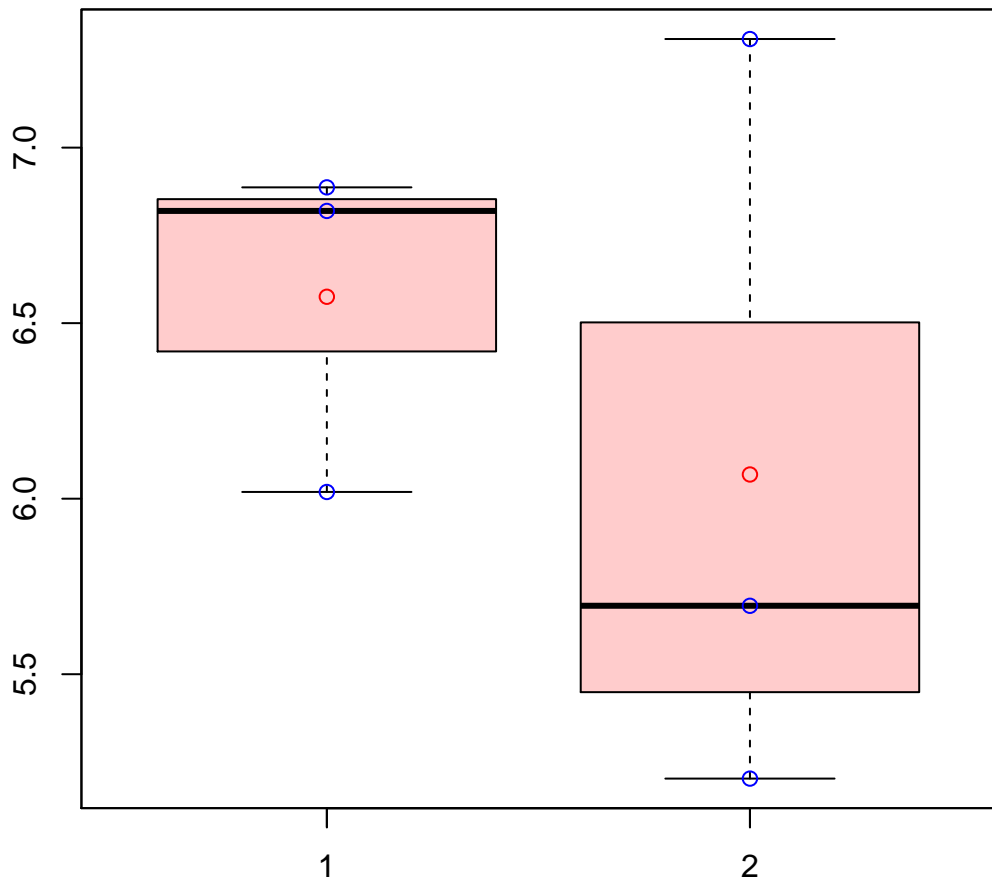

t-Test: p-value = 0.52

# CL479Contig1|CL479Contig1

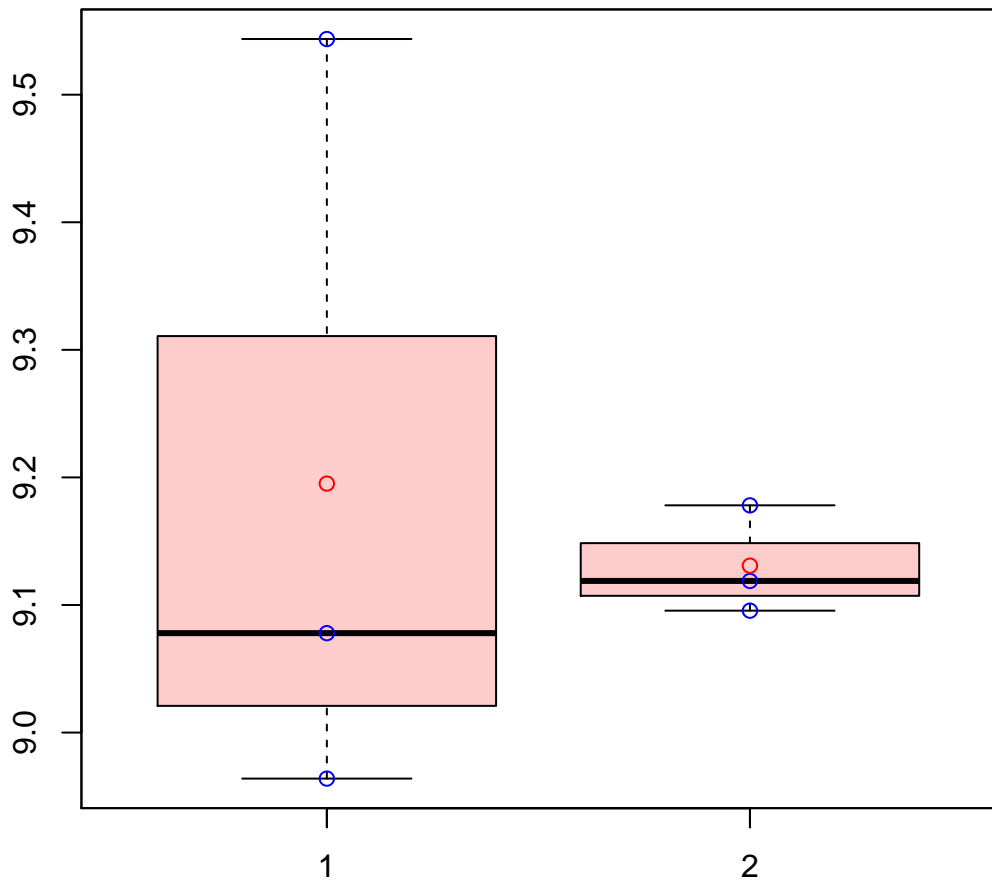

t-Test: p-value = 0.75

# CL47Contig45|CL47Contig45

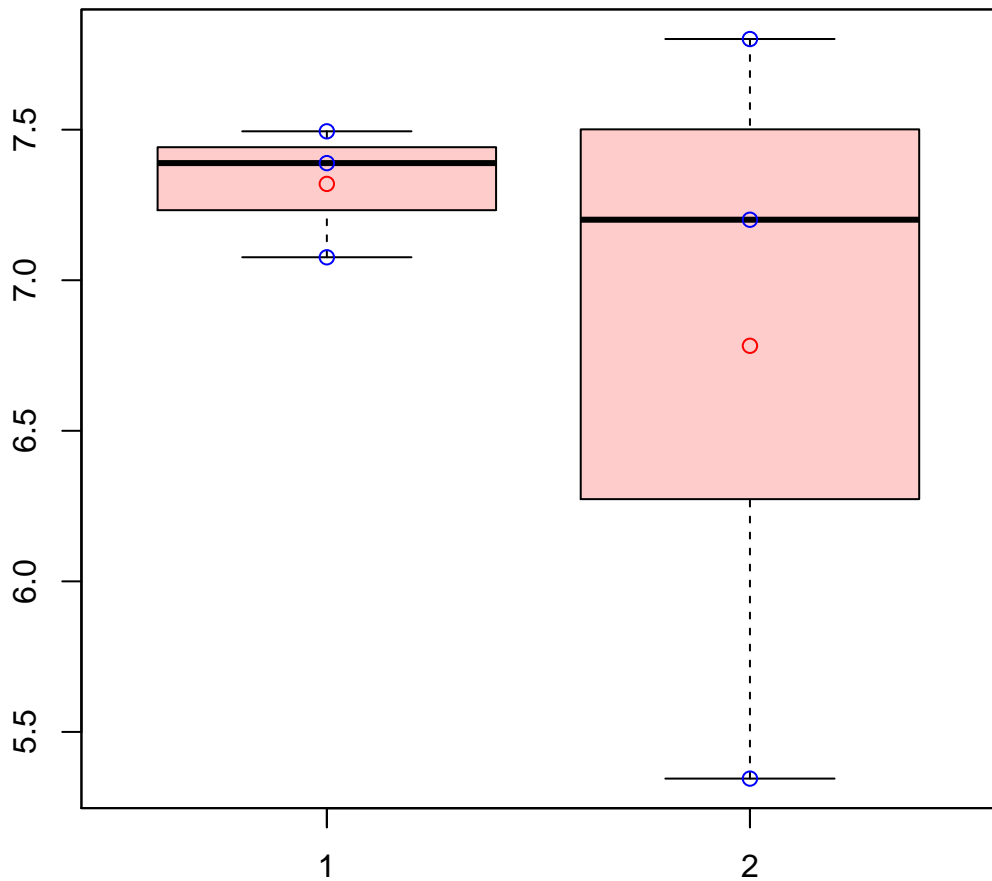

t-Test: p-value = 0.54

# CL4801Contig1|CL4801Contig1

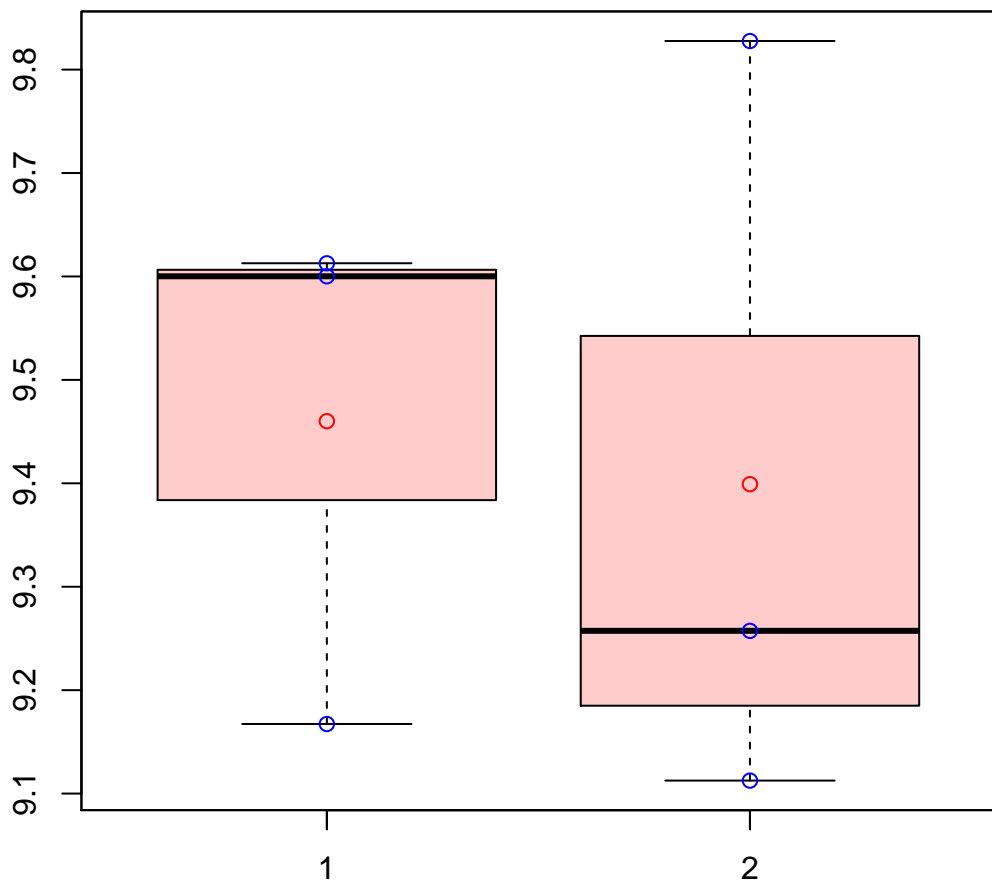

t-Test: p-value = 0.83



# CL4802Contig1|CL4802Contig1

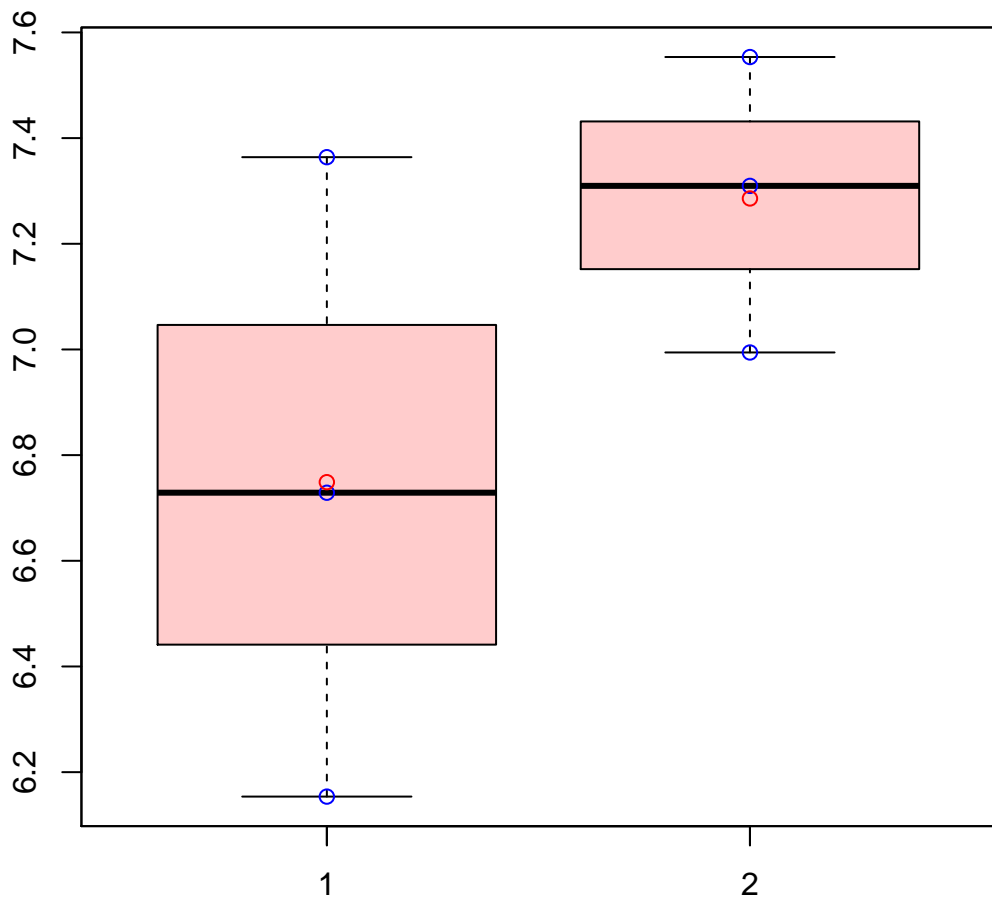

t-Test: p-value = 0.26

# CL482Contig7|CL482Contig7

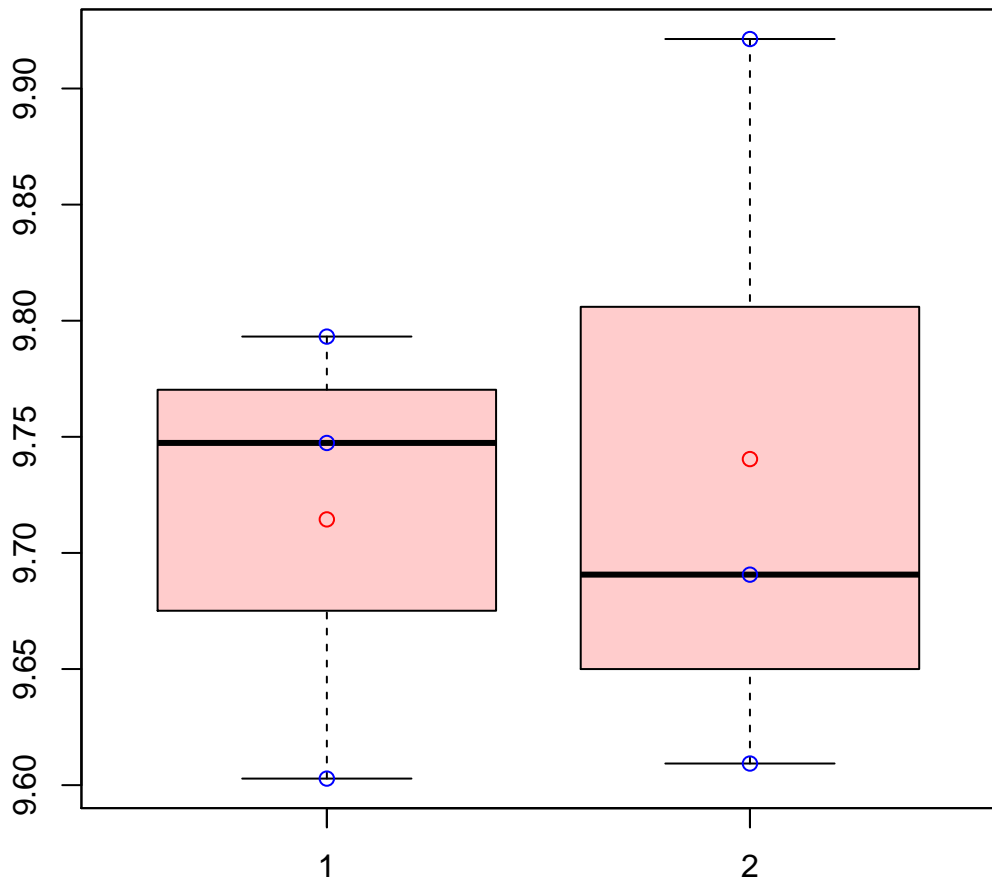

t-Test: p-value = 0.83

# CL4837Contig2|CL4837Contig2

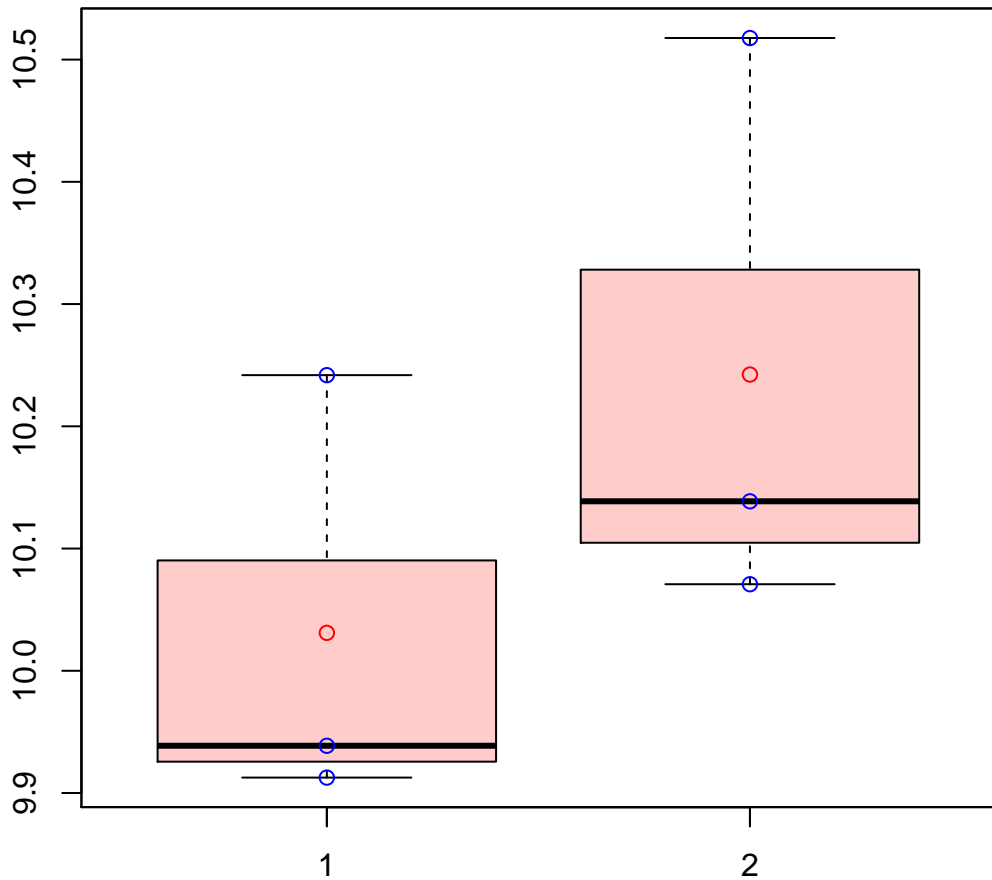

t-Test: p-value = 0.3

# CL4849Contig3|CL4849Contig3

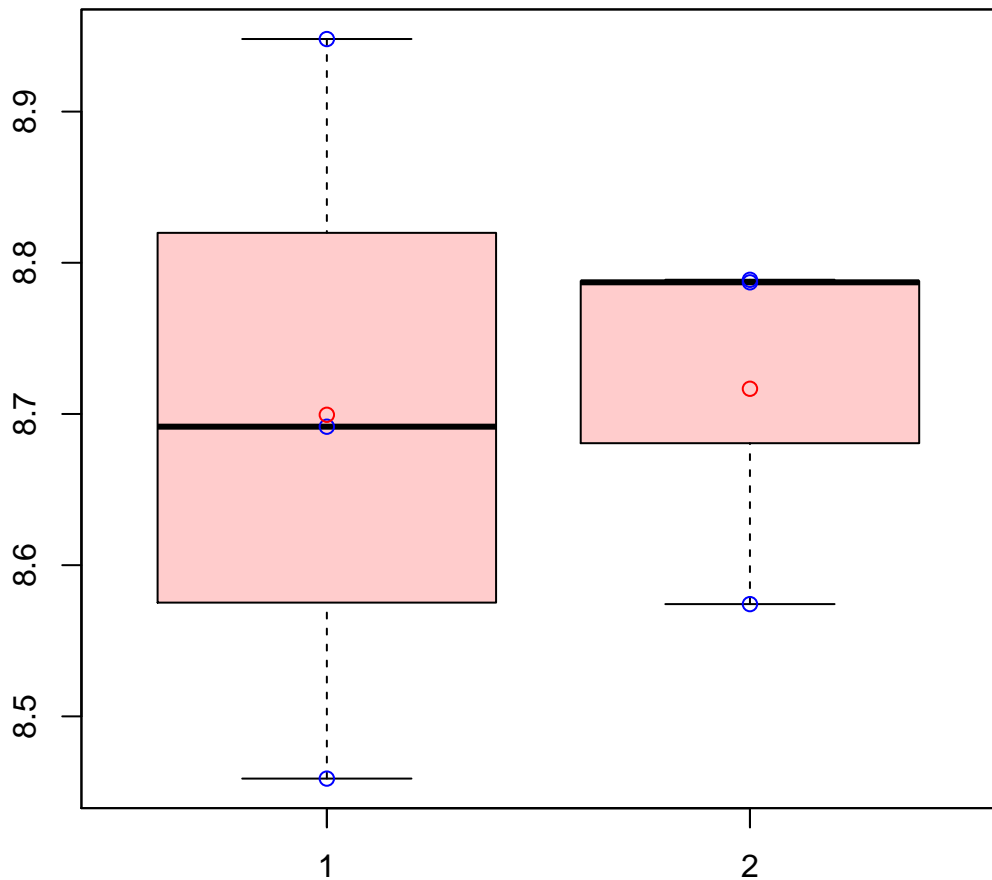

t-Test: p-value = 0.92

# CL4851Contig3|CL4851Contig3

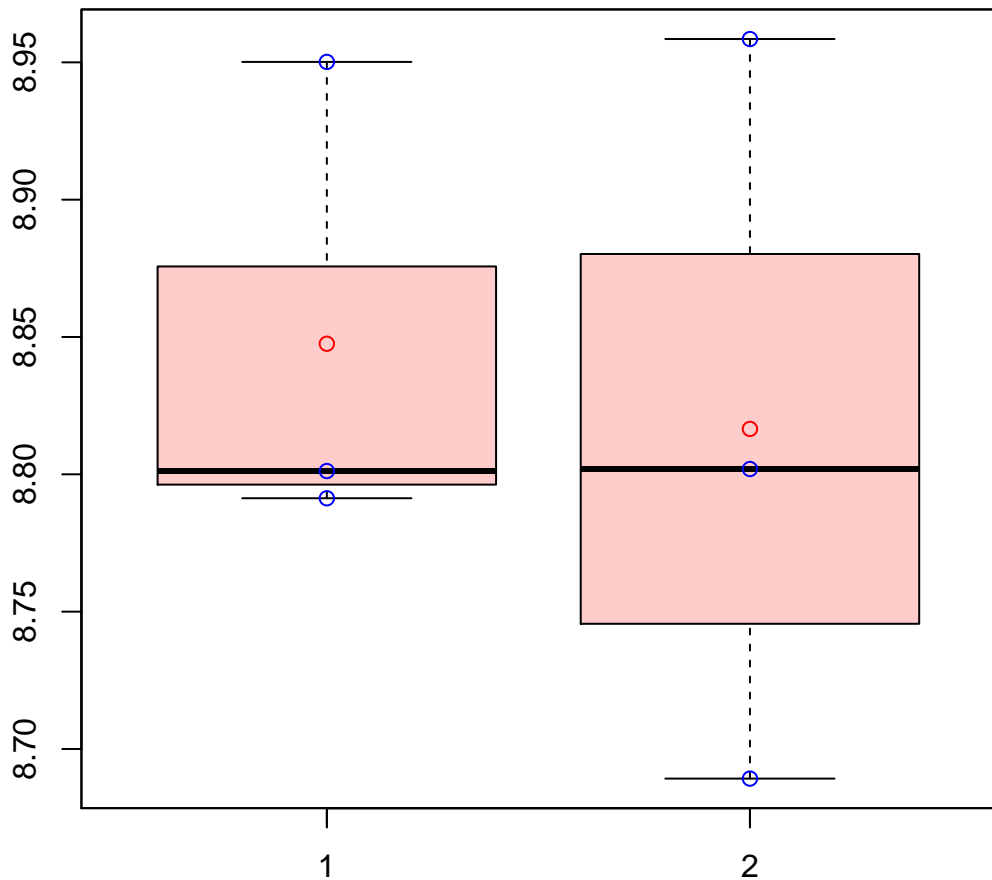

t-Test: p-value = 0.76

# CL4852Contig2|CL4852Contig2

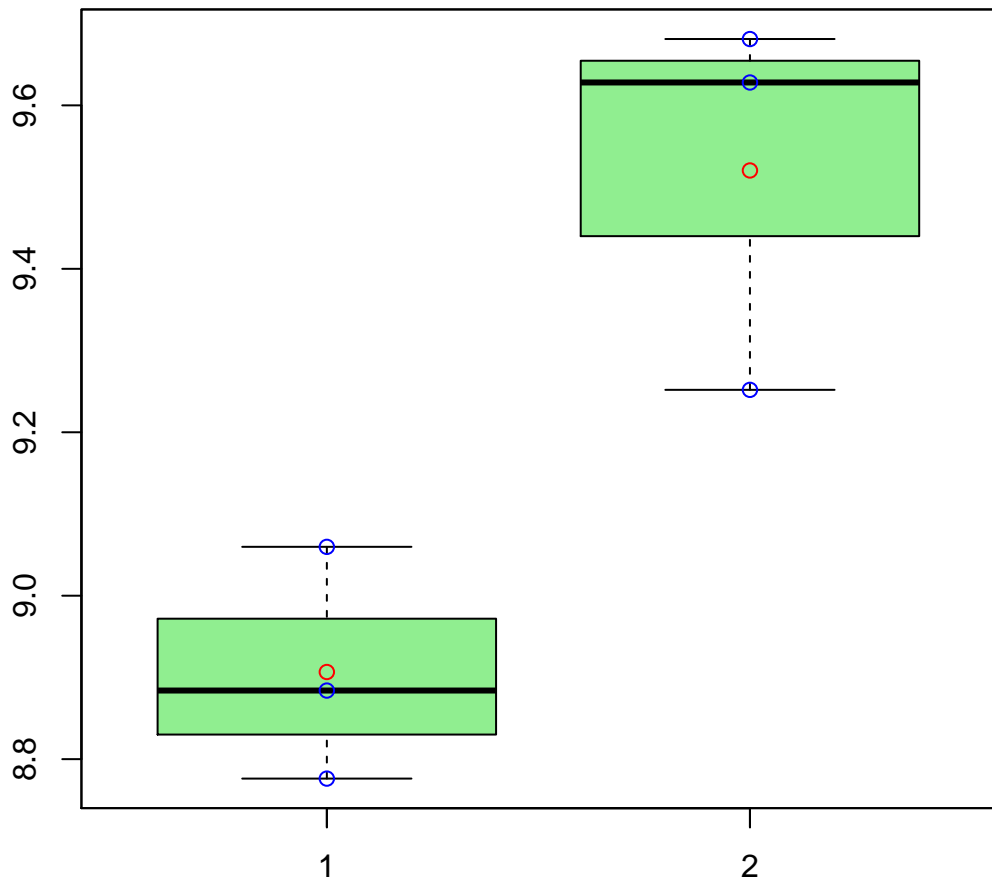

# CL4854Contig1|CL4854Contig1

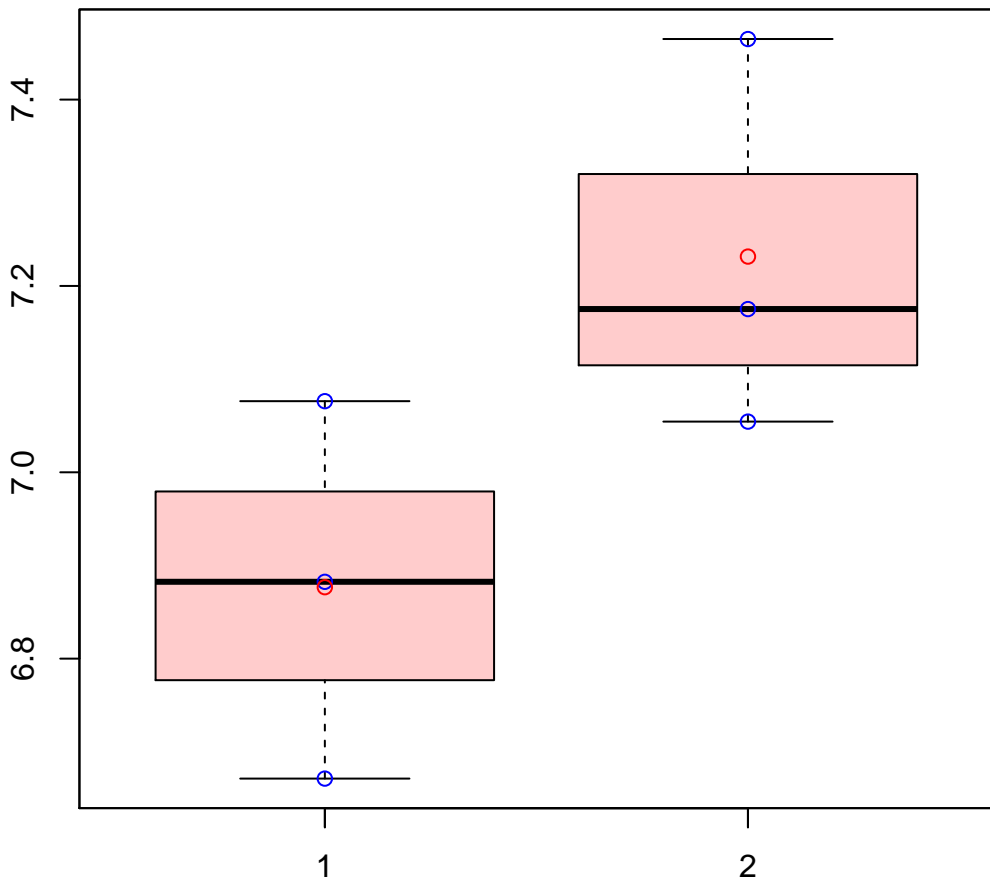

t-Test: p-value = 0.1

# CL4854Contig2|CL4854Contig2

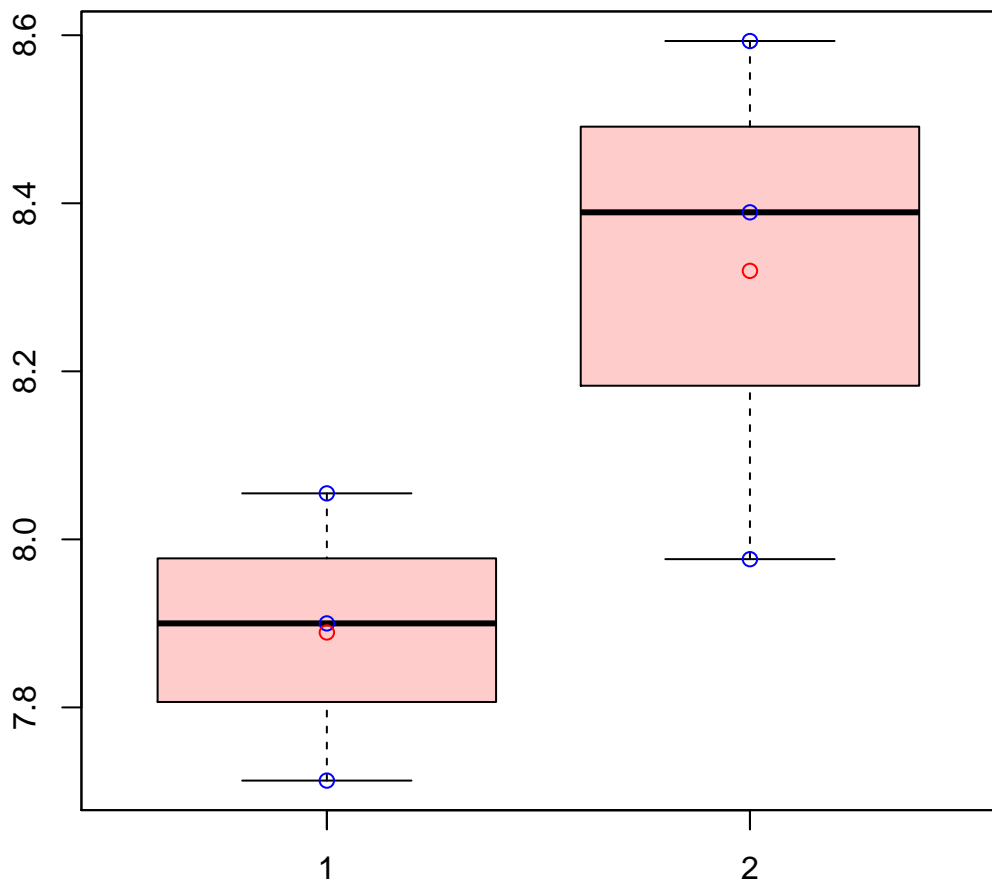

t-Test: p-value = 0.13



# CL4857Contig2|CL4857Contig2

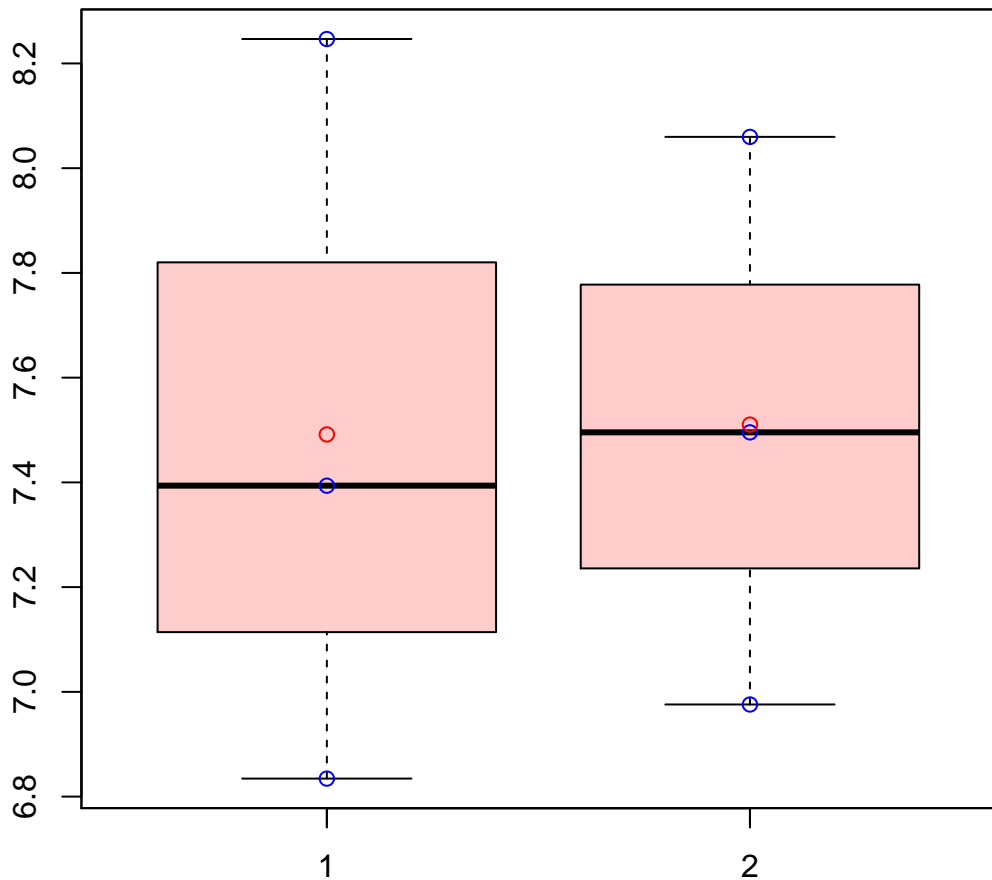

t-Test: p-value = 0.97

# CL4857Contig3|CL4857Contig3

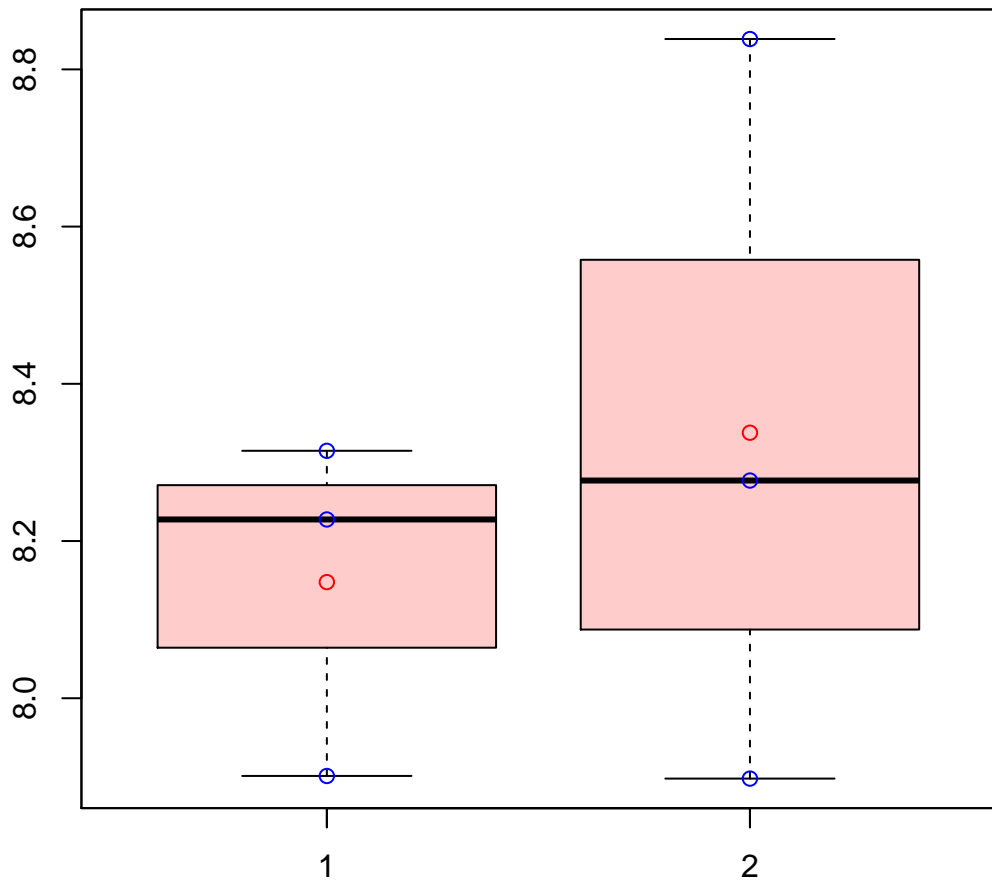

t-Test: p-value = 0.58

# CL485Contig4|CL485Contig4

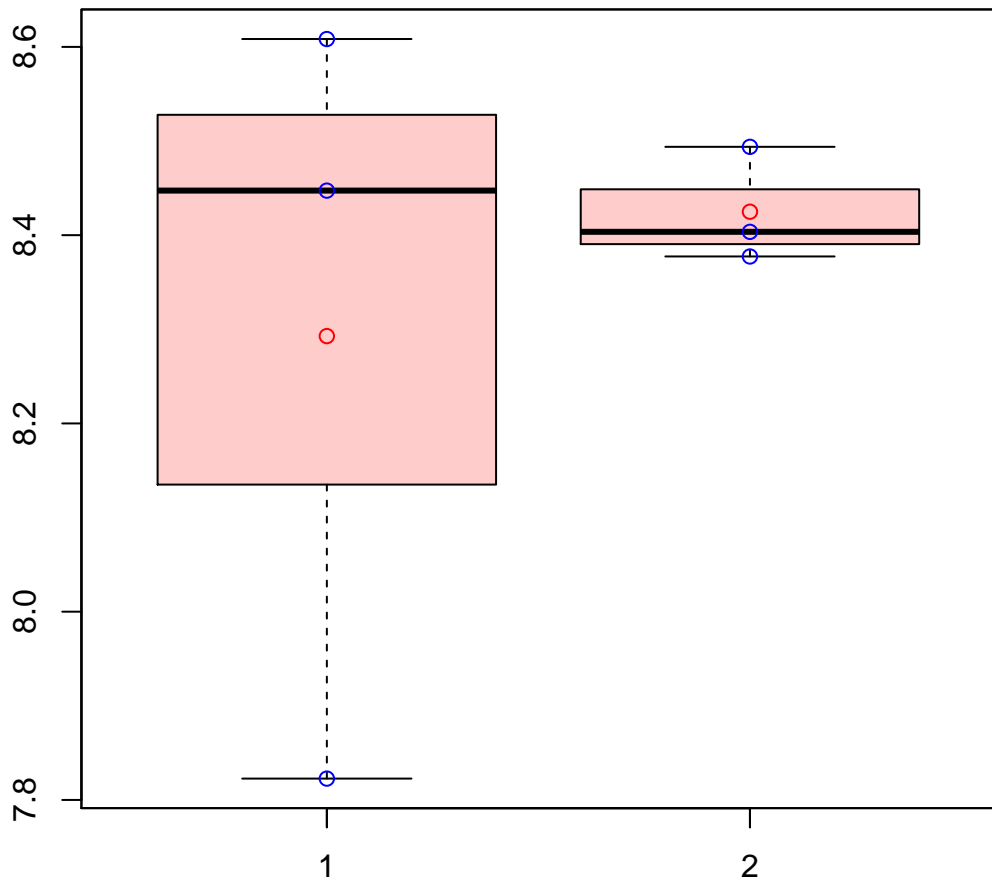

t-Test: p-value = 0.64

# CL487Contig5|CL487Contig5

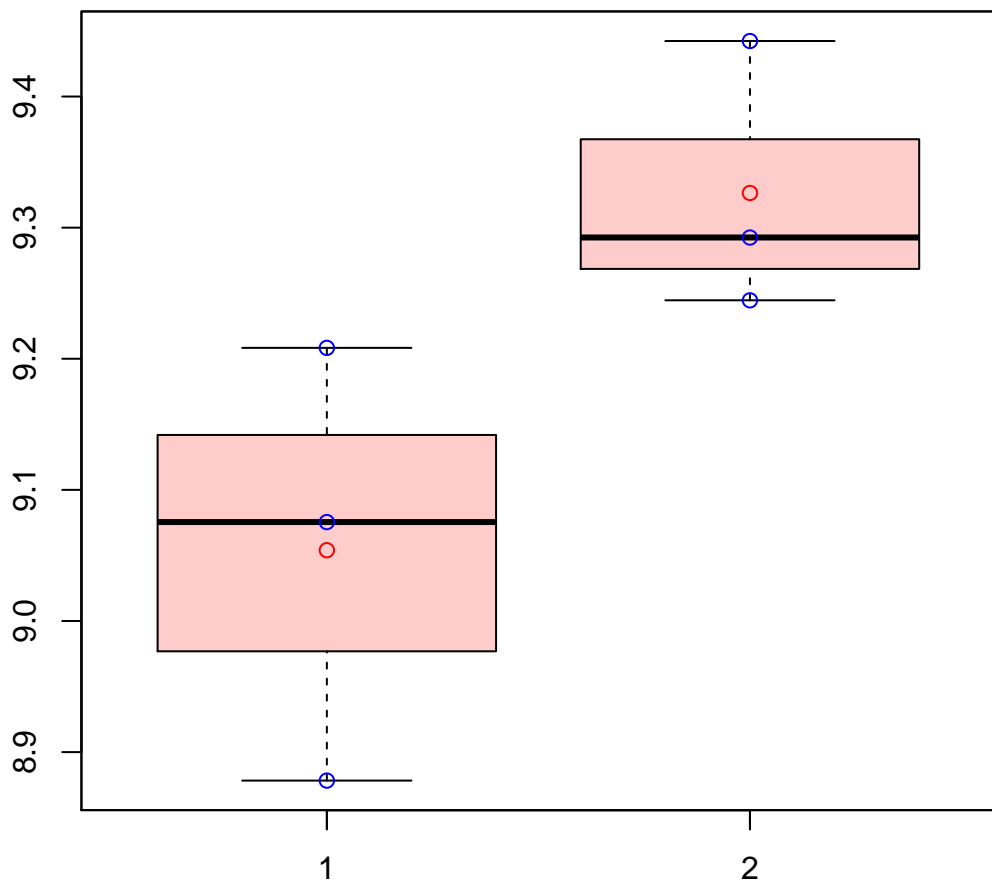

t-Test: p-value = 0.09

# CL487Contig6|CL487Contig6

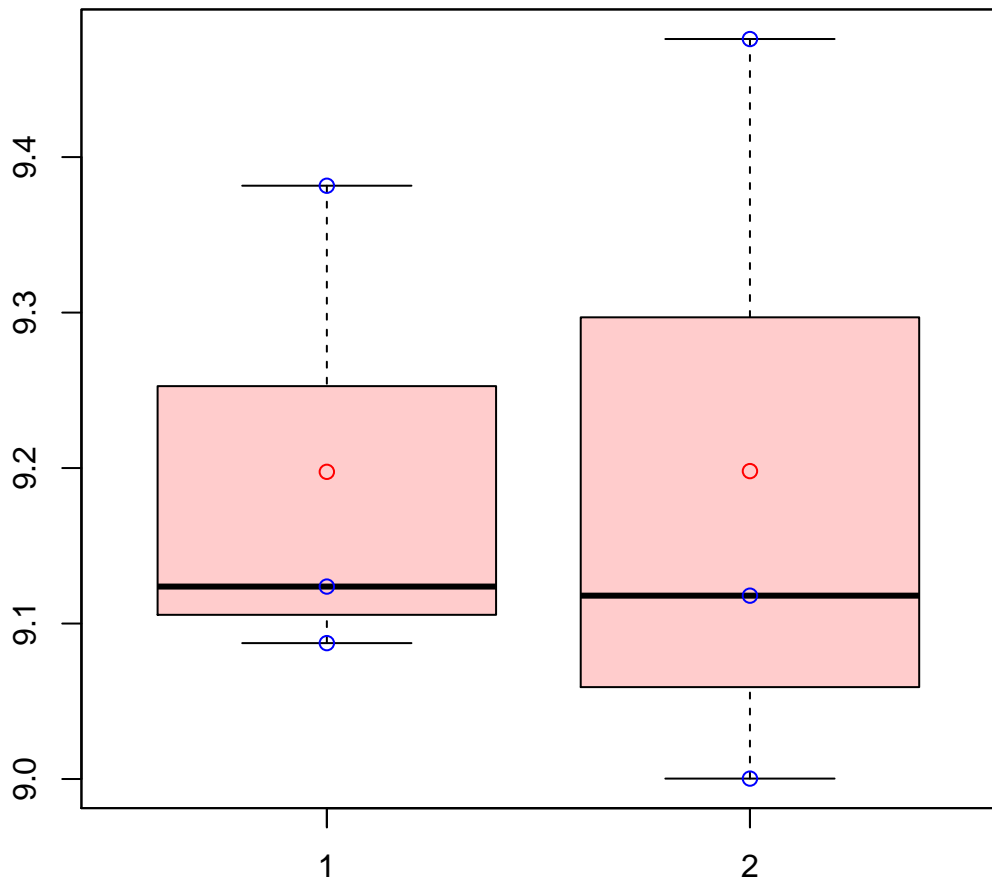

t-Test: p-value = 1

# CL487Contig9|CL487Contig9

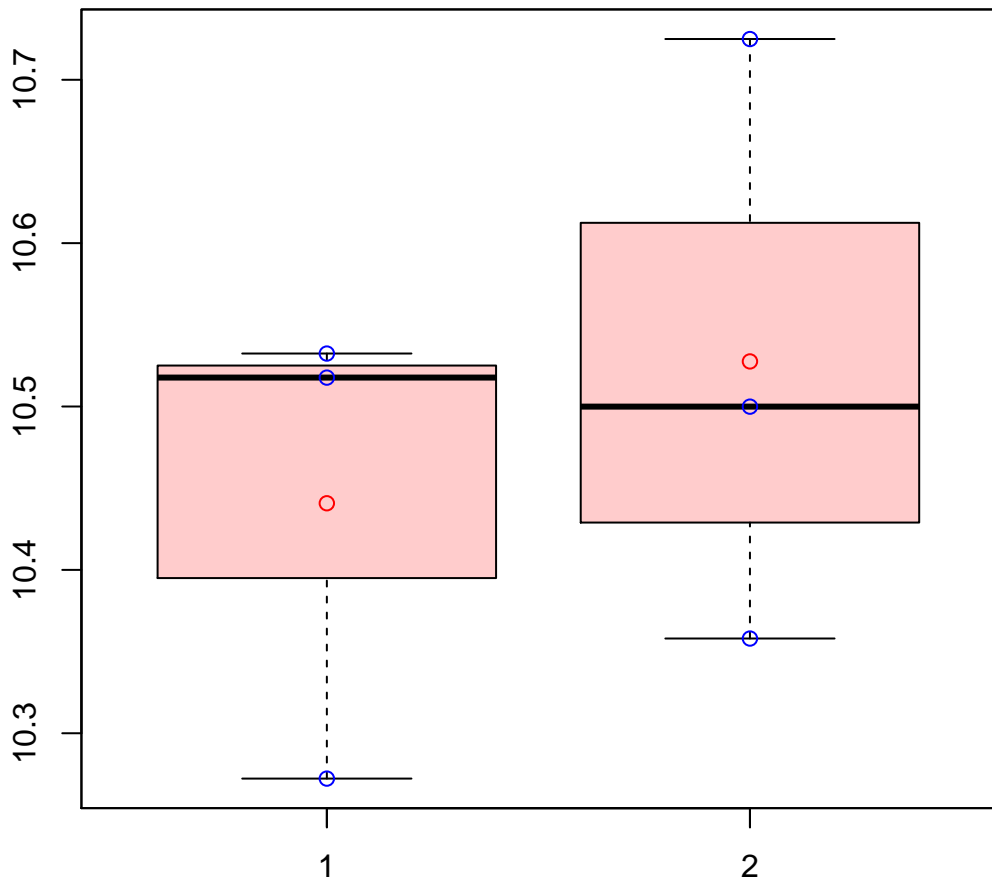

t-Test: p-value = 0.56

# CL4881Contig1|CL4881Contig1

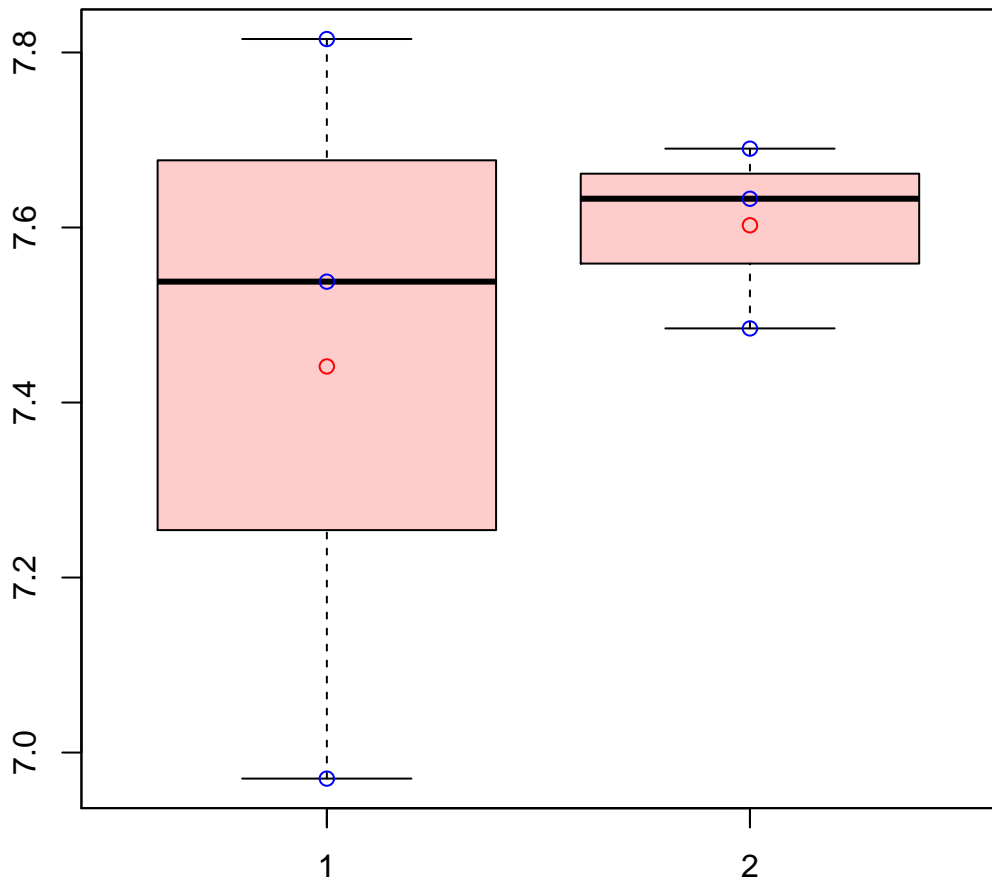

t-Test: p-value = 0.59

# CL48Contig14|CL48Contig14

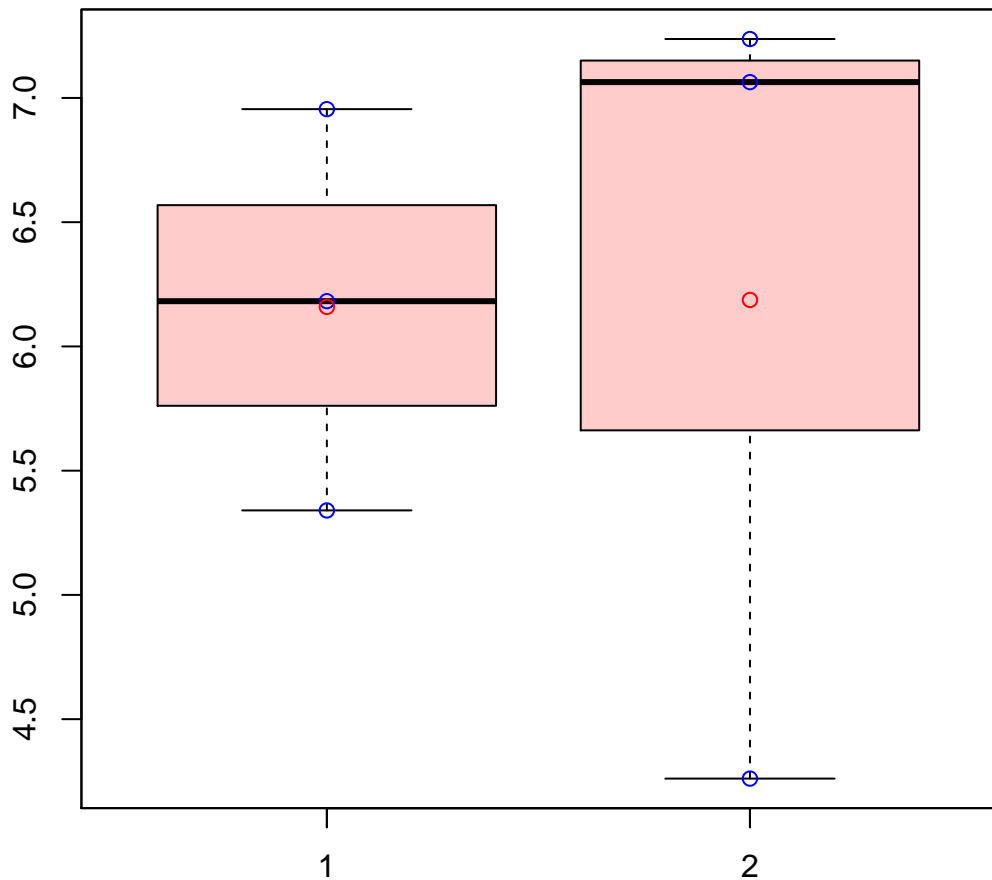

t-Test: p-value = 0.98



# CL4904Contig3|CL4904Contig3

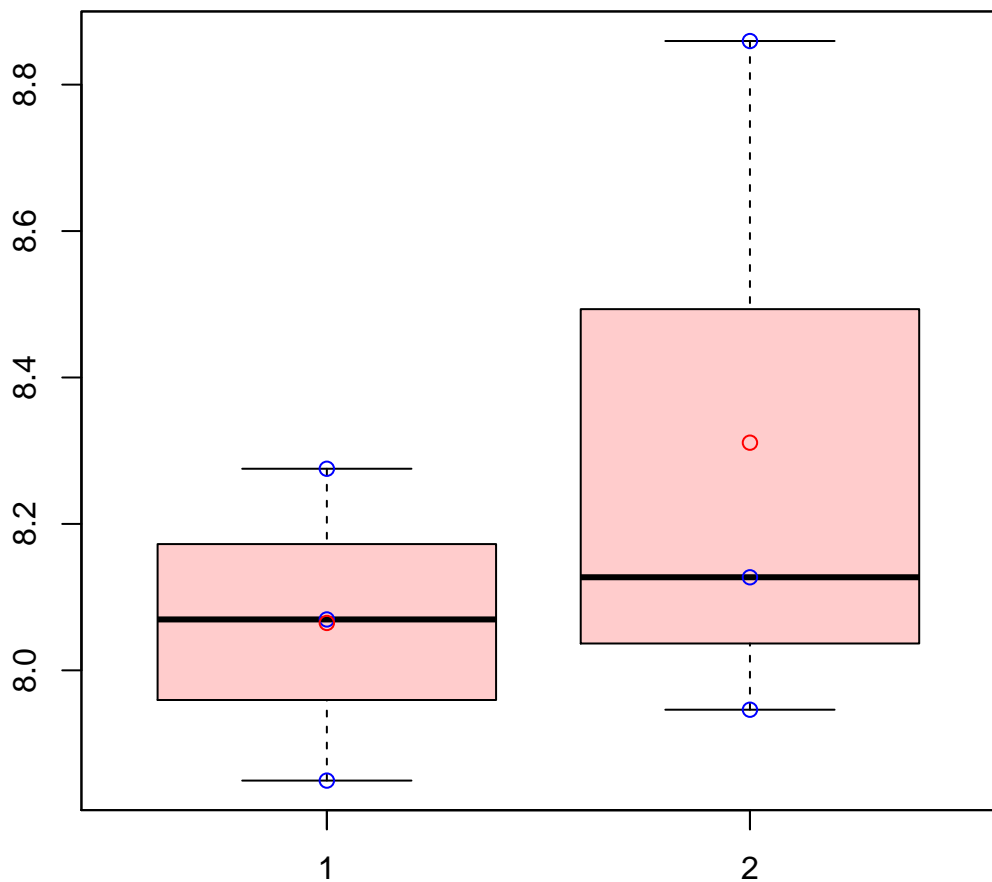

t-Test: p-value = 0.48

# CL4906Contig2|CL4906Contig2

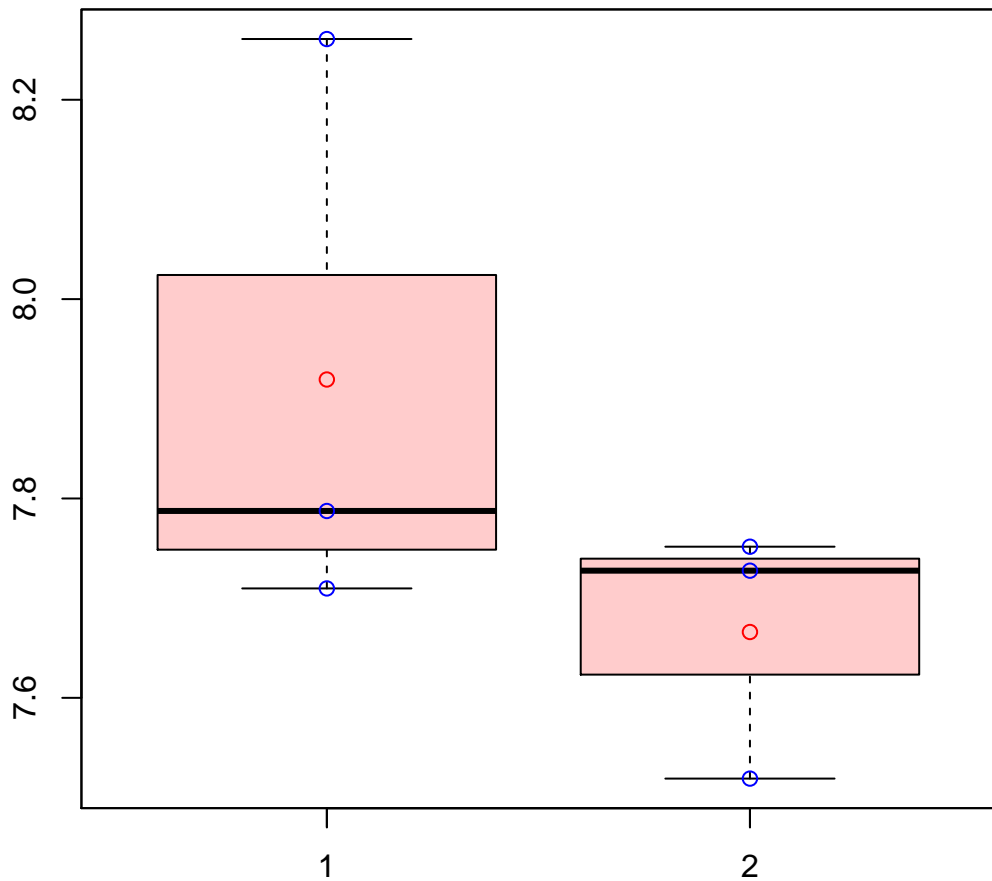

t-Test: p-value = 0.28

# CL4914Contig1|CL4914Contig1

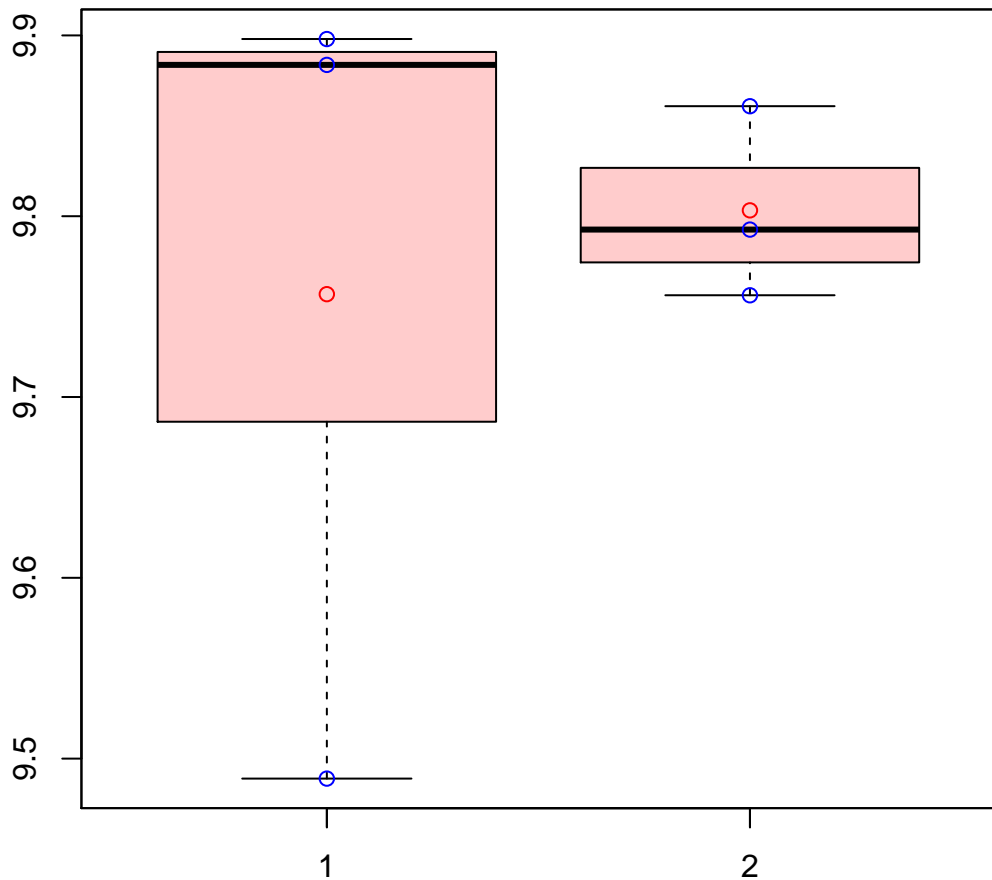

t-Test: p-value = 0.77

# CL4918Contig2|CL4918Contig2

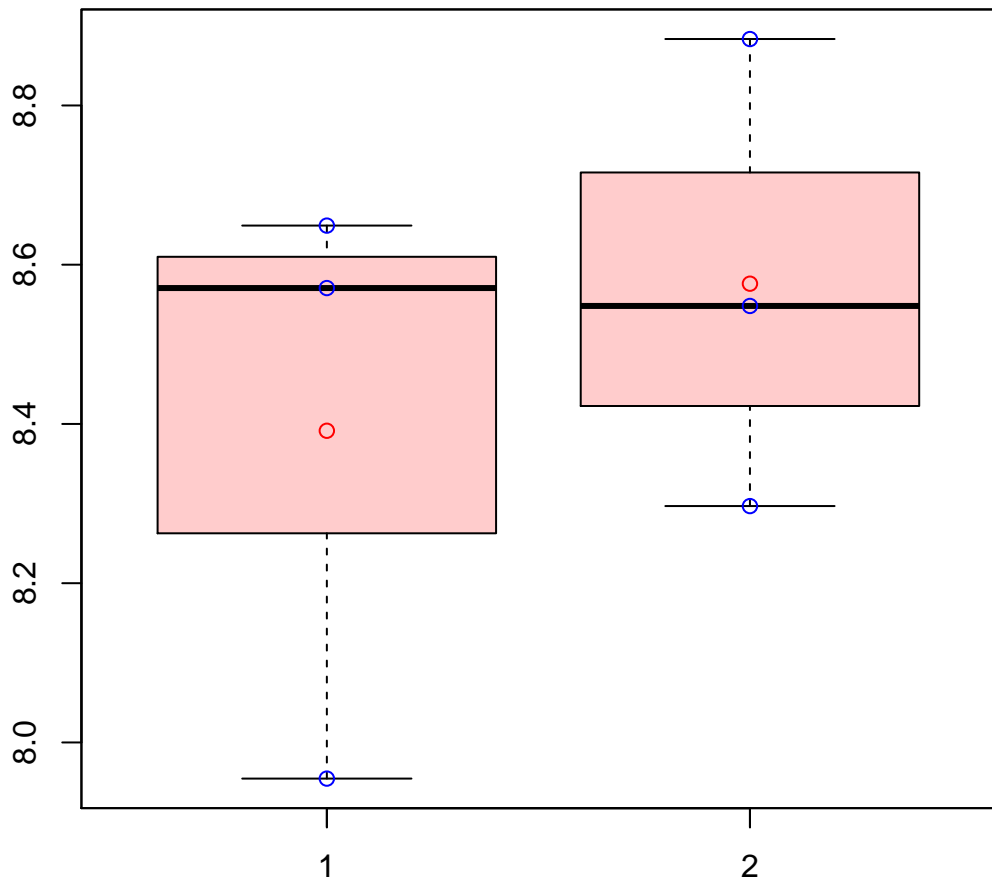

t-Test: p-value = 0.54

# CL4919Contig1|CL4919Contig1

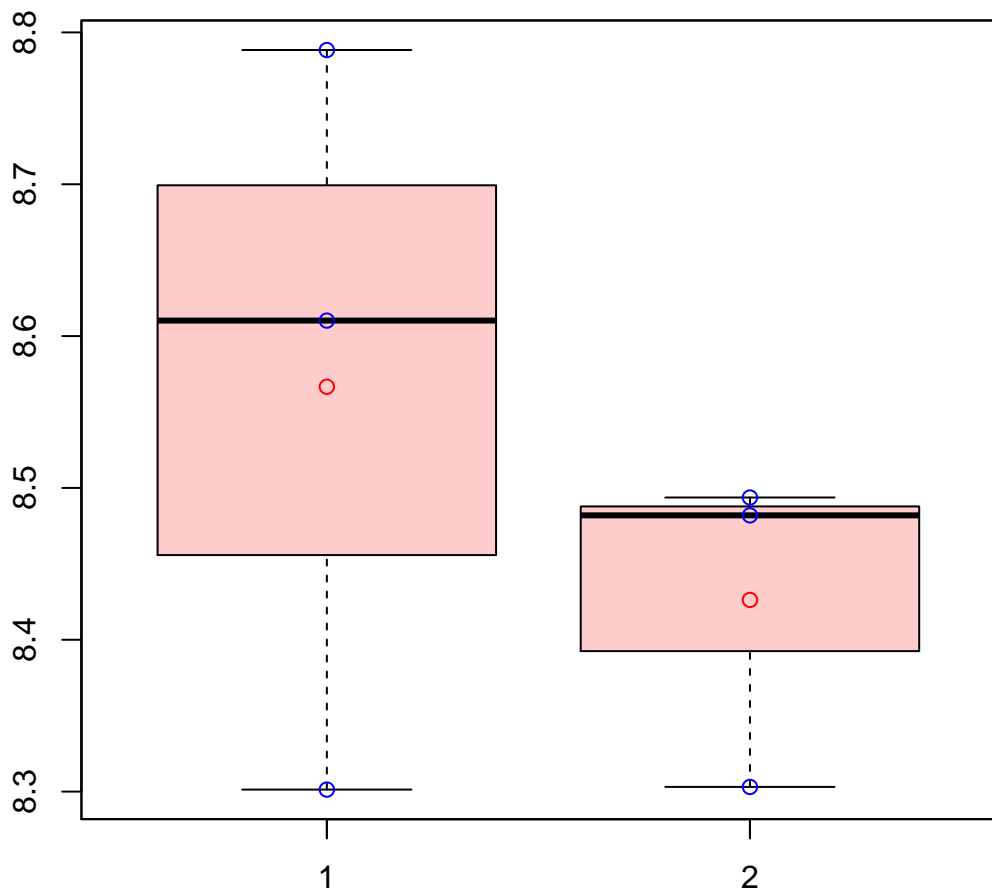

t-Test: p-value = 0.44

# CL4919Contig3|CL4919Contig3

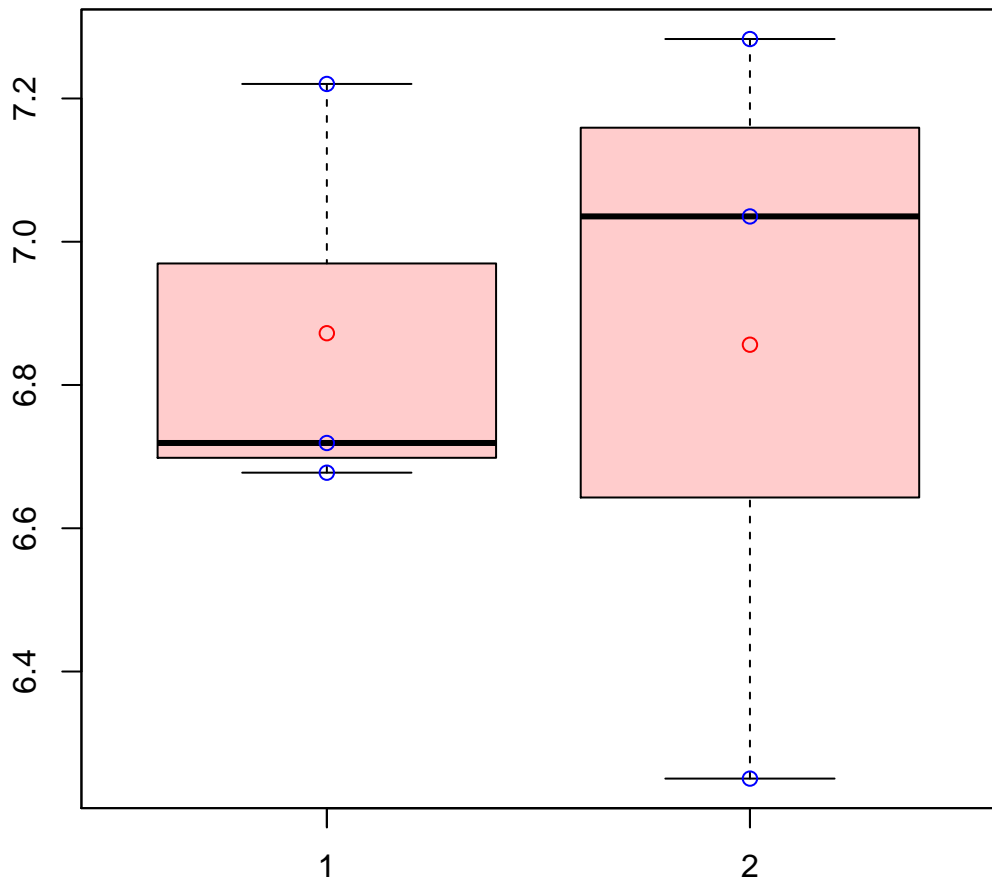

t-Test: p-value = 0.97

# CL491Contig4|CL491Contig4

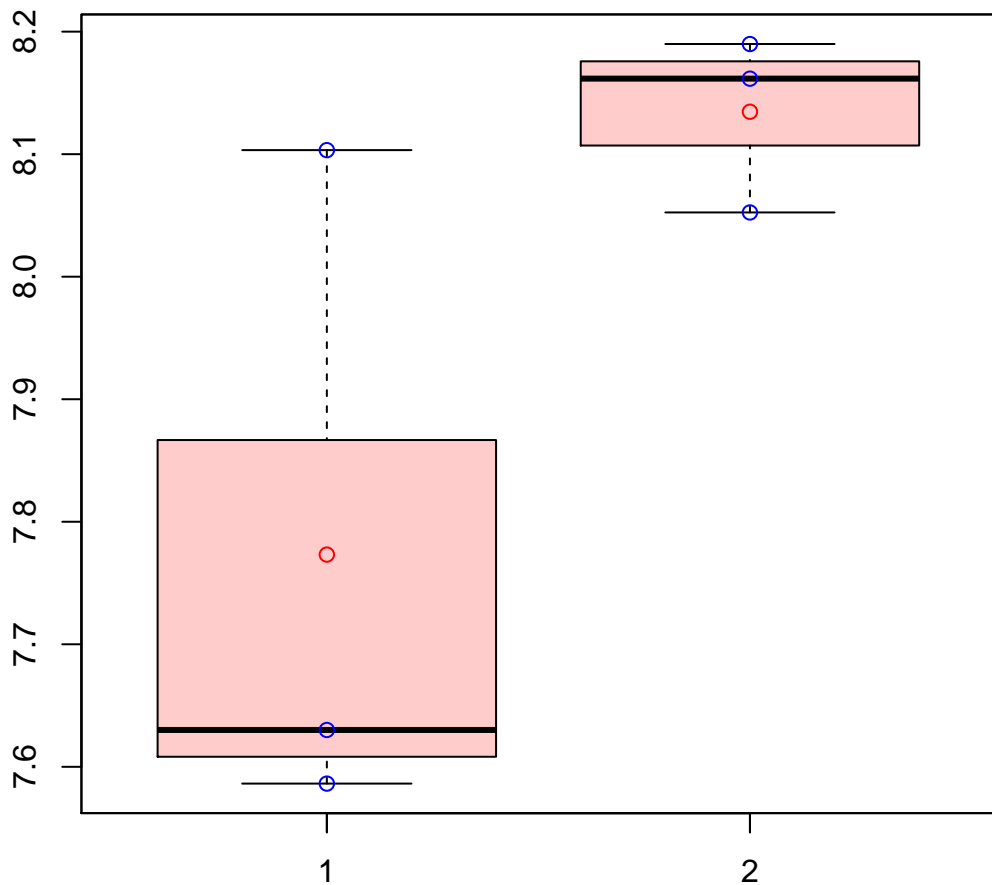

t-Test: p-value = 0.15

# CL4920Contig2|CL4920Contig2

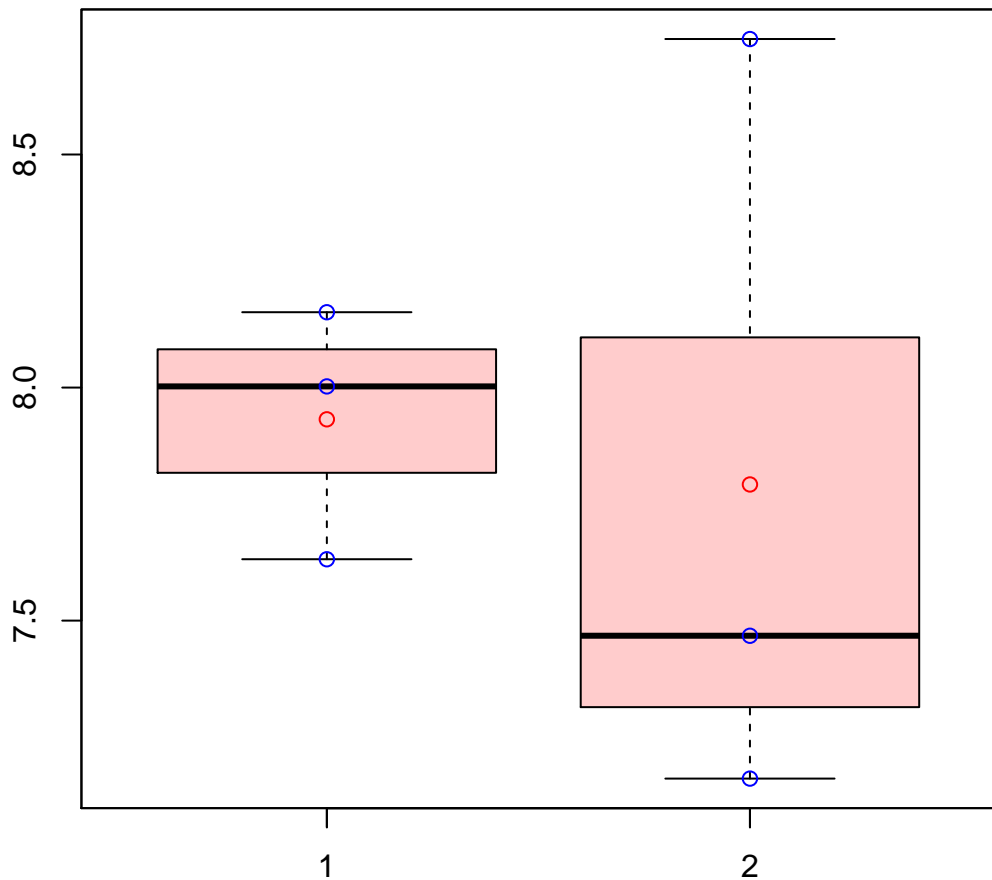

t-Test: p-value = 0.81



# CL4922Contig4|CL4922Contig4

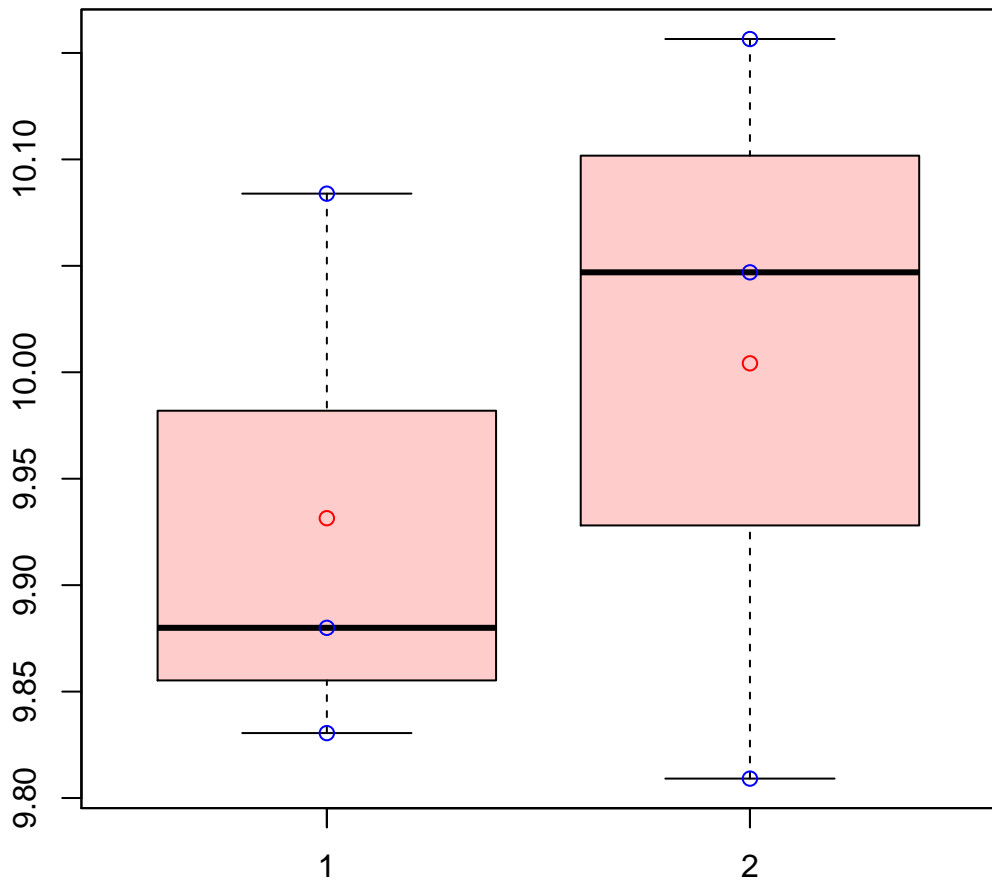

t-Test: p-value = 0.6

# CL4927Contig4|CL4927Contig4

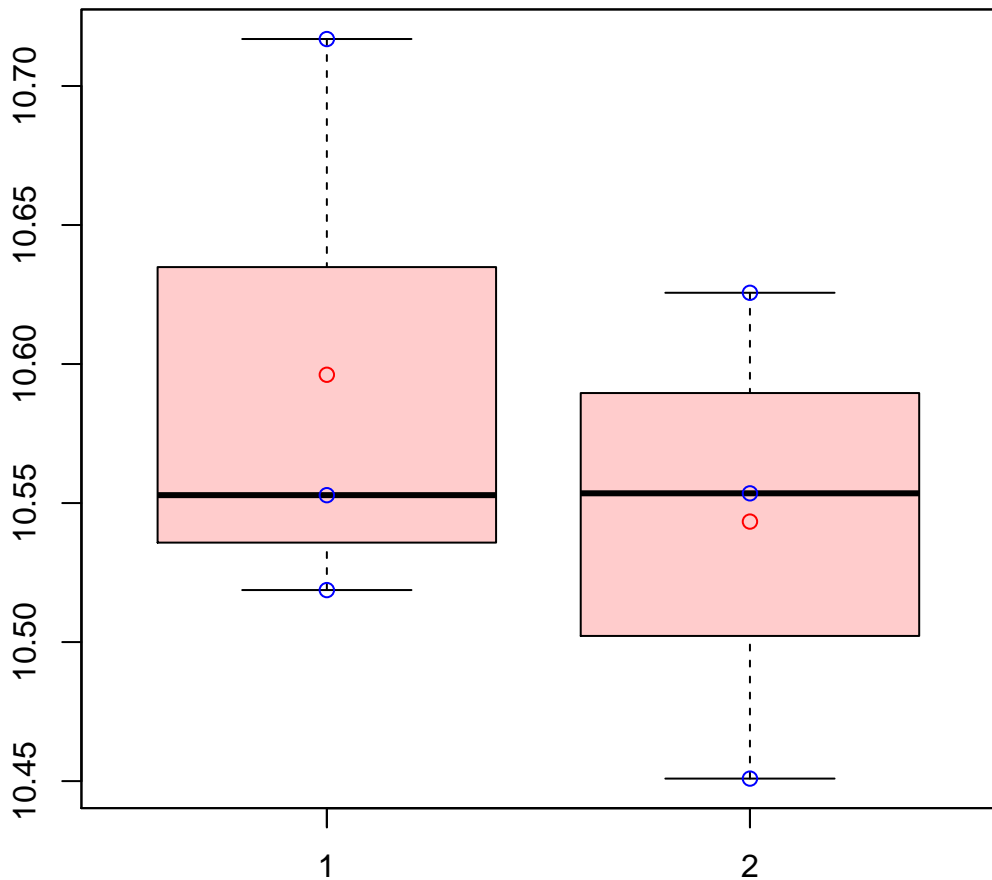

t-Test: p-value = 0.54

# CL4928Contig5|CL4928Contig5

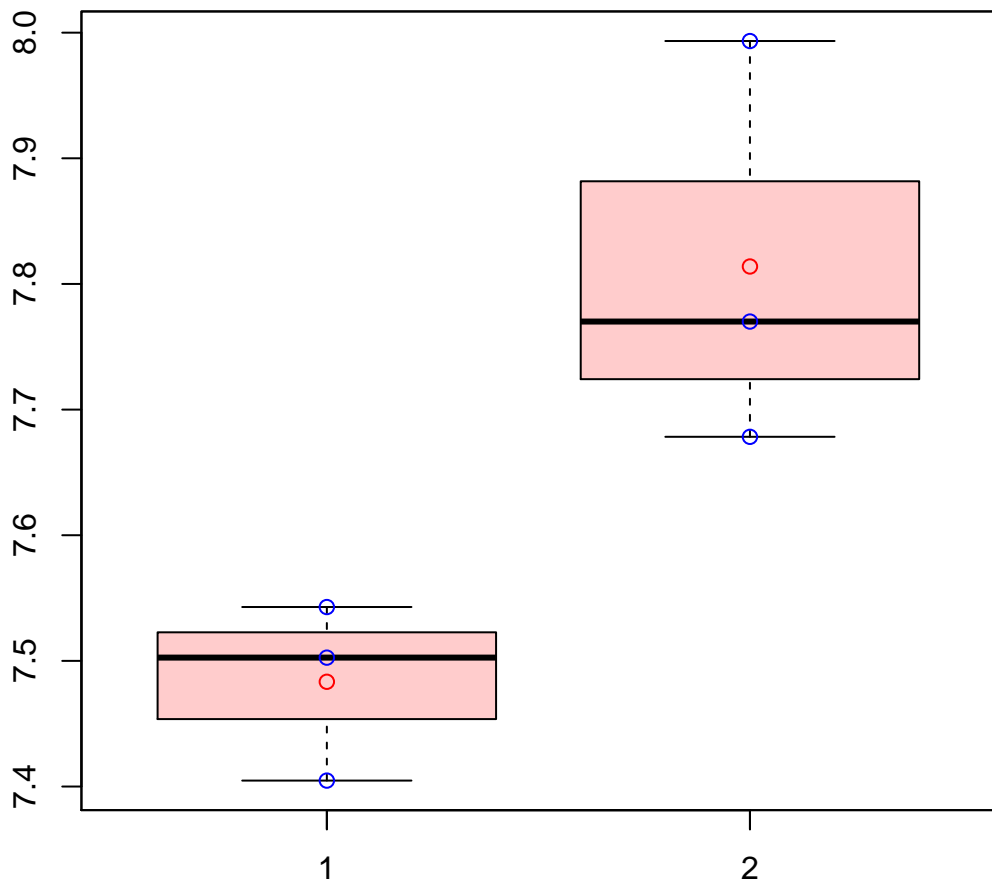

t-Test: p-value = 0.05

# CL4940Contig3|CL4940Contig3

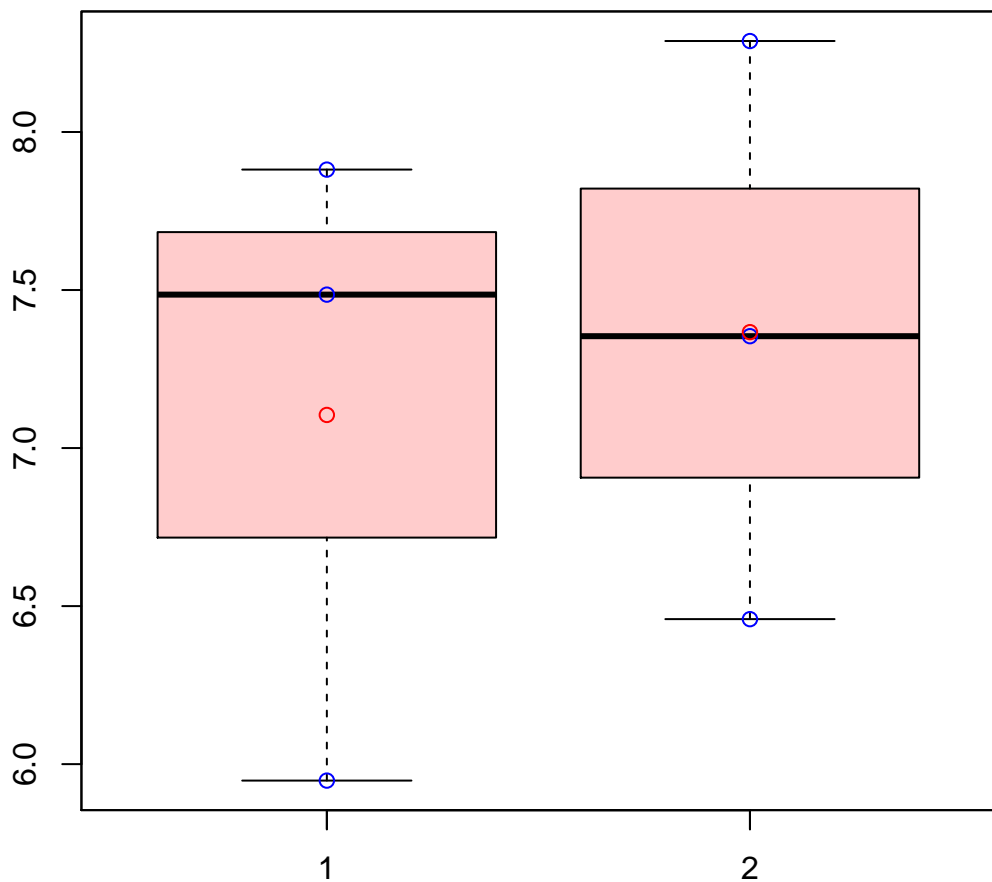

t-Test: p-value = 0.76

# CL4944Contig4|CL4944Contig4

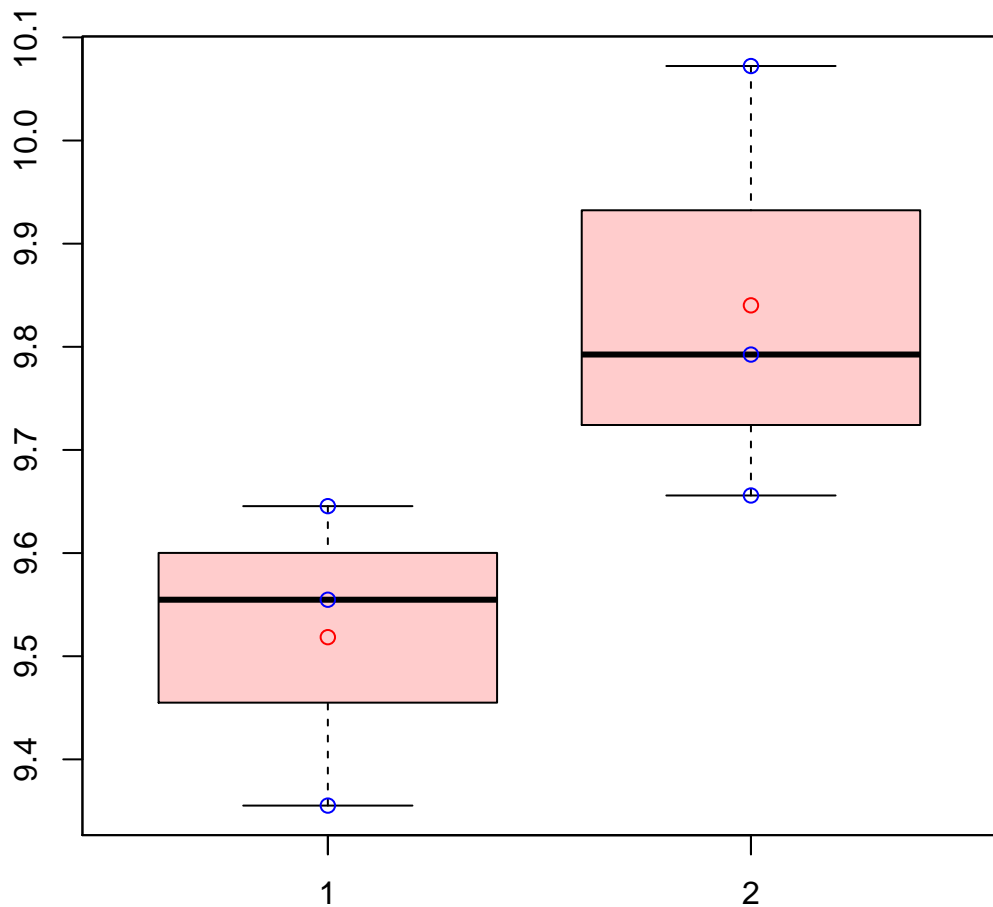

t-Test: p-value = 0.11

# CL494Contig2|CL494Contig2

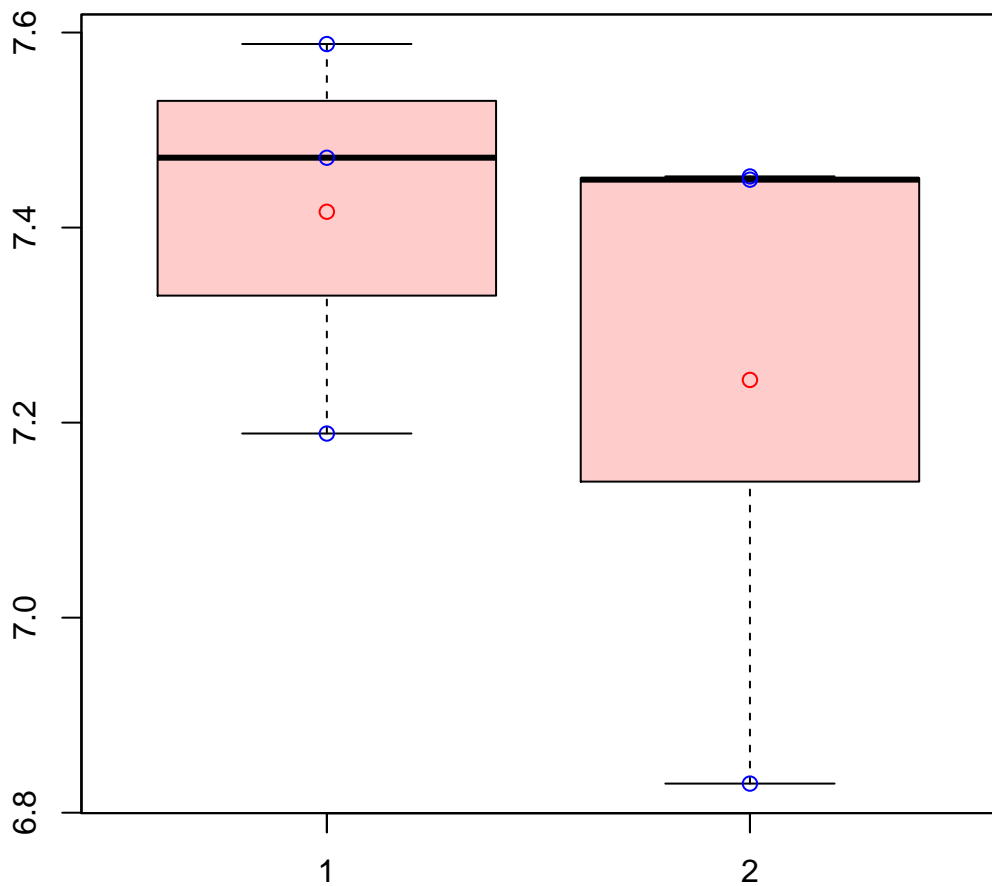

t-Test: p-value = 0.52

# CL4956Contig6|CL4956Contig6

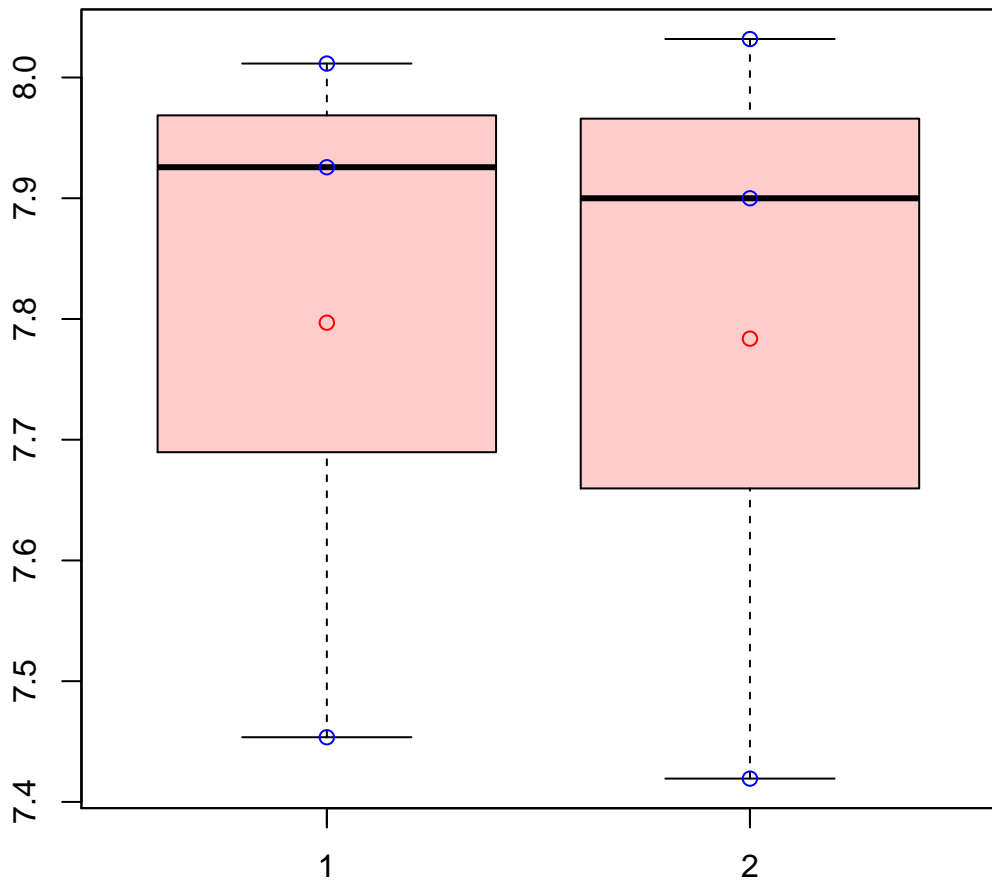

t-Test: p-value = 0.96

# CL495Contig2|CL495Contig2

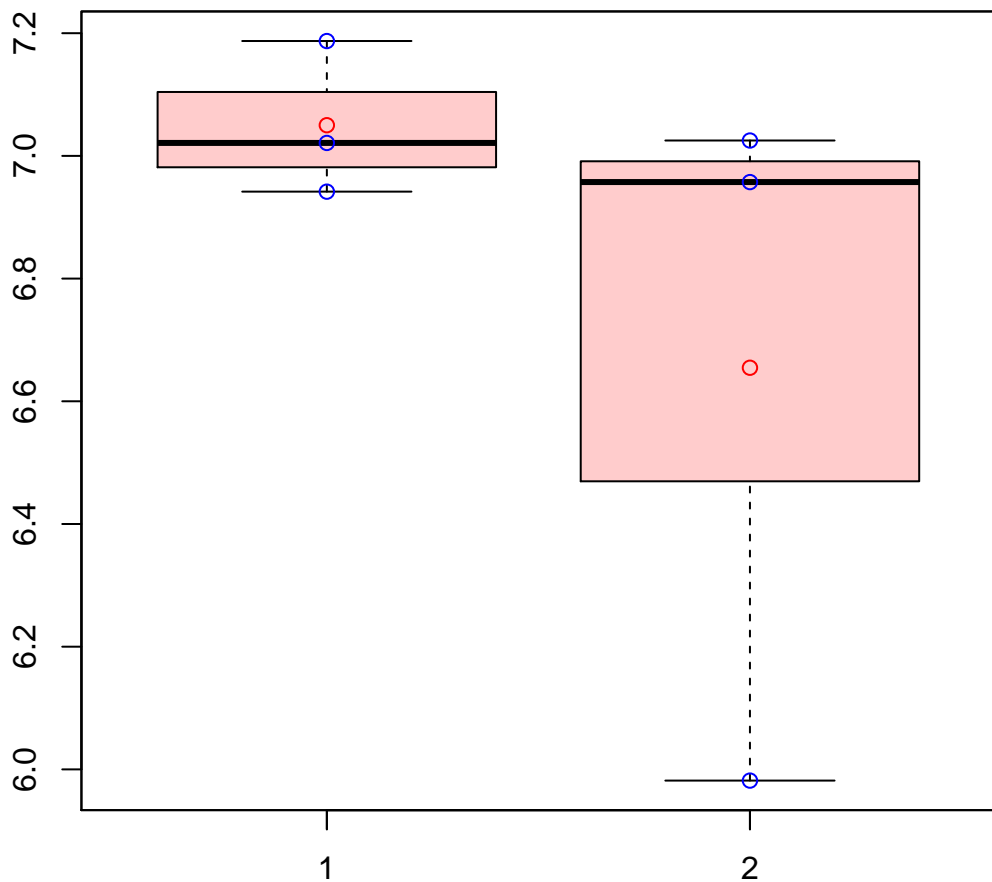

t-Test: p-value = 0.36



# CL4966Contig1|CL4966Contig1

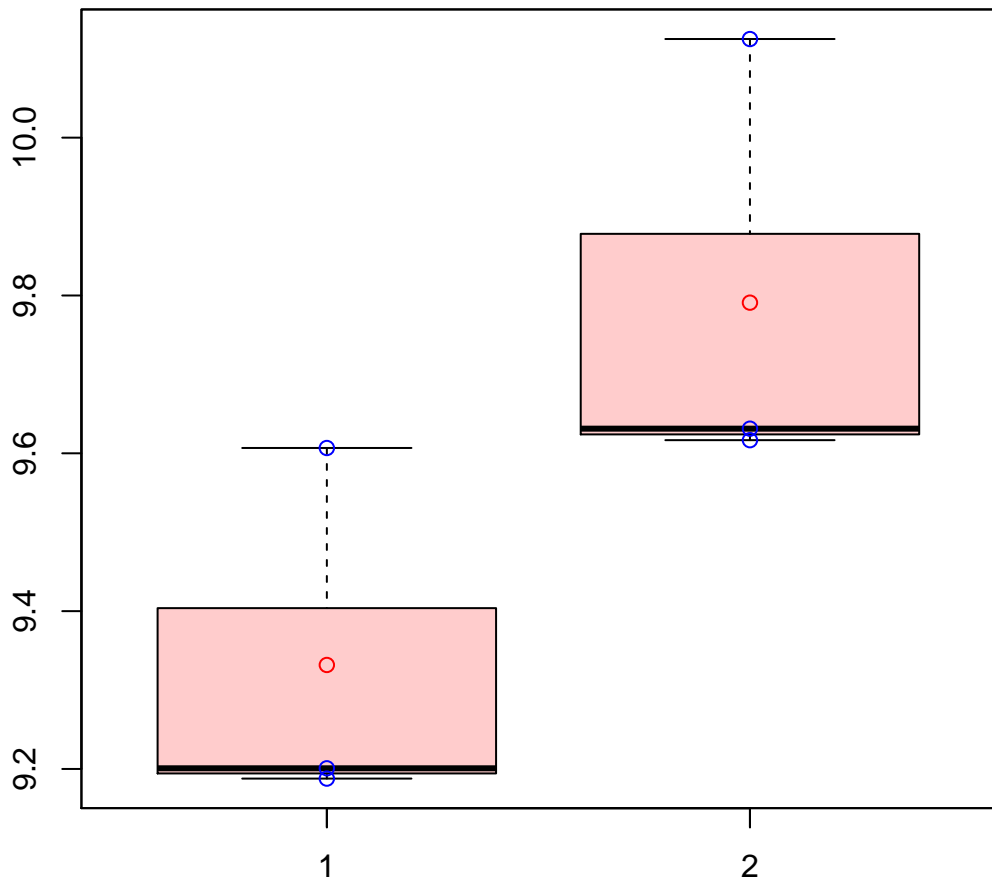

t-Test: p-value = 0.1

# CL496Contig4|CL496Contig4

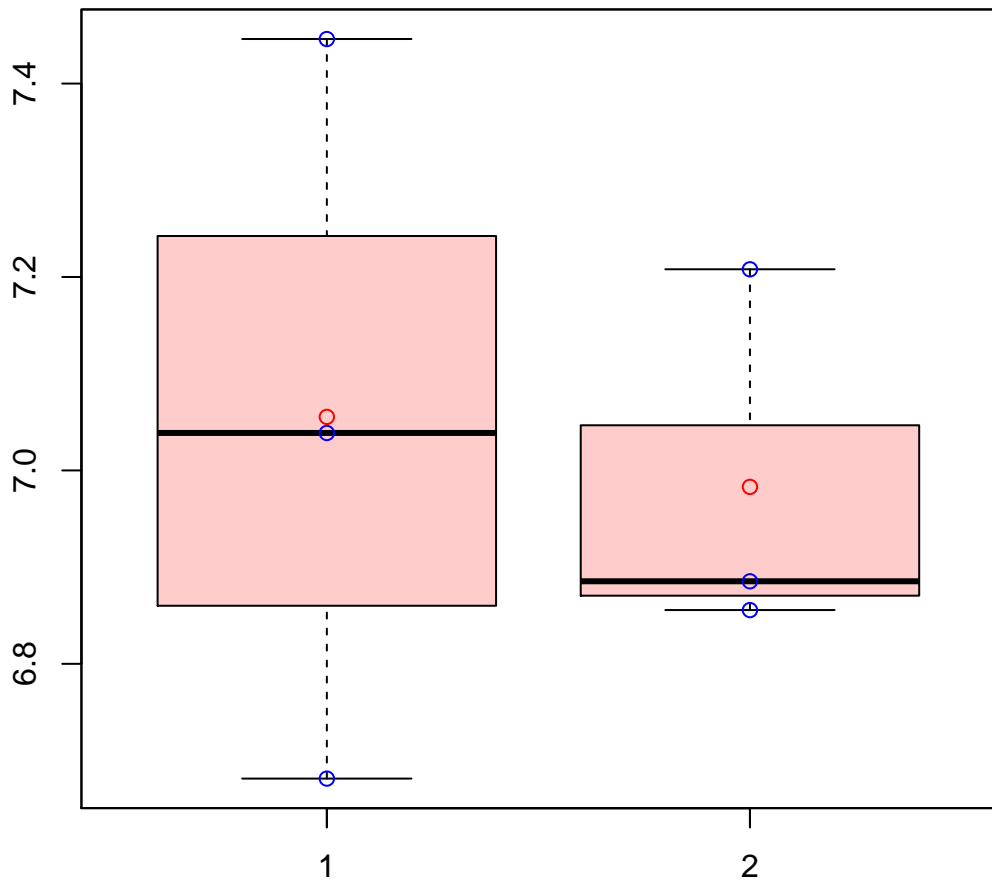

t-Test: p-value = 0.79

# CL496Contig6|CL496Contig6

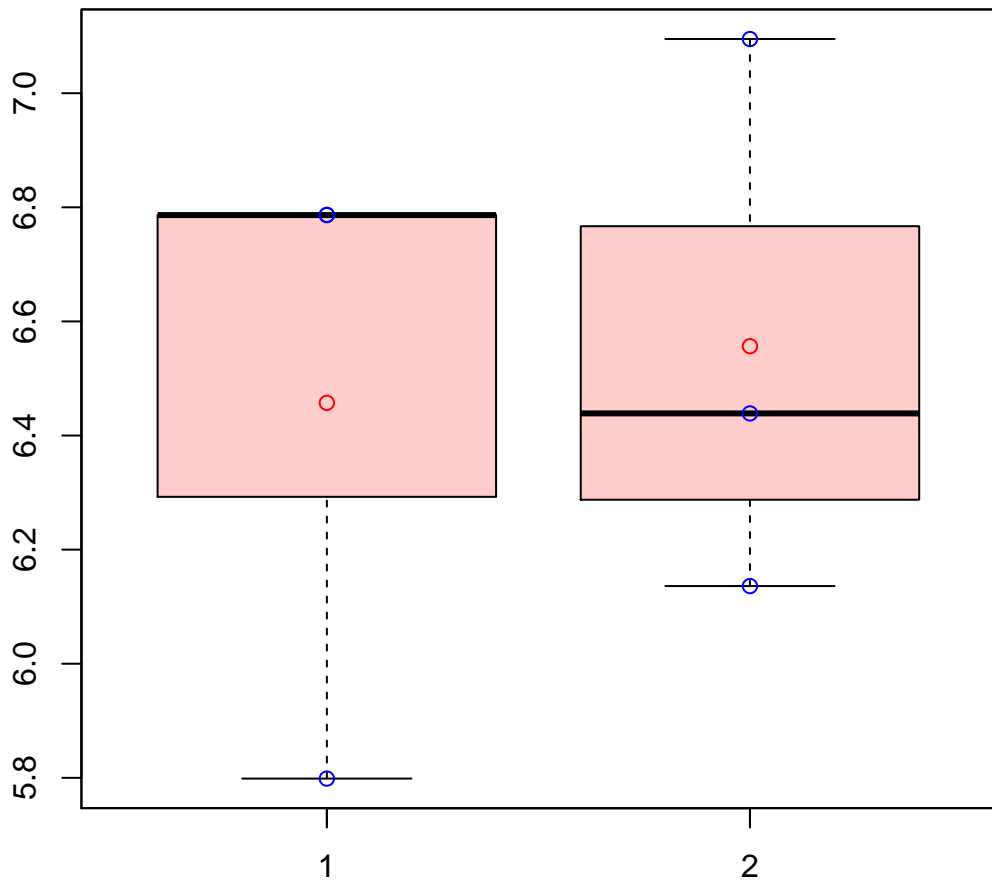

t-Test: p-value = 0.83

# CL499Contig1|CL499Contig1

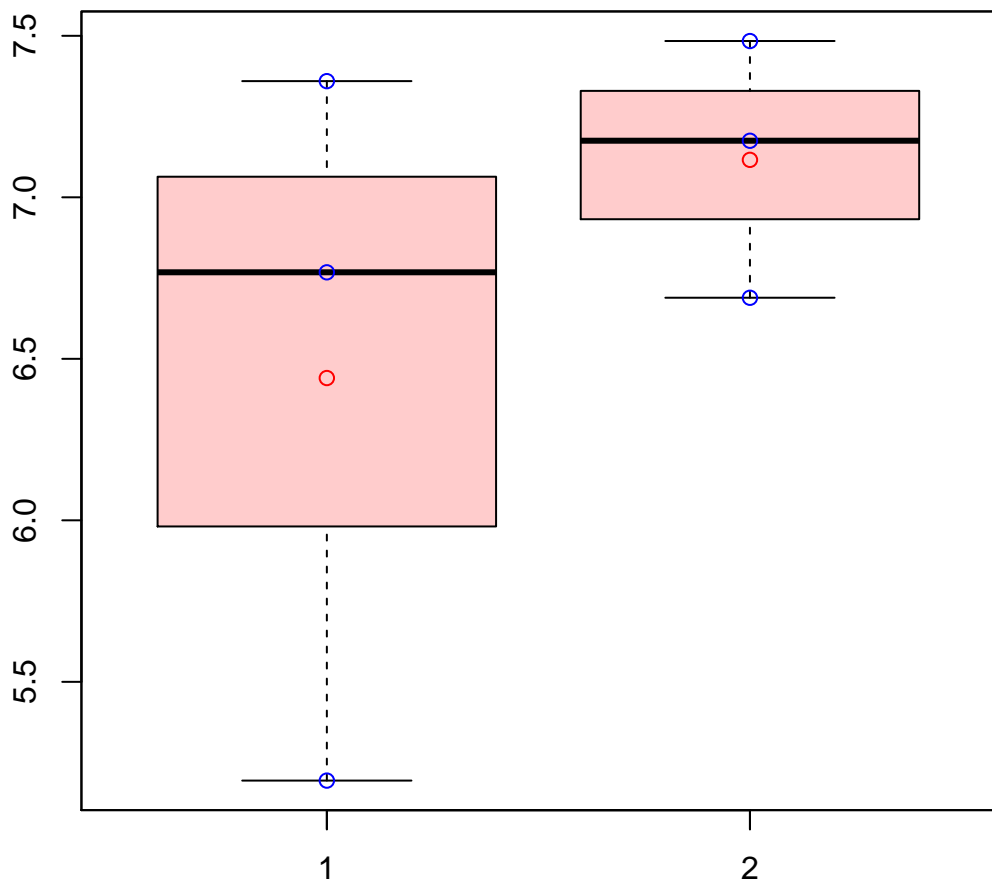

t-Test: p-value = 0.41

# CL499Contig3|CL499Contig3

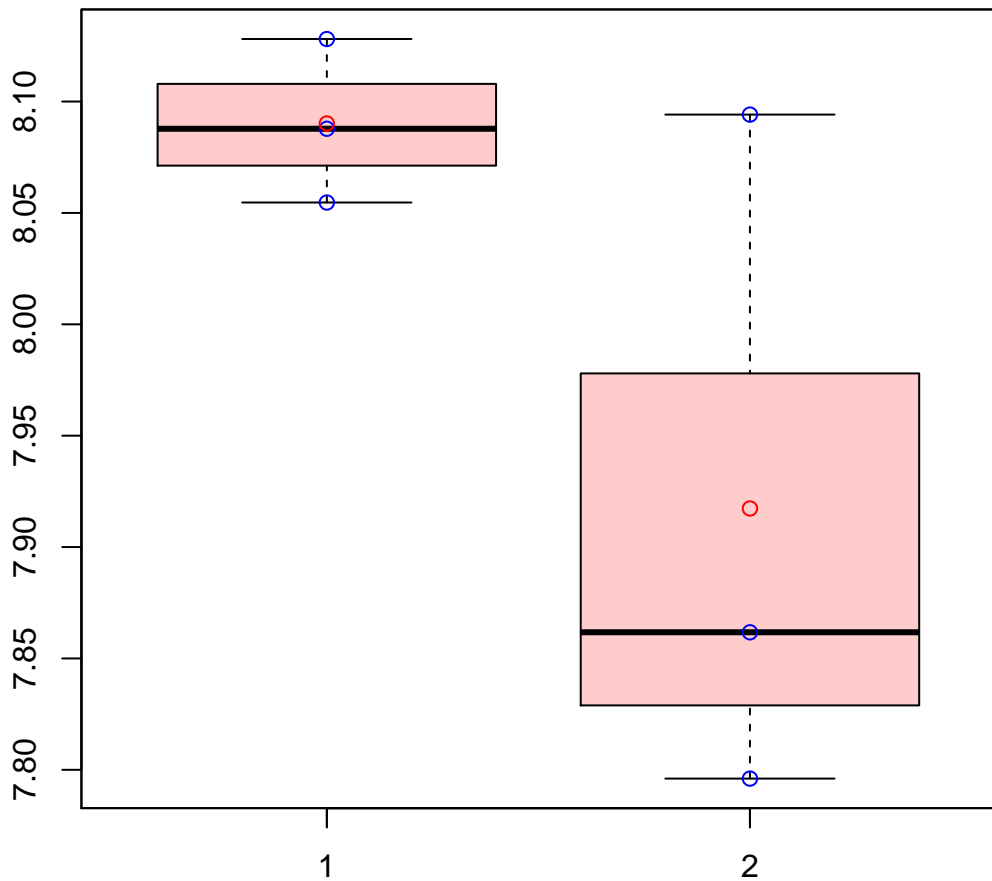

t-Test: p-value = 0.19

# CL49Contig18|CL49Contig18

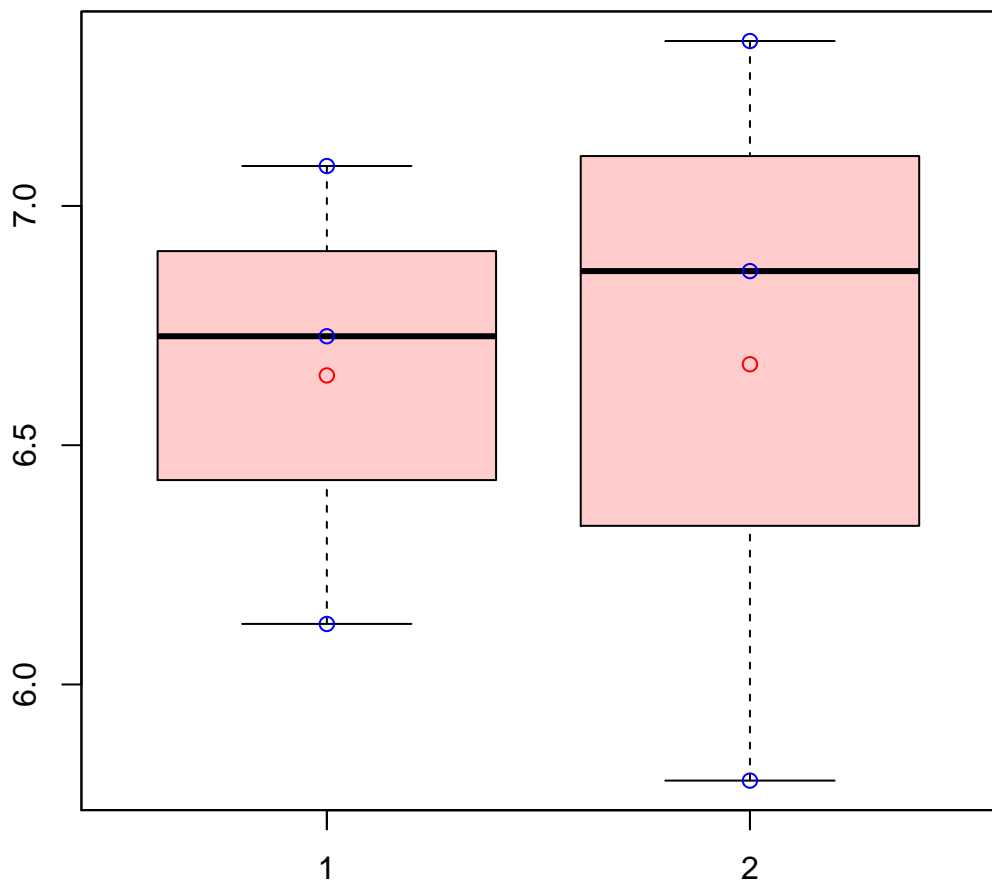

t-Test: p-value = 0.97

# CL4Contig15|CL4Contig15

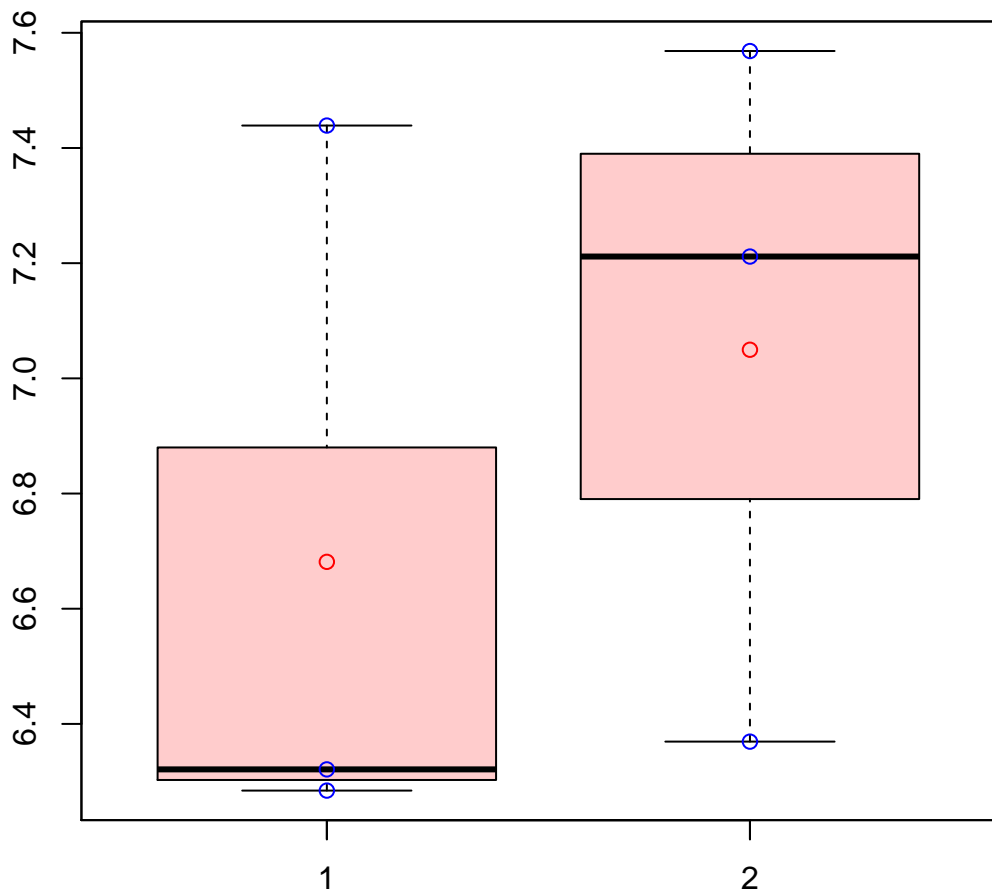

t-Test: p-value = 0.52

# CL4Contig24|CL4Contig24

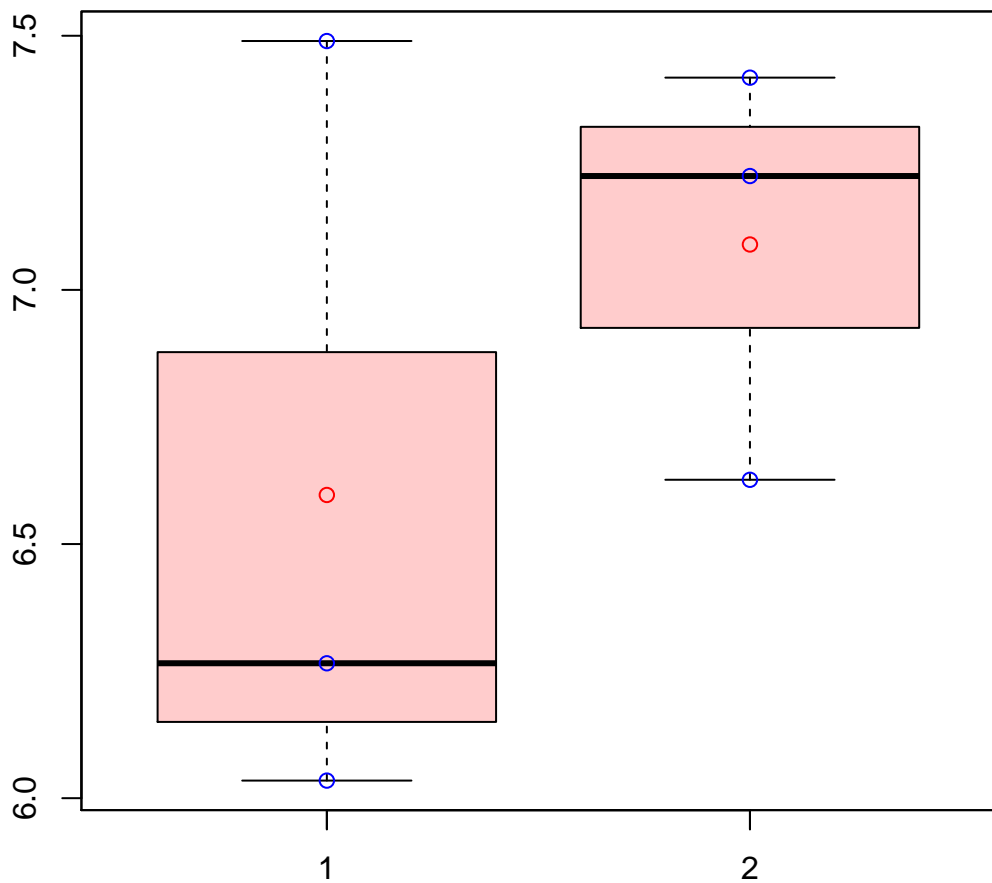

t-Test: p-value = 0.4



# CL4Contig27|CL4Contig27

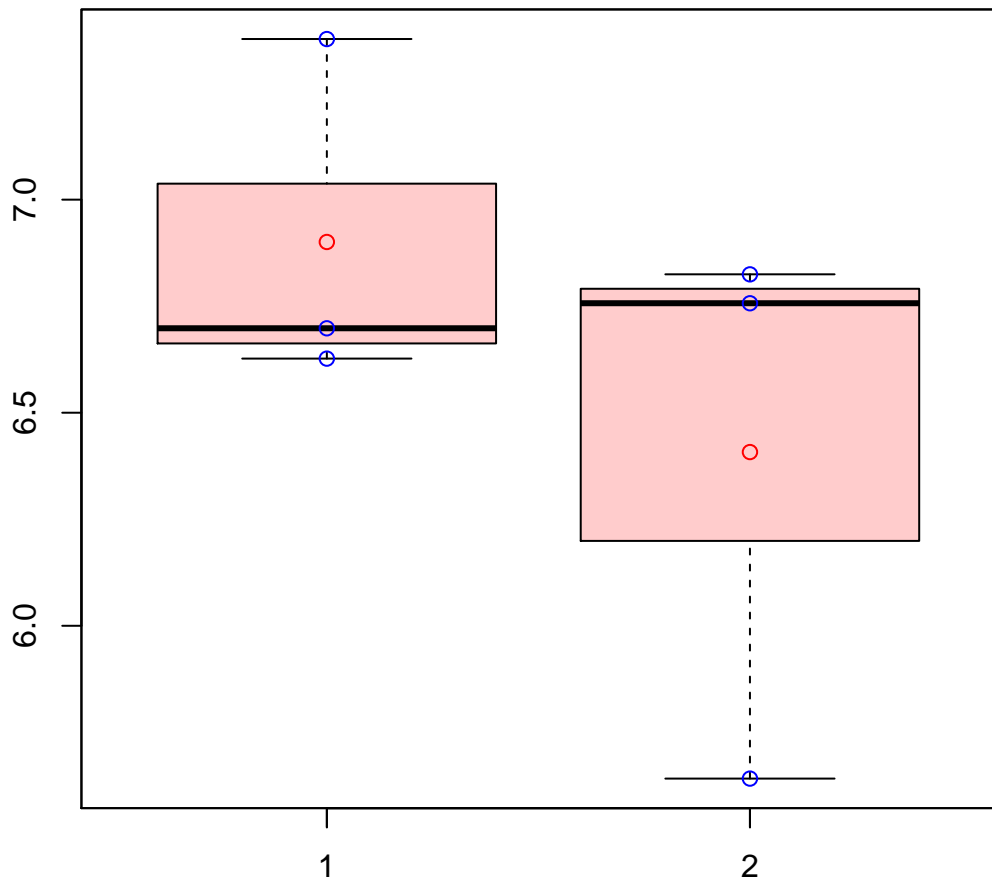

t-Test: p-value = 0.35

## CL4Contig32|CL4Contig32

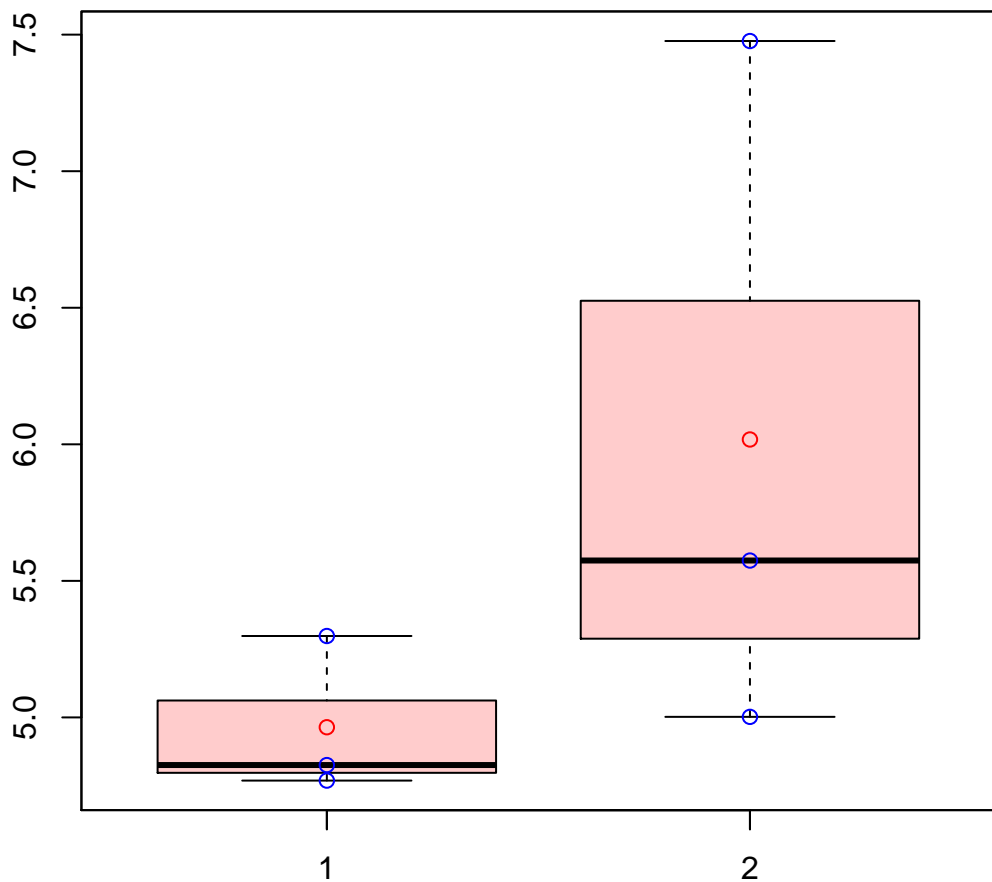

t-Test: p-value = 0.29

# CL4Contig39|CL4Contig39

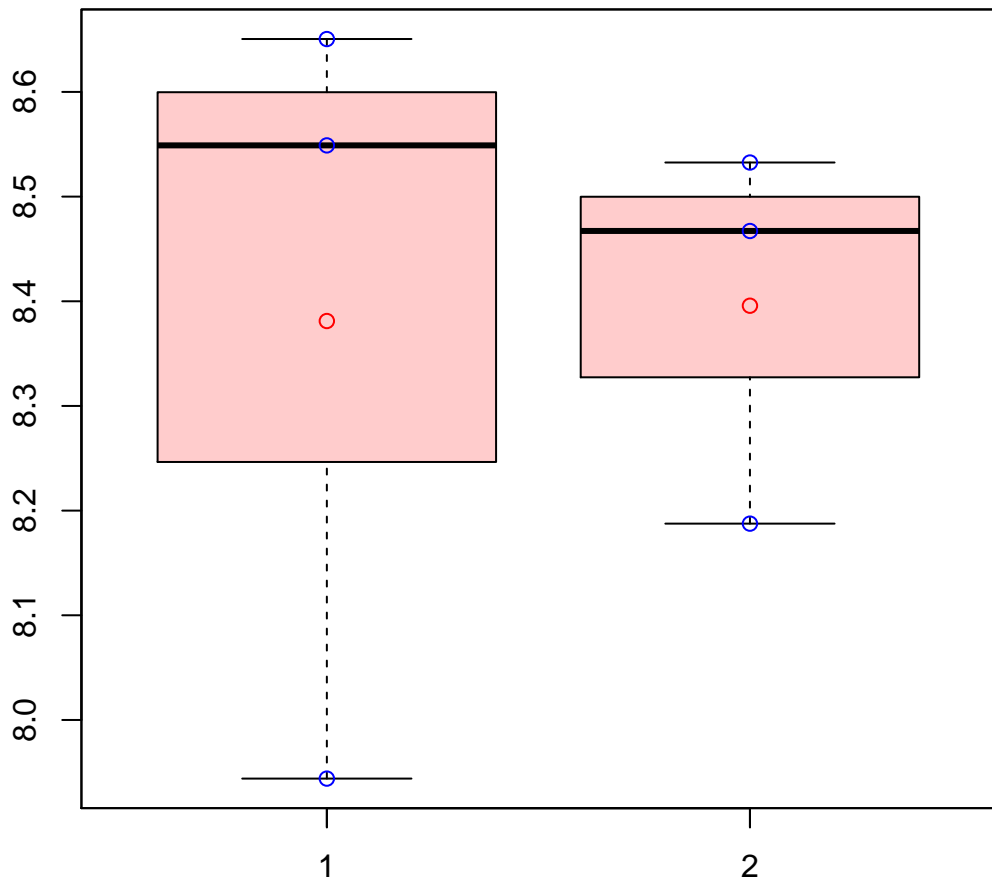

t-Test: p-value = 0.96

# CL4Contig54|CL4Contig54

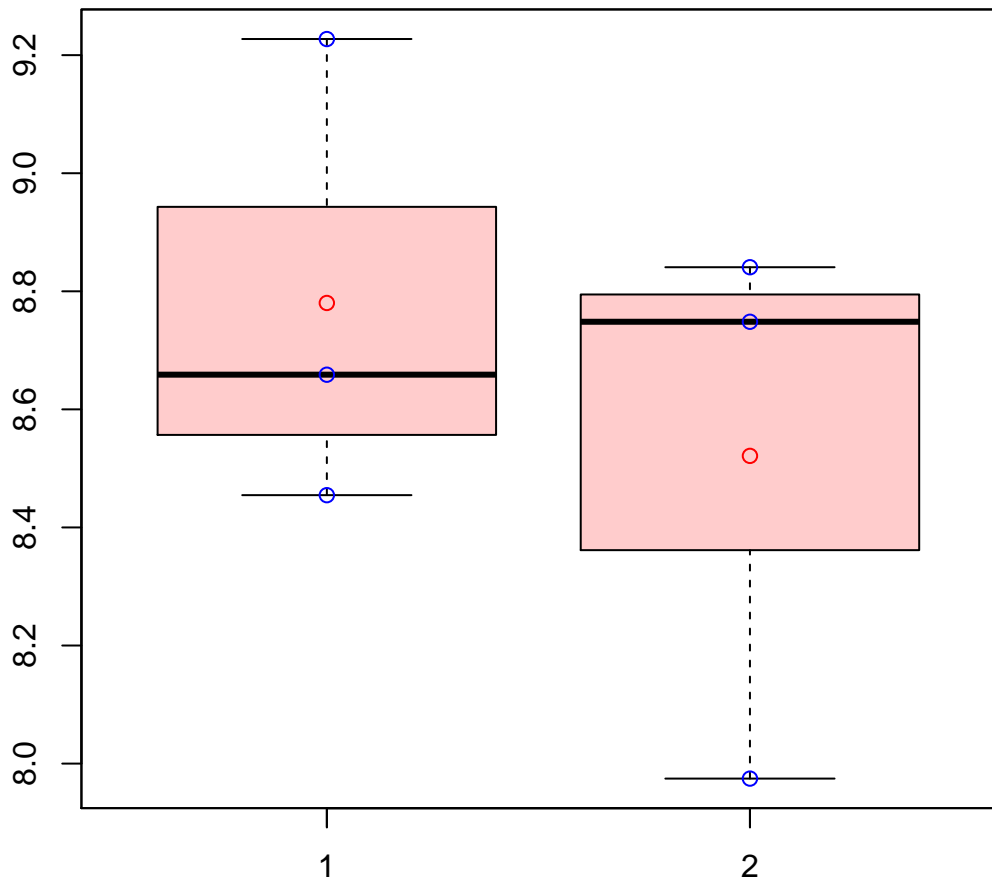

t-Test: p-value = 0.51

# CL4Contig5|CL4Contig5

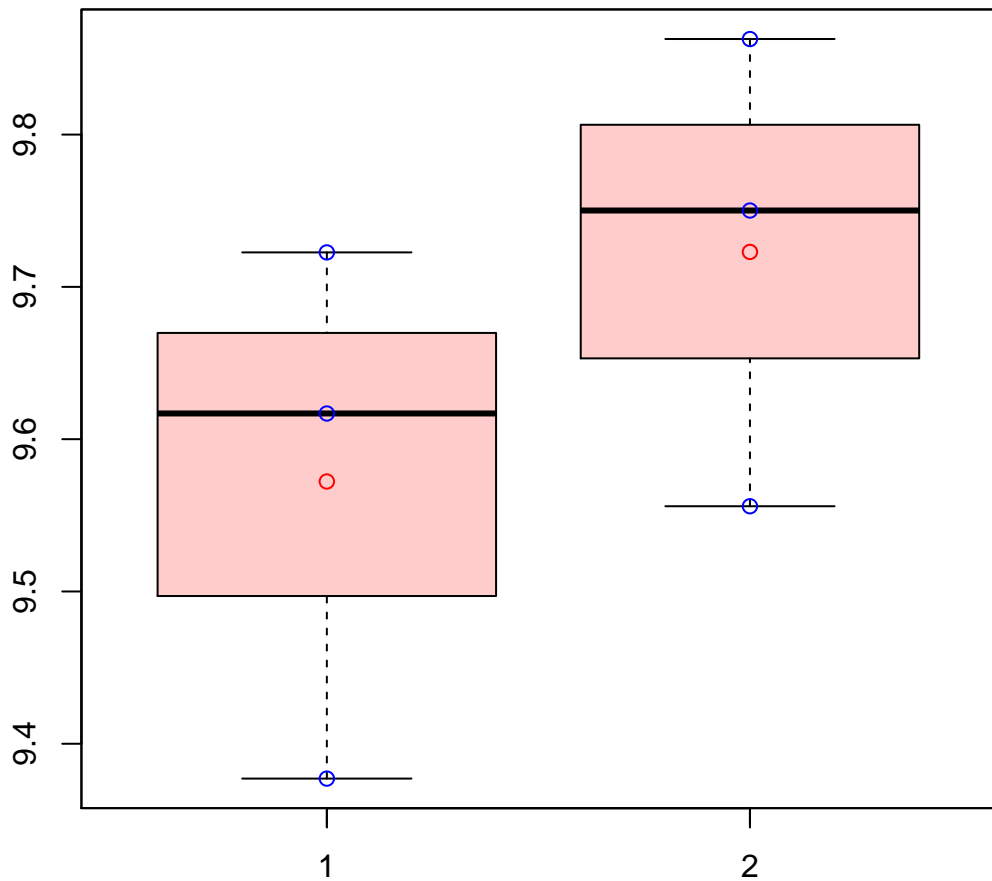

t-Test: p-value = 0.33

# CL4Contig67|CL4Contig67

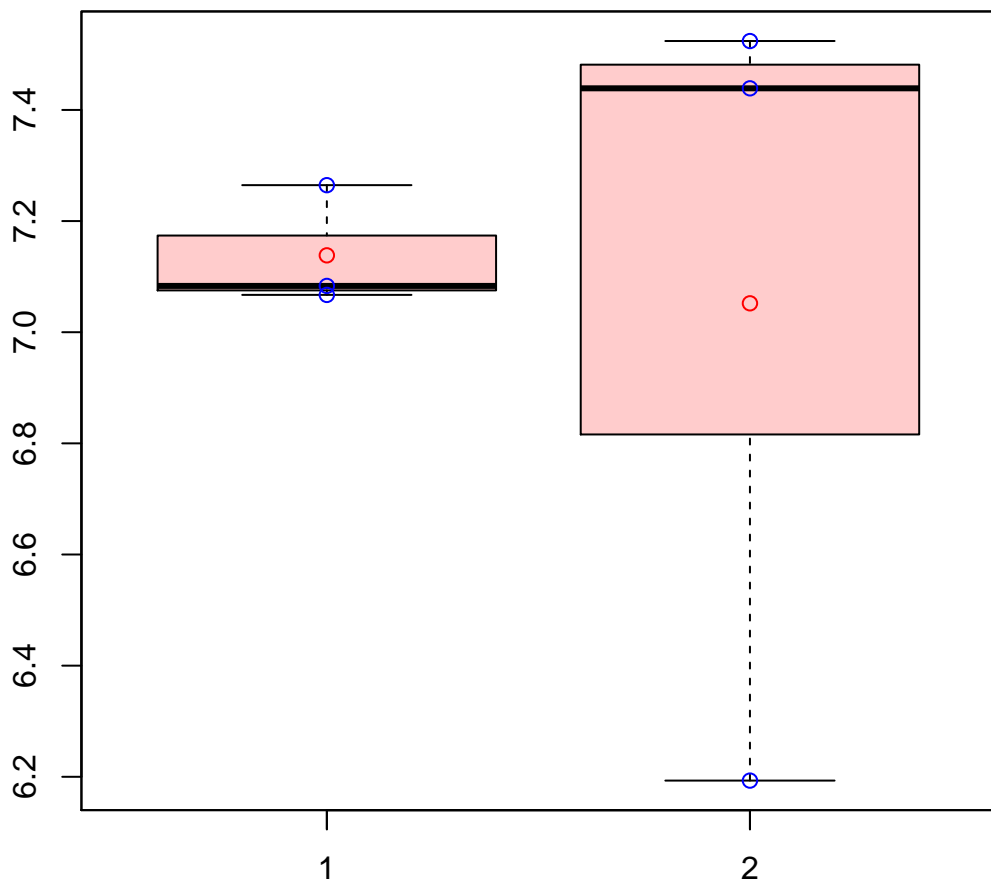

t-Test: p-value = 0.86

# CL5008Contig5|CL5008Contig5

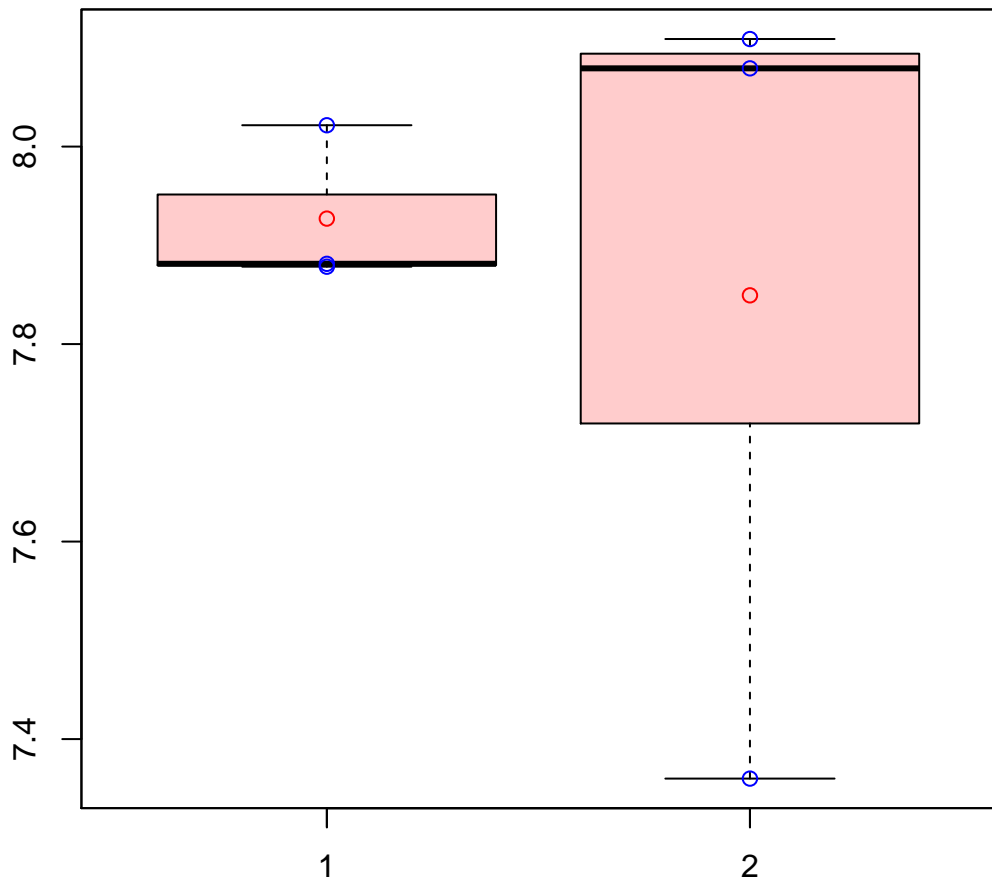

t-Test: p-value = 0.78

# CL500Contig8|CL500Contig8

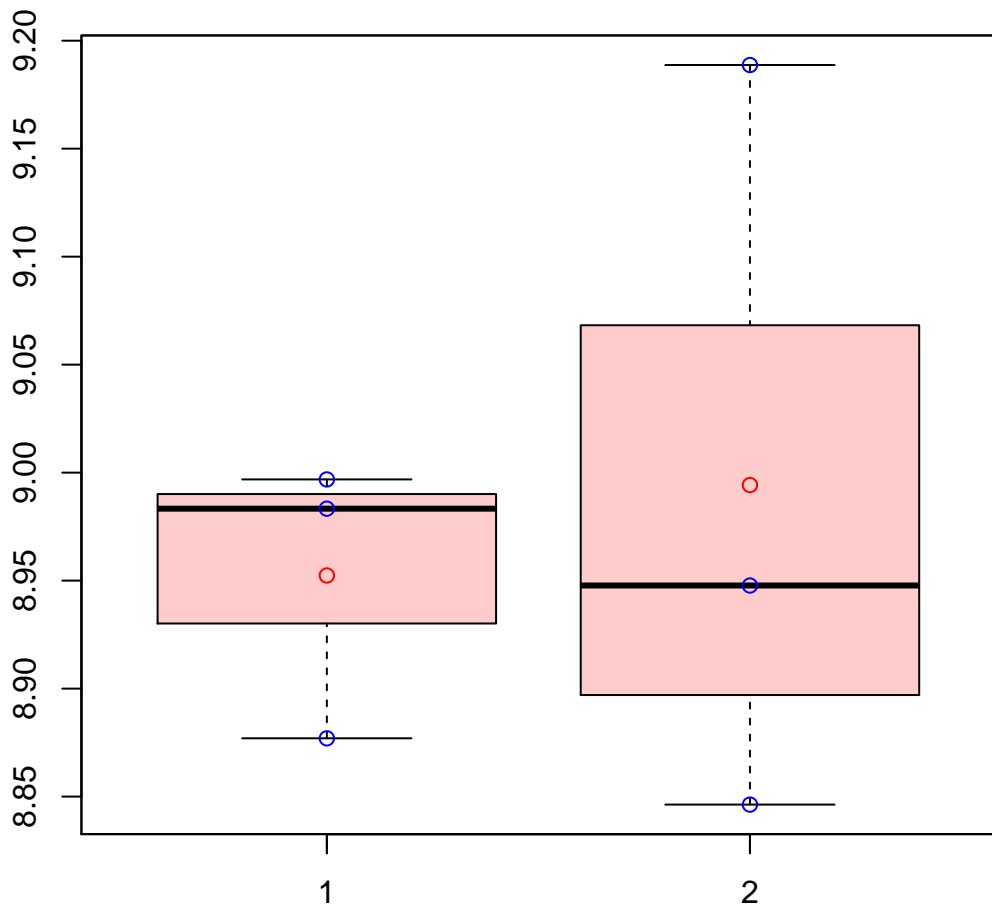

t-Test: p-value = 0.73



## CL5014Contig2|CL5014Contig2

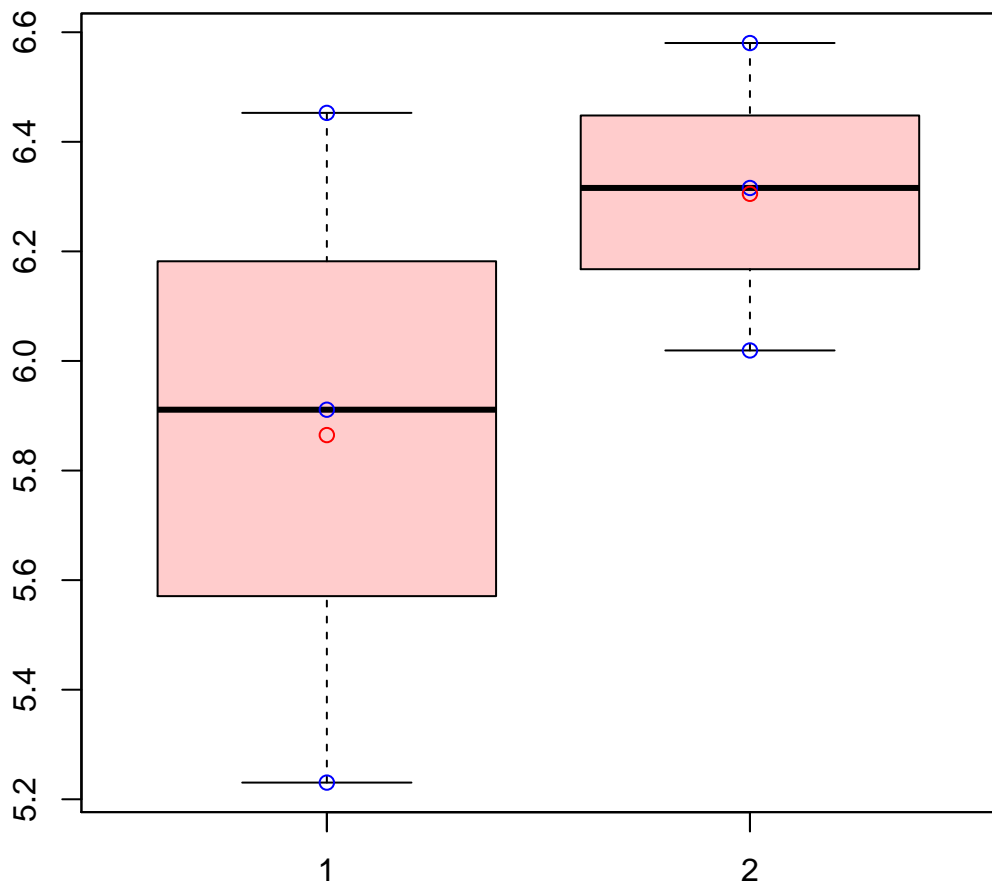

t-Test: p-value = 0.35

# CL501Contig14|CL501Contig14

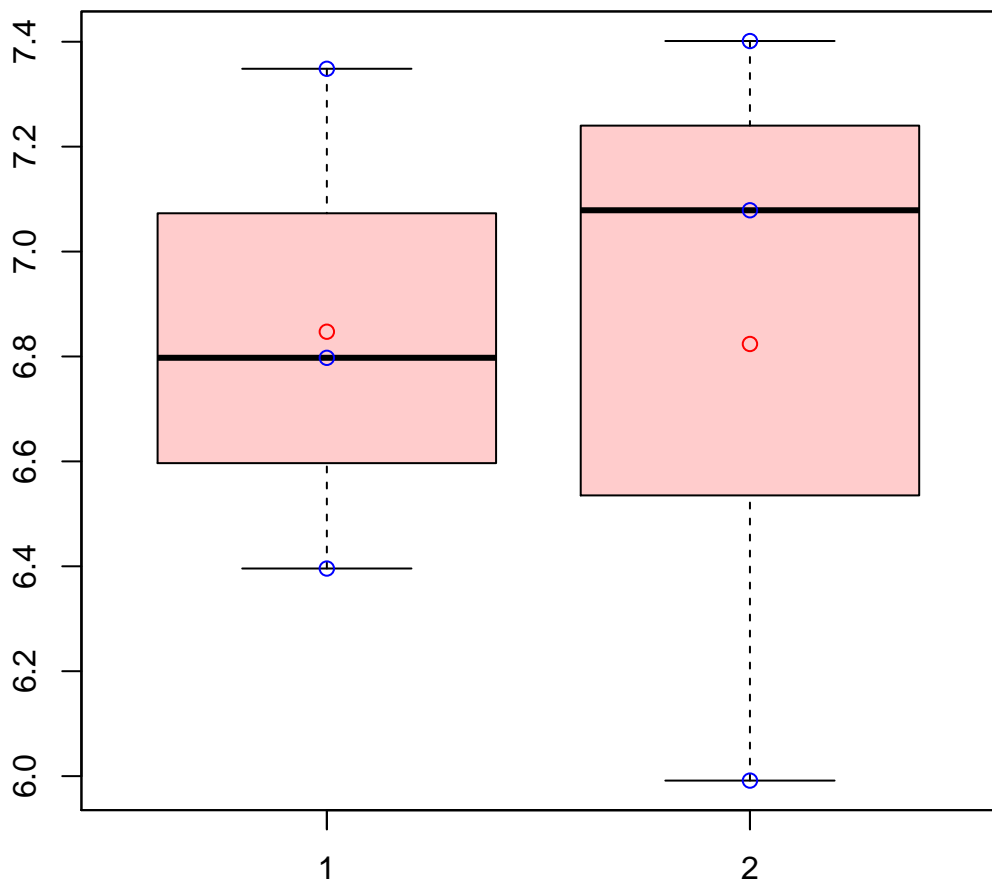

t-Test: p-value = 0.97

# CL501Contig4|CL501Contig4

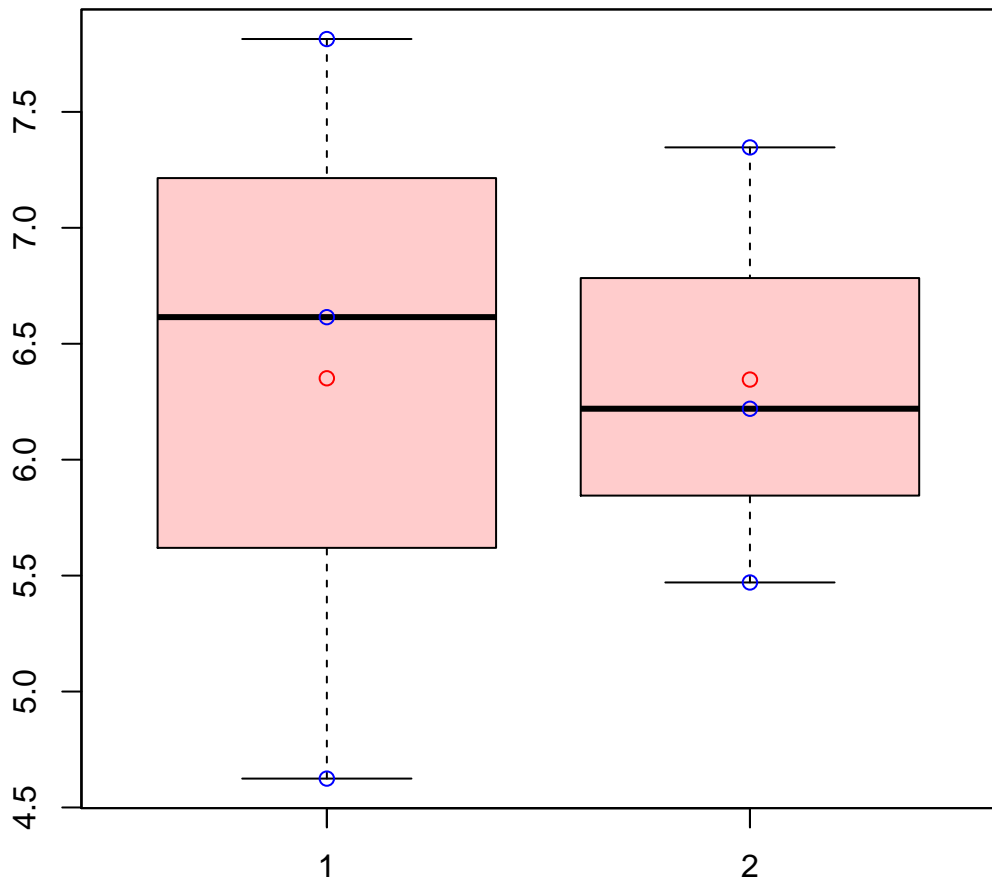

t-Test: p-value = 1

# CL5031Contig5|CL5031Contig5

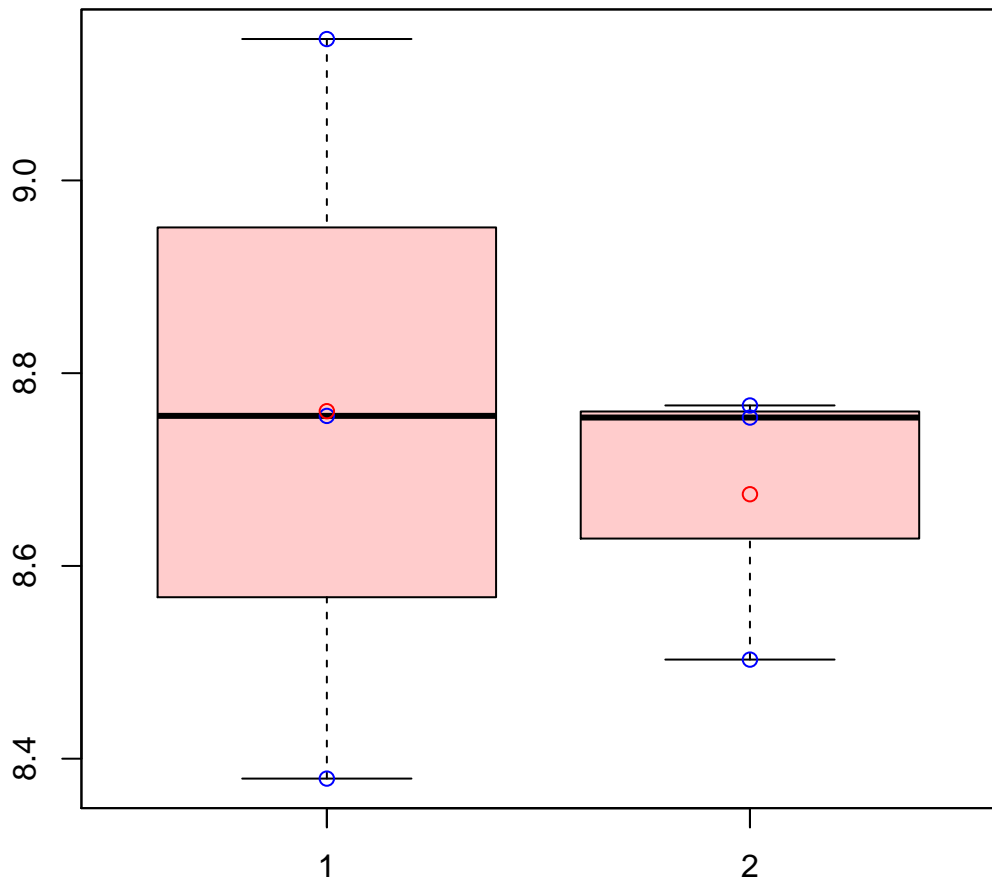

t-Test: p-value = 0.74

# CL5033Contig2|CL5033Contig2

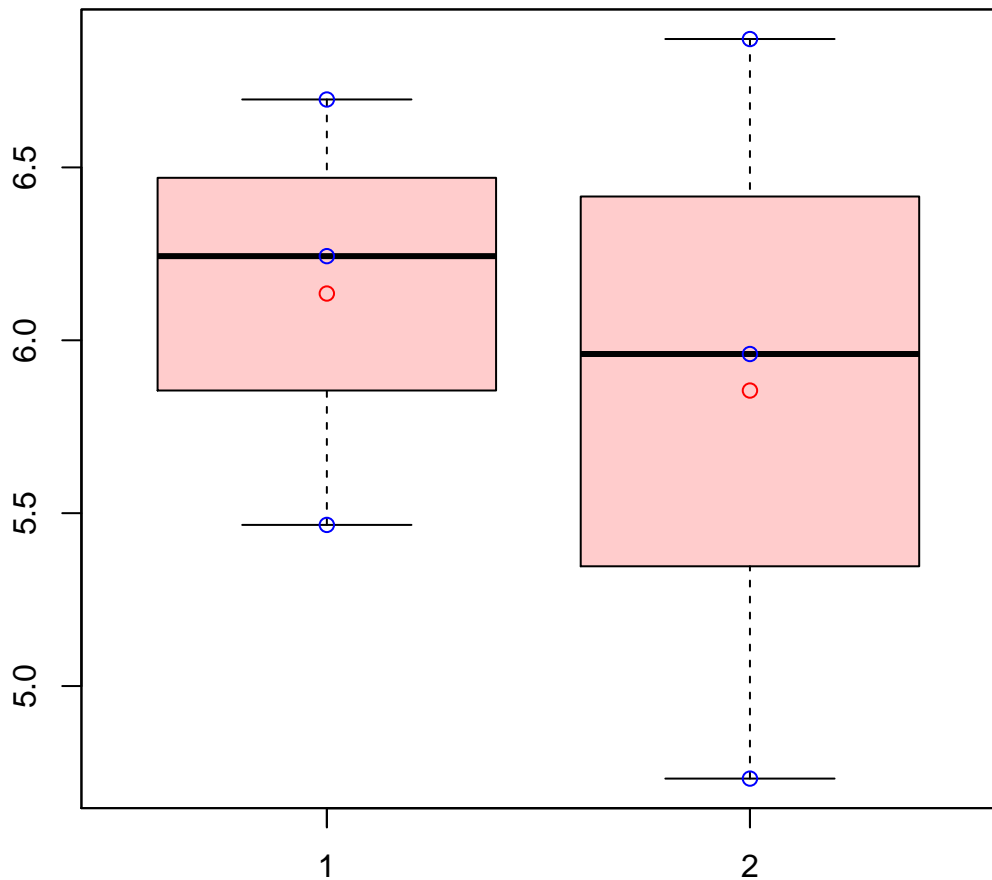

t-Test: p-value = 0.72

# CL5040Contig1|CL5040Contig1

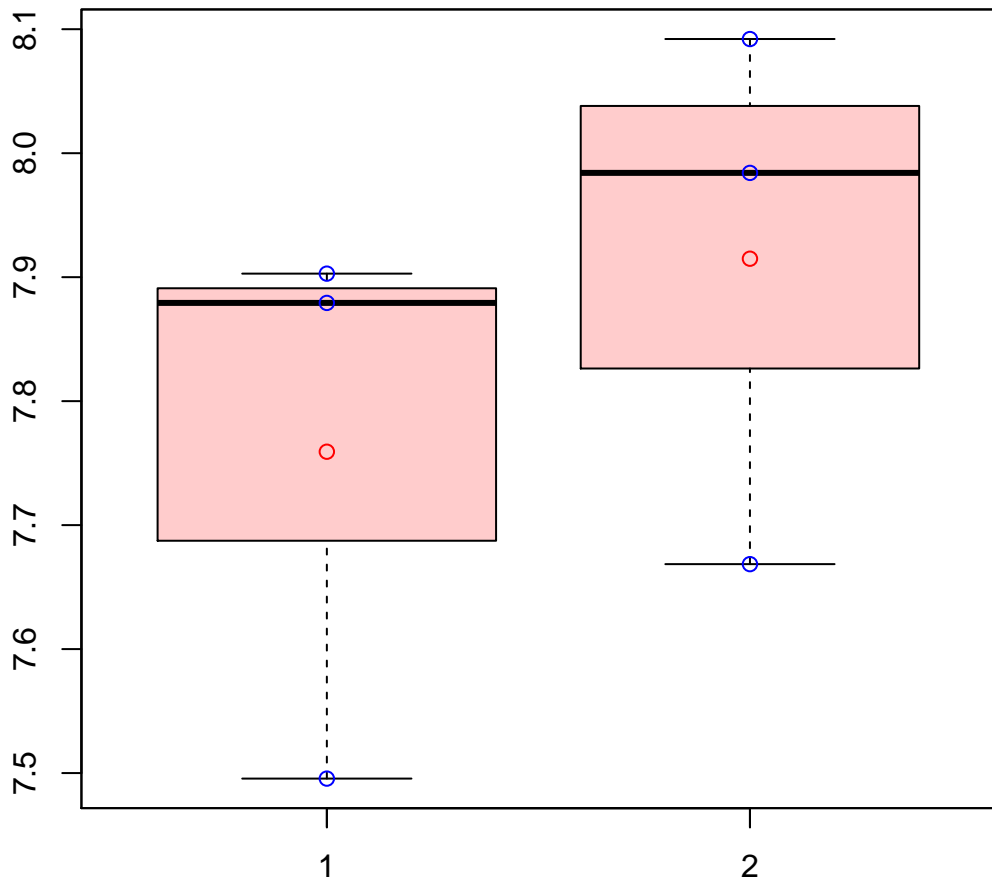

t-Test: p-value = 0.44

# CL5045Contig6|CL5045Contig6

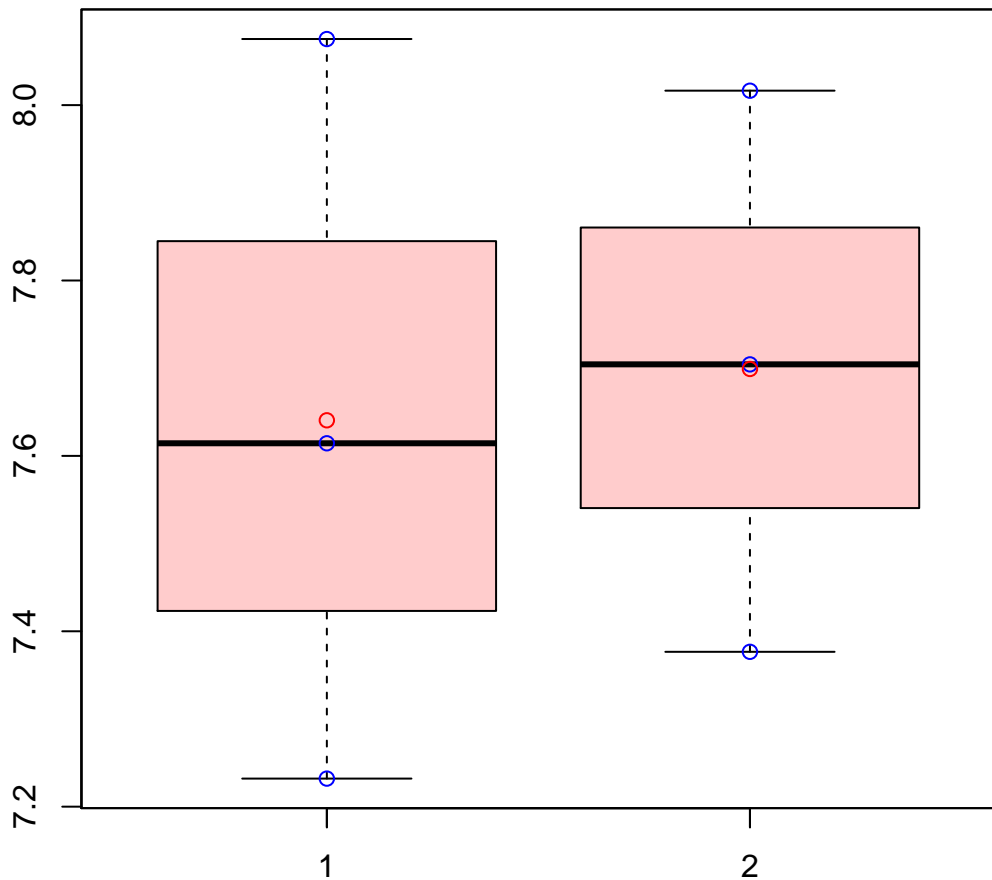

t-Test: p-value = 0.86

# CL5046Contig1|CL5046Contig1

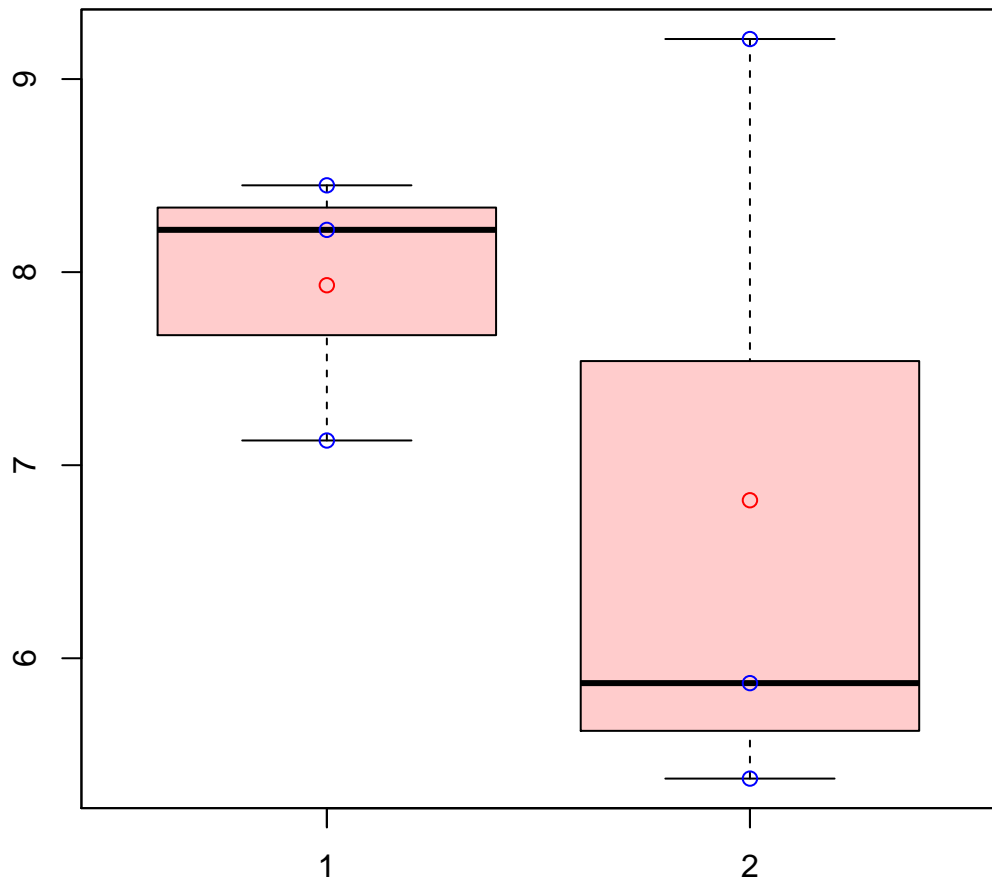

t-Test: p-value = 0.46



# CL5065Contig5|CL5065Contig5

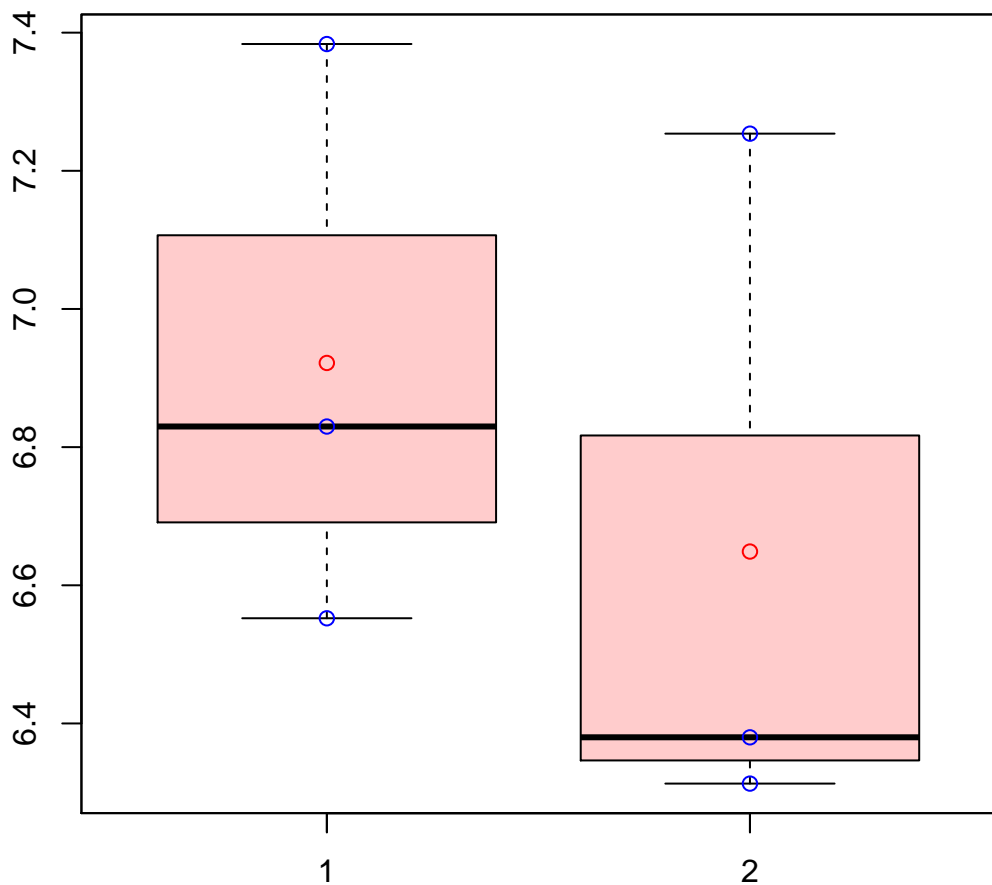

t-Test: p-value = 0.52

# CL506Contig2|CL506Contig2

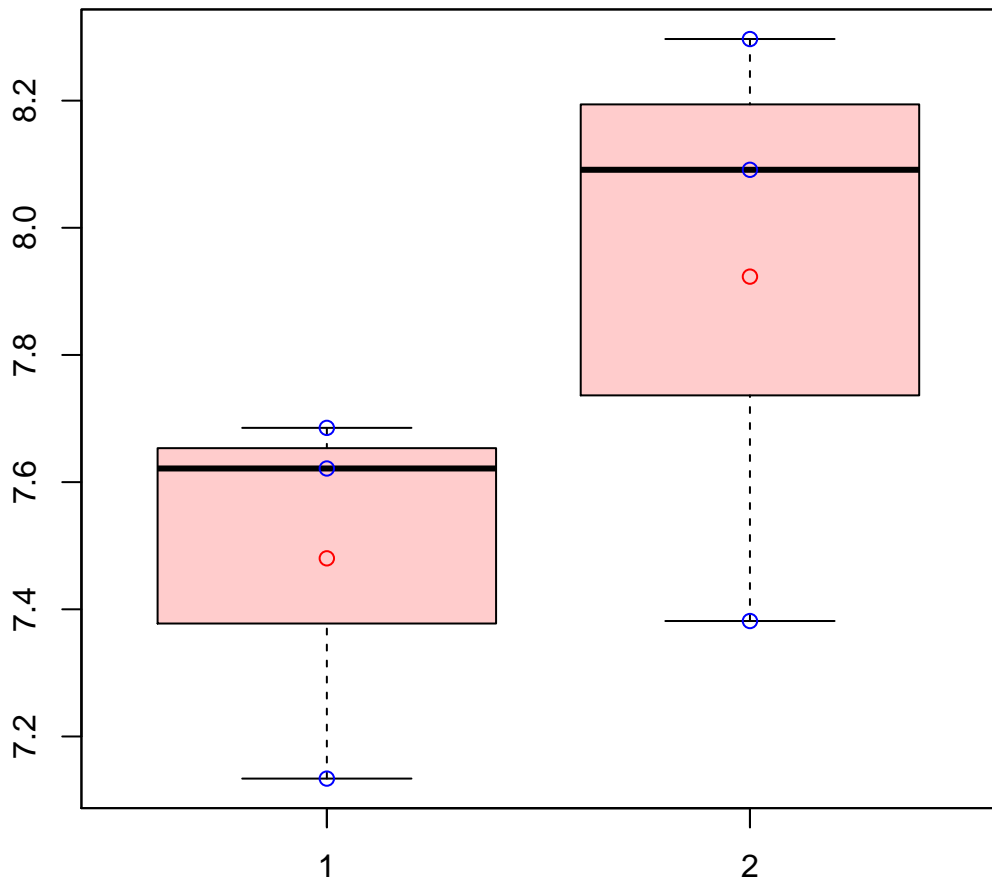

t-Test: p-value = 0.26

# CL506Contig6|CL506Contig6

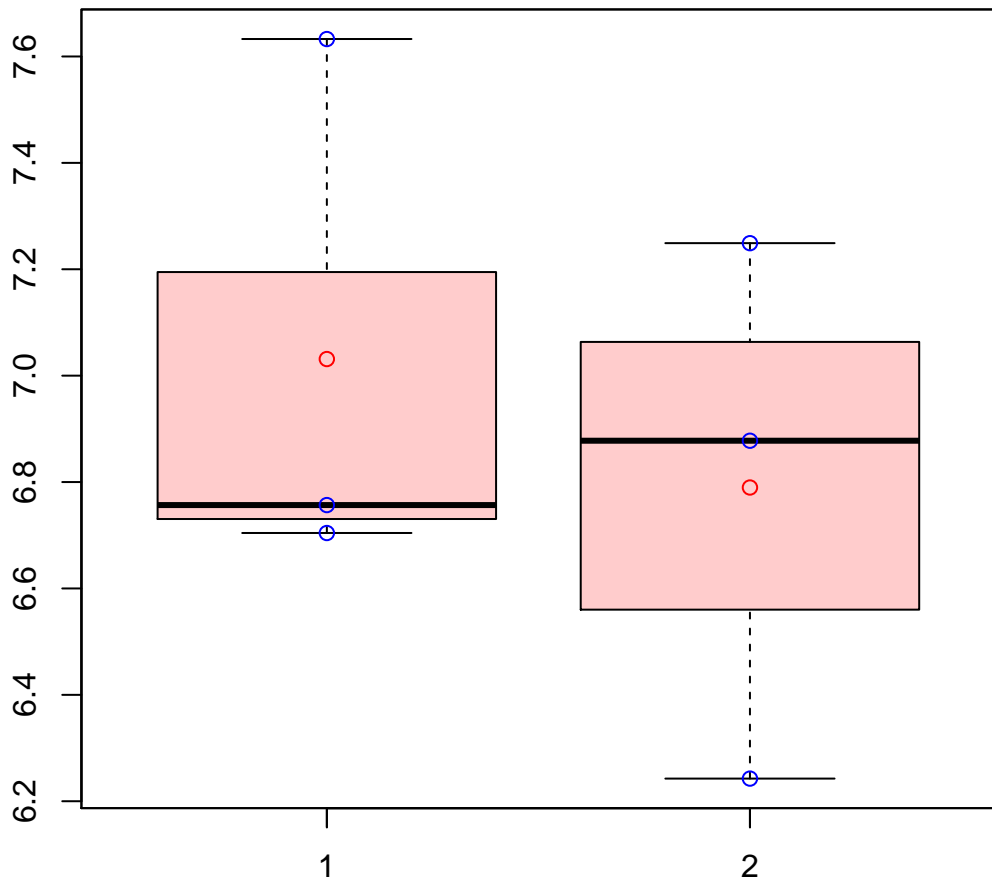

t-Test: p-value = 0.6

# CL5082Contig1|CL5082Contig1

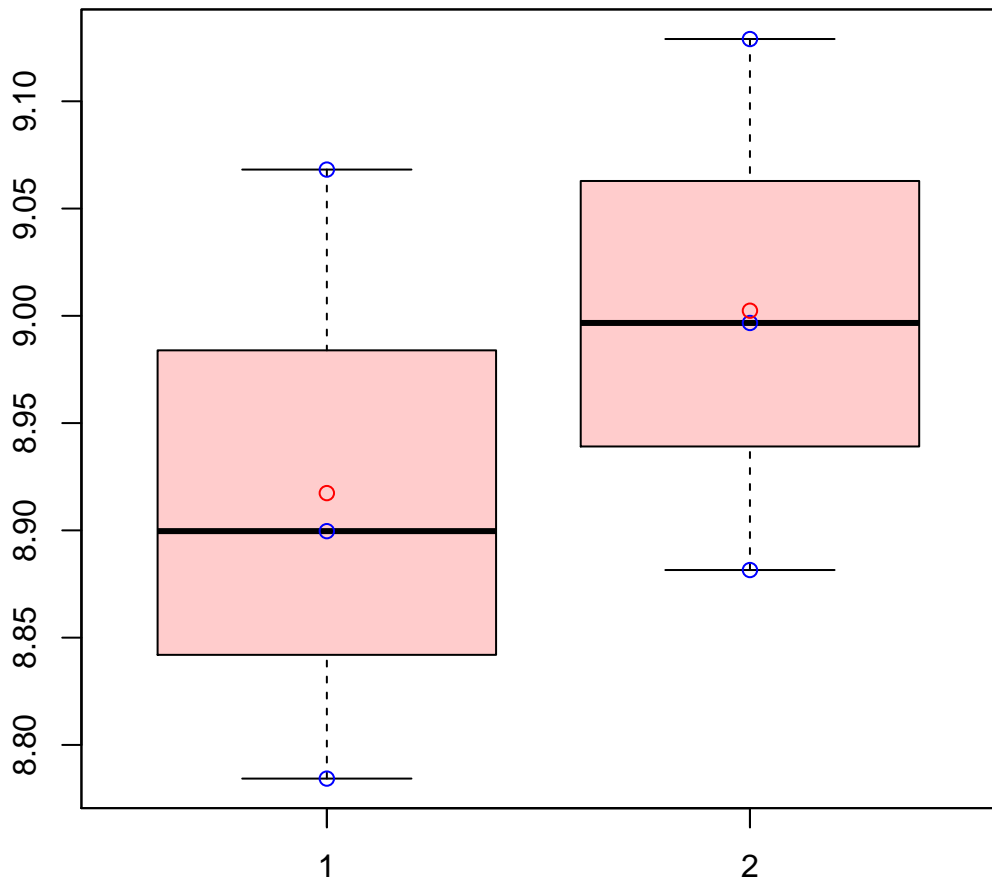

t-Test: p-value = 0.48

# CL5082Contig6|CL5082Contig6

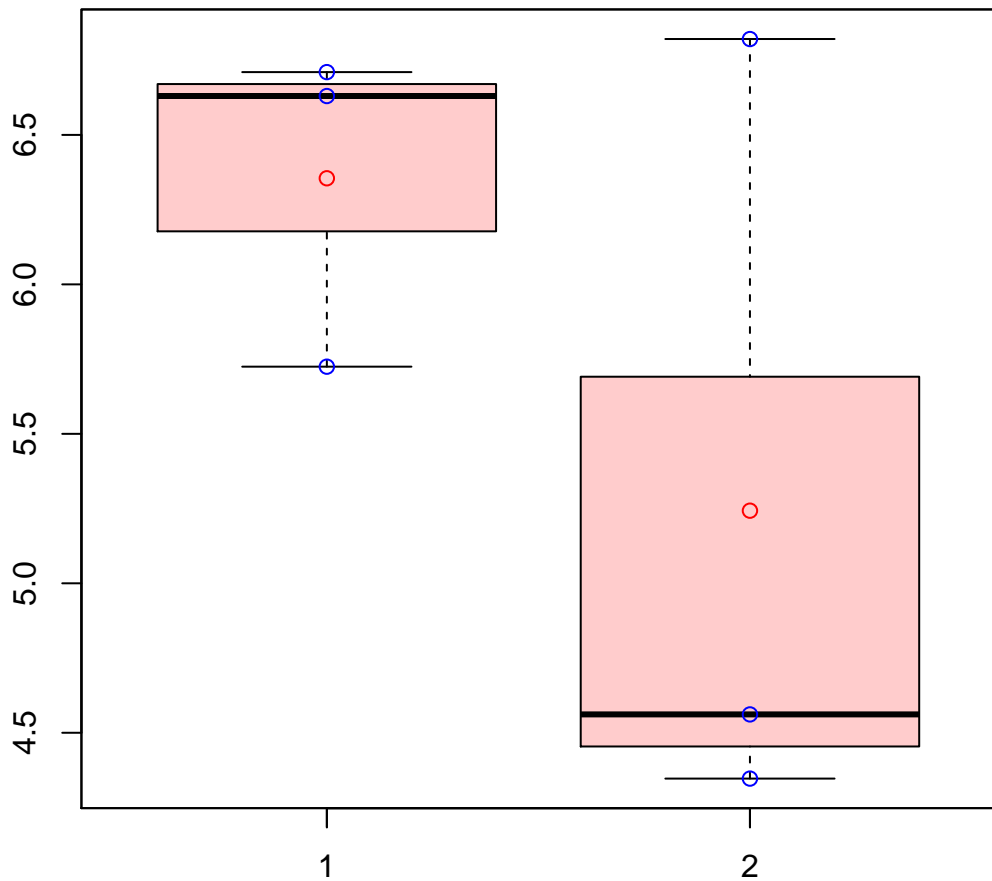

t-Test: p-value = 0.29

# CL508Contig2|CL508Contig2

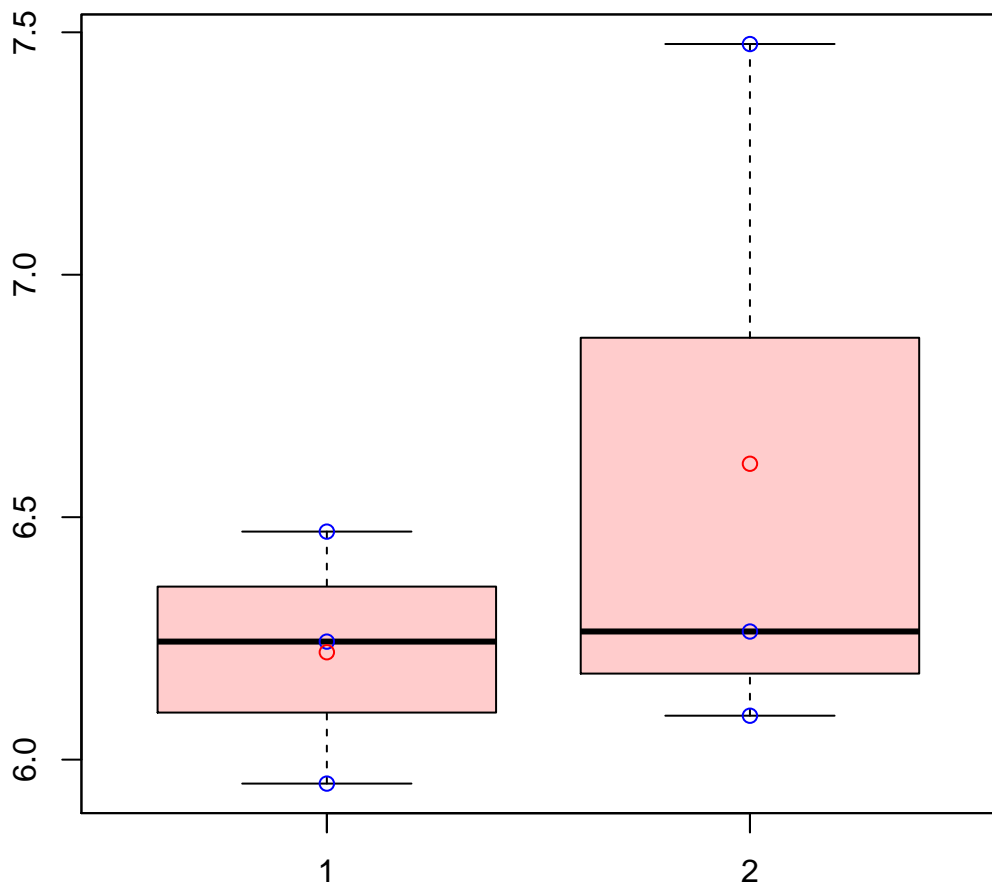

t-Test: p-value = 0.47

# CL5091Contig2|CL5091Contig2

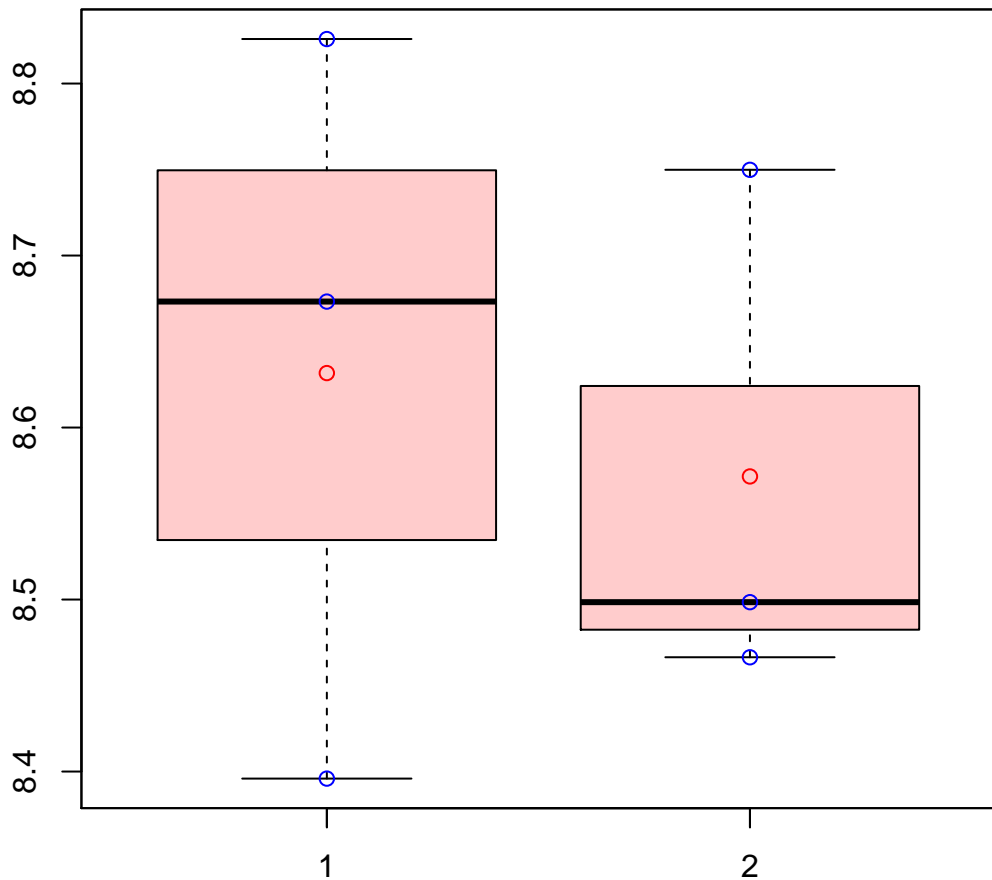

t-Test: p-value = 0.72

# CL5095Contig1|CL5095Contig1

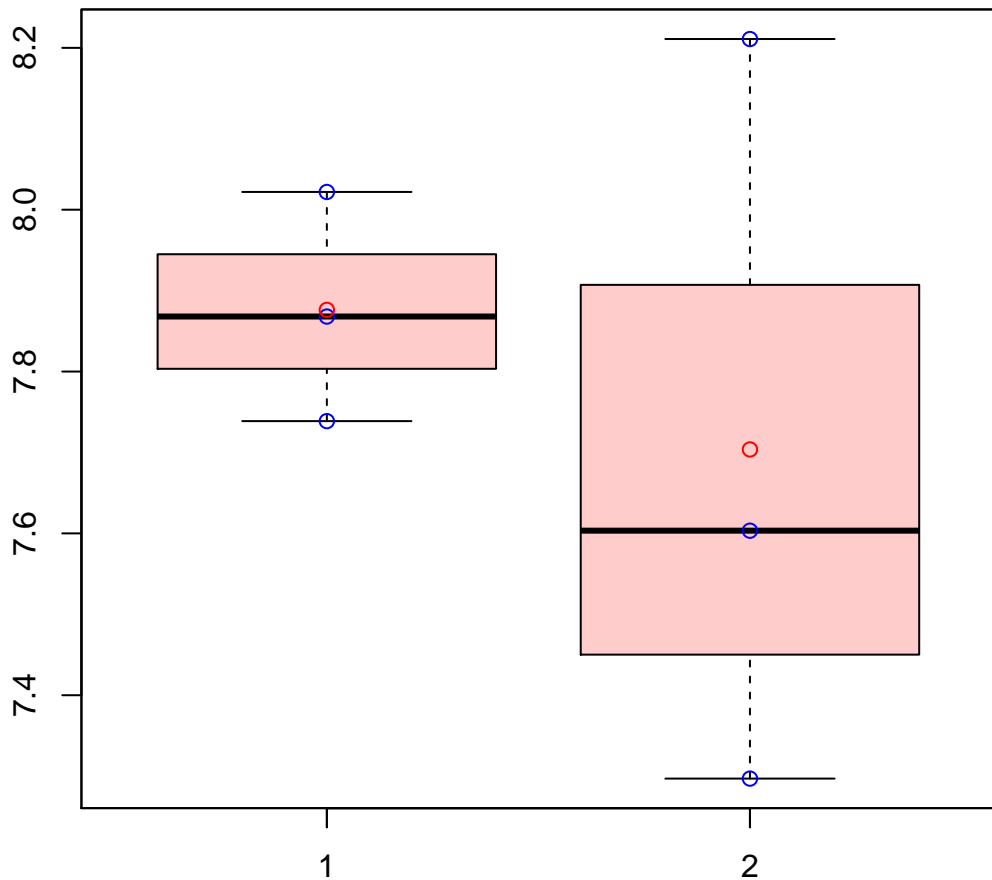

t-Test: p-value = 0.59



# CL5097Contig3|CL5097Contig3

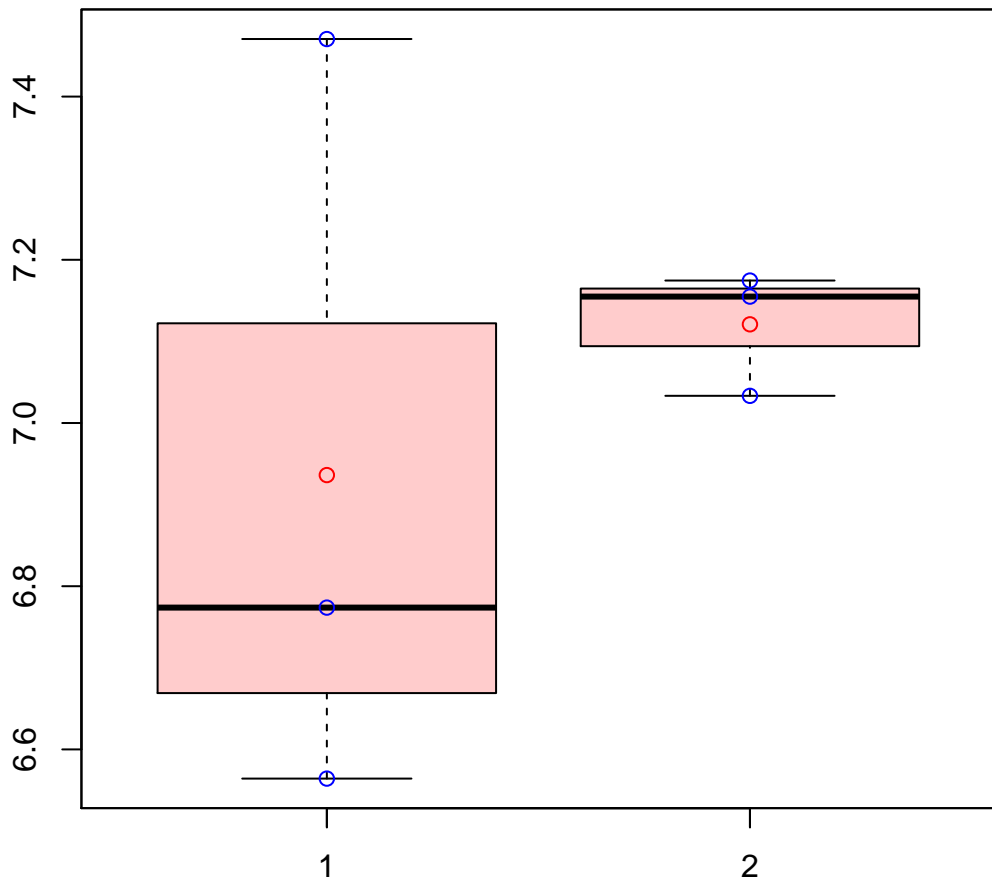

t-Test: p-value = 0.57

# CL5109Contig1|CL5109Contig1

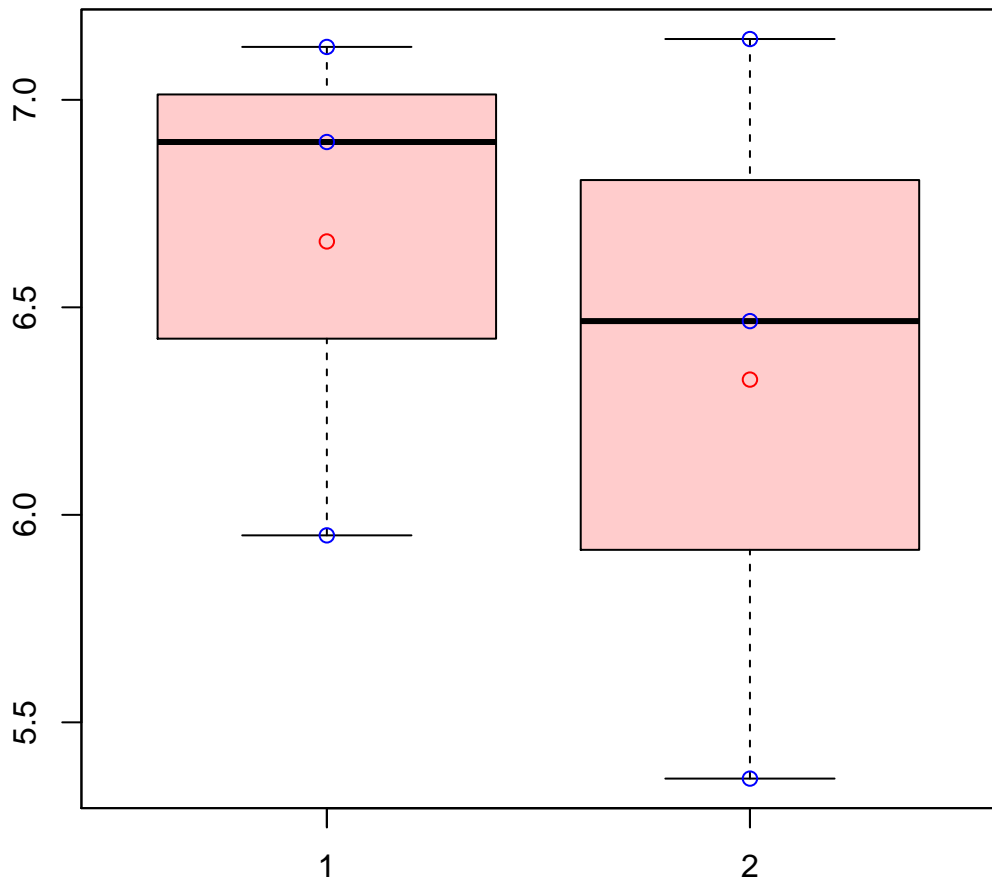

t-Test: p-value = 0.63

# CL510Contig10|CL510Contig10

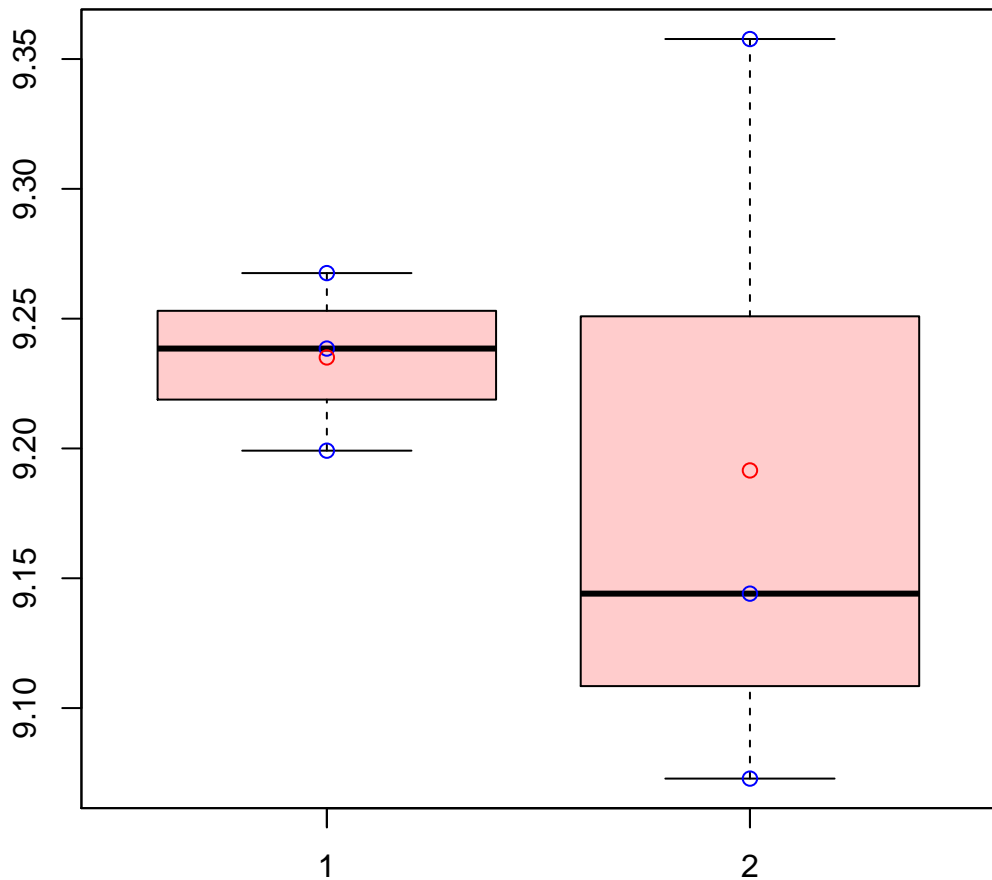

t-Test: p-value = 0.67

# CL5128Contig1|CL5128Contig1

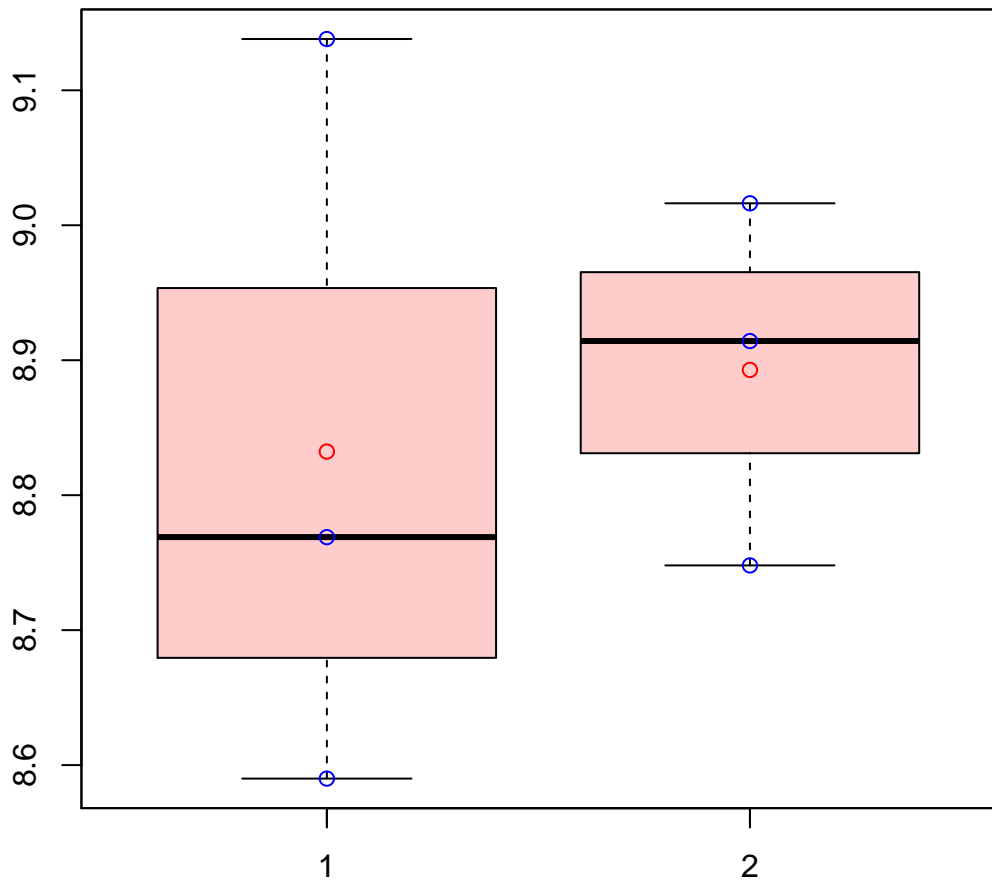

t-Test: p-value = 0.76

# CL512Contig4|CL512Contig4

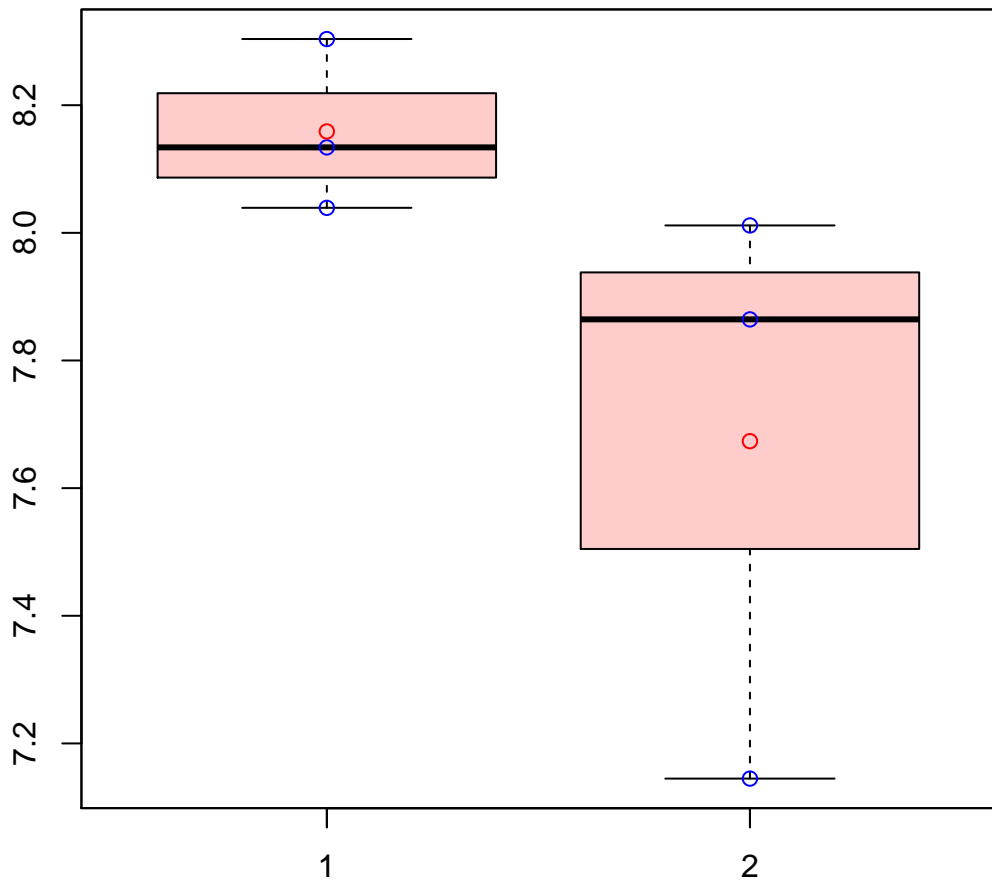

t-Test: p-value = 0.21

# CL513Contig10|CL513Contig10

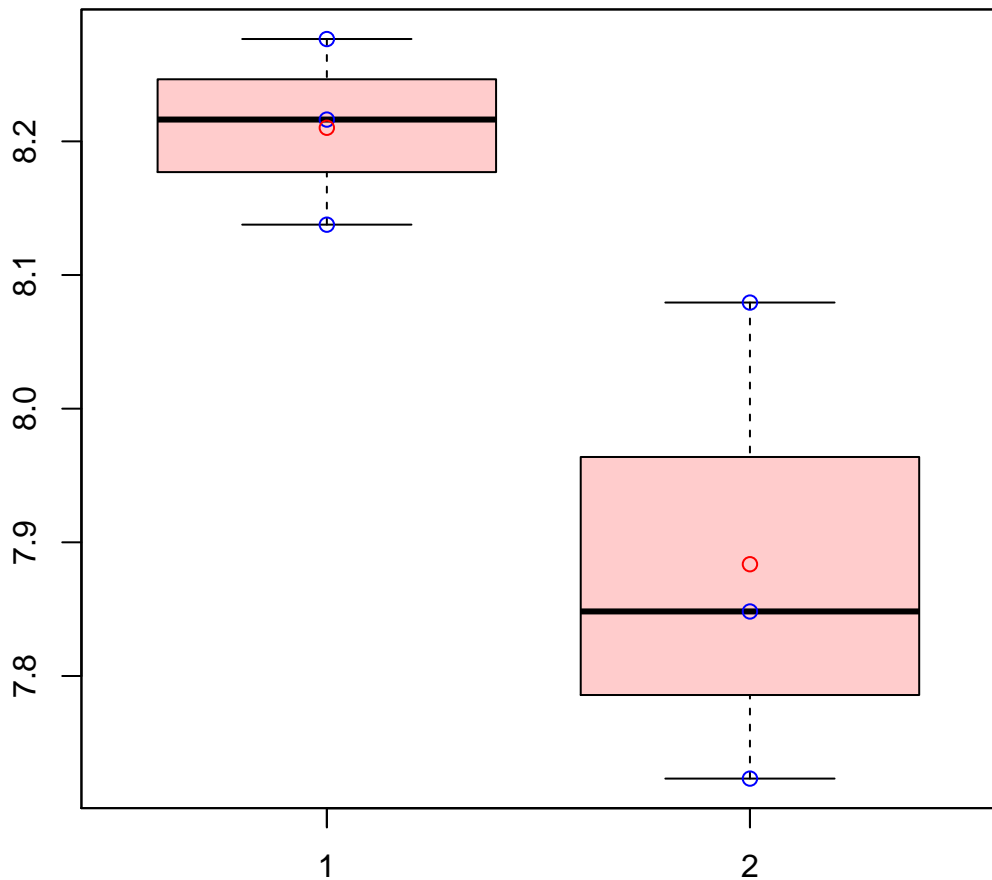

t-Test: p-value = 0.07

# CL5144Contig2|CL5144Contig2

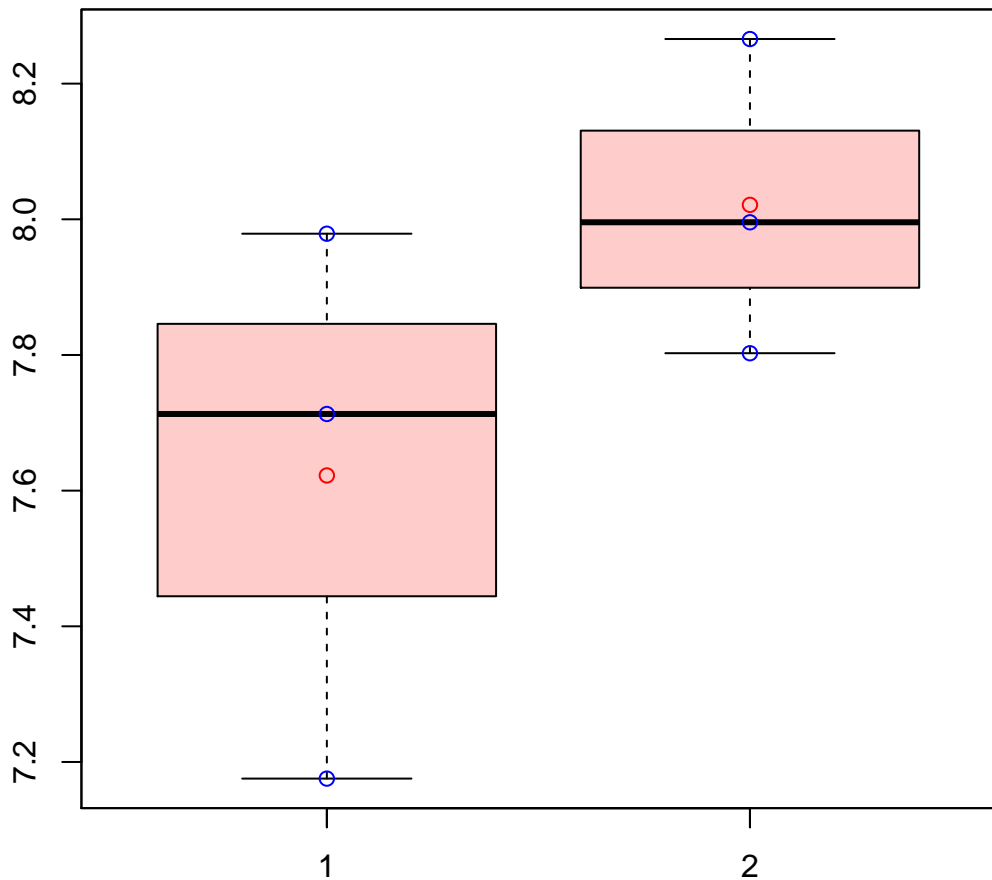

t-Test: p-value = 0.23

# CL514Contig12|CL514Contig12

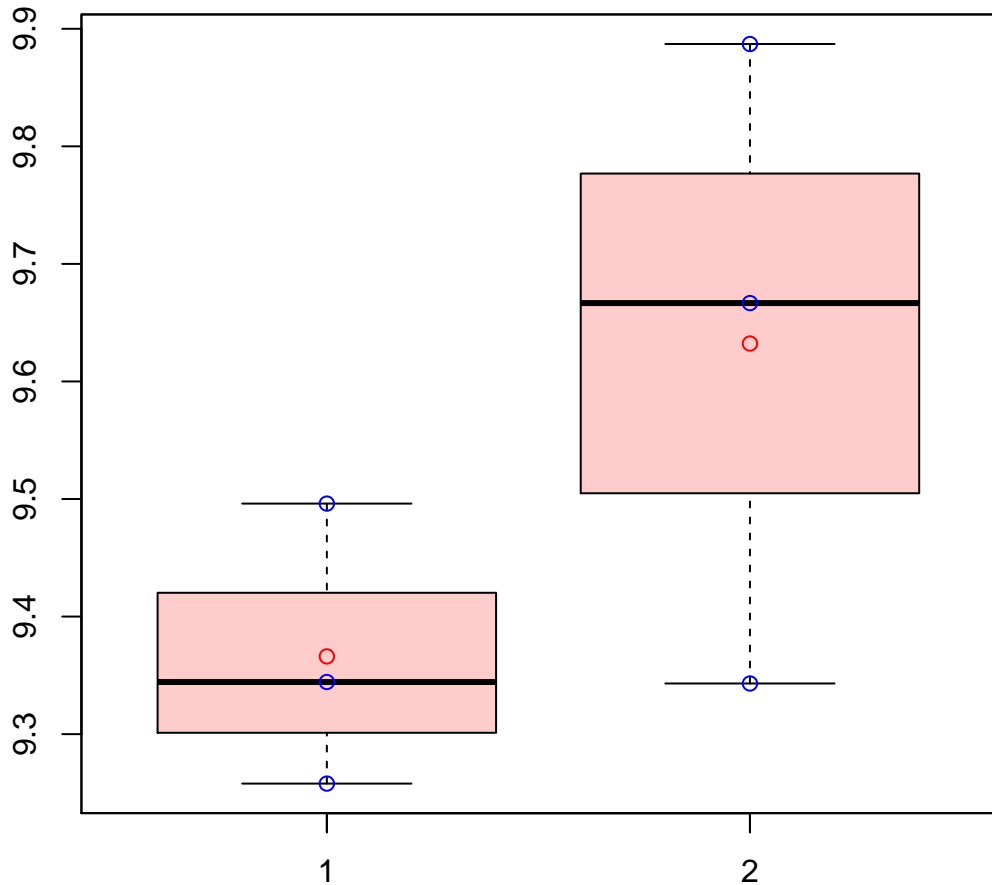

t-Test: p-value = 0.23



# CL514Contig2|CL514Contig2

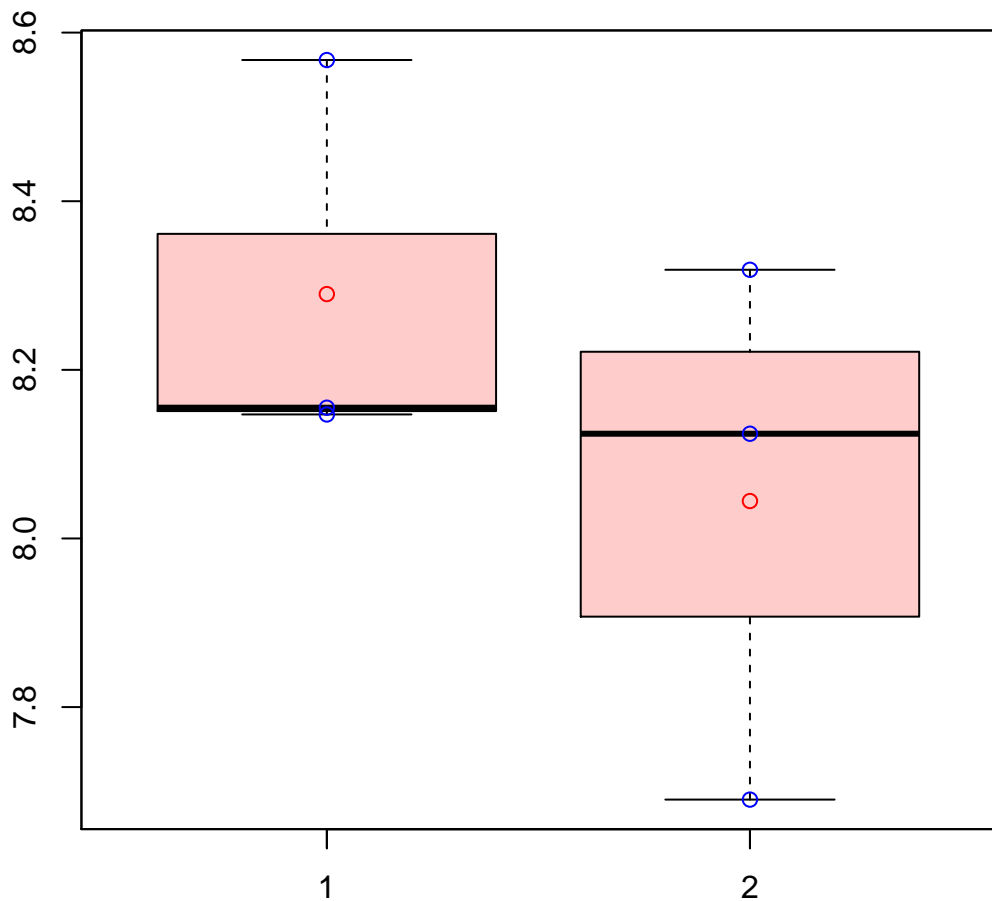

t-Test: p-value = 0.35

# CL5159Contig4|CL5159Contig4

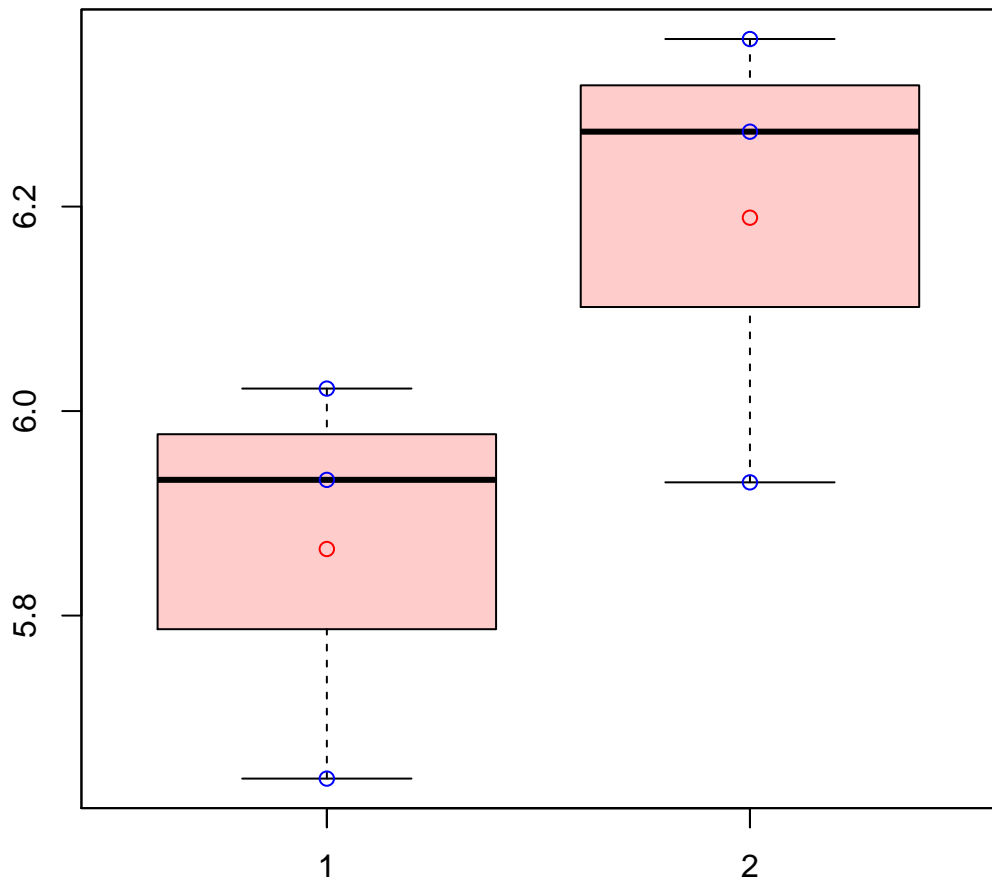

t-Test: p-value = 0.14

# CL5167Contig2|CL5167Contig2

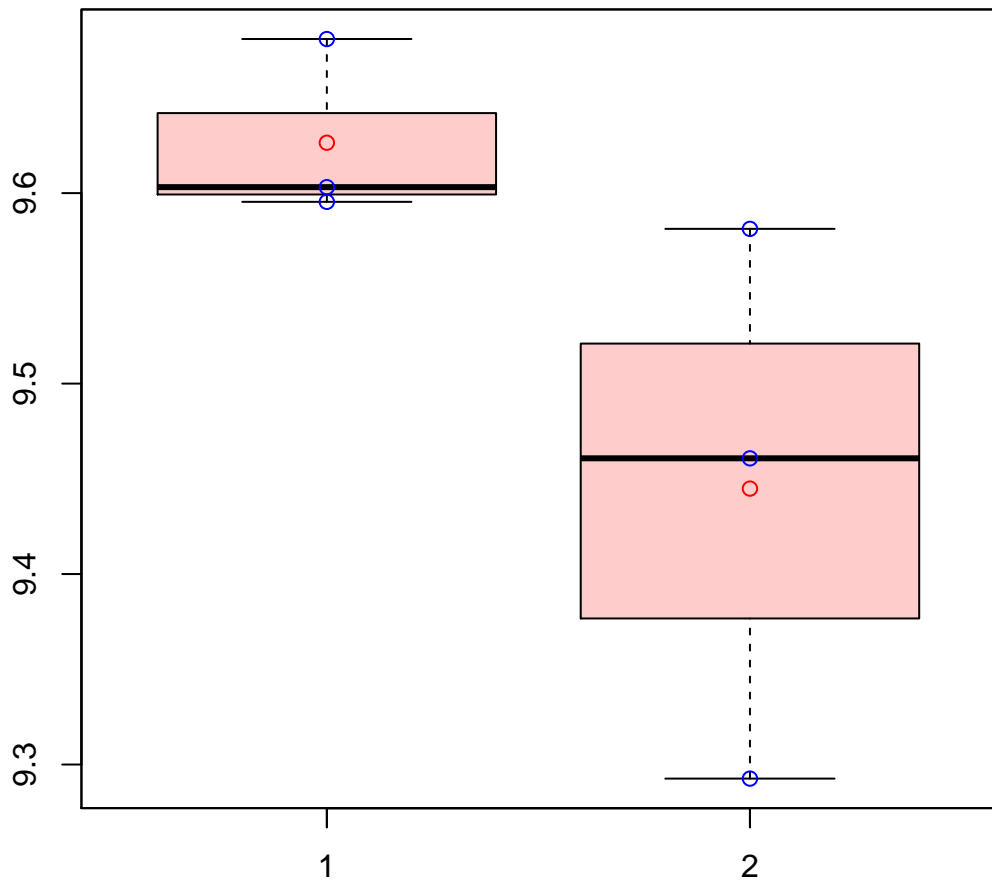

t-Test: p-value = 0.15

# CL5169Contig3|CL5169Contig3

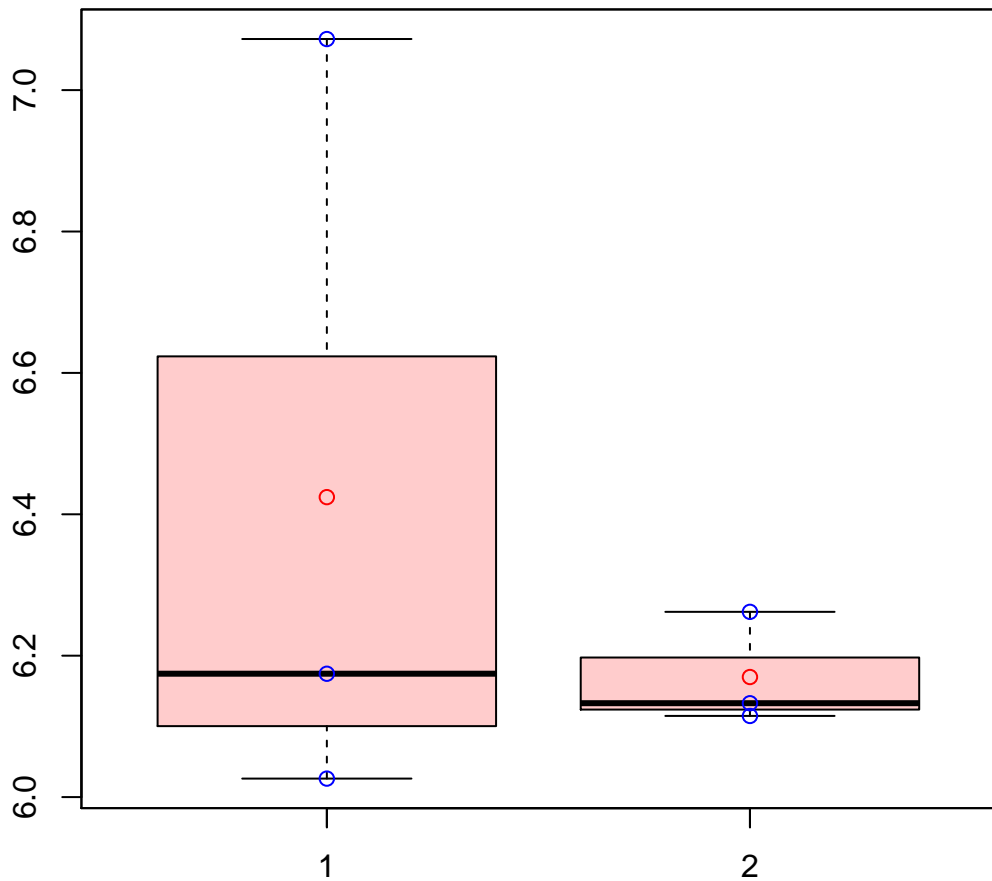

t-Test: p-value = 0.52

# CL516Contig3|CL516Contig3

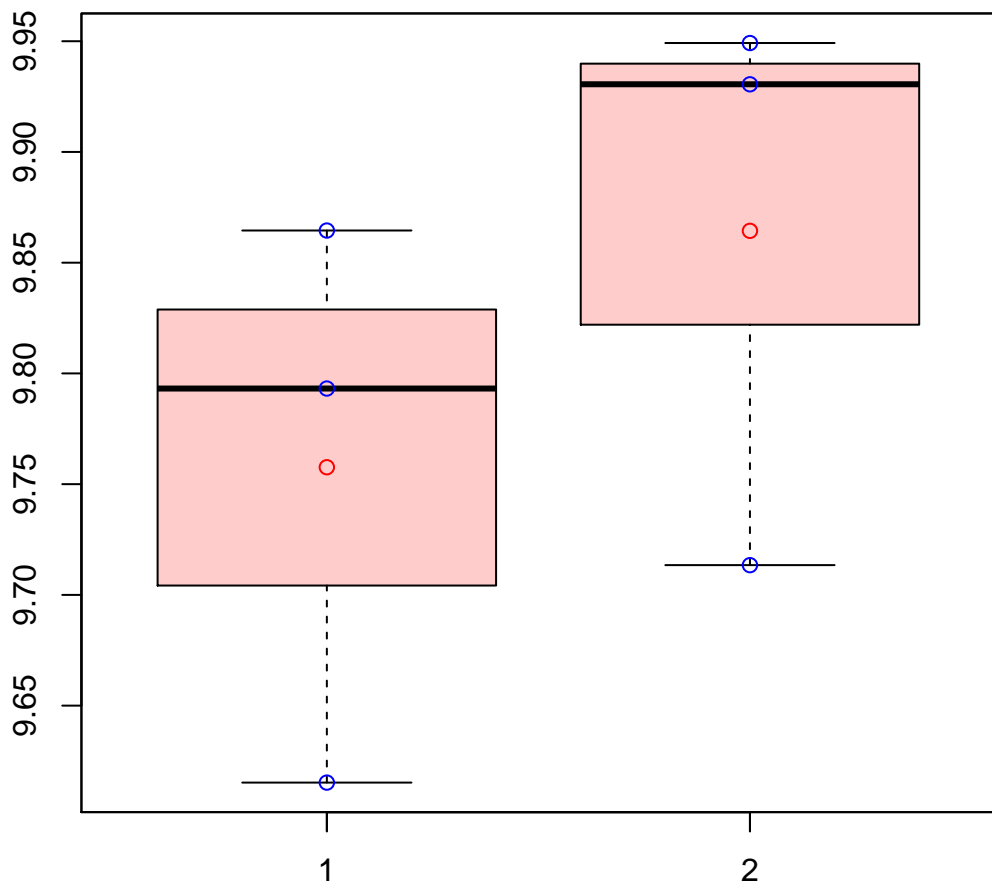

t-Test: p-value = 0.37

# CL5175Contig1|CL5175Contig1

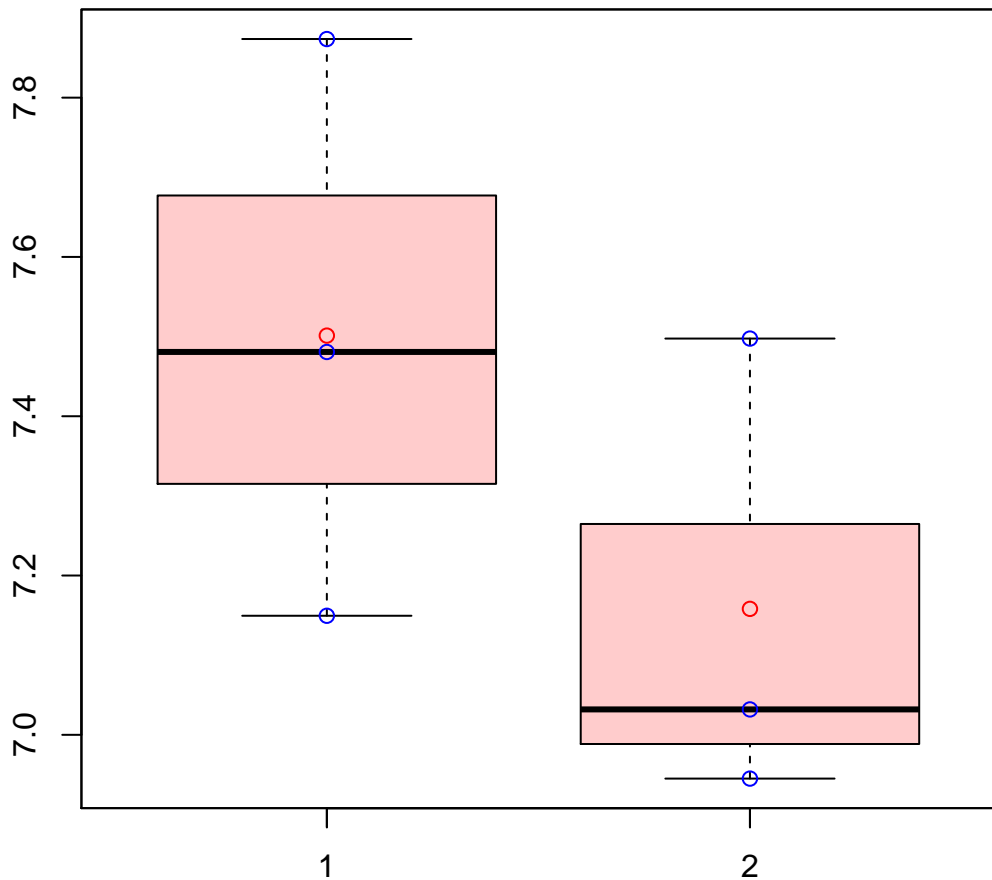

t-Test: p-value = 0.28

# CL5185Contig3|CL5185Contig3

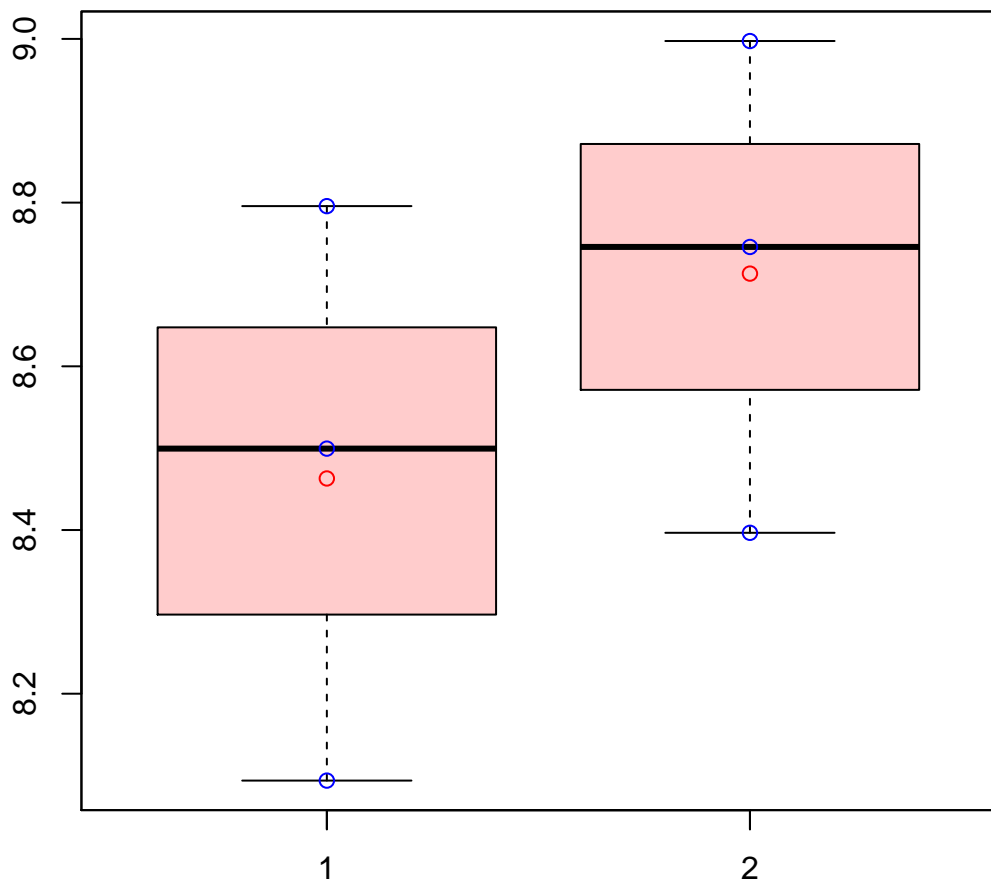

t-Test: p-value = 0.4

# CL5197Contig1|CL5197Contig1

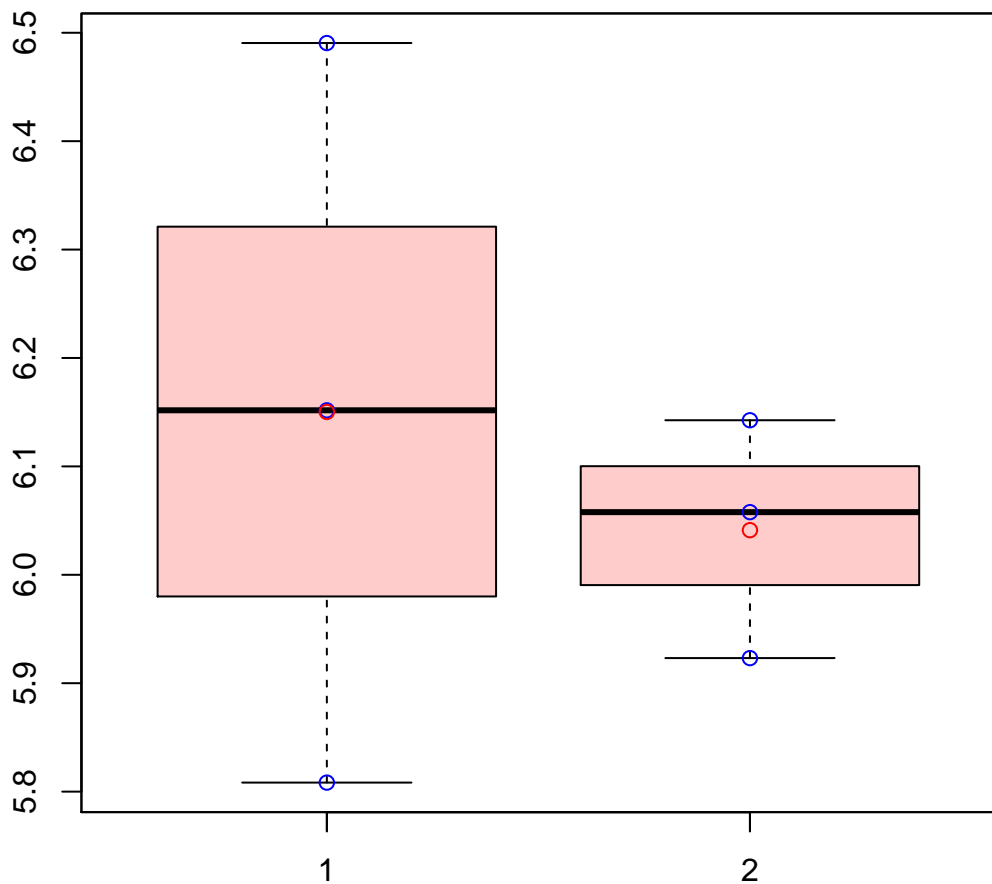

t-Test: p-value = 0.64



# CL5199Contig1|CL5199Contig1

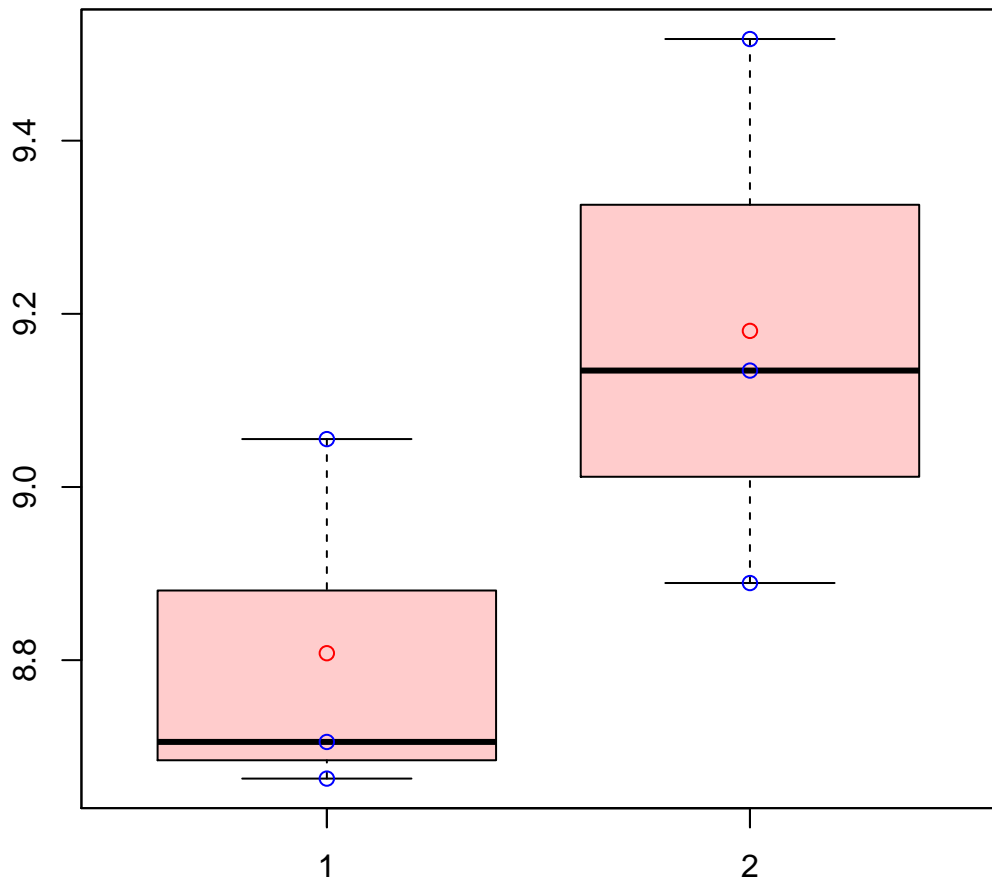

t-Test: p-value = 0.18

# CL5199Contig4|CL5199Contig4

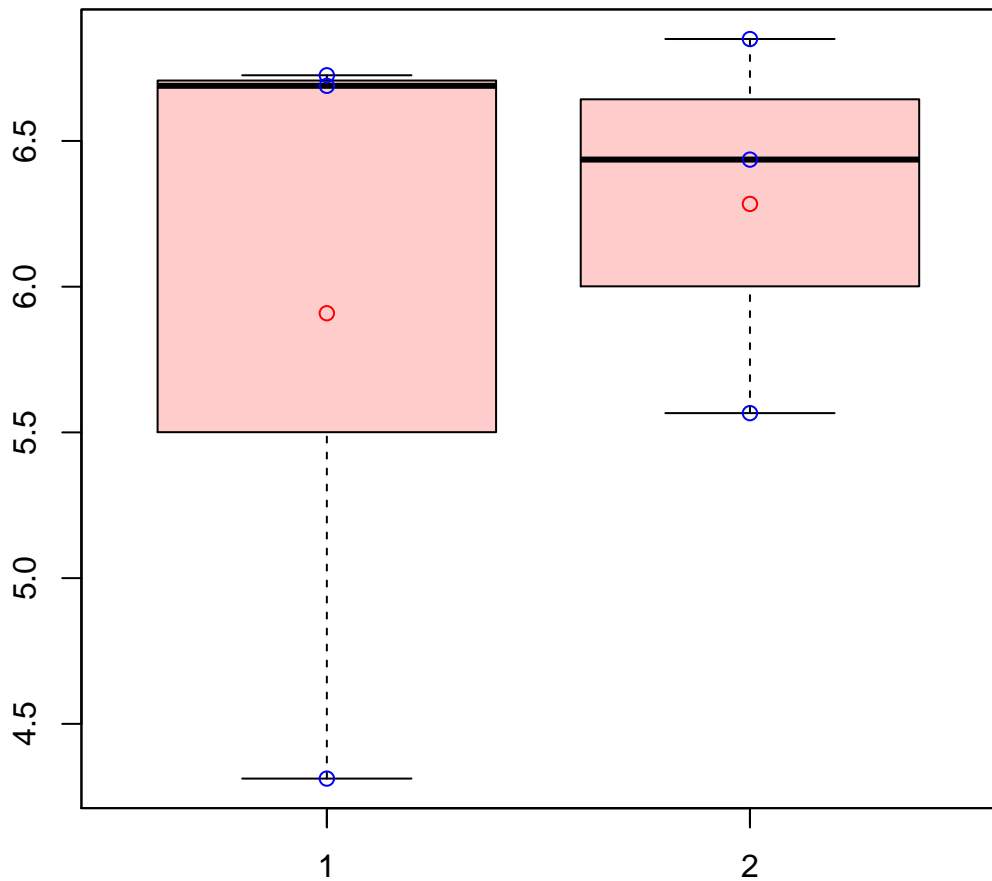

t-Test: p-value = 0.7

# CL519Contig15|CL519Contig15

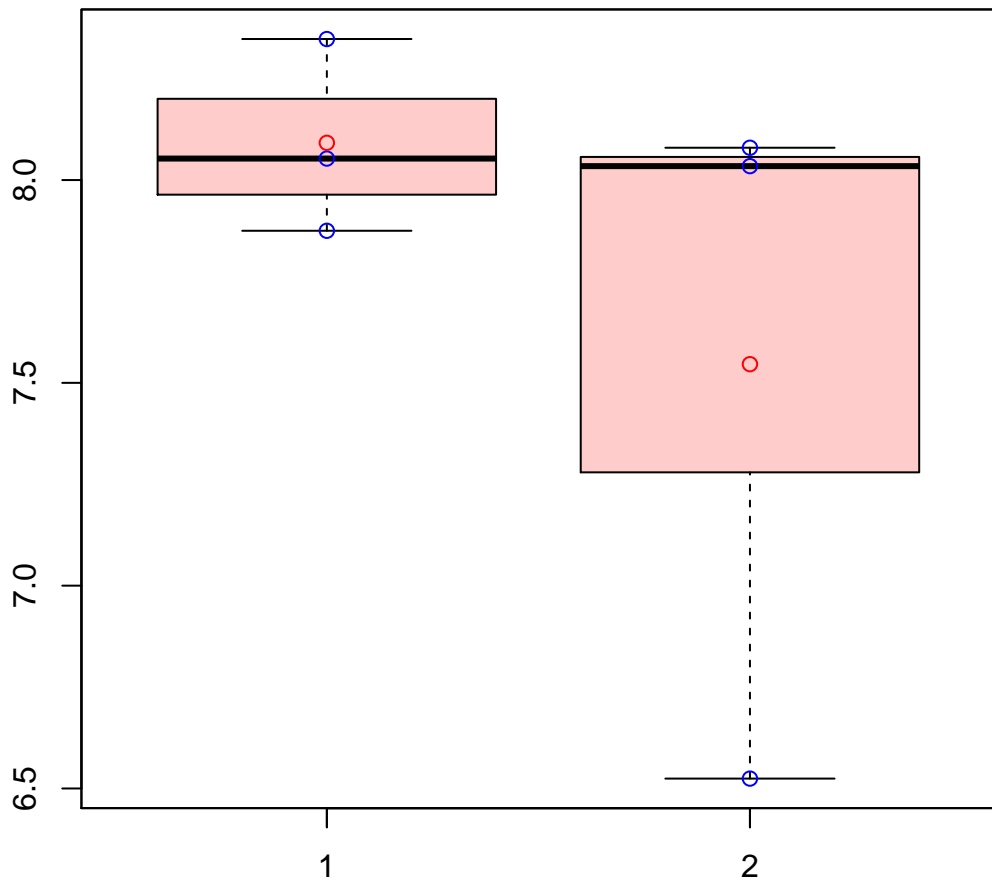

t-Test: p-value = 0.4

# CL519Contig19|CL519Contig19

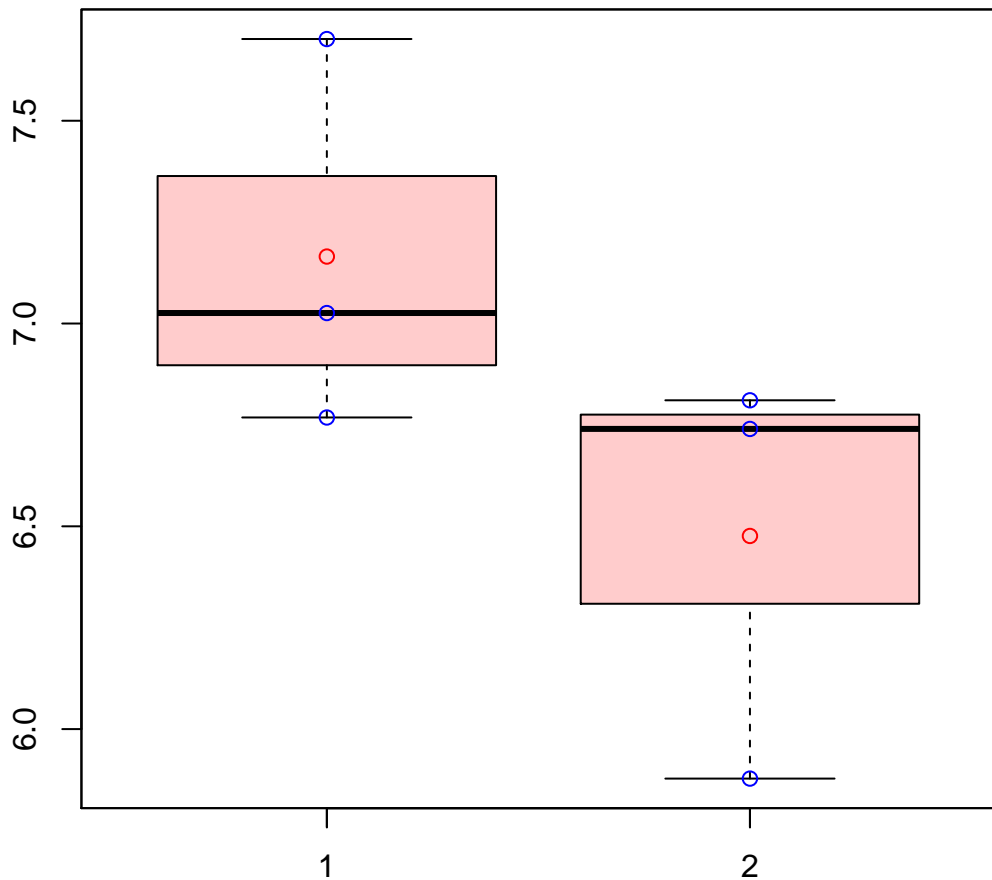

t-Test: p-value = 0.17

# CL519Contig1|CL519Contig1

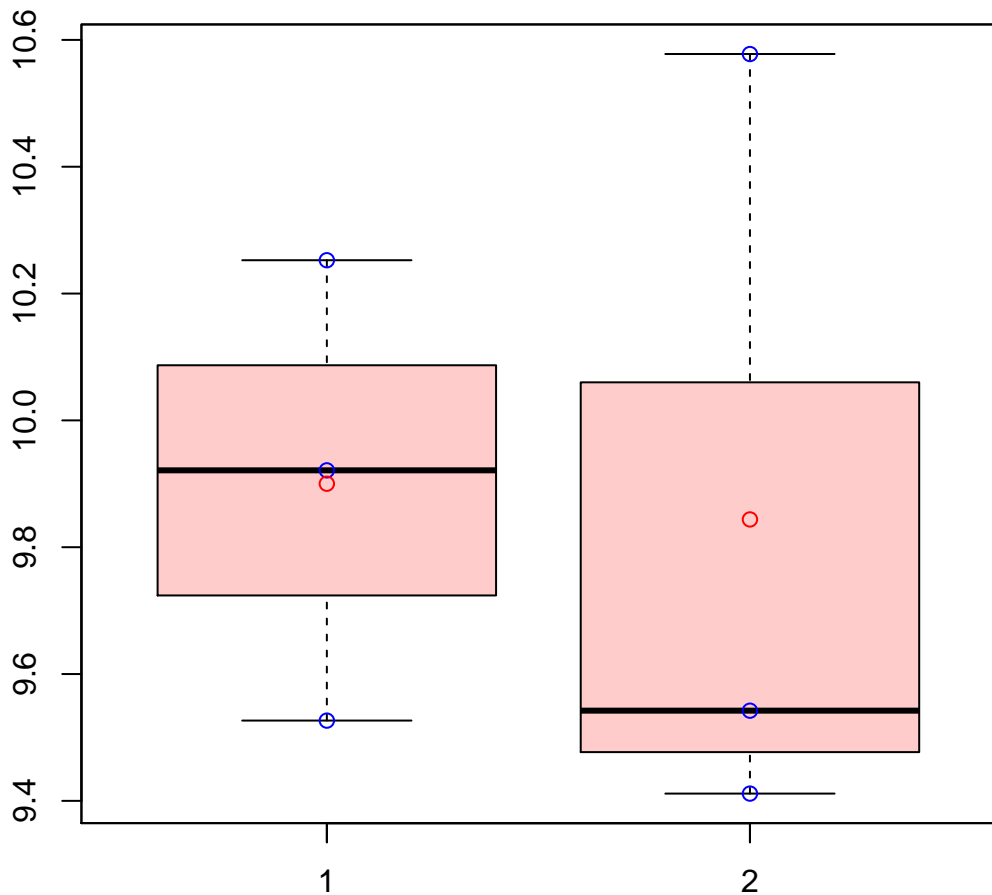

t-Test: p-value = 0.9

# CL5203Contig2|CL5203Contig2

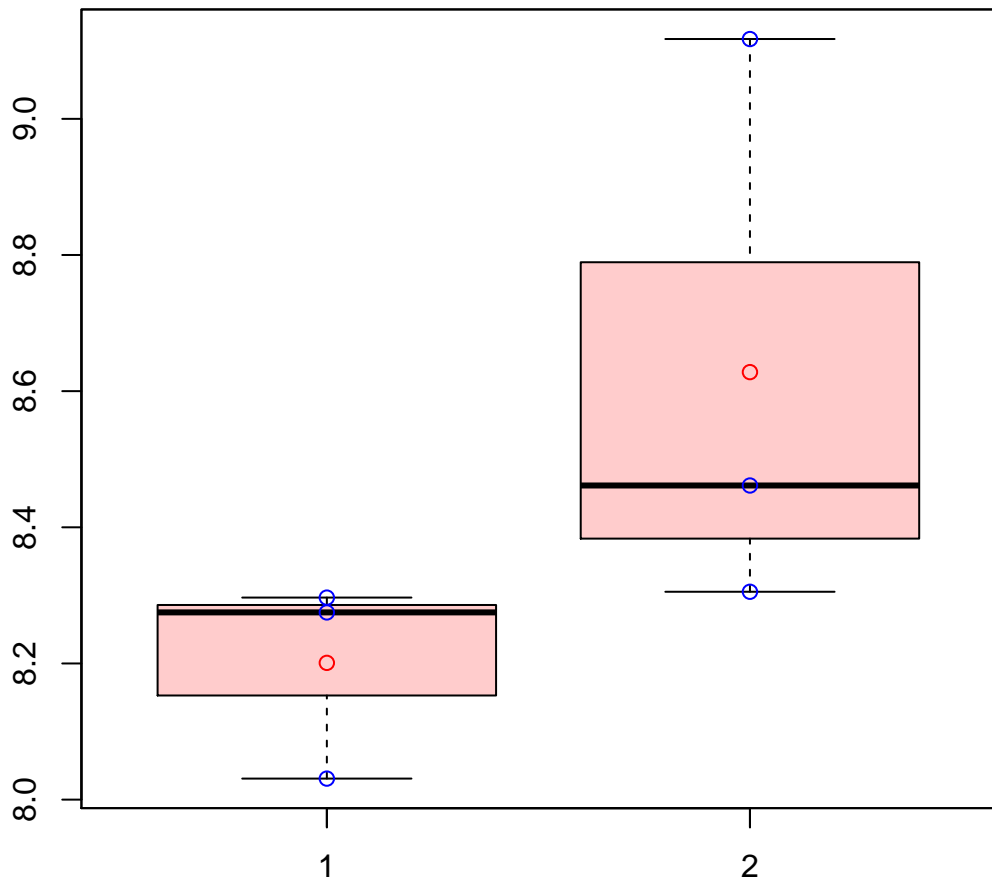

t-Test: p-value = 0.22

# CL520Contig16|CL520Contig16

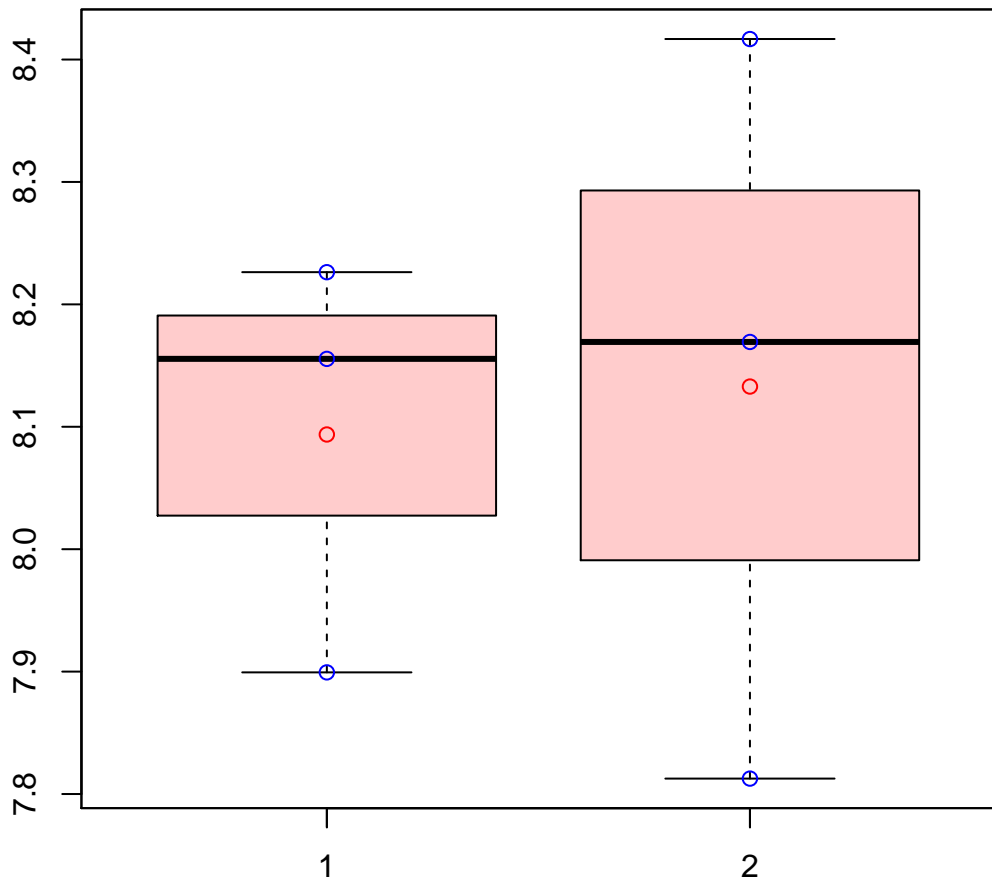

t-Test: p-value = 0.86

# CL520Contig8|CL520Contig8

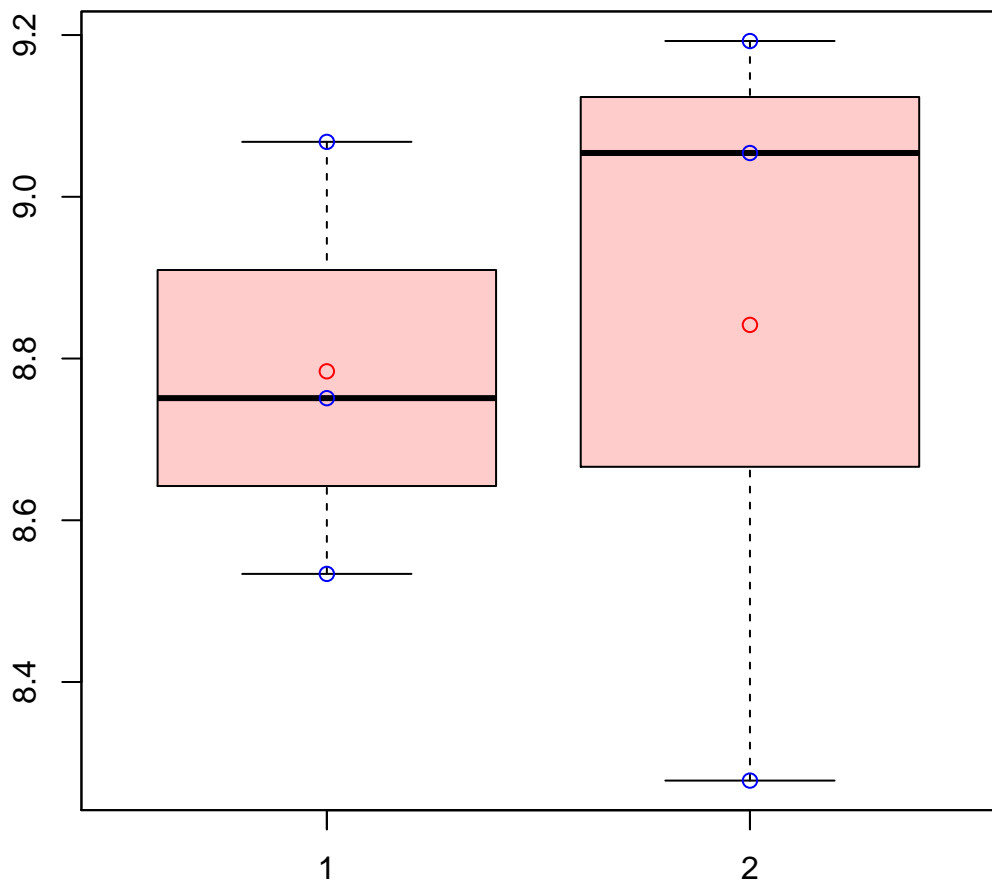

t-Test: p-value = 0.87



# CL5220Contig4|CL5220Contig4

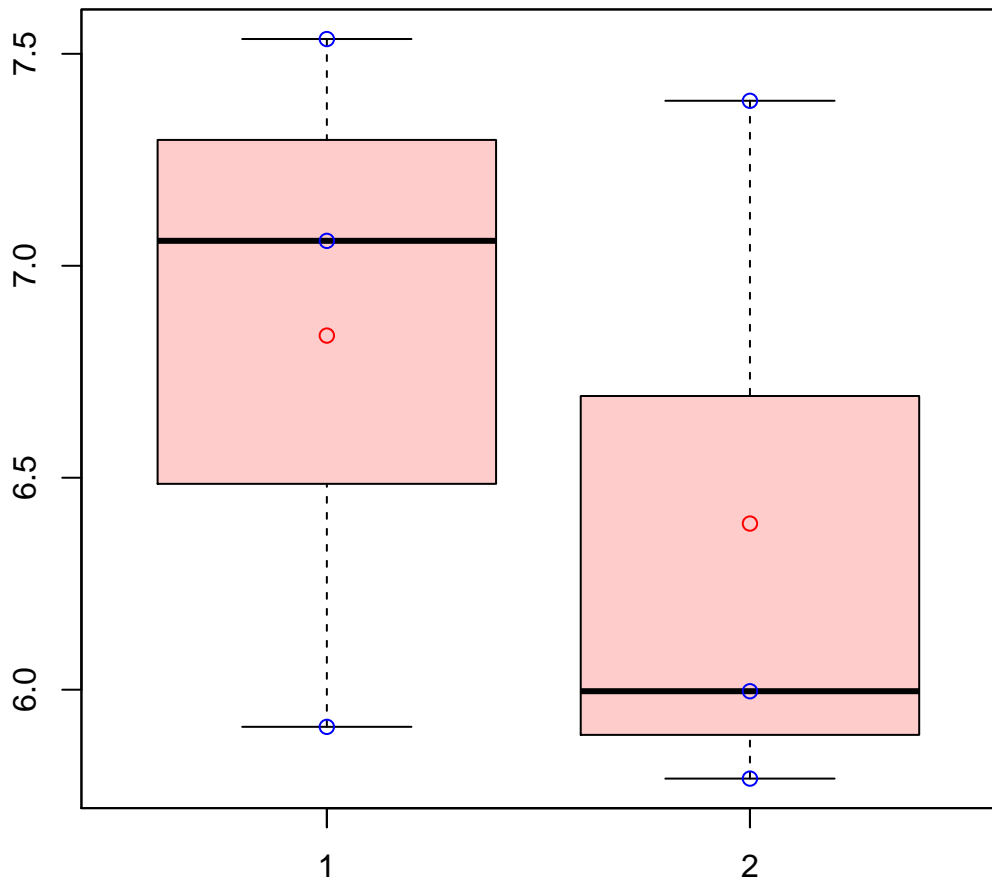

t-Test: p-value = 0.56

# CL5228Contig2|CL5228Contig2

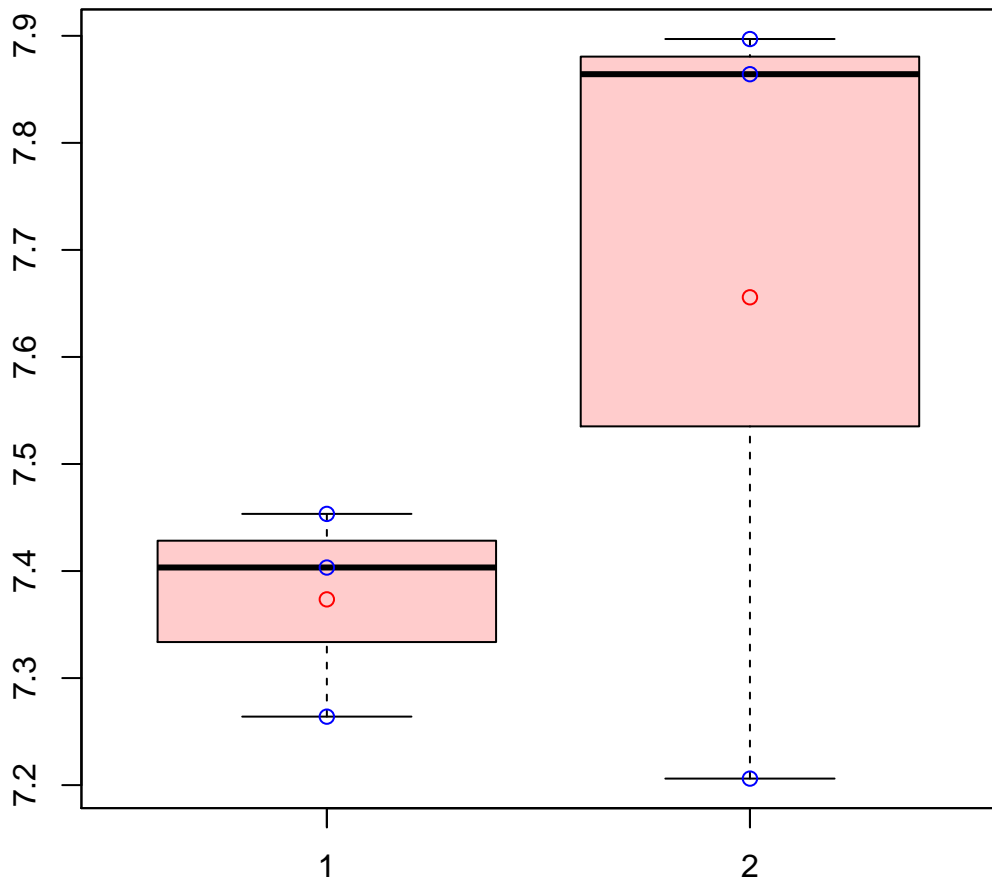

t-Test: p-value = 0.34

# CL5231Contig3|CL5231Contig3

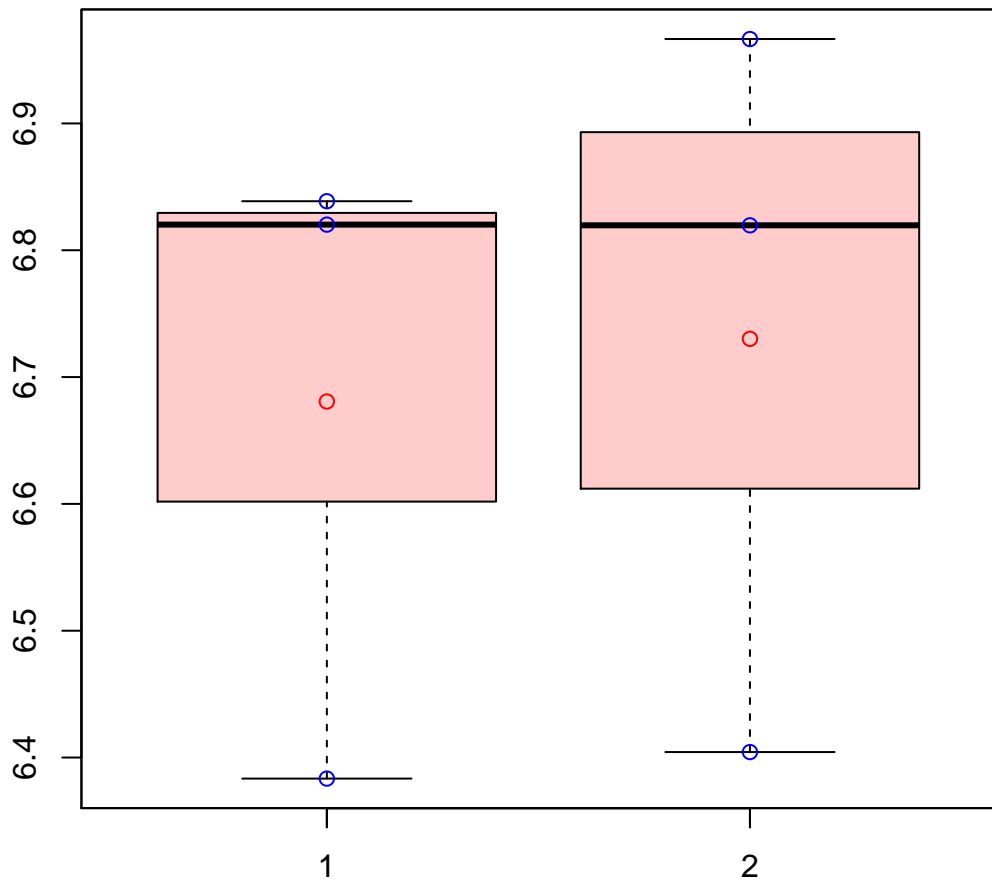

t-Test: p-value = 0.84

# CL5232Contig4|CL5232Contig4

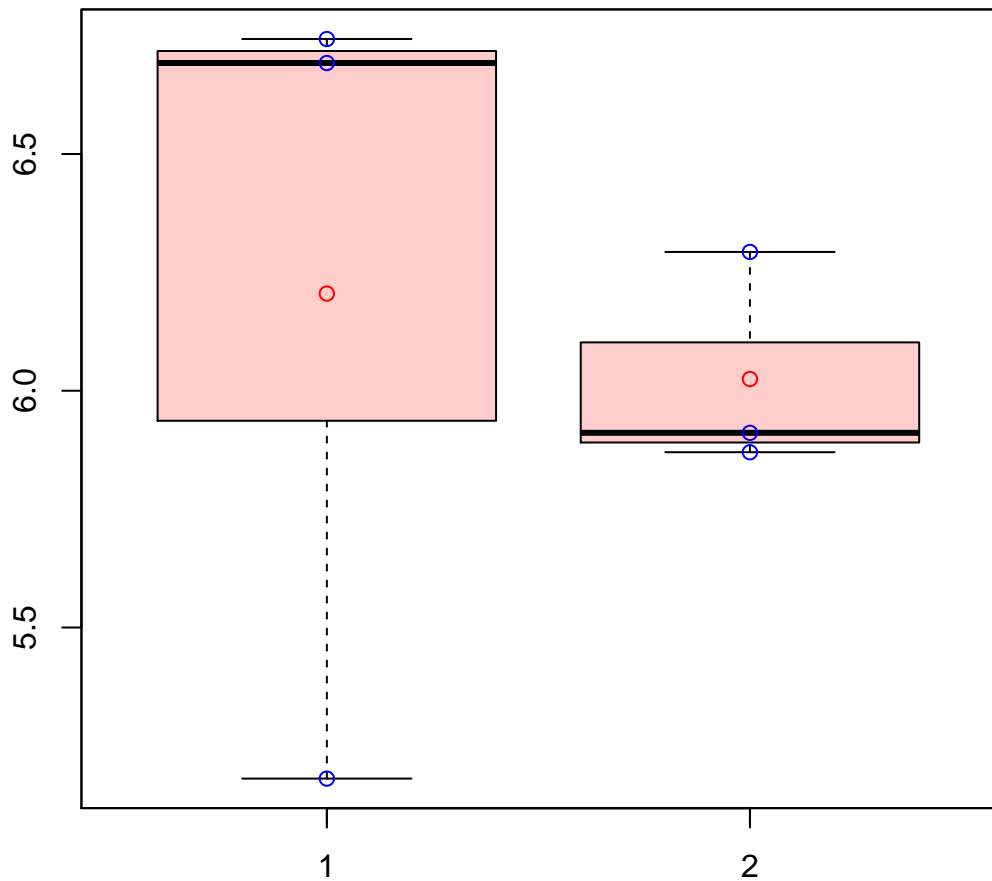

t-Test: p-value = 0.76

# CL5245Contig1|CL5245Contig1

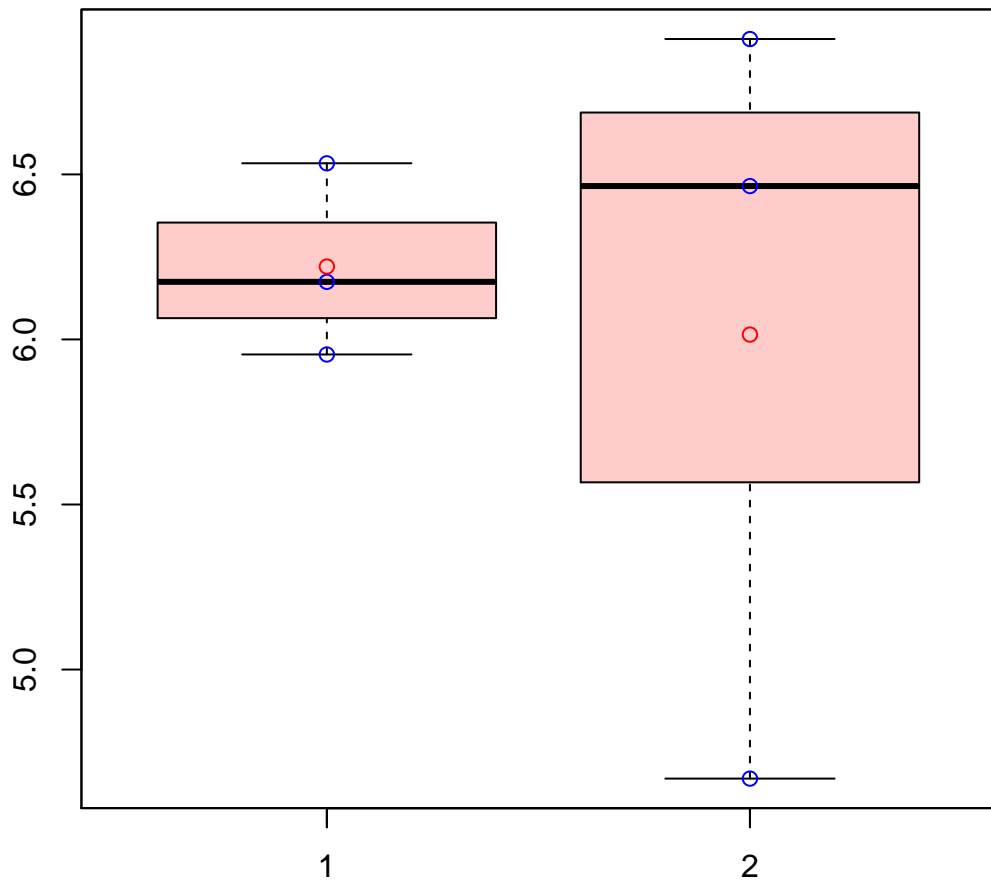

t-Test: p-value = 0.8

# CL5245Contig2|CL5245Contig2

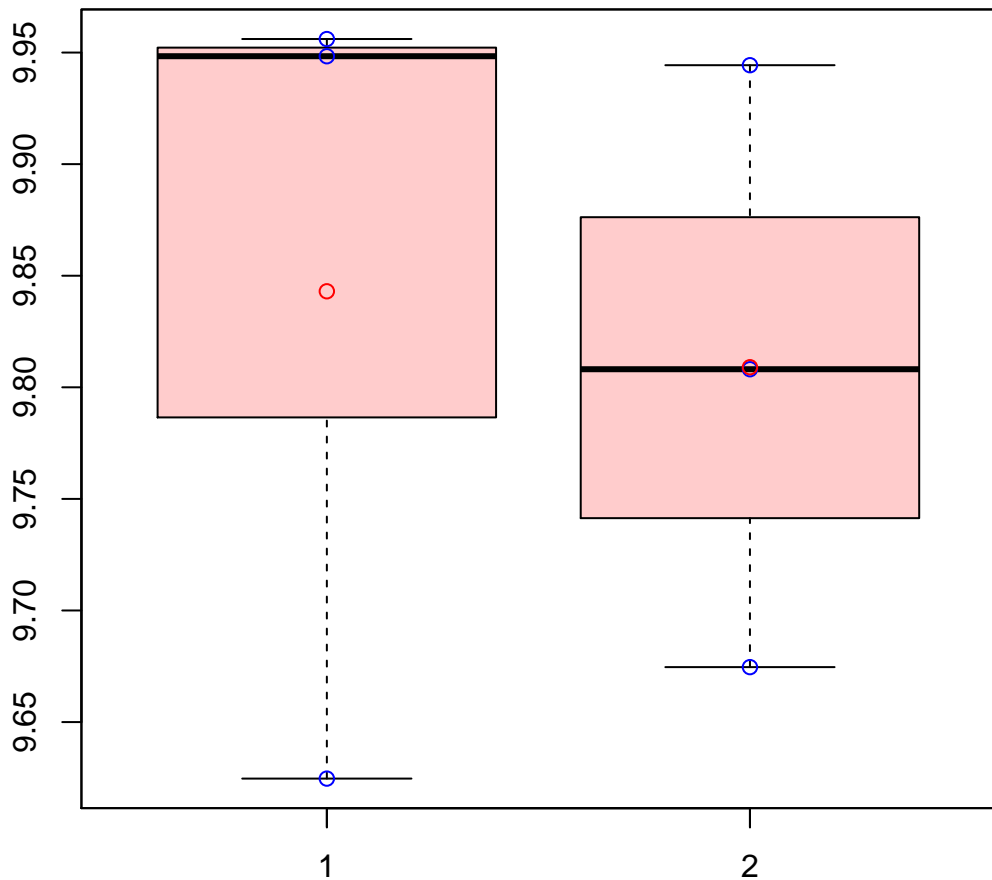

t-Test: p-value = 0.81

# CL5257Contig1|CL5257Contig1

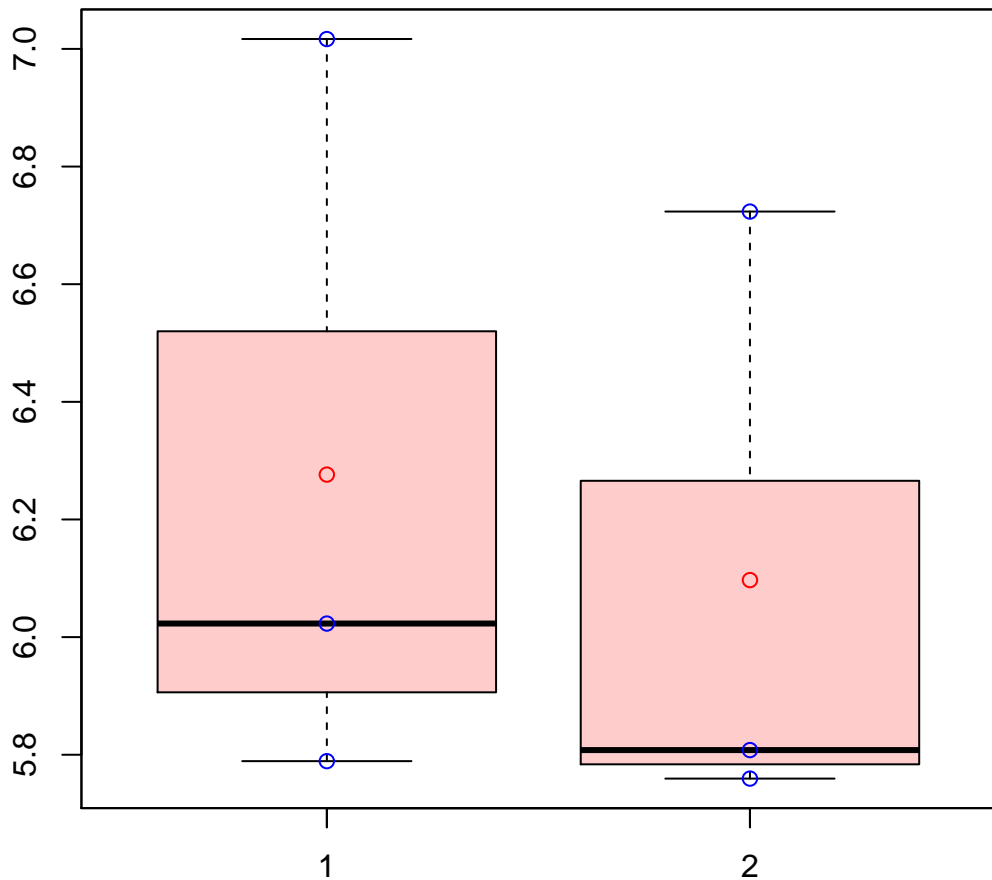

t-Test: p-value = 0.73

# CL5266Contig2|CL5266Contig2

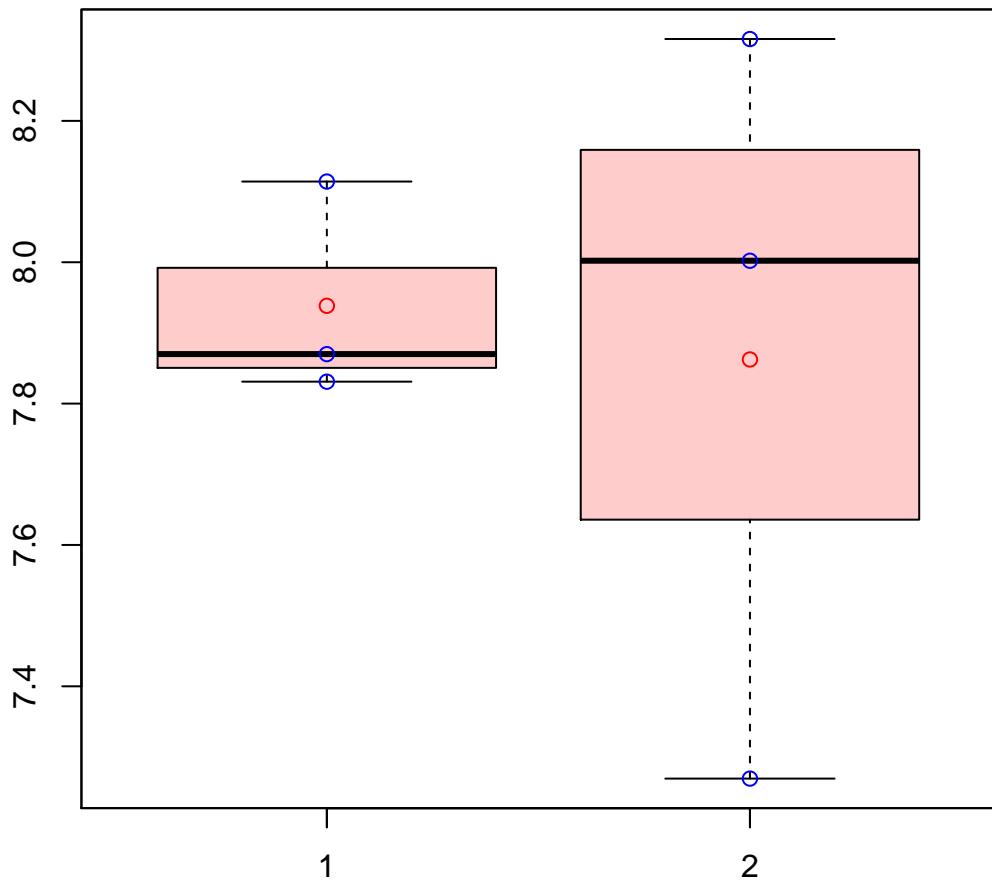

t-Test: p-value = 0.83



# CL526Contig1|CL526Contig1

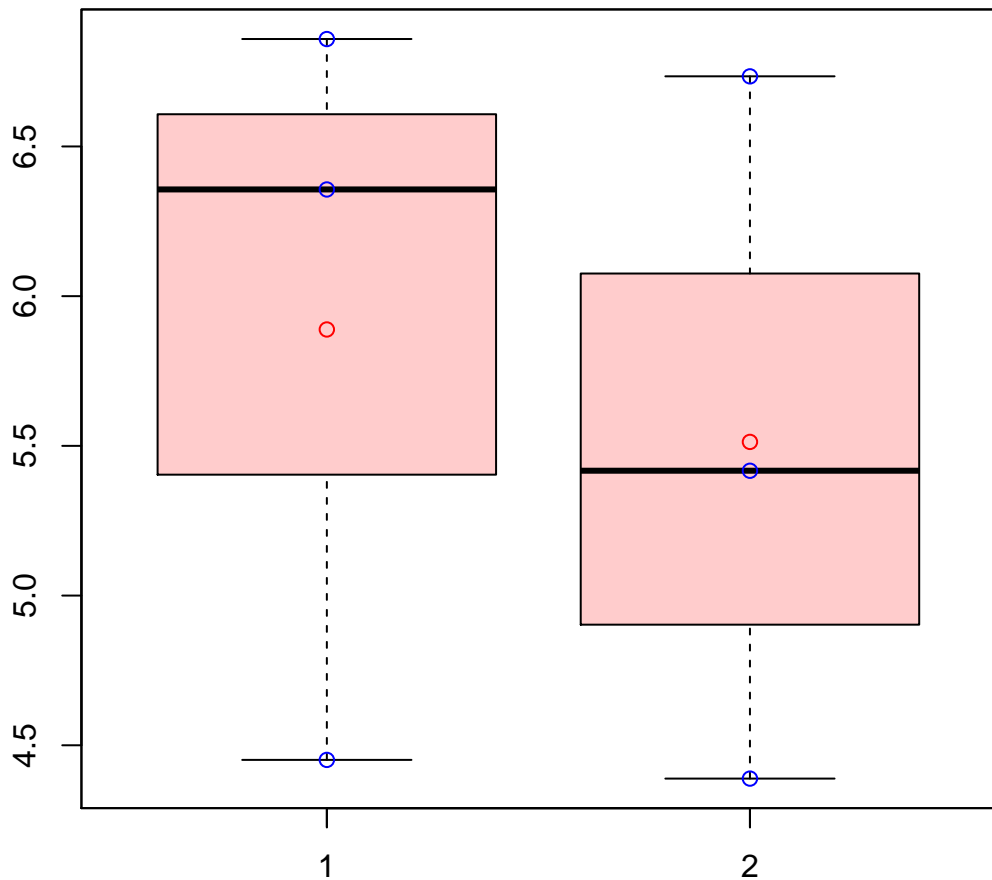

t-Test: p-value = 0.73

# CL5285Contig1|CL5285Contig1

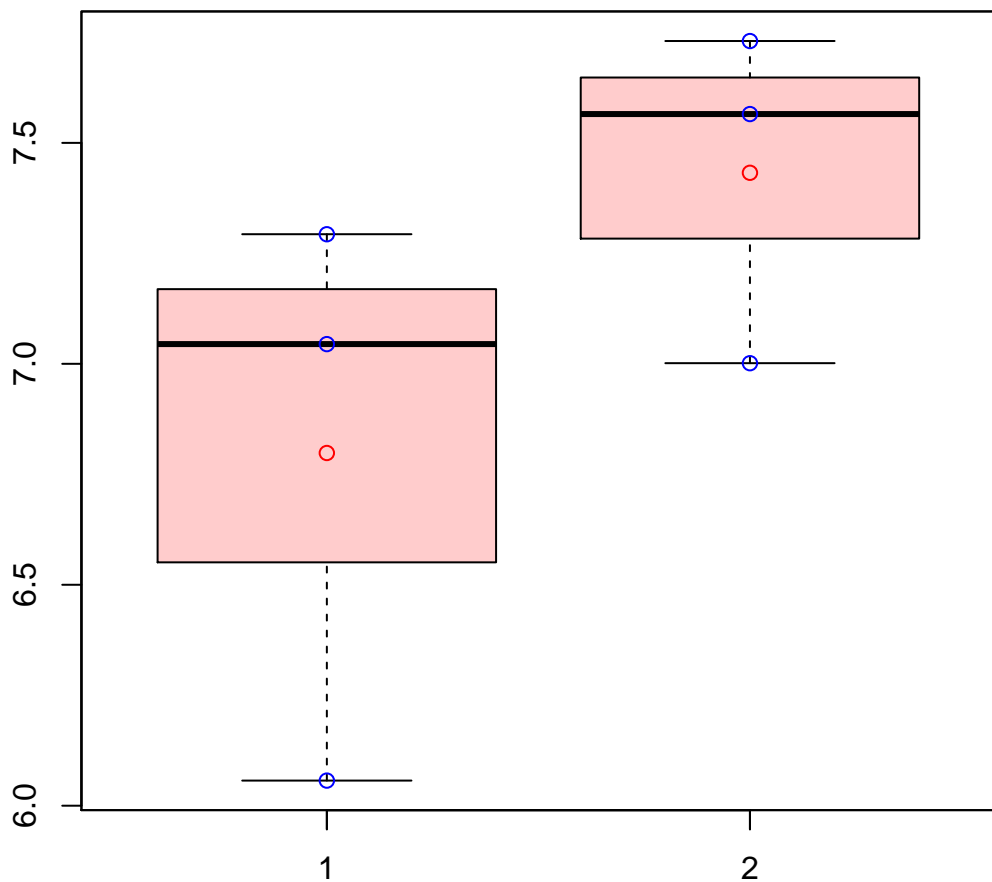

t-Test: p-value = 0.24

# CL52Contig13|CL52Contig13

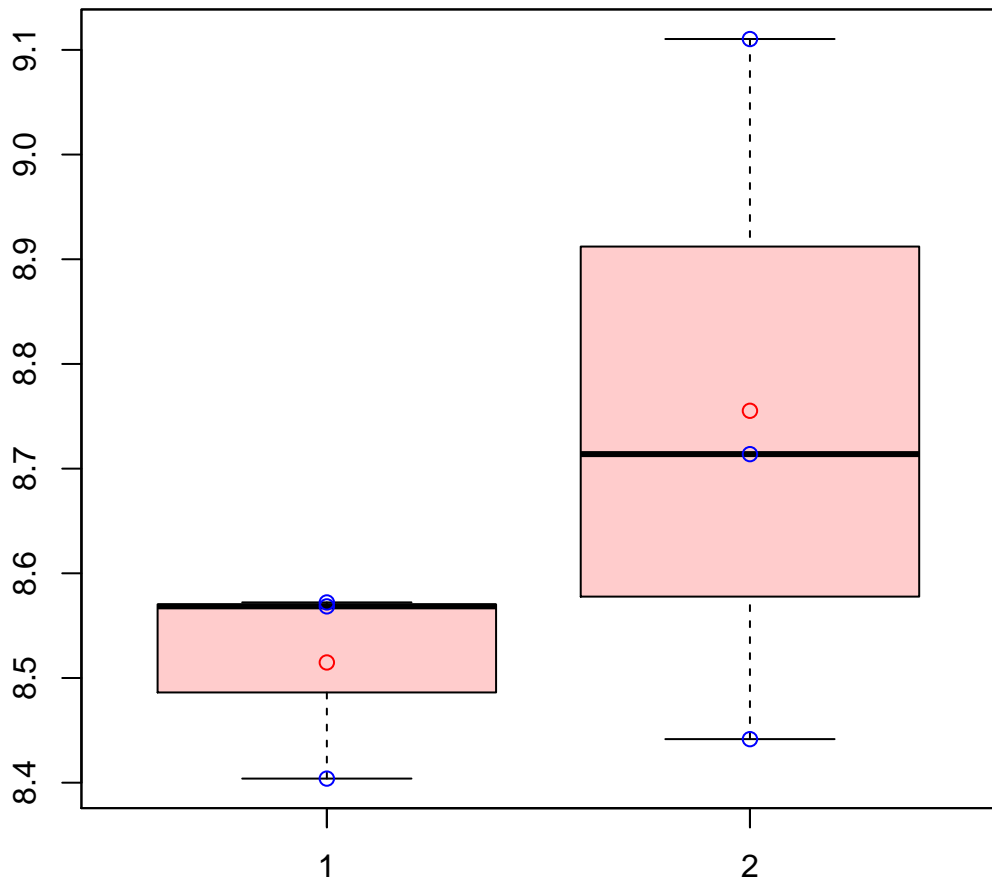

t-Test: p-value = 0.34

# CL52Contig6|CL52Contig6

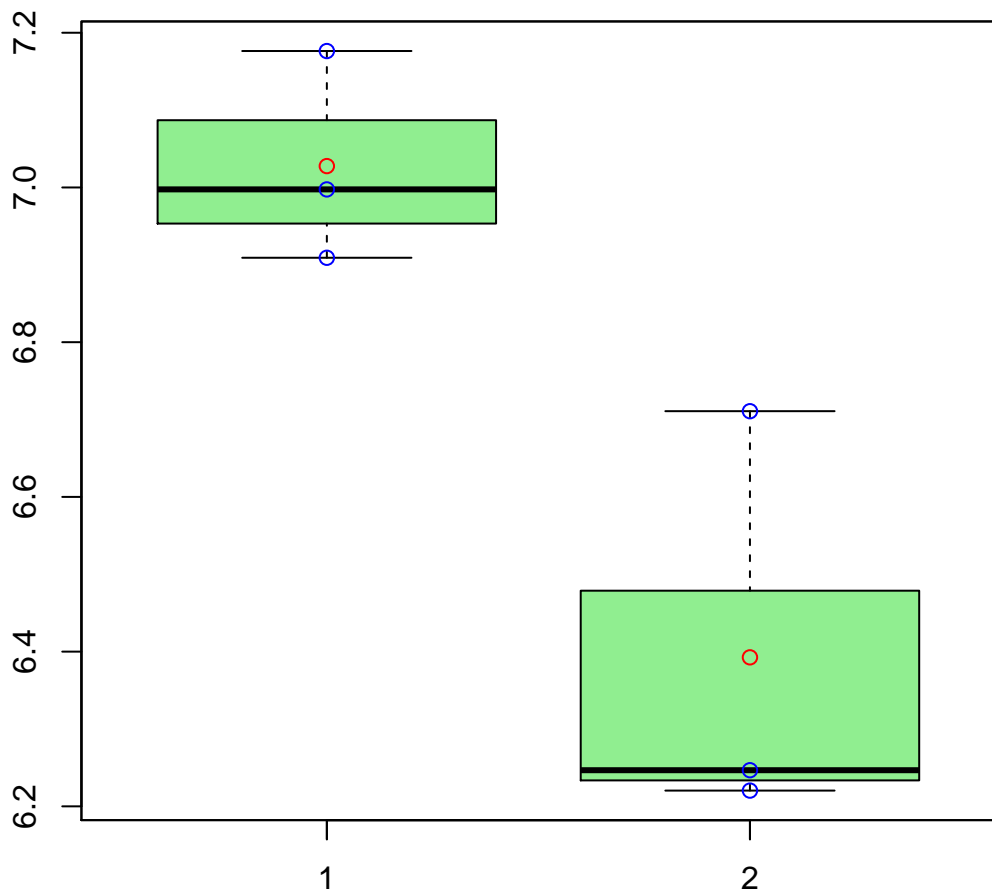

t-Test: p-value = 0.04

# CL5304Contig2|CL5304Contig2

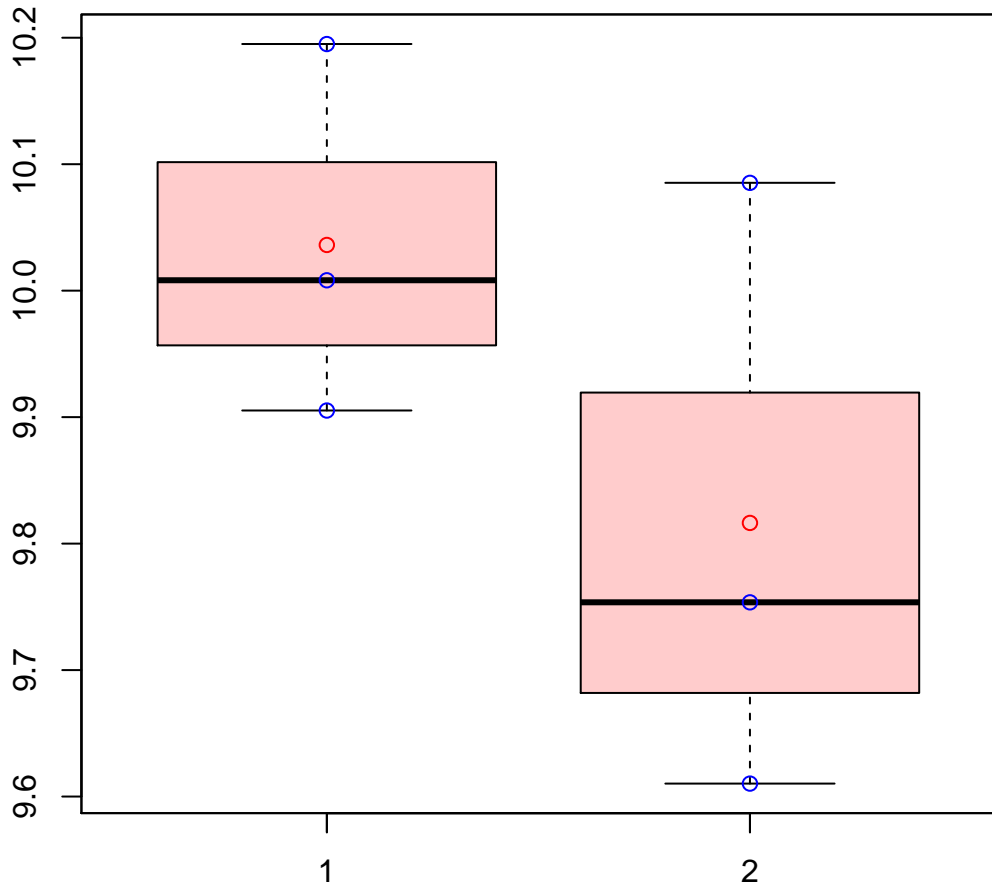

t-Test: p-value = 0.27

# CL5308Contig1|CL5308Contig1

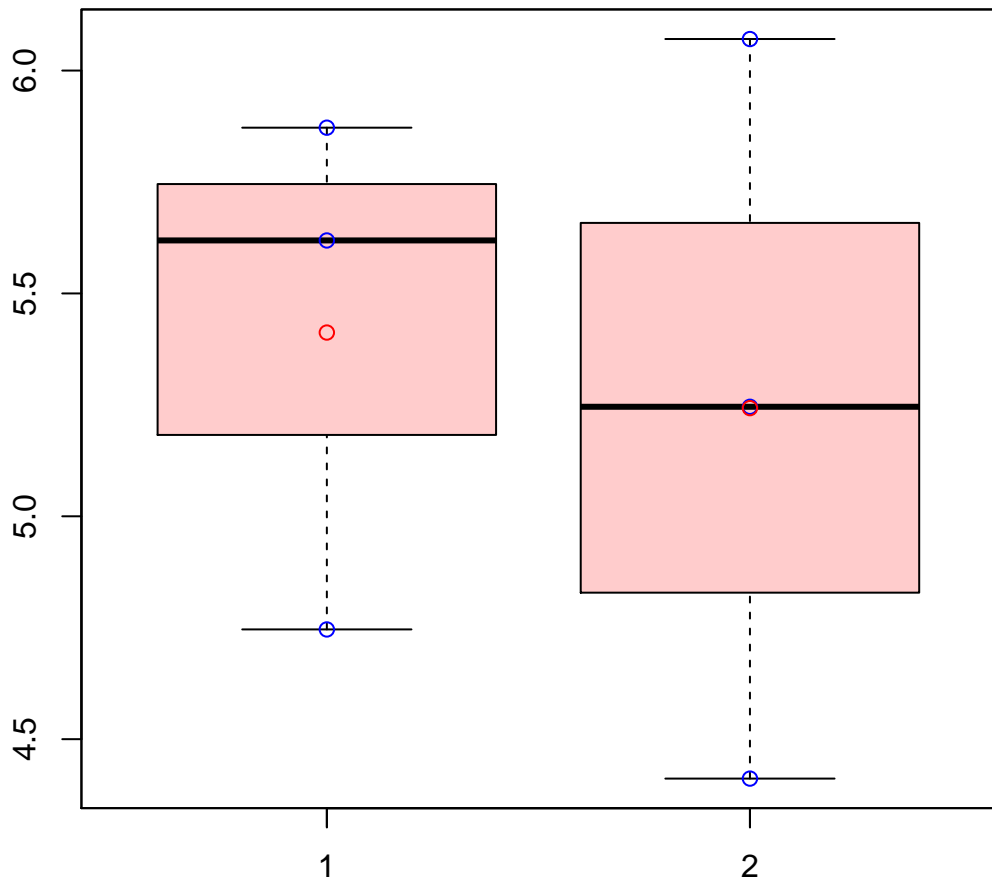

t-Test: p-value = 0.79

# CL5317Contig2|CL5317Contig2

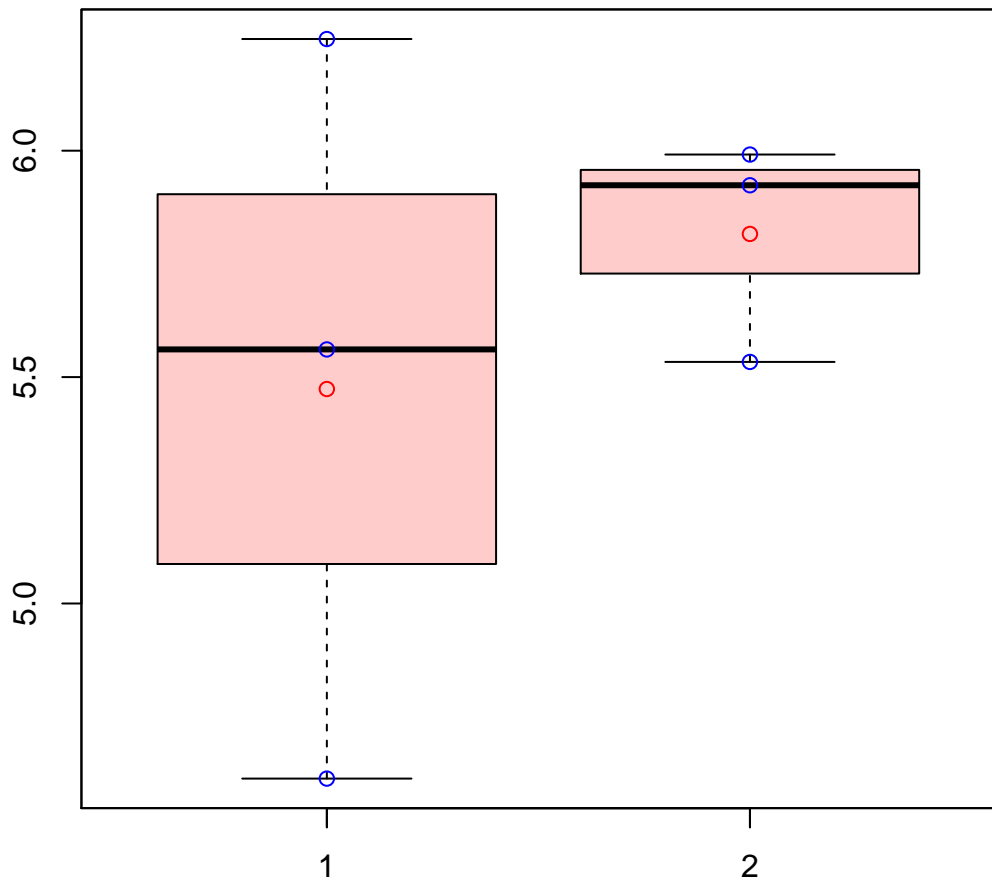

t-Test: p-value = 0.55

# CL5320Contig2|CL5320Contig2

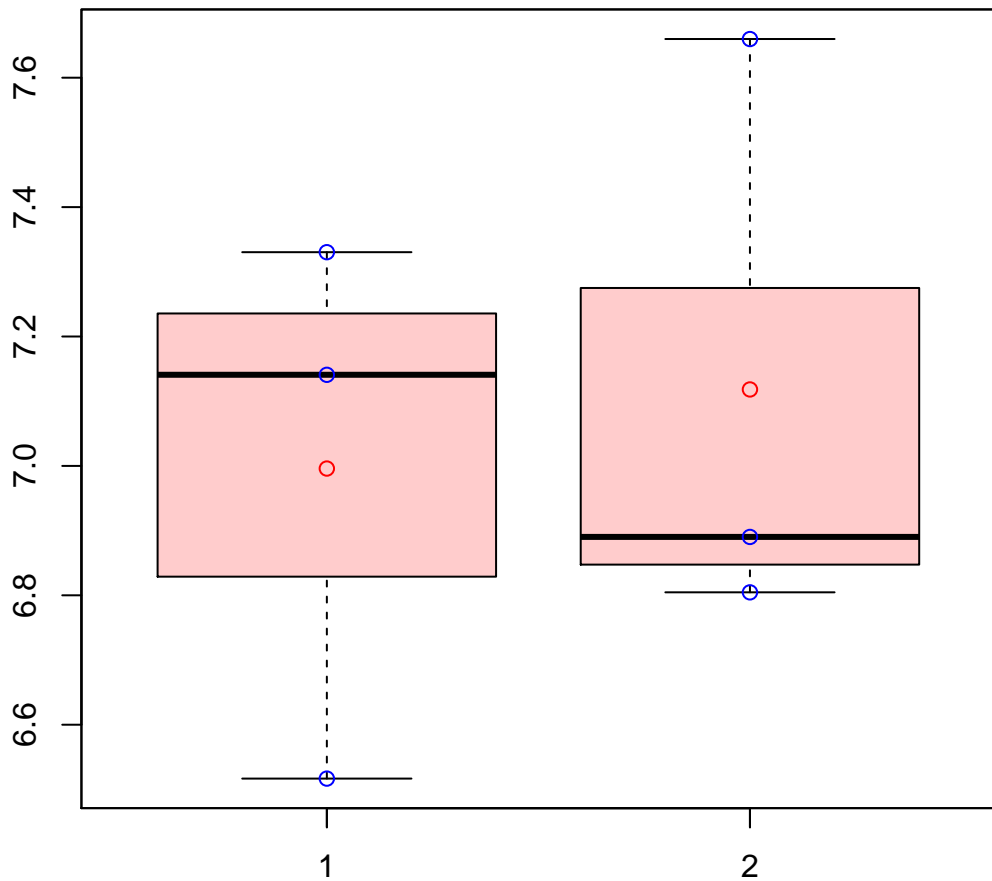

t-Test: p-value = 0.76



# CL5320Contig8|CL5320Contig8

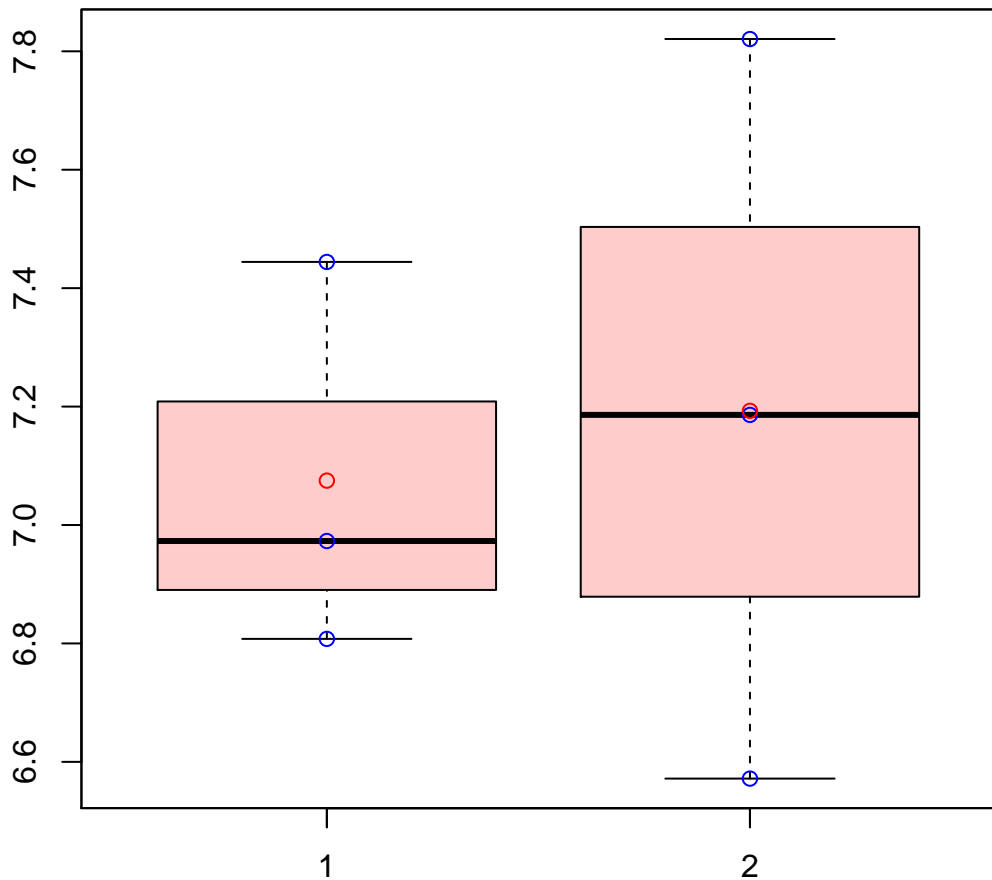

t-Test: p-value = 0.79

# CL5322Contig3|CL5322Contig3

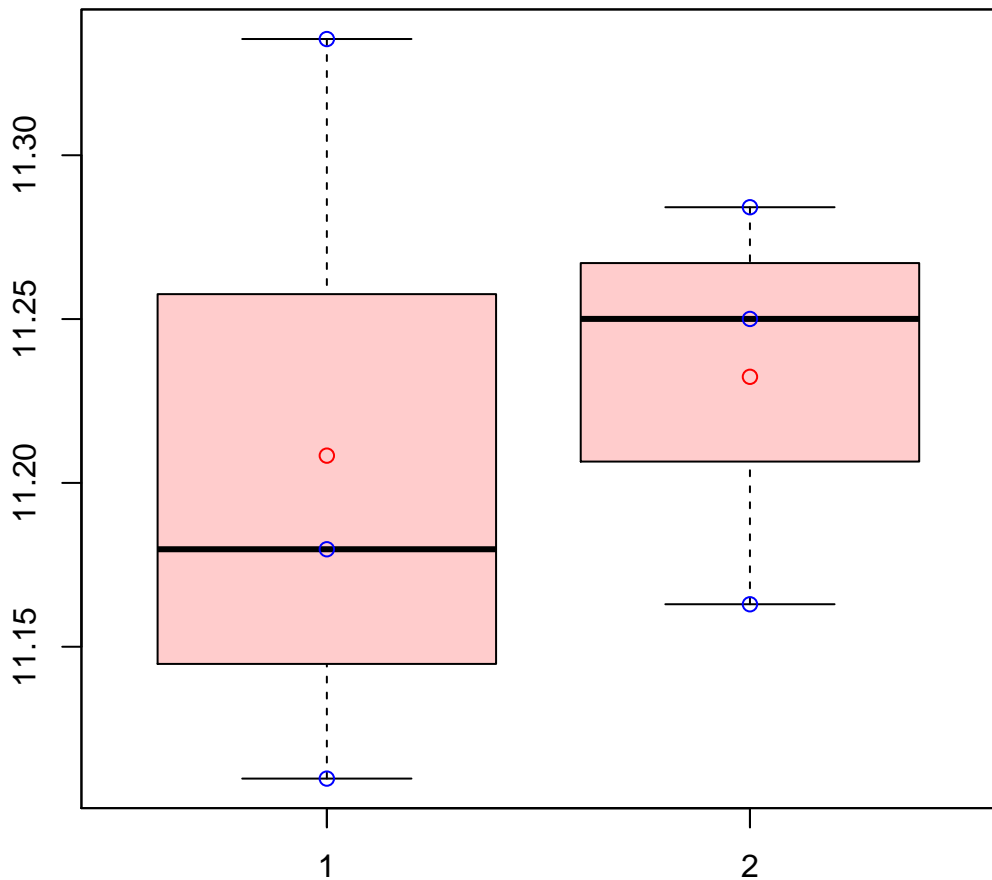

t-Test: p-value = 0.77

# CL5326Contig1|CL5326Contig1

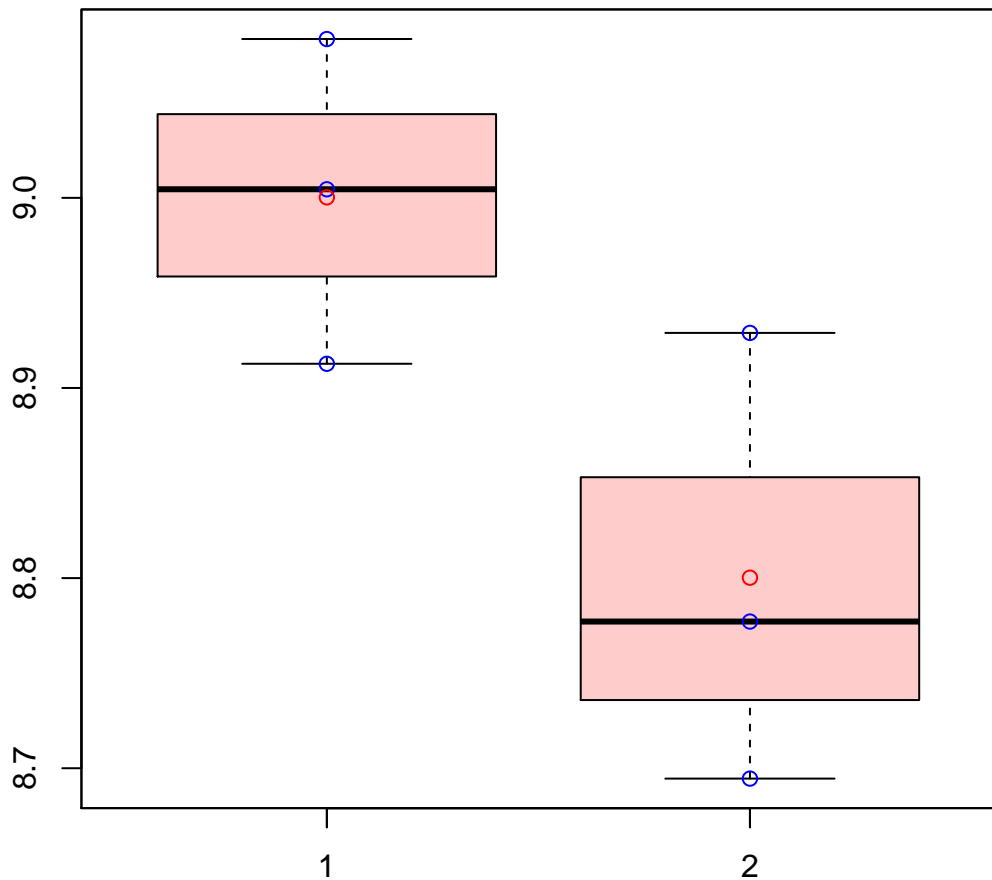

t-Test: p-value = 0.08

# CL532Contig4|CL532Contig4

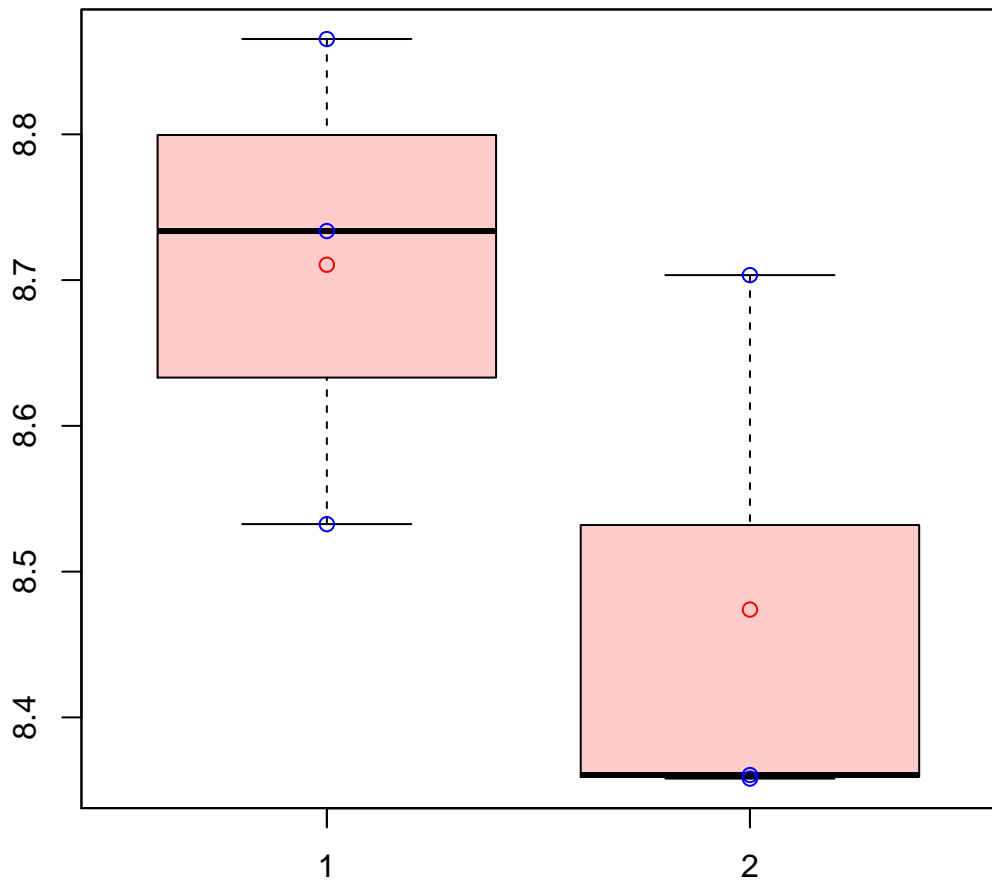

t-Test: p-value = 0.19

# CL5336Contig5|CL5336Contig5

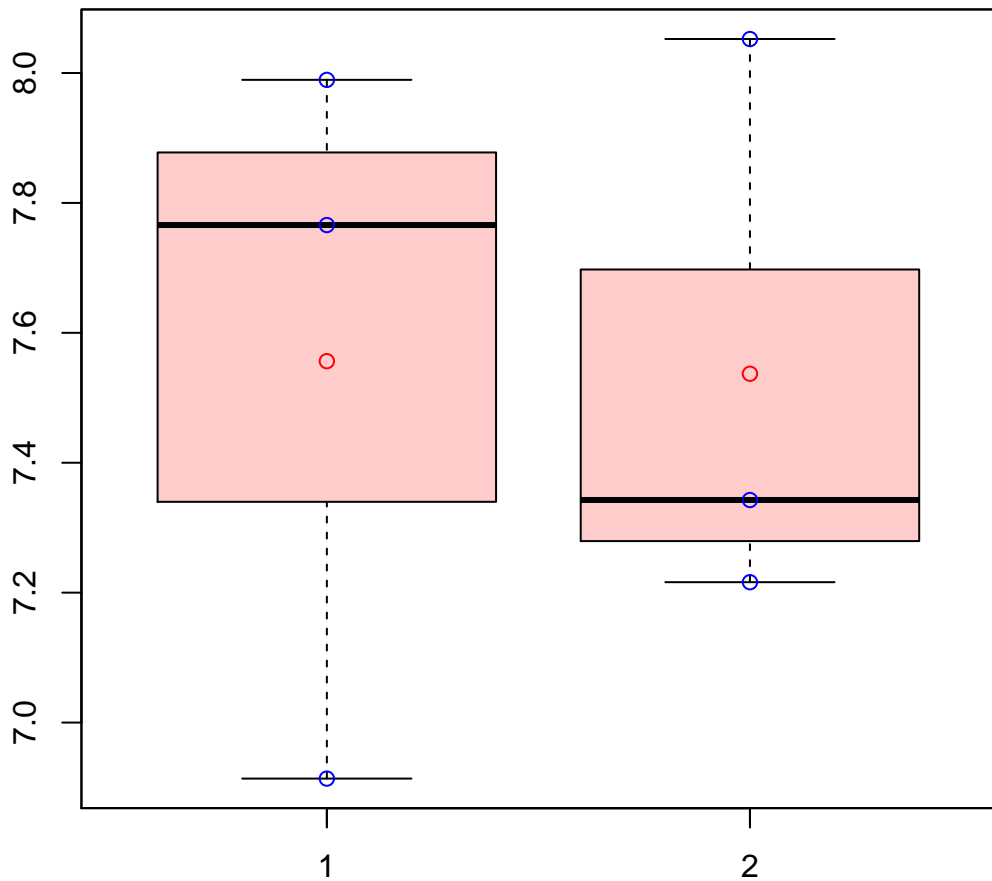

t-Test: p-value = 0.97

# CL533Contig10|CL533Contig10

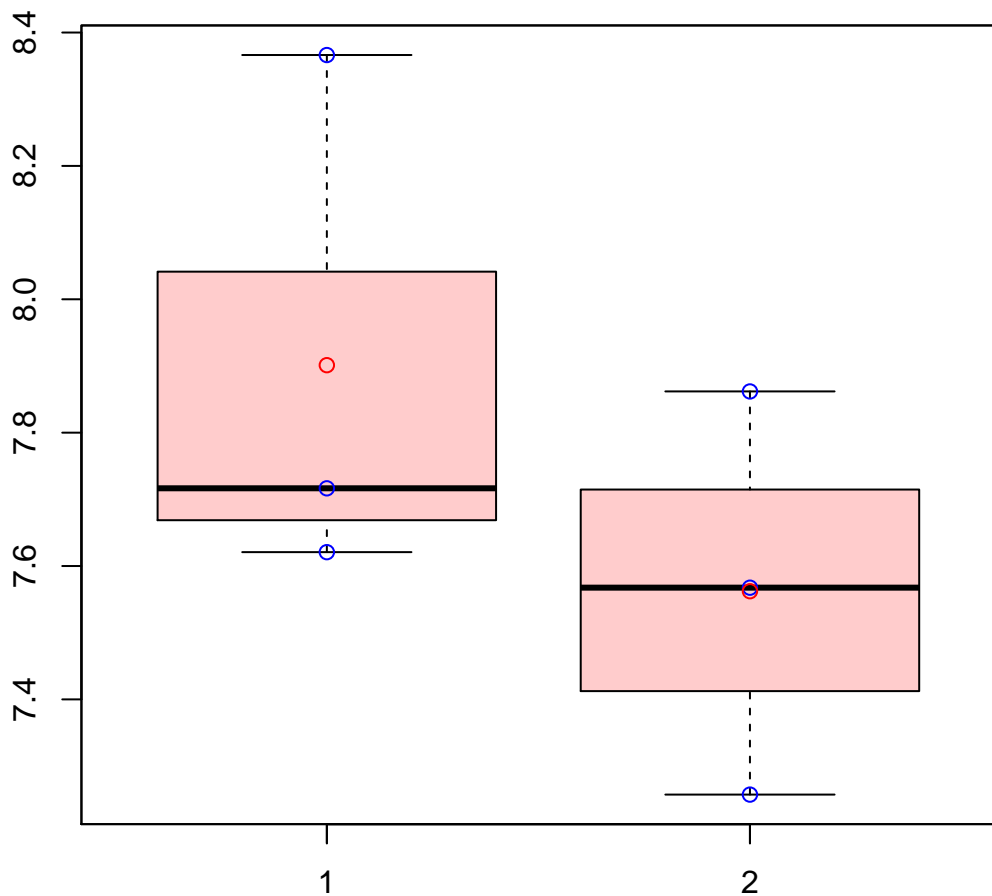

t-Test: p-value = 0.32

# CL533Contig12|CL533Contig12

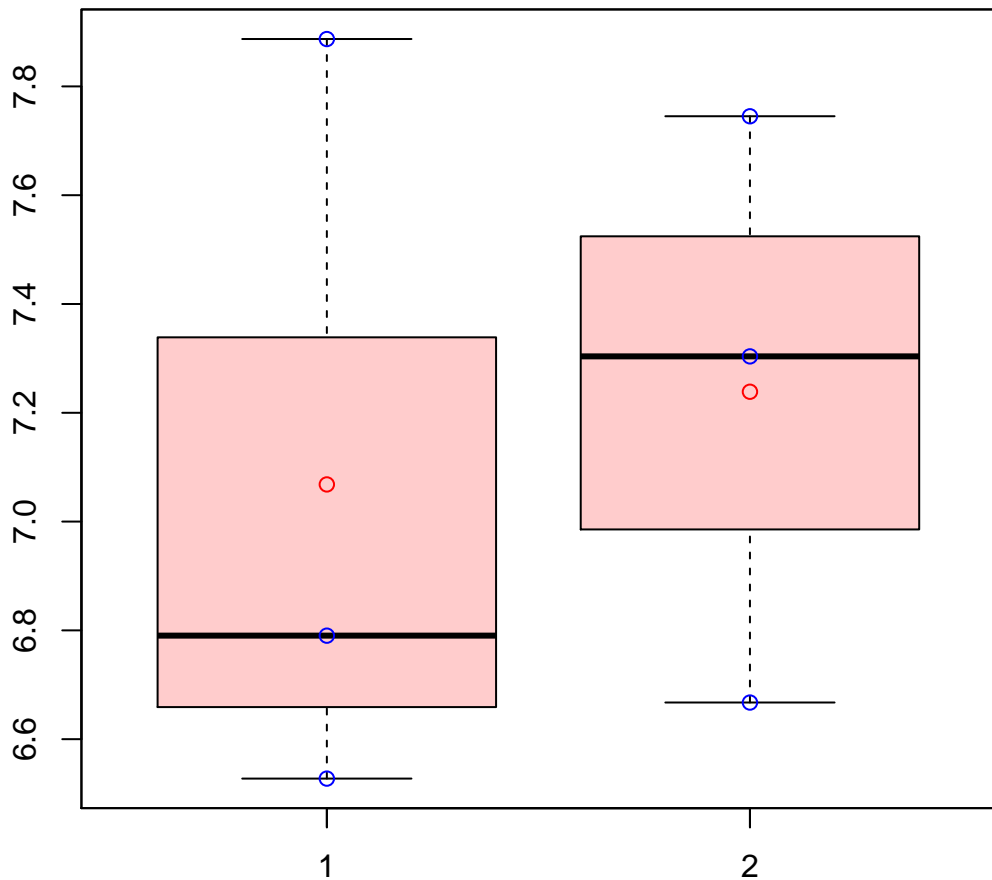

t-Test: p-value = 0.76

# CL5342Contig3|CL5342Contig3

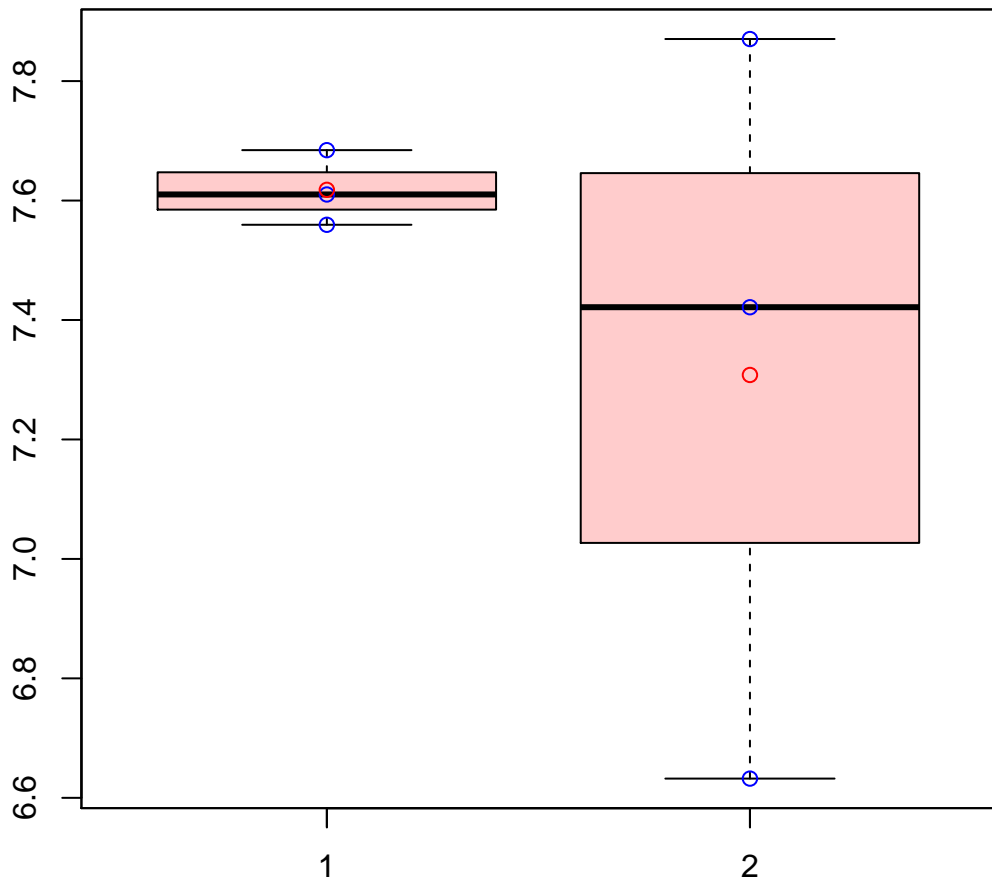

t-Test: p-value = 0.48



# CL5348Contig1|CL5348Contig1

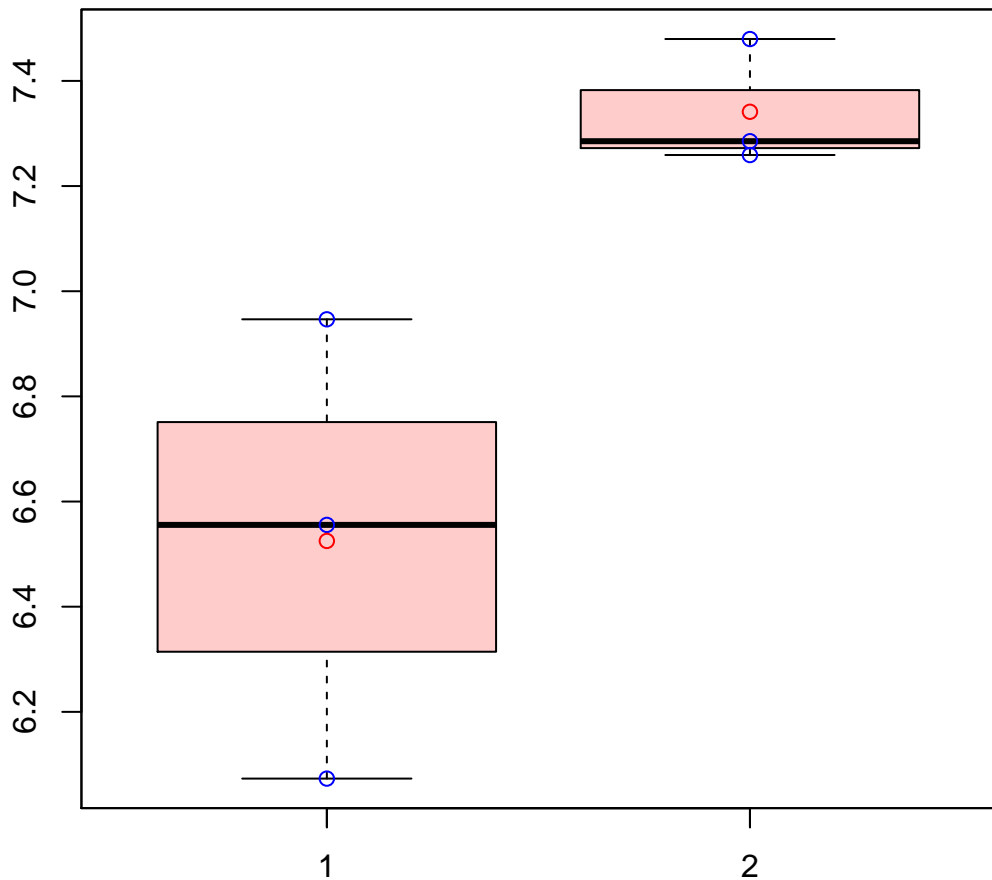

t-Test: p-value = 0.07

# CL5356Contig2|CL5356Contig2

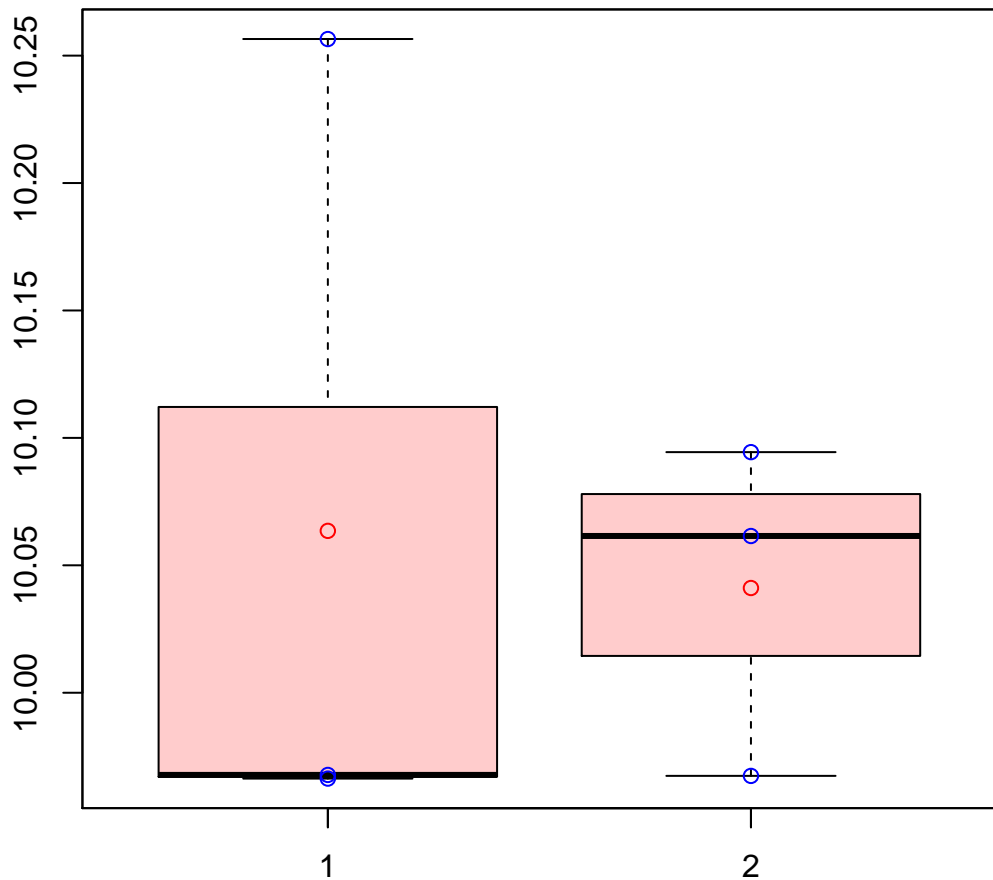

t-Test: p-value = 0.84

# CL5357Contig1|CL5357Contig1

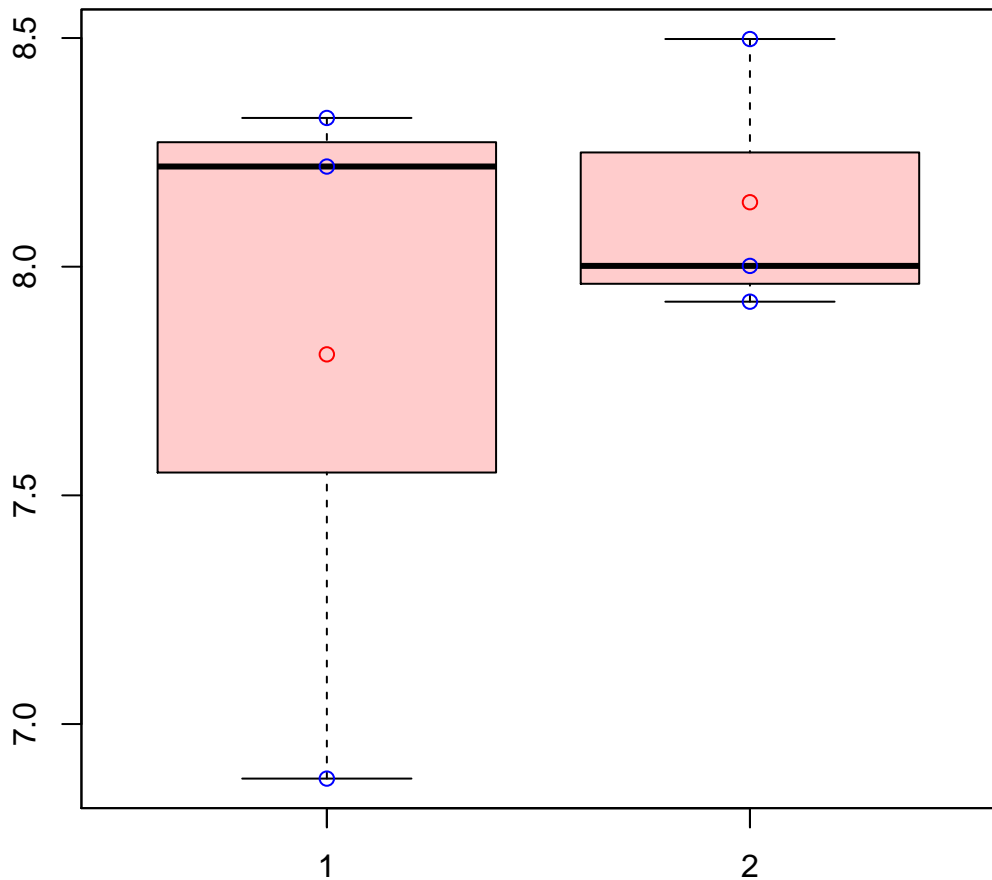

t-Test: p-value = 0.56

# CL535Contig1|CL535Contig1

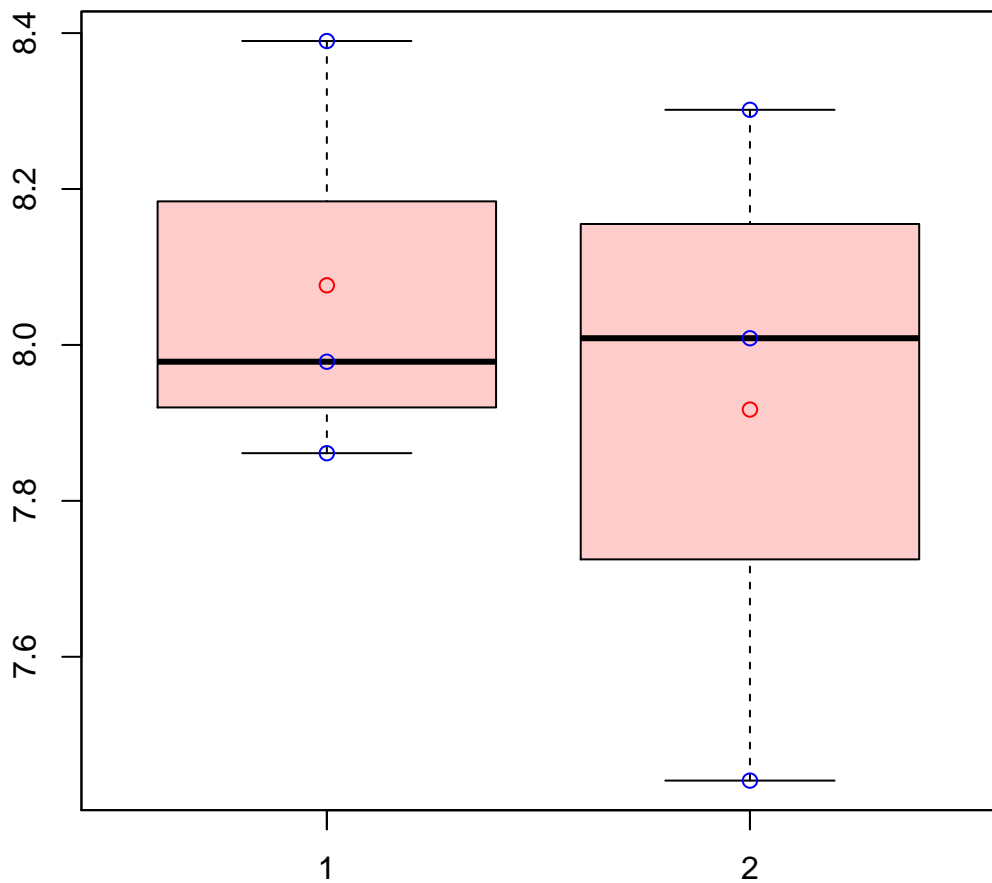

t-Test: p-value = 0.63

# CL5361Contig3|CL5361Contig3

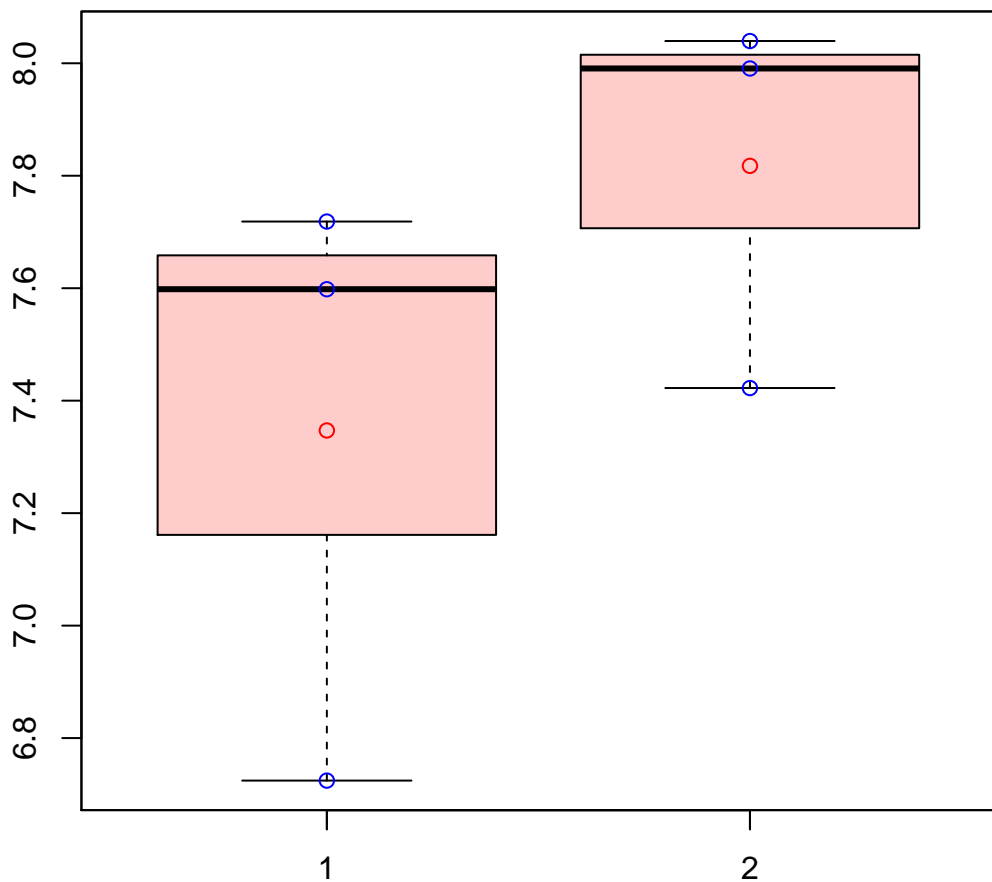

t-Test: p-value = 0.28

# CL5370Contig2|CL5370Contig2

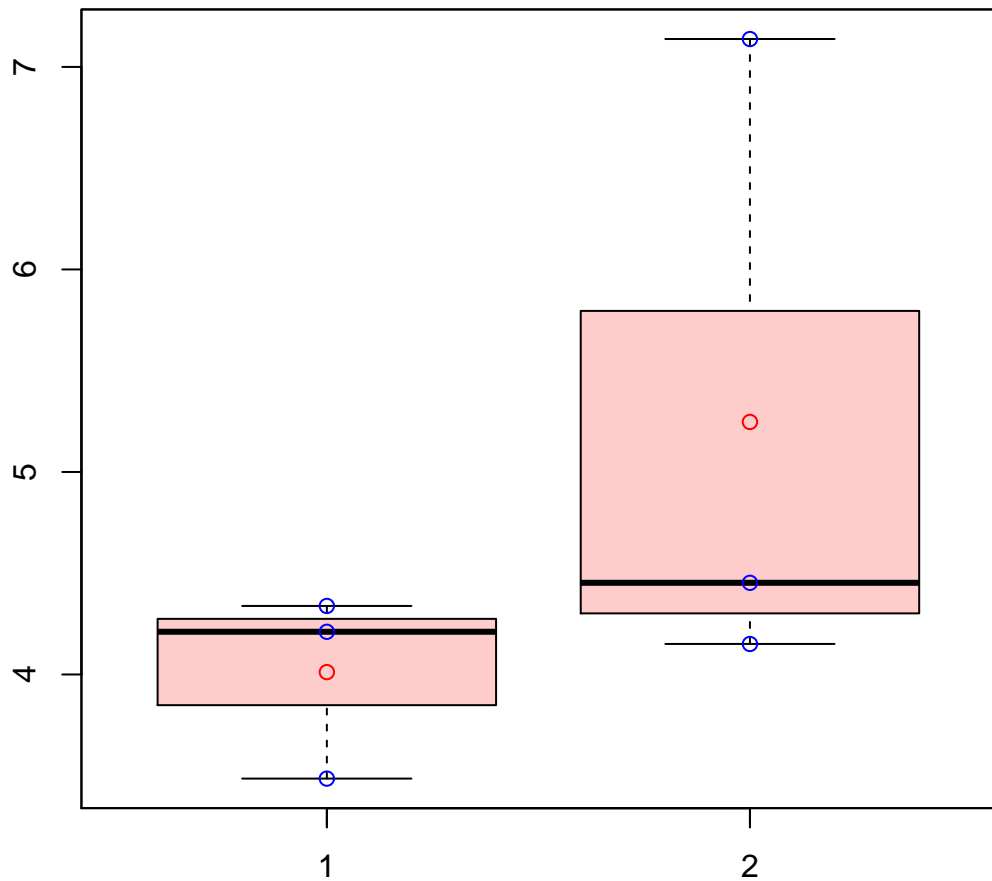

t-Test: p-value = 0.32

# CL5379Contig1|CL5379Contig1

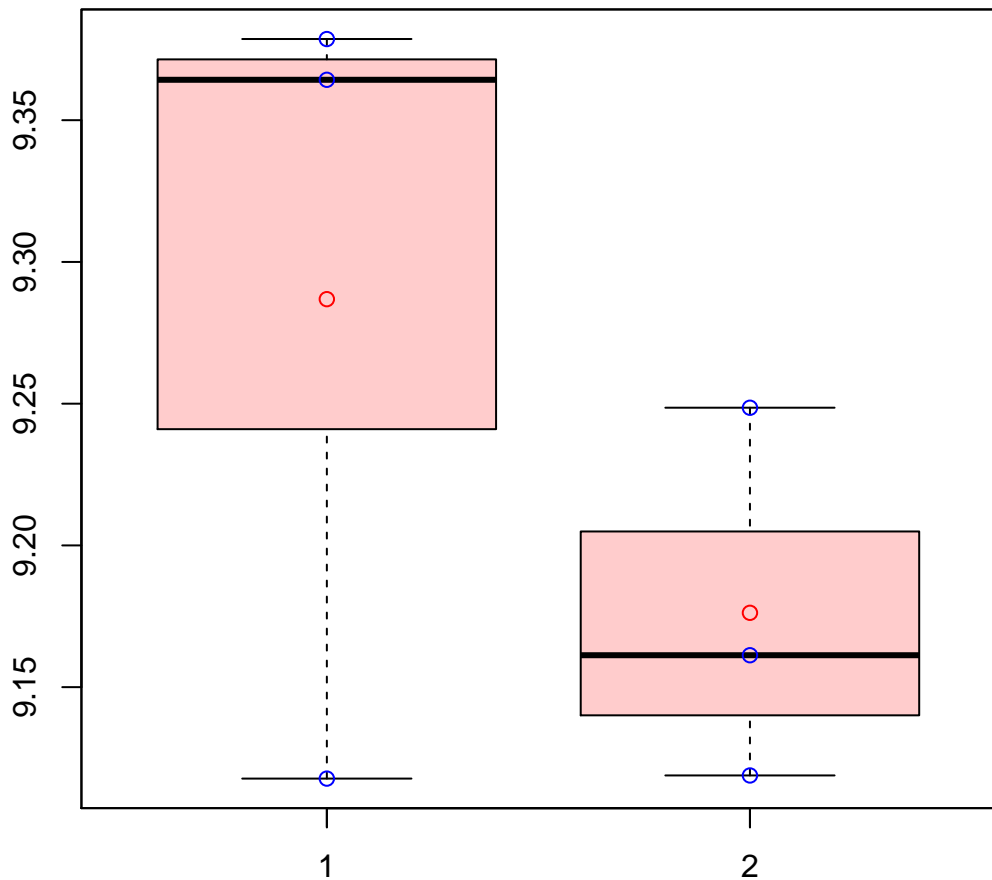

t-Test: p-value = 0.33

# CL5380Contig1|CL5380Contig1

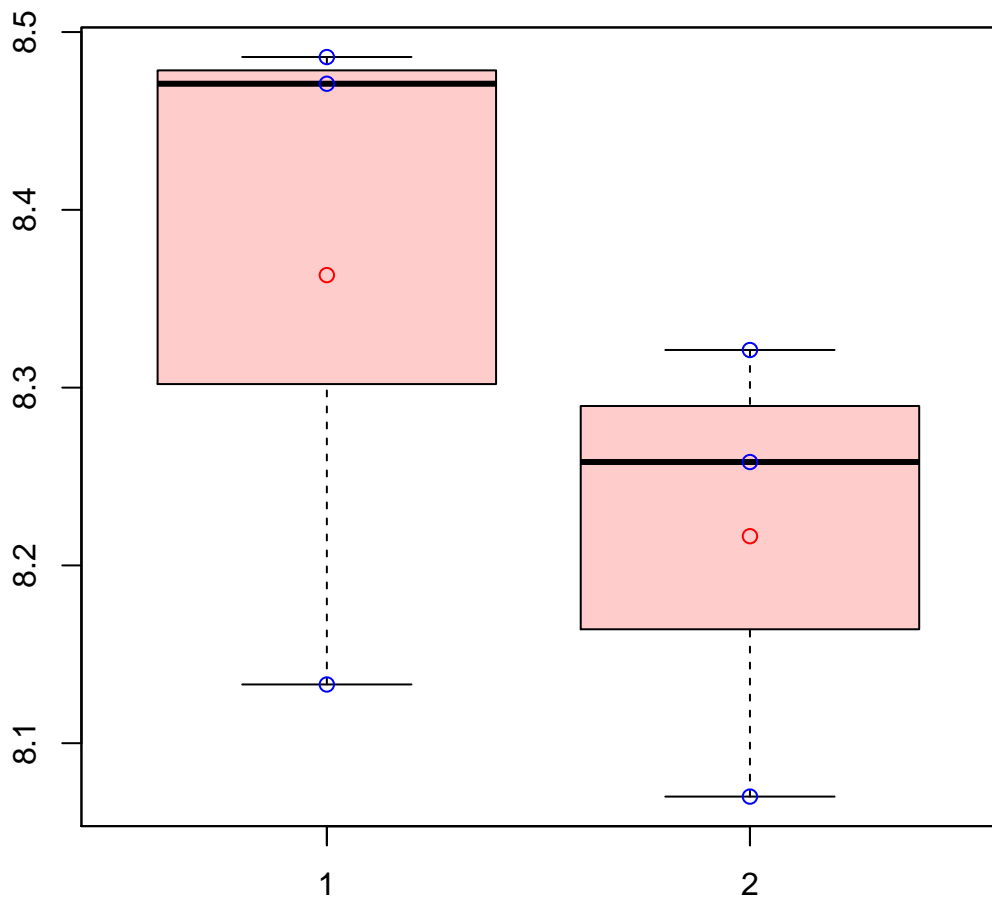

t-Test: p-value = 0.36



# CL5388Contig1|CL5388Contig1

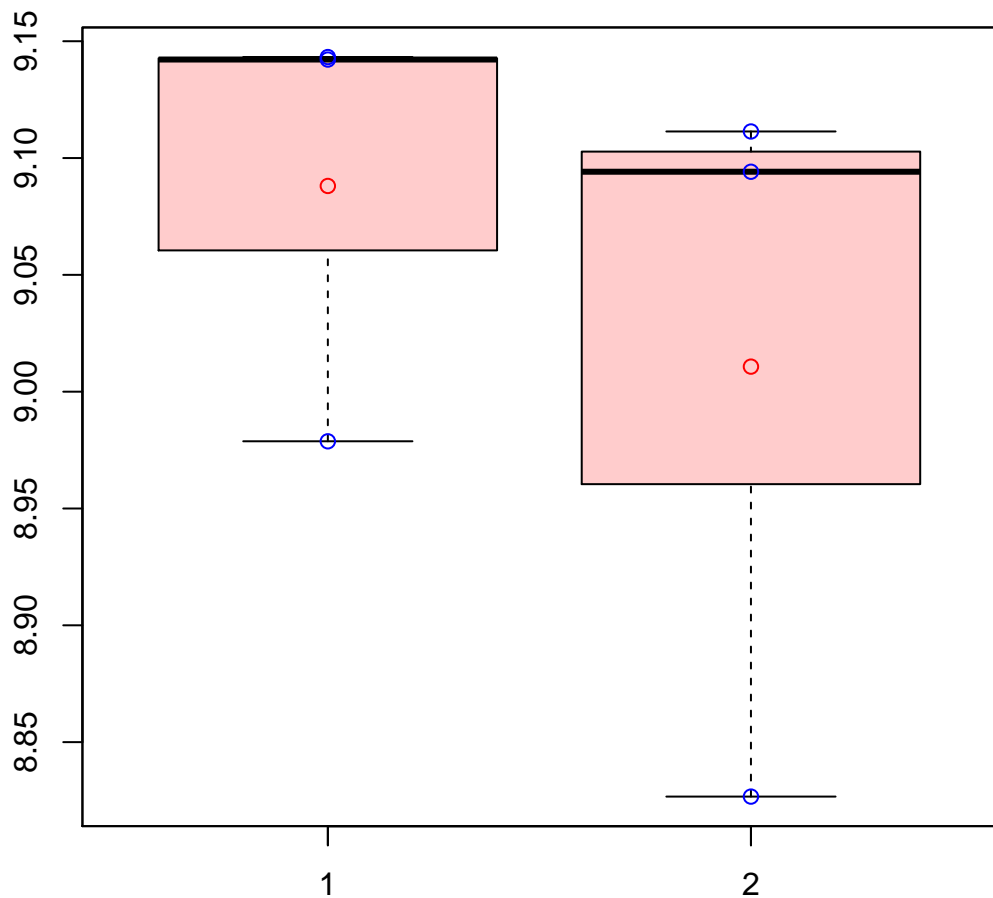

t-Test: p-value = 0.52

# CL5445Contig1|CL5445Contig1

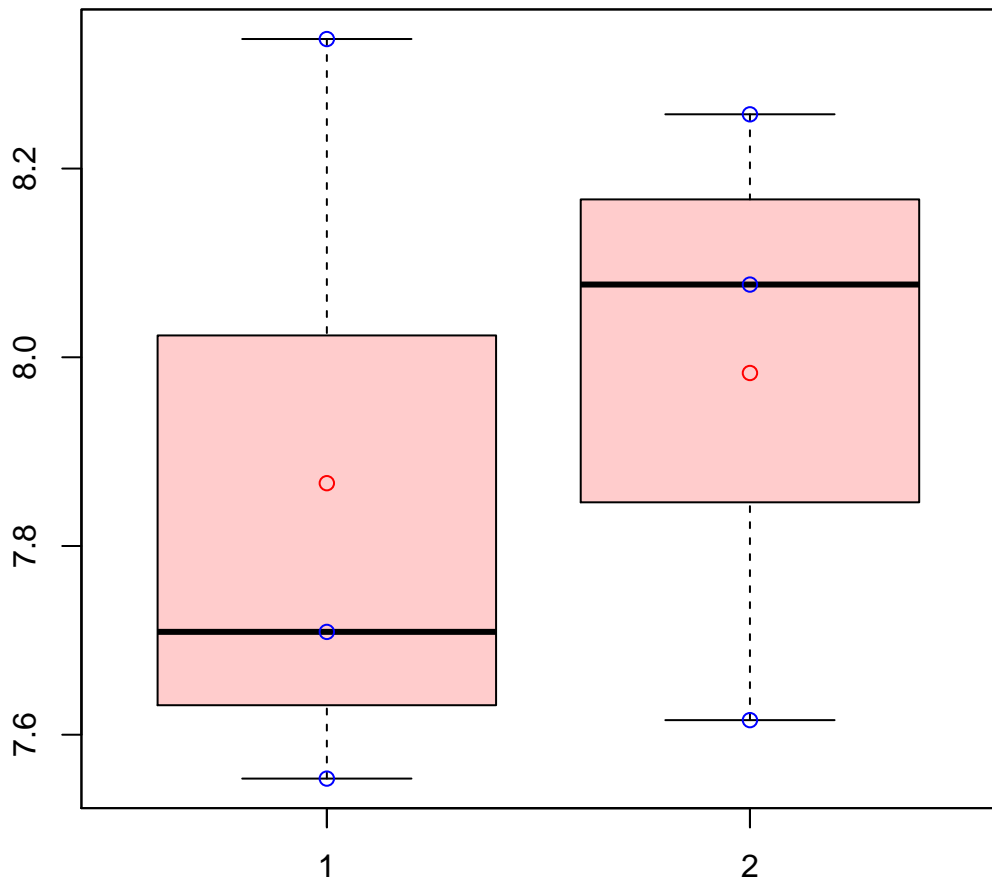

t-Test: p-value = 0.72

# CL5453Contig8|CL5453Contig8

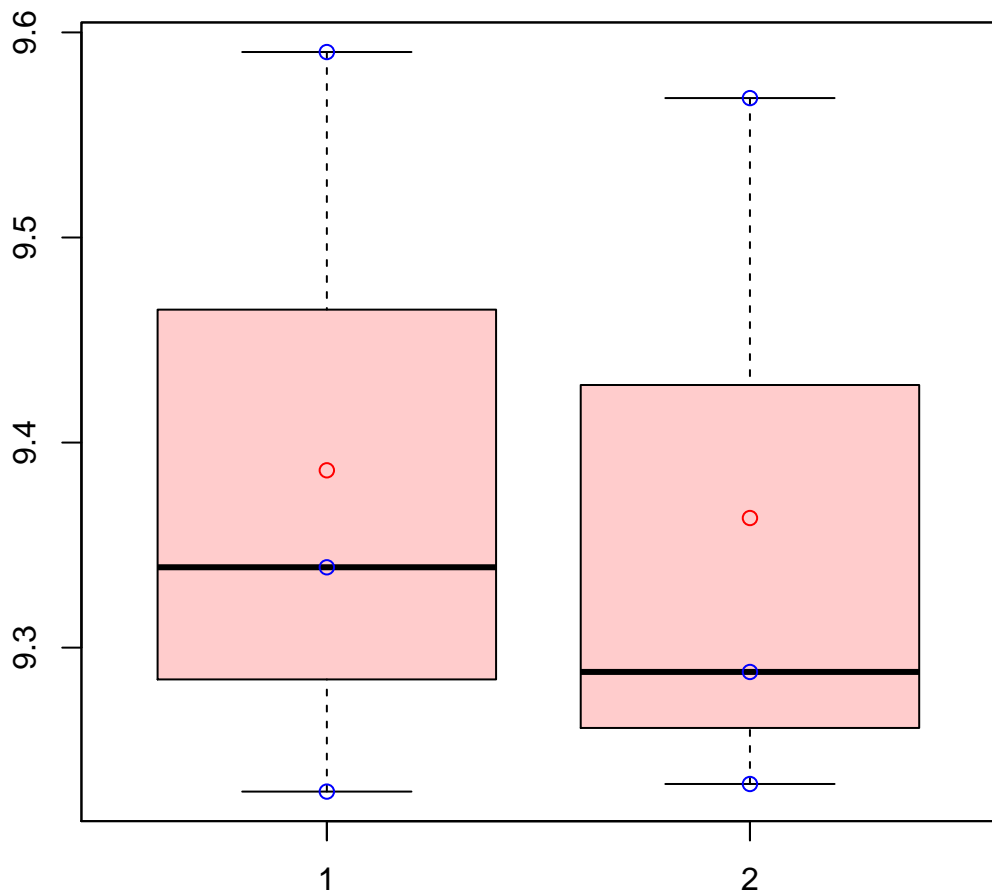

t-Test: p-value = 0.88

# CL5454Contig2|CL5454Contig2

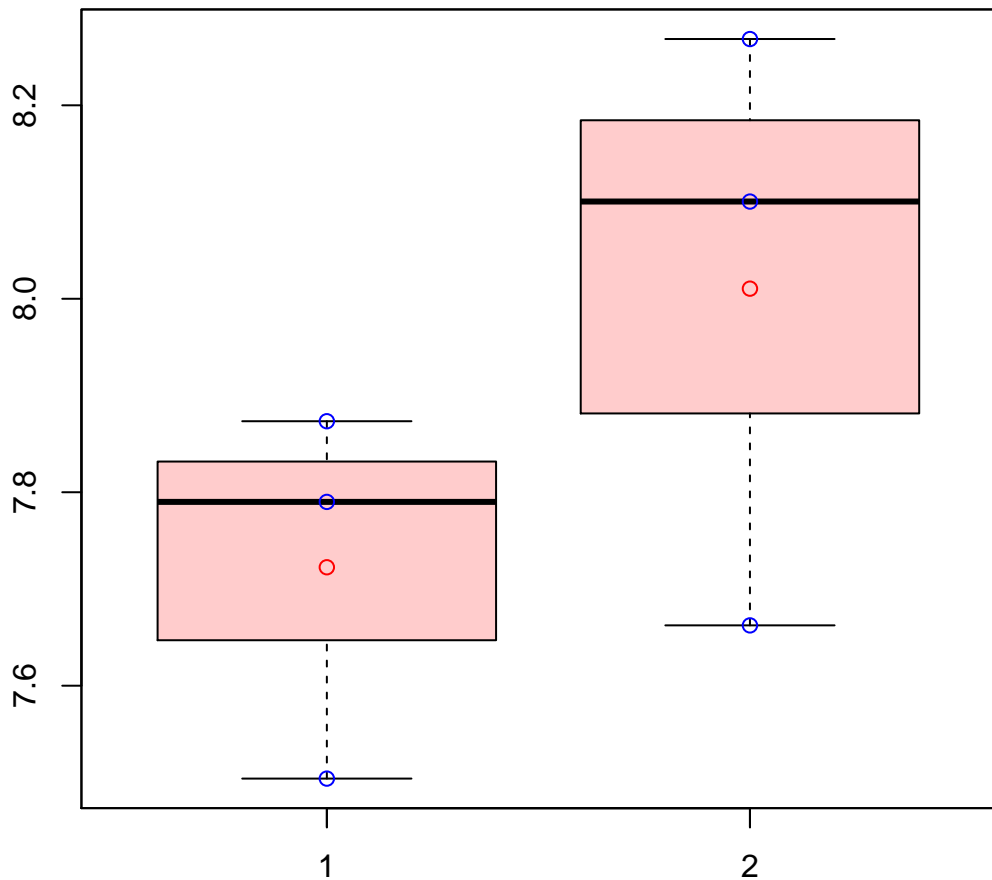

t-Test: p-value = 0.26

# CL5454Contig6|CL5454Contig6

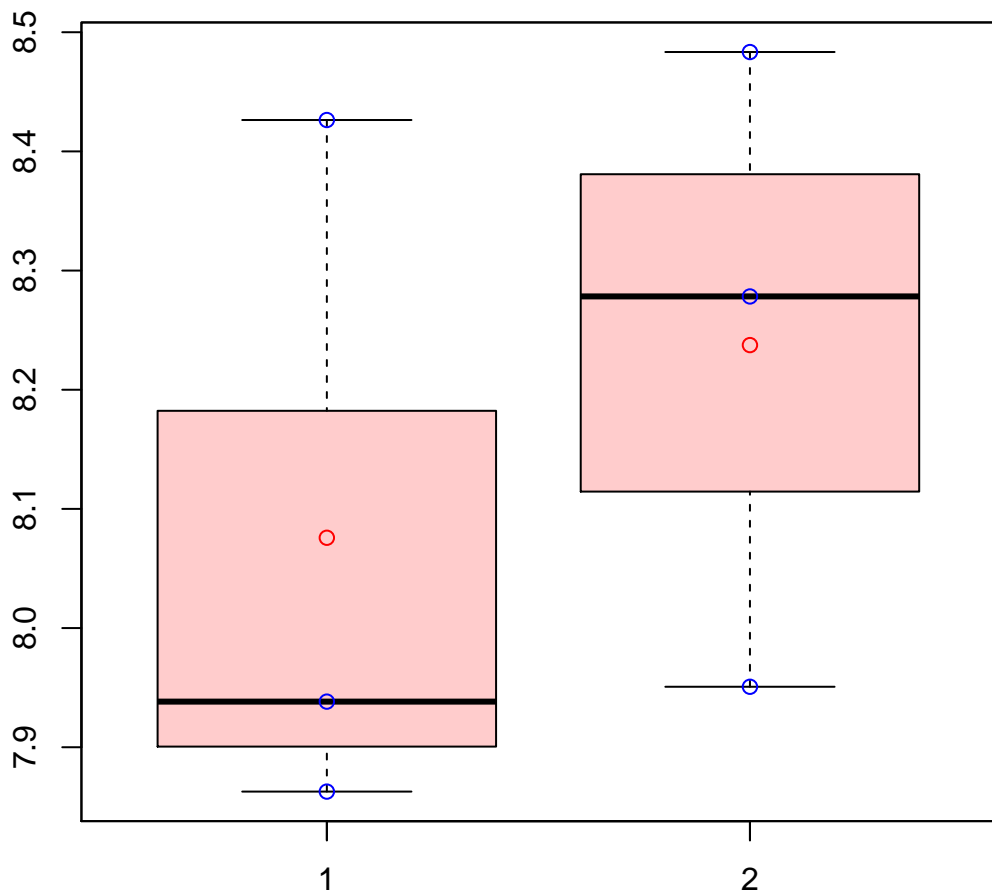

t-Test: p-value = 0.53

# CL5458Contig1|CL5458Contig1

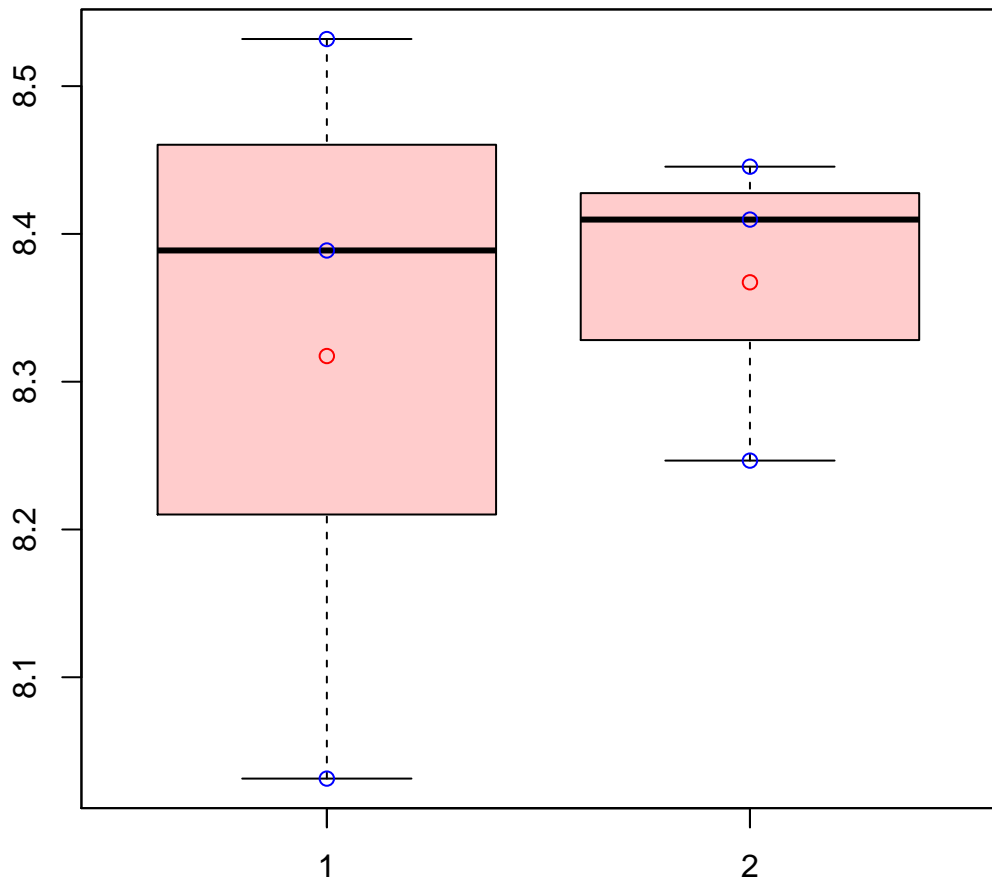

t-Test: p-value = 0.78

# CL5458Contig2|CL5458Contig2

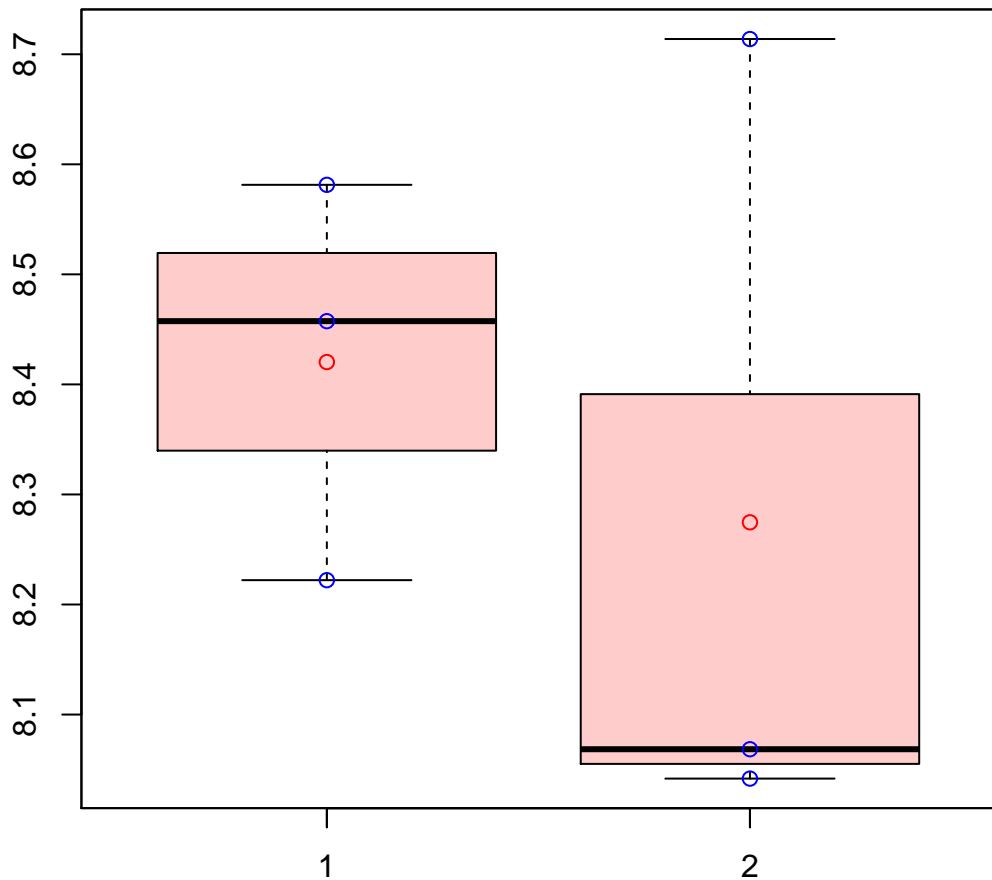

t-Test: p-value = 0.59

# CL5463Contig7|CL5463Contig7

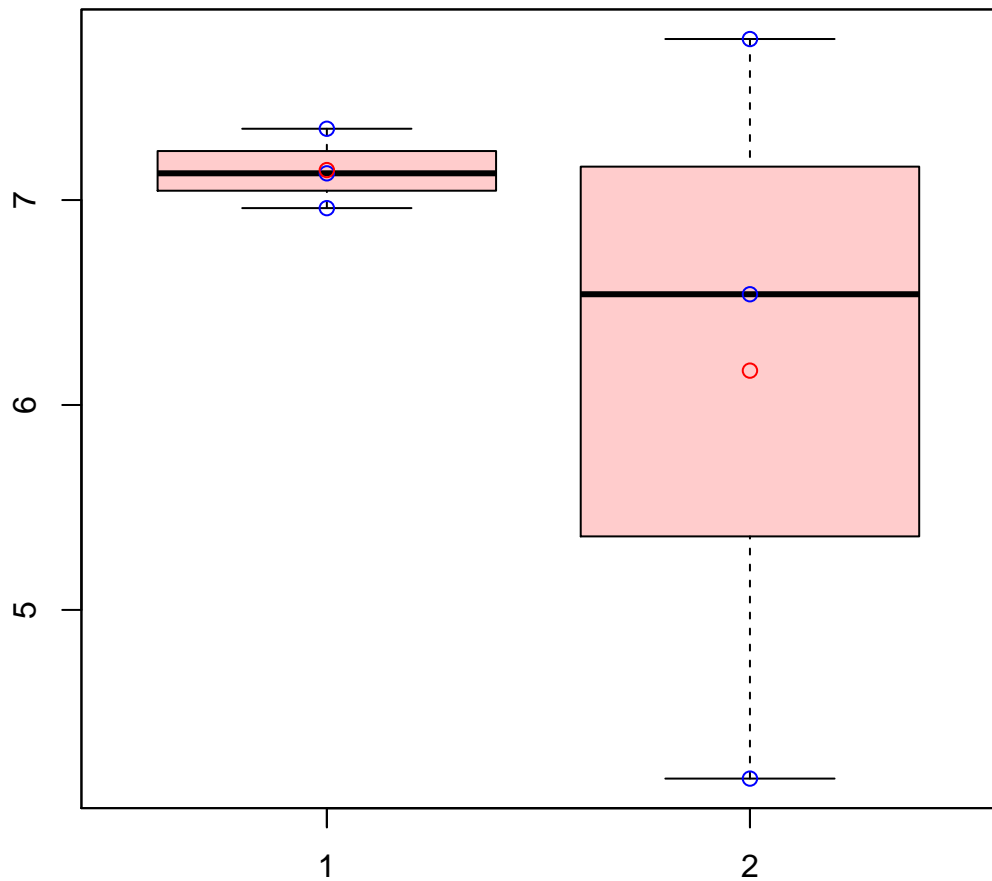

t-Test: p-value = 0.45



# CL5474Contig2|CL5474Contig2

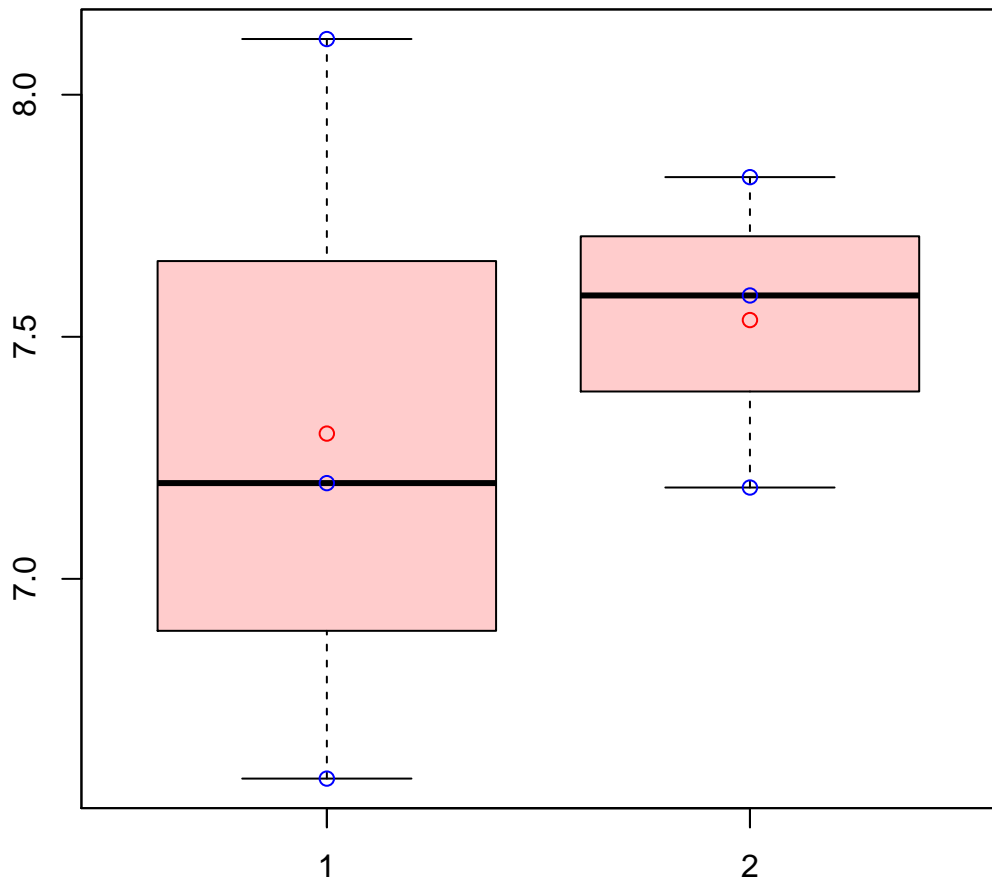

t-Test: p-value = 0.66

# CL5482Contig2|CL5482Contig2

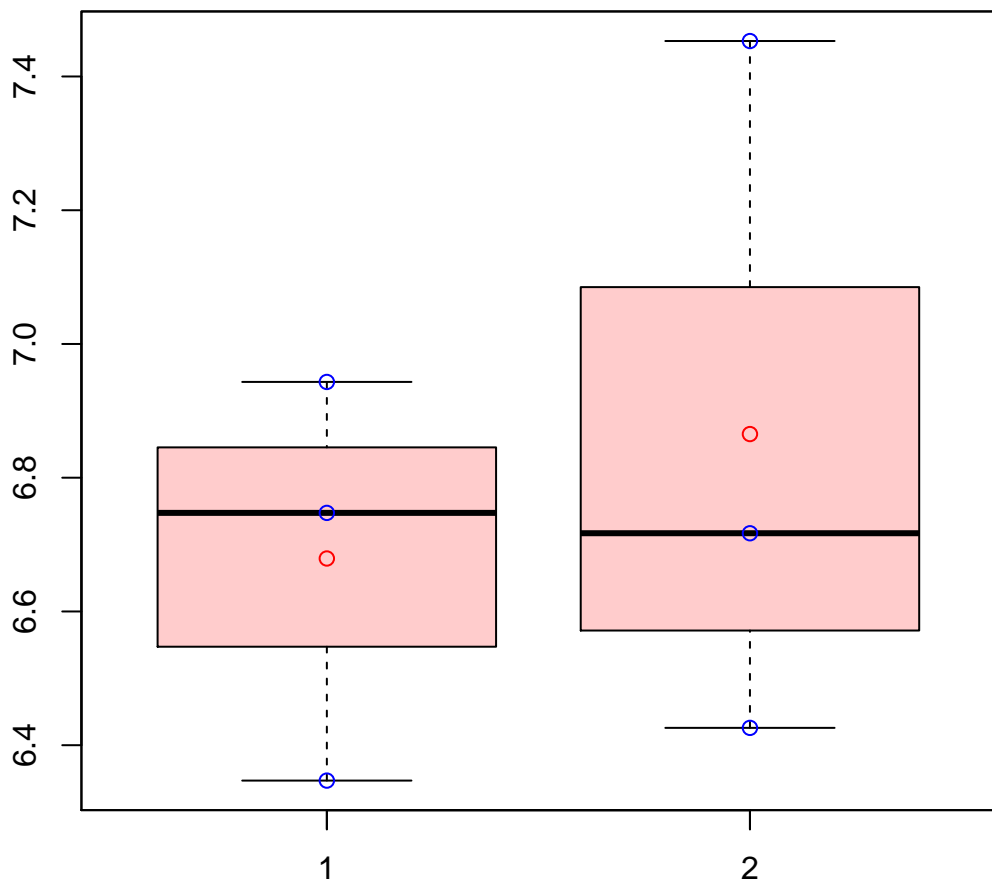

t-Test: p-value = 0.63

# CL548Contig9|CL548Contig9

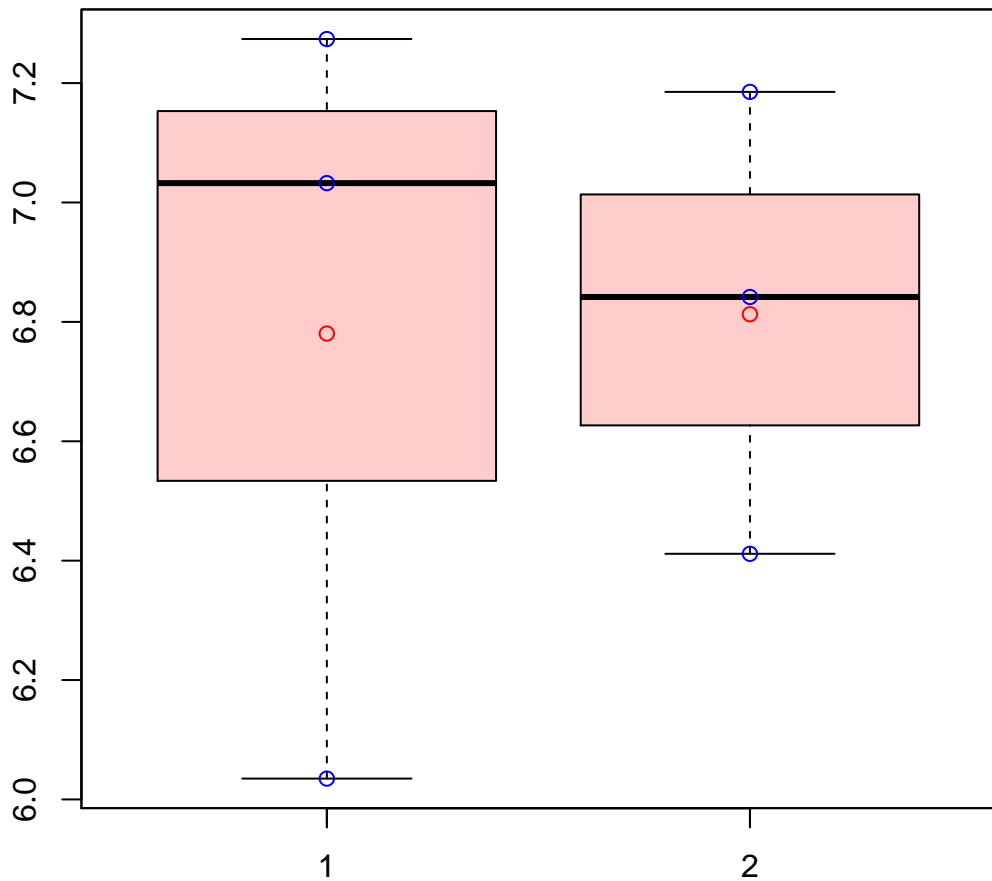

t-Test: p-value = 0.95

# CL5492Contig1|CL5492Contig1

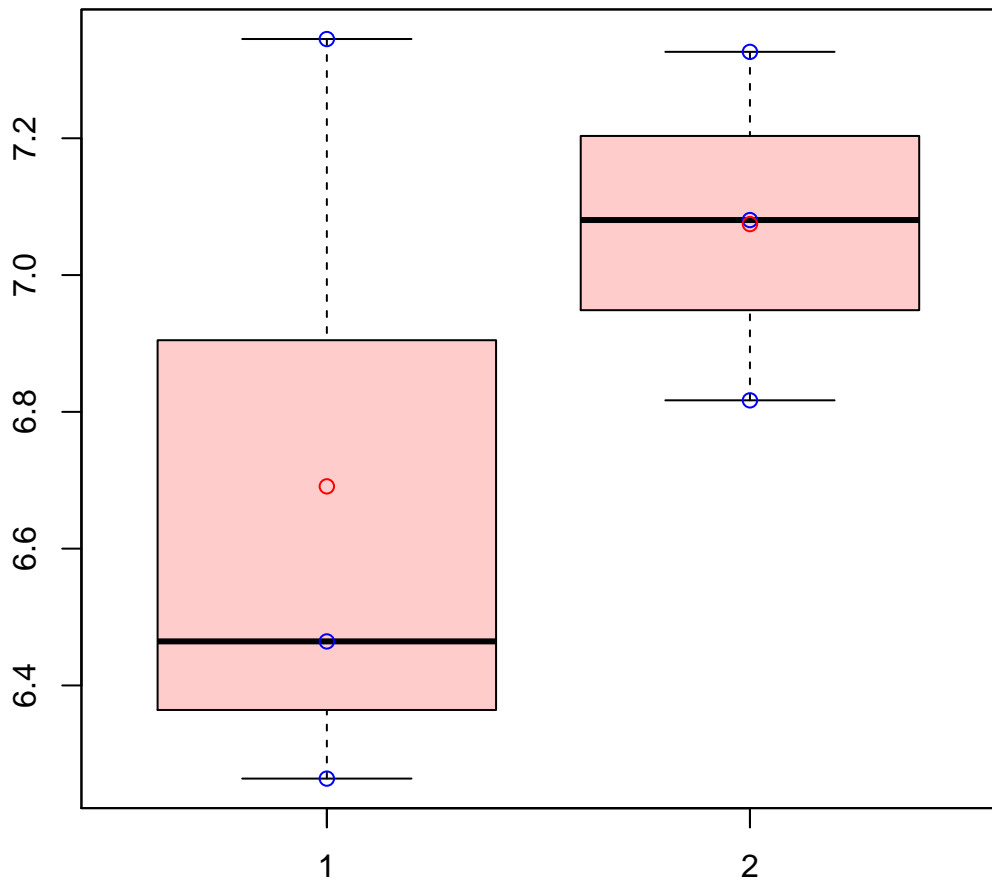

t-Test: p-value = 0.37

# CL5492Contig2|CL5492Contig2

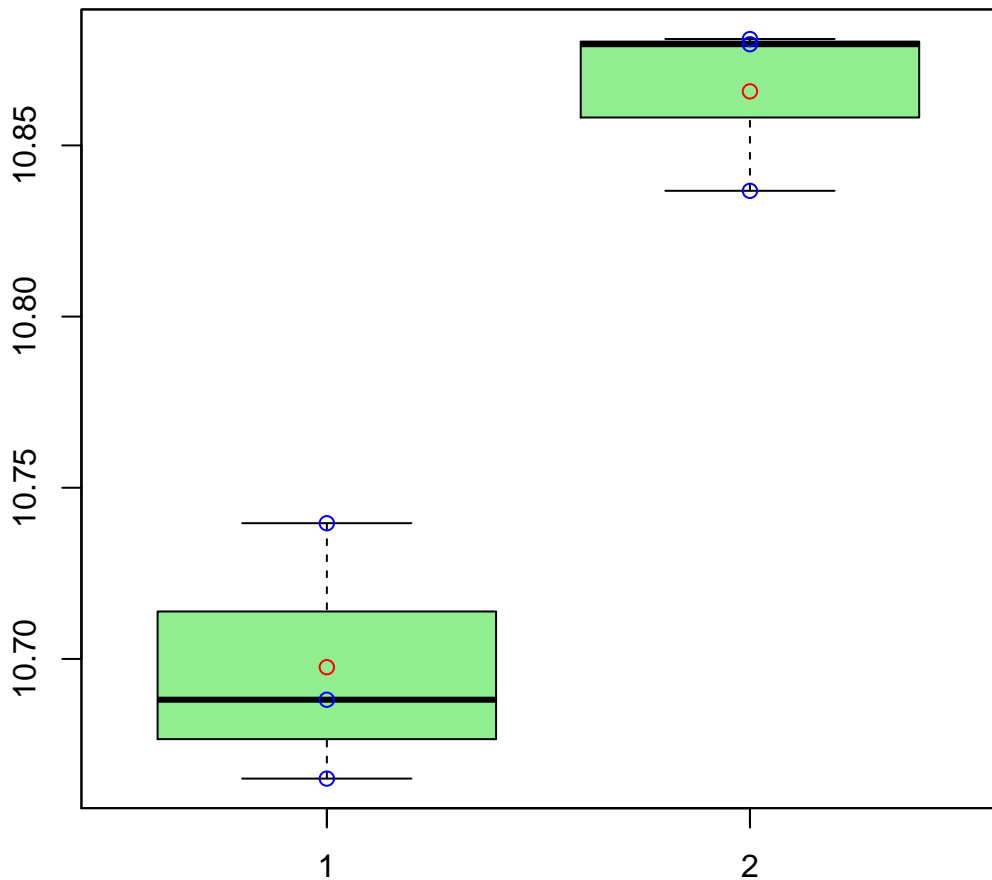

t-Test: p-value = 0.01

# CL5494Contig2|CL5494Contig2

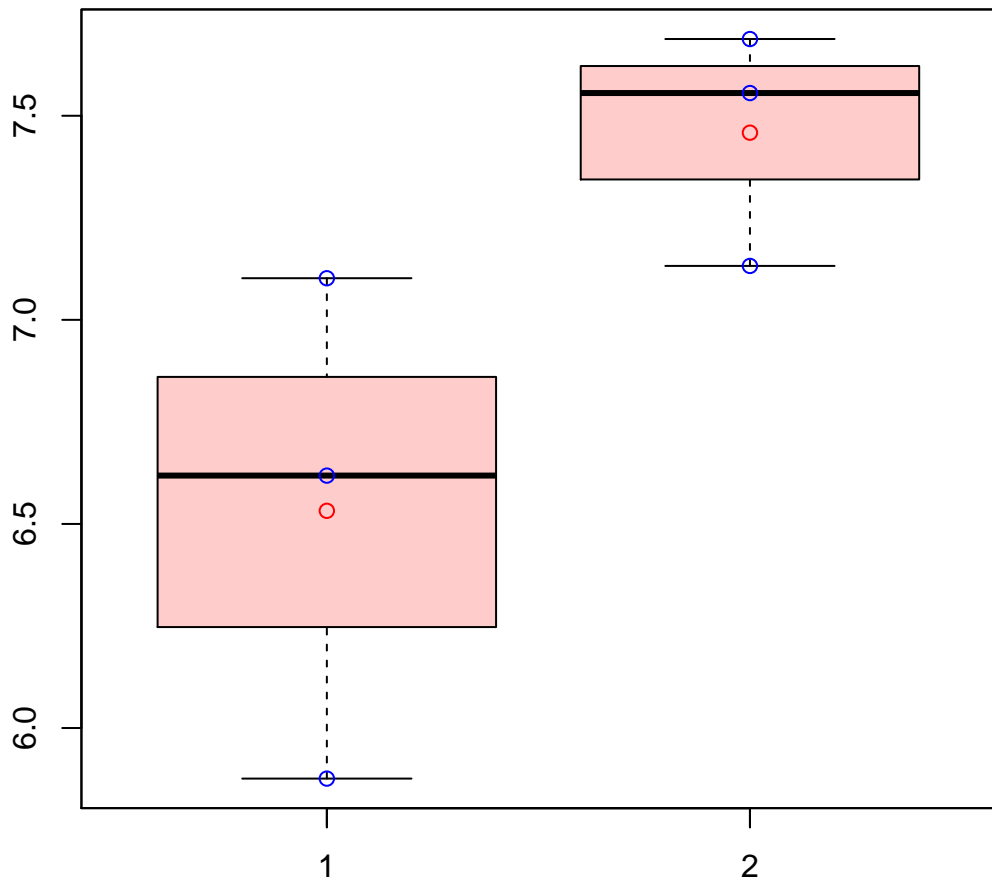

t-Test: p-value = 0.1

# CL54Contig14|CL54Contig14

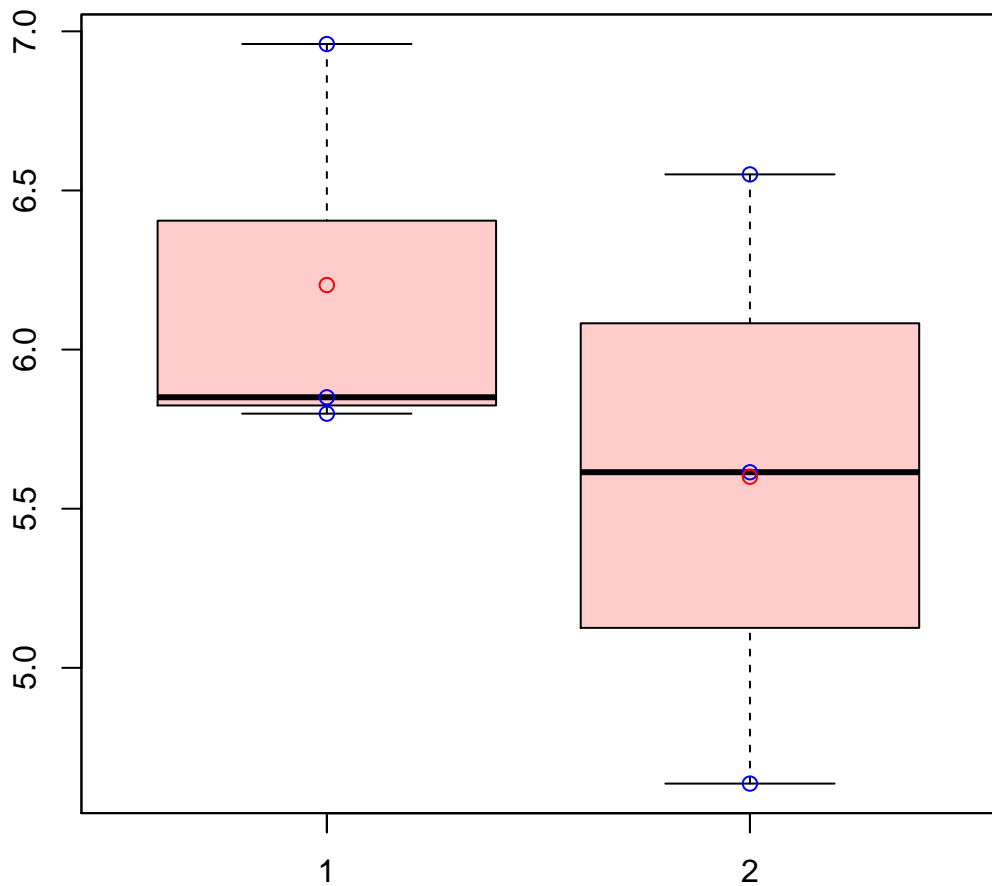

t-Test: p-value = 0.43

# CL54Contig19|CL54Contig19

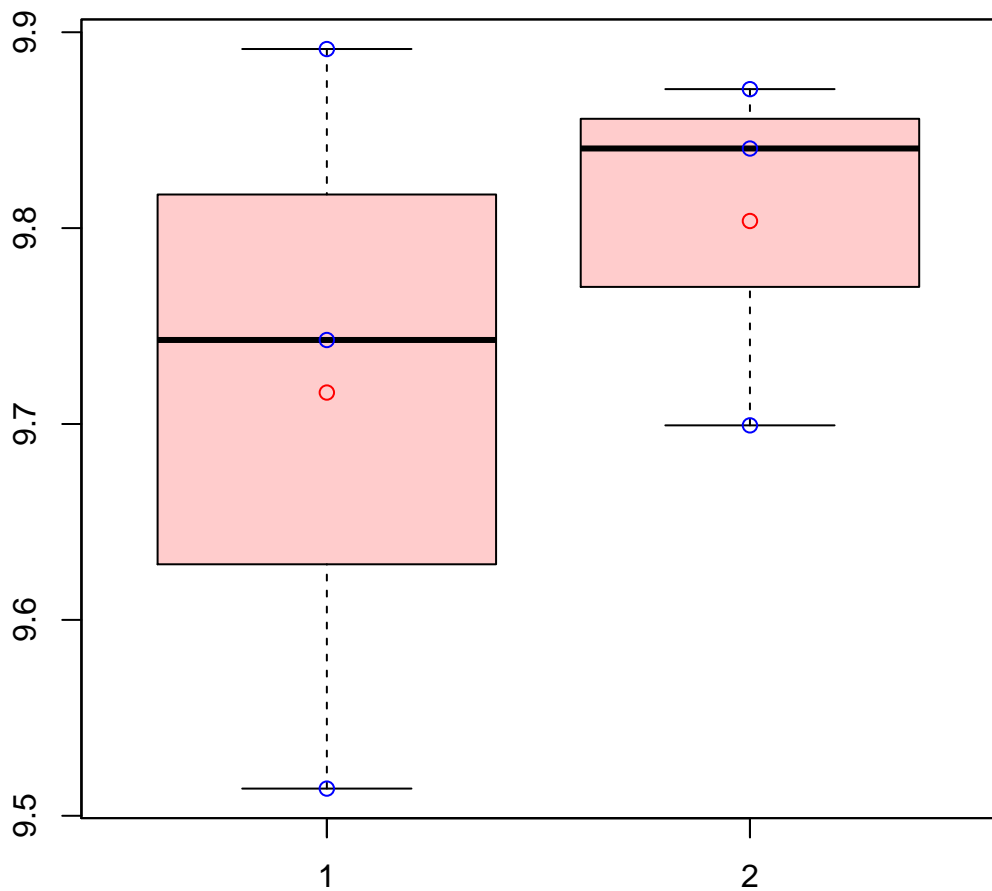

t-Test: p-value = 0.53



# CL54Contig24|CL54Contig24

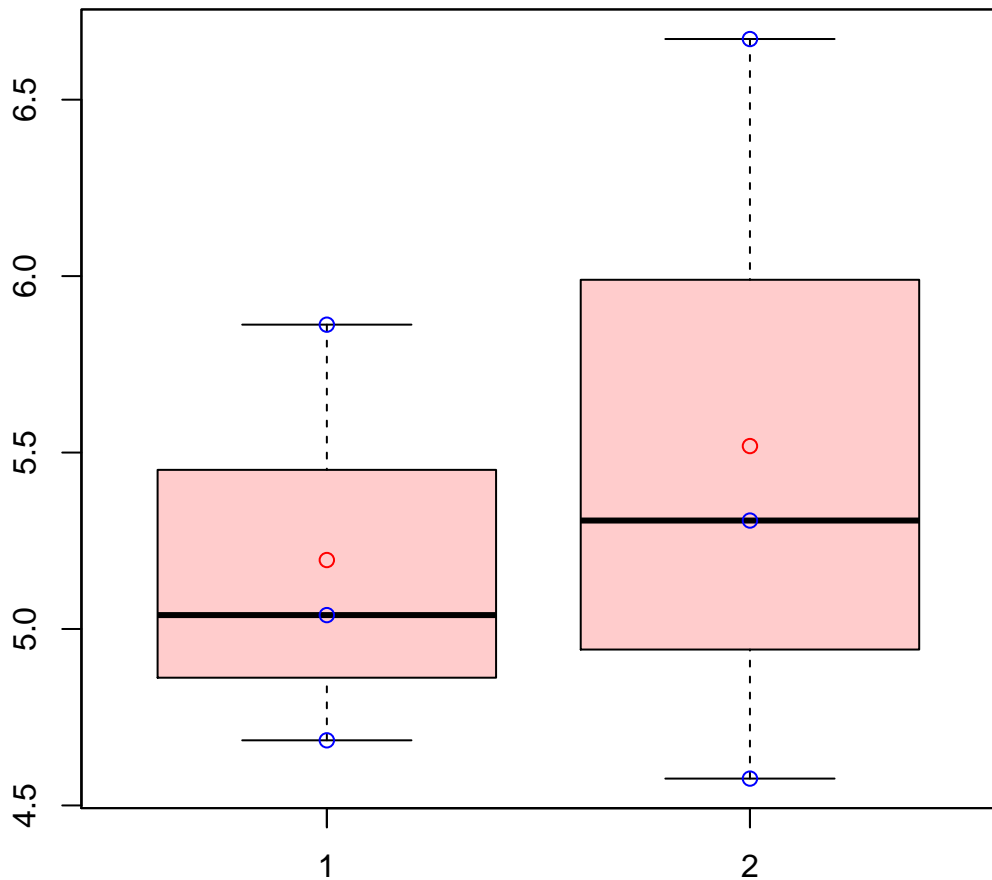

t-Test: p-value = 0.68

# CL5513Contig2|CL5513Contig2

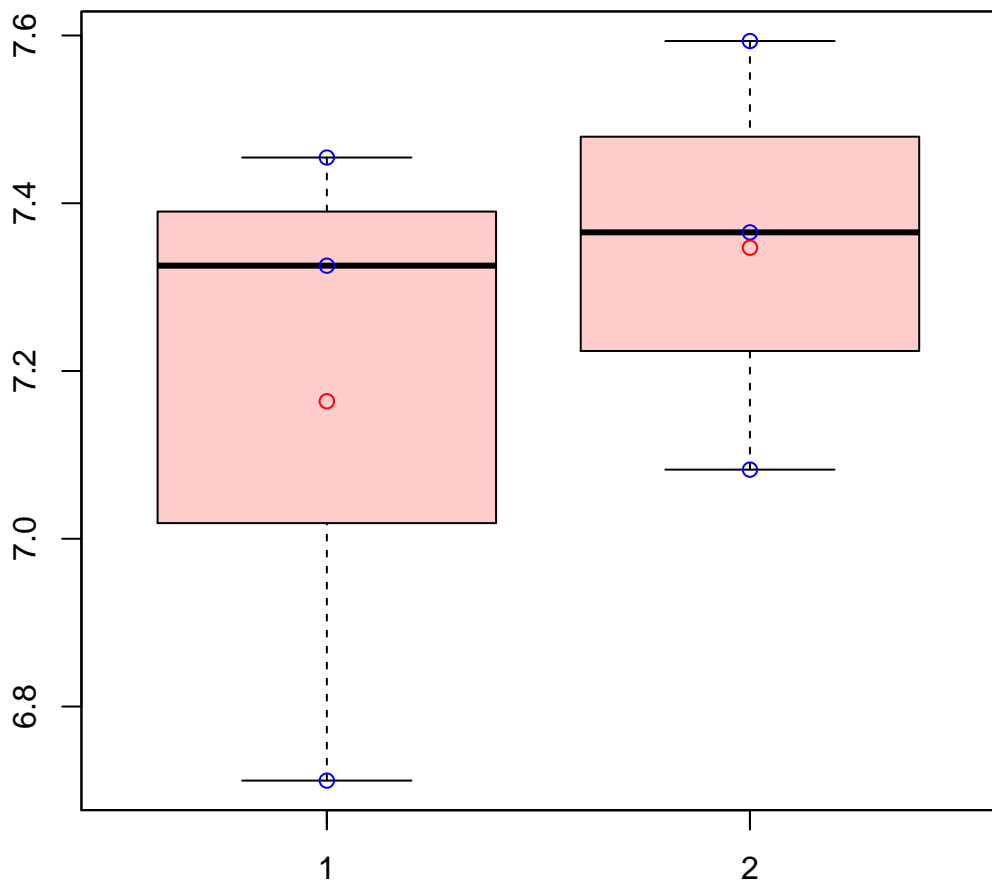

t-Test: p-value = 0.54

# CL552Contig3|CL552Contig3

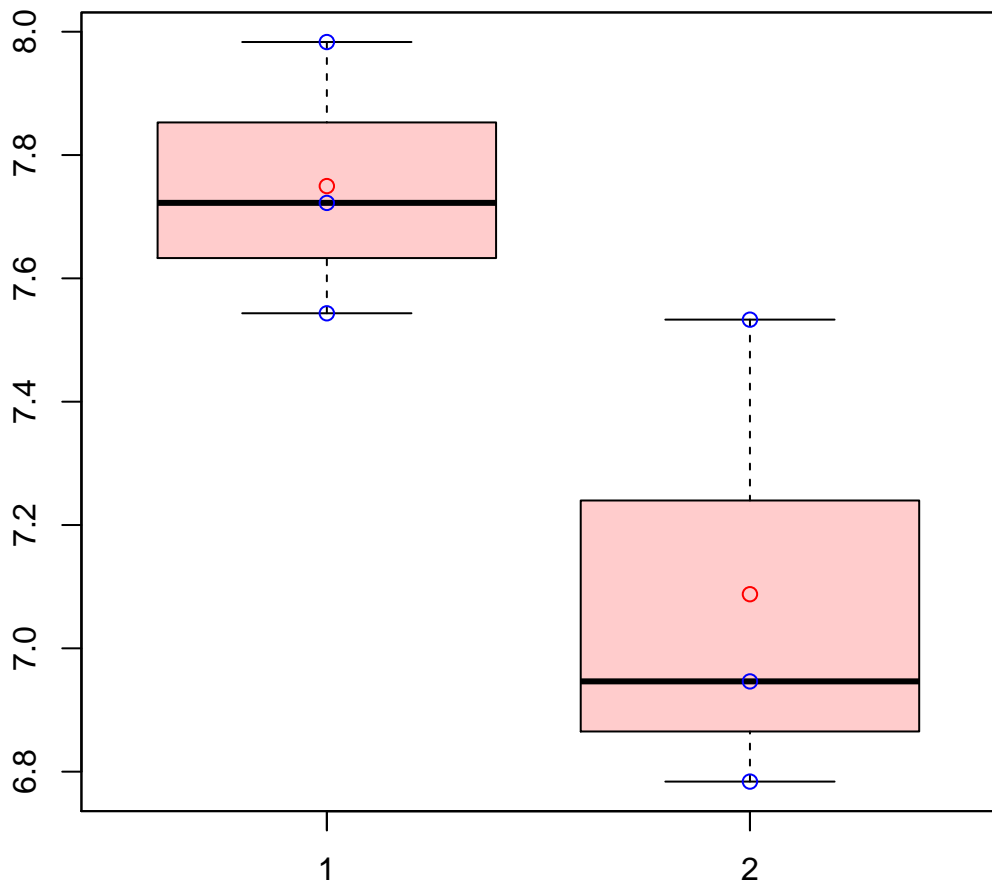

t-Test: p-value = 0.08

# CL5530Contig3|CL5530Contig3

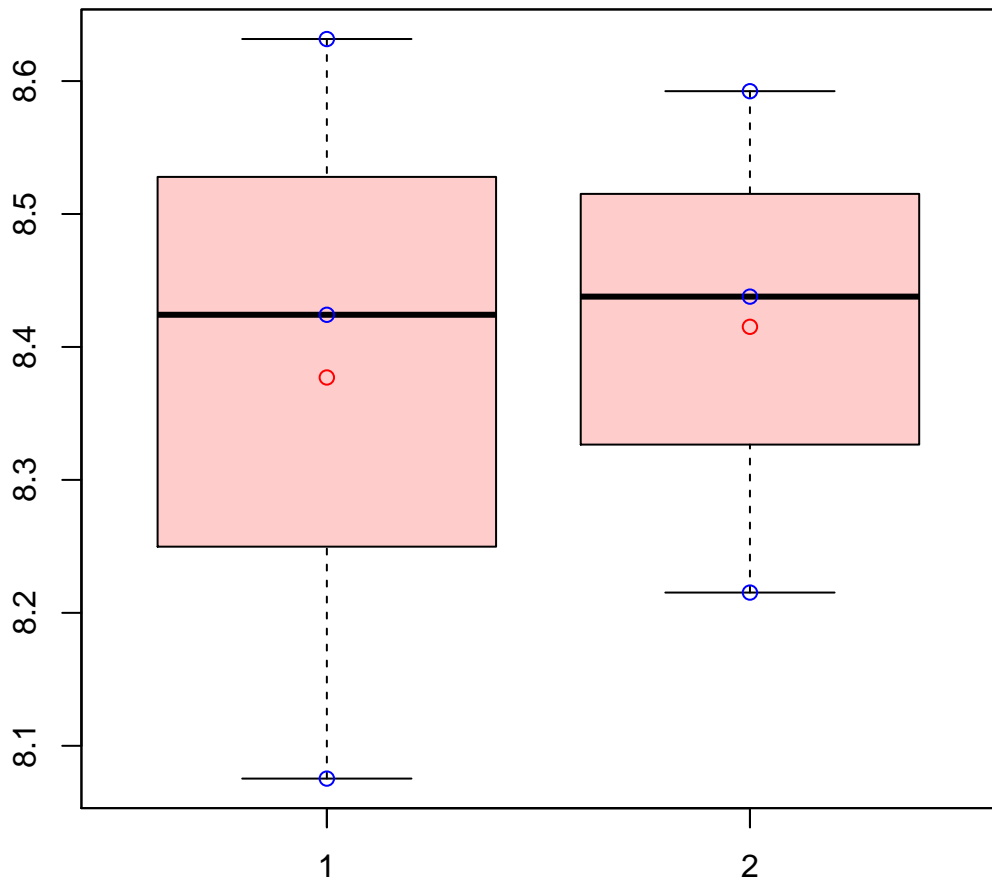

t-Test: p-value = 0.86

# CL5535Contig1|CL5535Contig1

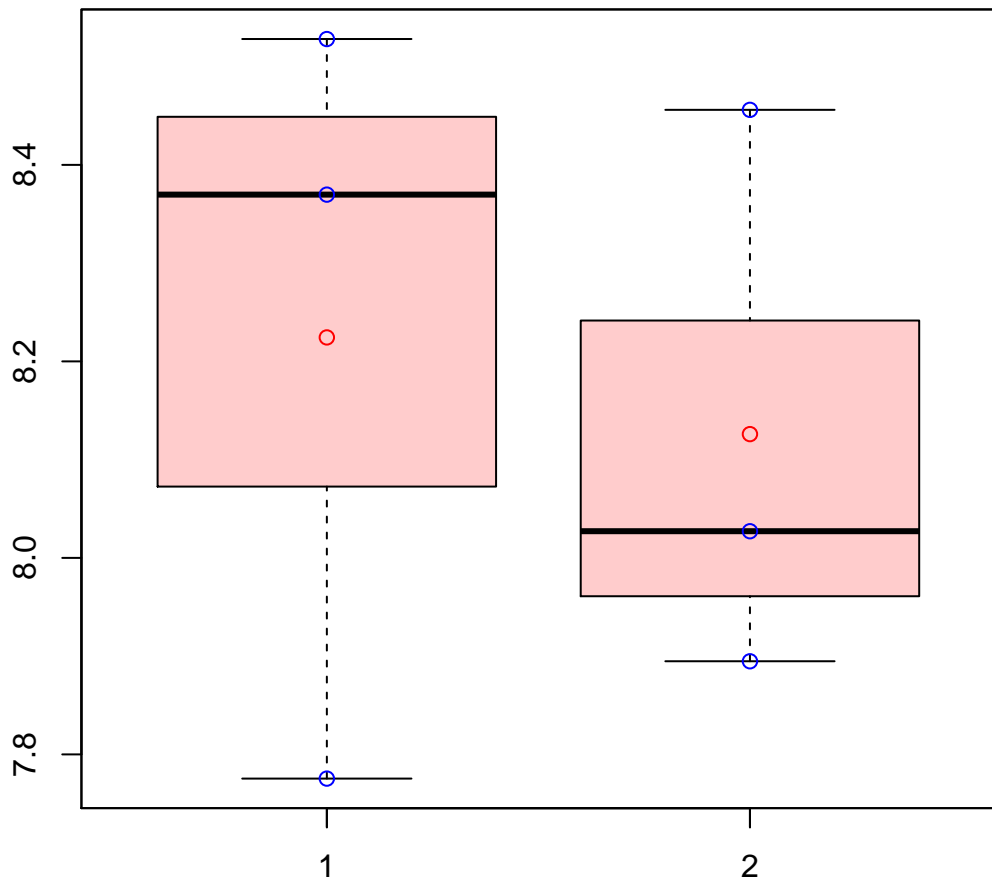

t-Test: p-value = 0.75

# CL5538Contig2|CL5538Contig2

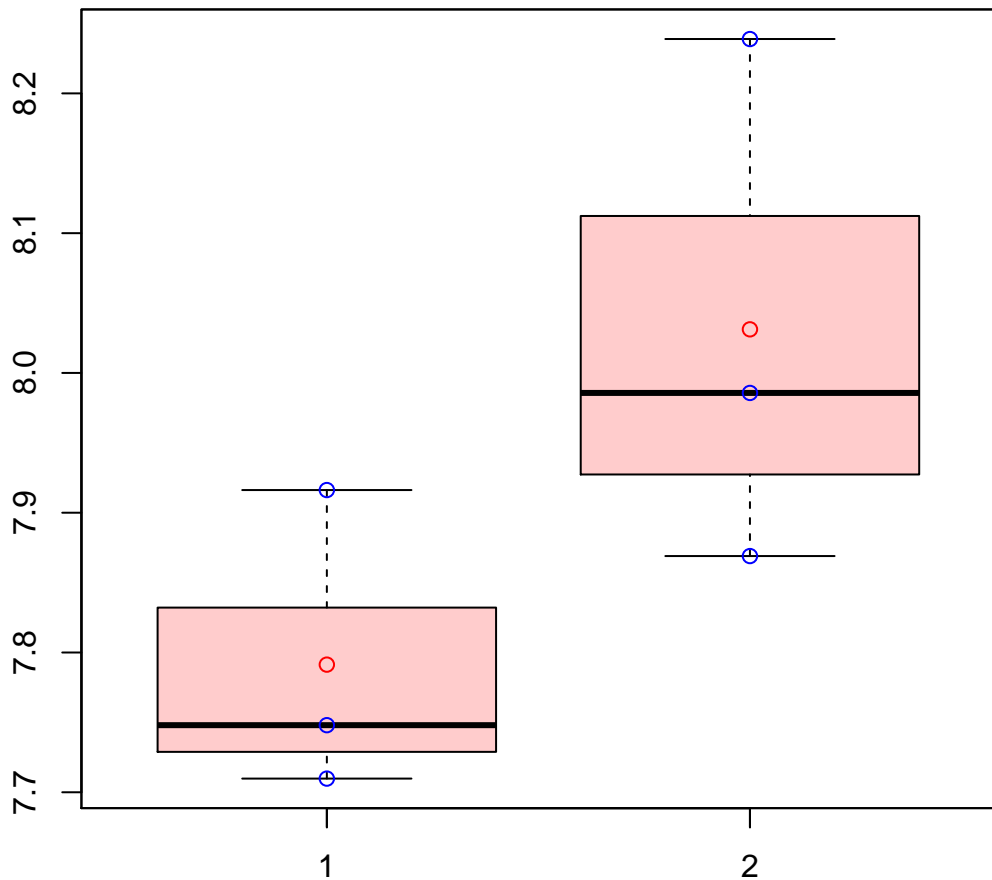

t-Test: p-value = 0.15

# CL5539Contig4|CL5539Contig4

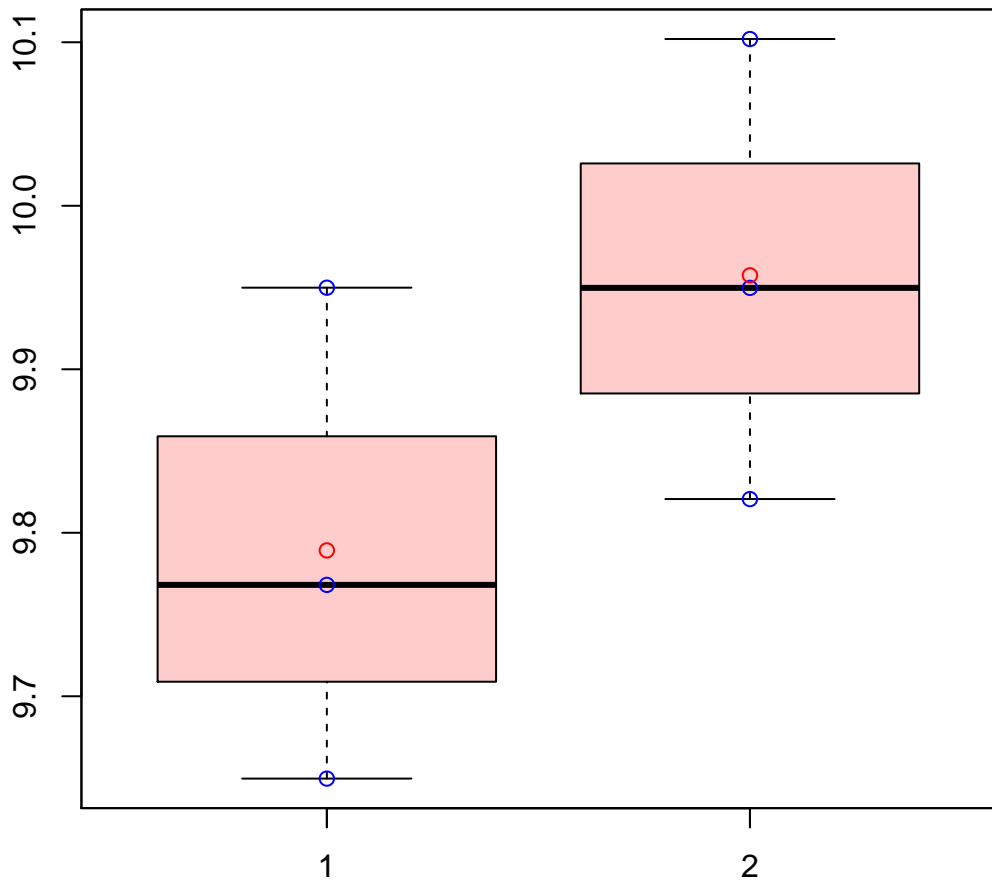

t-Test: p-value = 0.23

# CL5544Contig1|CL5544Contig1

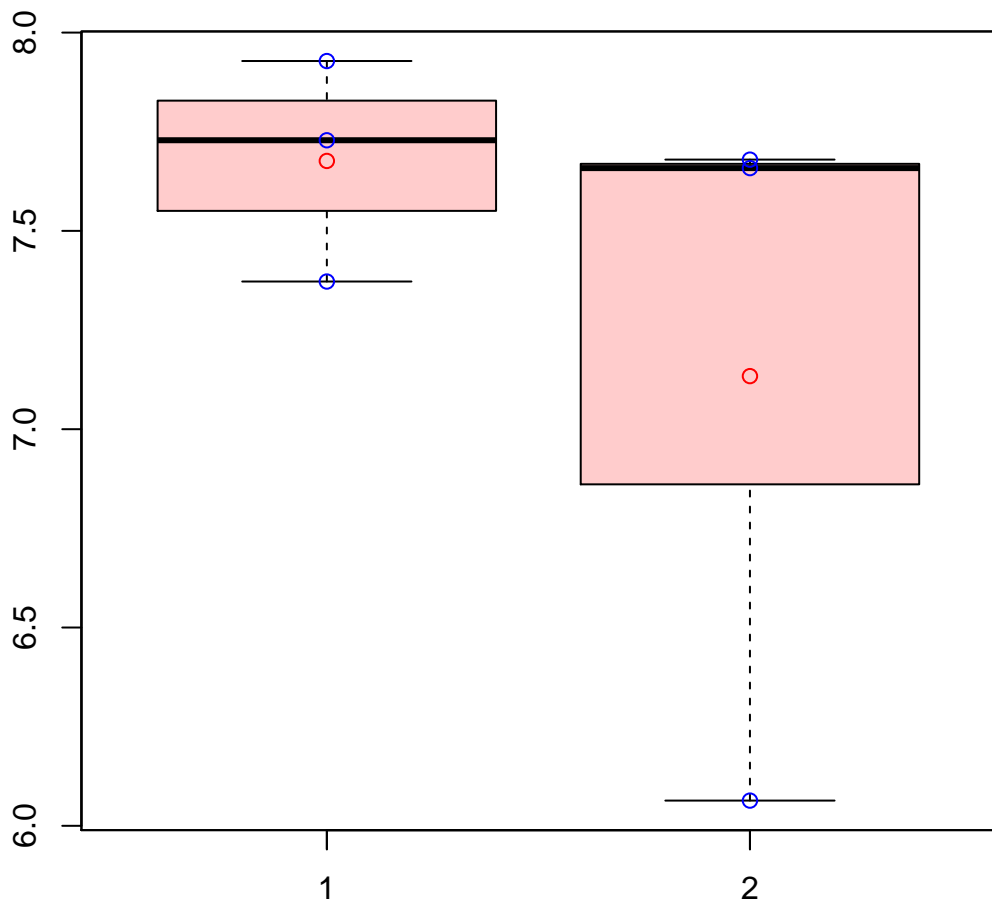

t-Test: p-value = 0.42



# CL5547Contig4|CL5547Contig4

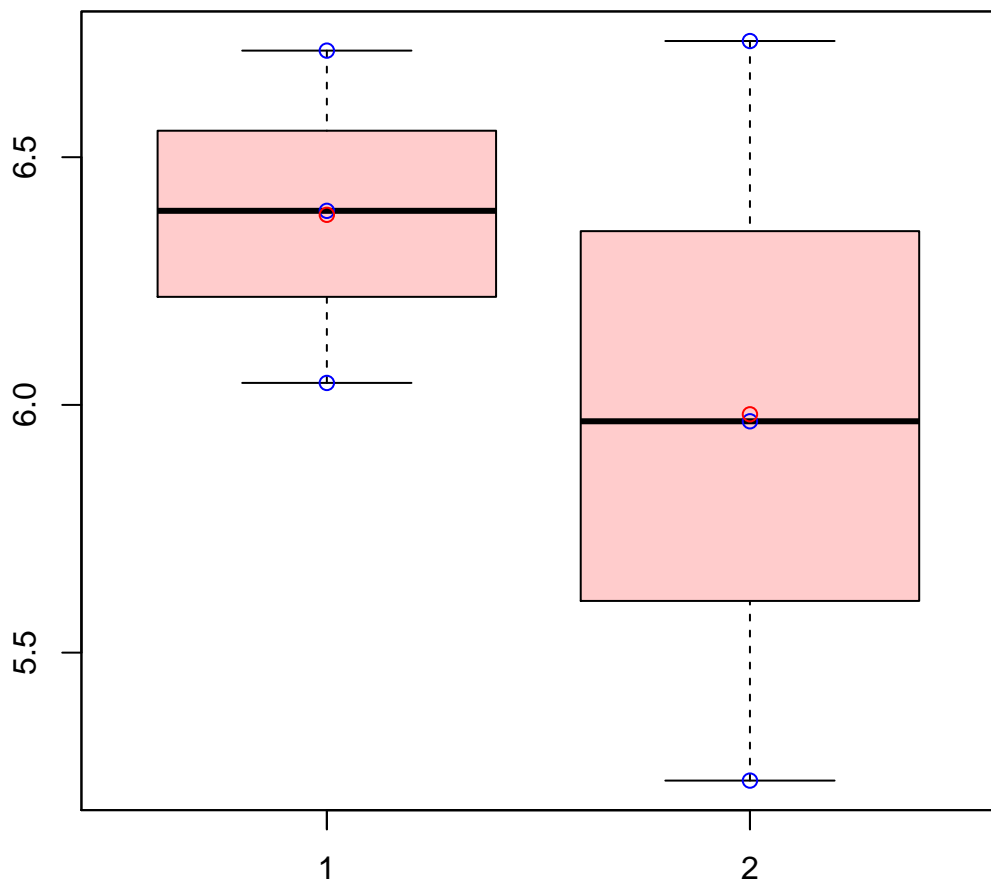

t-Test: p-value = 0.46

# CL555Contig8|CL555Contig8

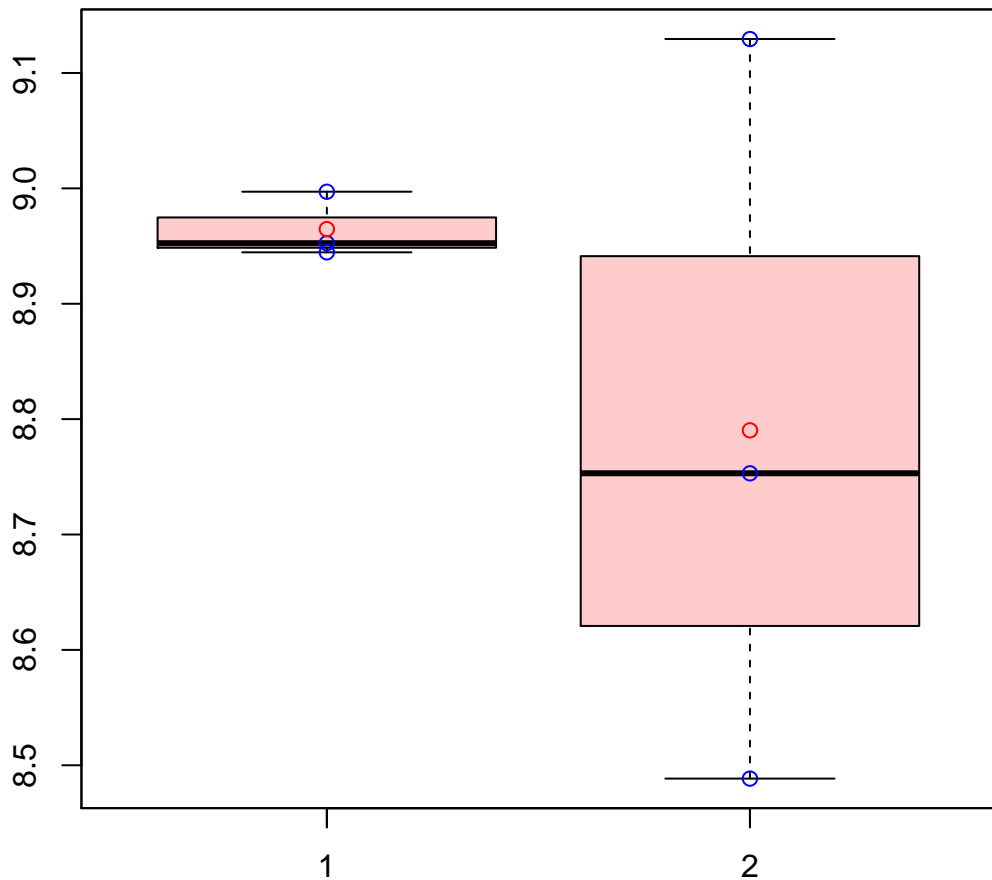

t-Test: p-value = 0.45

# CL5563Contig3|CL5563Contig3

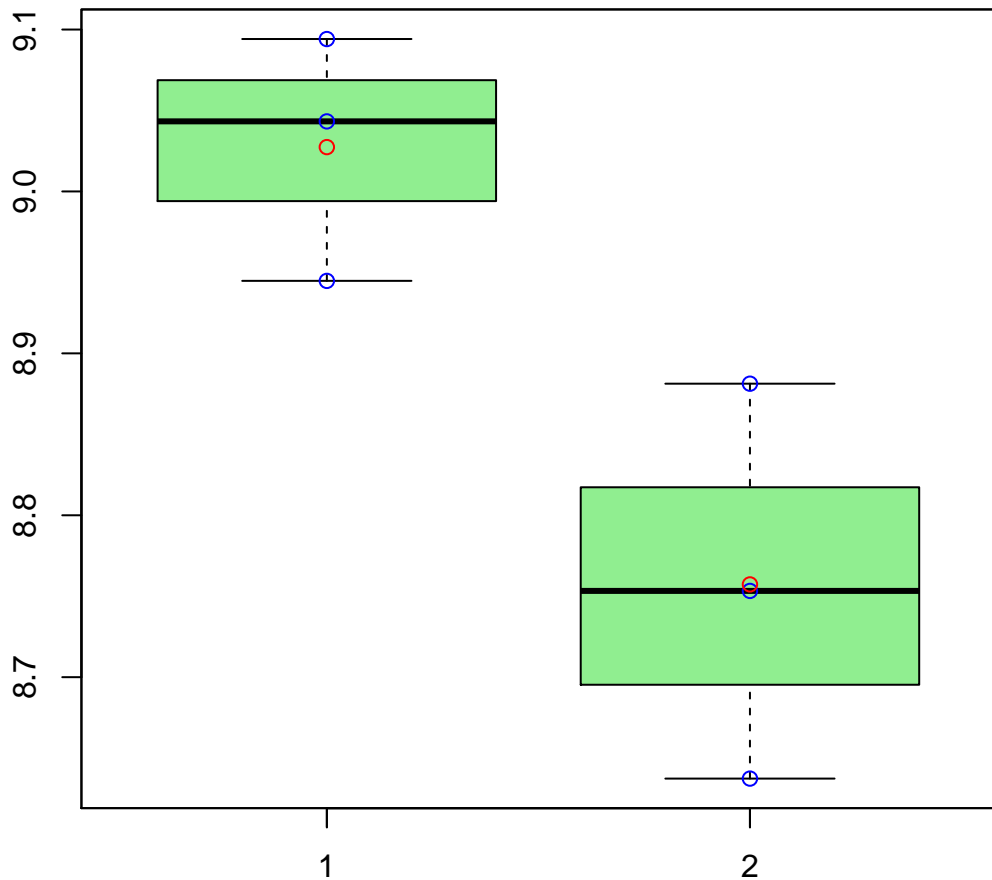

t-Test: p-value = 0.04

# CL5581Contig1|CL5581Contig1

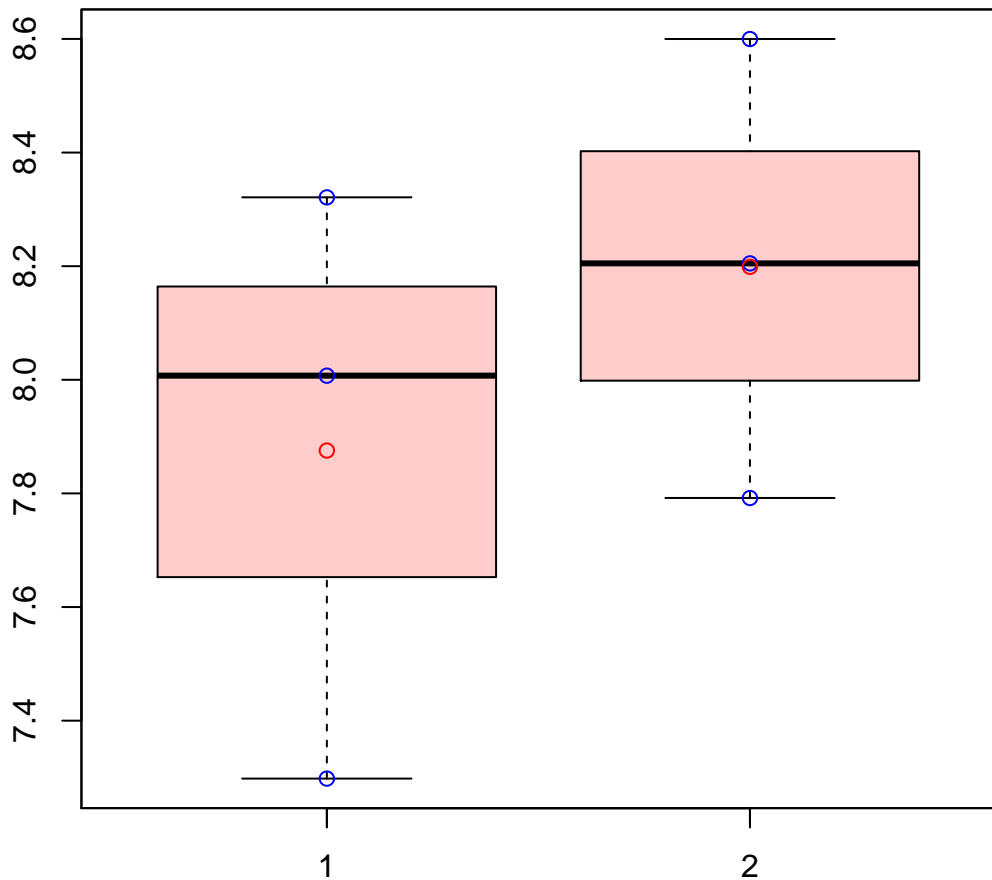

t-Test: p-value = 0.45

# CL5594Contig1|CL5594Contig1

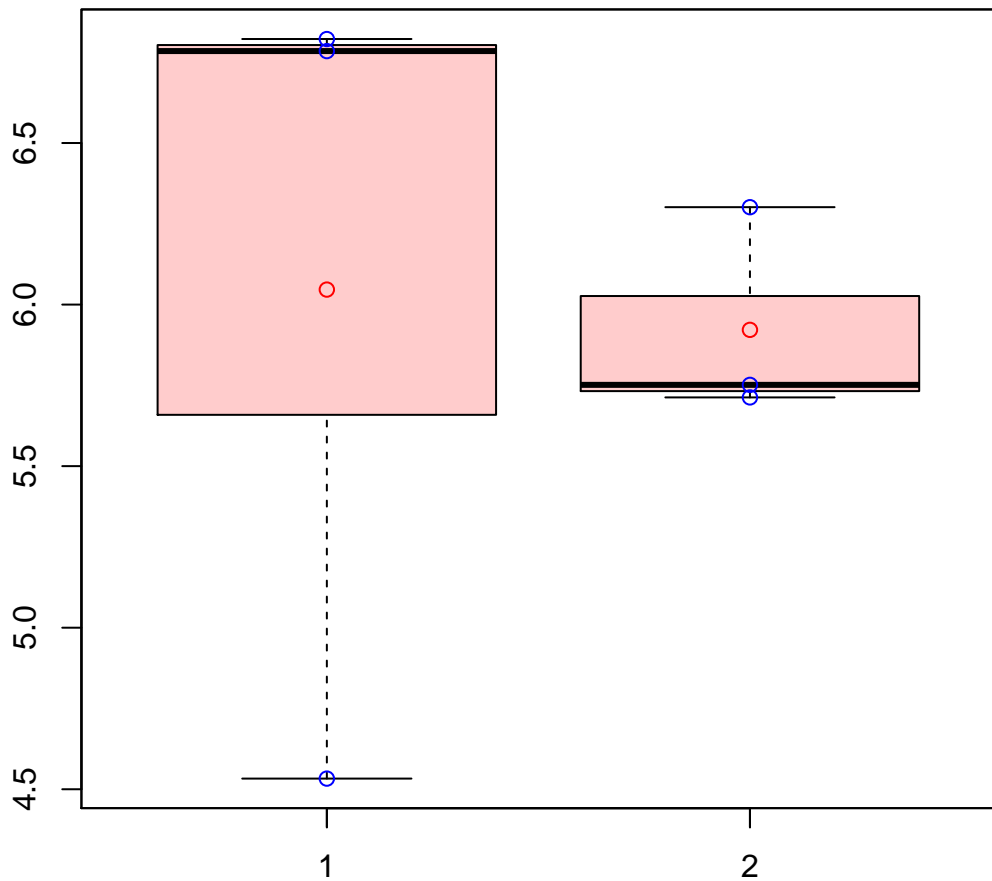

t-Test: p-value = 0.89

# CL5602Contig2|CL5602Contig2

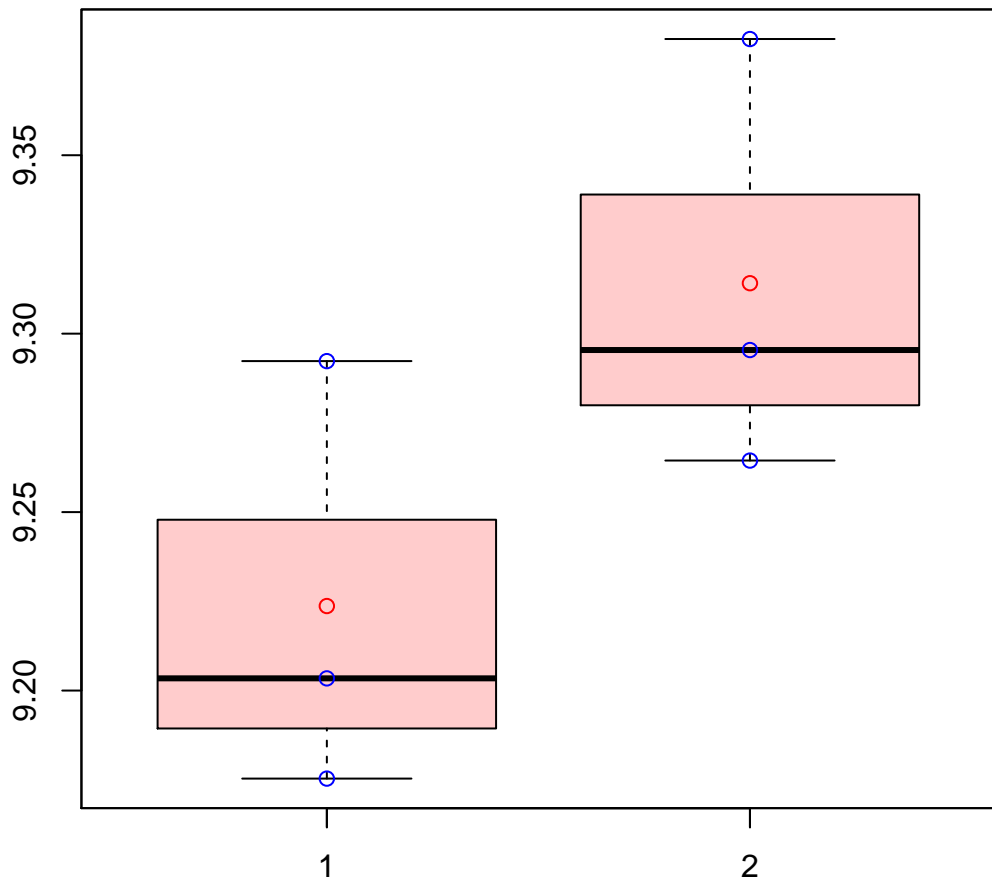

t-Test: p-value = 0.14

# CL5604Contig1|CL5604Contig1

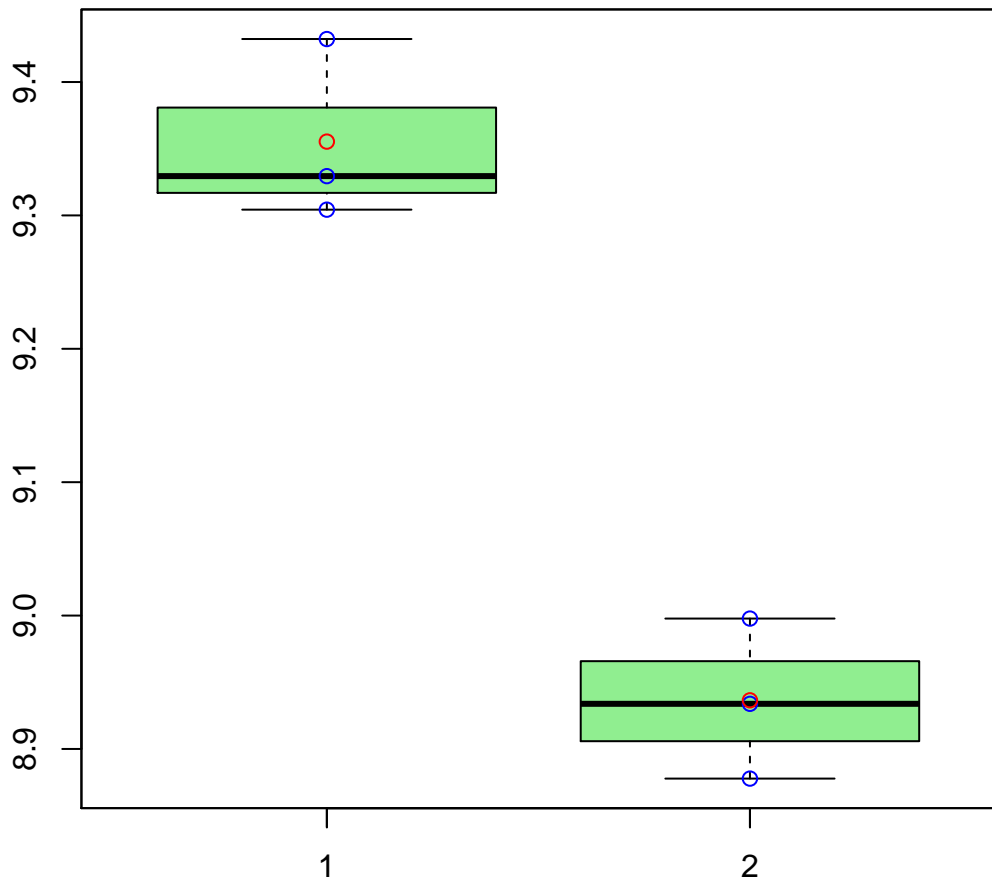

t-Test: p-value = 0

# CL560Contig2|CL560Contig2

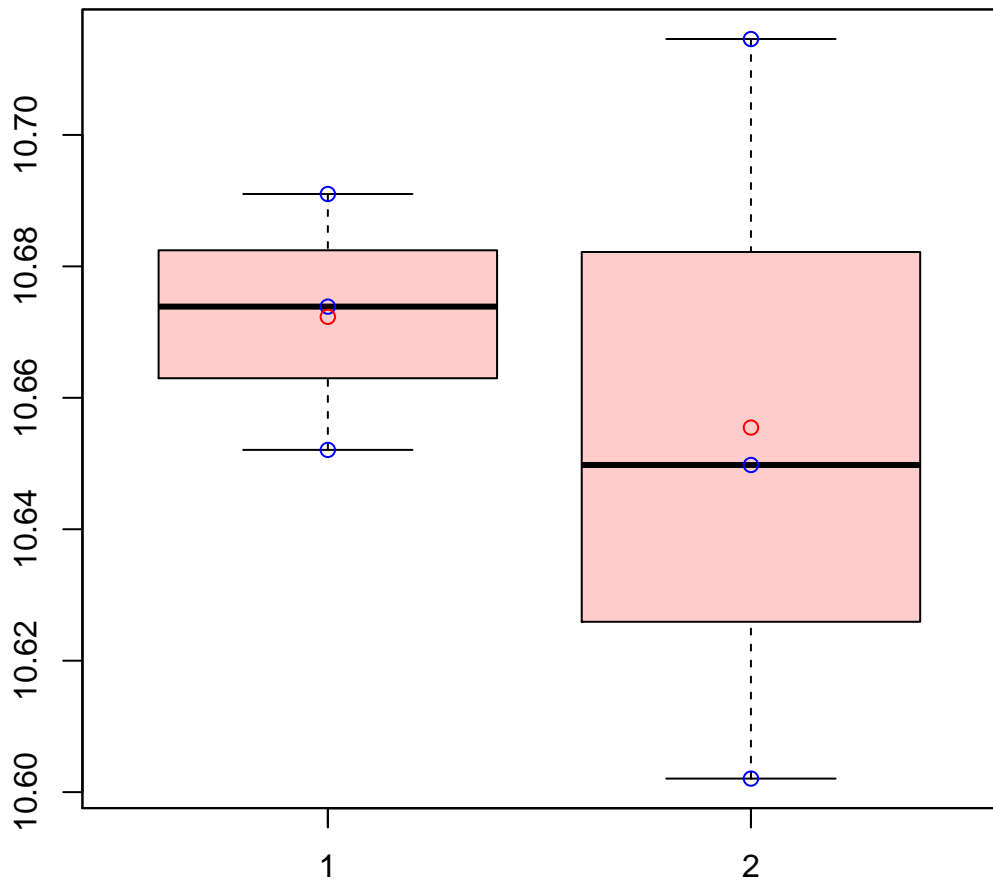

t-Test: p-value = 0.67



# CL561Contig7|CL561Contig7

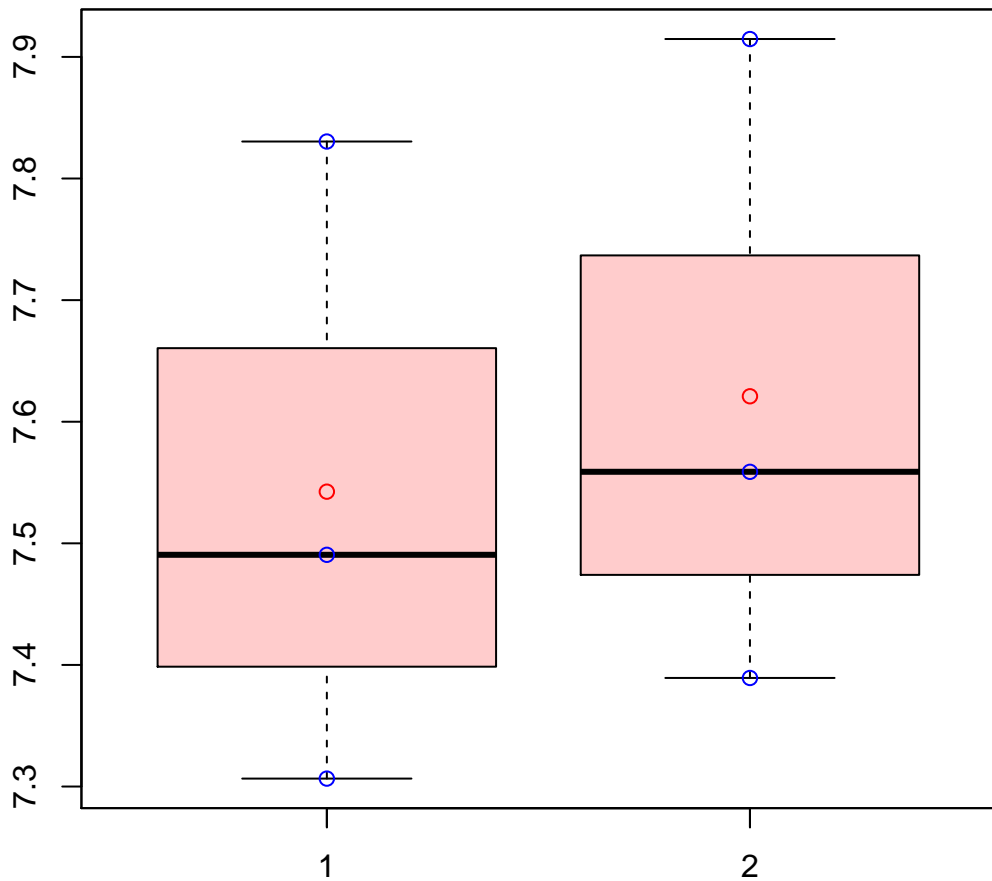

t-Test: p-value = 0.74

# CL5635Contig1|CL5635Contig1

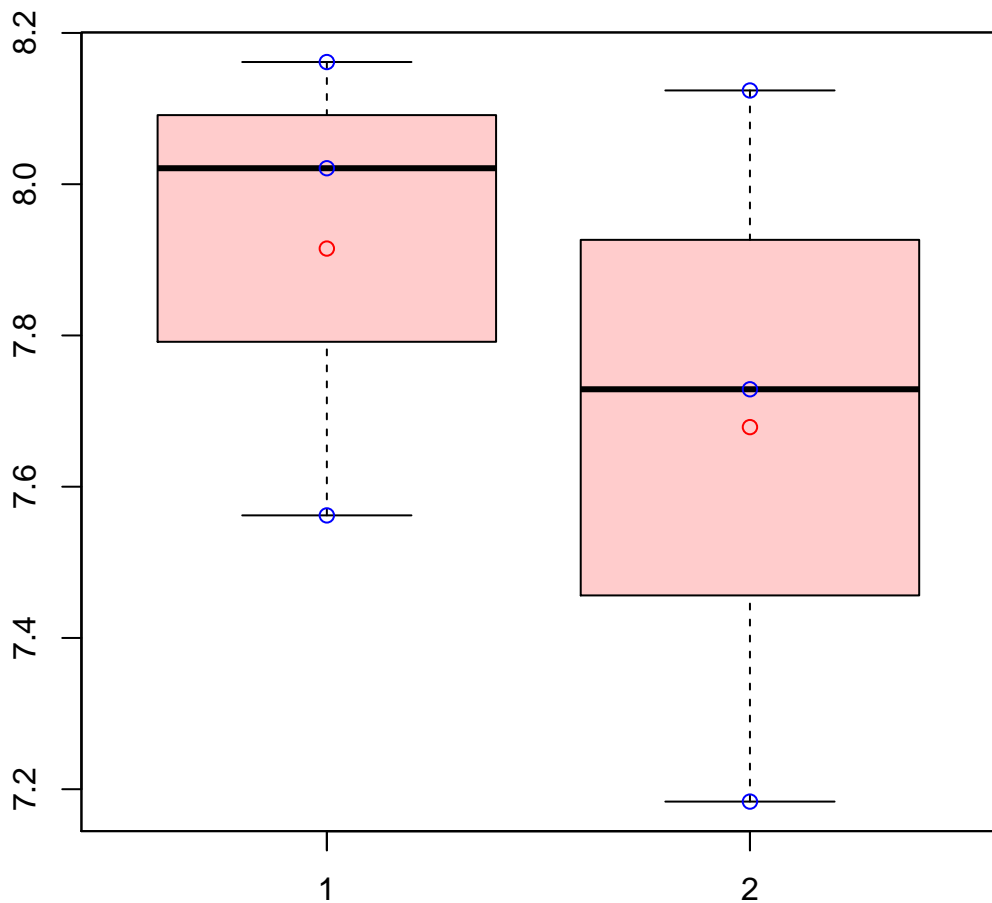

t-Test: p-value = 0.52

# CL5636Contig2|CL5636Contig2

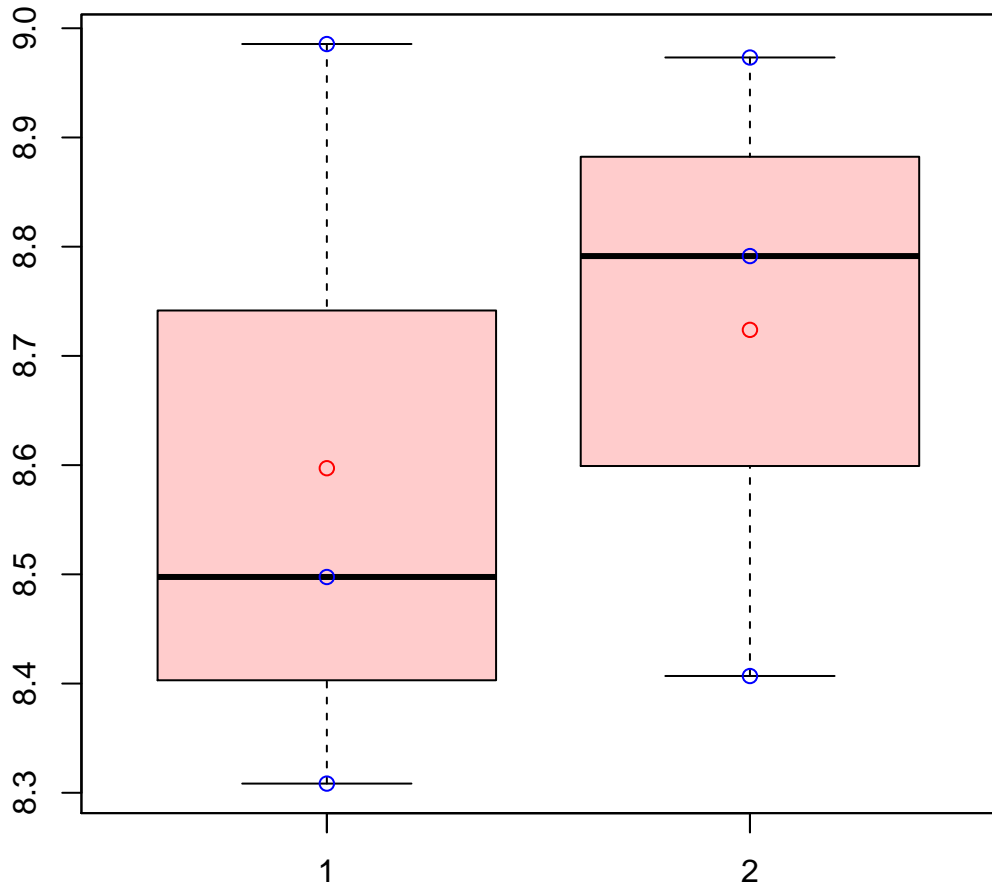

t-Test: p-value = 0.65

# CL5637Contig1|CL5637Contig1

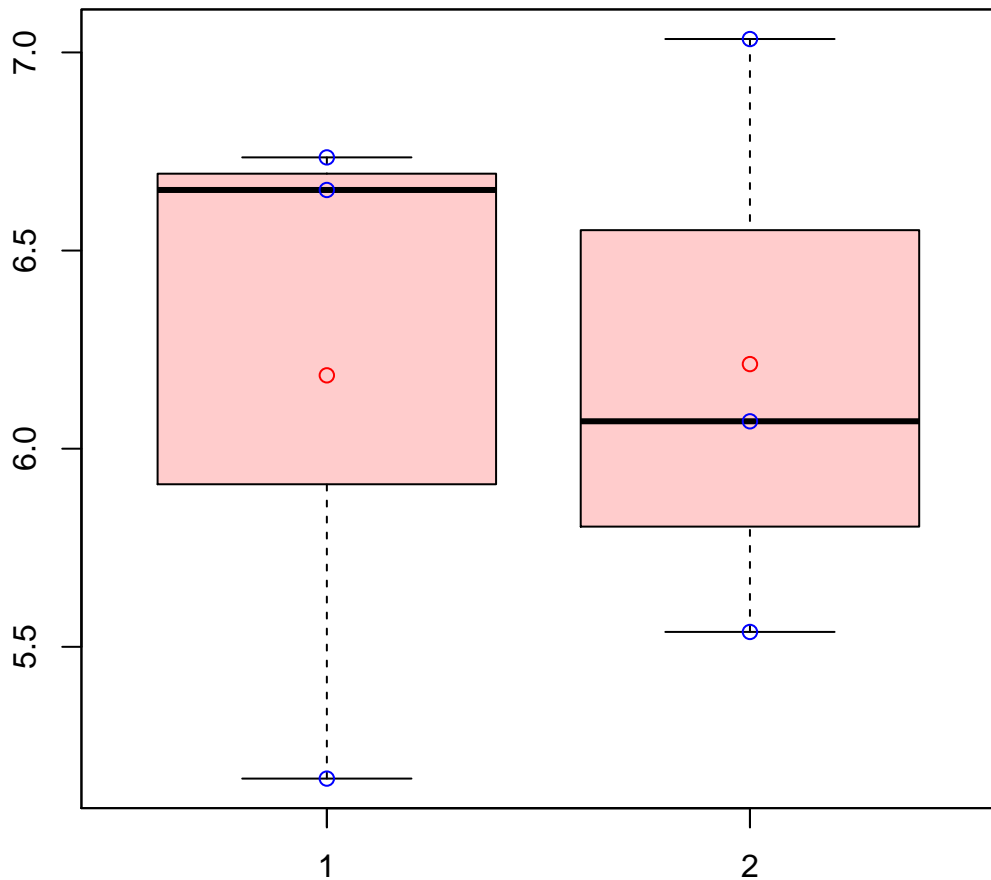

t-Test: p-value = 0.97

# CL5640Contig1|CL5640Contig1

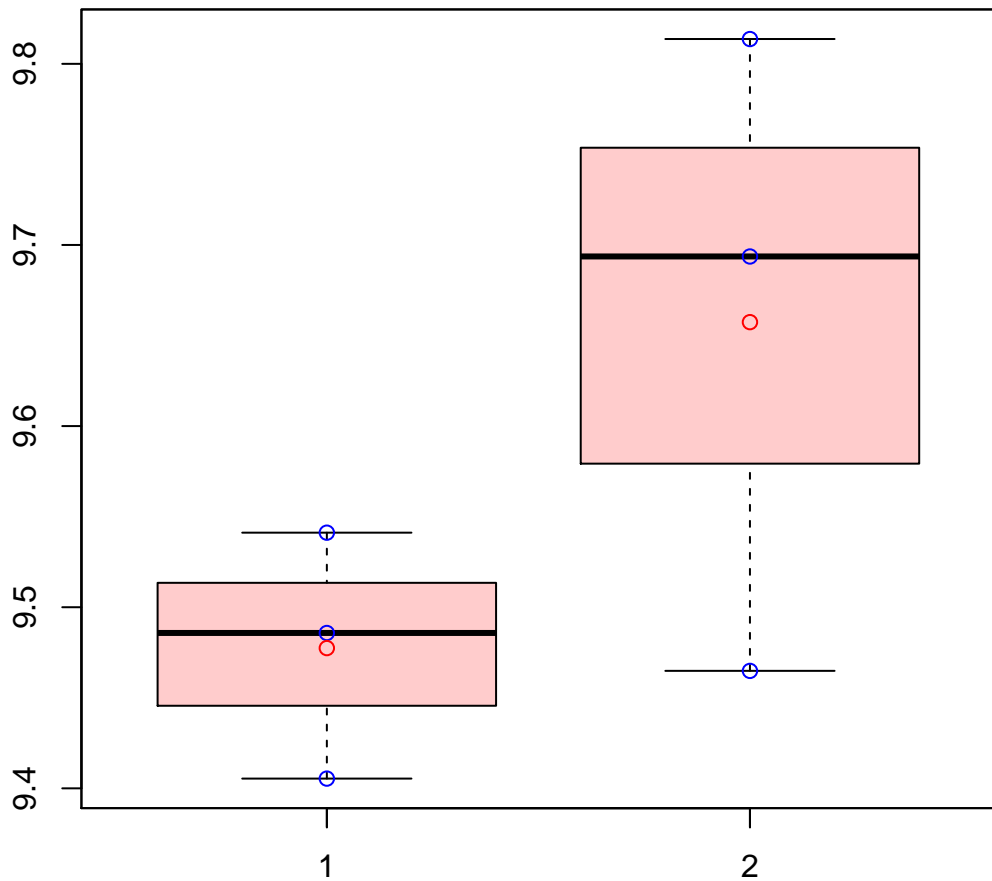

t-Test: p-value = 0.21

# CL5645Contig3|CL5645Contig3

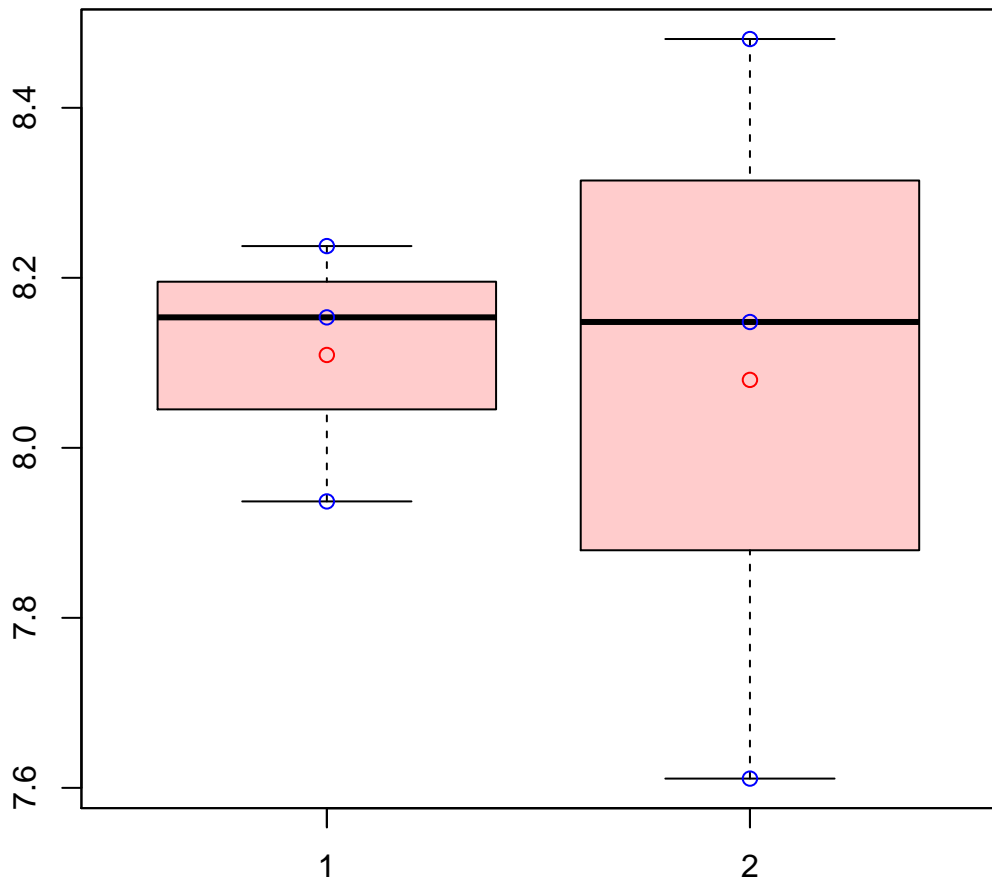

t-Test: p-value = 0.92

# CL5651Contig3|CL5651Contig3

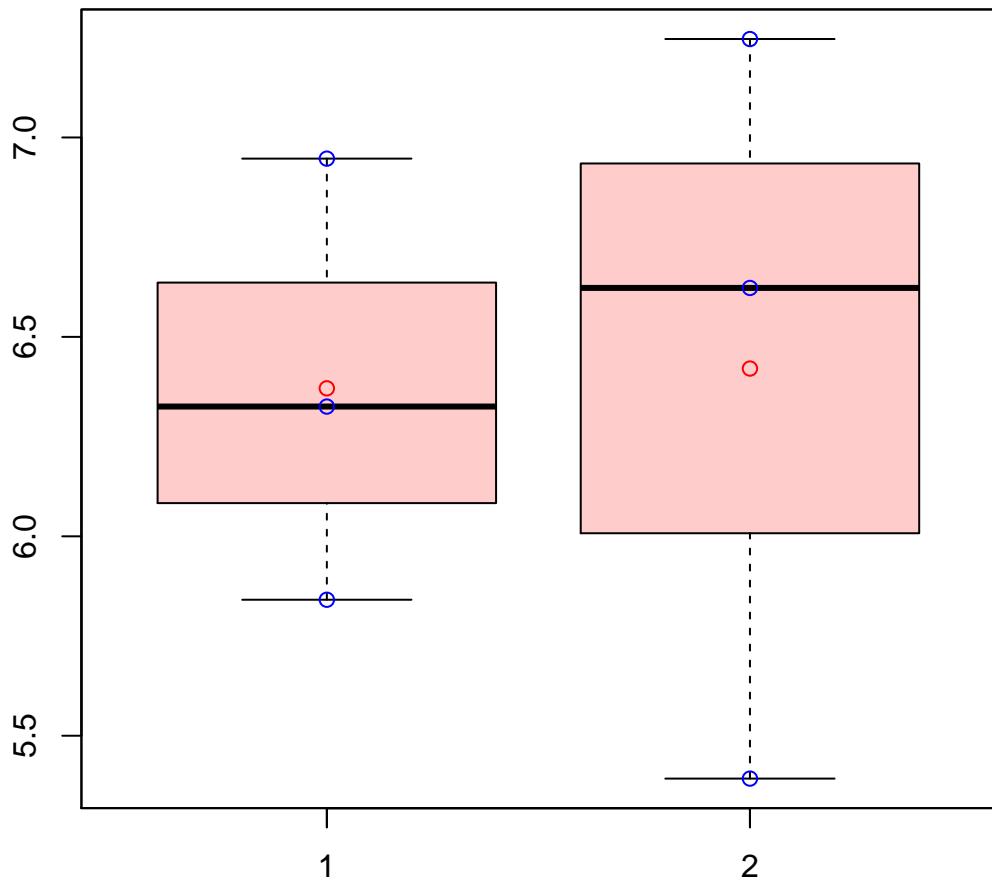

t-Test: p-value = 0.94

# CL5663Contig1|CL5663Contig1

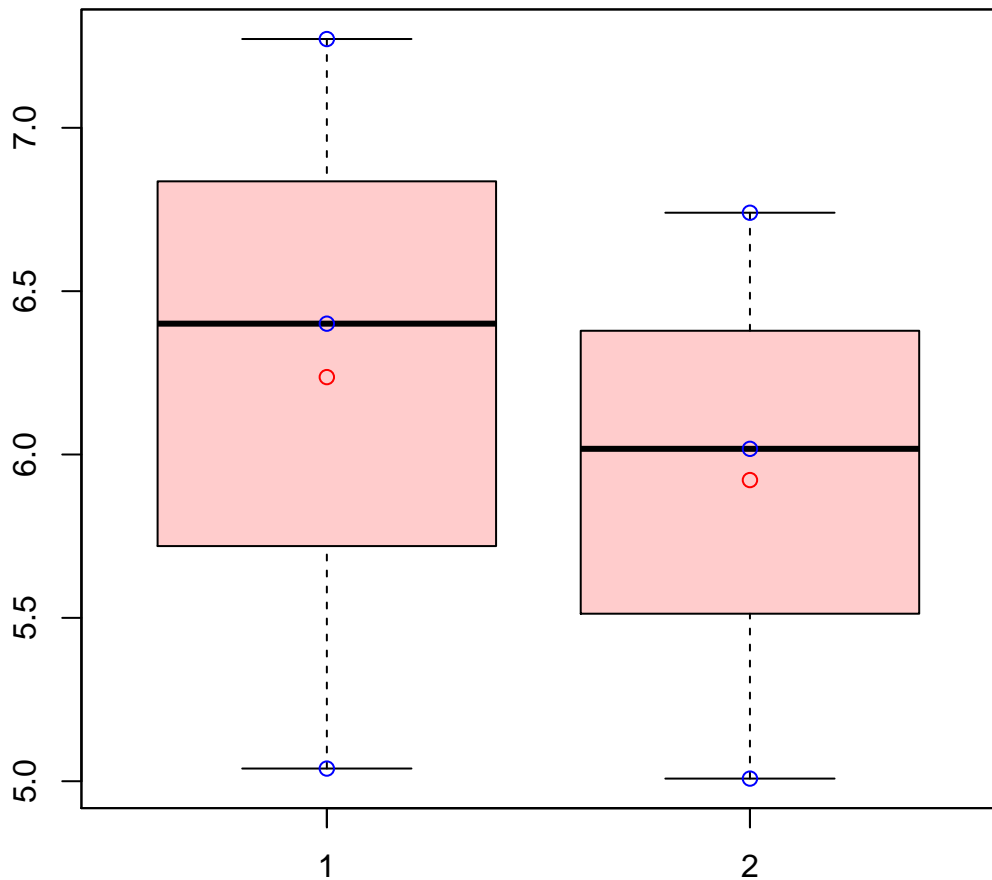

t-Test: p-value = 0.72



# CL5672Contig2|CL5672Contig2

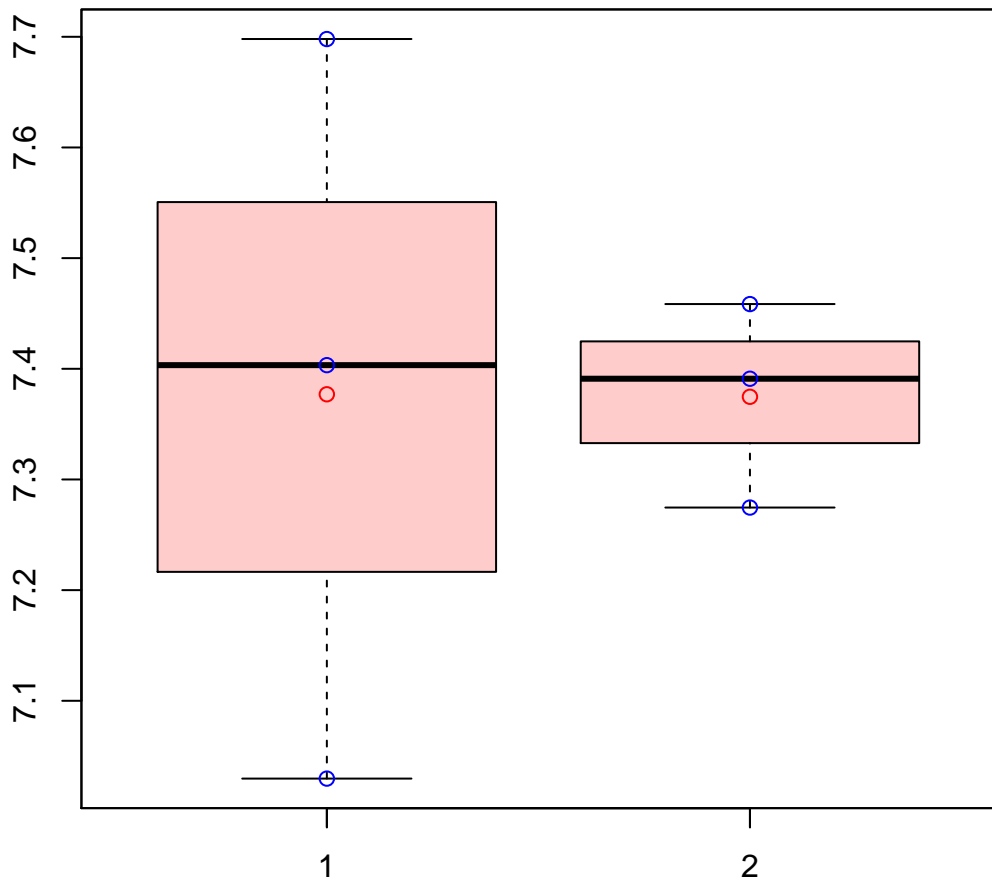

t-Test: p-value = 0.99

# CL567Contig16|CL567Contig16

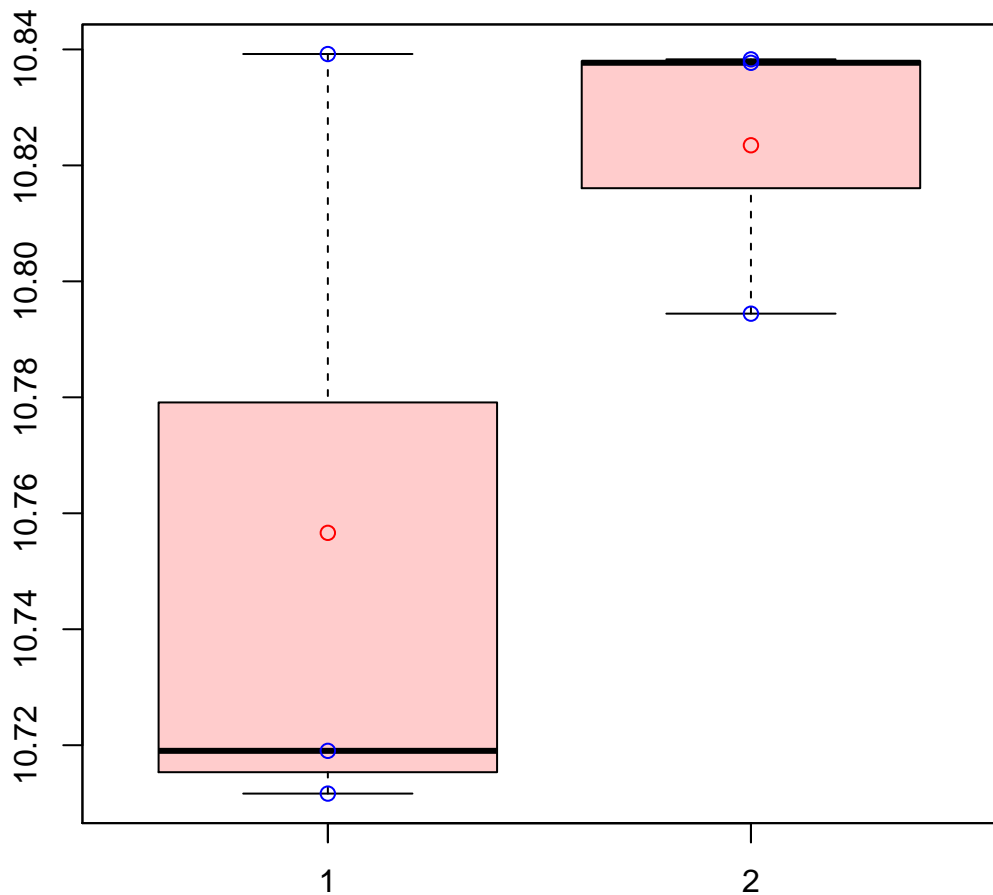

t-Test: p-value = 0.24

# CL567Contig3|CL567Contig3

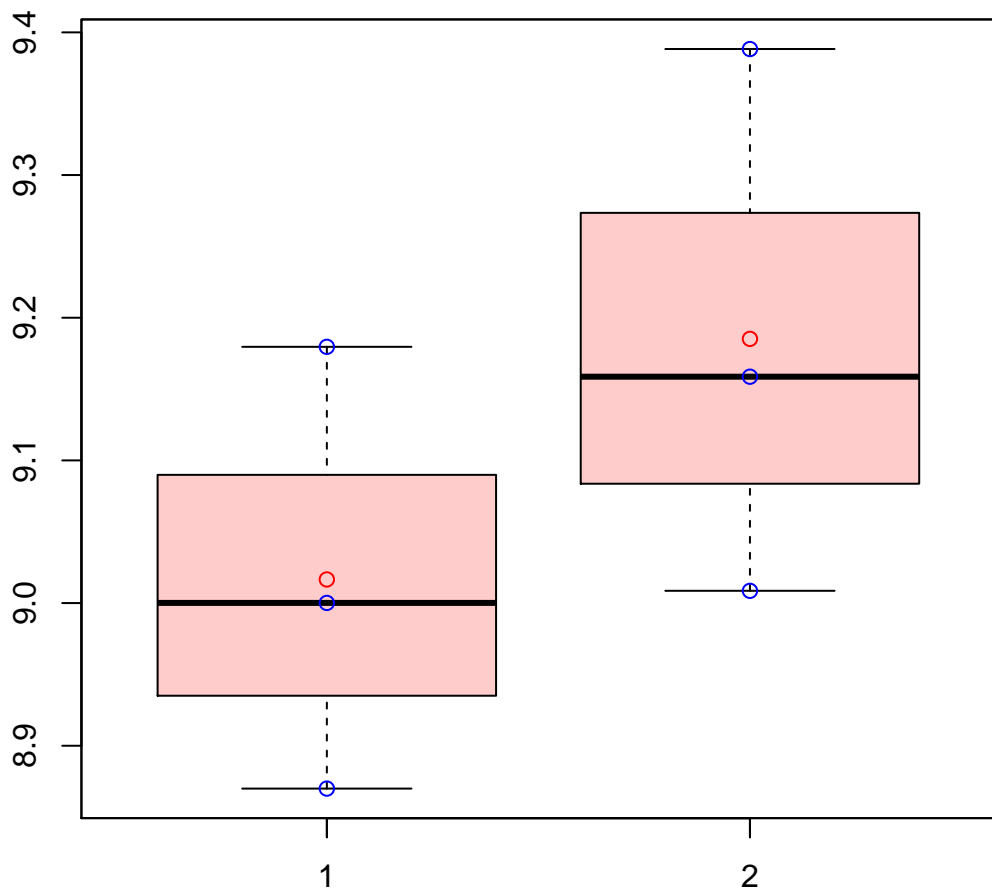

t-Test: p-value = 0.3

# CL567Contig8|CL567Contig8

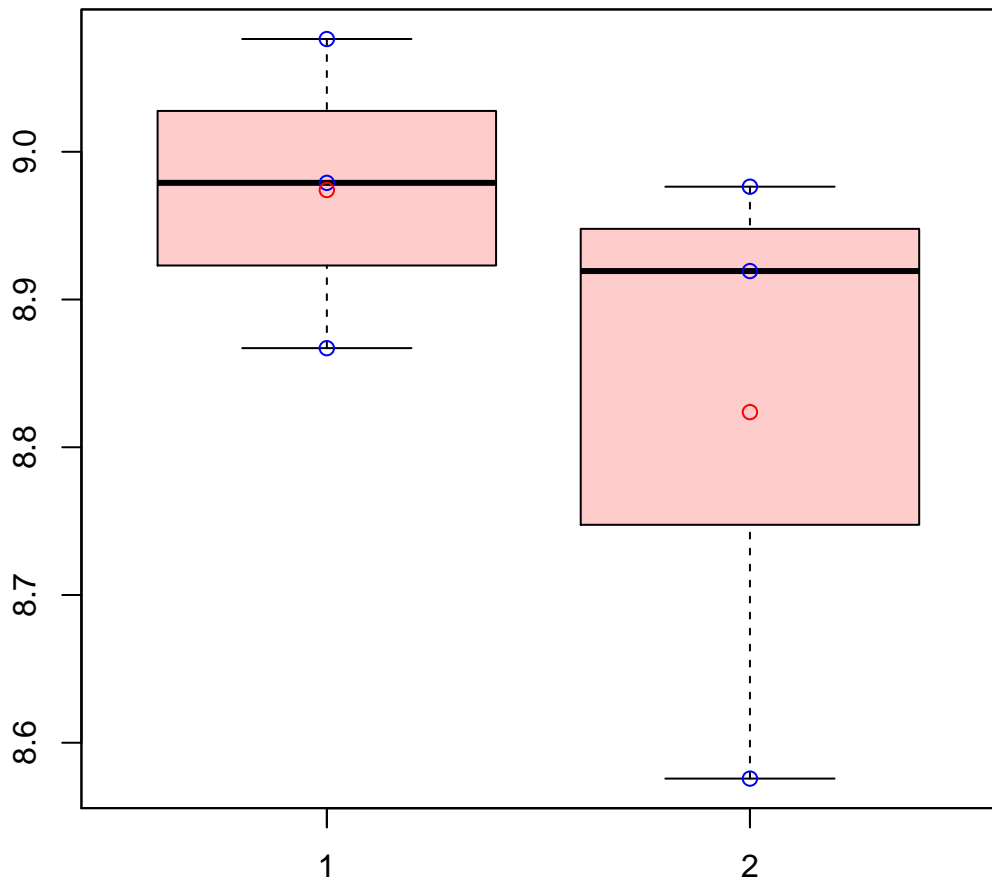

t-Test: p-value = 0.36

# CL5680Contig4|CL5680Contig4

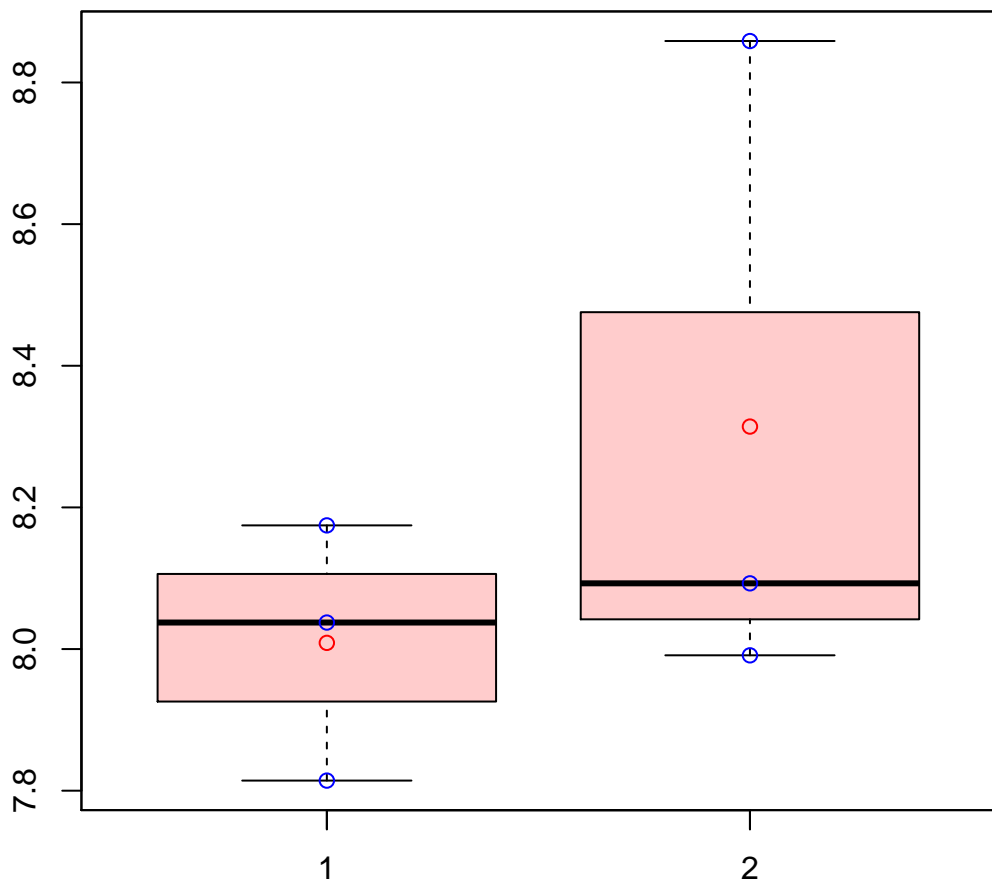

t-Test: p-value = 0.39

# CL5698Contig2|CL5698Contig2

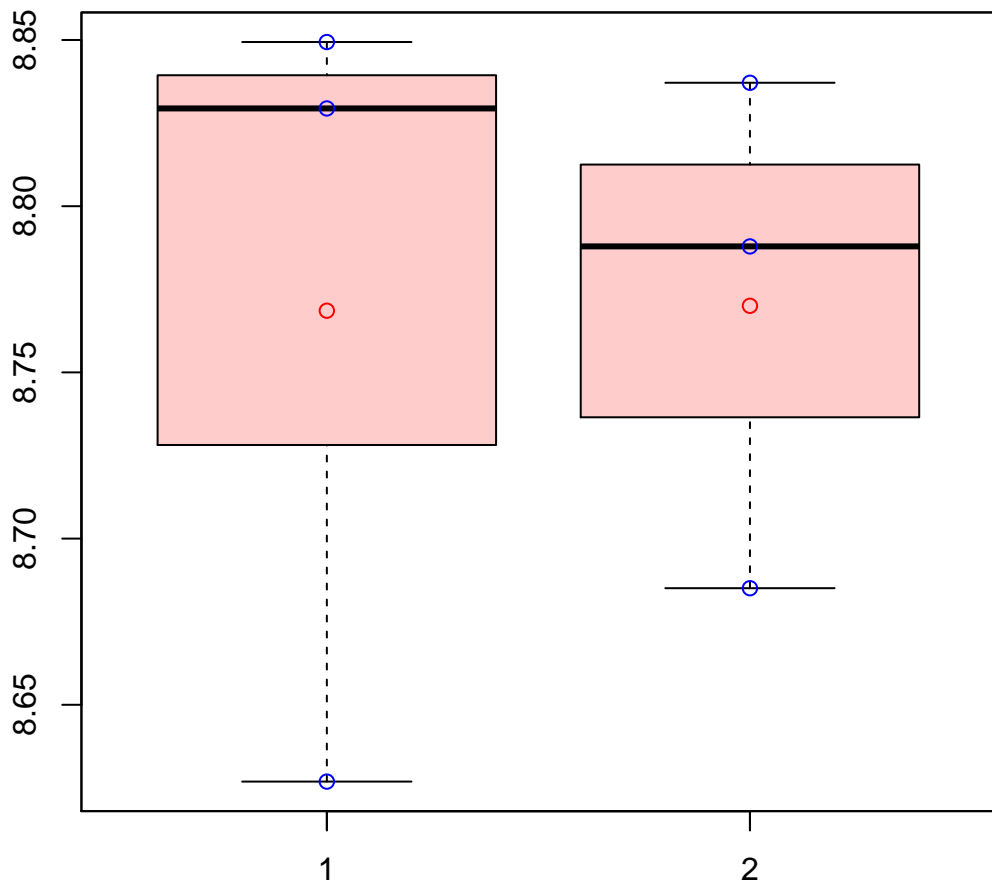

t-Test: p-value = 0.99

# CL5717Contig6|CL5717Contig6

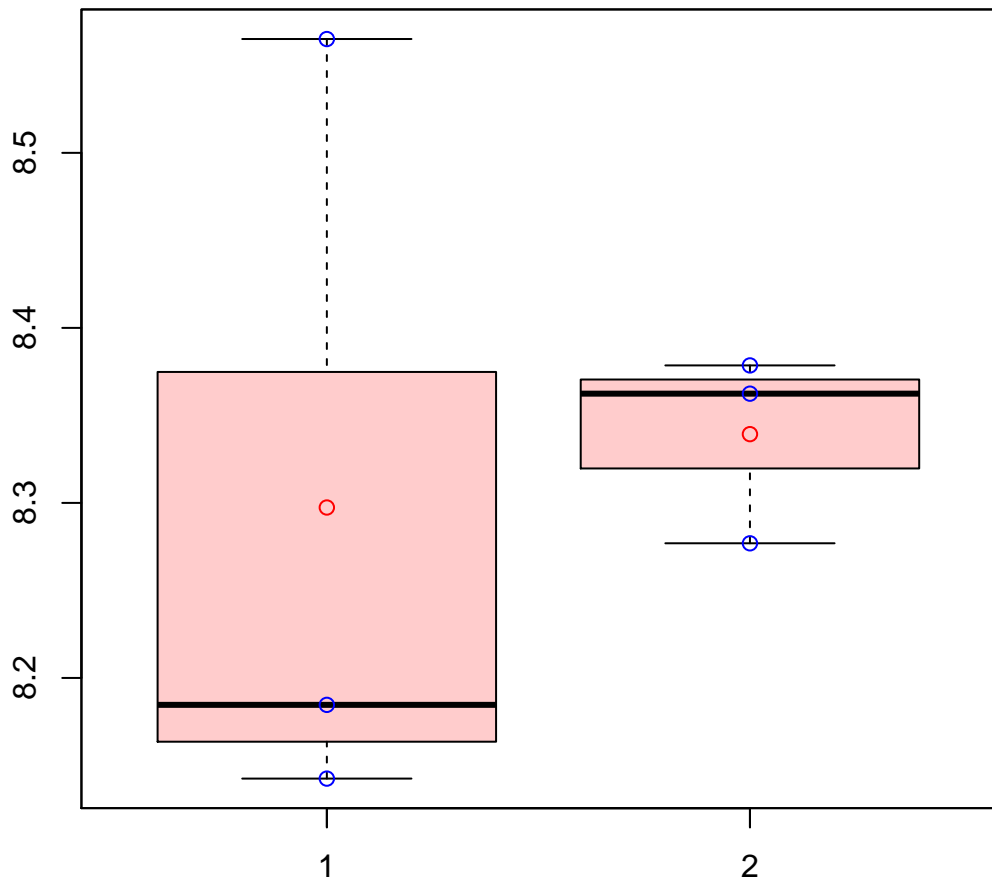

t-Test: p-value = 0.79

# CL5717Contig7|CL5717Contig7

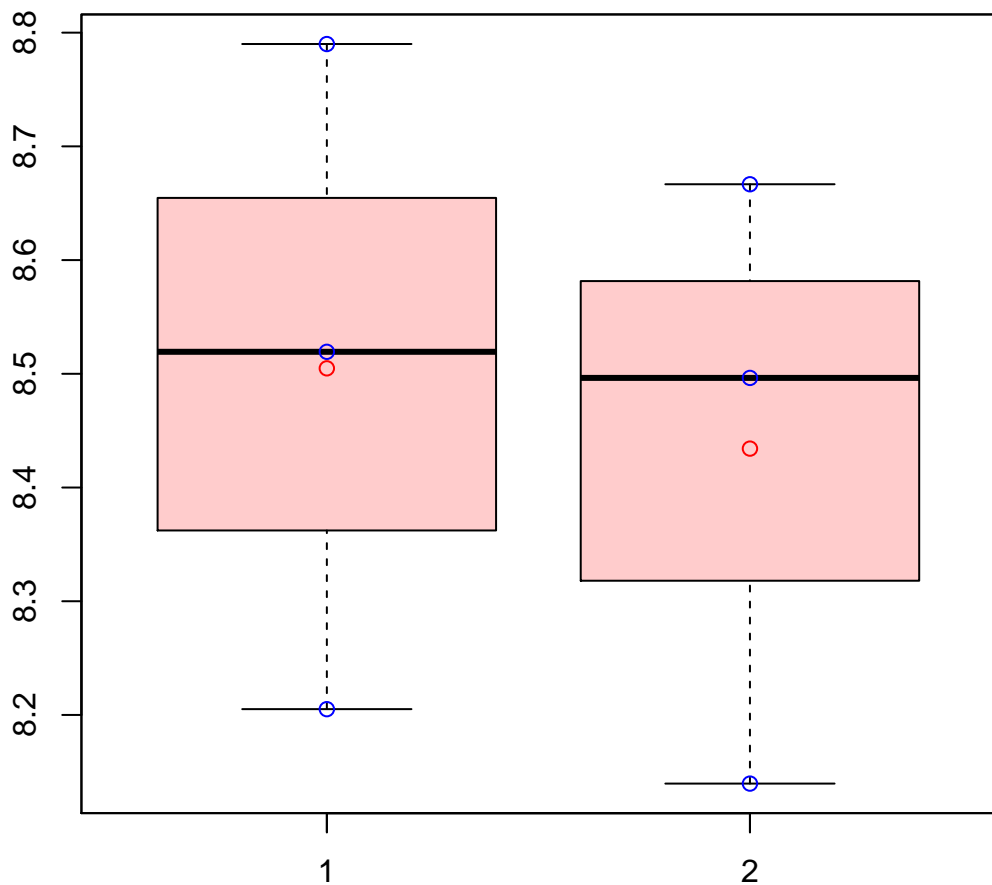

t-Test: p-value = 0.77



# CL572Contig4|CL572Contig4

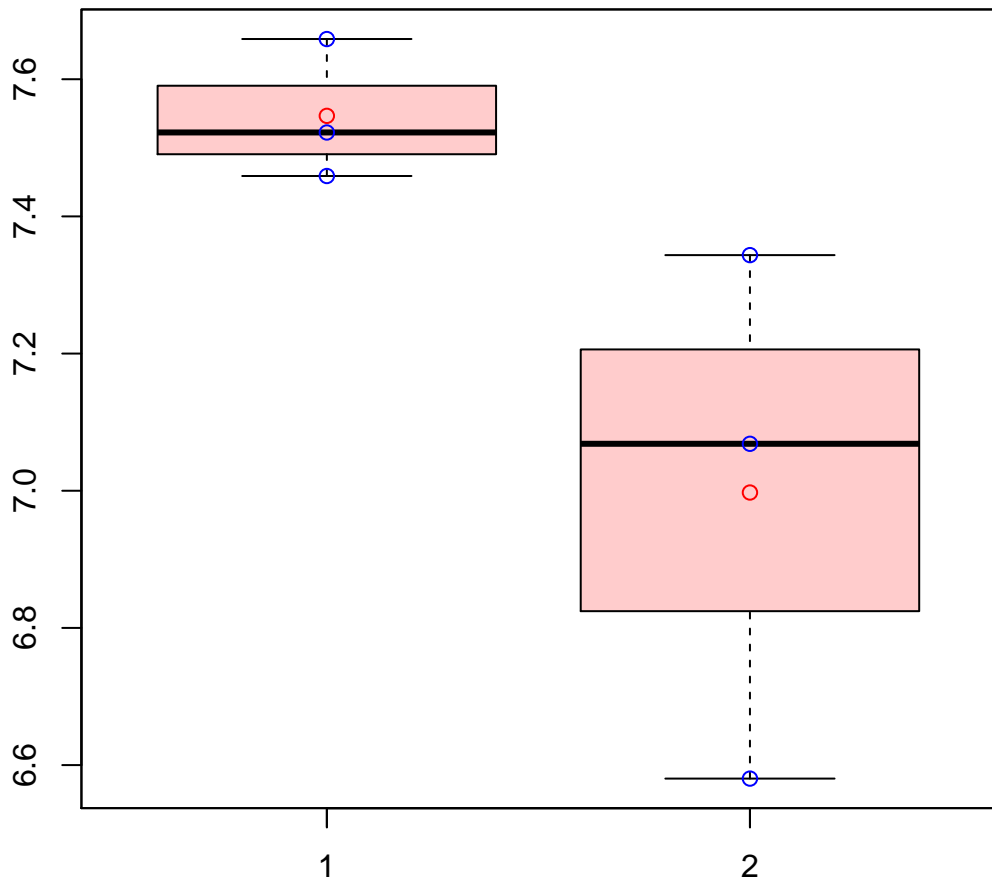

t-Test: p-value = 0.12

# CL5734Contig3|CL5734Contig3

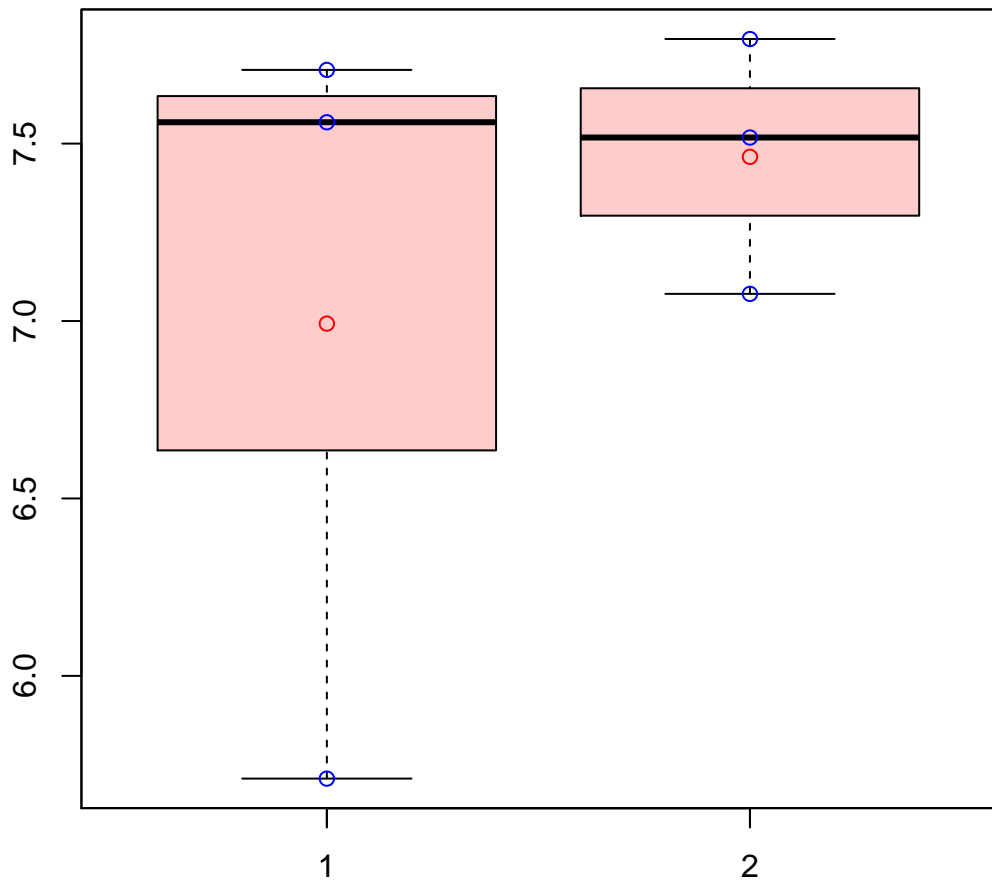

t-Test: p-value = 0.55

# CL5734Contig5|CL5734Contig5

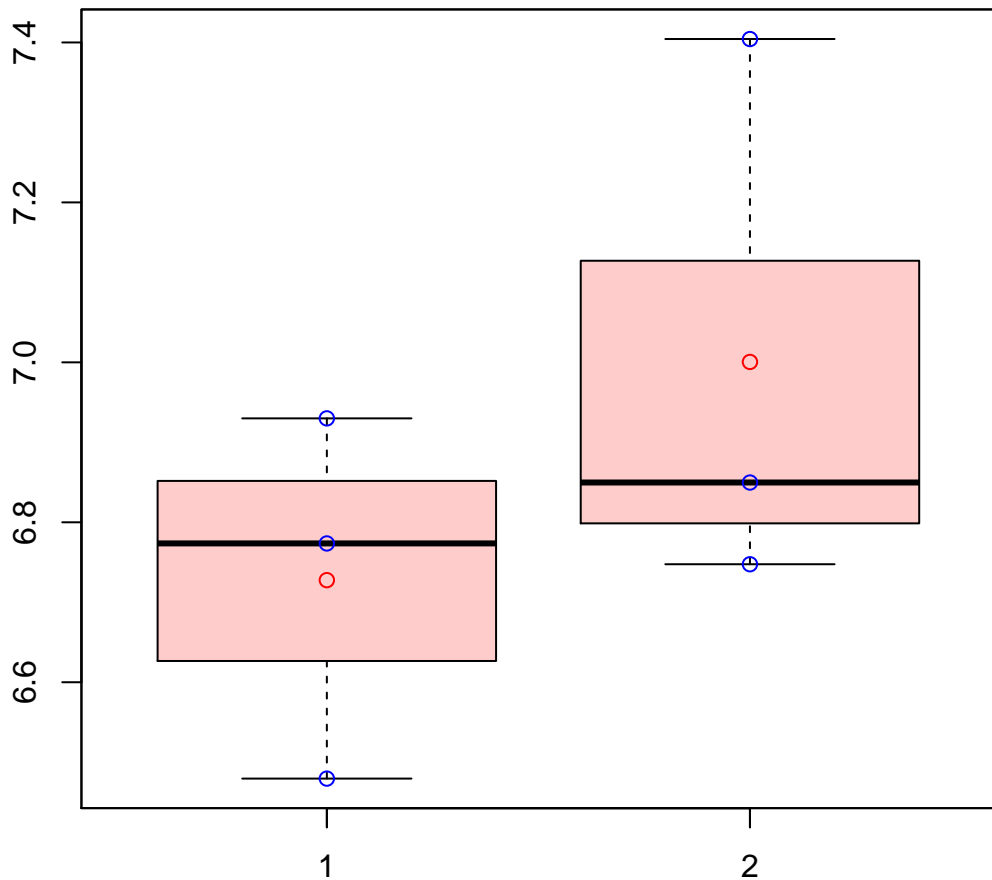

t-Test: p-value = 0.33

# CL5741Contig2|CL5741Contig2

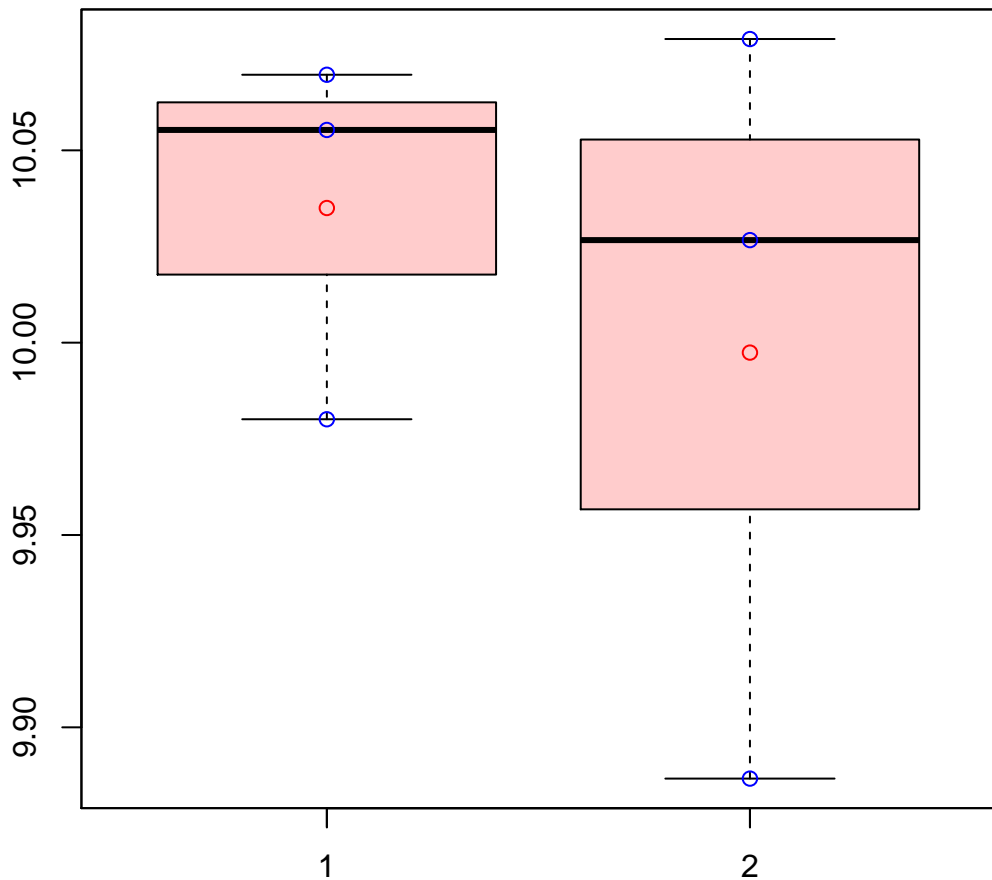

t-Test: p-value = 0.6

# CL5755Contig1|CL5755Contig1

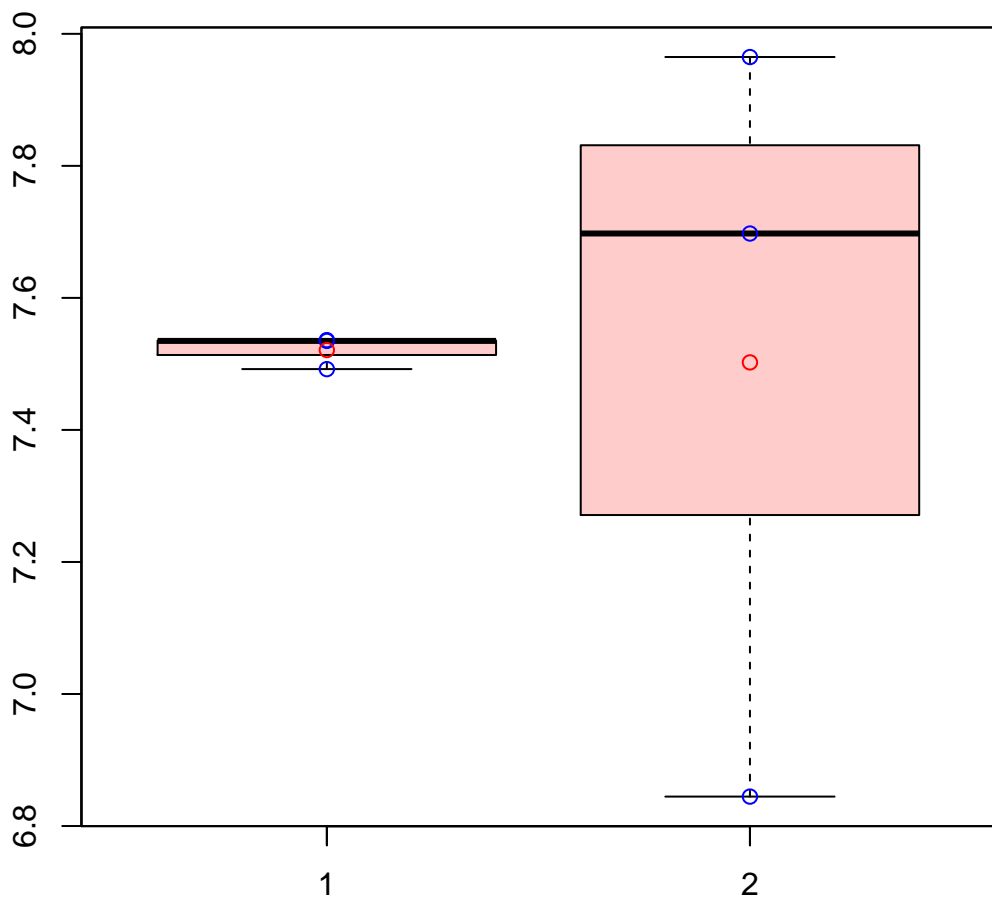

t-Test: p-value = 0.96

# CL5774Contig2|CL5774Contig2

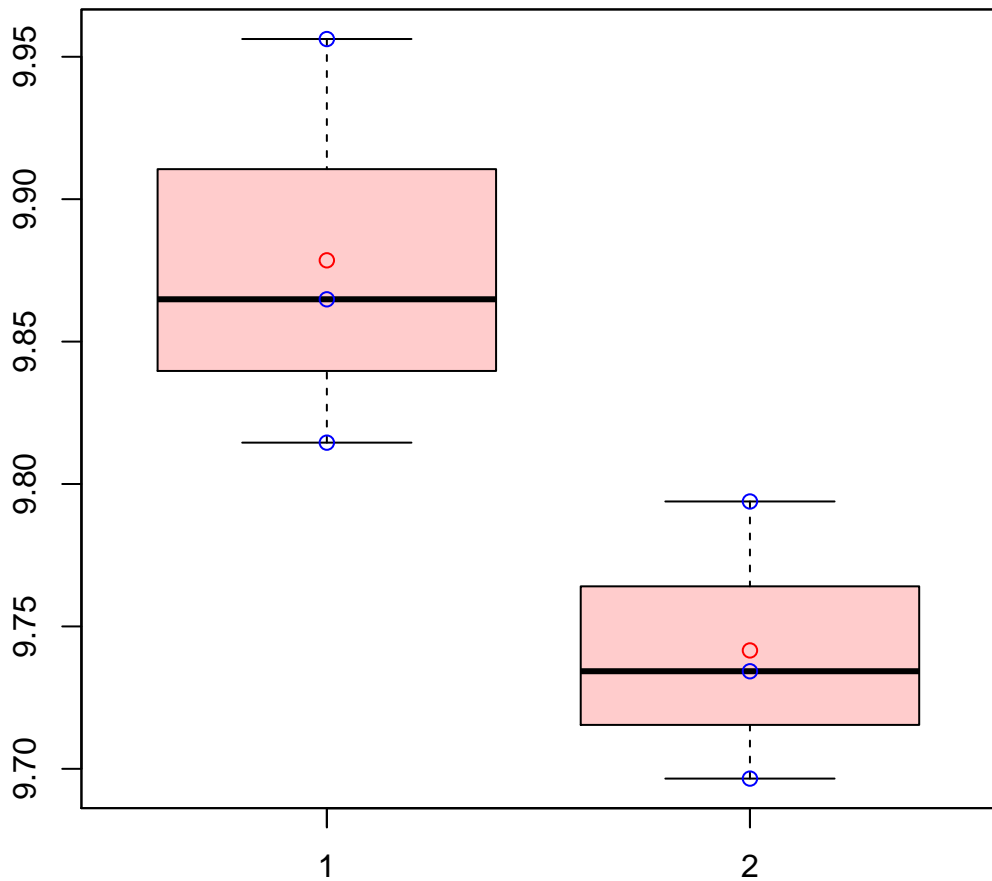

t-Test: p-value = 0.06

# CL577Contig14|CL577Contig14

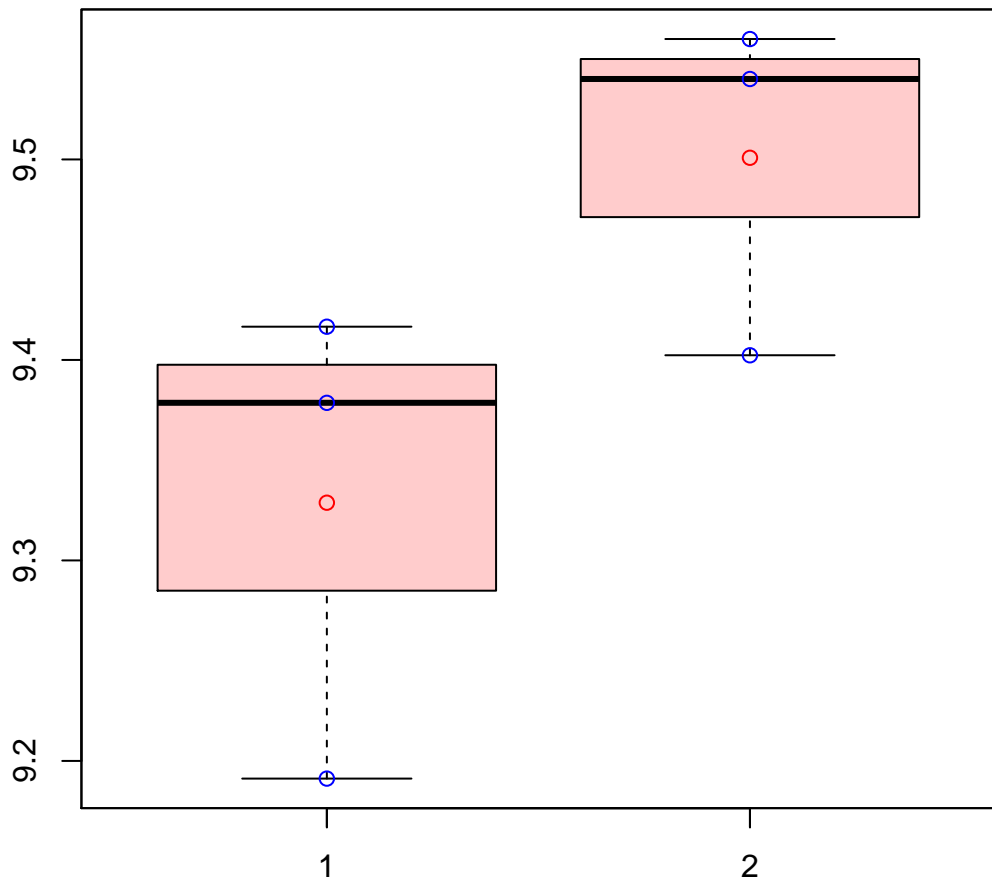

t-Test: p-value = 0.12

# CL5782Contig1|CL5782Contig1

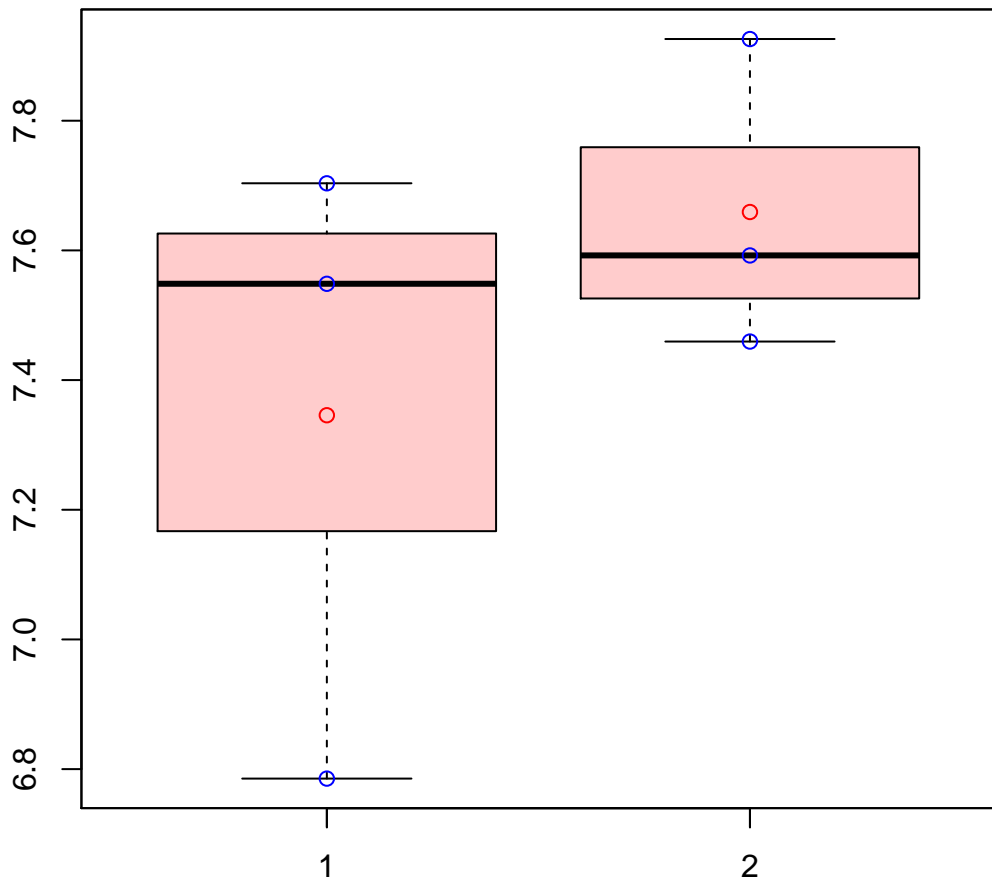

t-Test: p-value = 0.4



# CL5784Contig1|CL5784Contig1

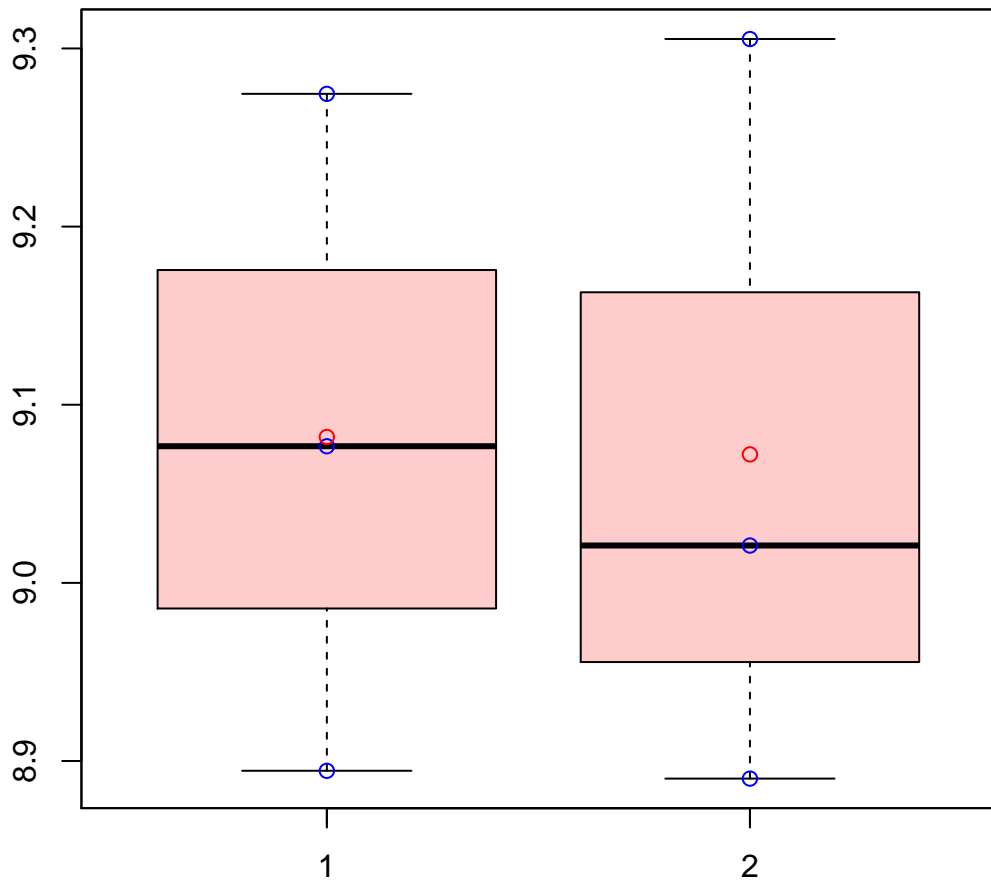

t-Test: p-value = 0.96

# CL5788Contig2|CL5788Contig2

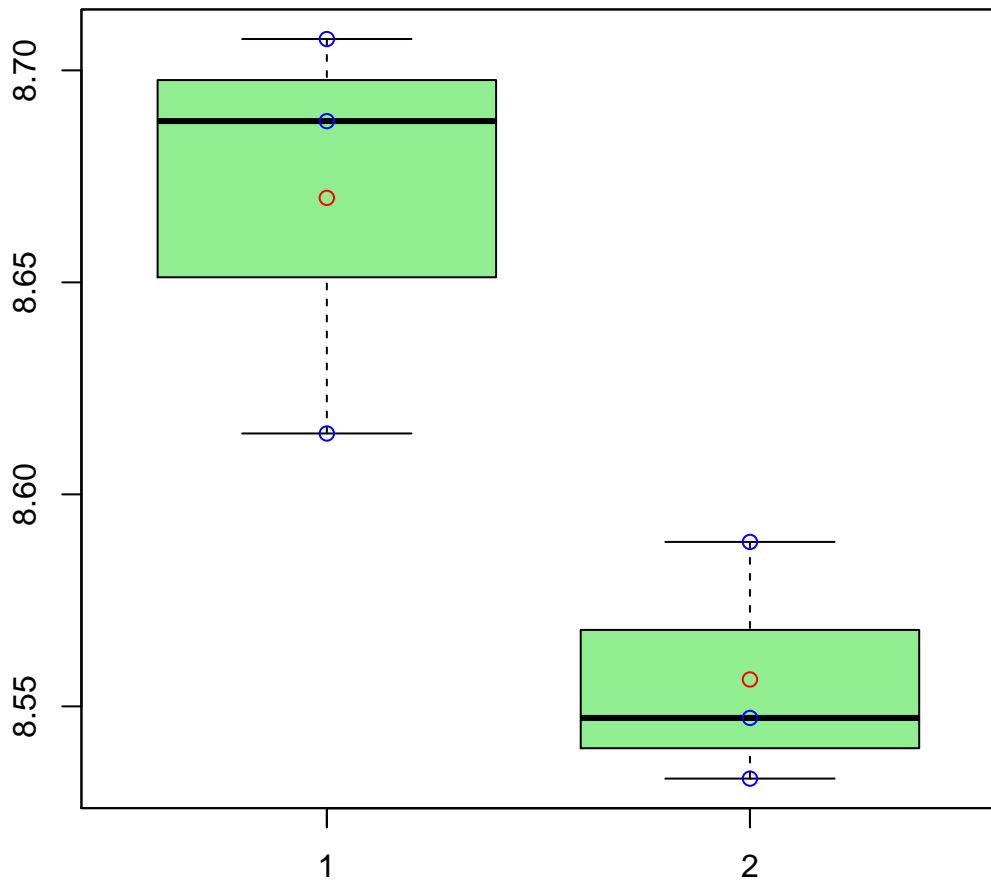

t-Test: p-value = 0.04

# CL579Contig13|CL579Contig13

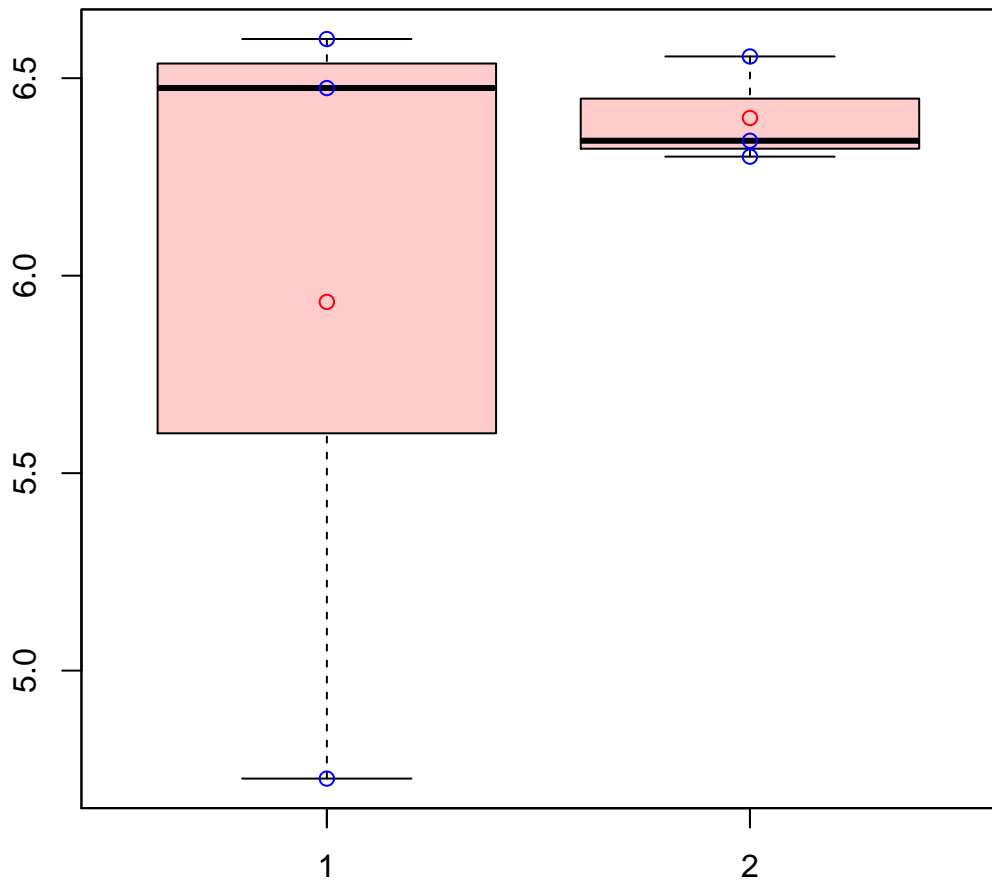

t-Test: p-value = 0.52

# CL579Contig2|CL579Contig2

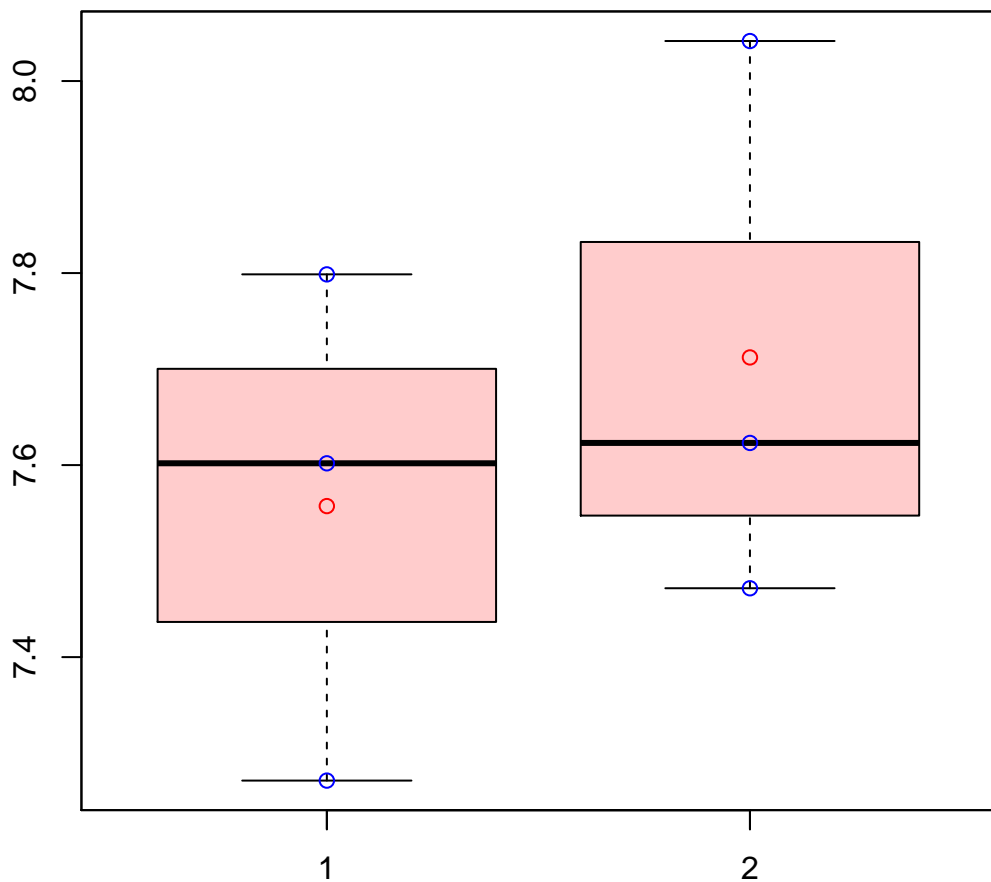

t-Test: p-value = 0.54

# CL5816Contig5|CL5816Contig5

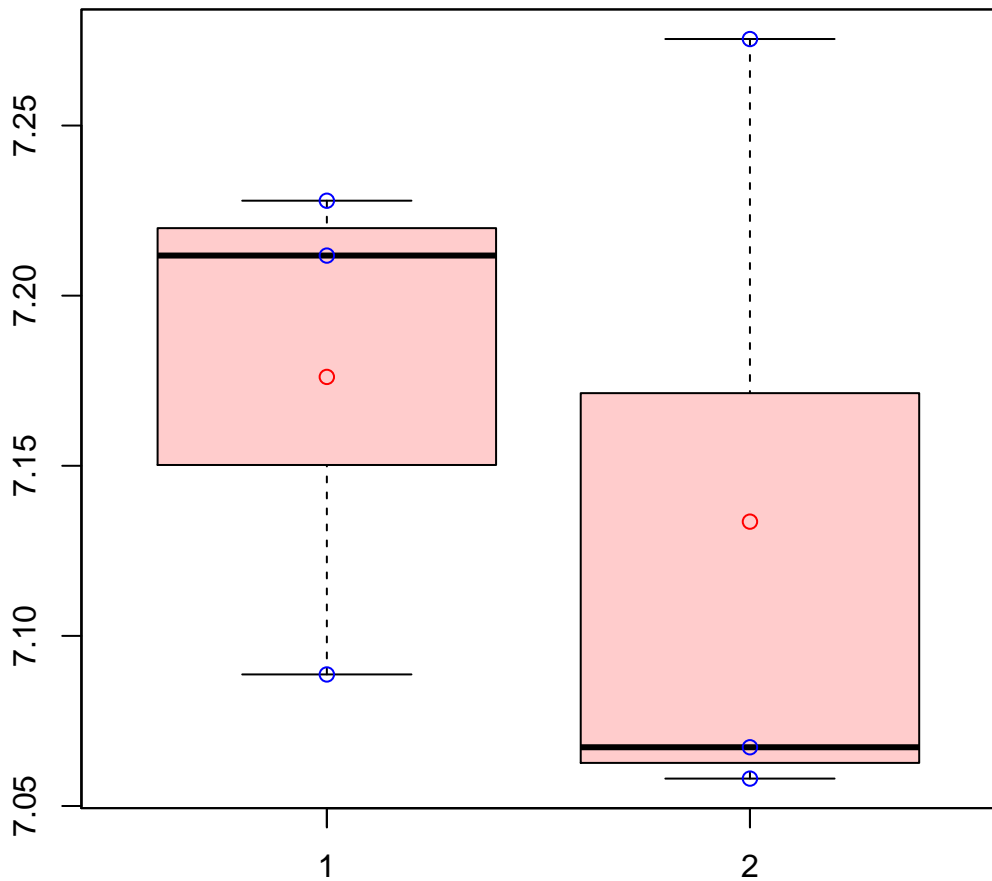

t-Test: p-value = 0.64

# CL5826Contig2|CL5826Contig2

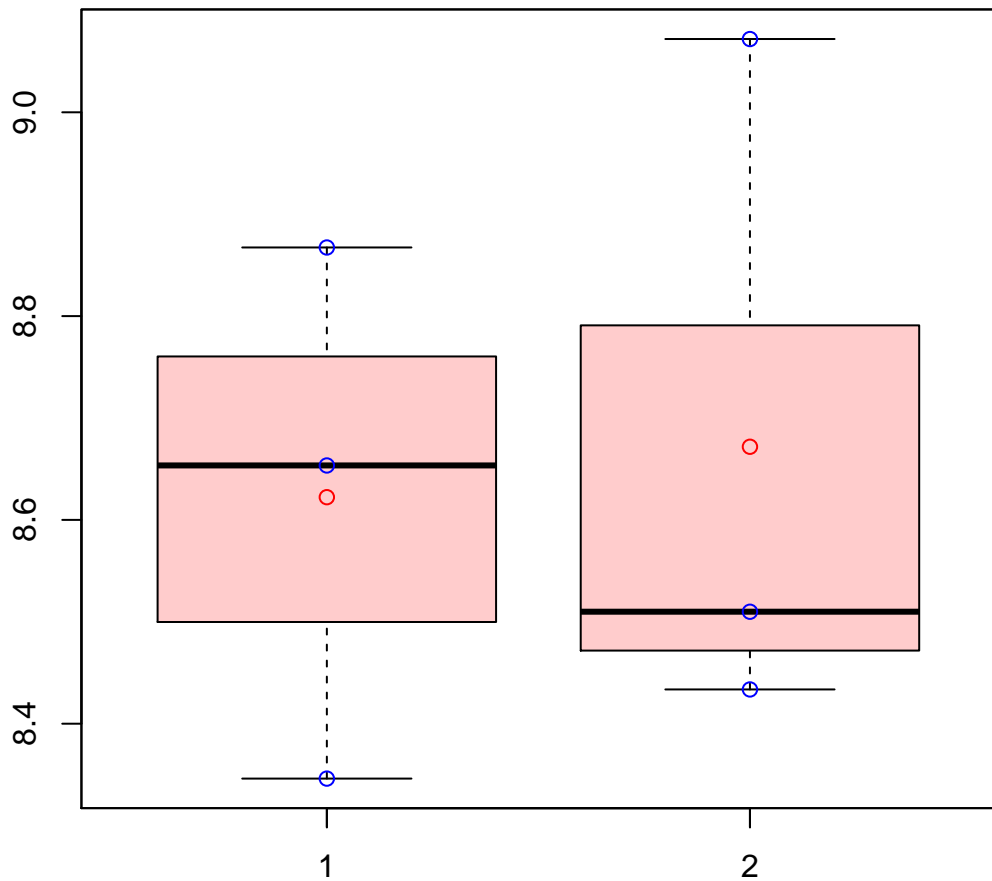

t-Test: p-value = 0.85

# CL5827Contig1|CL5827Contig1

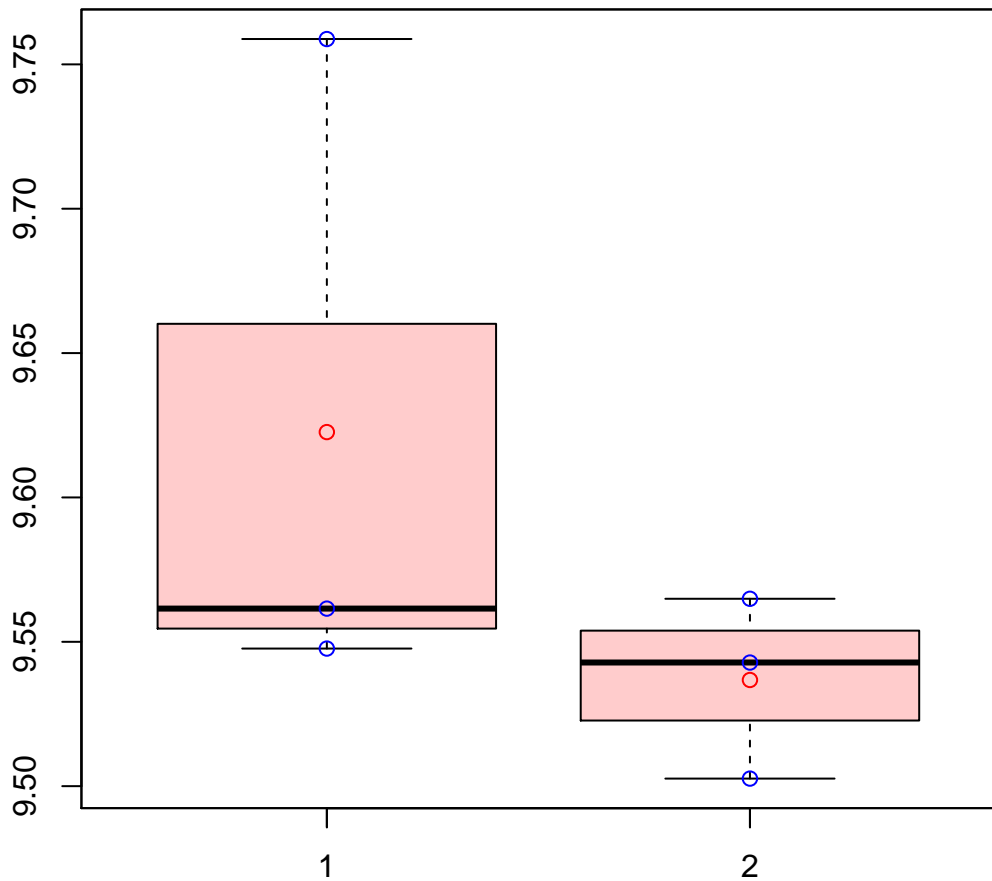

t-Test: p-value = 0.33

# CL582Contig2|CL582Contig2

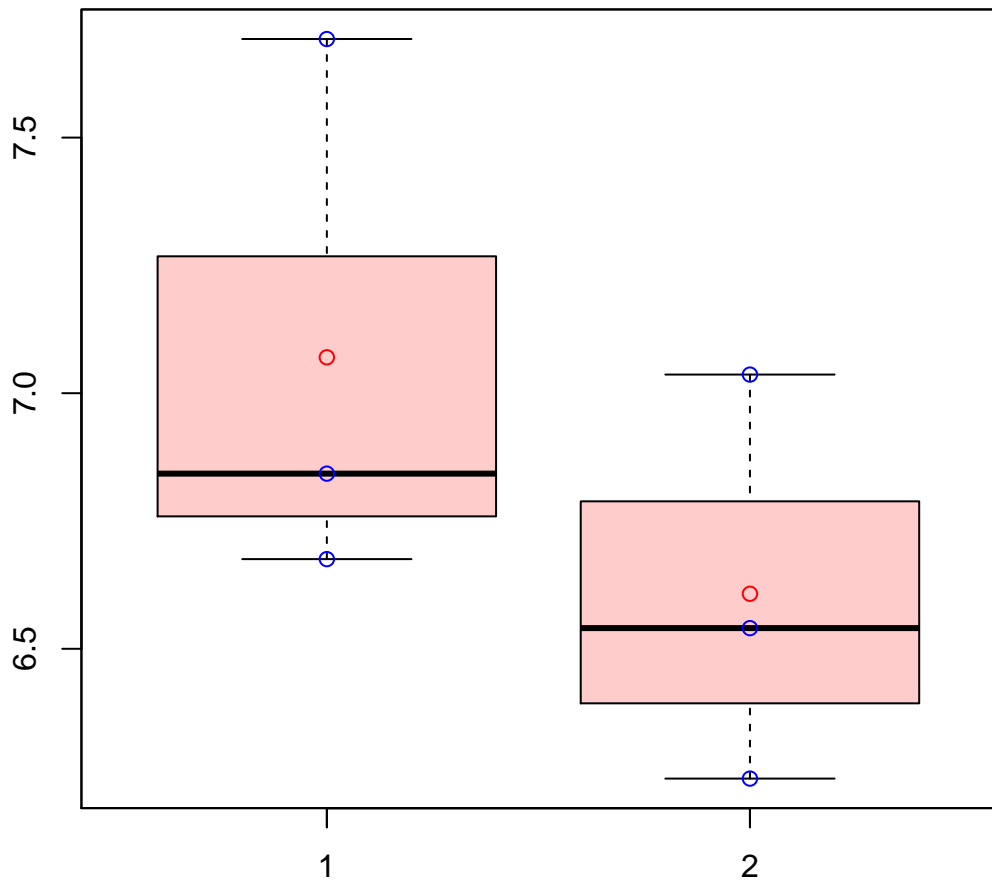

t-Test: p-value = 0.31



# CL5839Contig1|CL5839Contig1

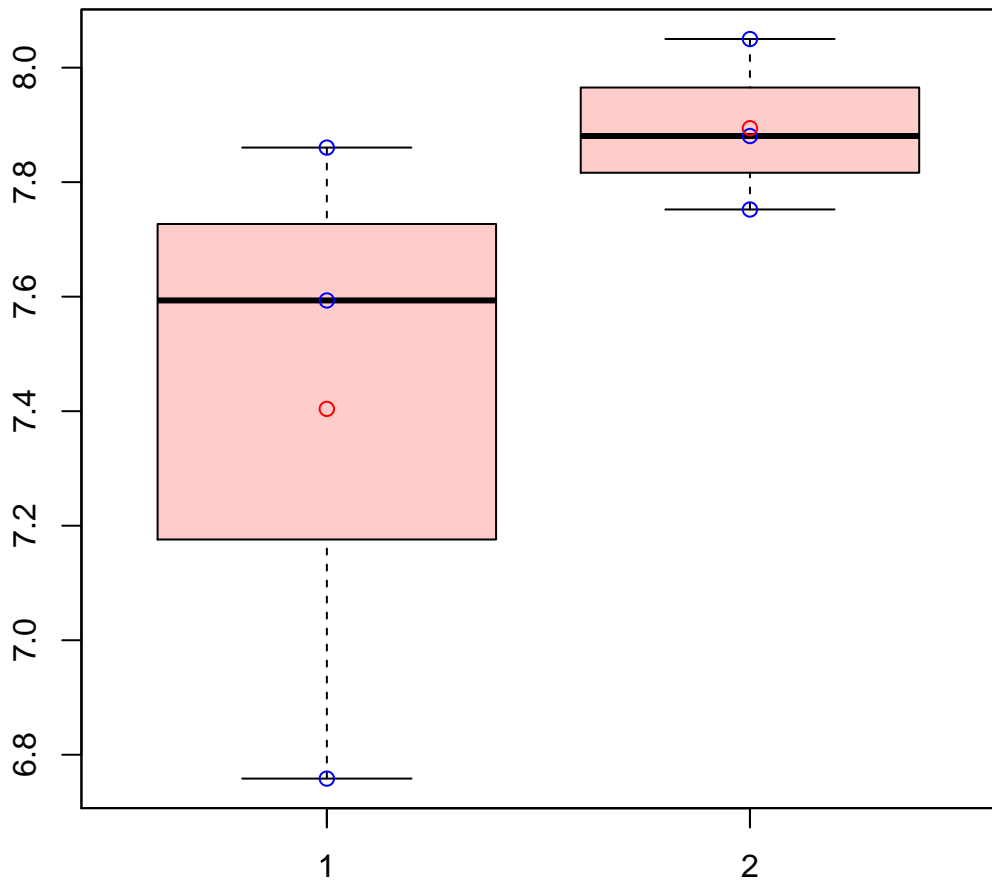

t-Test: p-value = 0.28

# CL5856Contig1|CL5856Contig1

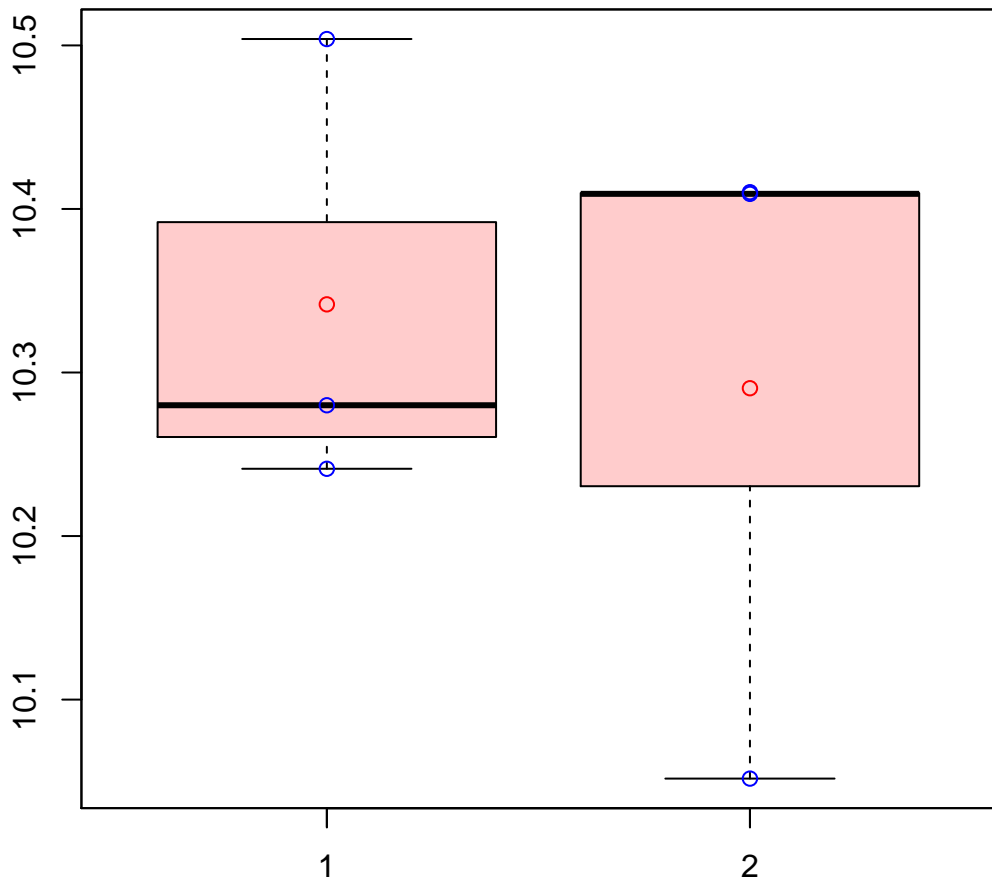

t-Test: p-value = 0.74

# CL5866Contig2|CL5866Contig2

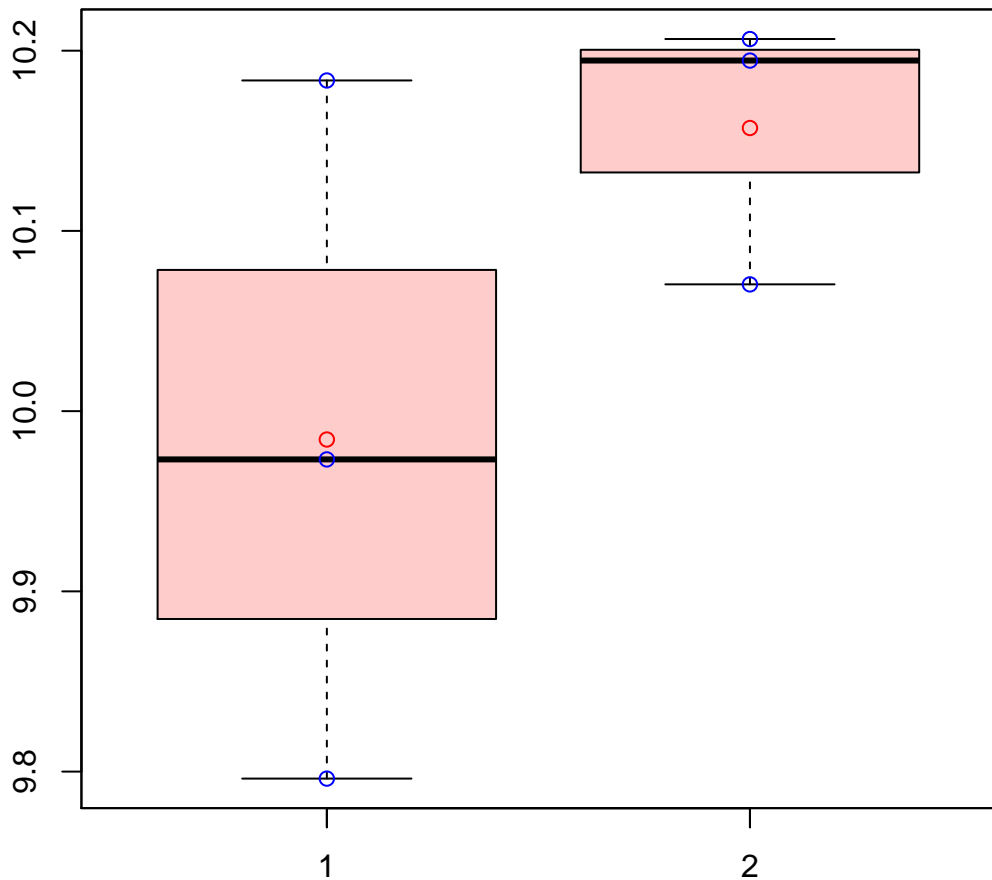

t-Test: p-value = 0.26

# CL5866Contig3|CL5866Contig3

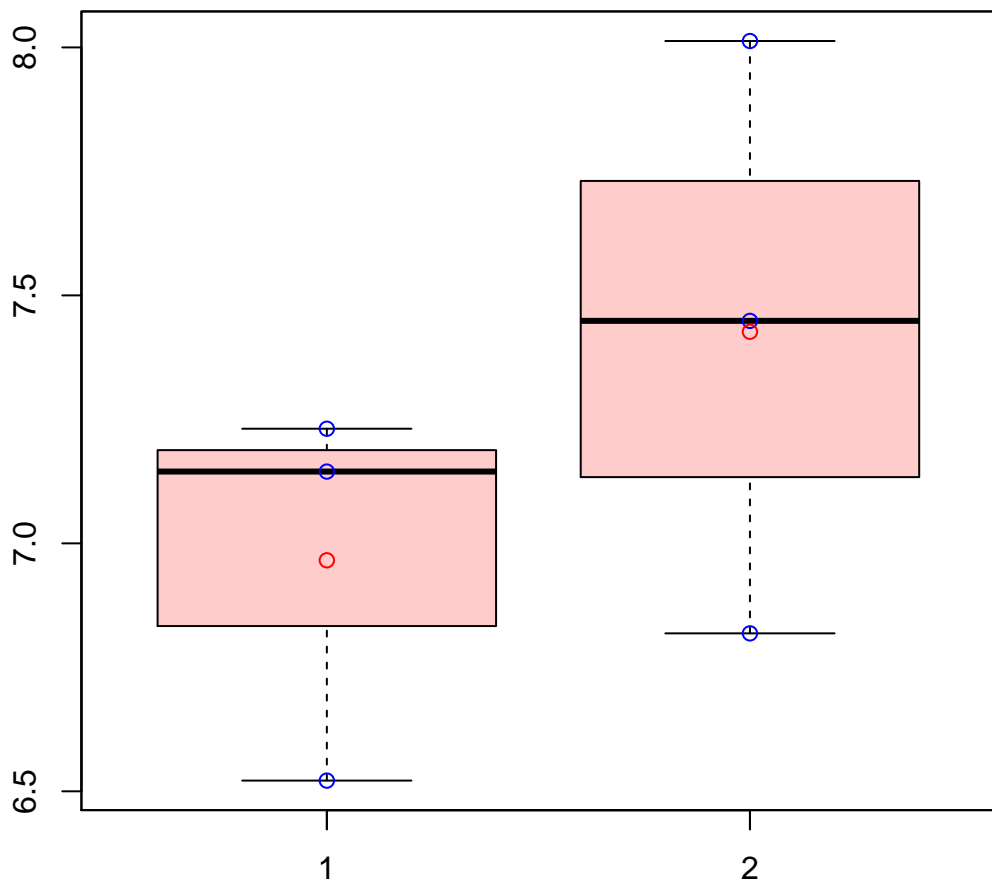

t-Test: p-value = 0.33

# CL5870Contig2|CL5870Contig2

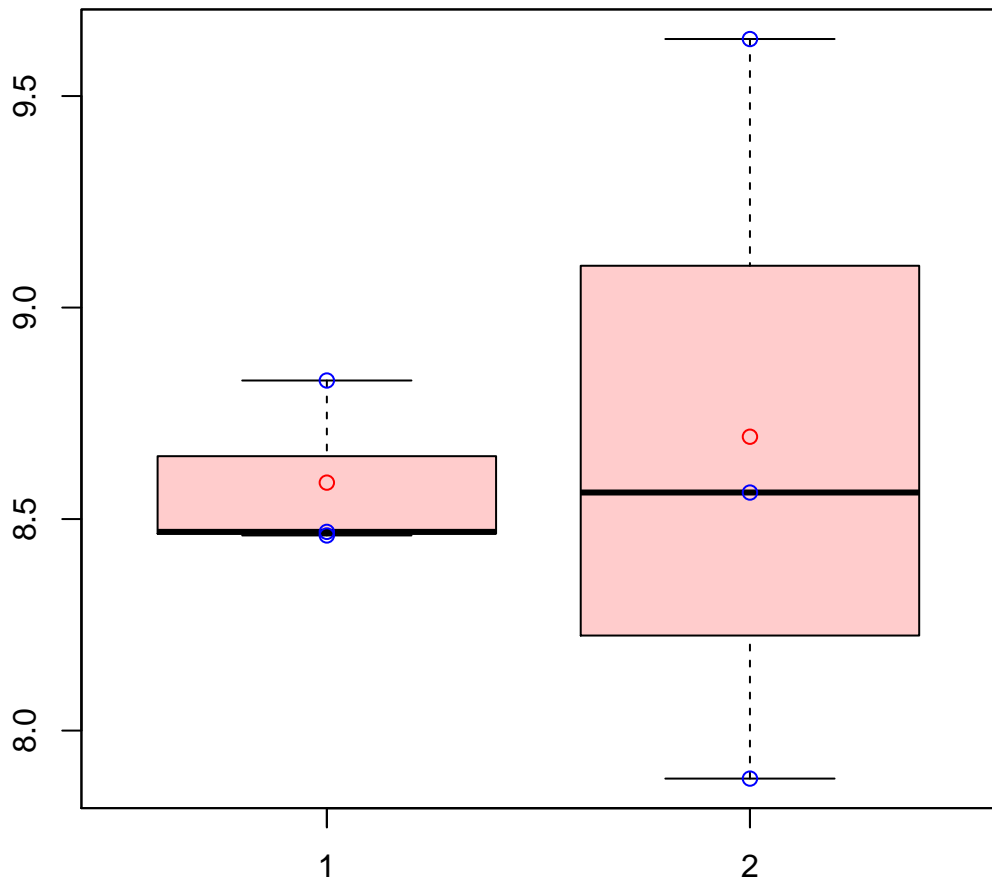

t-Test: p-value = 0.85

# CL5880Contig1|CL5880Contig1

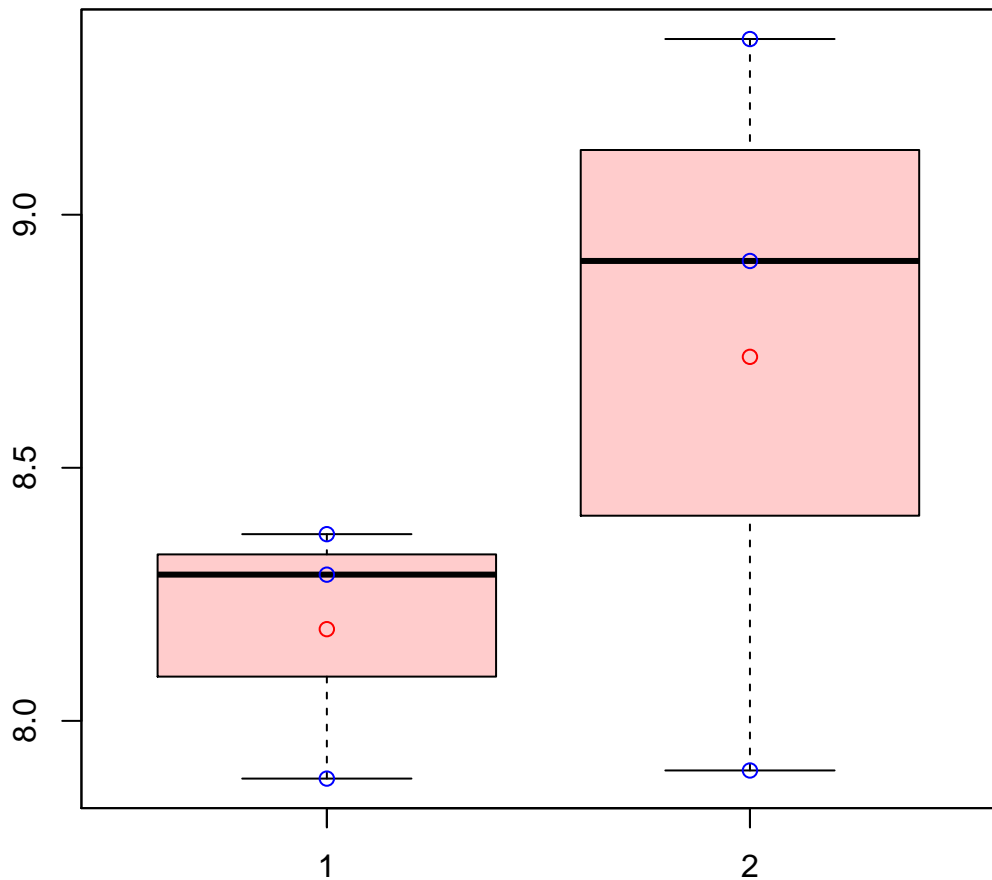

t-Test: p-value = 0.34

# CL5888Contig3|CL5888Contig3

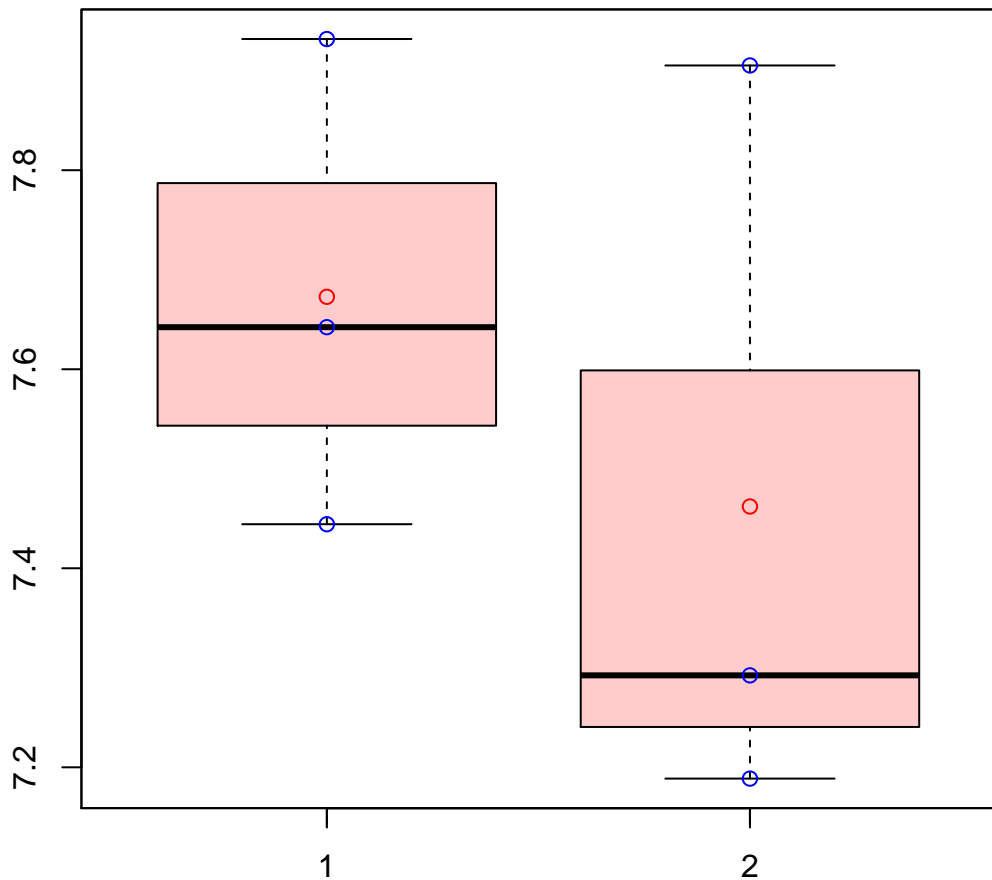

t-Test: p-value = 0.48

# CL5895Contig4|CL5895Contig4

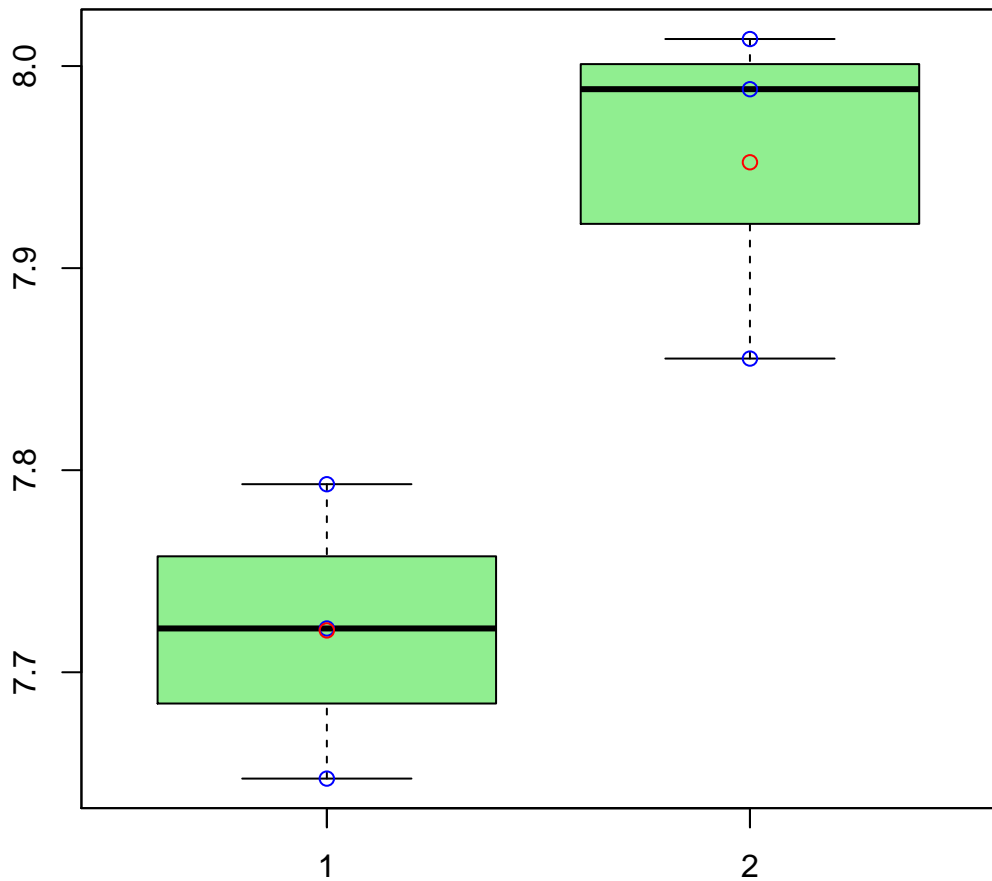

t-Test: p-value = 0.02



# CL5895Contig5|CL5895Contig5

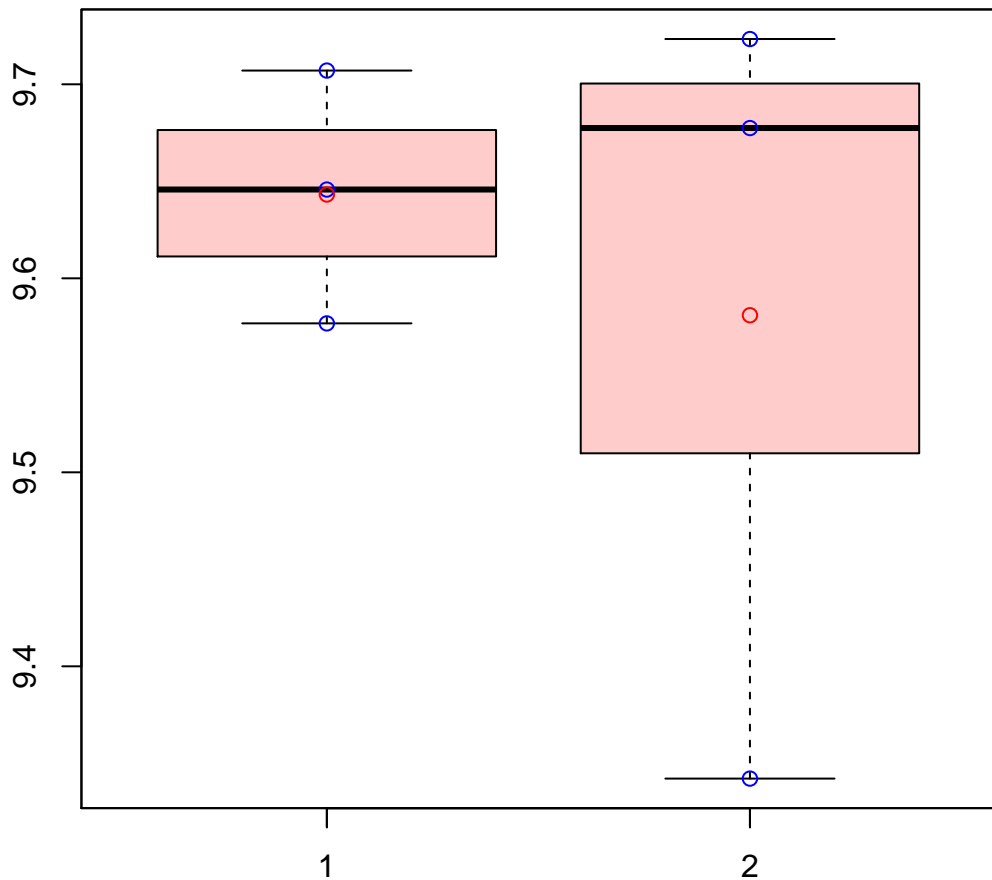

t-Test: p-value = 0.66

# CL58Contig38|CL58Contig38

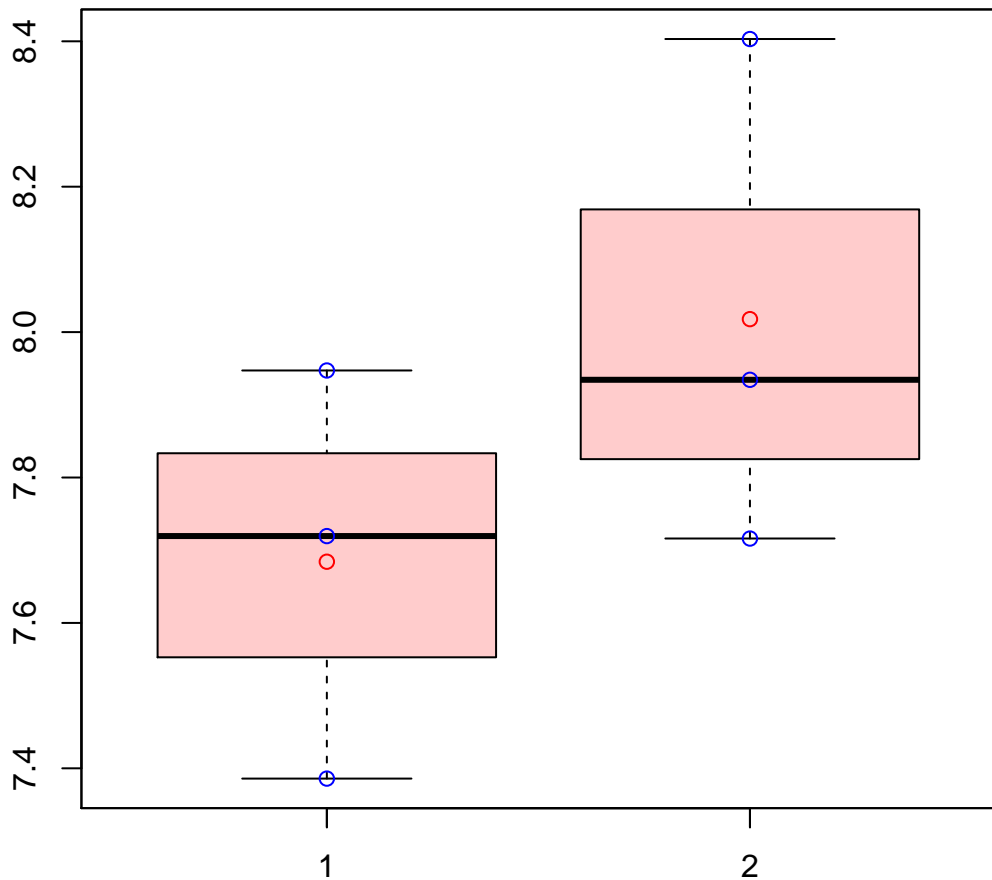

t-Test: p-value = 0.27

# CL5905Contig3|CL5905Contig3

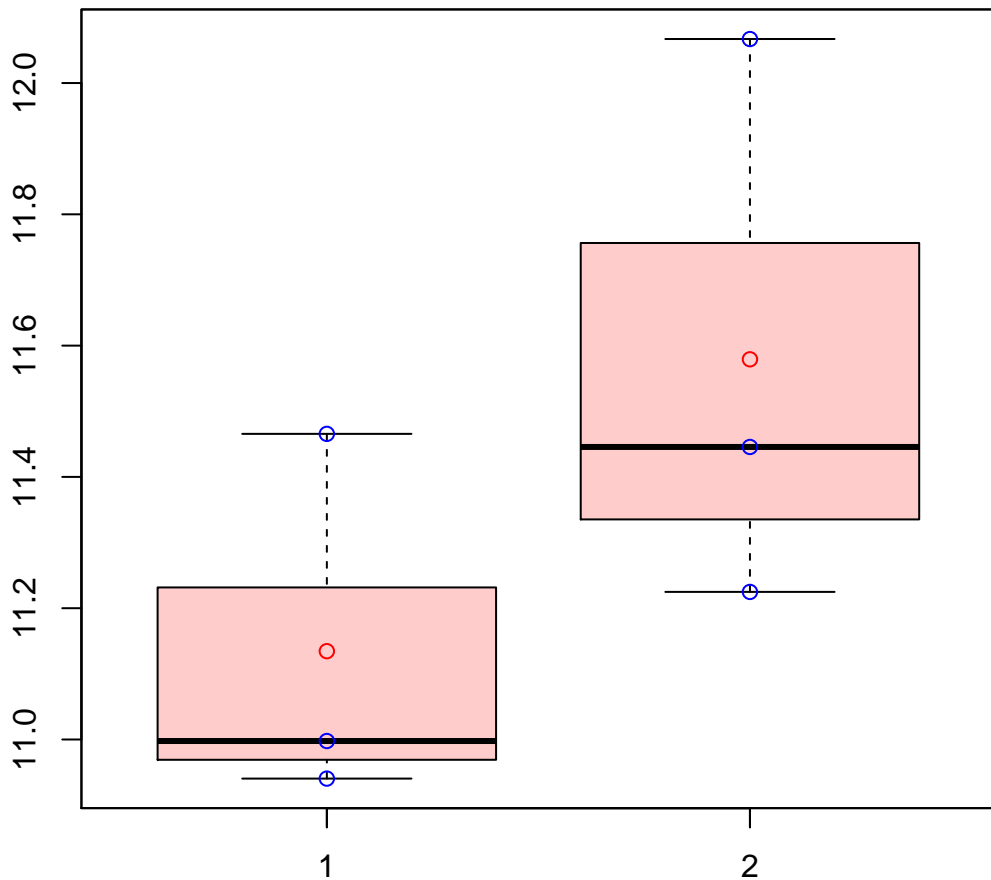

t-Test: p-value = 0.23

# CL5905Contig4|CL5905Contig4

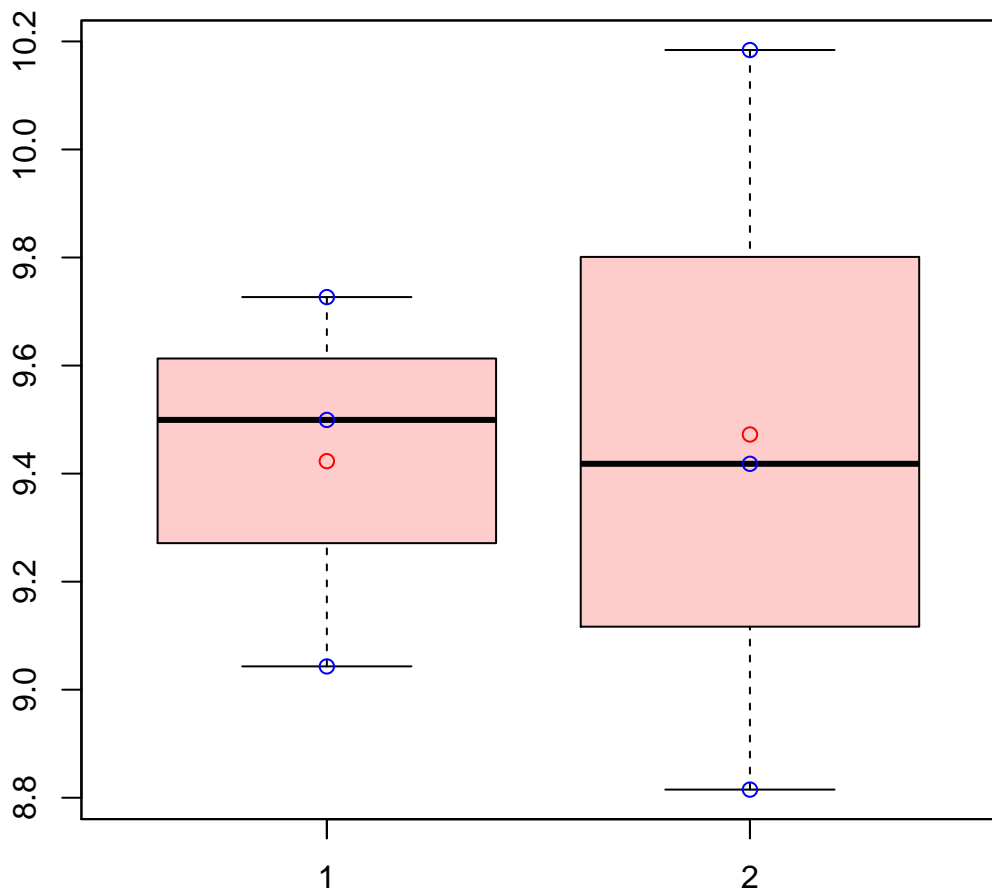

t-Test: p-value = 0.92

# CL590Contig1|CL590Contig1

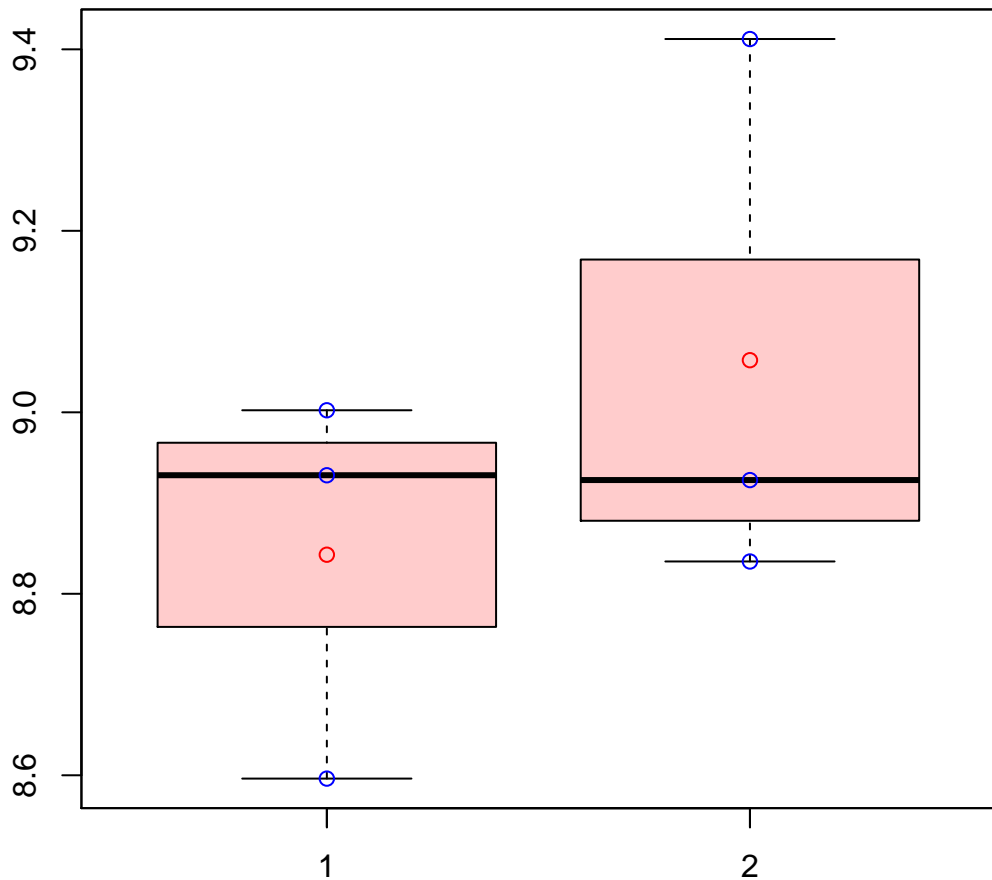

t-Test: p-value = 0.39

# CL5924Contig4|CL5924Contig4

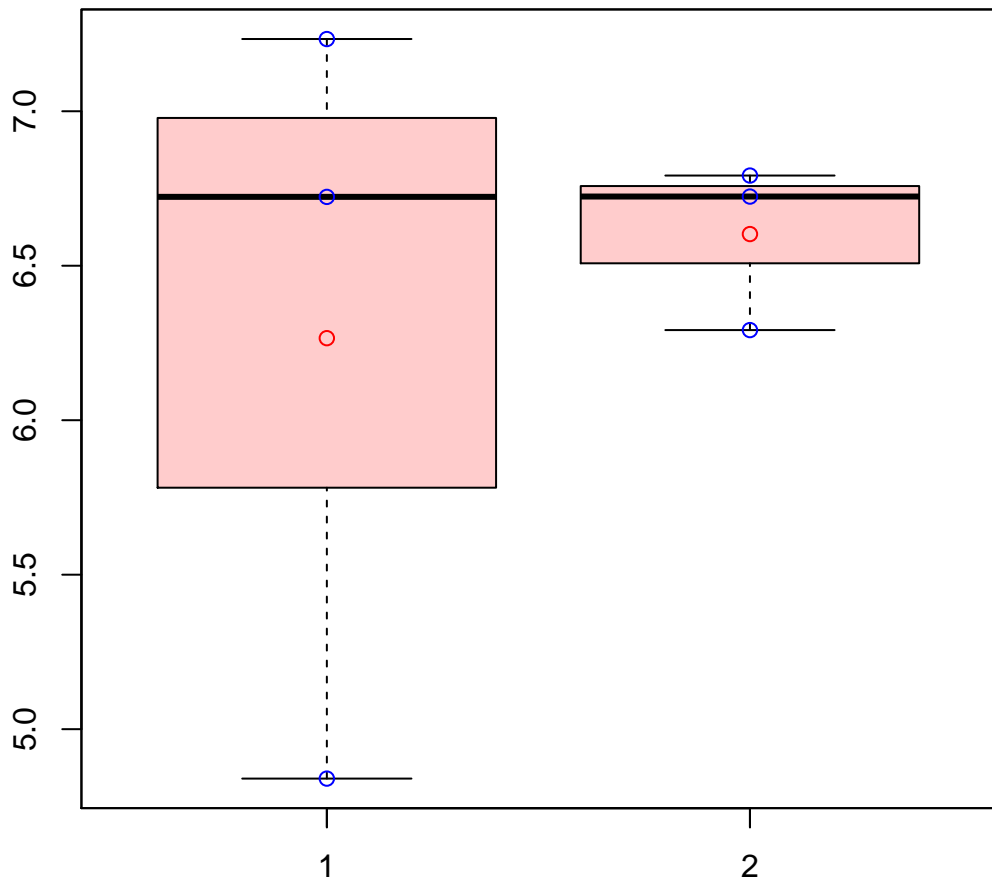

t-Test: p-value = 0.69

# CL5936Contig4|CL5936Contig4

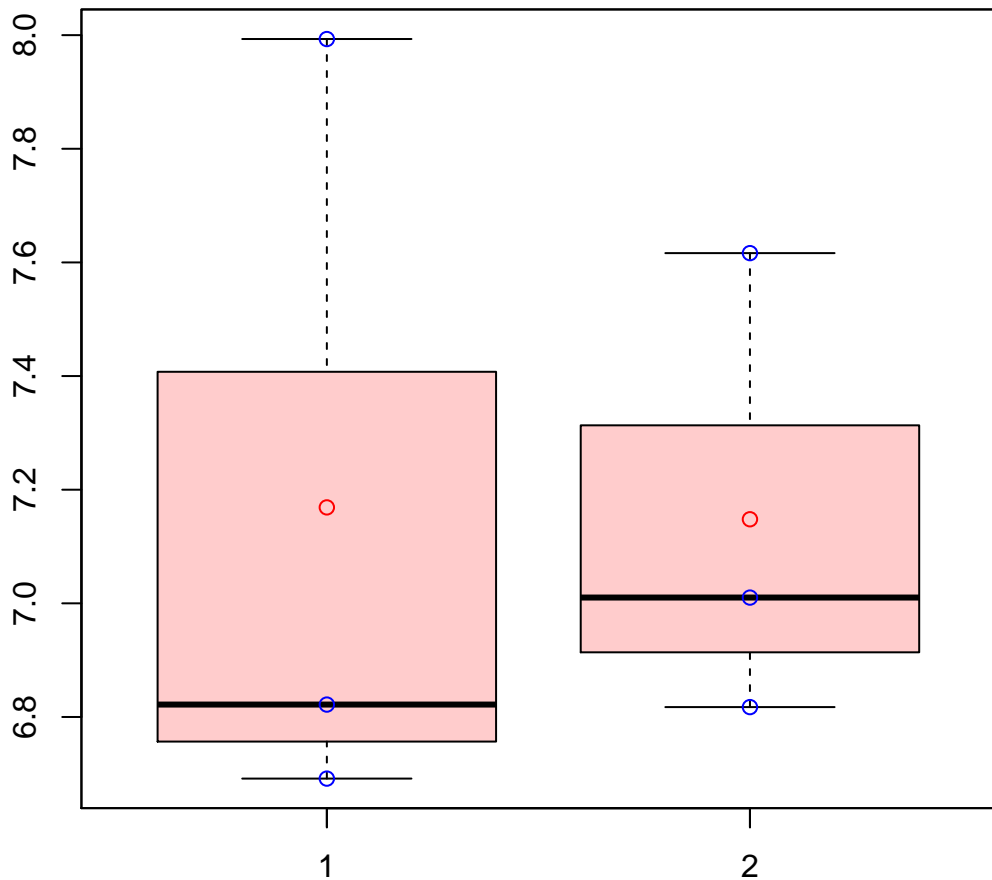

t-Test: p-value = 0.97

# CL5946Contig1|CL5946Contig1

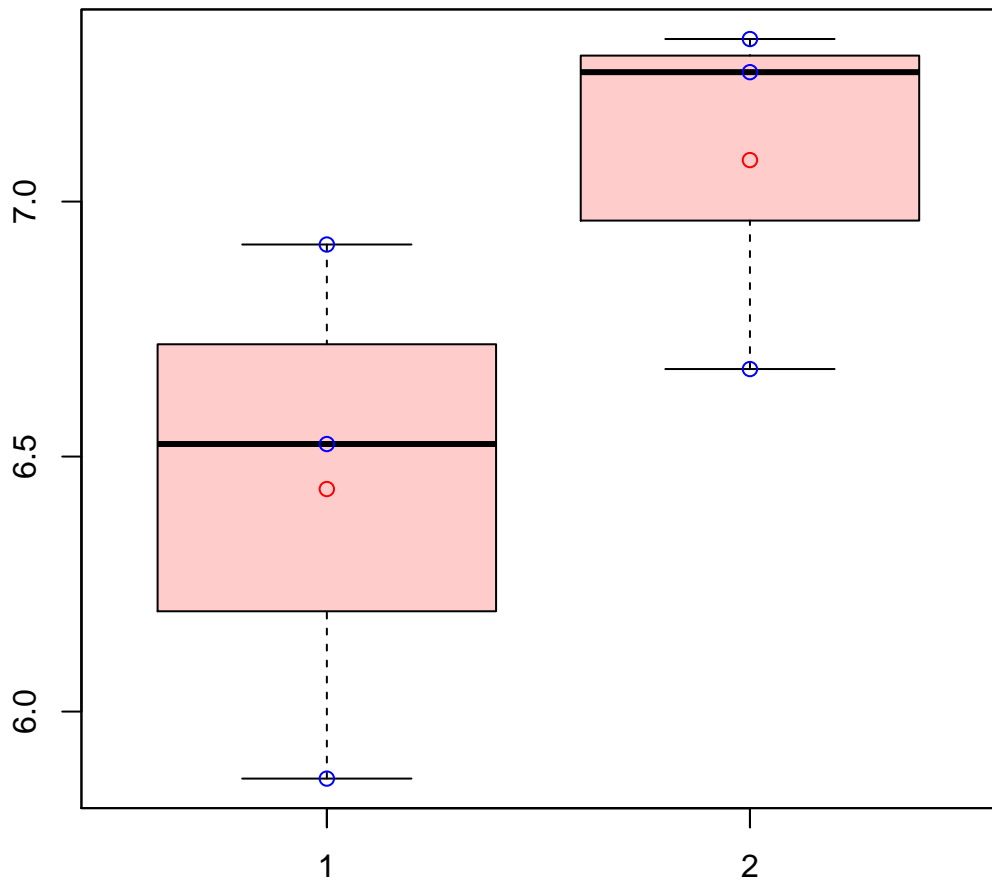

t-Test: p-value = 0.16



# CL5946Contig3|CL5946Contig3

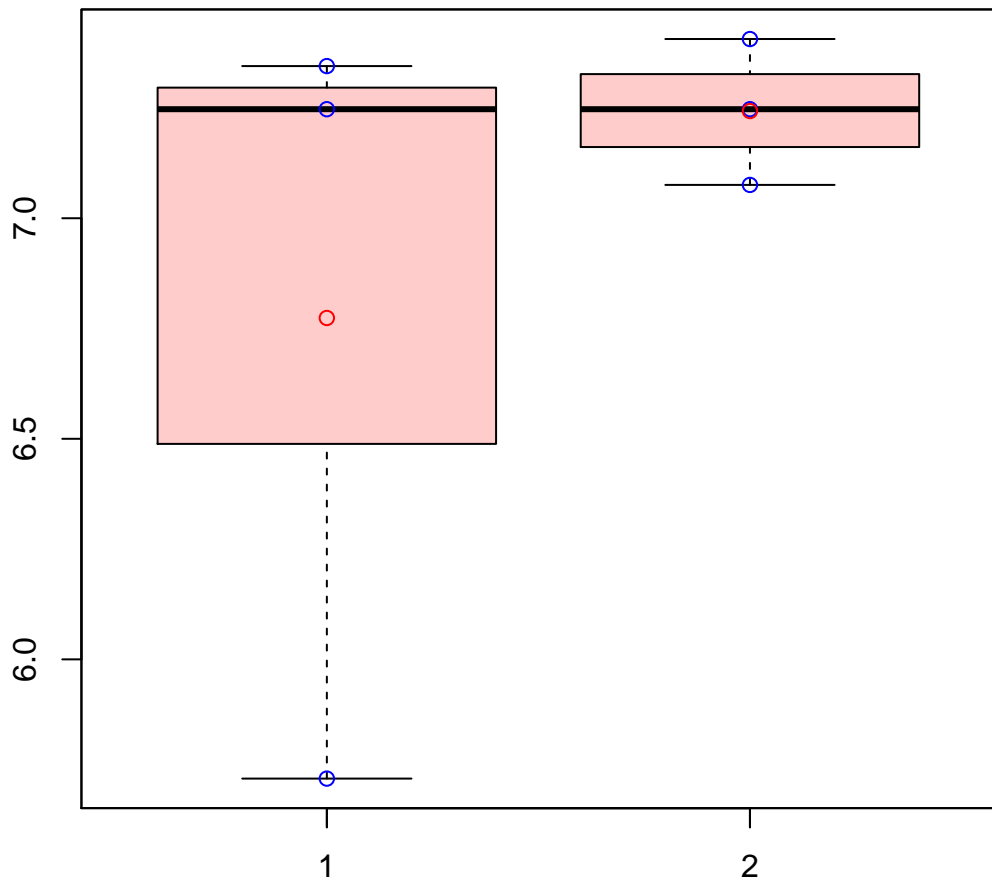

t-Test: p-value = 0.47

# CL595Contig11|CL595Contig11

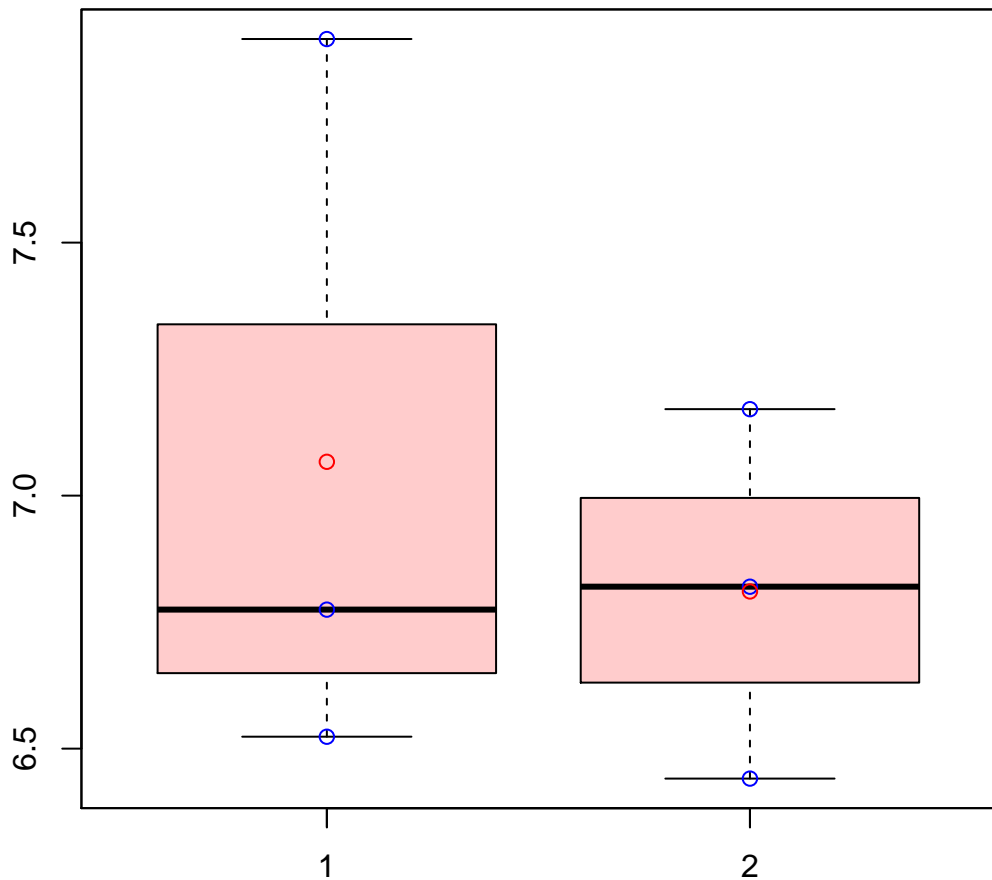

t-Test: p-value = 0.63

# CL595Contig3|CL595Contig3

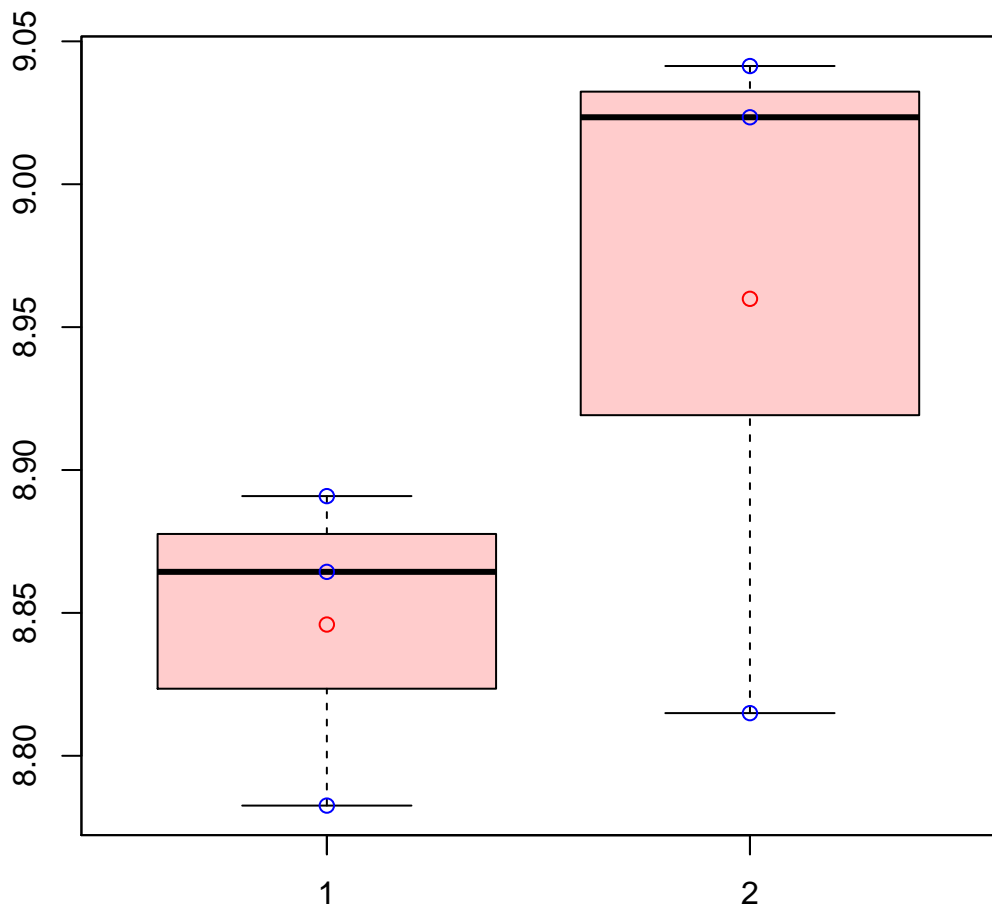

t-Test: p-value = 0.25

# CL595Contig4|CL595Contig4

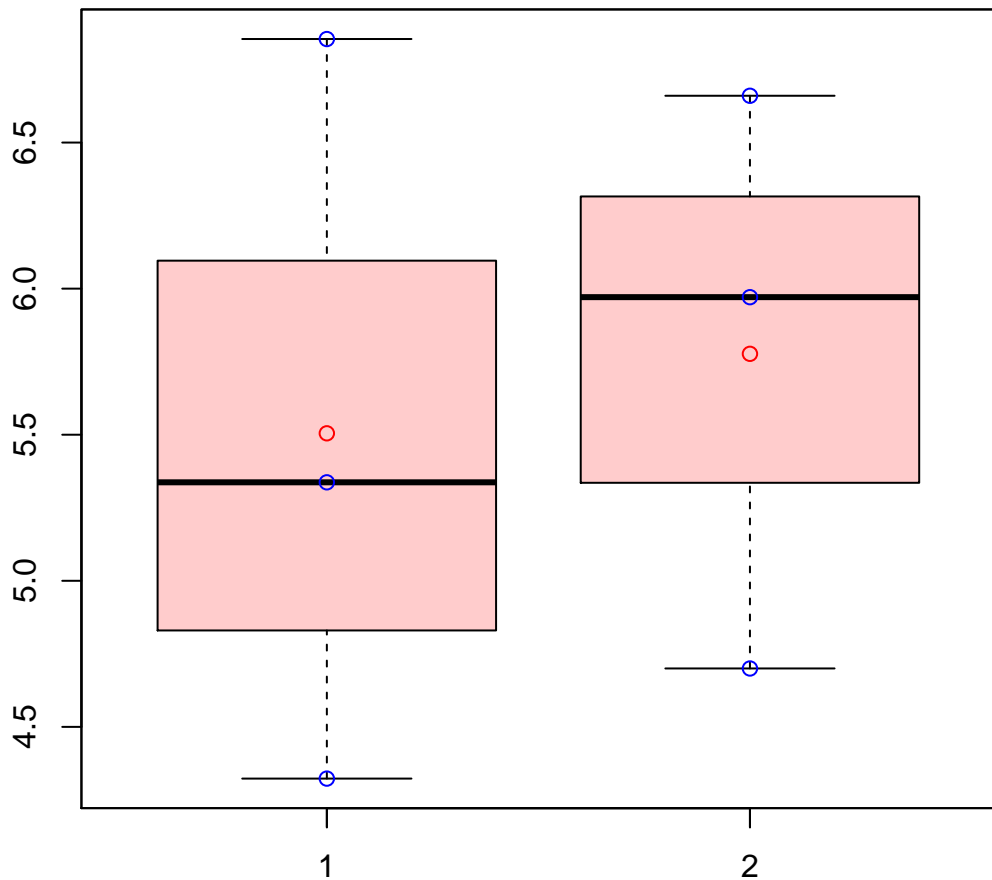

t-Test: p-value = 0.79

# CL5963Contig1|CL5963Contig1

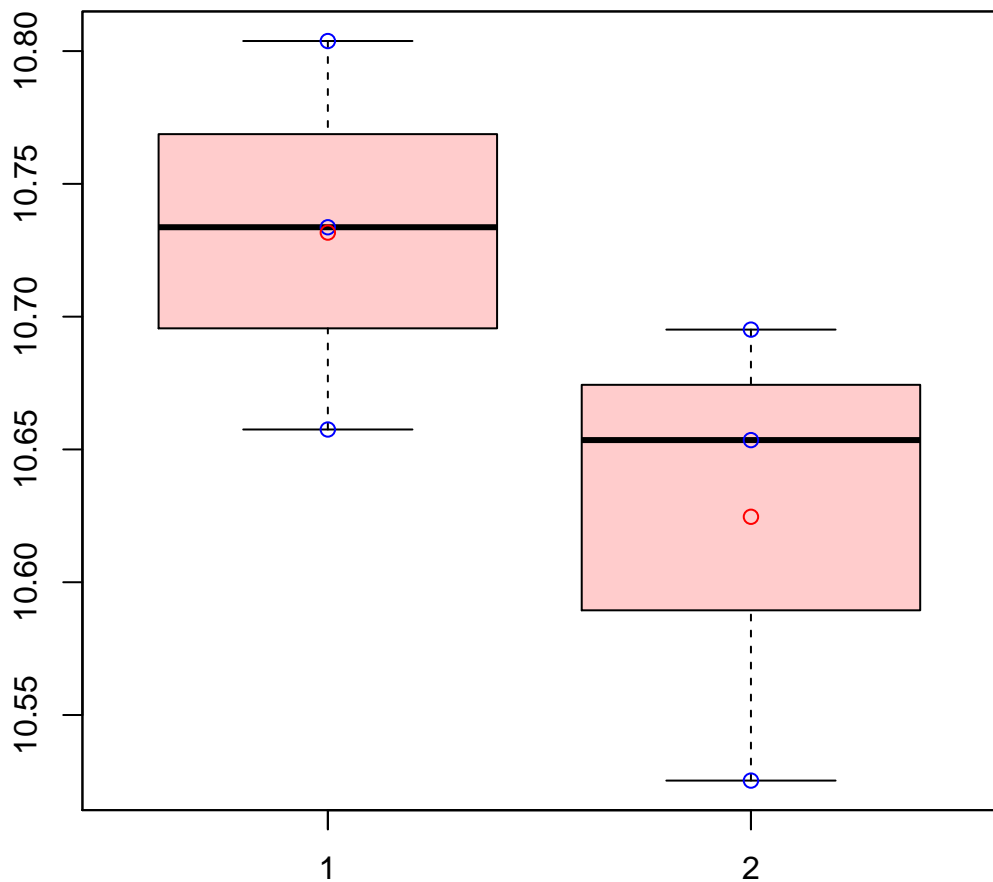

t-Test: p-value = 0.18

# CL5973Contig1|CL5973Contig1

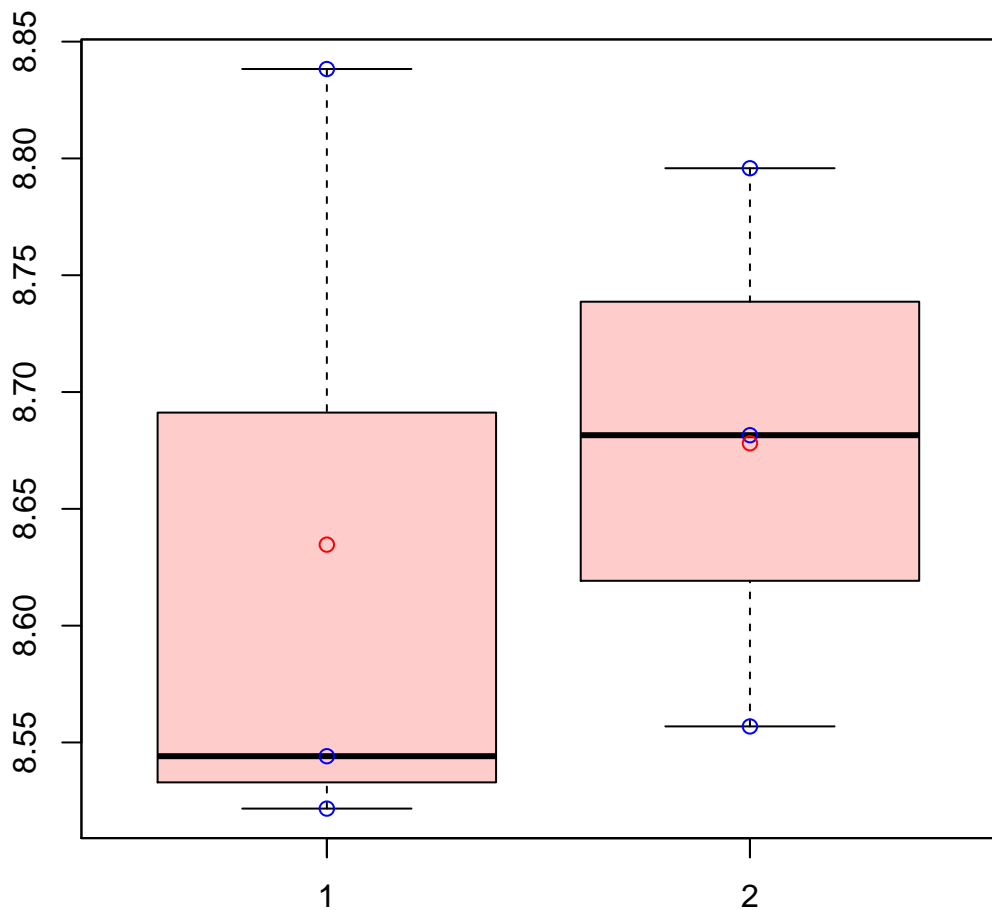

t-Test: p-value = 0.74

# CL5975Contig12|CL5975Contig12

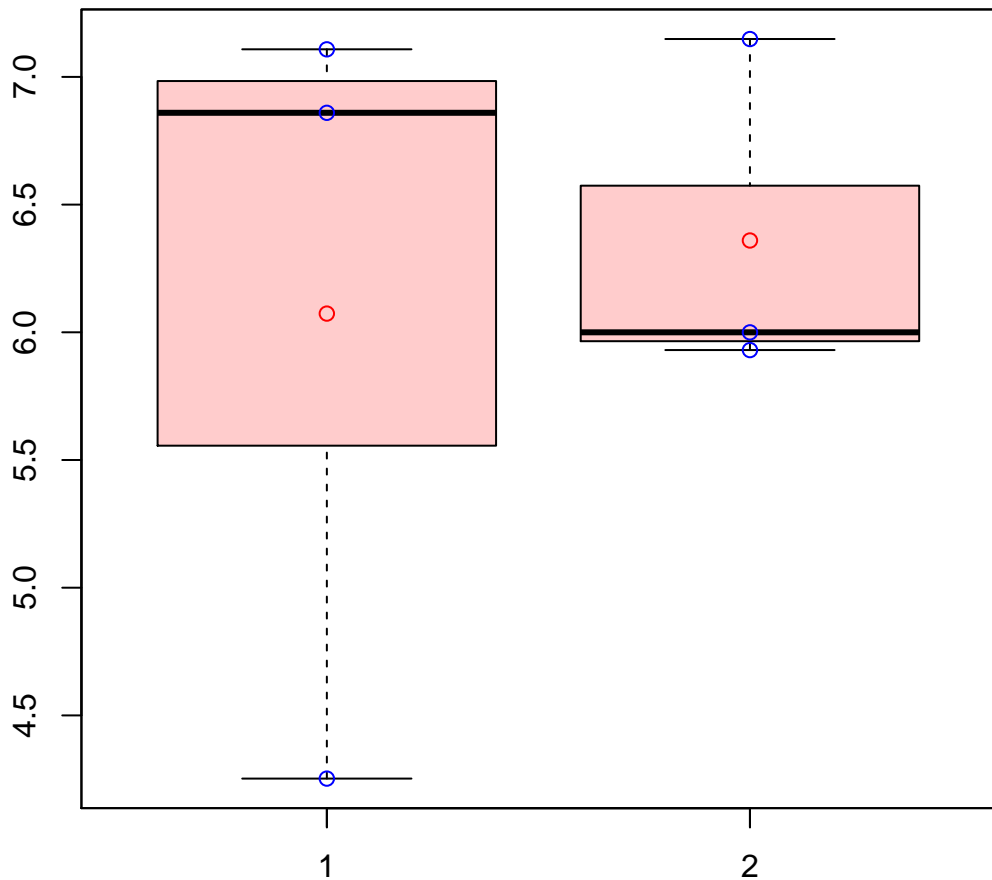

t-Test: p-value = 0.79

# CL5975Contig6|CL5975Contig6

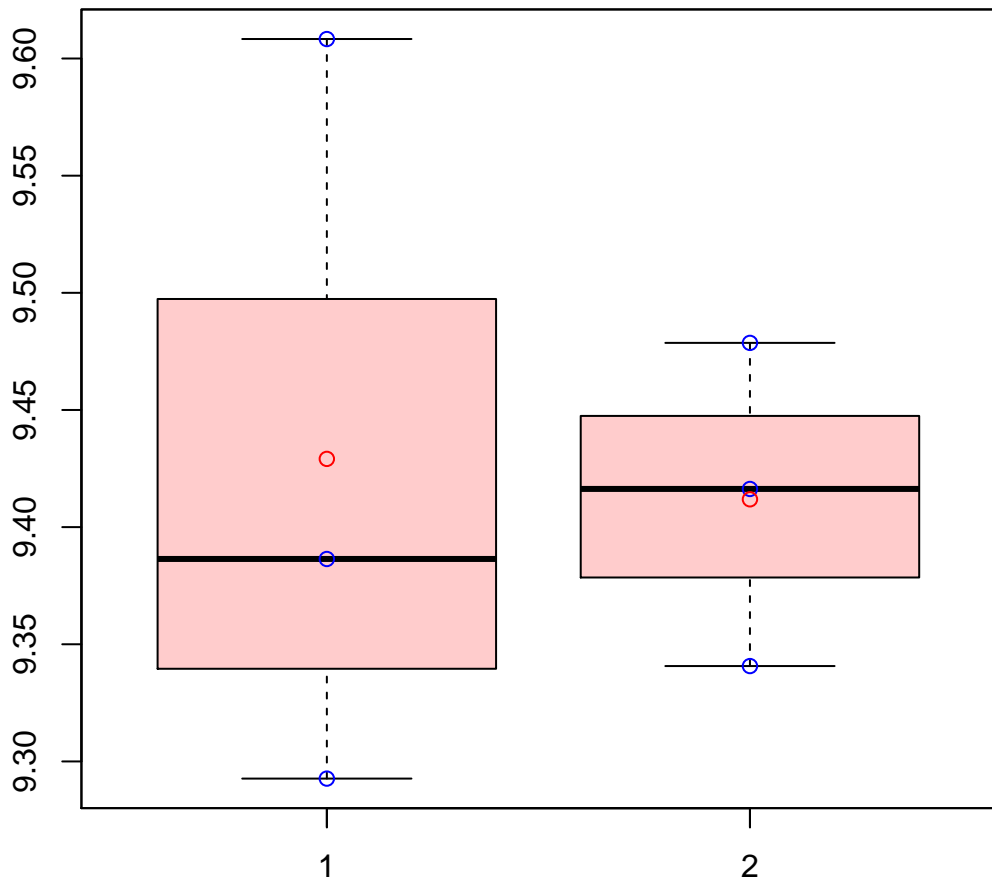

t-Test: p-value = 0.88



# CL5975Contig8|CL5975Contig8

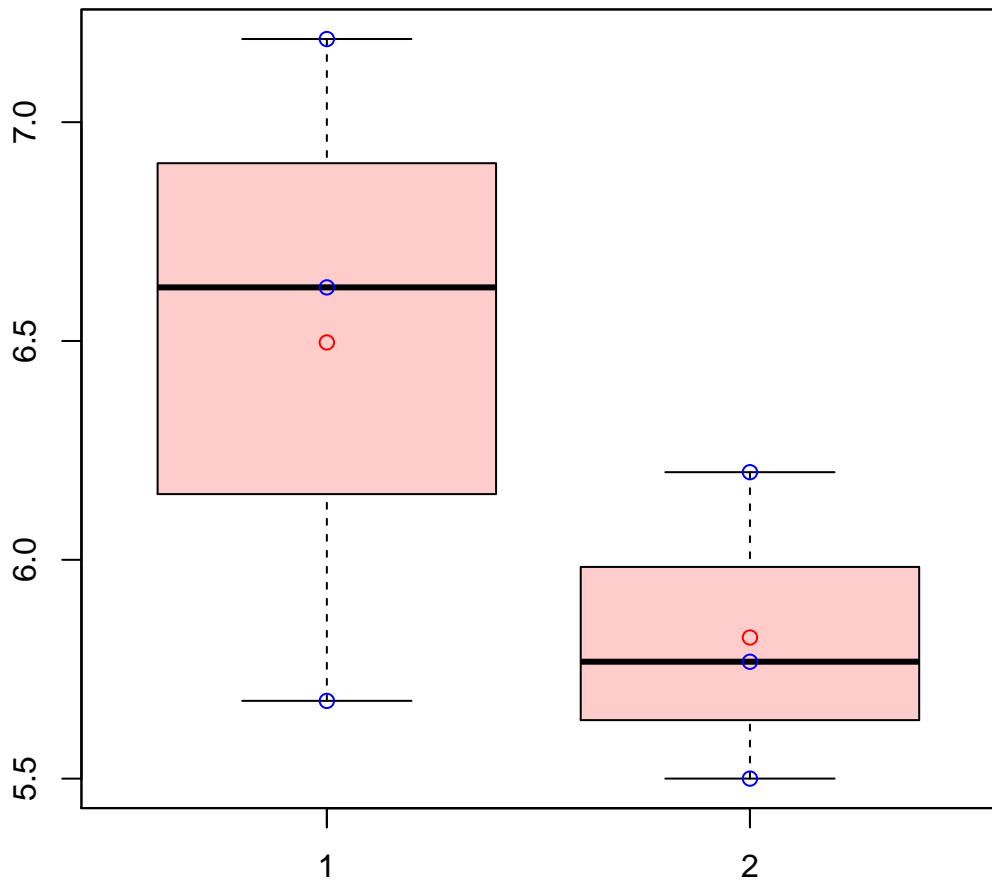

t-Test: p-value = 0.26

# CL5983Contig3|CL5983Contig3

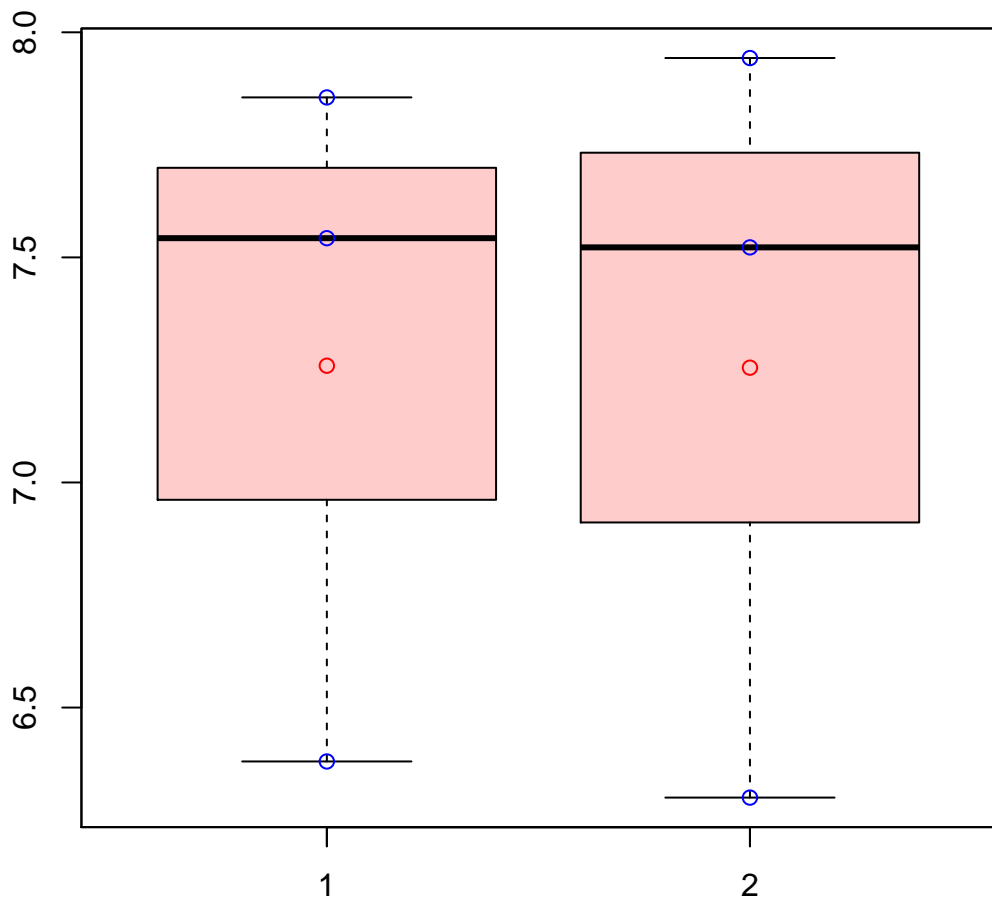

t-Test: p-value = 1

# CL5983Contig4|CL5983Contig4

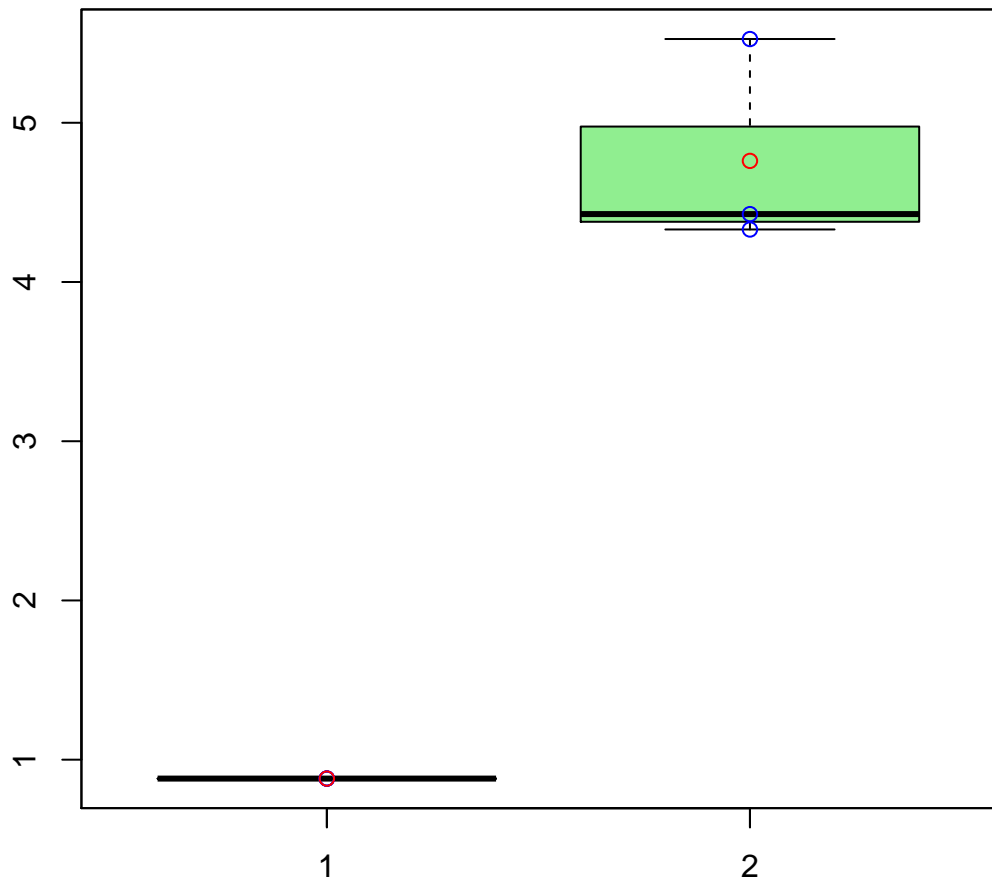

t-Test: p-value = 0.01

# CL5999Contig1|CL5999Contig1

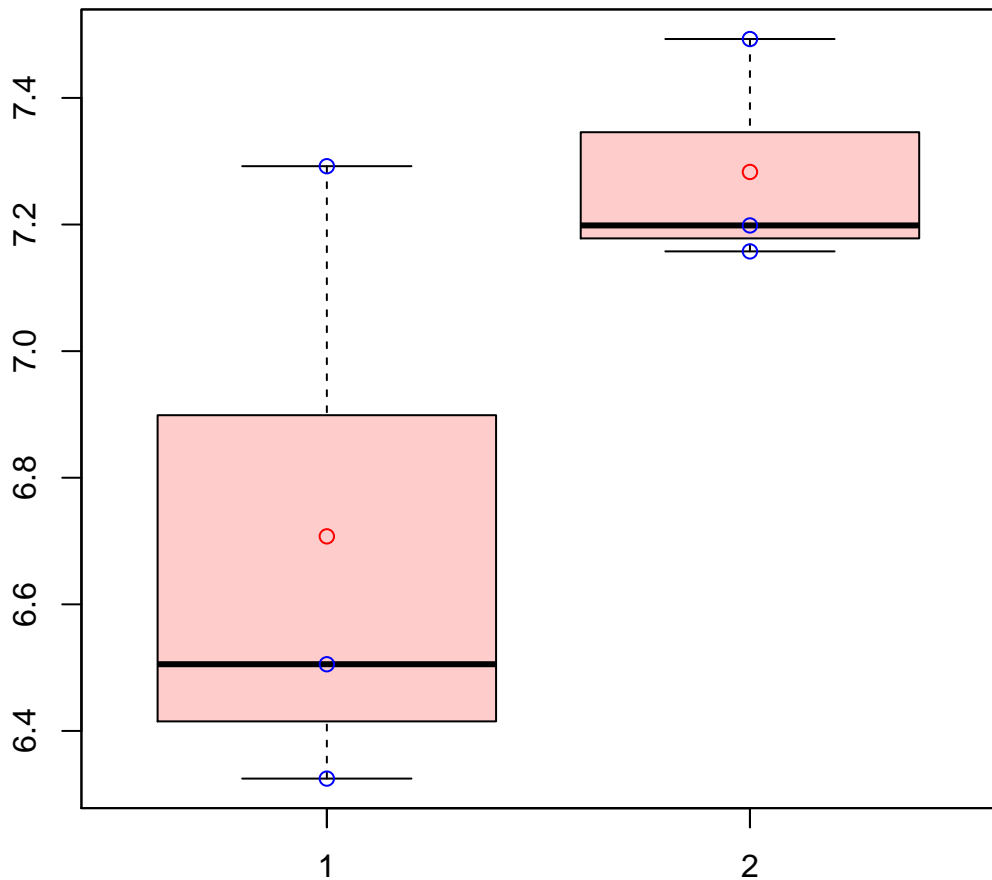

t-Test: p-value = 0.18

# CL599Contig1|CL599Contig1

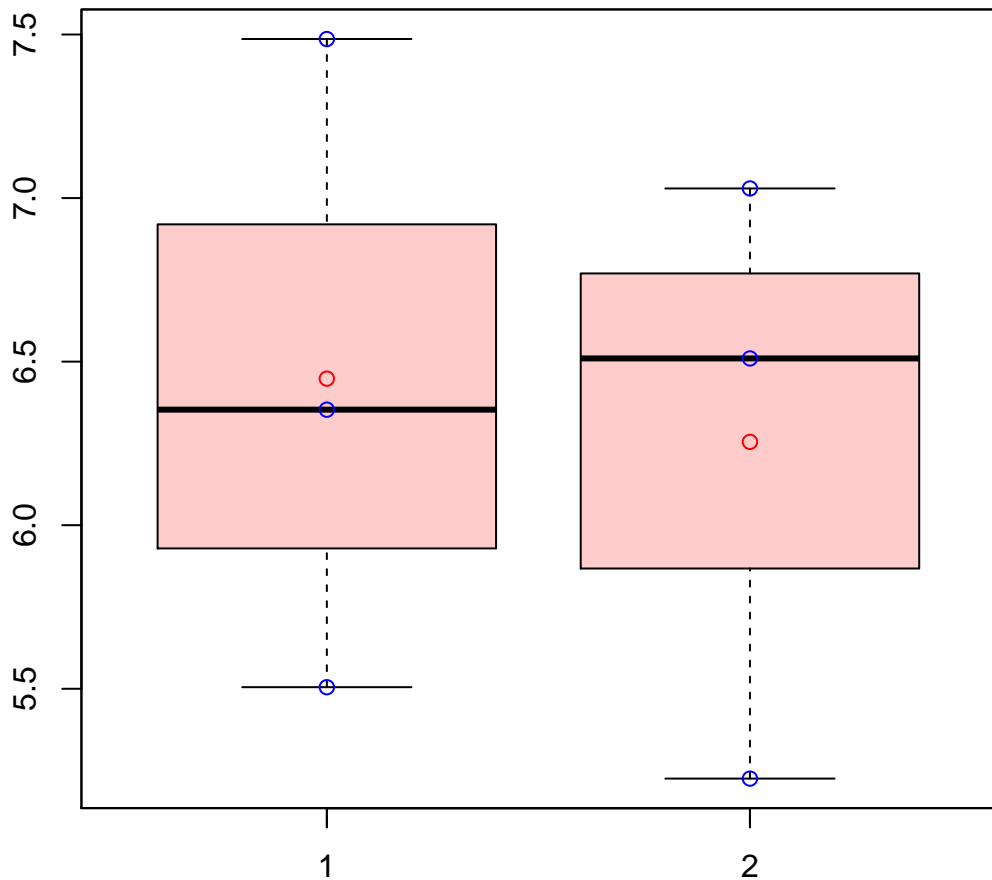

t-Test: p-value = 0.82

# CL5Contig21|CL5Contig21

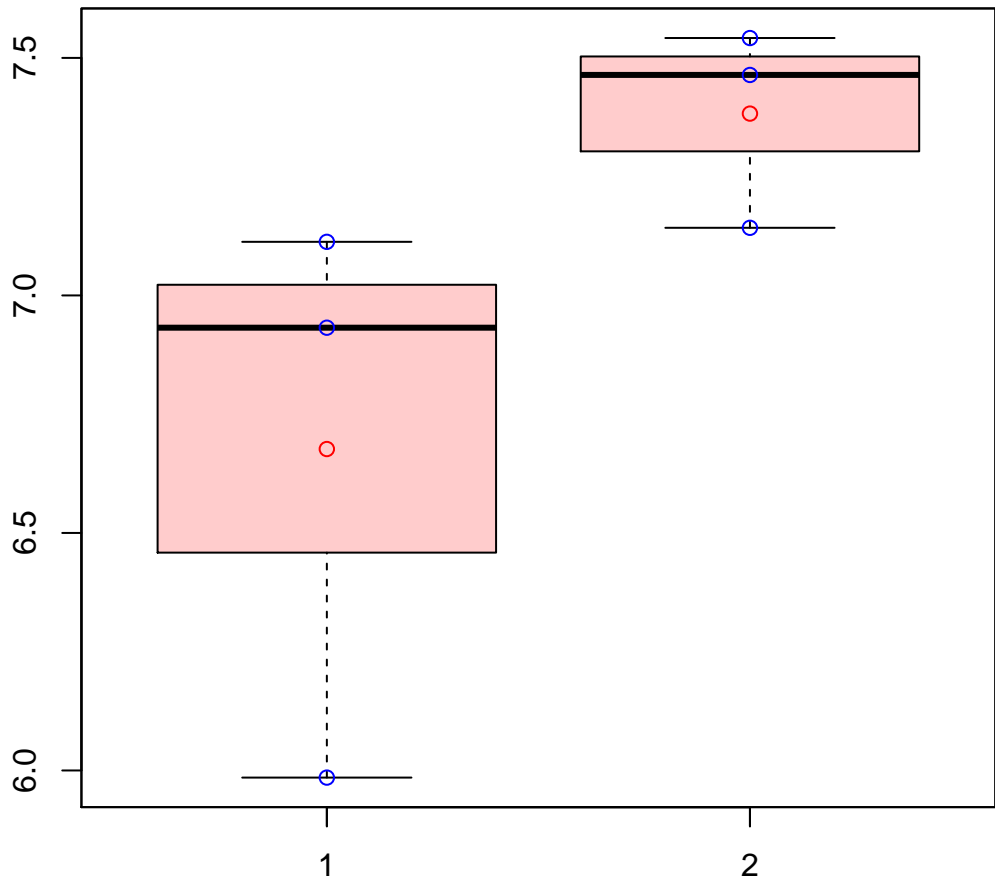

t-Test: p-value = 0.17

# CL5Contig53|CL5Contig53

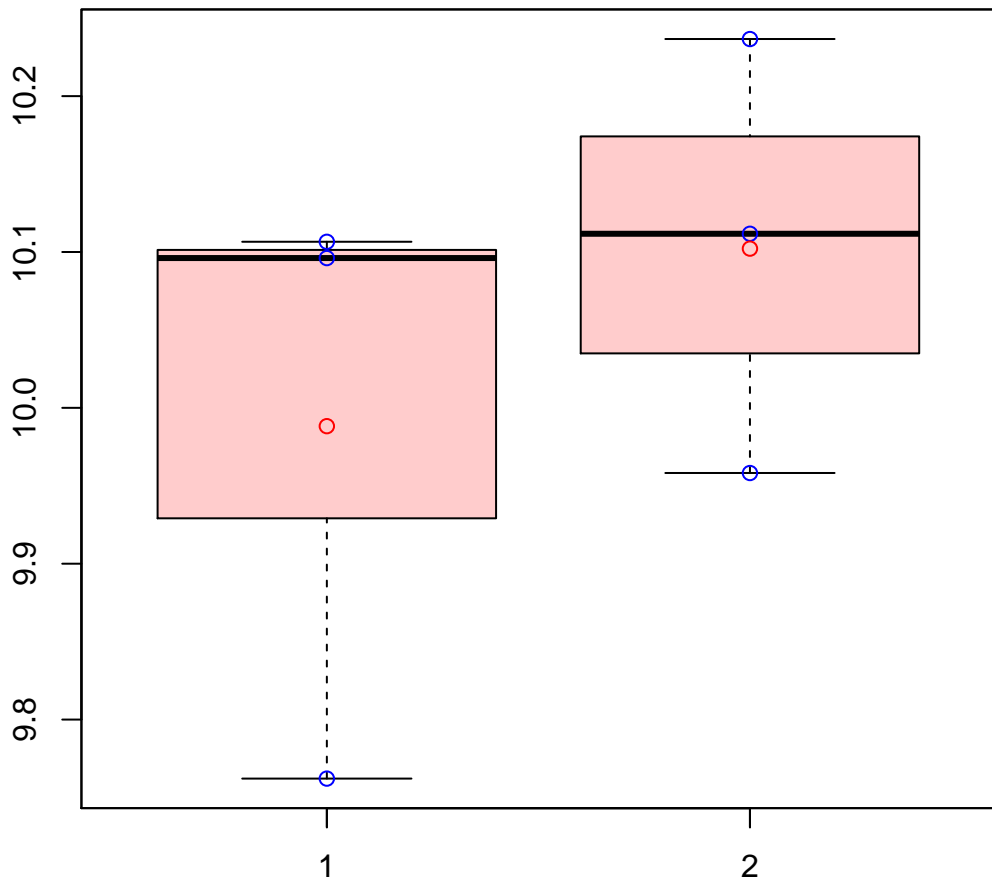

t-Test: p-value = 0.46

# CL5Contig54|CL5Contig54

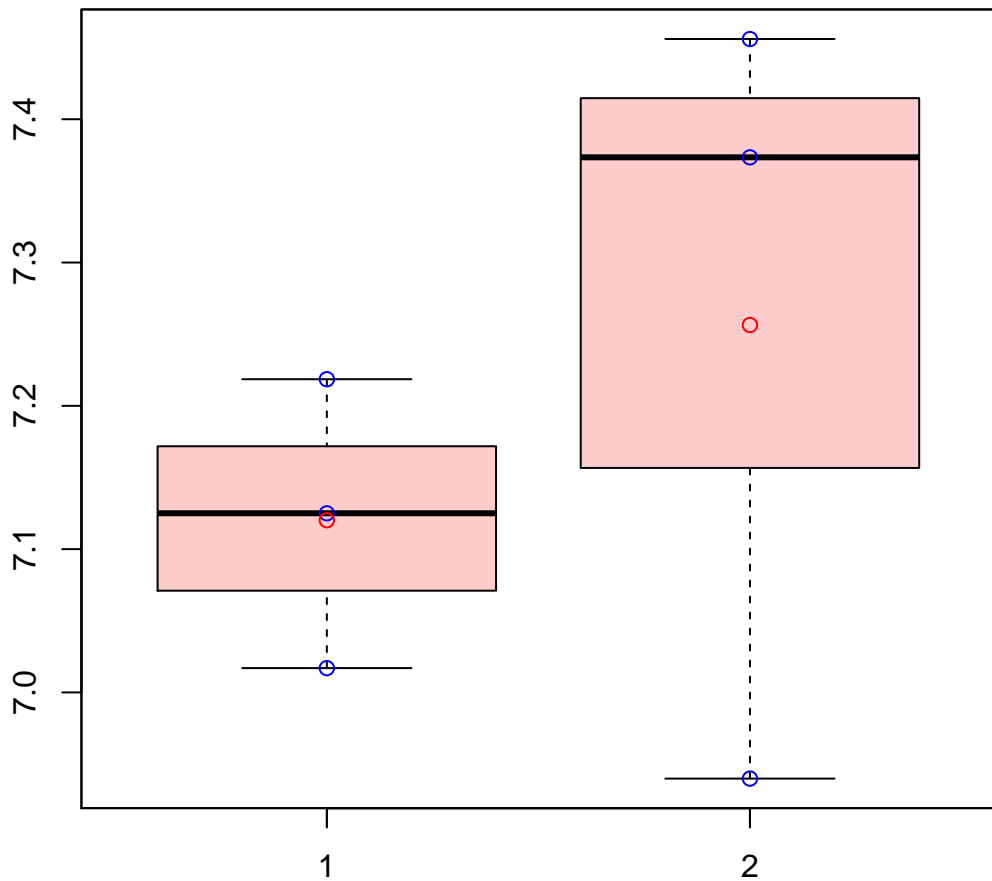

t-Test: p-value = 0.49



# CL5Contig9|CL5Contig9

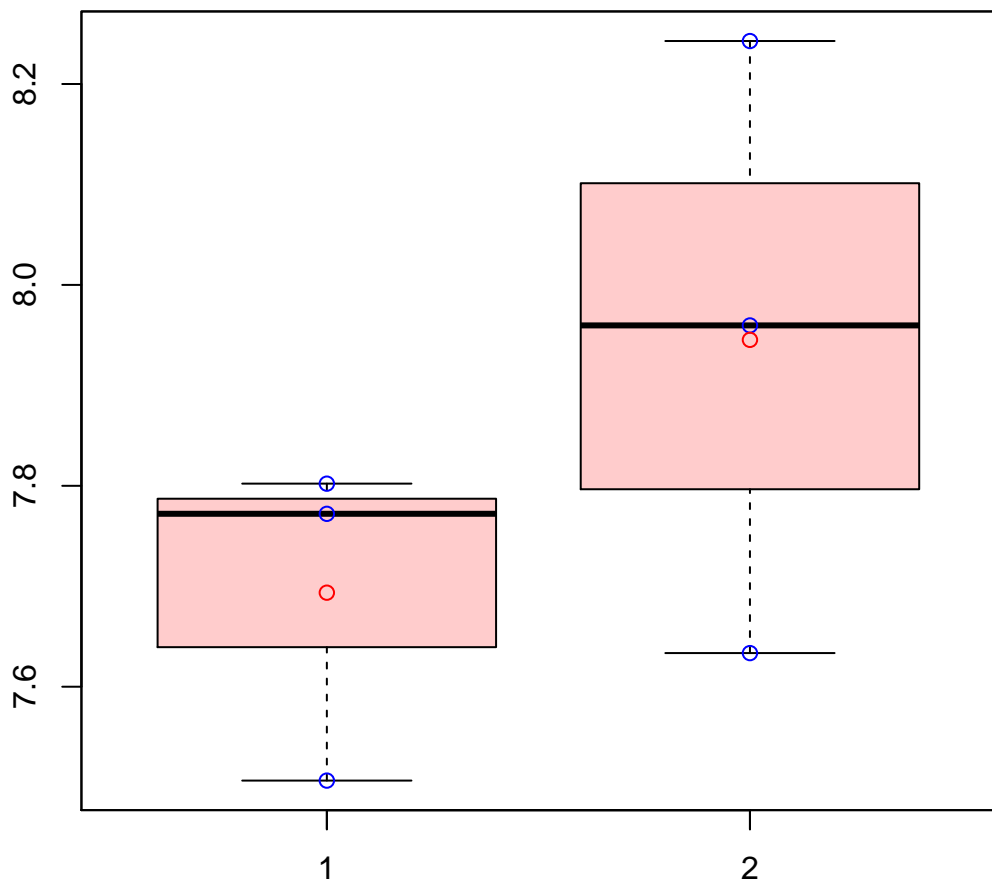

t-Test: p-value = 0.29

# CL6004Contig2|CL6004Contig2

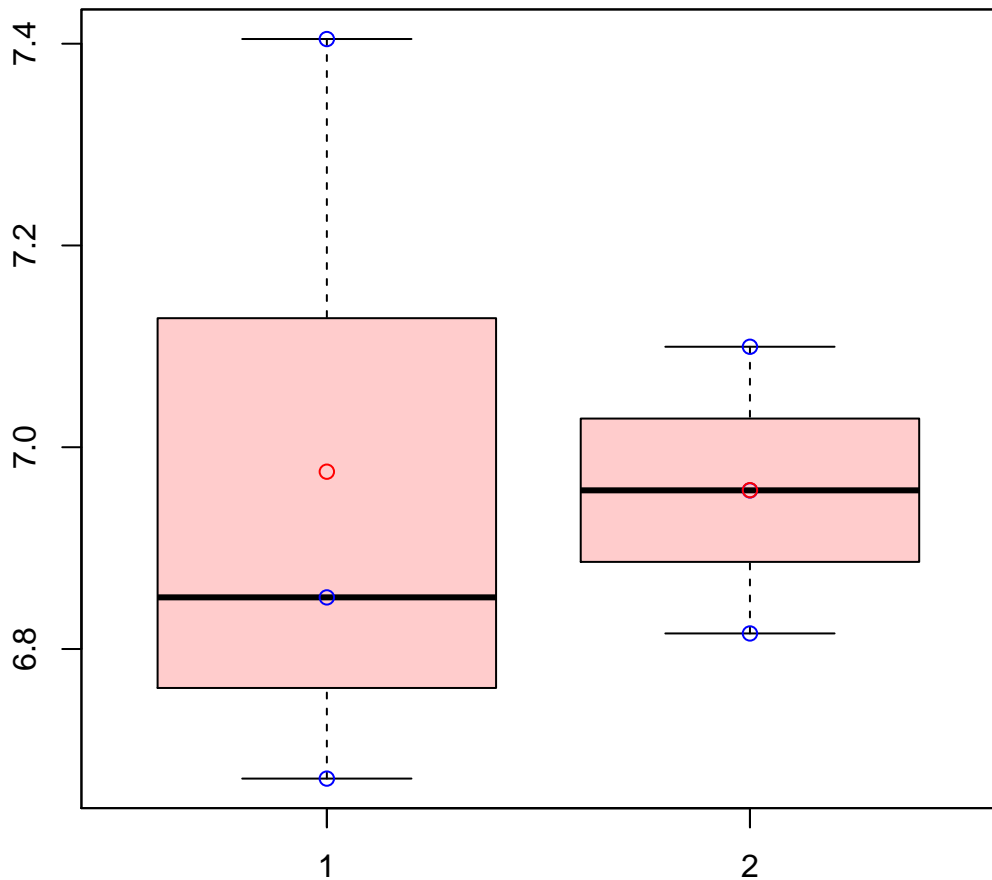

t-Test: p-value = 0.94

# CL6021Contig6|CL6021Contig6

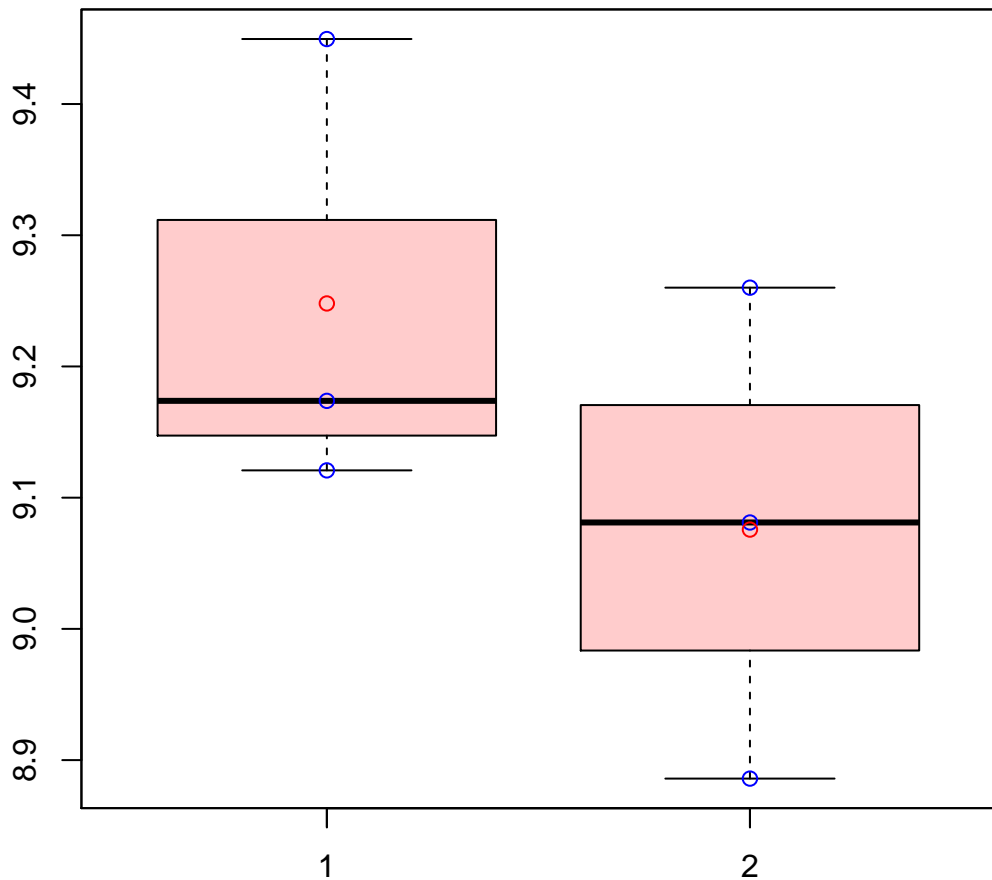

t-Test: p-value = 0.31

# CL6029Contig4|CL6029Contig4

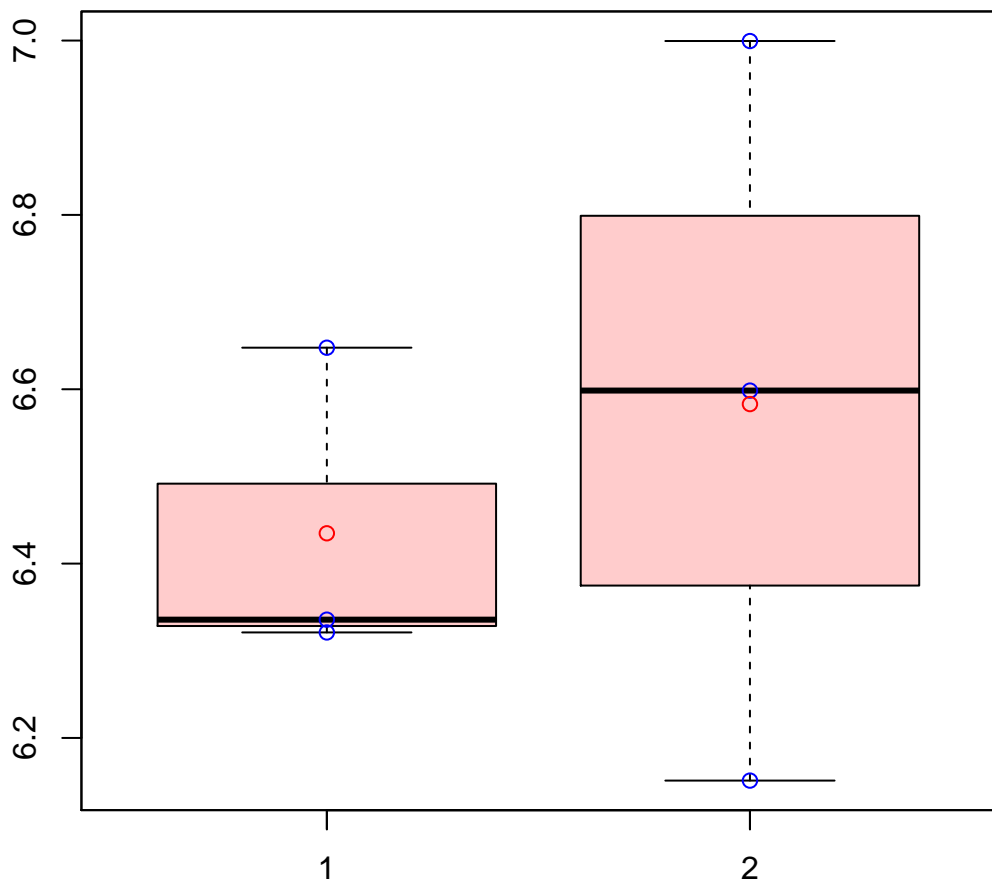

t-Test: p-value = 0.62

# CL602Contig13|CL602Contig13

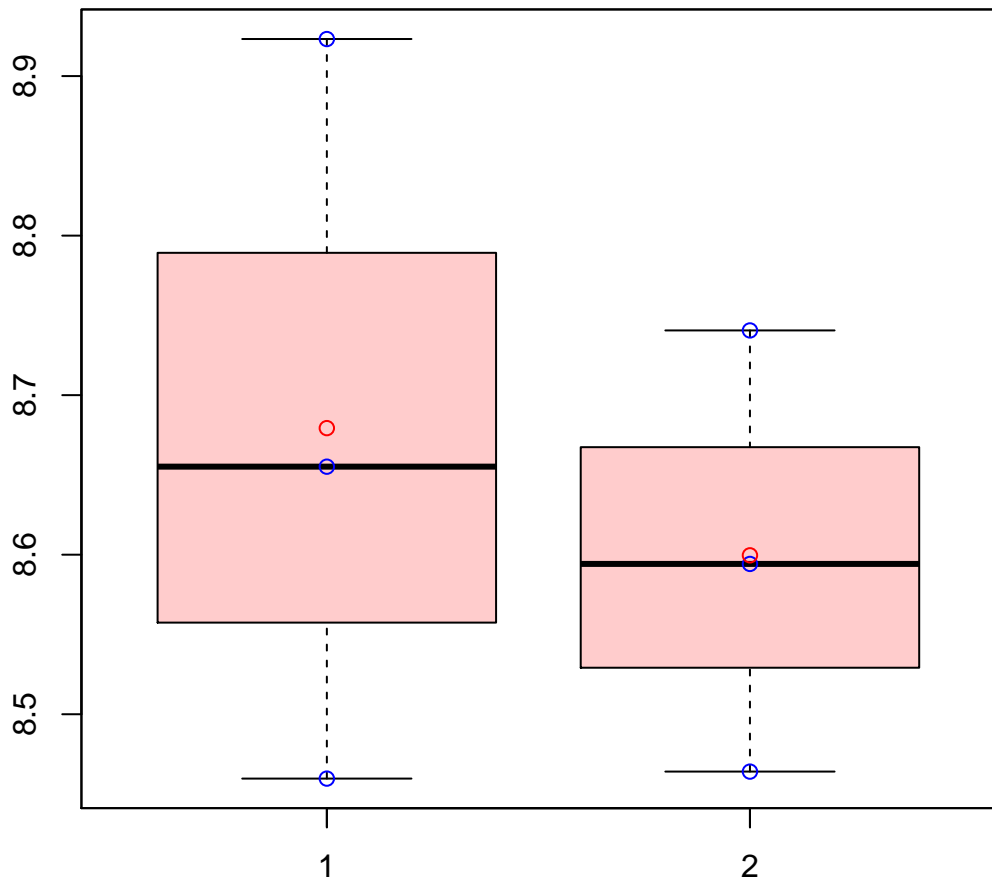

t-Test: p-value = 0.64

# CL602Contig2|CL602Contig2

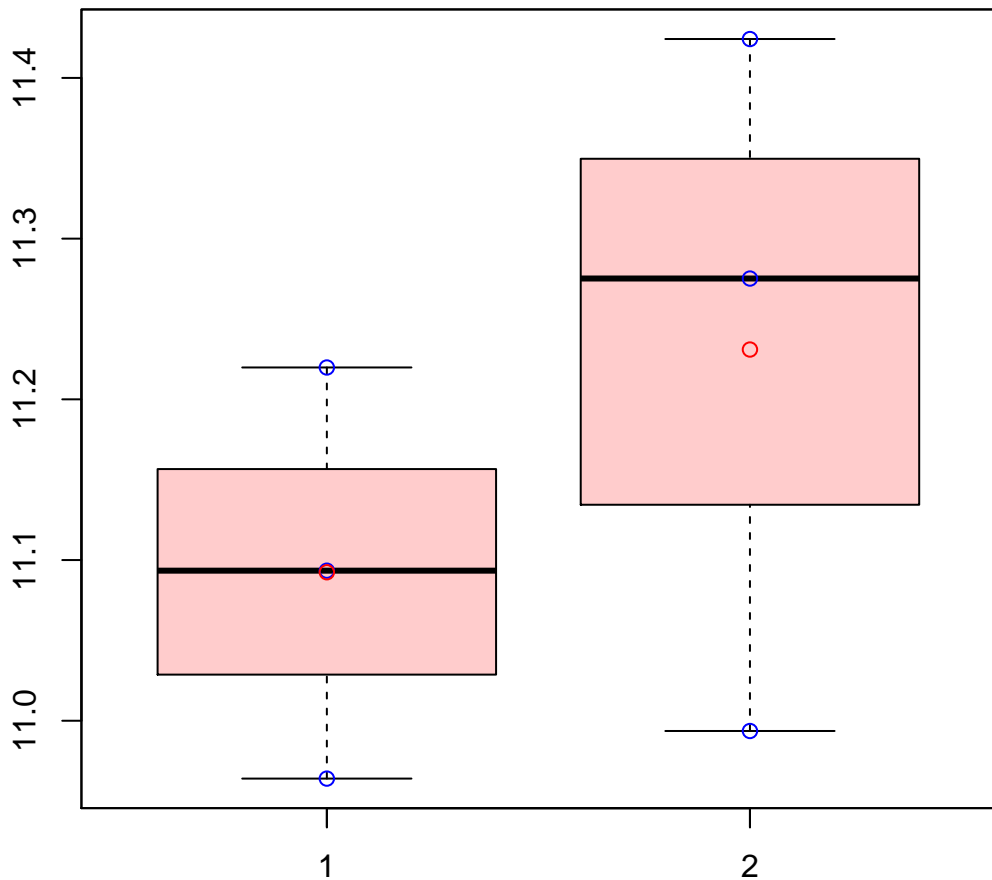

t-Test: p-value = 0.41

# CL6056Contig6|CL6056Contig6

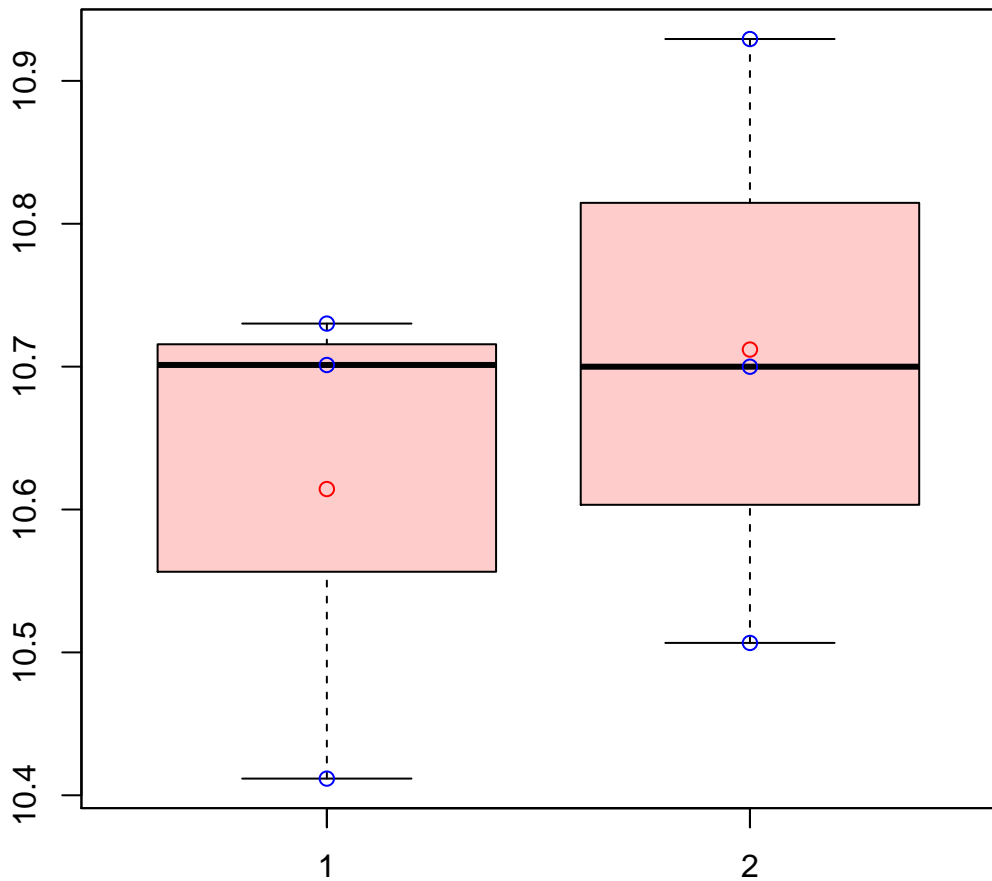

t-Test: p-value = 0.57

# CL6060Contig1|CL6060Contig1

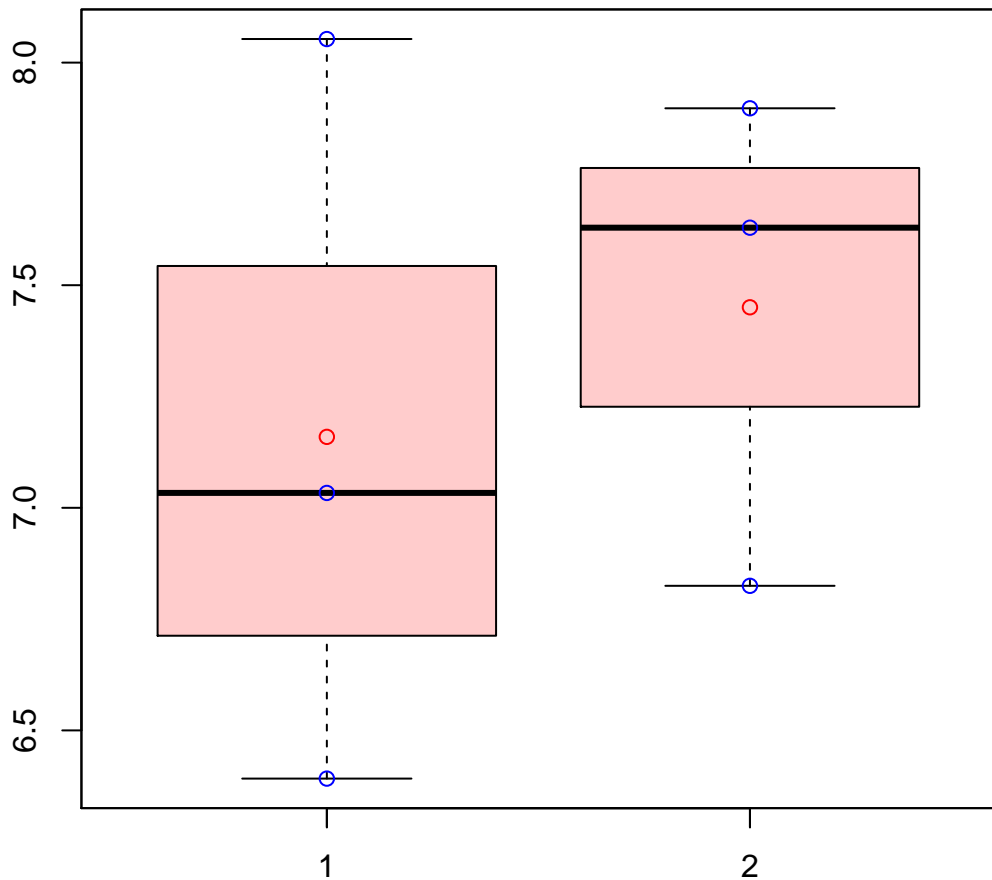

t-Test: p-value = 0.65



# CL6064Contig2|CL6064Contig2

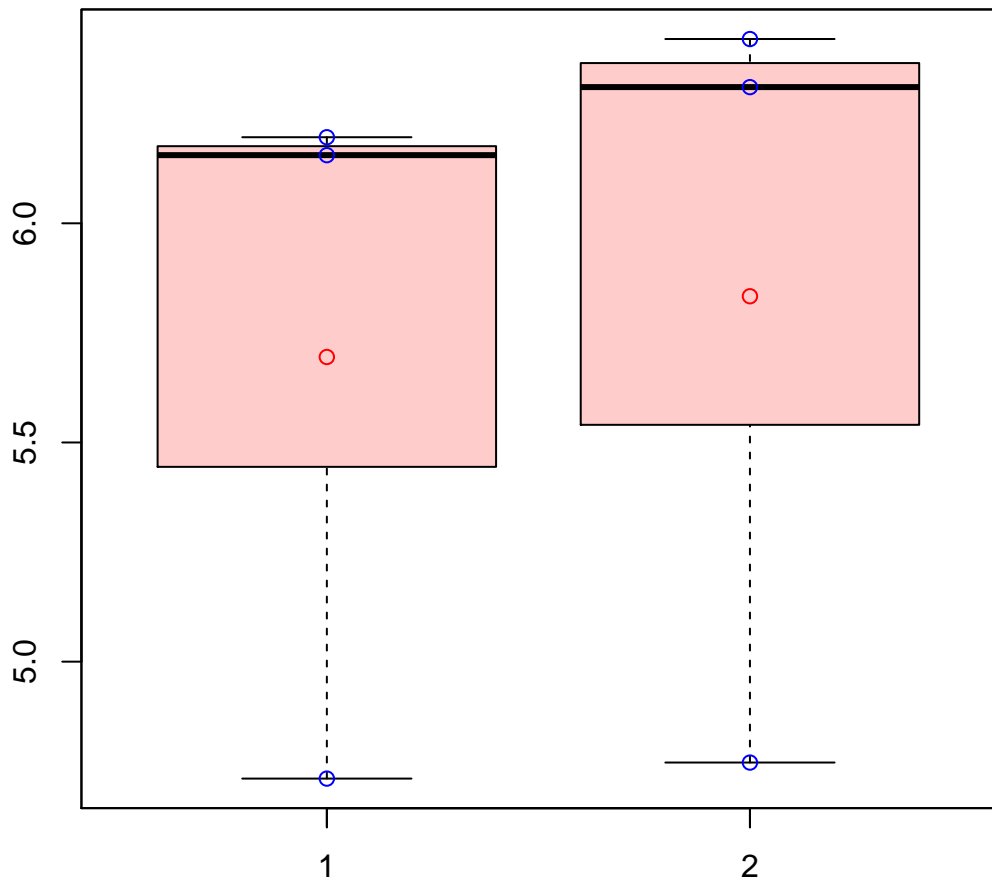

t-Test: p-value = 0.86

# CL6066Contig1|CL6066Contig1

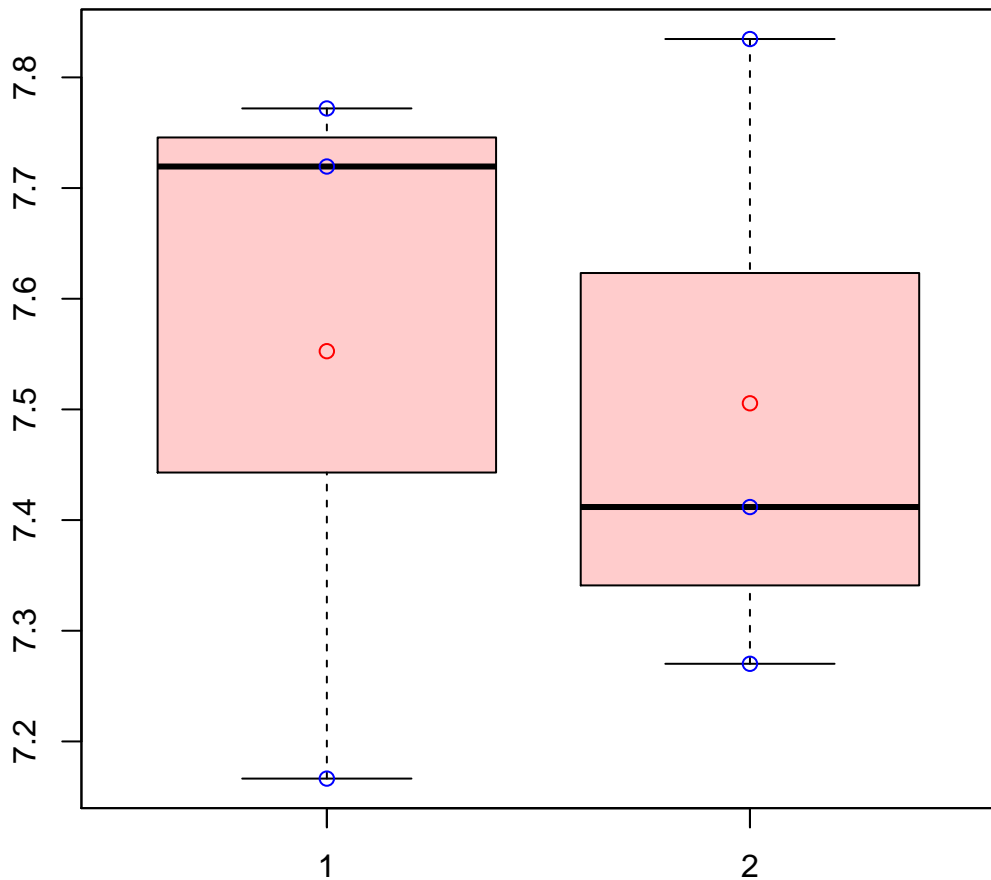

t-Test: p-value = 0.86

# CL6067Contig1|CL6067Contig1

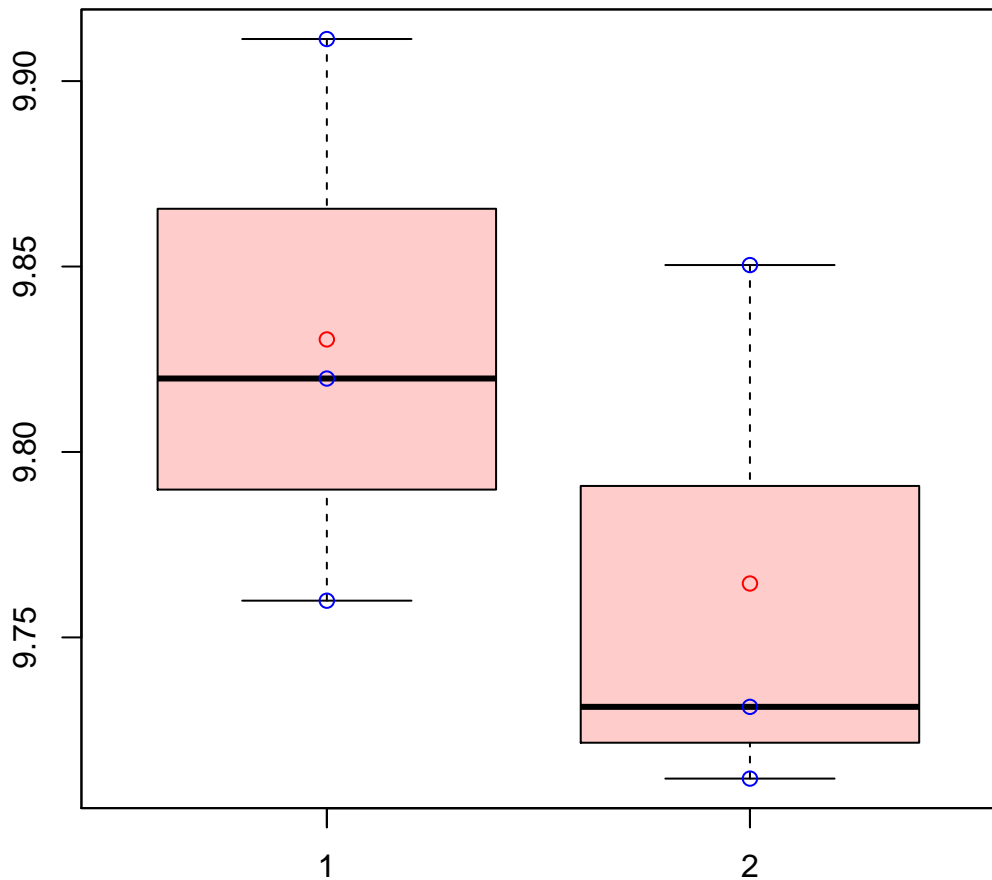

t-Test: p-value = 0.35

# CL6075Contig2|CL6075Contig2

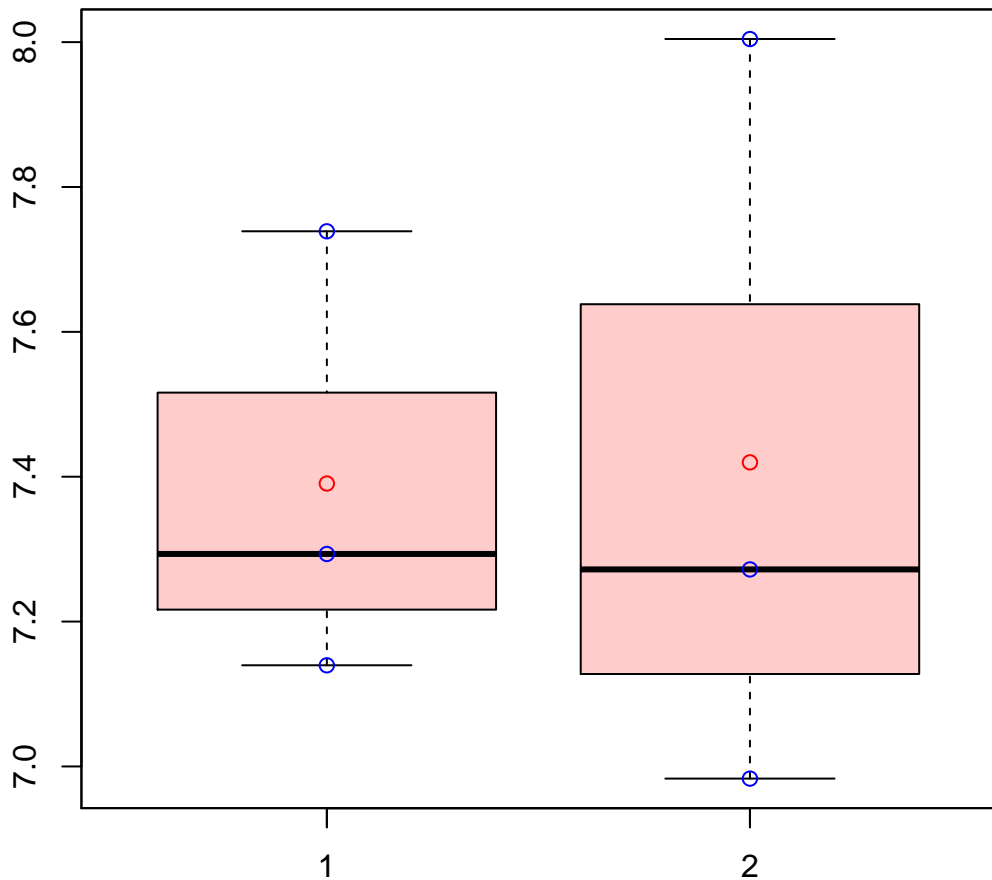

t-Test: p-value = 0.94

# CL6078Contig6|CL6078Contig6

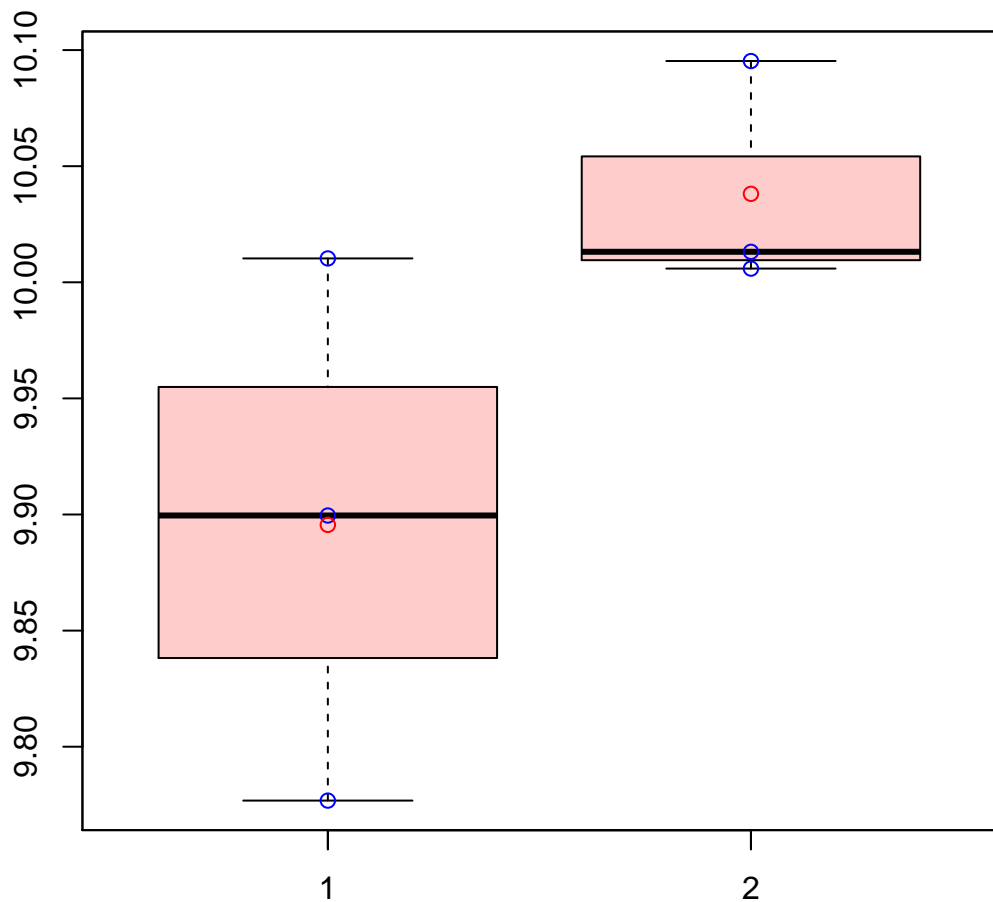

t-Test: p-value = 0.16

# CL607Contig1|CL607Contig1

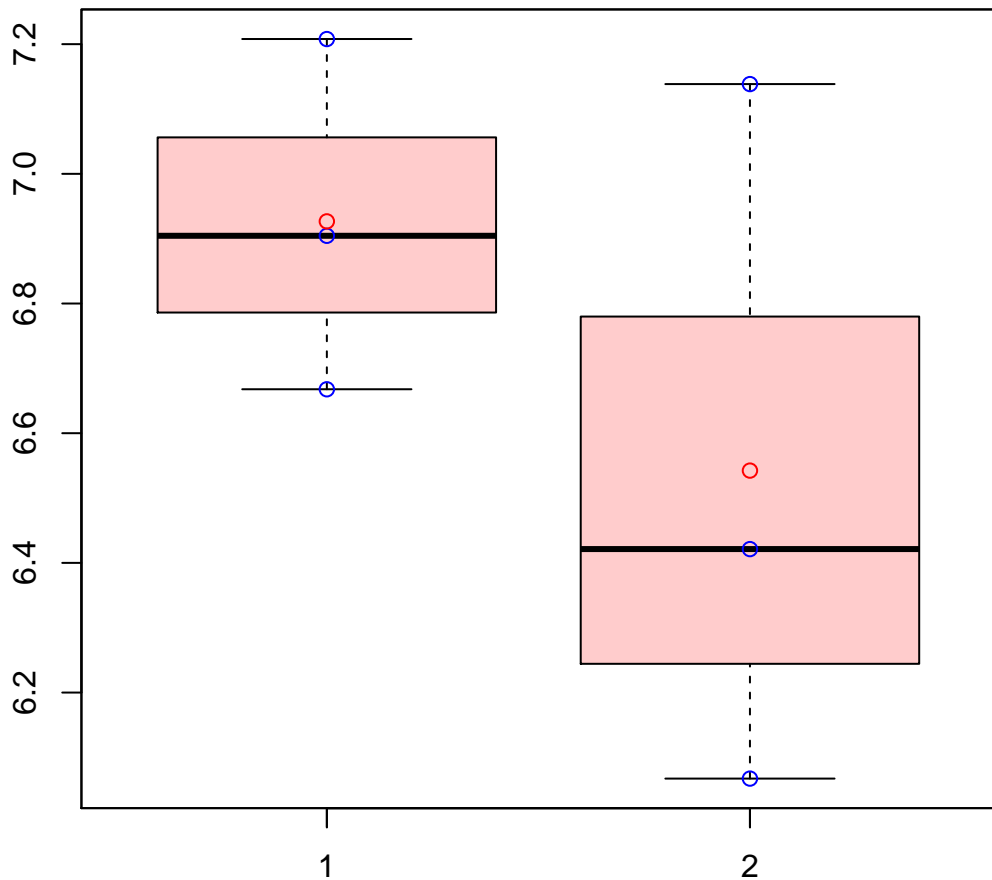

t-Test: p-value = 0.36

# CL607Contig2|CL607Contig2

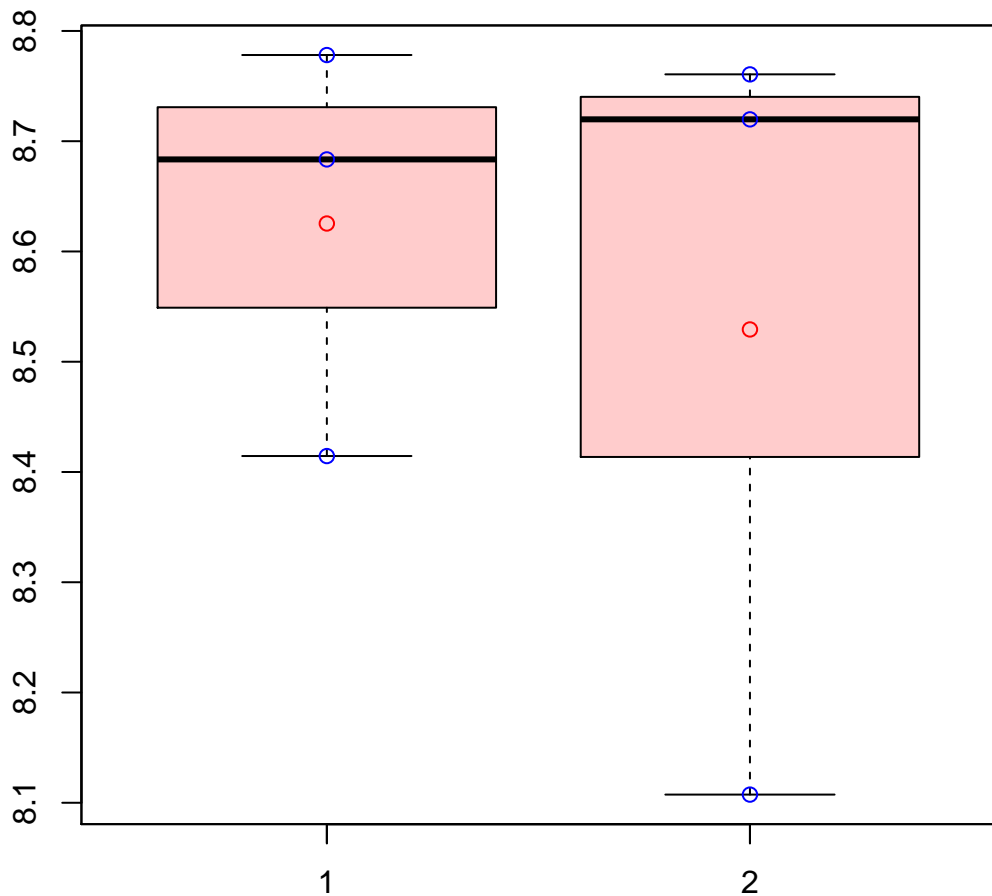

t-Test: p-value = 0.71

# CL607Contig3|CL607Contig3

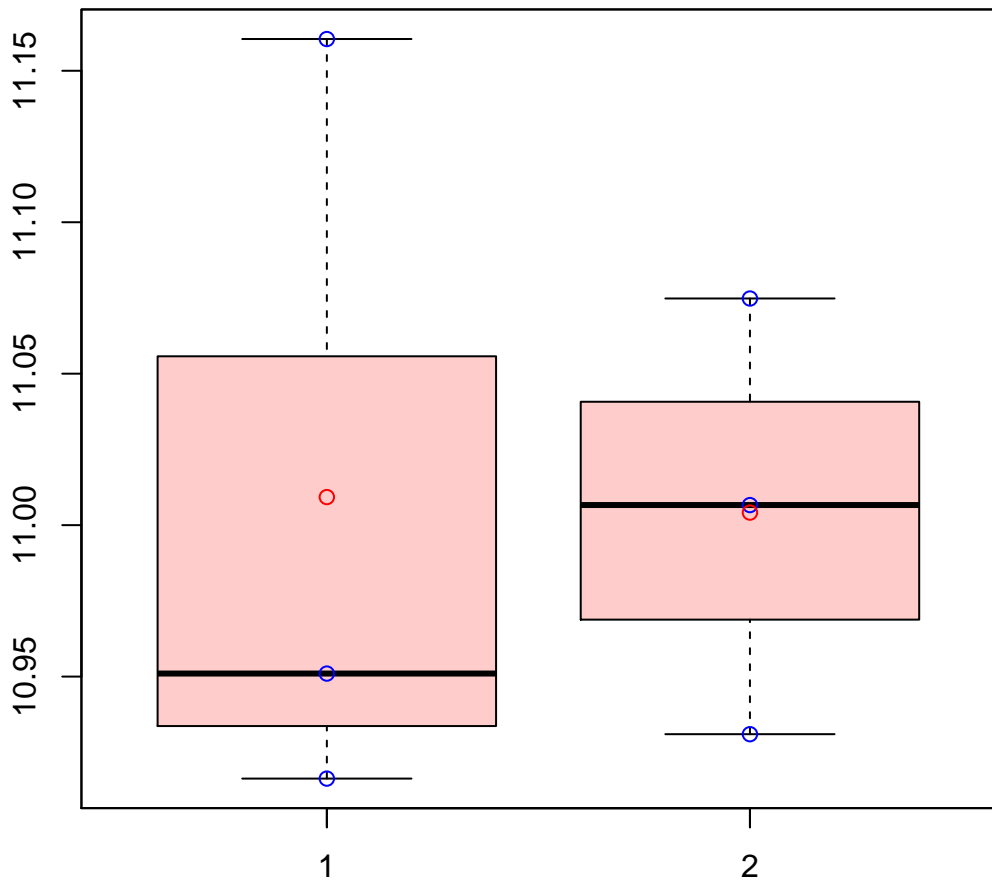

t-Test: p-value = 0.96



# CL608Contig1|CL608Contig1

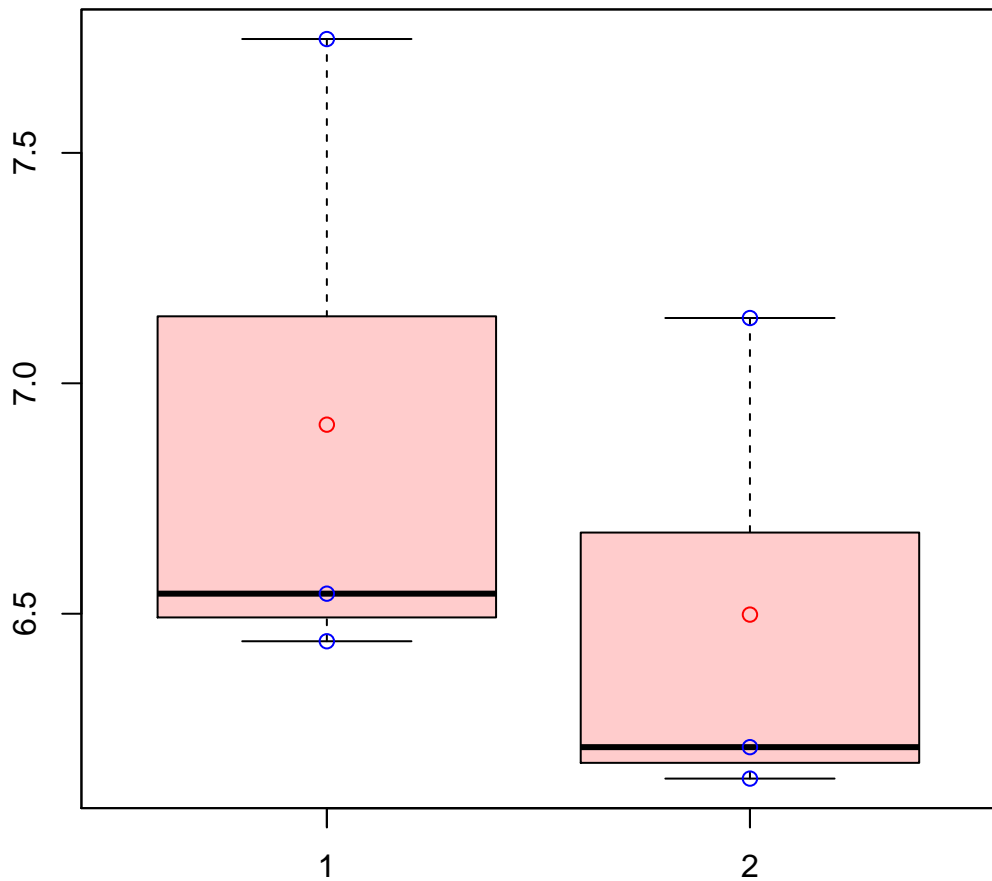

t-Test: p-value = 0.48

# CL60Contig22|CL60Contig22

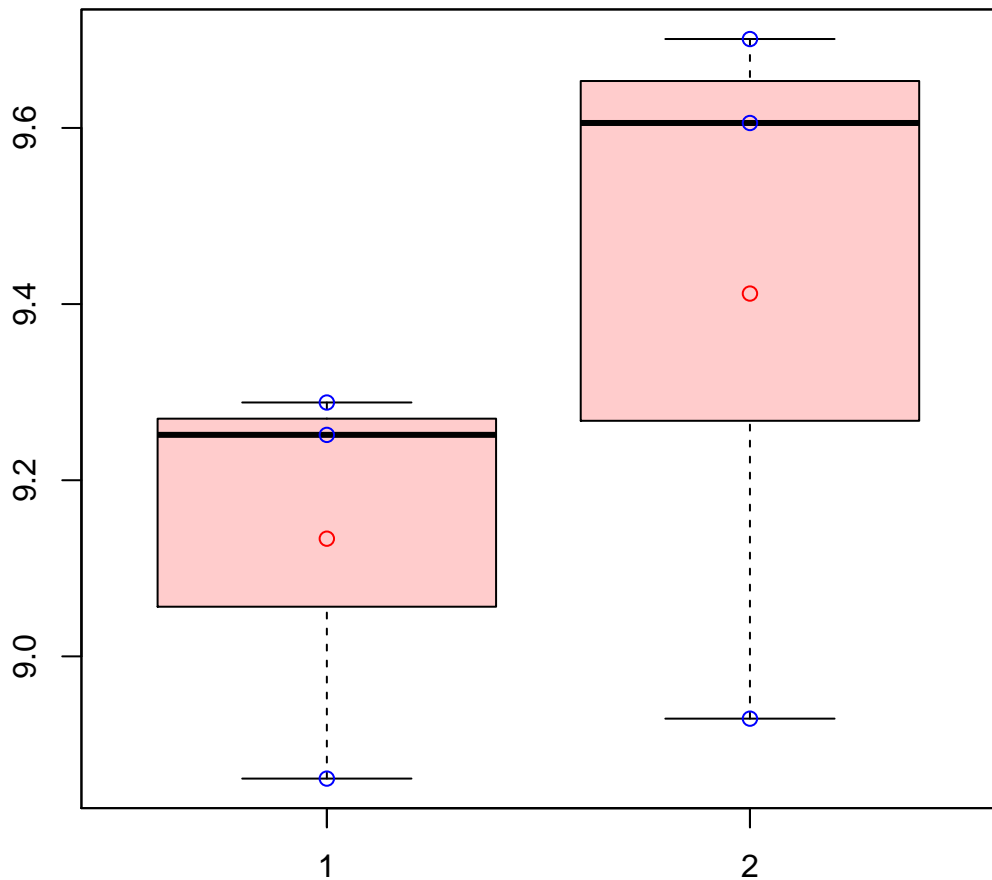

t-Test: p-value = 0.39

# CL60Contig34|CL60Contig34

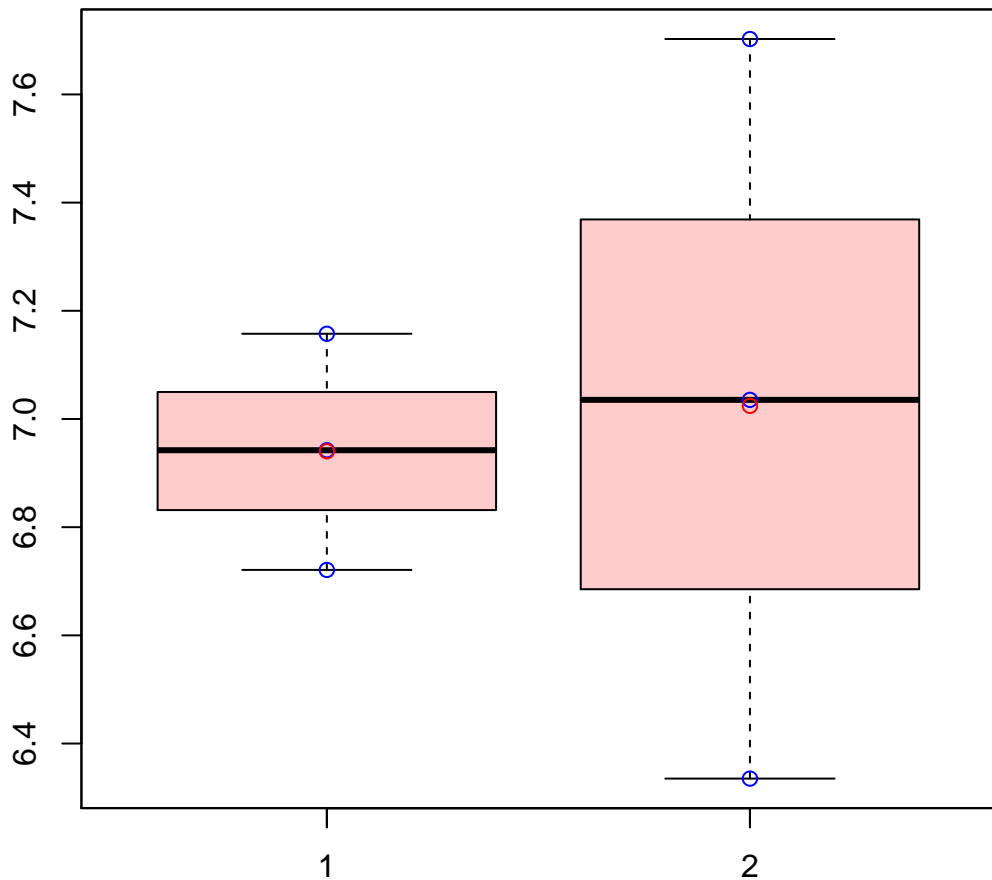

t-Test: p-value = 0.86

# CL612Contig6|CL612Contig6

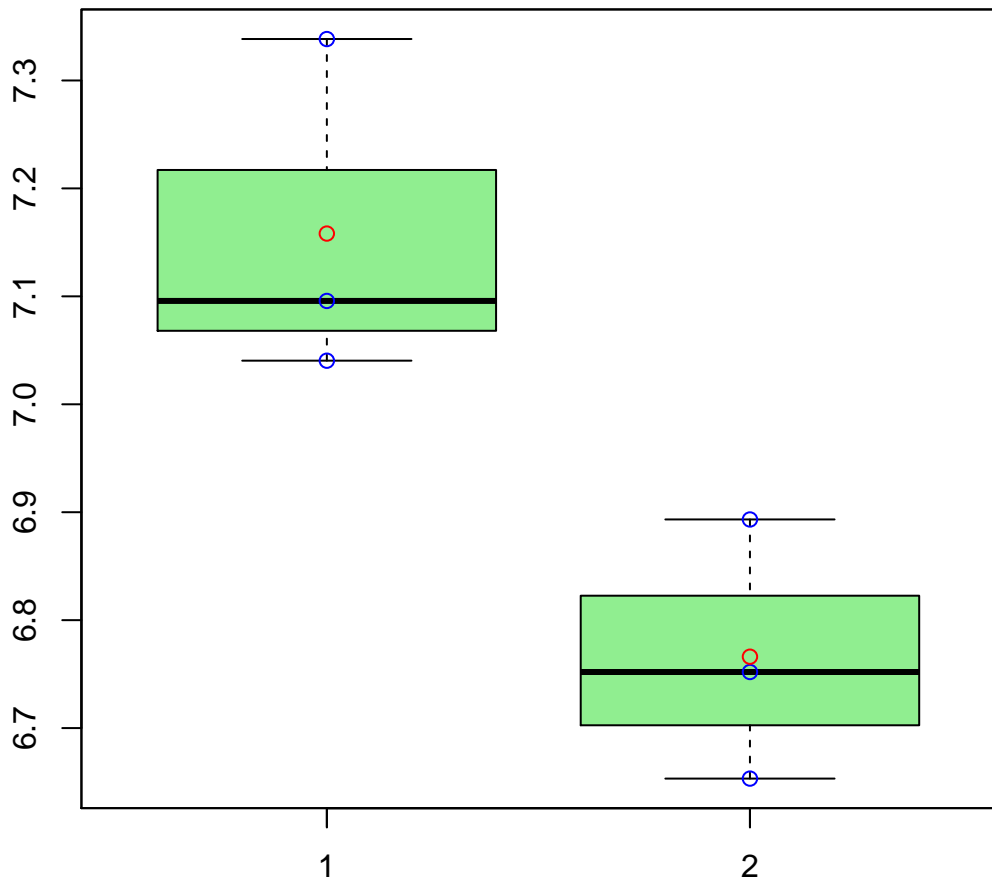

t-Test: p-value = 0.03

# CL612Contig8|CL612Contig8

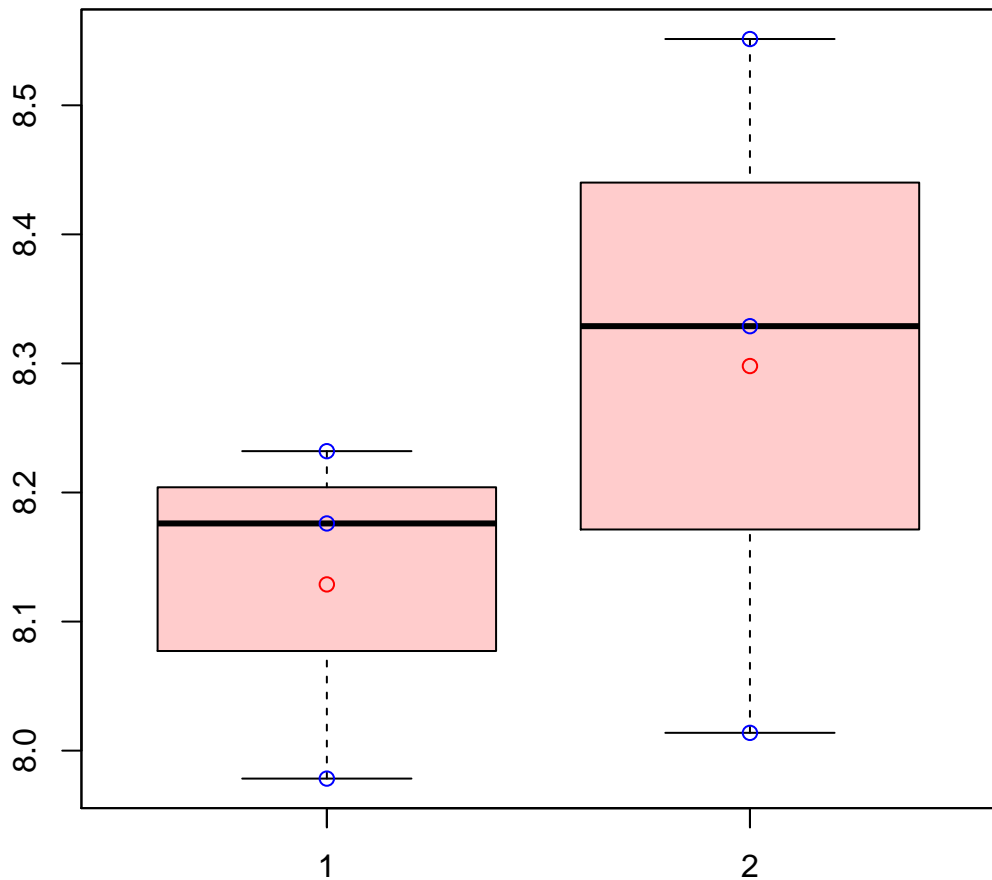

t-Test: p-value = 0.4

# CL614Contig11|CL614Contig11

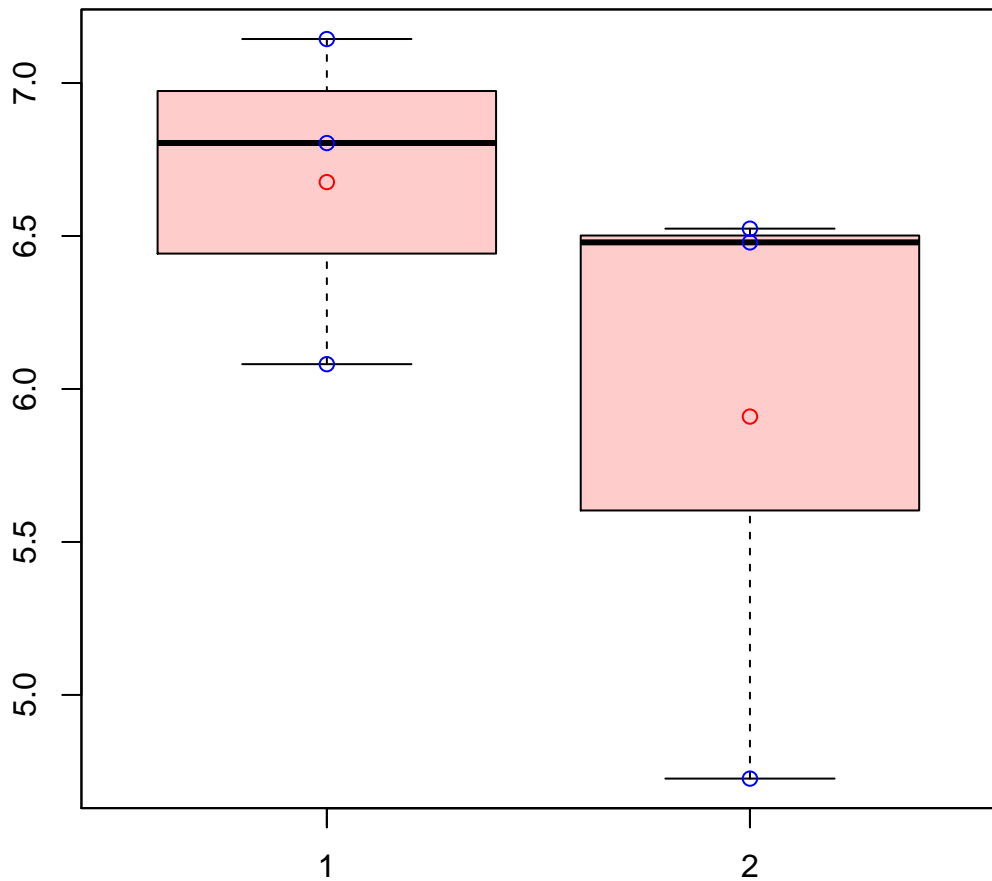

t-Test: p-value = 0.33

# CL6157Contig3|CL6157Contig3

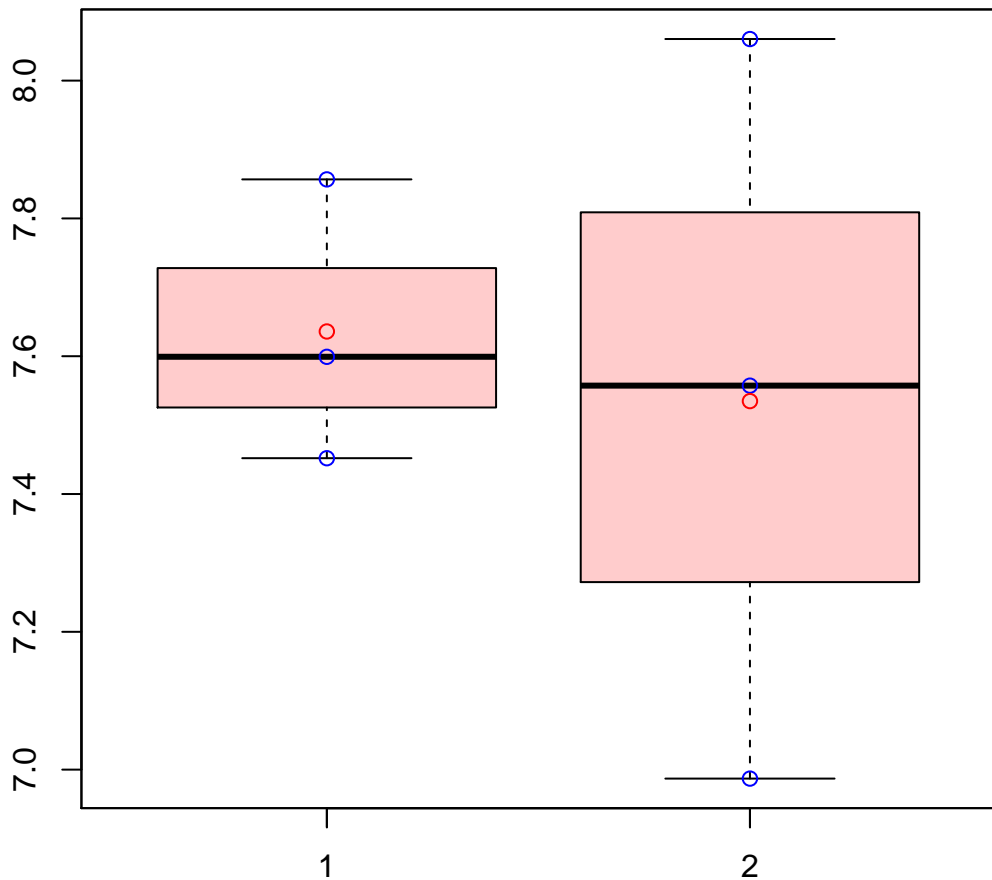

t-Test: p-value = 0.78

# CL6165Contig1|CL6165Contig1

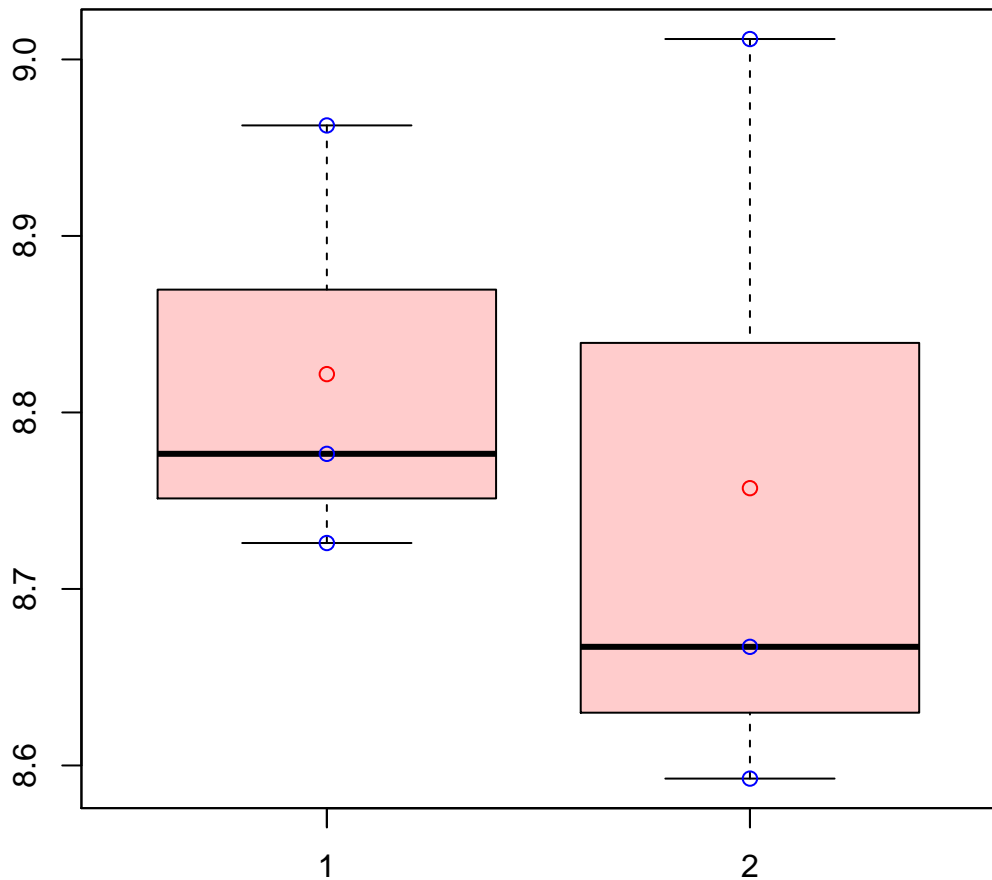

t-Test: p-value = 0.69



# CL6178Contig2|CL6178Contig2

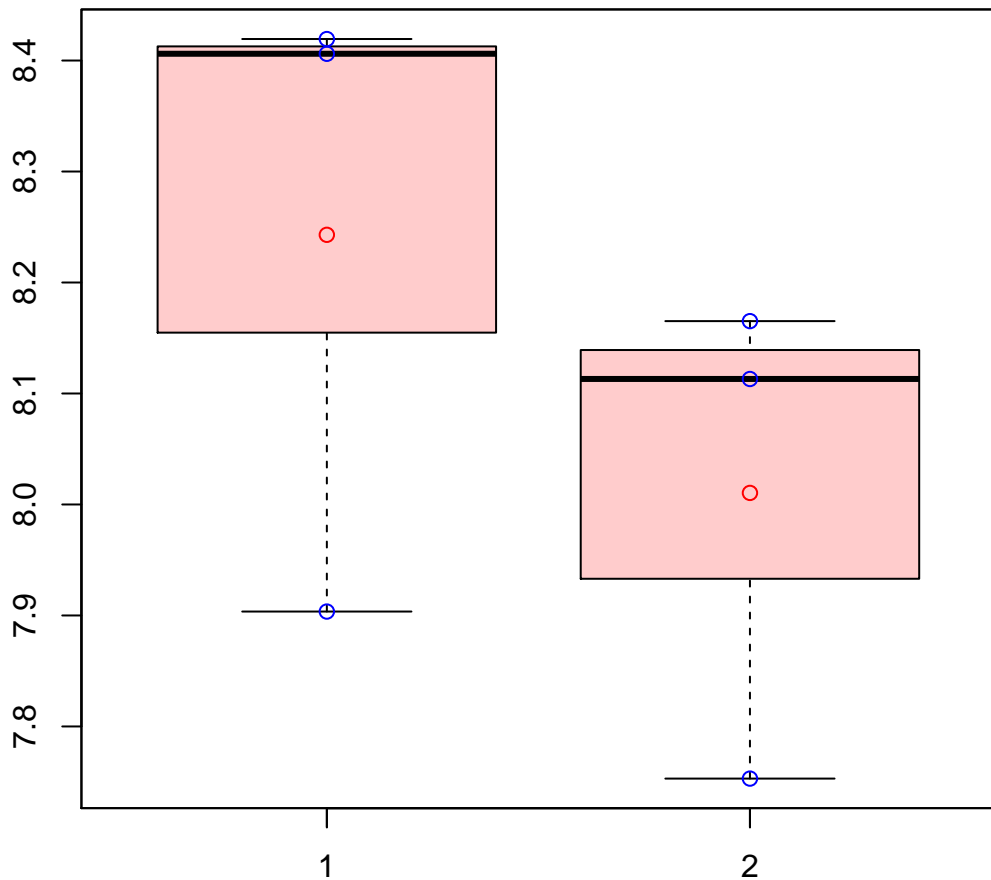

t-Test: p-value = 0.34

# CL6189Contig1|CL6189Contig1

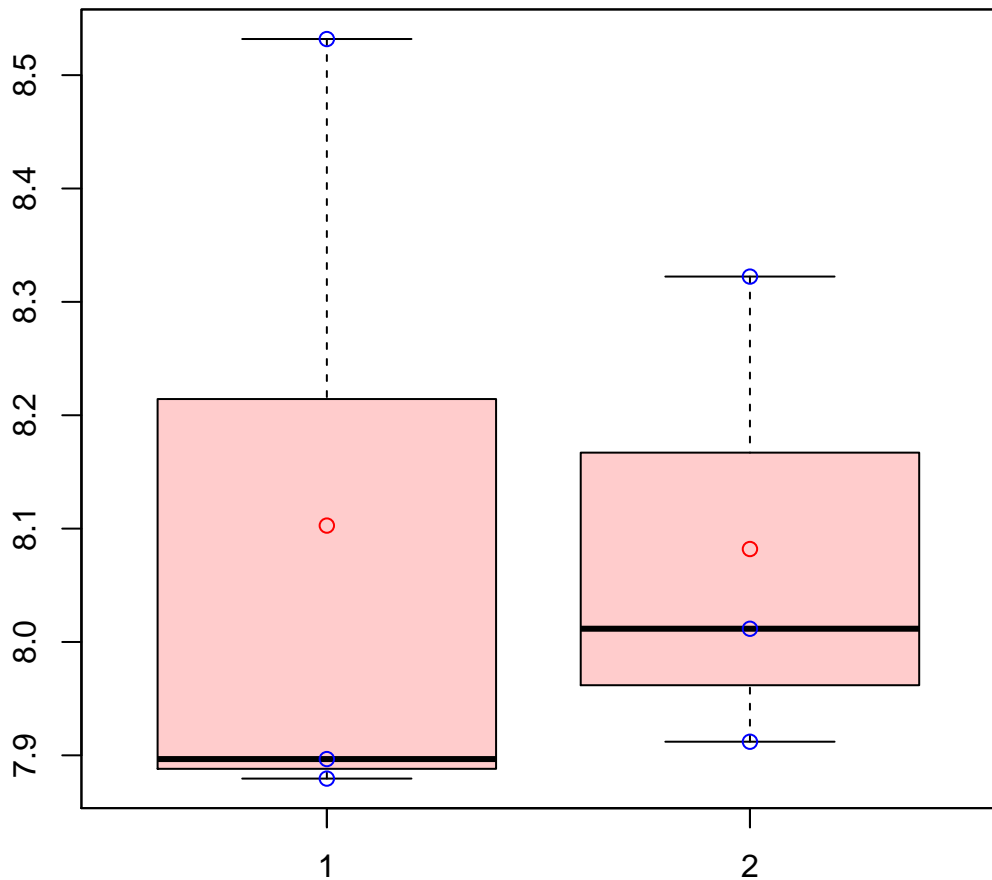

t-Test: p-value = 0.94

# CL6190Contig1|CL6190Contig1

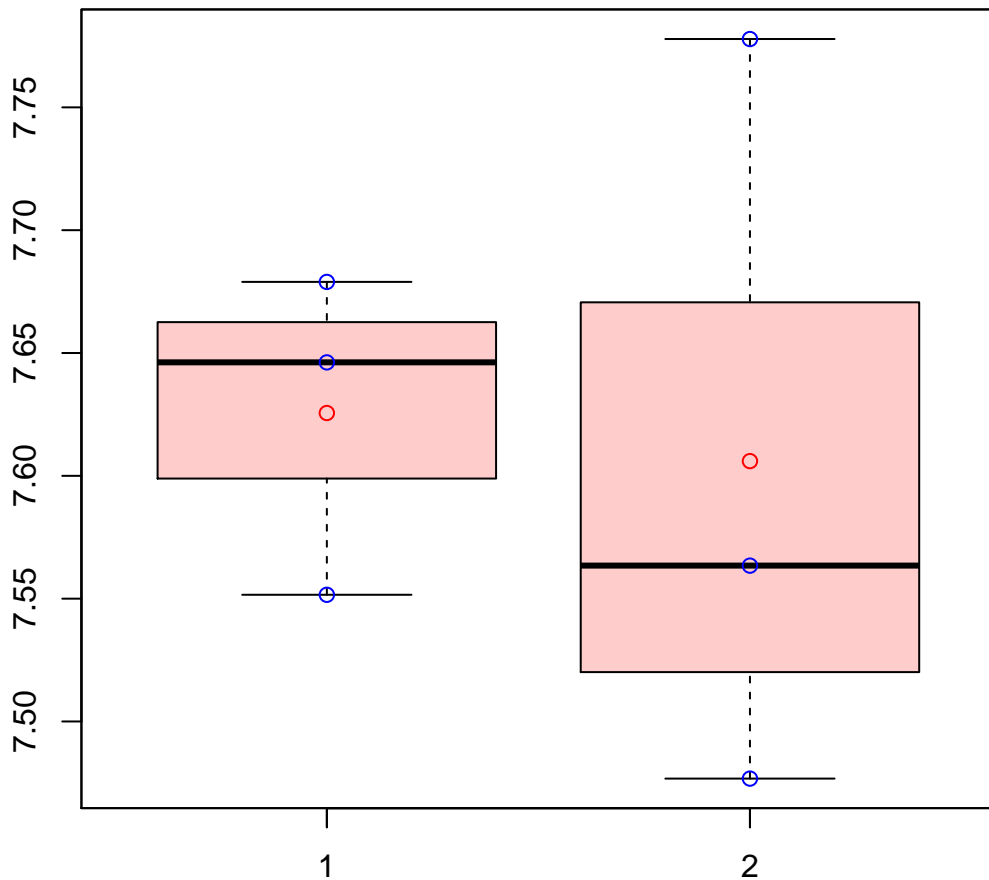

t-Test: p-value = 0.85

# CL6193Contig3|CL6193Contig3

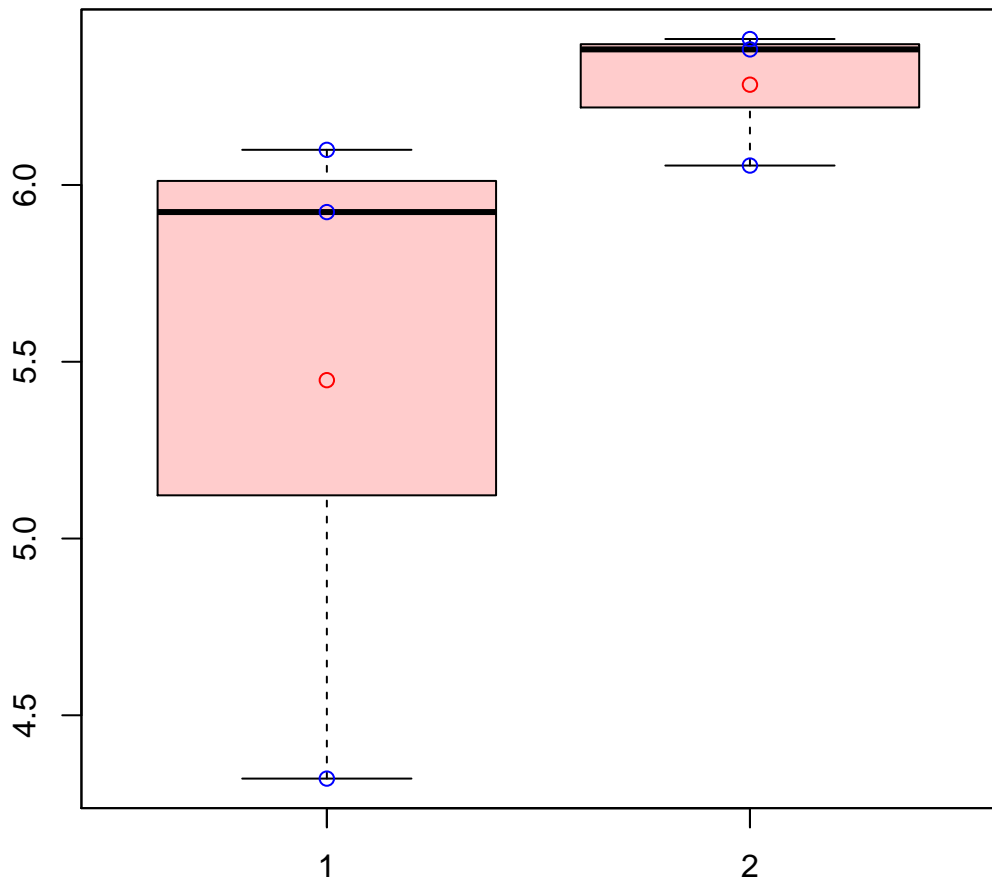

t-Test: p-value = 0.28

# CL6199Contig1|CL6199Contig1

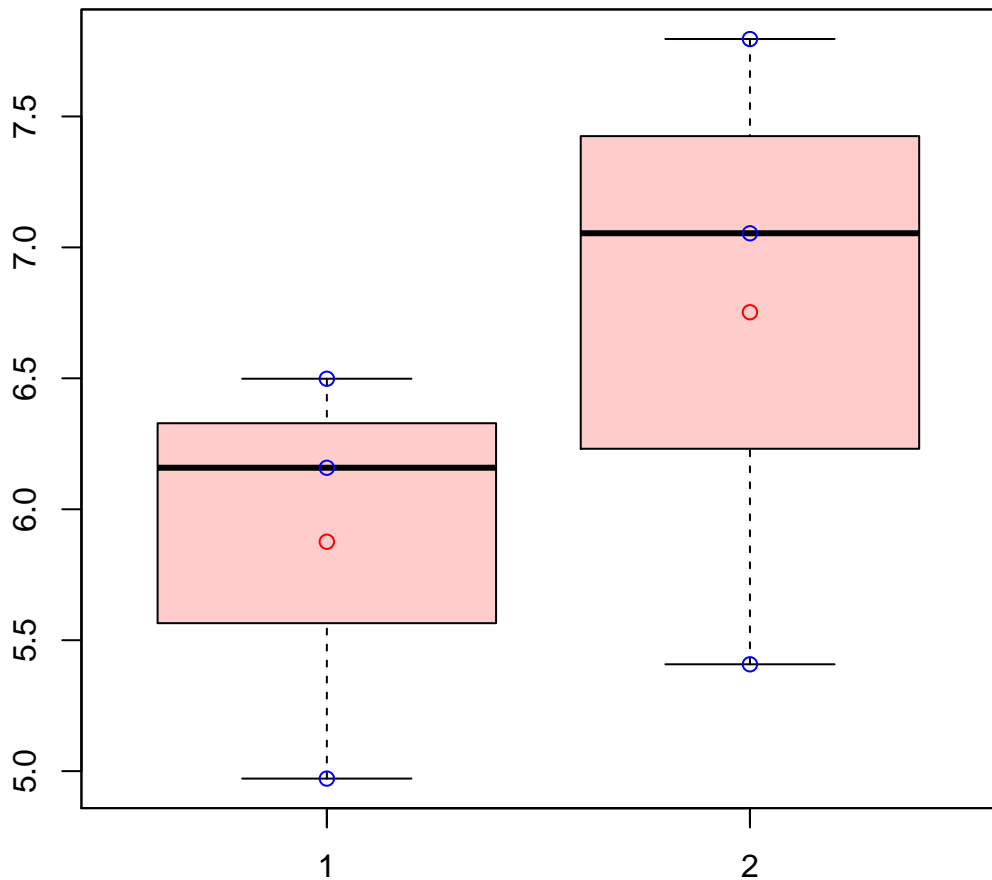

t-Test: p-value = 0.37

# CL61Contig20|CL61Contig20

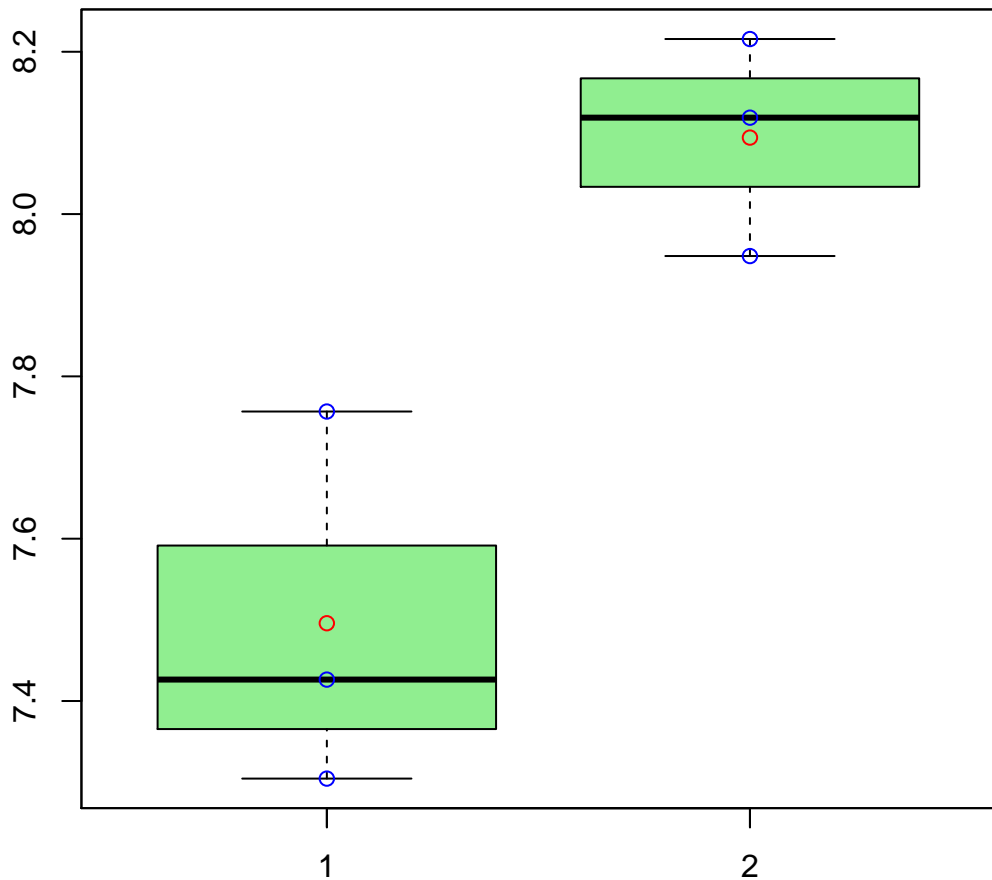

t-Test: p-value = 0.03

# CL6235Contig1|CL6235Contig1

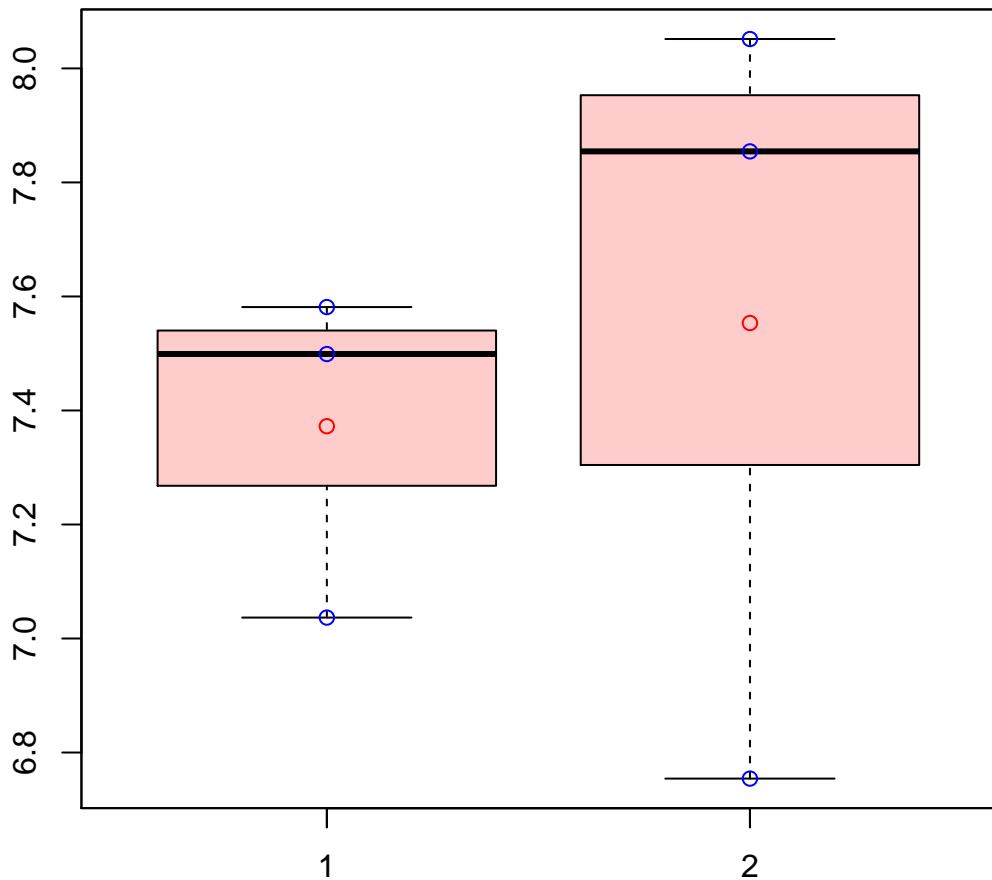

t-Test: p-value = 0.71

# CL6253Contig2|CL6253Contig2

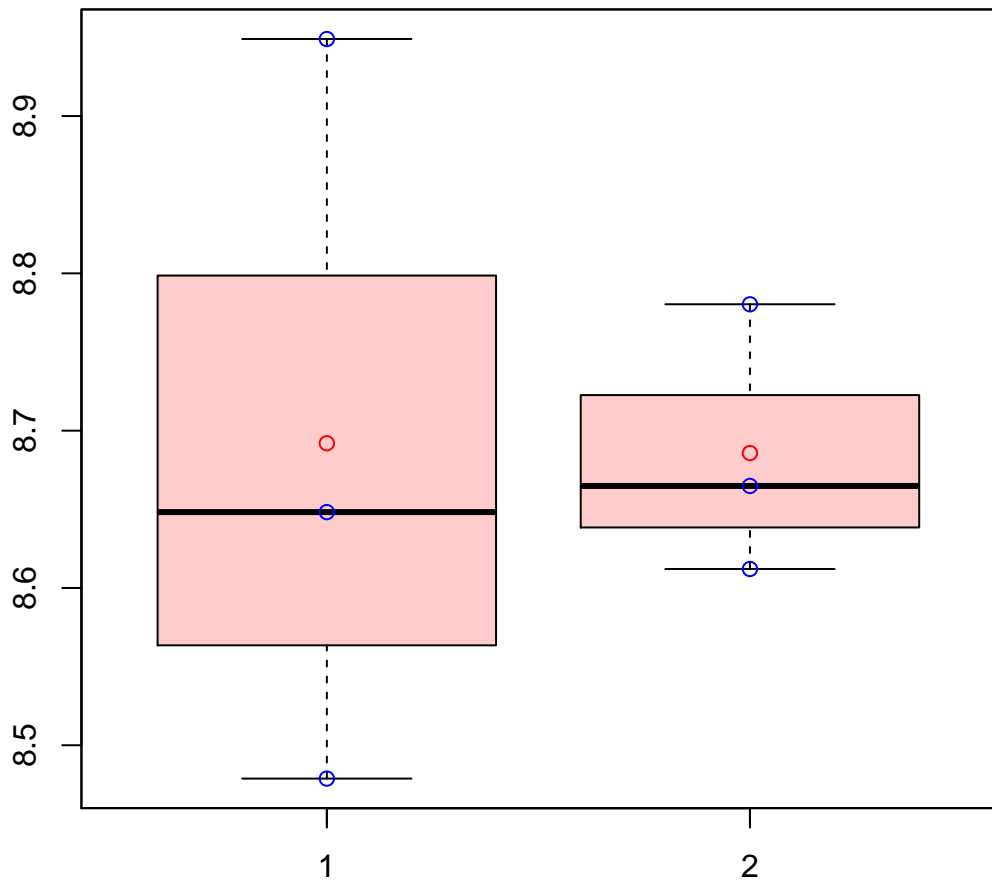

t-Test: p-value = 0.97



# CL625Contig6|CL625Contig6

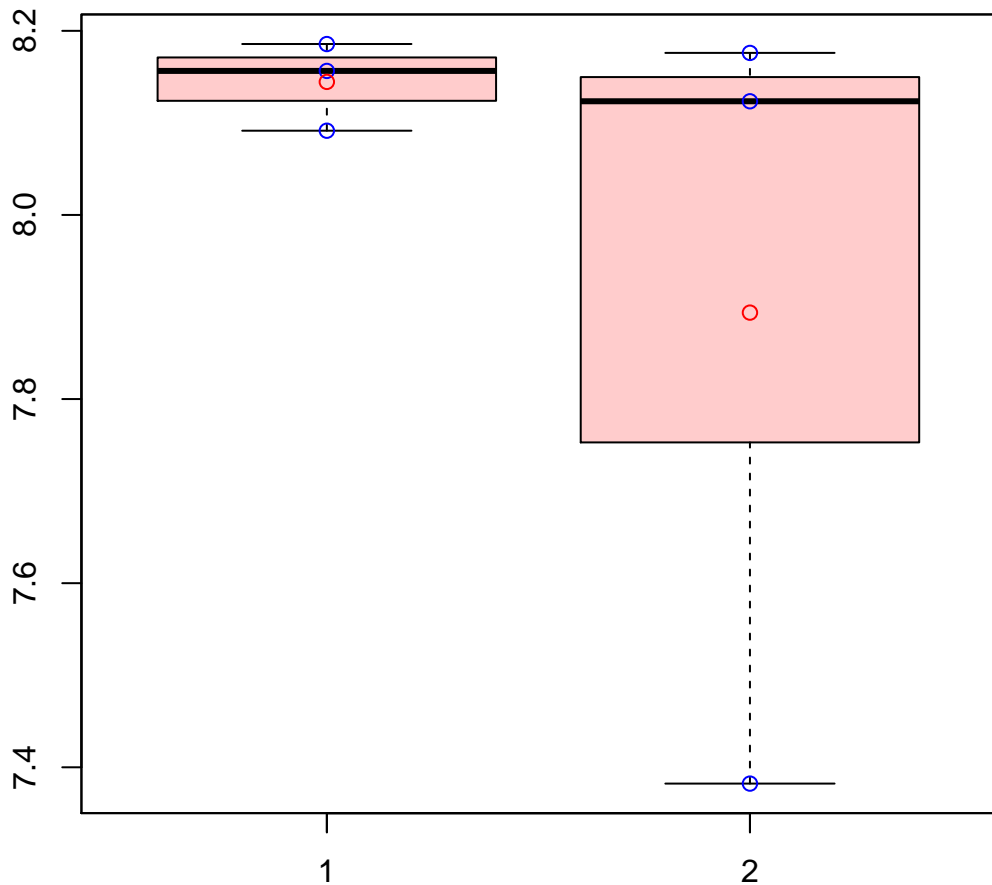

t-Test: p-value = 0.43

# CL628Contig2|CL628Contig2

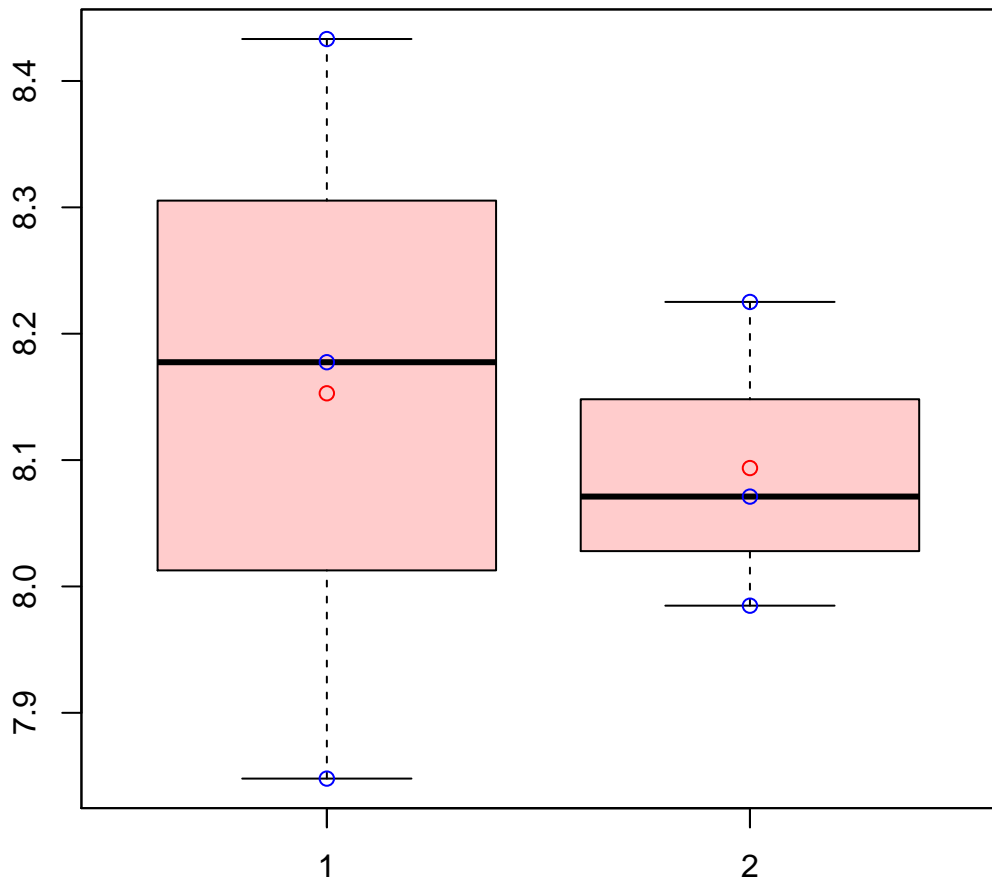

t-Test: p-value = 0.77

# CL629Contig13|CL629Contig13

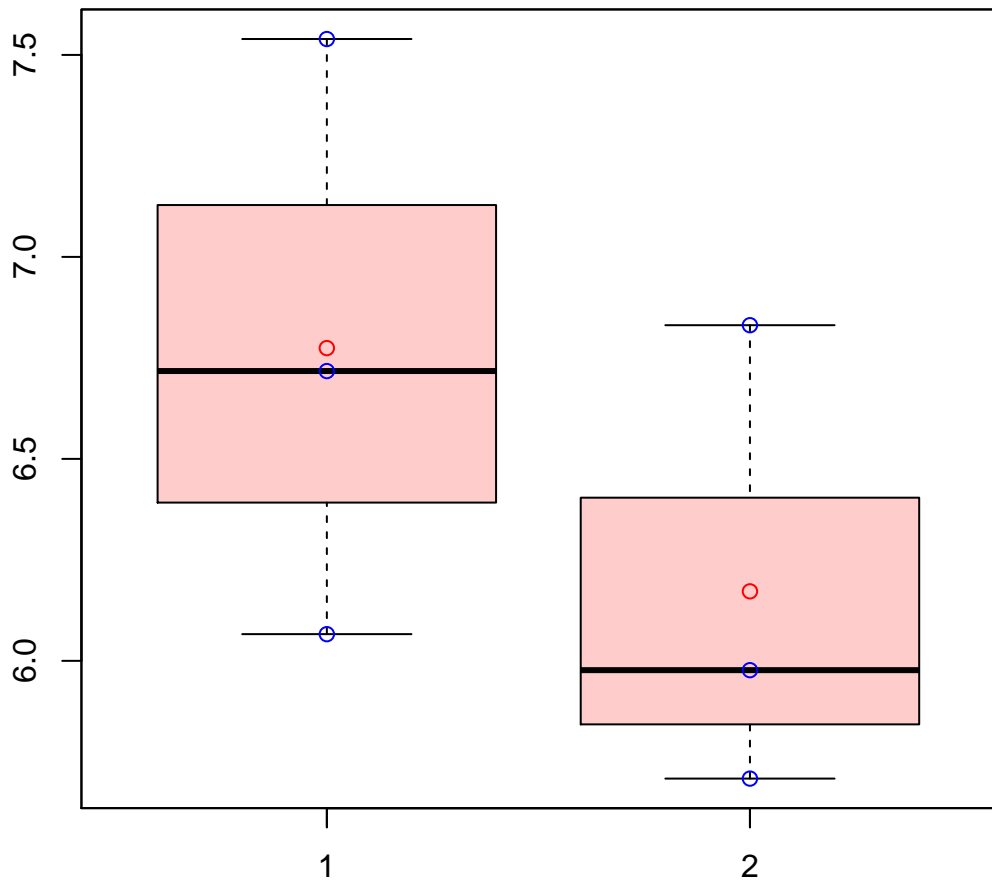

t-Test: p-value = 0.33

# CL629Contig14|CL629Contig14

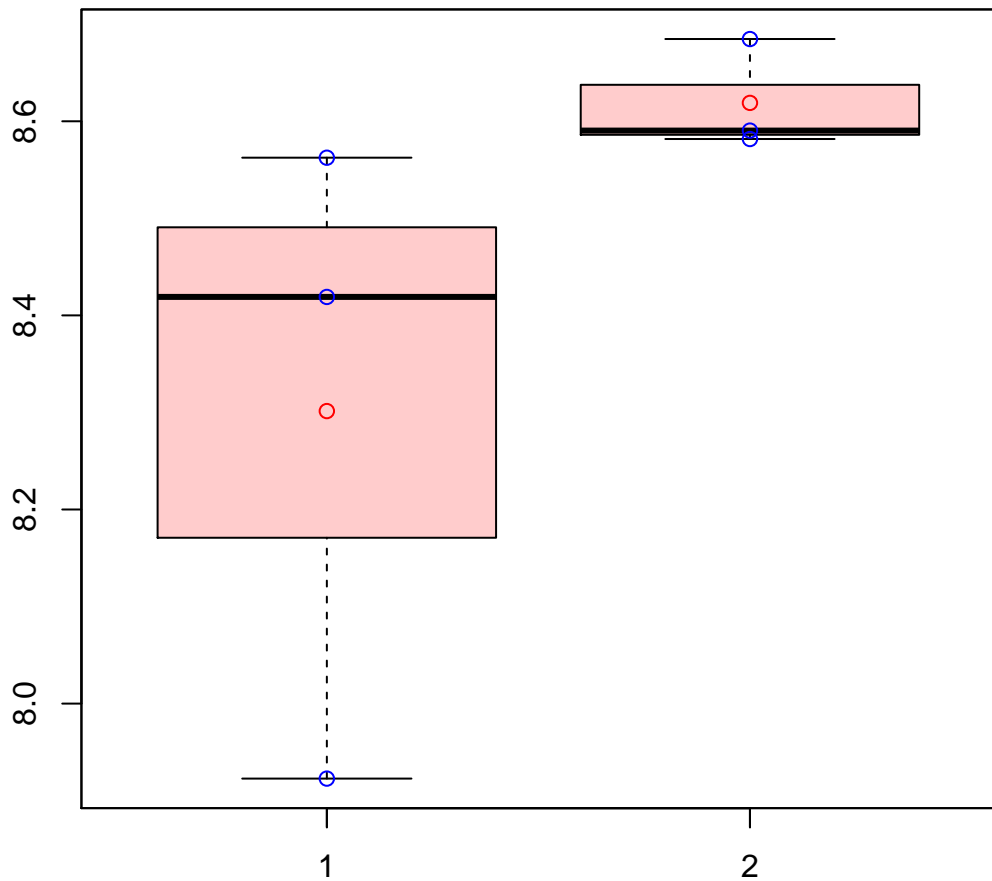

t-Test: p-value = 0.24

# CL629Contig5|CL629Contig5

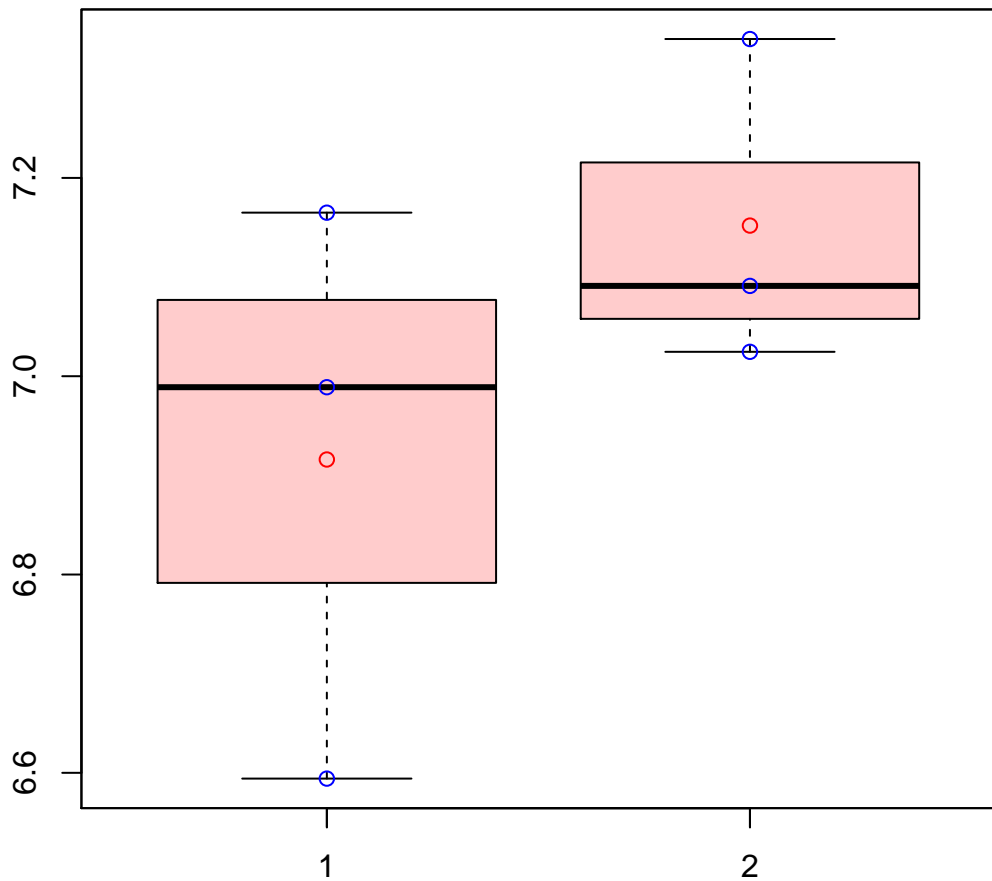

t-Test: p-value = 0.31

# CL630Contig2|CL630Contig2

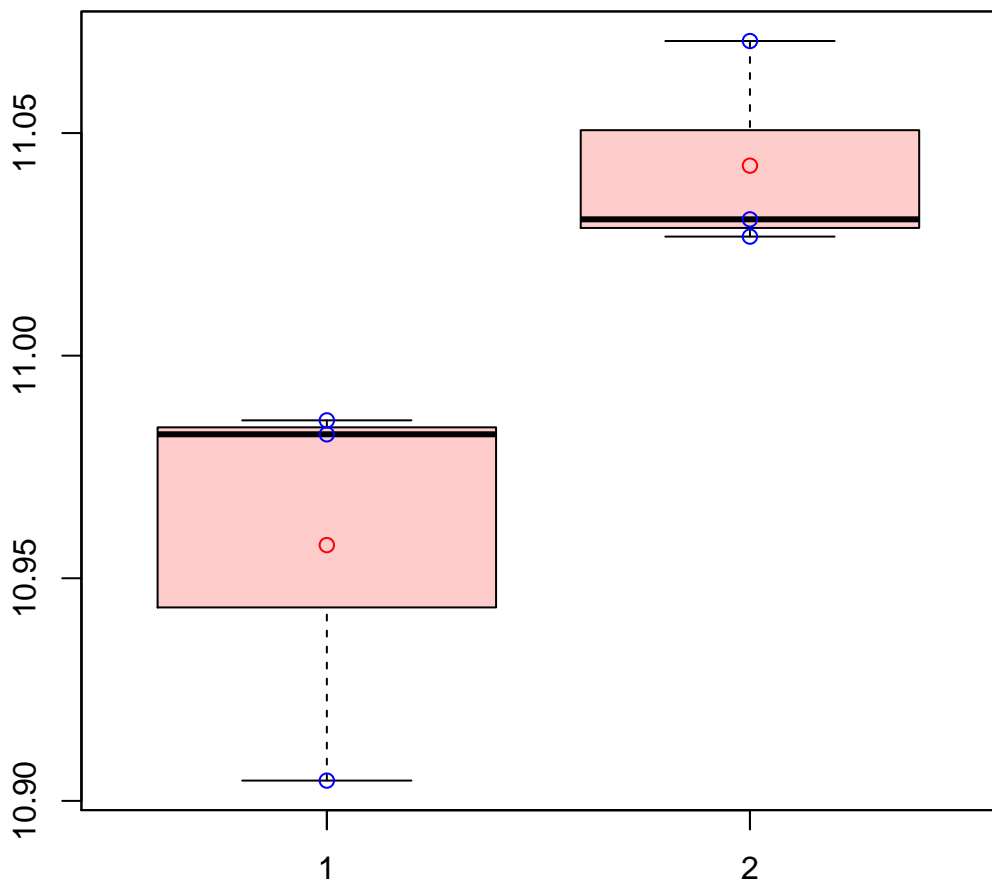

t-Test: p-value = 0.06

# CL630Contig6|CL630Contig6

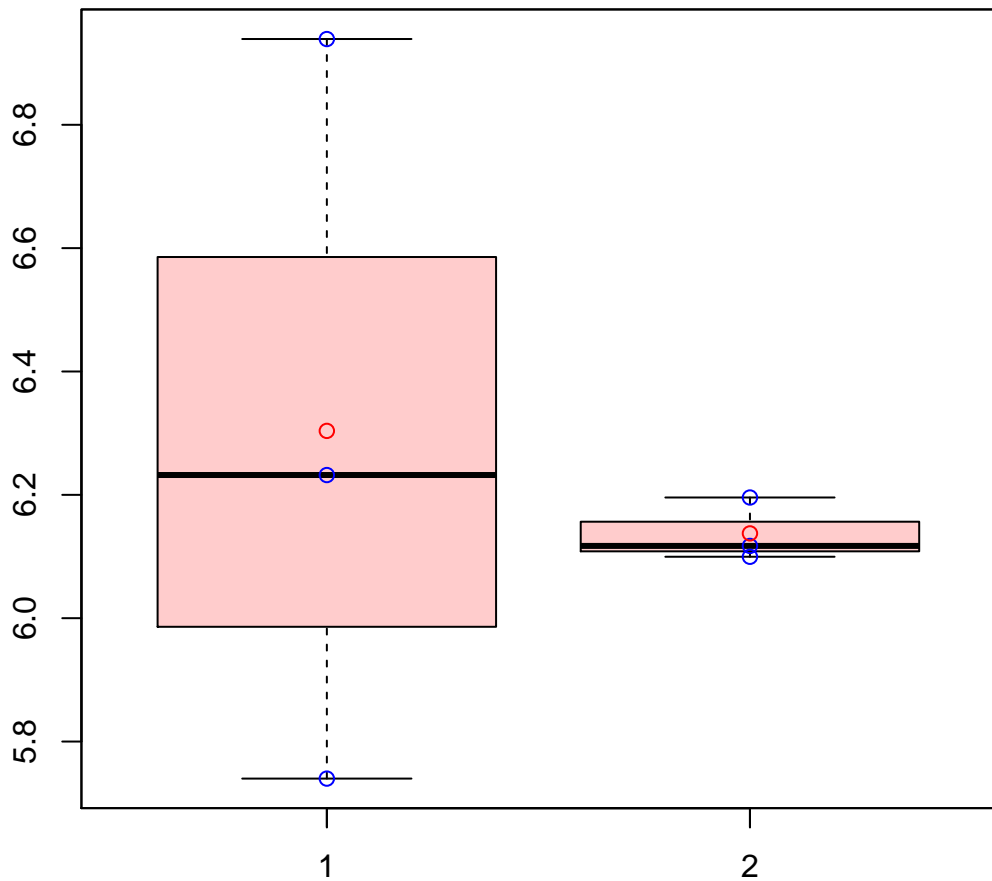

t-Test: p-value = 0.68

# CL6314Contig1|CL6314Contig1

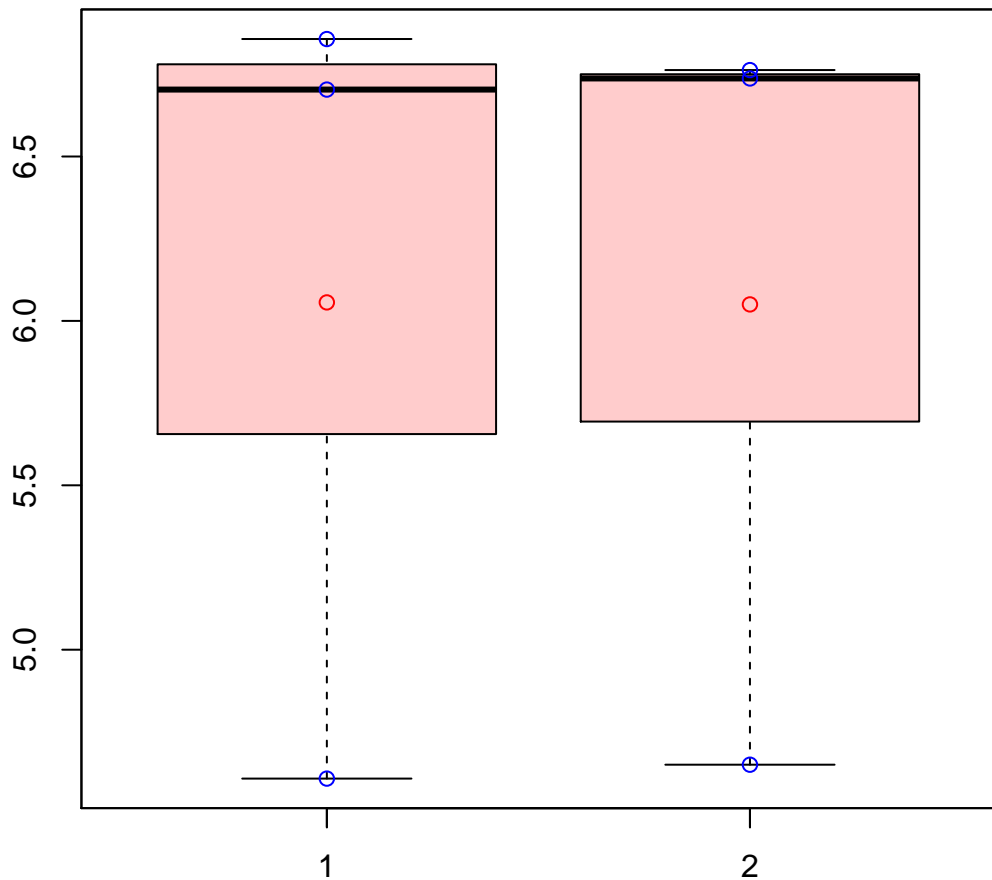

t-Test: p-value = 1



# CL6319Contig2|CL6319Contig2

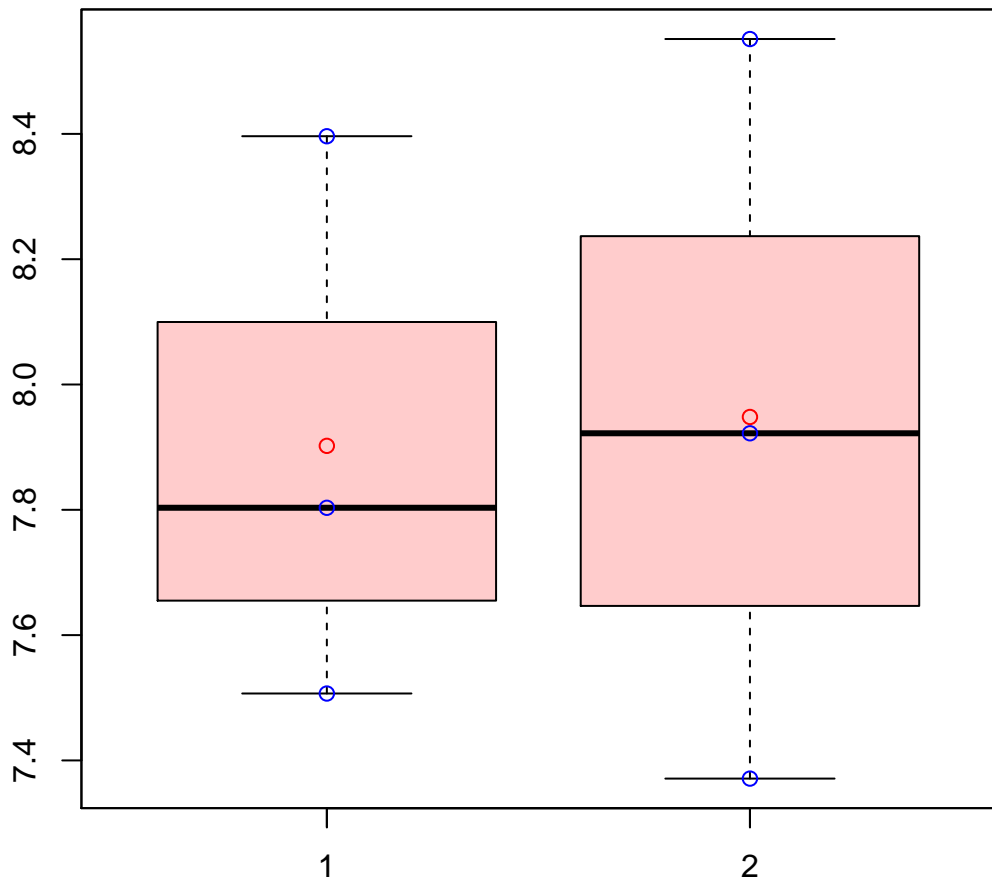

t-Test: p-value = 0.92

# CL6320Contig1|CL6320Contig1

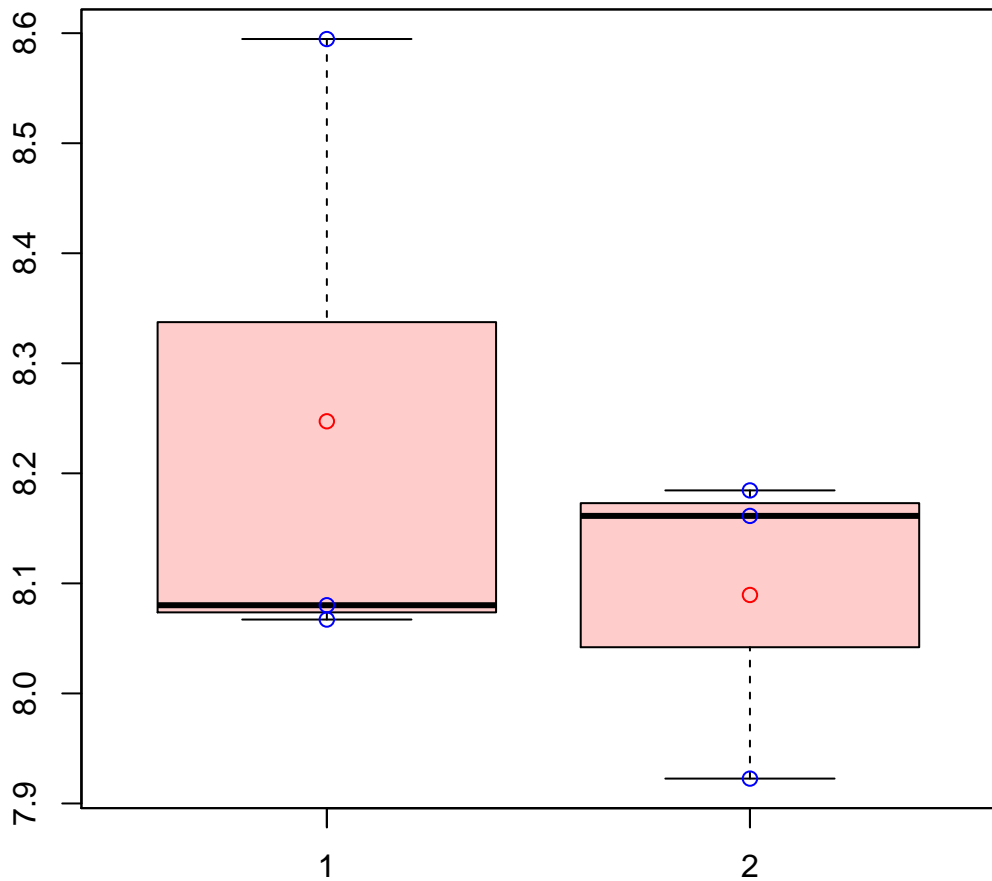

t-Test: p-value = 0.48

# CL632Contig14|CL632Contig14

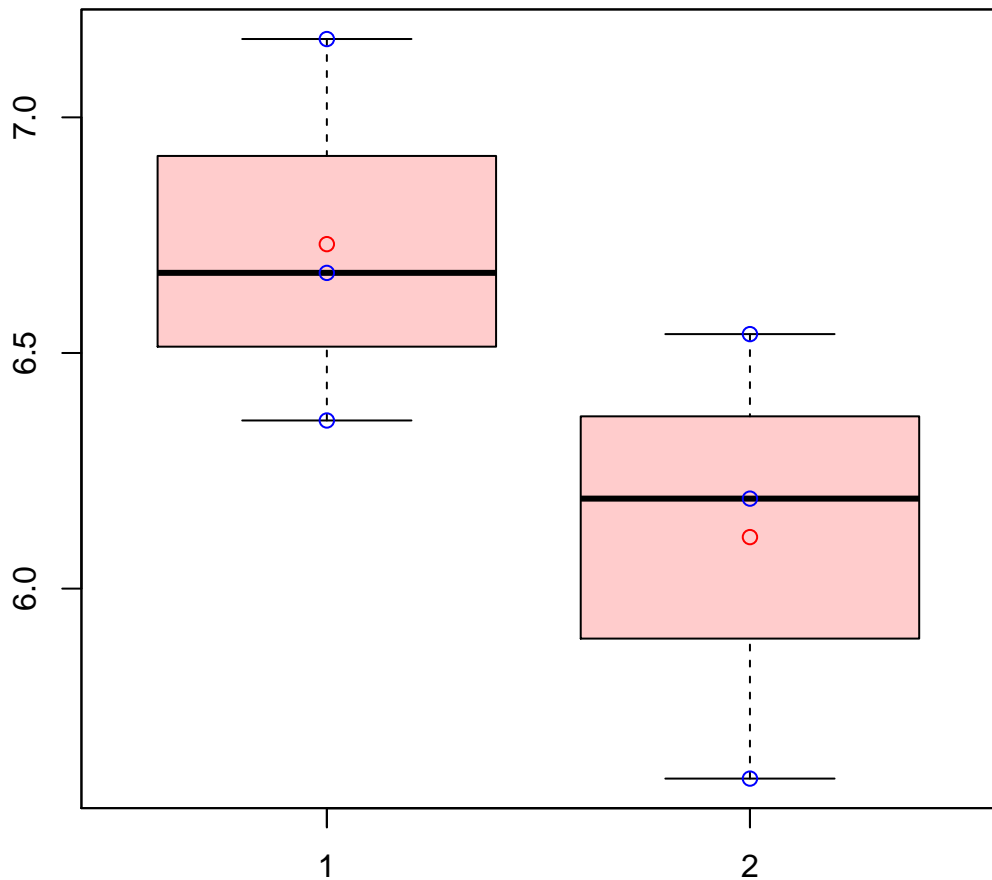

t-Test: p-value = 0.16

# CL632Contig9|CL632Contig9

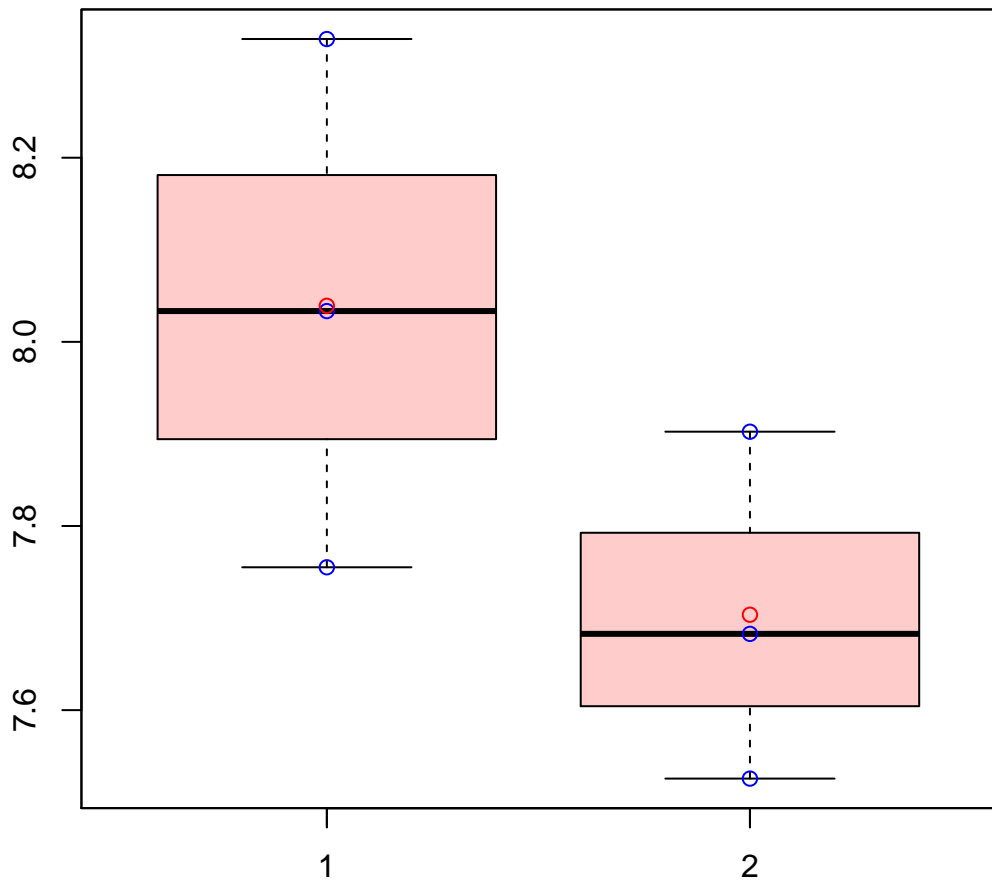

t-Test: p-value = 0.18

# CL6331Contig2|CL6331Contig2

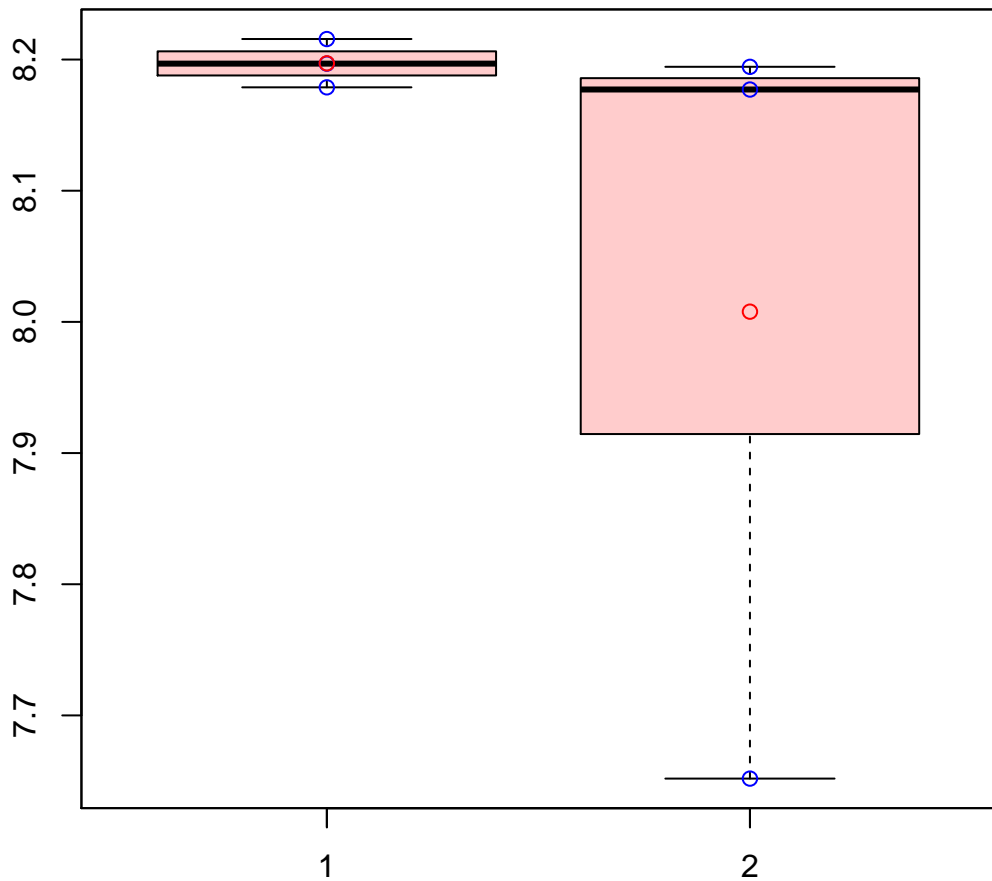

t-Test: p-value = 0.4

# CL6340Contig4|CL6340Contig4

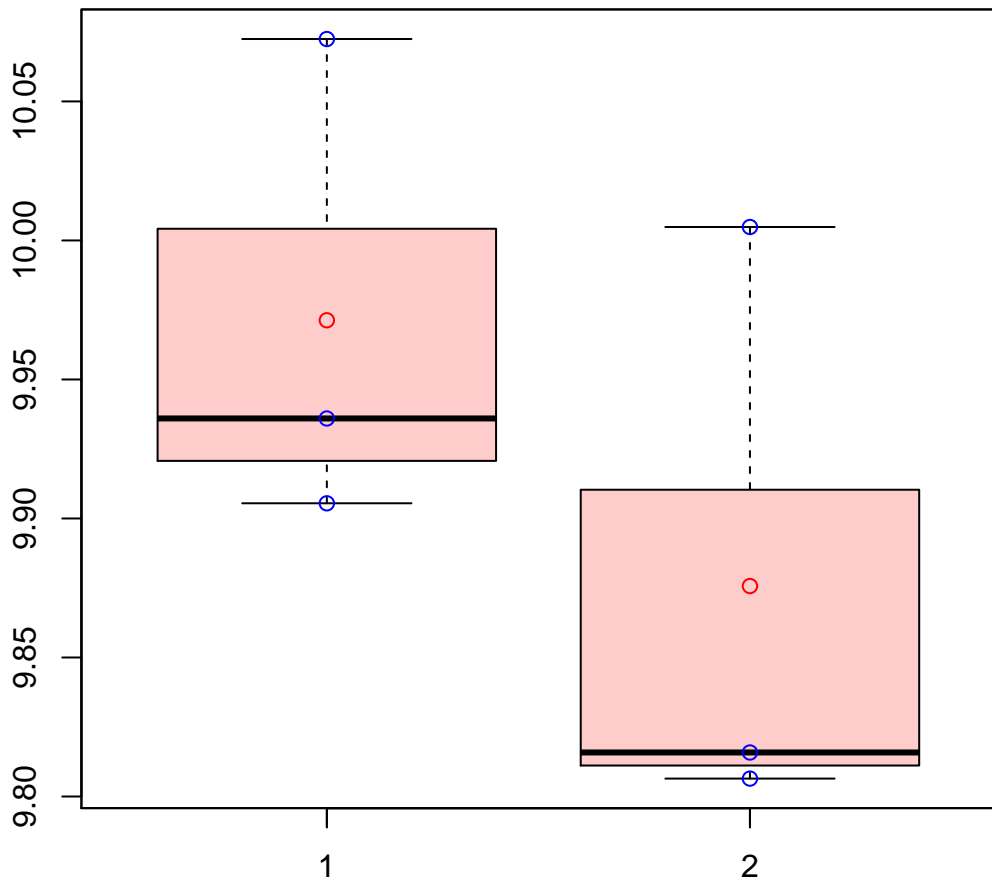

t-Test: p-value = 0.31

# CL6341Contig1|CL6341Contig1

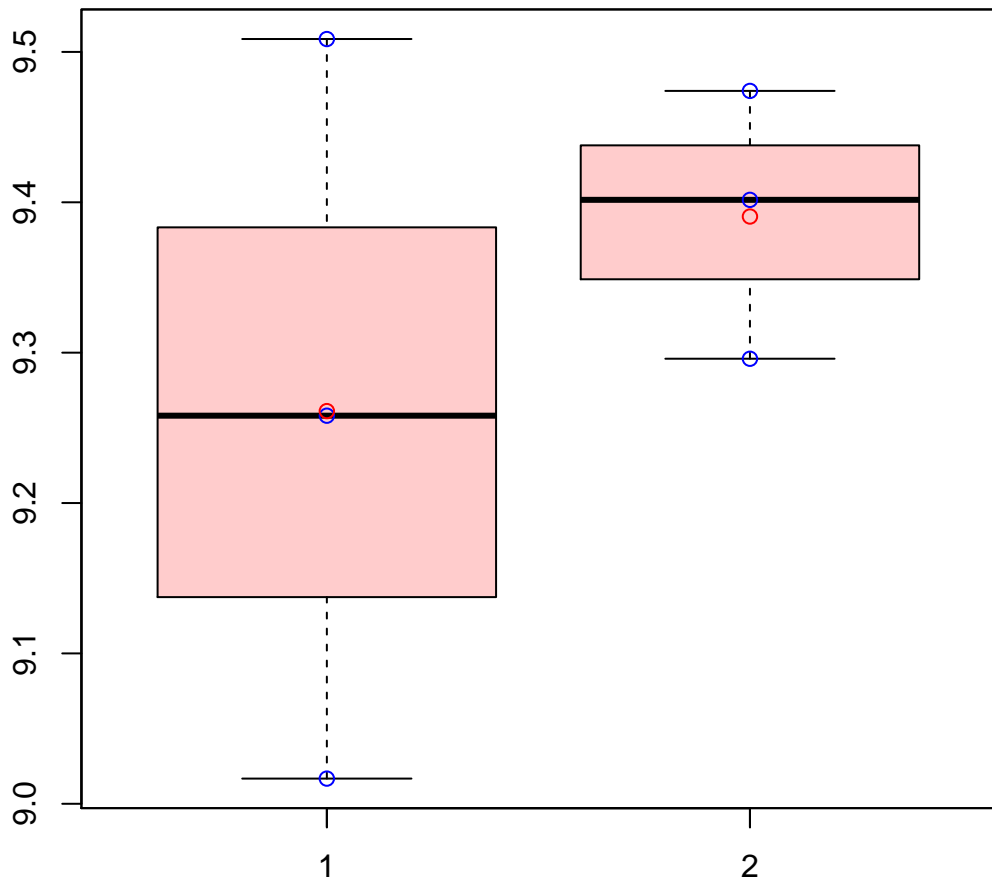

t-Test: p-value = 0.47

# CL6369Contig5|CL6369Contig5

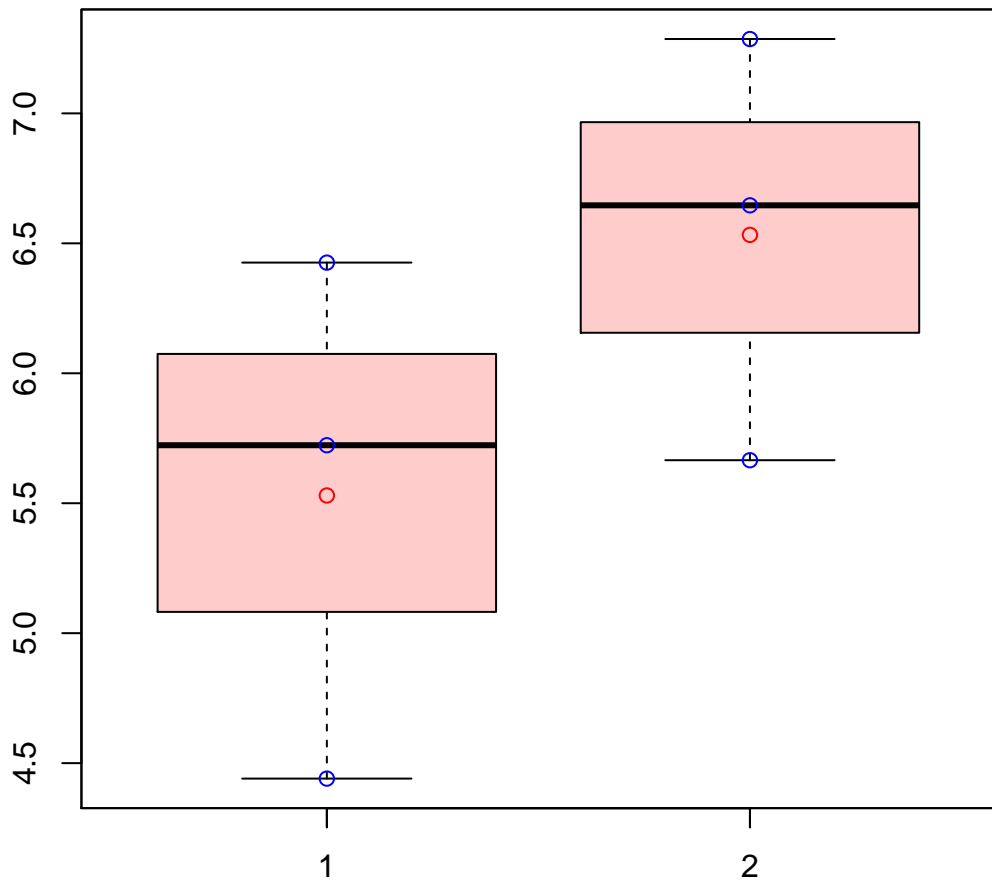

t-Test: p-value = 0.25



# CL6371Contig1|CL6371Contig1

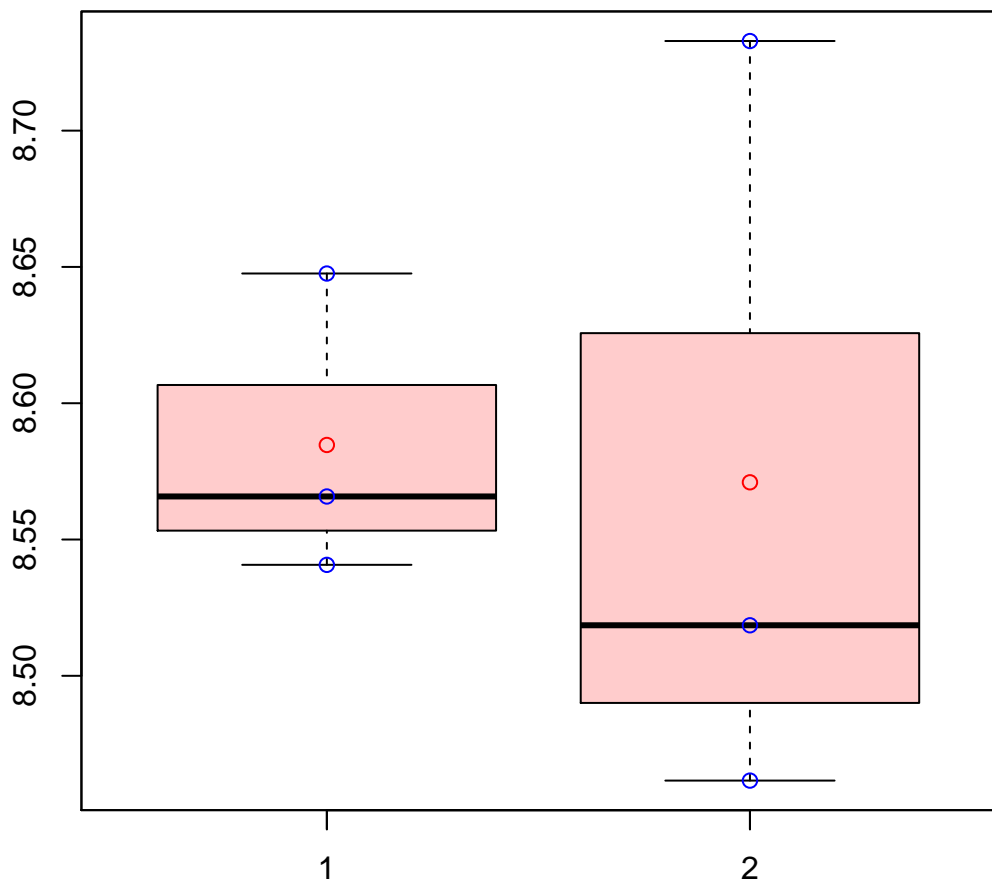

t-Test: p-value = 0.89

# CL6373Contig4|CL6373Contig4

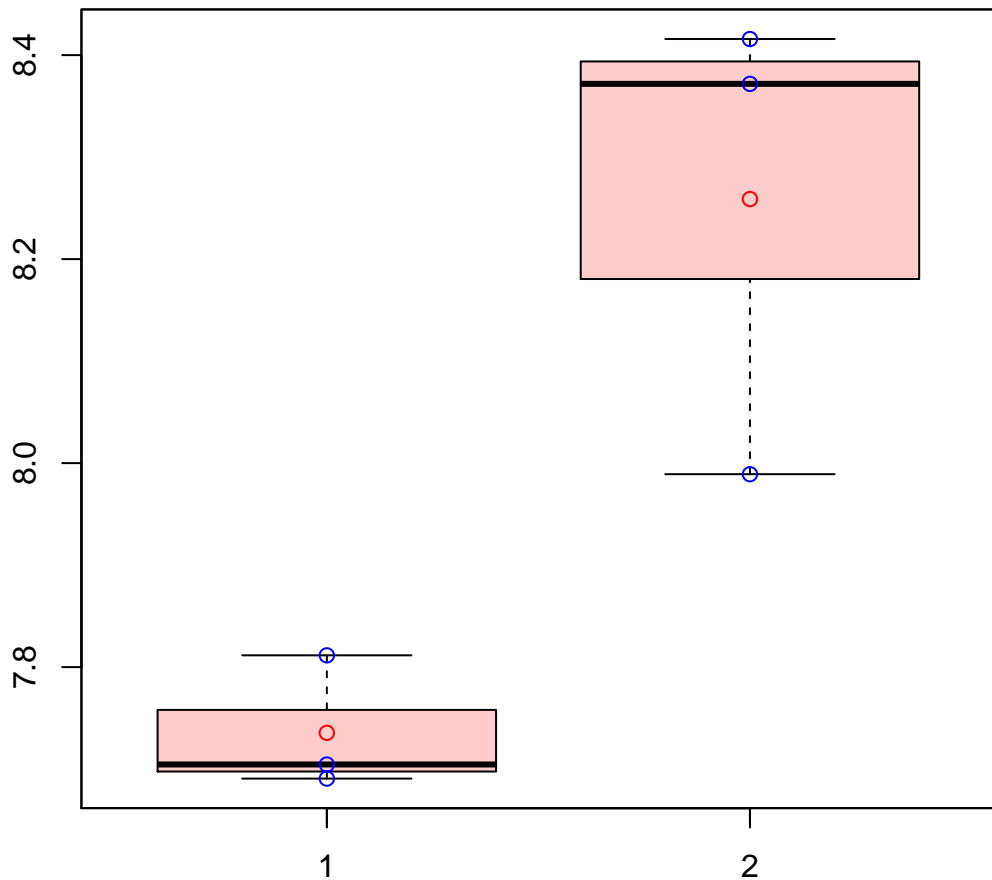

t-Test: p-value = 0.05

# CL637Contig1|CL637Contig1

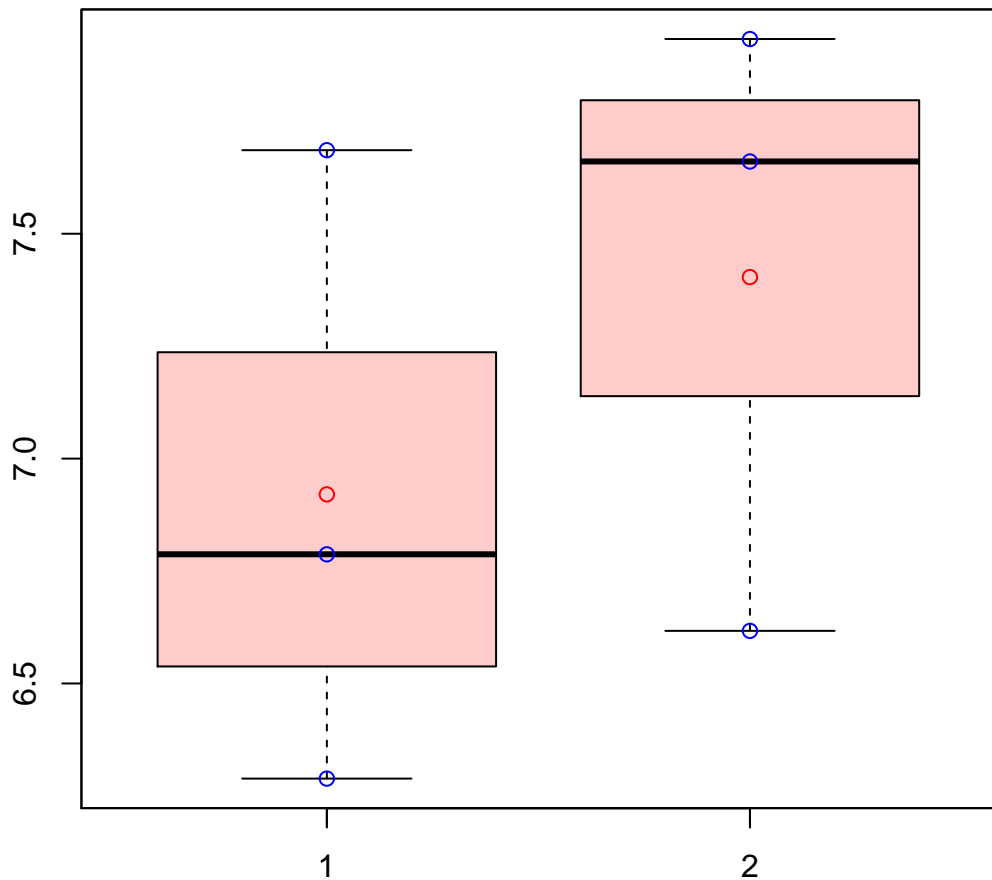

t-Test: p-value = 0.45

# CL6385Contig2|CL6385Contig2

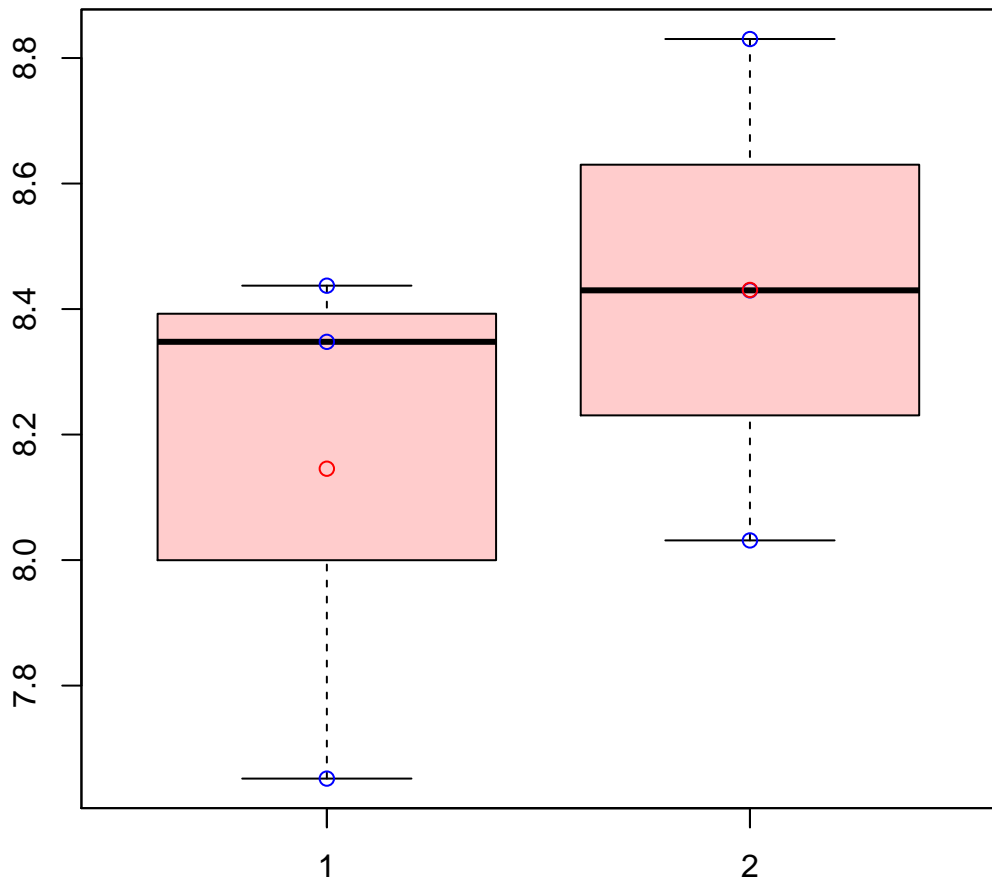

t-Test: p-value = 0.45

# CL638Contig10|CL638Contig10

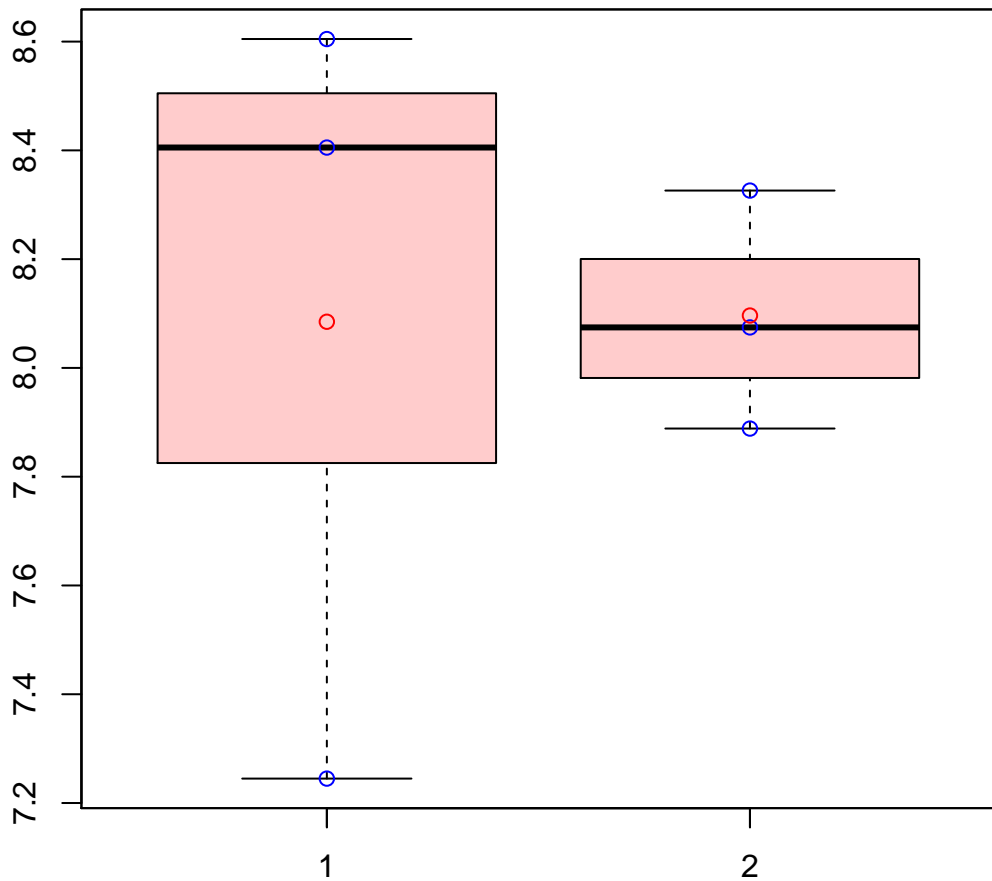

t-Test: p-value = 0.98

# CL6391Contig1|CL6391Contig1

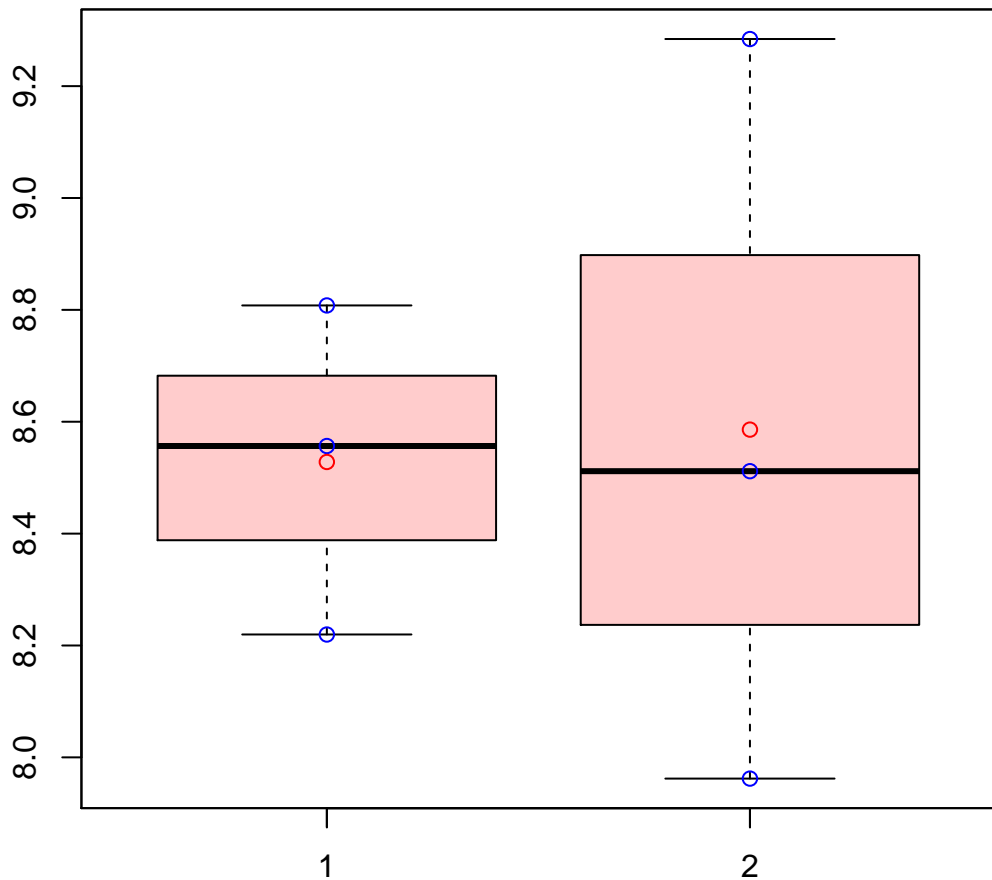

t-Test: p-value = 0.9

# CL6391Contig3|CL6391Contig3

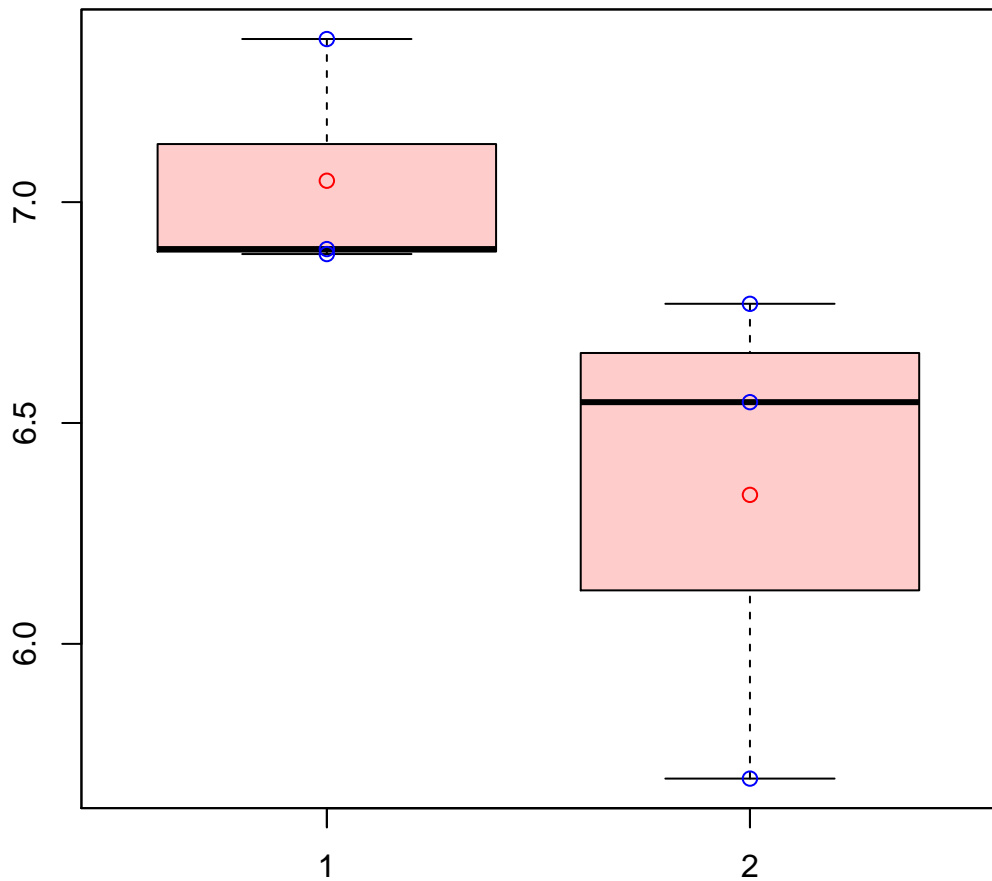

t-Test: p-value = 0.15

# CL6392Contig4|CL6392Contig4

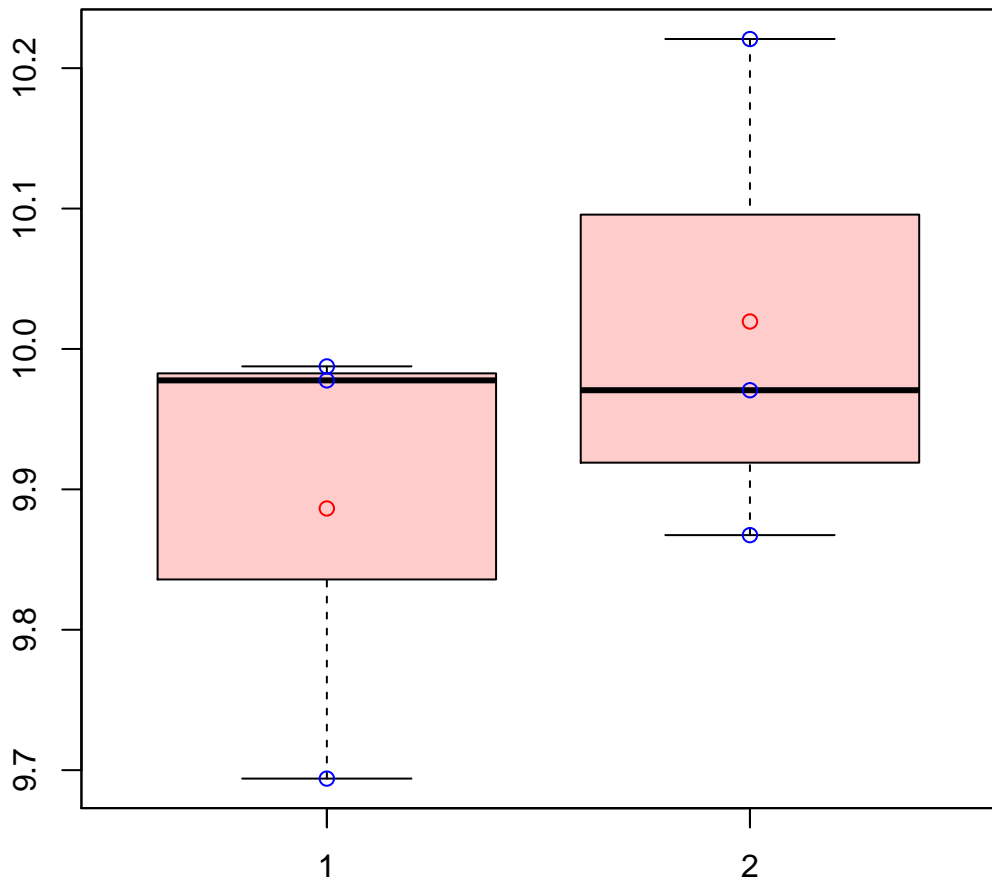

t-Test: p-value = 0.4



# CL6393Contig2|CL6393Contig2

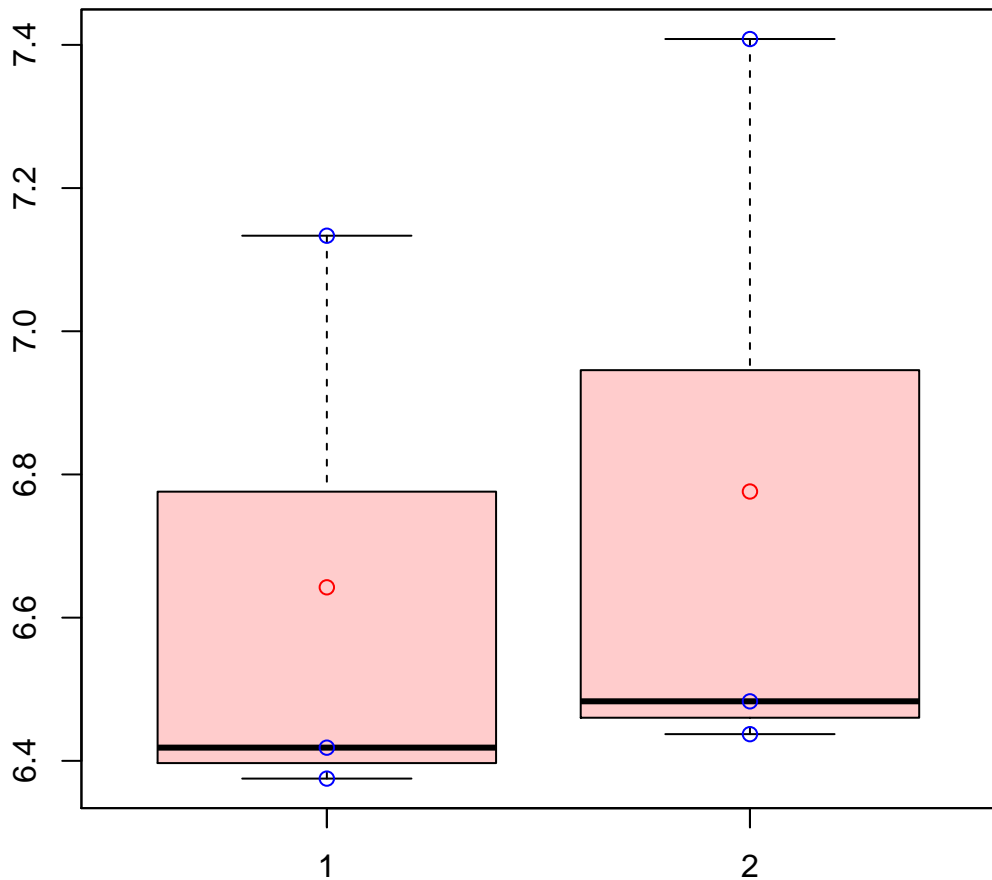

t-Test: p-value = 0.76

# CL639Contig1|CL639Contig1

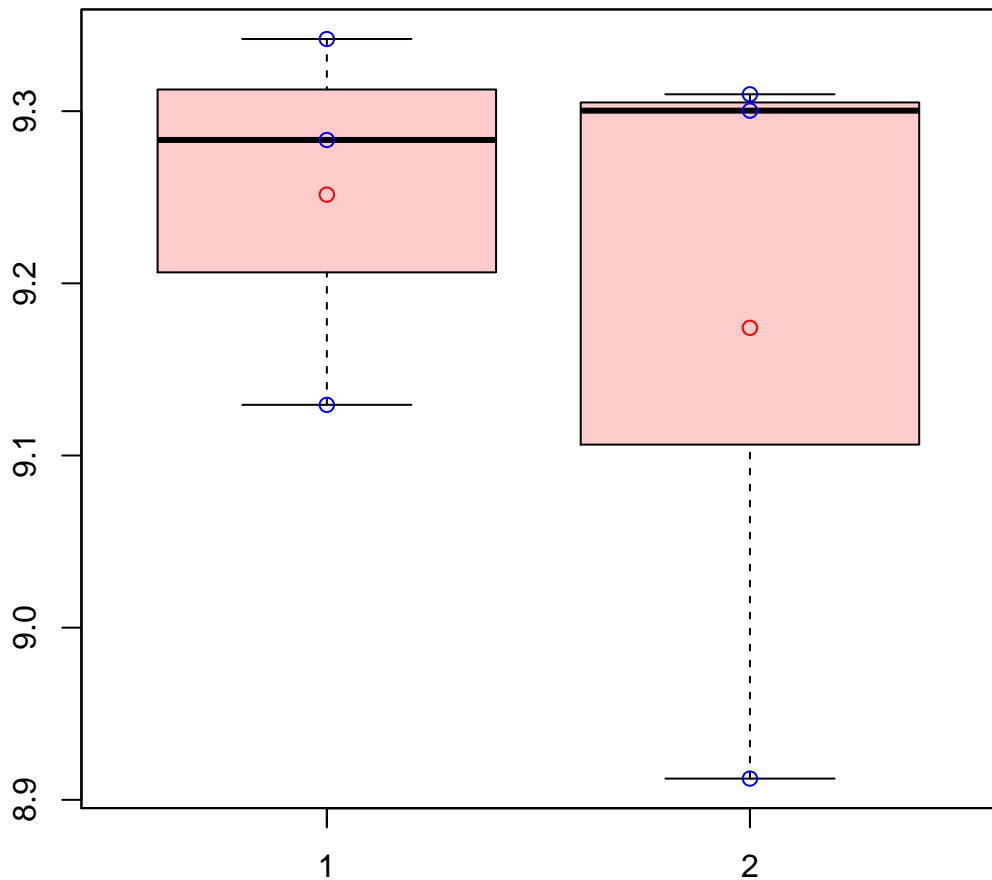

t-Test: p-value = 0.63

# CL63Contig22|CL63Contig22

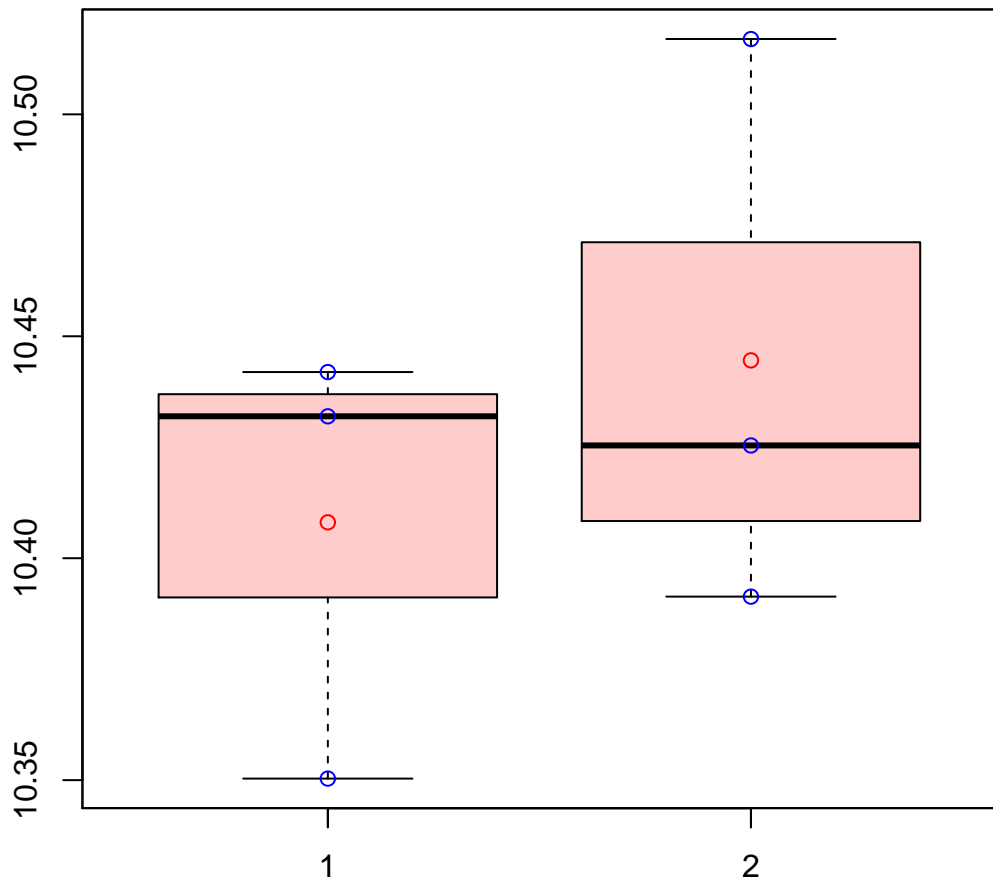

t-Test: p-value = 0.49

# CL63Contig23|CL63Contig23

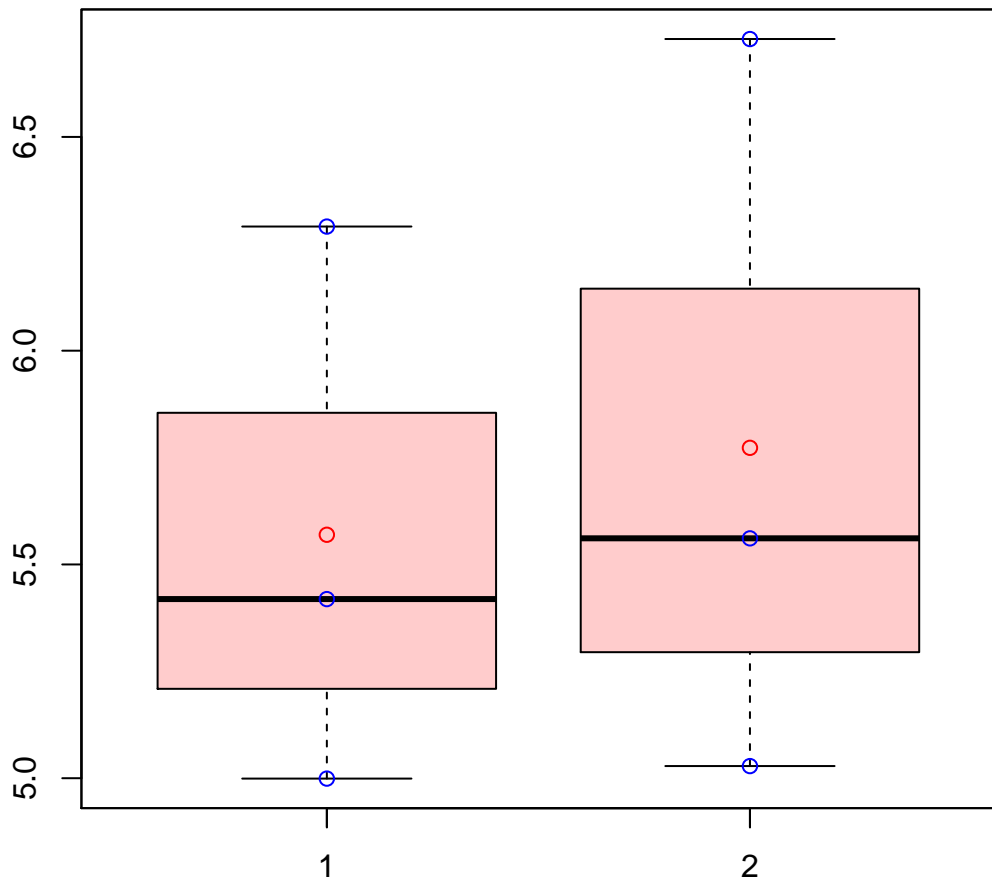

t-Test: p-value = 0.76

# CL63Contig29|CL63Contig29

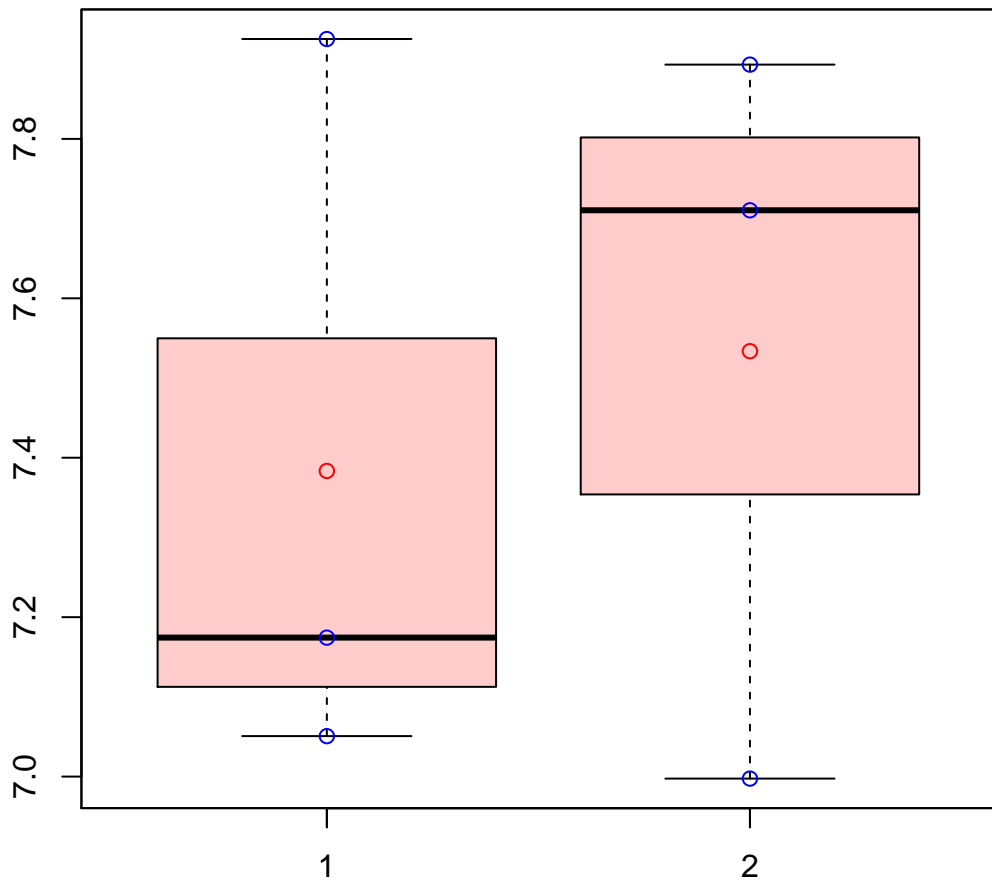

t-Test: p-value = 0.72

# CL63Contig31|CL63Contig31

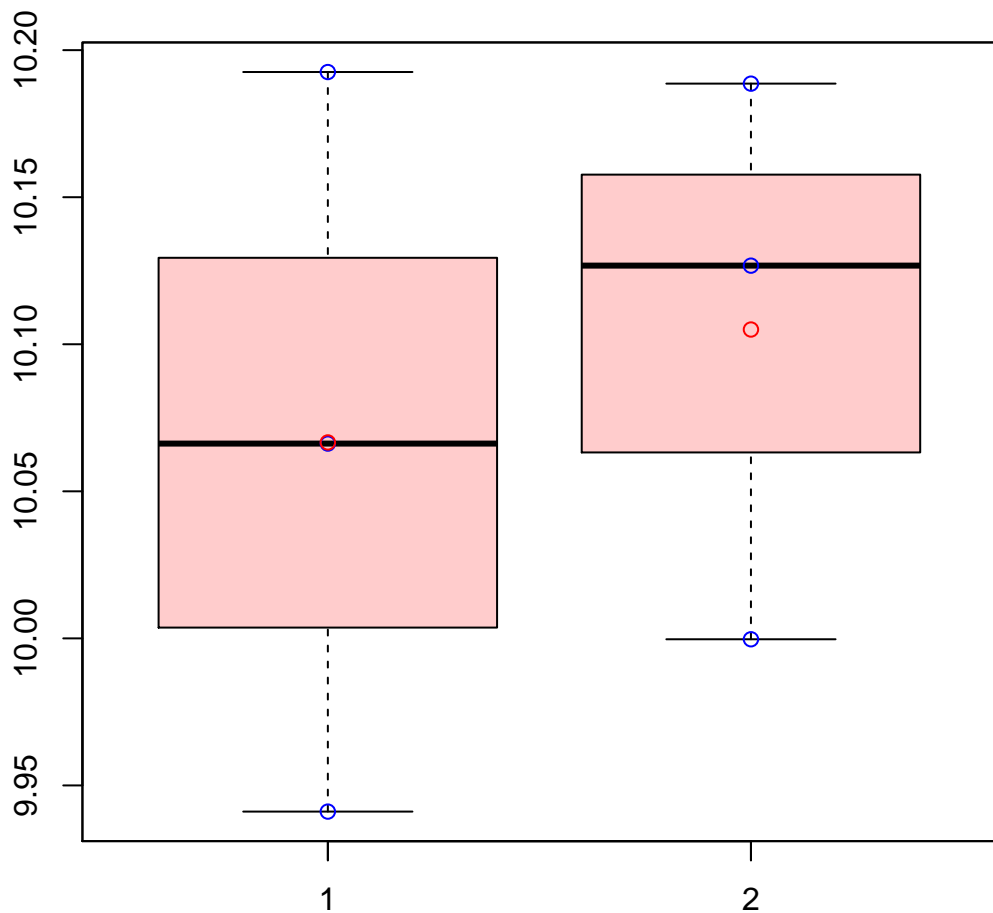

t-Test: p-value = 0.7

# CL6407Contig3|CL6407Contig3

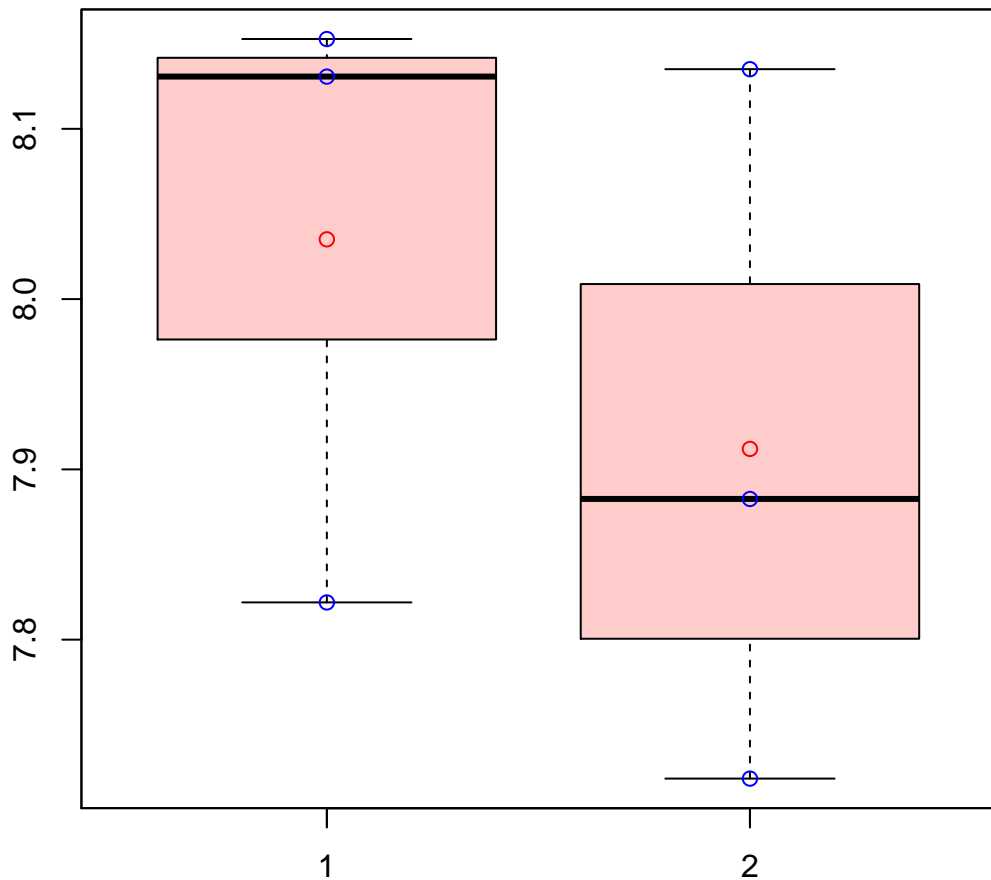

t-Test: p-value = 0.49

# CL6428Contig1|CL6428Contig1

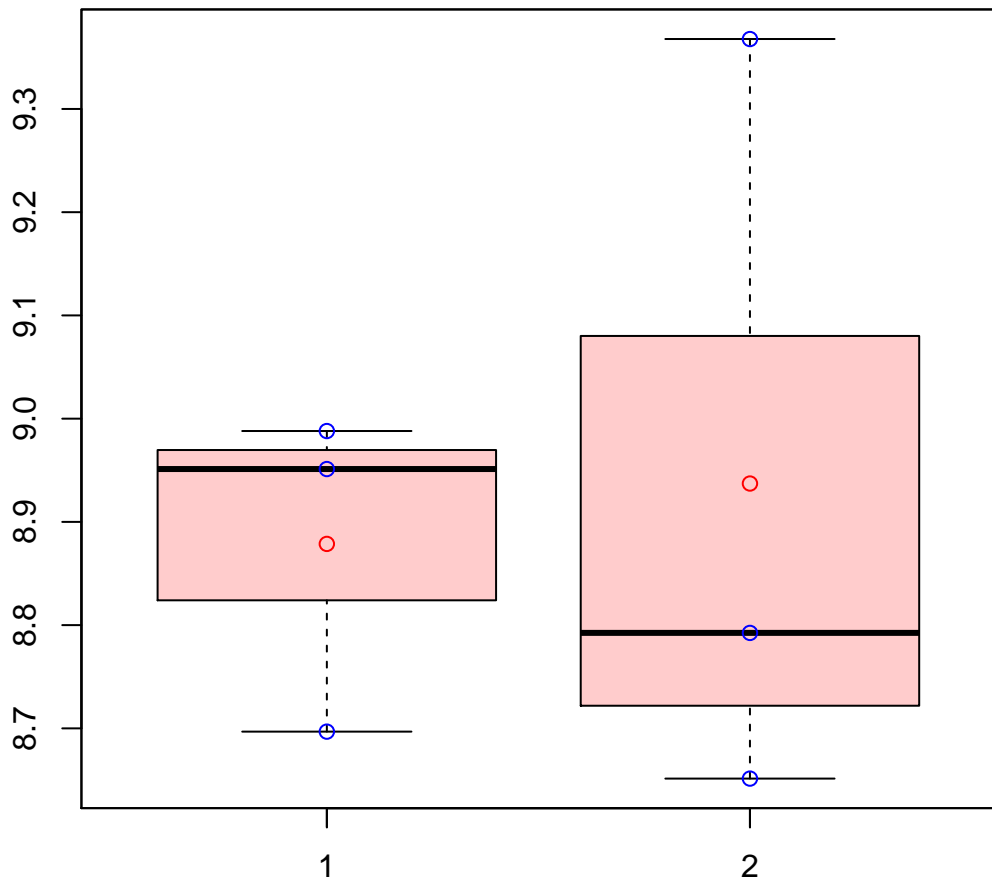

t-Test: p-value = 0.82



# CL6443Contig4|CL6443Contig4

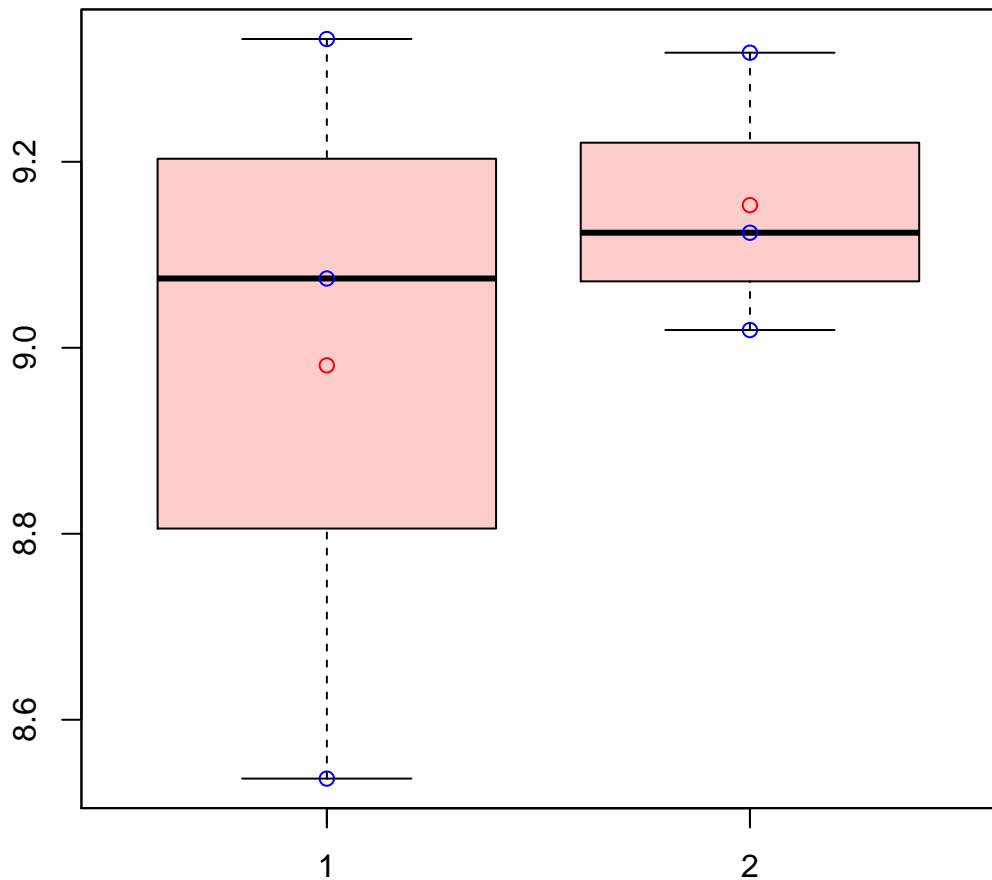

t-Test: p-value = 0.55

# CL6459Contig1|CL6459Contig1

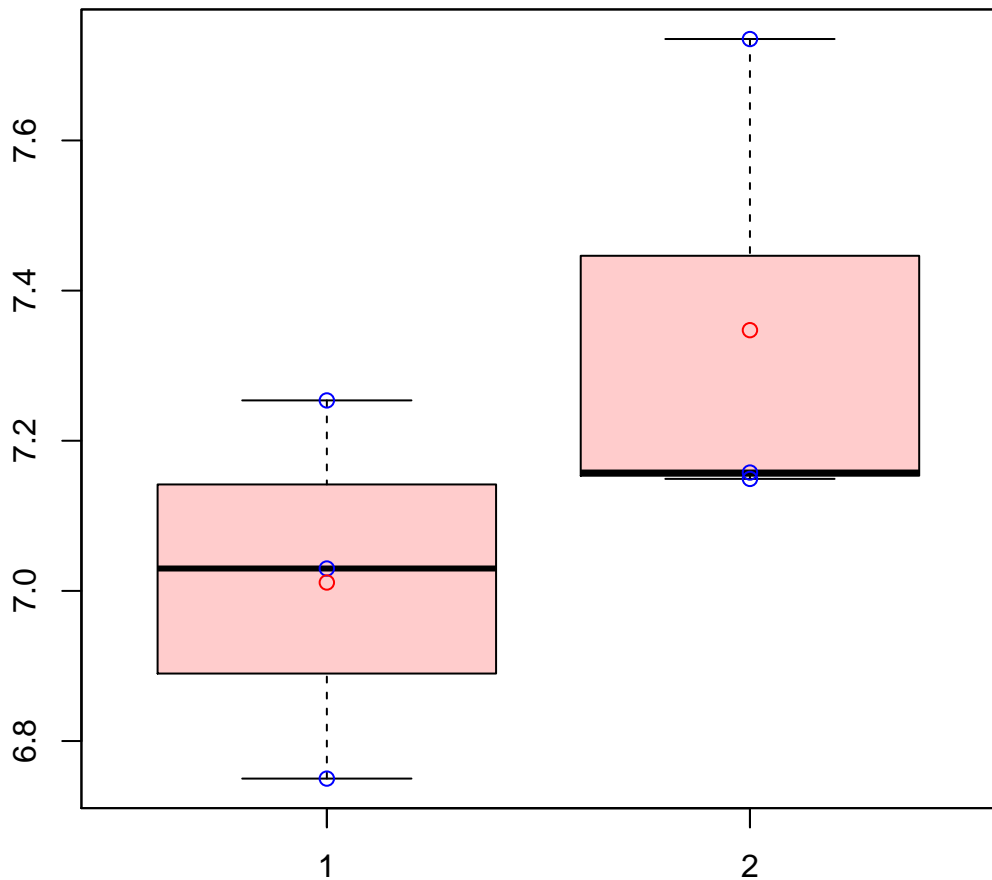

t-Test: p-value = 0.24

# CL645Contig1|CL645Contig1

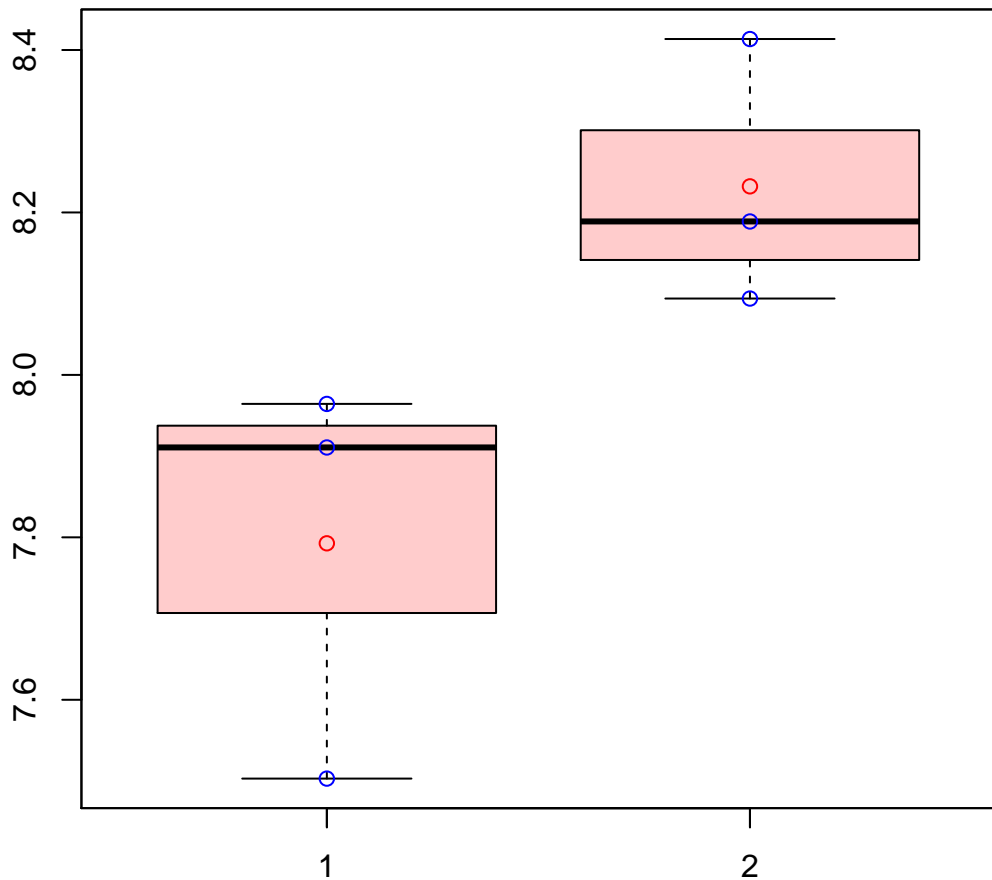

t-Test: p-value = 0.07

# CL6468Contig2|CL6468Contig2

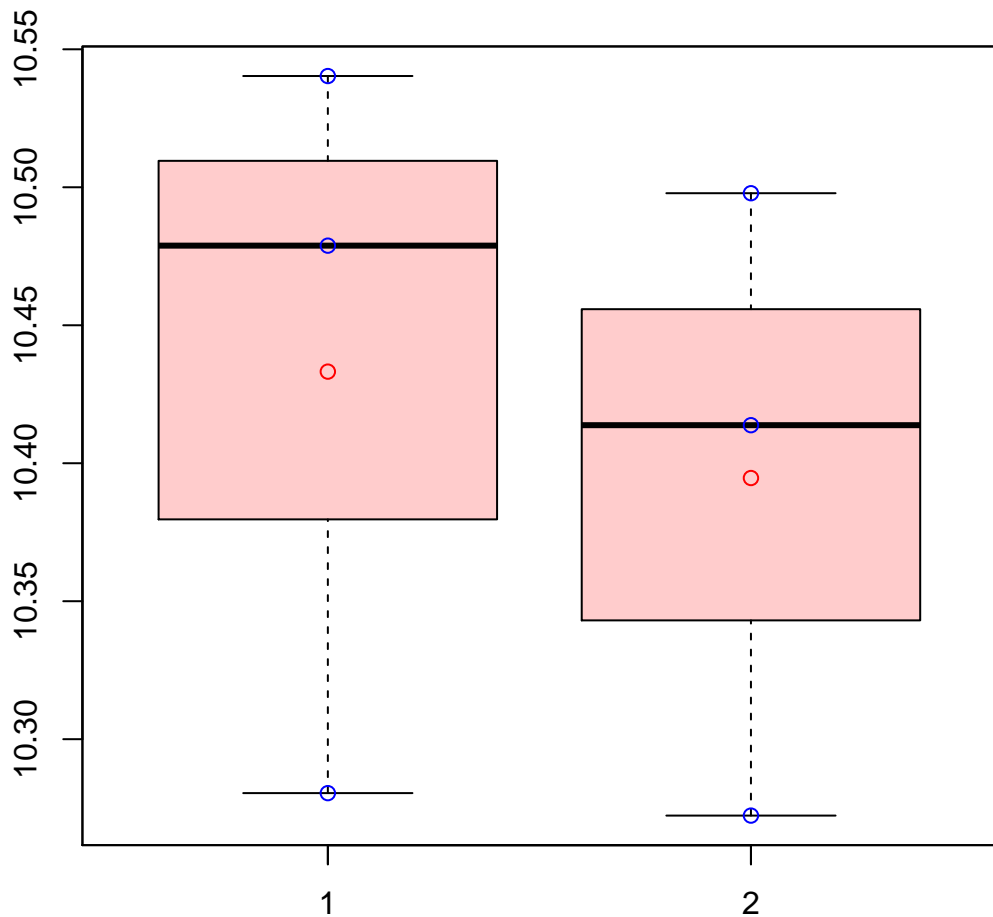

t-Test: p-value = 0.73

# CL6470Contig1|CL6470Contig1

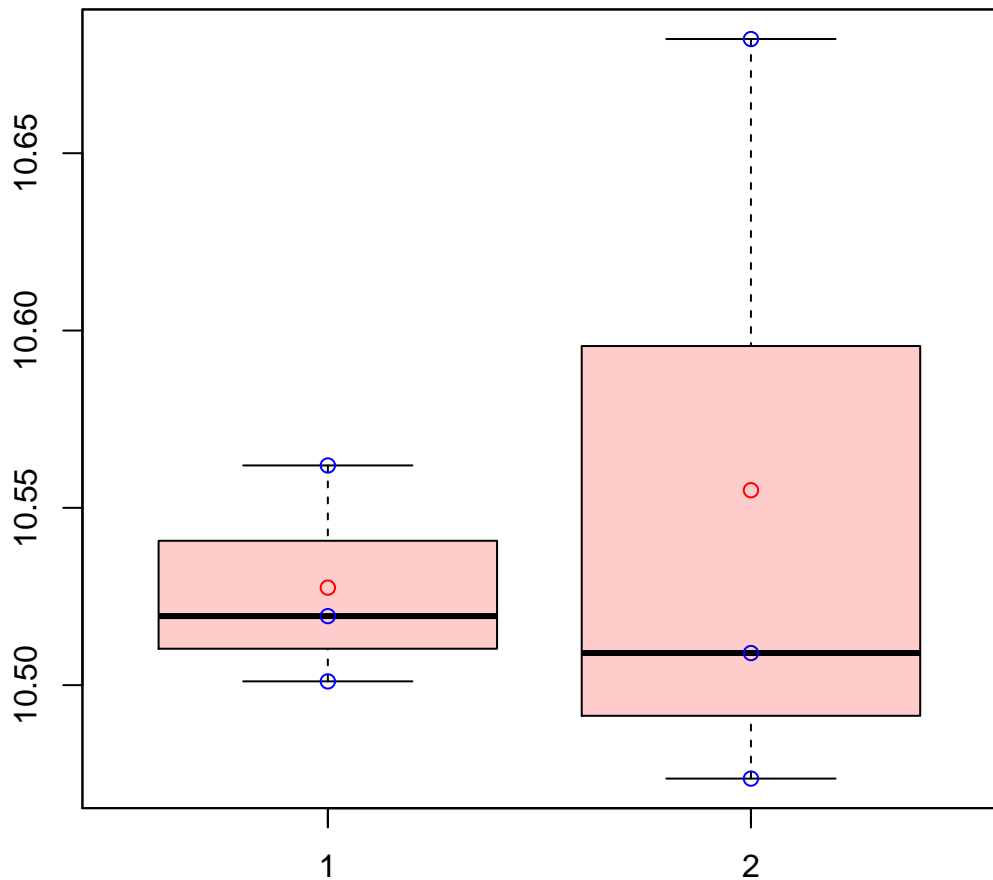

t-Test: p-value = 0.72

# CL6481Contig1|CL6481Contig1

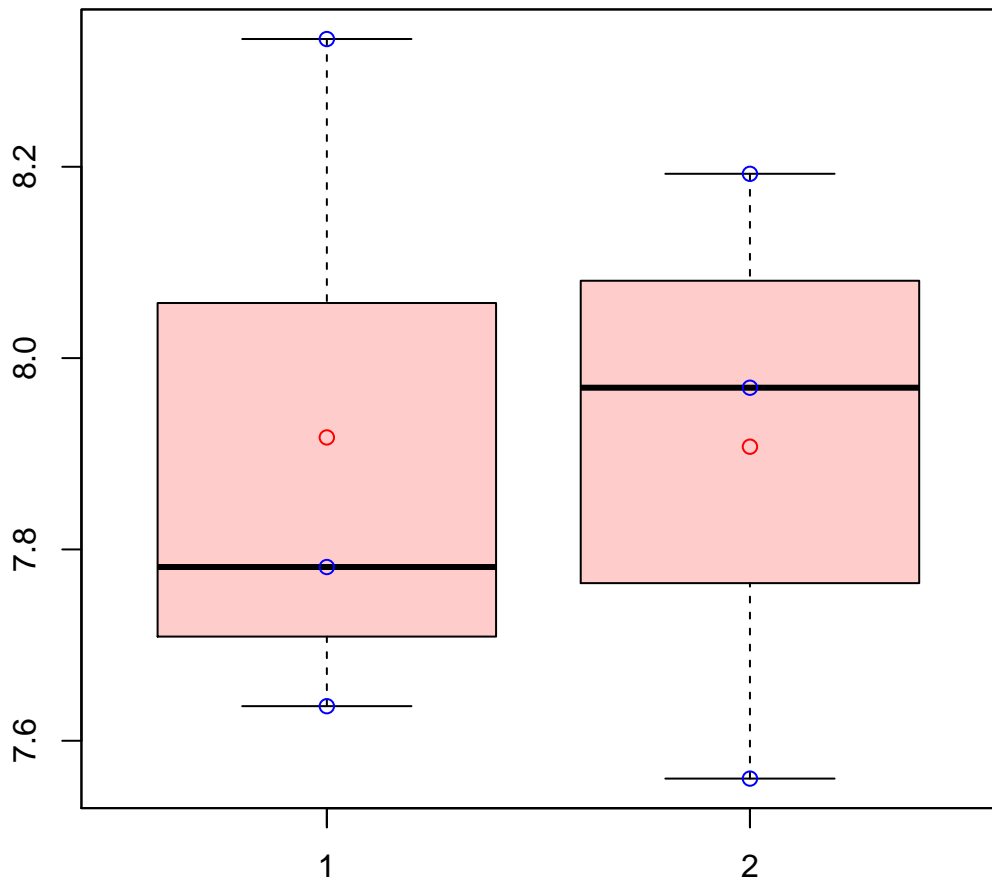

t-Test: p-value = 0.97

# CL6483Contig3|CL6483Contig3

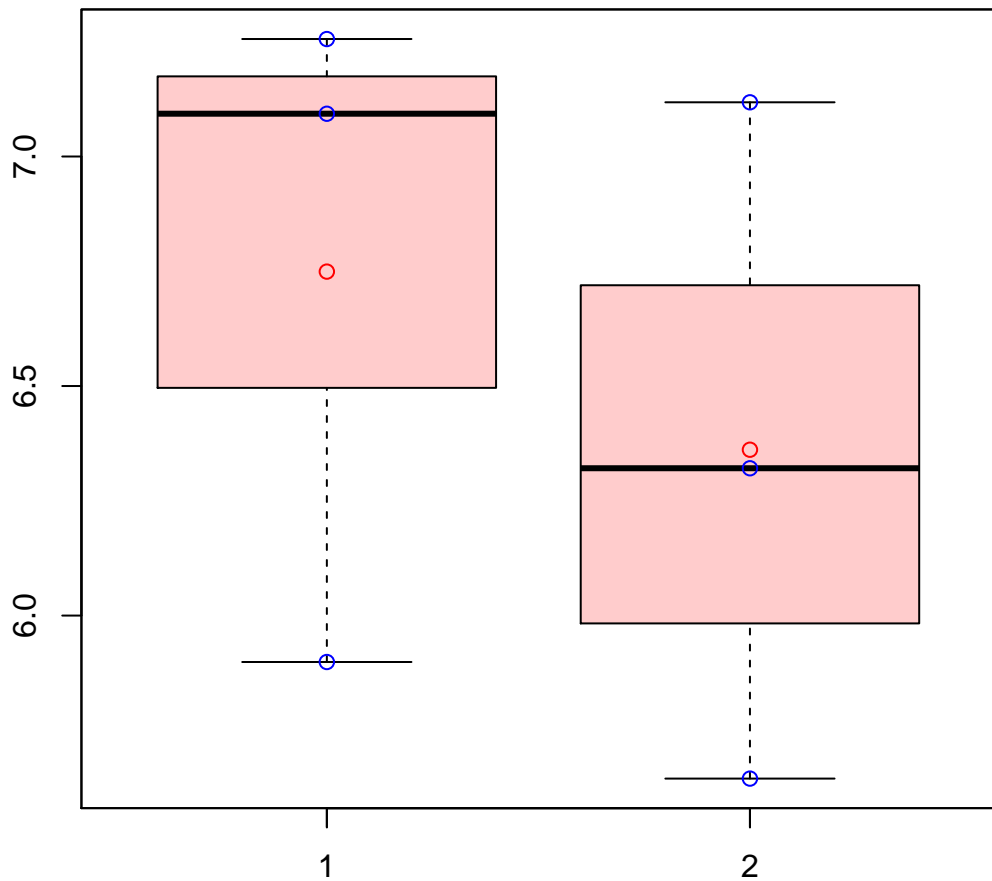

t-Test: p-value = 0.56

# CL6491Contig4|CL6491Contig4

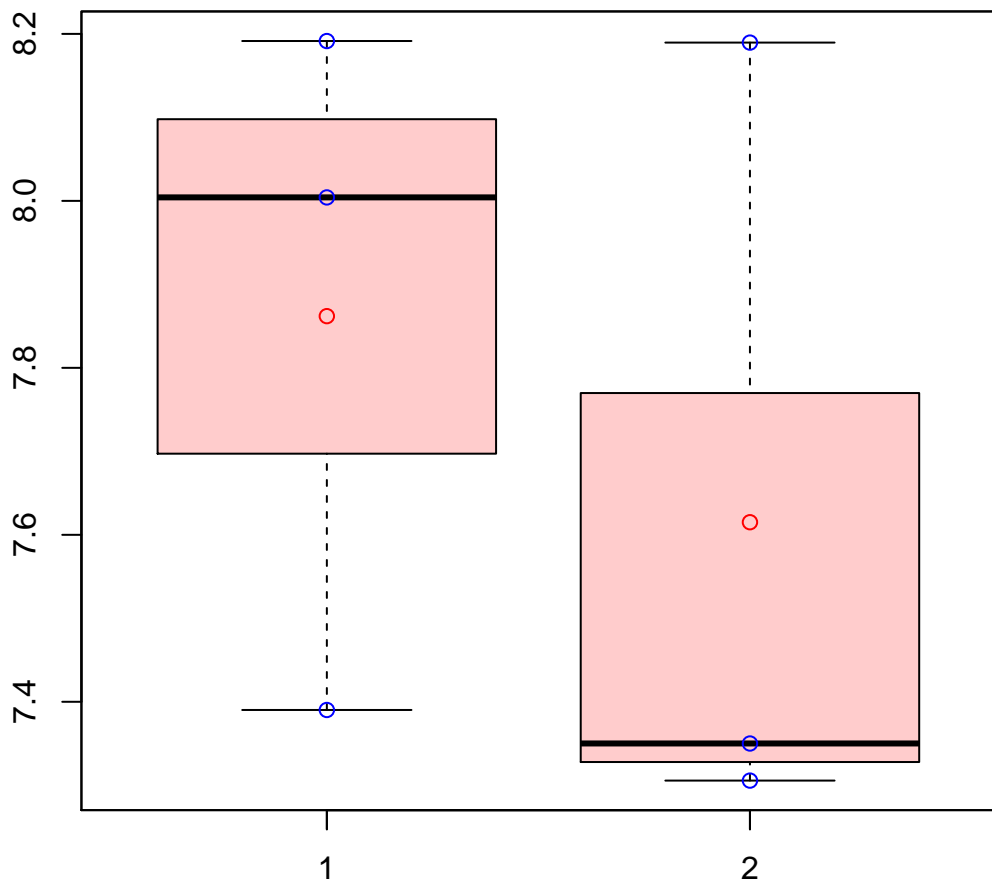

t-Test: p-value = 0.55



# CL6492Contig1|CL6492Contig1

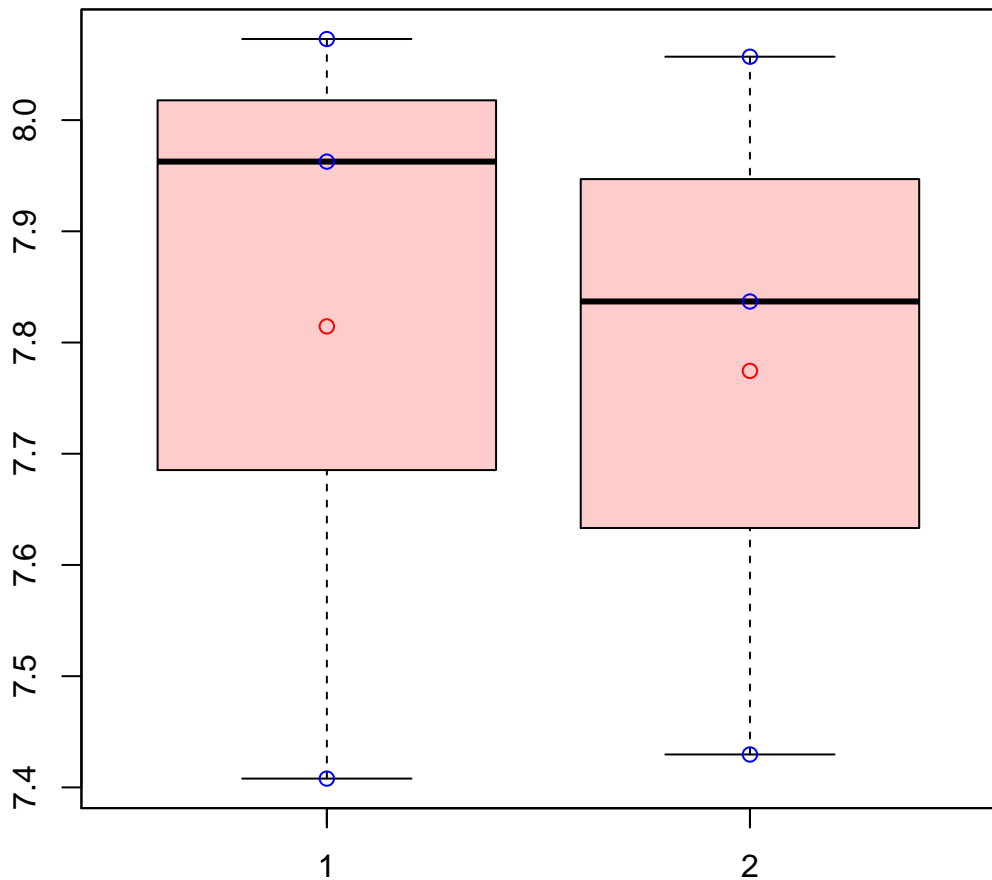

t-Test: p-value = 0.89

# CL6495Contig2|CL6495Contig2

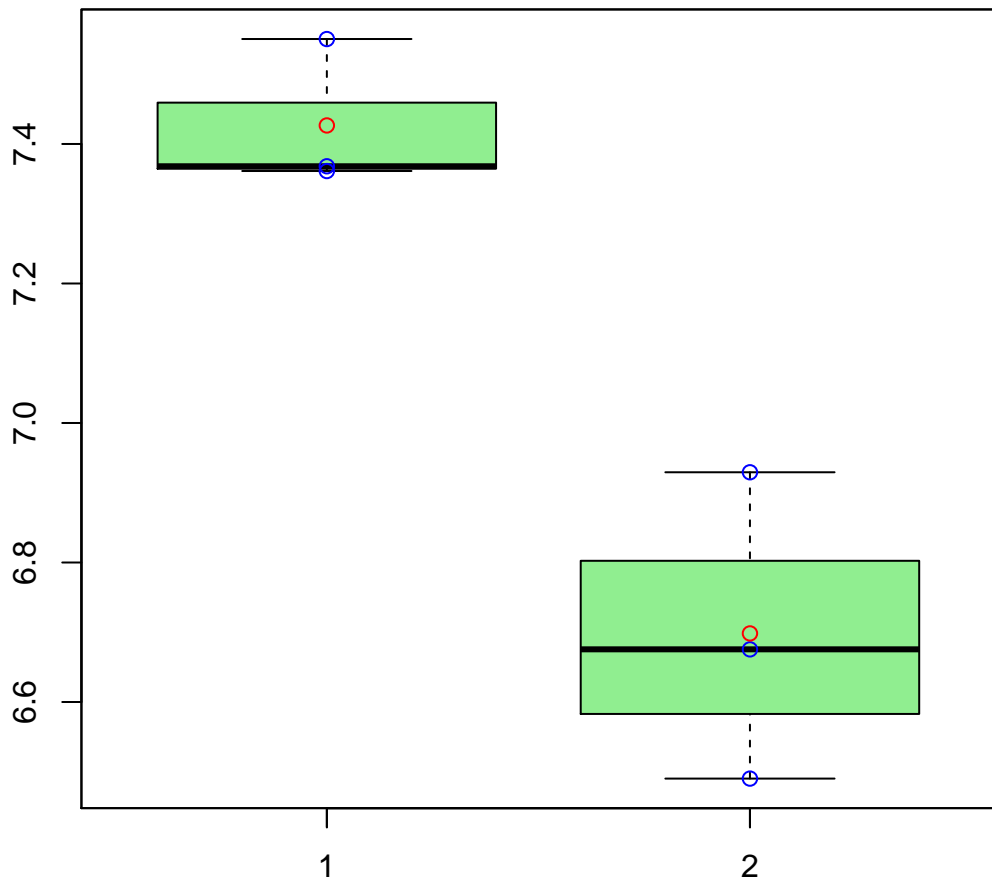

t-Test: p-value = 0.02

# CL6504Contig2|CL6504Contig2

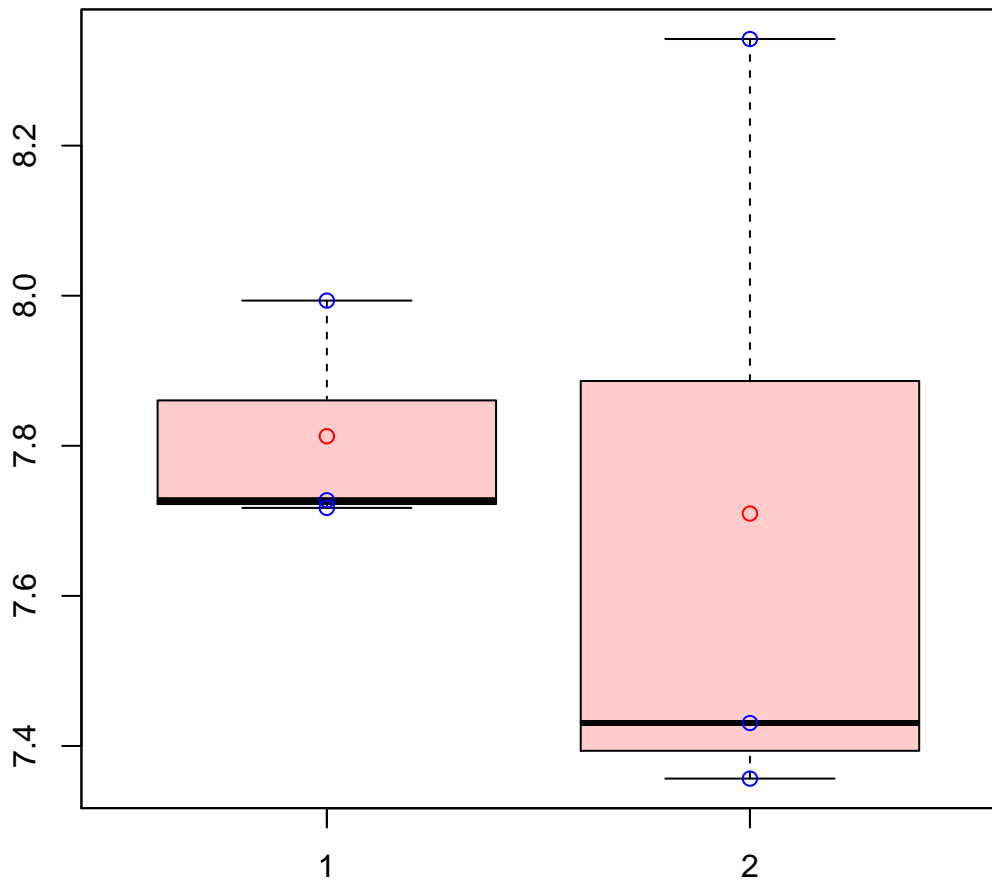

t-Test: p-value = 0.78

# CL6509Contig1|CL6509Contig1

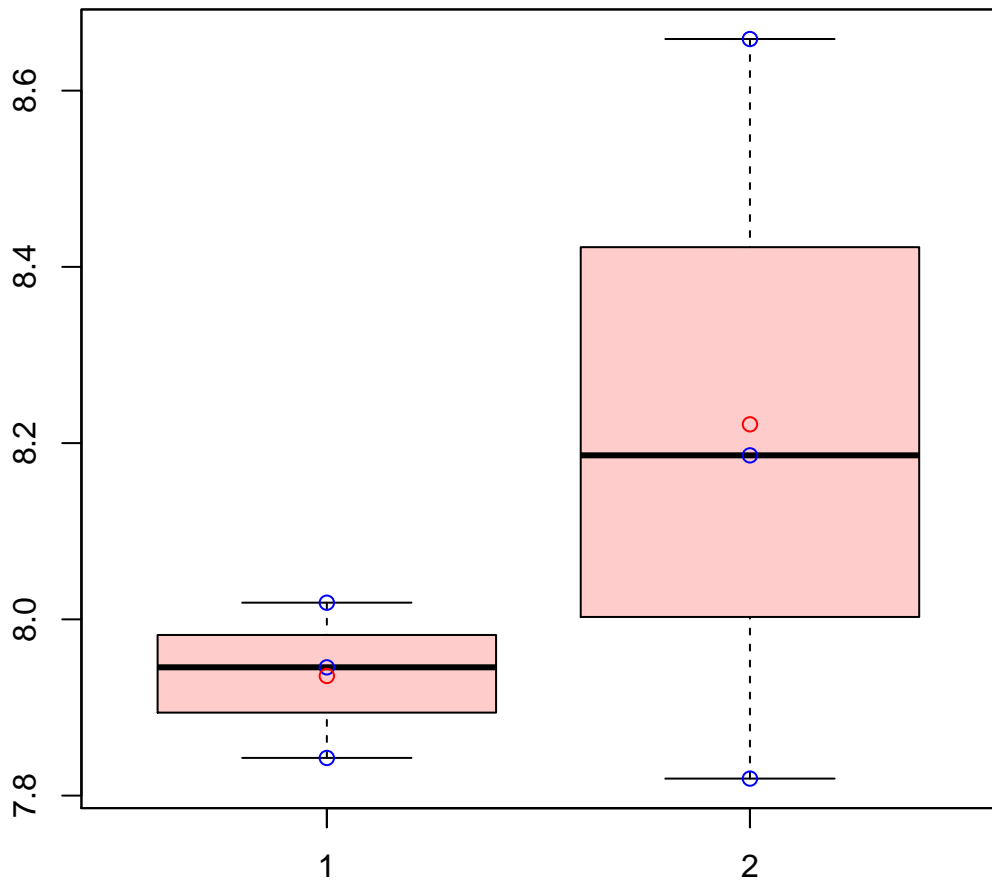

t-Test: p-value = 0.36

# CL6510Contig2|CL6510Contig2

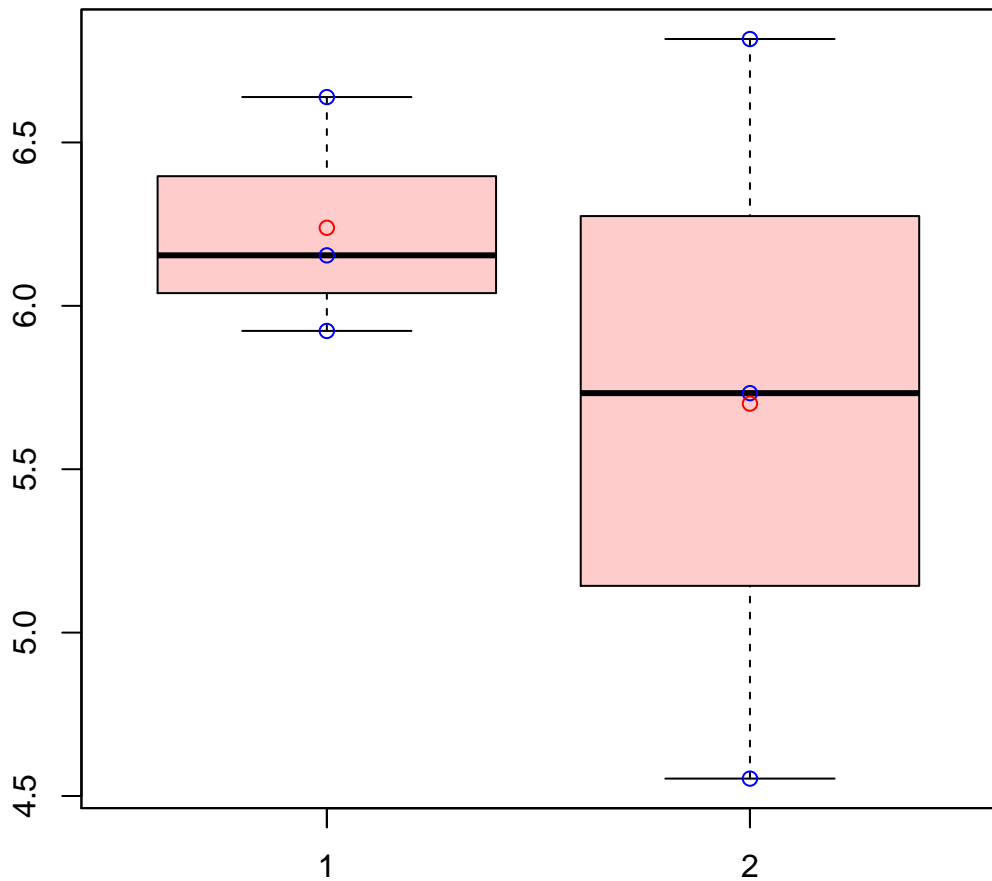

t-Test: p-value = 0.5

# CL6511Contig2|CL6511Contig2

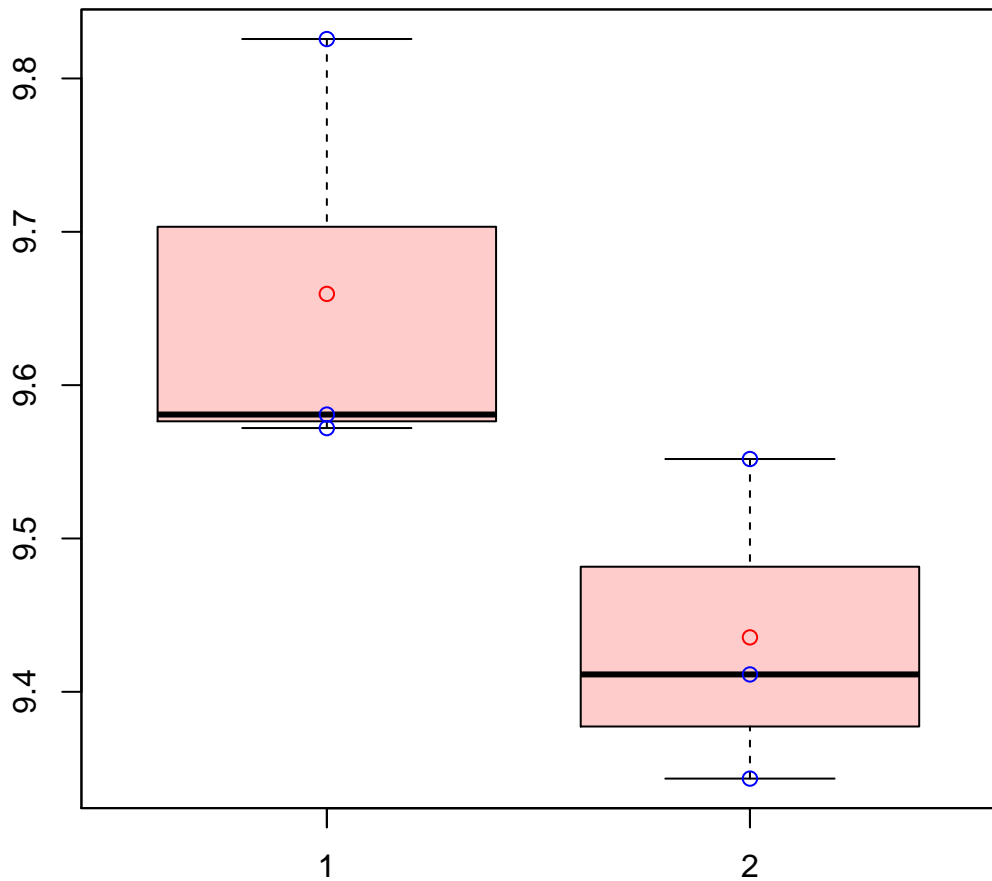

t-Test: p-value = 0.1

# CL6512Contig2|CL6512Contig2

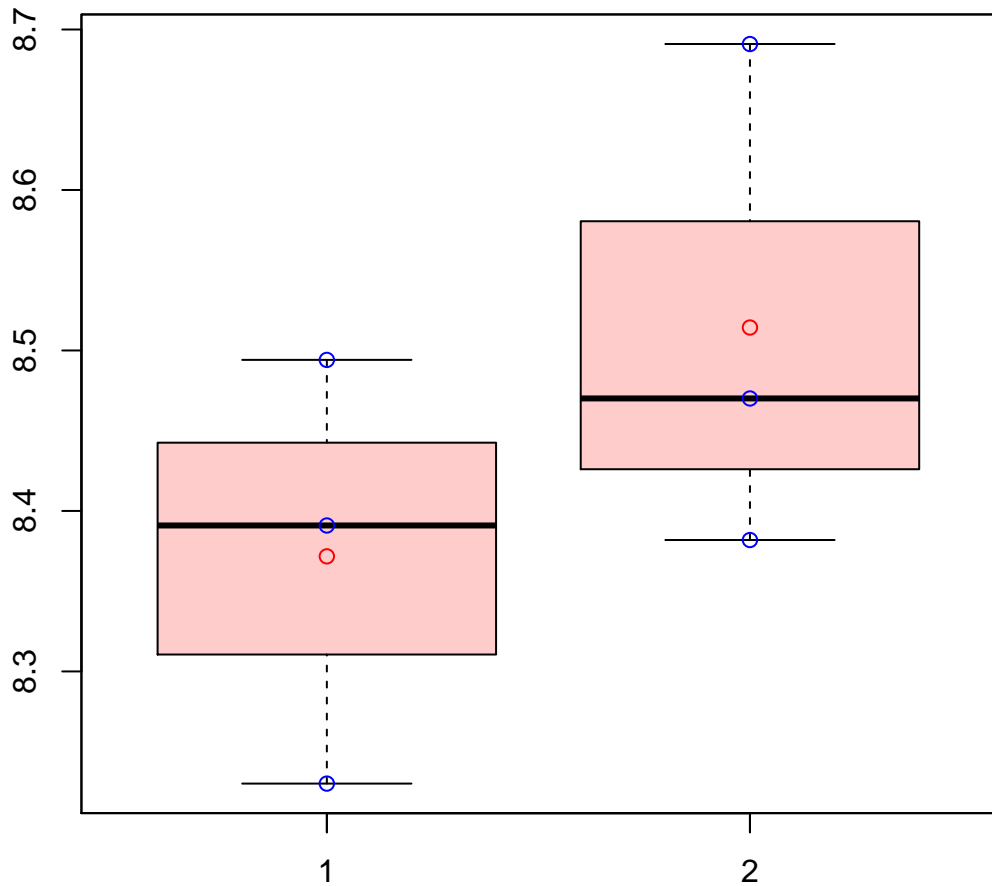

t-Test: p-value = 0.3

# CL6513Contig1|CL6513Contig1

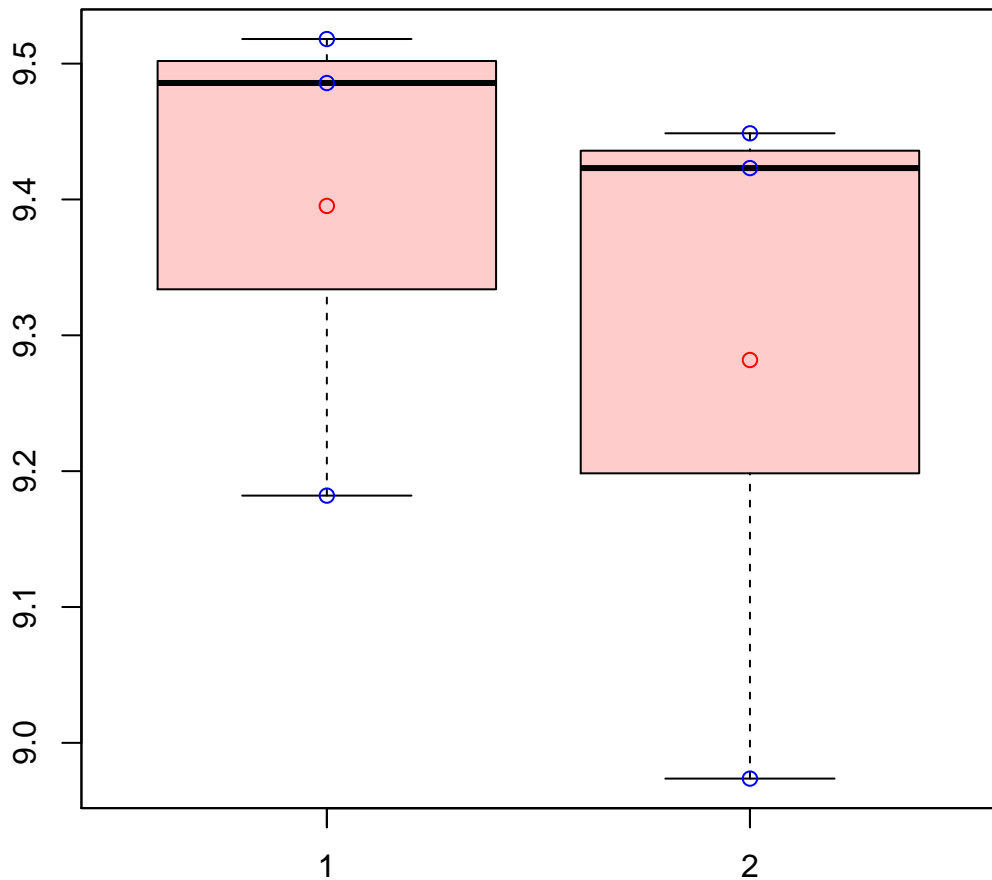

t-Test: p-value = 0.58



# CL6517Contig3|CL6517Contig3

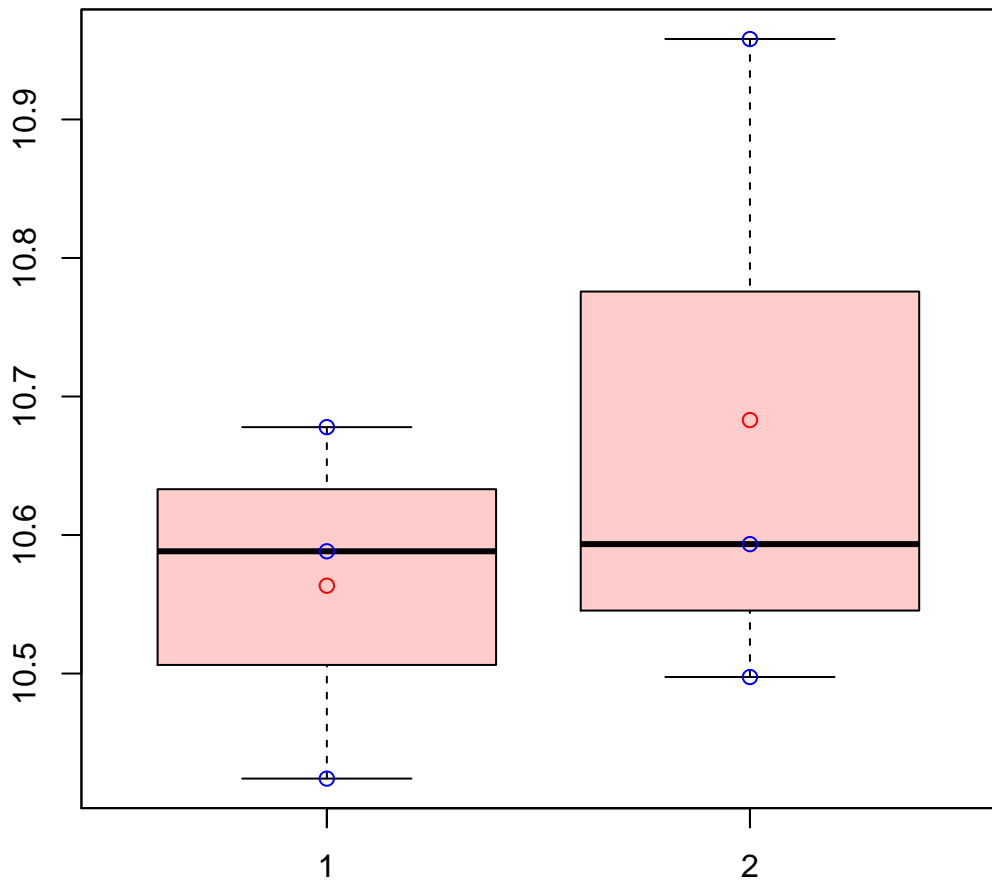

t-Test: p-value = 0.51

# CL6520Contig1|CL6520Contig1

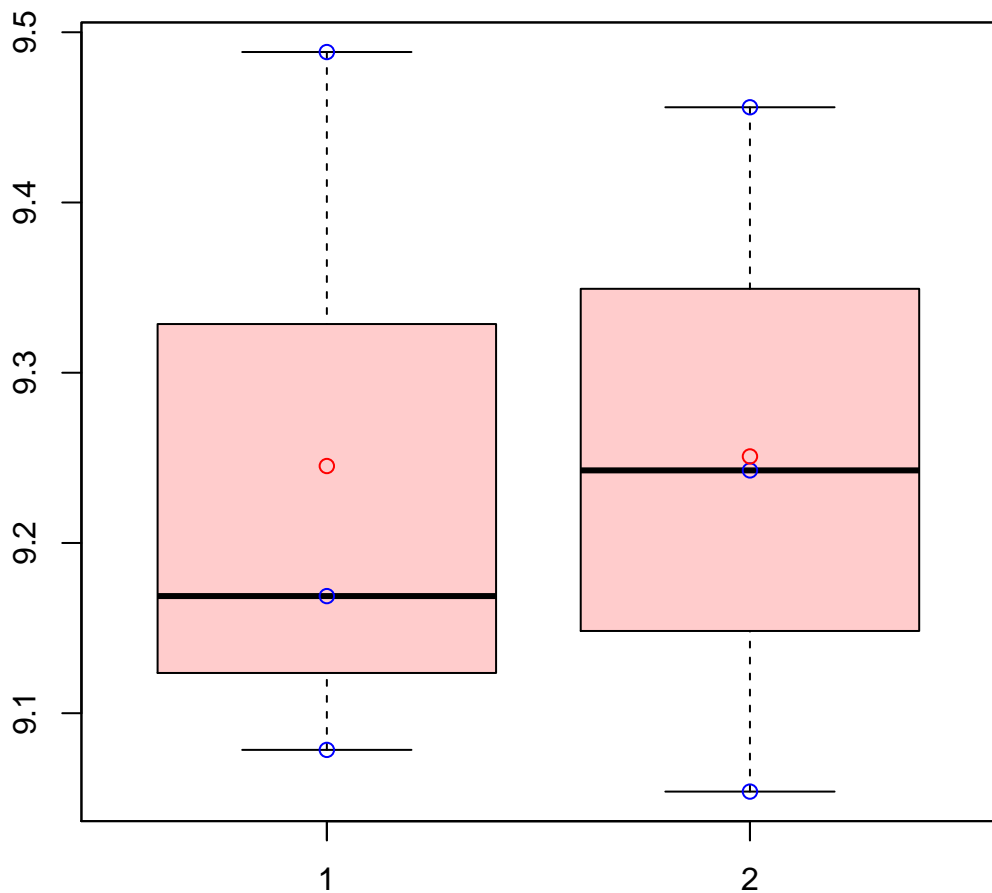

t-Test: p-value = 0.98

# CL6522Contig2|CL6522Contig2

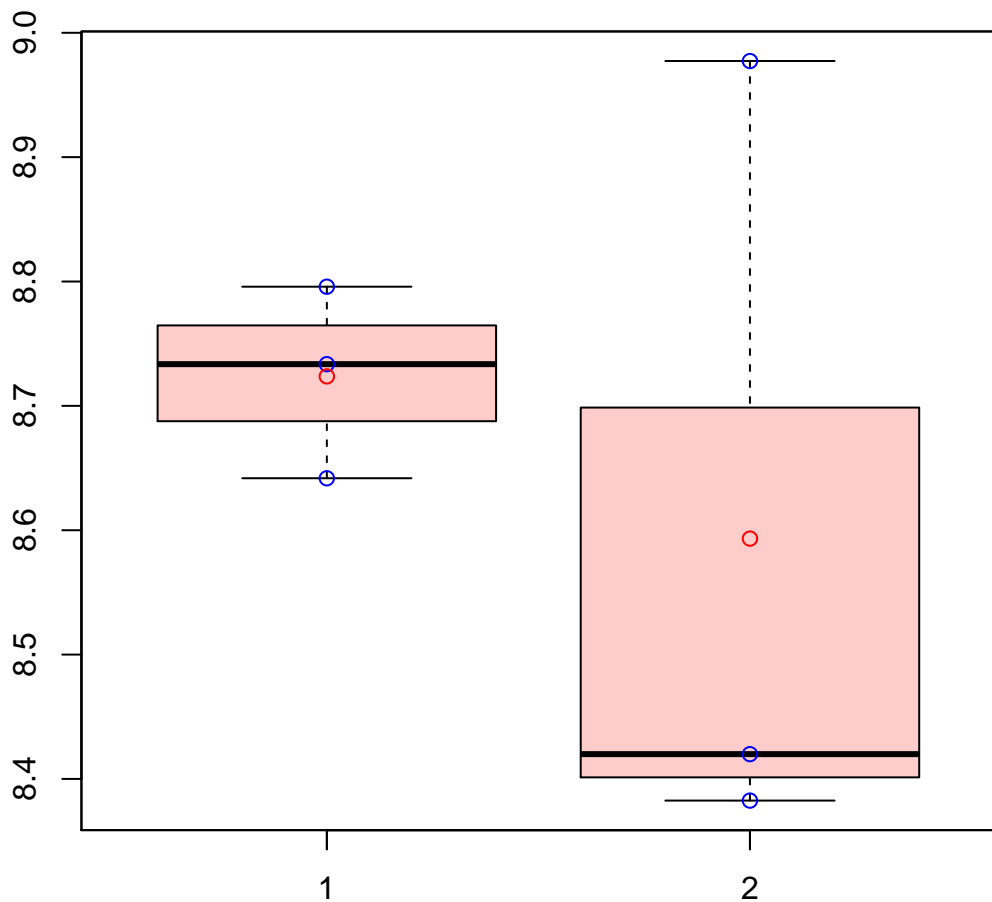

t-Test: p-value = 0.57

# CL652Contig3|CL652Contig3

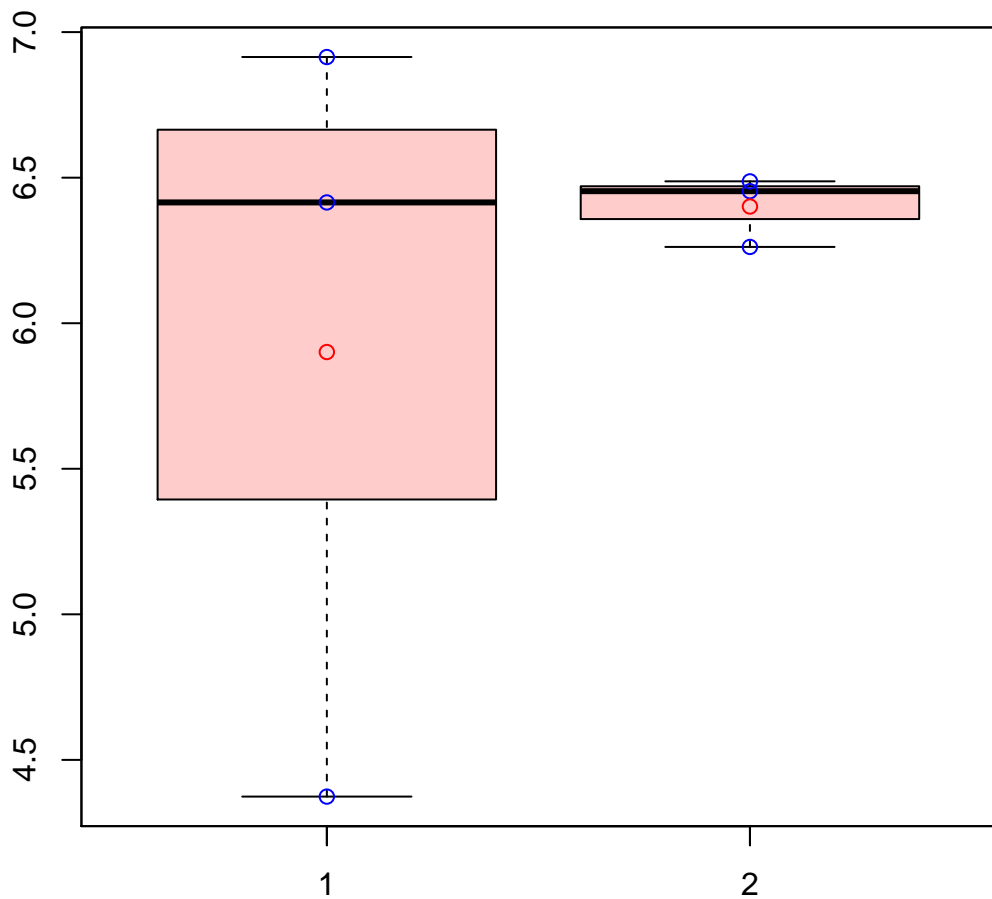

t-Test: p-value = 0.59

# CL6530Contig3|CL6530Contig3

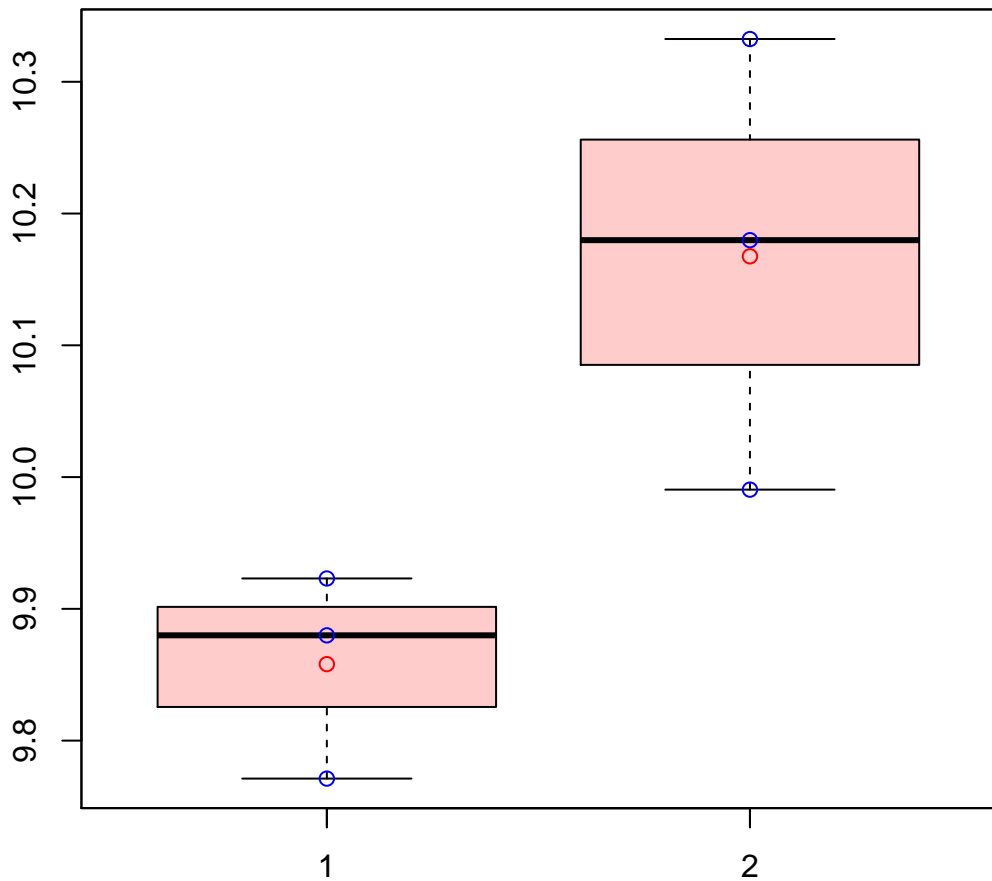

t-Test: p-value = 0.07

# CL6532Contig2|CL6532Contig2

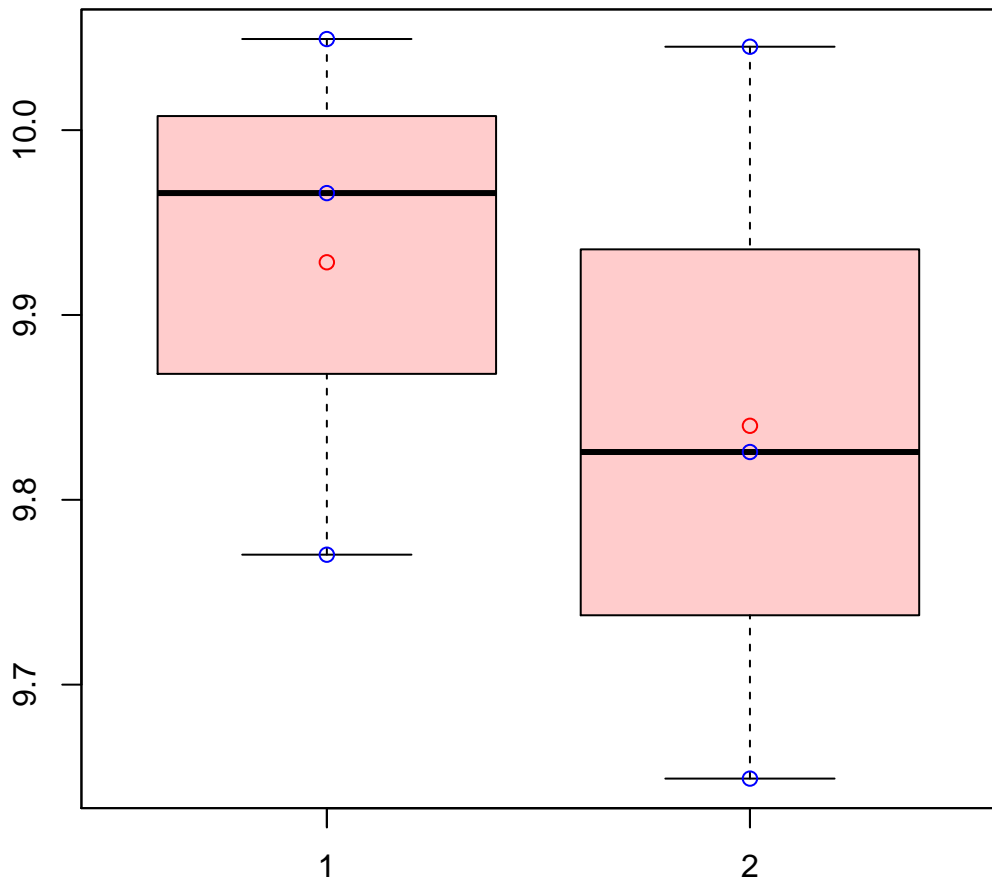

t-Test: p-value = 0.57

# CL6535Contig2|CL6535Contig2

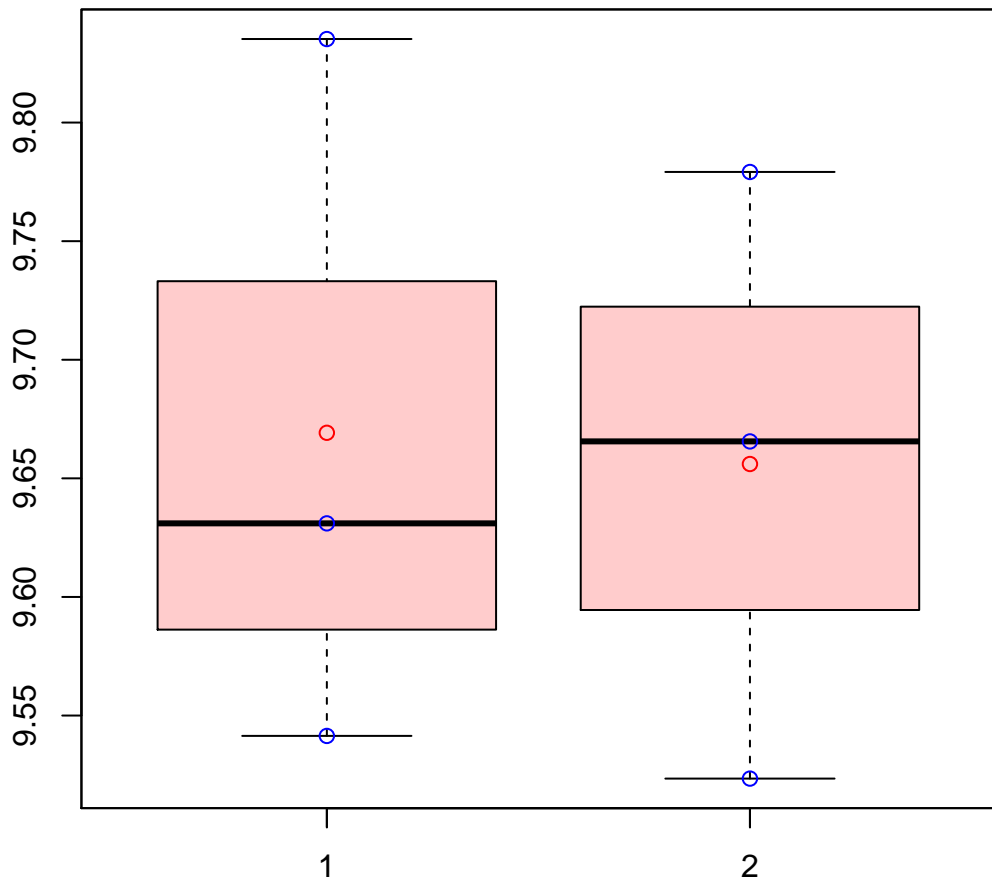

t-Test: p-value = 0.91

# CL653Contig2|CL653Contig2

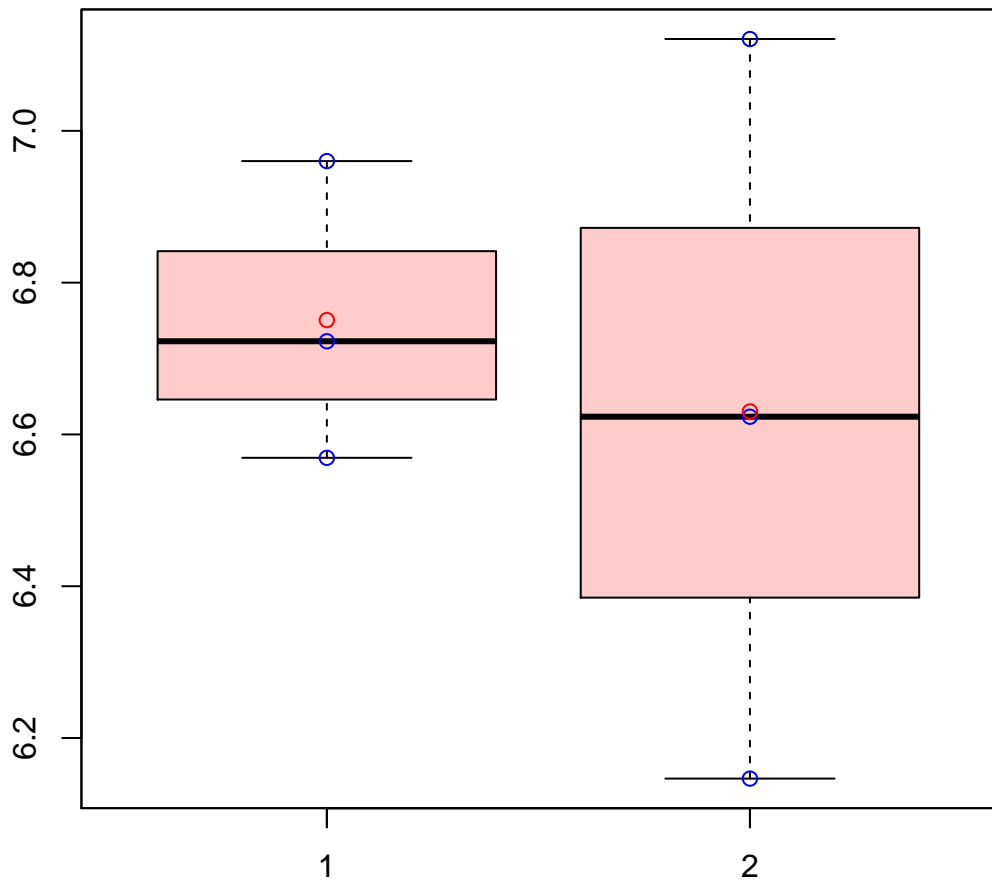

t-Test: p-value = 0.72



# CL653Contig4|CL653Contig4

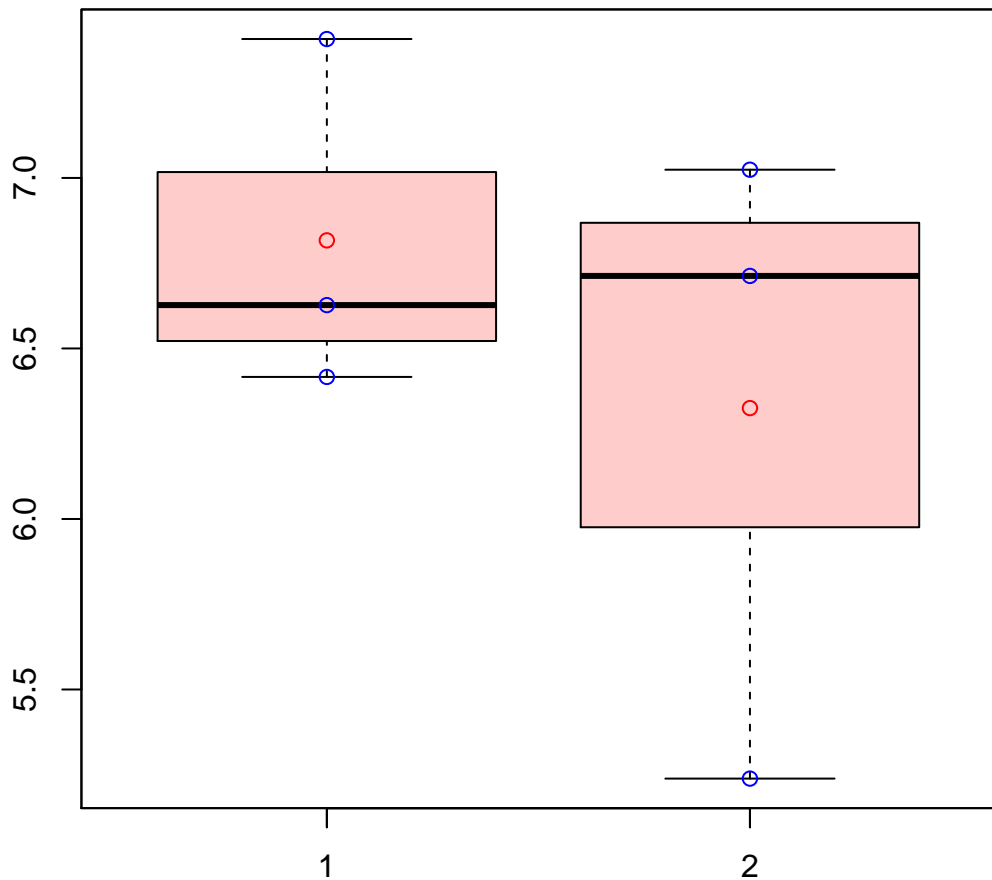

t-Test: p-value = 0.49

# CL6545Contig2|CL6545Contig2

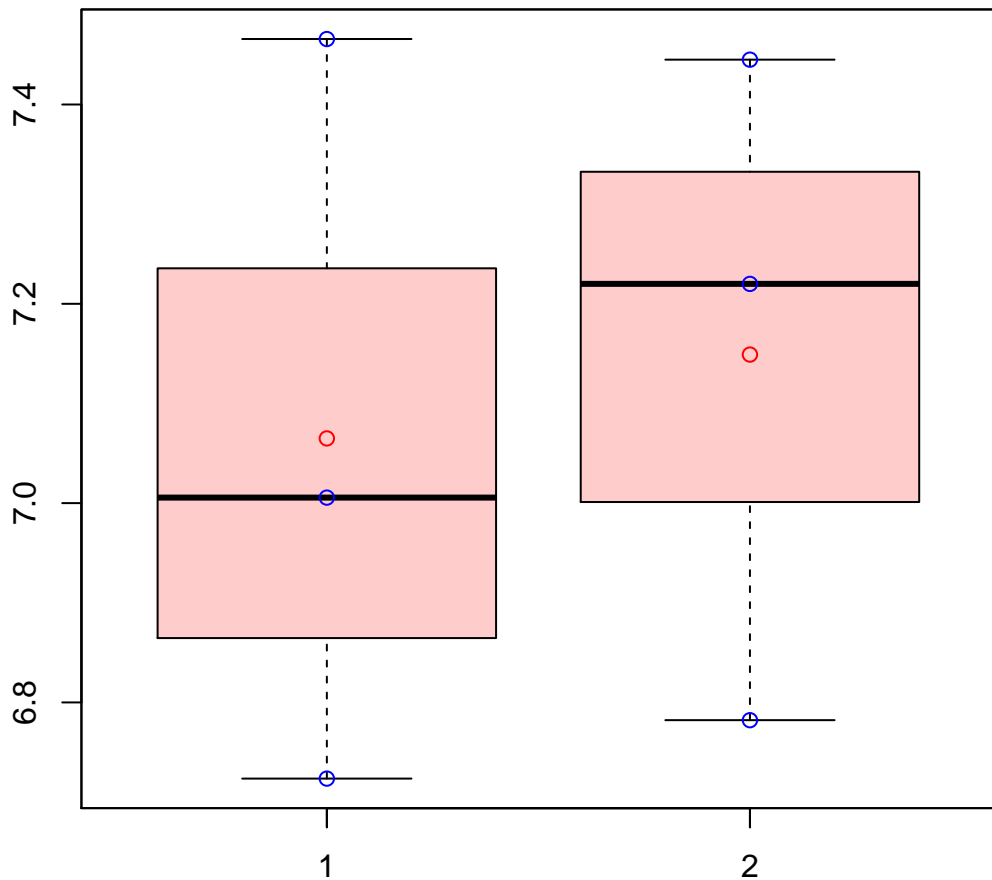

t-Test: p-value = 0.79

# CL6622Contig3|CL6622Contig3

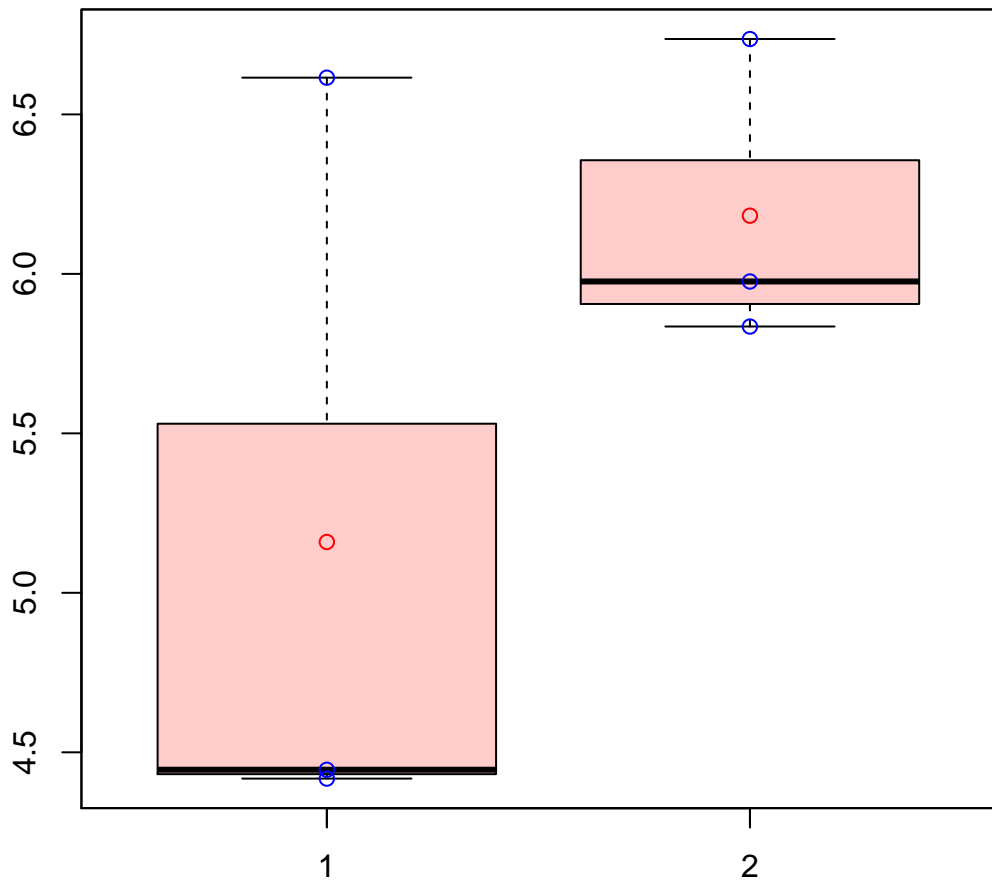

t-Test: p-value = 0.29

# CL662Contig1|CL662Contig1

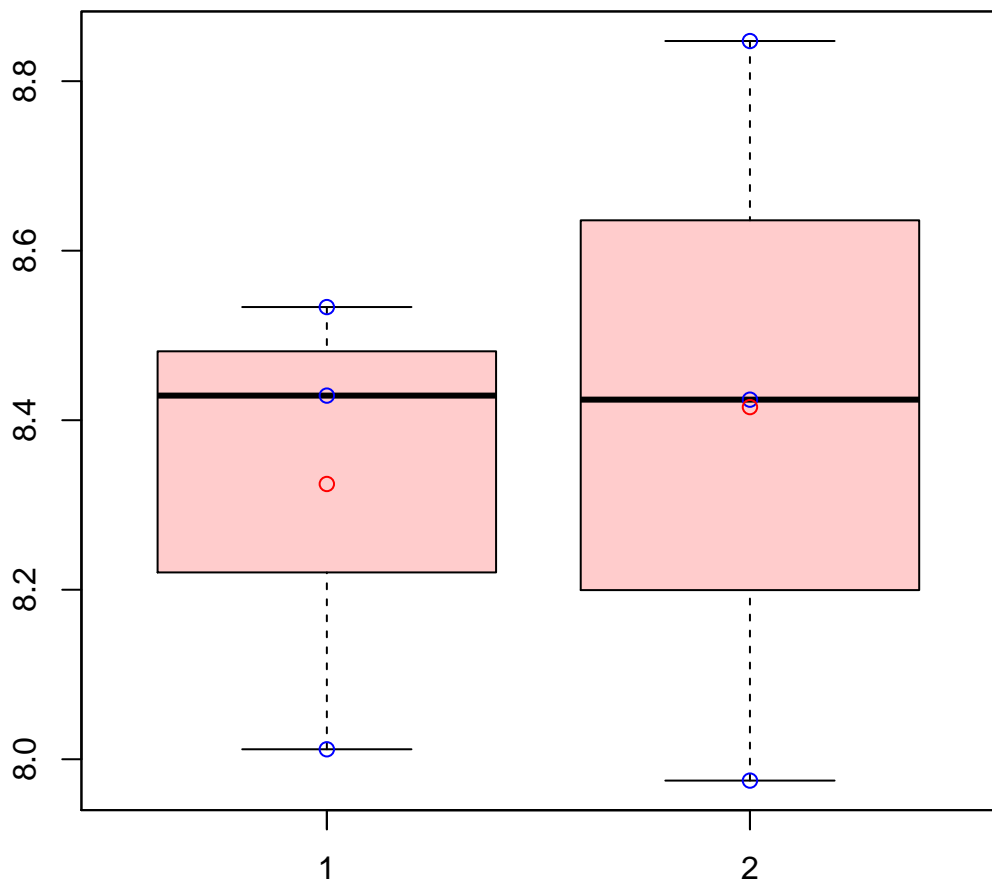

t-Test: p-value = 0.78

# CL6633Contig2|CL6633Contig2

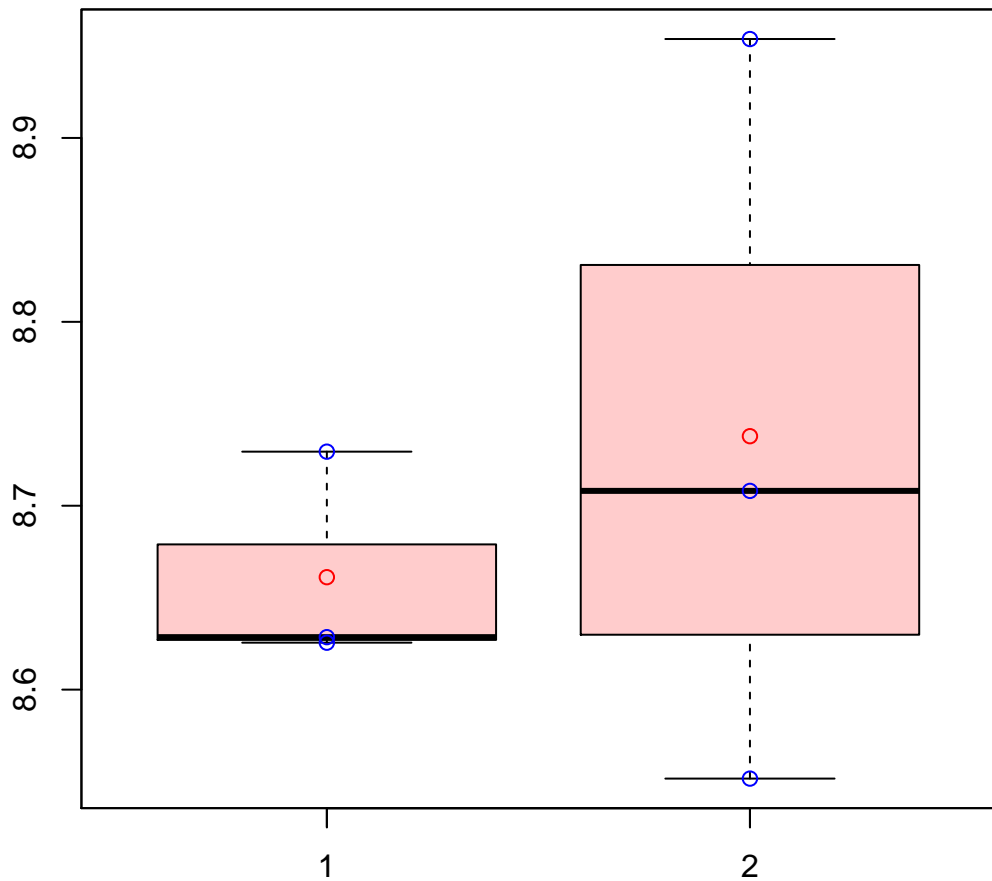

t-Test: p-value = 0.59

# CL6640Contig1|CL6640Contig1

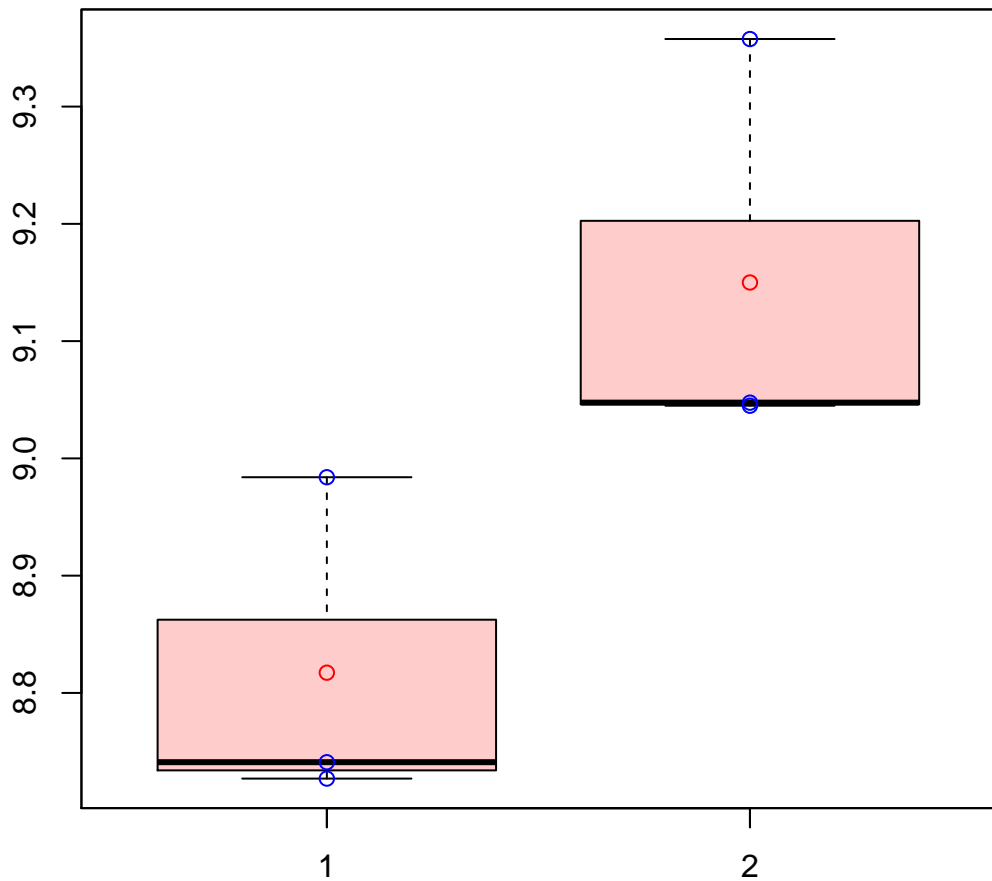

t-Test: p-value = 0.07

# CL6651Contig3|CL6651Contig3

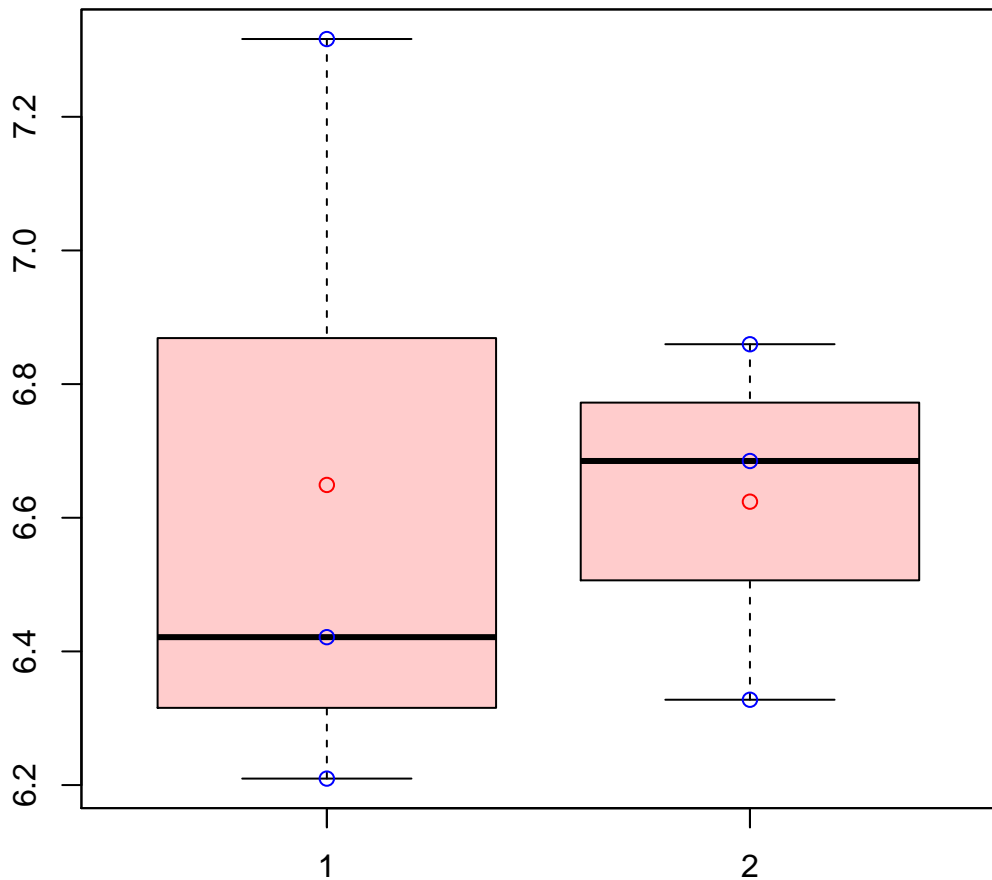

t-Test: p-value = 0.95

# CL6654Contig2|CL6654Contig2

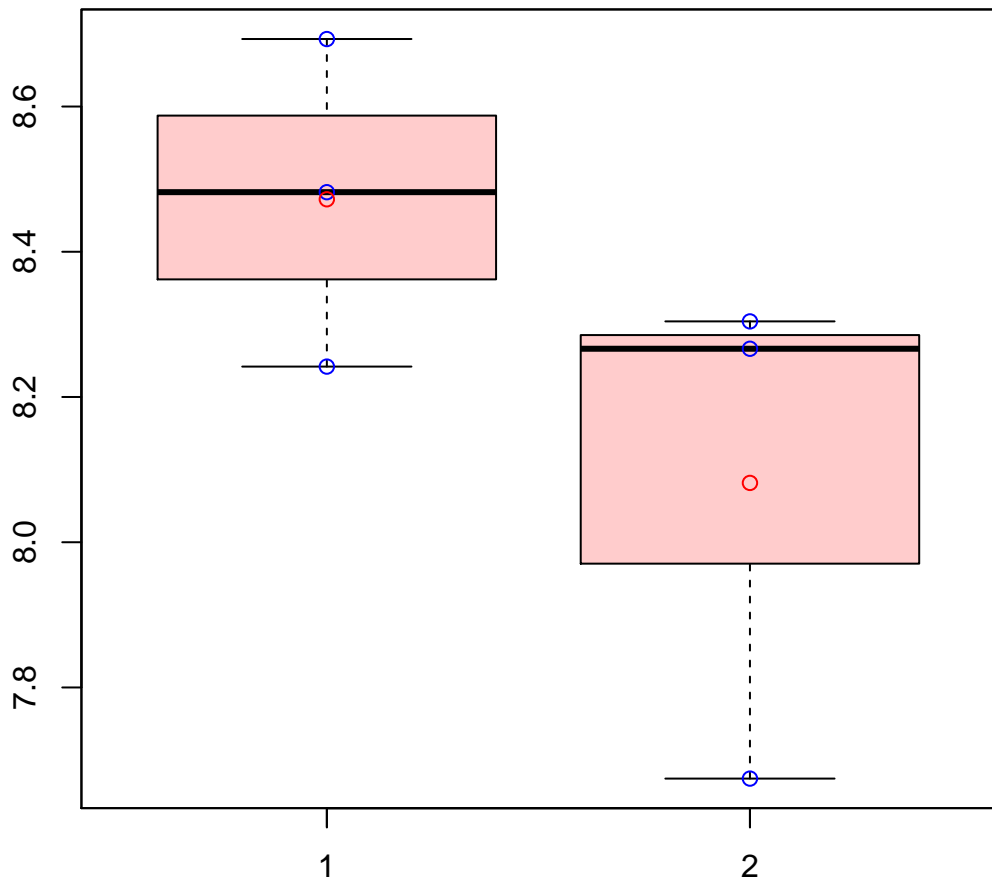

t-Test: p-value = 0.19



# CL6655Contig5|CL6655Contig5

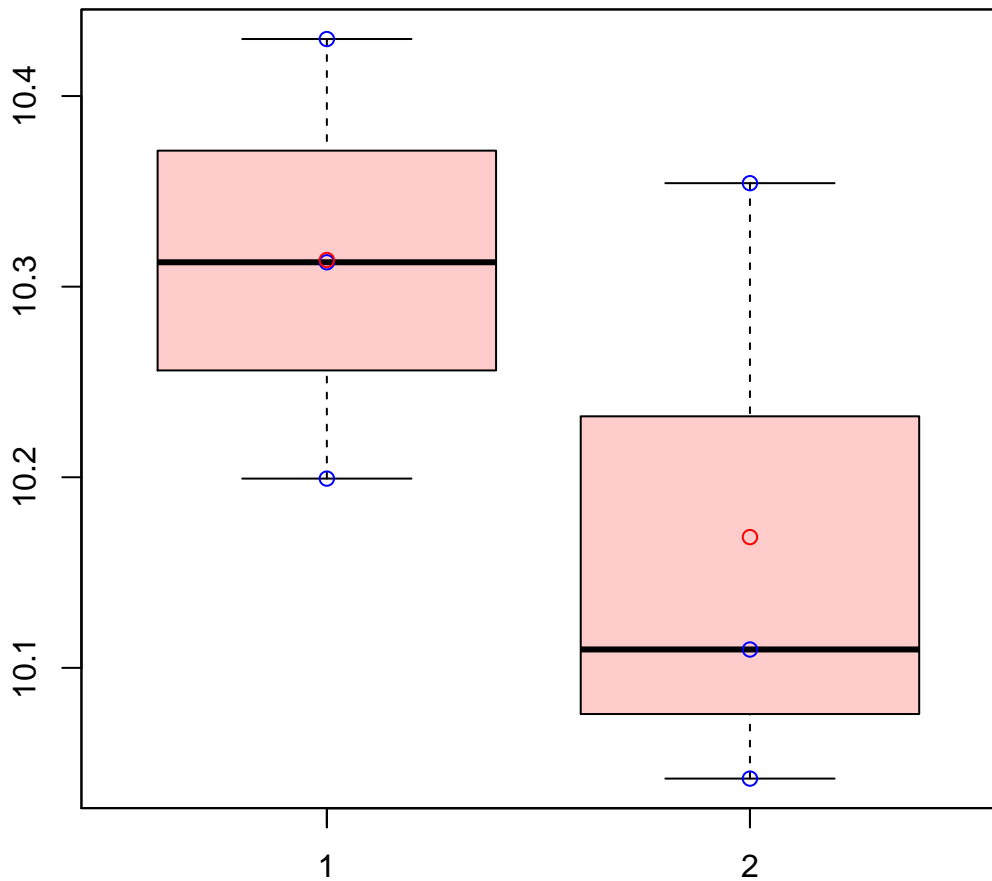

t-Test: p-value = 0.29

# CL6669Contig1|CL6669Contig1

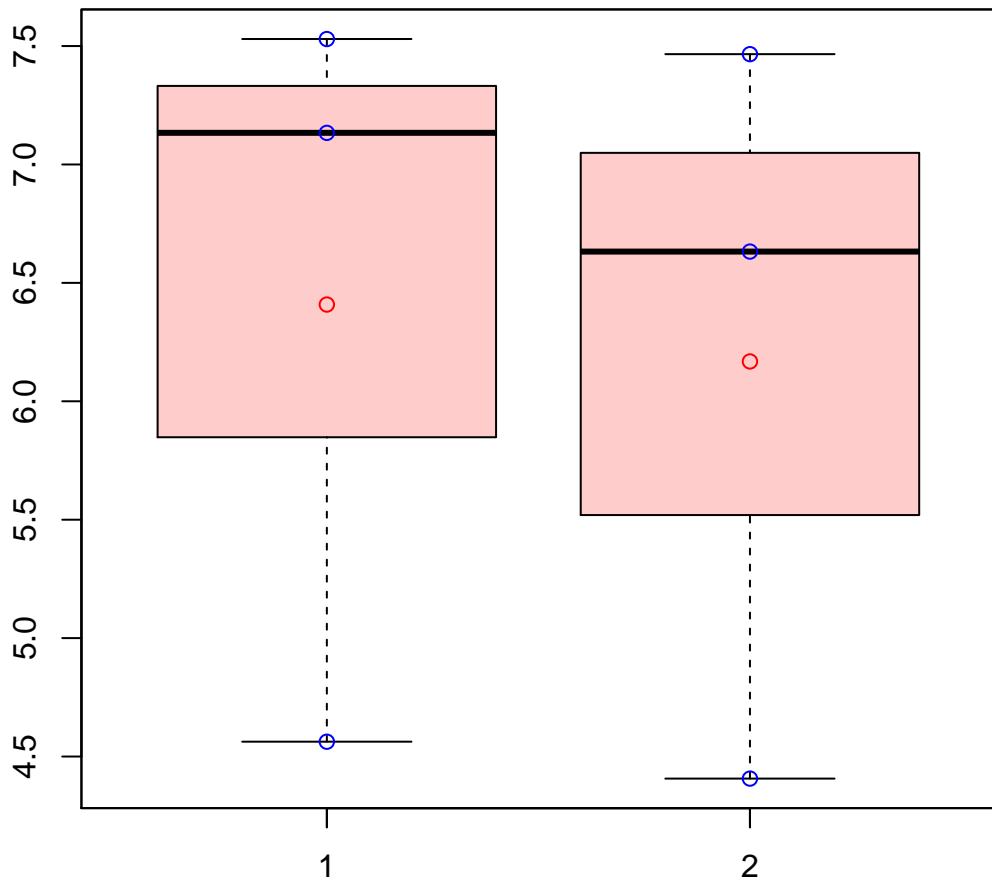

t-Test: p-value = 0.86

# CL667Contig9|CL667Contig9

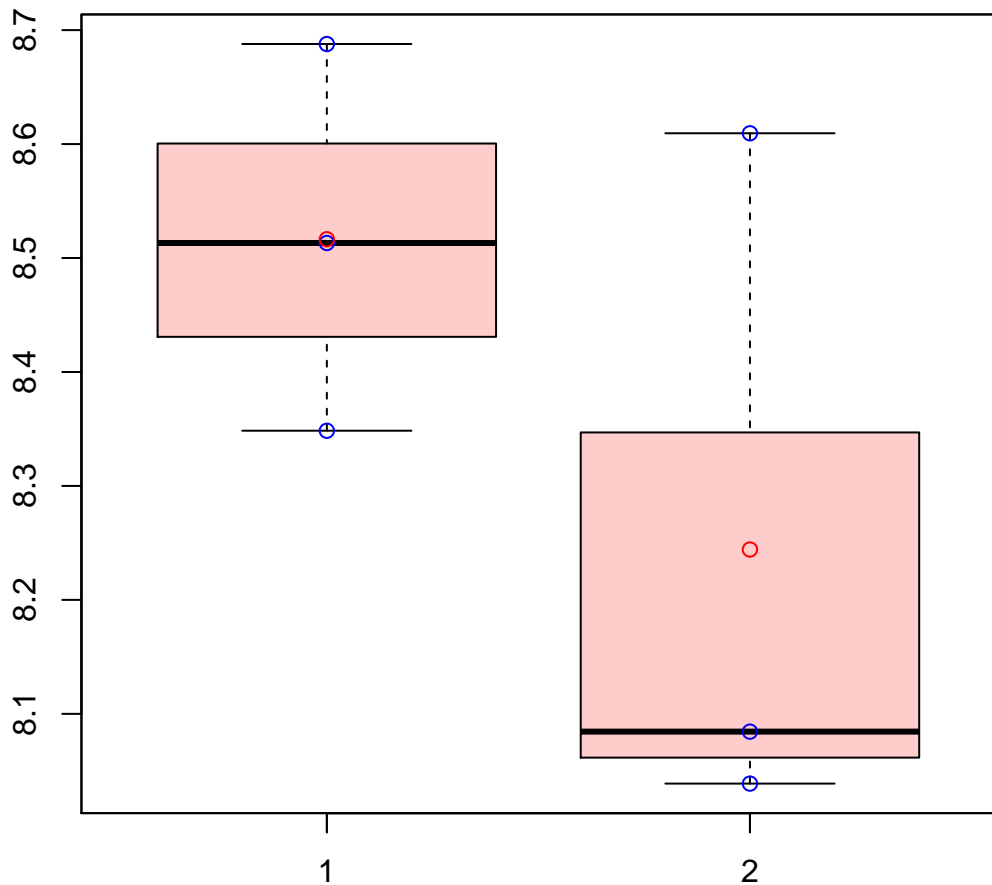

t-Test: p-value = 0.28

# CL6695Contig2|CL6695Contig2

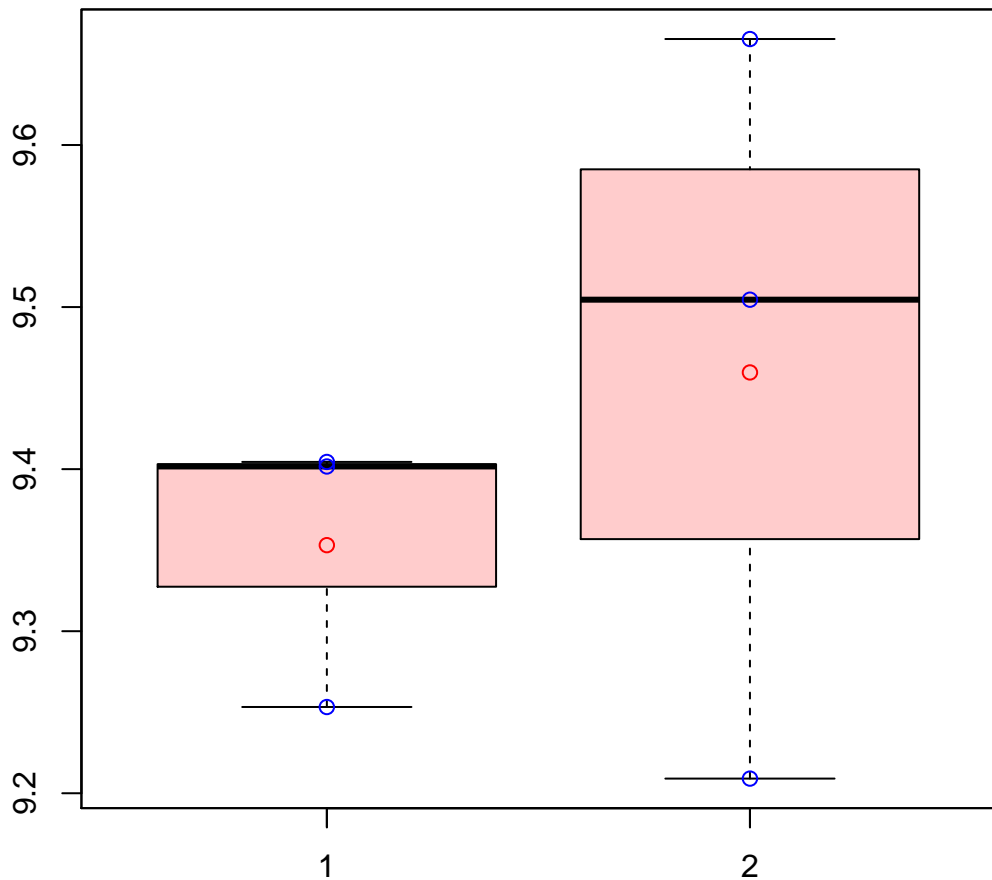

t-Test: p-value = 0.52

# CL66Contig14|CL66Contig14

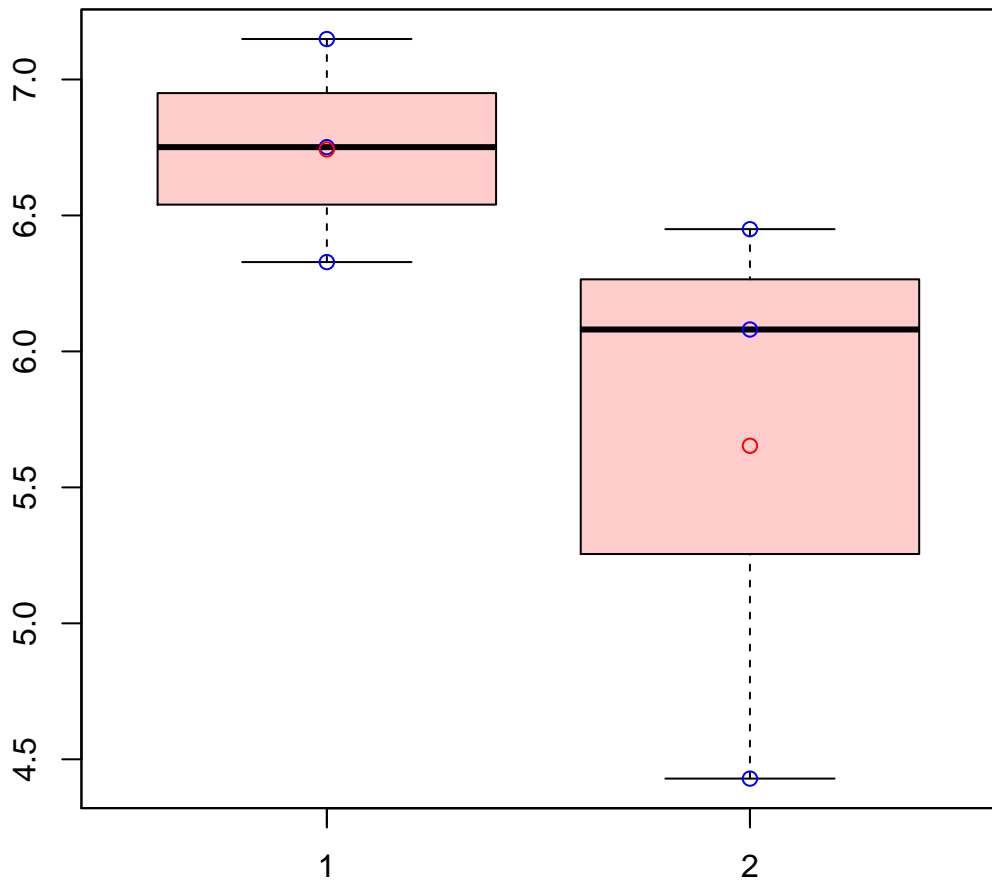

t-Test: p-value = 0.21

# CL66Contig8|CL66Contig8

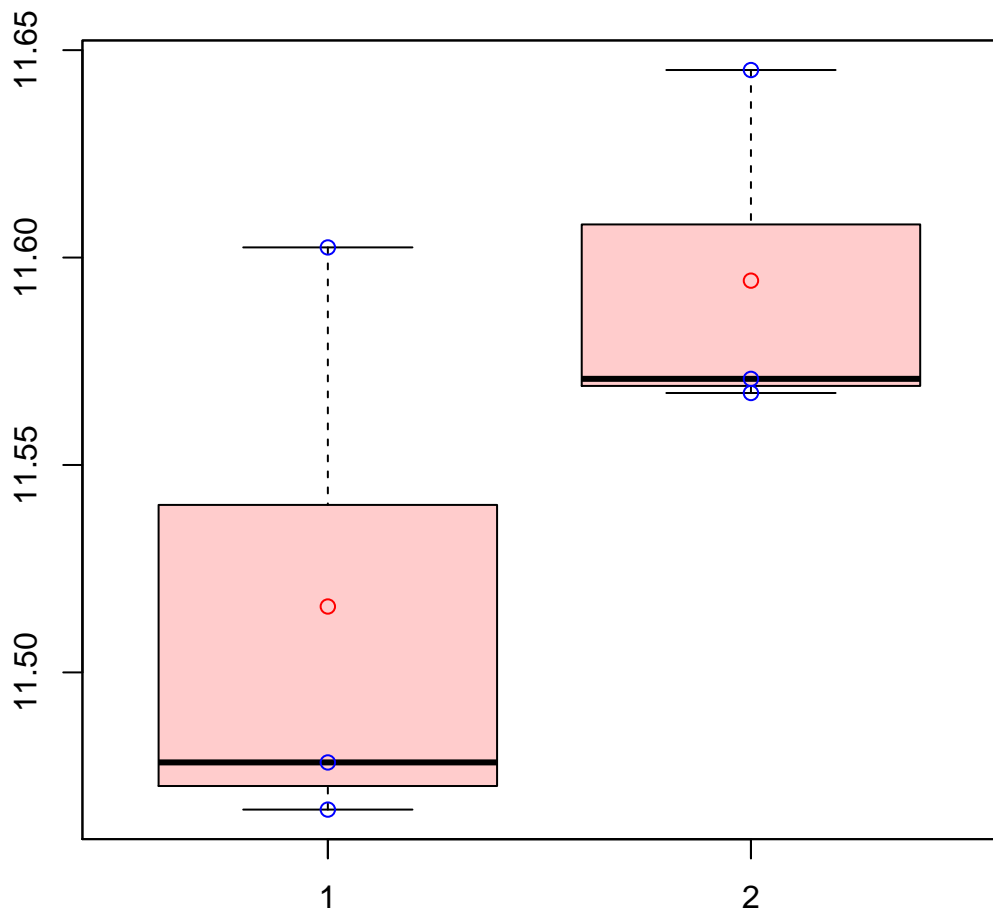

t-Test: p-value = 0.21

# CL6706Contig1|CL6706Contig1

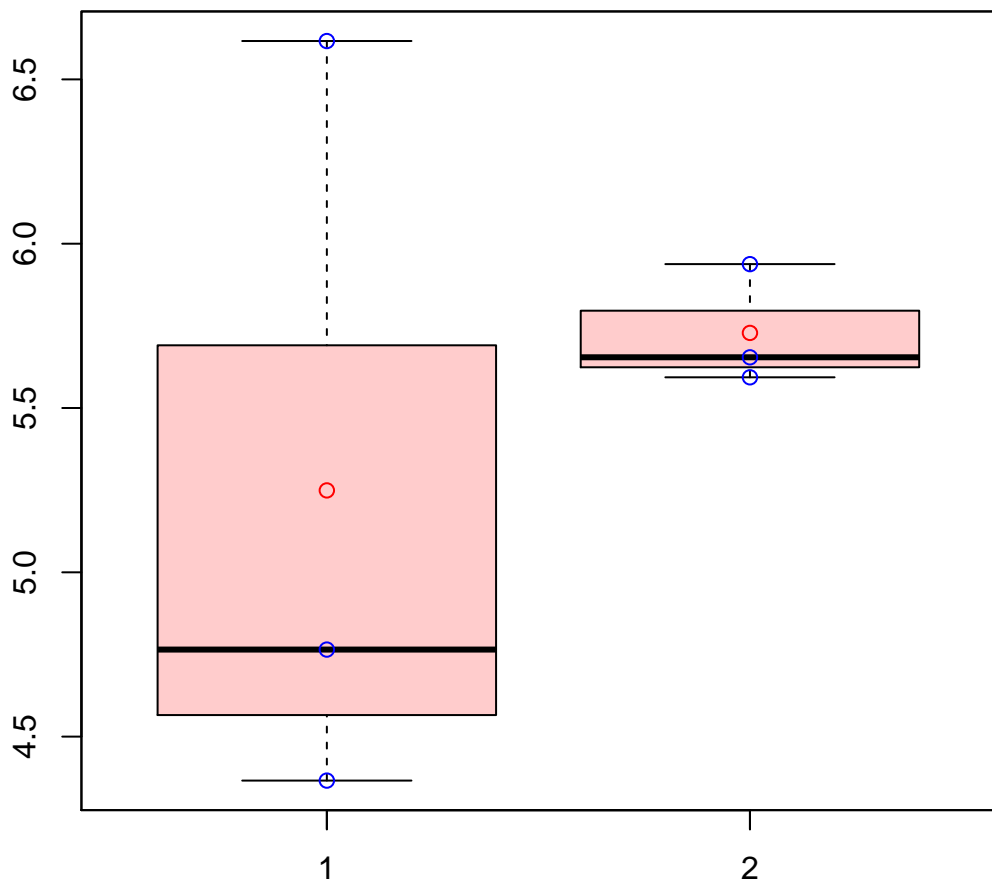

t-Test: p-value = 0.56

# CL6718Contig1|CL6718Contig1

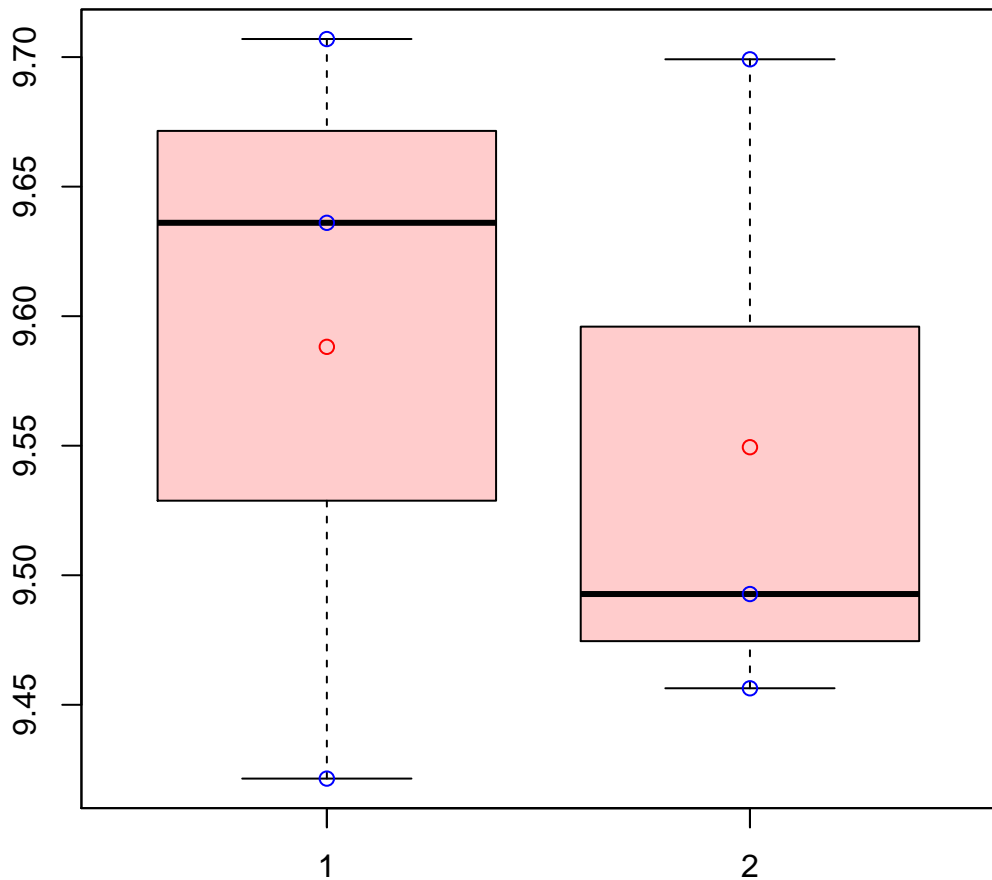

t-Test: p-value = 0.75



# CL671Contig5|CL671Contig5

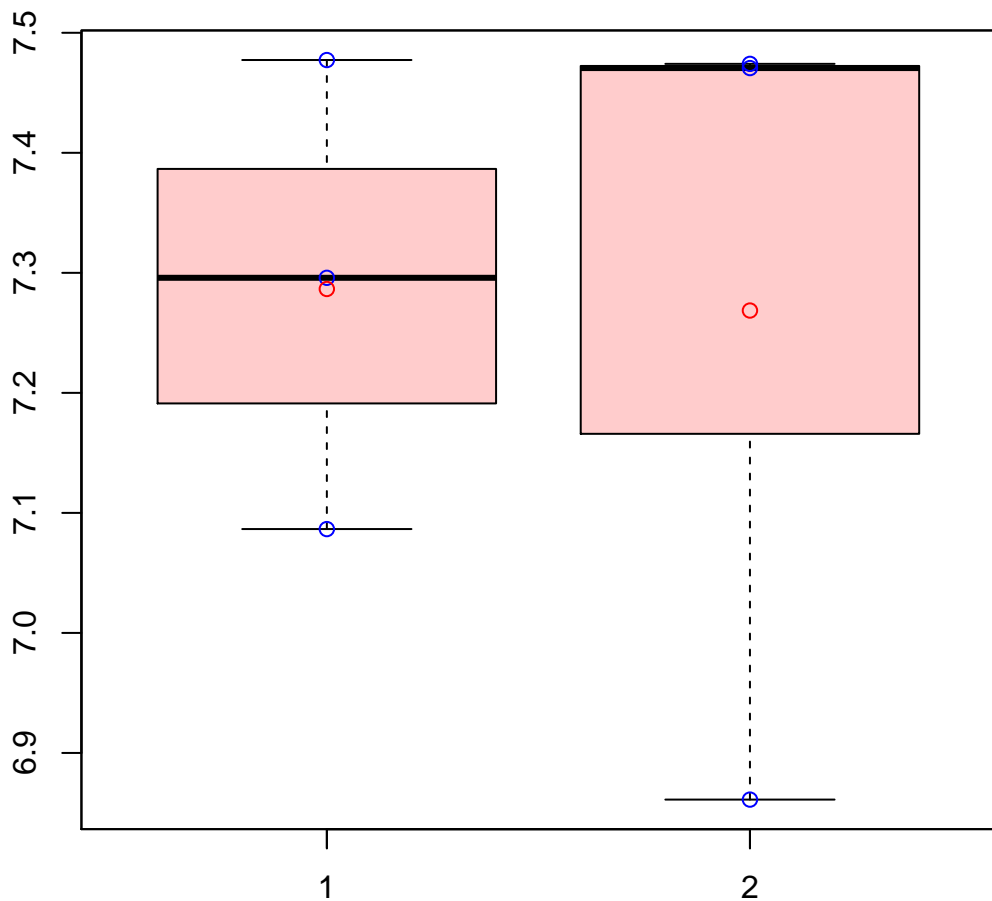

t-Test: p-value = 0.94

# CL6720Contig1|CL6720Contig1

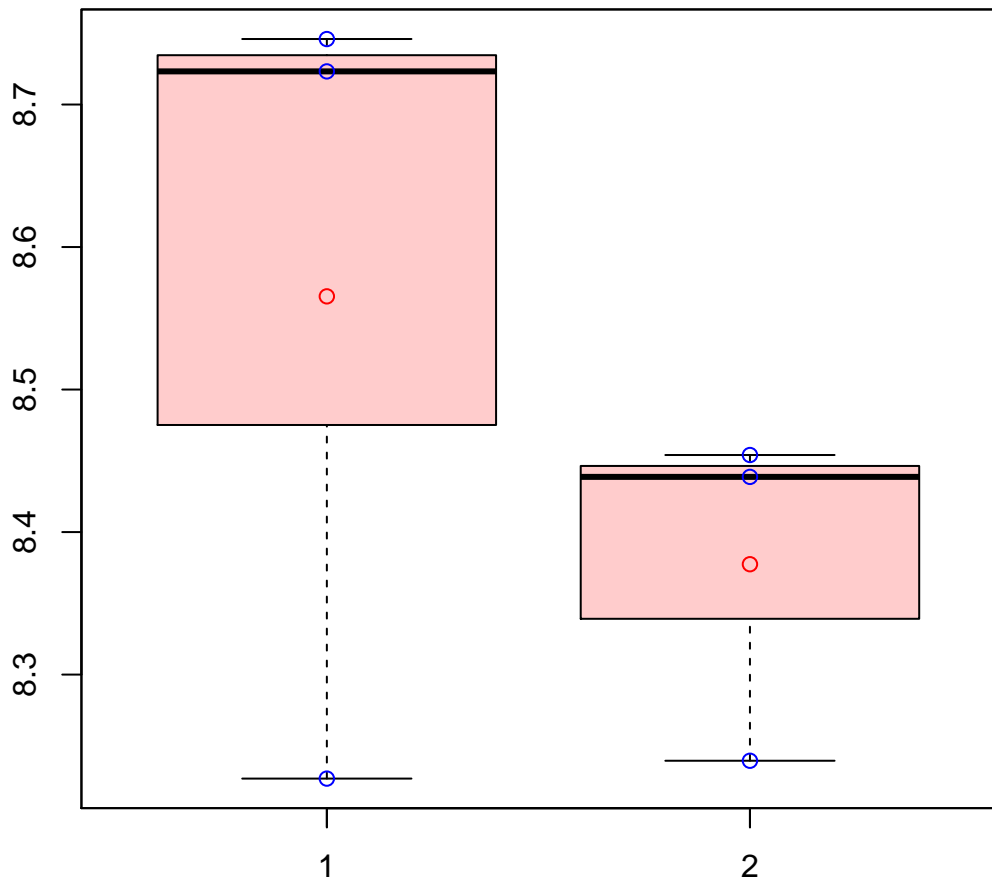

t-Test: p-value = 0.39

# CL6723Contig2|CL6723Contig2

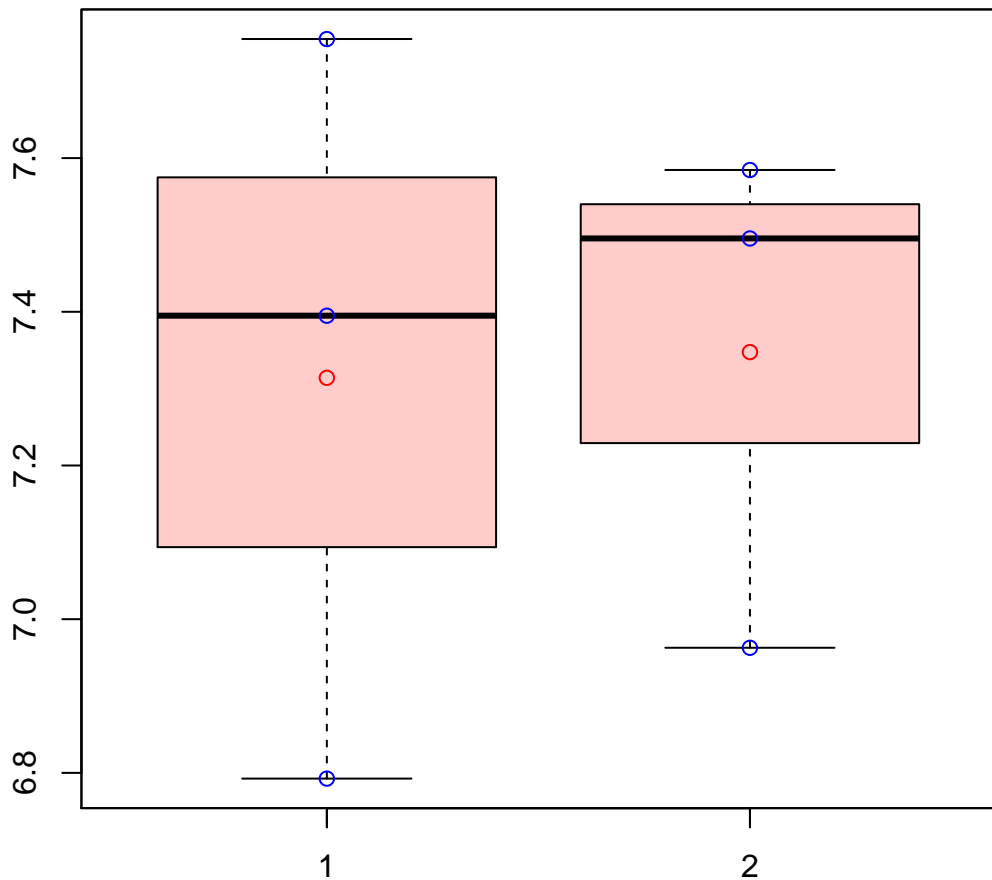

t-Test: p-value = 0.93

# CL6736Contig1|CL6736Contig1

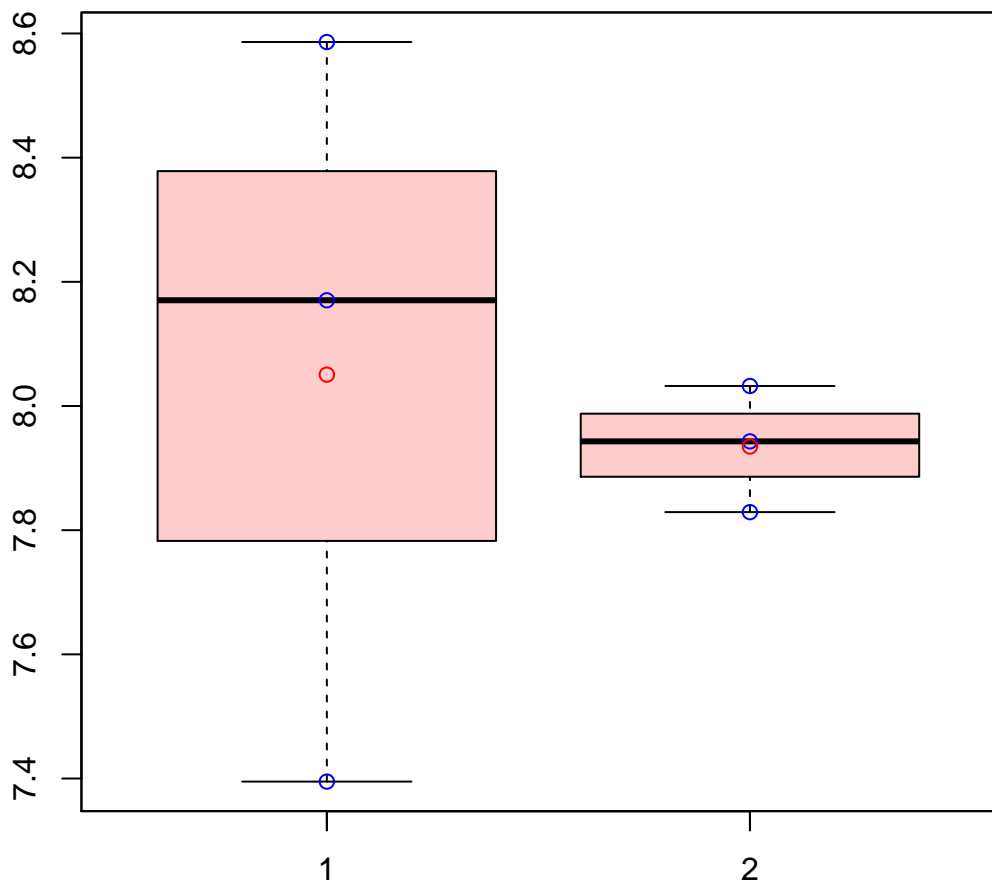

t-Test: p-value = 0.77

# CL6749Contig1|CL6749Contig1

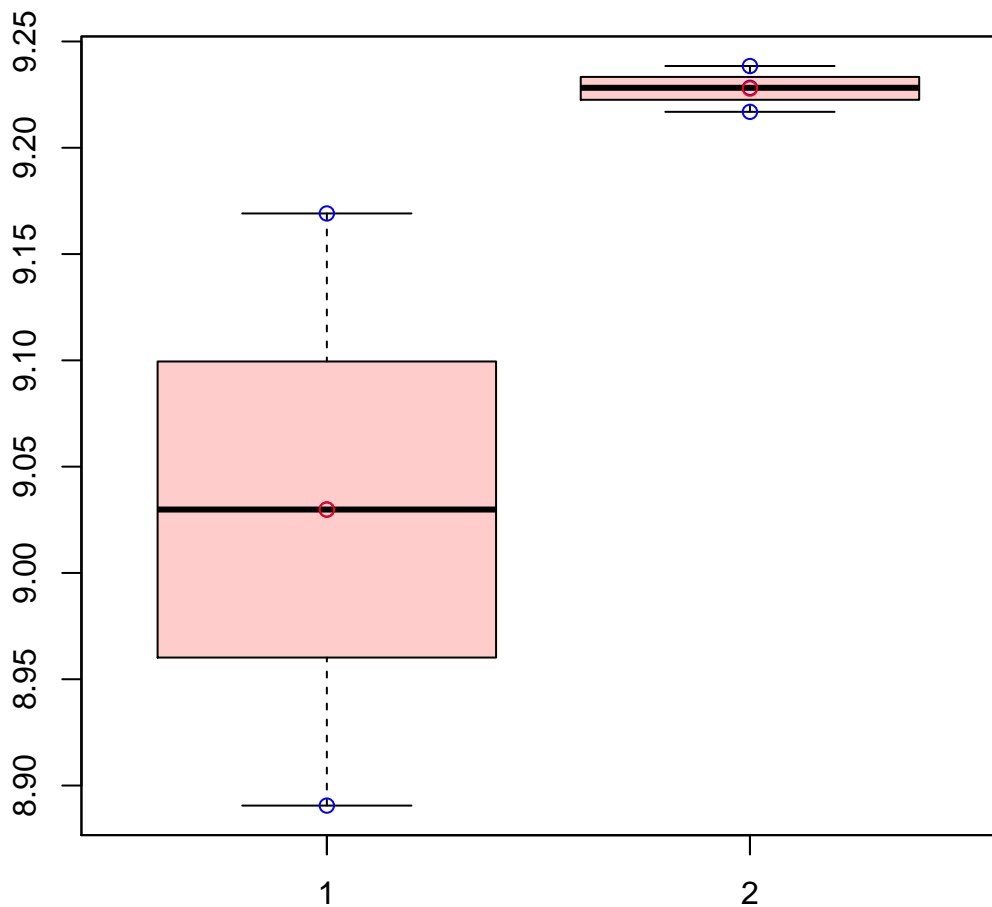

t-Test: p-value = 0.13

# CL6749Contig2|CL6749Contig2

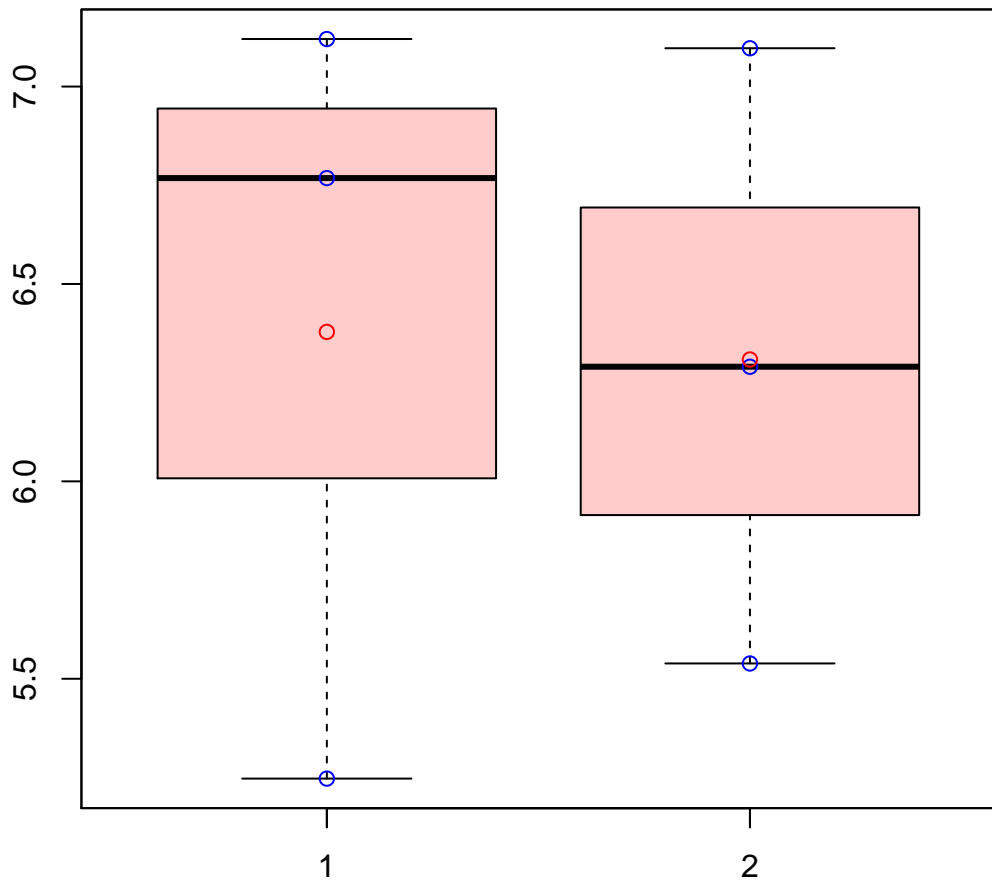

t-Test: p-value = 0.93

# CL674Contig5|CL674Contig5

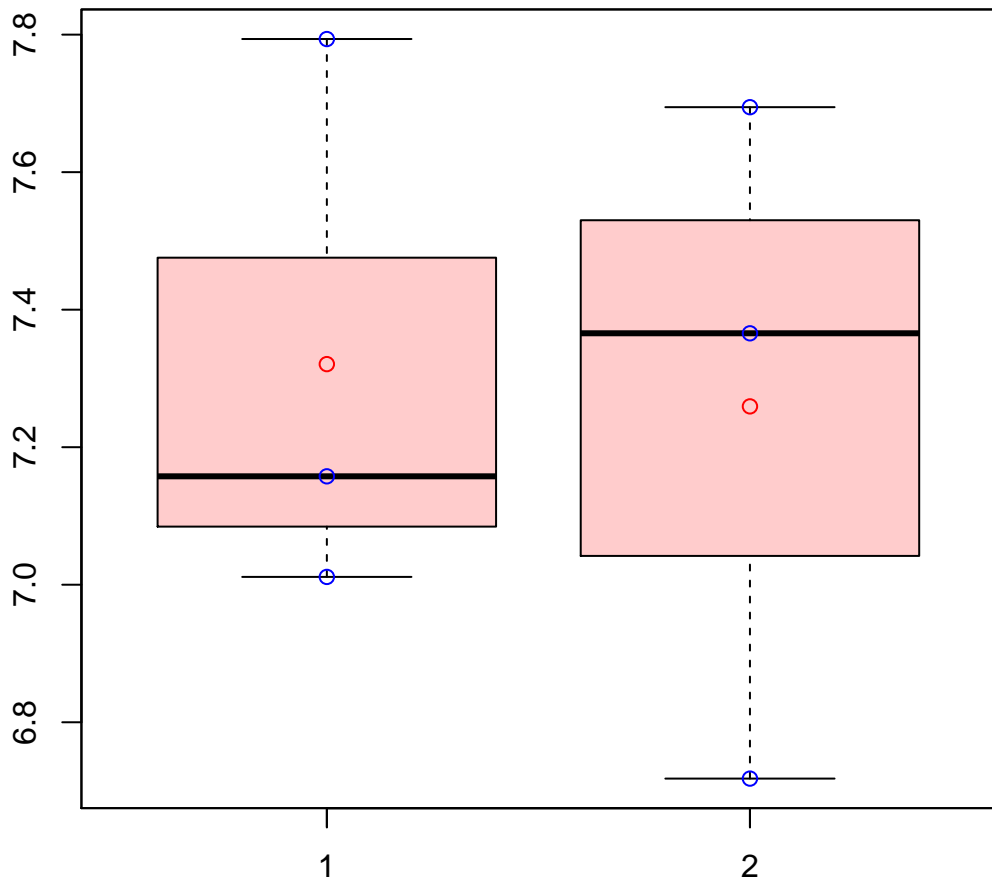

t-Test: p-value = 0.88

# CL676Contig2|CL676Contig2

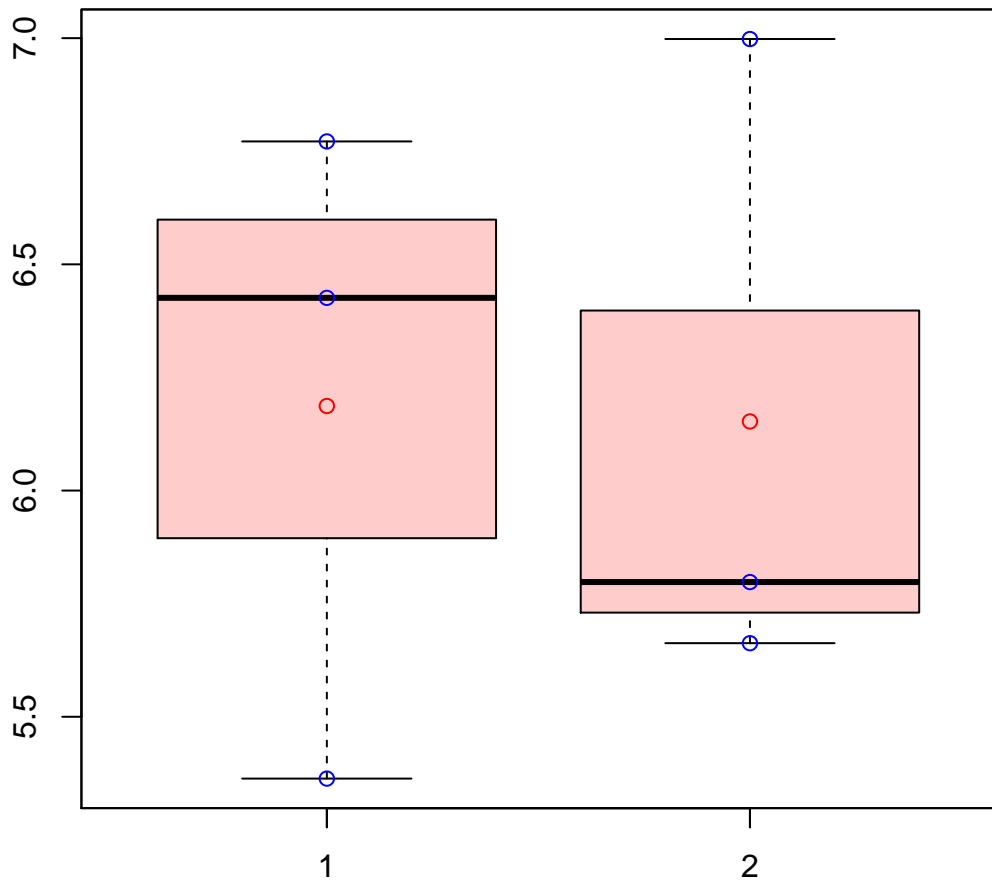

t-Test: p-value = 0.96



# CL6773Contig2|CL6773Contig2

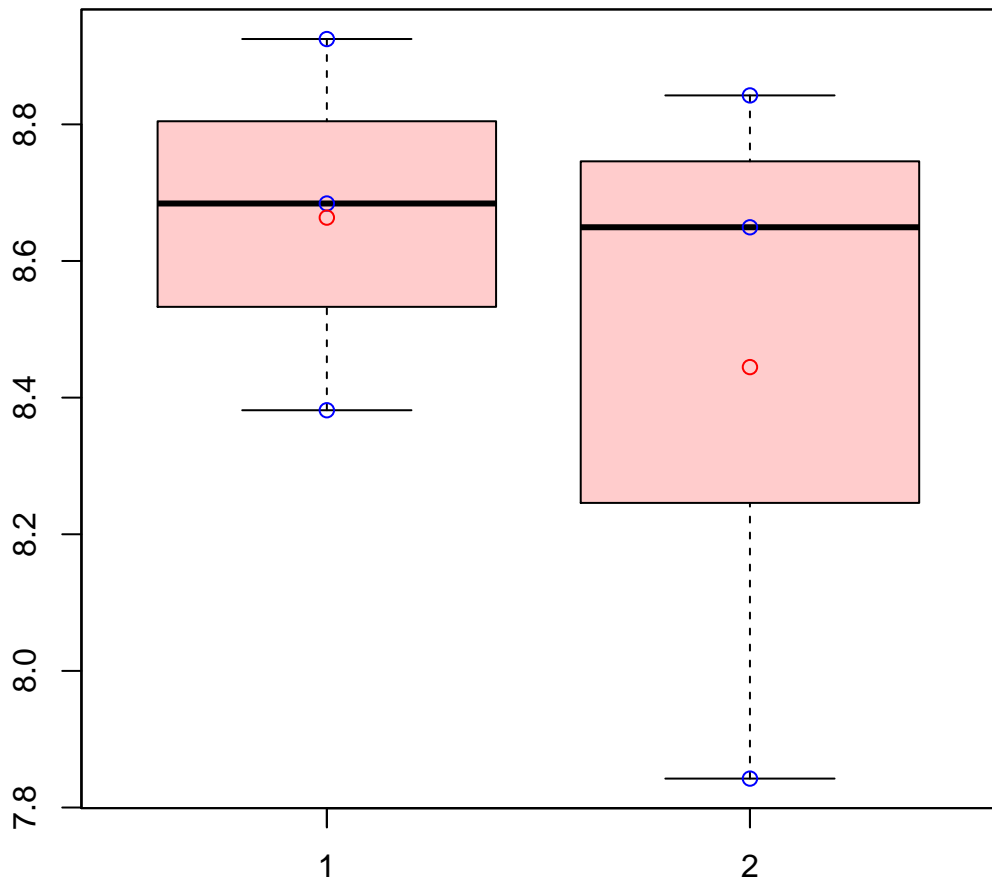

t-Test: p-value = 0.57

# CL678Contig11|CL678Contig11

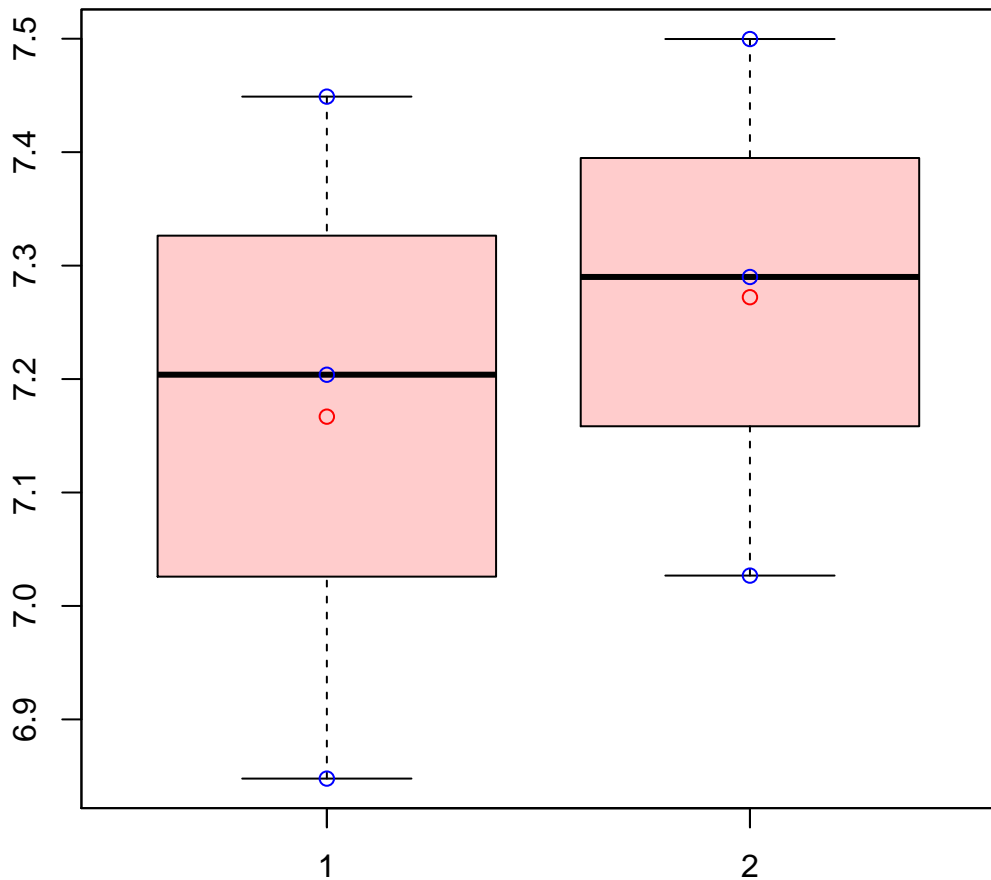

t-Test: p-value = 0.66

# CL678Contig5|CL678Contig5

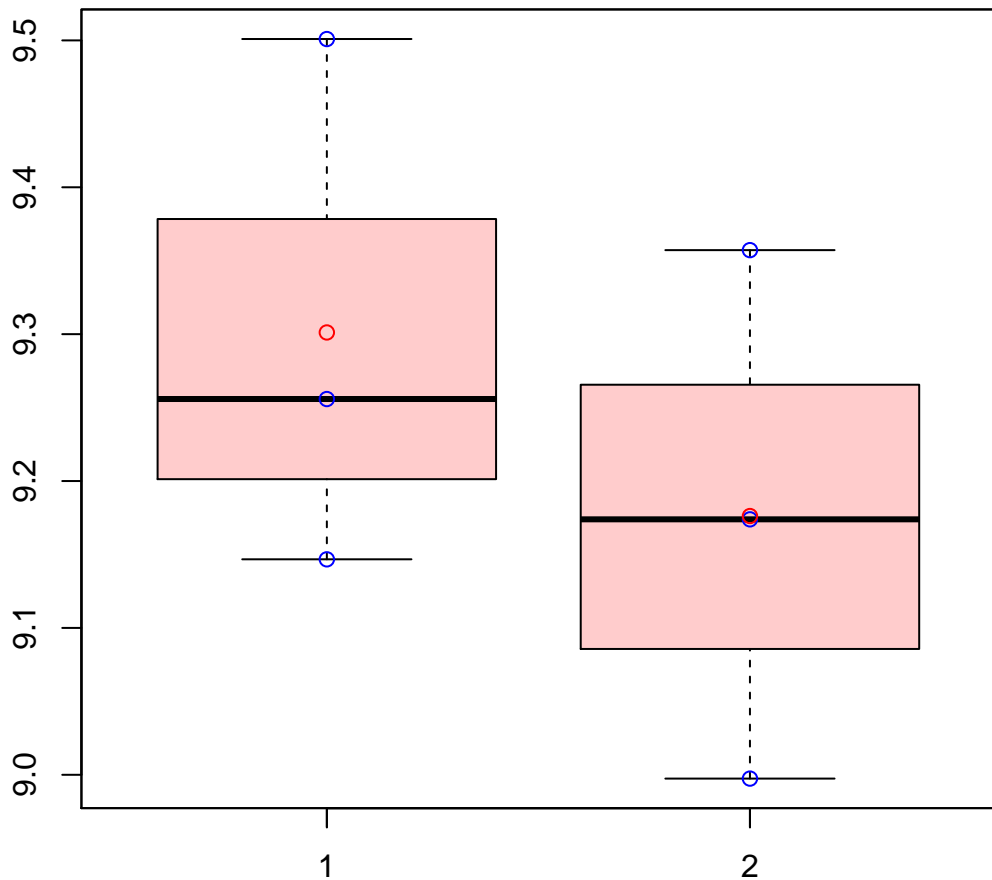

t-Test: p-value = 0.44

# CL6790Contig1|CL6790Contig1

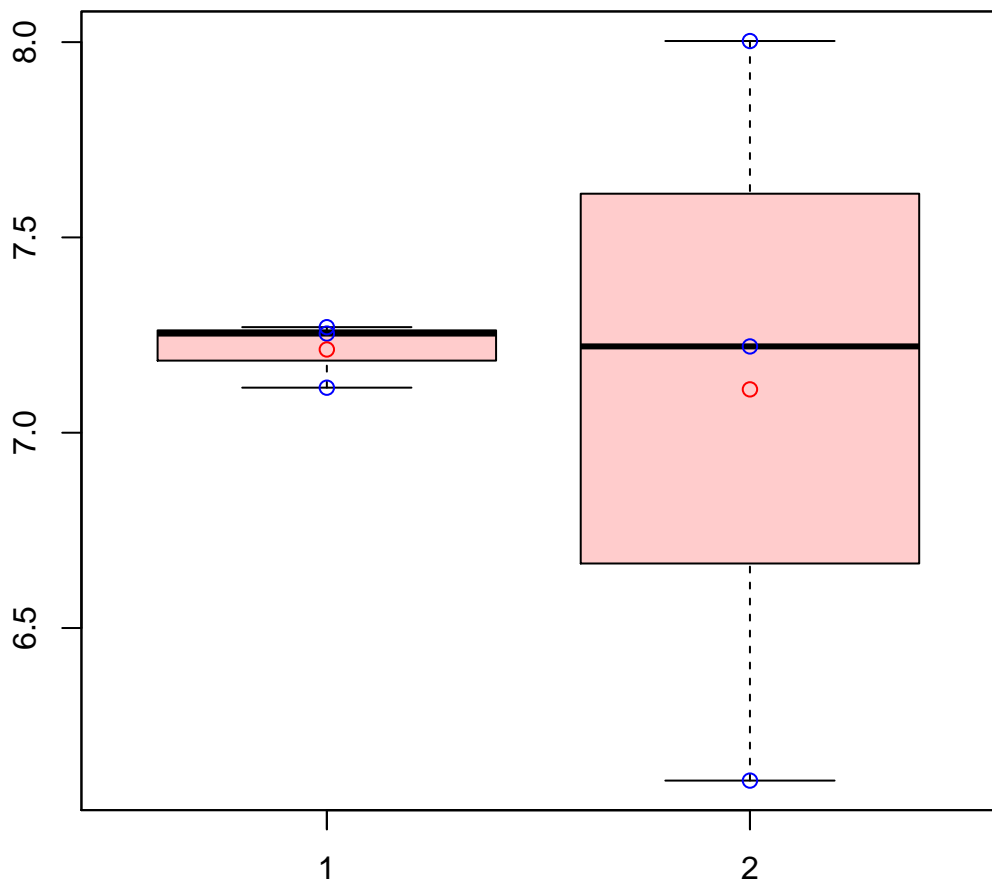

t-Test: p-value = 0.87

# CL6796Contig2|CL6796Contig2

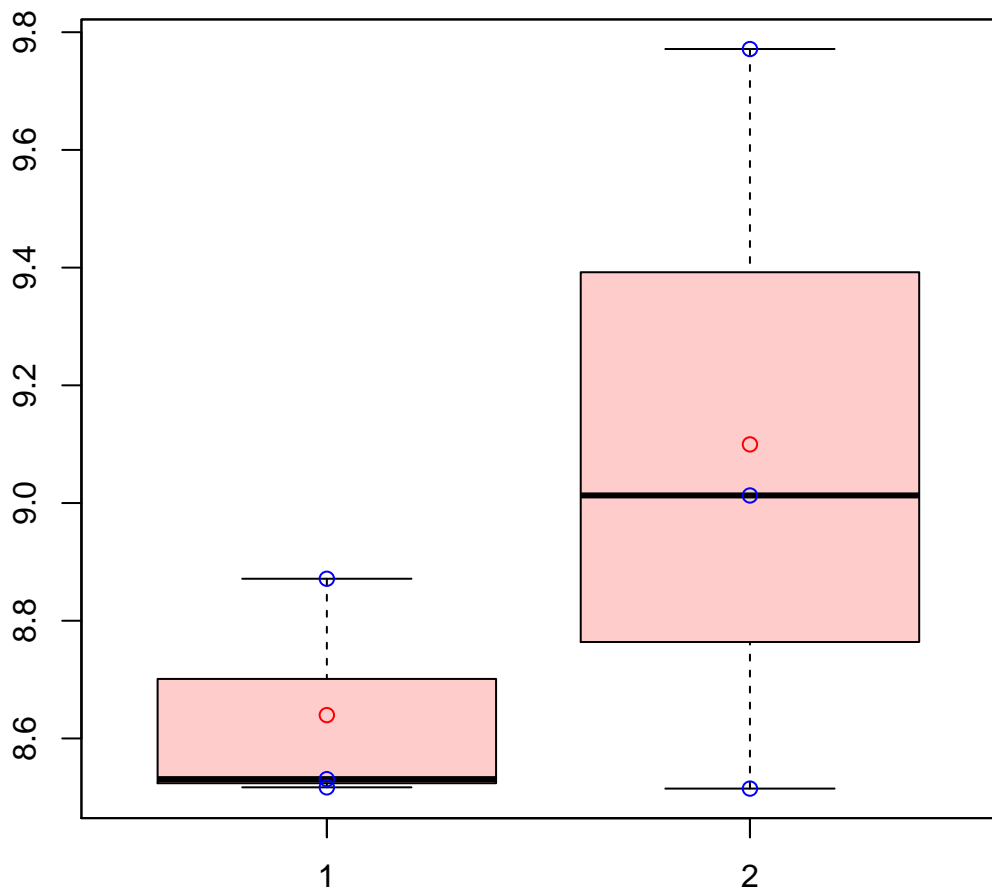

t-Test: p-value = 0.34

# CL6796Contig3|CL6796Contig3

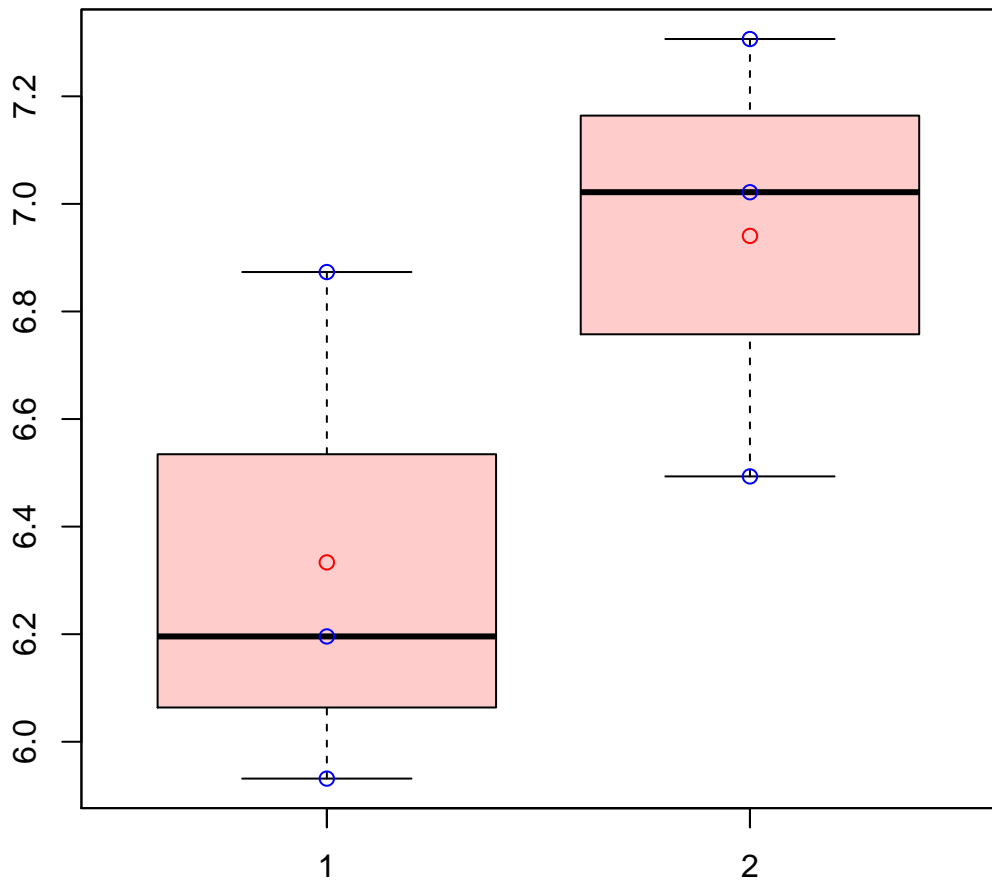

t-Test: p-value = 0.18

# CL679Contig5|CL679Contig5

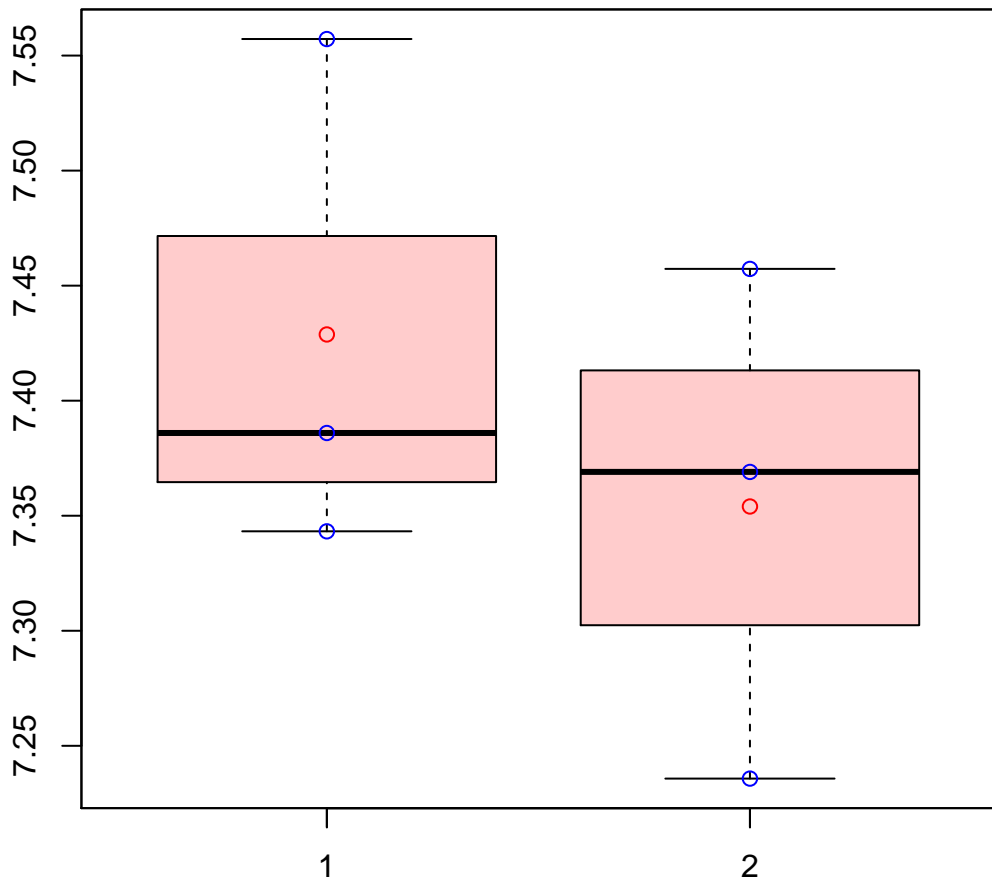

t-Test: p-value = 0.46

## CL67Contig2|CL67Contig2

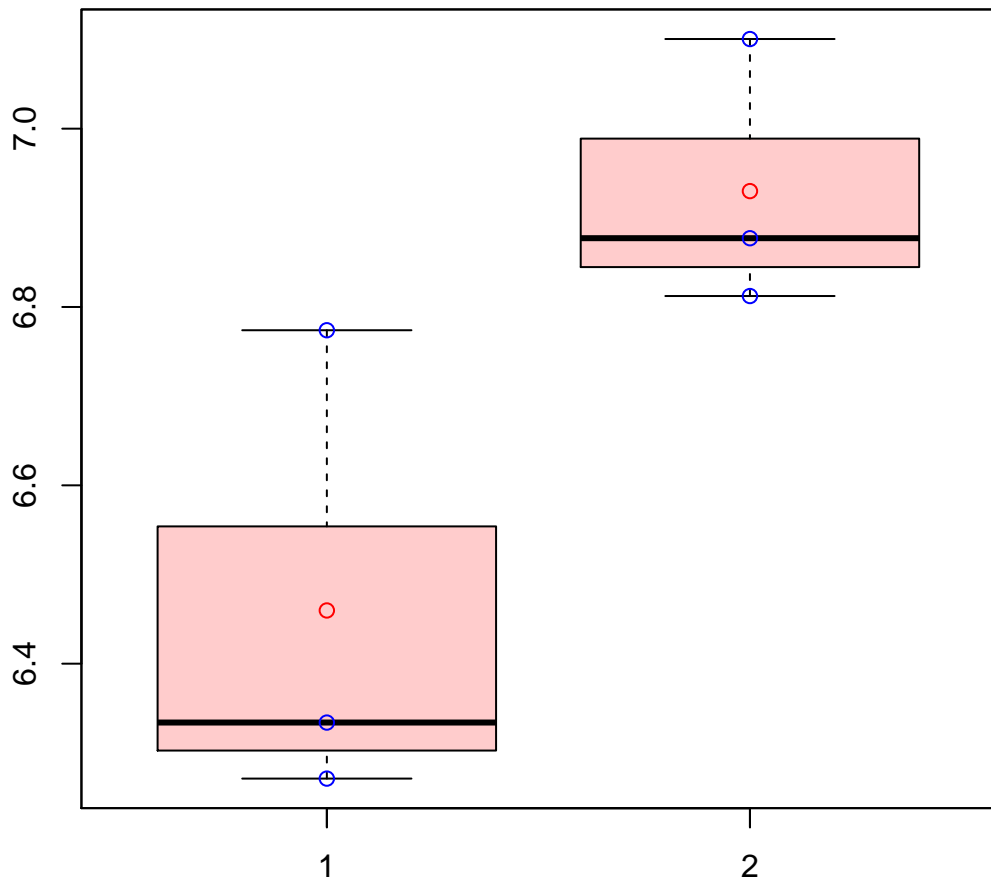

t-Test: p-value = 0.08



# CL6816Contig4|CL6816Contig4

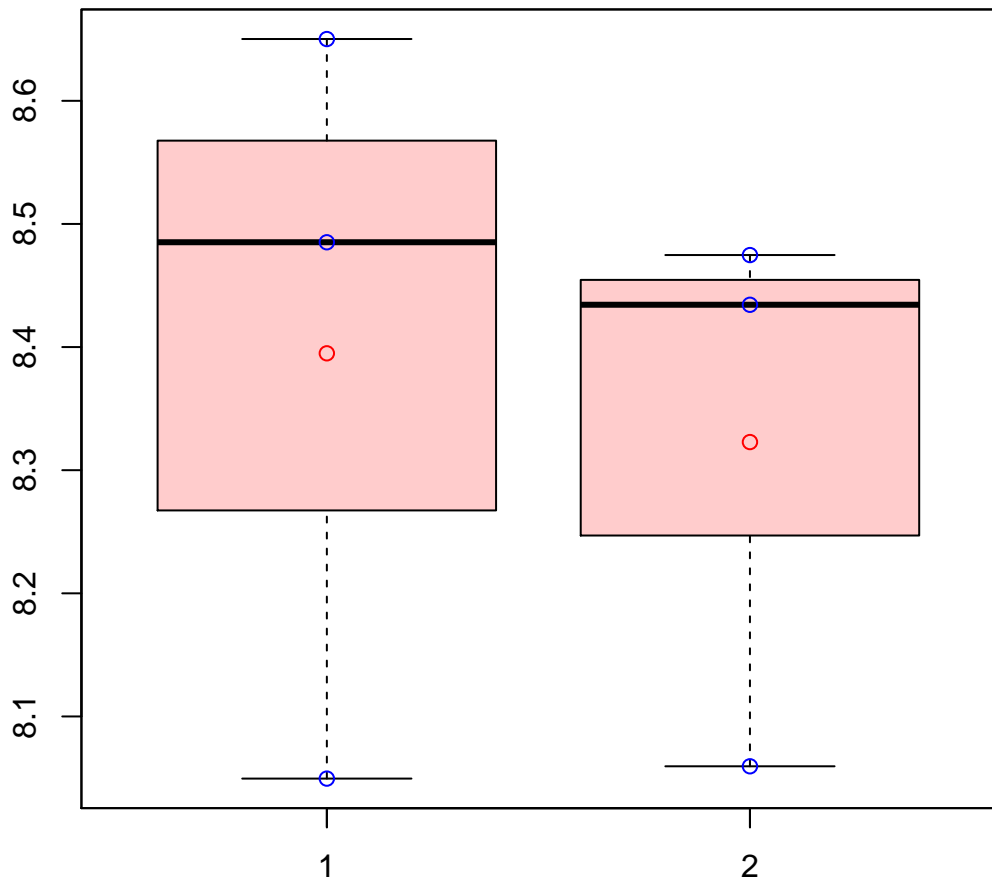

t-Test: p-value = 0.76

# CL6820Contig1|CL6820Contig1

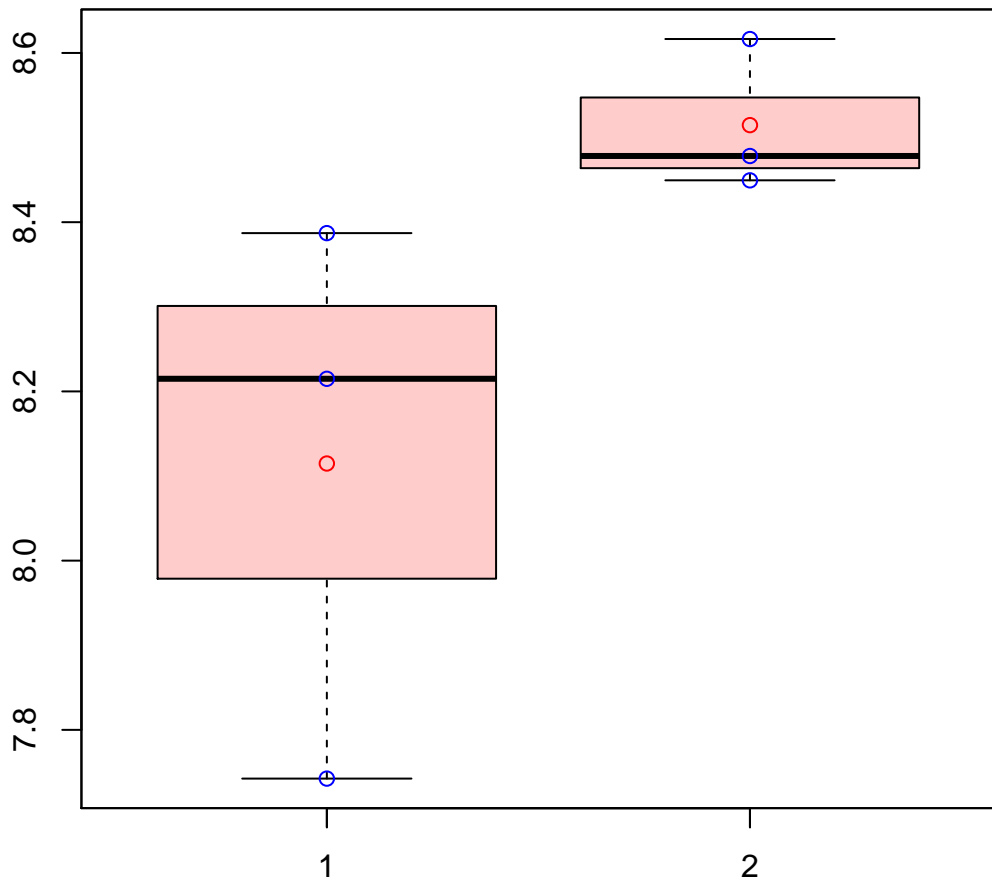

t-Test: p-value = 0.17

# CL682Contig1|CL682Contig1

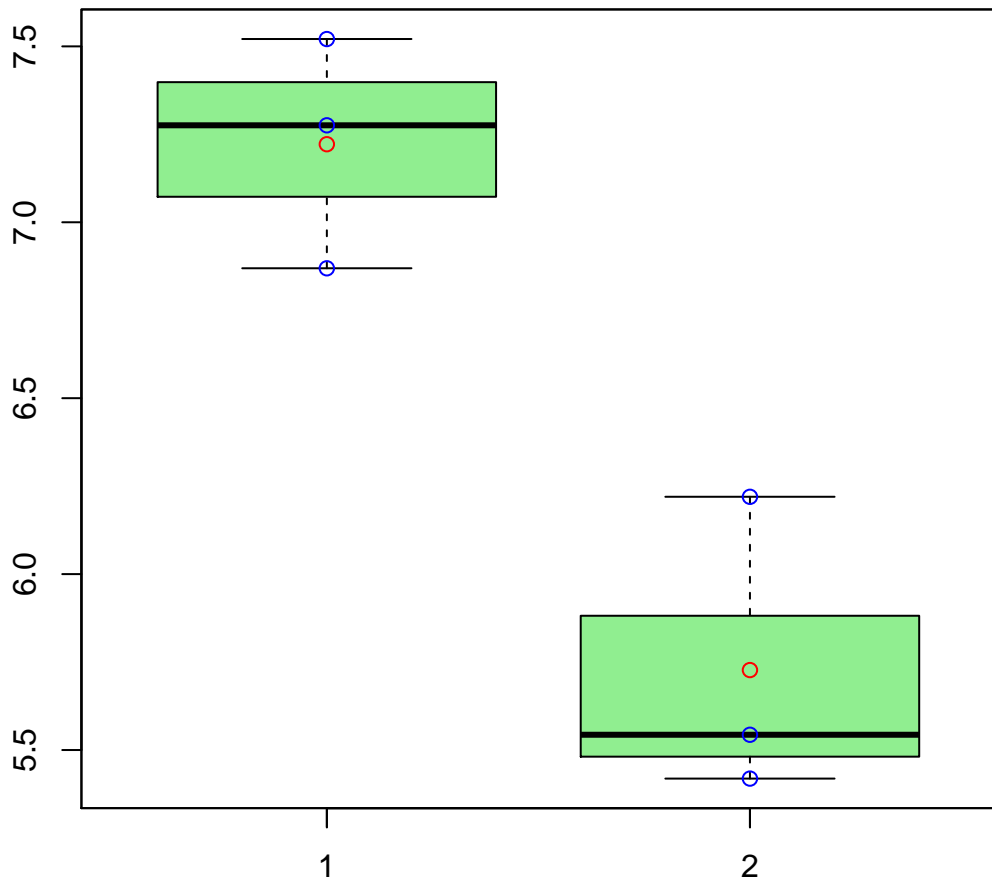

t-Test: p-value = 0.01

# CL6832Contig2|CL6832Contig2

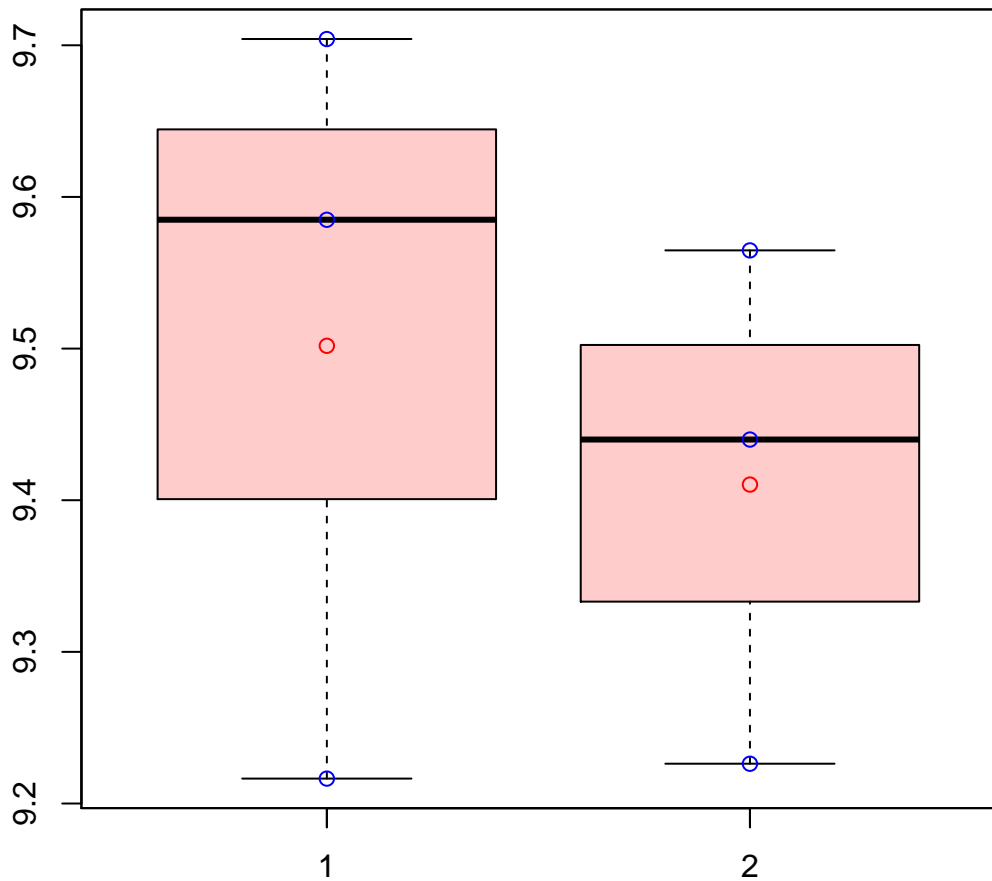

t-Test: p-value = 0.64

# CL6836Contig2|CL6836Contig2

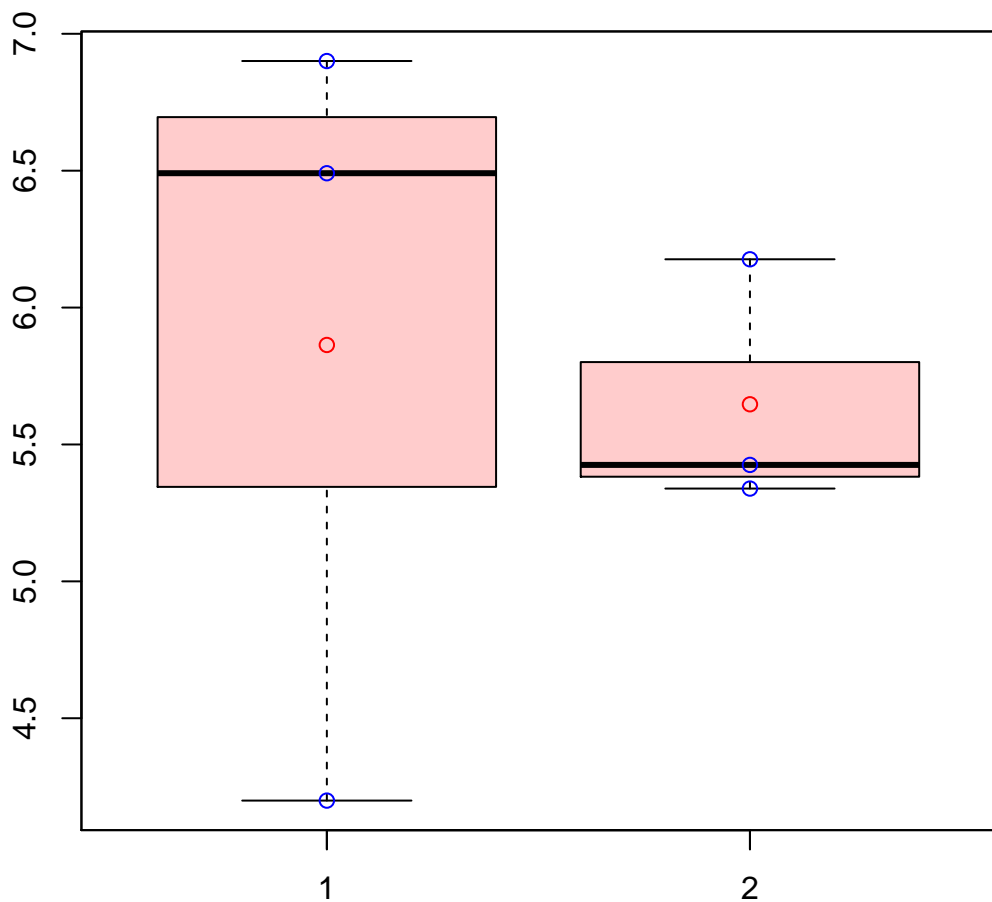

t-Test: p-value = 0.83

# CL6840Contig4|CL6840Contig4

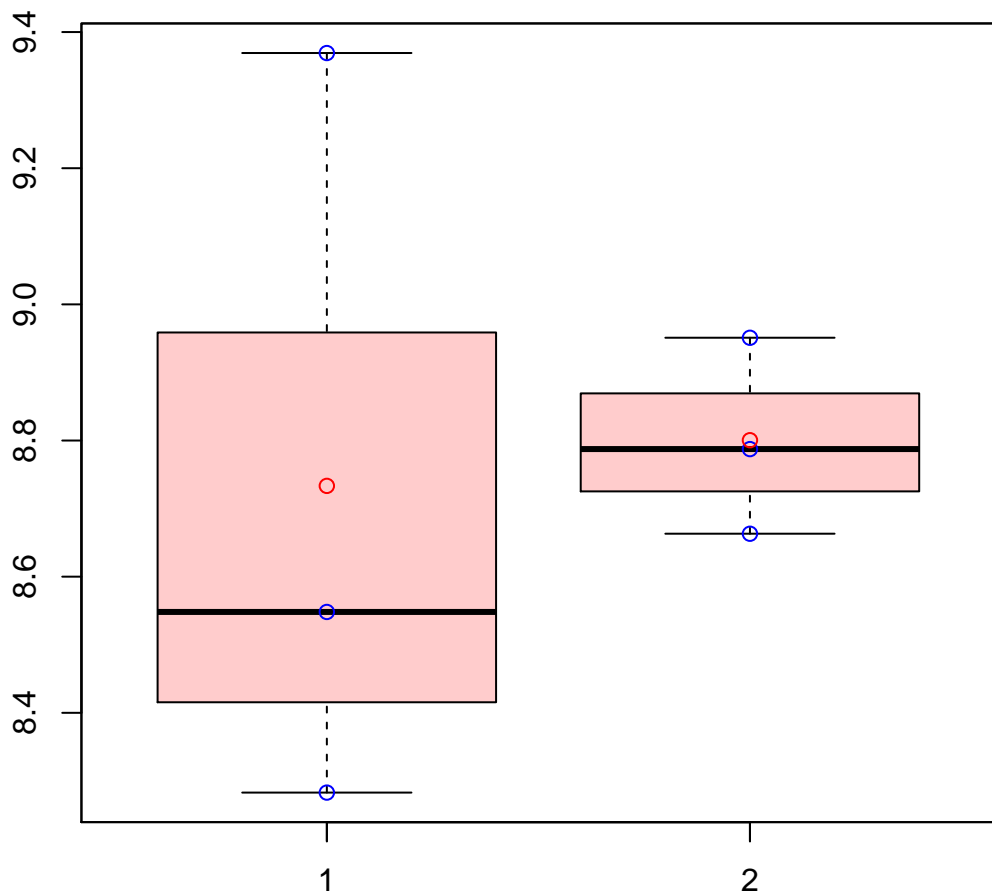

t-Test: p-value = 0.86

# CL6841Contig3|CL6841Contig3

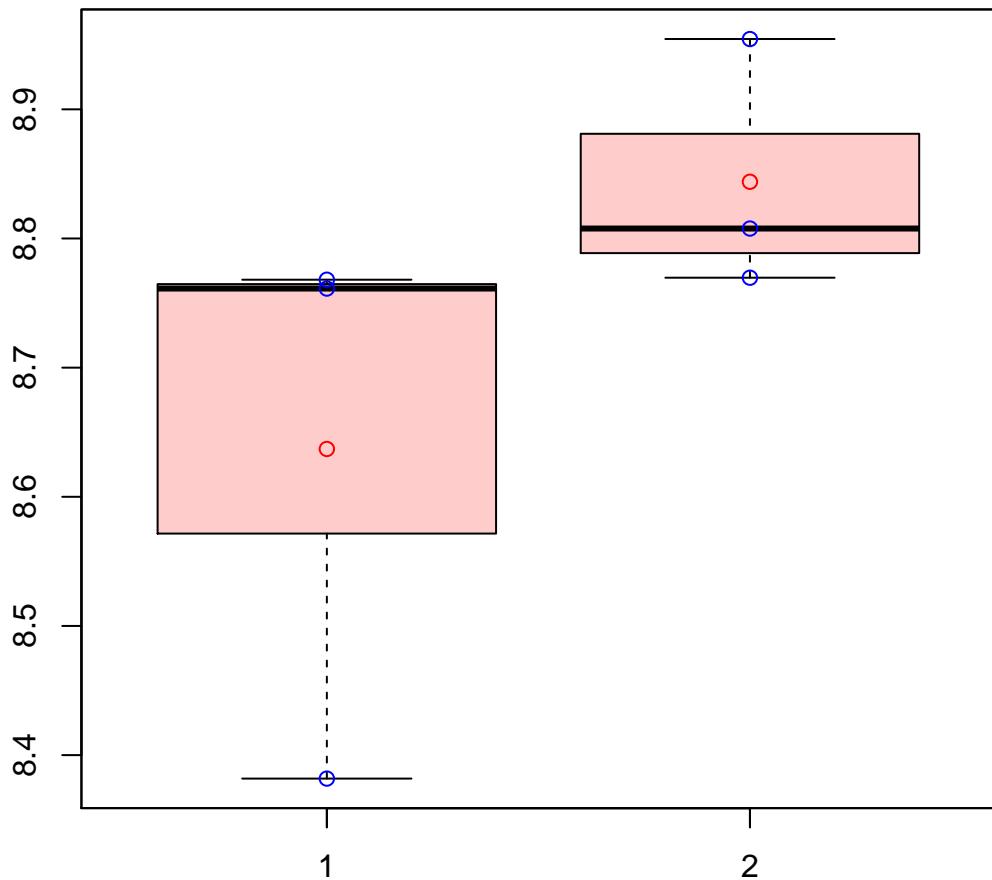

t-Test: p-value = 0.24

# CL6842Contig6|CL6842Contig6

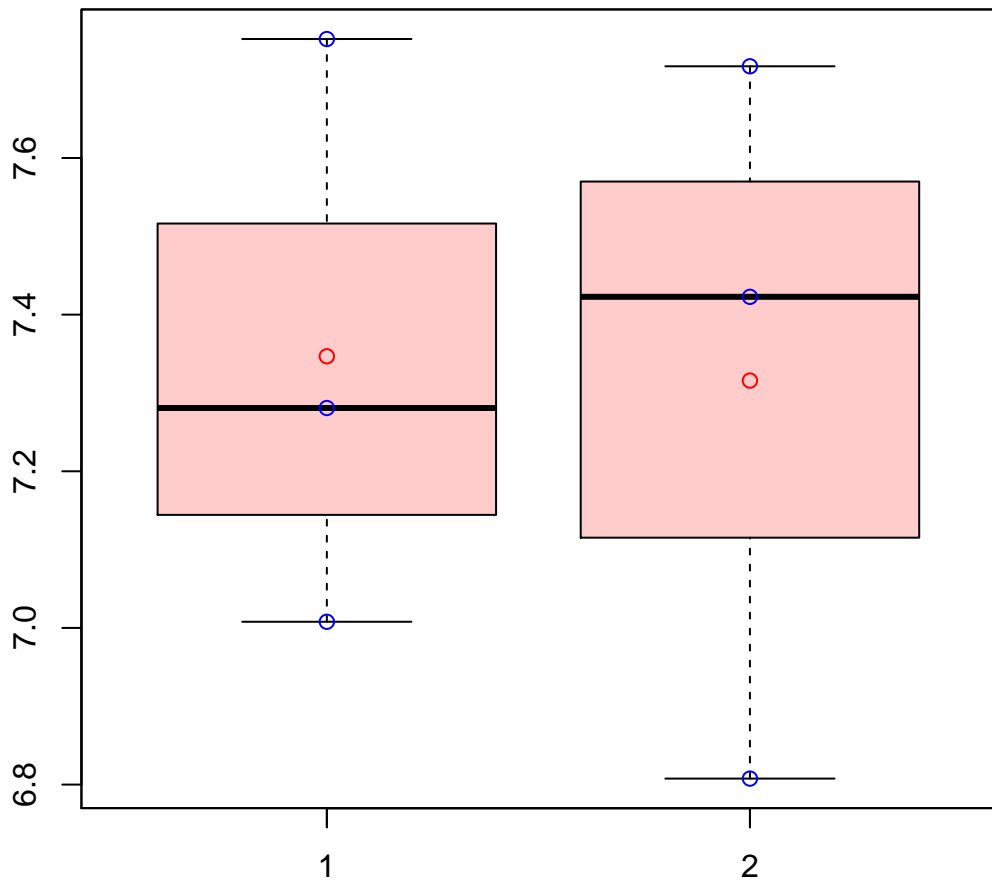

t-Test: p-value = 0.93



# CL6845Contig2|CL6845Contig2

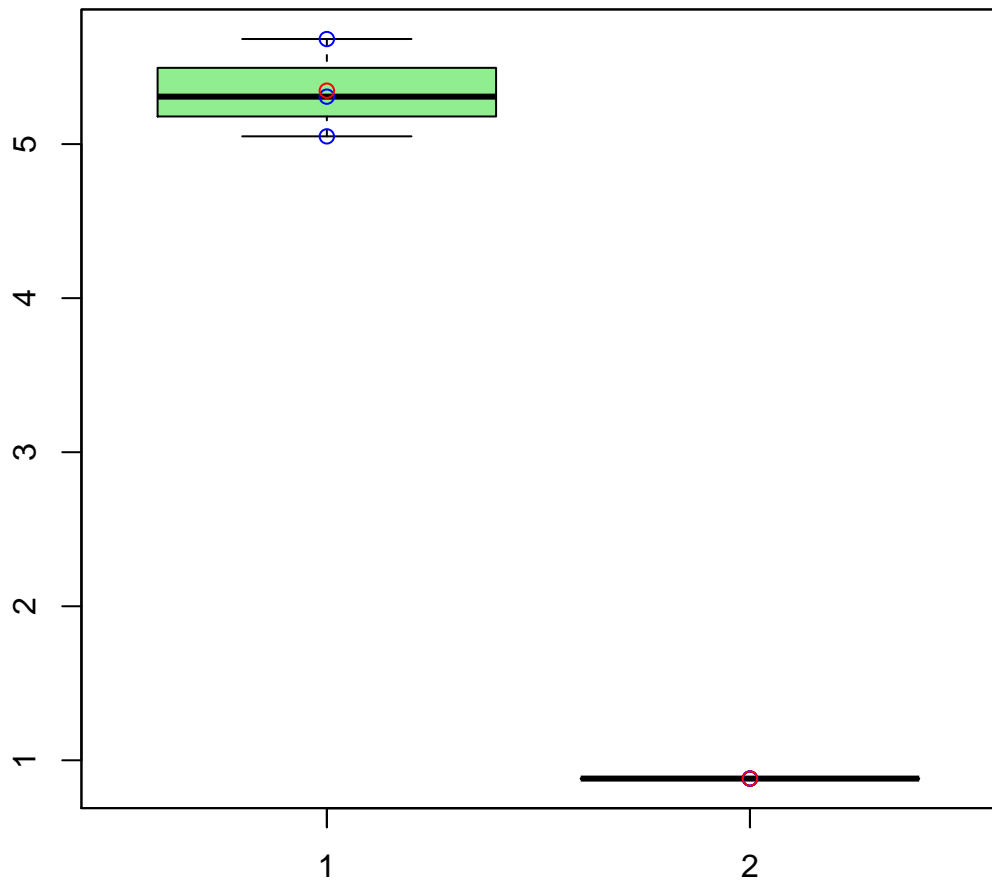

t-Test: p-value = 0

# CL6851Contig4|CL6851Contig4

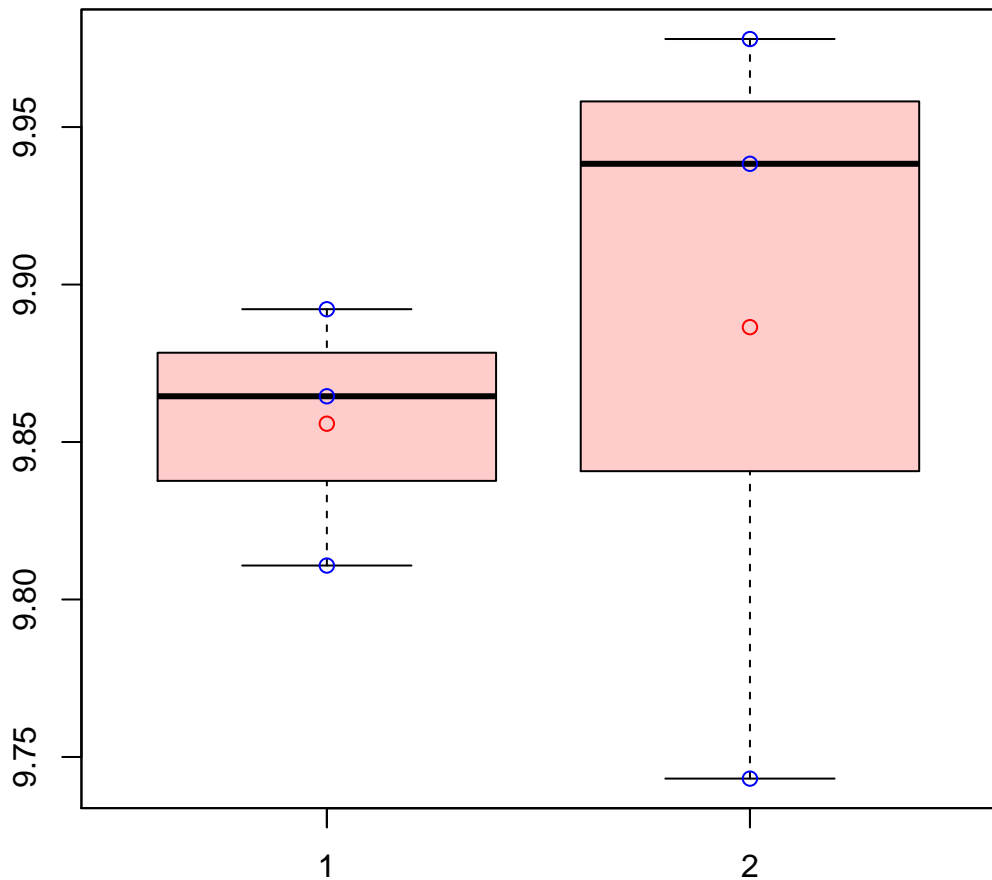

t-Test: p-value = 0.72

# CL6857Contig3|CL6857Contig3

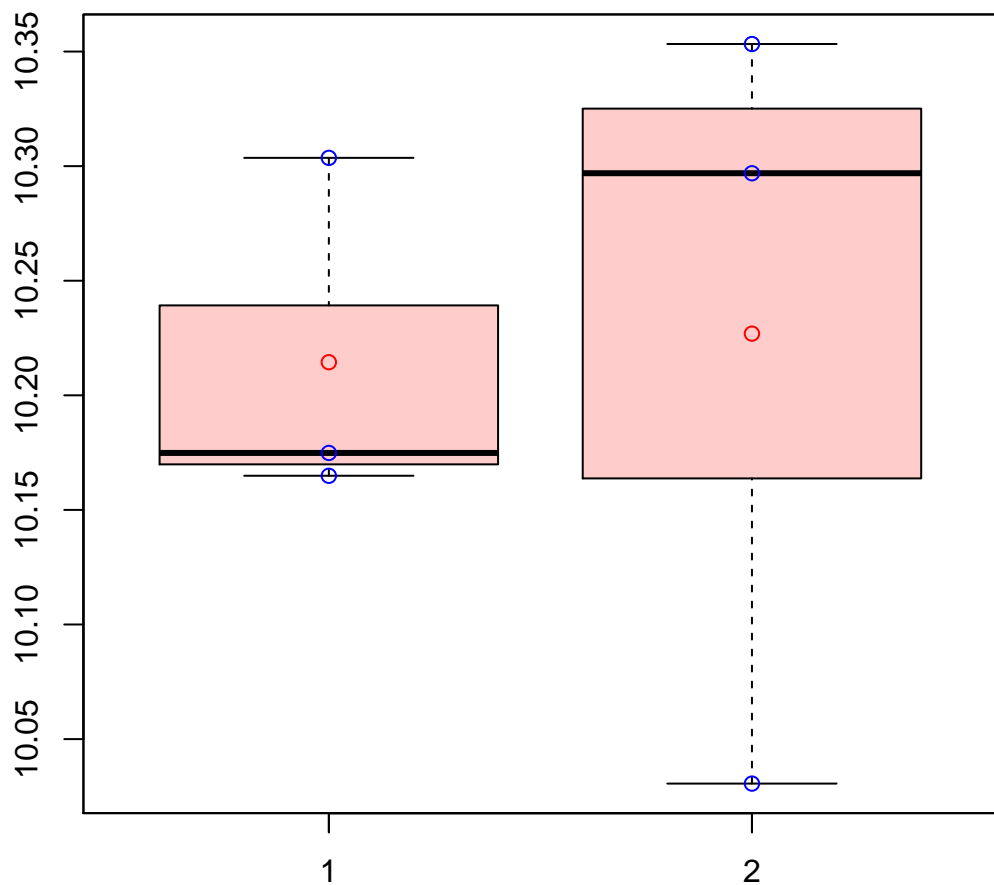

t-Test: p-value = 0.92

# CL6858Contig3|CL6858Contig3

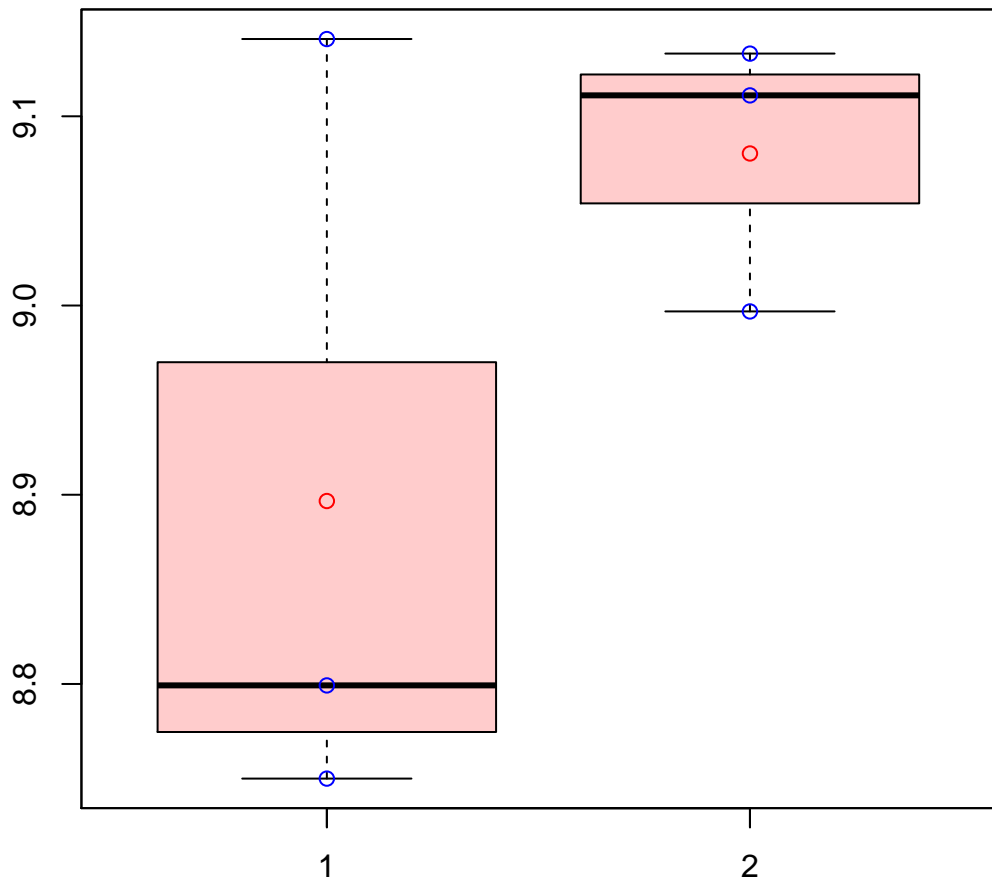

t-Test: p-value = 0.27

# CL6864Contig2|CL6864Contig2

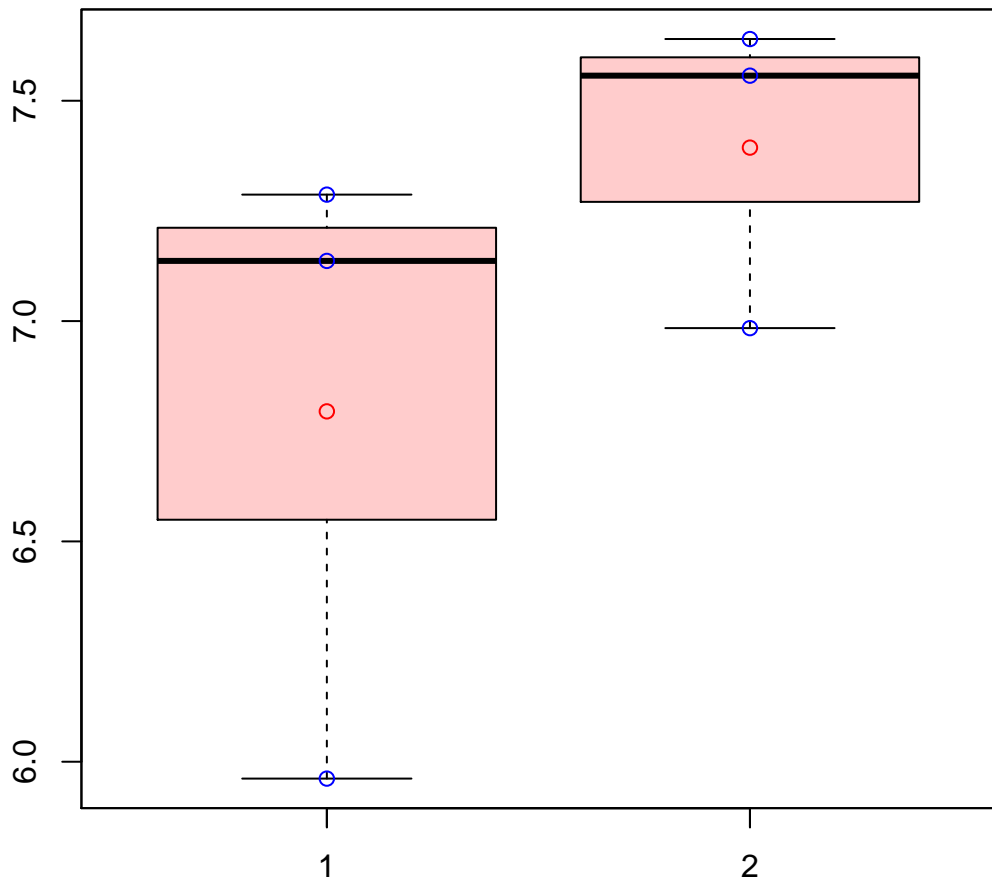

t-Test: p-value = 0.29

# CL6873Contig1|CL6873Contig1

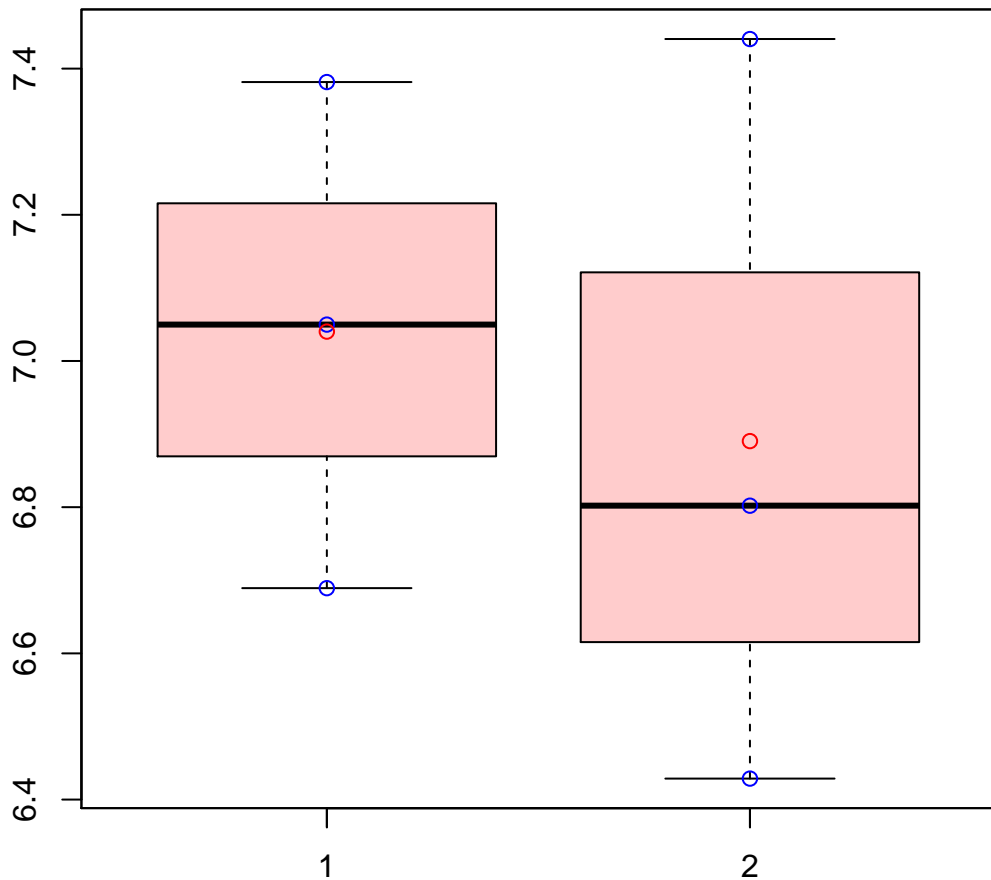

t-Test: p-value = 0.7

# CL6873Contig3|CL6873Contig3

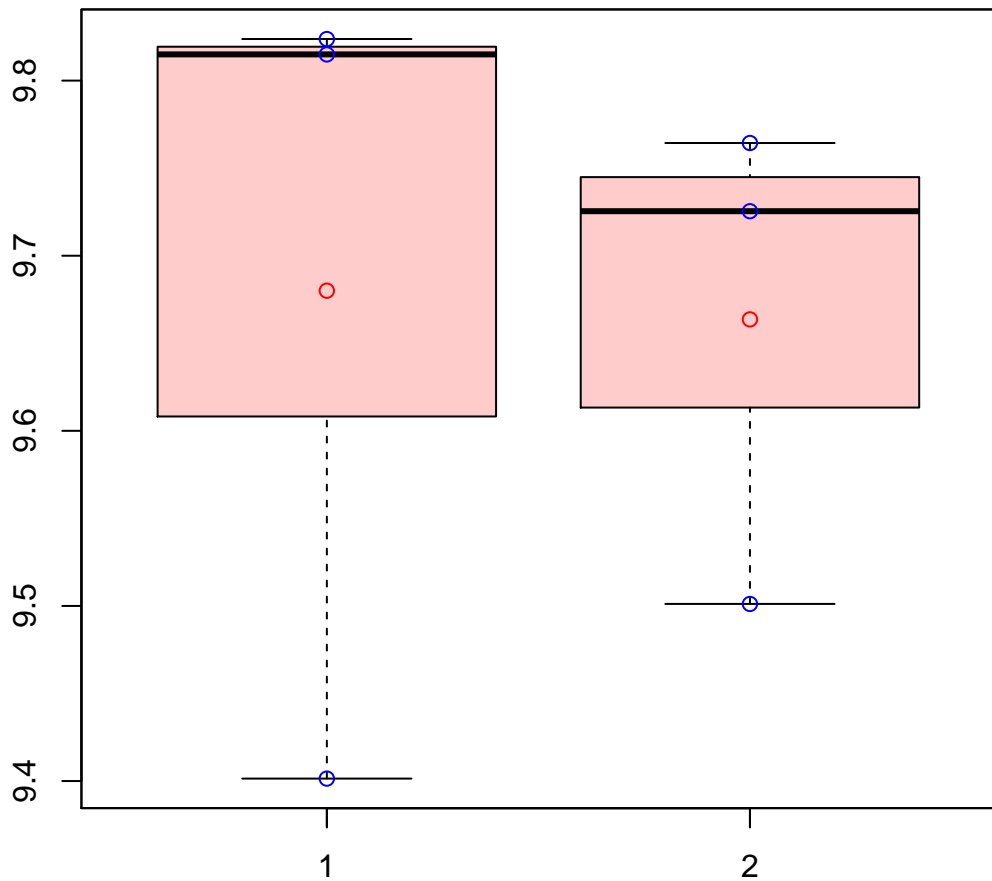

t-Test: p-value = 0.93

# CL6873Contig5|CL6873Contig5

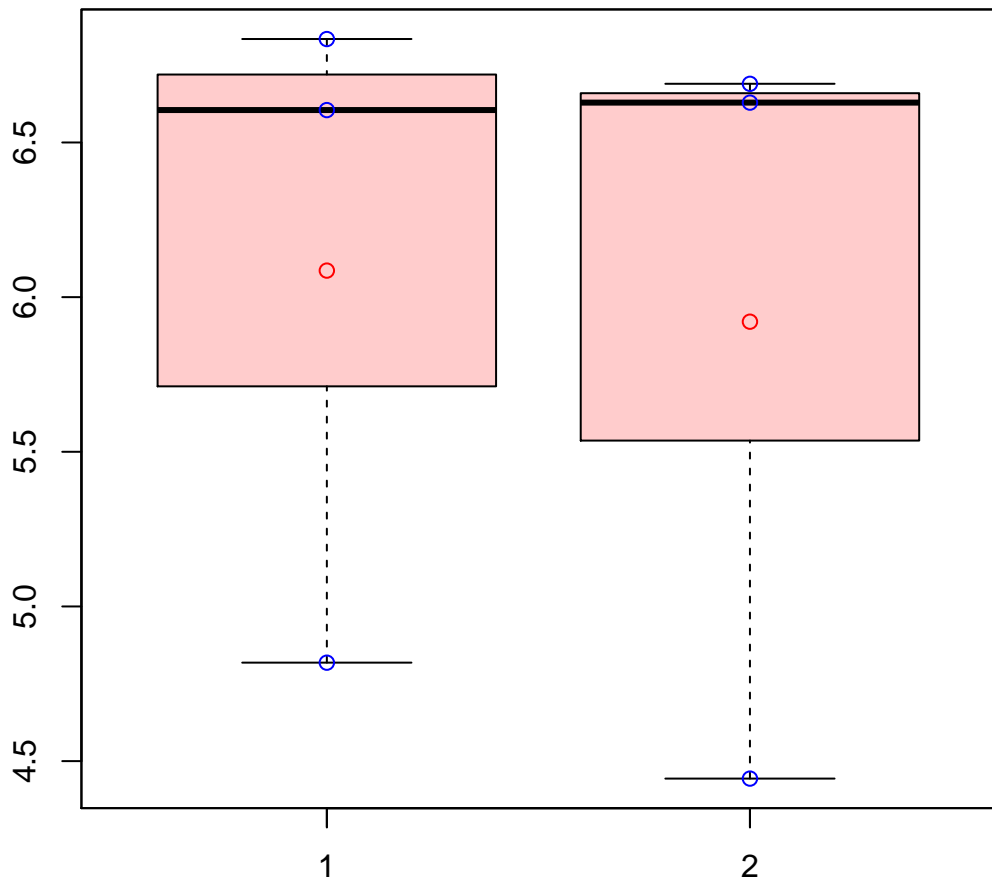

t-Test: p-value = 0.87



# CL687Contig1|CL687Contig1

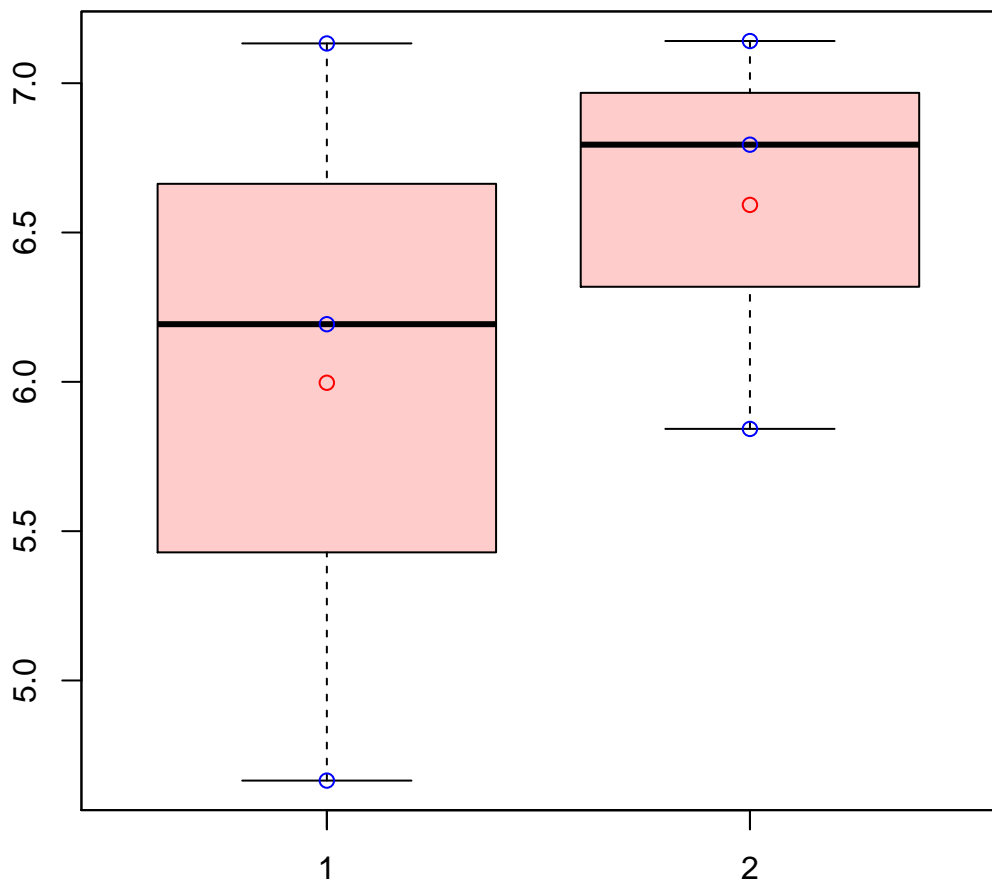

t-Test: p-value = 0.52

# CL6898Contig2|CL6898Contig2

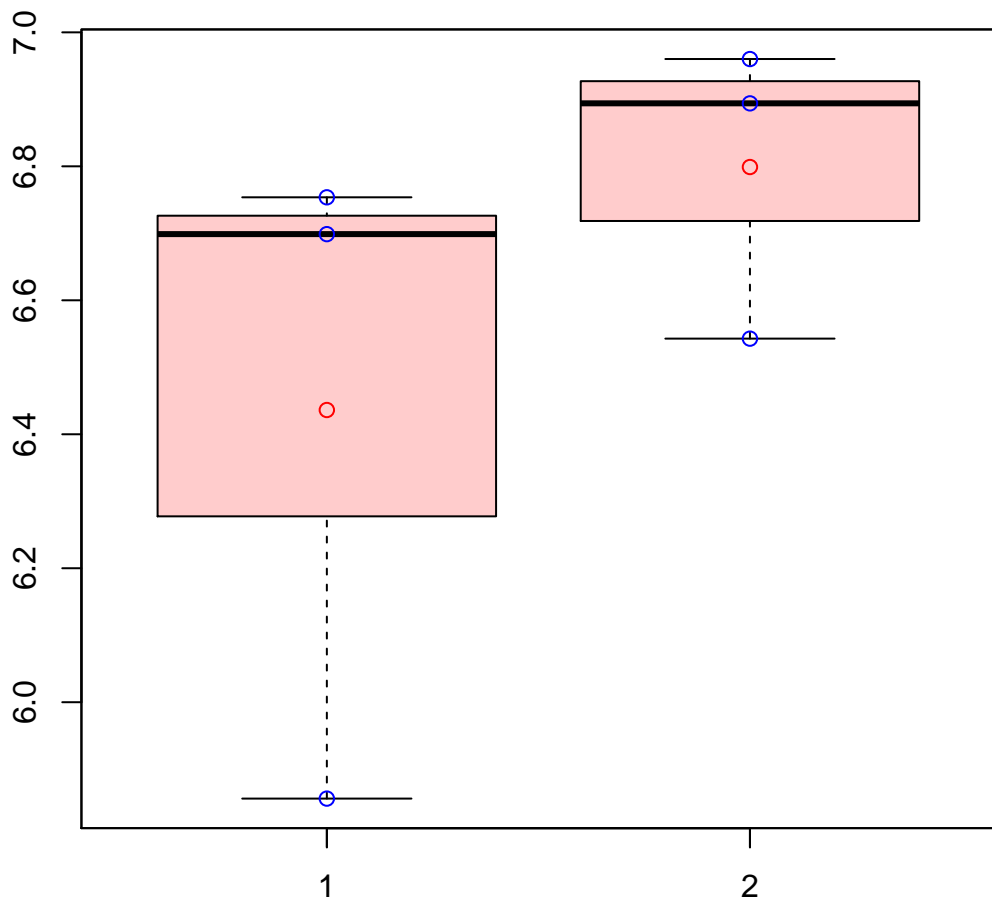

t-Test: p-value = 0.34

# CL6898Contig4|CL6898Contig4

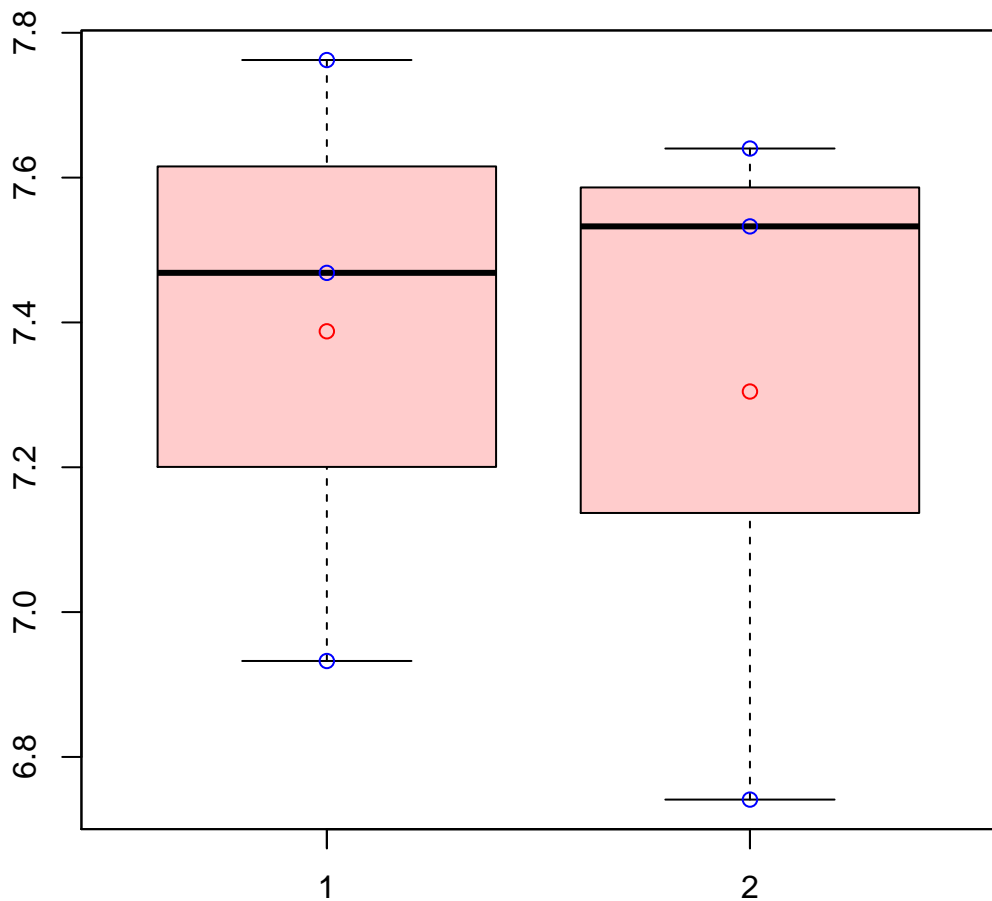

t-Test: p-value = 0.83

# CL68Contig21|CL68Contig21

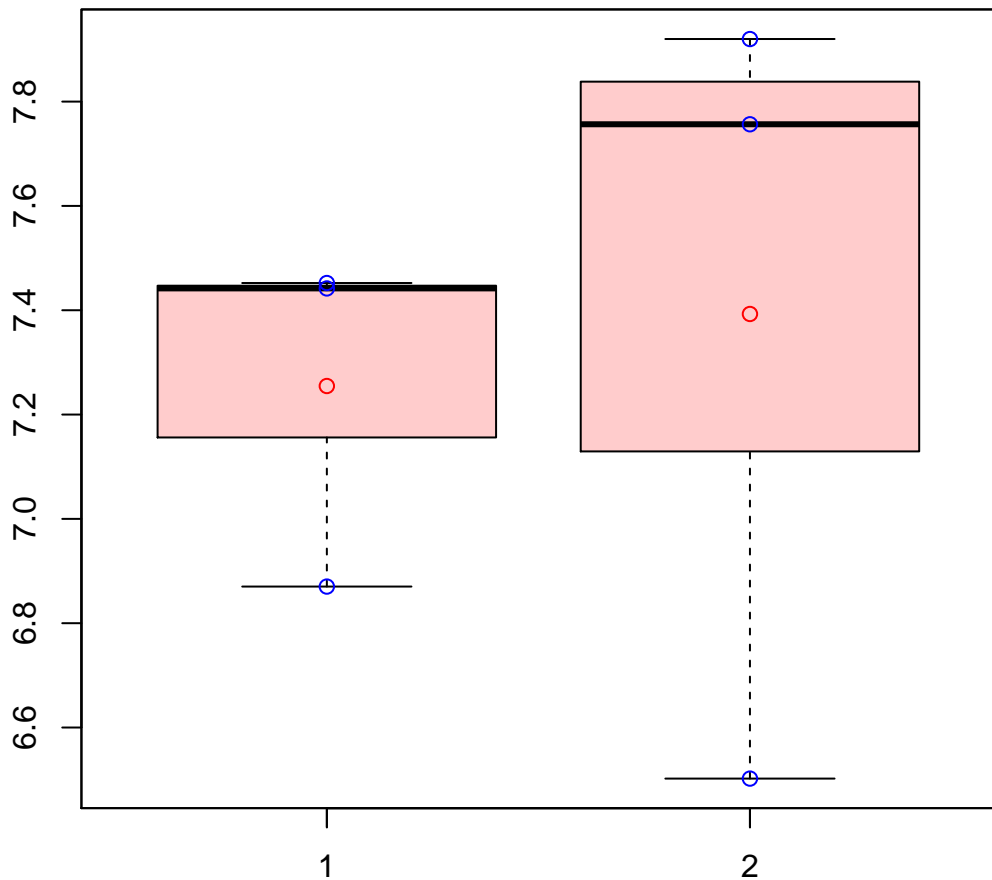

t-Test: p-value = 0.8

# CL68Contig32|CL68Contig32

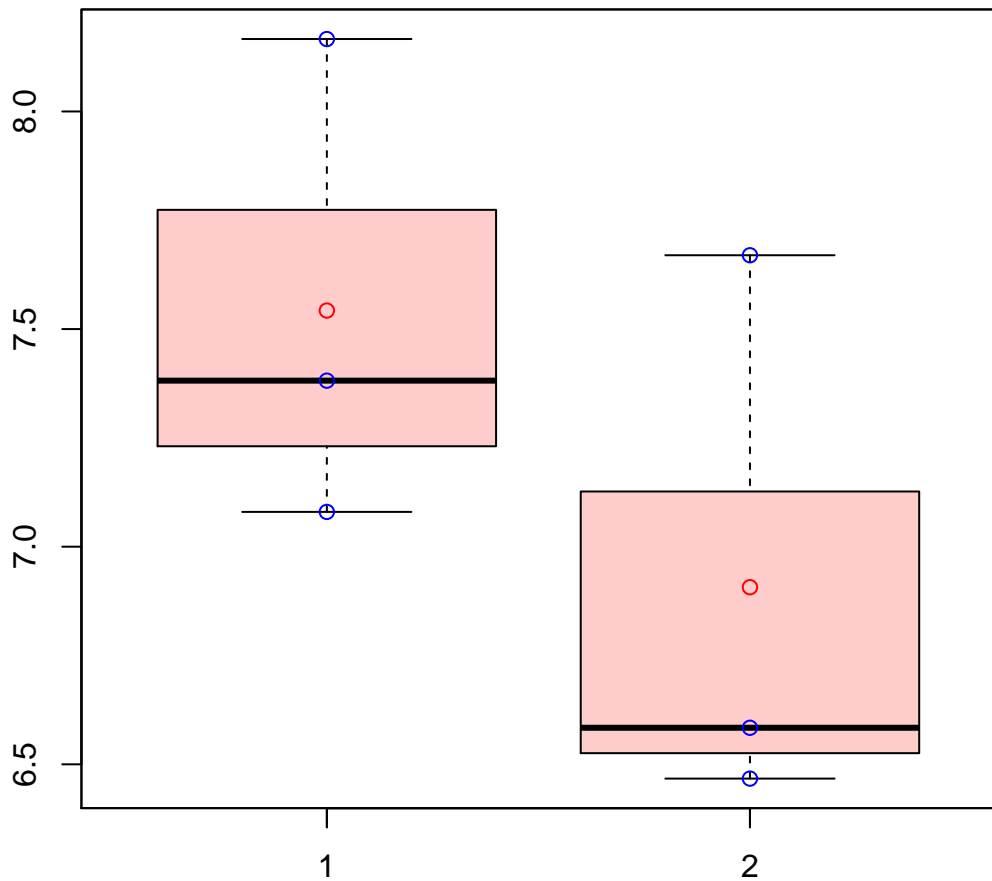

t-Test: p-value = 0.28

# CL6927Contig2|CL6927Contig2

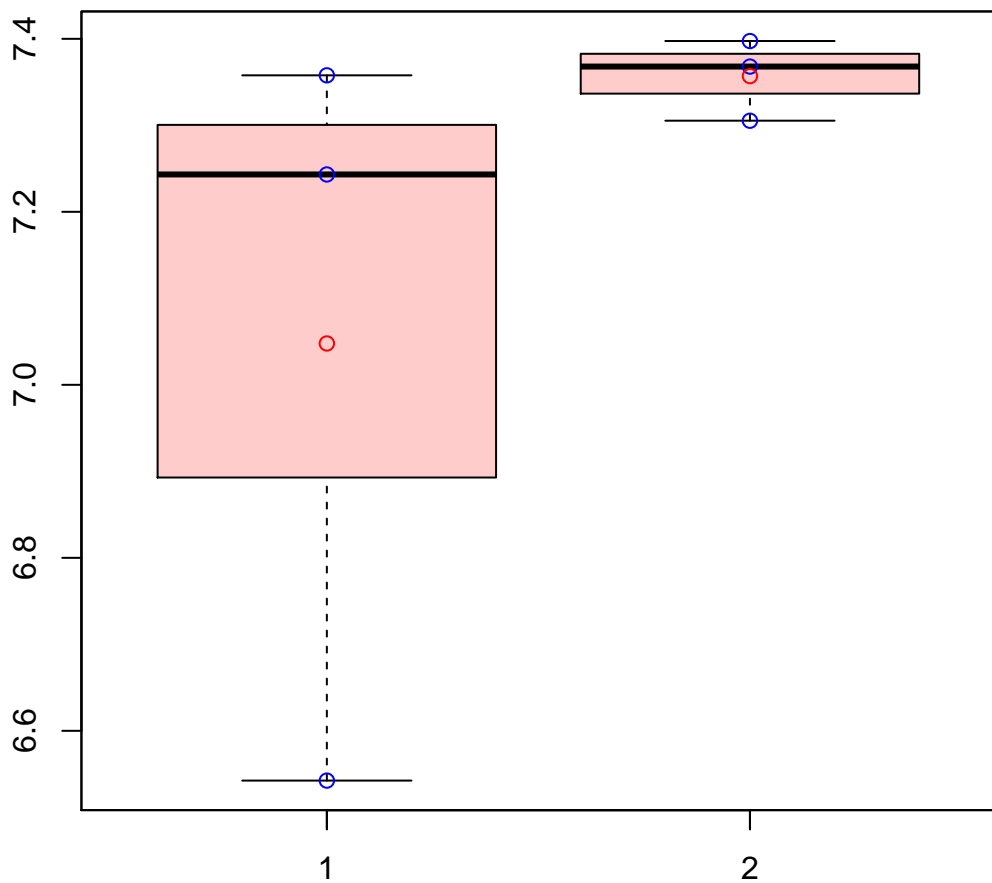

t-Test: p-value = 0.35

# CL692Contig1|CL692Contig1

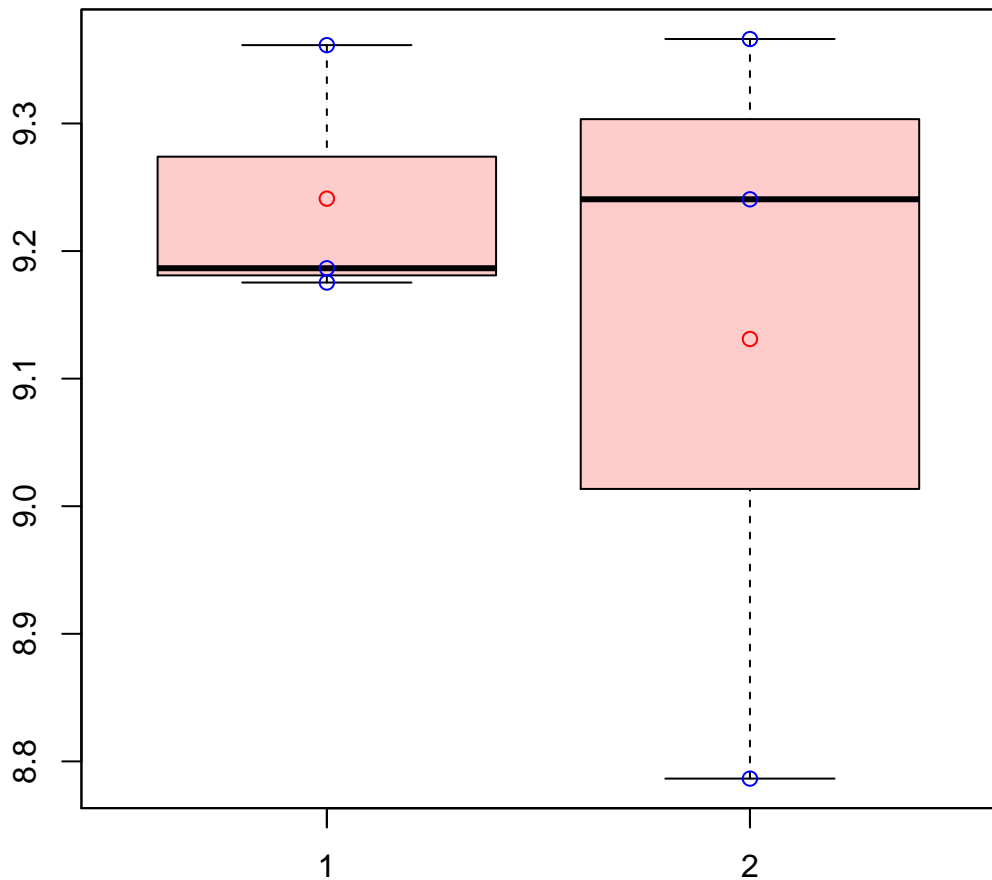

t-Test: p-value = 0.6

# CL6938Contig2|CL6938Contig2

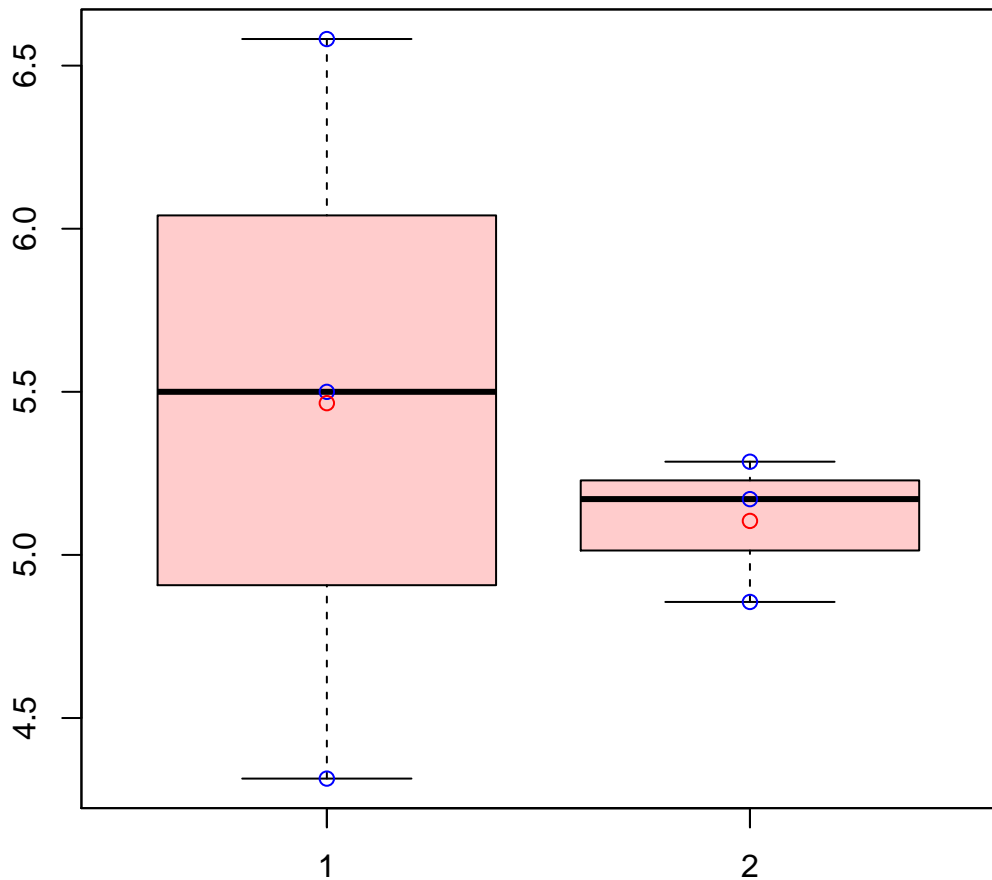

t-Test: p-value = 0.64



# CL6947Contig3|CL6947Contig3

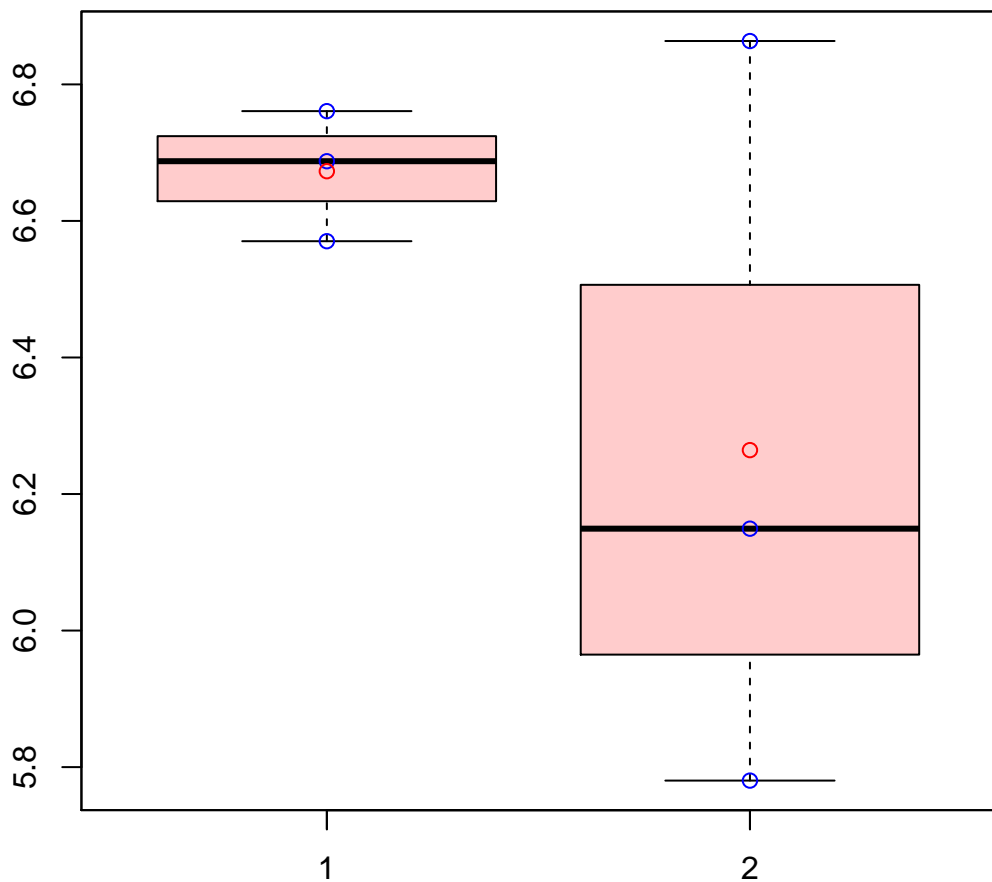

t-Test: p-value = 0.33

# CL694Contig1|CL694Contig1

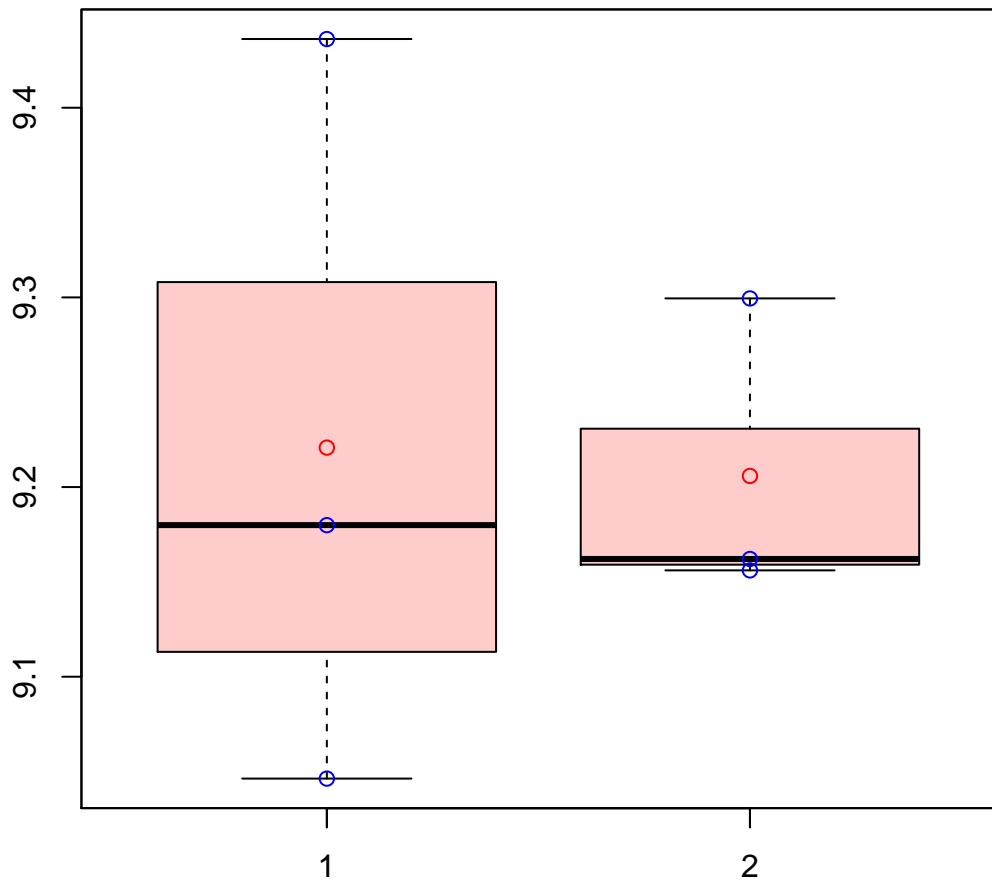

t-Test: p-value = 0.91

# CL694Contig2|CL694Contig2

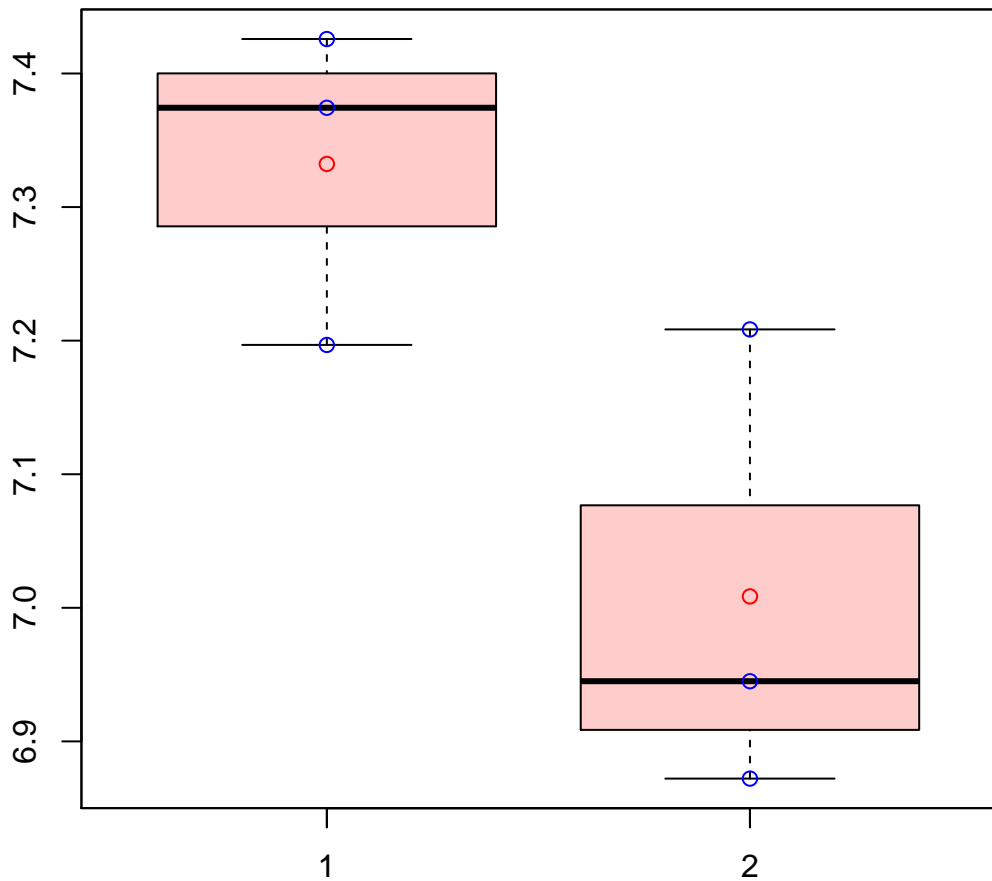

t-Test: p-value = 0.07

# CL6963Contig2|CL6963Contig2

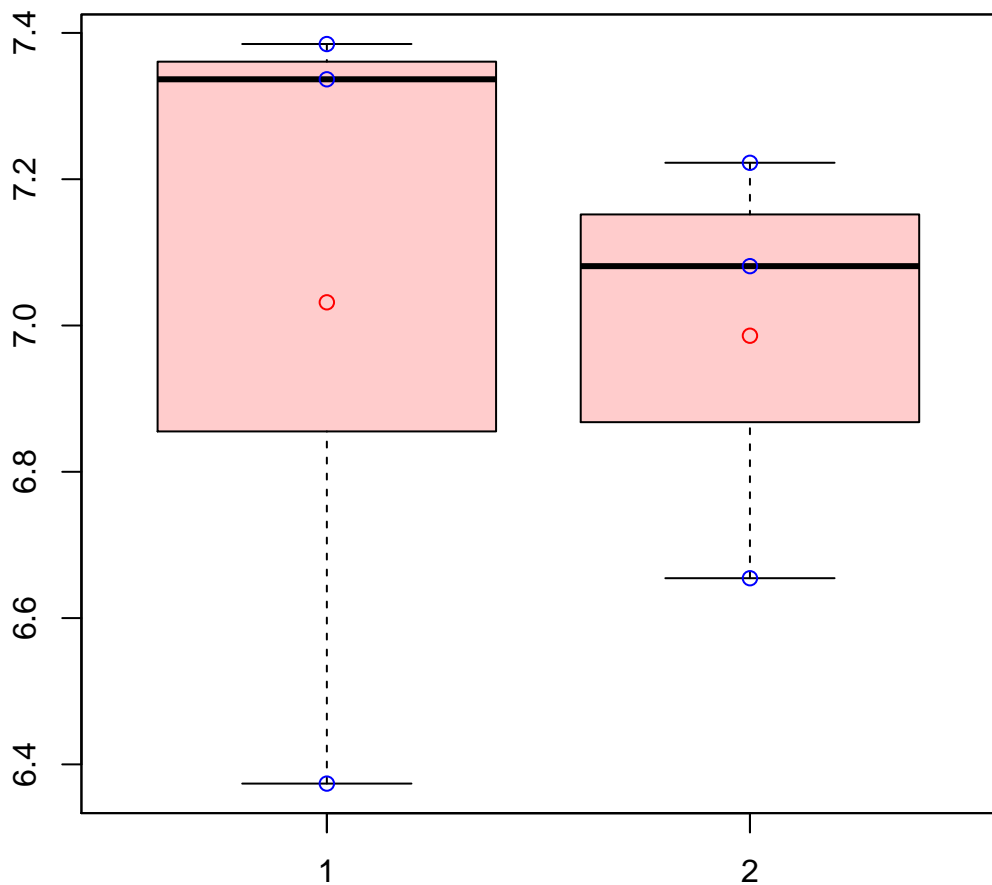

t-Test: p-value = 0.91

# CL698Contig2|CL698Contig2

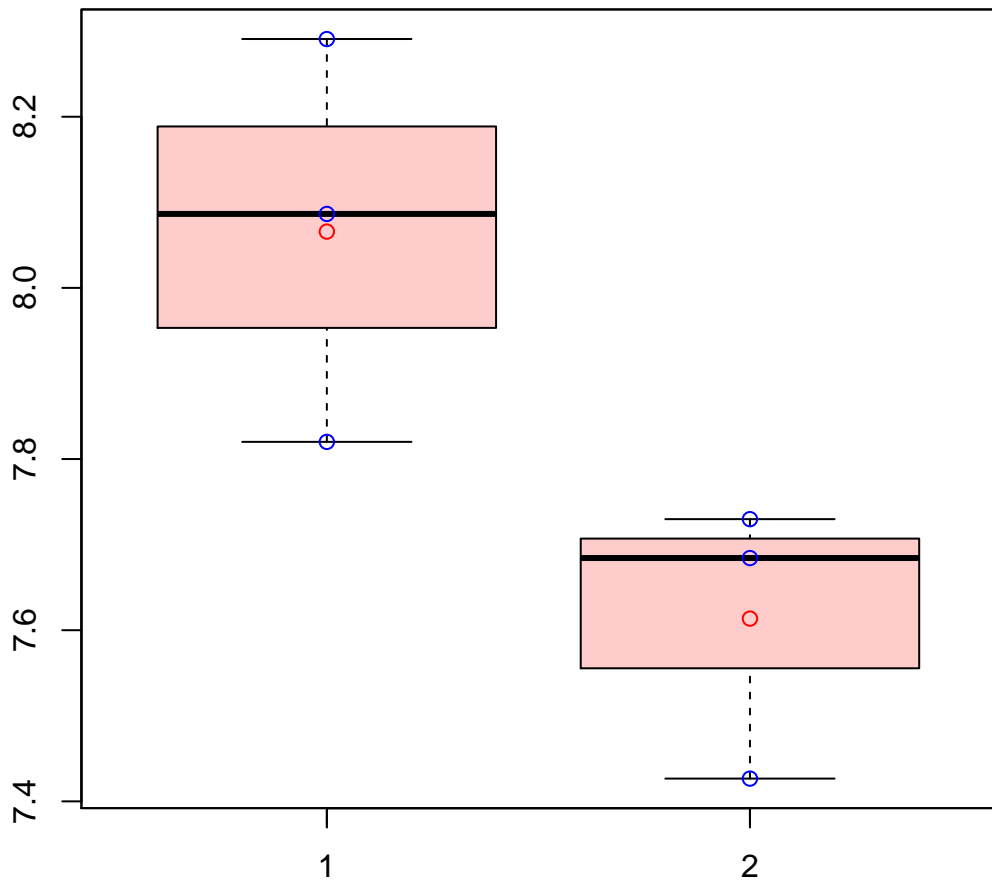

t-Test: p-value = 0.06

# CL699Contig6|CL699Contig6

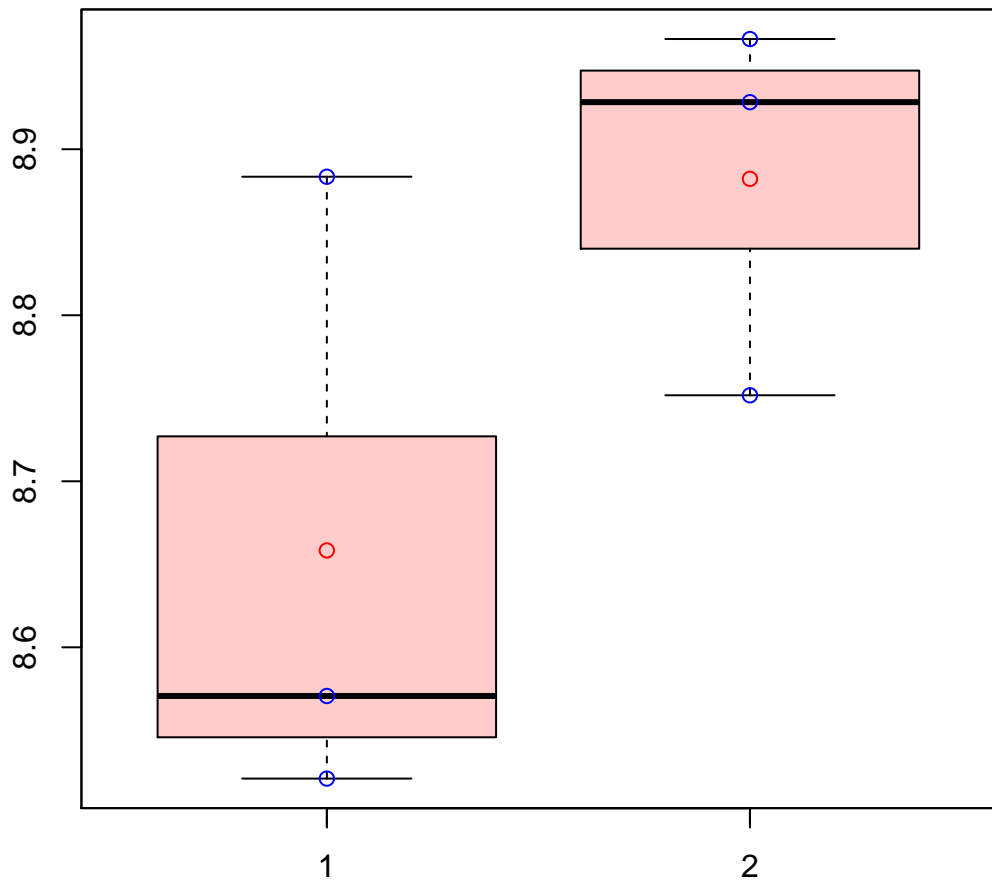

t-Test: p-value = 0.18

# CL6Contig21|CL6Contig21

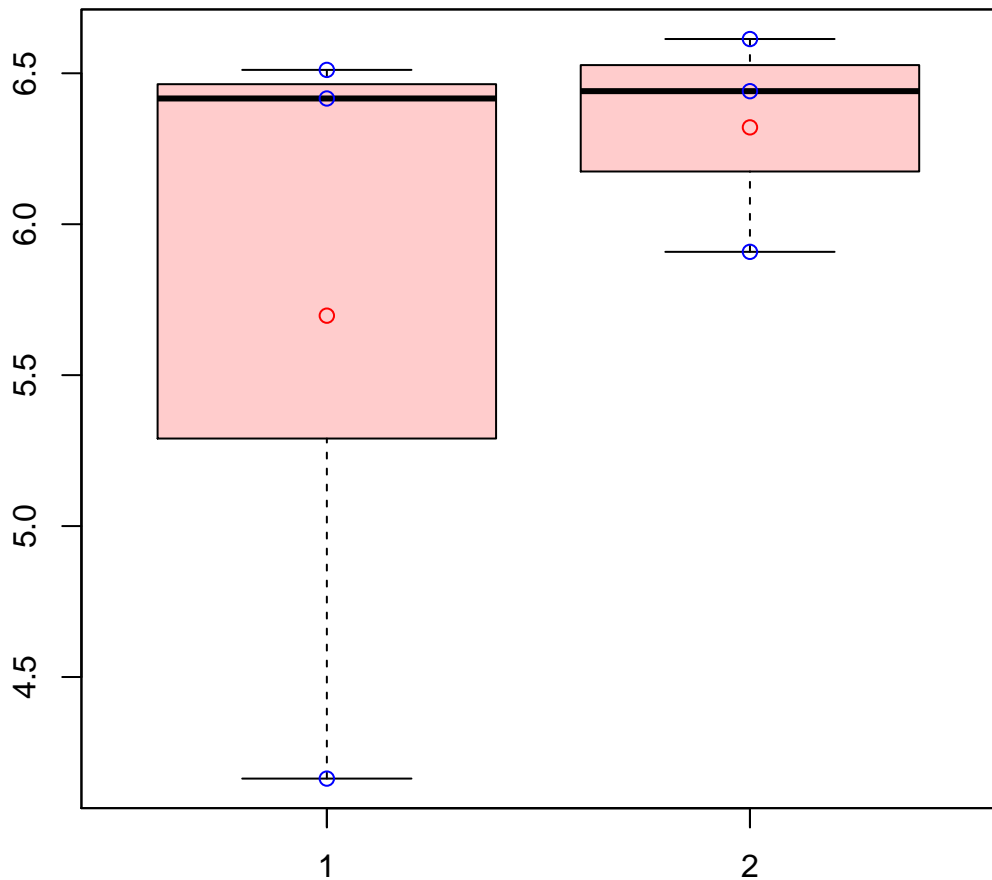

t-Test: p-value = 0.51

# CL6Contig61|CL6Contig61

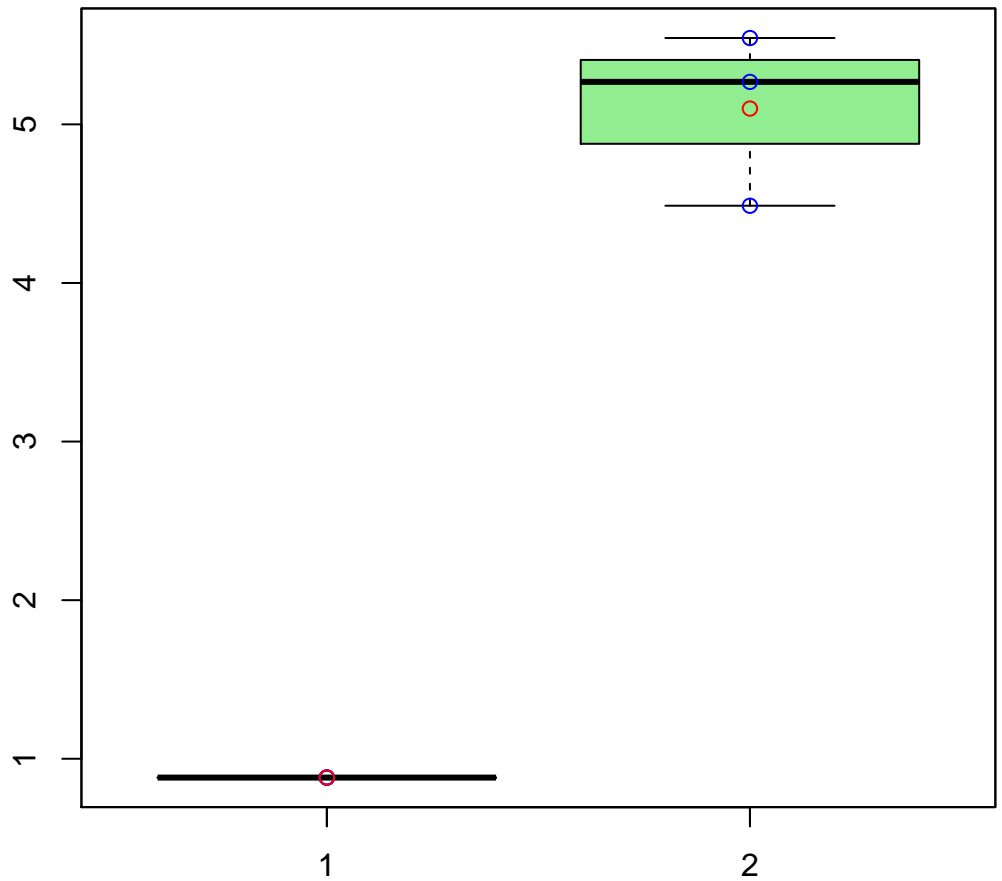

t-Test: p-value = 0.01



# CL700Contig1|CL700Contig1

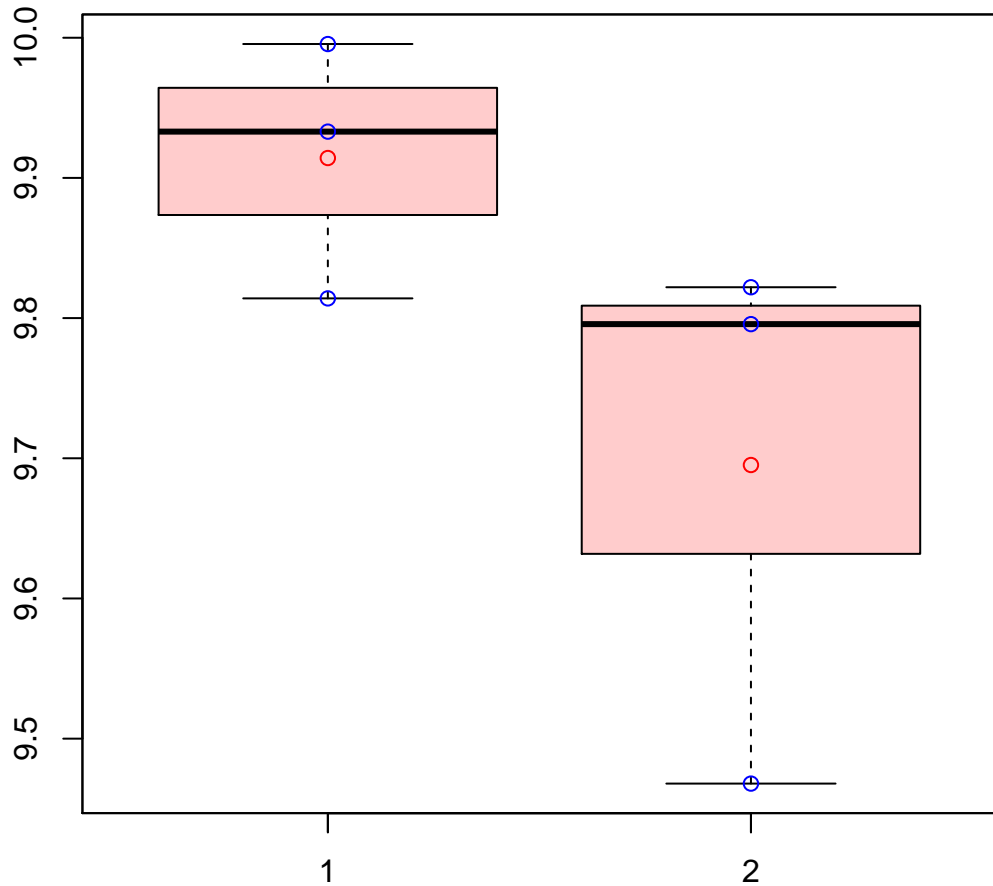

t-Test: p-value = 0.19

# CL700Contig3|CL700Contig3

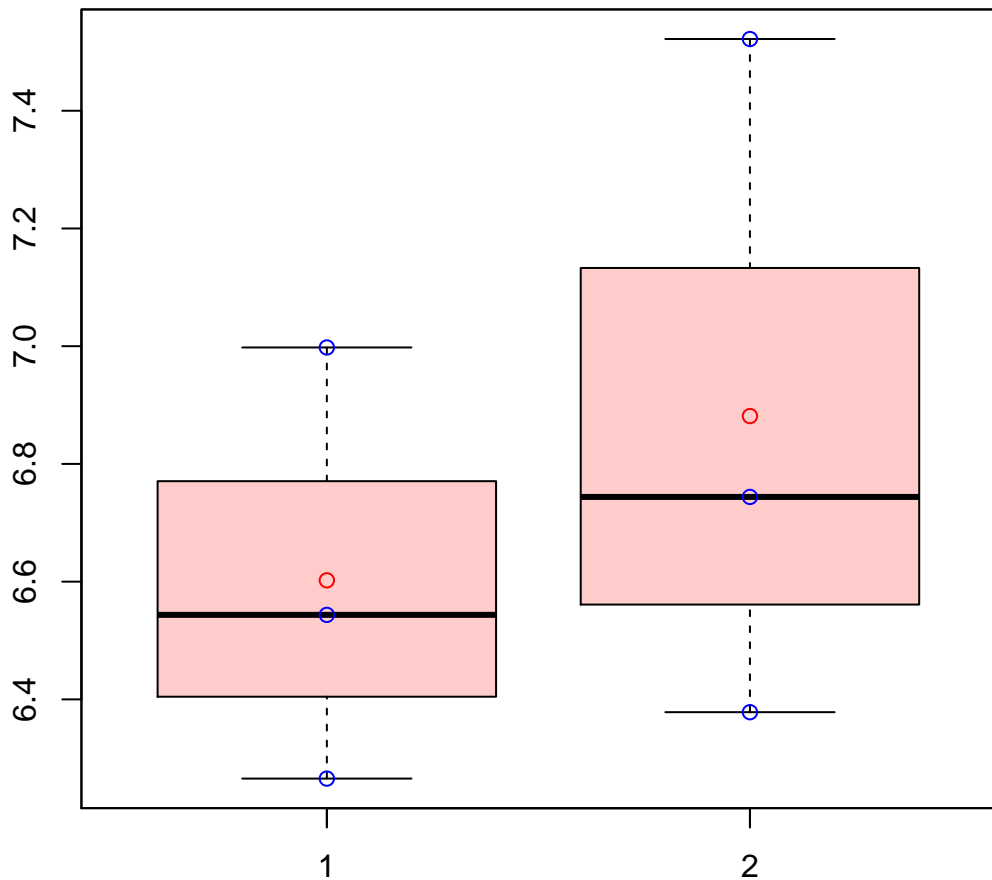

t-Test: p-value = 0.53

# CL702Contig1|CL702Contig1

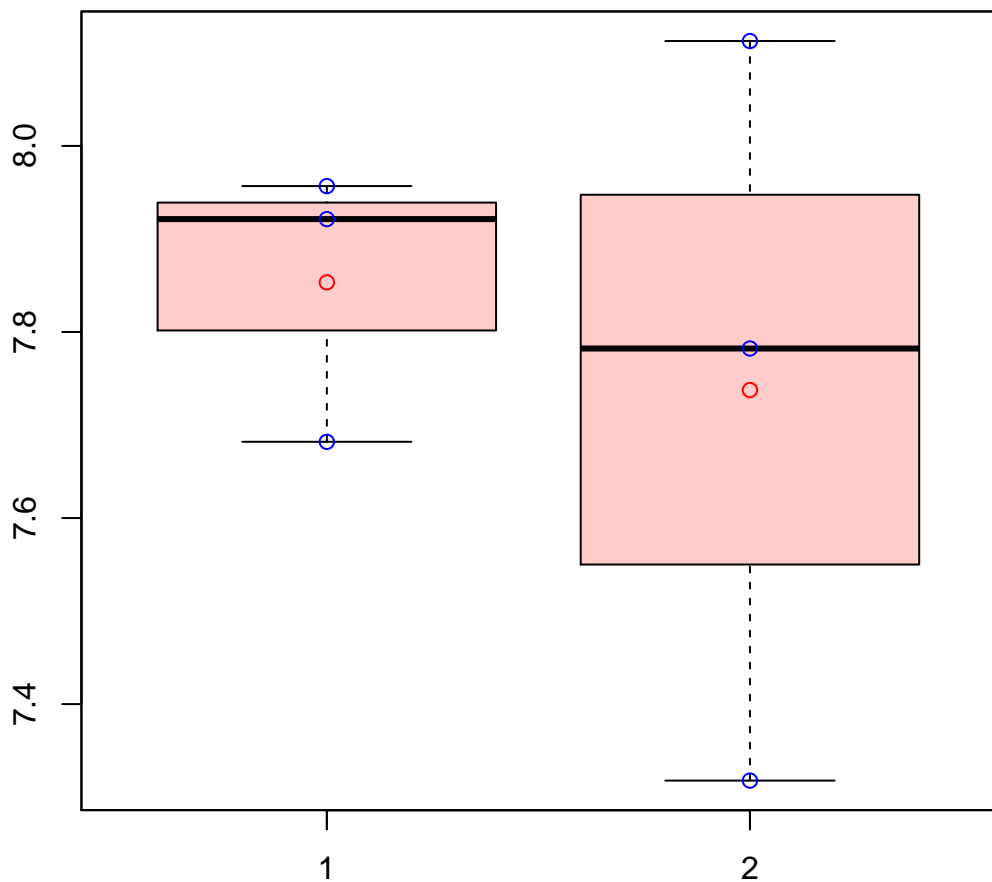

t-Test: p-value = 0.68

# CL7048Contig1|CL7048Contig1

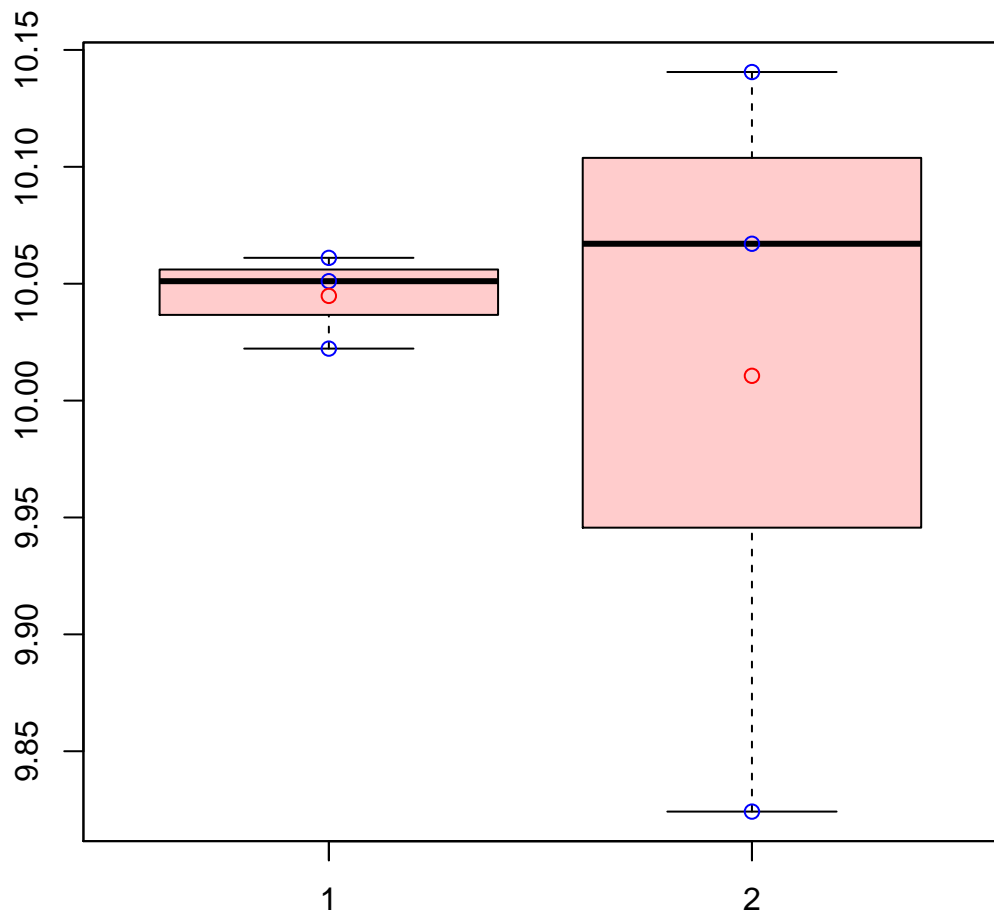

t-Test: p-value = 0.76

# CL7060Contig1|CL7060Contig1

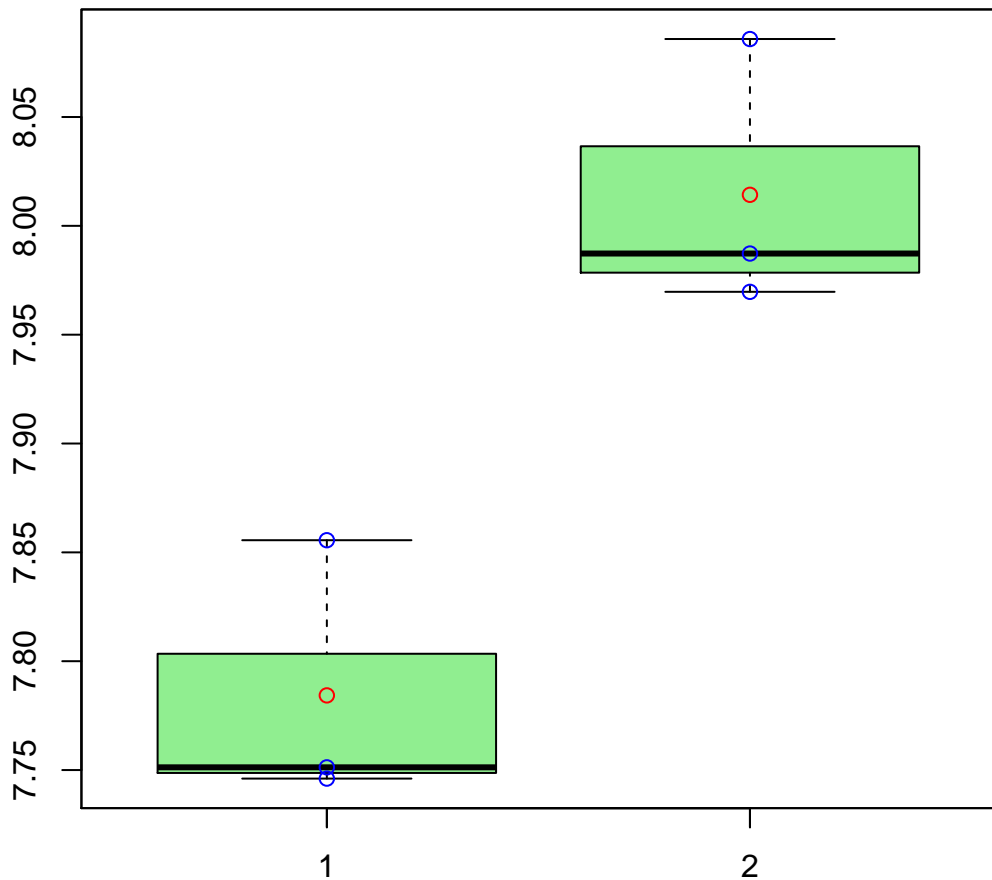

t-Test: p-value = 0.01

# CL7060Contig3|CL7060Contig3

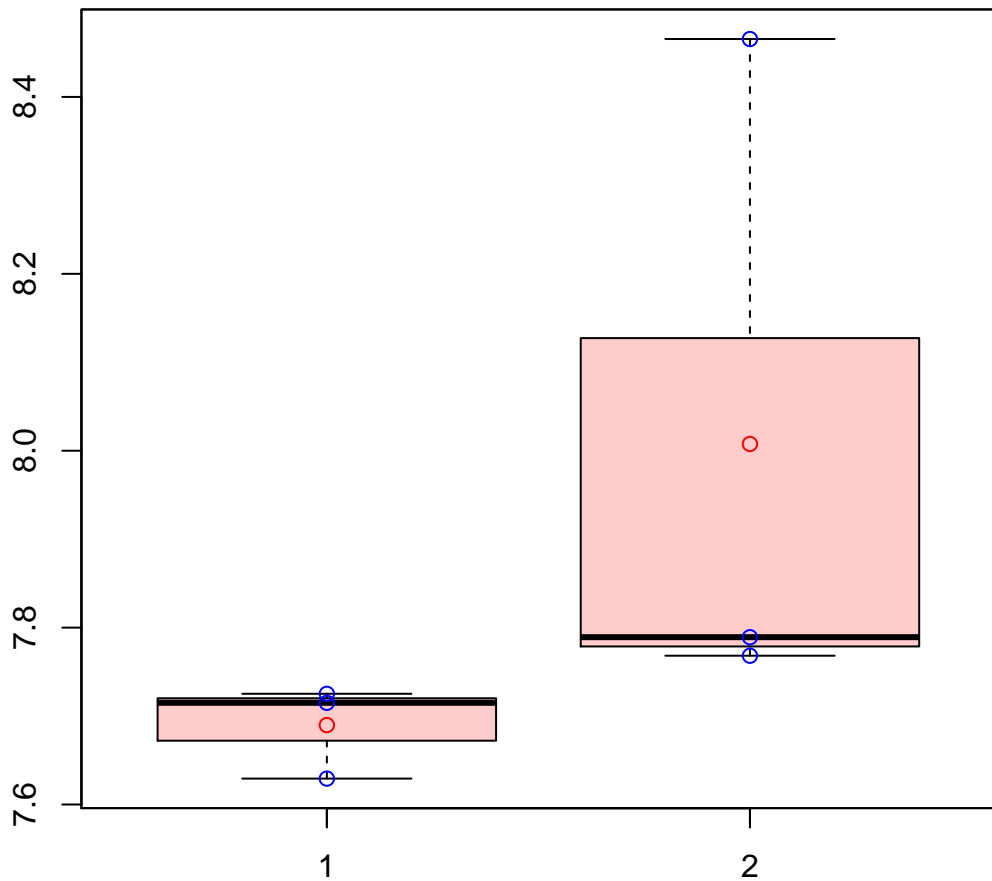

t-Test: p-value = 0.3

# CL7065Contig1|CL7065Contig1

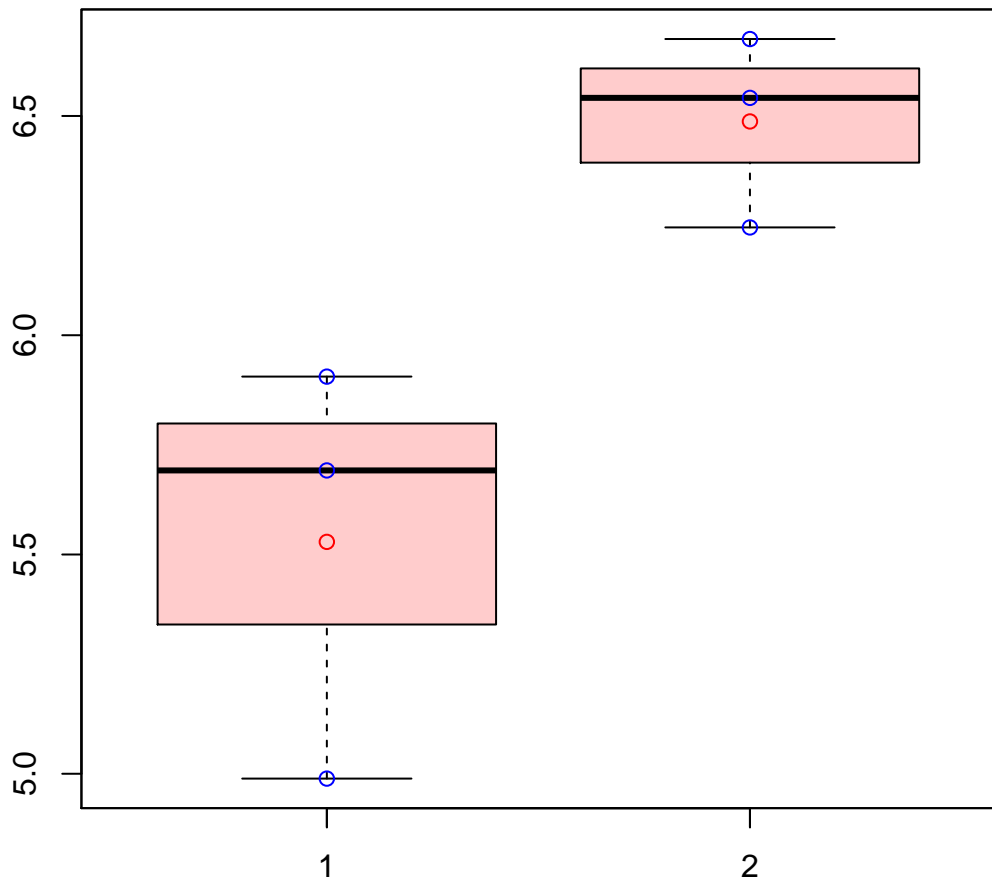

t-Test: p-value = 0.06

# CL7068Contig1|CL7068Contig1

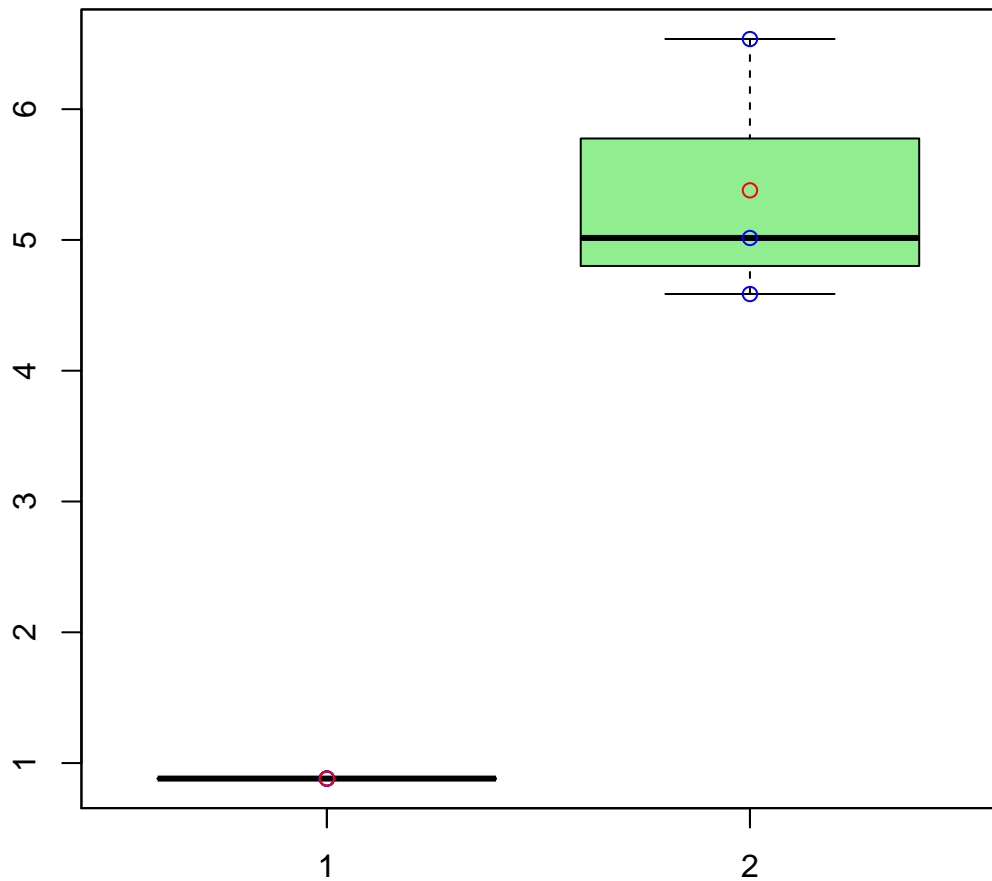

t-Test: p-value = 0.02



# CL7074Contig4|CL7074Contig4

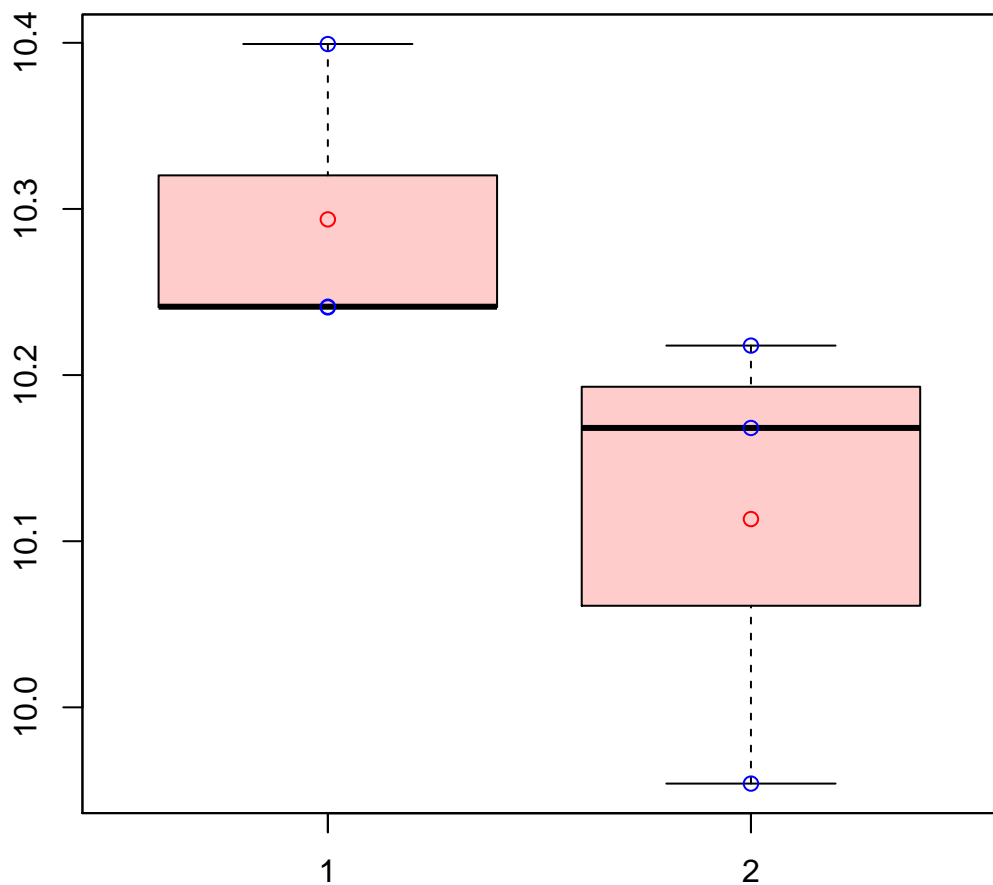

t-Test: p-value = 0.15

# CL7088Contig3|CL7088Contig3

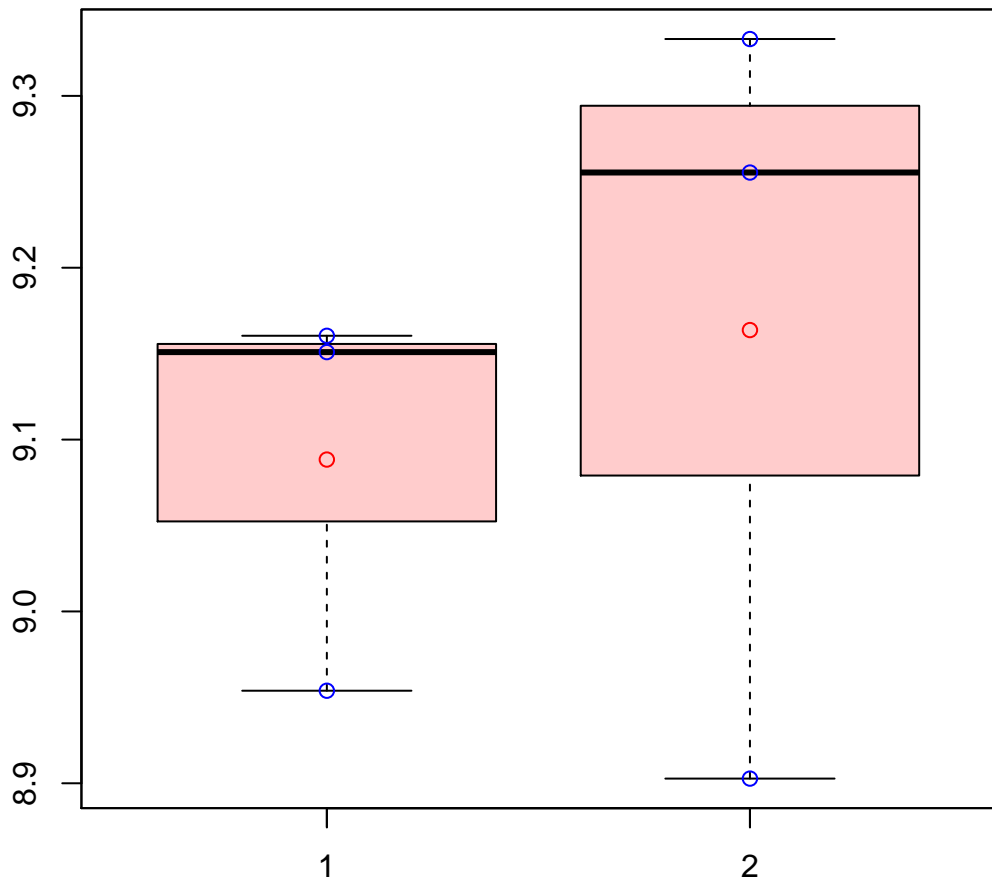

t-Test: p-value = 0.65

# CL7092Contig1|CL7092Contig1

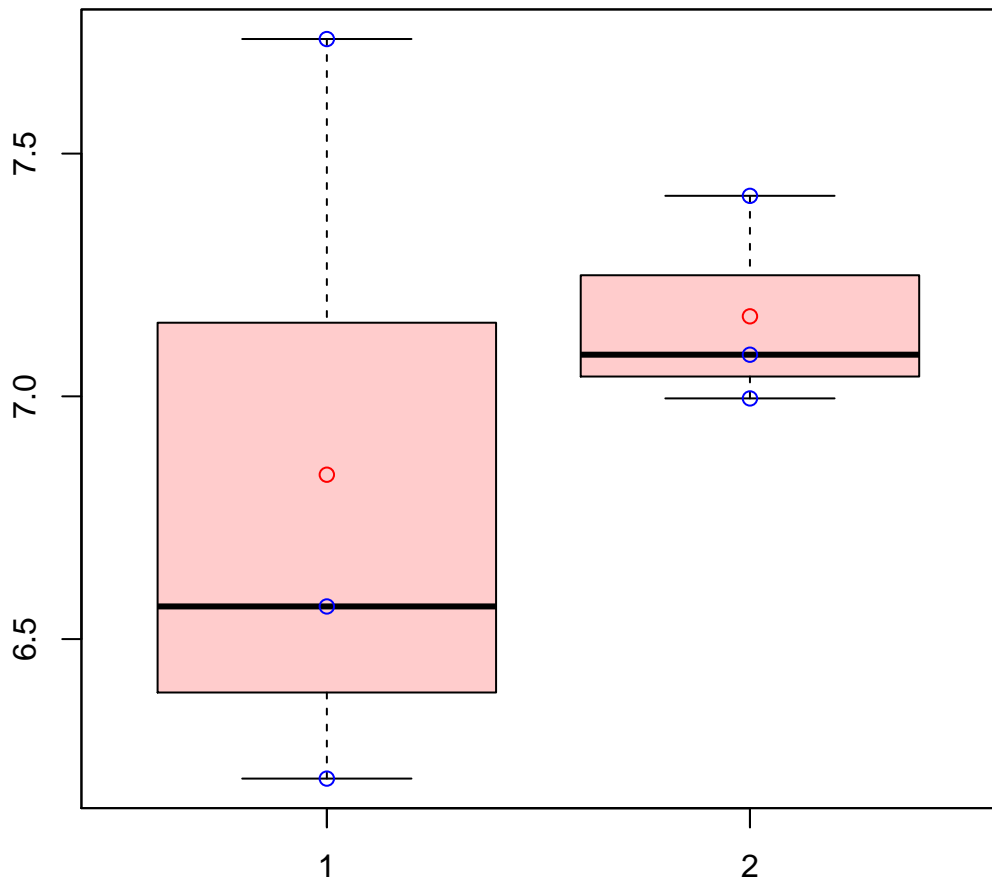

t-Test: p-value = 0.56

# CL7099Contig1|CL7099Contig1

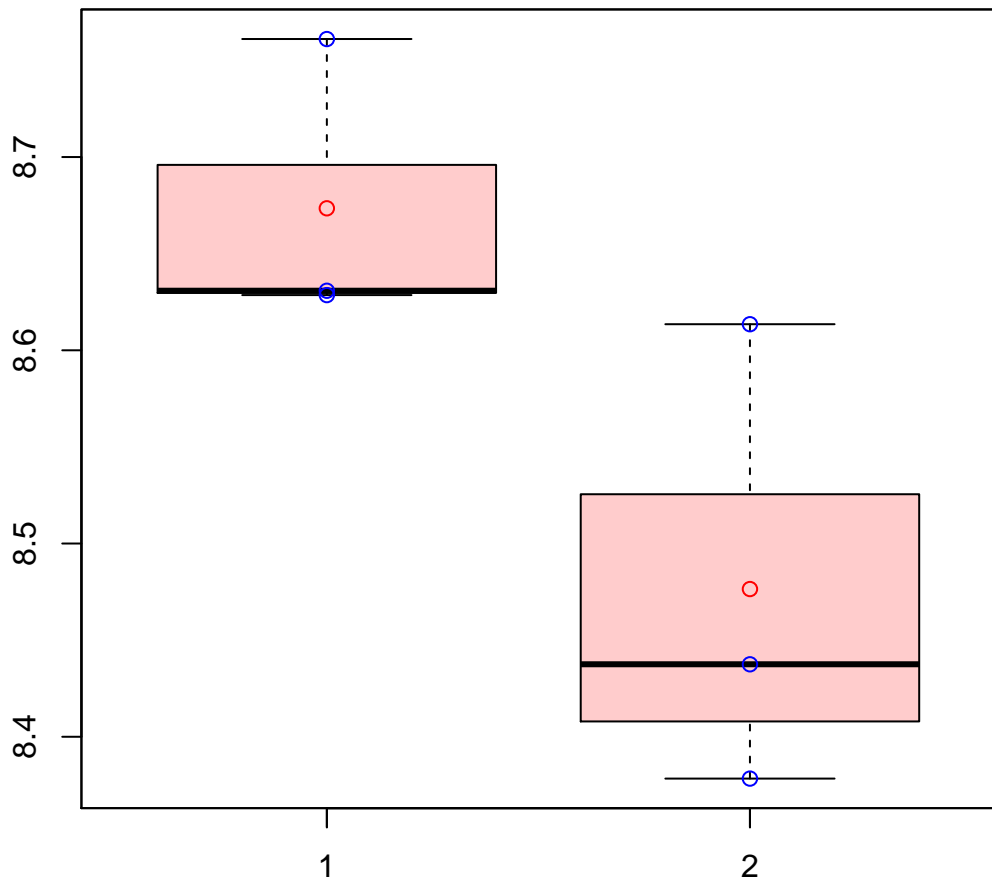

t-Test: p-value = 0.09

# CL70Contig5|CL70Contig5

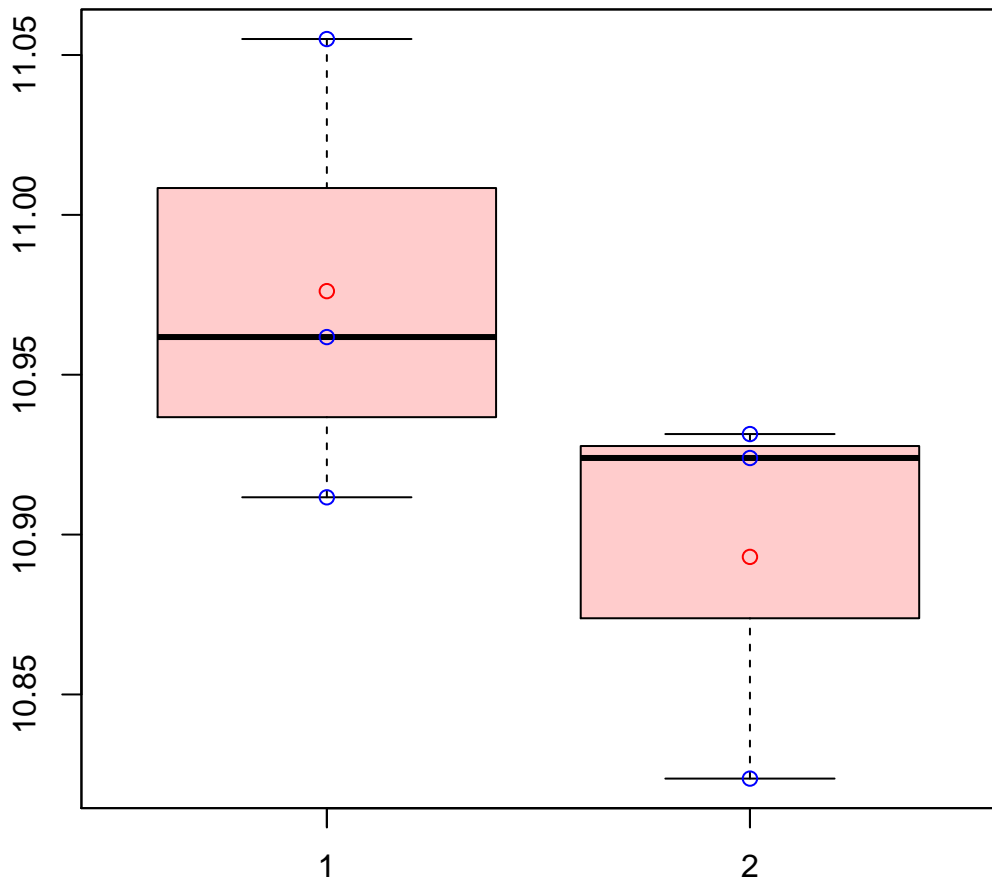

t-Test: p-value = 0.2

# CL70Contig6|CL70Contig6

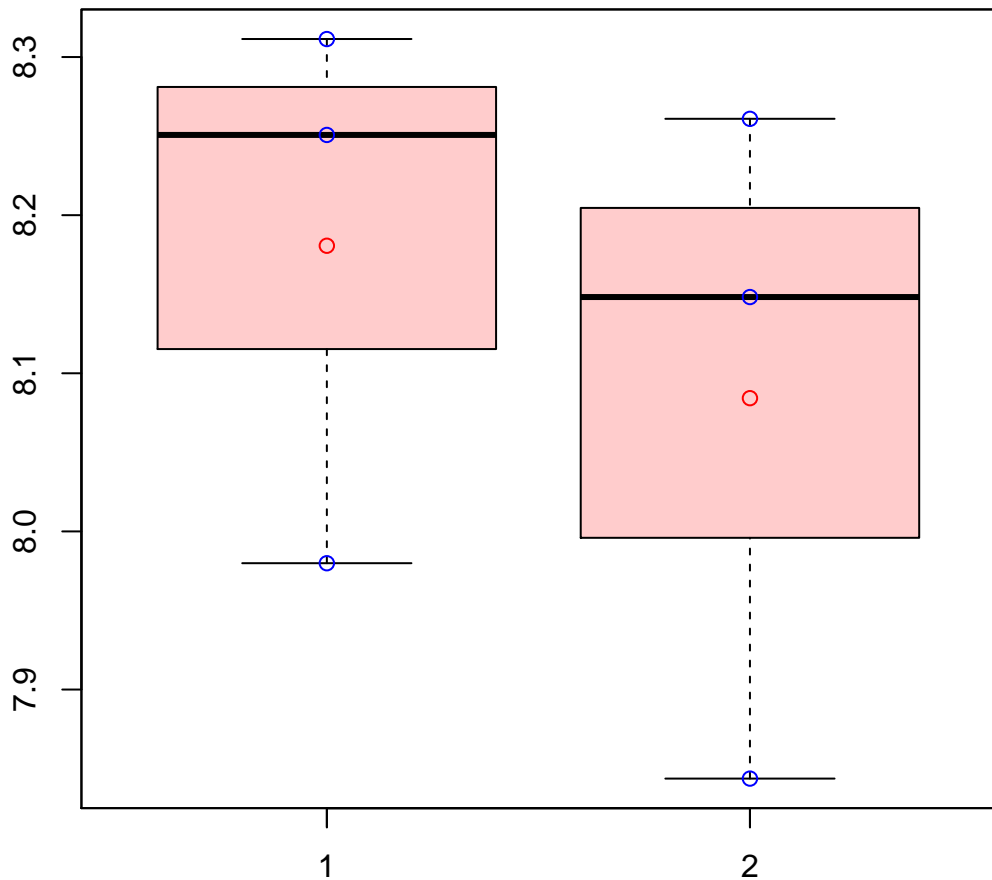

t-Test: p-value = 0.58

# CL7110Contig2|CL7110Contig2

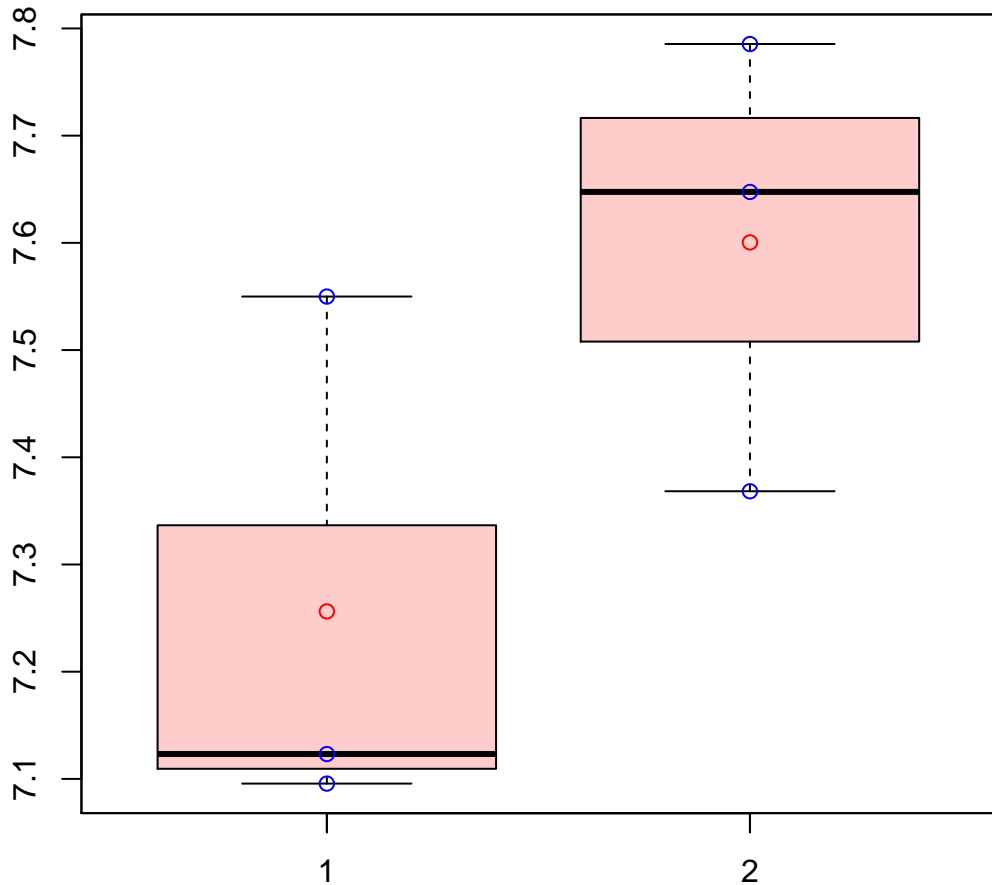

t-Test: p-value = 0.15

# CL711Contig1|CL711Contig1

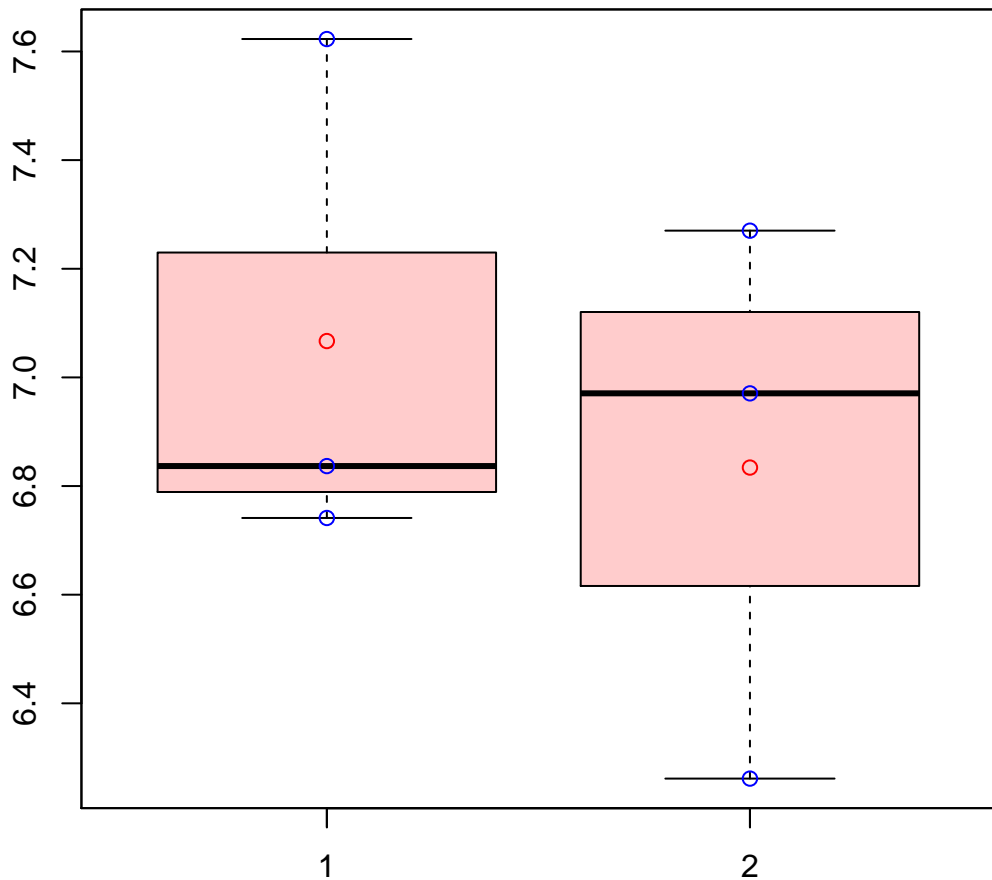

t-Test: p-value = 0.6



# CL711Contig2|CL711Contig2

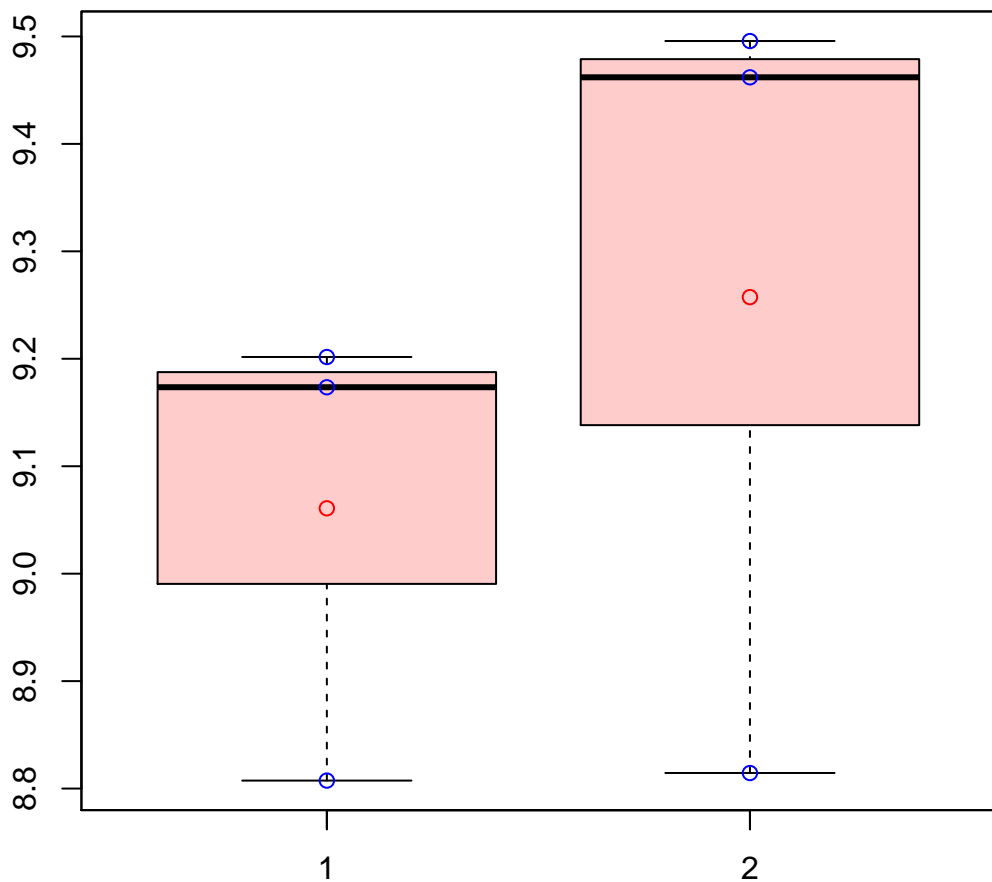

t-Test: p-value = 0.49

# CL711Contig5|CL711Contig5

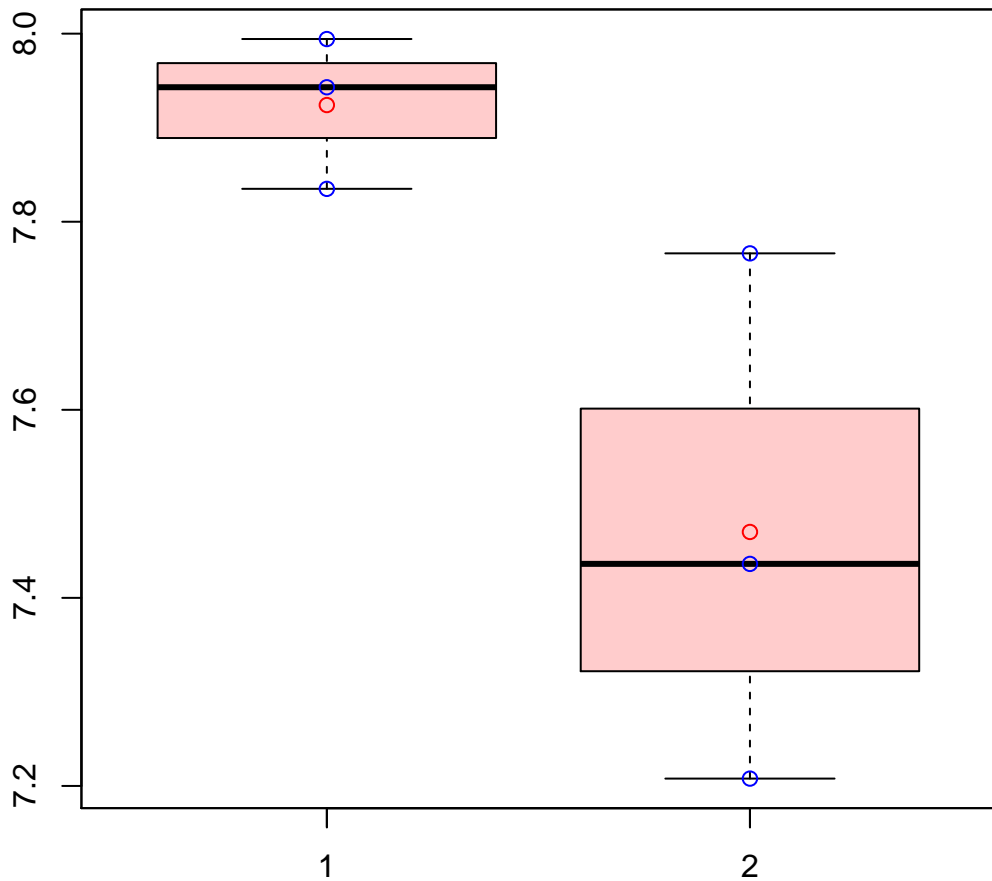

t-Test: p-value = 0.1

# CL7124Contig2|CL7124Contig2

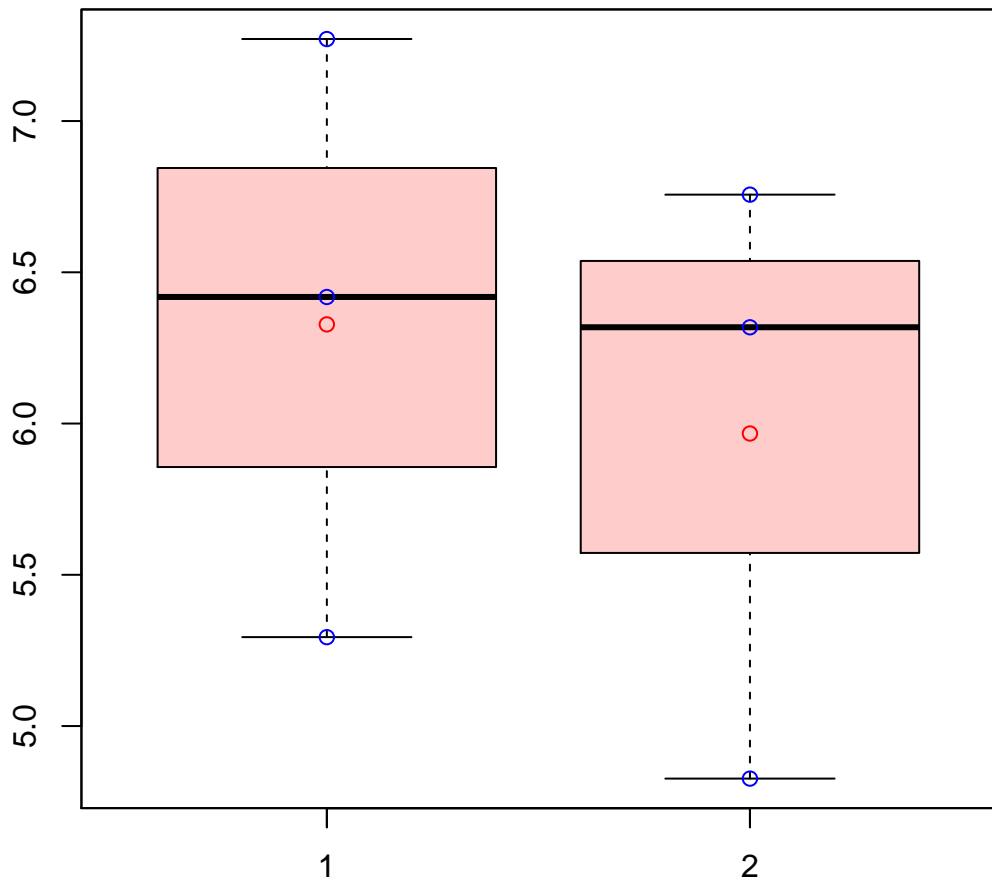

t-Test: p-value = 0.68

# CL7130Contig2|CL7130Contig2

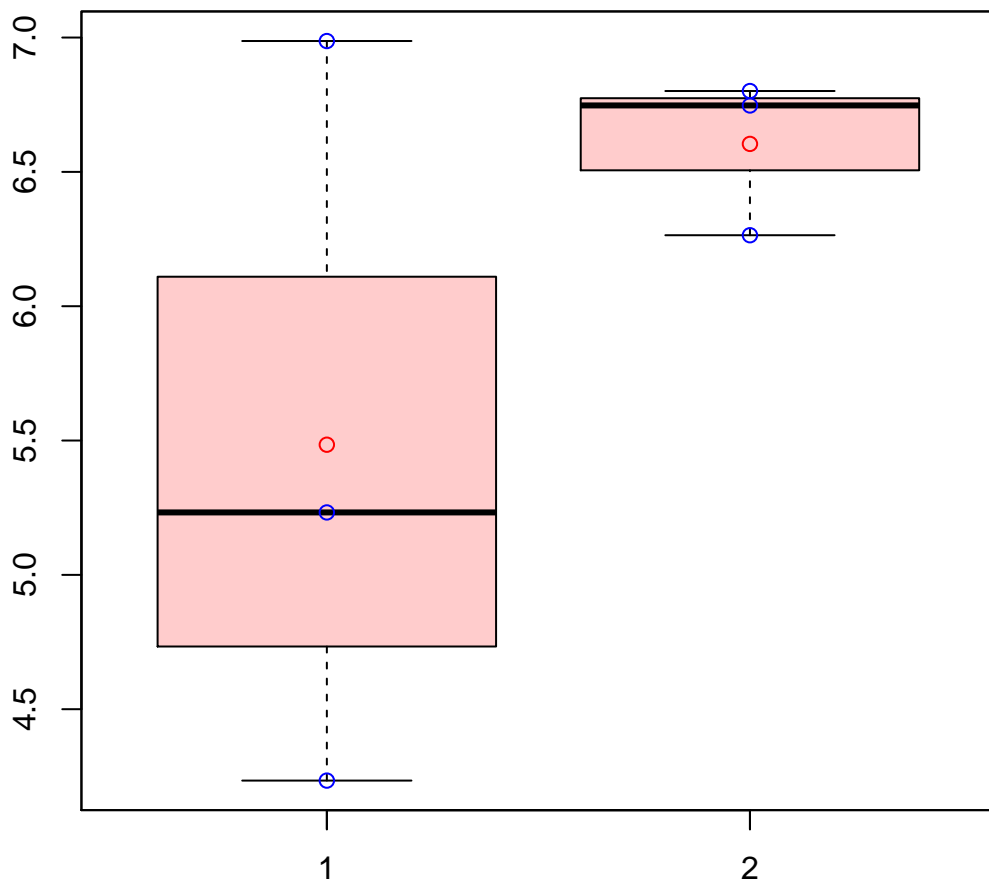

t-Test: p-value = 0.3

# CL7130Contig5|CL7130Contig5

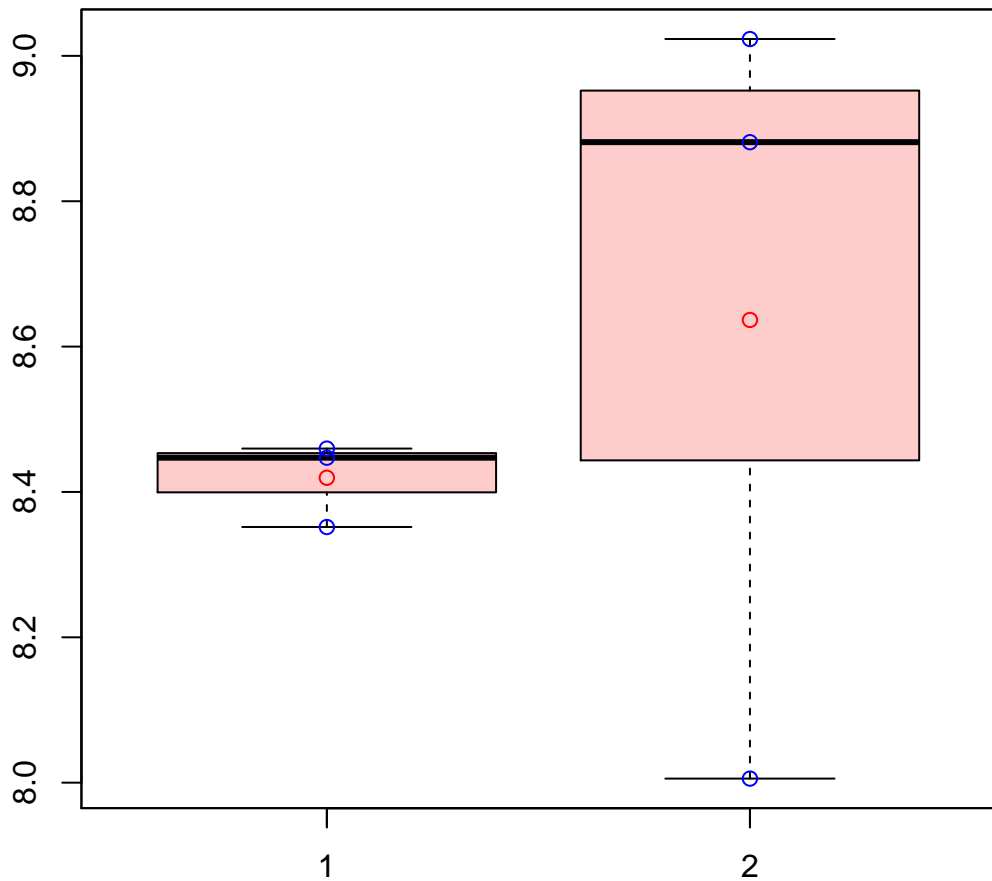

t-Test: p-value = 0.57

# CL7134Contig4|CL7134Contig4

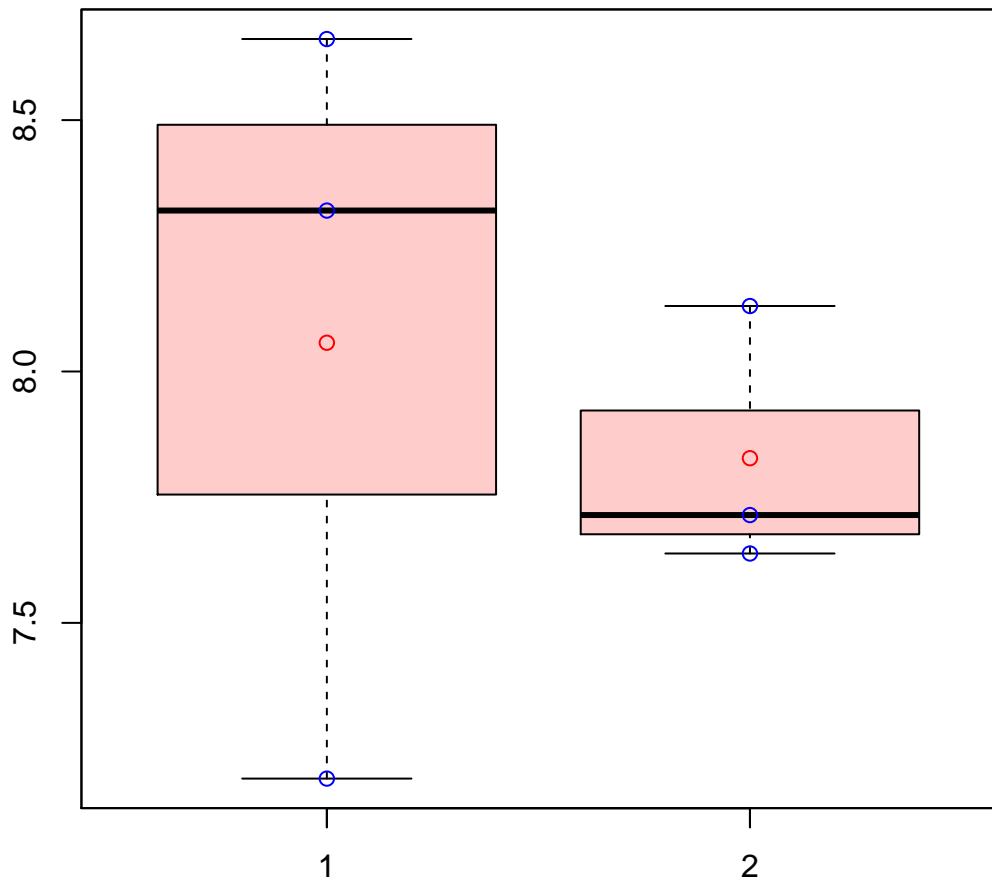

t-Test: p-value = 0.67

# CL7140Contig3|CL7140Contig3

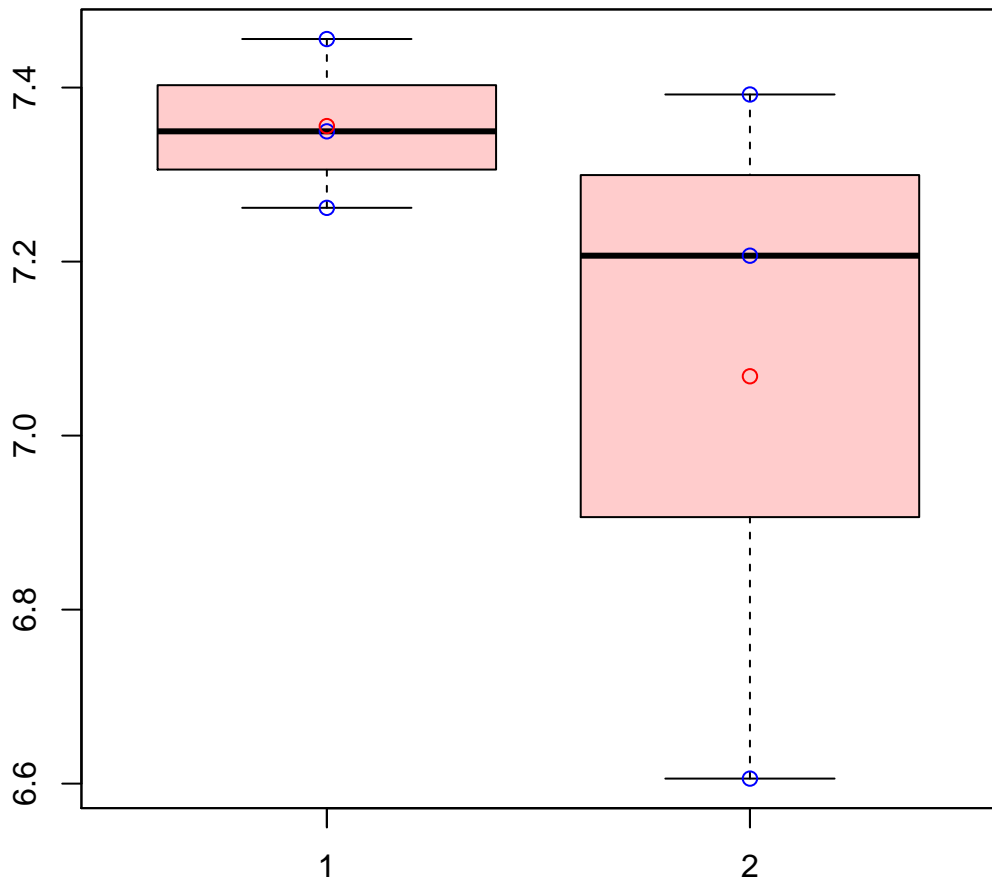

t-Test: p-value = 0.35

# CL7142Contig2|CL7142Contig2

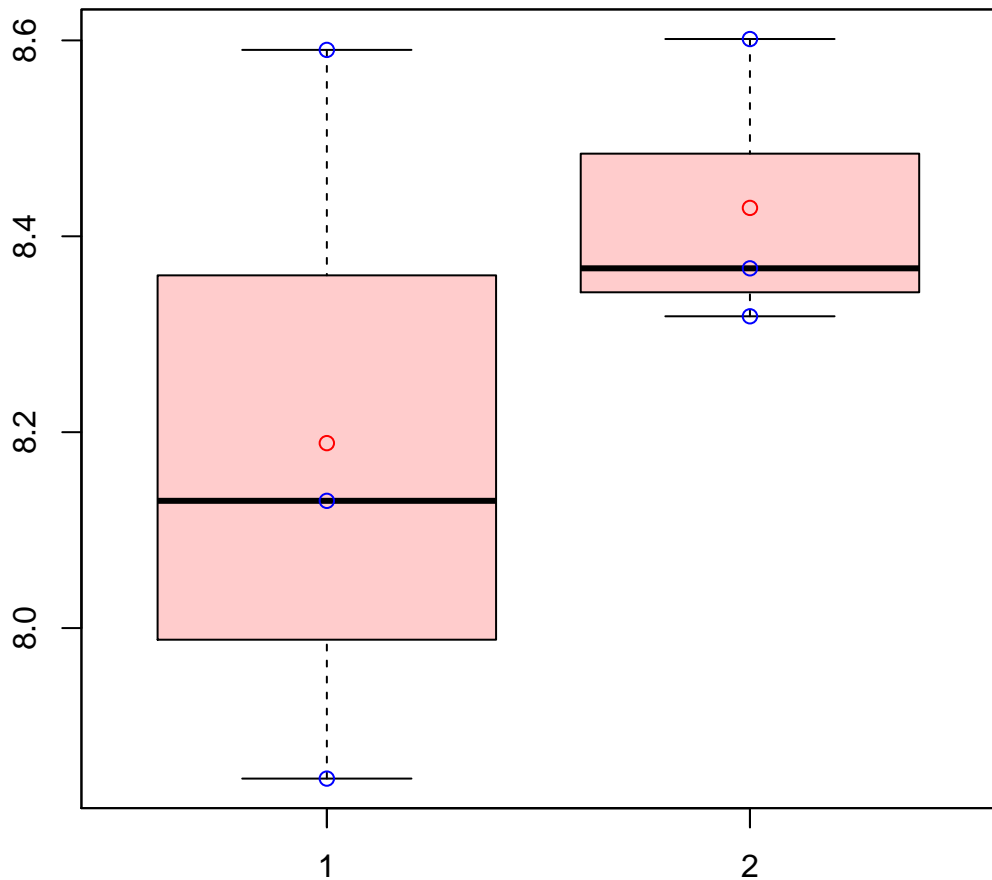

t-Test: p-value = 0.39



# CL714Contig1|CL714Contig1

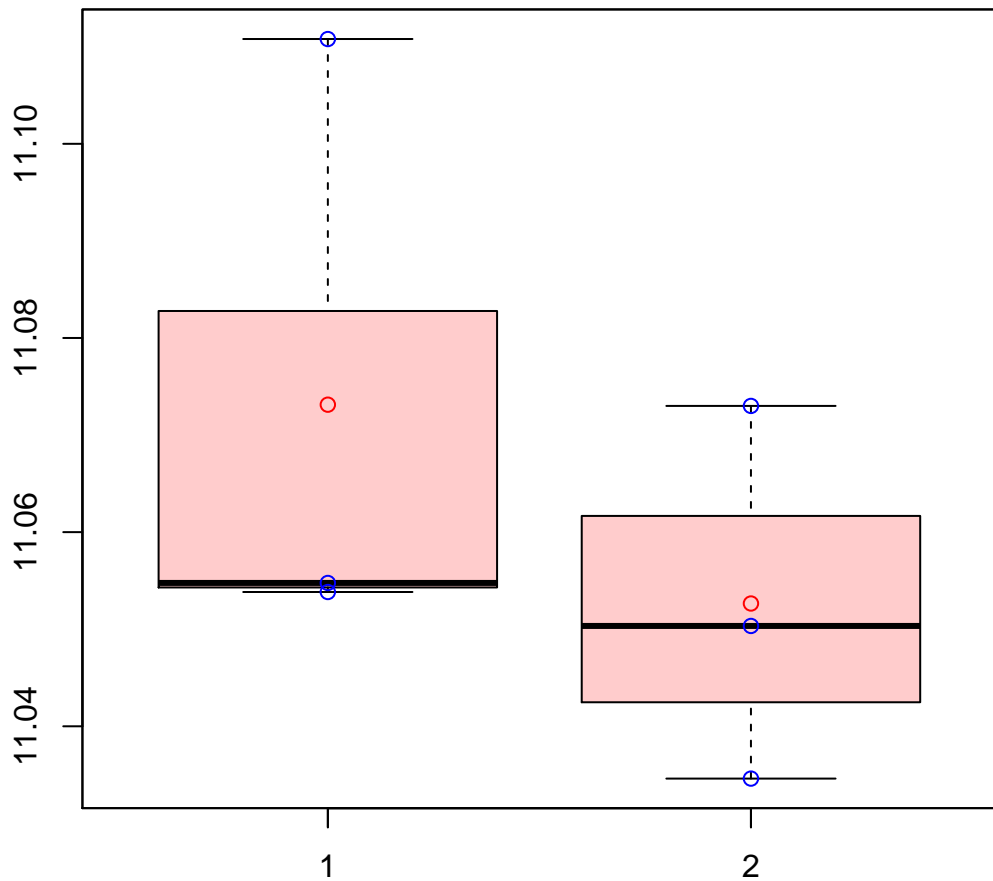

t-Test: p-value = 0.41

# CL714Contig2|CL714Contig2

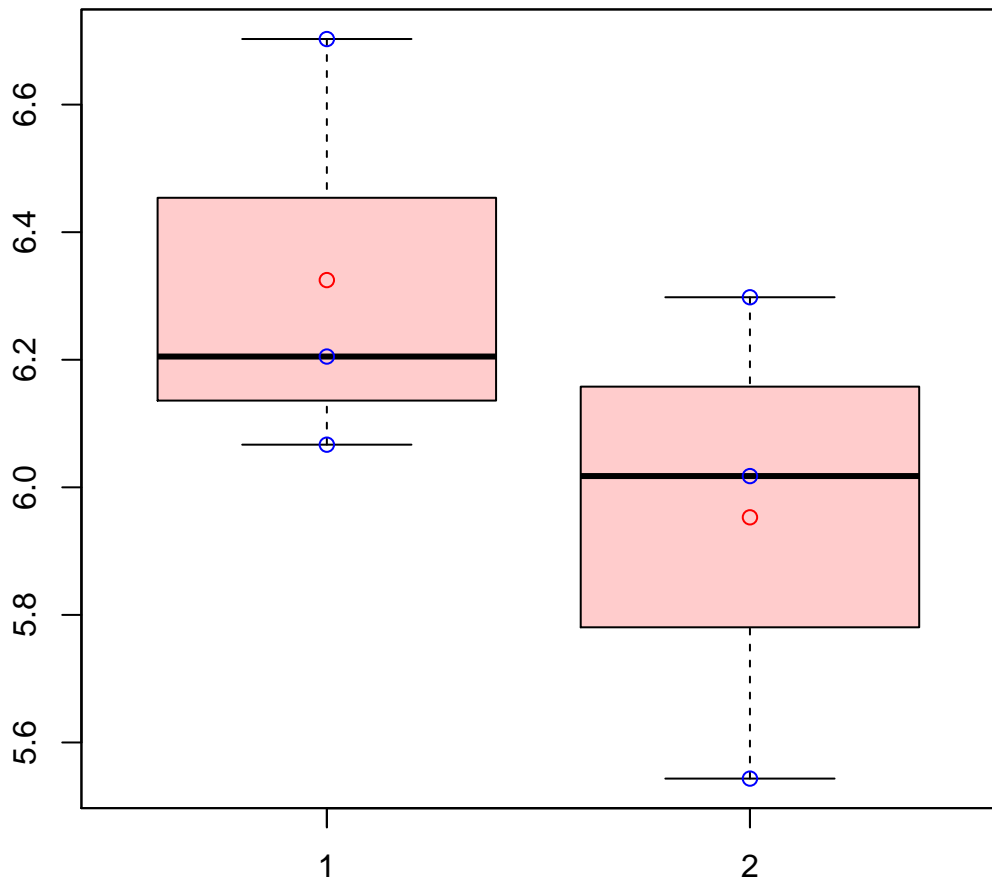

t-Test: p-value = 0.27

# CL714Contig5|CL714Contig5

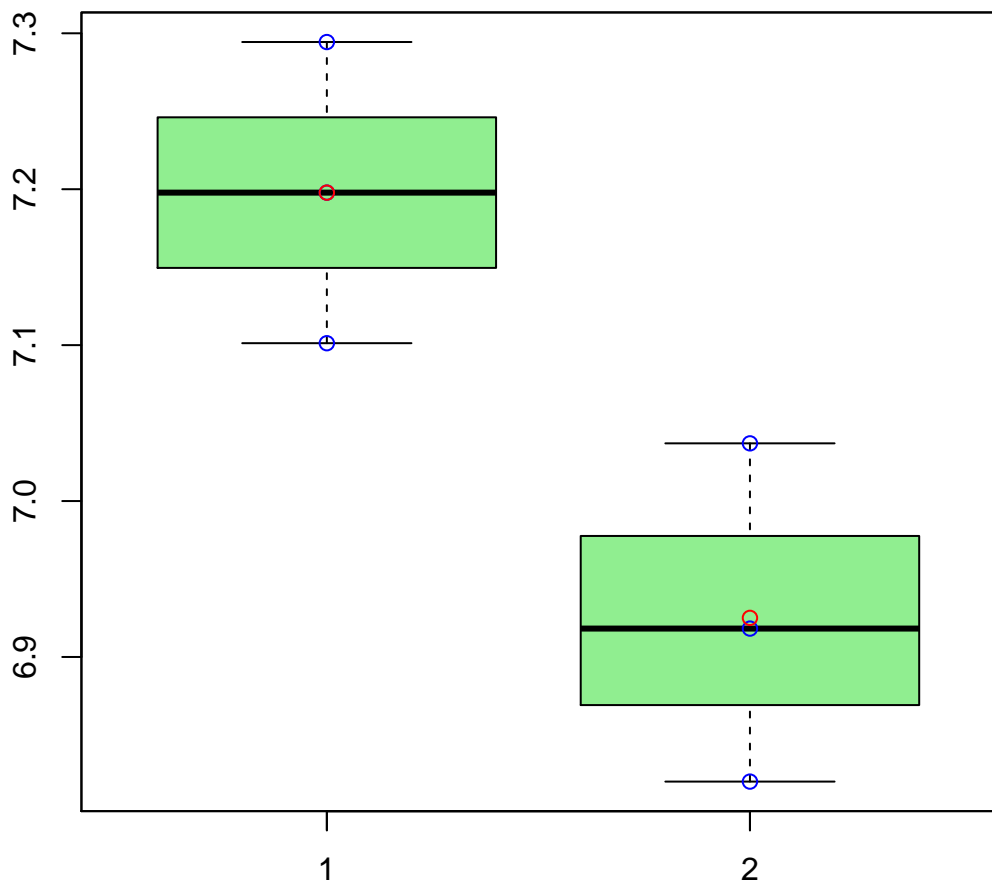

t-Test: p-value = 0.03

# CL714Contig6|CL714Contig6

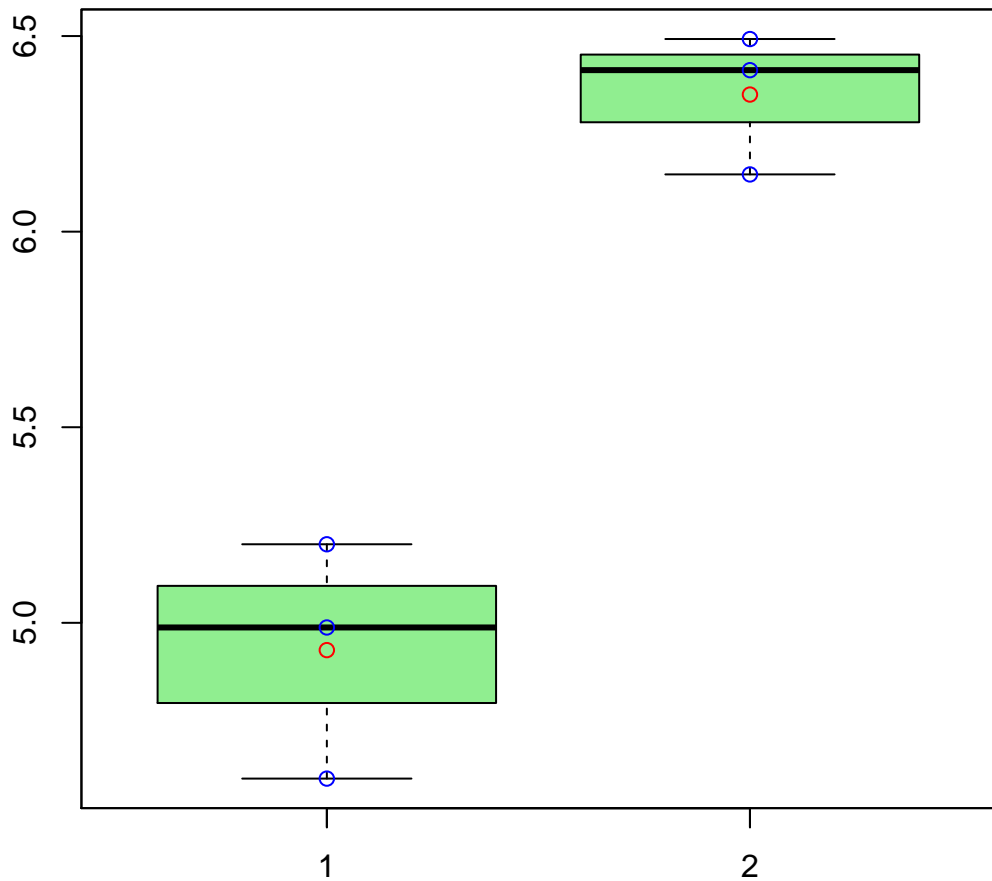

t-Test: p-value = 0

# CL714Contig7|CL714Contig7

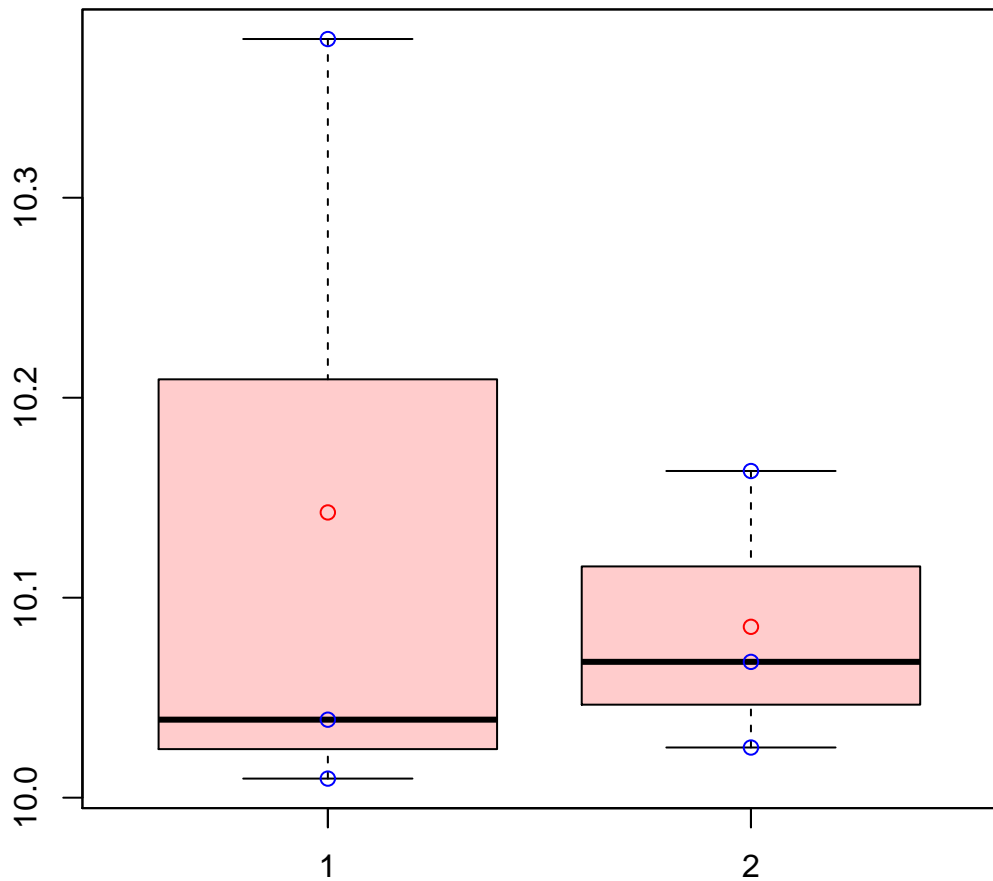

t-Test: p-value = 0.69

# CL7159Contig3|CL7159Contig3

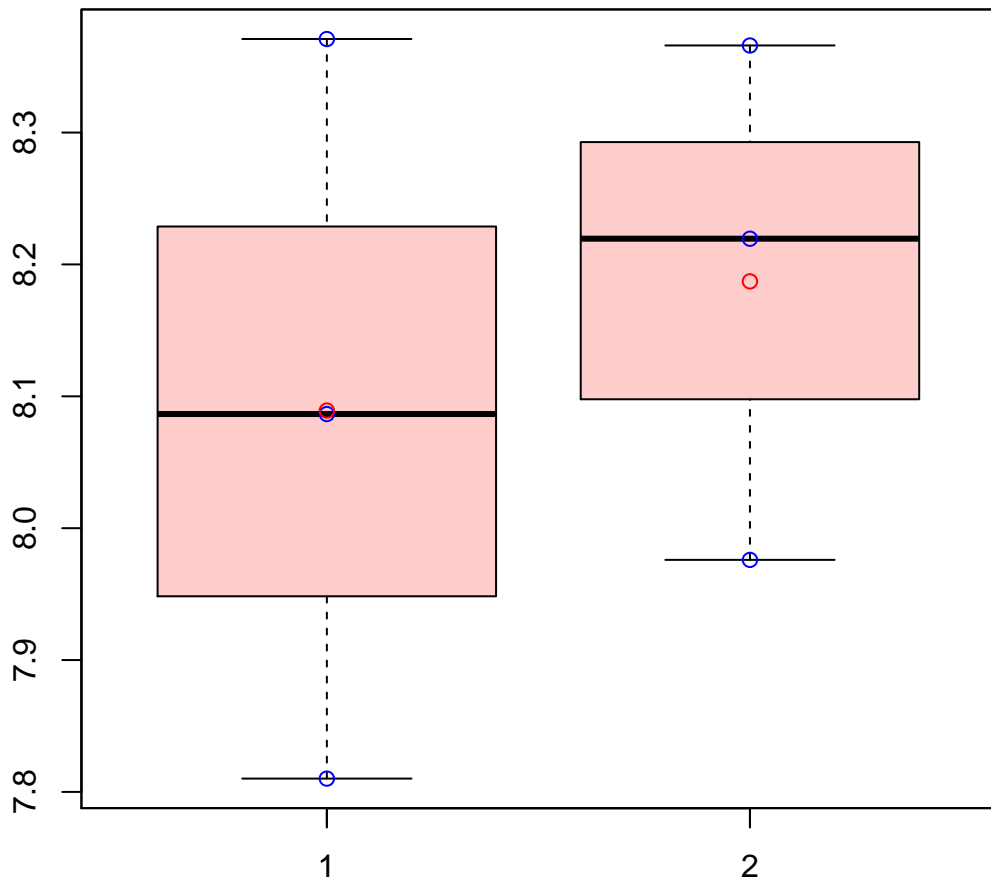

t-Test: p-value = 0.65

# CL715Contig2|CL715Contig2

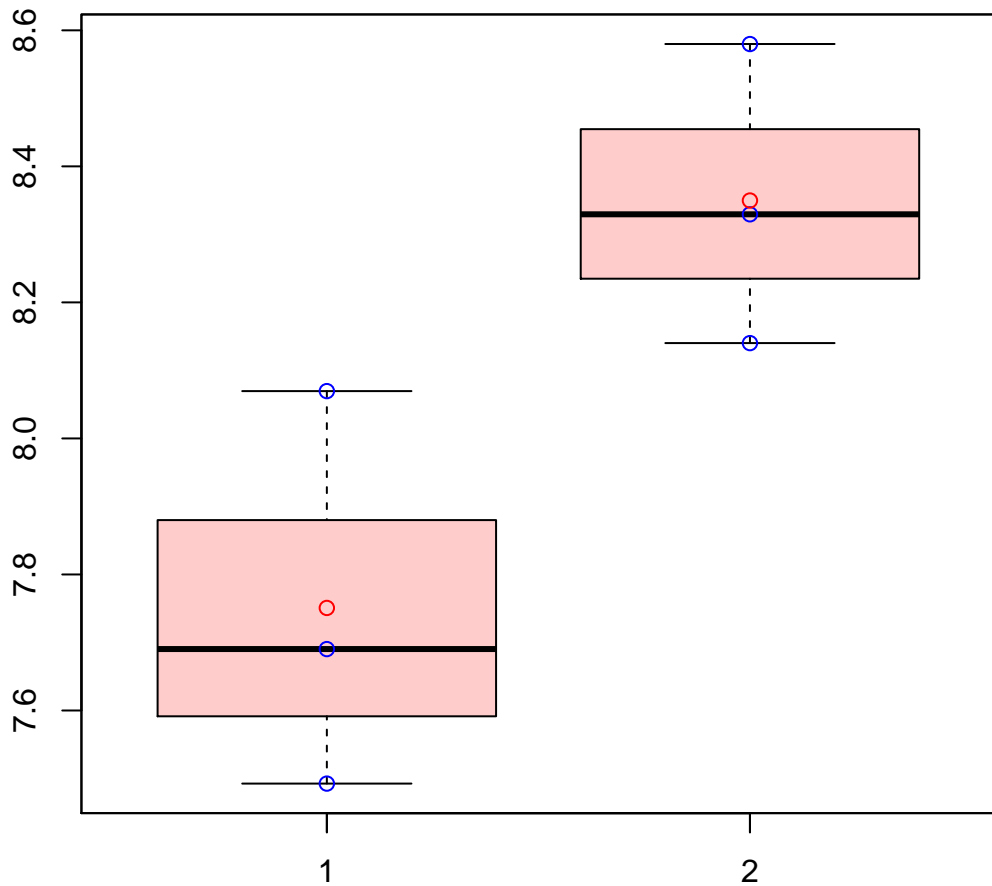

t-Test: p-value = 0.05

# CL716Contig5|CL716Contig5

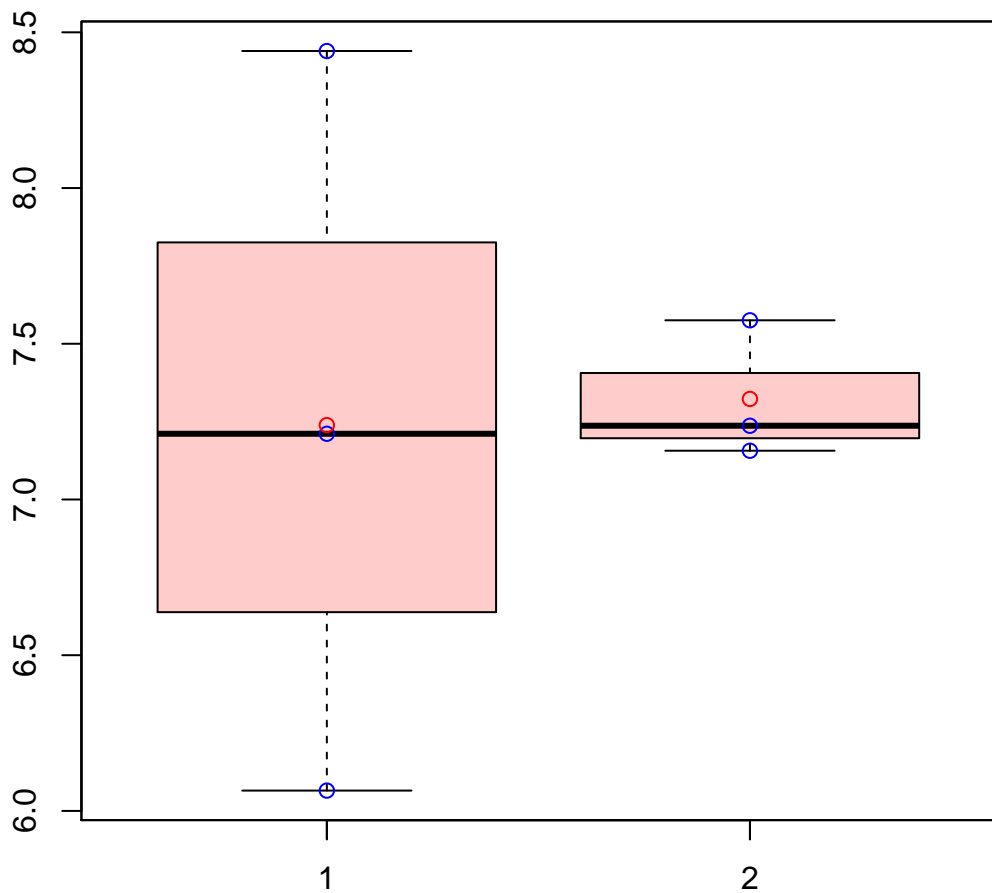

t-Test: p-value = 0.91



# CL7170Contig2|CL7170Contig2

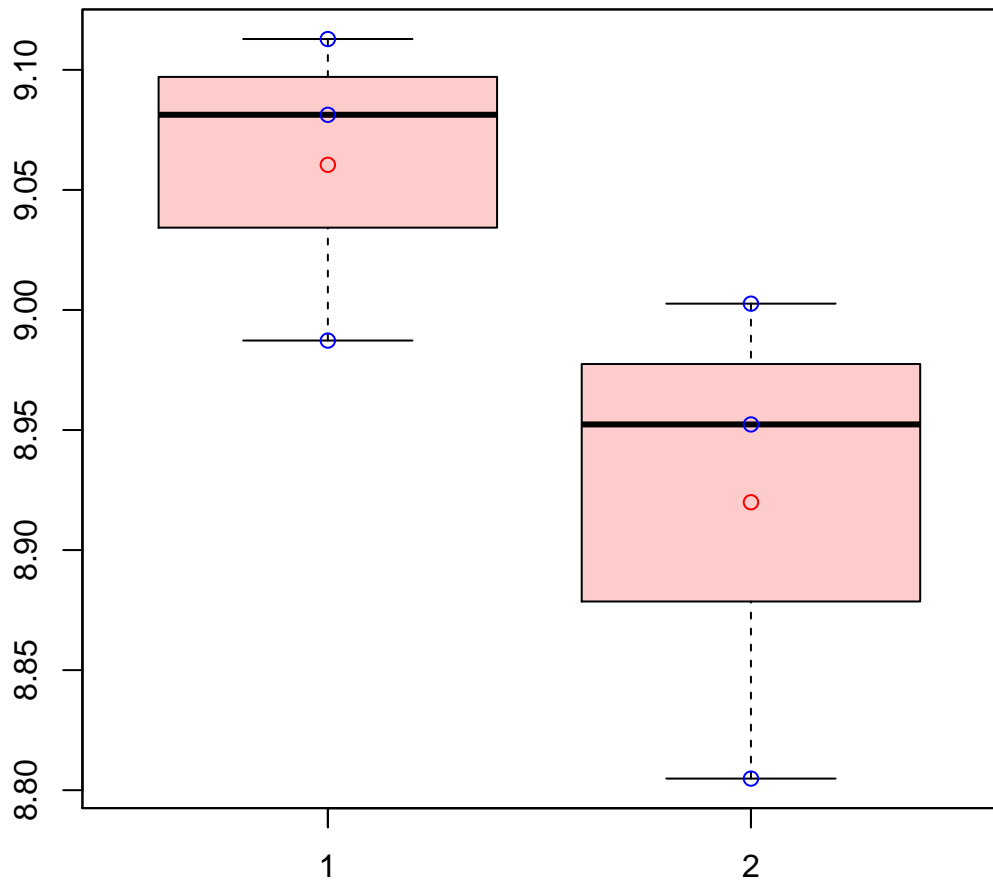

t-Test: p-value = 0.13

# CL7175Contig1|CL7175Contig1

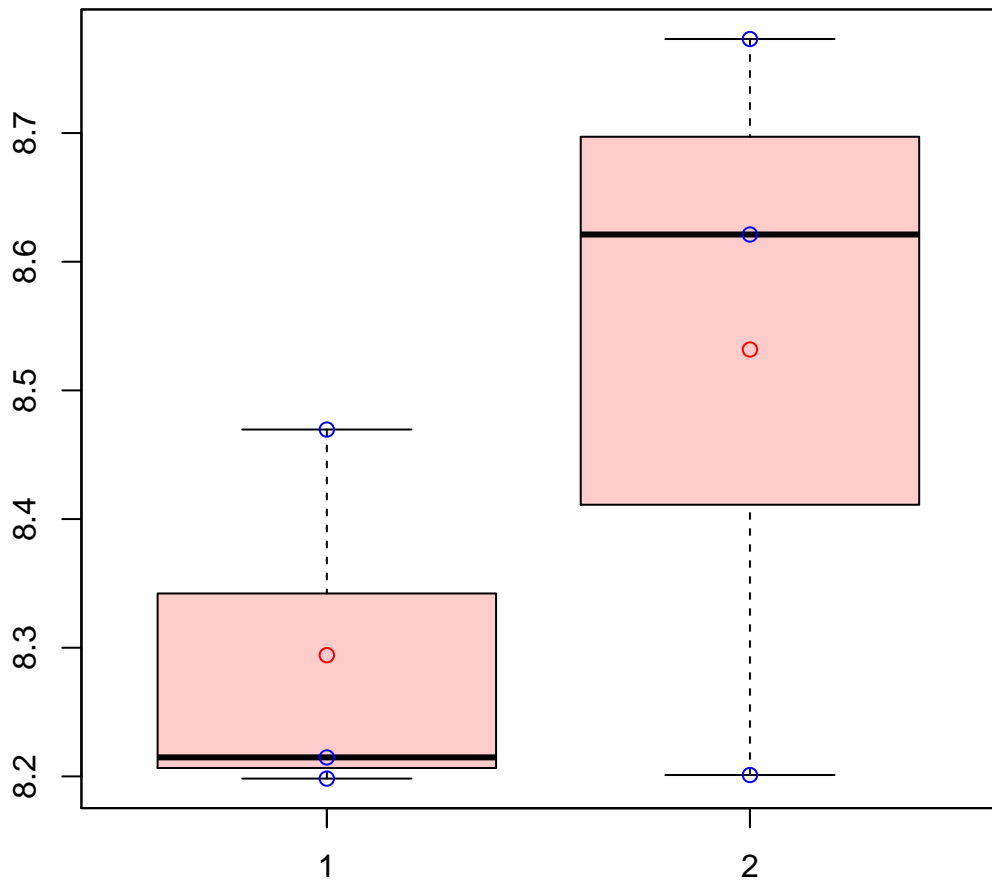

t-Test: p-value = 0.3

# CL7188Contig1|CL7188Contig1

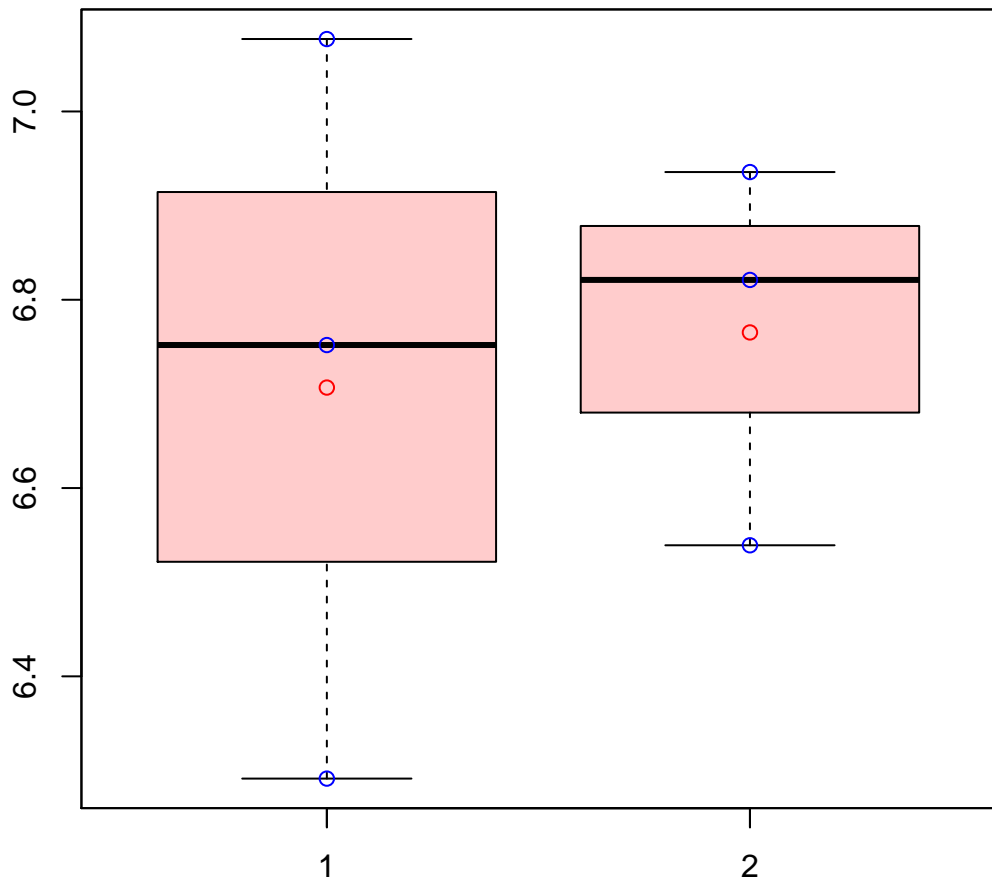

t-Test: p-value = 0.83

# CL718Contig4|CL718Contig4

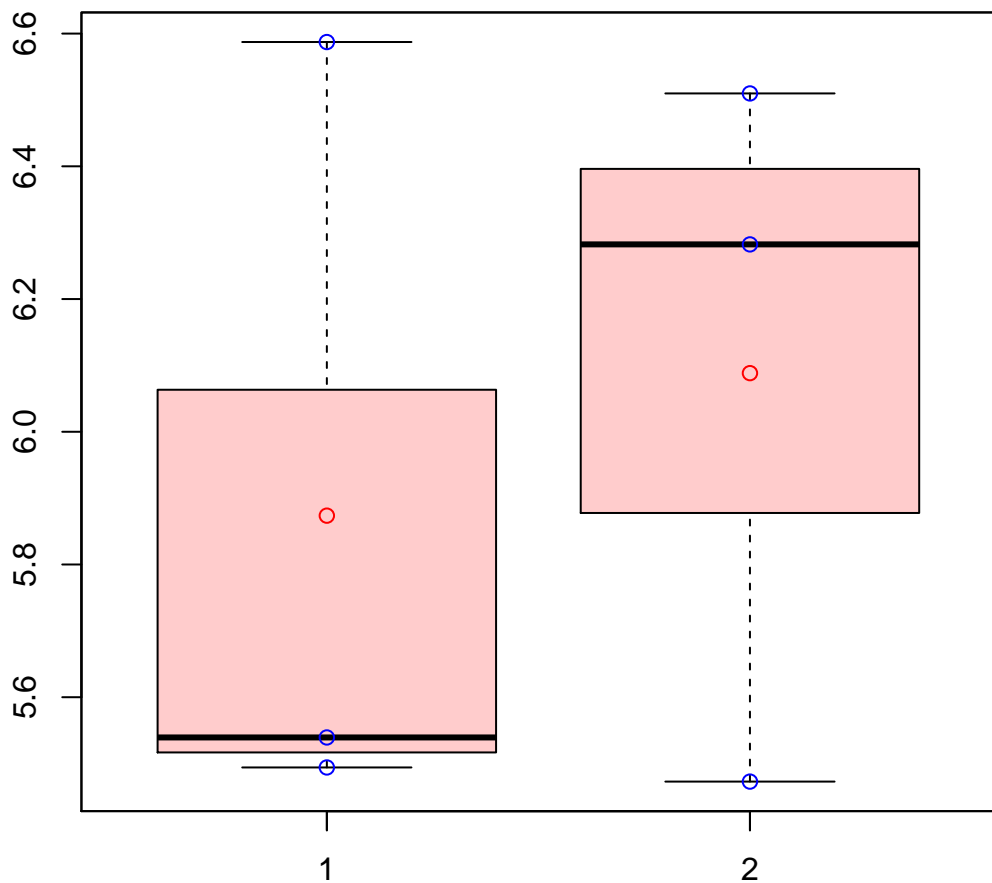

t-Test: p-value = 0.68

# CL7194Contig2|CL7194Contig2

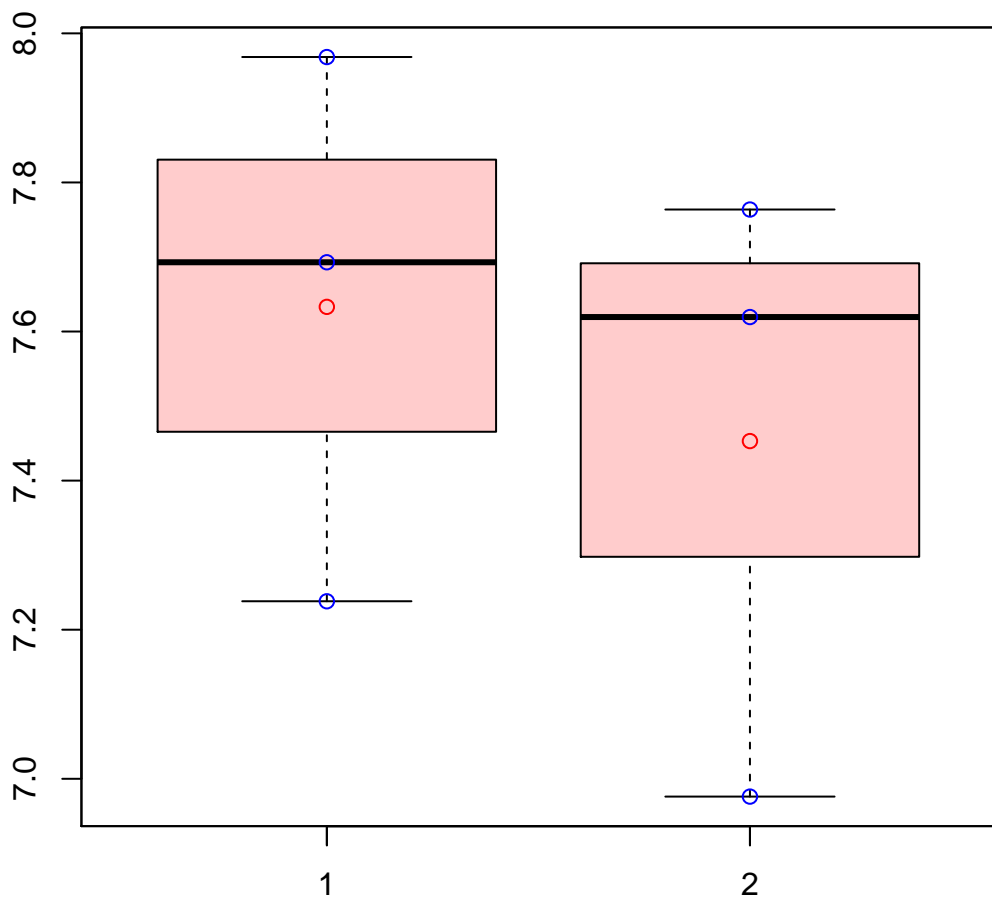

t-Test: p-value = 0.61

# CL7196Contig1|CL7196Contig1

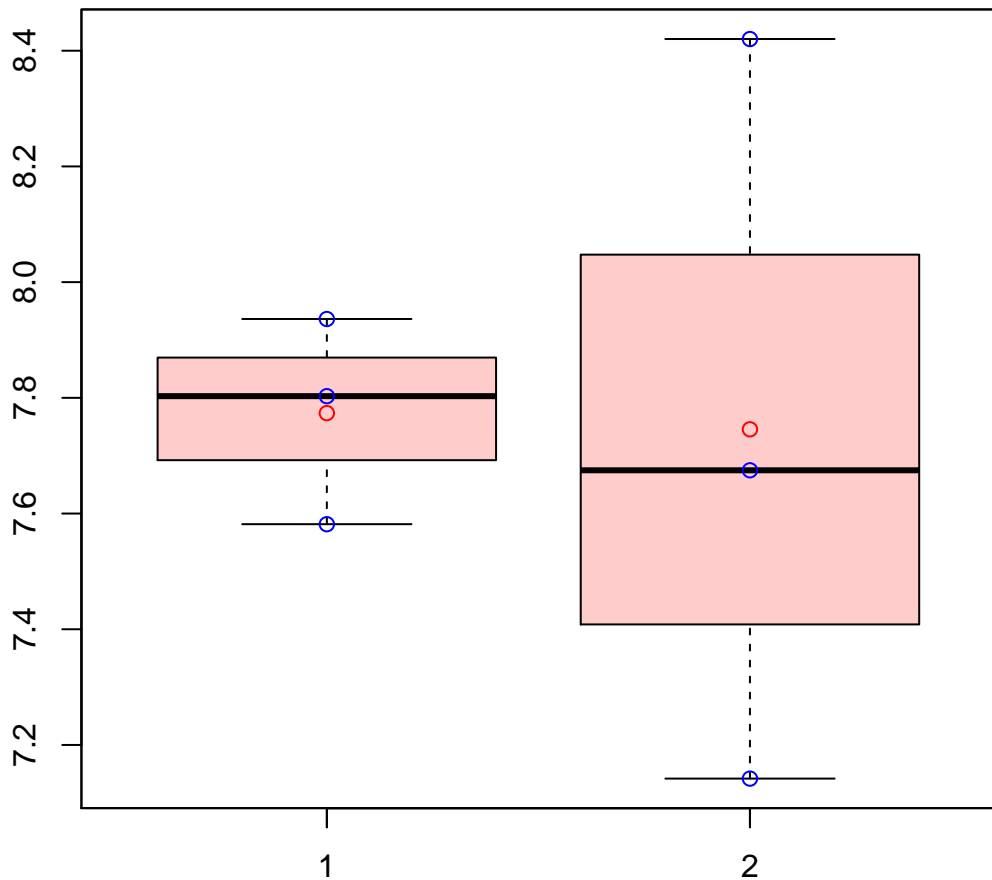

t-Test: p-value = 0.95

# CL7196Contig2|CL7196Contig2

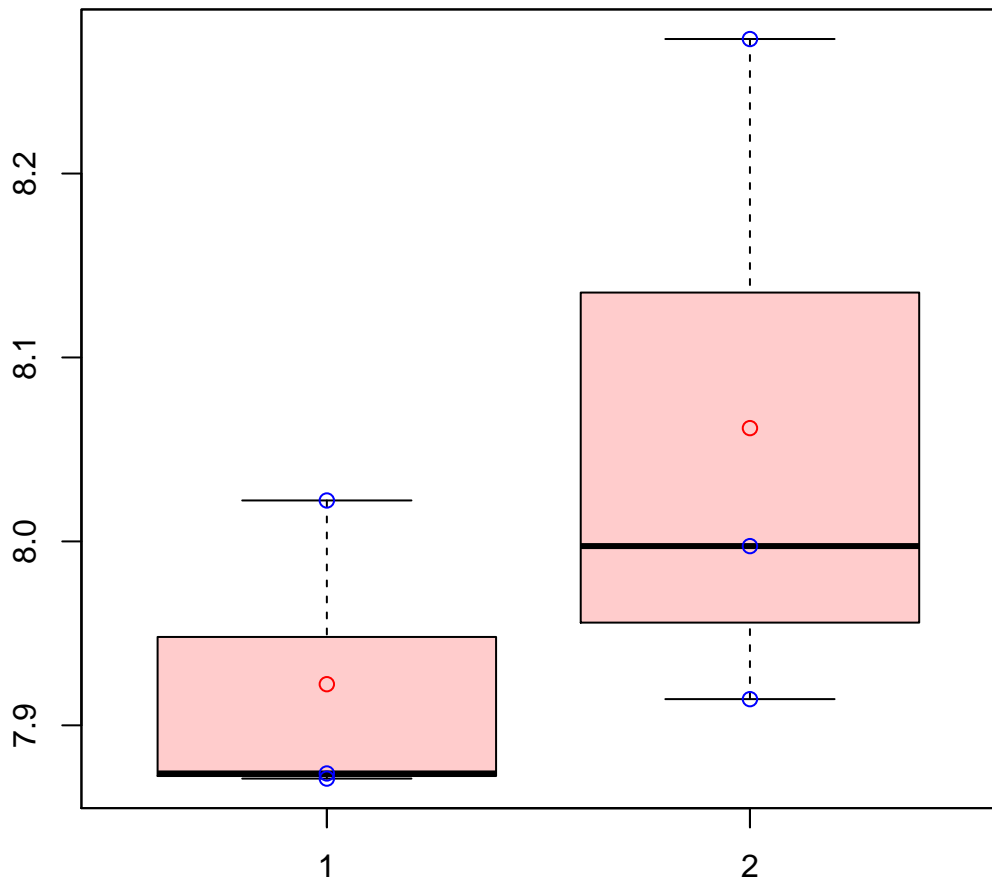

t-Test: p-value = 0.33

# CL7210Contig2|CL7210Contig2

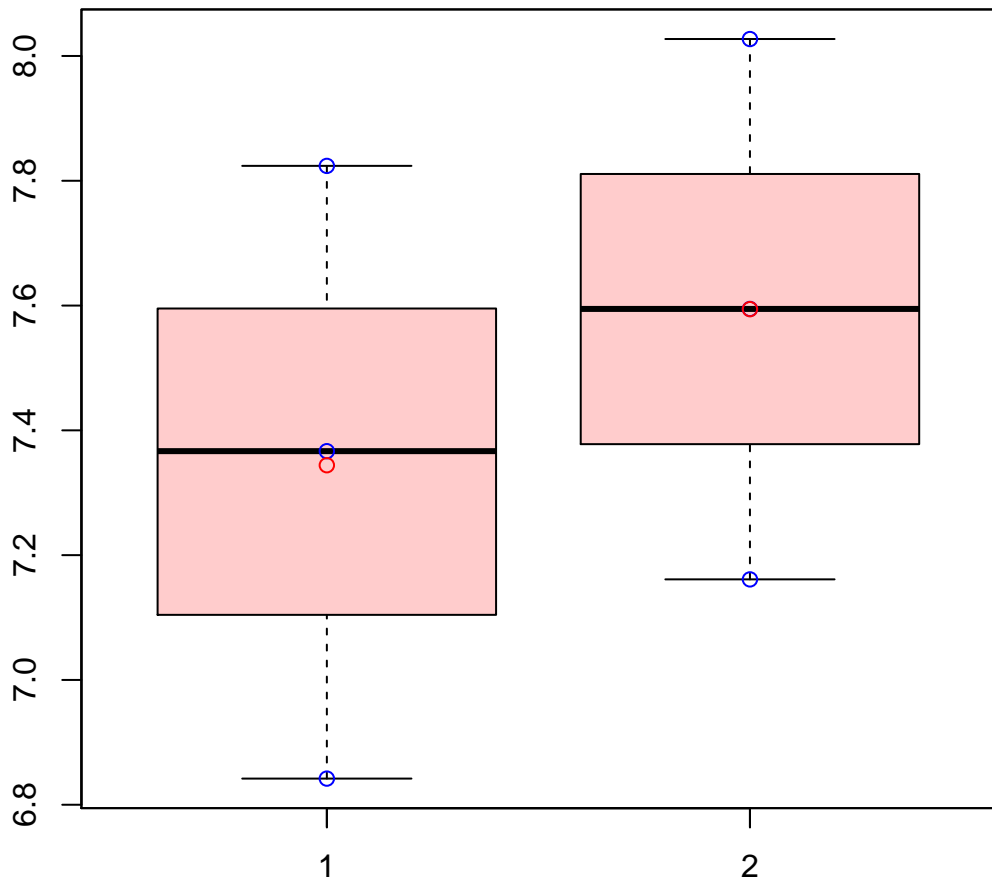

t-Test: p-value = 0.54



# CL7211Contig1|CL7211Contig1

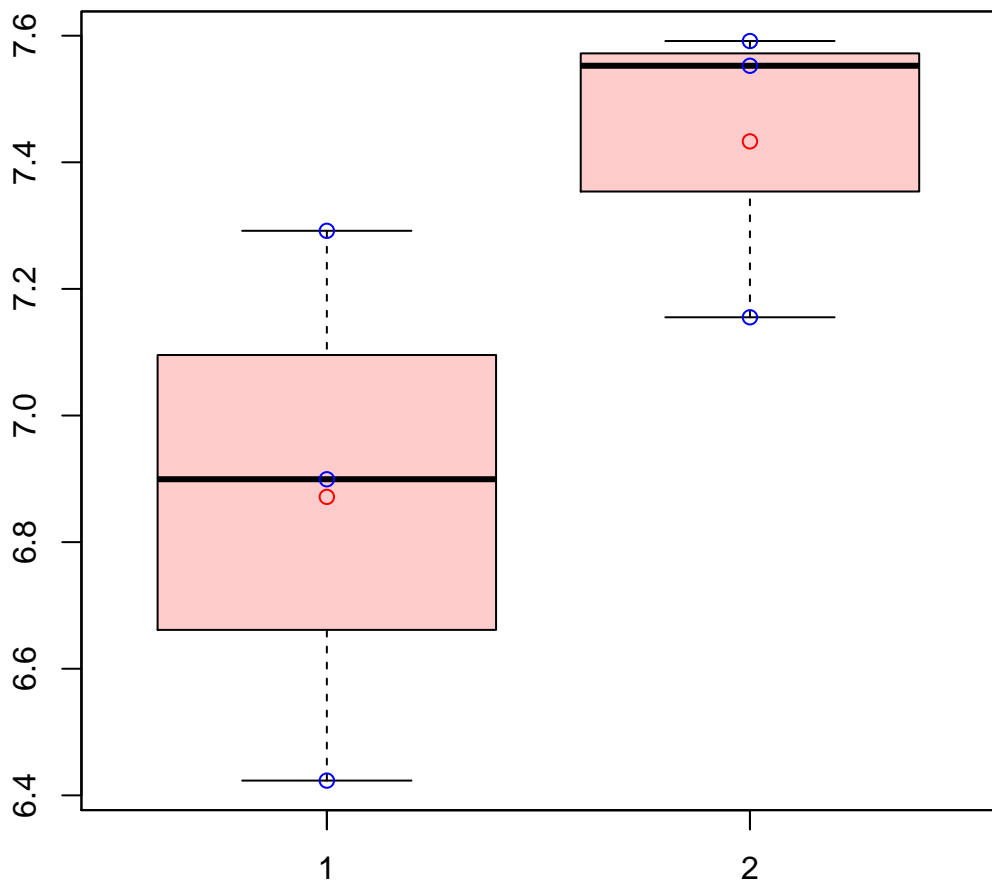

t-Test: p-value = 0.14

# CL7215Contig2|CL7215Contig2

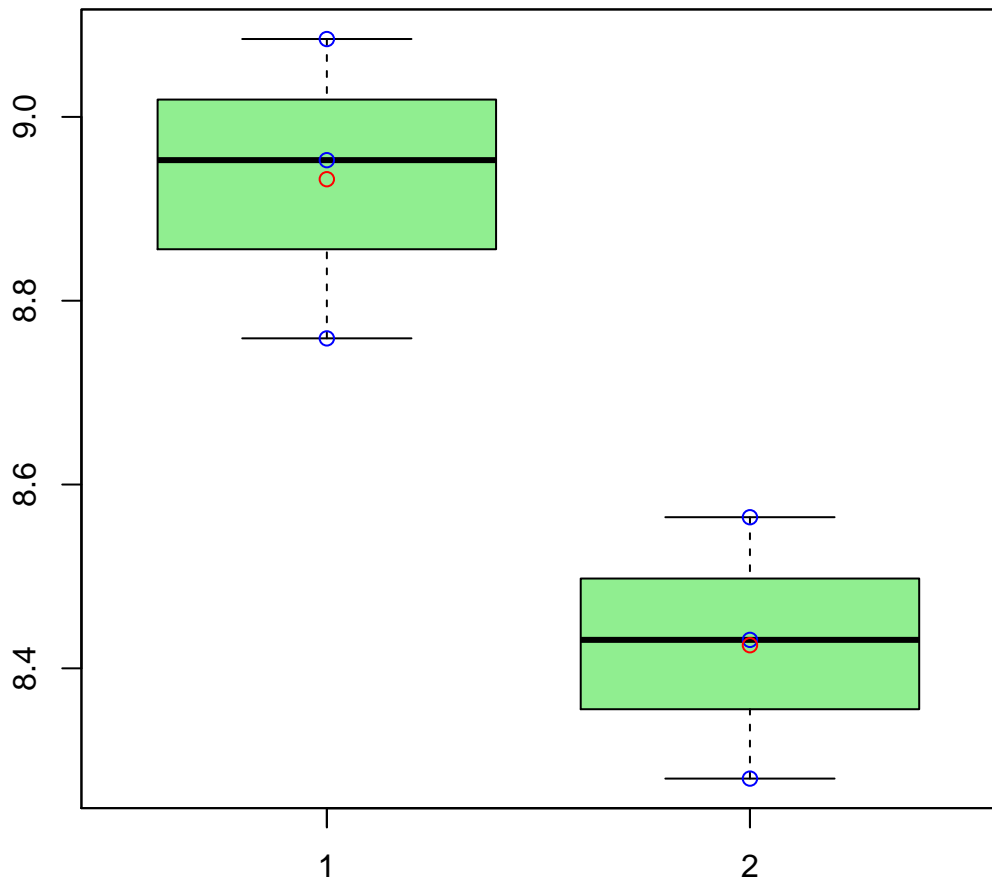

t-Test: p-value = 0.02

# CL721Contig4|CL721Contig4

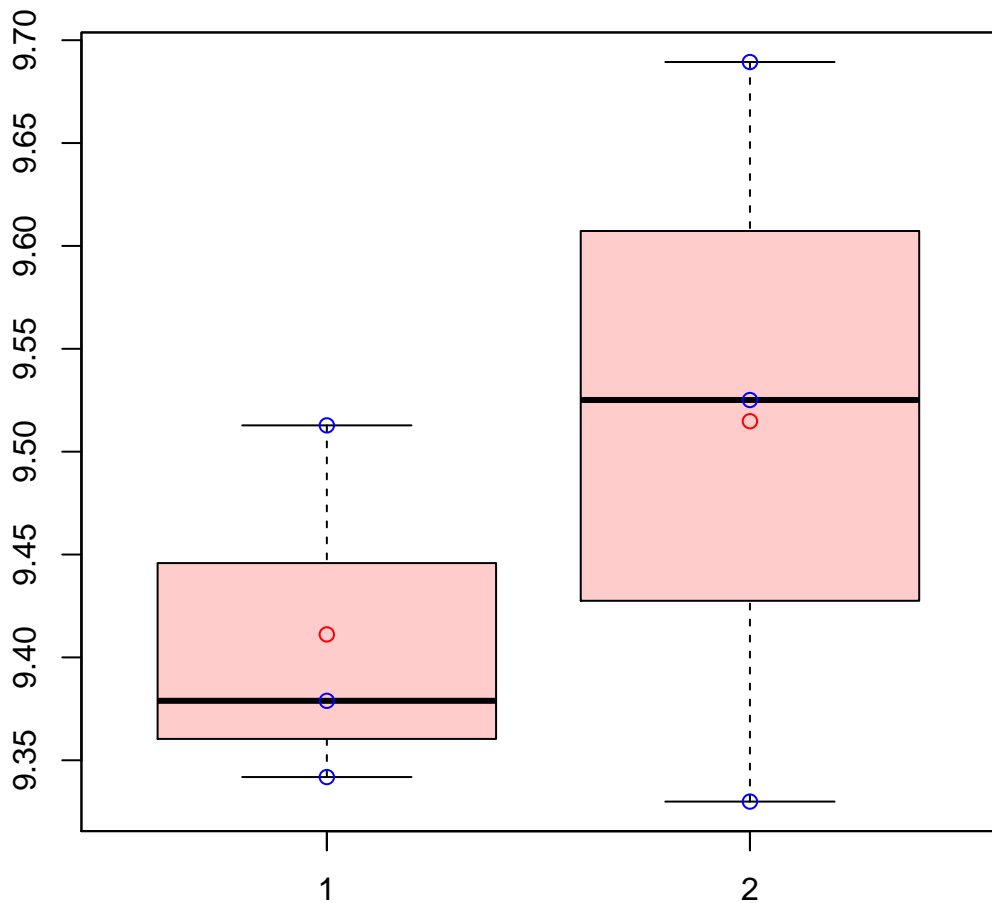

t-Test: p-value = 0.44

# CL7228Contig2|CL7228Contig2

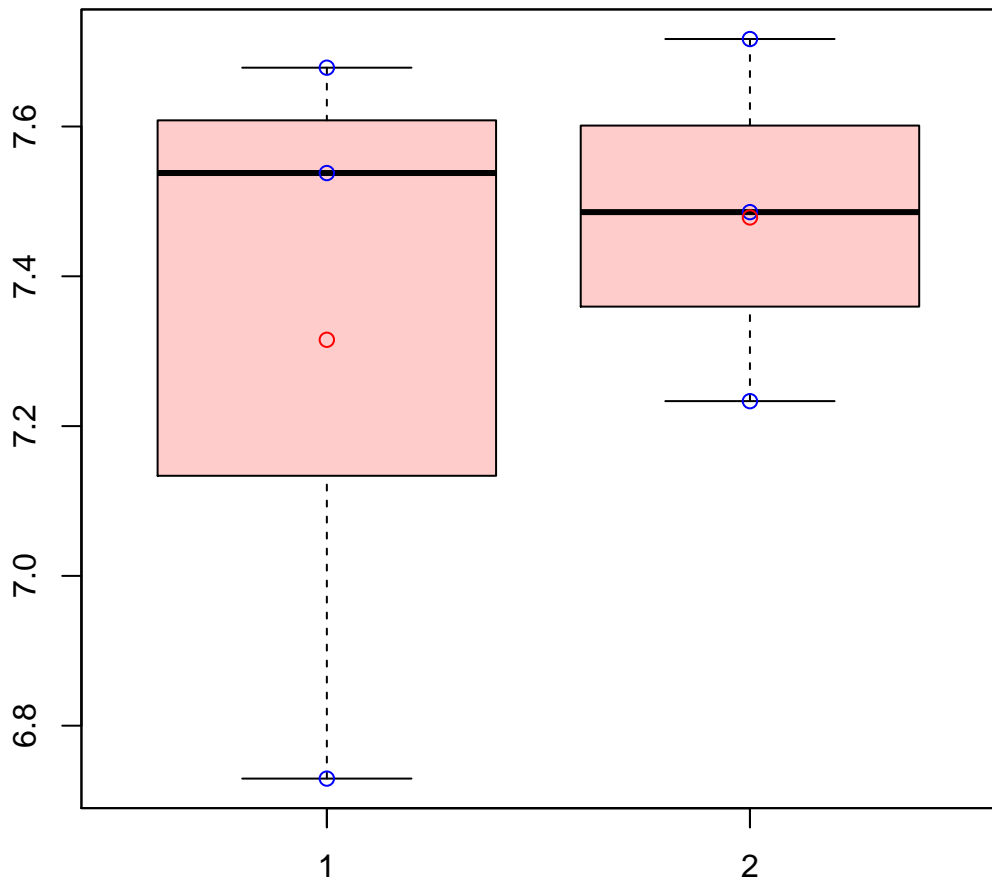

t-Test: p-value = 0.65

# CL722Contig8|CL722Contig8

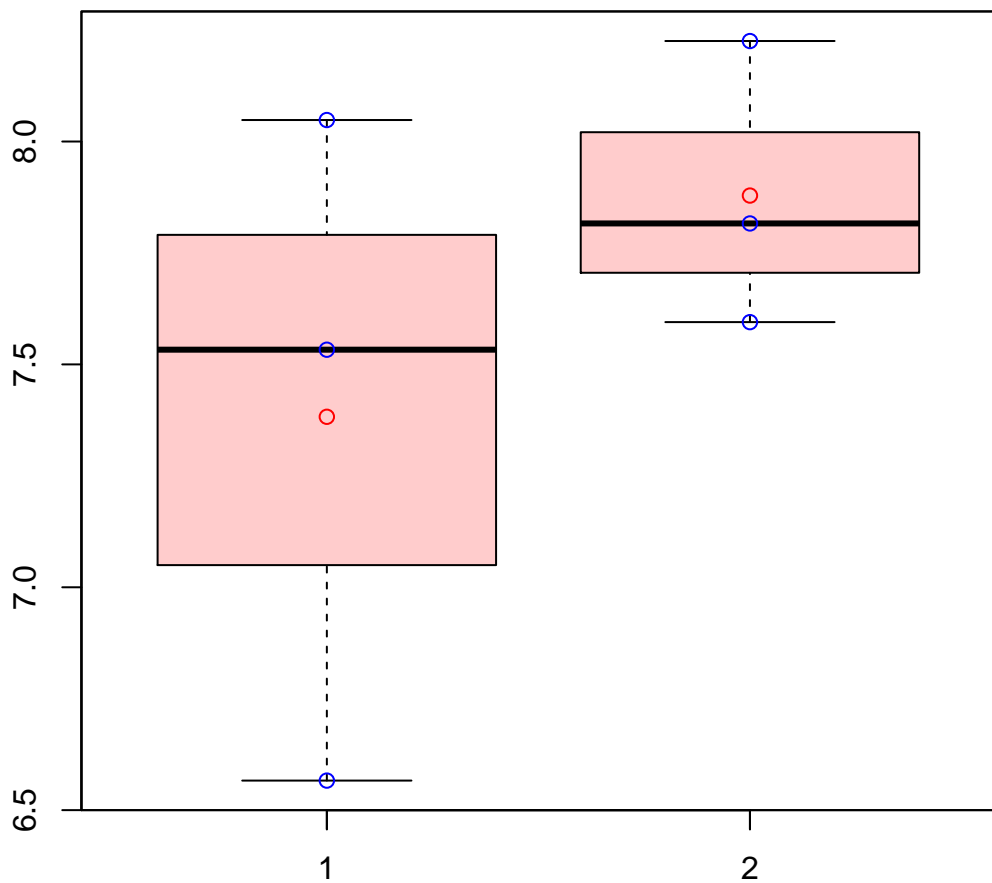

t-Test: p-value = 0.38

# CL7247Contig4|CL7247Contig4

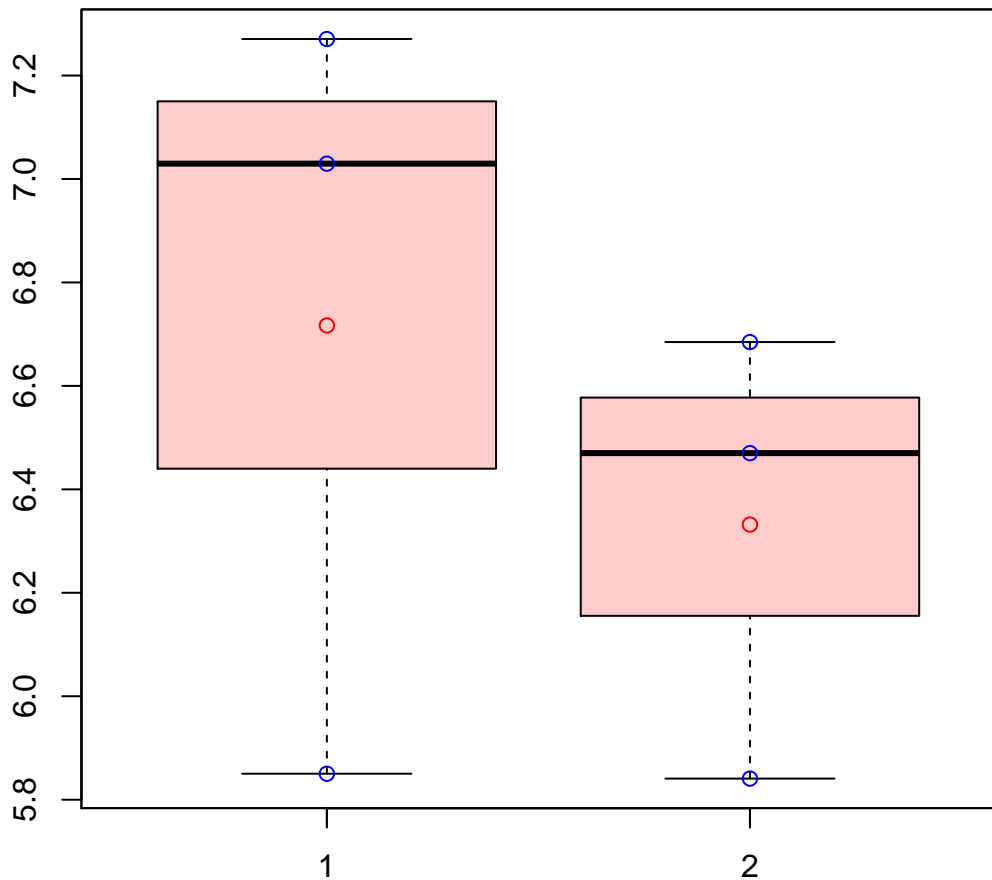

t-Test: p-value = 0.5

# CL724Contig15|CL724Contig15

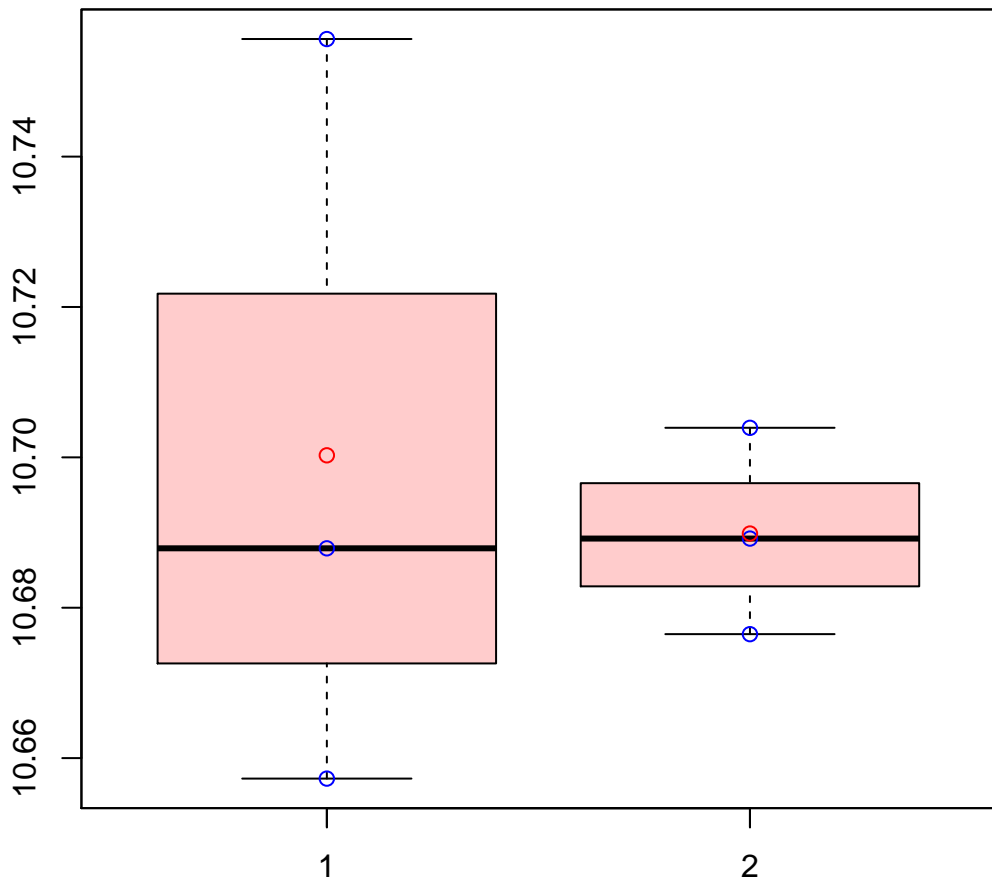

t-Test: p-value = 0.76

# CL724Contig2|CL724Contig2

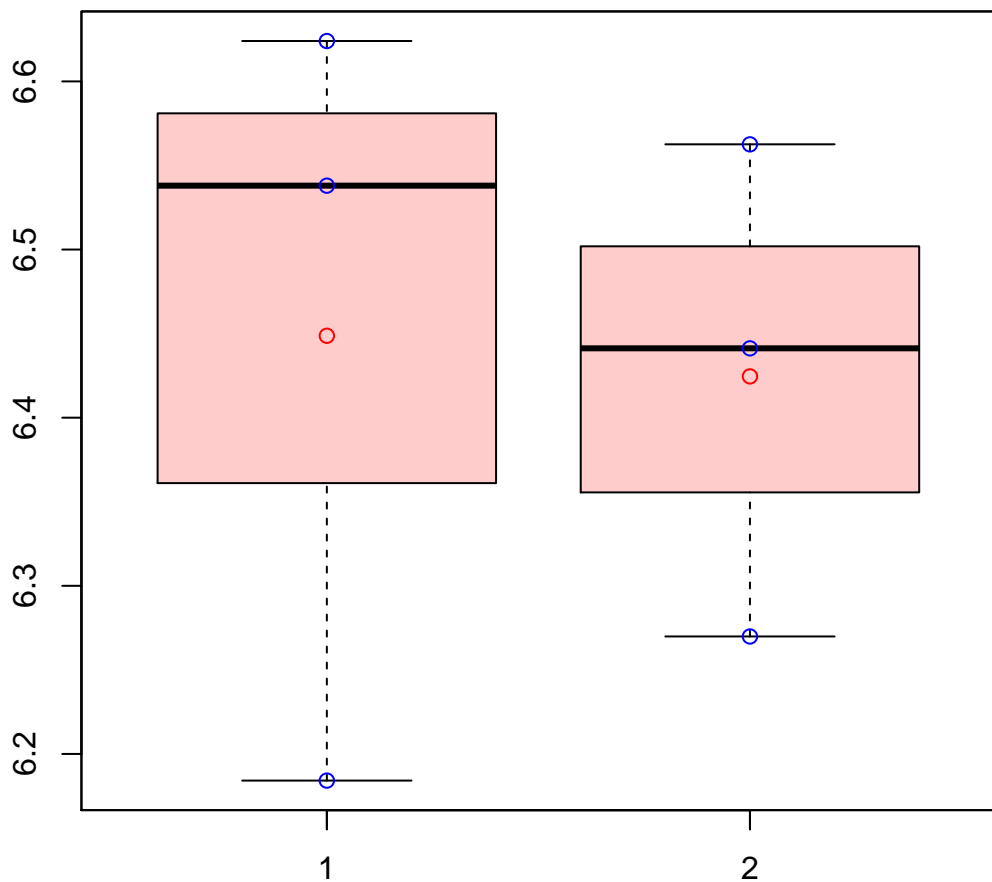

t-Test: p-value = 0.89



# CL724Contig6|CL724Contig6

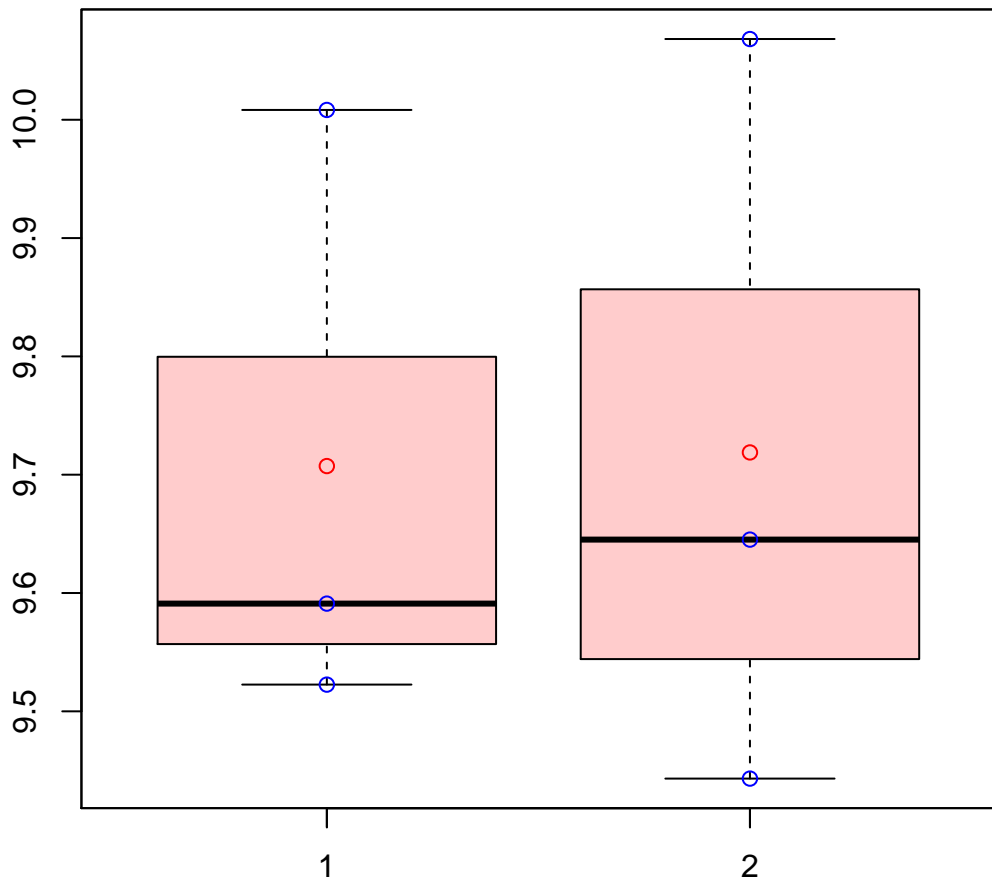

t-Test: p-value = 0.96

# CL7267Contig2|CL7267Contig2

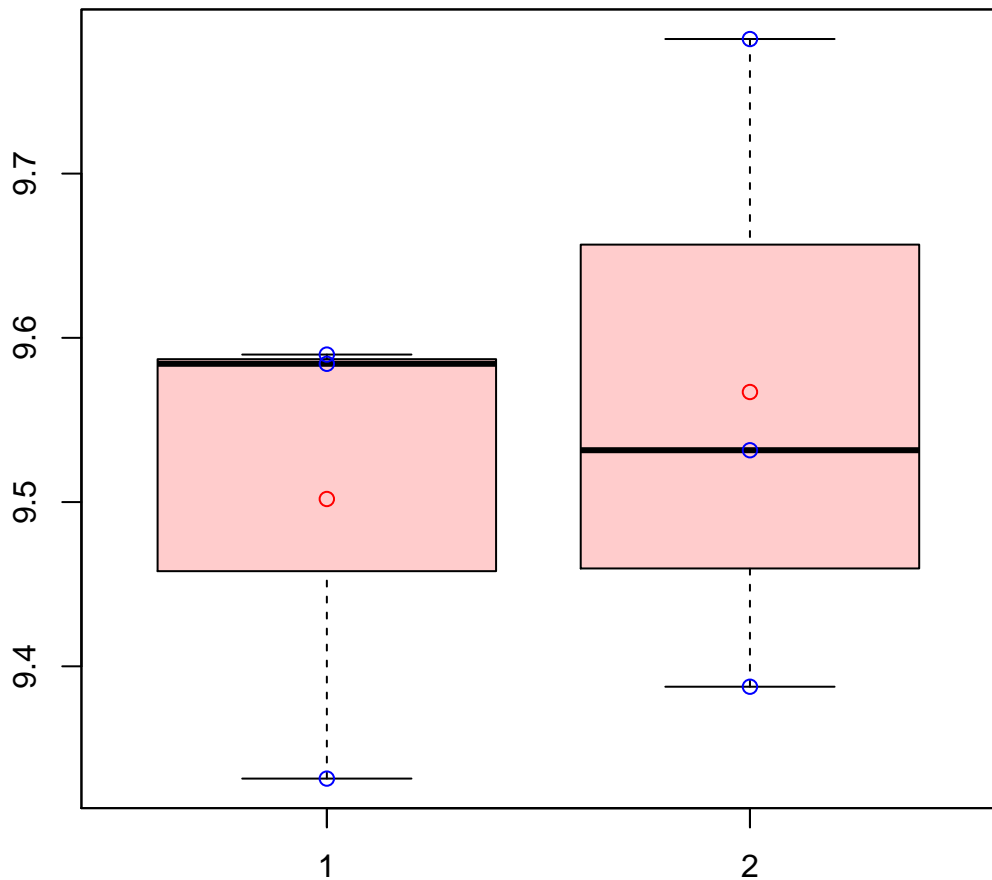

t-Test: p-value = 0.67

# CL7287Contig3|CL7287Contig3

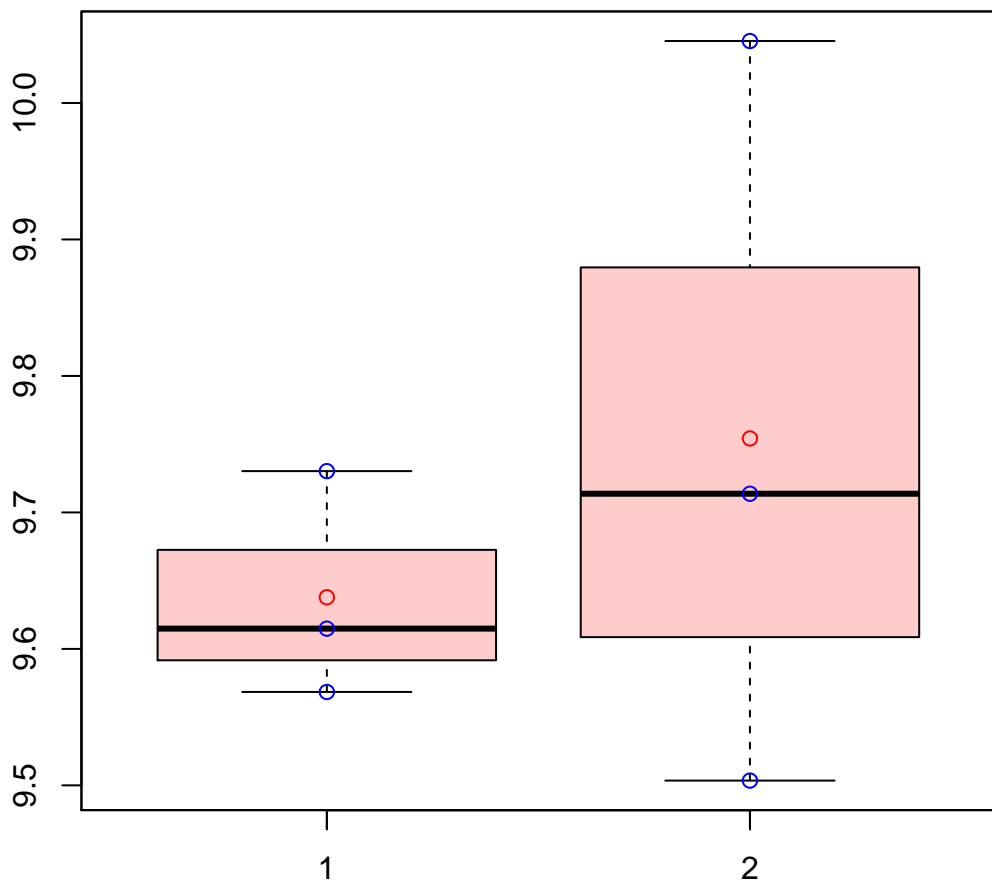

t-Test: p-value = 0.54

# CL7288Contig1|CL7288Contig1

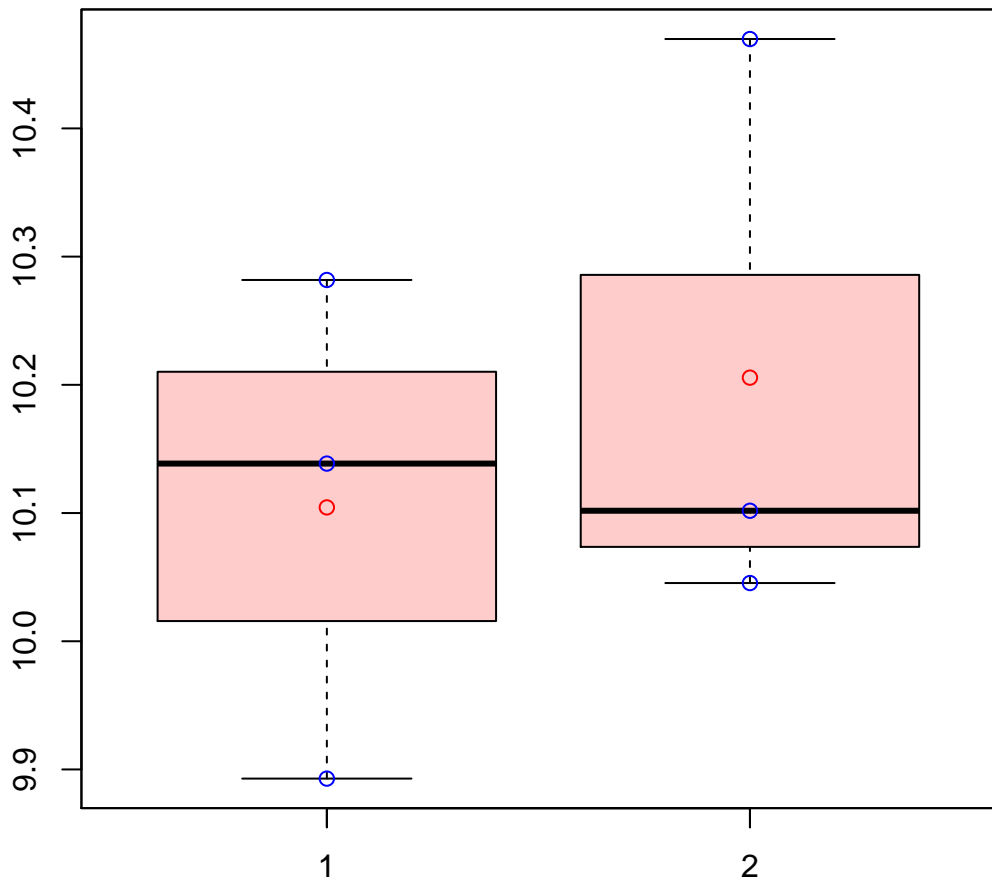

t-Test: p-value = 0.59

# CL728Contig5|CL728Contig5

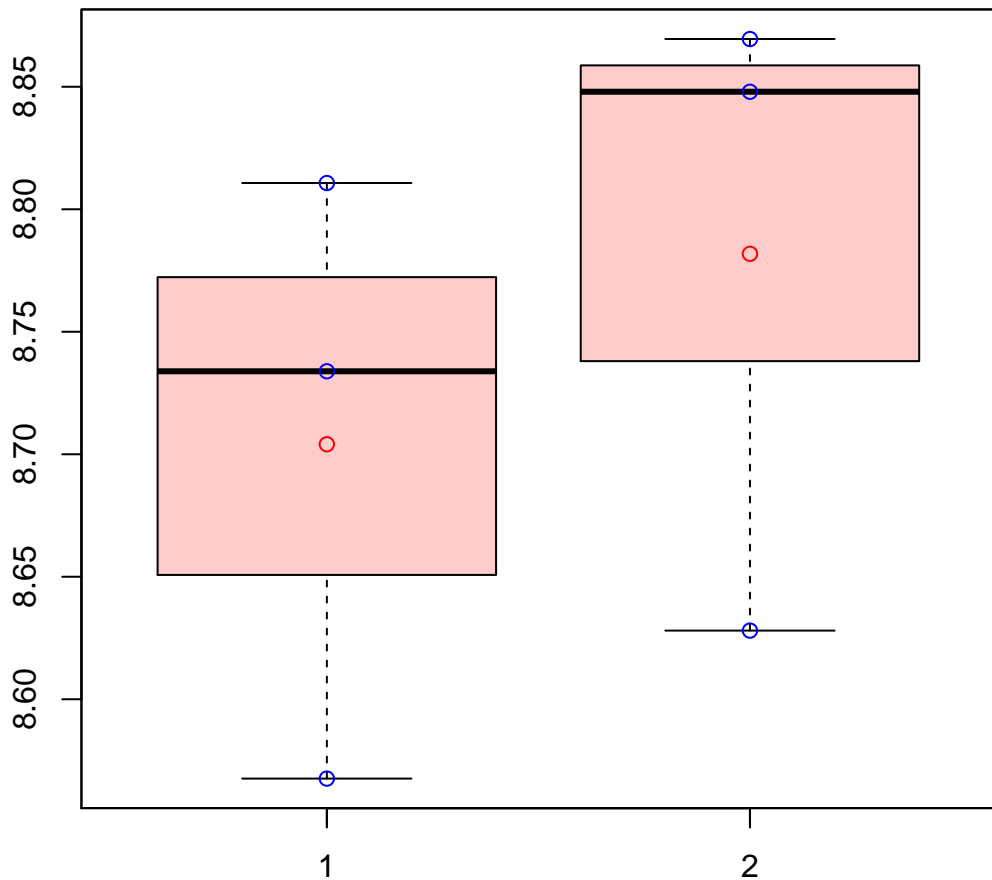

t-Test: p-value = 0.5

# CL72Contig10|CL72Contig10

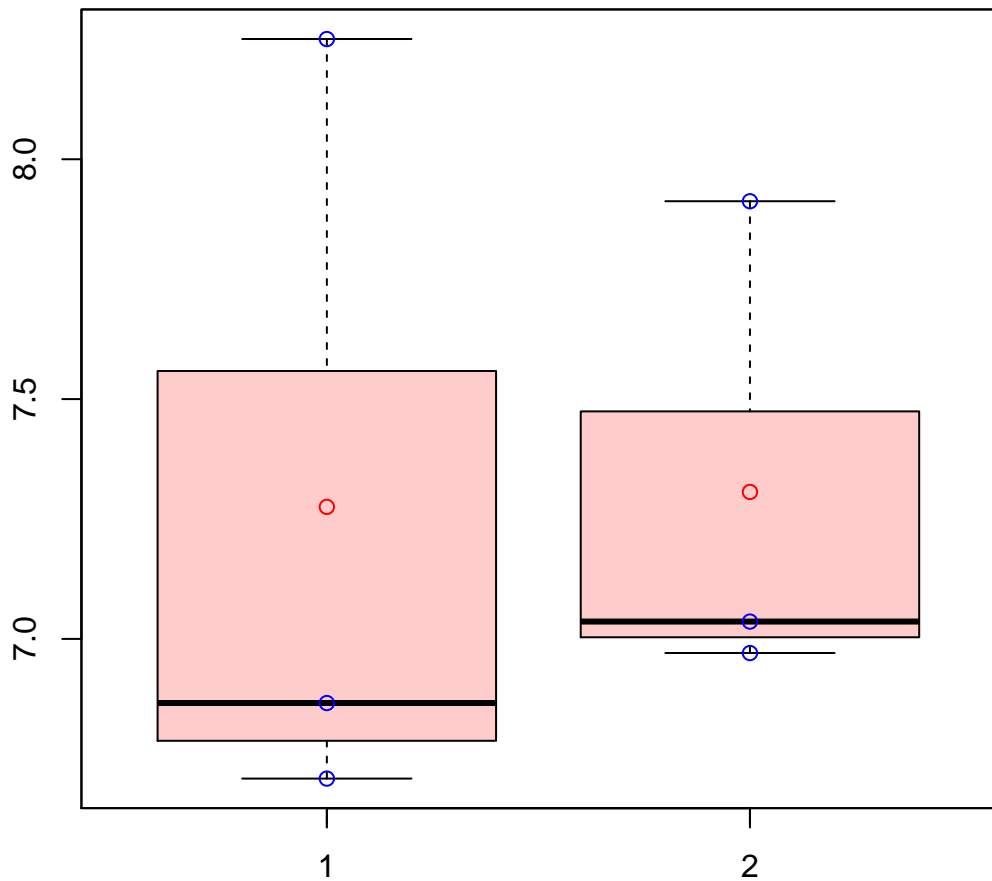

t-Test: p-value = 0.96

# CL72Contig17|CL72Contig17

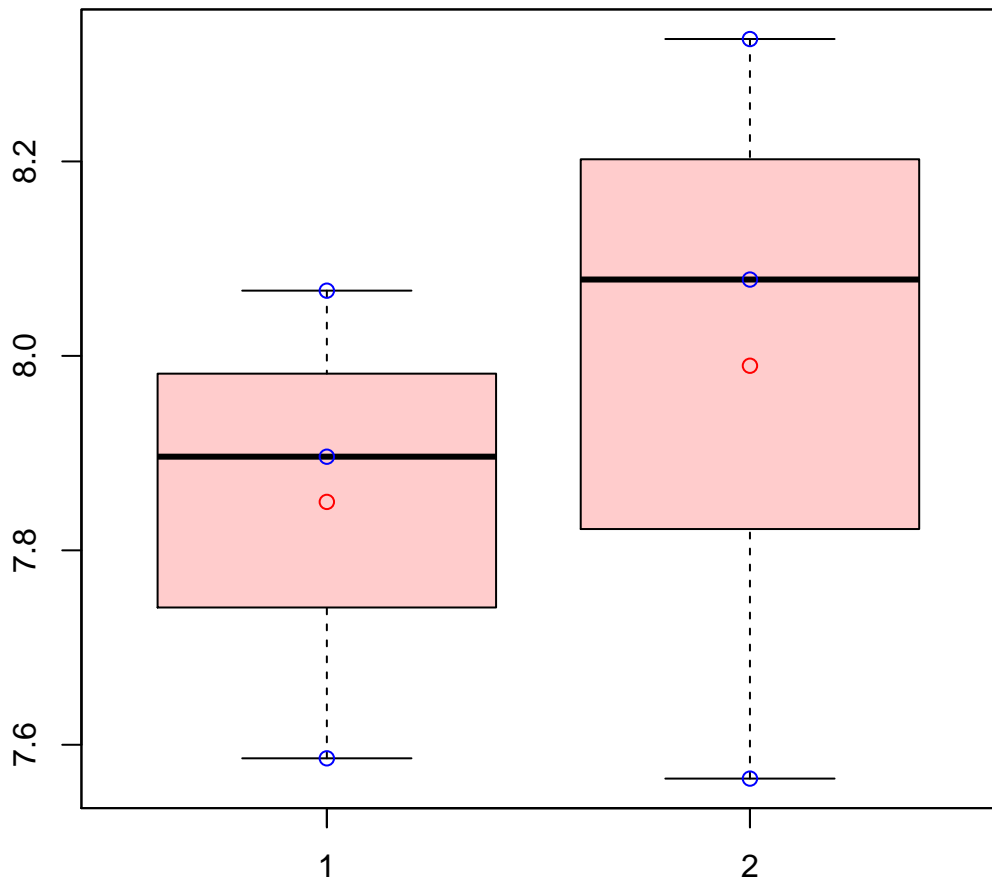

t-Test: p-value = 0.63

# CL72Contig18|CL72Contig18

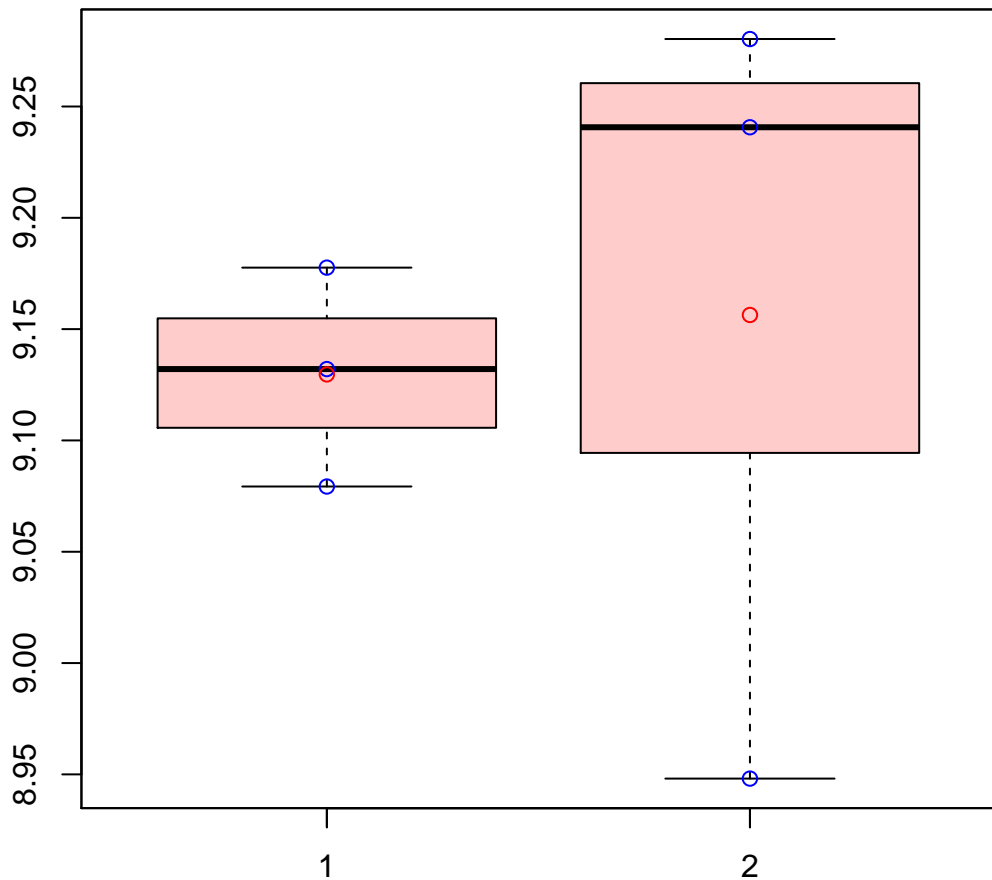

t-Test: p-value = 0.83



# CL72Contig20|CL72Contig20

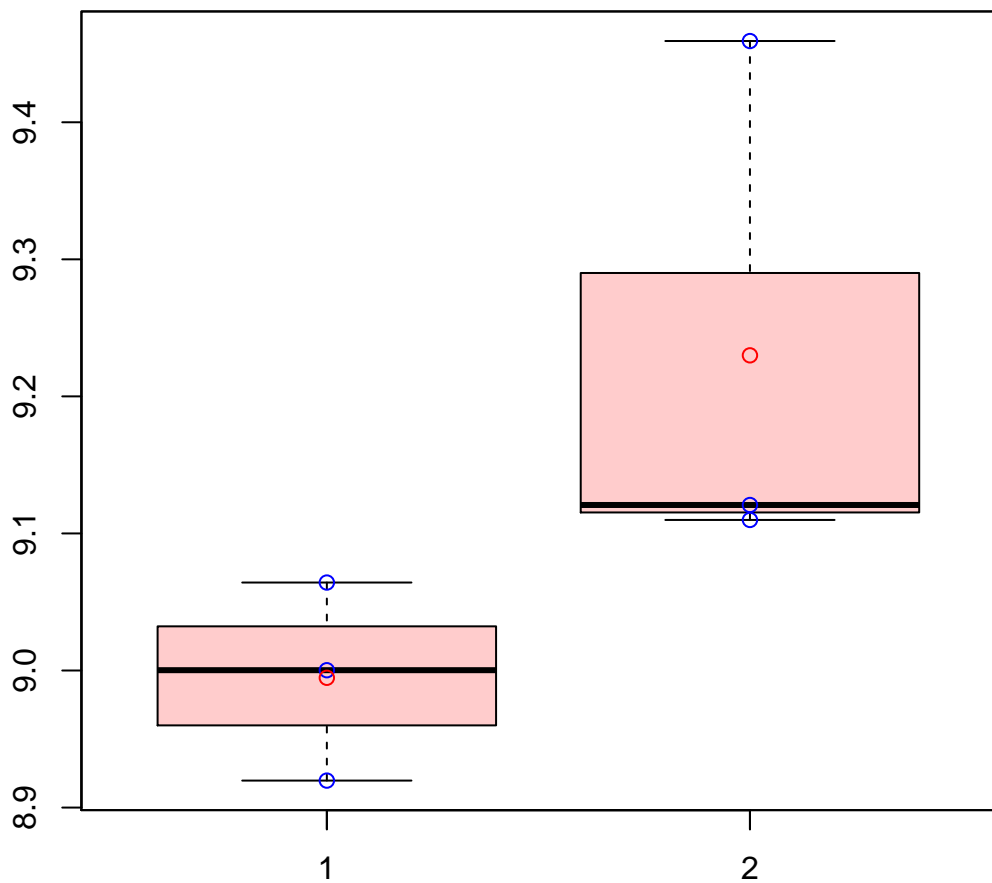

t-Test: p-value = 0.17

# CL72Contig23|CL72Contig23

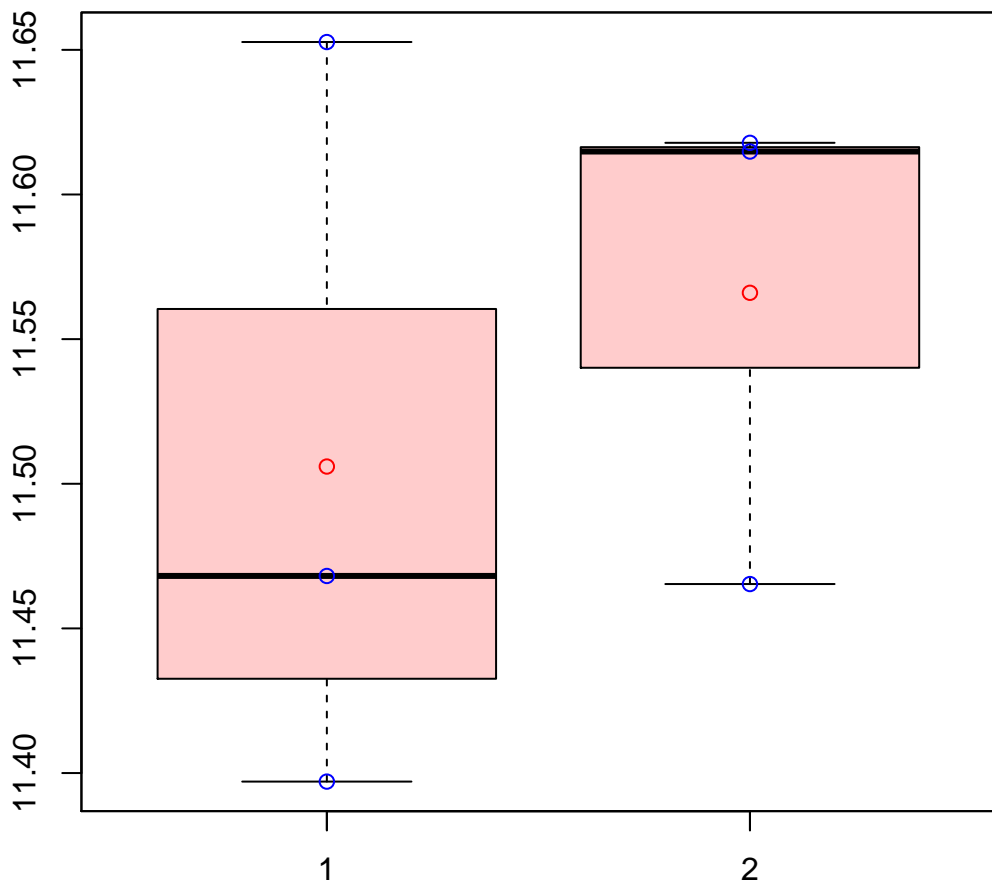

t-Test: p-value = 0.55

# CL72Contig3|CL72Contig3

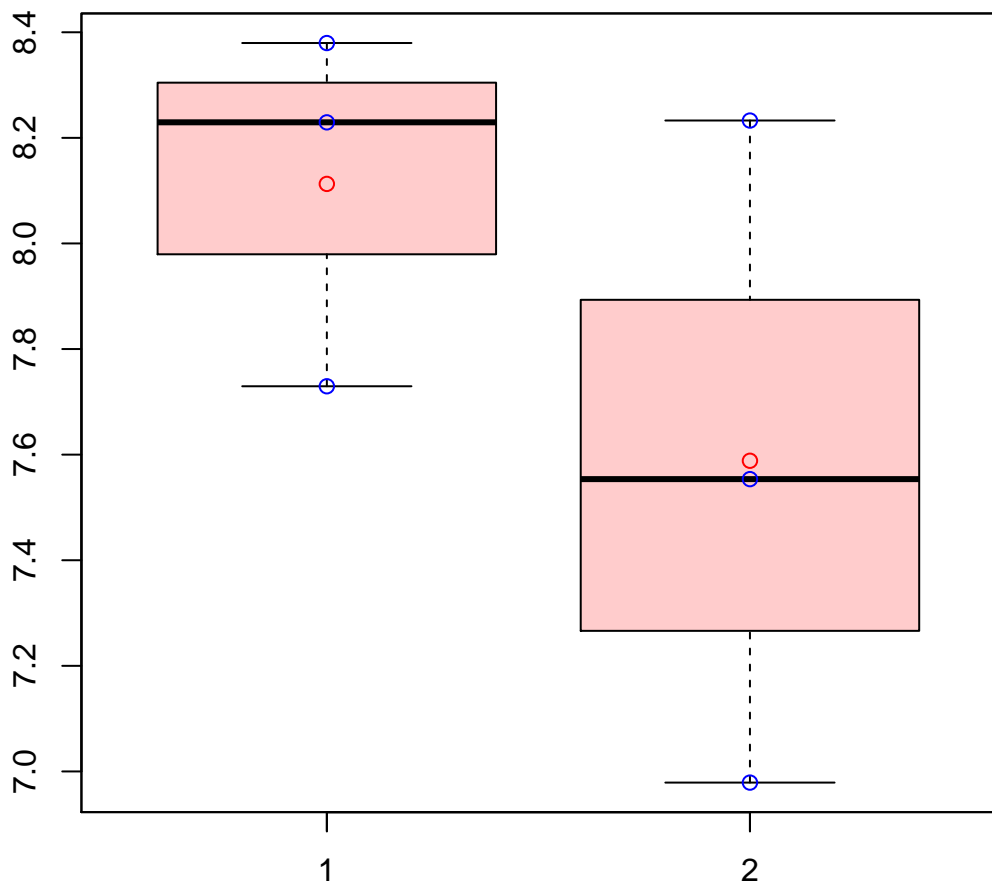

t-Test: p-value = 0.29

# CL72Contig5|CL72Contig5

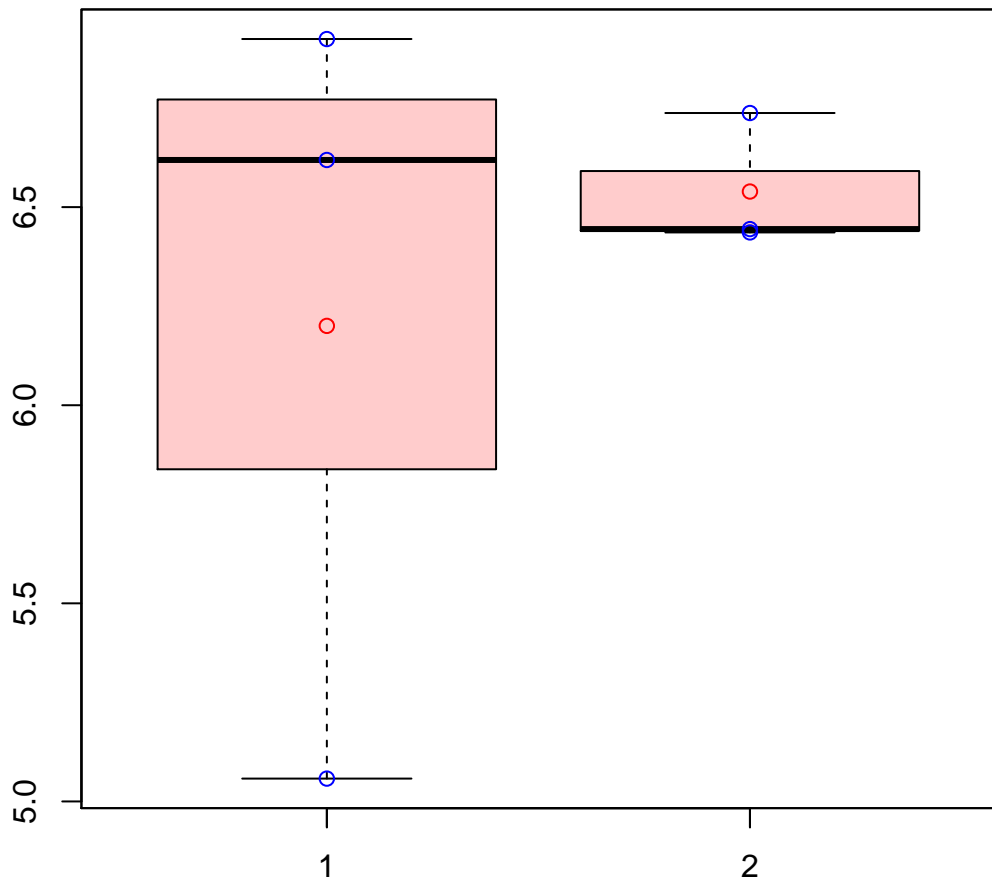

t-Test: p-value = 0.62

# CL72Contig6|CL72Contig6

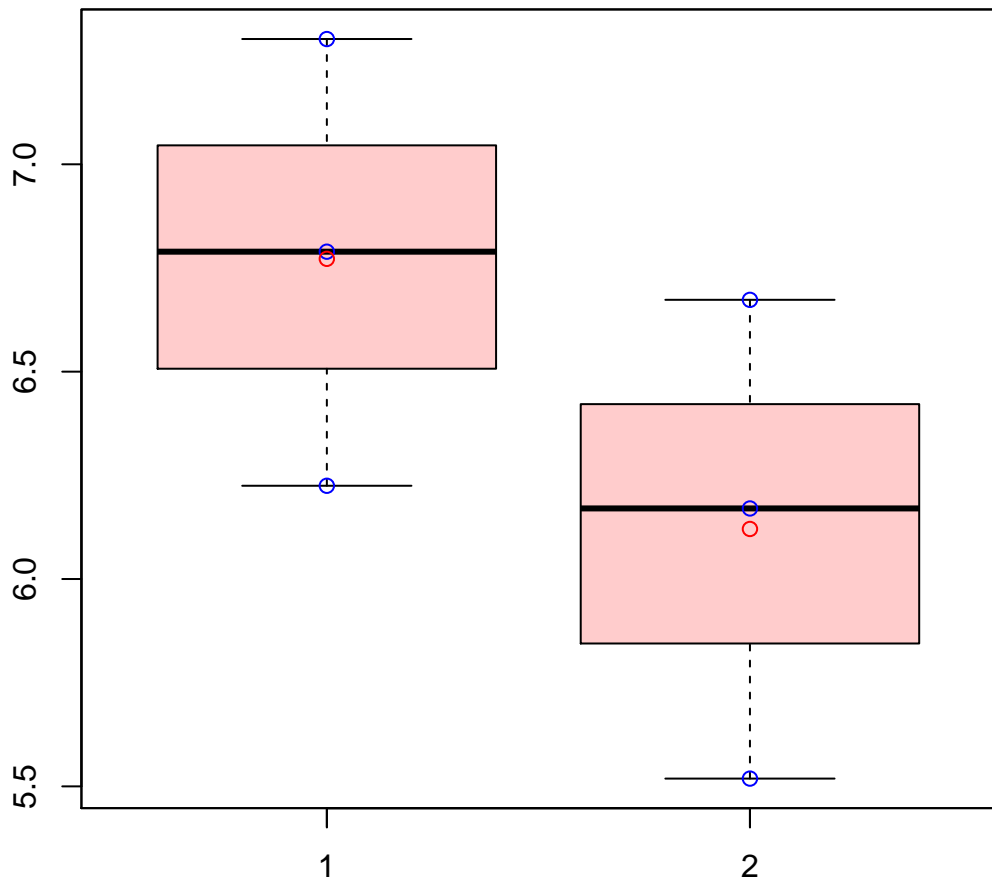

t-Test: p-value = 0.23

# CL72Contig8|CL72Contig8

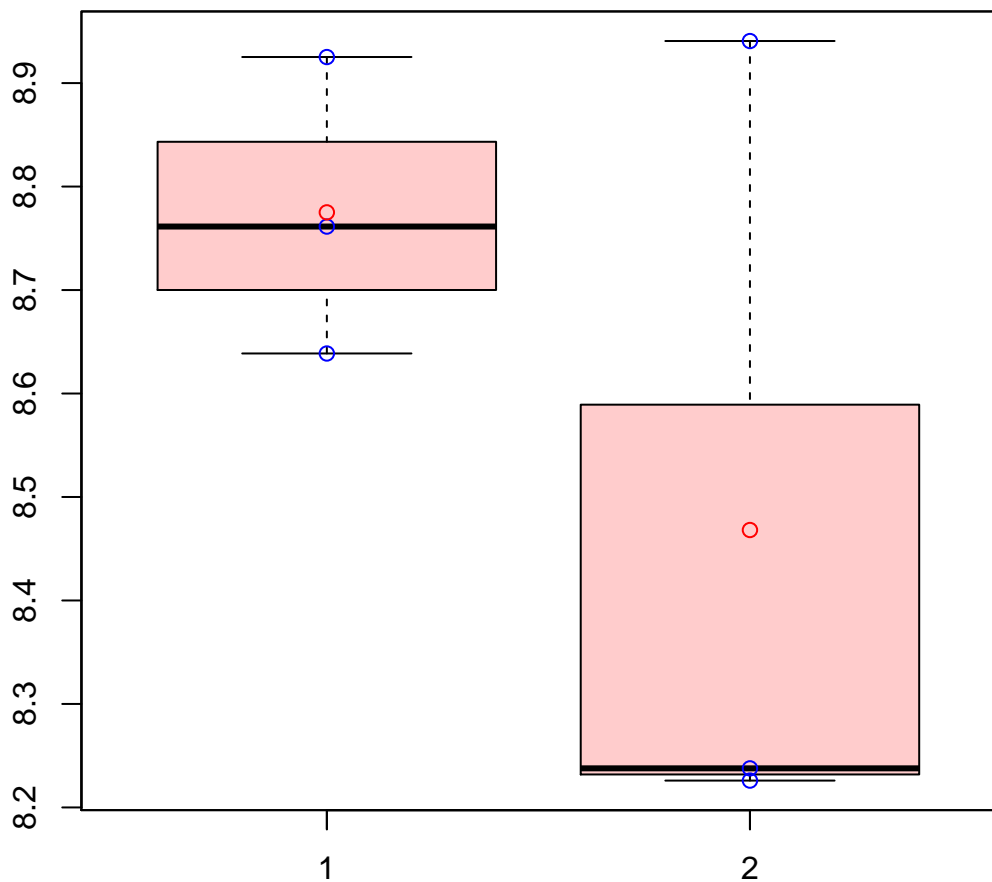

t-Test: p-value = 0.32

# CL72Contig9|CL72Contig9

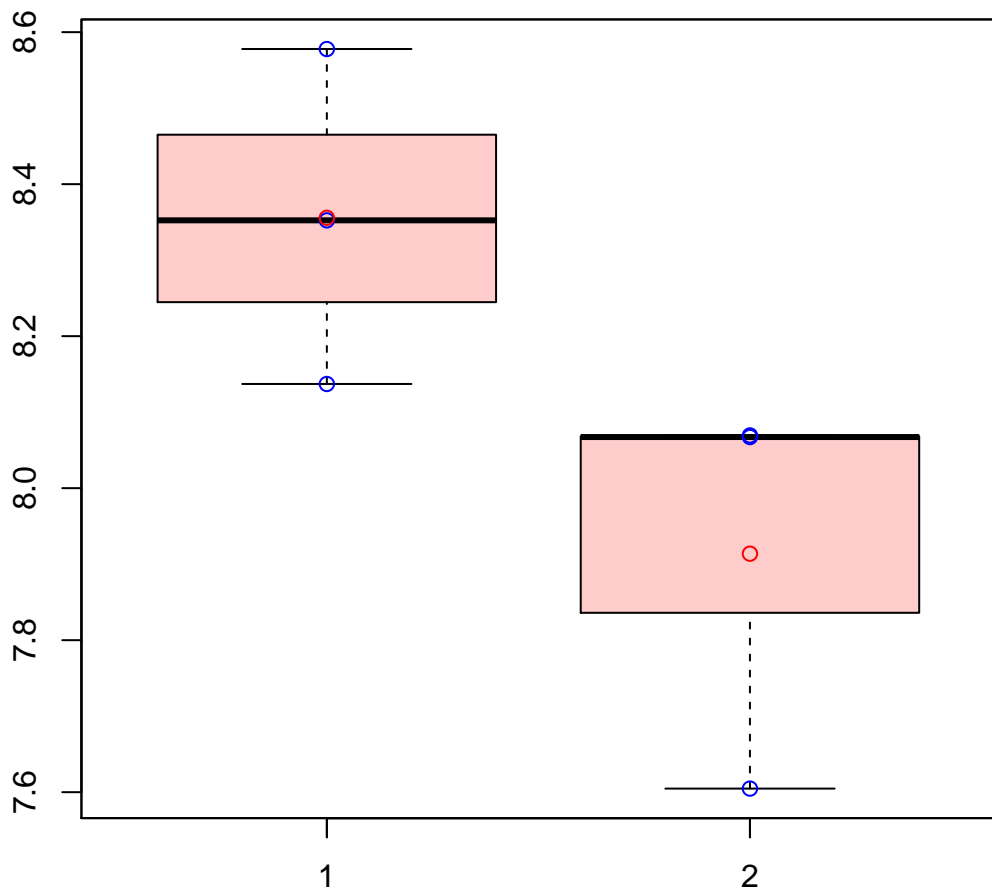

t-Test: p-value = 0.09

# CL7310Contig4|CL7310Contig4

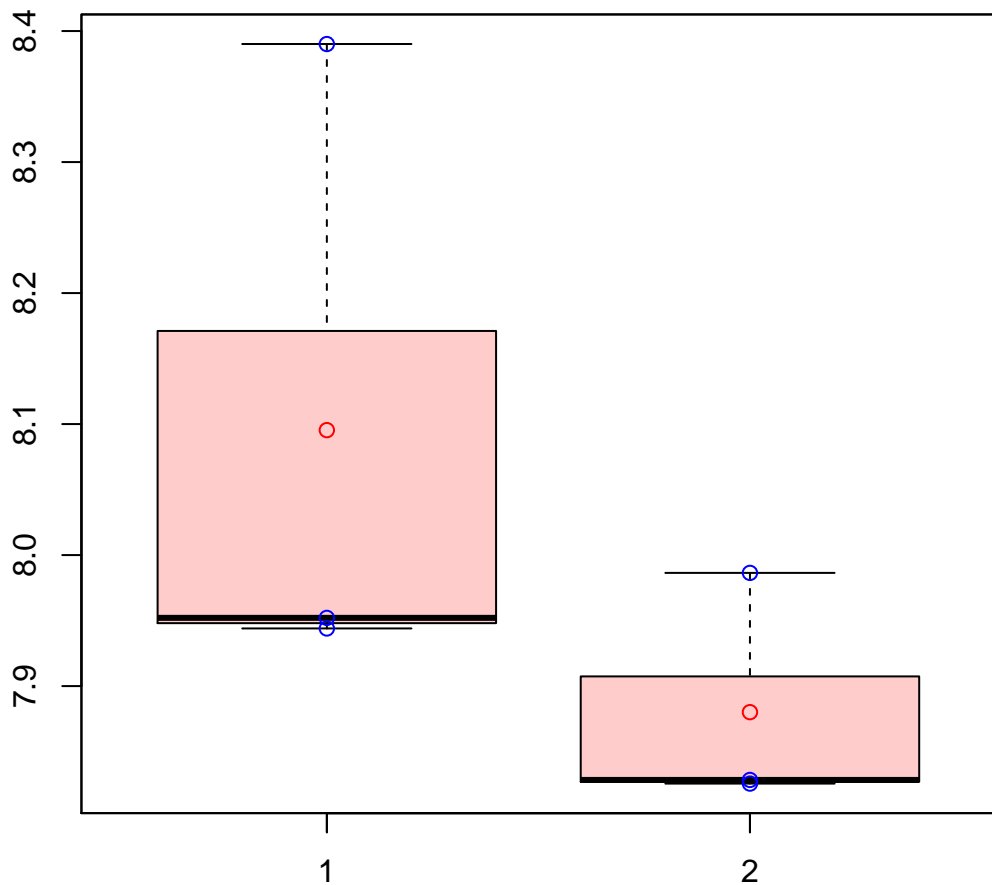

t-Test: p-value = 0.28



# CL7321Contig3|CL7321Contig3

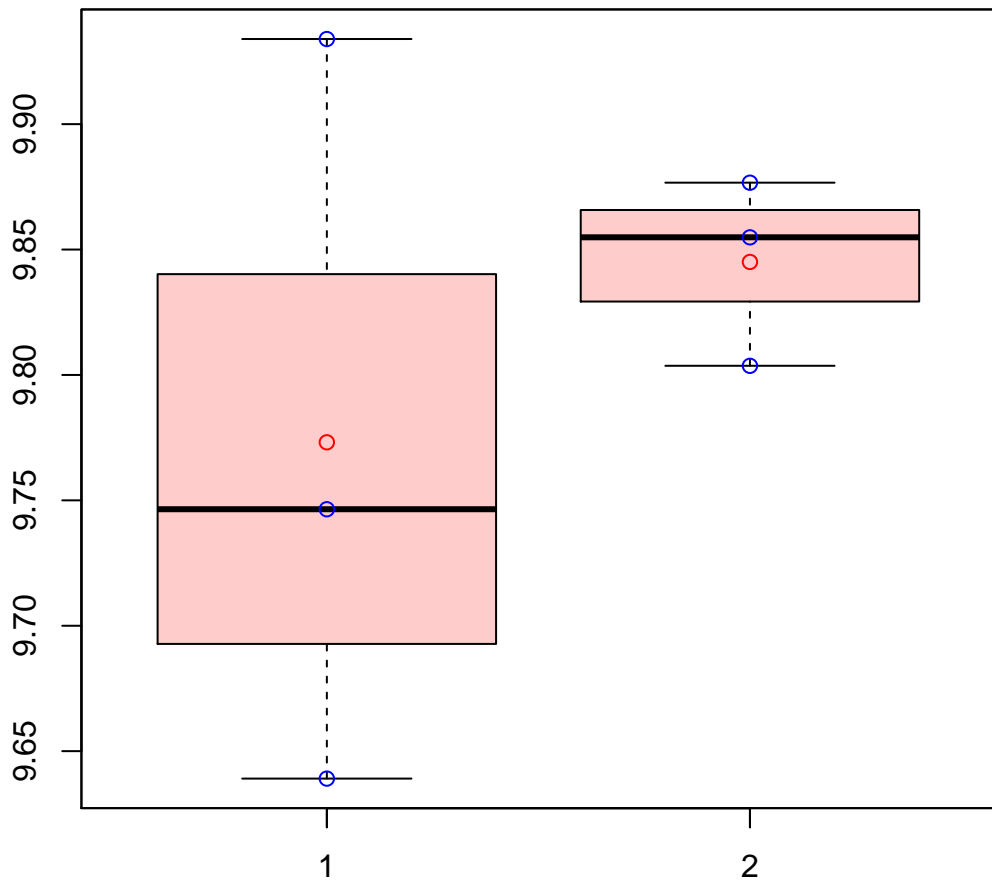

t-Test: p-value = 0.49

# CL7342Contig1|CL7342Contig1

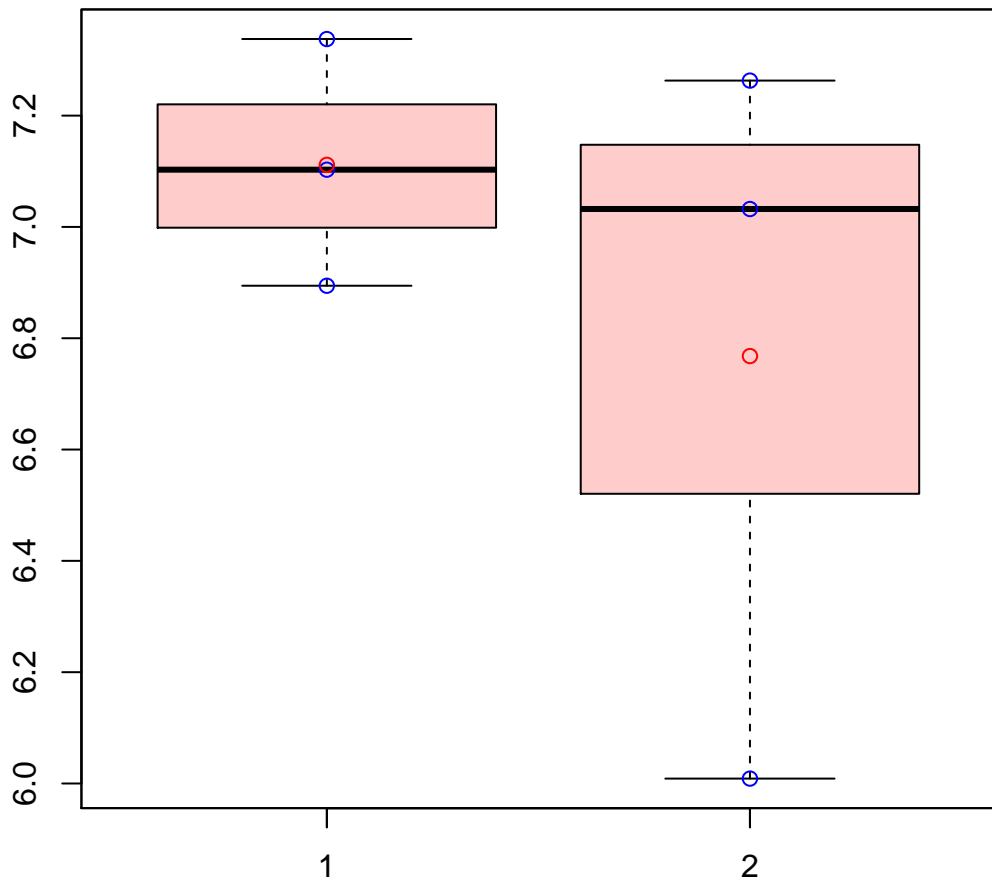

t-Test: p-value = 0.47

# CL7347Contig2|CL7347Contig2

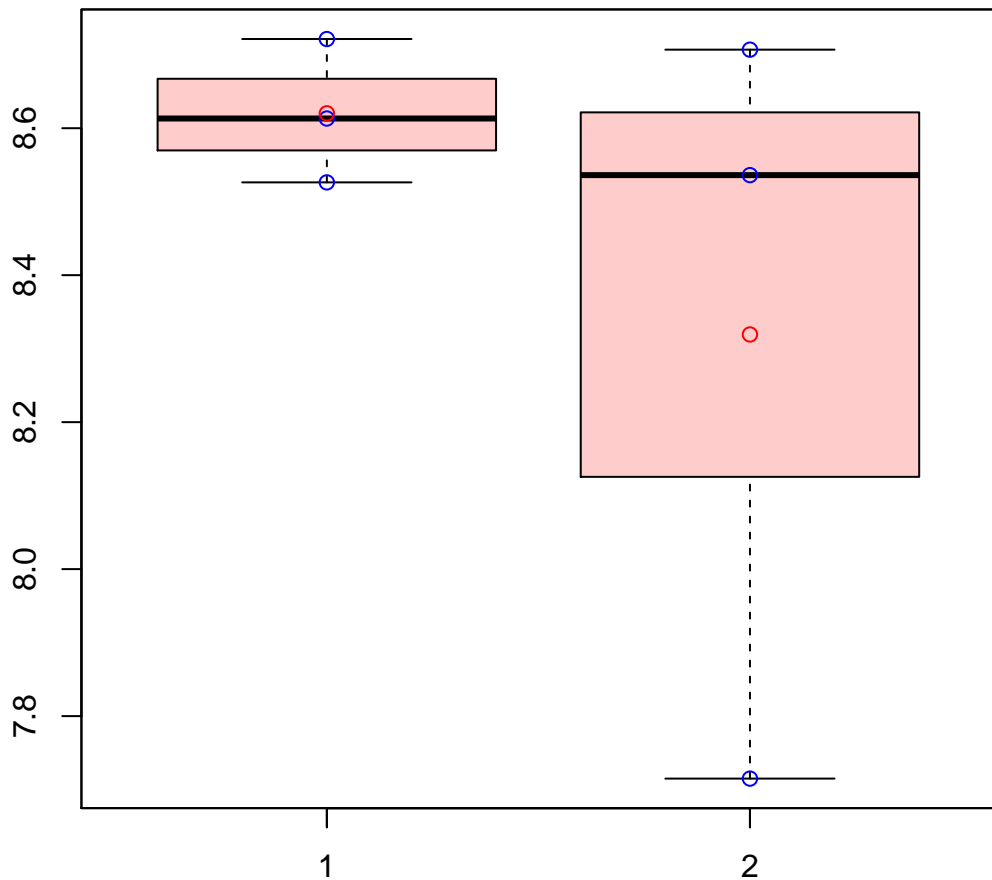

t-Test: p-value = 0.43

# CL7355Contig4|CL7355Contig4

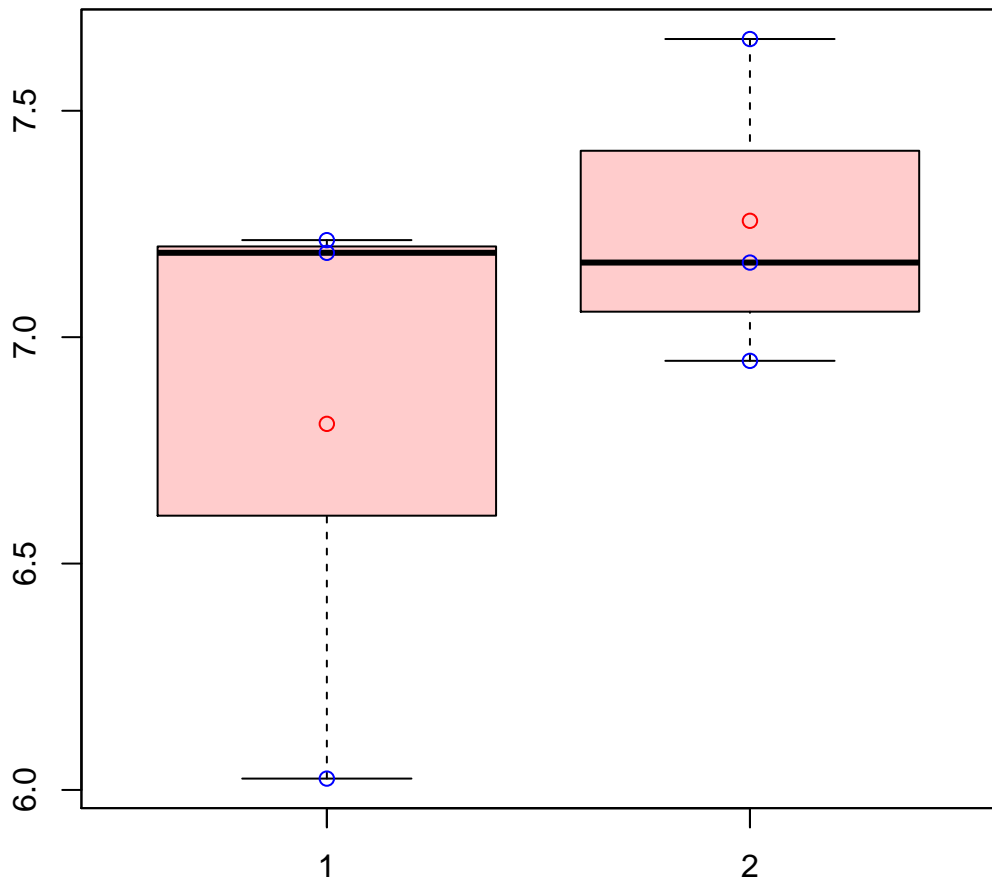

t-Test: p-value = 0.39

# CL7356Contig1|CL7356Contig1

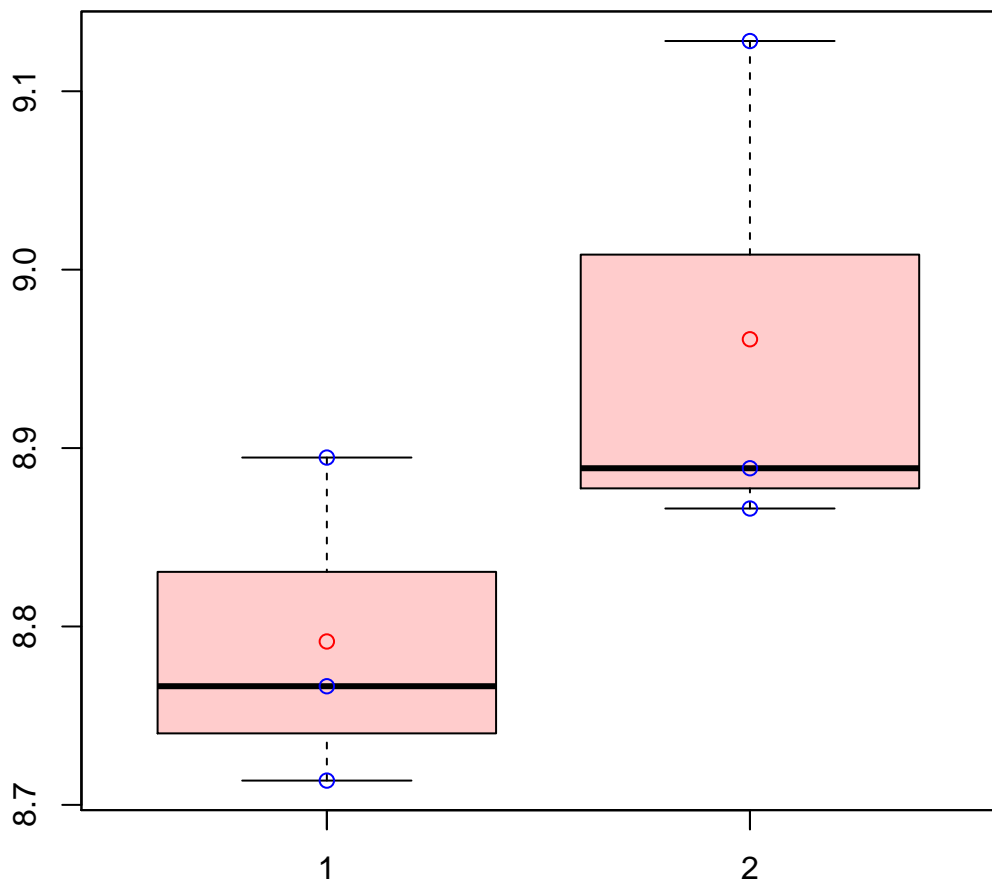

t-Test: p-value = 0.18

# CL735Contig2|CL735Contig2

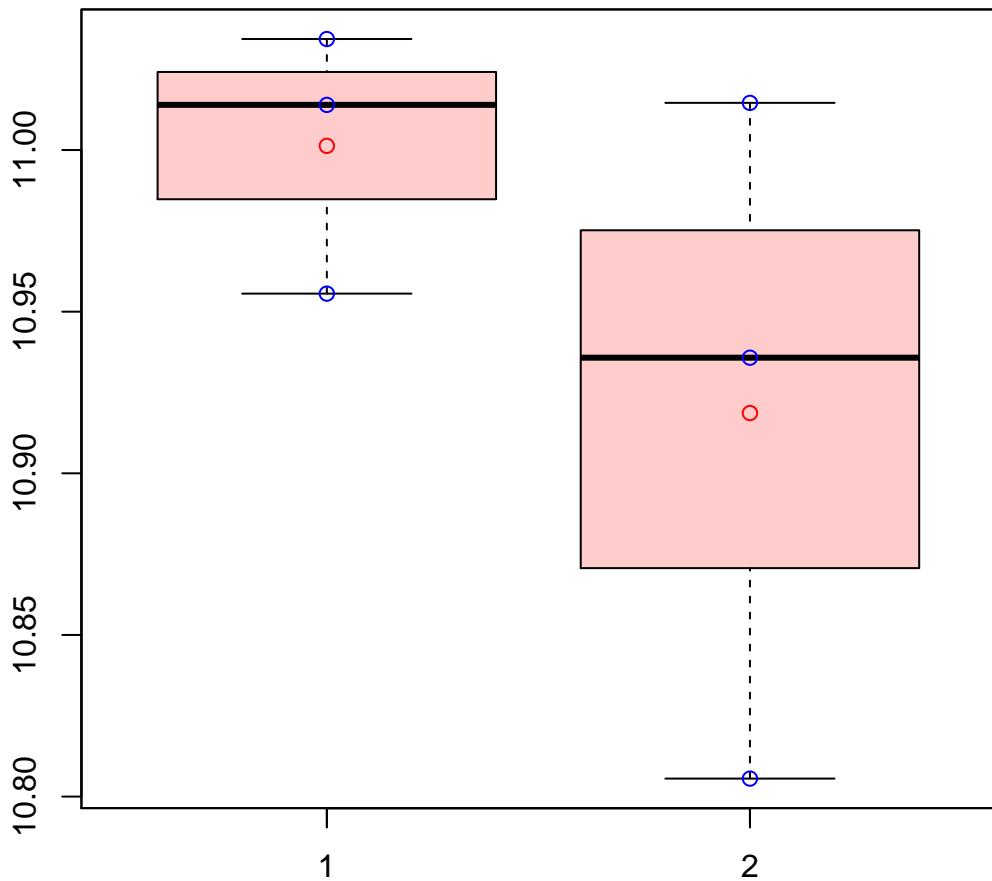

t-Test: p-value = 0.31

# CL7361Contig1|CL7361Contig1

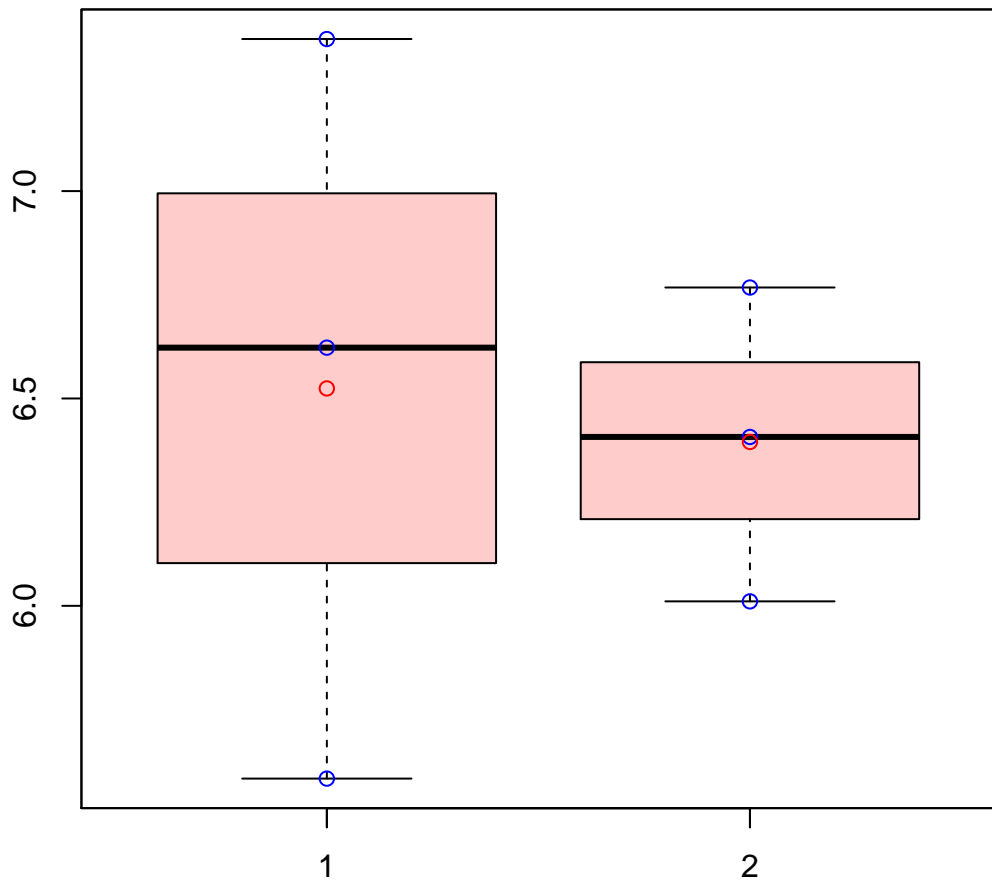

t-Test: p-value = 0.83

# CL737Contig11|CL737Contig11

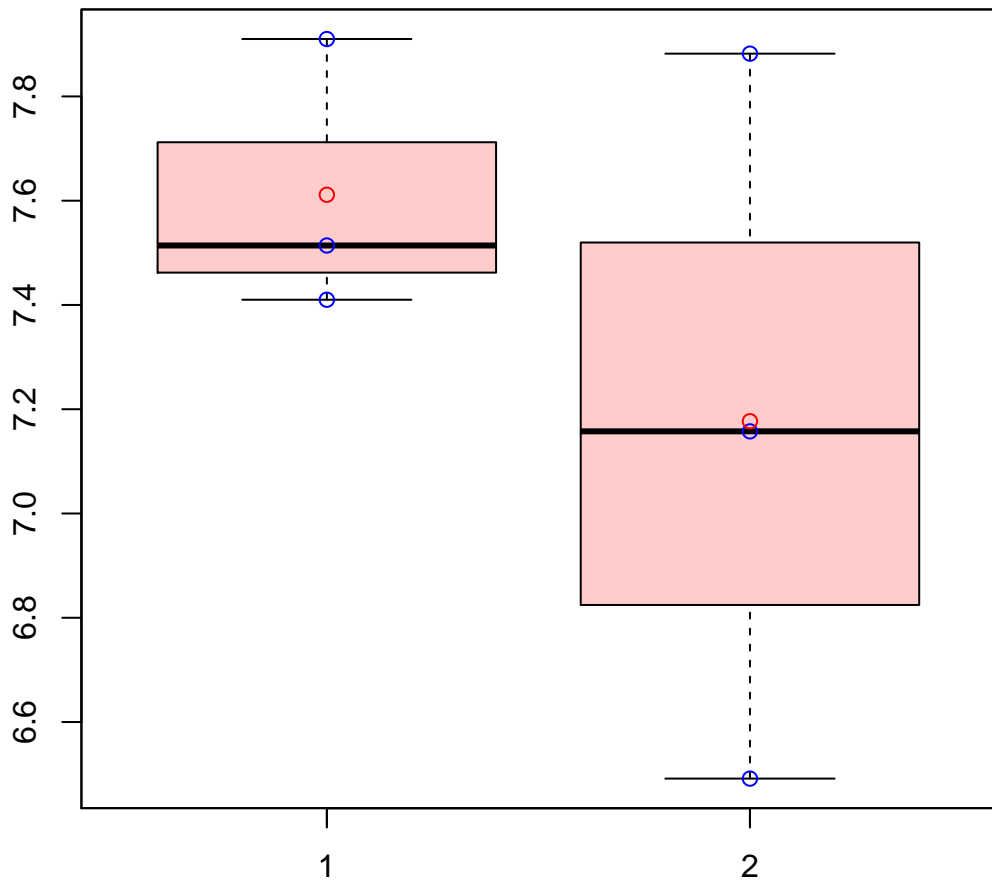

t-Test: p-value = 0.4



# CL738Contig9|CL738Contig9

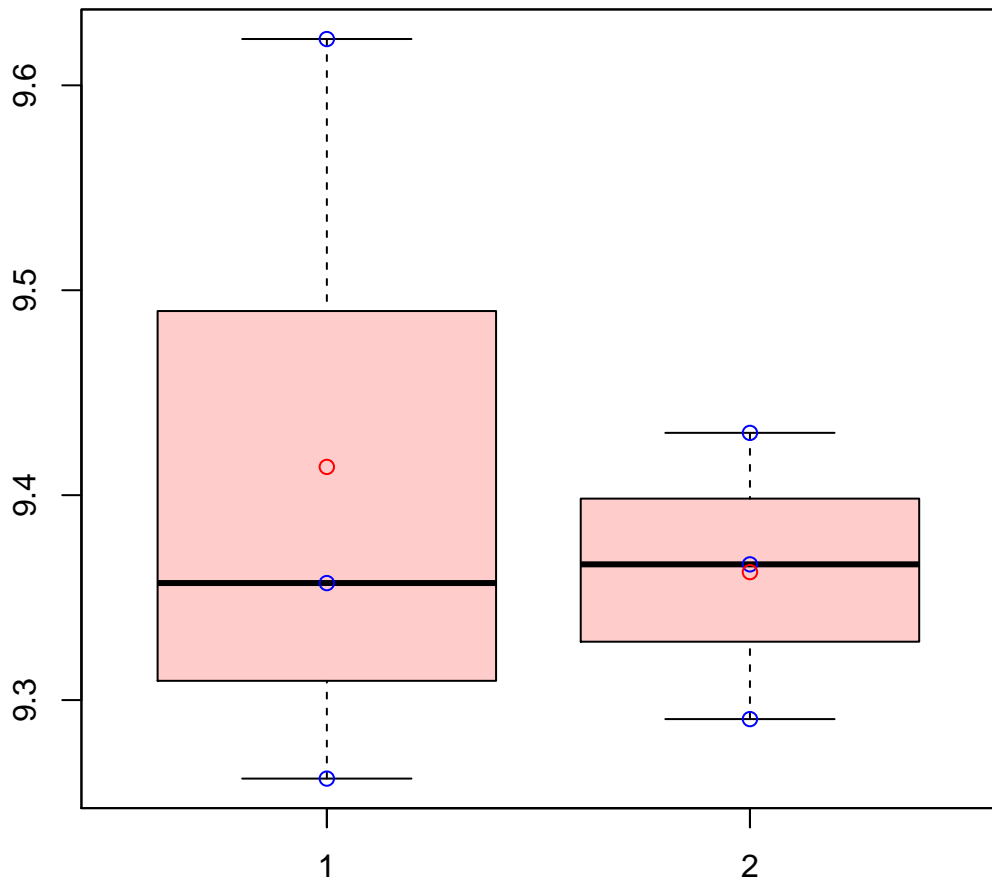

t-Test: p-value = 0.69

# CL7396Contig3|CL7396Contig3

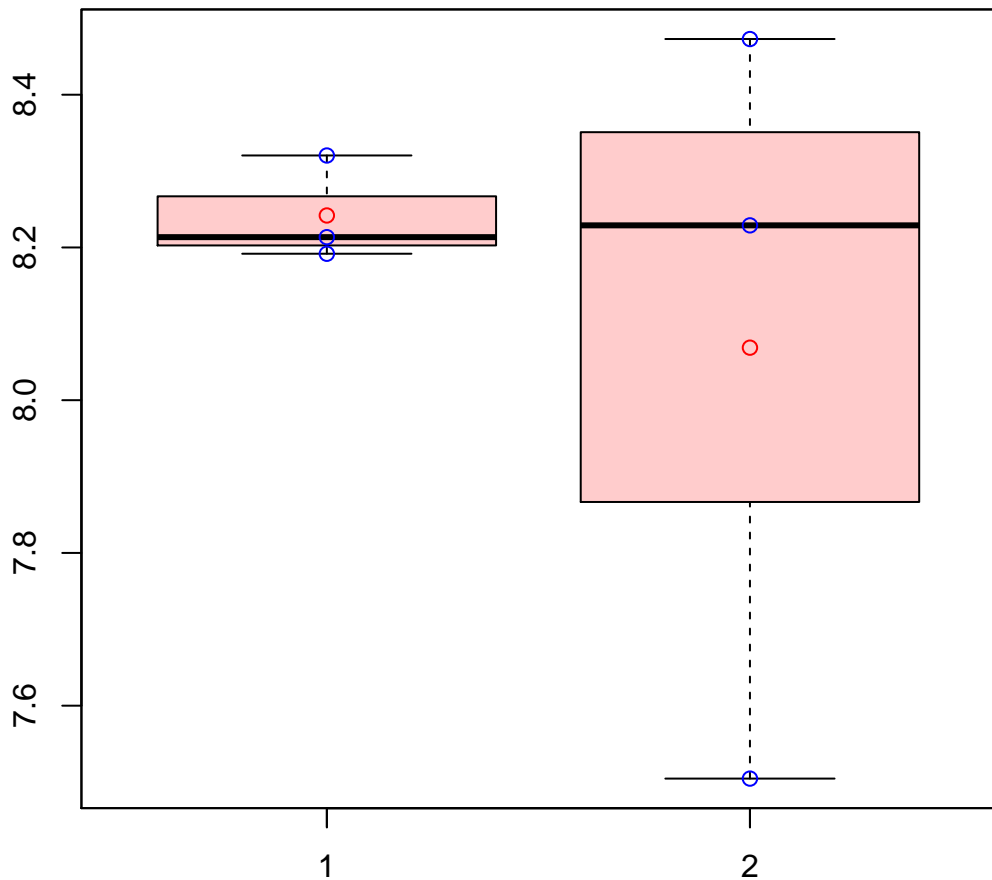

t-Test: p-value = 0.61

# CL73Contig10|CL73Contig10

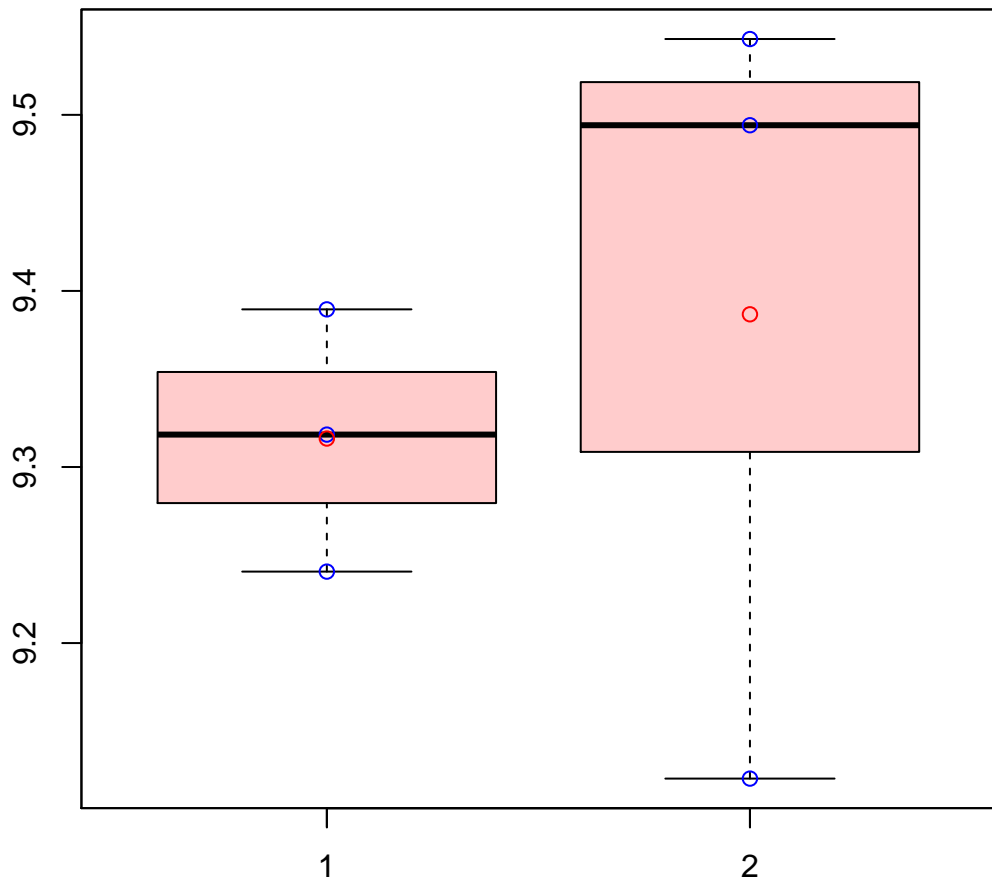

t-Test: p-value = 0.66

# CL73Contig17|CL73Contig17

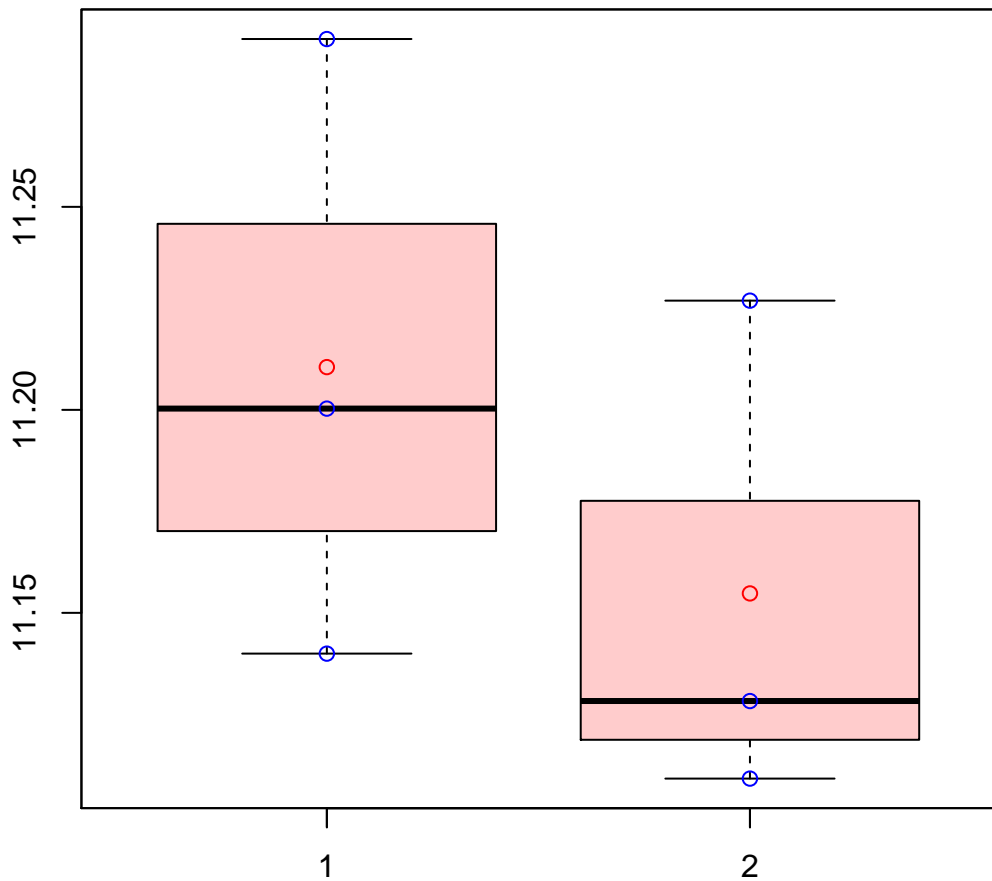

t-Test: p-value = 0.39

# CL73Contig3|CL73Contig3

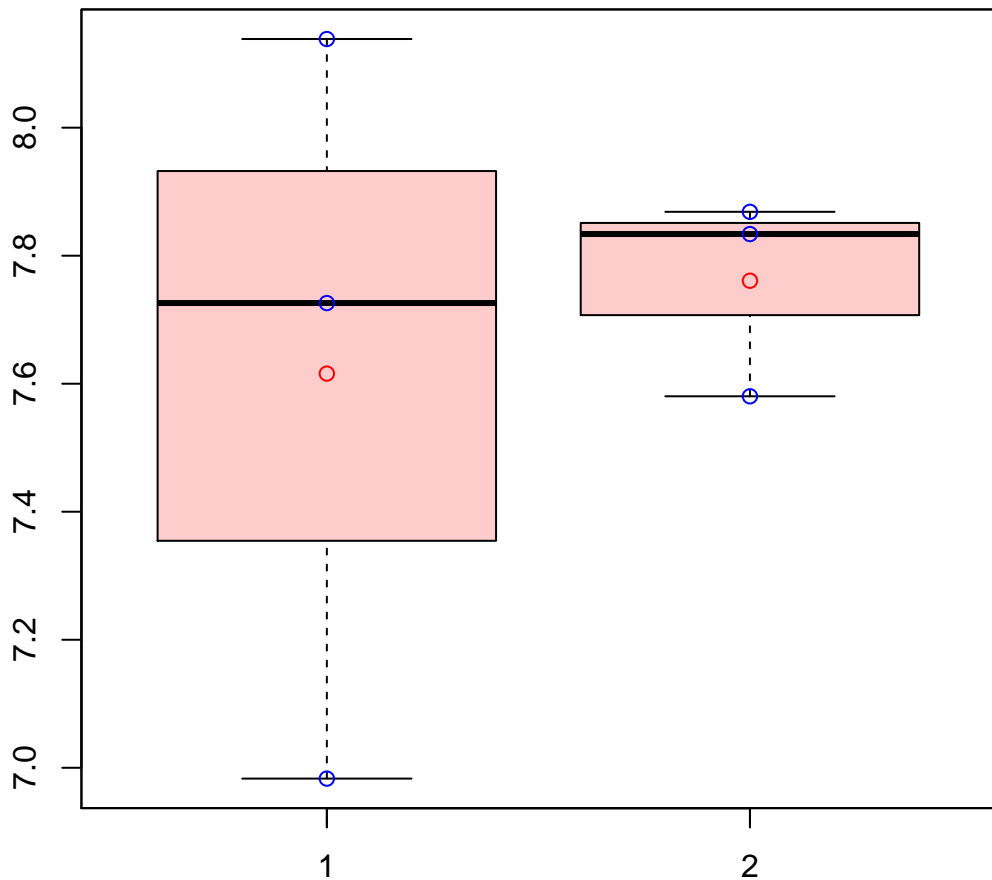

t-Test: p-value = 0.71

# CL7405Contig3|CL7405Contig3

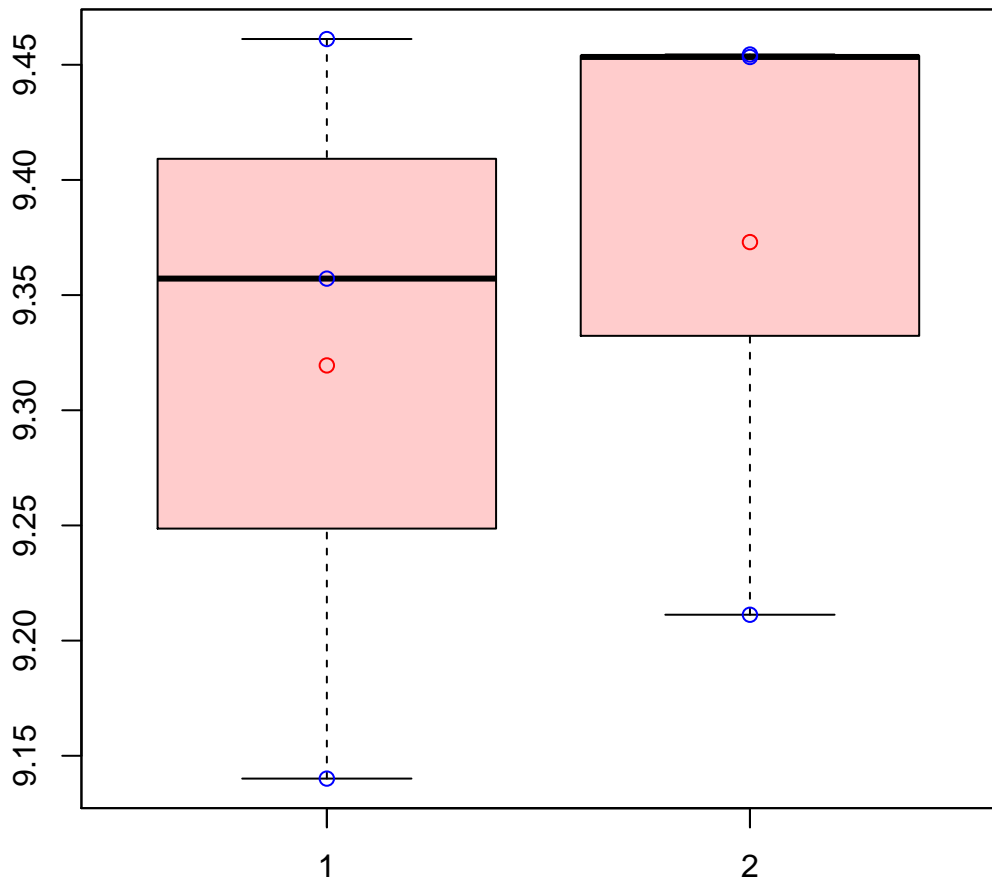

t-Test: p-value = 0.69

# CL7405Contig5|CL7405Contig5

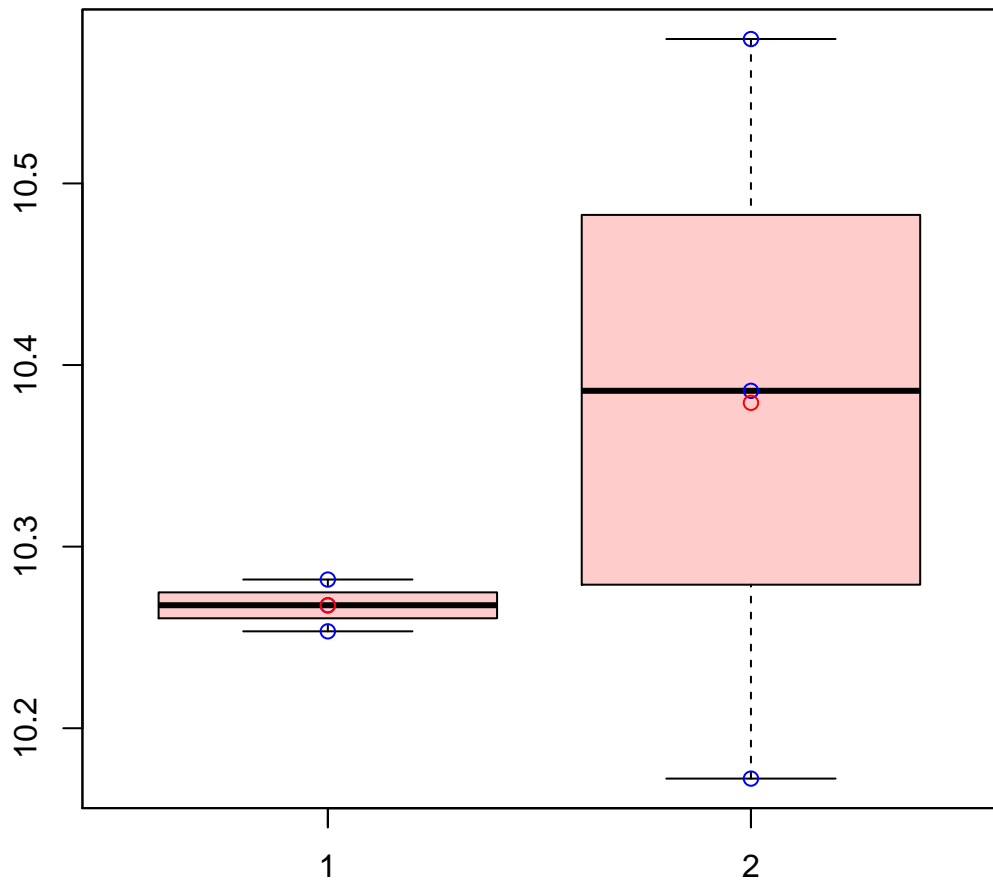

t-Test: p-value = 0.44

# CL7414Contig3|CL7414Contig3

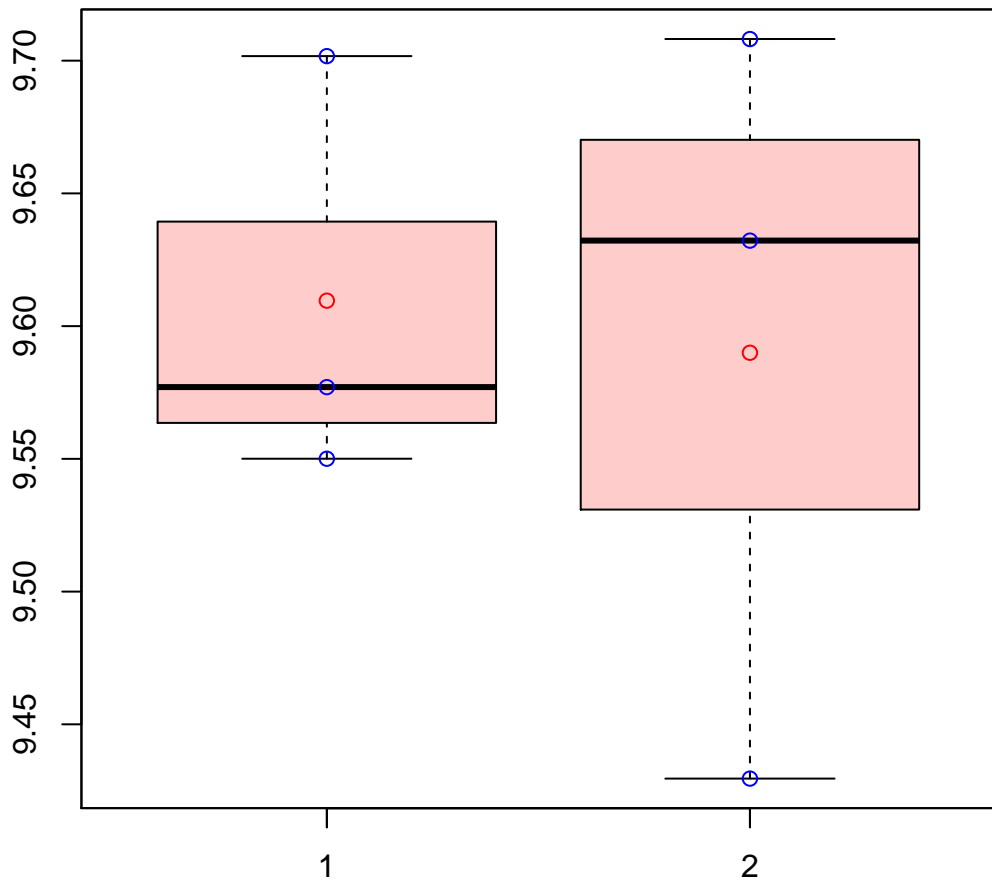

t-Test: p-value = 0.85



# CL7425Contig1|CL7425Contig1

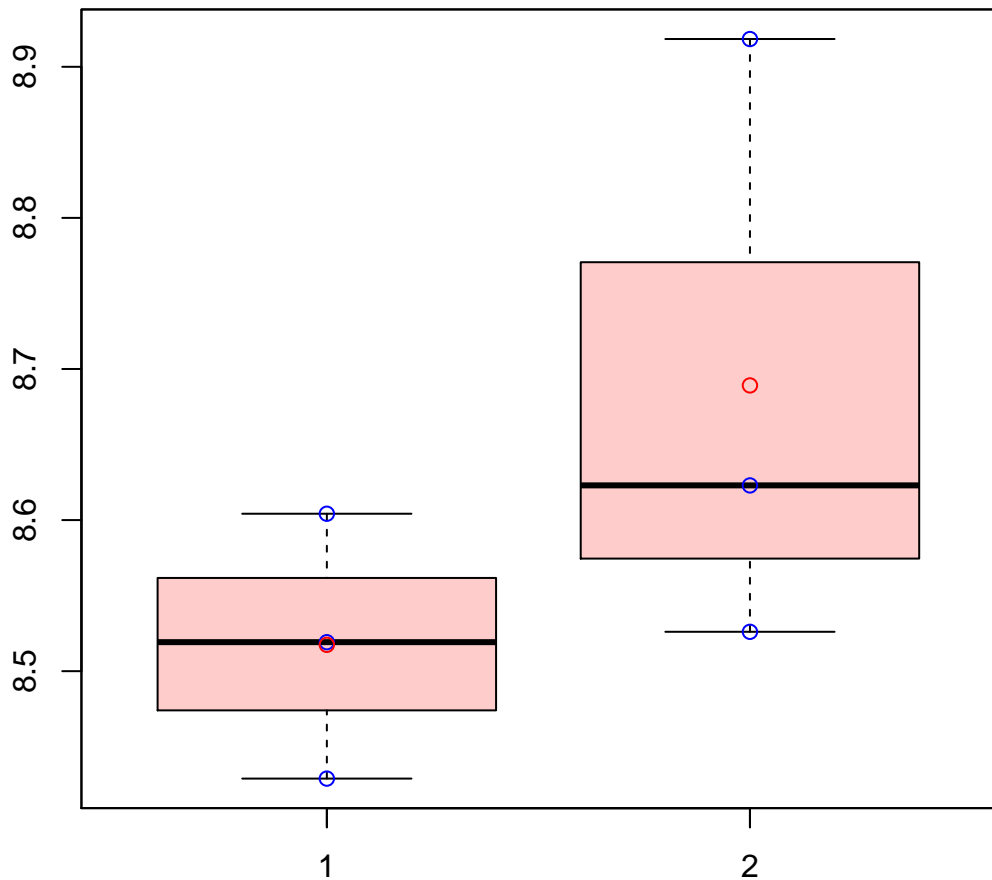

t-Test: p-value = 0.28

# CL7437Contig1|CL7437Contig1

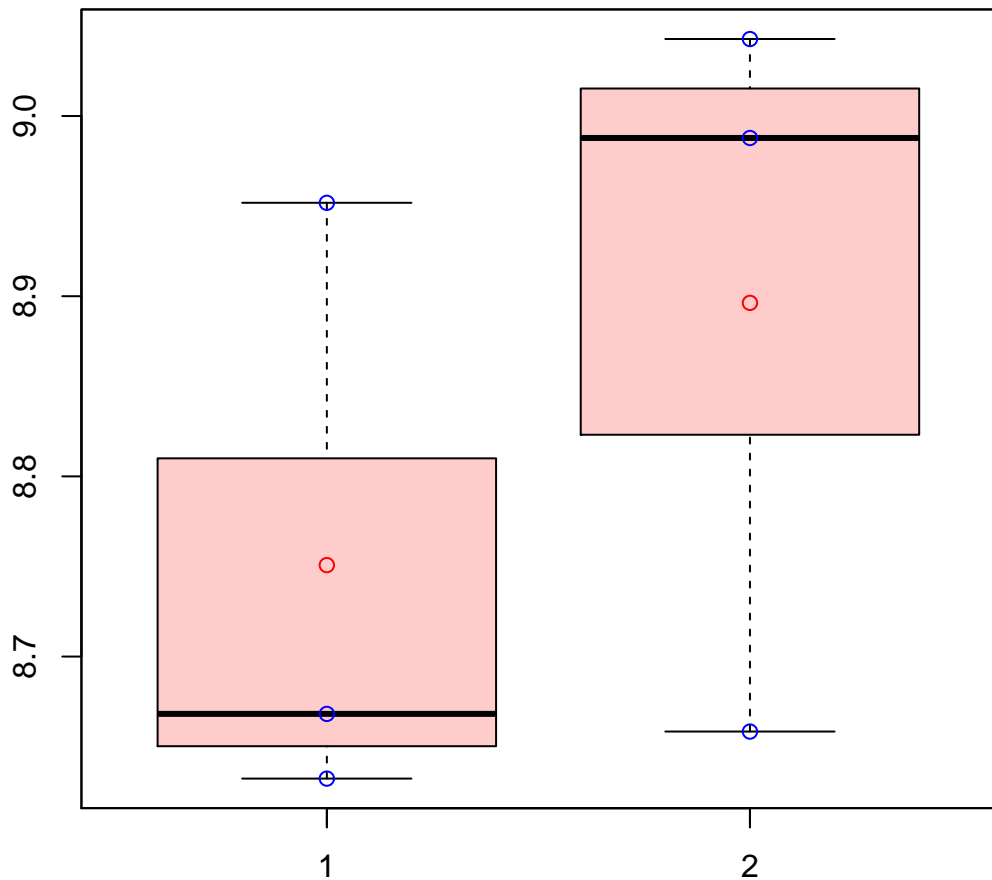

t-Test: p-value = 0.41

# CL7445Contig3|CL7445Contig3

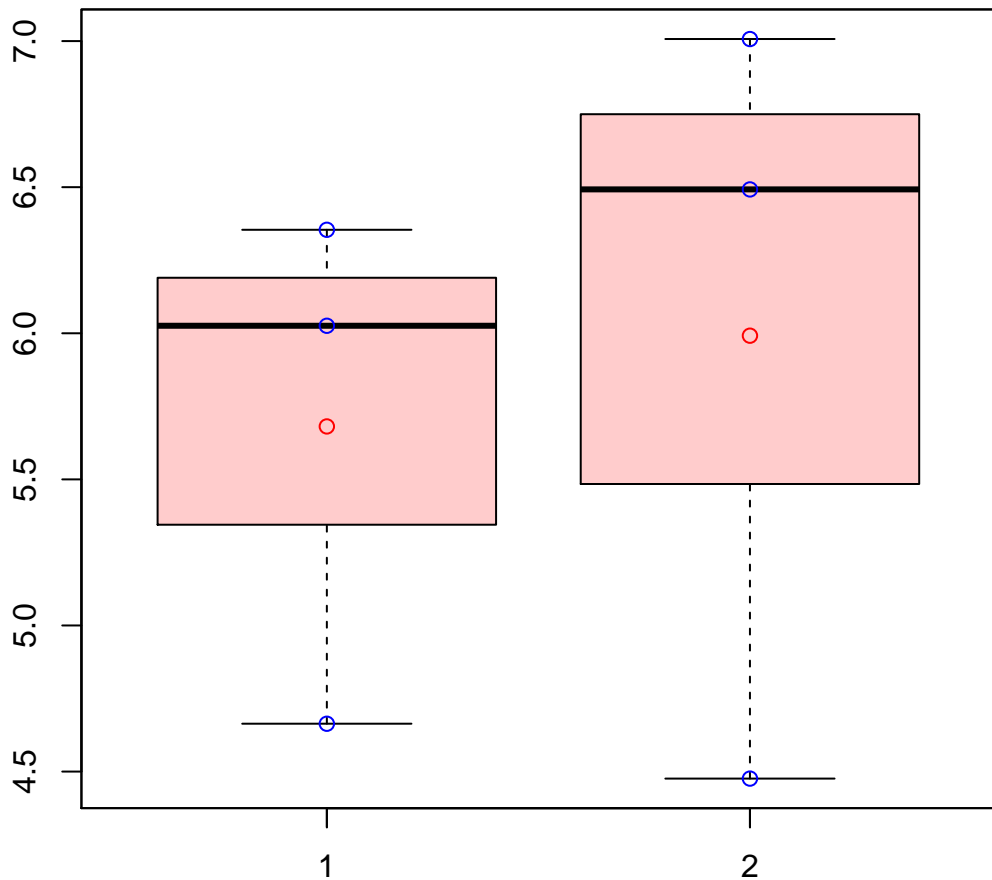

t-Test: p-value = 0.76

# CL7457Contig2|CL7457Contig2

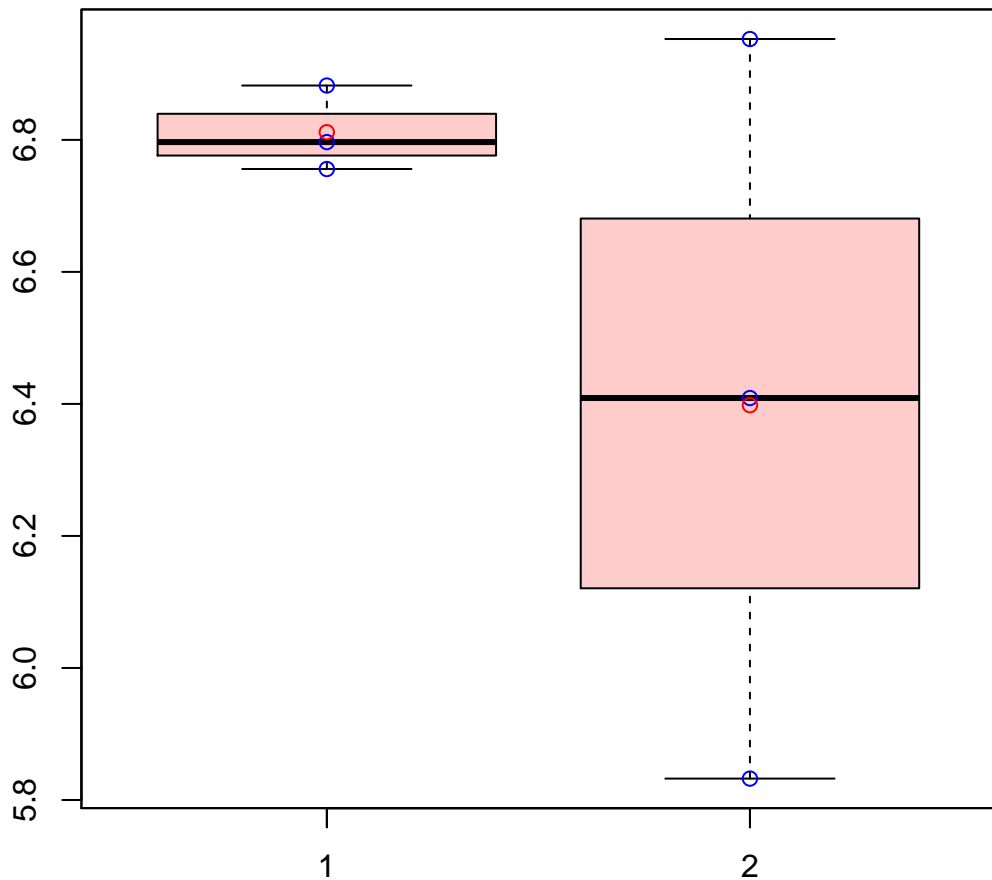

t-Test: p-value = 0.33

# CL746Contig3|CL746Contig3

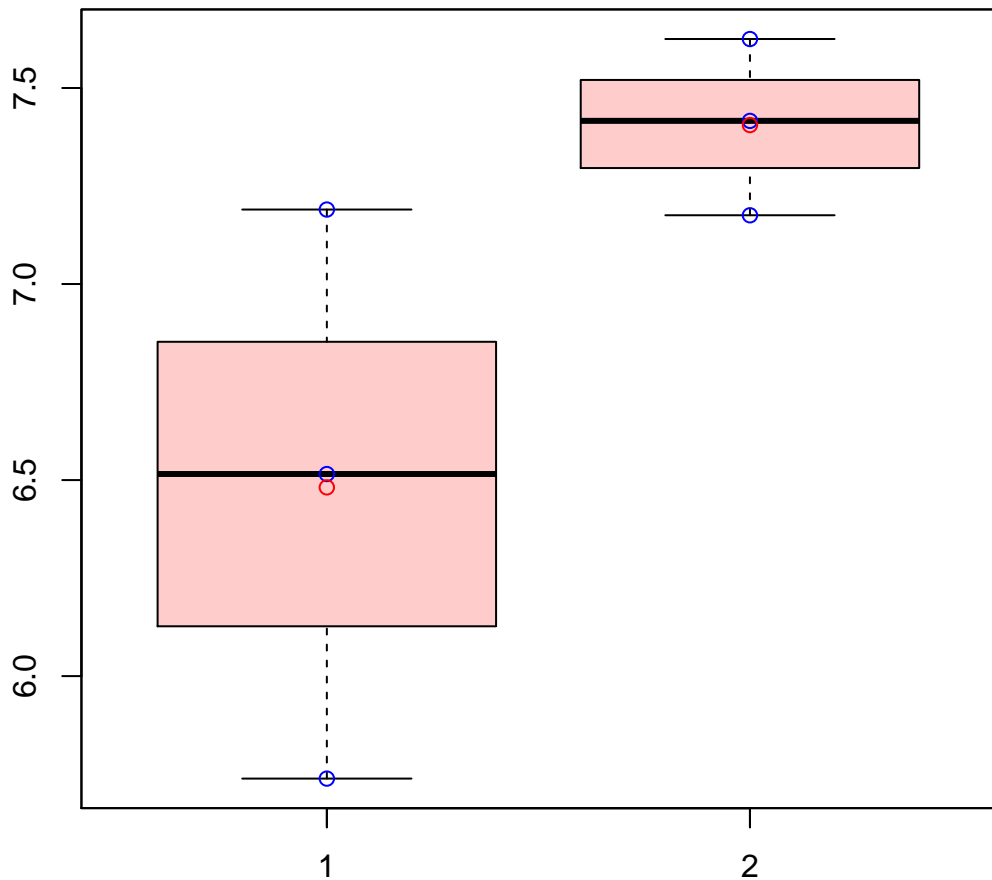

t-Test: p-value = 0.15

# CL7473Contig1|CL7473Contig1

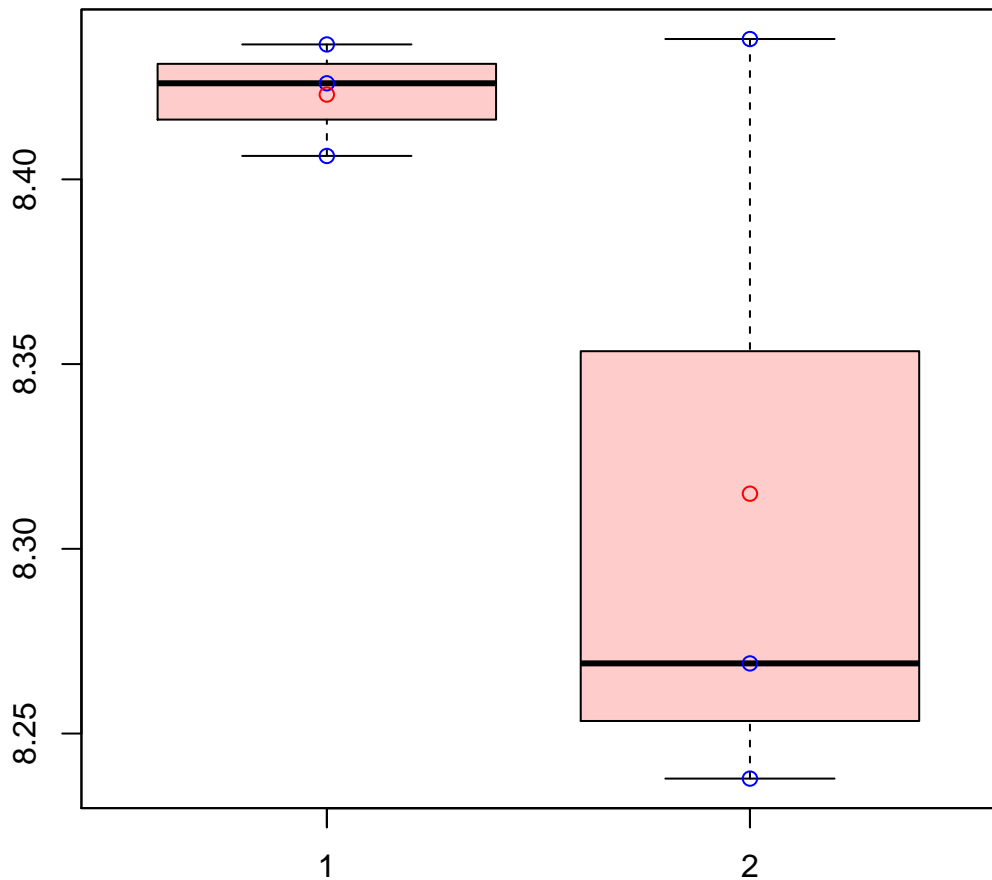

t-Test: p-value = 0.22

# CL7489Contig1|CL7489Contig1

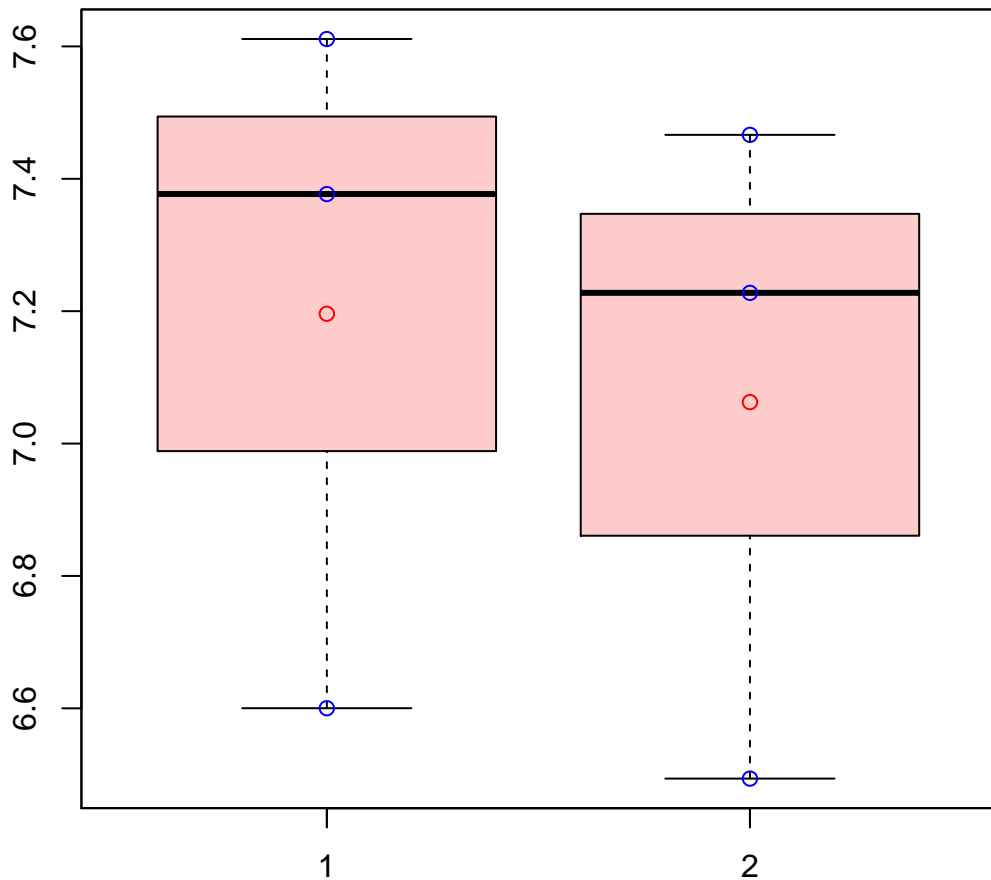

t-Test: p-value = 0.77

# CL74Contig10|CL74Contig10

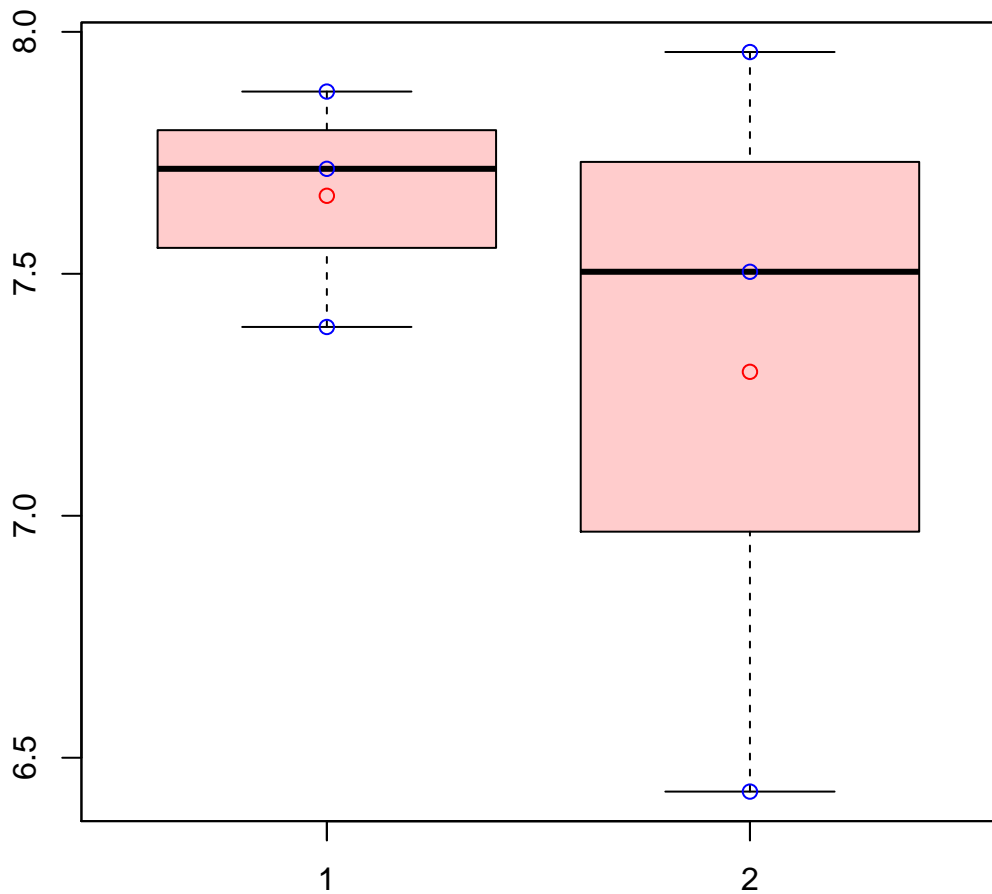

t-Test: p-value = 0.51



# CL74Contig2|CL74Contig2

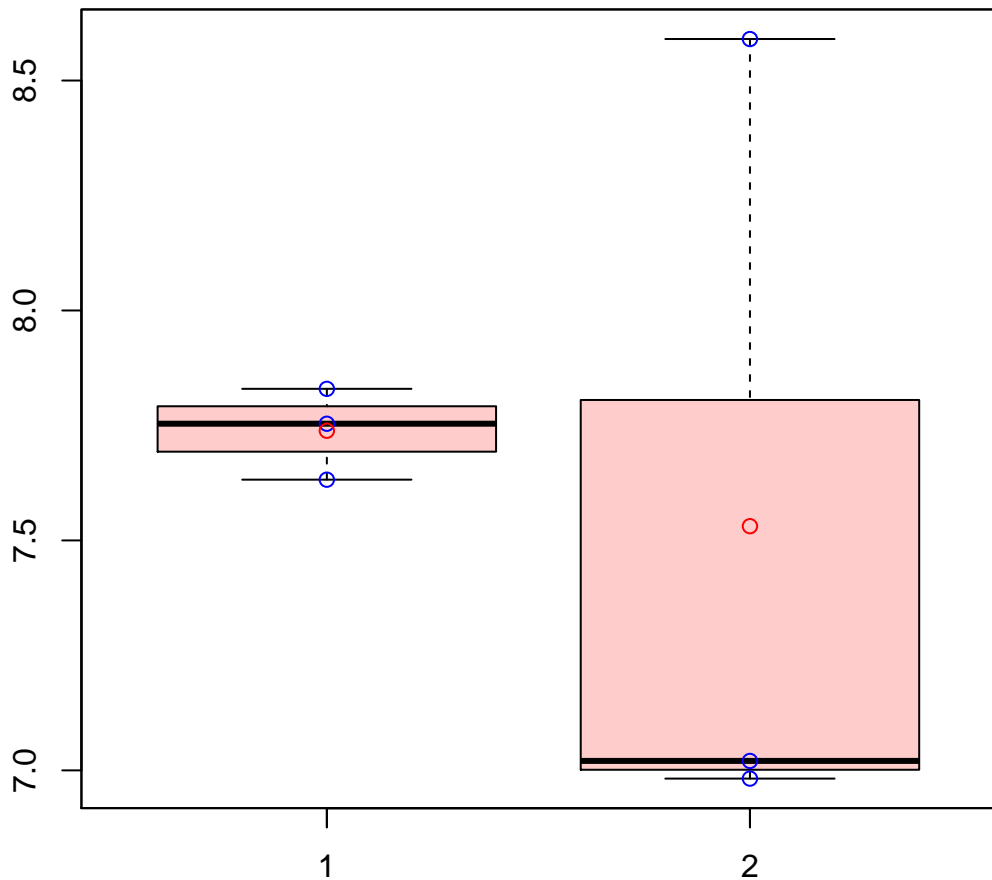

t-Test: p-value = 0.73

# CL750Contig10|CL750Contig10

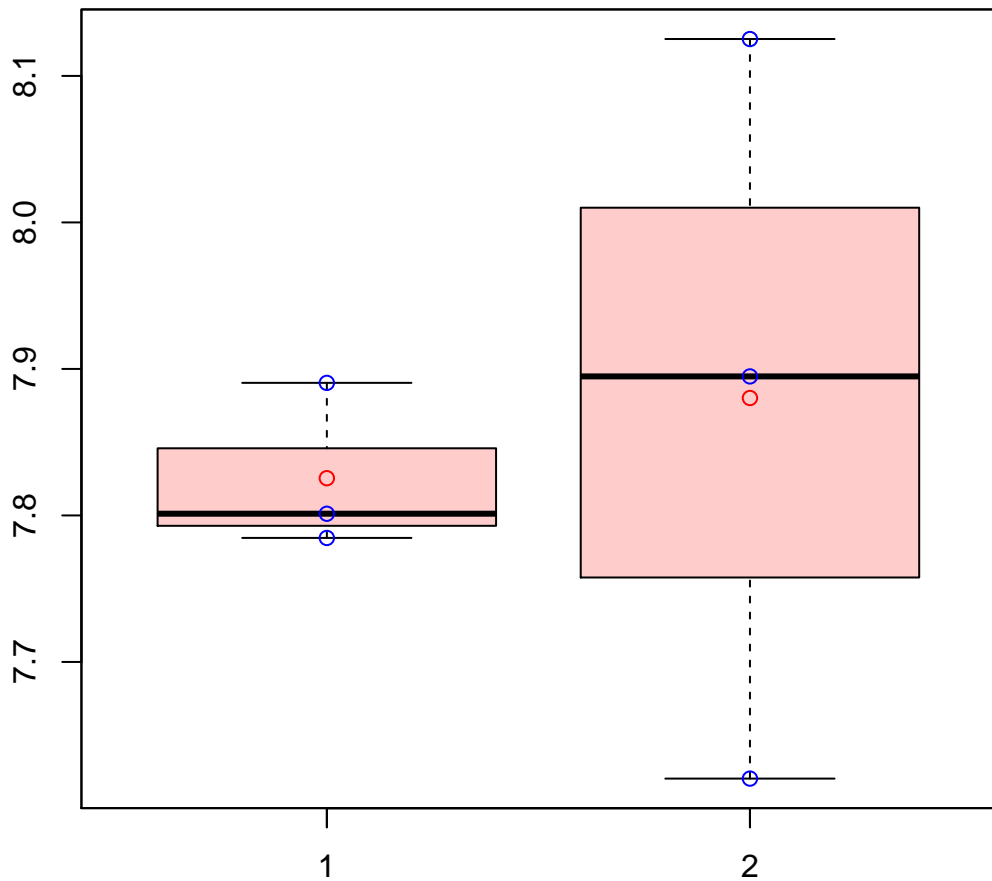

t-Test: p-value = 0.75

# CL750Contig4|CL750Contig4

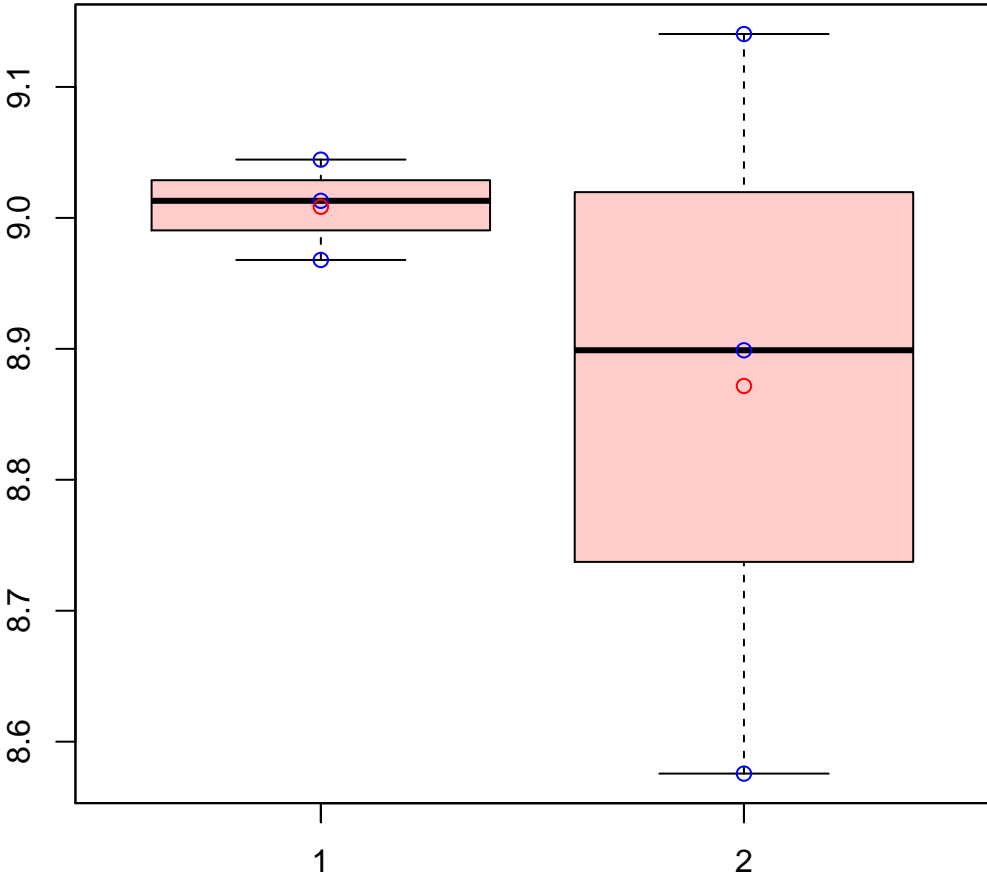

t-Test: p-value = 0.49

# CL750Contig6|CL750Contig6

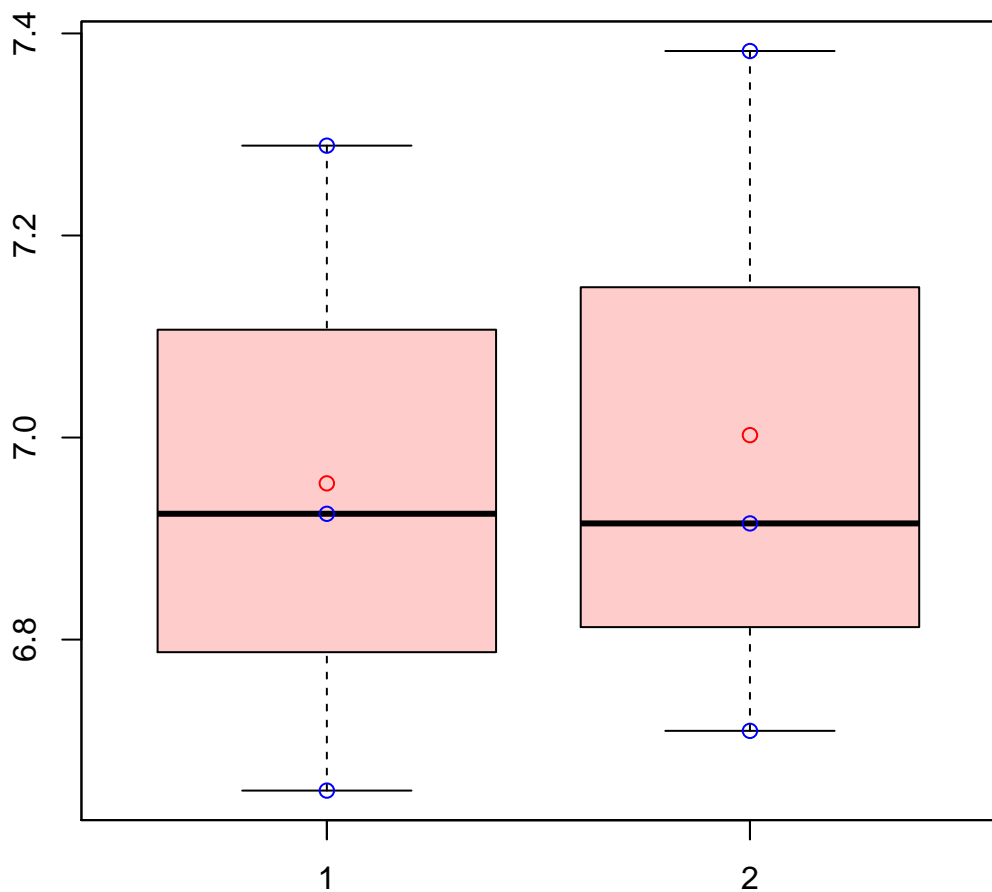

t-Test: p-value = 0.87

# CL7514Contig1|CL7514Contig1

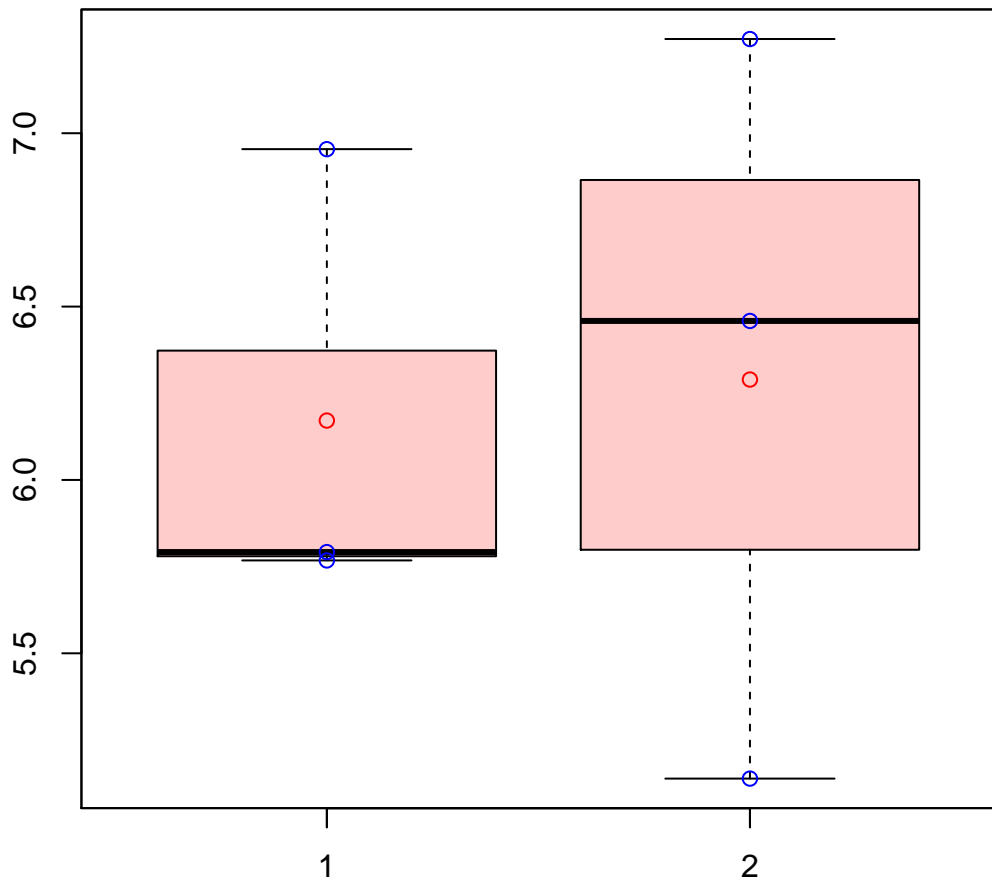

t-Test: p-value = 0.88

# CL7529Contig1|CL7529Contig1

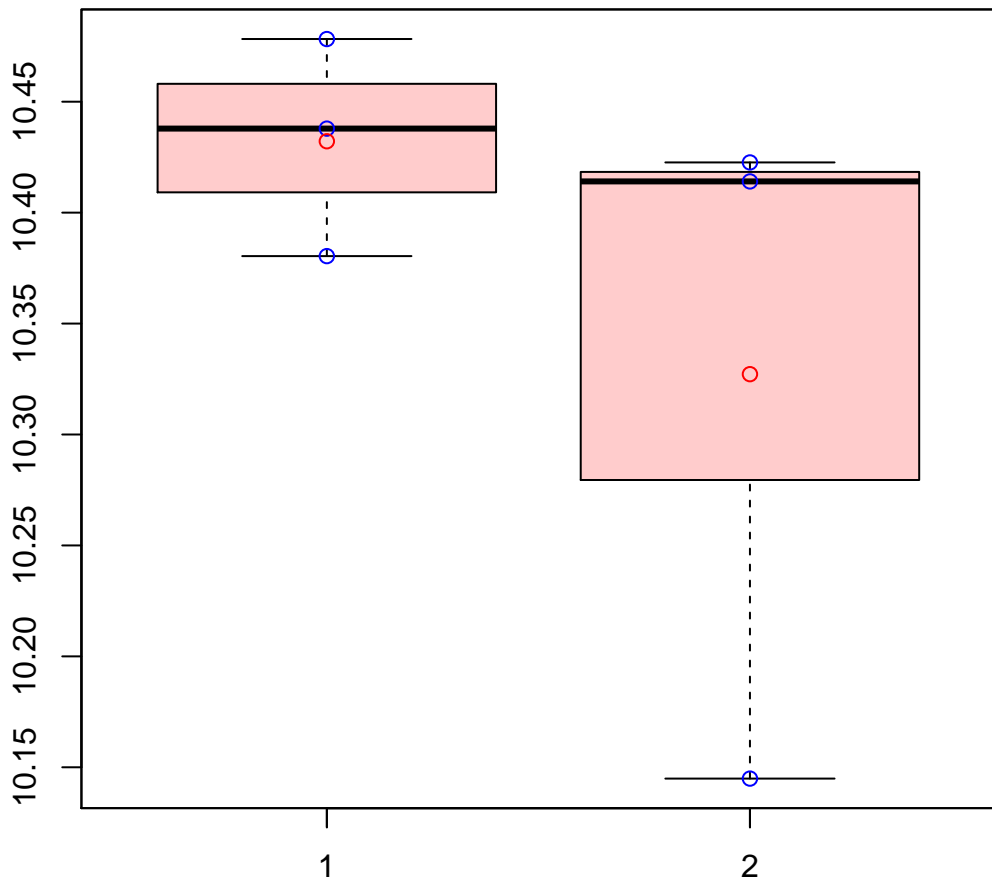

t-Test: p-value = 0.37

# CL7530Contig3|CL7530Contig3

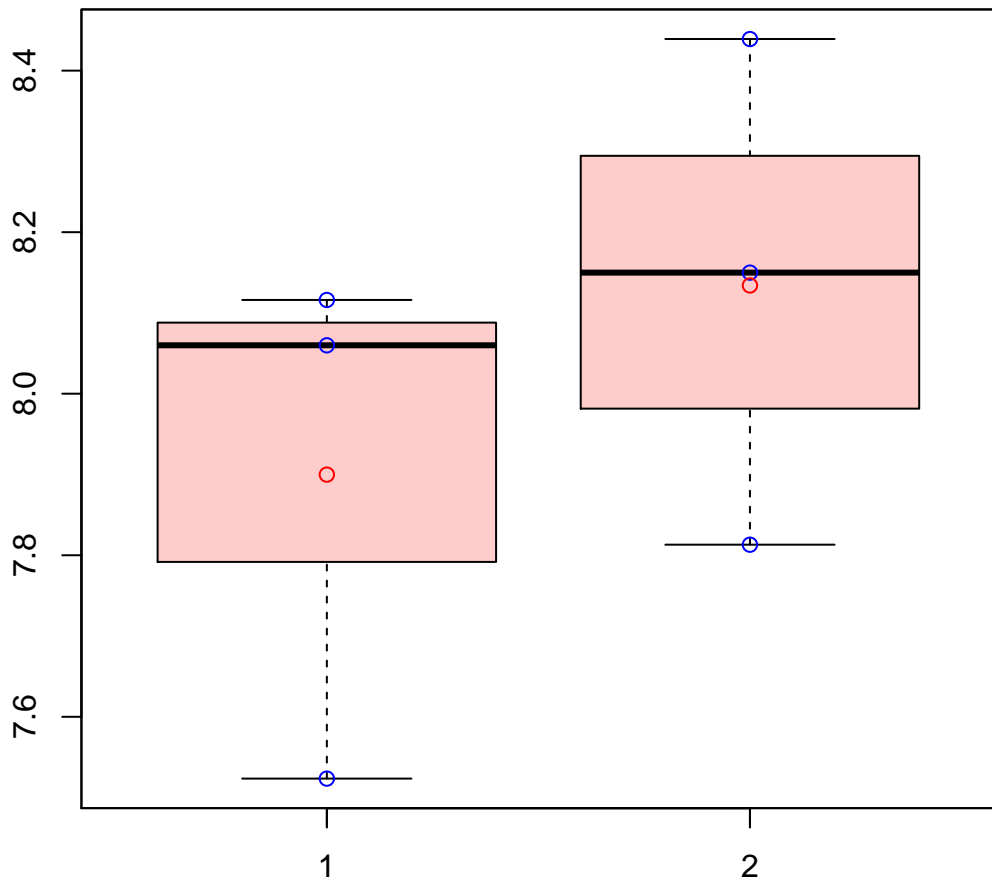

t-Test: p-value = 0.42

# CL7534Contig1|CL7534Contig1

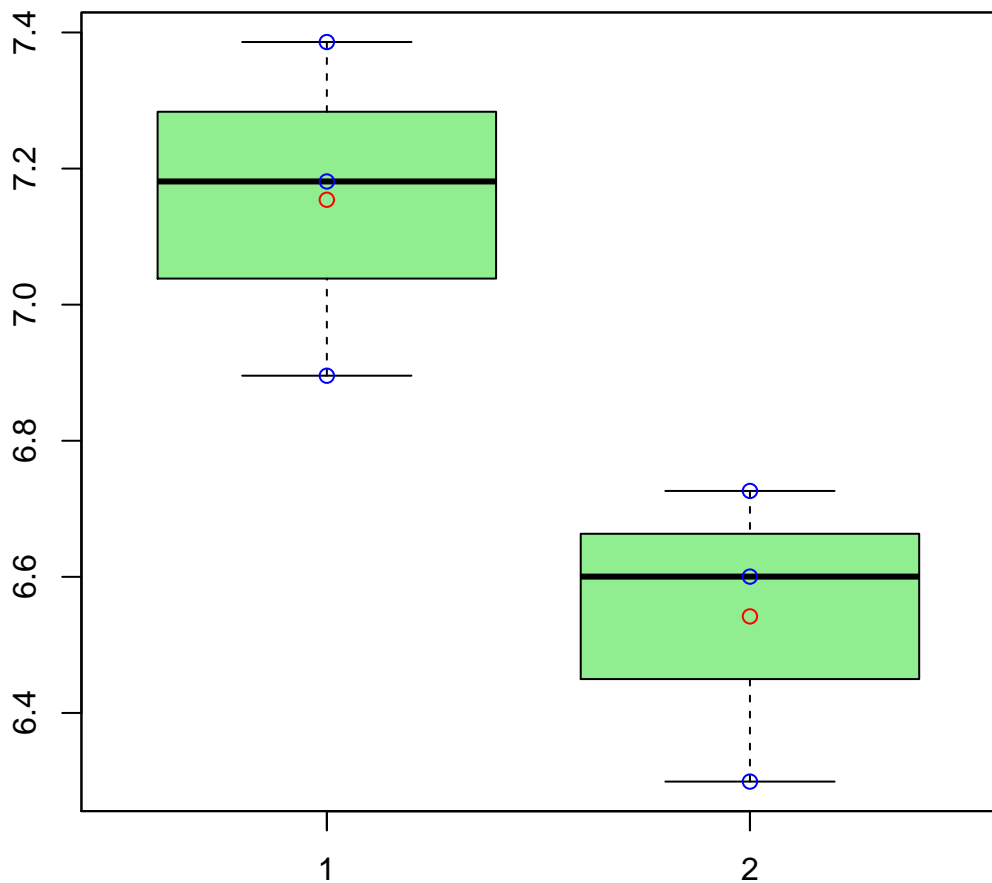

t-Test: p-value = 0.03



# CL7539Contig2|CL7539Contig2

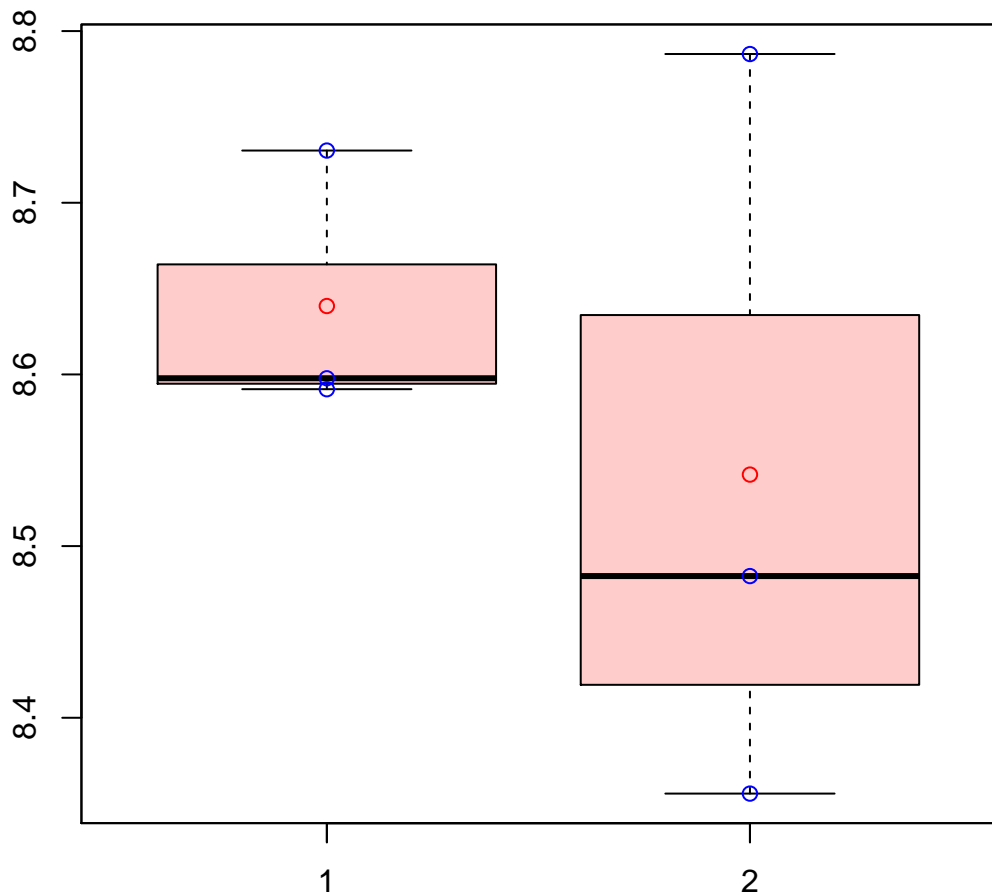

t-Test: p-value = 0.53

# CL7539Contig3|CL7539Contig3

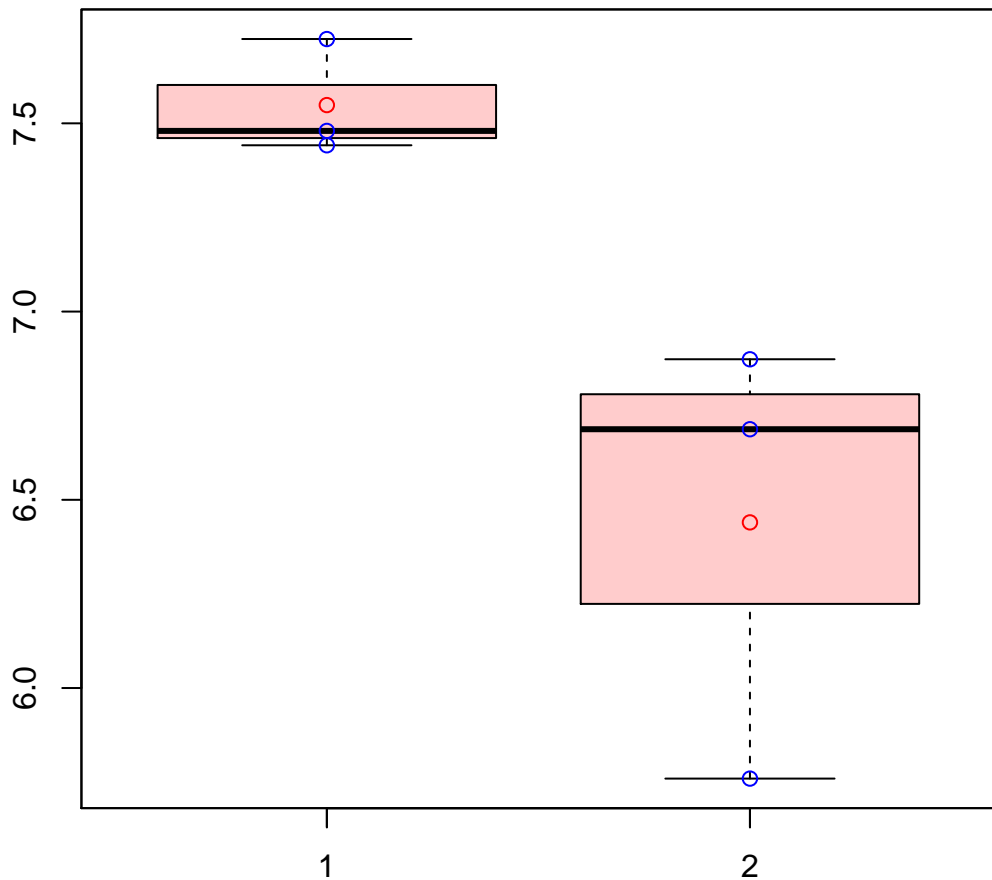

t-Test: p-value = 0.08

# CL7541Contig1|CL7541Contig1

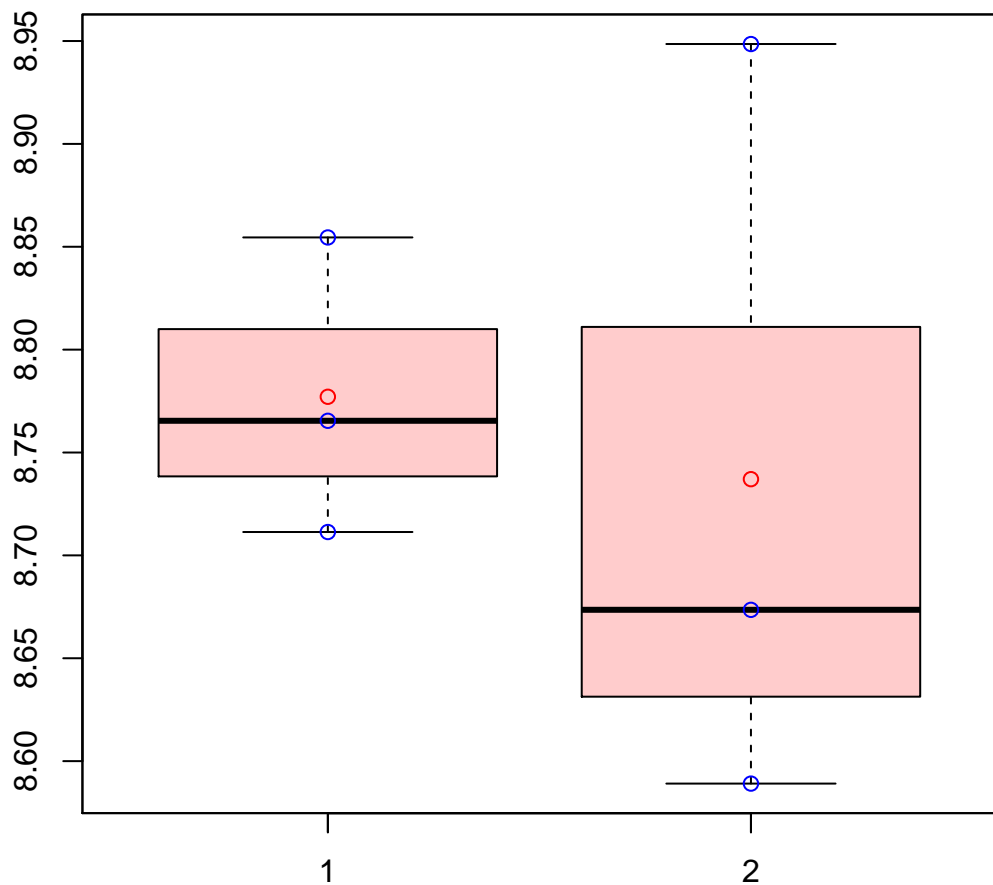

t-Test: p-value = 0.76

# CL7548Contig3|CL7548Contig3

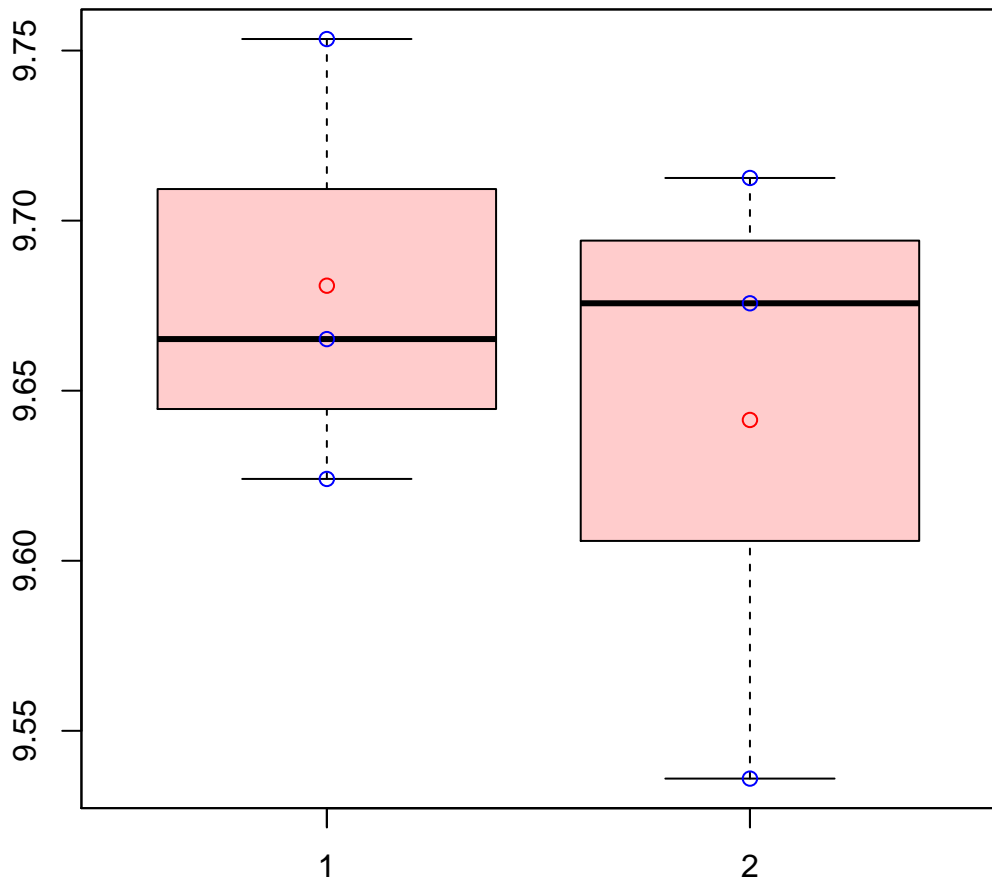

t-Test: p-value = 0.58

# CL7549Contig1|CL7549Contig1

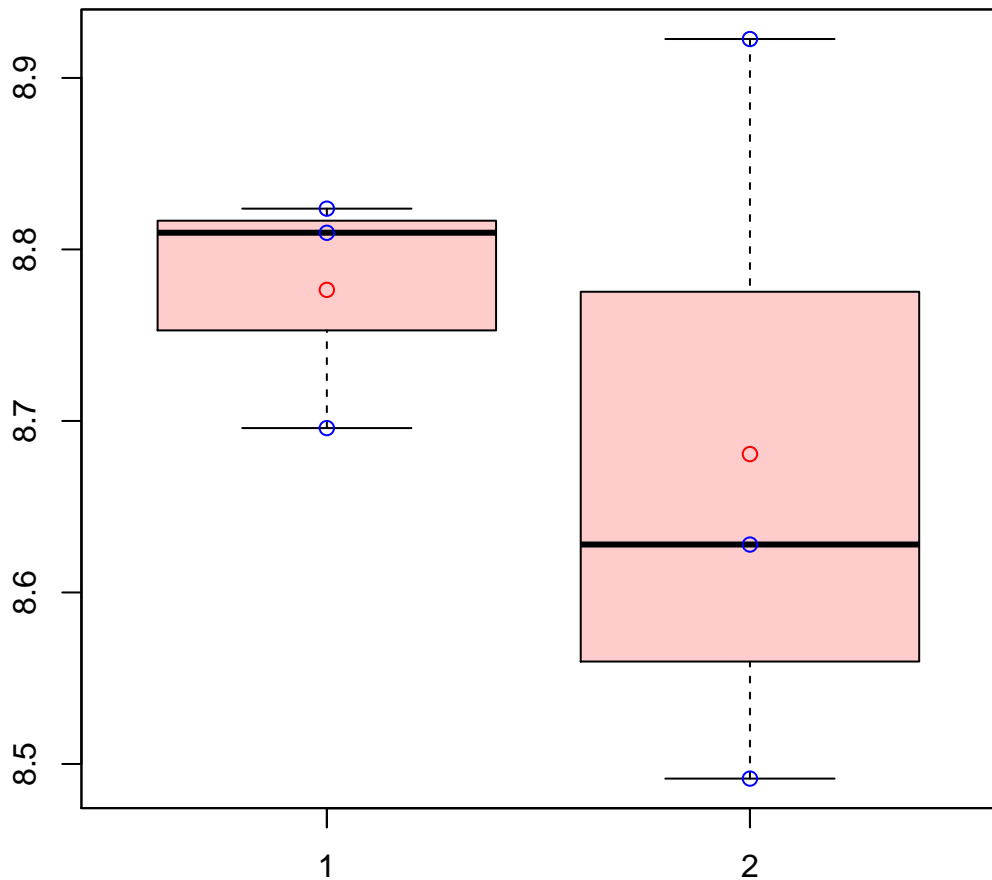

t-Test: p-value = 0.54

# CL7553Contig2|CL7553Contig2

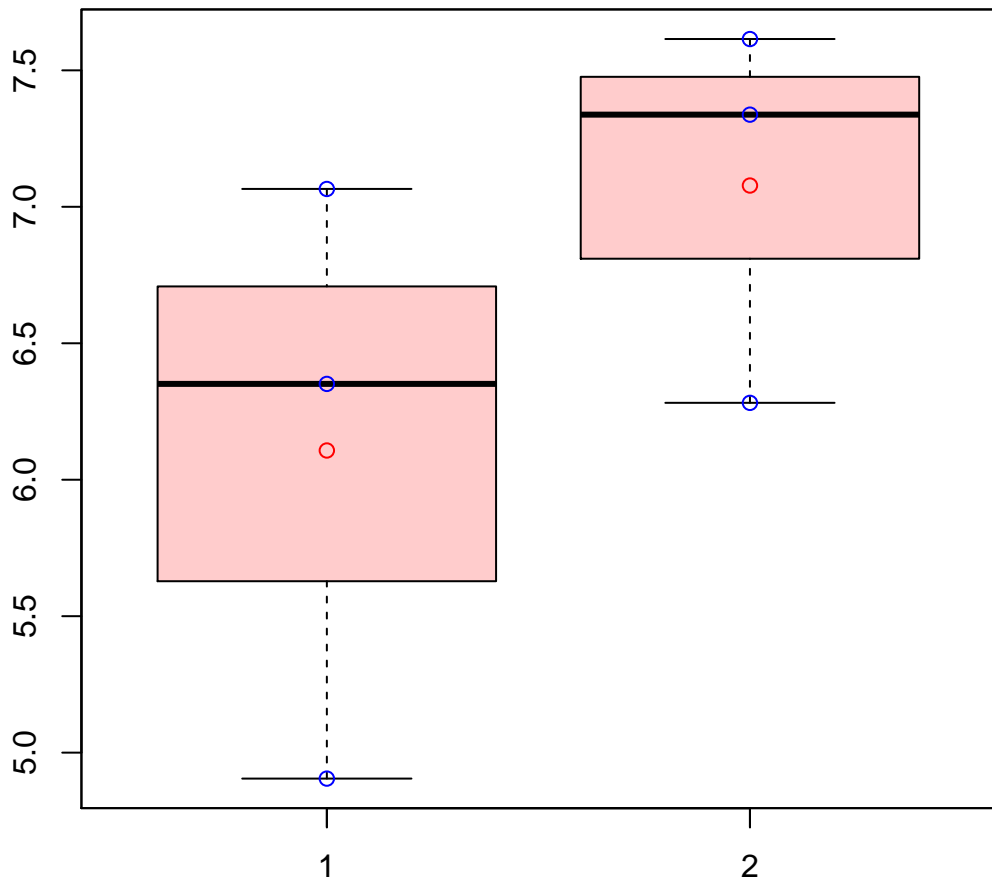

t-Test: p-value = 0.28

# CL7555Contig2|CL7555Contig2

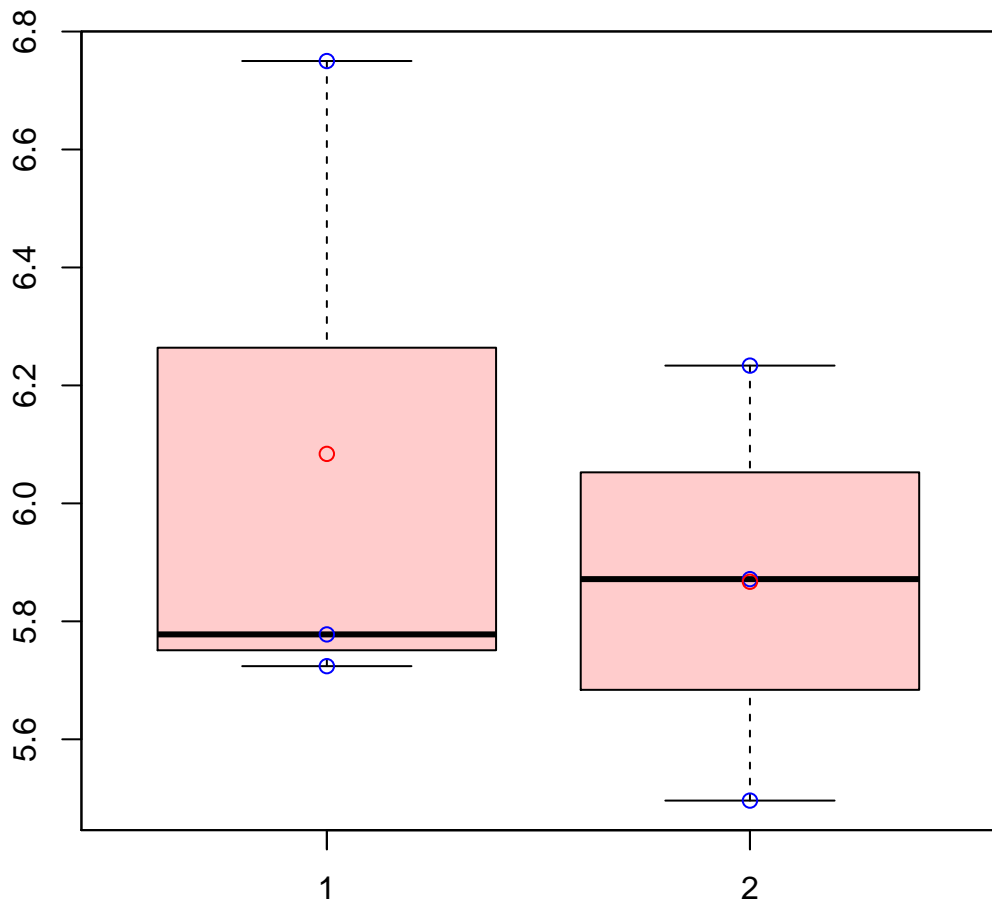

t-Test: p-value = 0.62

# CL7561Contig2|CL7561Contig2

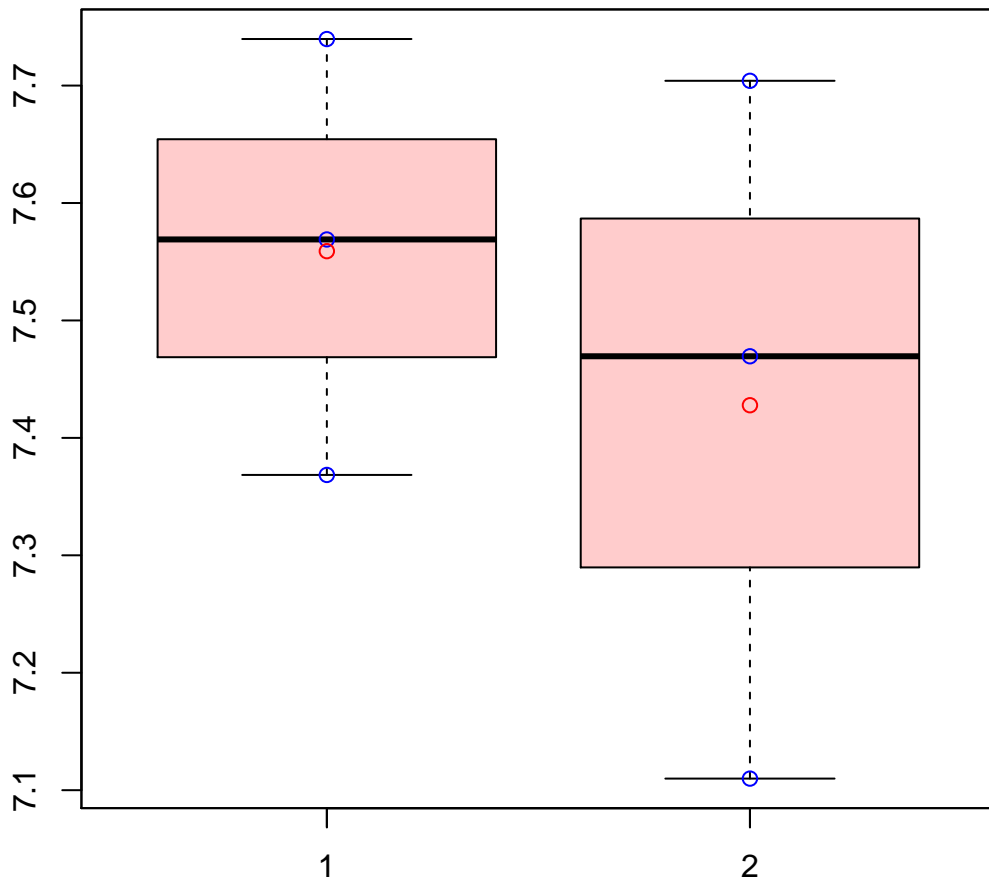

t-Test: p-value = 0.56



# CL7562Contig4|CL7562Contig4

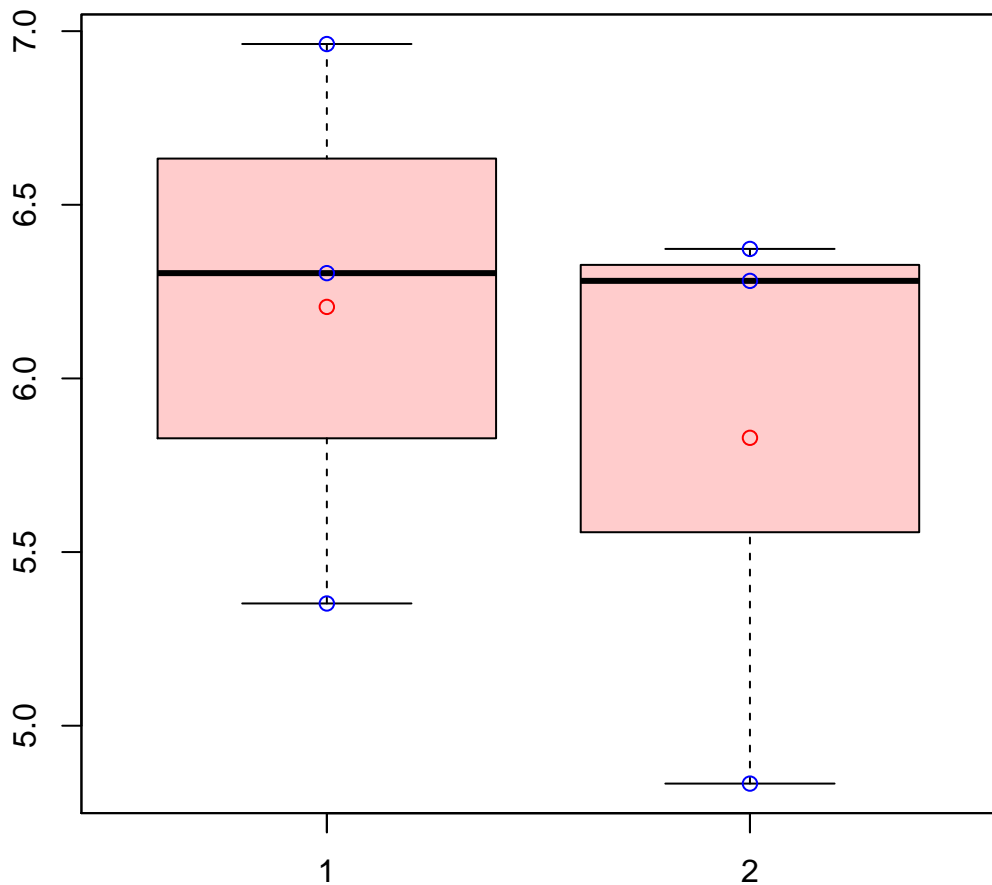

t-Test: p-value = 0.61

# CL7568Contig1|CL7568Contig1

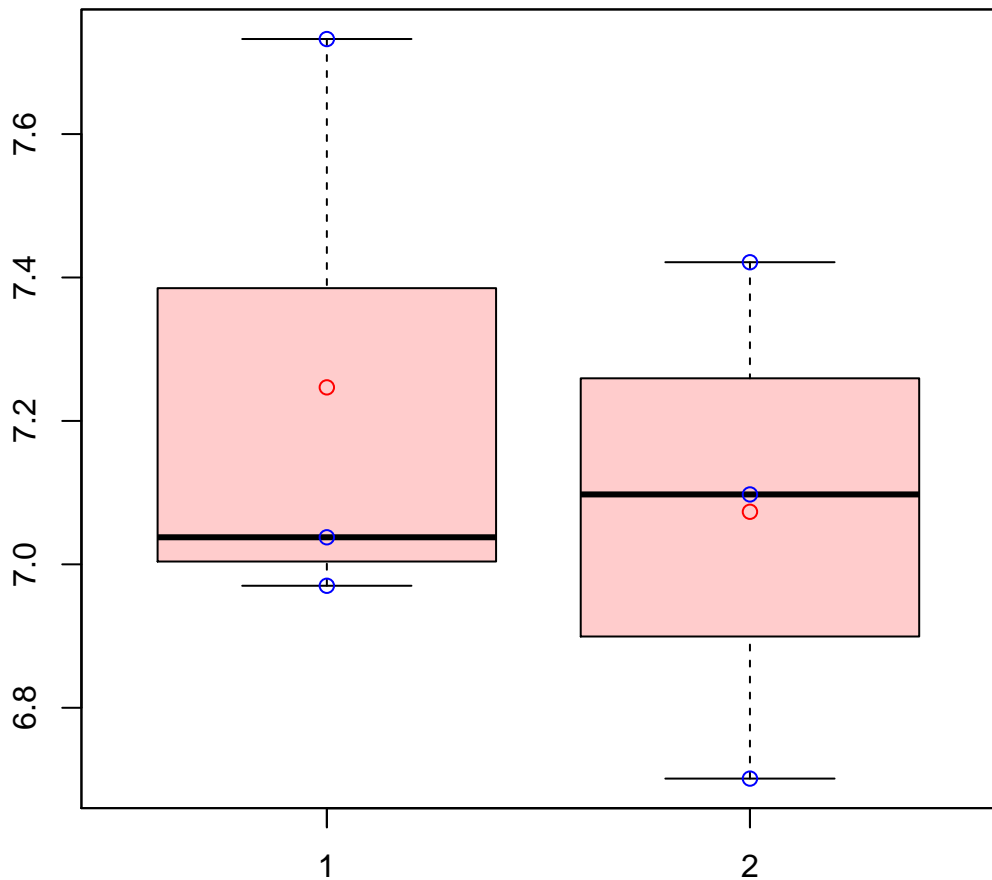

t-Test: p-value = 0.62

# CL756Contig3|CL756Contig3

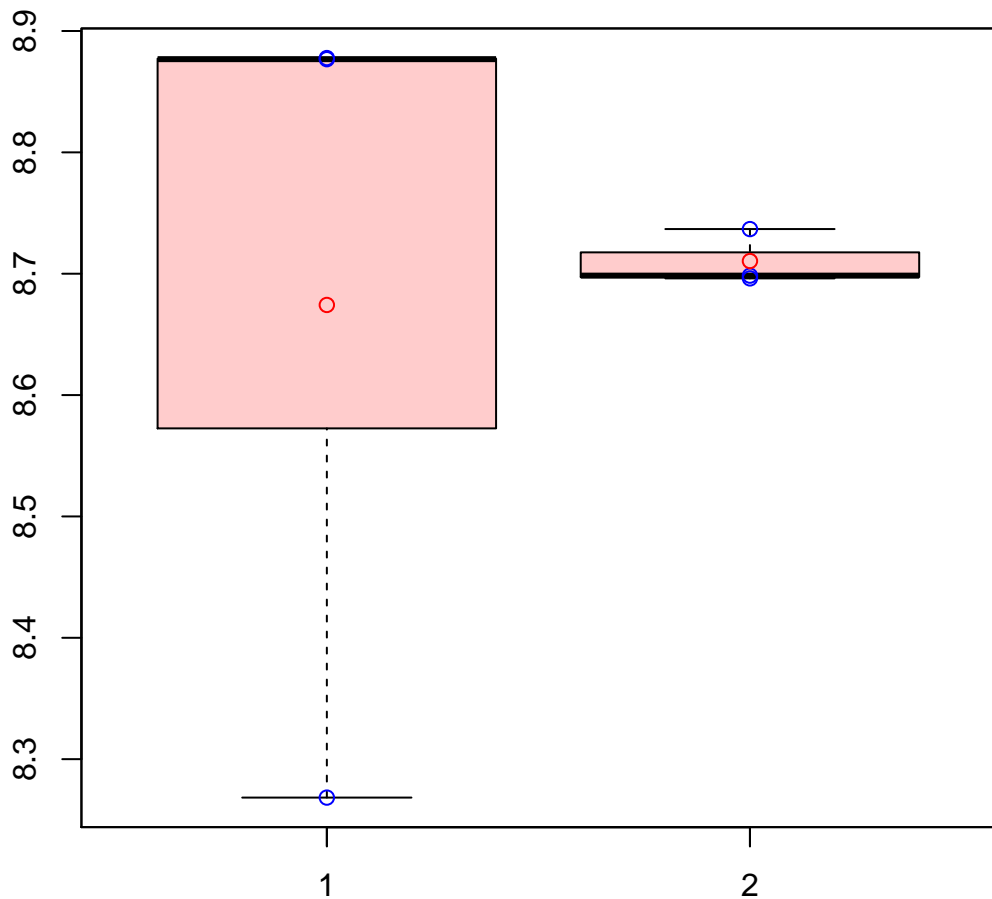

t-Test: p-value = 0.88

# CL7582Contig1|CL7582Contig1

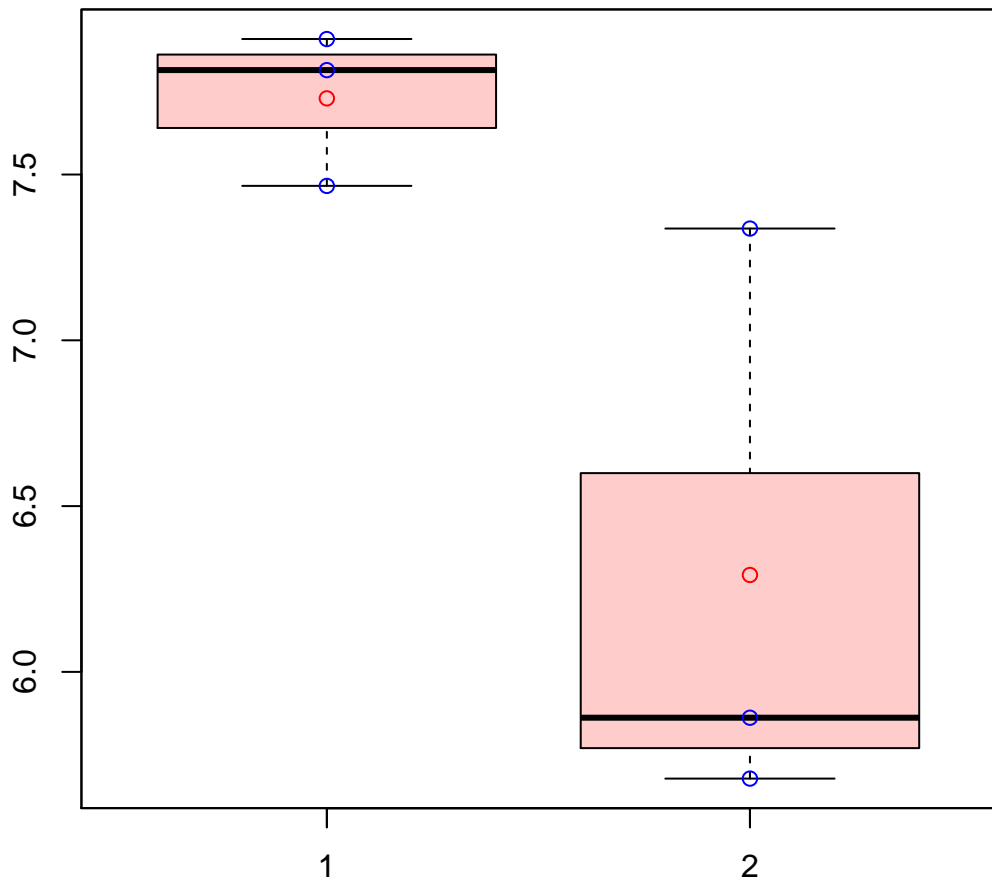

t-Test: p-value = 0.1

# CL7586Contig1|CL7586Contig1

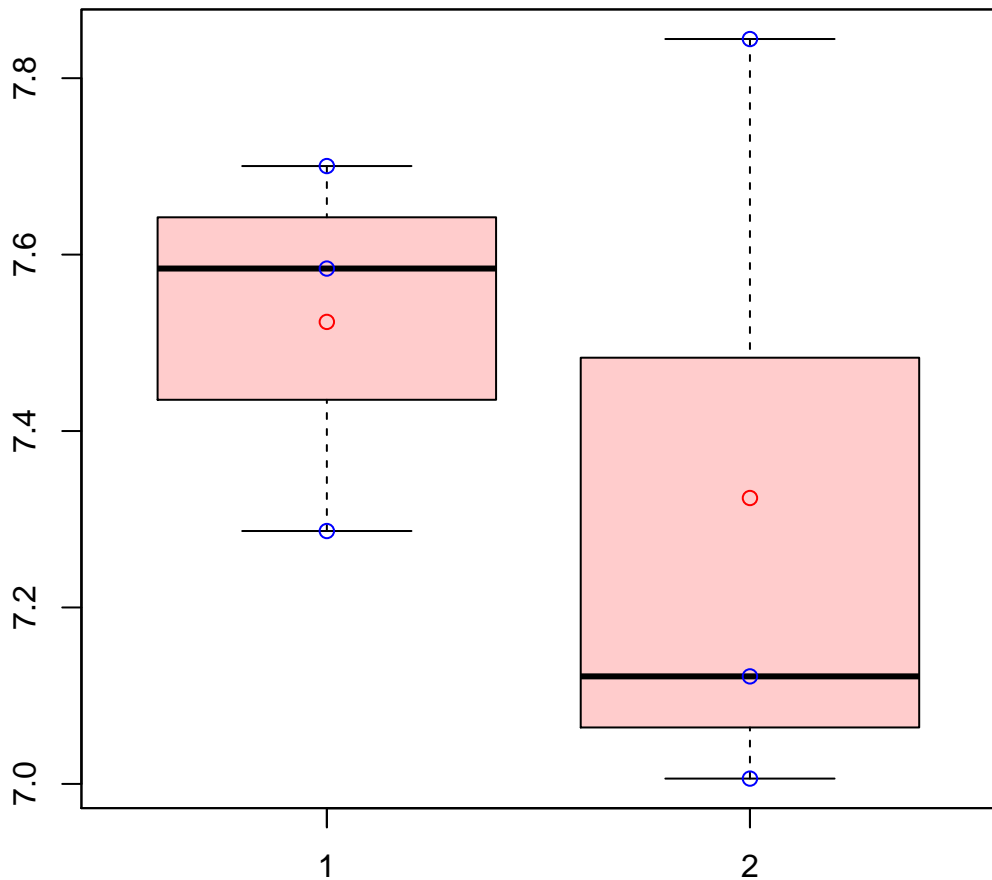

t-Test: p-value = 0.54

# CL758Contig8|CL758Contig8

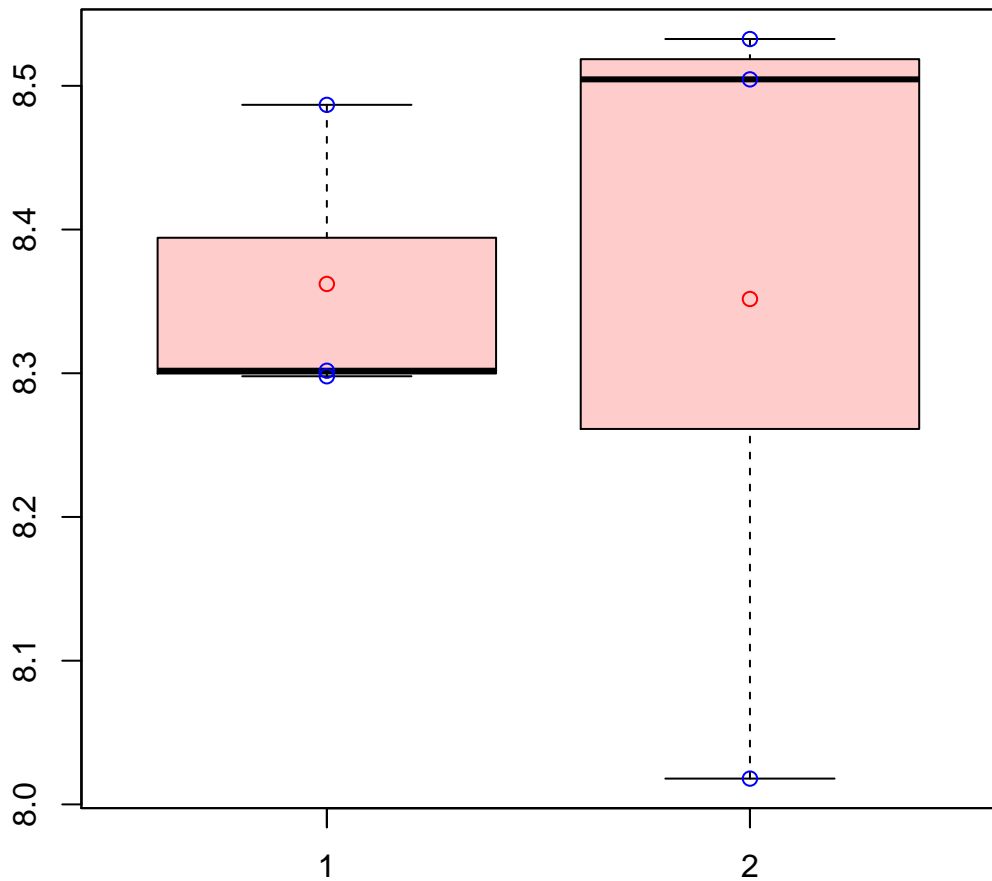

t-Test: p-value = 0.96

# CL7590Contig1|CL7590Contig1

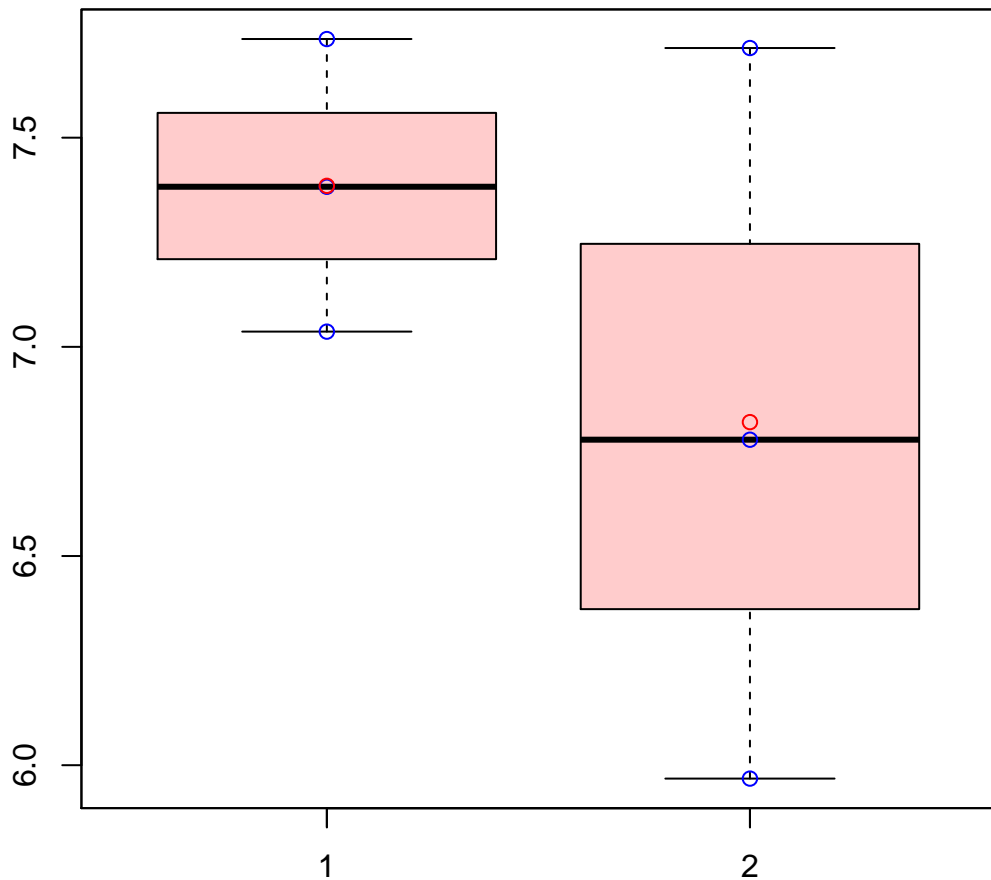

t-Test: p-value = 0.38

# CL7597Contig1|CL7597Contig1

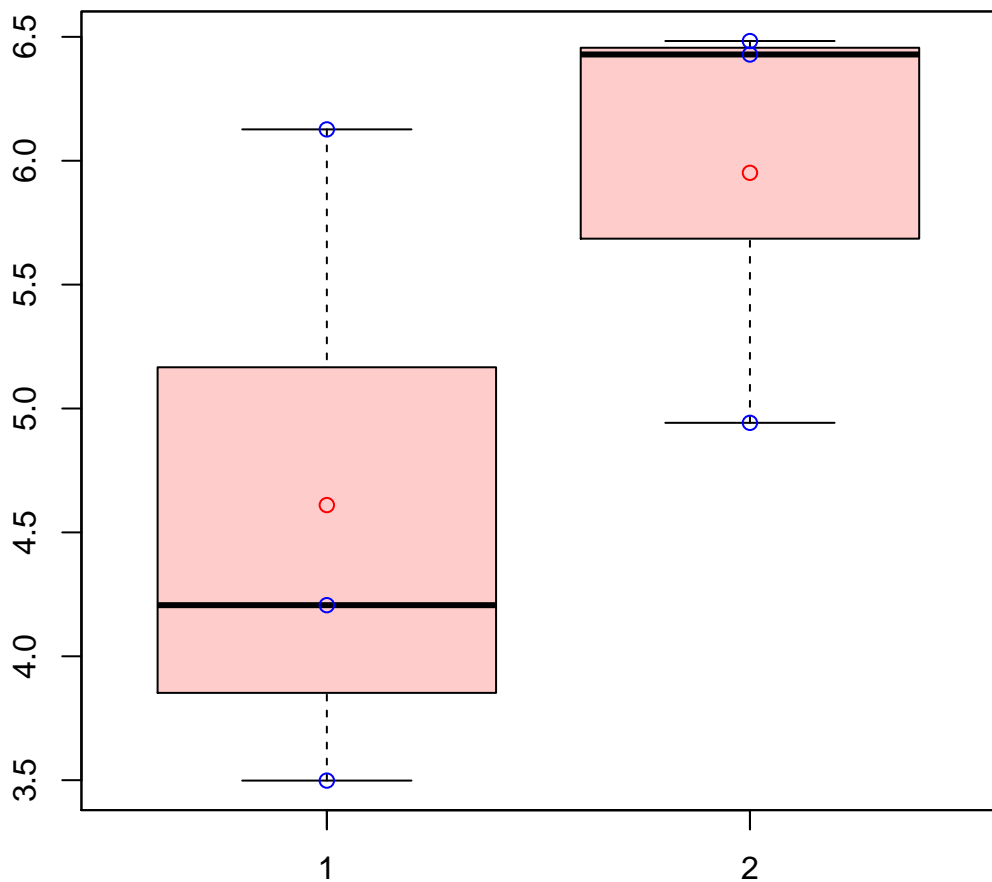

t-Test: p-value = 0.24



# CL75Contig19|CL75Contig19

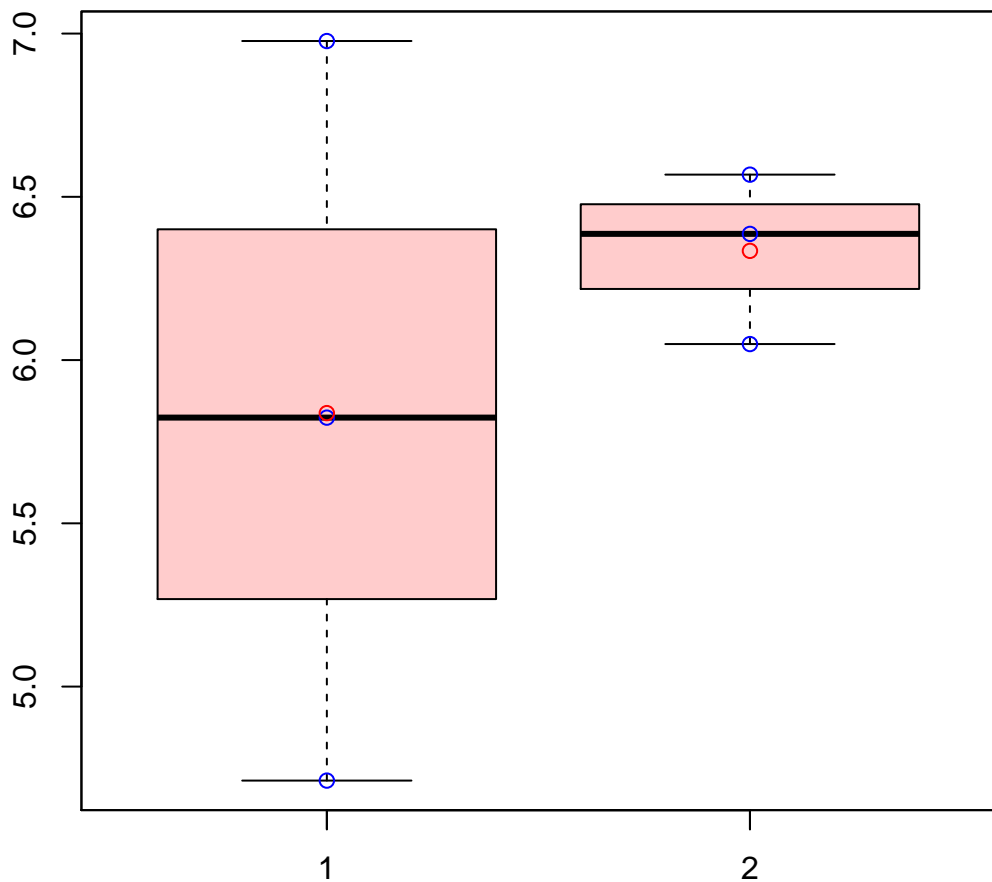

t-Test: p-value = 0.53

# CL7613Contig1|CL7613Contig1

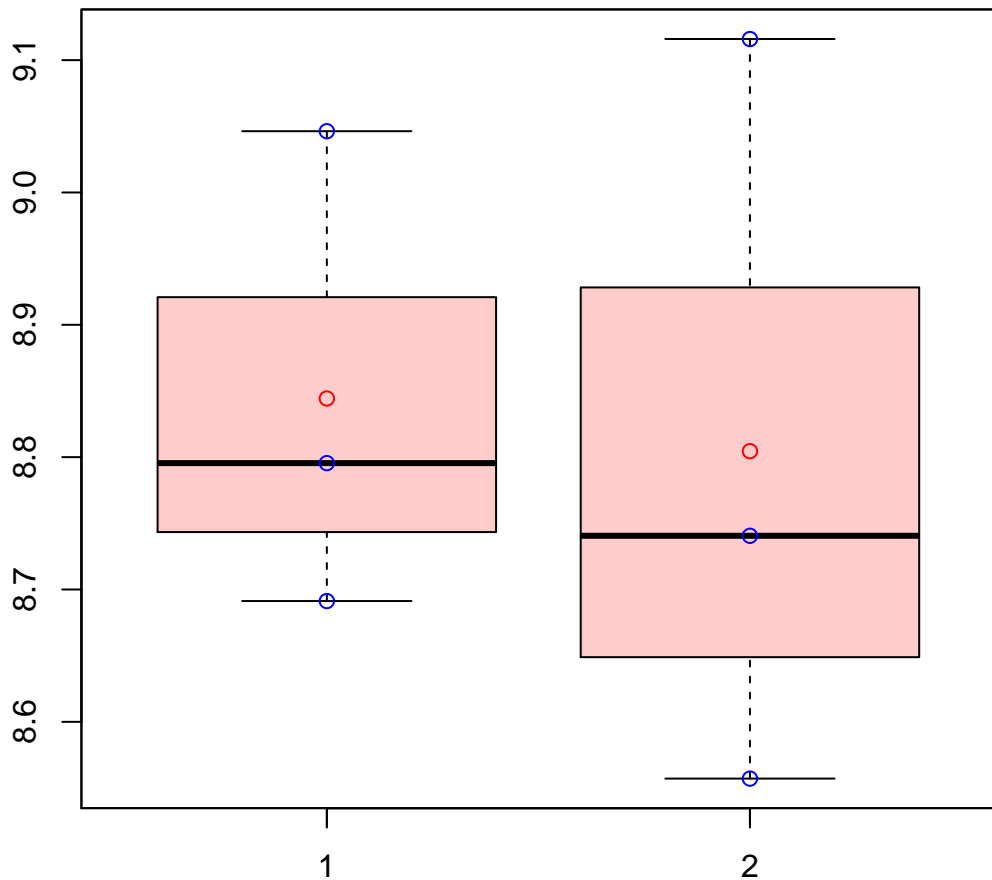

t-Test: p-value = 0.85

# CL762Contig13|CL762Contig13

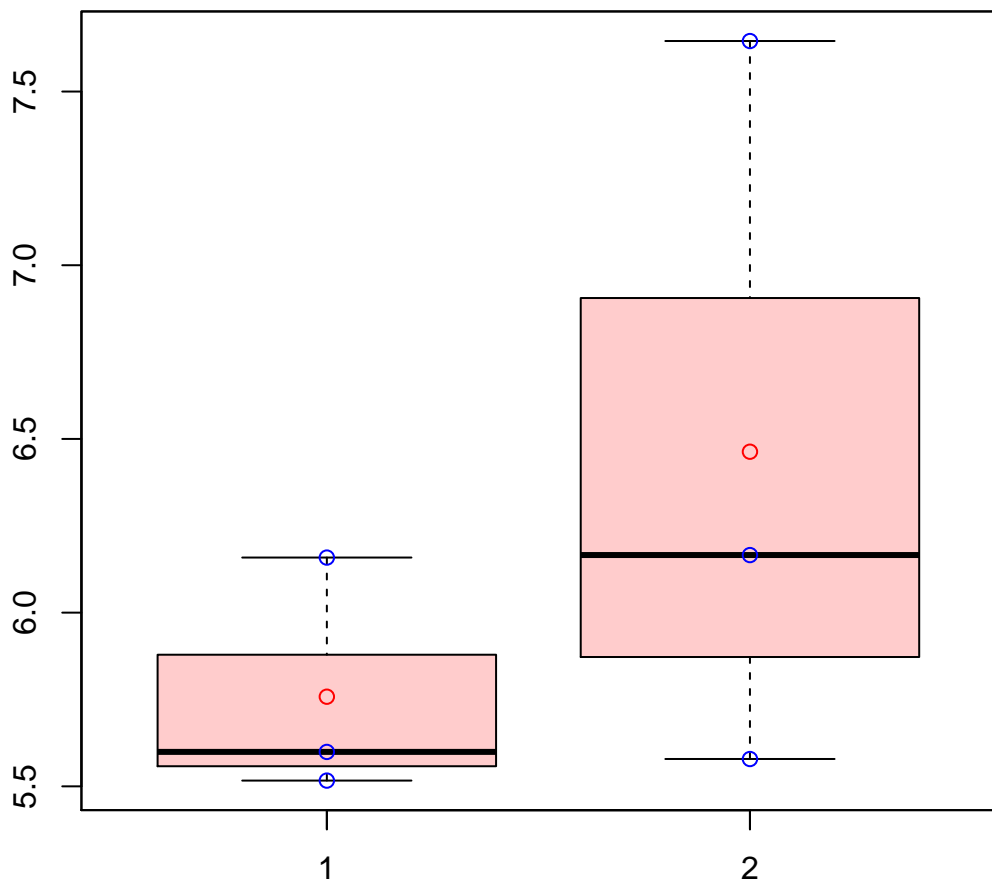

t-Test: p-value = 0.37

# CL7638Contig1|CL7638Contig1

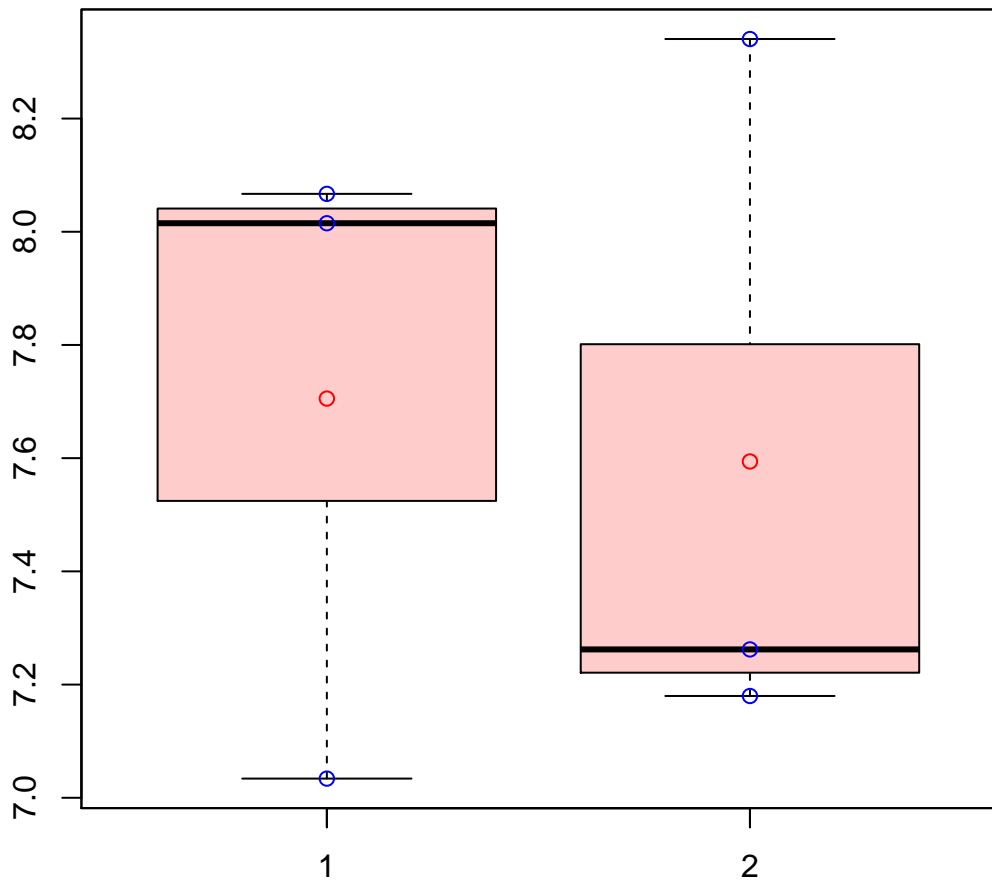

t-Test: p-value = 0.84

# CL7638Contig2|CL7638Contig2

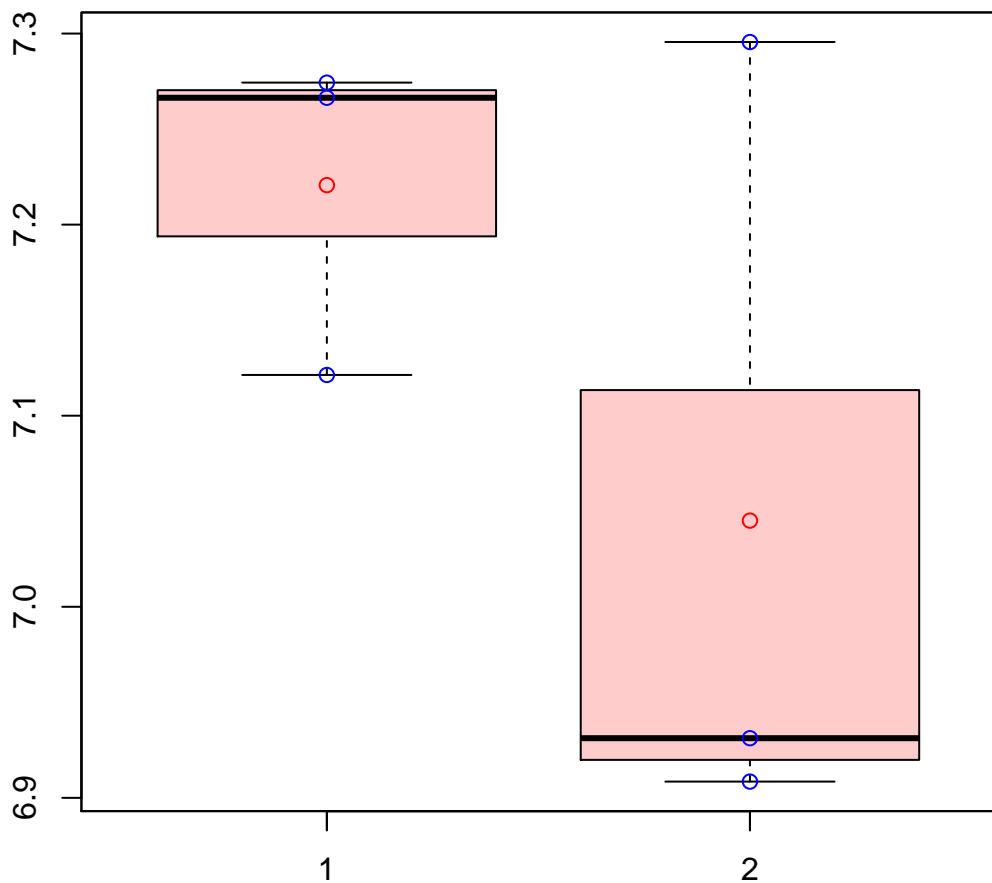

t-Test: p-value = 0.3

# CL7647Contig1|CL7647Contig1

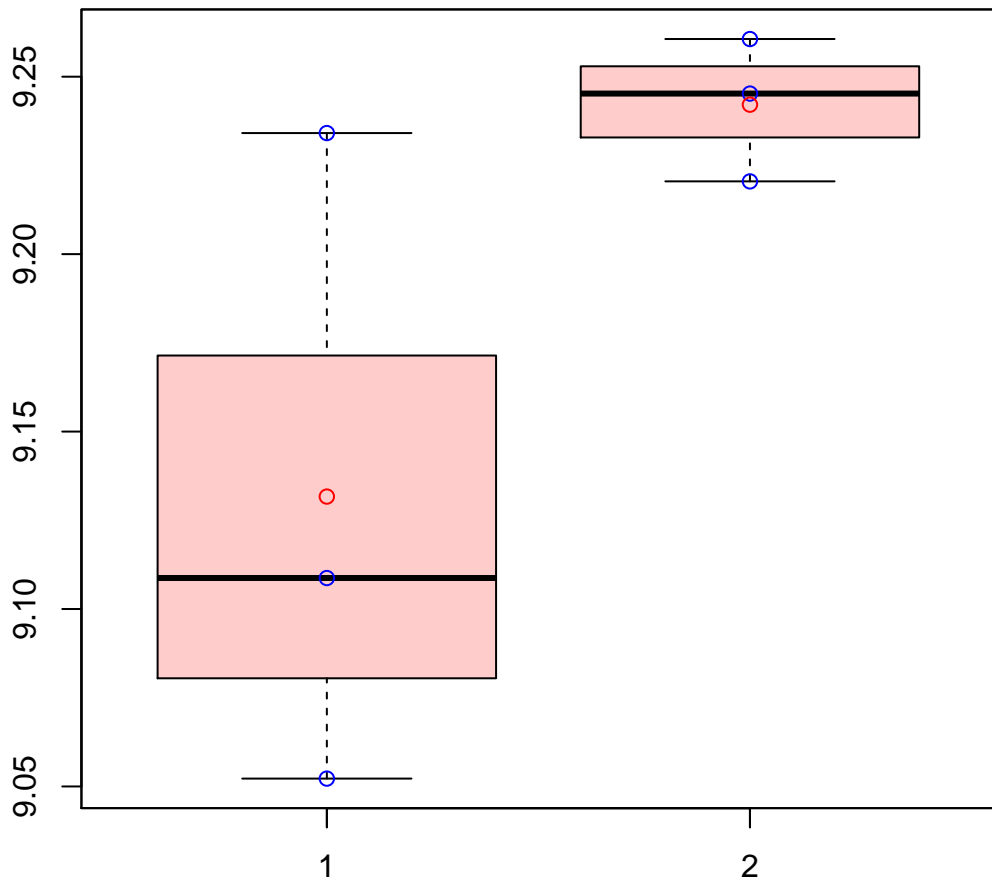

t-Test: p-value = 0.17

# CL7668Contig2|CL7668Contig2

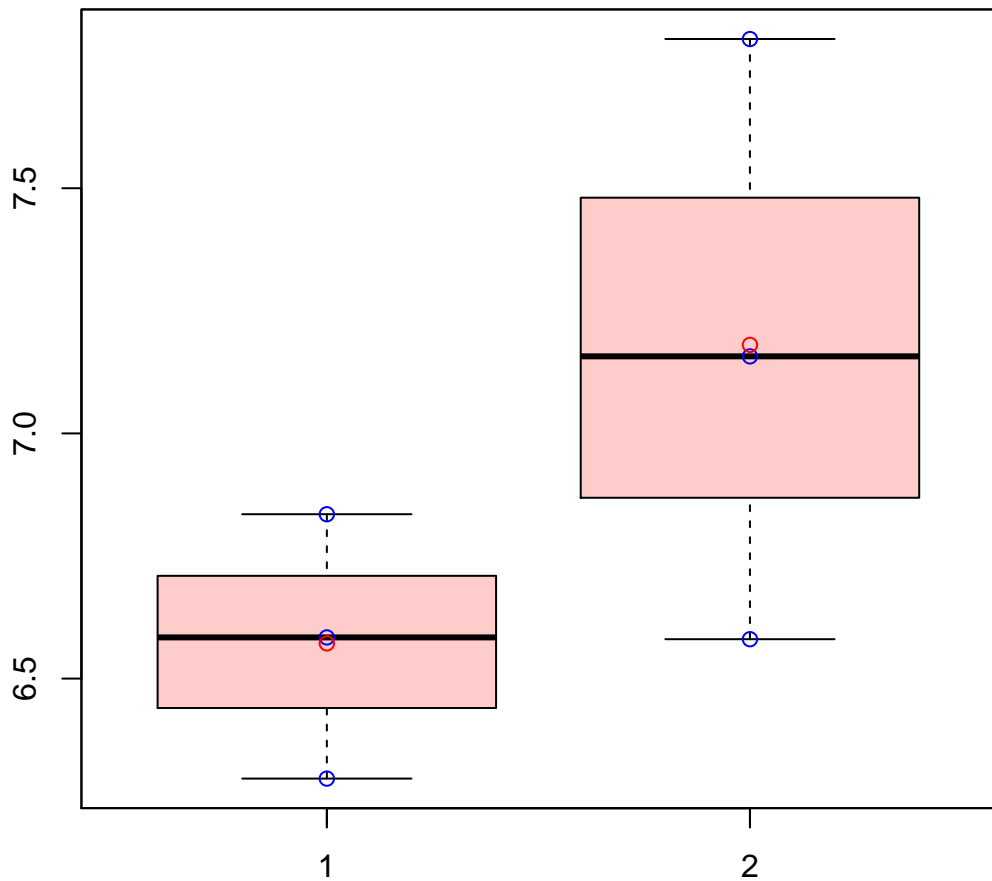

t-Test: p-value = 0.22

# CL7671Contig2|CL7671Contig2

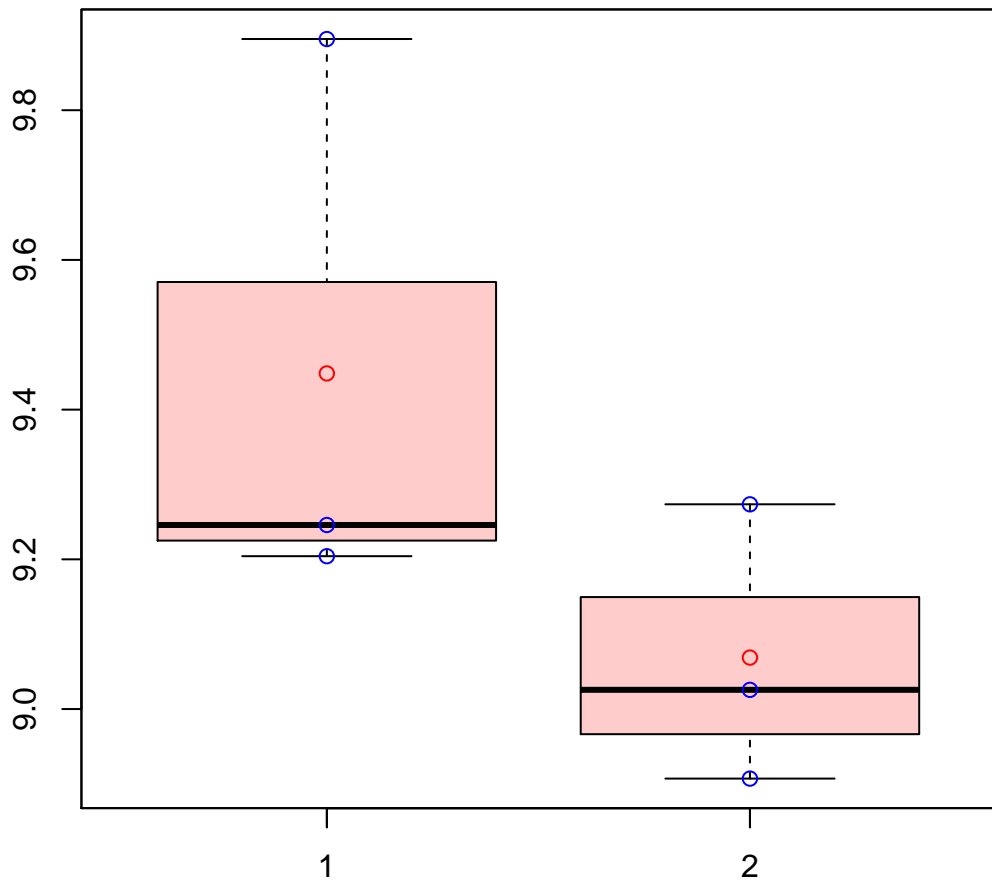

t-Test: p-value = 0.23



# CL7673Contig1|CL7673Contig1

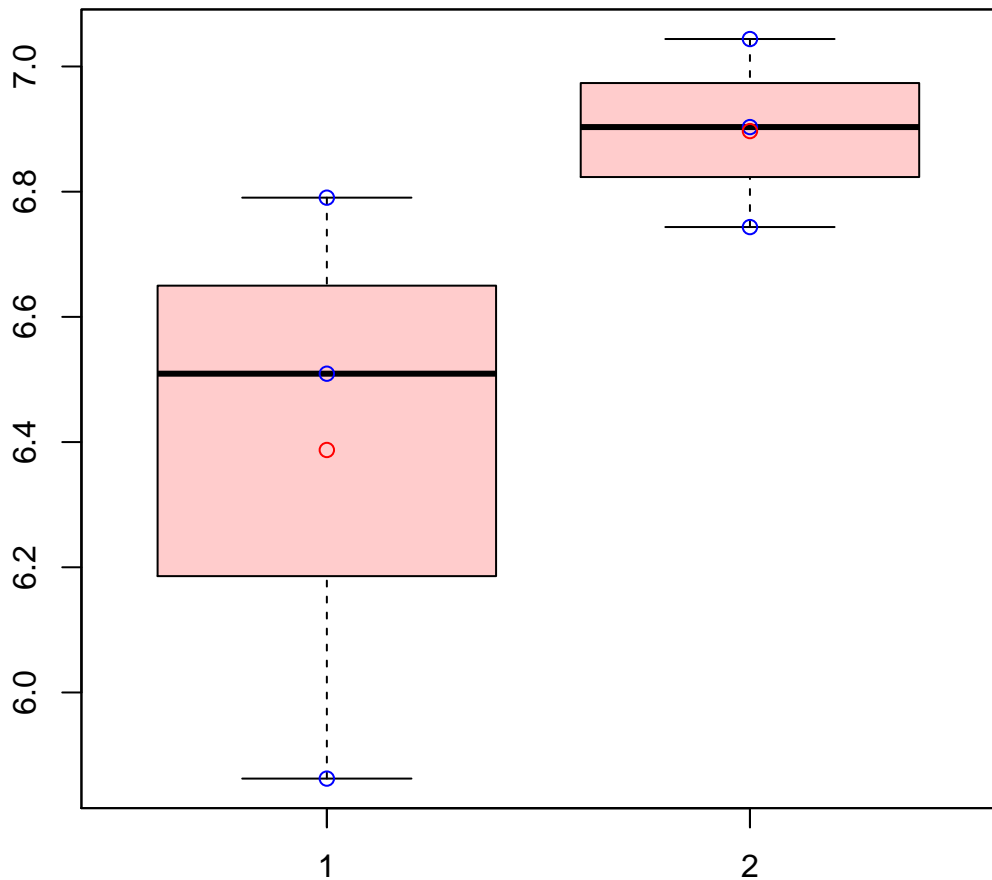

t-Test: p-value = 0.2

# CL7674Contig2|CL7674Contig2

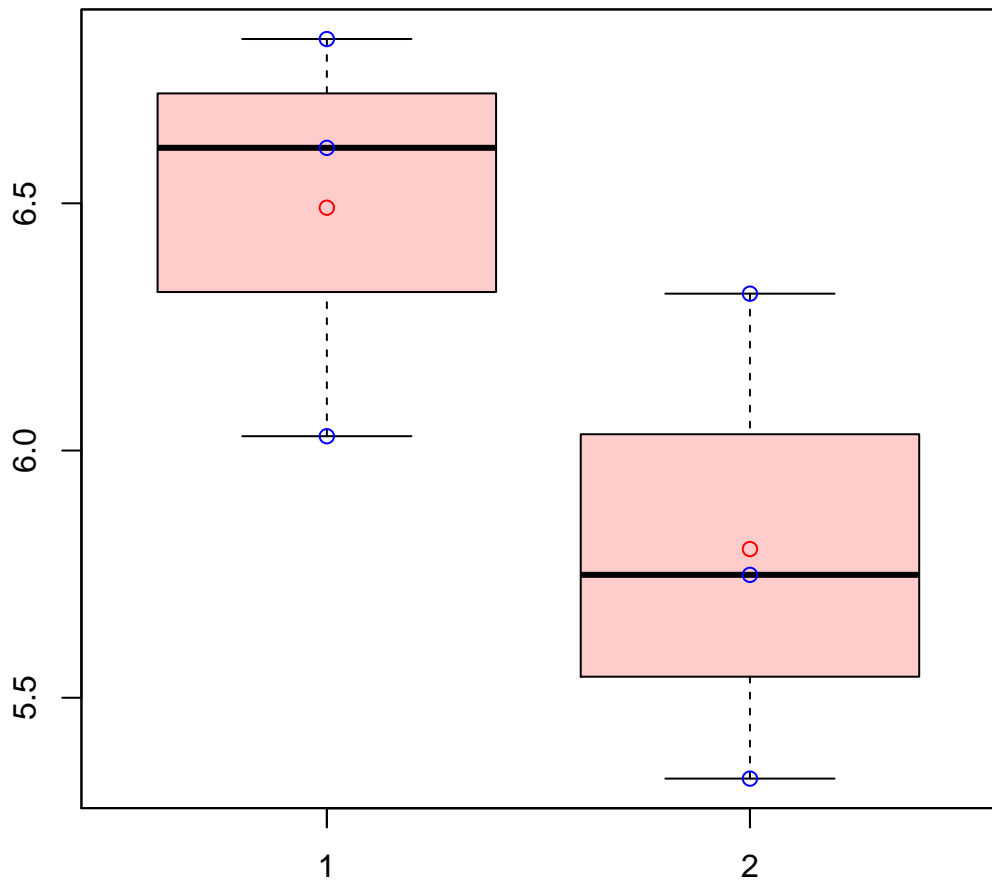

t-Test: p-value = 0.14

# CL767Contig5|CL767Contig5

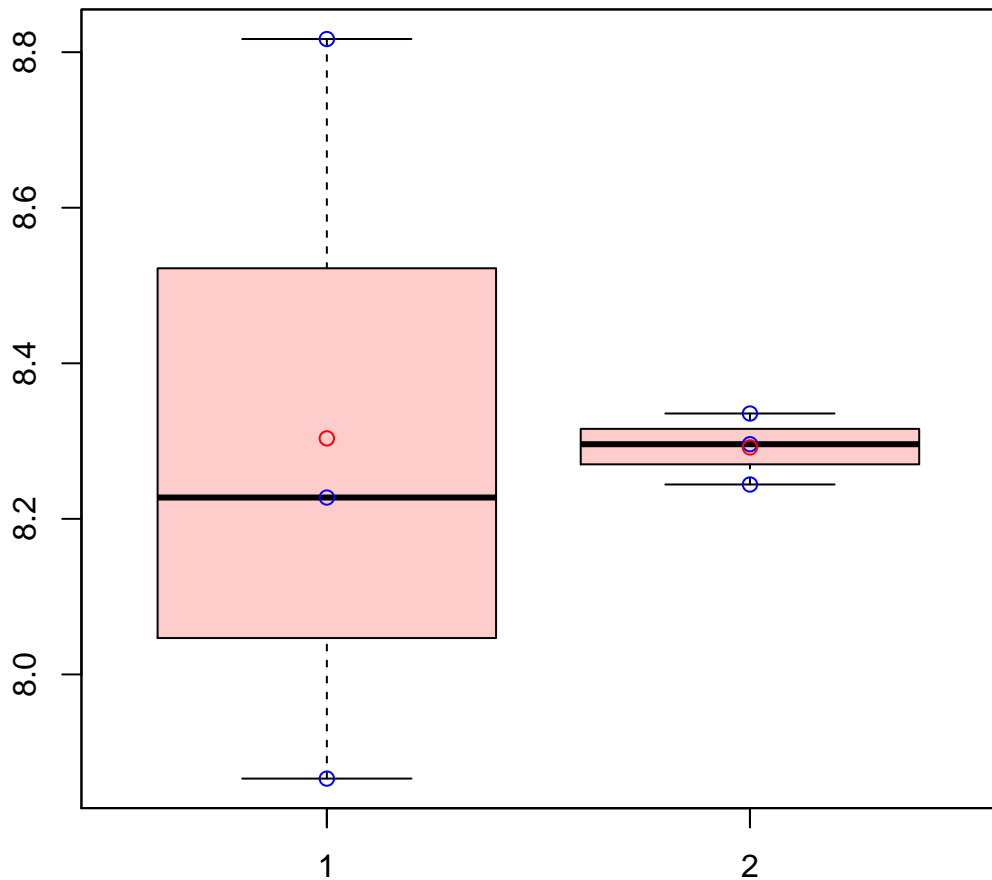

t-Test: p-value = 0.97

# CL7698Contig2|CL7698Contig2

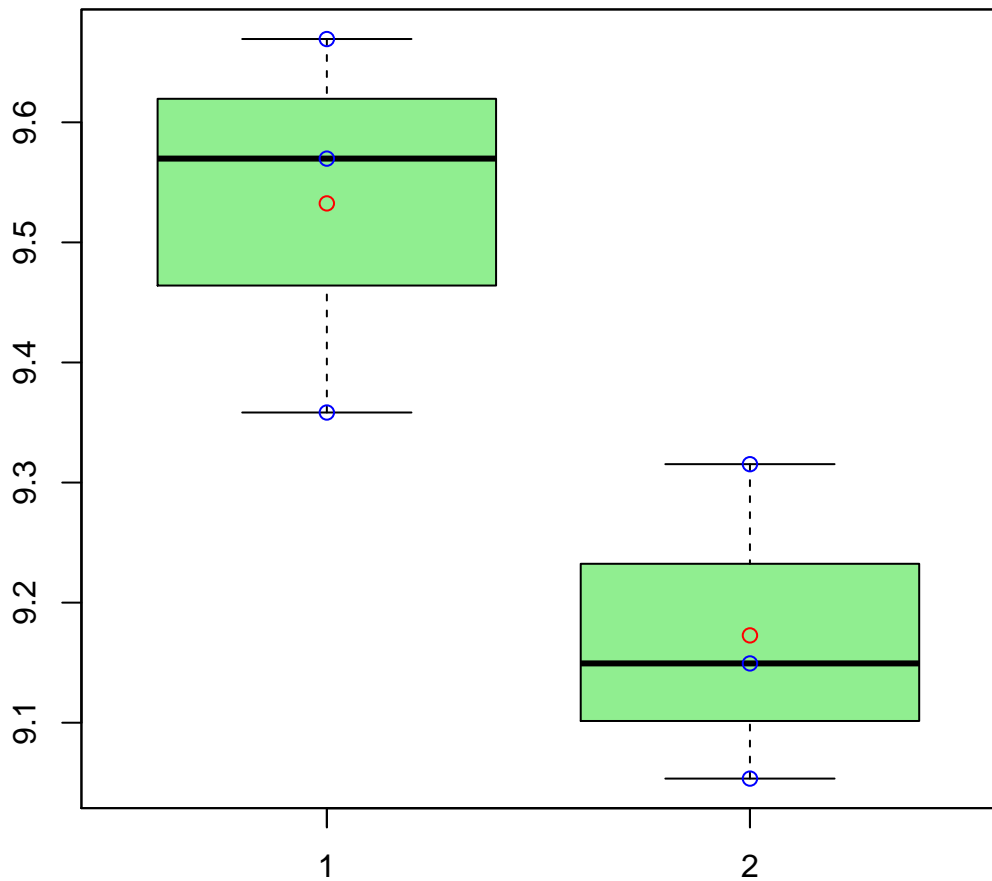

t-Test: p-value = 0.04

# CL769Contig3|CL769Contig3

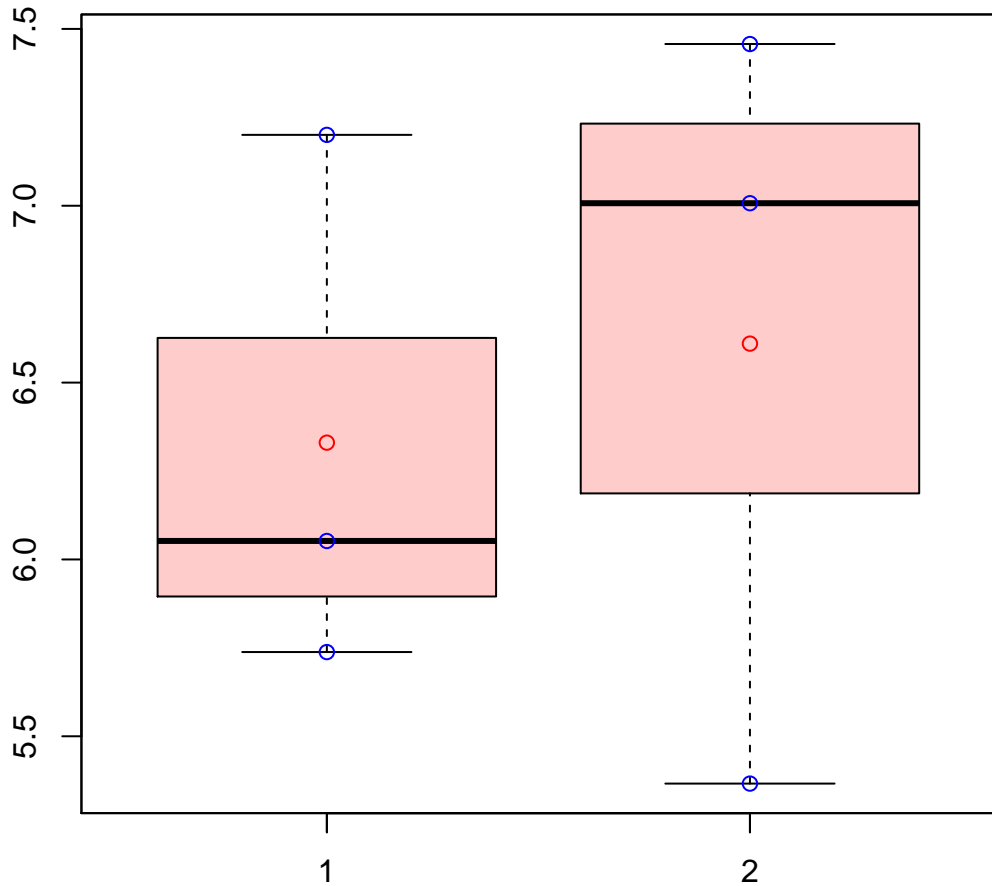

t-Test: p-value = 0.74

# CL76Contig17|CL76Contig17

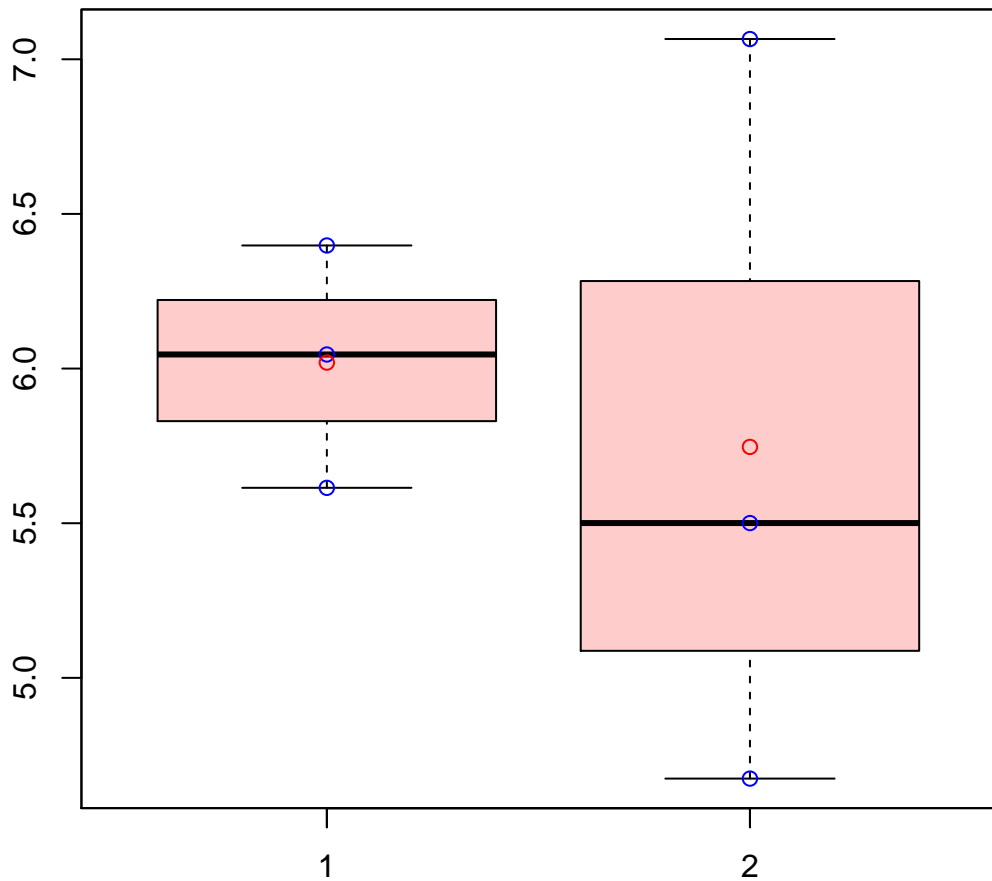

t-Test: p-value = 0.74

# CL7703Contig1|CL7703Contig1

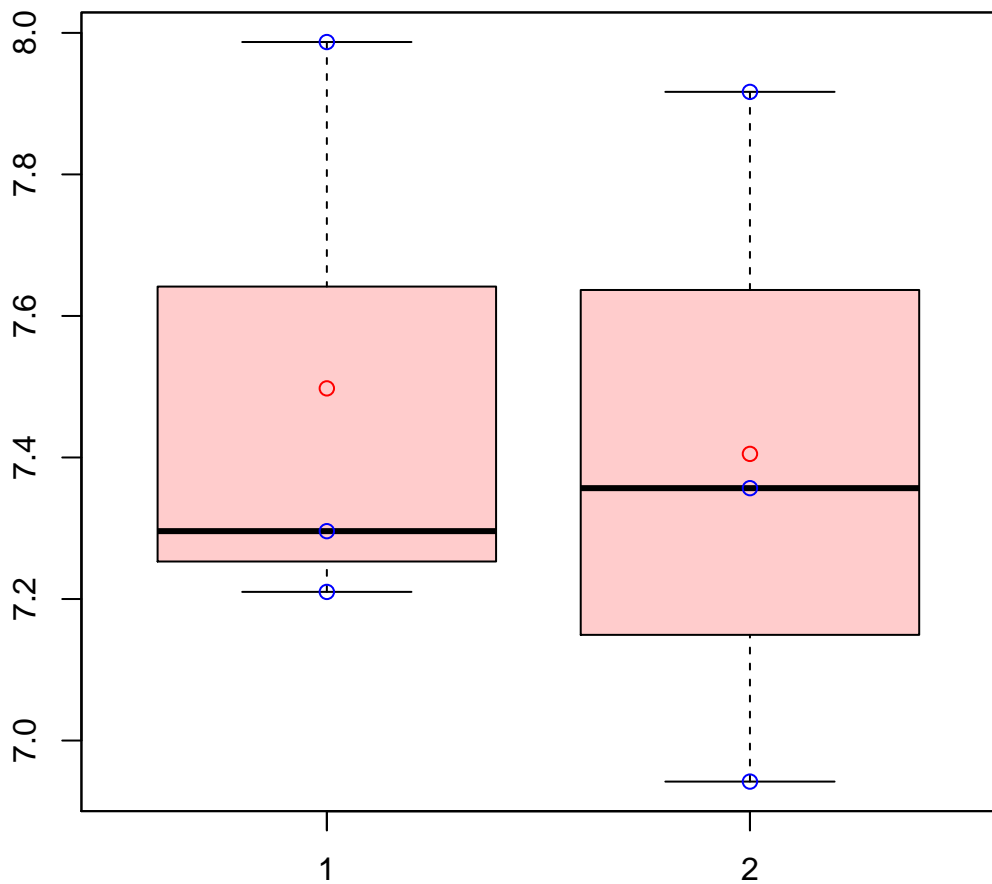

t-Test: p-value = 0.82

# CL770Contig6|CL770Contig6

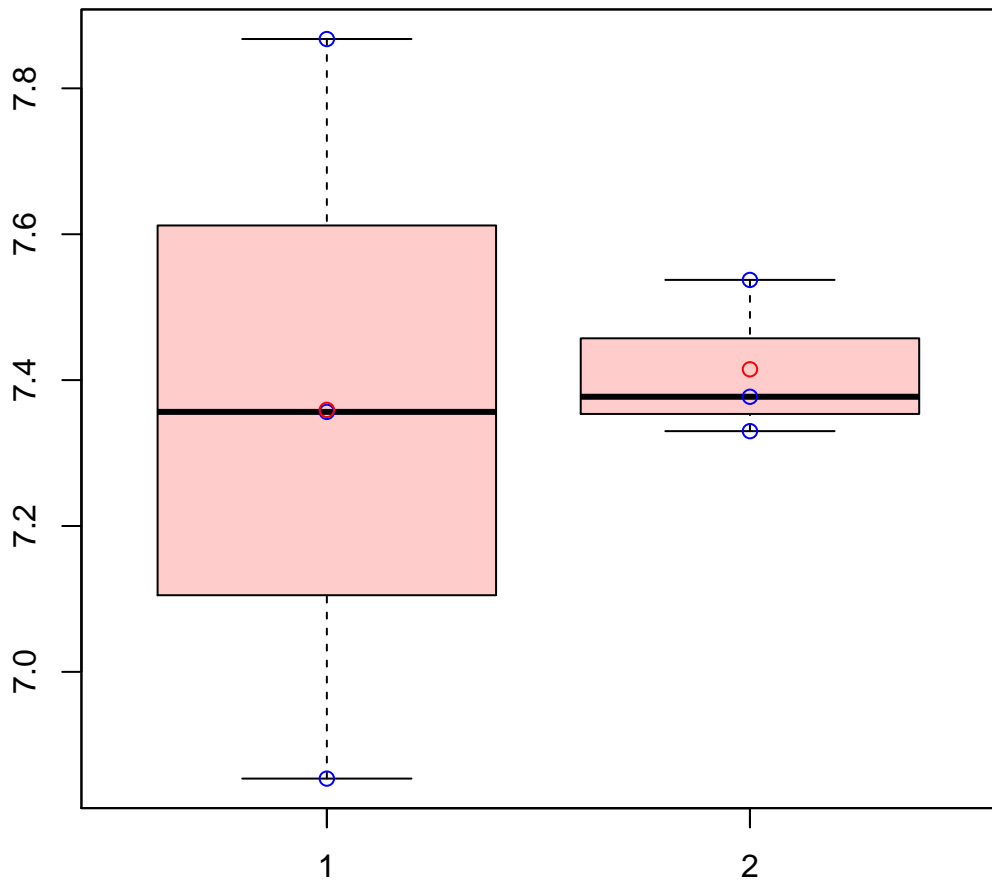

t-Test: p-value = 0.87



# CL7710Contig2|CL7710Contig2

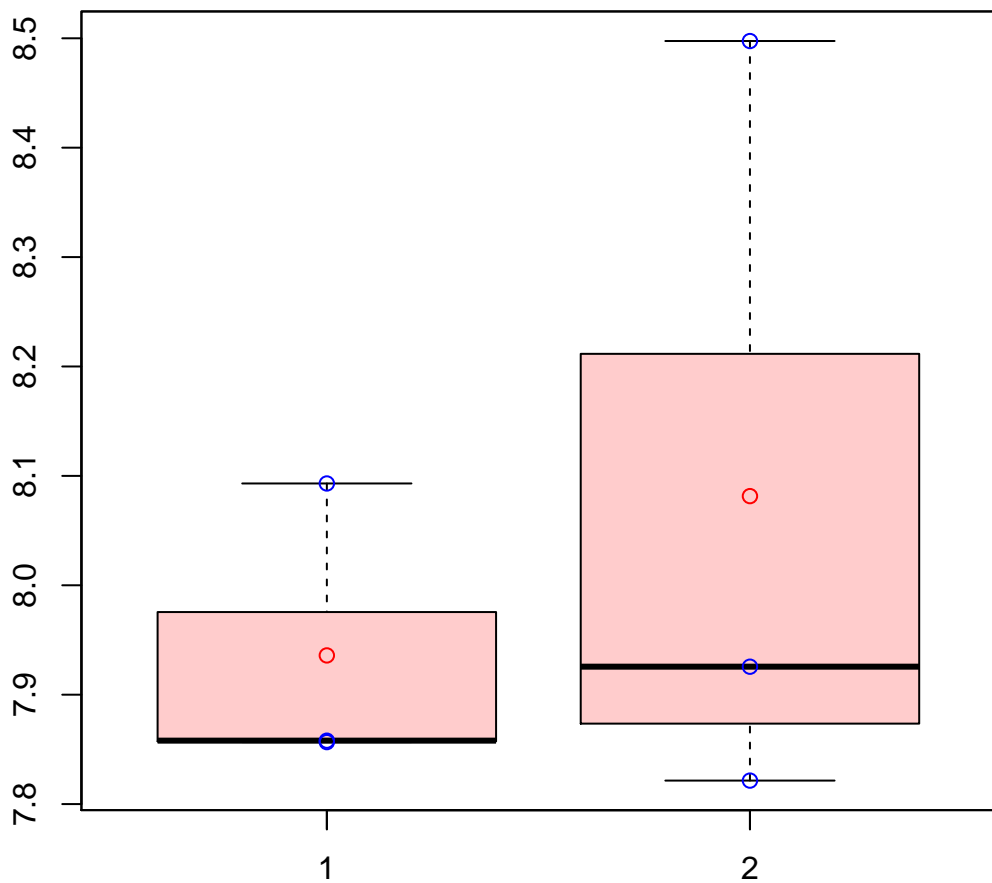

t-Test: p-value = 0.57

# CL7716Contig2|CL7716Contig2

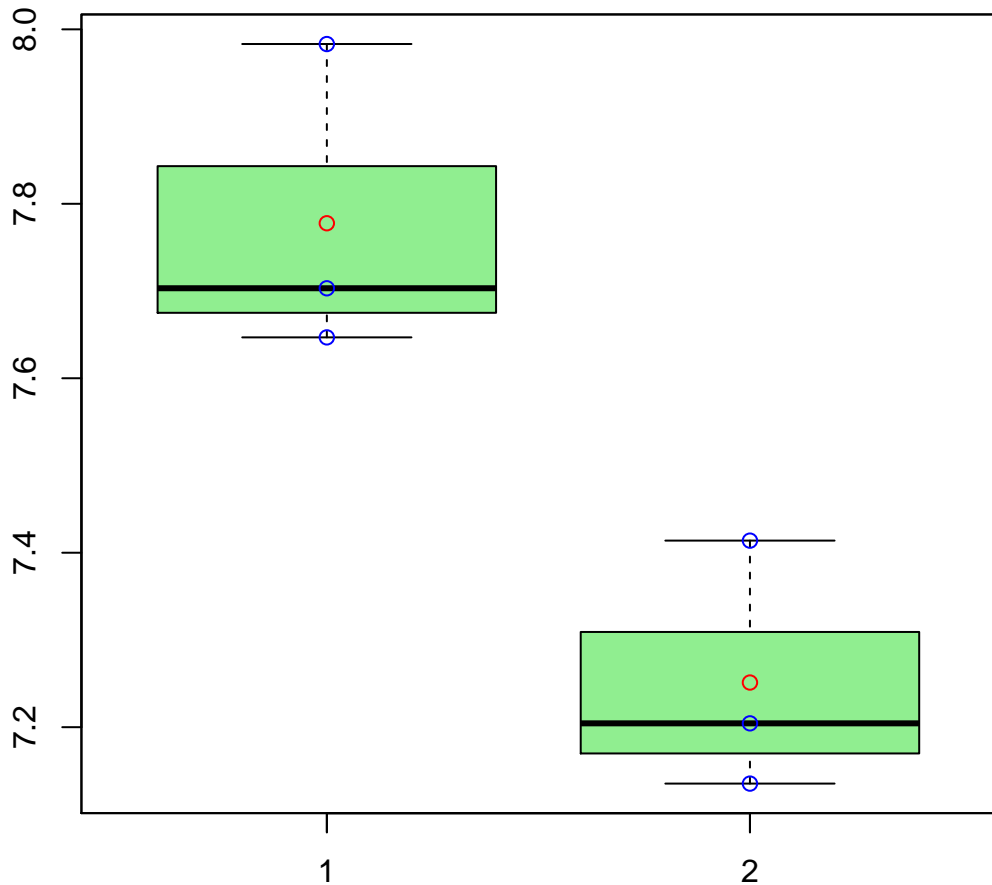

t-Test: p-value = 0.02

# CL7729Contig2|CL7729Contig2

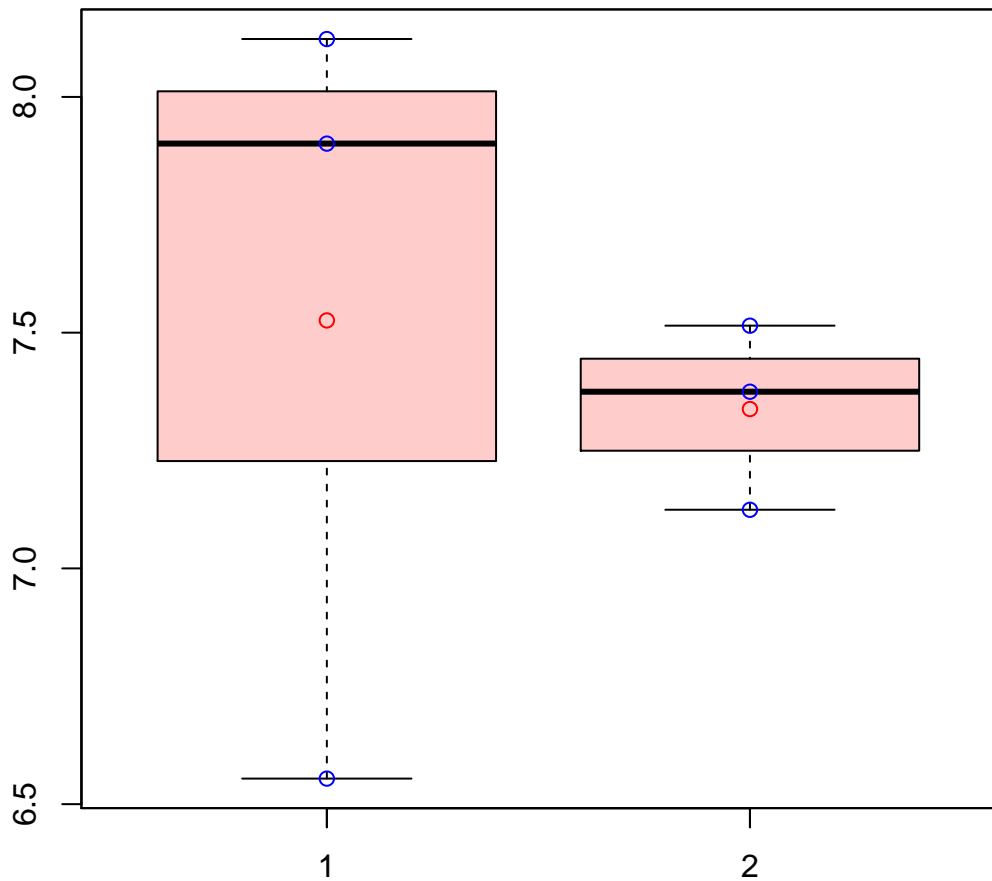

t-Test: p-value = 0.74

# CL772Contig7|CL772Contig7

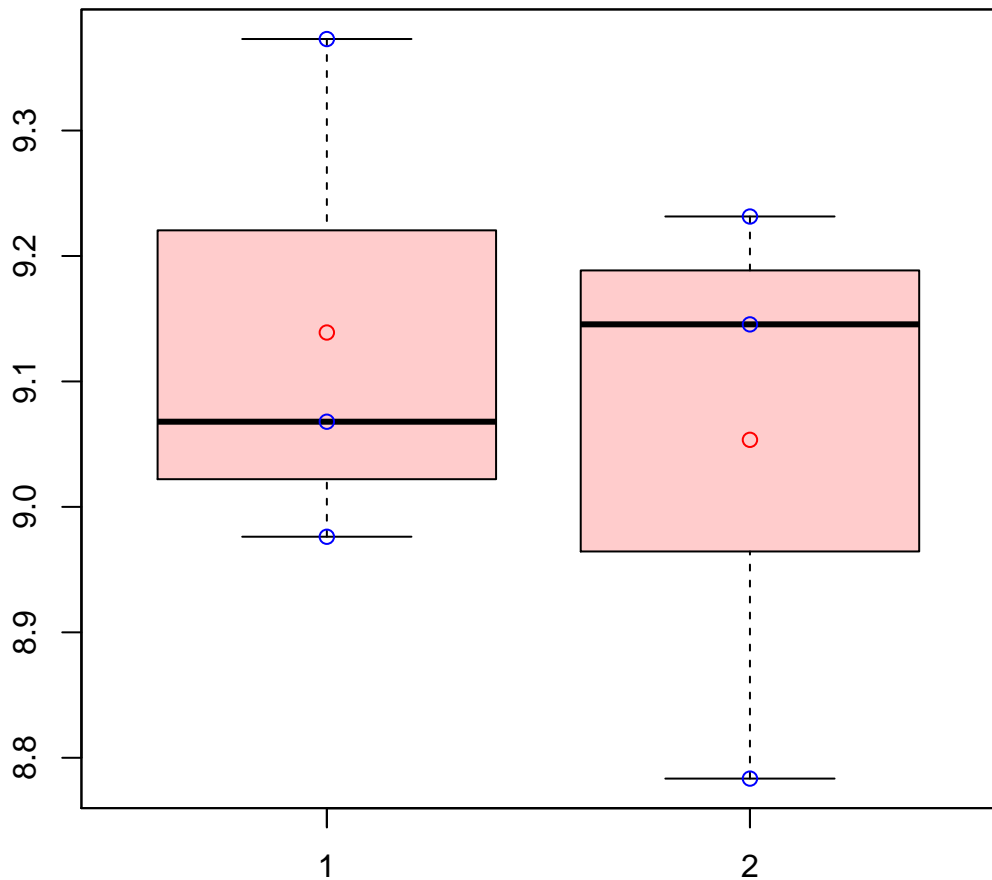

t-Test: p-value = 0.66

# CL7748Contig2|CL7748Contig2

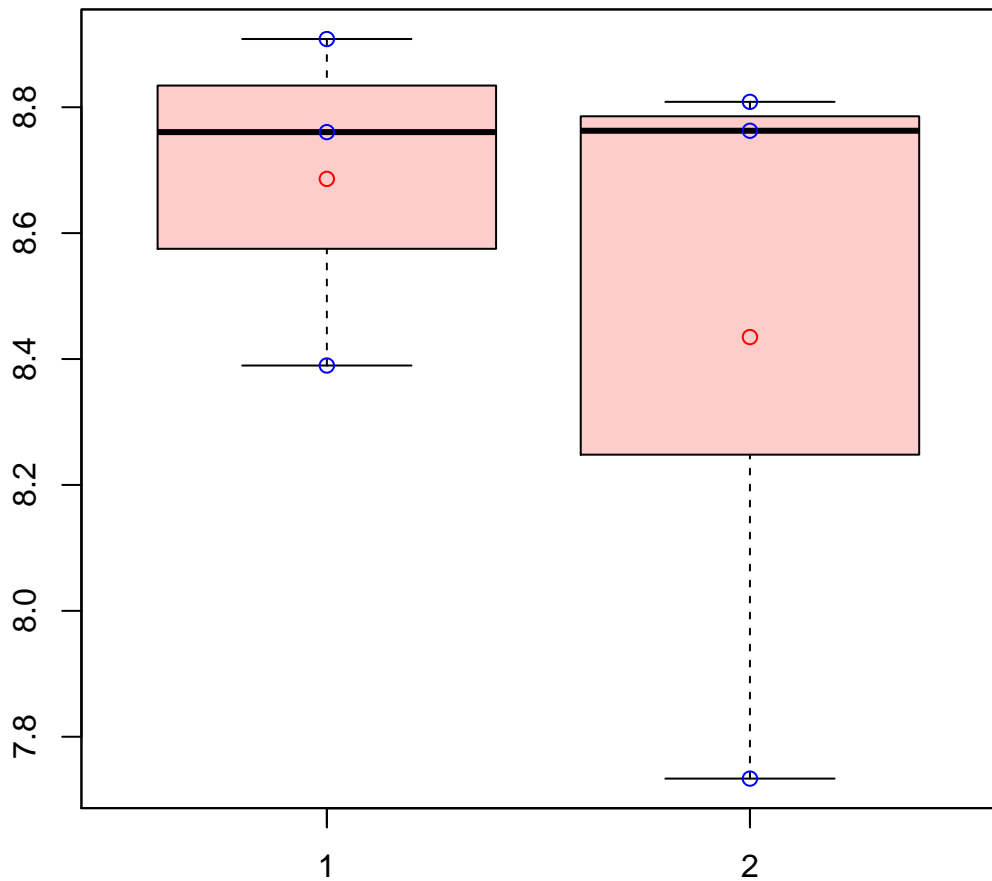

t-Test: p-value = 0.56

# CL7773Contig2|CL7773Contig2

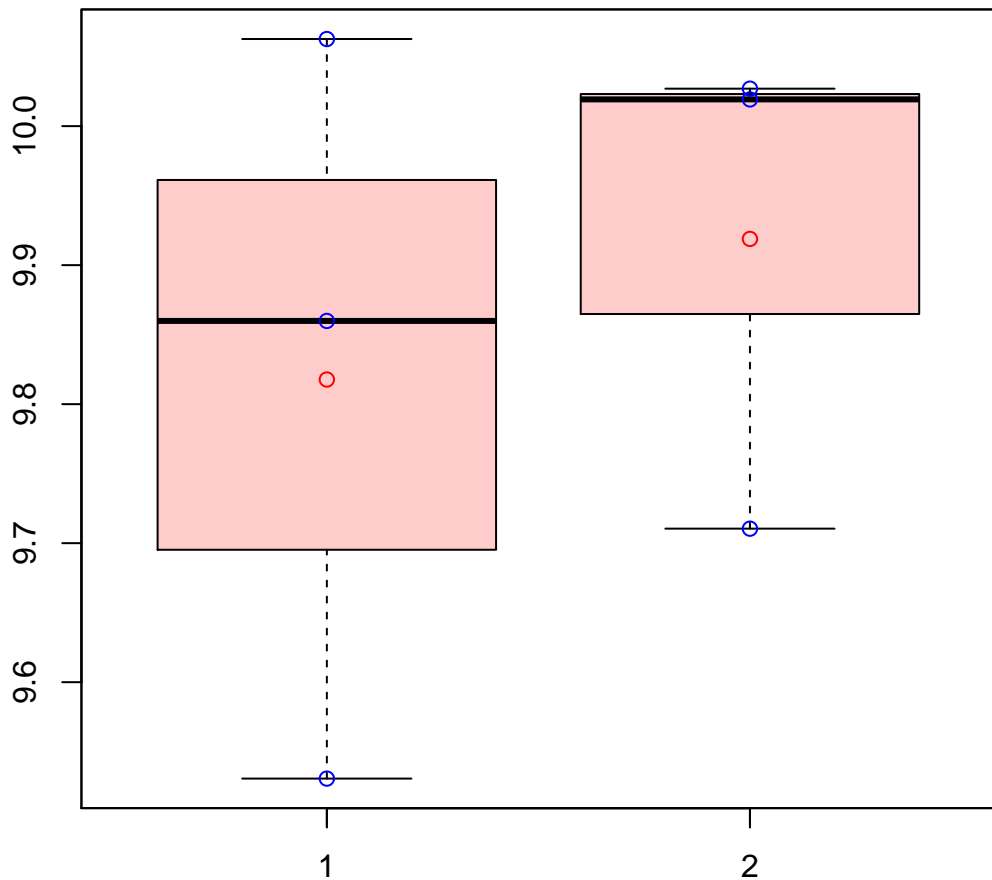

t-Test: p-value = 0.62

# CL777Contig3|CL777Contig3

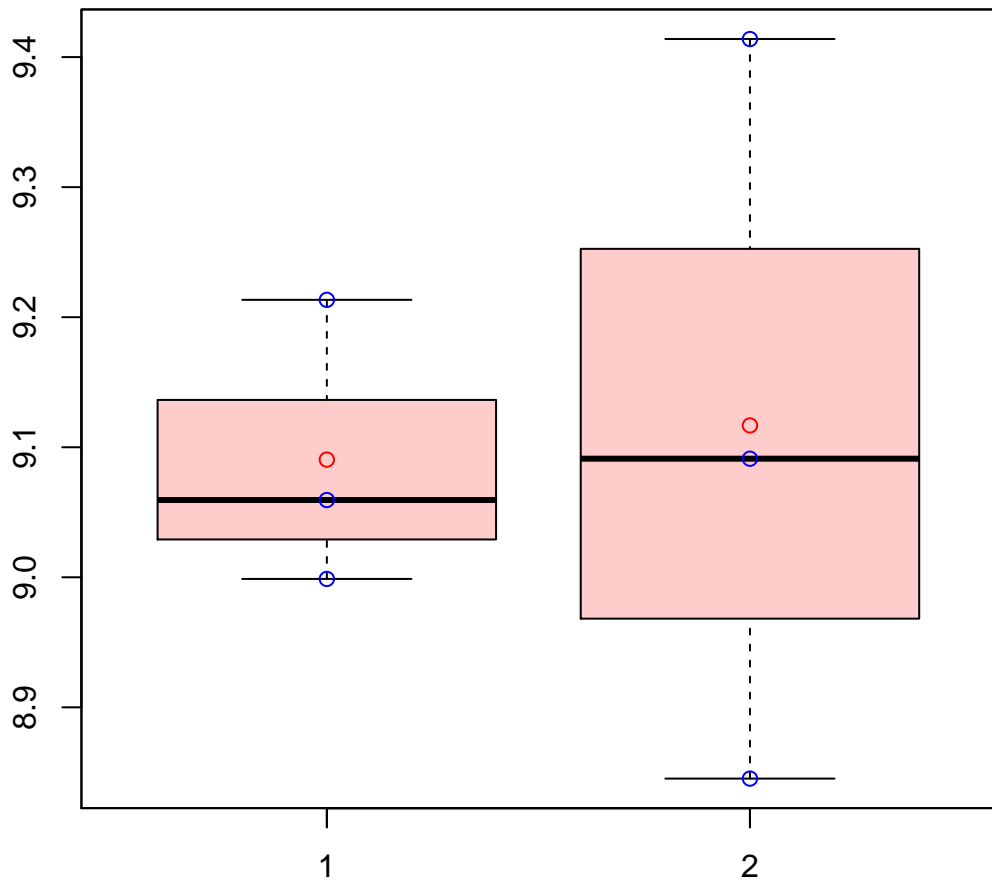

t-Test: p-value = 0.89

# CL7796Contig2|CL7796Contig2

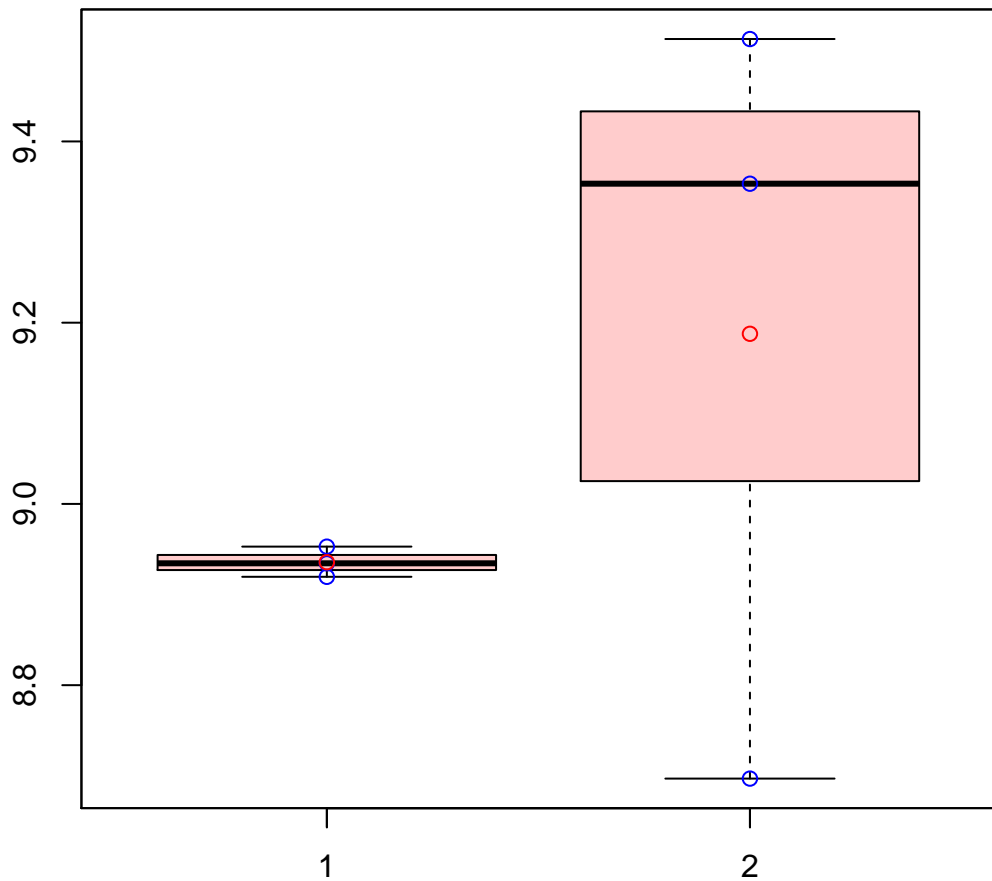

t-Test: p-value = 0.42



# CL77Contig18|CL77Contig18

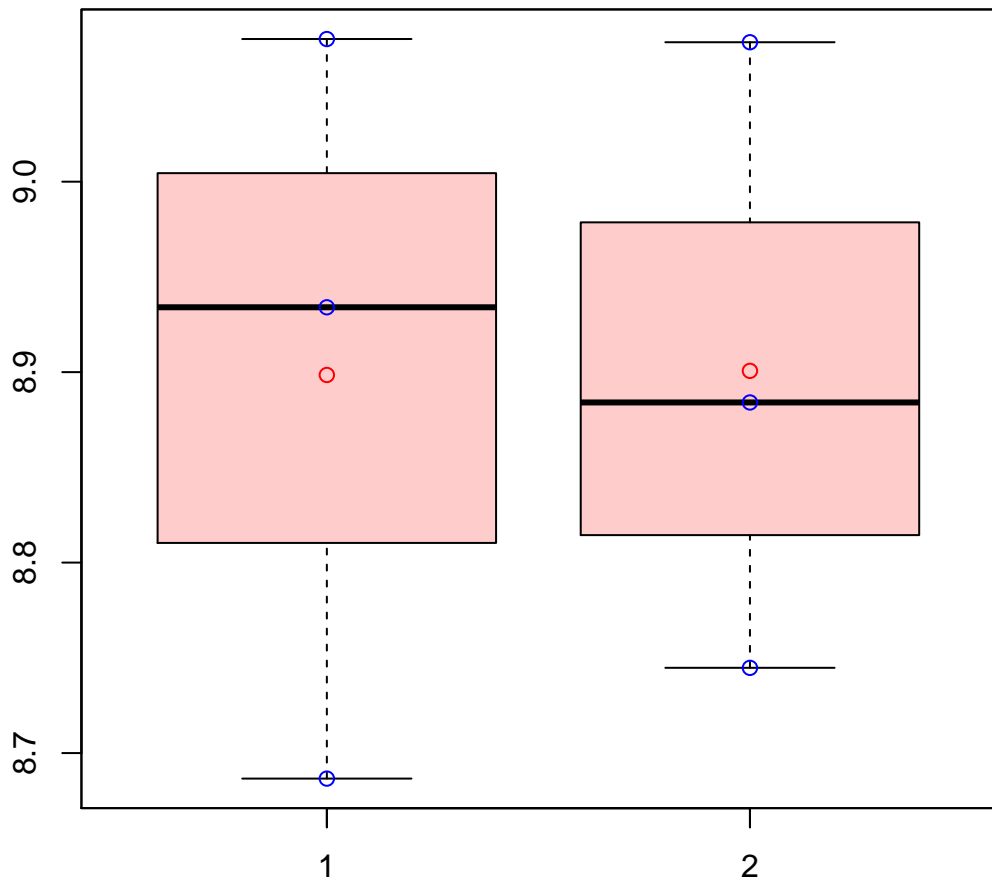

t-Test: p-value = 0.99

# CL7813Contig4|CL7813Contig4

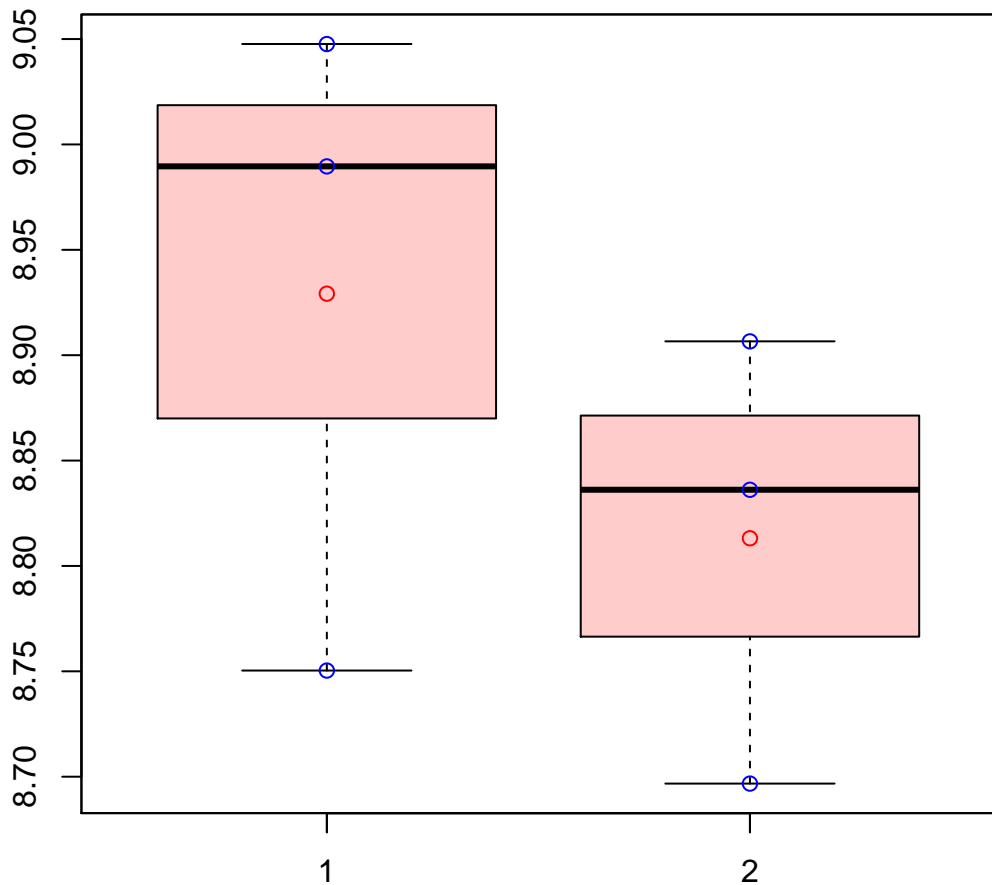

t-Test: p-value = 0.36

# CL7817Contig3|CL7817Contig3

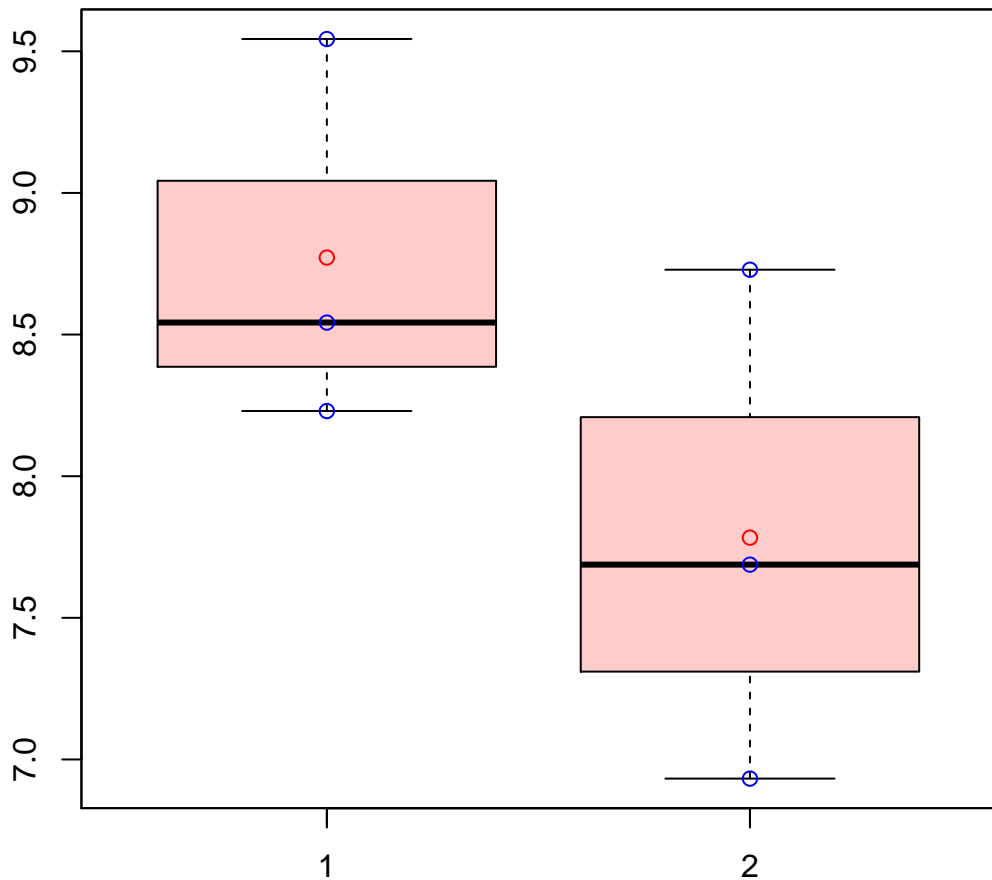

t-Test: p-value = 0.21

# CL7819Contig2|CL7819Contig2

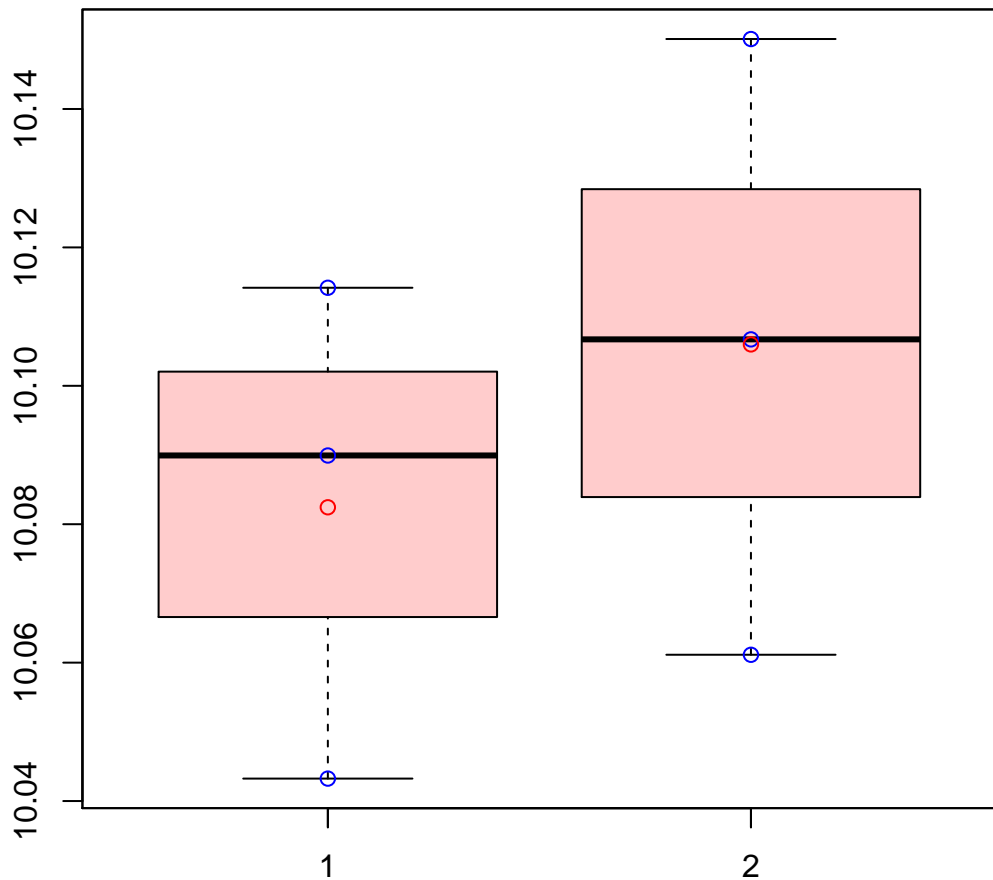

t-Test: p-value = 0.52

# CL781Contig6|CL781Contig6

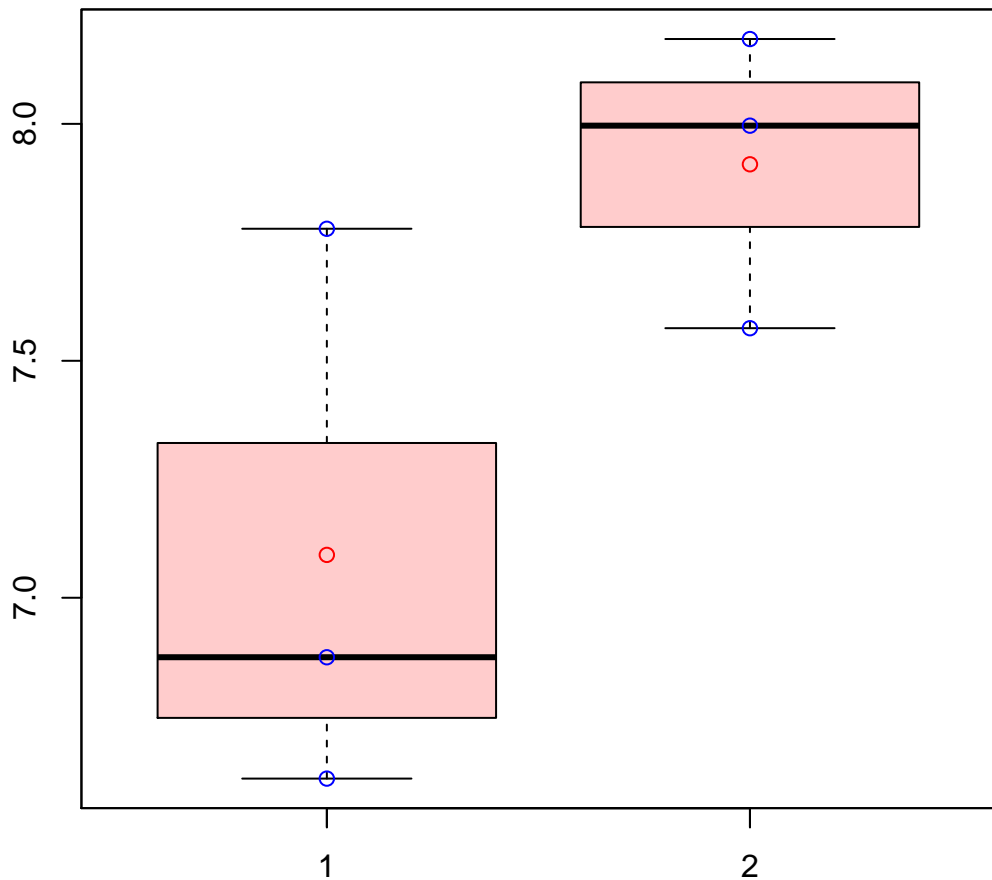

t-Test: p-value = 0.13

# CL7821Contig1|CL7821Contig1

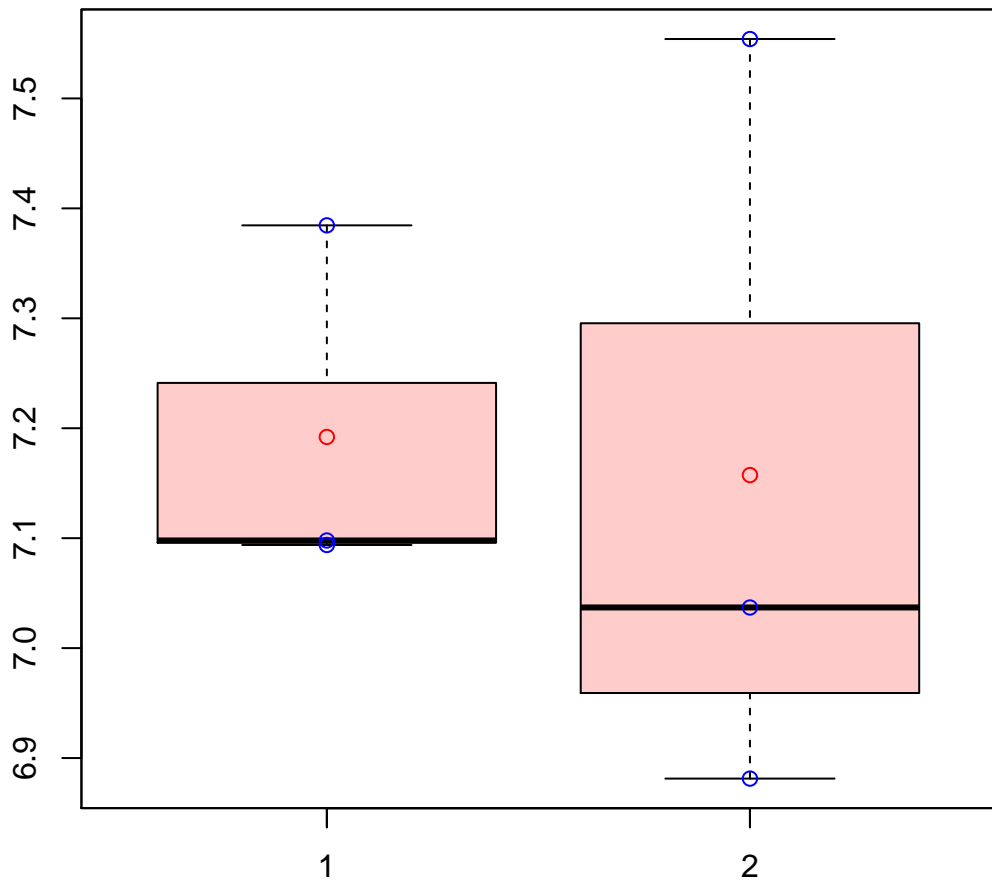

t-Test: p-value = 0.89

# CL7827Contig1|CL7827Contig1

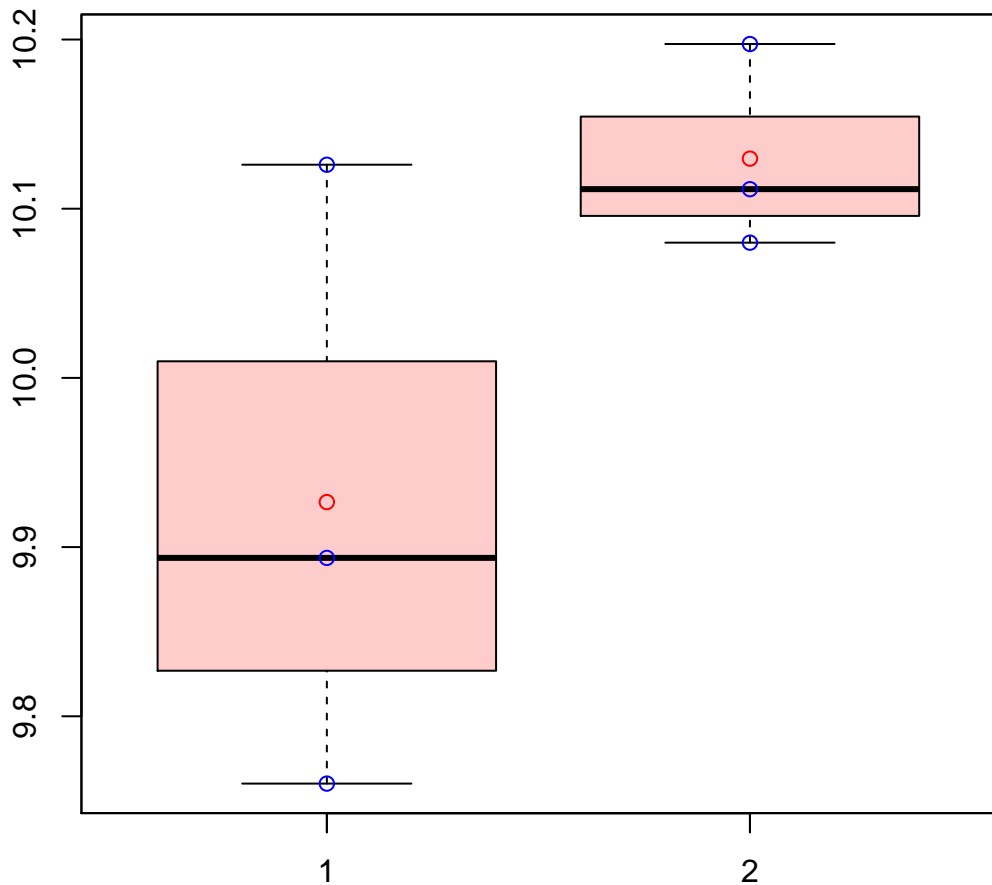

t-Test: p-value = 0.19

# CL782Contig5|CL782Contig5

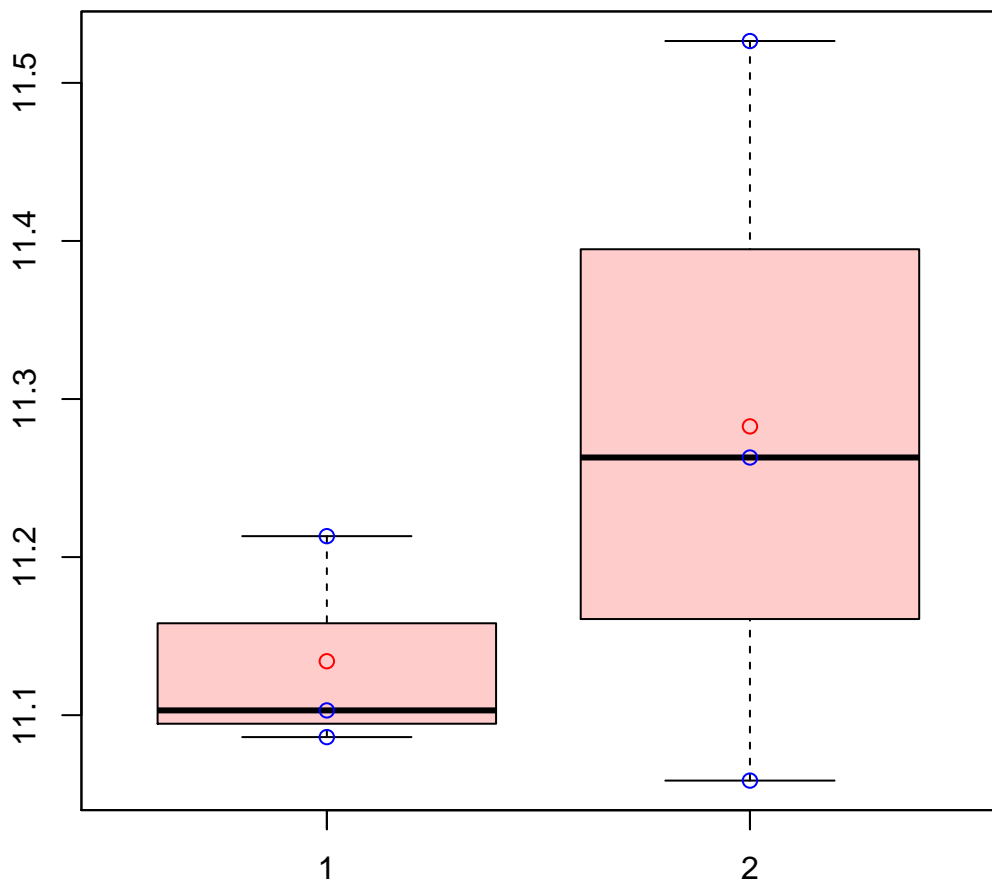

t-Test: p-value = 0.39



# CL782Contig7|CL782Contig7

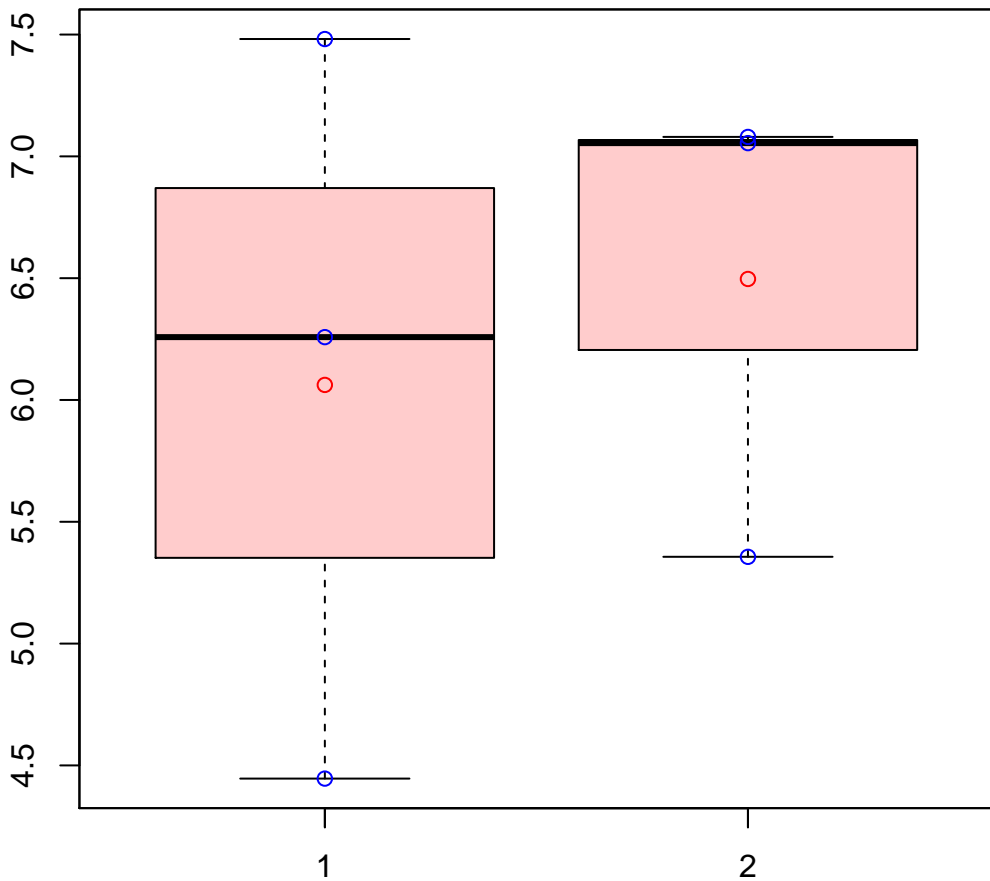

t-Test: p-value = 0.7

# CL7830Contig1|CL7830Contig1

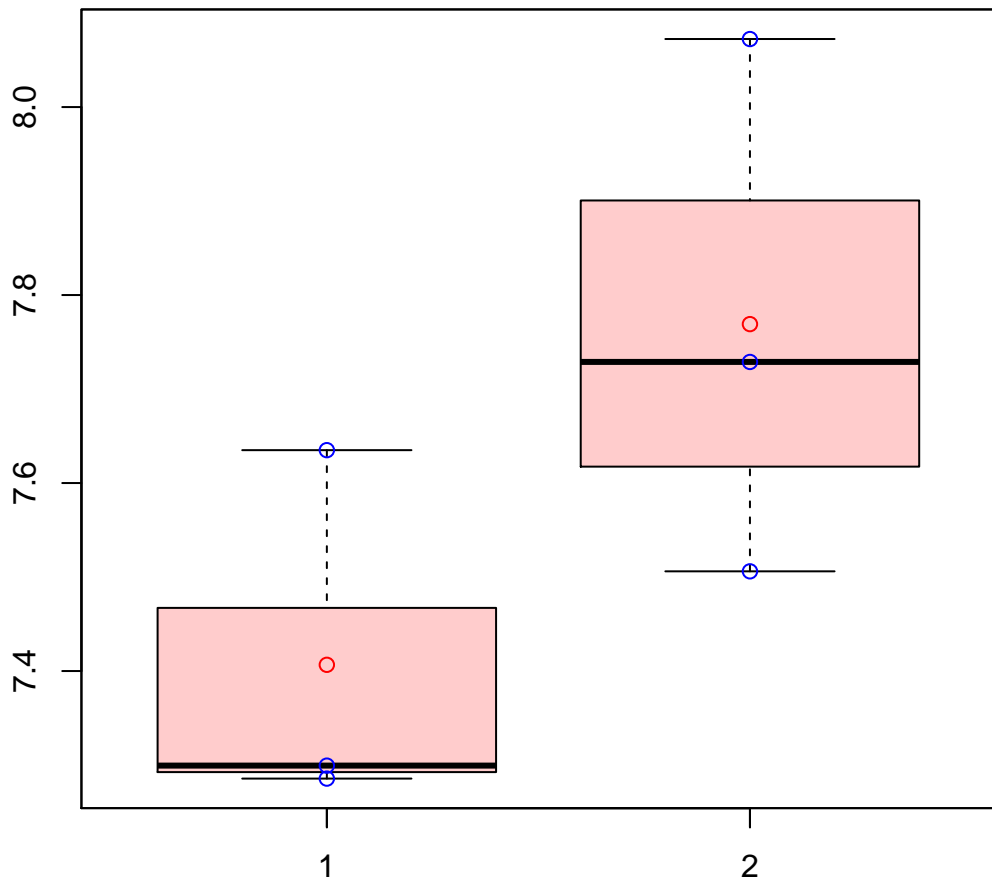

t-Test: p-value = 0.15

# CL7836Contig1|CL7836Contig1

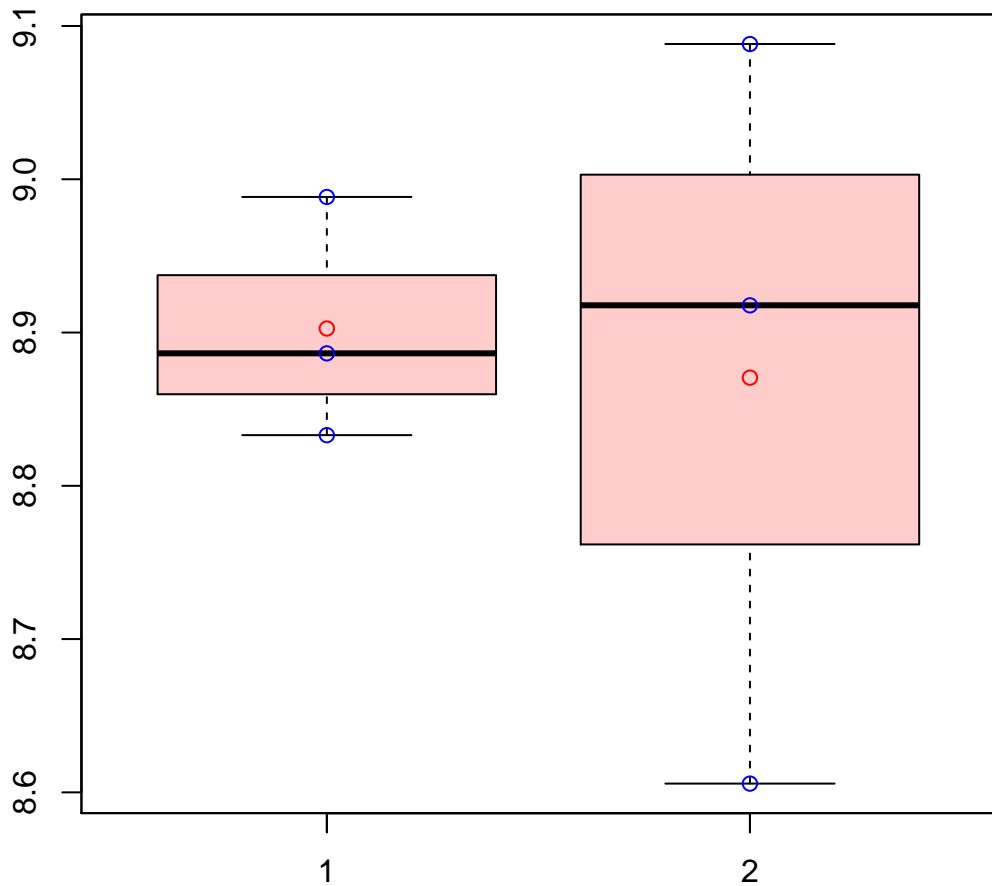

t-Test: p-value = 0.85

# CL7837Contig2|CL7837Contig2

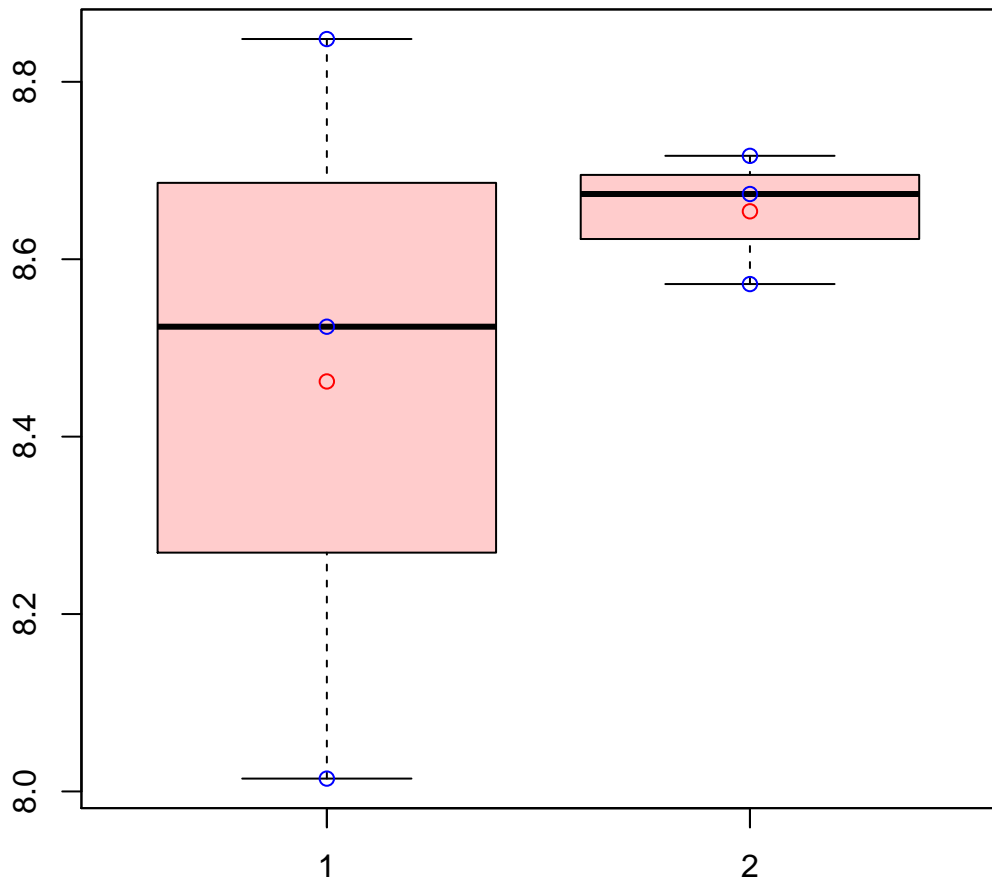

t-Test: p-value = 0.51

# CL785Contig6|CL785Contig6

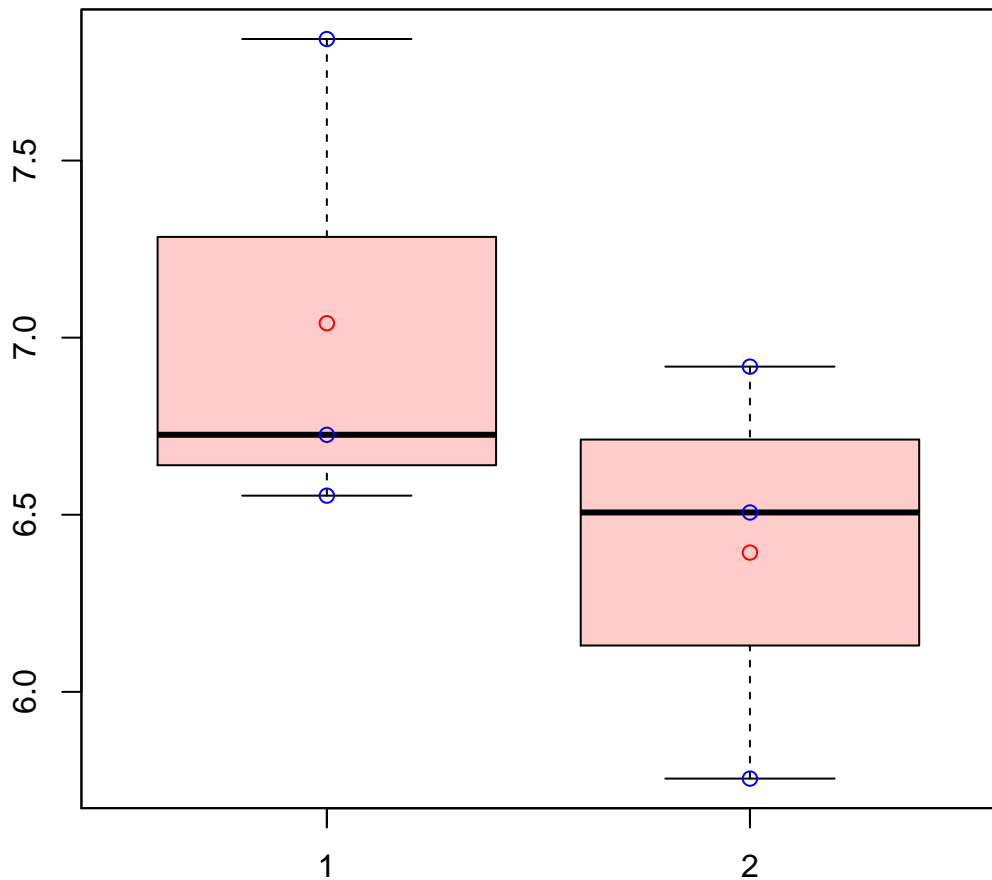

t-Test: p-value = 0.29

# CL786Contig3|CL786Contig3

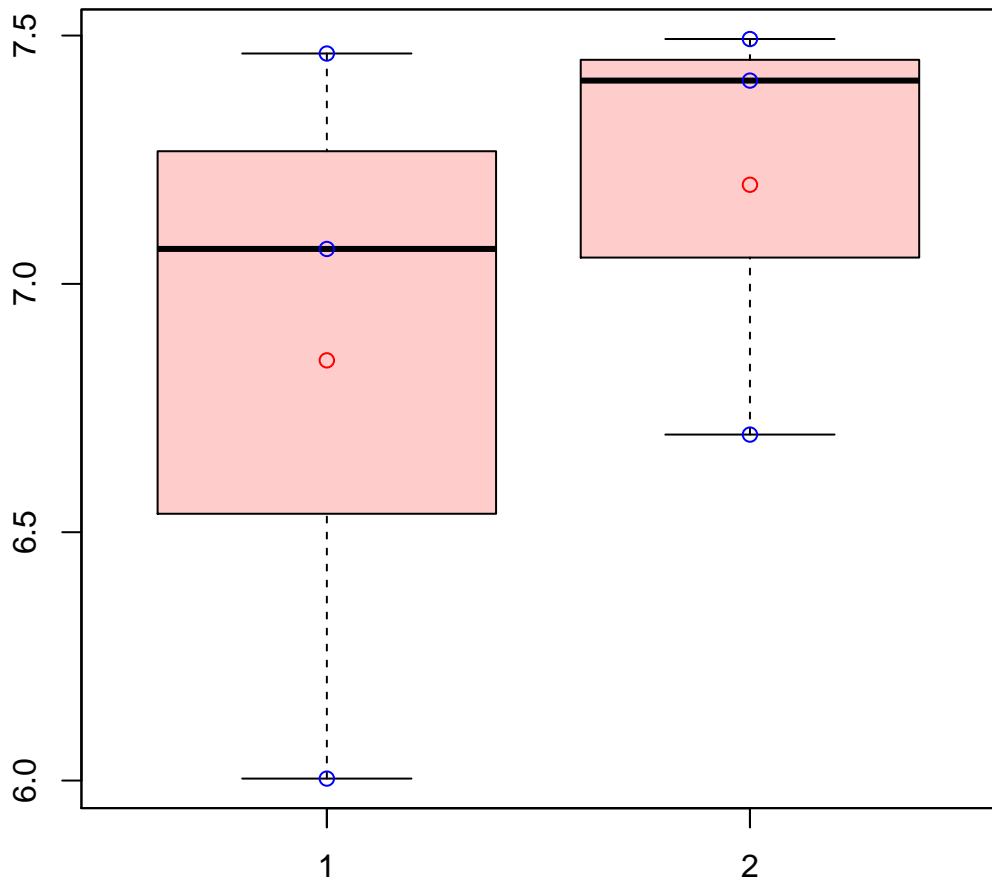

t-Test: p-value = 0.53

# CL786Contig5|CL786Contig5

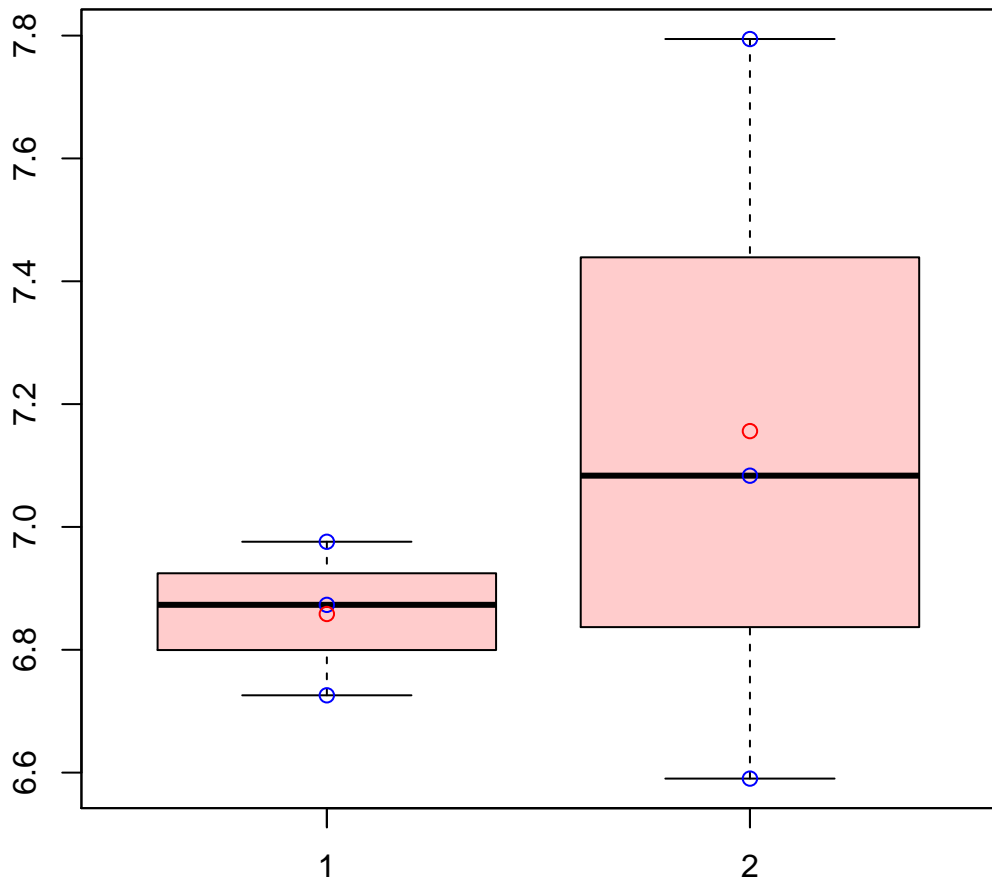

t-Test: p-value = 0.49

# CL7898Contig1|CL7898Contig1

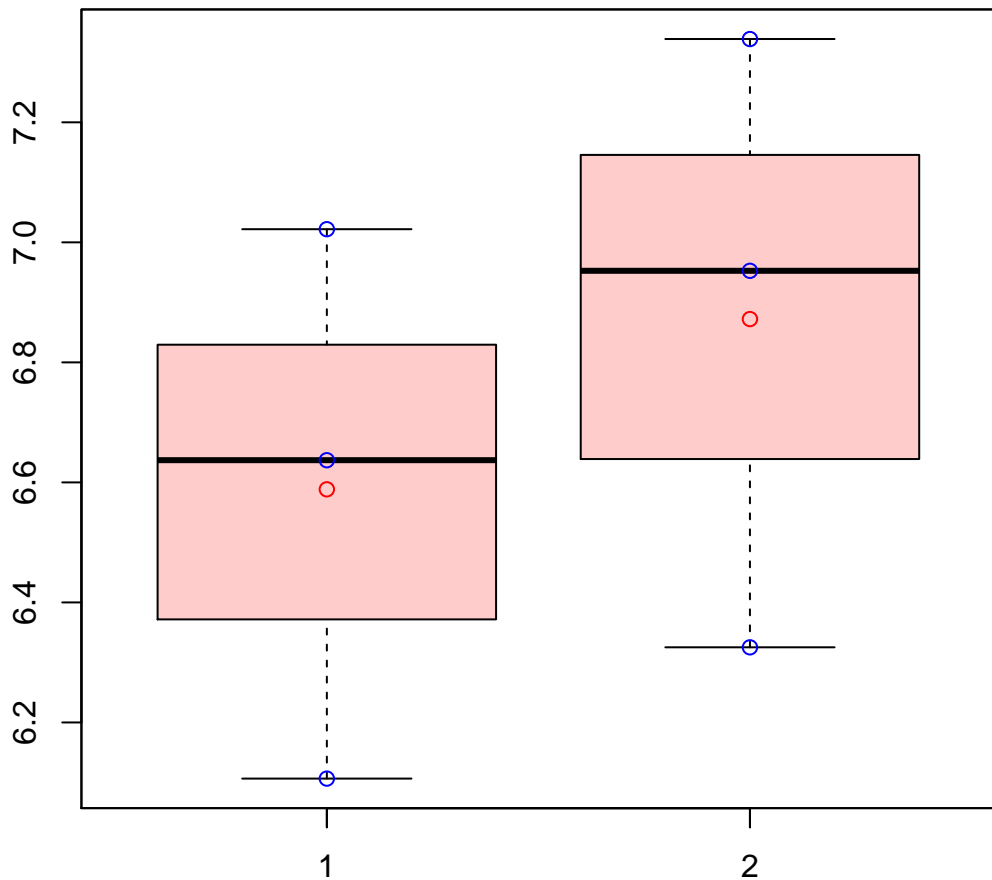

t-Test: p-value = 0.51



# CL78Contig11|CL78Contig11

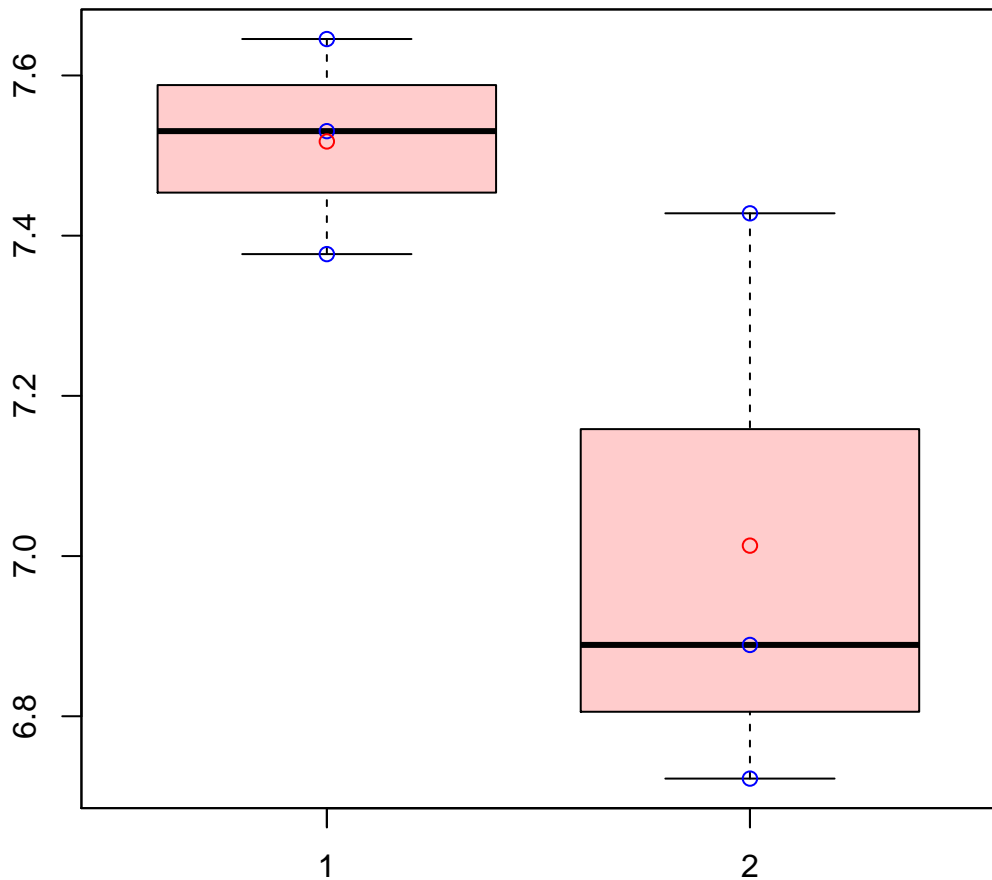

t-Test: p-value = 0.13

# CL78Contig14|CL78Contig14

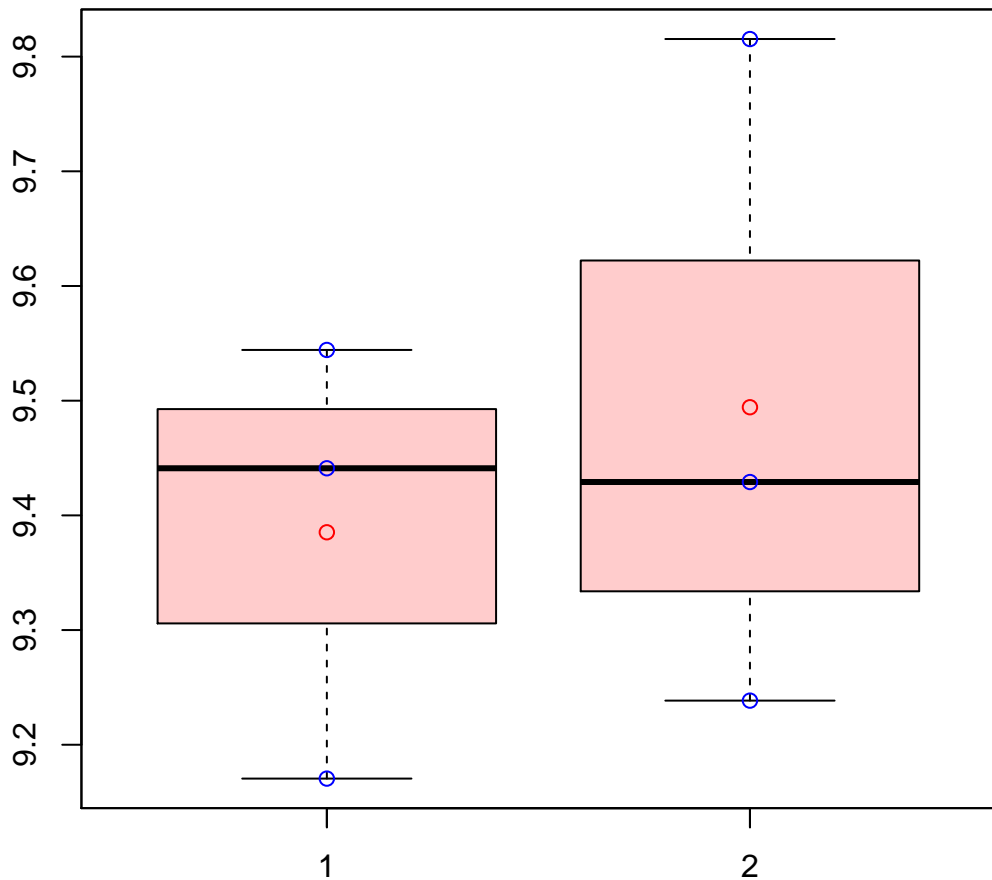

t-Test: p-value = 0.62

# CL78Contig22|CL78Contig22

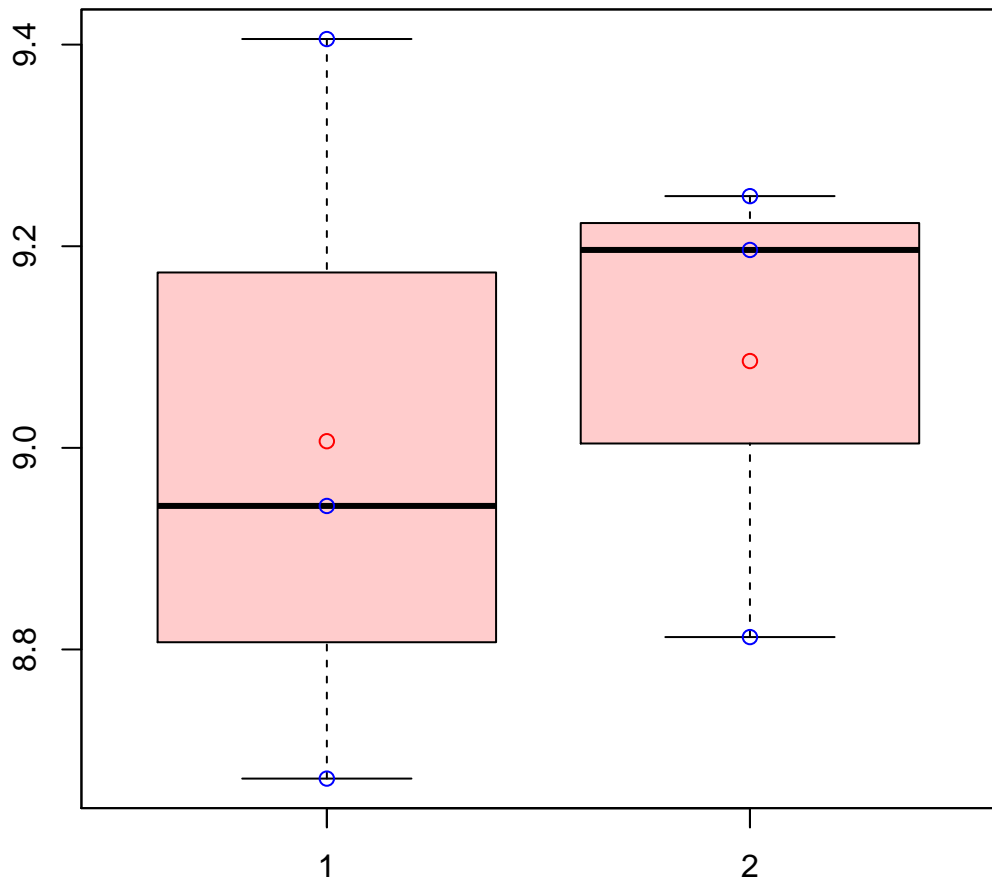

t-Test: p-value = 0.77

# CL78Contig26|CL78Contig26

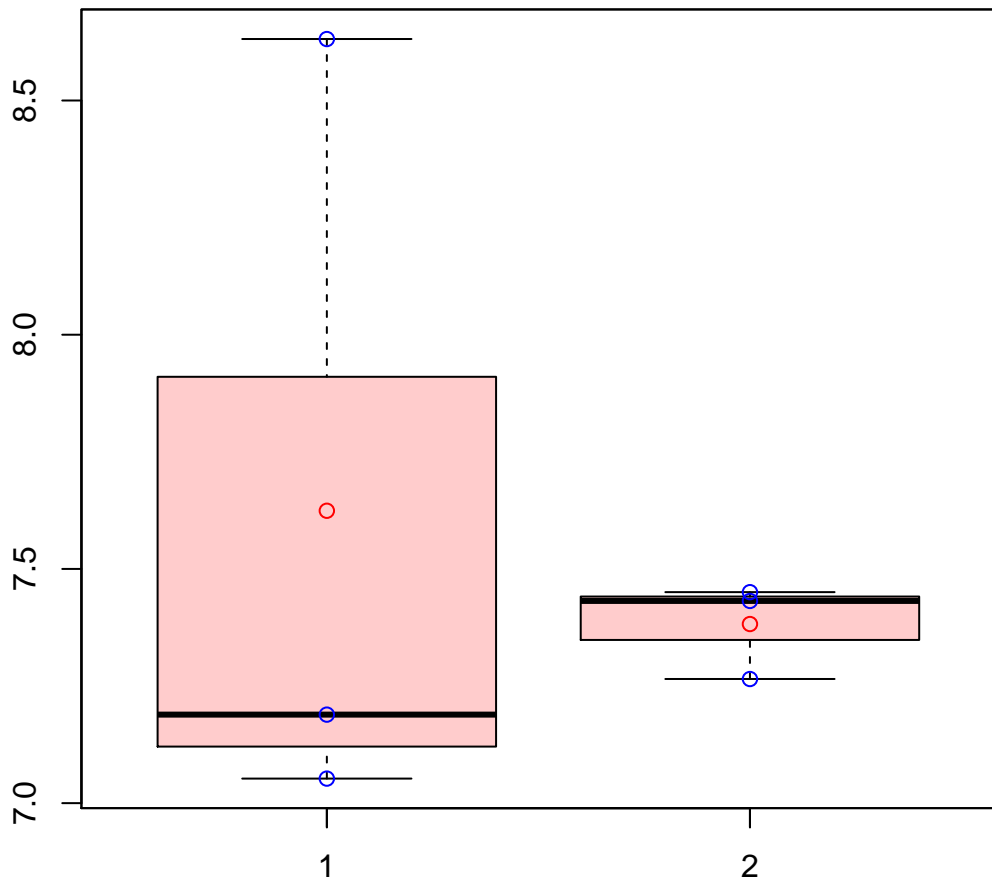

t-Test: p-value = 0.68

# CL78Contig33|CL78Contig33

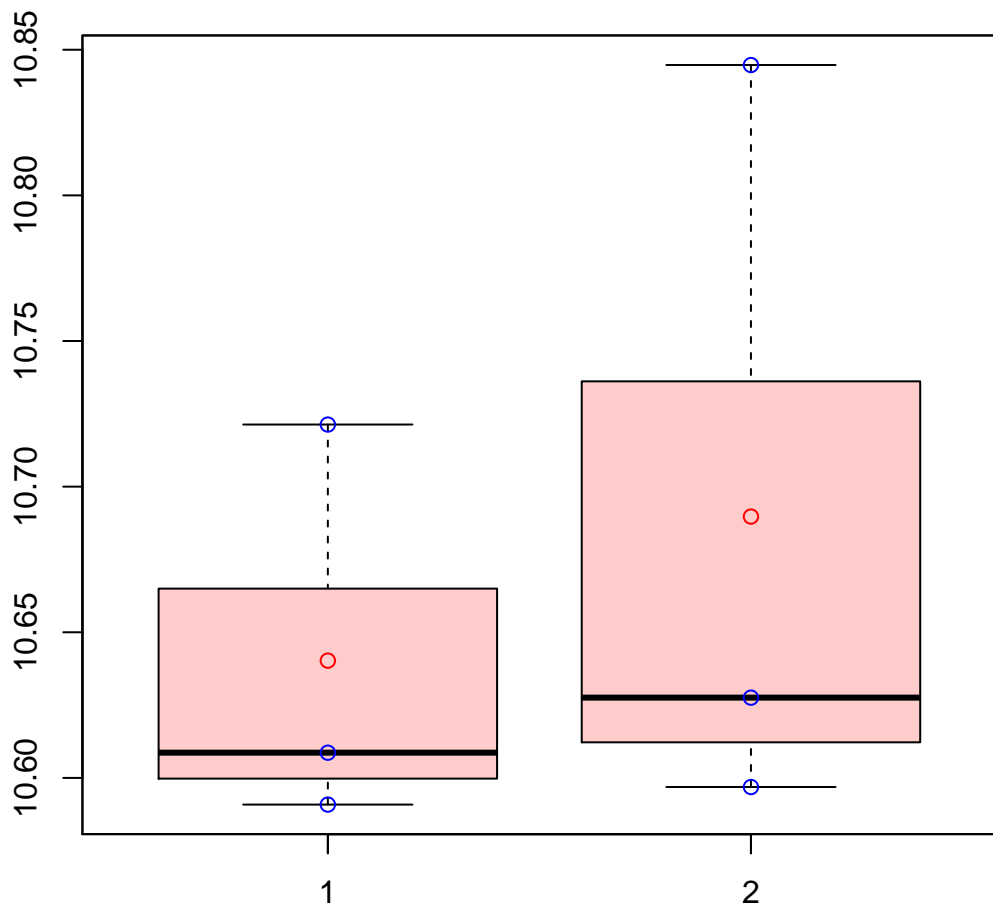

t-Test: p-value = 0.61

# CL78Contig4|CL78Contig4

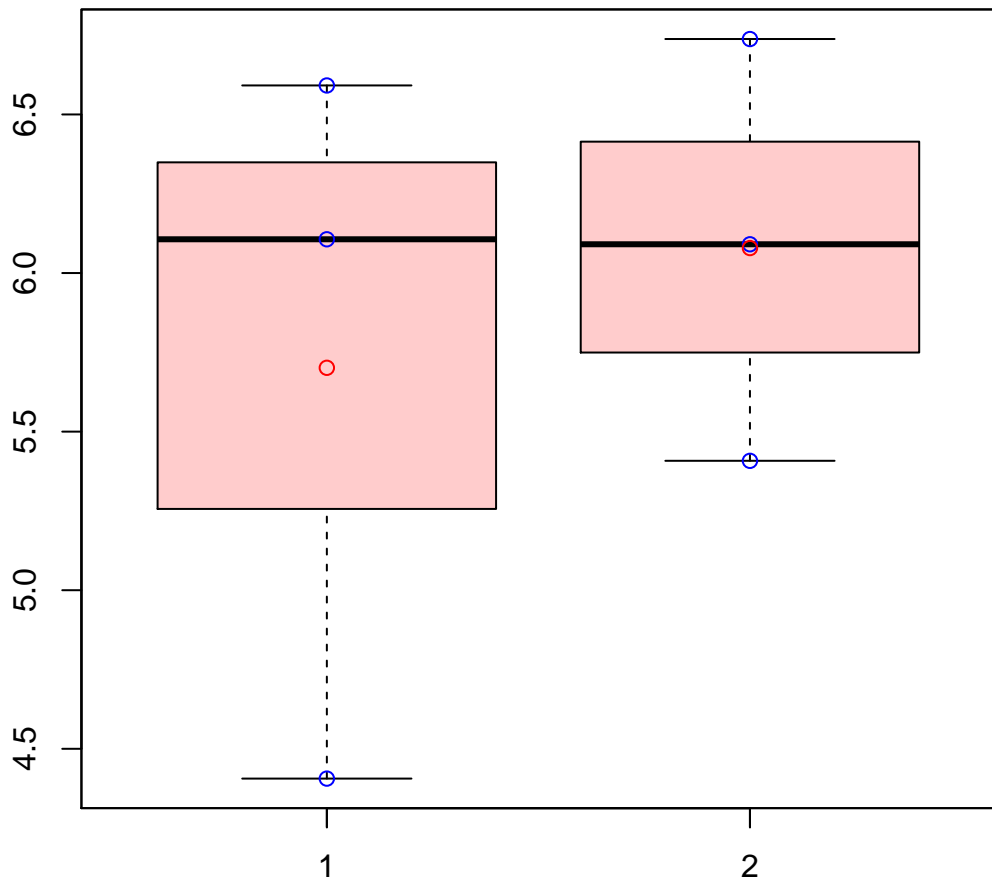

t-Test: p-value = 0.65

# CL78Contig8|CL78Contig8

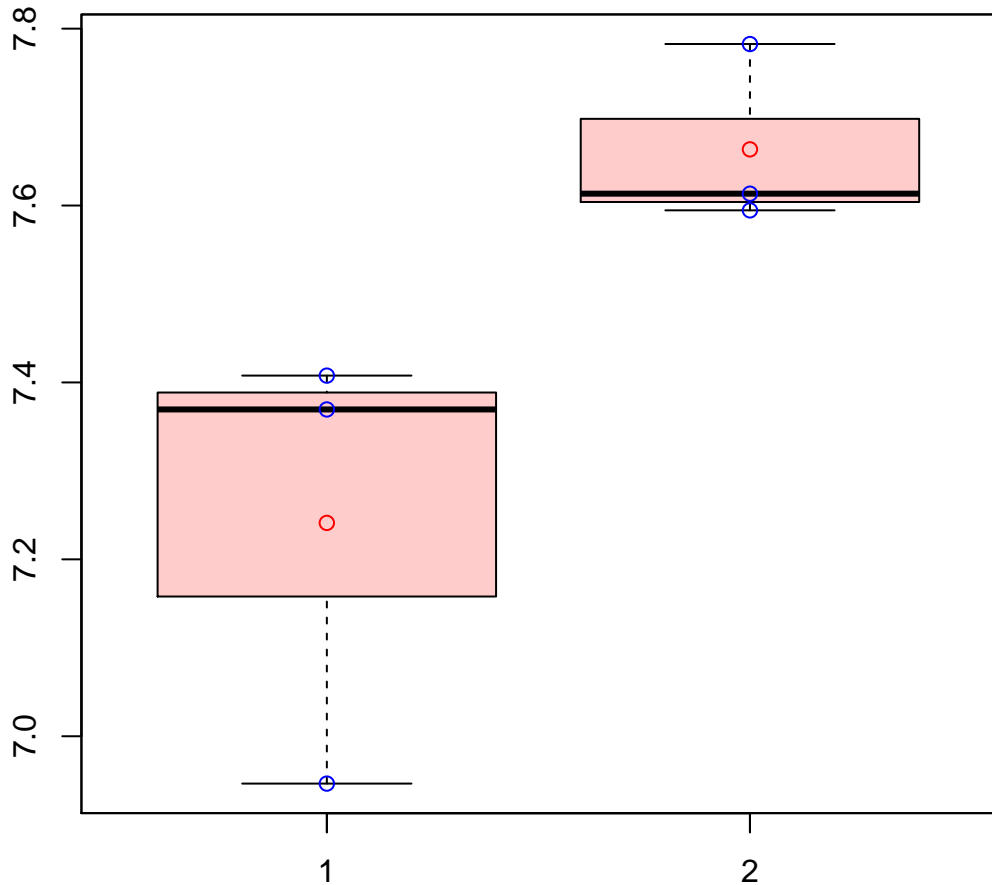

t-Test: p-value = 0.09

# CL7903Contig1|CL7903Contig1

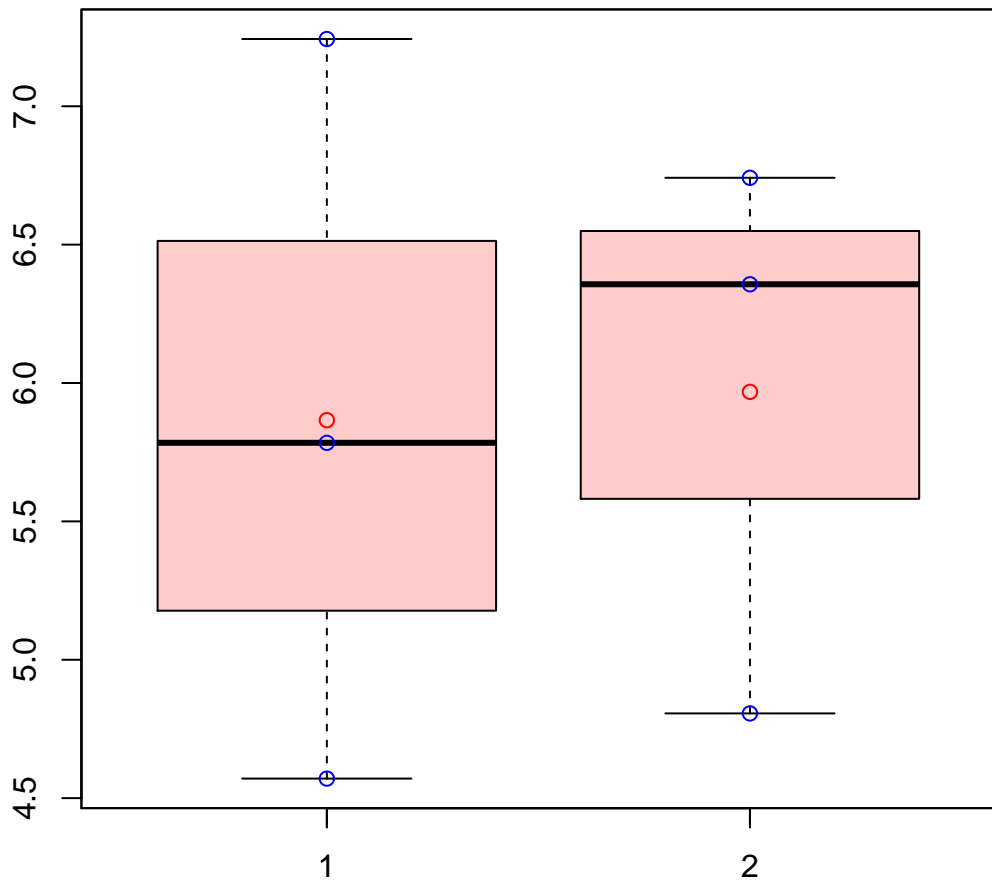

t-Test: p-value = 0.92



# CL7909Contig1|CL7909Contig1

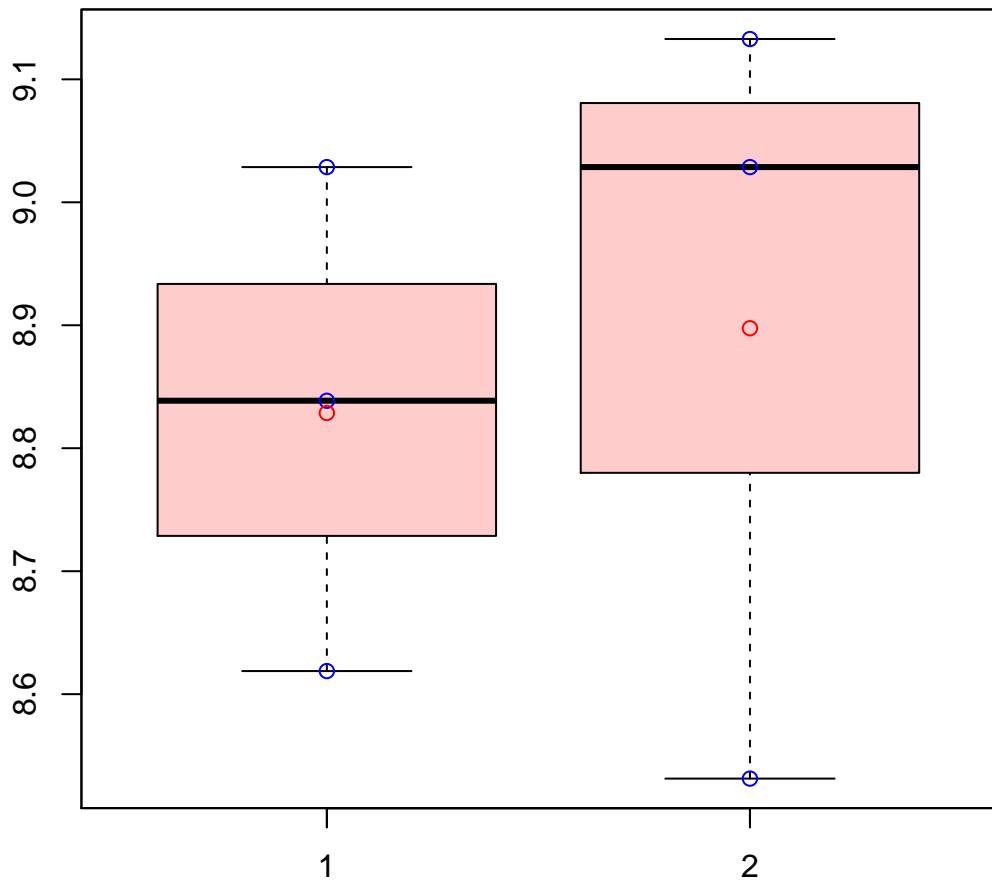

t-Test: p-value = 0.77

# CL7916Contig1|CL7916Contig1

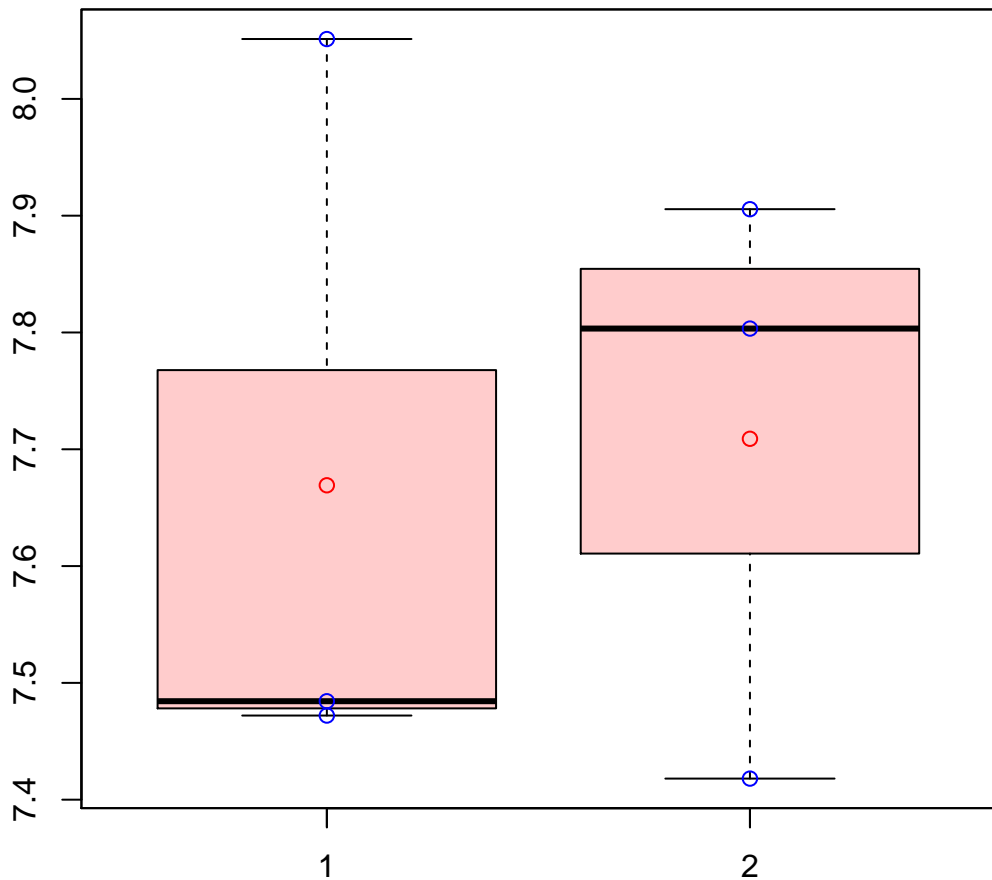

t-Test: p-value = 0.88

# CL7922Contig4|CL7922Contig4

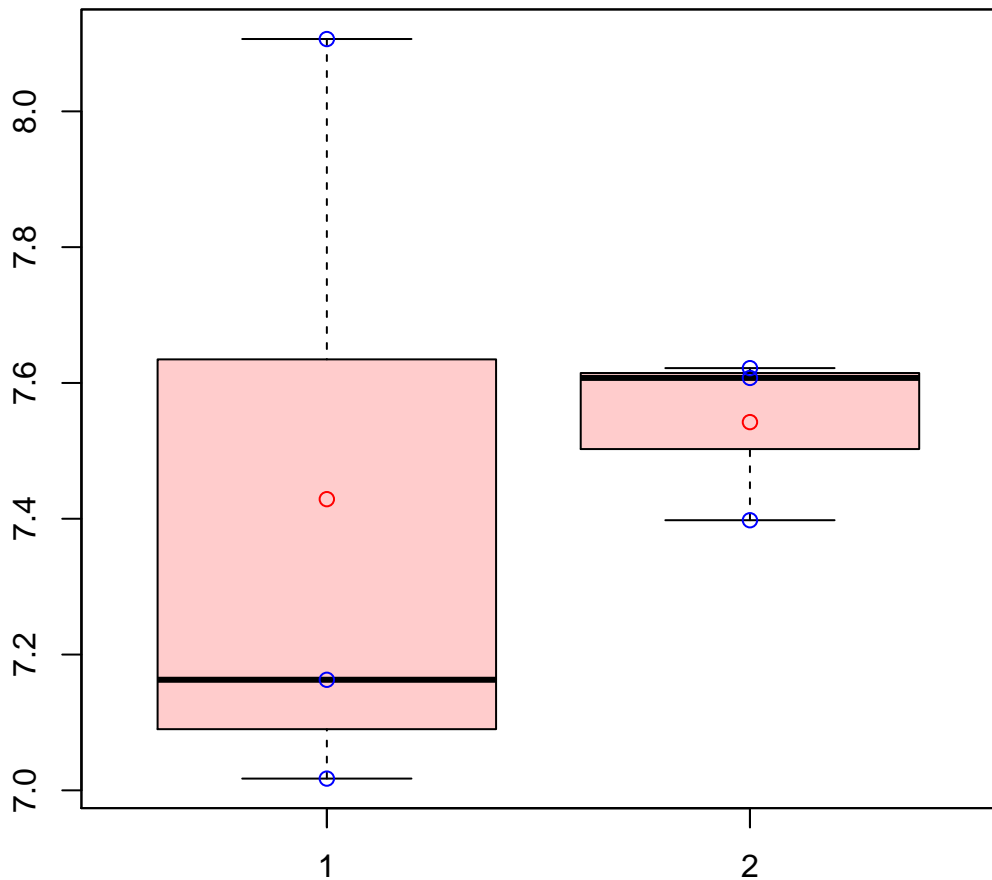

t-Test: p-value = 0.77

# CL7941Contig1|CL7941Contig1

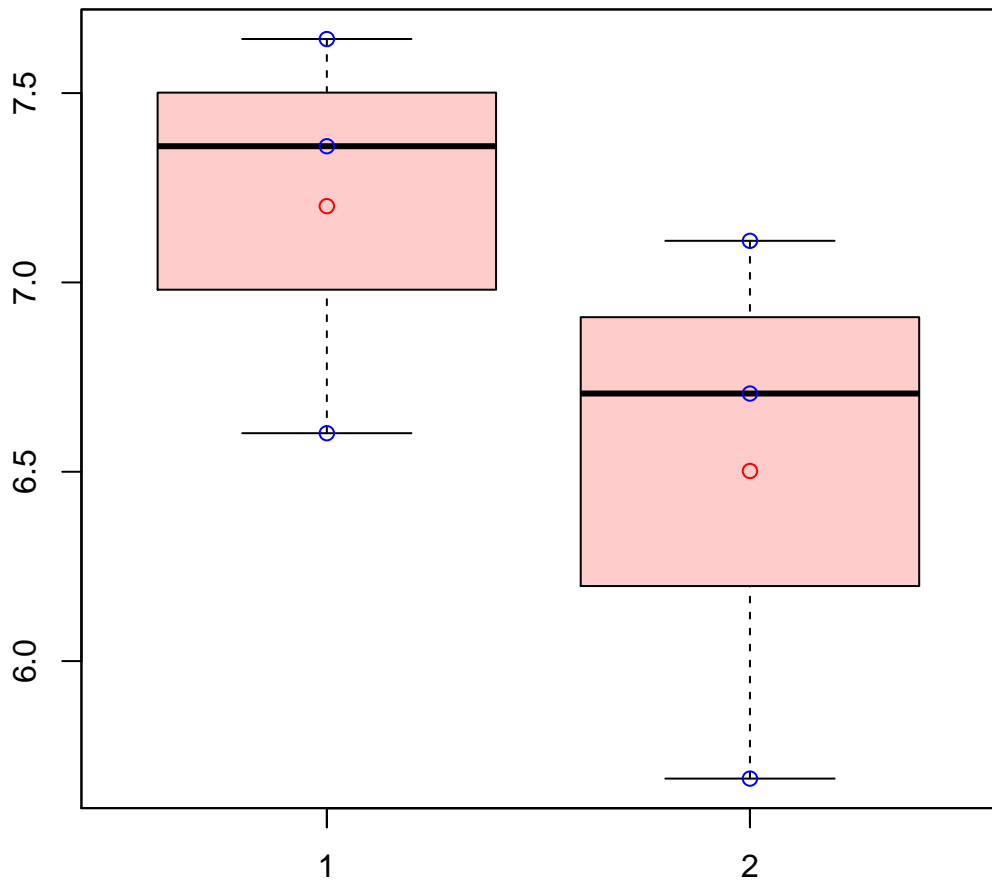

t-Test: p-value = 0.26

# CL7942Contig1|CL7942Contig1

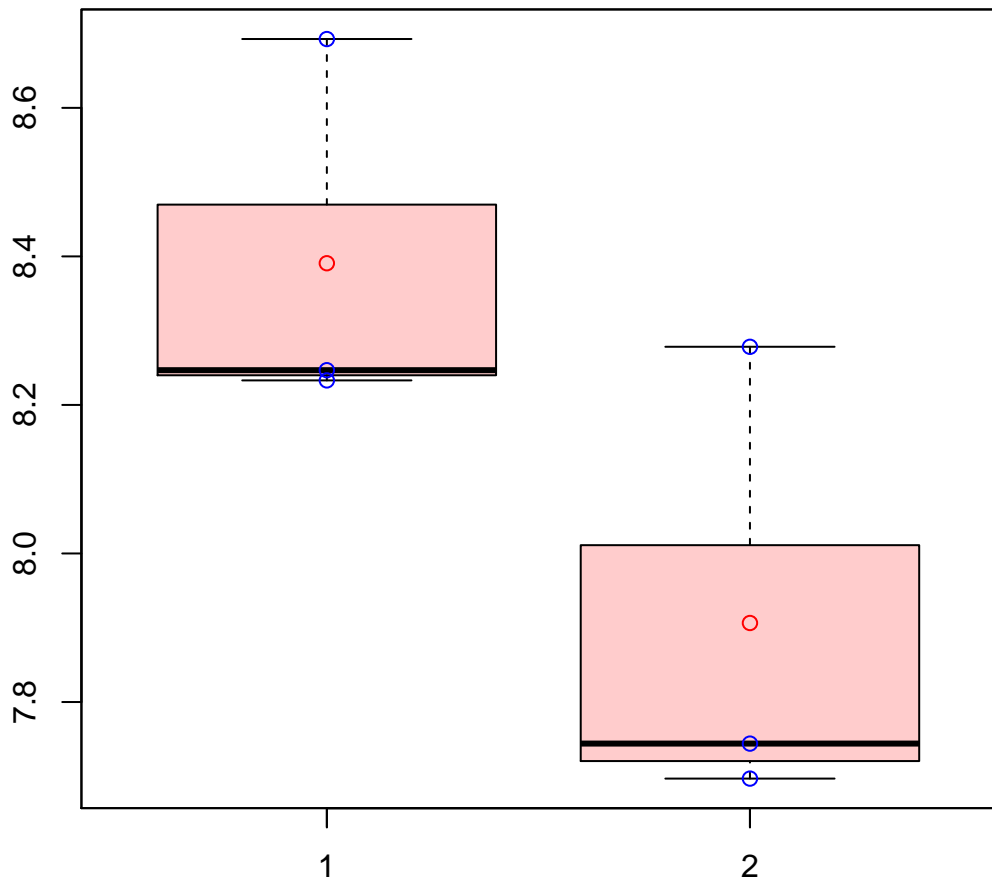

t-Test: p-value = 0.12

# CL794Contig9|CL794Contig9

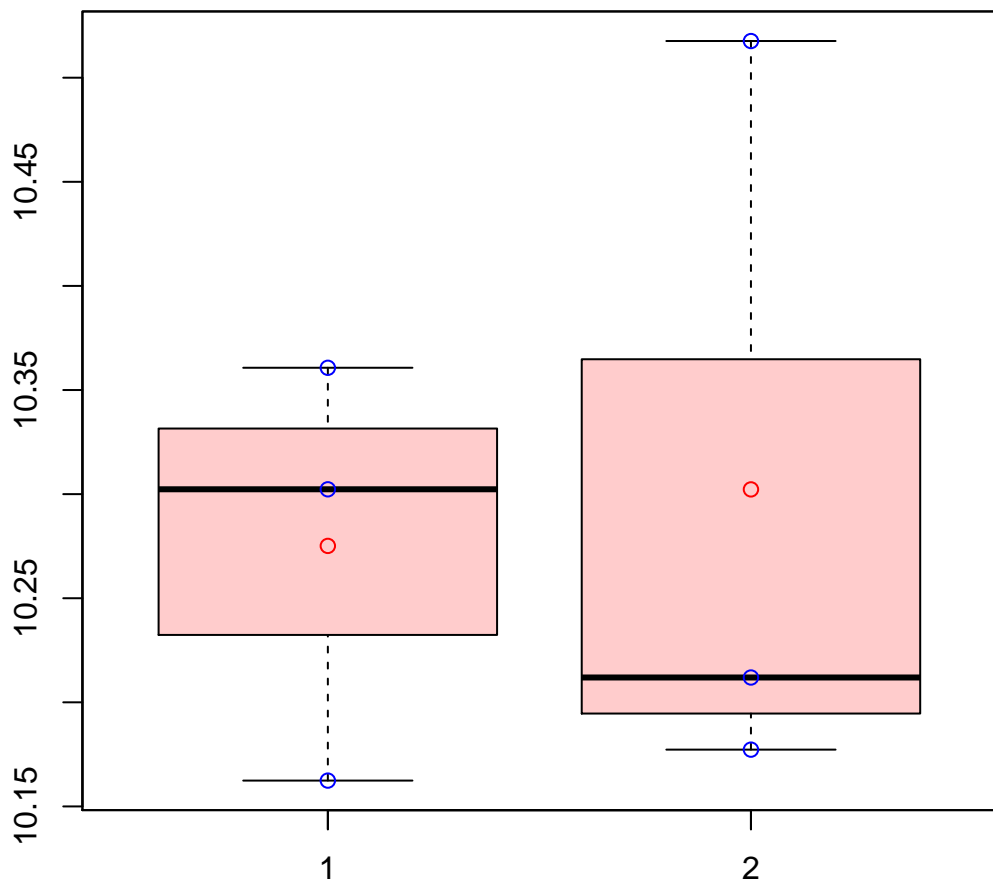

t-Test: p-value = 0.84

# CL7952Contig3|CL7952Contig3

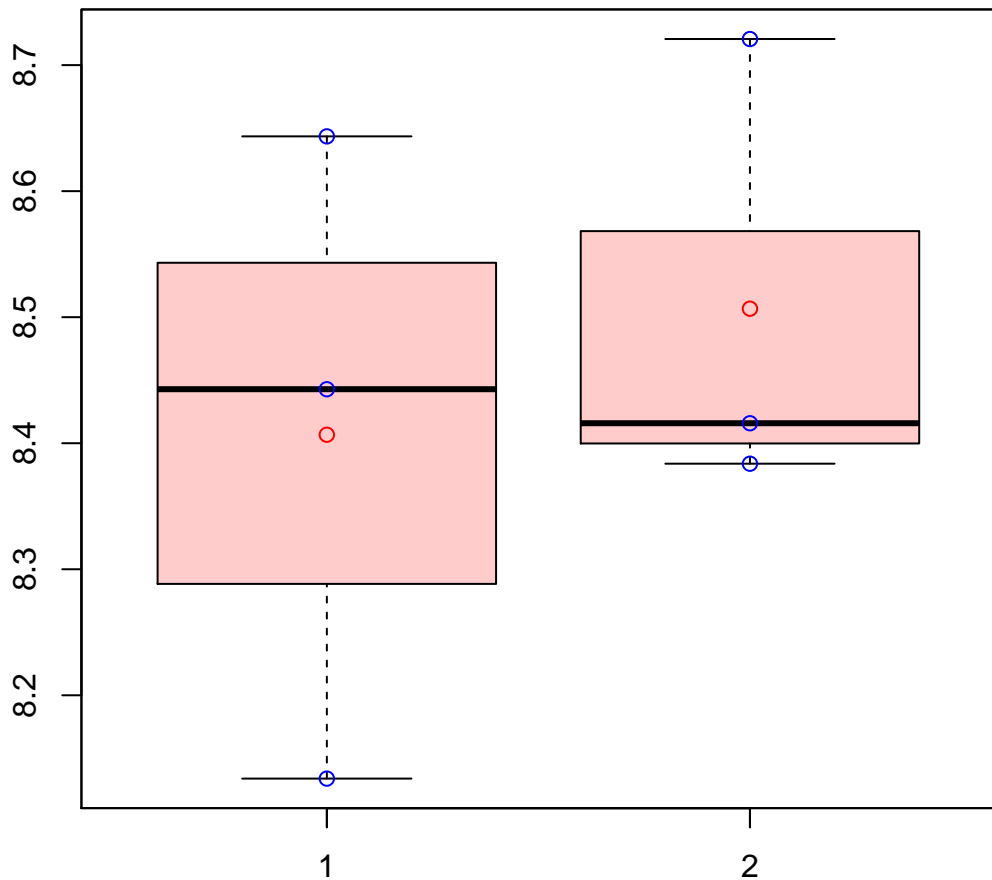

t-Test: p-value = 0.62

# CL7965Contig3|CL7965Contig3

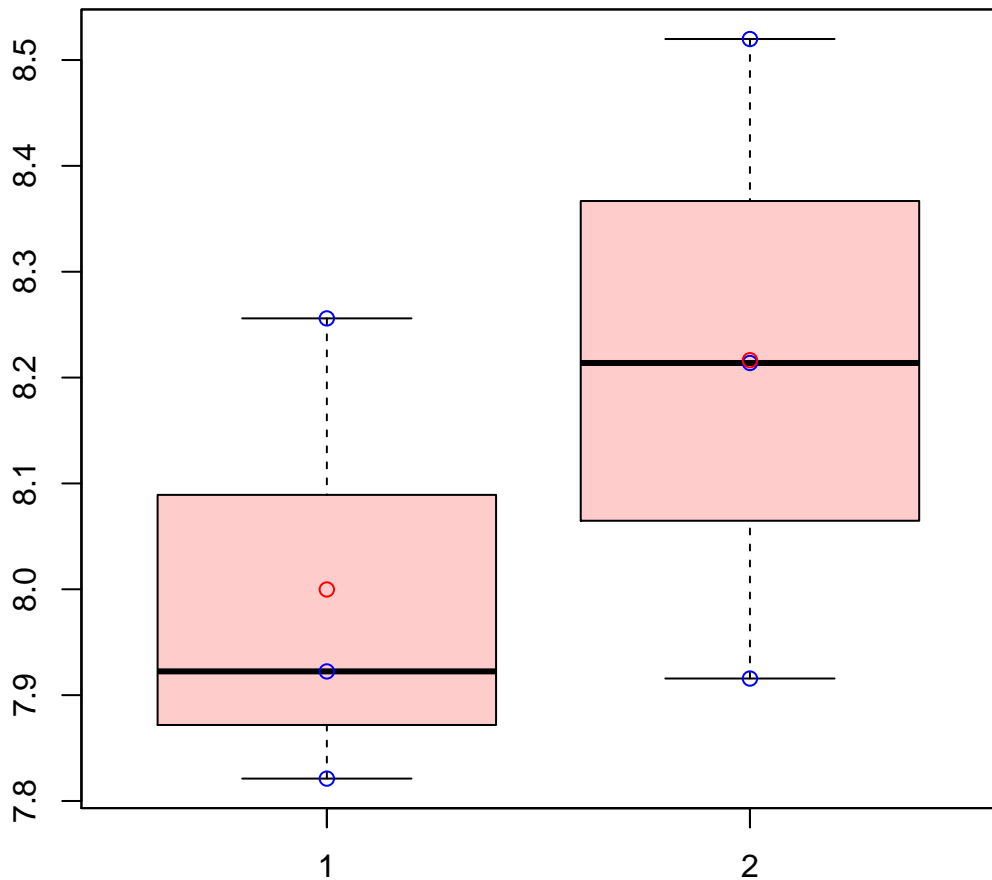

t-Test: p-value = 0.38



# CL796Contig10|CL796Contig10

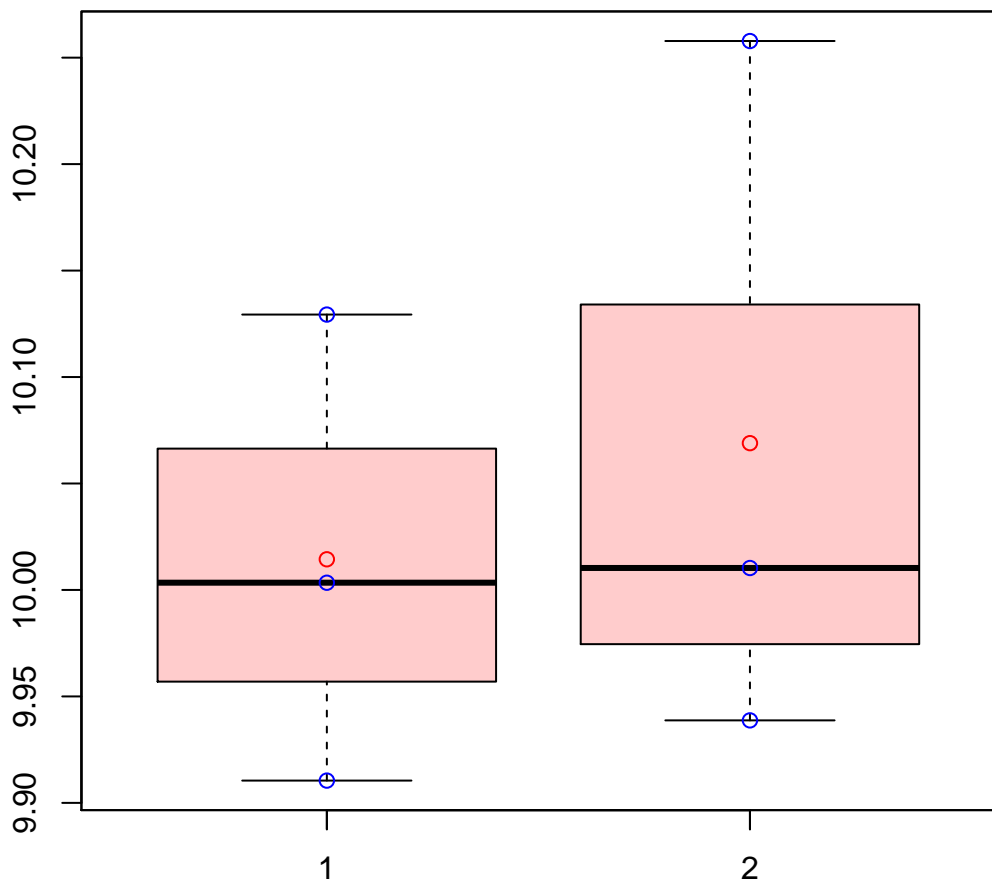

t-Test: p-value = 0.67

# CL7994Contig1|CL7994Contig1

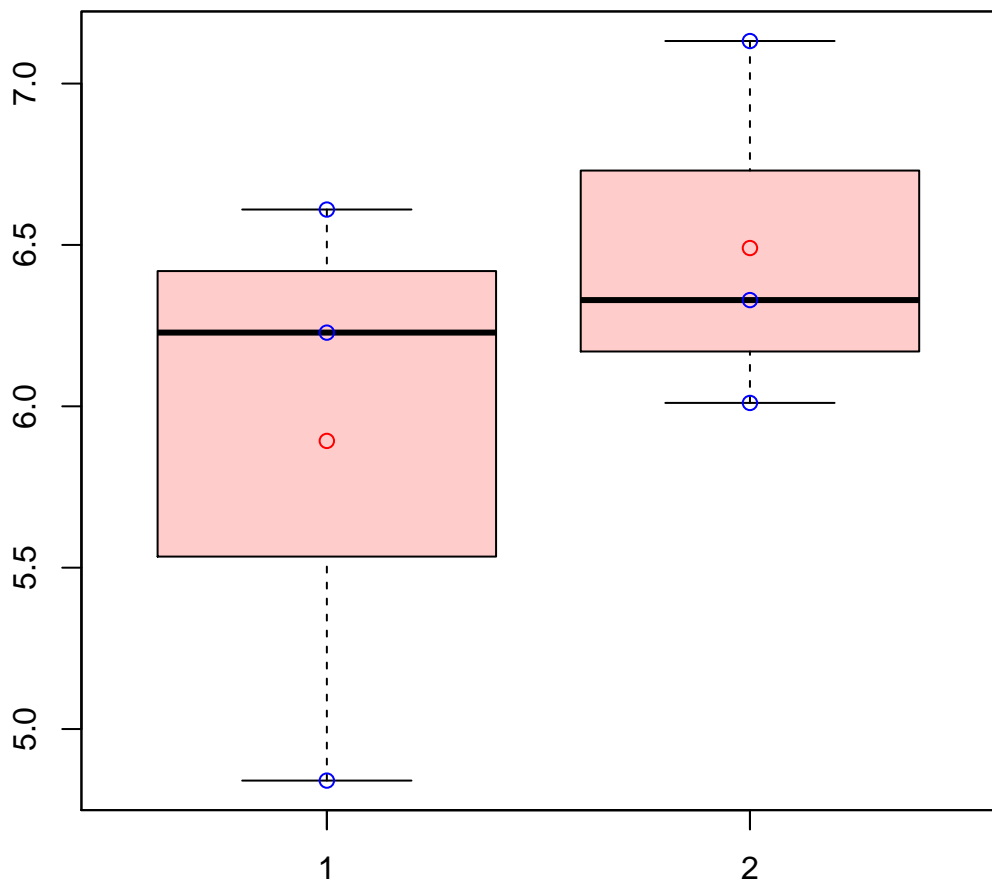

t-Test: p-value = 0.41

# CL7996Contig1|CL7996Contig1

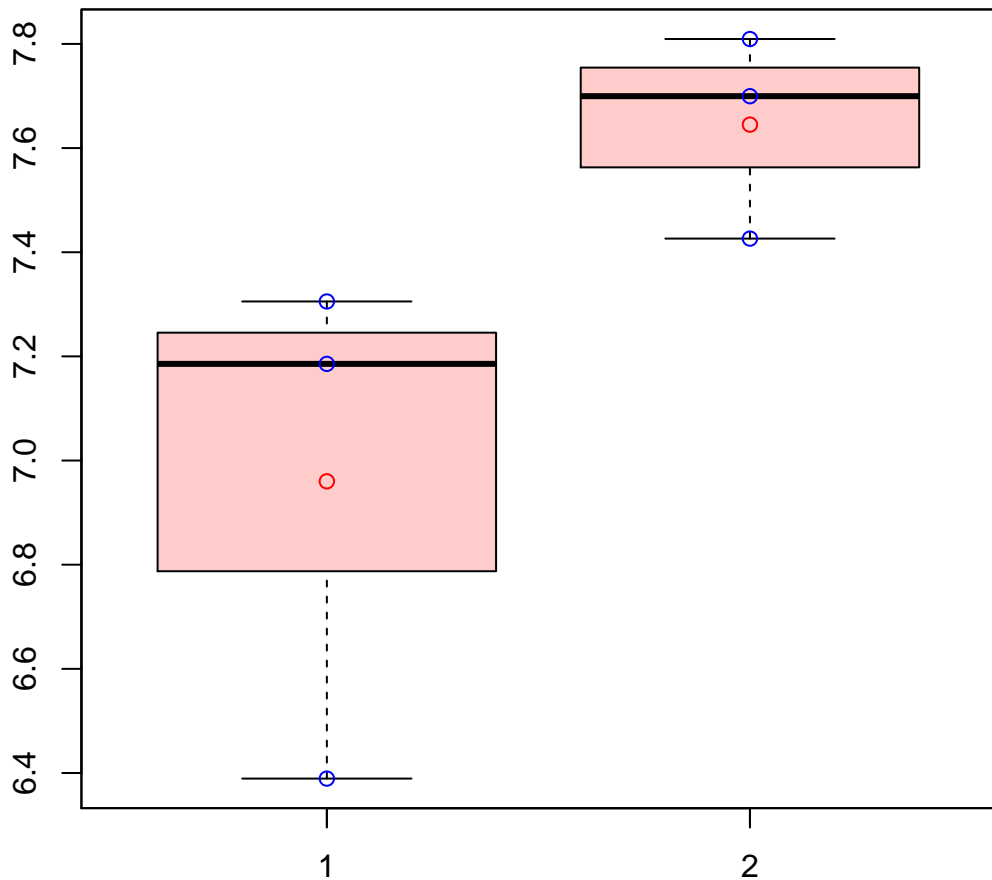

t-Test: p-value = 0.13

# CL7997Contig2|CL7997Contig2

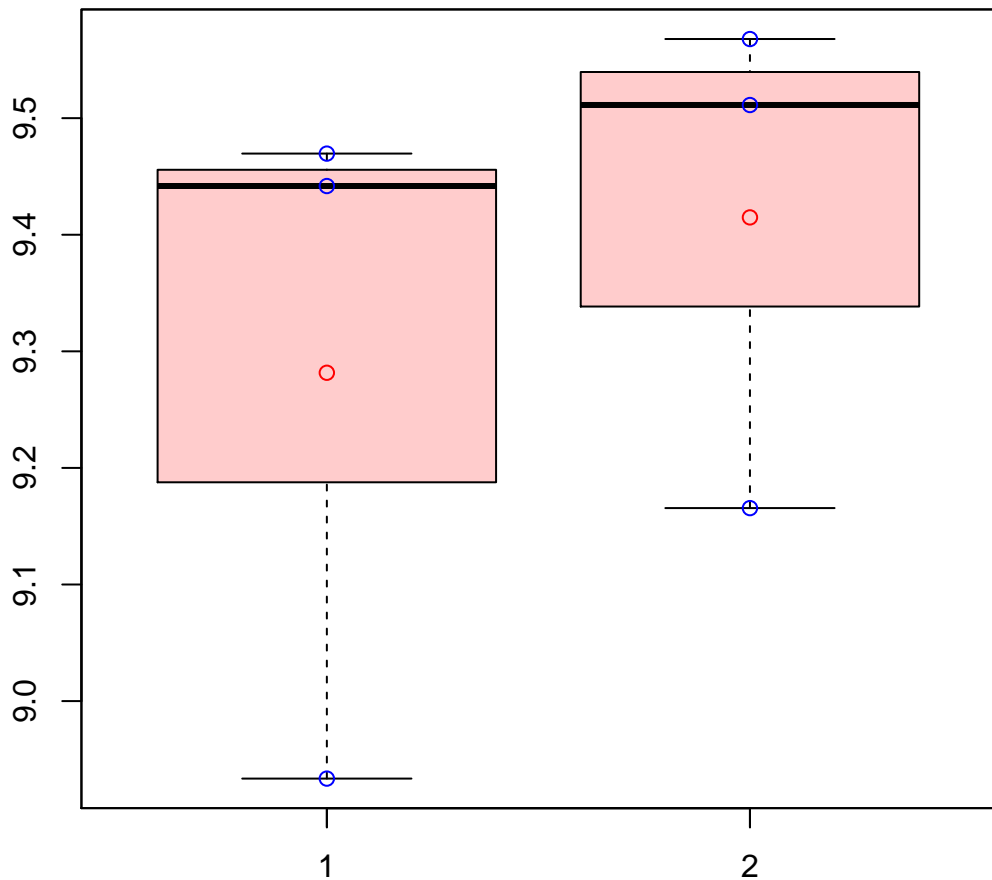

t-Test: p-value = 0.57

# CL799Contig2|CL799Contig2

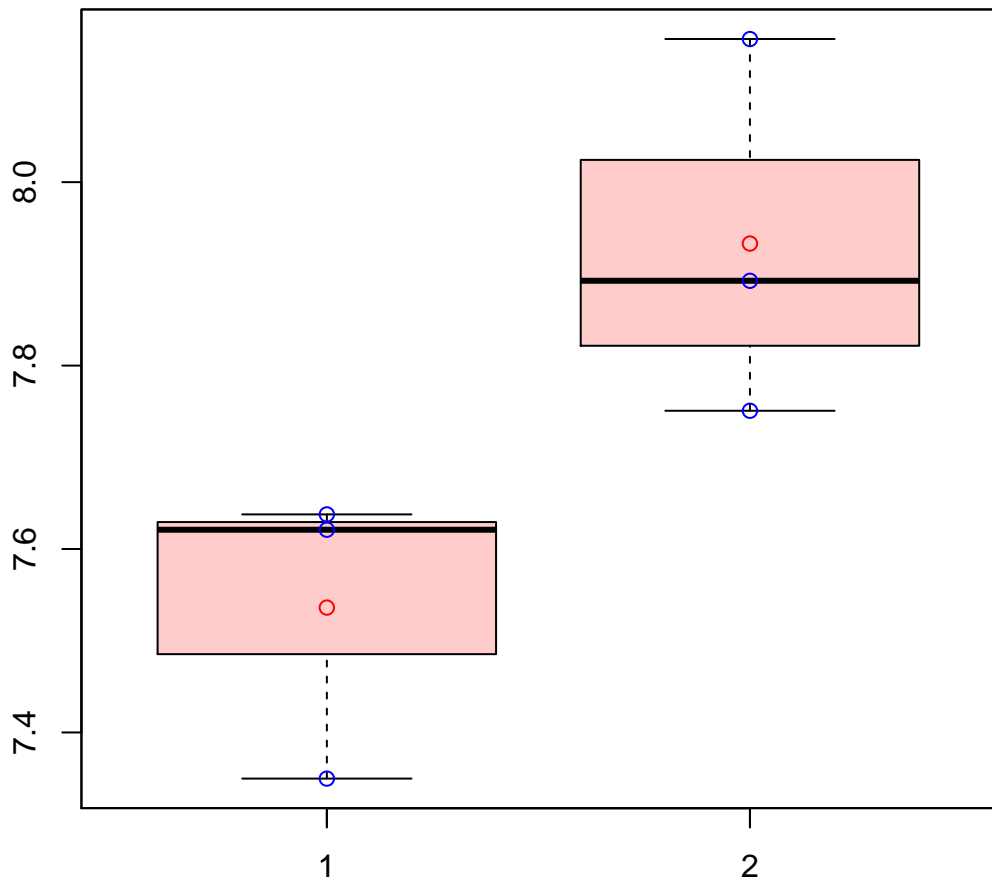

t-Test: p-value = 0.06

# CL7Contig11|CL7Contig11

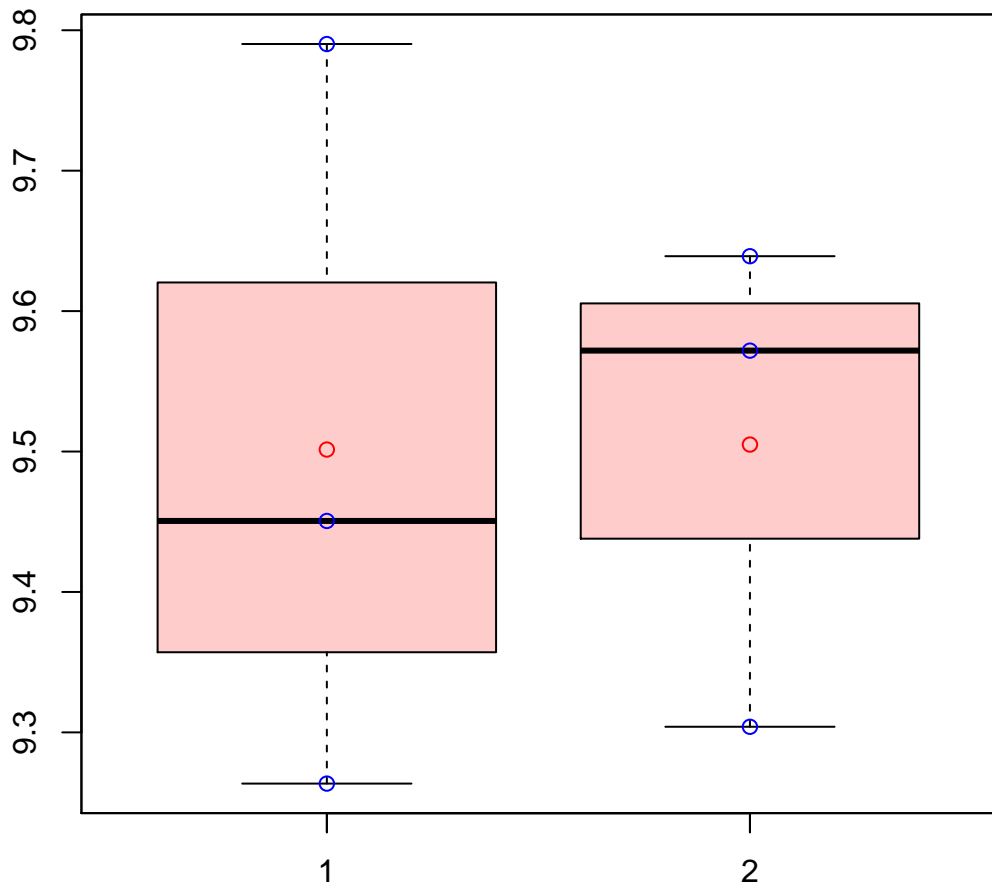

t-Test: p-value = 0.99

# CL7Contig23|CL7Contig23

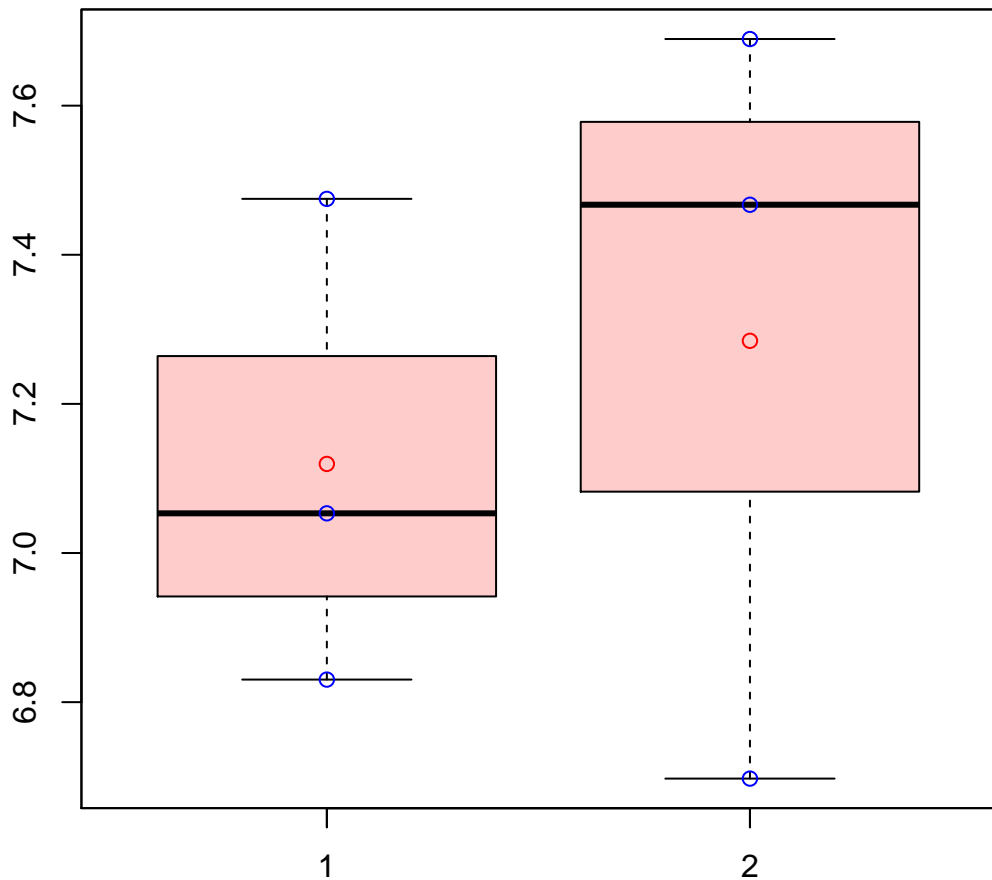

t-Test: p-value = 0.67

# CL7Contig54|CL7Contig54

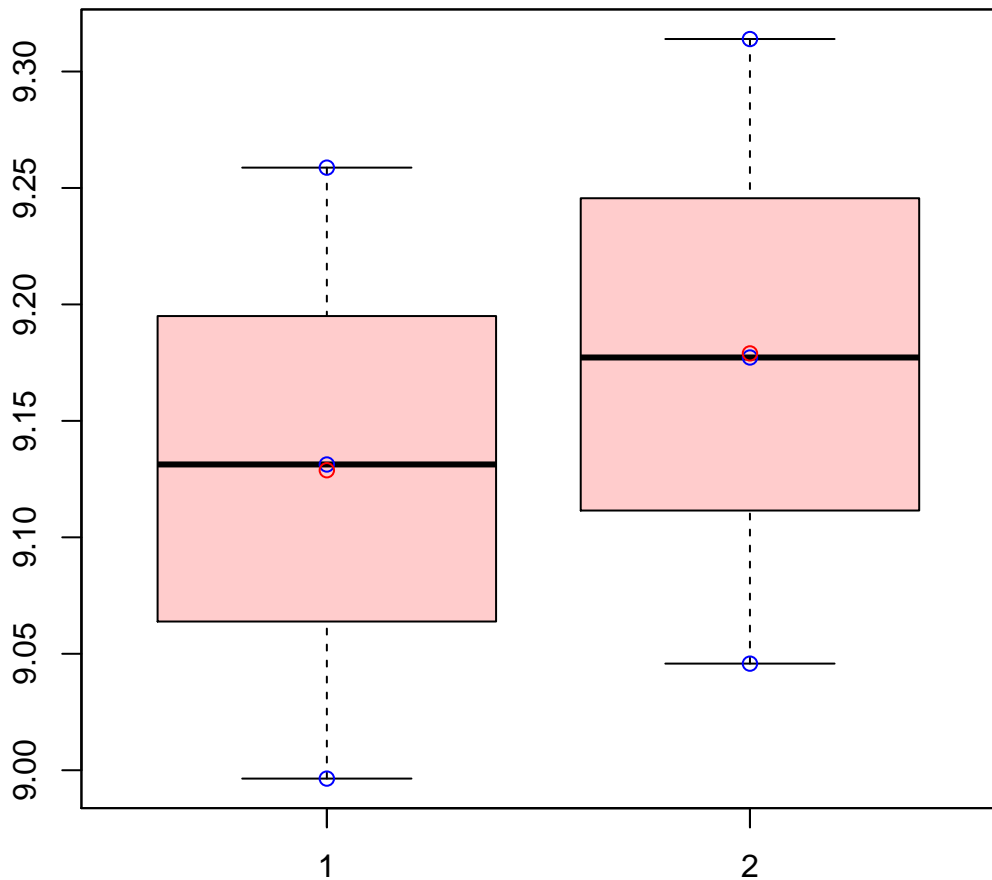

t-Test: p-value = 0.67



# CL8012Contig2|CL8012Contig2

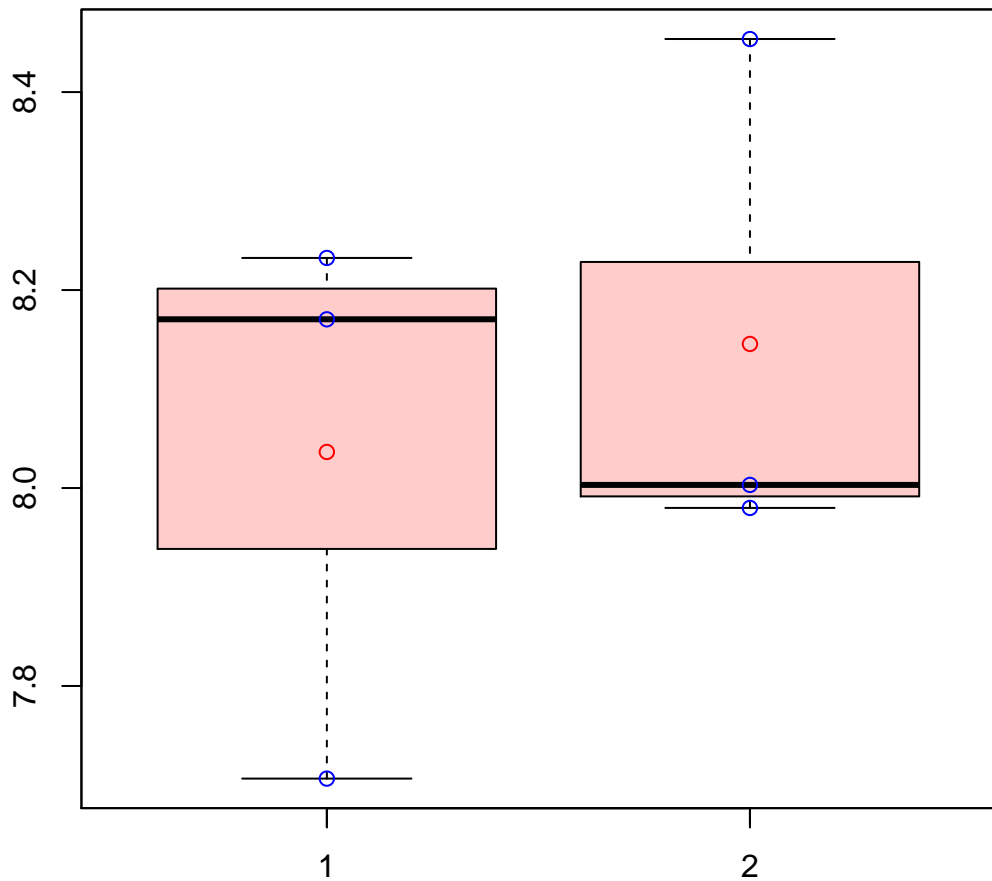

t-Test: p-value = 0.66

# CL8013Contig3|CL8013Contig3

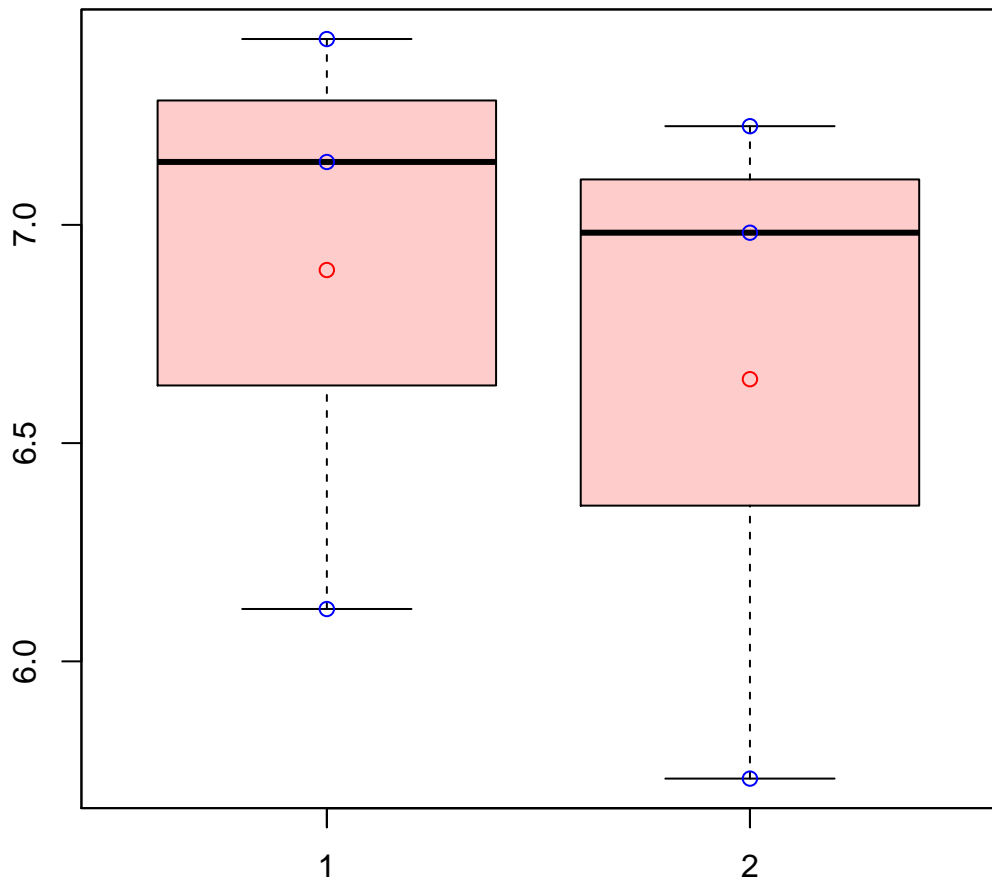

t-Test: p-value = 0.7

# CL801Contig1|CL801Contig1

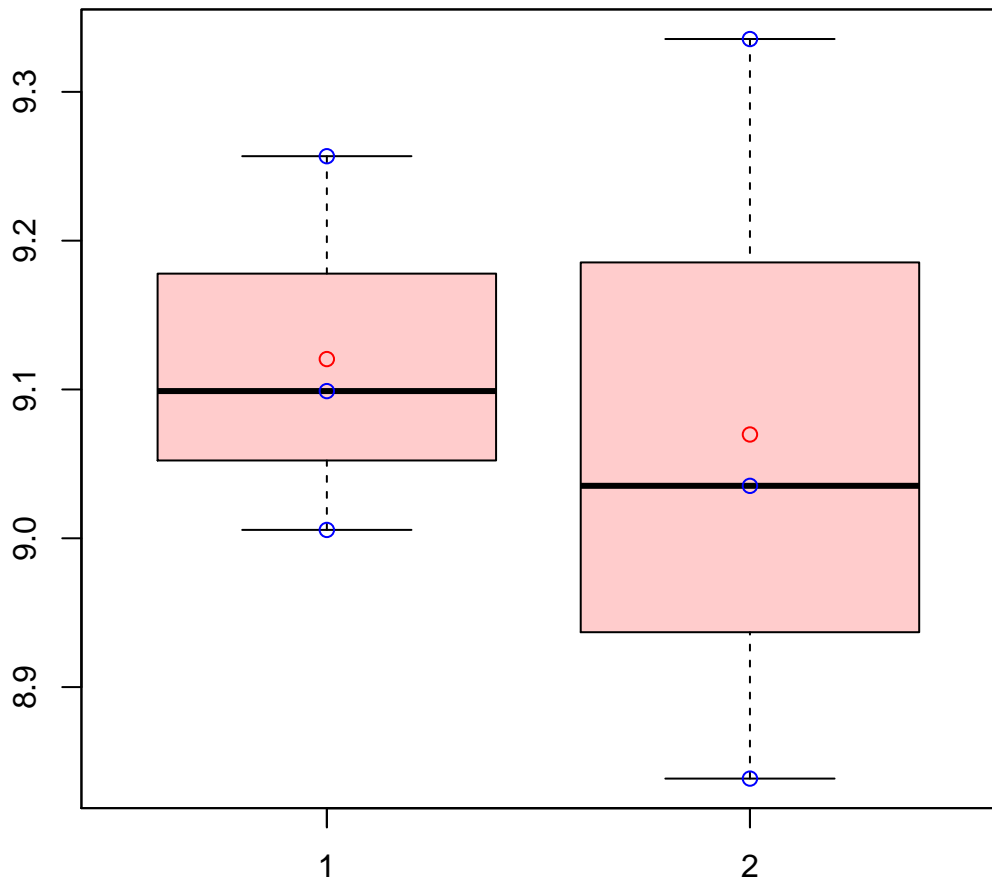

t-Test: p-value = 0.78

# CL8028Contig1|CL8028Contig1

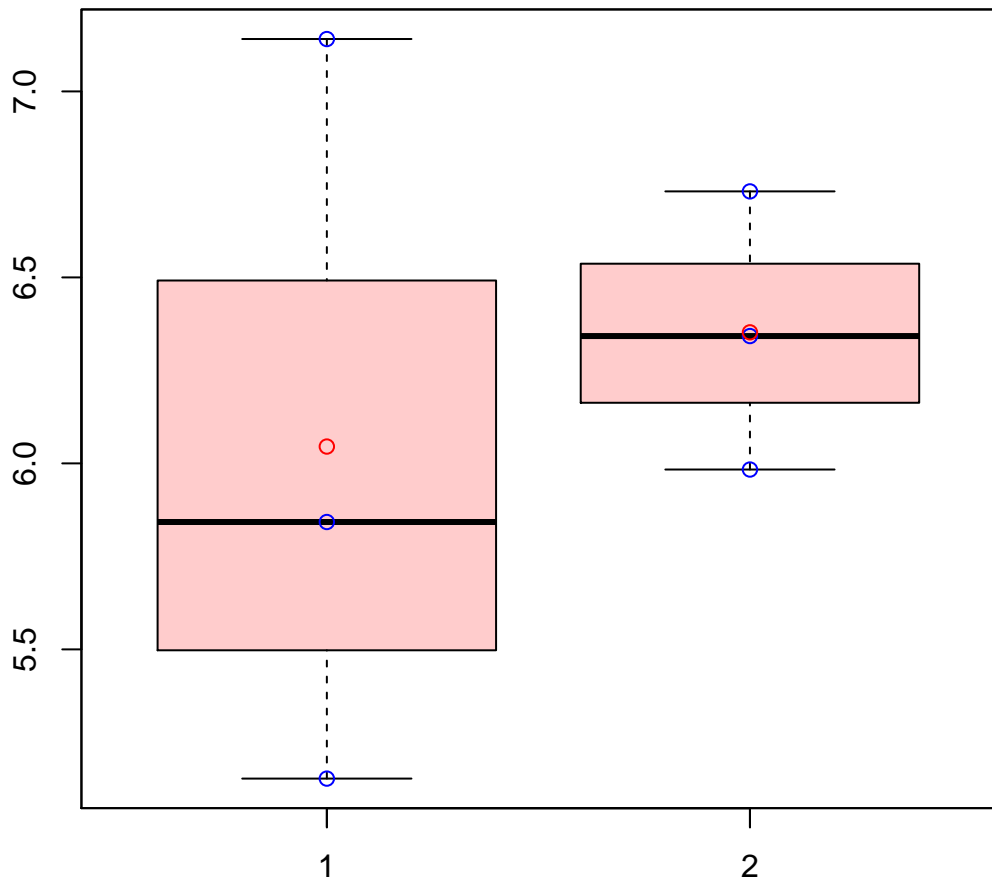

t-Test: p-value = 0.66

# CL802Contig3|CL802Contig3

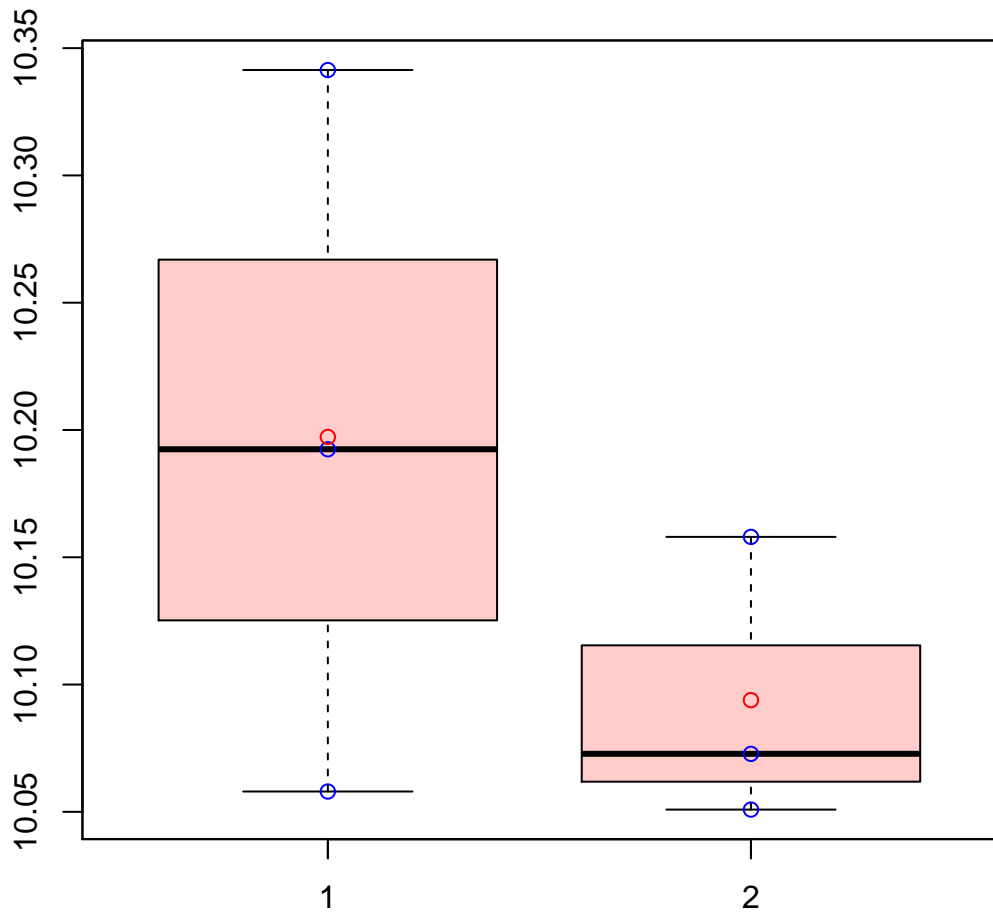

t-Test: p-value = 0.34

# CL804Contig4|CL804Contig4

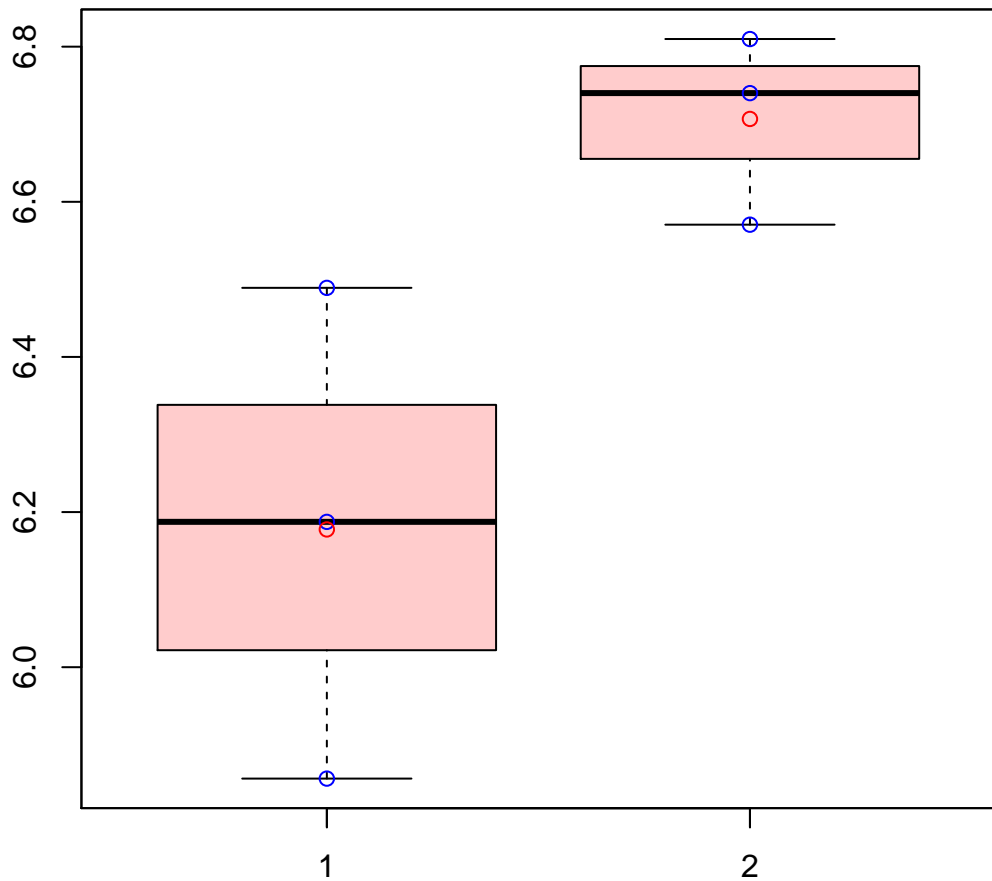

t-Test: p-value = 0.09

# CL8050Contig1|CL8050Contig1

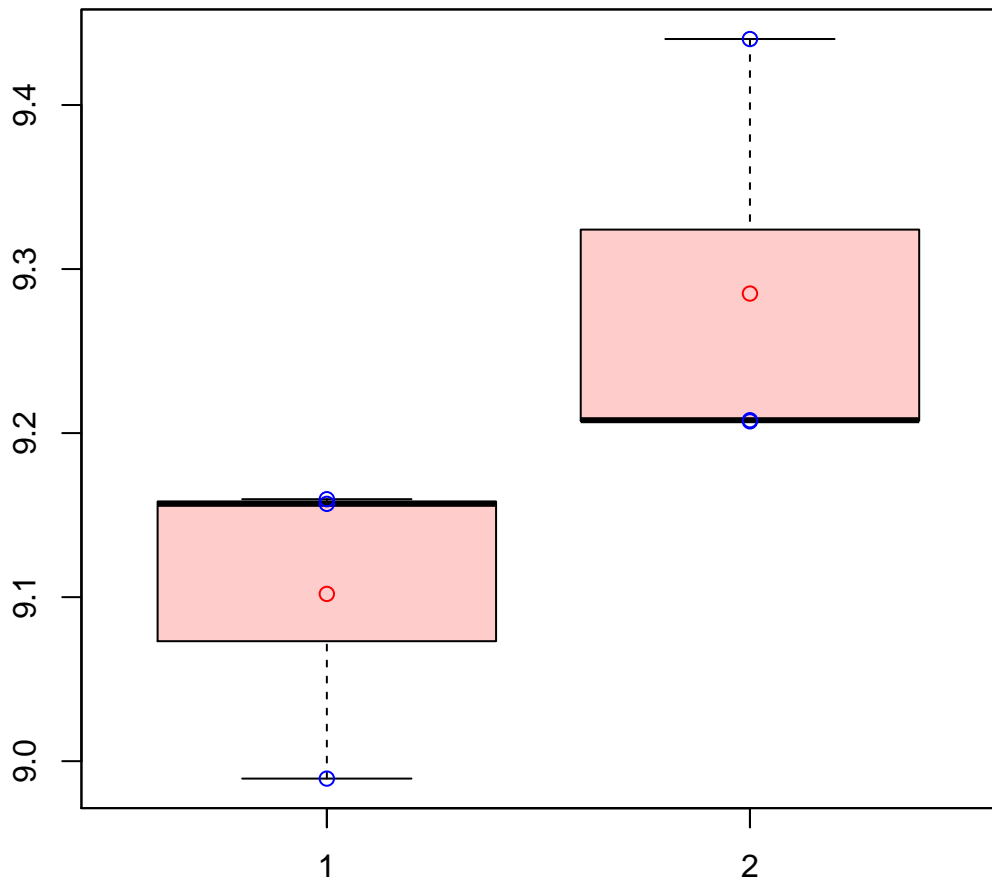

t-Test: p-value = 0.14

# CL8050Contig2|CL8050Contig2

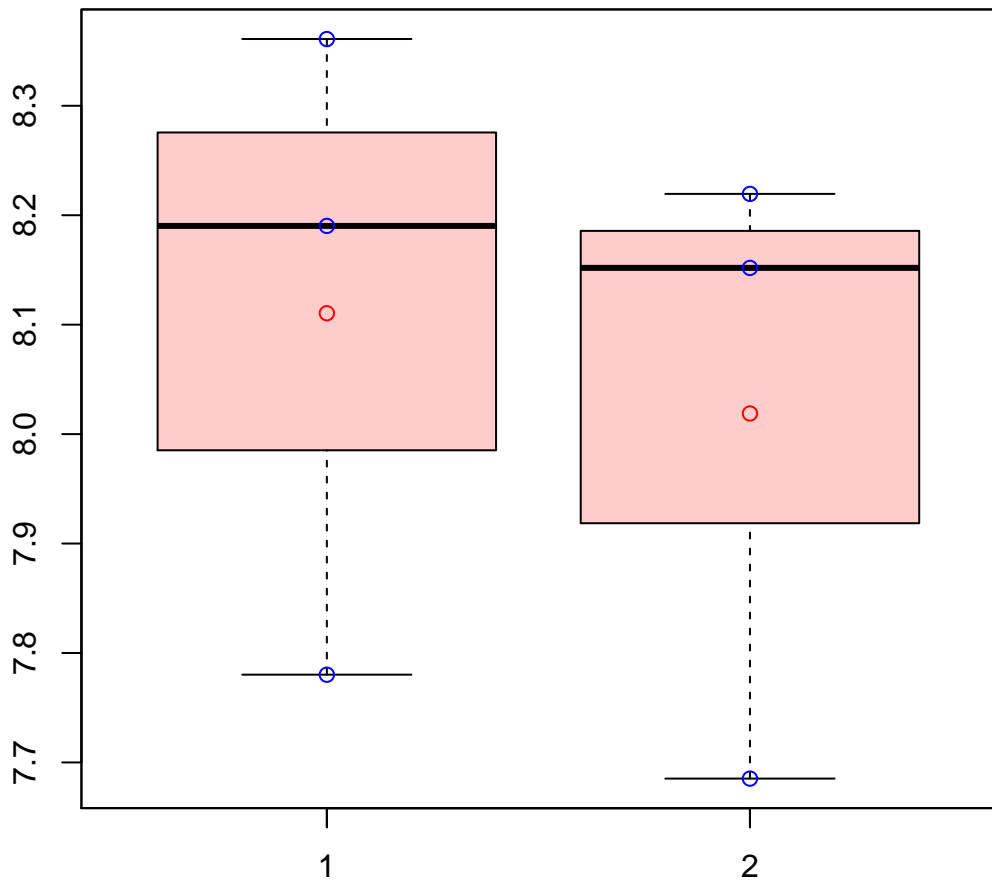

t-Test: p-value = 0.72



# CL8056Contig1|CL8056Contig1

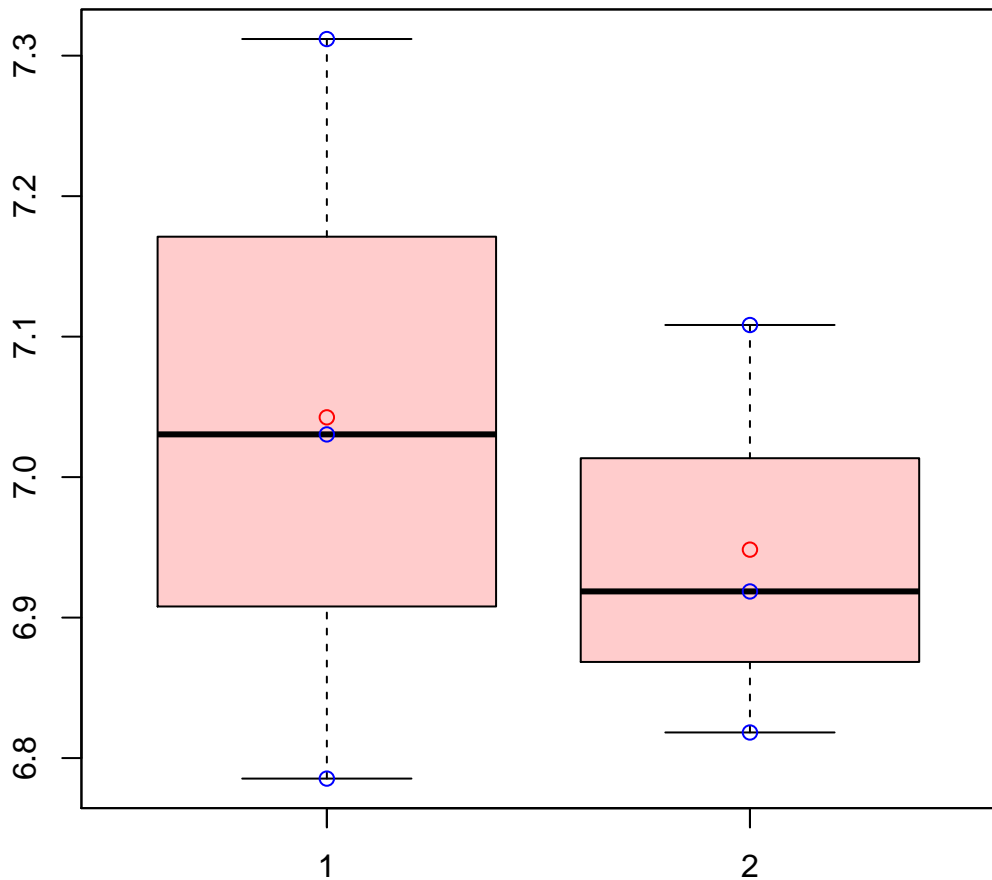

t-Test: p-value = 0.62

# CL8064Contig3|CL8064Contig3

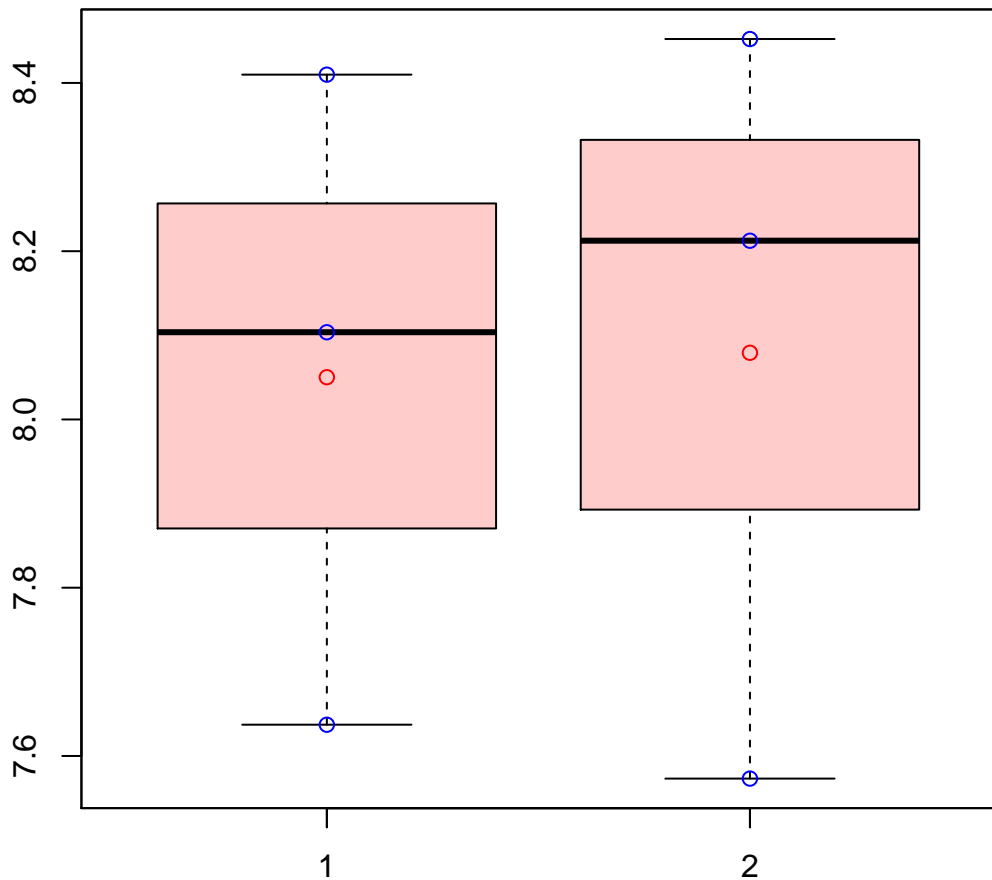

t-Test: p-value = 0.94

# CL806Contig11|CL806Contig11

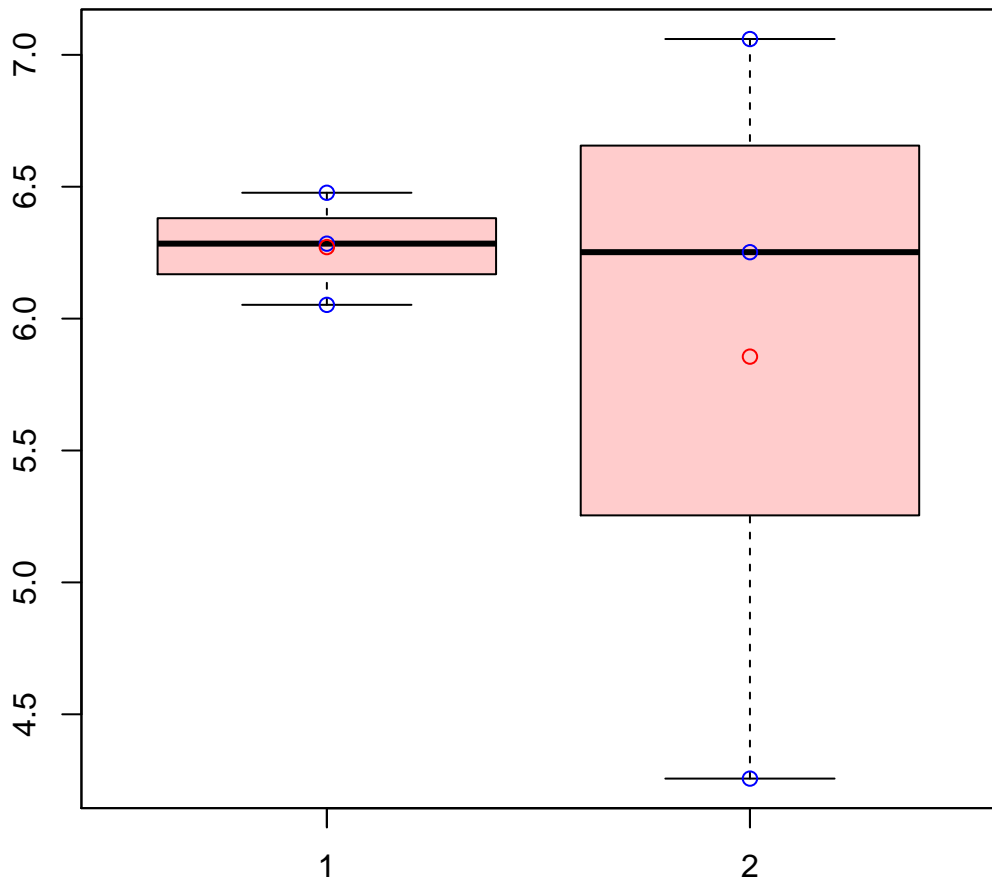

t-Test: p-value = 0.67

# CL8072Contig2|CL8072Contig2

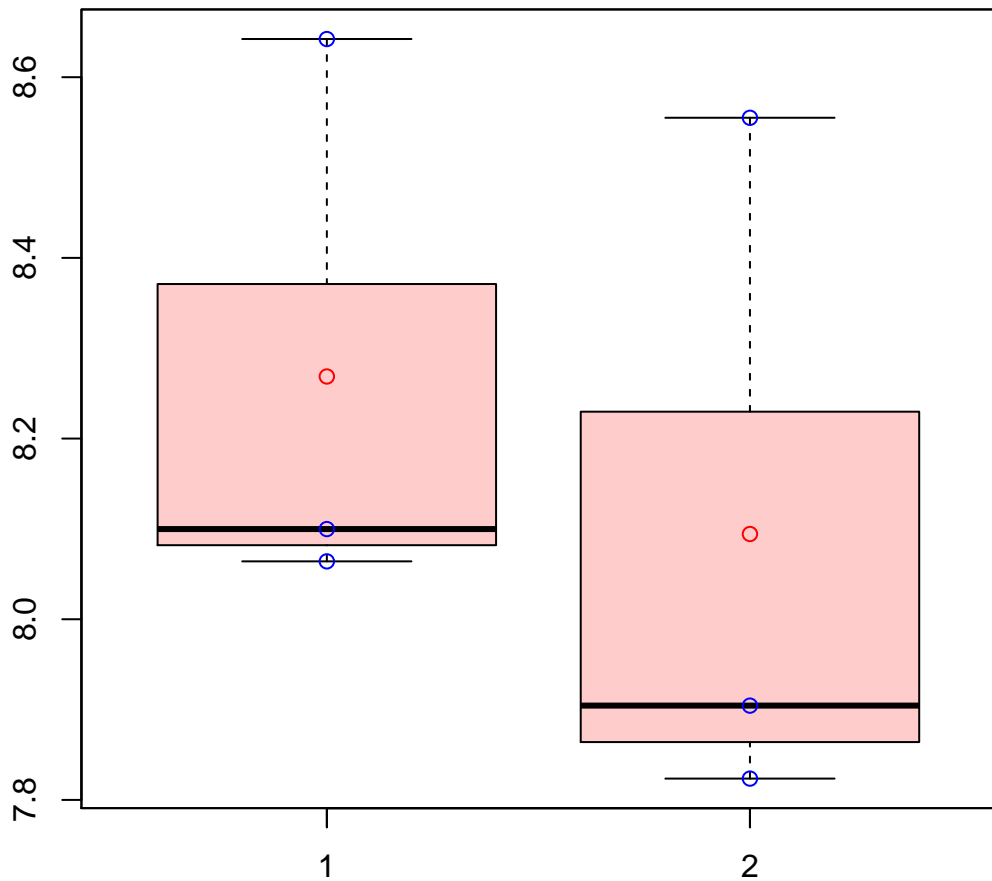

t-Test: p-value = 0.59

# CL8092Contig5|CL8092Contig5

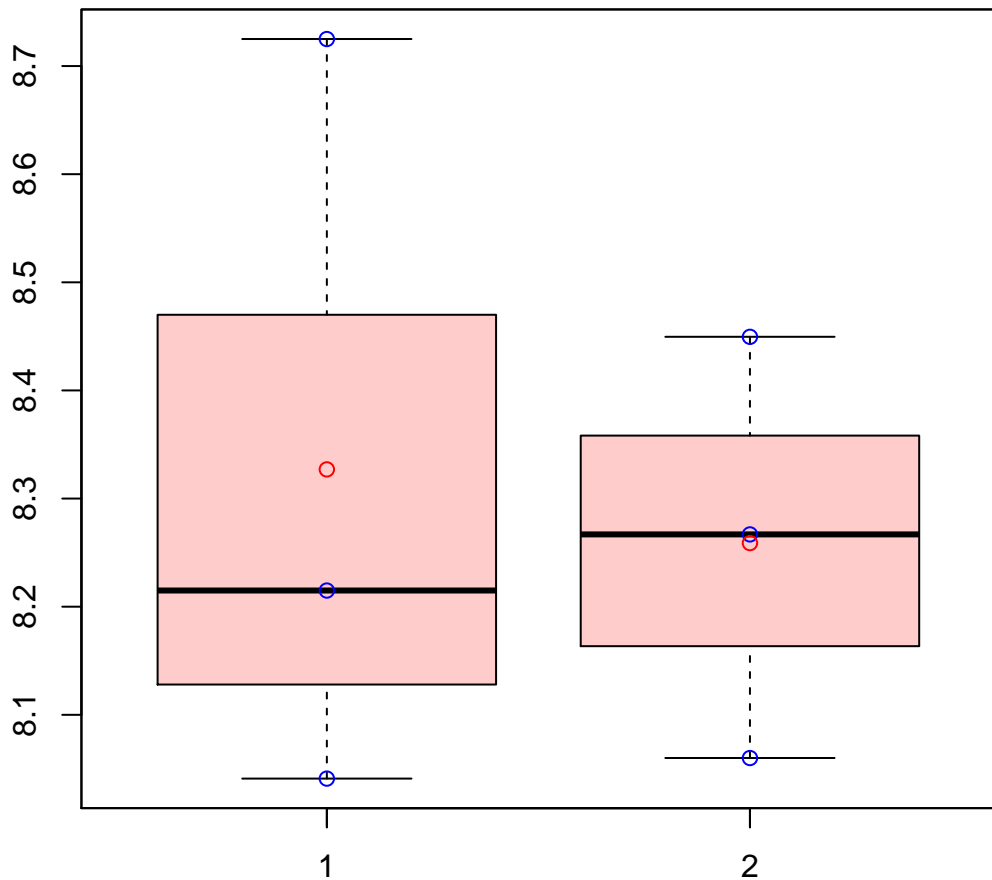

t-Test: p-value = 0.79

# CL8104Contig2|CL8104Contig2

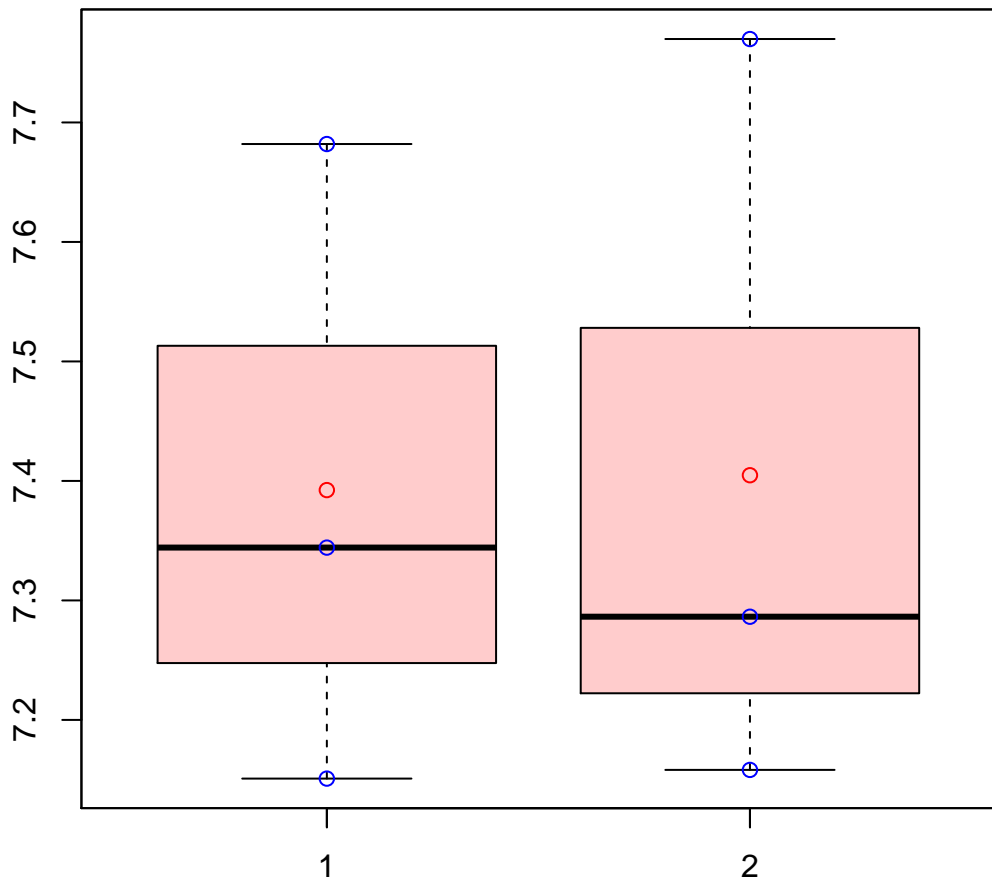

t-Test: p-value = 0.96

# CL811Contig3|CL811Contig3

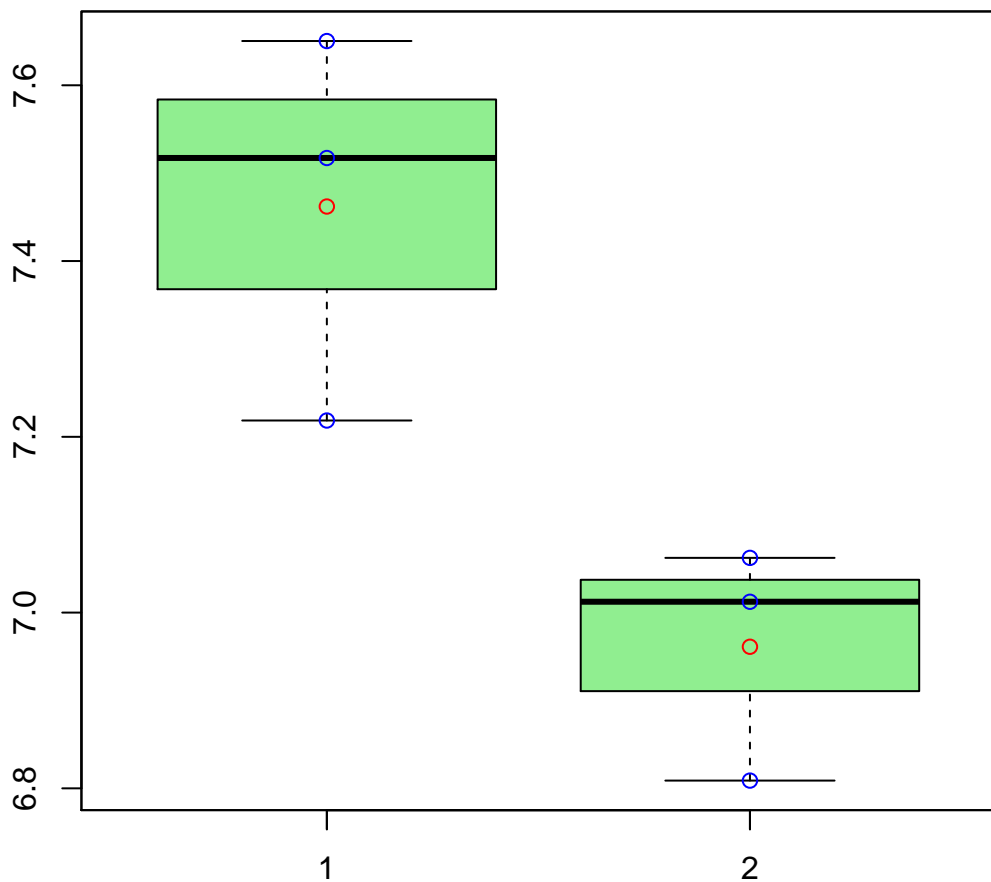

t-Test: p-value = 0.04

# CL8123Contig1|CL8123Contig1

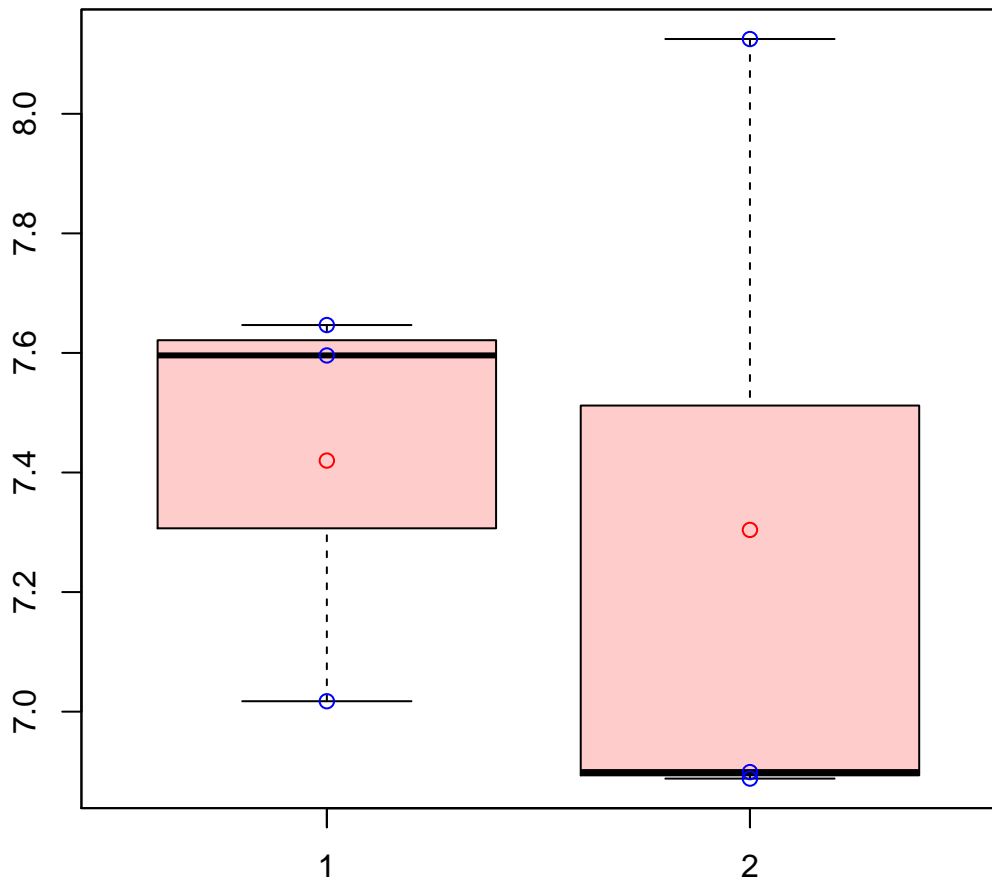

t-Test: p-value = 0.82



# CL8133Contig1|CL8133Contig1

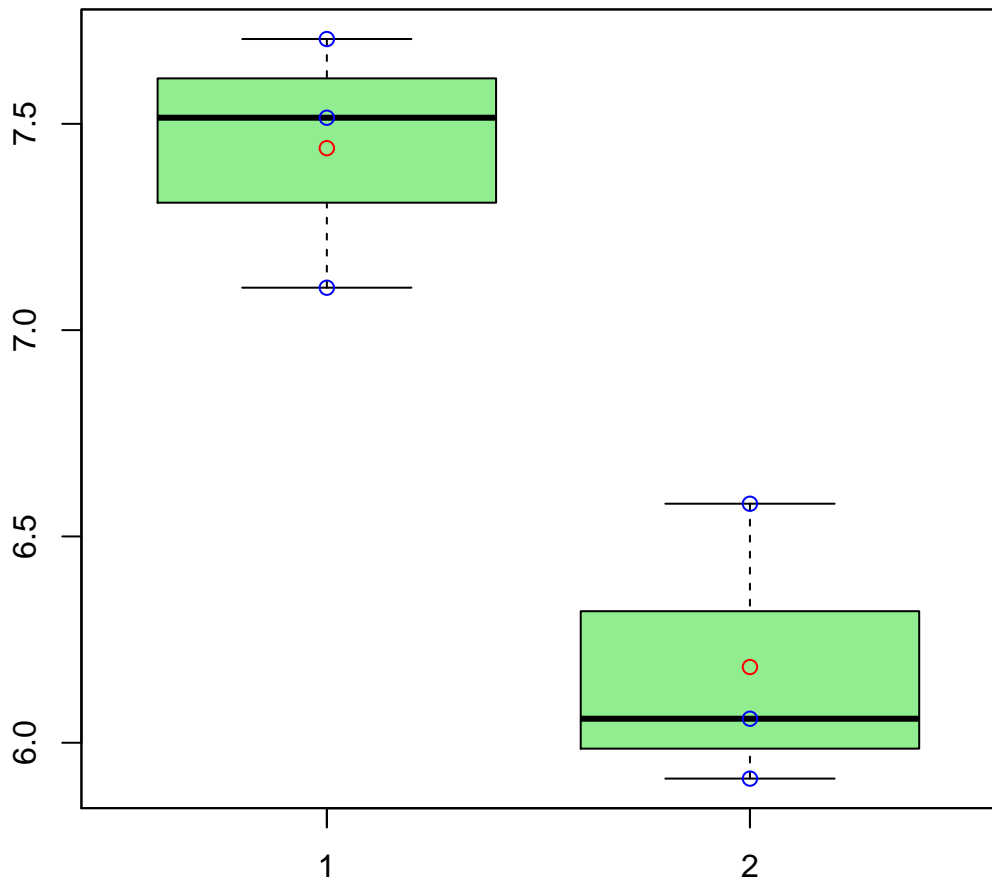

t-Test: p-value = 0.01

# CL8133Contig2|CL8133Contig2

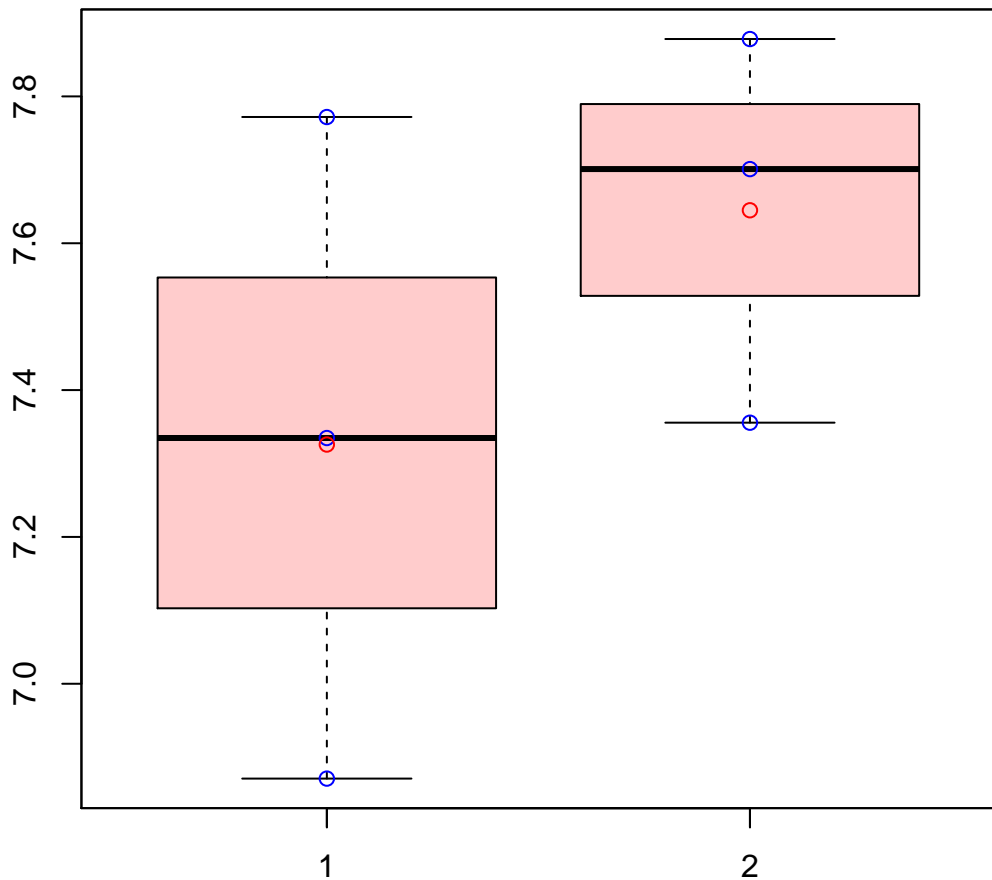

t-Test: p-value = 0.36

# CL8147Contig2|CL8147Contig2

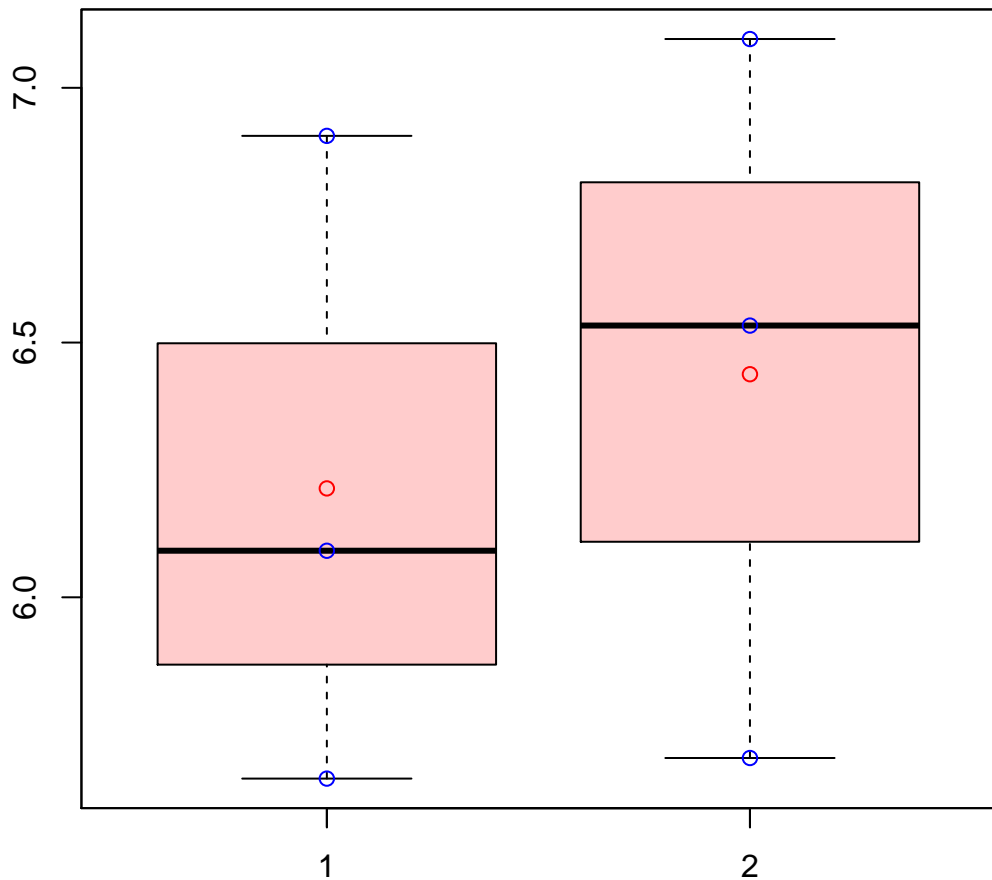

t-Test: p-value = 0.71

# CL8148Contig2|CL8148Contig2

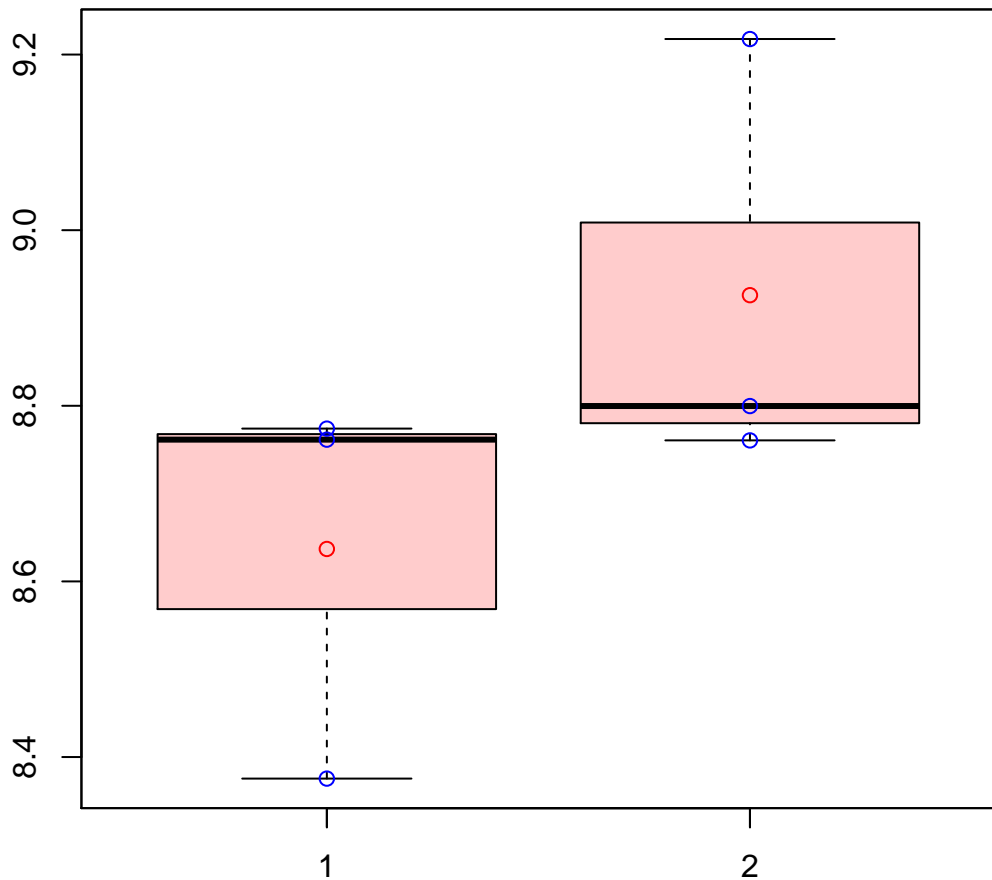

t-Test: p-value = 0.22

# CL814Contig10|CL814Contig10

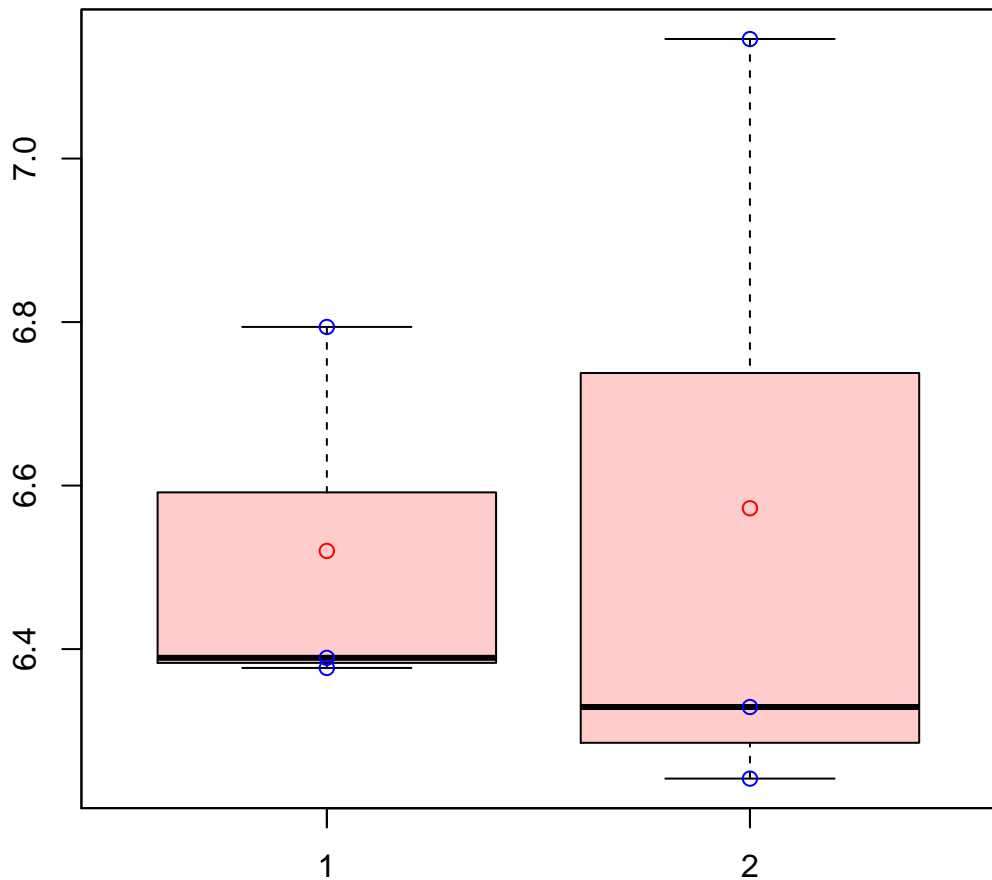

t-Test: p-value = 0.88

# CL8156Contig1|CL8156Contig1

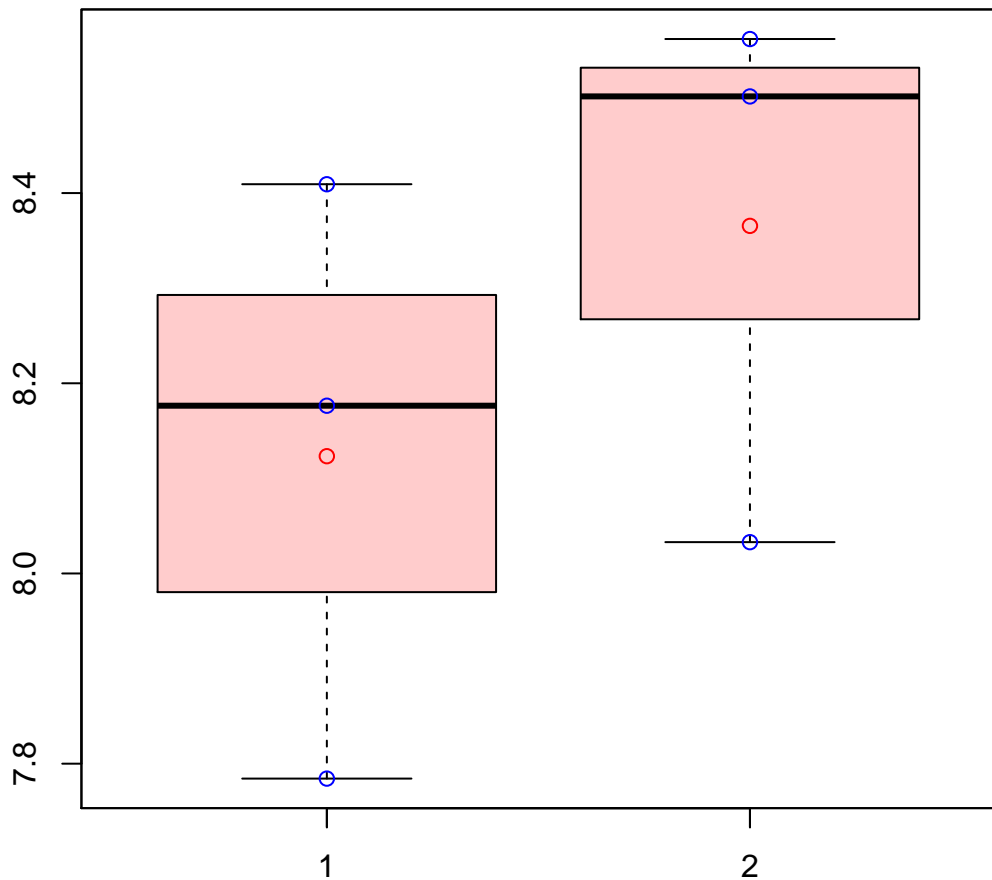

t-Test: p-value = 0.38

# CL8162Contig6|CL8162Contig6

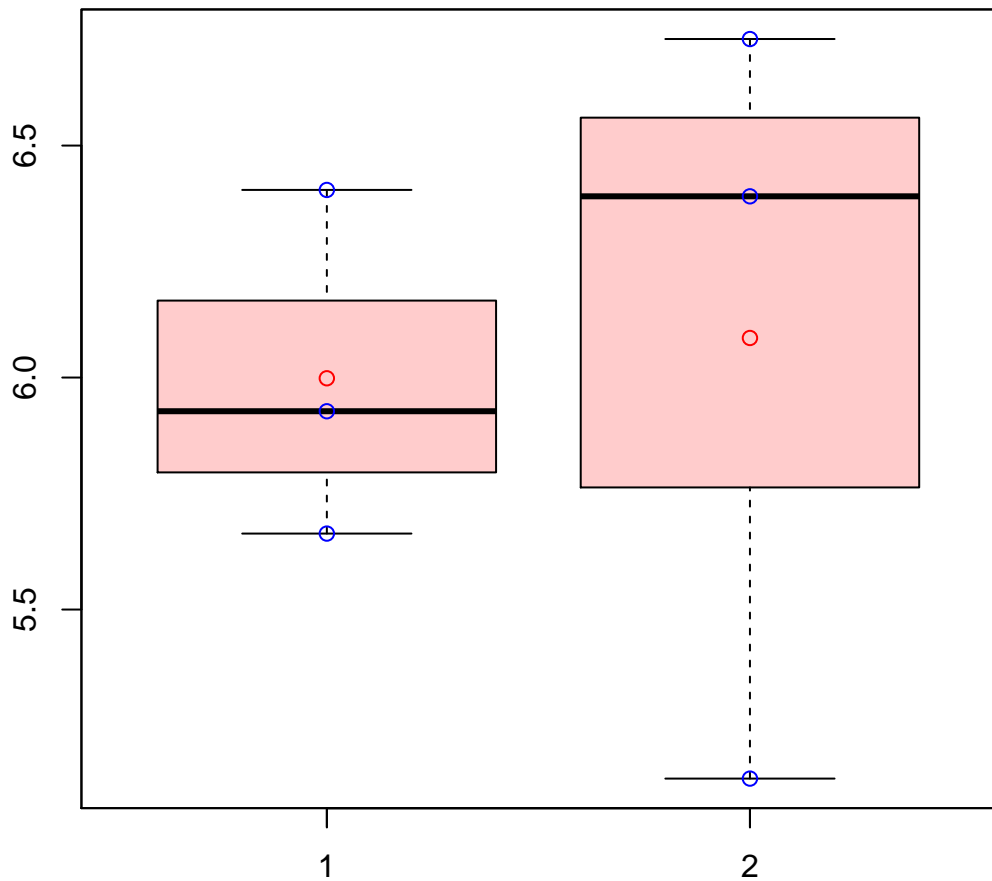

t-Test: p-value = 0.88

# CL8163Contig2|CL8163Contig2

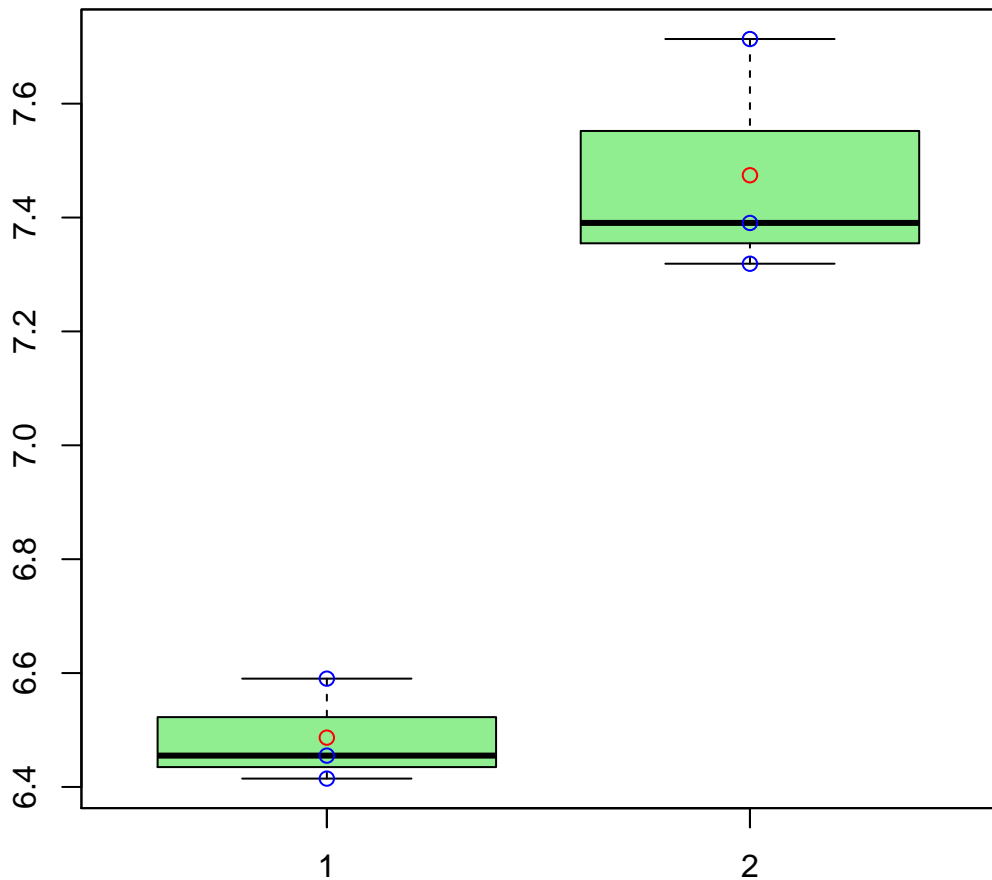

t-Test: p-value = 0.01



# CL8166Contig2|CL8166Contig2

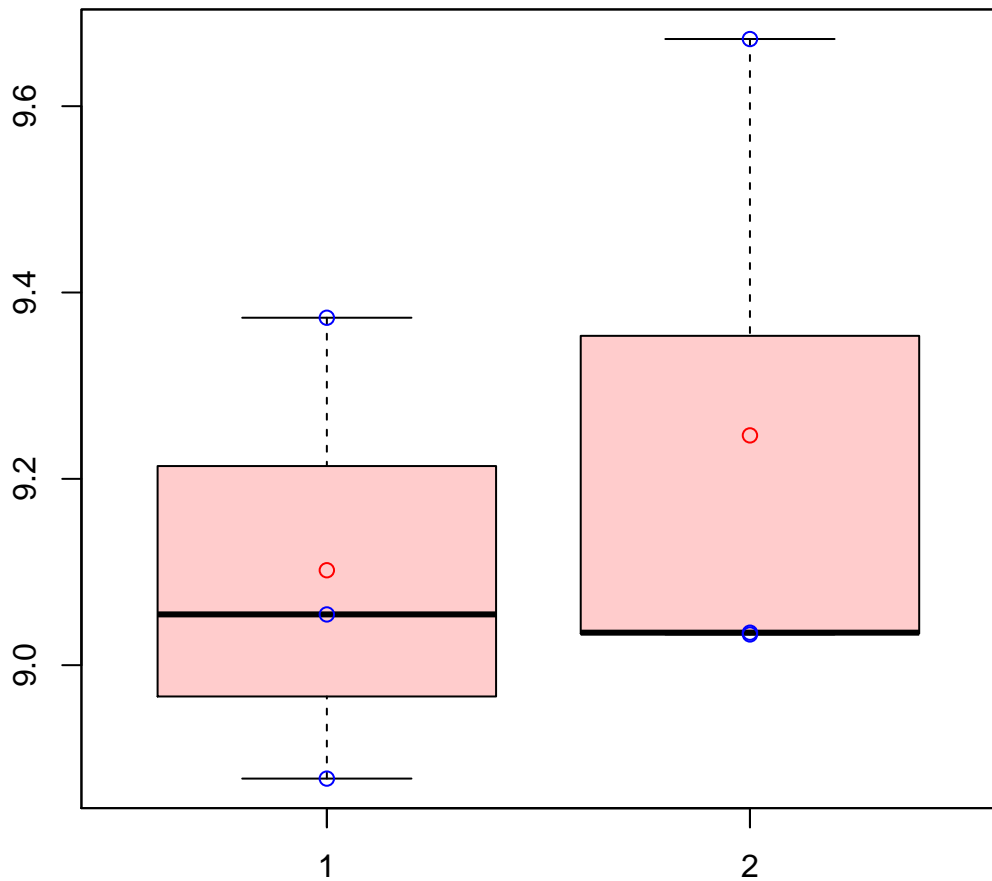

t-Test: p-value = 0.61

# CL8169Contig1|CL8169Contig1

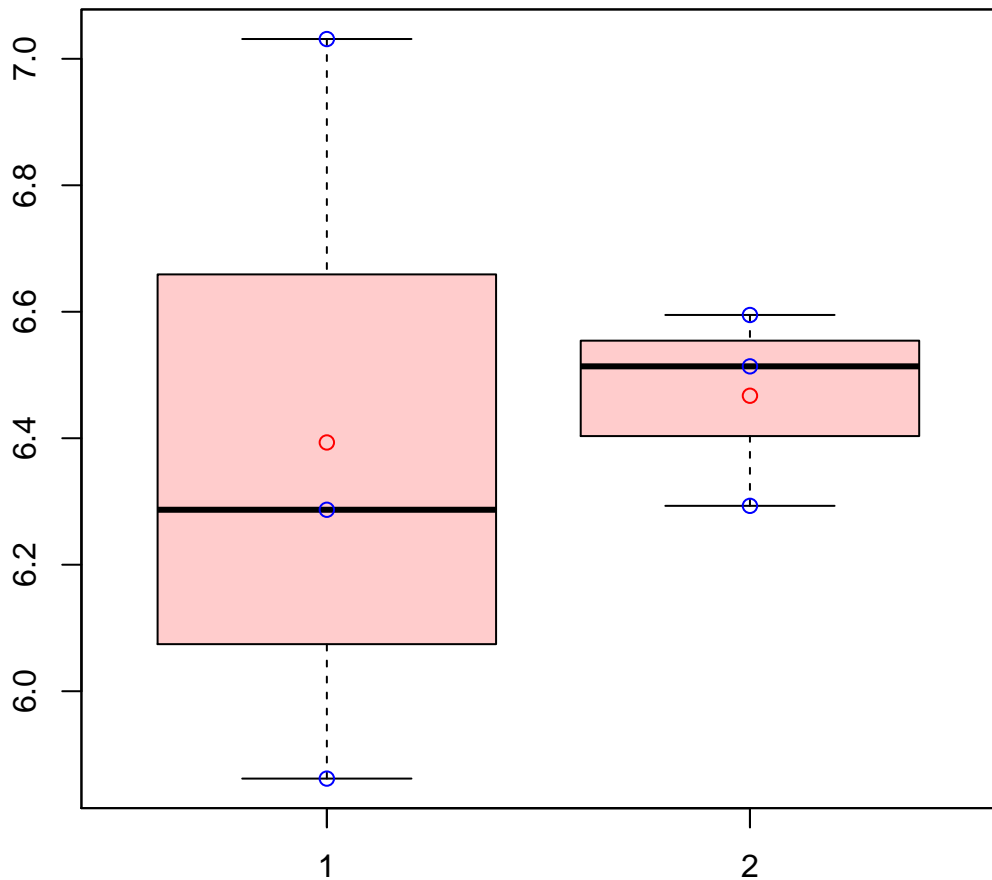

t-Test: p-value = 0.85

# CL816Contig2|CL816Contig2

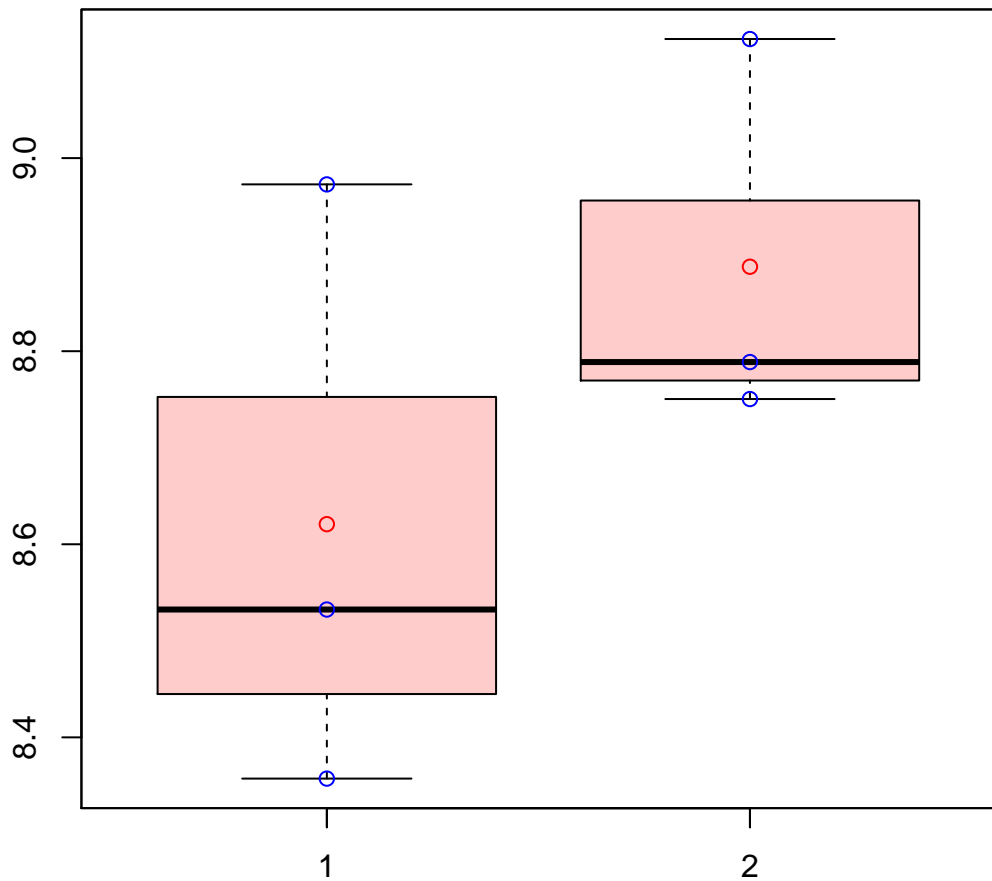

t-Test: p-value = 0.3

# CL818Contig5|CL818Contig5

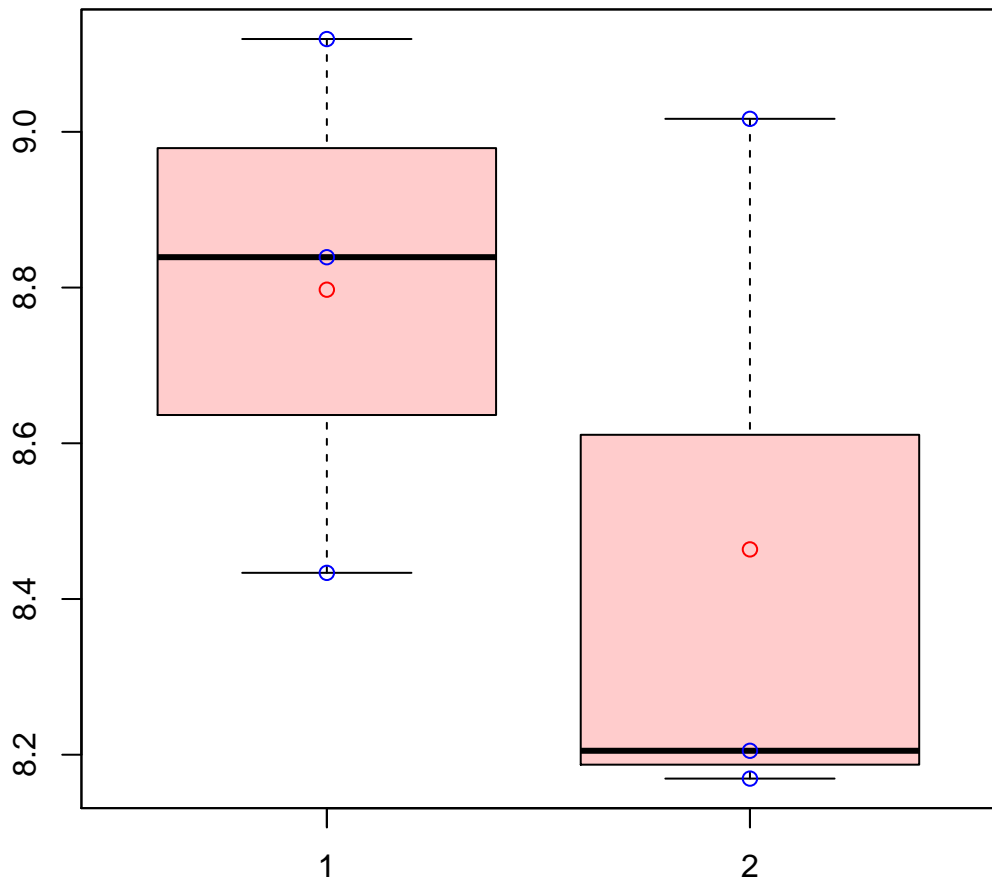

t-Test: p-value = 0.39

# CL818Contig7|CL818Contig7

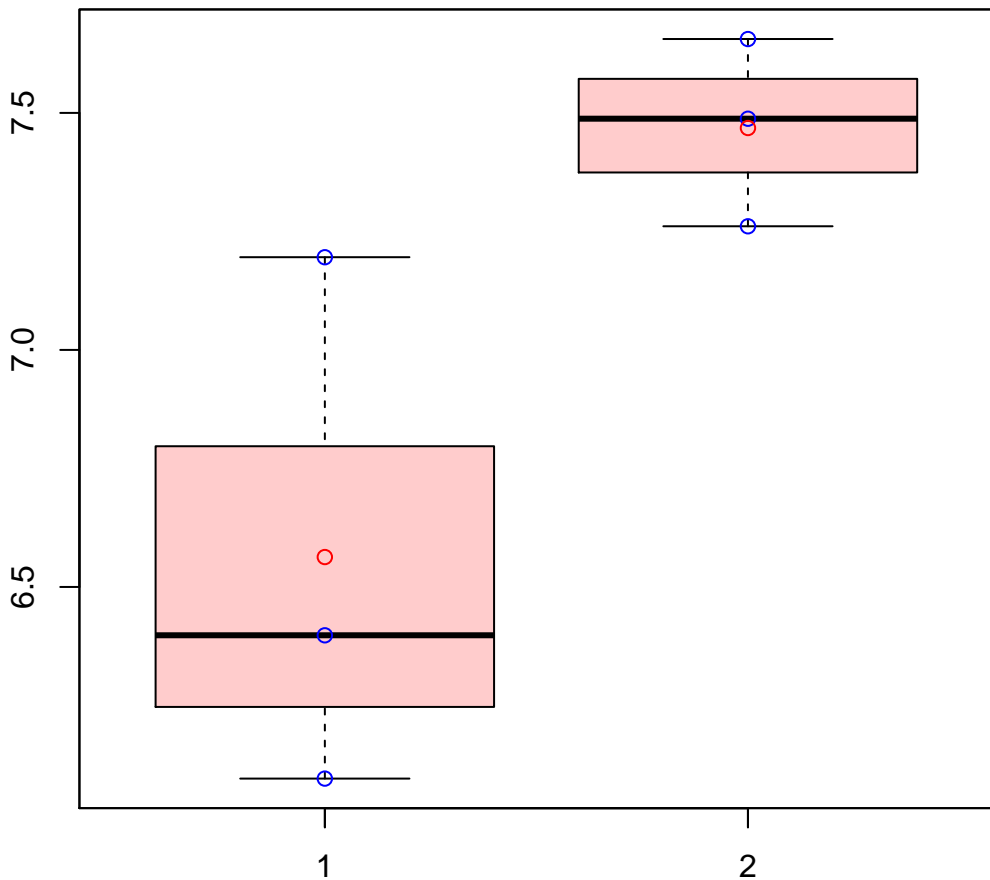

t-Test: p-value = 0.1

# CL819Contig2|CL819Contig2

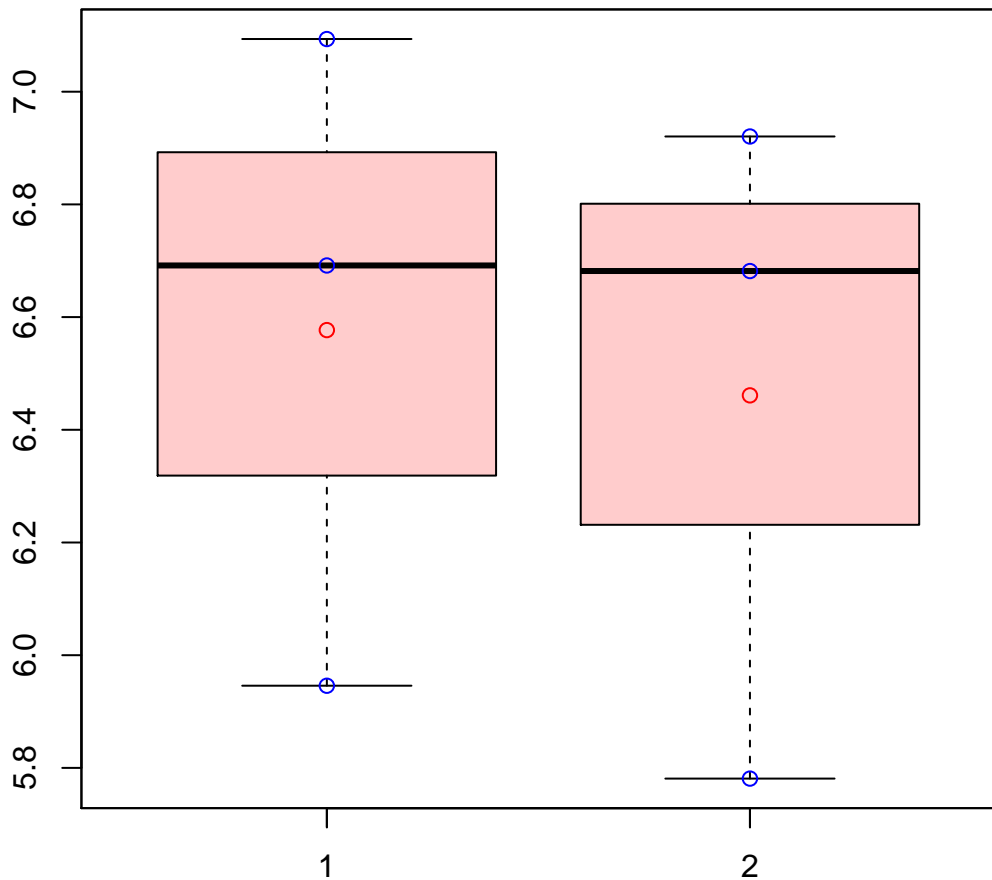

t-Test: p-value = 0.82

# CL81Contig24|CL81Contig24

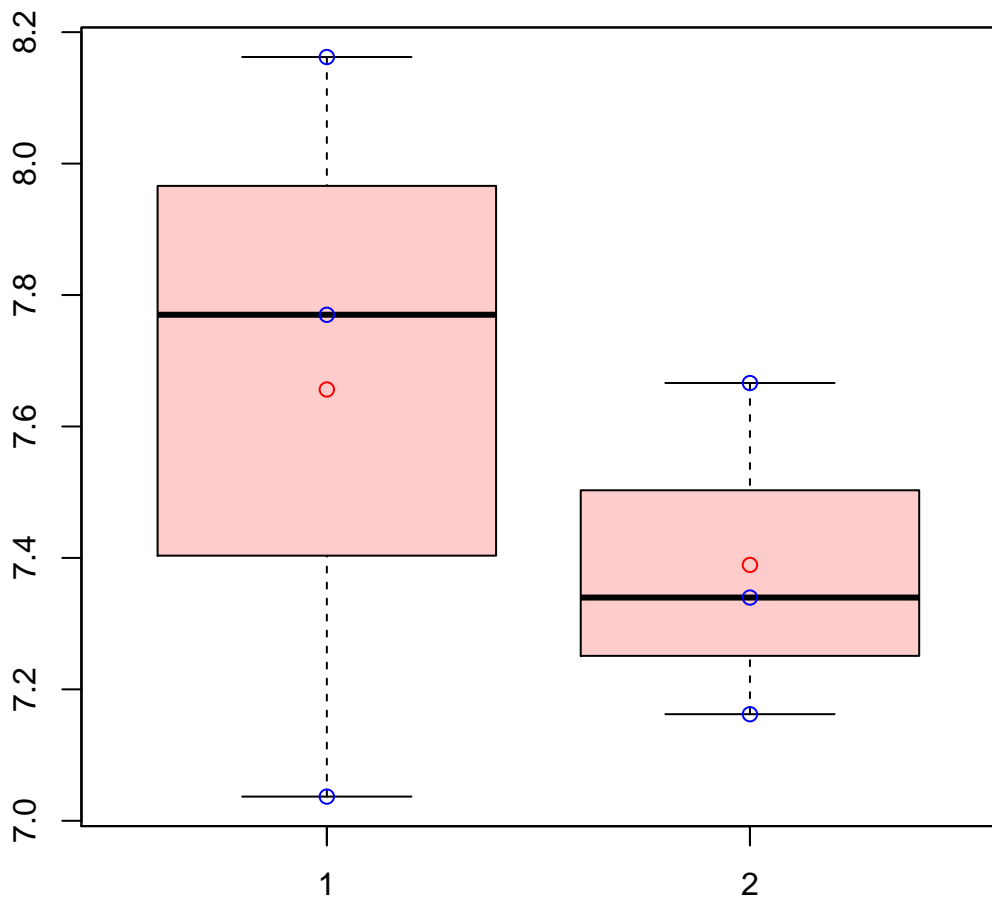

t-Test: p-value = 0.52

# CL8208Contig2|CL8208Contig2

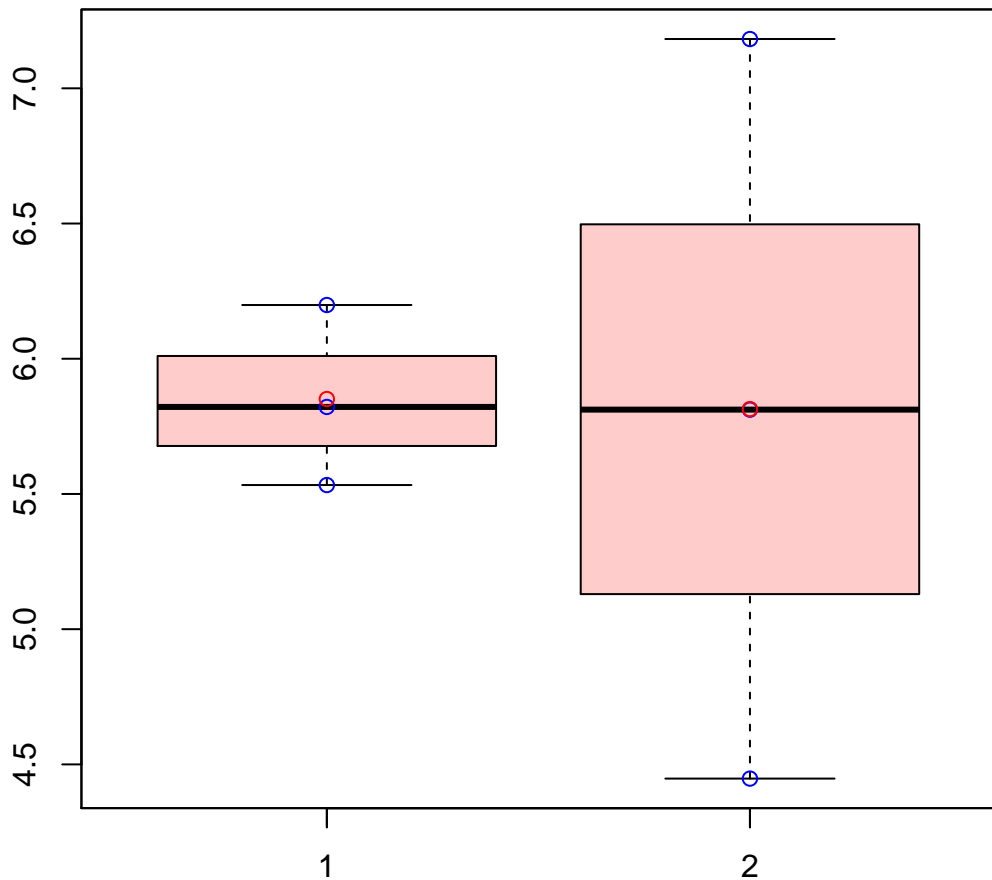

t-Test: p-value = 0.97



# CL820Contig1|CL820Contig1

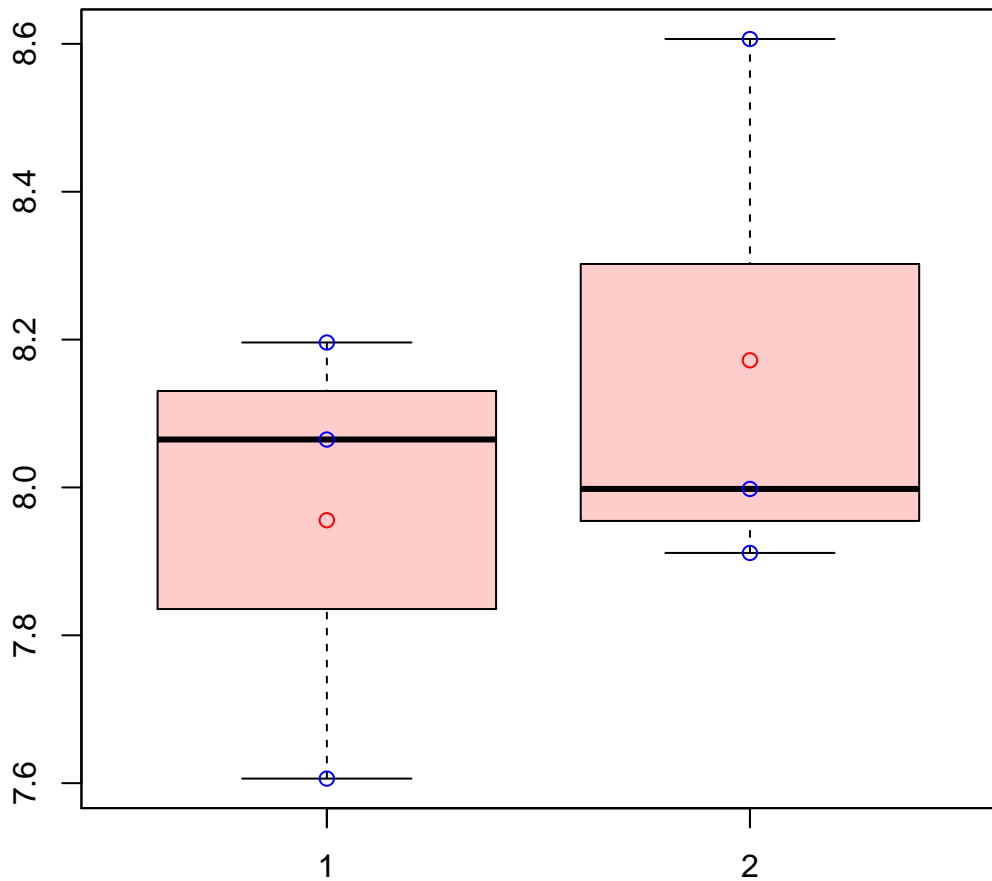

t-Test: p-value = 0.49

# CL820Contig8|CL820Contig8

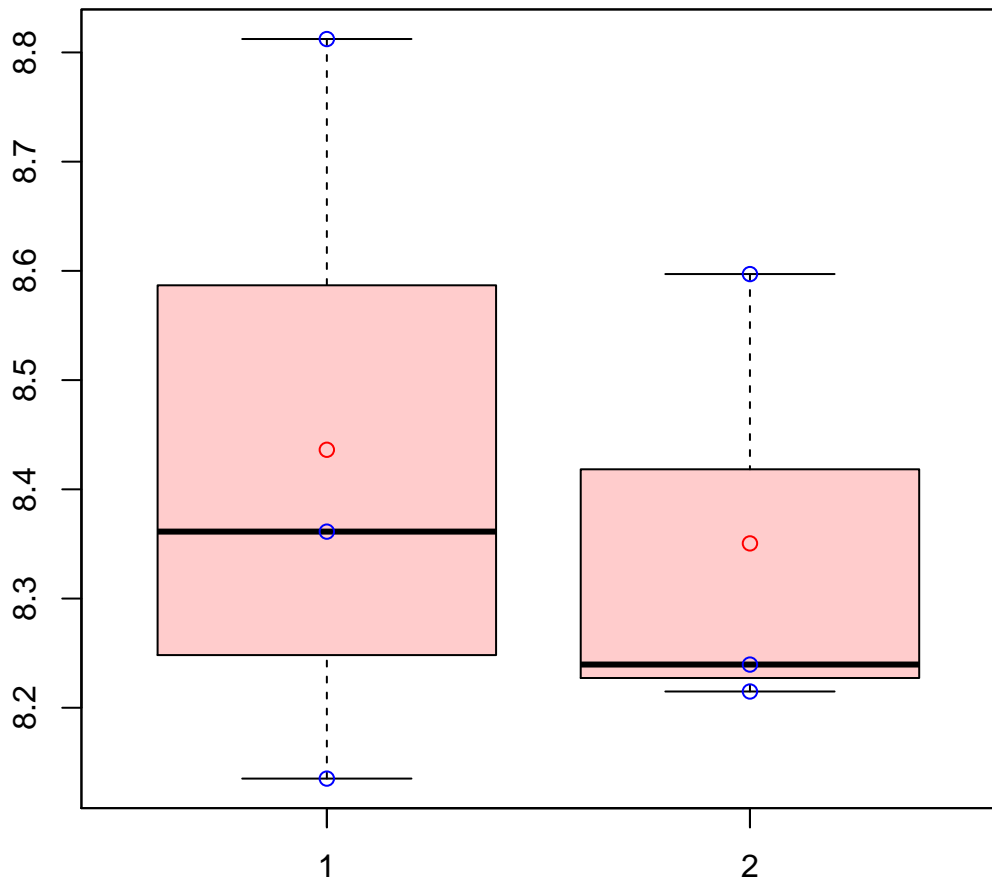

t-Test: p-value = 0.74

# CL820Contig9|CL820Contig9

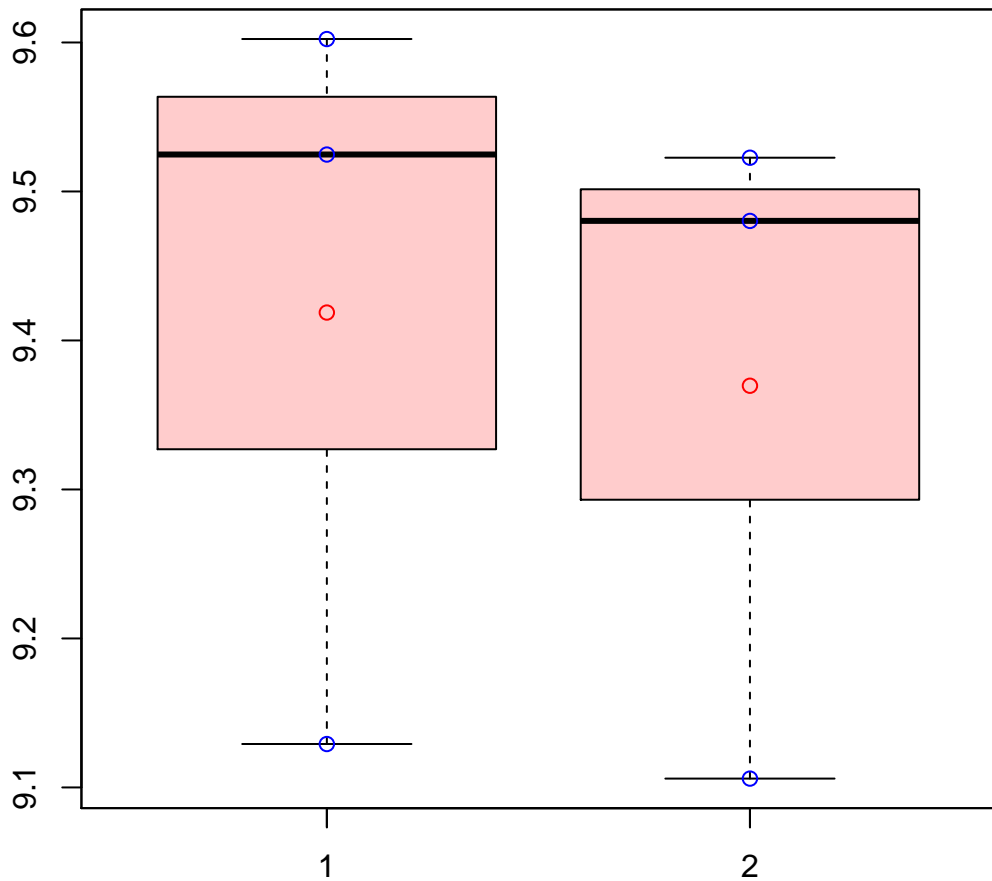

t-Test: p-value = 0.82

# CL8214Contig3|CL8214Contig3

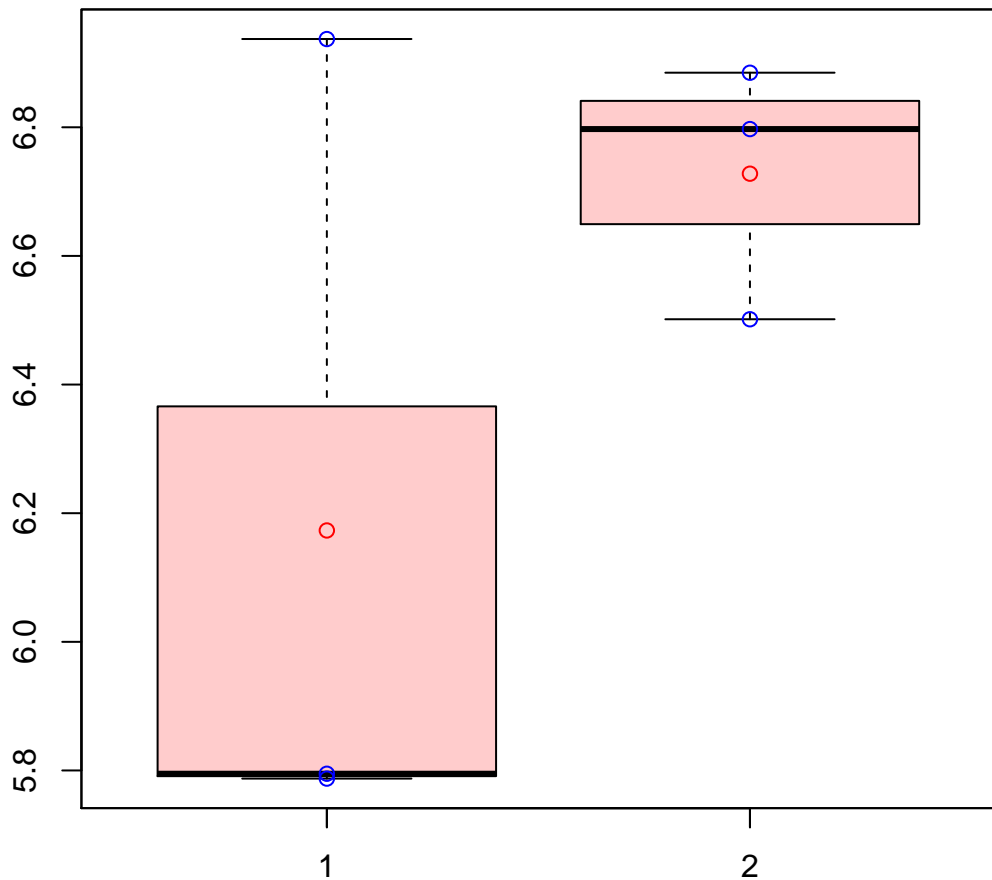

t-Test: p-value = 0.28

# CL821Contig1|CL821Contig1

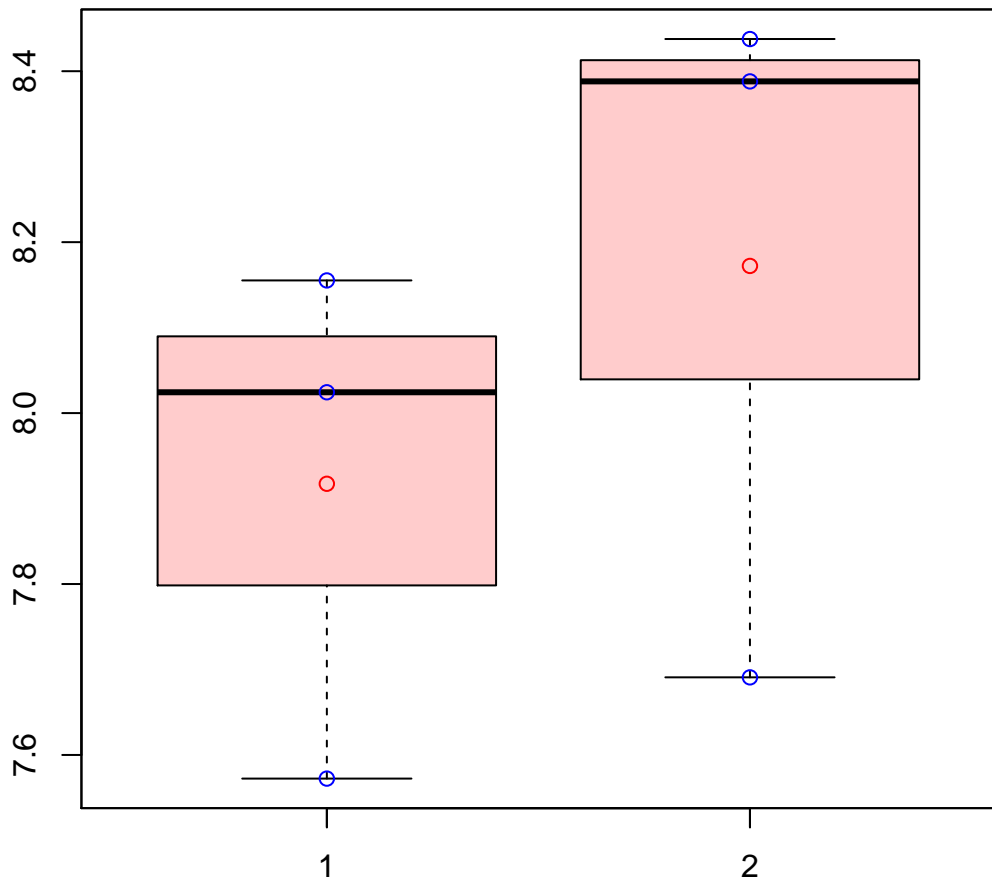

t-Test: p-value = 0.45

# CL821Contig2|CL821Contig2

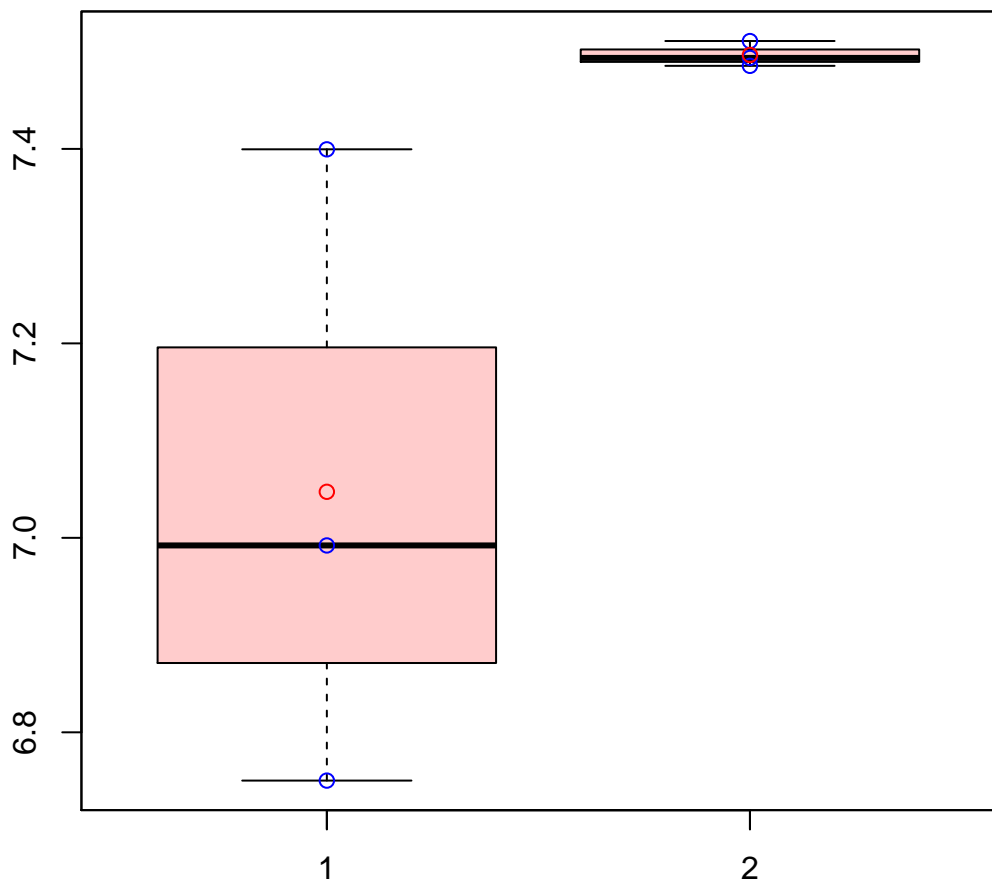

t-Test: p-value = 0.14

# CL821Contig3|CL821Contig3

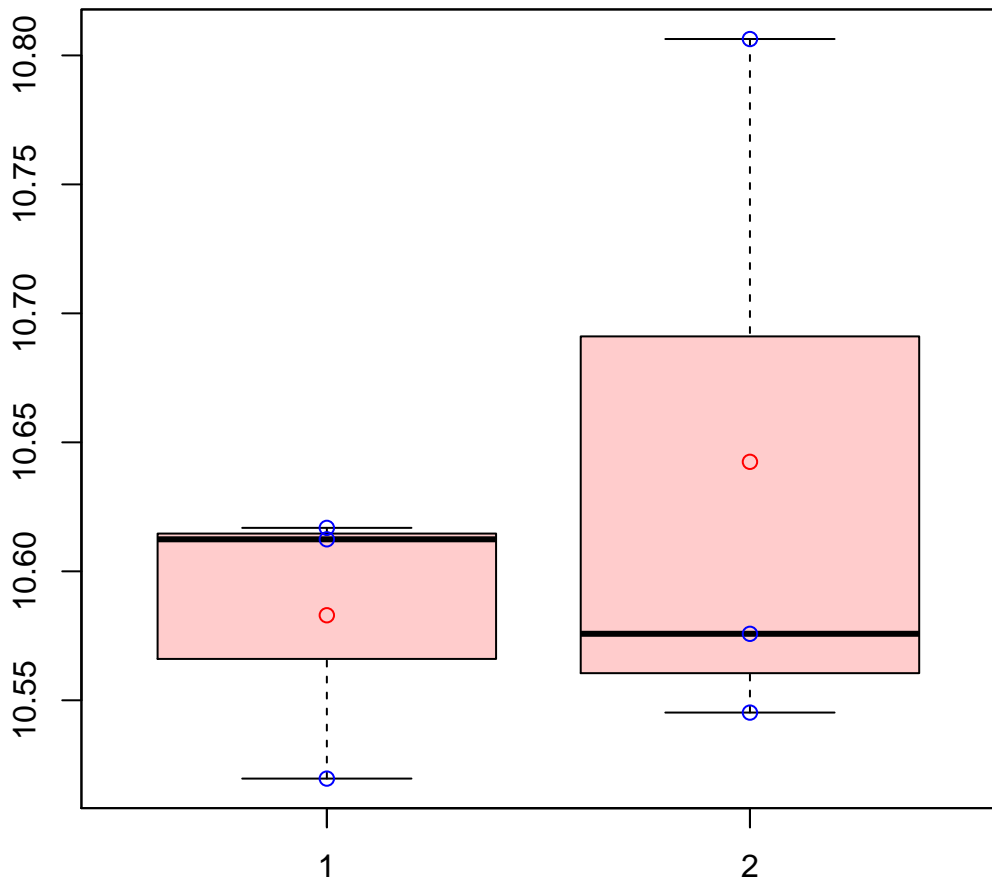

t-Test: p-value = 0.56

# CL8230Contig1|CL8230Contig1

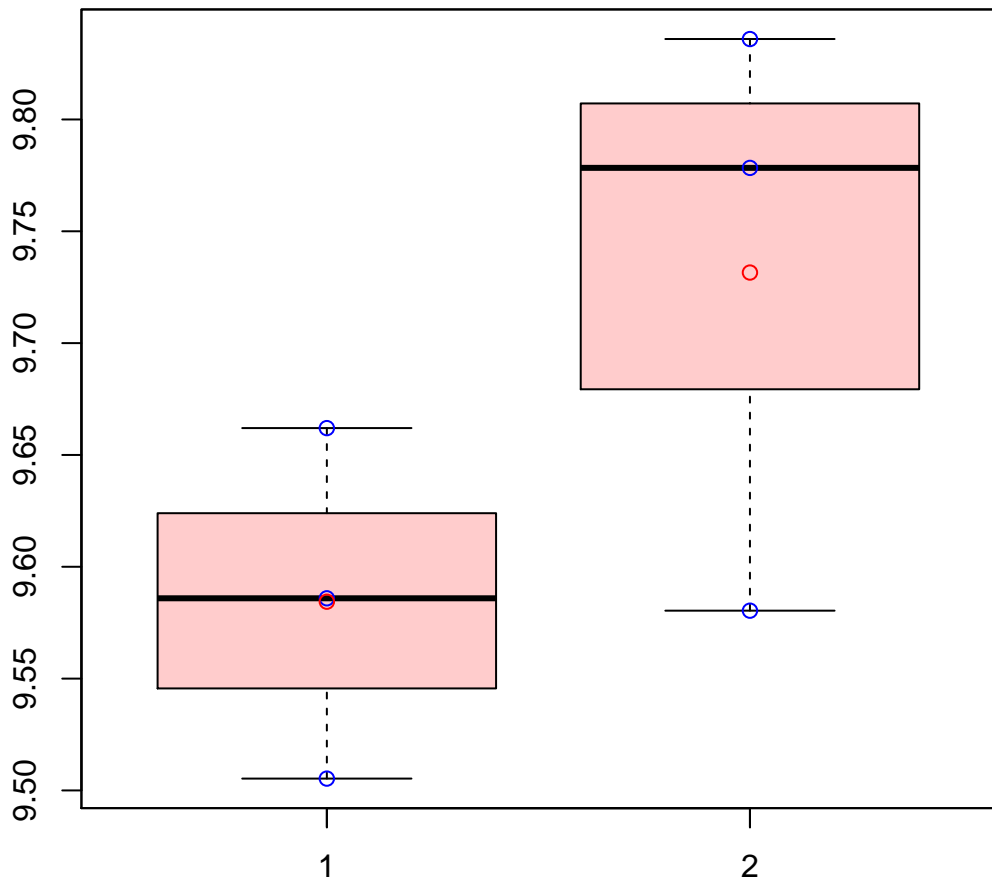

t-Test: p-value = 0.19



# CL8238Contig4|CL8238Contig4

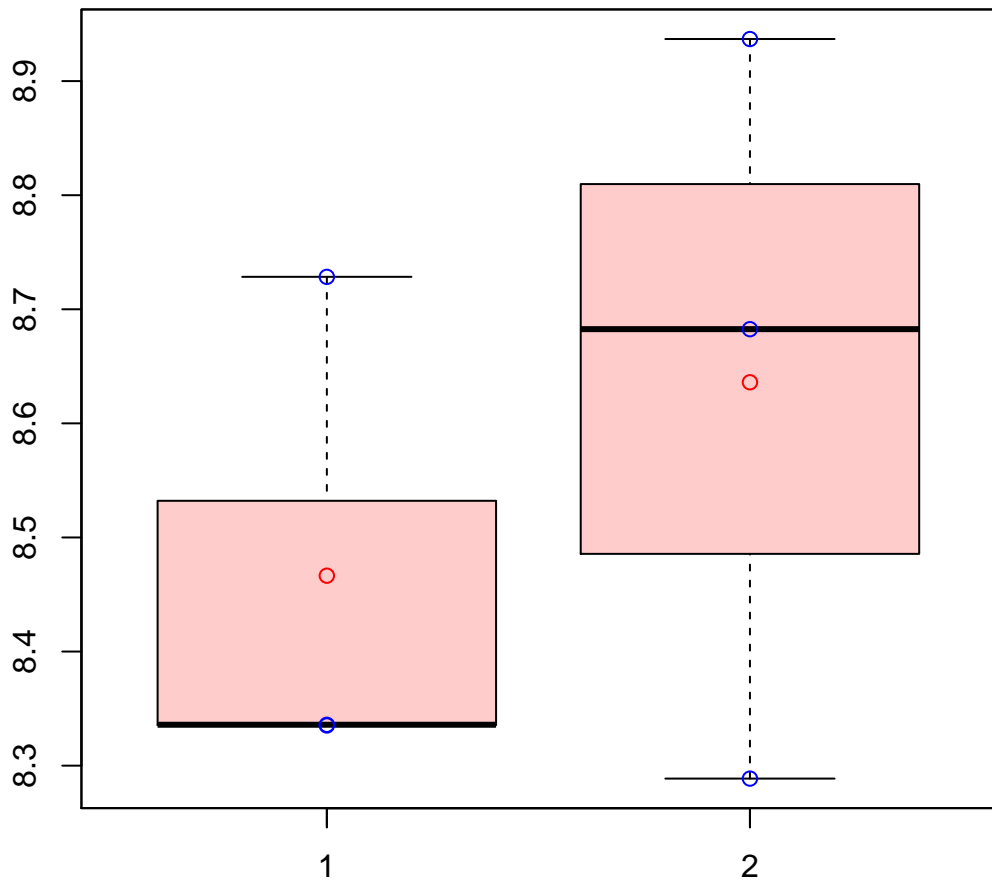

t-Test: p-value = 0.51

# CL8239Contig1|CL8239Contig1

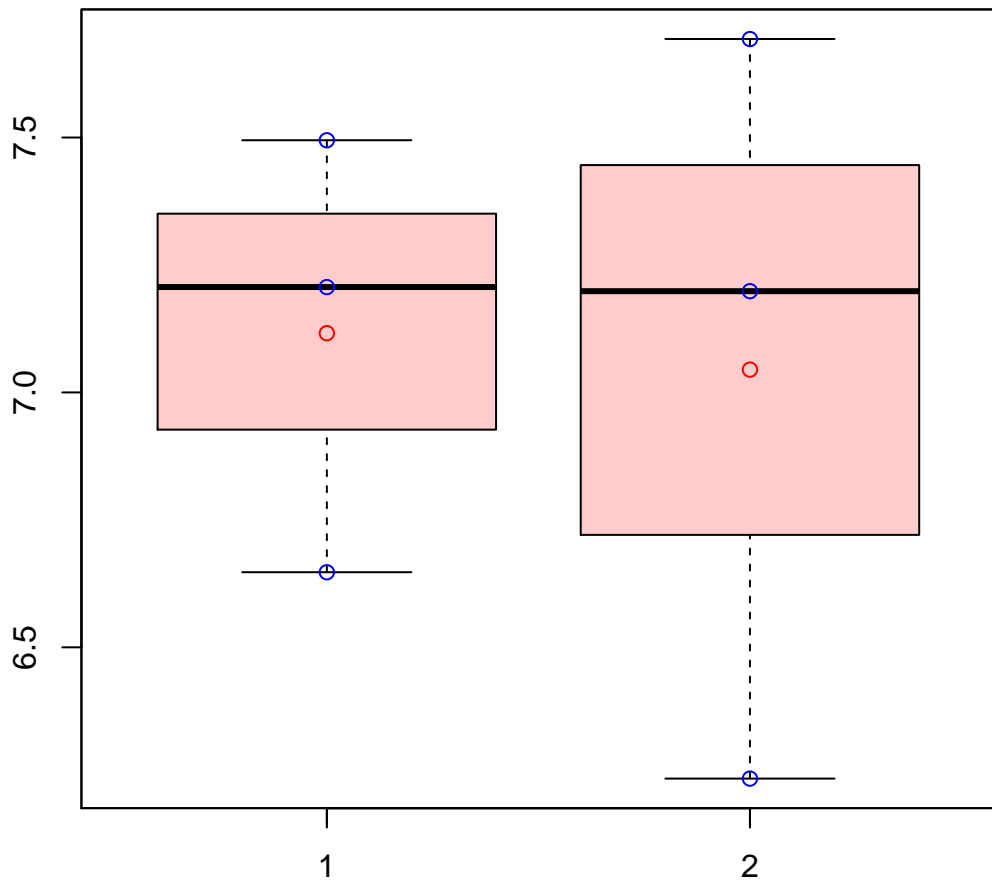

t-Test: p-value = 0.89

# CL8239Contig4|CL8239Contig4

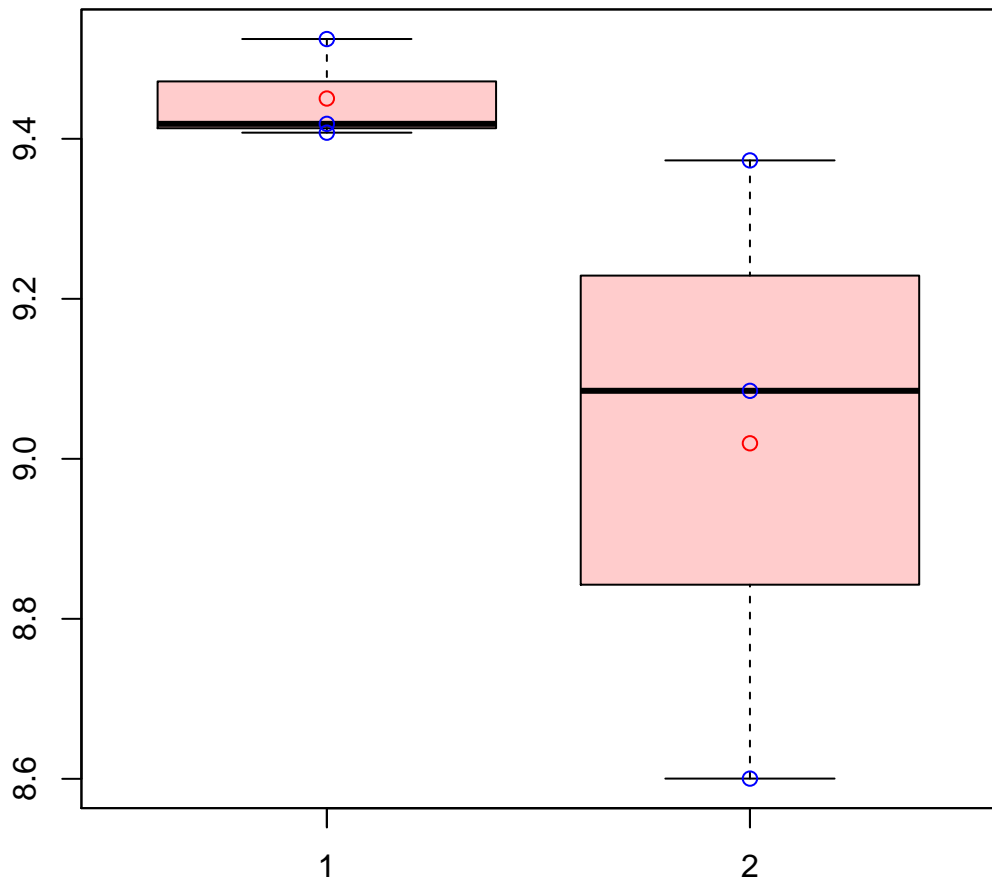

t-Test: p-value = 0.19

# CL8252Contig1|CL8252Contig1

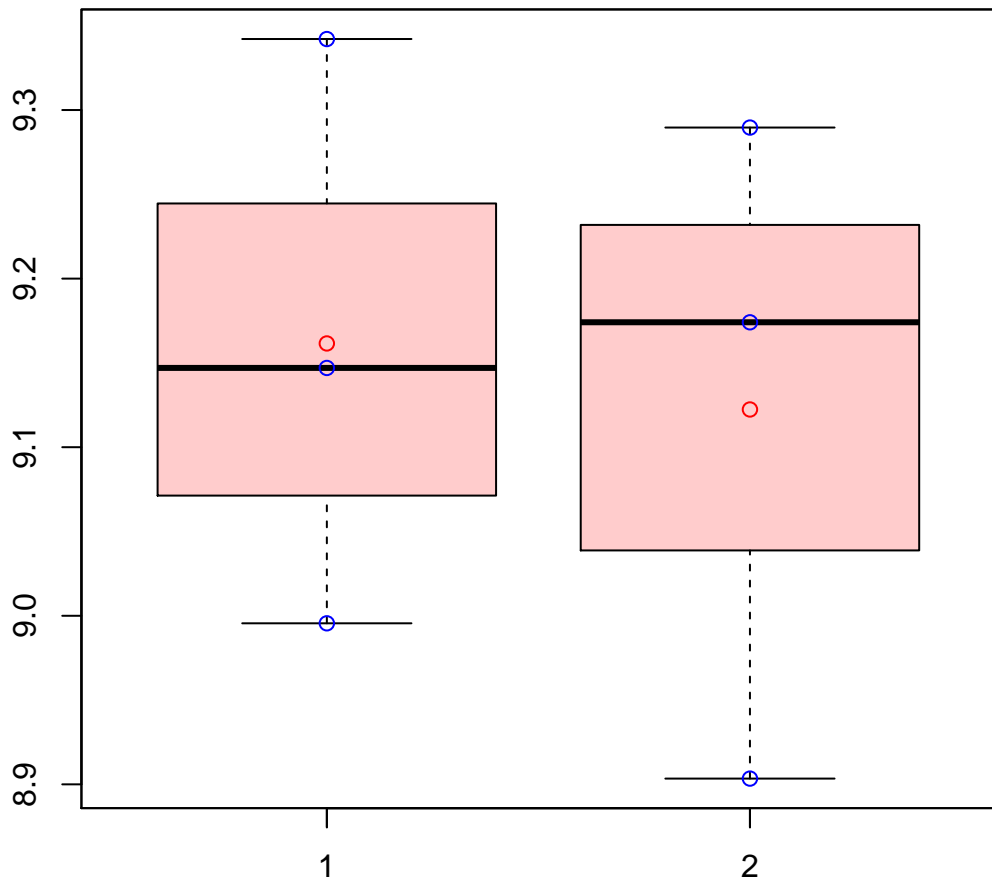

t-Test: p-value = 0.81

# CL826Contig5|CL826Contig5

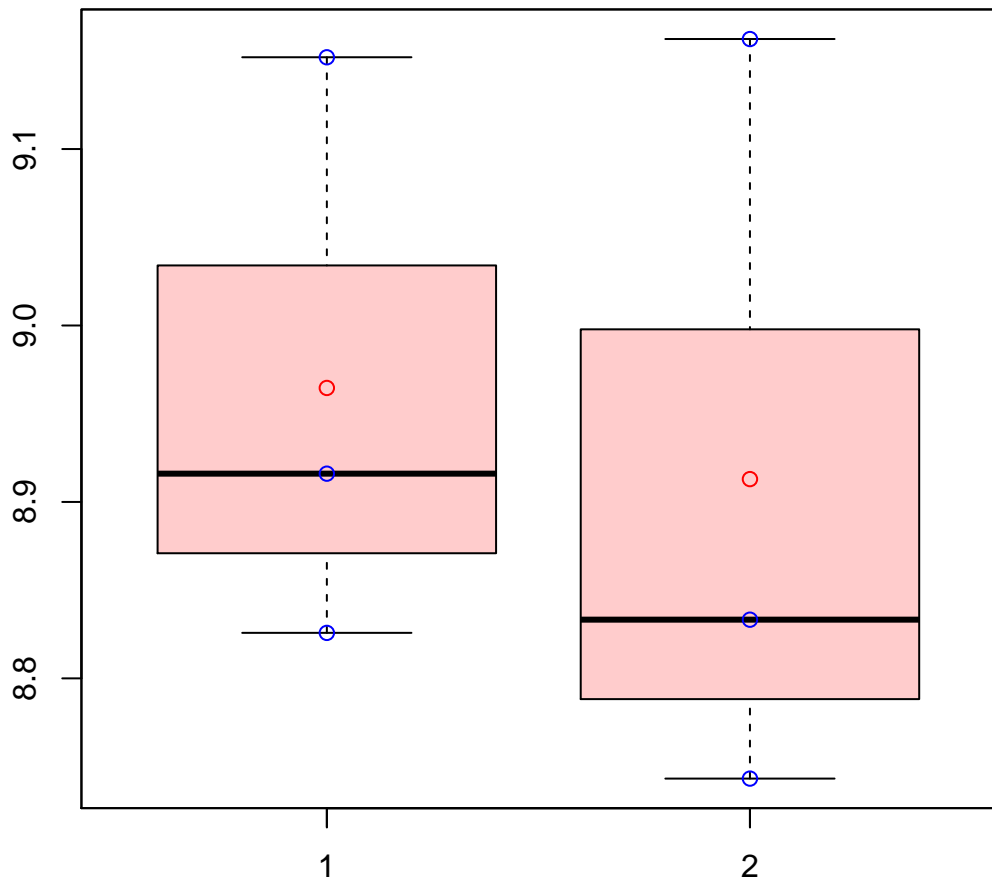

t-Test: p-value = 0.76

# CL8278Contig1|CL8278Contig1

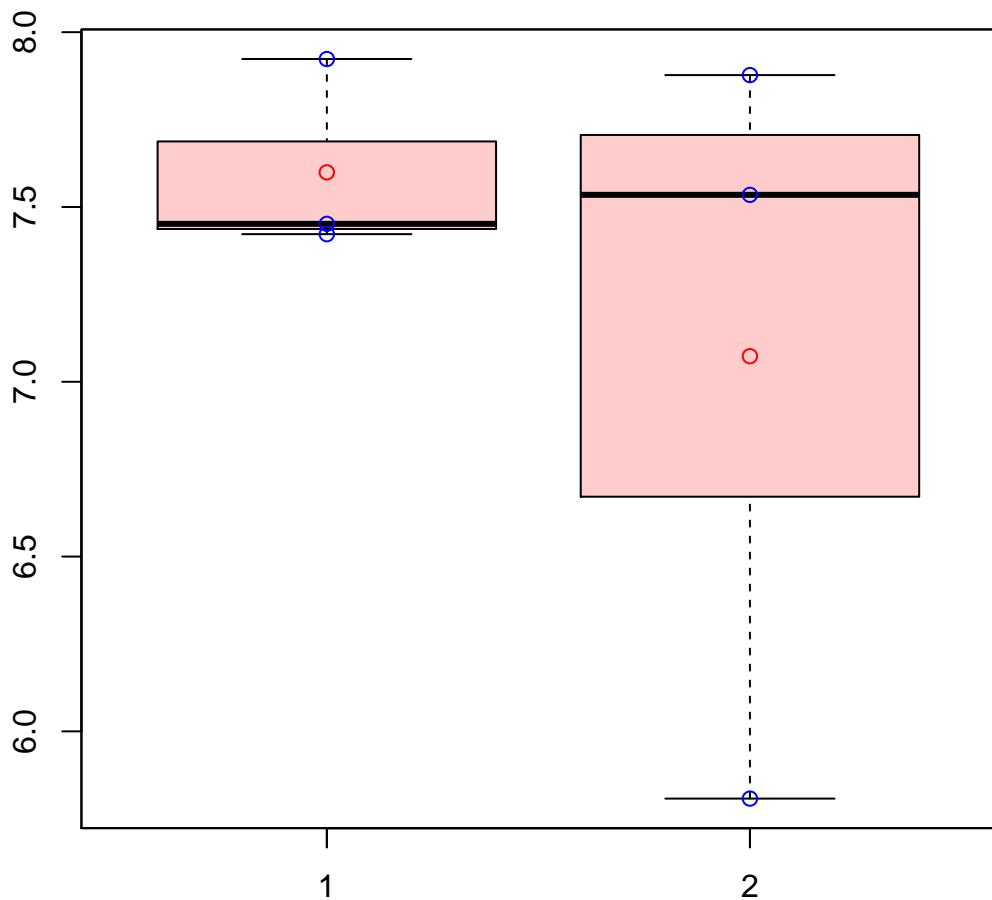

t-Test: p-value = 0.5

# CL8282Contig1|CL8282Contig1

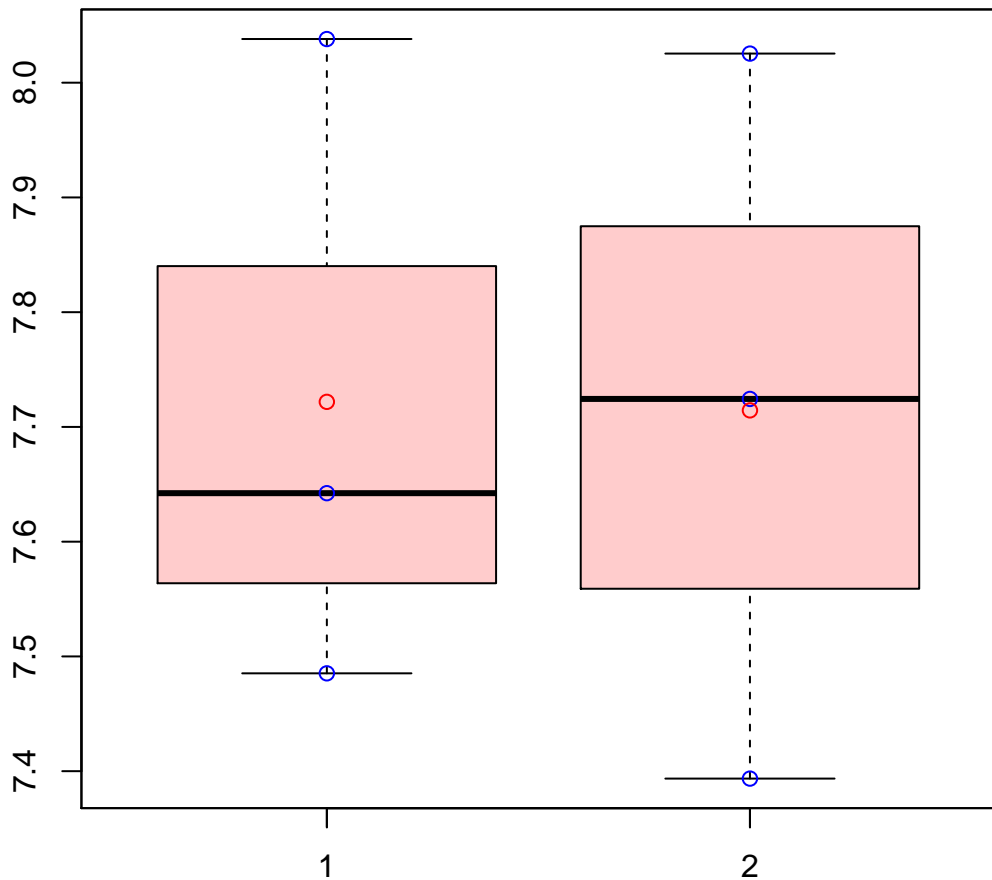

t-Test: p-value = 0.98

# CL828Contig11|CL828Contig11

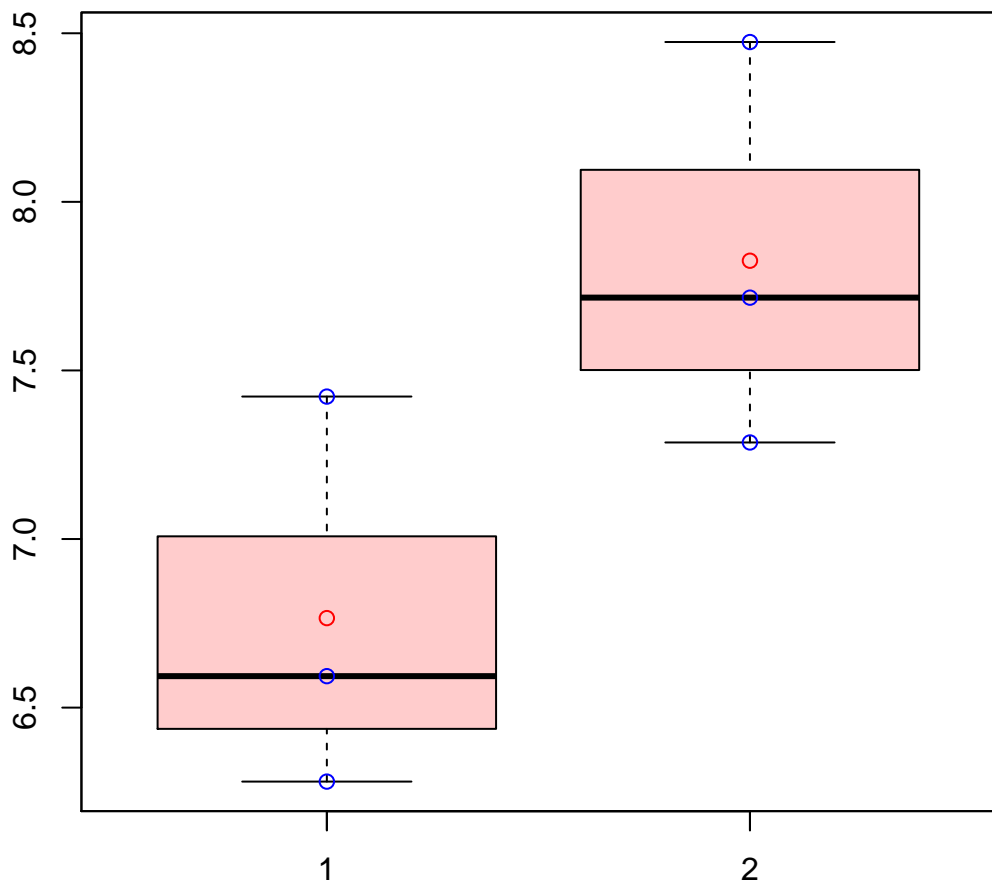

t-Test: p-value = 0.09



# CL82Contig12|CL82Contig12

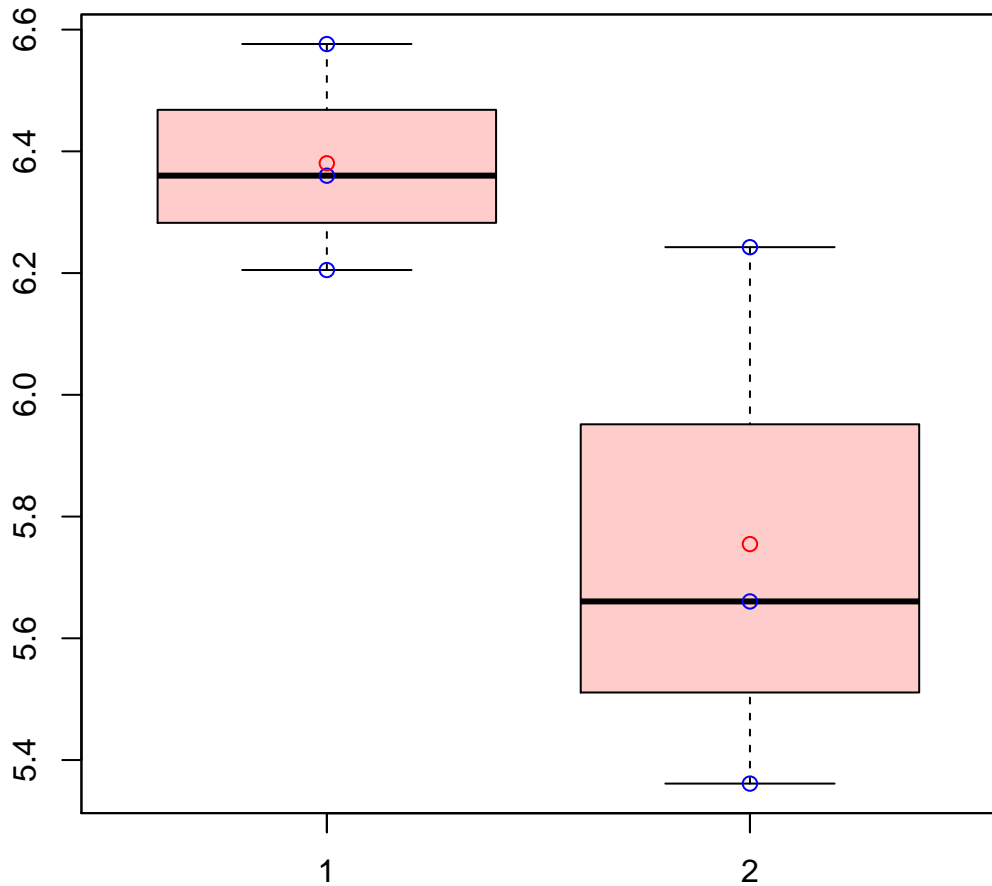

t-Test: p-value = 0.12

# CL8315Contig1|CL8315Contig1

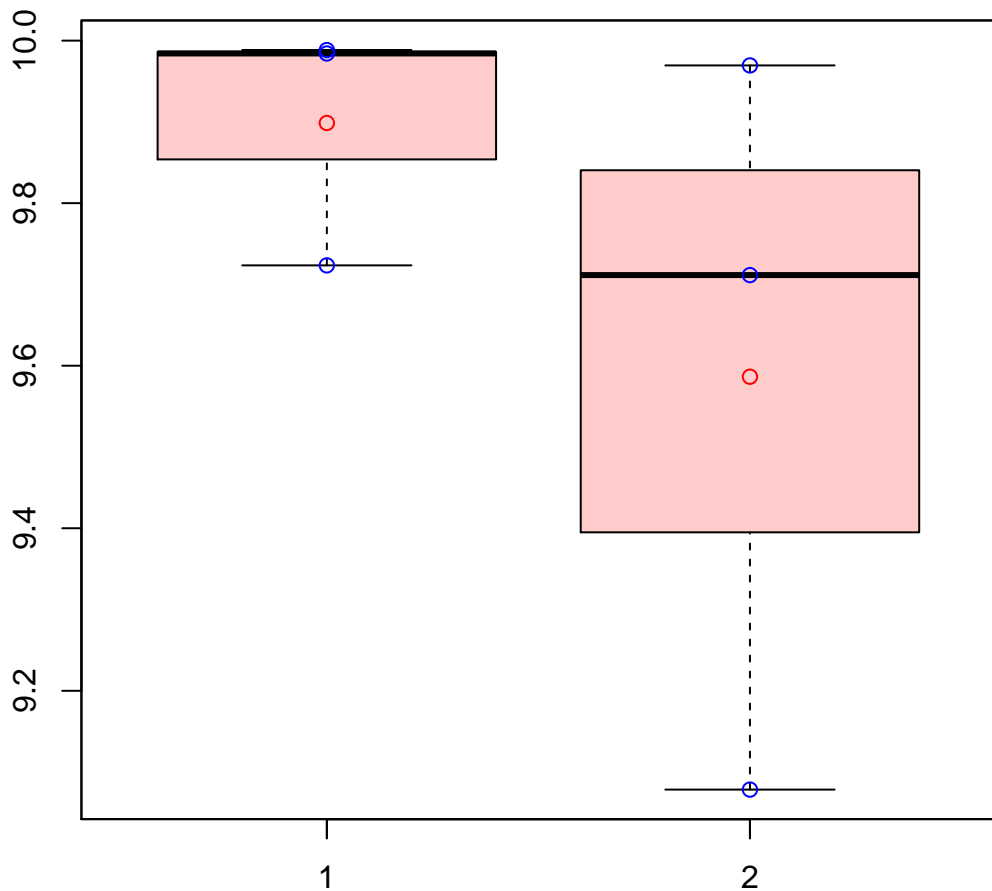

t-Test: p-value = 0.36

# CL833Contig1|CL833Contig1

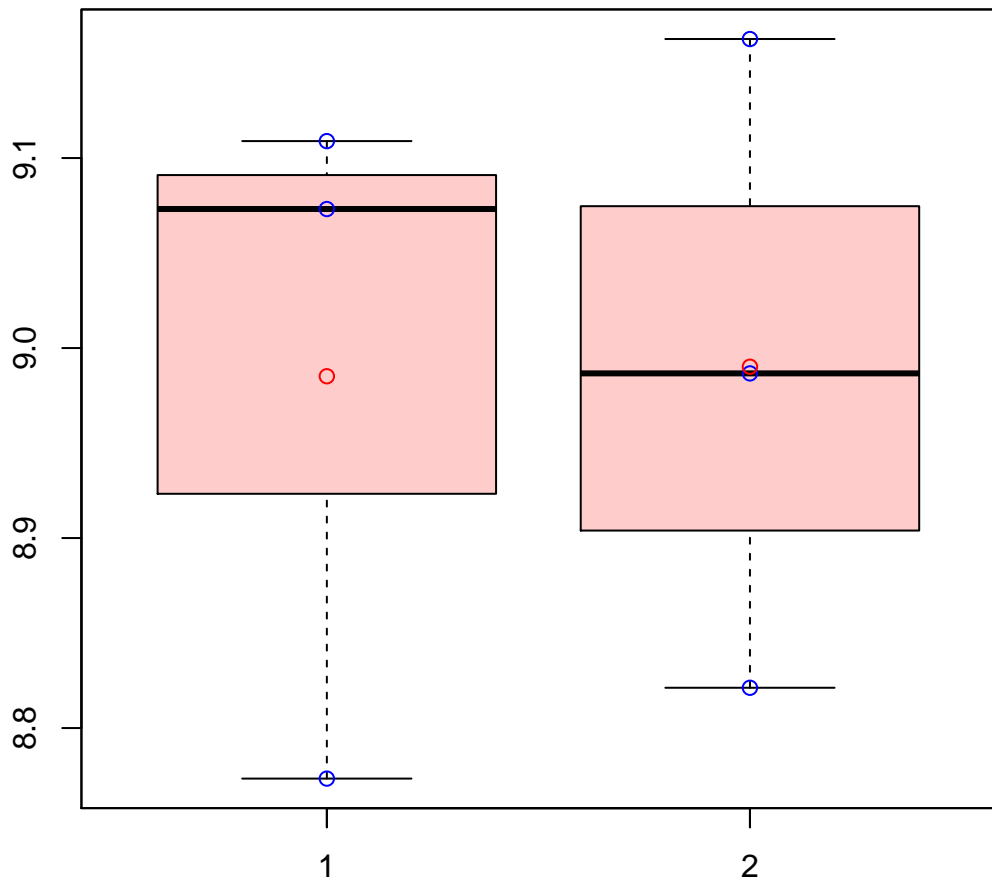

t-Test: p-value = 0.97

# CL8349Contig1|CL8349Contig1

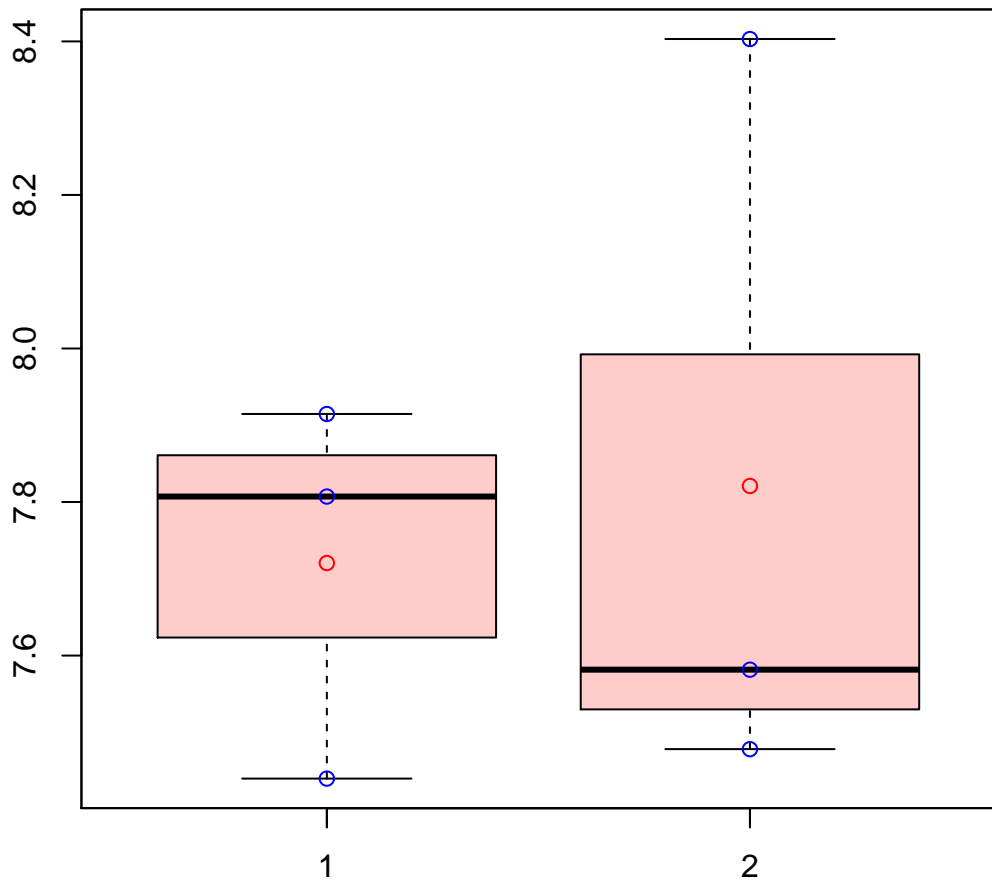

t-Test: p-value = 0.78

# CL8351Contig3|CL8351Contig3

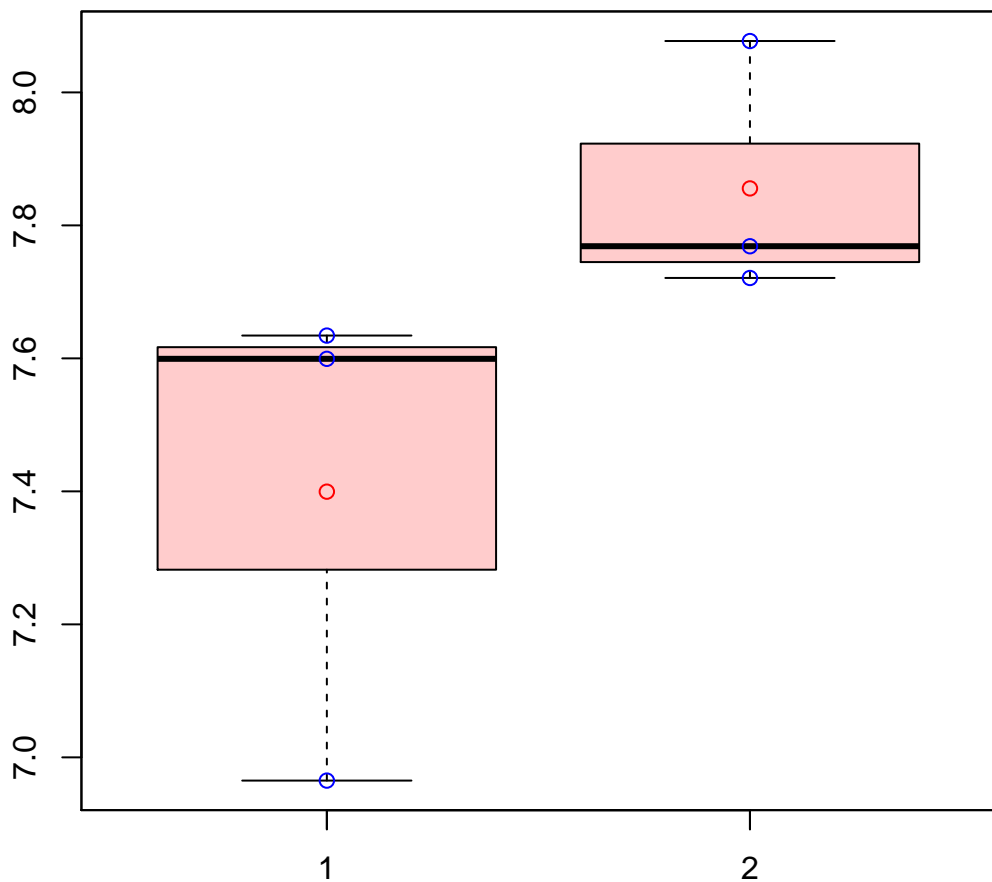

t-Test: p-value = 0.16

# CL8375Contig1|CL8375Contig1

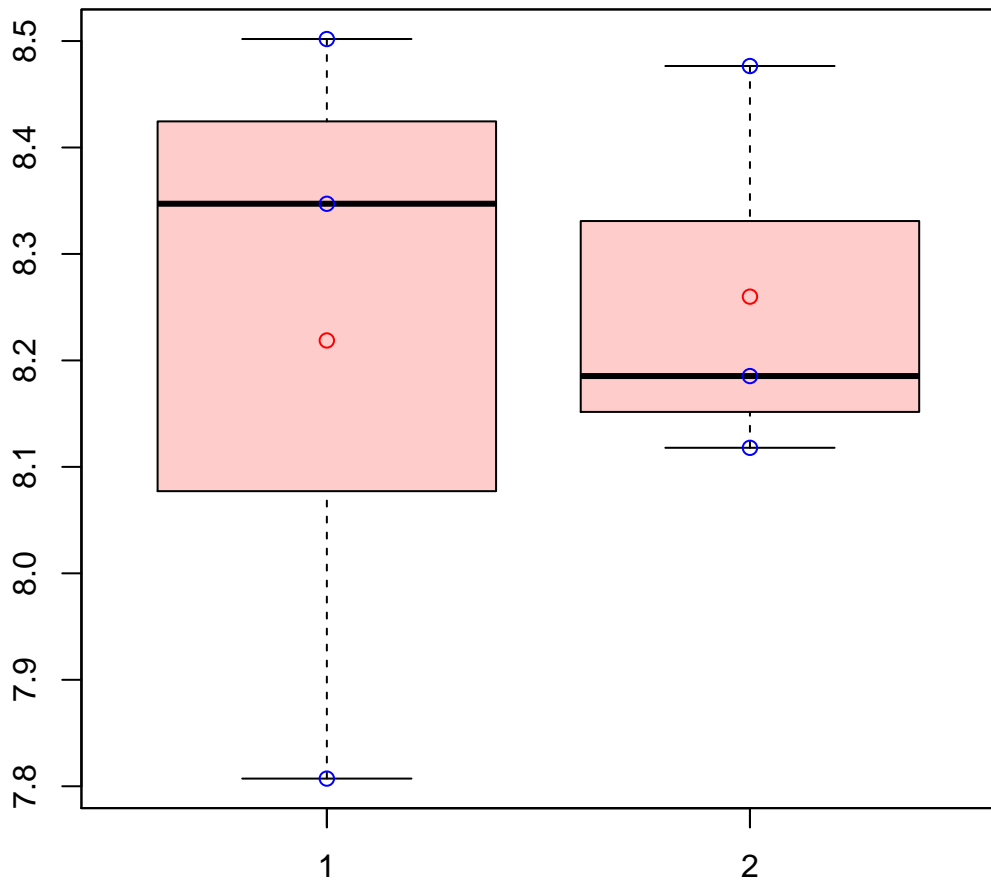

t-Test: p-value = 0.87

# CL837Contig2|CL837Contig2

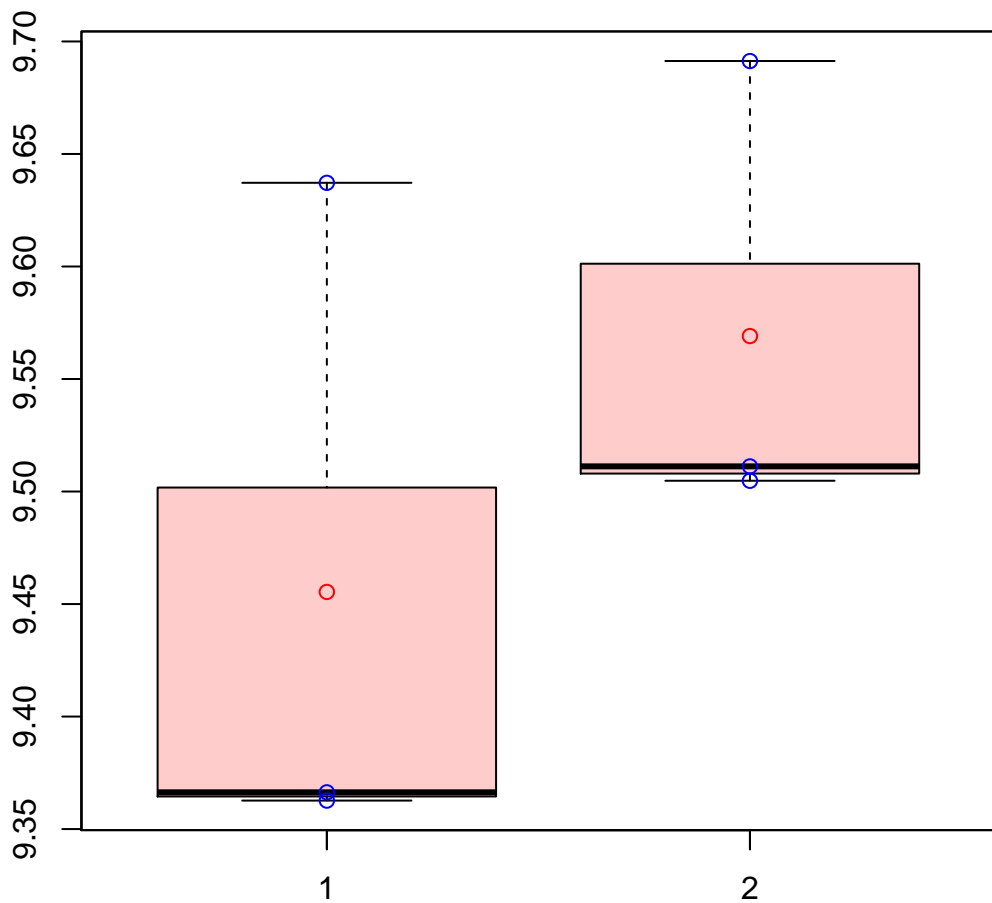

t-Test: p-value = 0.37

# CL837Contig4|CL837Contig4

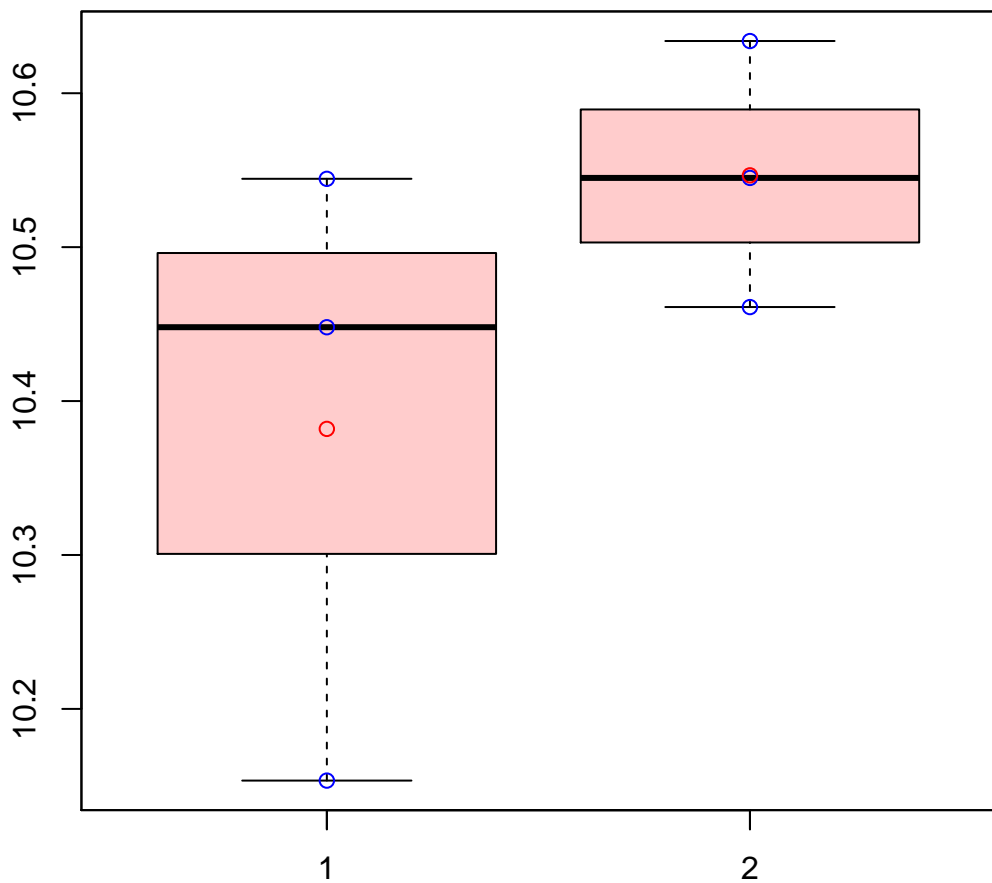

t-Test: p-value = 0.3



# CL837Contig5|CL837Contig5

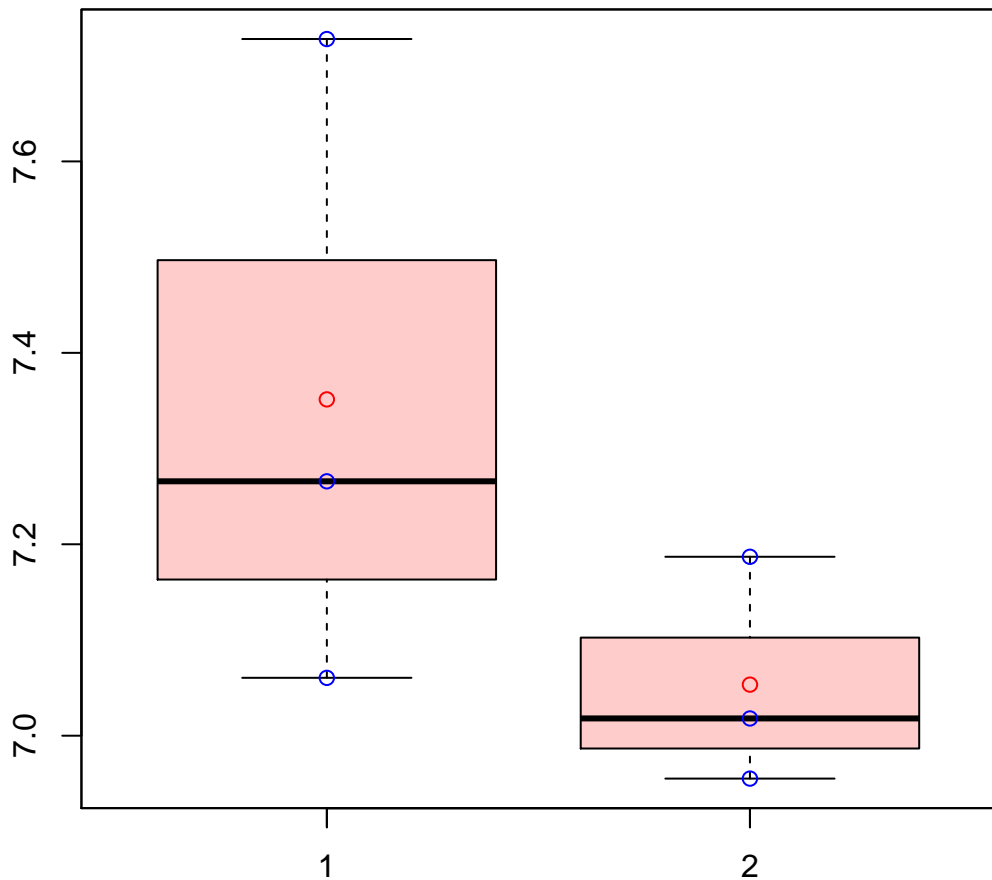

t-Test: p-value = 0.27

# CL8388Contig1|CL8388Contig1

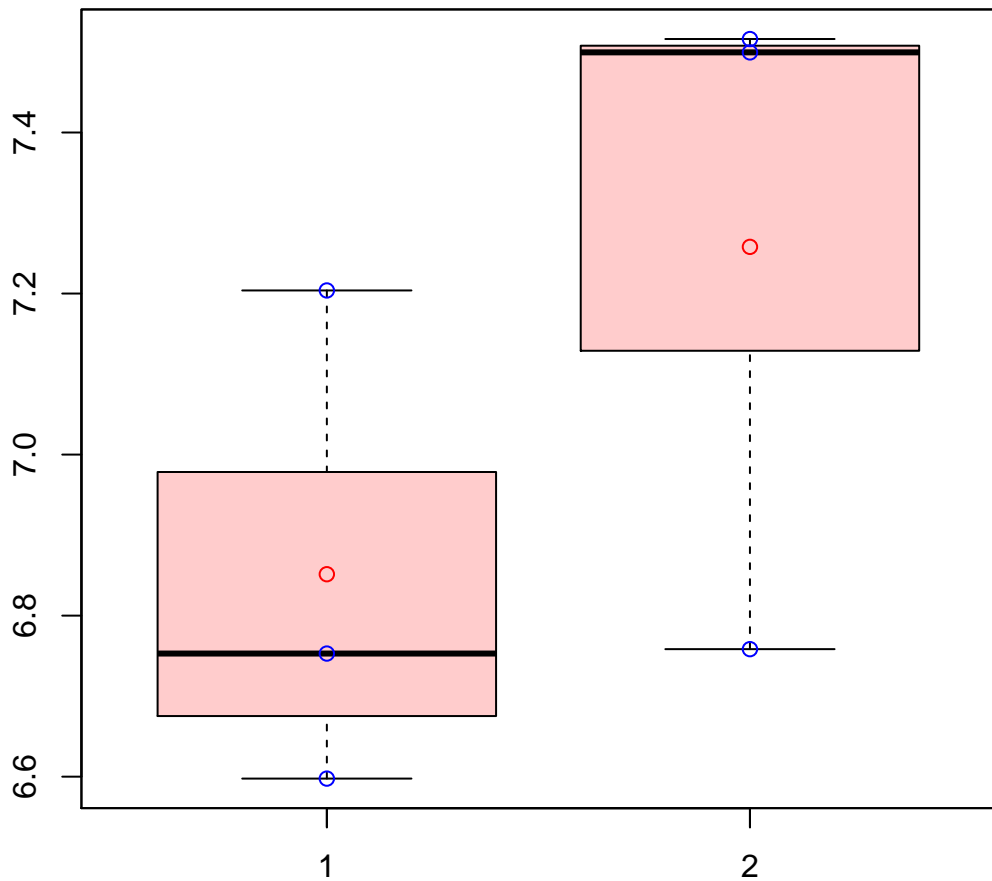

t-Test: p-value = 0.26

# CL840Contig9|CL840Contig9

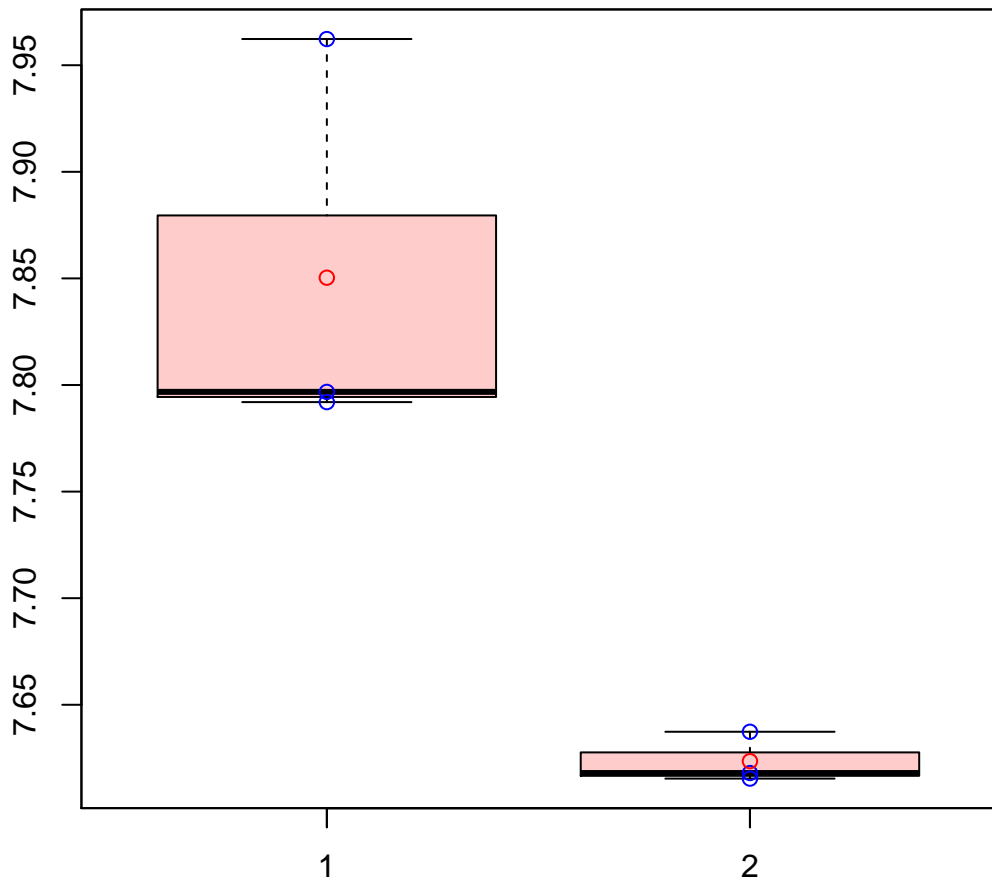

t-Test: p-value = 0.05

# CL8430Contig2|CL8430Contig2

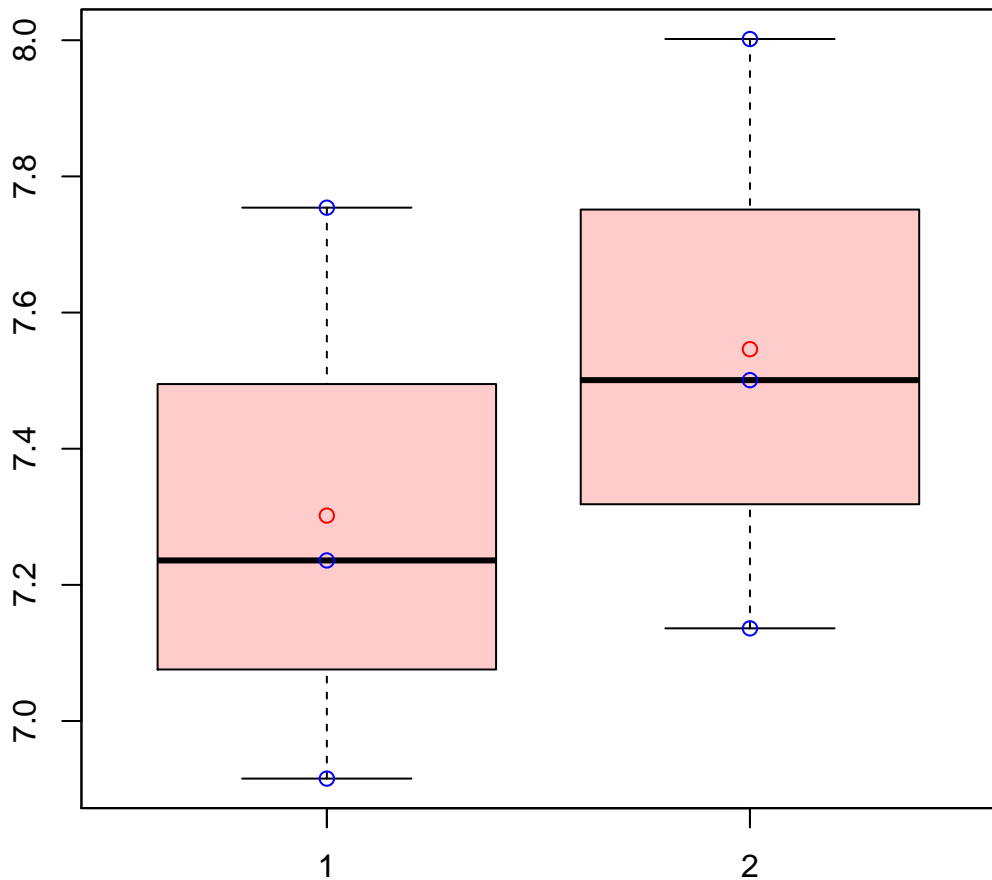

t-Test: p-value = 0.52

# CL8431Contig3|CL8431Contig3

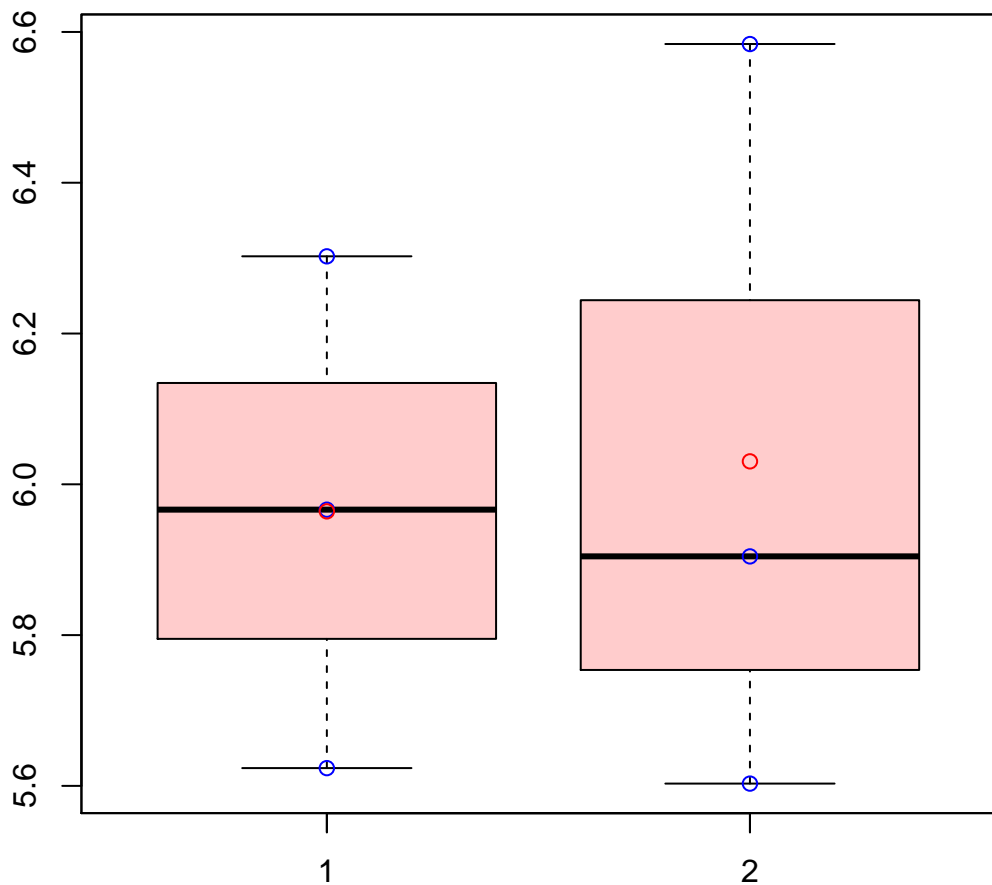

t-Test: p-value = 0.86

# CL8478Contig2|CL8478Contig2

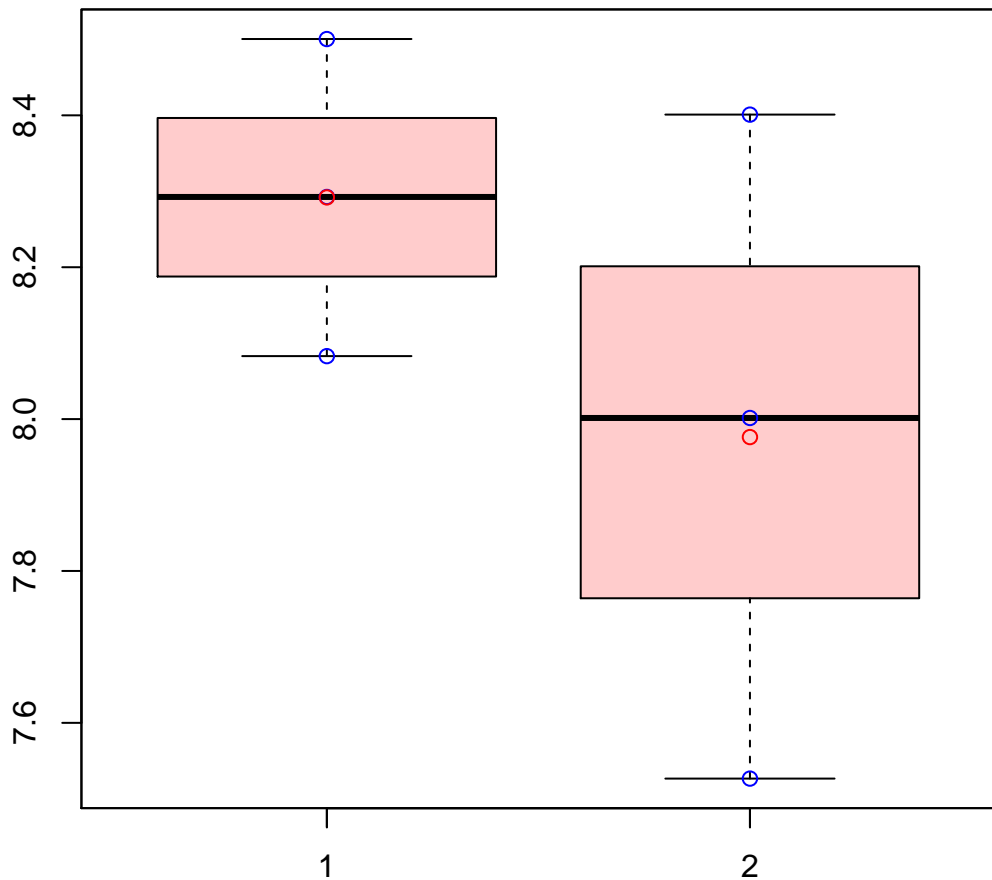

t-Test: p-value = 0.35

# CL8482Contig1|CL8482Contig1

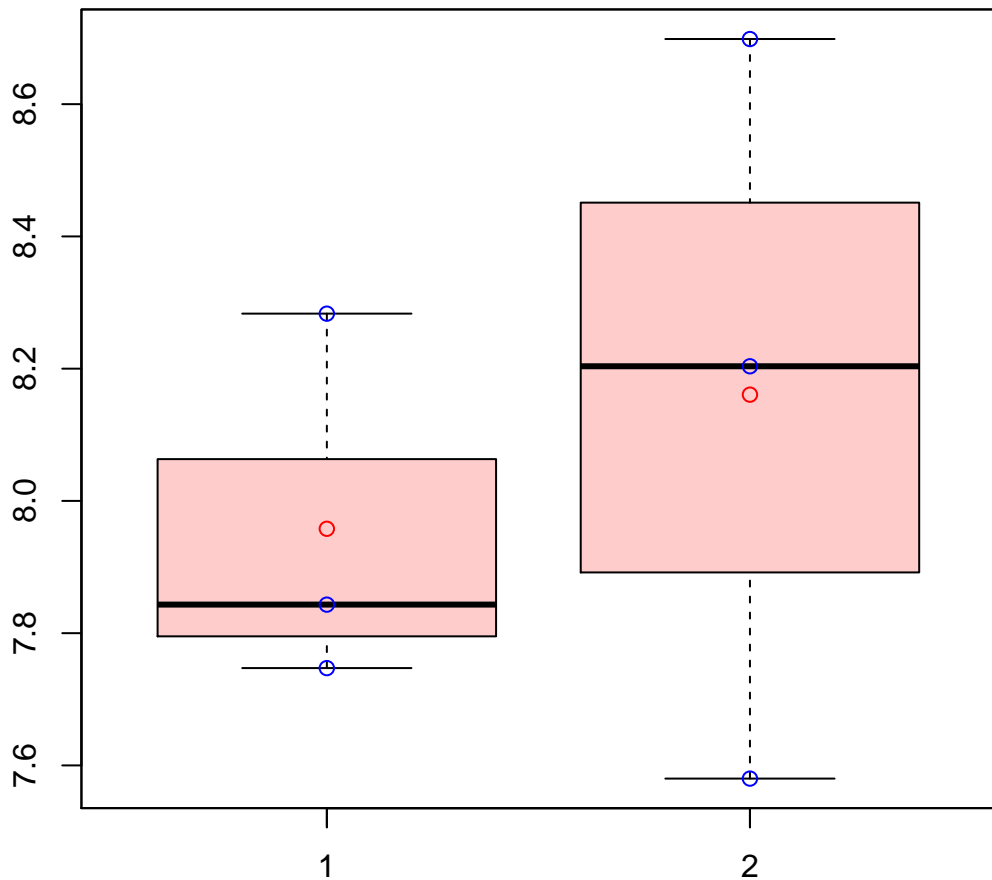

t-Test: p-value = 0.62

# CL84Contig6|CL84Contig6

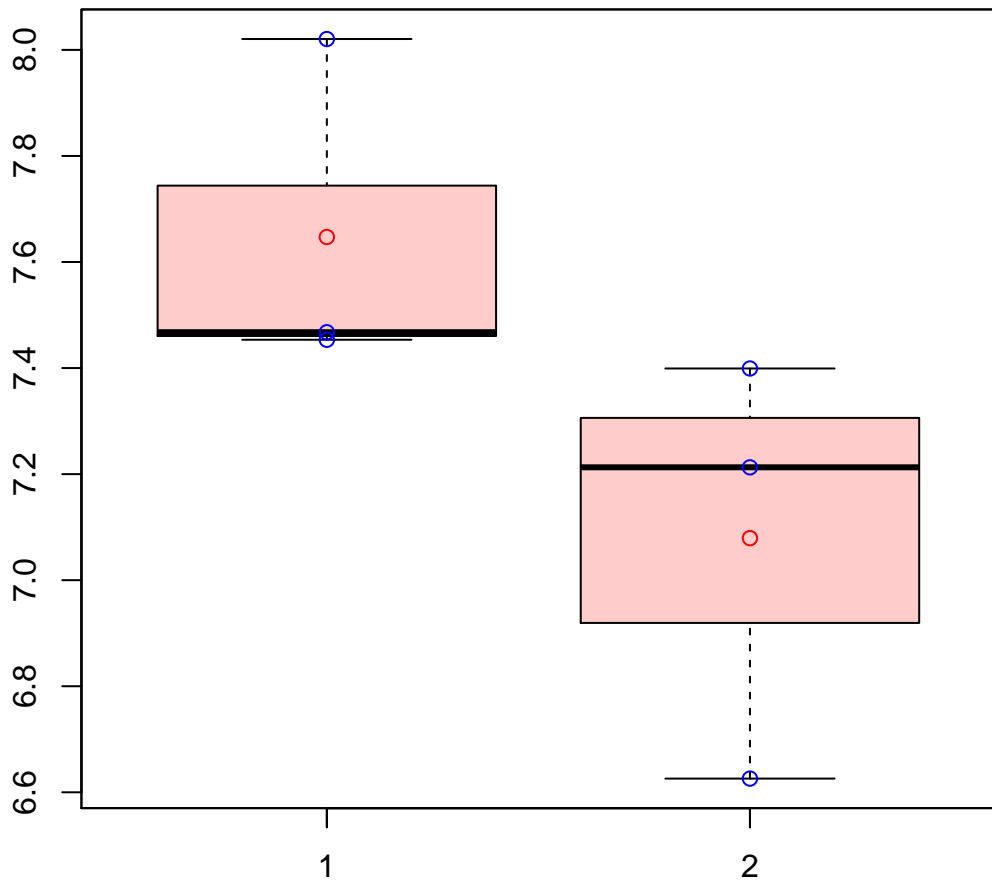

t-Test: p-value = 0.13



# CL8516Contig2|CL8516Contig2

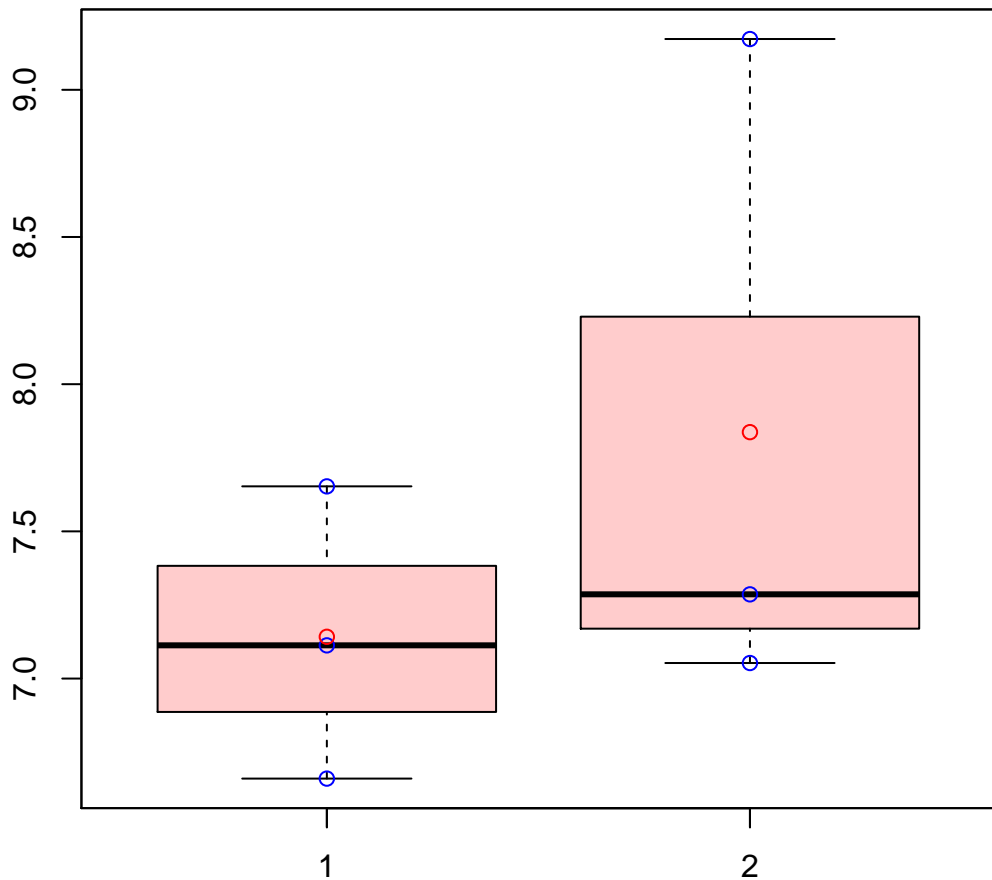

t-Test: p-value = 0.42

# CL8517Contig3|CL8517Contig3

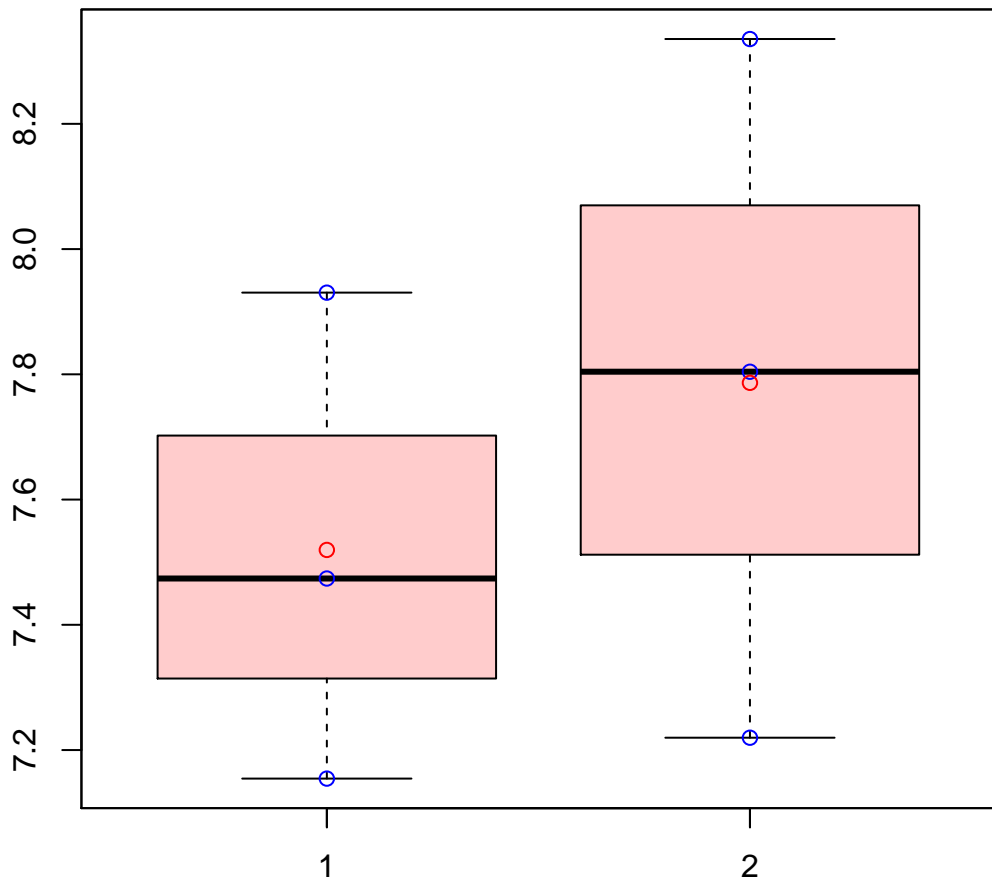

t-Test: p-value = 0.54

# CL8522Contig1|CL8522Contig1

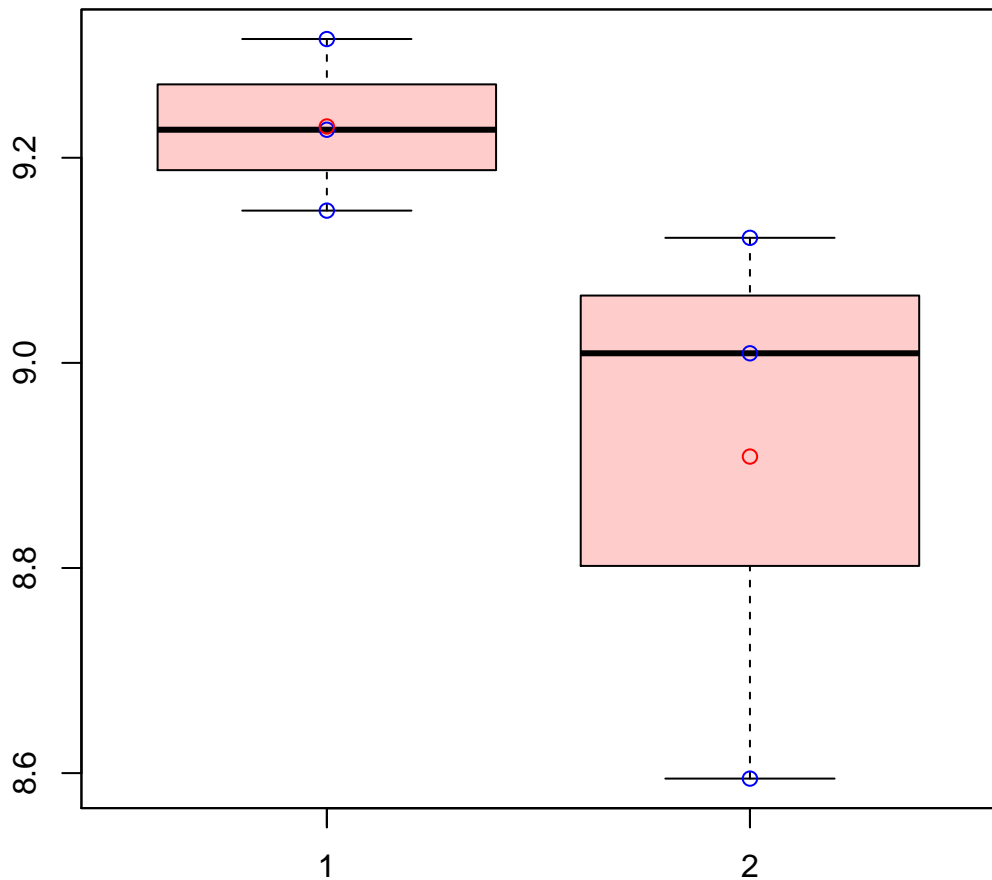

t-Test: p-value = 0.17

# CL852Contig5|CL852Contig5

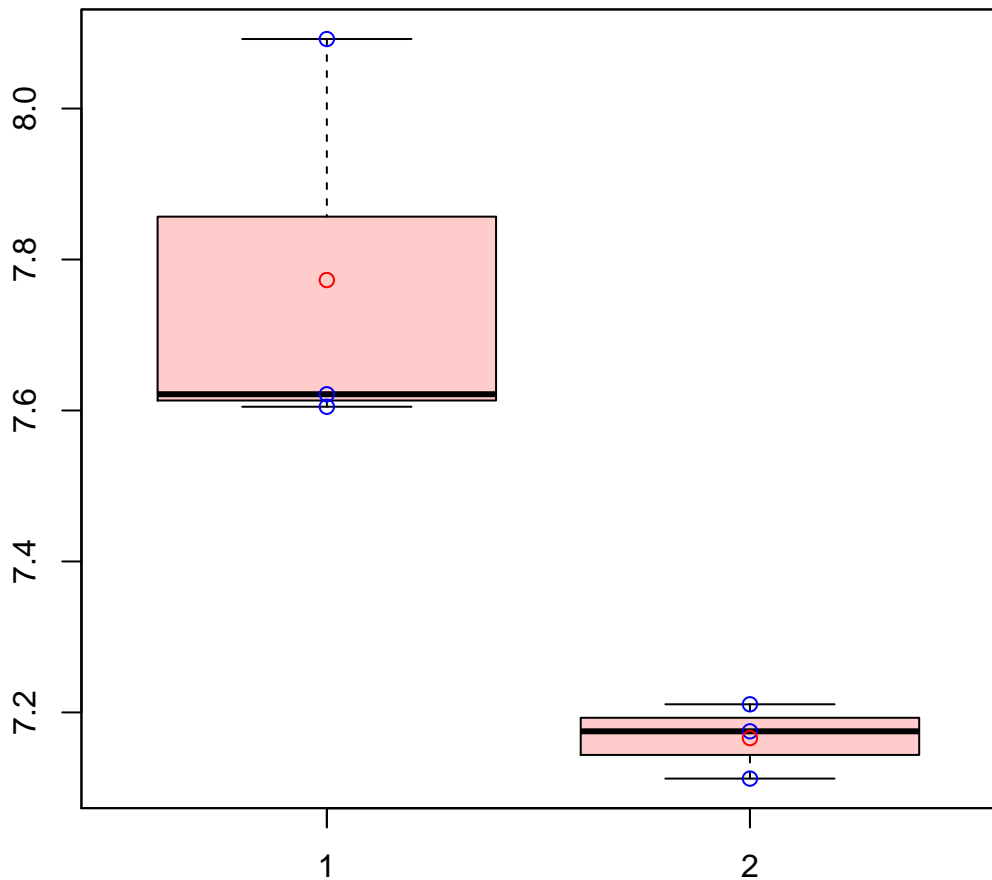

t-Test: p-value = 0.06

# CL853Contig3|CL853Contig3

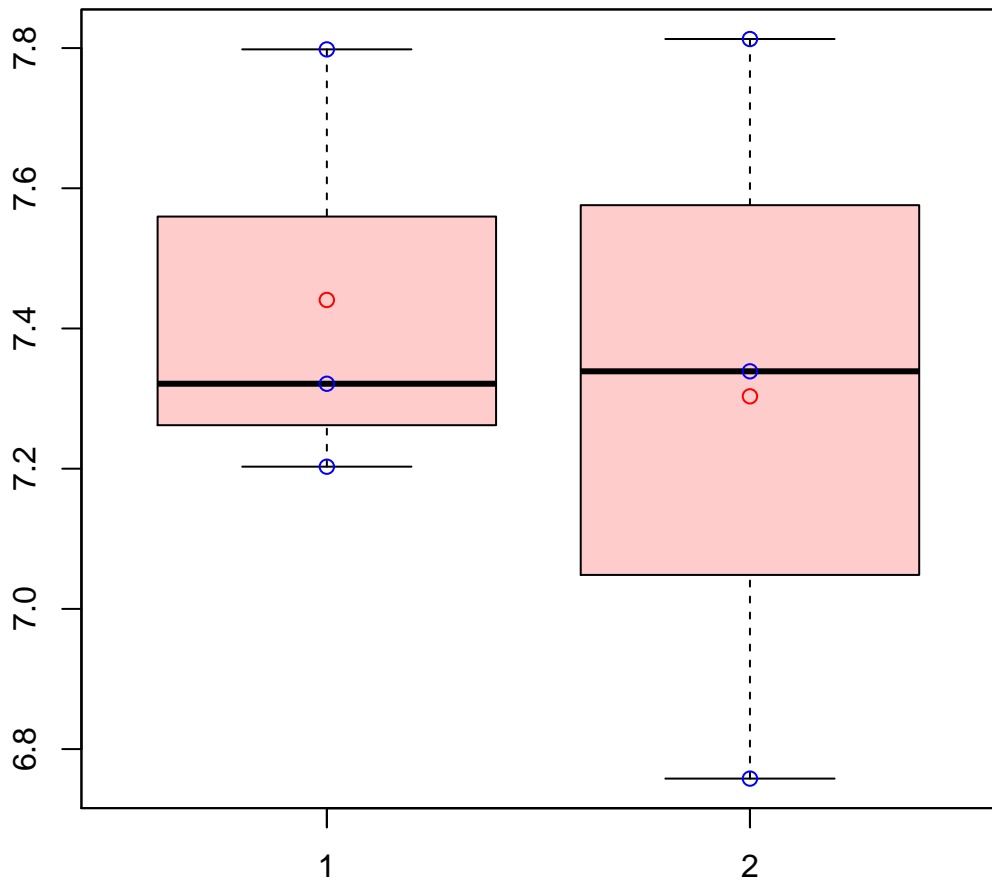

t-Test: p-value = 0.72

# CL854Contig7|CL854Contig7

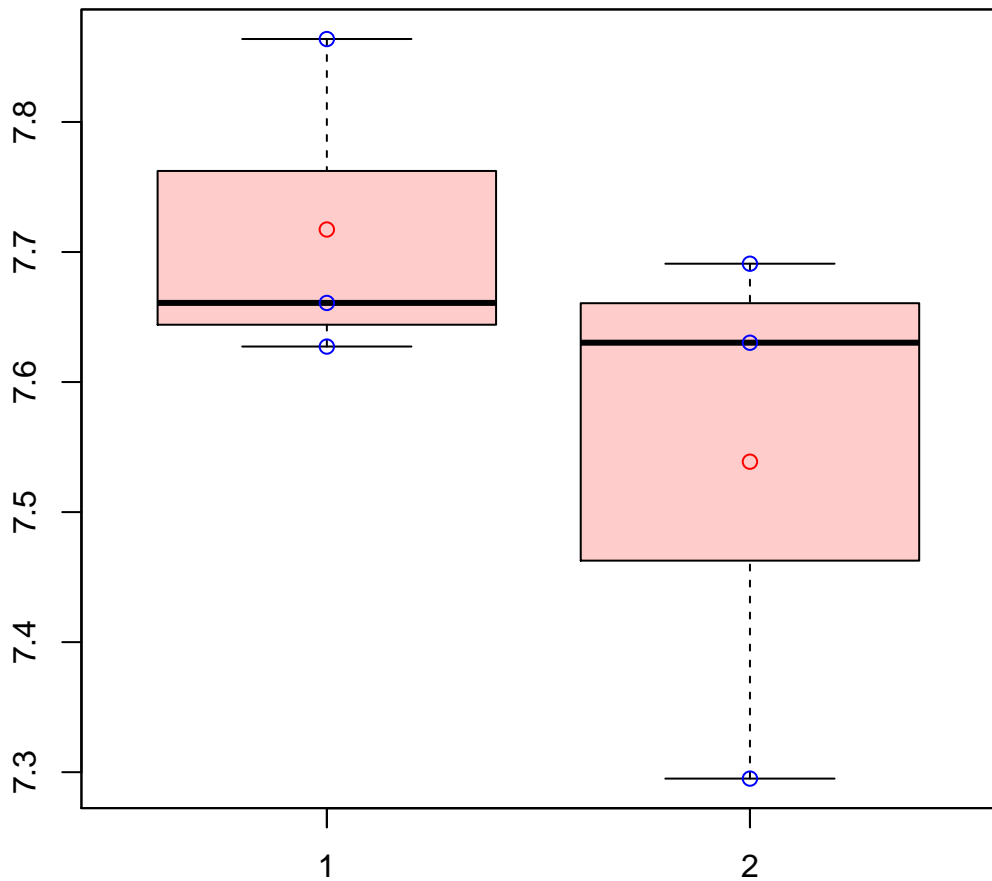

t-Test: p-value = 0.3

# CL8550Contig2|CL8550Contig2

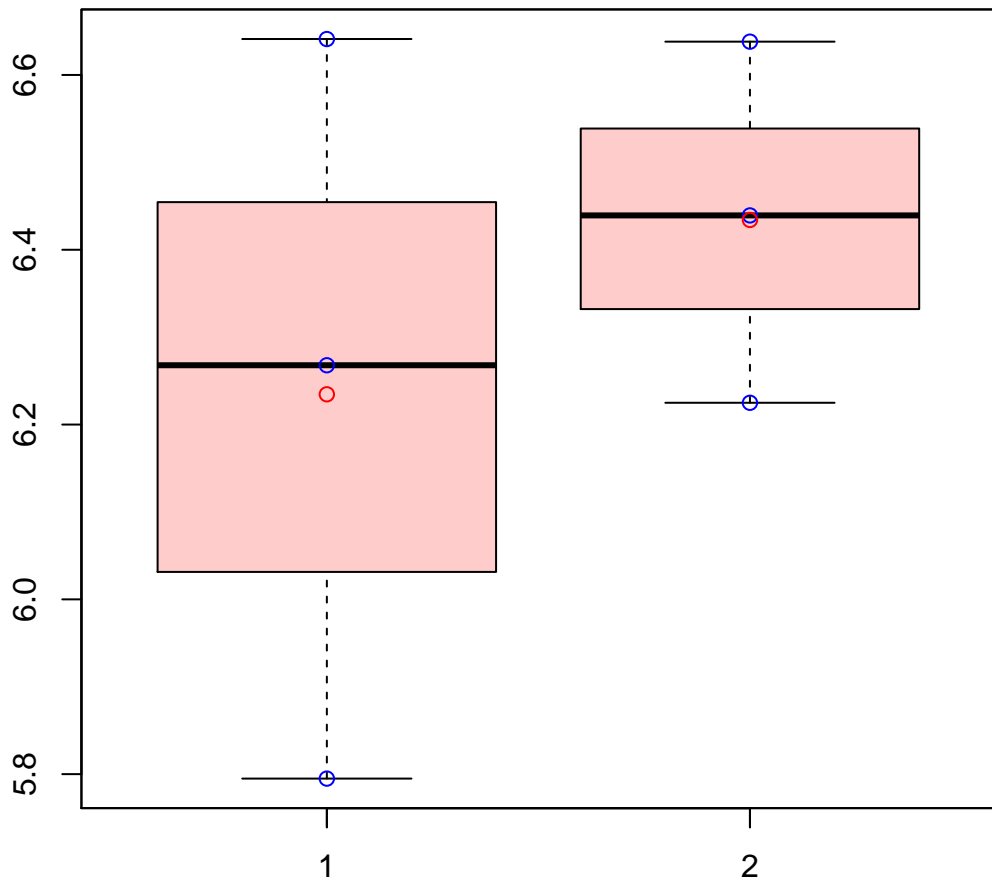

t-Test: p-value = 0.52

# CL856Contig3|CL856Contig3

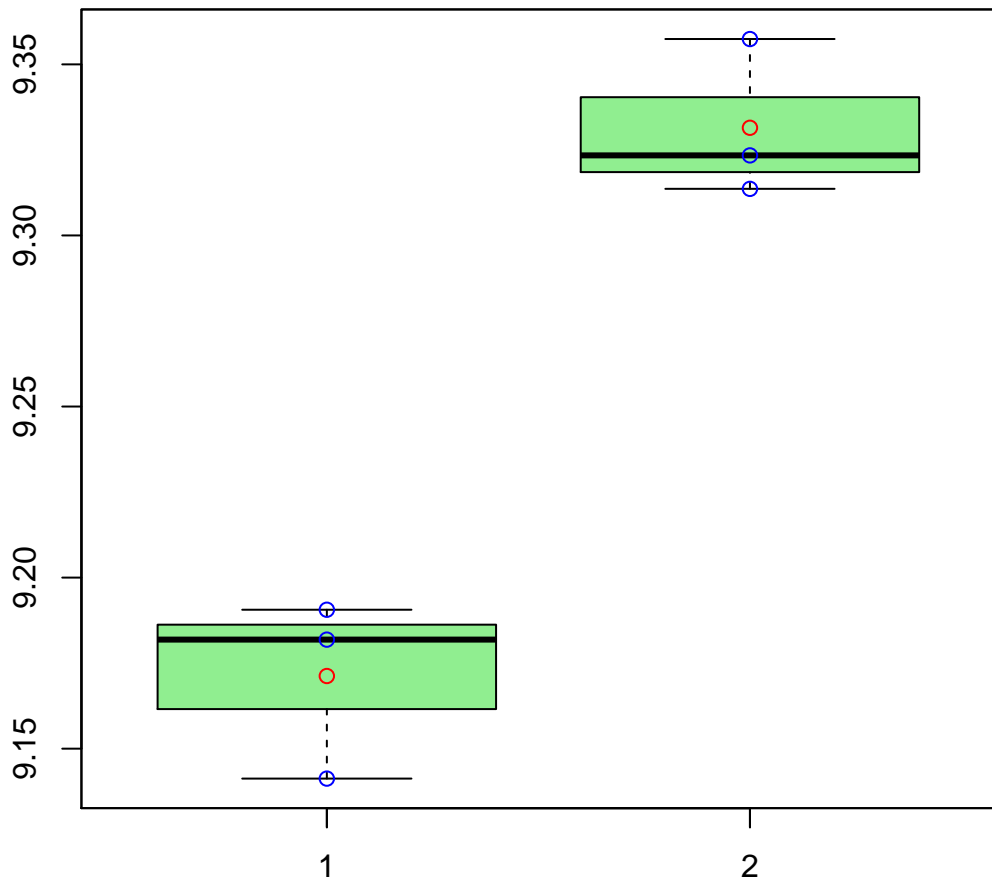

t-Test: p-value = 0



# CL8570Contig1|CL8570Contig1

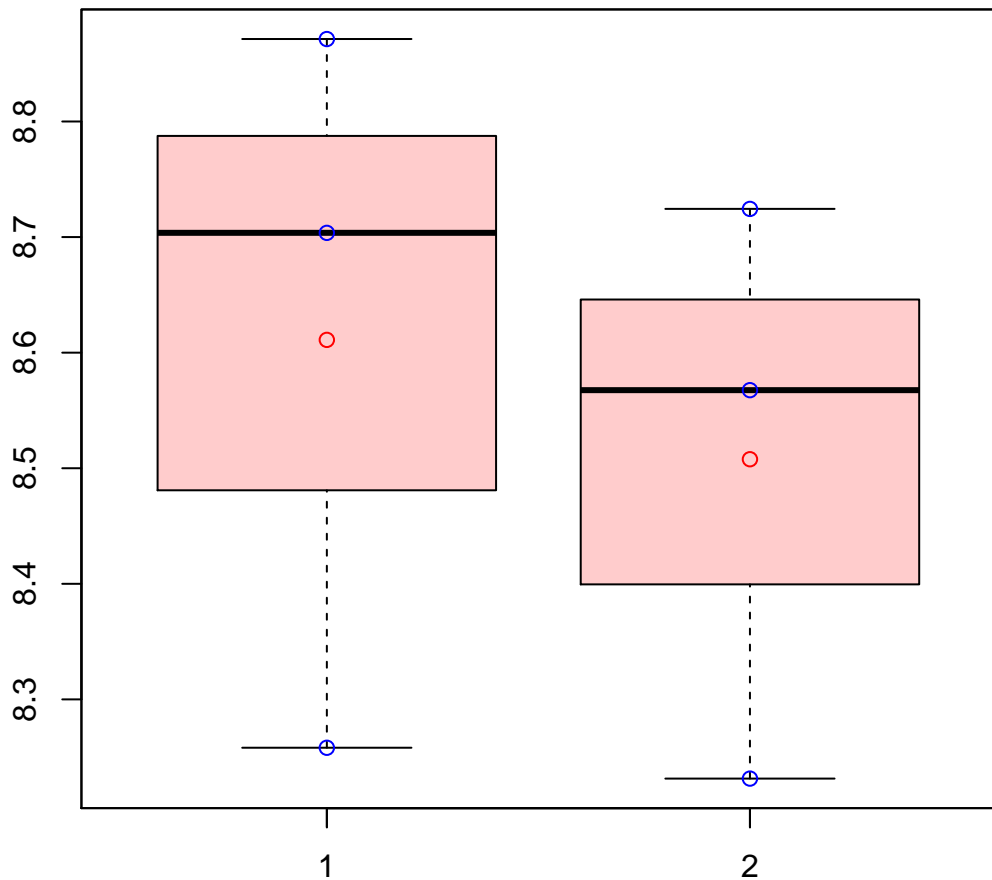

t-Test: p-value = 0.68

# CL857Contig8|CL857Contig8

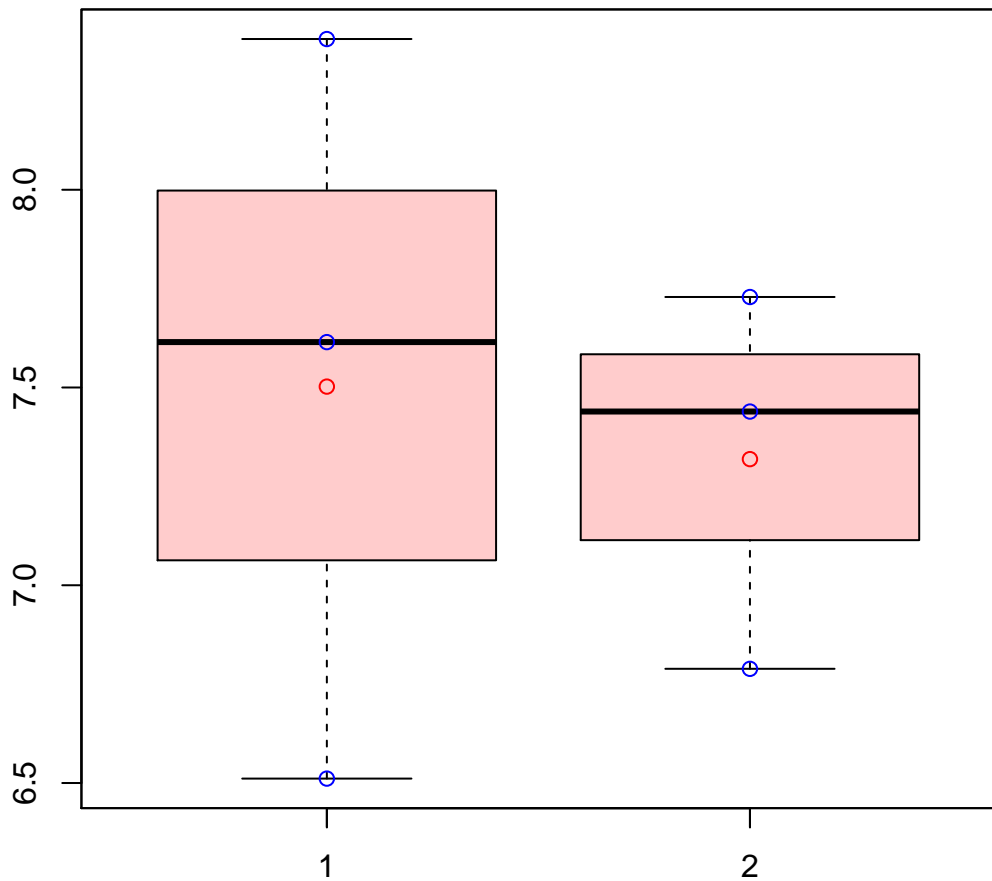

t-Test: p-value = 0.78

# CL858Contig7|CL858Contig7

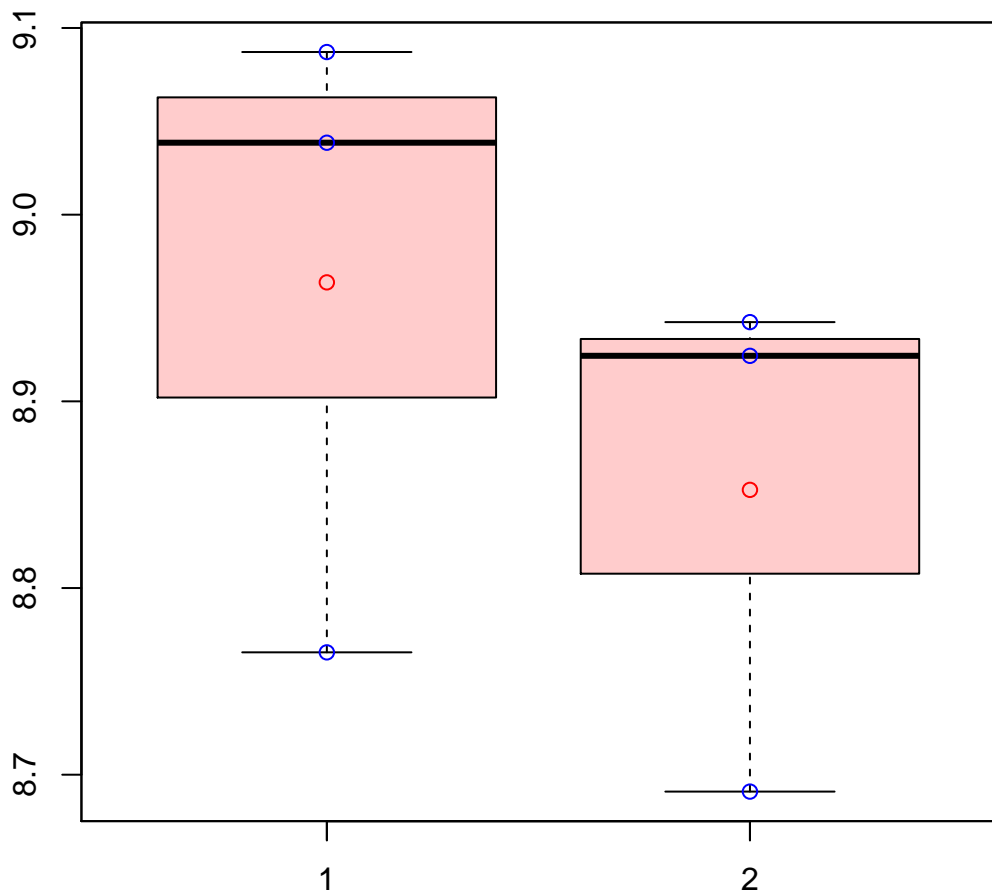

t-Test: p-value = 0.44

# CL8599Contig1|CL8599Contig1

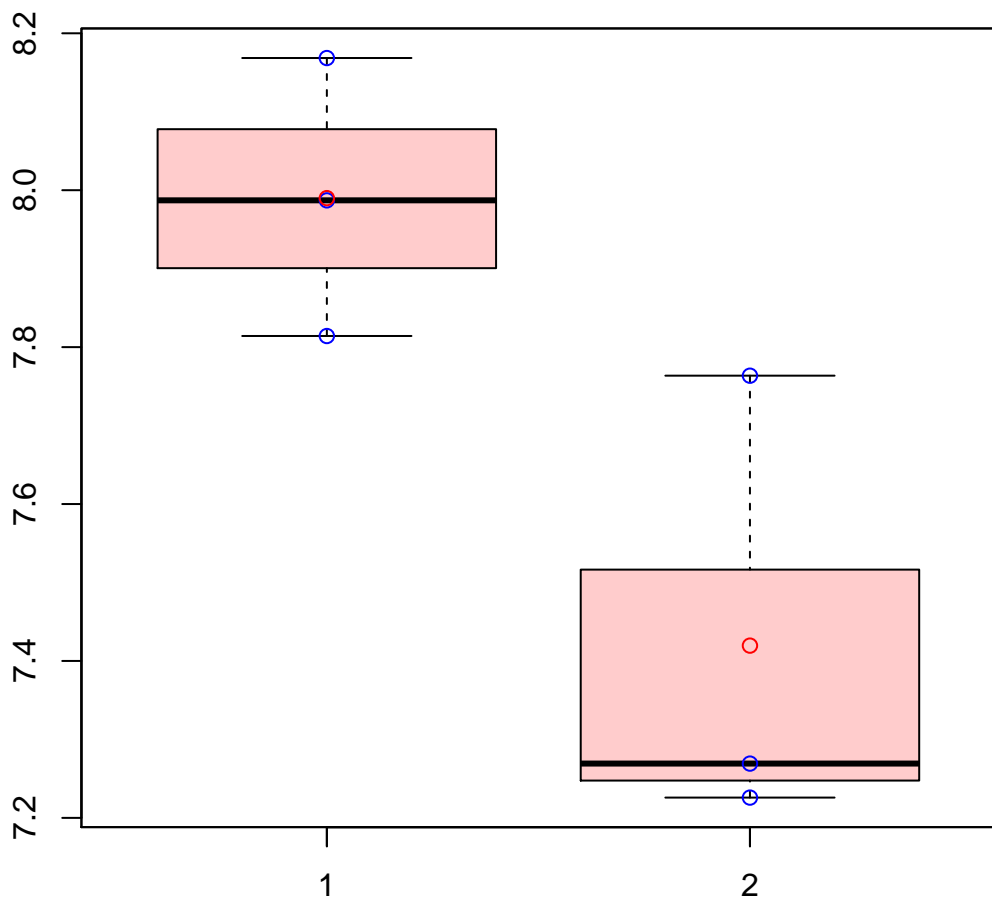

t-Test: p-value = 0.06

# CL859Contig6|CL859Contig6

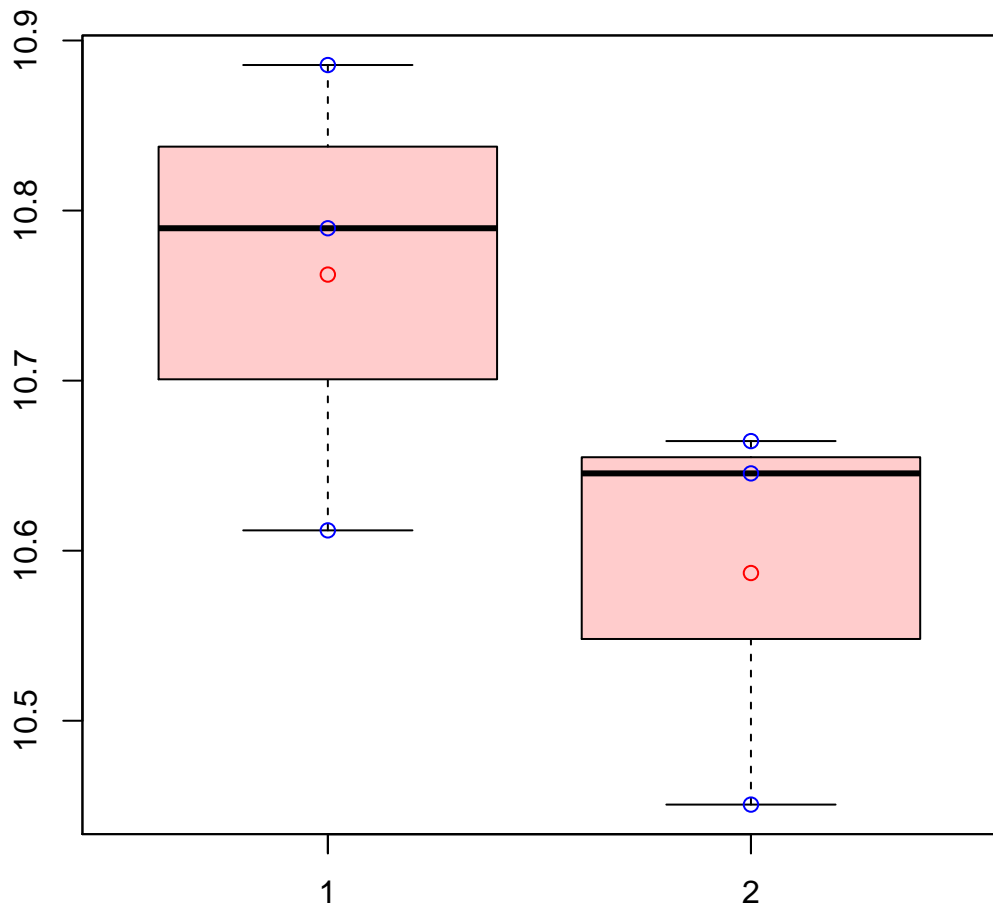

t-Test: p-value = 0.17

# CL859Contig9|CL859Contig9

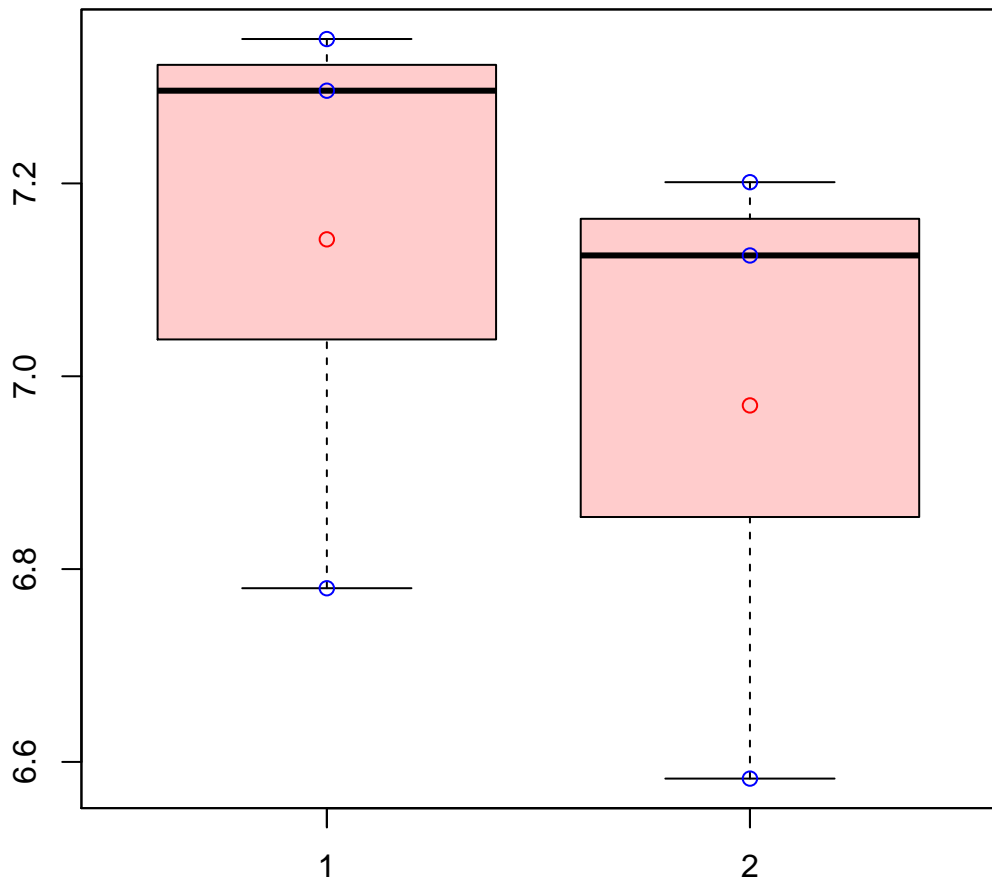

t-Test: p-value = 0.55

# CL85Contig4|CL85Contig4

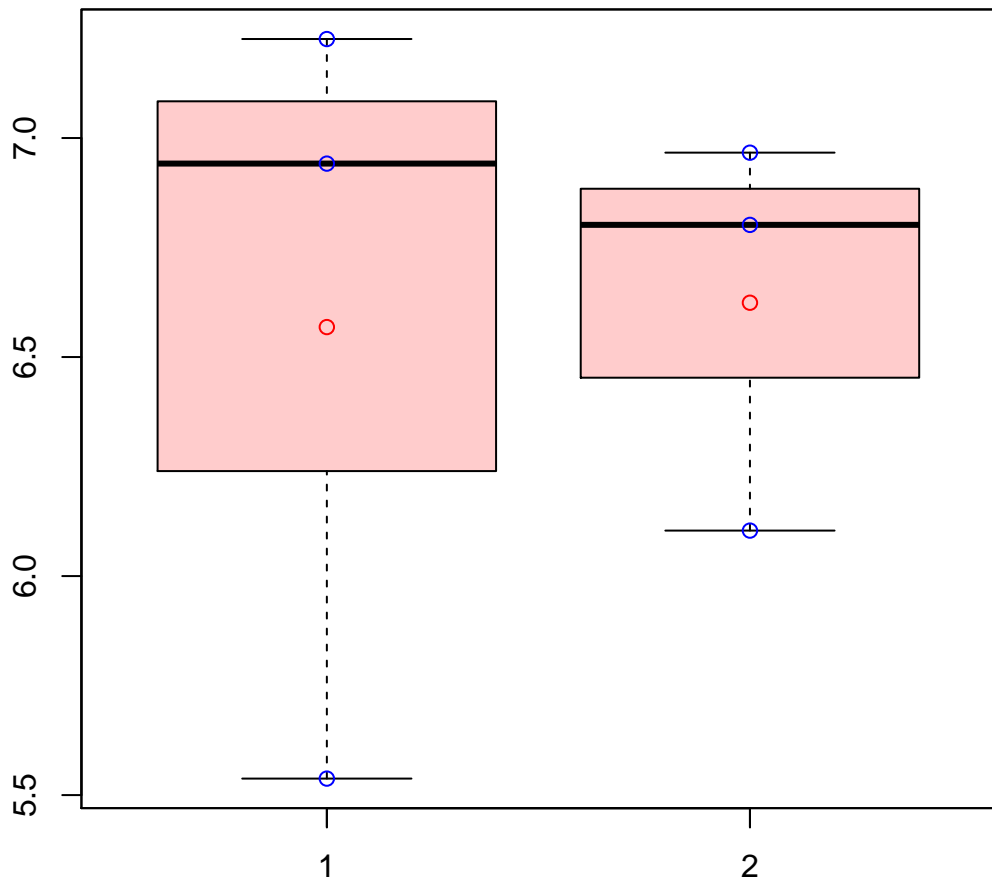

t-Test: p-value = 0.93

# CL860Contig4|CL860Contig4

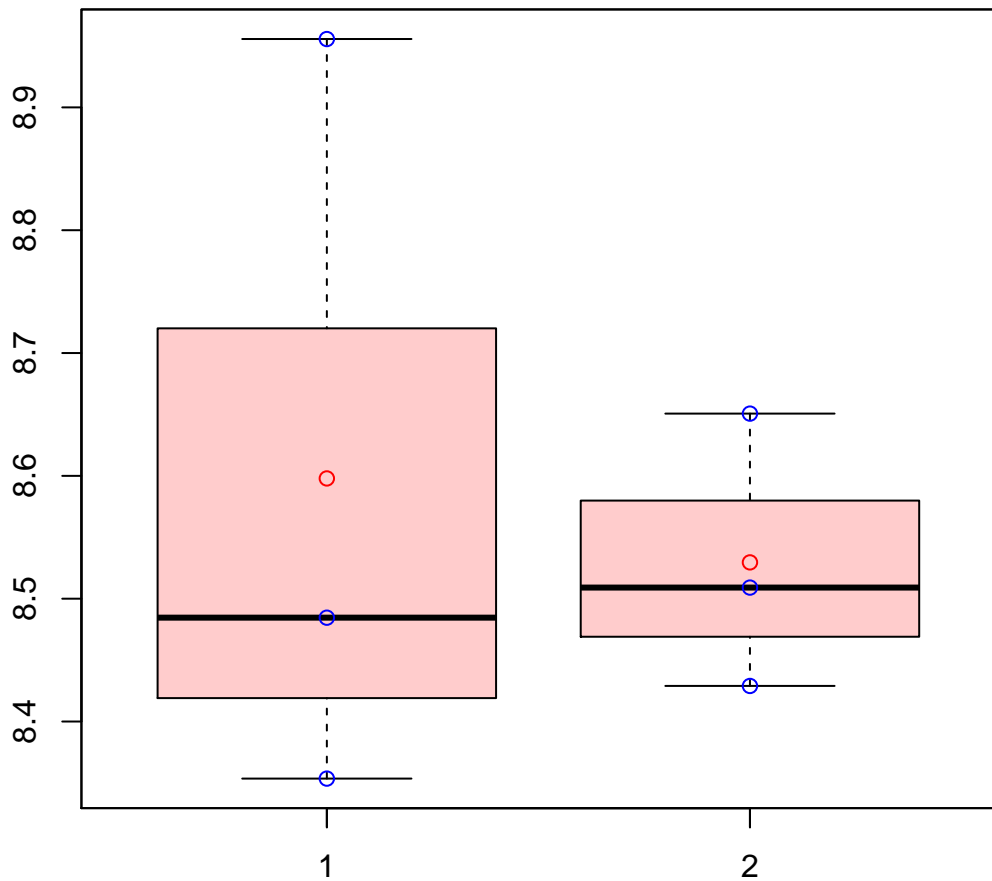

t-Test: p-value = 0.75



# CL8618Contig2|CL8618Contig2

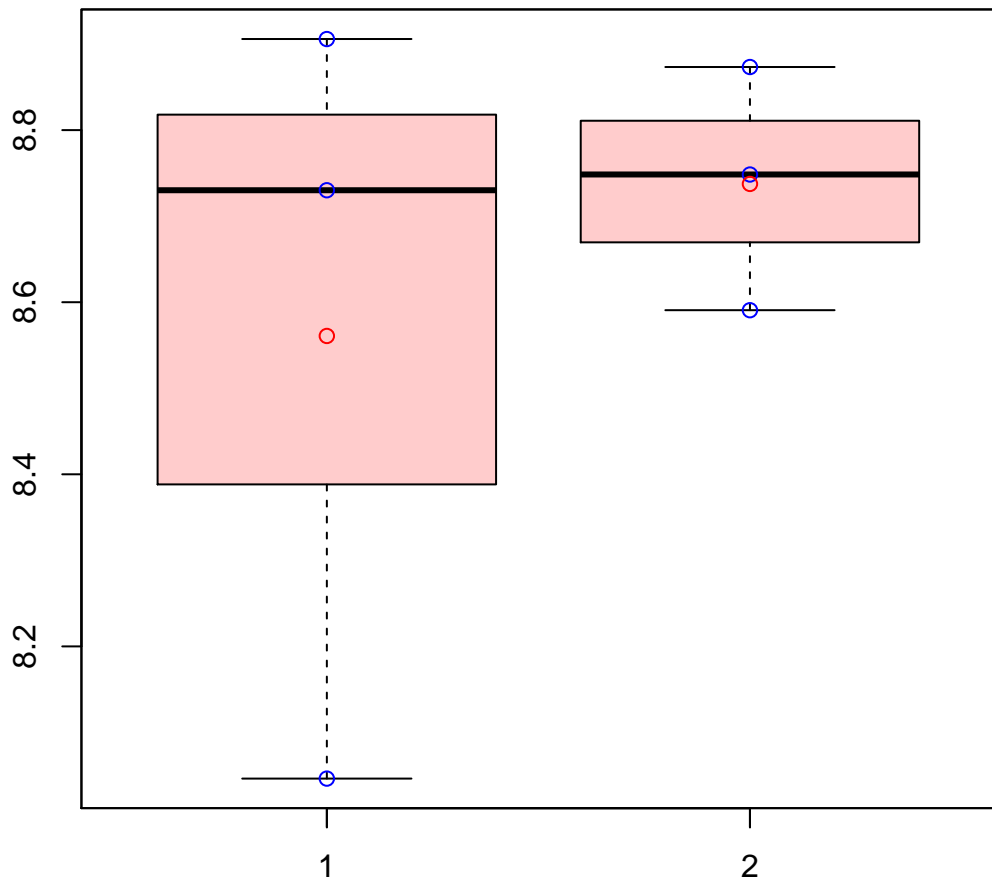

t-Test: p-value = 0.58

# CL861Contig6|CL861Contig6

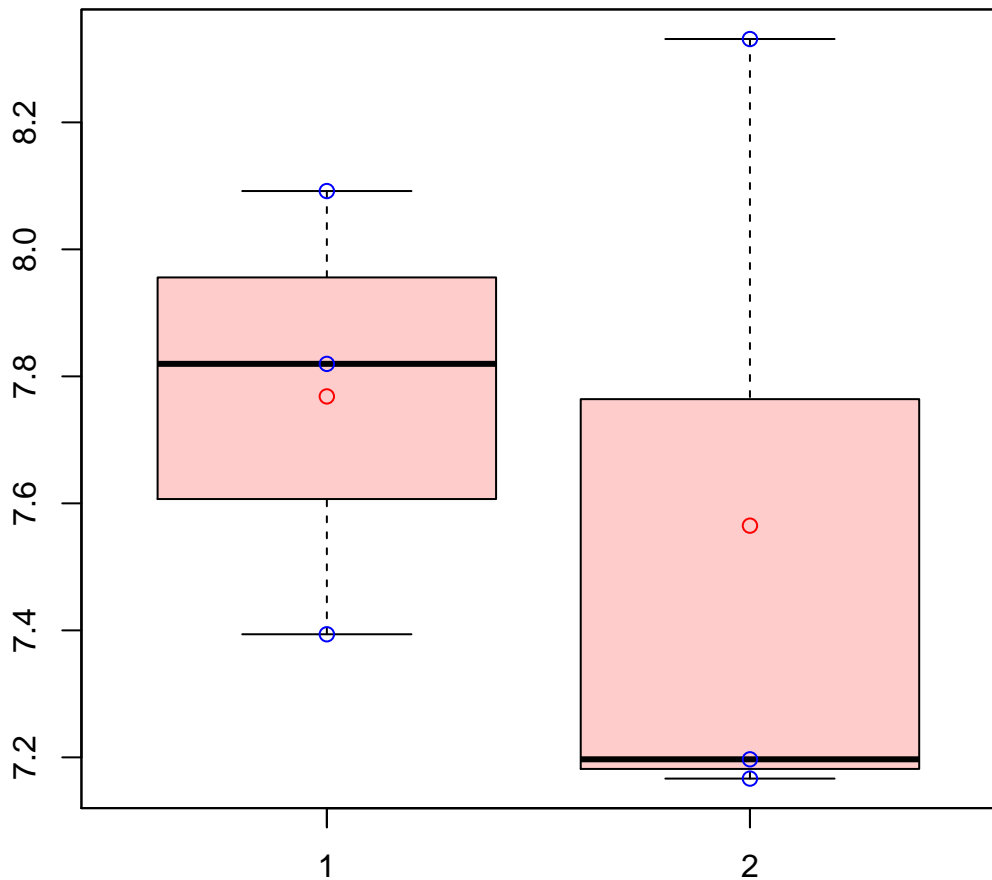

t-Test: p-value = 0.67

# CL8662Contig2|CL8662Contig2

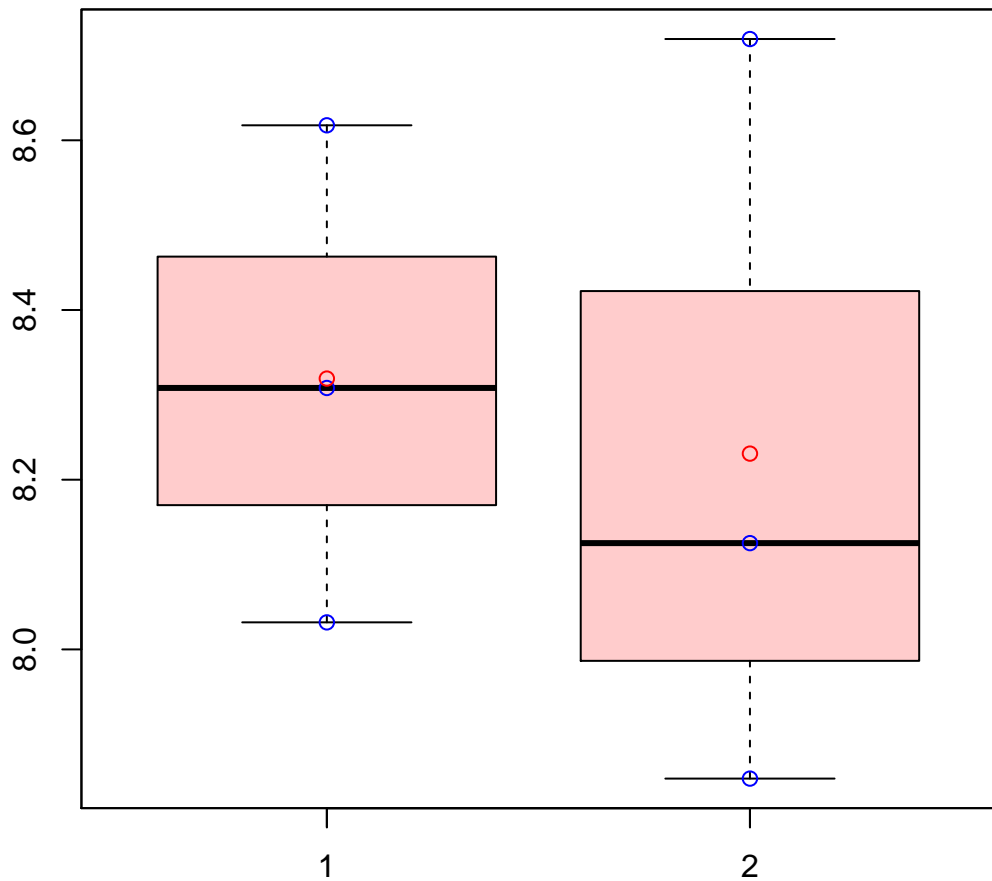

t-Test: p-value = 0.79

# CL8663Contig1|CL8663Contig1

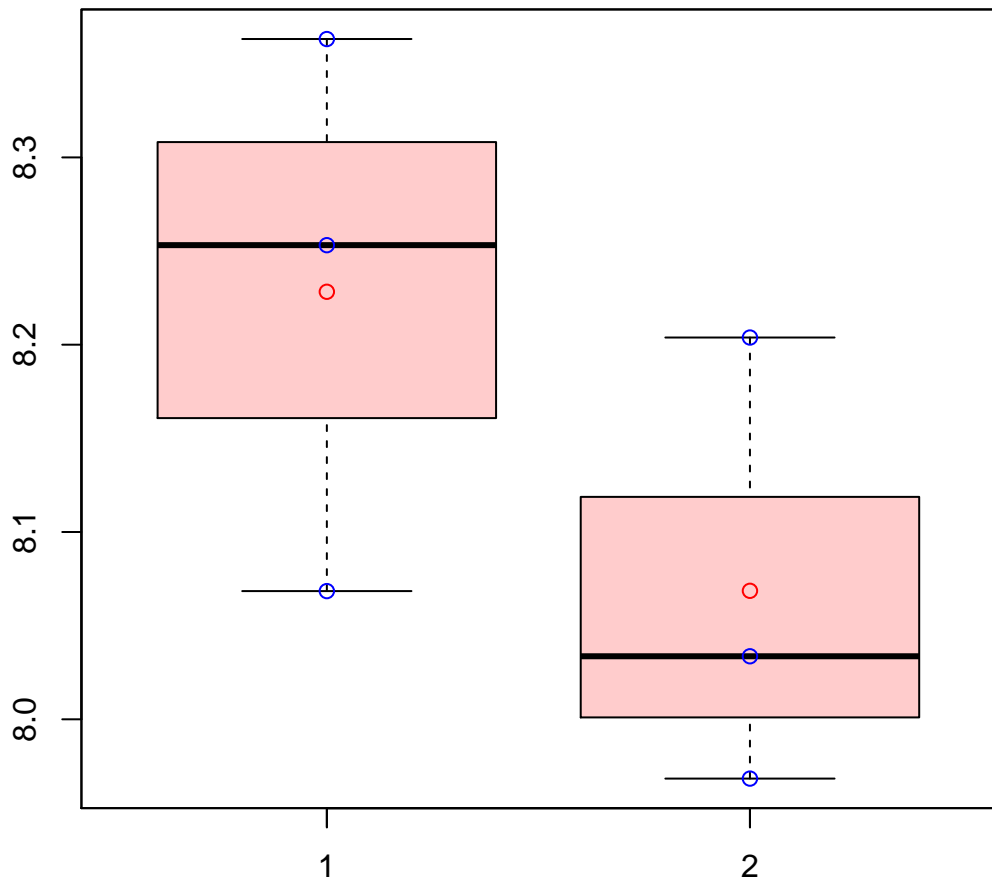

t-Test: p-value = 0.23

# CL8664Contig1|CL8664Contig1

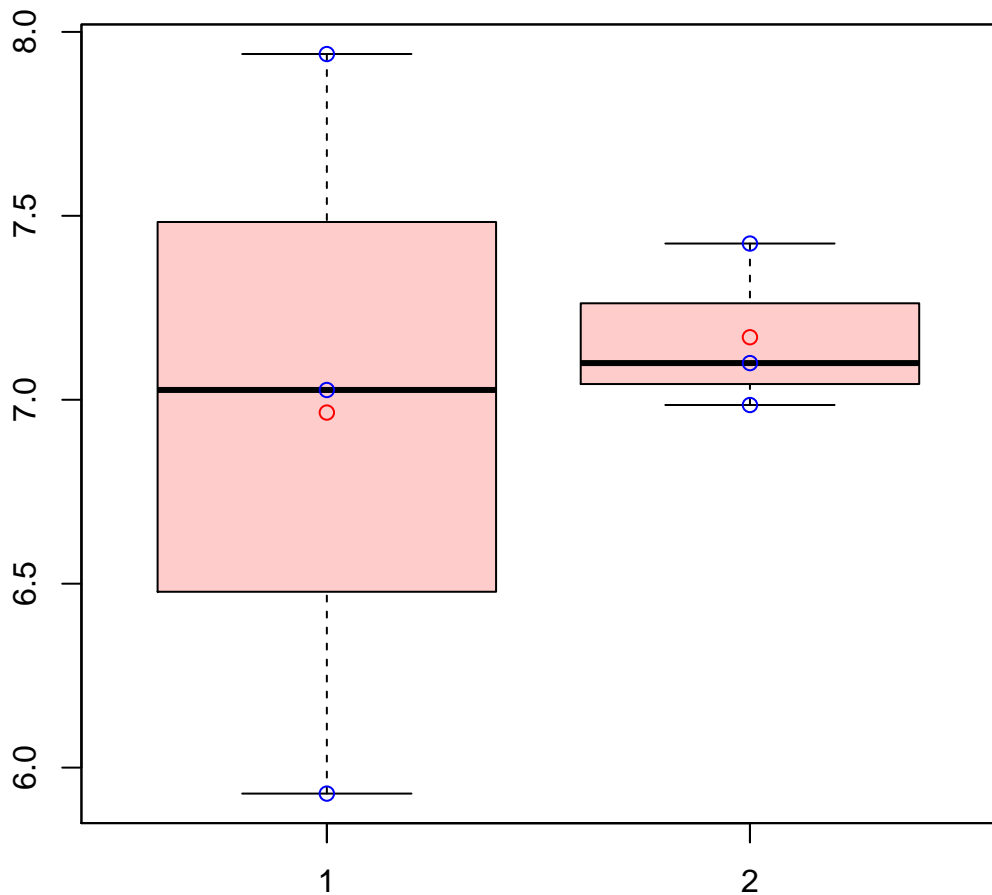

t-Test: p-value = 0.76

# CL867Contig2|CL867Contig2

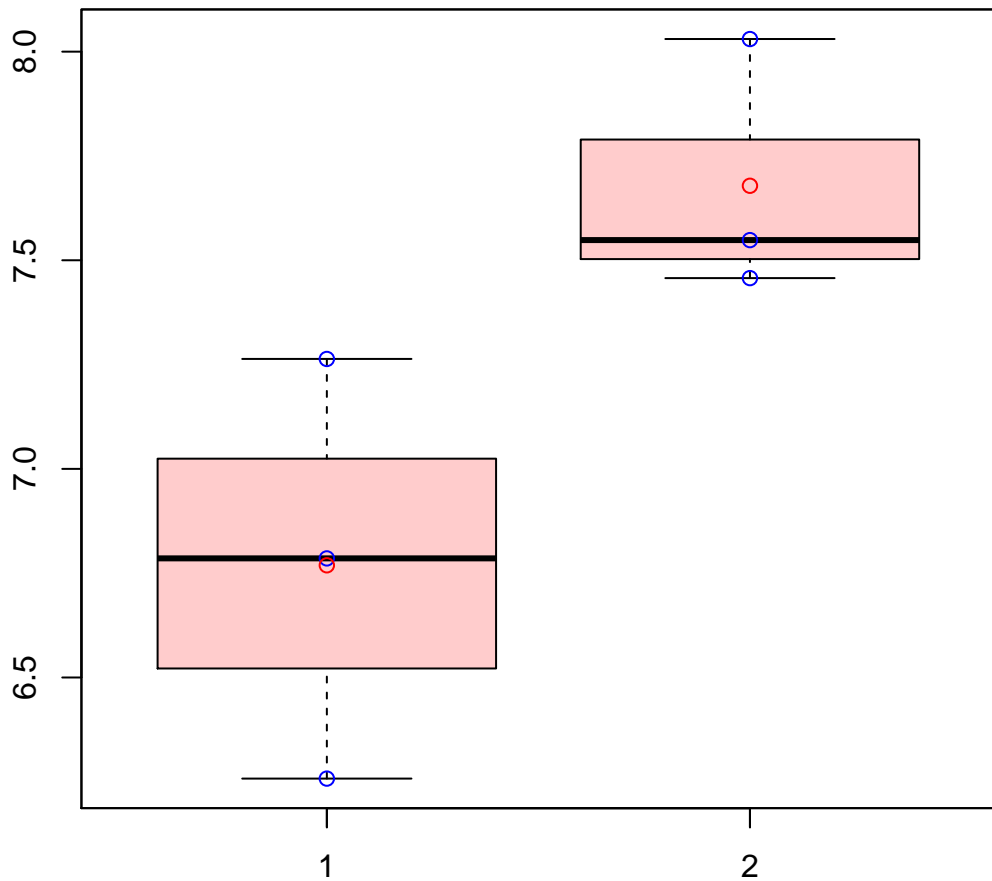

t-Test: p-value = 0.07

# CL8690Contig3|CL8690Contig3

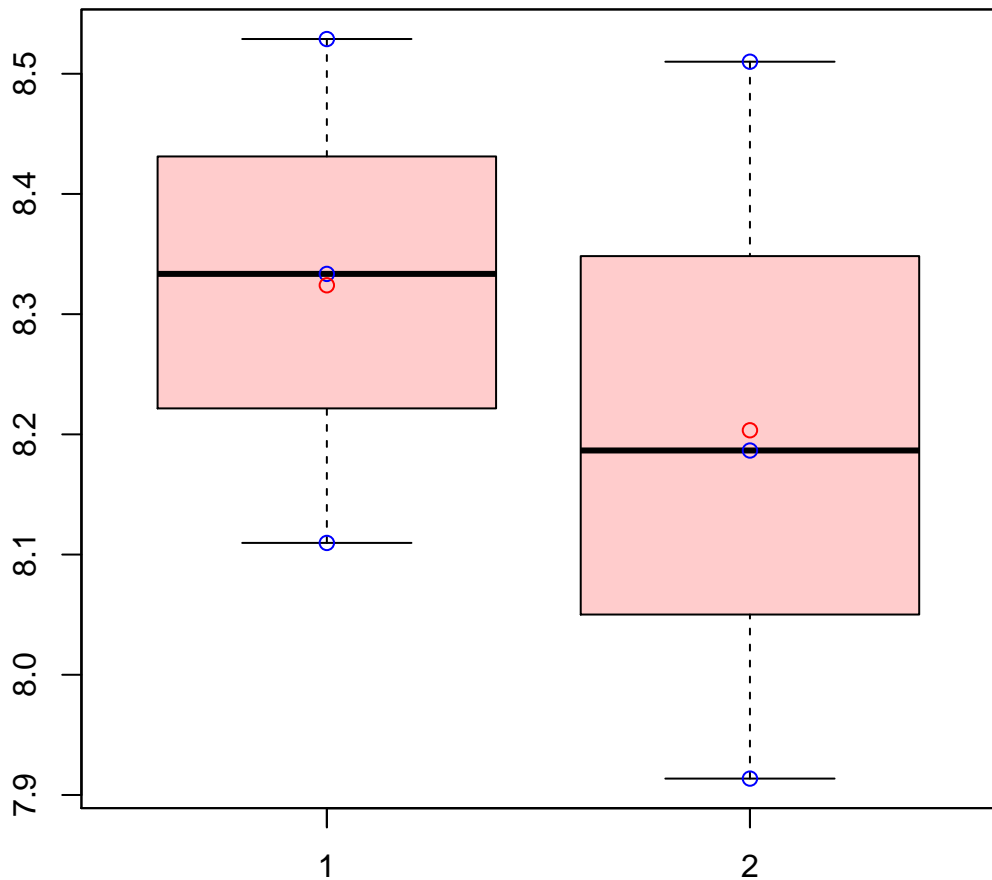

t-Test: p-value = 0.6

# CL86Contig4|CL86Contig4

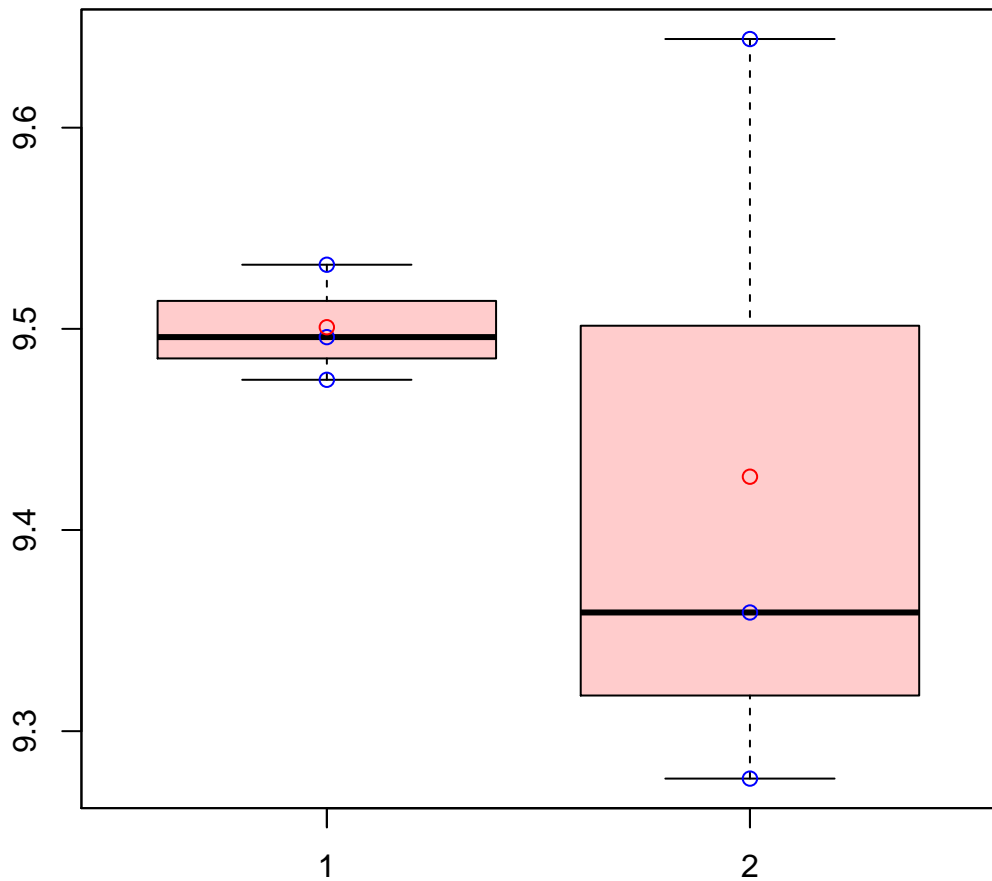

t-Test: p-value = 0.57



# CL8722Contig2|CL8722Contig2

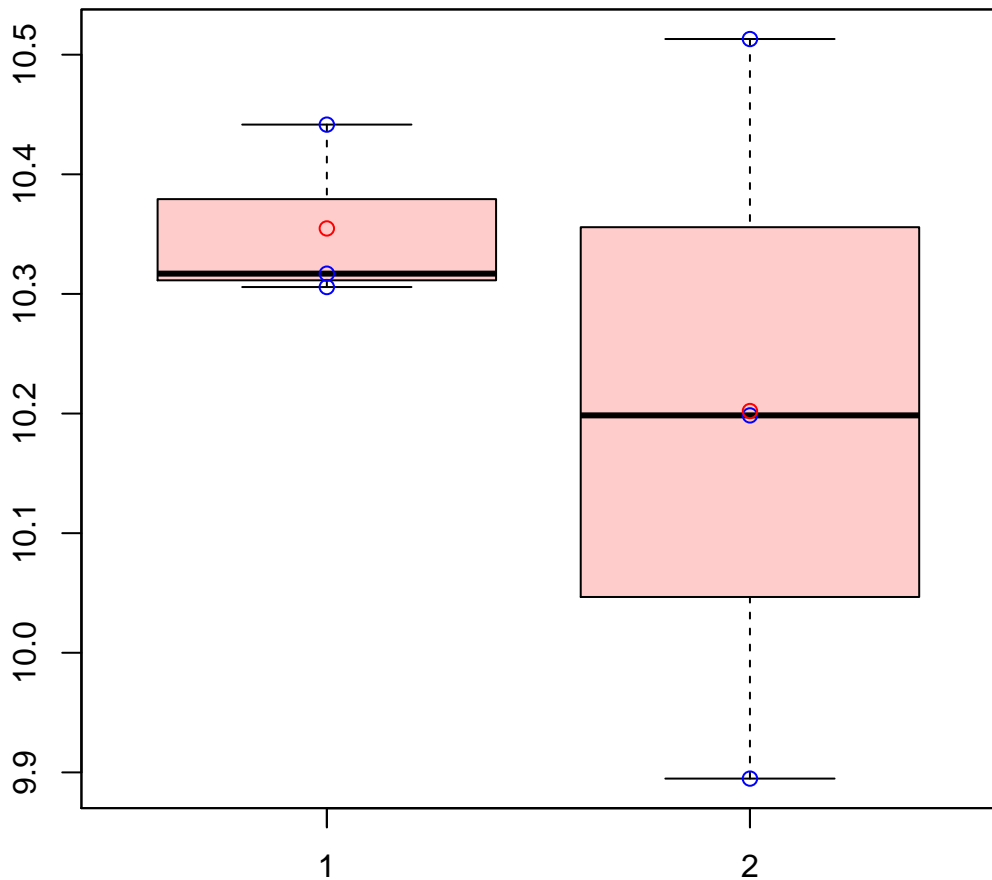

t-Test: p-value = 0.49

# CL8722Contig4|CL8722Contig4

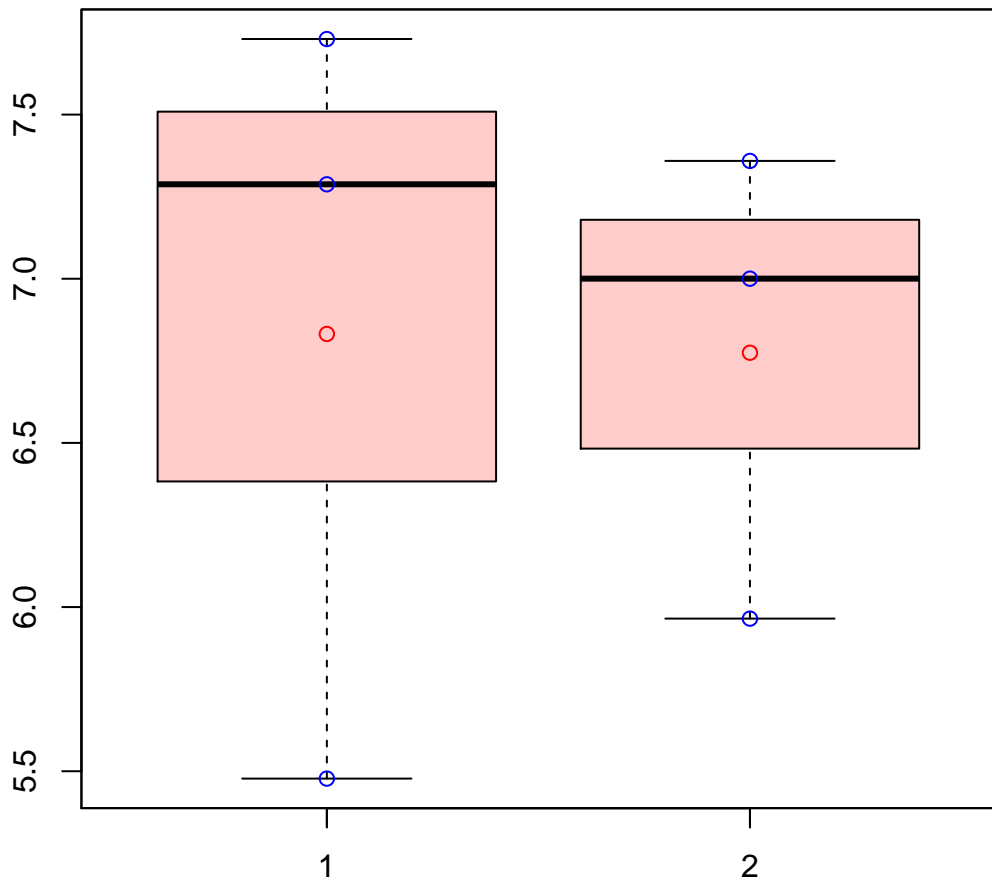

t-Test: p-value = 0.95

# CL8722Contig5|CL8722Contig5

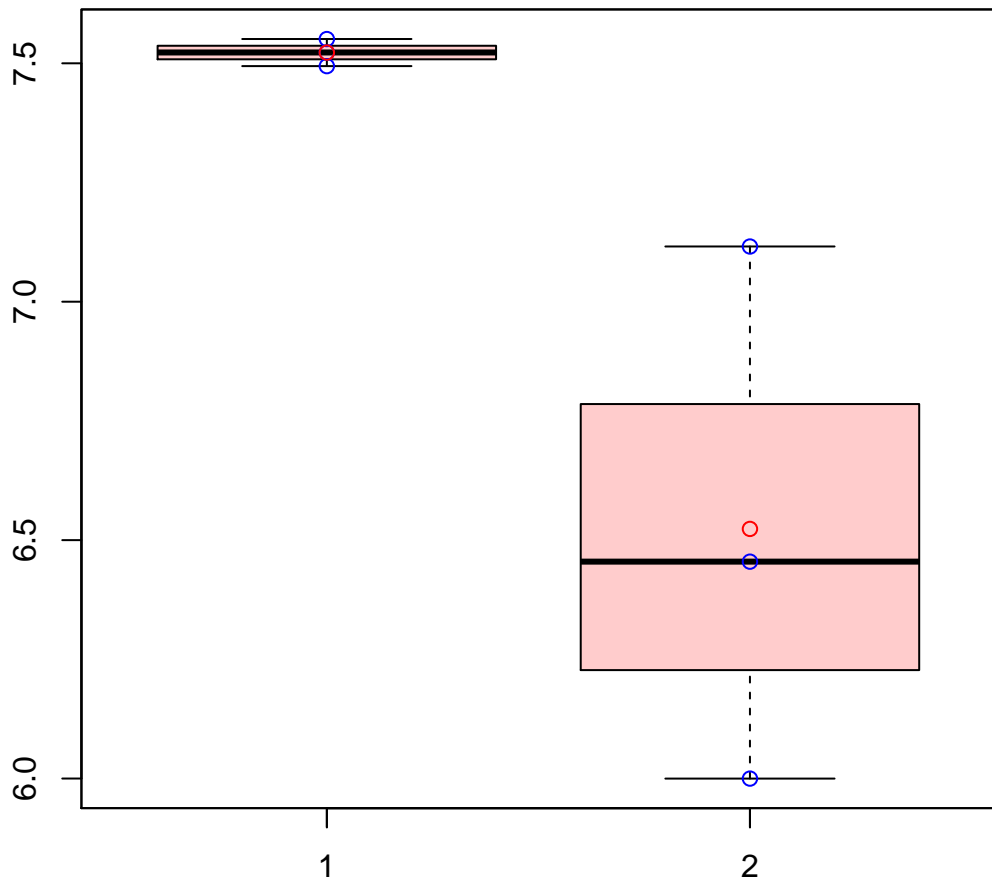

t-Test: p-value = 0.09

# CL8741Contig2|CL8741Contig2

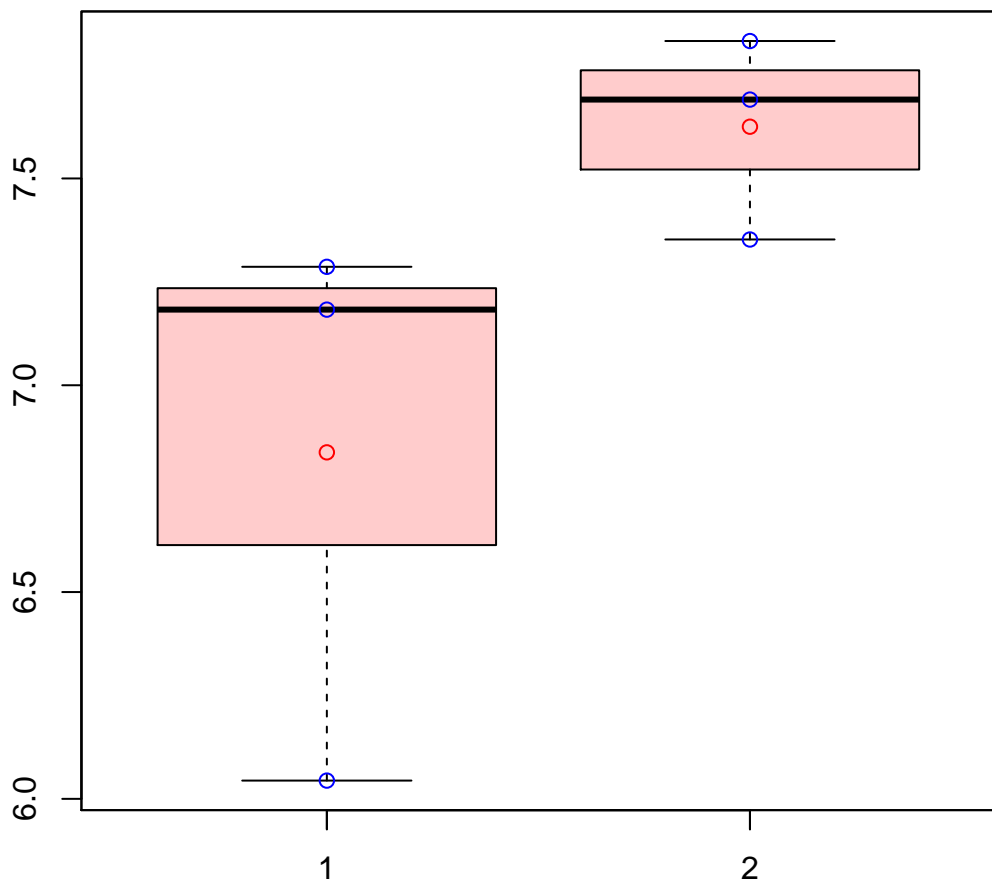

t-Test: p-value = 0.18

# CL8759Contig1|CL8759Contig1

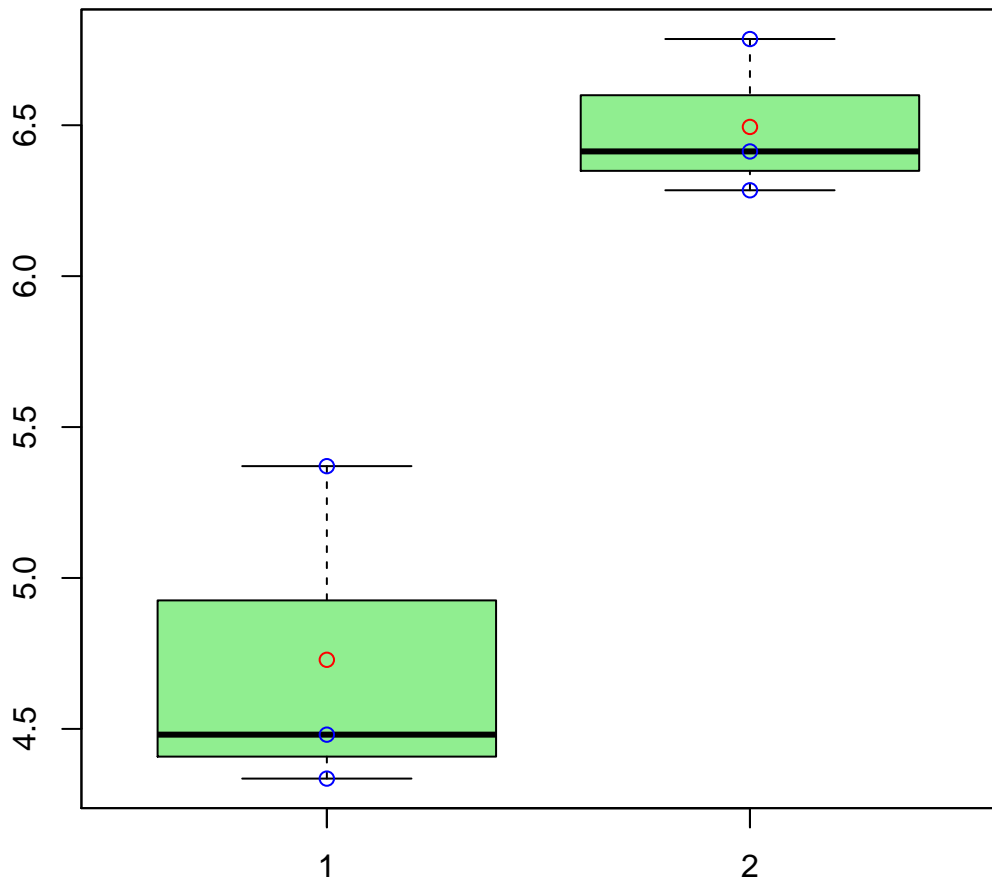

t-Test: p-value = 0.02

# CL8764Contig1|CL8764Contig1

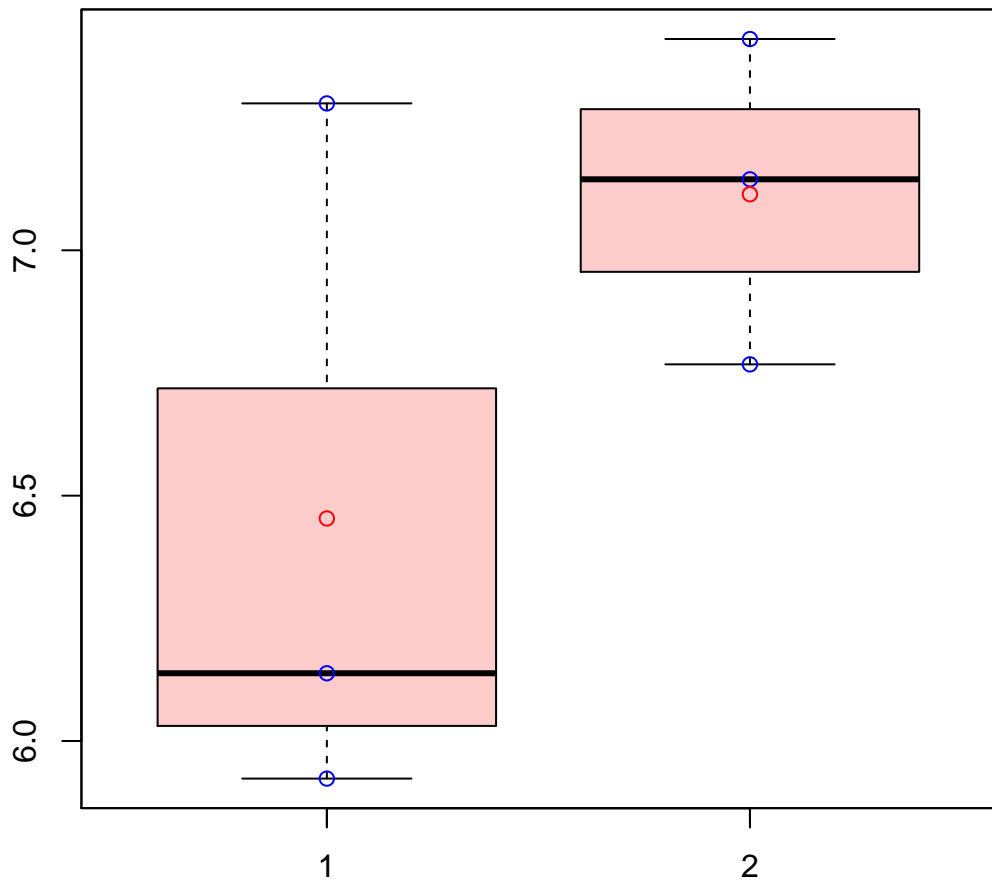

t-Test: p-value = 0.26

# CL876Contig4|CL876Contig4

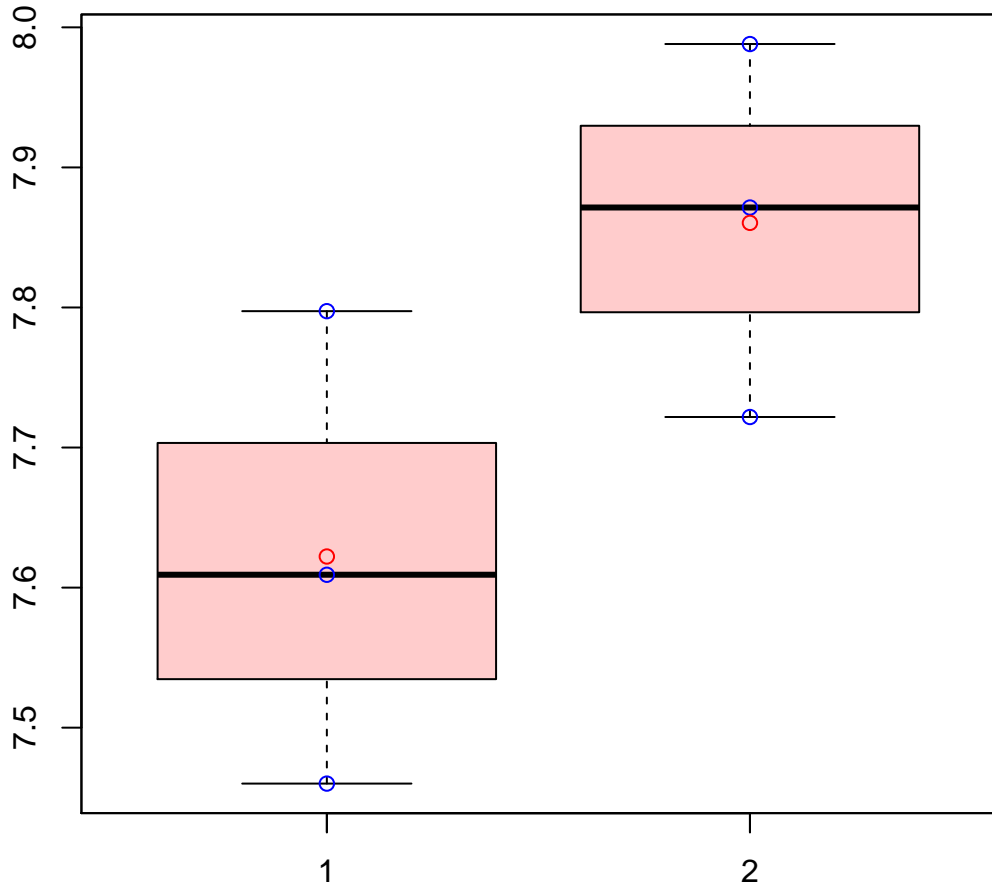

t-Test: p-value = 0.13

# CL8773Contig1|CL8773Contig1

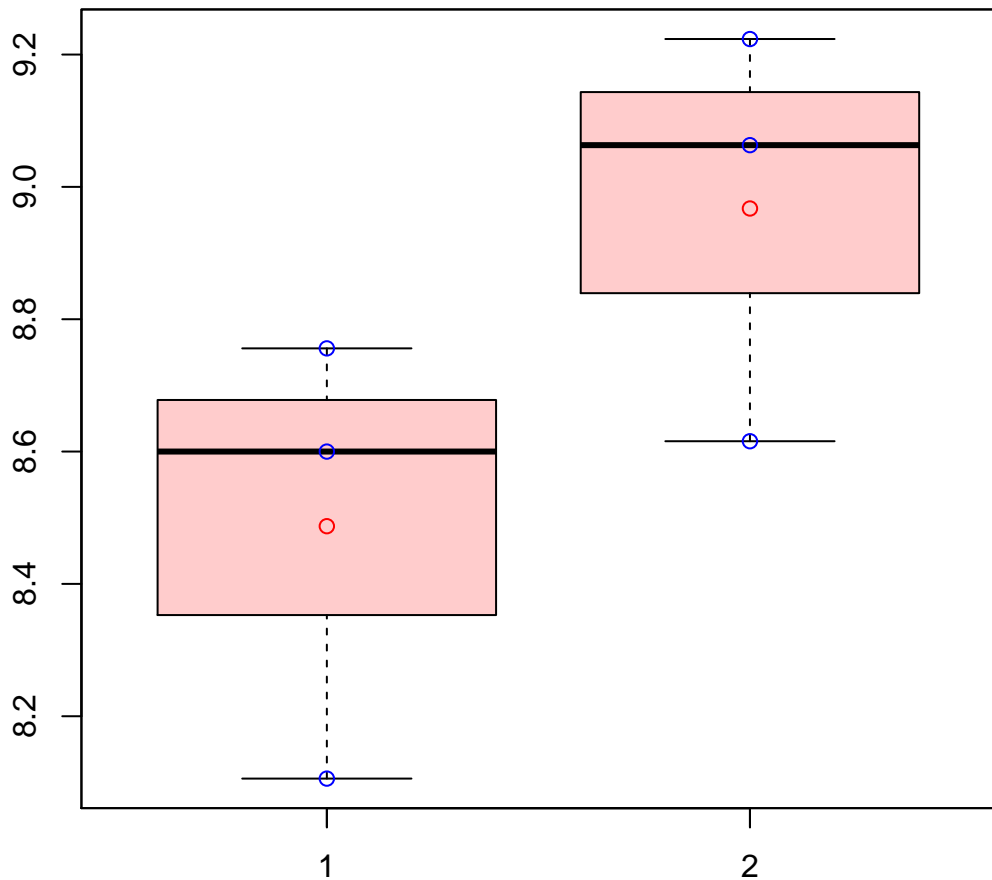

t-Test: p-value = 0.15



# CL8780Contig2|CL8780Contig2

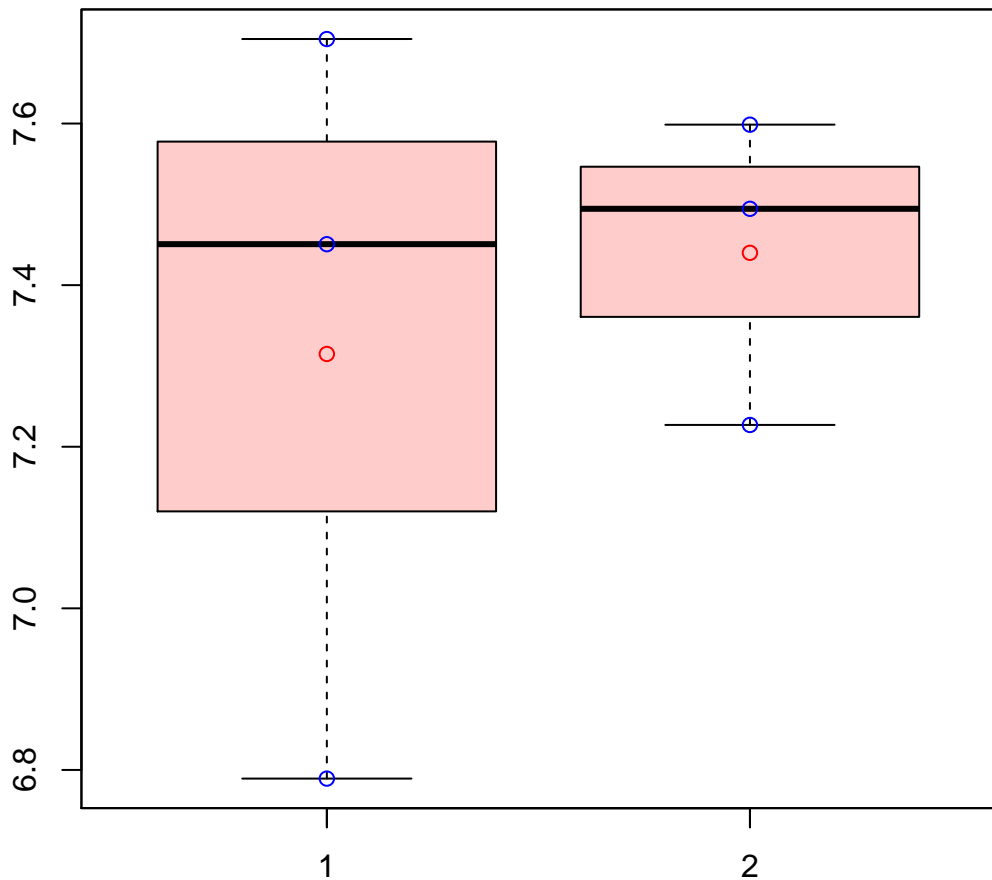

t-Test: p-value = 0.7

# CL879Contig11|CL879Contig11

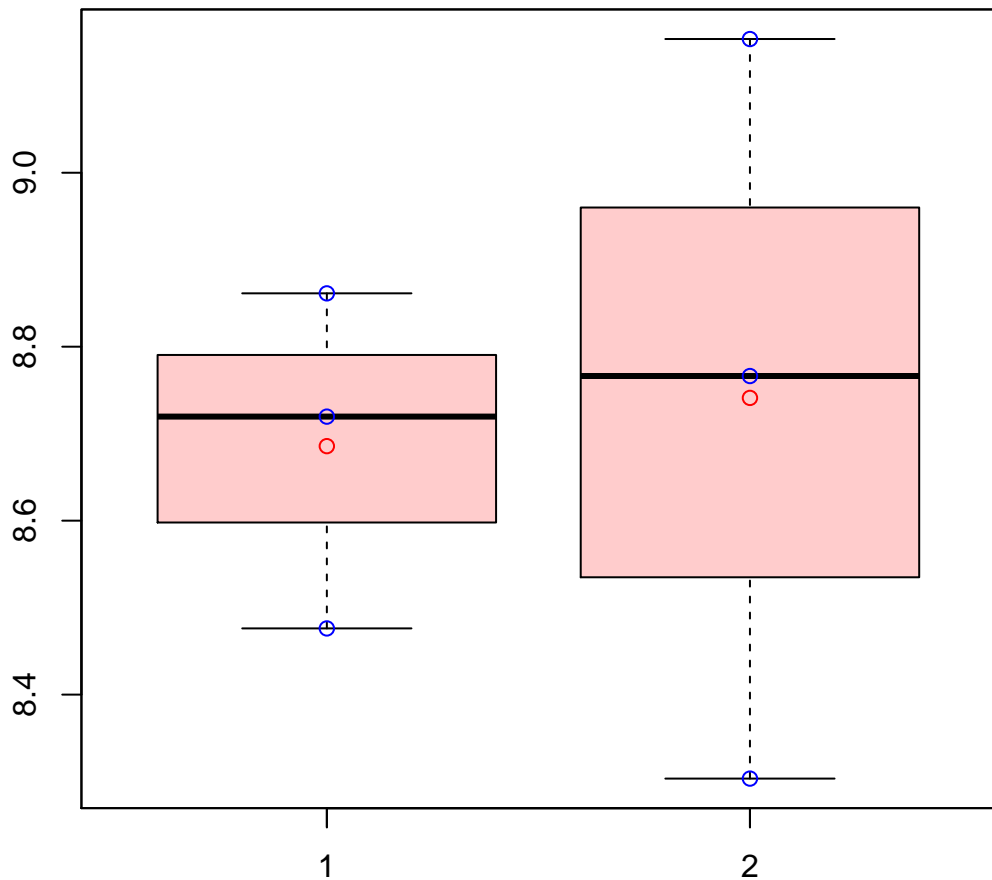

t-Test: p-value = 0.85

# CL87Contig11|CL87Contig11

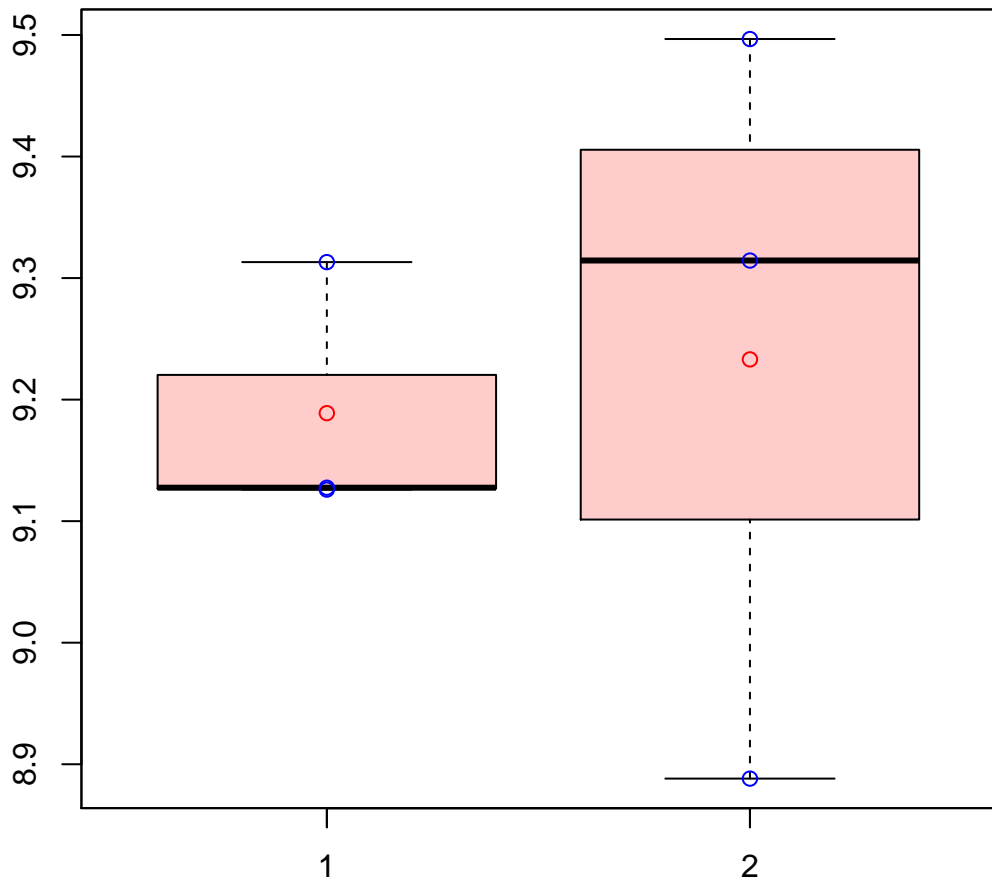

t-Test: p-value = 0.83

# CL87Contig20|CL87Contig20

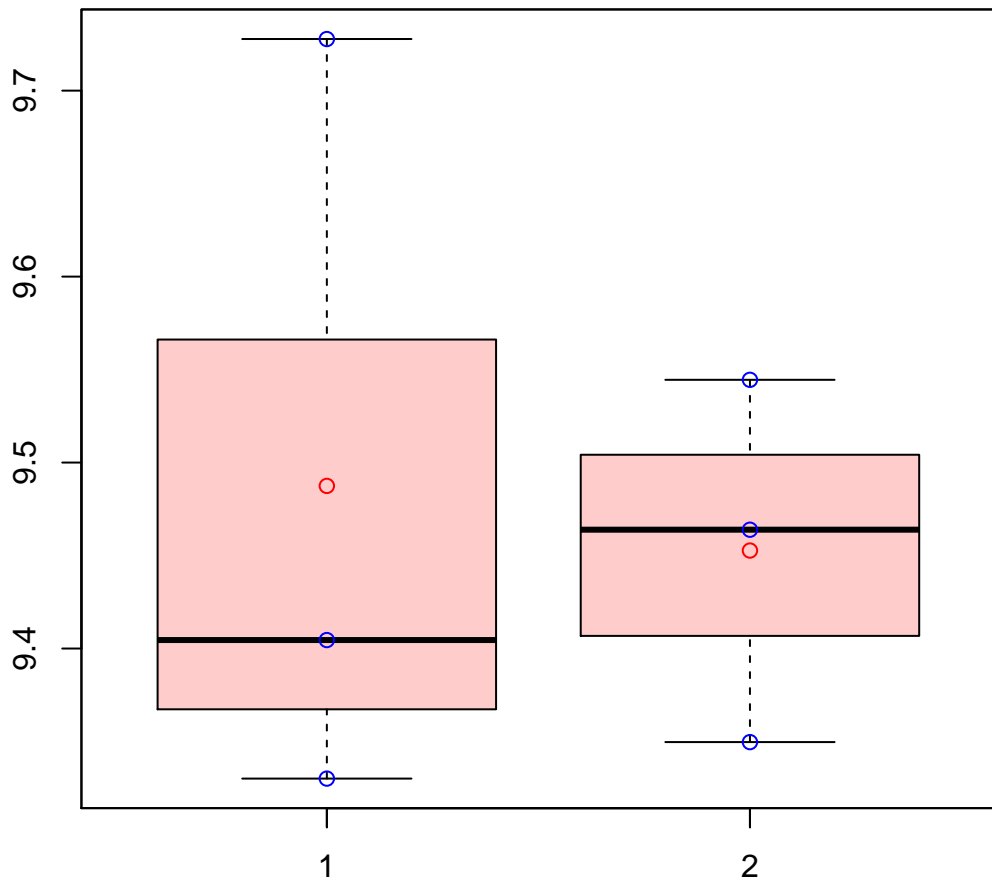

t-Test: p-value = 0.81

# CL87Contig25|CL87Contig25

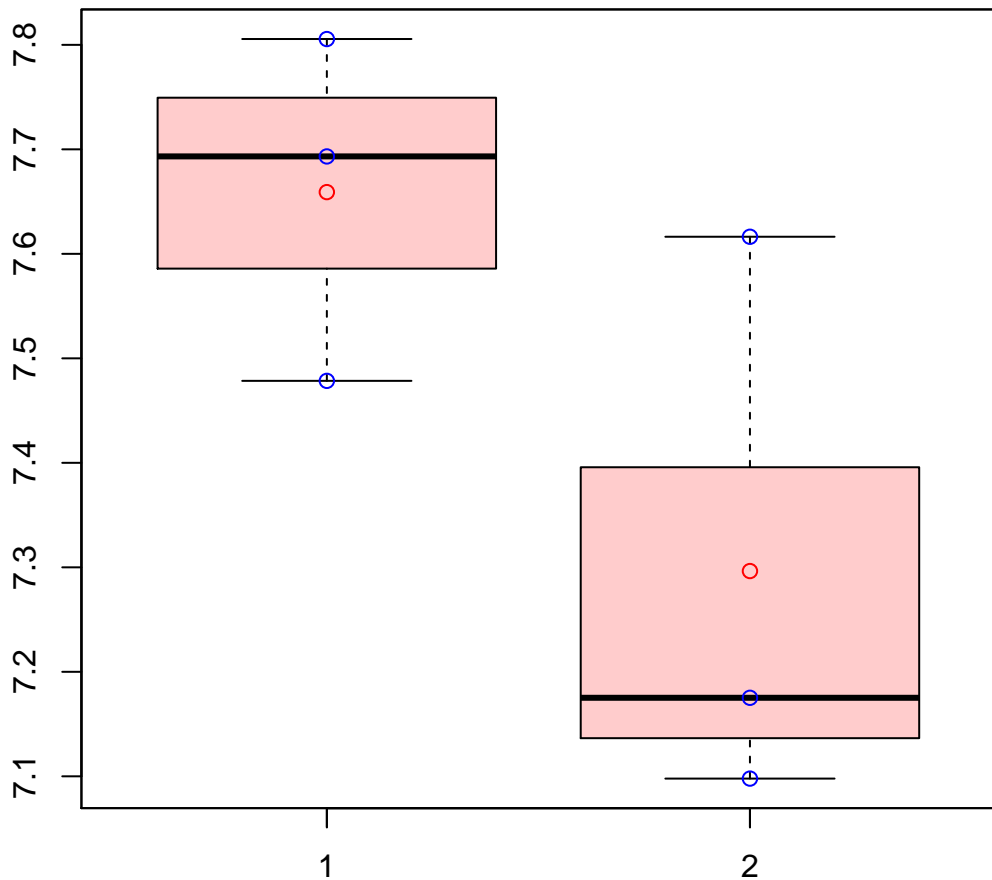

t-Test: p-value = 0.14

# CL8802Contig1|CL8802Contig1

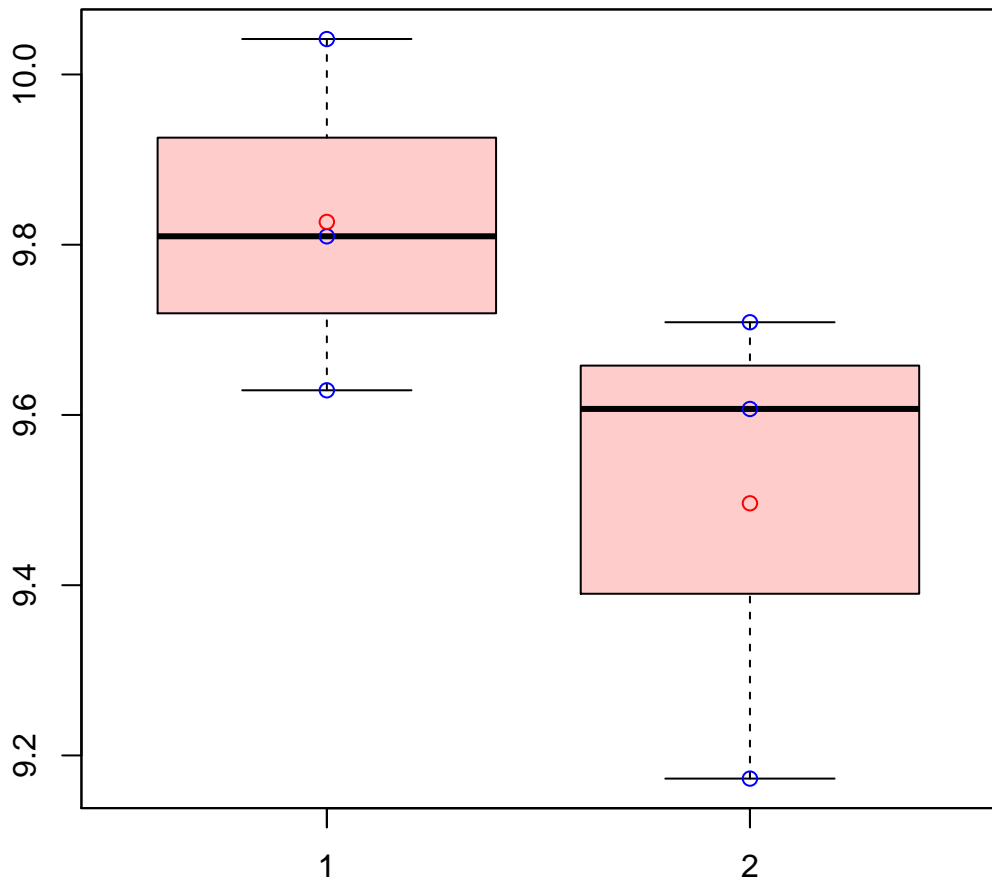

t-Test: p-value = 0.19

# CL8802Contig2|CL8802Contig2

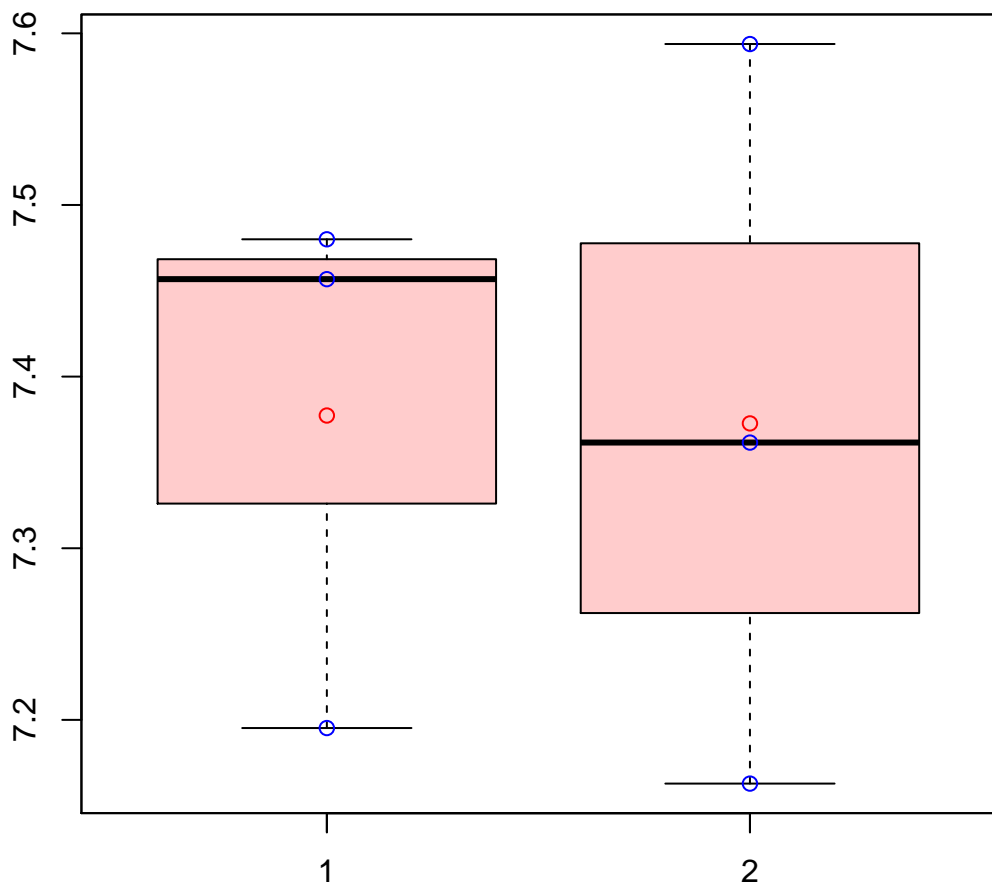

t-Test: p-value = 0.98

# CL8805Contig2|CL8805Contig2

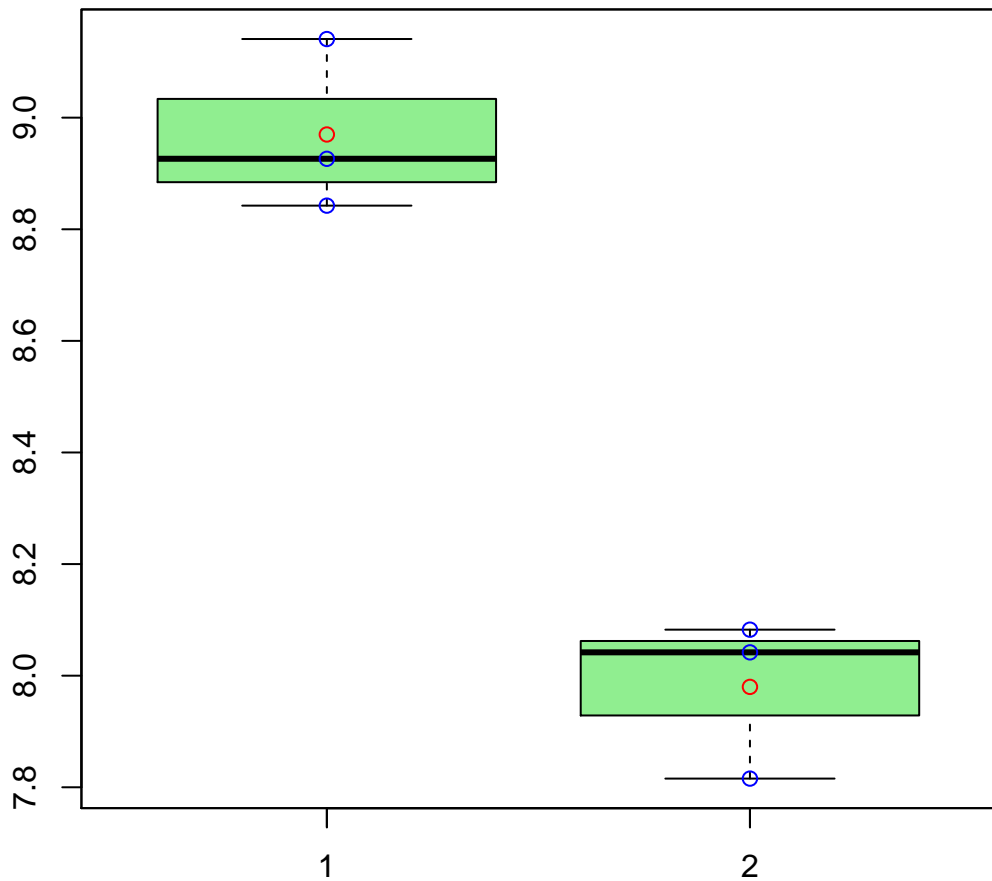

t-Test: p-value = 0



# CL880Contig1|CL880Contig1

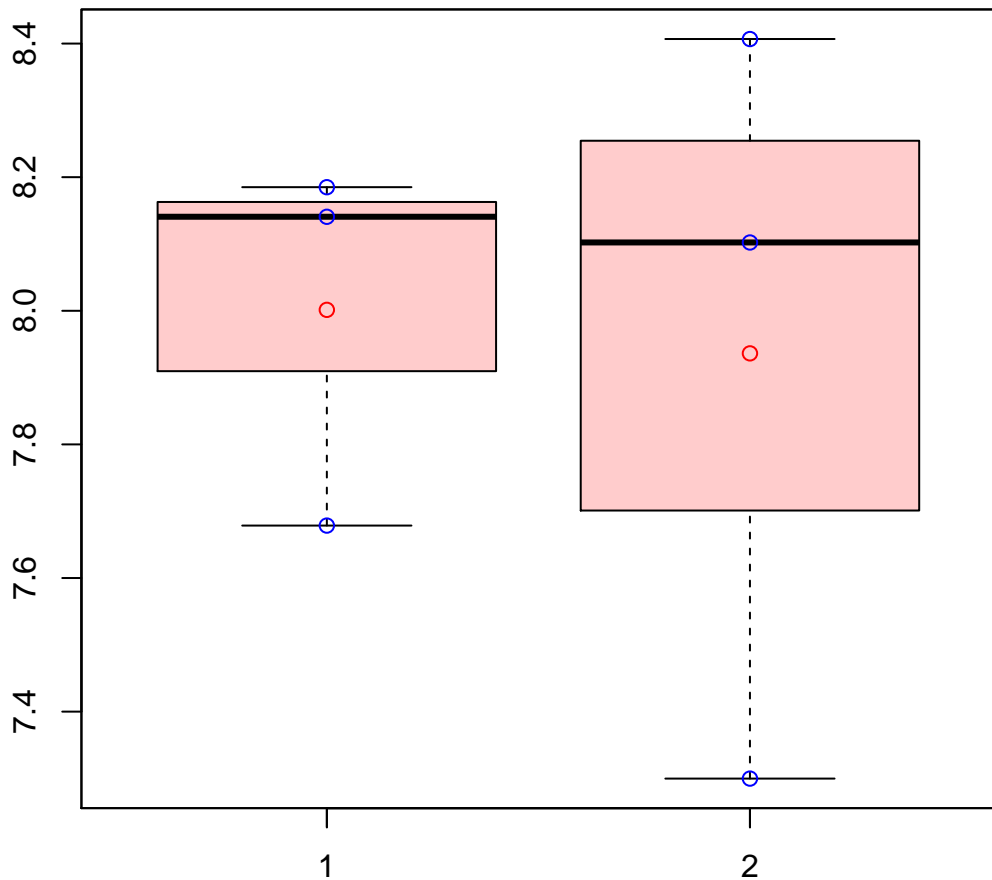

t-Test: p-value = 0.87

# CL8819Contig1|CL8819Contig1

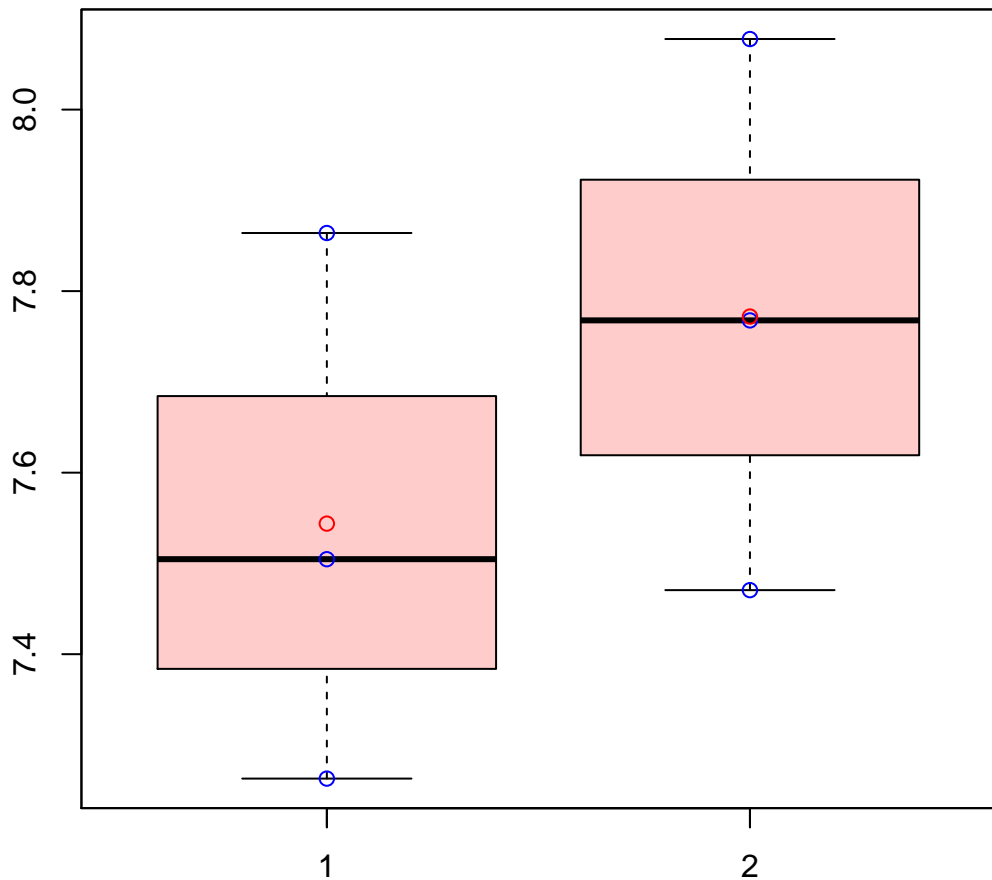

t-Test: p-value = 0.41

# CL883Contig2|CL883Contig2

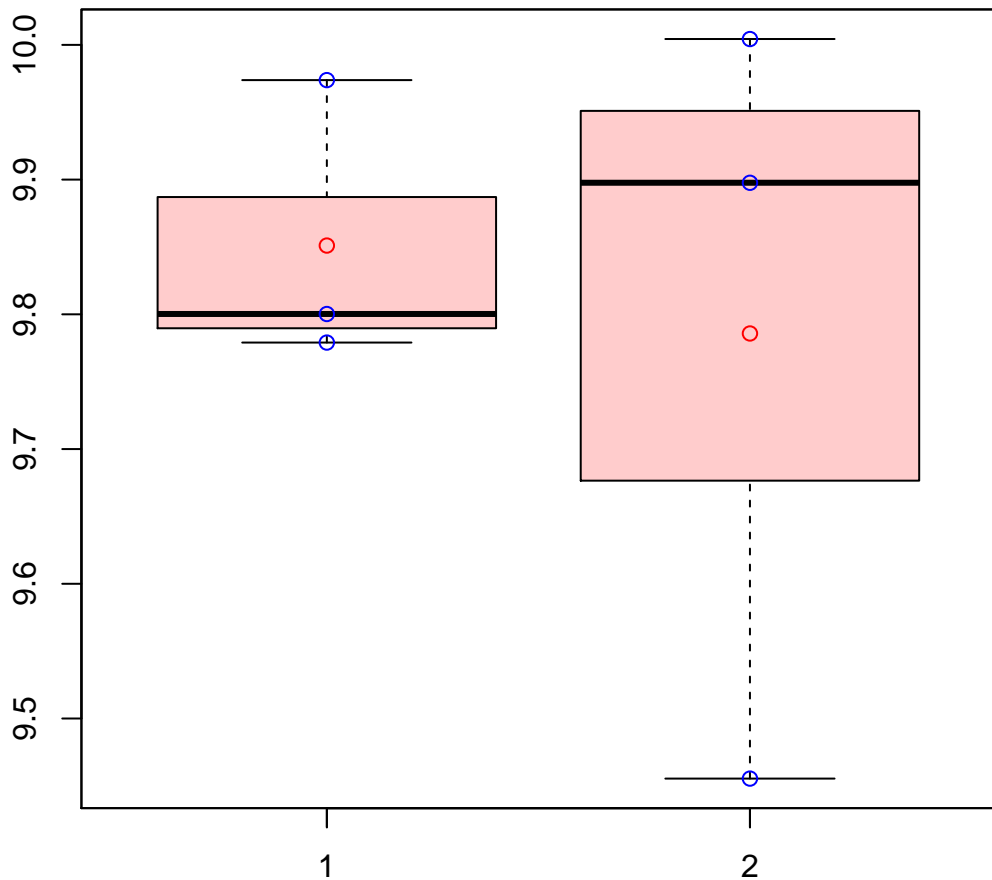

t-Test: p-value = 0.74

# CL8849Contig1|CL8849Contig1

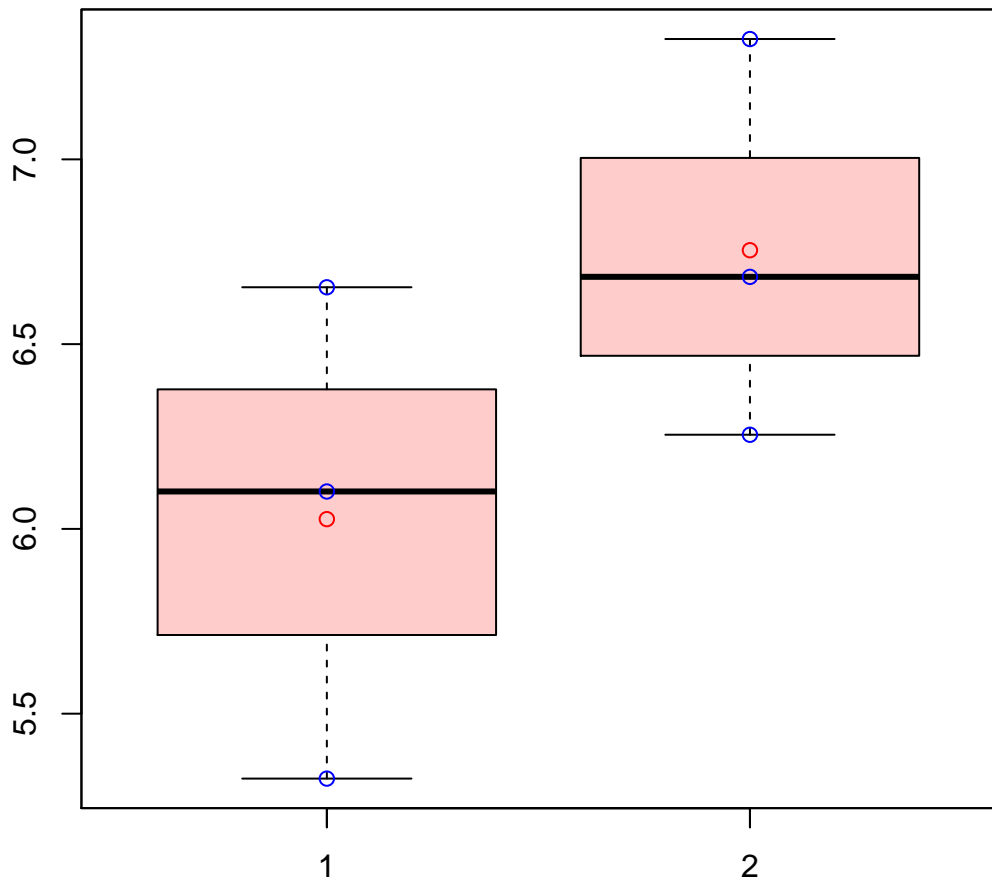

t-Test: p-value = 0.22

# CL884Contig2|CL884Contig2

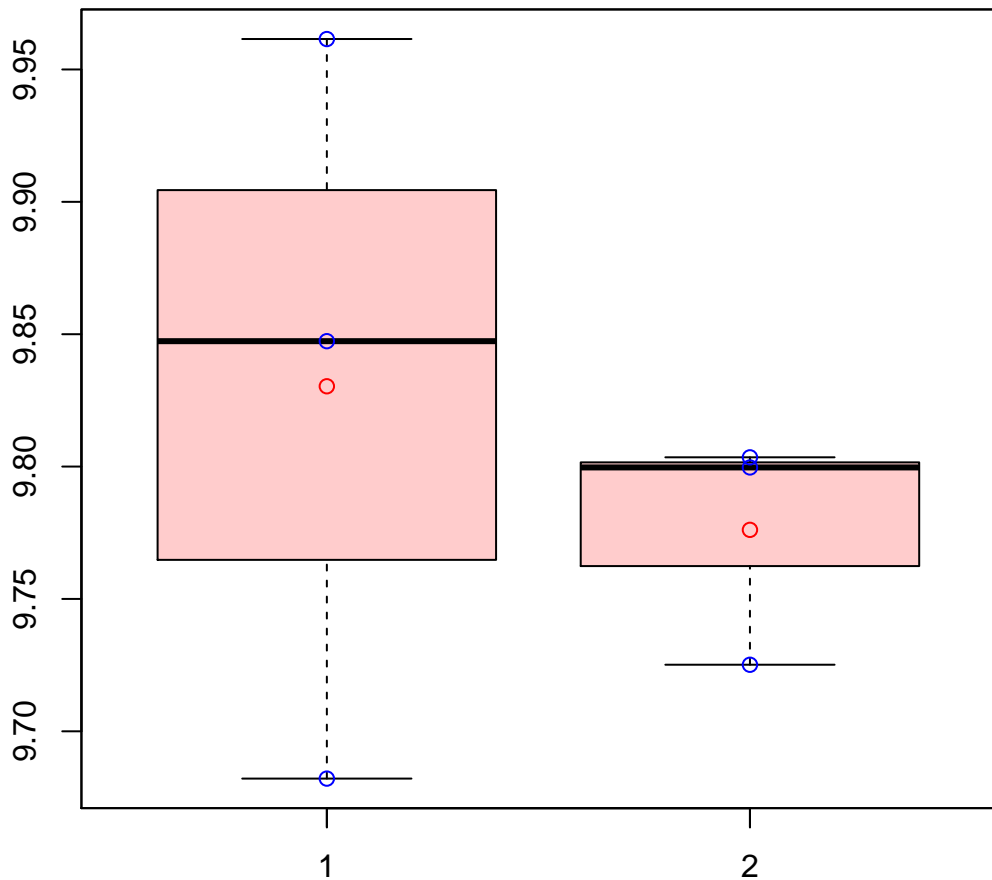

t-Test: p-value = 0.58

# CL884Contig3|CL884Contig3

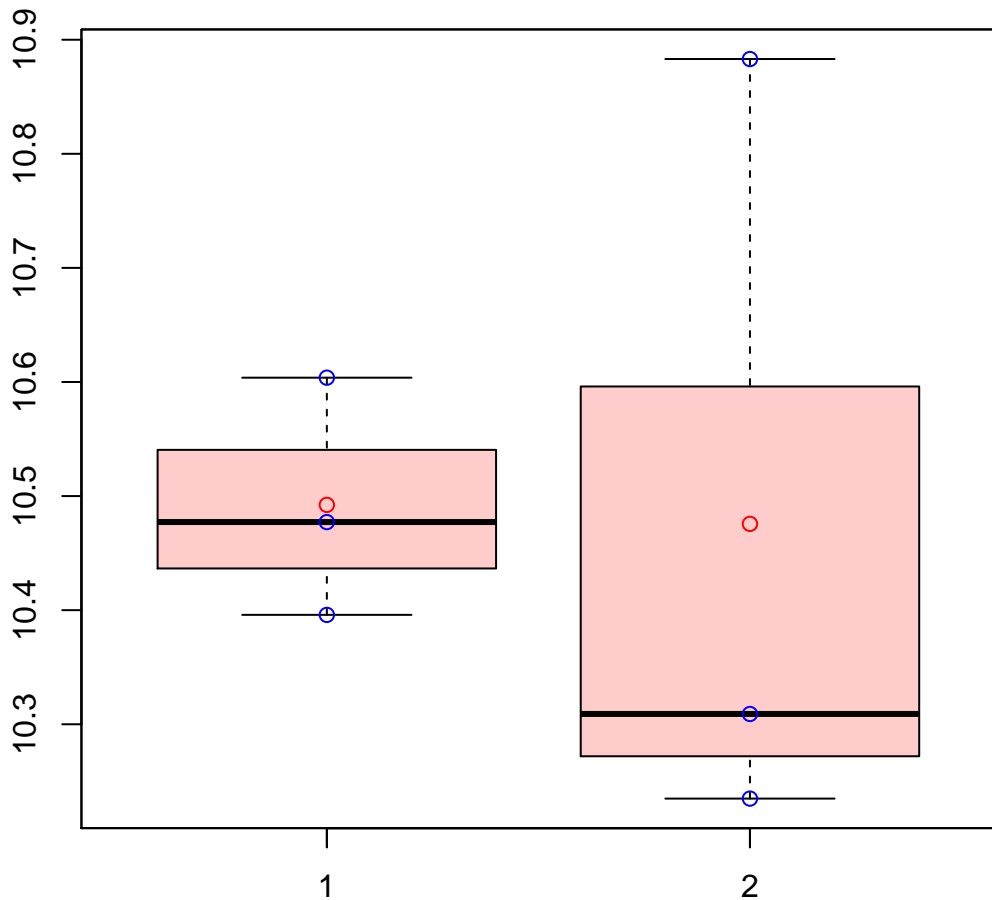

t-Test: p-value = 0.94

# CL884Contig4|CL884Contig4

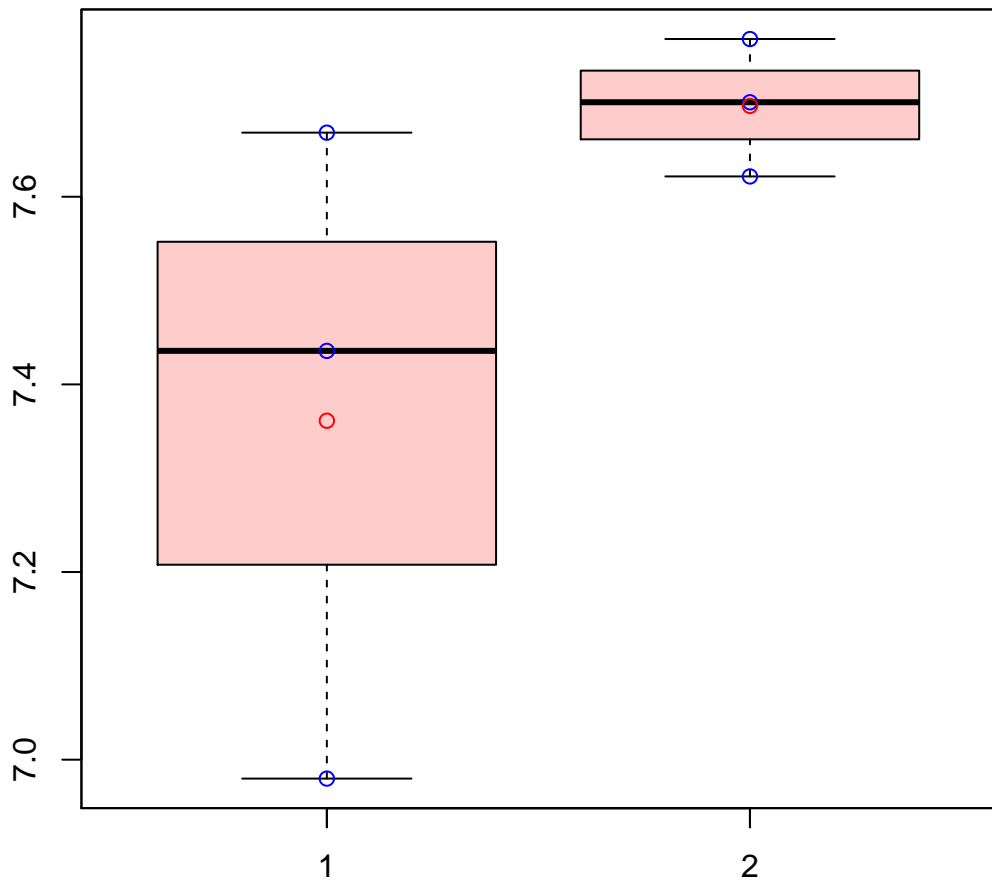

t-Test: p-value = 0.24

# CL885Contig1|CL885Contig1

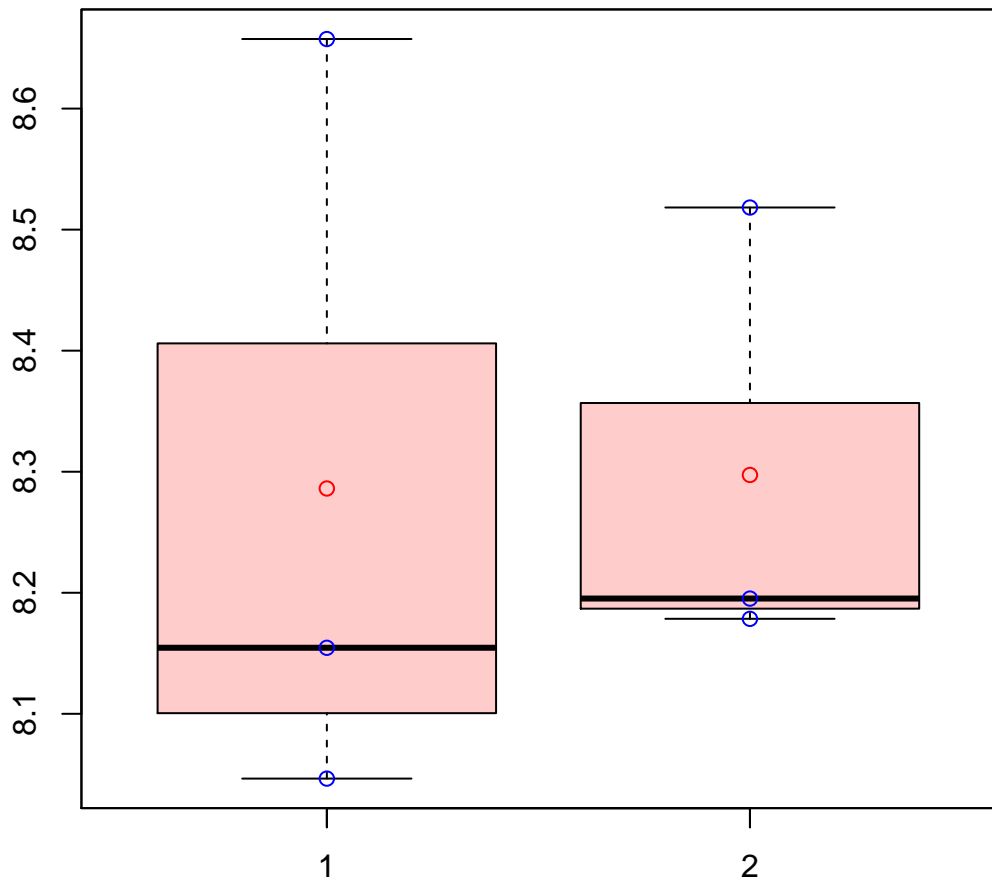

t-Test: p-value = 0.96



# CL8861Contig2|CL8861Contig2

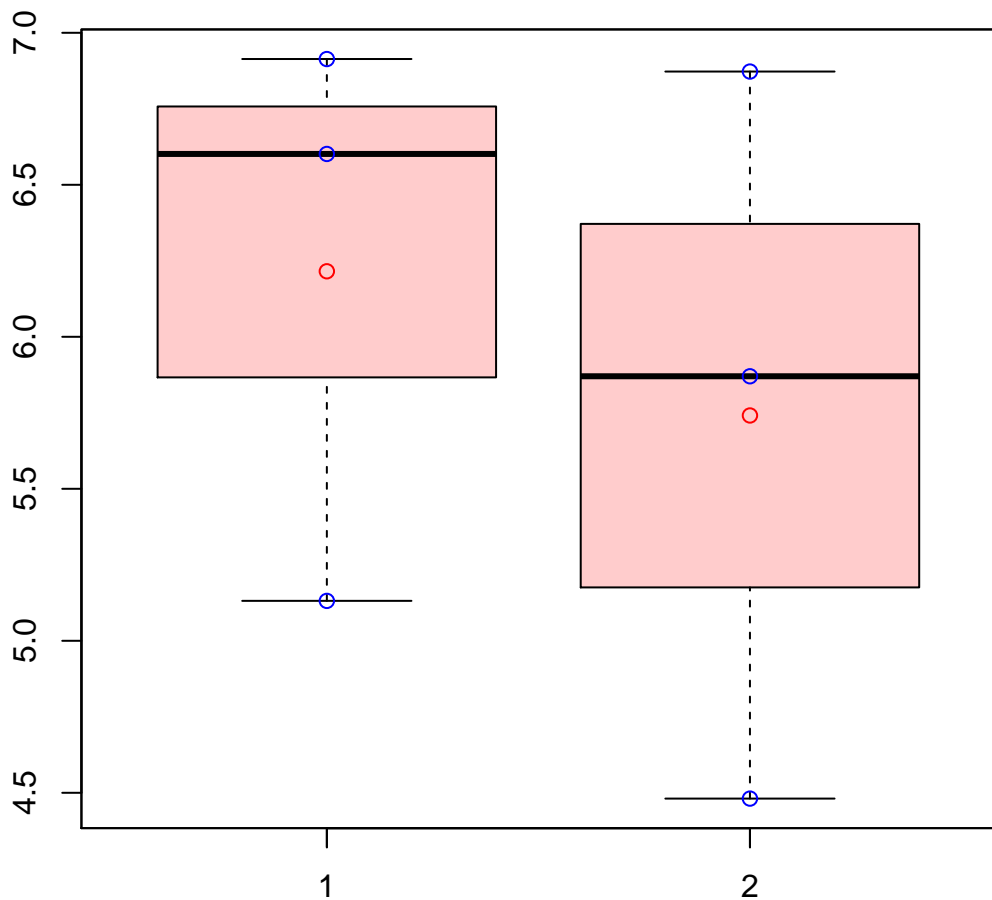

t-Test: p-value = 0.62

# CL8862Contig2|CL8862Contig2

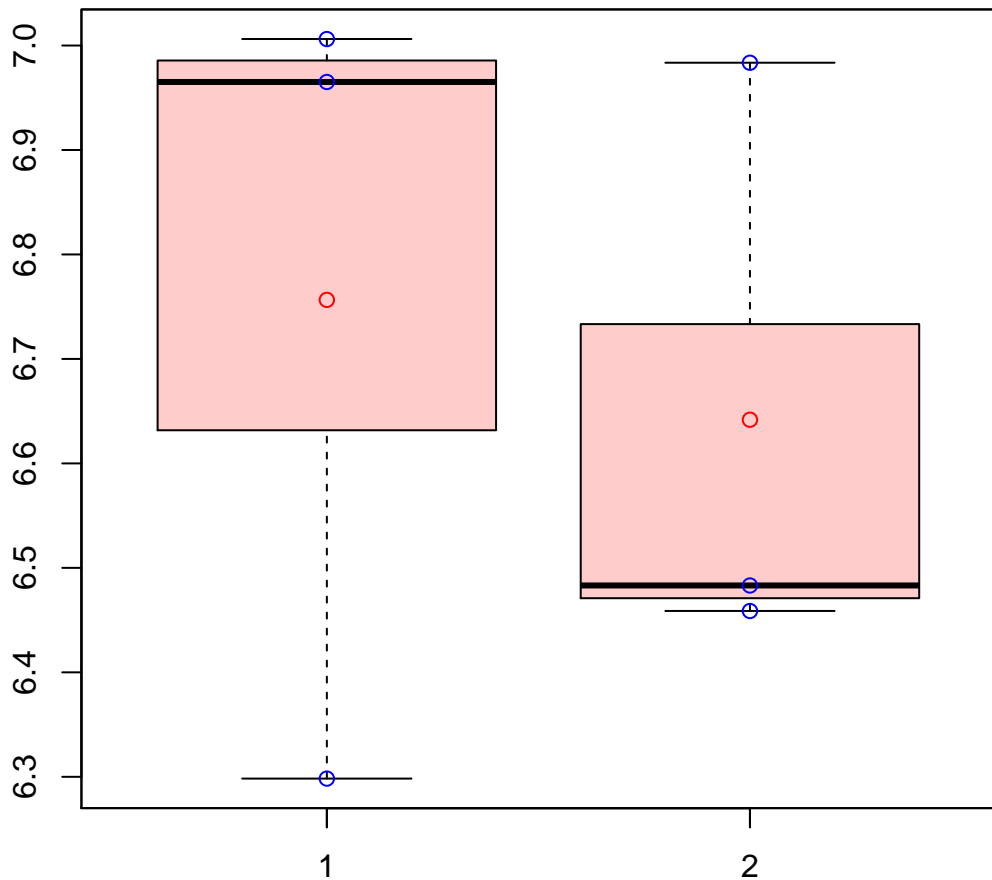

t-Test: p-value = 0.71

# CL886Contig5|CL886Contig5

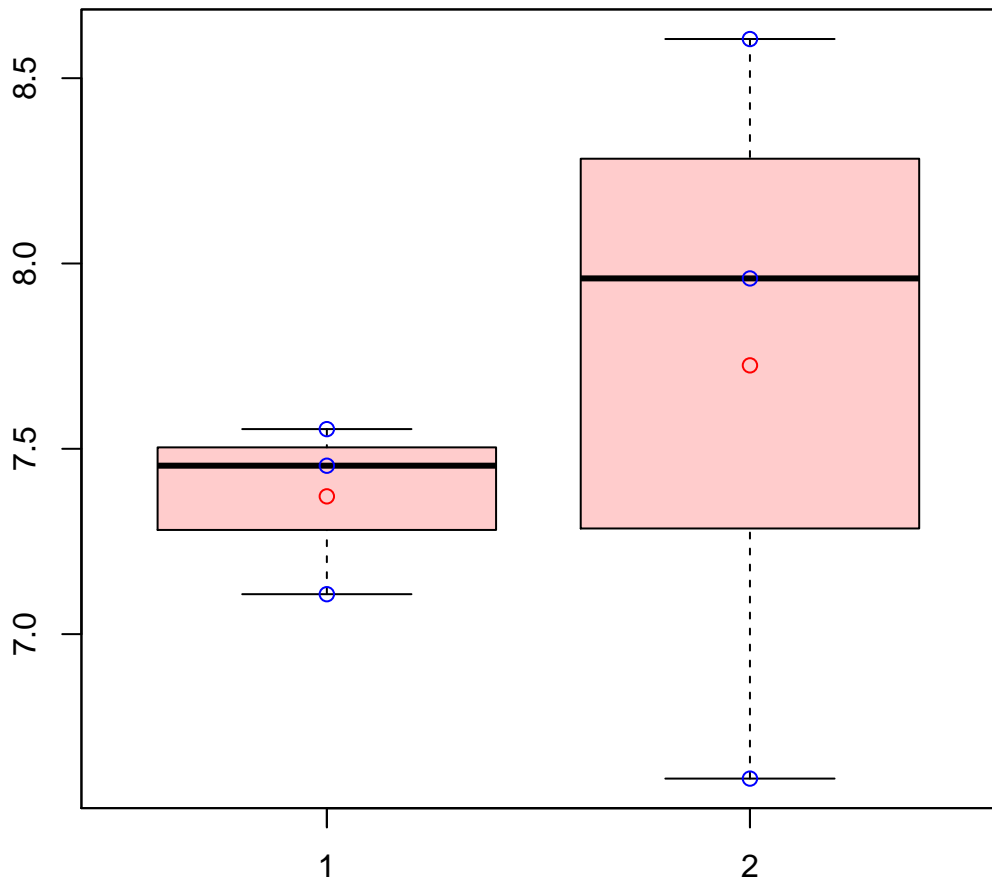

t-Test: p-value = 0.61

# CL890Contig6|CL890Contig6

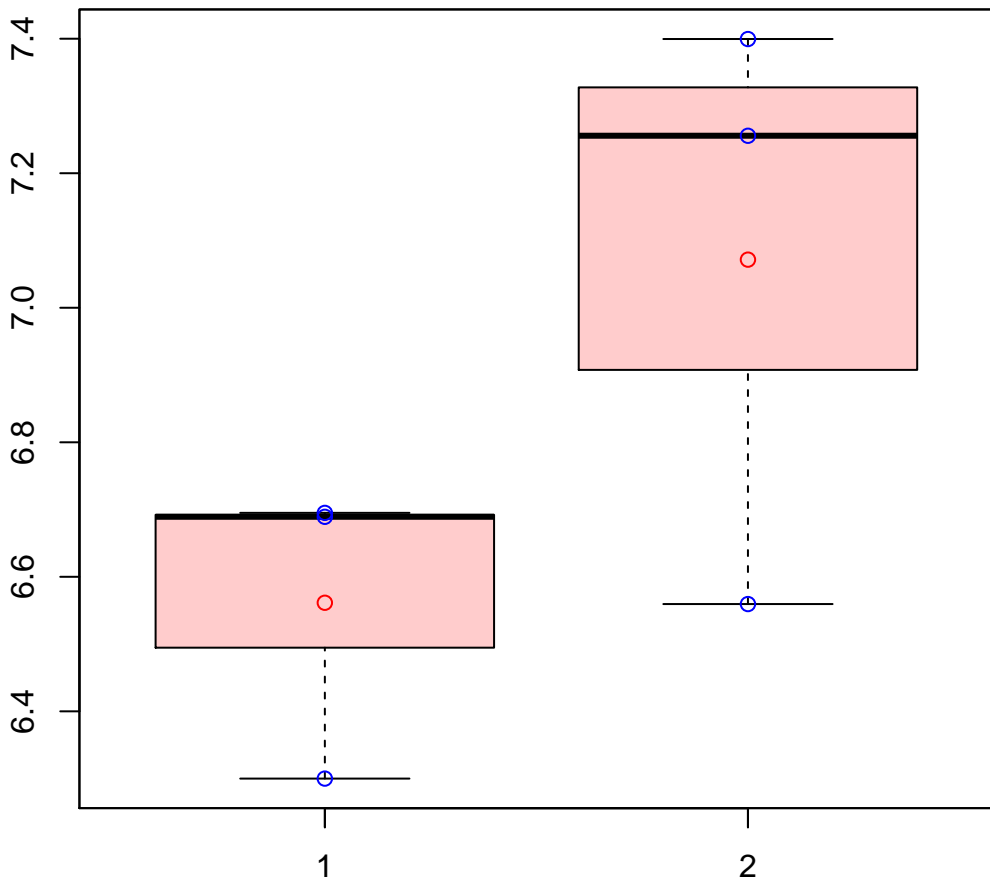

t-Test: p-value = 0.18

# CL8917Contig2|CL8917Contig2

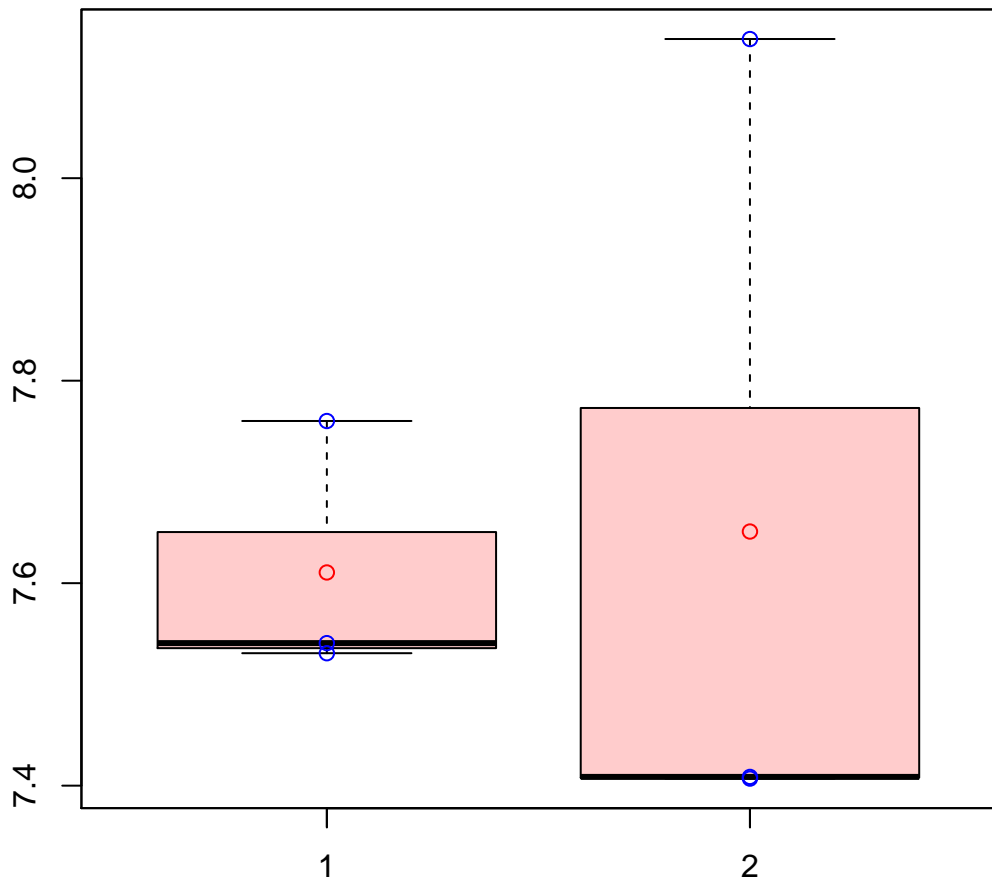

t-Test: p-value = 0.89

# CL891Contig6|CL891Contig6

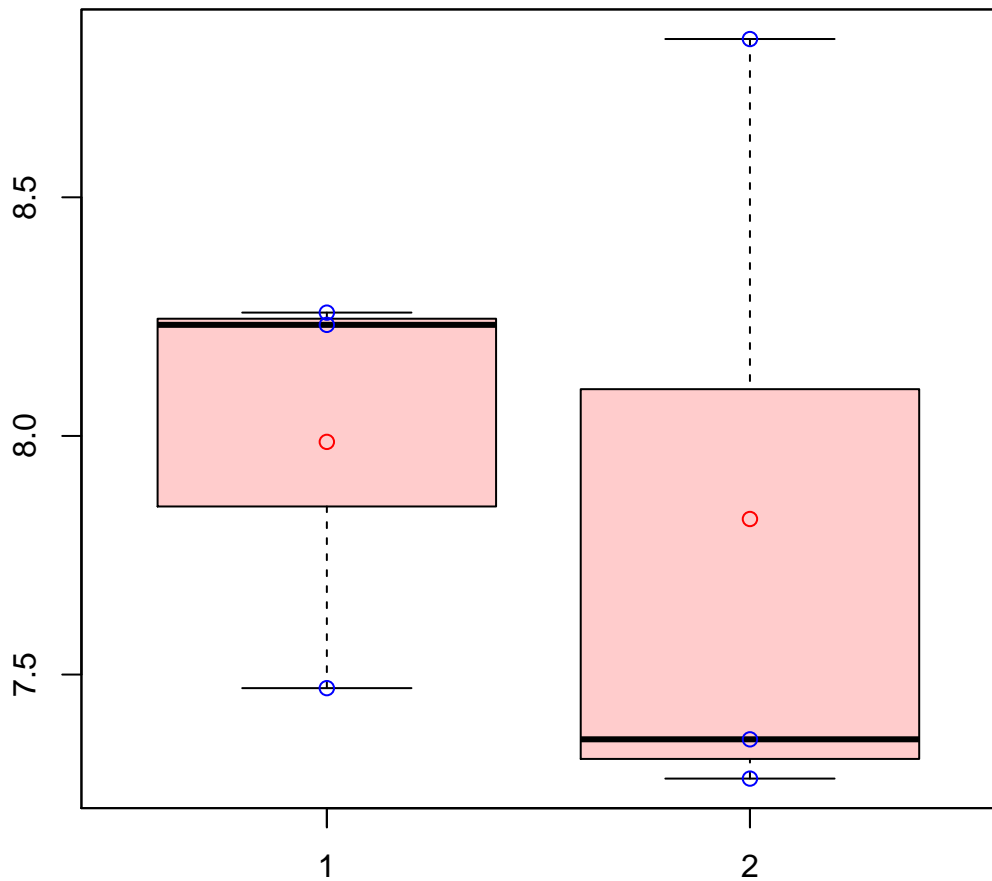

t-Test: p-value = 0.79

# CL8924Contig3|CL8924Contig3

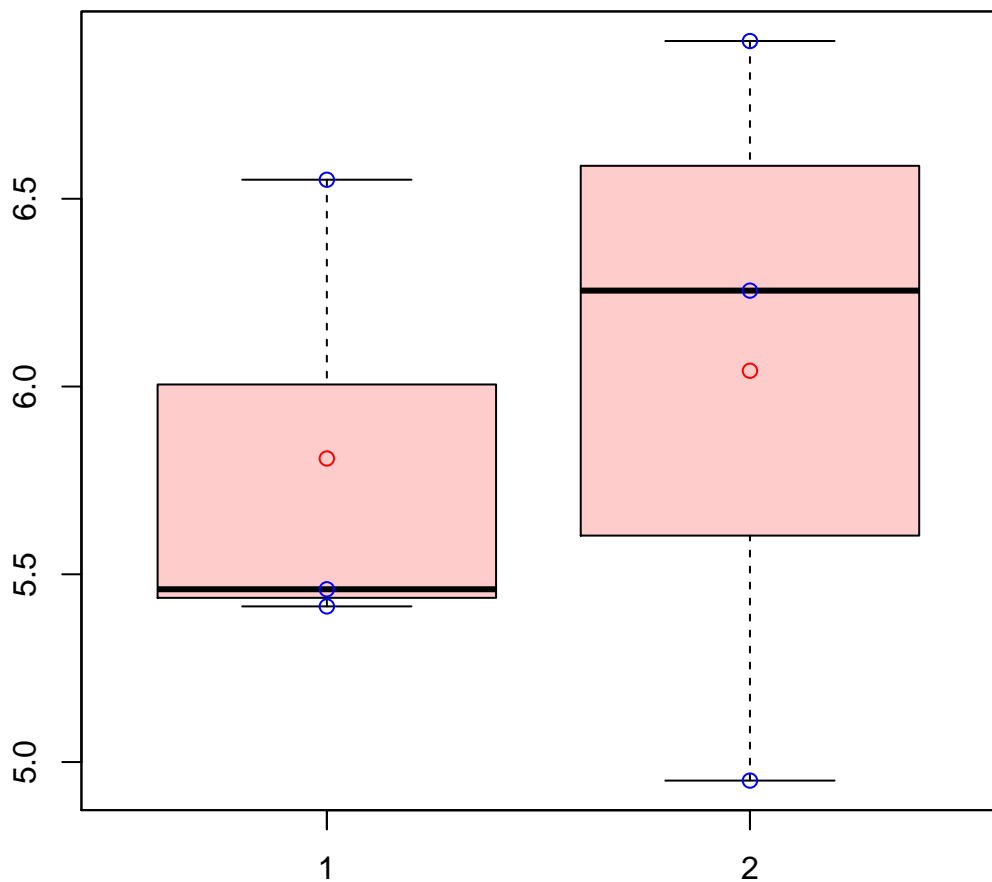

t-Test: p-value = 0.75

# CL8929Contig1|CL8929Contig1

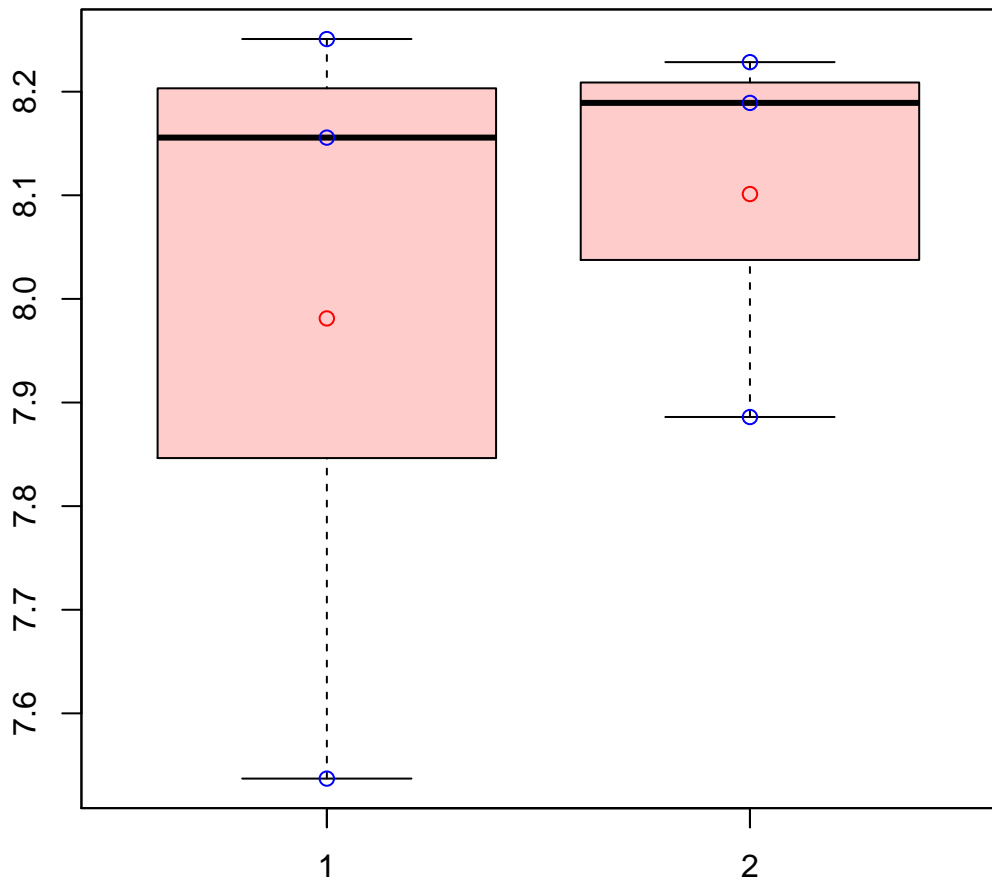

t-Test: p-value = 0.66



# CL8953Contig2|CL8953Contig2

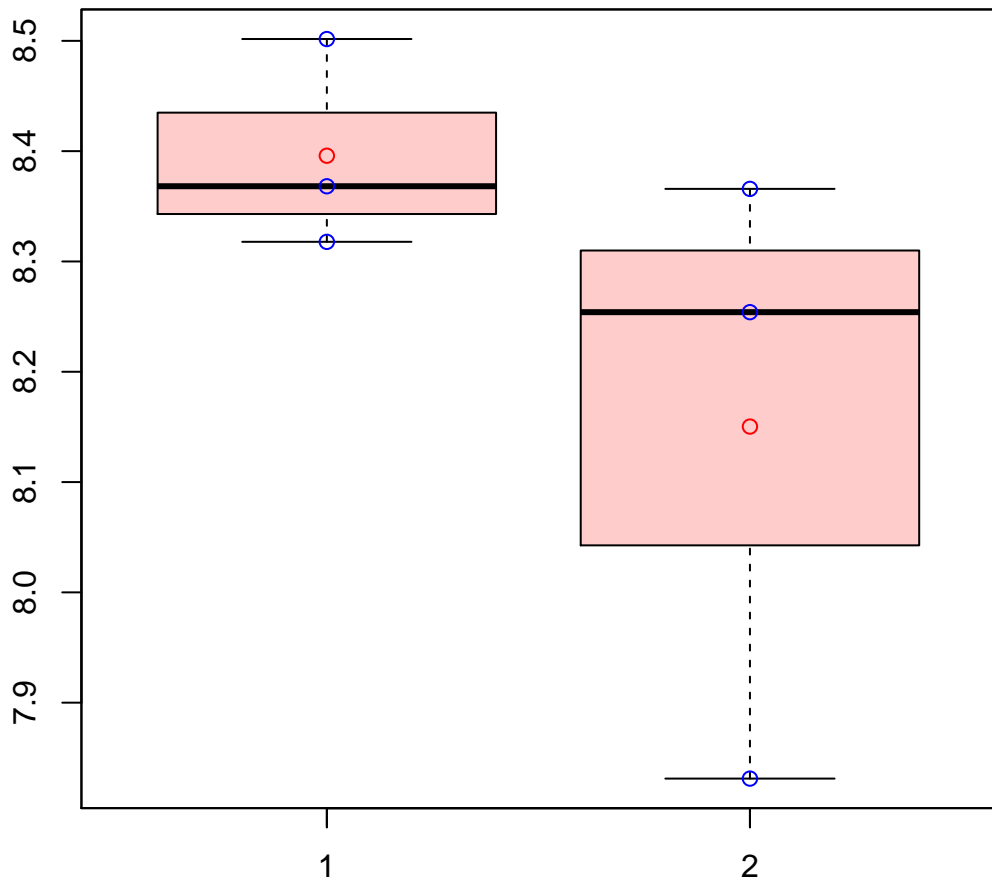

t-Test: p-value = 0.27

# CL895Contig4|CL895Contig4

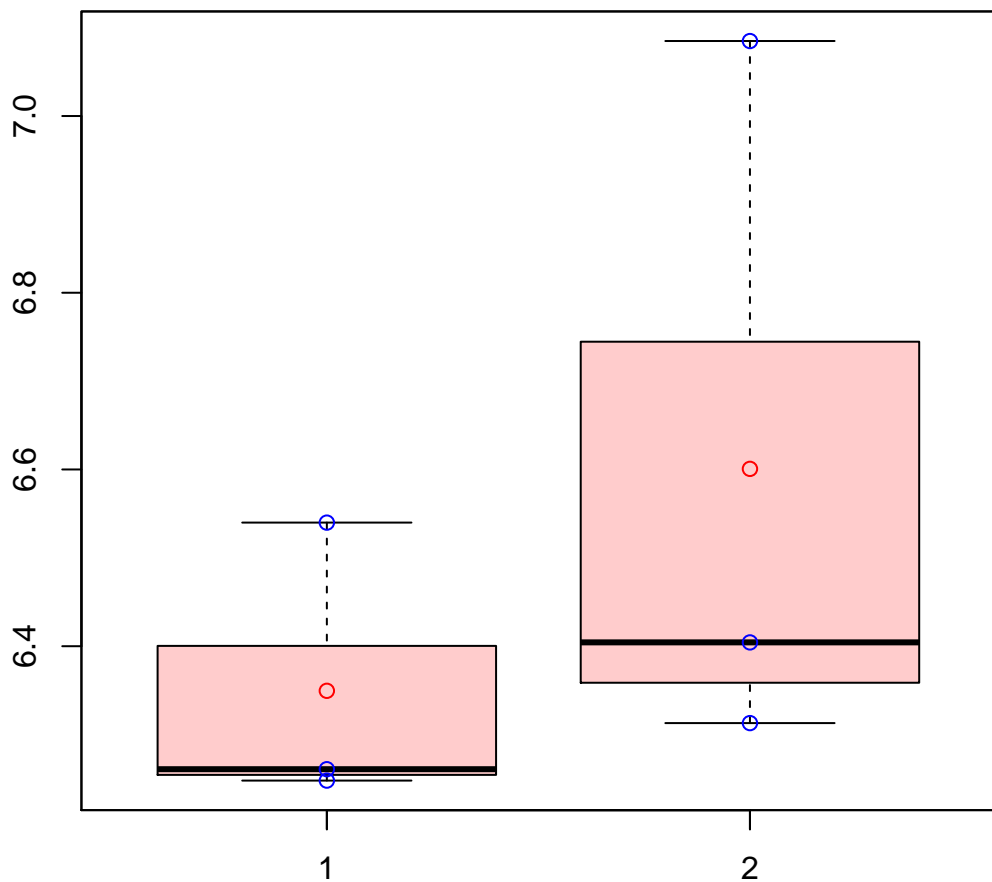

t-Test: p-value = 0.42

# CL8967Contig6|CL8967Contig6

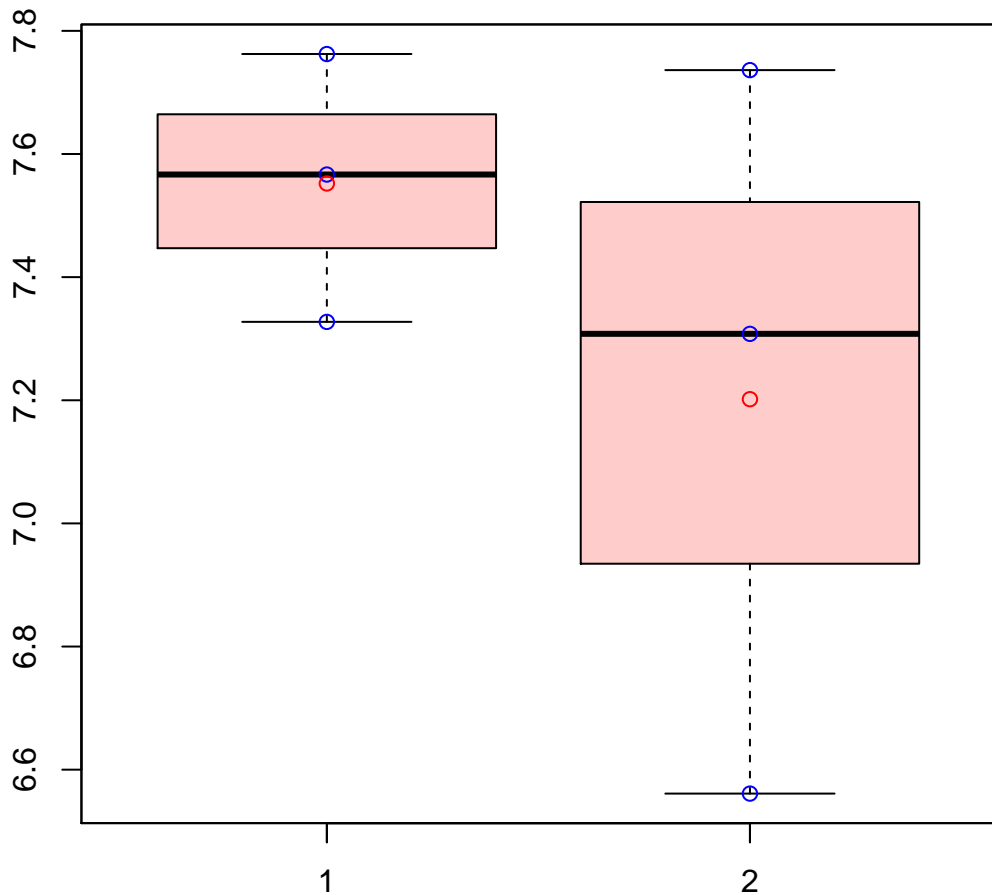

t-Test: p-value = 0.42

# CL8989Contig1|CL8989Contig1

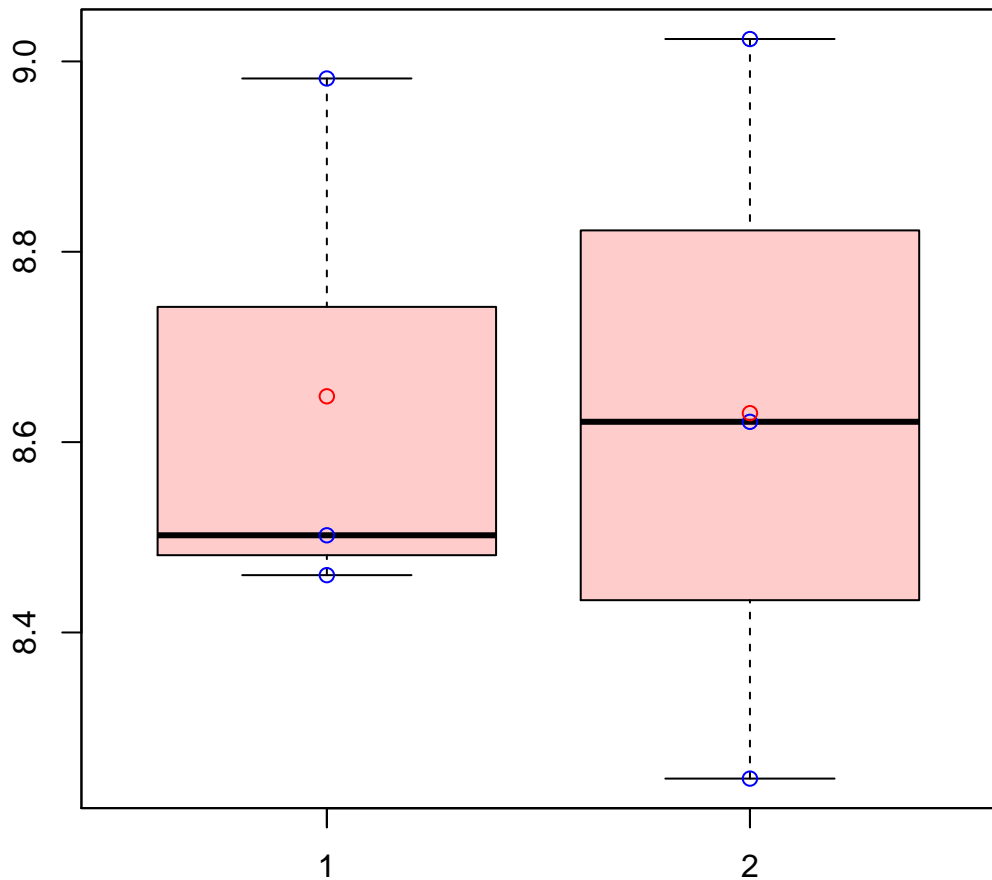

t-Test: p-value = 0.95

# CL8989Contig4|CL8989Contig4

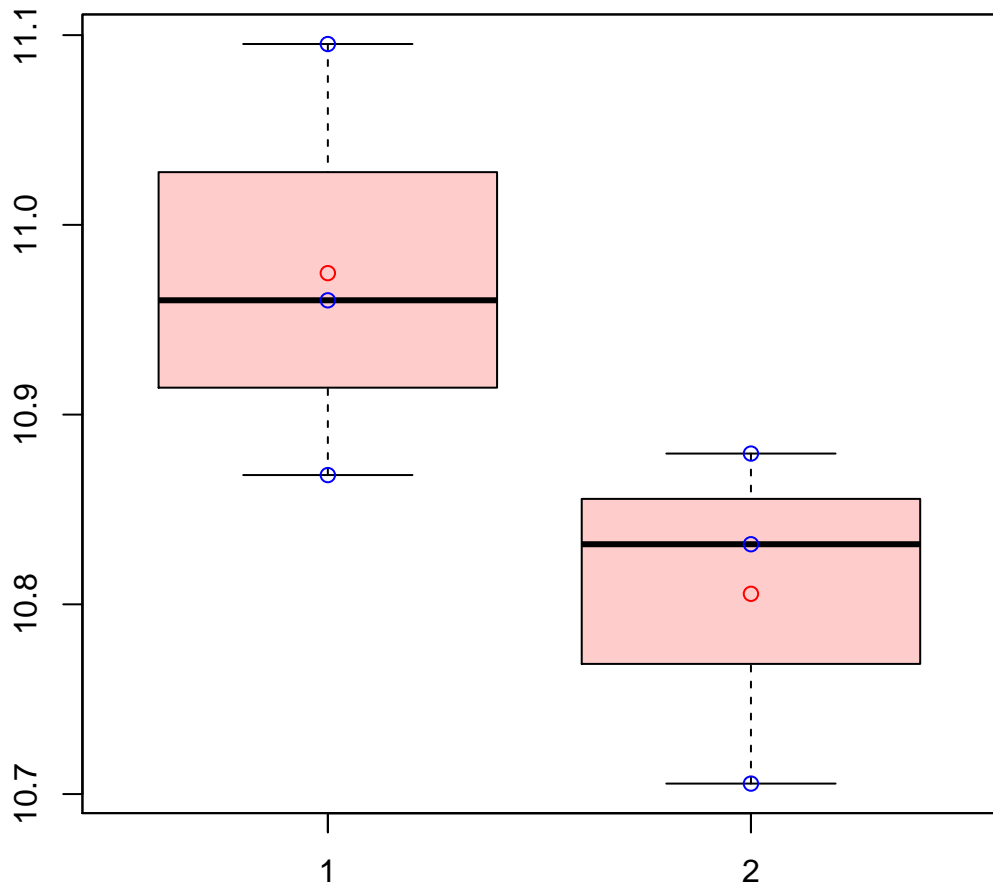

t-Test: p-value = 0.12

# CL898Contig1|CL898Contig1

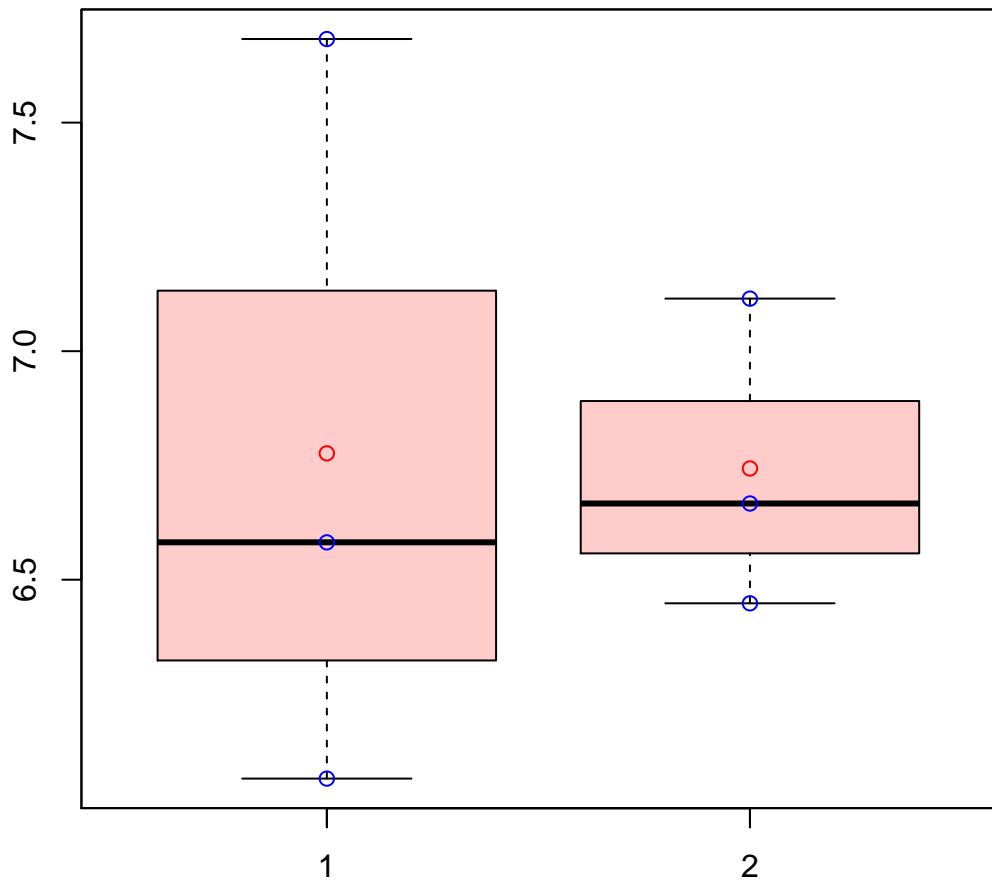

t-Test: p-value = 0.95

# CL898Contig7|CL898Contig7

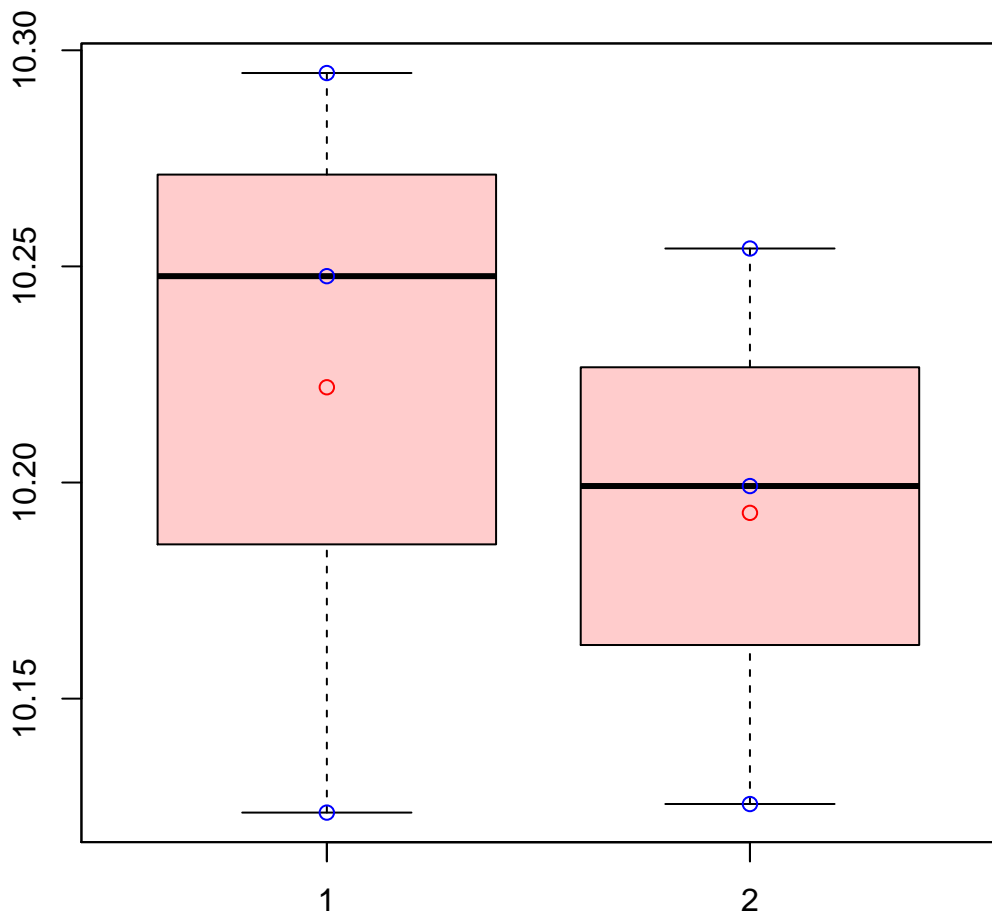

t-Test: p-value = 0.67

# CL8996Contig2|CL8996Contig2

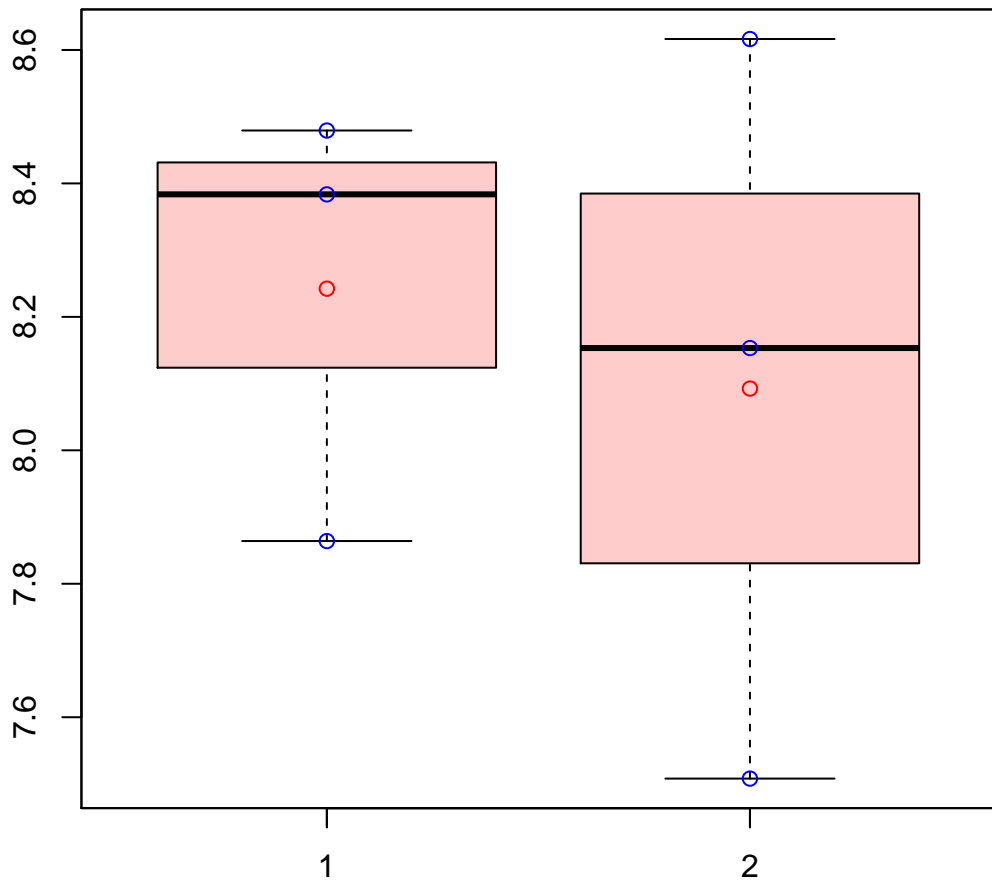

t-Test: p-value = 0.71



# CL899Contig4|CL899Contig4

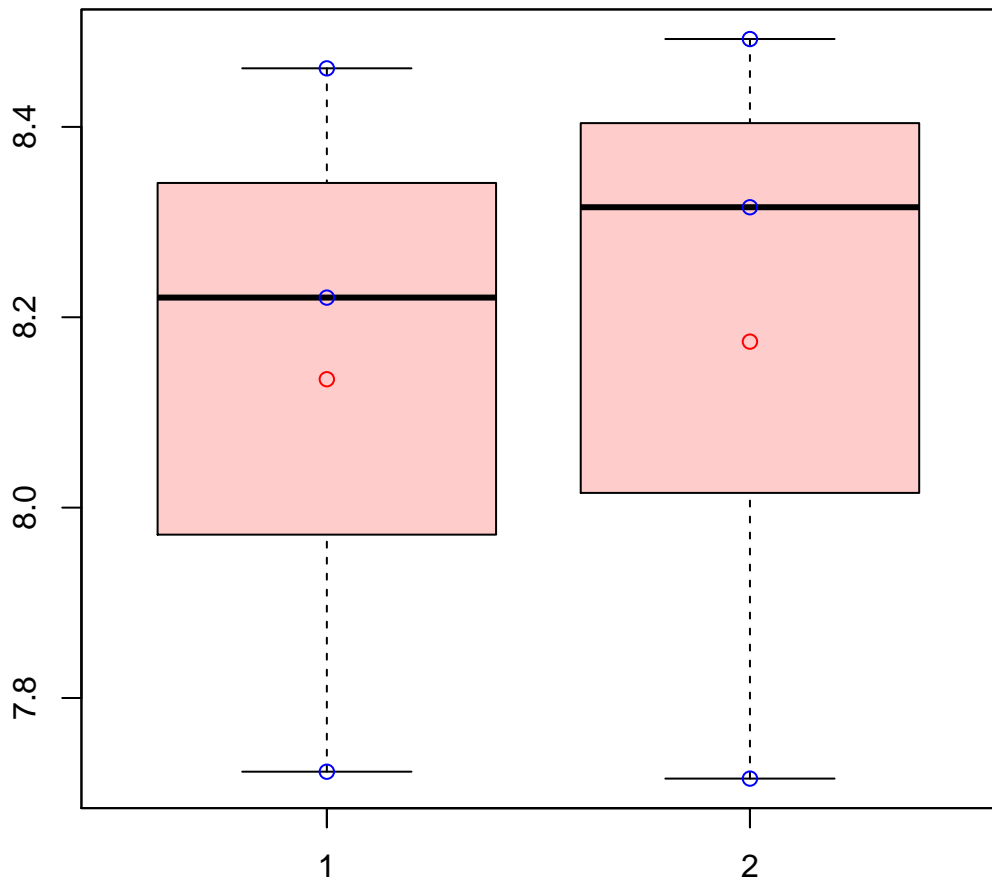

t-Test: p-value = 0.91

# CL89Contig18|CL89Contig18

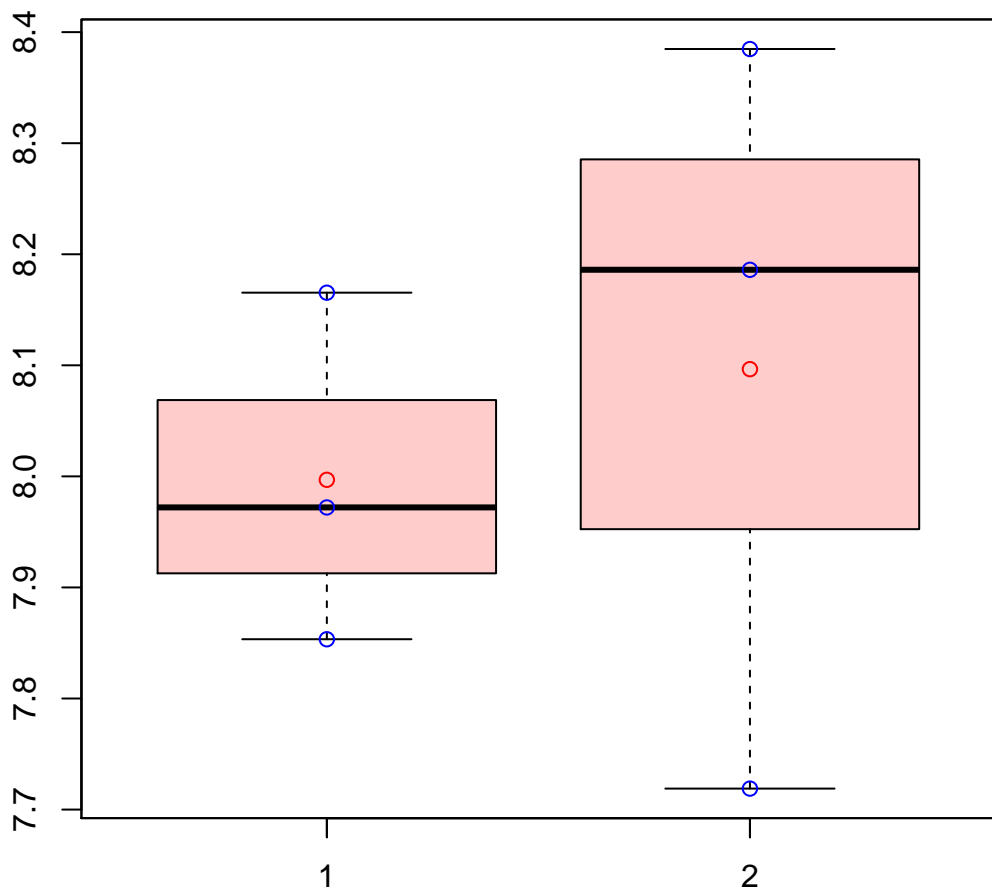

t-Test: p-value = 0.68

# CL9002Contig5|CL9002Contig5

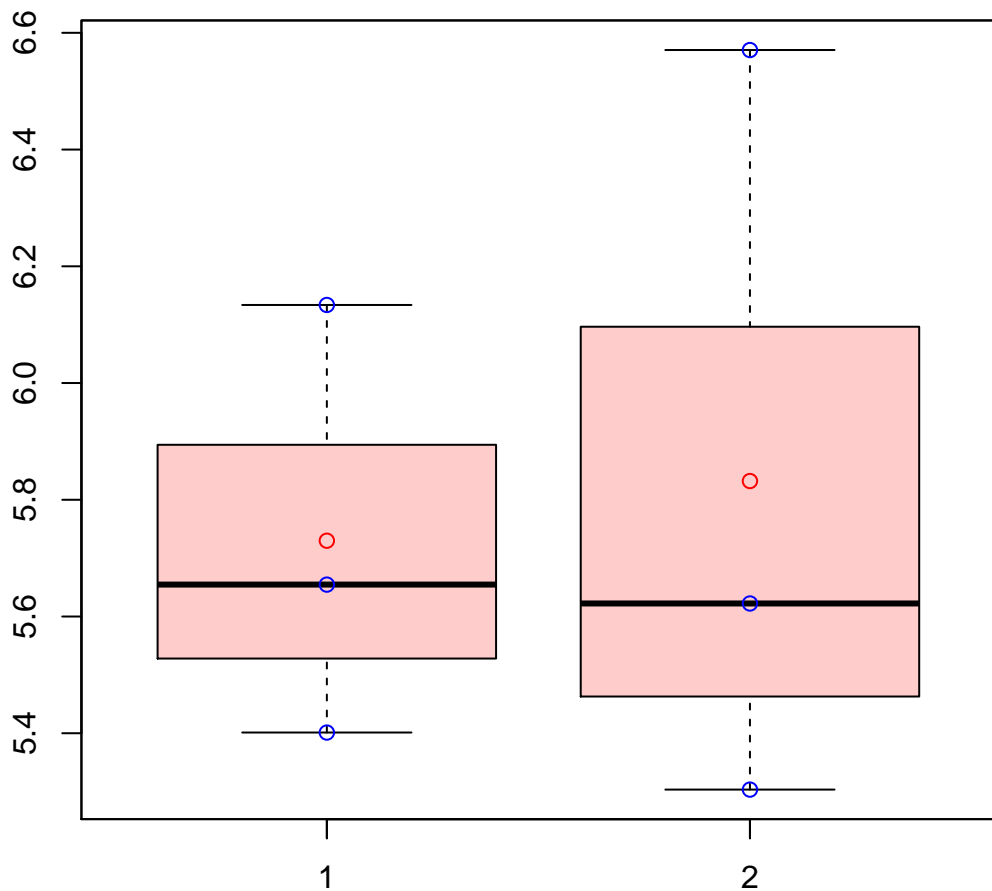

t-Test: p-value = 0.83

# CL9027Contig1|CL9027Contig1

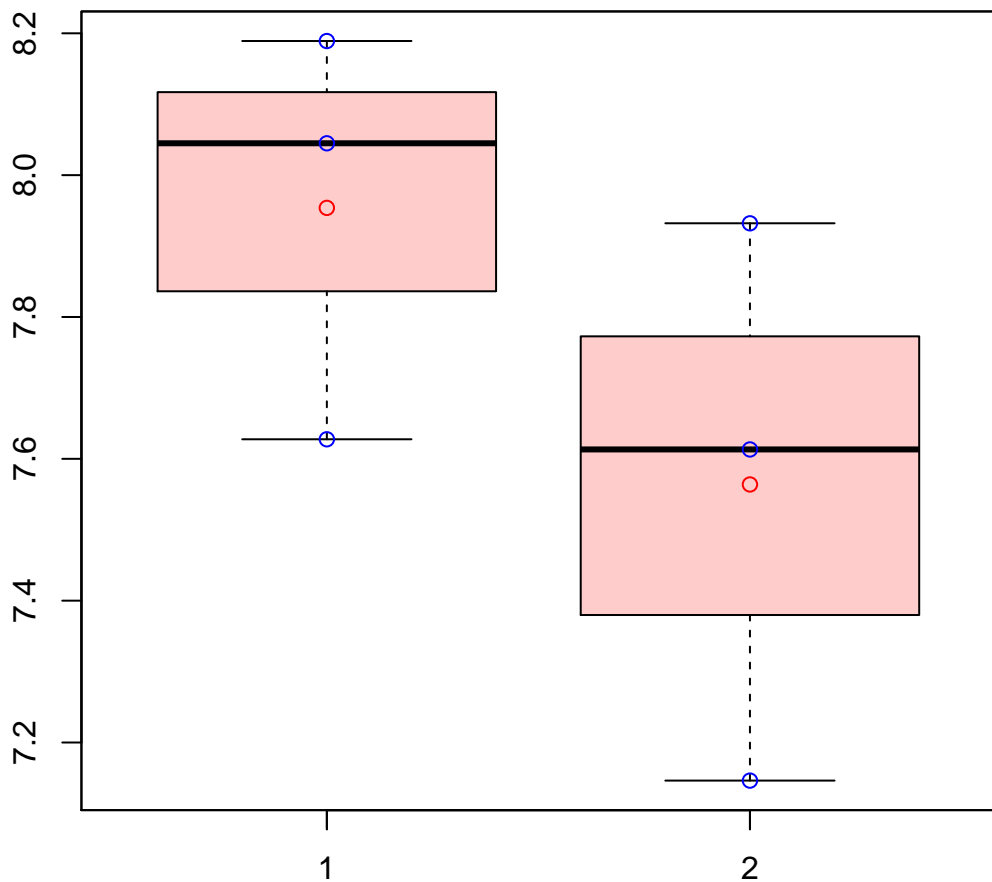

t-Test: p-value = 0.25

# CL903Contig5|CL903Contig5

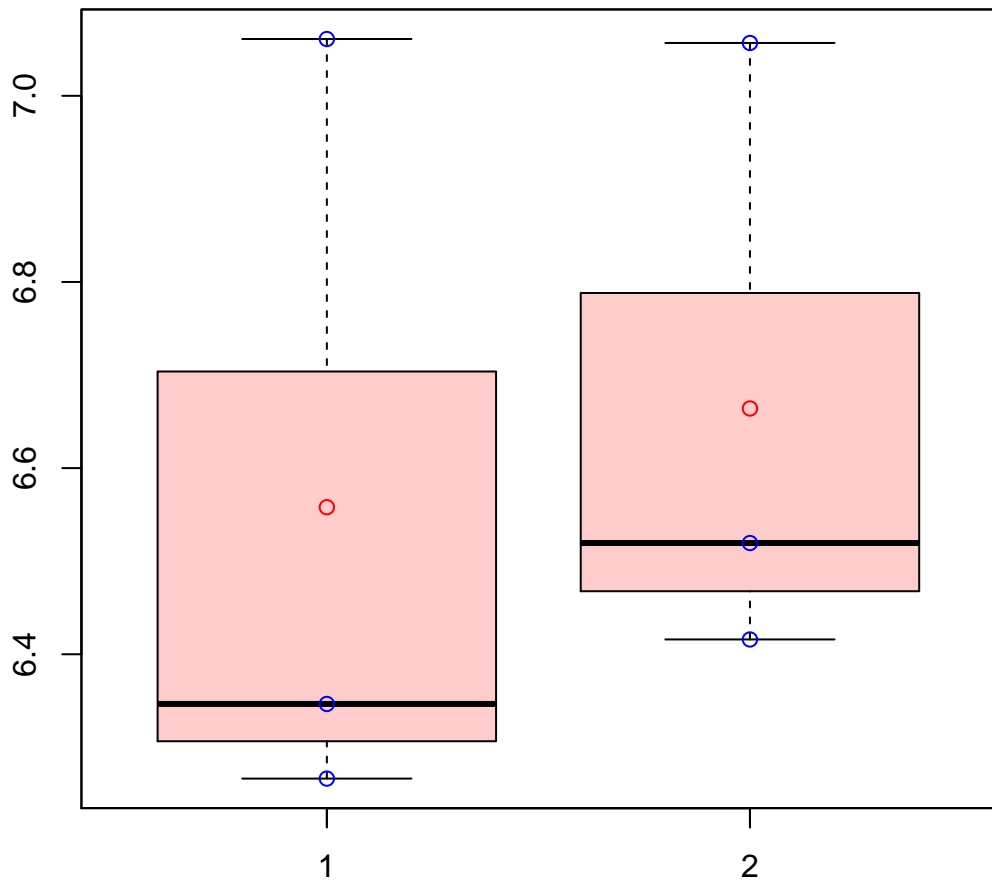

t-Test: p-value = 0.76

# CL9053Contig1|CL9053Contig1

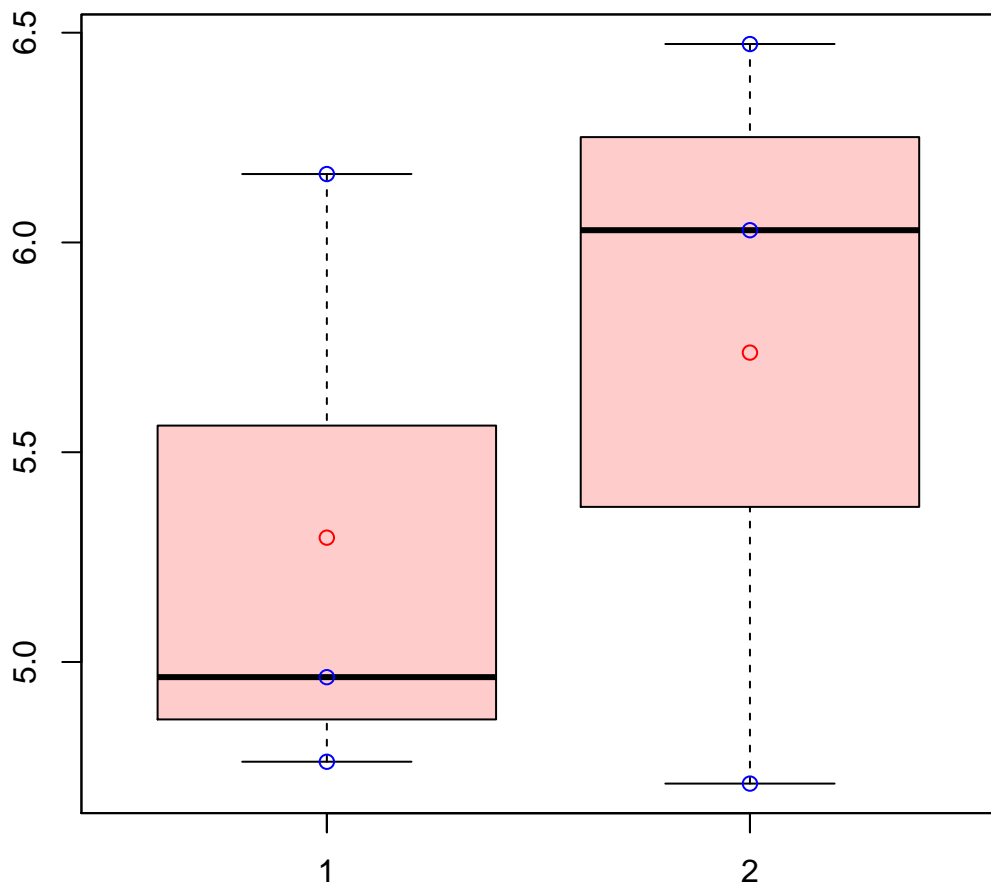

t-Test: p-value = 0.56

# CL905Contig3|CL905Contig3

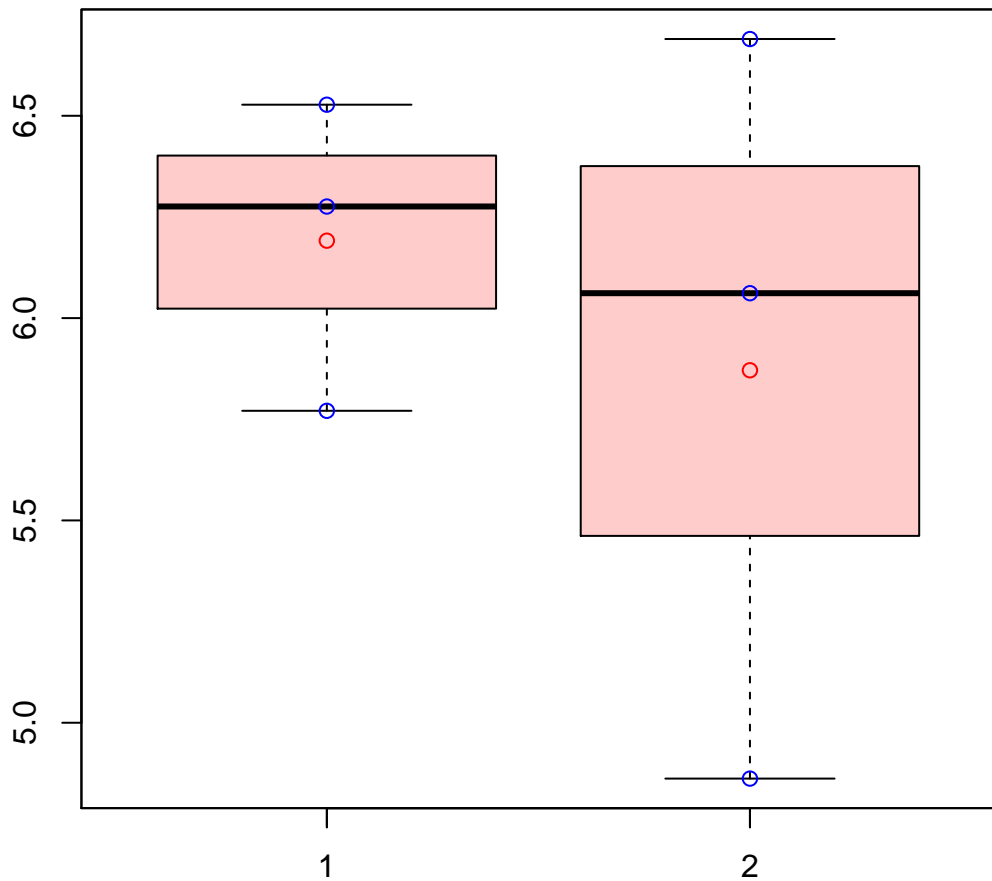

t-Test: p-value = 0.62

# CL9068Contig2|CL9068Contig2

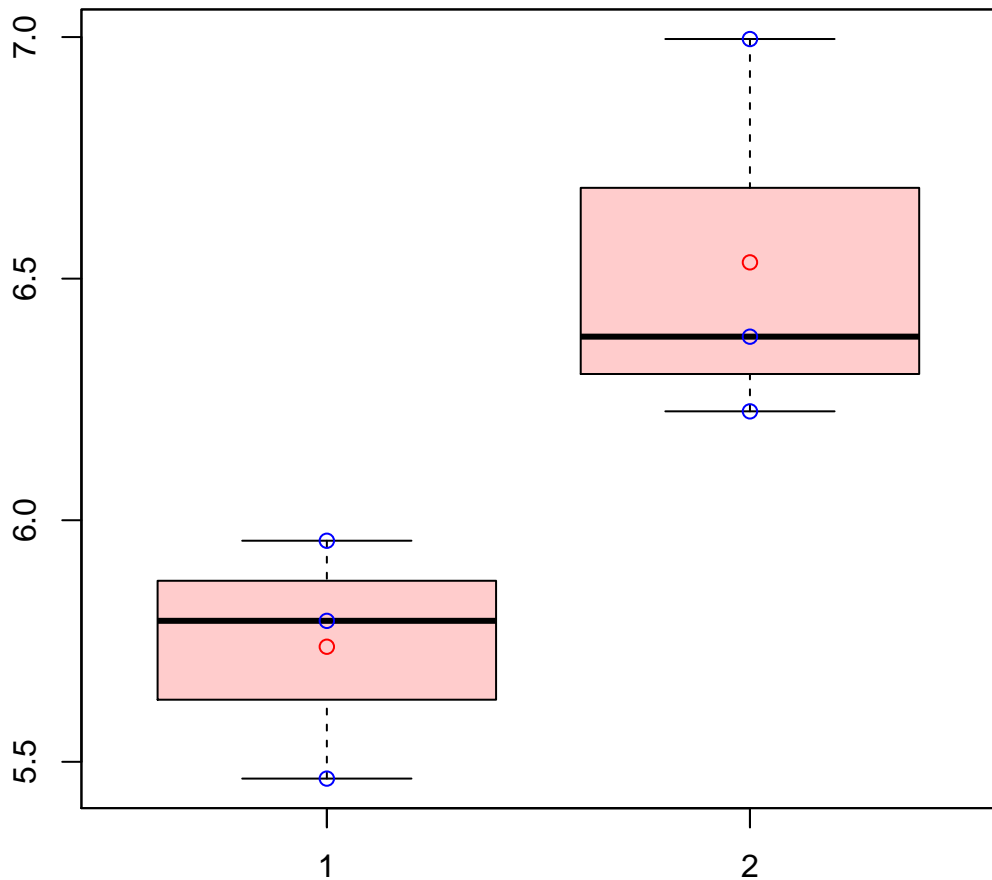

t-Test: p-value = 0.06



# CL908Contig3|CL908Contig3

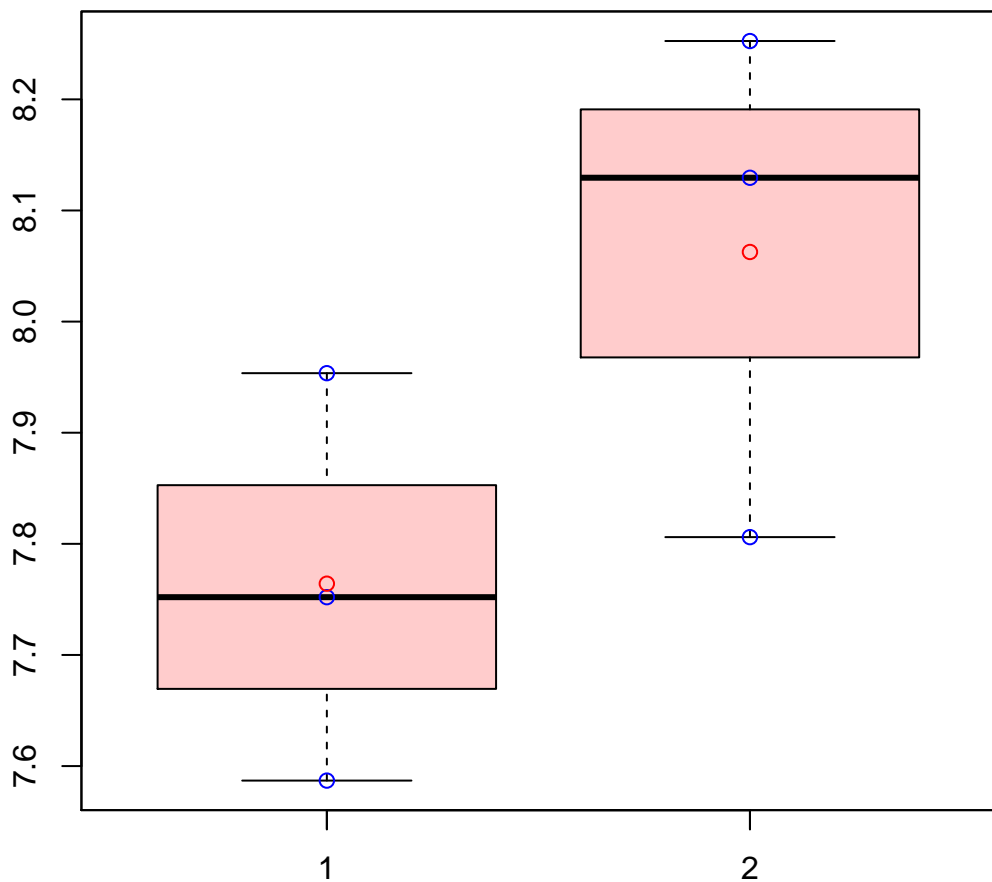

t-Test: p-value = 0.16

# CL909Contig5|CL909Contig5

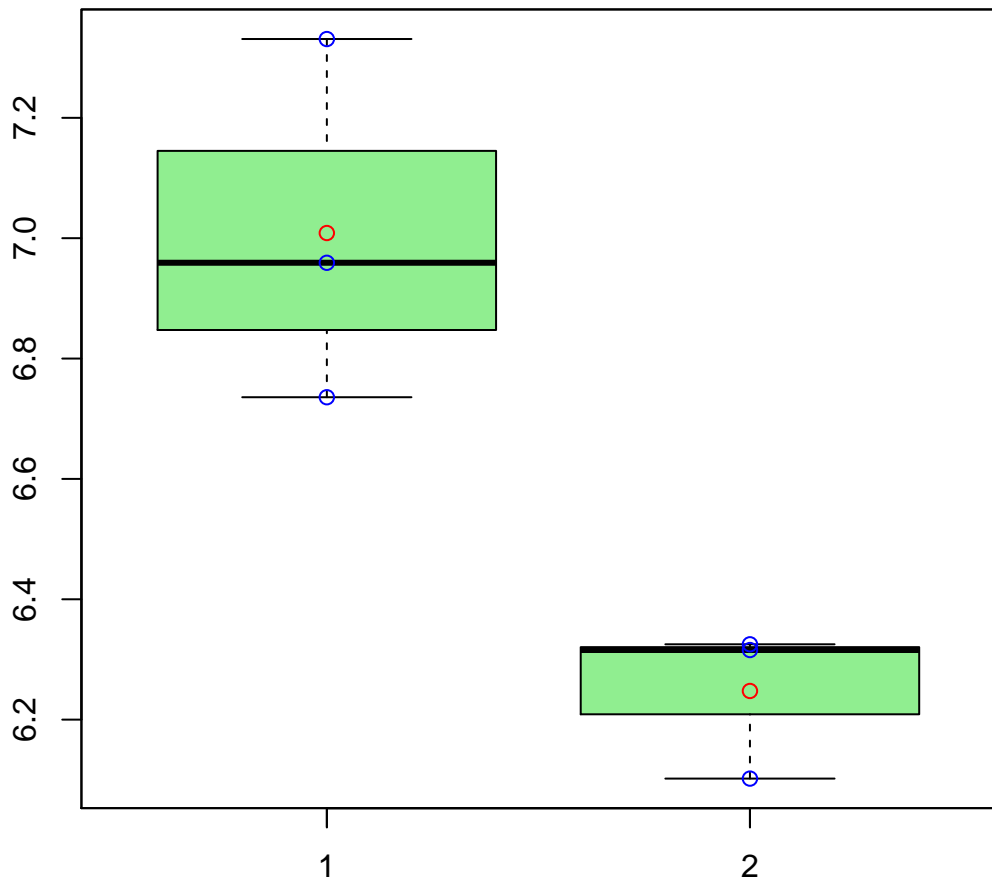

t-Test: p-value = 0.03

# CL909Contig7|CL909Contig7

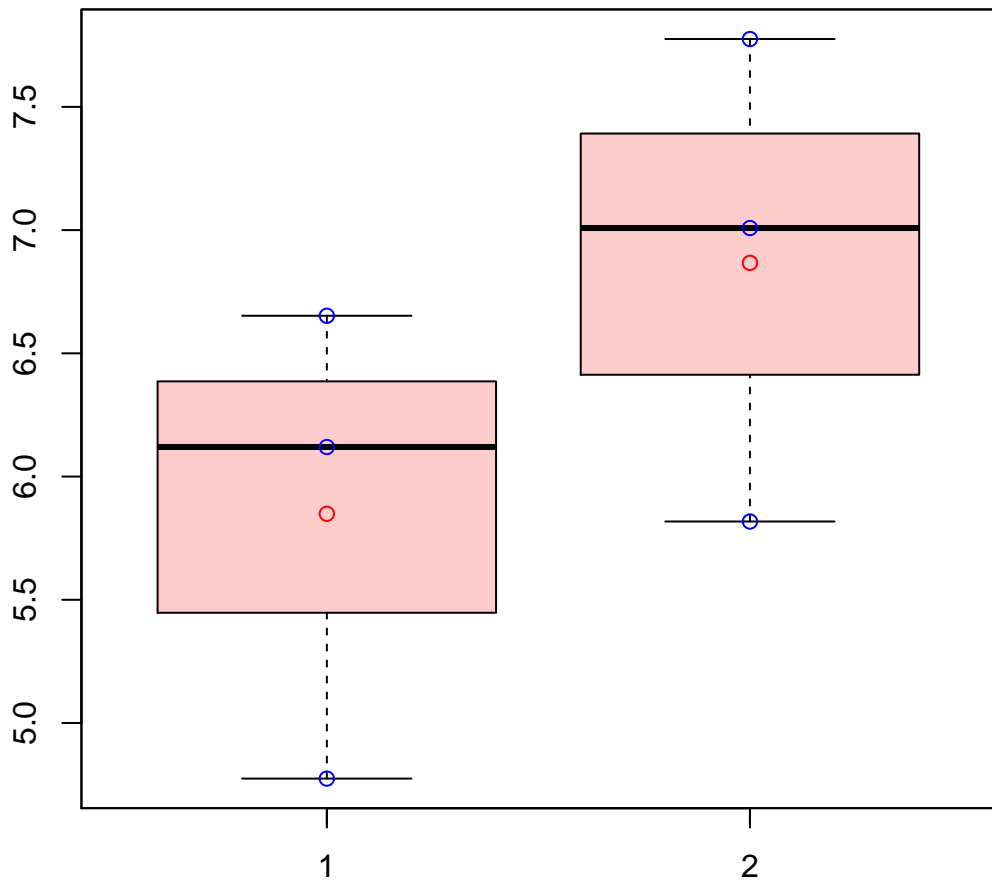

t-Test: p-value = 0.27

# CL9103Contig2|CL9103Contig2

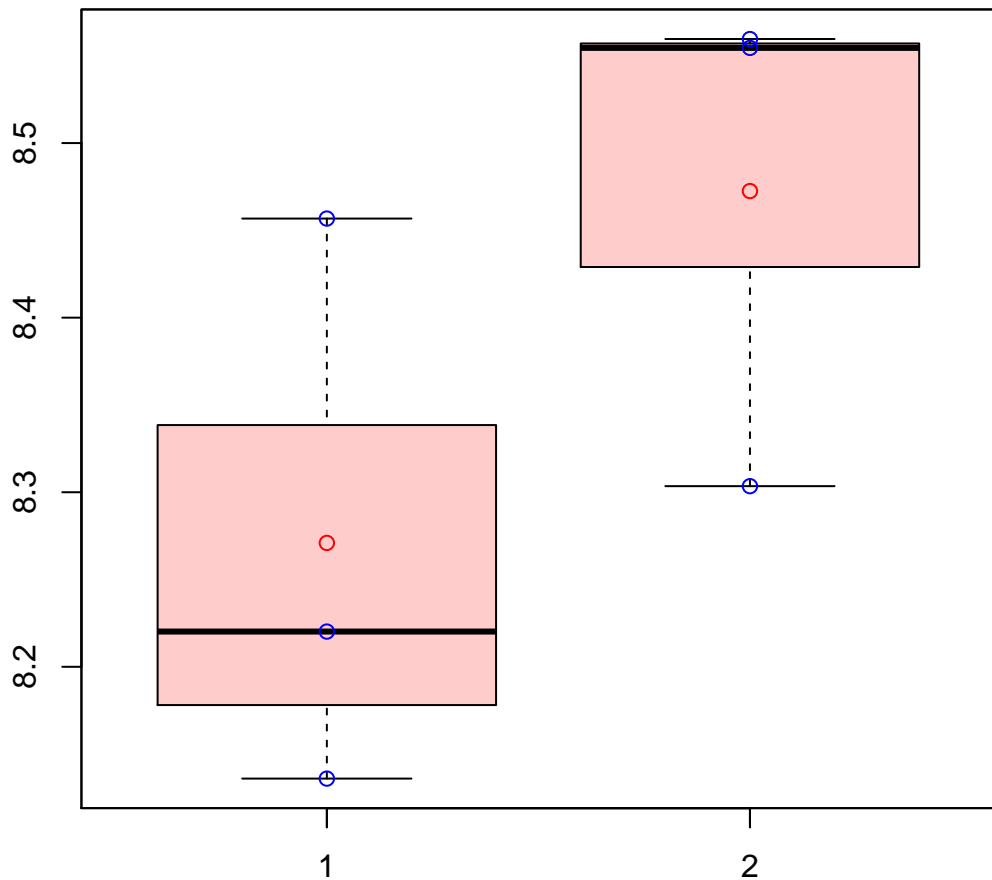

t-Test: p-value = 0.19

# CL911Contig4|CL911Contig4

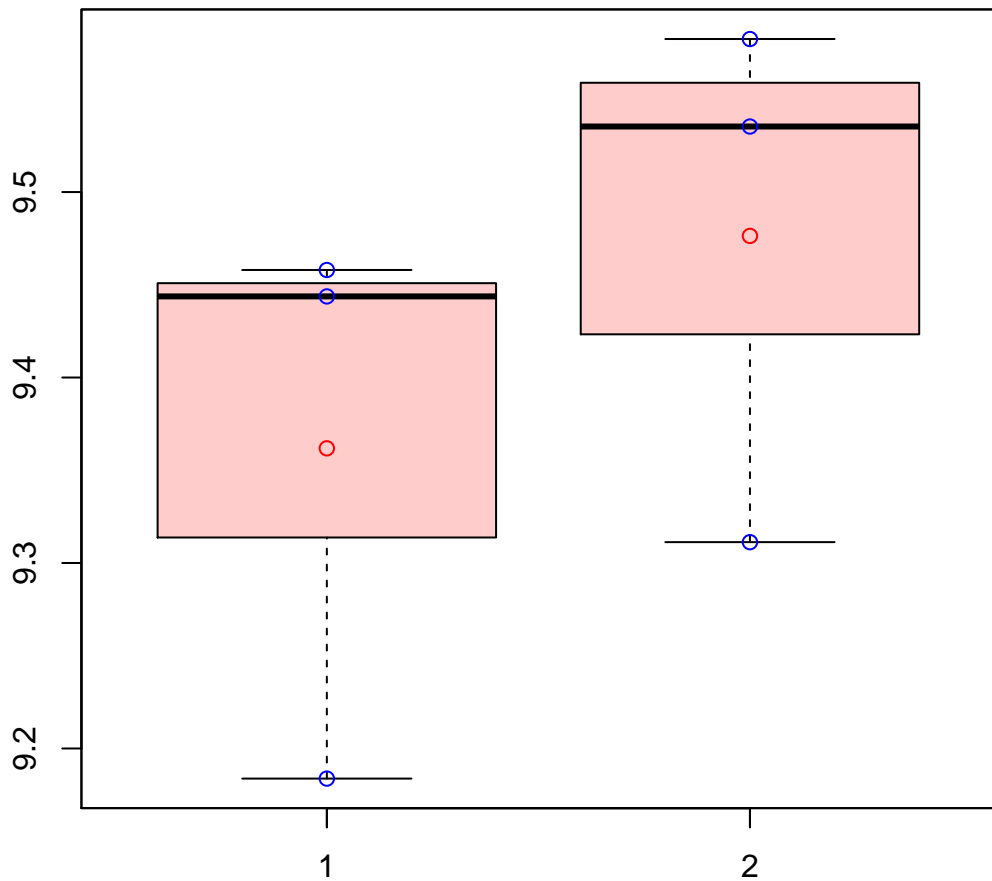

t-Test: p-value = 0.4

# CL9120Contig5|CL9120Contig5

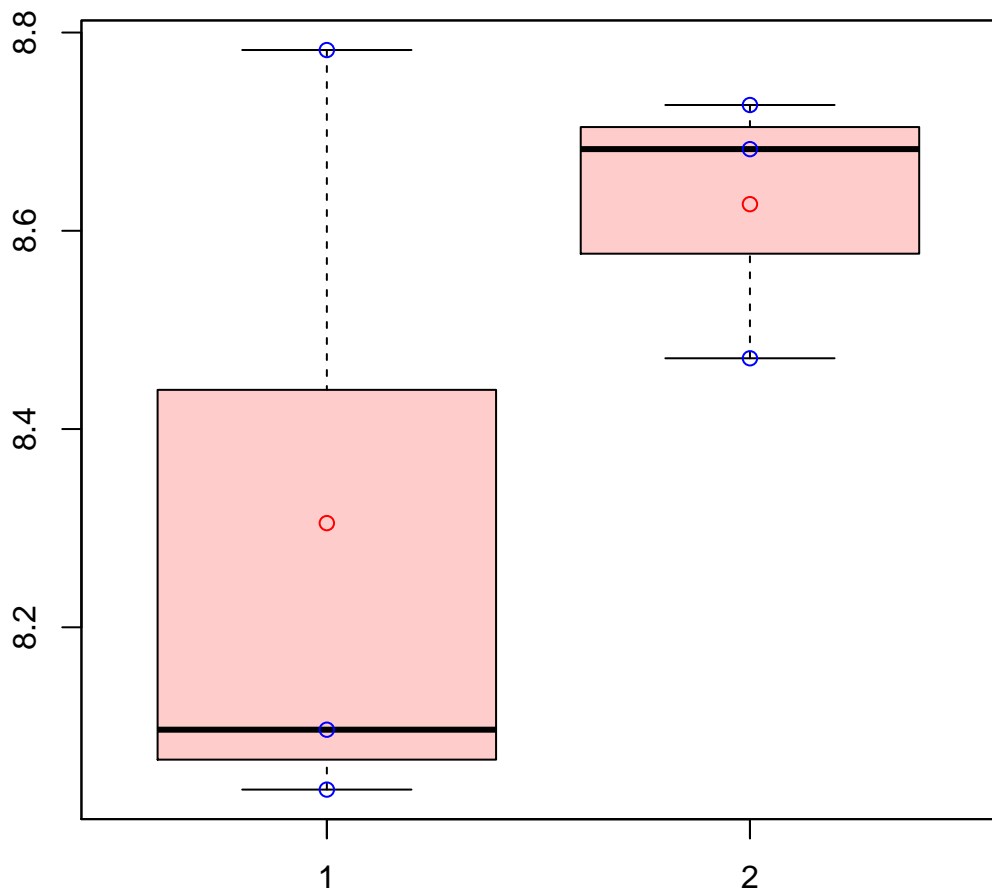

t-Test: p-value = 0.31

# CL9129Contig2|CL9129Contig2

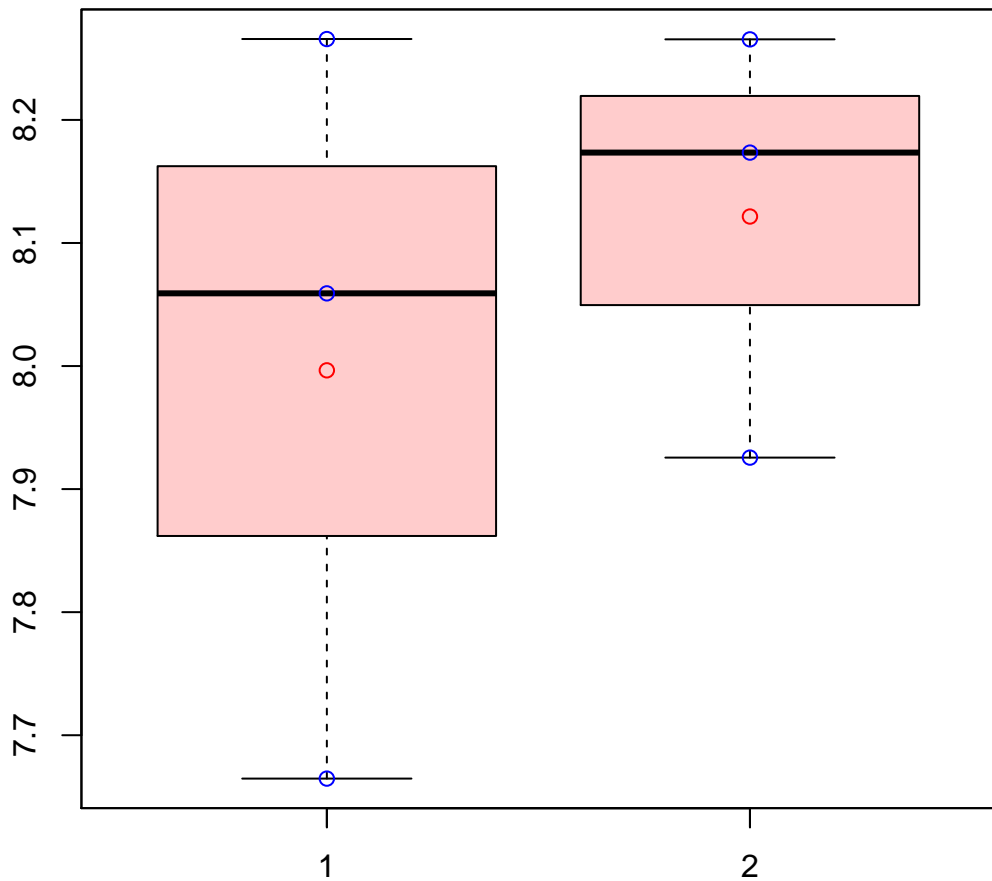

t-Test: p-value = 0.58

# CL913Contig1|CL913Contig1

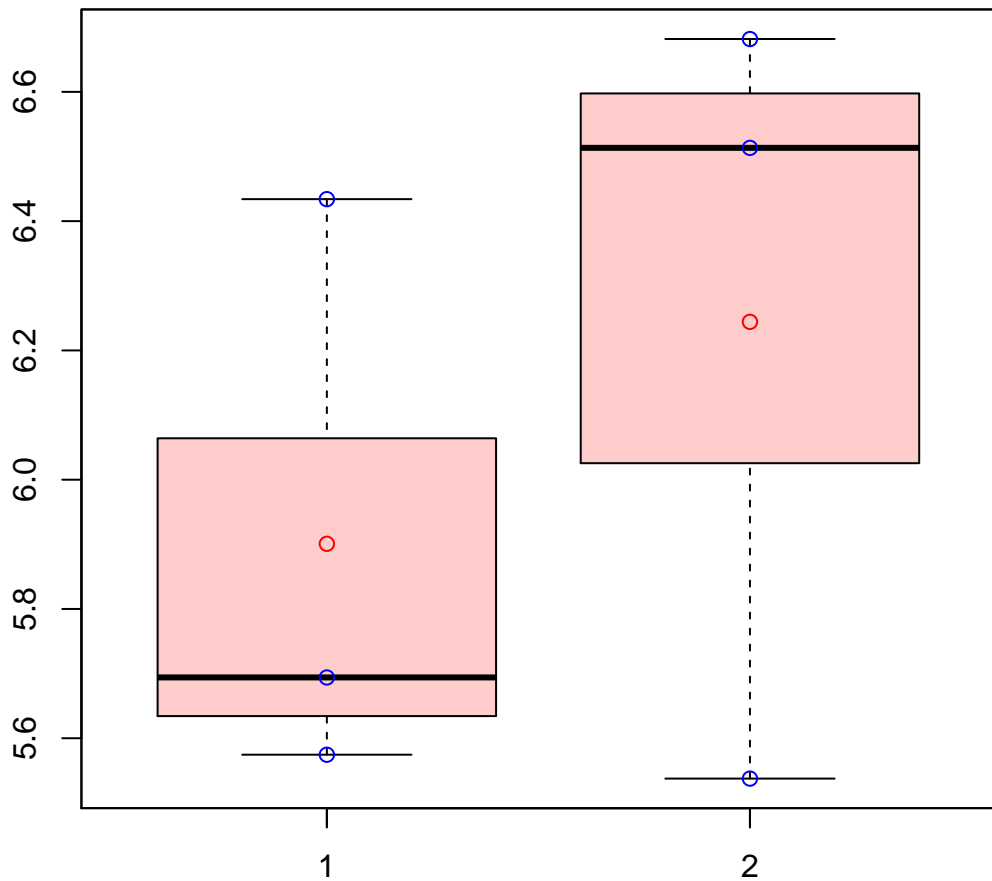

t-Test: p-value = 0.49



# CL914Contig2|CL914Contig2

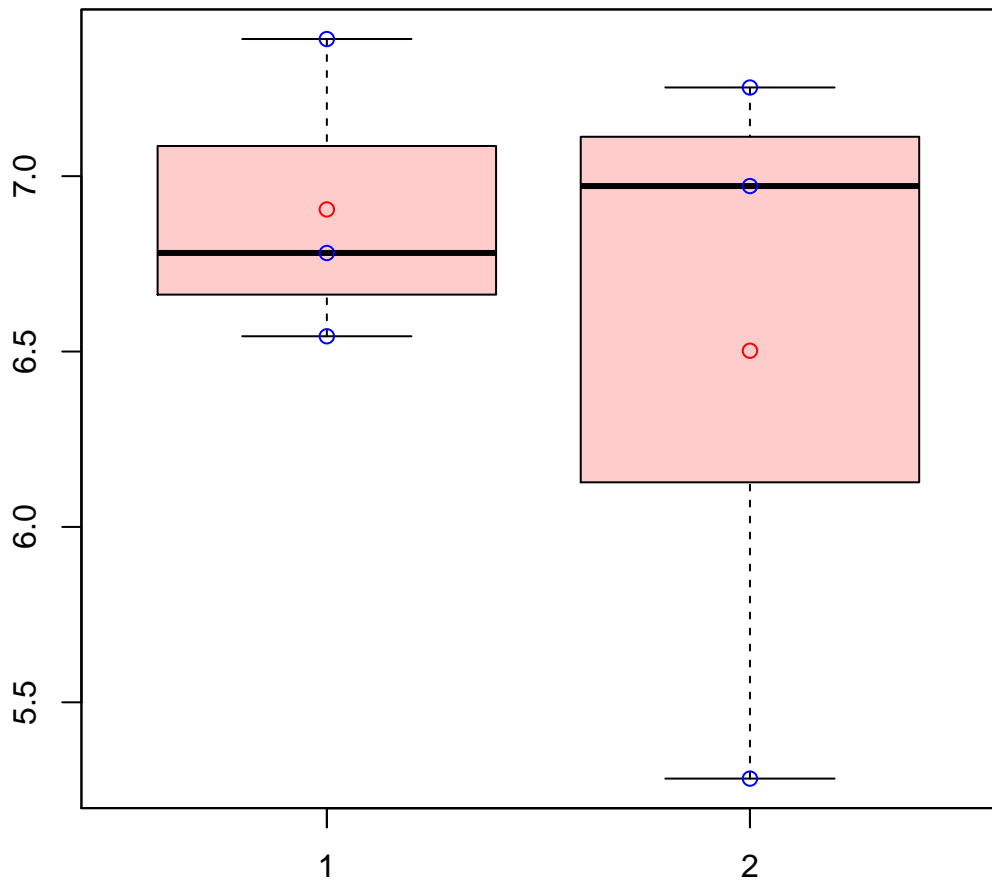

t-Test: p-value = 0.59

# CL9159Contig1|CL9159Contig1

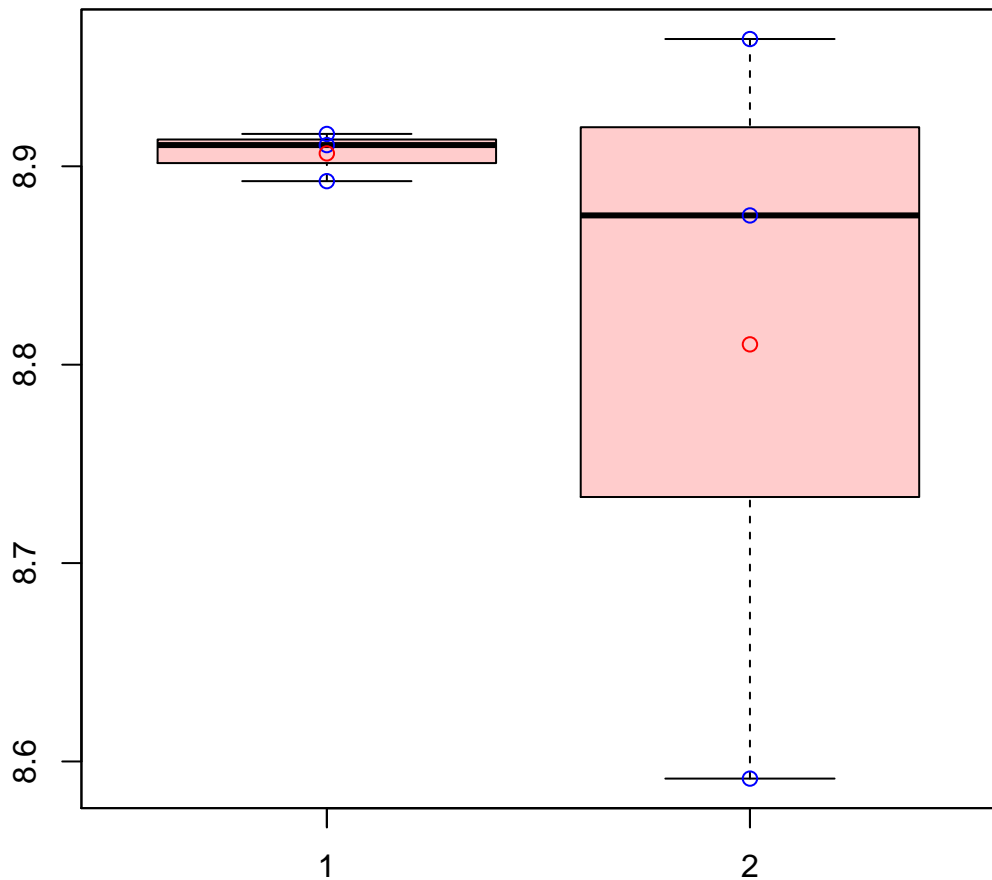

t-Test: p-value = 0.48

# CL9159Contig2|CL9159Contig2

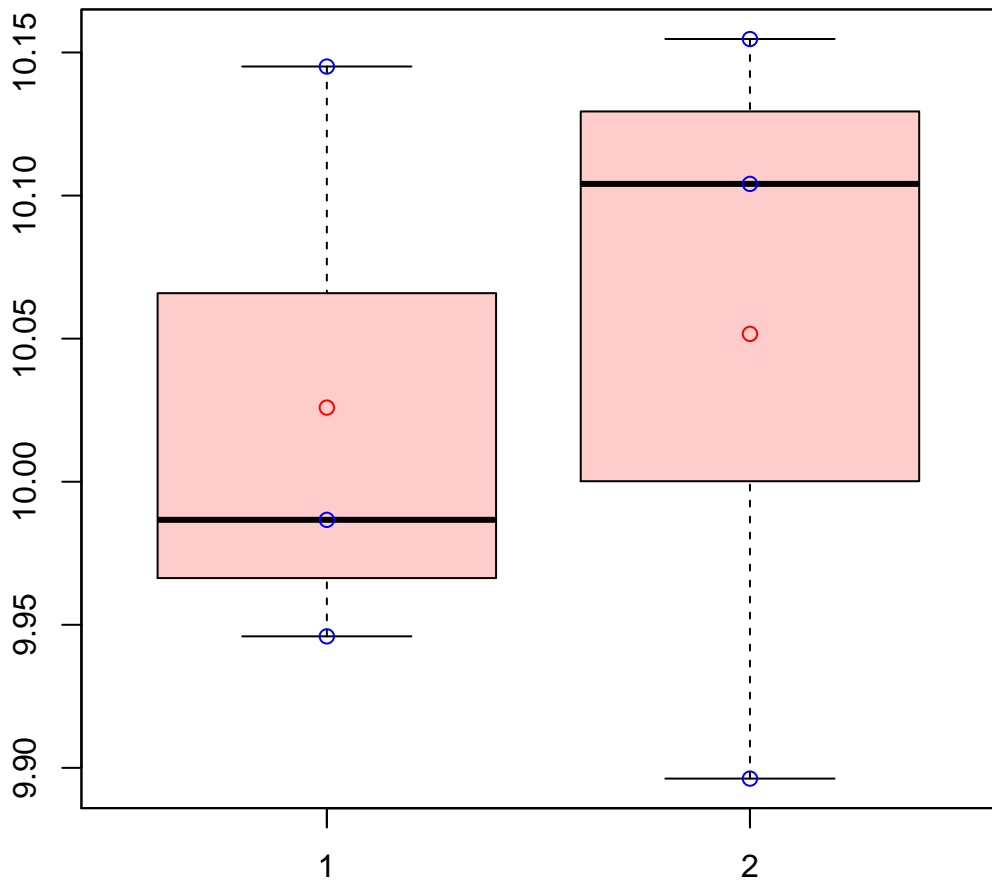

t-Test: p-value = 0.81

# CL915Contig4|CL915Contig4

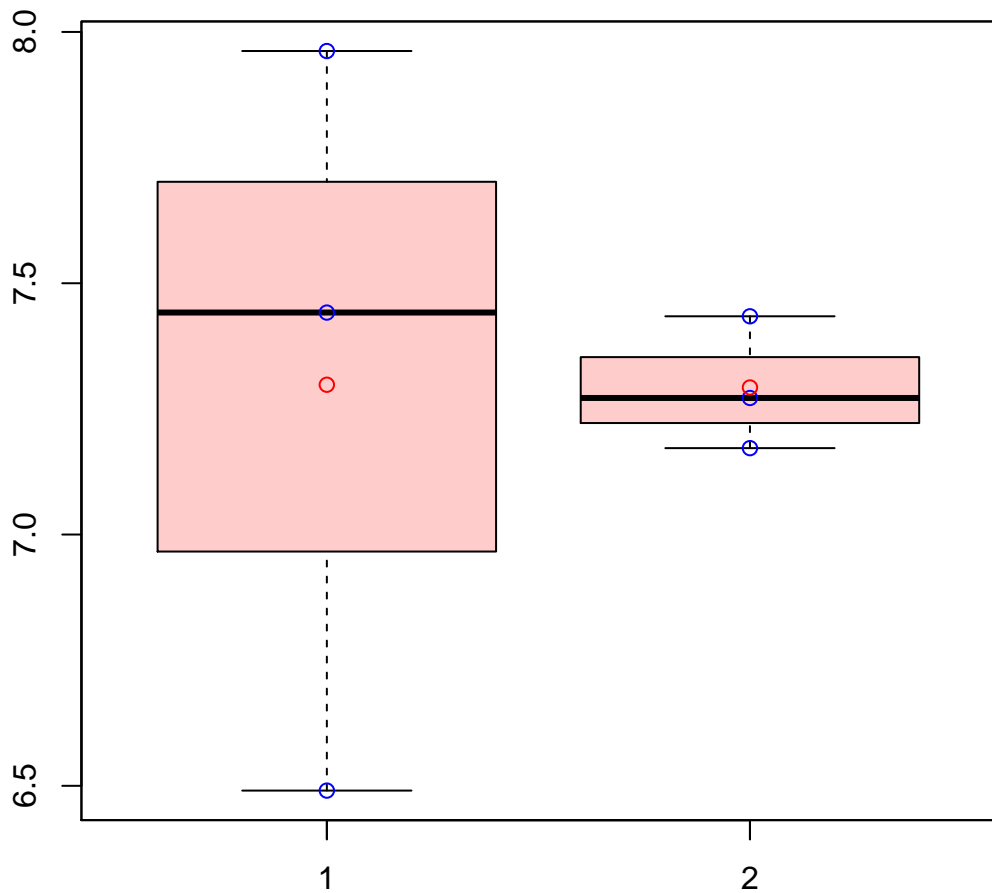

t-Test: p-value = 0.99

# CL9165Contig1|CL9165Contig1

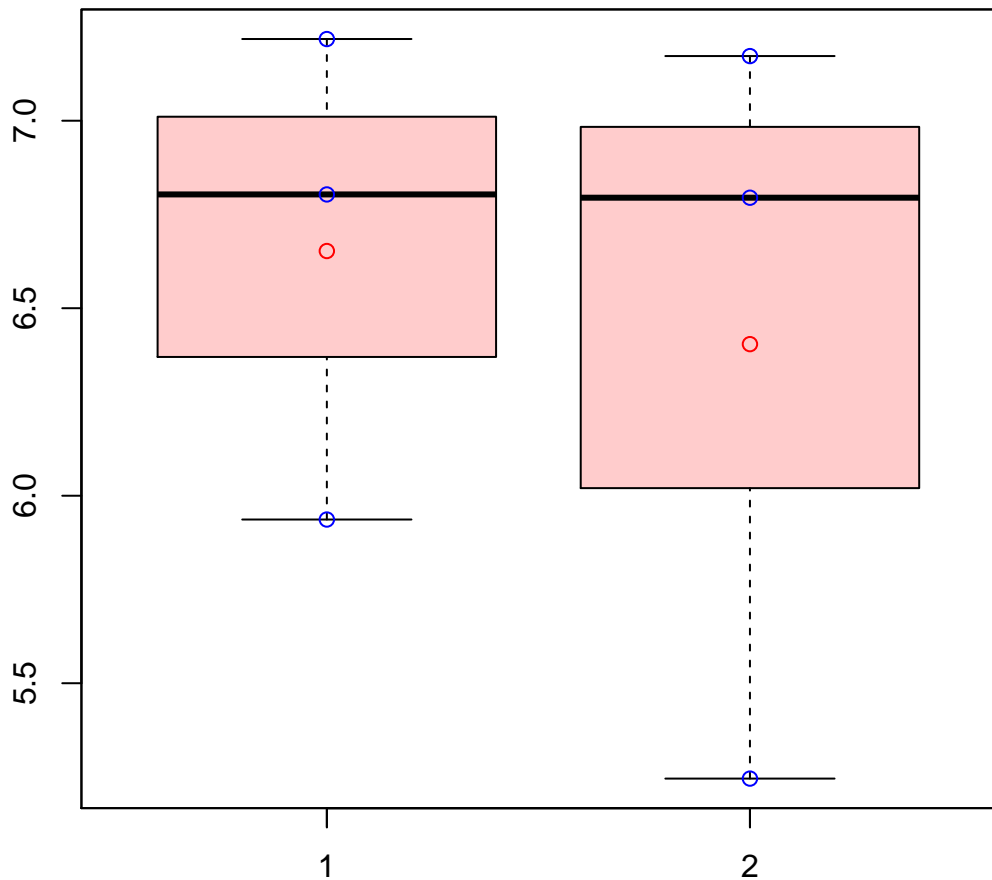

t-Test: p-value = 0.74

# CL9199Contig1|CL9199Contig1

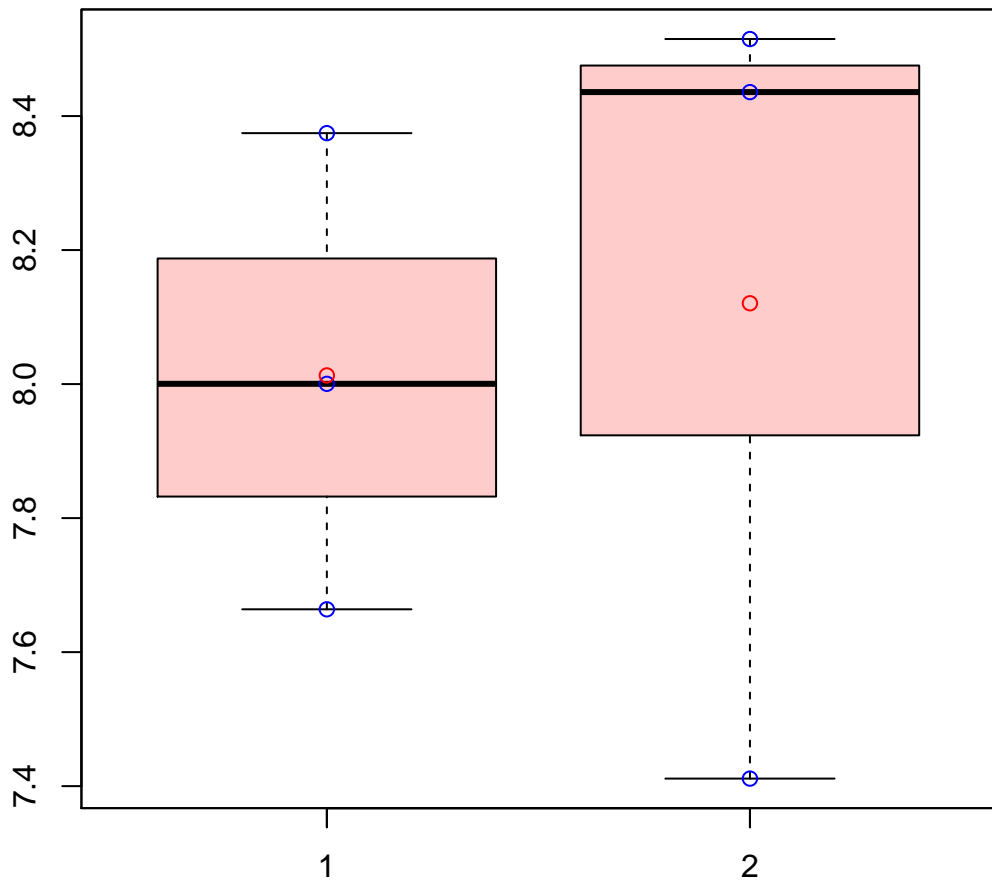

t-Test: p-value = 0.81

# CL9207Contig1|CL9207Contig1

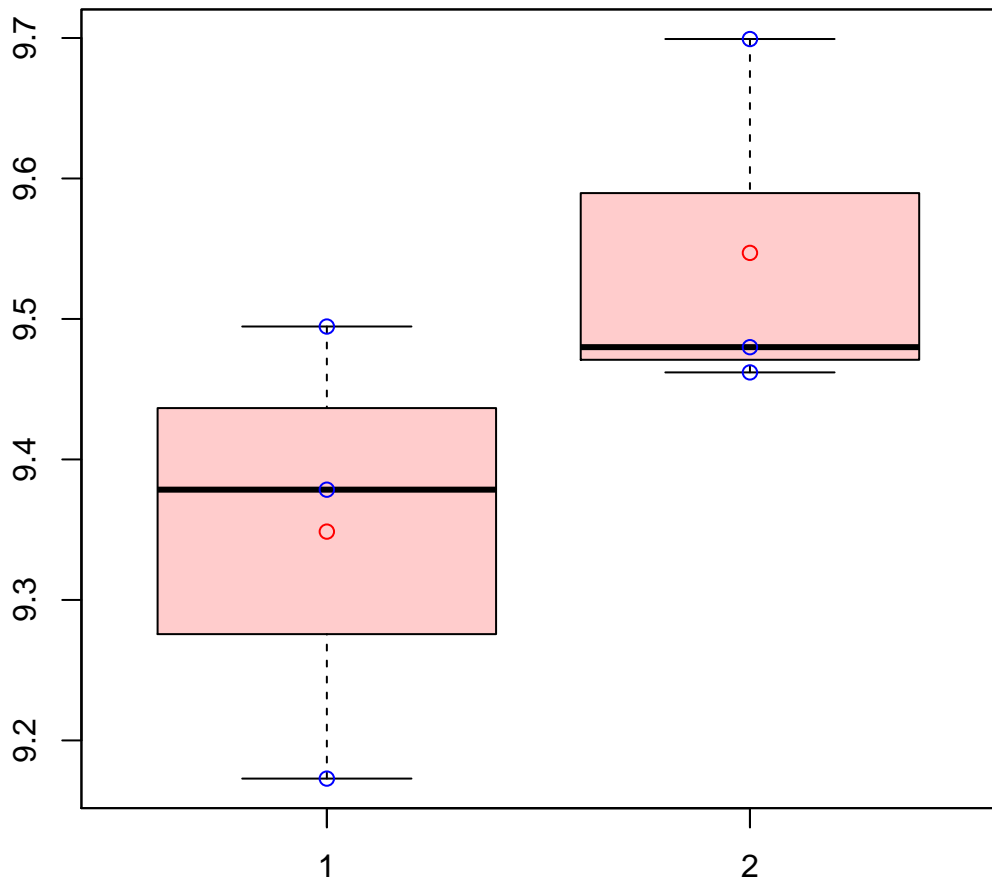

t-Test: p-value = 0.18

# CL9209Contig1|CL9209Contig1

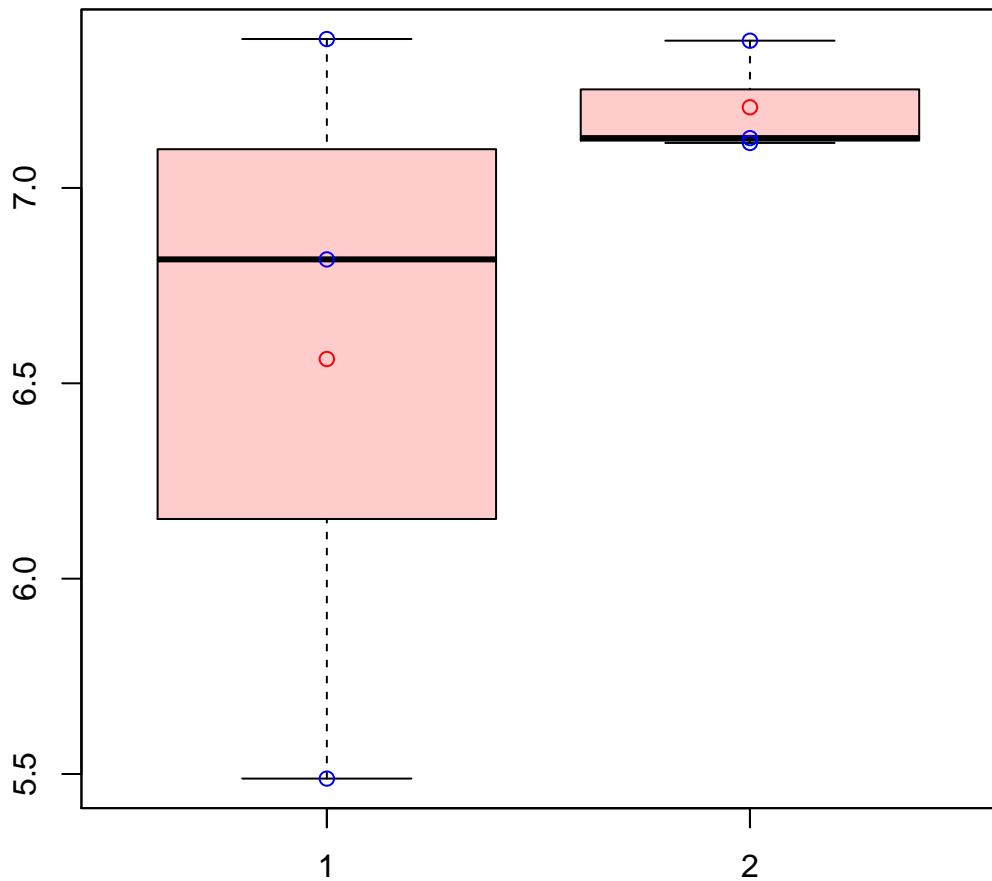

t-Test: p-value = 0.37



# CL9210Contig3|CL9210Contig3

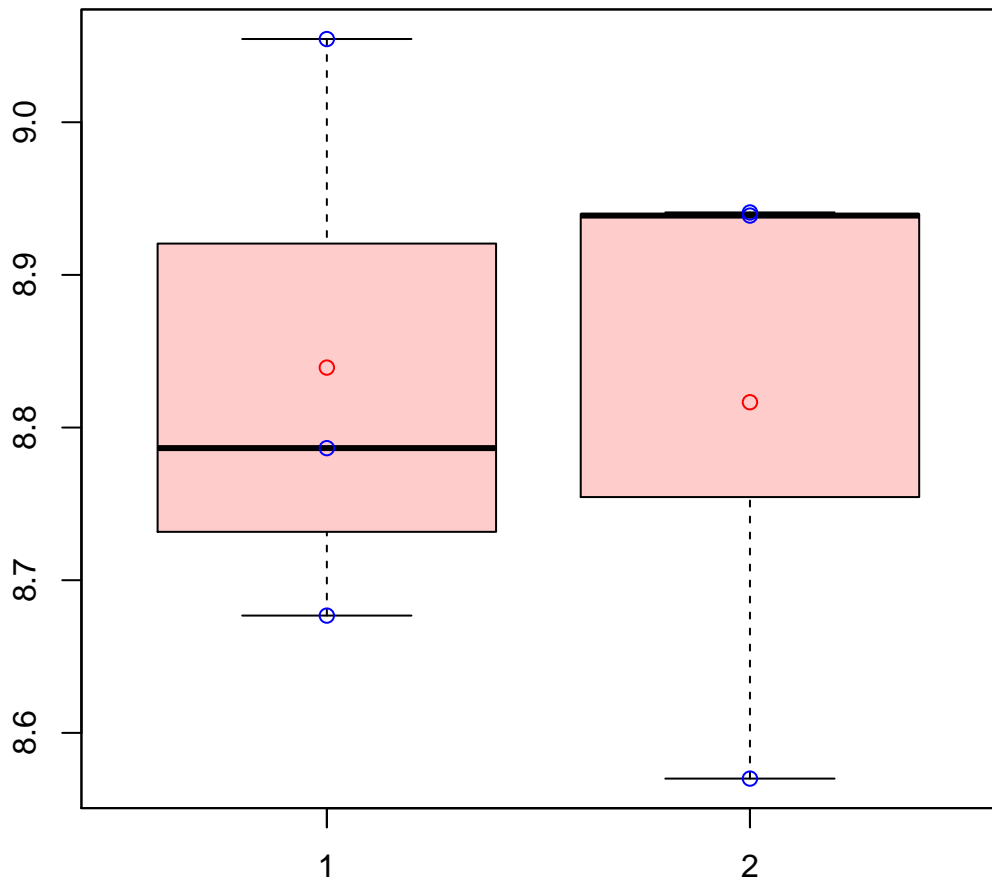

t-Test: p-value = 0.9

# CL9217Contig2|CL9217Contig2

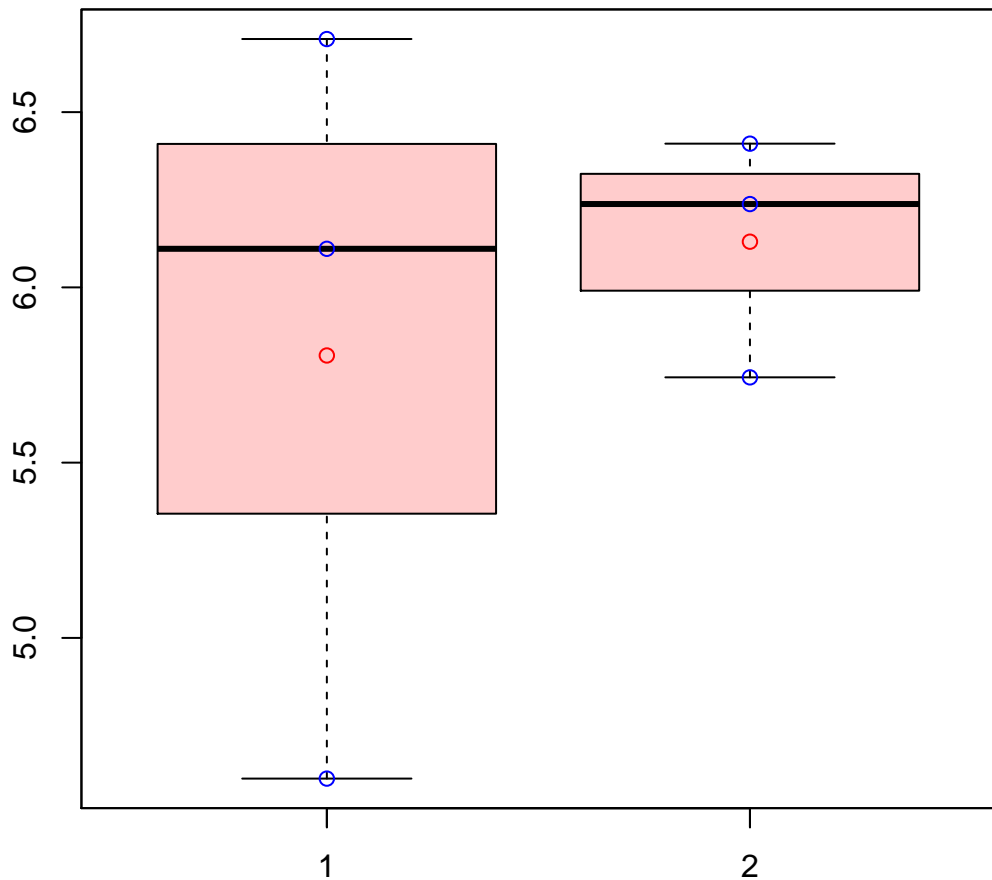

t-Test: p-value = 0.66

# CL9218Contig1|CL9218Contig1

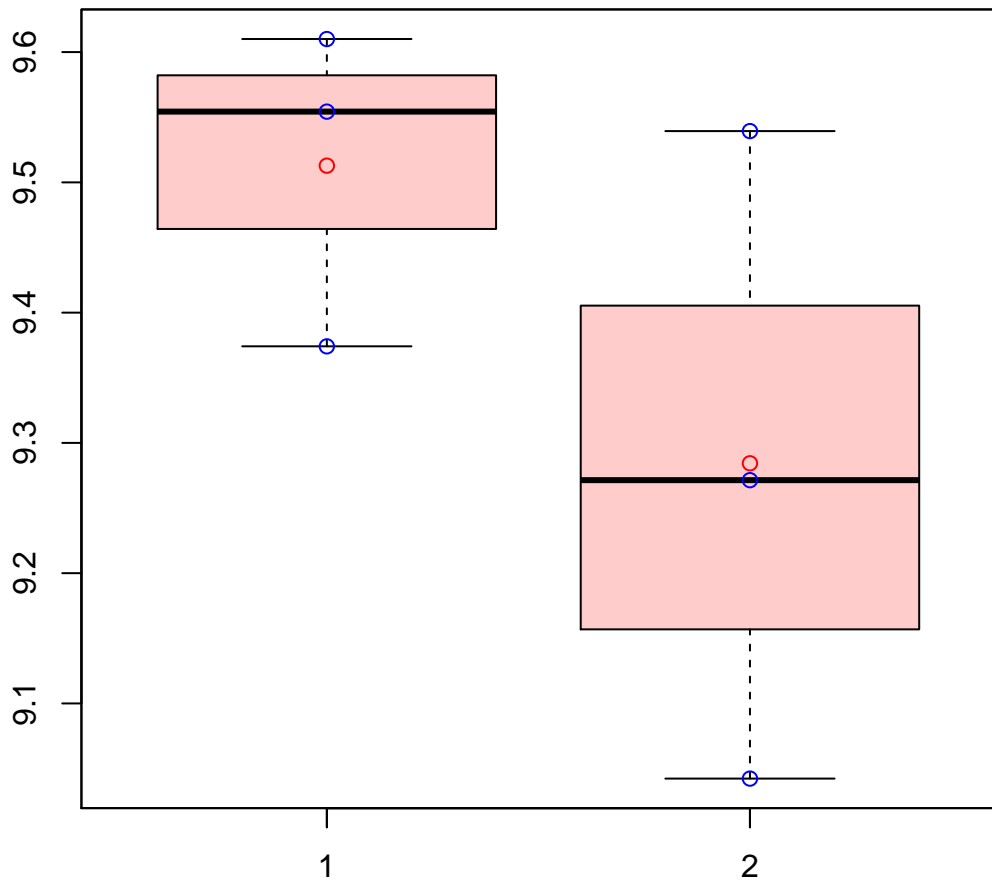

t-Test: p-value = 0.25

# CL922Contig1|CL922Contig1

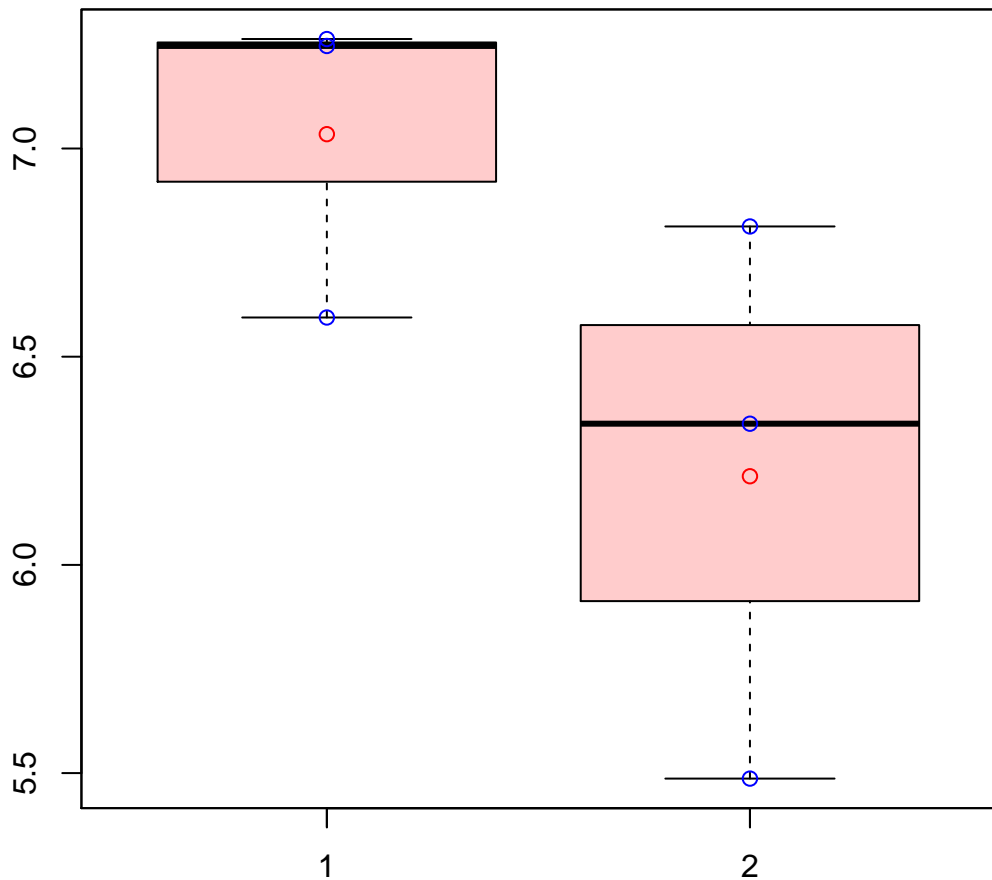

t-Test: p-value = 0.16

# CL9239Contig1|CL9239Contig1

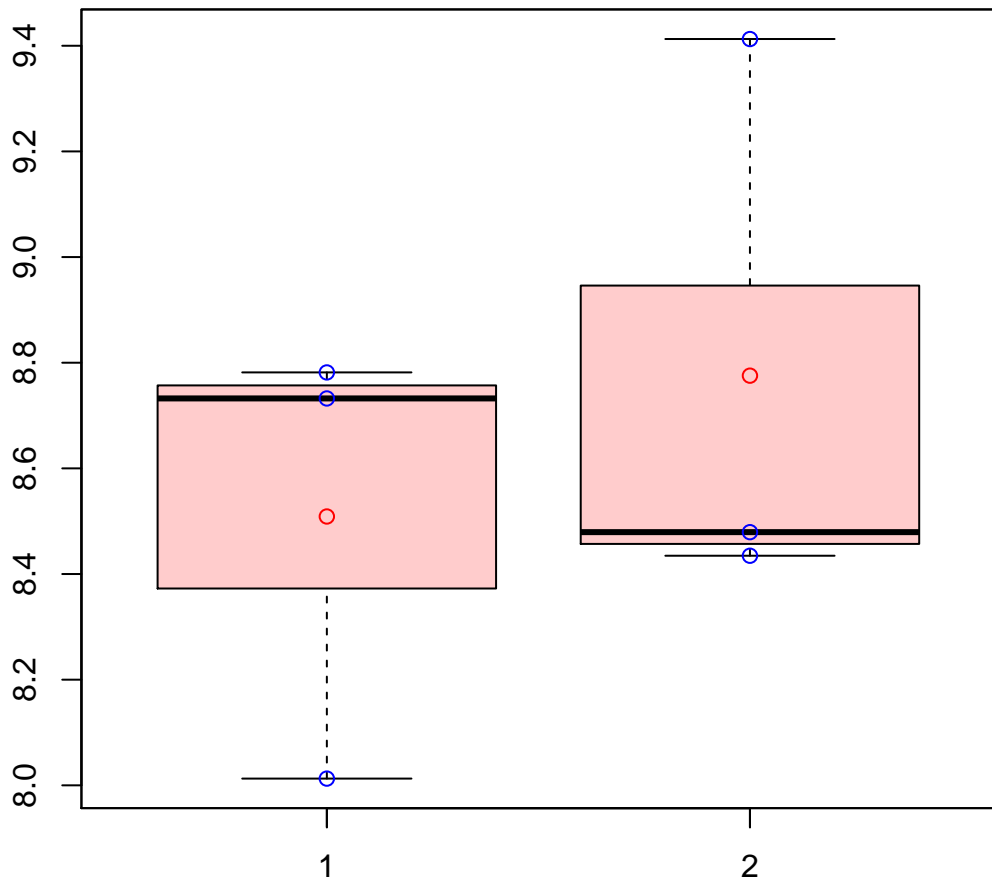

t-Test: p-value = 0.55

# CL9242Contig1|CL9242Contig1

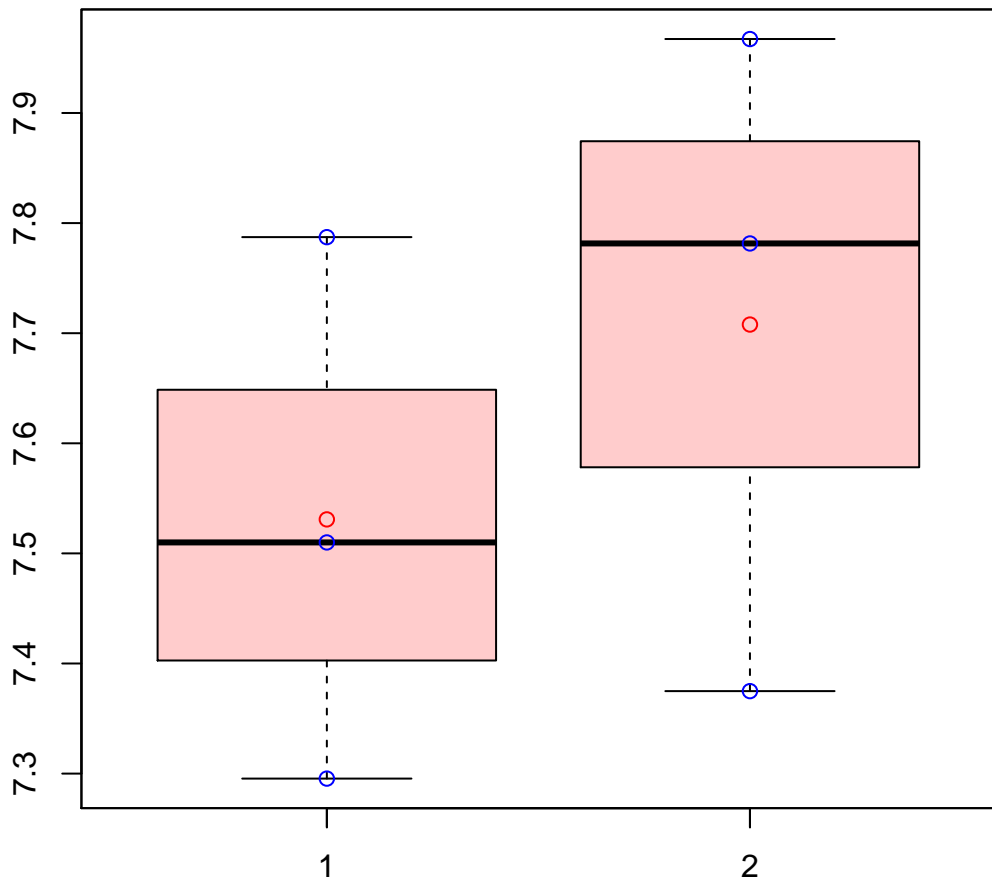

t-Test: p-value = 0.48

# CL924Contig7|CL924Contig7

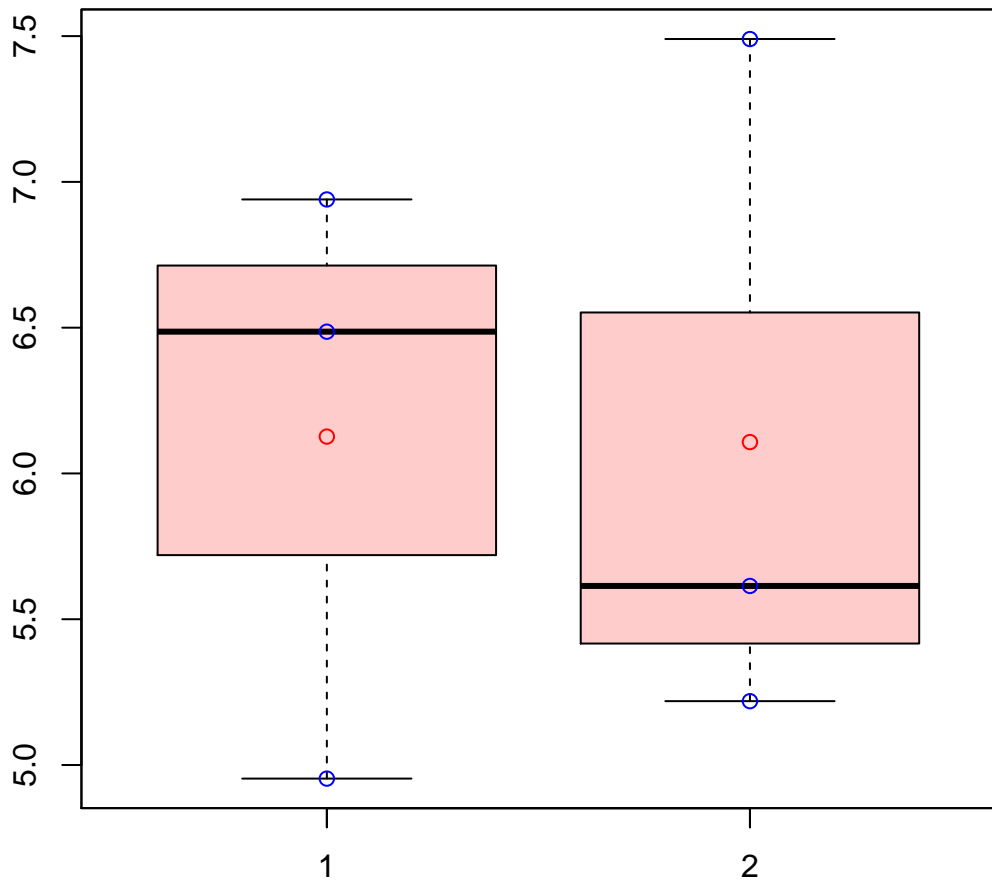

t-Test: p-value = 0.98

# CL926Contig6|CL926Contig6

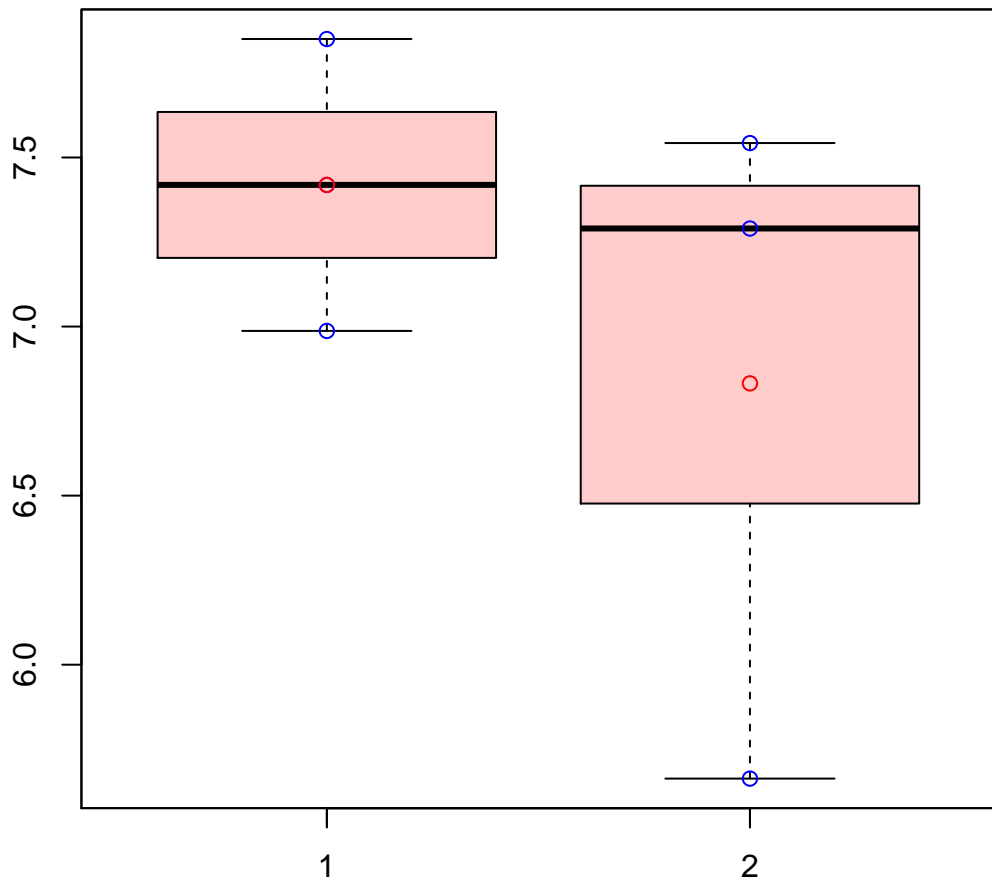

t-Test: p-value = 0.43



# CL9274Contig2|CL9274Contig2

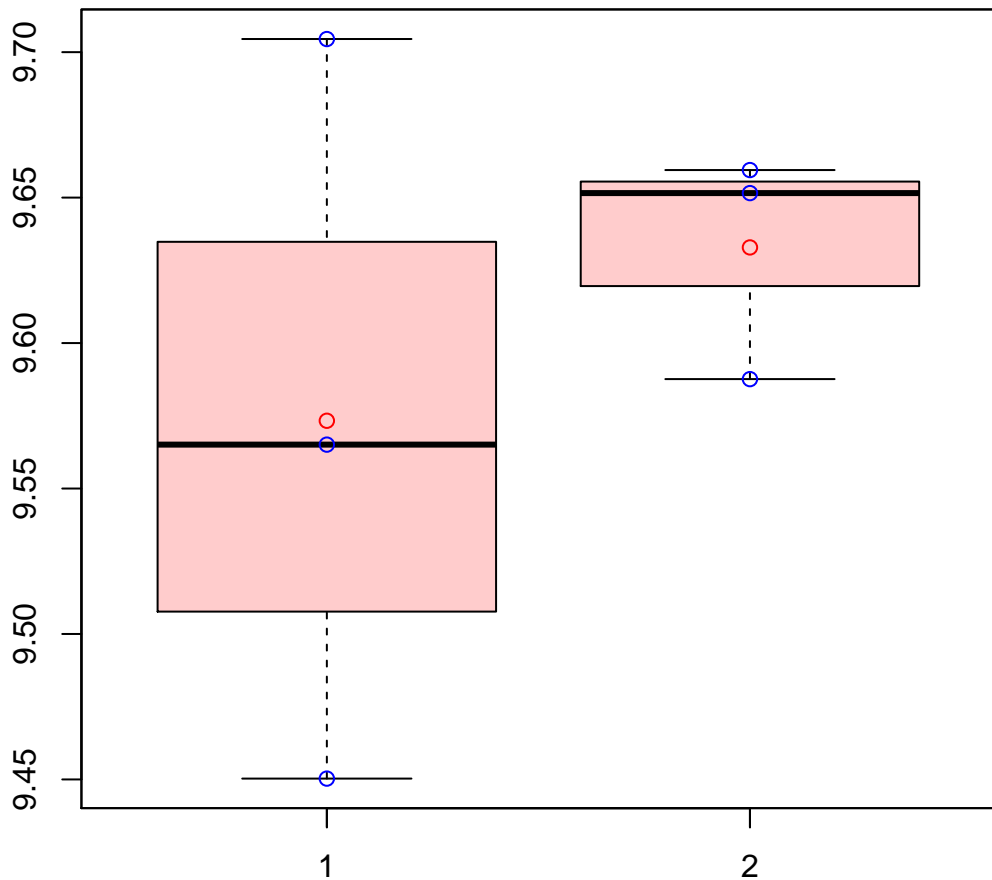

t-Test: p-value = 0.51

# CL9278Contig2|CL9278Contig2

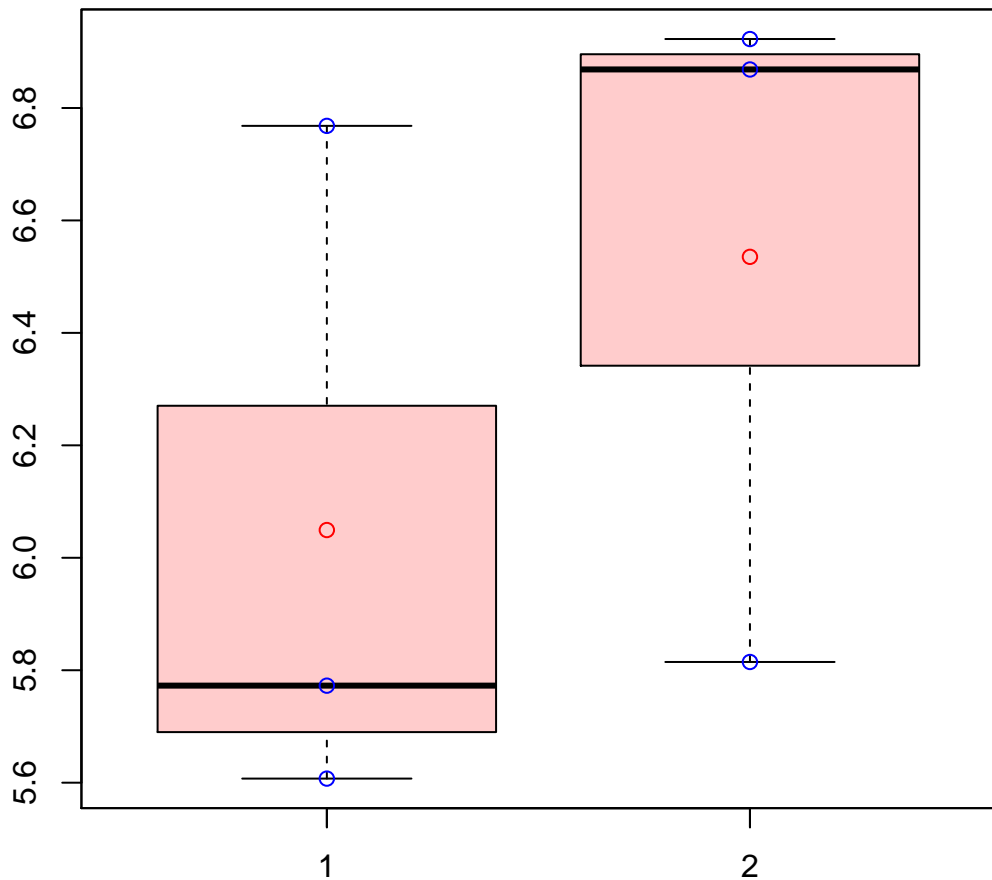

t-Test: p-value = 0.4

# CL9281Contig2|CL9281Contig2

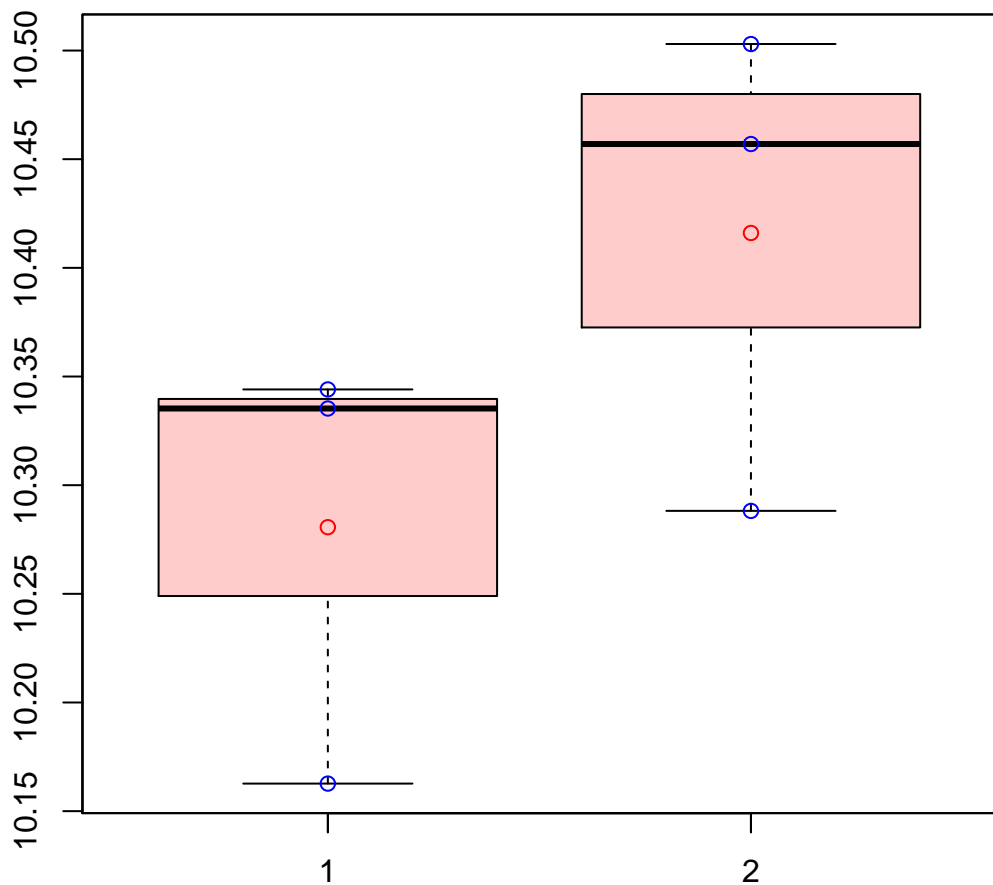

t-Test: p-value = 0.2

# CL9282Contig1|CL9282Contig1

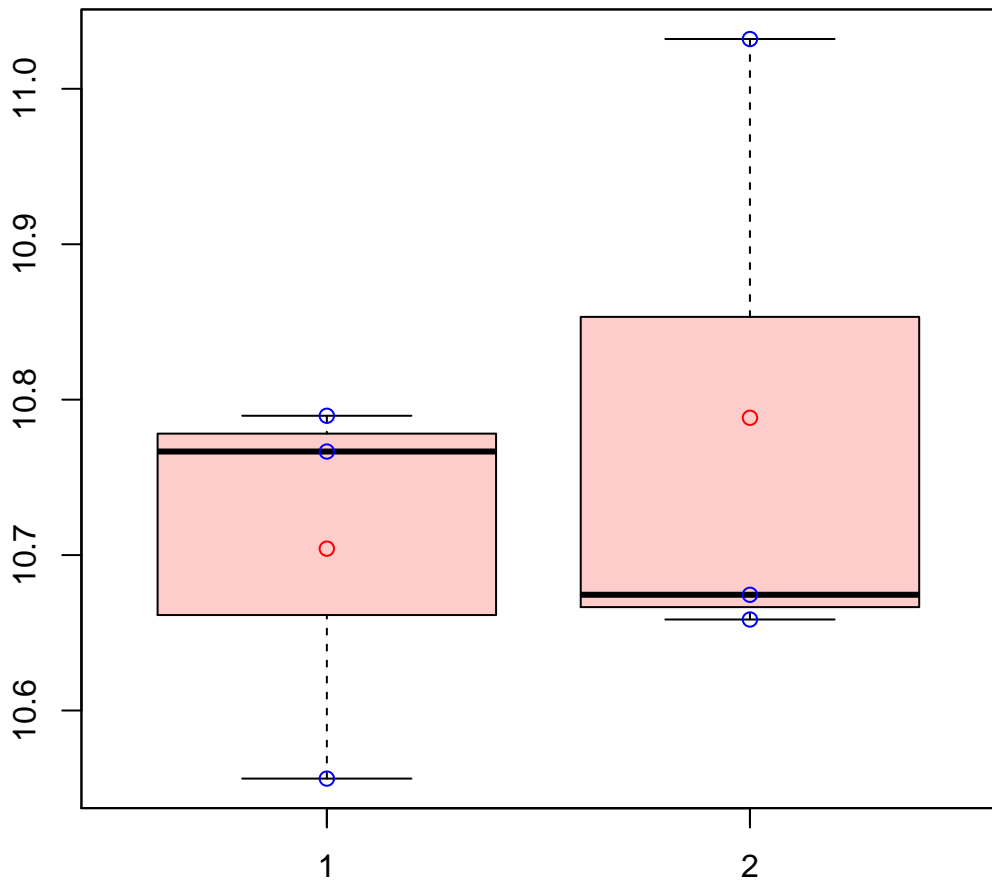

t-Test: p-value = 0.59

# CL929Contig6|CL929Contig6

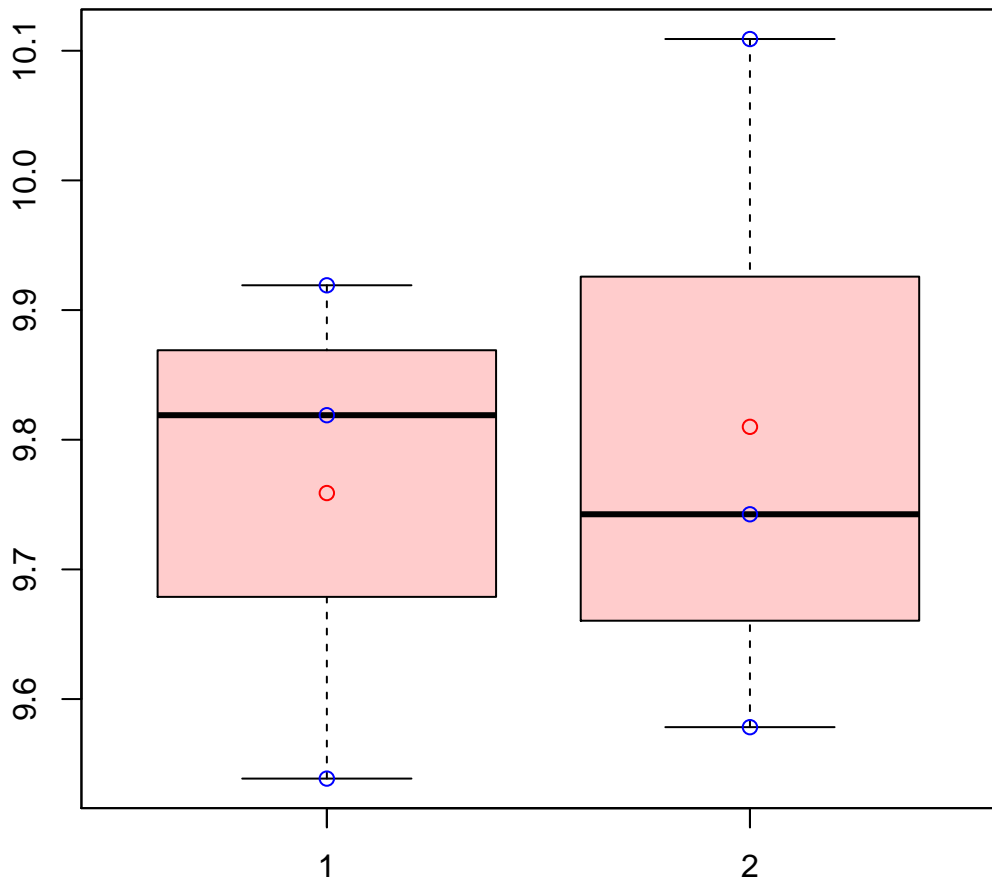

t-Test: p-value = 0.81

# CL92Contig10|CL92Contig10

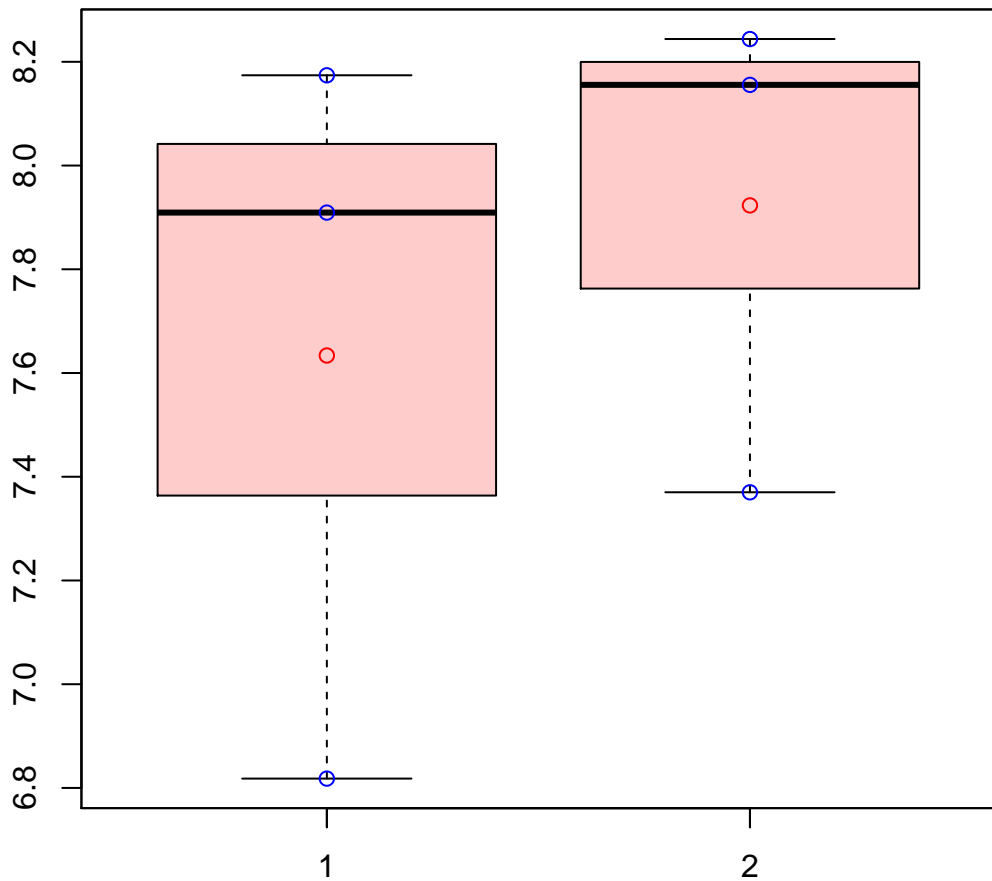

t-Test: p-value = 0.6

# CL9306Contig1|CL9306Contig1

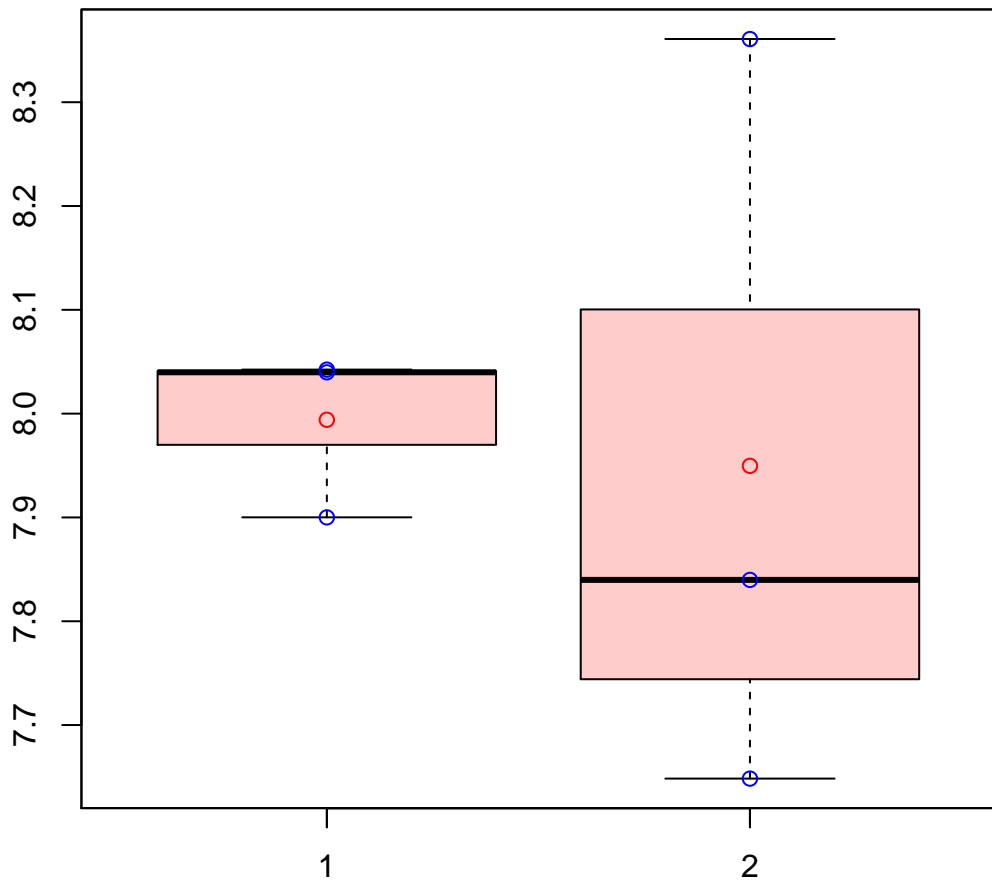

t-Test: p-value = 0.86

# CL9307Contig1|CL9307Contig1

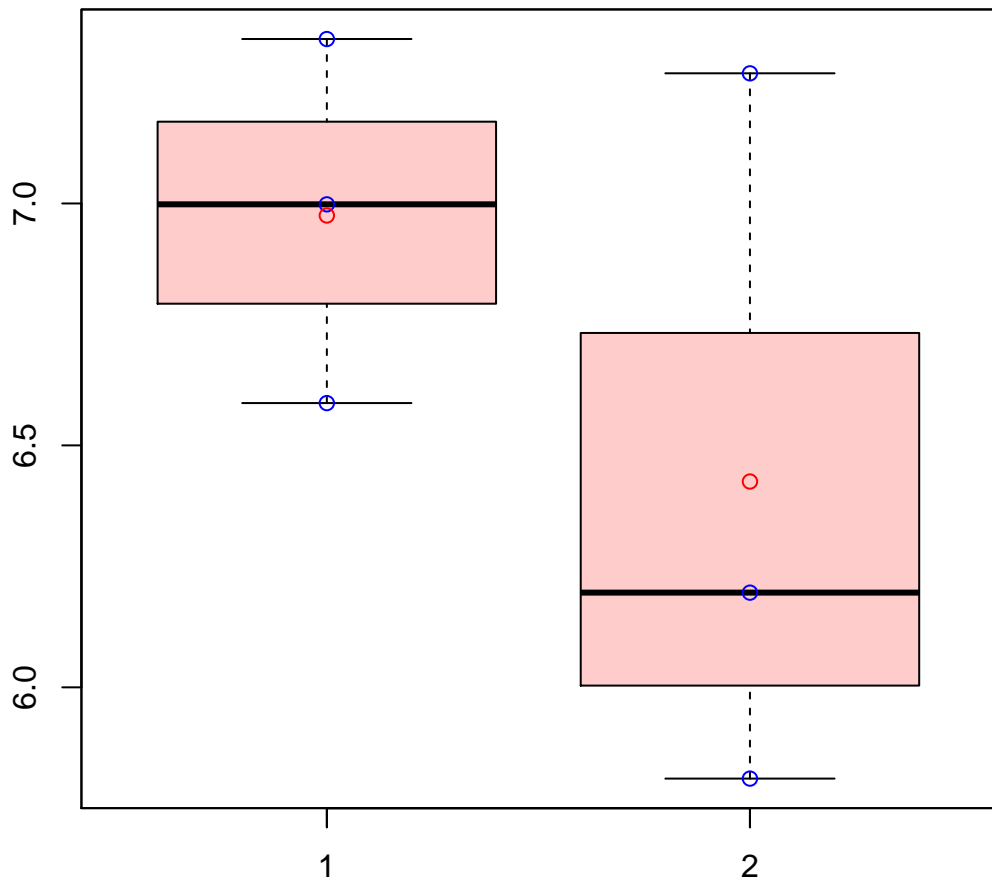

t-Test: p-value = 0.34



# CL931Contig6|CL931Contig6

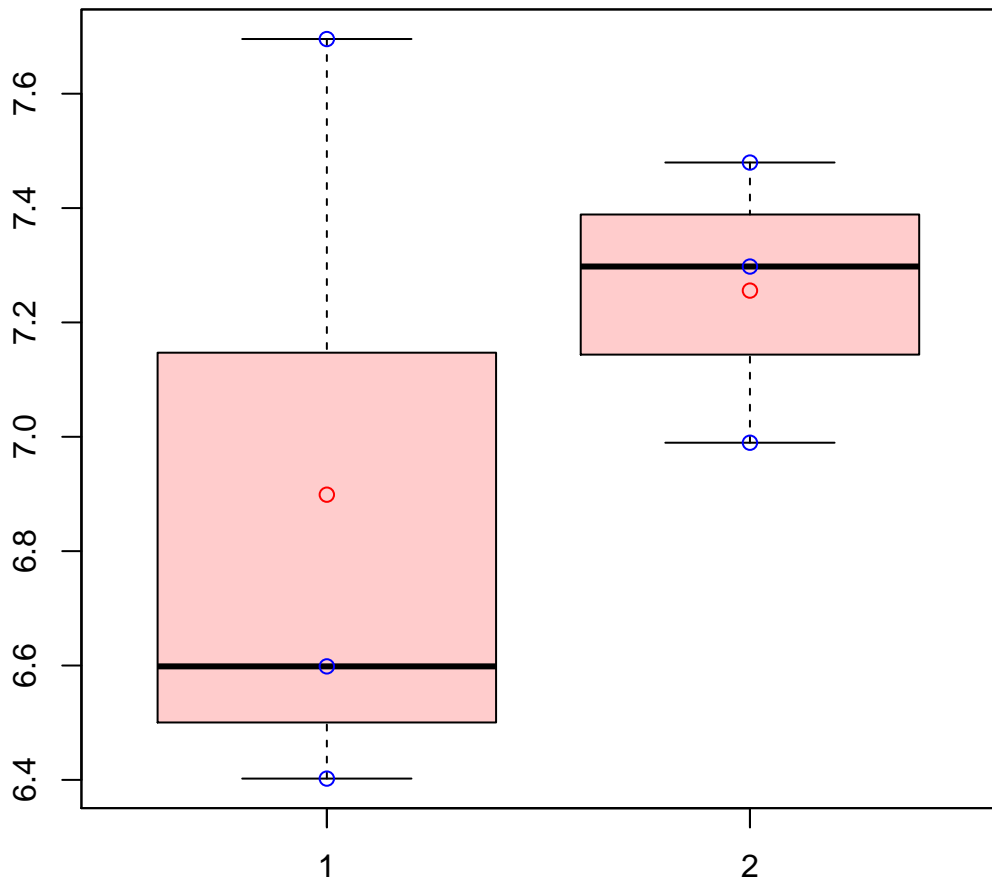

t-Test: p-value = 0.48

# CL9331Contig1|CL9331Contig1

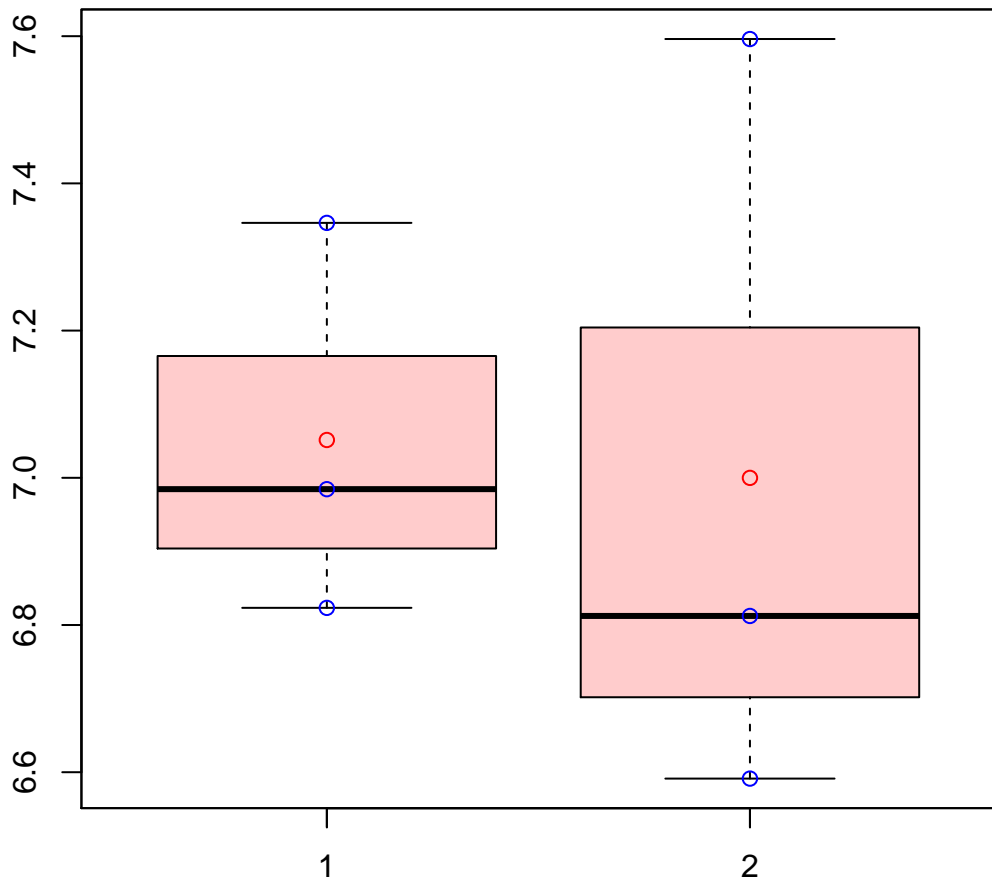

t-Test: p-value = 0.89

# CL9337Contig1|CL9337Contig1

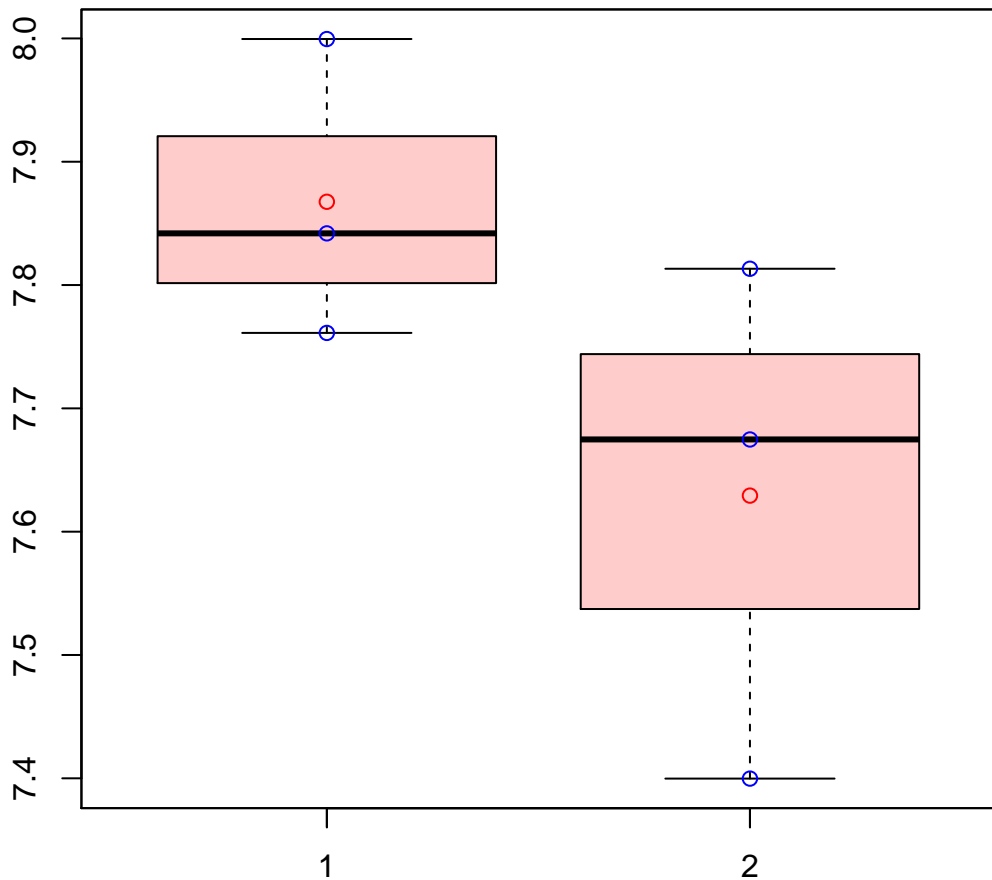

t-Test: p-value = 0.18

# CL9361Contig1|CL9361Contig1

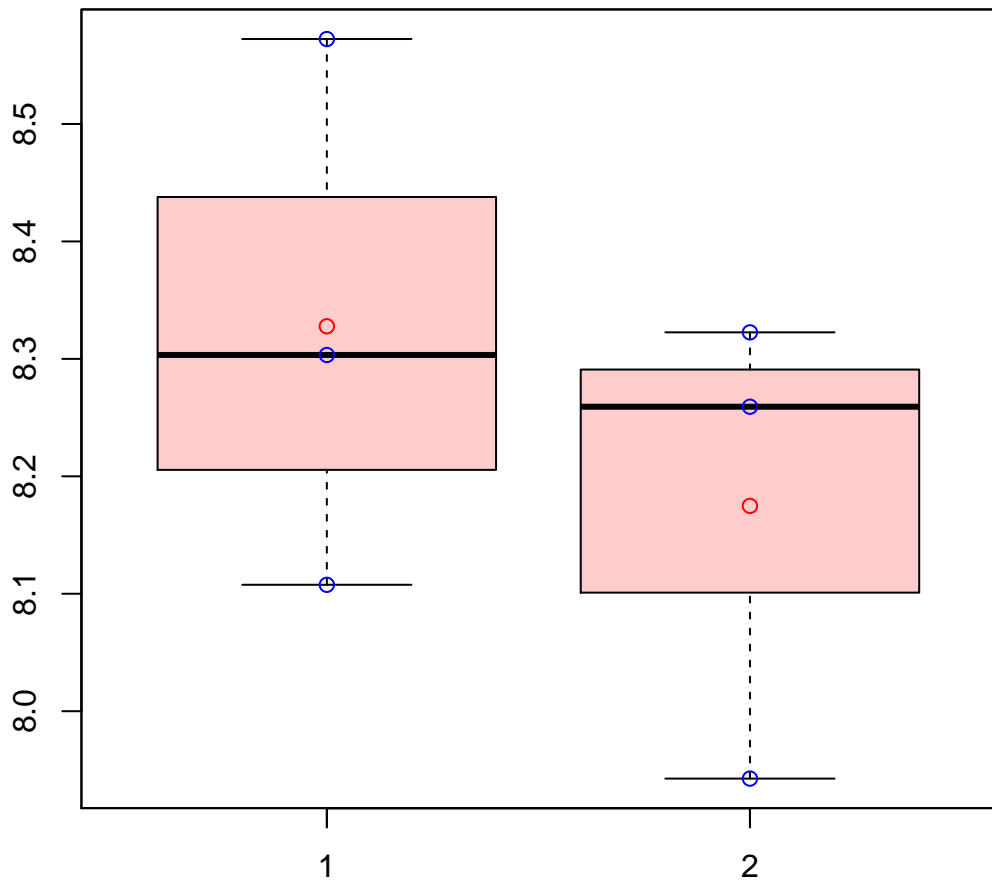

t-Test: p-value = 0.44

# CL9364Contig1|CL9364Contig1

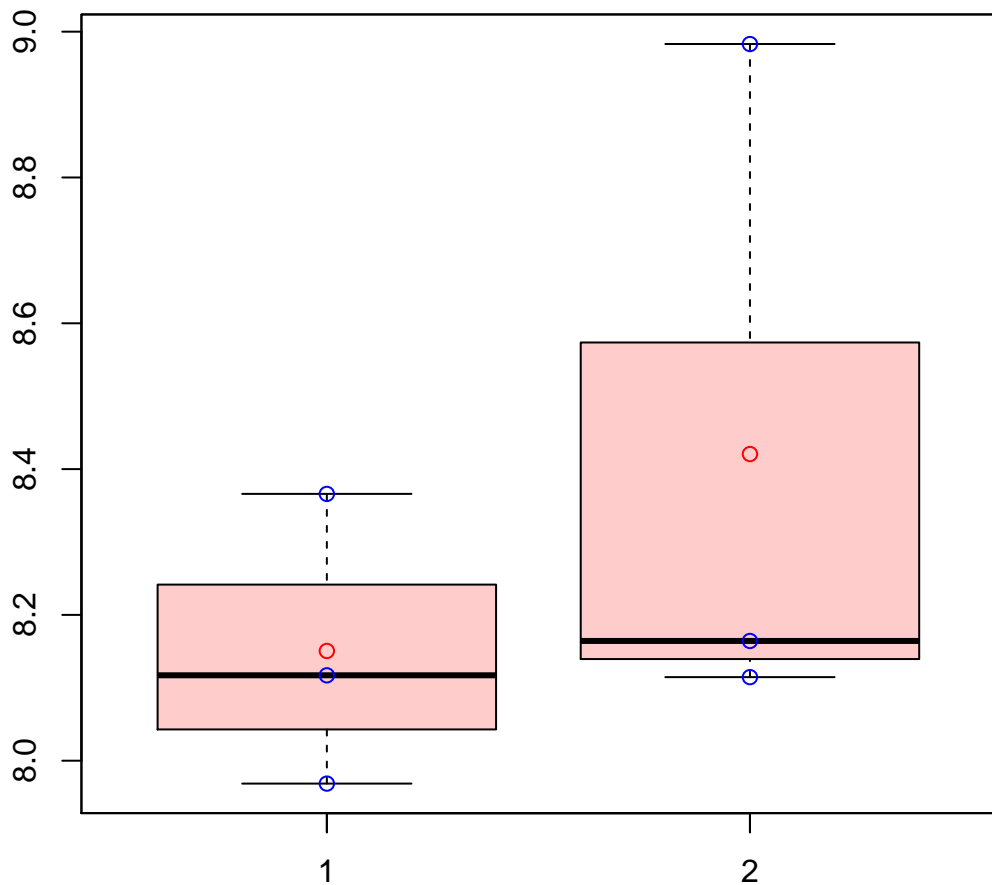

t-Test: p-value = 0.45

# CL9372Contig2|CL9372Contig2

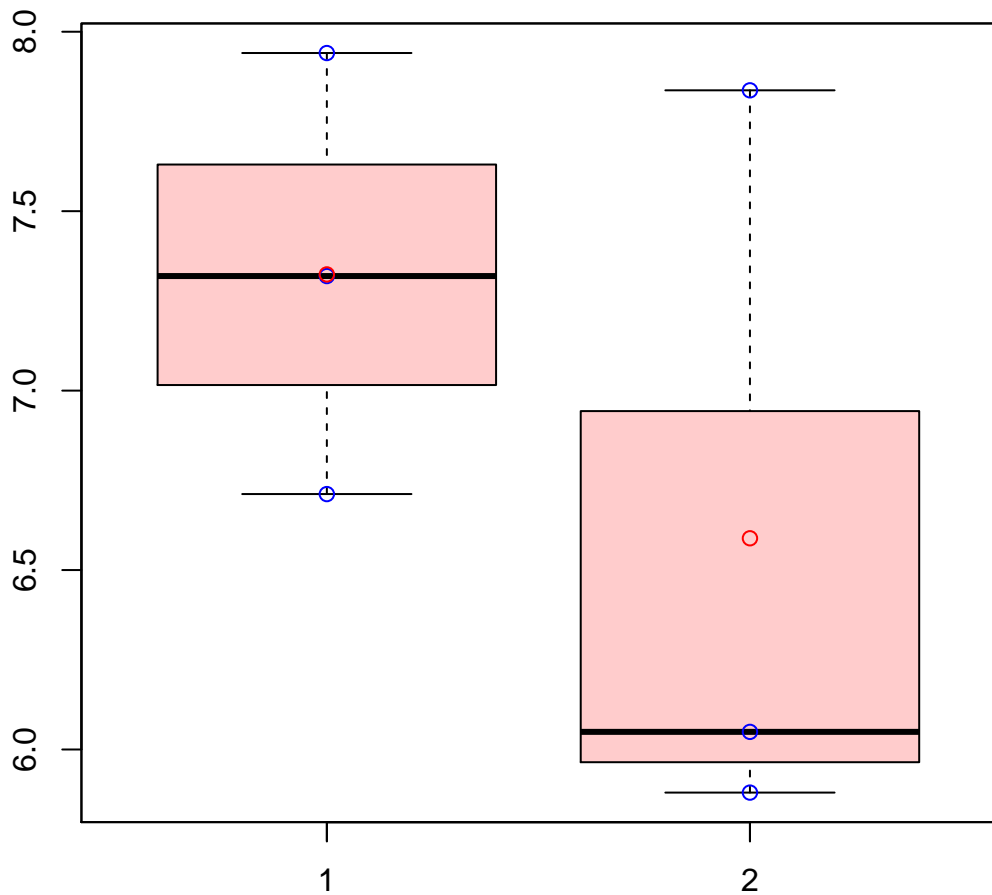

t-Test: p-value = 0.38

# CL9375Contig2|CL9375Contig2

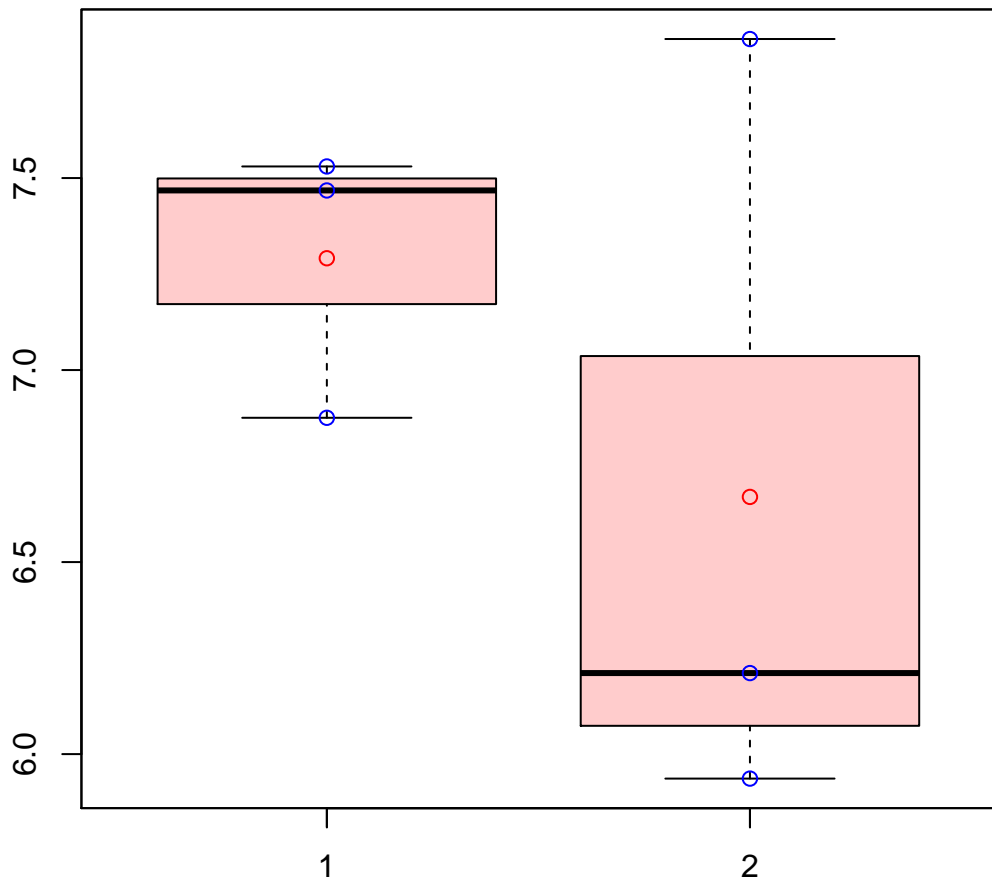

t-Test: p-value = 0.41

# CL939Contig1|CL939Contig1

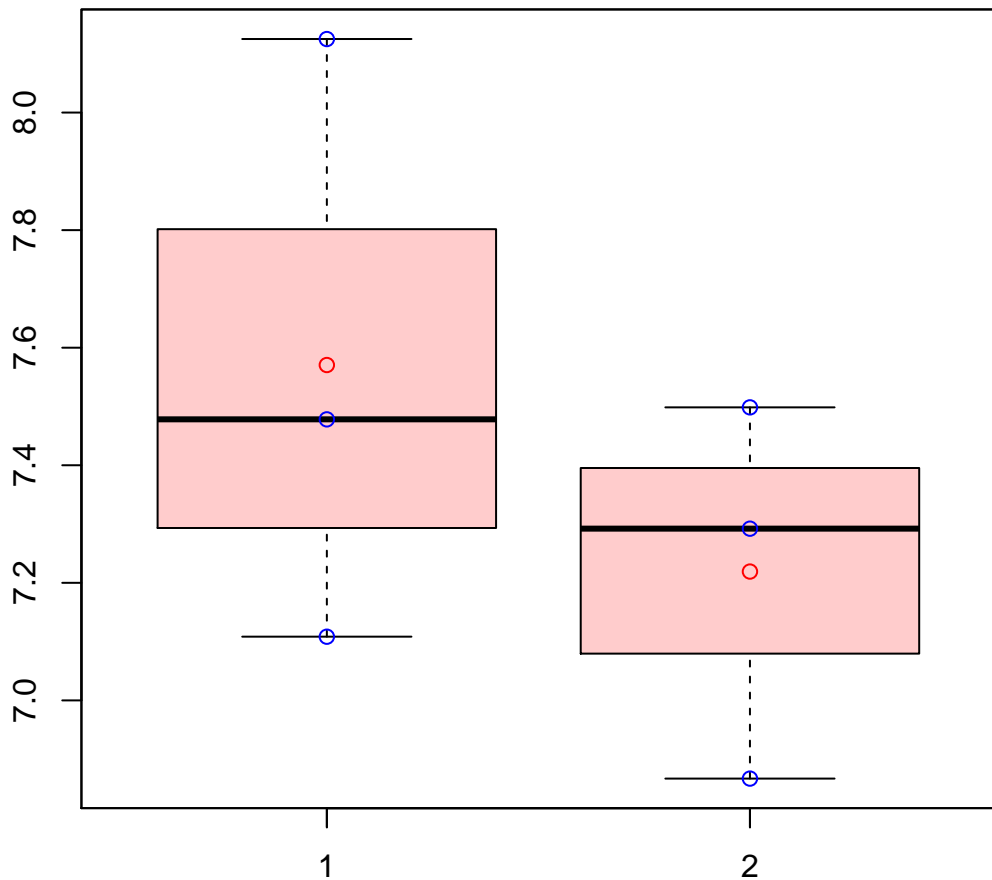

t-Test: p-value = 0.38



# CL939Contig6|CL939Contig6

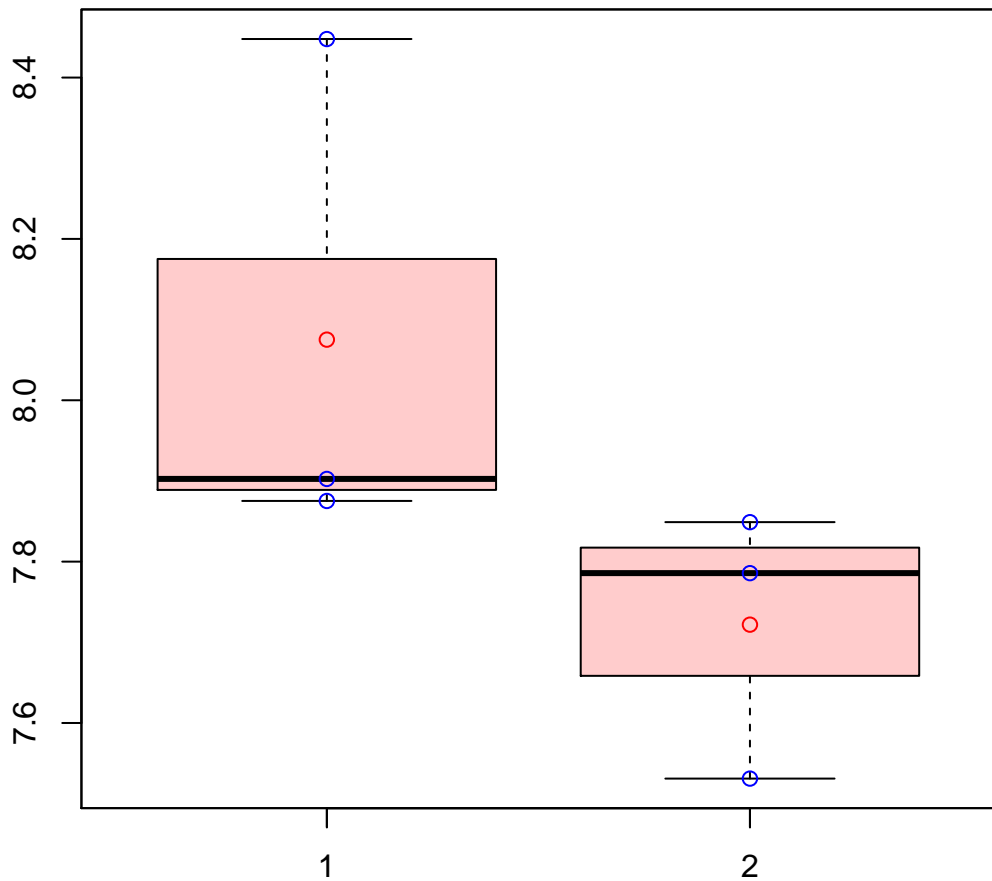

t-Test: p-value = 0.19

# CL93Contig11|CL93Contig11

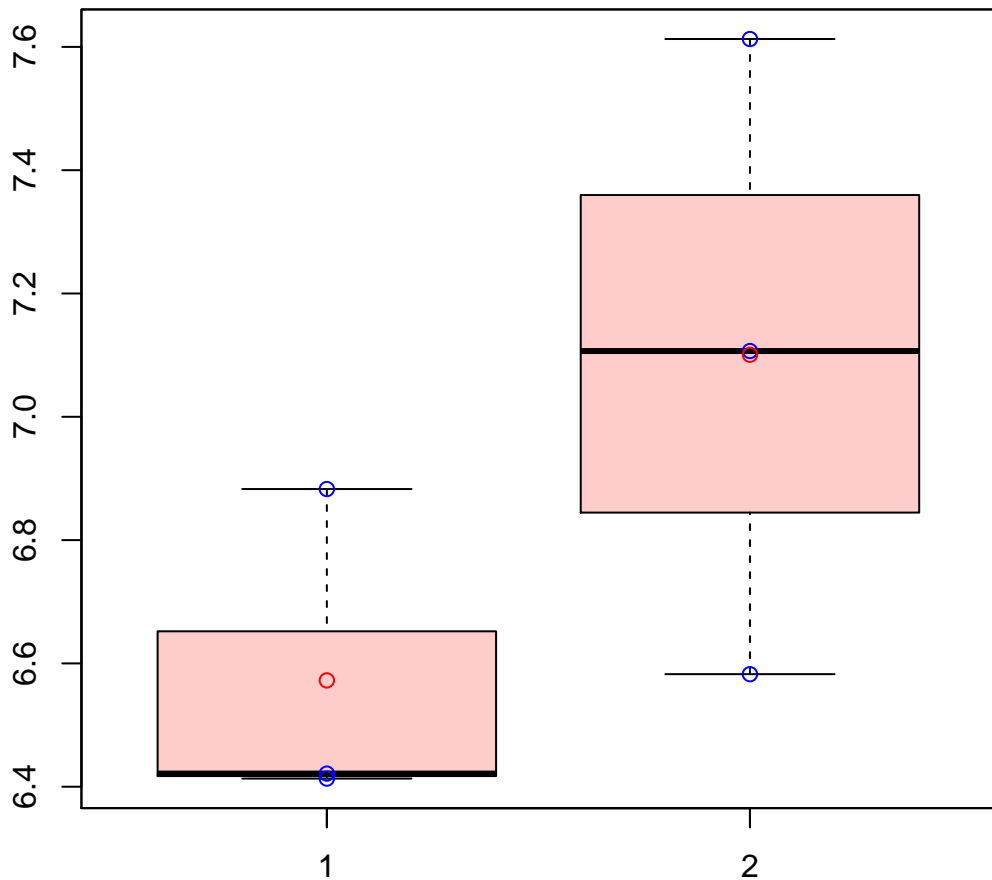

t-Test: p-value = 0.21

# CL9403Contig2|CL9403Contig2

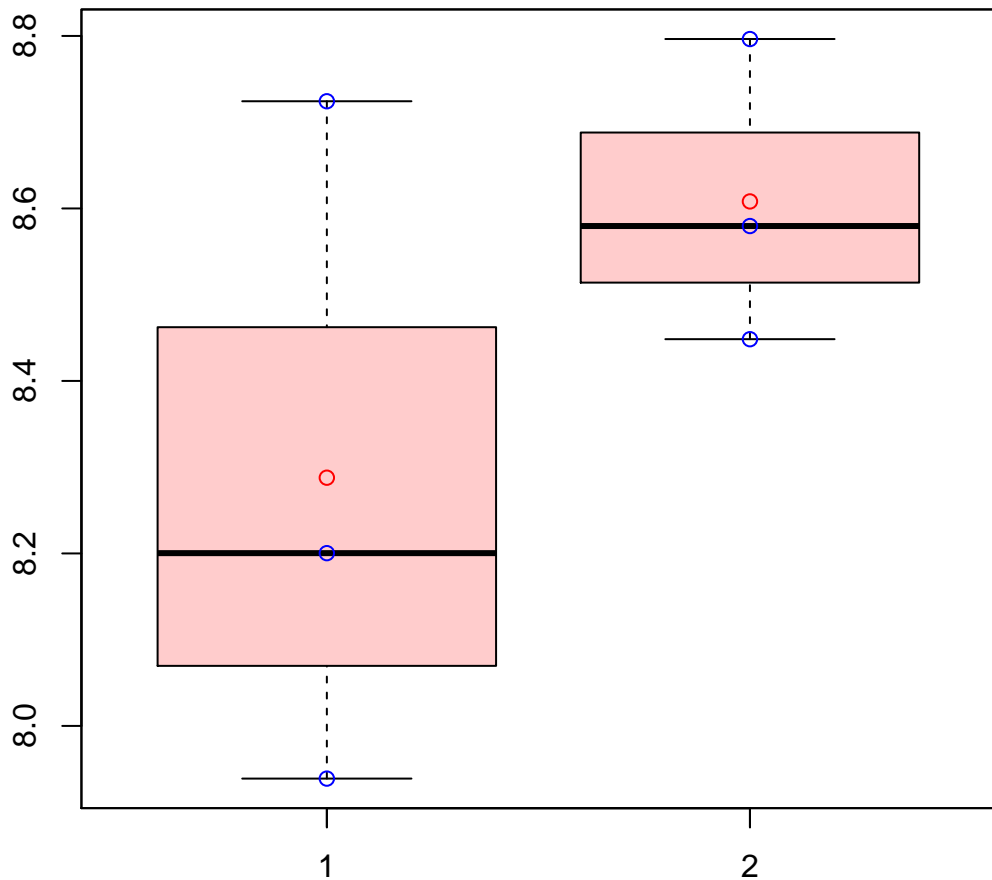

t-Test: p-value = 0.3

# CL9417Contig1|CL9417Contig1

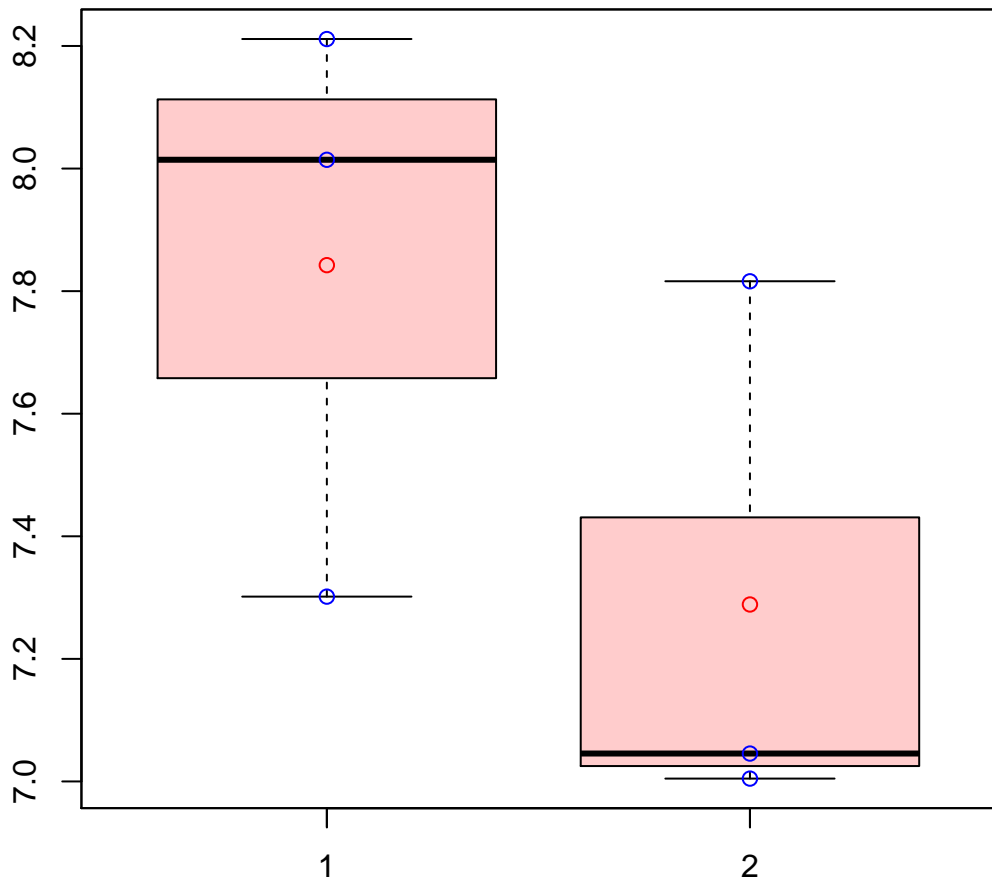

t-Test: p-value = 0.22

# CL941Contig2|CL941Contig2

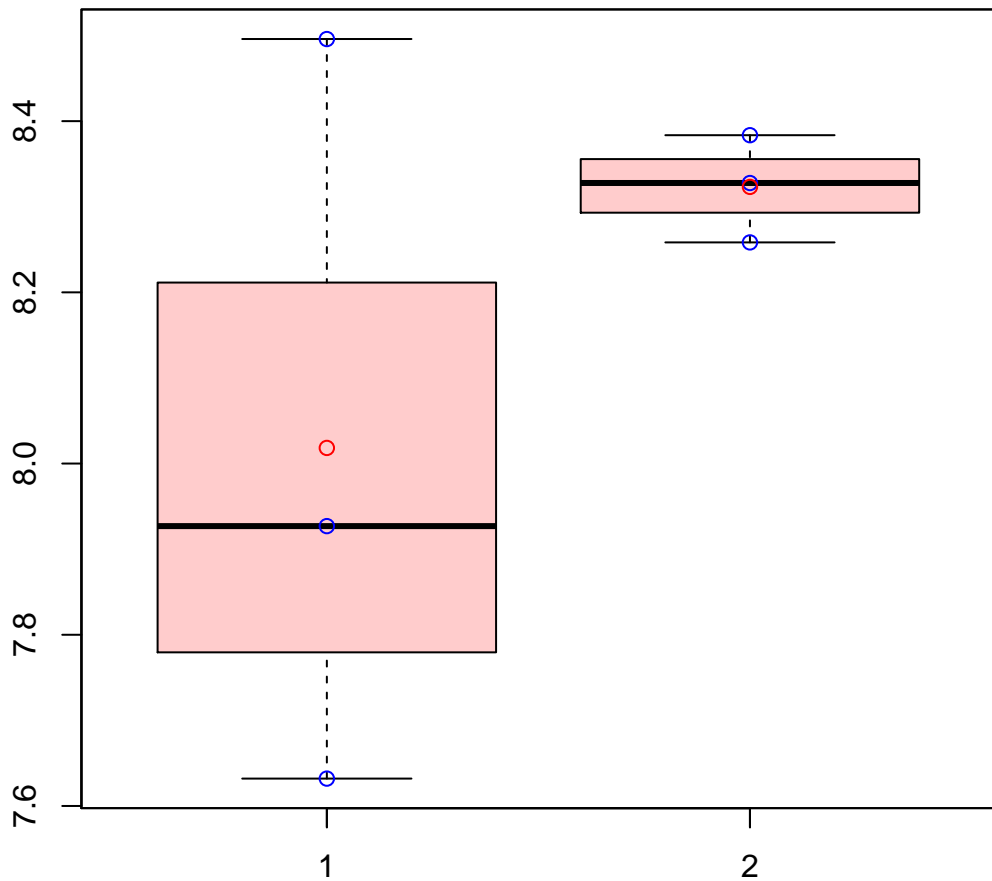

t-Test: p-value = 0.35

# CL941Contig7|CL941Contig7

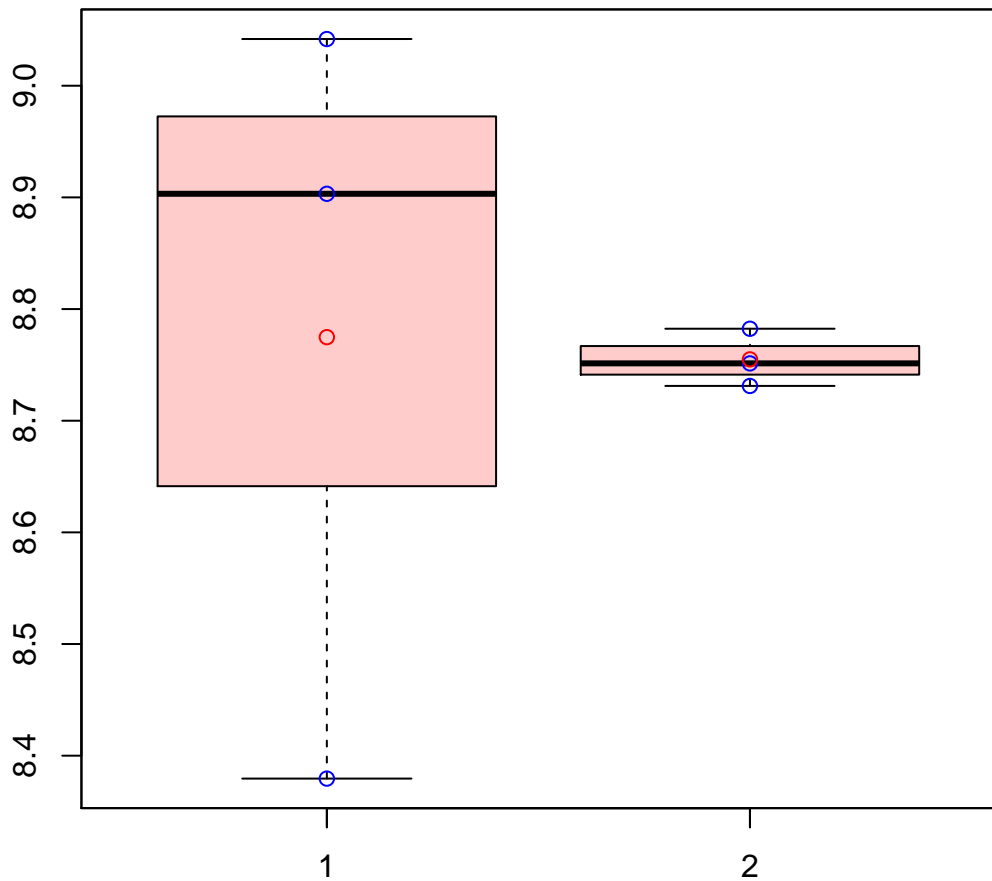

t-Test: p-value = 0.93

# CL9427Contig2|CL9427Contig2

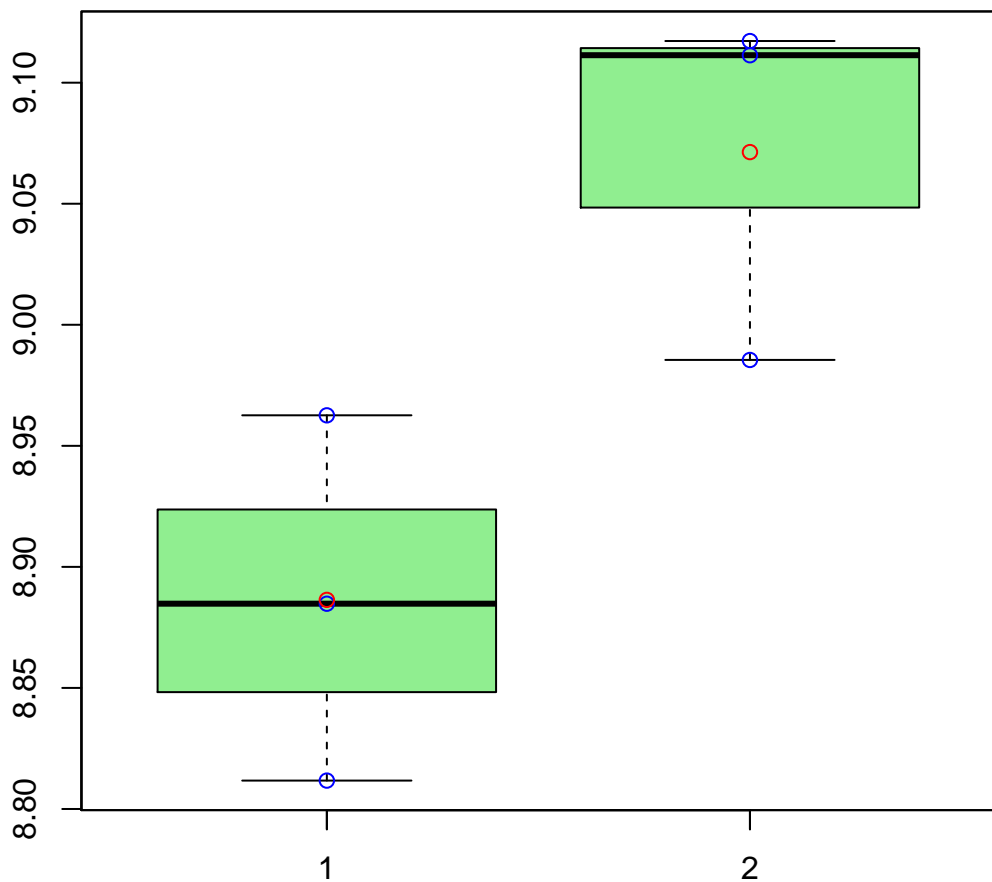

t-Test: p-value = 0.04

# CL942Contig2|CL942Contig2

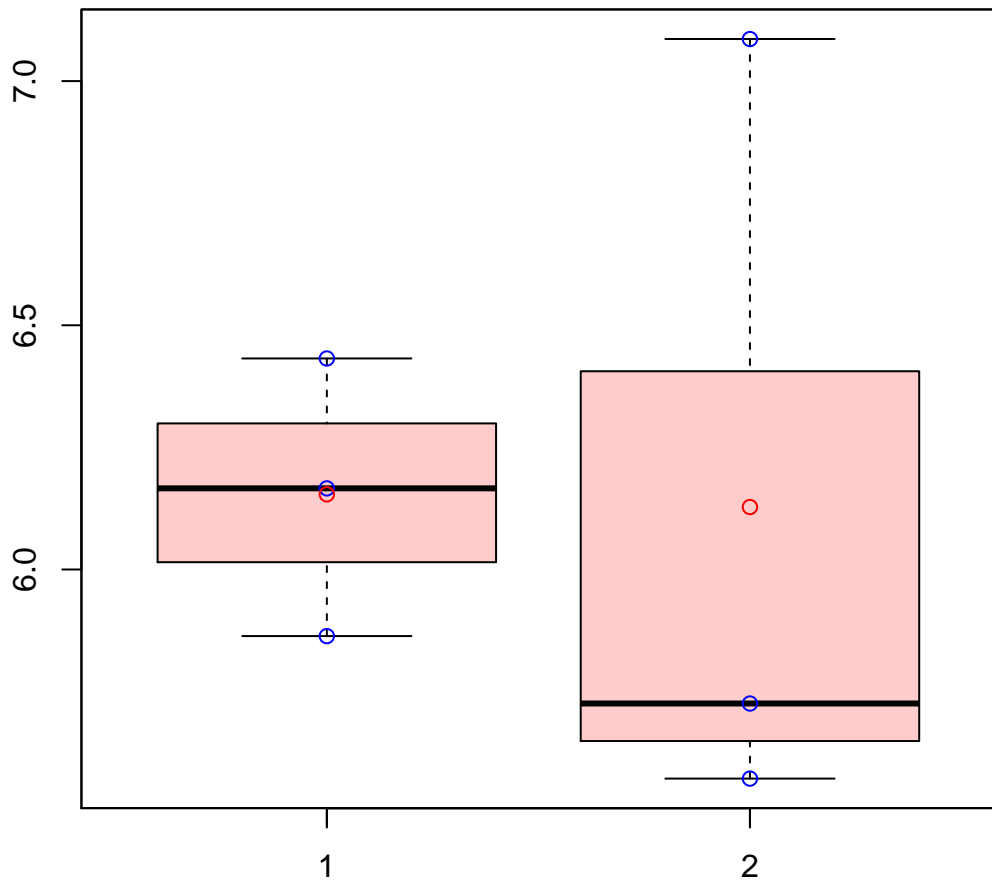

t-Test: p-value = 0.96



# CL942Contig4|CL942Contig4

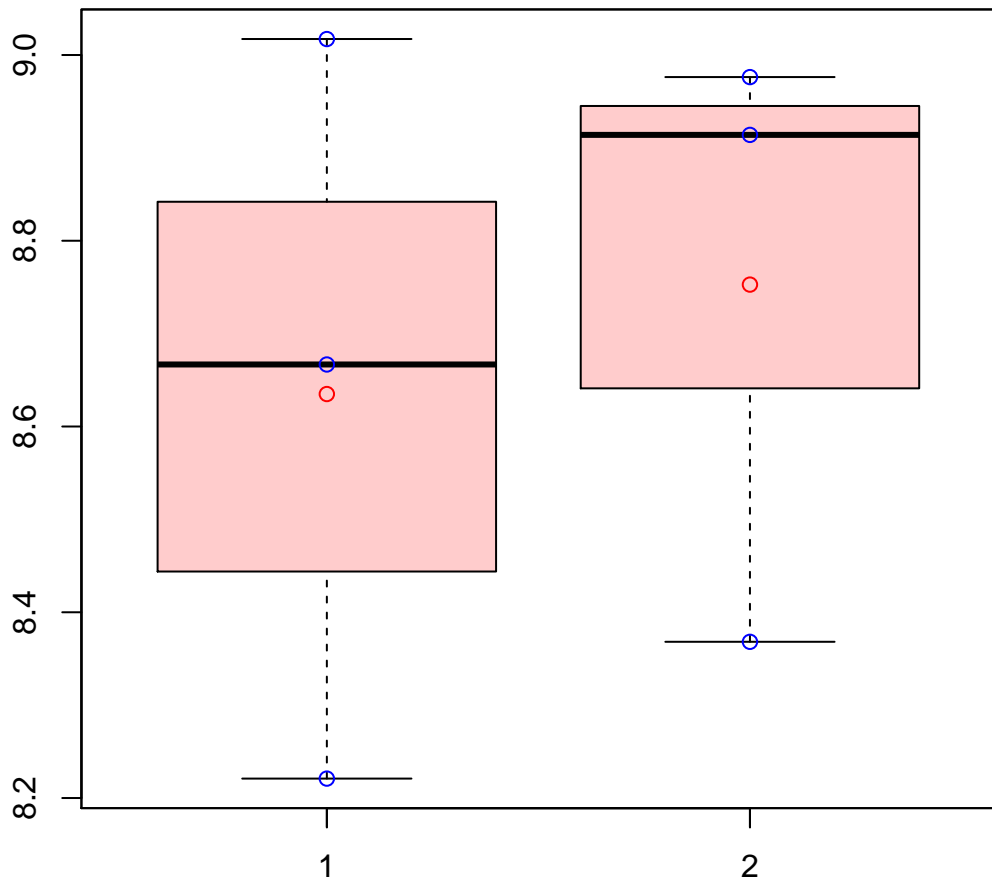

t-Test: p-value = 0.72

# CL943Contig2|CL943Contig2

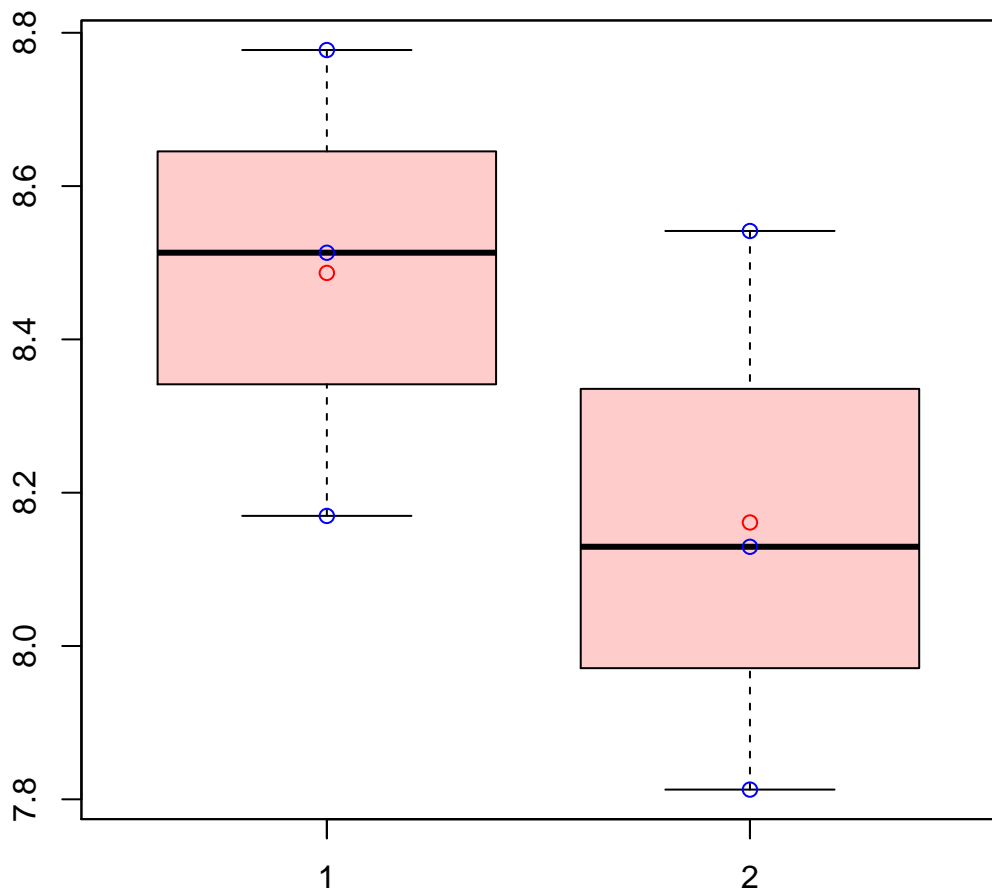

t-Test: p-value = 0.3

# CL943Contig4|CL943Contig4

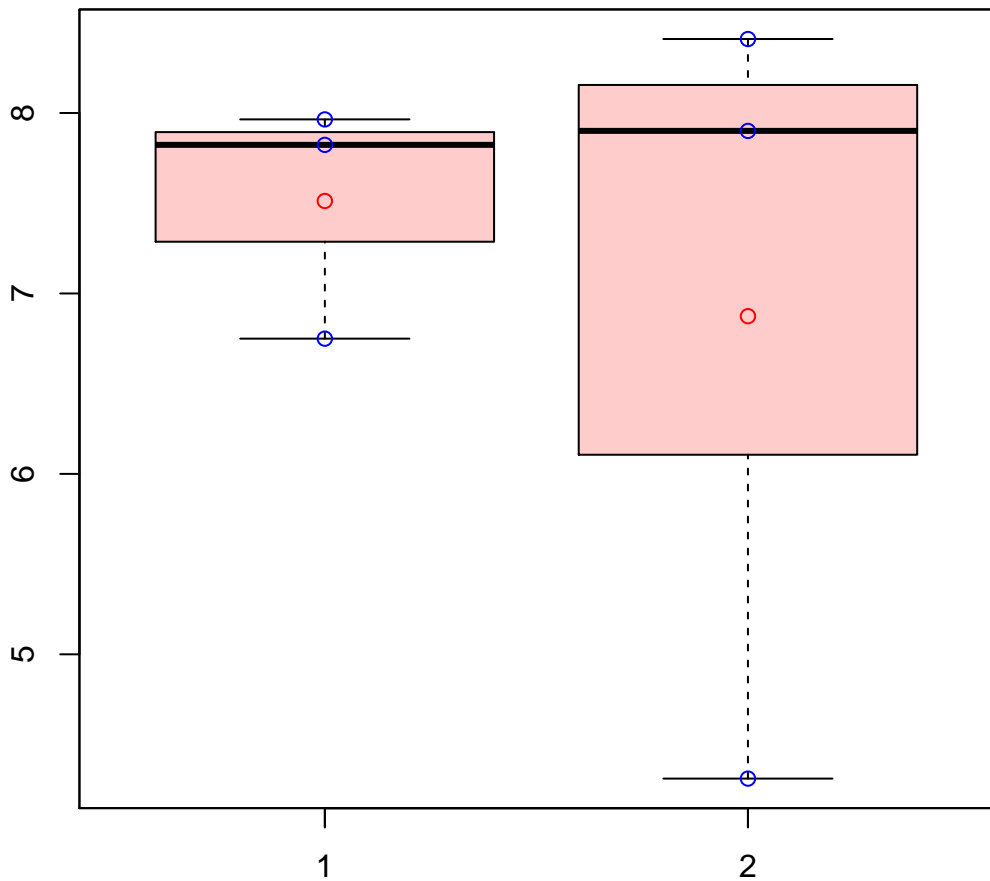

t-Test: p-value = 0.68

# CL9459Contig2|CL9459Contig2

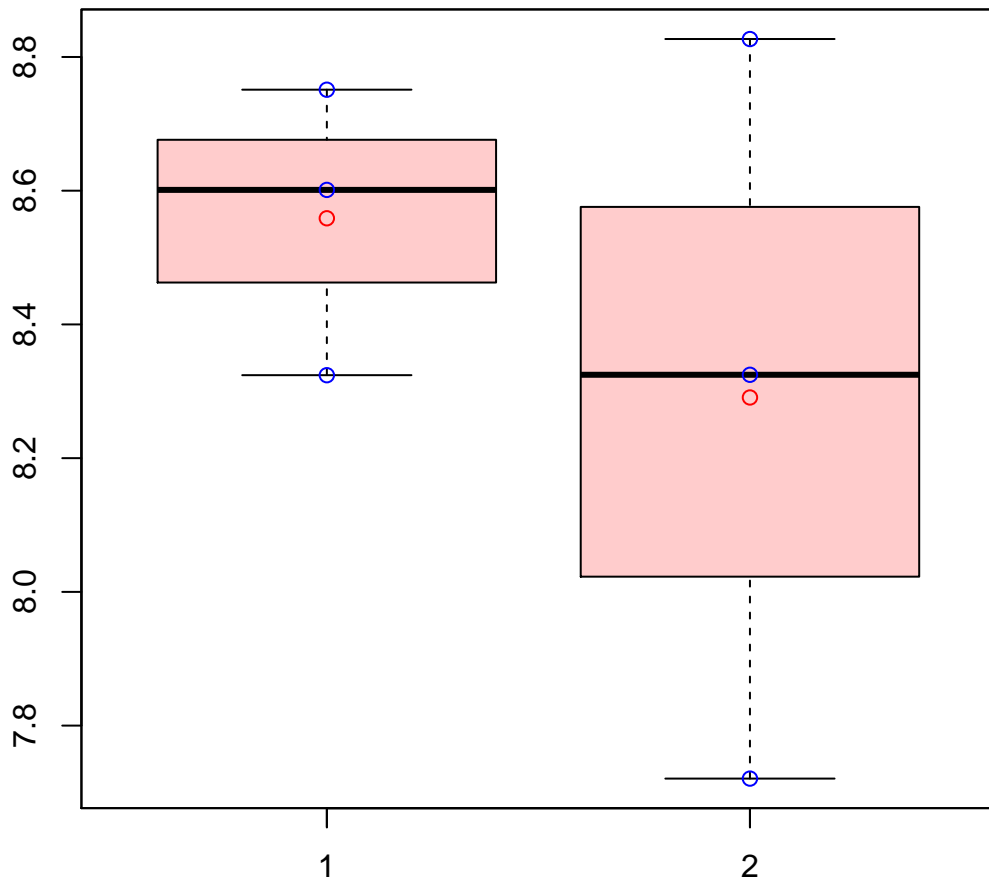

t-Test: p-value = 0.5

# CL950Contig3|CL950Contig3

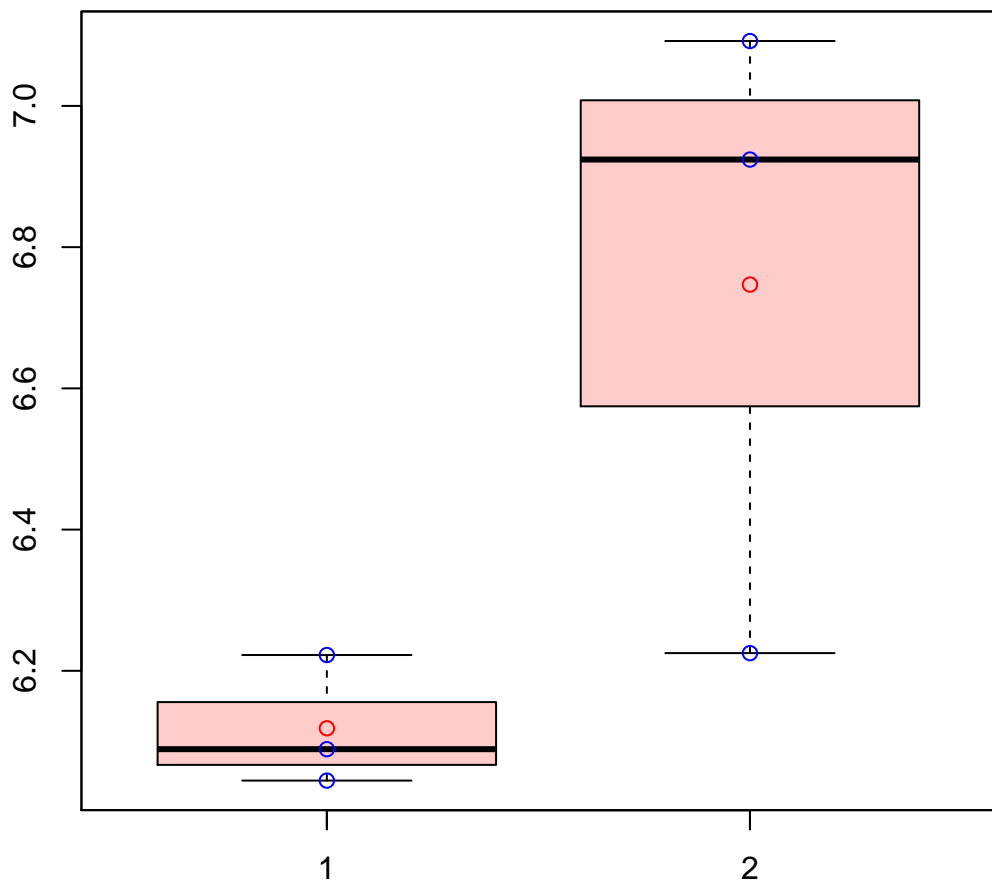

t-Test: p-value = 0.14

# CL9518Contig2|CL9518Contig2

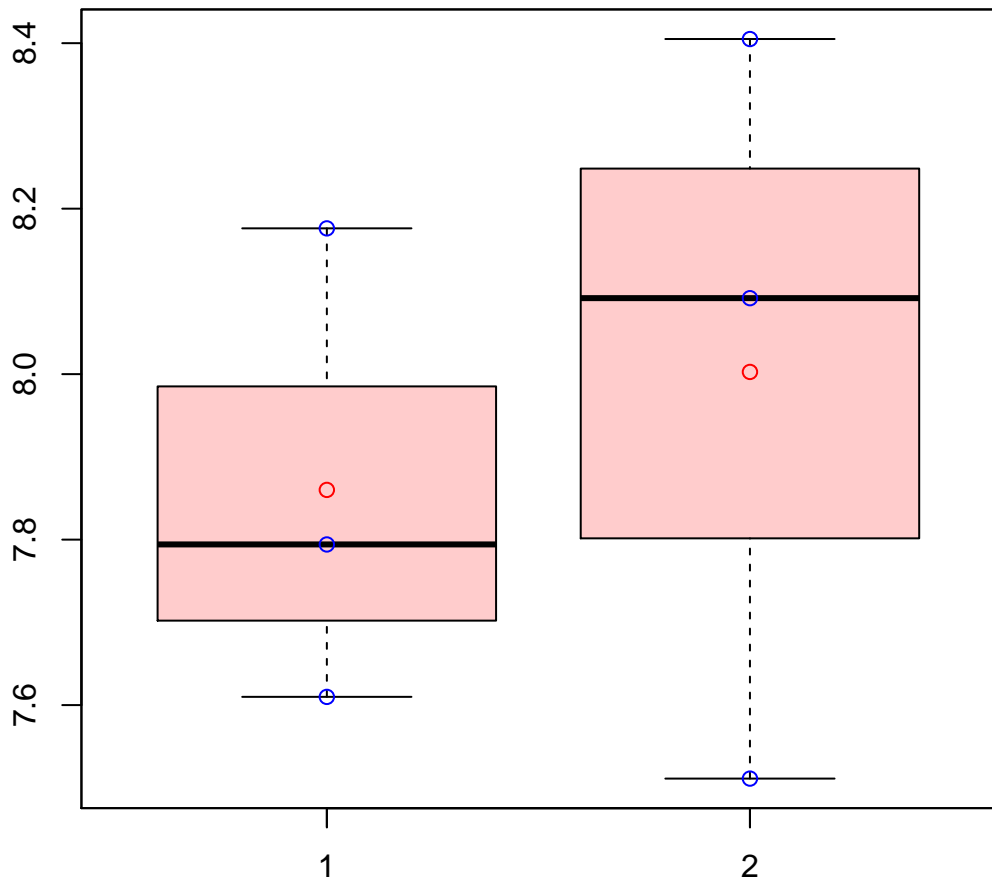

t-Test: p-value = 0.67

# CL953Contig5|CL953Contig5

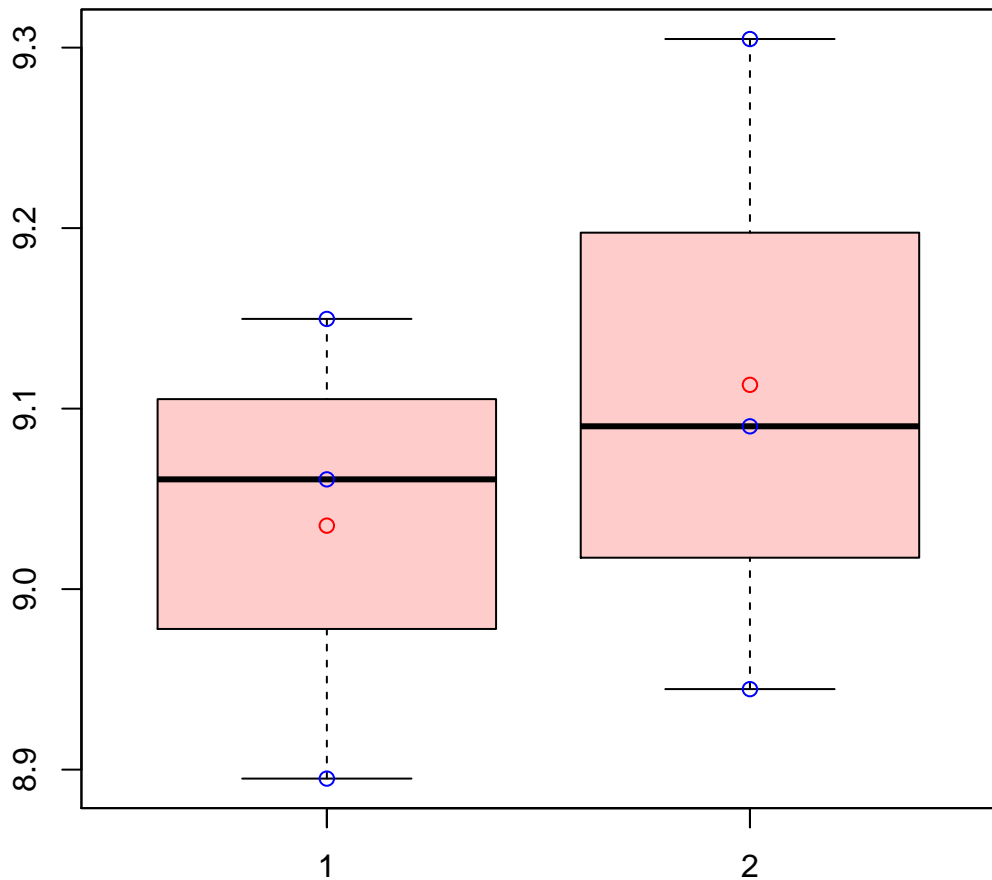

t-Test: p-value = 0.58

# CL9545Contig2|CL9545Contig2

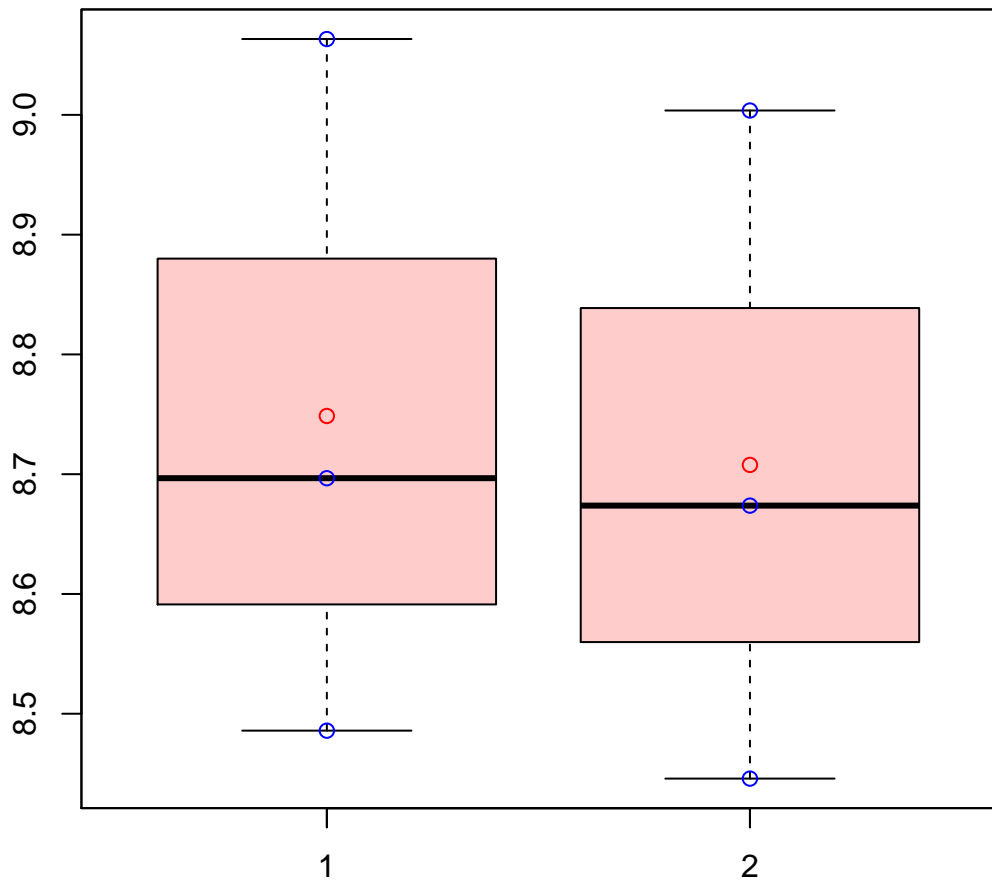

t-Test: p-value = 0.87



# CL954Contig2|CL954Contig2

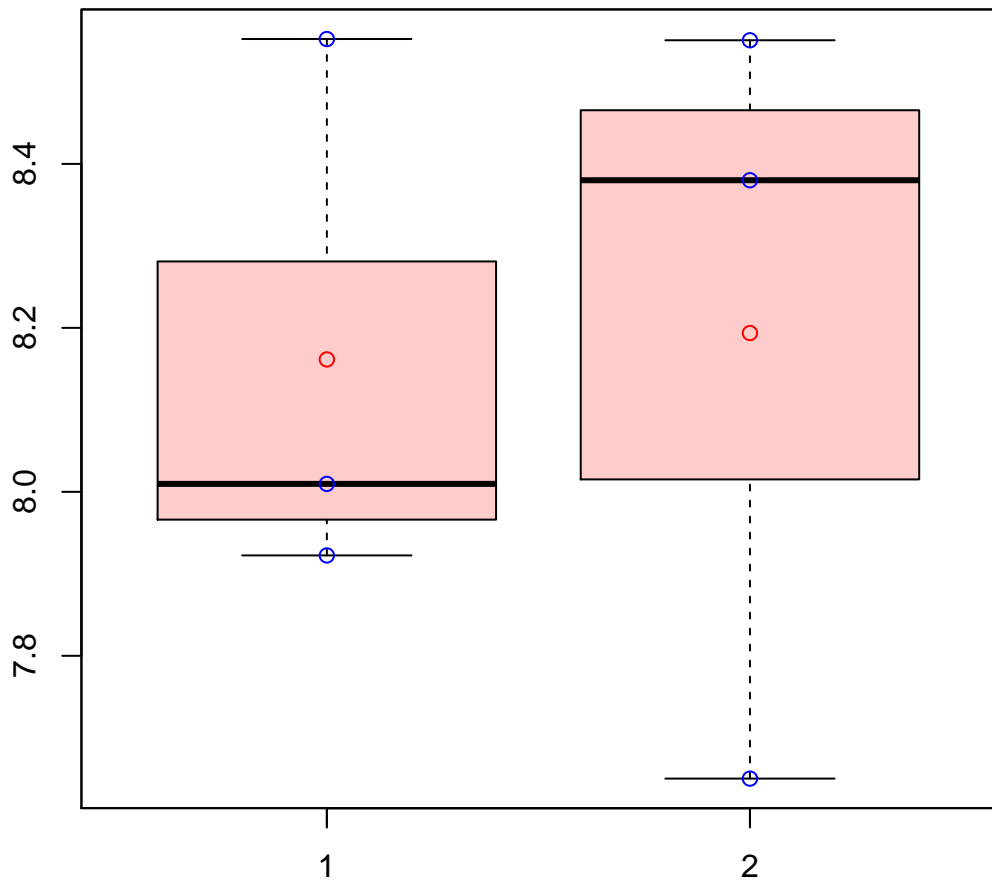

t-Test: p-value = 0.93

# CL958Contig1|CL958Contig1

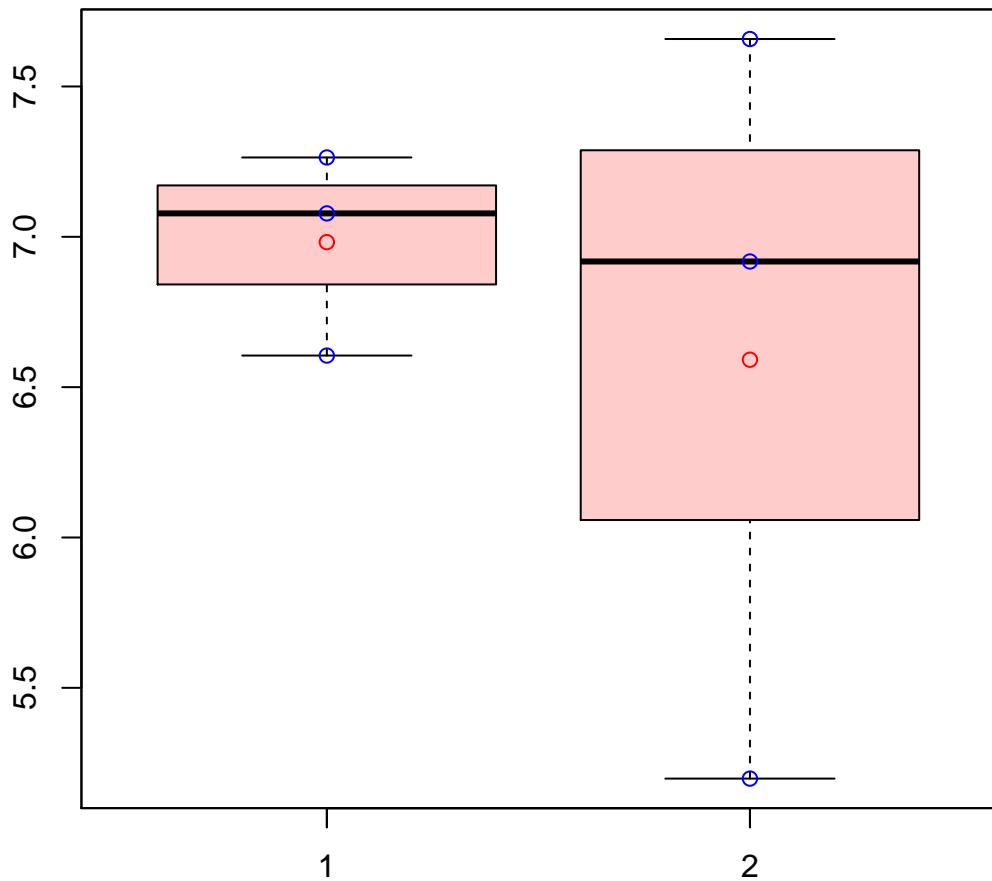

t-Test: p-value = 0.65

# CL958Contig5|CL958Contig5

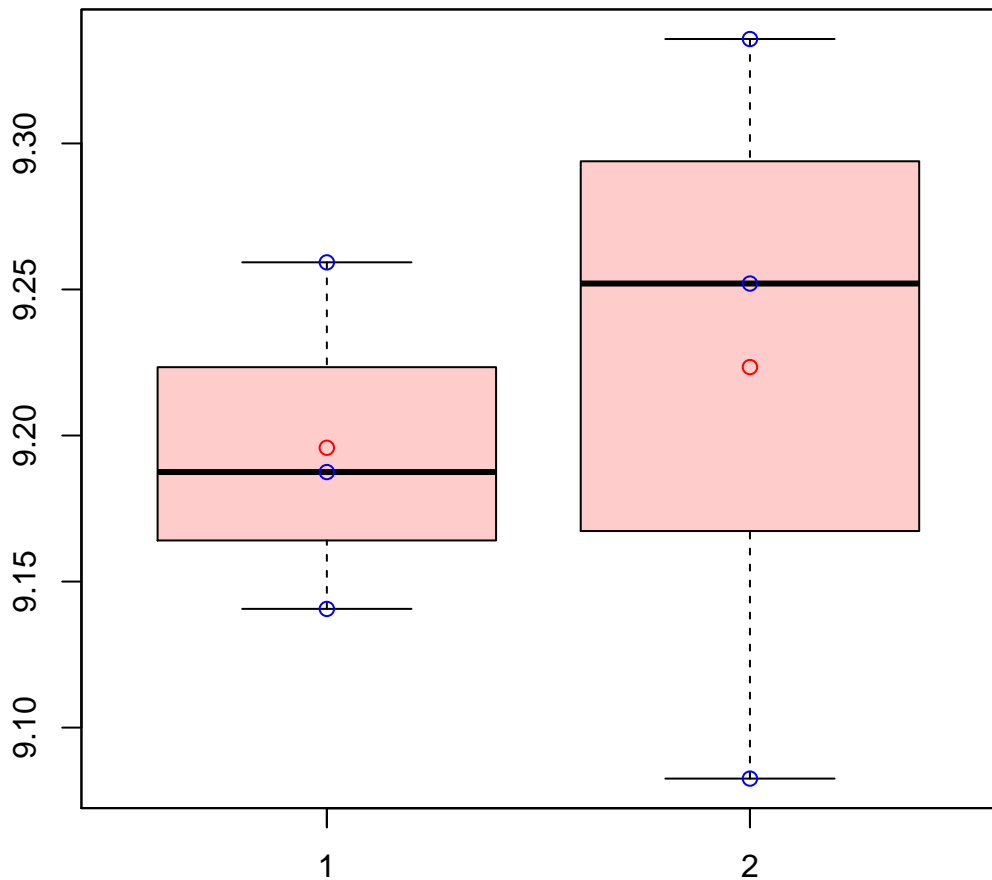

t-Test: p-value = 0.76

# CL959Contig12|CL959Contig12

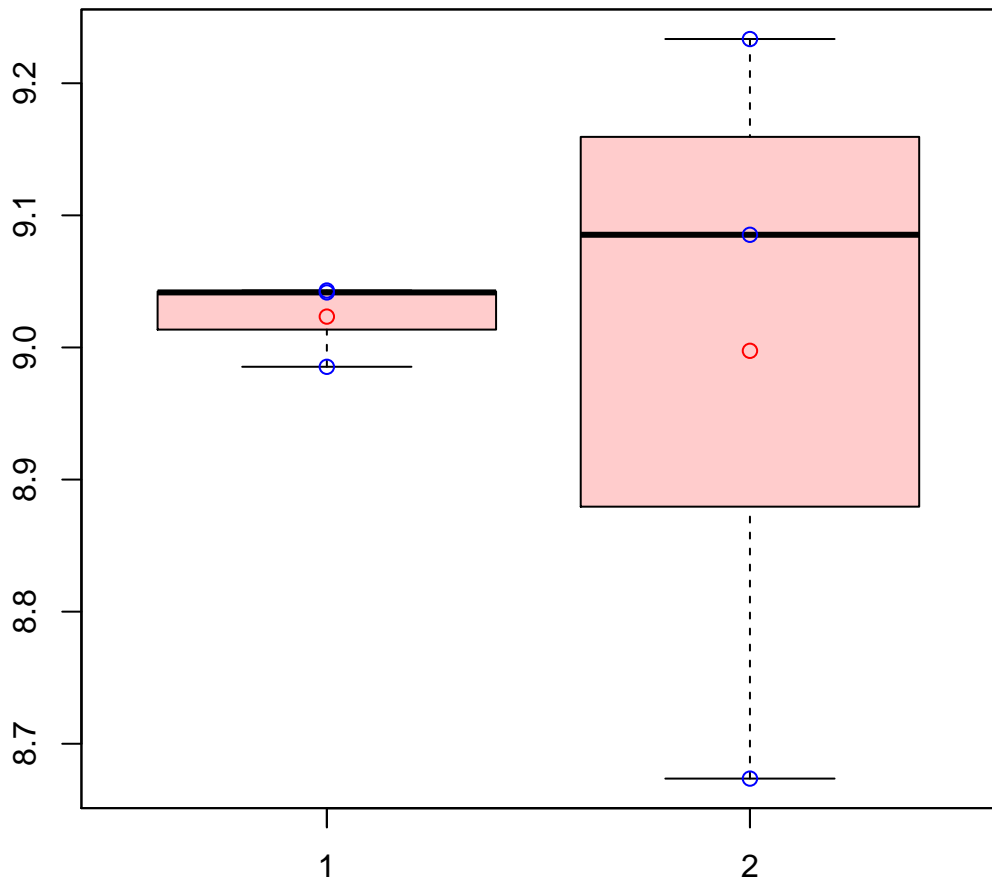

t-Test: p-value = 0.89

# CL95Contig4|CL95Contig4

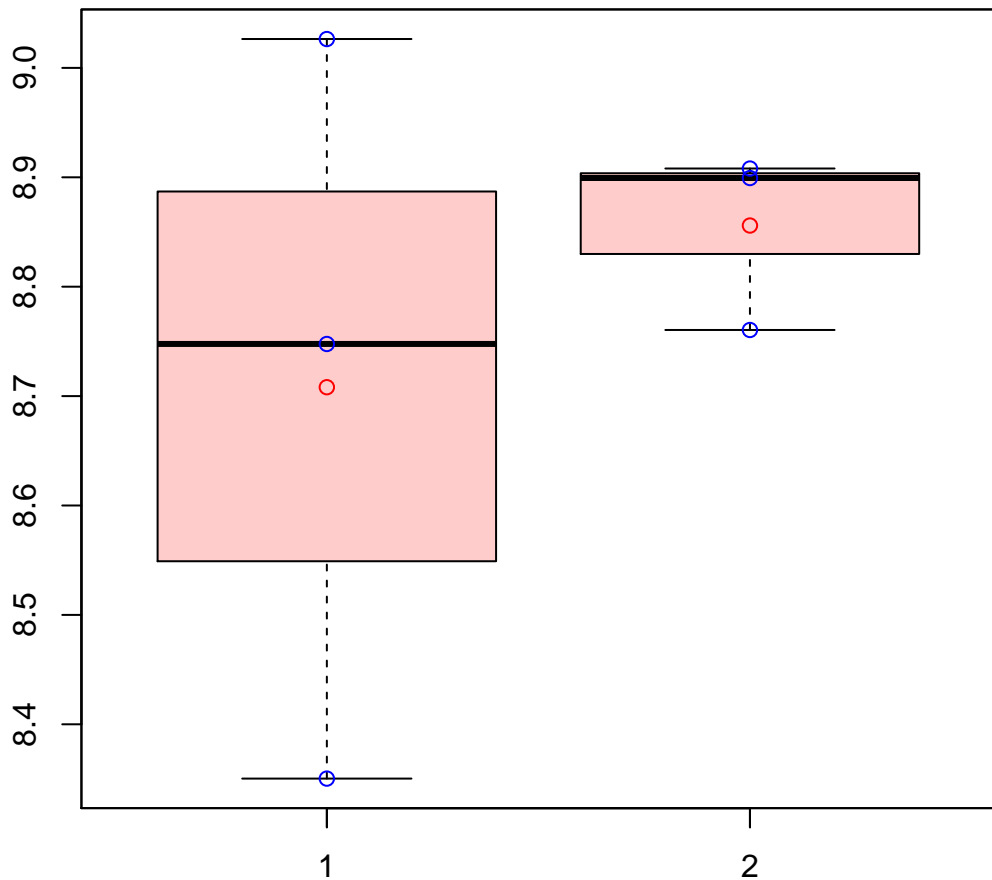

t-Test: p-value = 0.53

# CL961Contig3|CL961Contig3

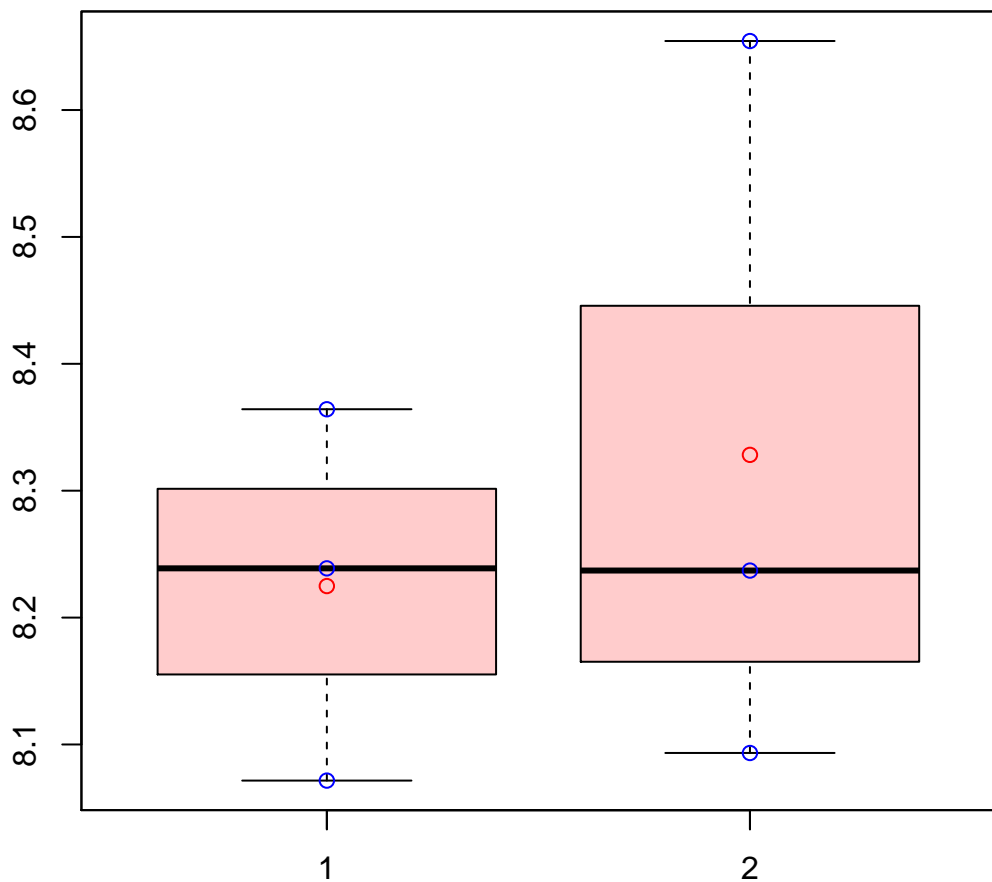

t-Test: p-value = 0.62

# CL9662Contig1|CL9662Contig1

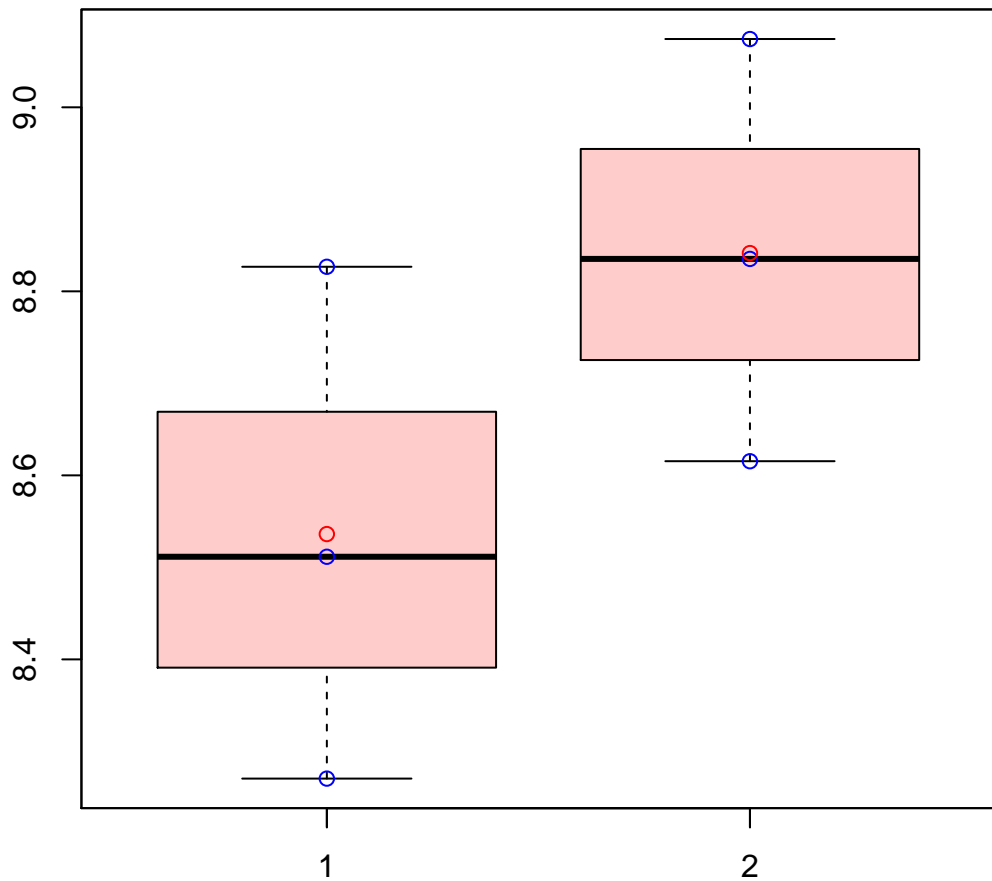

t-Test: p-value = 0.22

# CL9662Contig4|CL9662Contig4

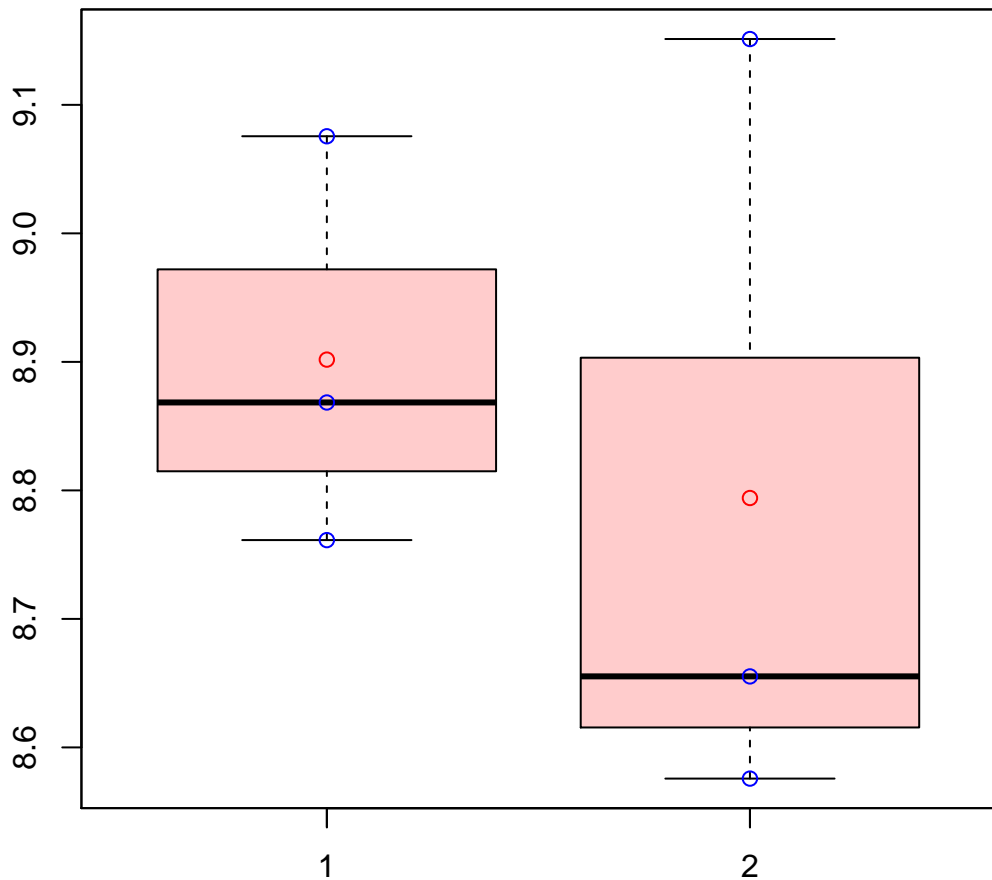

t-Test: p-value = 0.63



# CL9662Contig5|CL9662Contig5

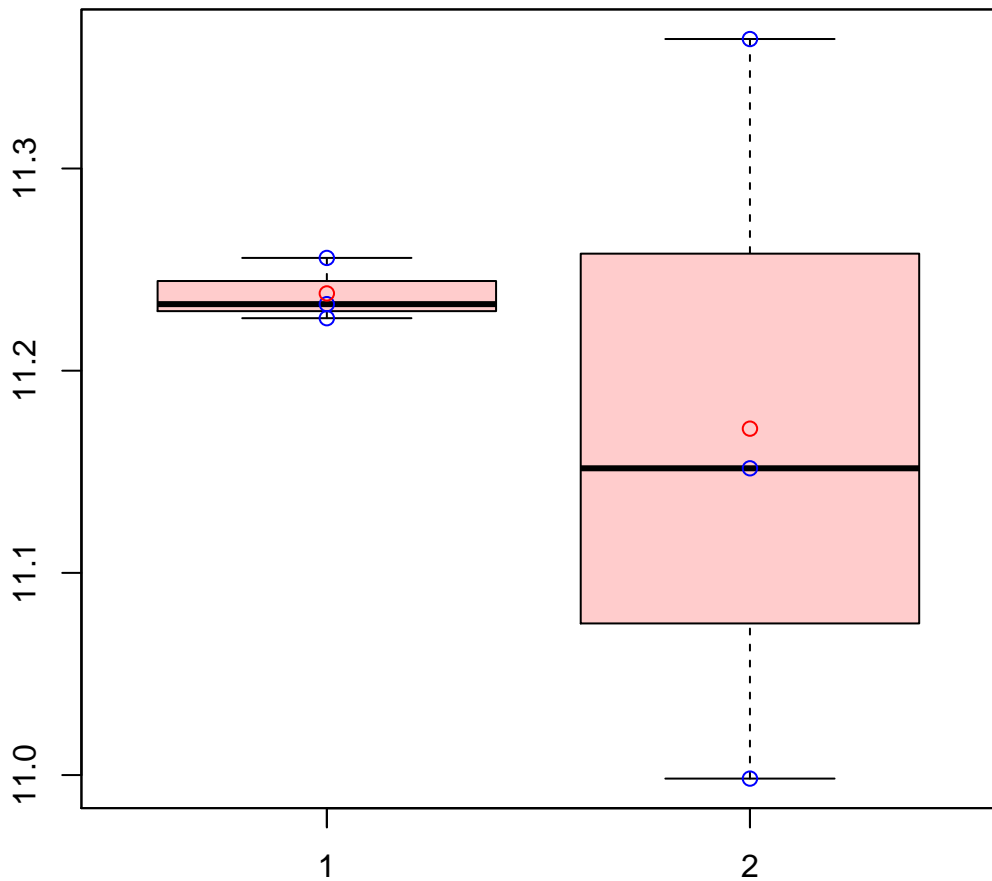

t-Test: p-value = 0.59

# CL9672Contig2|CL9672Contig2

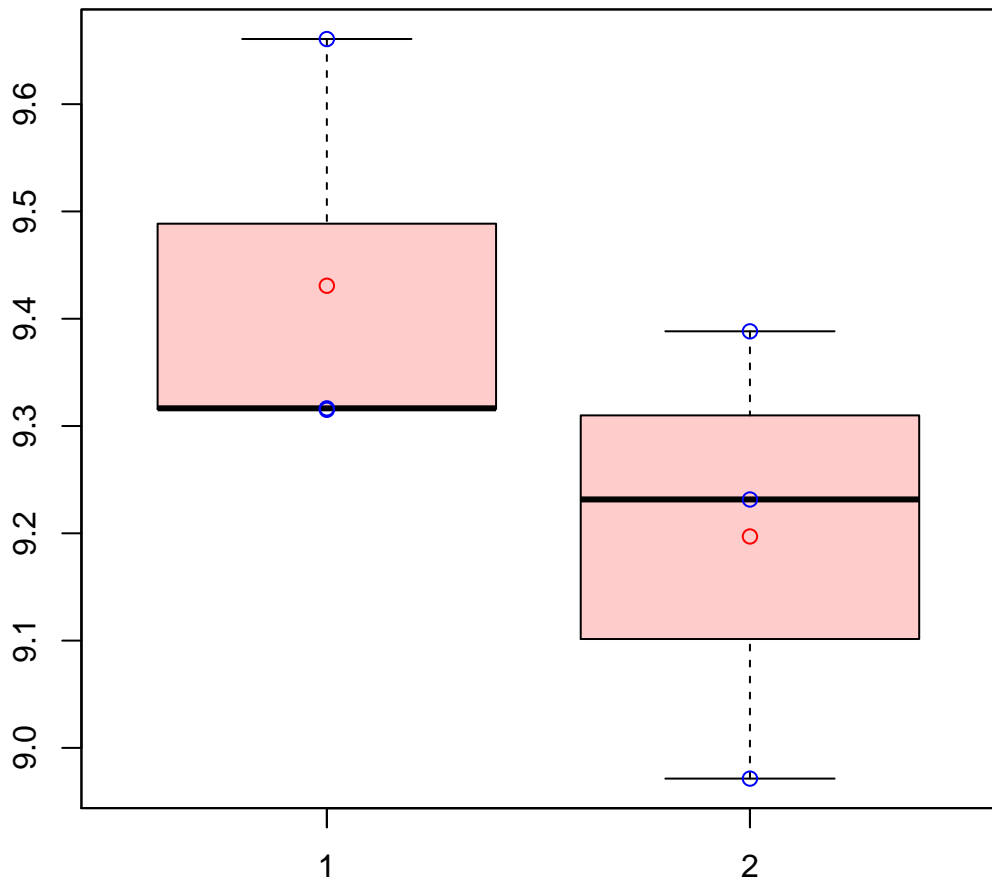

t-Test: p-value = 0.24

# CL9686Contig2|CL9686Contig2

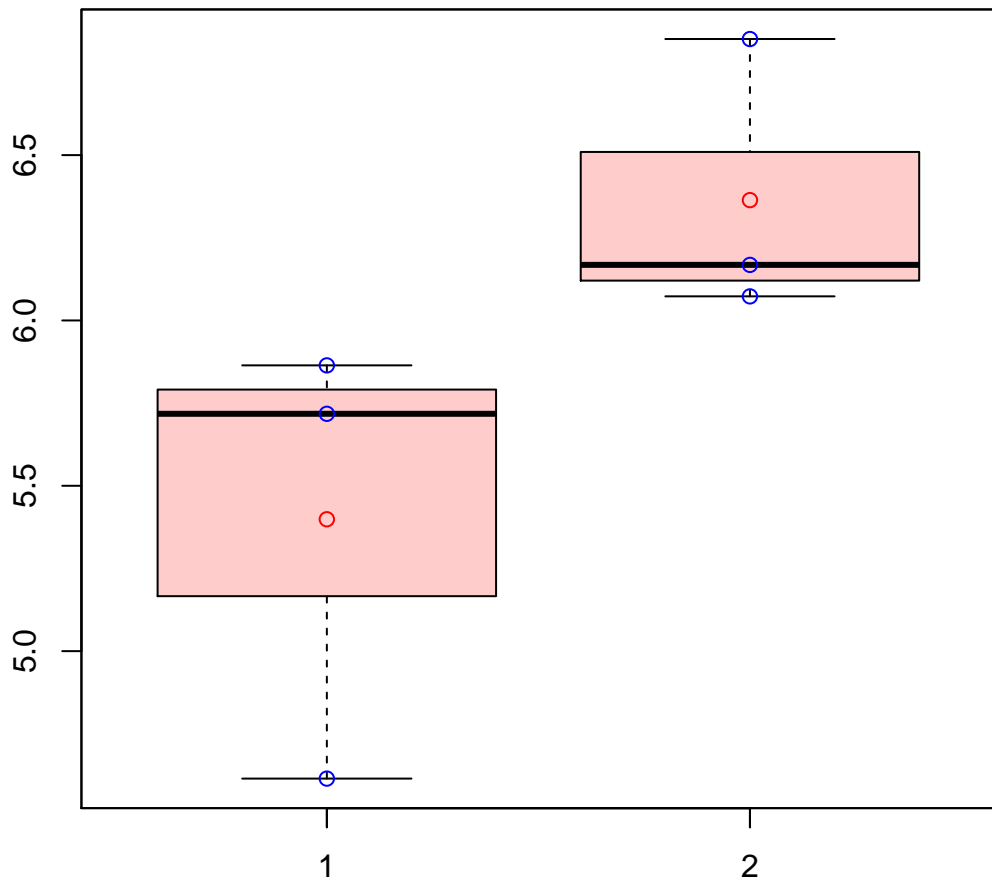

t-Test: p-value = 0.12

# CL969Contig2|CL969Contig2

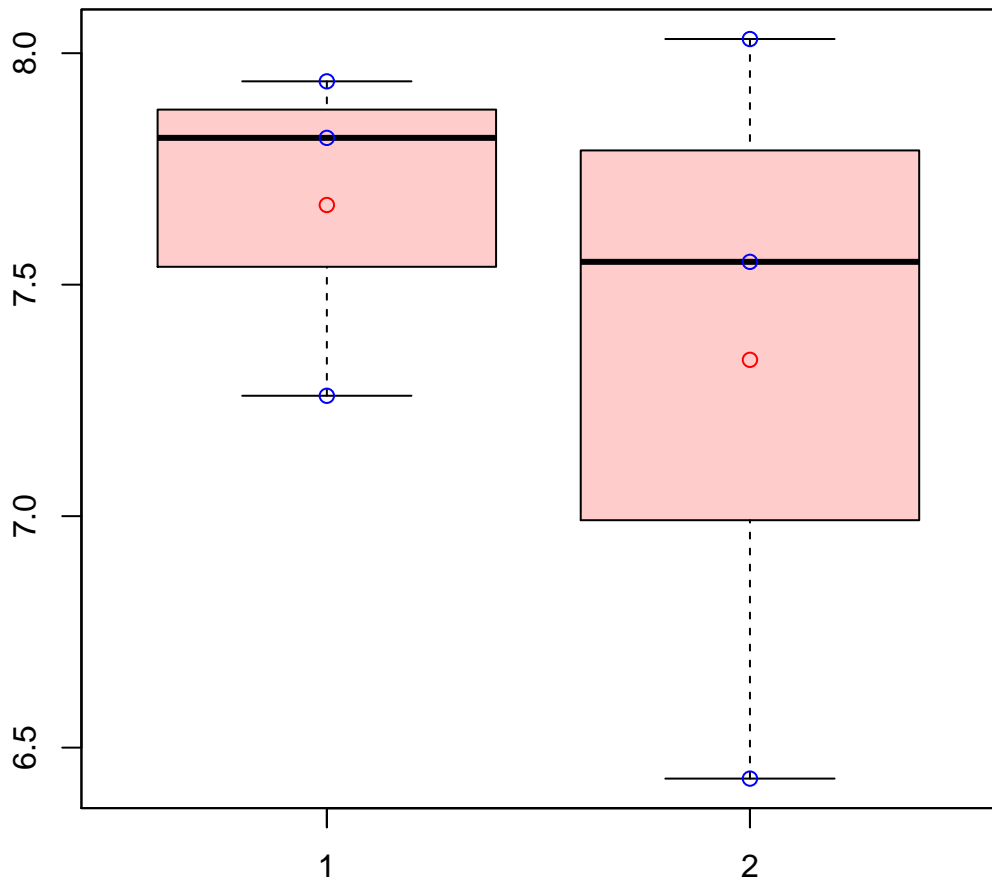

t-Test: p-value = 0.57

# CL969Contig4|CL969Contig4

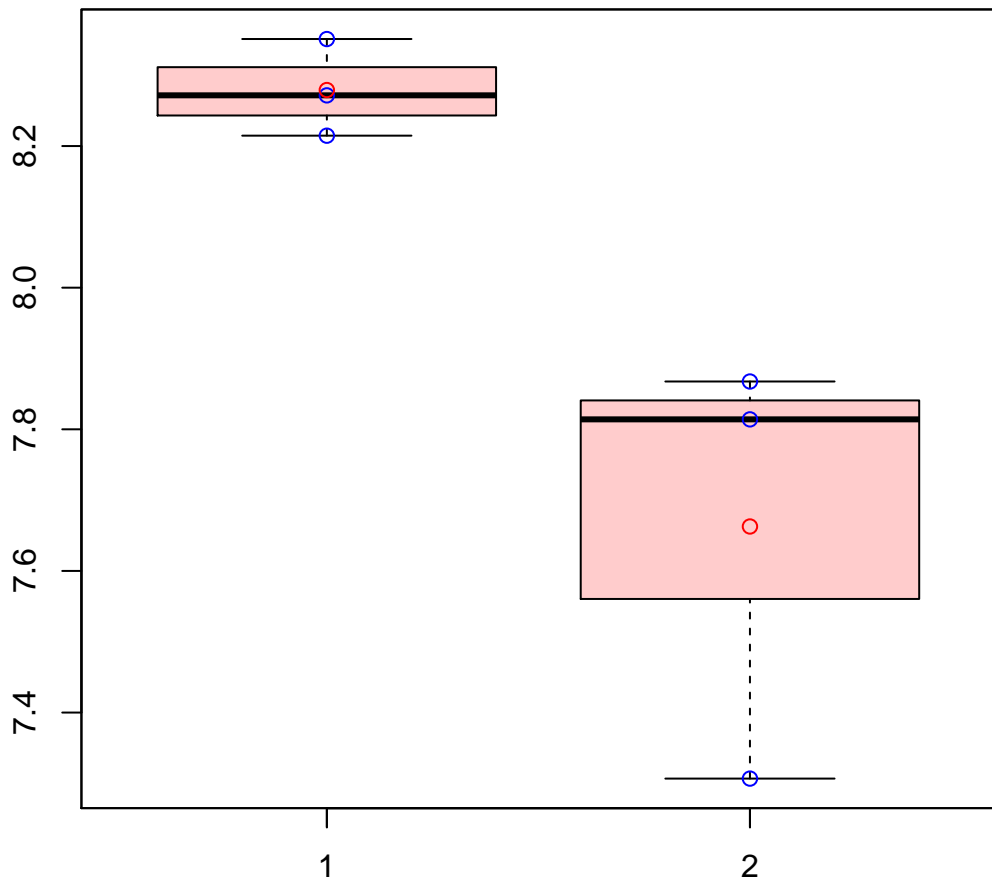

t-Test: p-value = 0.07

# CL96Contig3|CL96Contig3

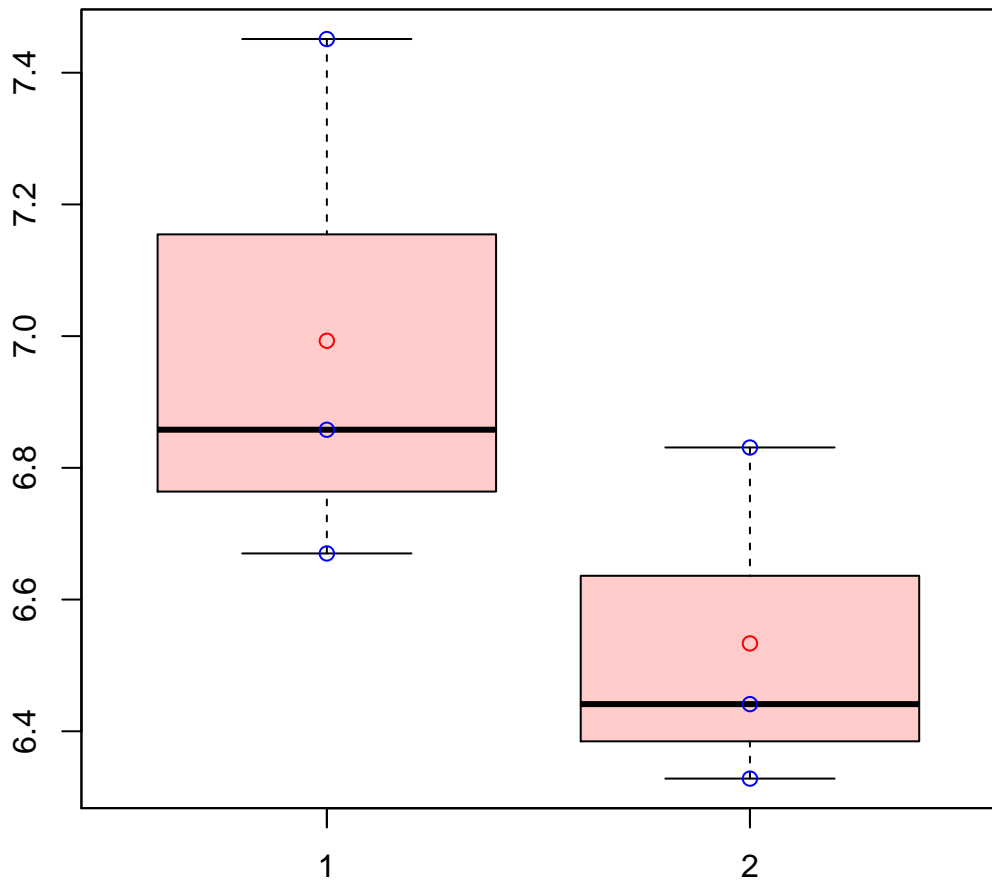

t-Test: p-value = 0.19

# CL9711Contig2|CL9711Contig2

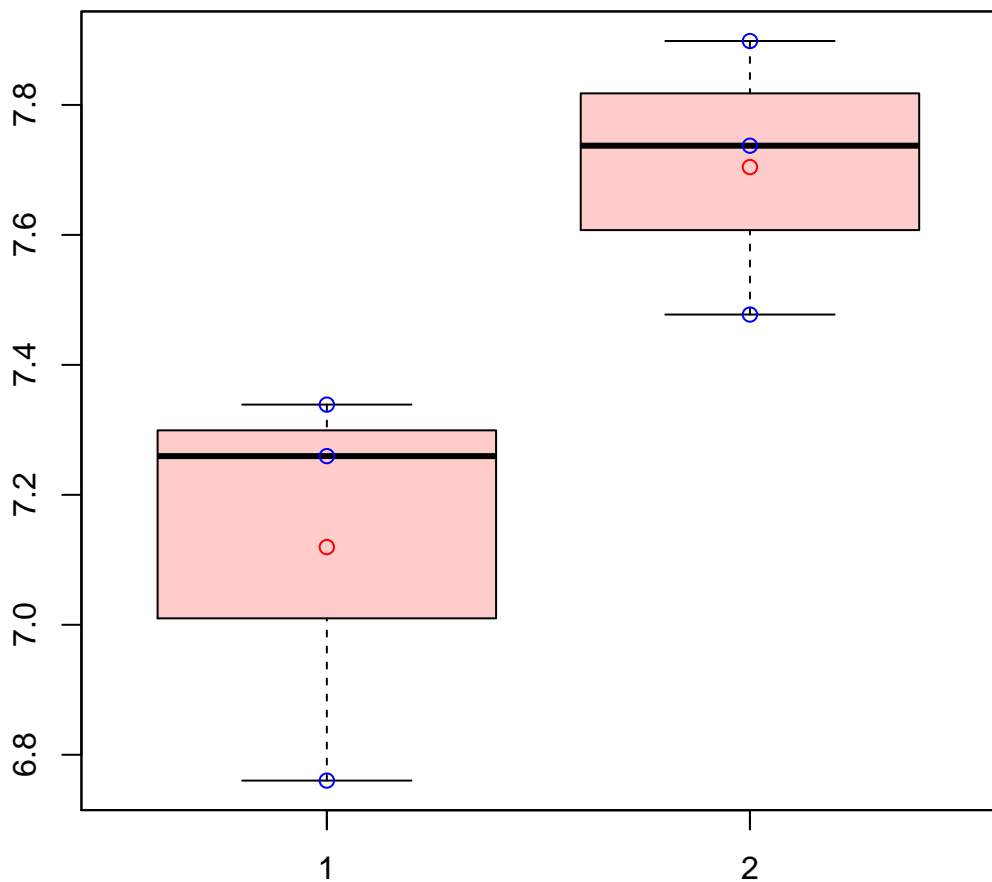

t-Test: p-value = 0.06

# CL973Contig2|CL973Contig2

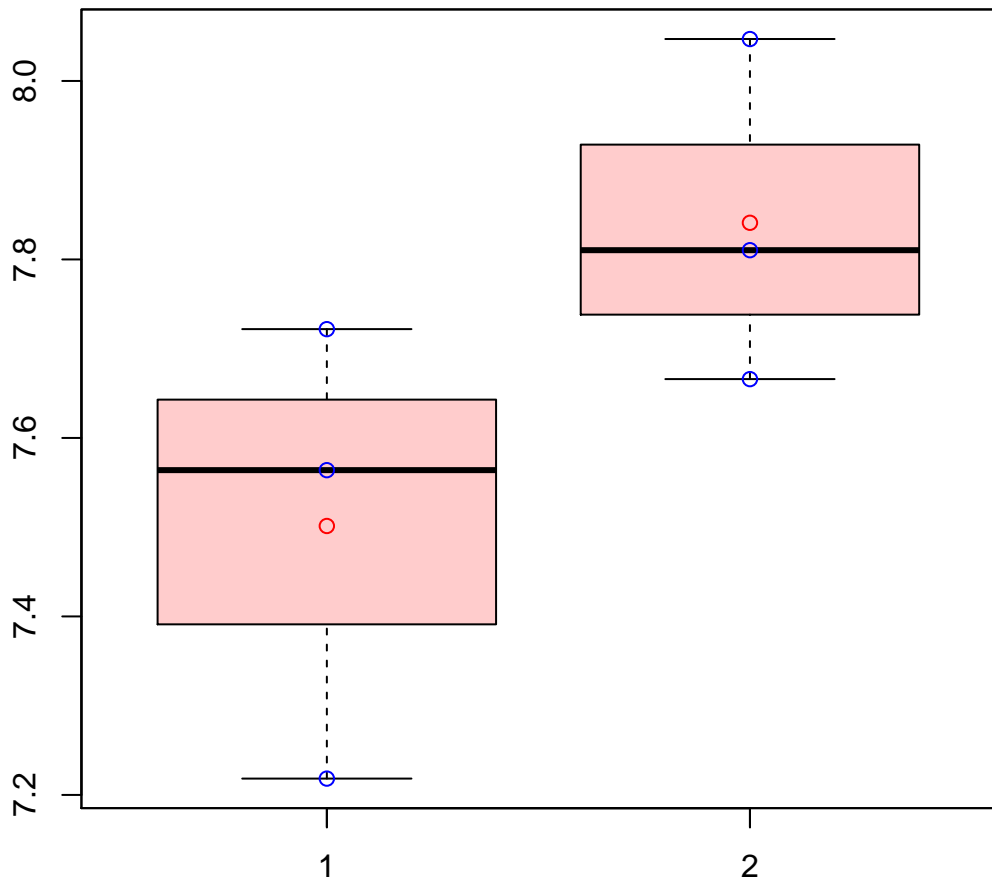

t-Test: p-value = 0.15



# CL973Contig4|CL973Contig4

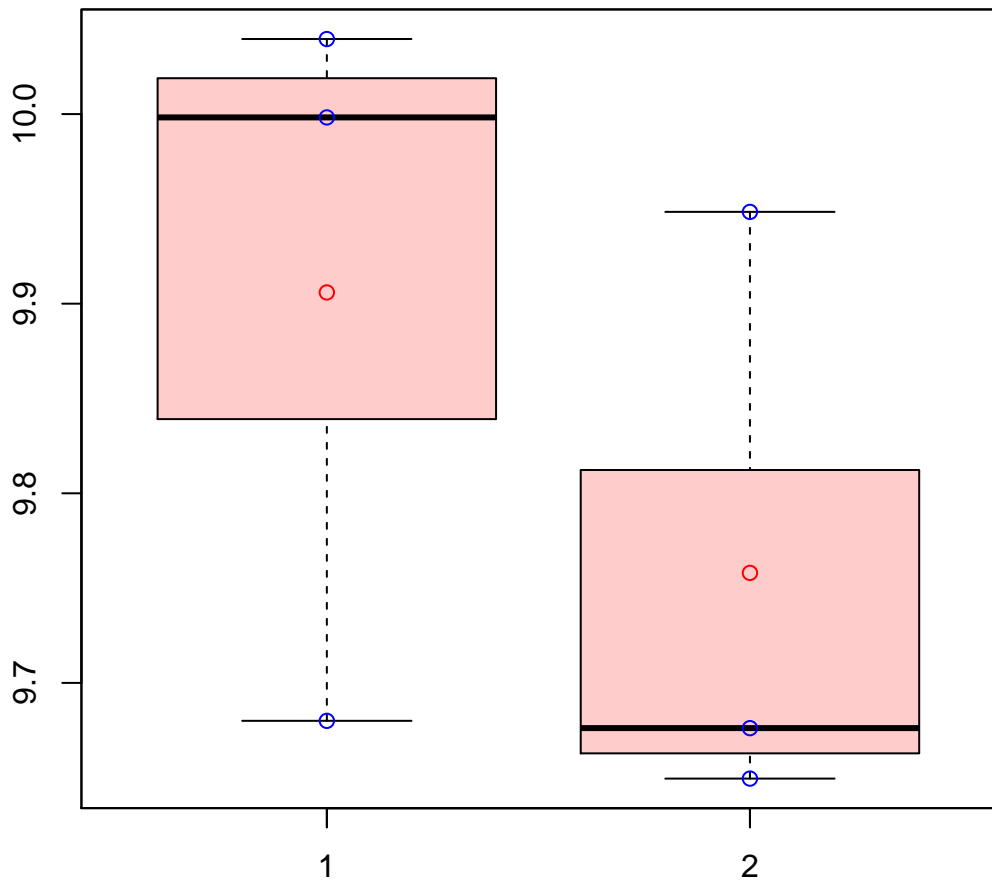

t-Test: p-value = 0.38

# CL975Contig6|CL975Contig6

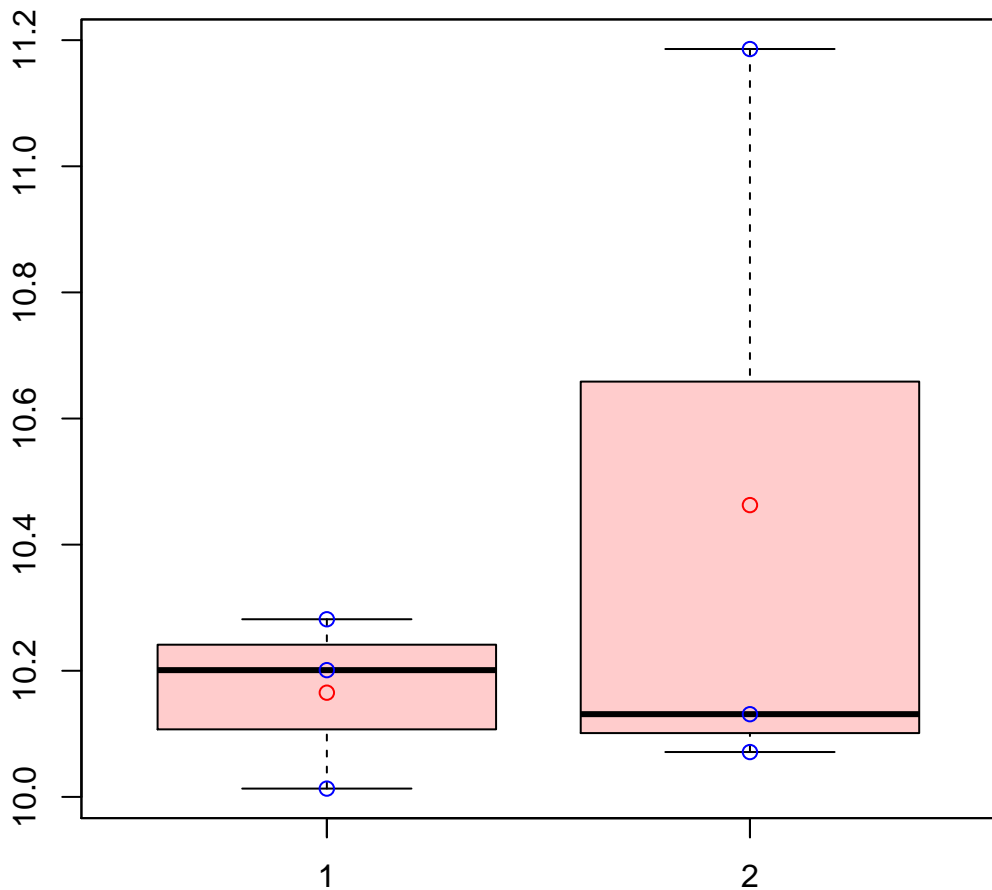

t-Test: p-value = 0.5

# CL977Contig4|CL977Contig4

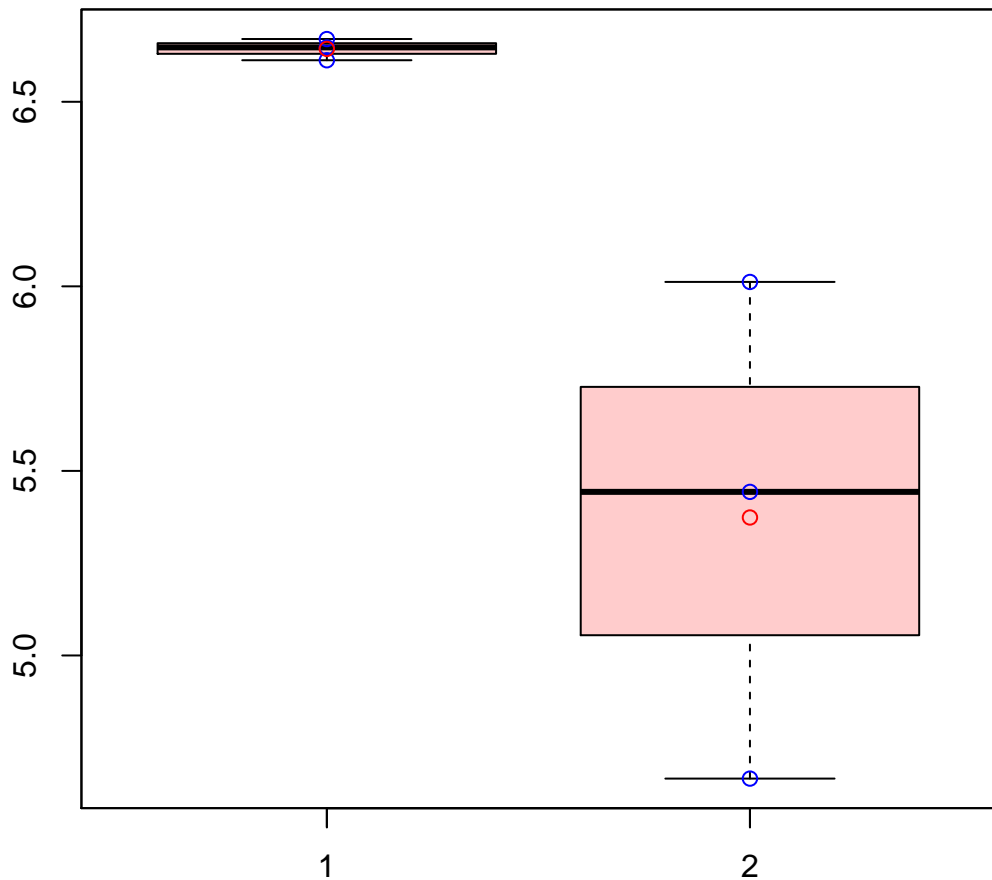

t-Test: p-value = 0.08

# CL9781Contig2|CL9781Contig2

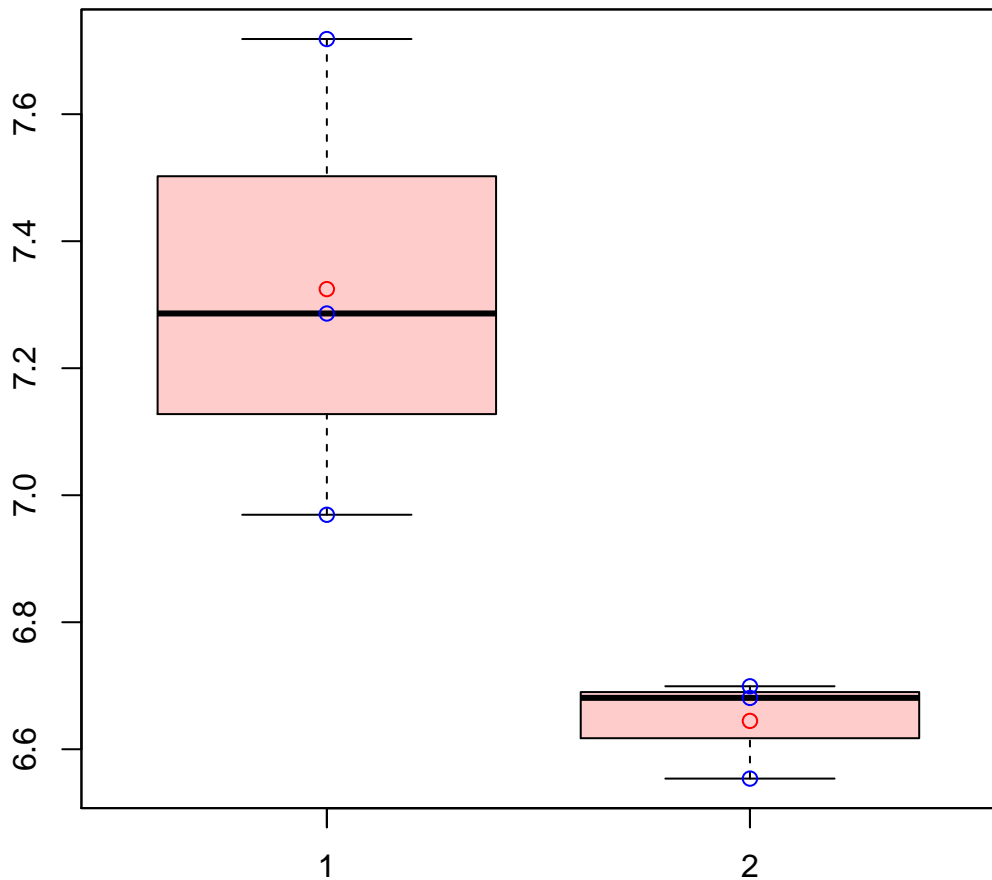

t-Test: p-value = 0.08

# CL9792Contig1|CL9792Contig1

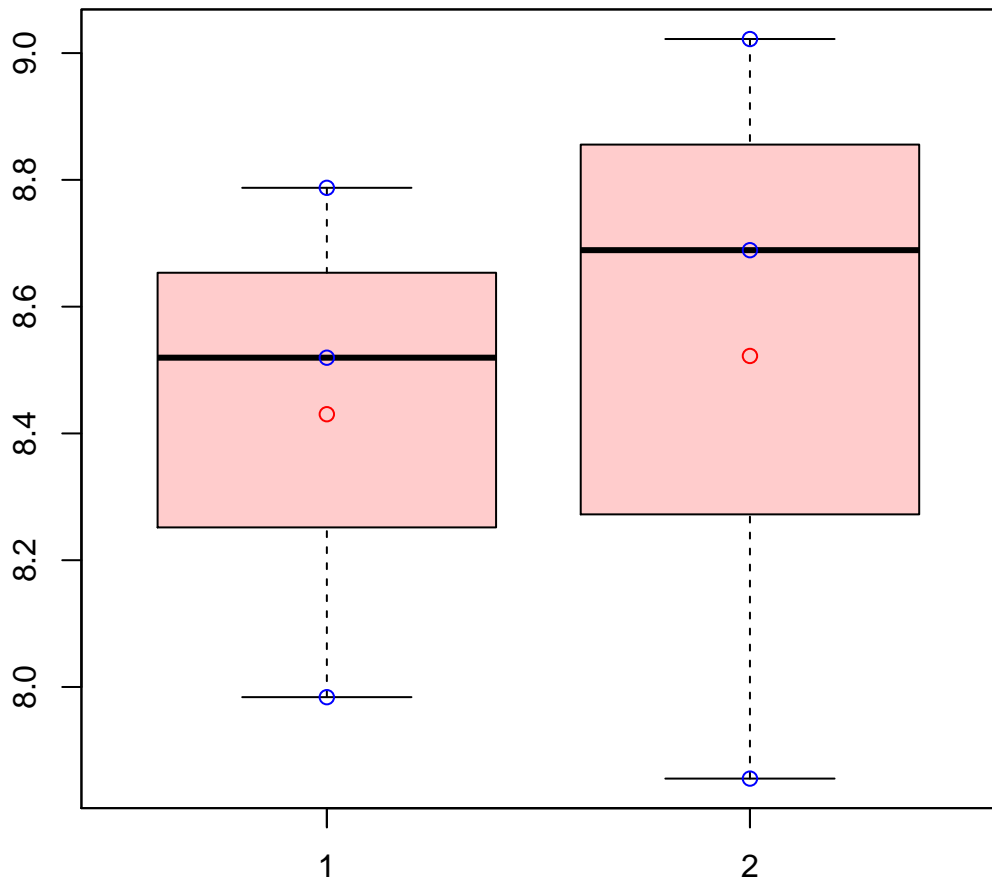

t-Test: p-value = 0.84

# CL980Contig6|CL980Contig6

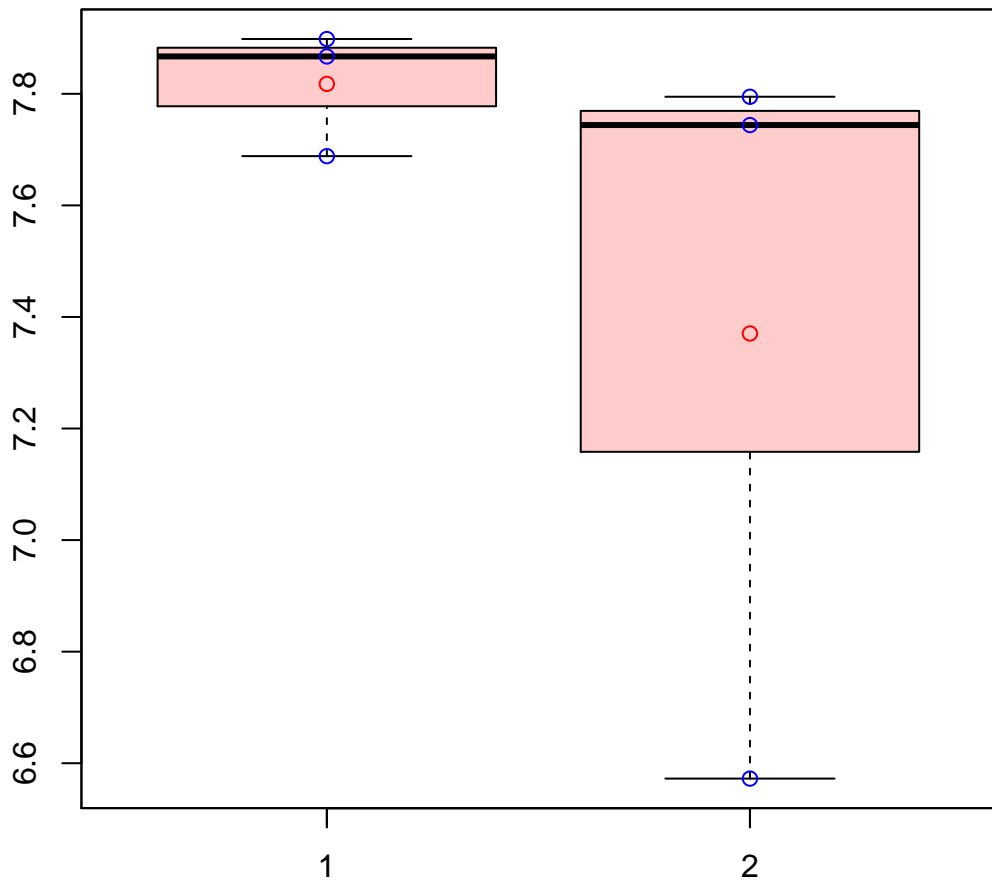

t-Test: p-value = 0.38

# CL9824Contig1|CL9824Contig1

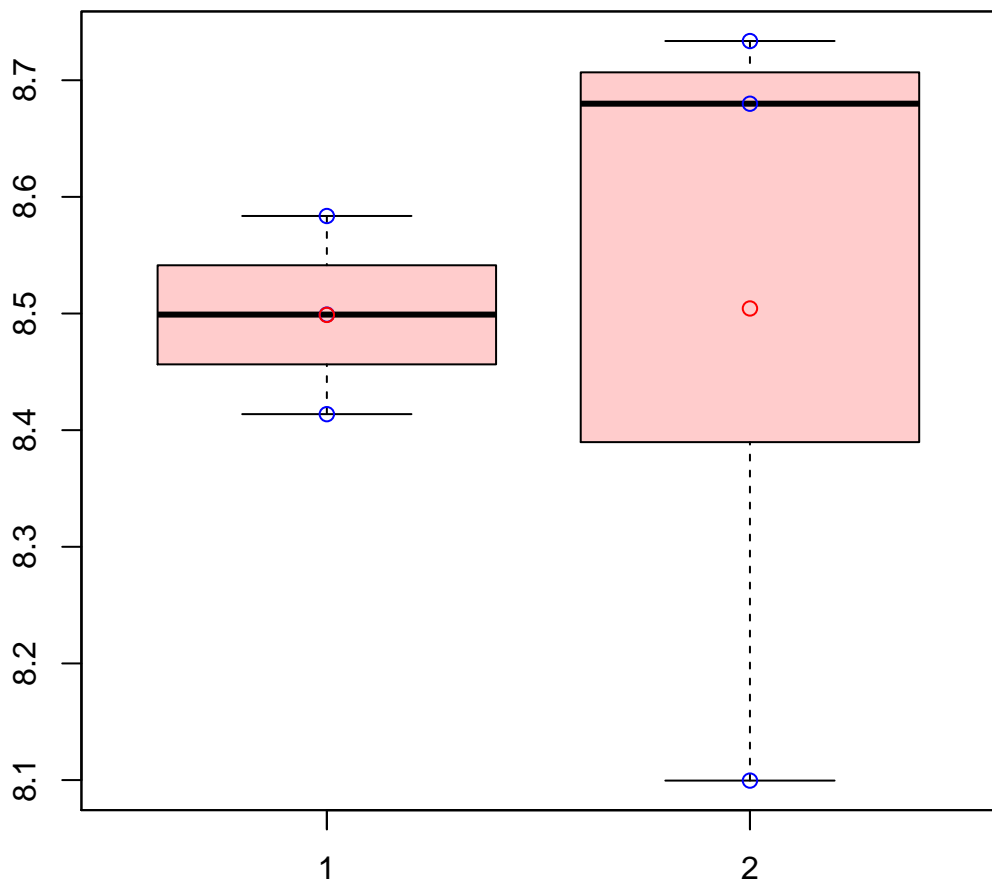

t-Test: p-value = 0.98

# CL9824Contig3|CL9824Contig3

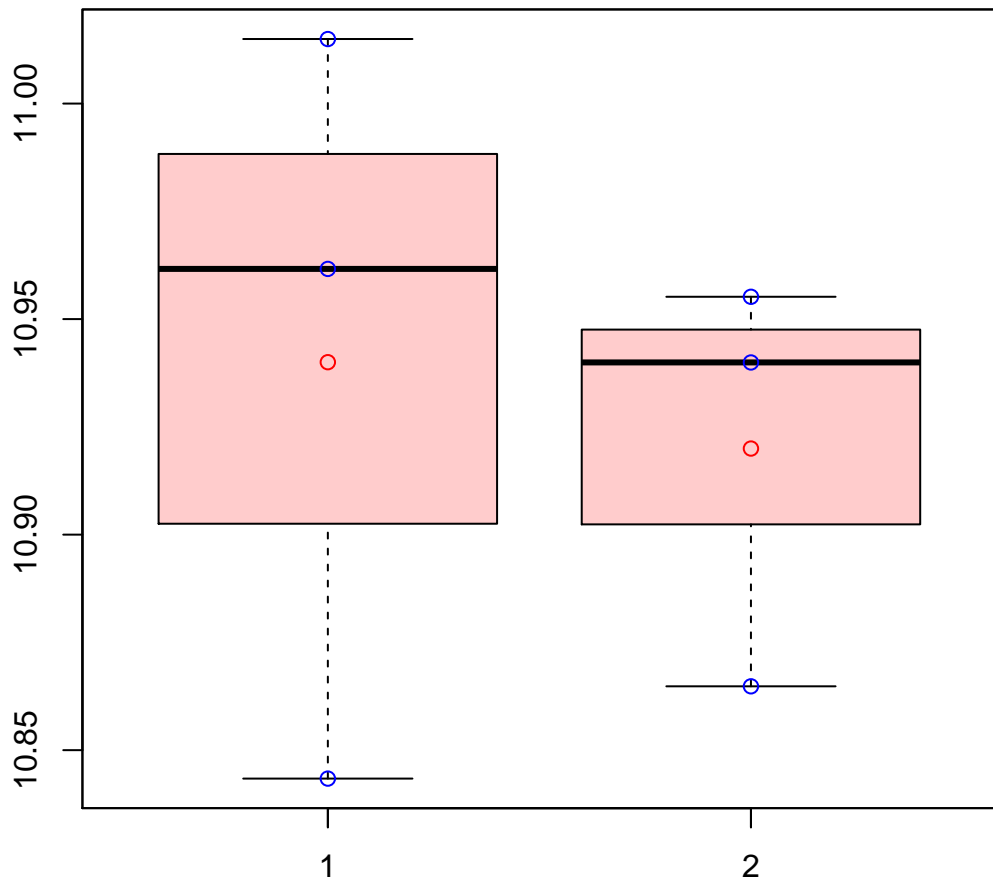

t-Test: p-value = 0.75



# CL9849Contig3|CL9849Contig3

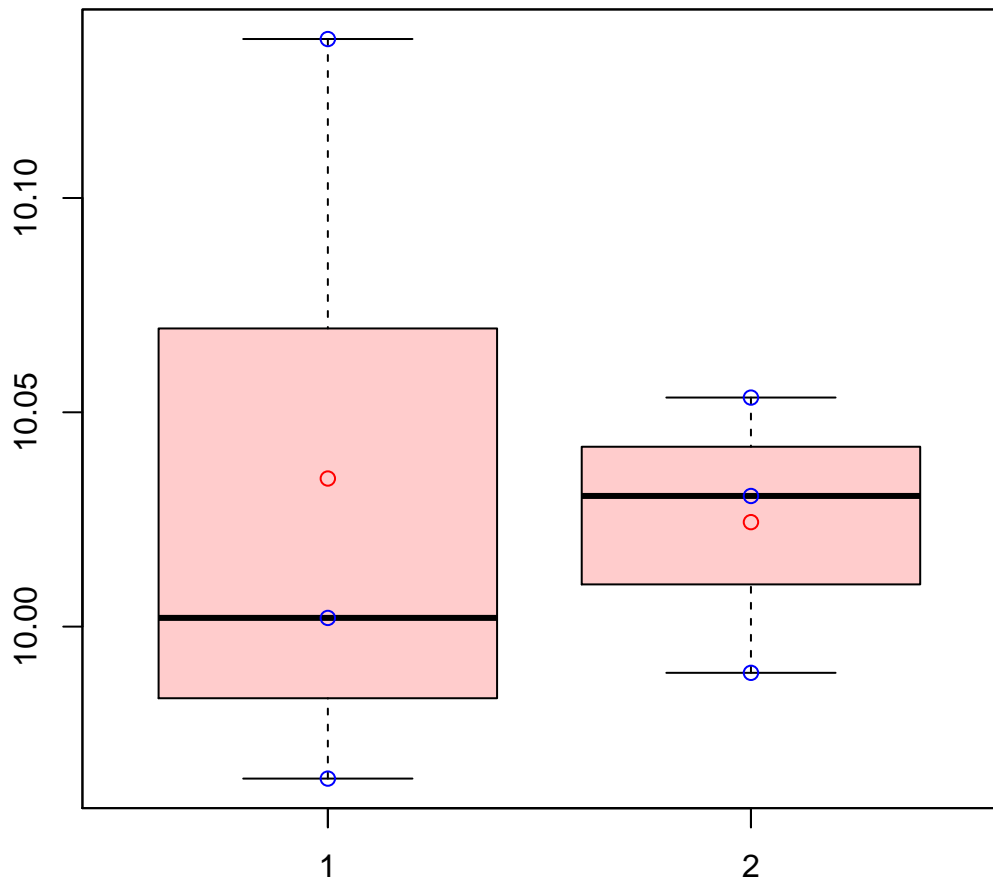

t-Test: p-value = 0.87

# CL9878Contig2|CL9878Contig2

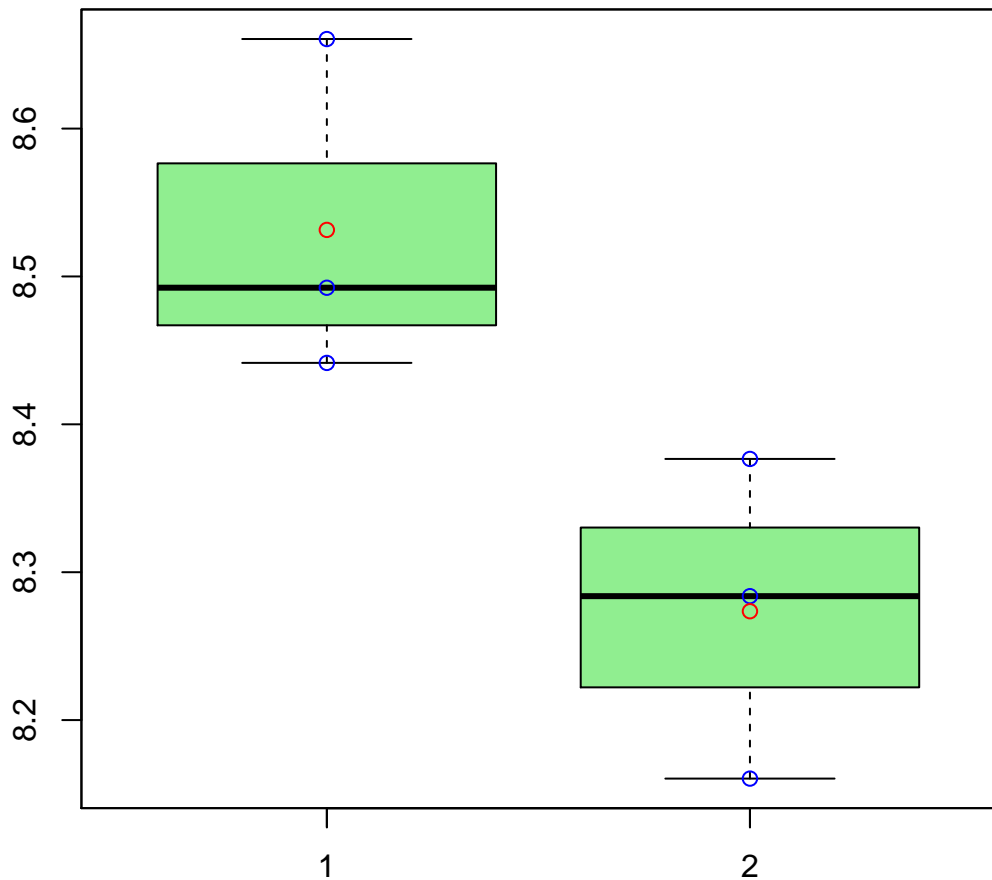

t-Test: p-value = 0.05

# CL9881Contig2|CL9881Contig2

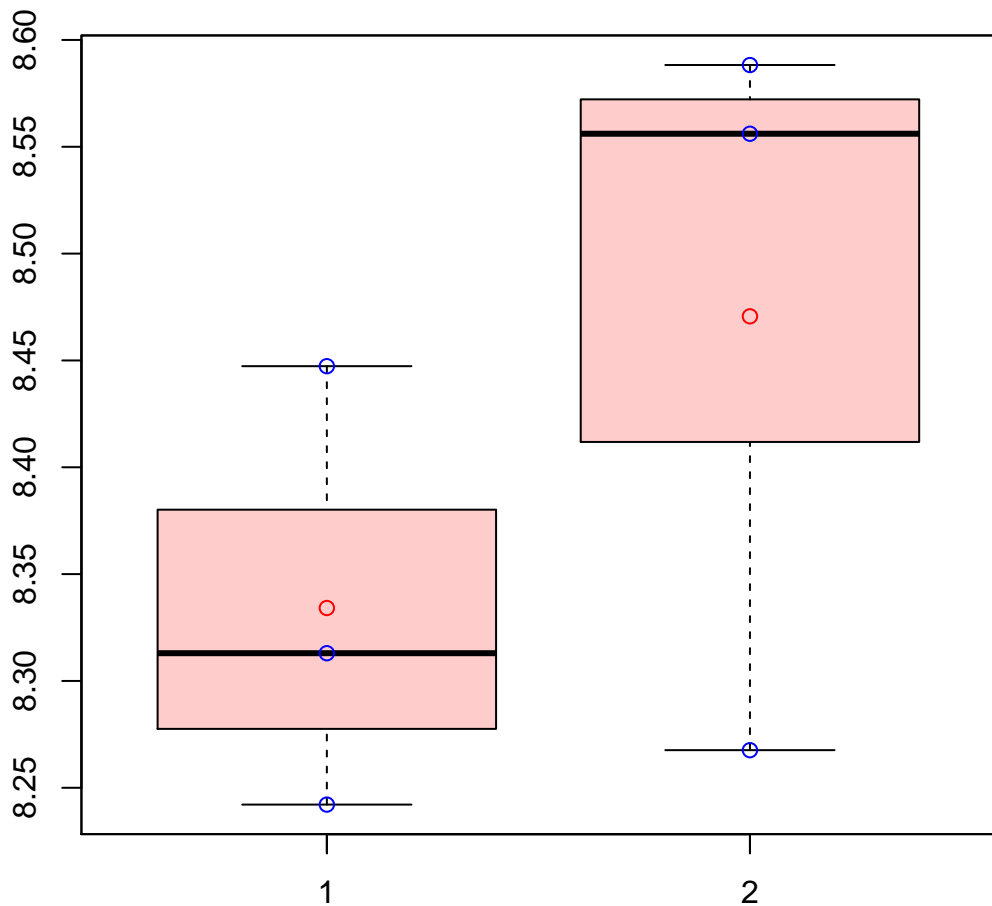

t-Test: p-value = 0.33

# CL9891Contig1|CL9891Contig1

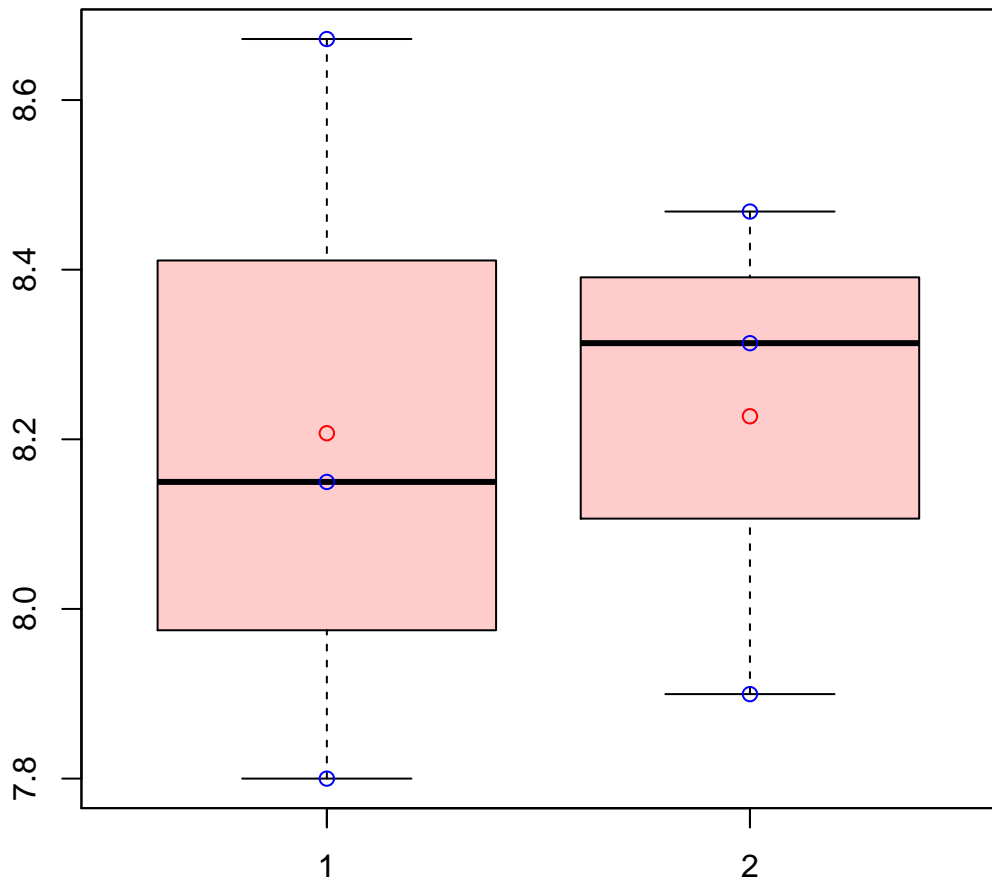

t-Test: p-value = 0.95

# CL9898Contig3|CL9898Contig3

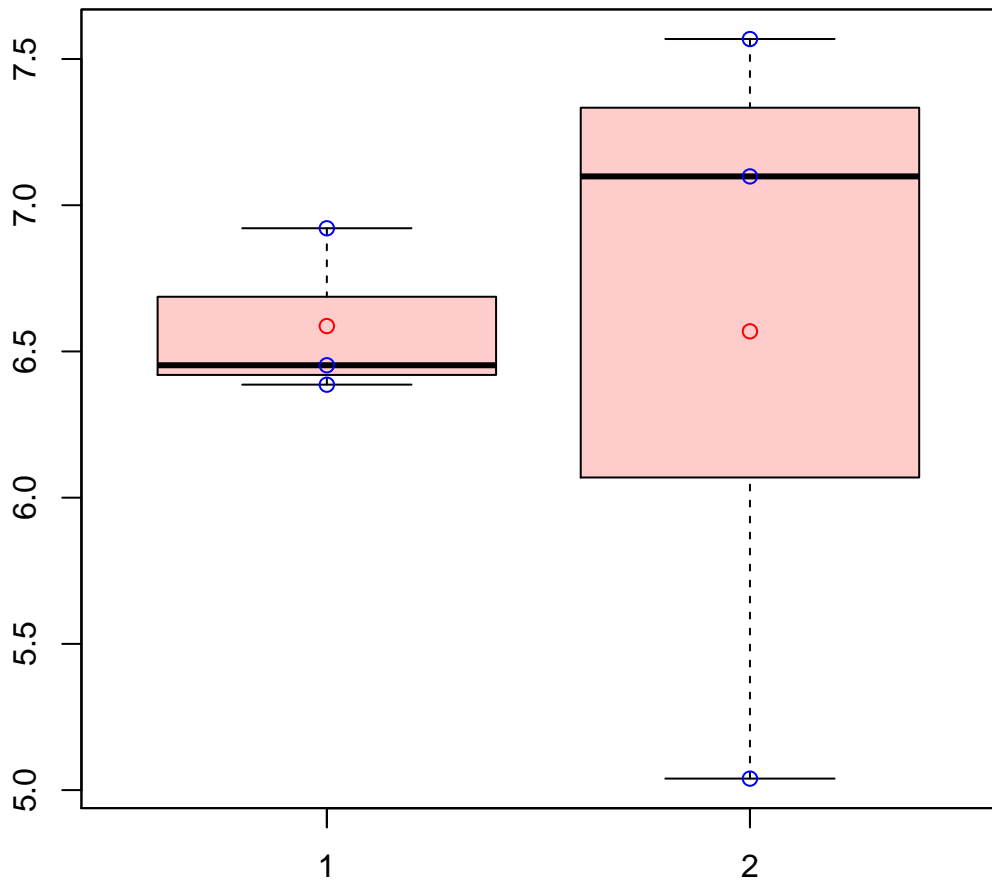

t-Test: p-value = 0.98

# CL990Contig6|CL990Contig6

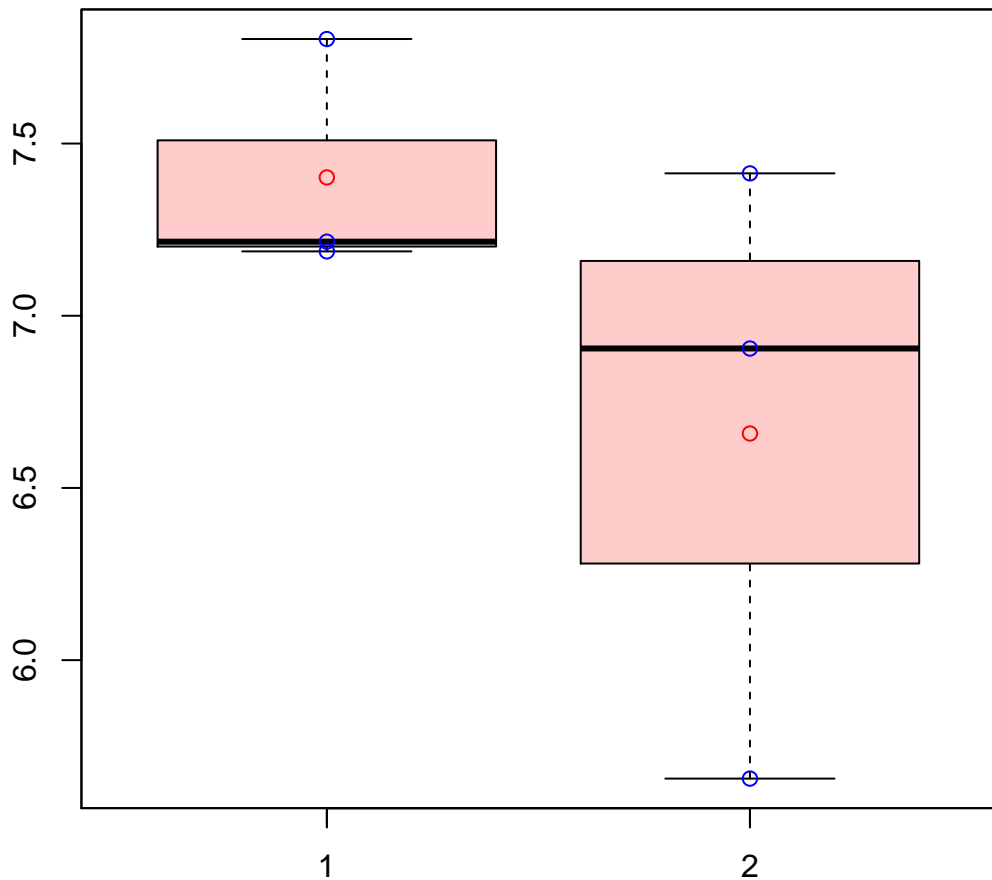

t-Test: p-value = 0.29

# CL9910Contig1|CL9910Contig1

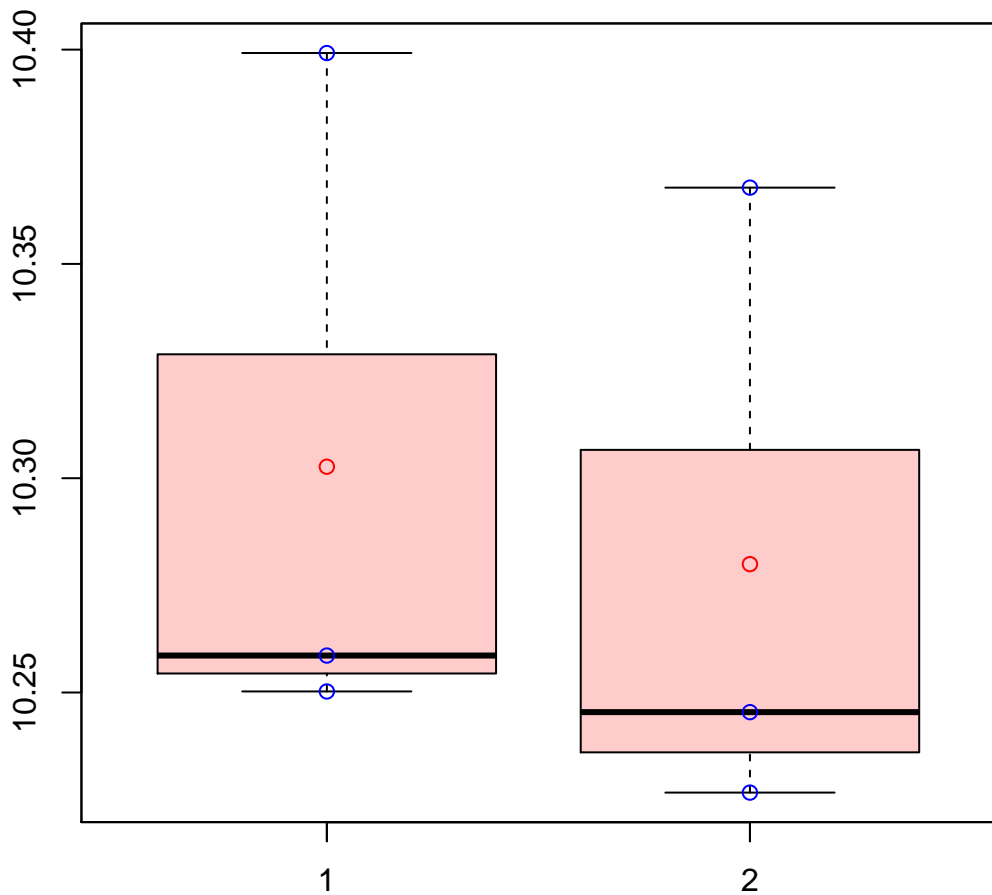

t-Test: p-value = 0.75

# CL993Contig6|CL993Contig6

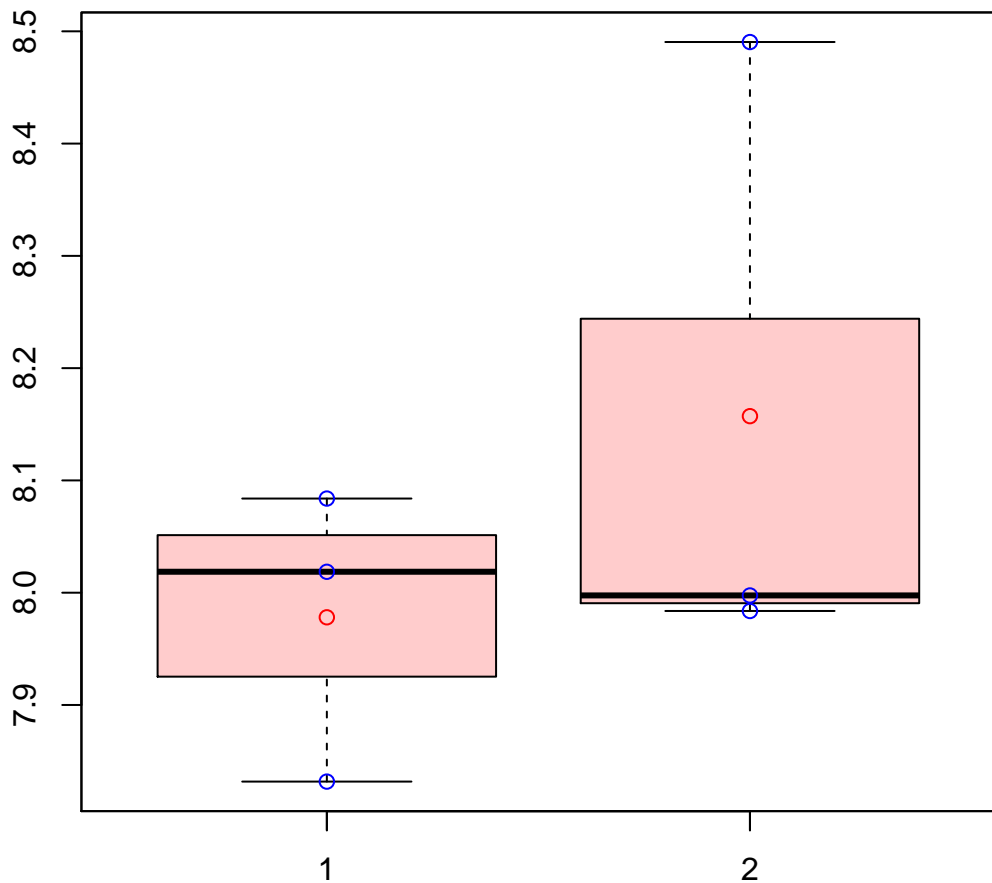

t-Test: p-value = 0.4



# CL993Contig9|CL993Contig9

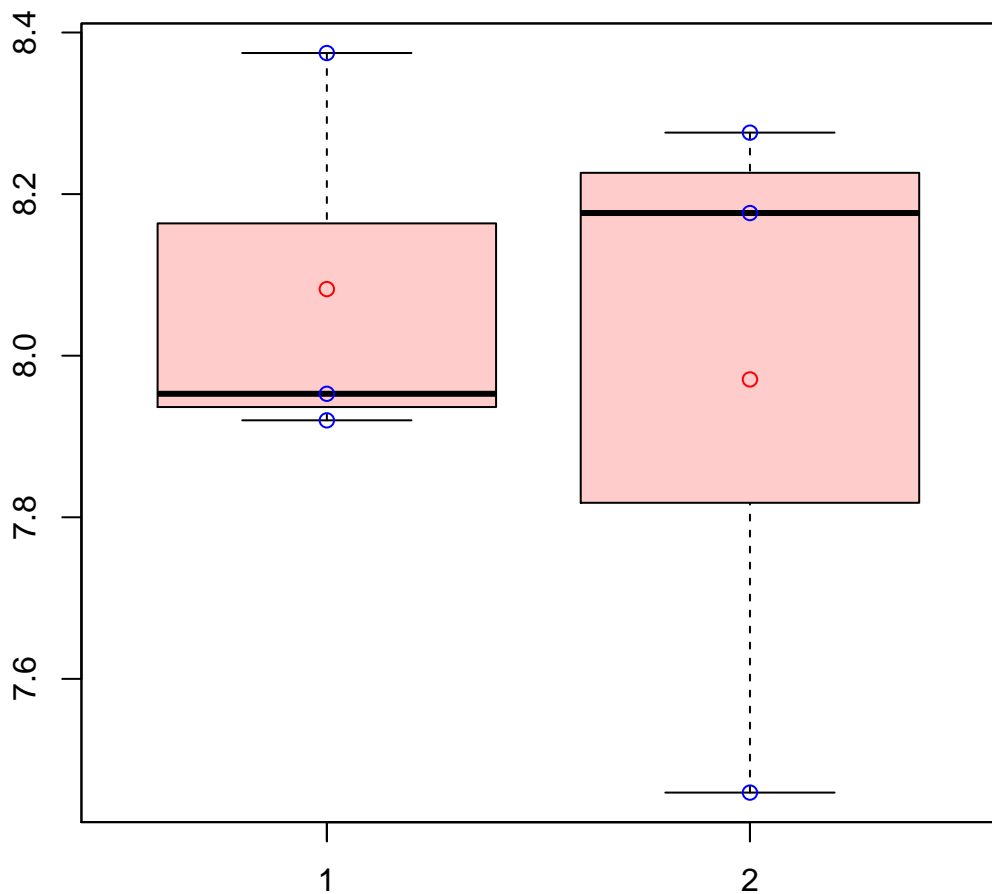

t-Test: p-value = 0.73

# CL9960Contig2|CL9960Contig2

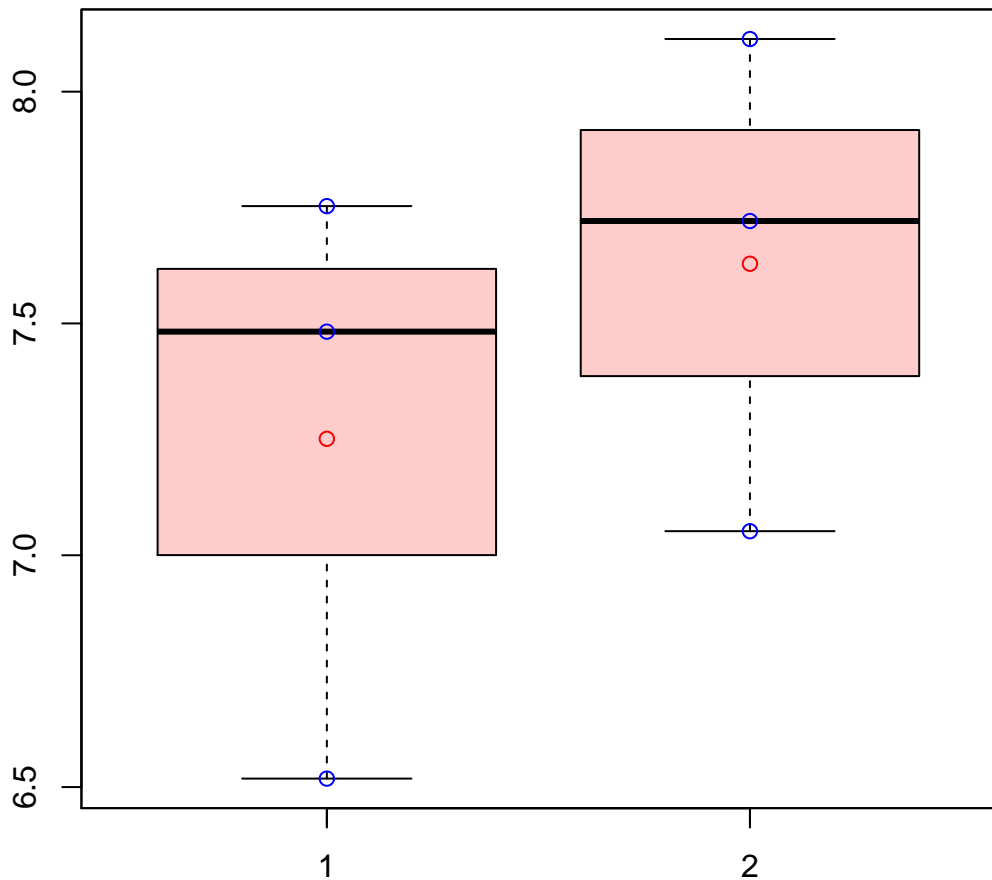

t-Test: p-value = 0.48

# CL9963Contig1|CL9963Contig1

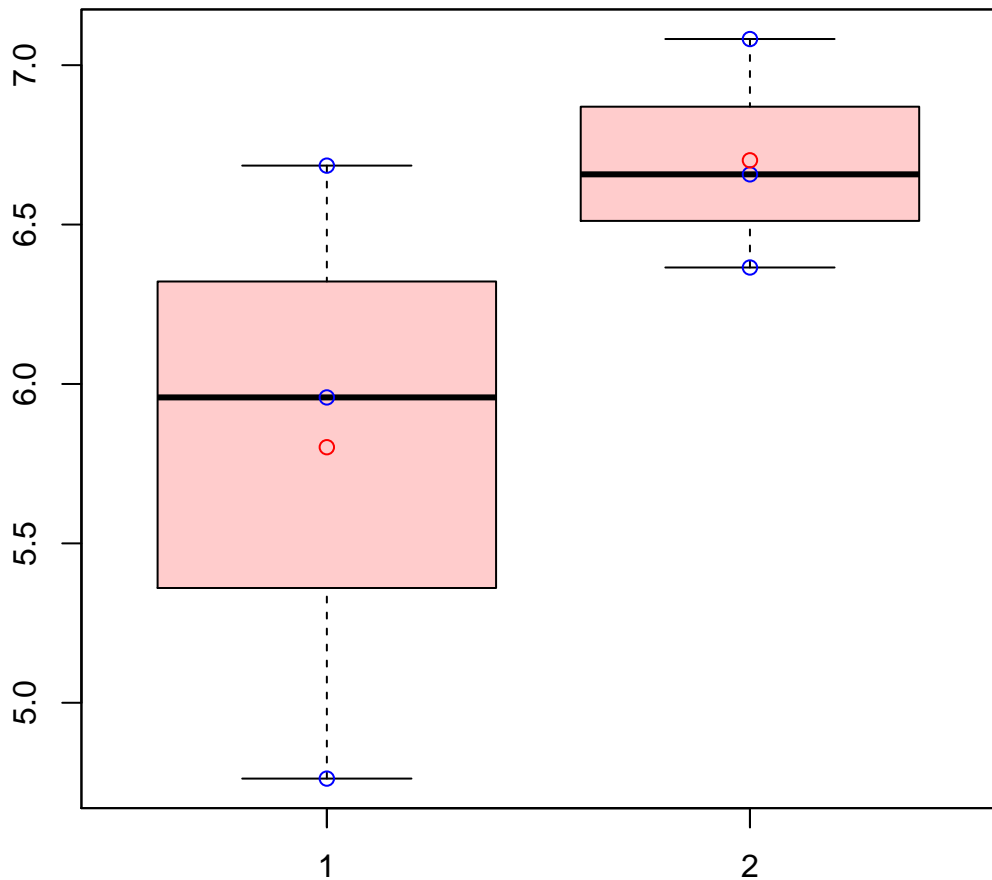

t-Test: p-value = 0.24

# CL9973Contig2|CL9973Contig2

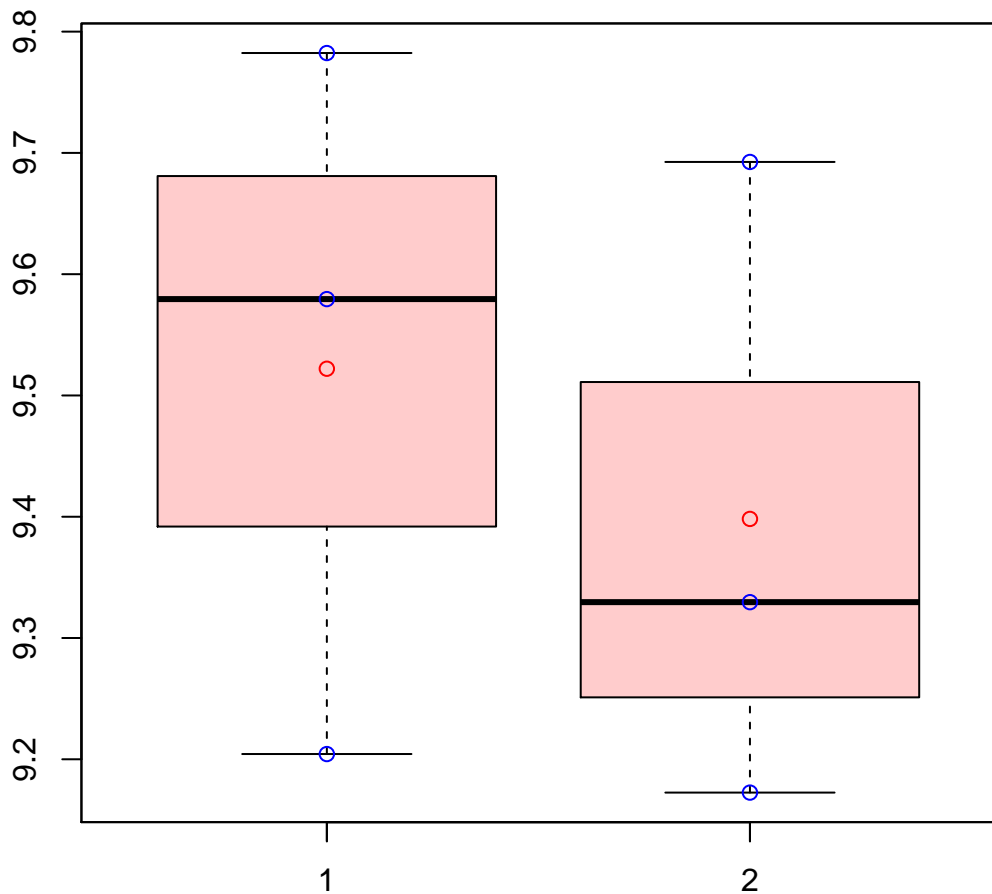

t-Test: p-value = 0.62

# CL9974Contig1|CL9974Contig1

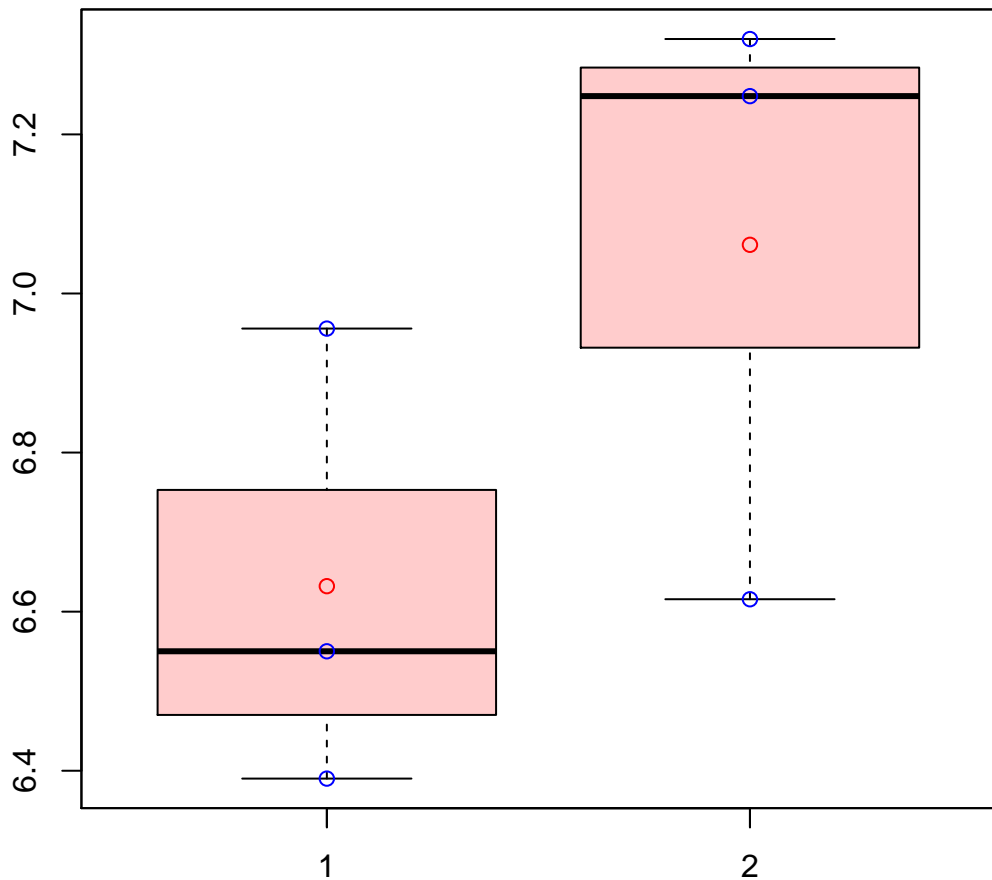

t-Test: p-value = 0.21

# CL997Contig5|CL997Contig5

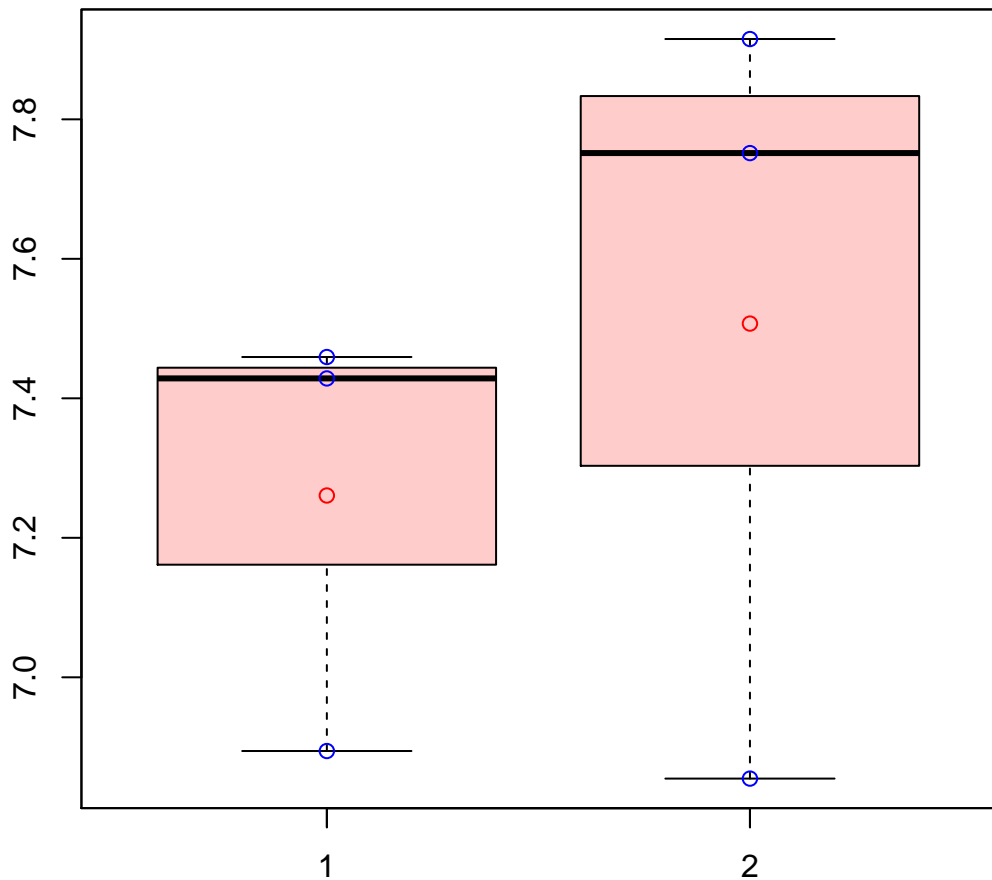

t-Test: p-value = 0.56

# CL99Contig10|CL99Contig10

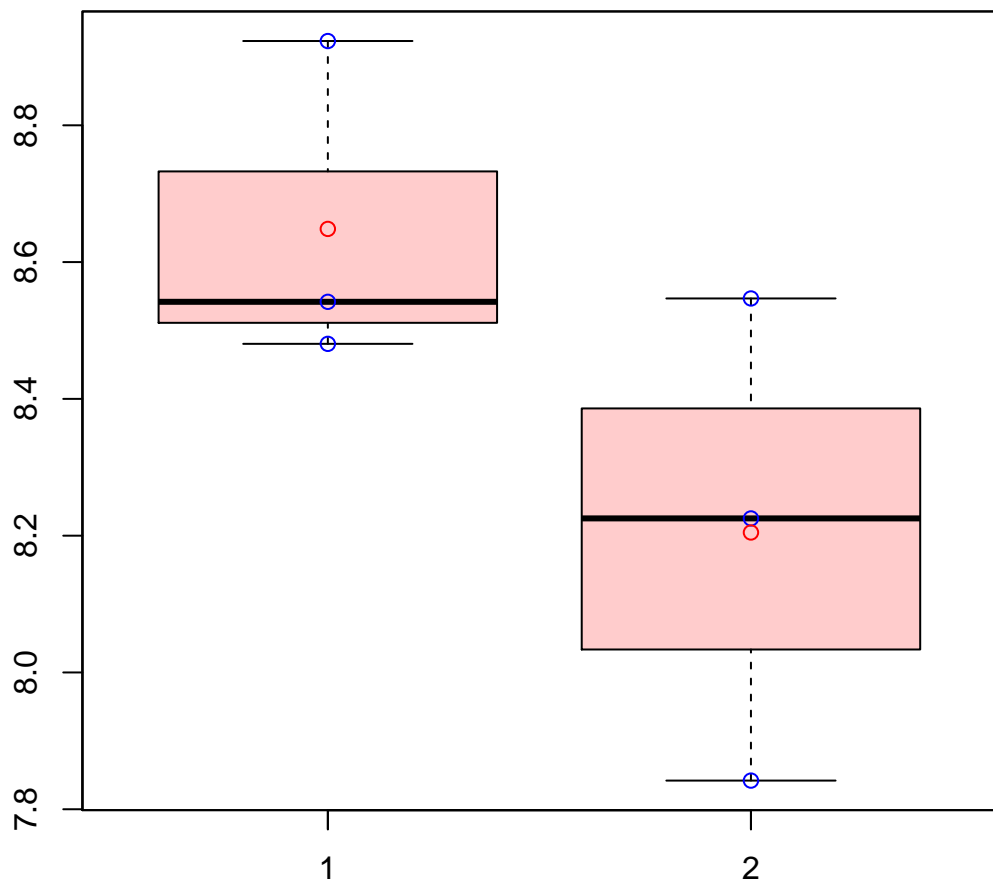

t-Test: p-value = 0.16

# CL99Contig13|CL99Contig13

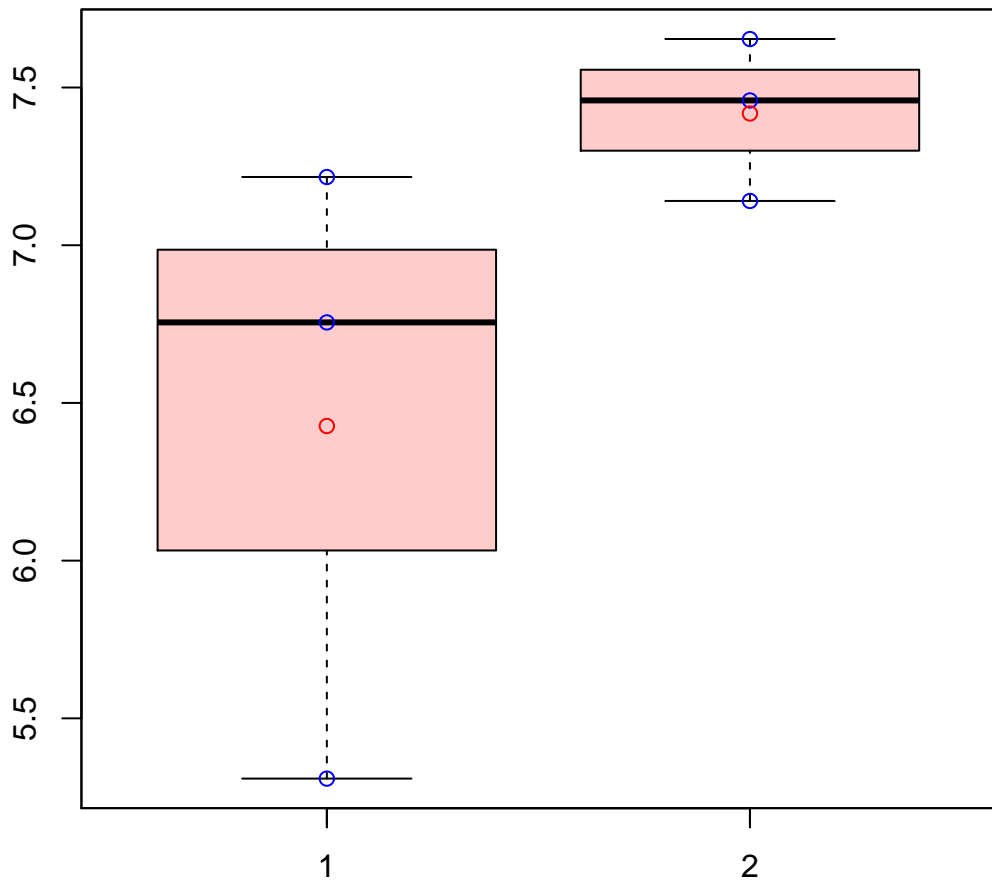

t-Test: p-value = 0.22



# CL99Contig18|CL99Contig18

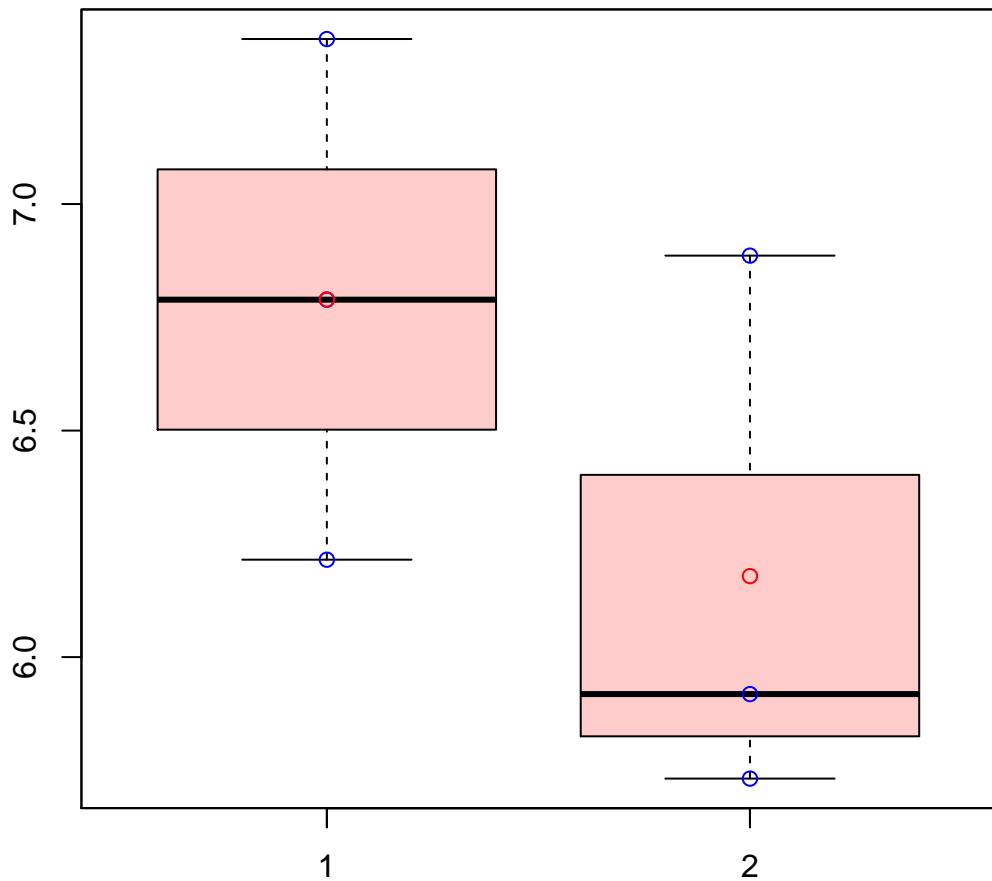

t-Test: p-value = 0.28

# CL99Contig22|CL99Contig22

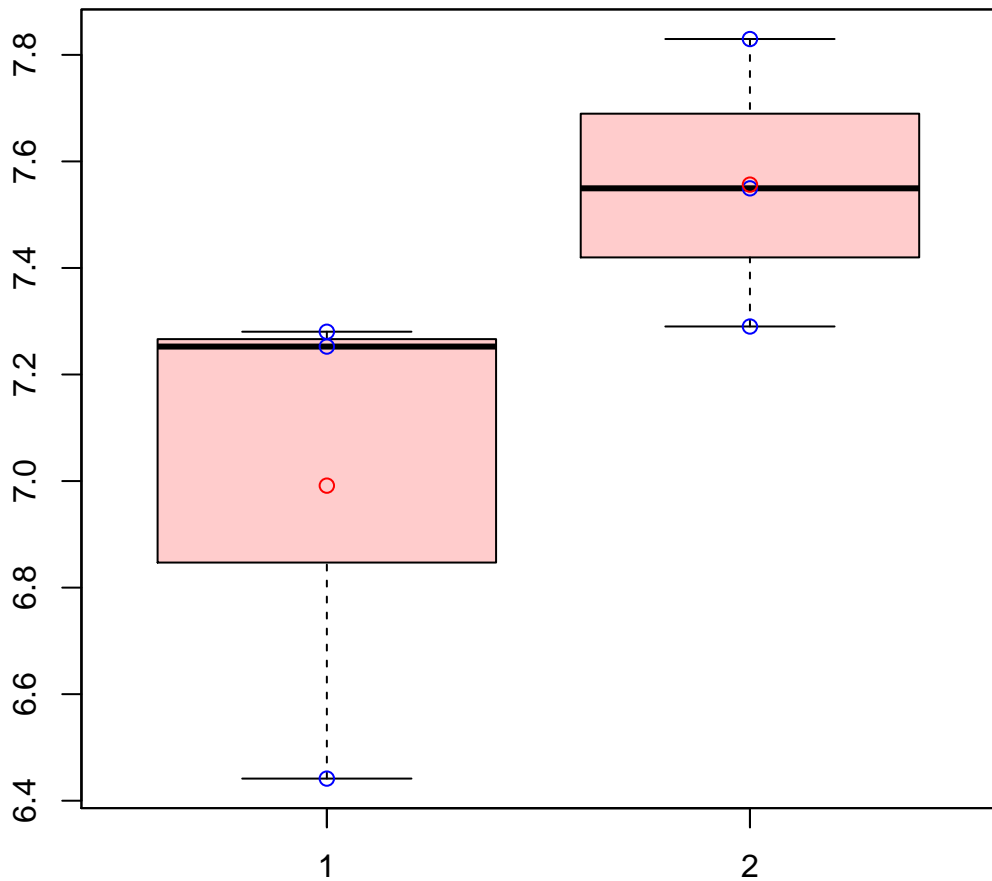

t-Test: p-value = 0.17

# CL99Contig6|CL99Contig6

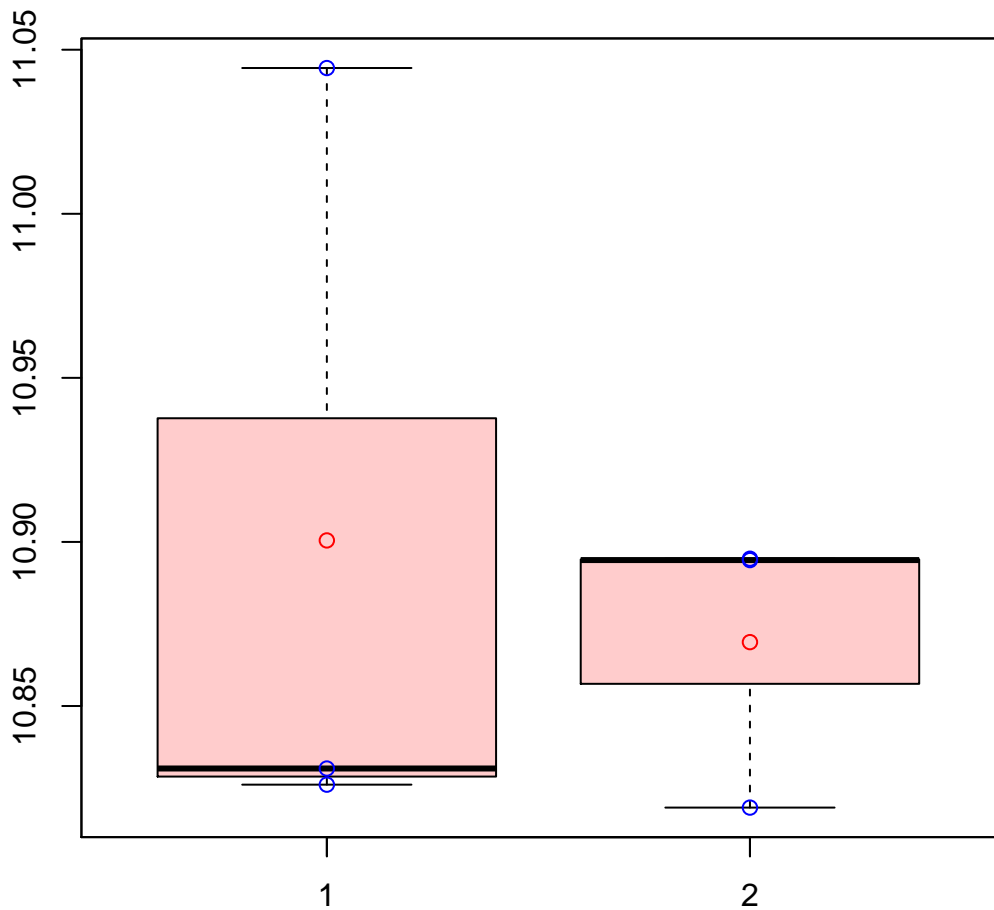

t-Test: p-value = 0.72

# CL9Contig20|CL9Contig20

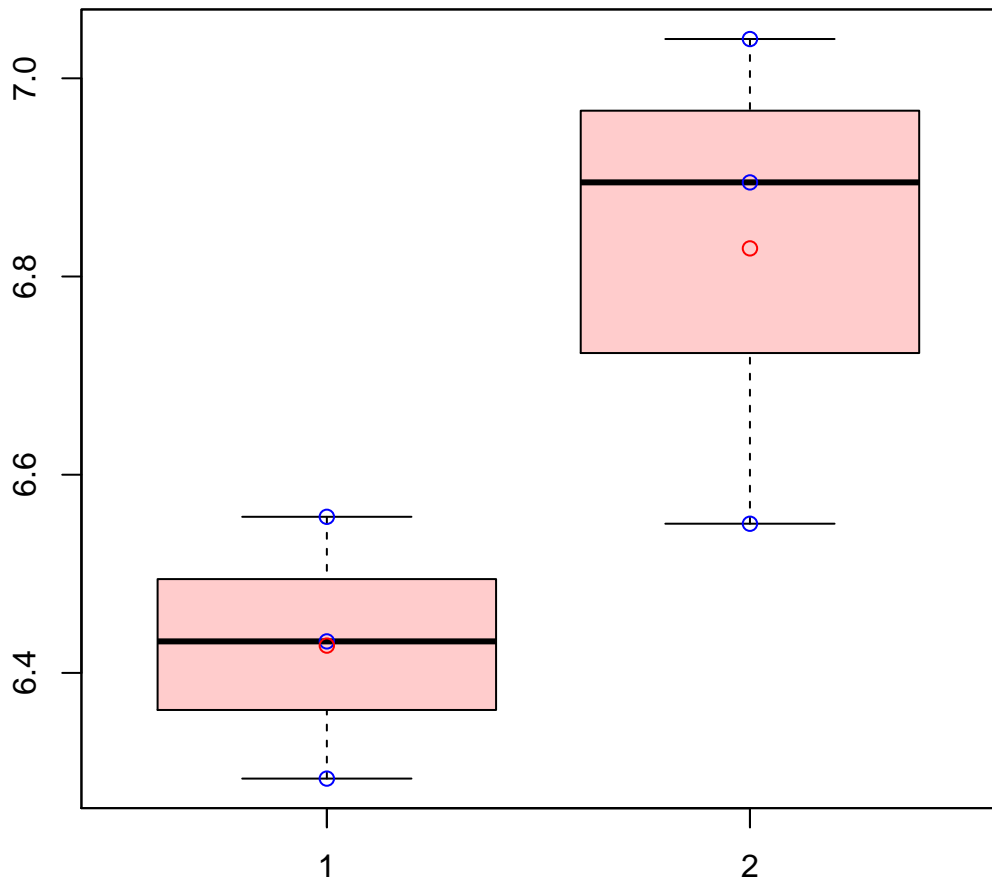

t-Test: p-value = 0.09

# CL9Contig35|CL9Contig35

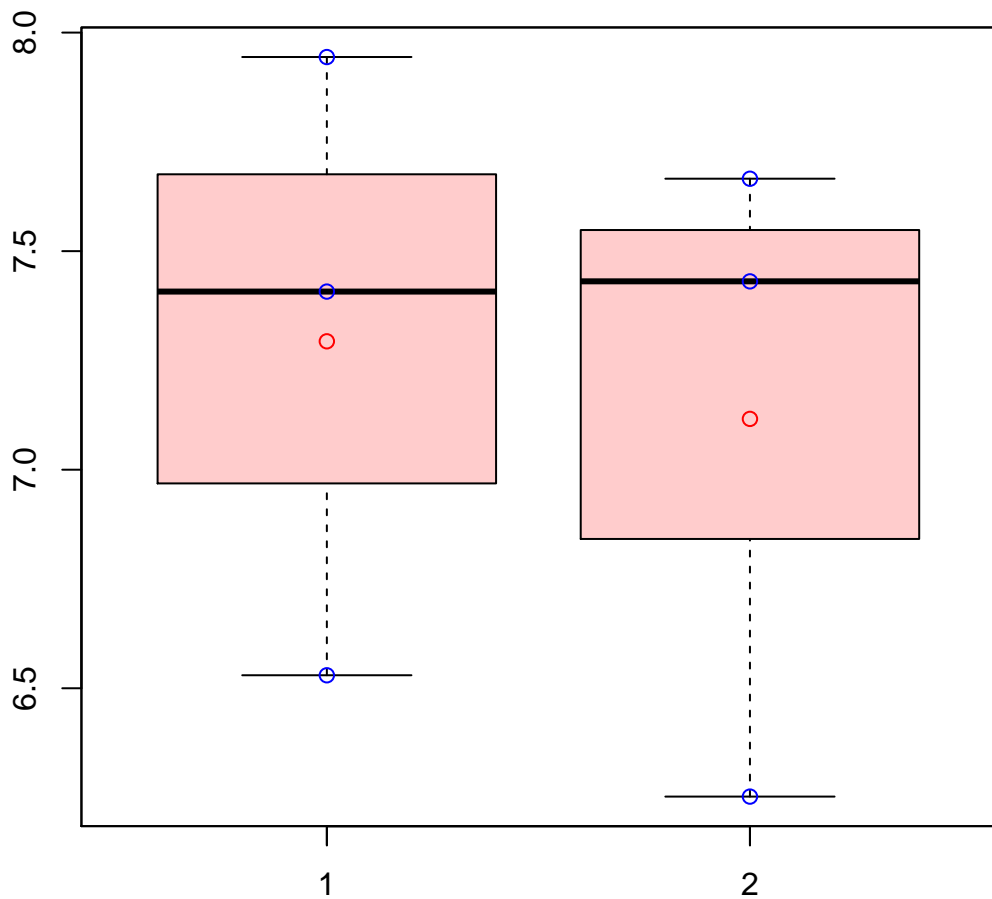

t-Test: p-value = 0.78

# CLPP8\_ERATE|CLPP8\_ERATE

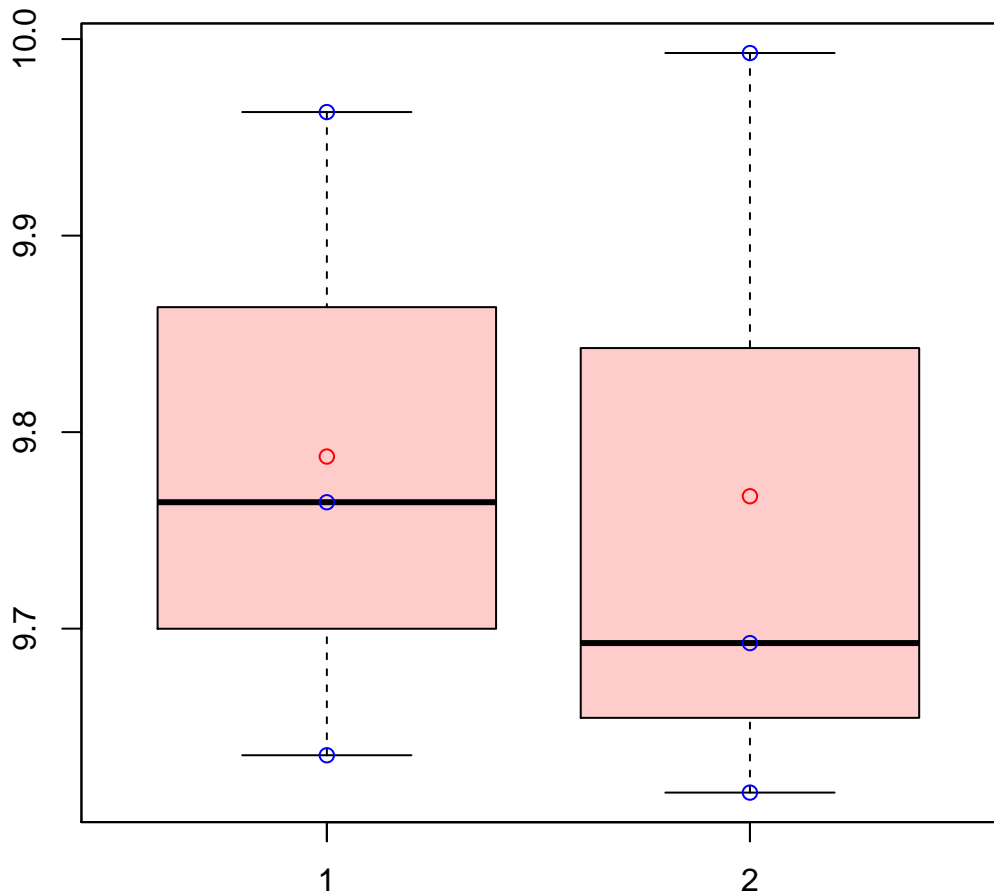

t-Test: p-value = 0.9

comp10971\_c0\_seq1|comp10971\_c0\_seq1

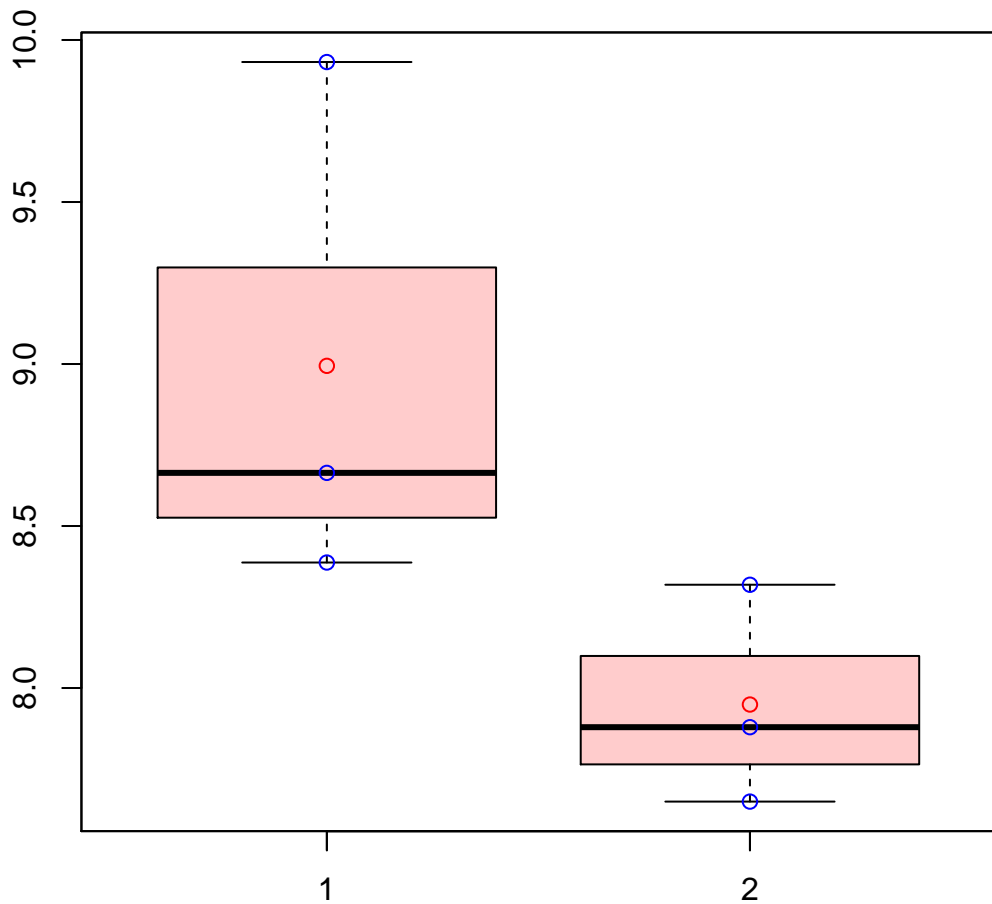

t-Test: p-value = 0.15

# comp1100\_c0\_seq1|comp1100\_c0\_seq1

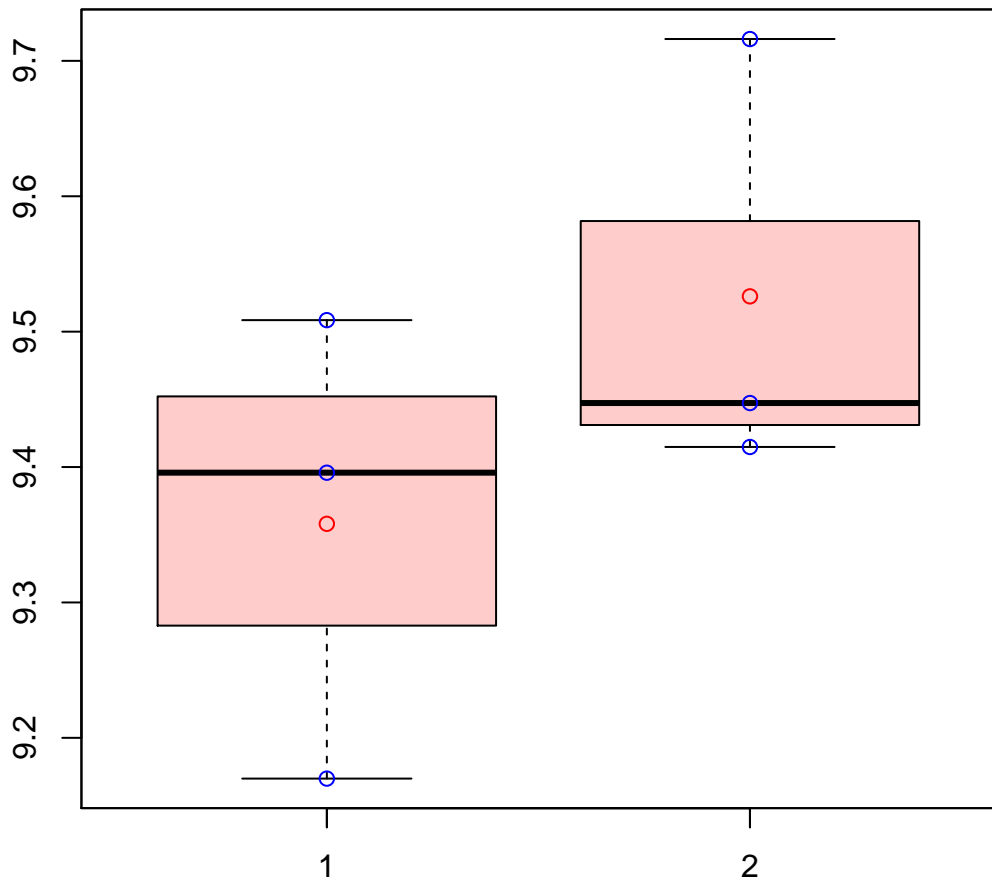

t-Test: p-value = 0.29



# comp11559\_c0\_seq6|comp11559\_c0\_seq6

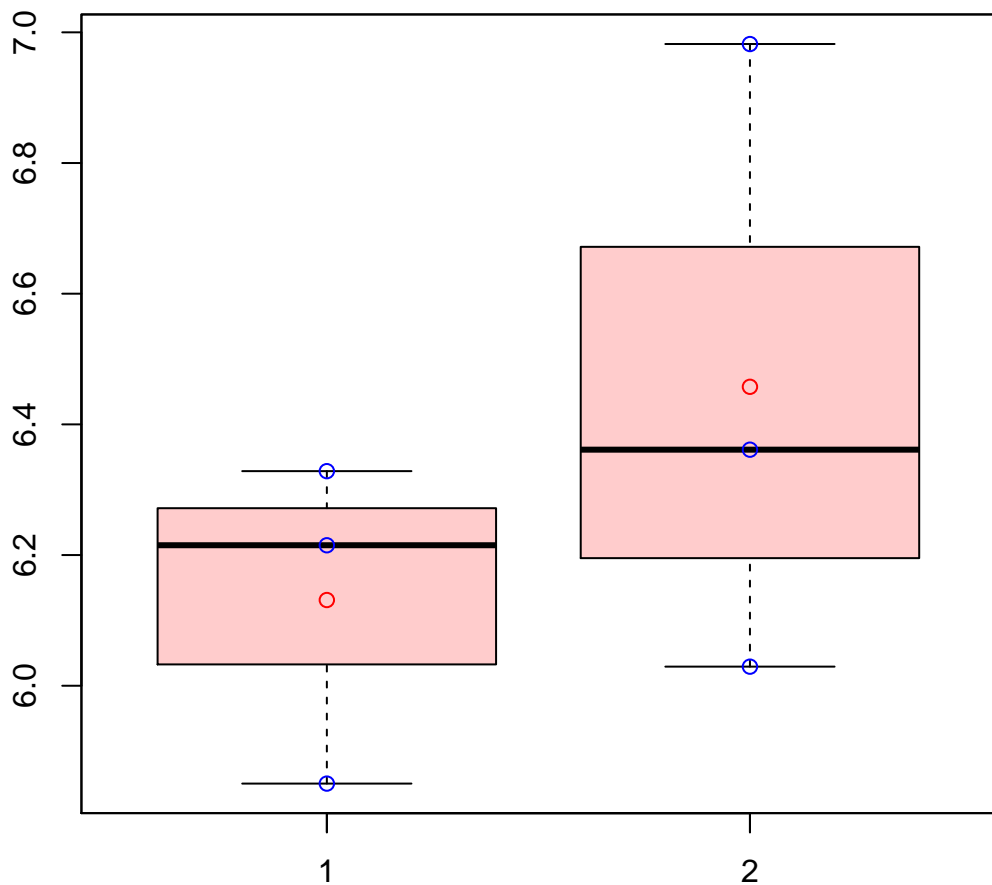

t-Test: p-value = 0.38

comp1287\_c0\_seq1|comp1287\_c0\_seq1

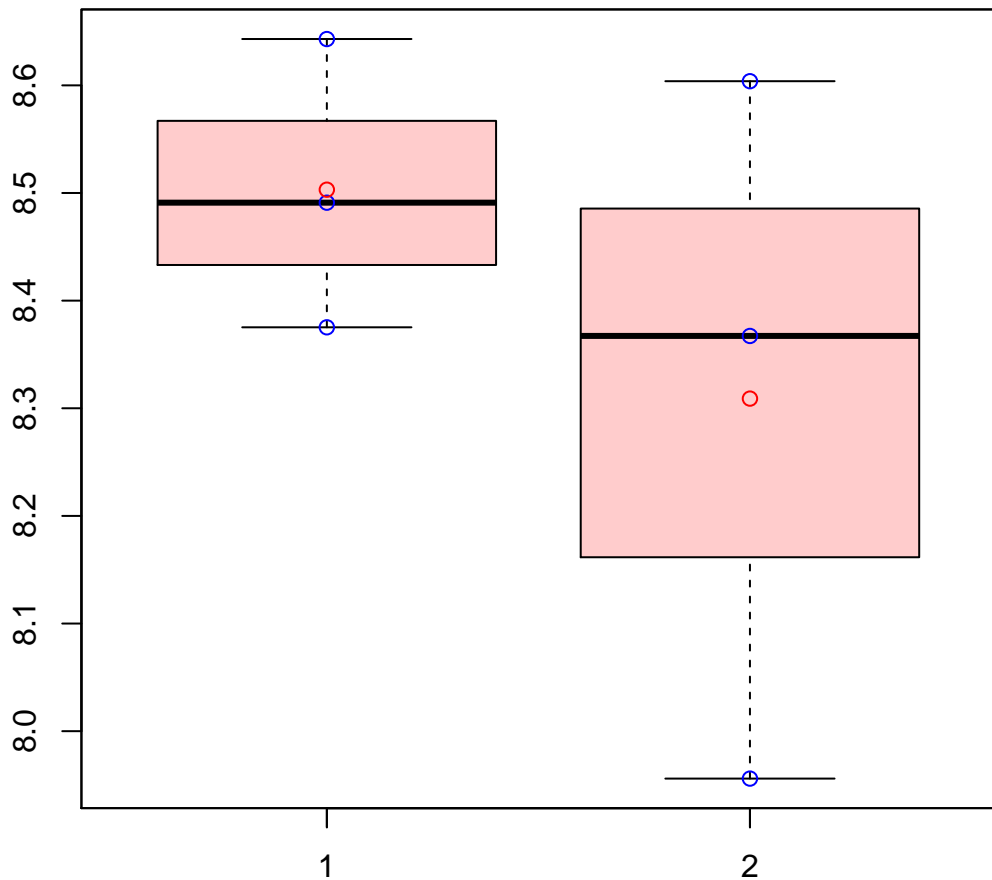

t-Test: p-value = 0.42

**comp1325\_c0\_seq38|comp1325\_c0\_seq38**

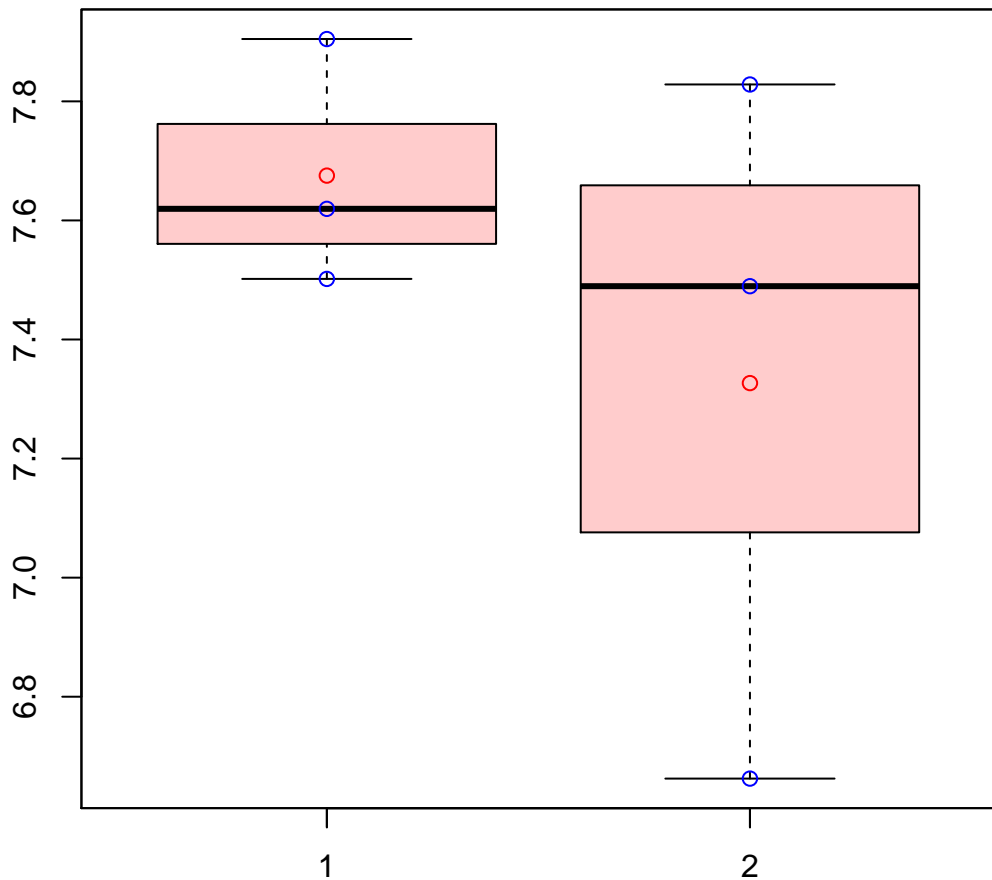

t-Test: p-value = 0.42

**comp13984\_c0\_seq1|comp13984\_c0\_seq1**

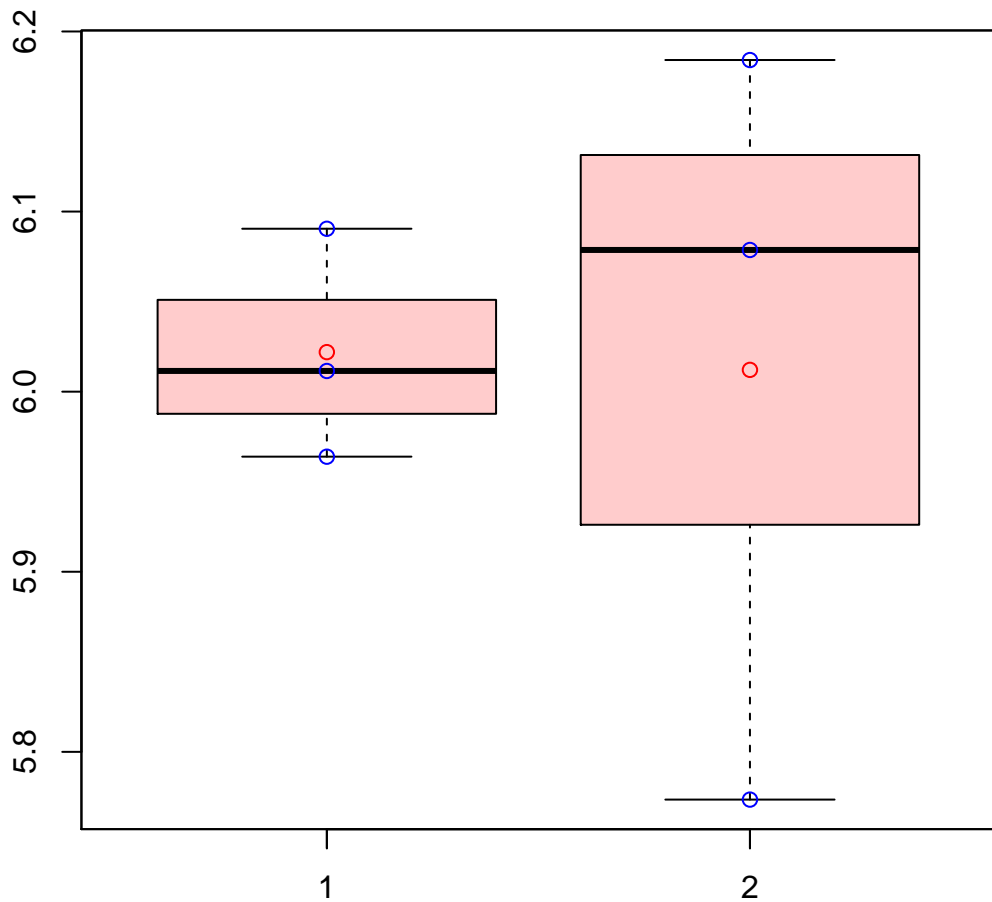

t-Test: p-value = 0.94

comp13984\_c0\_seq2|comp13984\_c0\_seq2

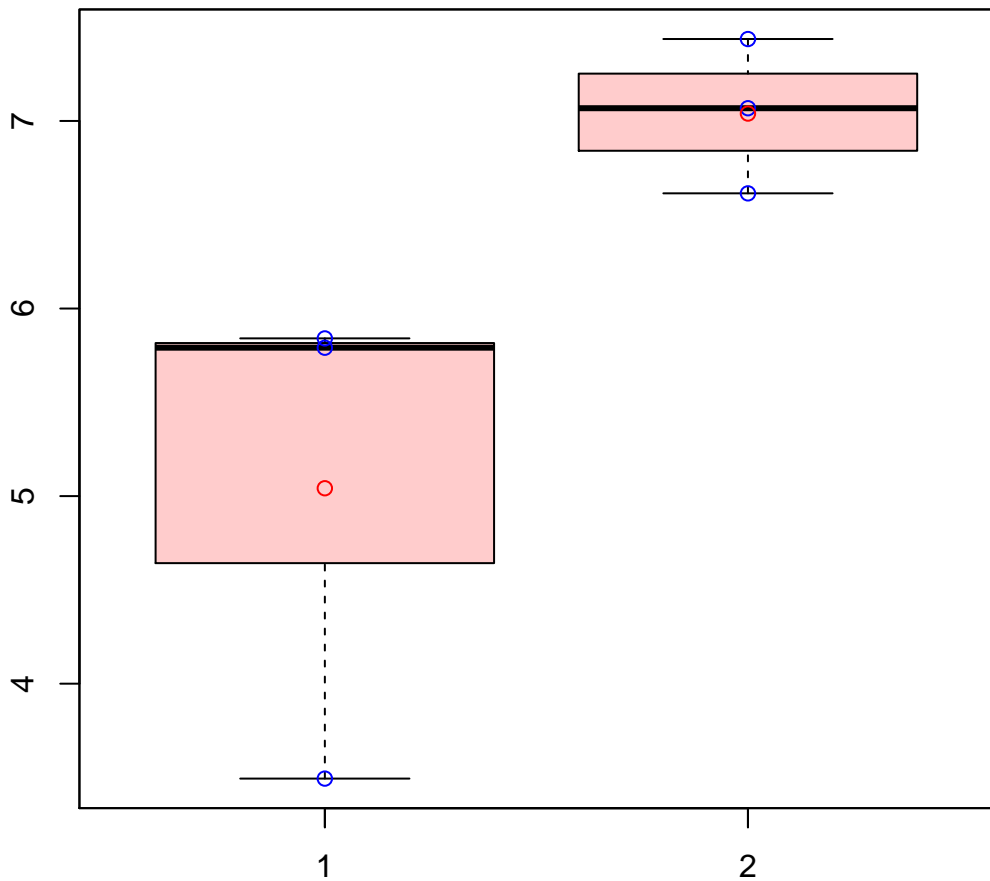

t-Test: p-value = 0.11

comp21949\_c0\_seq4|comp21949\_c0\_seq4

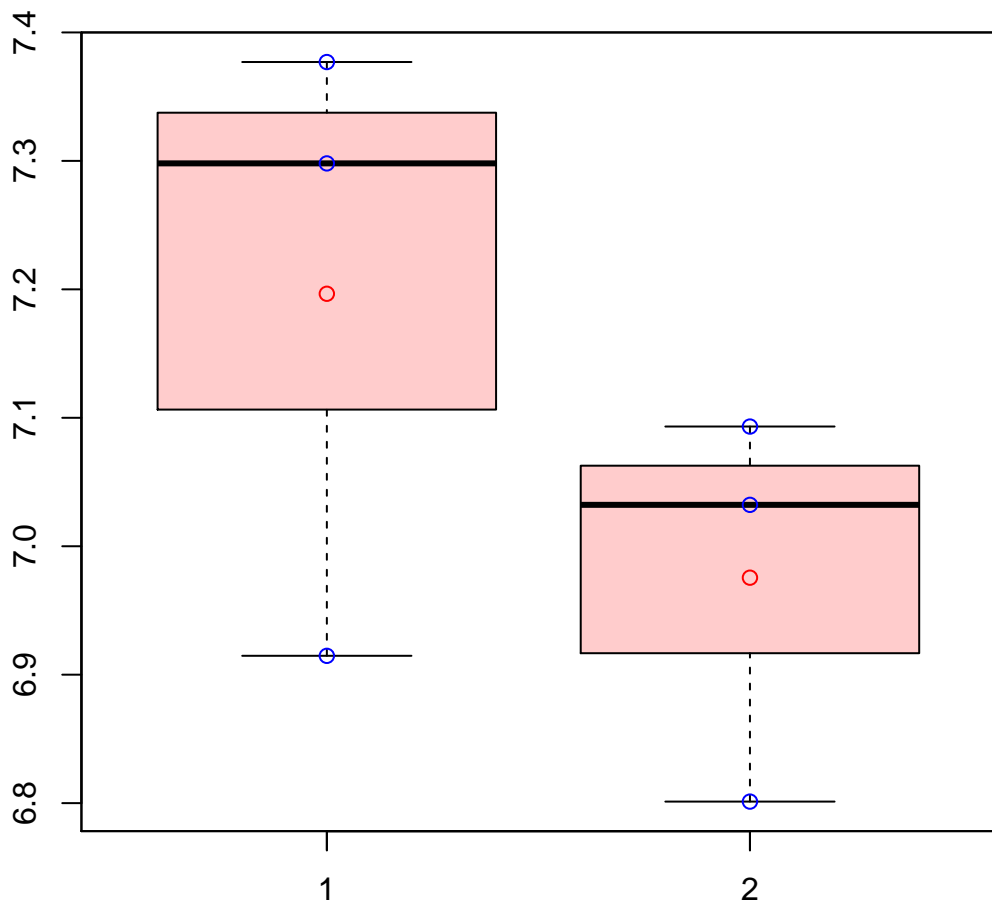

t-Test: p-value = 0.27

comp2297\_c0\_seq7|comp2297\_c0\_seq7

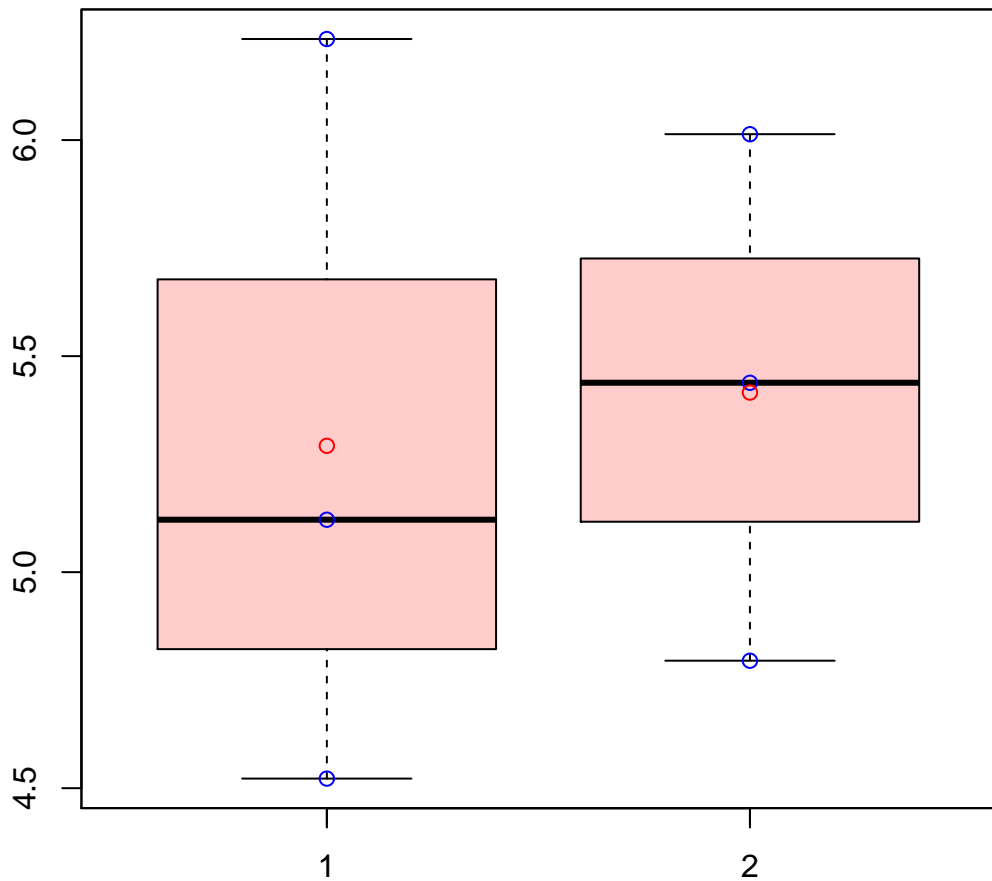

t-Test: p-value = 0.85

comp2740\_c0\_seq1|comp2740\_c0\_seq1

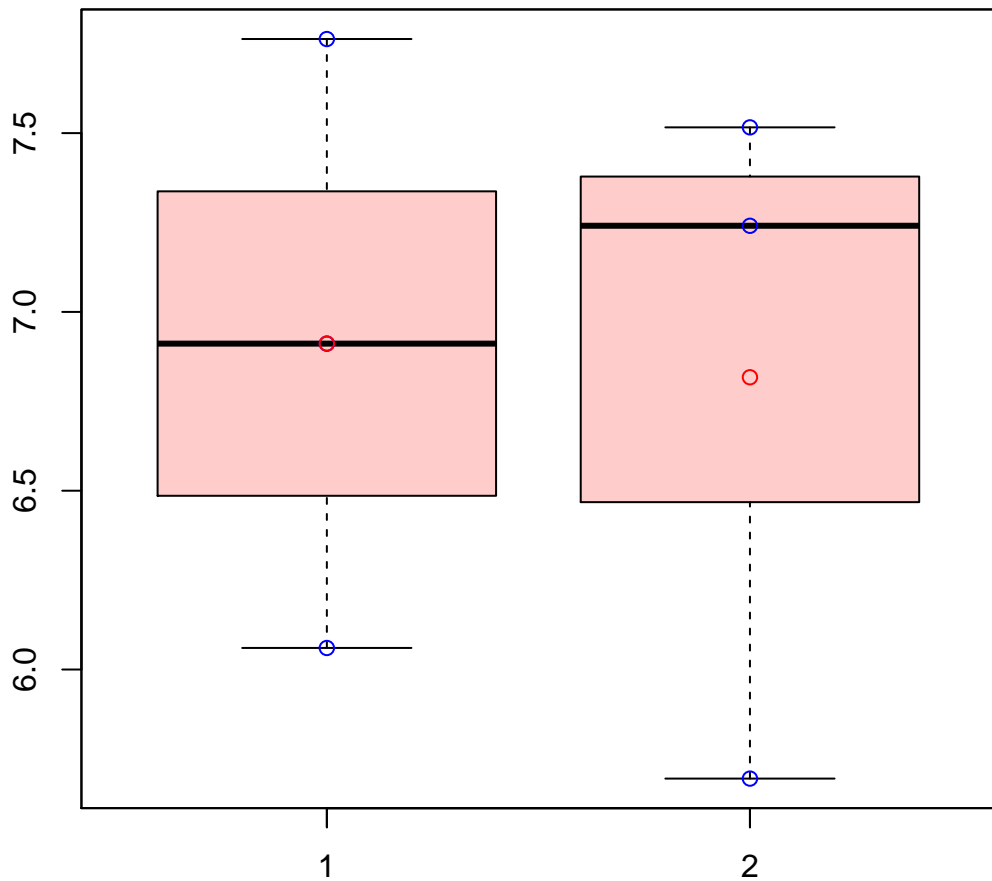

t-Test: p-value = 0.91



# comp2813\_c0\_seq5|comp2813\_c0\_seq5

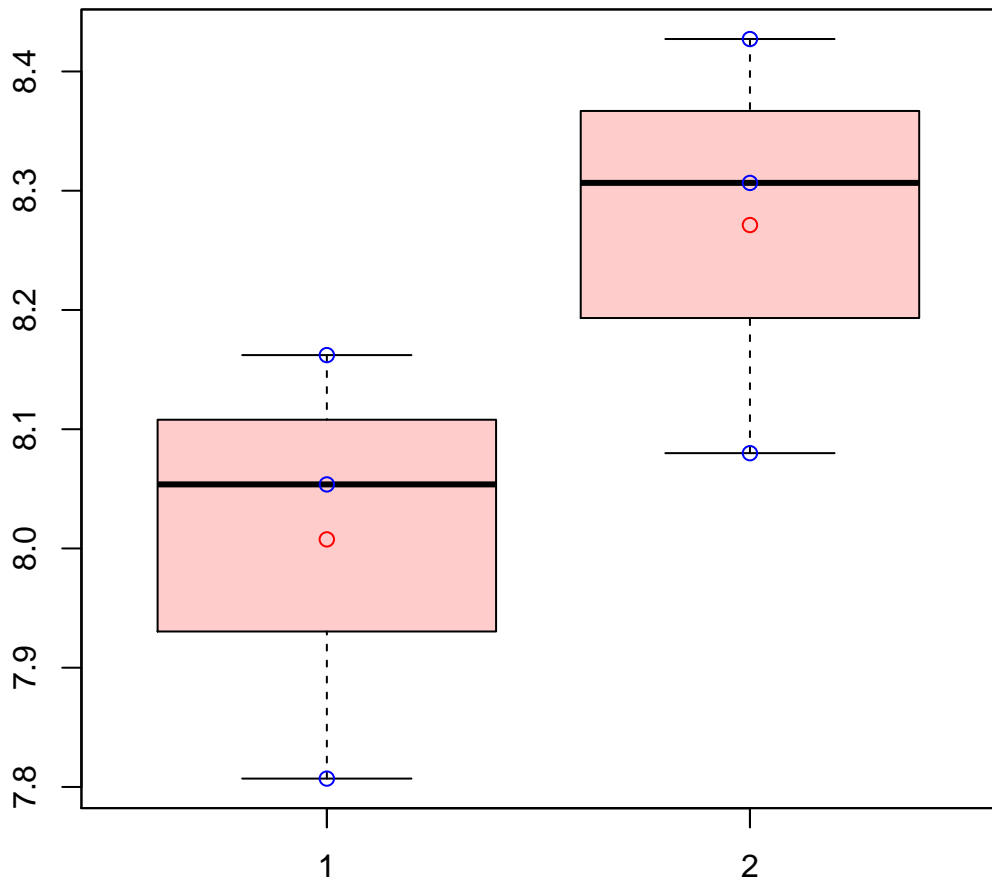

t-Test: p-value = 0.15

# comp3757\_c0\_seq1|comp3757\_c0\_seq1

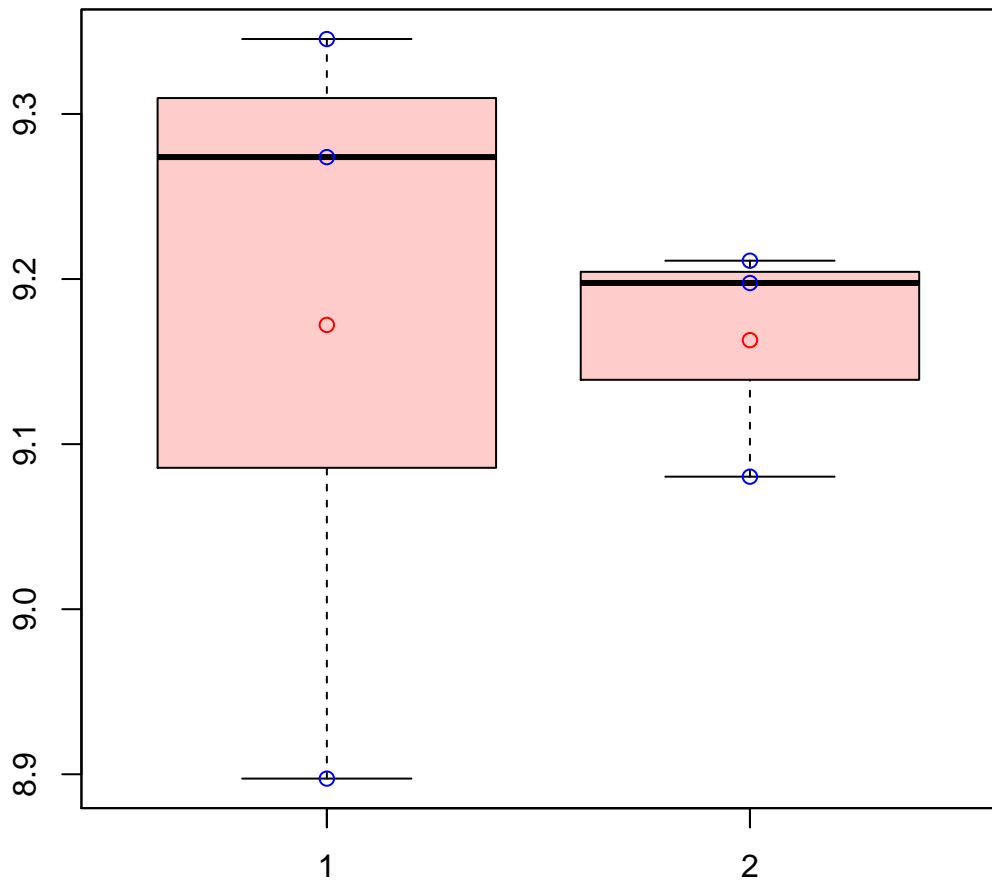

t-Test: p-value = 0.95

# comp42\_c0\_seq1|comp42\_c0\_seq1

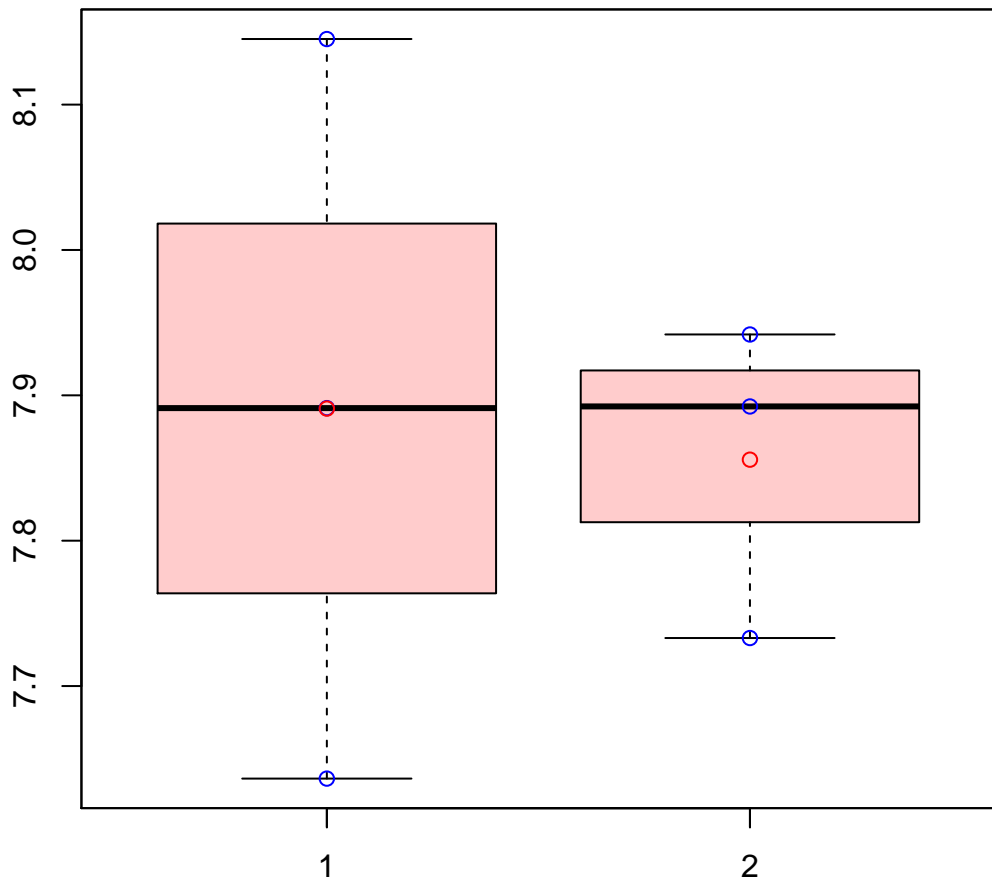

t-Test: p-value = 0.84

comp5643\_c0\_seq23|comp5643\_c0\_seq23

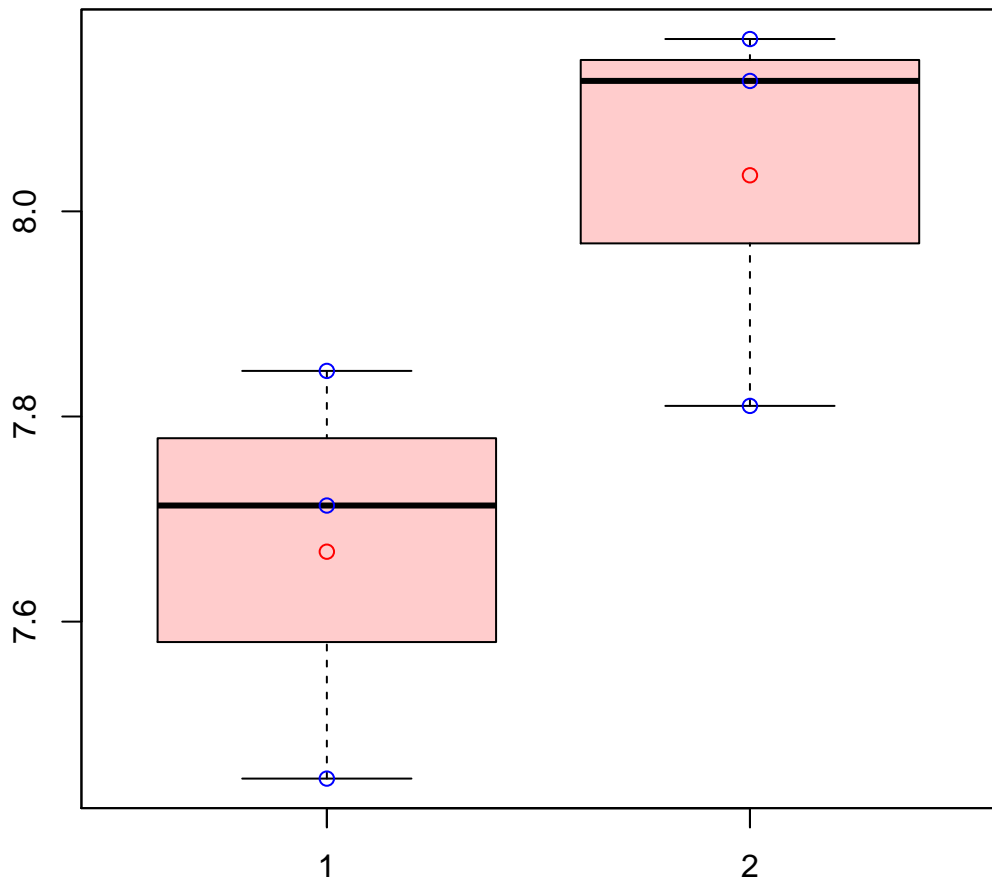

t-Test: p-value = 0.09

comp62429\_c0\_seq1|comp62429\_c0\_seq1

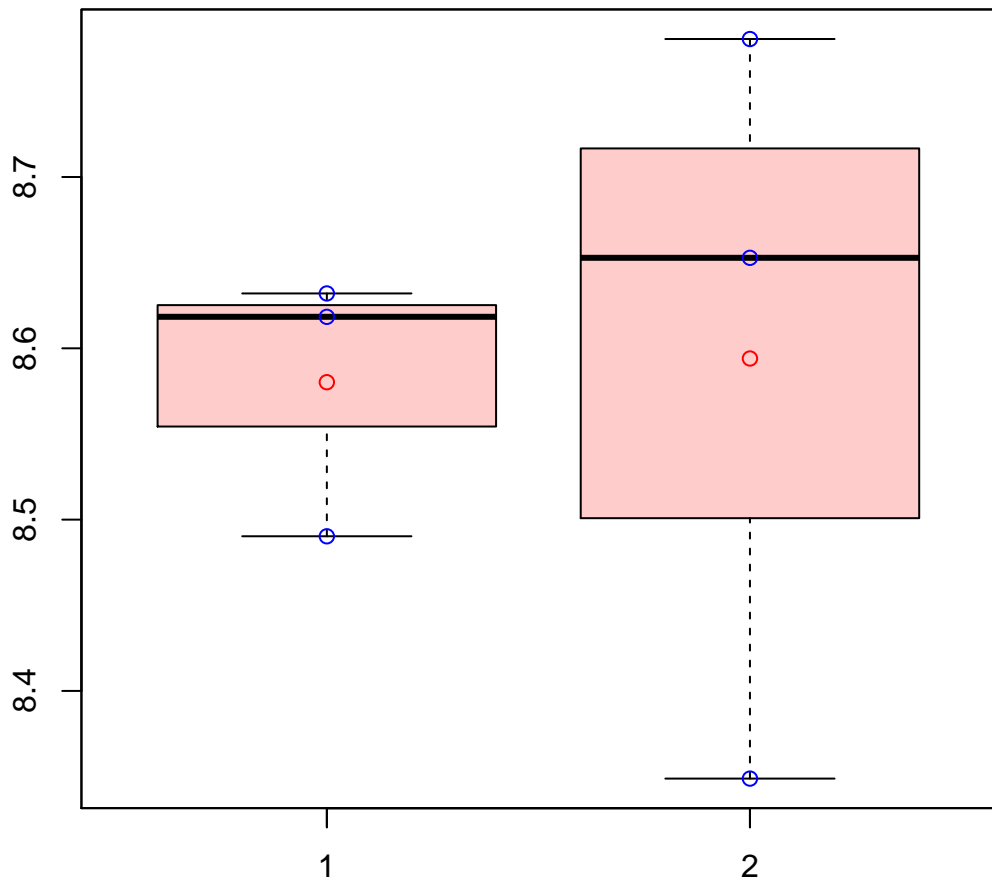

t-Test: p-value = 0.93

# comp7683\_c0\_seq3|comp7683\_c0\_seq3

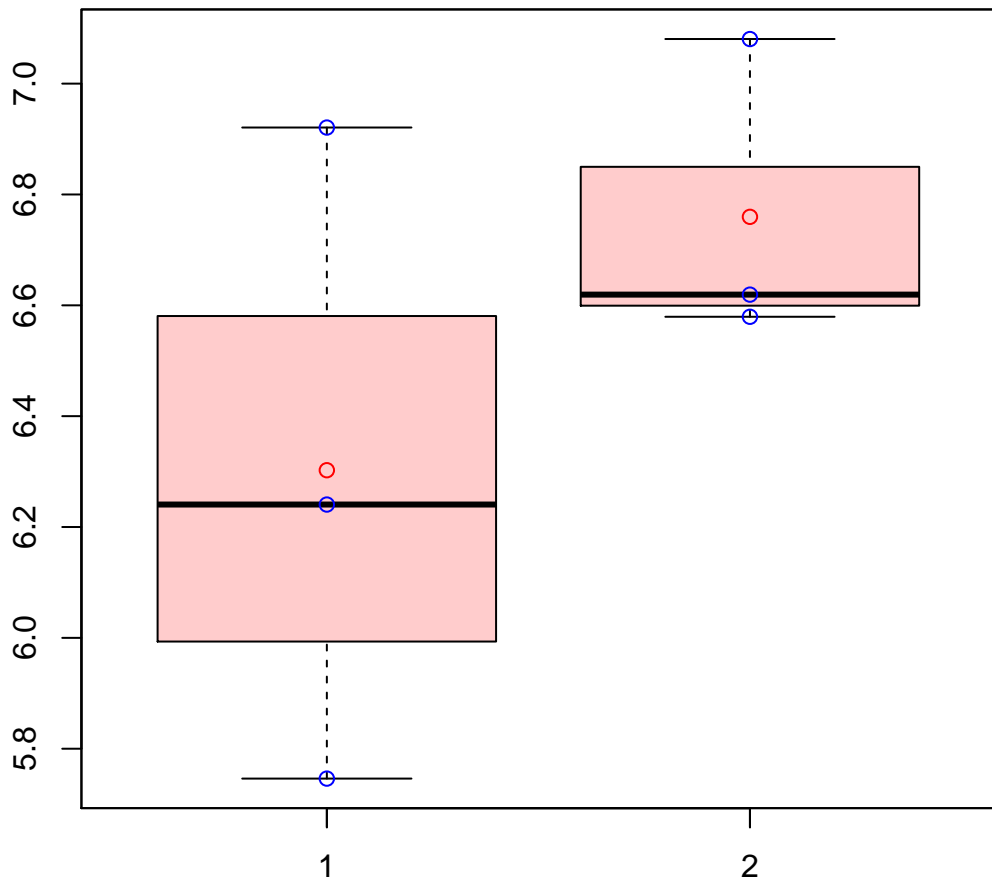

t-Test: p-value = 0.32

comp8394\_c0\_seq2|comp8394\_c0\_seq2

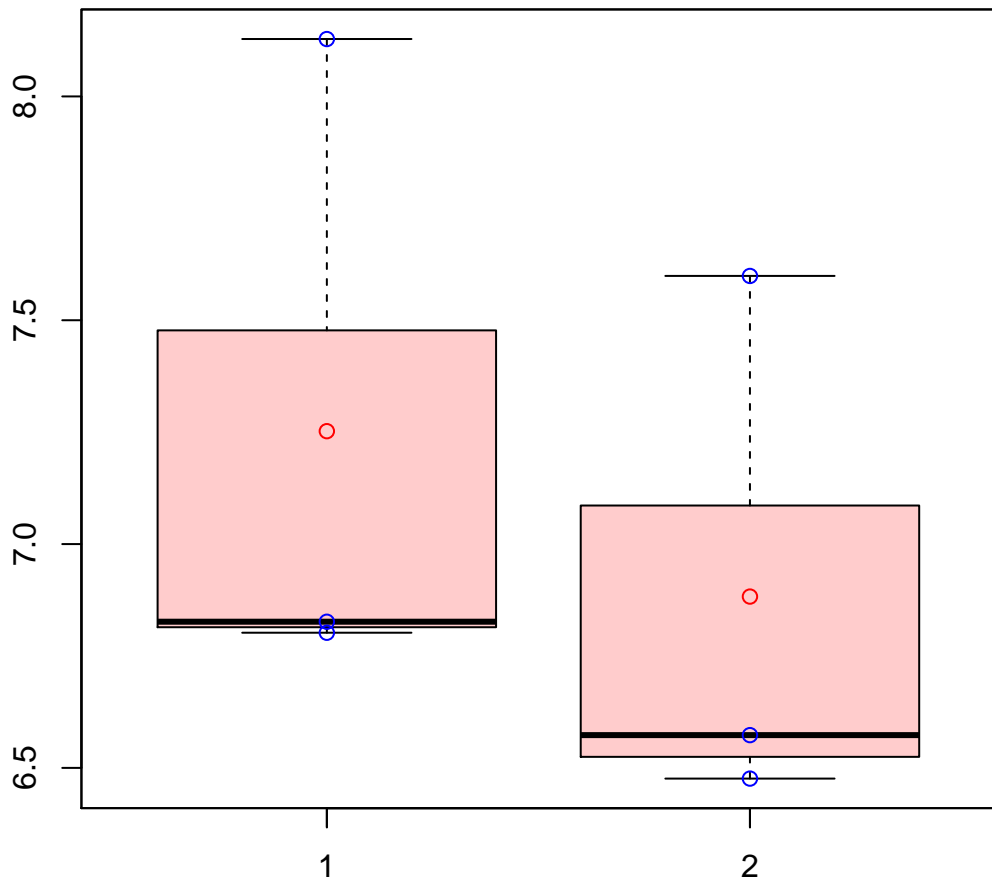

t-Test: p-value = 0.55

# CYNS14\_ERATE|CYNS14\_ERATE

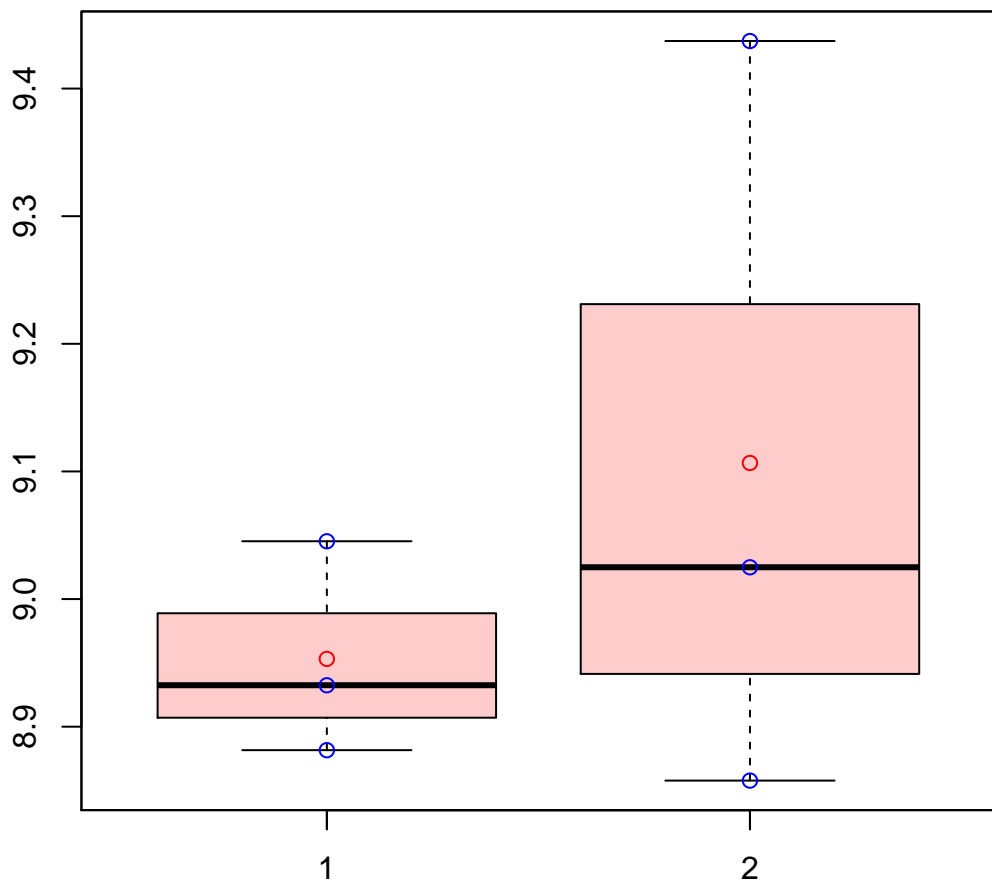

t-Test: p-value = 0.47



# CYNS15\_ERATE|CYNS15\_ERATE

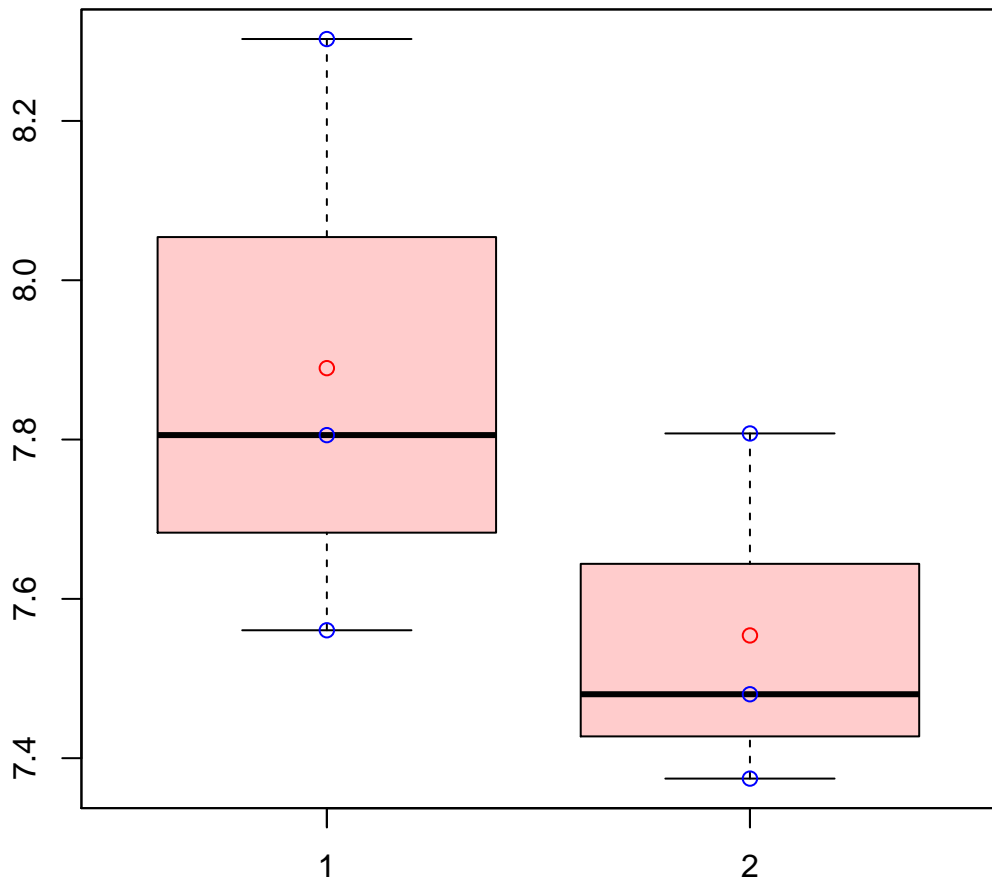

t-Test: p-value = 0.27

# DAPAT1\_ERATE|DAPAT1\_ERATE

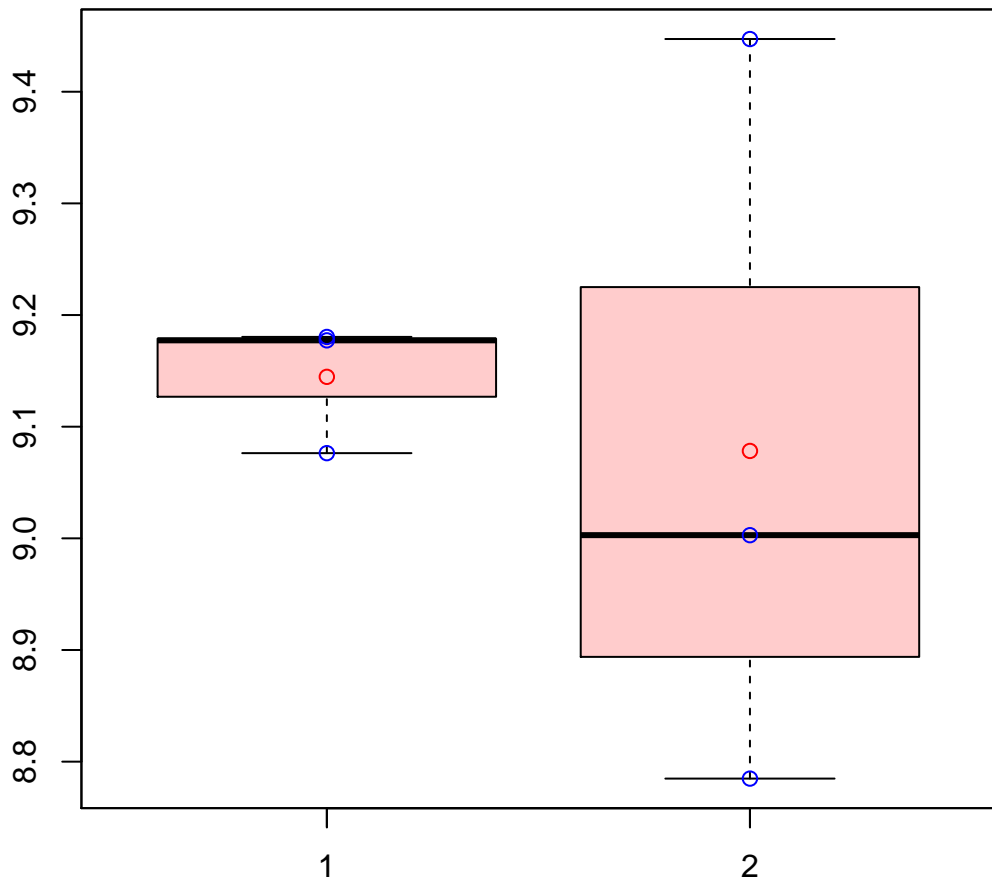

t-Test: p-value = 0.77

# DHAS1\_ERATE|DHAS1\_ERATE

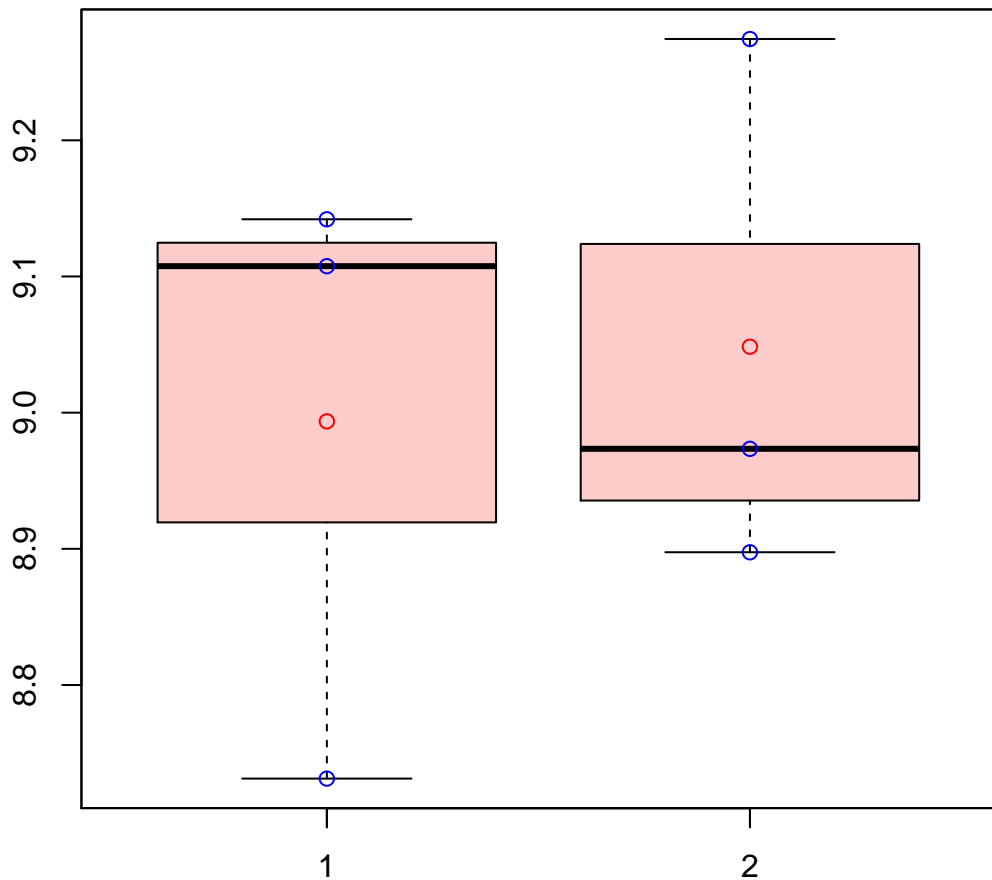

t-Test: p-value = 0.77

# DNAJ13\_ERATE|DNAJ13\_ERATE

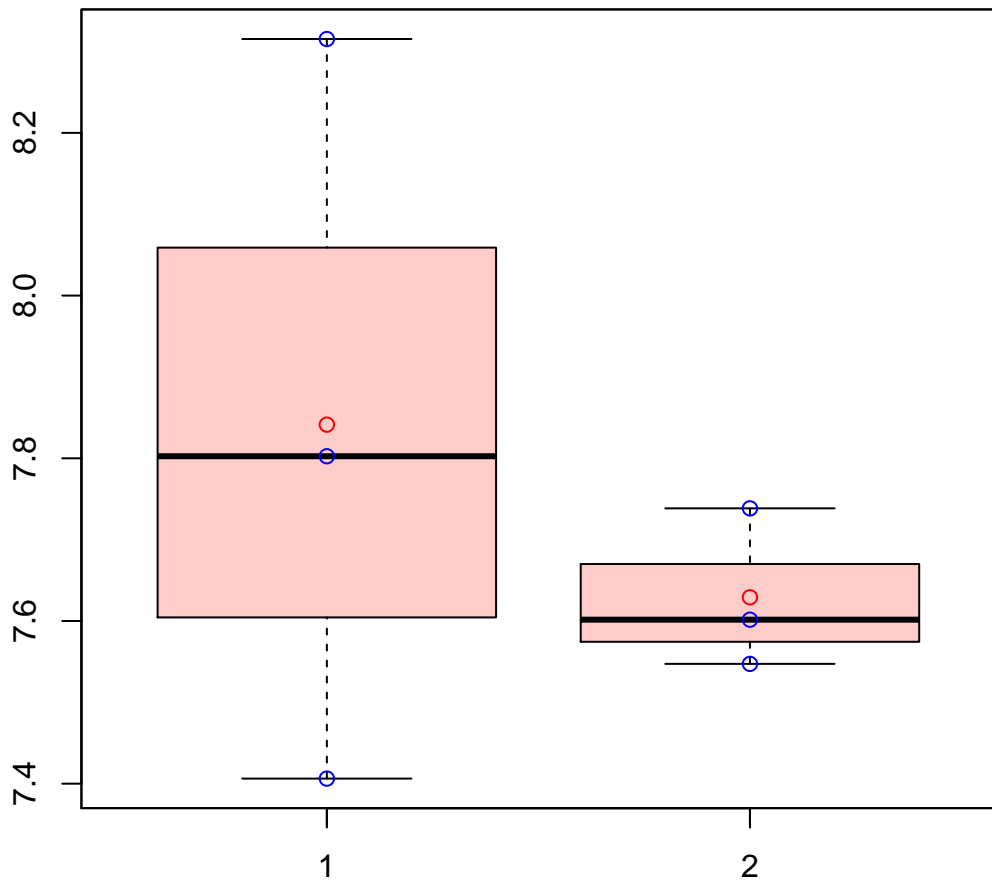

t-Test: p-value = 0.51

# DNAK1\_ERATE|DNAK1\_ERATE

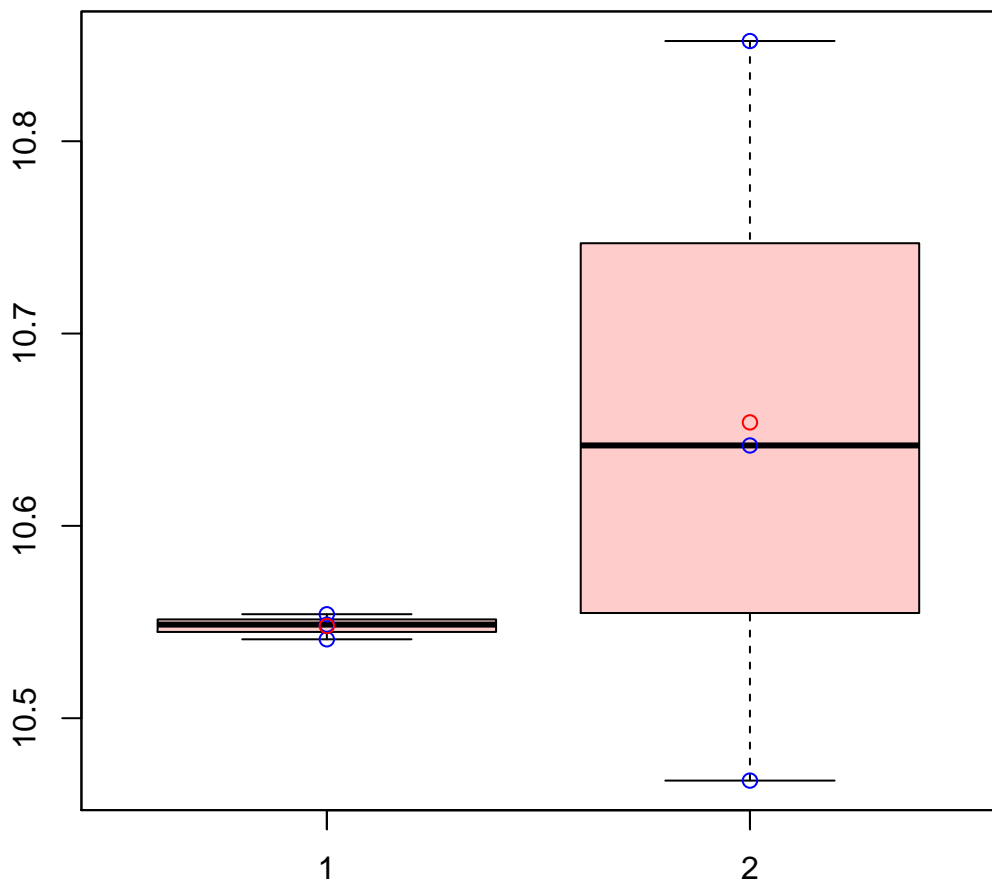

t-Test: p-value = 0.44

# DNAK24\_ERATE|DNAK24\_ERATE

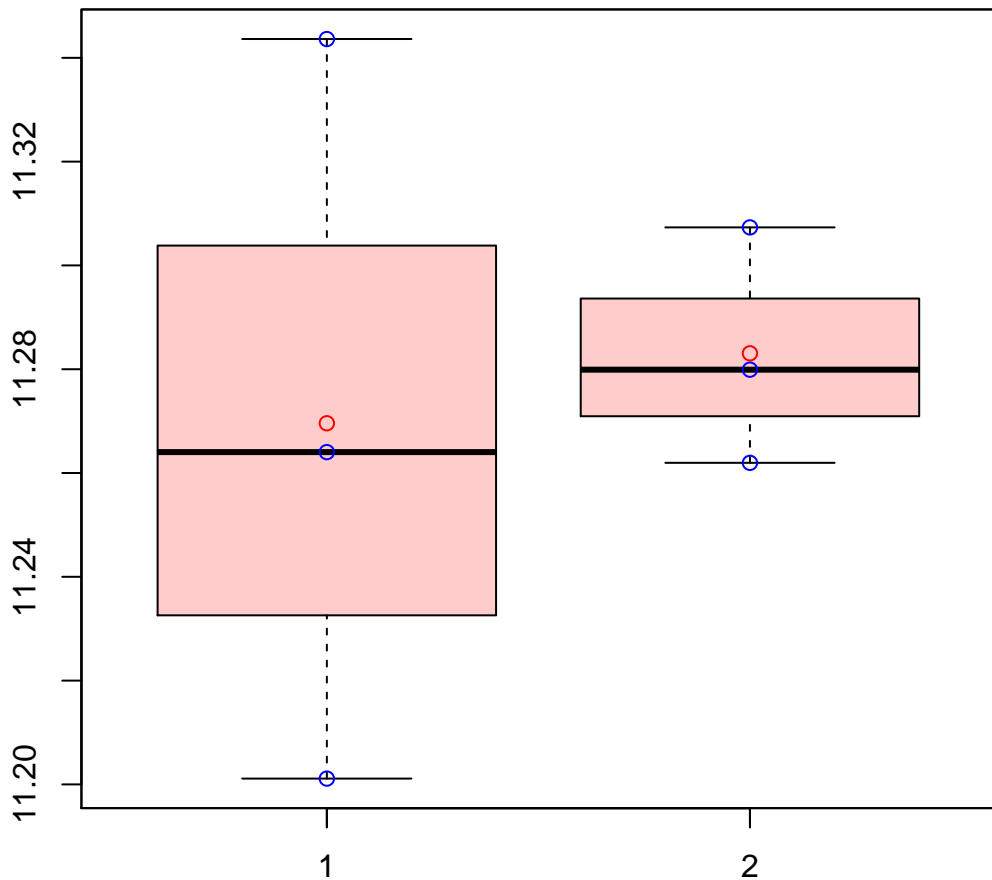

t-Test: p-value = 0.78

# DNAK3\_ERATE|DNAK3\_ERATE

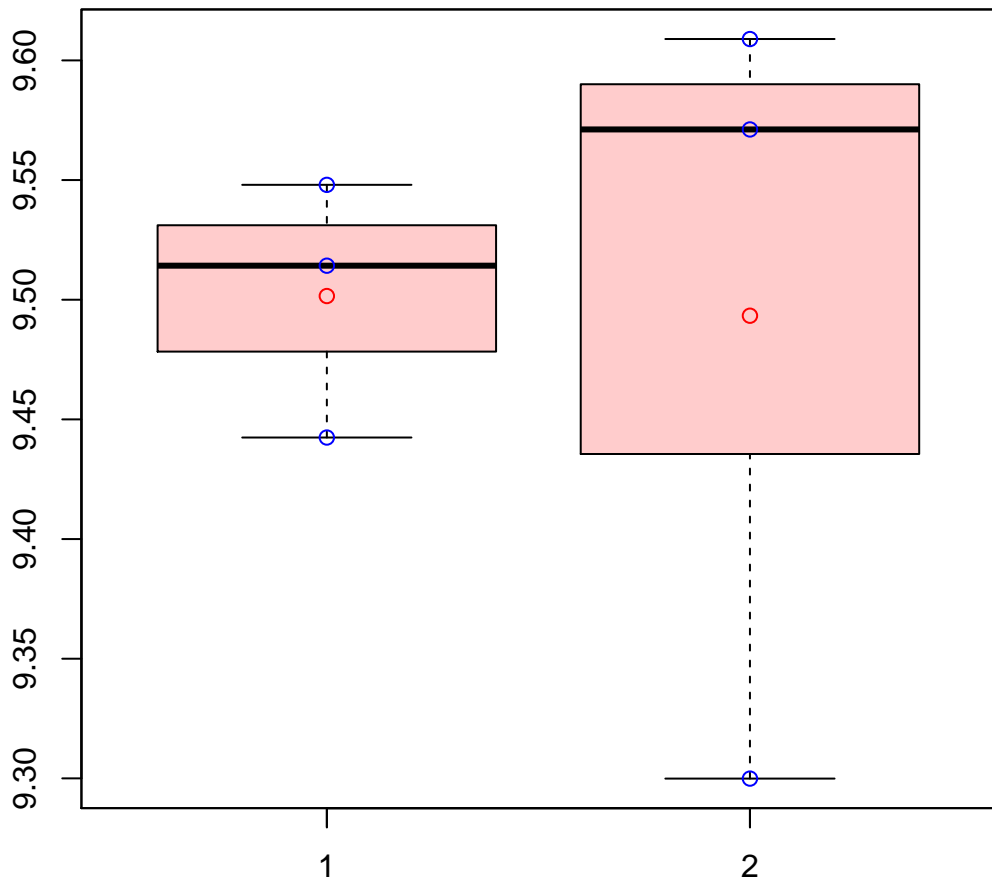

t-Test: p-value = 0.94

# DNAK4\_ERATE|DNAK4\_ERATE

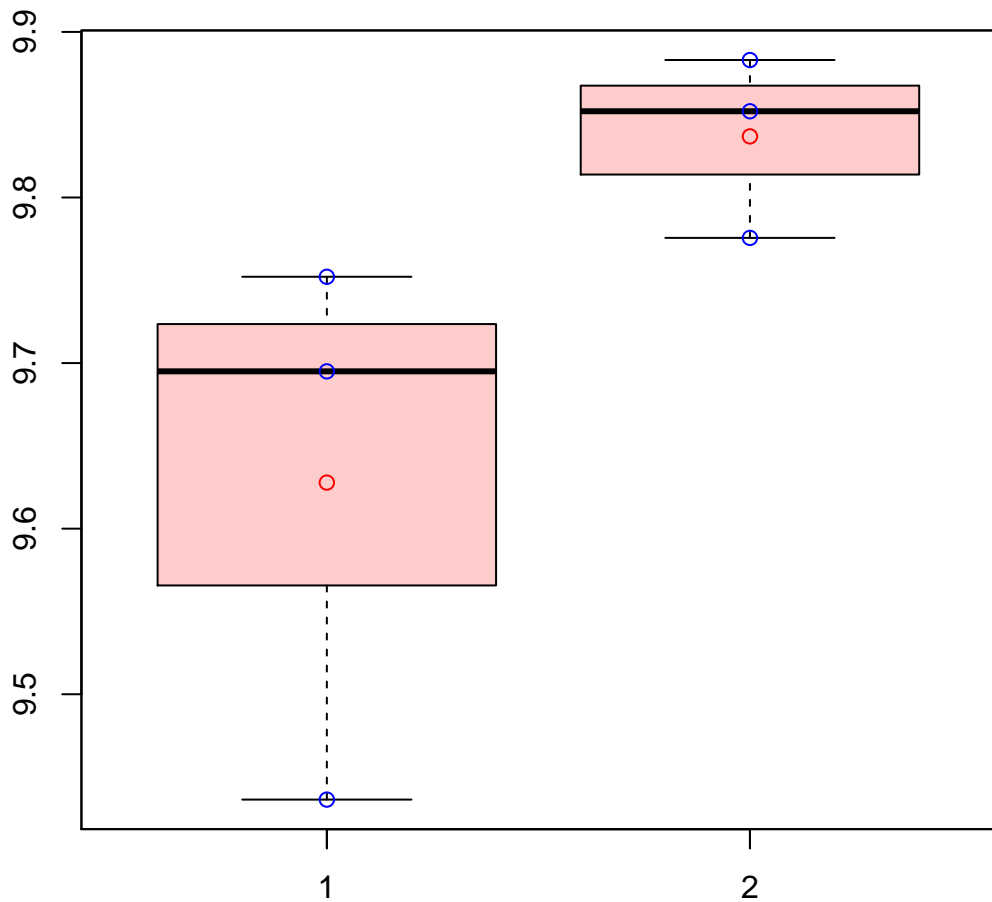

t-Test: p-value = 0.15



## ENO2\_ERATE|ENO2\_ERATE

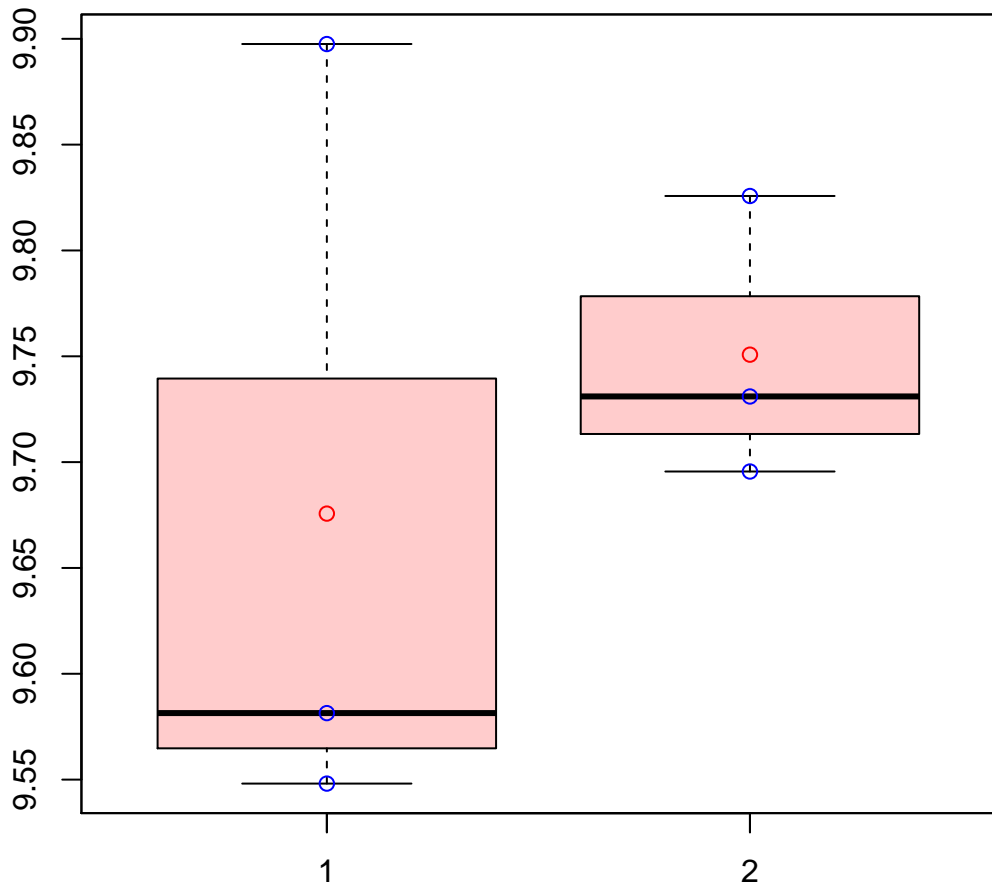

t-Test: p-value = 0.58

## ENO3\_ERATE|ENO3\_ERATE

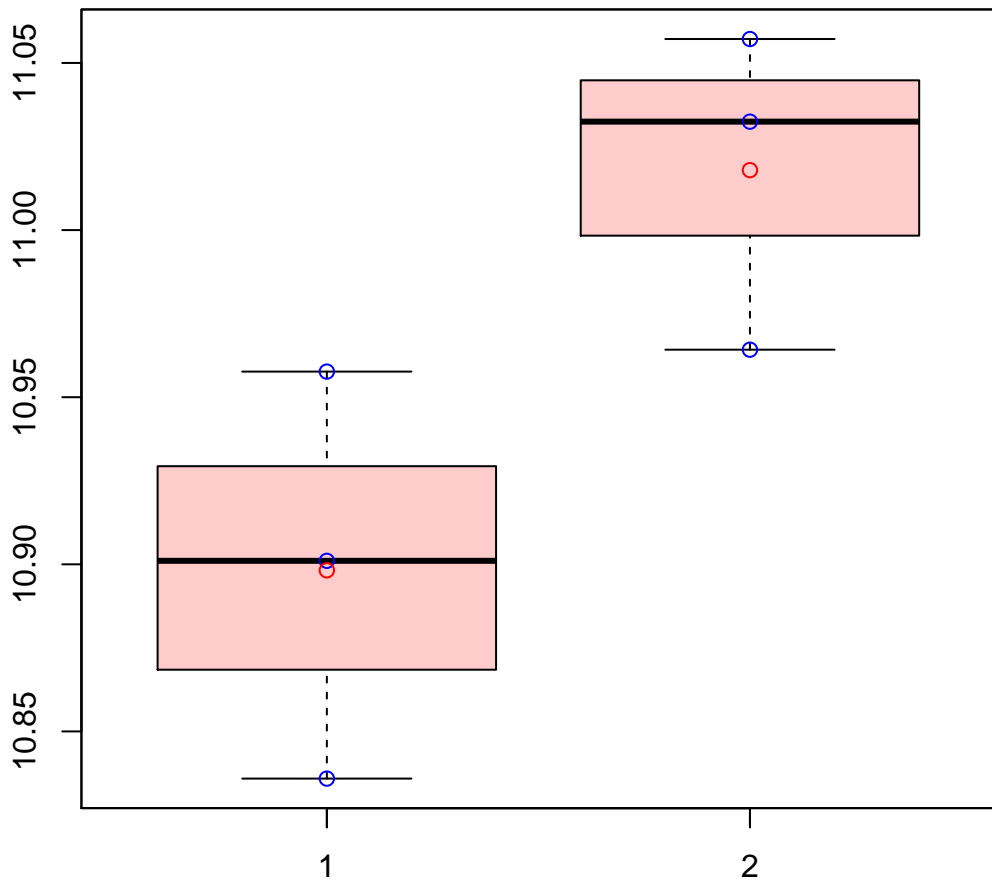

t-Test: p-value = 0.06

# F16PA13\_ERATE|F16PA13\_ERATE

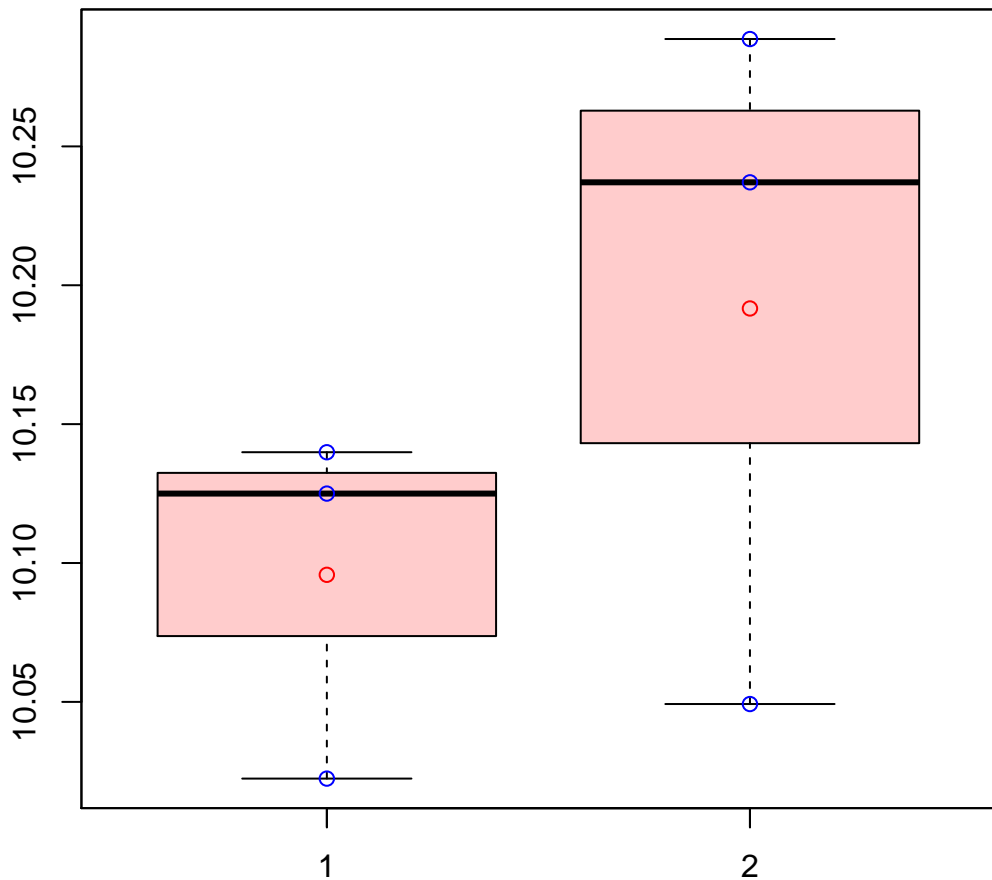

t-Test: p-value = 0.33

# F16PA15\_ERATE|F16PA15\_ERATE

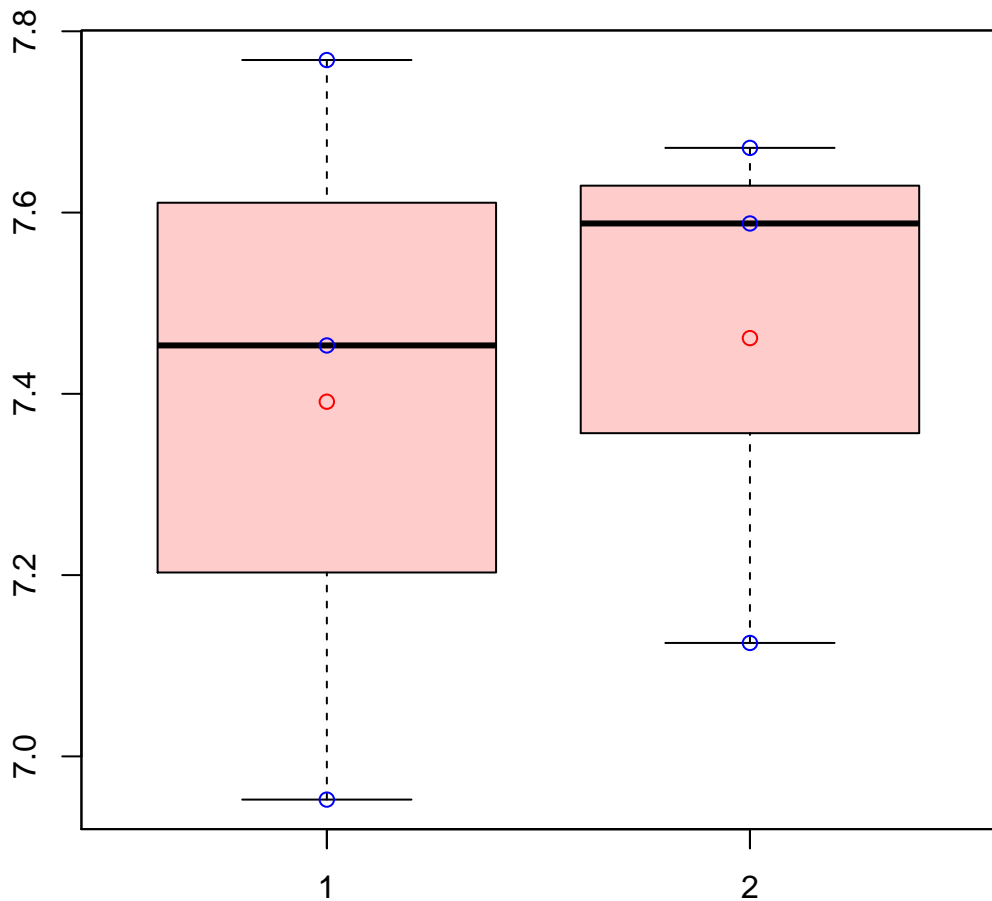

t-Test: p-value = 0.82

# F16PA7\_ERATE|F16PA7\_ERATE

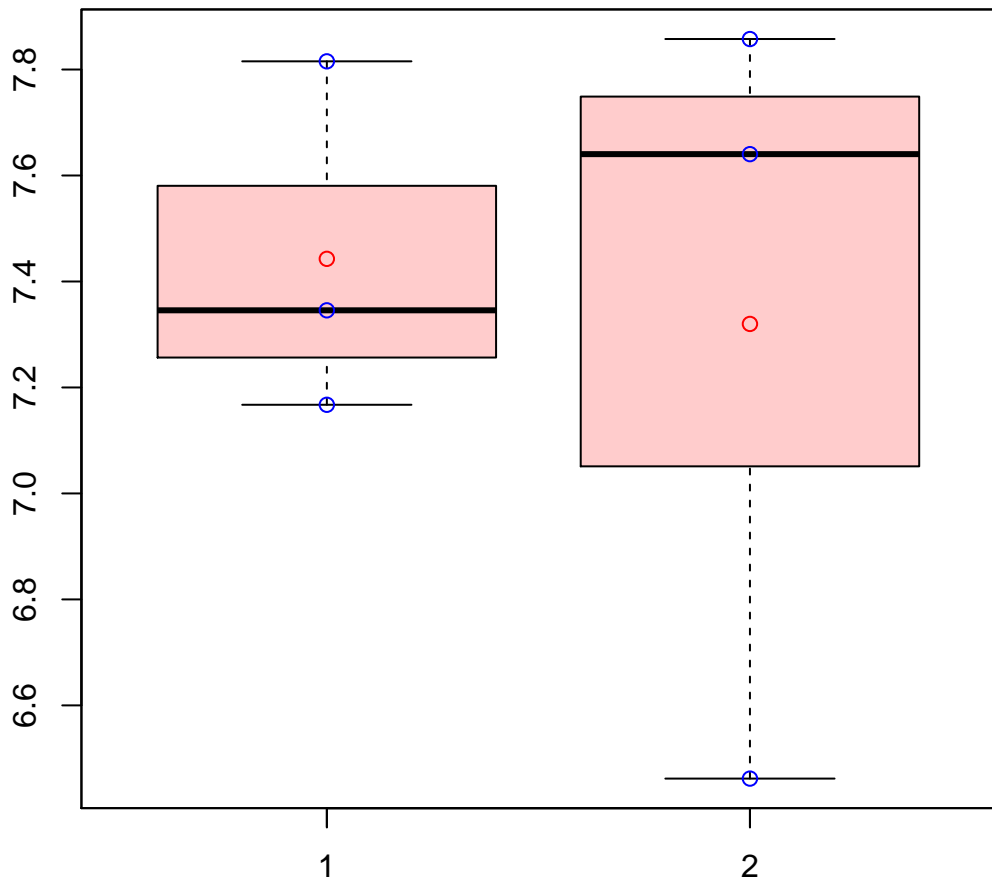

t-Test: p-value = 0.81

# FTSH11\_ERATE|FTSH11\_ERATE

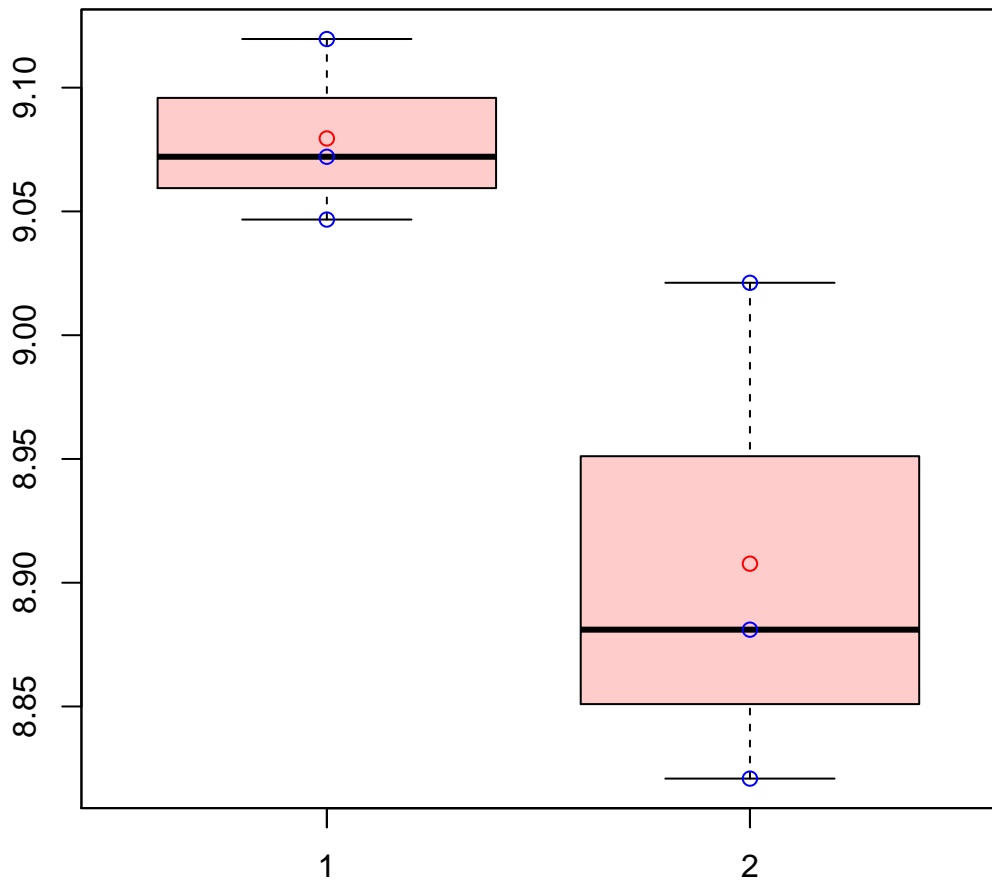

t-Test: p-value = 0.09

# FTSH14\_ERATE|FTSH14\_ERATE

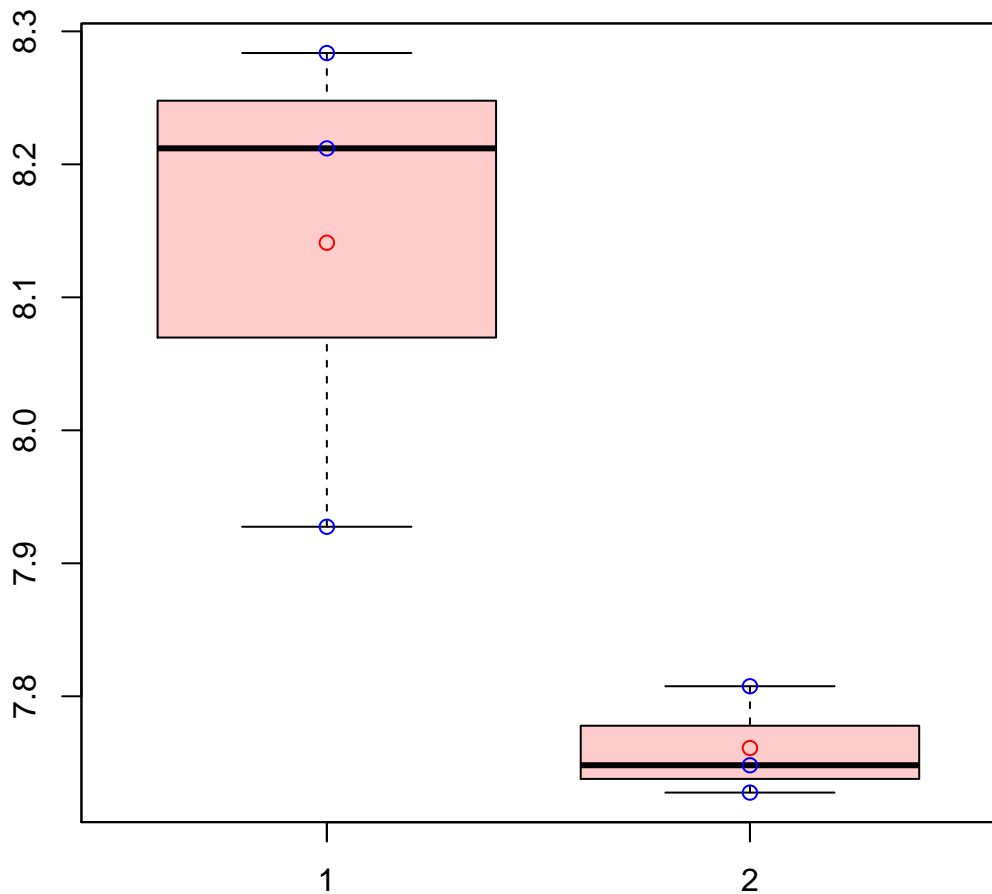

t-Test: p-value = 0.07

# FTSH15\_ERATE|FTSH15\_ERATE

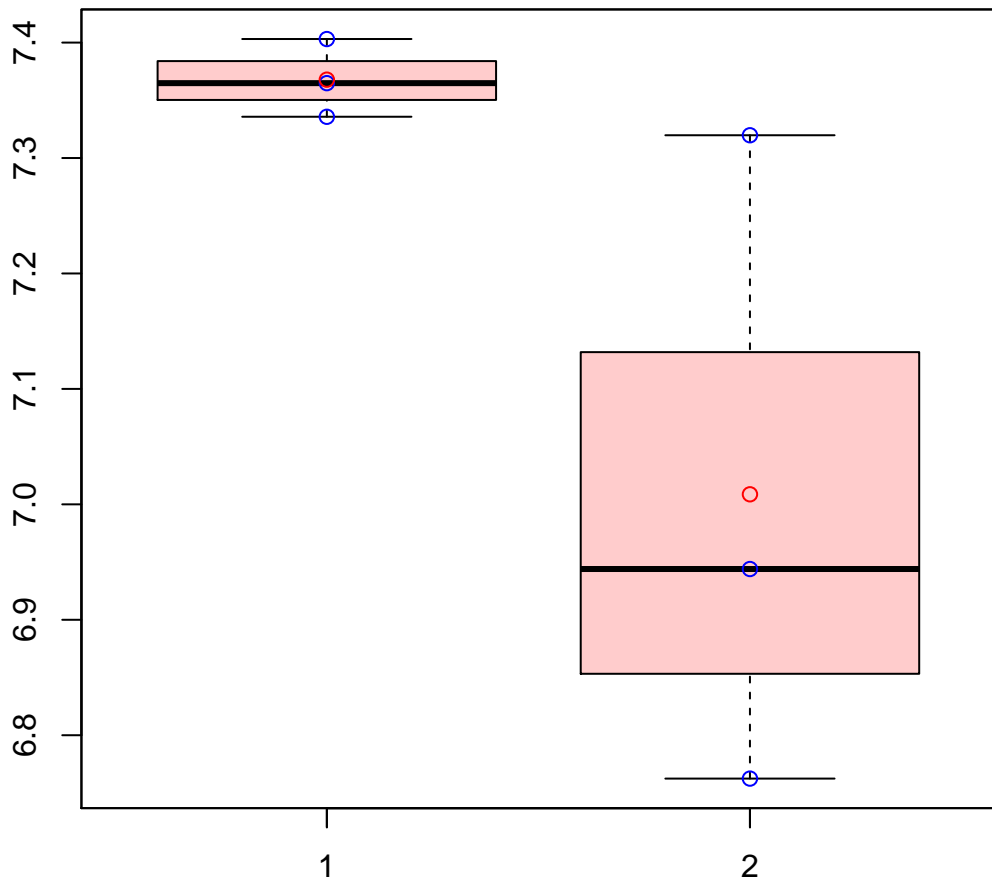

t-Test: p-value = 0.16



# FTSH16\_ERATE|FTSH16\_ERATE

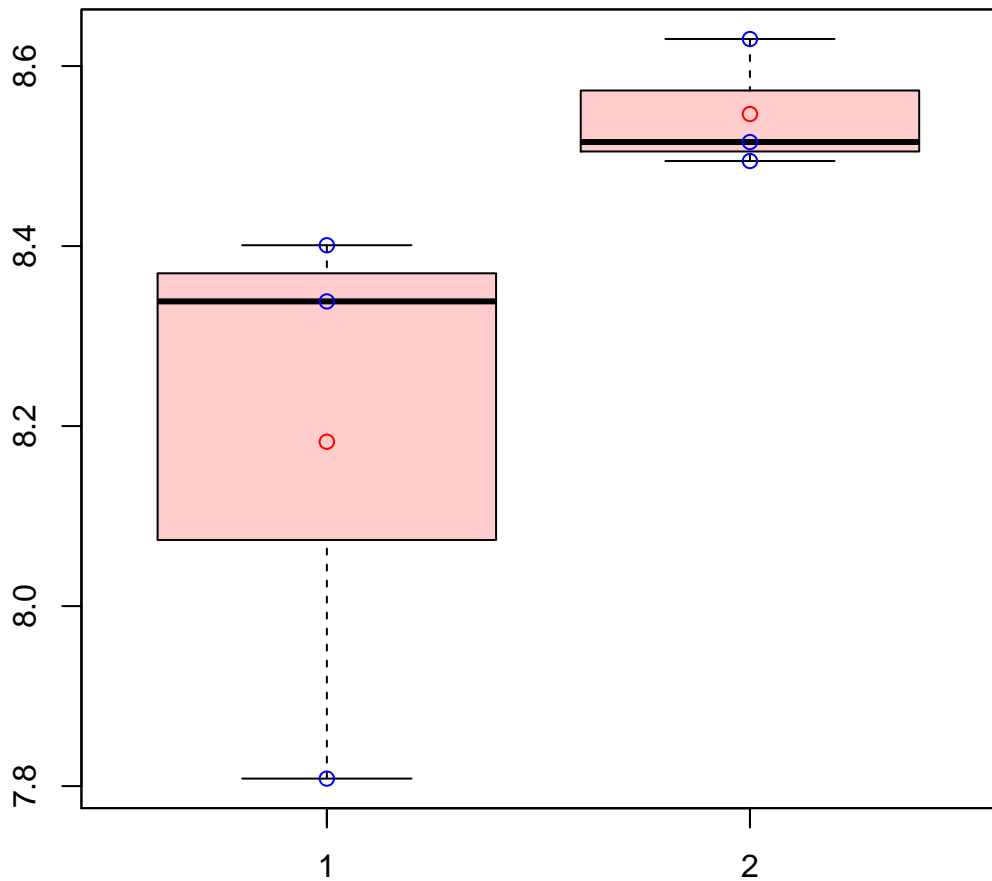

t-Test: p-value = 0.19

# FTSH3\_ERATE|FTSH3\_ERATE

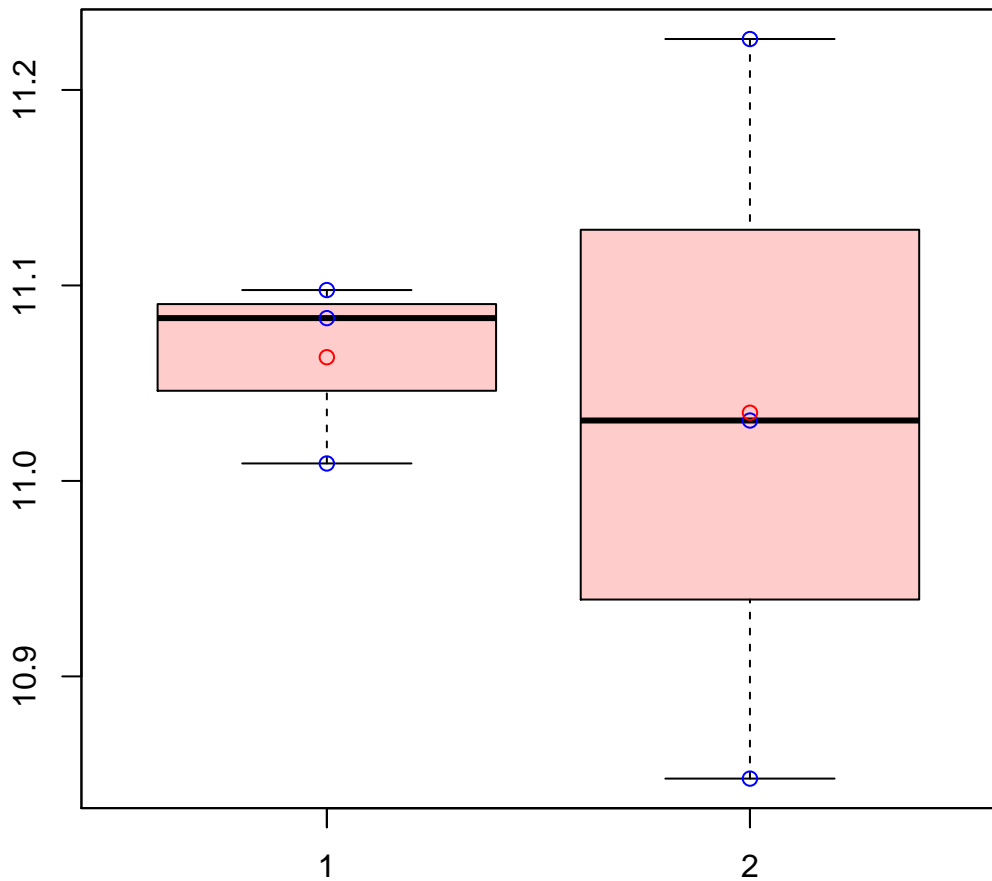

t-Test: p-value = 0.82

# FTSH7\_ERATE|FTSH7\_ERATE

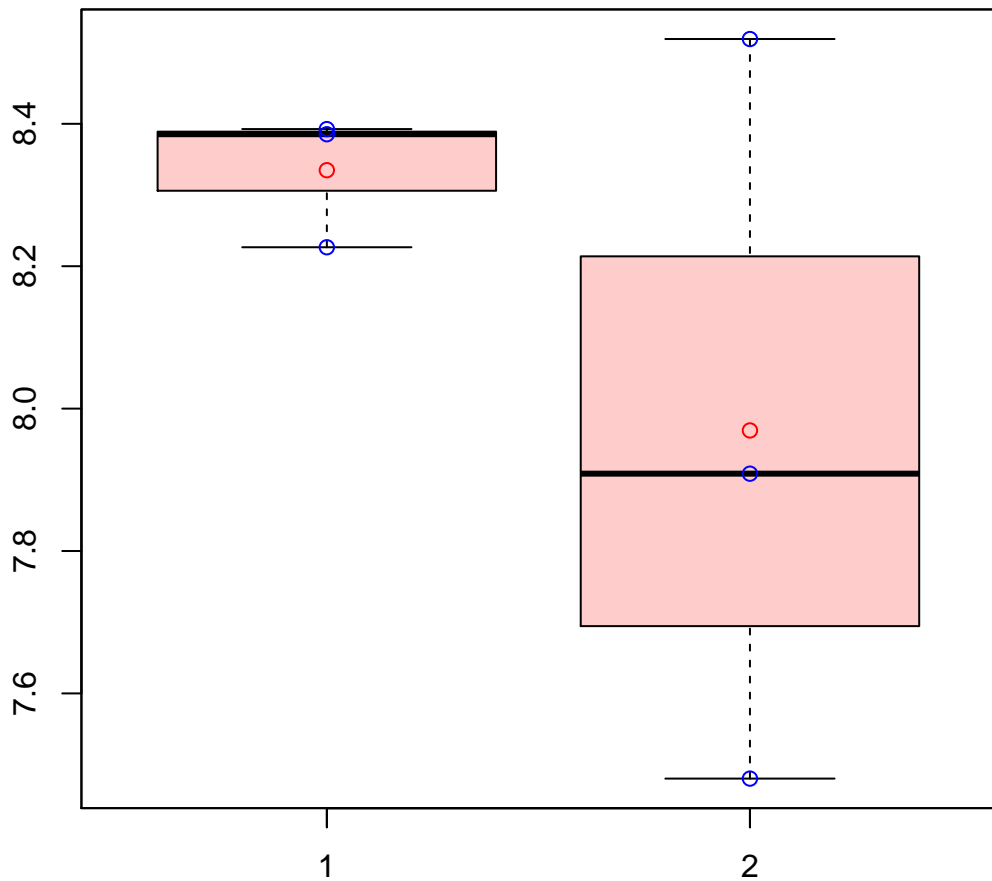

t-Test: p-value = 0.35

# FTSH\_ERATE|FTSH\_ERATE

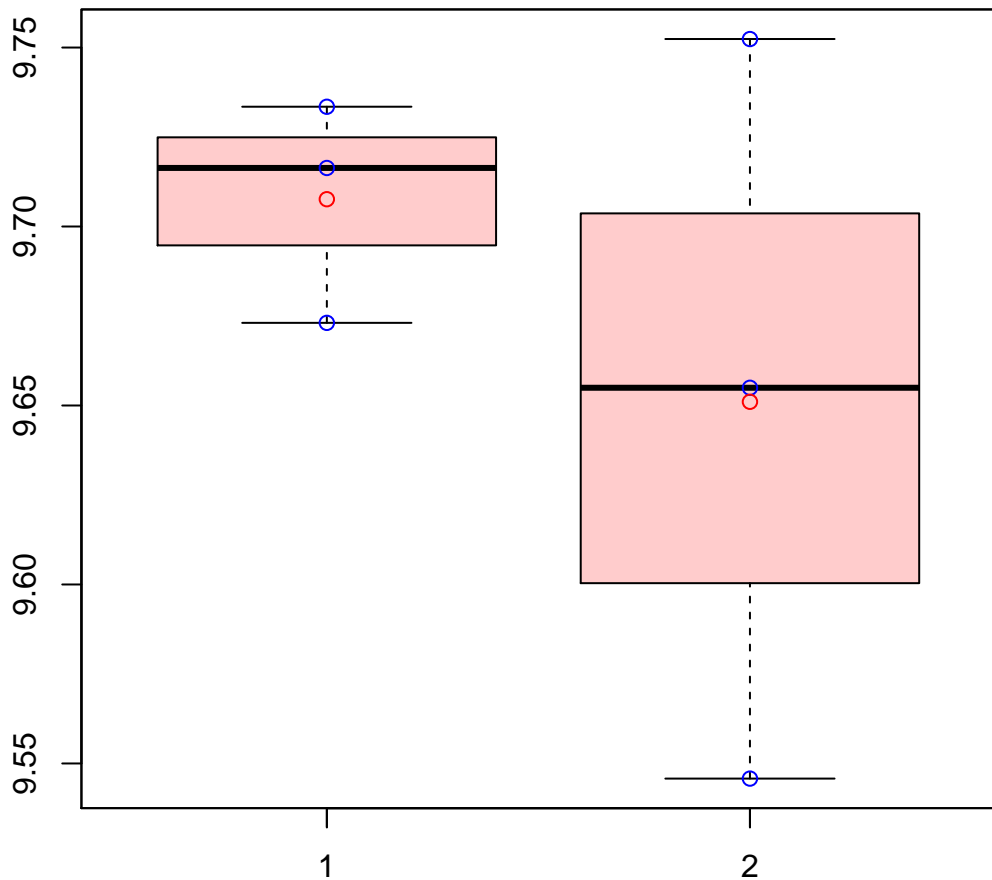

t-Test: p-value = 0.45

# G6PI3\_ERATE|G6PI3\_ERATE

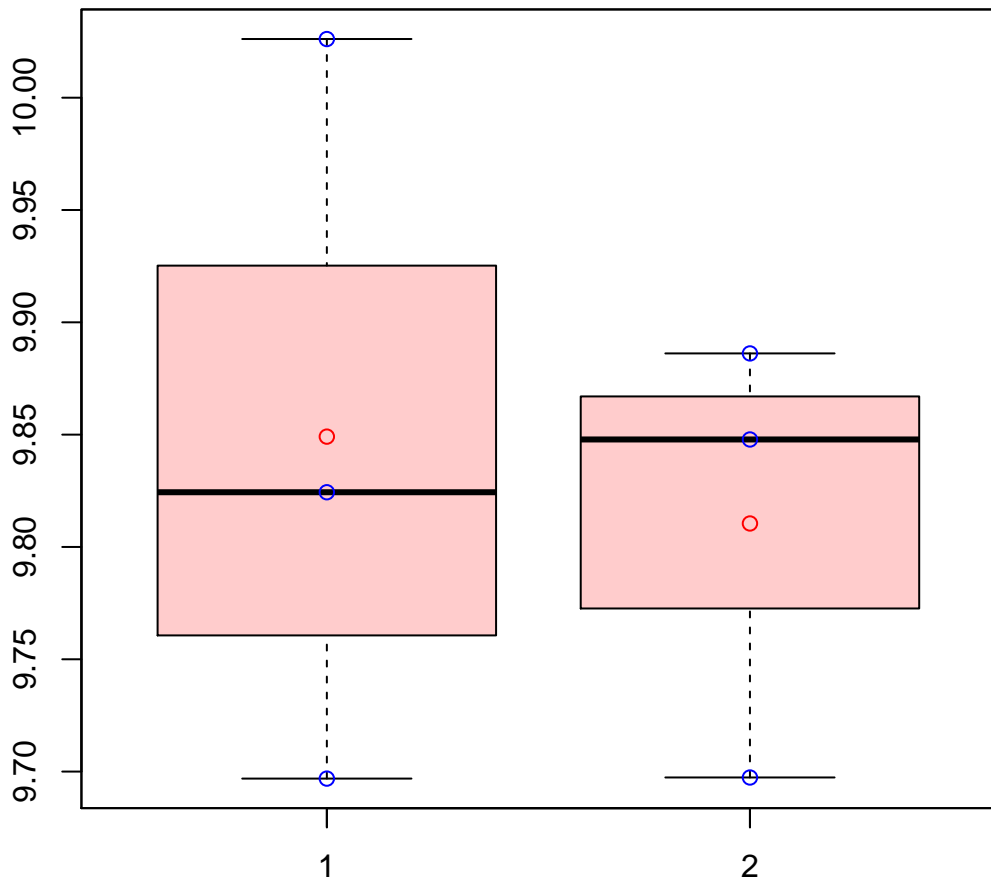

t-Test: p-value = 0.75

# G6PI\_ERATE|G6PI\_ERATE

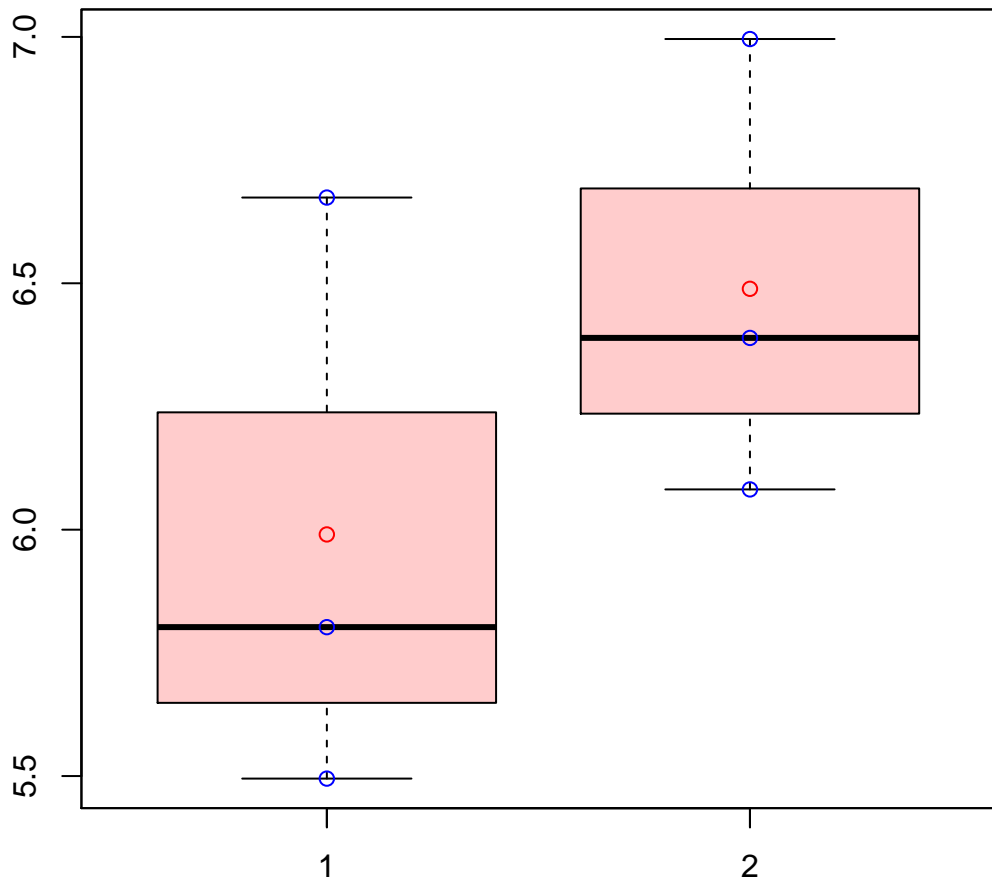

t-Test: p-value = 0.33

# GCSP1\_ERATE|GCSP1\_ERATE

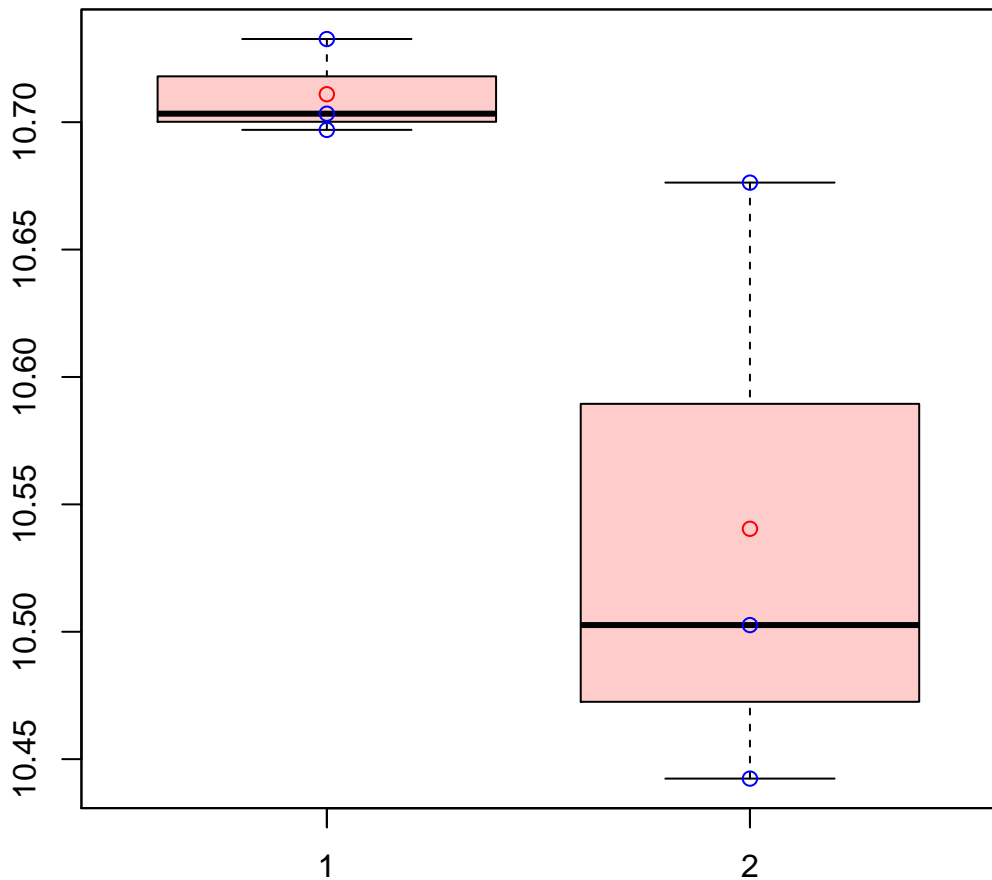

t-Test: p-value = 0.13

# GLYA3\_ERATE|GLYA3\_ERATE

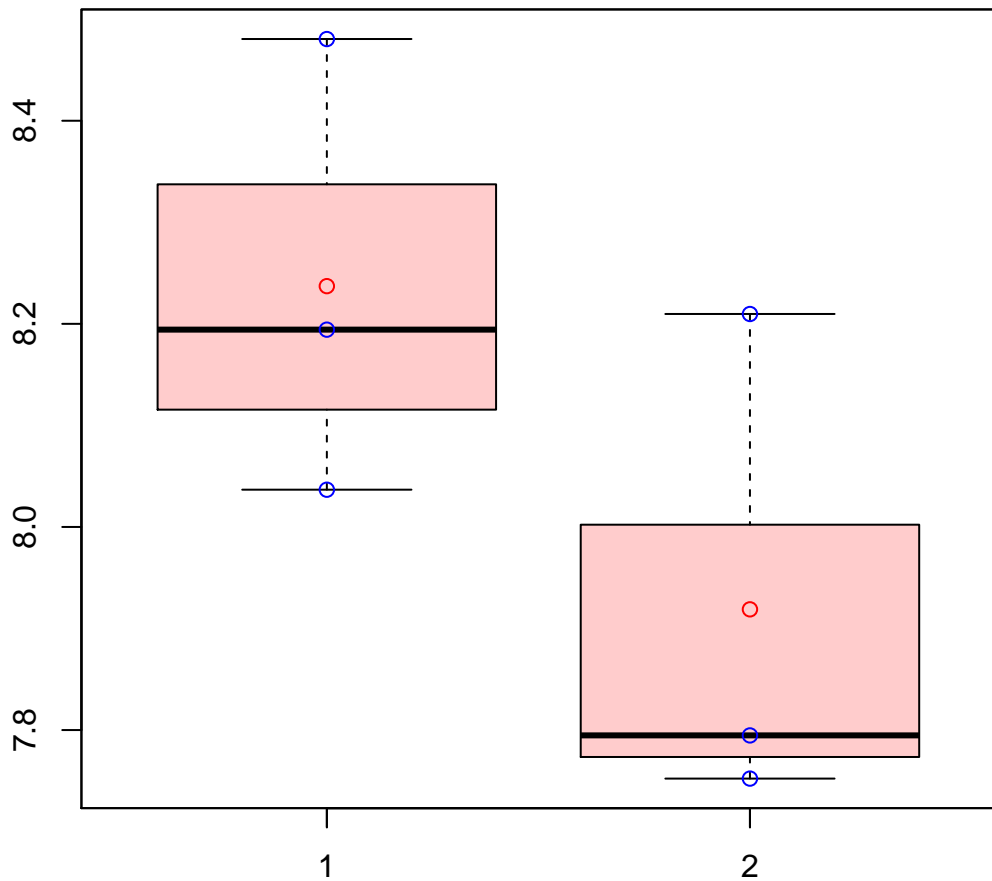

t-Test: p-value = 0.18



# HEM31\_ERATE|HEM31\_ERATE

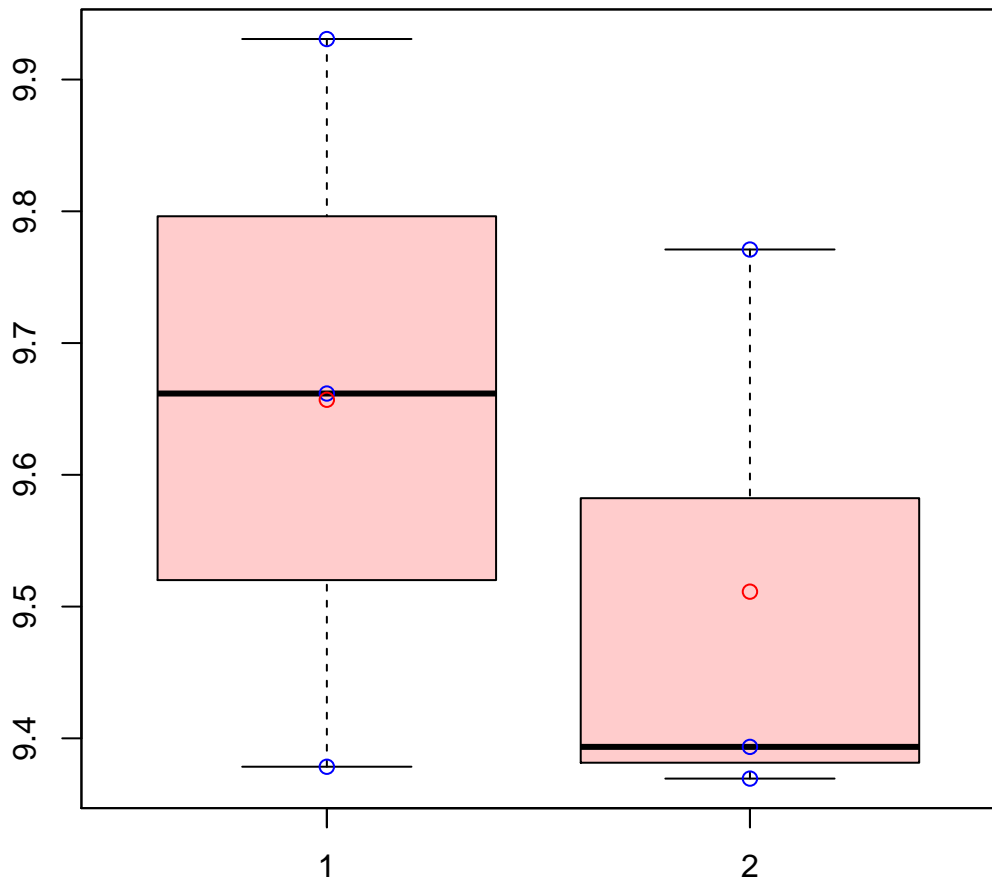

t-Test: p-value = 0.52

# HPPA2\_ERATE|HPPA2\_ERATE

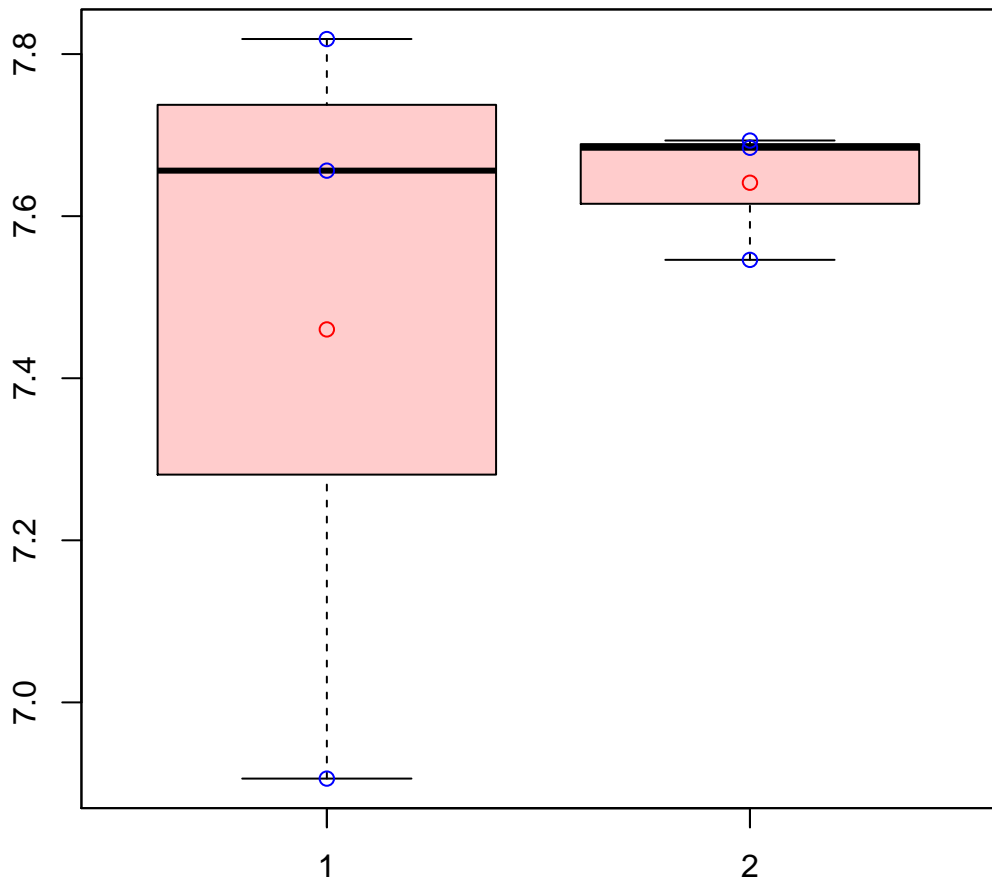

t-Test: p-value = 0.59

# HPPA4\_ERATE|HPPA4\_ERATE

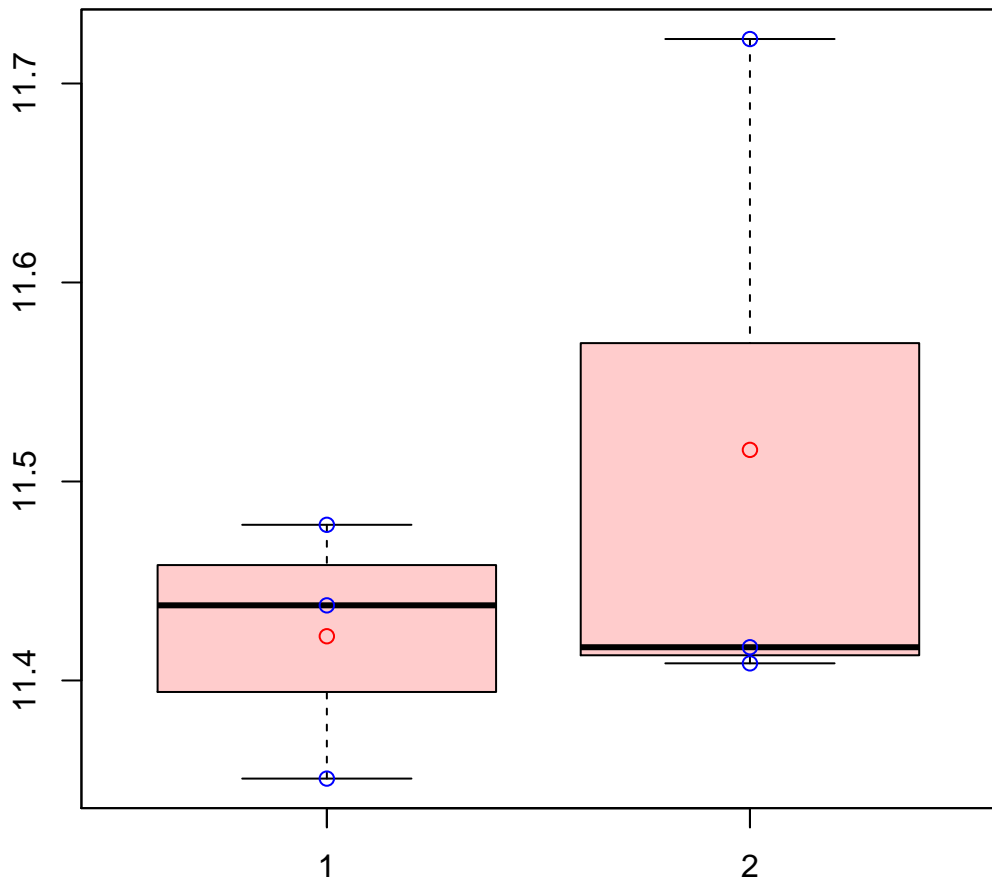

t-Test: p-value = 0.47

# HPPA7\_ERATE|HPPA7\_ERATE

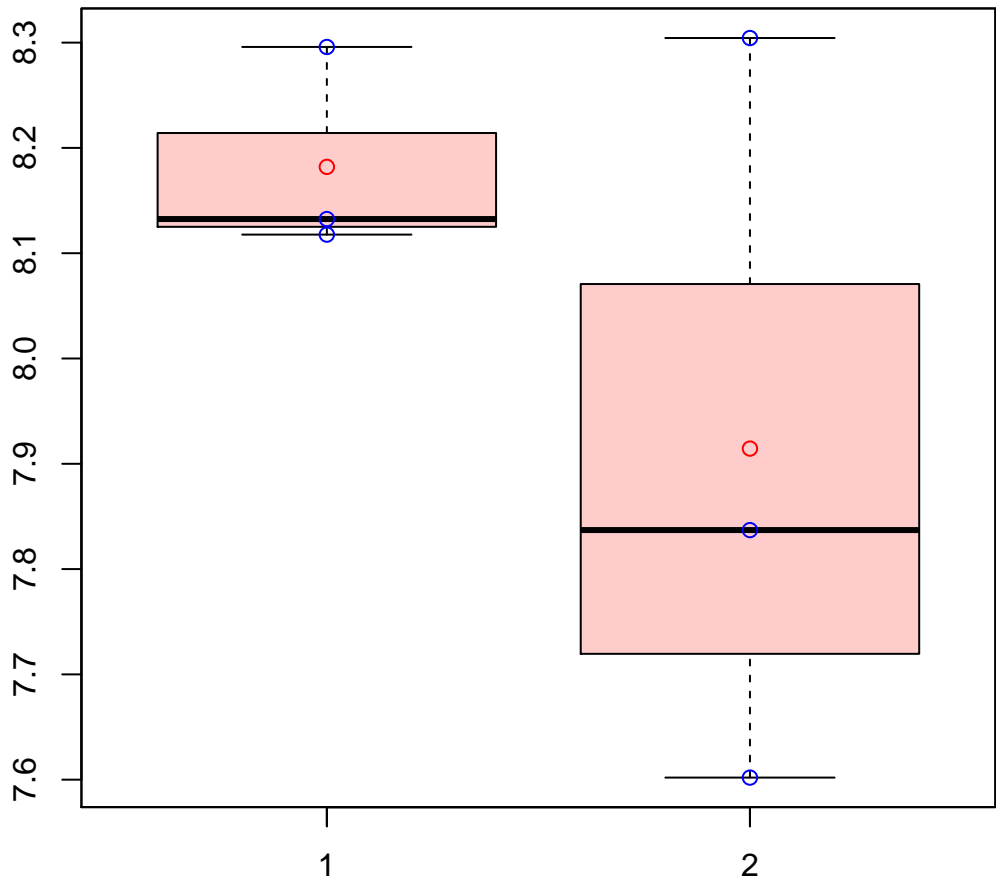

t-Test: p-value = 0.32

# HTPG11\_ERATE|HTPG11\_ERATE

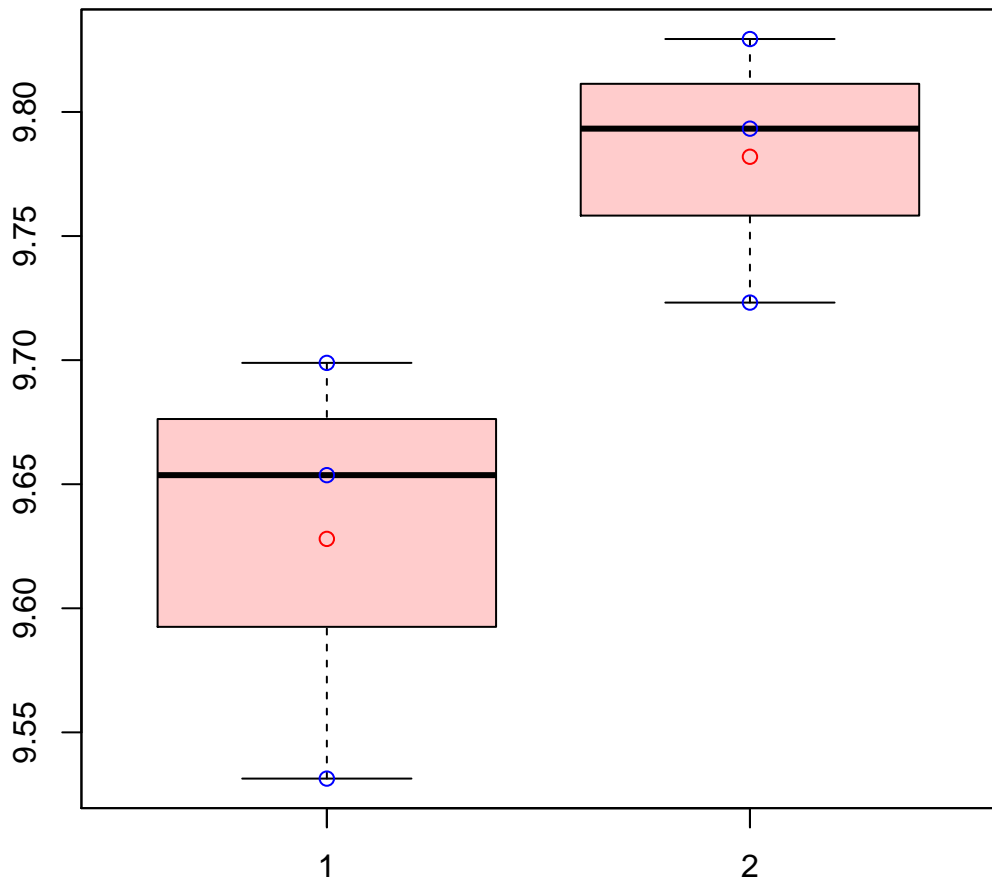

t-Test: p-value = 0.07

# HTPG13\_ERATE|HTPG13\_ERATE

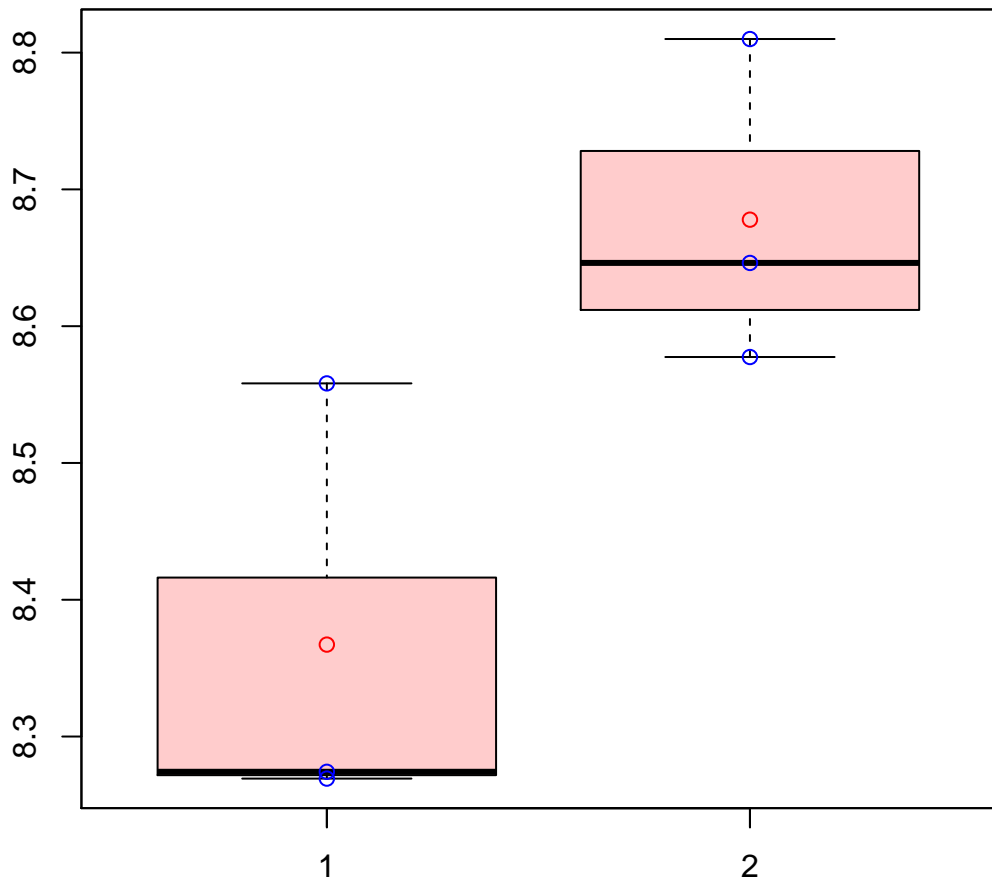

t-Test: p-value = 0.06

# HTPG3\_ERATE|HTPG3\_ERATE

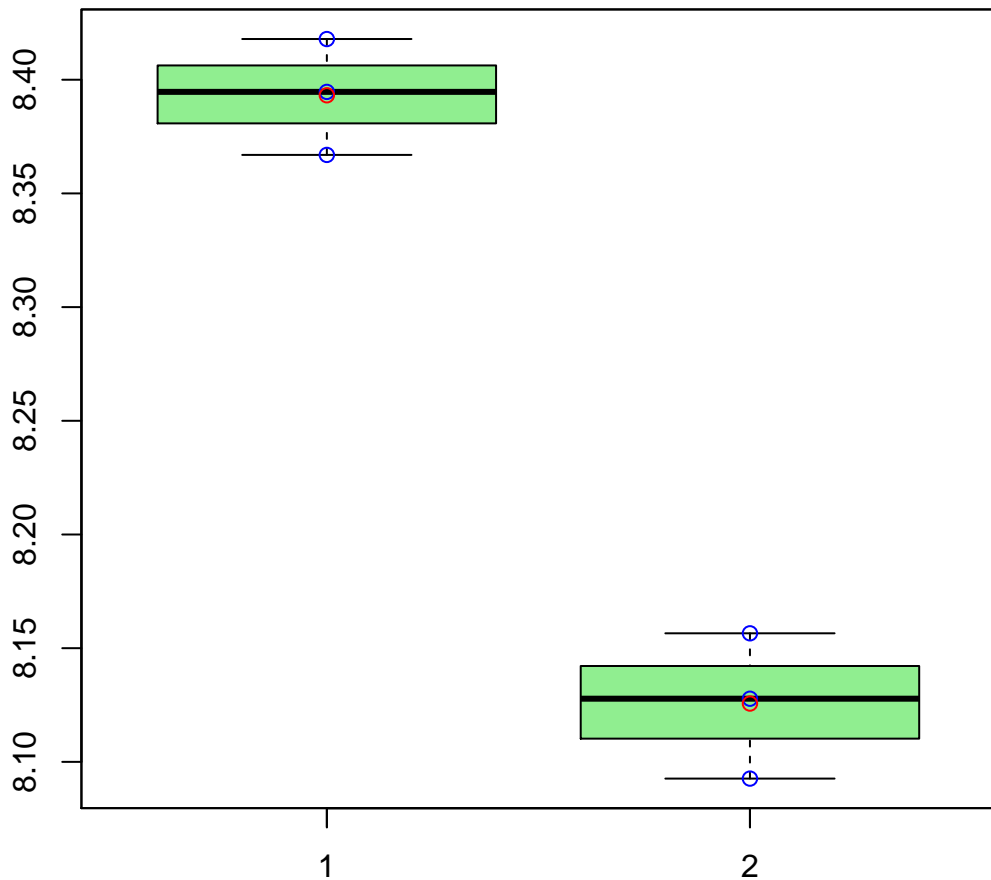

t-Test: p-value = 0

# HTPG5\_ERATE|HTPG5\_ERATE

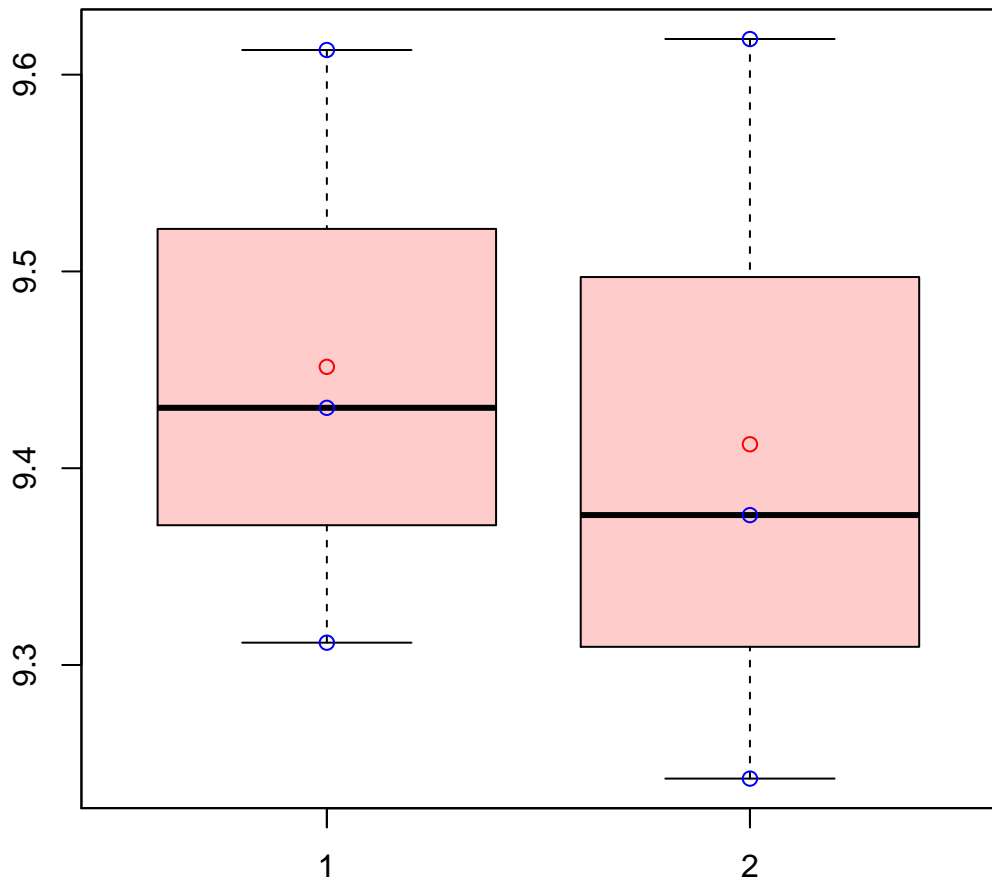

t-Test: p-value = 0.79



# HTPG8\_ERATE|HTPG8\_ERATE

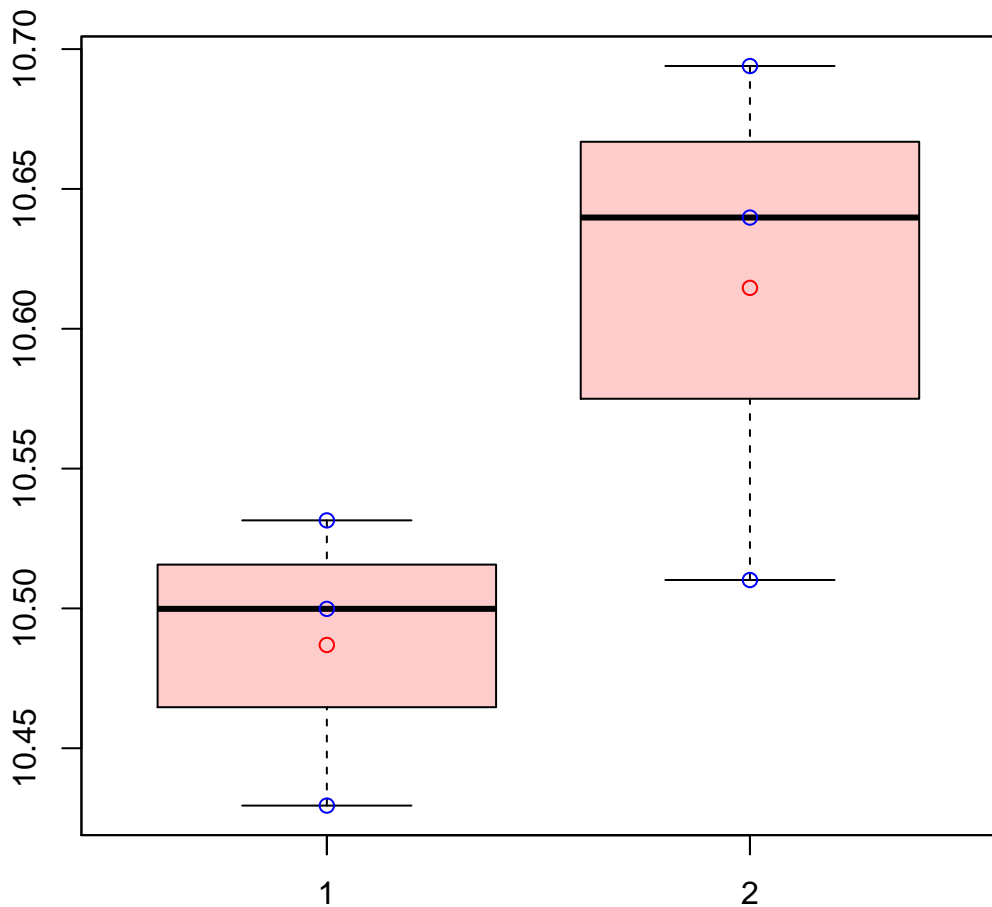

t-Test: p-value = 0.13

# HTPG9\_ERATE|HTPG9\_ERATE

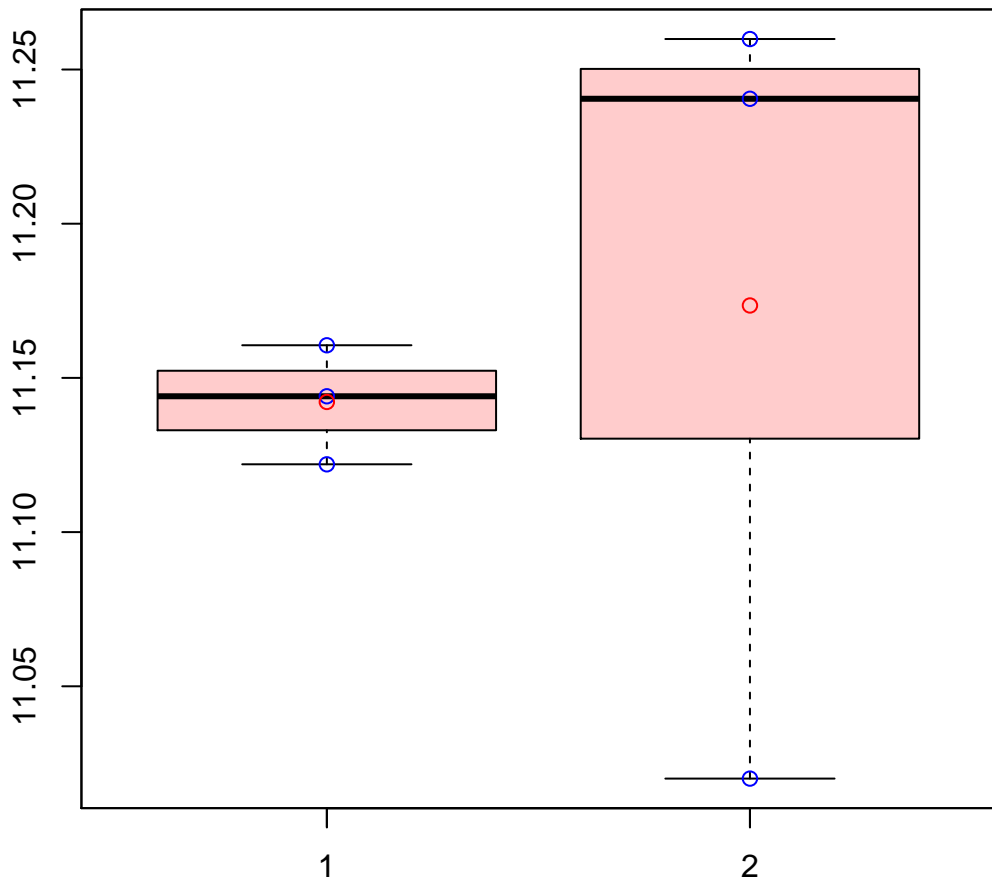

t-Test: p-value = 0.72

# isotig00702|isotig00702

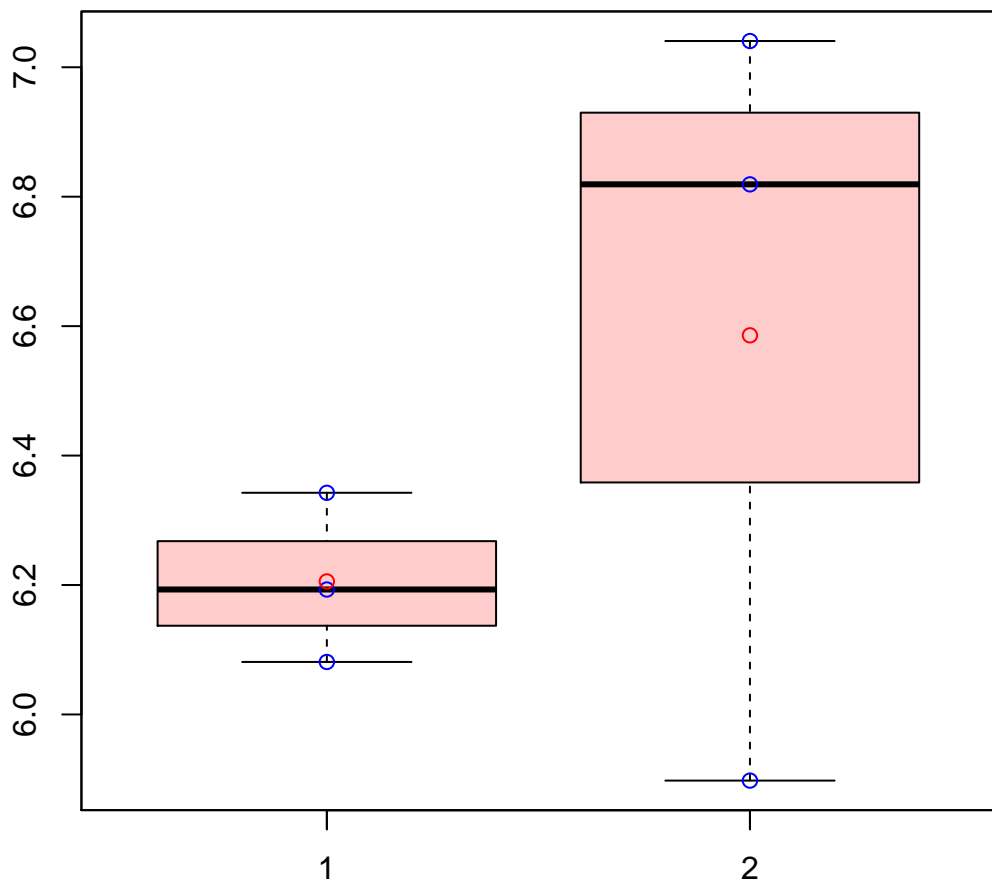

t-Test: p-value = 0.39

isotig01136|isotig01136

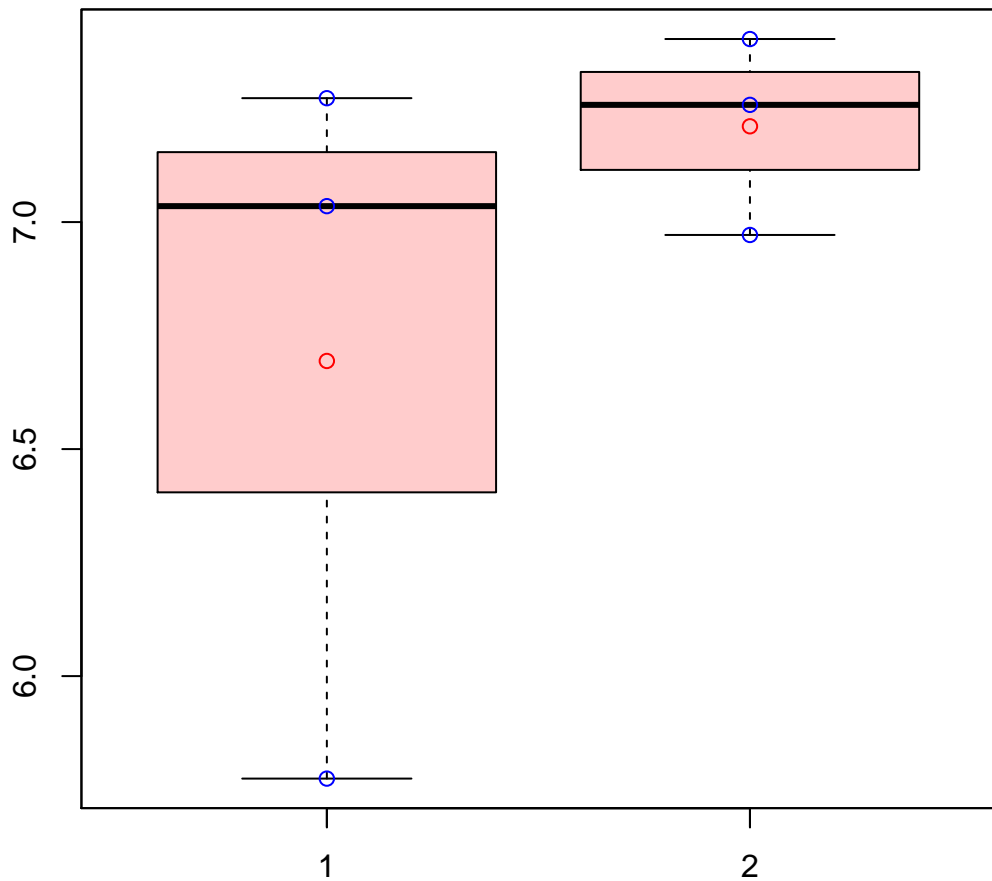

t-Test: p-value = 0.38

isotig03753|isotig03753

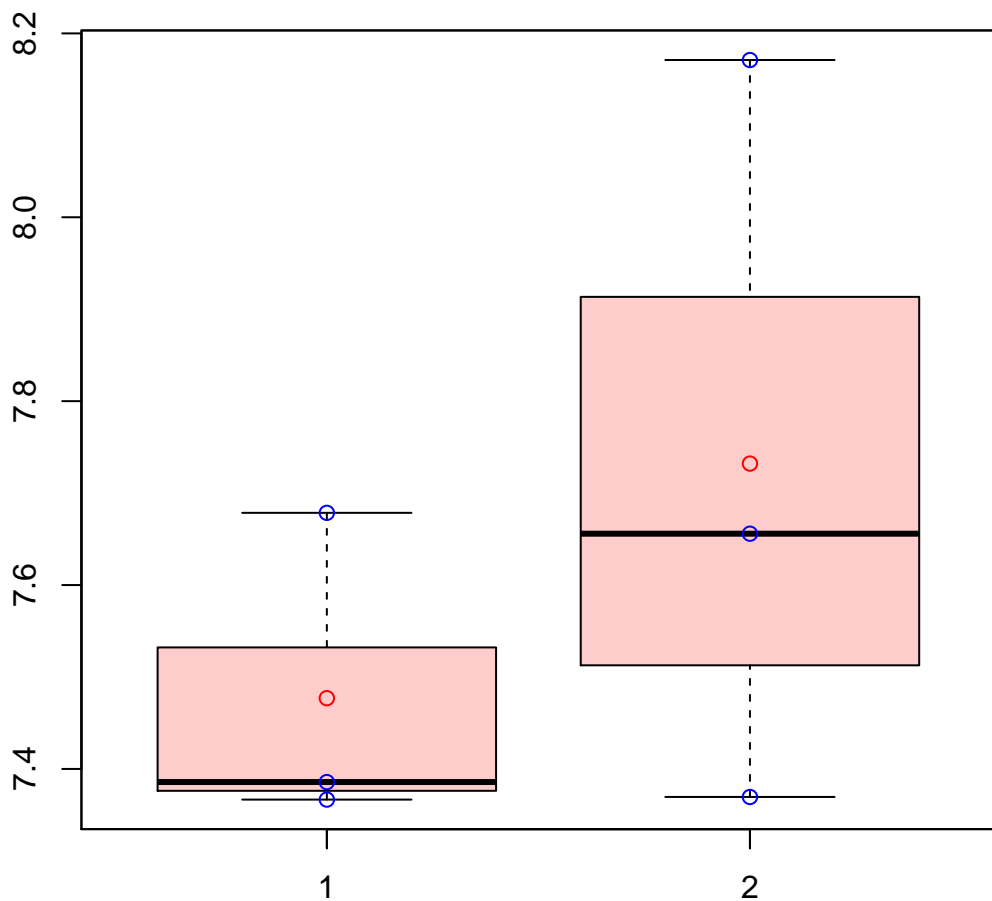

t-Test: p-value = 0.4

# isotig03755|isotig03755

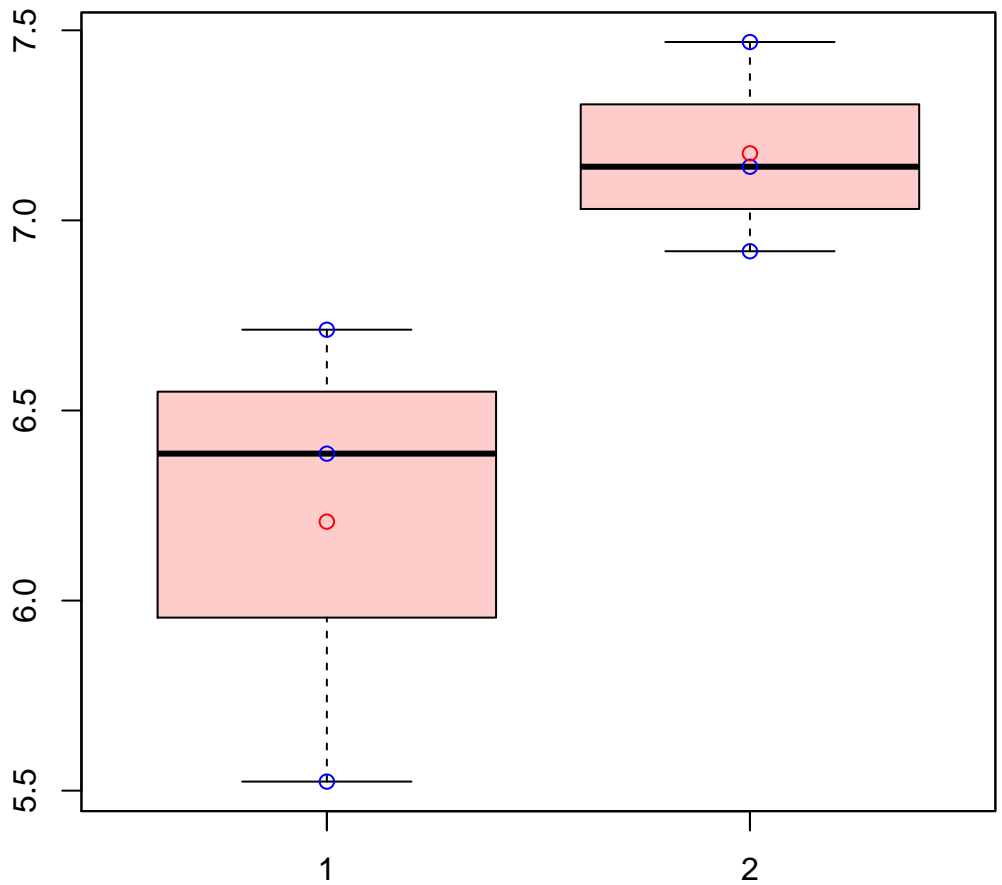

t-Test: p-value = 0.1

# isotig03774|isotig03774

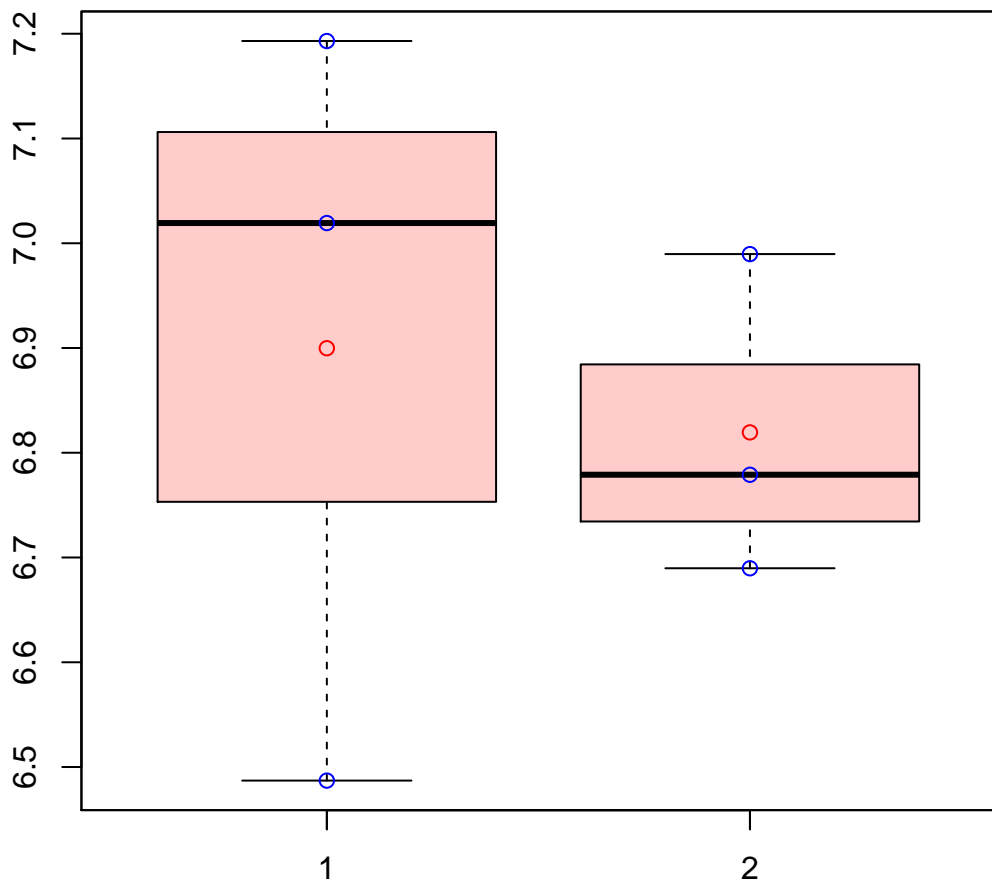

t-Test: p-value = 0.75

# isotig03902|isotig03902

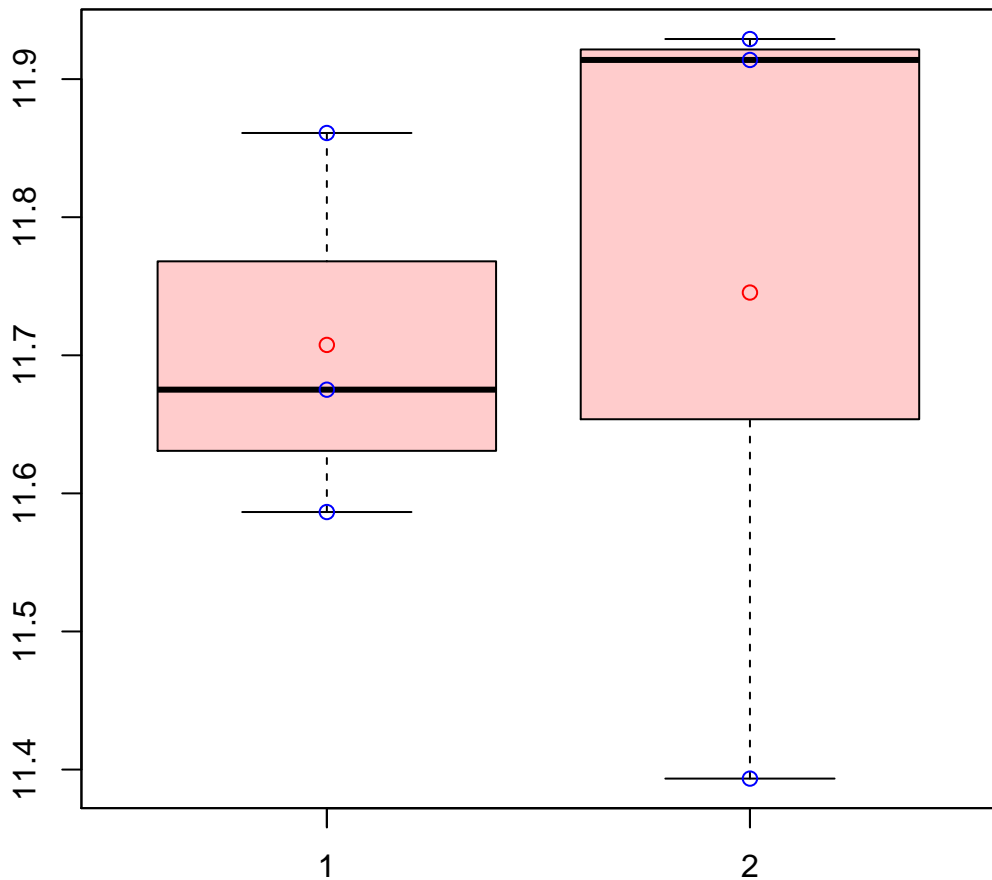

t-Test: p-value = 0.86



# isotig04017|isotig04017

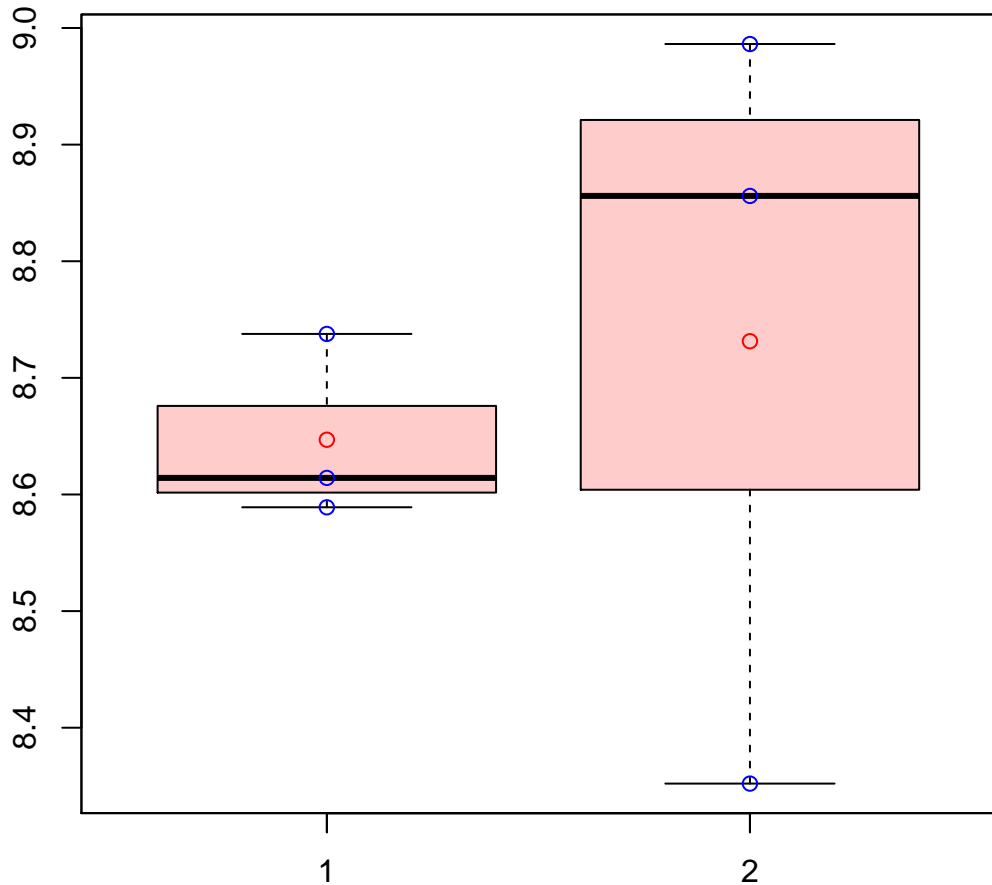

t-Test: p-value = 0.71

# isotig04020|isotig04020

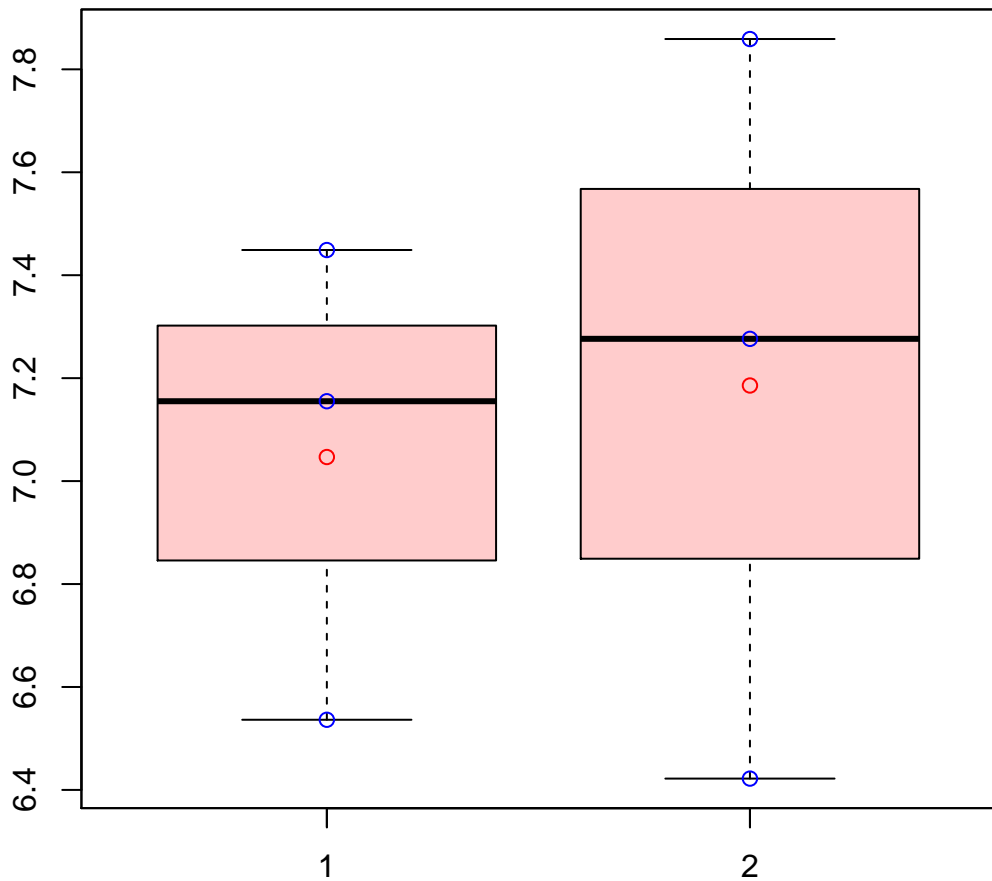

t-Test: p-value = 0.8

# isotig04028|isotig04028

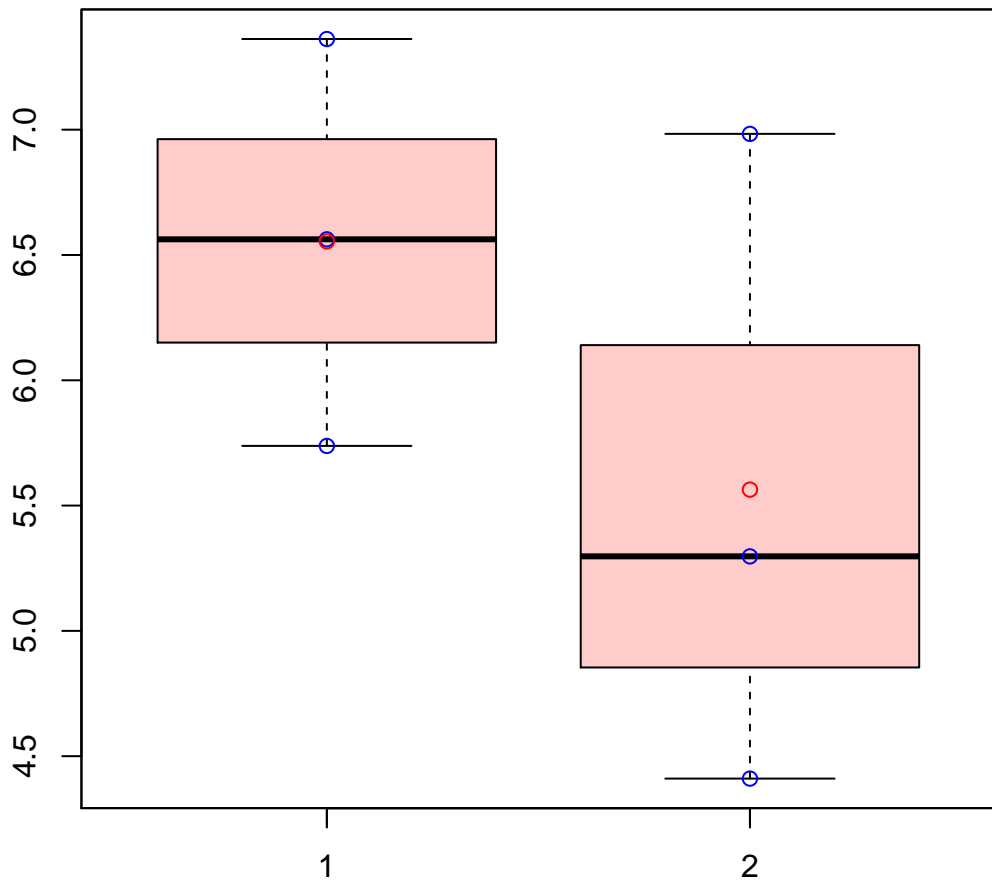

t-Test: p-value = 0.34

# isotig04407|isotig04407

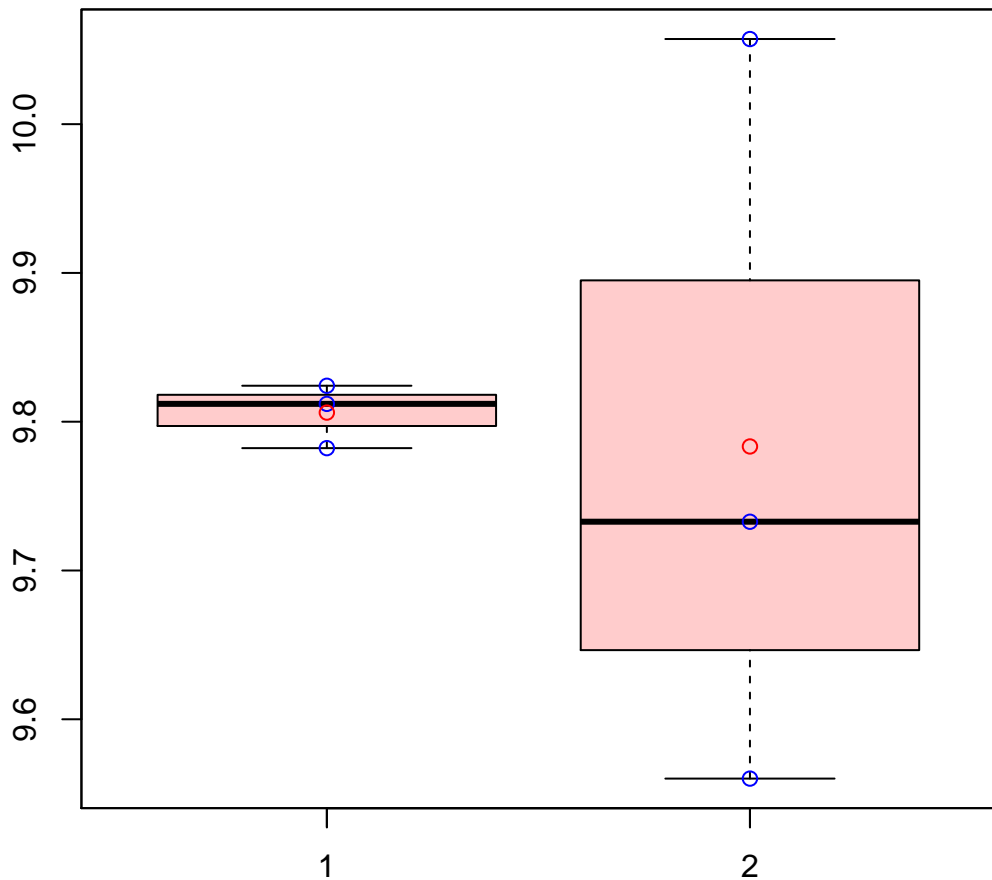

t-Test: p-value = 0.89

# isotig04972|isotig04972

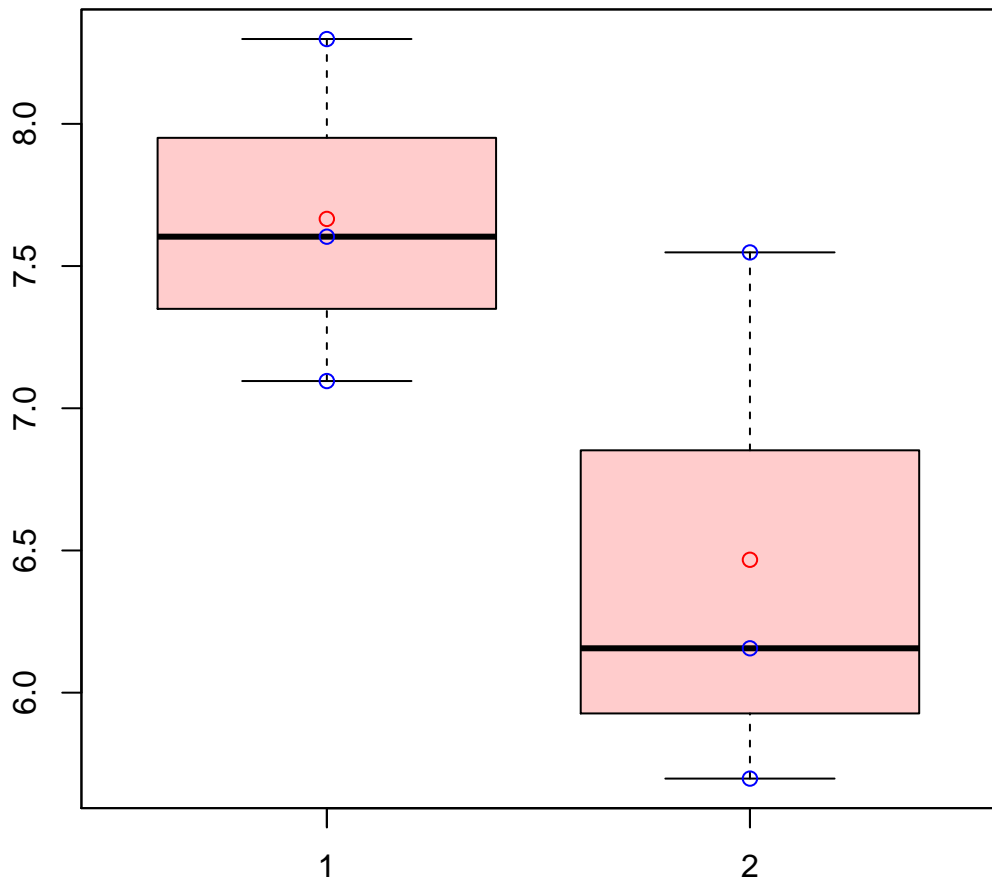

t-Test: p-value = 0.16

# isotig05526|isotig05526

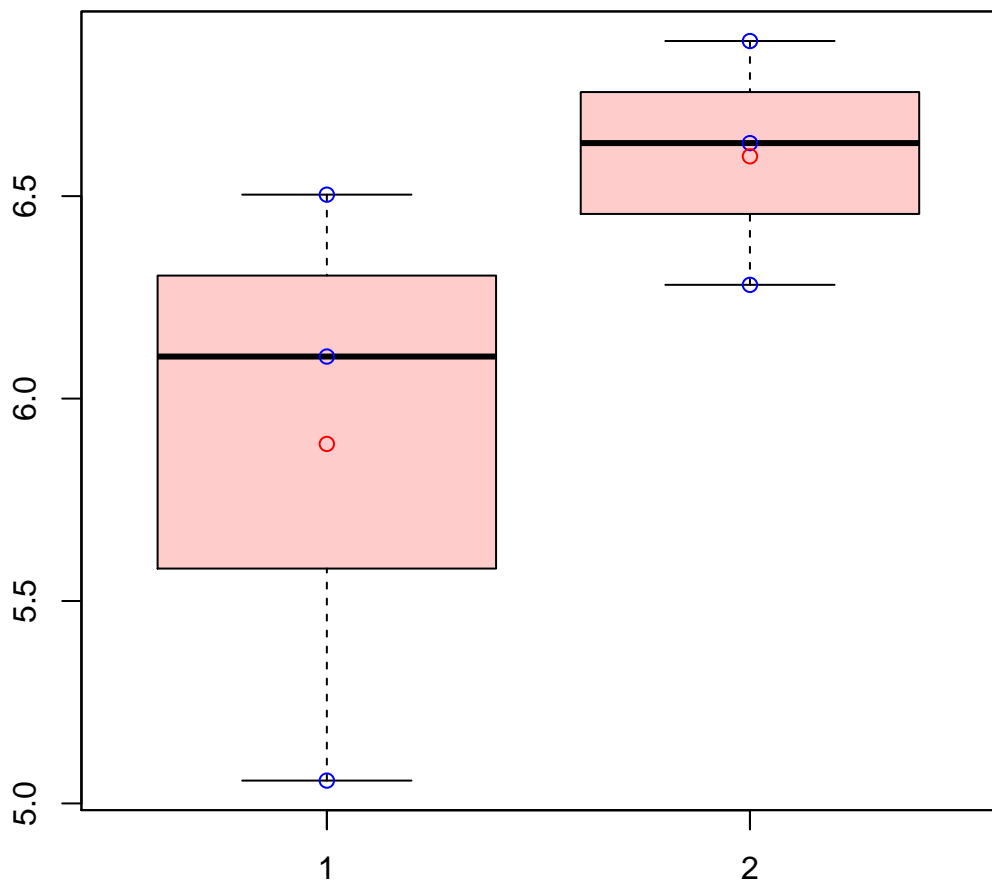

t-Test: p-value = 0.24

# isotig06277|isotig06277

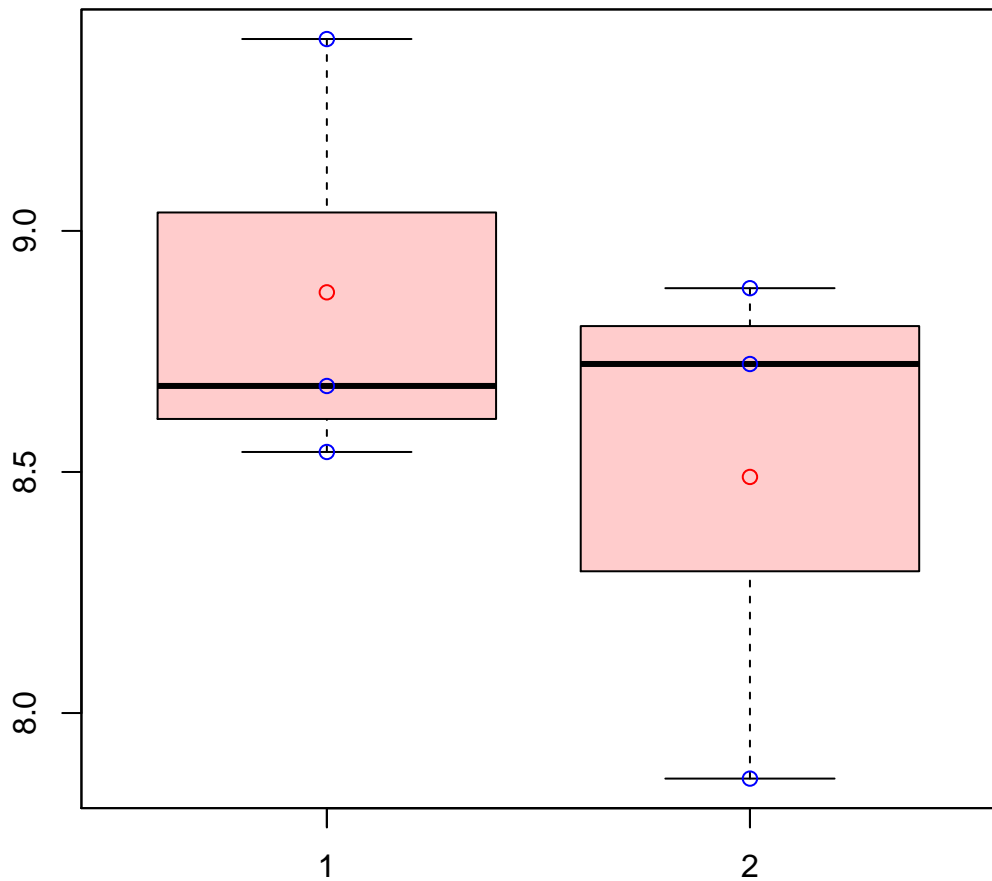

t-Test: p-value = 0.41

# isotig07055|isotig07055

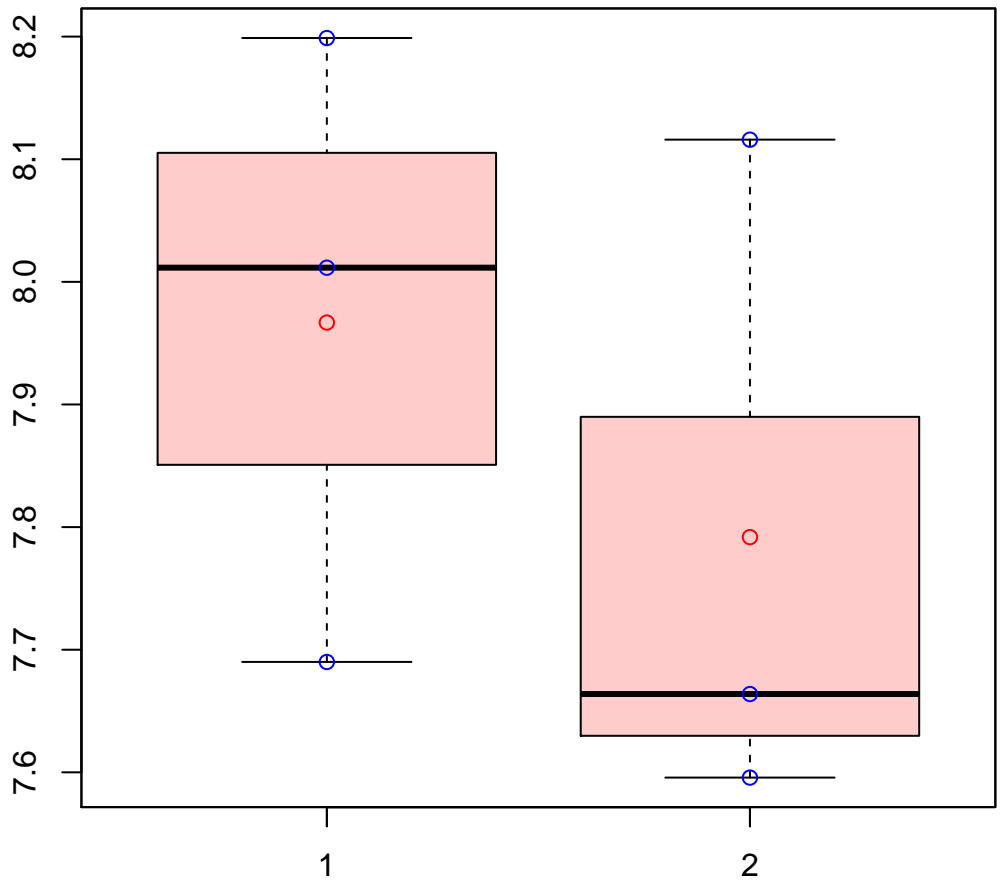

t-Test: p-value = 0.47



isotig07688|isotig07688

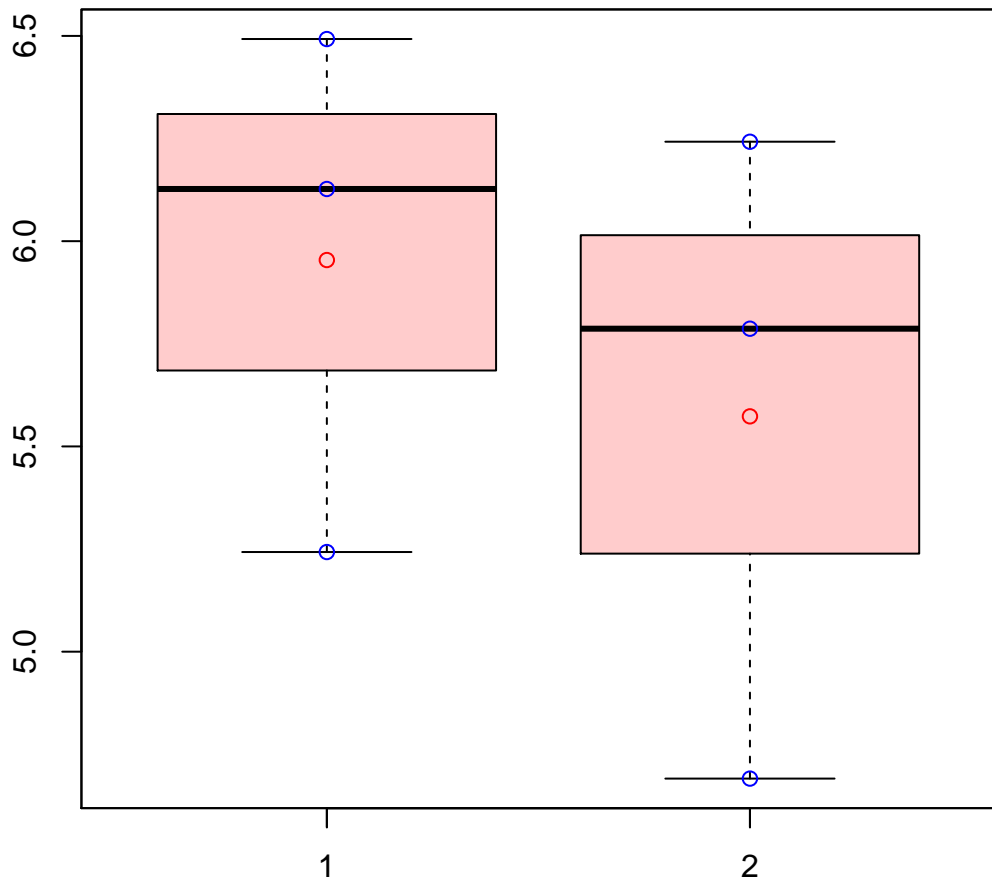

t-Test: p-value = 0.56

# isotig07921|isotig07921

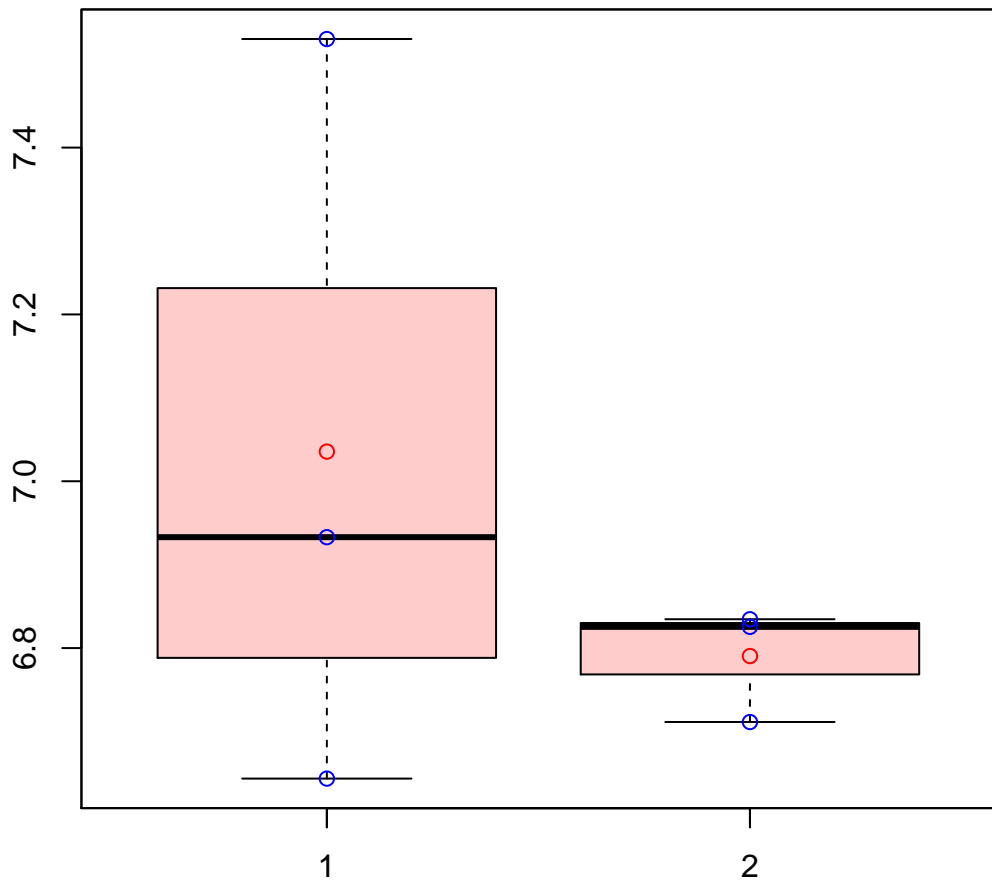

t-Test: p-value = 0.45

# isotig08027|isotig08027

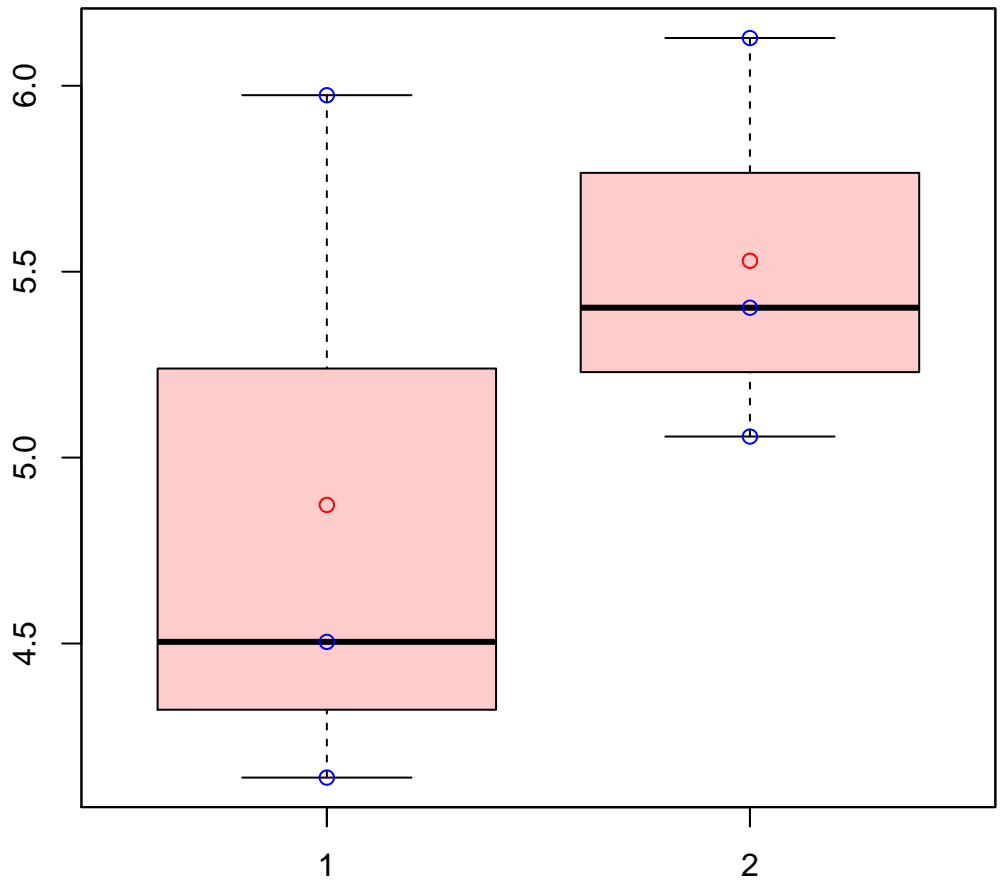

t-Test: p-value = 0.38

# isotig08284|isotig08284

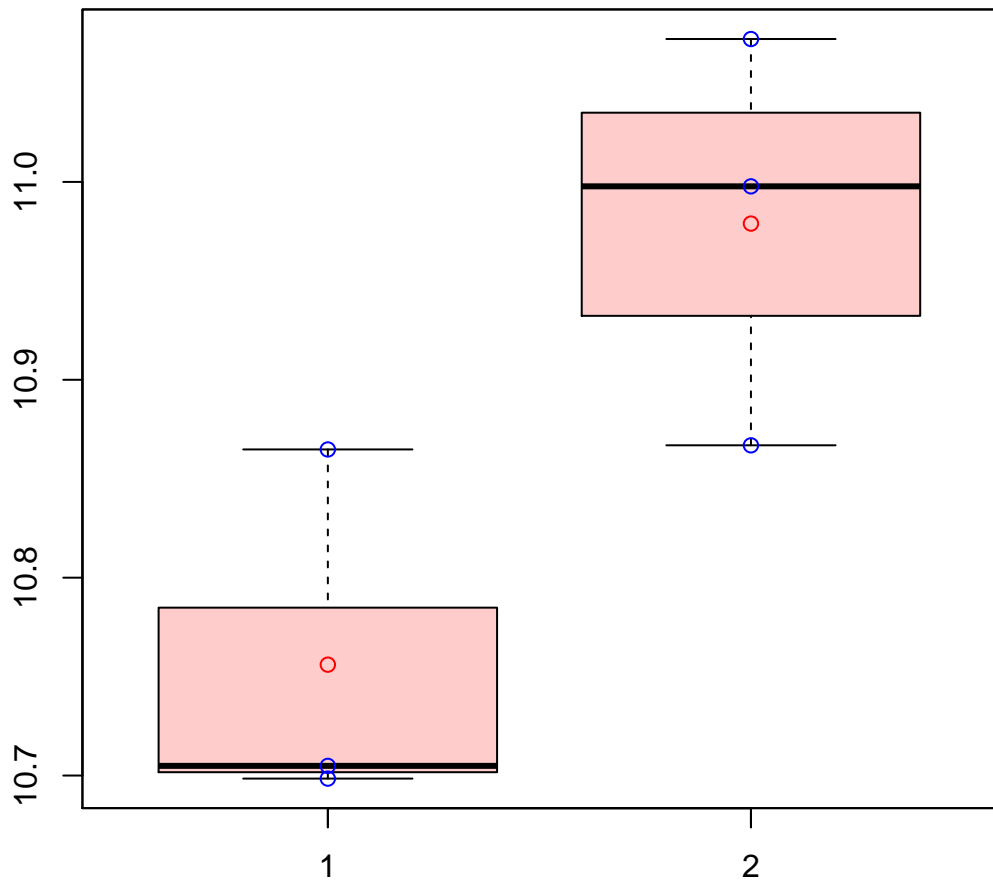

t-Test: p-value = 0.05

# isotig09880|isotig09880

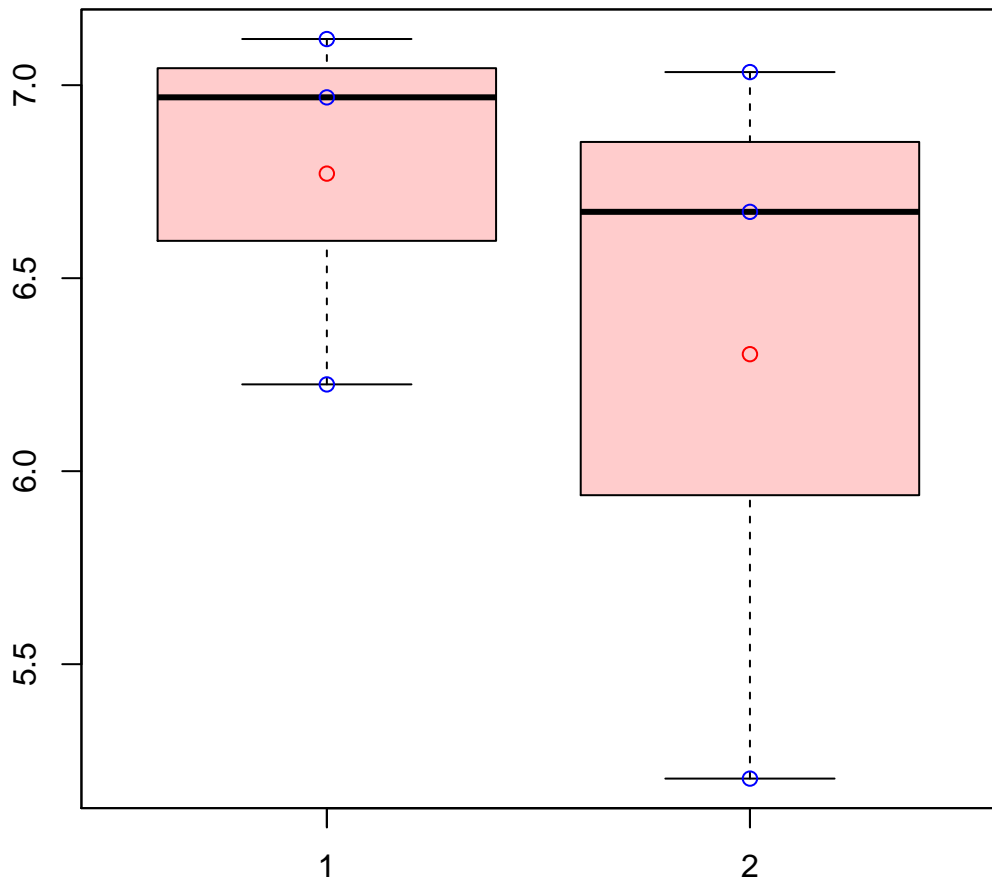

t-Test: p-value = 0.51

# isotig10340|isotig10340

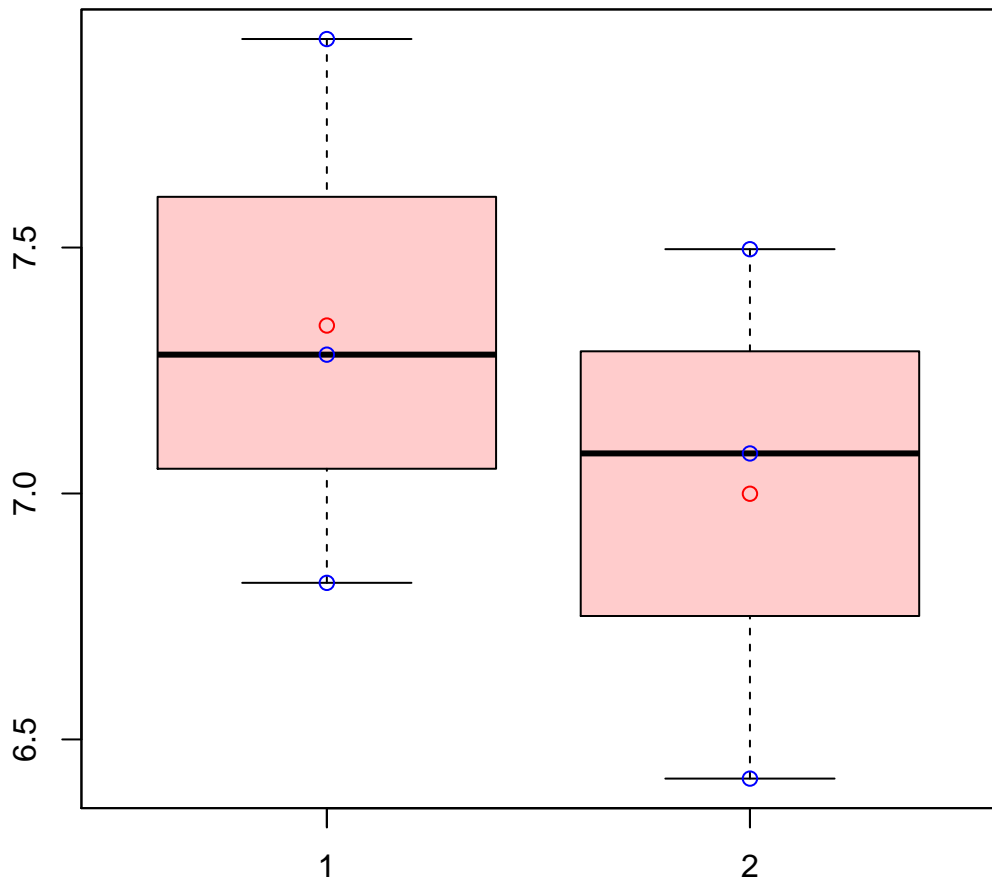

t-Test: p-value = 0.49

# isotig11046|isotig11046

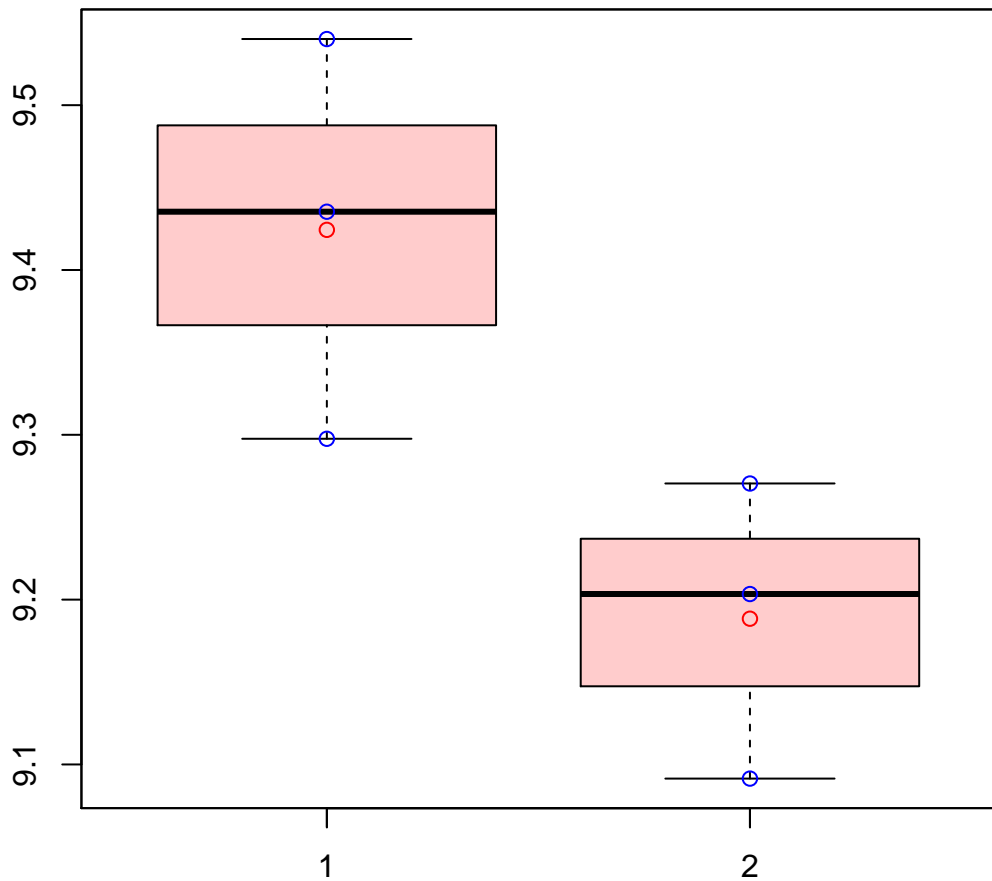

t-Test: p-value = 0.06

# isotig11290|isotig11290

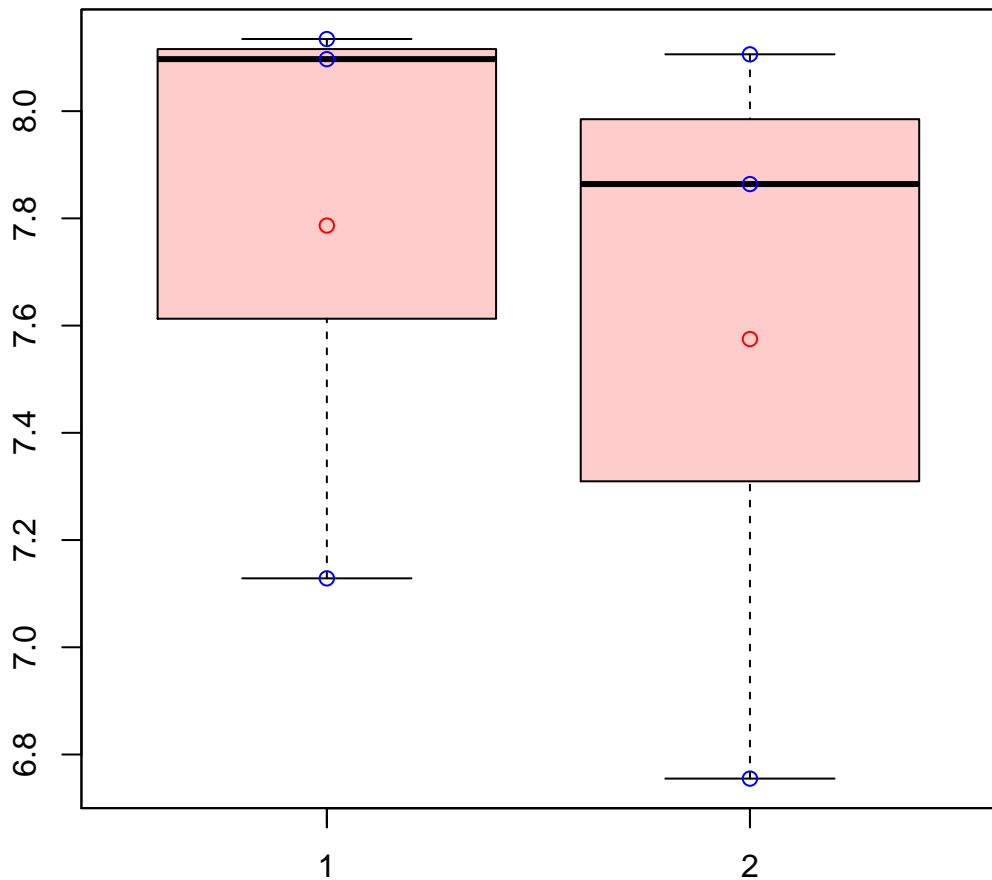

t-Test: p-value = 0.71



# isotig13959|isotig13959

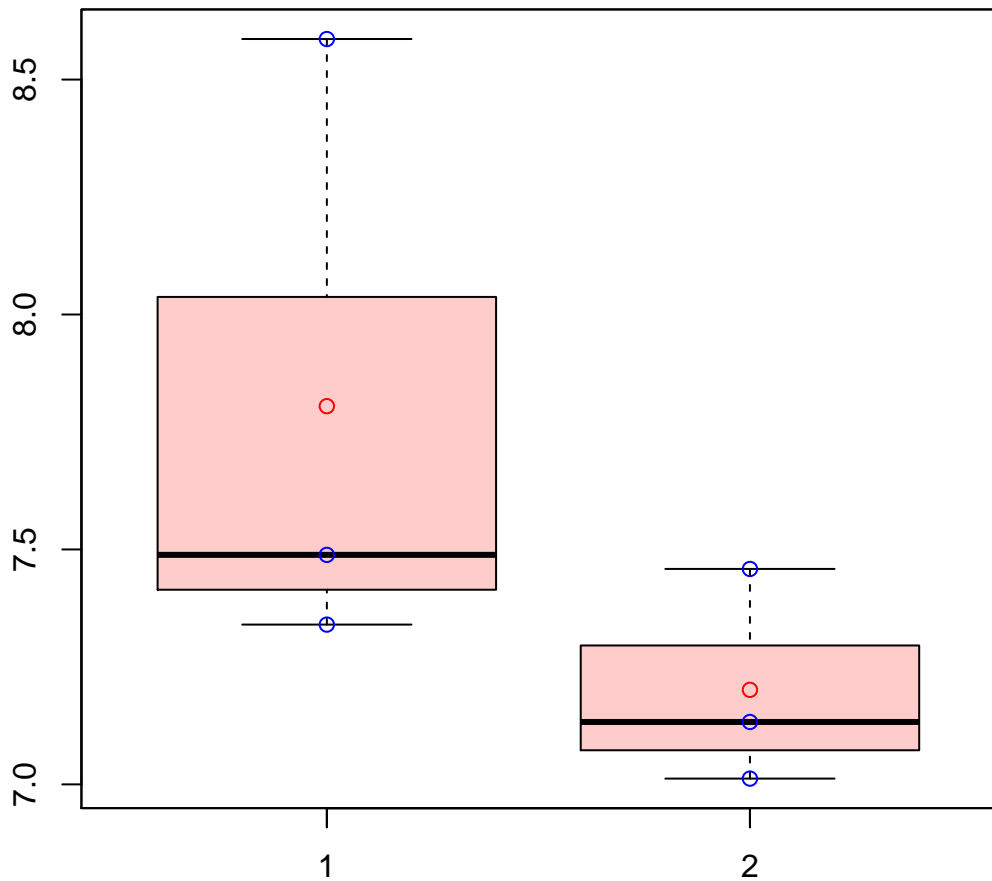

t-Test: p-value = 0.26

isotig15227|isotig15227

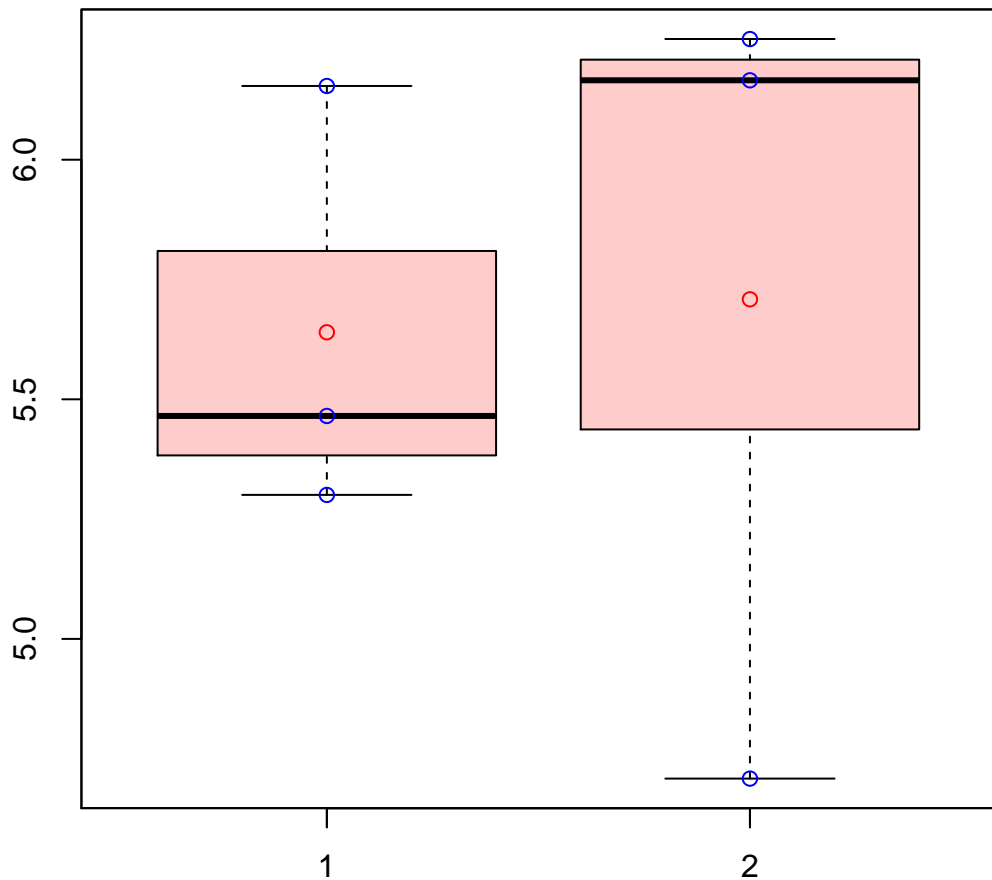

t-Test: p-value = 0.91

# isotig16381|isotig16381

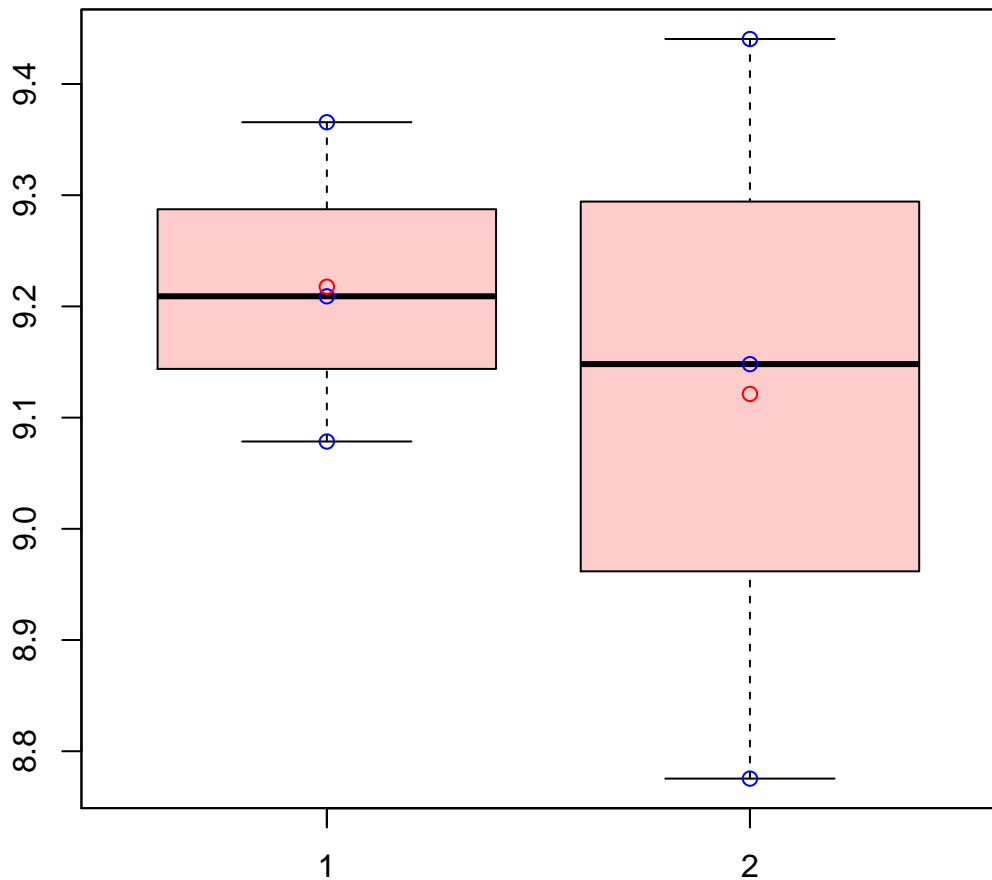

t-Test: p-value = 0.68

# isotig16578|isotig16578

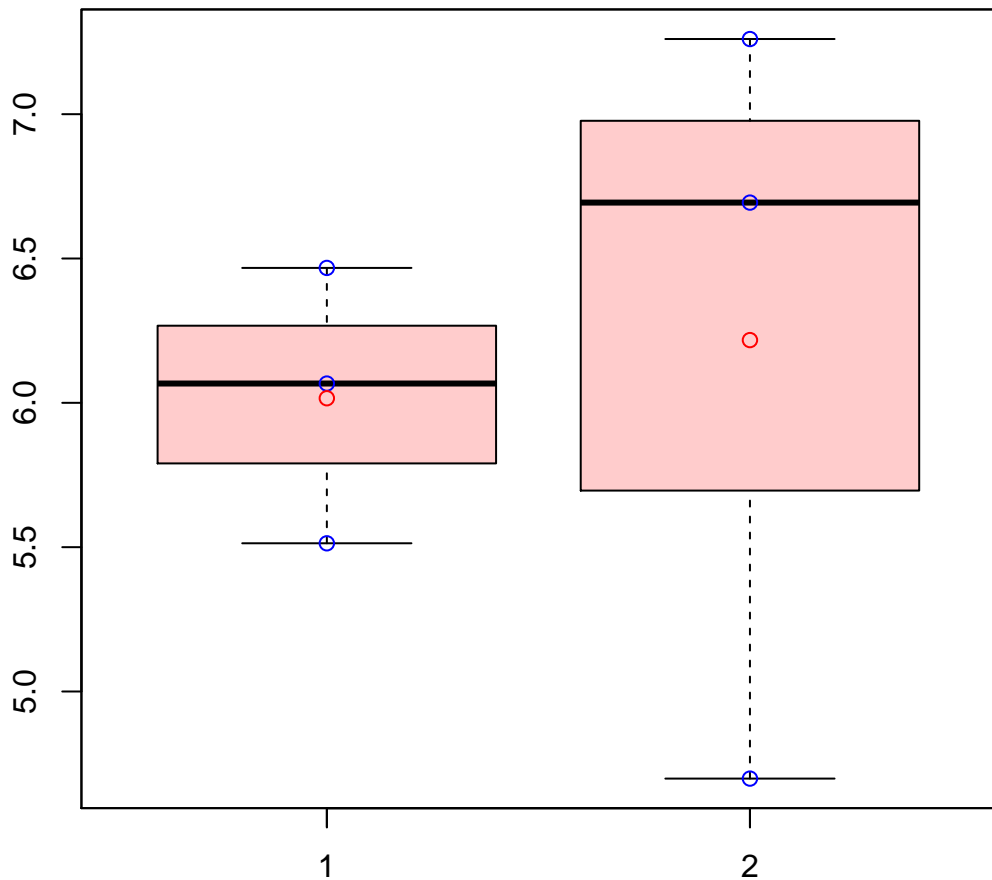

t-Test: p-value = 0.83

# isotig17049|isotig17049

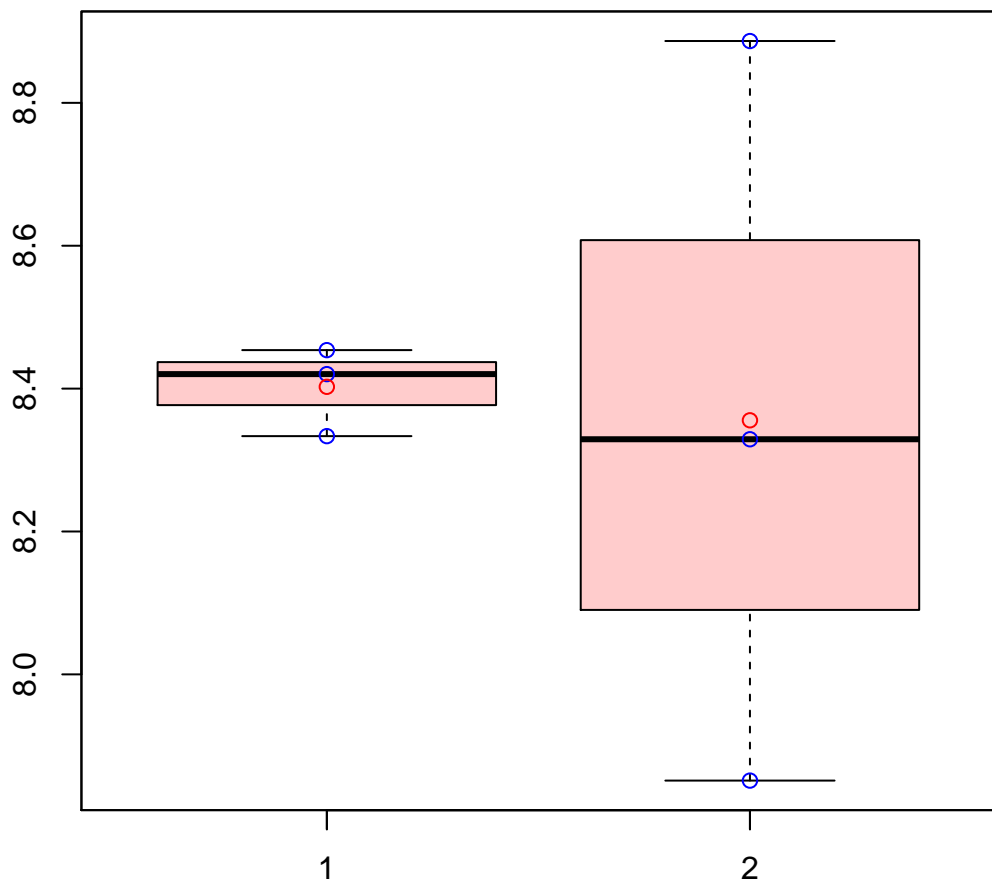

t-Test: p-value = 0.89

# isotig18981|isotig18981

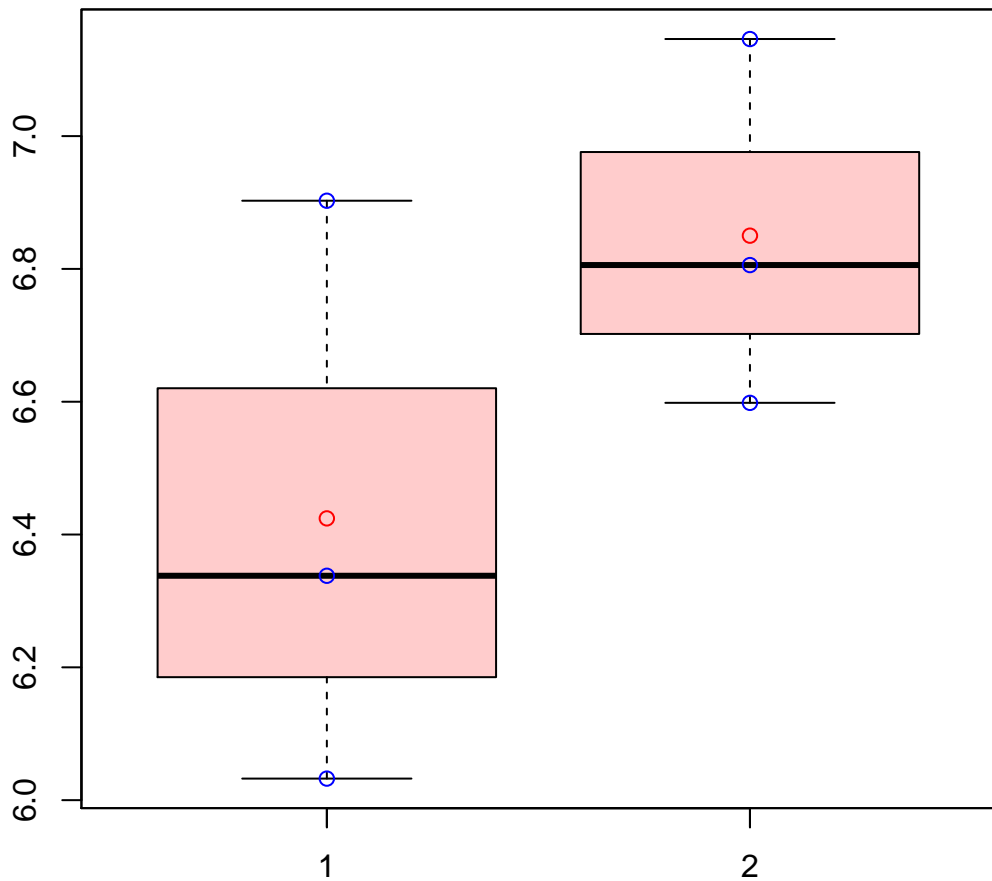

t-Test: p-value = 0.24

# isotig20927|isotig20927

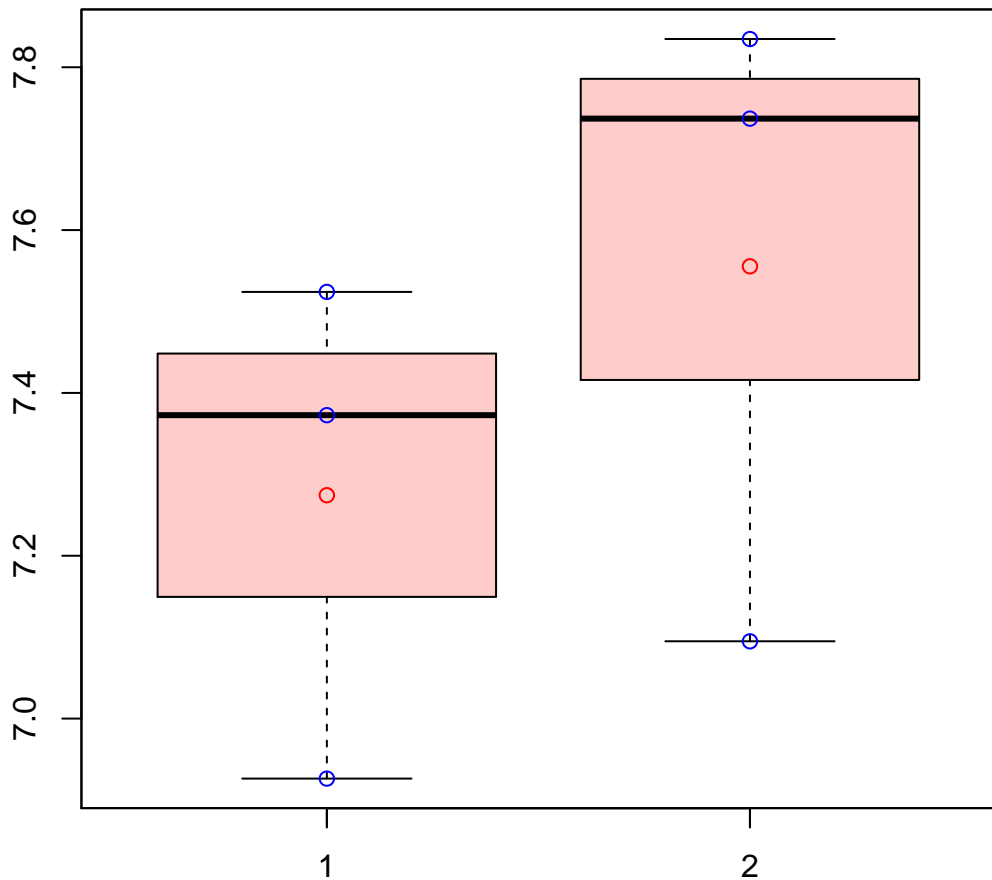

t-Test: p-value = 0.4

isotig21147|isotig21147

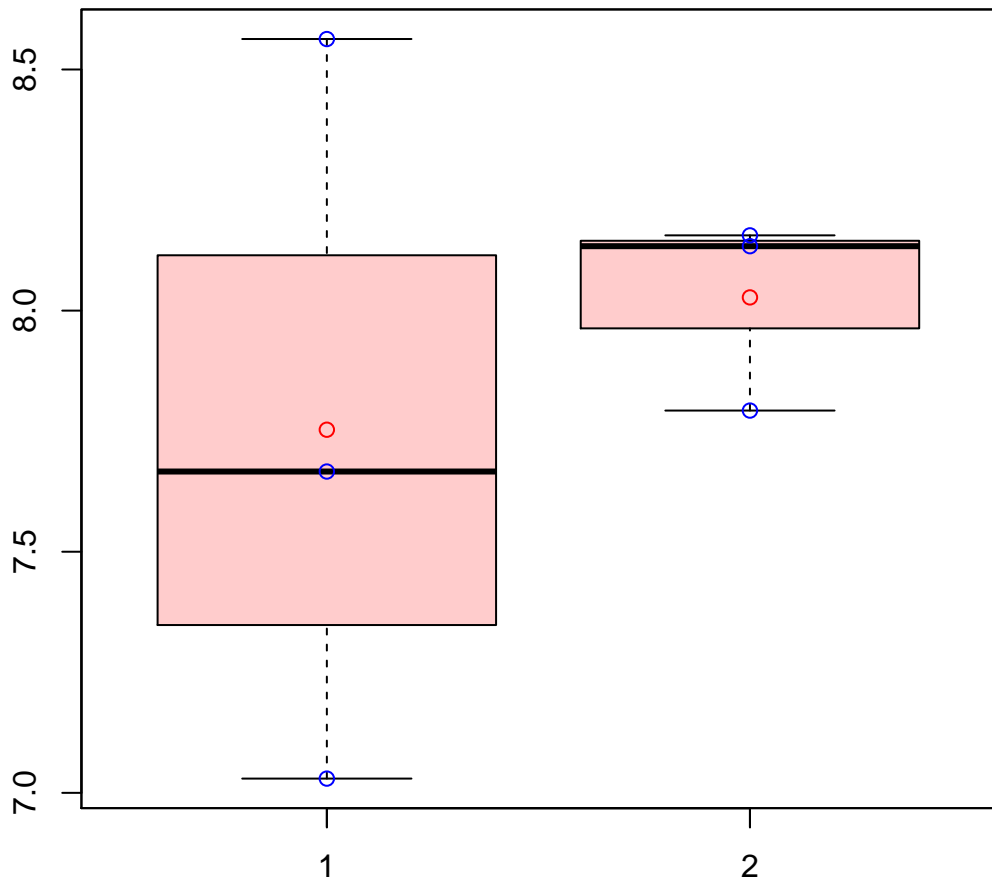

t-Test: p-value = 0.6



# isotig21337|isotig21337

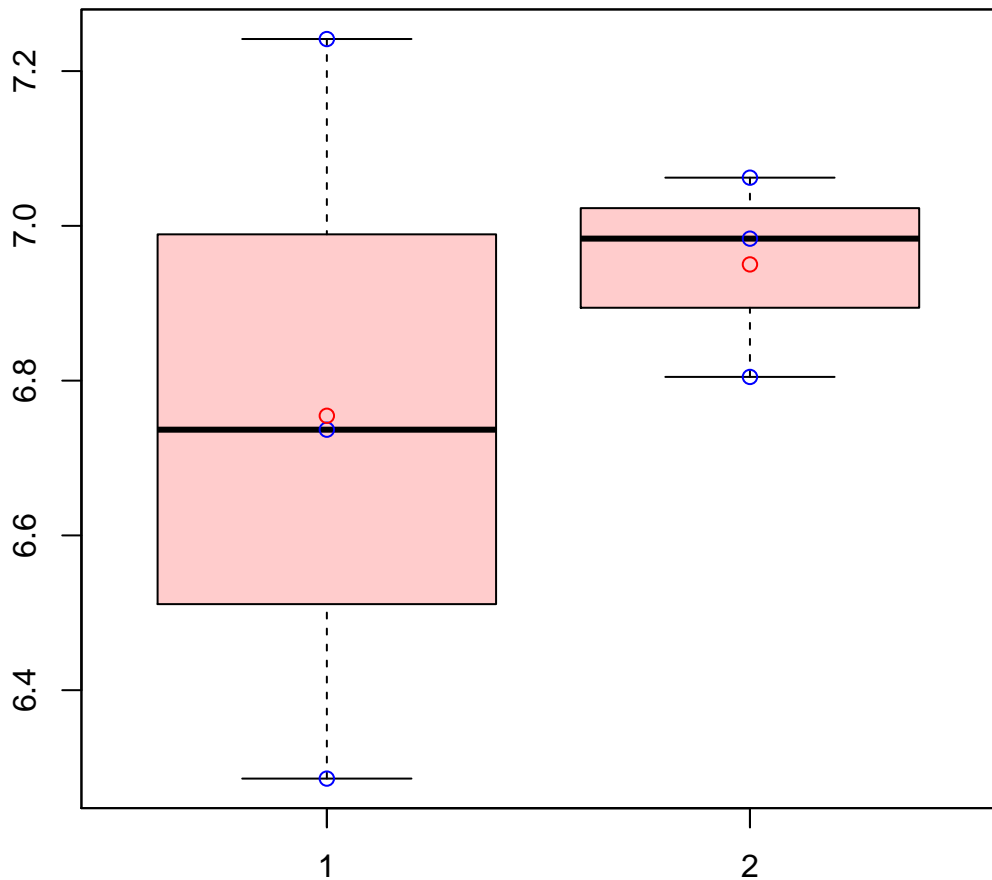

t-Test: p-value = 0.56

# isotig21390|isotig21390

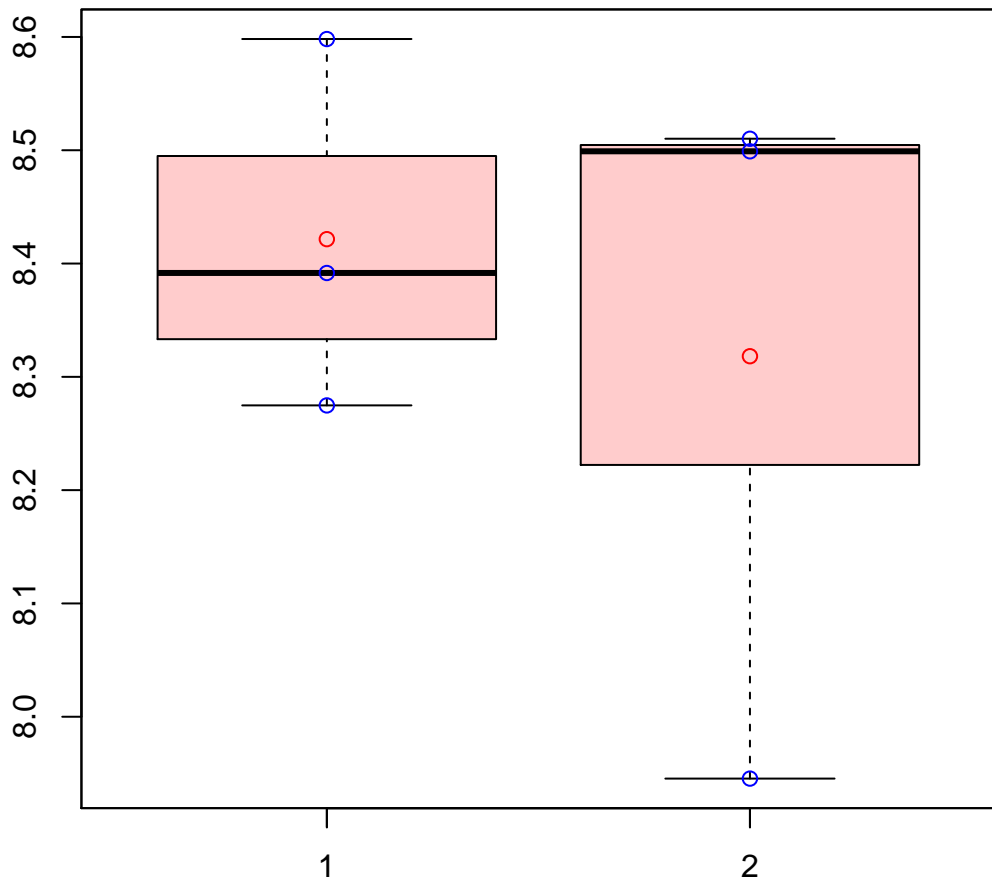

t-Test: p-value = 0.66

# isotig22806|isotig22806

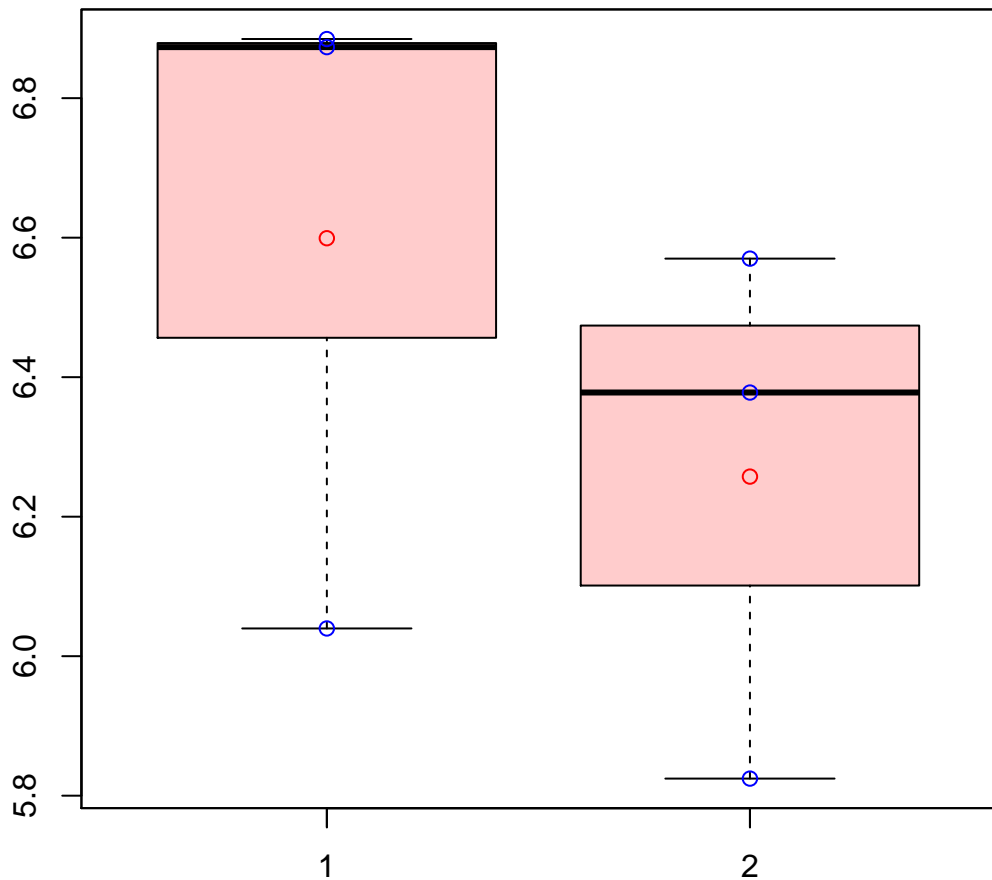

t-Test: p-value = 0.4

# isotig23406|isotig23406

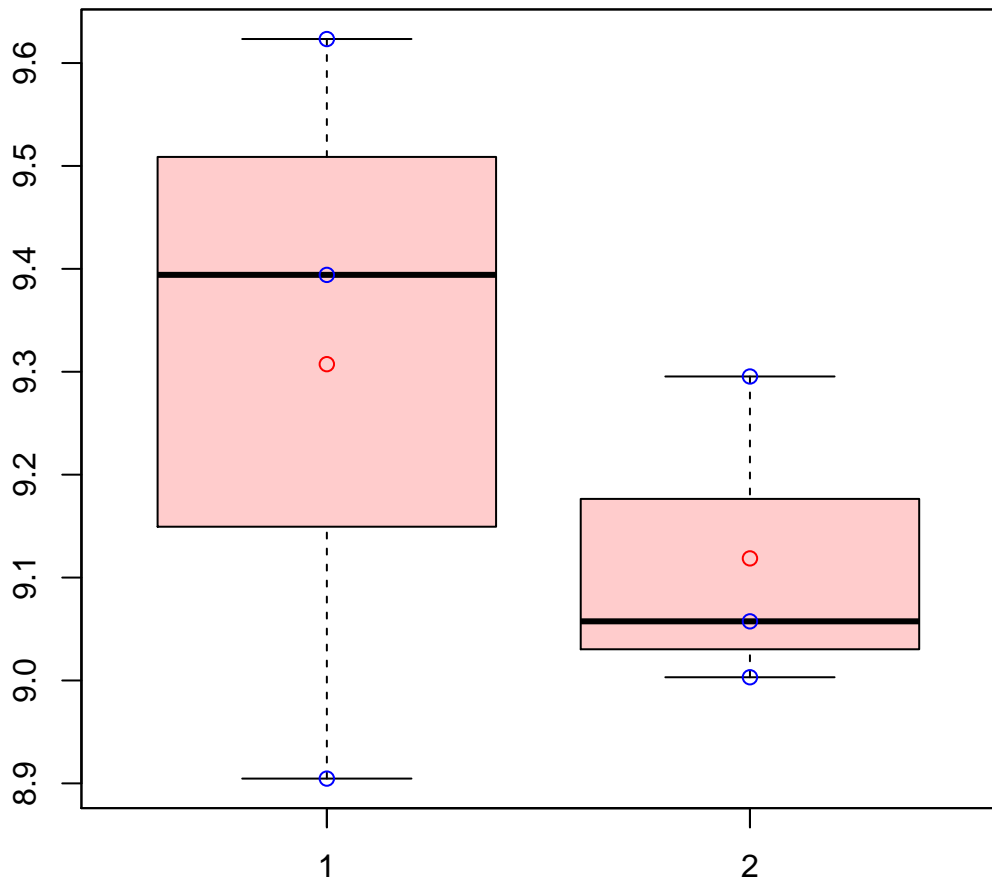

t-Test: p-value = 0.48

# isotig32319|isotig32319

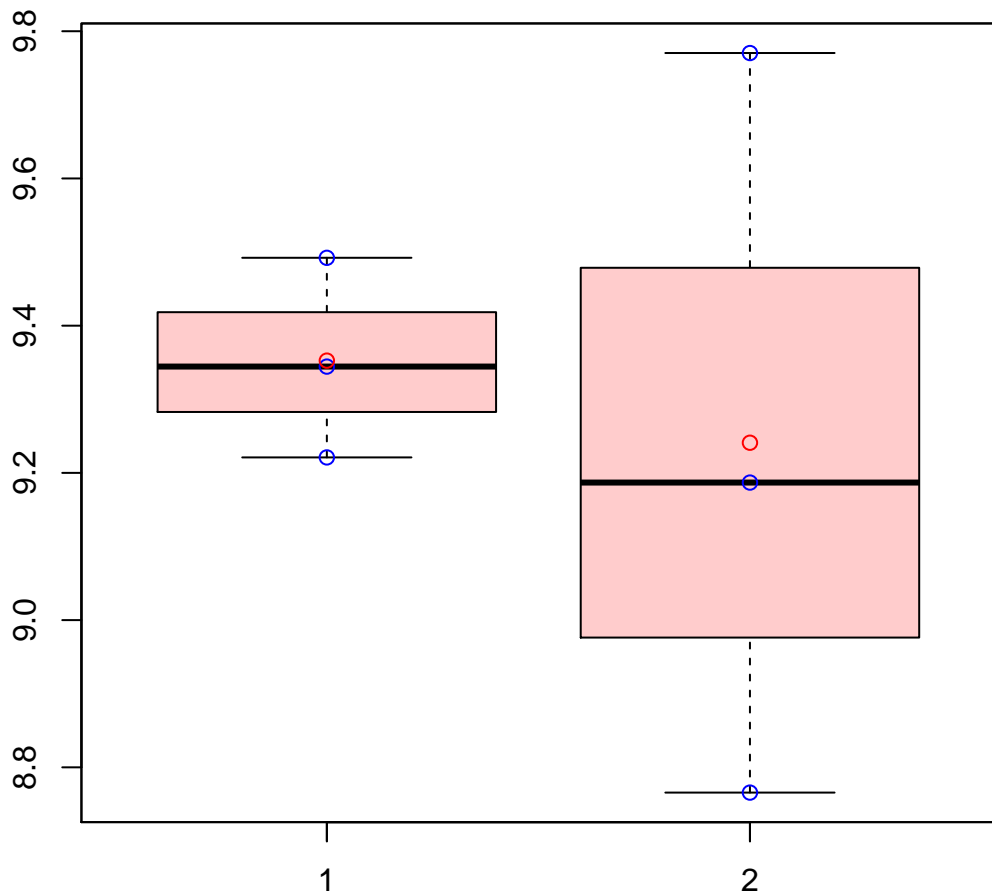

t-Test: p-value = 0.74

# isotig34100|isotig34100

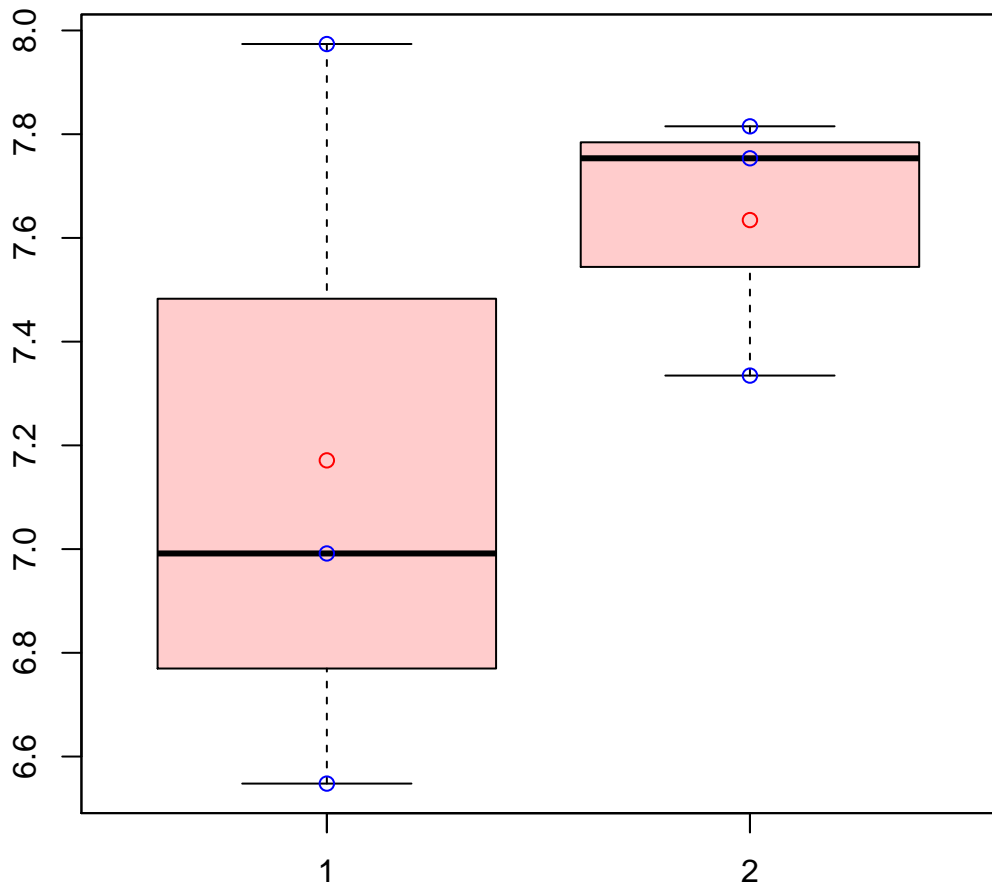

t-Test: p-value = 0.39

# ISPG1\_ERATE|ISPG1\_ERATE

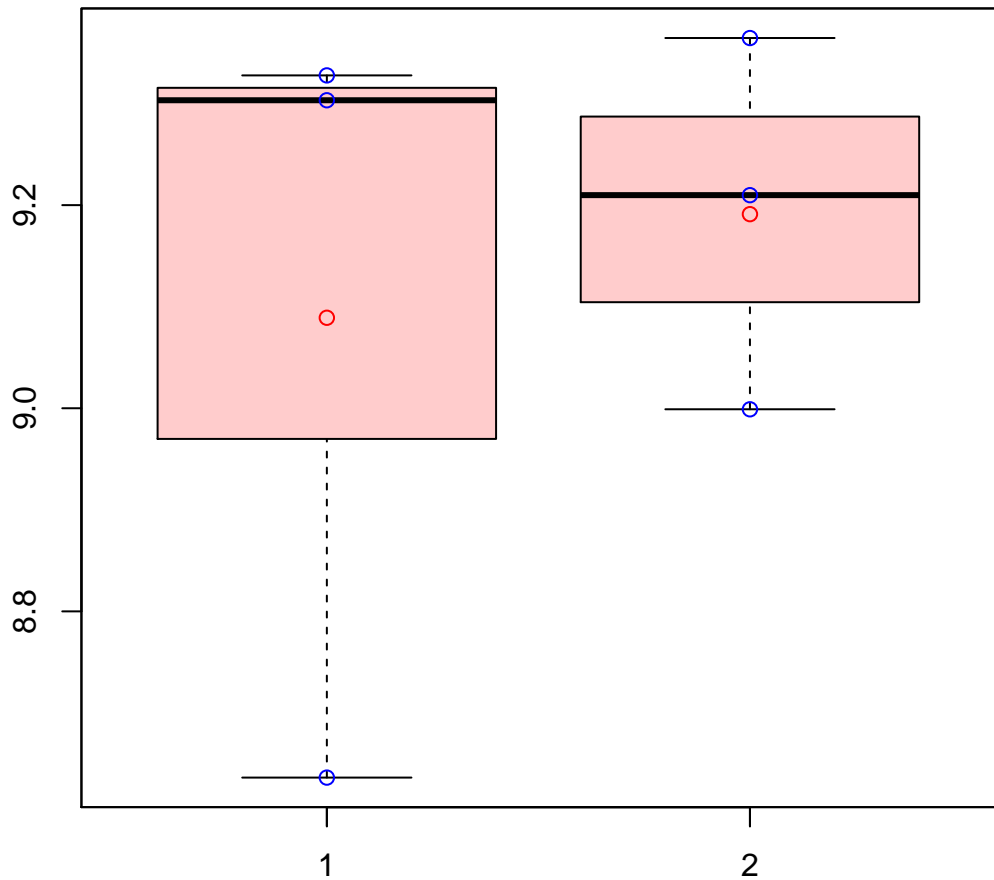

t-Test: p-value = 0.71

# ISPG3\_ERATE|ISPG3\_ERATE

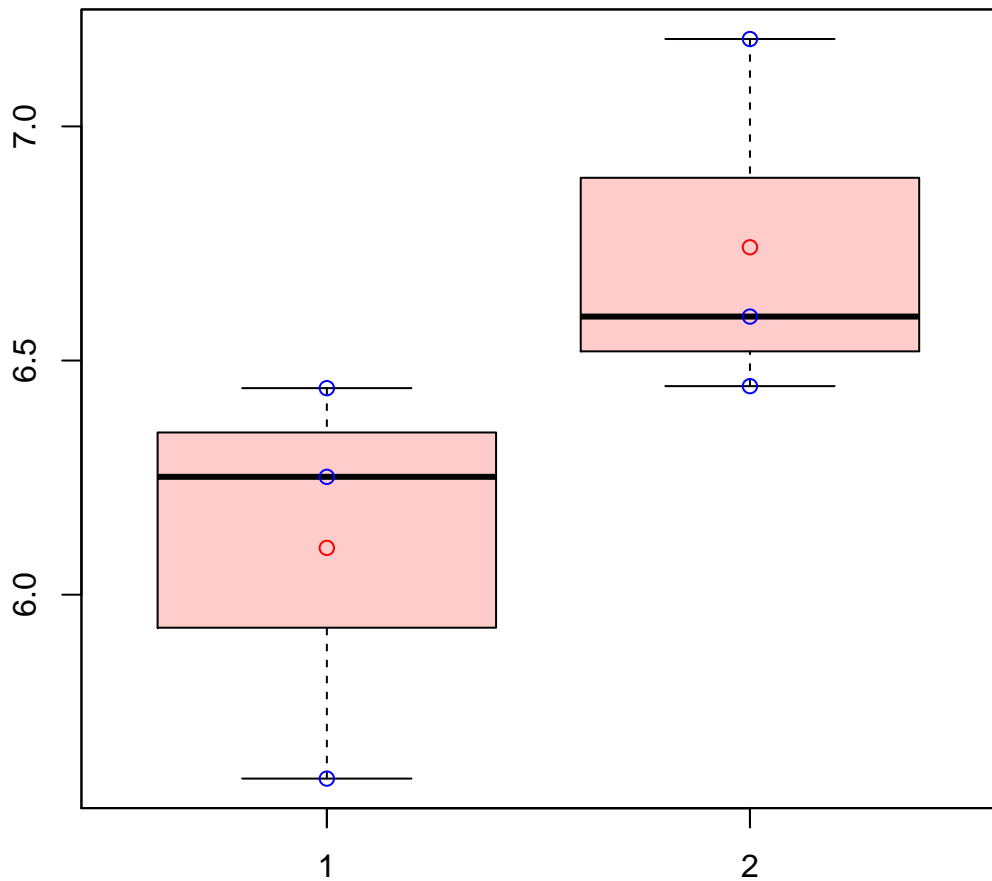

t-Test: p-value = 0.13



# KAD2\_ERATE|KAD2\_ERATE

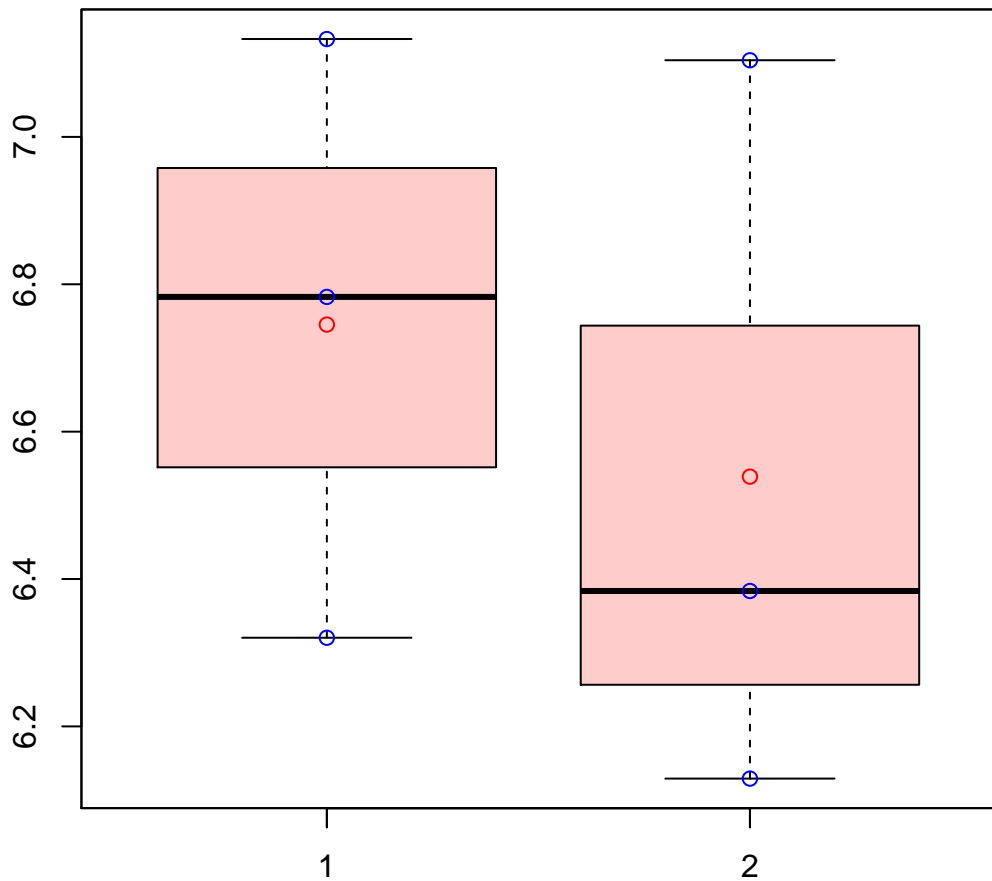

t-Test: p-value = 0.61

# LEPA4\_ERATE|LEPA4\_ERATE

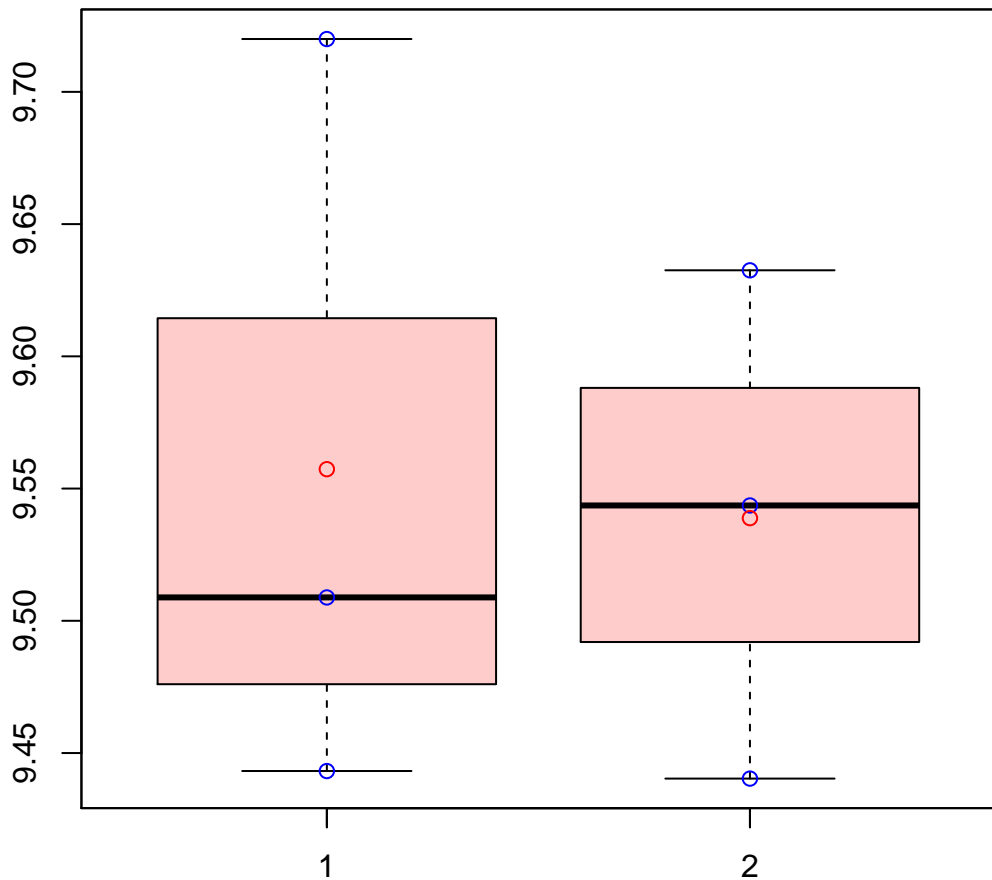

t-Test: p-value = 0.86

# LEU31\_ERATE|LEU31\_ERATE

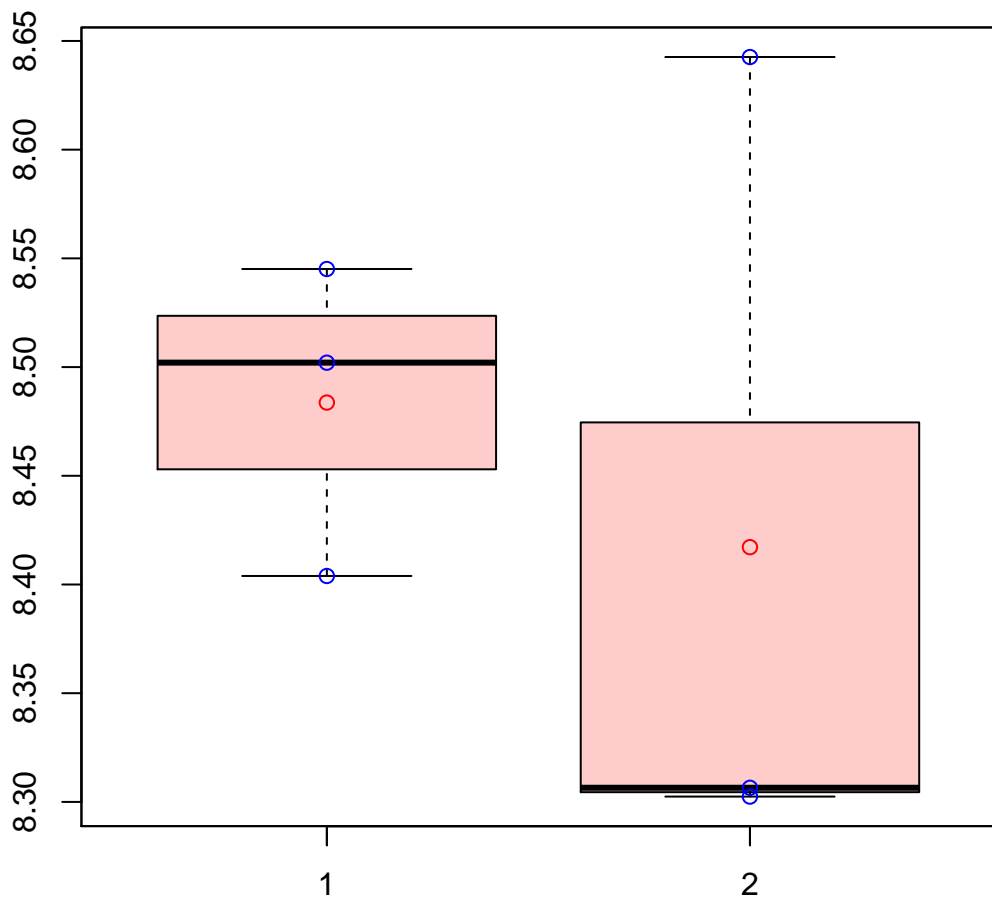

t-Test: p-value = 0.63

# LEU34\_ERATE|LEU34\_ERATE

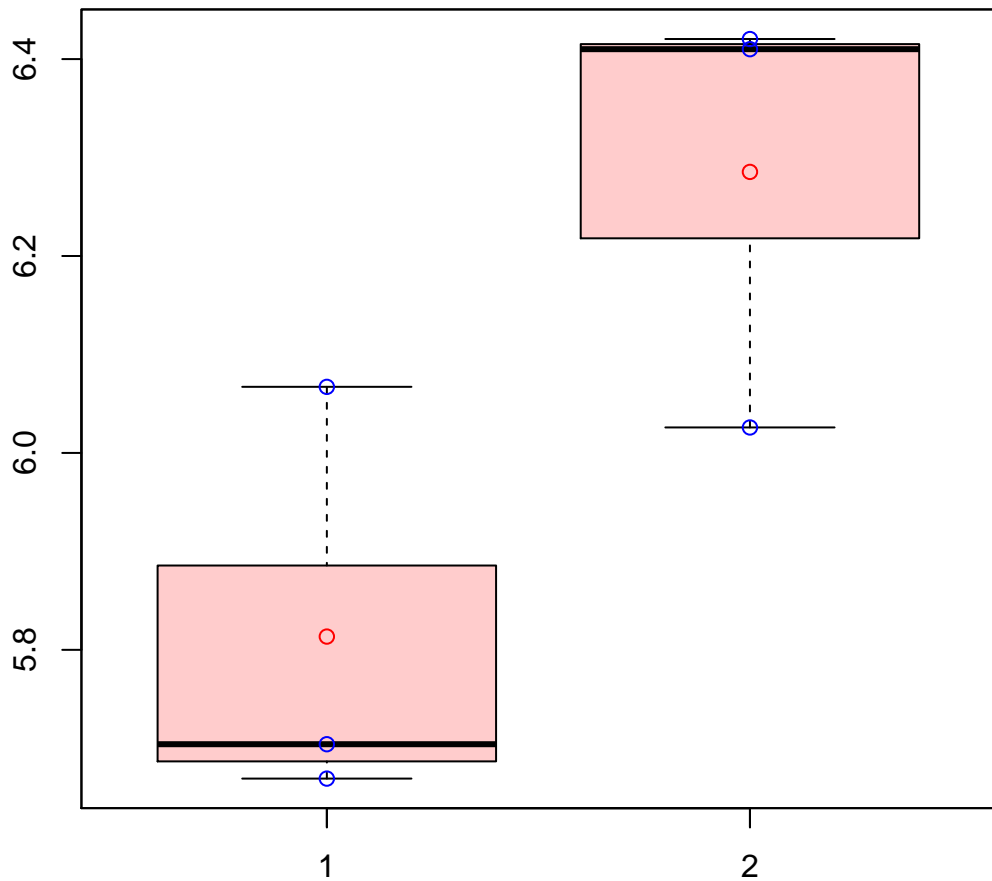

t-Test: p-value = 0.06

# Locus\_10667\_4\_5|Locus\_10667\_4\_5

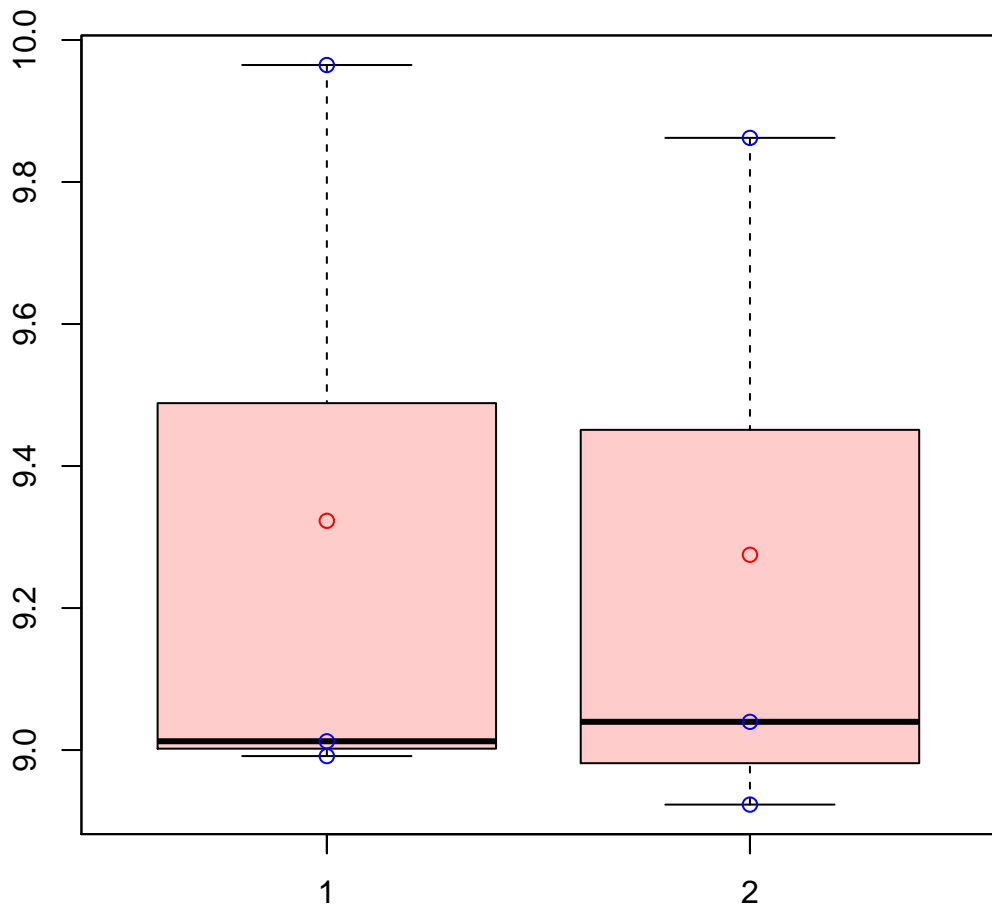

t-Test: p-value = 0.92

# Locus\_11108\_5\_6|Locus\_11108\_5\_6

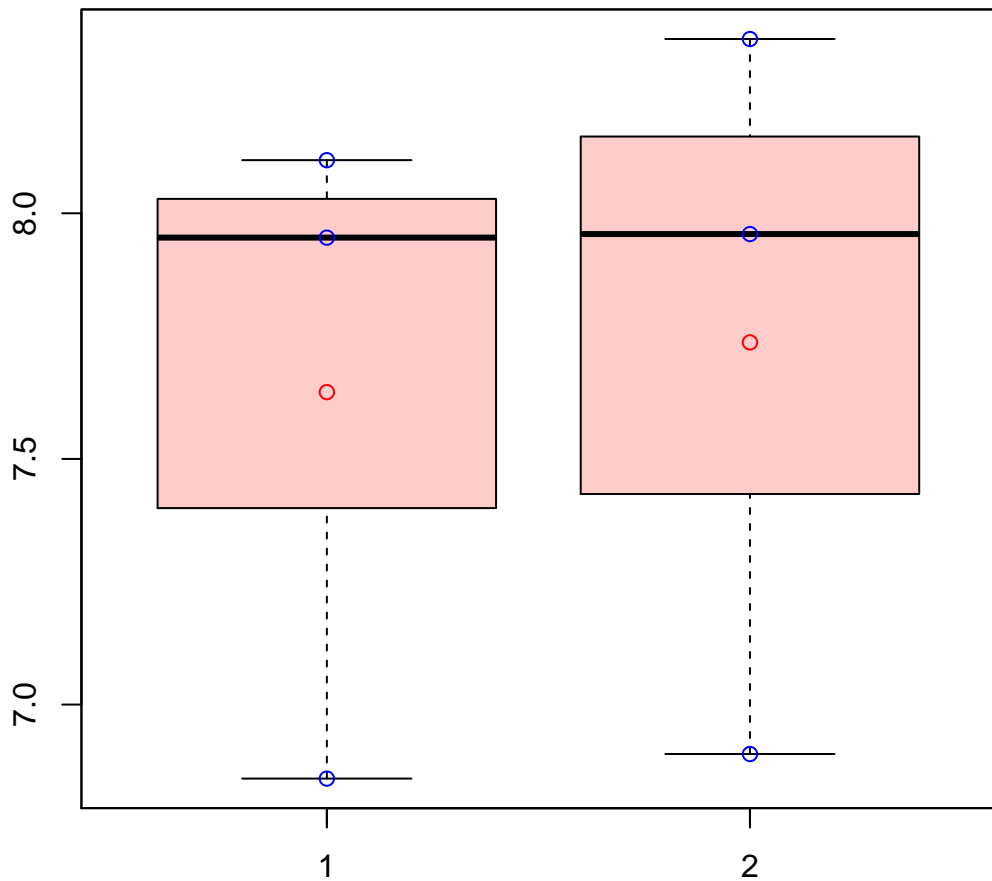

t-Test: p-value = 0.87

# Locus\_1113\_2\_2|Locus\_1113\_2\_2

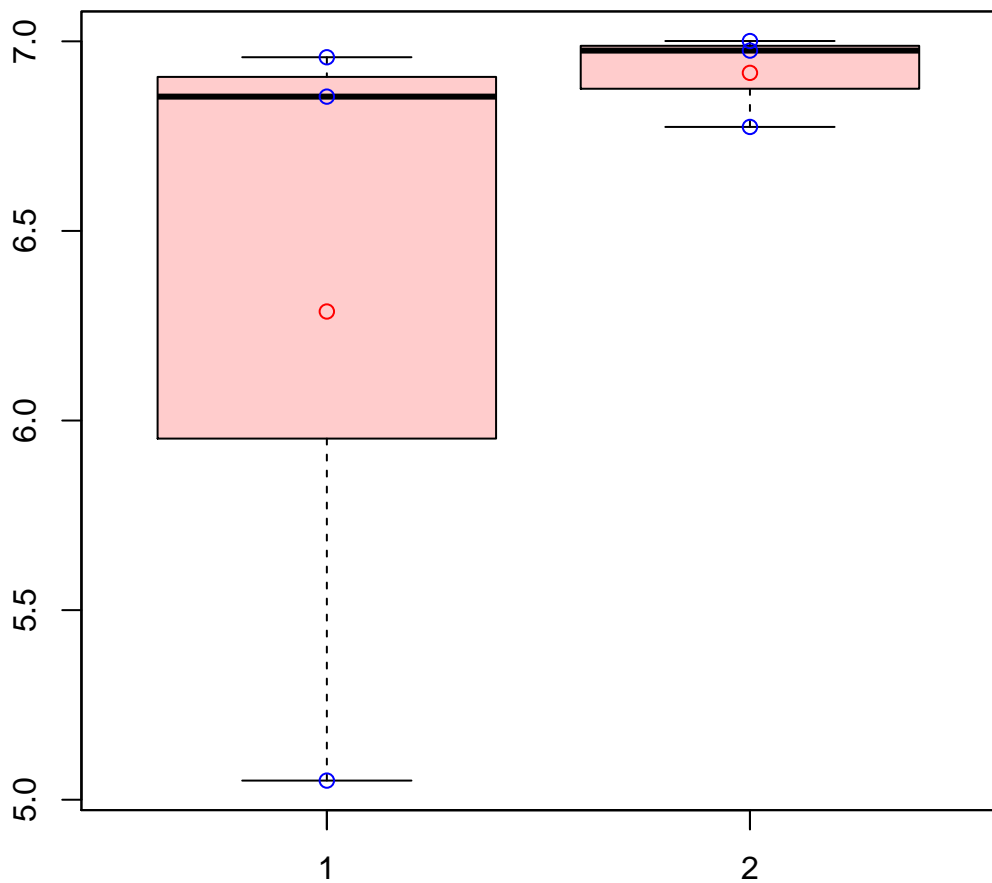

t-Test: p-value = 0.42

# Locus\_1138\_1\_3|Locus\_1138\_1\_3

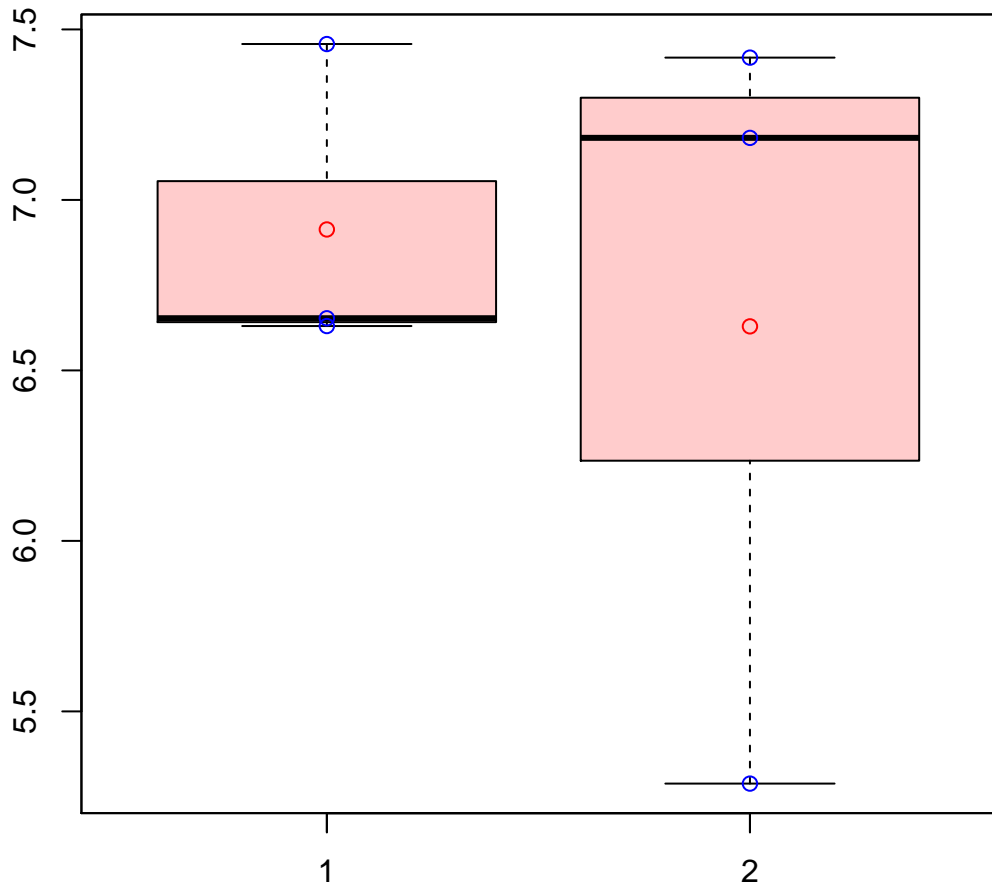

t-Test: p-value = 0.73



# Locus\_11848\_5\_6|Locus\_11848\_5\_6

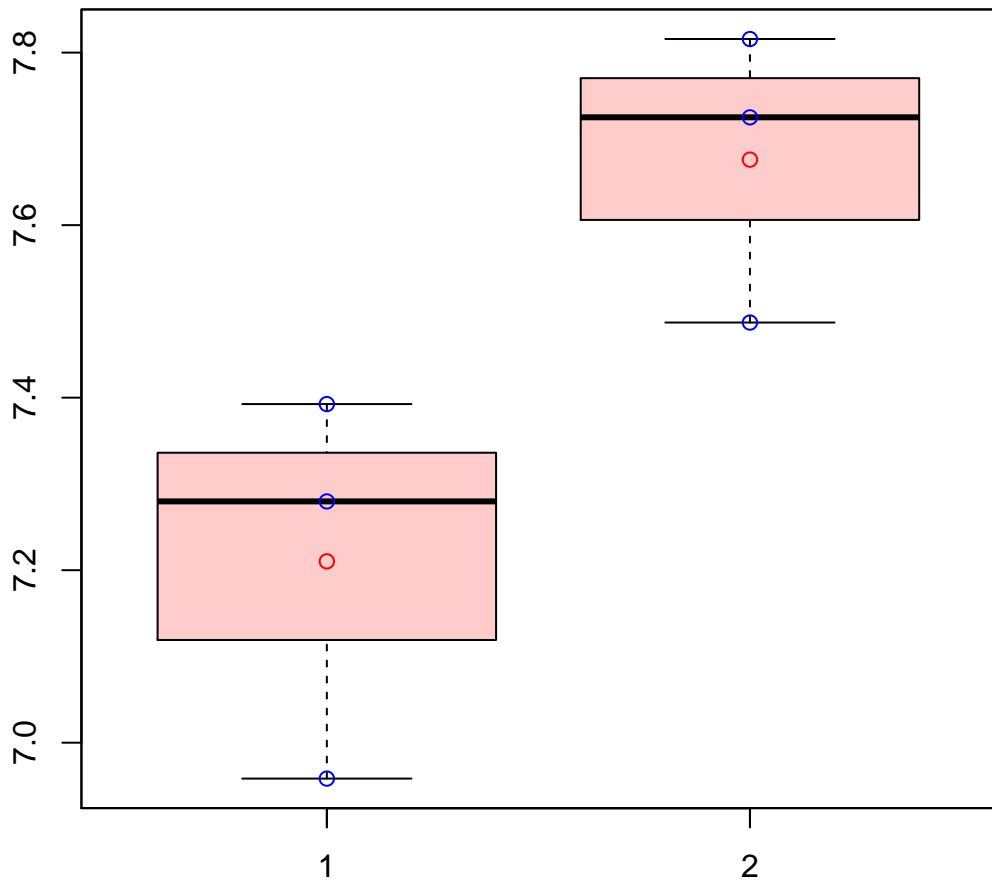

t-Test: p-value = 0.05

# Locus\_12209\_4\_6|Locus\_12209\_4\_6

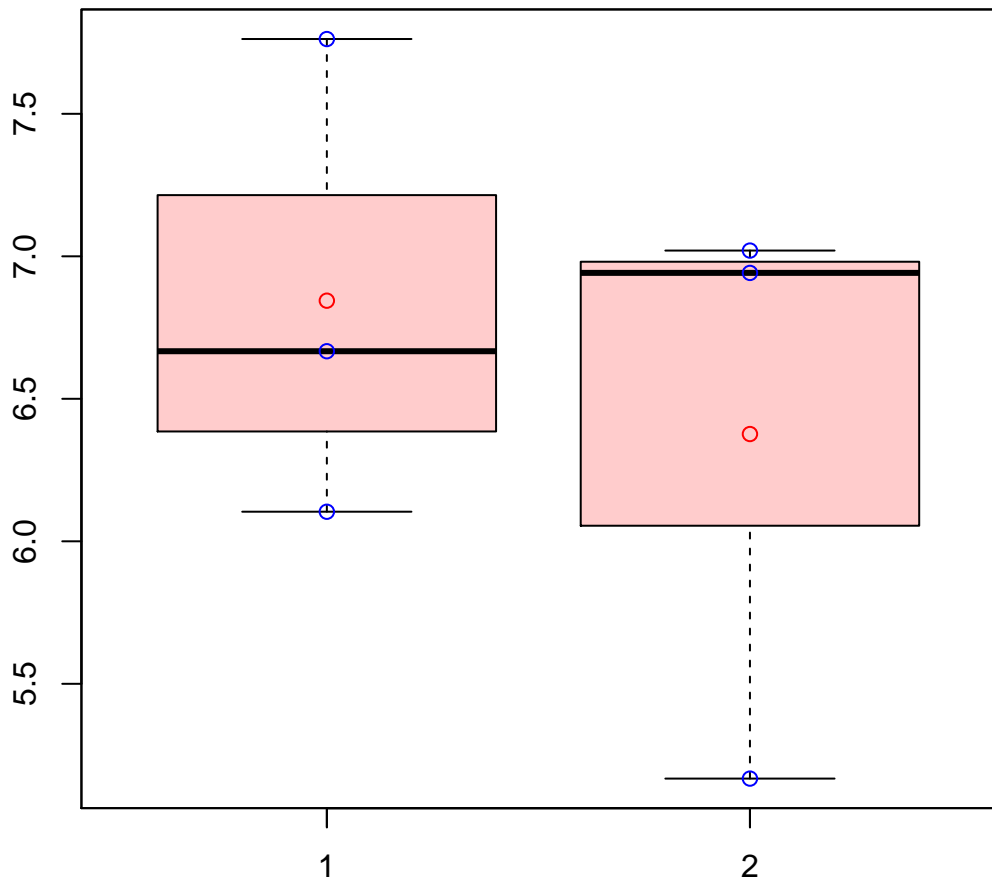

t-Test: p-value = 0.58

# Locus\_1225\_11\_12|Locus\_1225\_11\_12

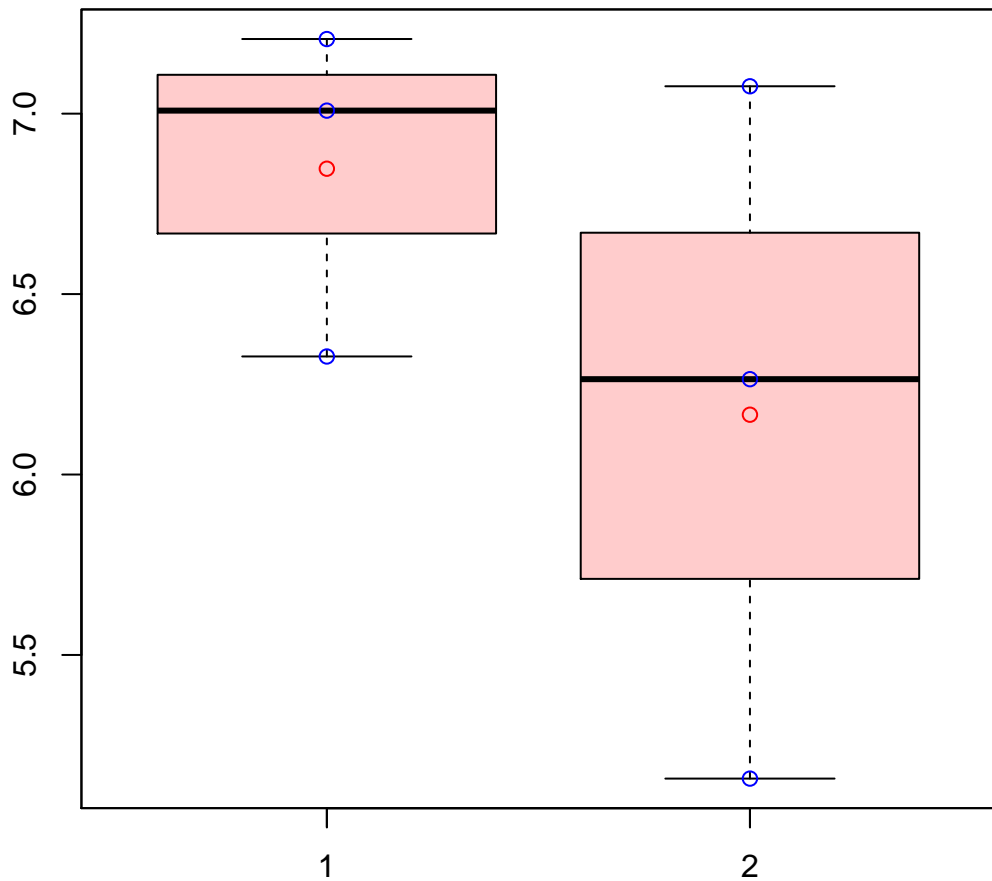

t-Test: p-value = 0.35

# Locus\_13156\_11\_12|Locus\_13156\_11\_12

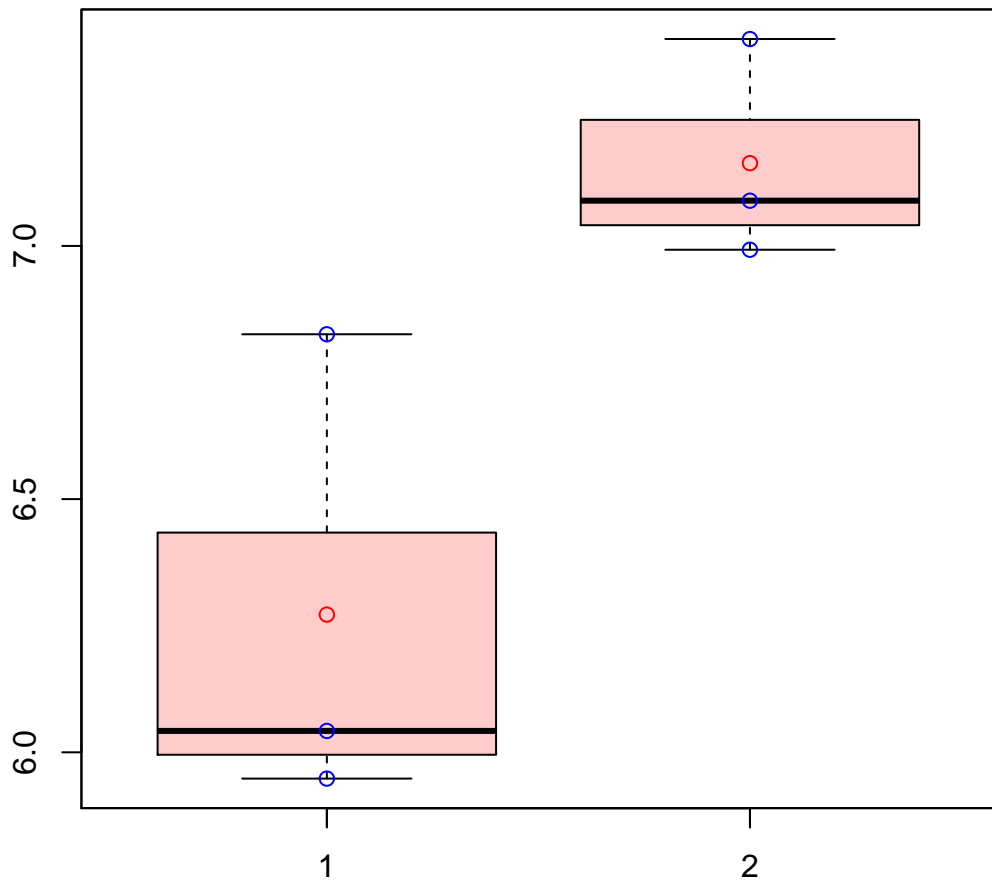

t-Test: p-value = 0.07

# Locus\_1430\_4\_6|Locus\_1430\_4\_6

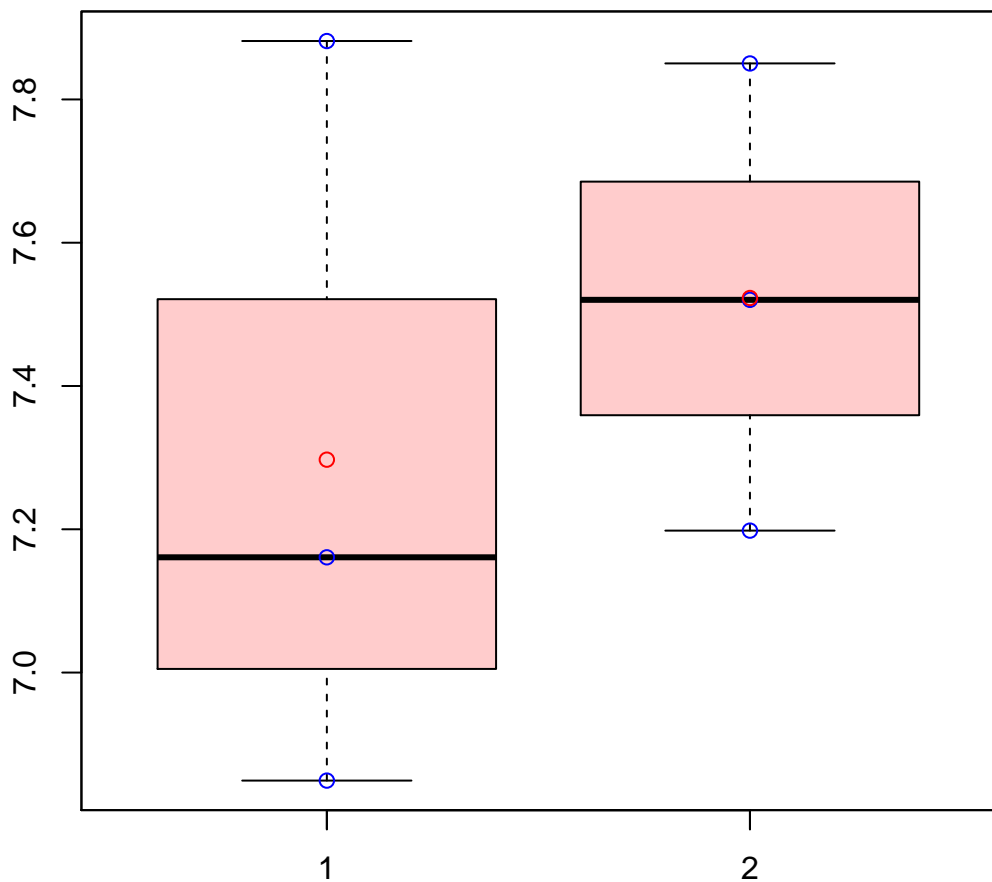

t-Test: p-value = 0.57

# Locus\_153\_4\_6|Locus\_153\_4\_6

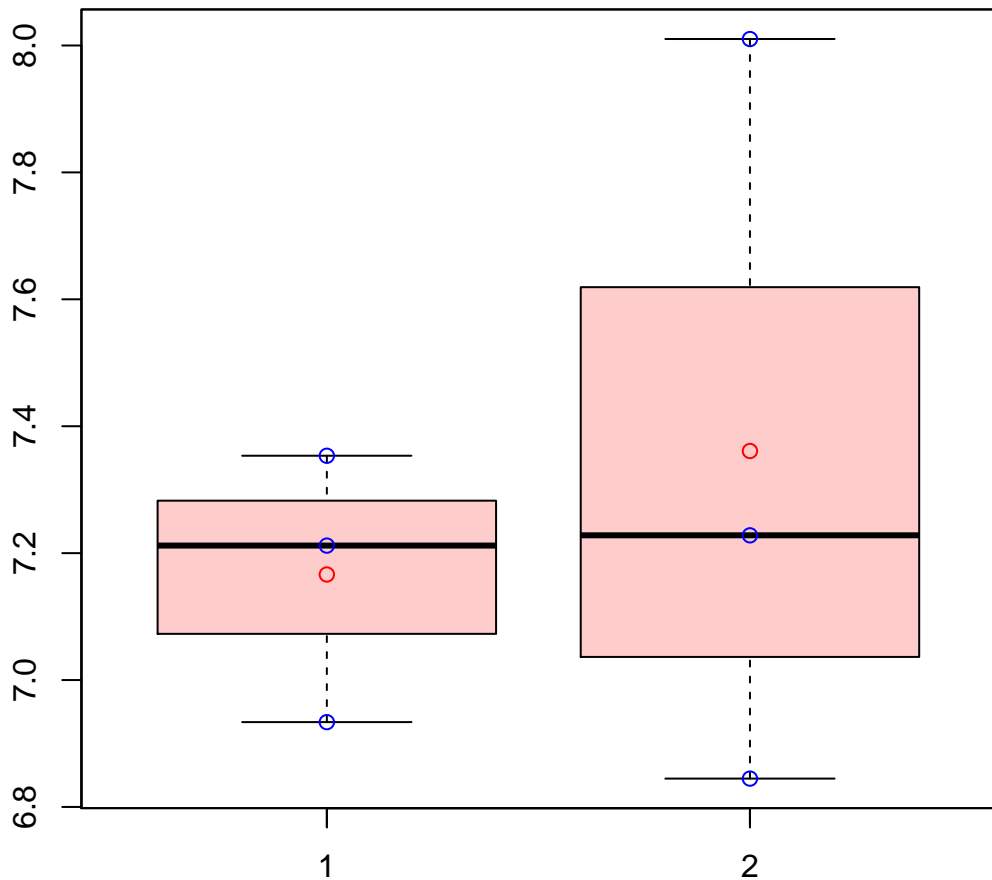

t-Test: p-value = 0.64

# Locus\_15480\_1\_7|Locus\_15480\_1\_7

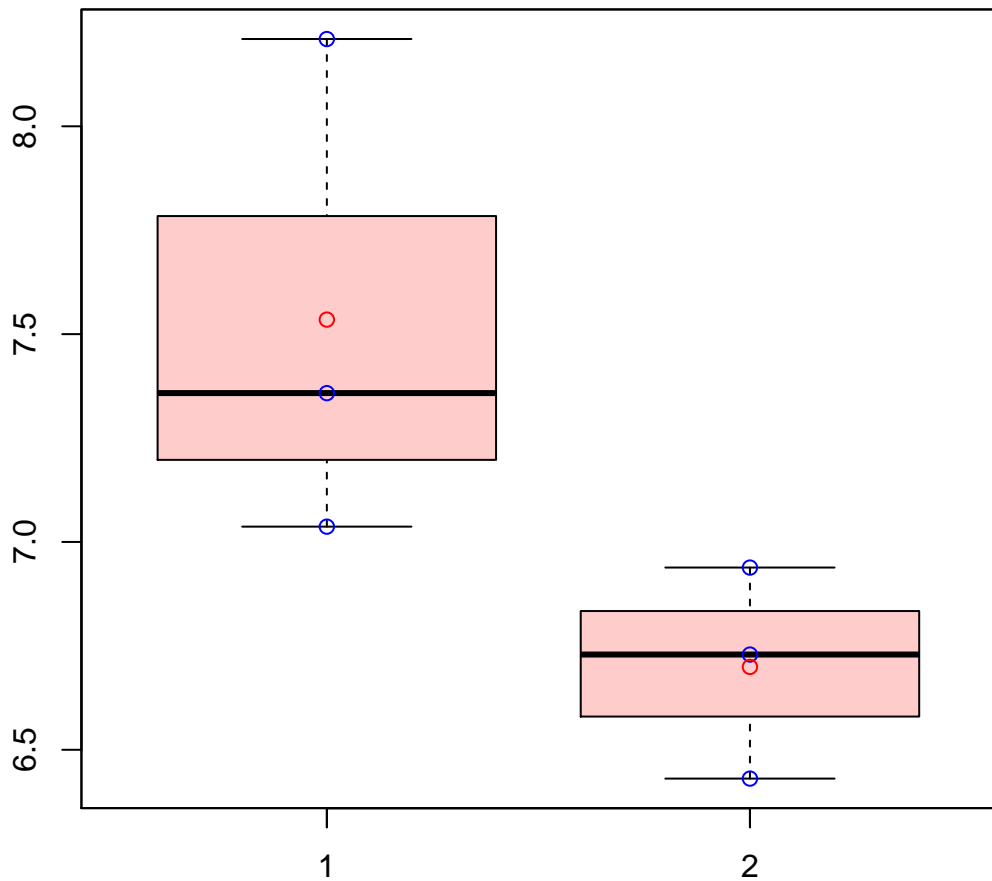

t-Test: p-value = 0.13

# Locus\_15723\_4\_6|Locus\_15723\_4\_6

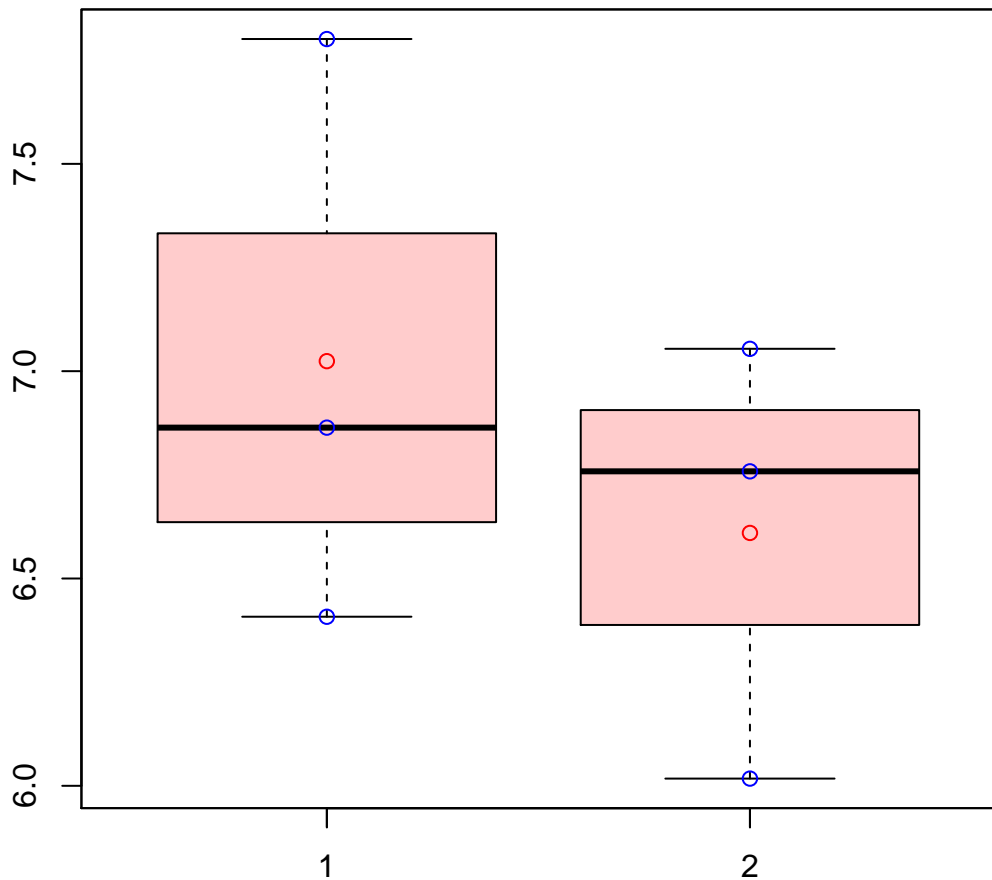

t-Test: p-value = 0.47



# Locus\_1651\_3\_5|Locus\_1651\_3\_5

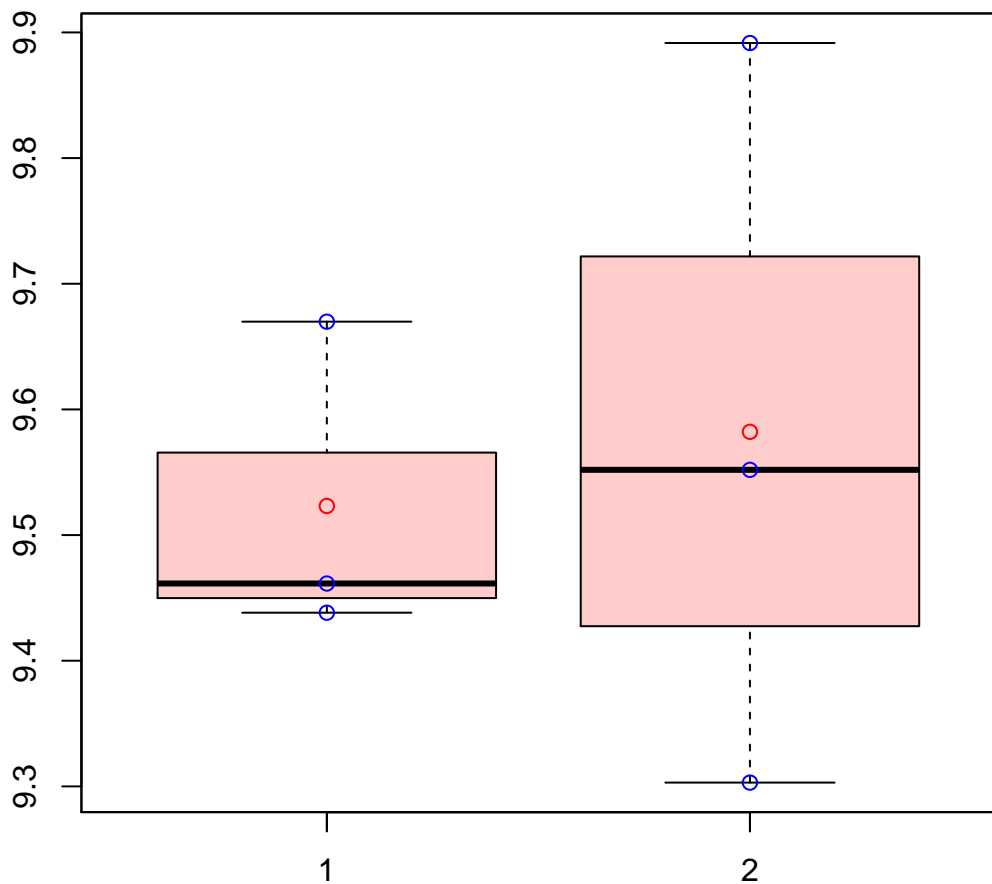

t-Test: p-value = 0.77

# Locus\_1783\_2\_10|Locus\_1783\_2\_10

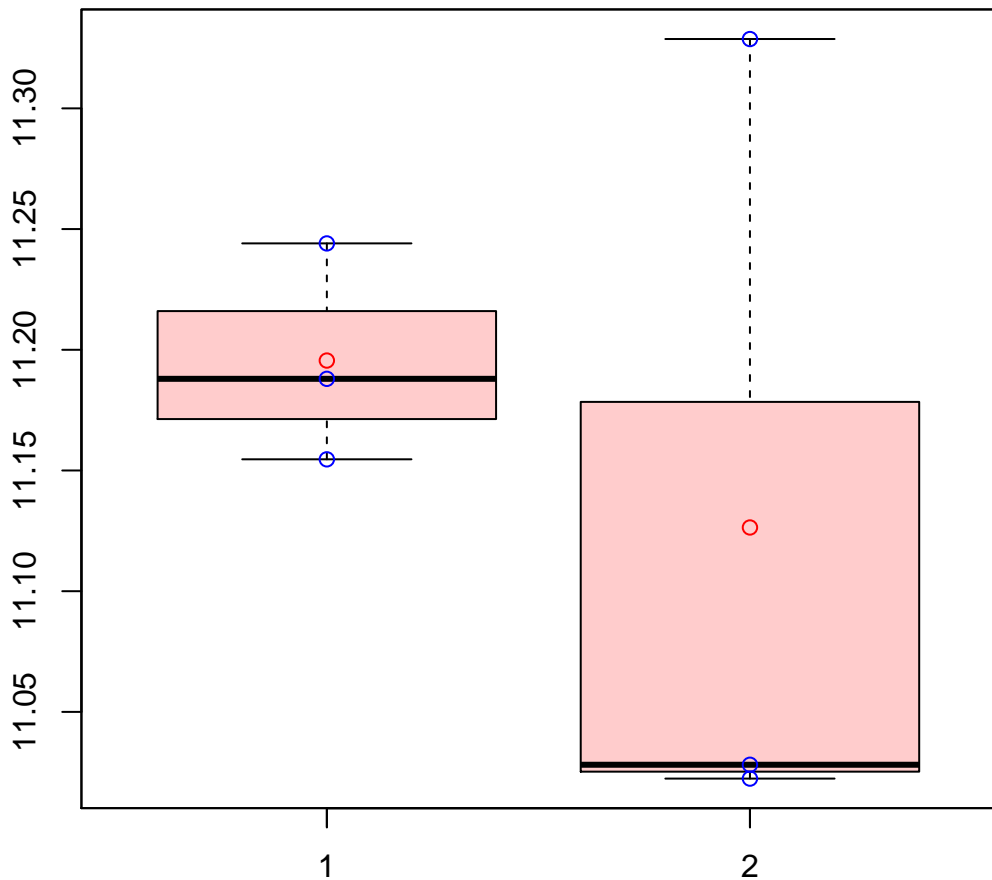

t-Test: p-value = 0.57

# Locus\_1811\_4\_10|Locus\_1811\_4\_10

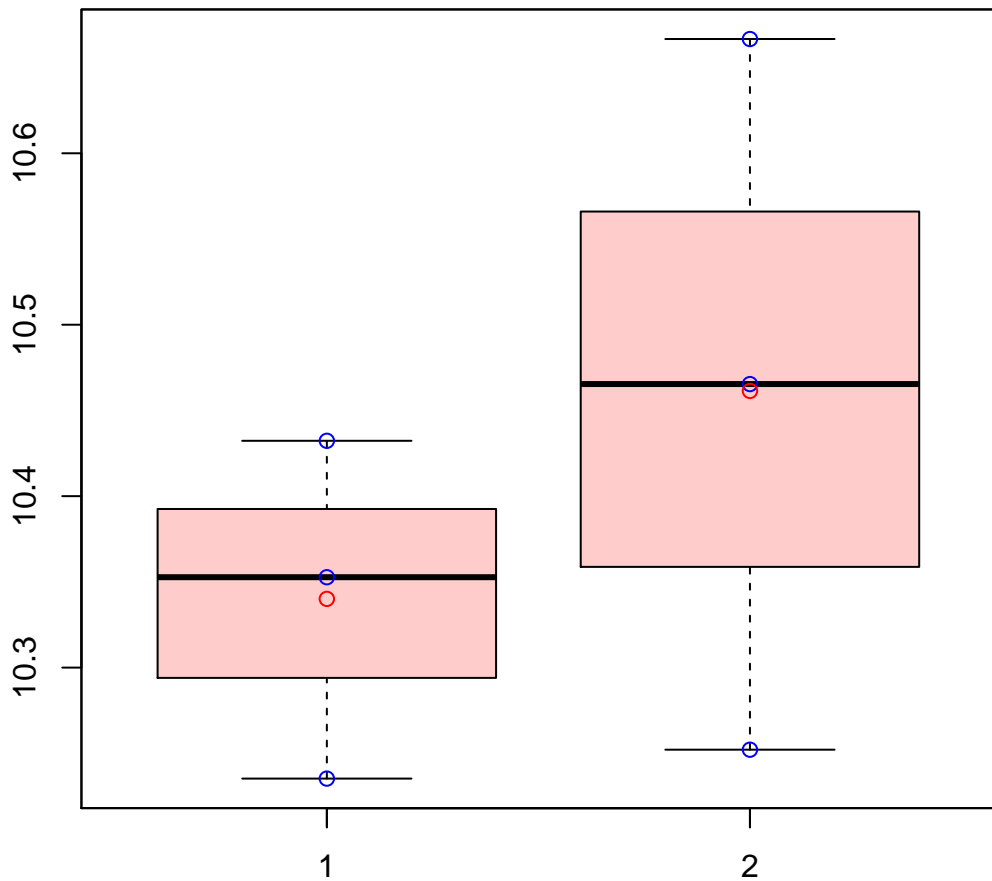

t-Test: p-value = 0.43

# Locus\_18328\_6\_7|Locus\_18328\_6\_7

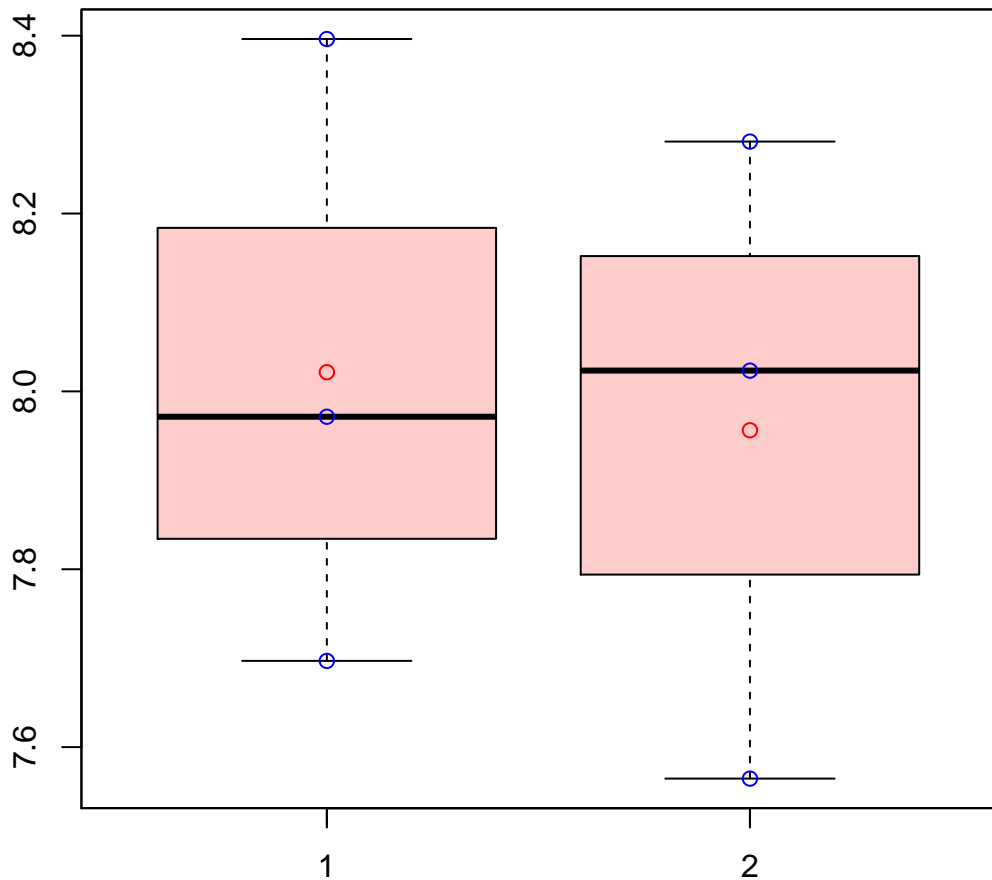

t-Test: p-value = 0.83

# Locus\_1972\_7\_10|Locus\_1972\_7\_10

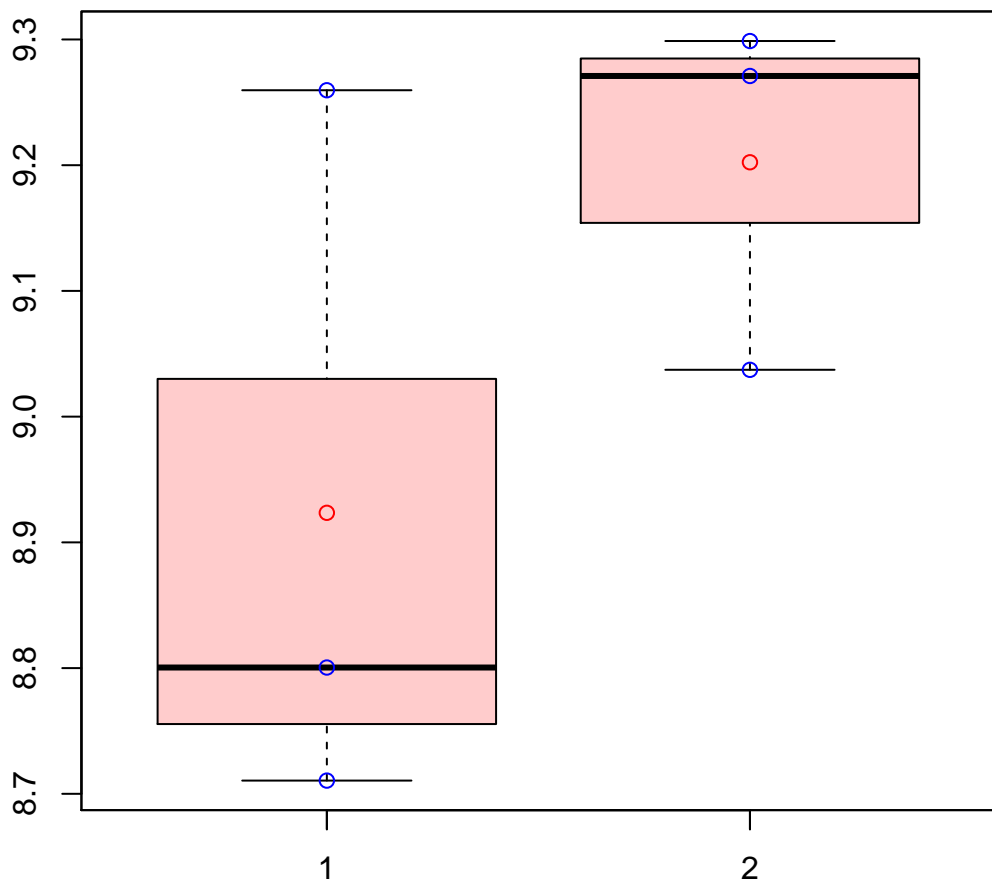

t-Test: p-value = 0.24

# Locus\_1987\_2\_9|Locus\_1987\_2\_9

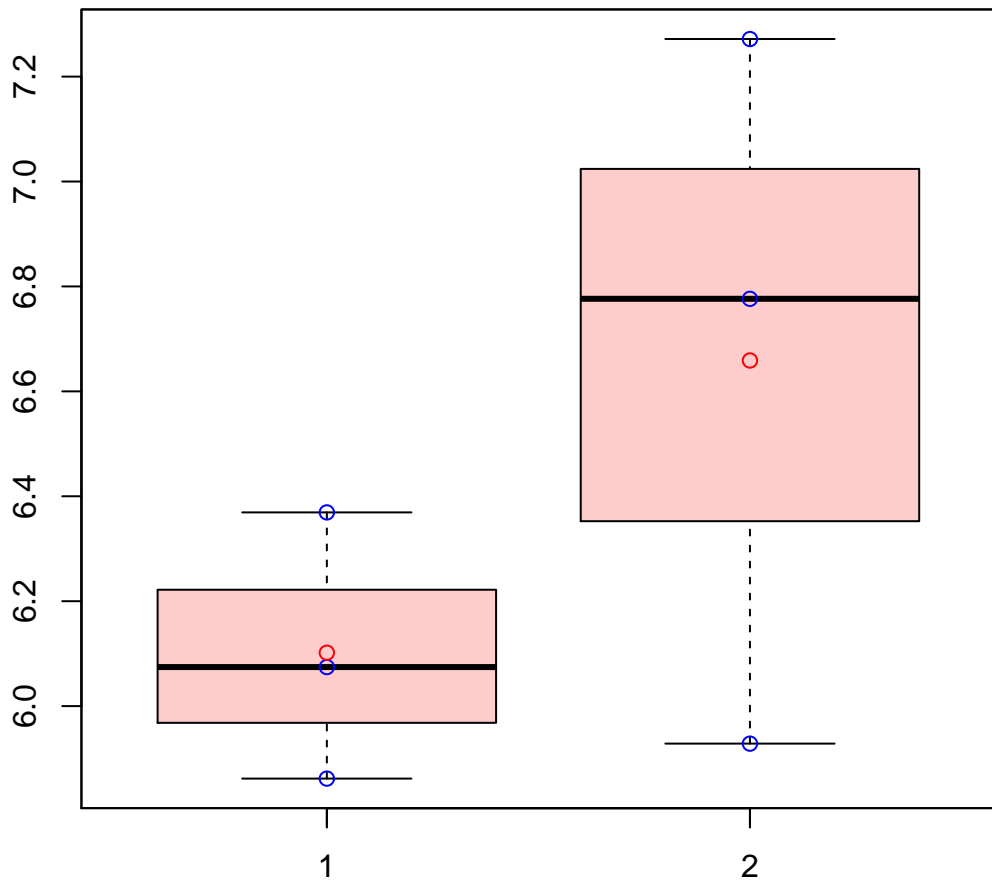

t-Test: p-value = 0.29

# Locus\_2004\_9\_11|Locus\_2004\_9\_11

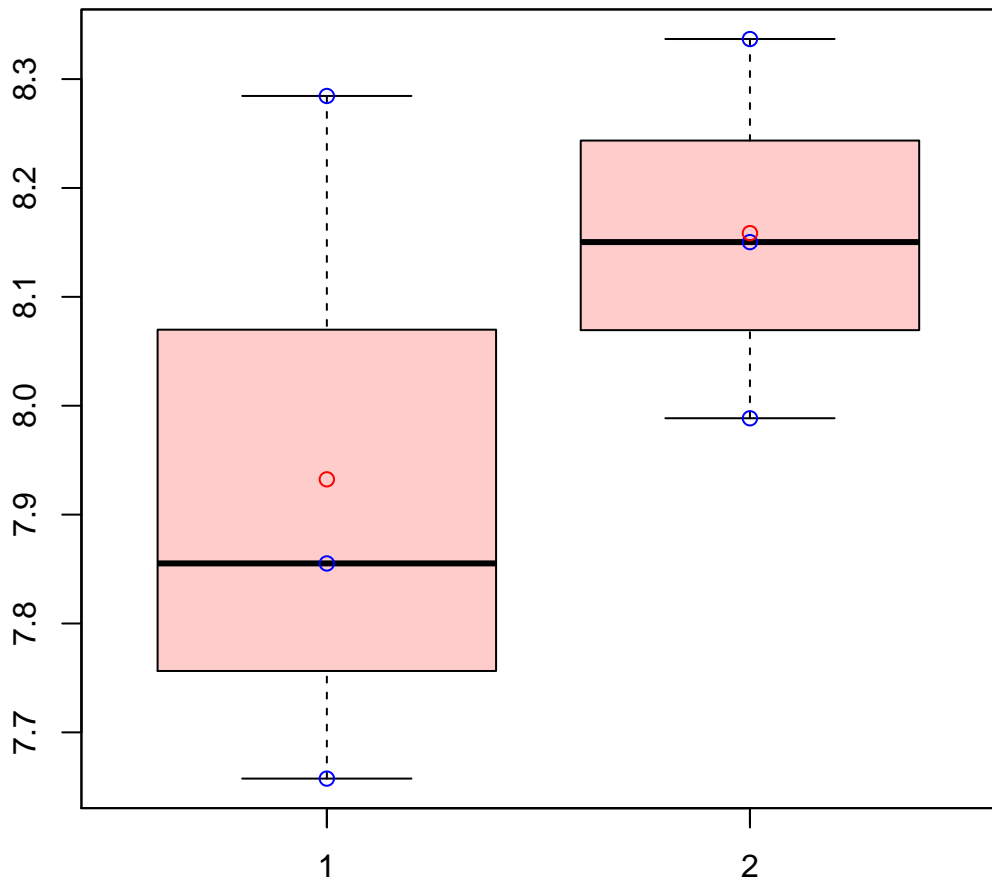

t-Test: p-value = 0.36

# Locus\_2016\_8\_9|Locus\_2016\_8\_9

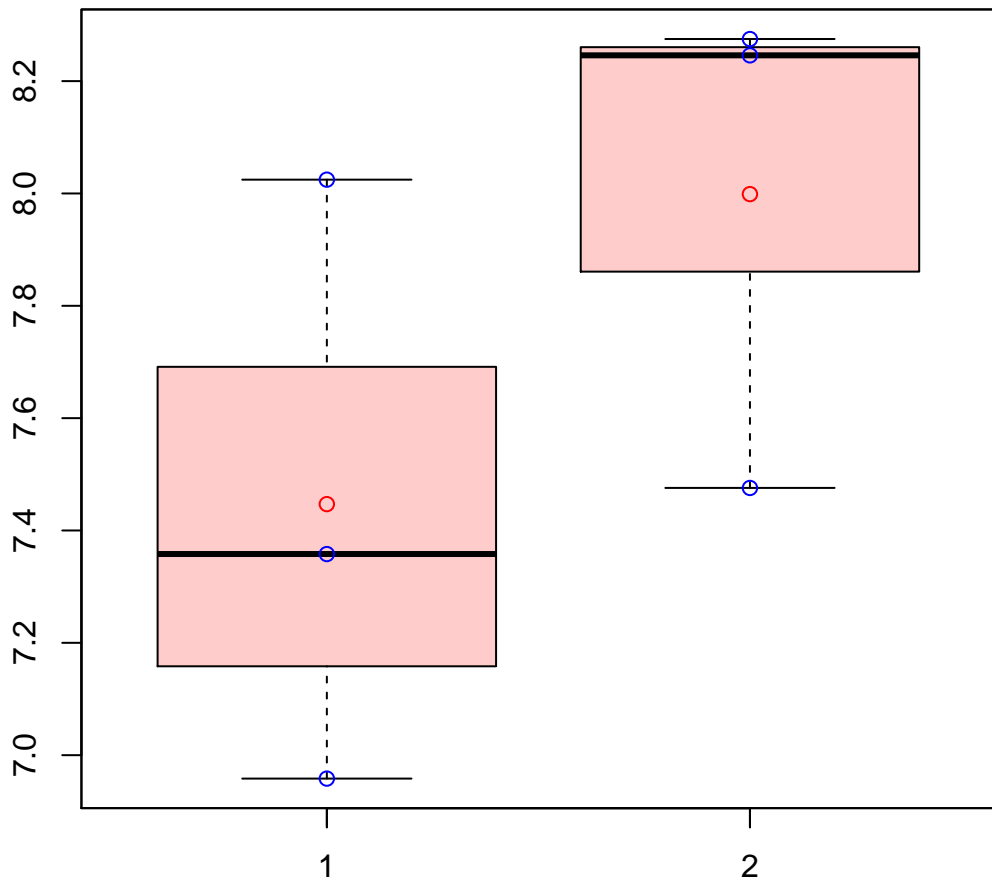

t-Test: p-value = 0.25



# Locus\_217\_3\_7|Locus\_217\_3\_7

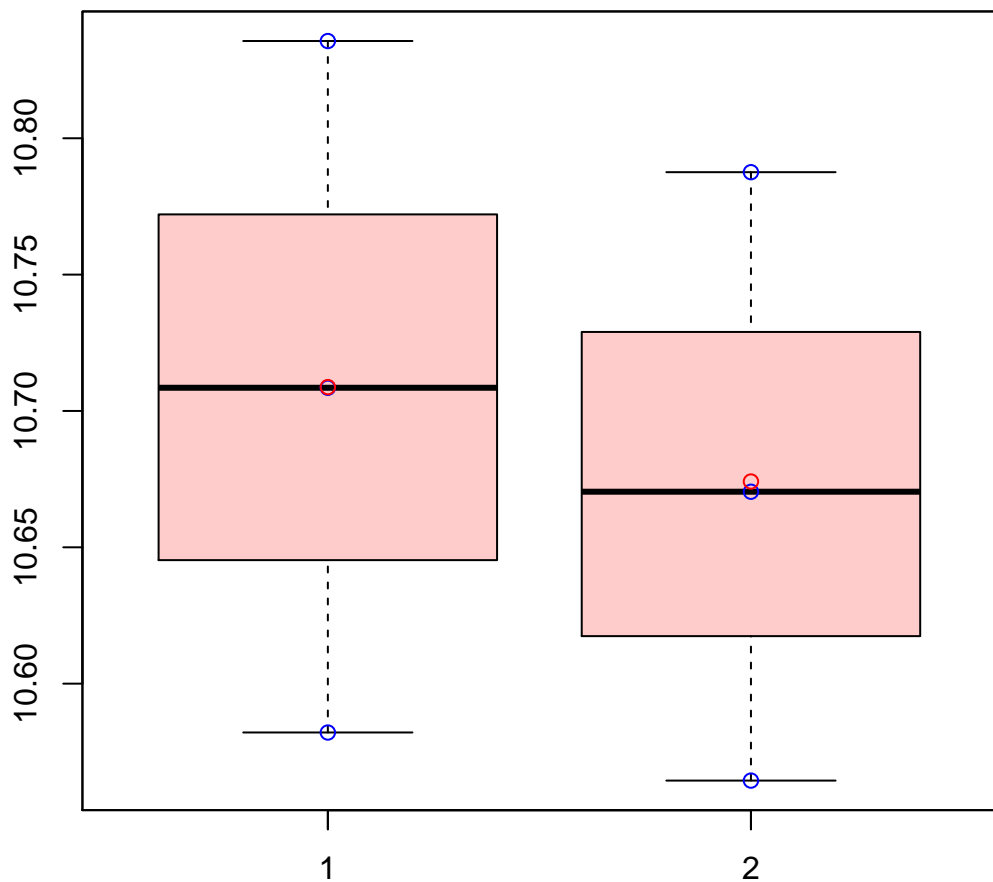

t-Test: p-value = 0.74

# Locus\_2174\_5\_9|Locus\_2174\_5\_9

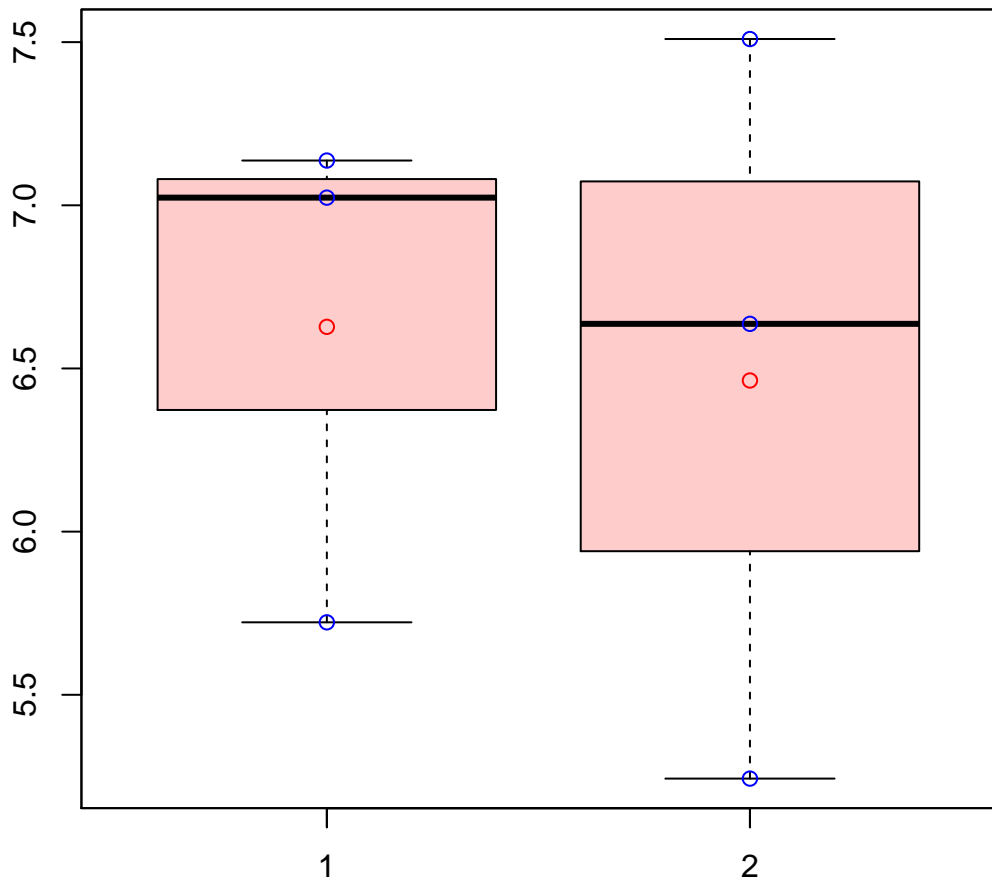

t-Test: p-value = 0.85

# Locus\_222\_5\_11|Locus\_222\_5\_11

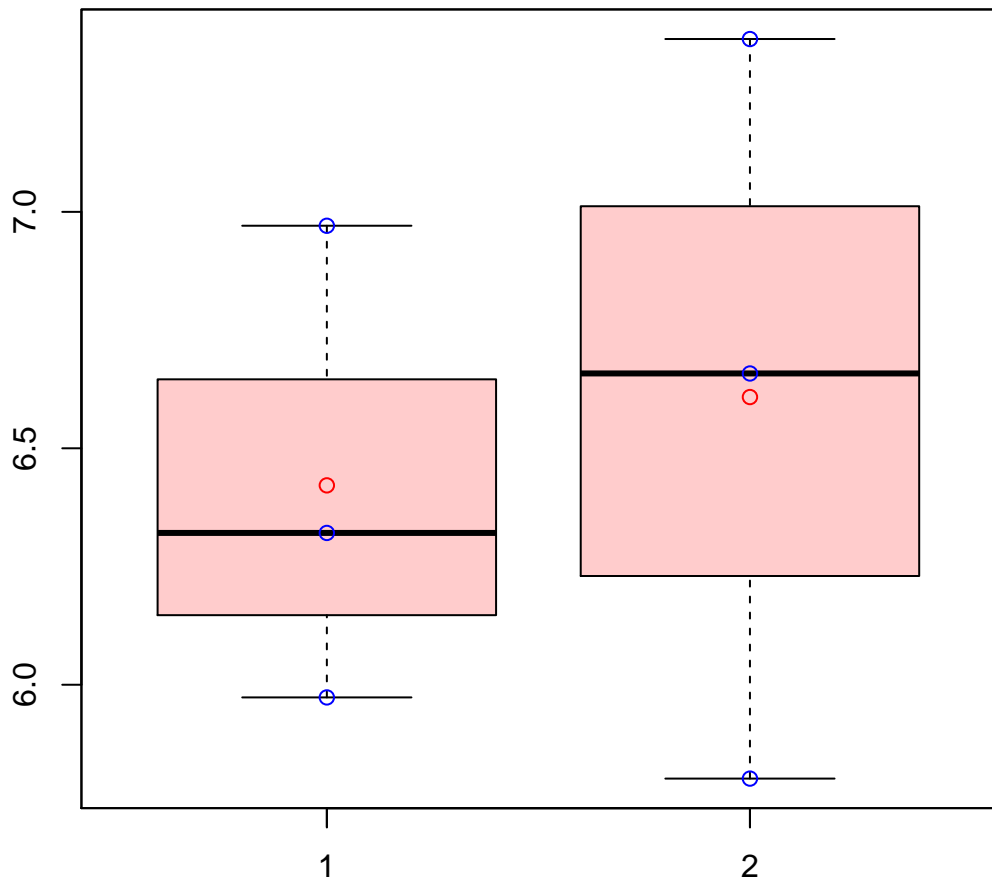

t-Test: p-value = 0.75

# Locus\_2281\_8\_10|Locus\_2281\_8\_10

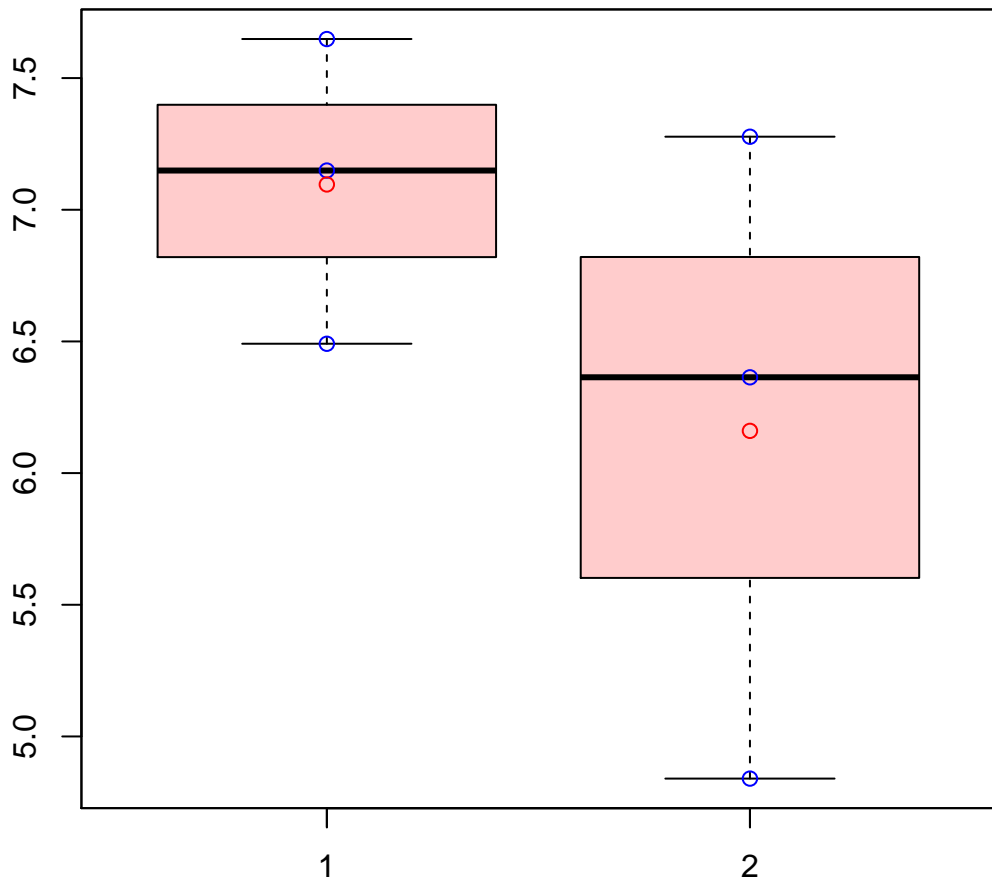

t-Test: p-value = 0.32

# Locus\_2288\_7\_9|Locus\_2288\_7\_9

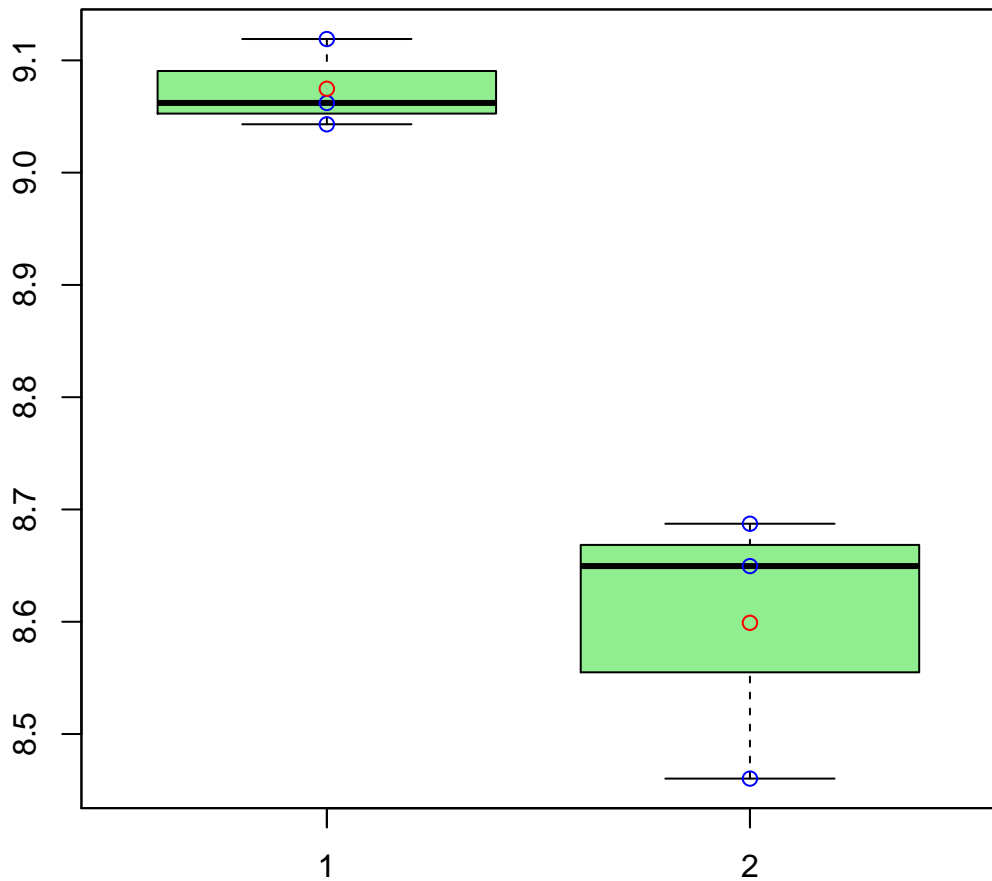

t-Test: p-value = 0.01

# Locus\_2294\_3\_12|Locus\_2294\_3\_12

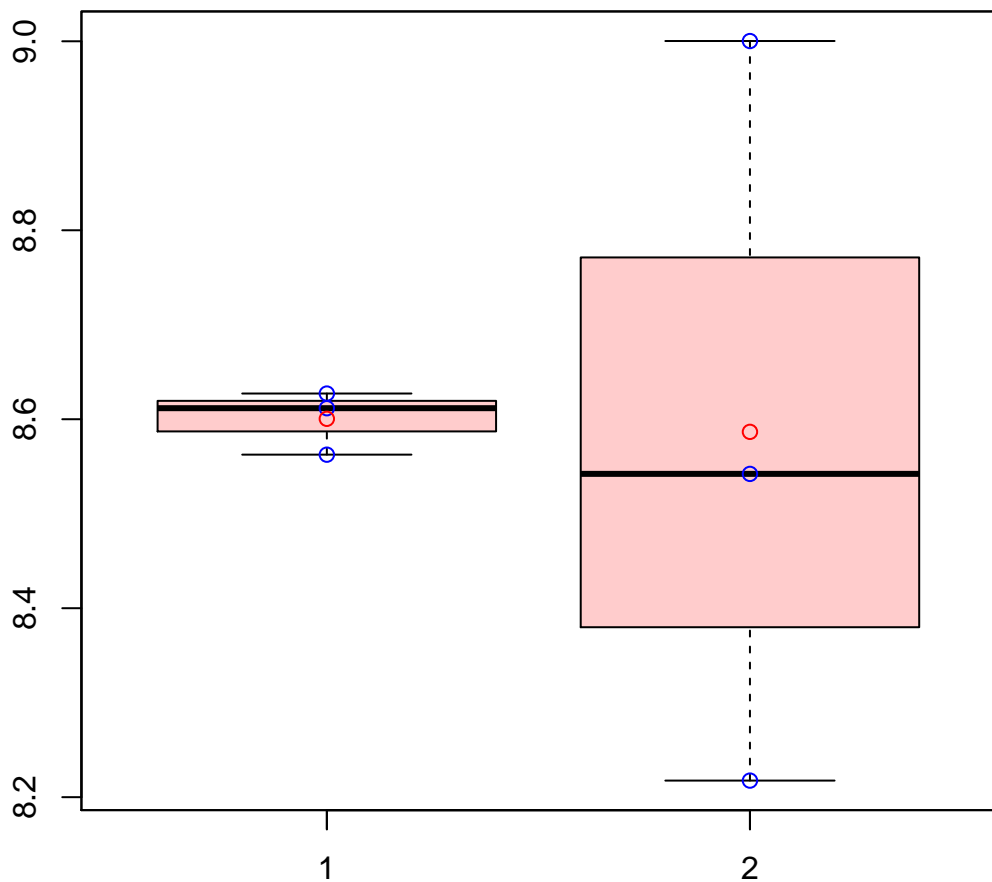

t-Test: p-value = 0.96

# Locus\_230\_1\_1|Locus\_230\_1\_1

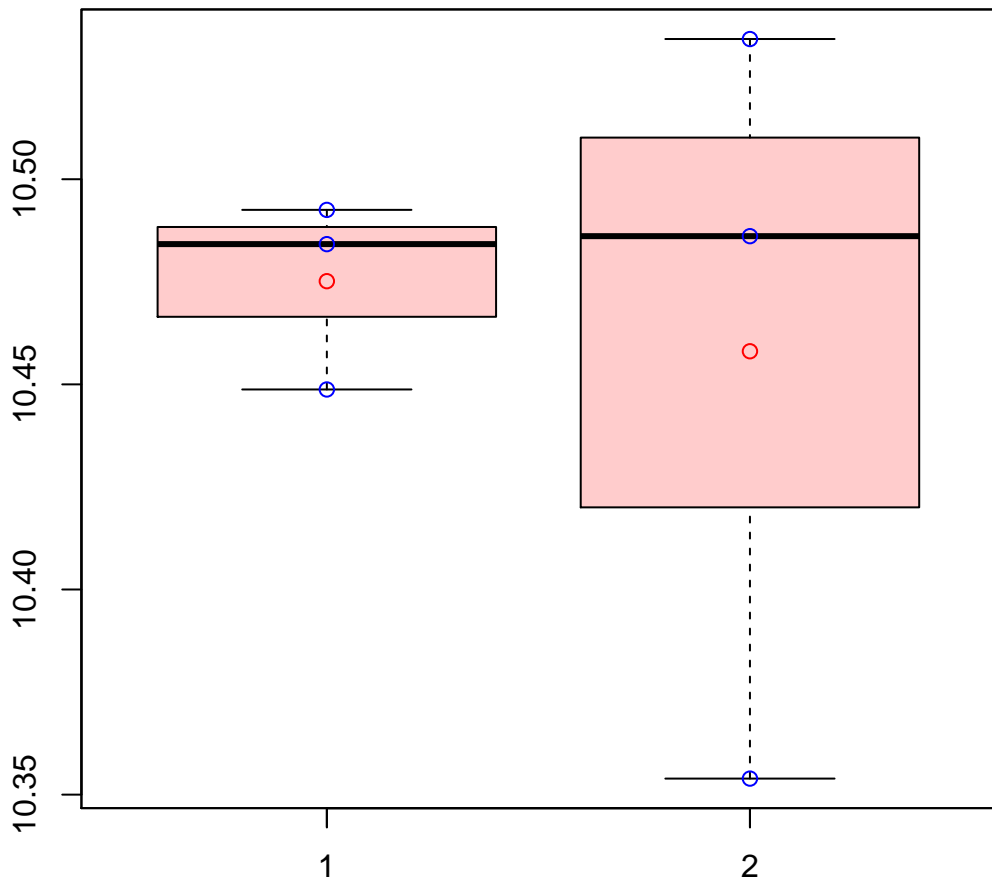

t-Test: p-value = 0.78

# Locus\_2388\_3\_9|Locus\_2388\_3\_9

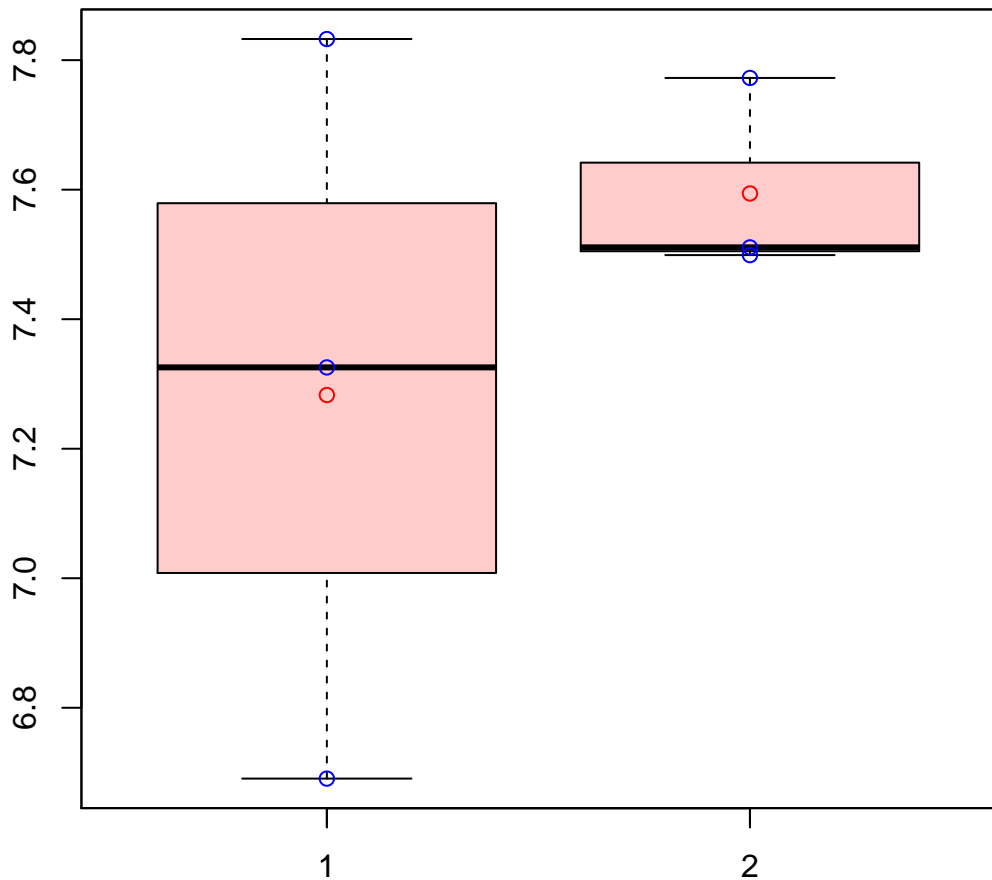

t-Test: p-value = 0.45



# Locus\_246\_4\_5|Locus\_246\_4\_5

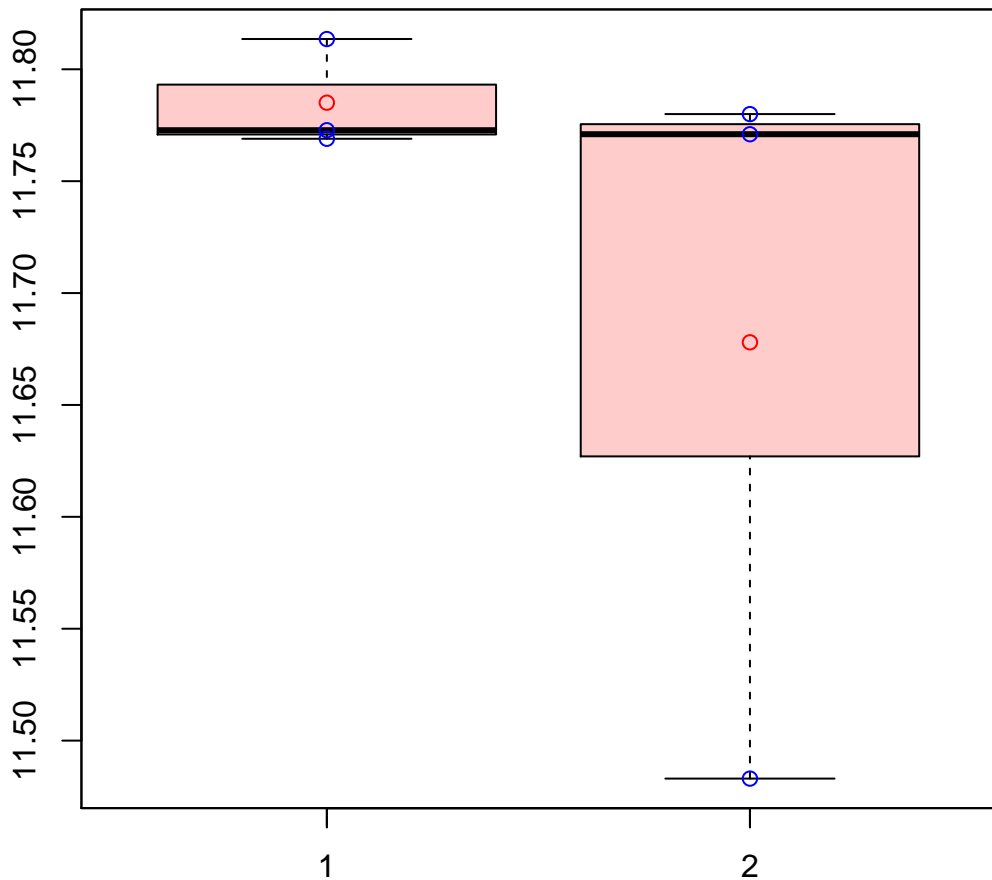

t-Test: p-value = 0.39

# Locus\_2602\_2\_9|Locus\_2602\_2\_9

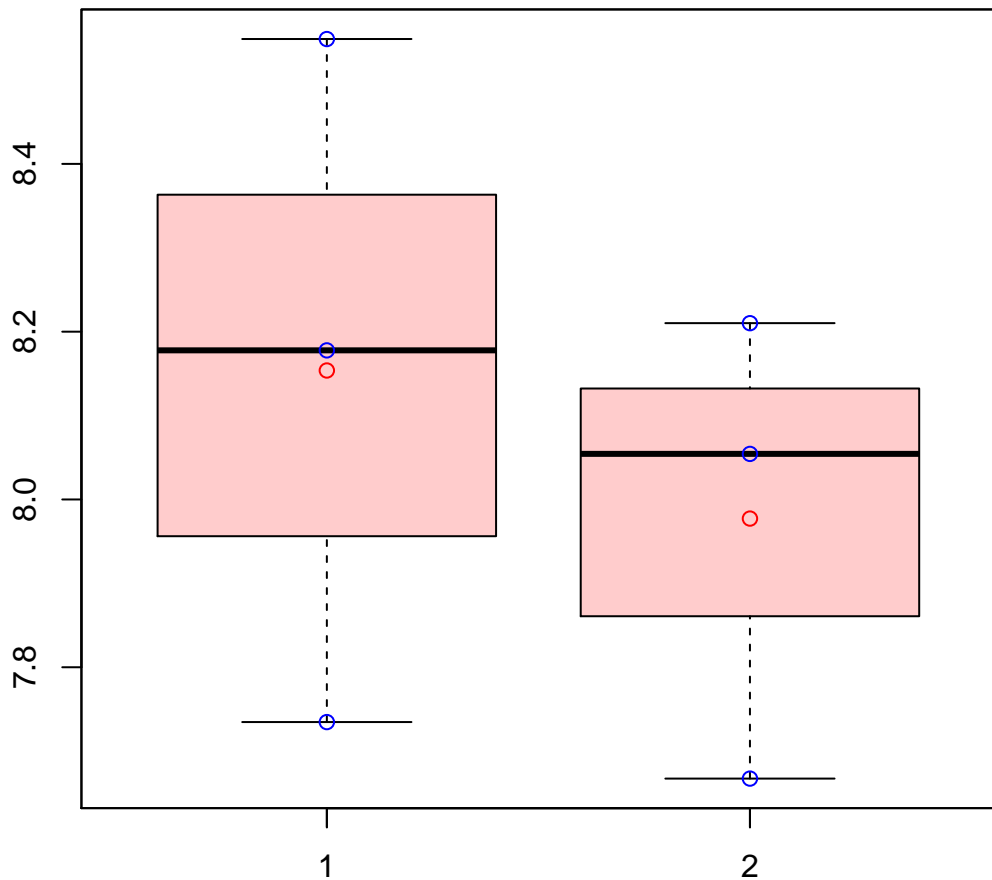

t-Test: p-value = 0.57

# Locus\_2764\_4\_8|Locus\_2764\_4\_8

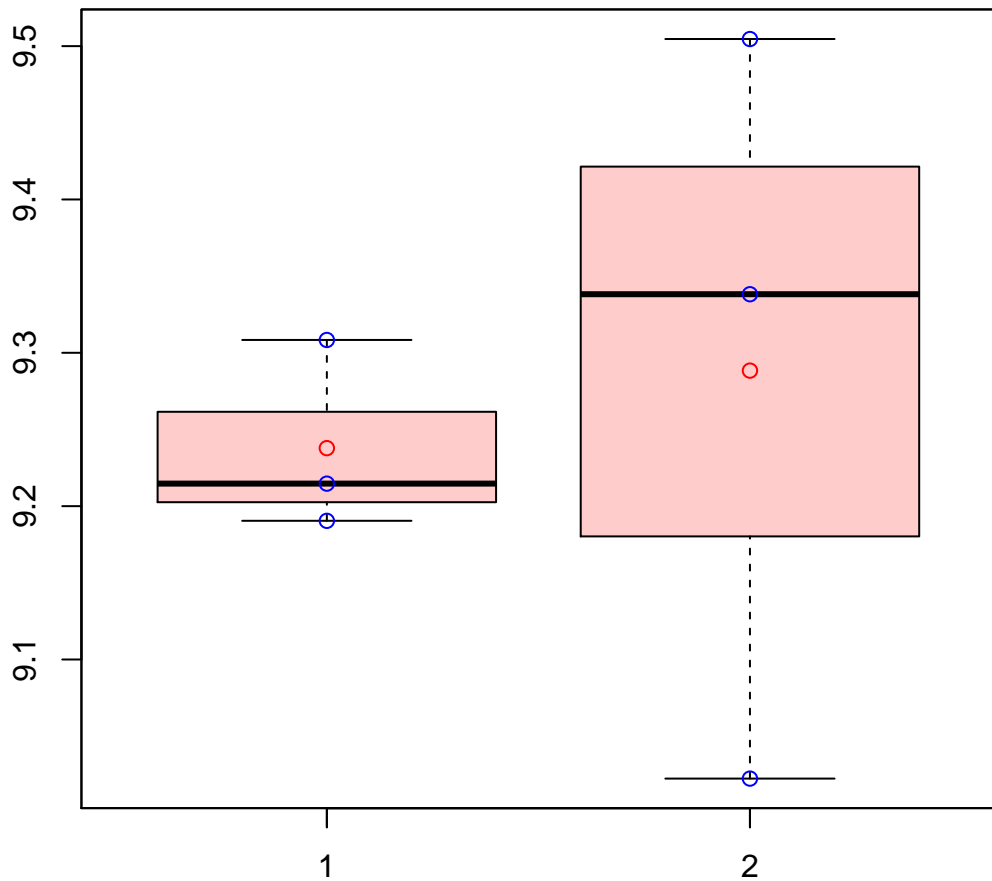

t-Test: p-value = 0.76

# Locus\_2939\_8\_10|Locus\_2939\_8\_10

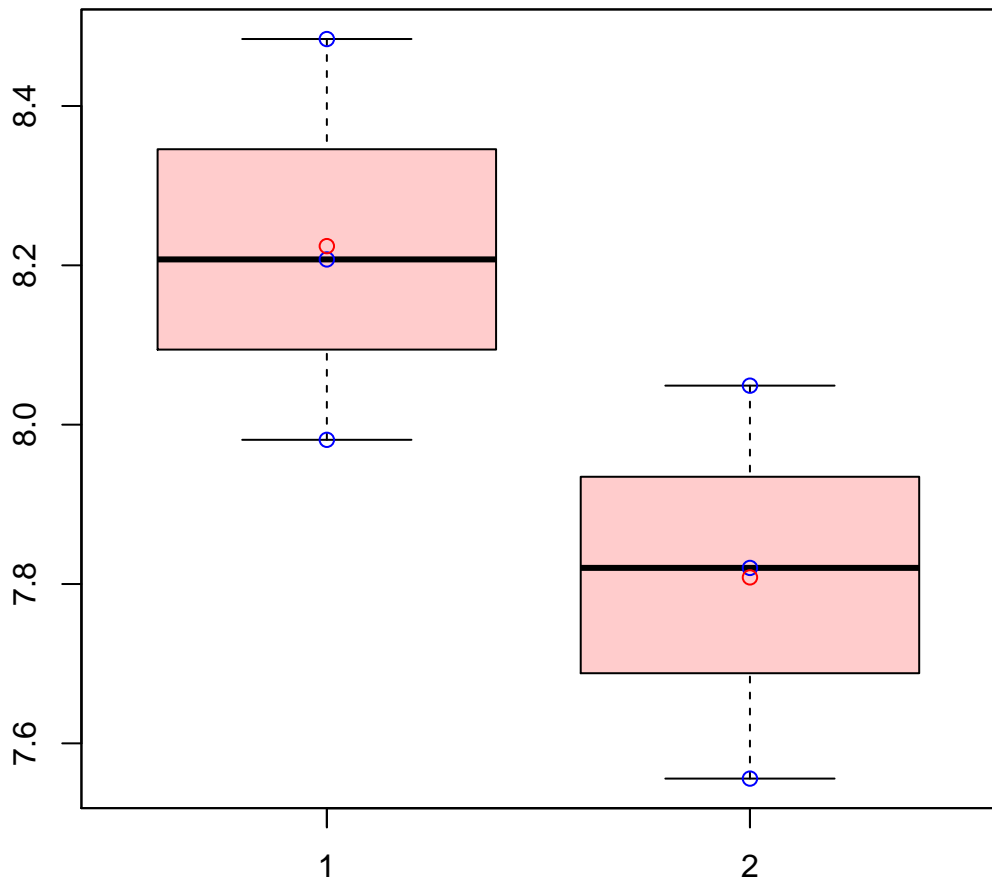

t-Test: p-value = 0.11

# Locus\_2954\_3\_10|Locus\_2954\_3\_10

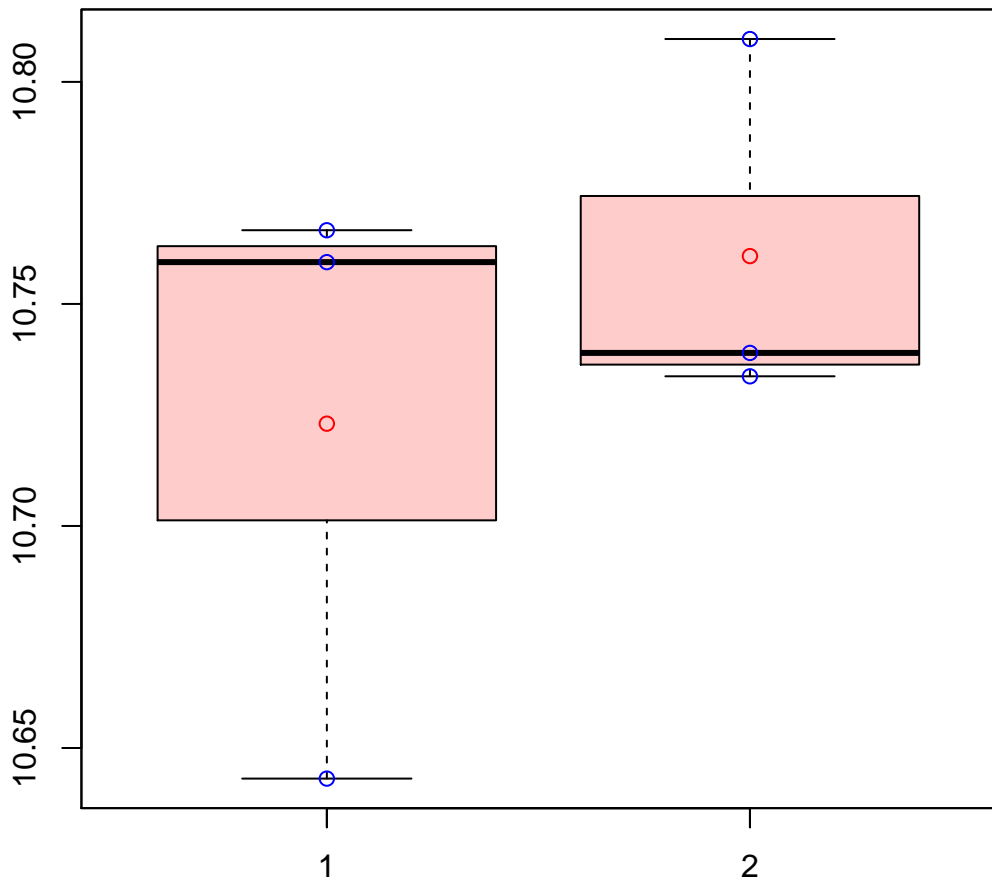

t-Test: p-value = 0.47

# Locus\_2965\_1\_3|Locus\_2965\_1\_3

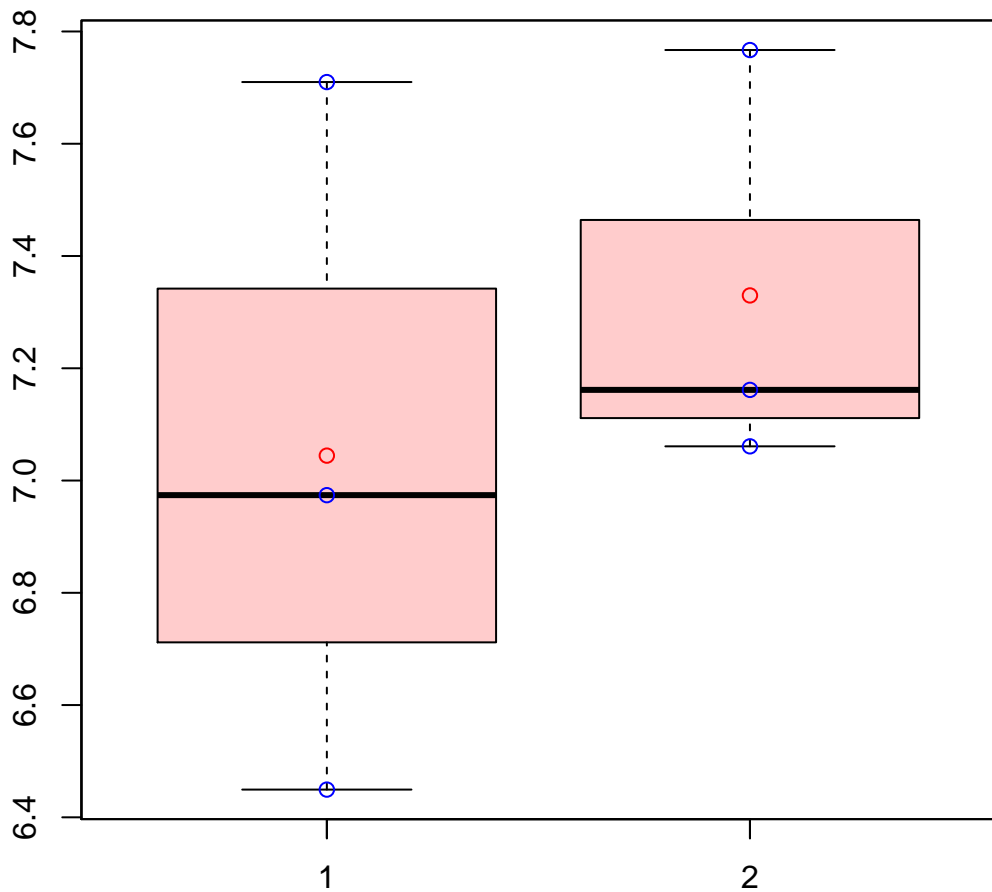

t-Test: p-value = 0.55

# Locus\_2972\_3\_7|Locus\_2972\_3\_7

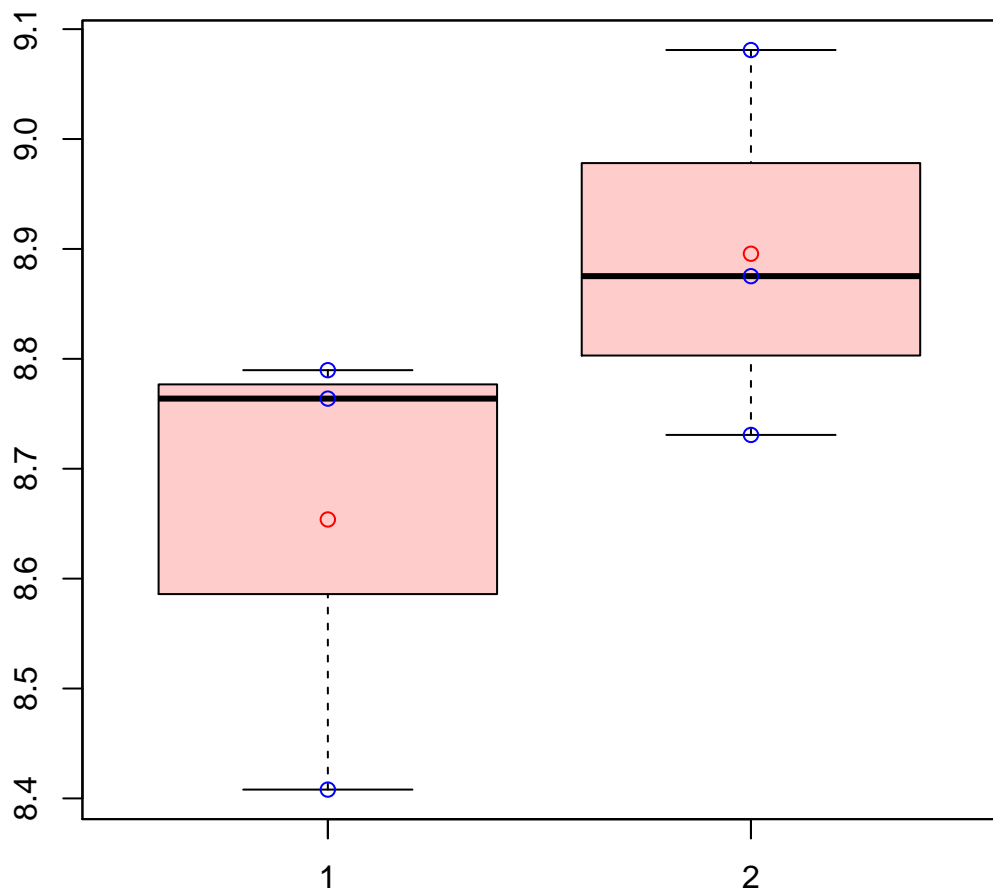

t-Test: p-value = 0.21

# Locus\_2984\_2\_9|Locus\_2984\_2\_9

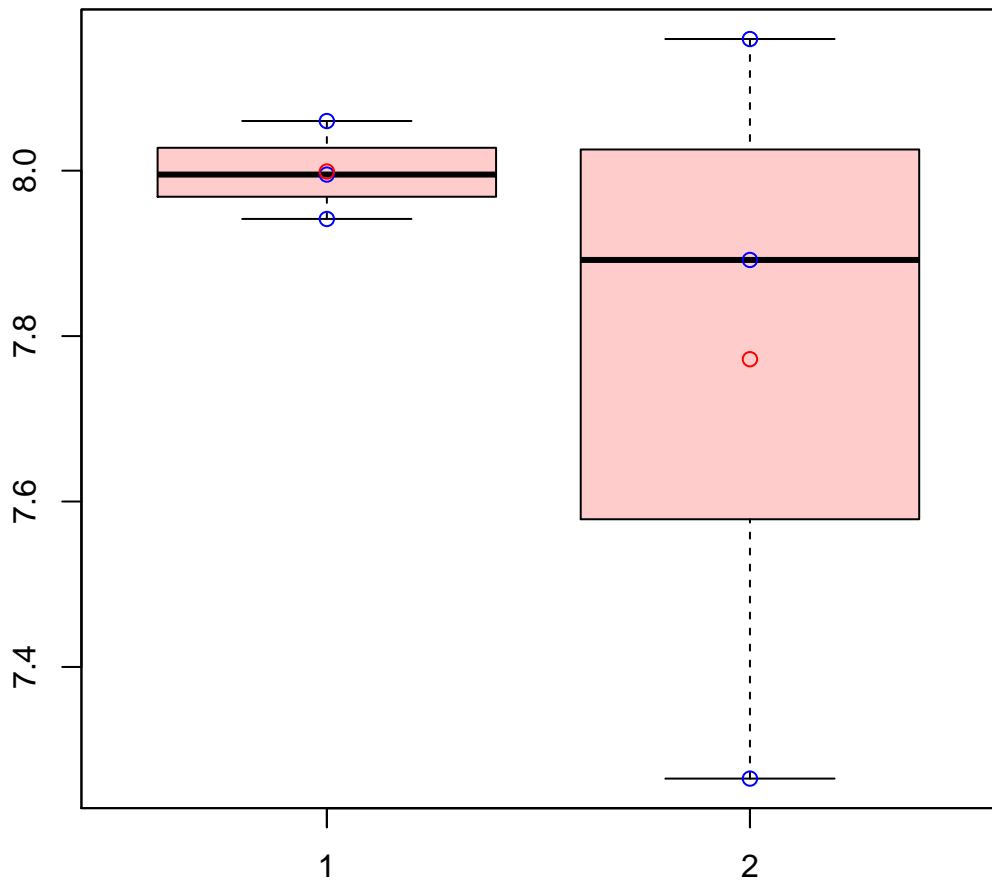

t-Test: p-value = 0.48



# Locus\_30109\_4\_6|Locus\_30109\_4\_6

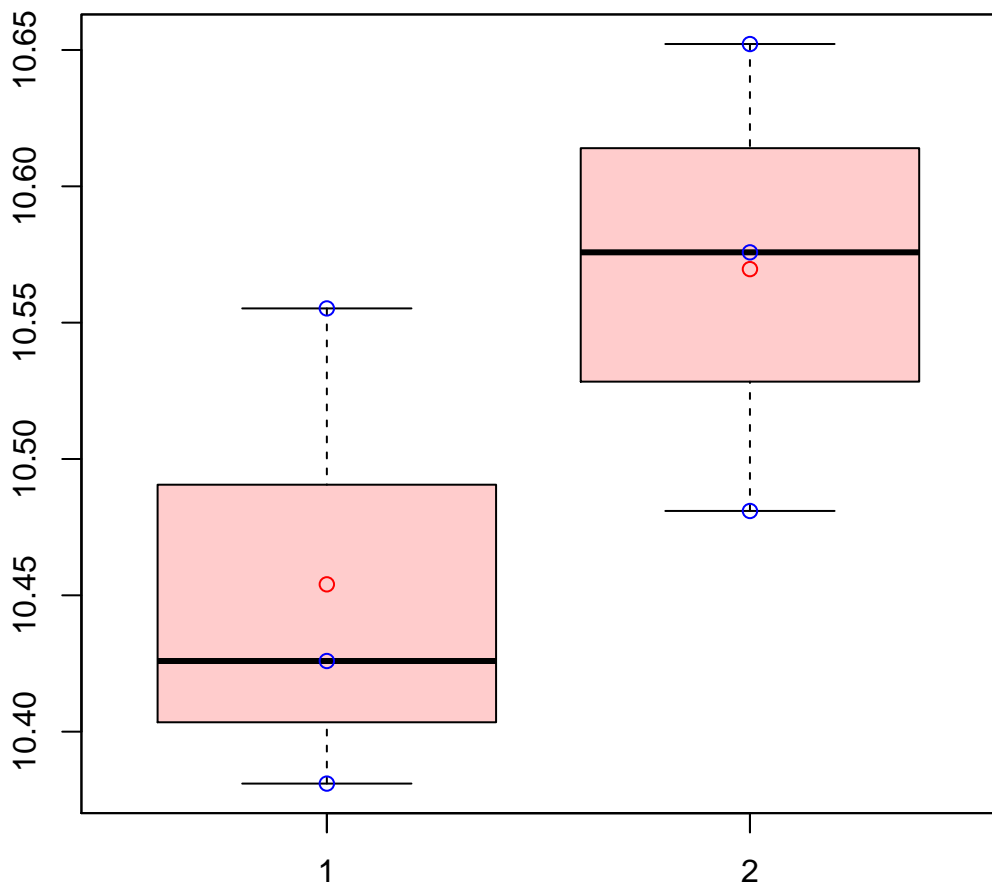

t-Test: p-value = 0.18

# Locus\_3417\_4\_6|Locus\_3417\_4\_6

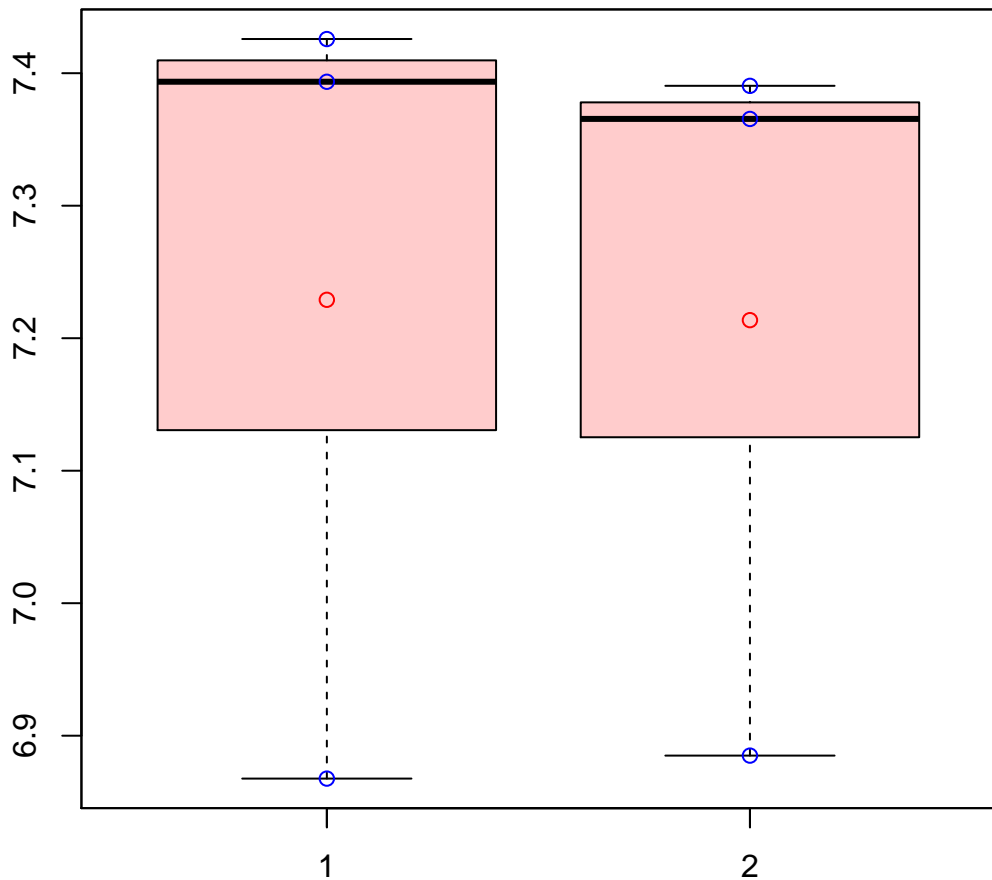

t-Test: p-value = 0.95

# Locus\_3532\_1\_8|Locus\_3532\_1\_8

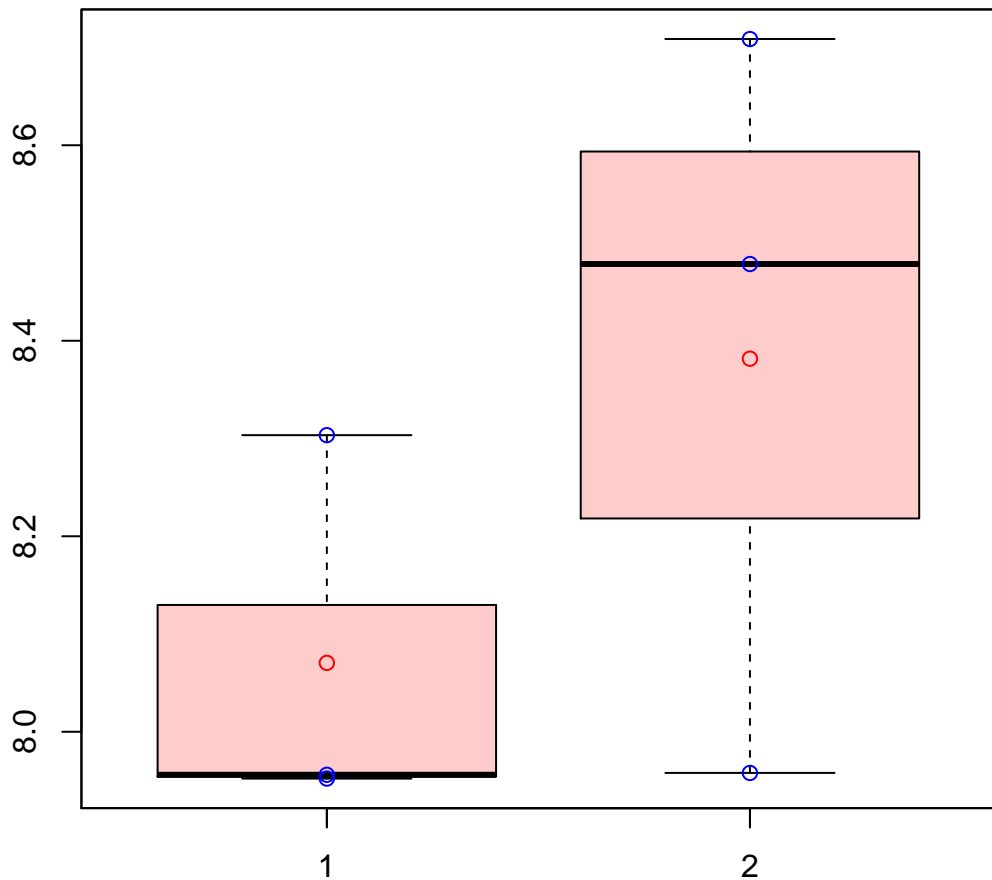

t-Test: p-value = 0.3

# Locus\_3637\_9\_10|Locus\_3637\_9\_10

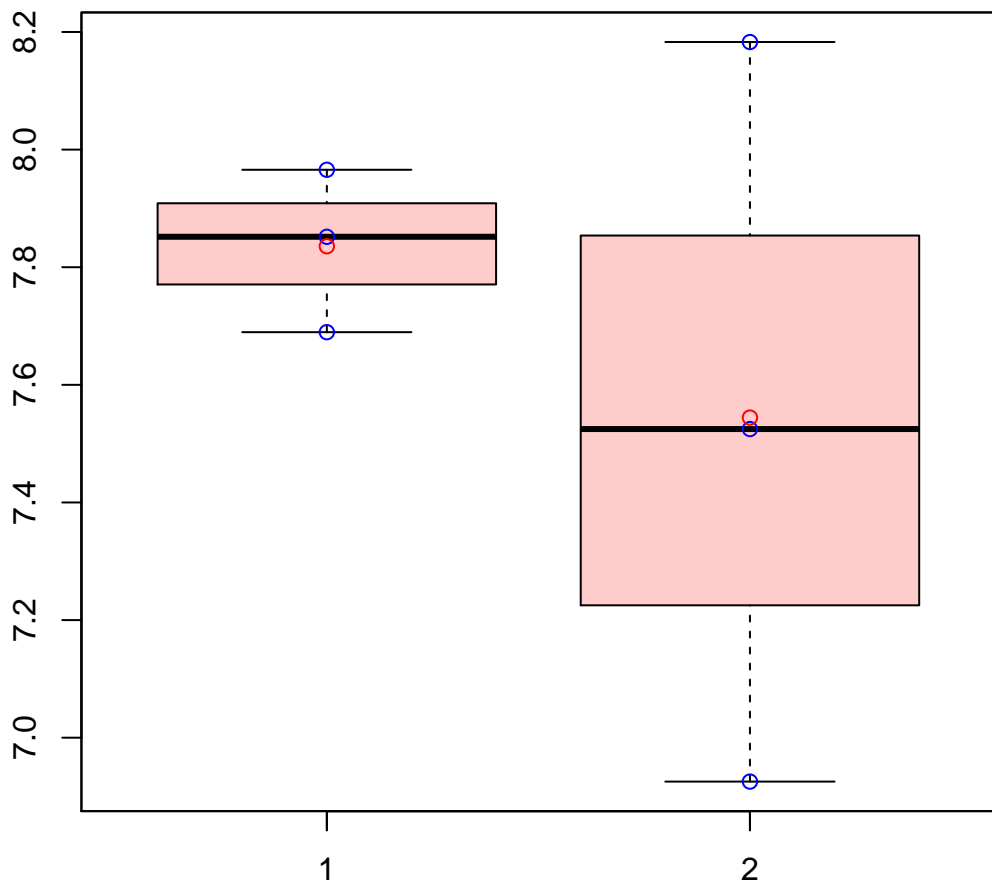

t-Test: p-value = 0.51

# Locus\_3778\_1\_5|Locus\_3778\_1\_5

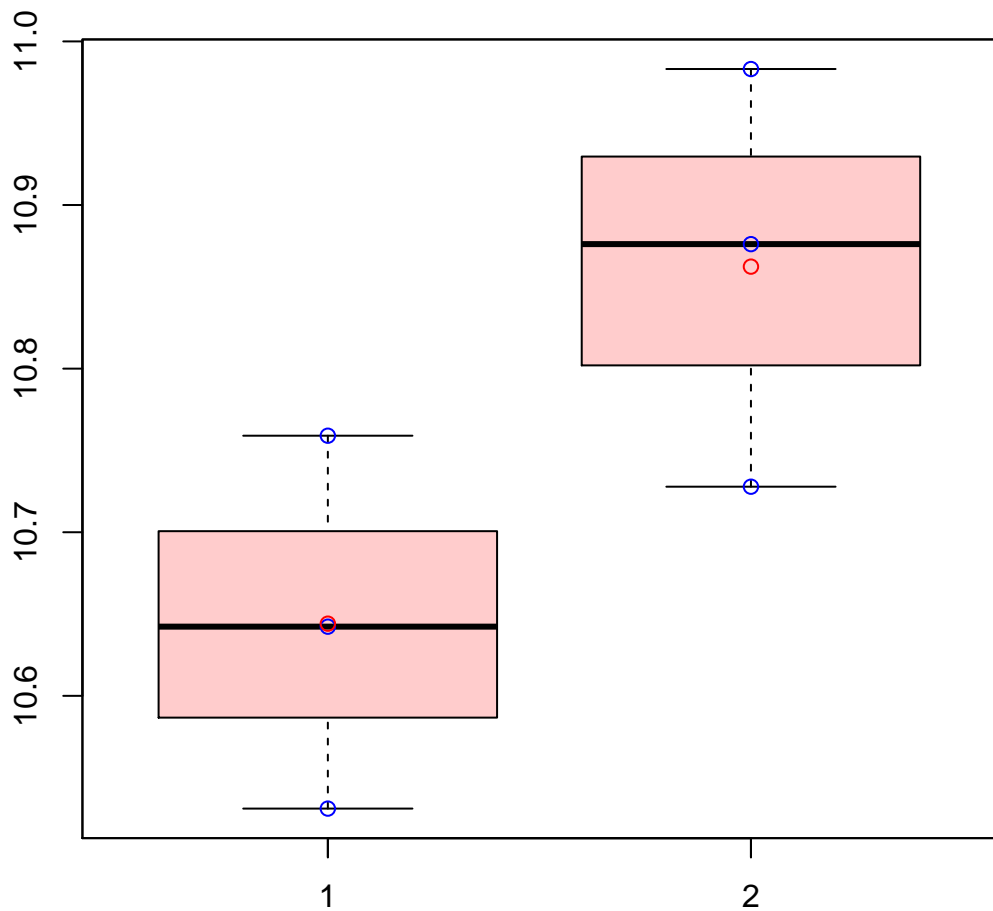

t-Test: p-value = 0.09

# Locus\_391\_4\_12|Locus\_391\_4\_12

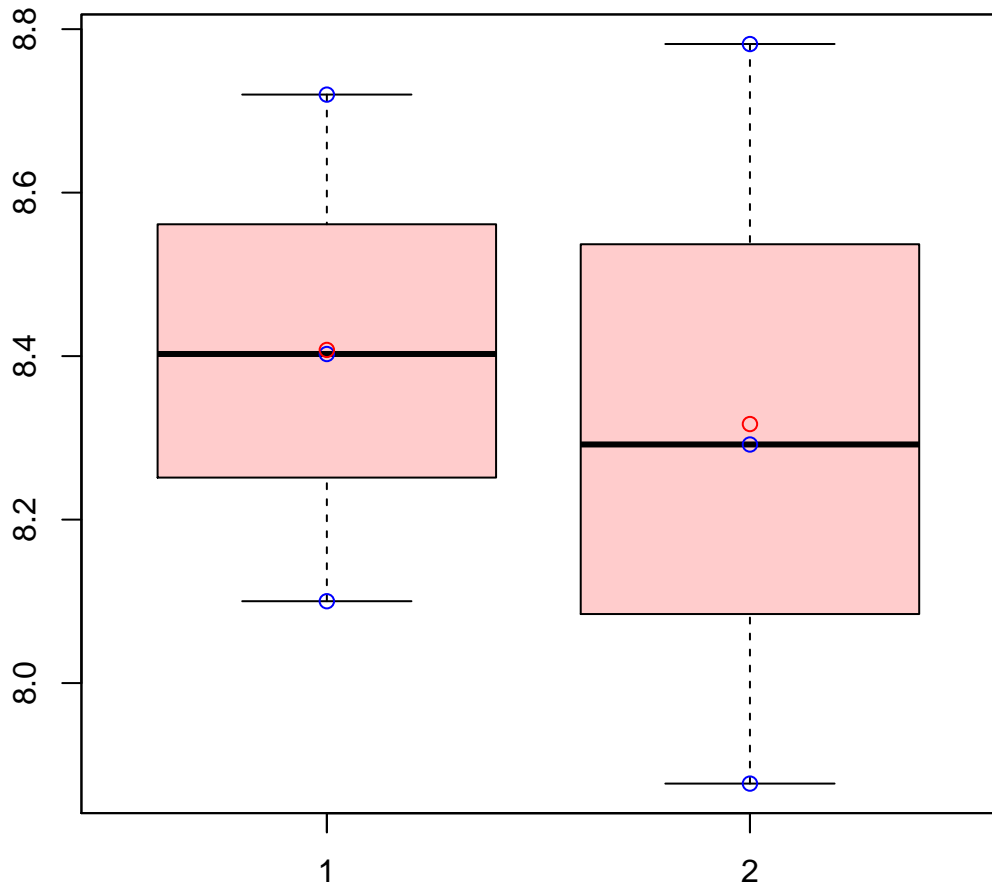

t-Test: p-value = 0.79

# Locus\_4035\_1\_7|Locus\_4035\_1\_7

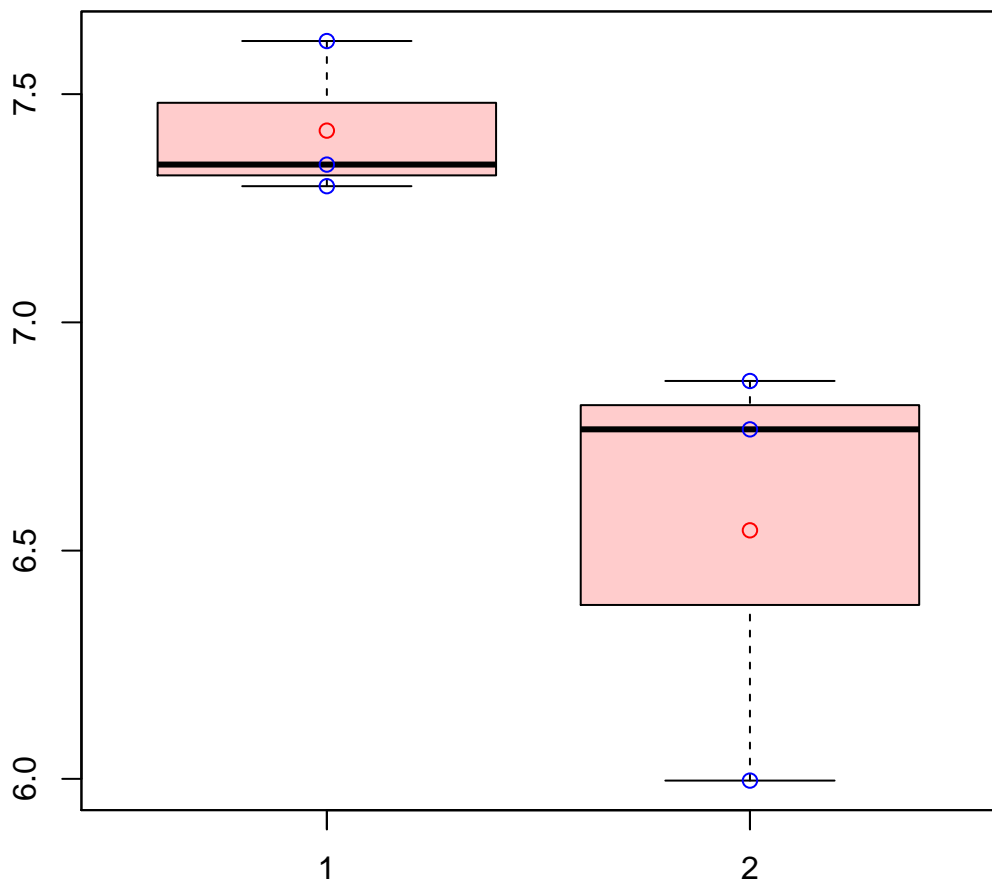

t-Test: p-value = 0.07

# Locus\_4256\_5\_6|Locus\_4256\_5\_6

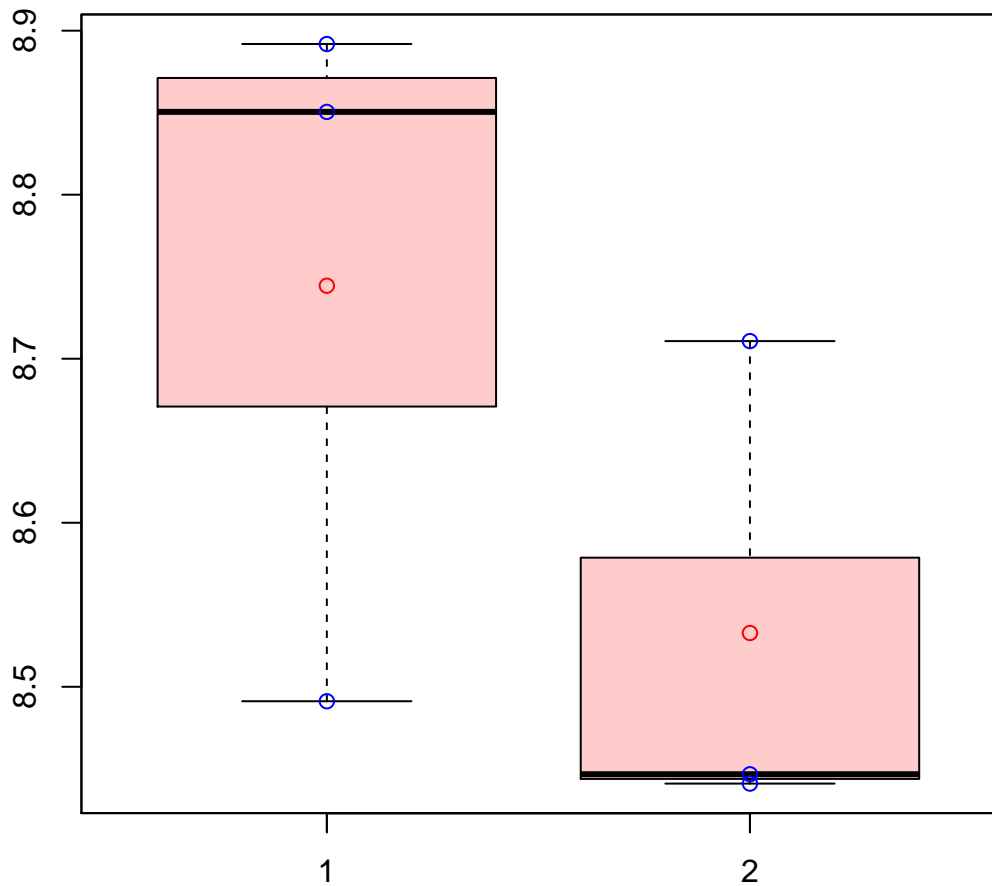

t-Test: p-value = 0.25



# Locus\_4333\_6\_8|Locus\_4333\_6\_8

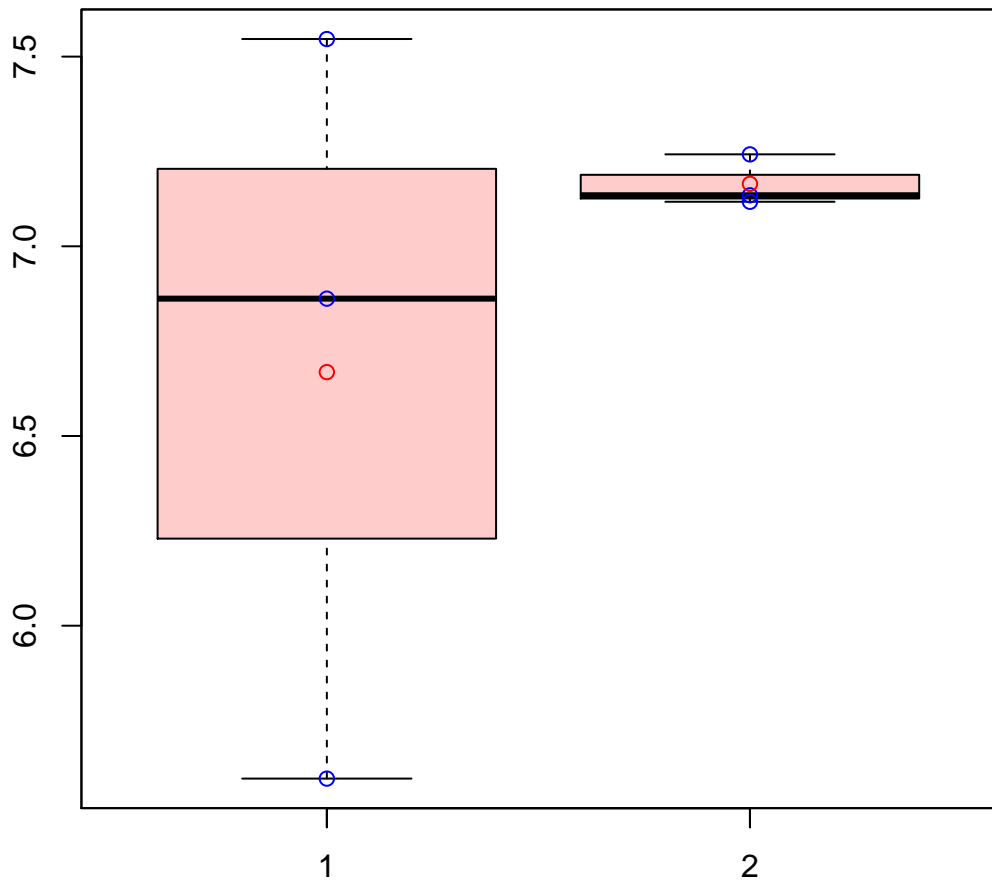

t-Test: p-value = 0.48

# Locus\_44\_9\_9|Locus\_44\_9\_9

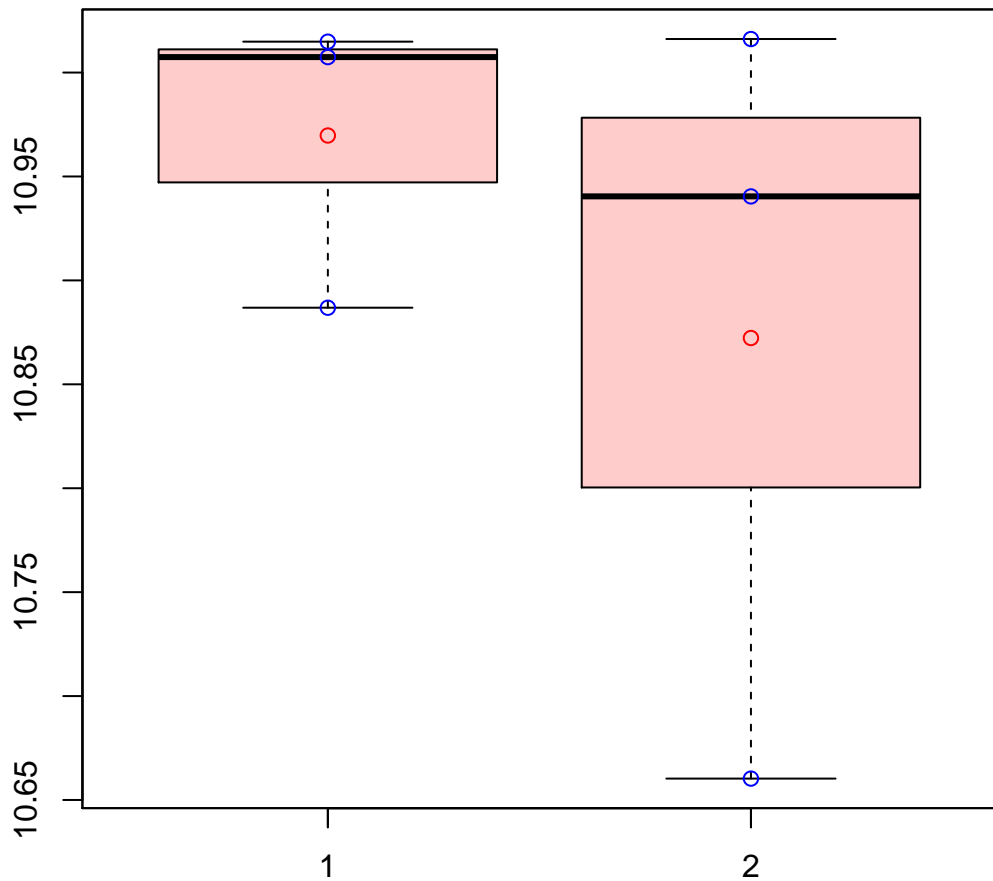

t-Test: p-value = 0.47

# Locus\_4532\_4\_11|Locus\_4532\_4\_11

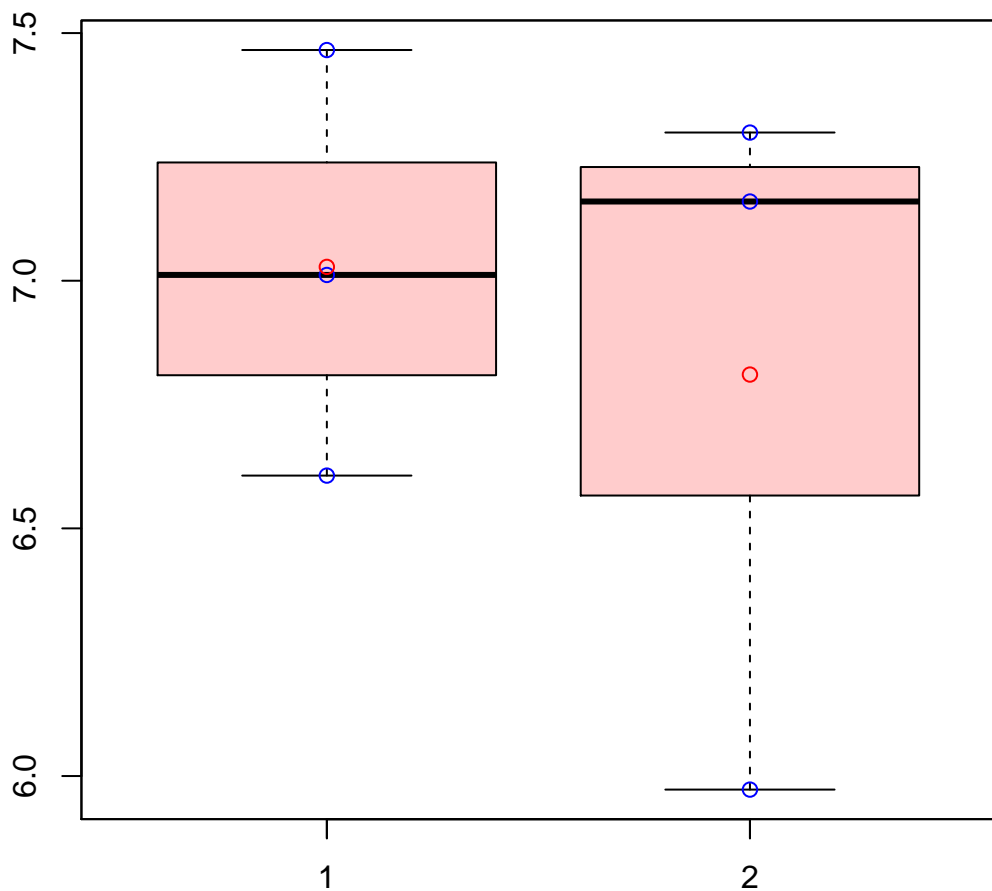

t-Test: p-value = 0.68

# Locus\_454\_4\_9|Locus\_454\_4\_9

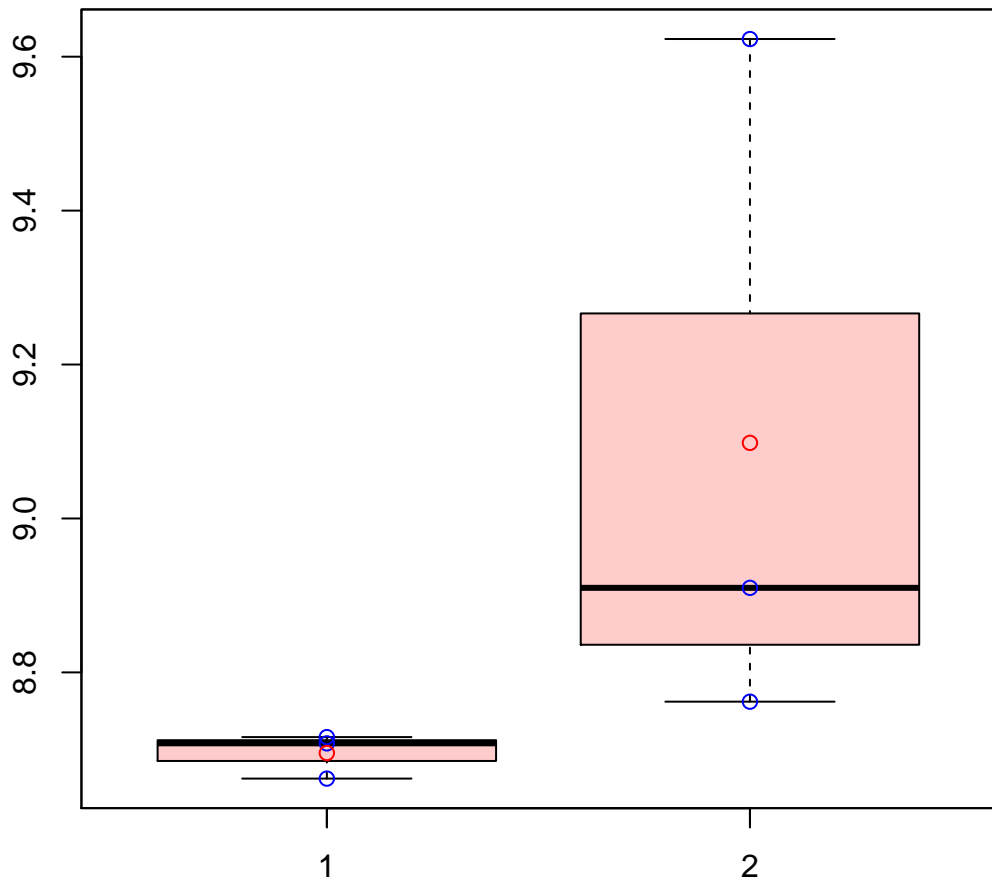

t-Test: p-value = 0.27

# Locus\_4547\_2\_11|Locus\_4547\_2\_11

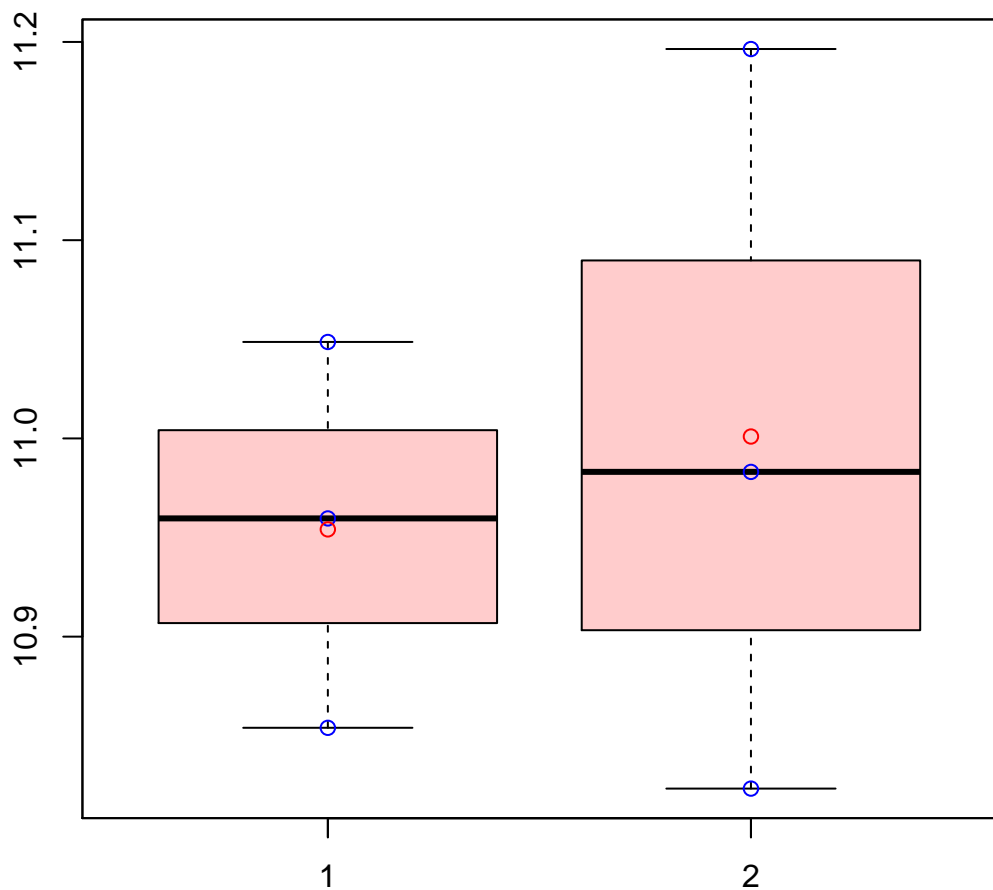

t-Test: p-value = 0.73

# Locus\_46\_2\_9|Locus\_46\_2\_9

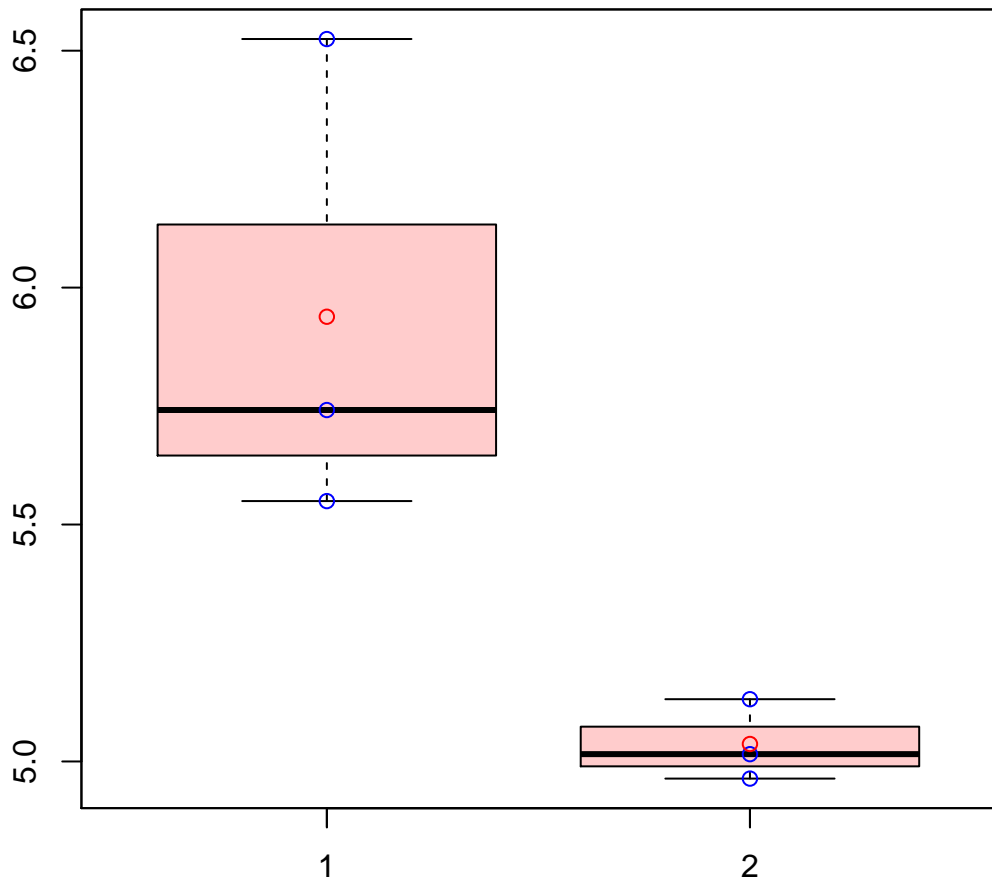

t-Test: p-value = 0.09

# Locus\_471\_2\_7|Locus\_471\_2\_7

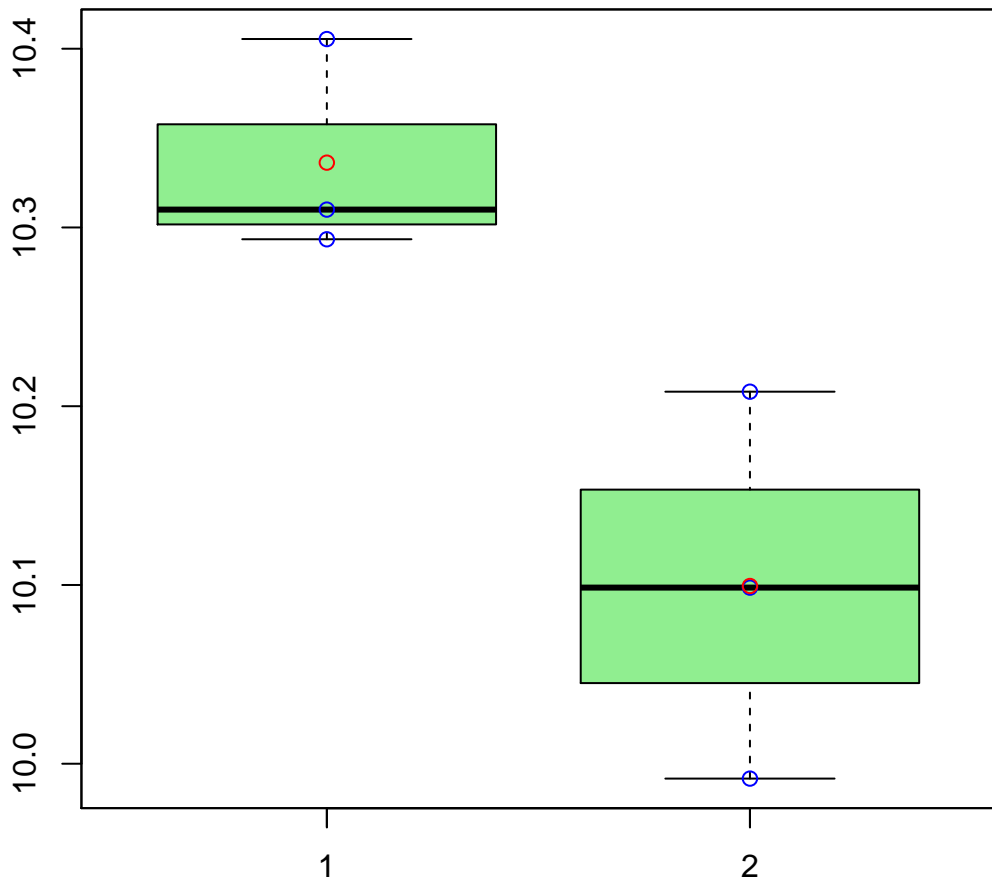

t-Test: p-value = 0.04

# Locus\_4939\_4\_10|Locus\_4939\_4\_10

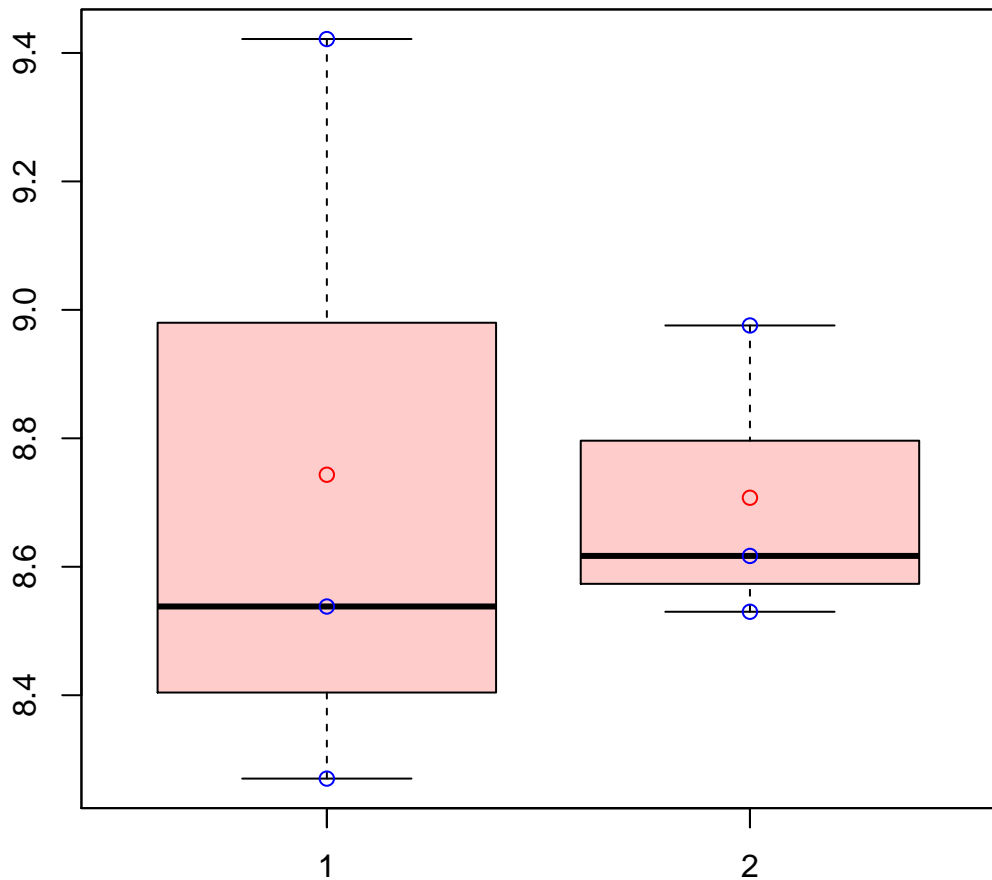

t-Test: p-value = 0.93



# Locus\_49\_76\_82|Locus\_49\_76\_82

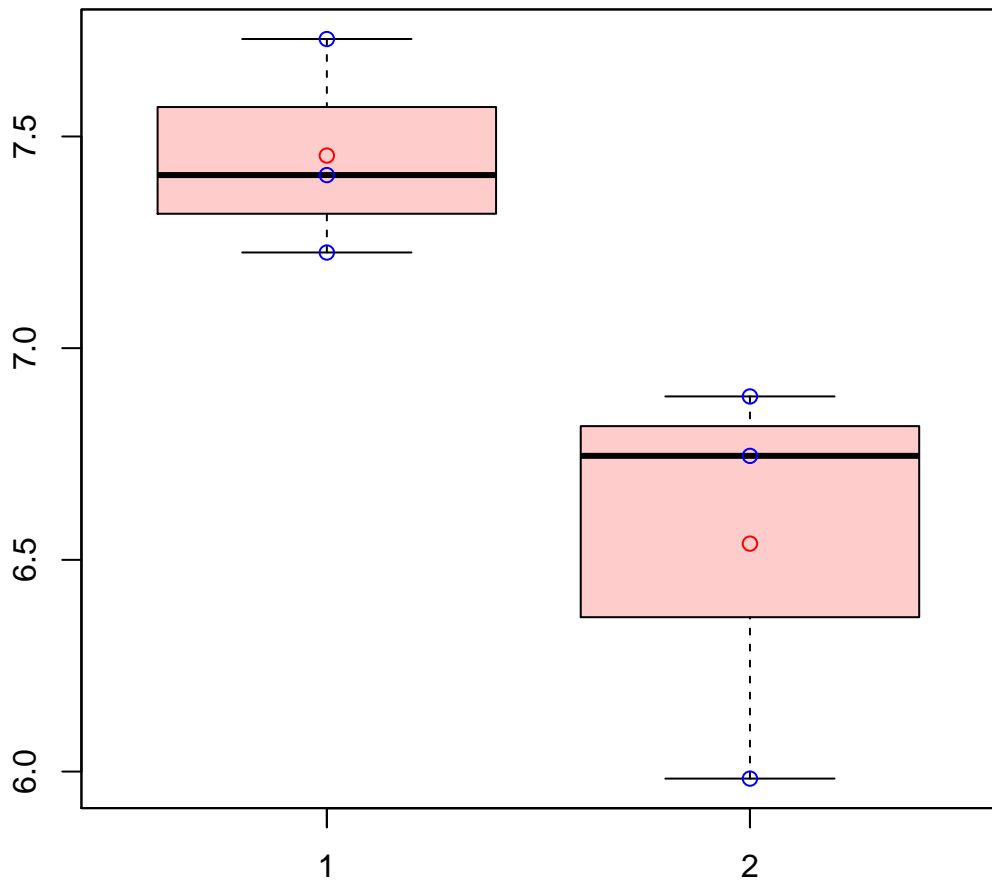

t-Test: p-value = 0.06

# Locus\_49\_80\_82|Locus\_49\_80\_82

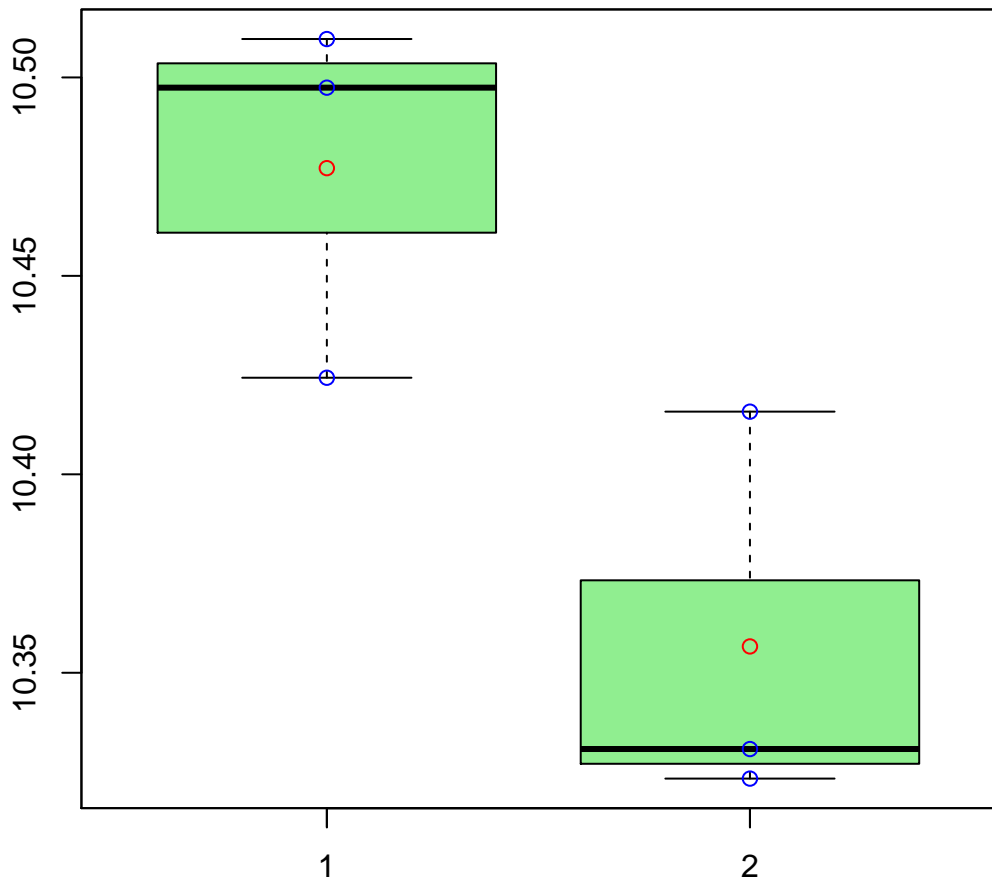

t-Test: p-value = 0.04

# Locus\_49\_81\_82|Locus\_49\_81\_82

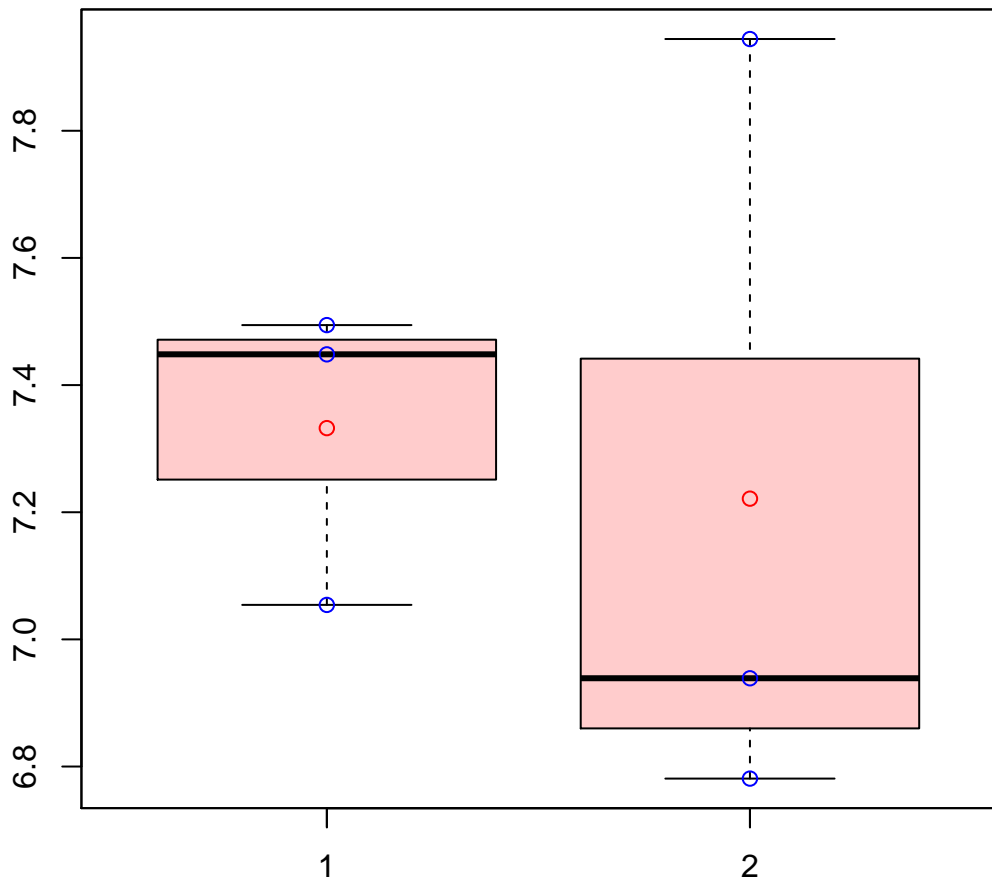

t-Test: p-value = 0.8

# Locus\_5081\_2\_10|Locus\_5081\_2\_10

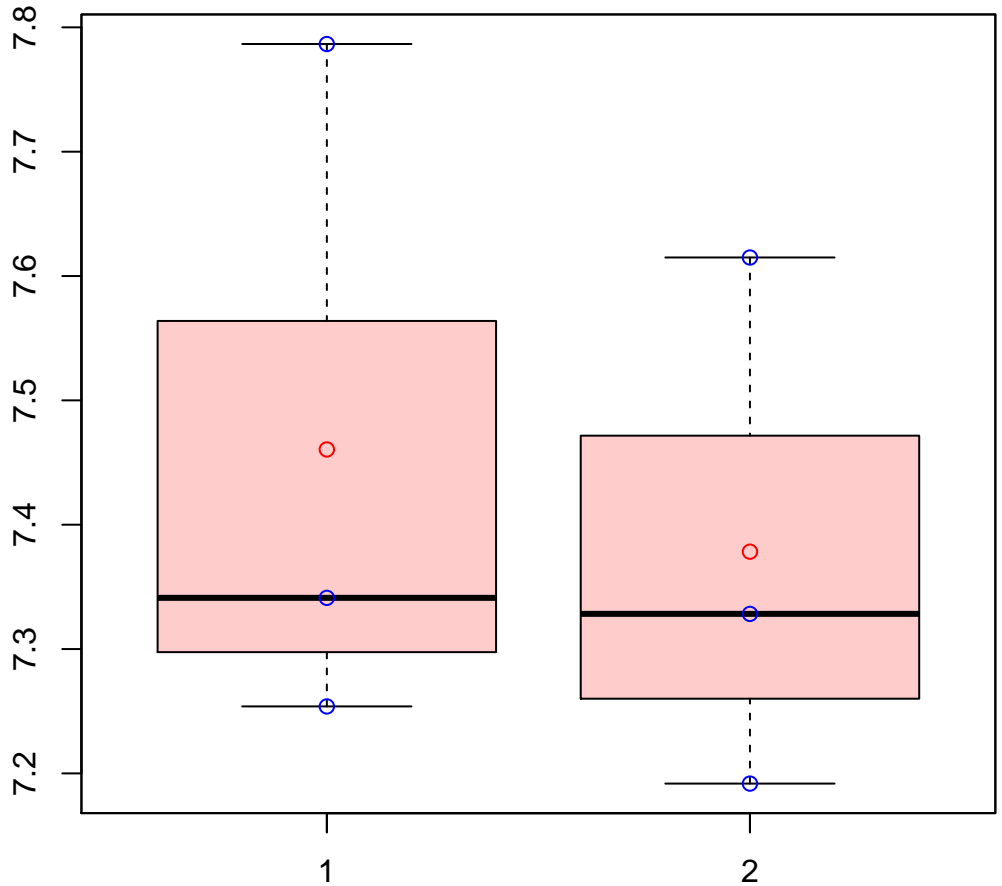

t-Test: p-value = 0.71

# Locus\_5256\_3\_3|Locus\_5256\_3\_3

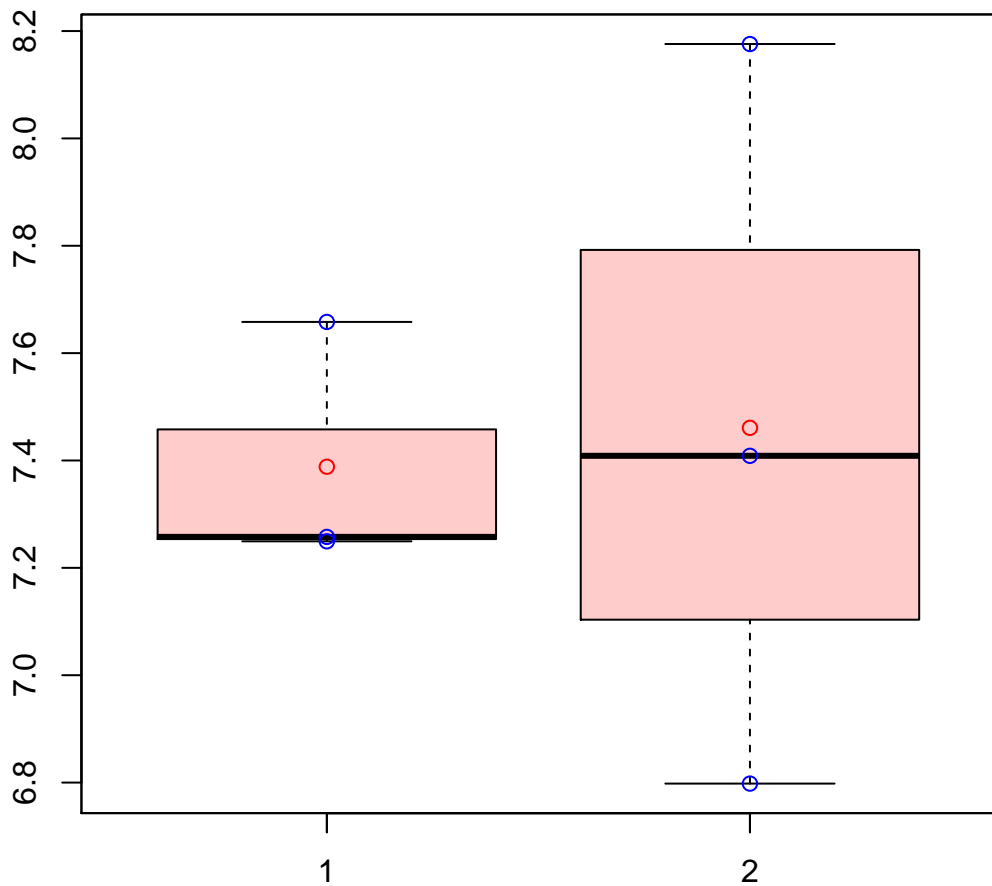

t-Test: p-value = 0.88

# Locus\_543\_17\_19|Locus\_543\_17\_19

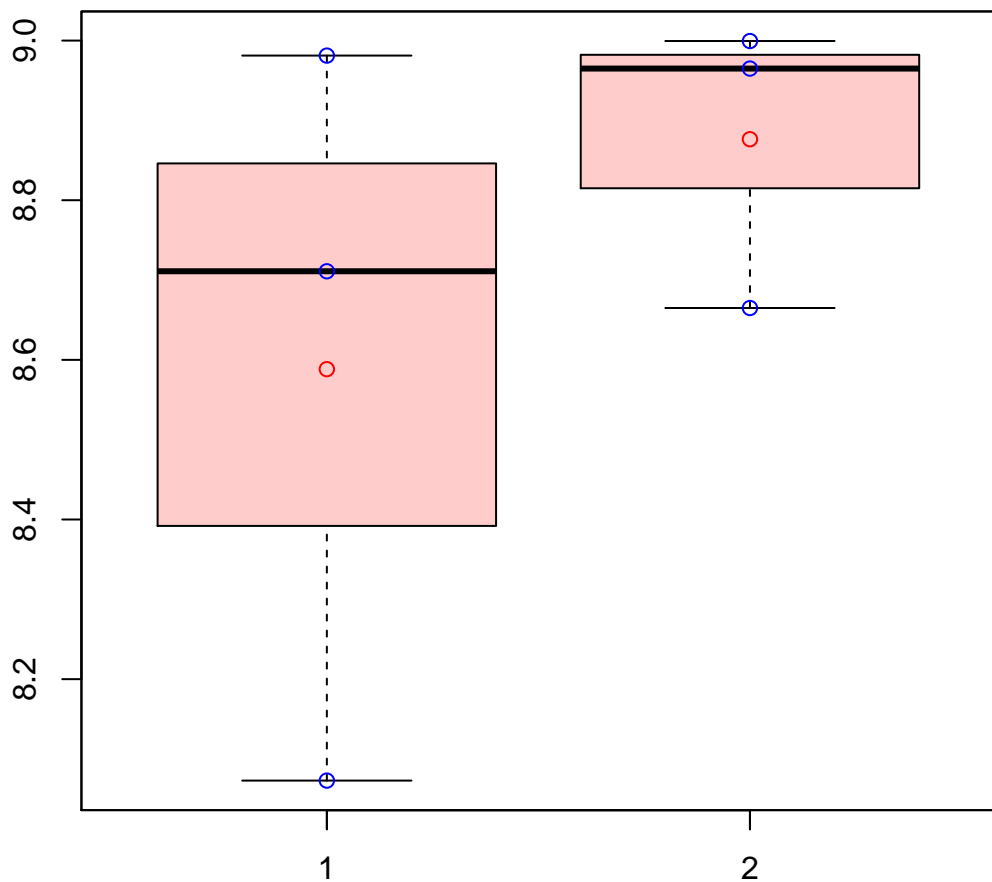

t-Test: p-value = 0.4

# Locus\_5765\_3\_5|Locus\_5765\_3\_5

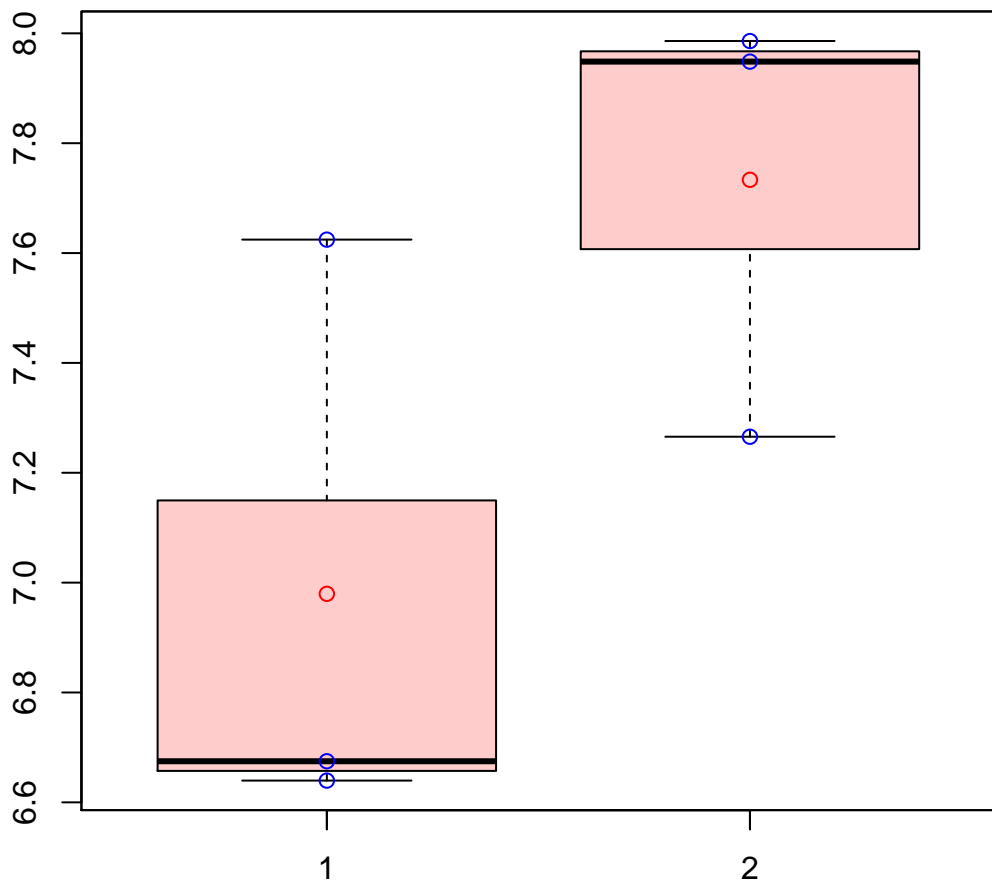

t-Test: p-value = 0.14

# Locus\_5770\_2\_2|Locus\_5770\_2\_2

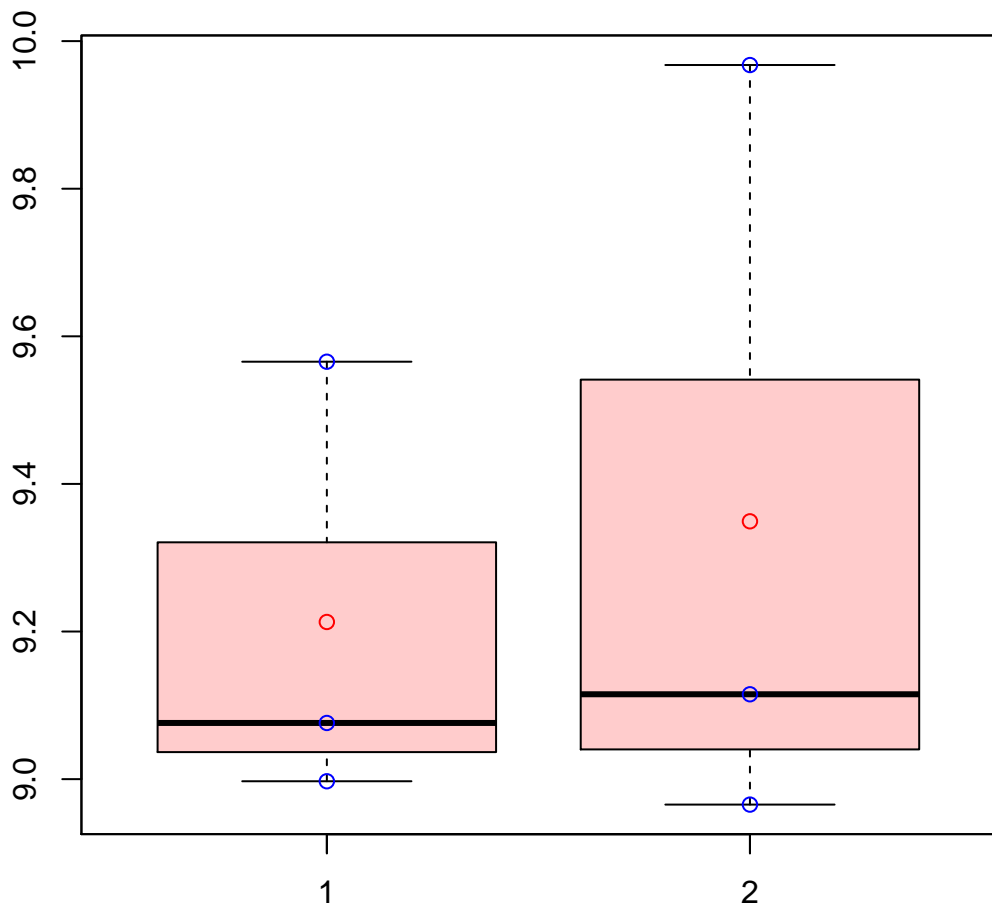

t-Test: p-value = 0.73



# Locus\_6091\_1\_8|Locus\_6091\_1\_8

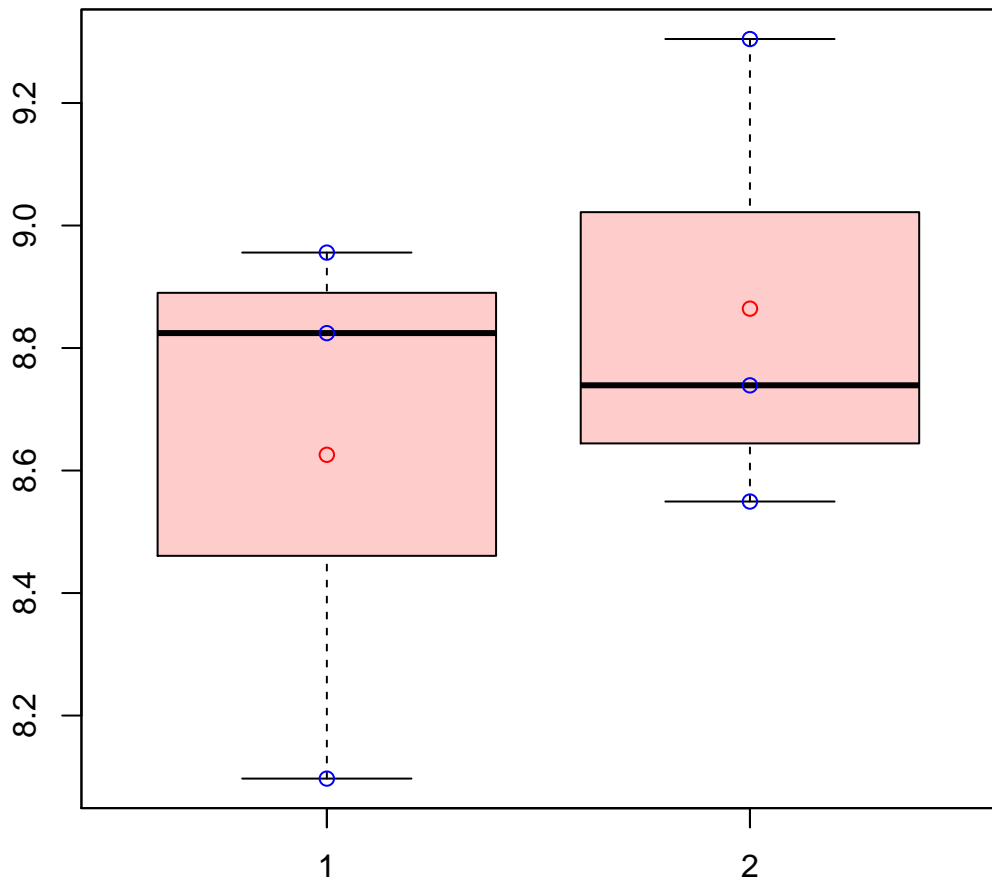

t-Test: p-value = 0.53

# Locus\_6091\_2\_8|Locus\_6091\_2\_8

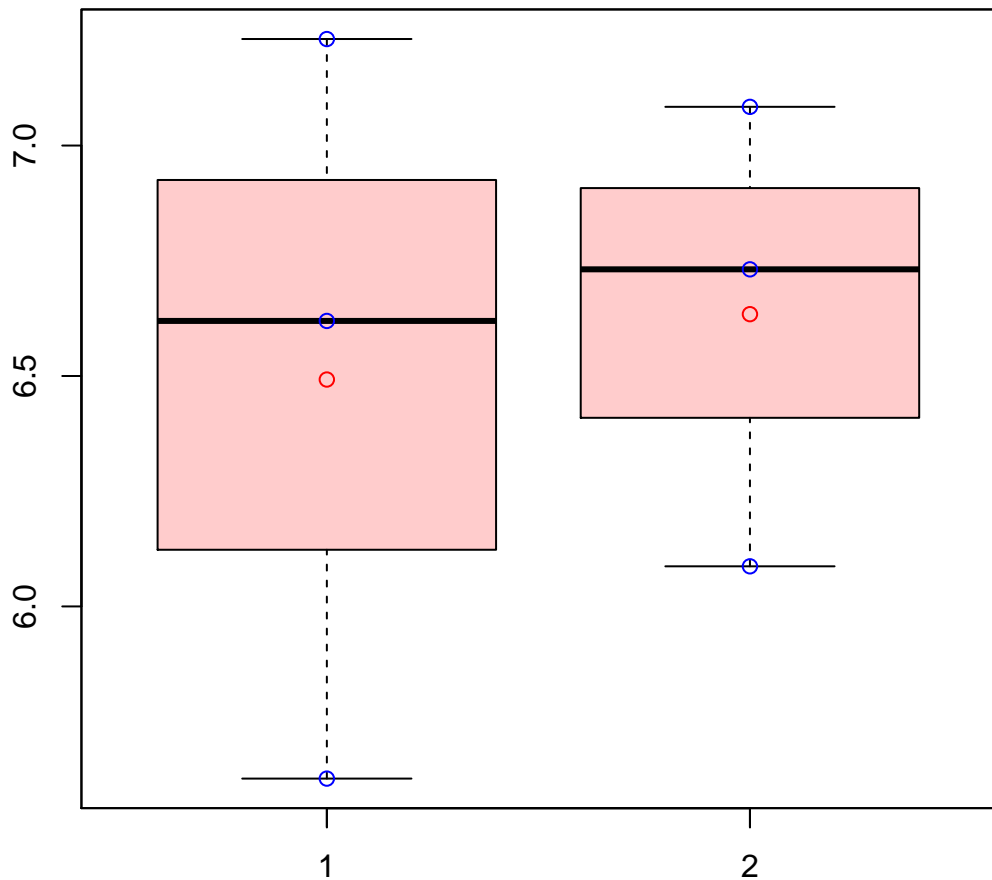

t-Test: p-value = 0.81

# Locus\_6130\_5\_8|Locus\_6130\_5\_8

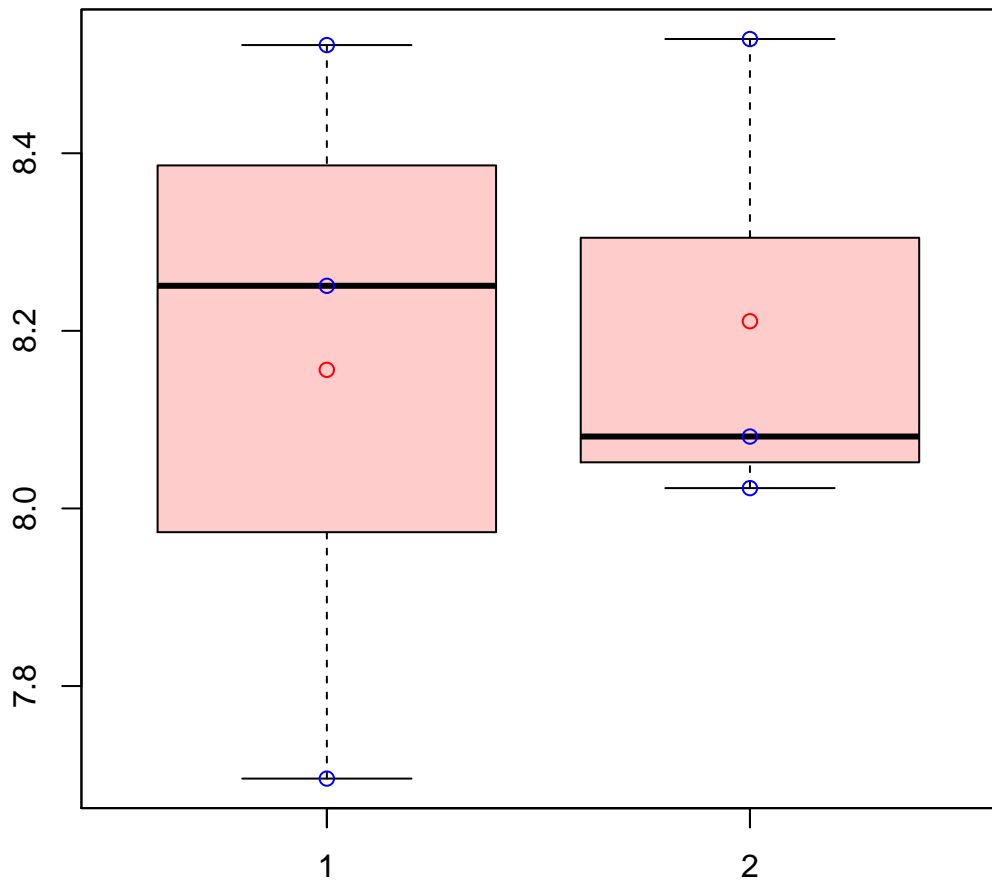

t-Test: p-value = 0.86

# Locus\_618\_5\_6|Locus\_618\_5\_6

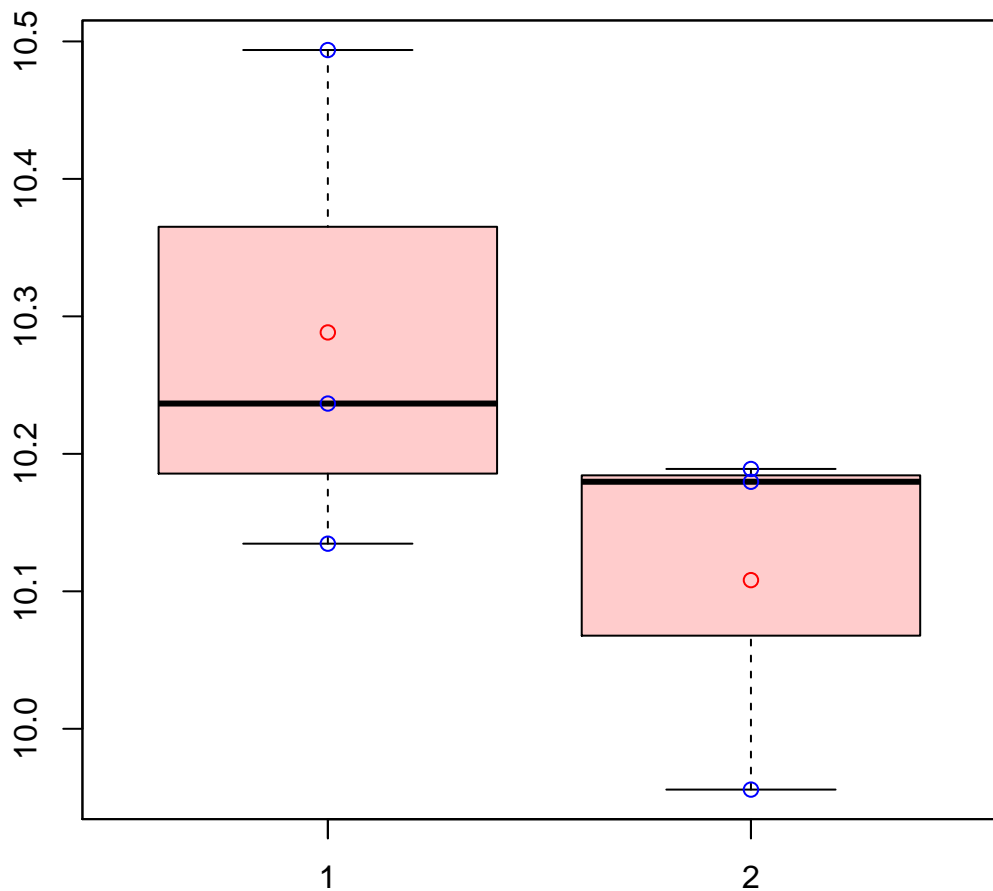

t-Test: p-value = 0.25

# Locus\_619\_2\_8|Locus\_619\_2\_8

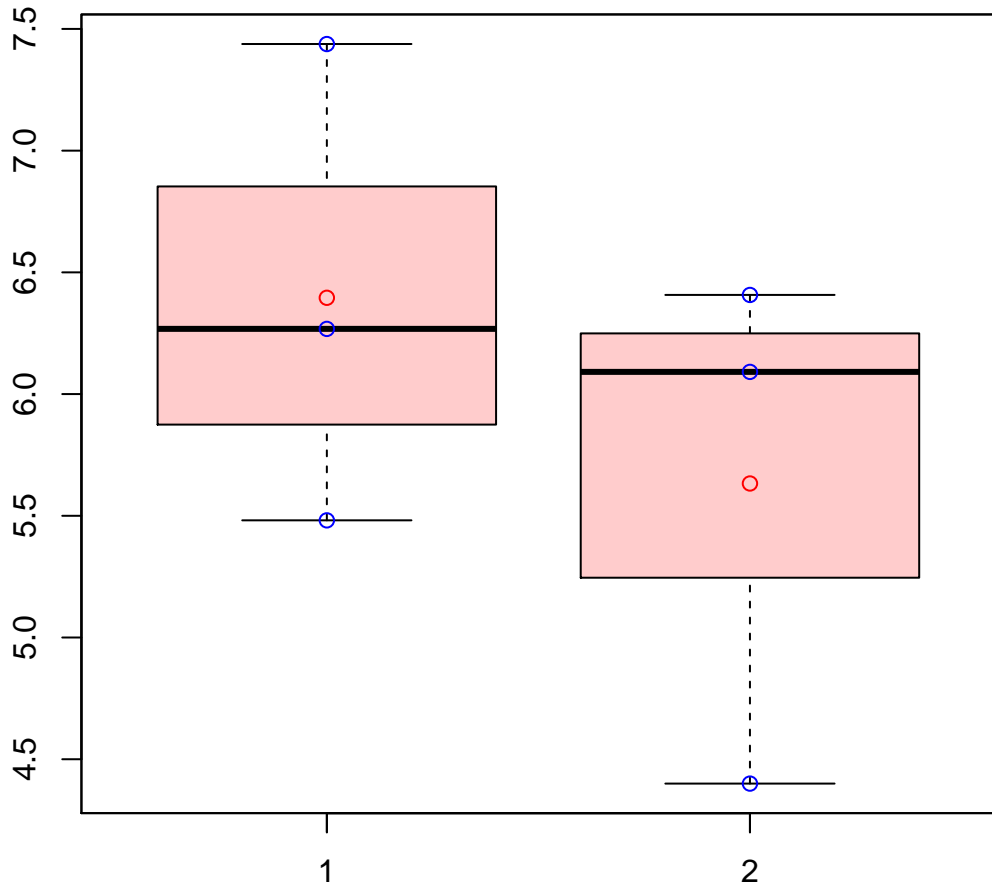

t-Test: p-value = 0.42

# Locus\_6504\_2\_6|Locus\_6504\_2\_6

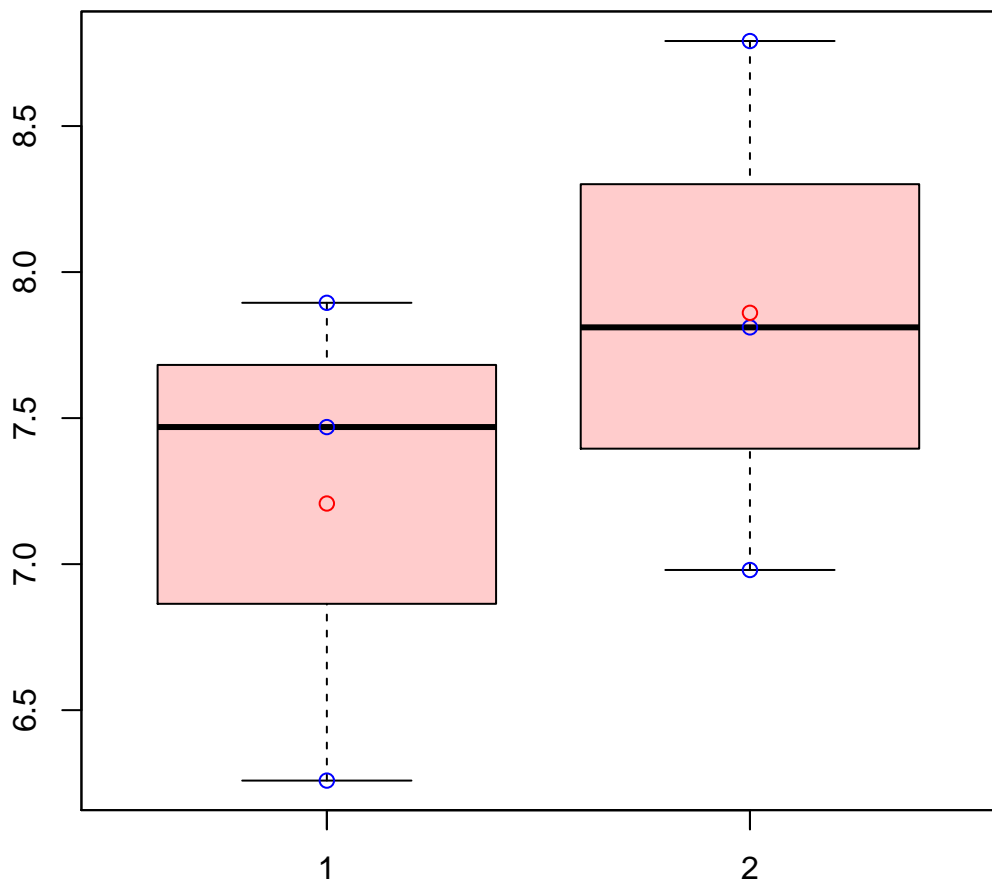

t-Test: p-value = 0.41

# Locus\_65\_7\_13|Locus\_65\_7\_13

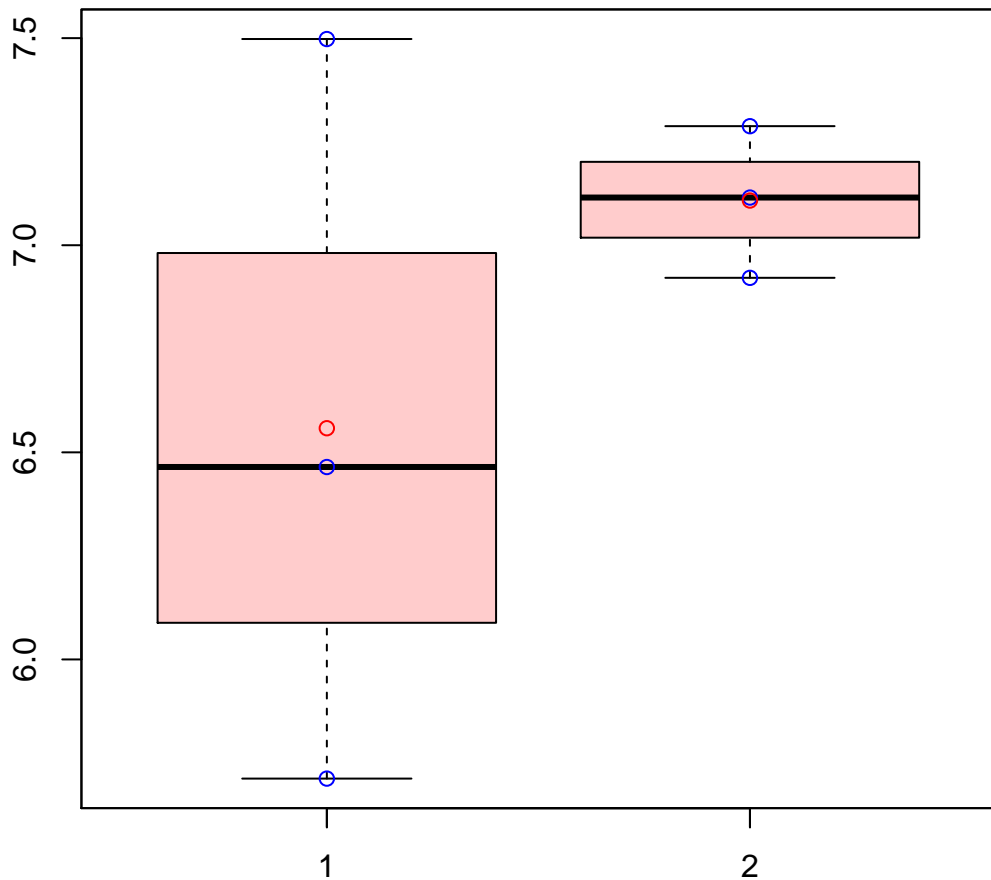

t-Test: p-value = 0.4

# Locus\_6732\_3\_10|Locus\_6732\_3\_10

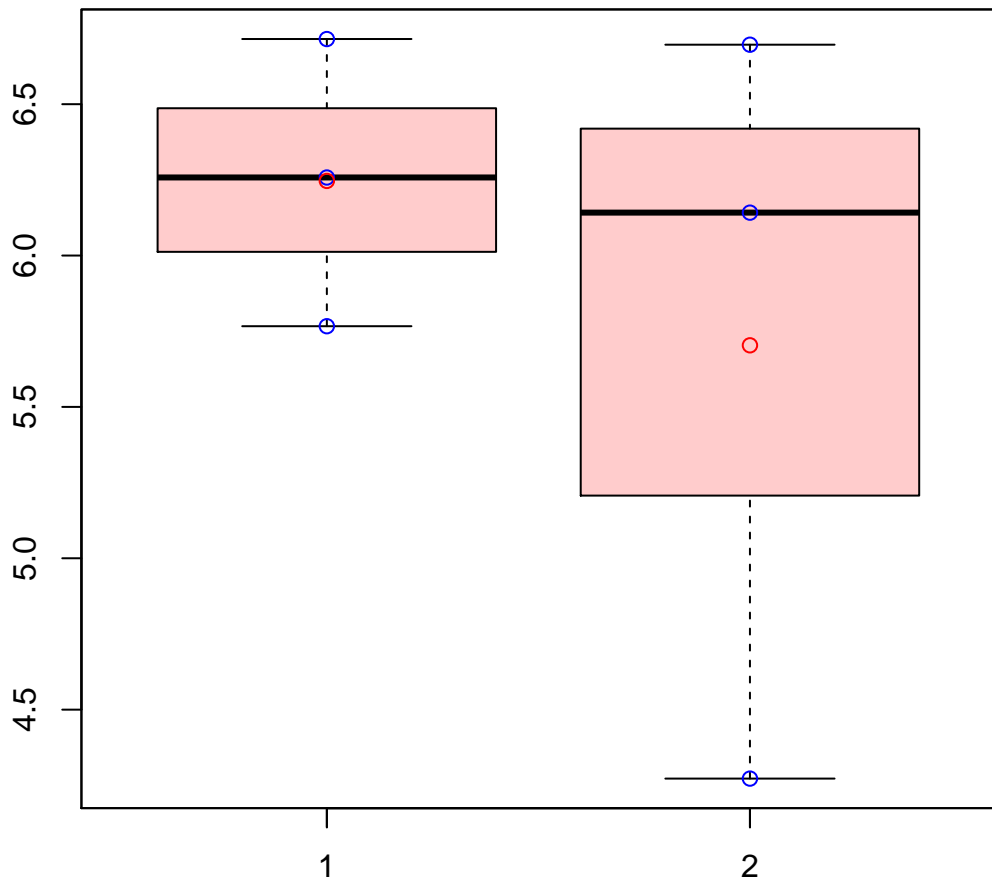

t-Test: p-value = 0.55



# Locus\_6980\_3\_5|Locus\_6980\_3\_5

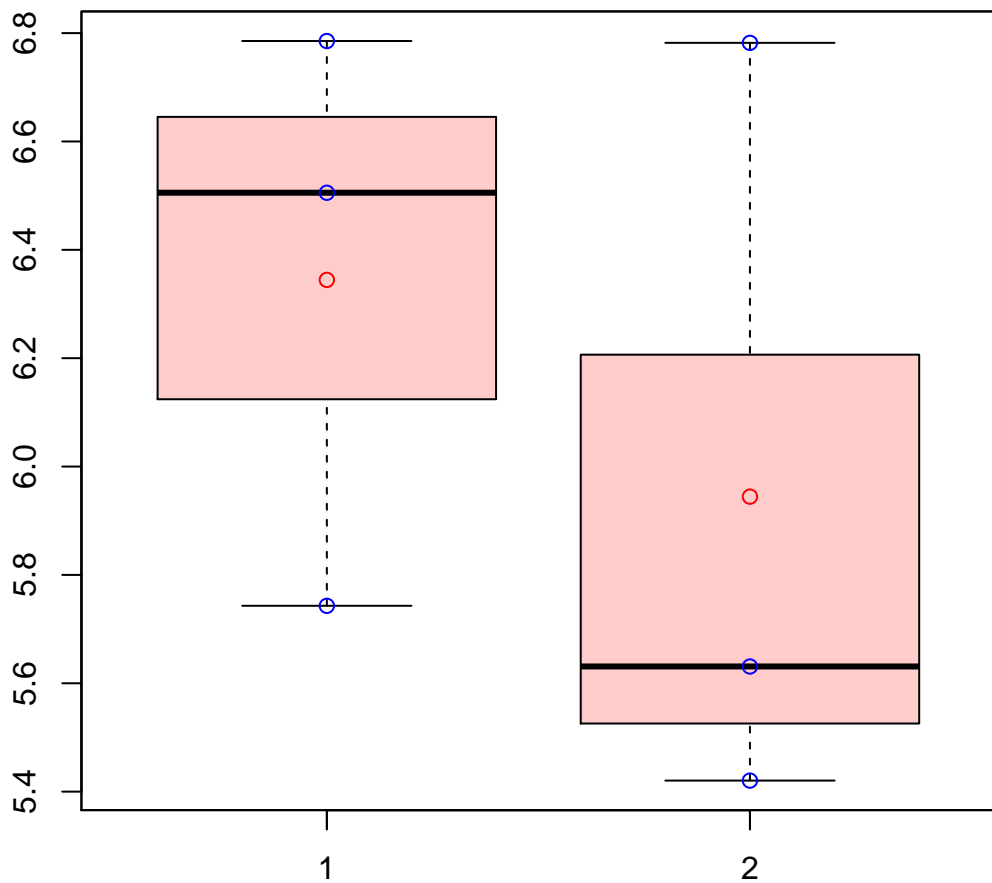

t-Test: p-value = 0.49

# Locus\_7074\_7\_8|Locus\_7074\_7\_8

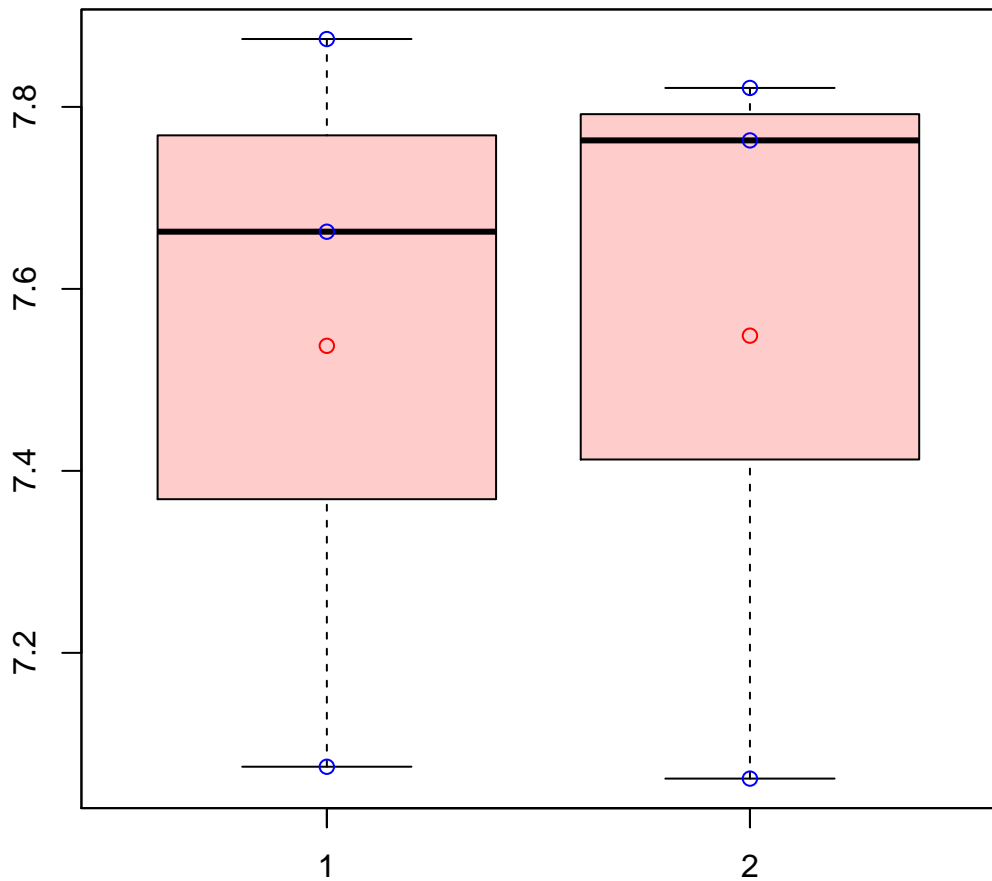

t-Test: p-value = 0.98

# Locus\_7184\_13\_13|Locus\_7184\_13\_13

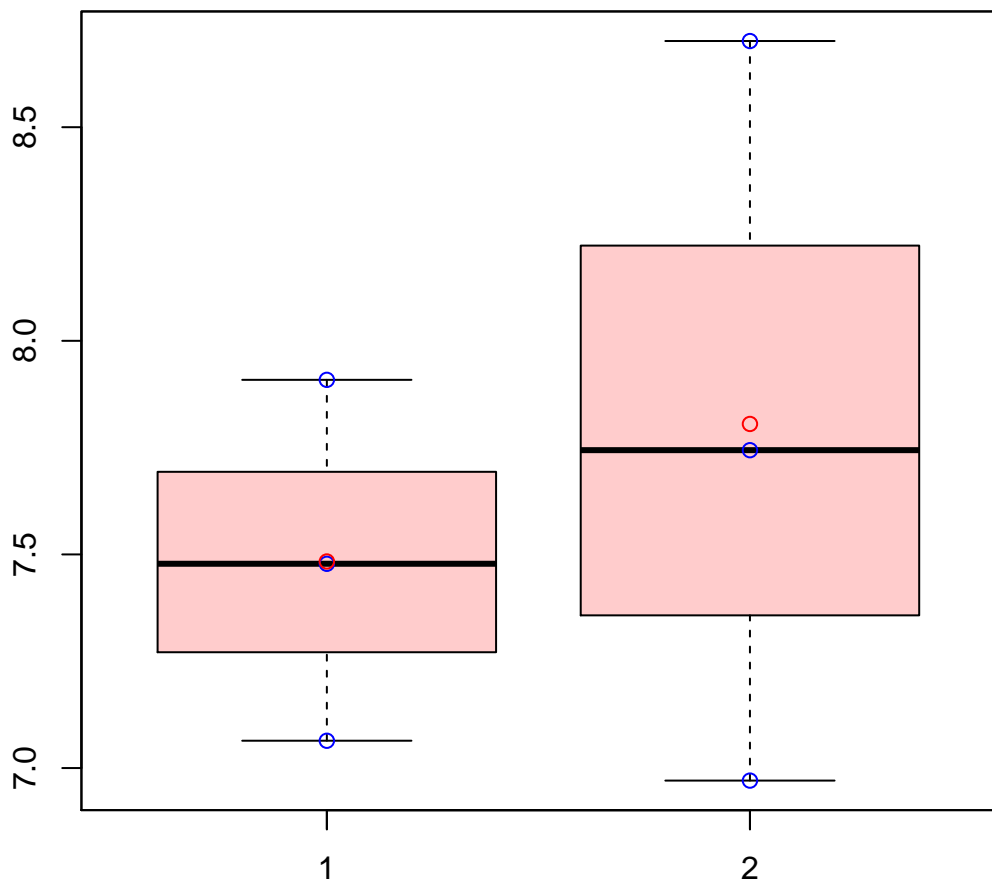

t-Test: p-value = 0.61

# Locus\_7356\_1\_2|Locus\_7356\_1\_2

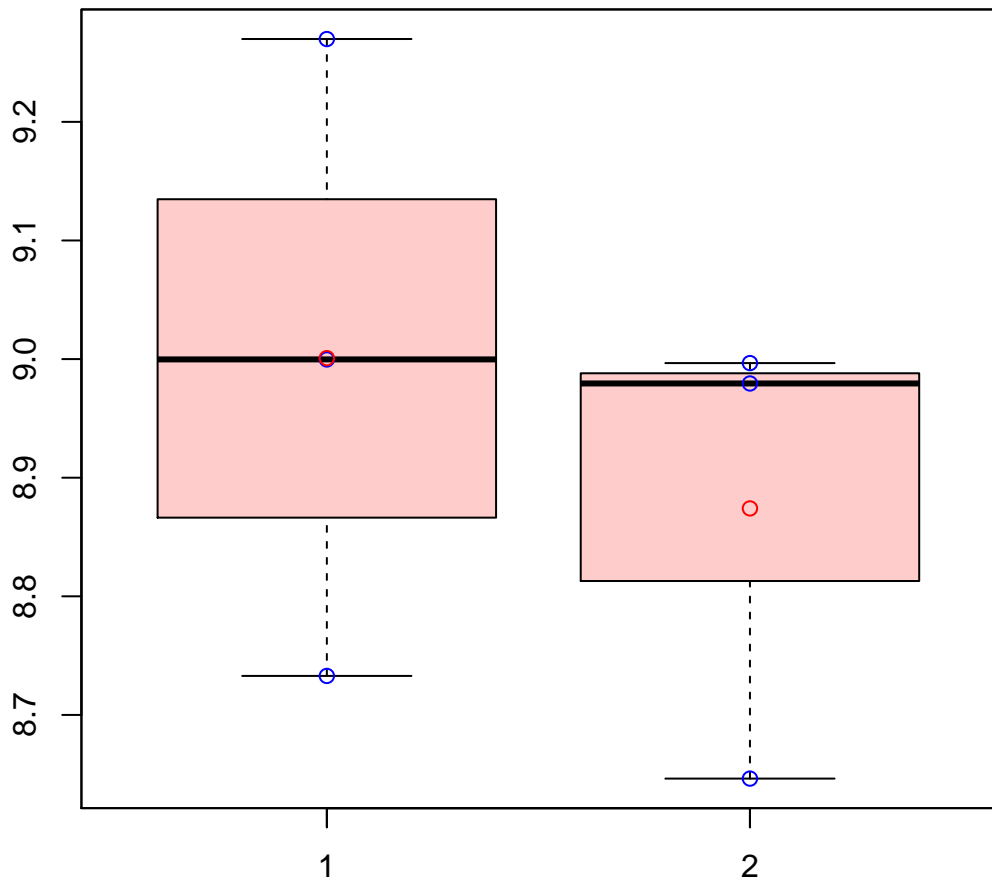

t-Test: p-value = 0.55

# Locus\_740\_1\_7|Locus\_740\_1\_7

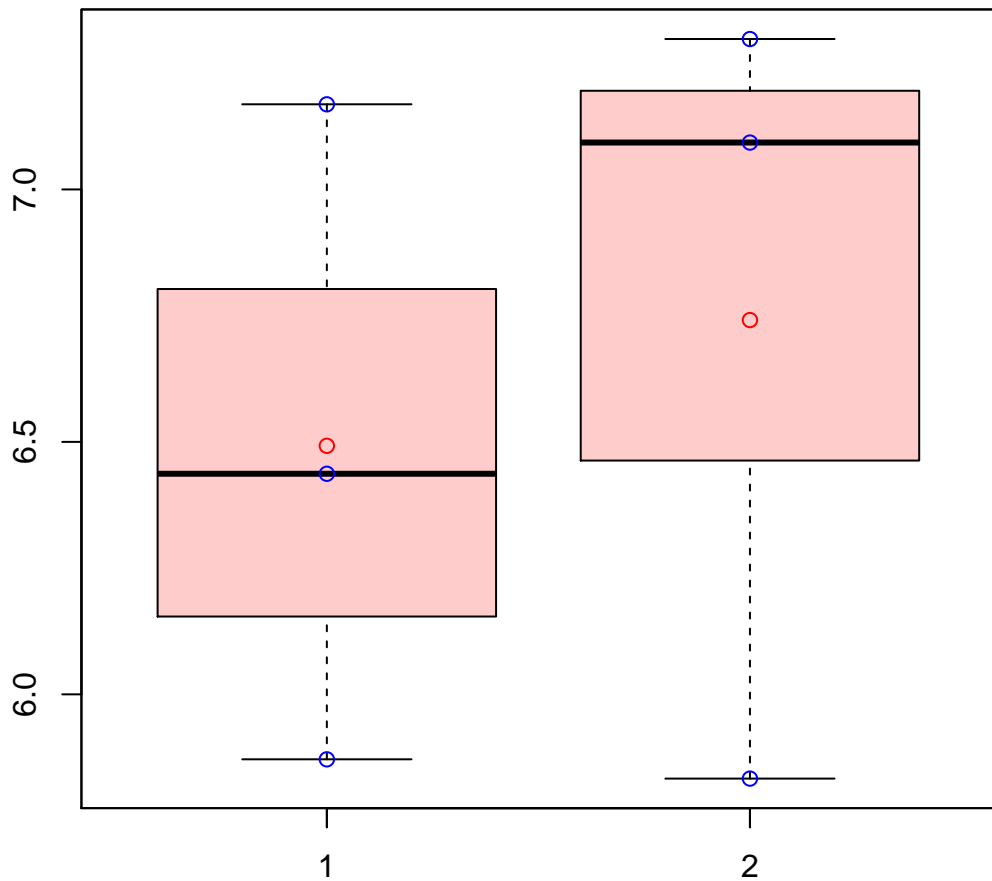

t-Test: p-value = 0.7

# Locus\_748\_6\_7|Locus\_748\_6\_7

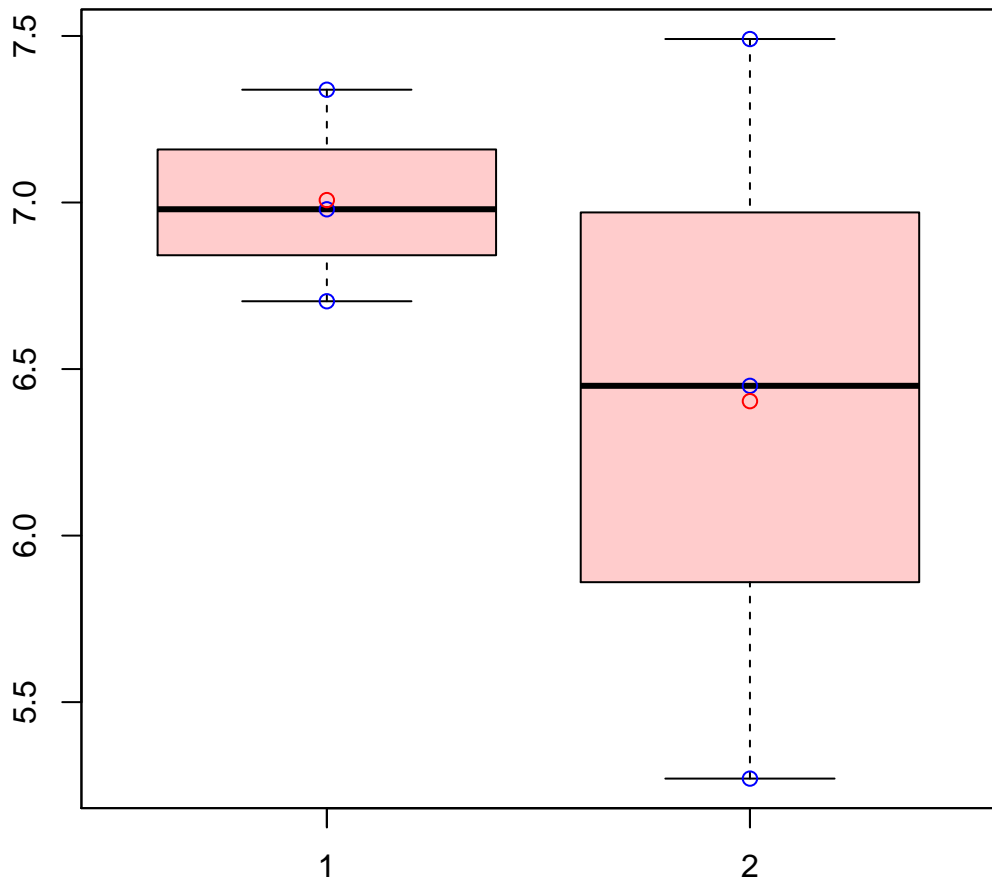

t-Test: p-value = 0.45

# Locus\_78\_1\_2|Locus\_78\_1\_2

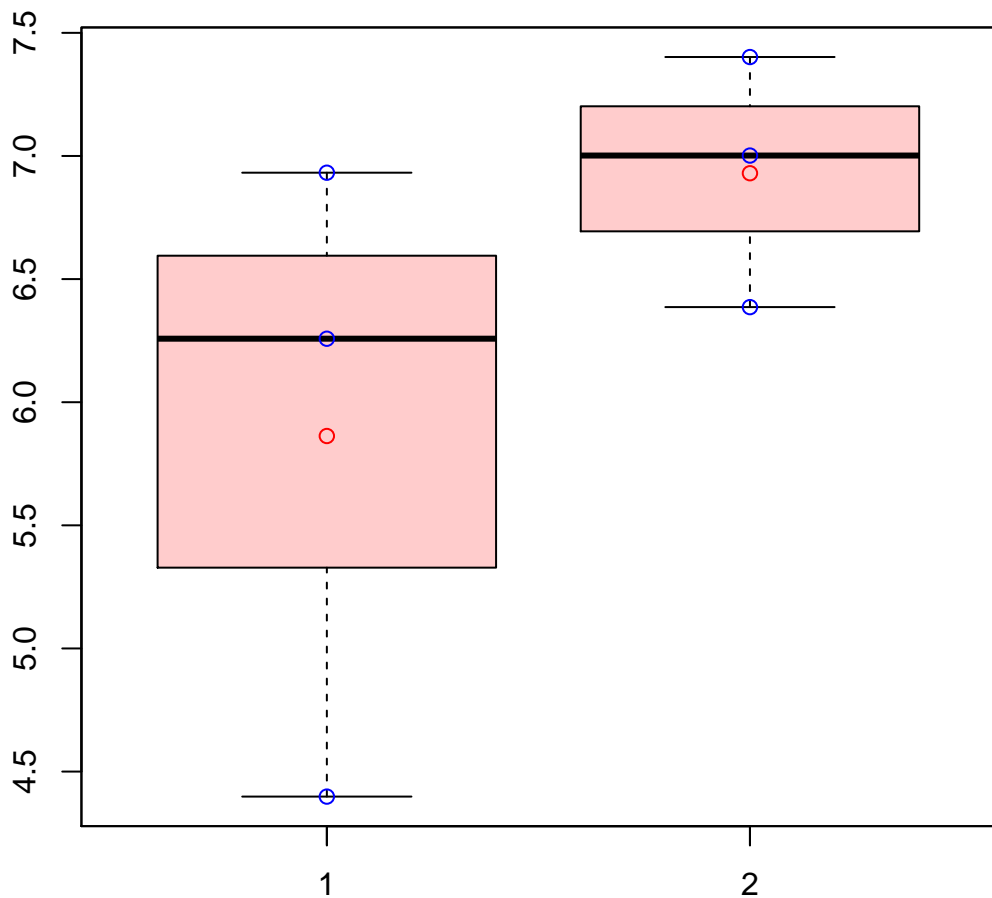

t-Test: p-value = 0.29

# Locus\_7869\_3\_11|Locus\_7869\_3\_11

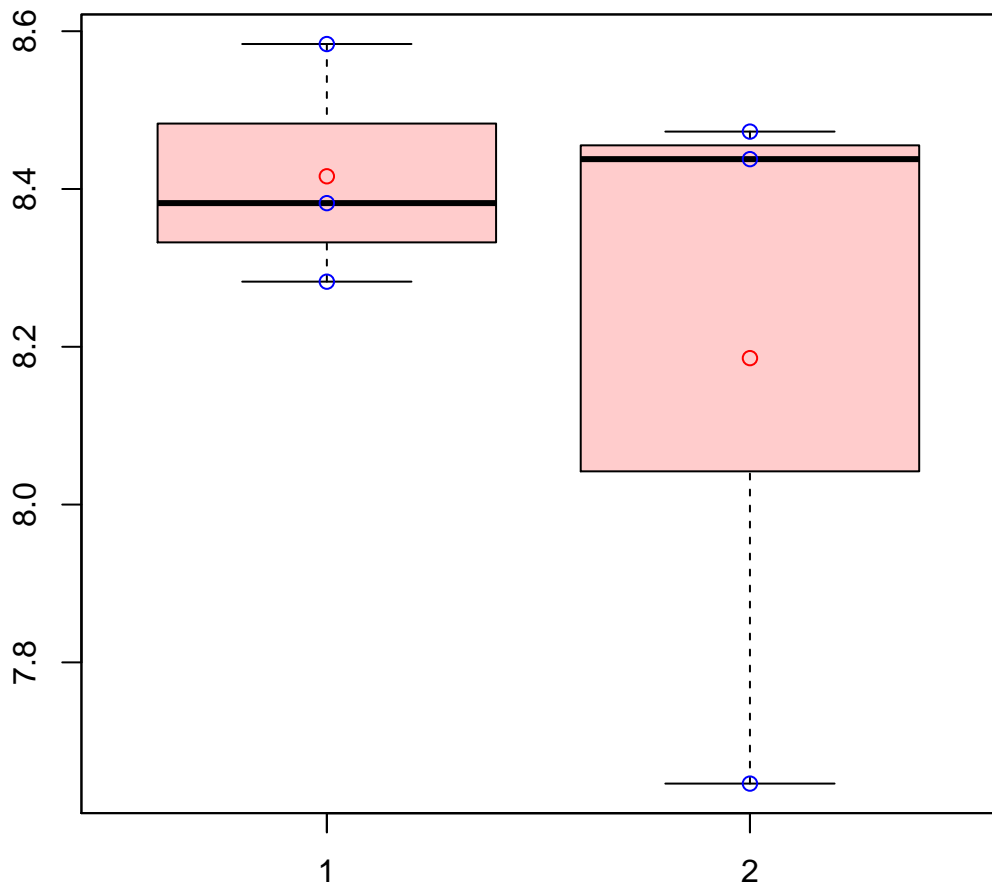

t-Test: p-value = 0.49



# Locus\_8175\_4\_5|Locus\_8175\_4\_5

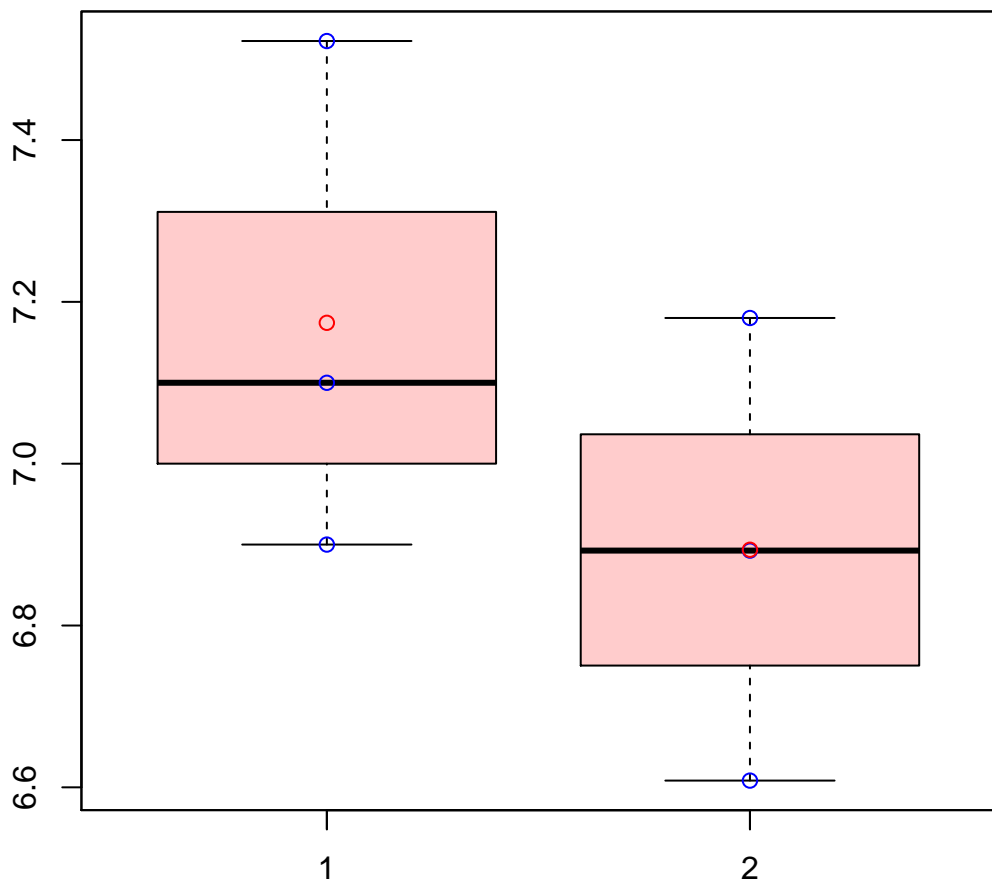

t-Test: p-value = 0.32

# Locus\_82\_4\_4|Locus\_82\_4\_4

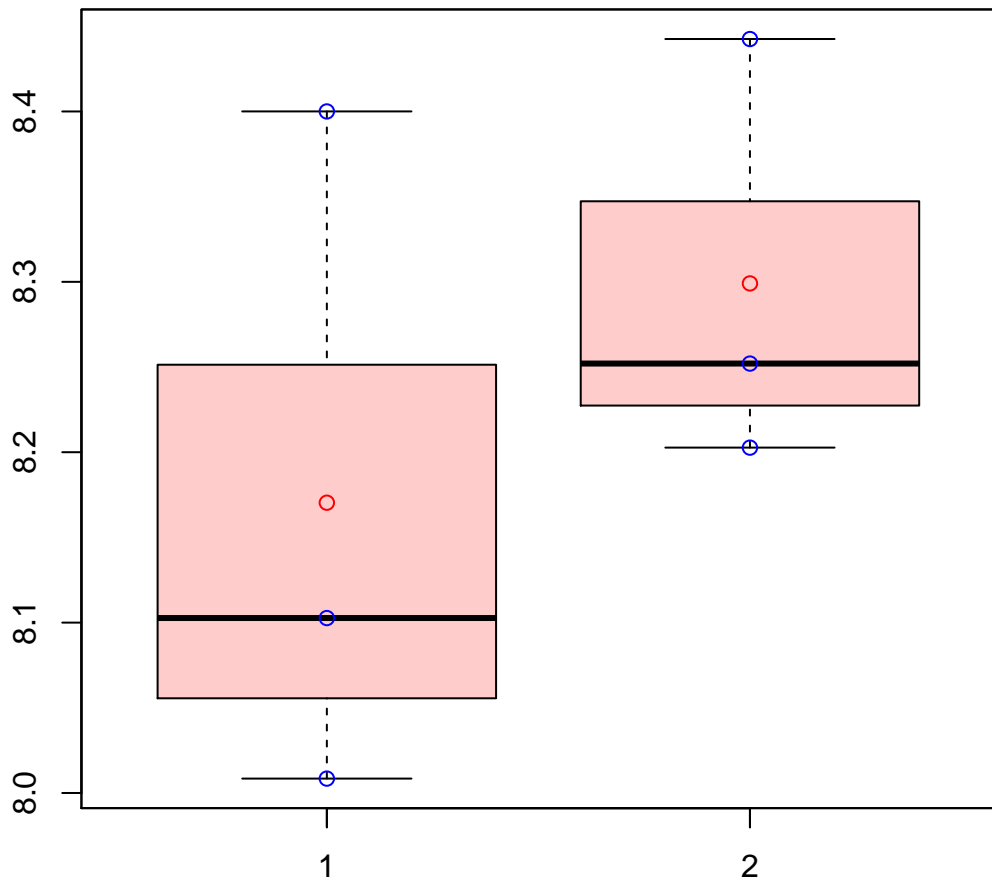

t-Test: p-value = 0.42

# Locus\_83\_4\_5|Locus\_83\_4\_5

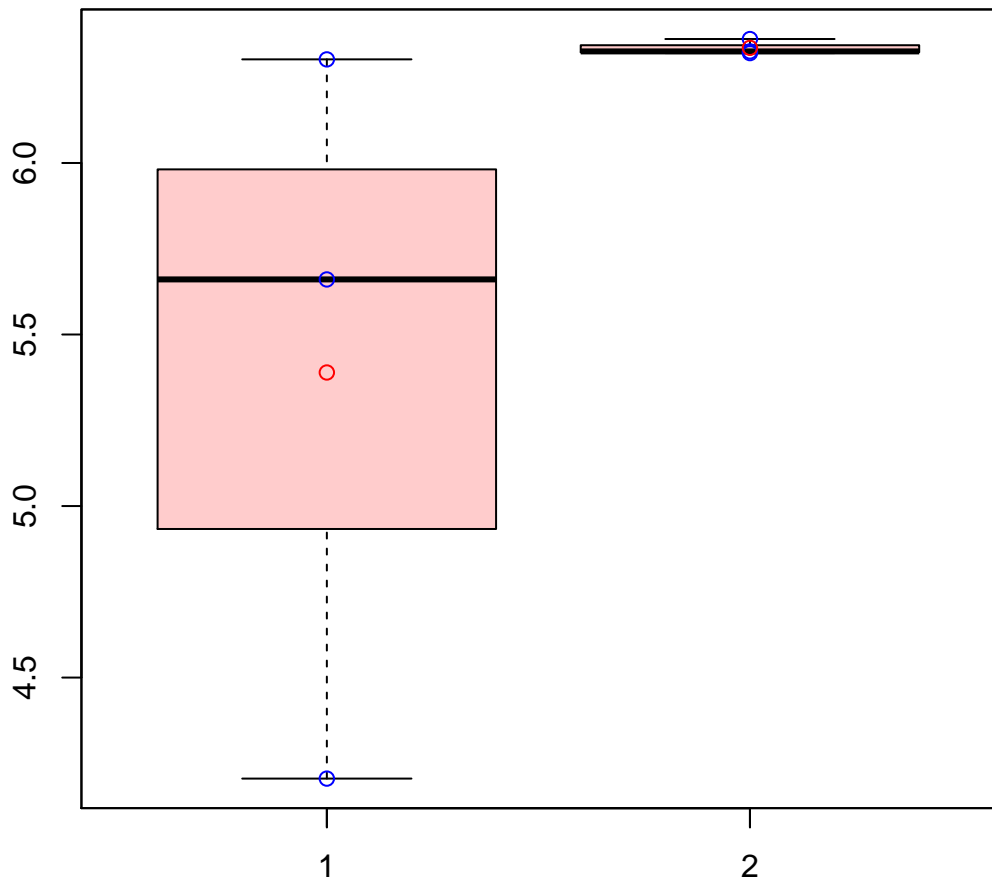

t-Test: p-value = 0.27

# Locus\_8528\_2\_5|Locus\_8528\_2\_5

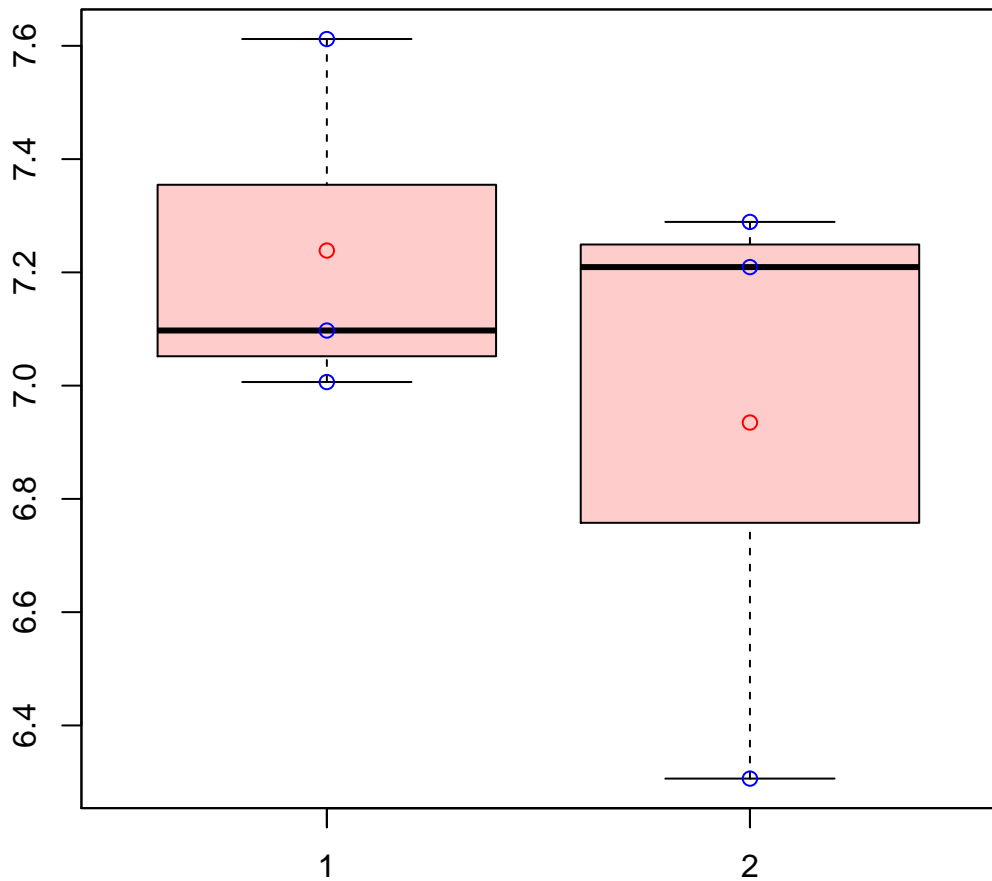

t-Test: p-value = 0.46

# Locus\_927\_3\_10|Locus\_927\_3\_10

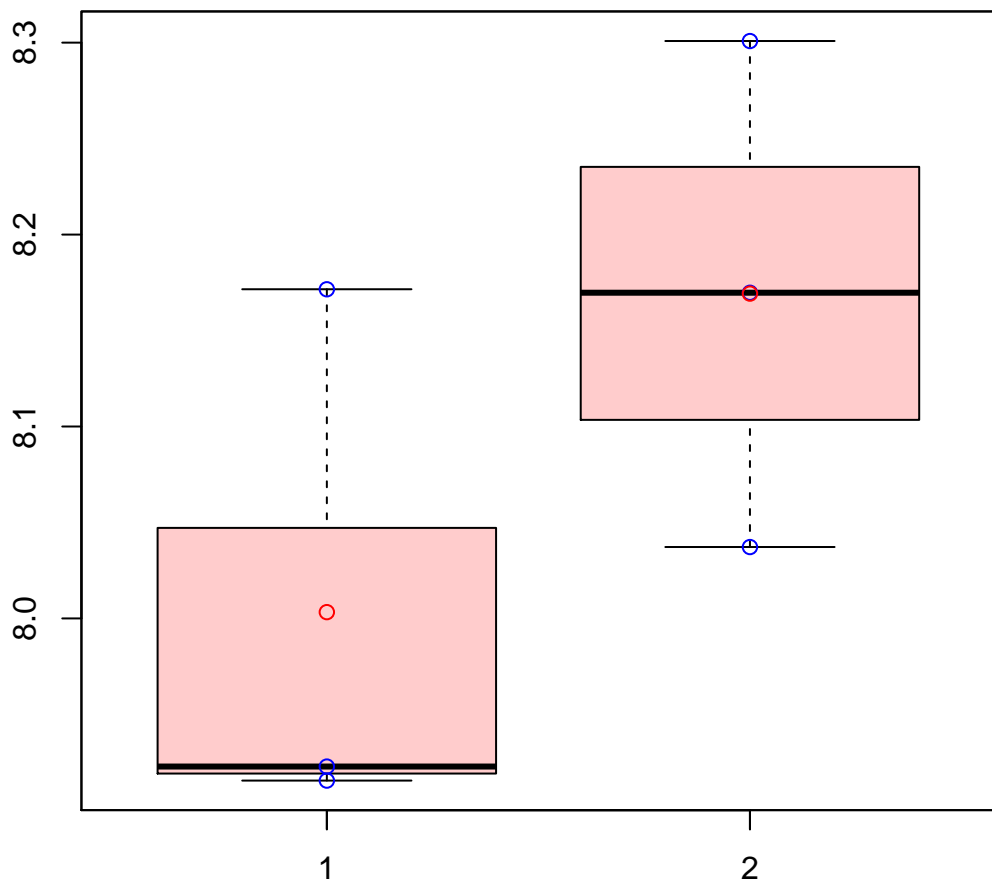

t-Test: p-value = 0.22

# Locus\_94\_2\_6|Locus\_94\_2\_6

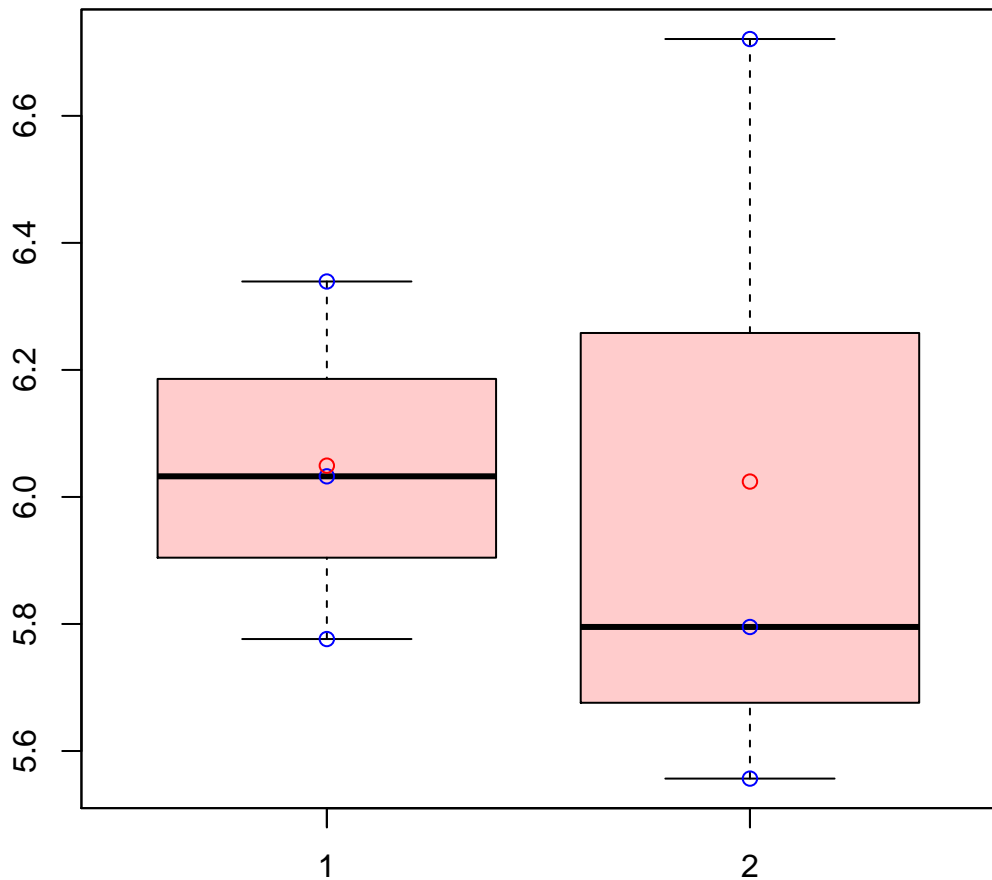

t-Test: p-value = 0.95

# METE4\_ERATE|METE4\_ERATE

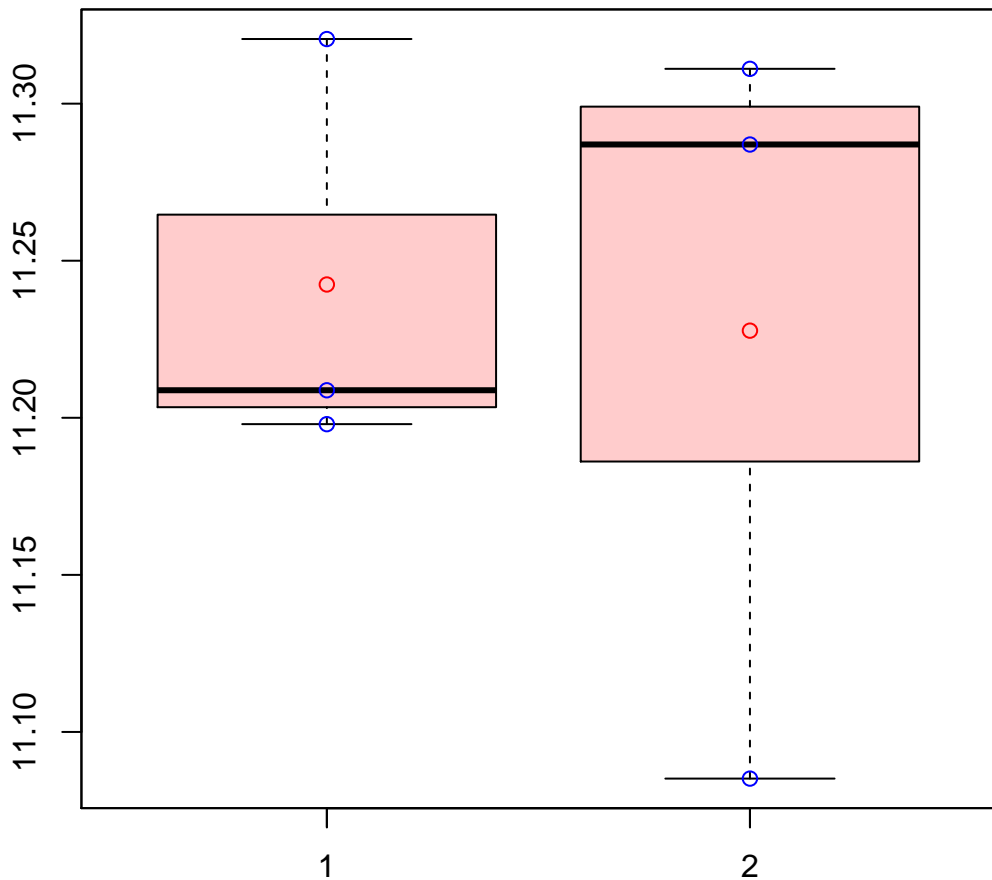

t-Test: p-value = 0.87

## NDK2\_ERATE|NDK2\_ERATE

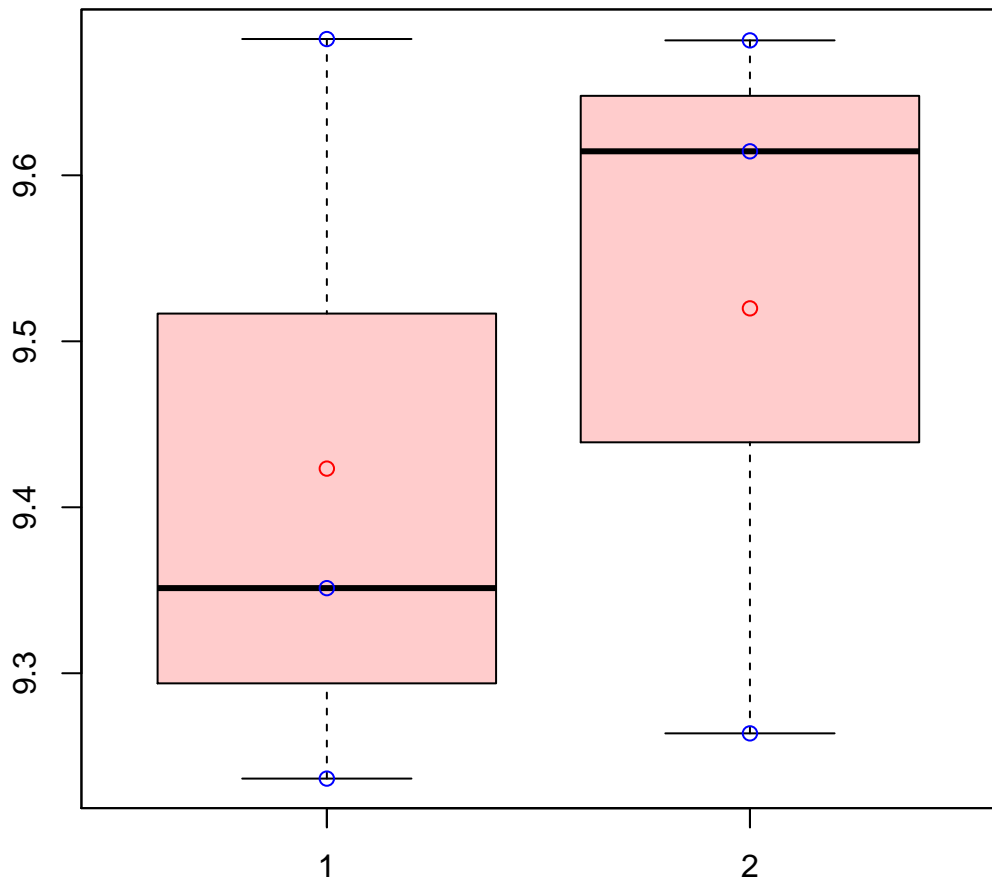

t-Test: p-value = 0.63



# NDK4\_ERATE|NDK4\_ERATE

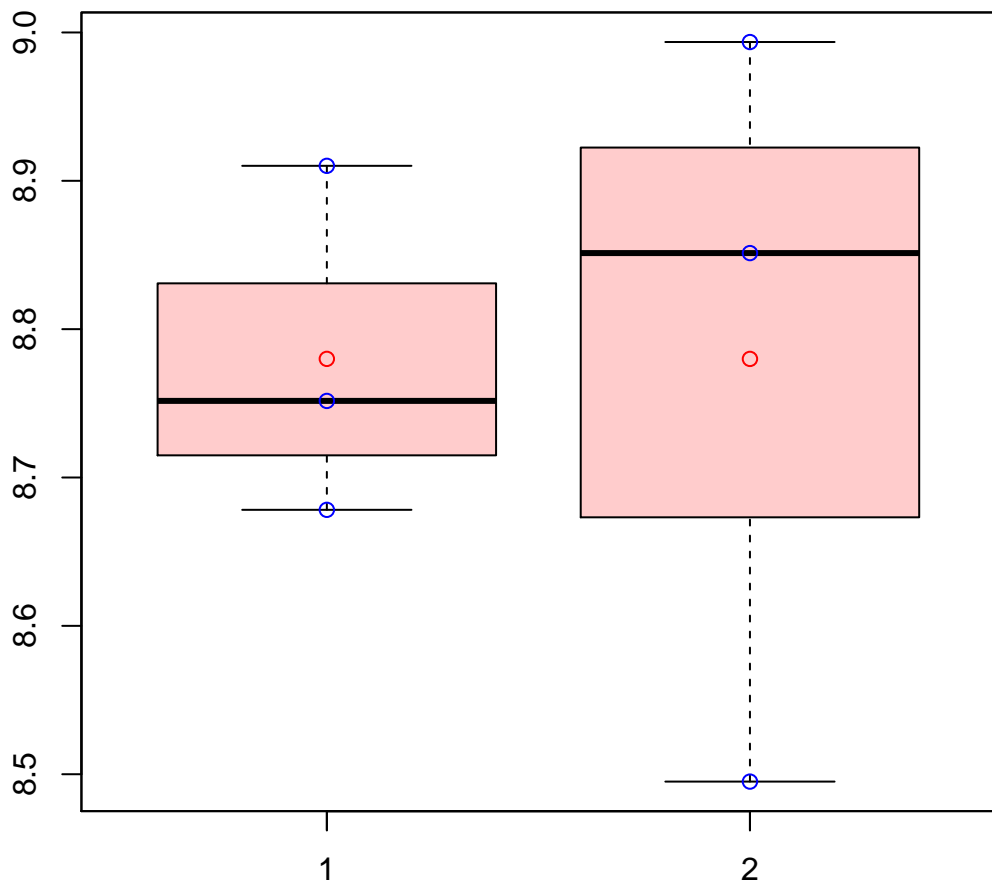

t-Test: p-value = 1

# PDXS6\_ERATE|PDXS6\_ERATE

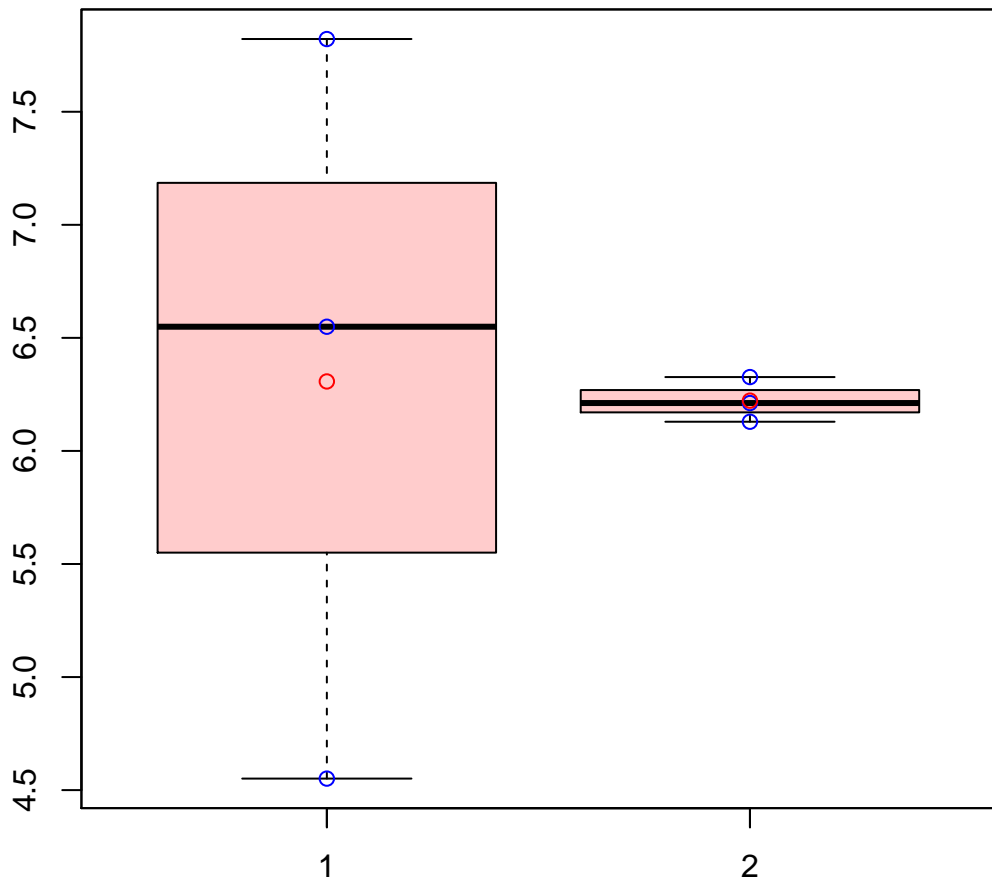

t-Test: p-value = 0.94

# PGK5\_ERATE|PGK5\_ERATE

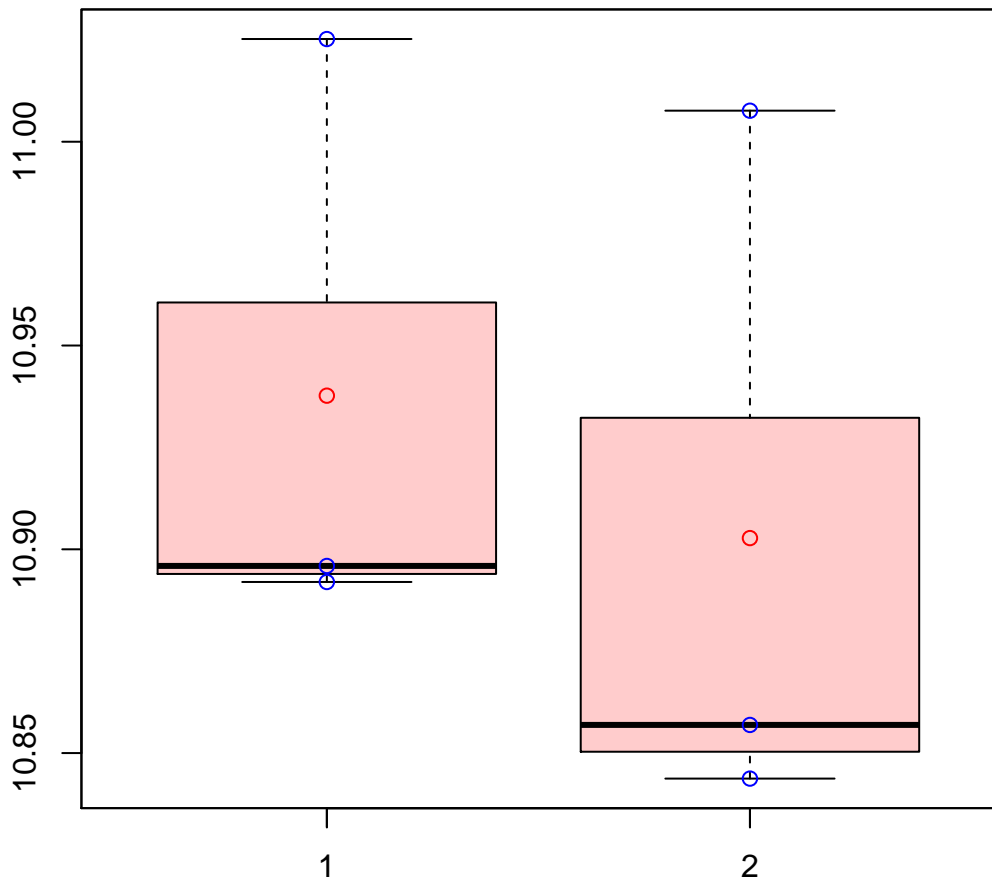

t-Test: p-value = 0.64

# PSB287\_ERATE|PSB287\_ERATE

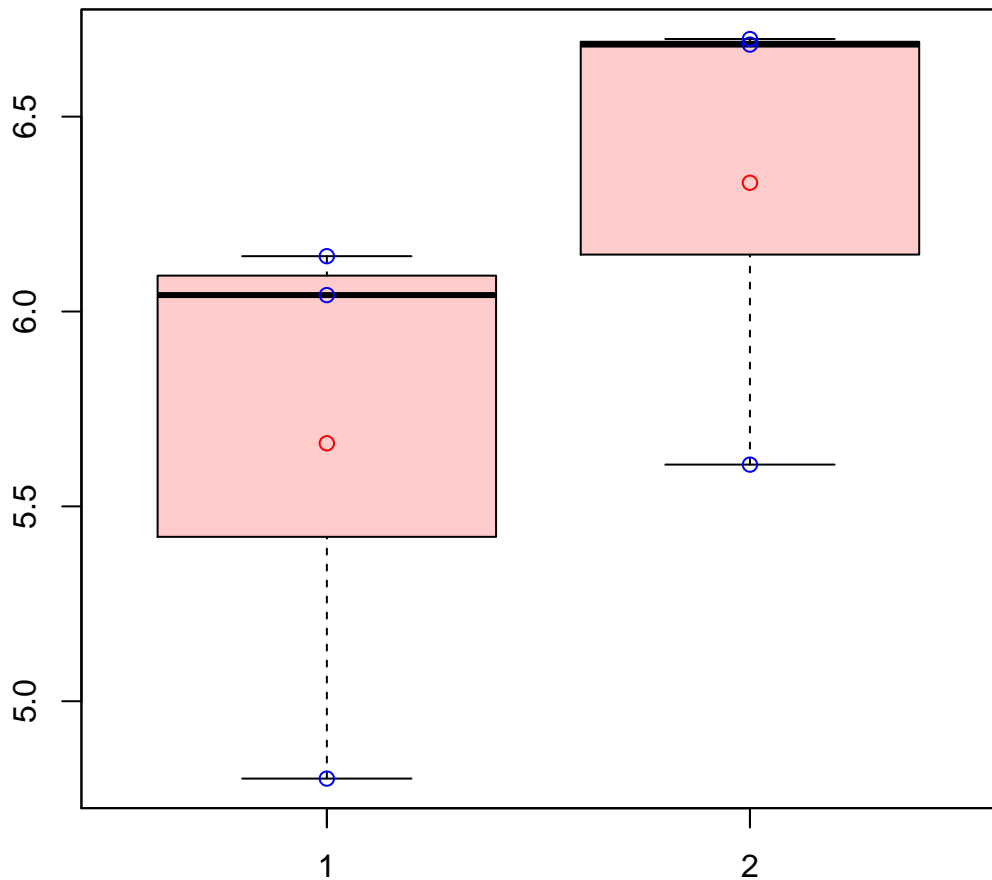

t-Test: p-value = 0.3

# PSBA5\_ERATE|PSBA5\_ERATE

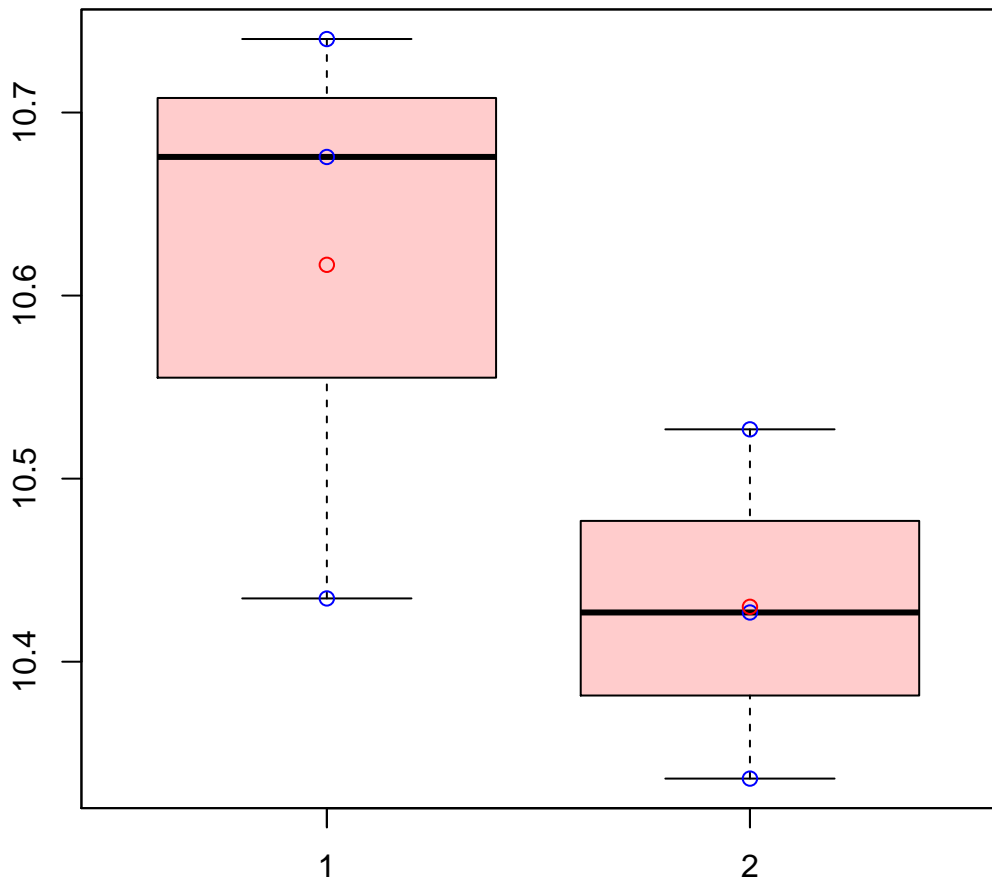

t-Test: p-value = 0.18

# PYRE7\_ERATE|PYRE7\_ERATE

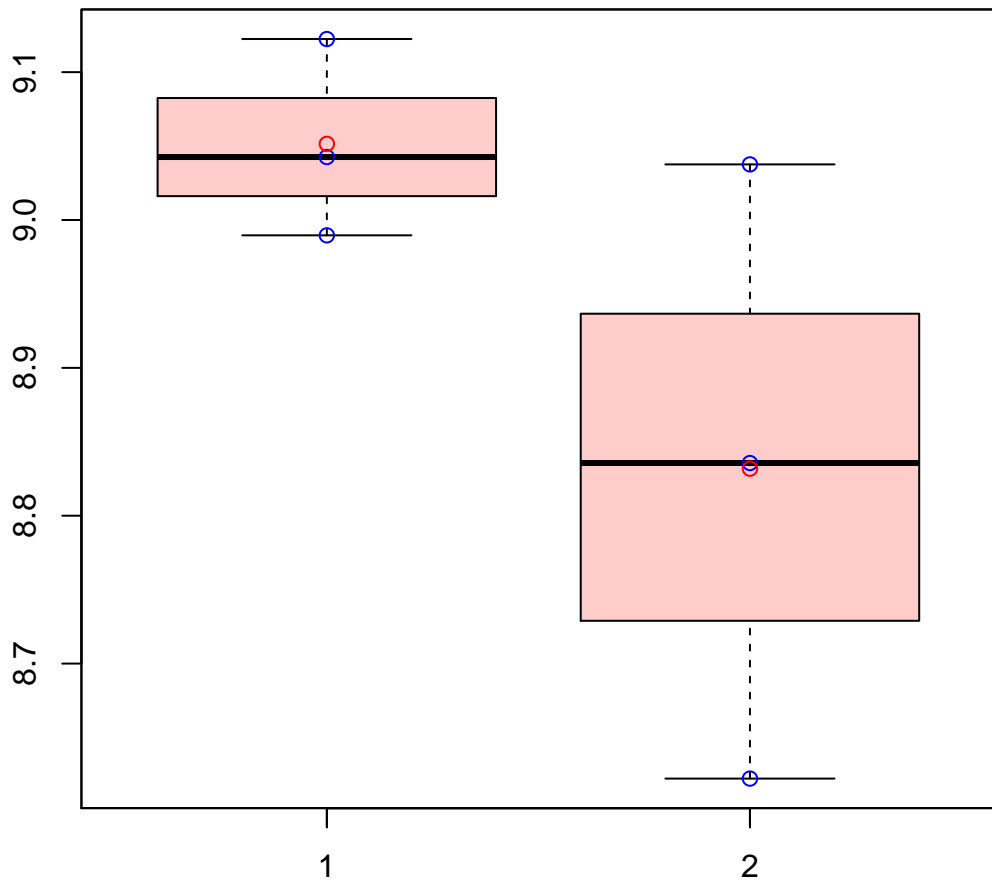

t-Test: p-value = 0.2

# RBL3\_ERATE|RBL3\_ERATE

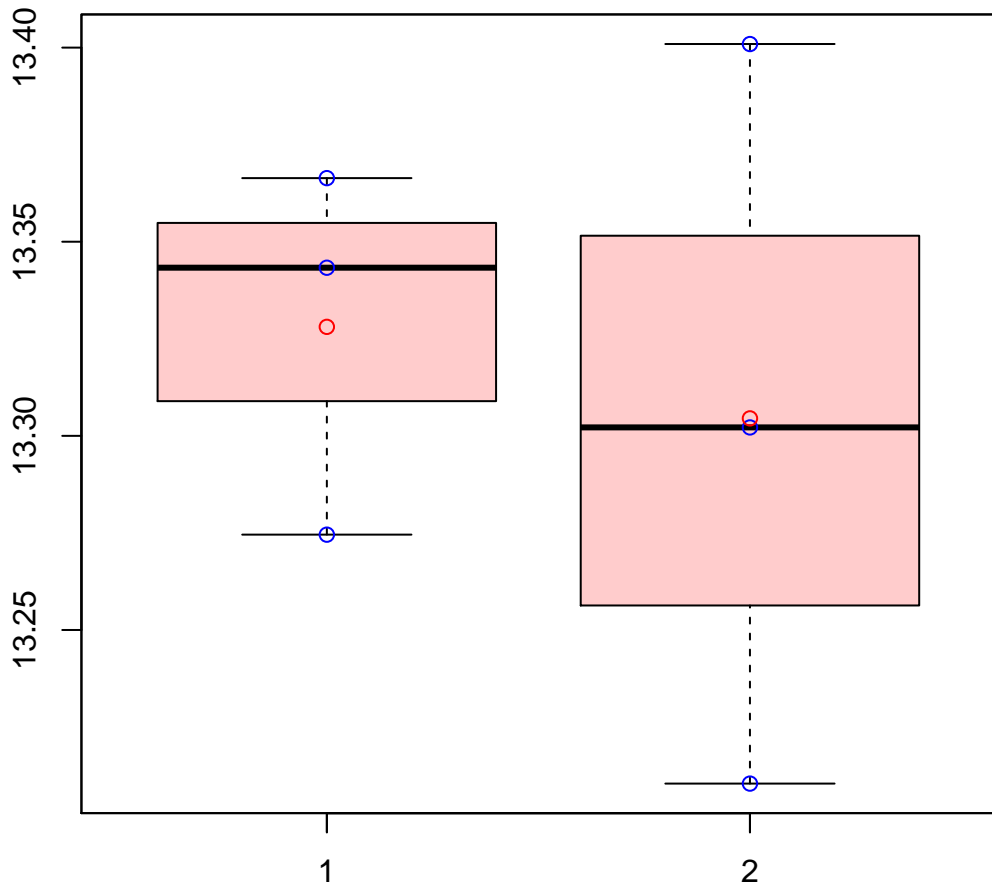

t-Test: p-value = 0.73

# RPIA2\_ERATE|RPIA2\_ERATE

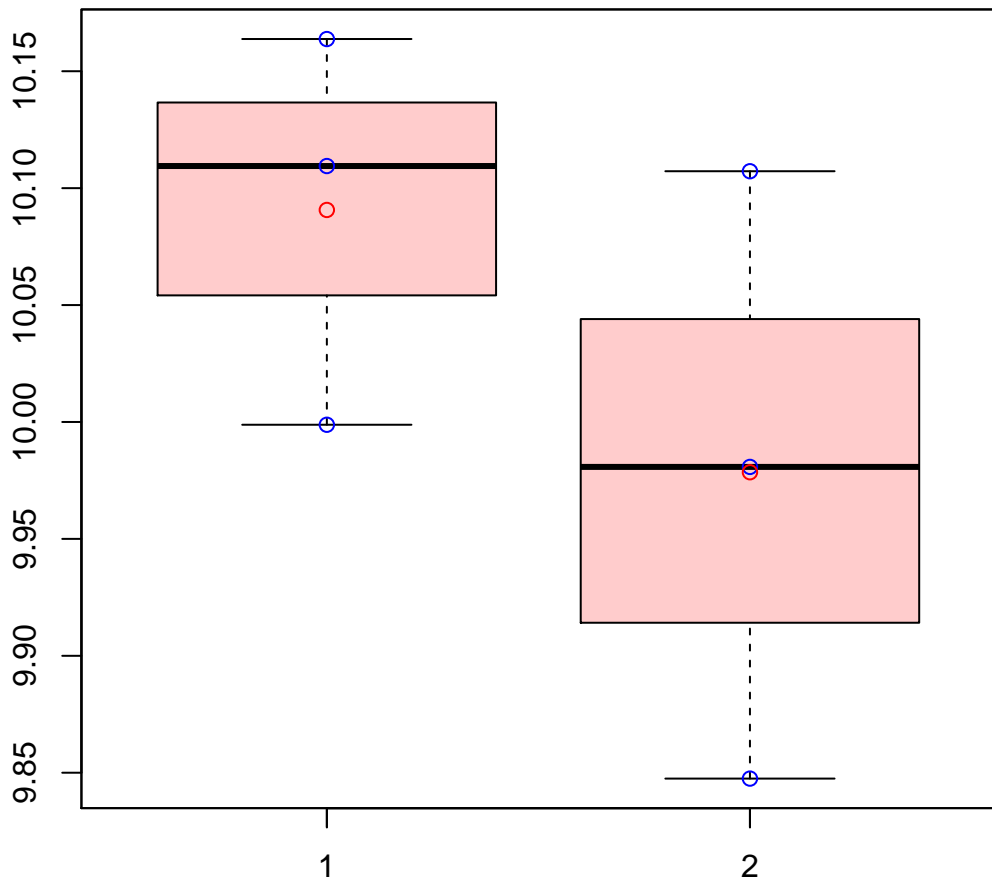

t-Test: p-value = 0.29



# RS17E6\_ERATE|RS17E6\_ERATE

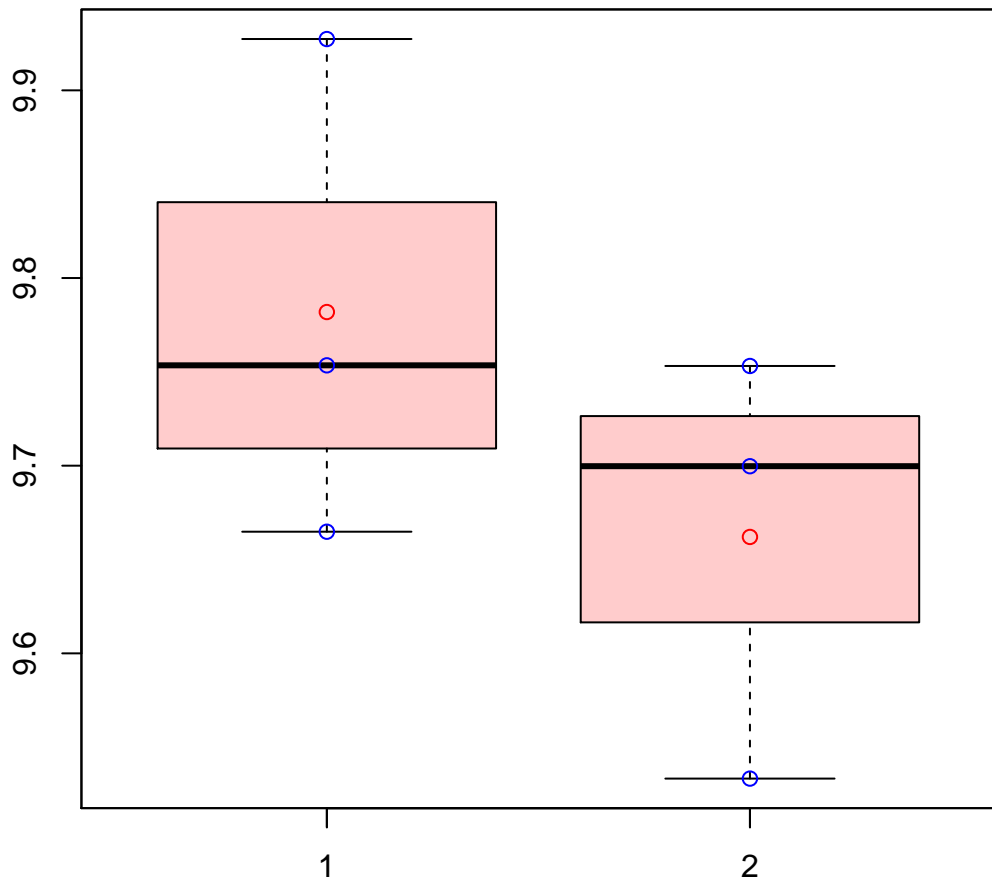

t-Test: p-value = 0.31

# RSMG8\_ERATE|RSMG8\_ERATE

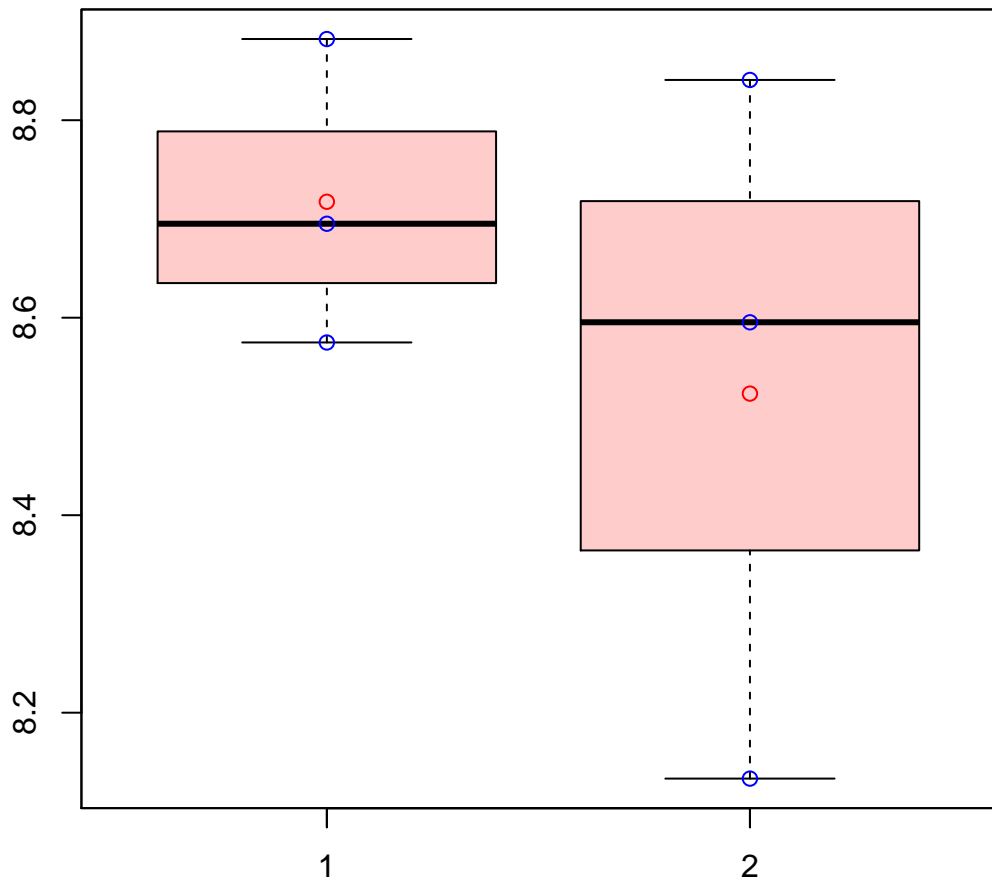

t-Test: p-value = 0.46

# SECA9\_ERATE|SECA9\_ERATE

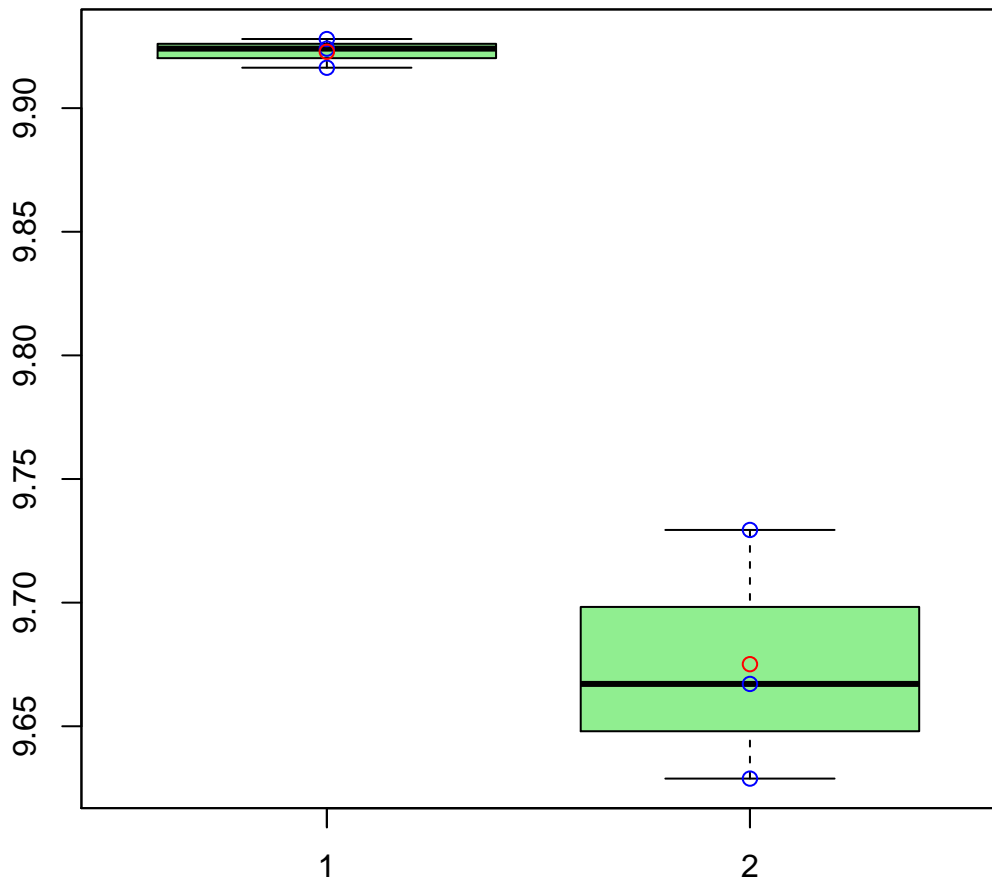

t-Test: p-value = 0.01

# SECY7\_ERATE|SECY7\_ERATE

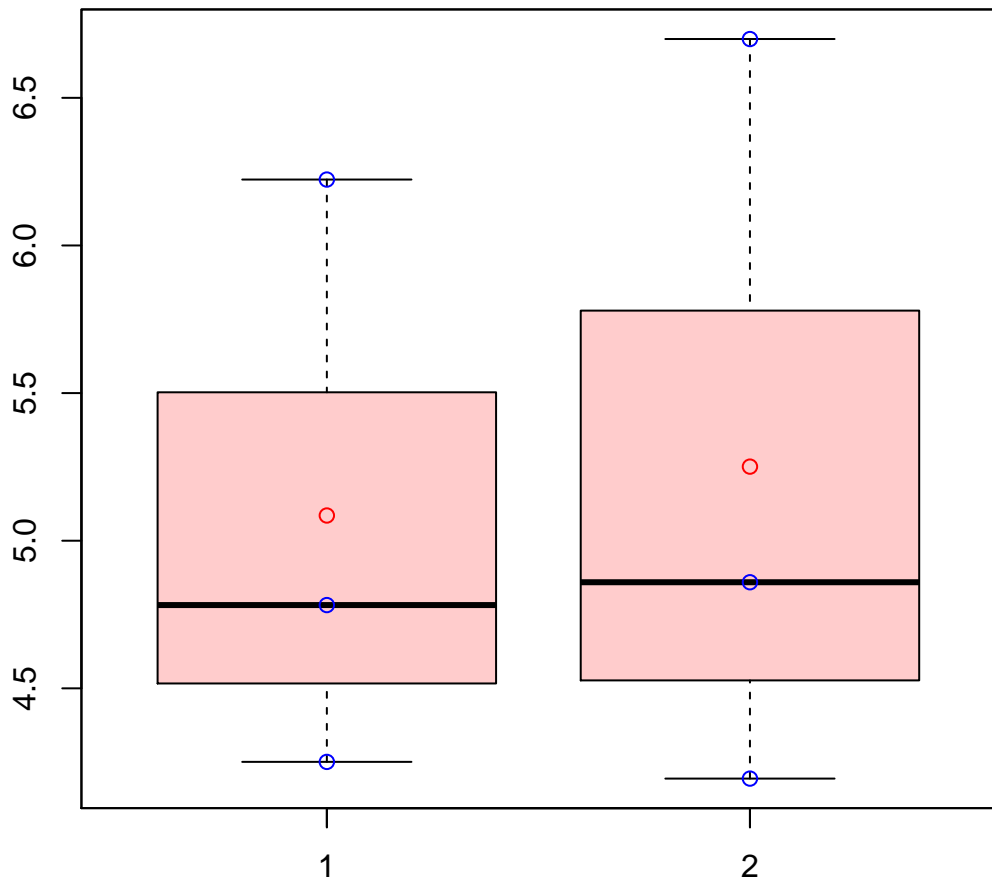

t-Test: p-value = 0.87

# SERC2\_ERATE|SERC2\_ERATE

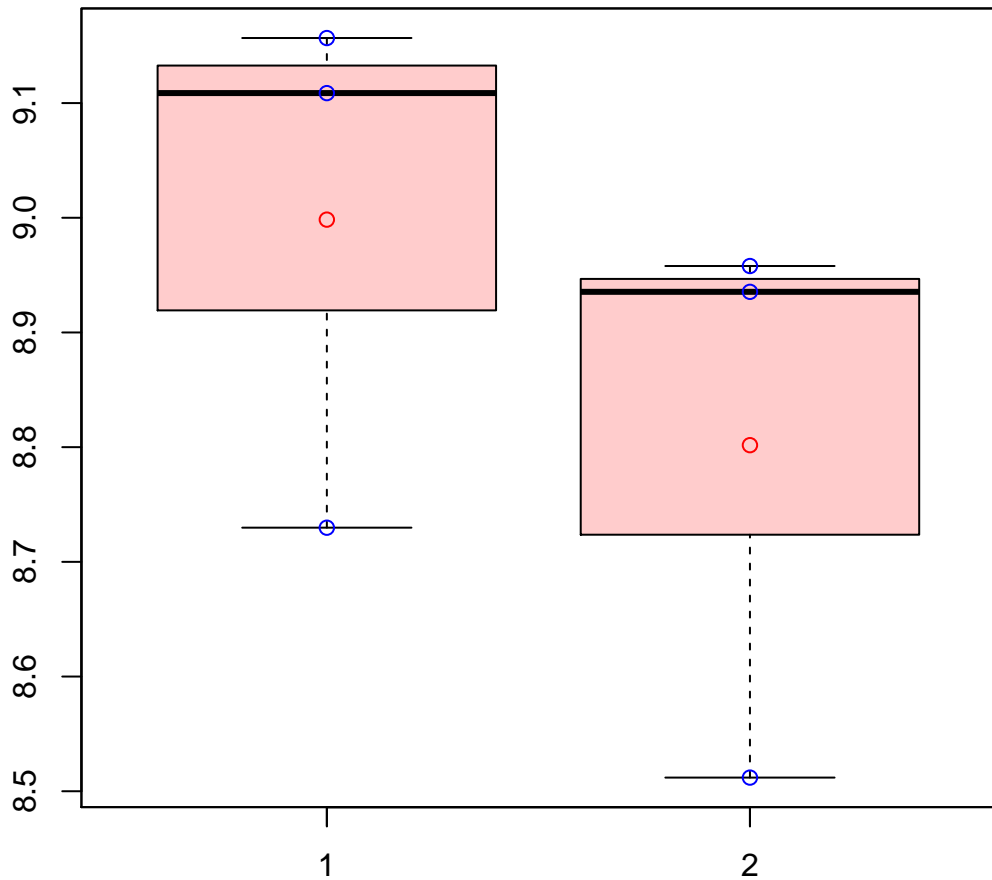

t-Test: p-value = 0.38

# SERC6\_ERATE|SERC6\_ERATE

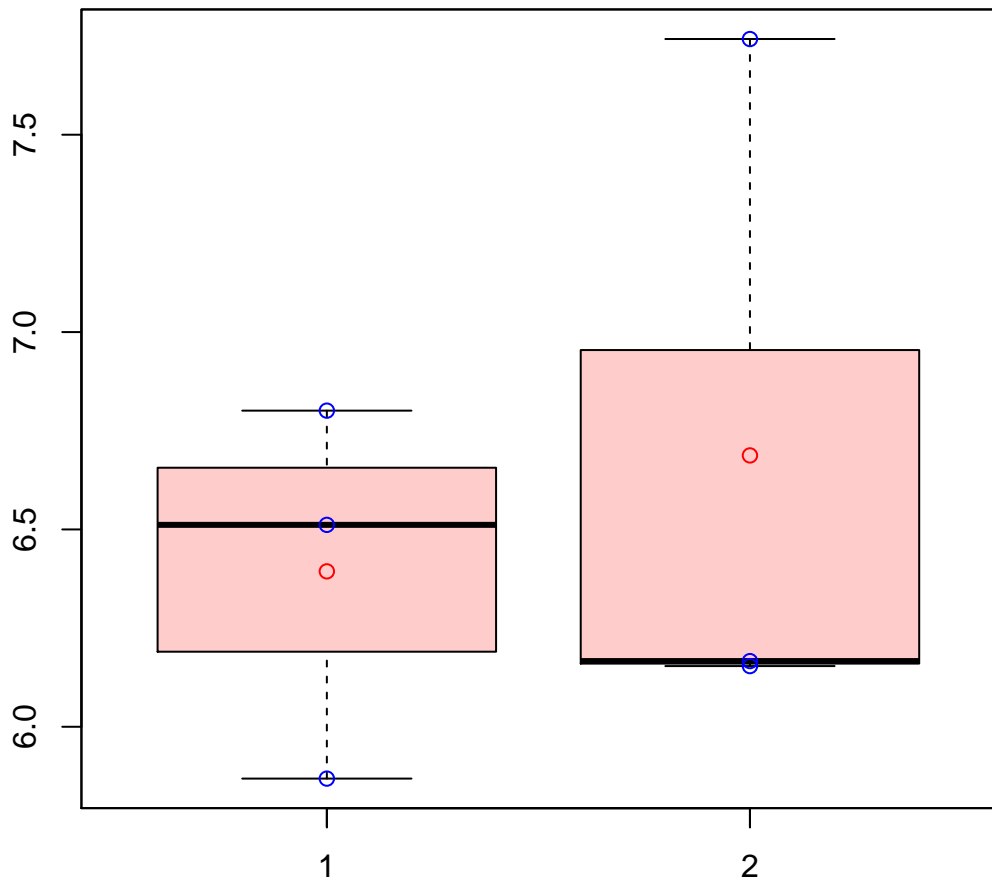

t-Test: p-value = 0.66

# SPEE4\_ERATE|SPEE4\_ERATE

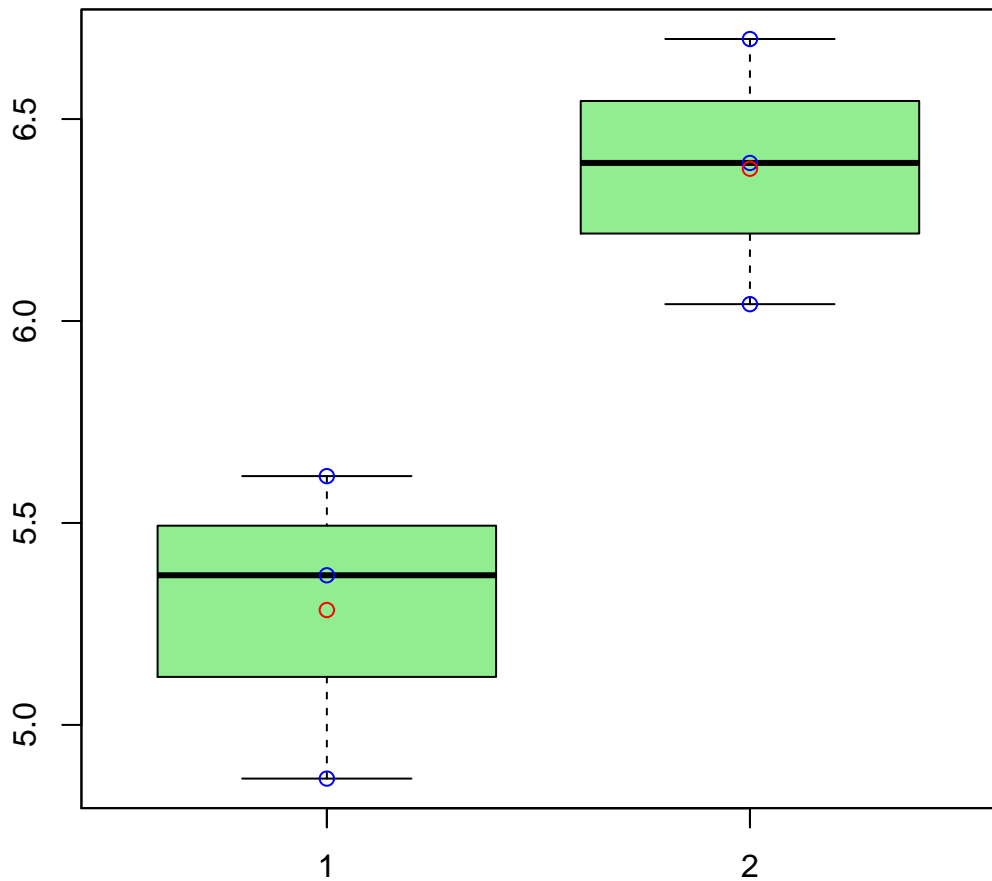

t-Test: p-value = 0.02

# SYI3\_ERATE|SYI3\_ERATE

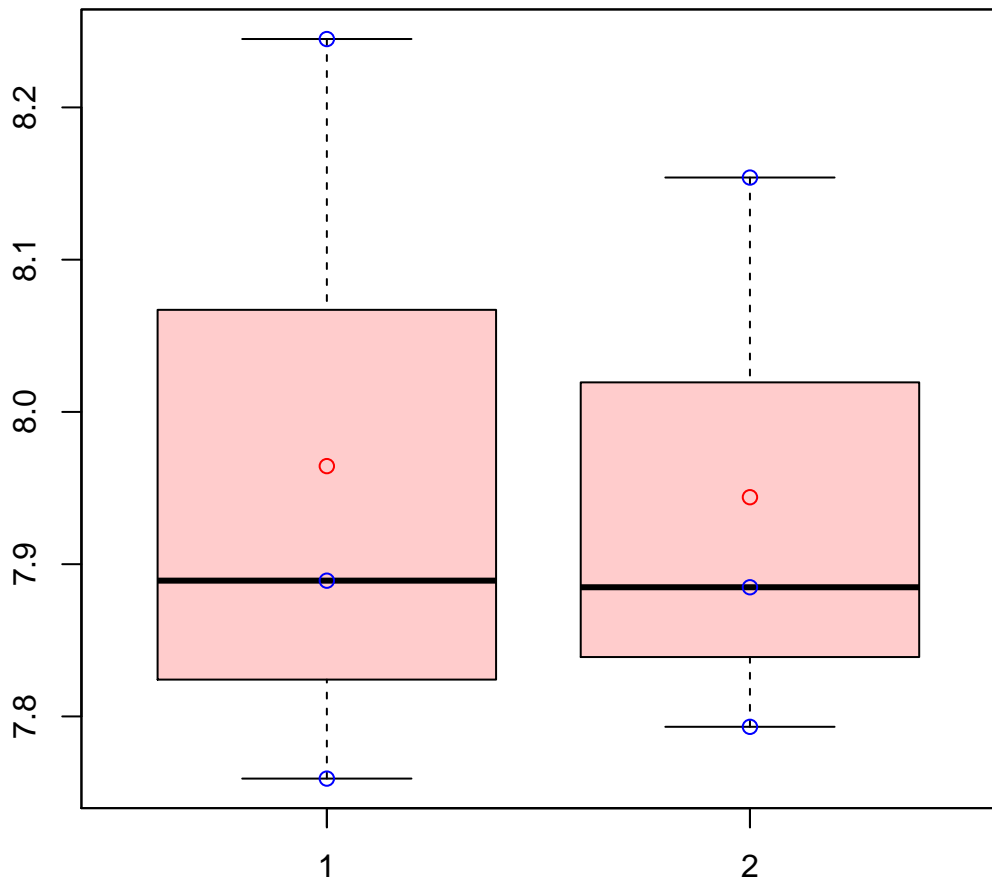

t-Test: p-value = 0.92



# SYK5\_ERATE|SYK5\_ERATE

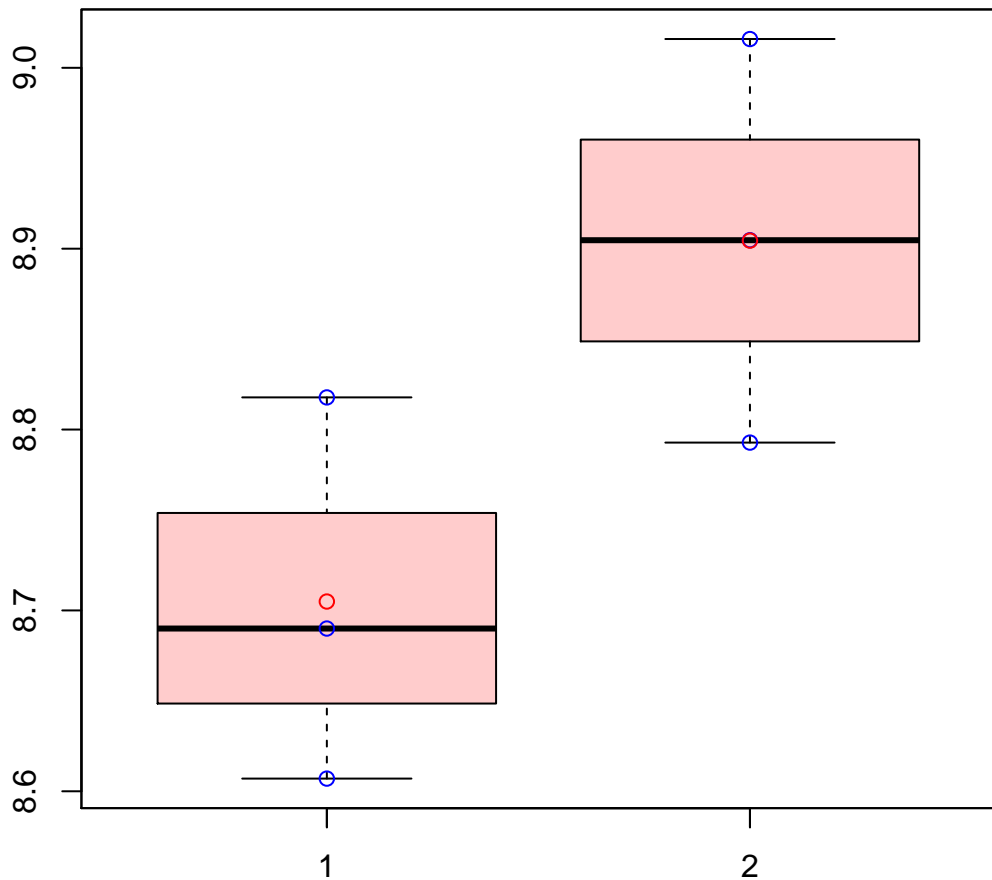

t-Test: p-value = 0.09

# SYP2\_ERATE|SYP2\_ERATE

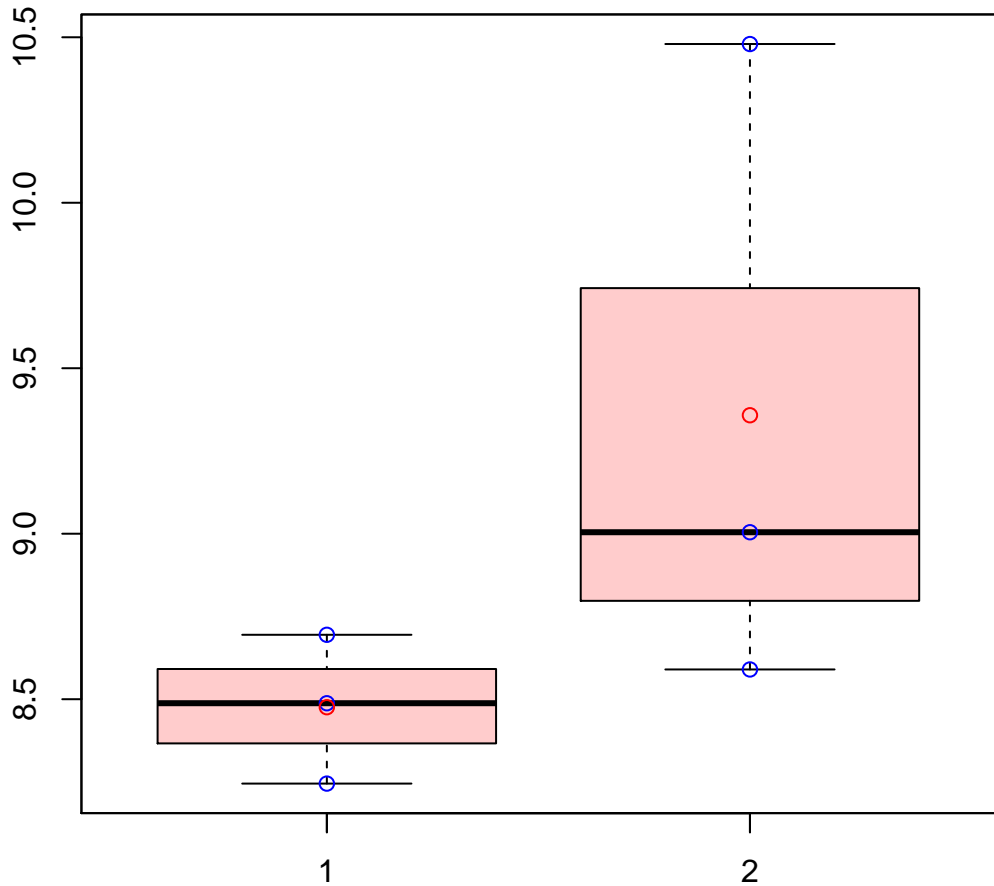

t-Test: p-value = 0.26

# TAL9\_ERATE|TAL9\_ERATE

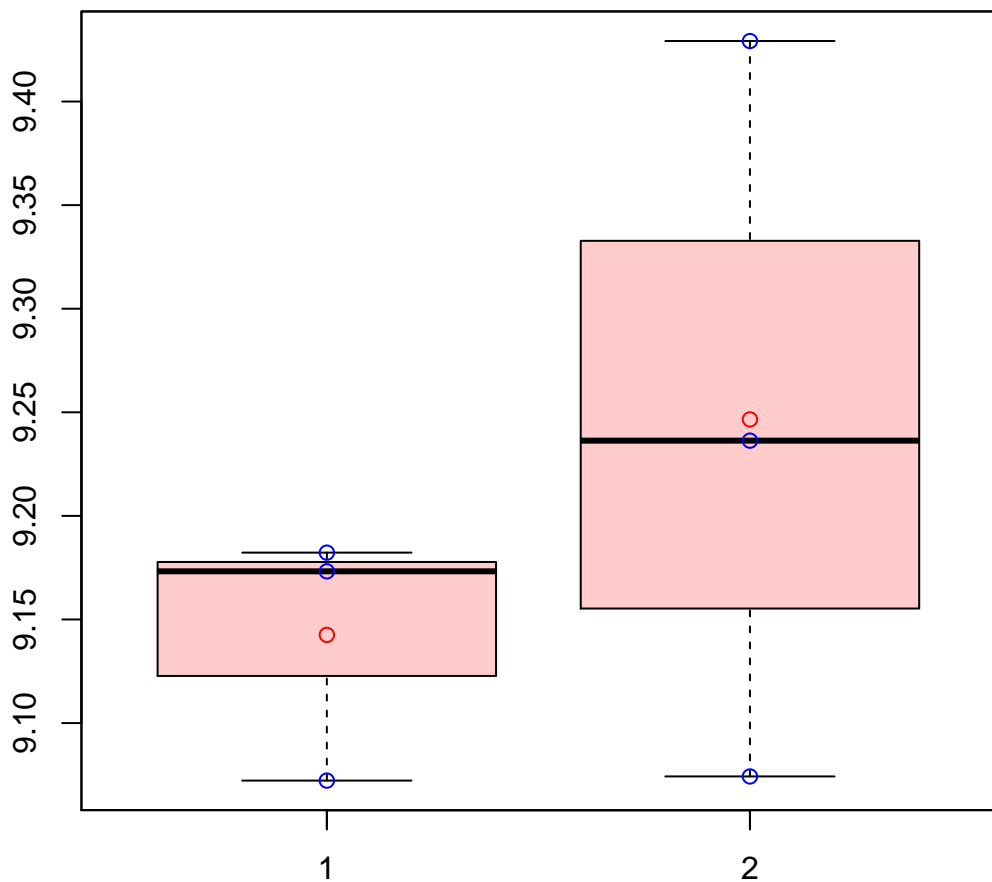

t-Test: p-value = 0.42

# THF13\_ERATE|THF13\_ERATE

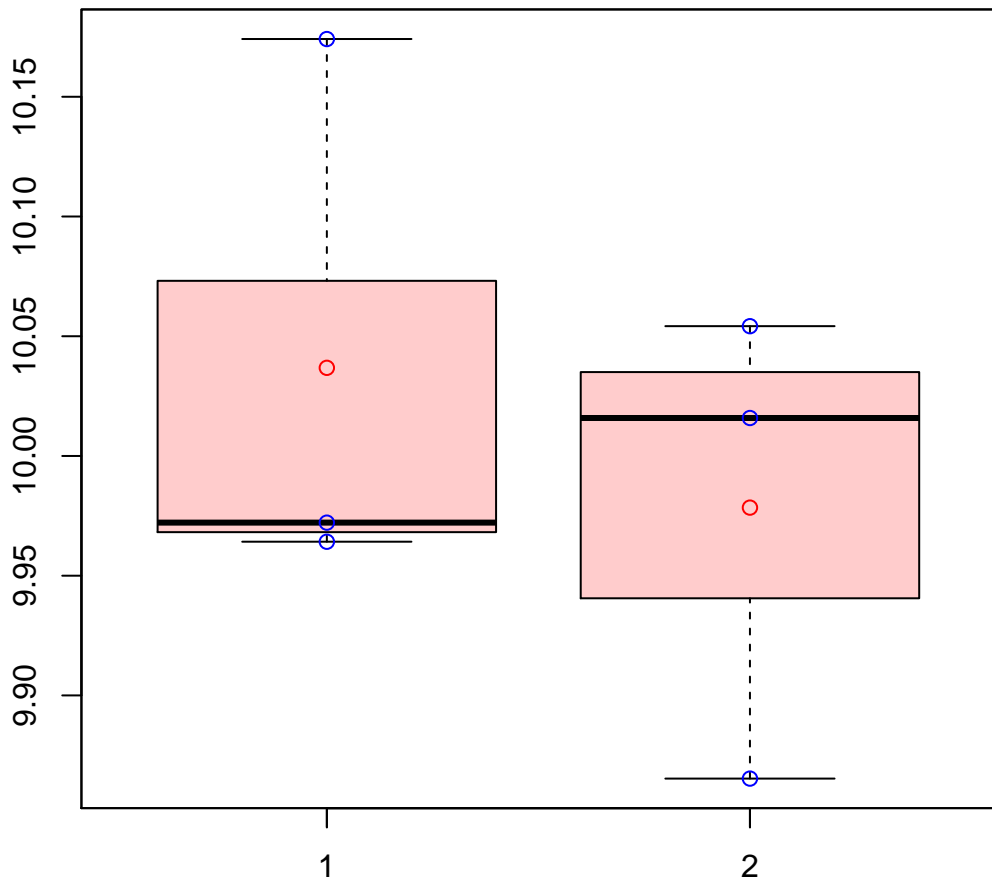

t-Test: p-value = 0.55

# VATA23\_ERATE|VATA23\_ERATE

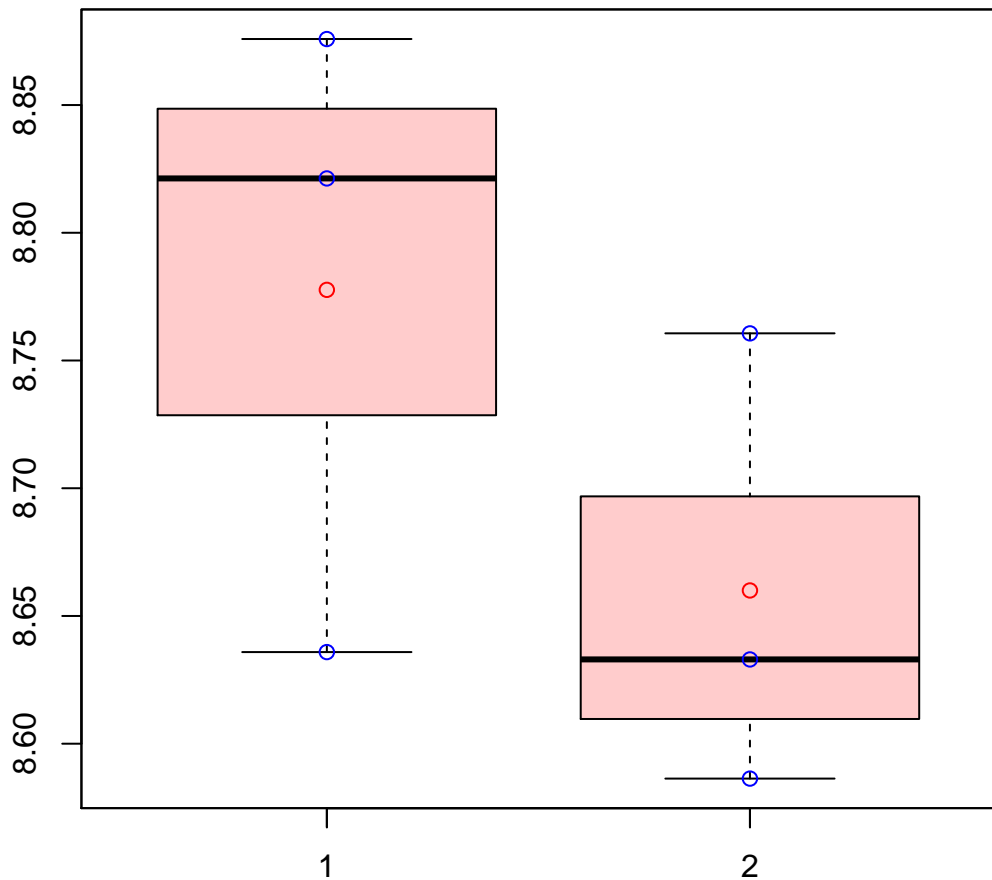

t-Test: p-value = 0.26

# VATA8\_ERATE|VATA8\_ERATE

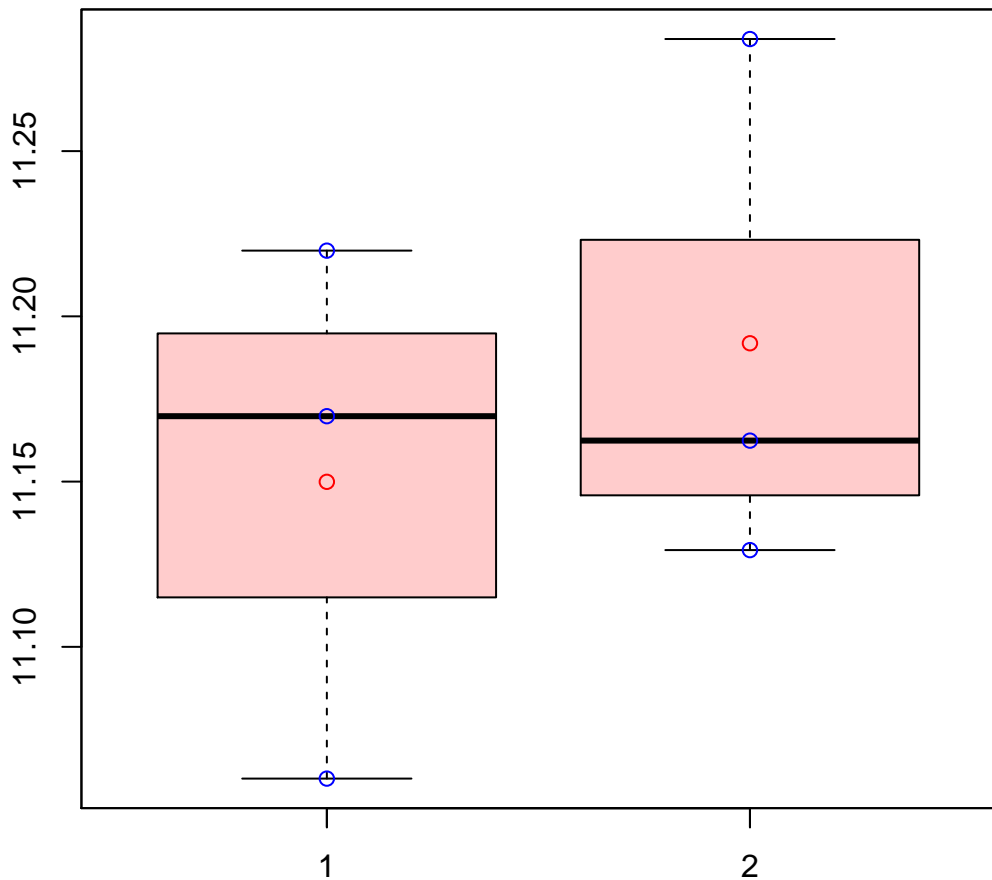

t-Test: p-value = 0.56

# VATB2\_ERATE|VATB2\_ERATE

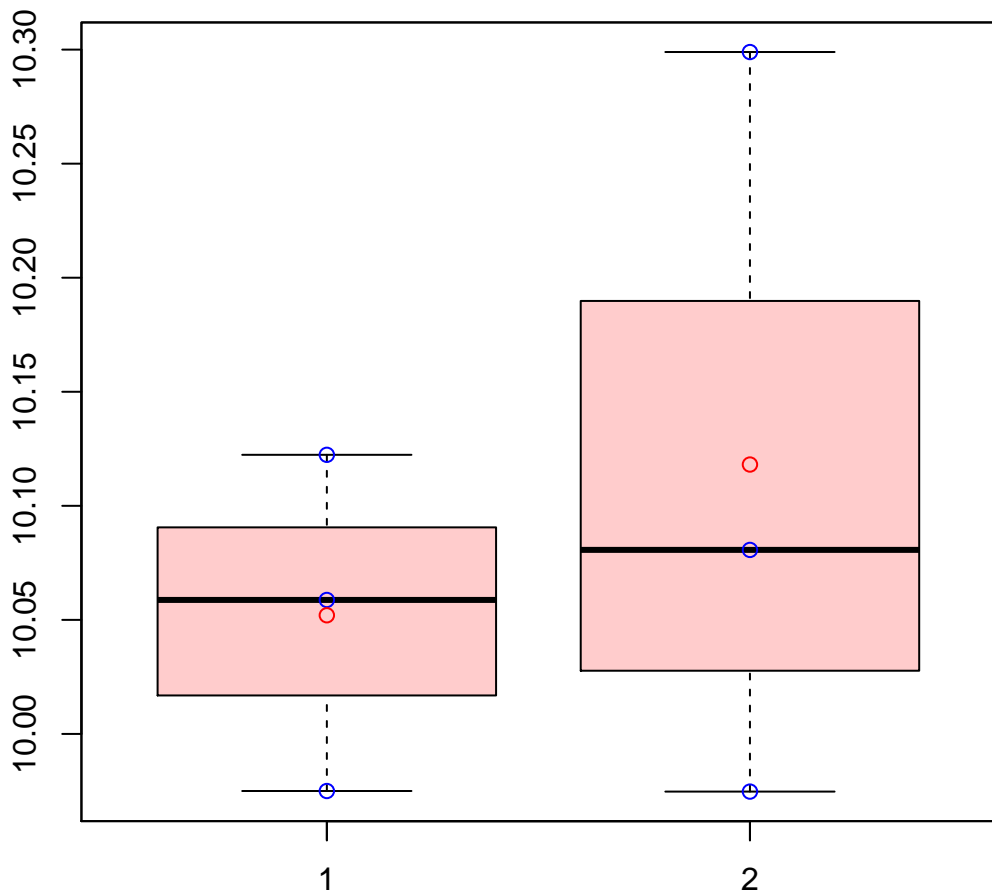

t-Test: p-value = 0.58

# VATE8\_ERATE|VATE8\_ERATE

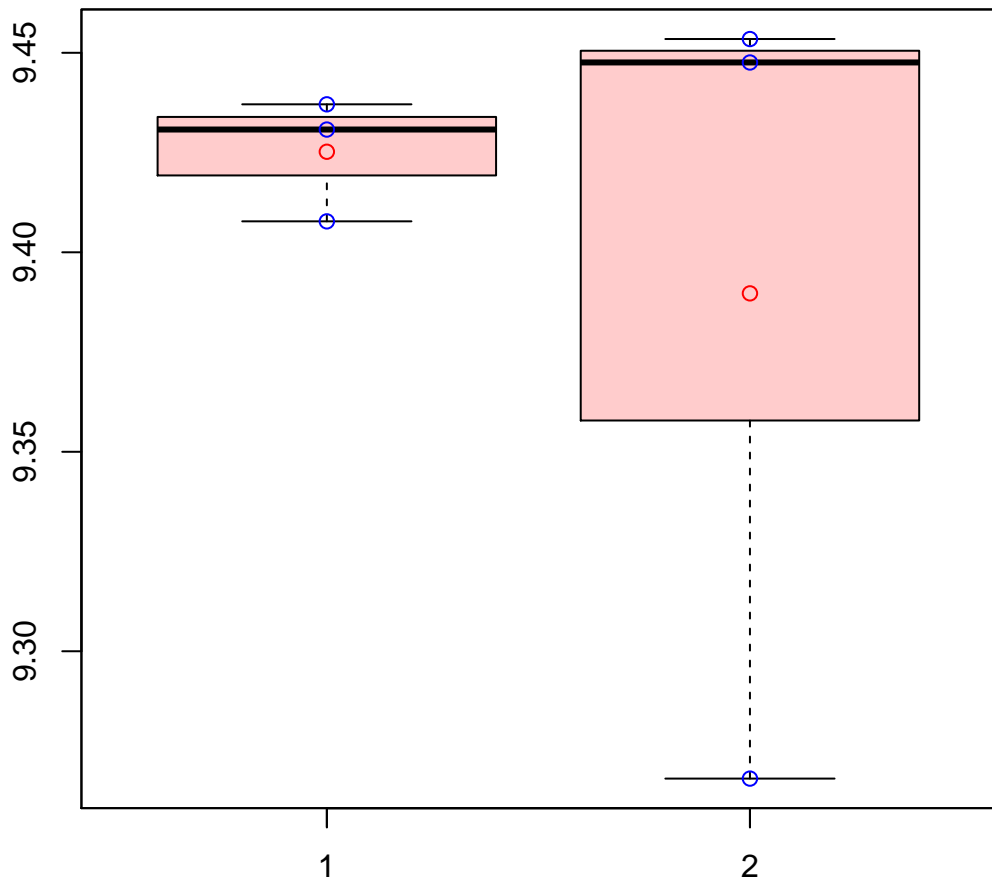

t-Test: p-value = 0.62
