# Supplementary material for: A Proteomic Approach to Investigate the Drought Response in the Orphan Crop Eragrostis tef
Source: MDPI journal article supplement (doi:10.3390/proteomes5040032), 2017-11-15
Supplement: s1 [file s1]

# ACSF1\_ERATE|ACSF1\_ERATE

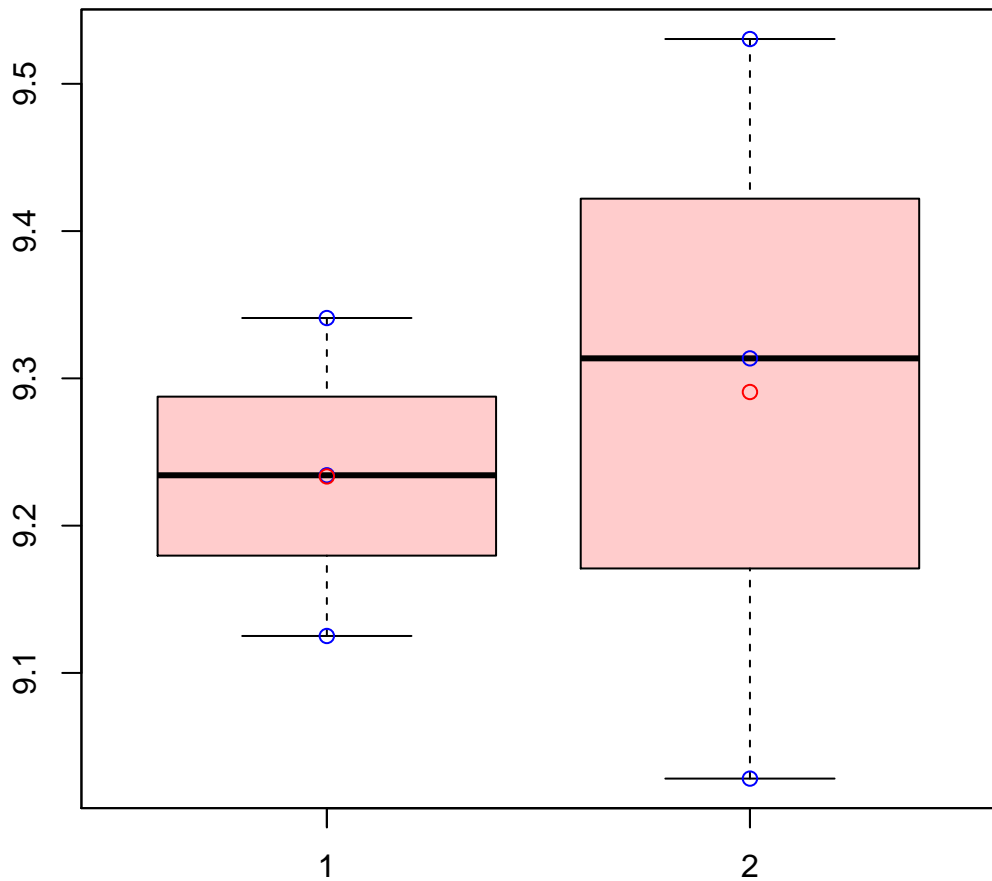

t-Test: p-value = 0.74

# AMPA14\_ERATE|AMPA14\_ERATE

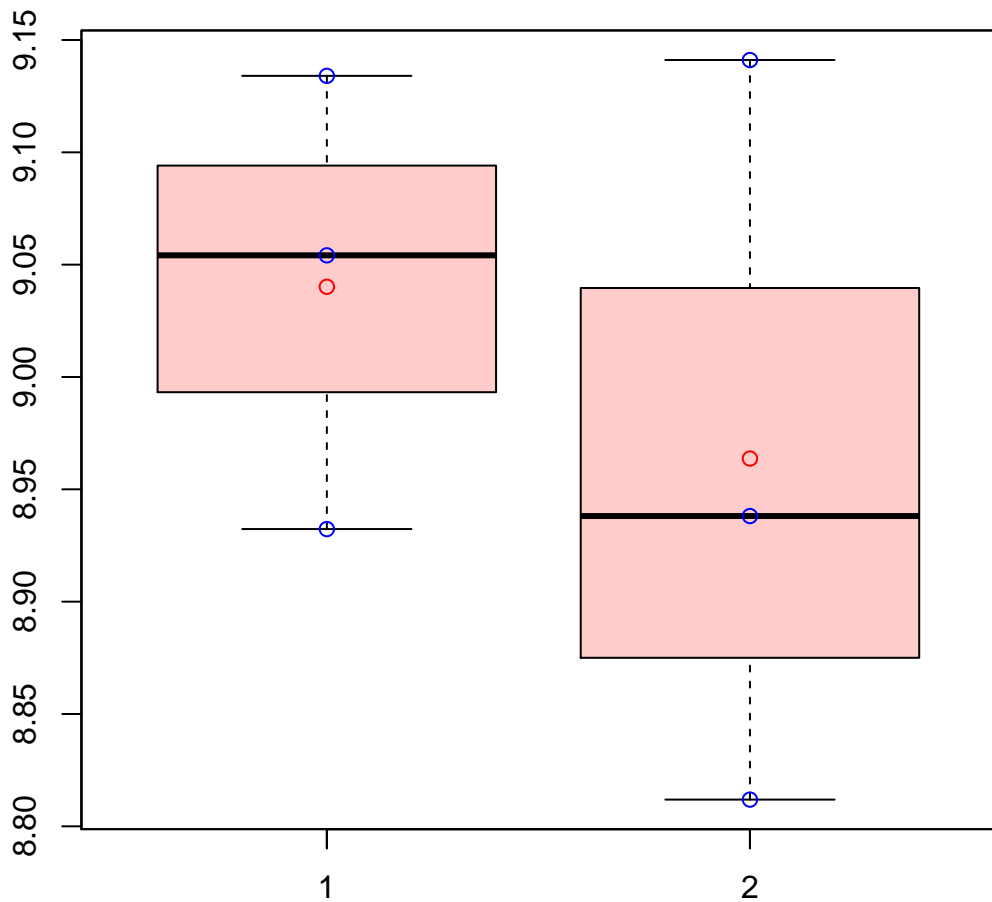

t-Test: p-value = 0.54

# AMPA2\_ERATE|AMPA2\_ERATE

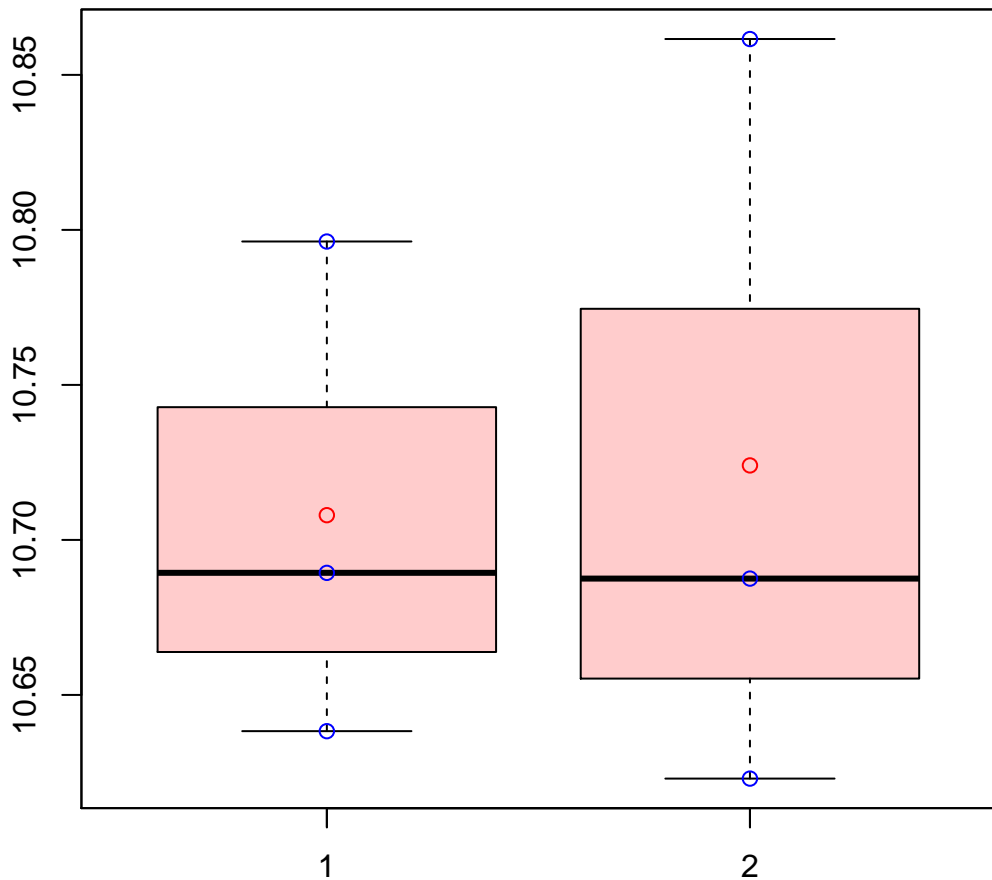

t-Test: p-value = 0.86

# AMPA4\_ERATE|AMPA4\_ERATE

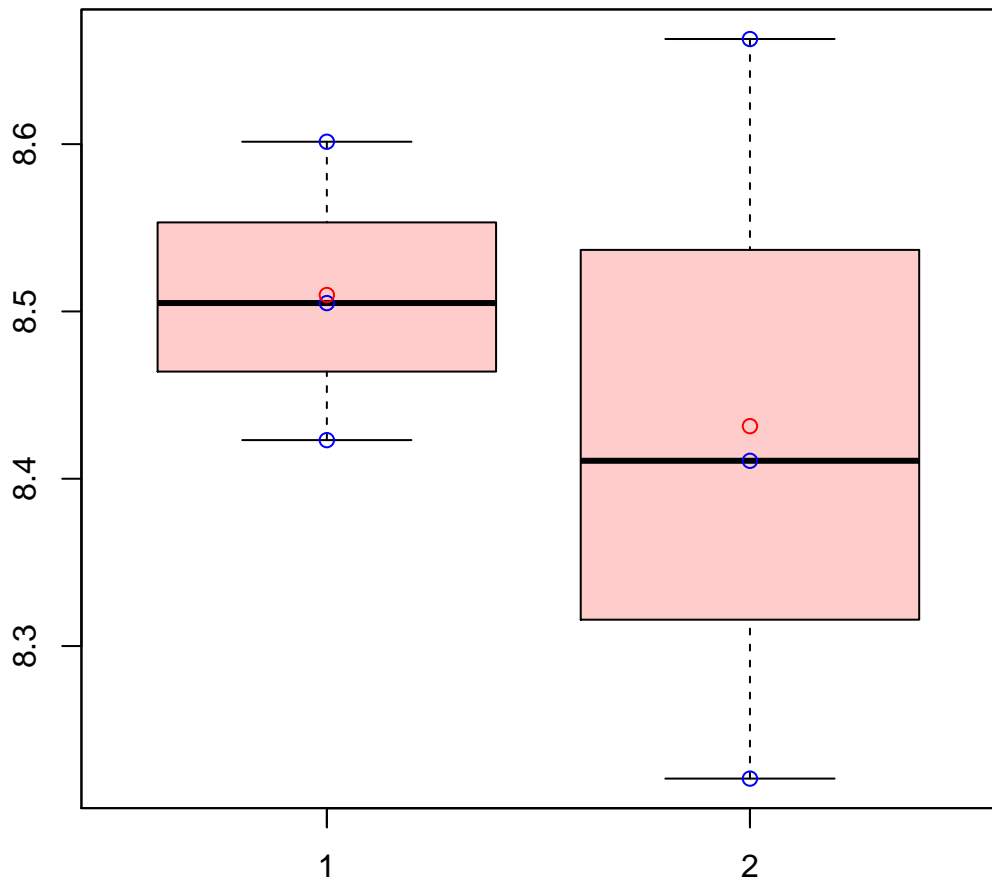

t-Test: p-value = 0.61

# AMPA5\_ERATE|AMPA5\_ERATE

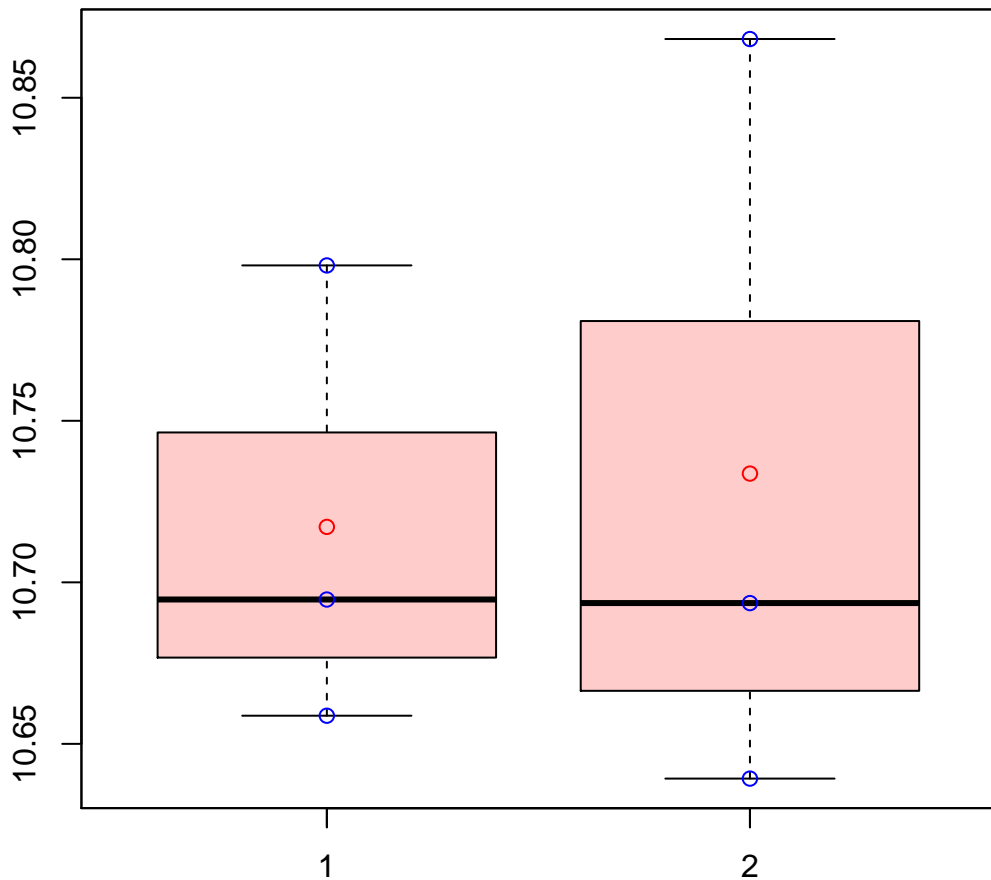

t-Test: p-value = 0.85

# AMPA9\_ERATE|AMPA9\_ERATE

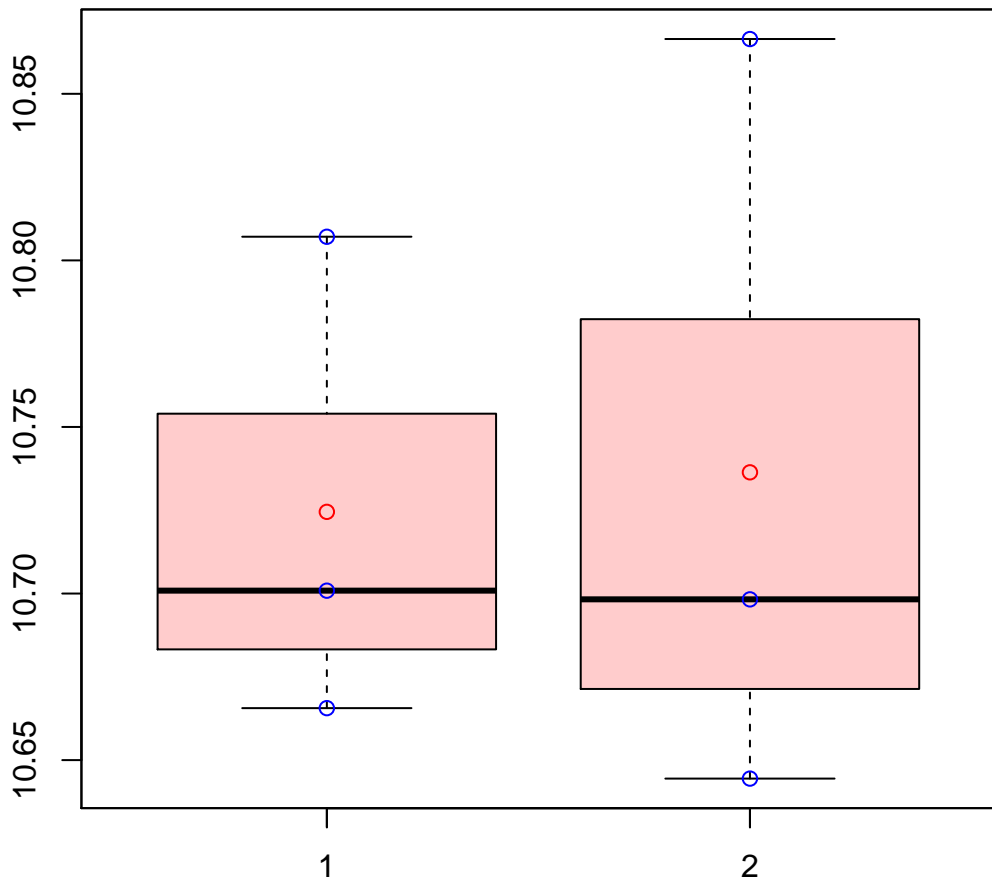

t-Test: p-value = 0.89

# ARGC2\_ERATE|ARGC2\_ERATE

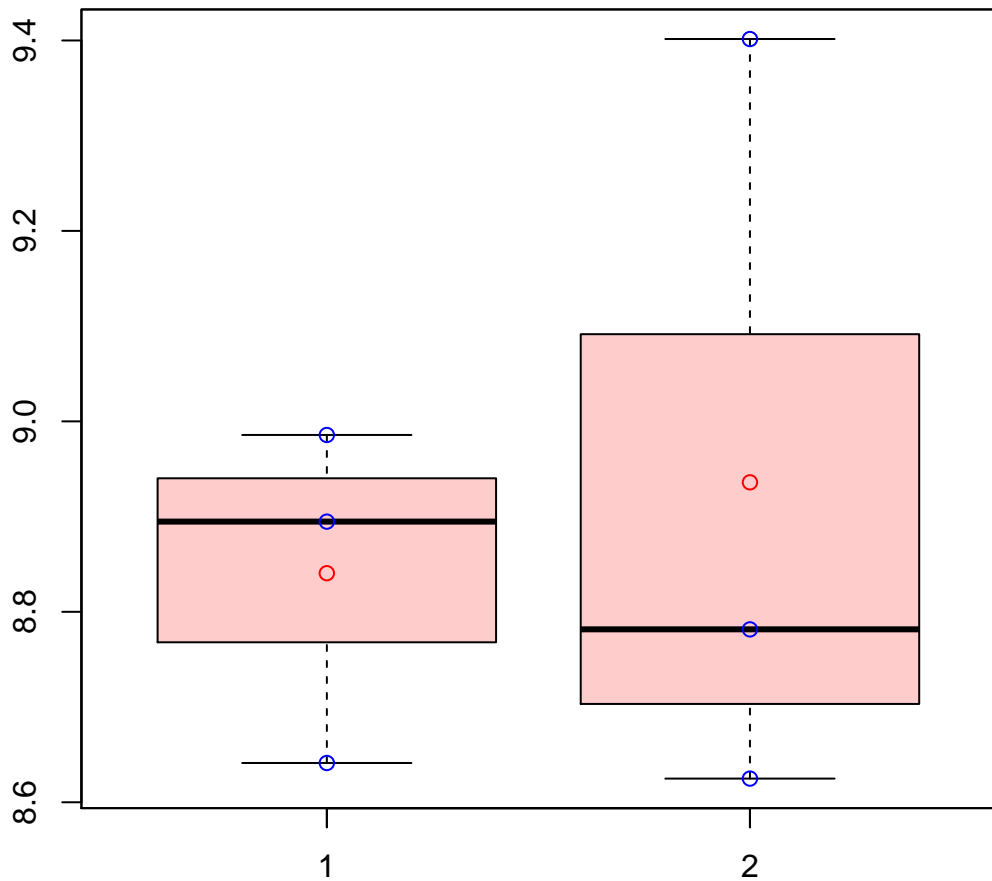

t-Test: p-value = 0.74

# AROB5\_ERATE|AROB5\_ERATE

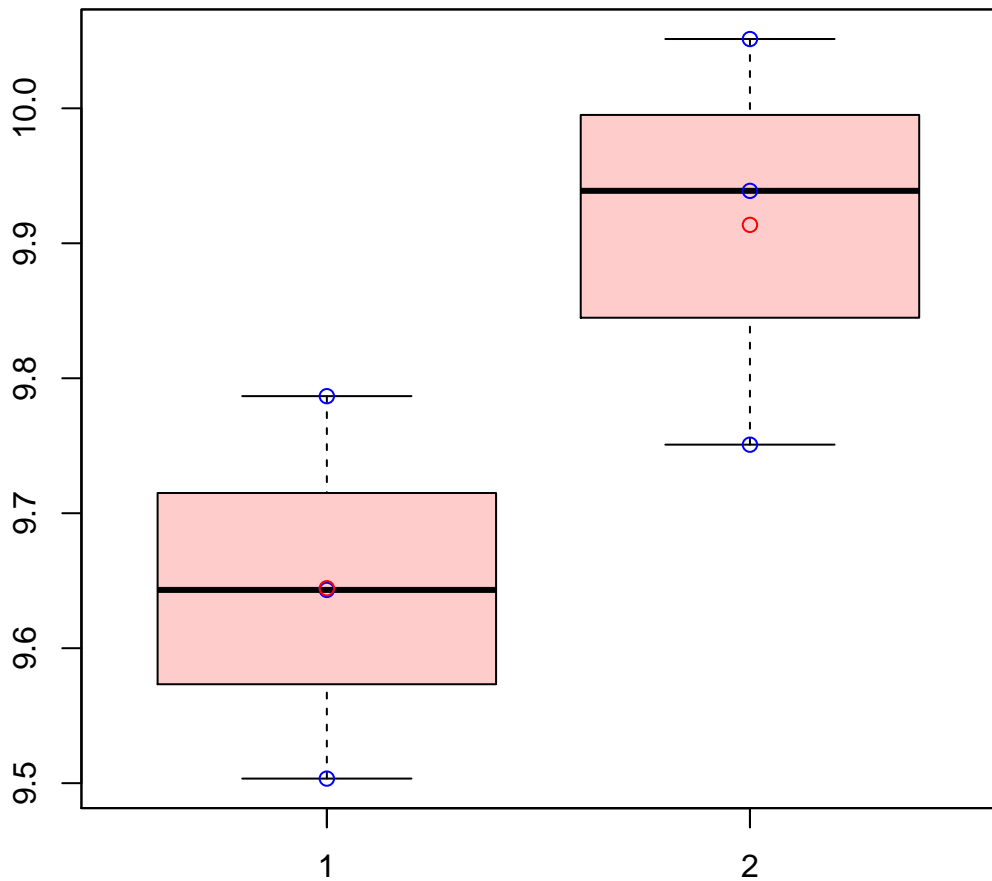

t-Test: p-value = 0.09



# ATPA6\_ERATE|ATPA6\_ERATE

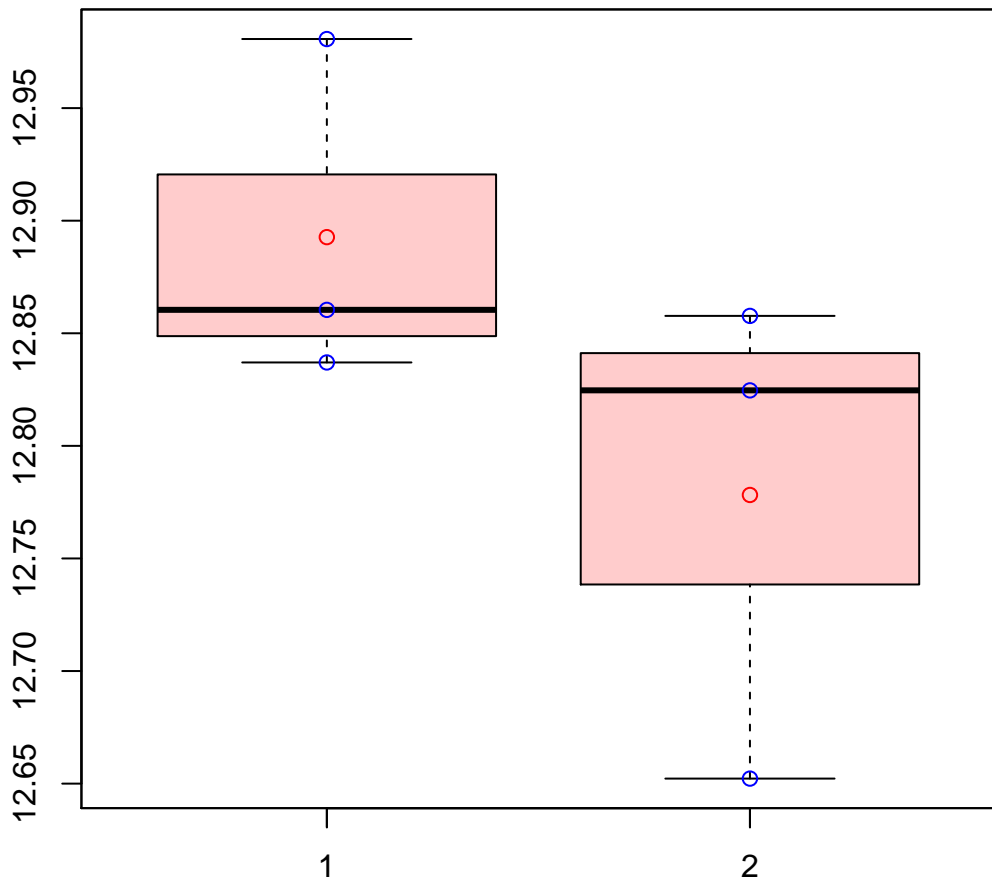

t-Test: p-value = 0.22

# ATPB10\_ERATE|ATPB10\_ERATE

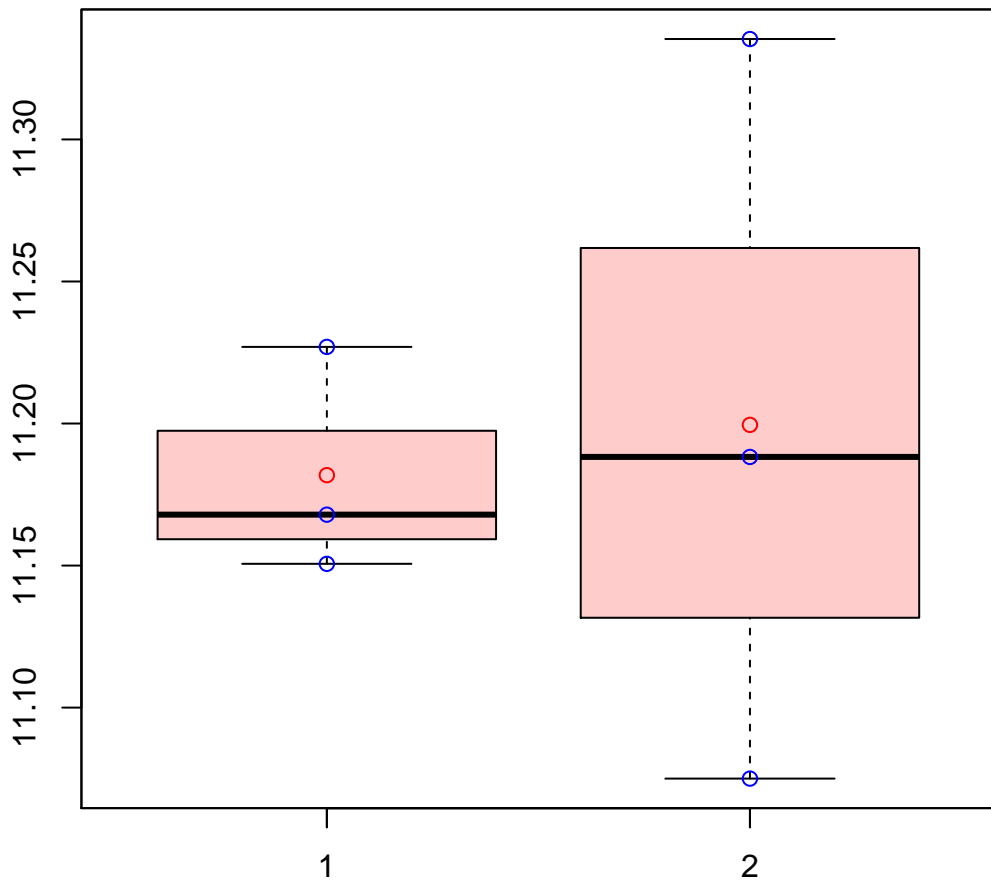

t-Test: p-value = 0.84

# ATPB5\_ERATE|ATPB5\_ERATE

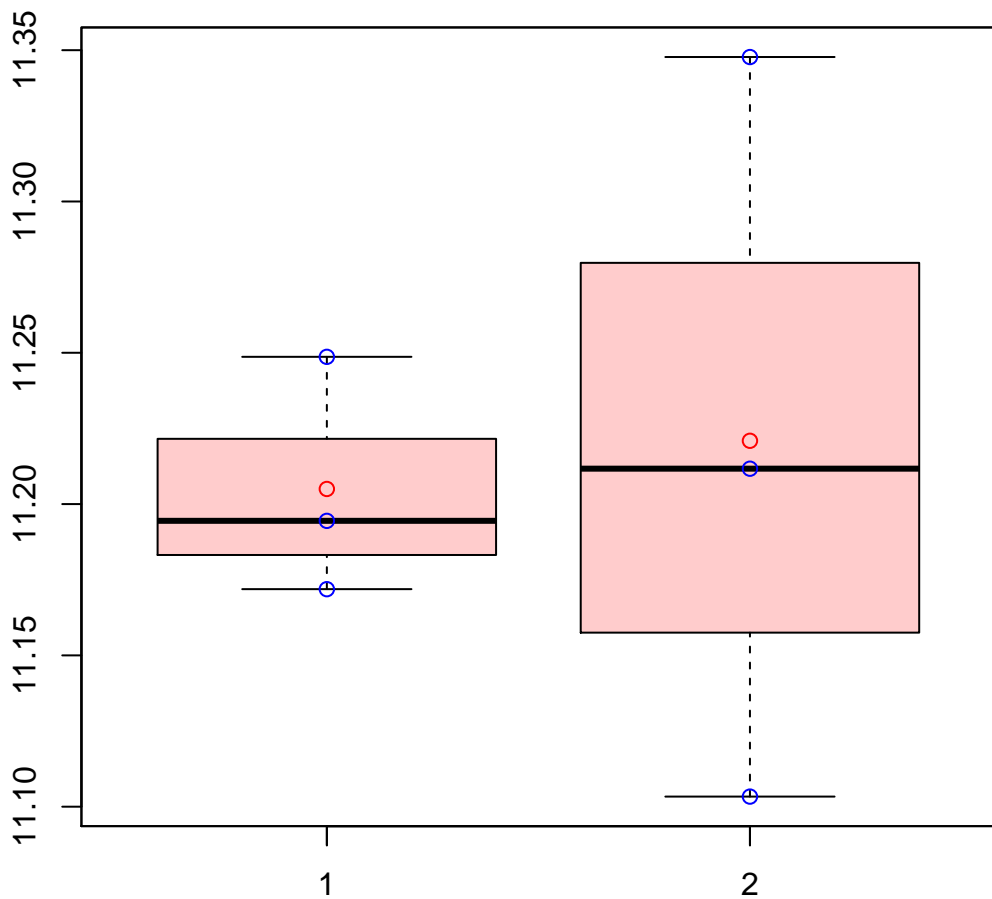

t-Test: p-value = 0.85

# ATPB6\_ERATE|ATPB6\_ERATE

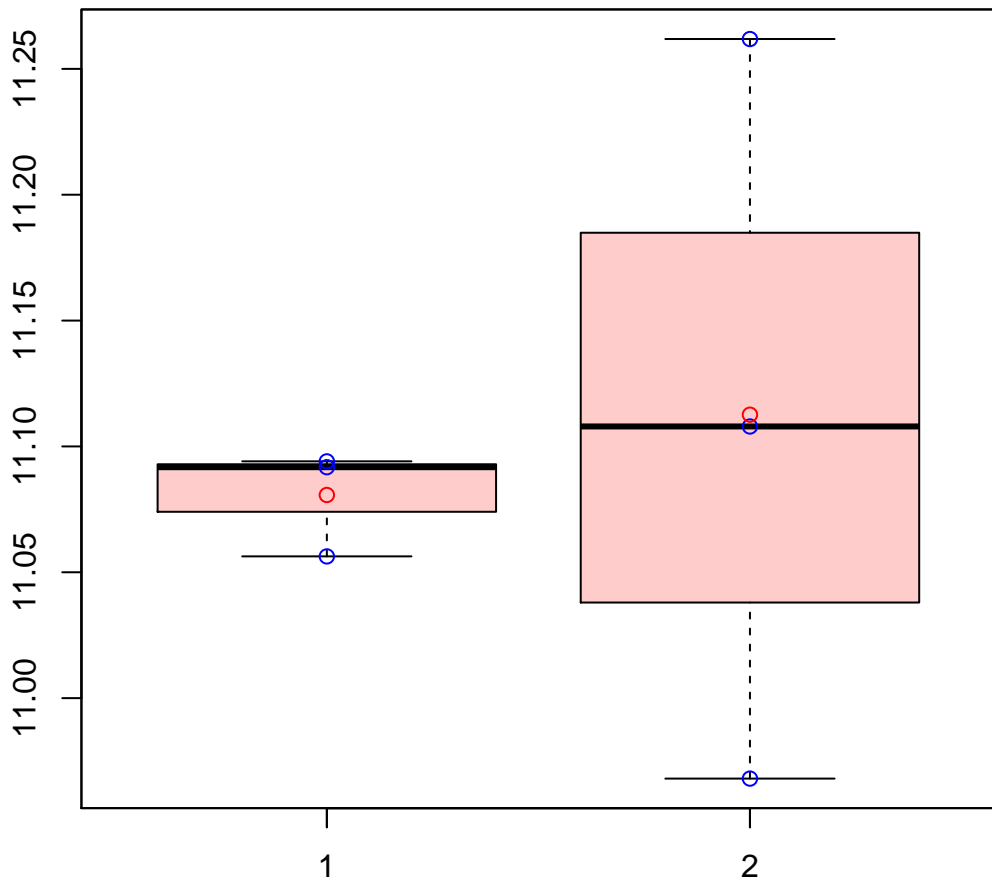

t-Test: p-value = 0.74

# ATPG7\_ERATE|ATPG7\_ERATE

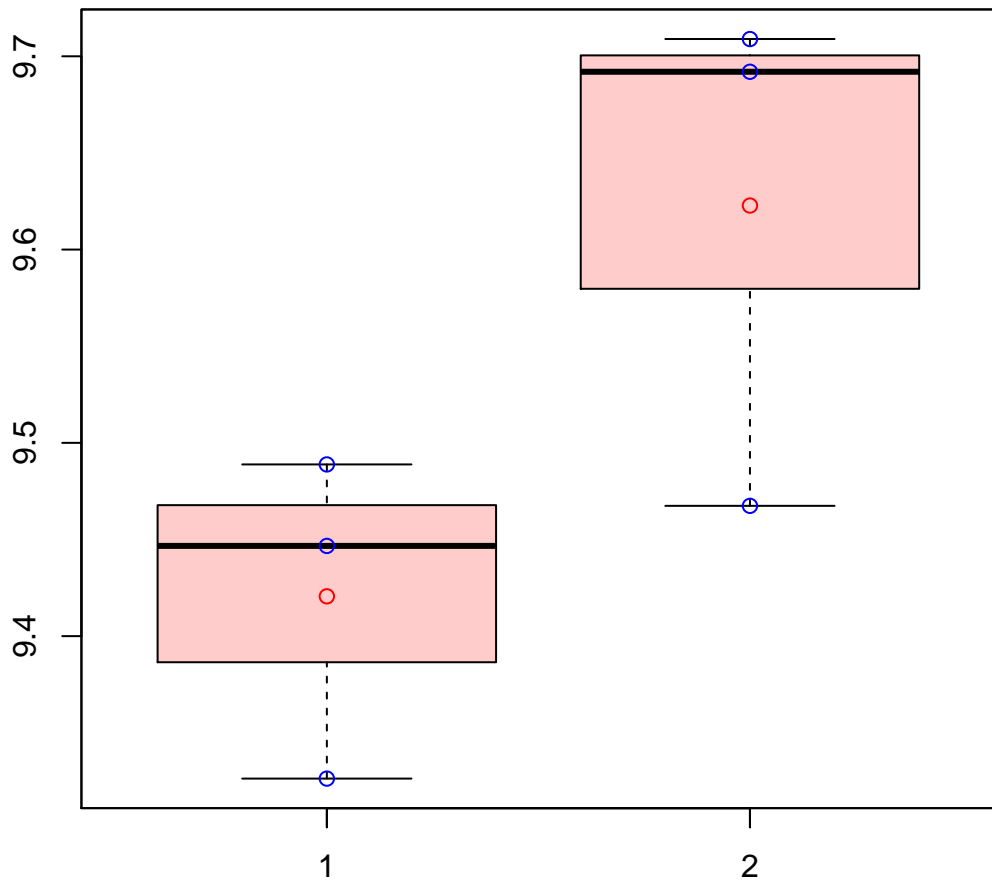

t-Test: p-value = 0.11

# CAPP12\_ERATE|CAPP12\_ERATE

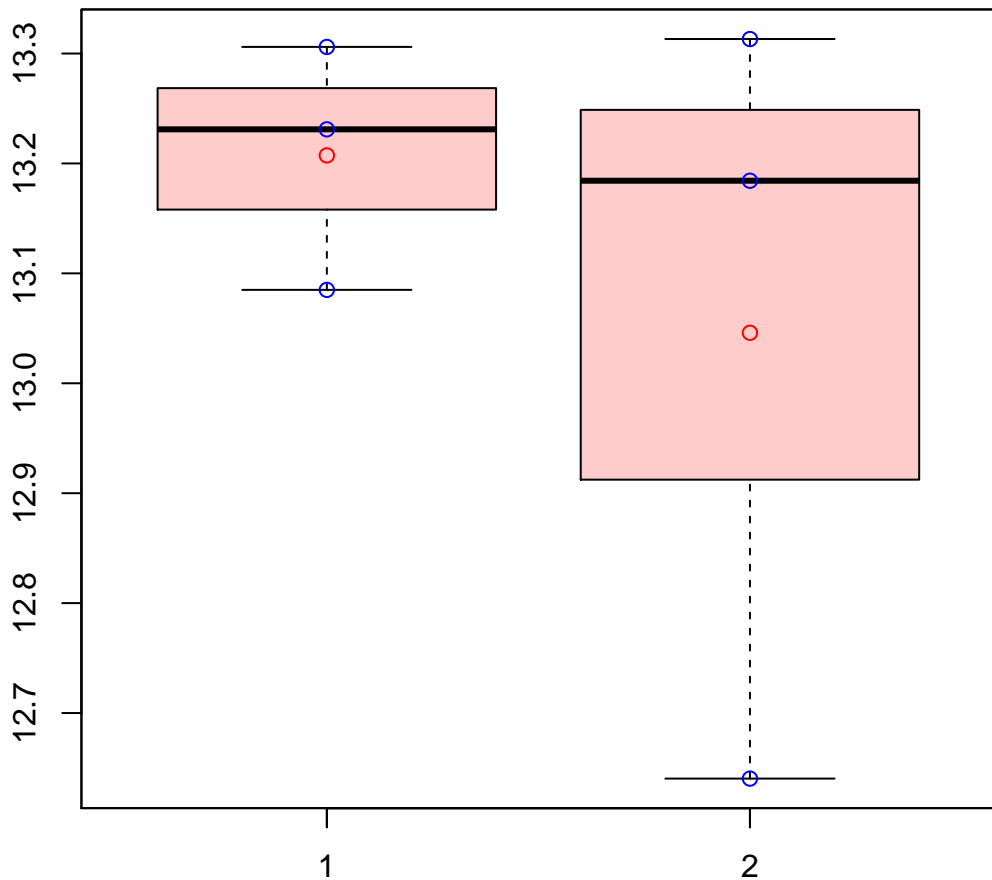

t-Test: p-value = 0.52

# CAPP1\_ERATE|CAPP1\_ERATE

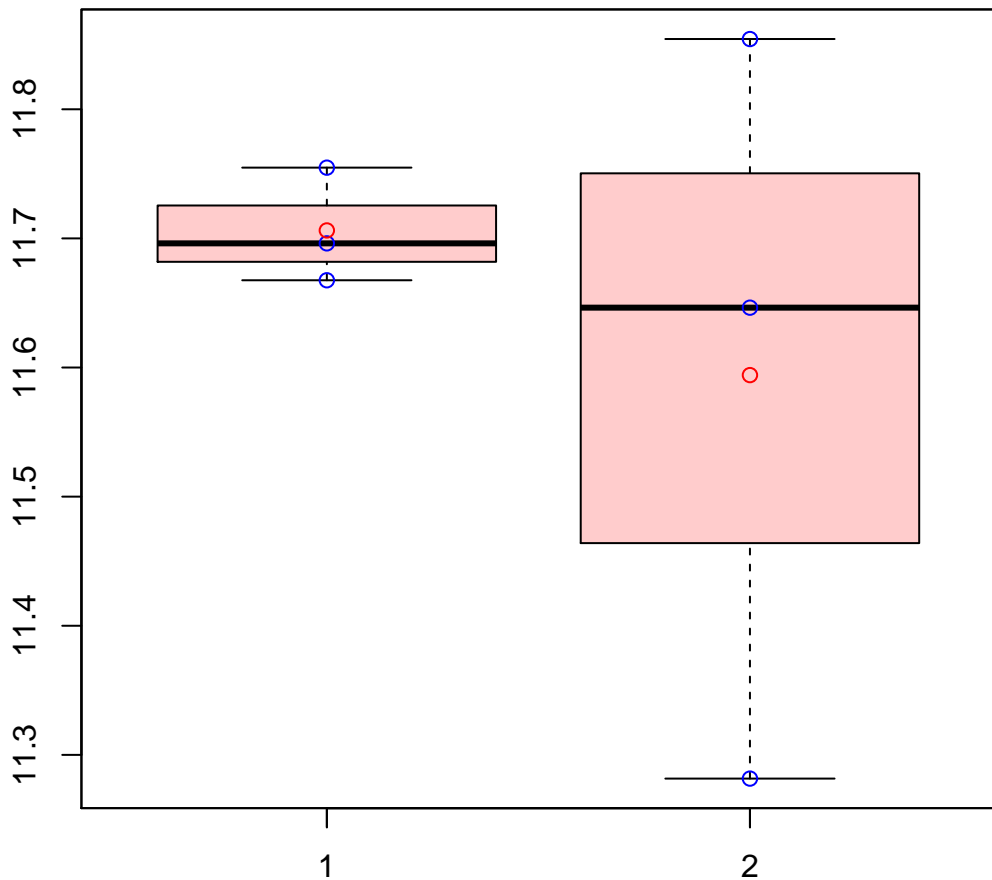

t-Test: p-value = 0.57

# CAPP2\_ERATE|CAPP2\_ERATE

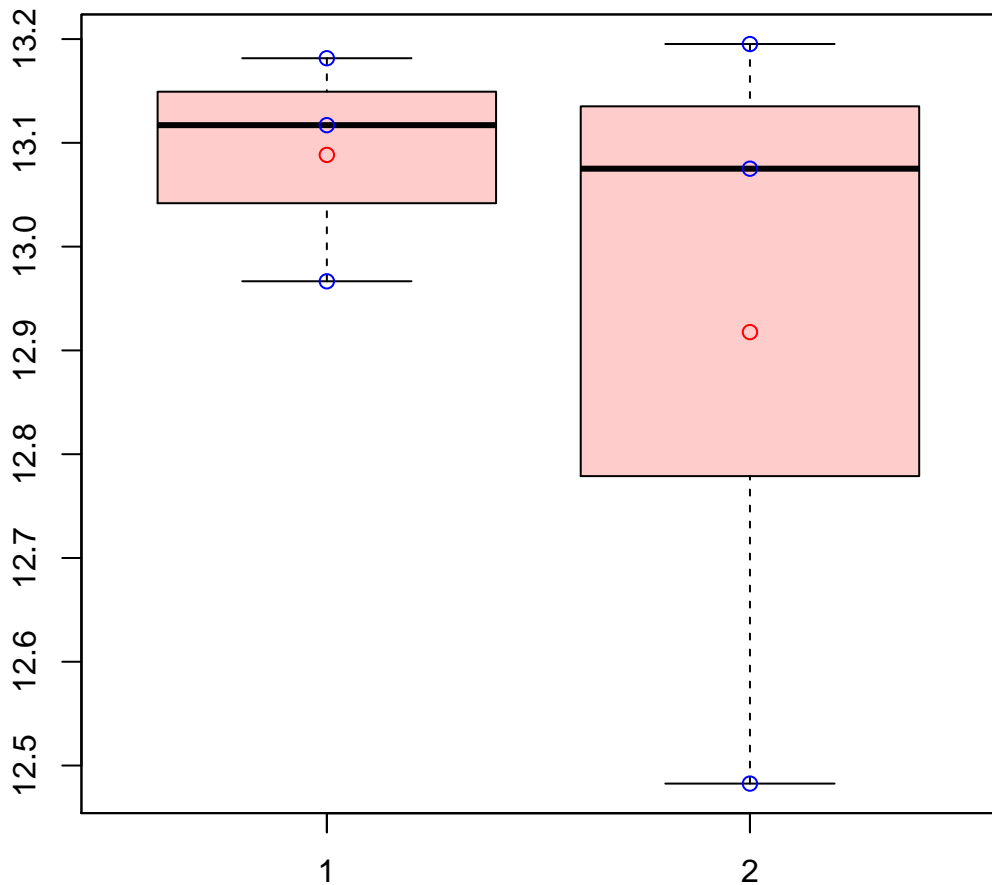

t-Test: p-value = 0.52



# CAPP3\_ERATE|CAPP3\_ERATE

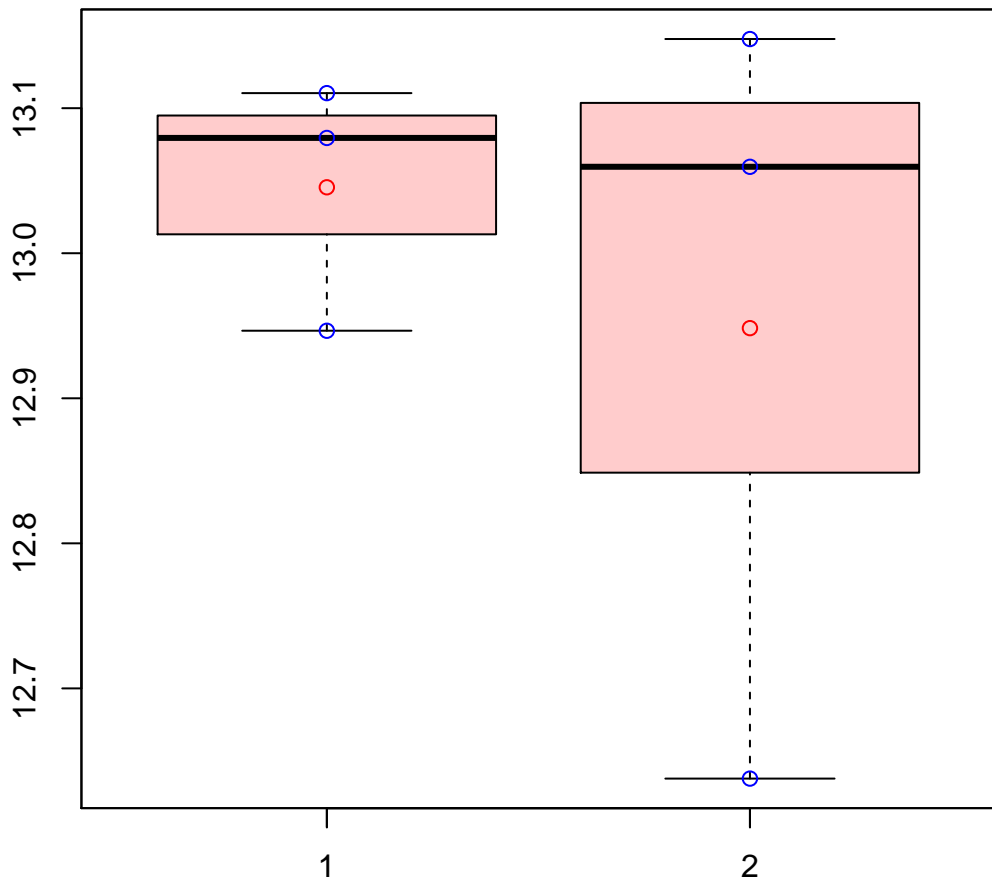

t-Test: p-value = 0.61

# CAPP5\_ERATE|CAPP5\_ERATE

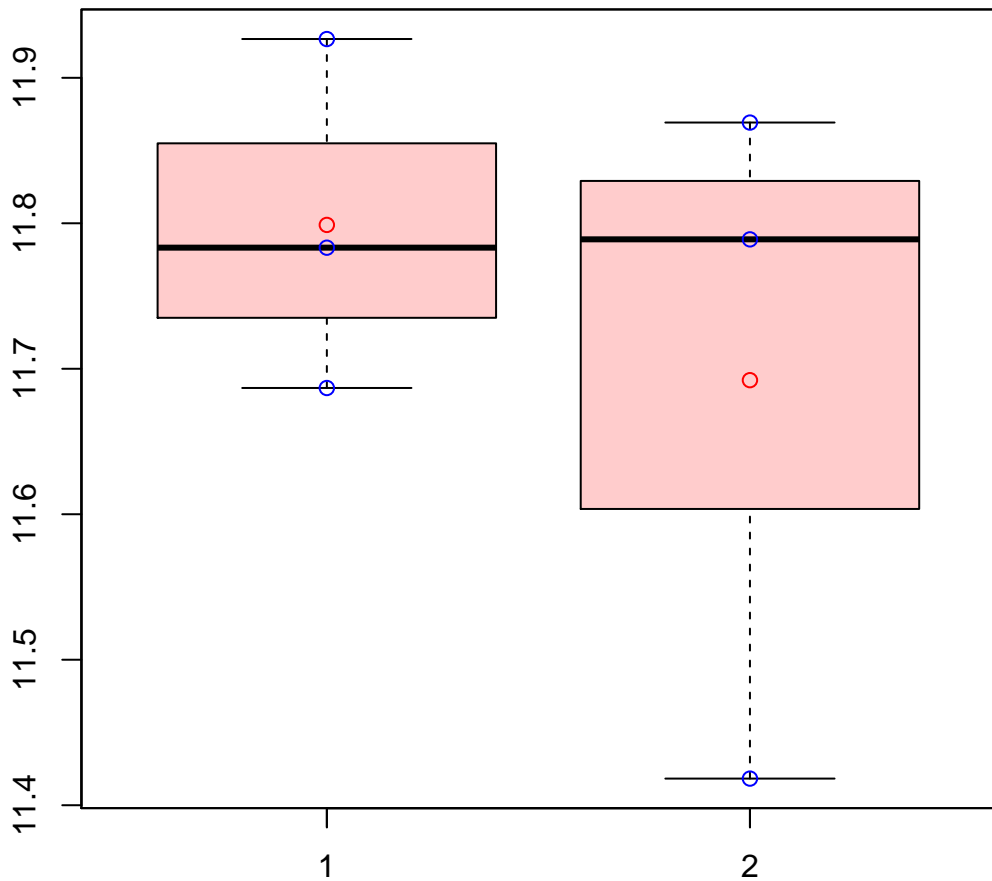

t-Test: p-value = 0.54

# CAPP7\_ERATE|CAPP7\_ERATE

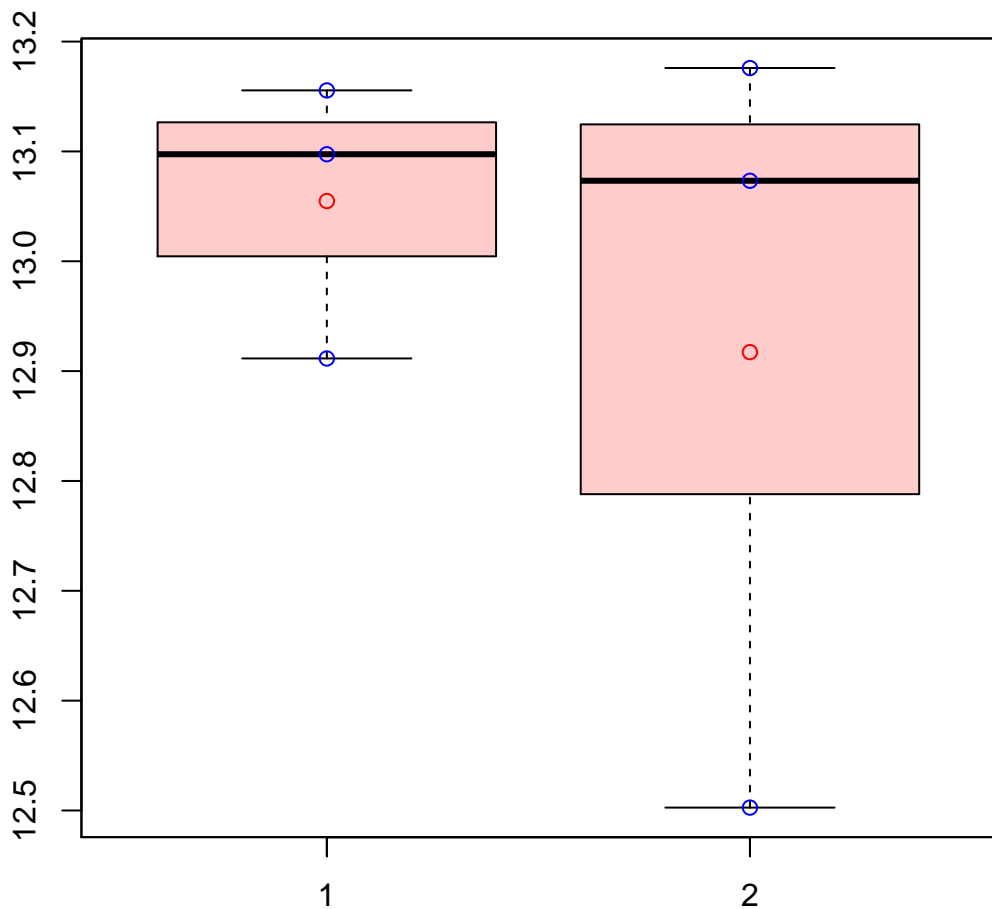

t-Test: p-value = 0.59

# CAPP8\_ERATE|CAPP8\_ERATE

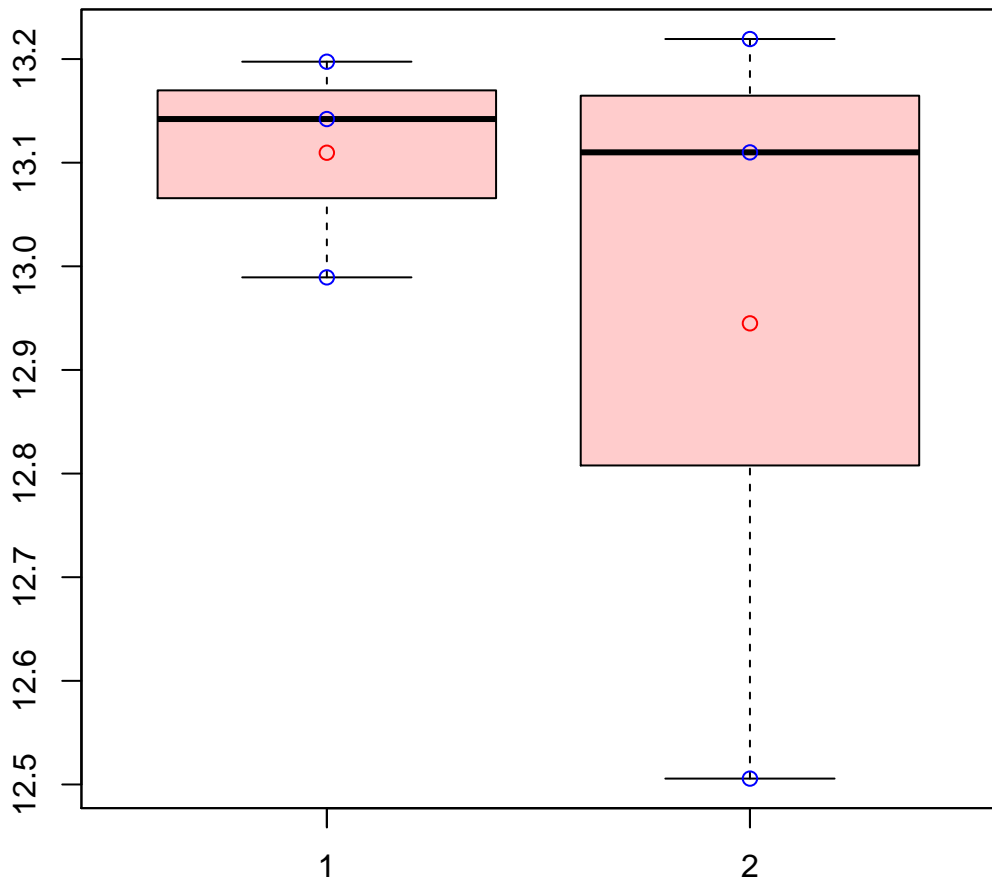

t-Test: p-value = 0.54

# CH601\_ERATE|CH601\_ERATE

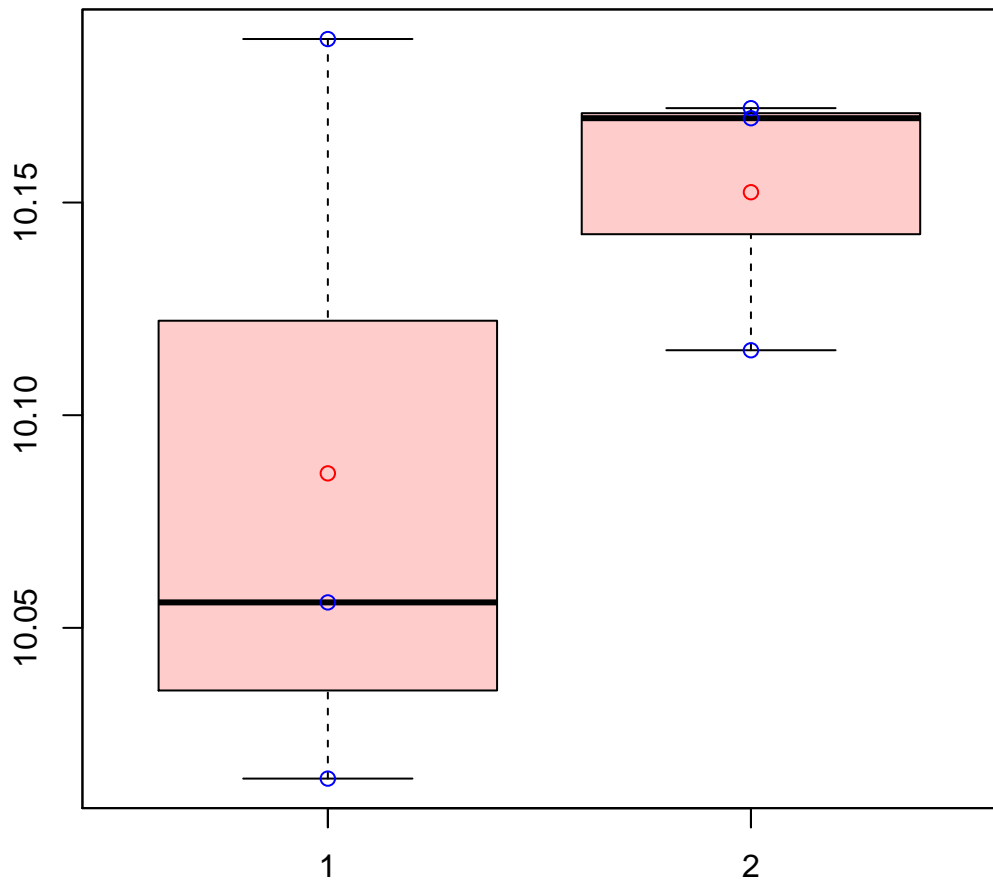

t-Test: p-value = 0.34

# CH604\_ERATE|CH604\_ERATE

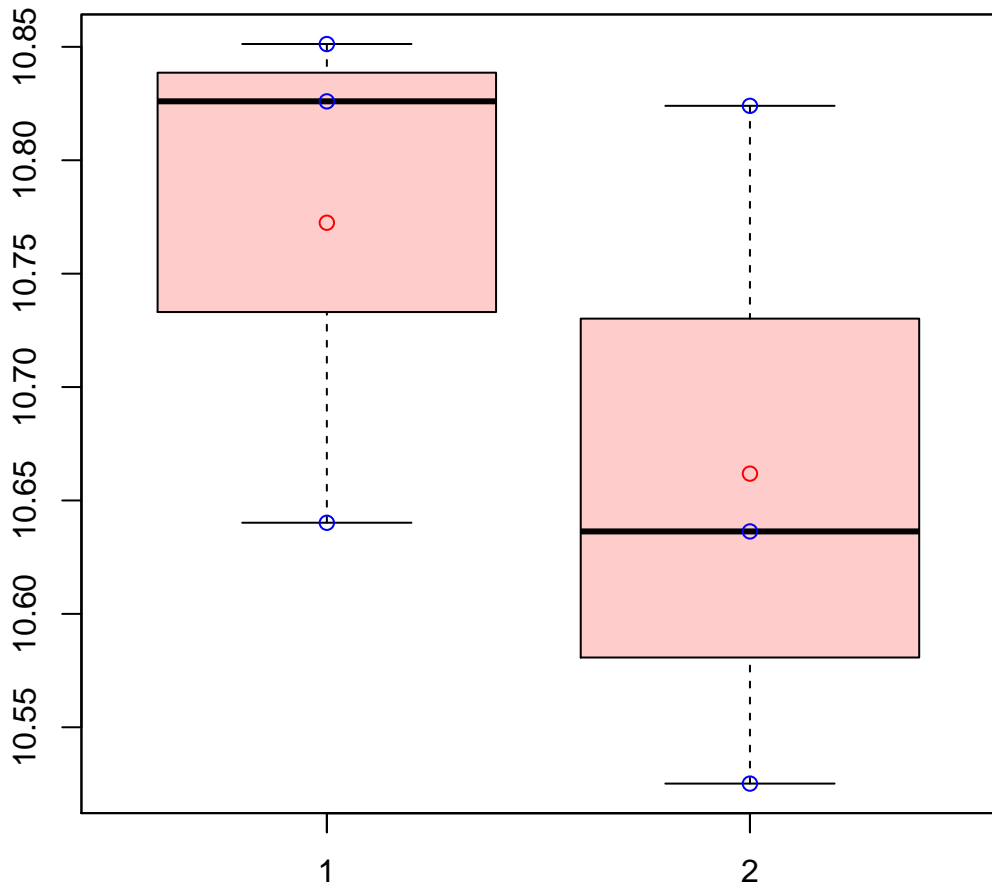

t-Test: p-value = 0.37

# CL10027Contig2|CL10027Contig2

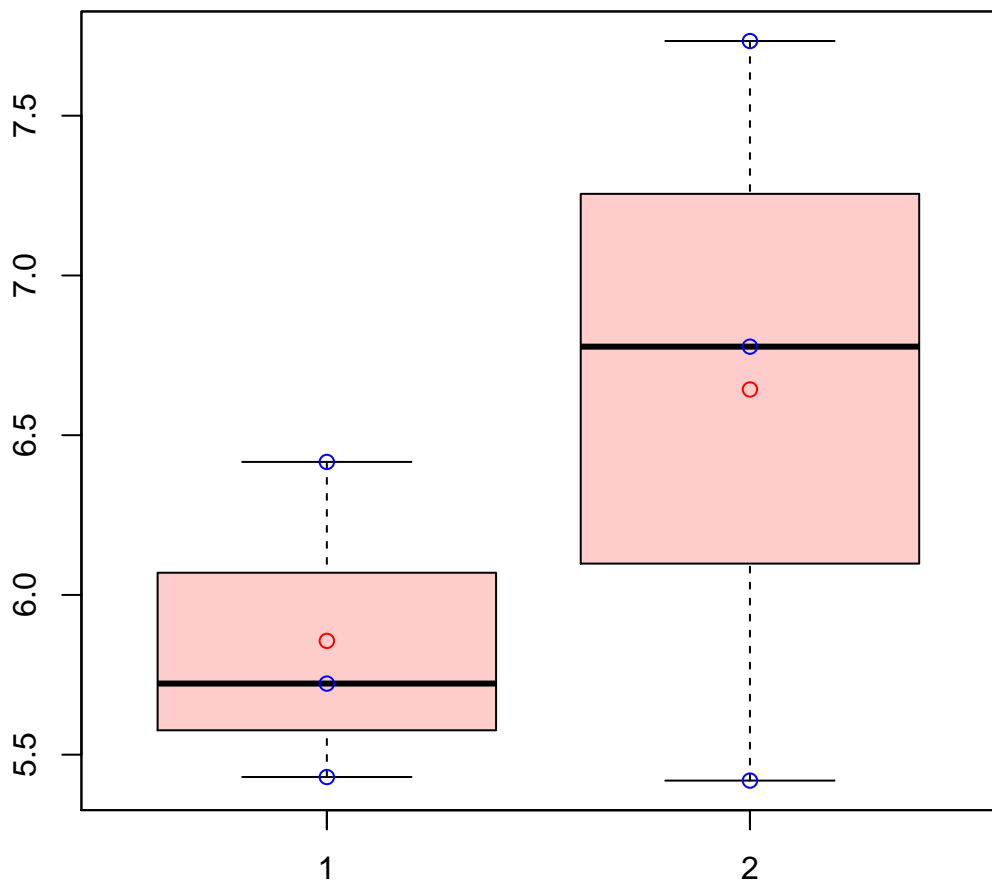

t-Test: p-value = 0.37

# CL1002Contig1|CL1002Contig1

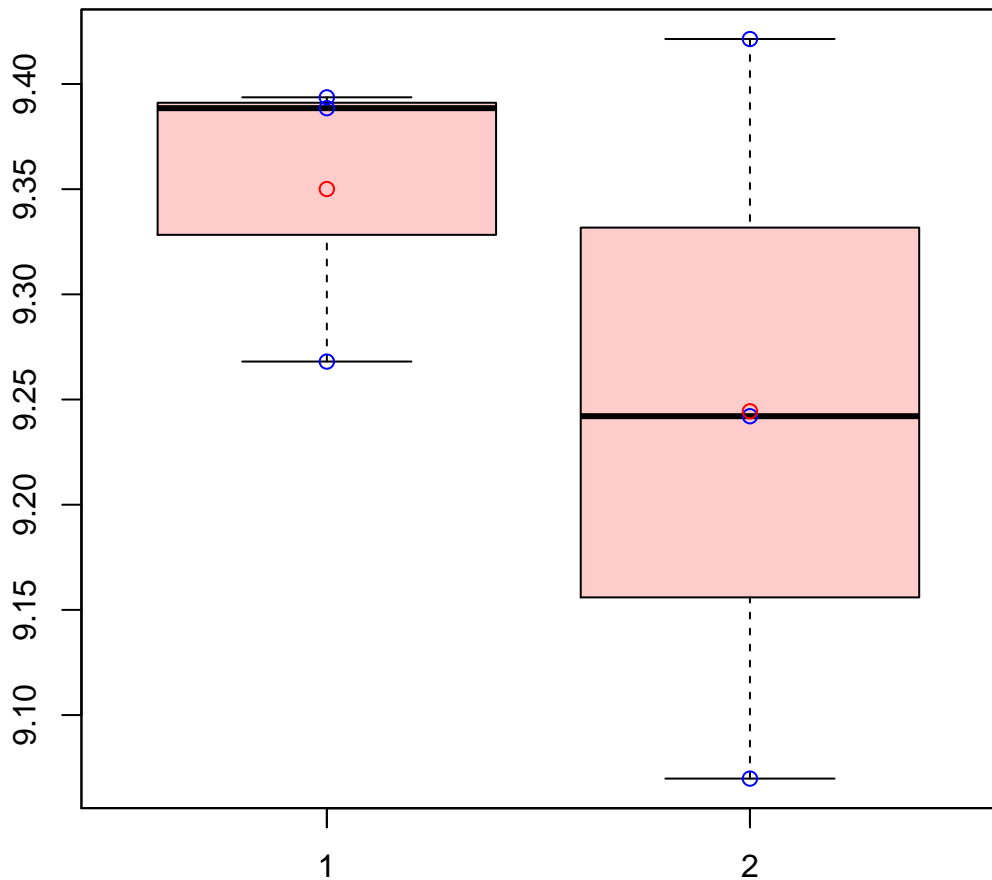

t-Test: p-value = 0.41



# CL1002Contig4|CL1002Contig4

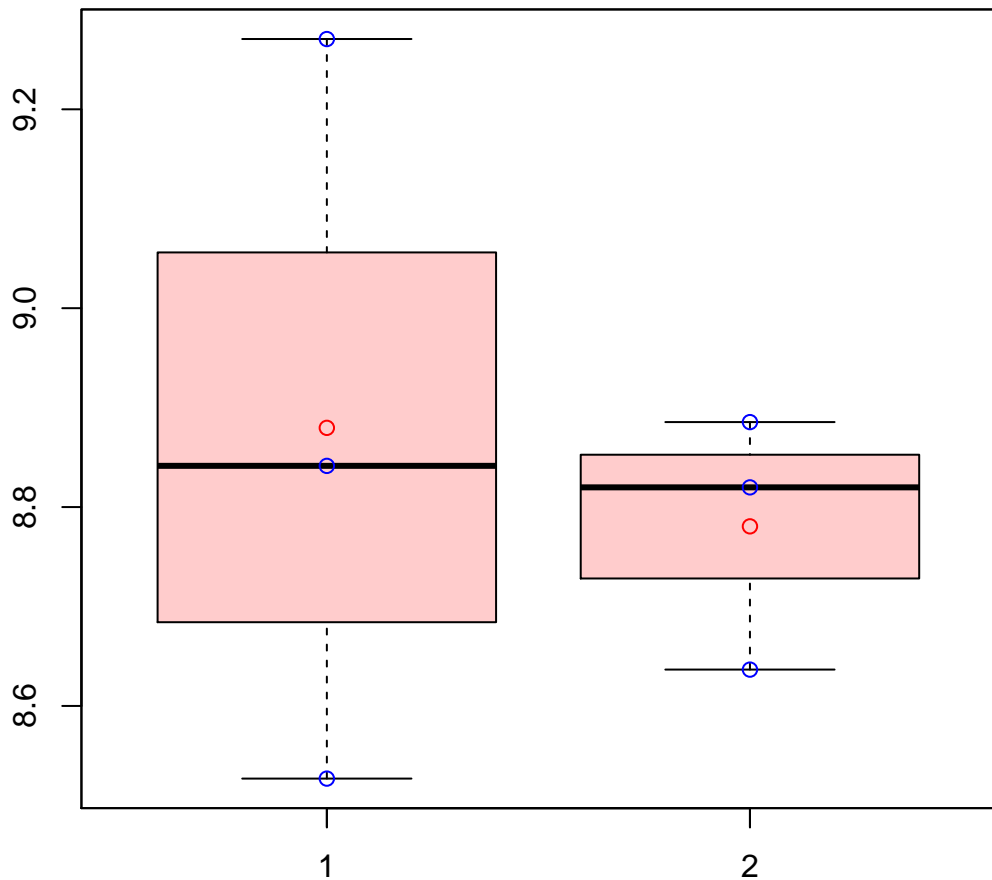

t-Test: p-value = 0.7

# CL1002Contig5|CL1002Contig5

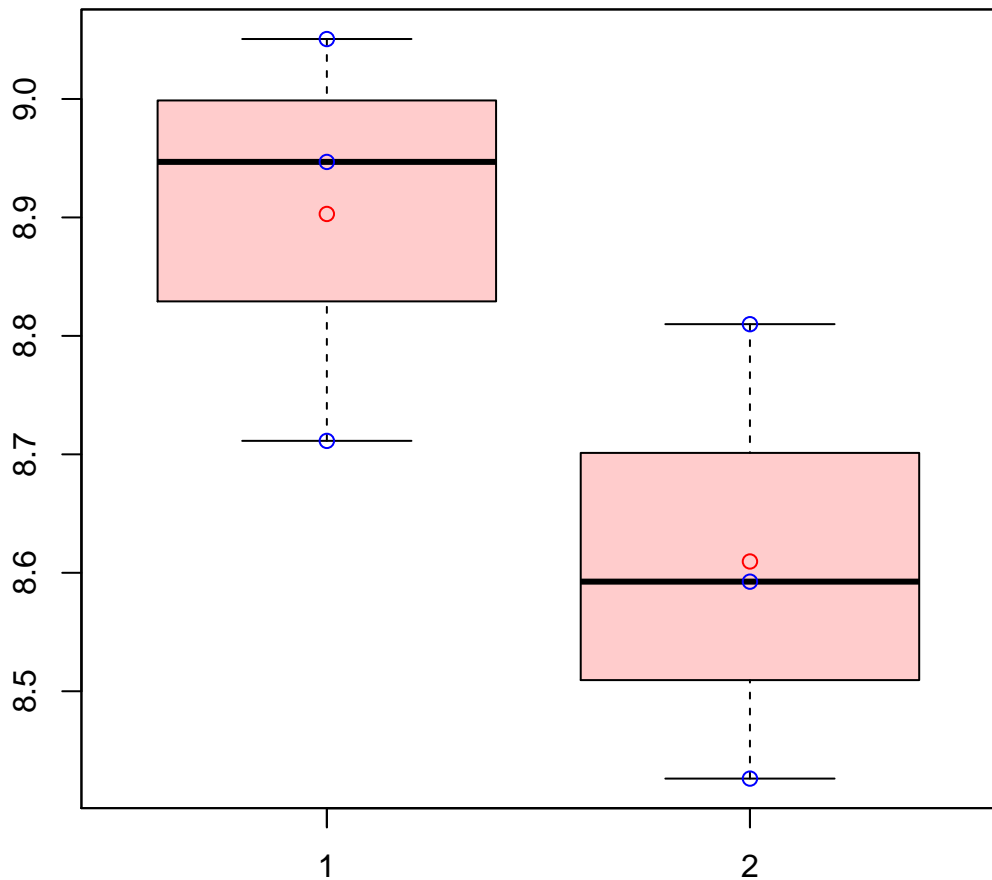

t-Test: p-value = 0.12

# CL1002Contig6|CL1002Contig6

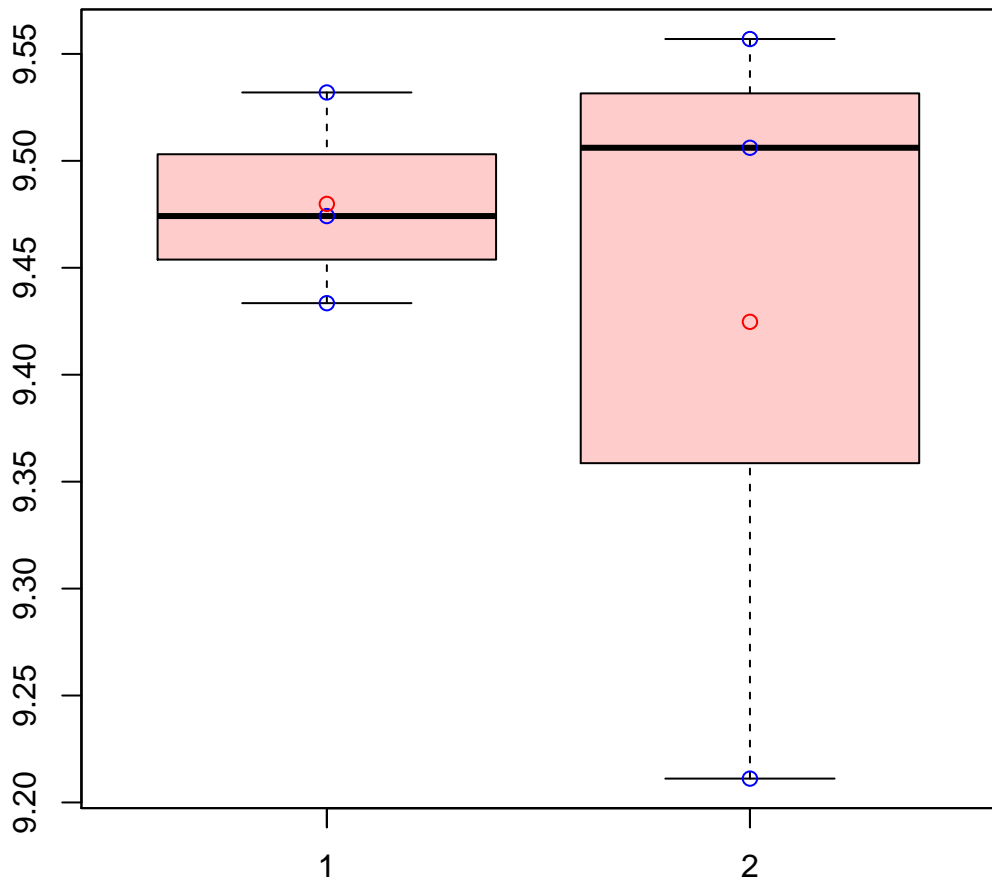

t-Test: p-value = 0.66

# CL10034Contig1|CL10034Contig1

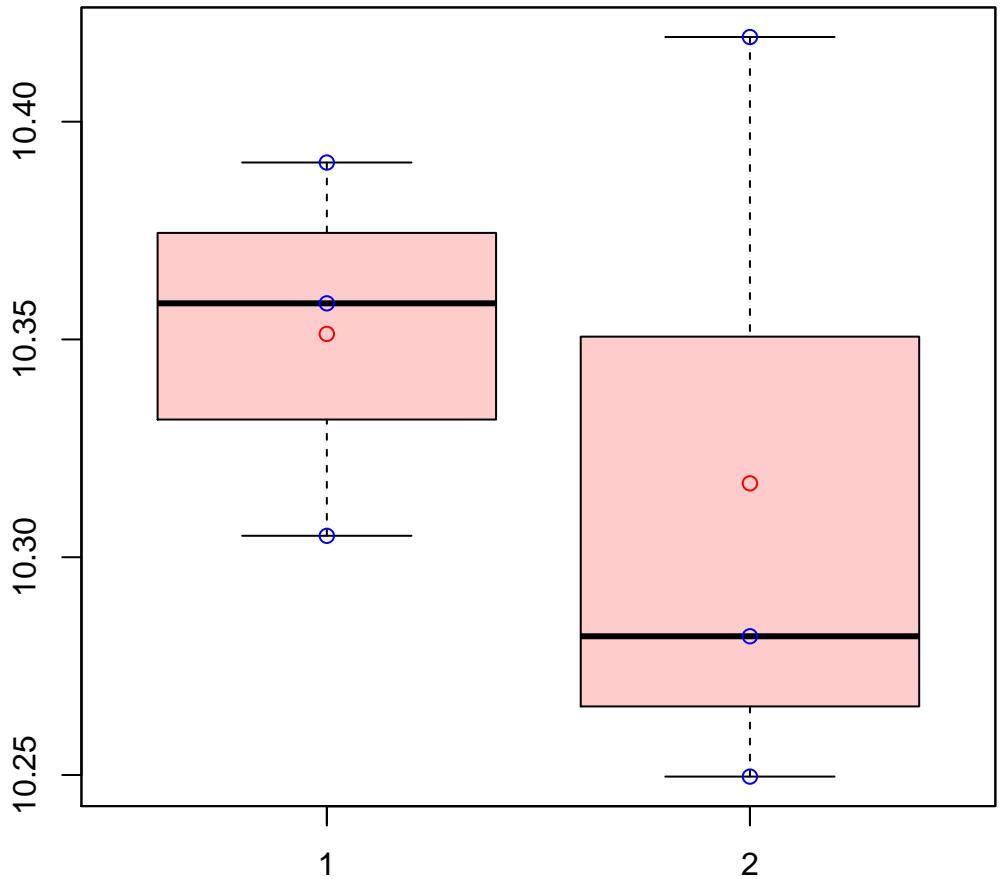

t-Test: p-value = 0.6

# CL10034Contig2|CL10034Contig2

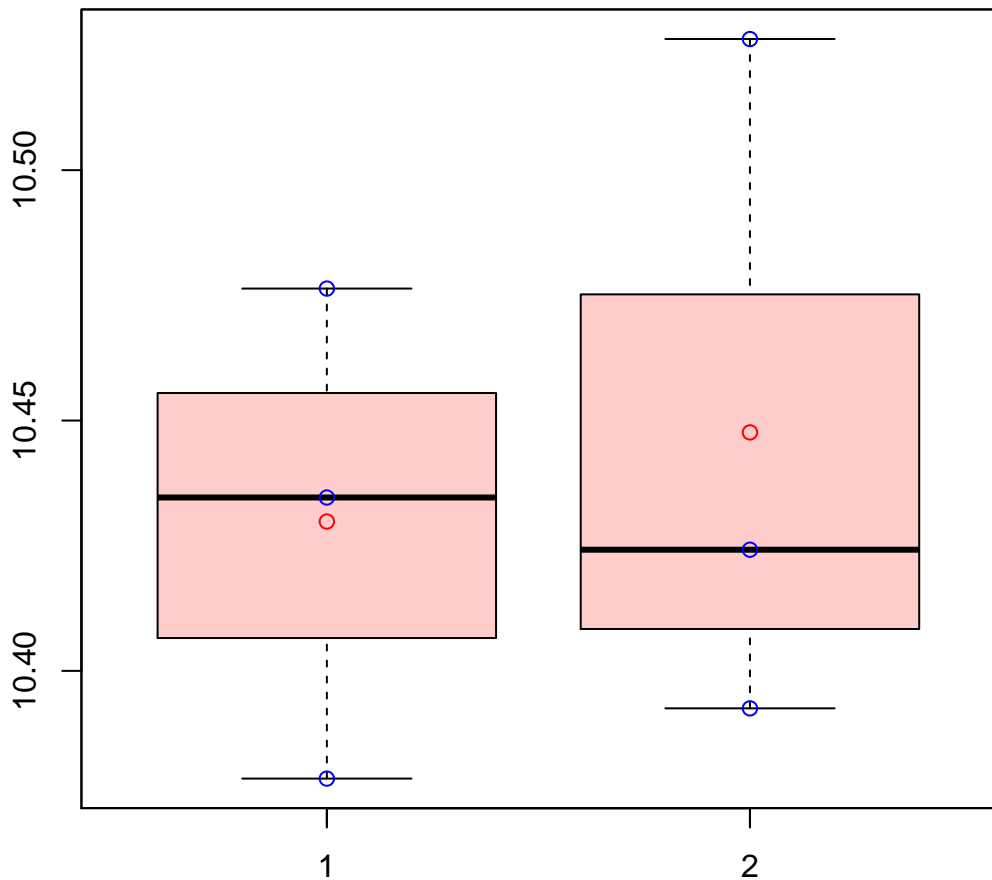

t-Test: p-value = 0.74

# CL10037Contig1|CL10037Contig1

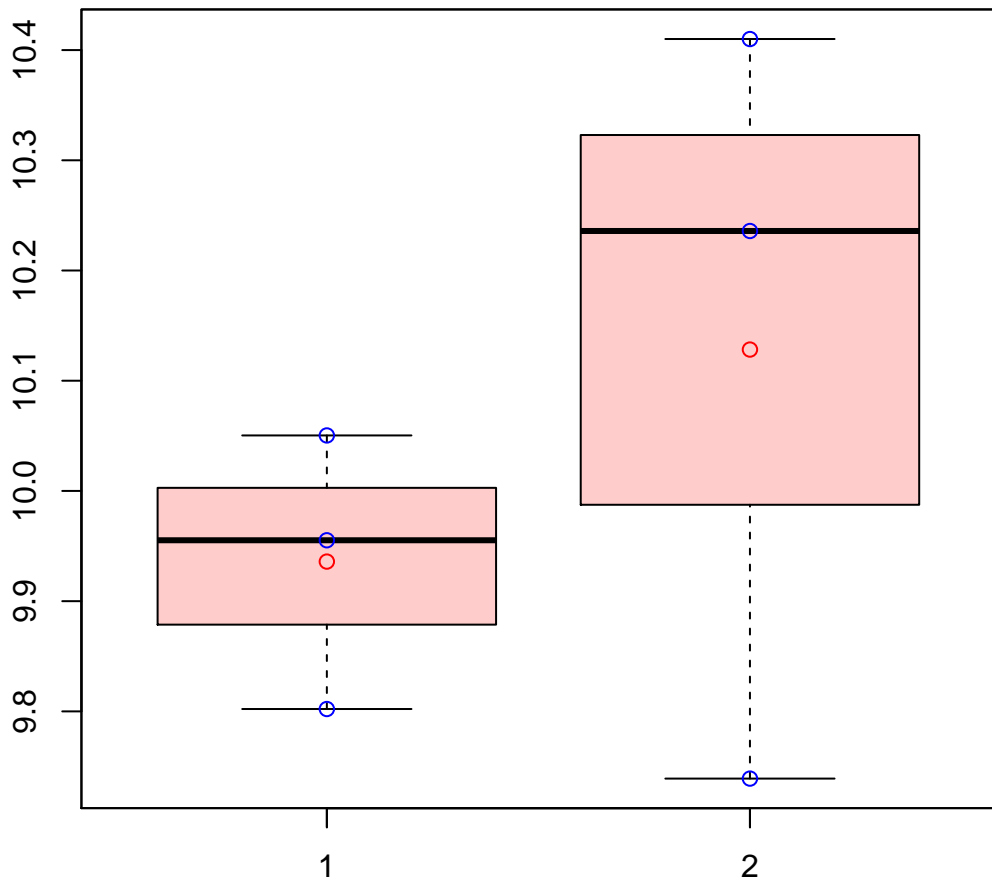

t-Test: p-value = 0.45

# CL1004Contig1|CL1004Contig1

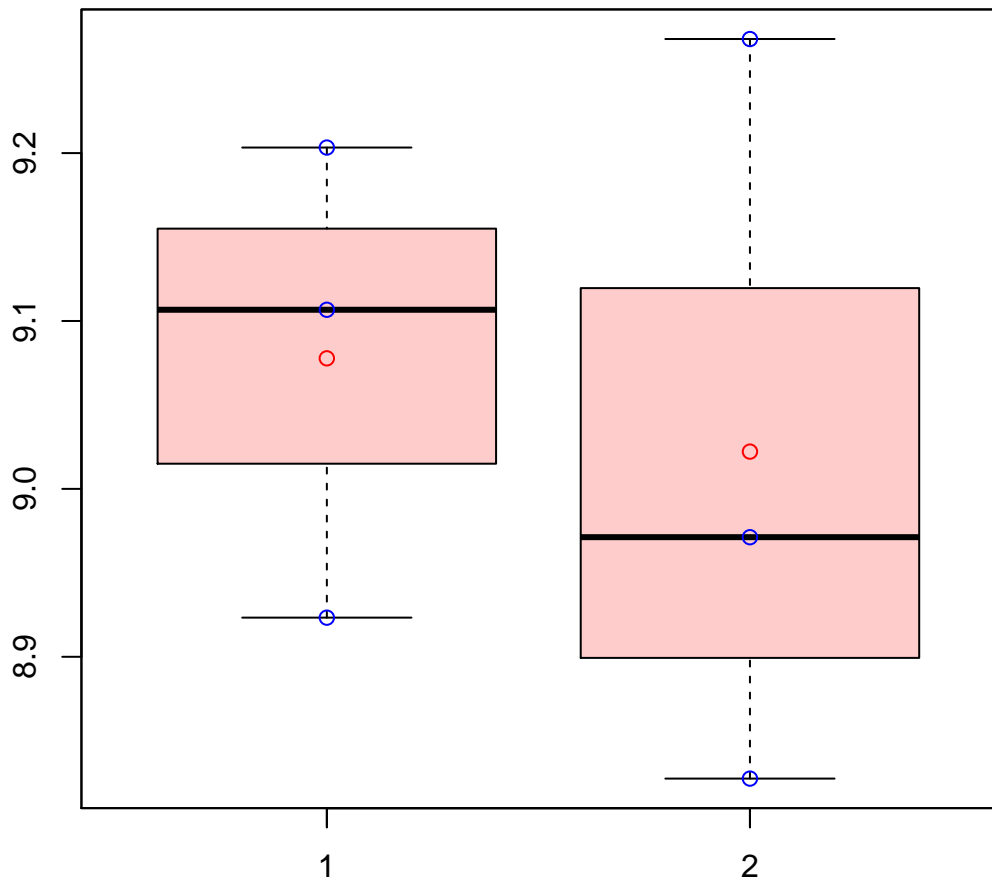

t-Test: p-value = 0.74

# CL1004Contig2|CL1004Contig2

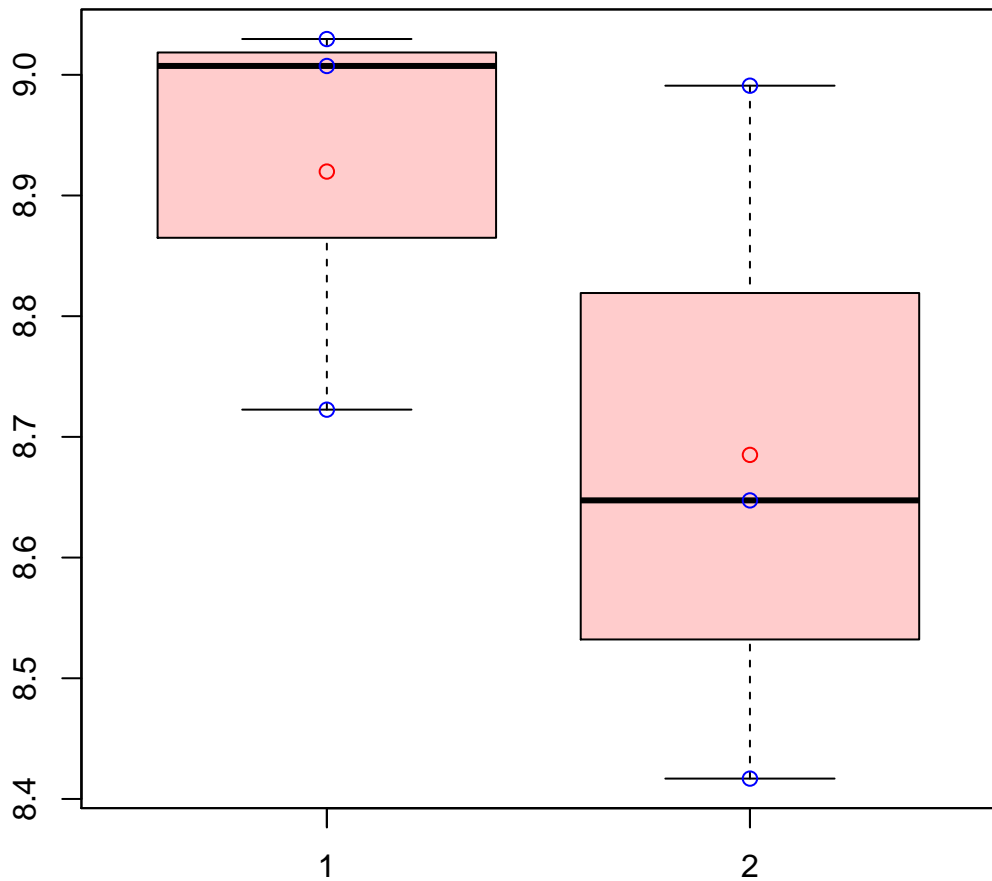

t-Test: p-value = 0.31



# CL10055Contig2|CL10055Contig2

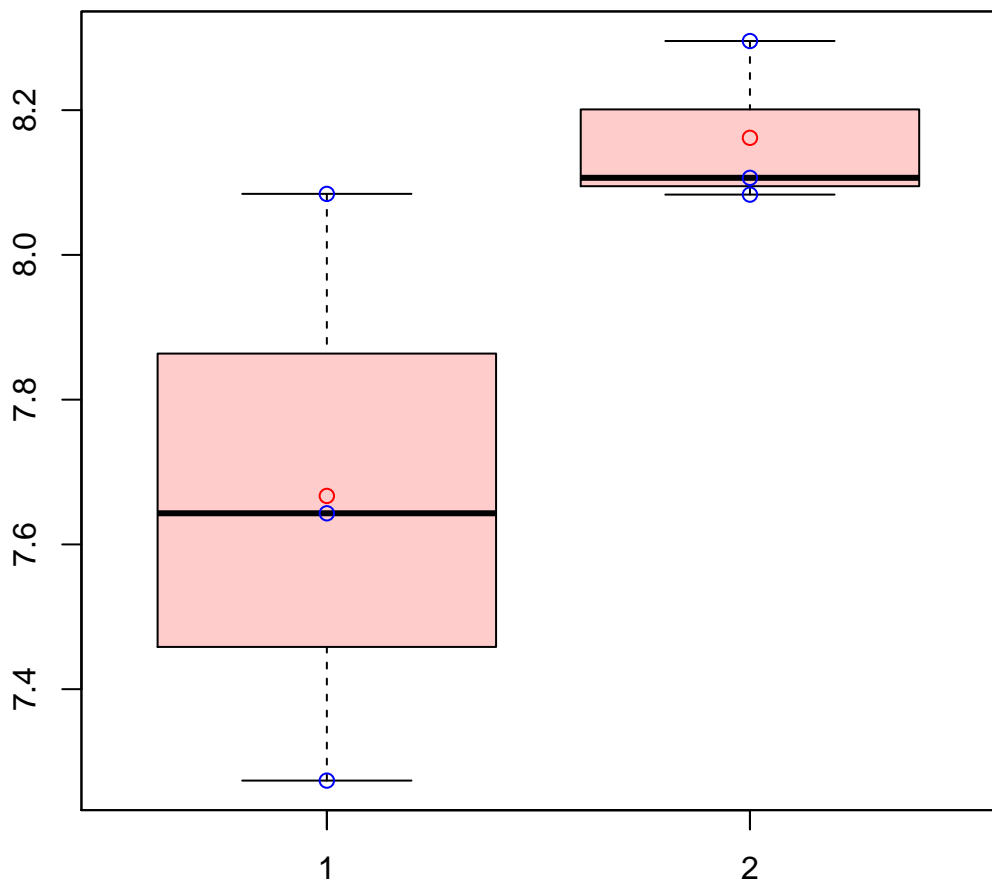

t-Test: p-value = 0.16

# CL10057Contig1|CL10057Contig1

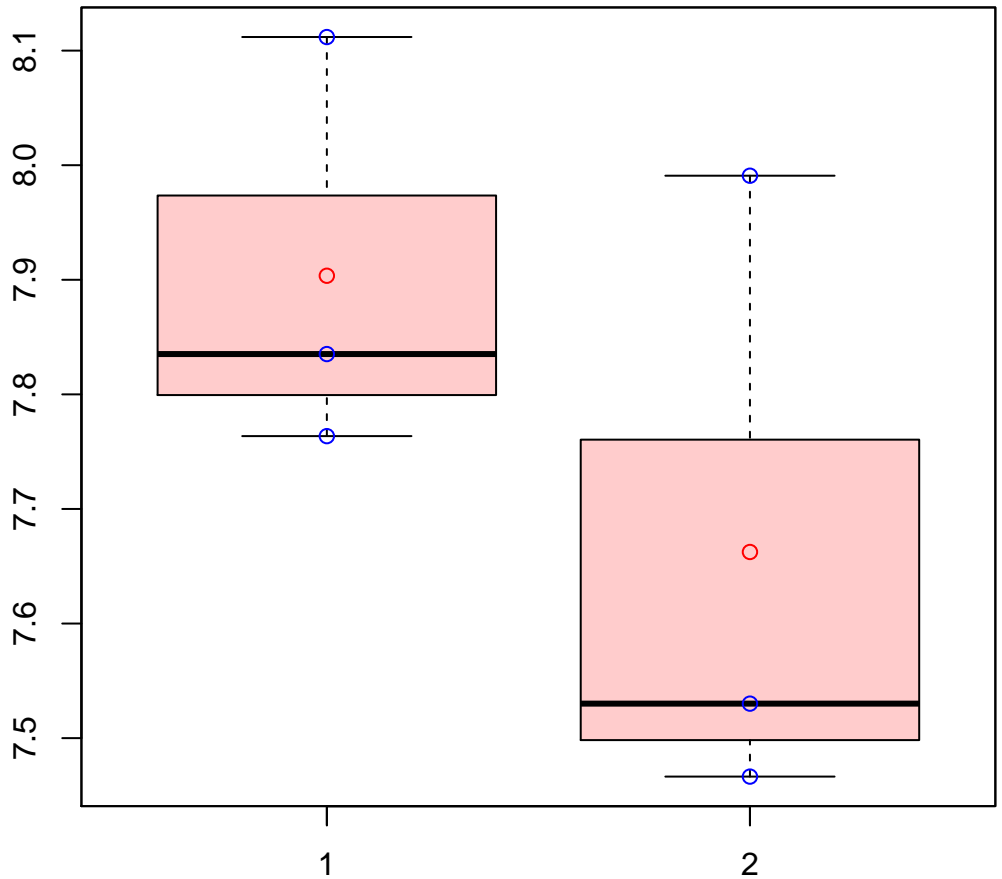

t-Test: p-value = 0.3

# CL1005Contig1|CL1005Contig1

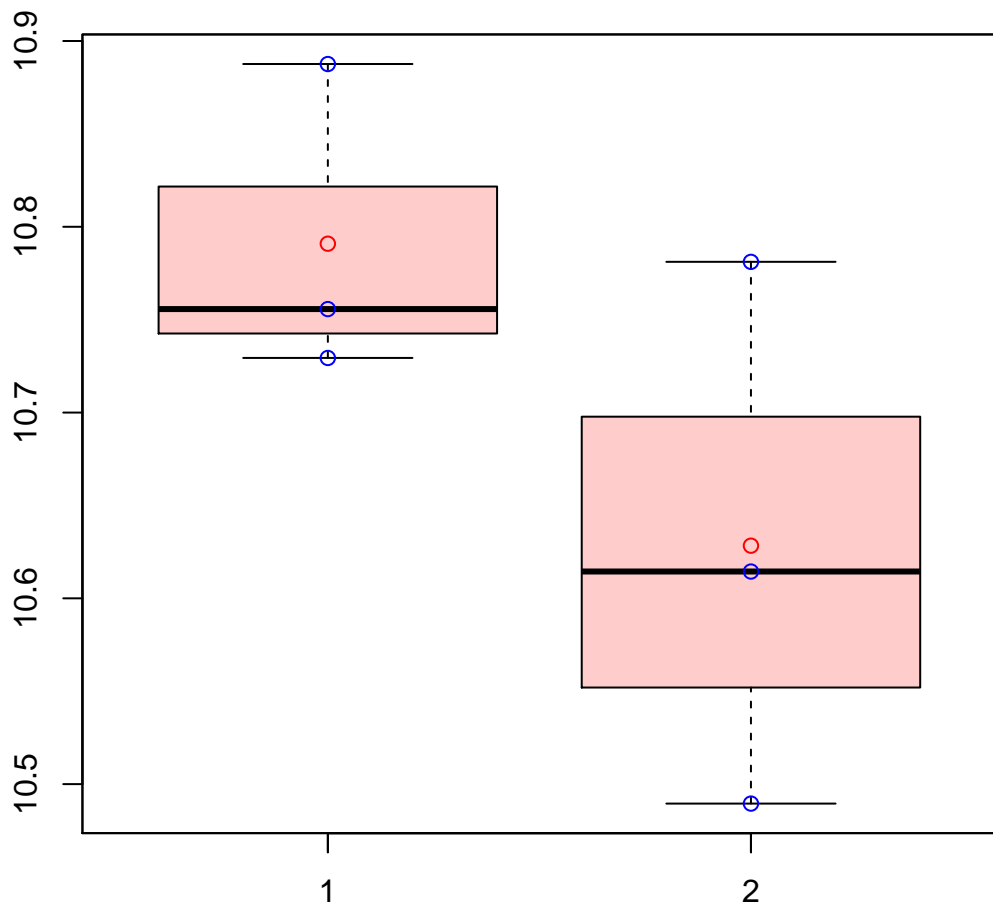

t-Test: p-value = 0.19

# CL10077Contig1|CL10077Contig1

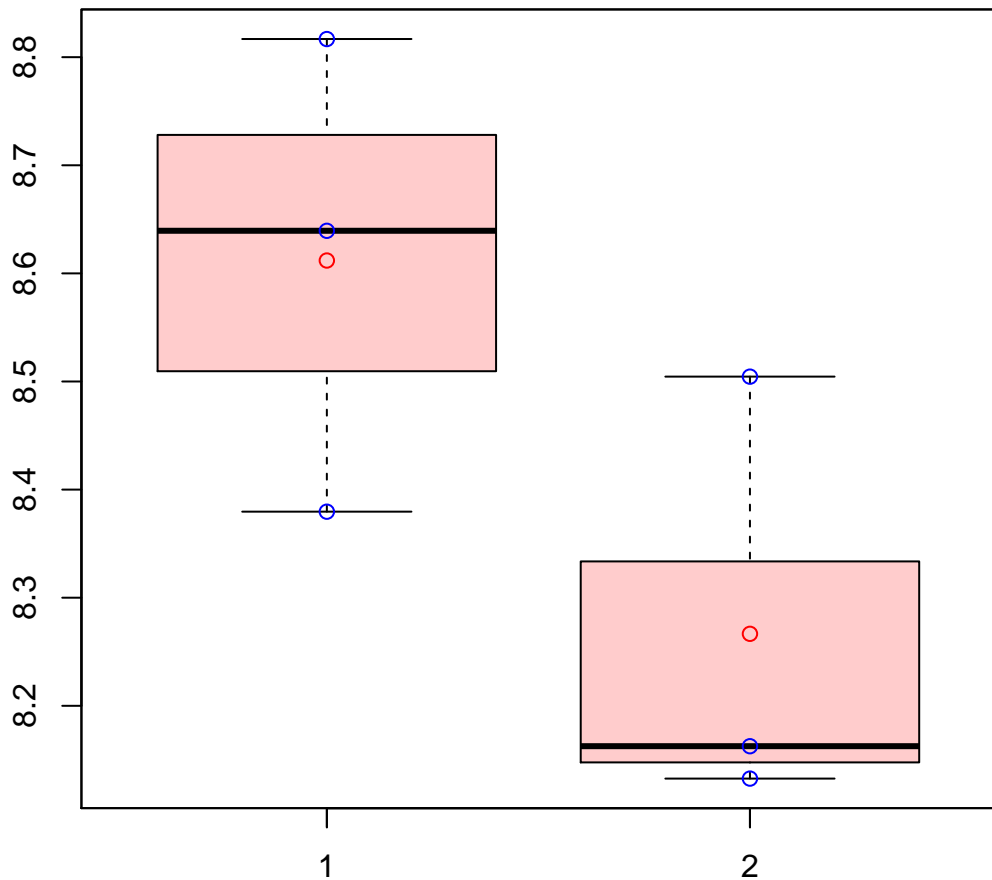

t-Test: p-value = 0.12

# CL10079Contig1|CL10079Contig1

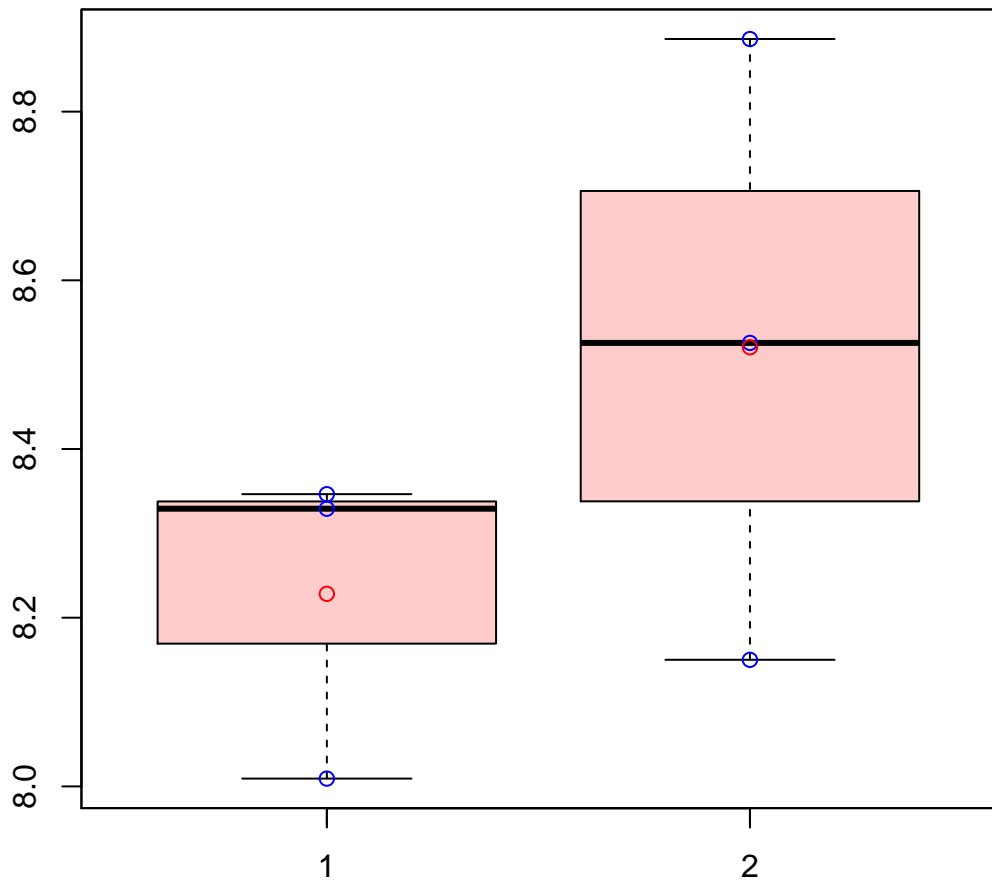

t-Test: p-value = 0.31

# CL100Contig17|CL100Contig17

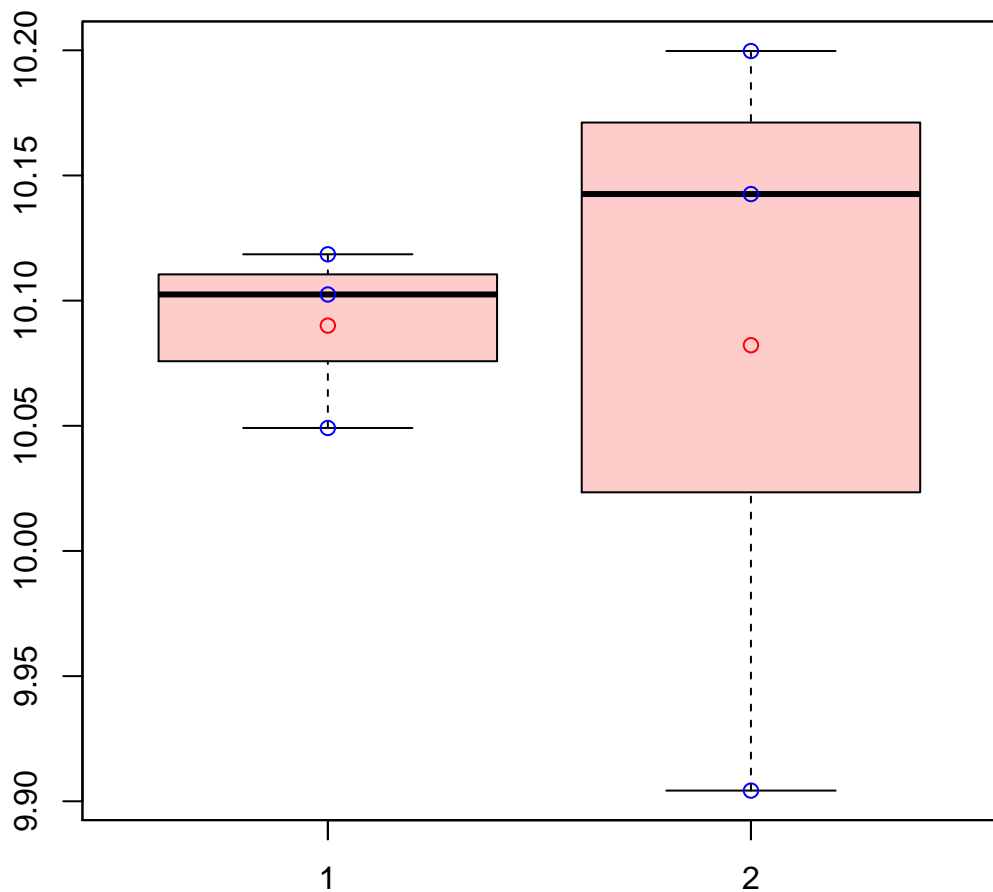

t-Test: p-value = 0.94

# CL100Contig19|CL100Contig19

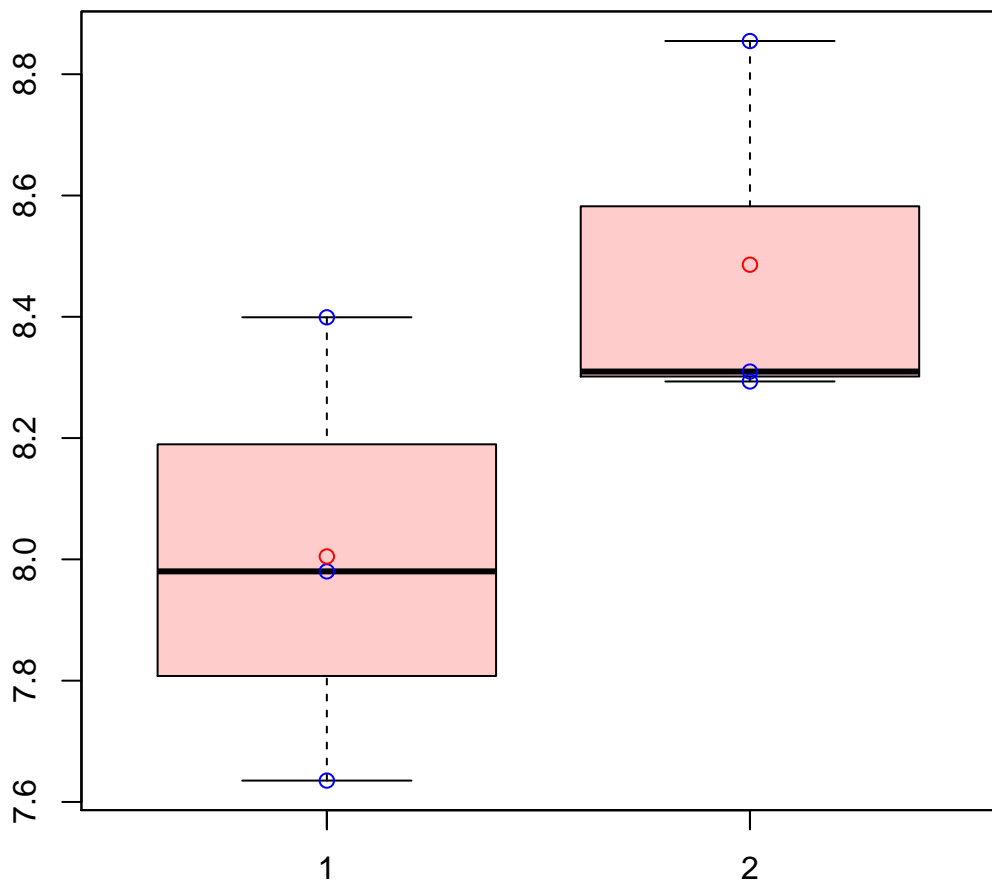

t-Test: p-value = 0.17

# CL100Contig5|CL100Contig5

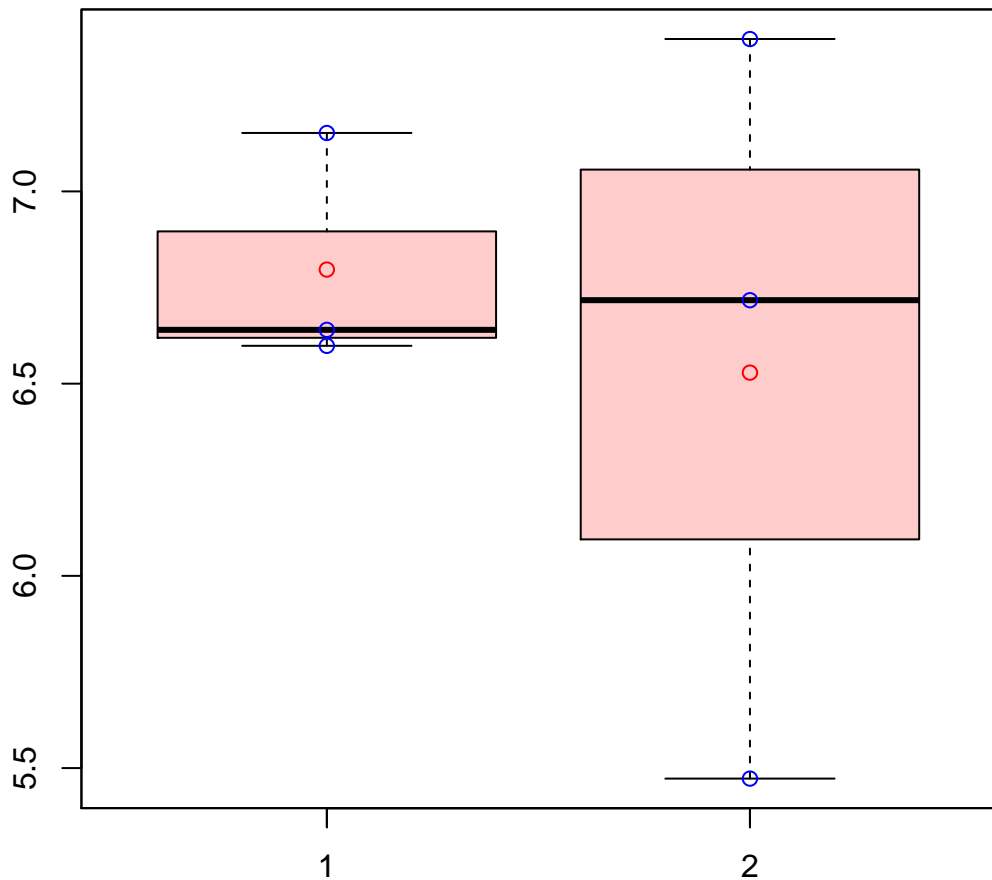

t-Test: p-value = 0.69



# CL10106Contig3|CL10106Contig3

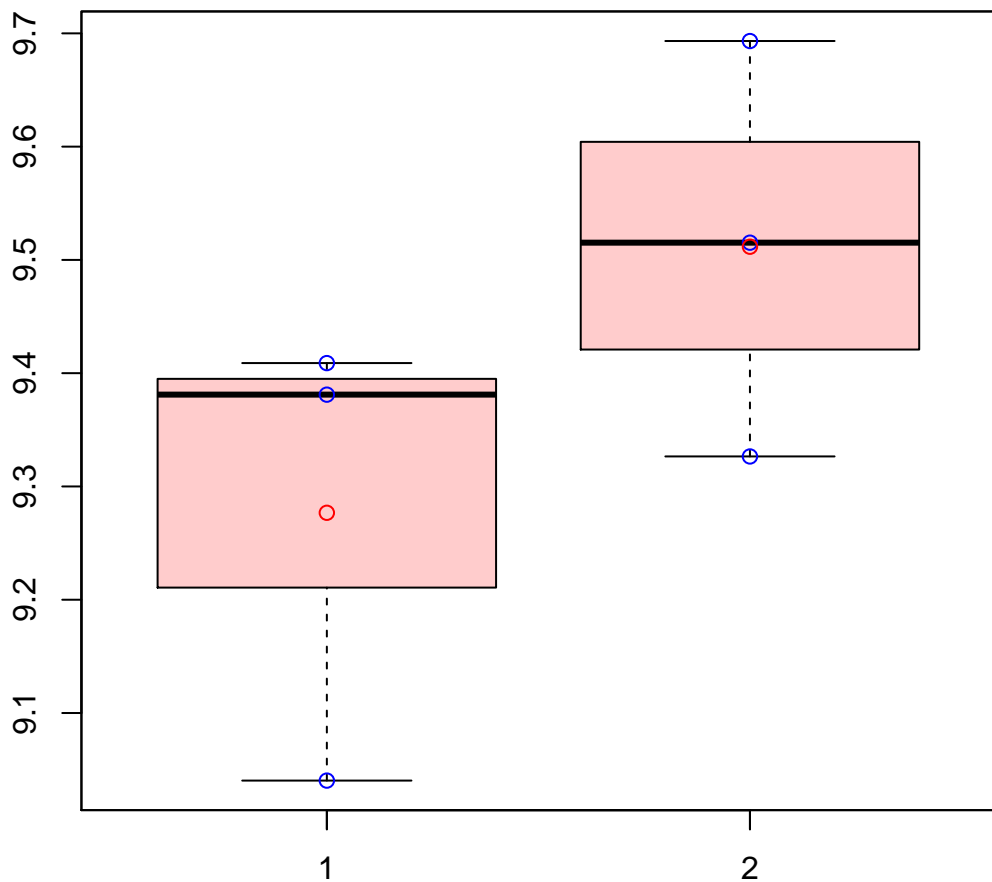

t-Test: p-value = 0.21

# CL1010Contig1|CL1010Contig1

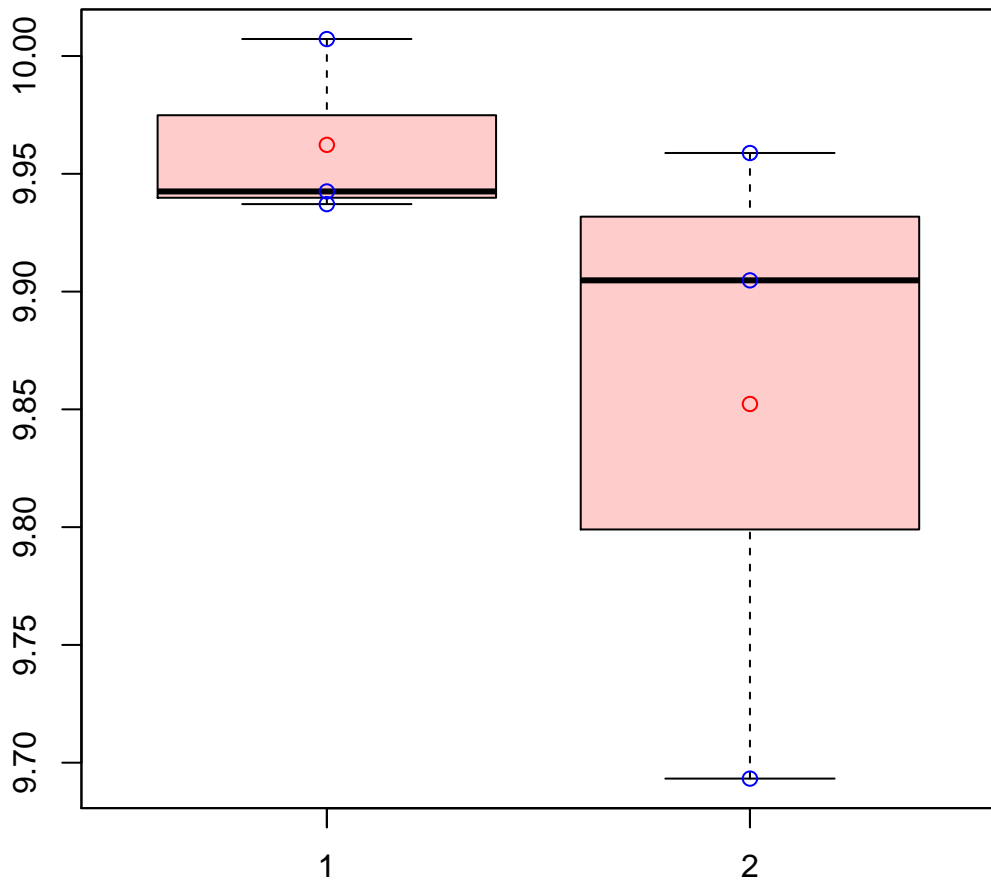

t-Test: p-value = 0.31

# CL1010Contig2|CL1010Contig2

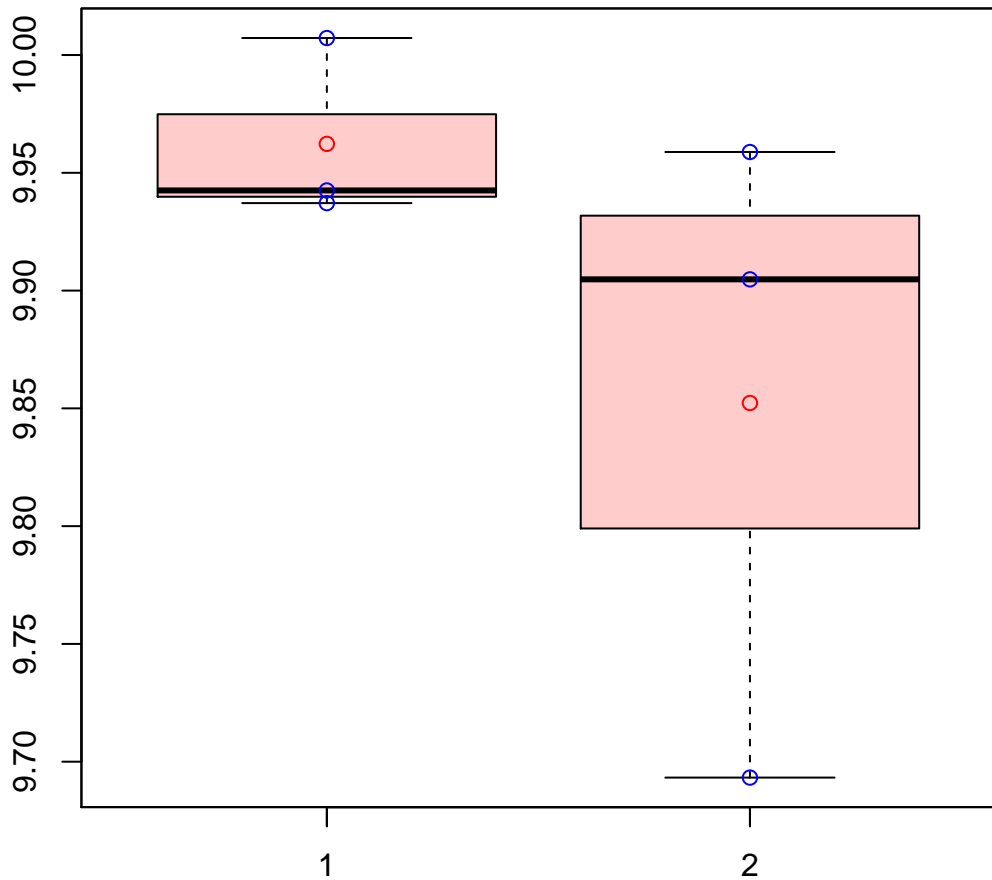

t-Test: p-value = 0.31

# CL1010Contig4|CL1010Contig4

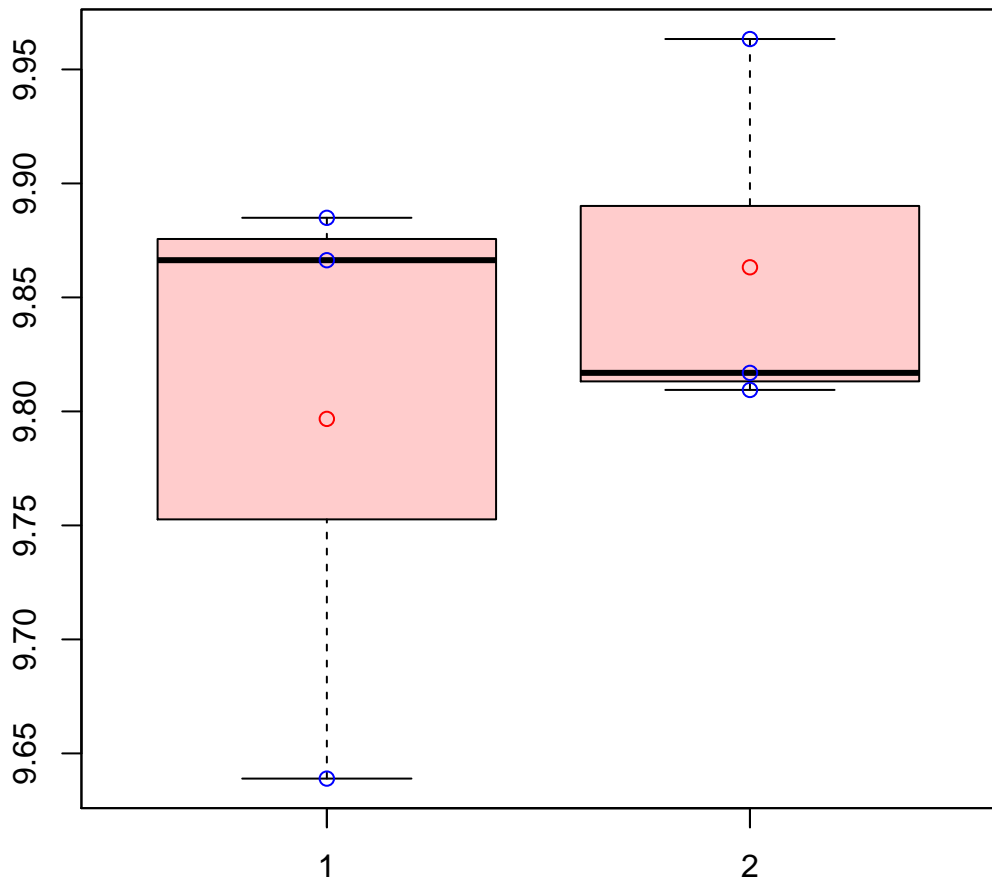

t-Test: p-value = 0.52

# CL10114Contig1|CL10114Contig1

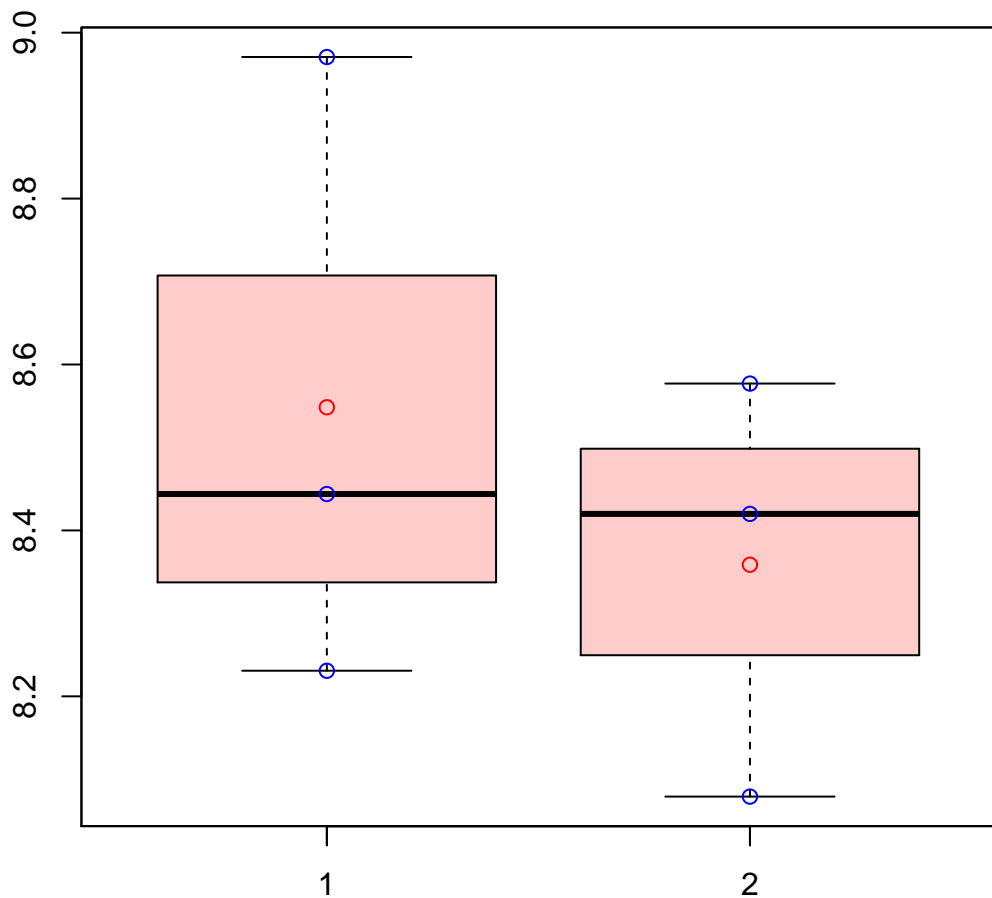

t-Test: p-value = 0.52

# CL10114Contig2|CL10114Contig2



t-Test: p-value = 0.52

# CL1011Contig3|CL1011Contig3

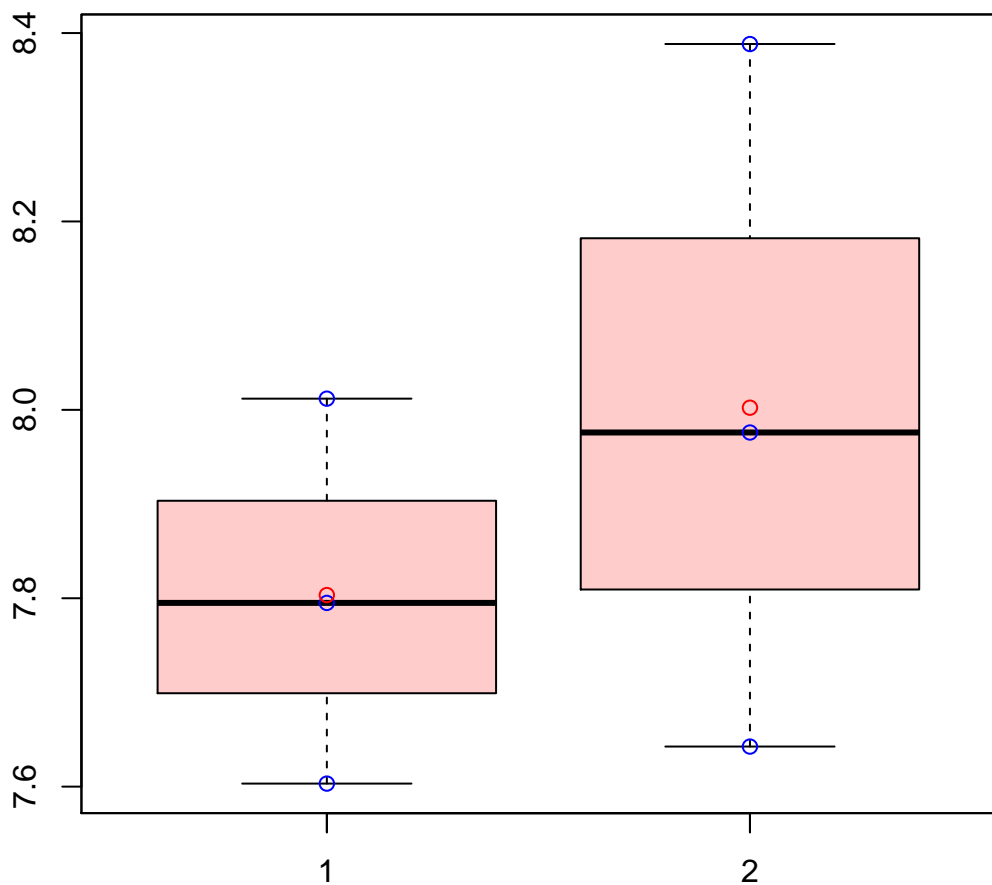

t-Test: p-value = 0.48

# CL1013Contig3|CL1013Contig3

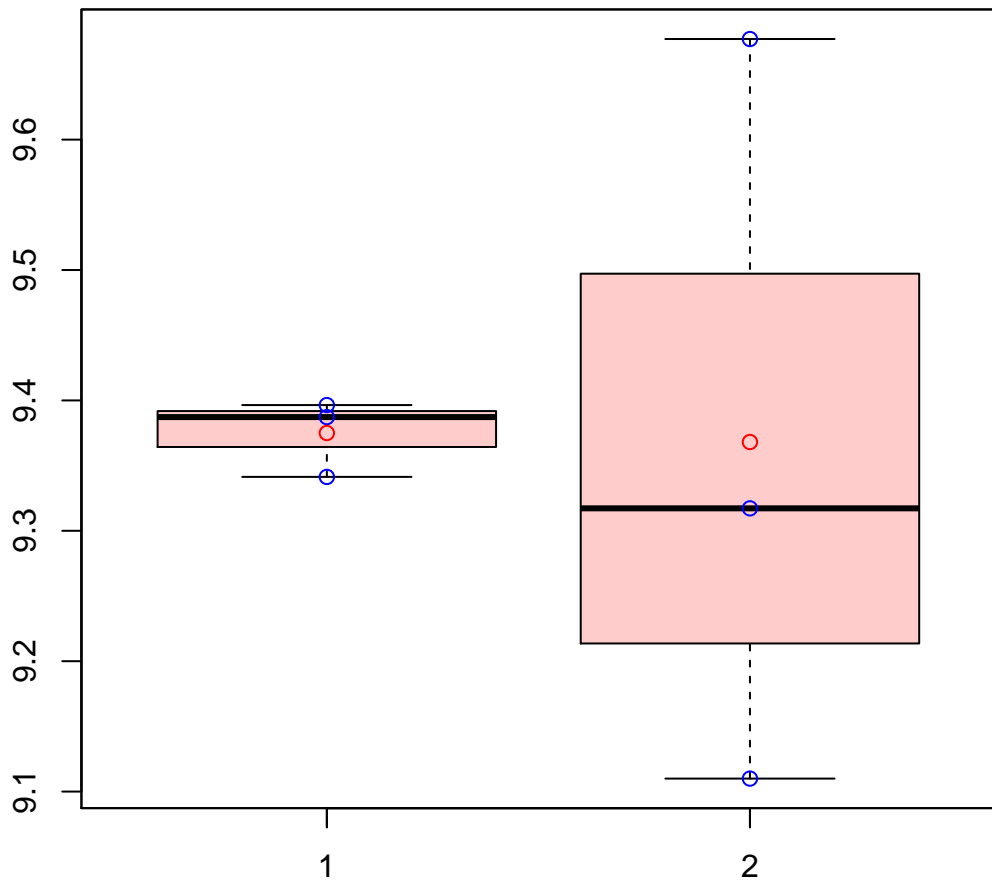

t-Test: p-value = 0.97



# CL1013Contig4|CL1013Contig4

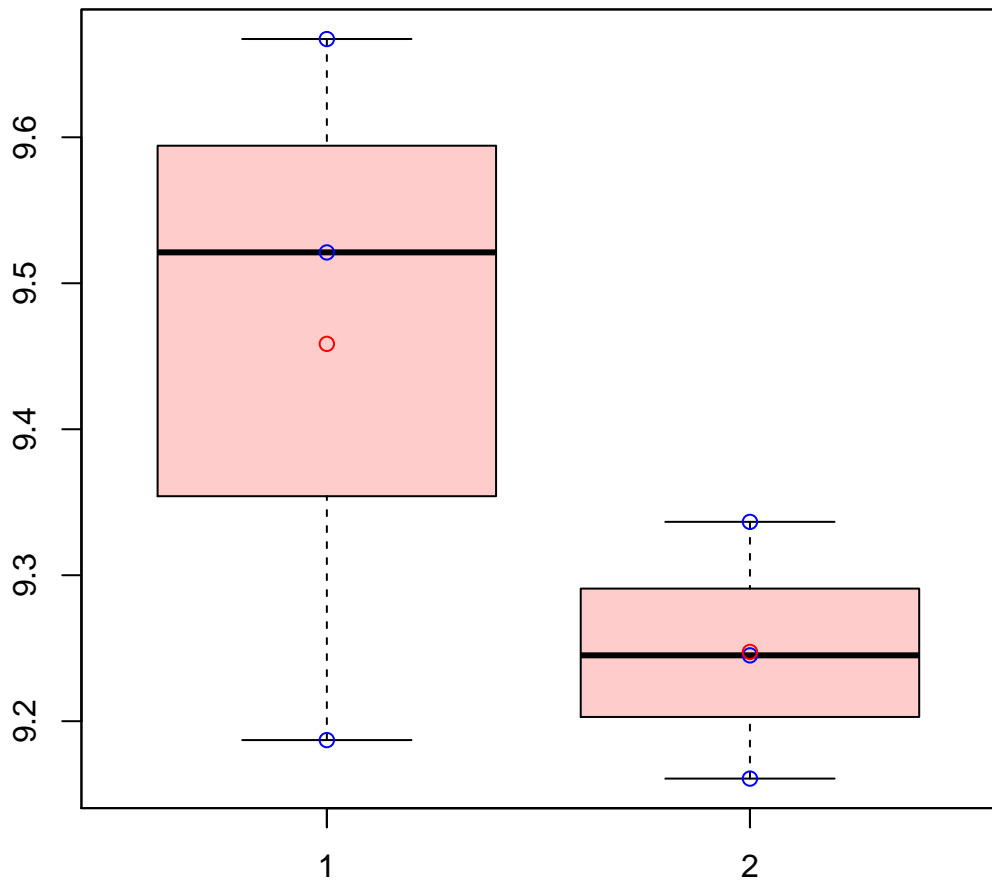

t-Test: p-value = 0.27

# CL1013Contig9|CL1013Contig9

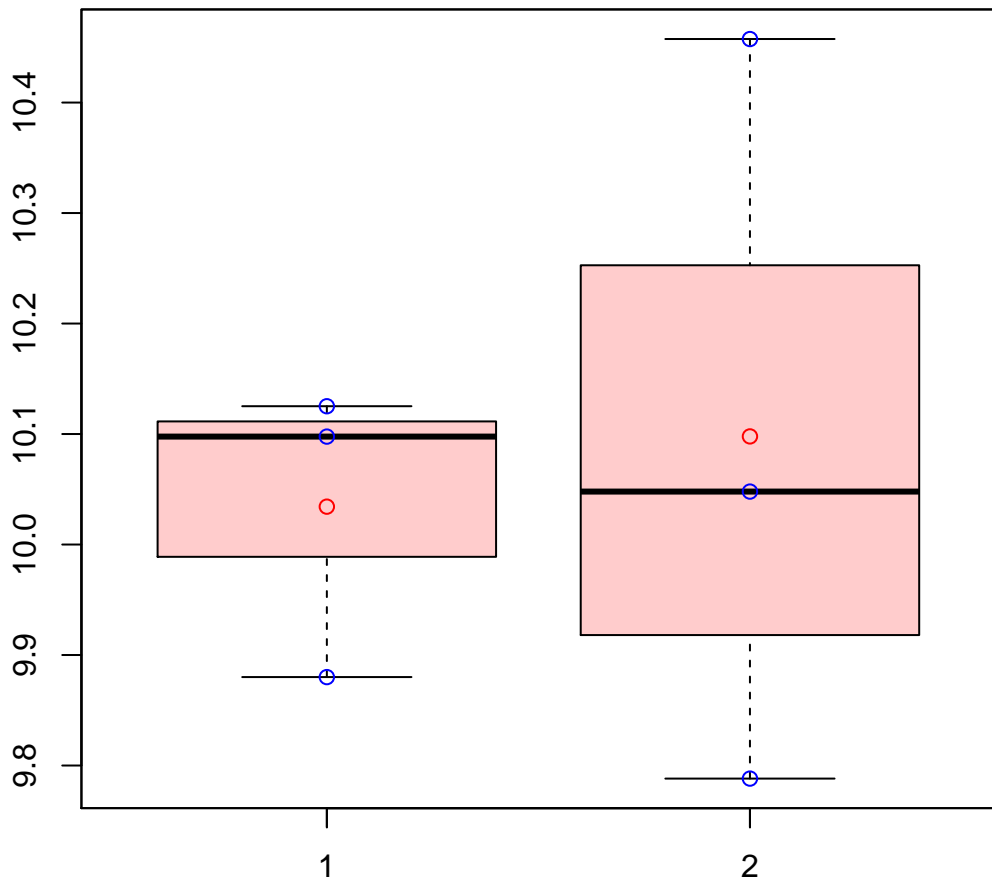

t-Test: p-value = 0.78

# CL10144Contig1|CL10144Contig1

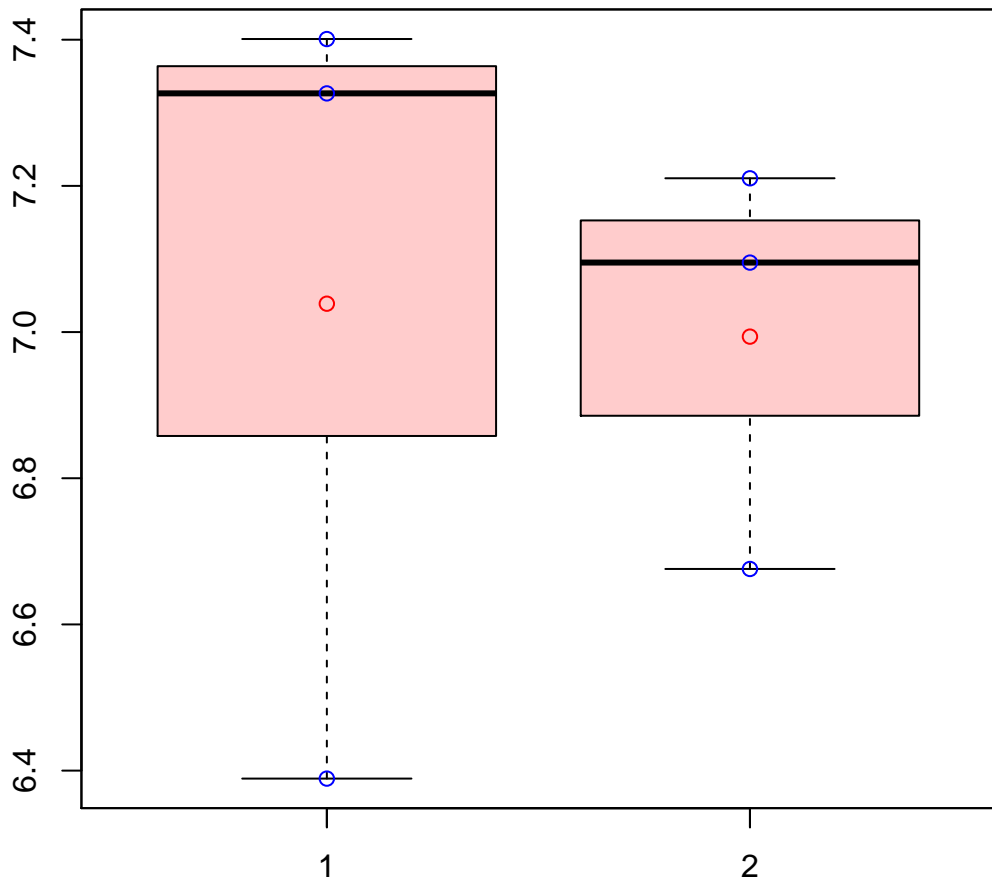

t-Test: p-value = 0.91

# CL10162Contig3|CL10162Contig3

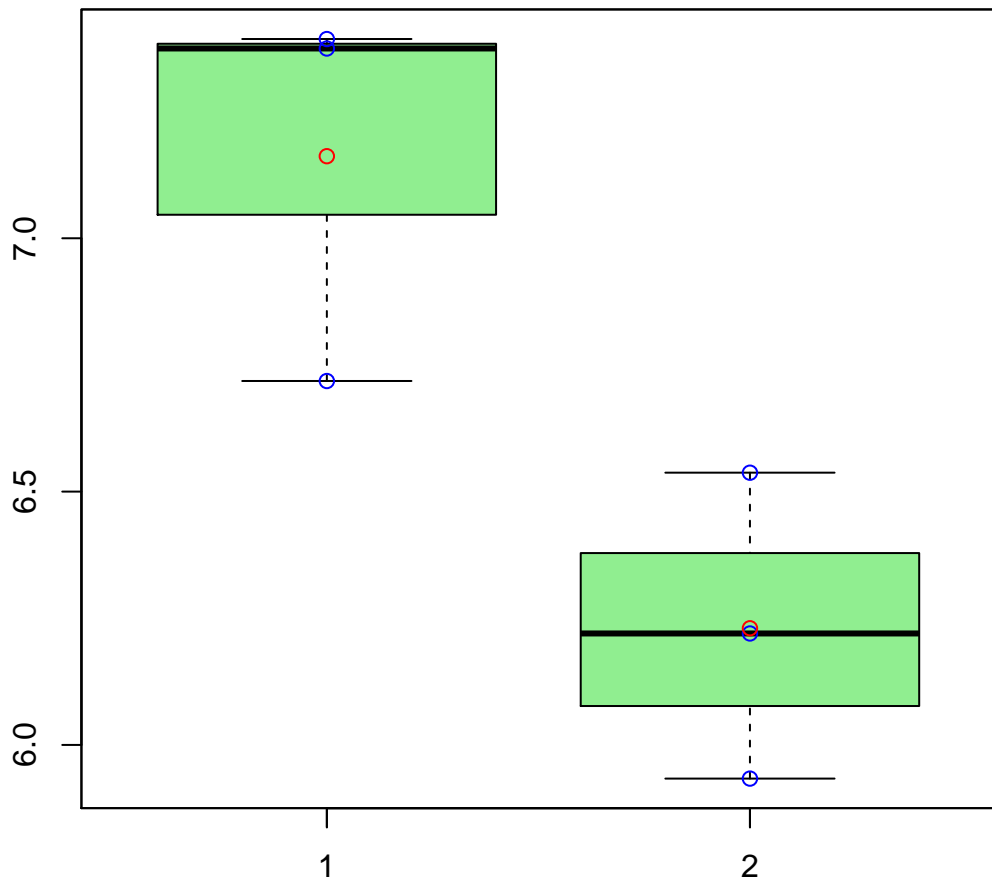

t-Test: p-value = 0.03

# CL10171Contig2|CL10171Contig2

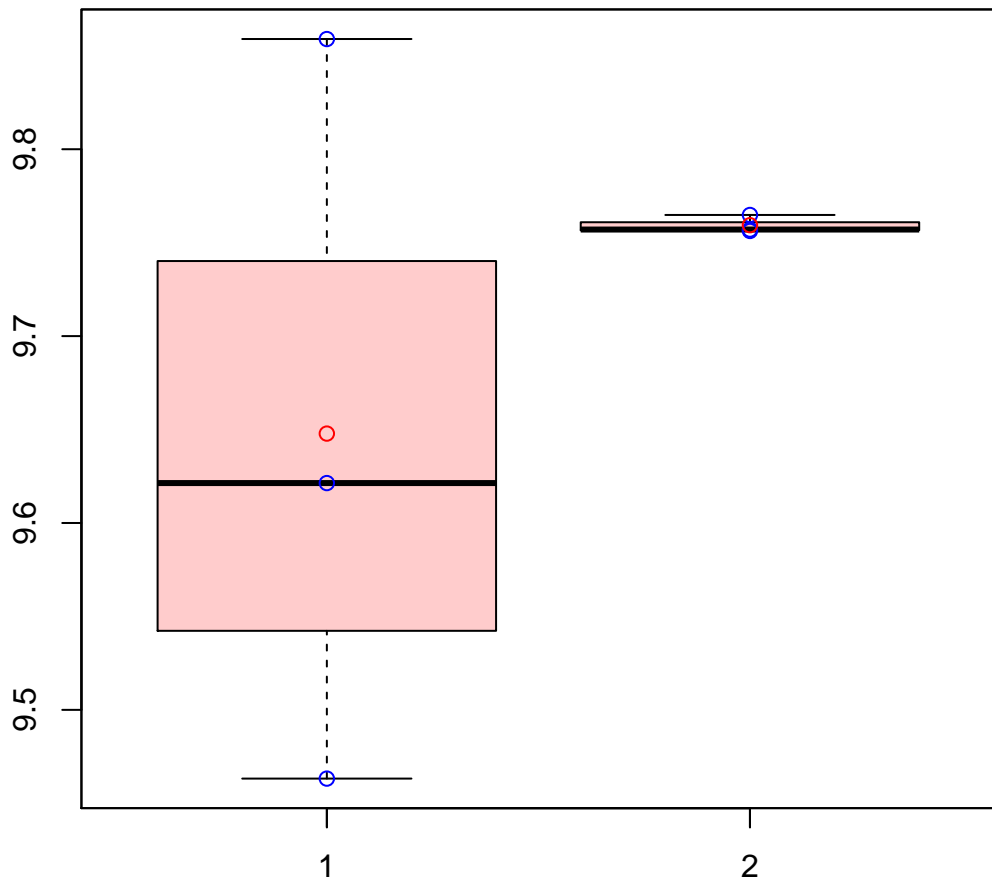

t-Test: p-value = 0.43

# CL10197Contig1|CL10197Contig1

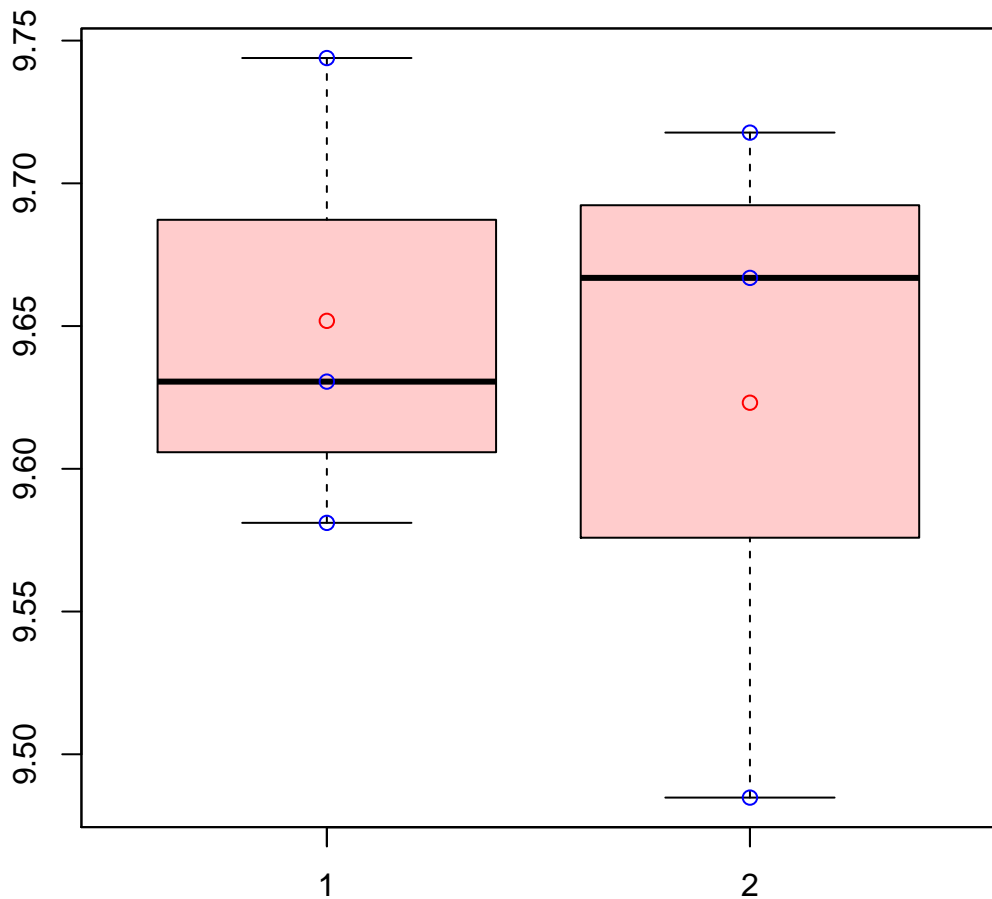

t-Test: p-value = 0.76

# CL101Contig2|CL101Contig2

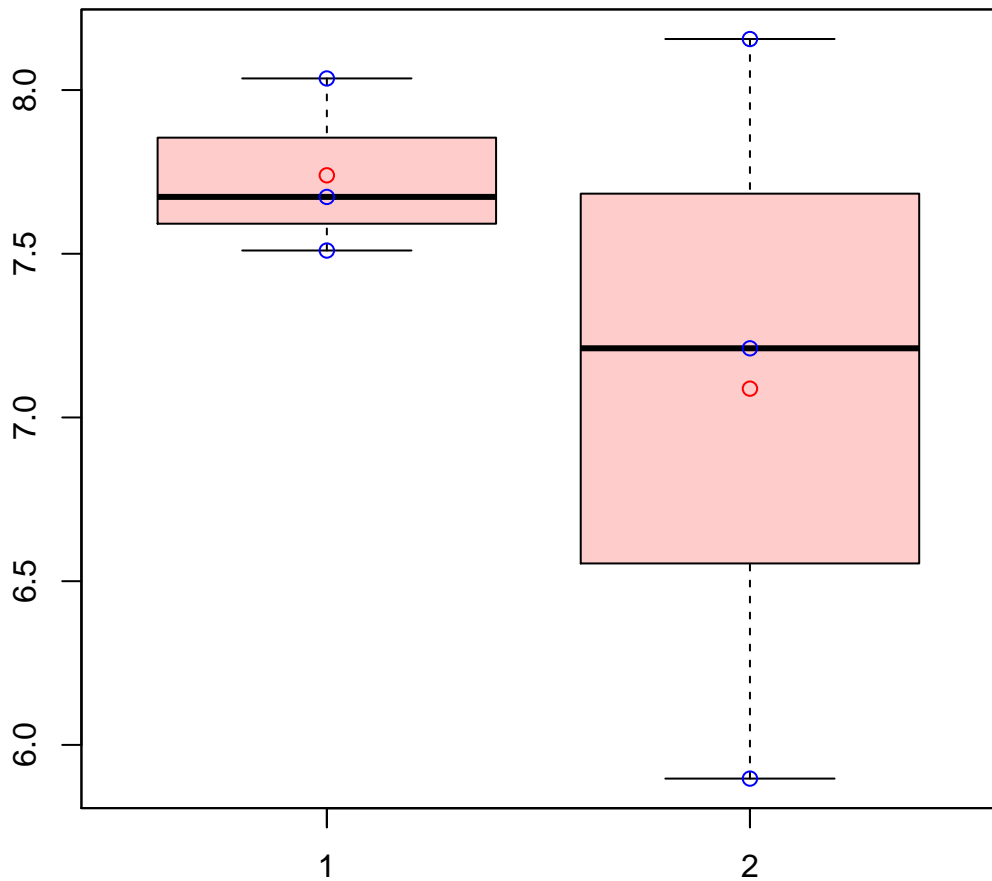

t-Test: p-value = 0.43

# CL10212Contig1|CL10212Contig1

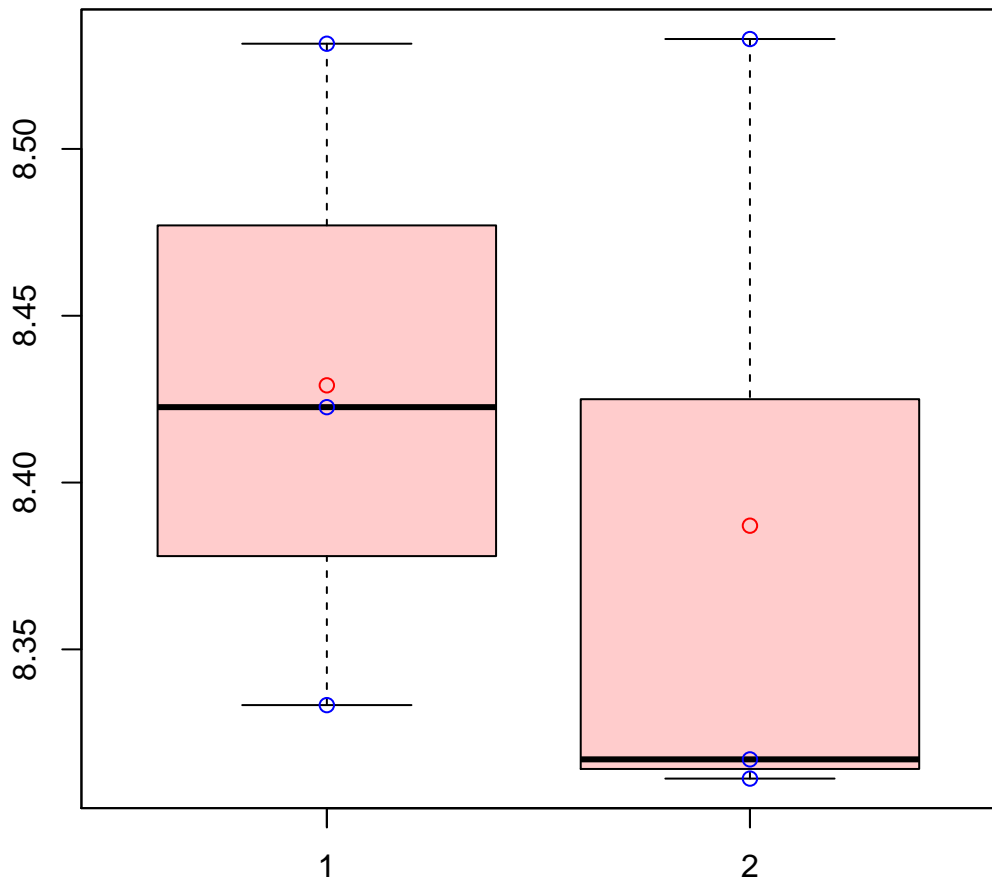

t-Test: p-value = 0.68



# CL10223Contig2|CL10223Contig2

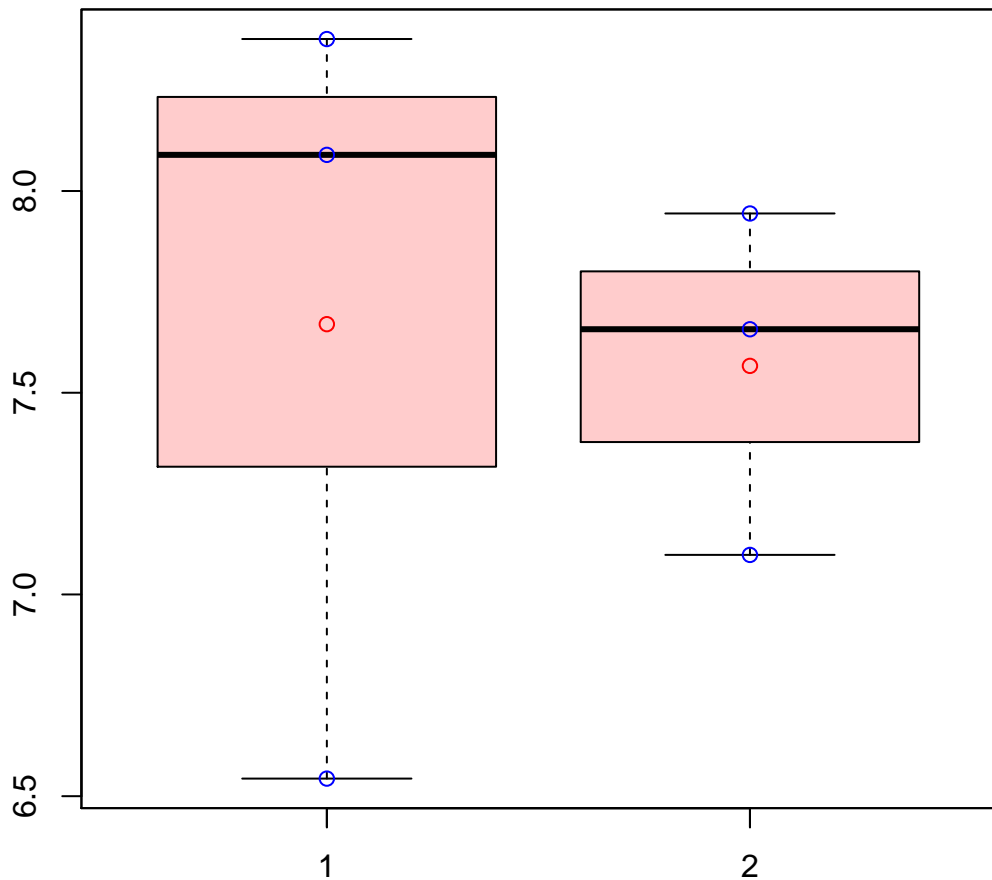

t-Test: p-value = 0.88

# CL10223Contig3|CL10223Contig3

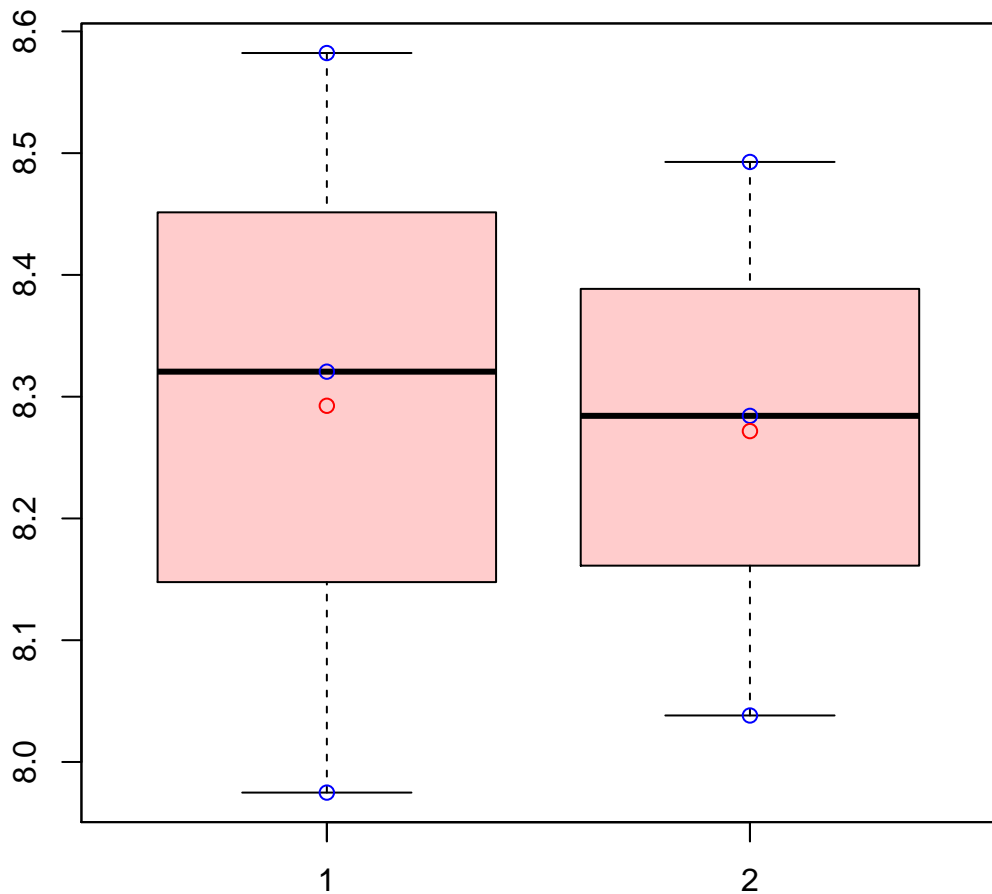

t-Test: p-value = 0.93

# CL10226Contig1|CL10226Contig1

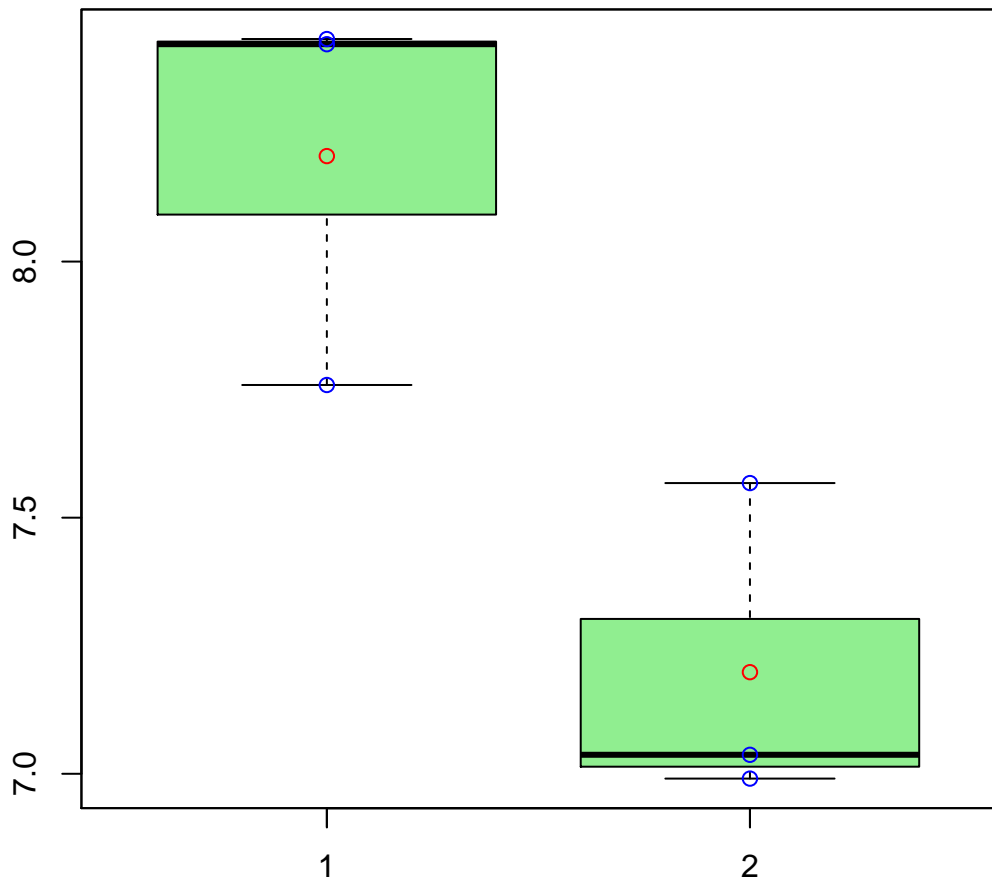

t-Test: p-value = 0.03

# CL10234Contig2|CL10234Contig2

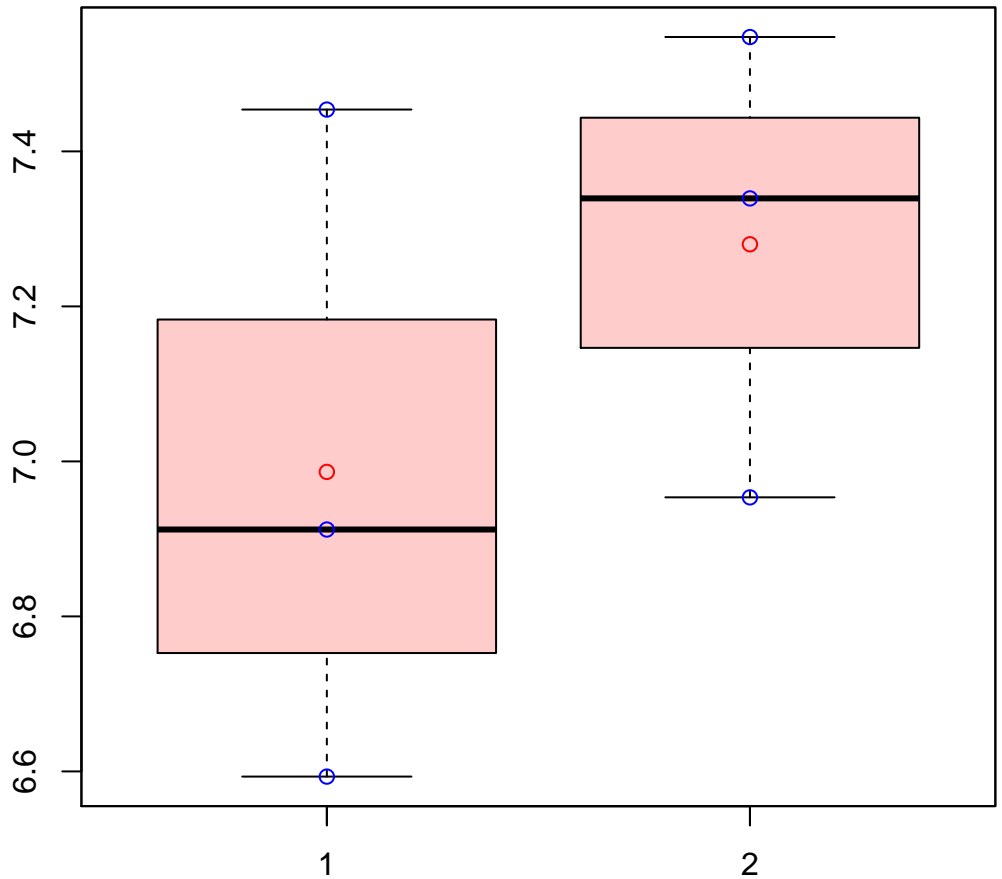

t-Test: p-value = 0.4

# CL10242Contig1|CL10242Contig1

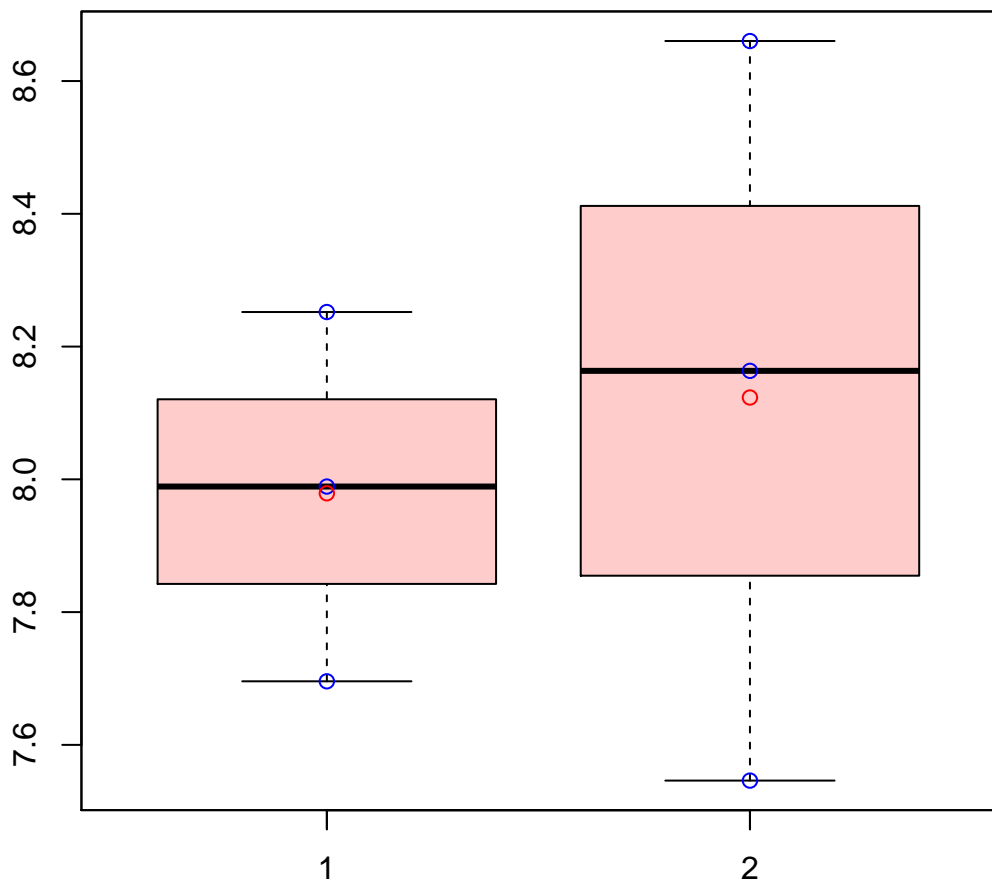

t-Test: p-value = 0.72

# CL1025Contig3|CL1025Contig3

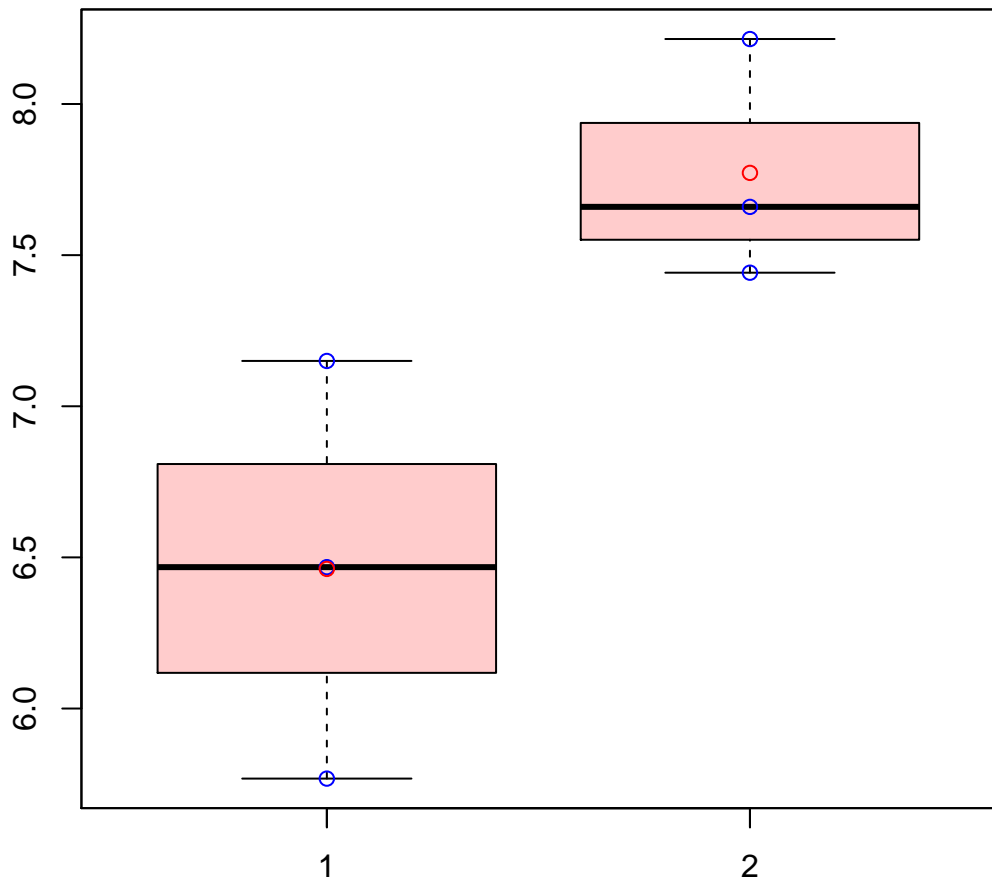

t-Test: p-value = 0.06

# CL10261Contig1|CL10261Contig1

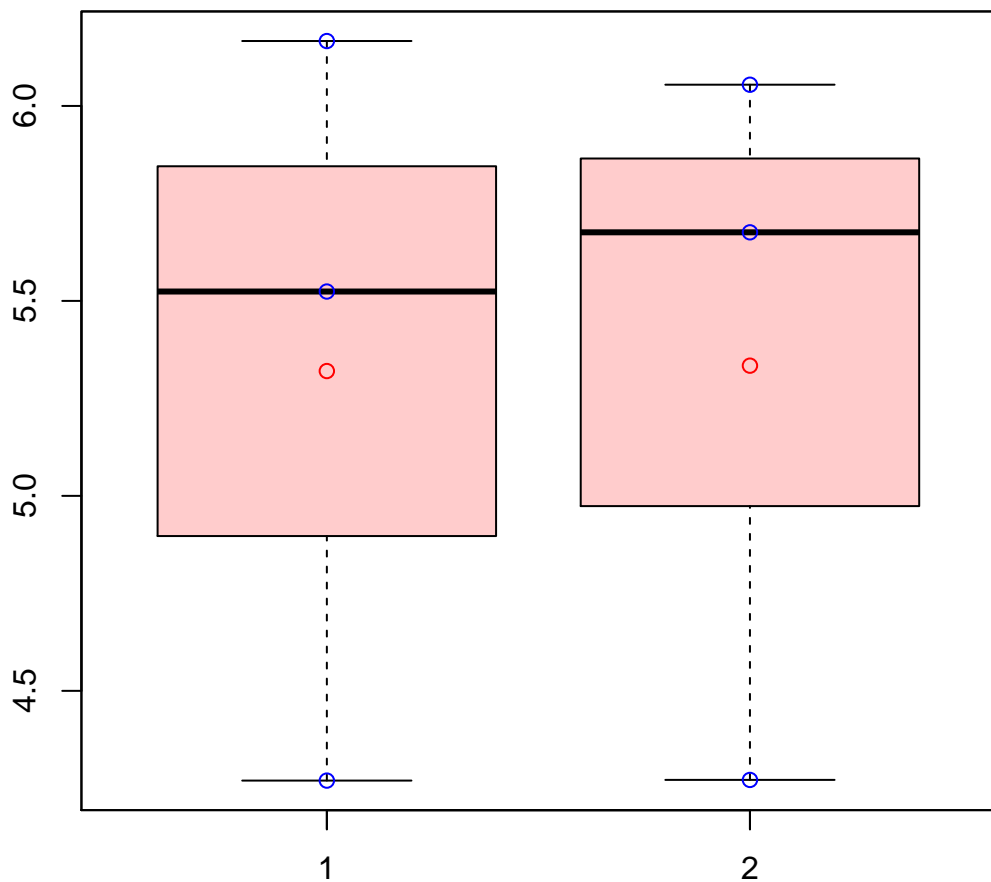

t-Test: p-value = 0.99

# CL1026Contig5|CL1026Contig5

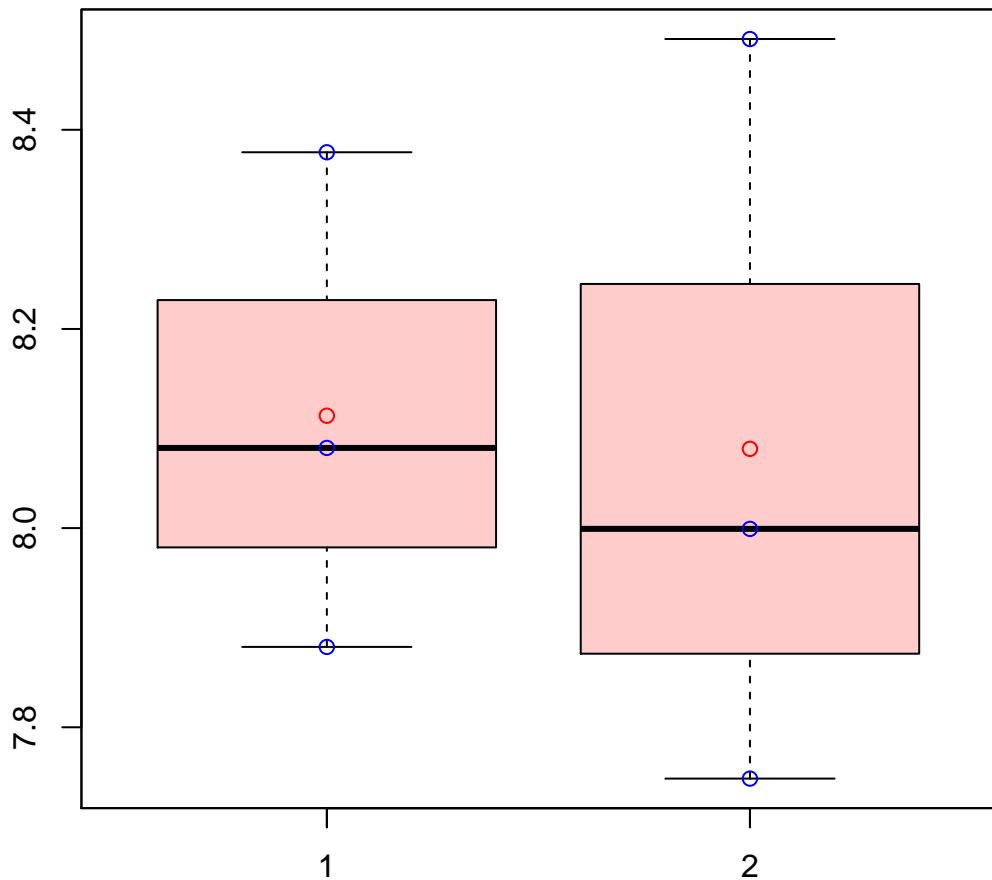

t-Test: p-value = 0.91



# CL1026Contig6|CL1026Contig6

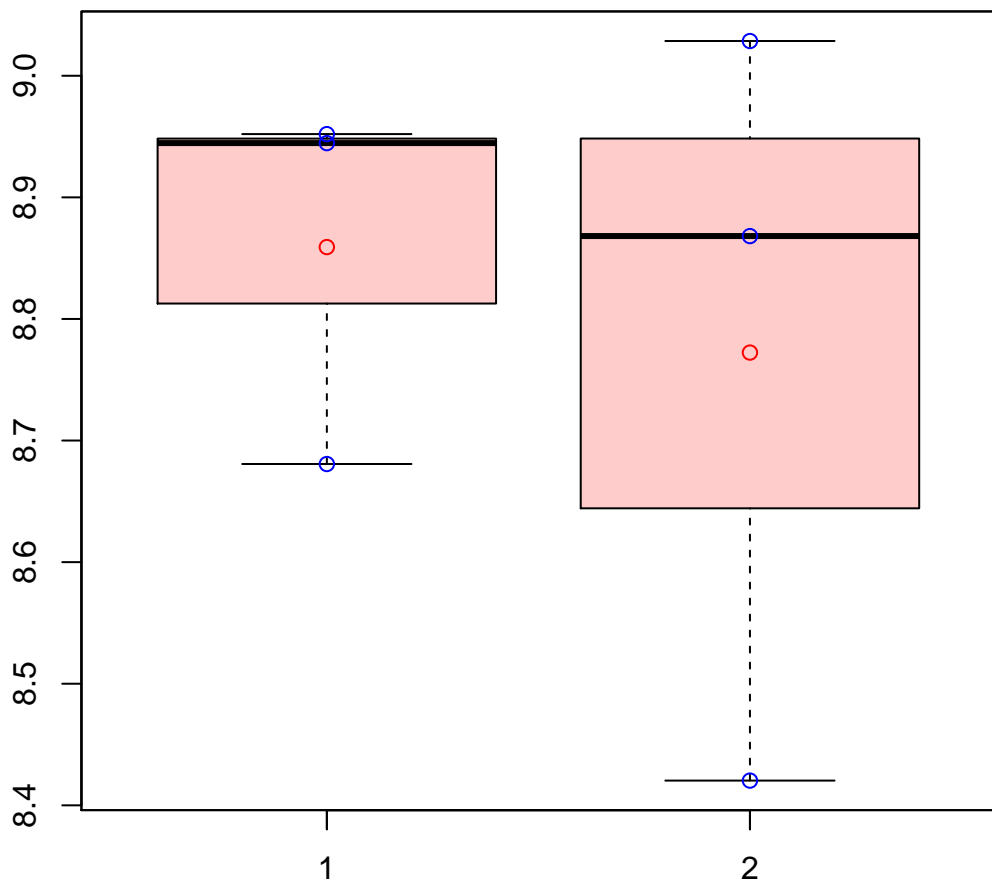

t-Test: p-value = 0.7

# CL10274Contig1|CL10274Contig1

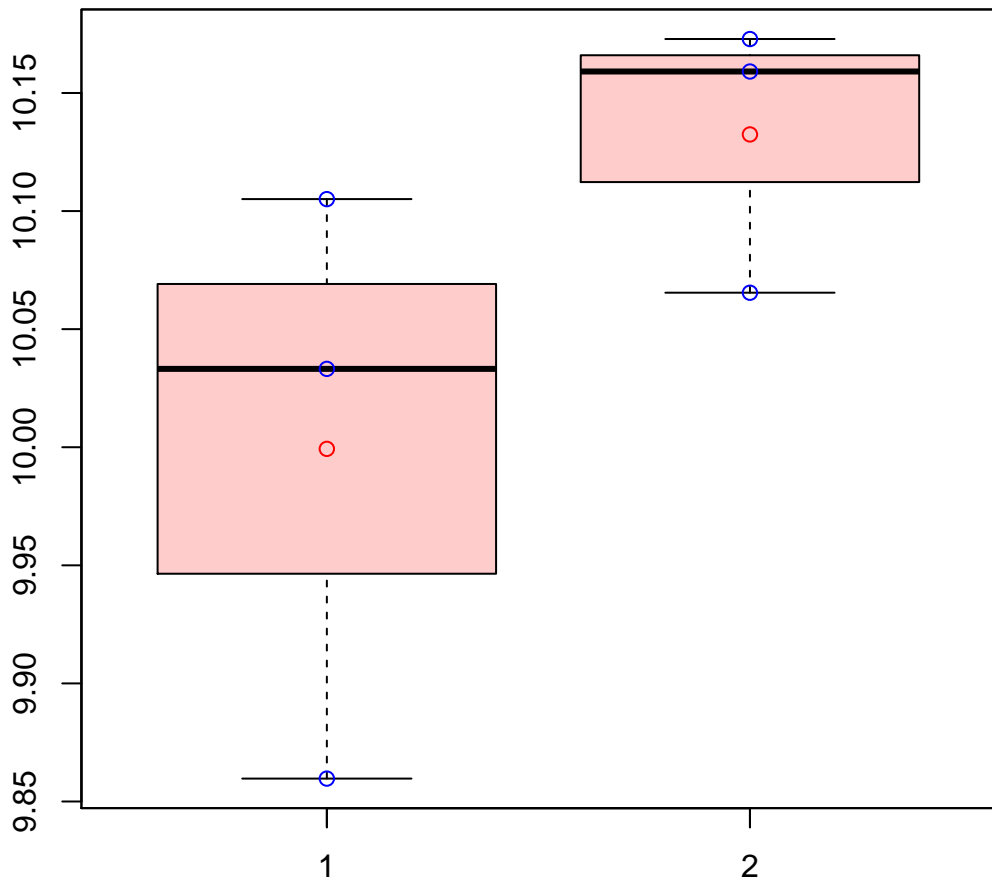

t-Test: p-value = 0.2

# CL10279Contig1|CL10279Contig1

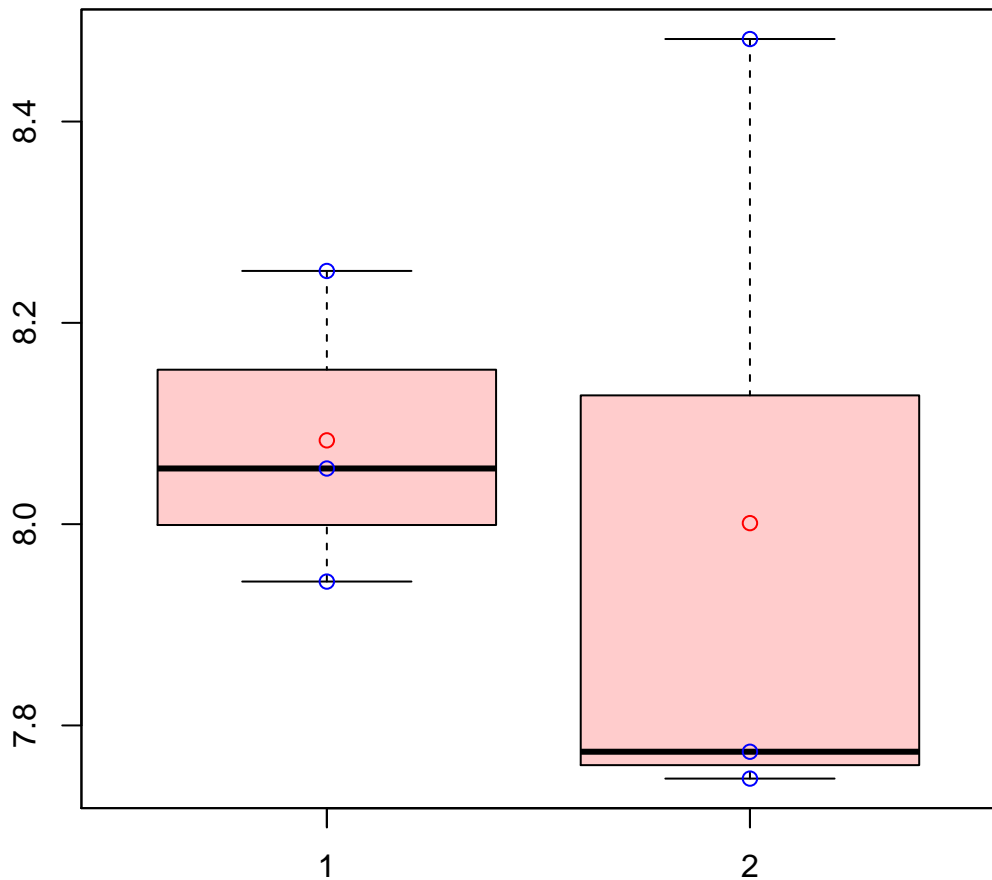

t-Test: p-value = 0.77

# CL1027Contig10|CL1027Contig10

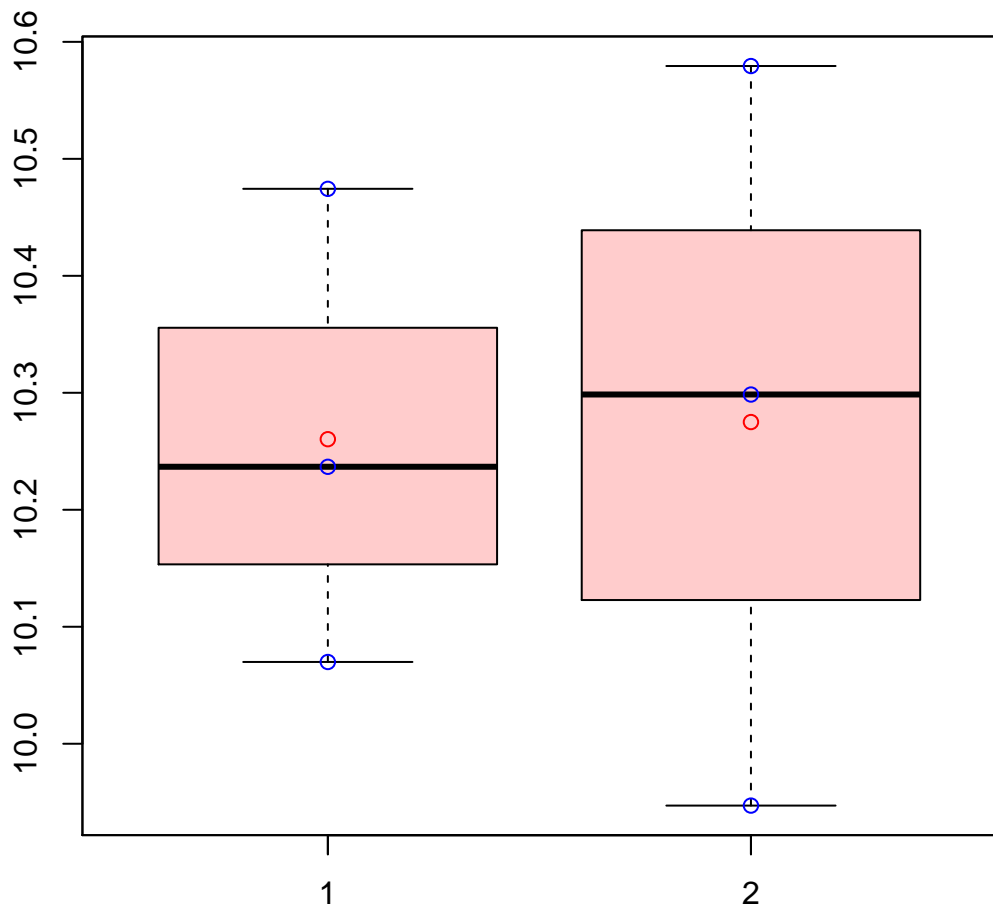

t-Test: p-value = 0.95

# CL1027Contig3|CL1027Contig3

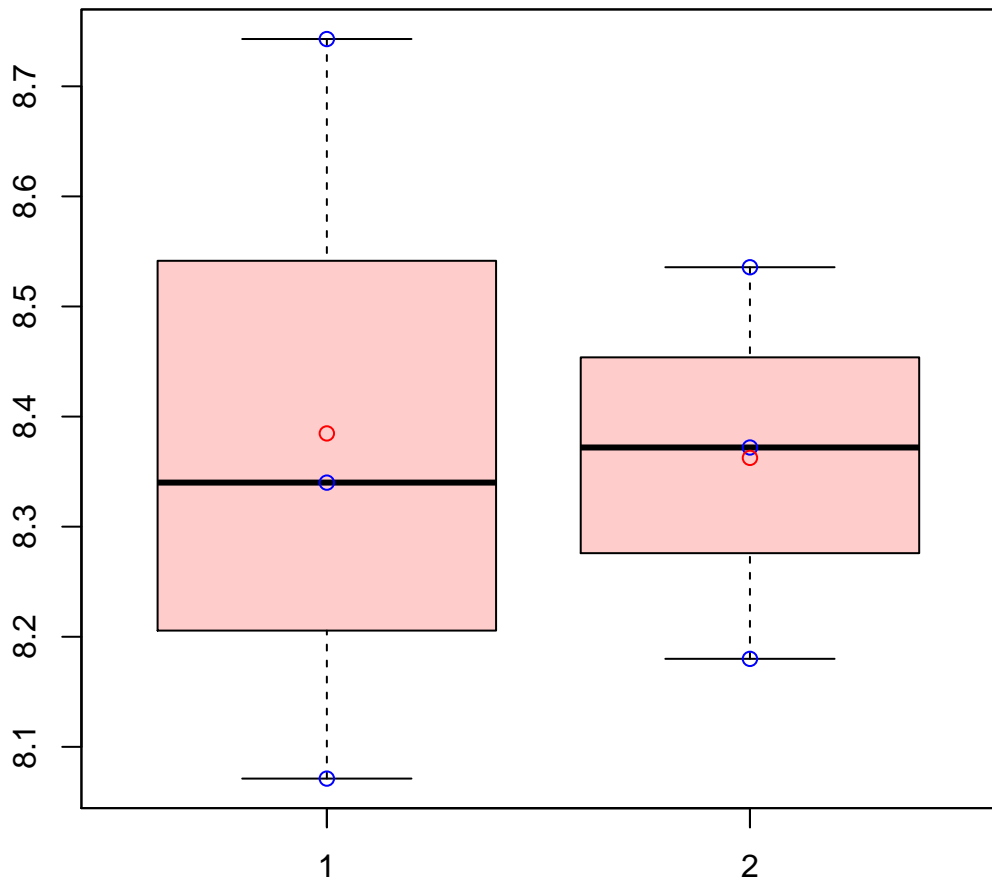

t-Test: p-value = 0.93

# CL1027Contig6|CL1027Contig6



t-Test: p-value = 0.93

# CL102Contig20|CL102Contig20

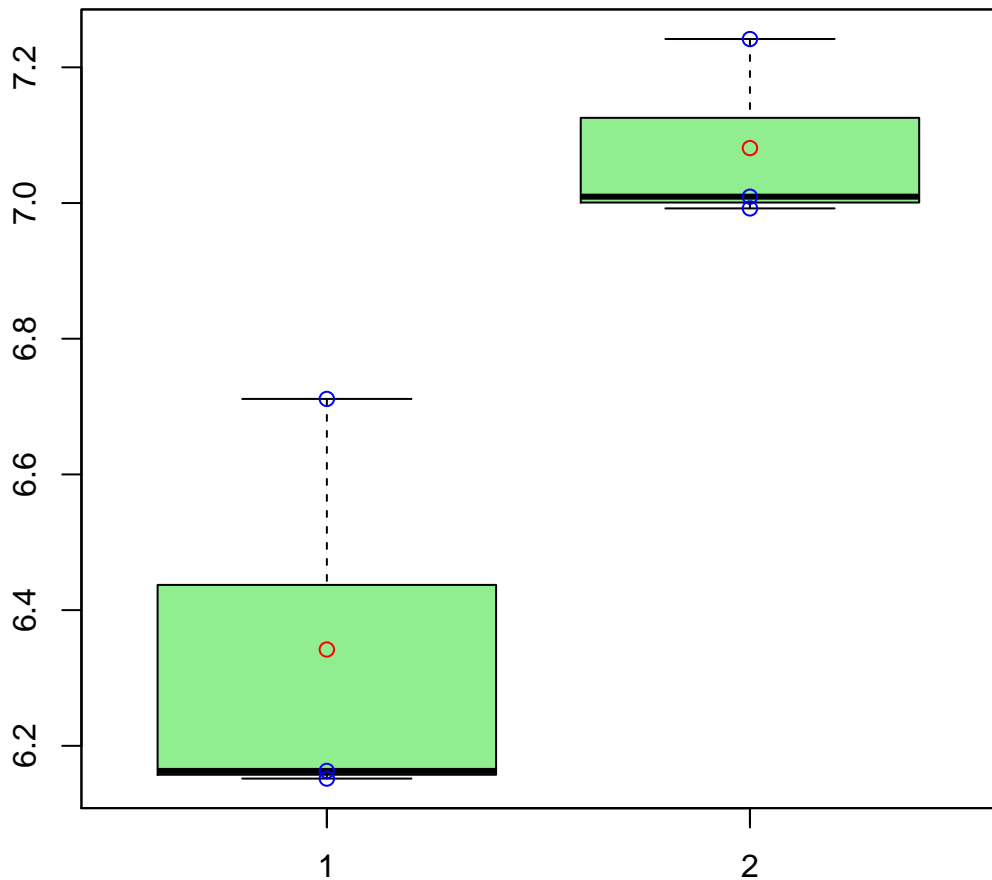

t-Test: p-value = 0.04

# CL102Contig3|CL102Contig3

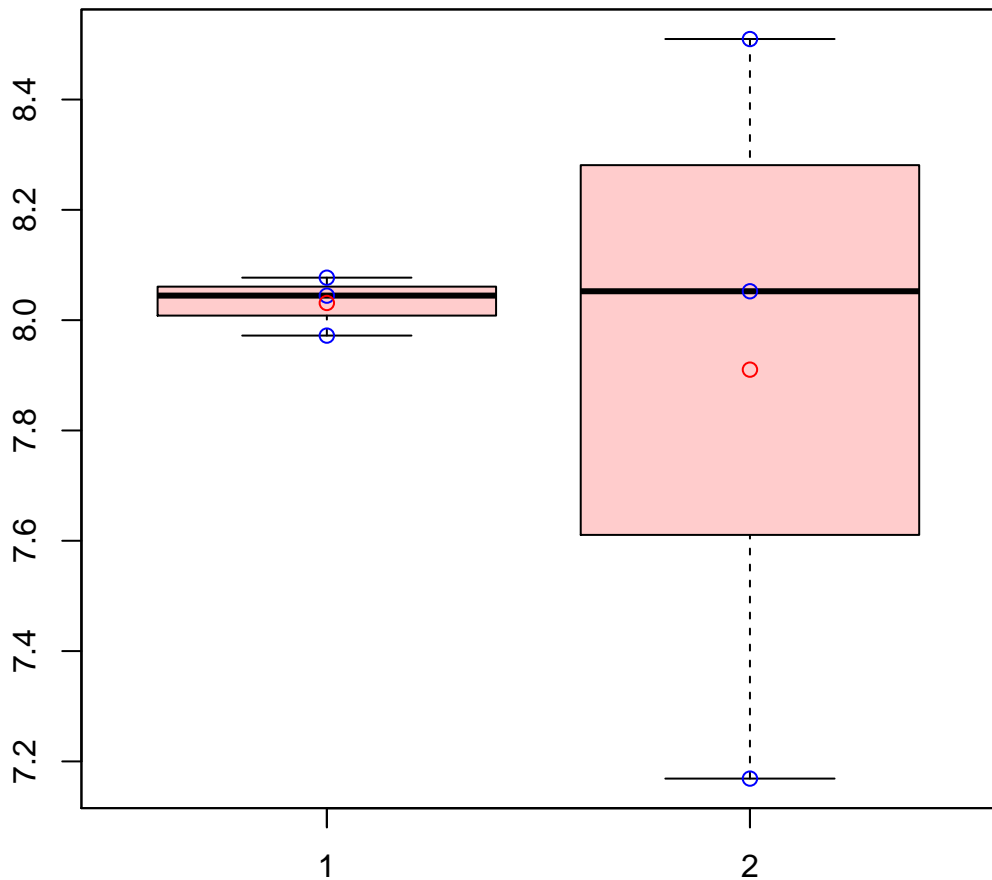

t-Test: p-value = 0.79



# CL10302Contig1|CL10302Contig1

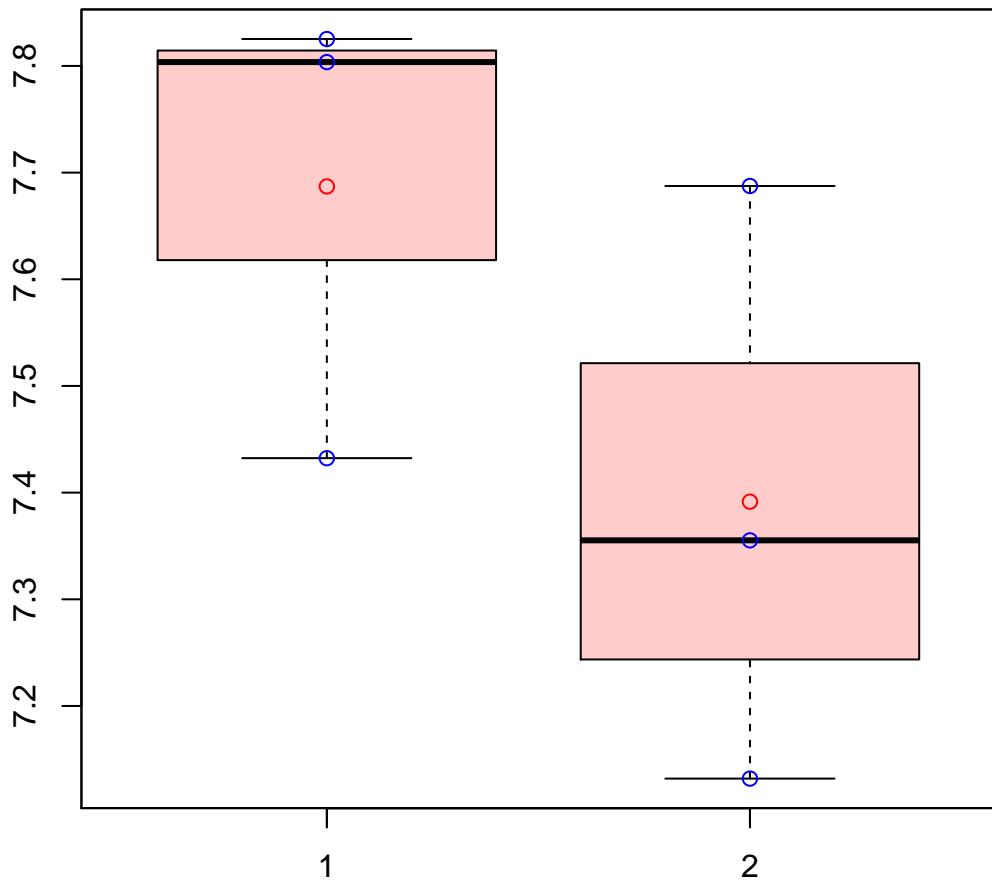

t-Test: p-value = 0.23

# CL1030Contig10|CL1030Contig10

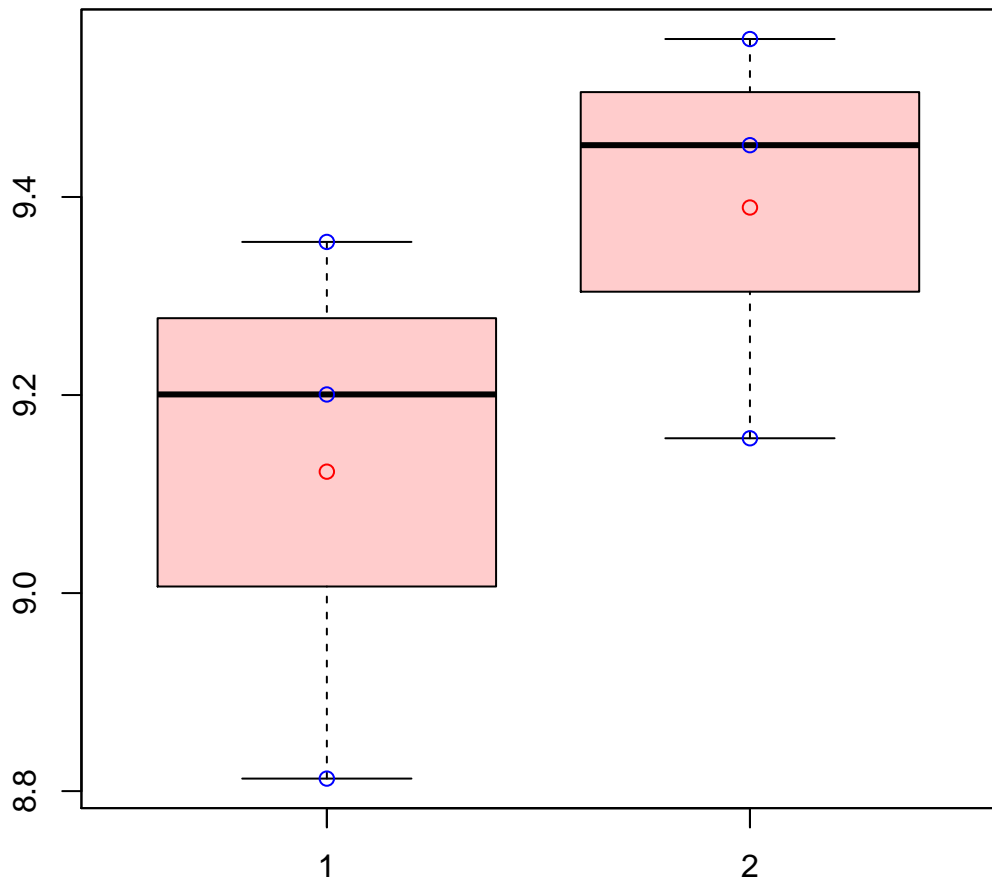

t-Test: p-value = 0.26

# CL1030Contig13|CL1030Contig13

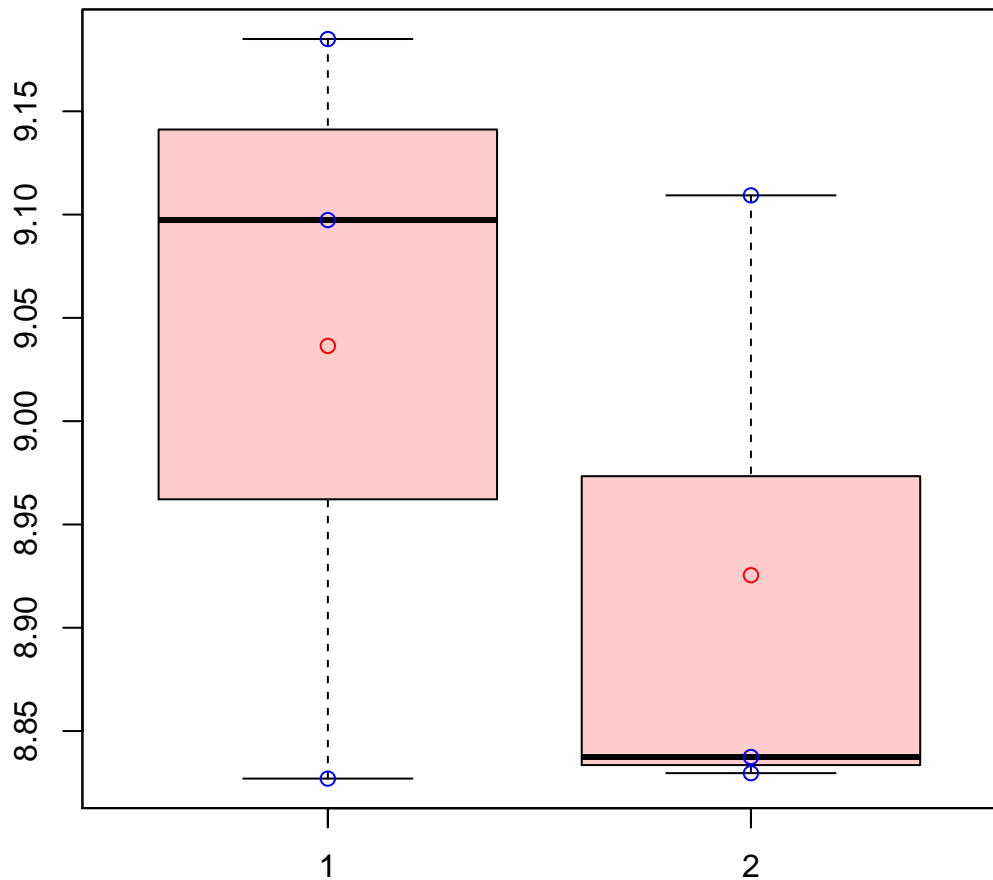

t-Test: p-value = 0.48

# CL1030Contig2|CL1030Contig2

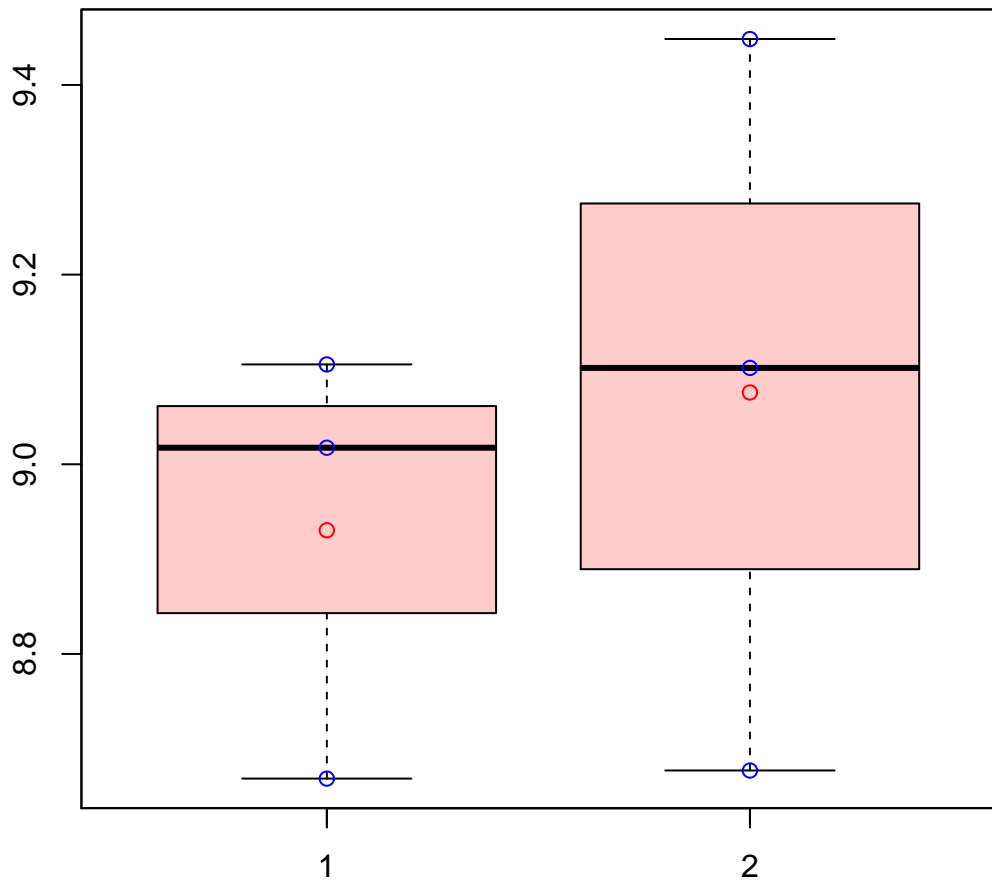

t-Test: p-value = 0.61

# CL1030Contig3|CL1030Contig3



t-Test: p-value = 0.61

# CL1030Contig8|CL1030Contig8

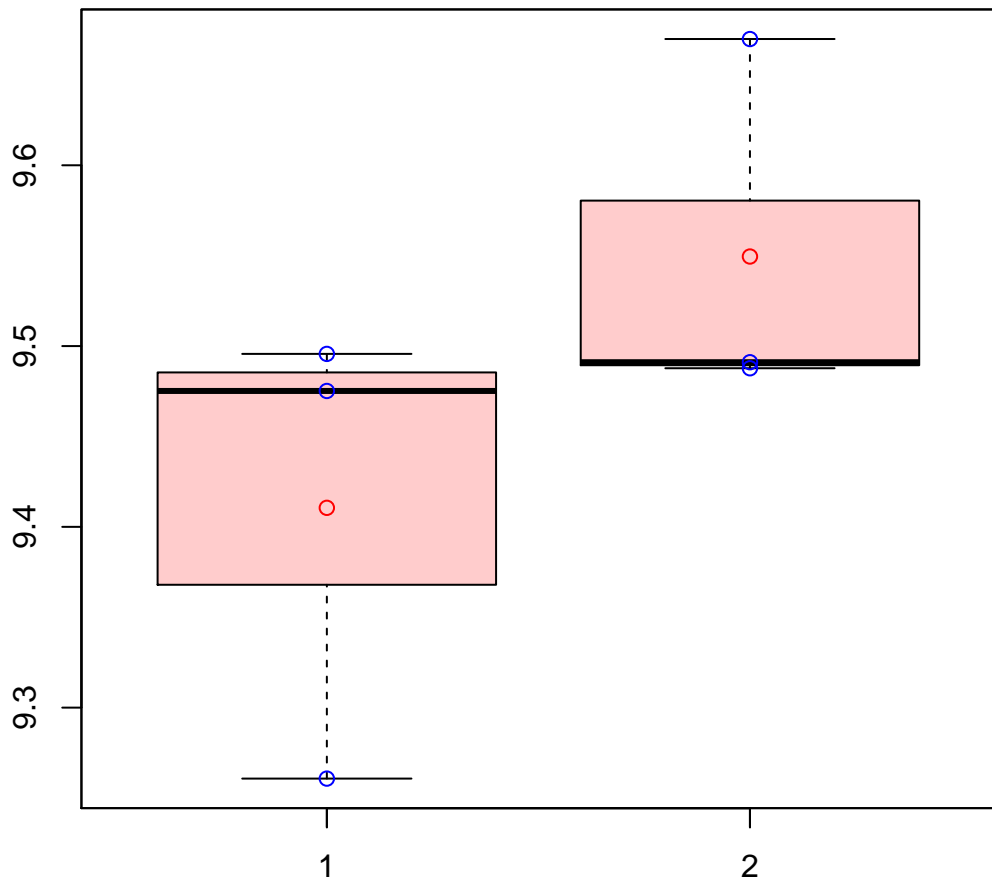

t-Test: p-value = 0.23

# CL1030Contig9|CL1030Contig9

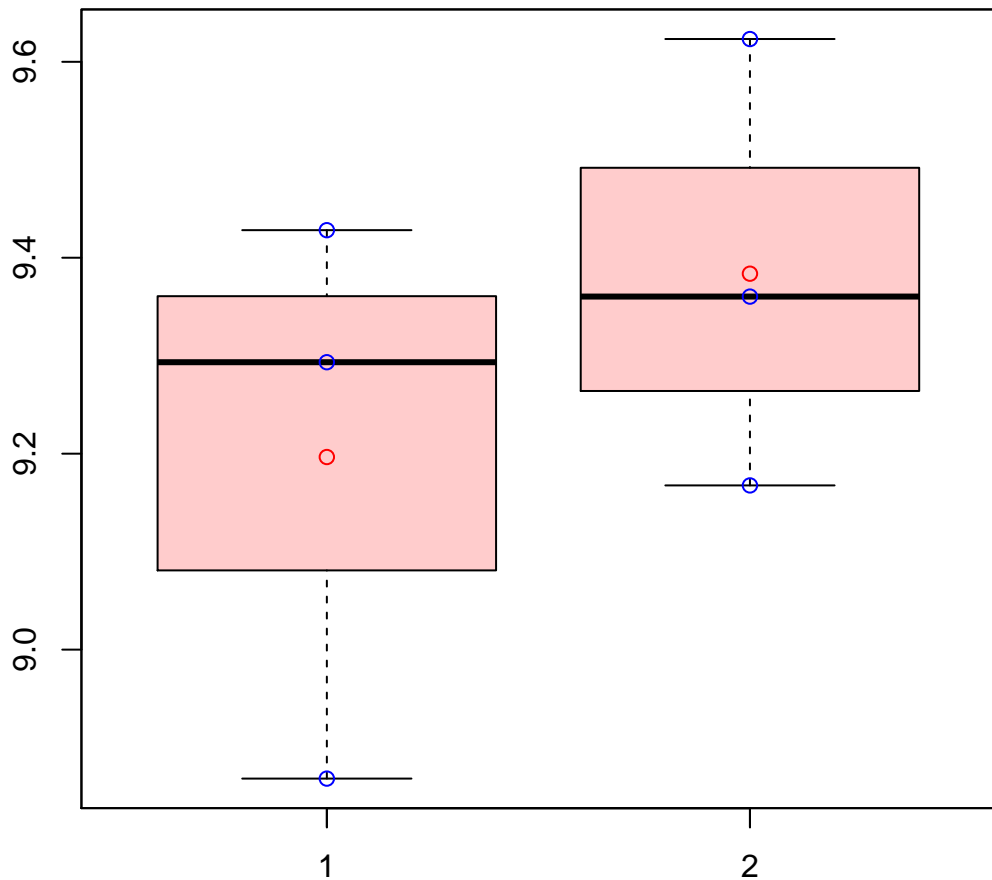

t-Test: p-value = 0.43

# CL10316Contig1|CL10316Contig1

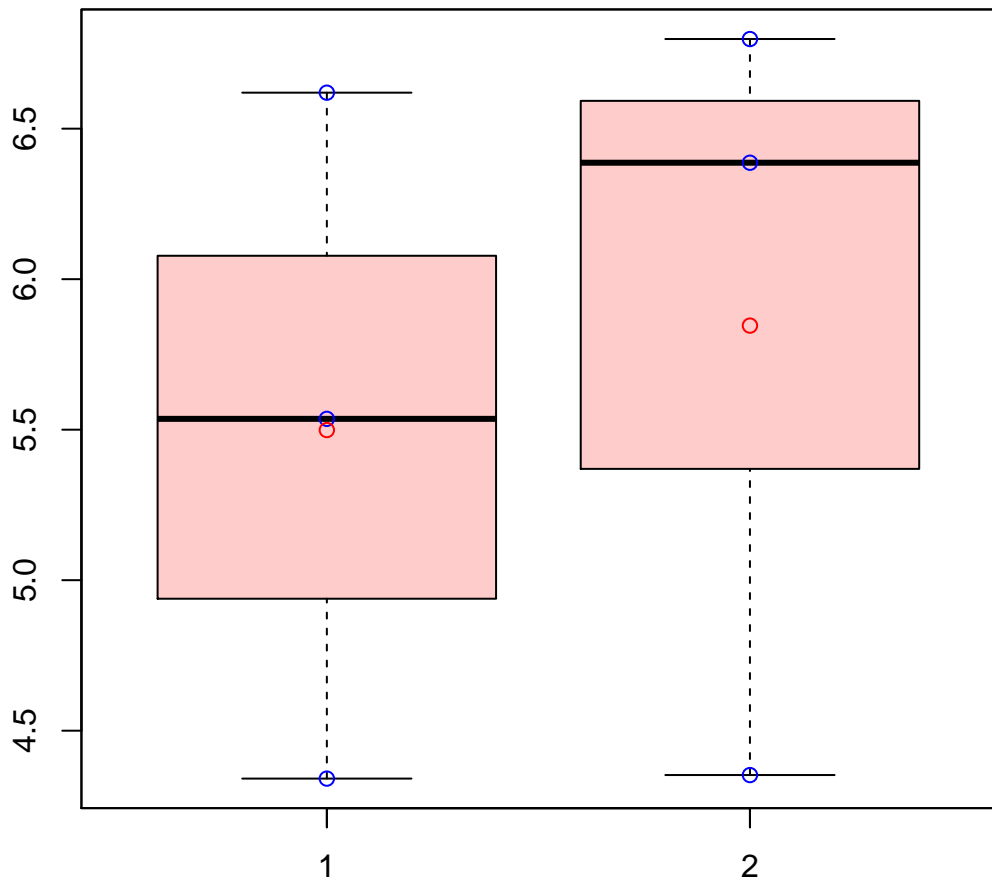

t-Test: p-value = 0.75



# CL10339Contig2|CL10339Contig2

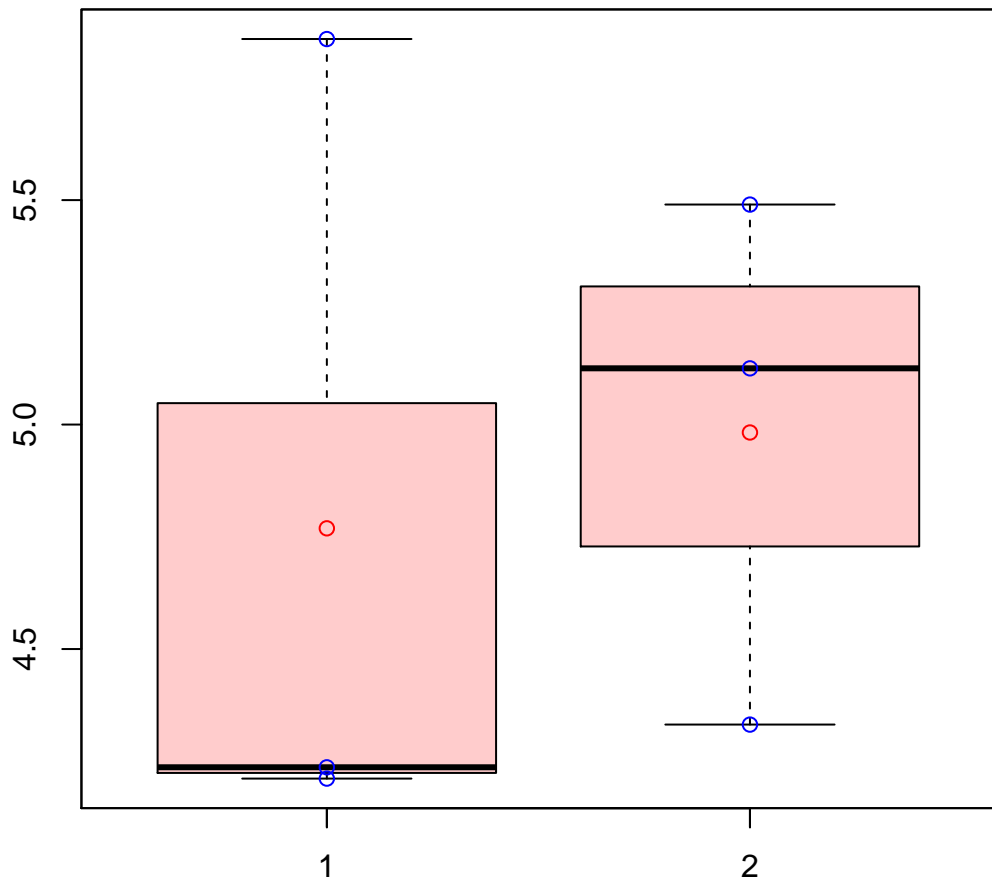

t-Test: p-value = 0.76

# CL10344Contig2|CL10344Contig2

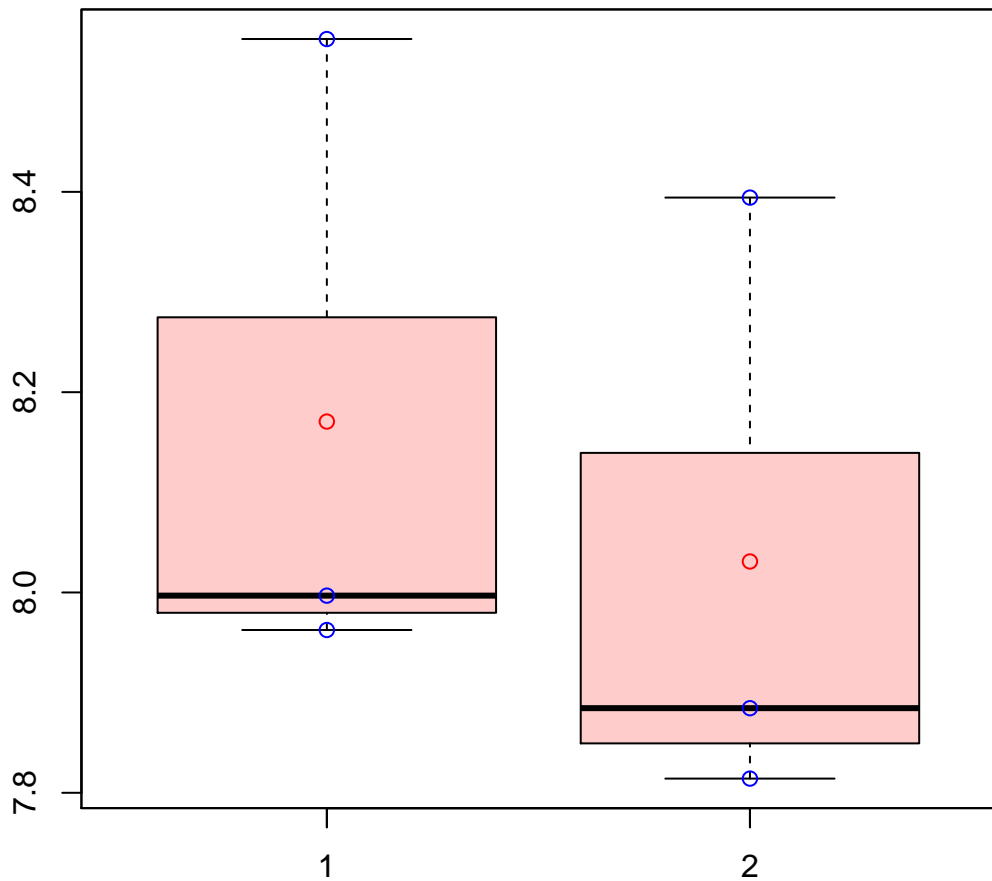

t-Test: p-value = 0.63

# CL1034Contig1|CL1034Contig1

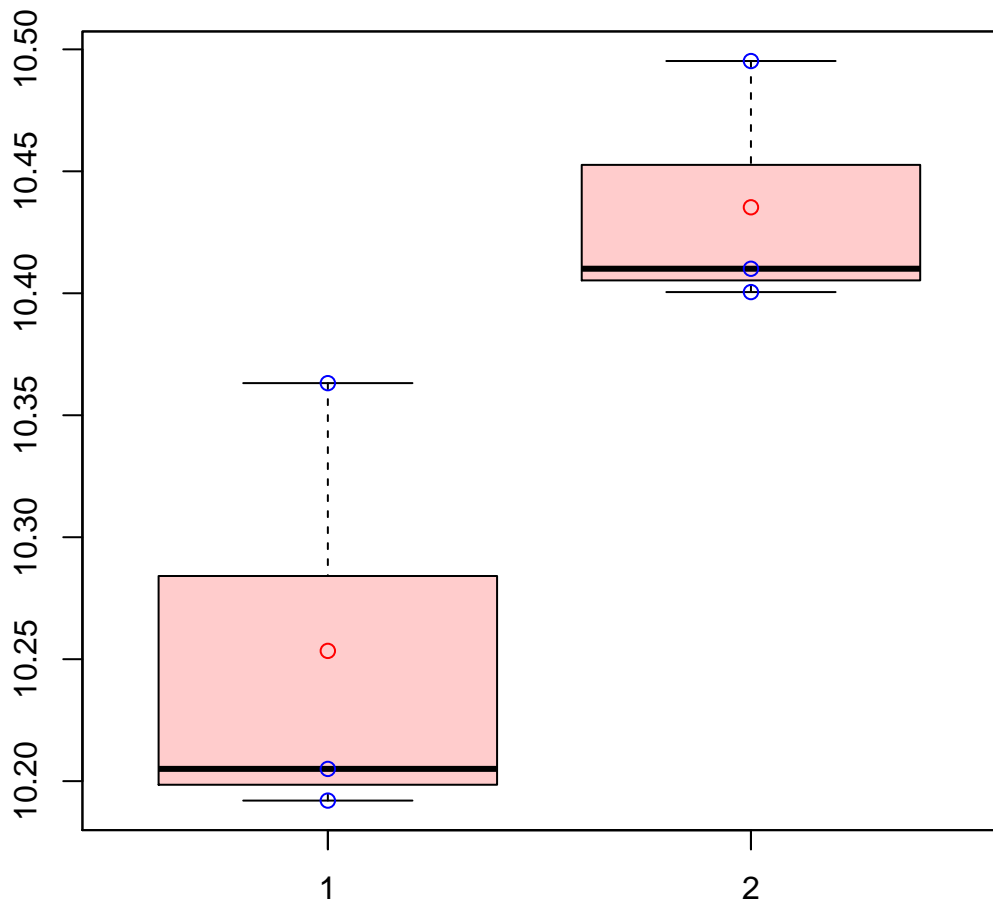

t-Test: p-value = 0.06

# CL1034Contig2|CL1034Contig2

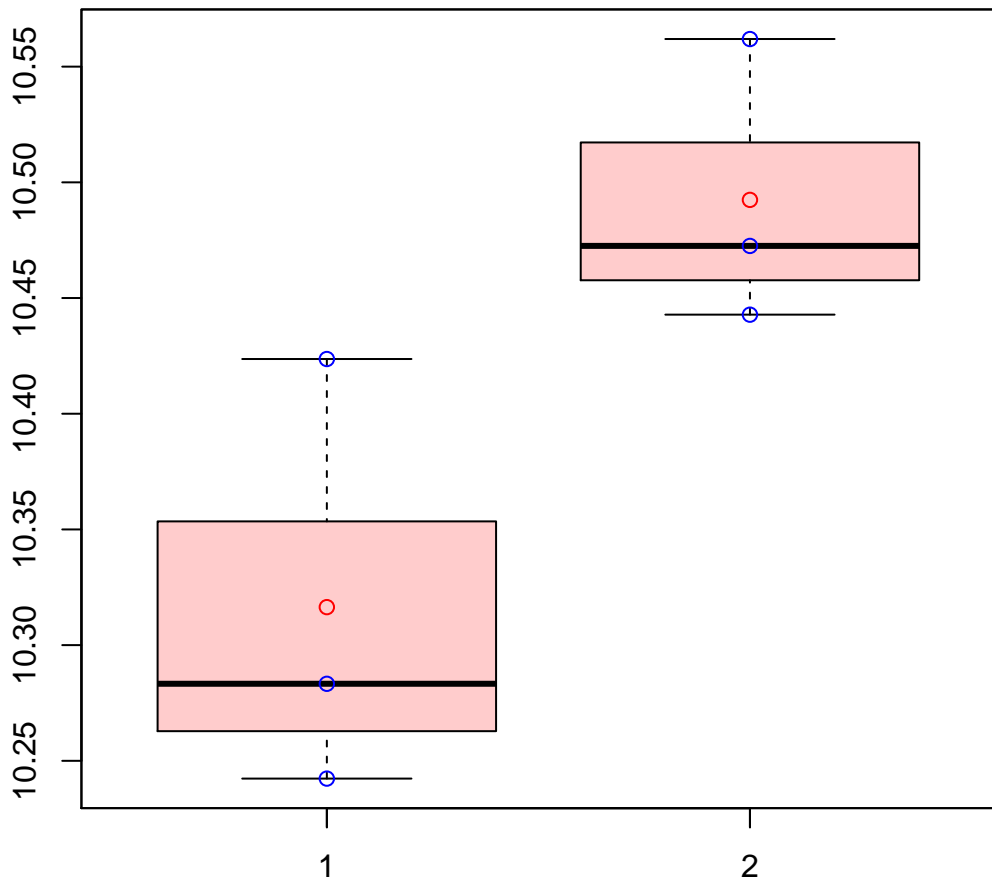

t-Test: p-value = 0.06

# CL1034Contig5|CL1034Contig5

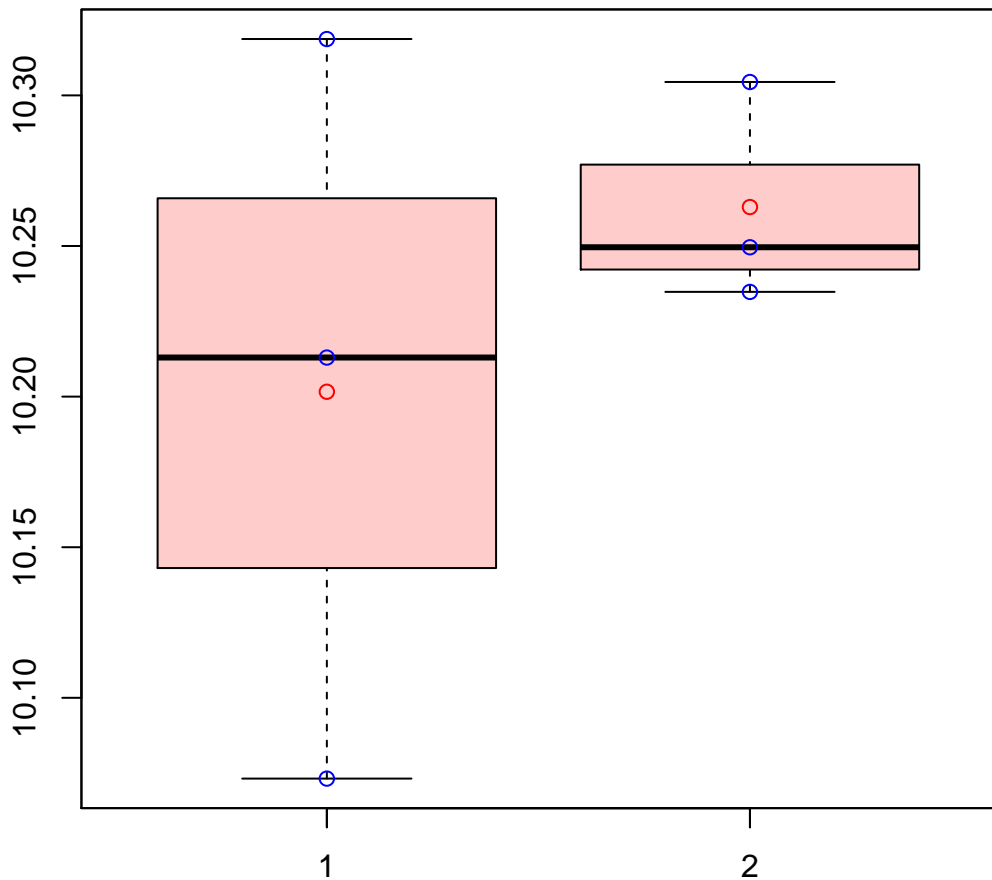

t-Test: p-value = 0.48

# CL1035Contig10|CL1035Contig10

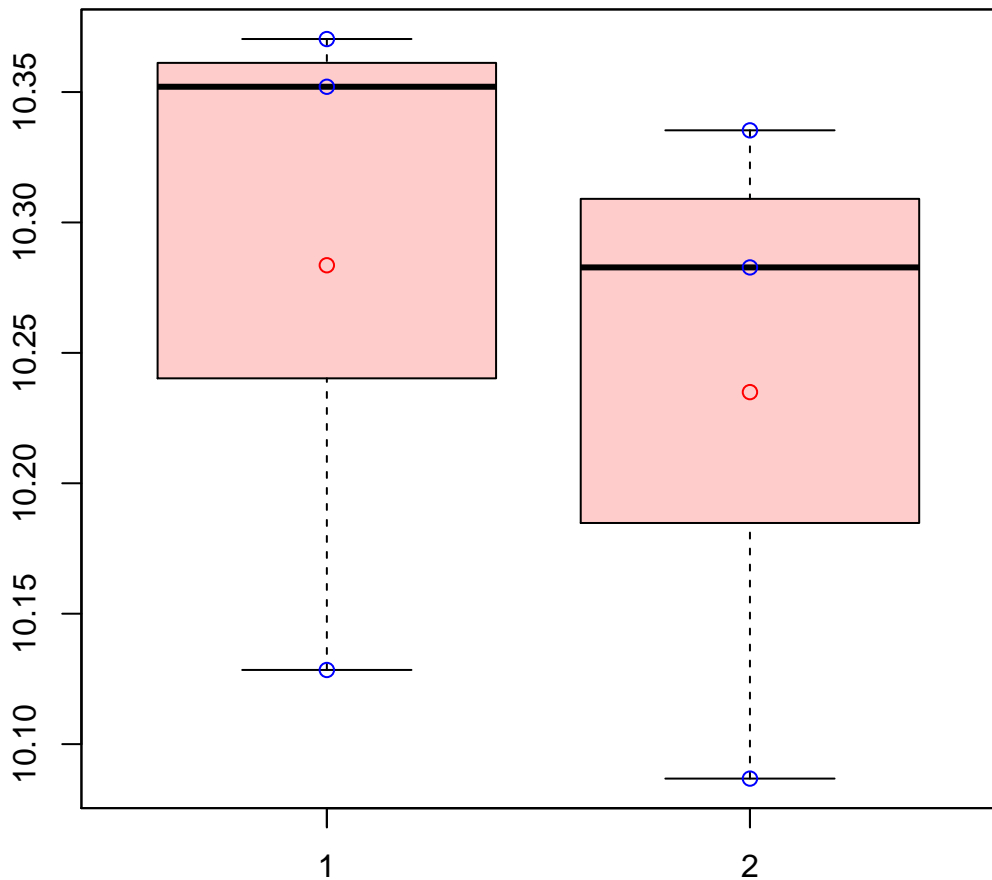

t-Test: p-value = 0.68

# CL1035Contig11|CL1035Contig11

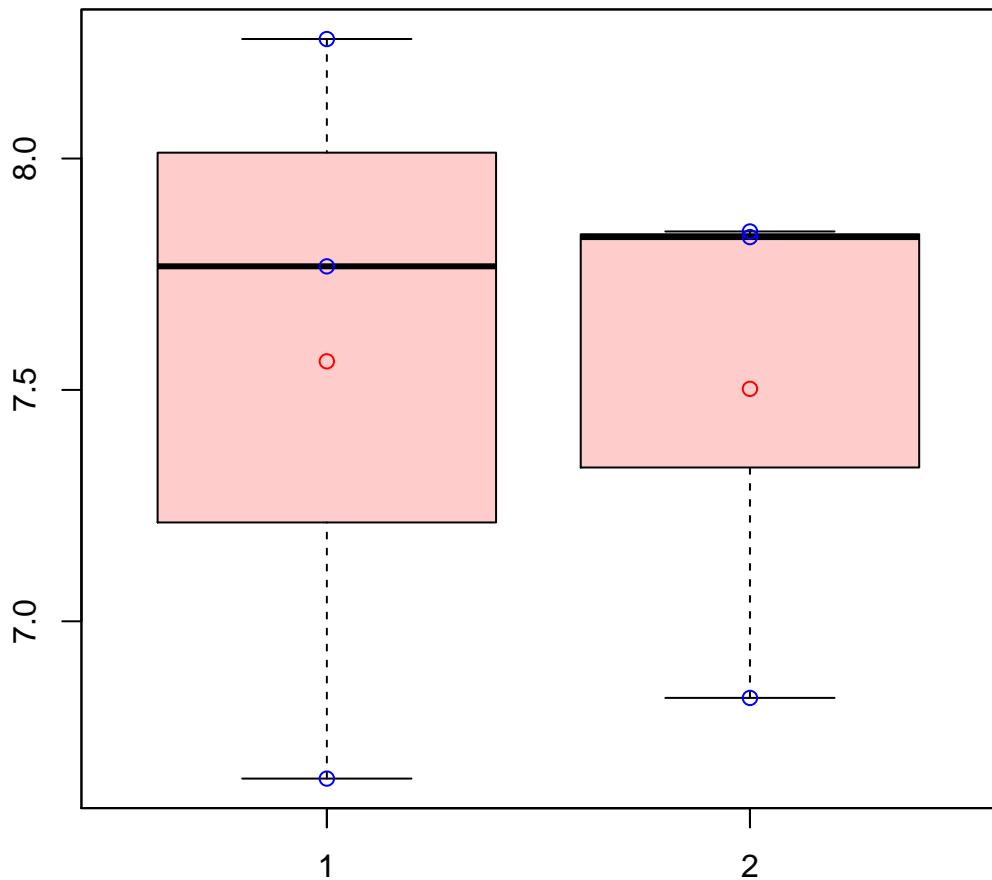

t-Test: p-value = 0.92

# CL1035Contig6|CL1035Contig6

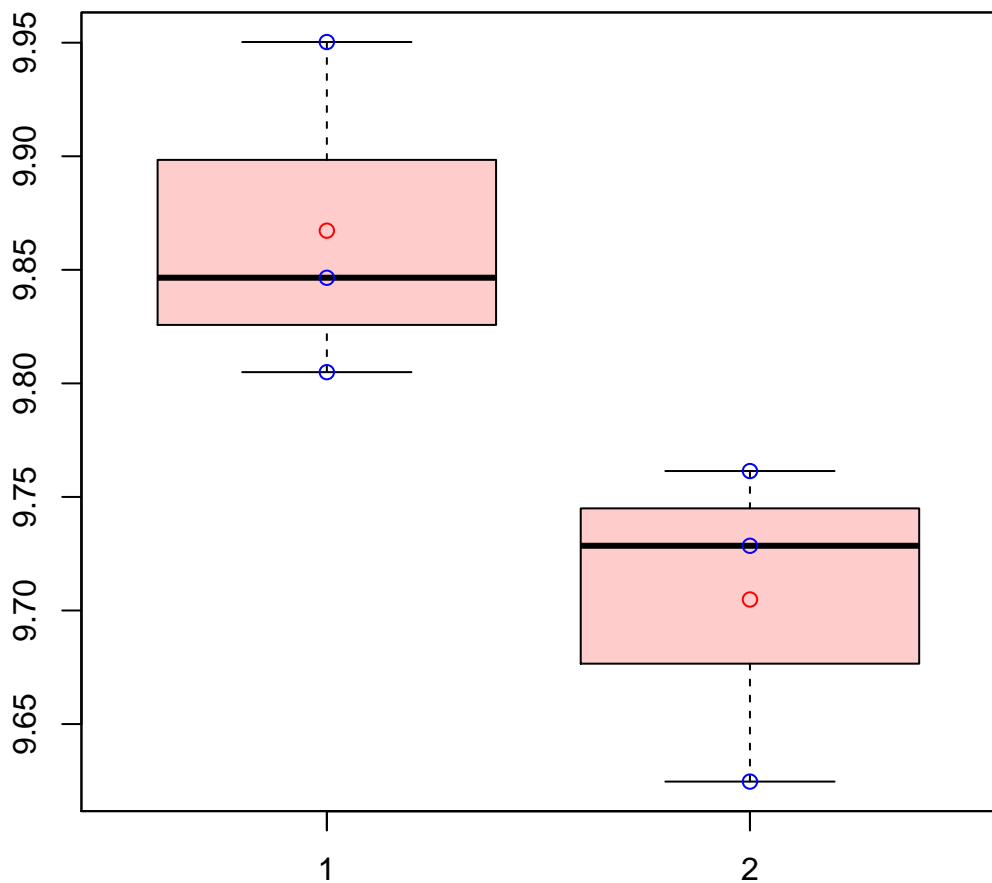

t-Test: p-value = 0.05



# CL10372Contig2|CL10372Contig2

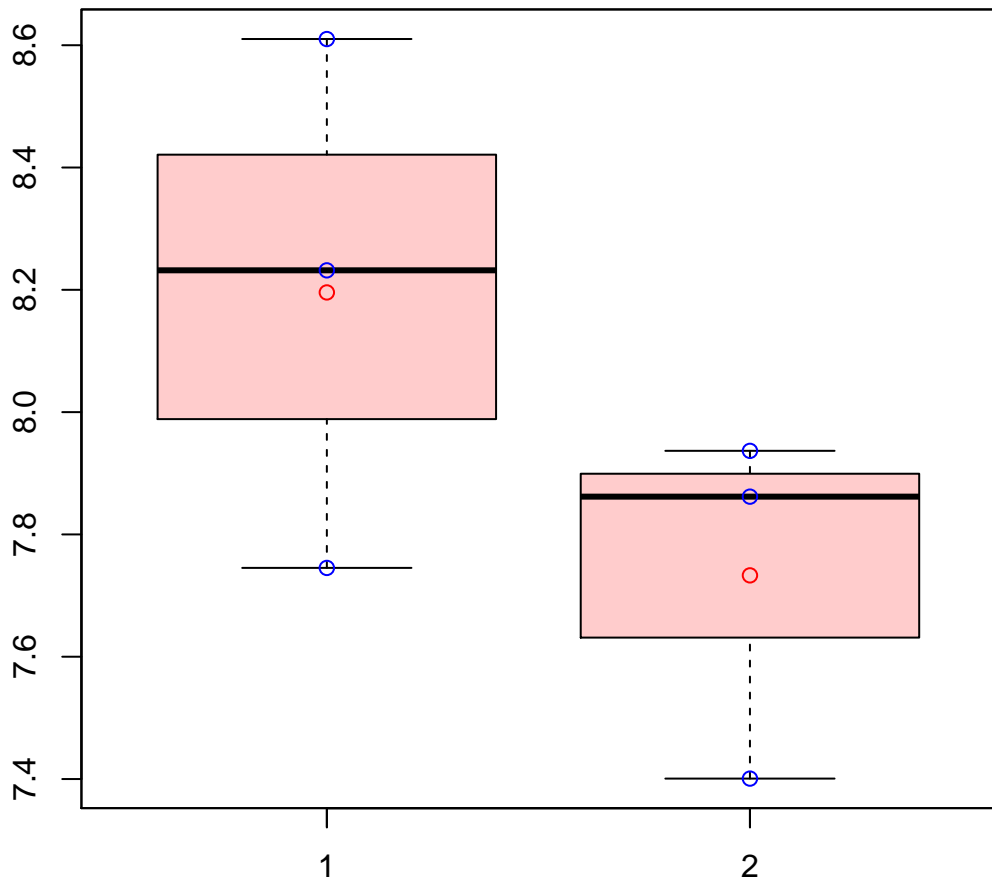

t-Test: p-value = 0.21

# CL10382Contig4|CL10382Contig4

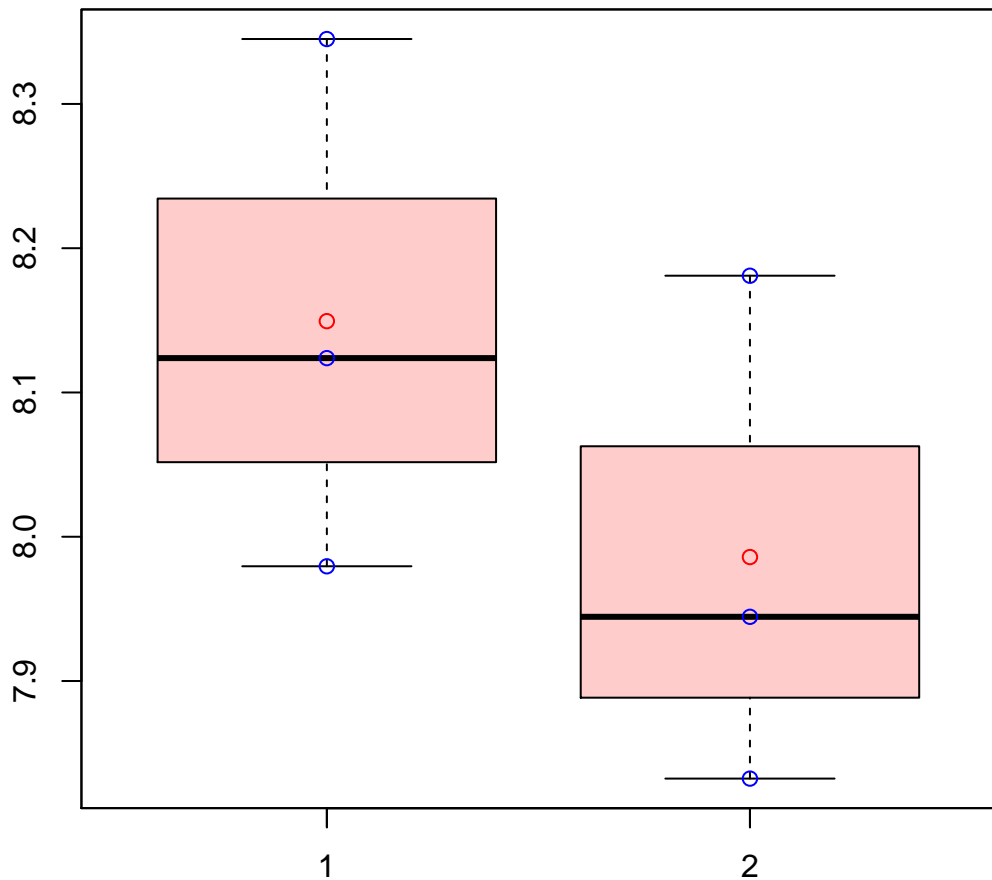

t-Test: p-value = 0.33

# CL10387Contig2|CL10387Contig2

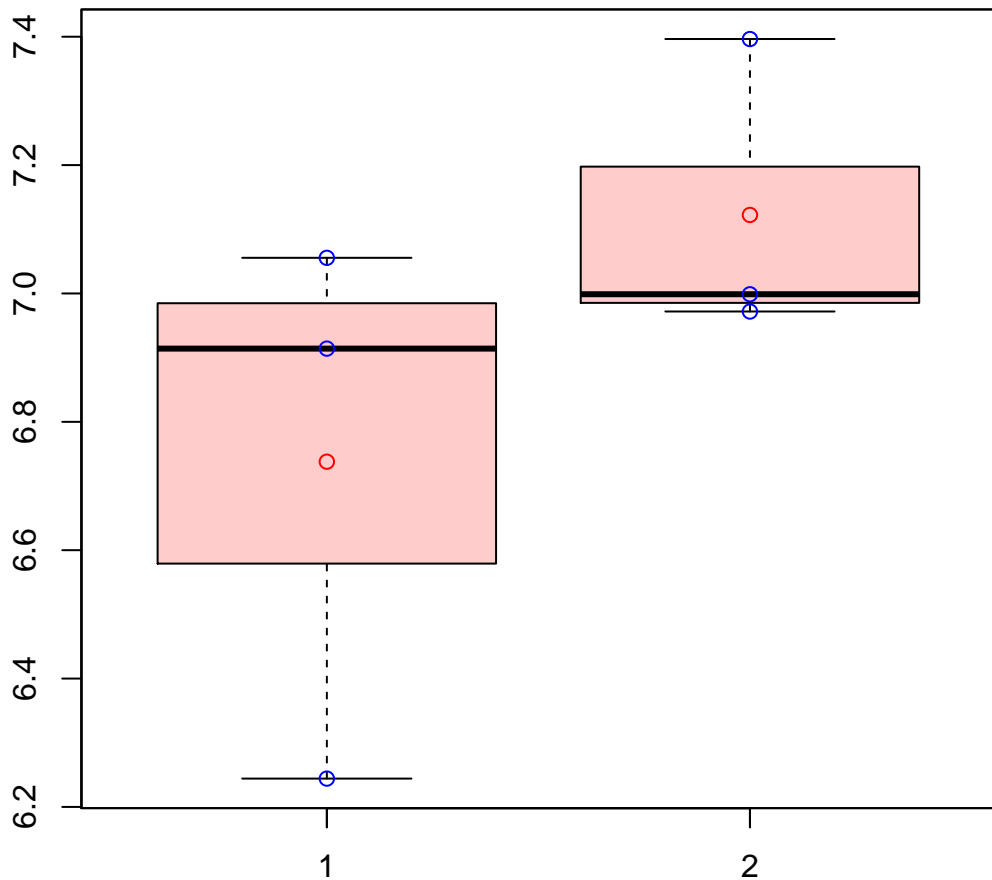

t-Test: p-value = 0.27

# CL1039Contig2|CL1039Contig2

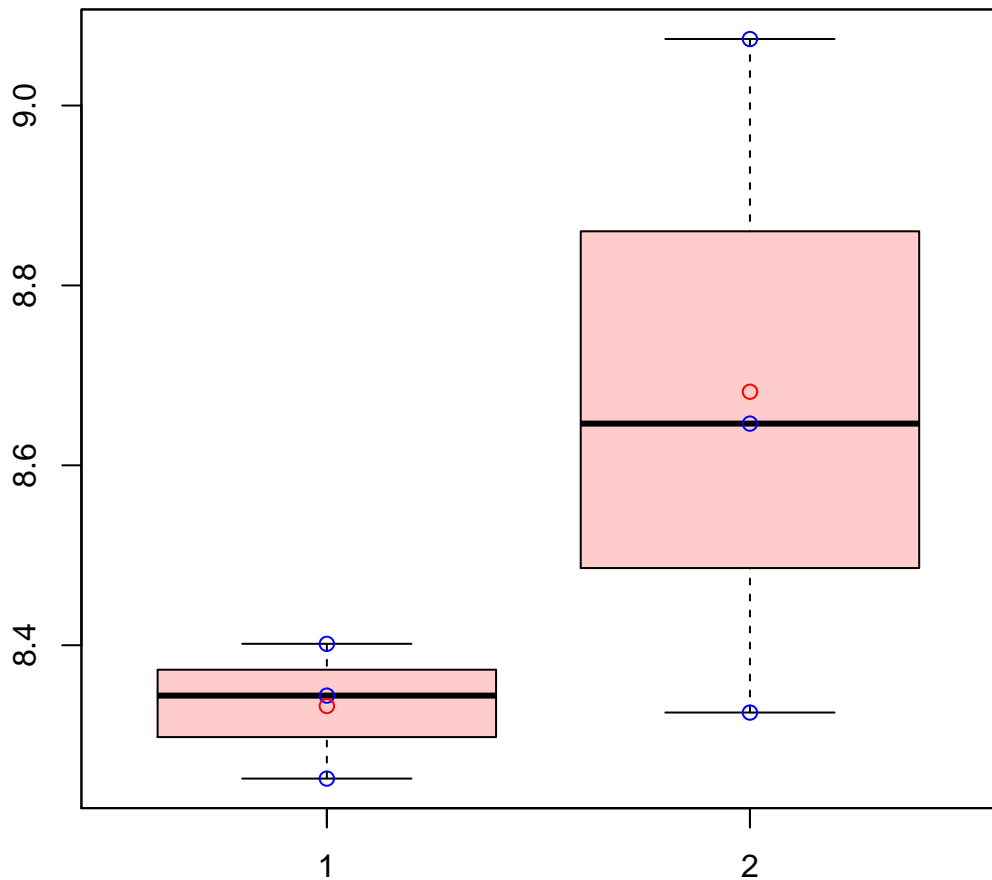

t-Test: p-value = 0.25

# CL103Contig5|CL103Contig5

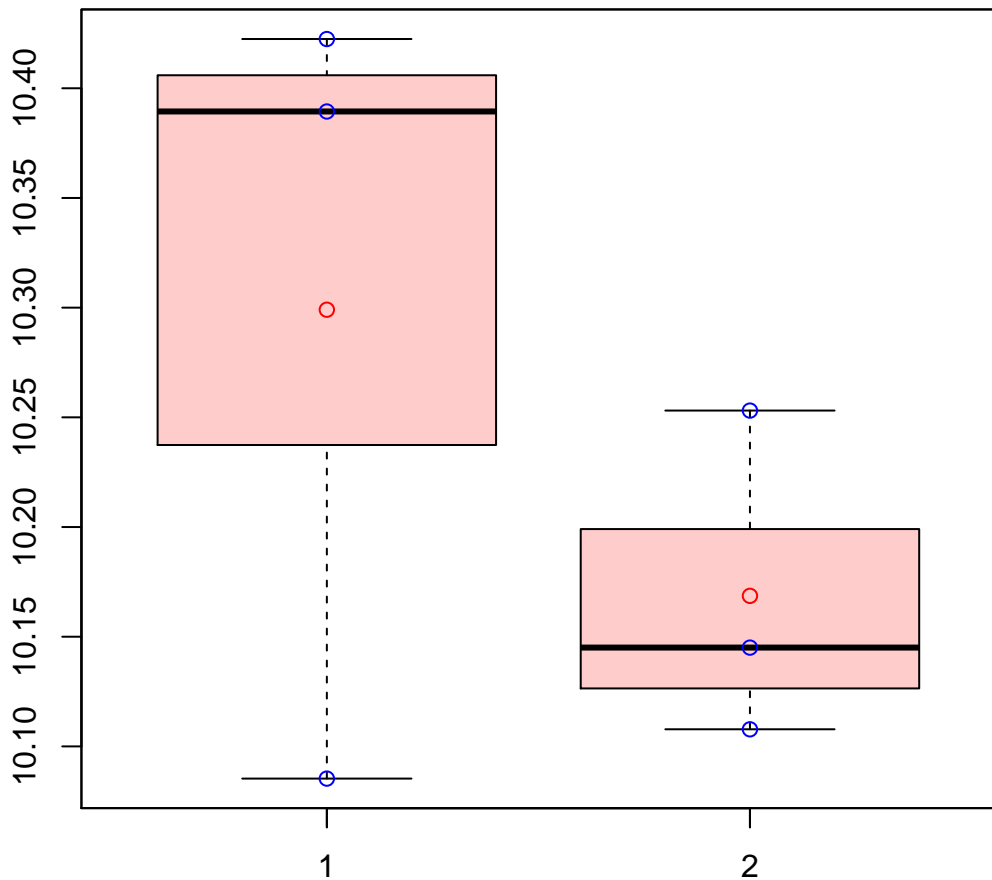

t-Test: p-value = 0.35

# CL103Contig6|CL103Contig6

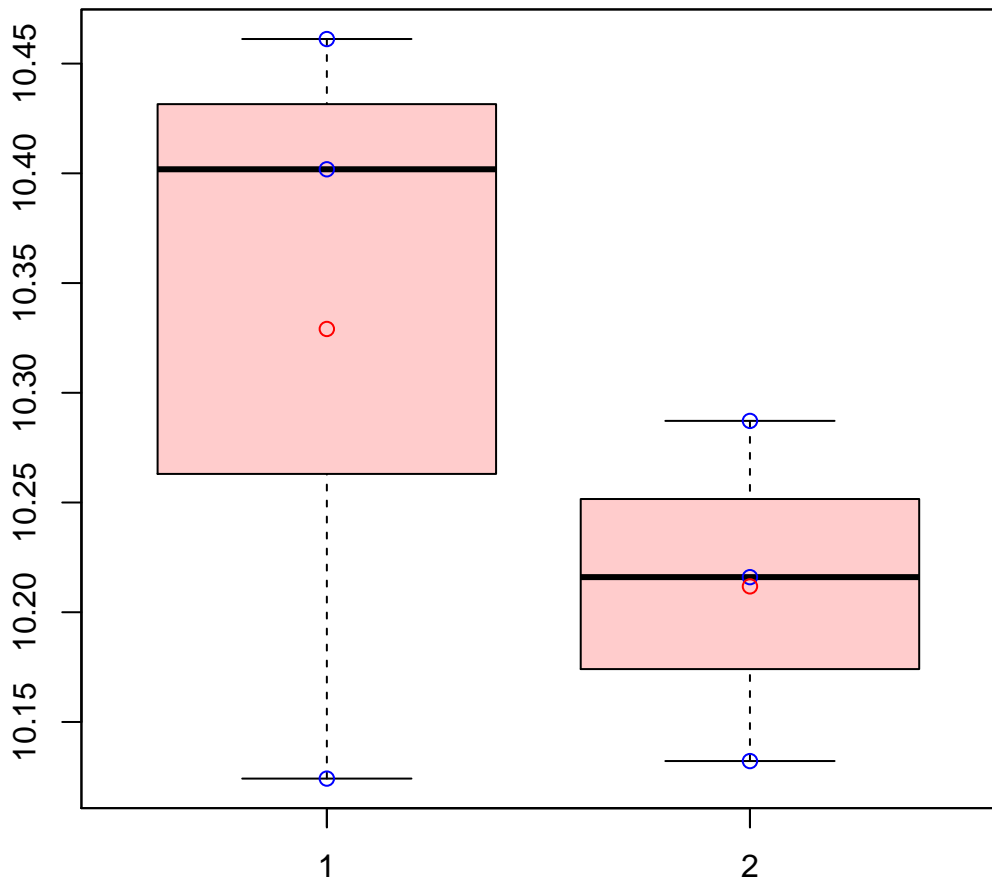

t-Test: p-value = 0.38

# CL1040Contig3|CL1040Contig3

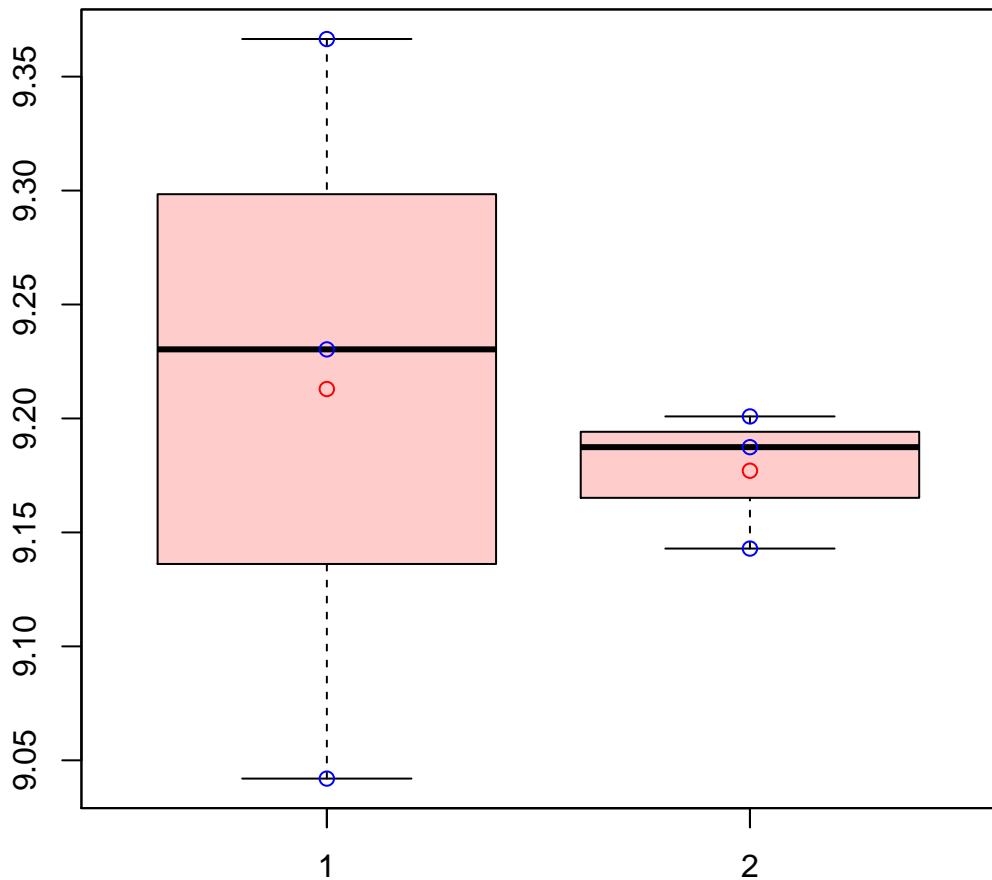

t-Test: p-value = 0.74

# CL1040Contig6|CL1040Contig6

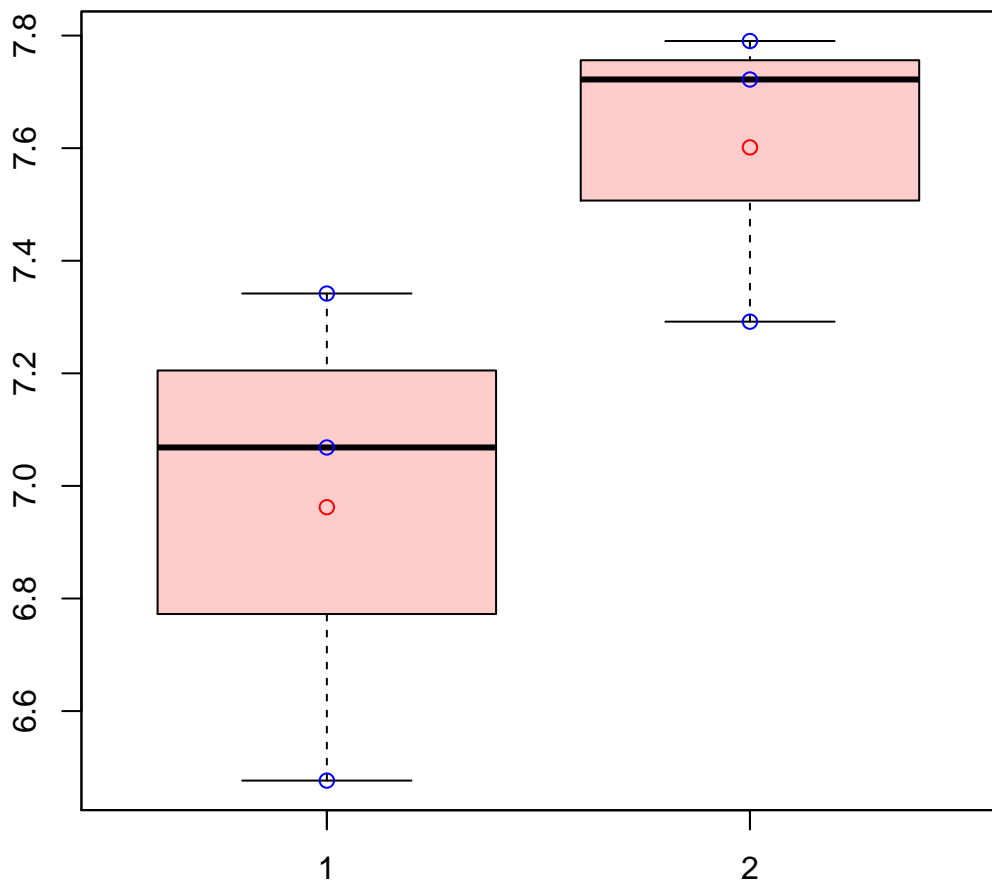

t-Test: p-value = 0.11



# CL1040Contig8|CL1040Contig8

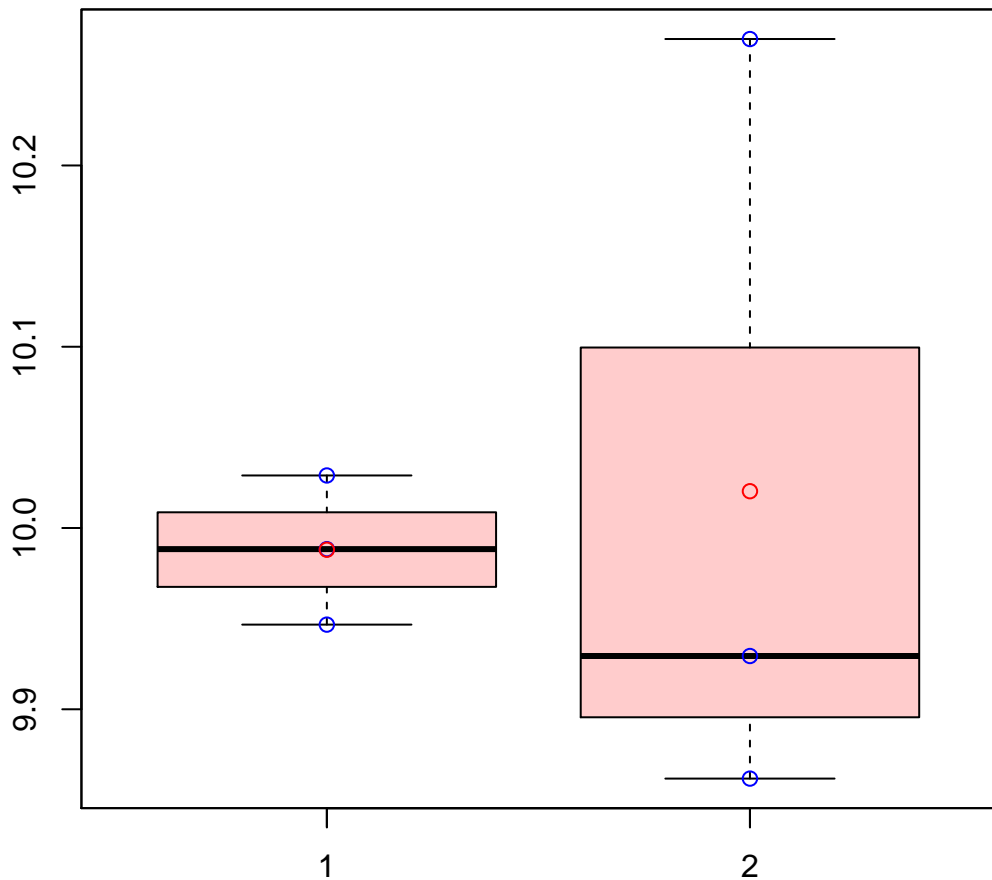

t-Test: p-value = 0.82

# CL10414Contig2|CL10414Contig2

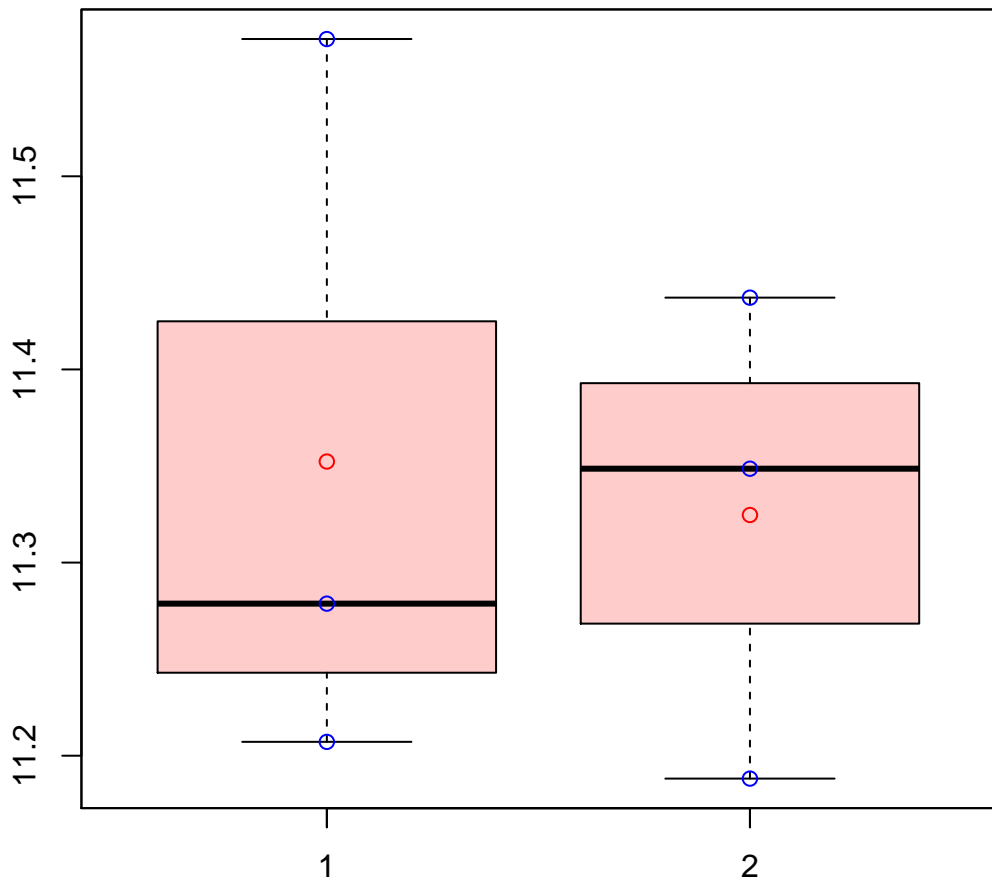

t-Test: p-value = 0.85

# CL1042Contig2|CL1042Contig2

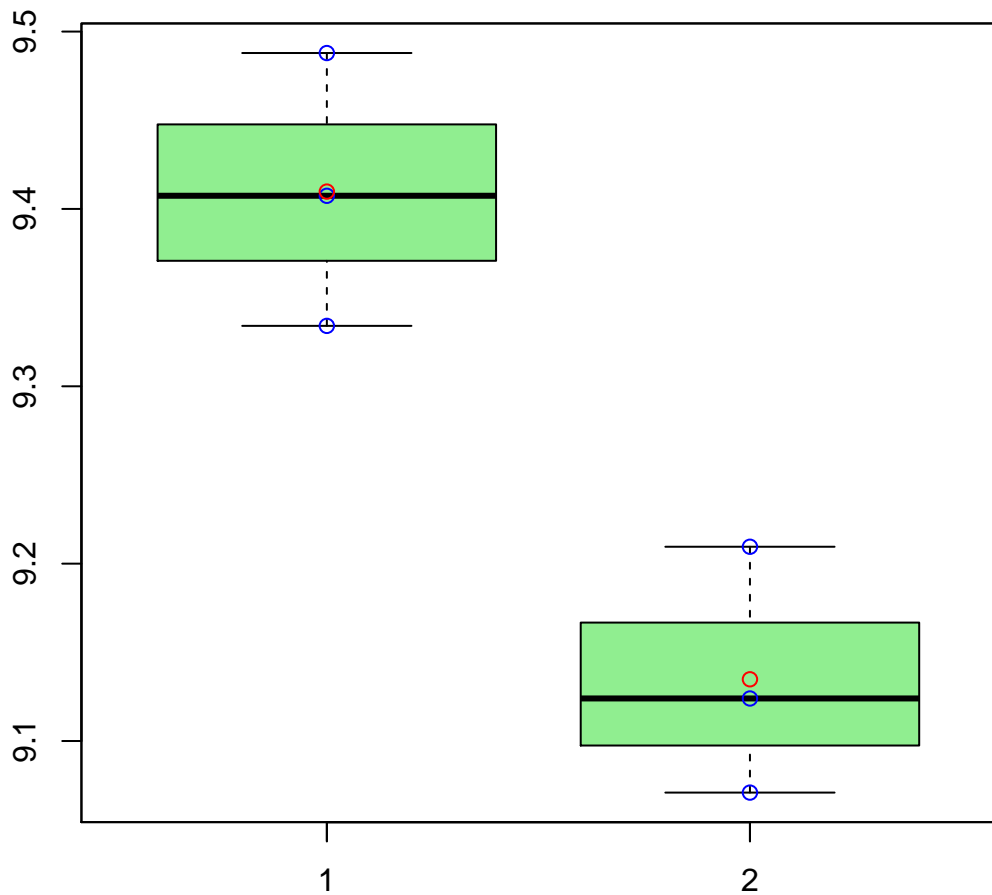

t-Test: p-value = 0.01

# CL1043Contig8|CL1043Contig8

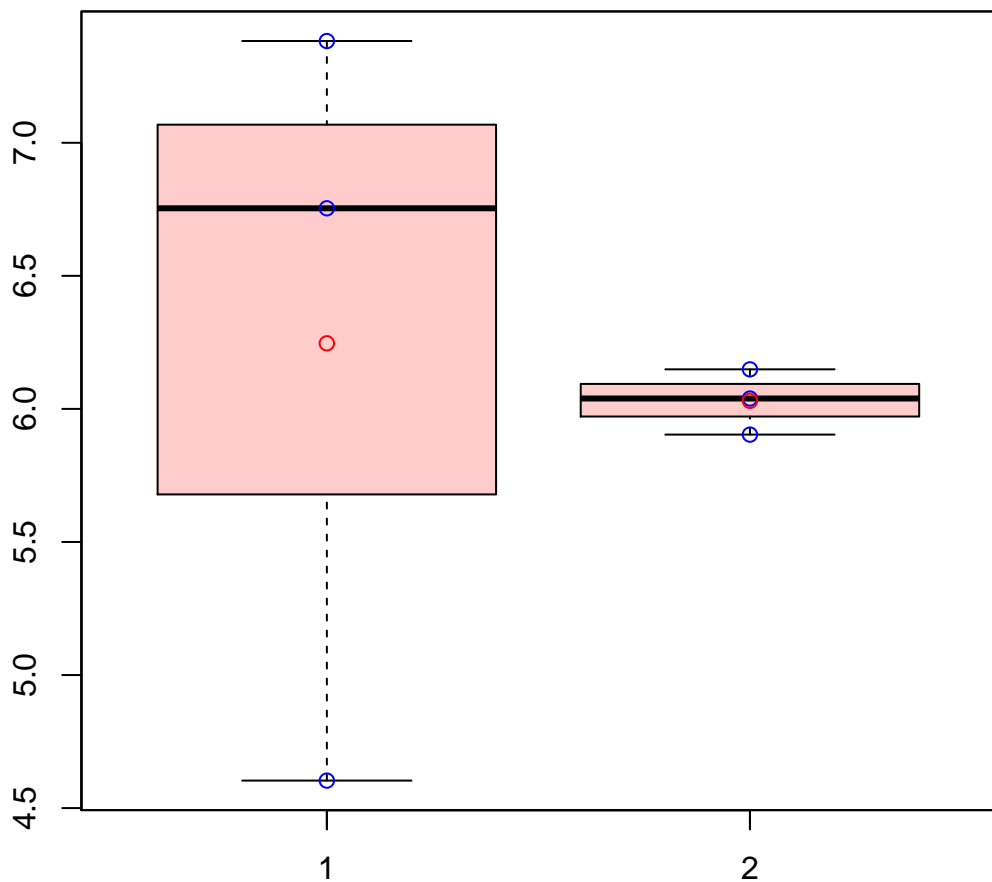

t-Test: p-value = 0.82

# CL10449Contig2|CL10449Contig2

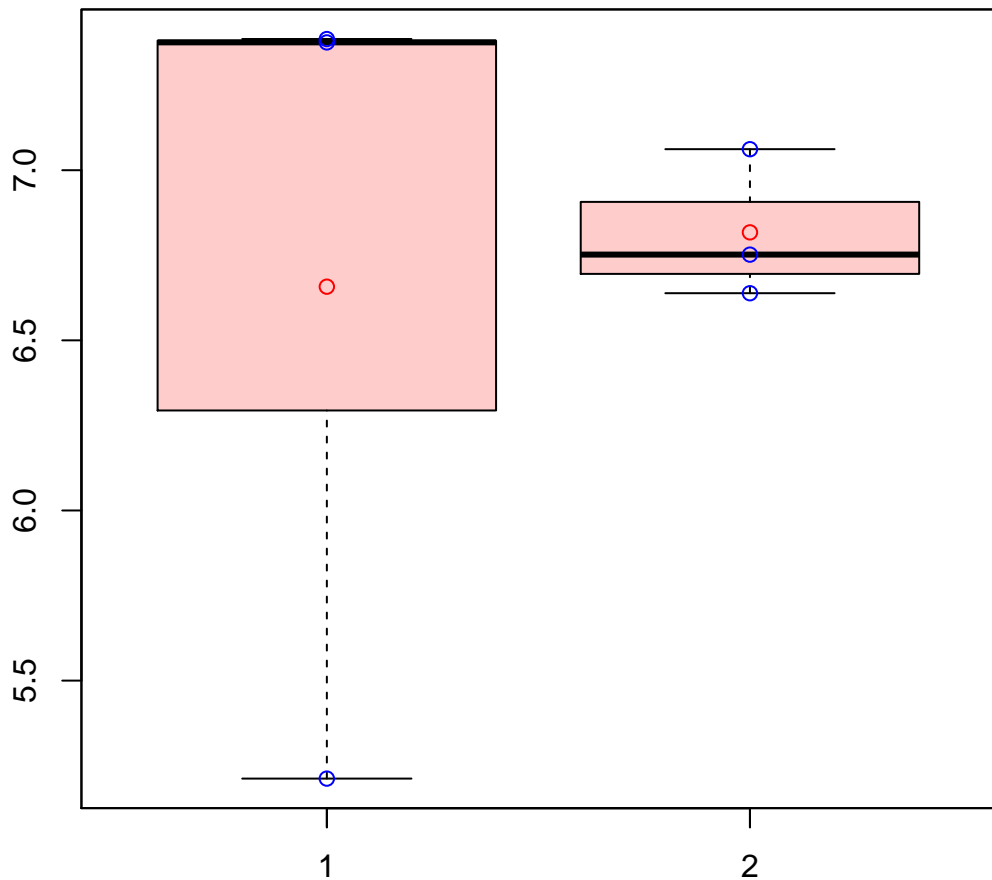

t-Test: p-value = 0.85

# CL1044Contig5|CL1044Contig5

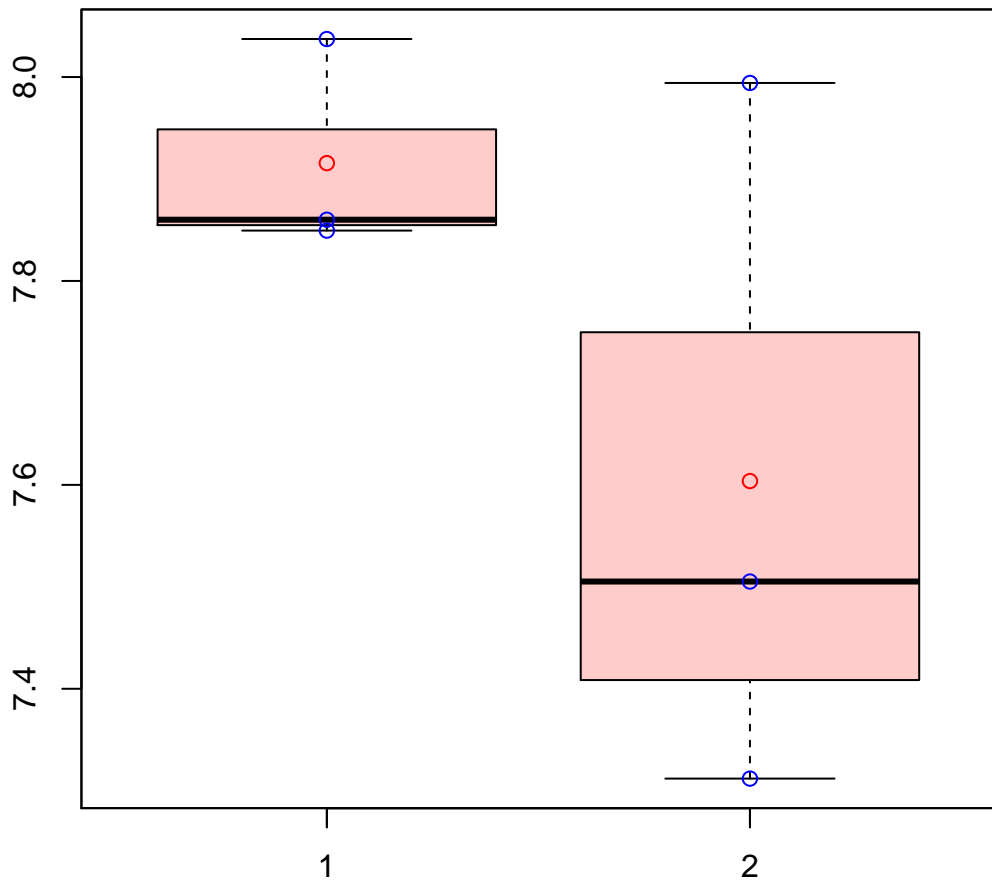

t-Test: p-value = 0.26

# CL1044Contig9|CL1044Contig9

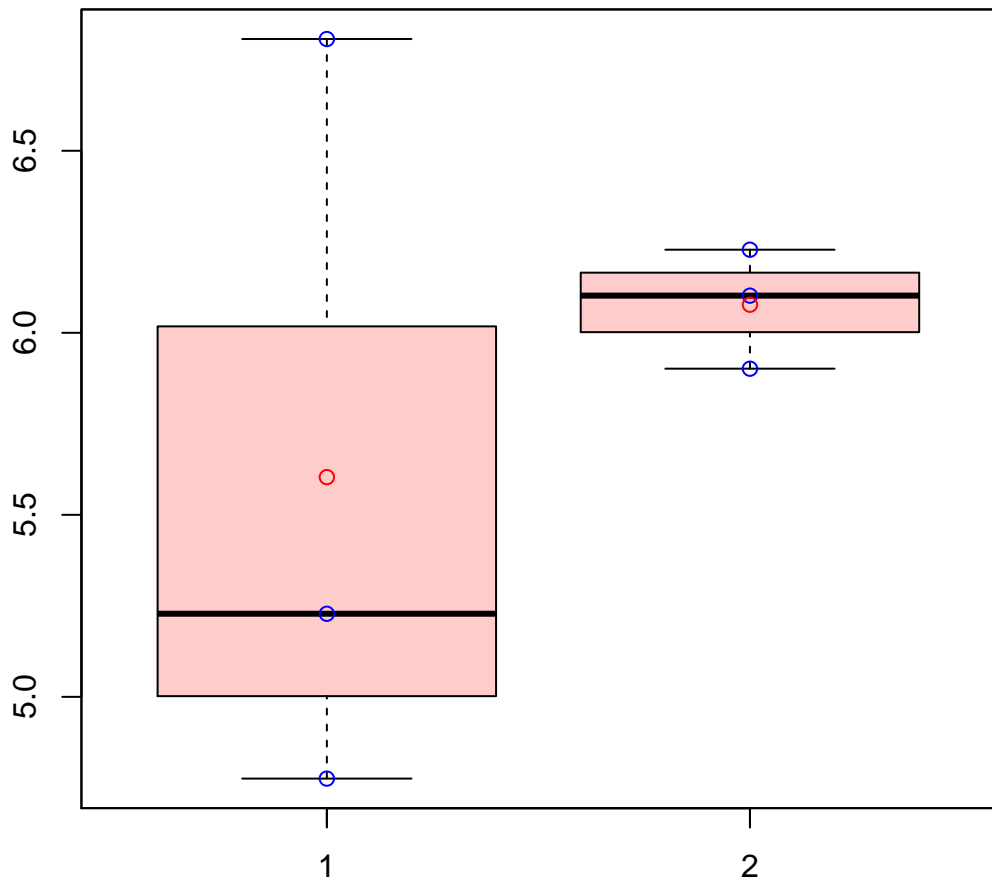

t-Test: p-value = 0.52

# CL10467Contig1|CL10467Contig1

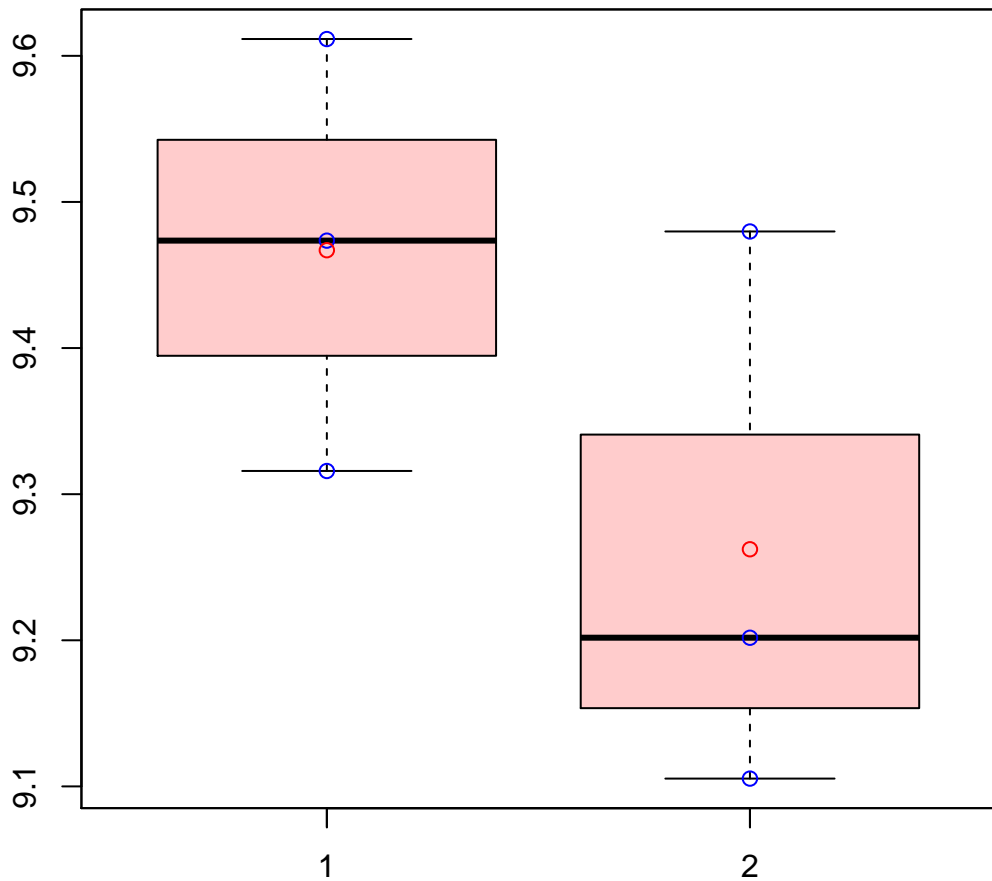

t-Test: p-value = 0.23



# CL10469Contig1|CL10469Contig1

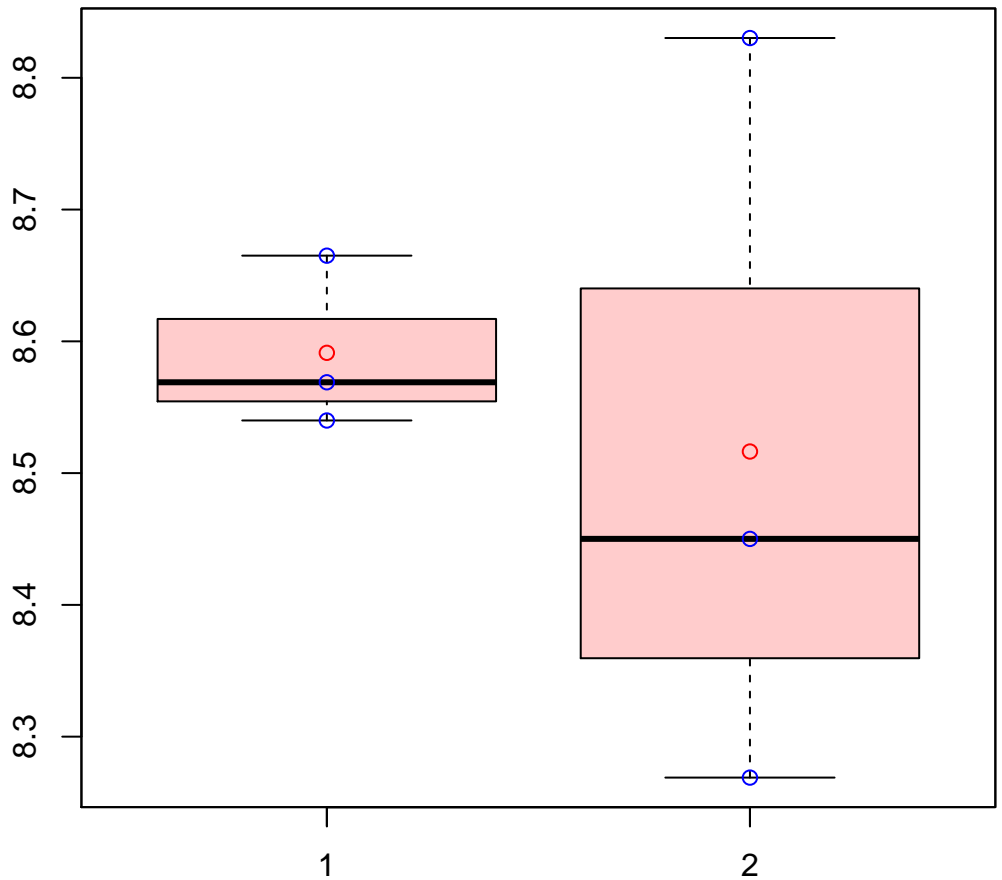

t-Test: p-value = 0.7

# CL1046Contig12|CL1046Contig12

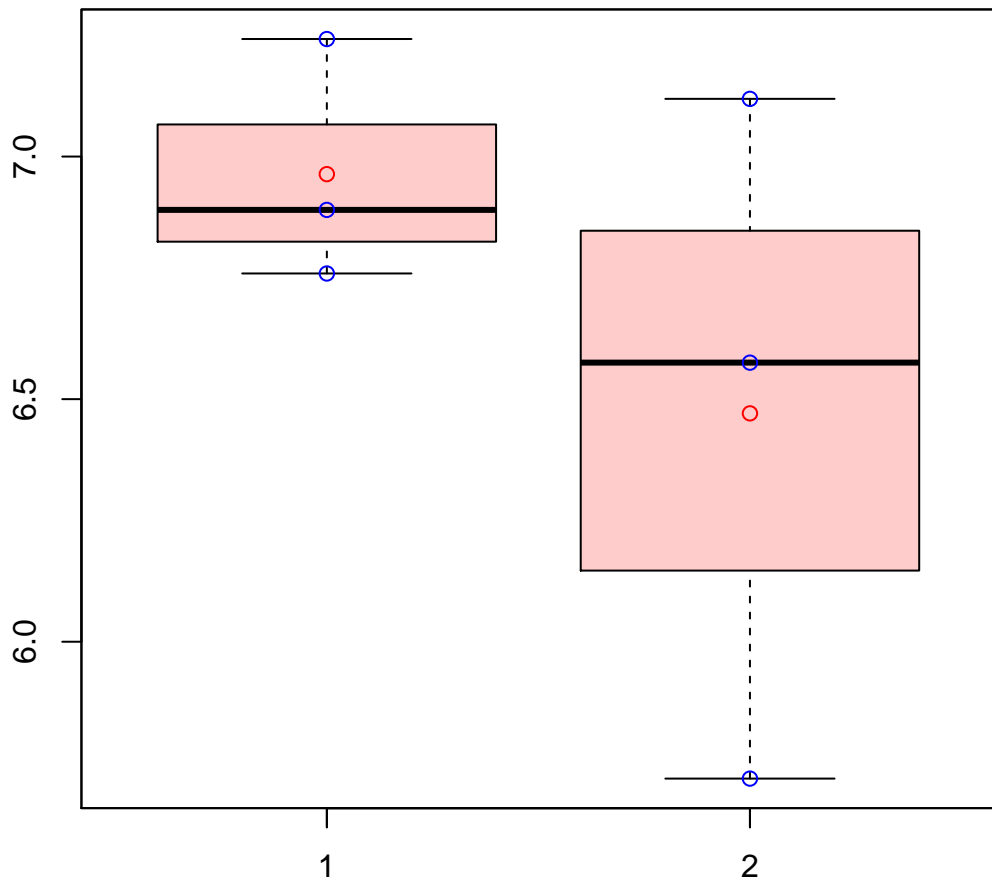

t-Test: p-value = 0.35

# CL1046Contig13|CL1046Contig13

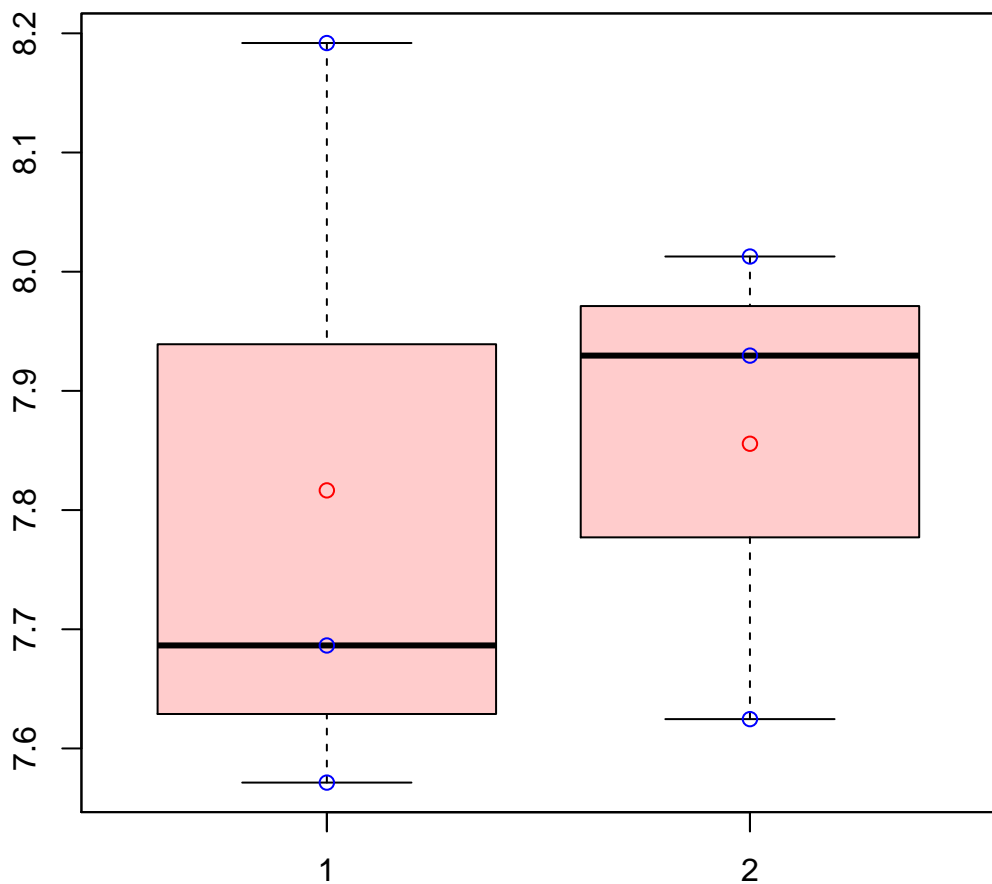

t-Test: p-value = 0.87

# CL10481Contig2|CL10481Contig2

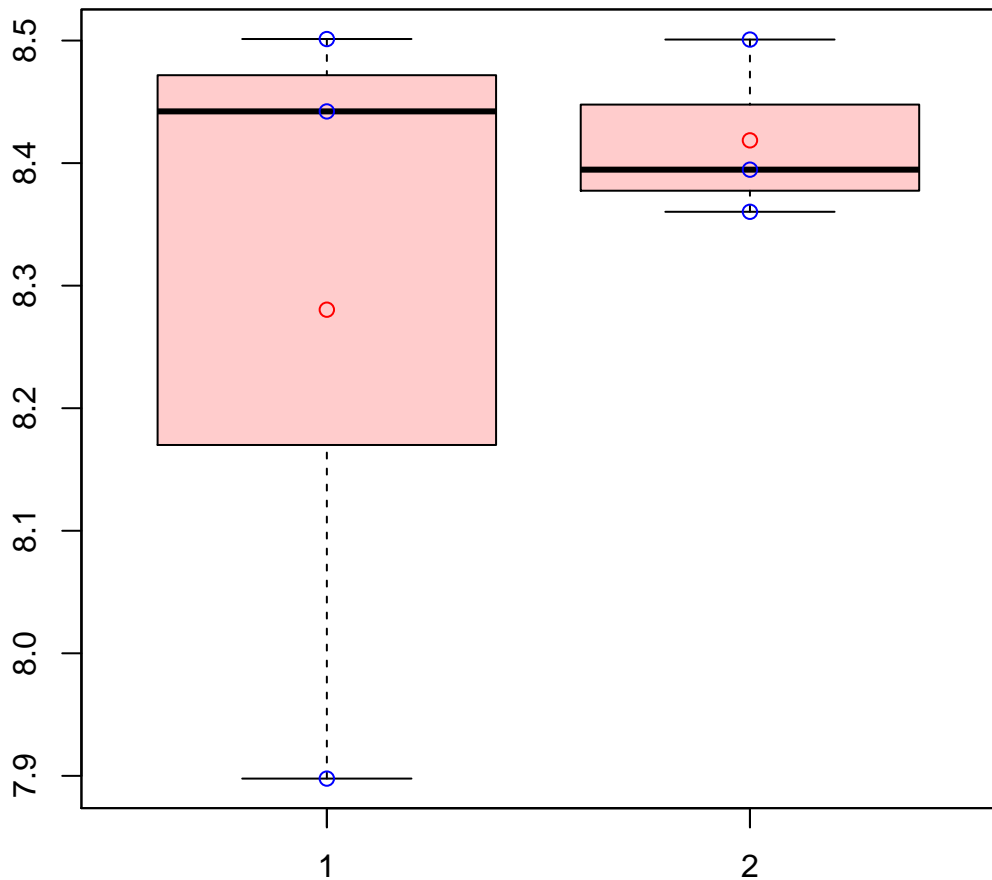

t-Test: p-value = 0.55

# CL10481Contig3|CL10481Contig3

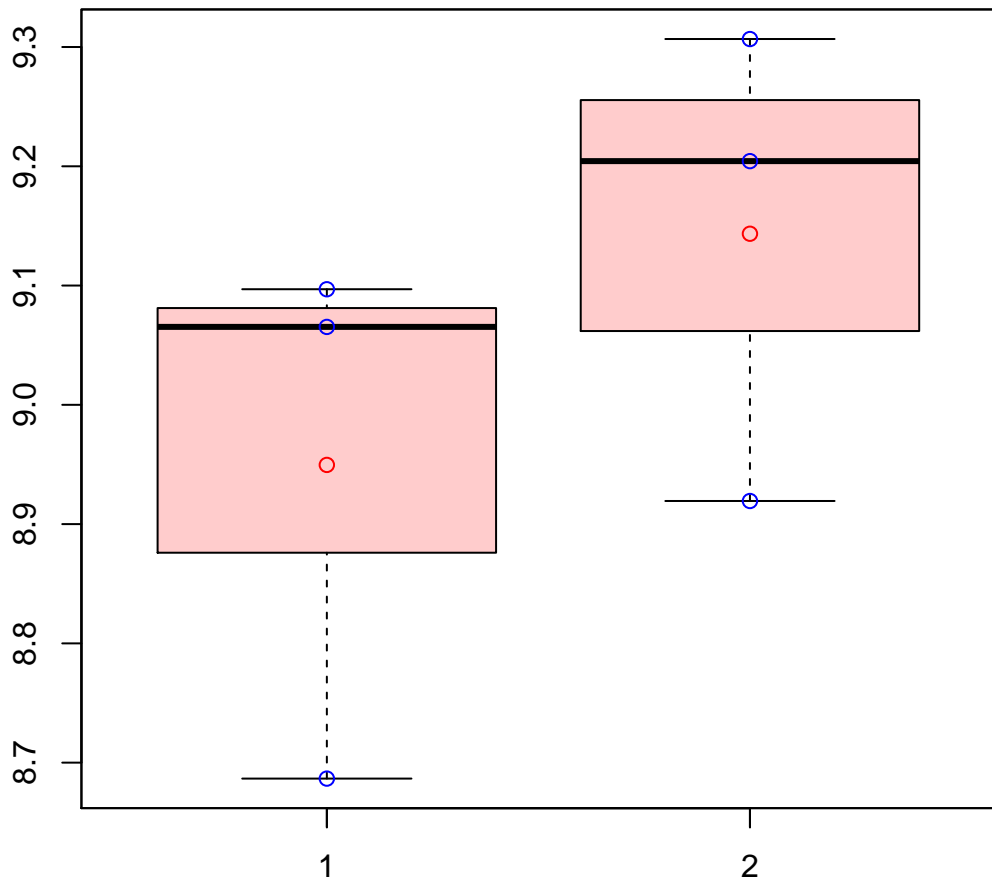

t-Test: p-value = 0.33

# CL10483Contig1|CL10483Contig1

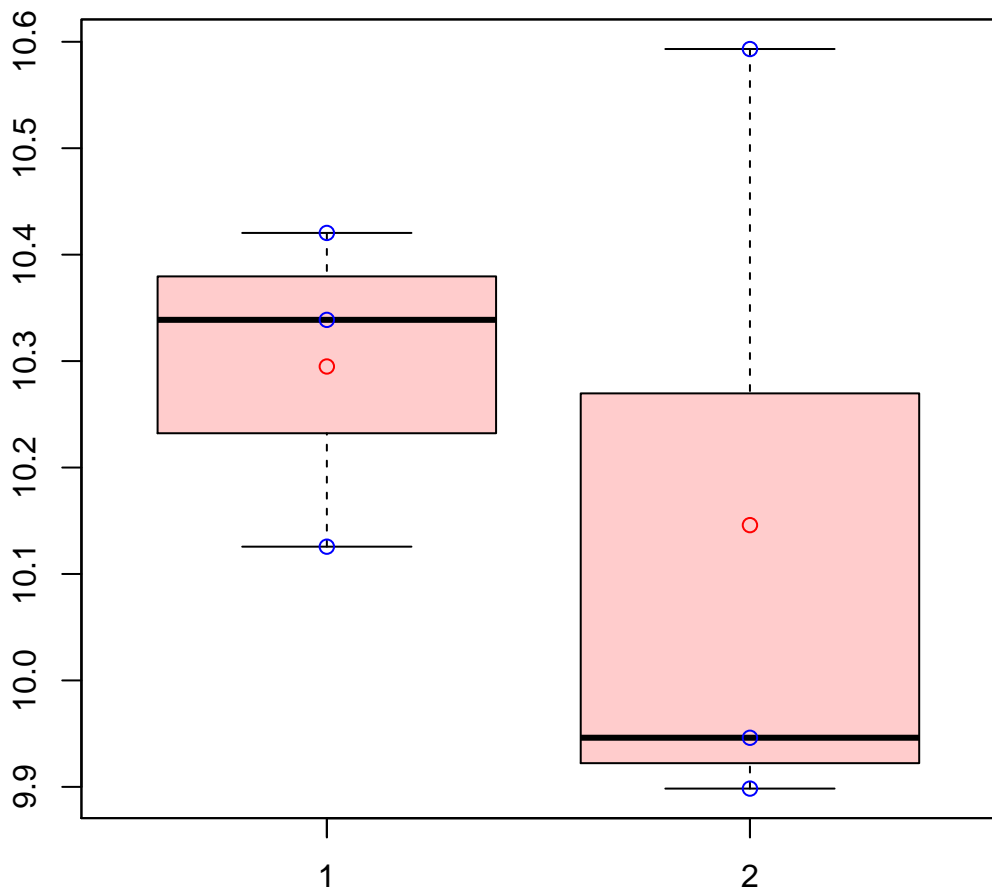

t-Test: p-value = 0.59

# CL10491Contig1|CL10491Contig1

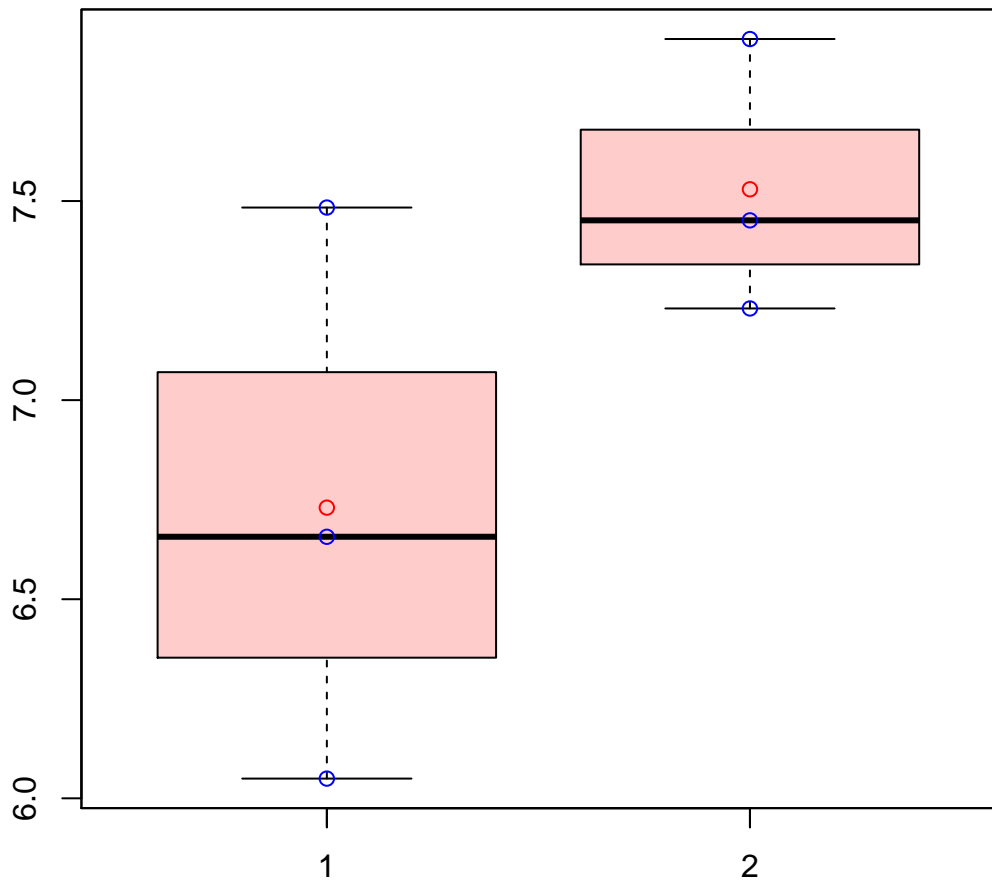

t-Test: p-value = 0.19

# CL104Contig2|CL104Contig2

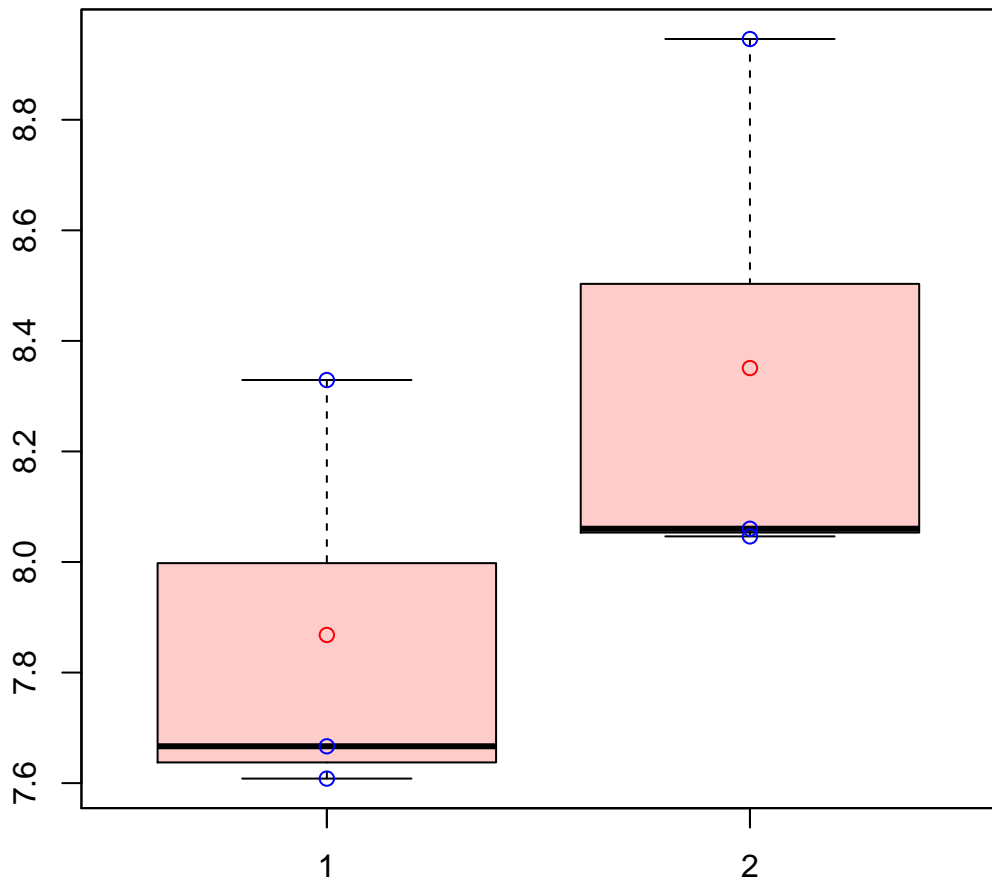

t-Test: p-value = 0.27



# CL10519Contig1|CL10519Contig1

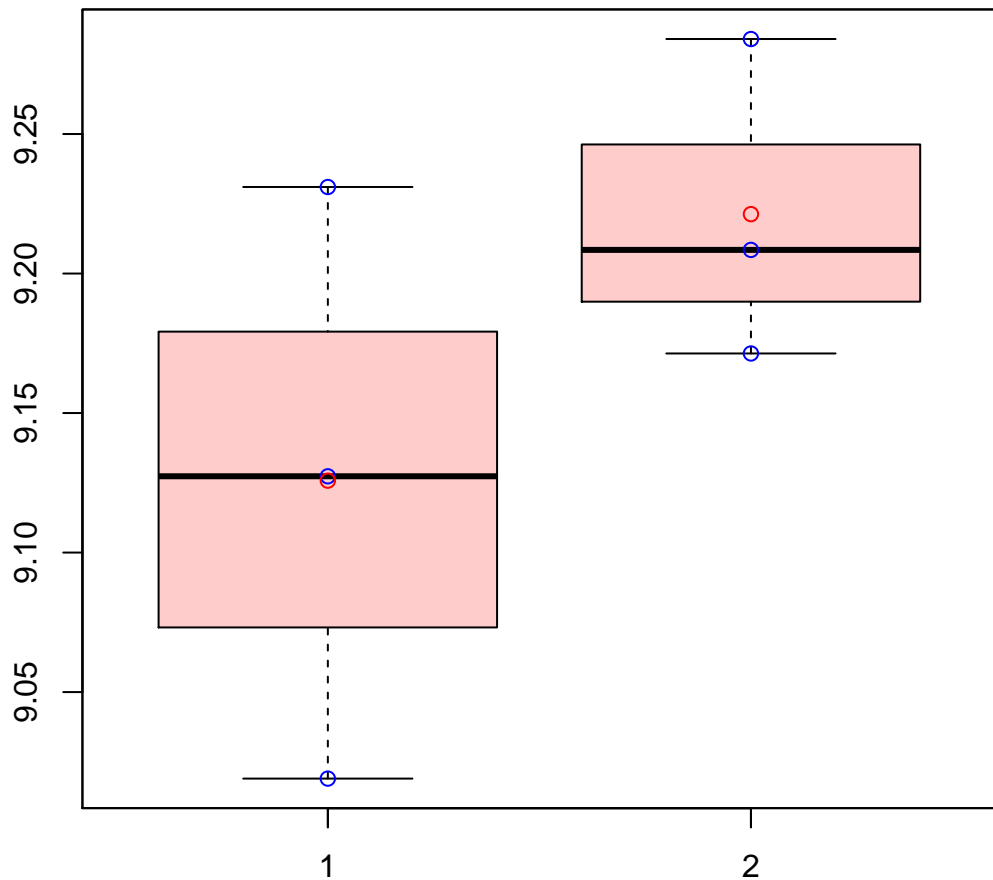

t-Test: p-value = 0.26

# CL10524Contig1|CL10524Contig1

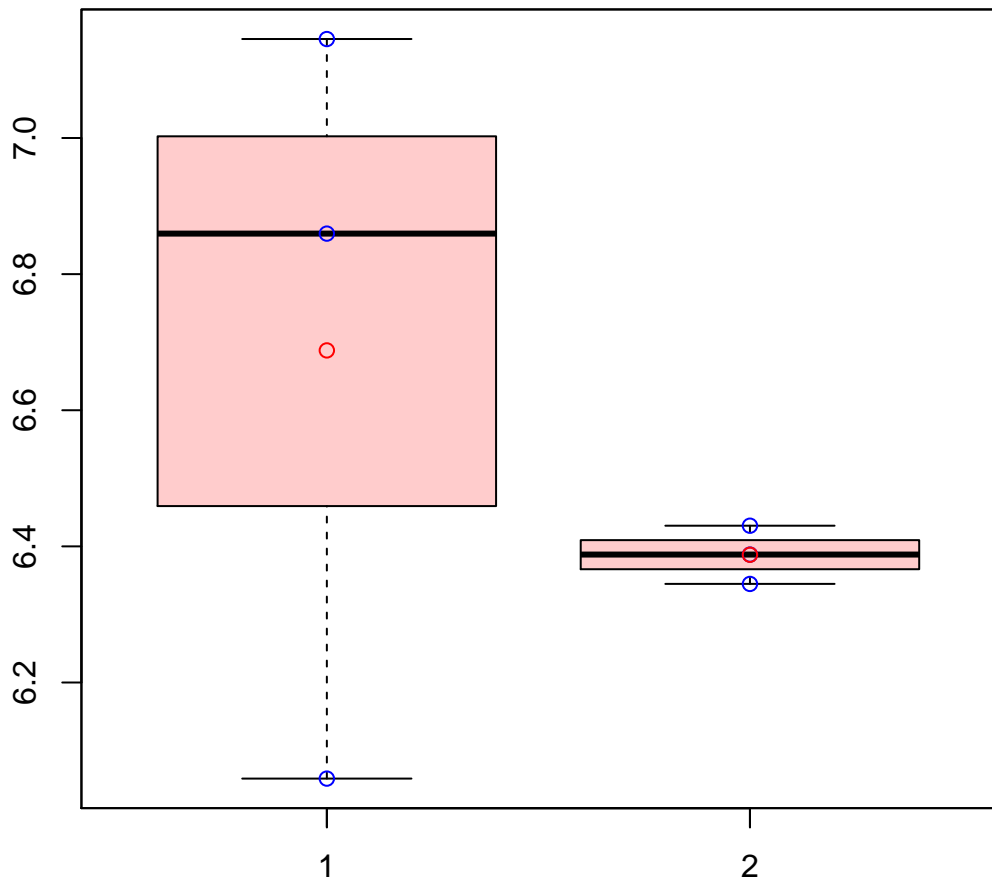

t-Test: p-value = 0.45

# CL10531Contig1|CL10531Contig1

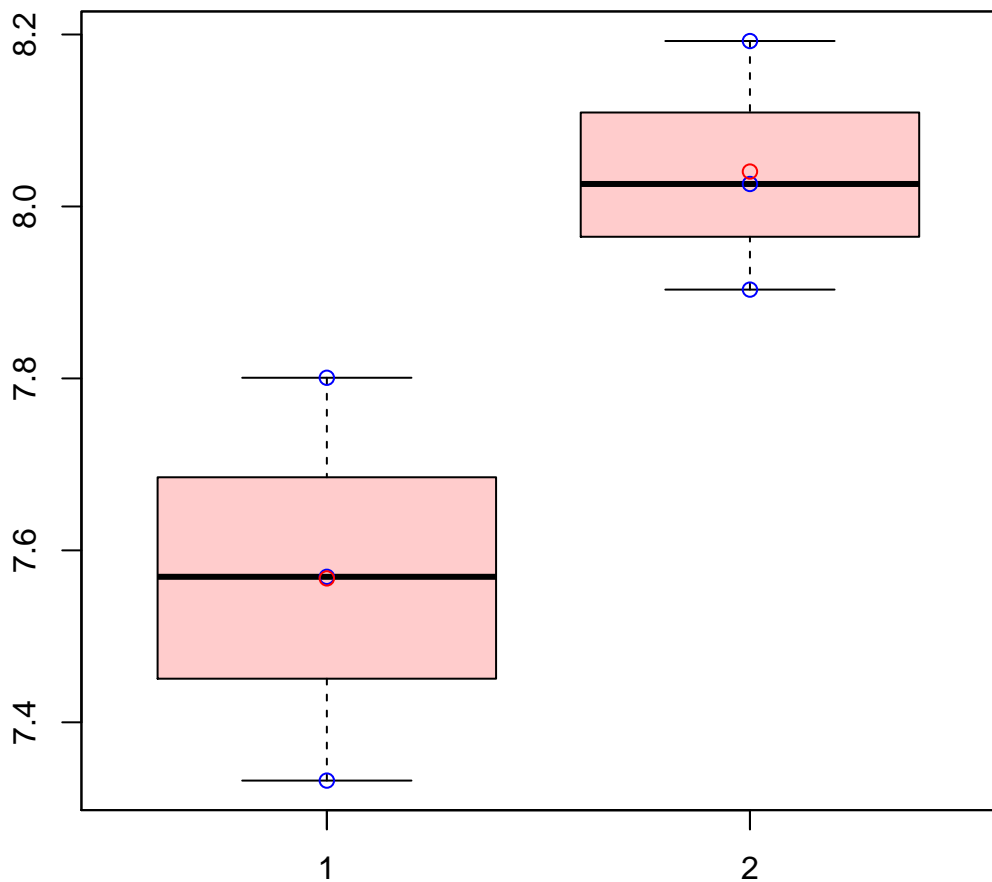

t-Test: p-value = 0.05

# CL10533Contig2|CL10533Contig2

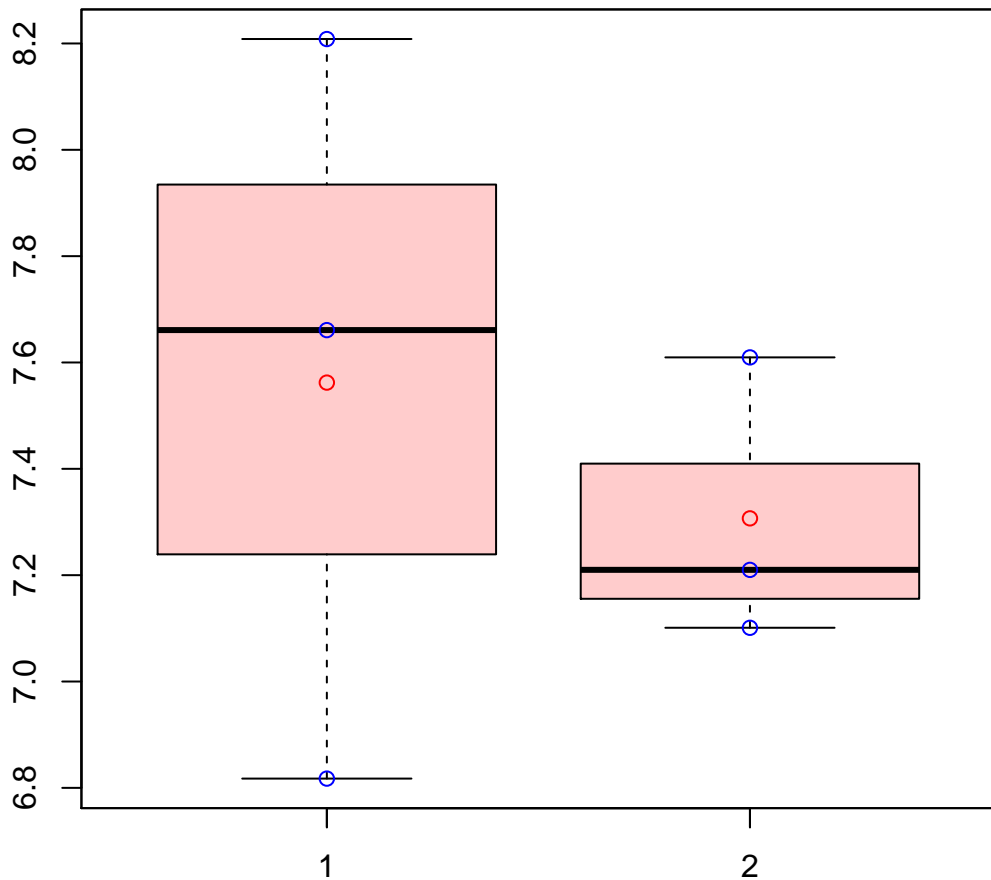

t-Test: p-value = 0.6

# CL10543Contig3|CL10543Contig3

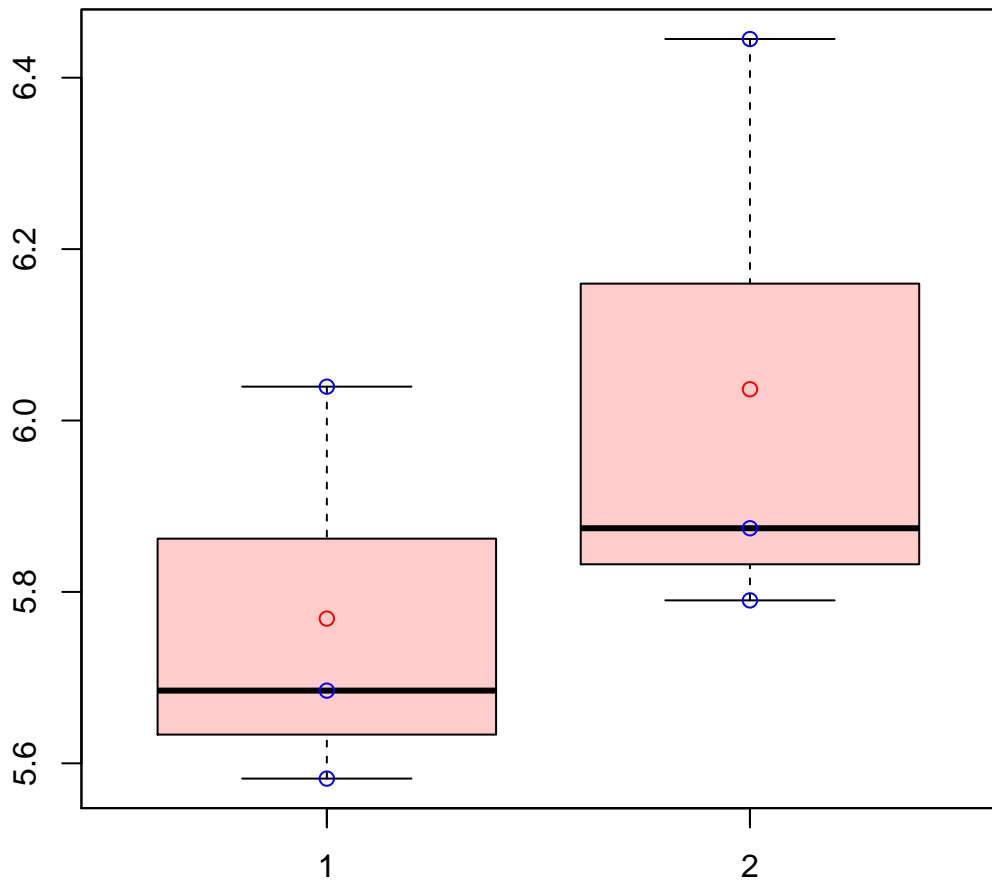

t-Test: p-value = 0.35

# CL1054Contig1|CL1054Contig1

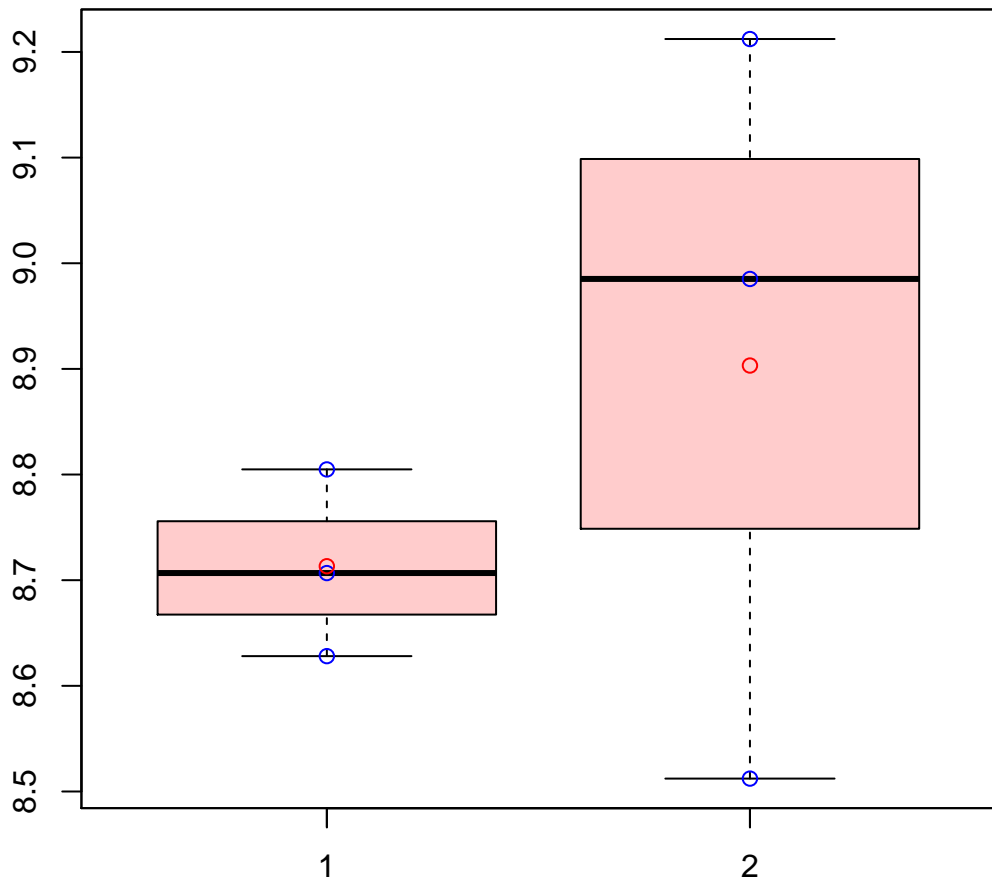

t-Test: p-value = 0.46

# CL1056Contig5|CL1056Contig5

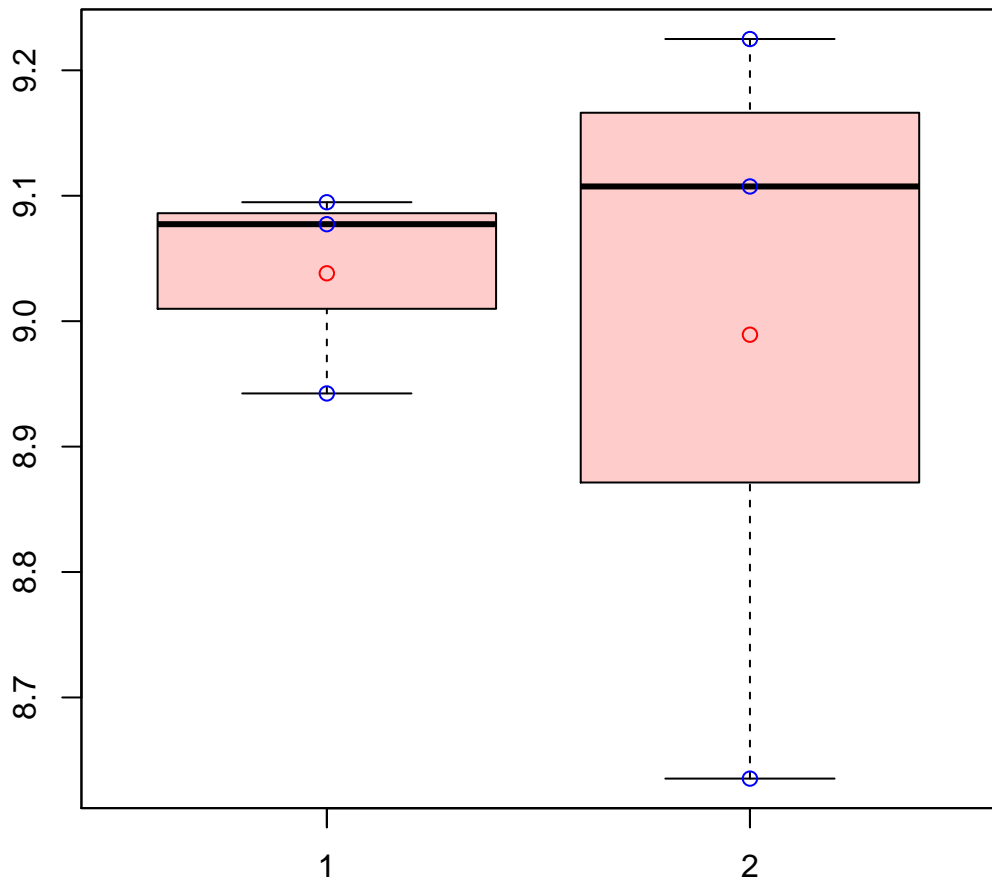

t-Test: p-value = 0.81

# CL10574Contig1|CL10574Contig1

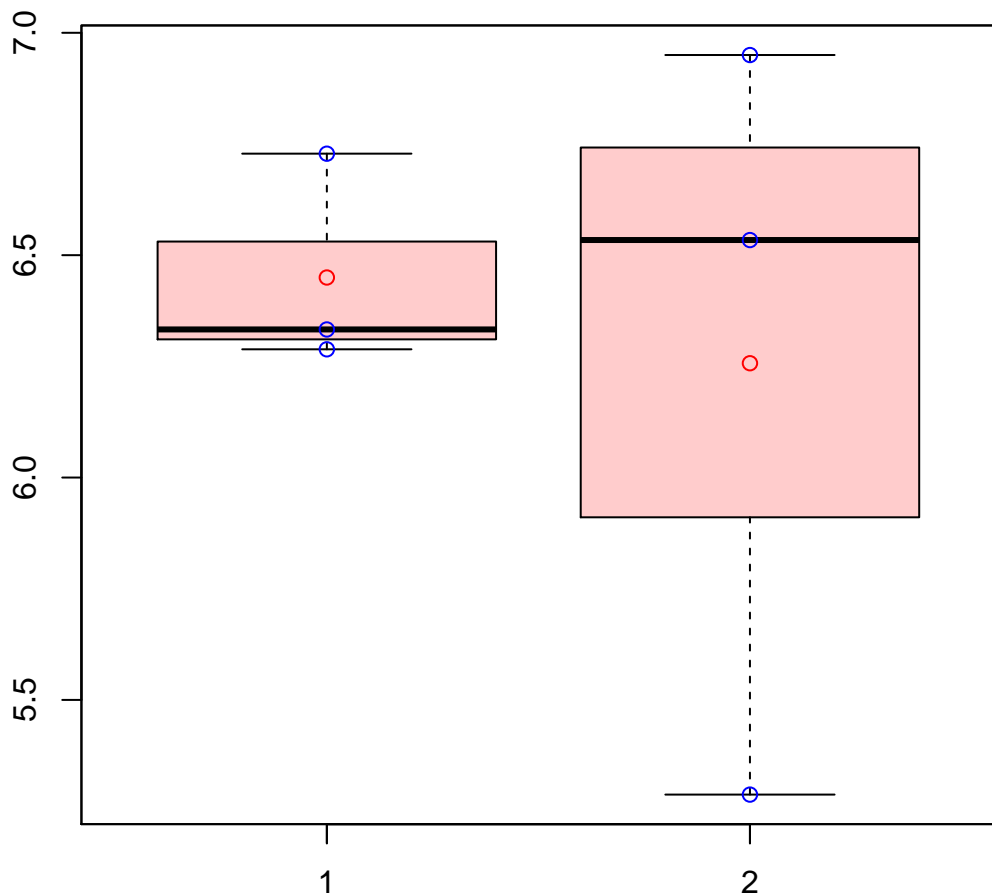

t-Test: p-value = 0.74



# CL10584Contig1|CL10584Contig1

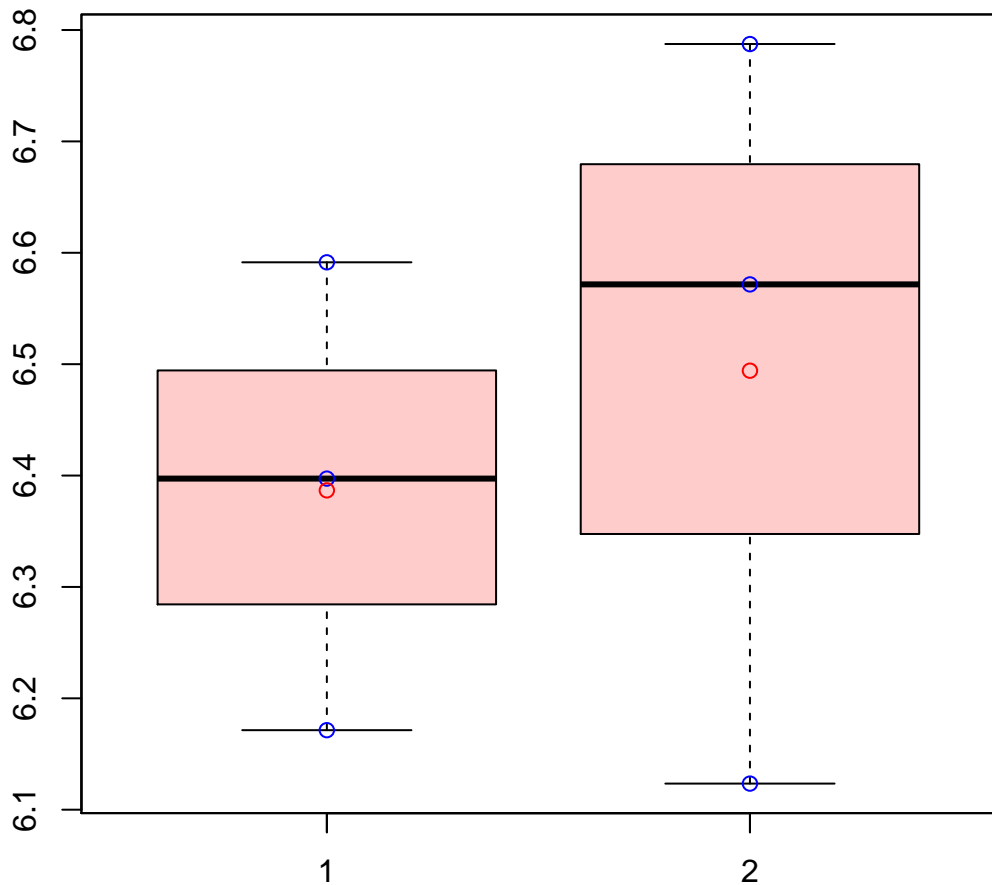

t-Test: p-value = 0.67

# CL10586Contig1|CL10586Contig1

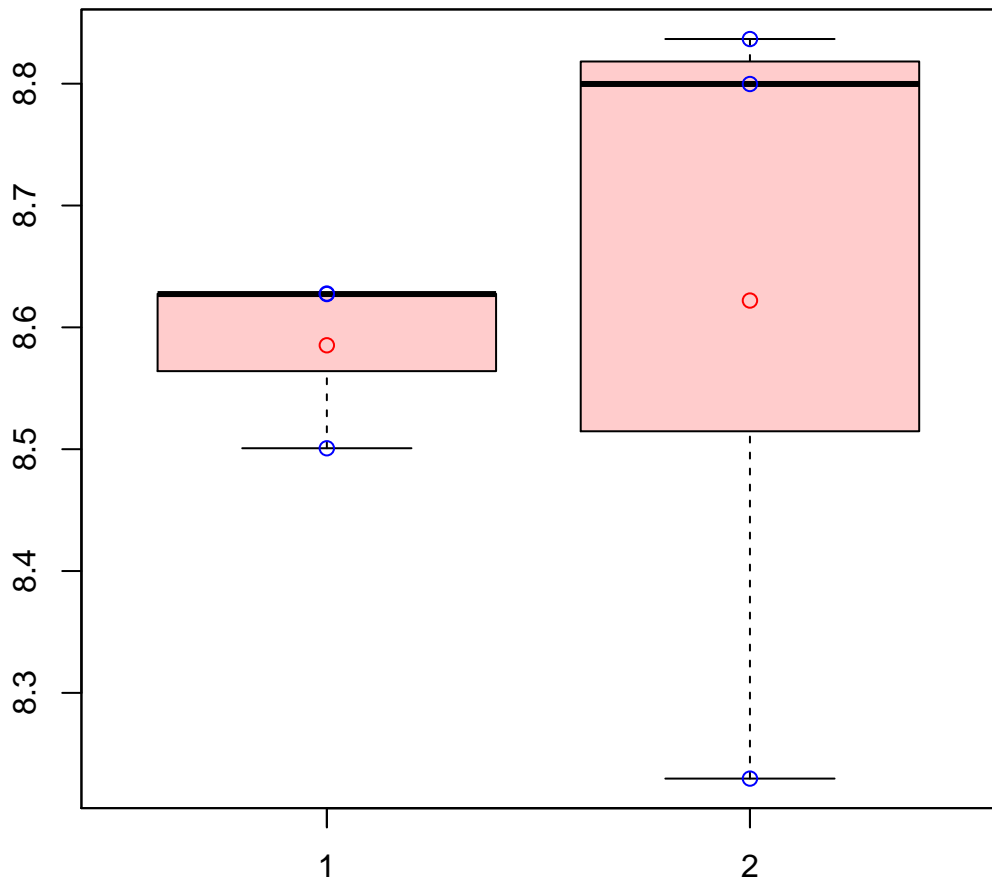

t-Test: p-value = 0.87

# CL10587Contig2|CL10587Contig2

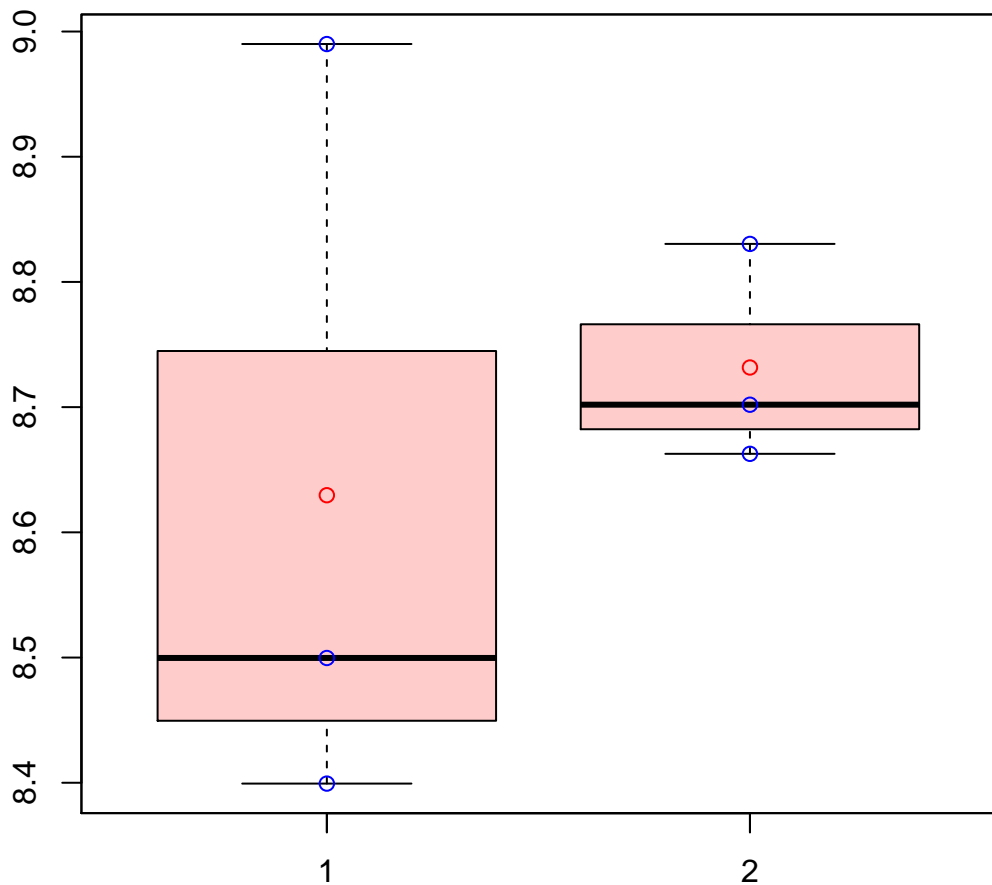

t-Test: p-value = 0.64

# CL105Contig4|CL105Contig4

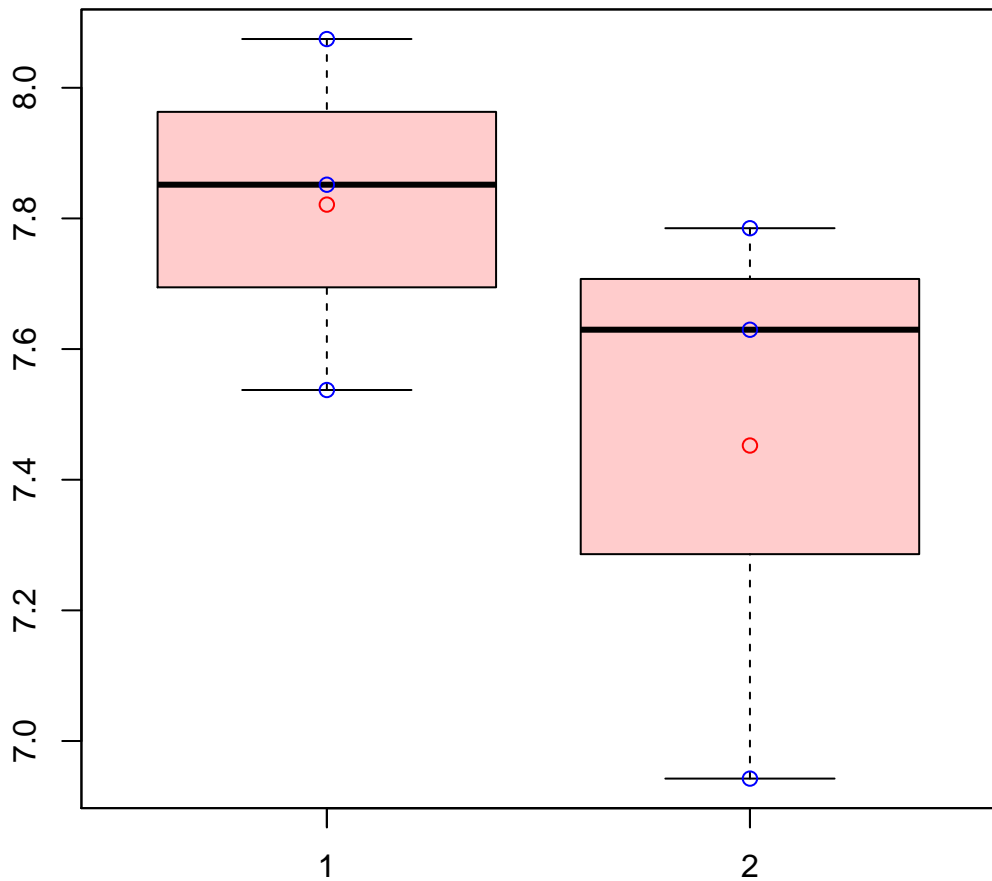

t-Test: p-value = 0.3

# CL10608Contig1|CL10608Contig1

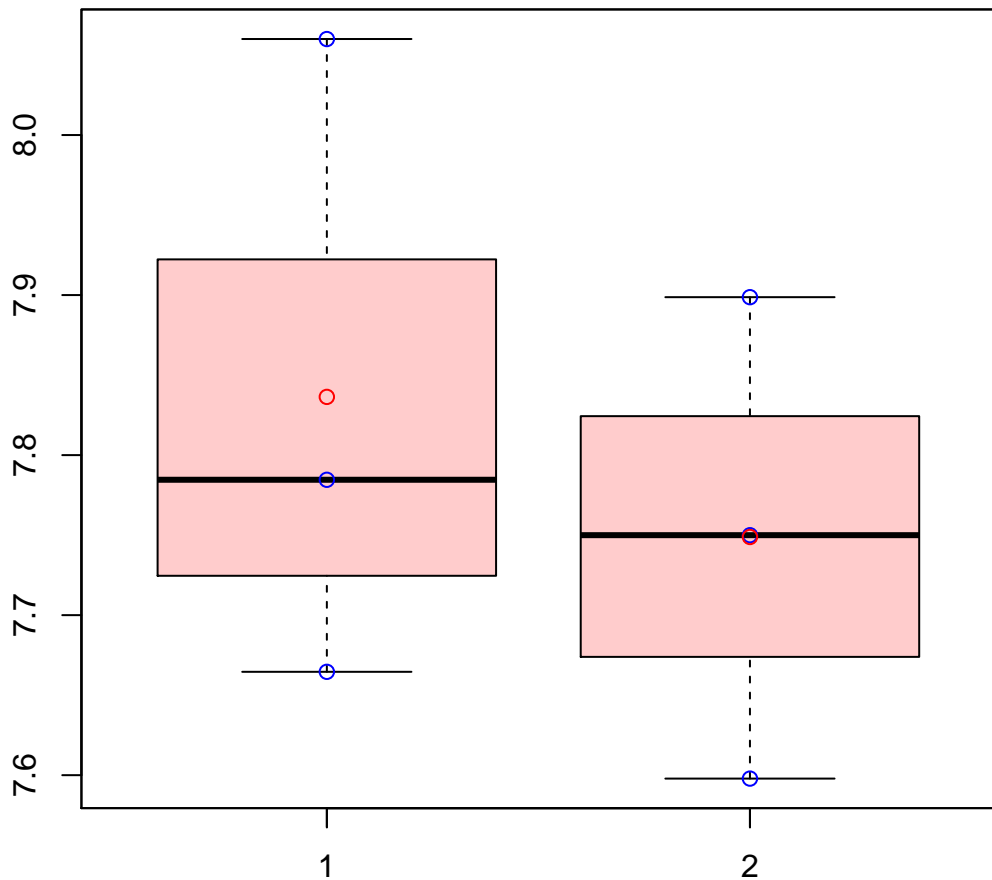

t-Test: p-value = 0.58

# CL1062Contig5|CL1062Contig5

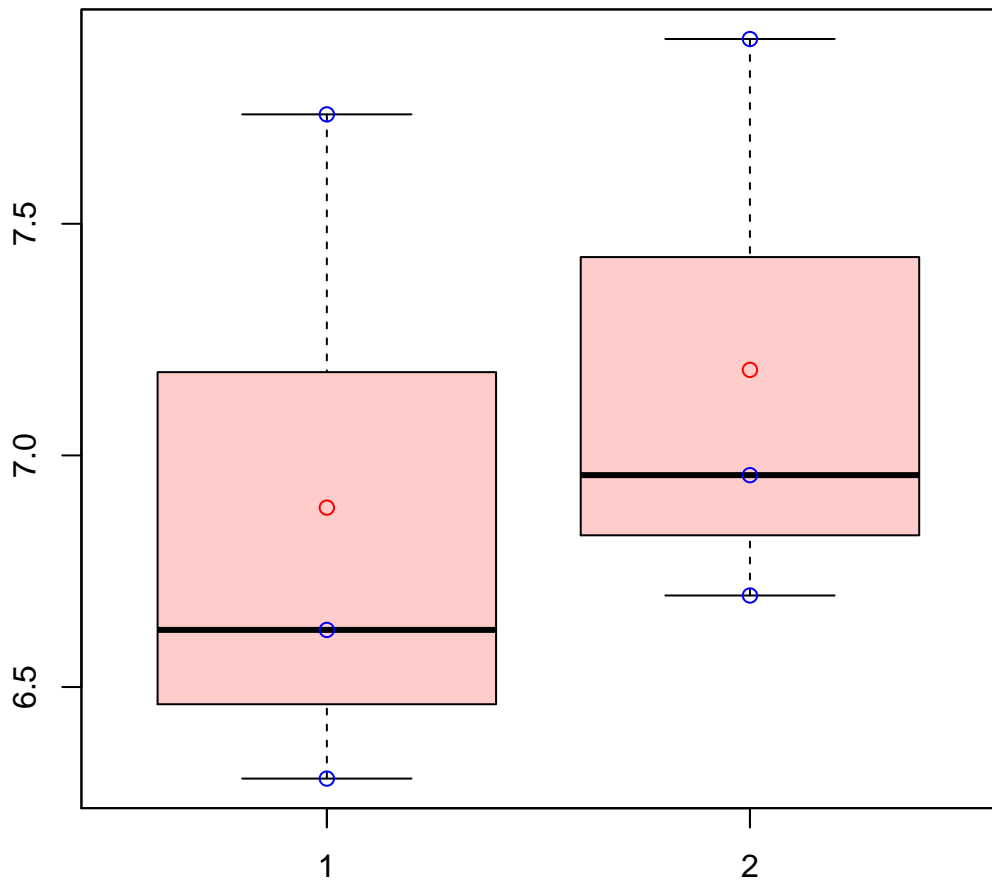

t-Test: p-value = 0.63

# CL10636Contig1|CL10636Contig1

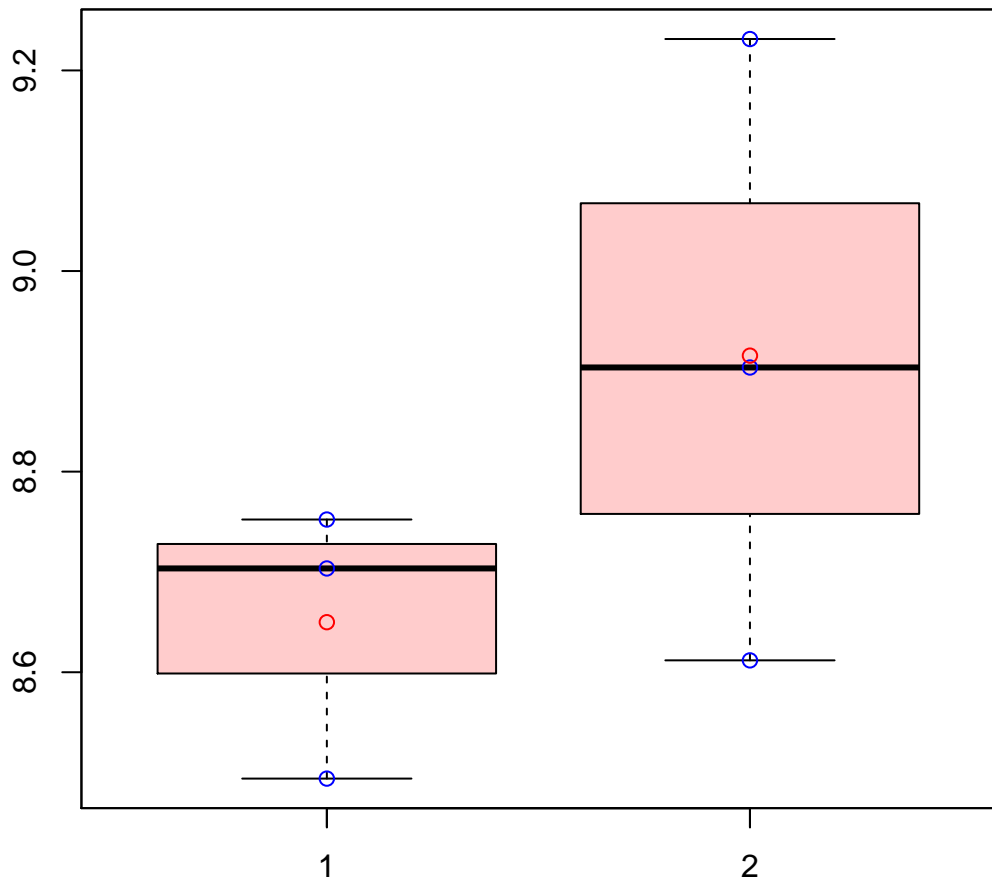

t-Test: p-value = 0.27

# CL10636Contig2|CL10636Contig2



t-Test: p-value = 0.27



# CL1063Contig4|CL1063Contig4

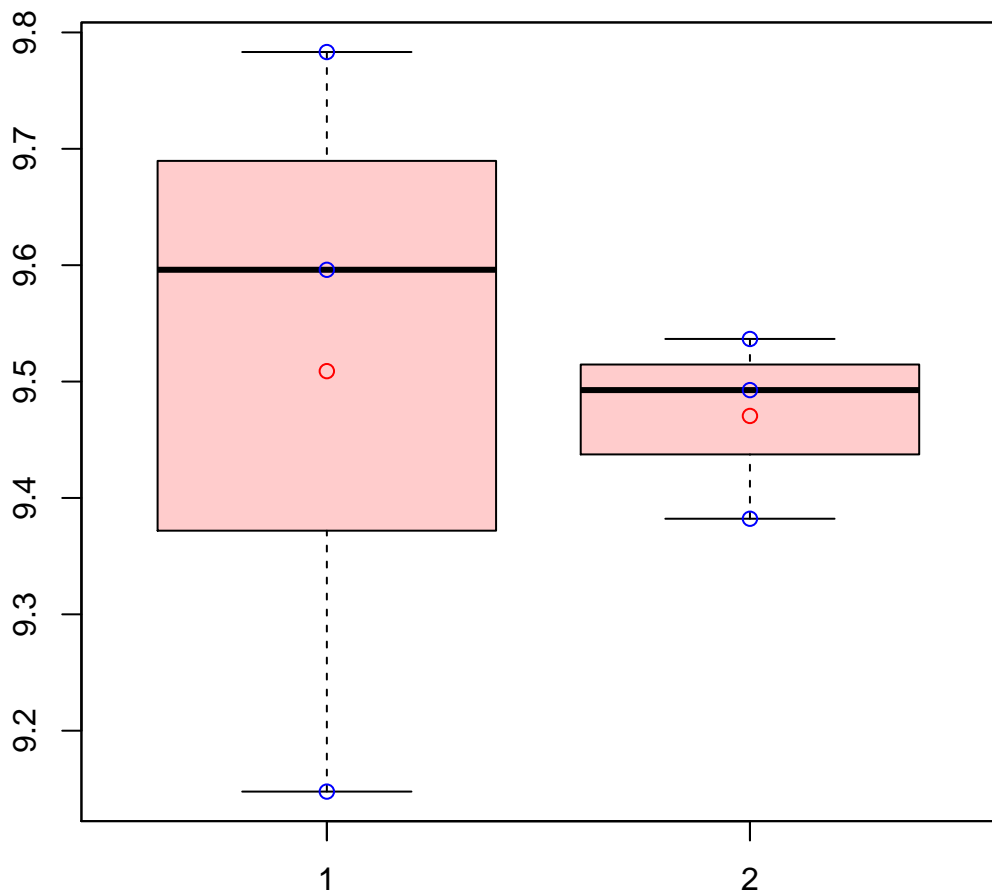

t-Test: p-value = 0.86

# CL1063Contig6|CL1063Contig6

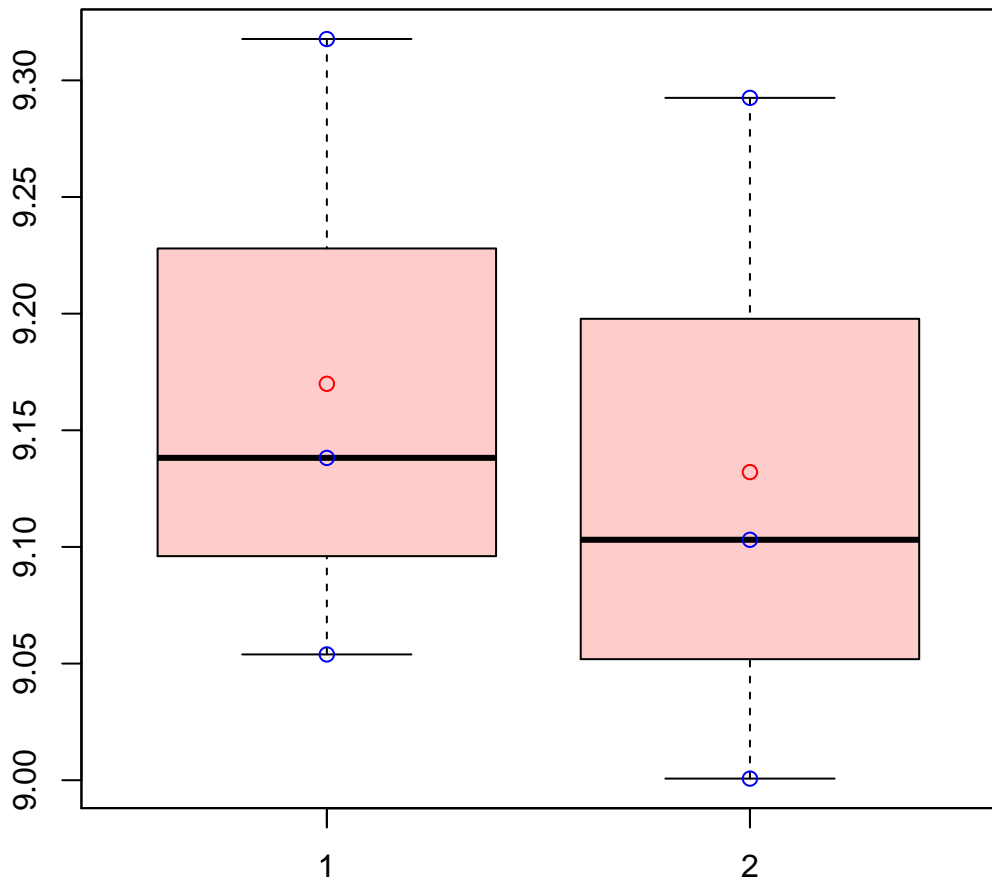

t-Test: p-value = 0.76

# CL10646Contig2|CL10646Contig2

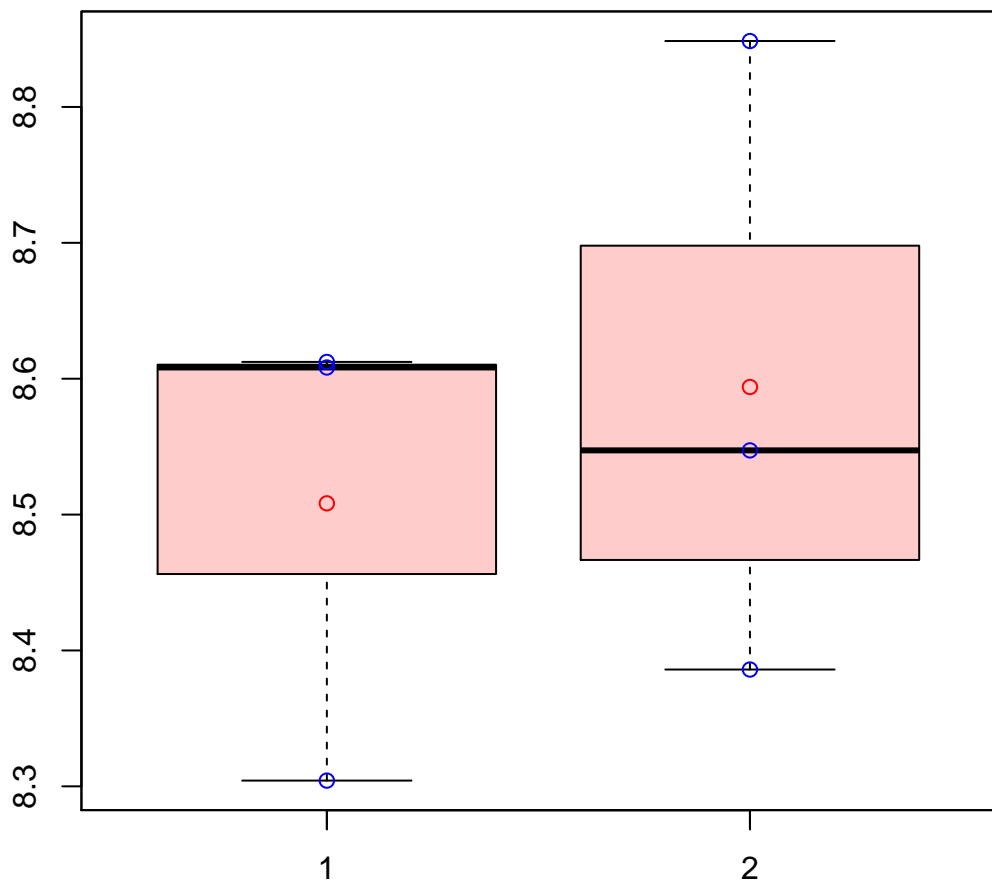

t-Test: p-value = 0.64

# CL10659Contig2|CL10659Contig2

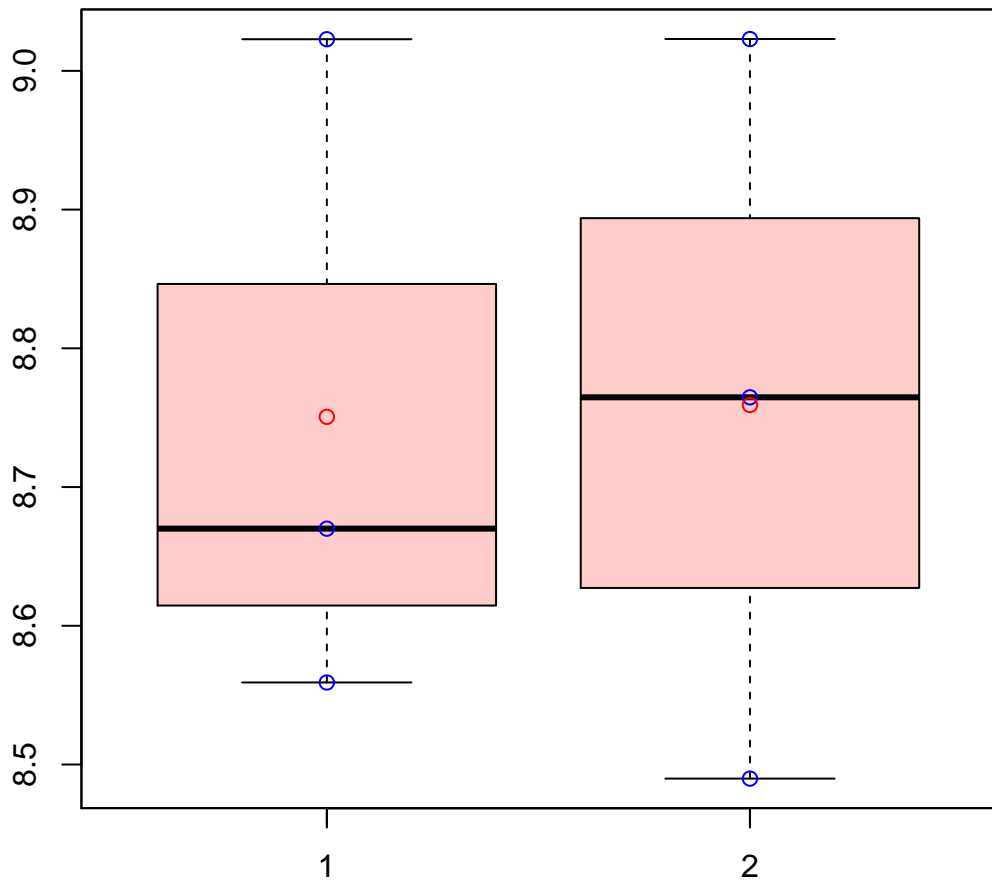

t-Test: p-value = 0.97

# CL10661Contig2|CL10661Contig2

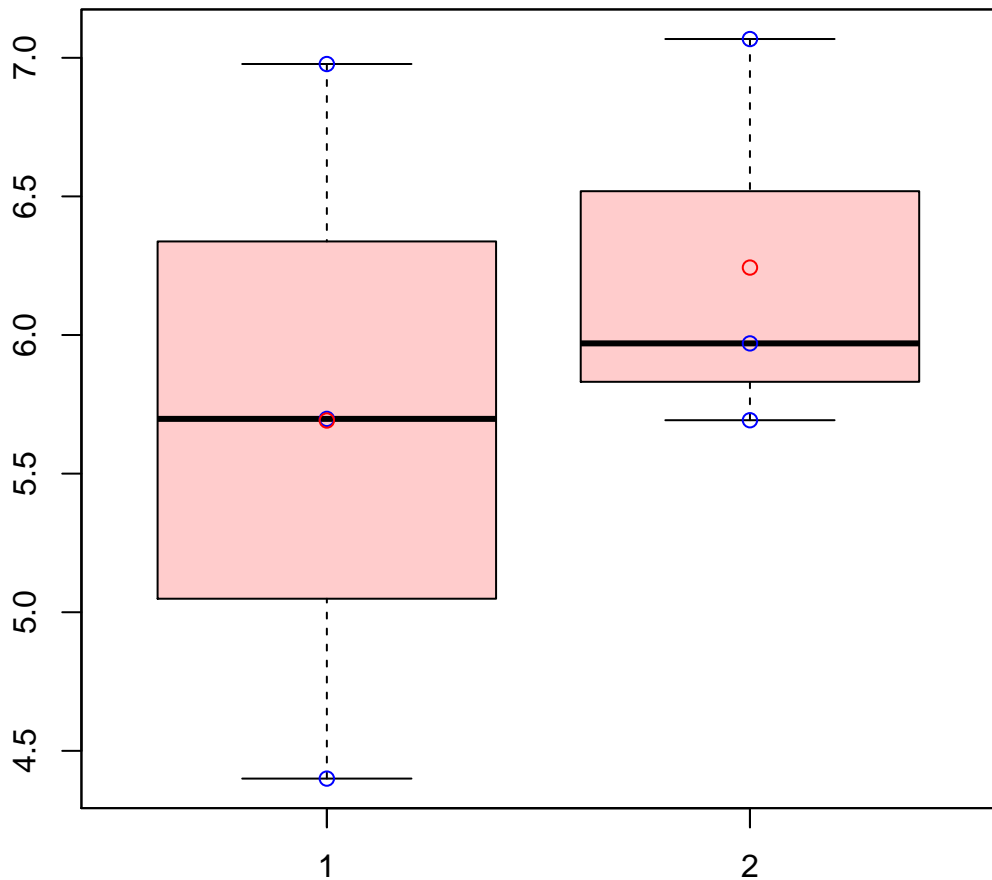

t-Test: p-value = 0.56

# CL10667Contig2|CL10667Contig2

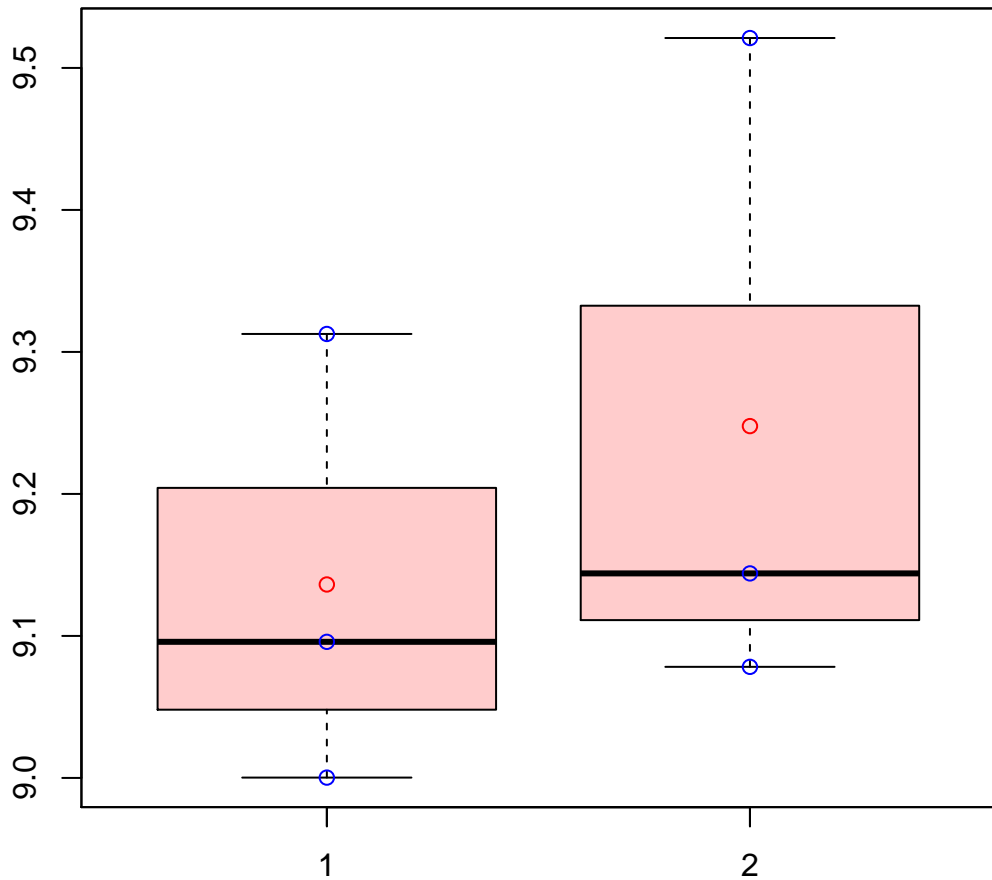

t-Test: p-value = 0.54

# CL1067Contig15|CL1067Contig15

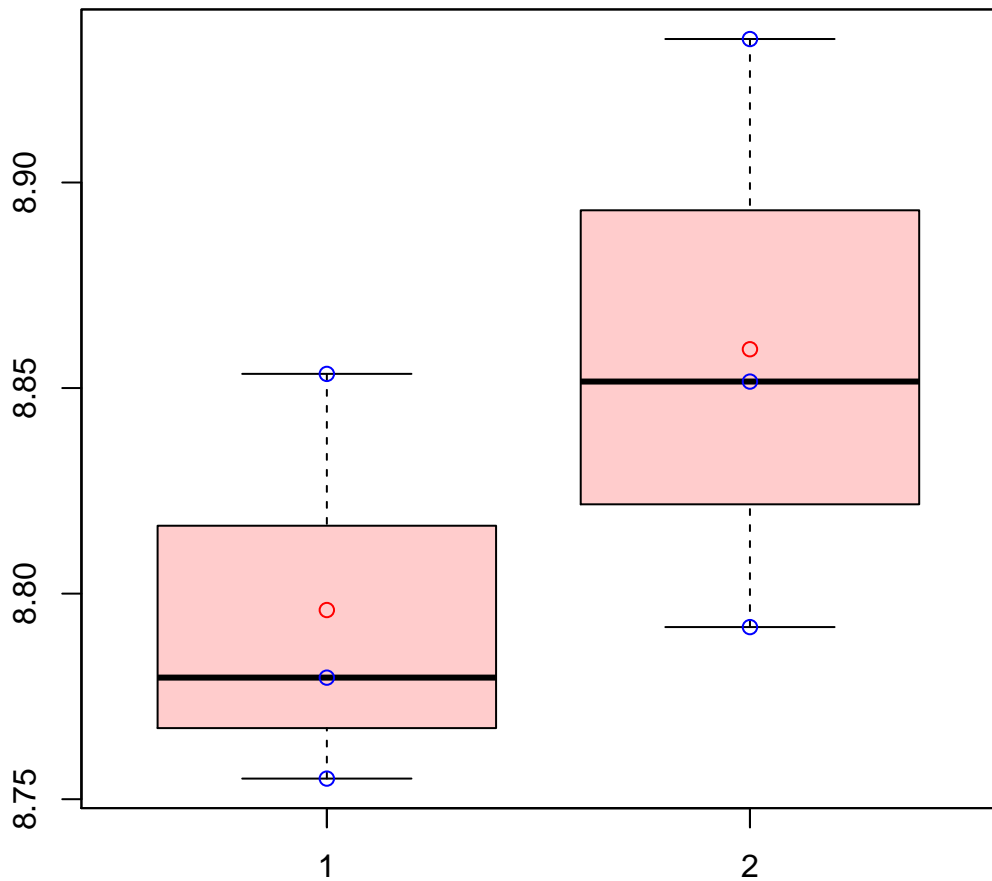

t-Test: p-value = 0.29

# CL1068Contig5|CL1068Contig5

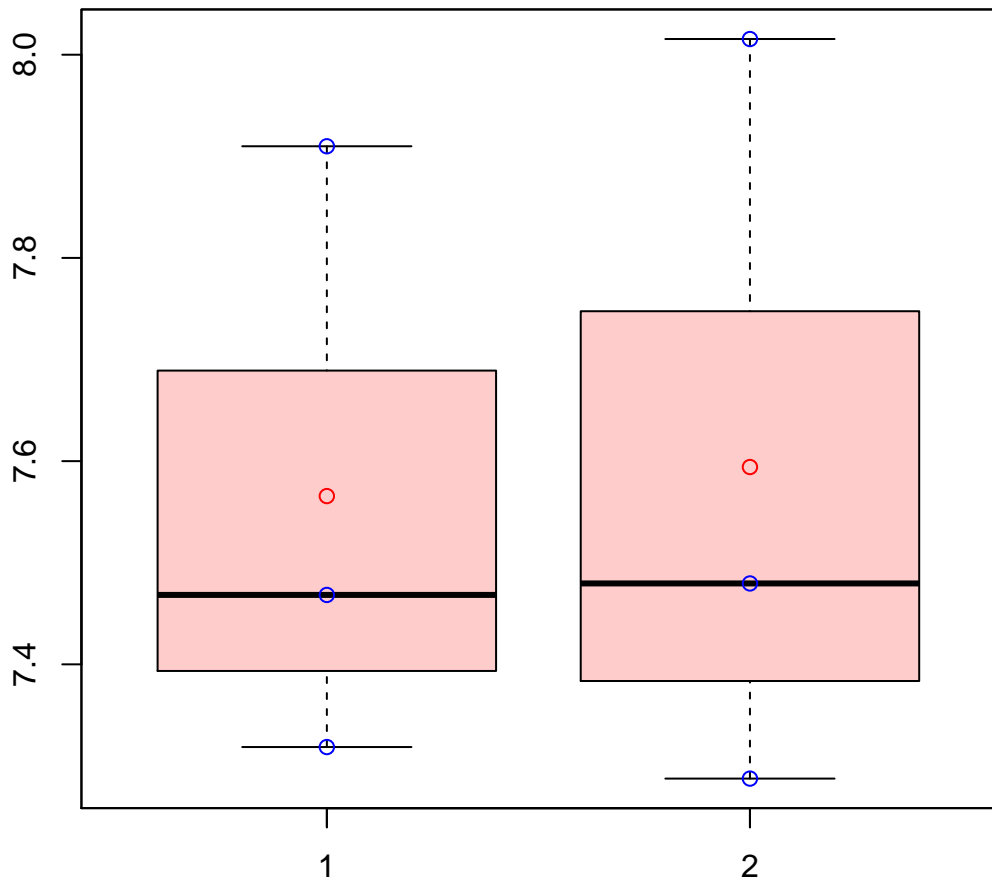

t-Test: p-value = 0.92



# CL106Contig10|CL106Contig10

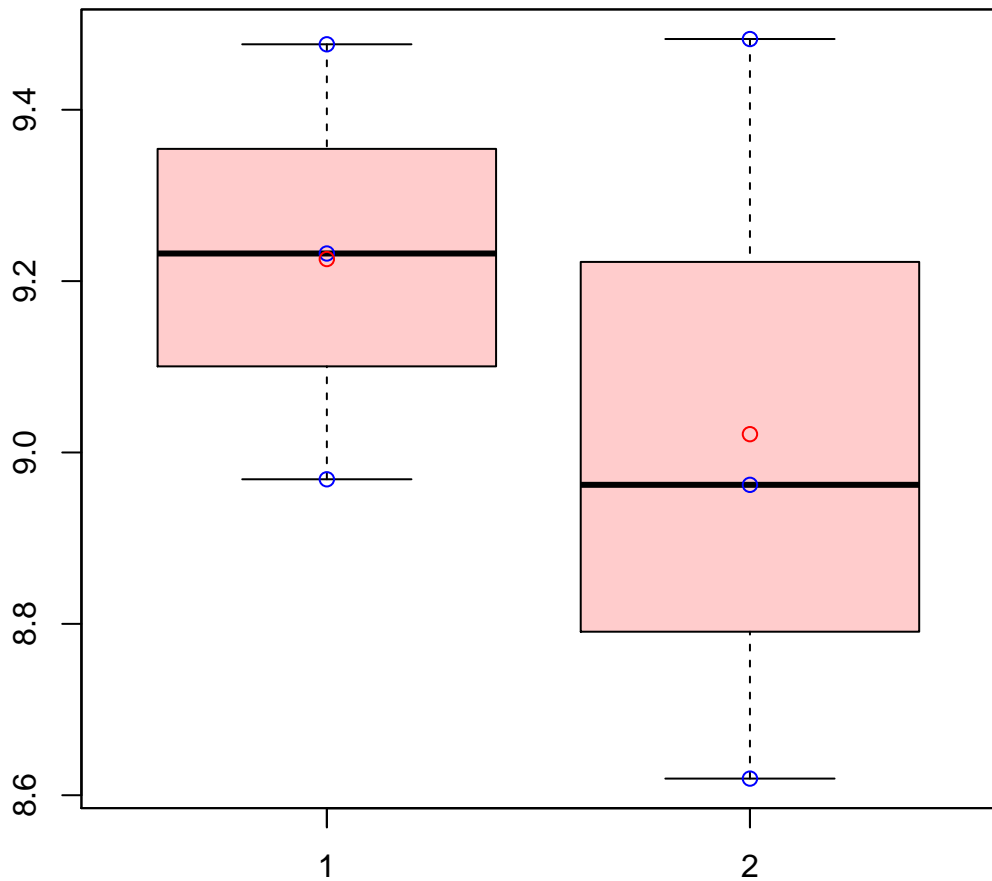

t-Test: p-value = 0.53

# CL106Contig11|CL106Contig11

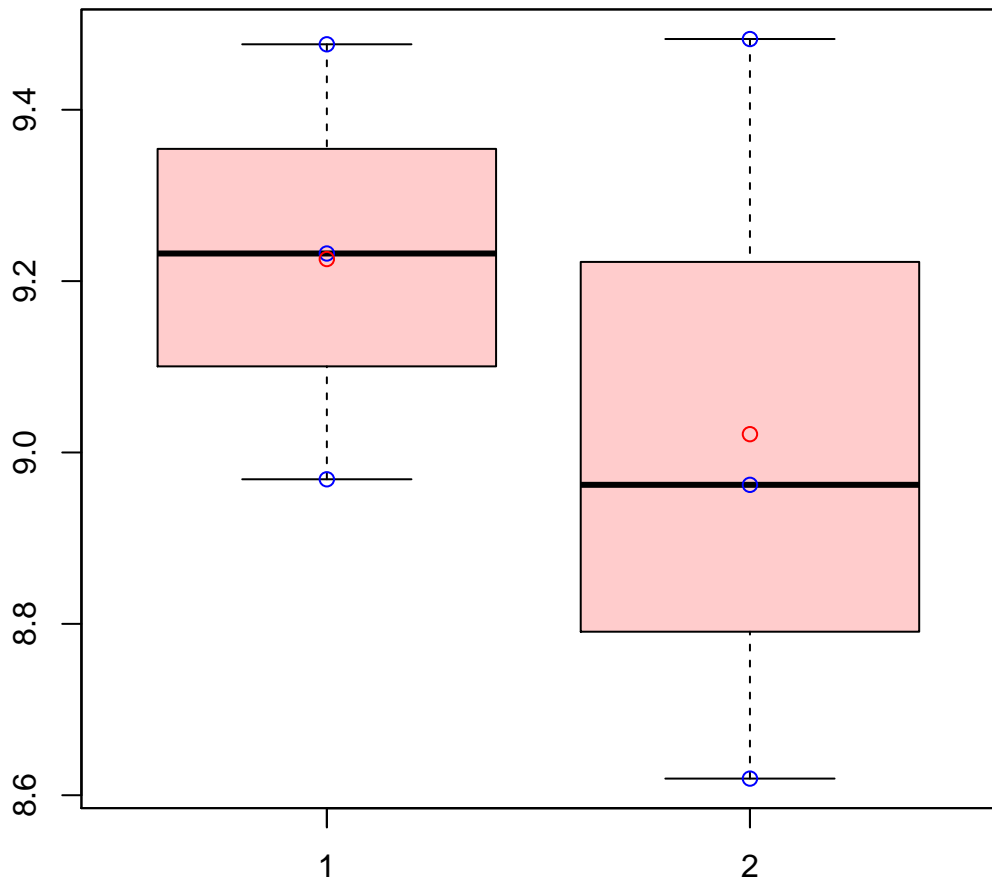

t-Test: p-value = 0.53

# CL106Contig12|CL106Contig12



t-Test: p-value = 0.53

# CL106Contig4|CL106Contig4

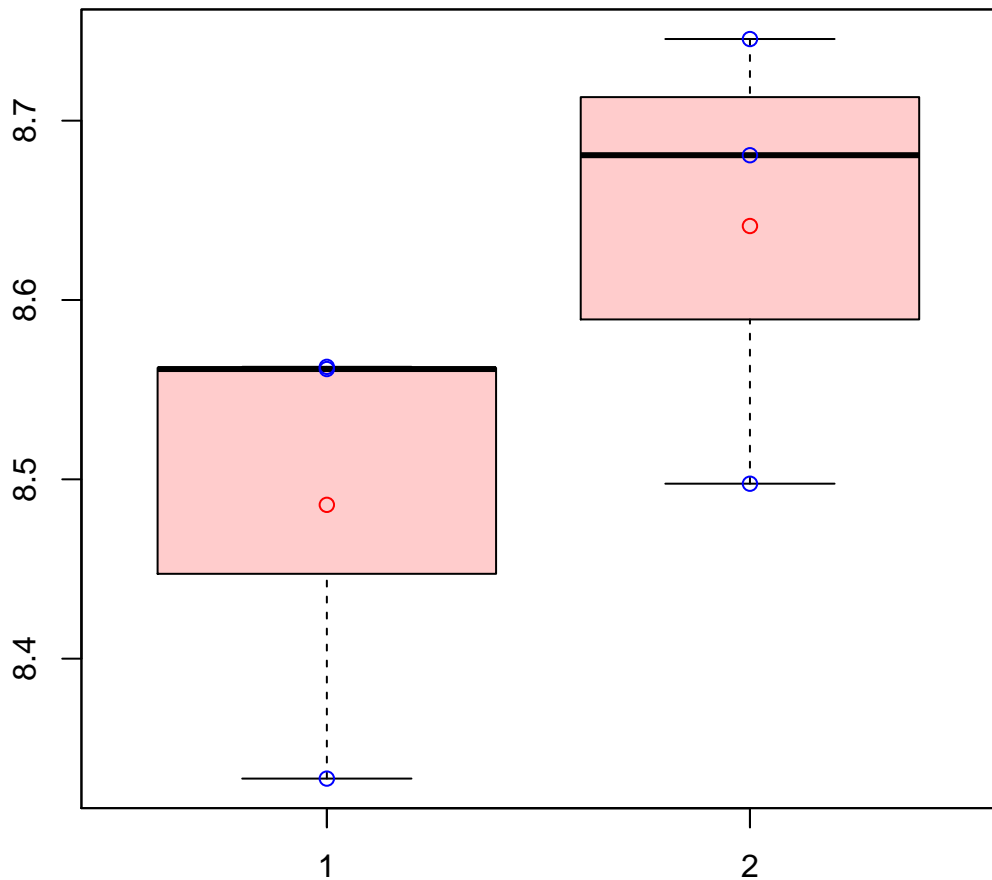

t-Test: p-value = 0.22

# CL106Contig5|CL106Contig5

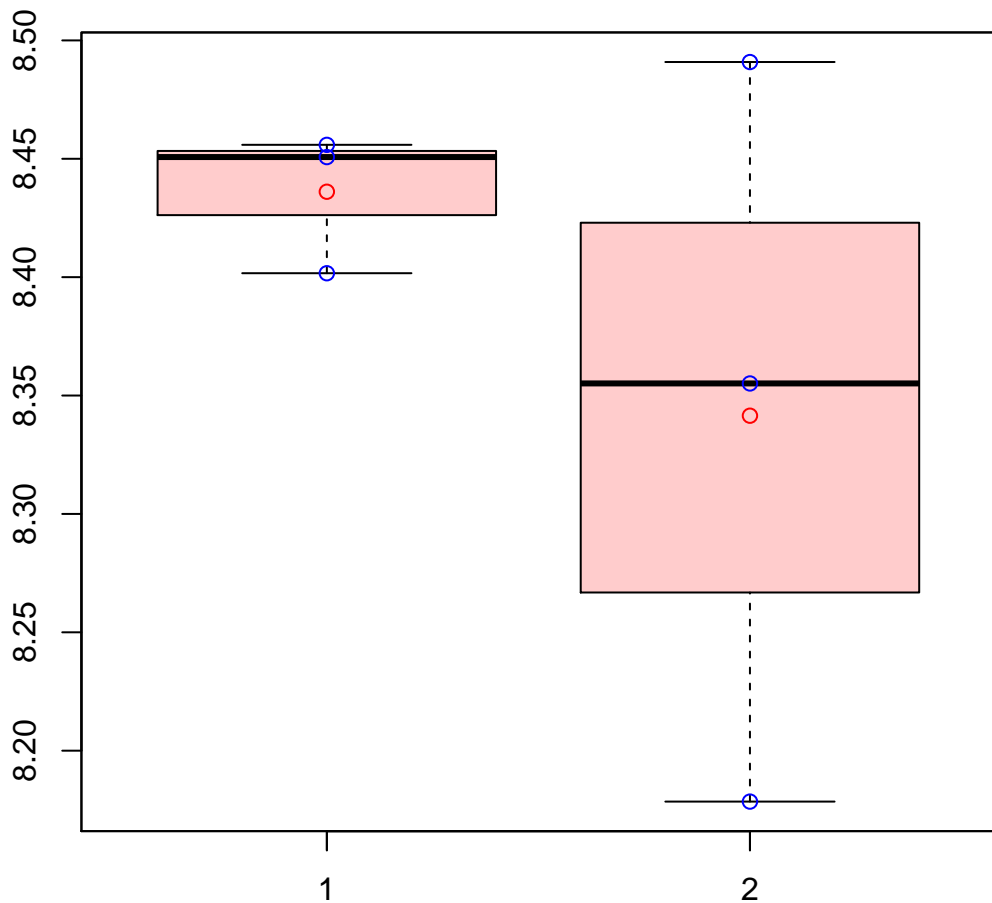

t-Test: p-value = 0.41

# CL106Contig8|CL106Contig8



t-Test: p-value = 0.53

# CL1072Contig2|CL1072Contig2

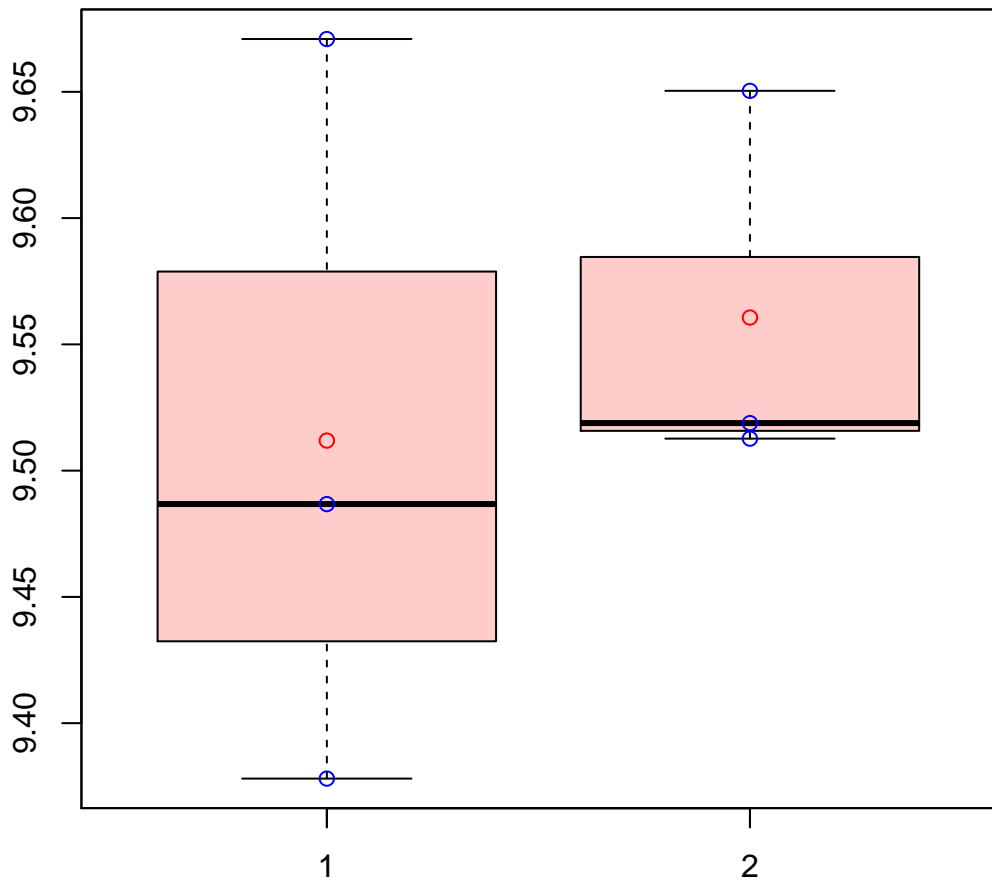

t-Test: p-value = 0.65

# CL1073Contig1|CL1073Contig1

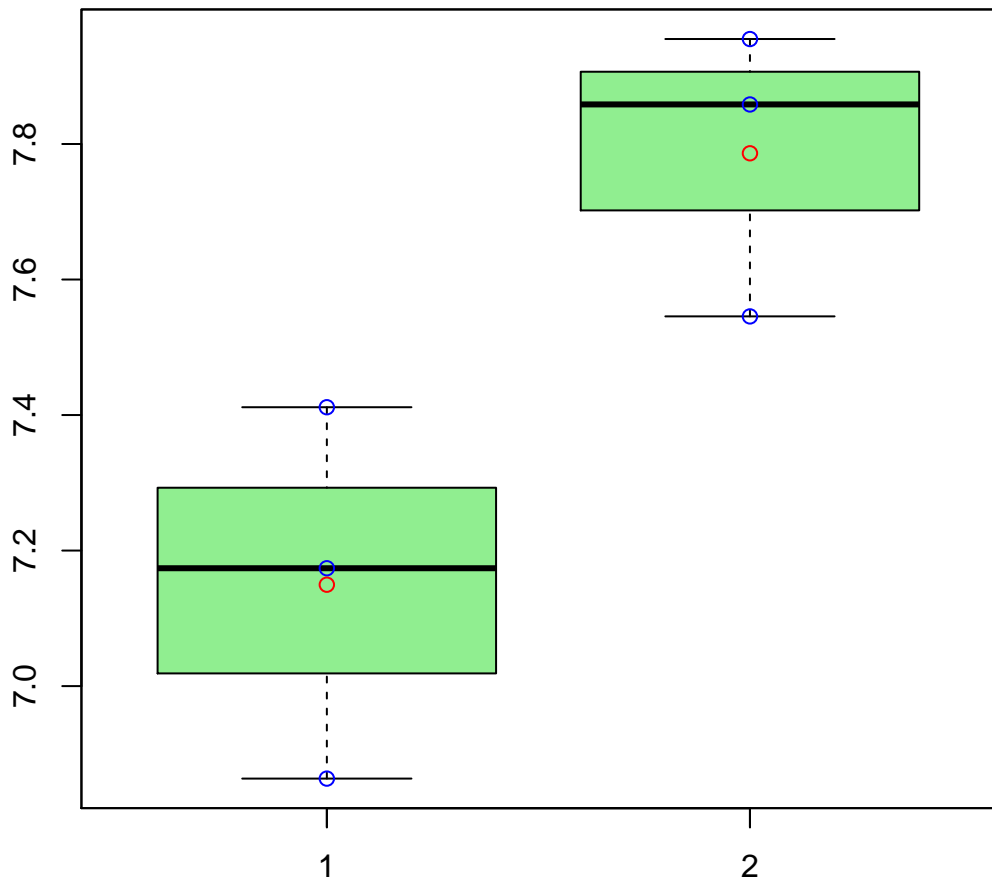

t-Test: p-value = 0.04



# CL1073Contig4|CL1073Contig4

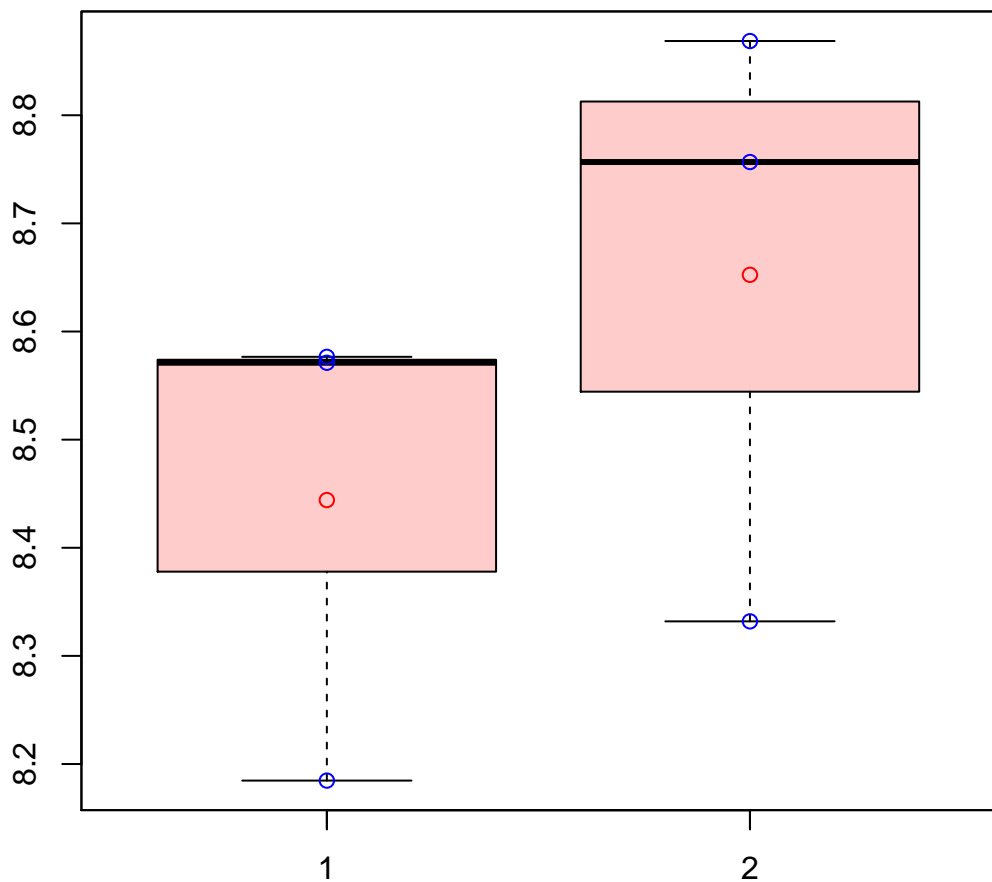

t-Test: p-value = 0.38

# CL10748Contig1|CL10748Contig1

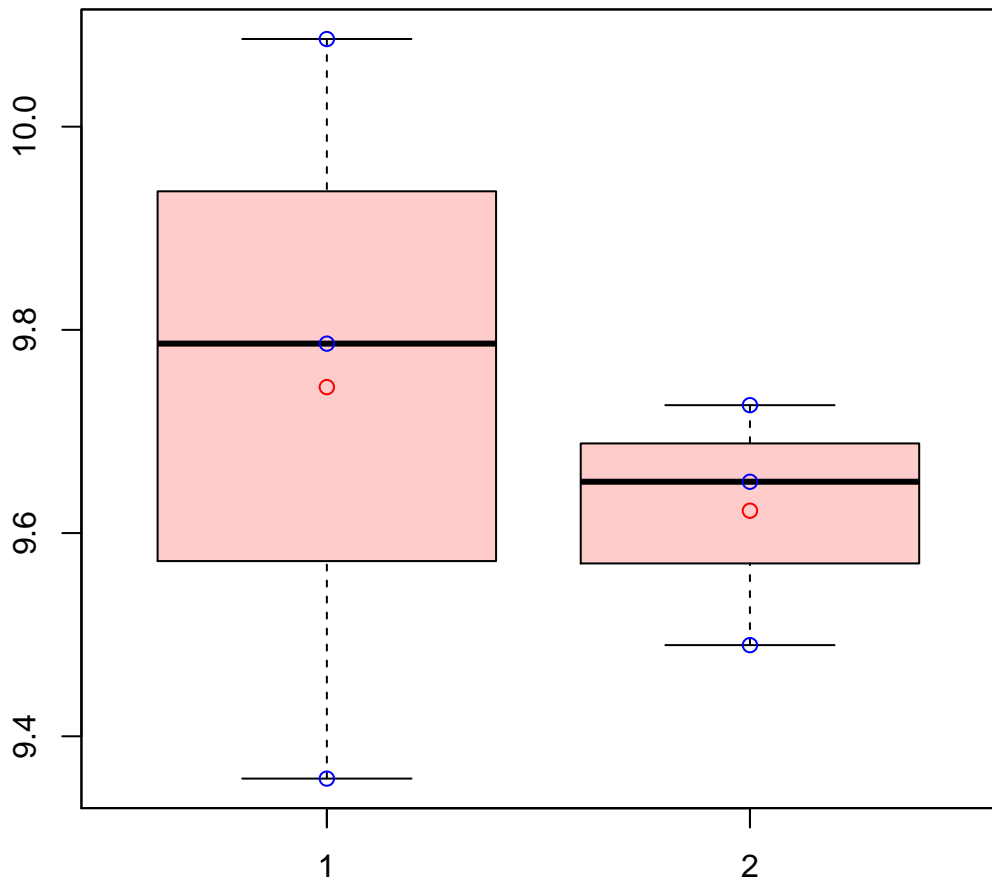

t-Test: p-value = 0.63

# CL1074Contig5|CL1074Contig5

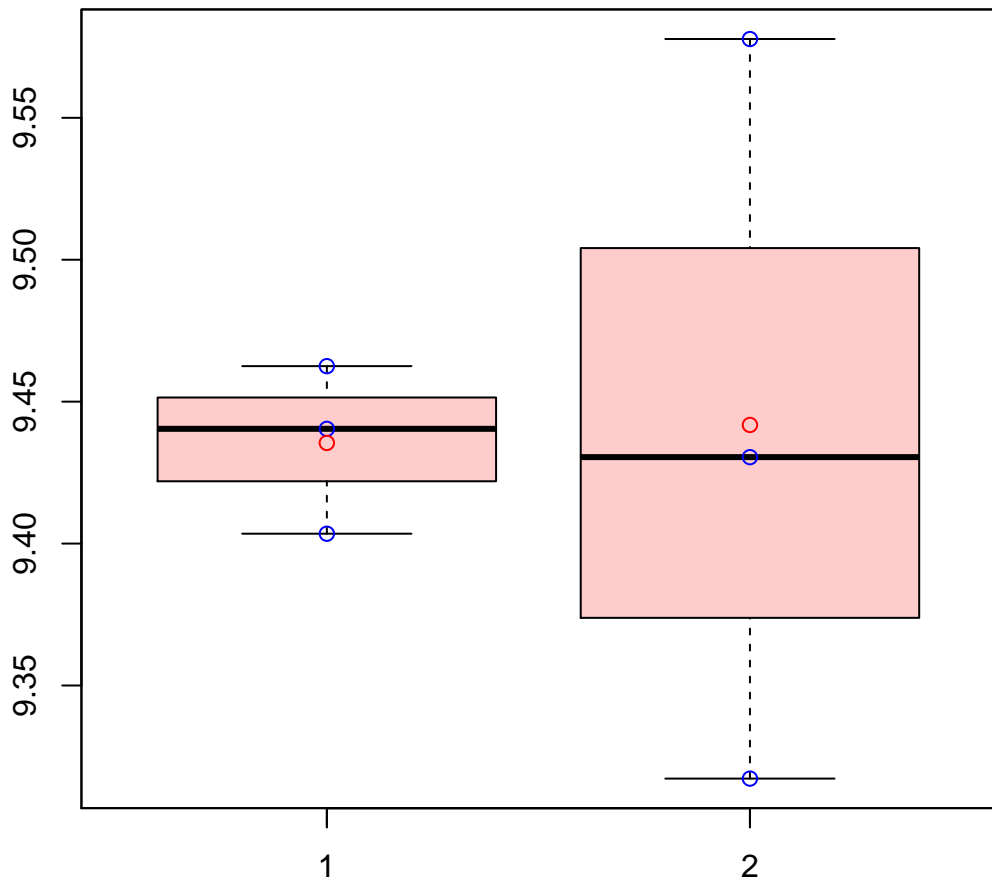

t-Test: p-value = 0.94

# CL1075Contig9|CL1075Contig9

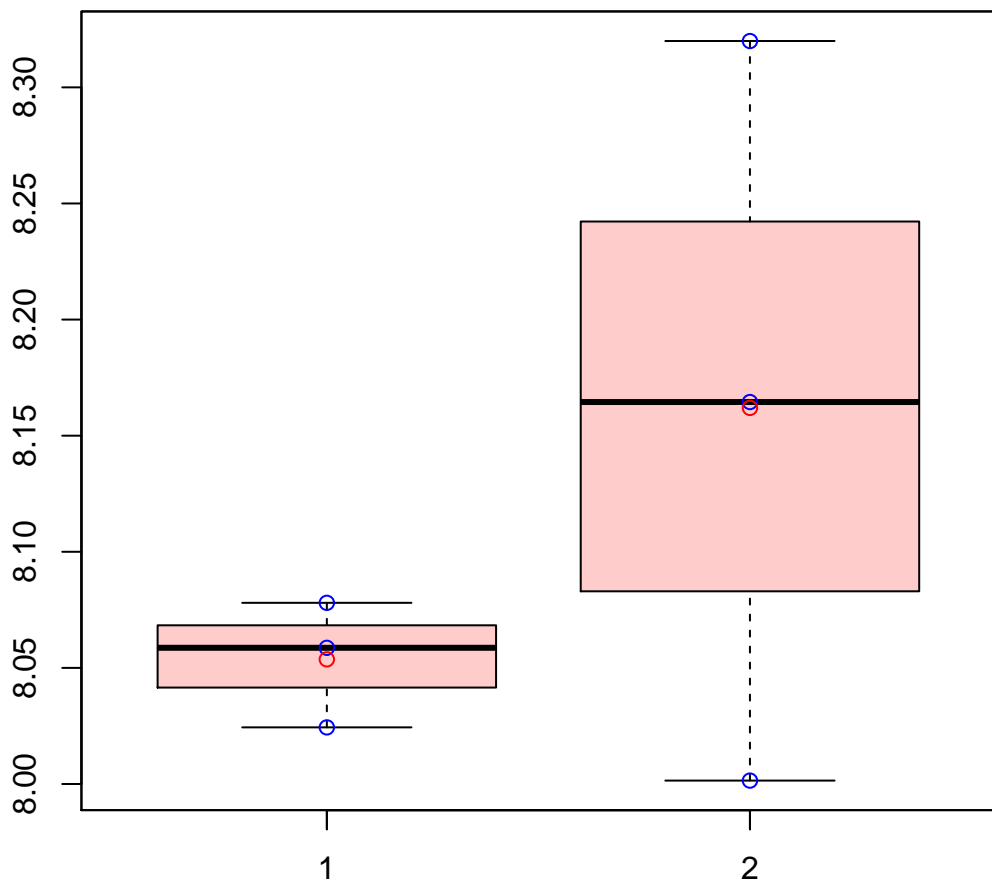

t-Test: p-value = 0.36

# CL10763Contig1|CL10763Contig1

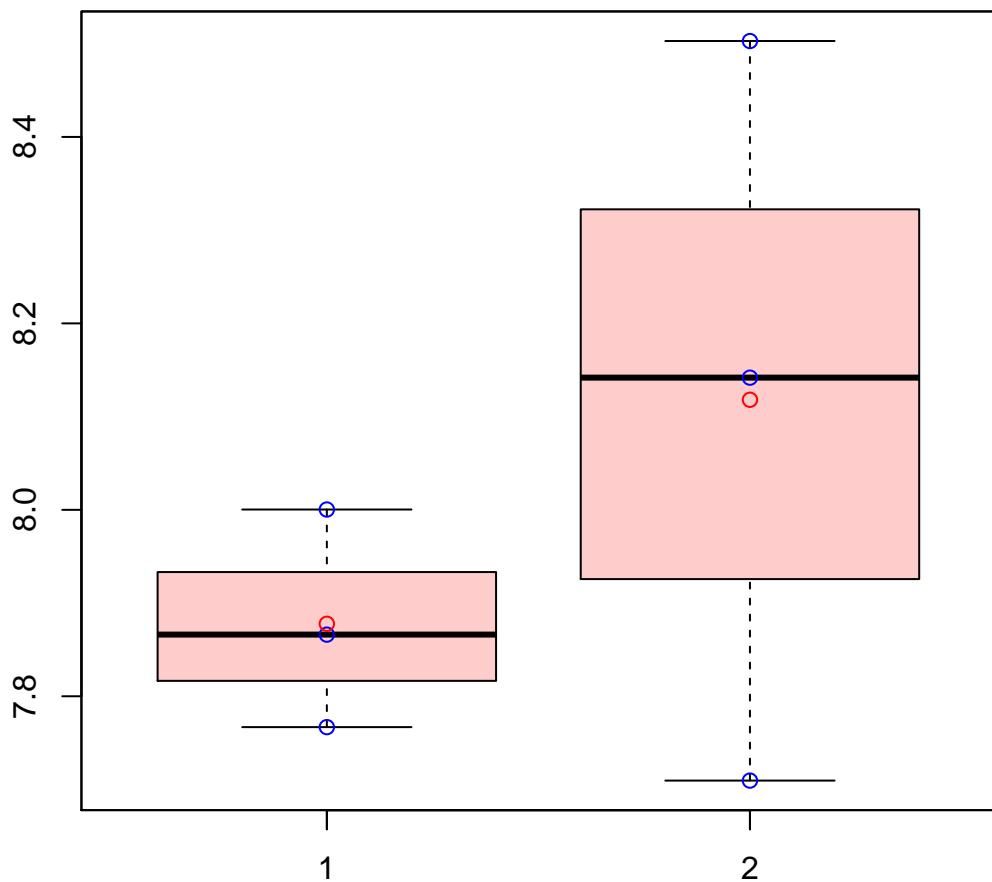

t-Test: p-value = 0.41

# CL10765Contig1|CL10765Contig1

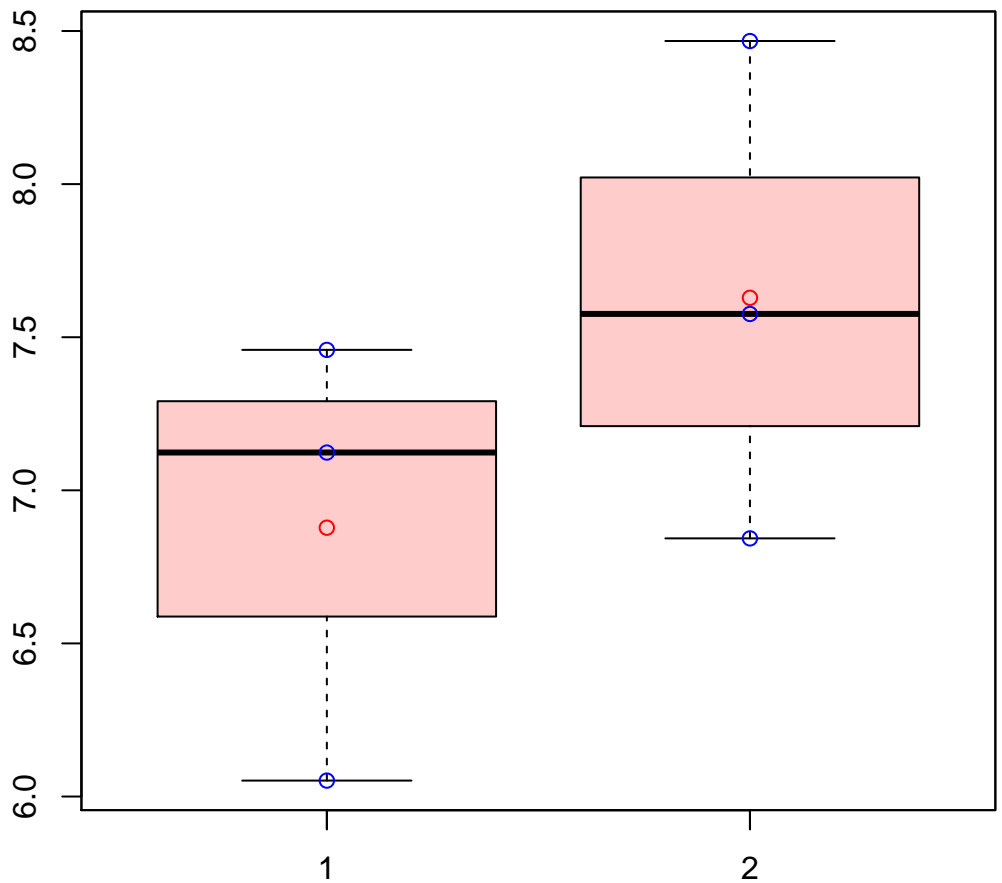

t-Test: p-value = 0.3

# CL10771Contig1|CL10771Contig1

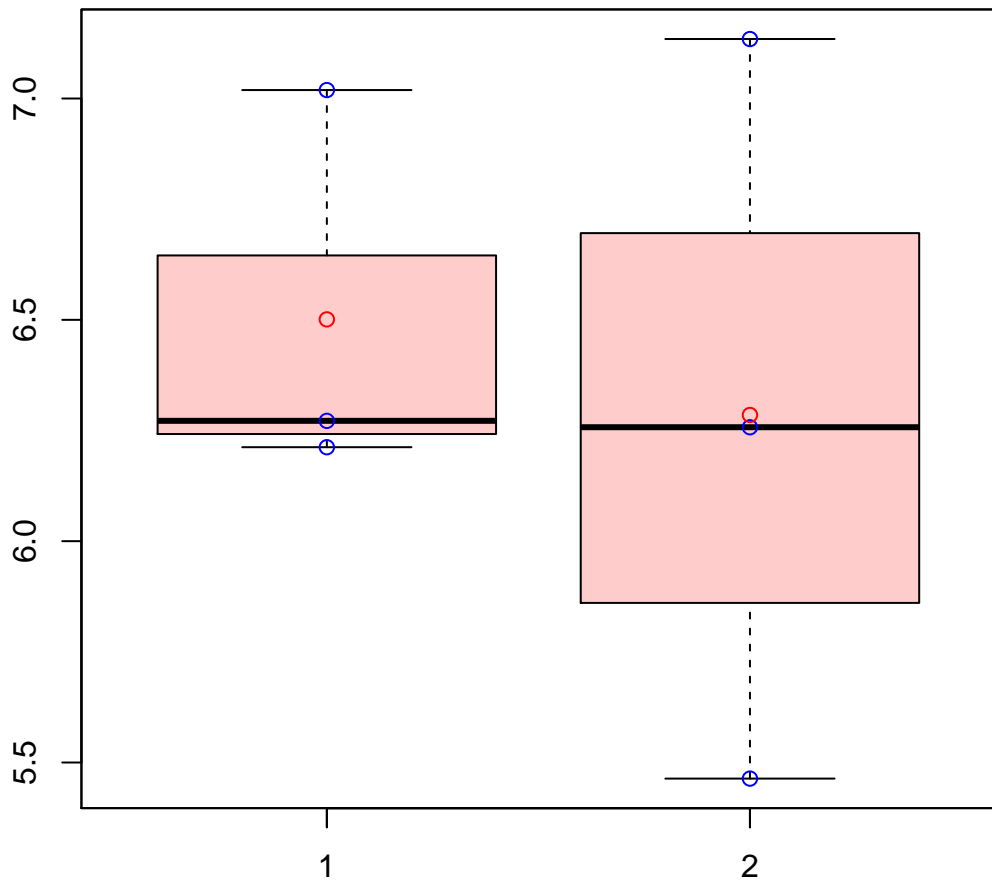

t-Test: p-value = 0.72

# CL10787Contig1|CL10787Contig1

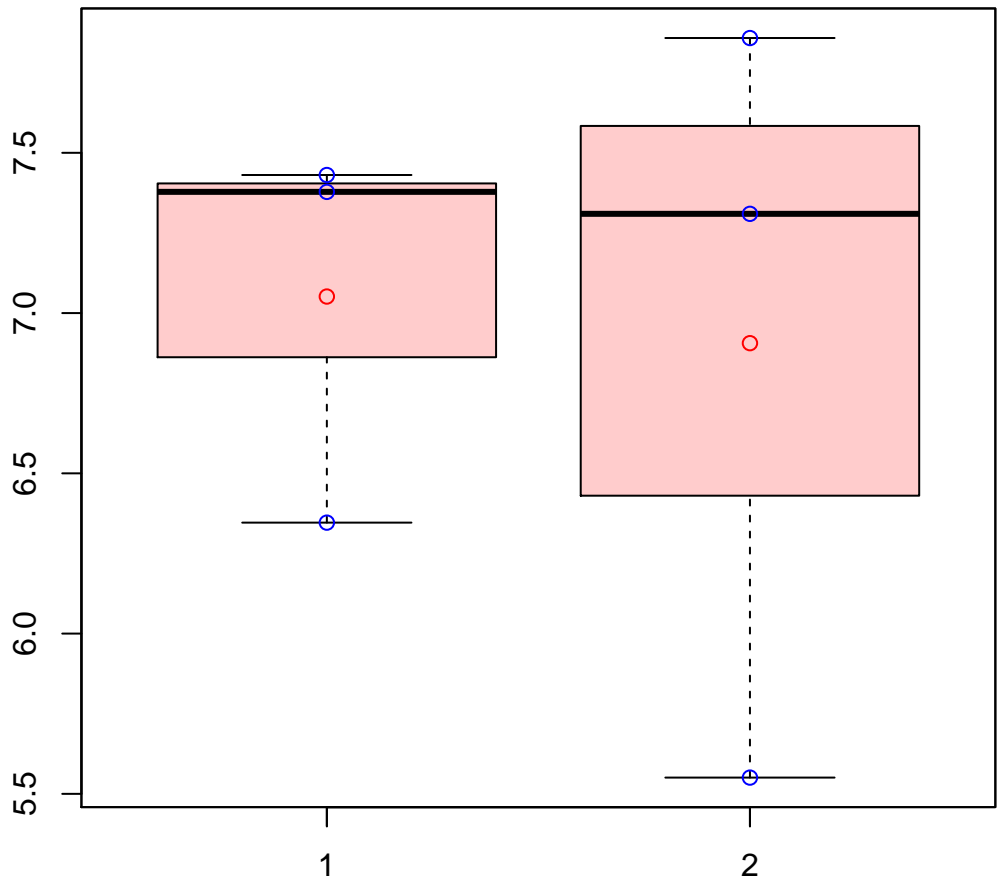

t-Test: p-value = 0.86



# CL10796Contig1|CL10796Contig1

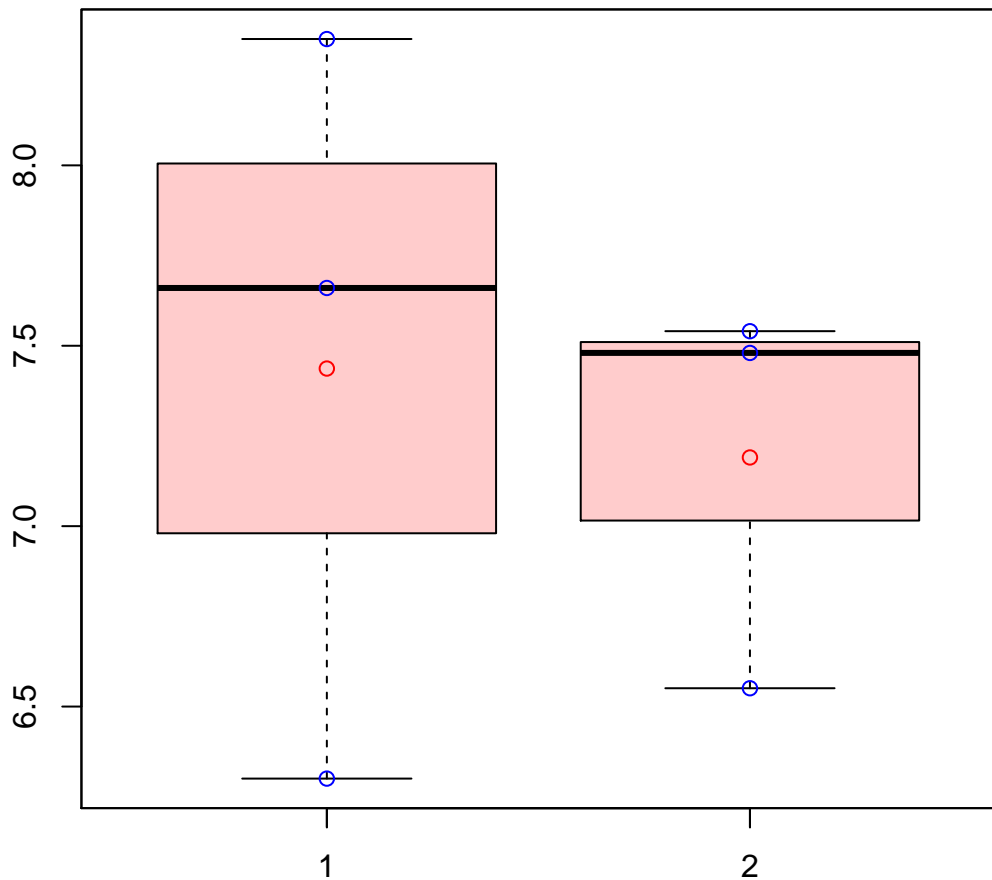

t-Test: p-value = 0.74

# CL10796Contig2|CL10796Contig2



t-Test: p-value = 0.74

# CL107Contig11|CL107Contig11

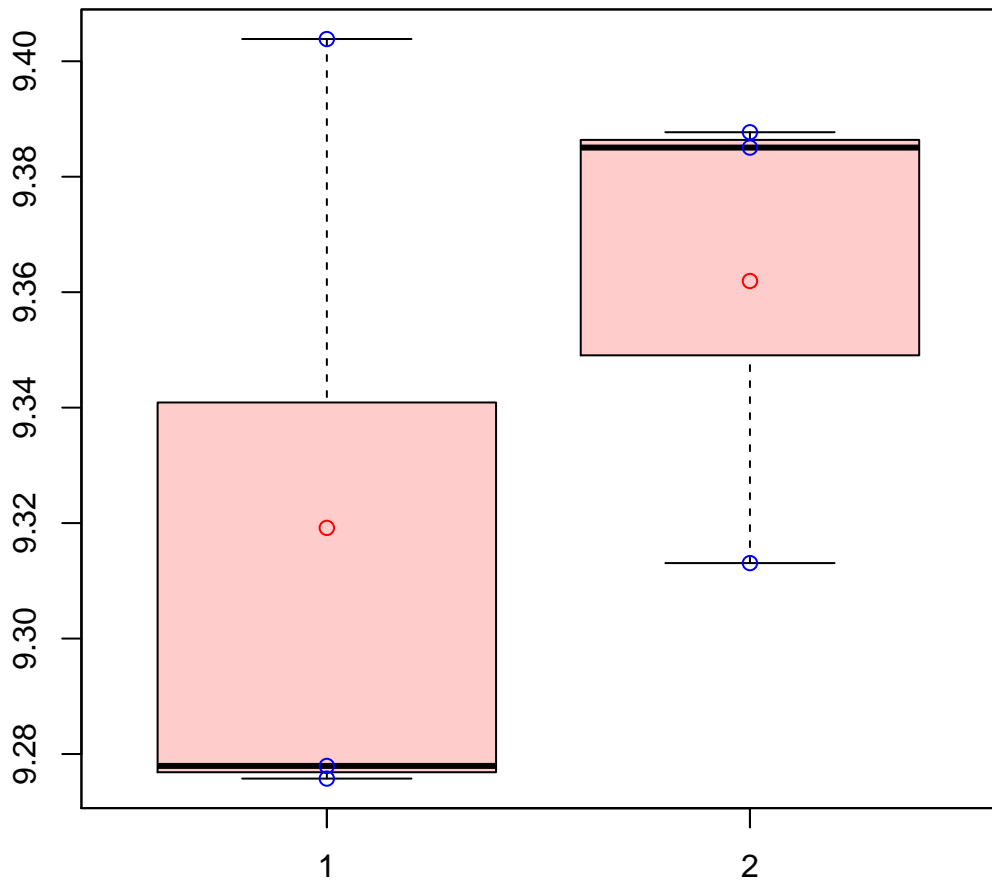

t-Test: p-value = 0.44

# CL107Contig12|CL107Contig12



t-Test: p-value = 0.44

# CL107Contig15|CL107Contig15

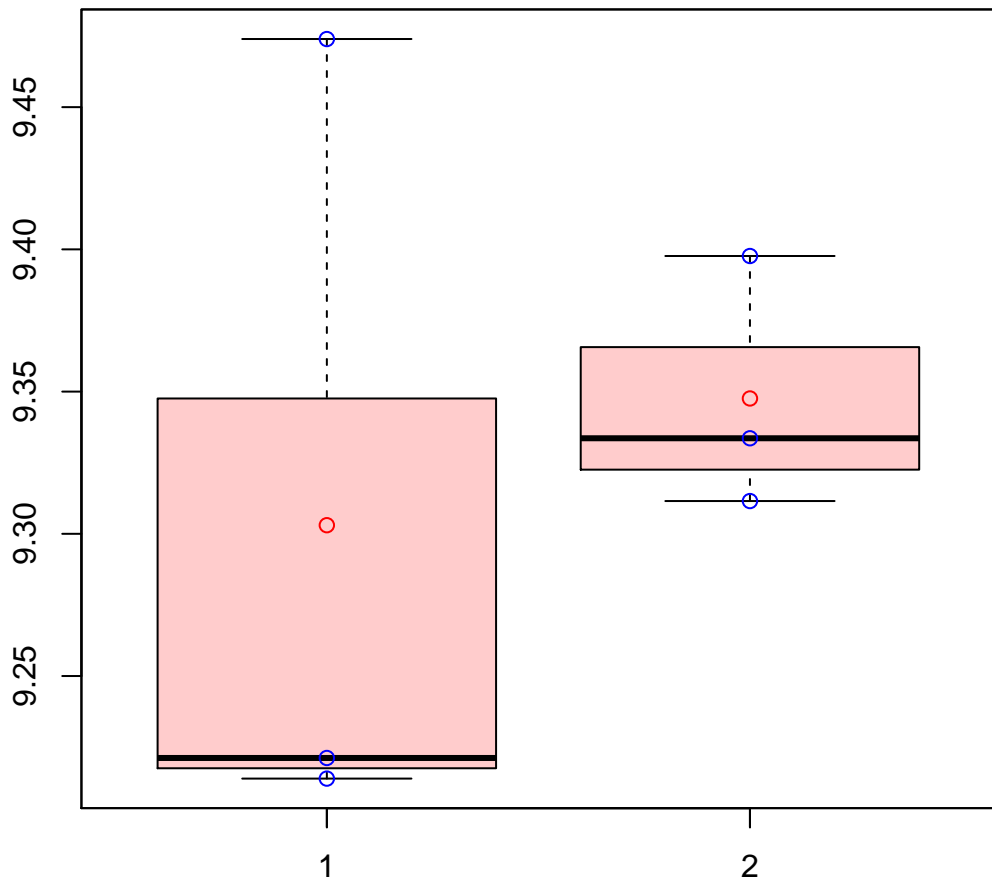

t-Test: p-value = 0.66

# CL107Contig4|CL107Contig4



t-Test: p-value = 0.44

# CL107Contig5|CL107Contig5

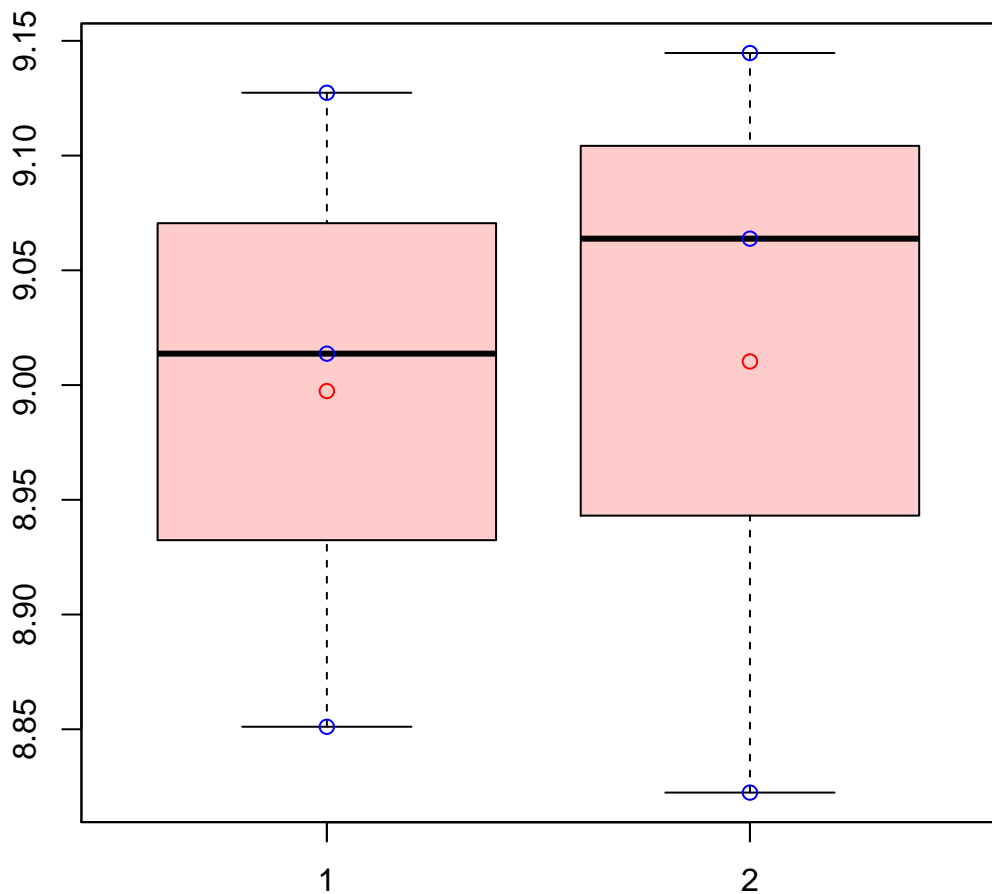

t-Test: p-value = 0.92

# CL10807Contig2|CL10807Contig2

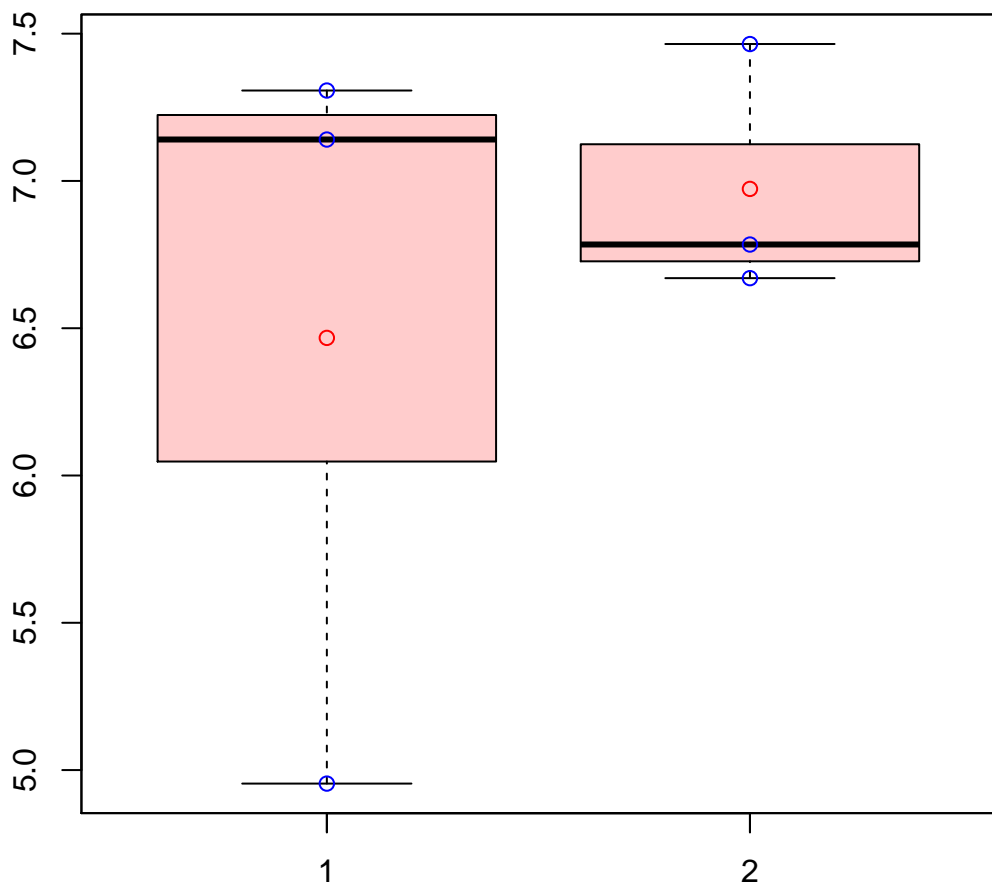

t-Test: p-value = 0.58



# CL10811Contig2|CL10811Contig2

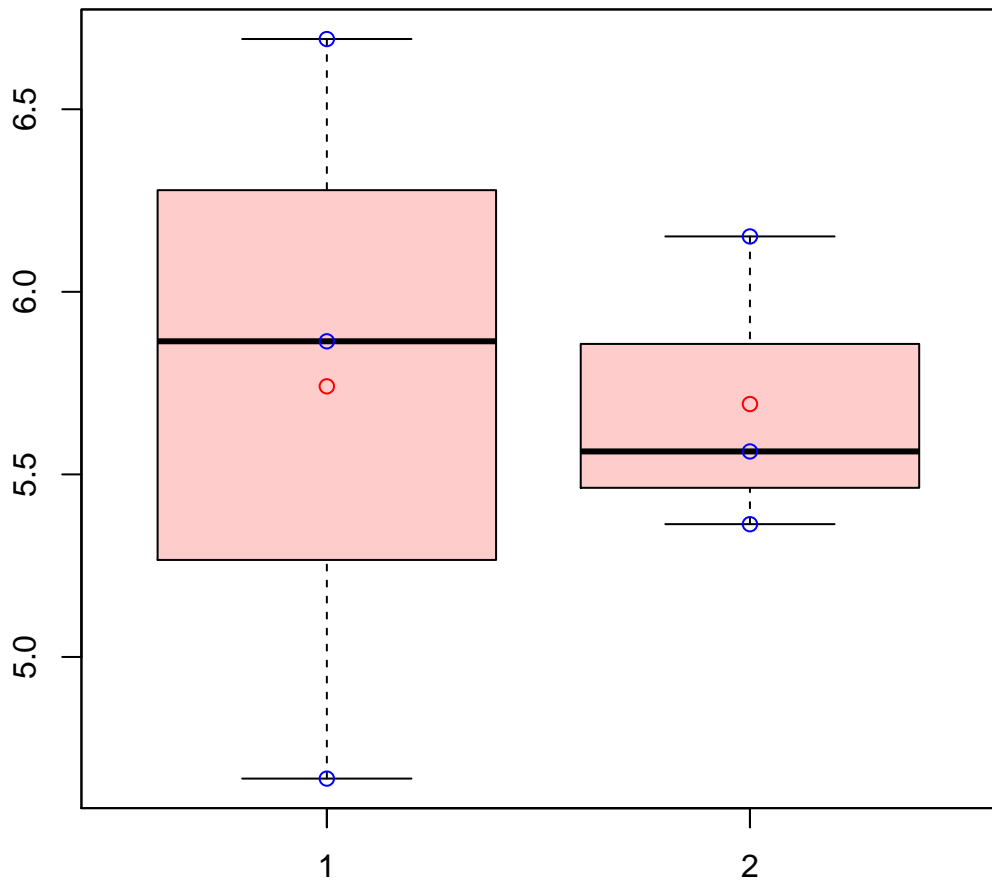

t-Test: p-value = 0.94

# CL10823Contig2|CL10823Contig2

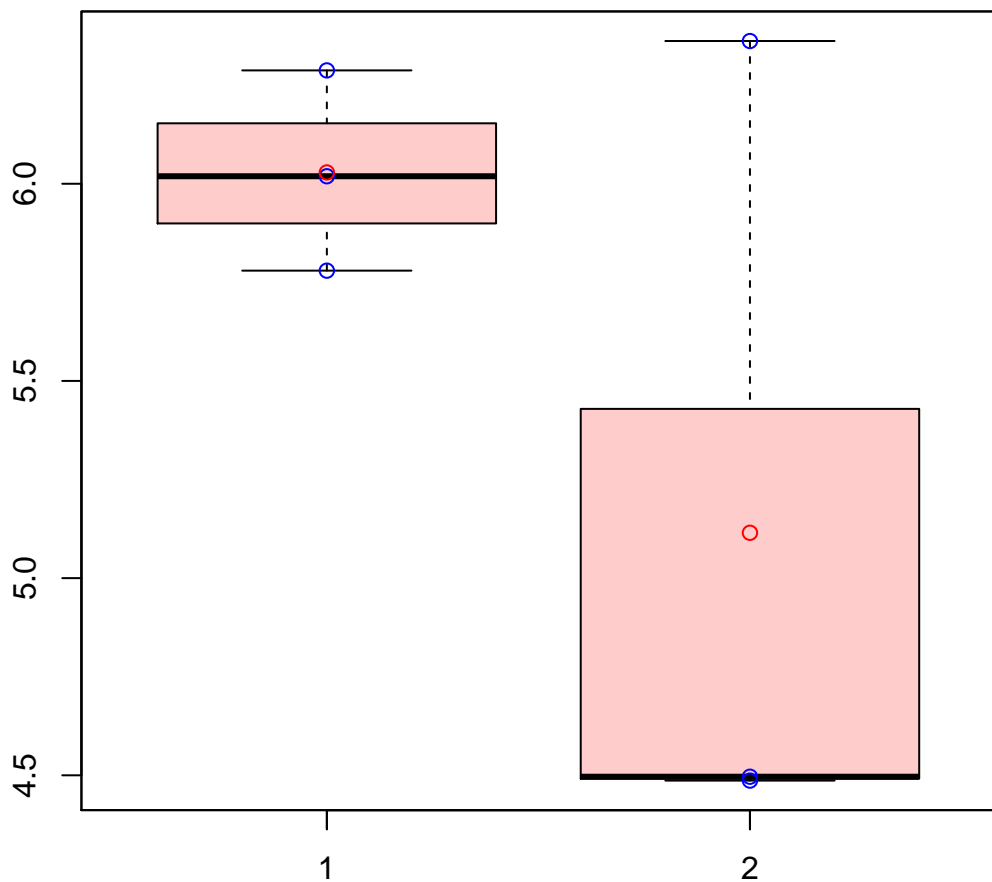

t-Test: p-value = 0.28

# CL10841Contig2|CL10841Contig2

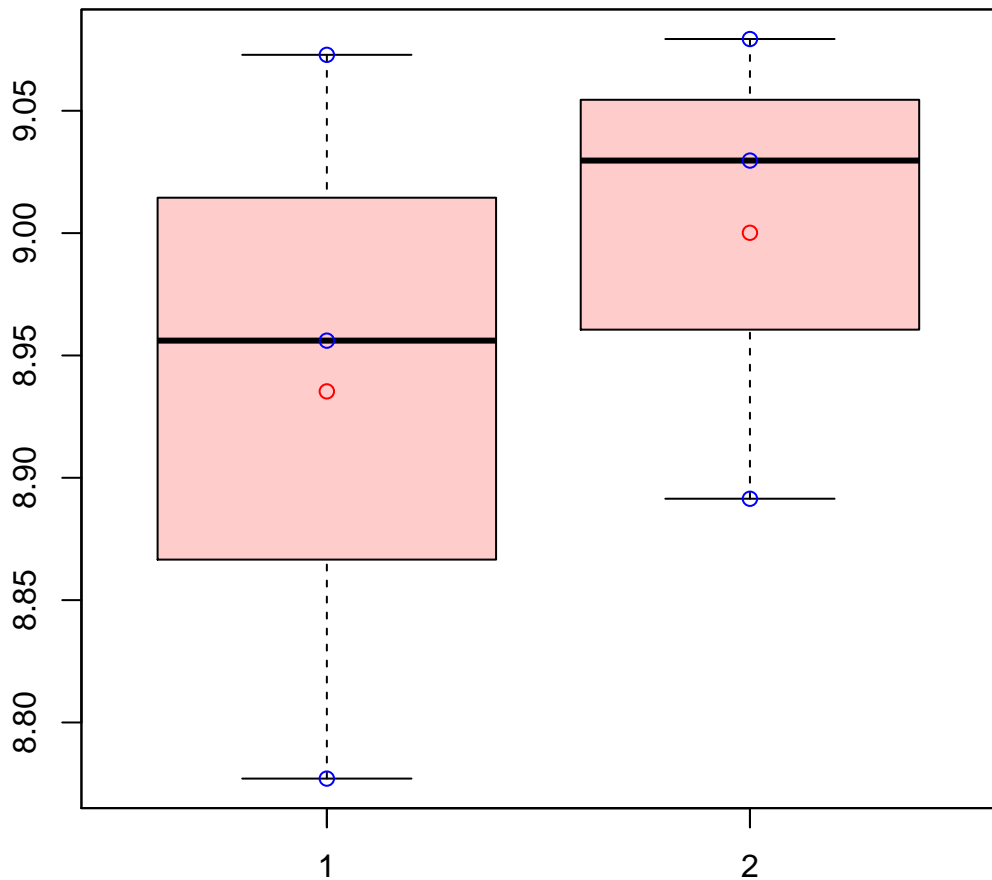

t-Test: p-value = 0.57

# CL10848Contig2|CL10848Contig2

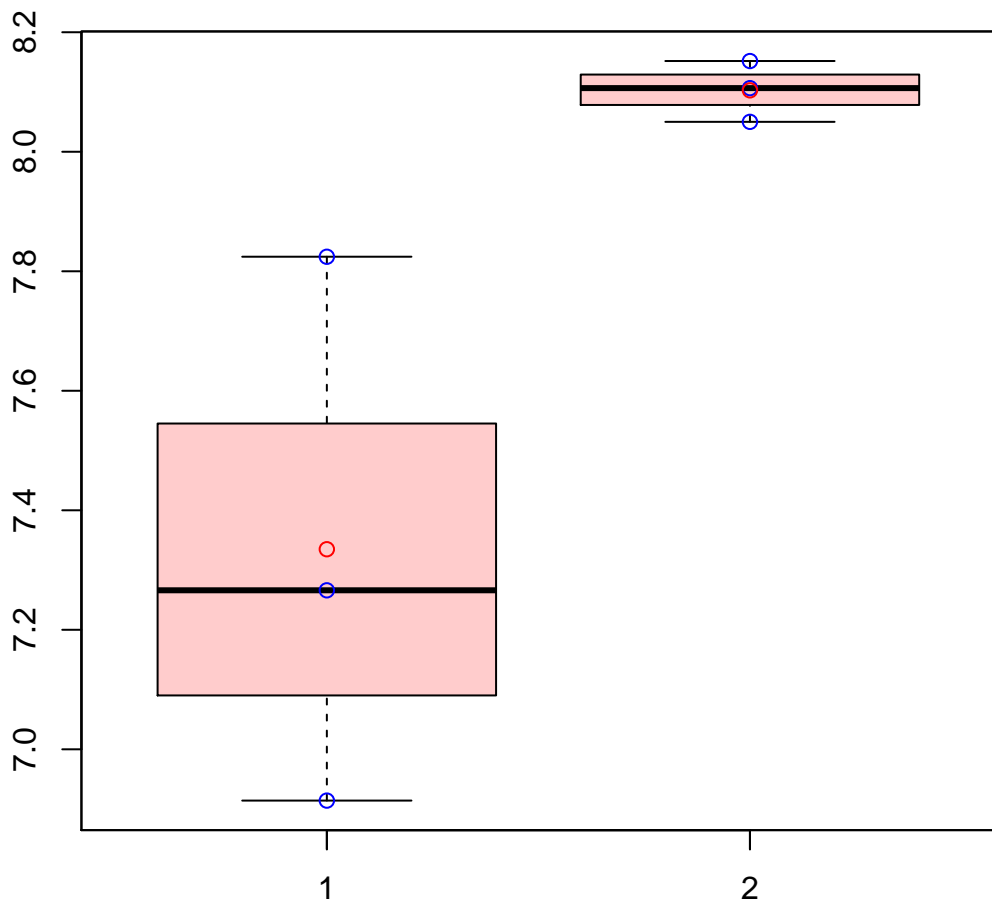

t-Test: p-value = 0.1

# CL10857Contig1|CL10857Contig1

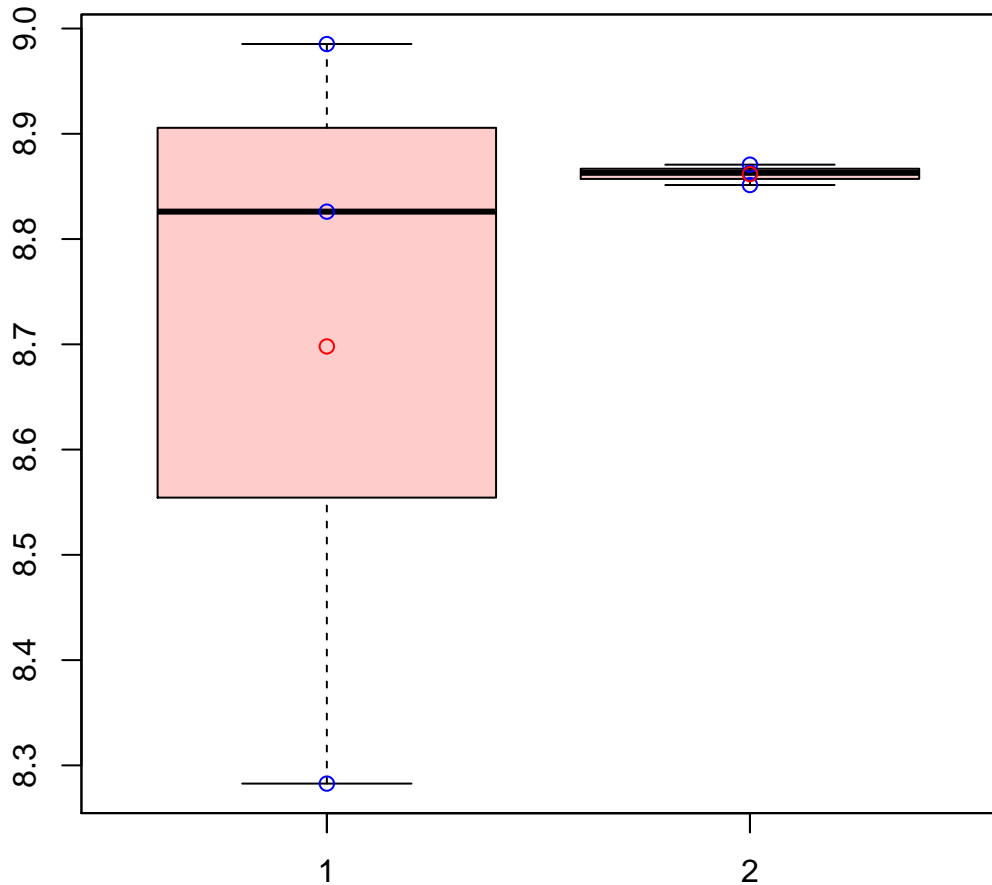

t-Test: p-value = 0.52

# CL1085Contig2|CL1085Contig2

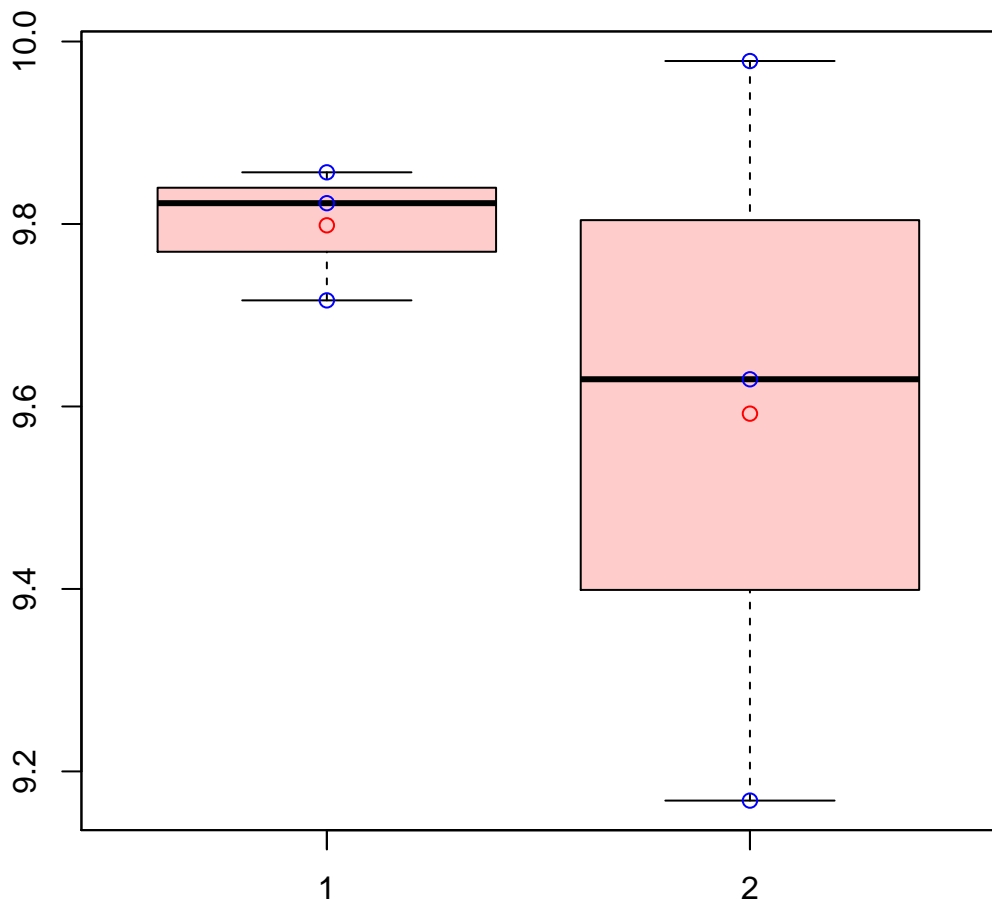

t-Test: p-value = 0.47

# CL1085Contig5|CL1085Contig5

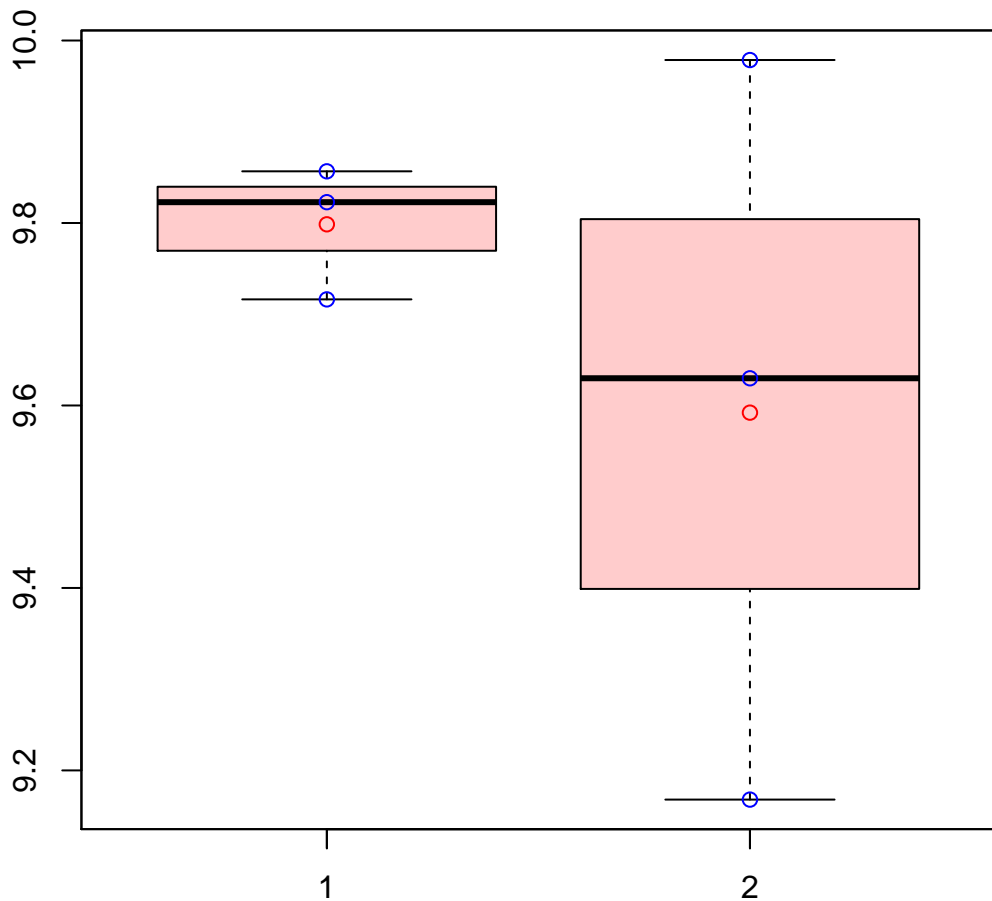

t-Test: p-value = 0.47

# CL1085Contig7|CL1085Contig7

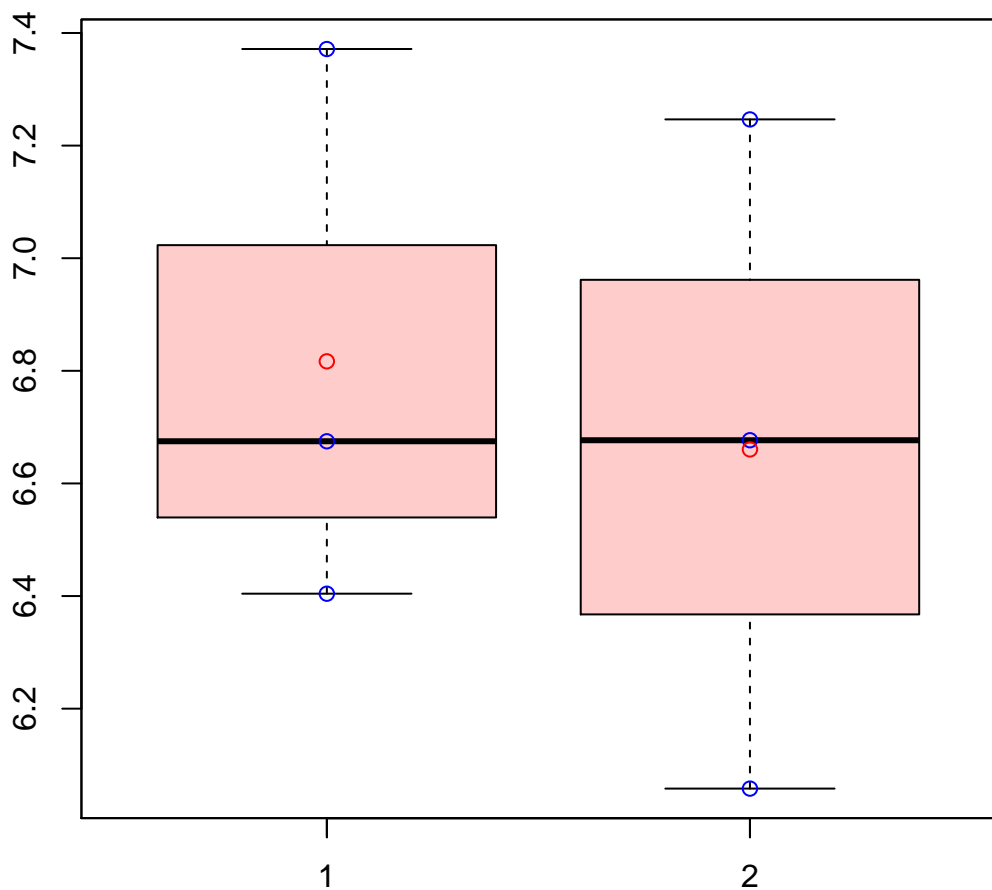

t-Test: p-value = 0.75



# CL1085Contig9|CL1085Contig9

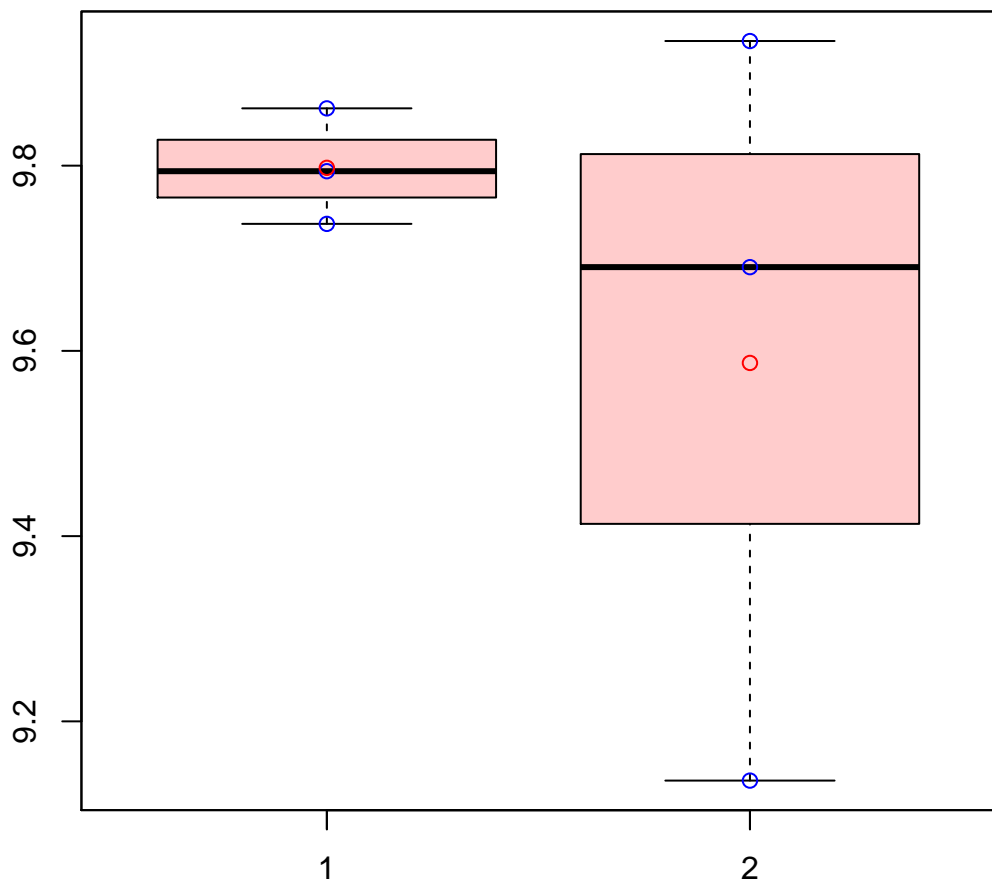

t-Test: p-value = 0.47

# CL10863Contig1|CL10863Contig1

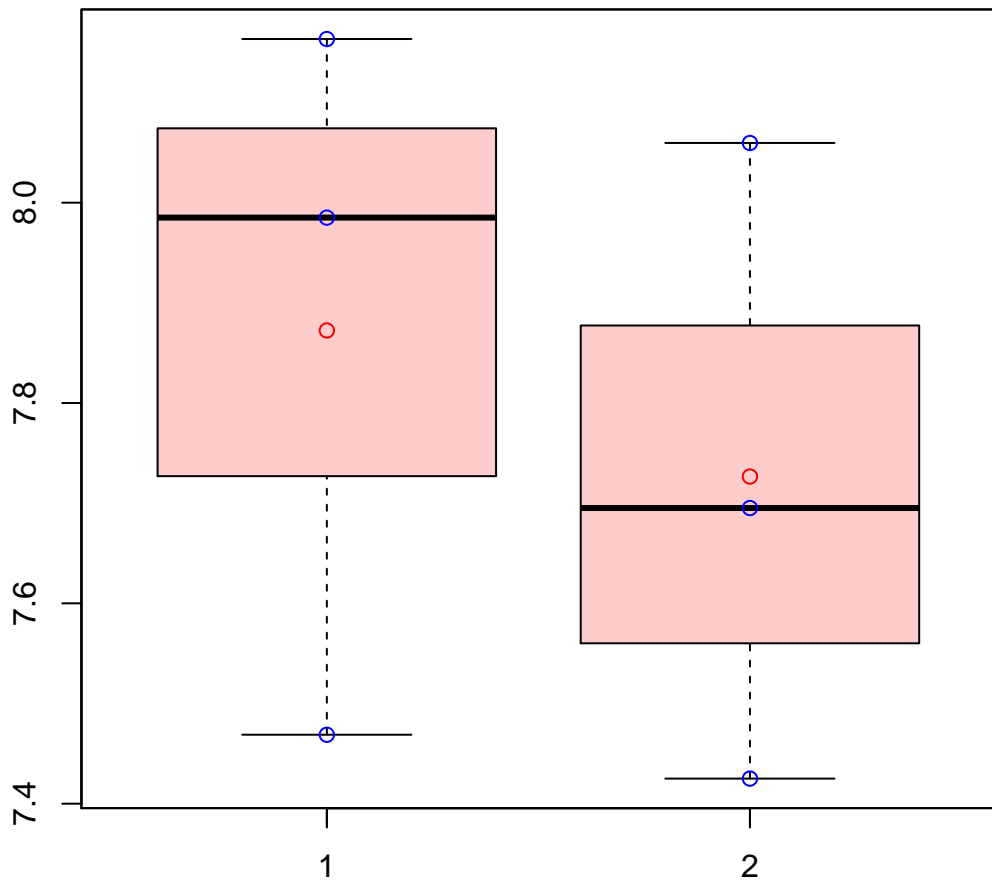

t-Test: p-value = 0.63

# CL10863Contig2|CL10863Contig2



t-Test: p-value = 0.63

# CL10865Contig2|CL10865Contig2

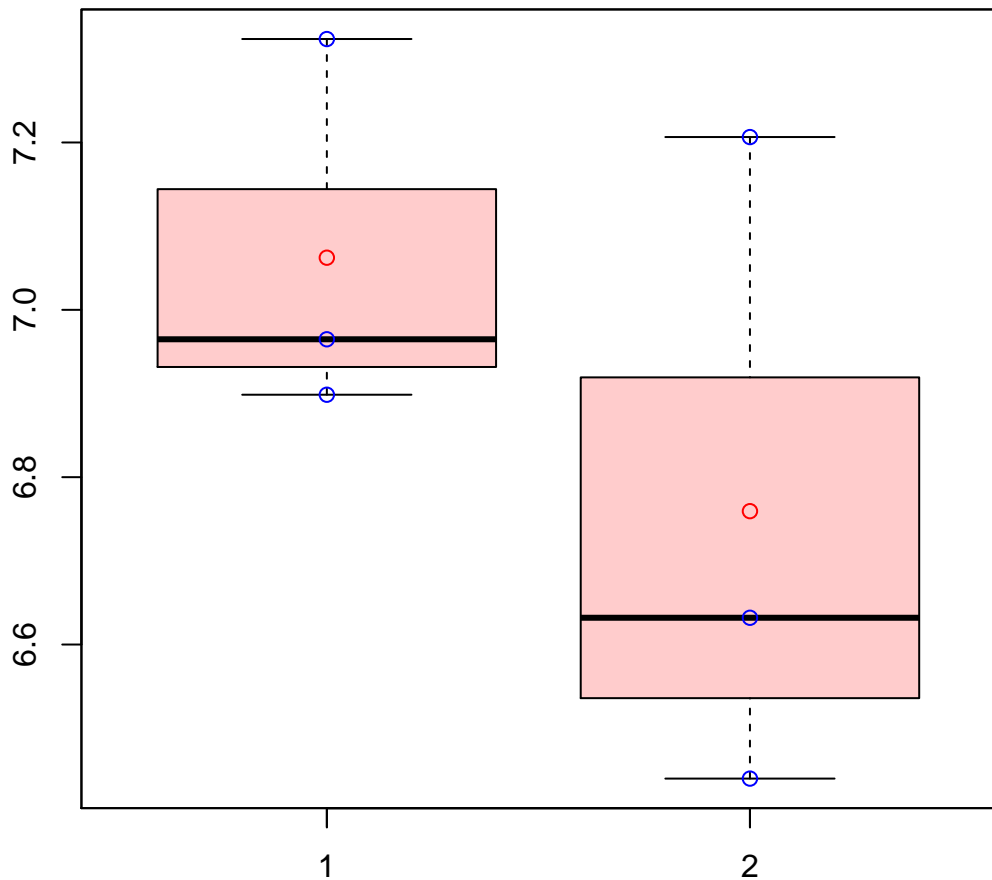

t-Test: p-value = 0.33

# CL10866Contig1|CL10866Contig1

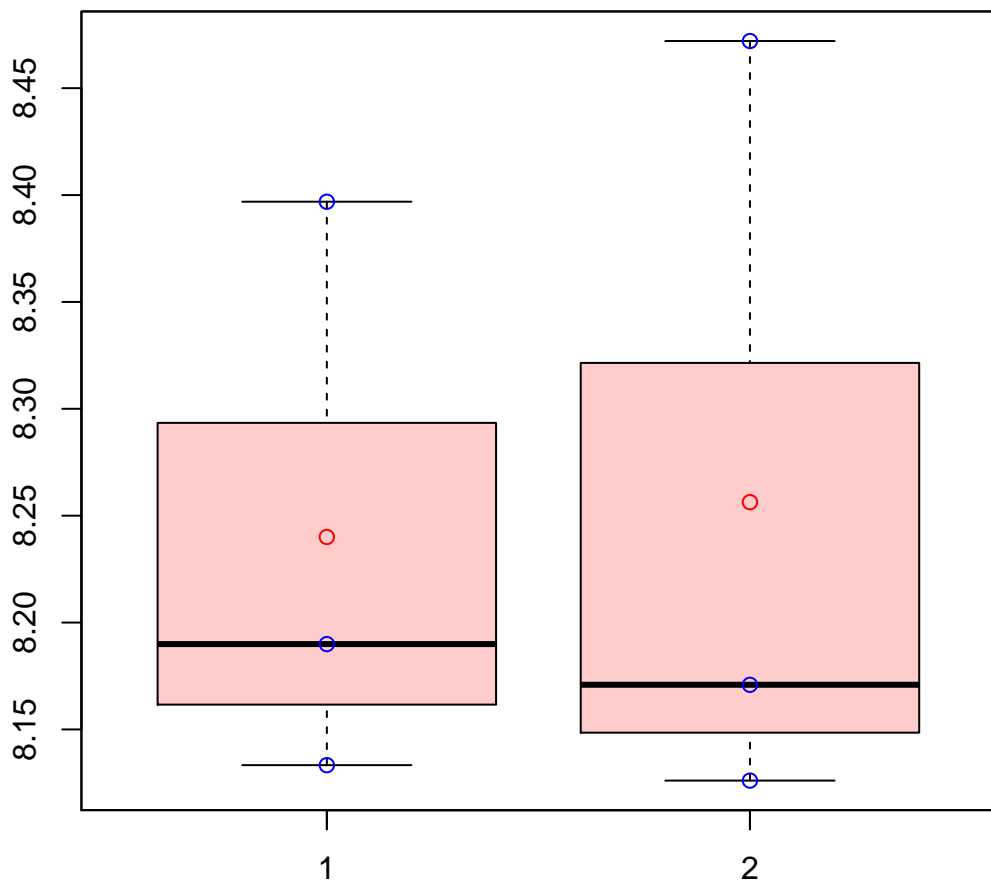

t-Test: p-value = 0.91

# CL10869Contig1|CL10869Contig1

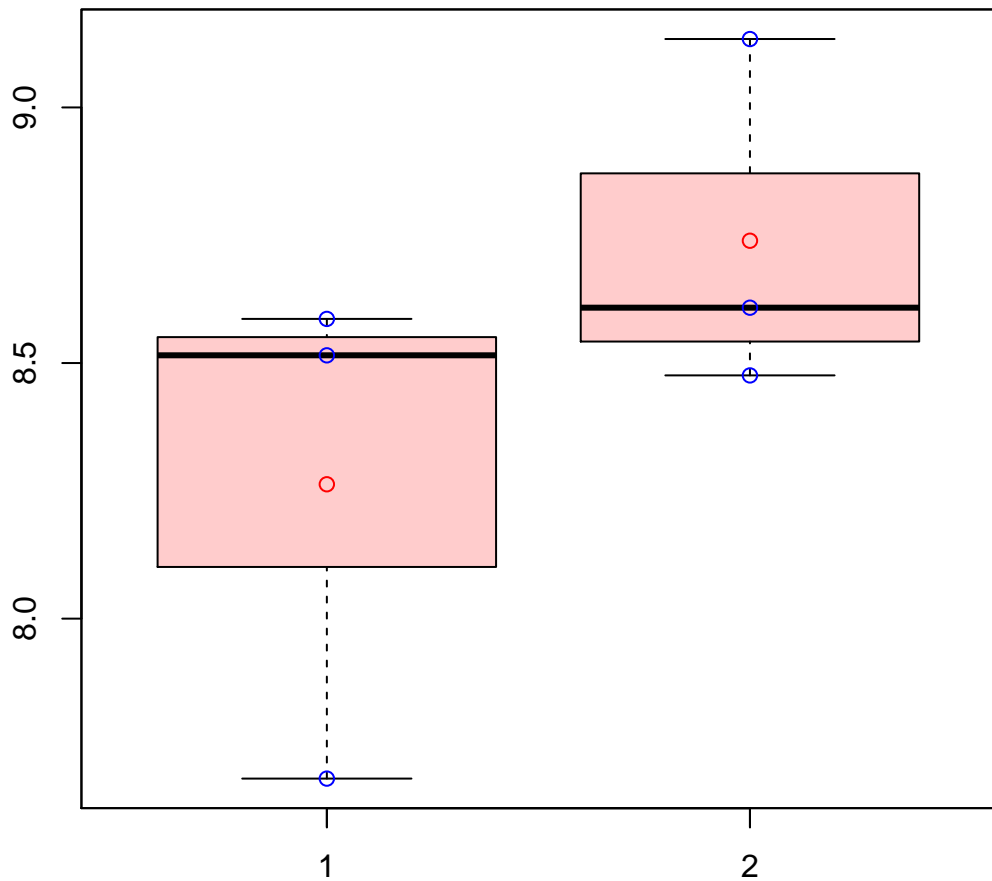

t-Test: p-value = 0.25

# CL10870Contig1|CL10870Contig1

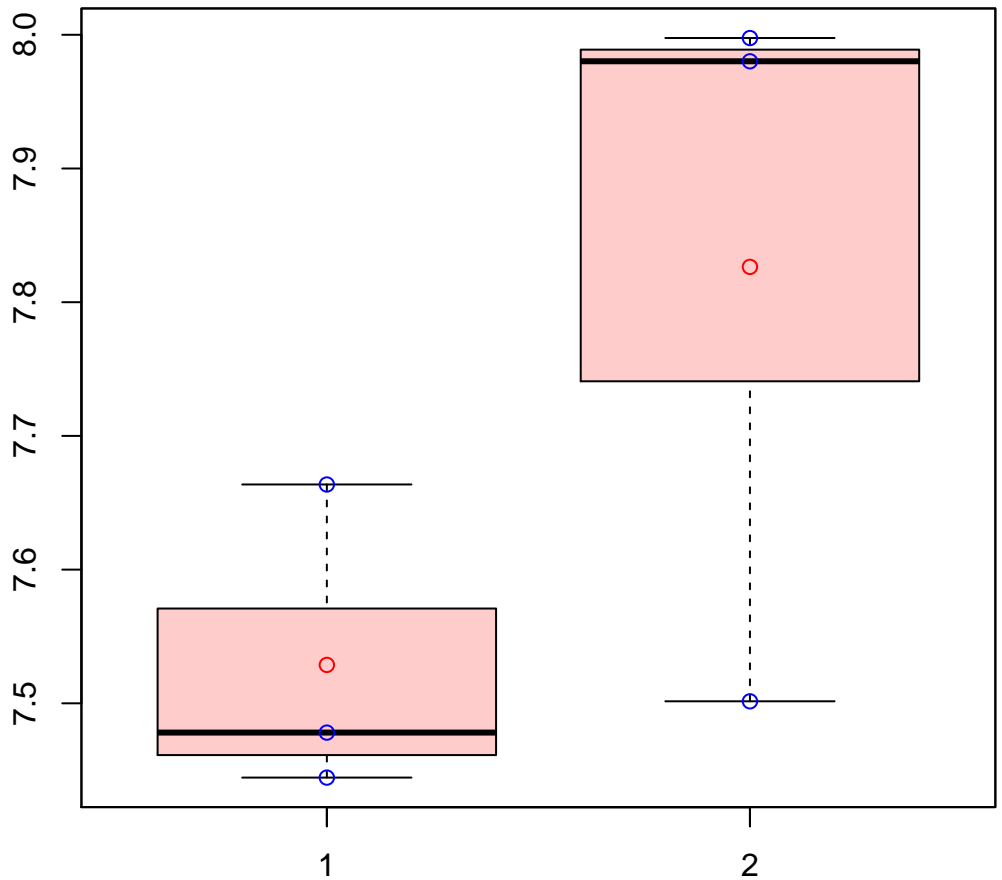

t-Test: p-value = 0.2

# CL10874Contig1|CL10874Contig1

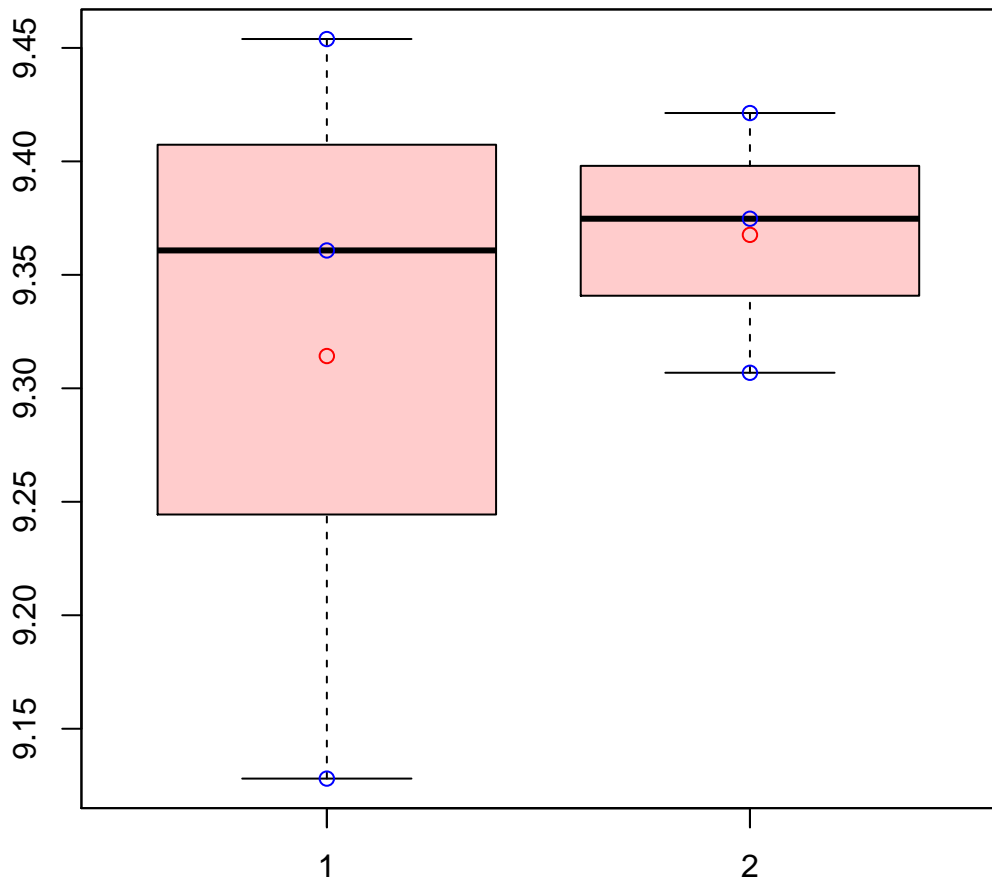

t-Test: p-value = 0.65



# CL1087Contig13|CL1087Contig13

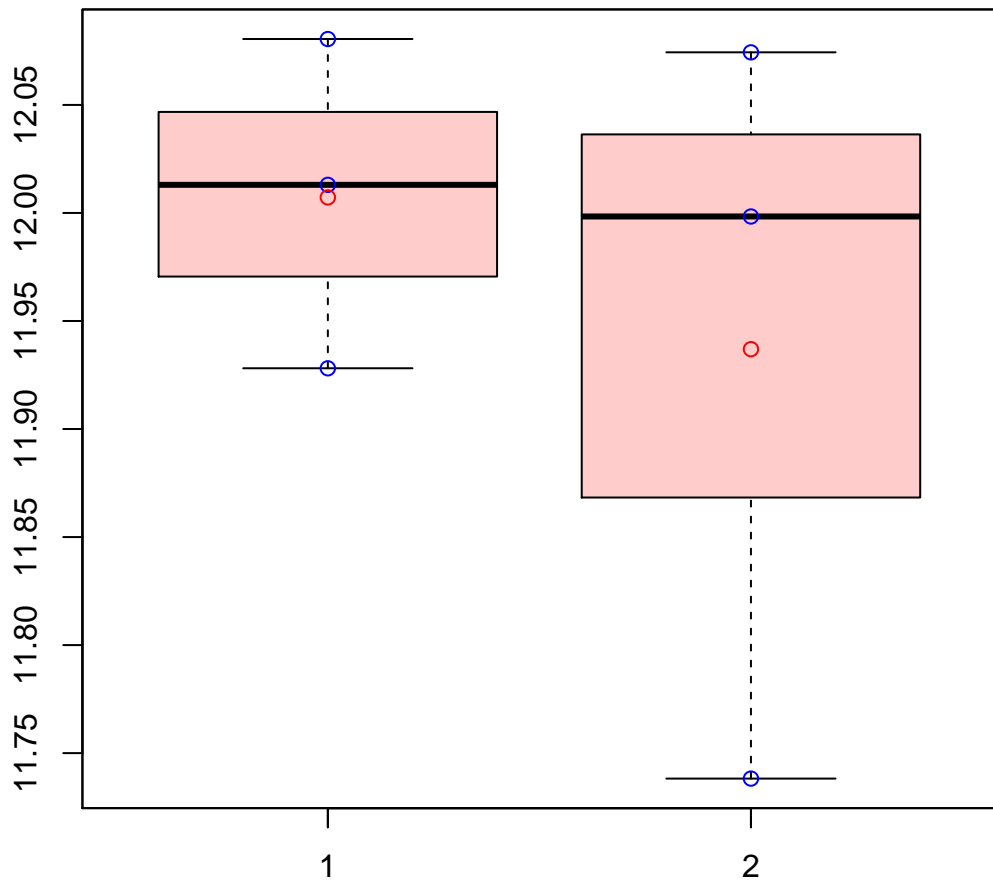

t-Test: p-value = 0.58

# CL1087Contig15|CL1087Contig15

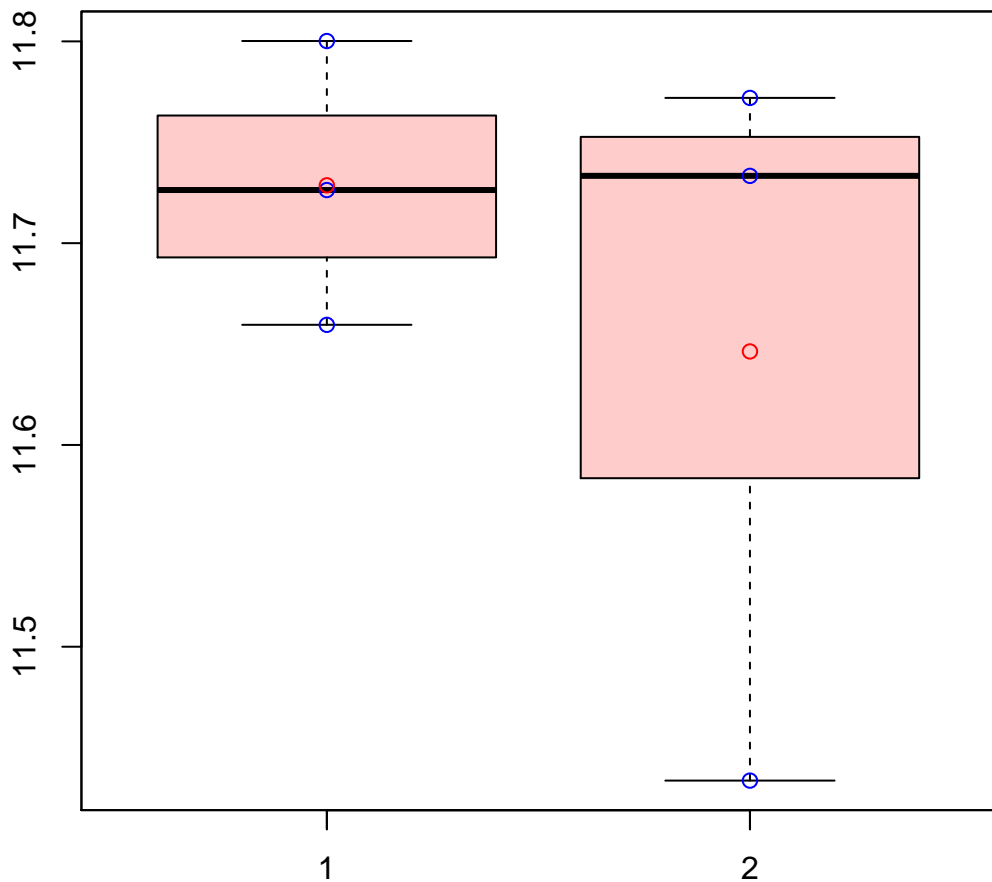

t-Test: p-value = 0.53

# CL1087Contig3|CL1087Contig3

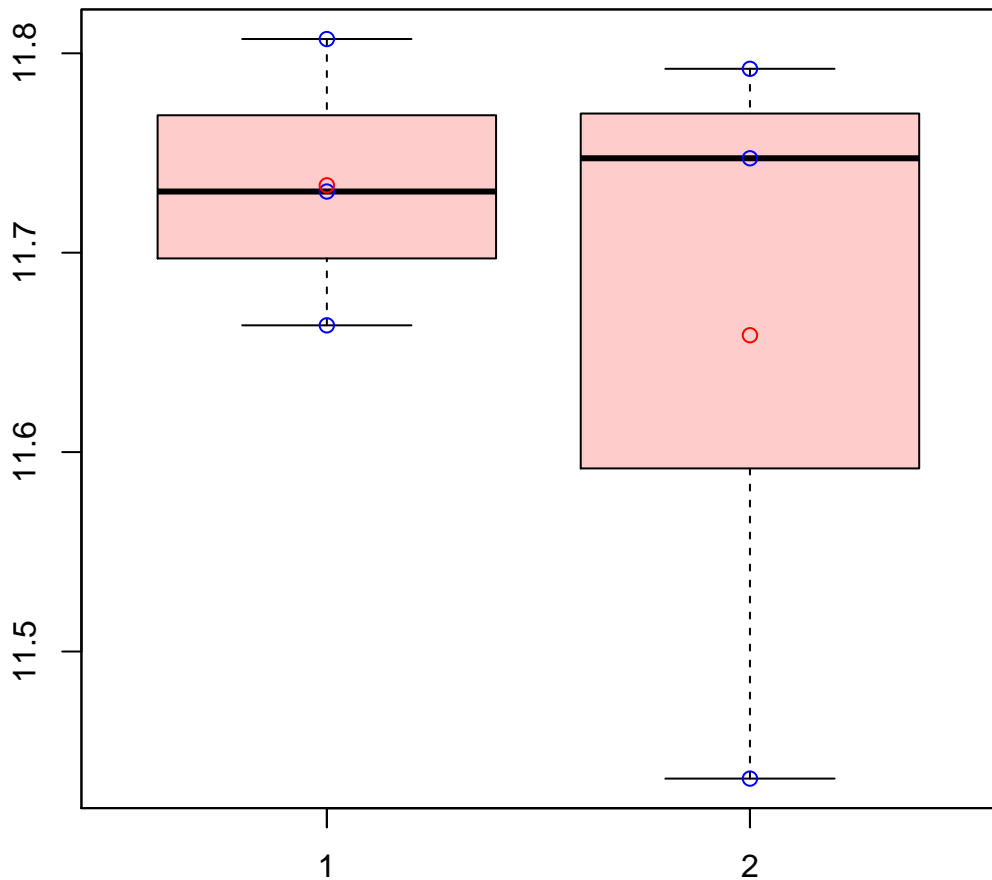

t-Test: p-value = 0.58

# CL1087Contig7|CL1087Contig7

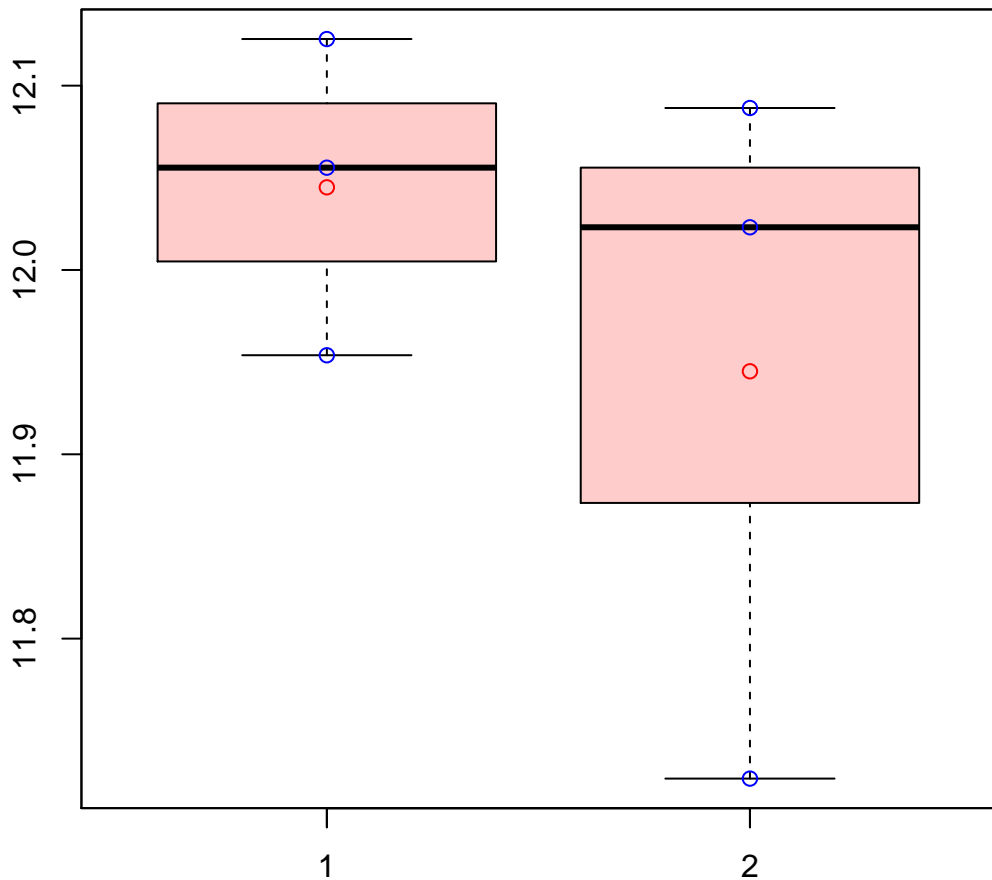

t-Test: p-value = 0.48

# CL1087Contig8|CL1087Contig8

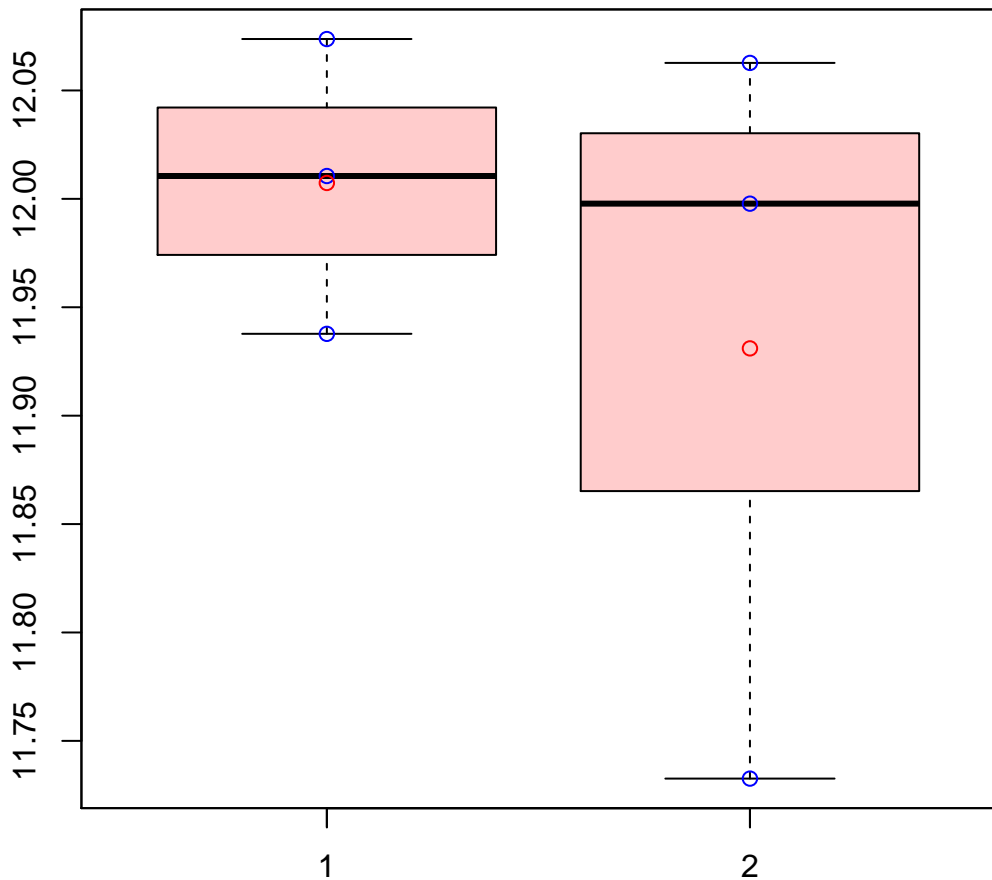

t-Test: p-value = 0.54

# CL10896Contig1|CL10896Contig1

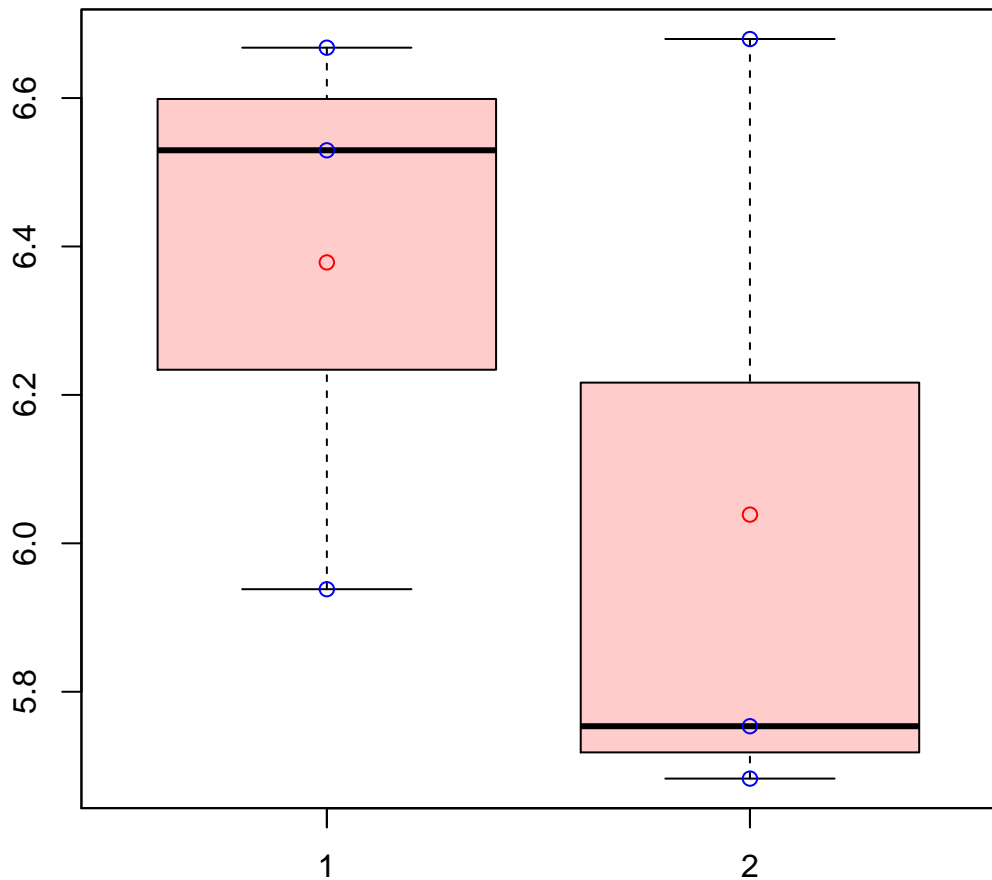

t-Test: p-value = 0.44

# CL108Contig8|CL108Contig8

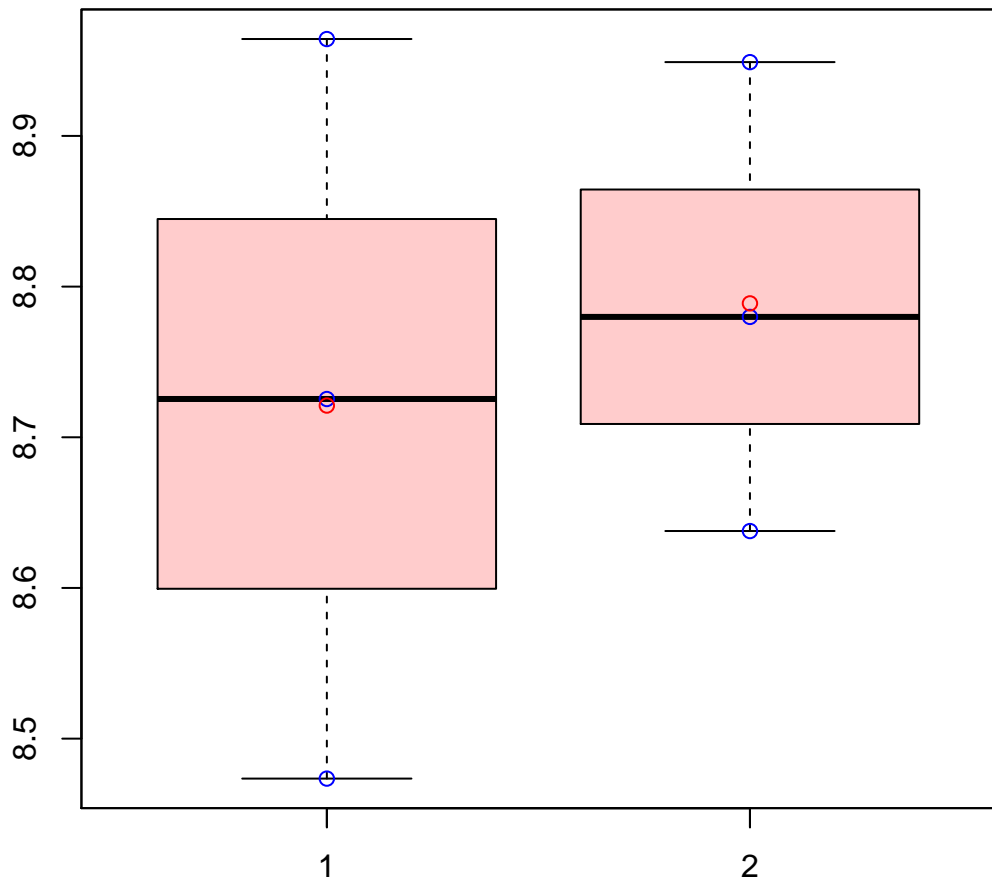

t-Test: p-value = 0.71

# CL1092Contig1|CL1092Contig1

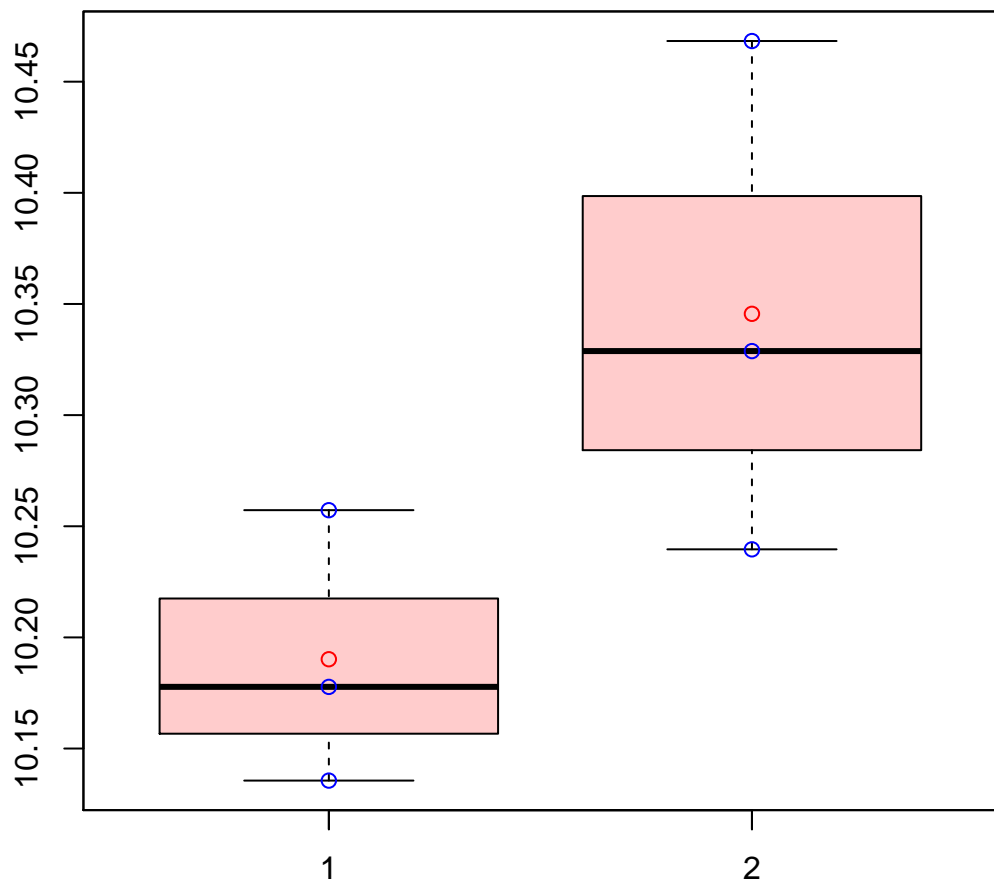

t-Test: p-value = 0.13



# CL1092Contig2|CL1092Contig2

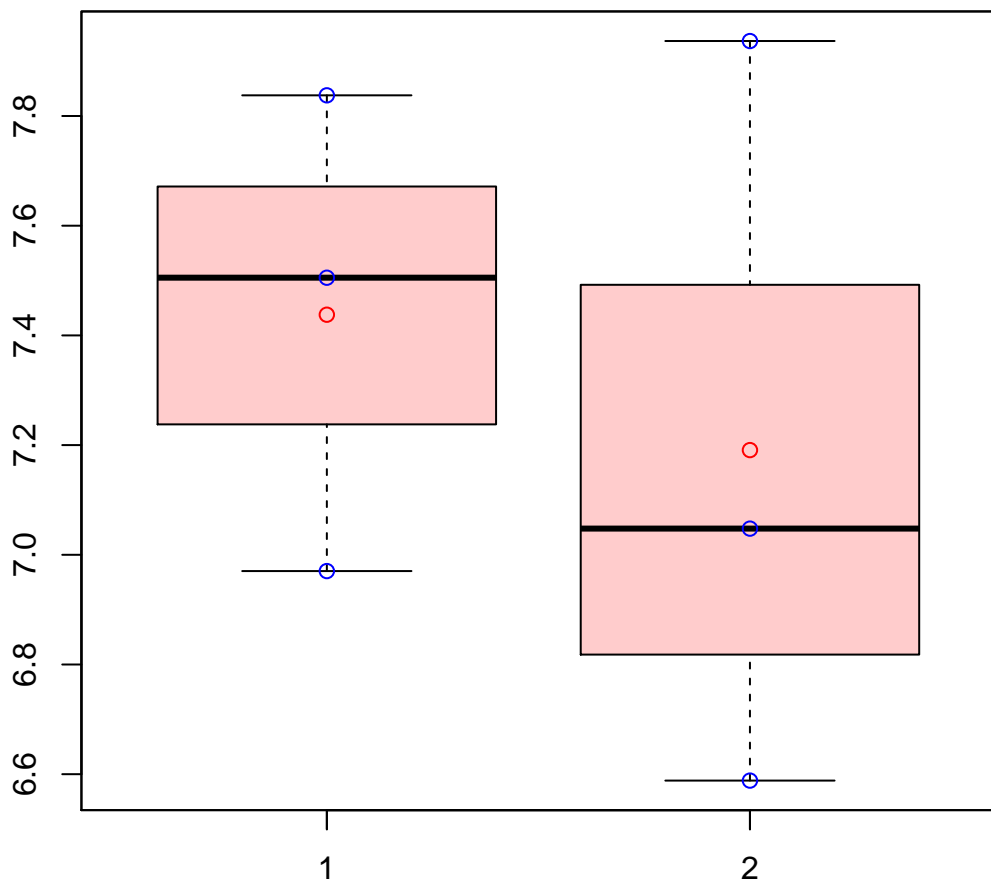

t-Test: p-value = 0.63

# CL1092Contig3|CL1092Contig3

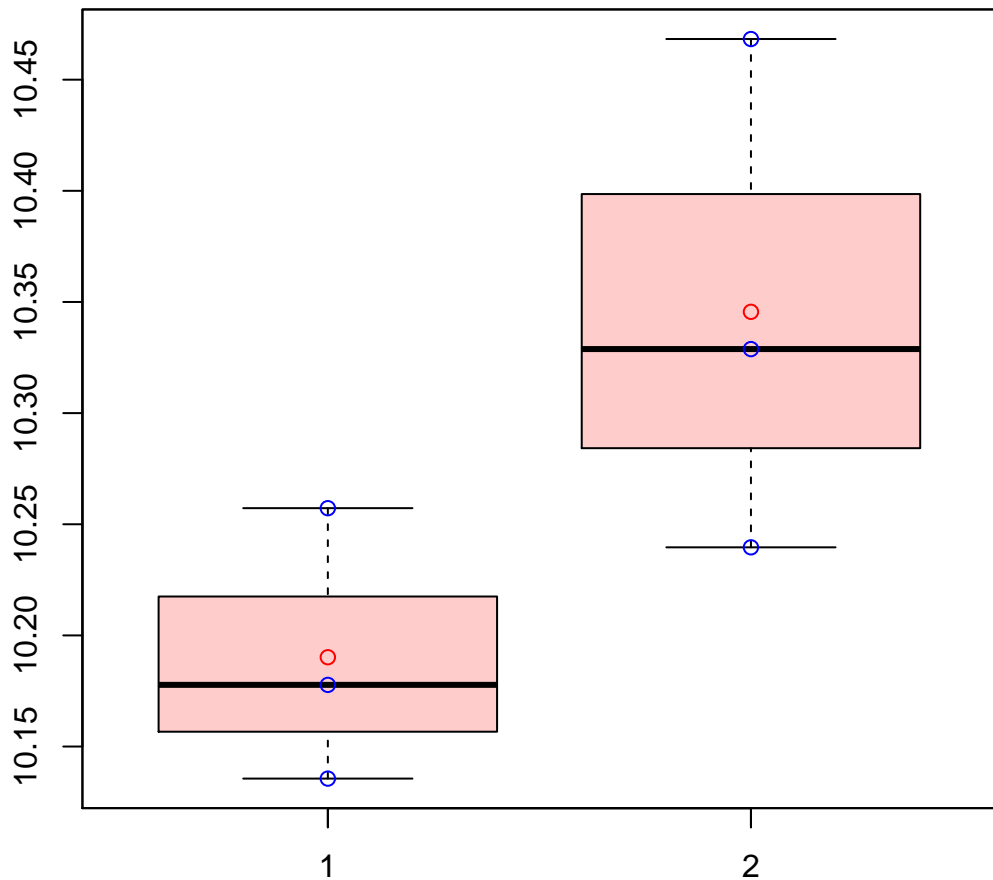

t-Test: p-value = 0.13

# CL1092Contig5|CL1092Contig5

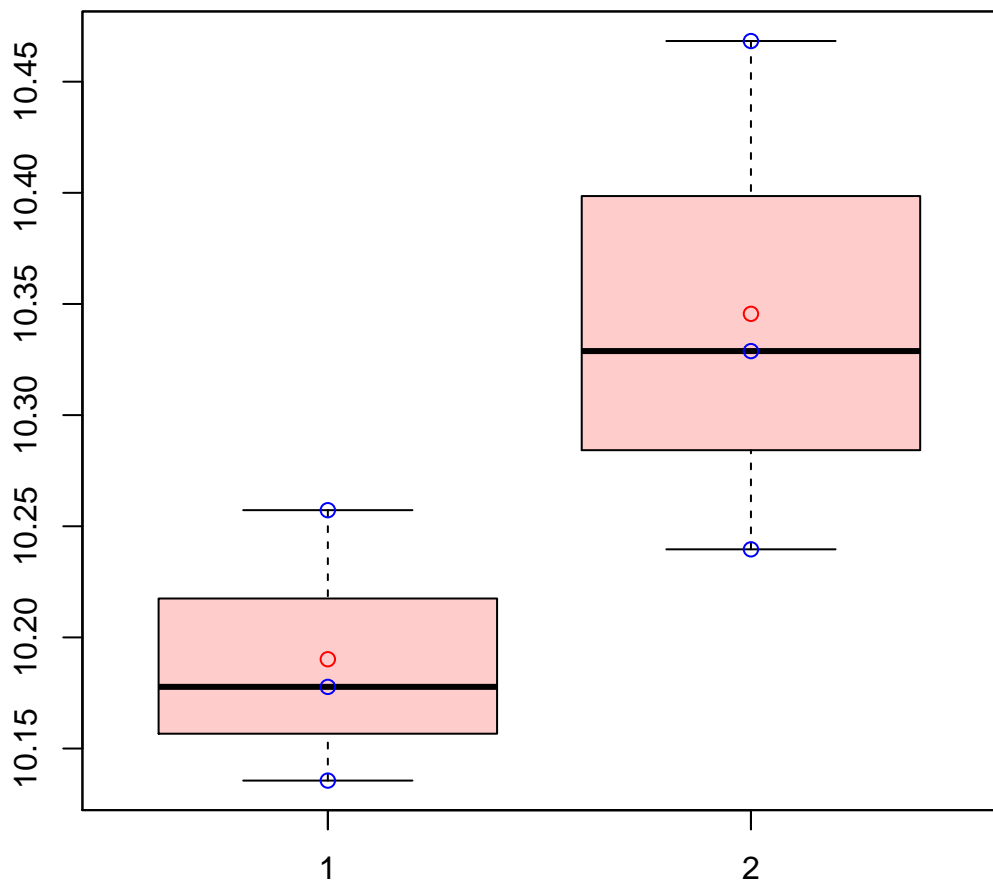

t-Test: p-value = 0.13

# CL10931Contig2|CL10931Contig2

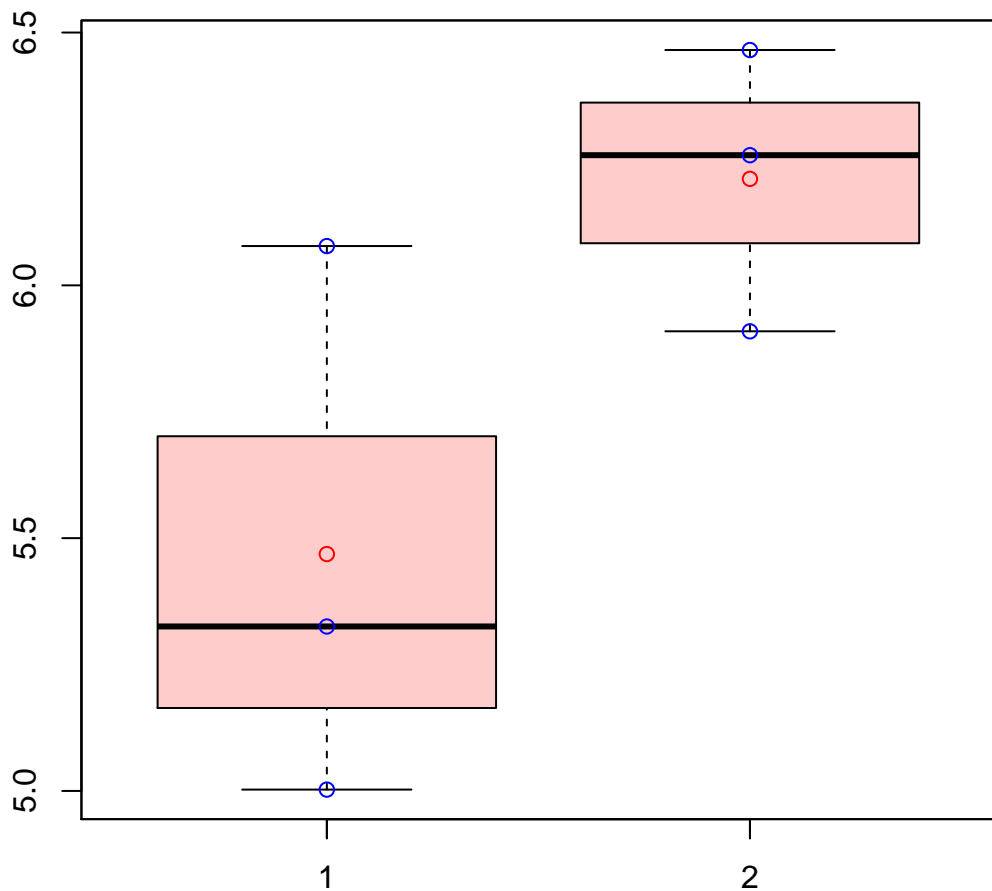

t-Test: p-value = 0.13

# CL1094Contig10|CL1094Contig10

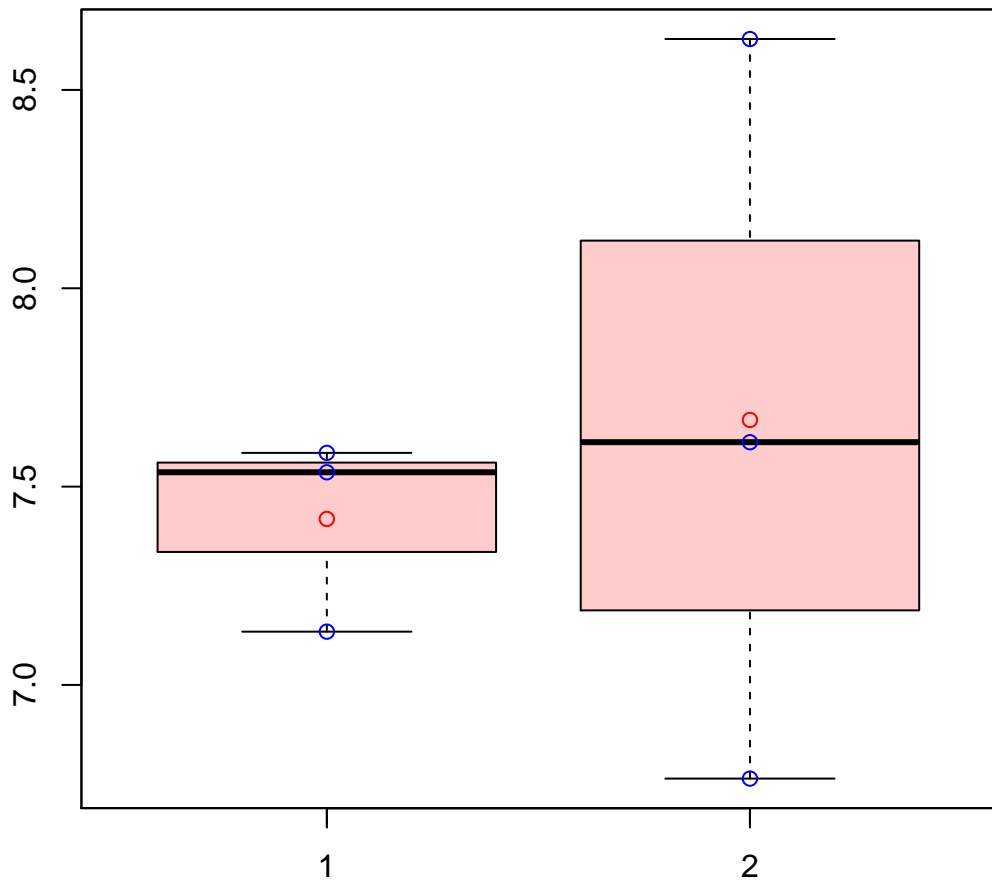

t-Test: p-value = 0.69

# CL1096Contig3|CL1096Contig3

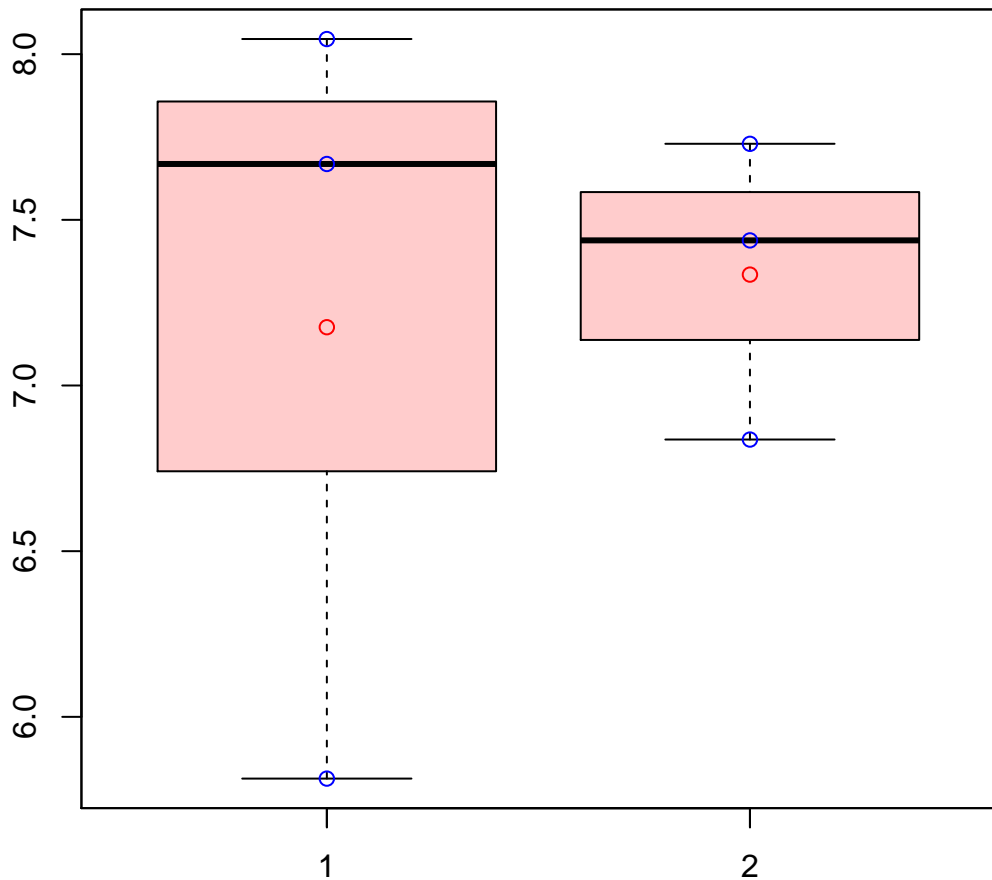

t-Test: p-value = 0.85

# CL10977Contig1|CL10977Contig1

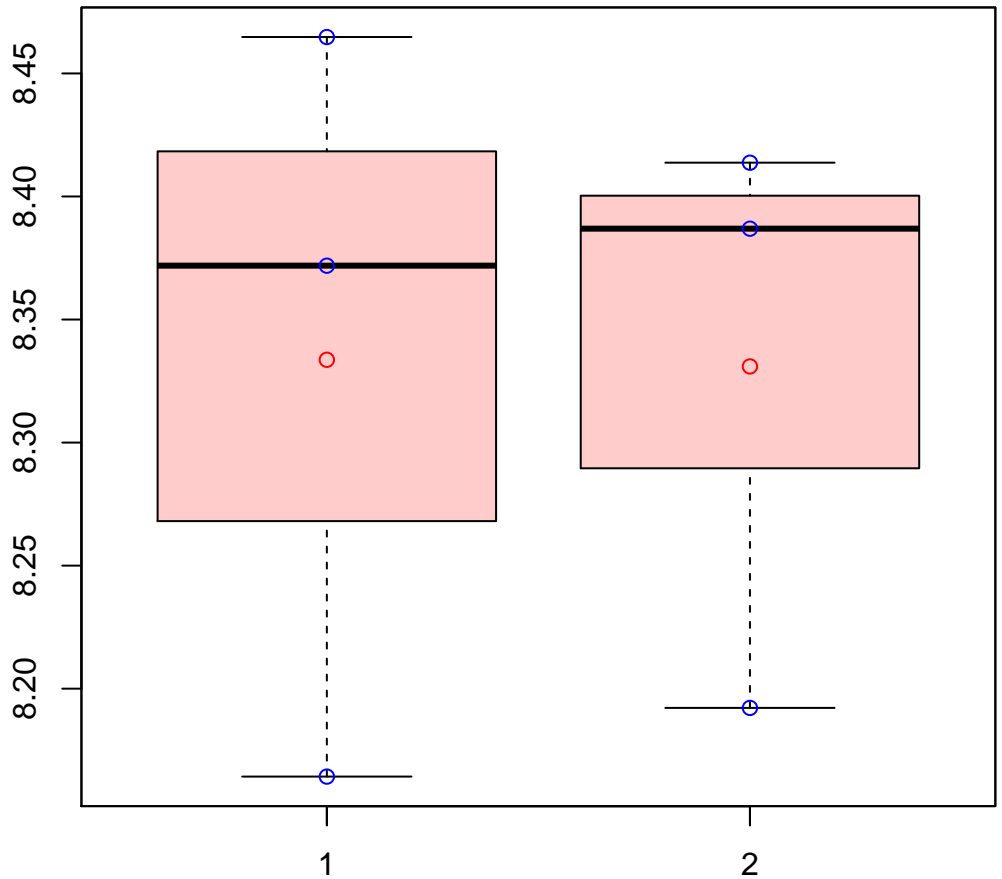

t-Test: p-value = 0.98

# CL10988Contig1|CL10988Contig1

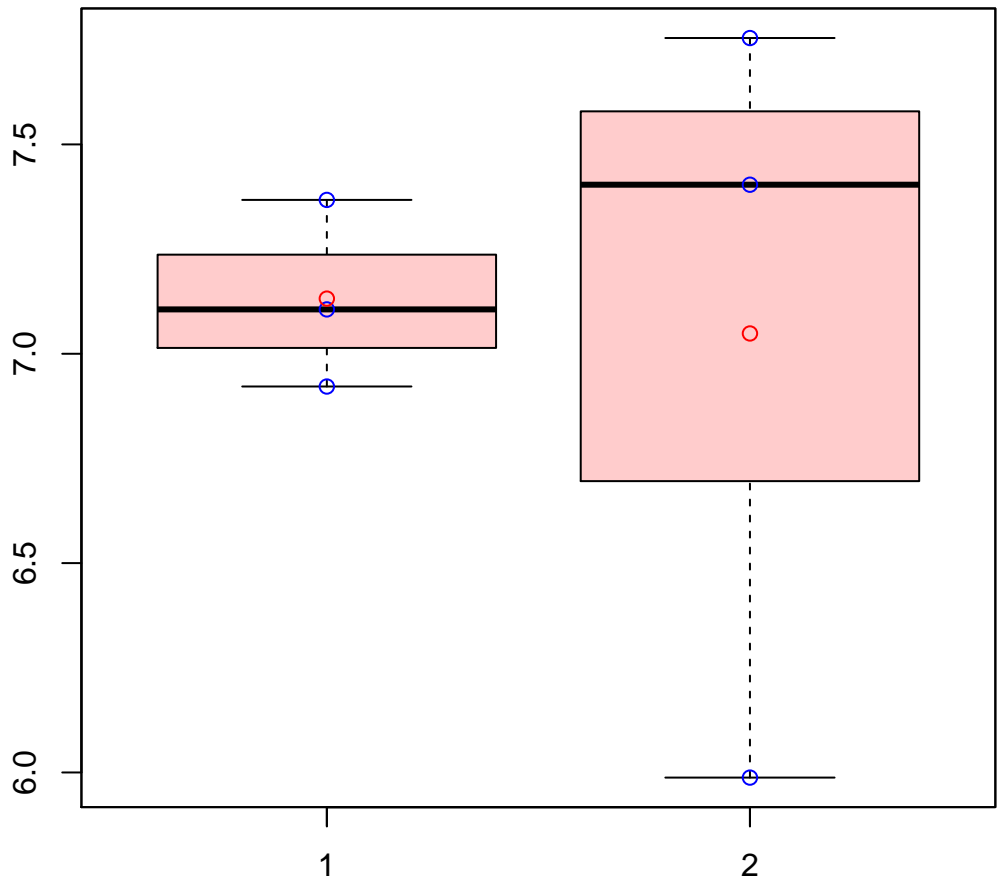

t-Test: p-value = 0.89



# CL10Contig41|CL10Contig41

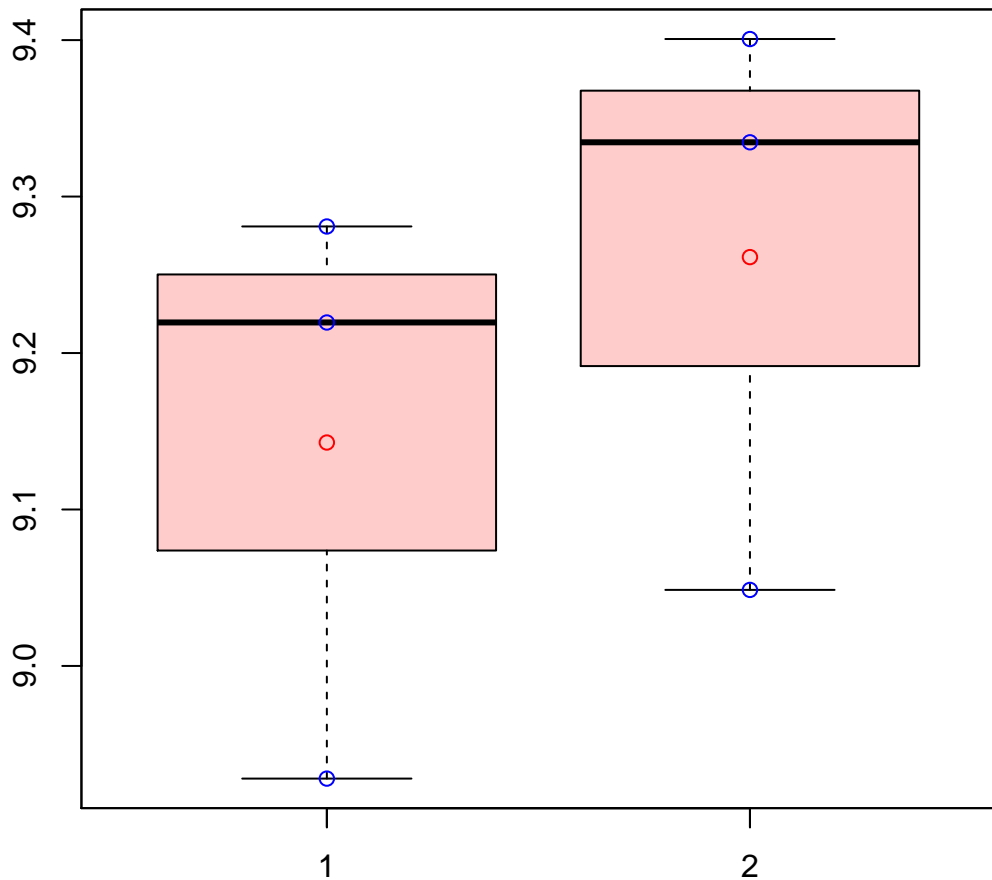

t-Test: p-value = 0.48

# CL10Contig43|CL10Contig43

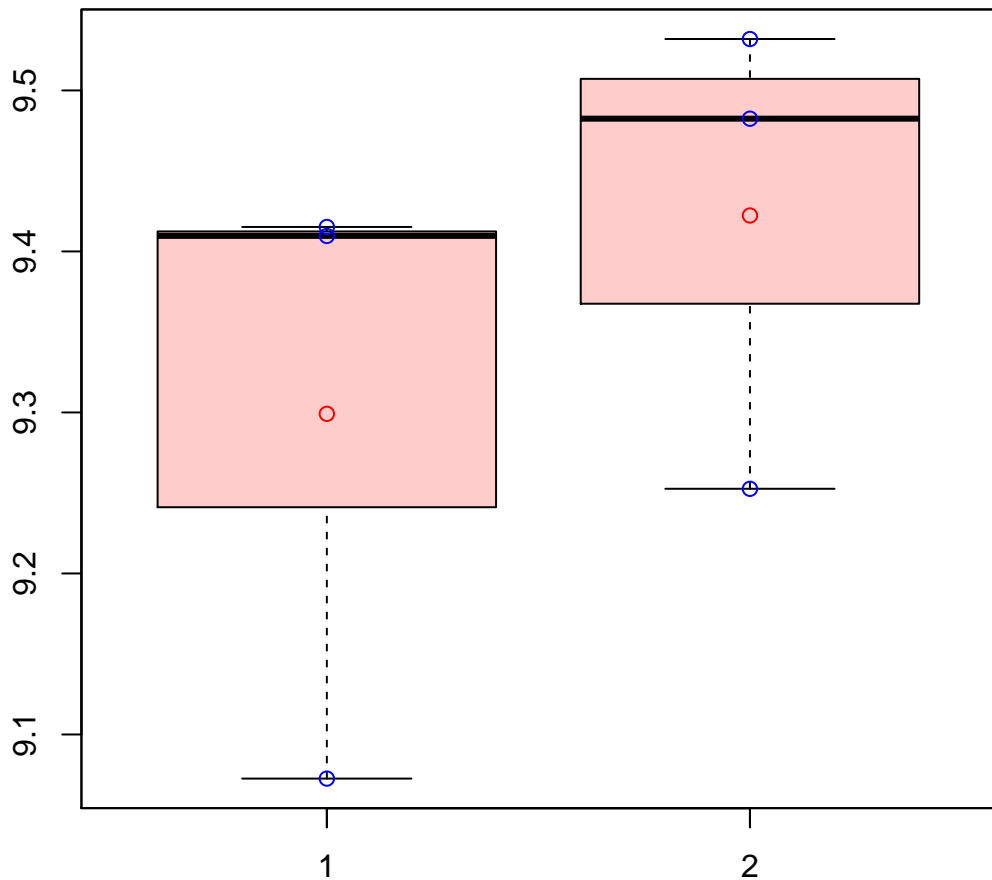

t-Test: p-value = 0.44

# CL10Contig44|CL10Contig44

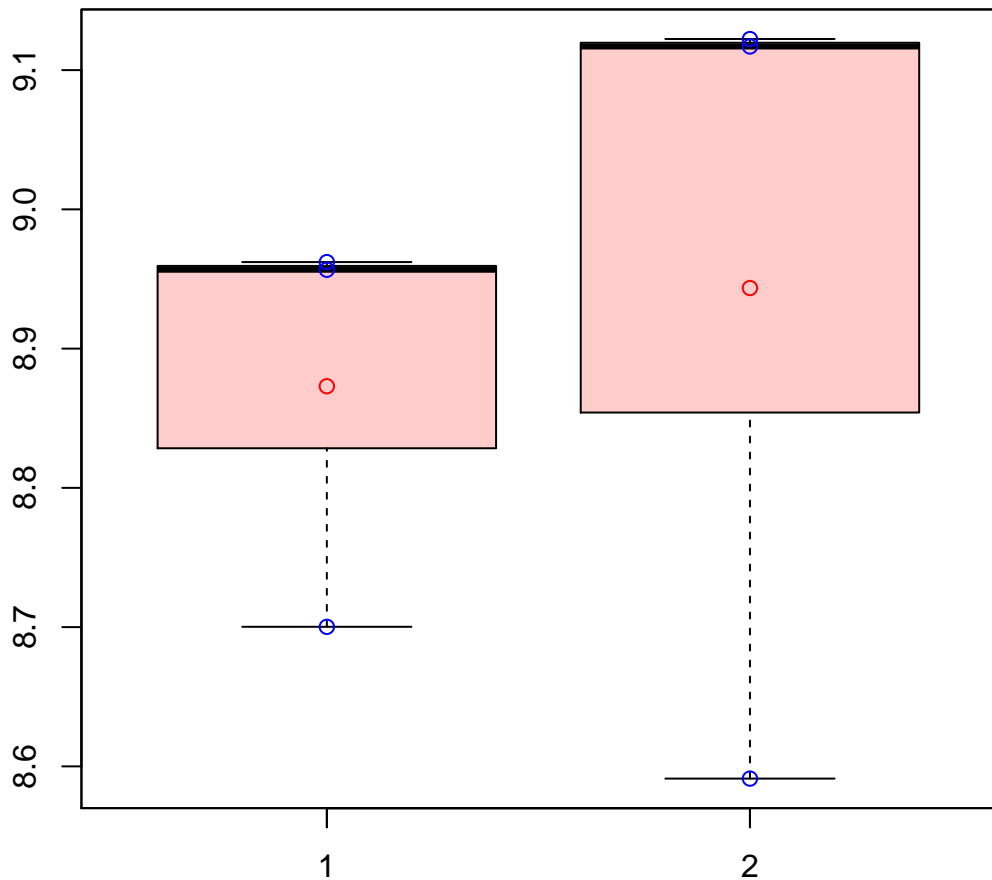

t-Test: p-value = 0.74

# CL10Contig48|CL10Contig48

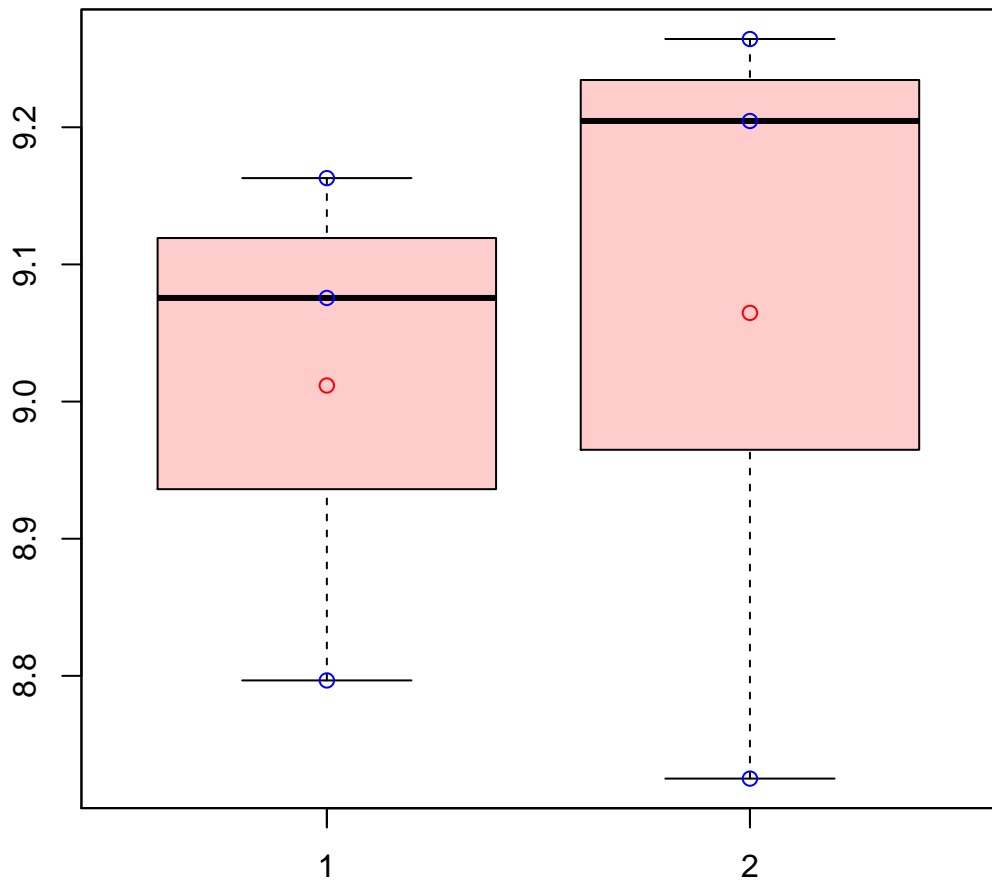

t-Test: p-value = 0.81

# CL10Contig4|CL10Contig4

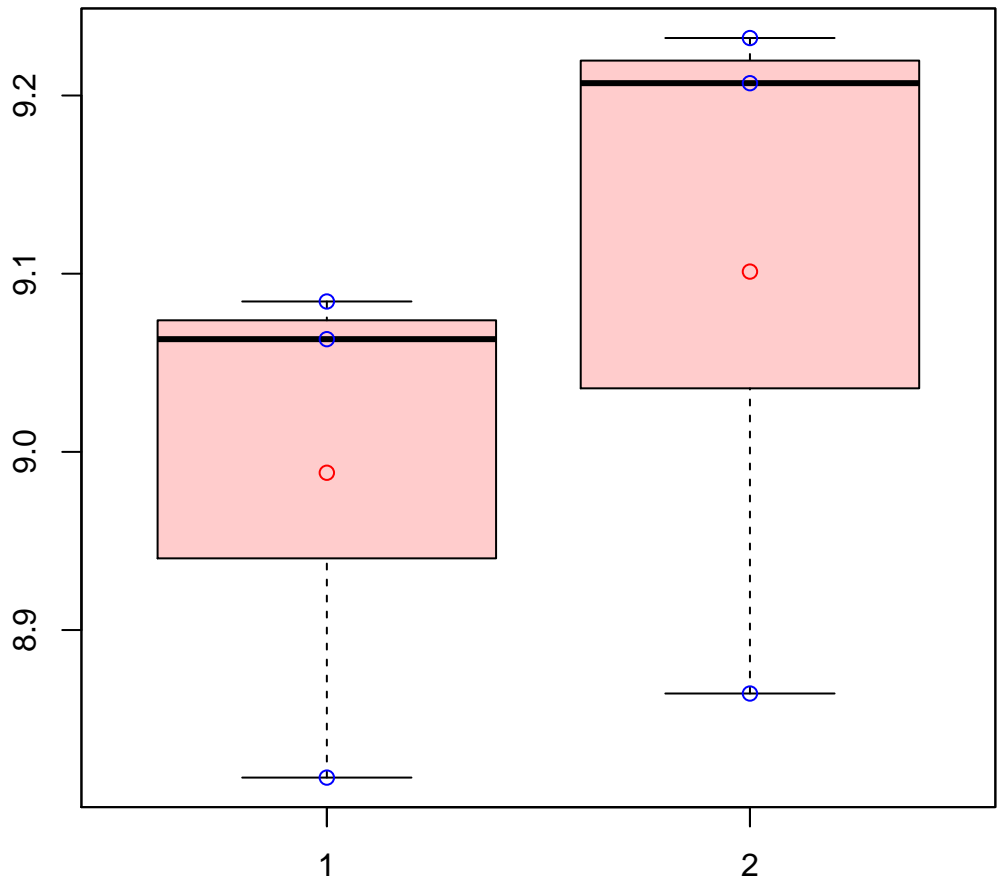

t-Test: p-value = 0.49

# CL10Contig6|CL10Contig6

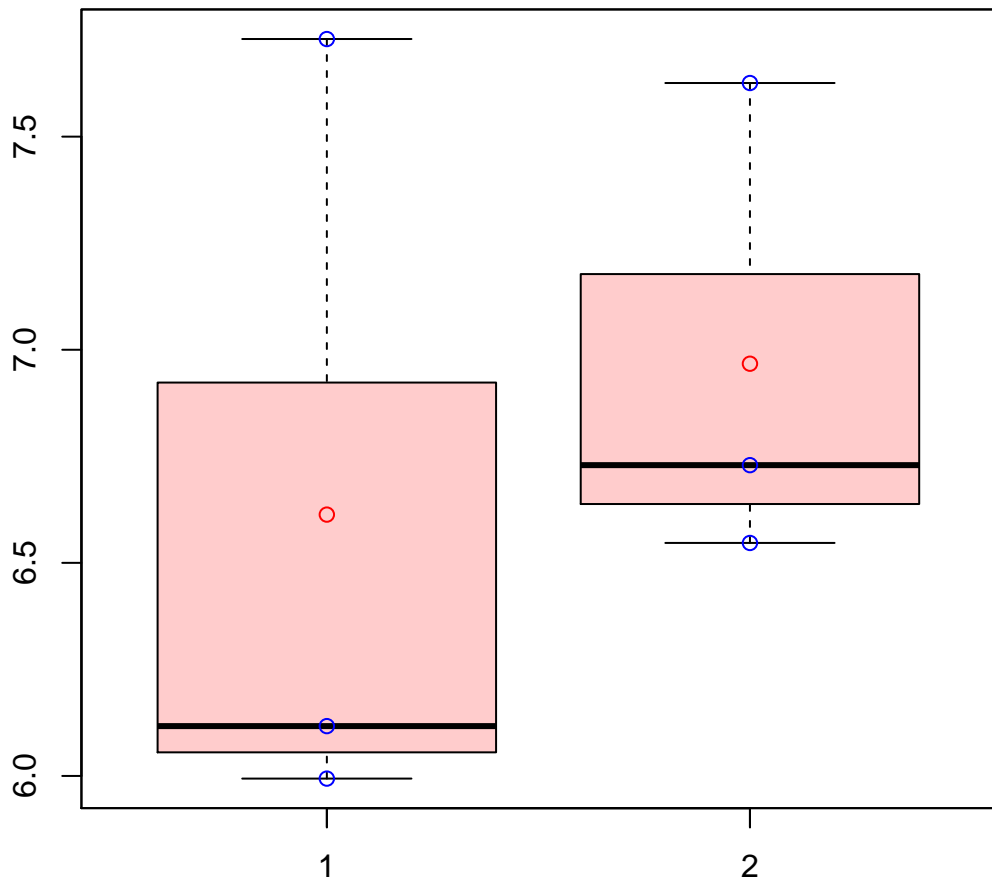

t-Test: p-value = 0.62

# CL10Contig9|CL10Contig9

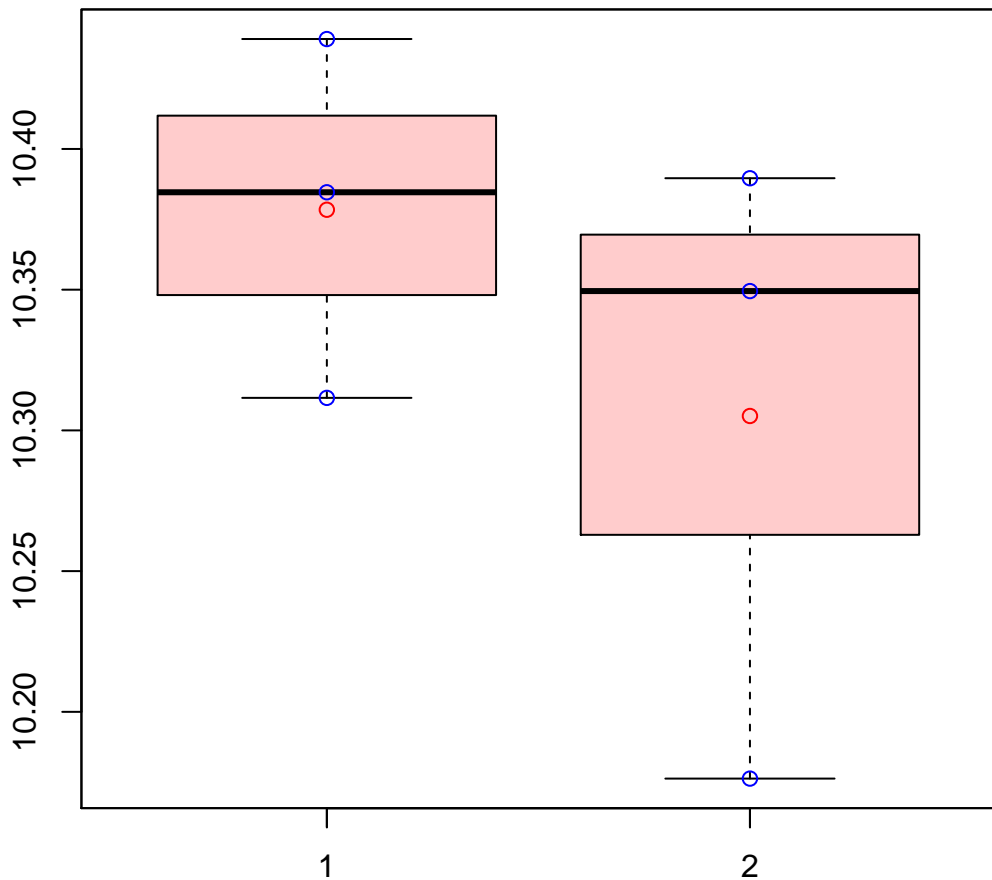

t-Test: p-value = 0.4

# CL11027Contig1|CL11027Contig1

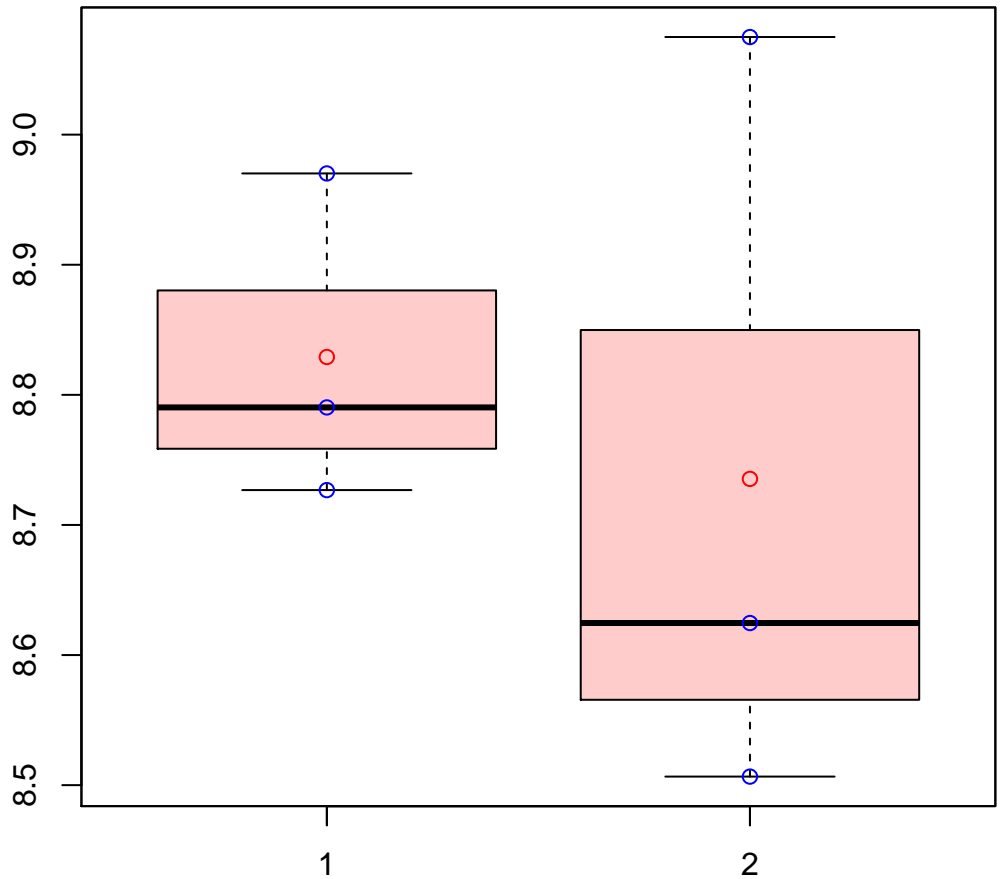

t-Test: p-value = 0.66



# CL1102Contig2|CL1102Contig2

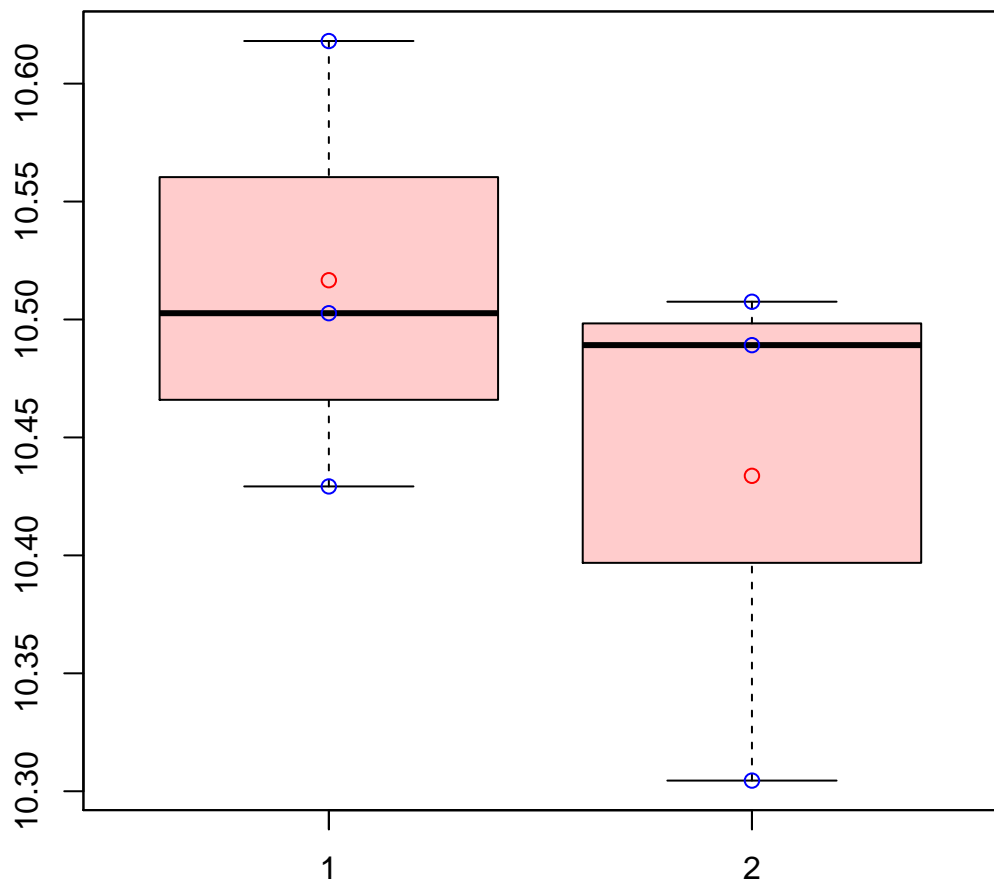

t-Test: p-value = 0.39

# CL11030Contig1|CL11030Contig1

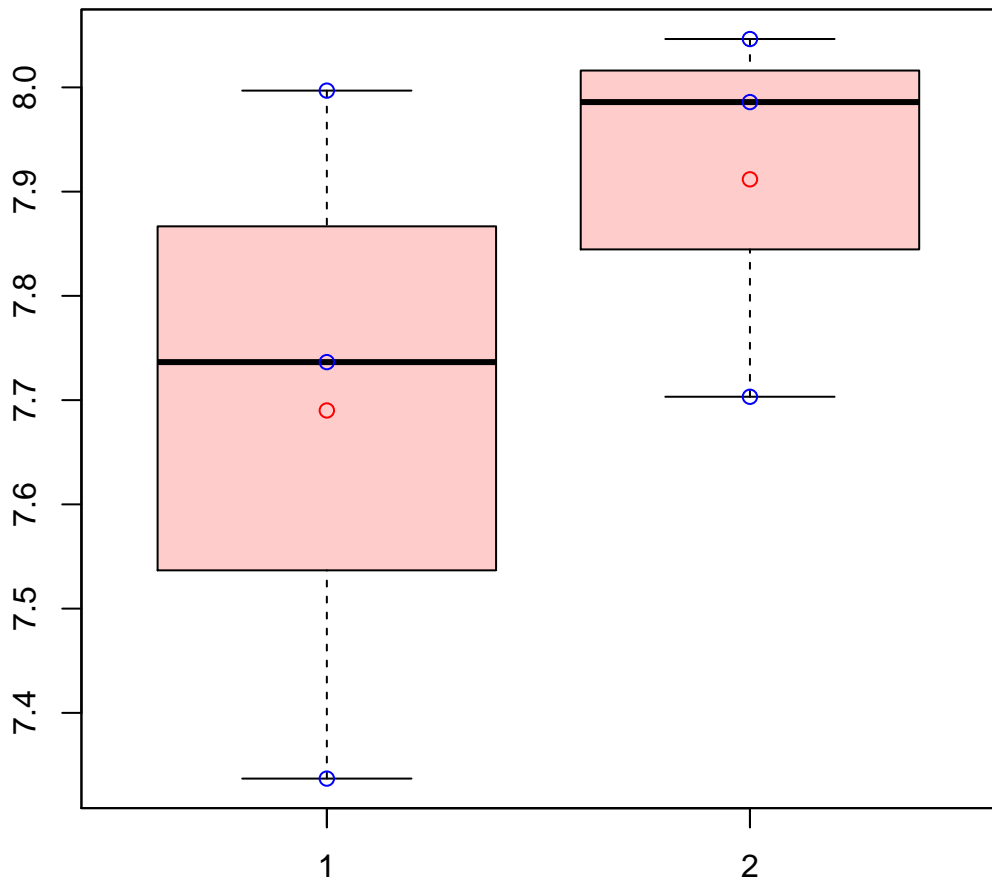

t-Test: p-value = 0.38

# CL11030Contig2|CL11030Contig2

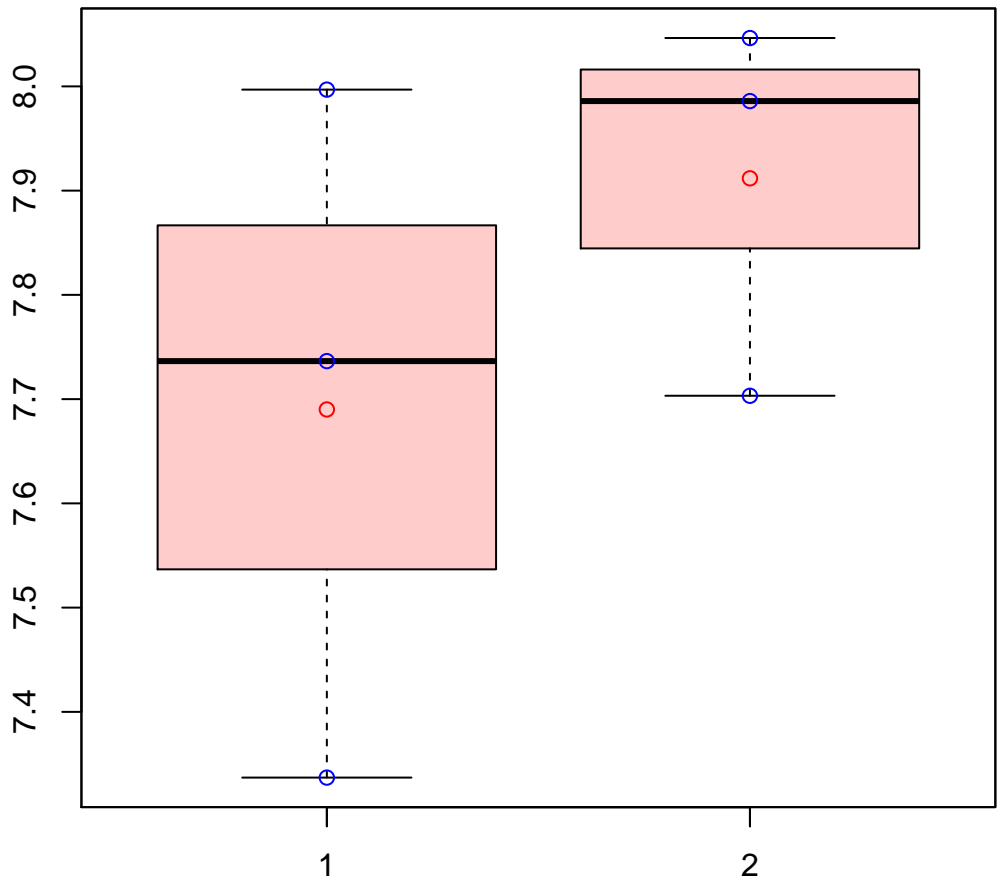

t-Test: p-value = 0.38

# CL11043Contig1|CL11043Contig1

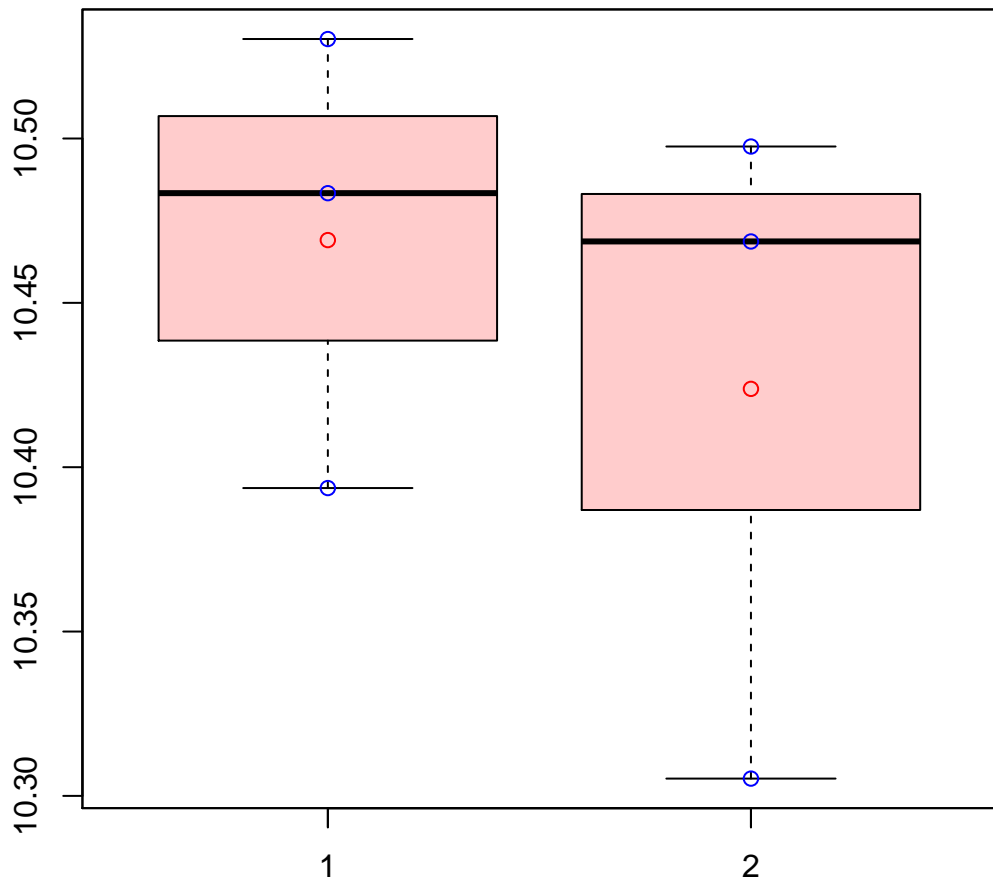

t-Test: p-value = 0.57

# CL1105Contig5|CL1105Contig5

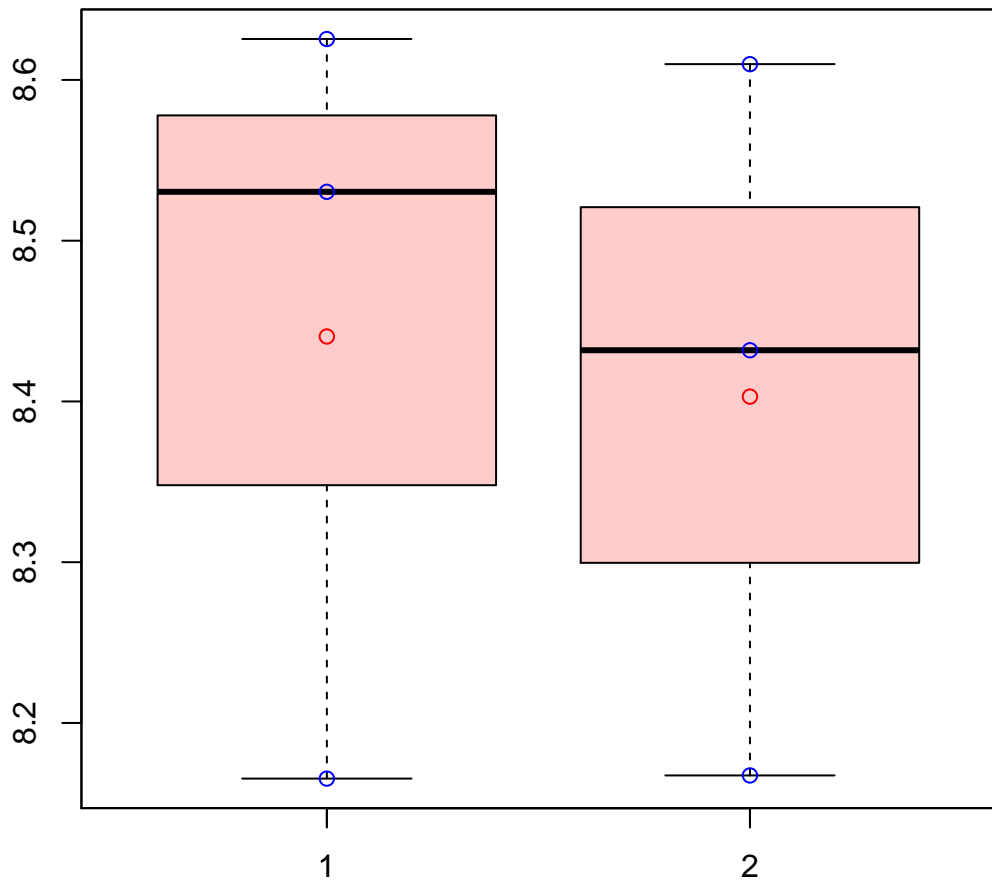

t-Test: p-value = 0.85

# CL11065Contig1|CL11065Contig1

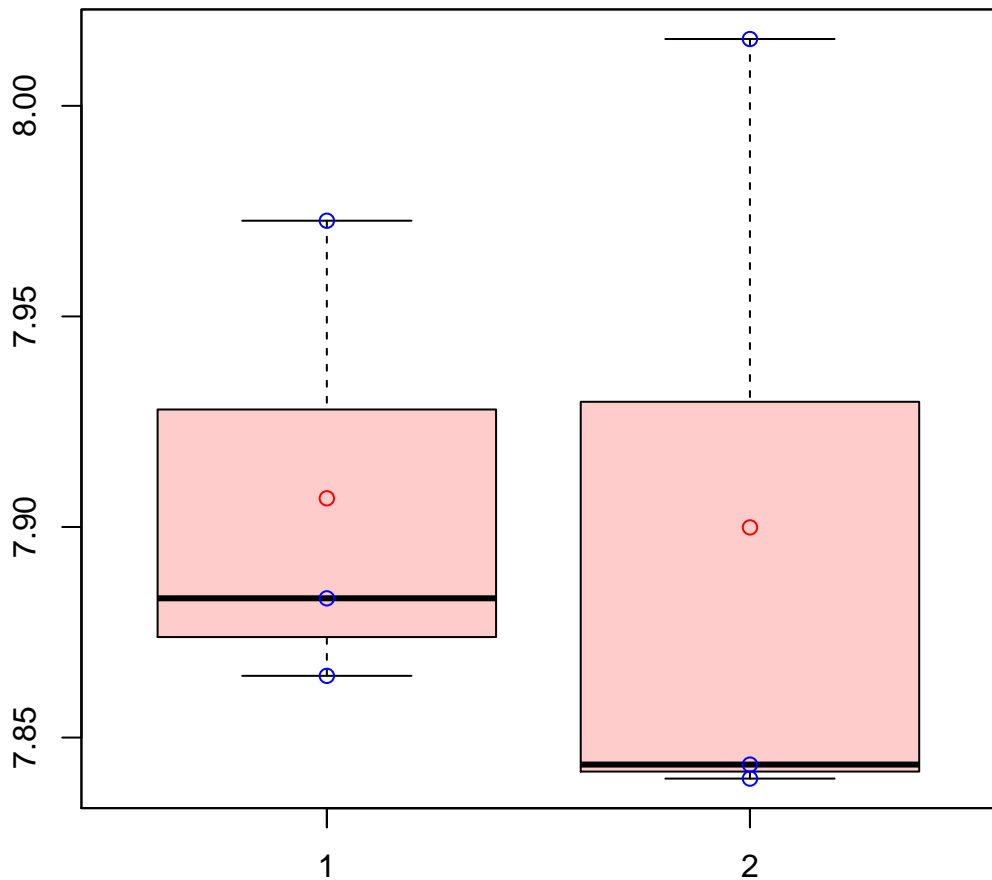

t-Test: p-value = 0.92

# CL11071Contig1|CL11071Contig1

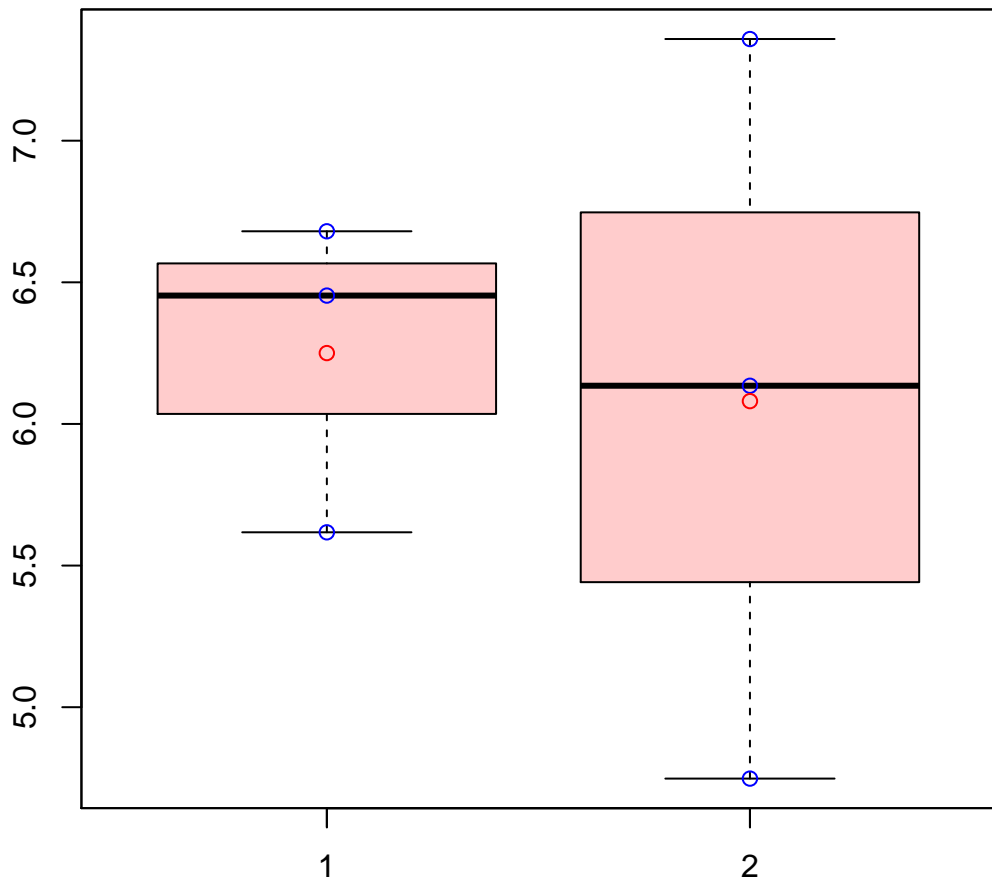

t-Test: p-value = 0.85

# CL1107Contig1|CL1107Contig1

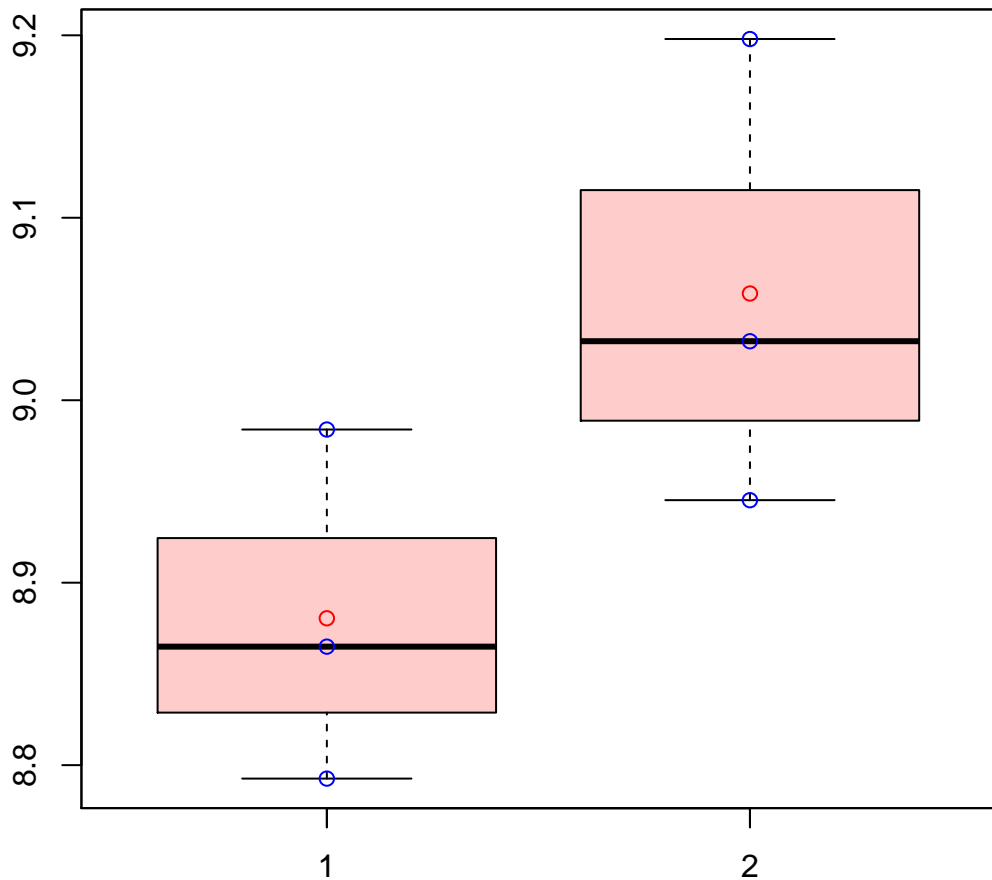

t-Test: p-value = 0.13



# CL1107Contig3|CL1107Contig3

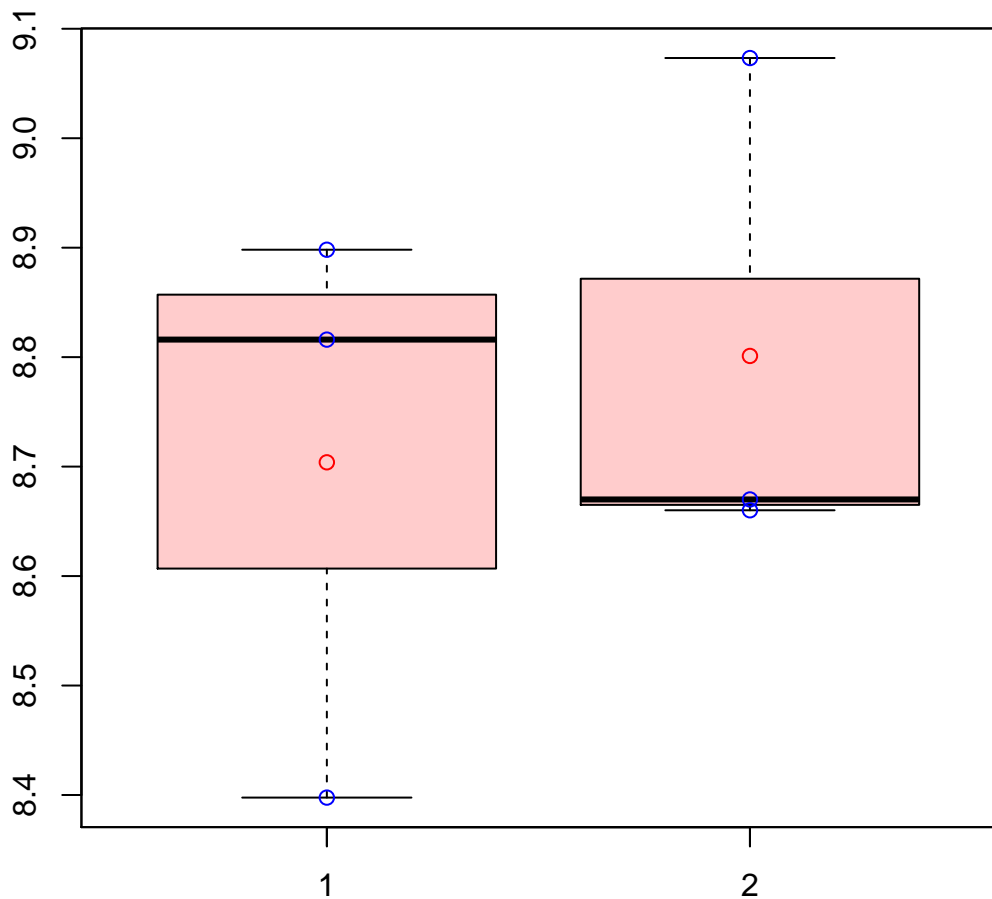

t-Test: p-value = 0.66

# CL1107Contig5|CL1107Contig5

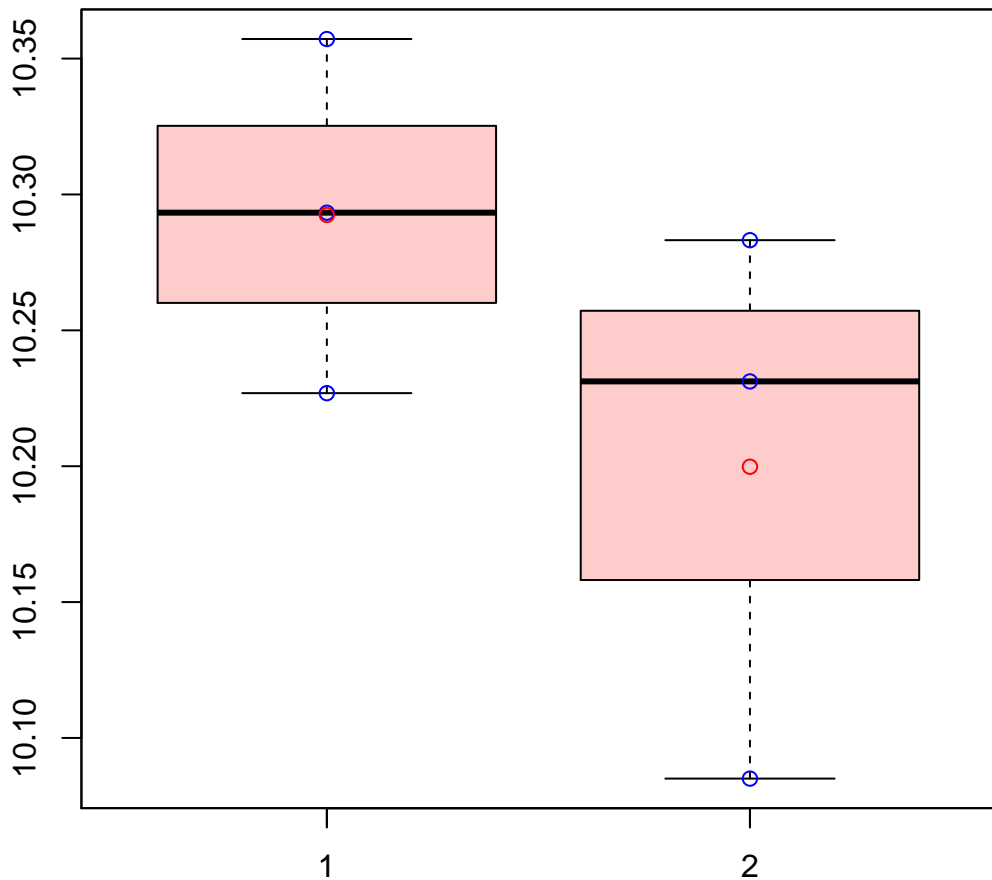

t-Test: p-value = 0.27

# CL11097Contig1|CL11097Contig1

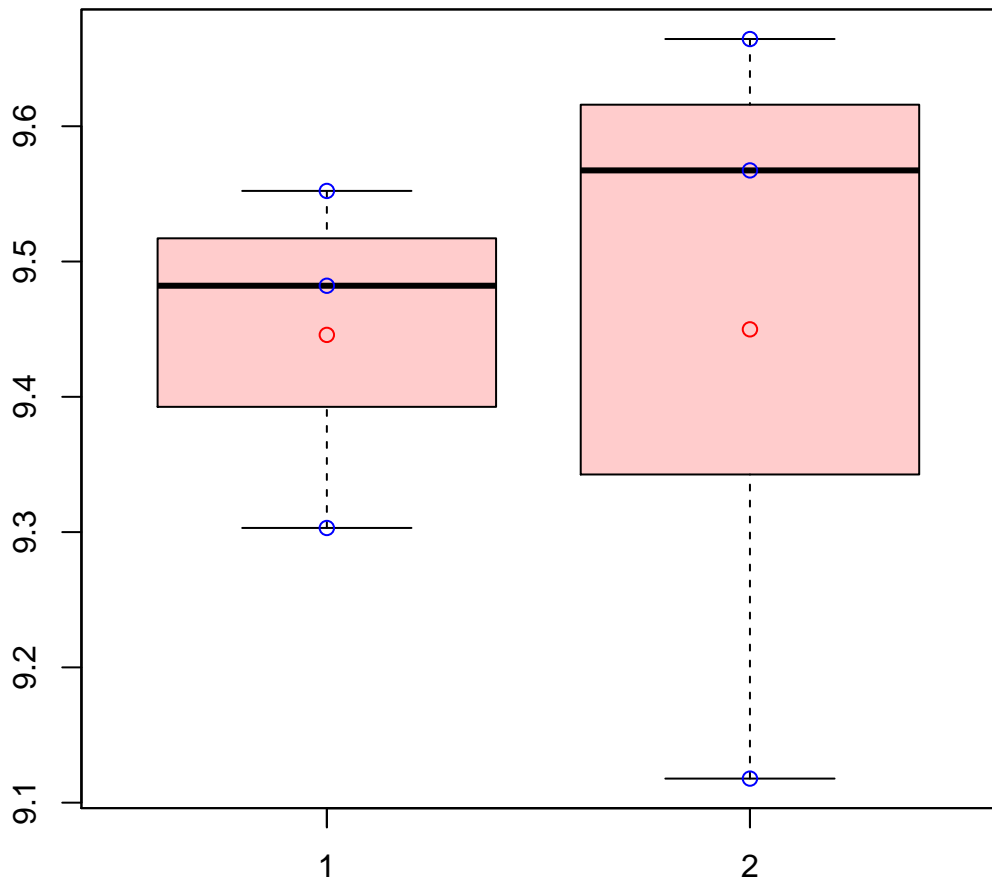

t-Test: p-value = 0.98

# CL110Contig26|CL110Contig26

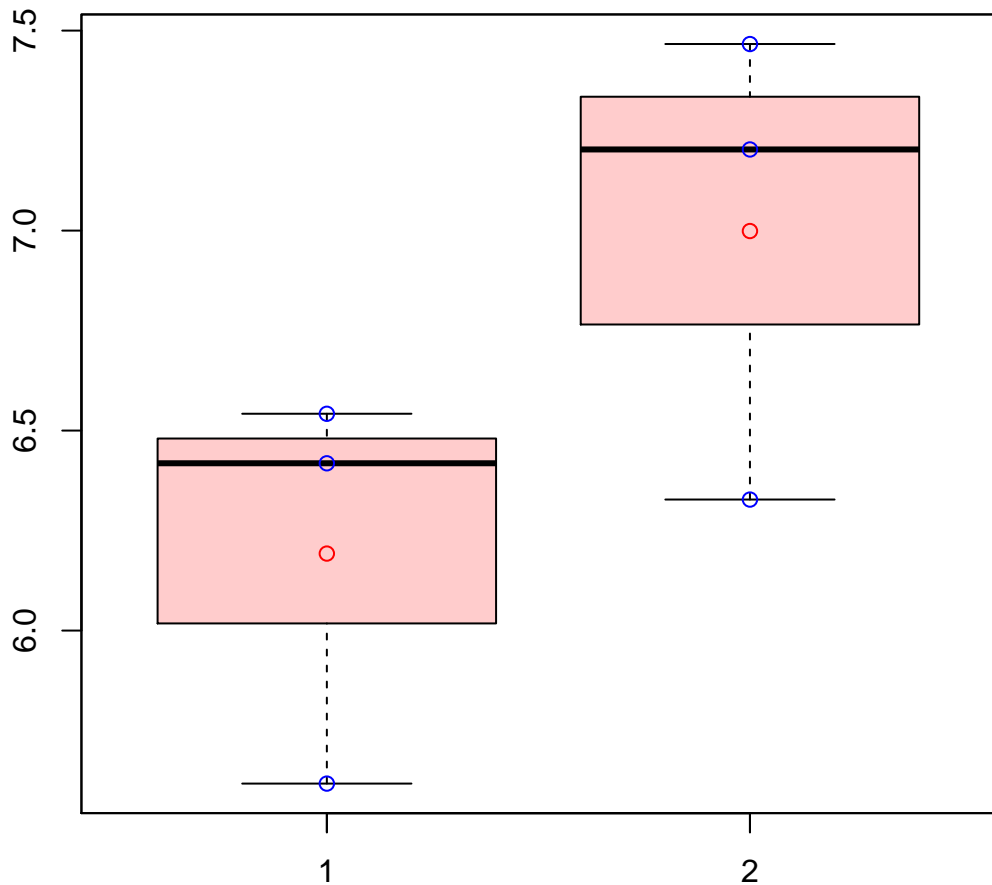

t-Test: p-value = 0.15

# CL110Contig8|CL110Contig8

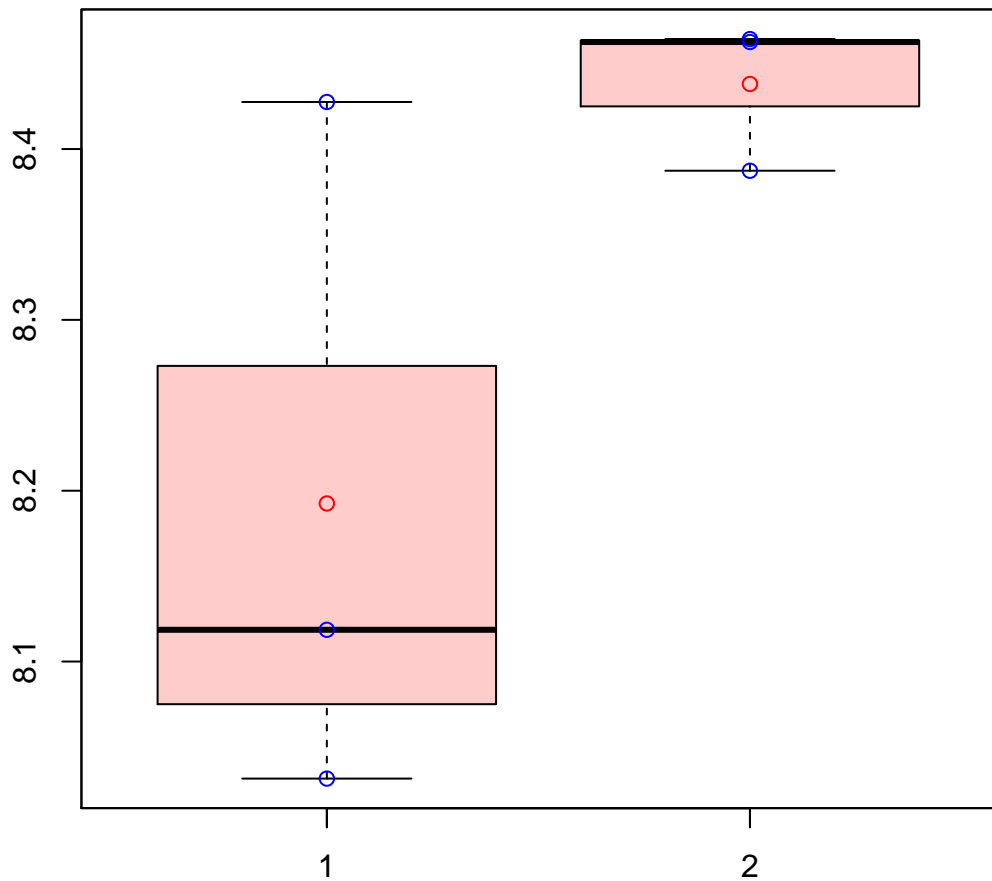

t-Test: p-value = 0.17

# CL1111Contig7|CL1111Contig7



t-Test: p-value = 0.85

# CL11137Contig2|CL11137Contig2

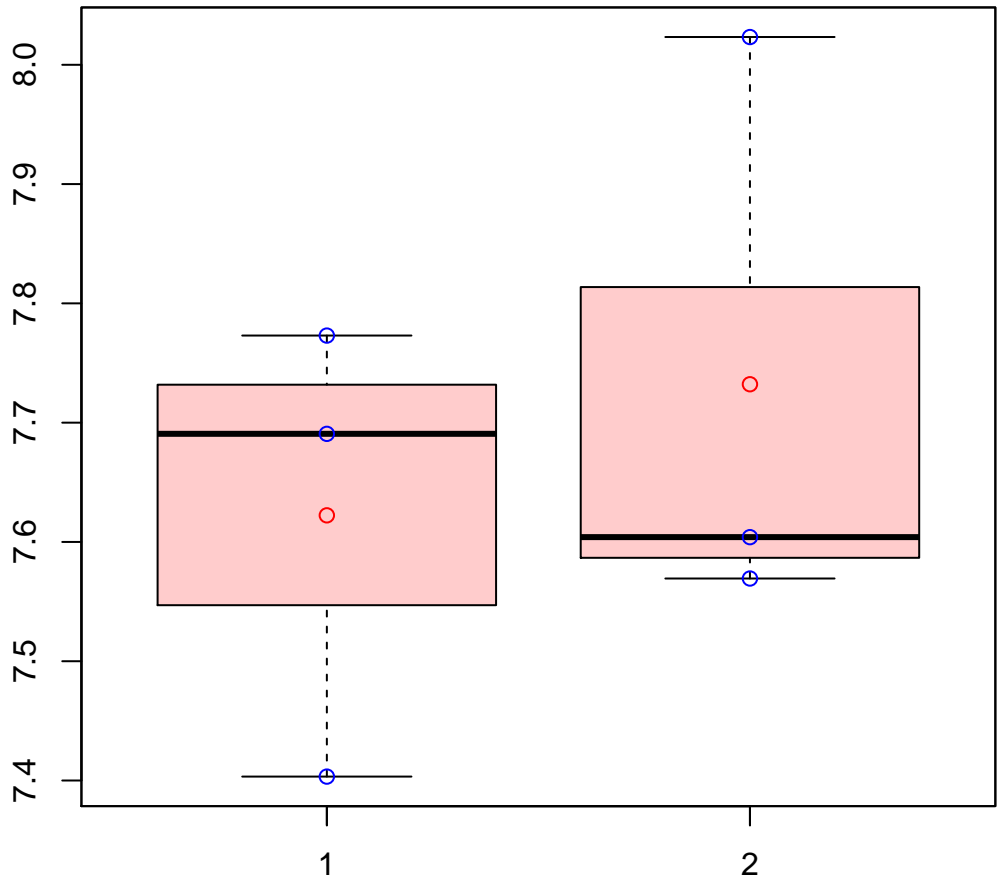

t-Test: p-value = 0.58

# CL1114Contig3|CL1114Contig3

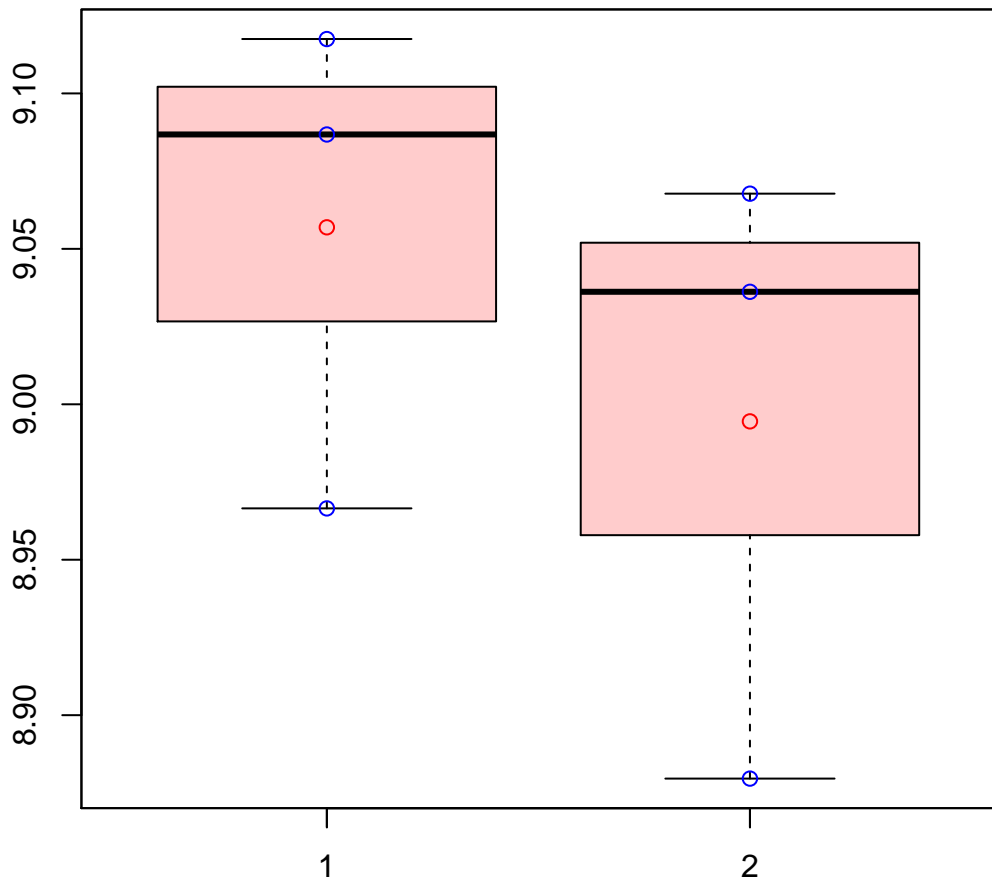

t-Test: p-value = 0.45



# CL1115Contig1|CL1115Contig1

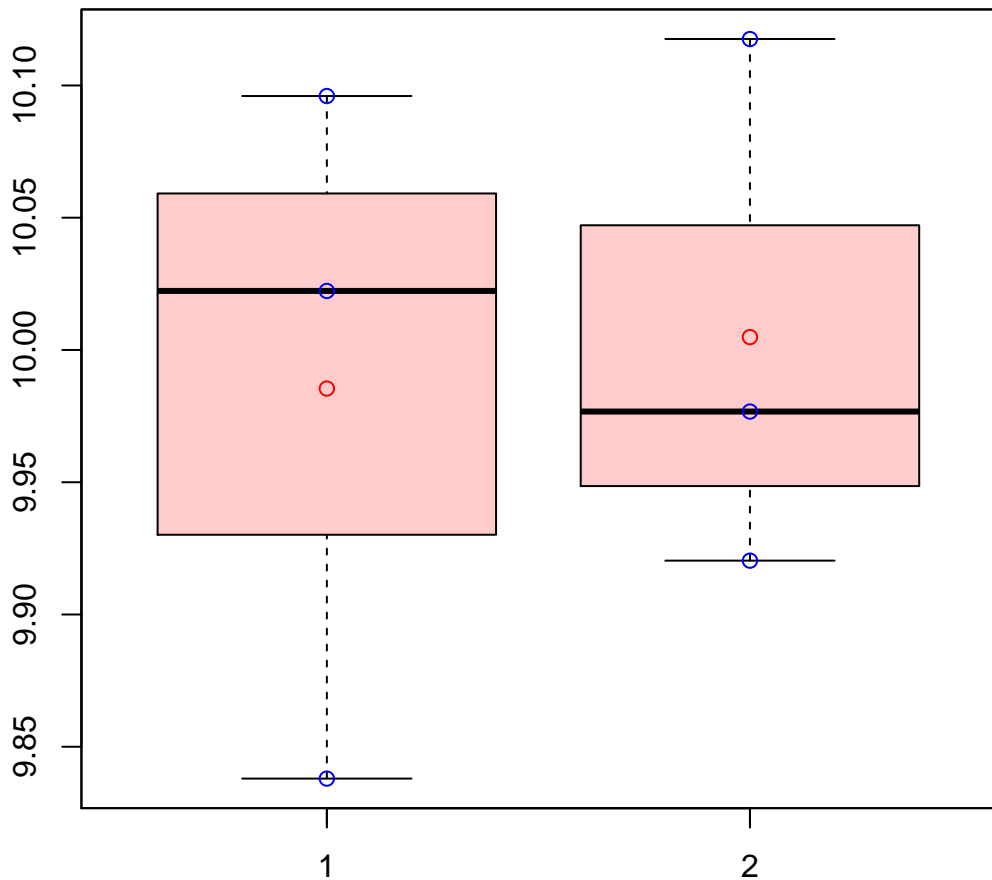

t-Test: p-value = 0.85

# CL1115Contig5|CL1115Contig5

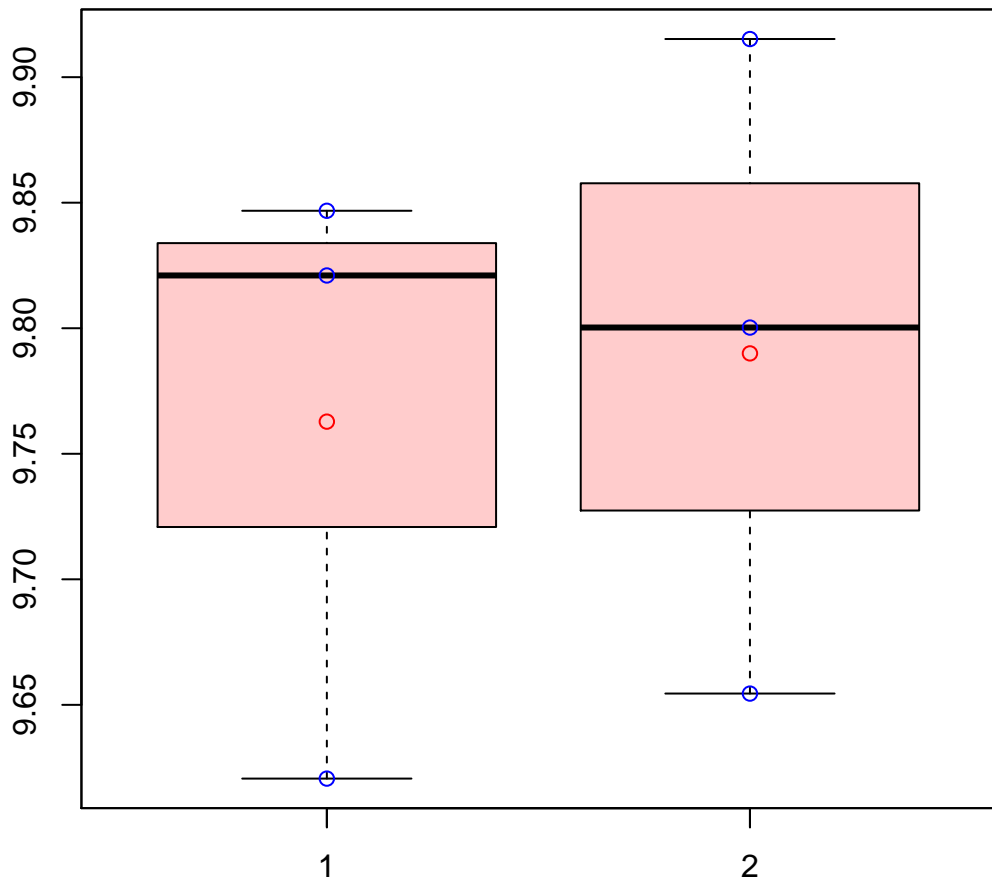

t-Test: p-value = 0.81

# CL1115Contig6|CL1115Contig6

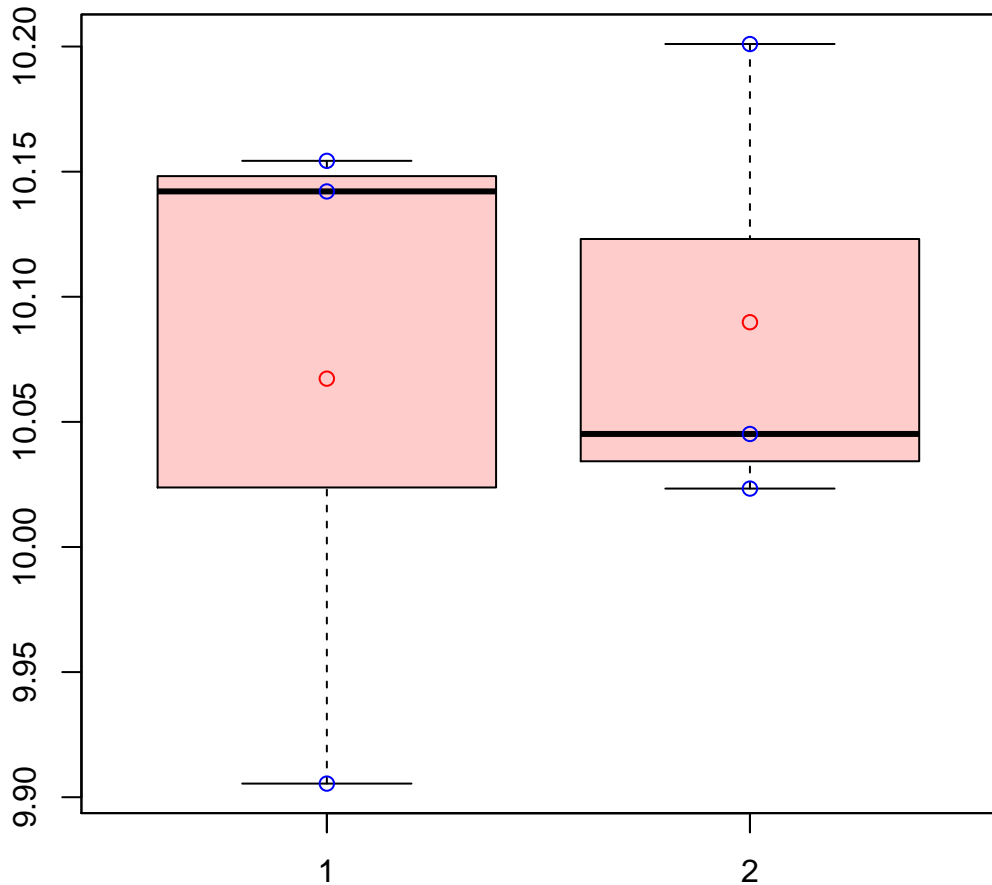

t-Test: p-value = 0.83

# CL1115Contig7|CL1115Contig7

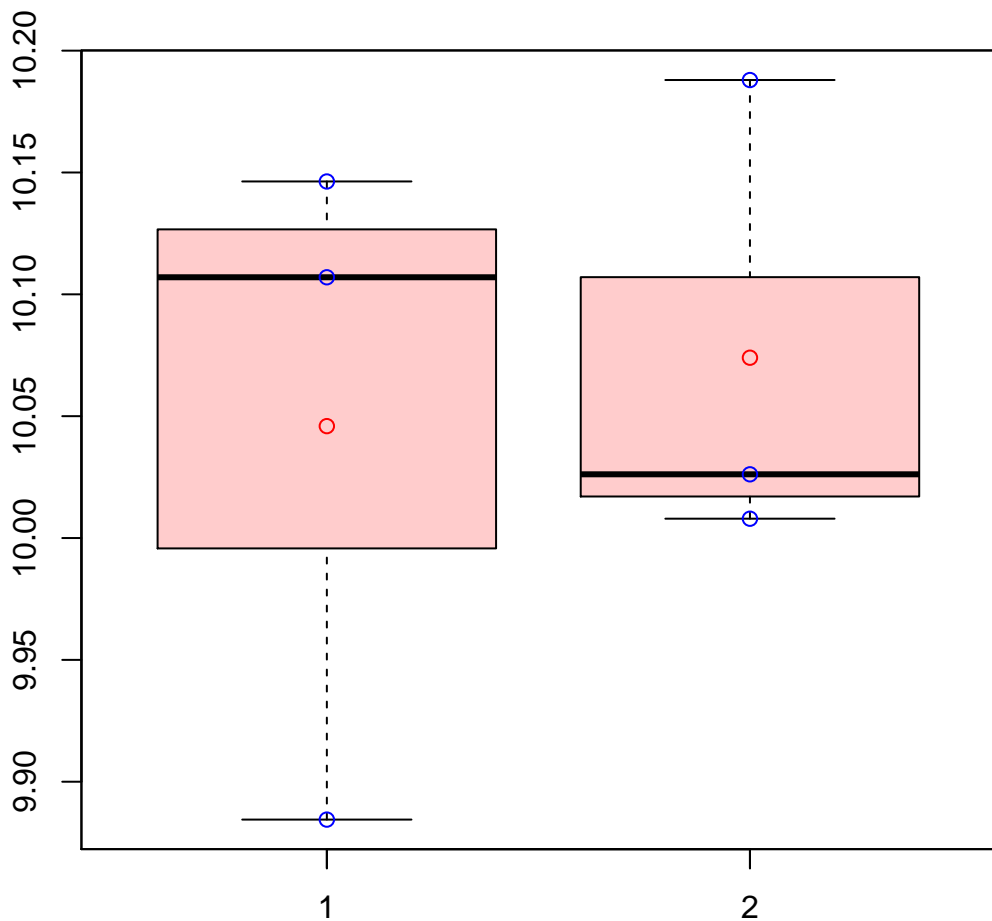

t-Test: p-value = 0.79

# CL11160Contig1|CL11160Contig1

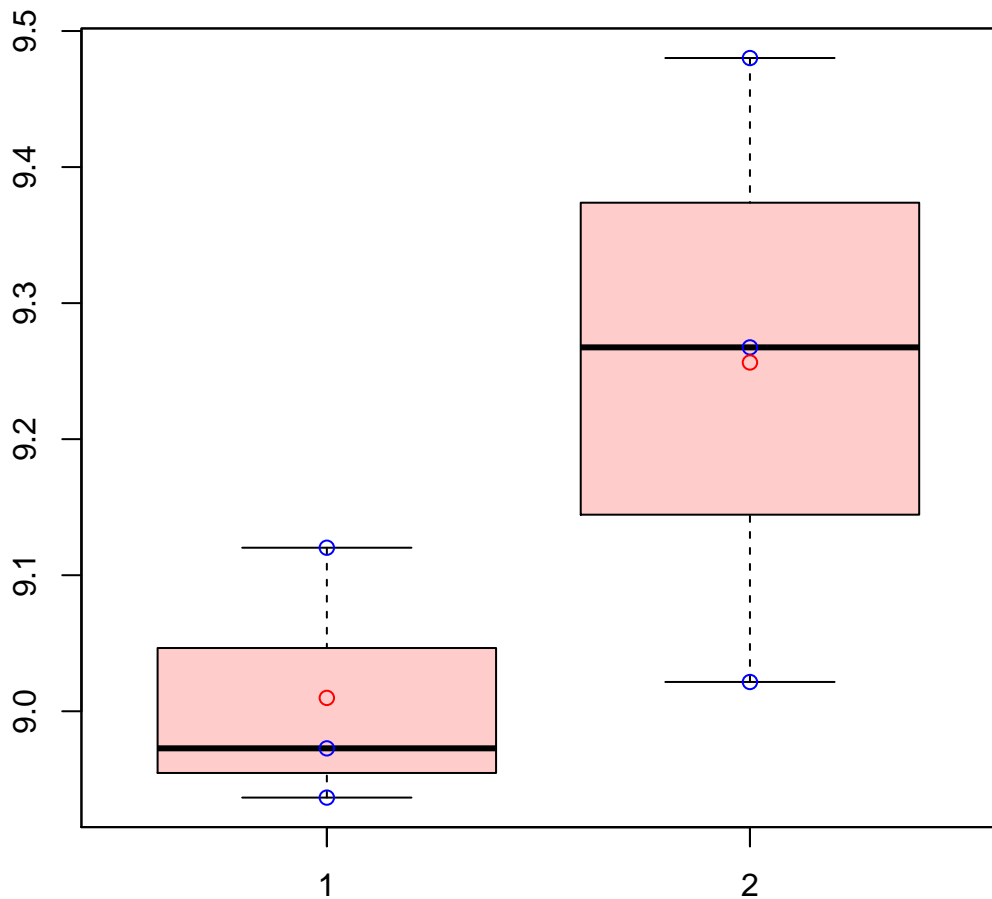

t-Test: p-value = 0.2

# CL11170Contig2|CL11170Contig2

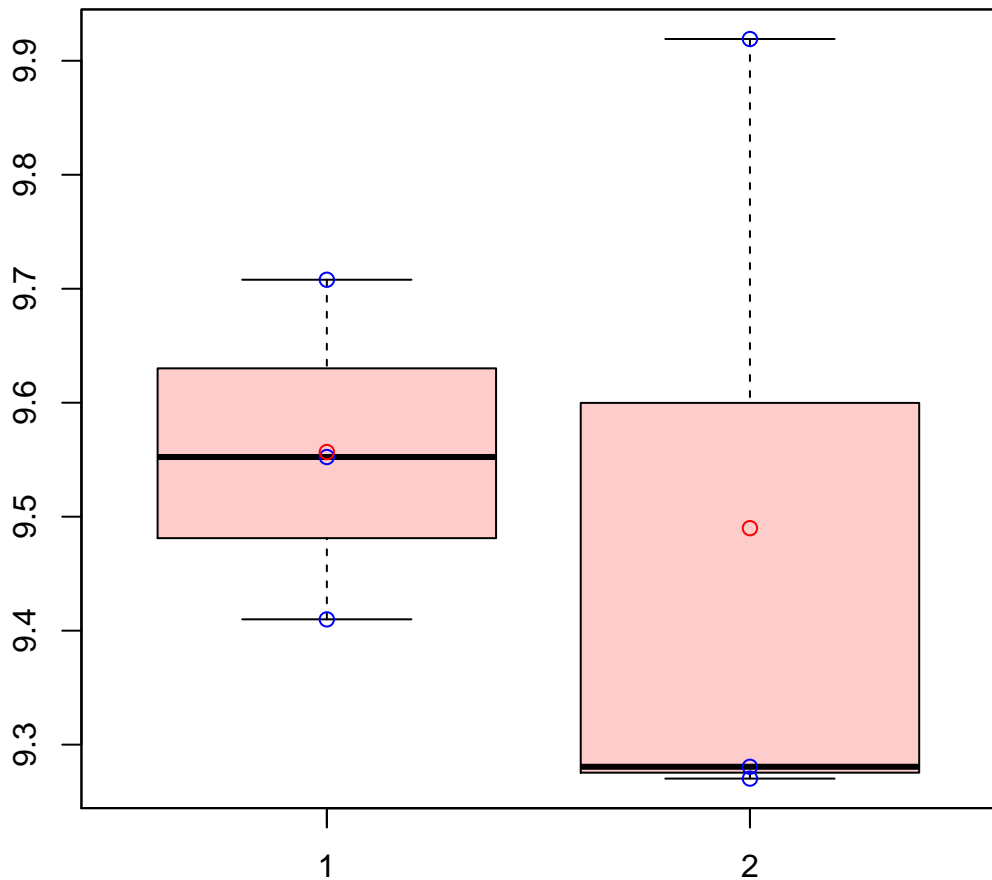

t-Test: p-value = 0.79

# CL11175Contig2|CL11175Contig2

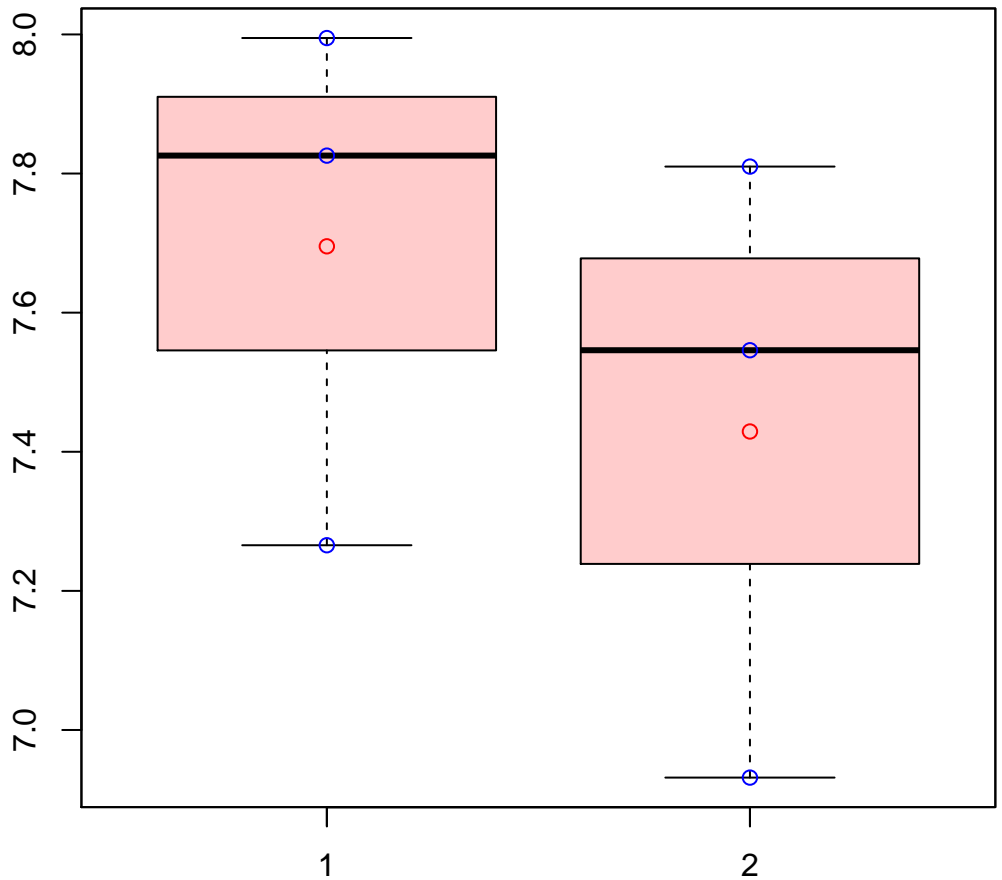

t-Test: p-value = 0.48

# CL11177Contig2|CL11177Contig2

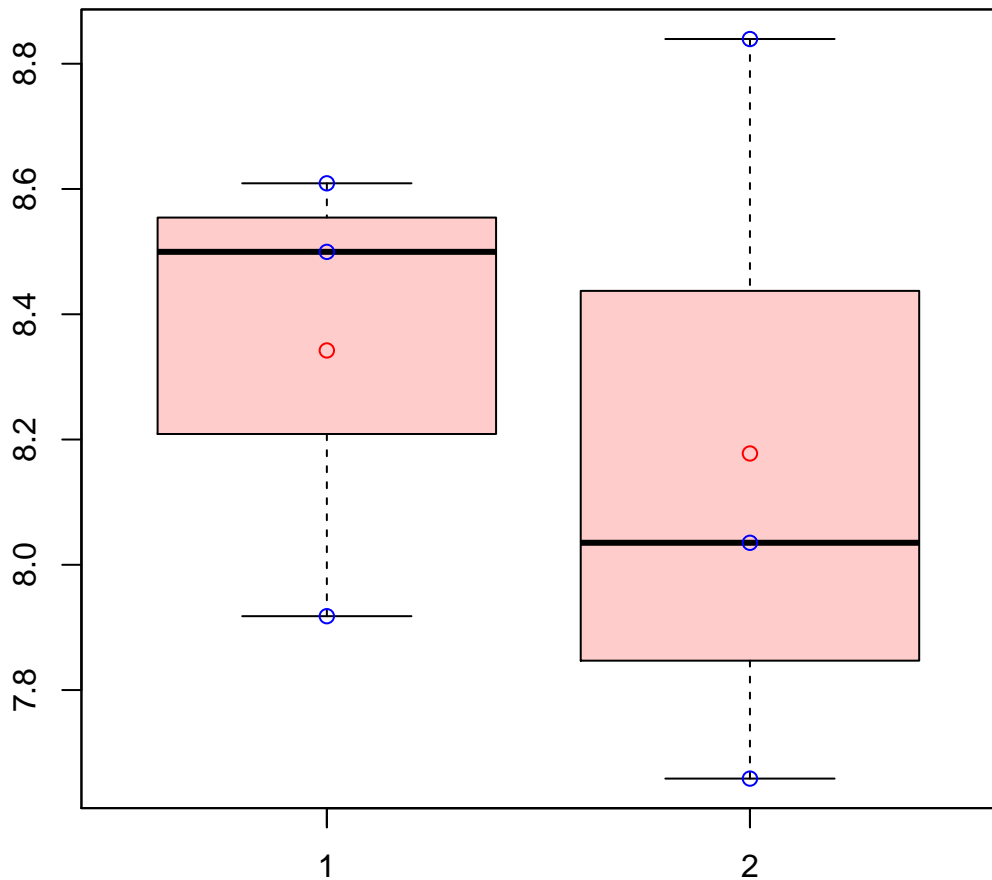

t-Test: p-value = 0.71



# CL11178Contig1|CL11178Contig1

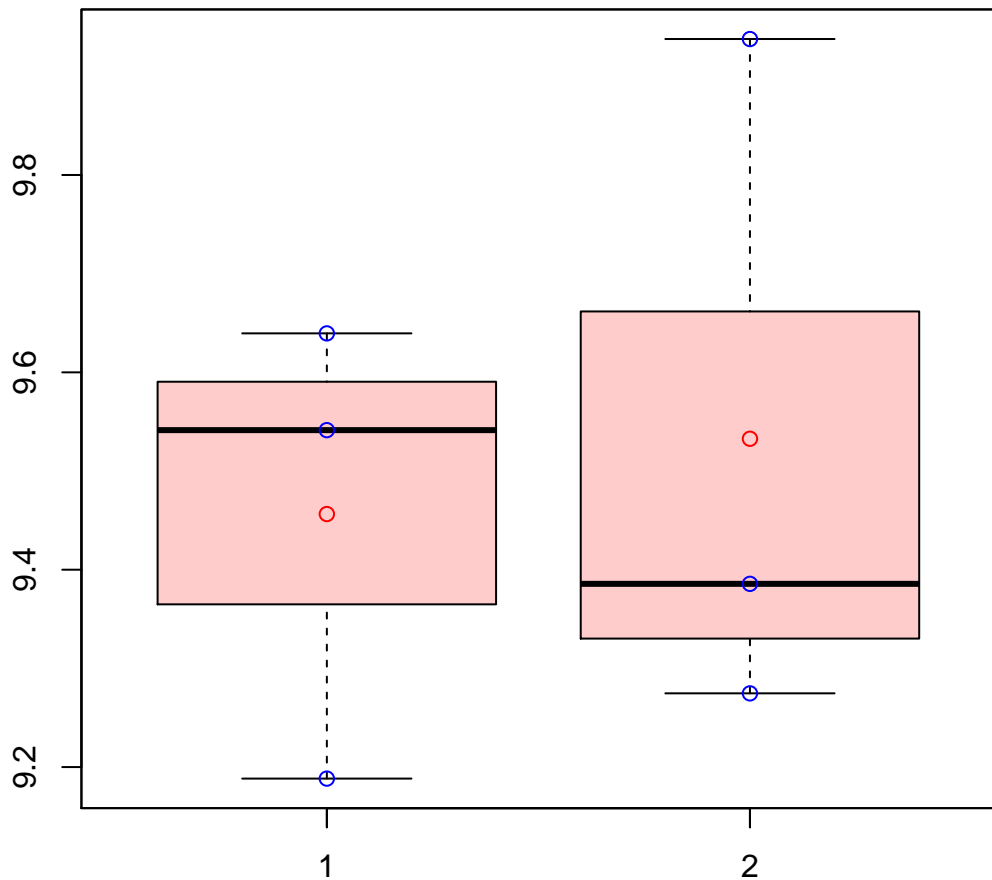

t-Test: p-value = 0.77

# CL11181Contig1|CL11181Contig1

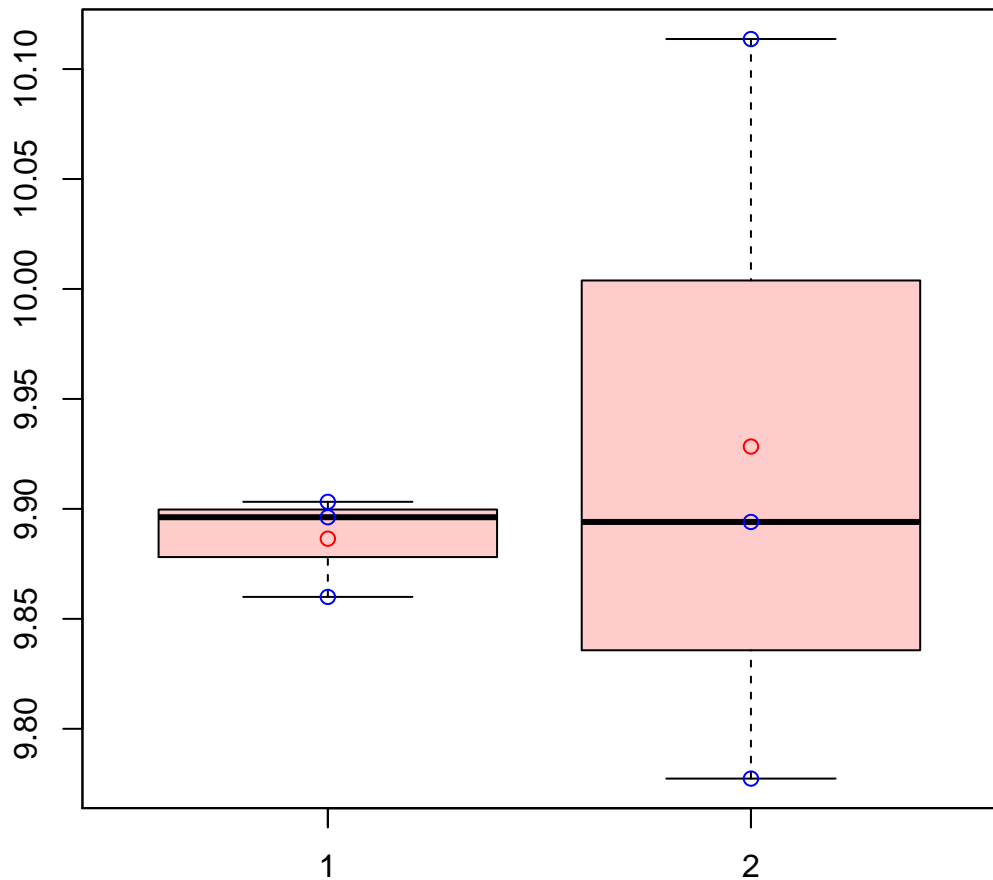

t-Test: p-value = 0.71

# CL1119Contig1|CL1119Contig1

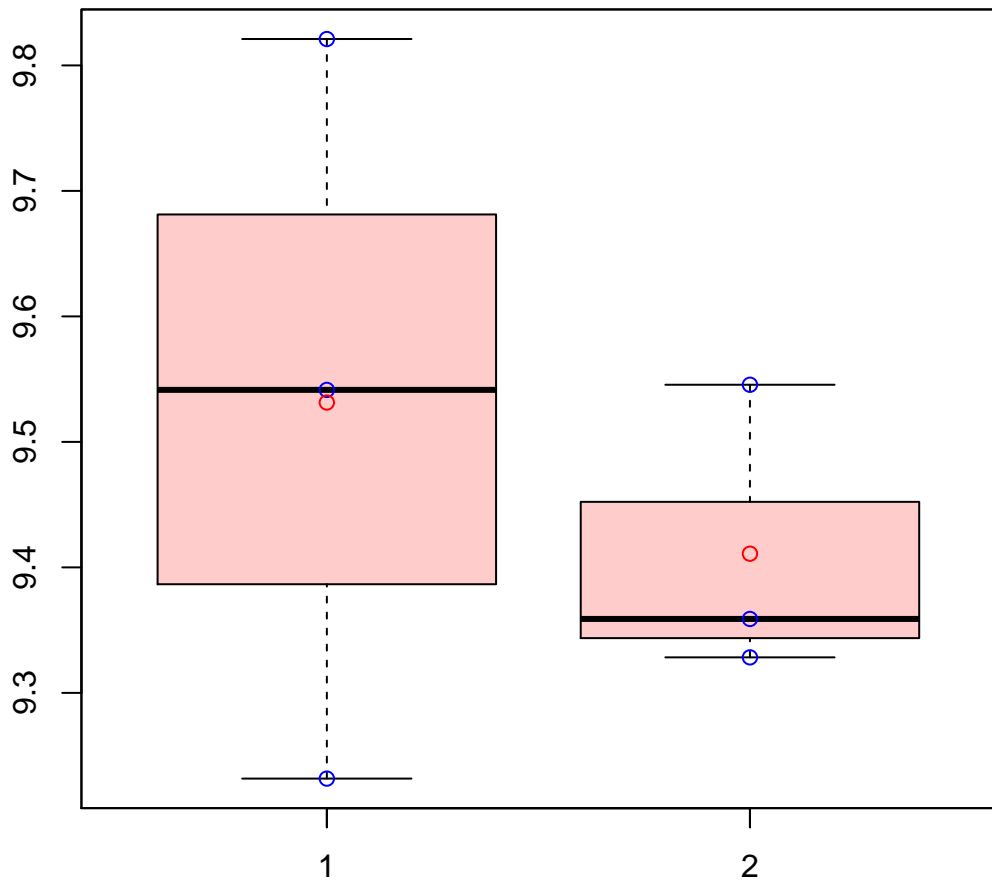

t-Test: p-value = 0.56

# CL1119Contig4|CL1119Contig4

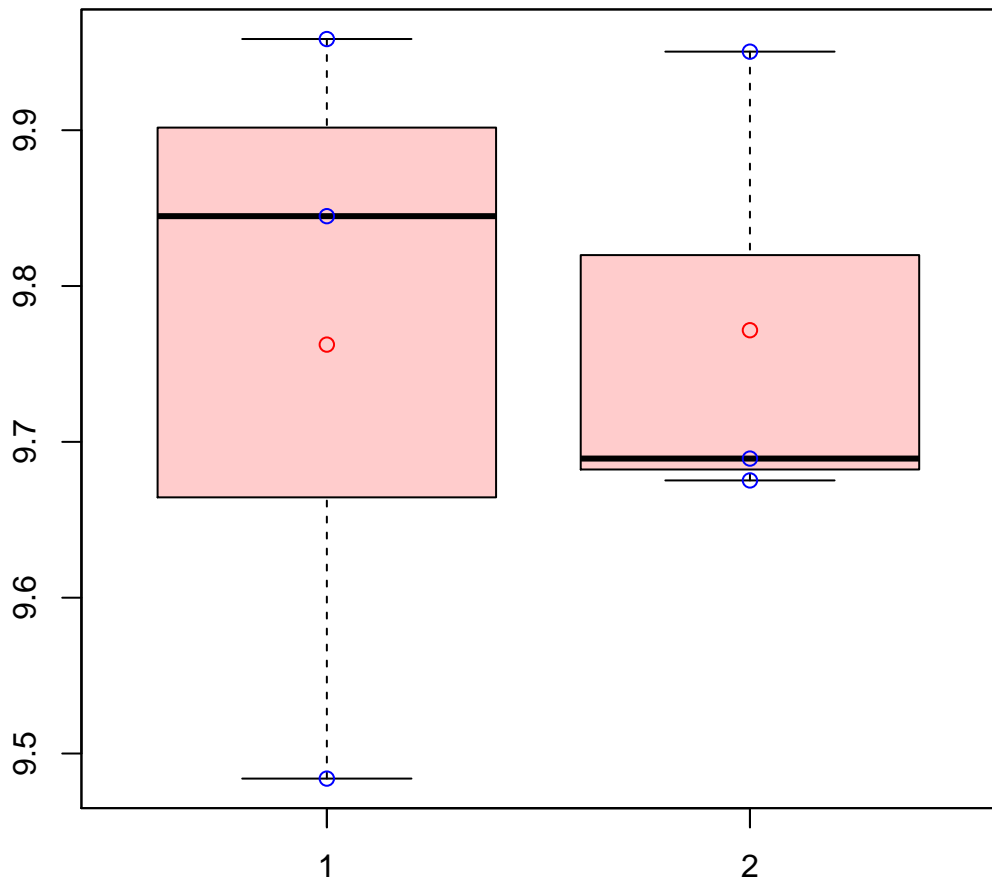

t-Test: p-value = 0.96

# CL1119Contig5|CL1119Contig5

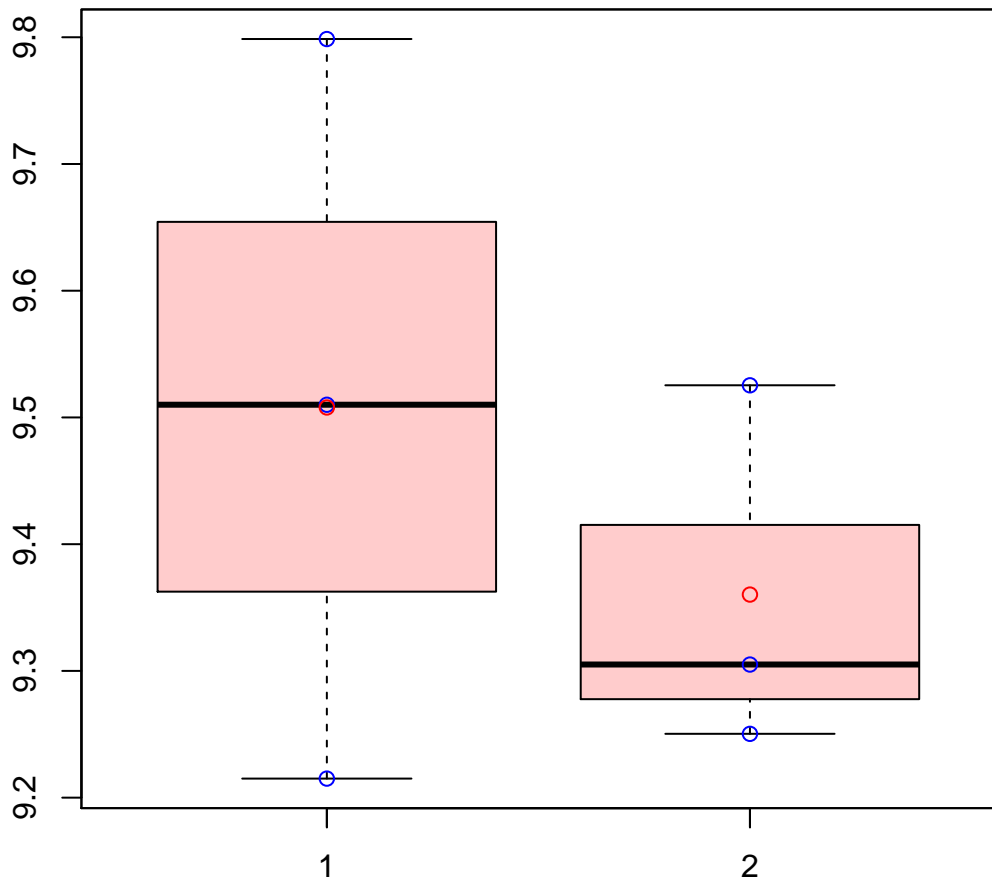

t-Test: p-value = 0.49

# CL1119Contig7|CL1119Contig7

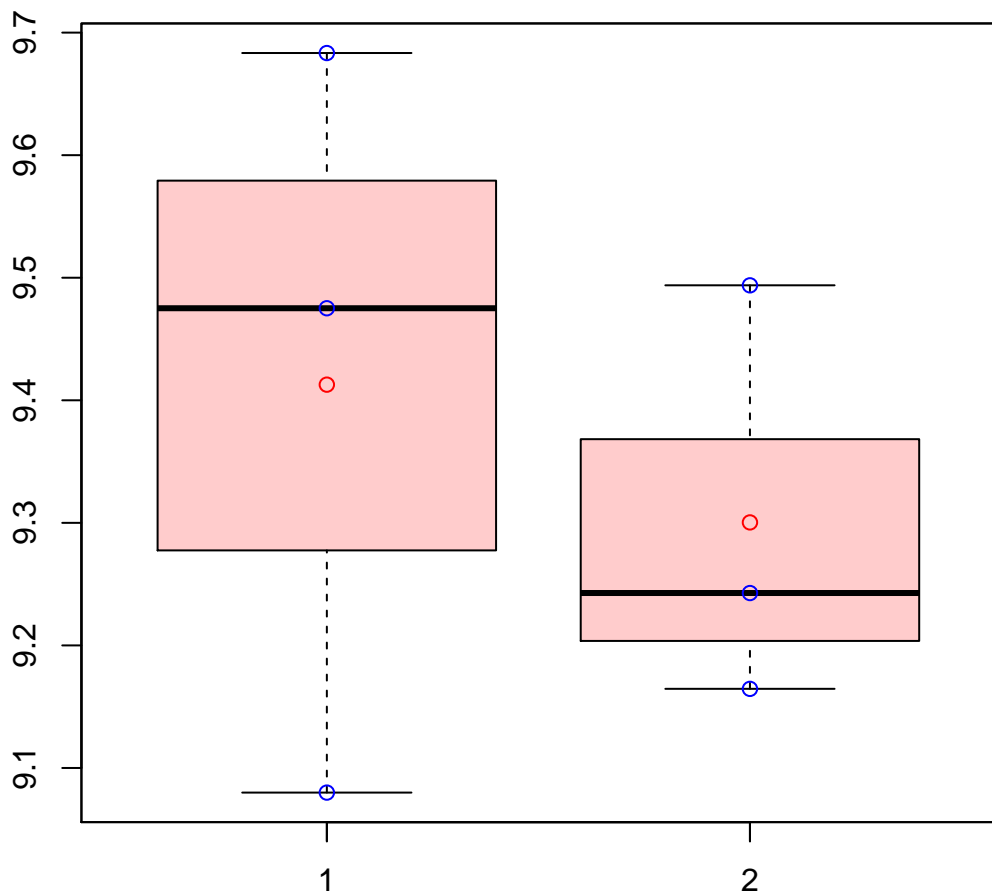

t-Test: p-value = 0.62

# CL111Contig10|CL111Contig10

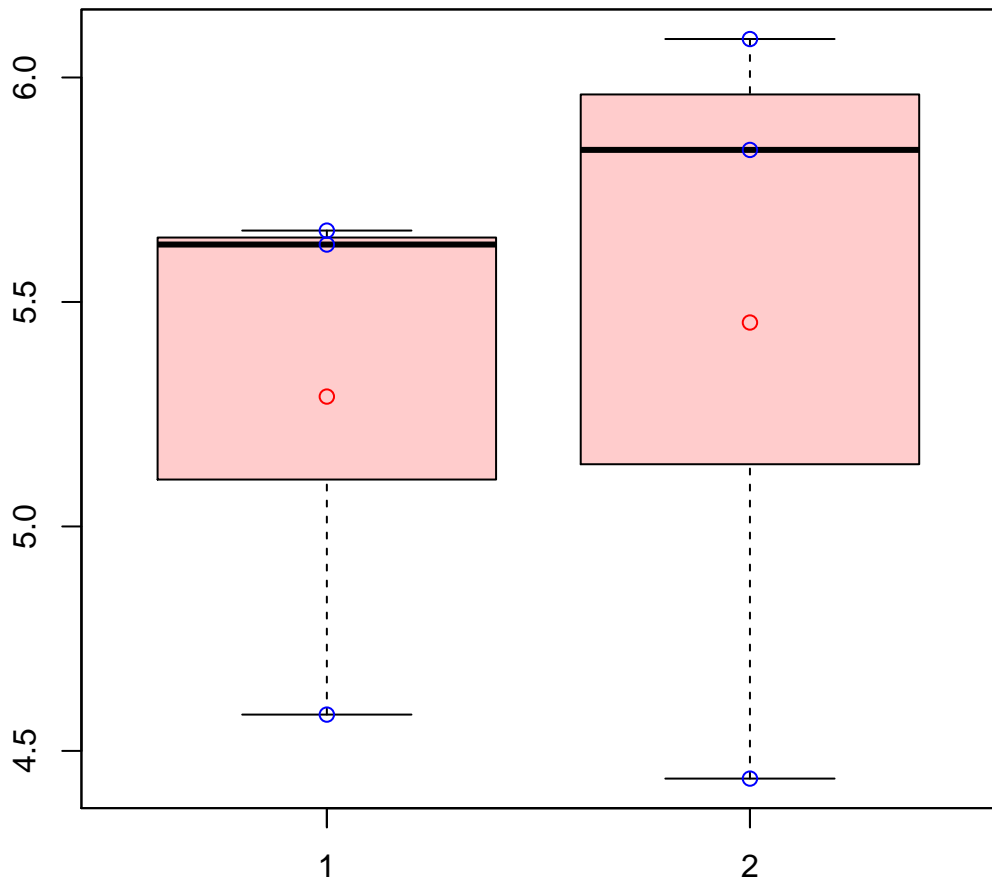

t-Test: p-value = 0.81

# CL111Contig11|CL111Contig11

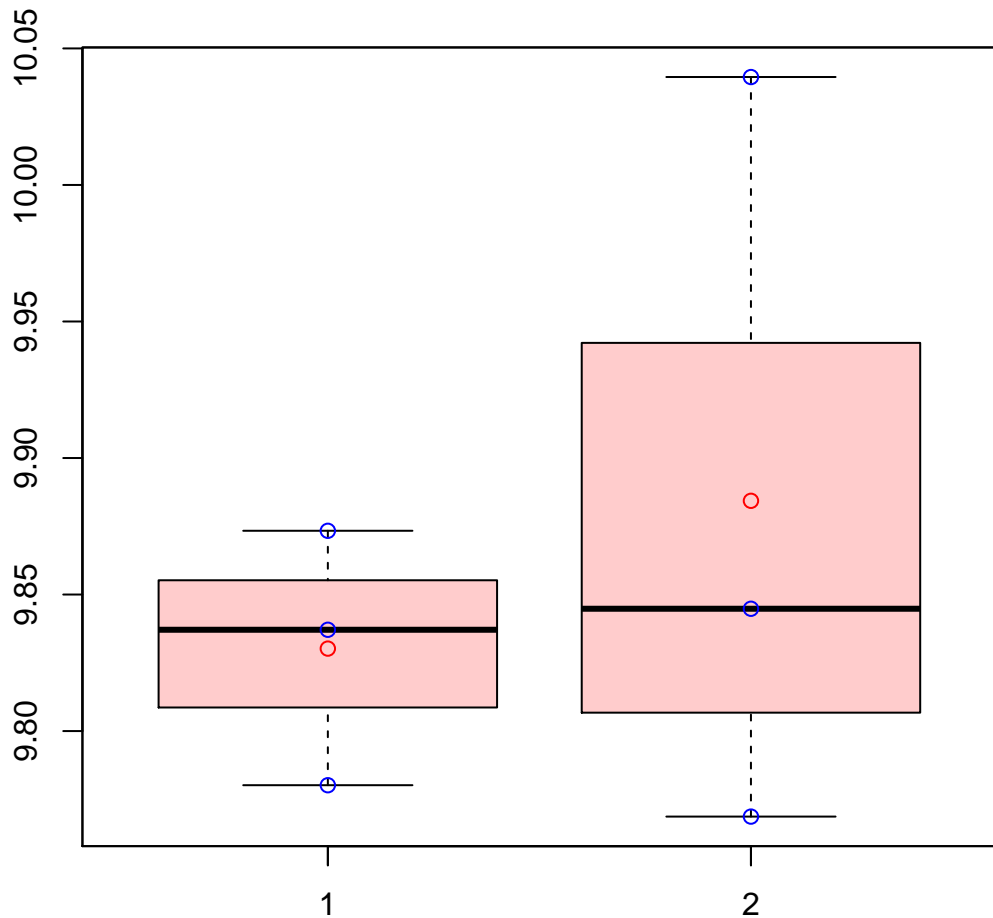

t-Test: p-value = 0.58



# CL111Contig14|CL111Contig14

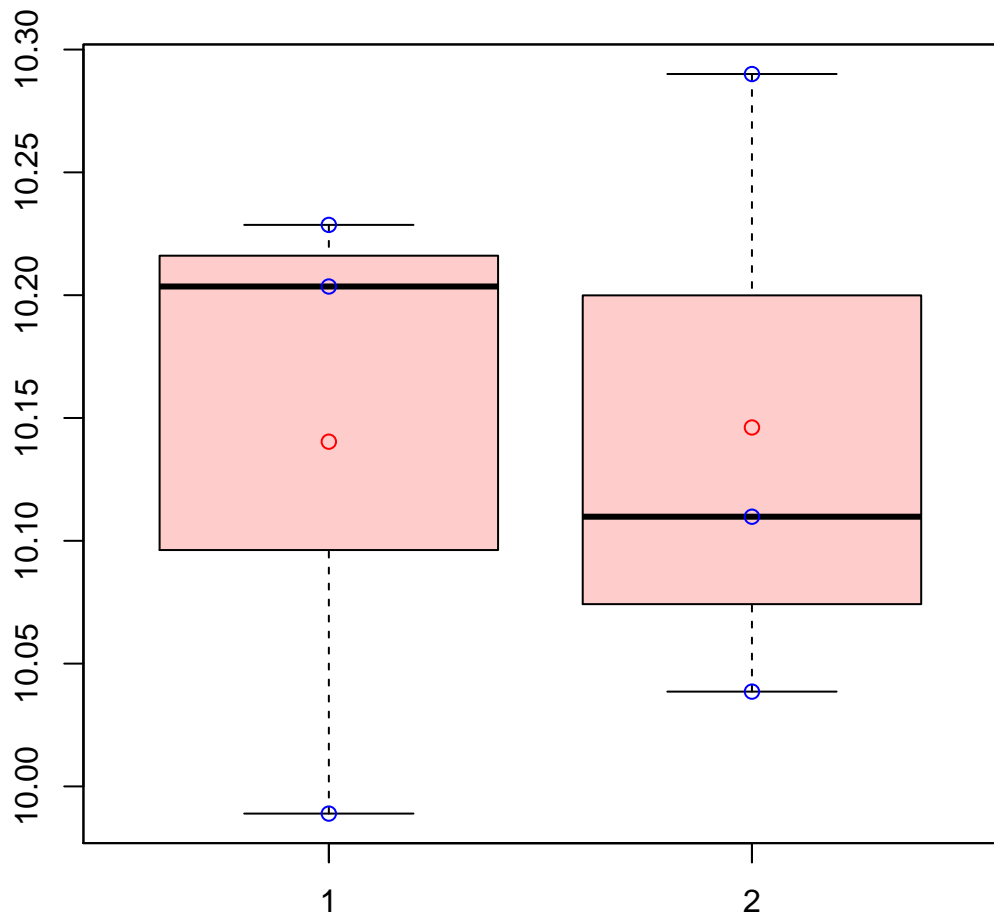

t-Test: p-value = 0.96

# CL111Contig6|CL111Contig6

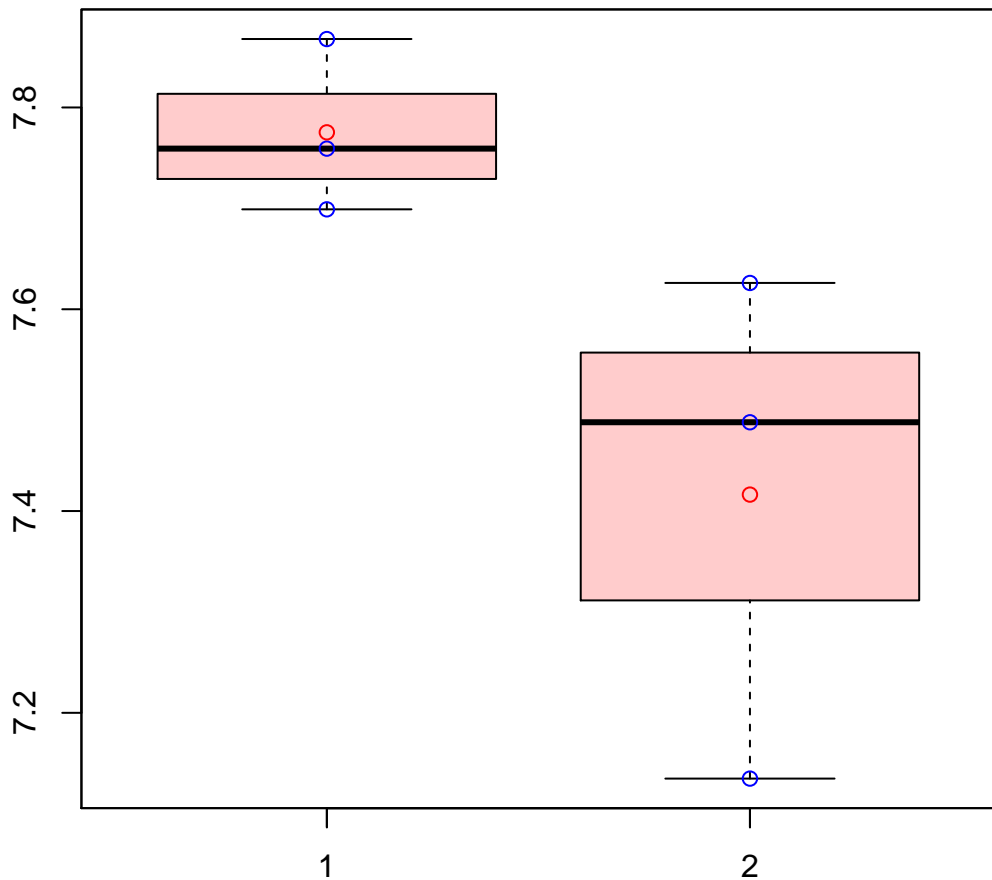

t-Test: p-value = 0.12

# CL111Contig8|CL111Contig8



t-Test: p-value = 0.26

# CL111Contig9|CL111Contig9



t-Test: p-value = 0.58

# CL11228Contig1|CL11228Contig1

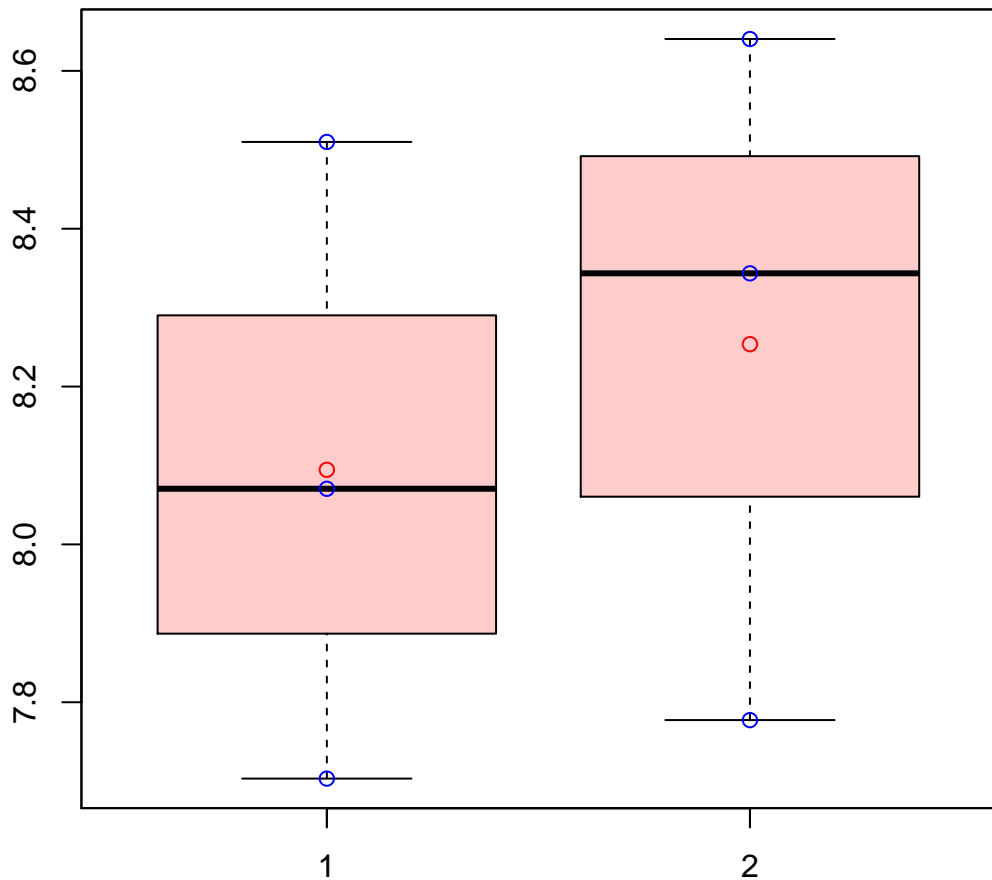

t-Test: p-value = 0.67

# CL1122Contig2|CL1122Contig2

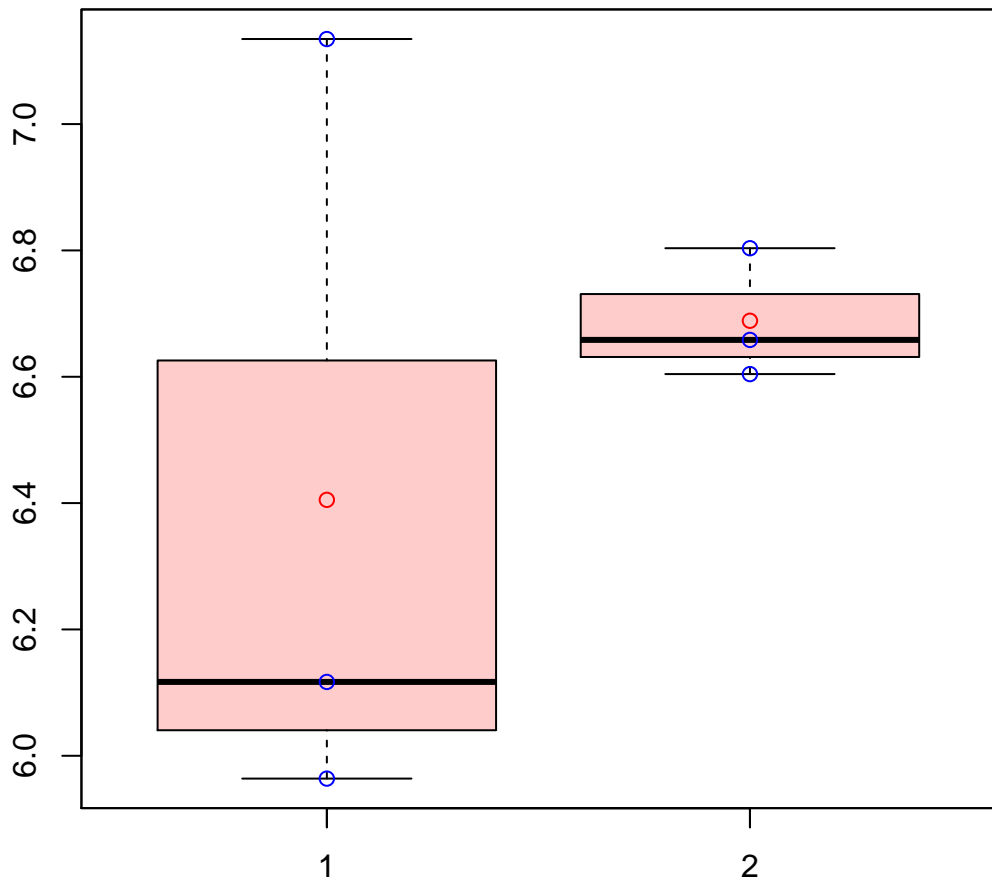

t-Test: p-value = 0.52

# CL1123Contig1|CL1123Contig1

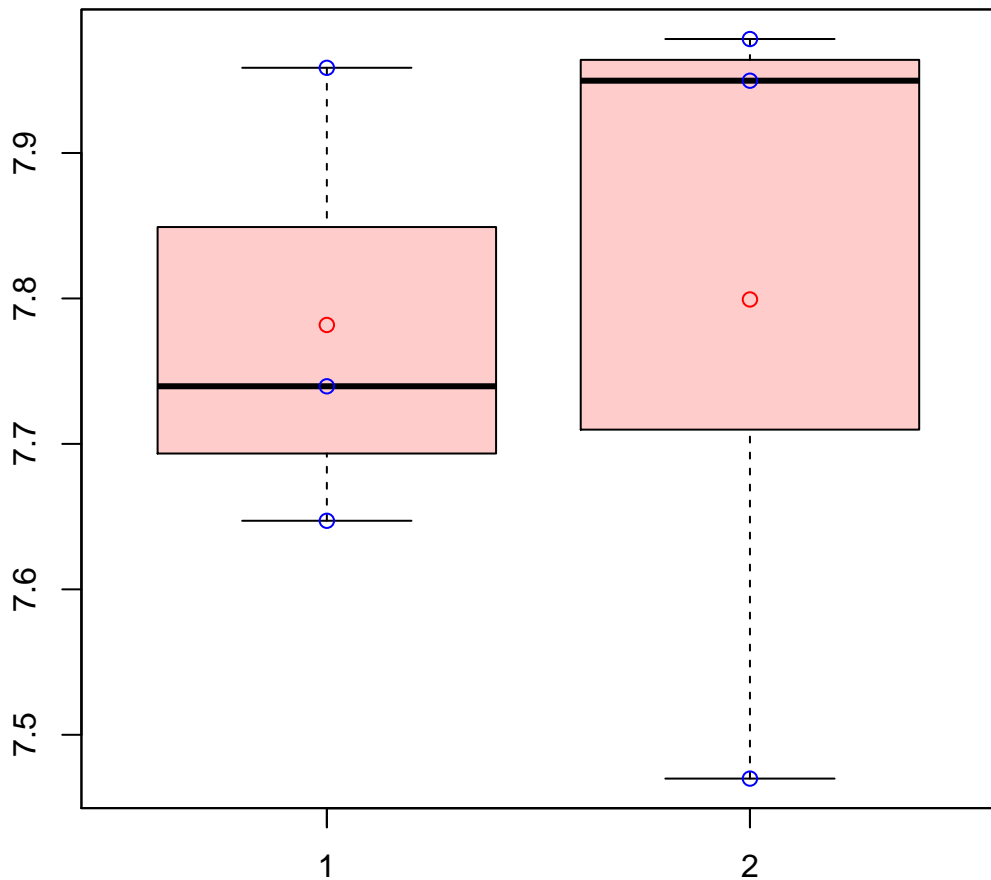

t-Test: p-value = 0.93

# CL1125Contig1|CL1125Contig1

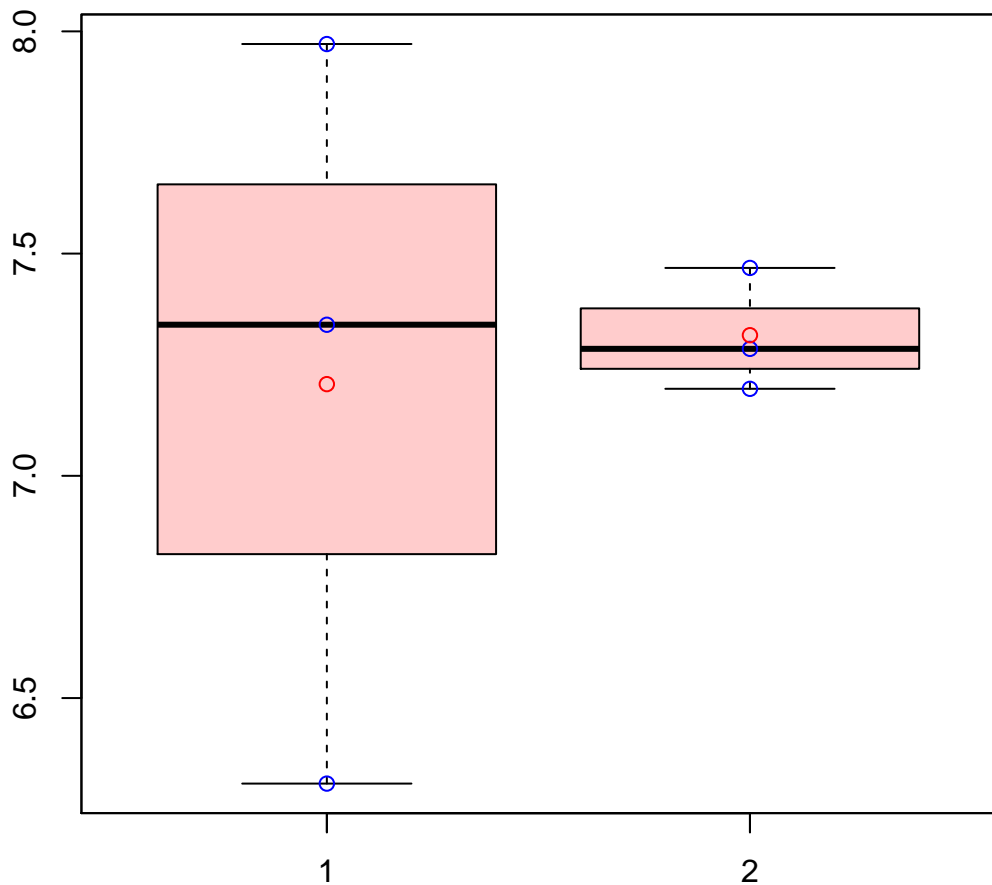

t-Test: p-value = 0.84



# CL1125Contig7|CL1125Contig7

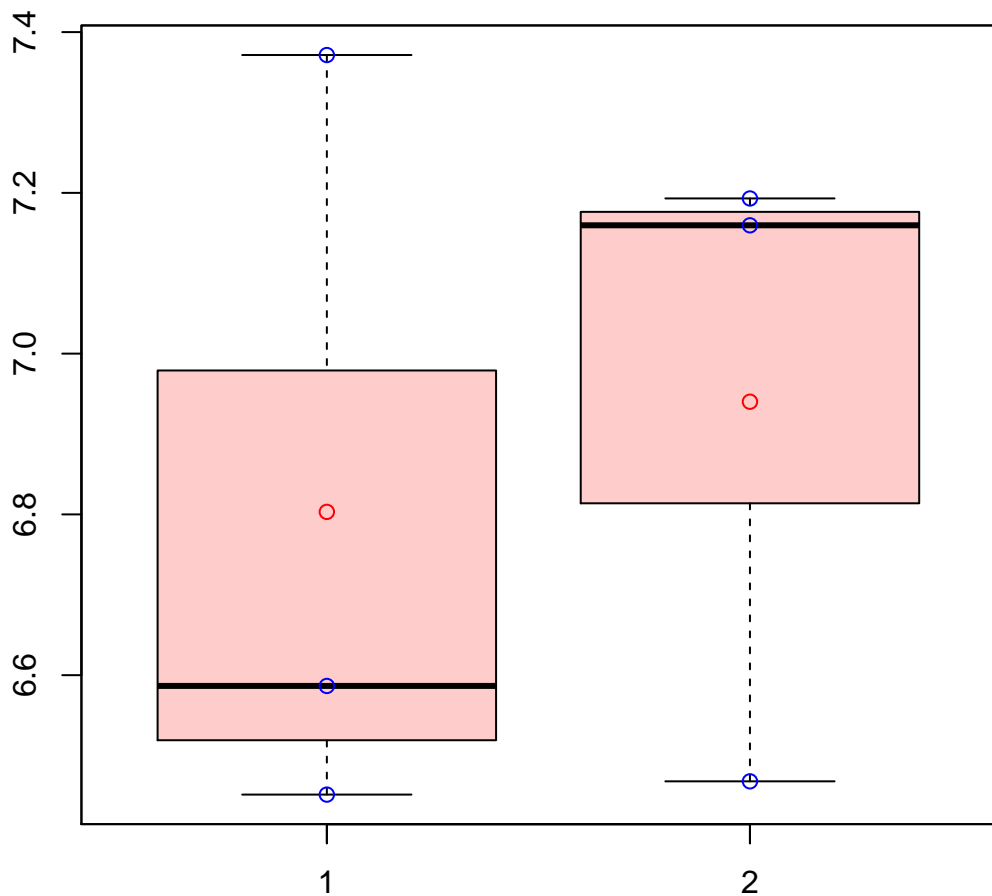

t-Test: p-value = 0.73

# CL1127Contig6|CL1127Contig6

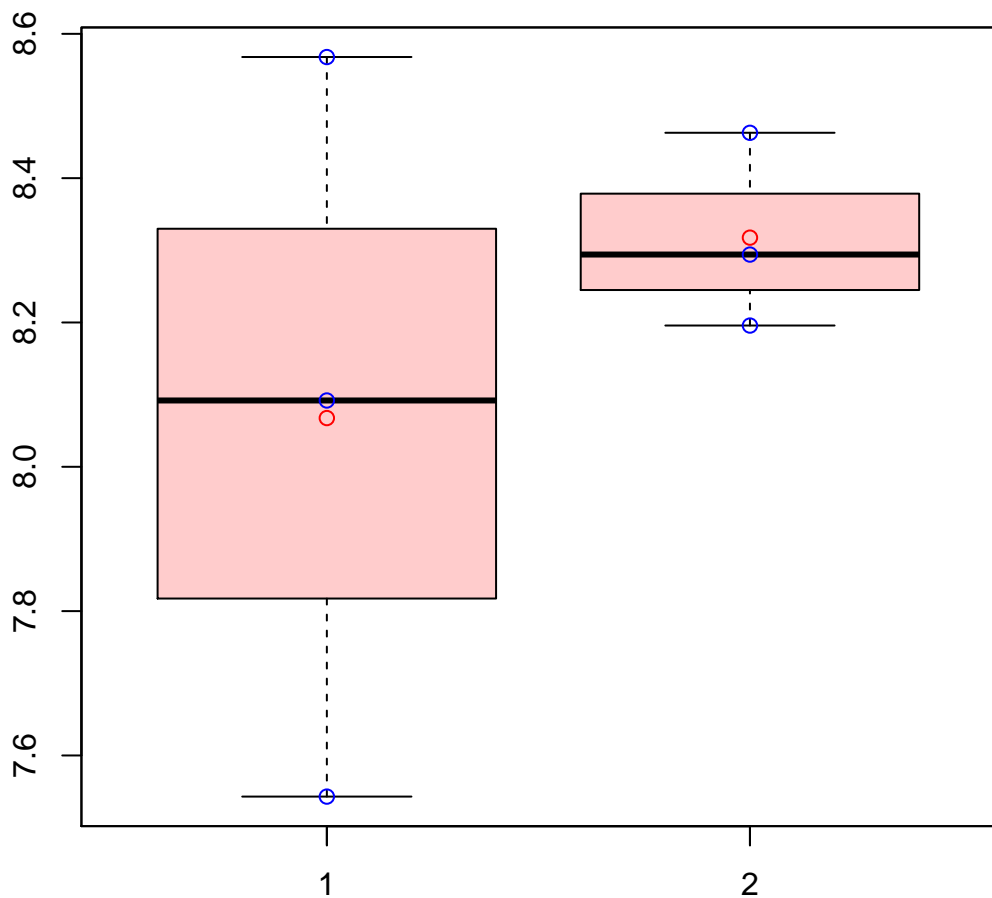

t-Test: p-value = 0.49

# CL11292Contig1|CL11292Contig1

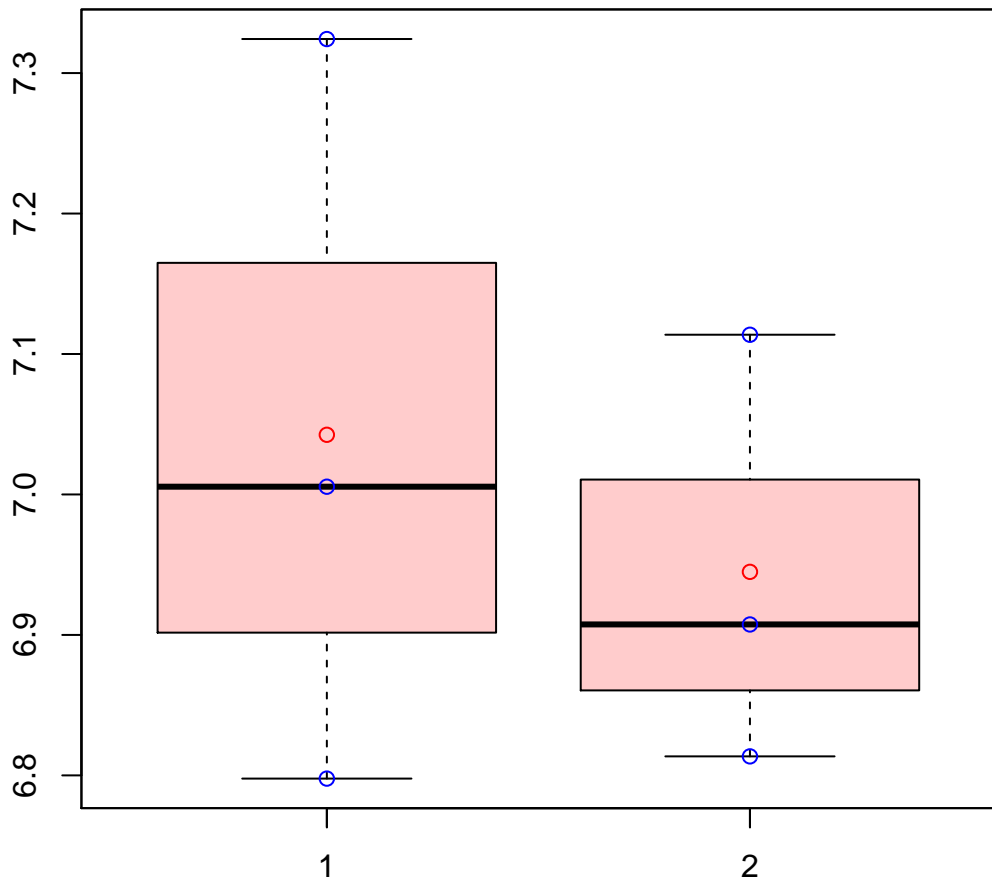

t-Test: p-value = 0.62

# CL11294Contig1|CL11294Contig1

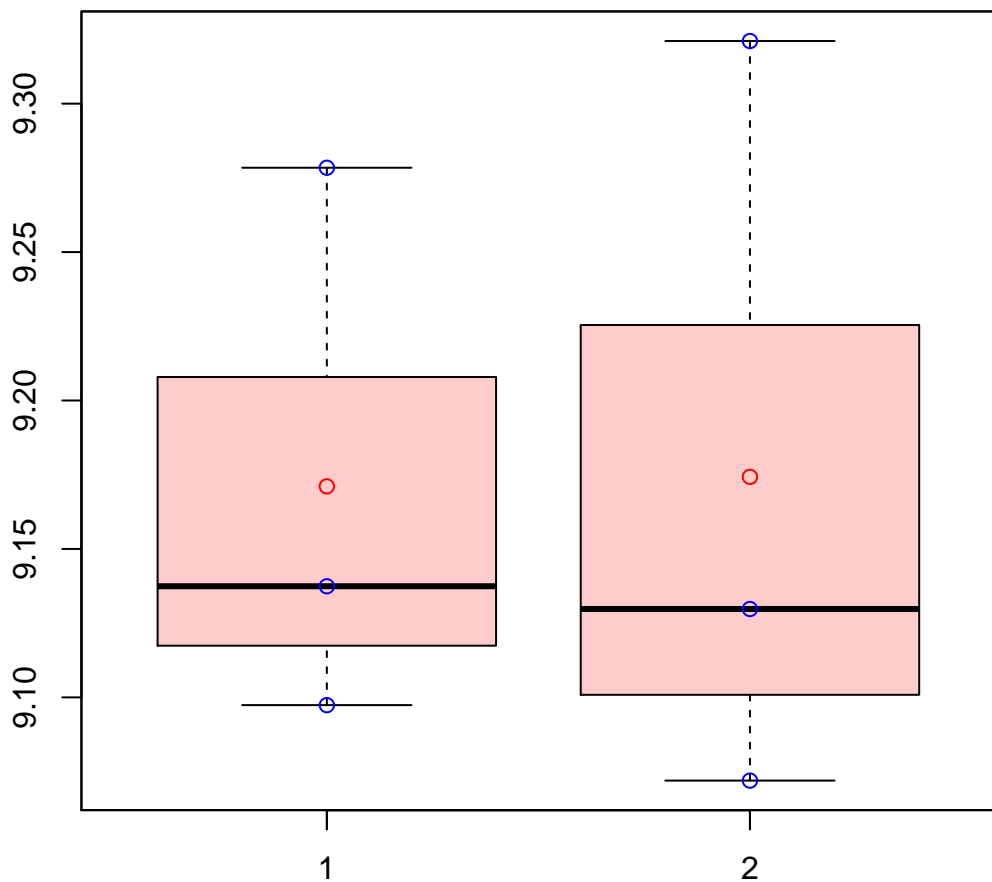

t-Test: p-value = 0.97

# CL1130Contig1|CL1130Contig1

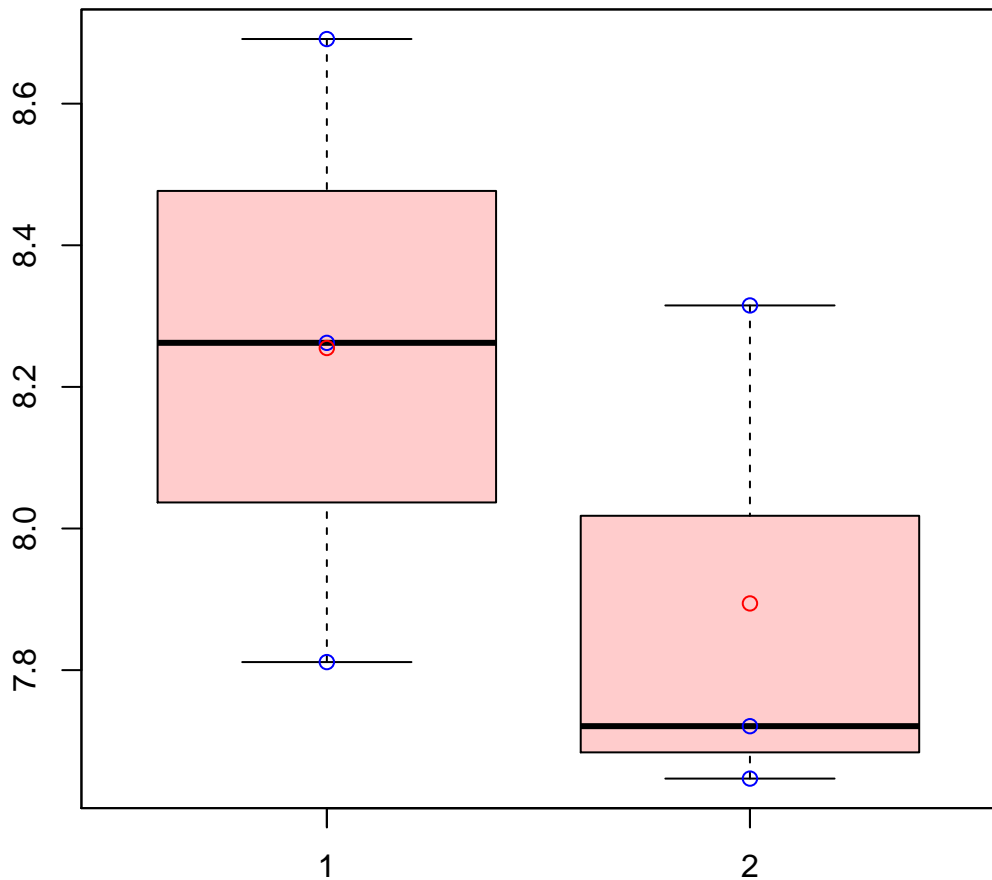

t-Test: p-value = 0.34

# CL11310Contig1|CL11310Contig1

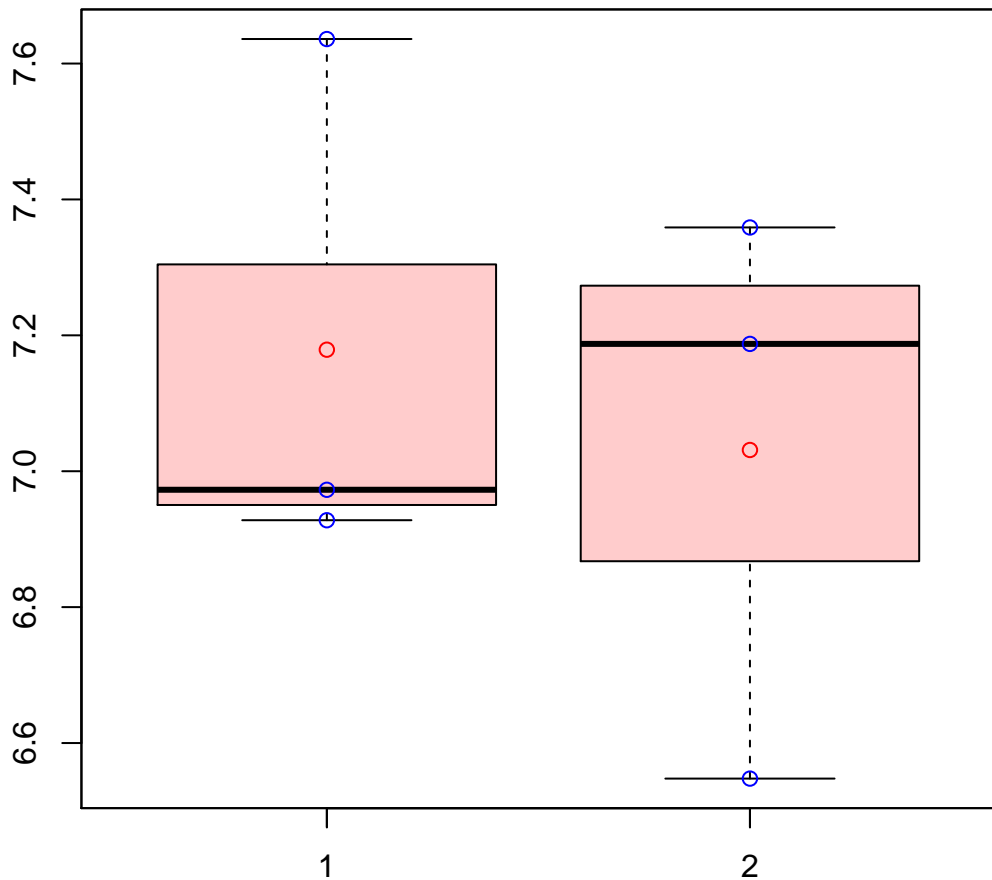

t-Test: p-value = 0.68

# CL11312Contig1|CL11312Contig1

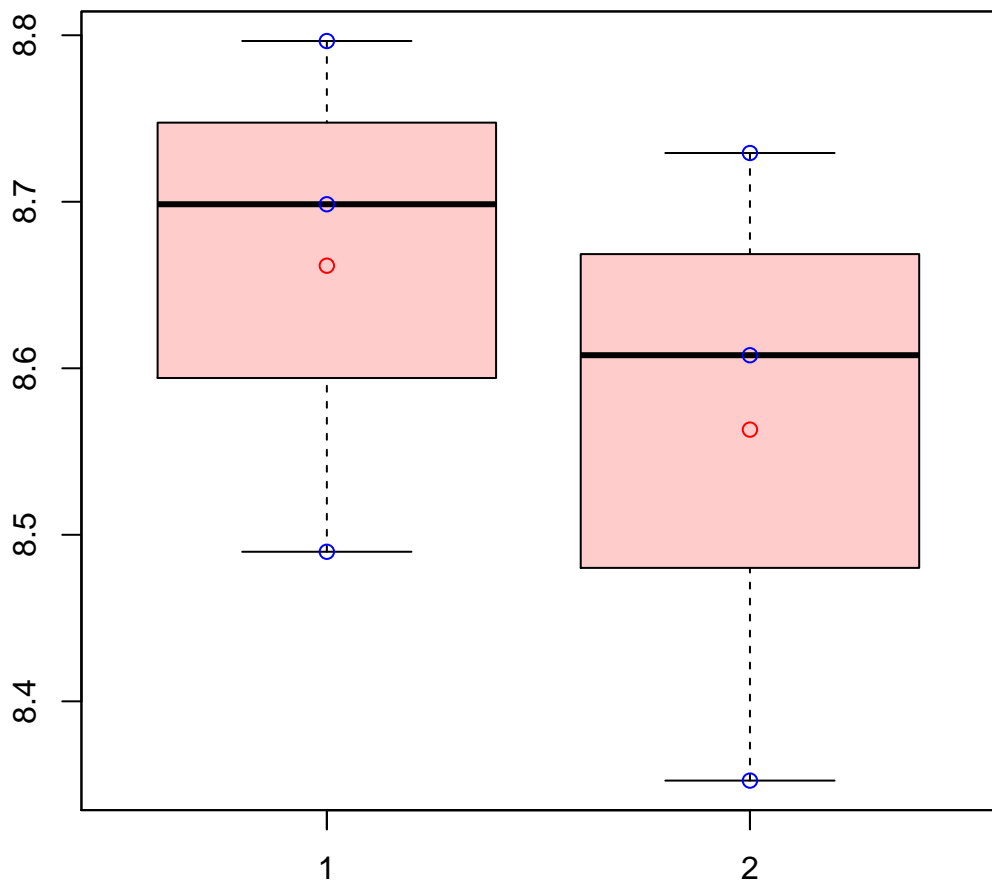

t-Test: p-value = 0.53

# CL11329Contig1|CL11329Contig1

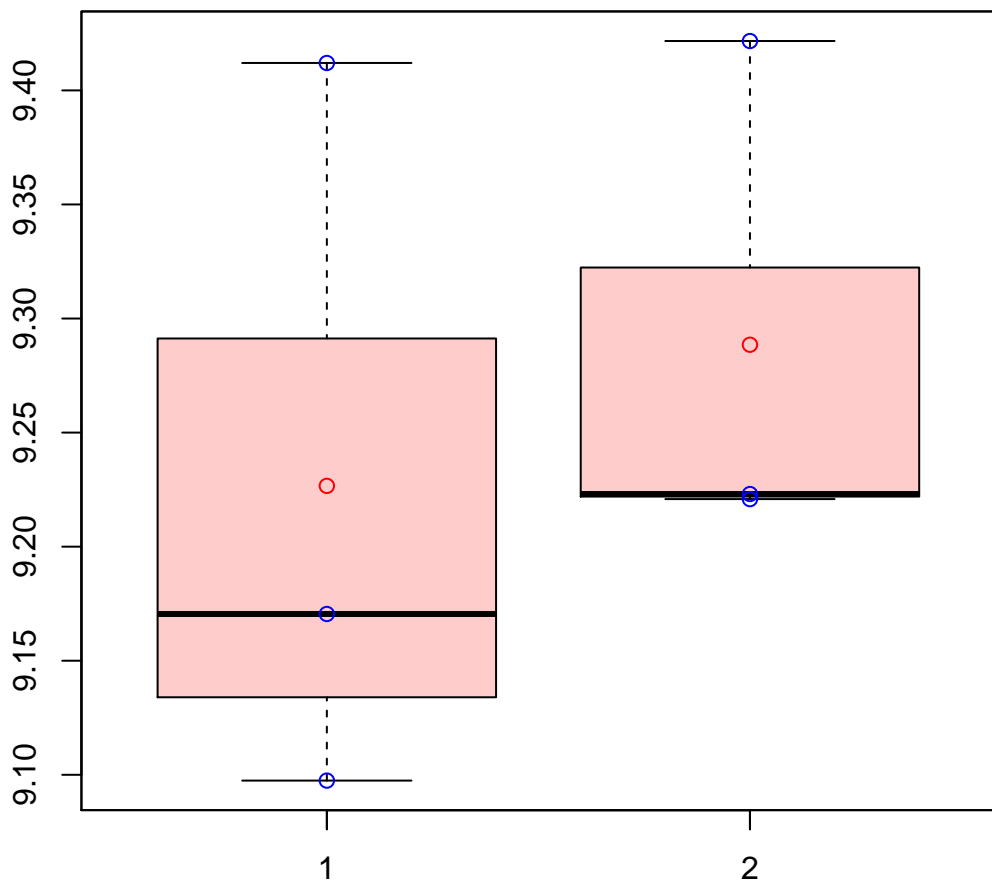

t-Test: p-value = 0.63



# CL1135Contig3|CL1135Contig3

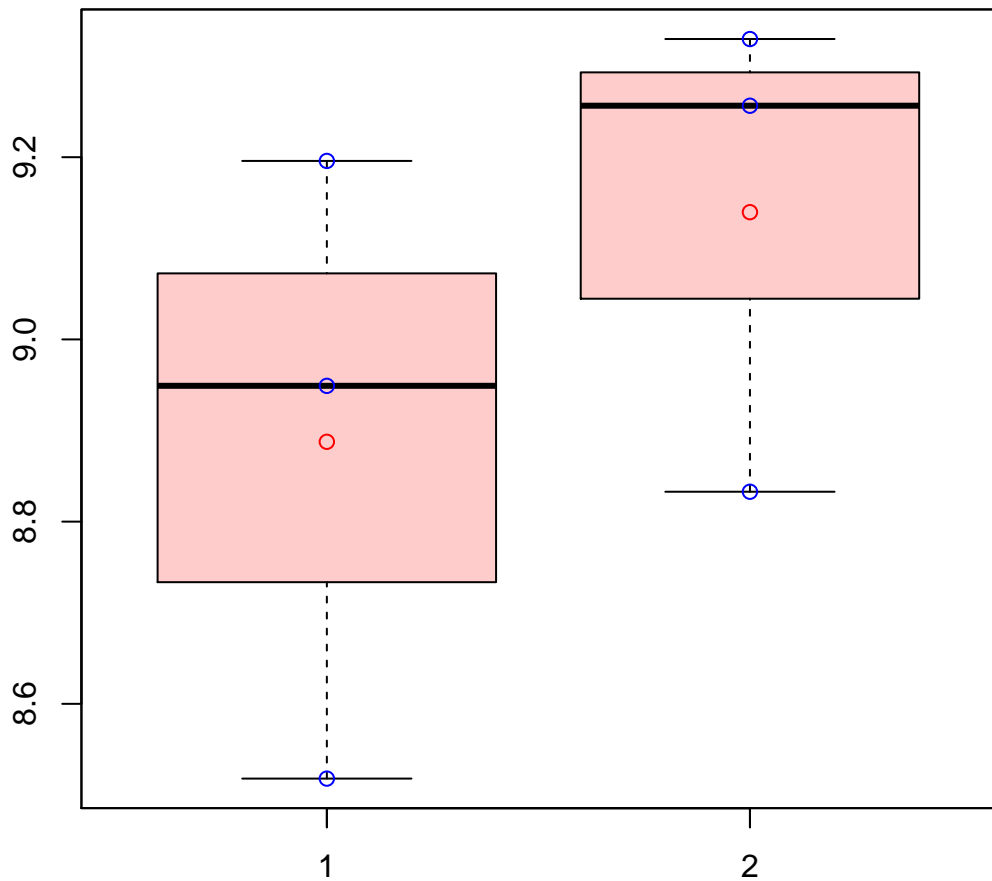

t-Test: p-value = 0.38

# CL1135Contig4|CL1135Contig4

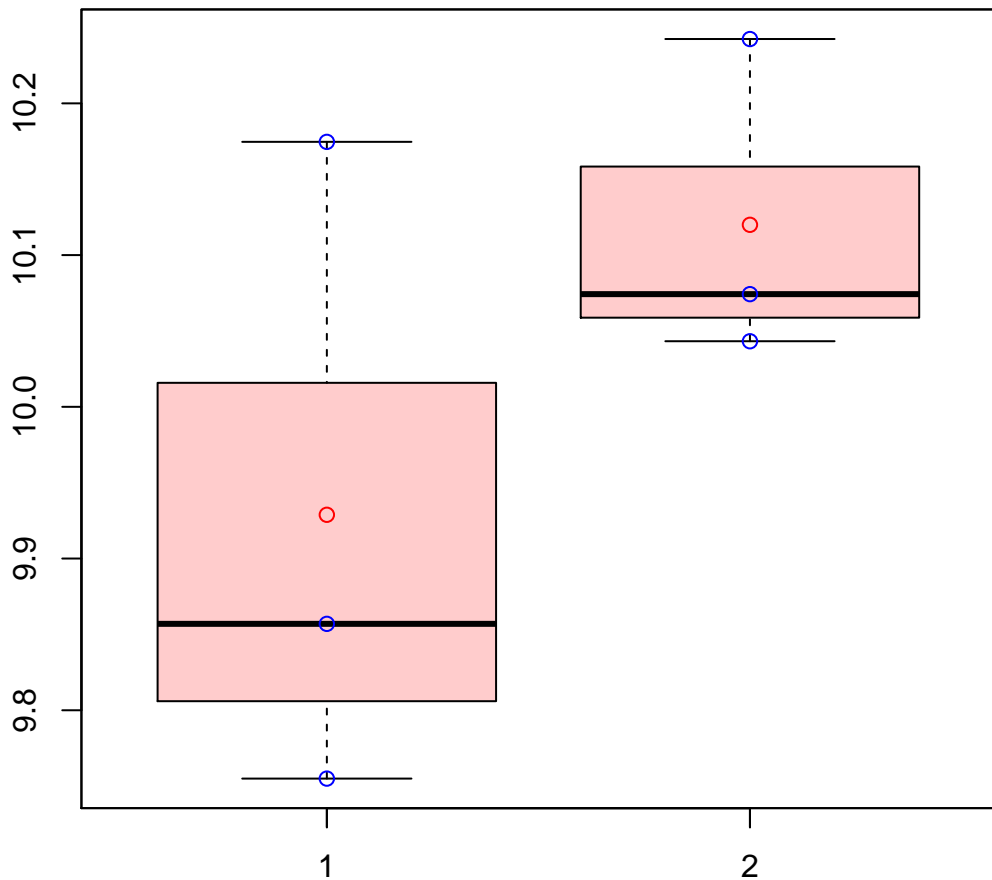

t-Test: p-value = 0.27

# CL1135Contig7|CL1135Contig7

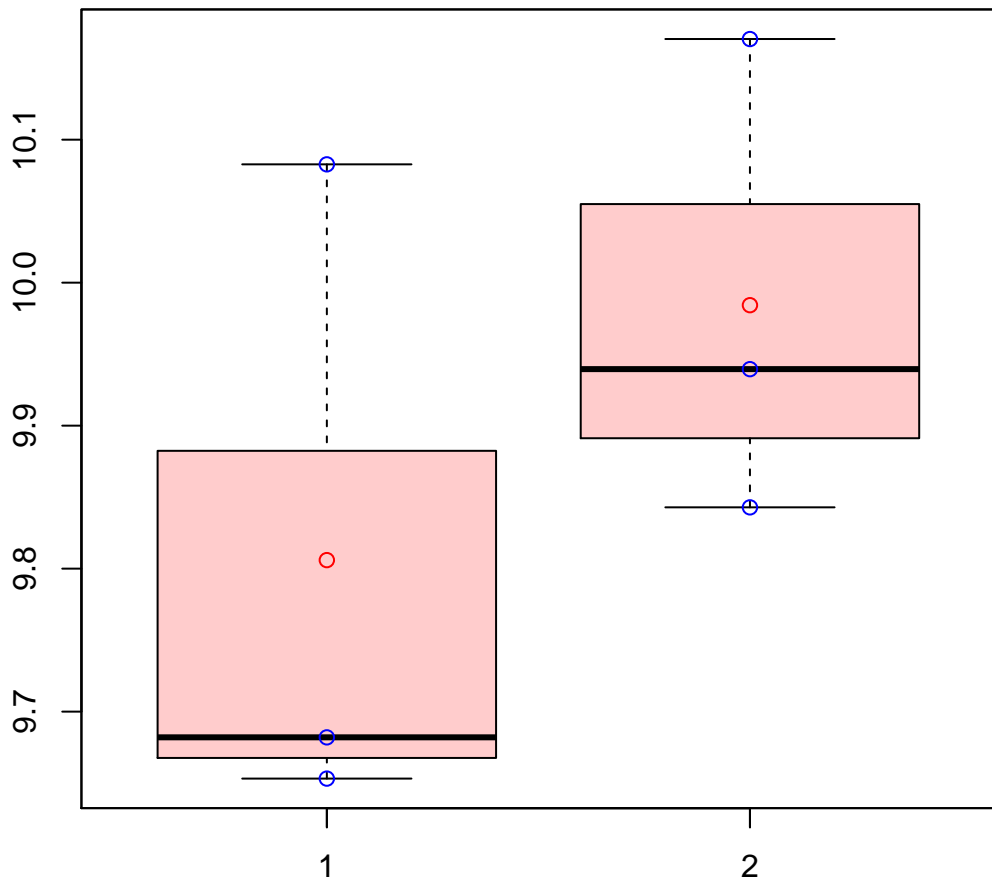

t-Test: p-value = 0.36

# CL1135Contig8|CL1135Contig8



t-Test: p-value = 0.27

# CL1135Contig9|CL1135Contig9

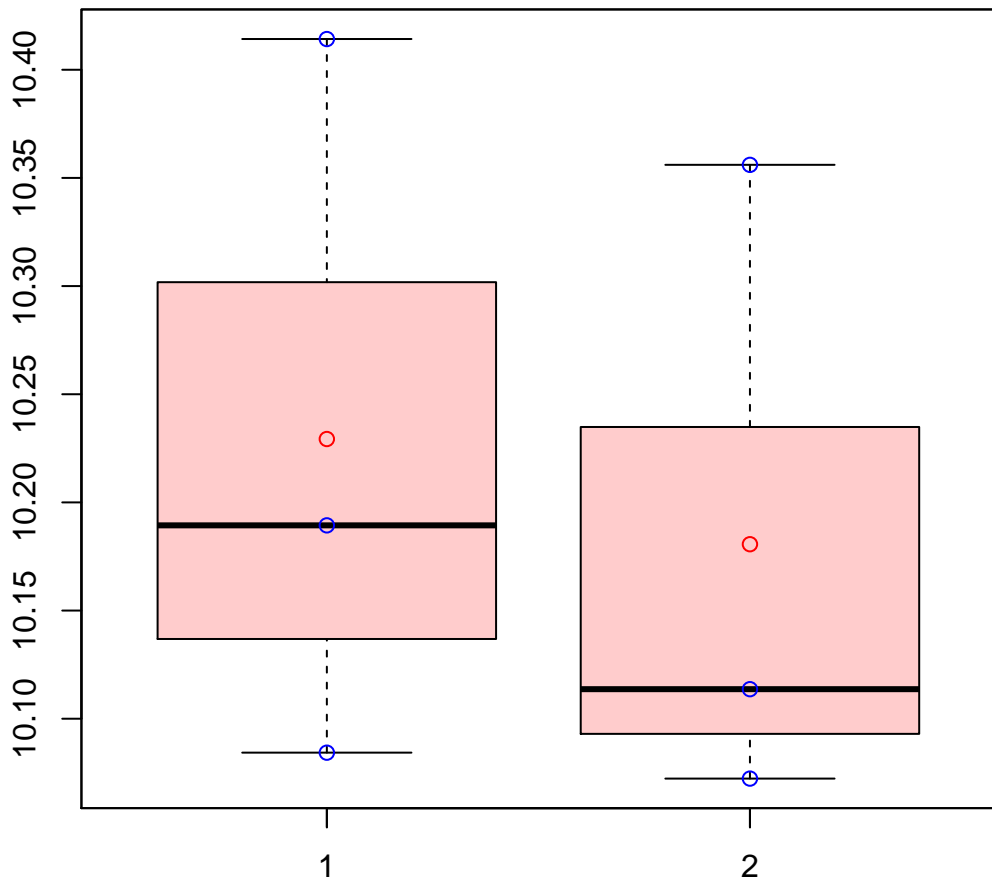

t-Test: p-value = 0.73

# CL11374Contig1|CL11374Contig1

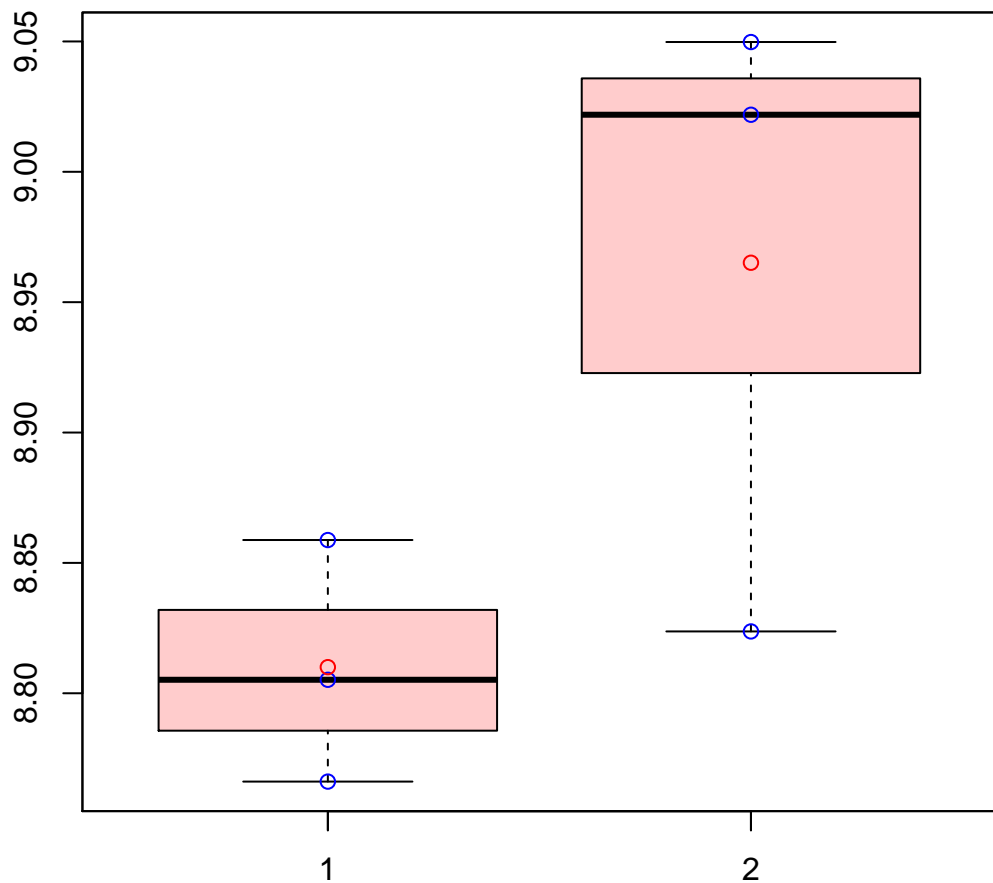

t-Test: p-value = 0.15

# CL11374Contig2|CL11374Contig2

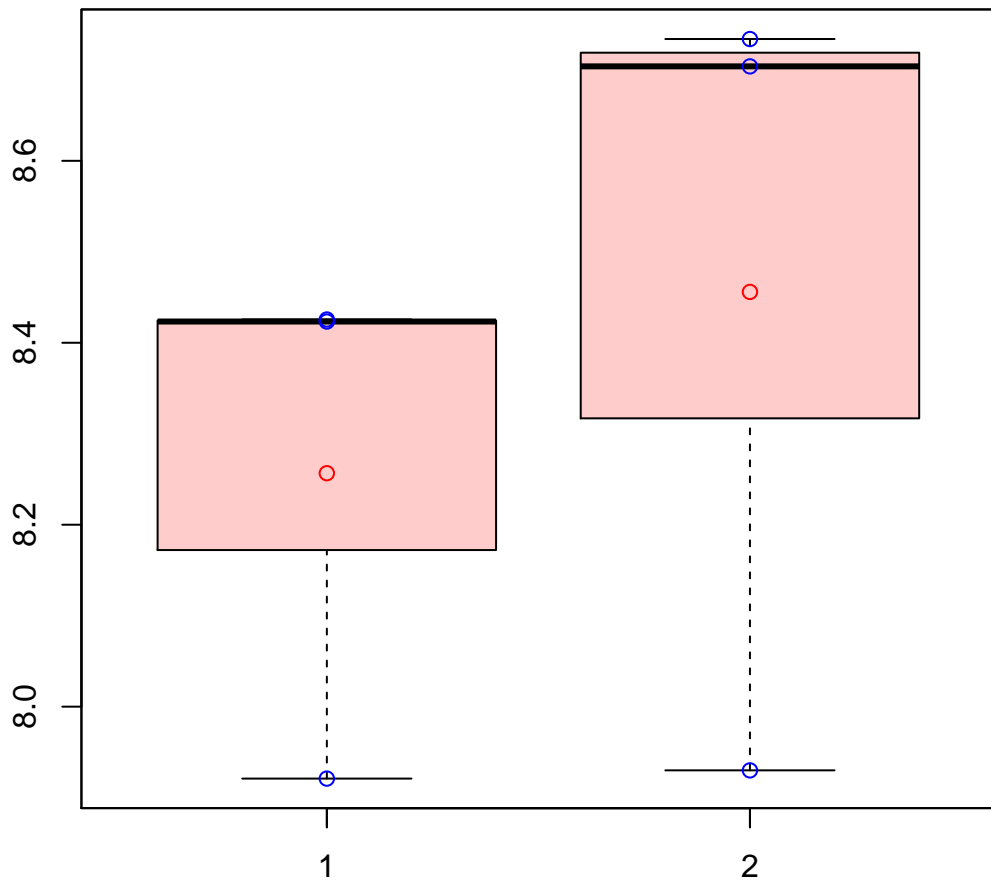

t-Test: p-value = 0.56

# CL11382Contig2|CL11382Contig2

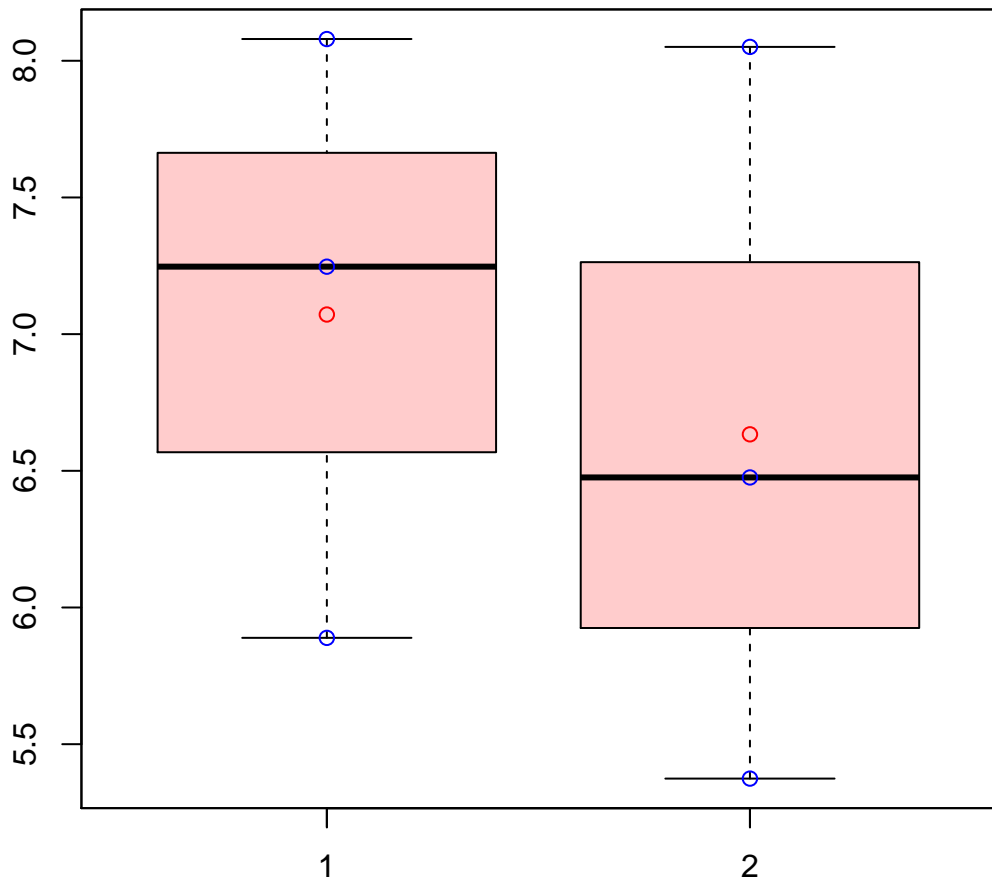

t-Test: p-value = 0.69



# CL11388Contig1|CL11388Contig1

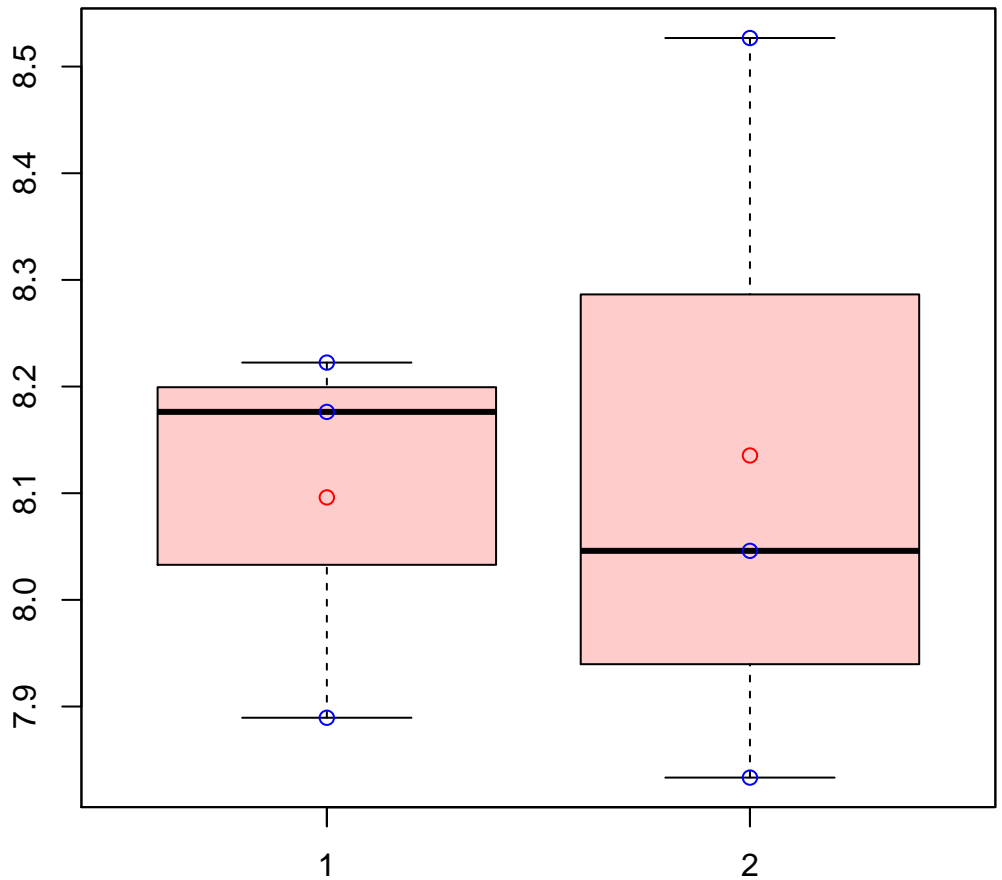

t-Test: p-value = 0.88

# CL11390Contig1|CL11390Contig1

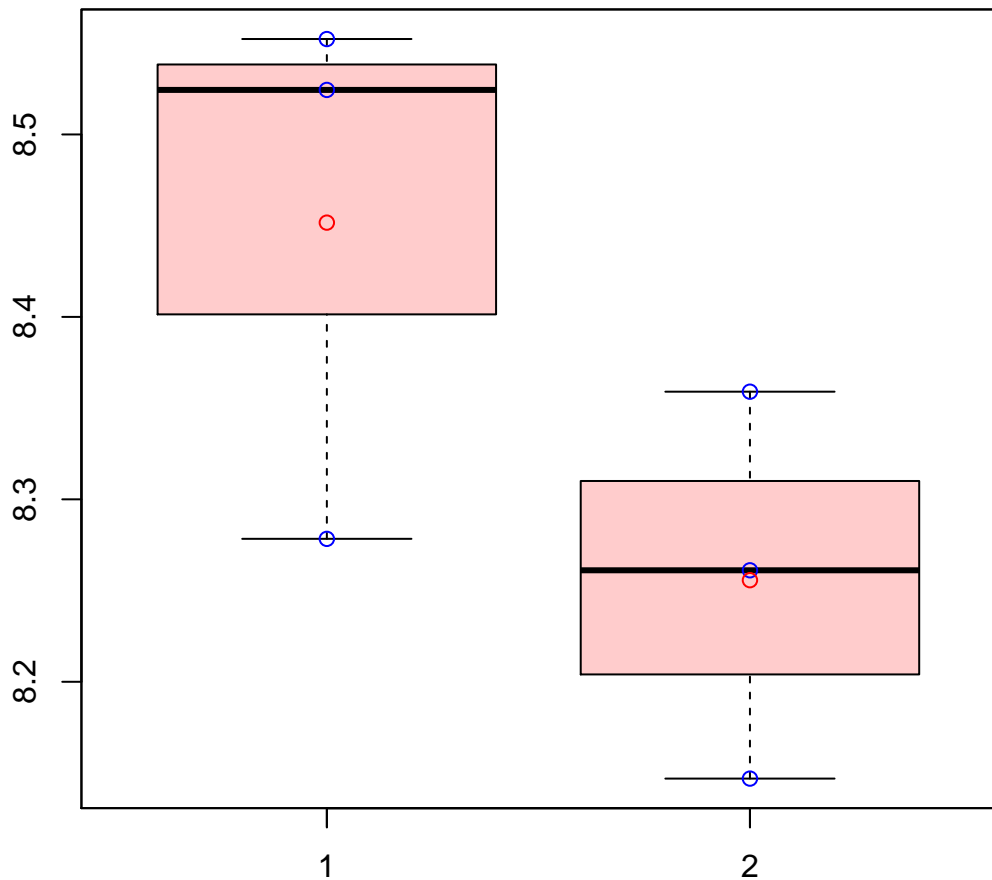

t-Test: p-value = 0.15

# CL11390Contig2|CL11390Contig2



t-Test: p-value = 0.15

# CL11398Contig1|CL11398Contig1

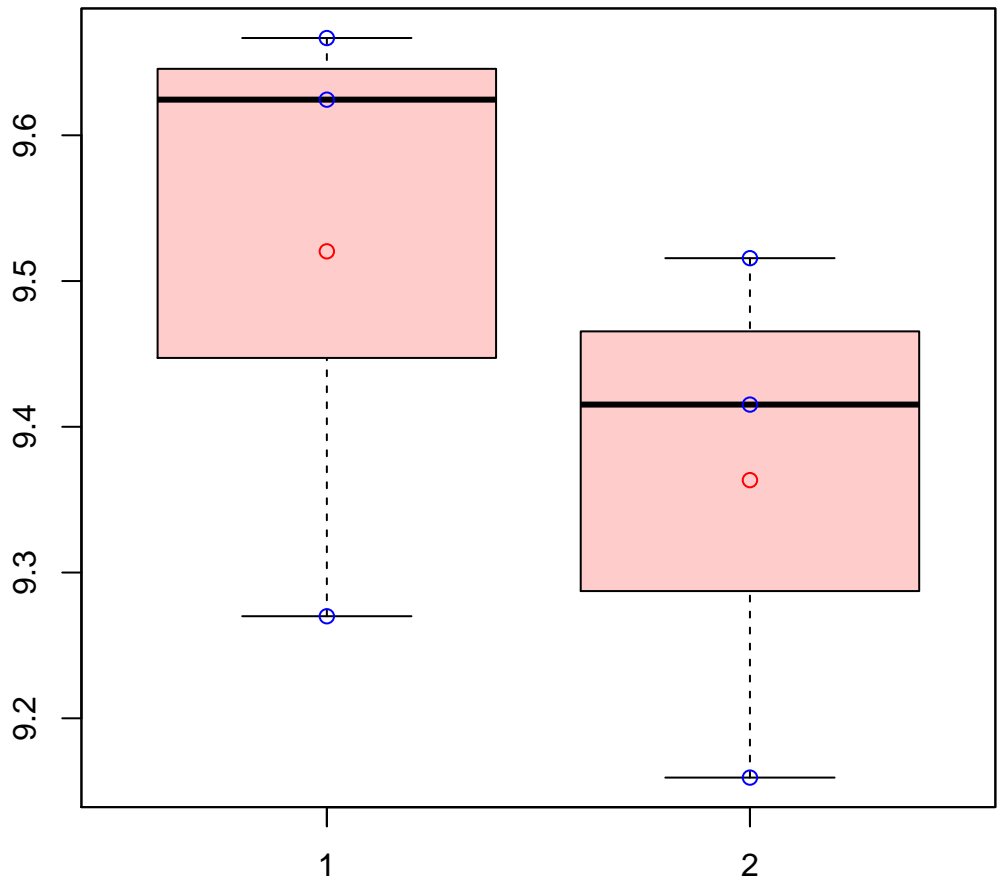

t-Test: p-value = 0.4

# CL11398Contig2|CL11398Contig2

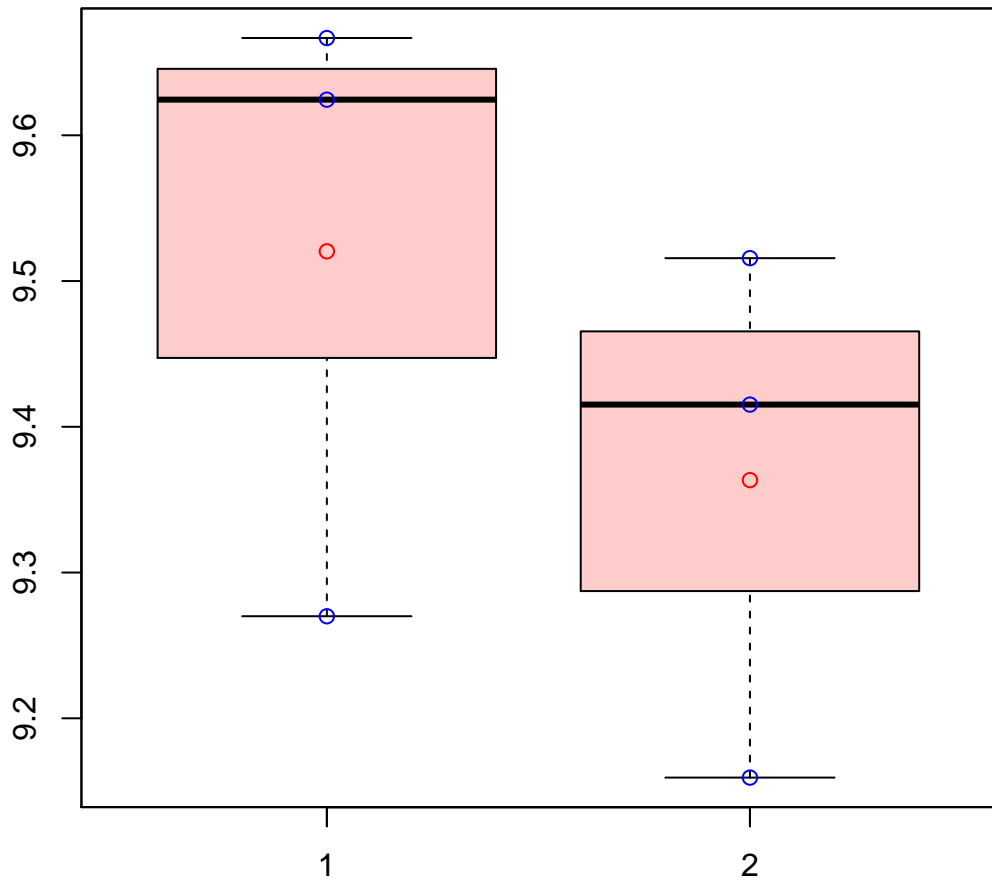

t-Test: p-value = 0.4

# CL113Contig3|CL113Contig3

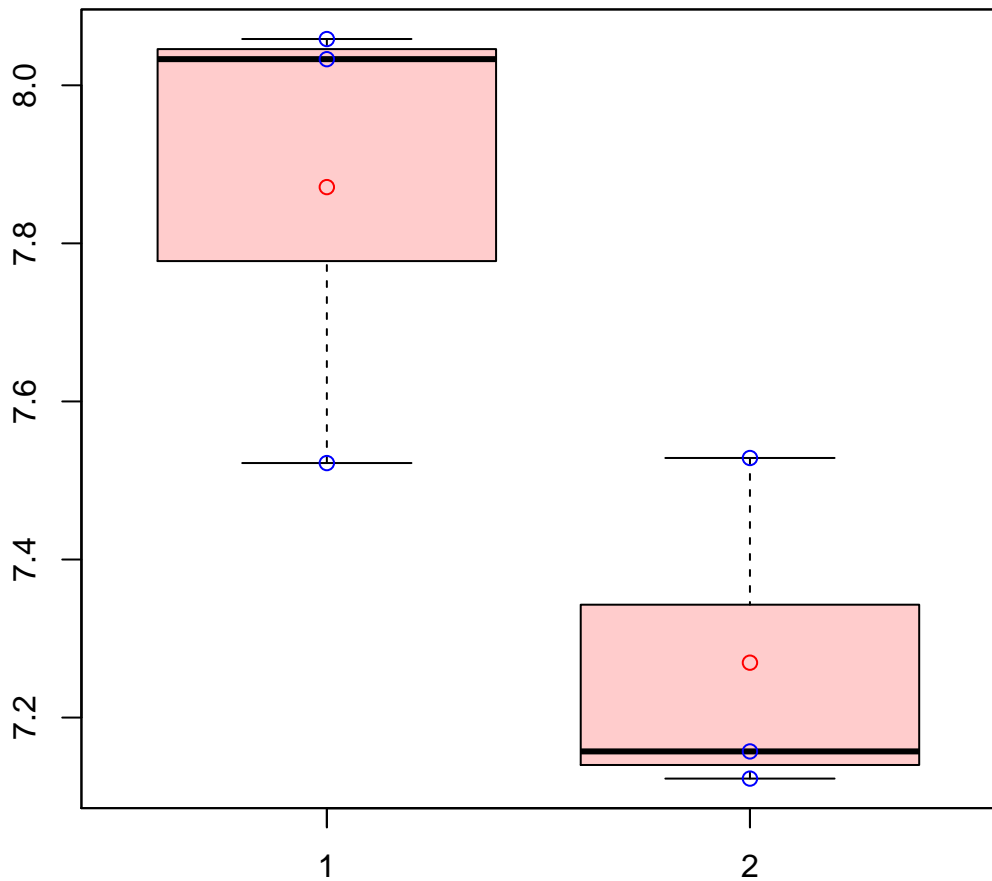

t-Test: p-value = 0.06

# CL113Contig4|CL113Contig4



t-Test: p-value = 0.06

# CL11416Contig1|CL11416Contig1

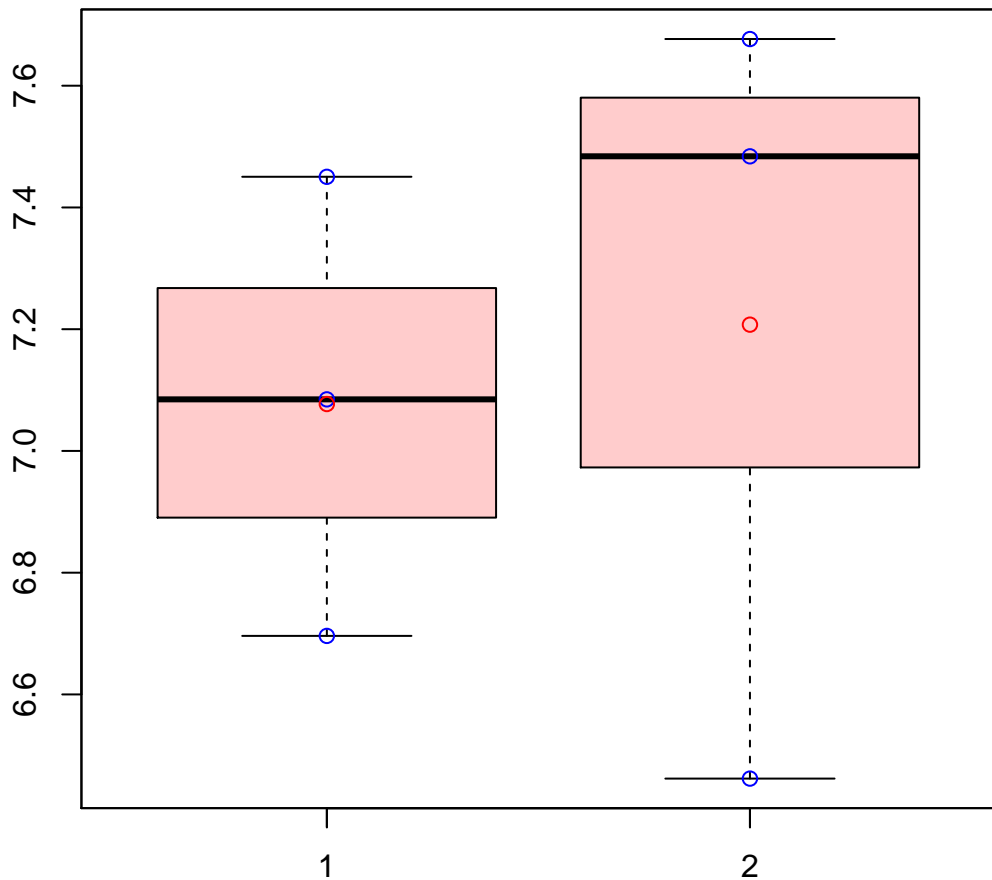

t-Test: p-value = 0.78



# CL11420Contig1|CL11420Contig1

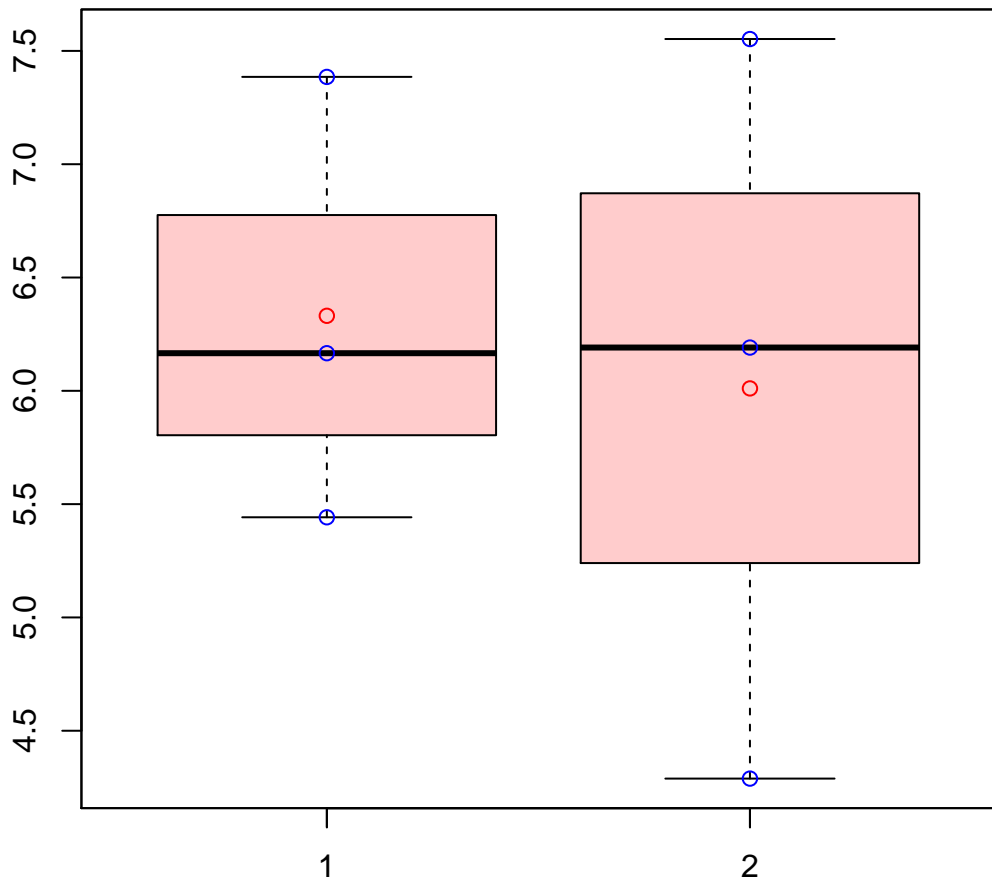

t-Test: p-value = 0.79

# CL11449Contig1|CL11449Contig1

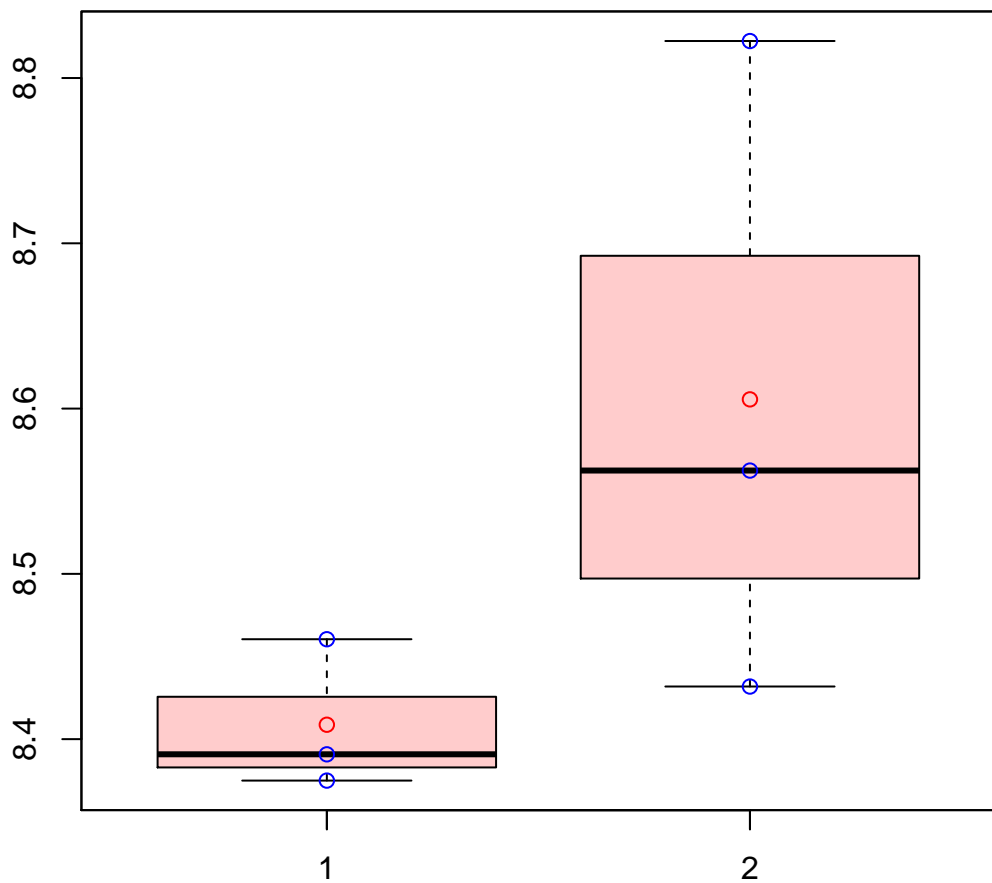

t-Test: p-value = 0.22

# CL11449Contig2|CL11449Contig2

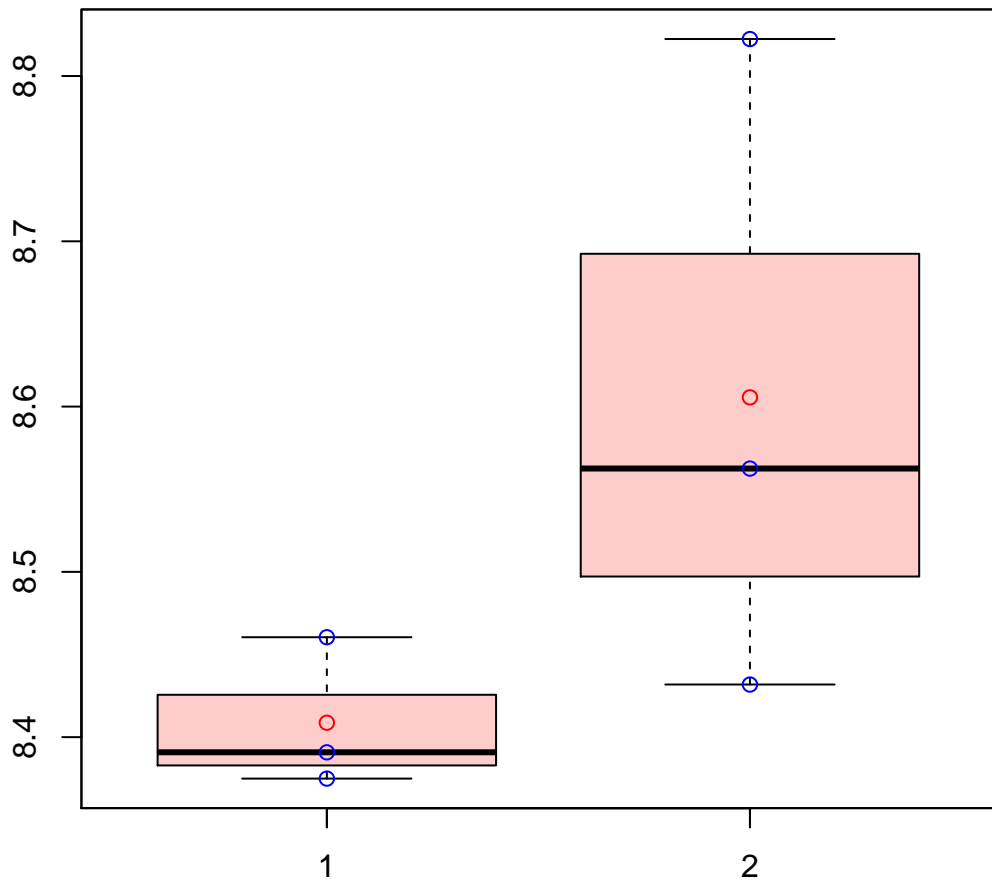

t-Test: p-value = 0.22

# CL1144Contig1|CL1144Contig1

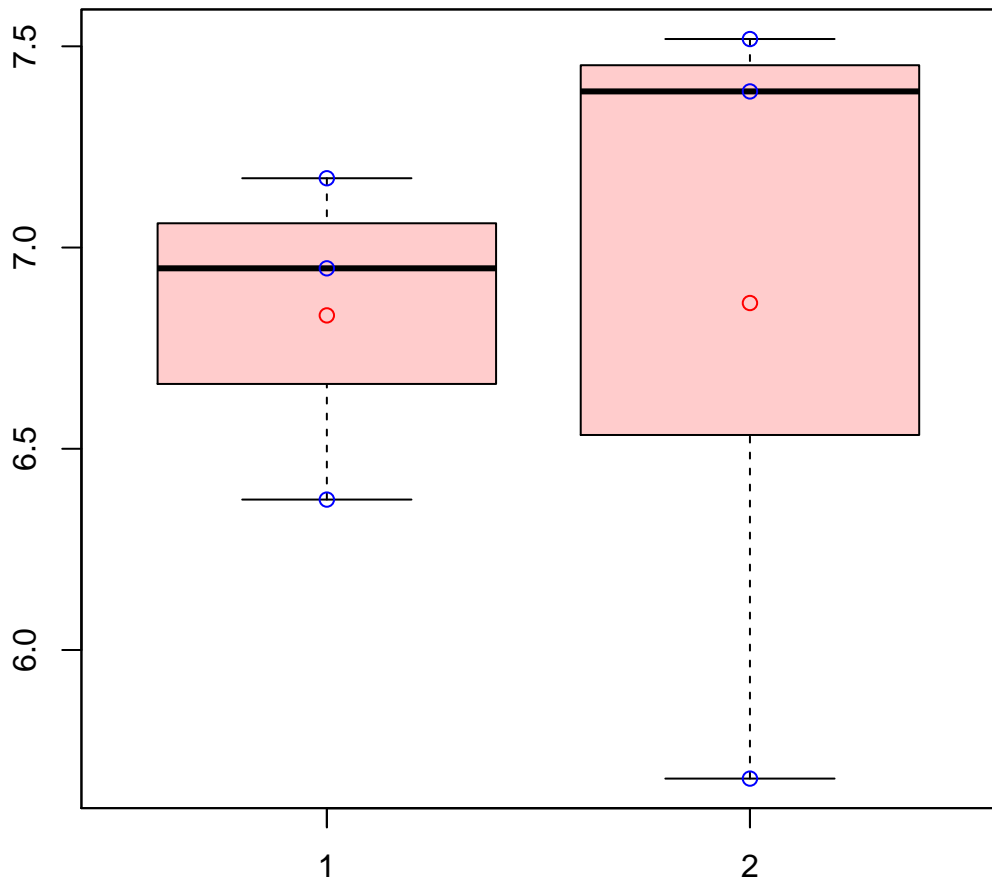

t-Test: p-value = 0.97

# CL1144Contig4|CL1144Contig4

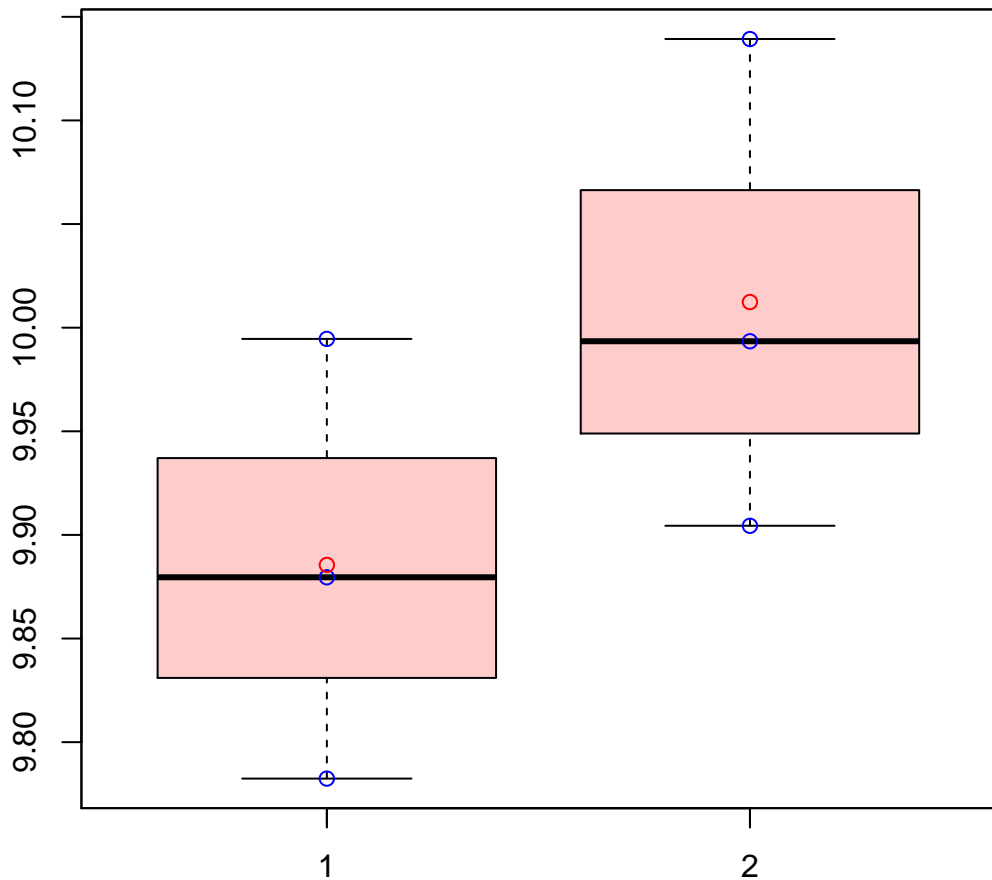

t-Test: p-value = 0.24

# CL1144Contig5|CL1144Contig5

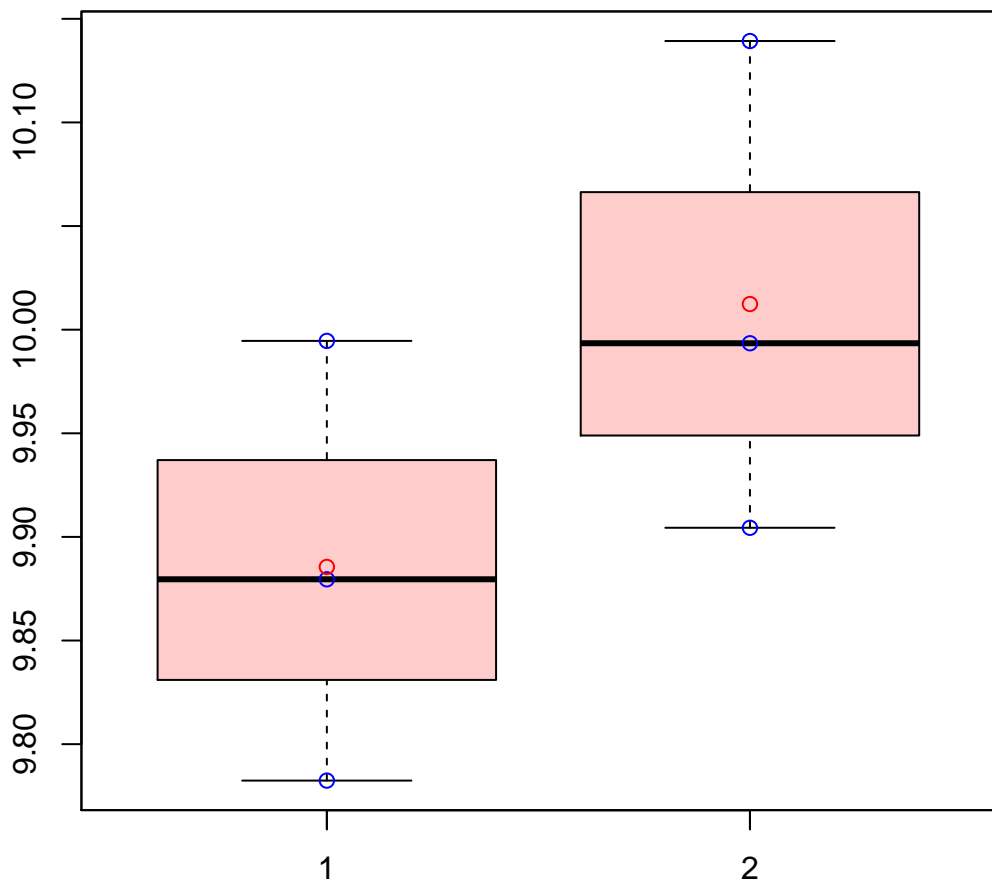

t-Test: p-value = 0.24

# CL11470Contig1|CL11470Contig1

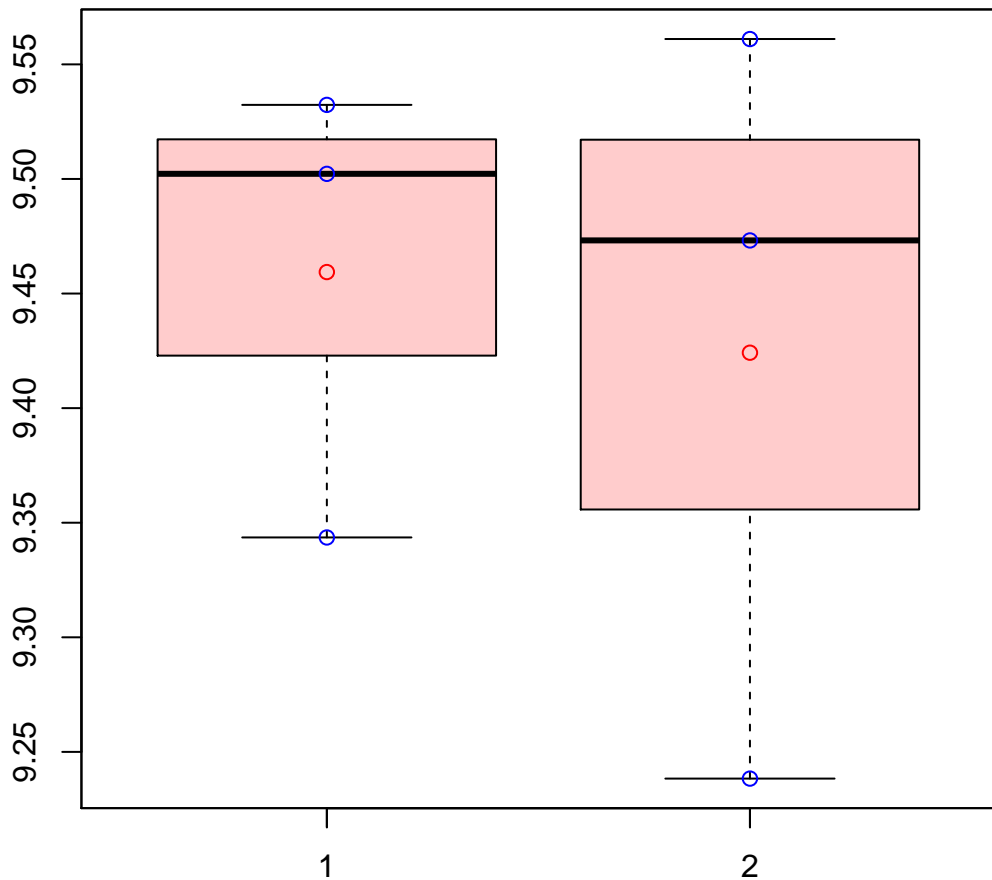

t-Test: p-value = 0.77

# CL114Contig10|CL114Contig10

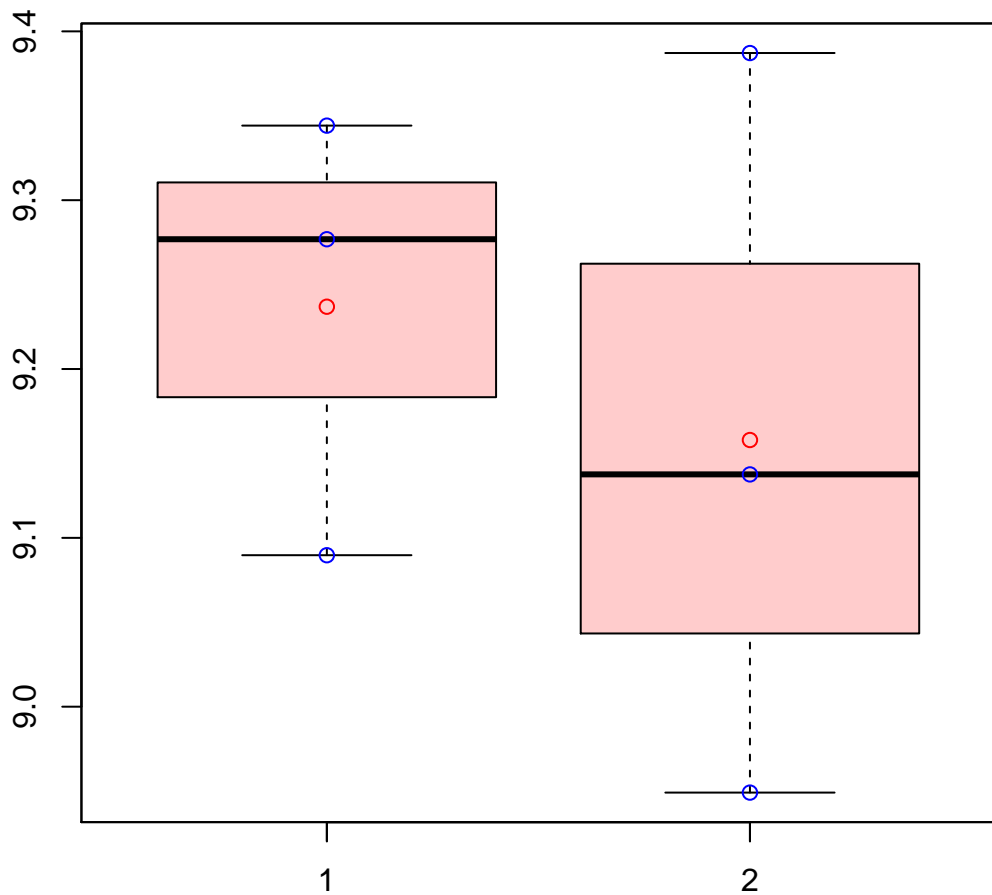

t-Test: p-value = 0.63



# CL11513Contig1|CL11513Contig1

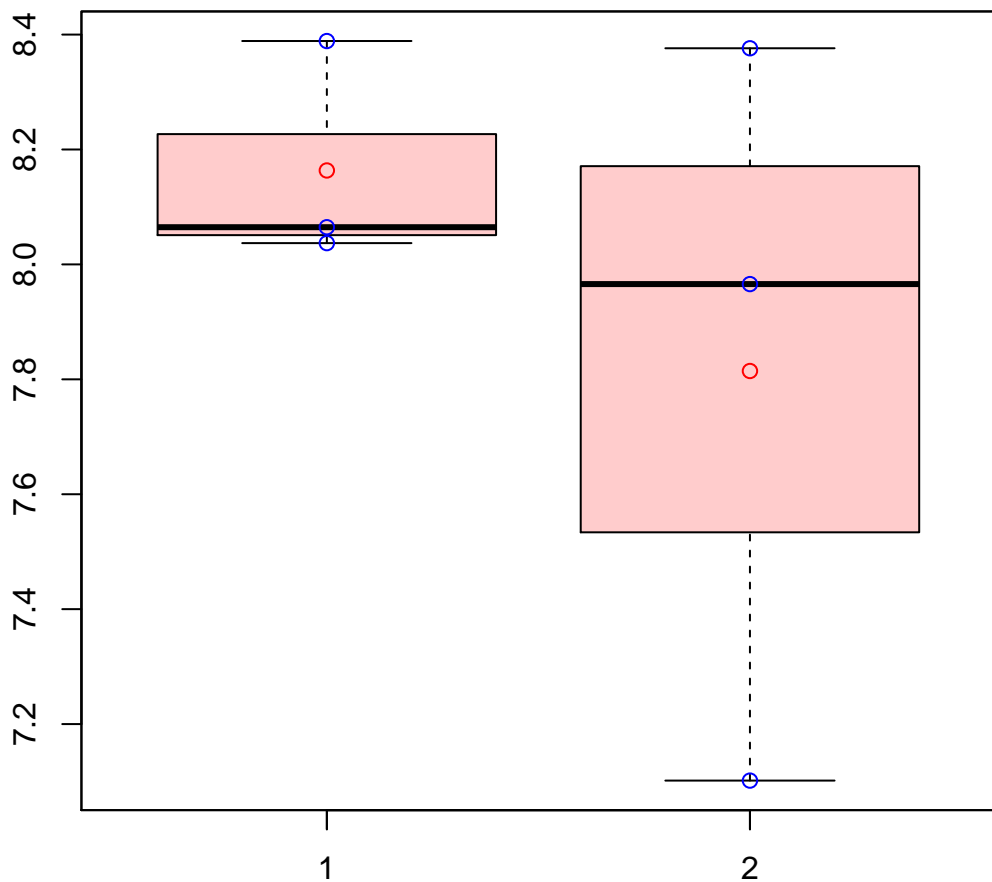

t-Test: p-value = 0.45

# CL11517Contig1|CL11517Contig1

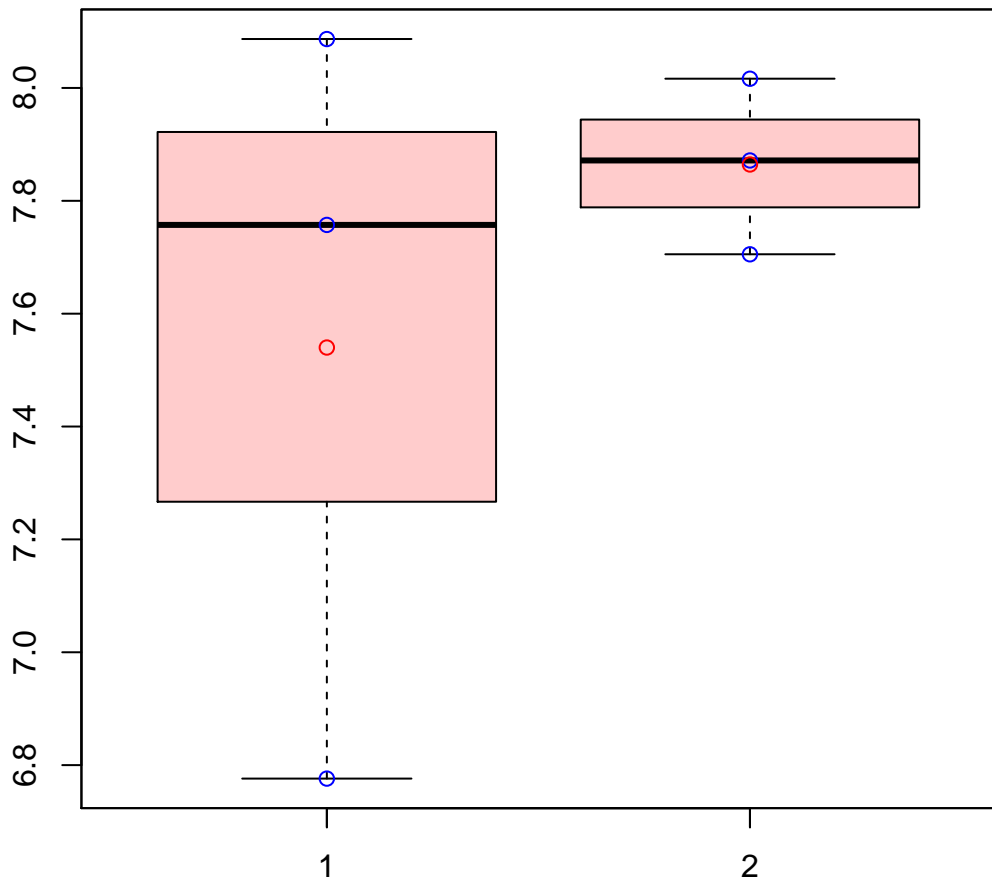

t-Test: p-value = 0.5

# CL11527Contig1|CL11527Contig1

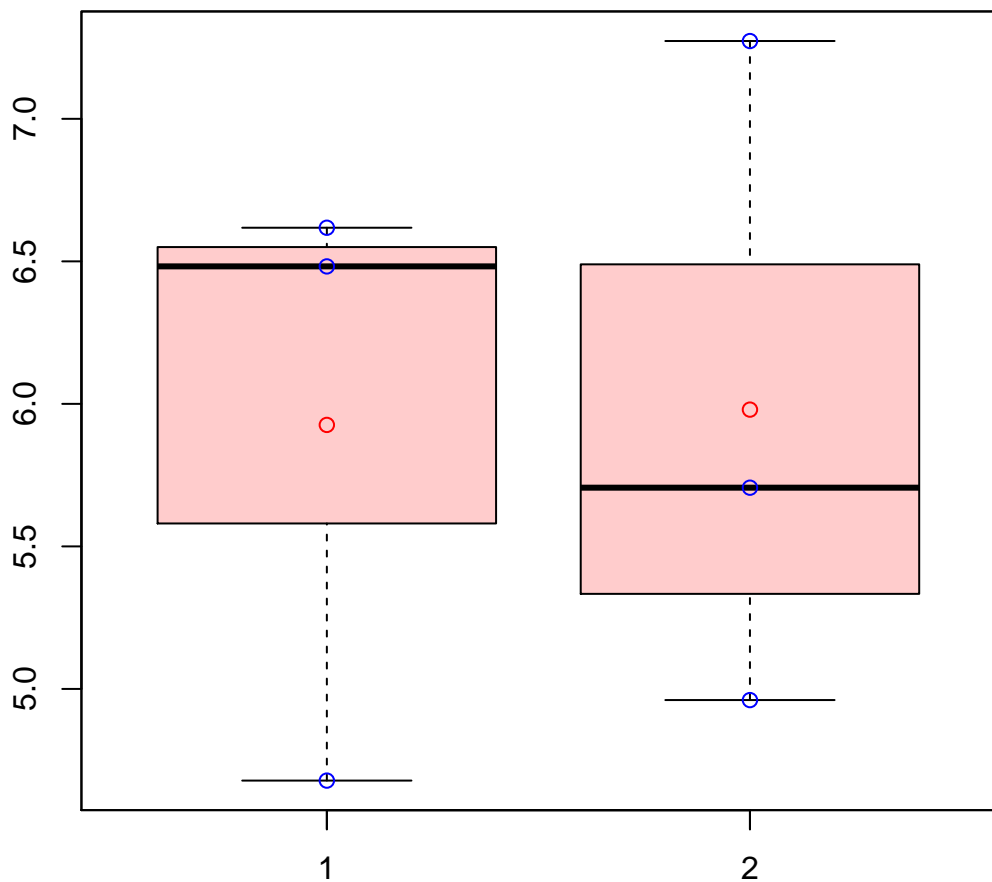

t-Test: p-value = 0.96

# CL1152Contig1|CL1152Contig1

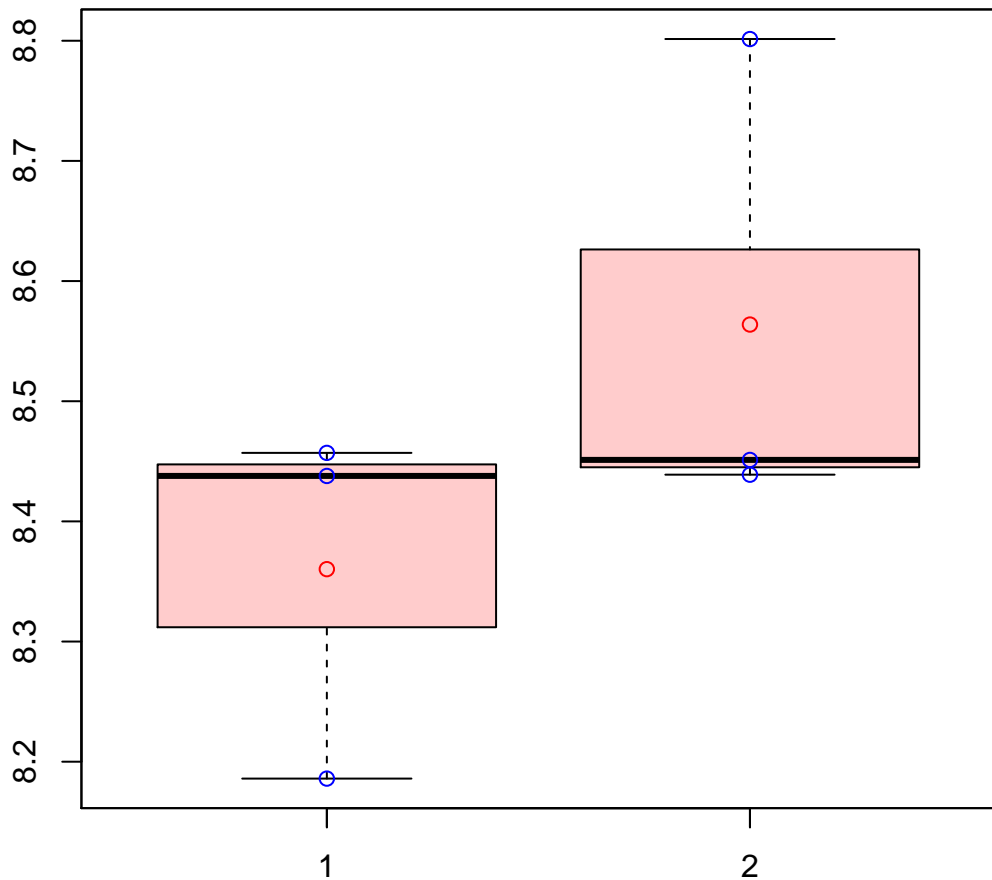

t-Test: p-value = 0.25

# CL1152Contig2|CL1152Contig2

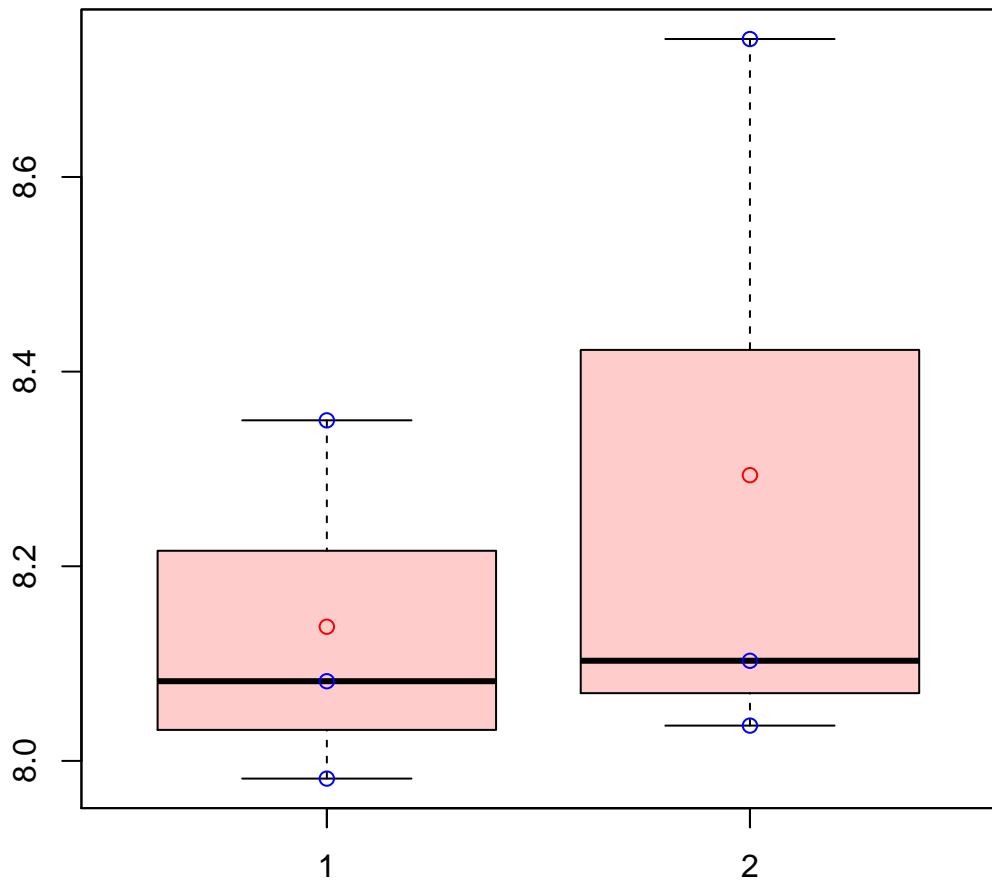

t-Test: p-value = 0.58

# CL1153Contig1|CL1153Contig1

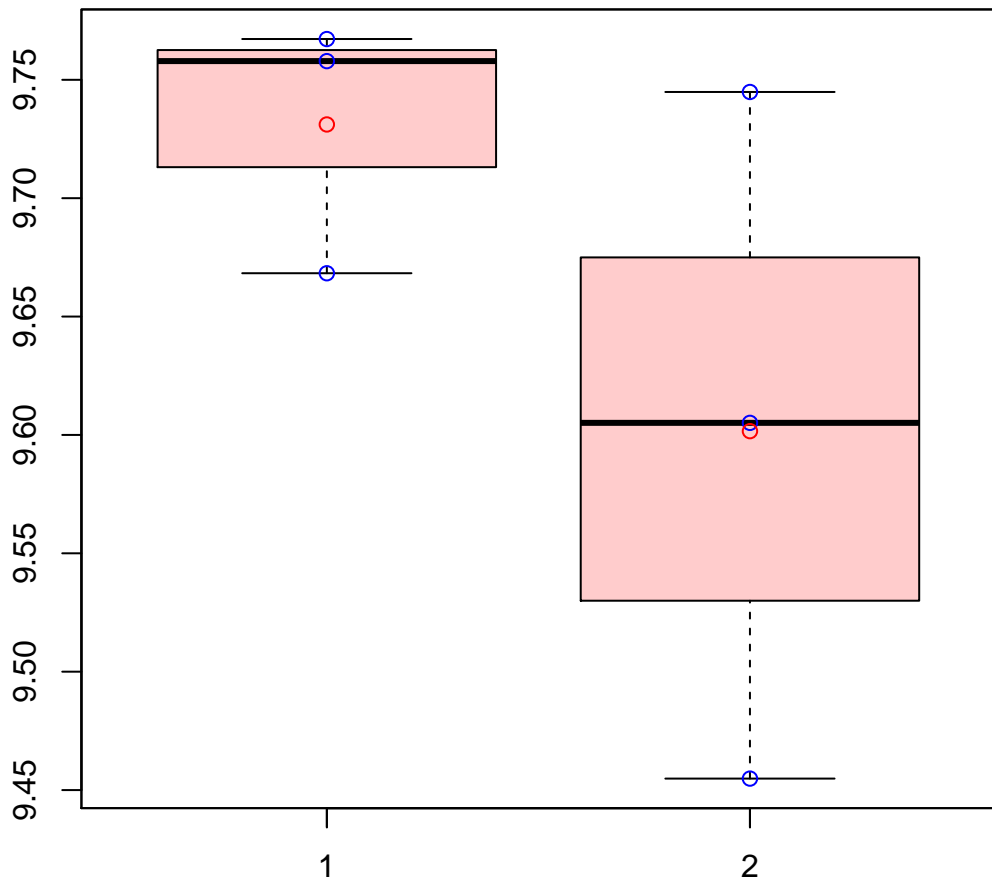

t-Test: p-value = 0.26

# CL1153Contig4|CL1153Contig4

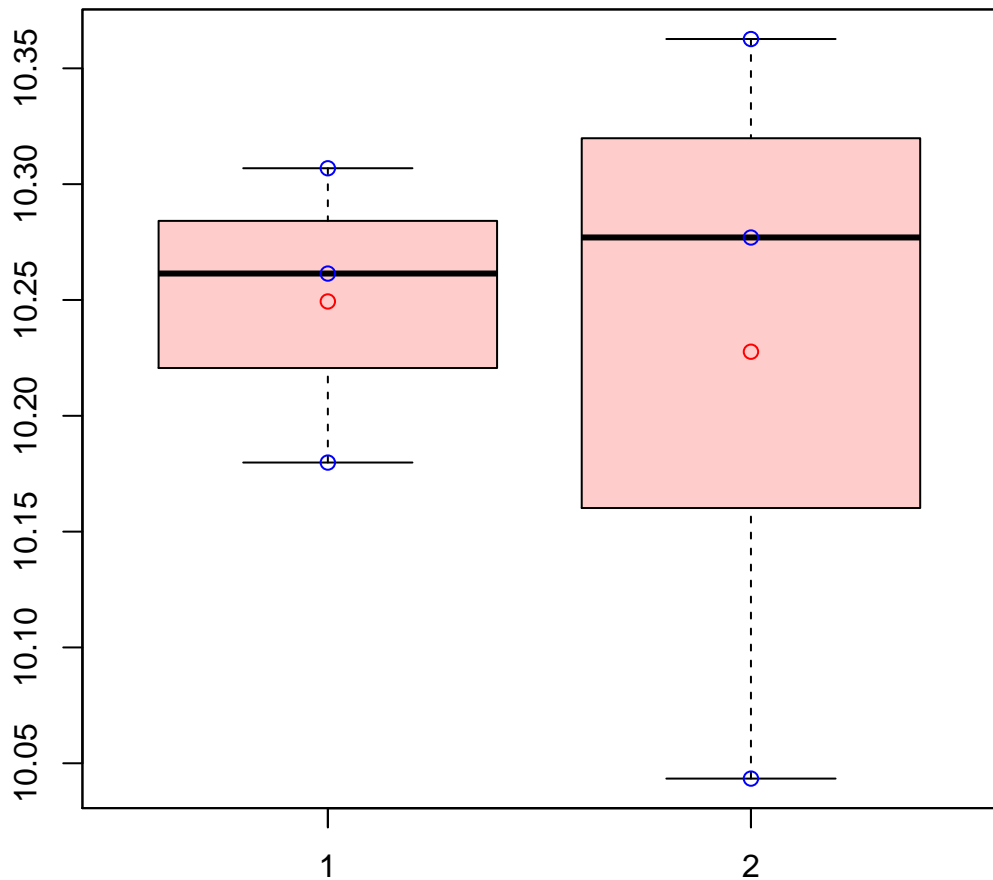

t-Test: p-value = 0.85

# CL11549Contig1|CL11549Contig1

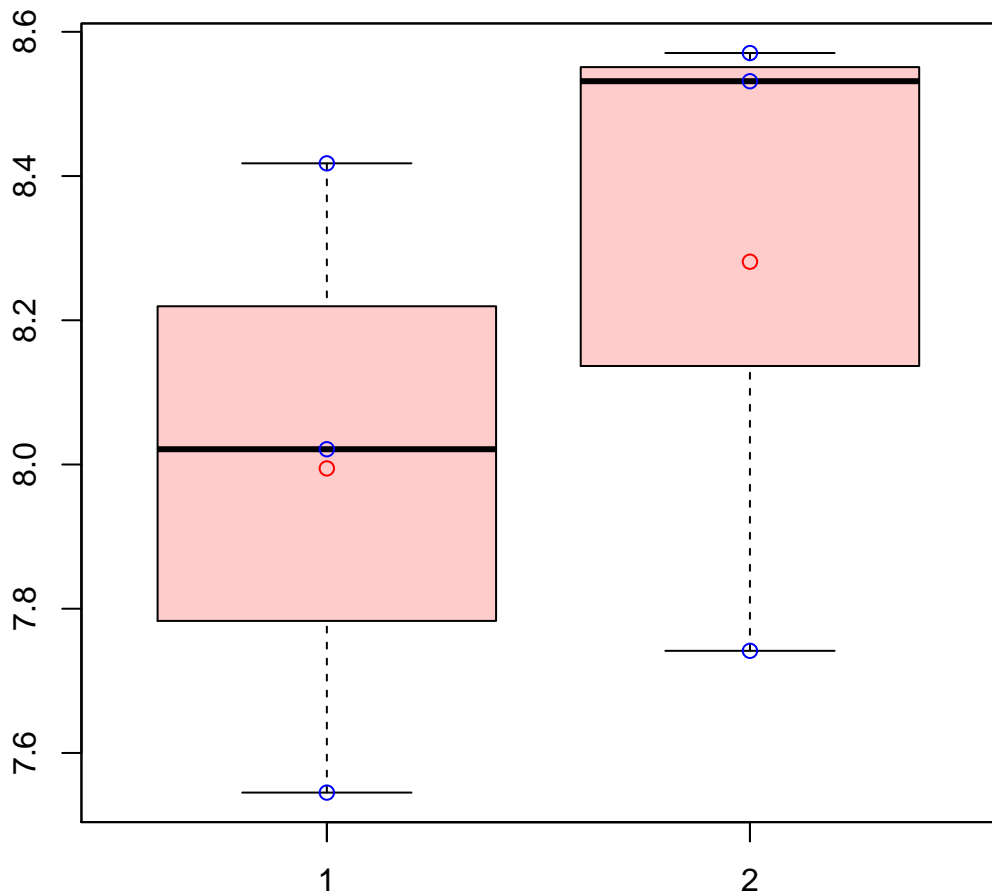

t-Test: p-value = 0.48



# CL1154Contig2|CL1154Contig2

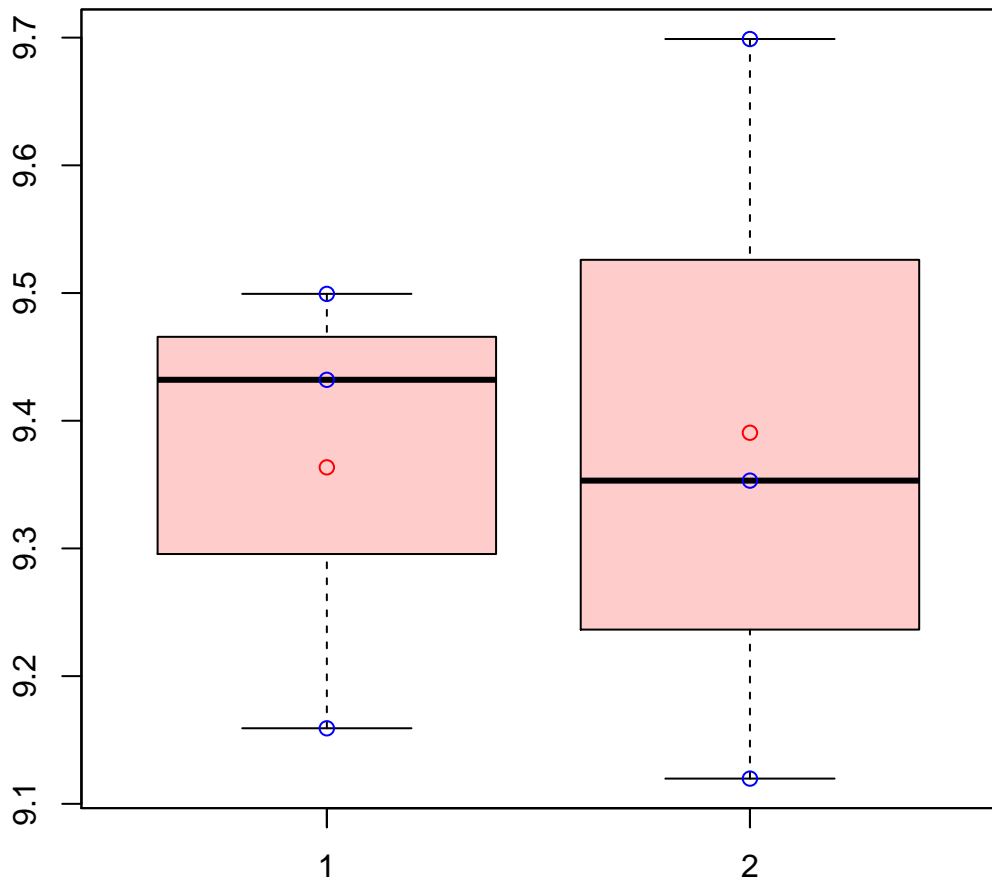

t-Test: p-value = 0.9

# CL1155Contig3|CL1155Contig3

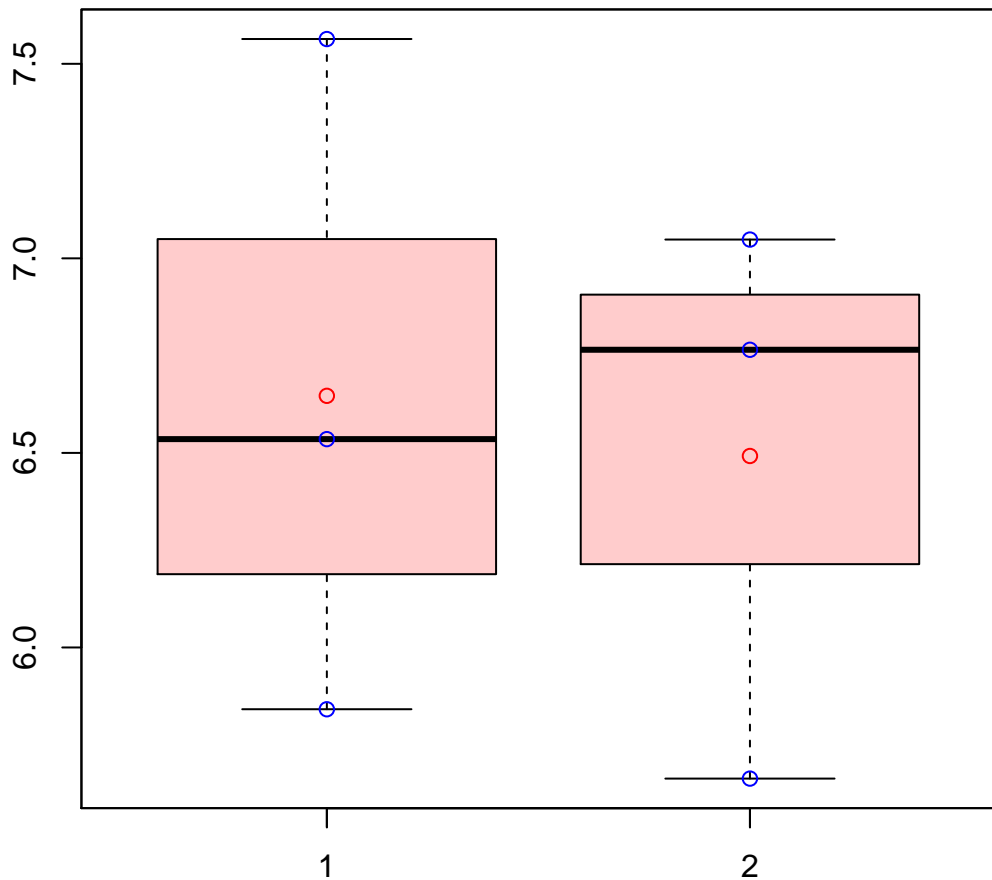

t-Test: p-value = 0.83

# CL1155Contig4|CL1155Contig4



t-Test: p-value = 0.83

# CL1155Contig5|CL1155Contig5



t-Test: p-value = 0.83

# CL1156Contig3|CL1156Contig3

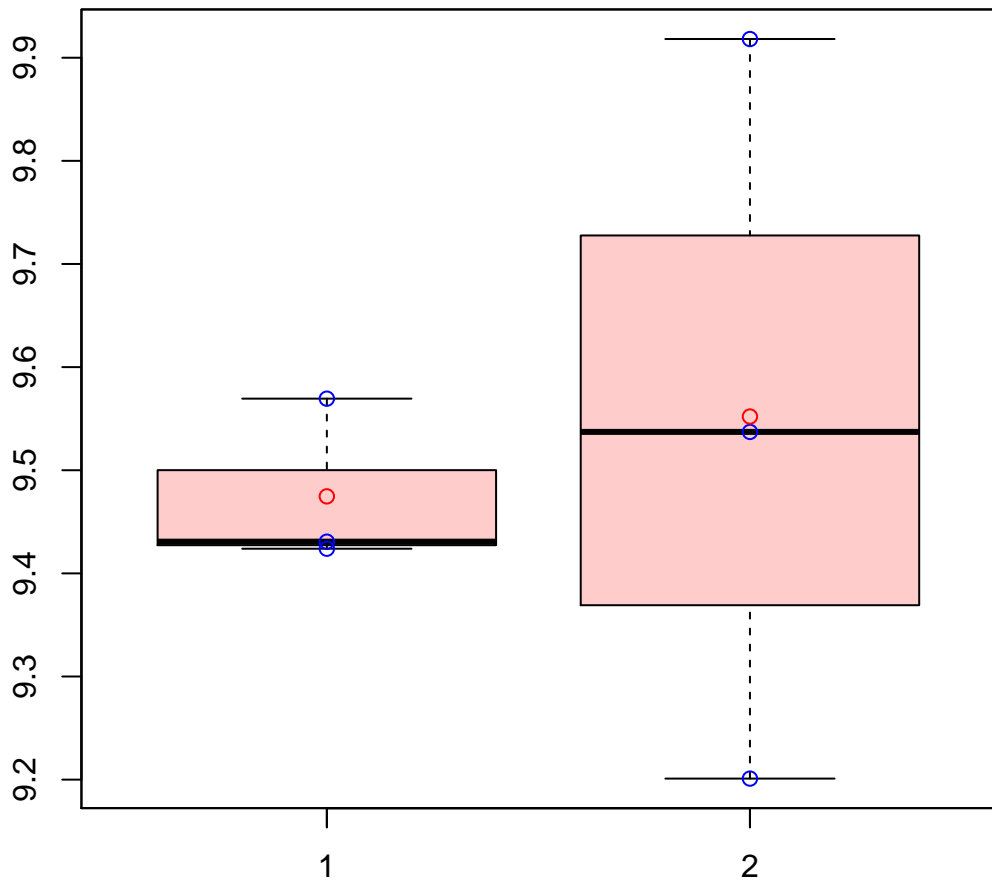

t-Test: p-value = 0.75

# CL11576Contig1|CL11576Contig1

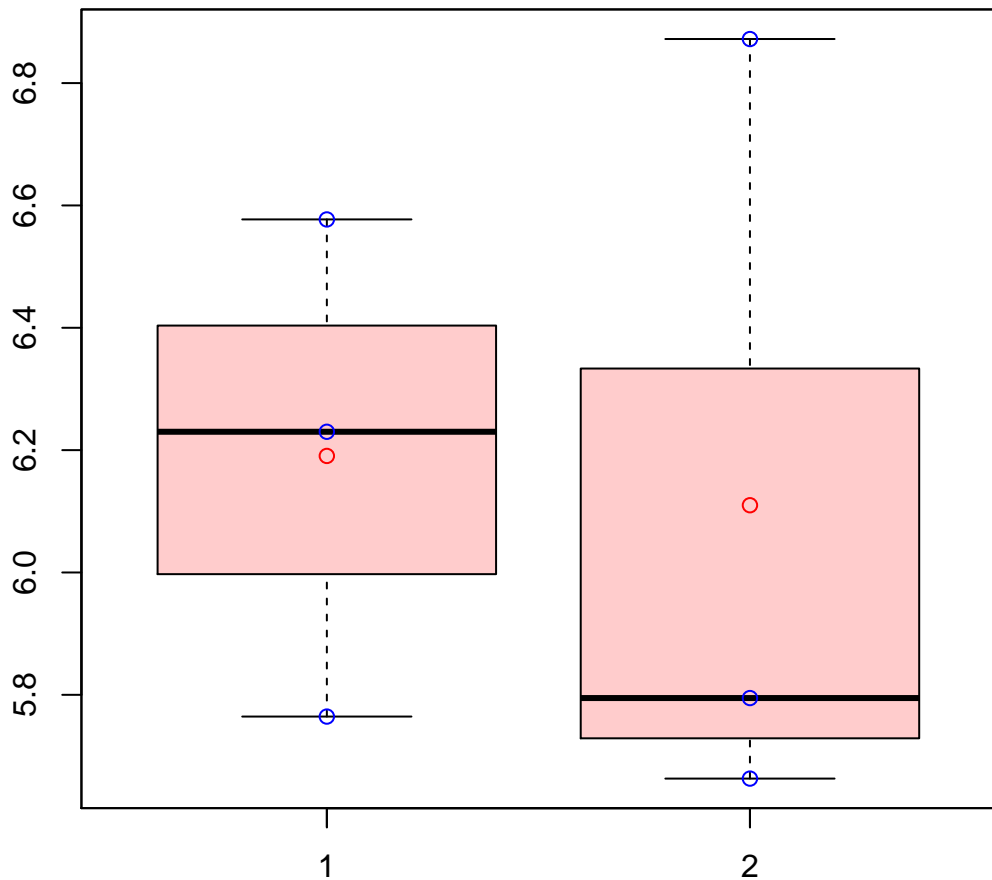

t-Test: p-value = 0.87

# CL1158Contig1|CL1158Contig1

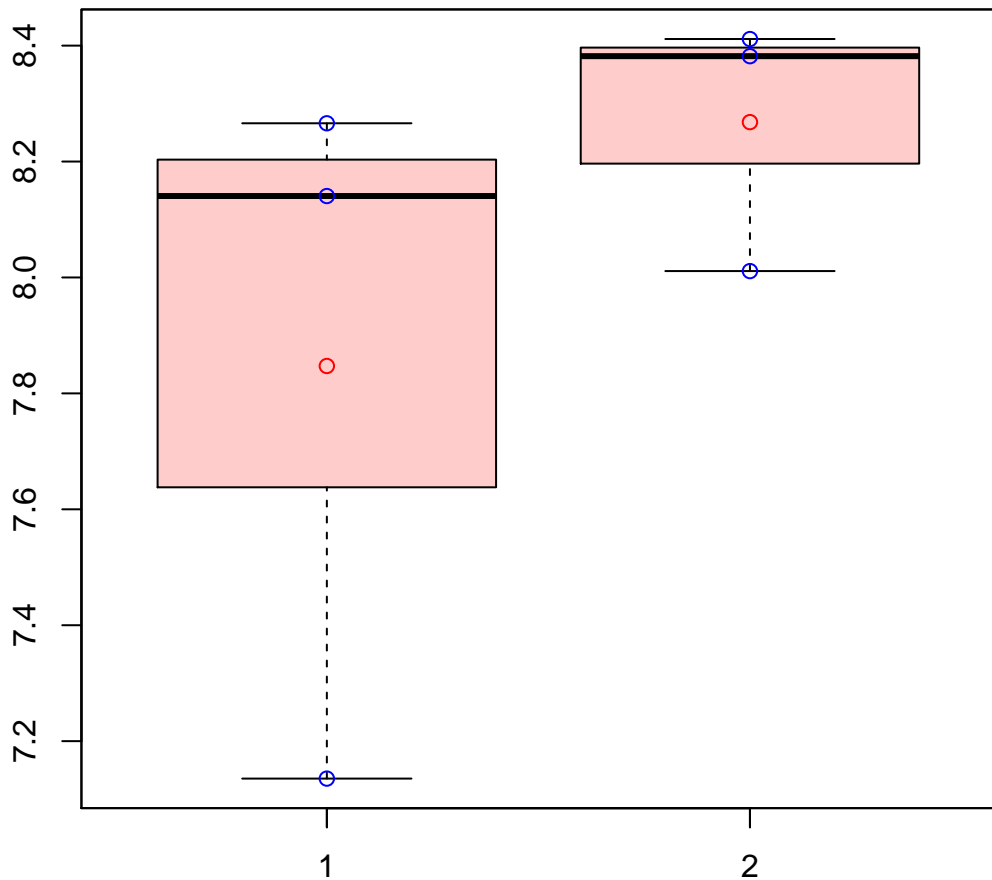

t-Test: p-value = 0.36

# CL1158Contig2|CL1158Contig2

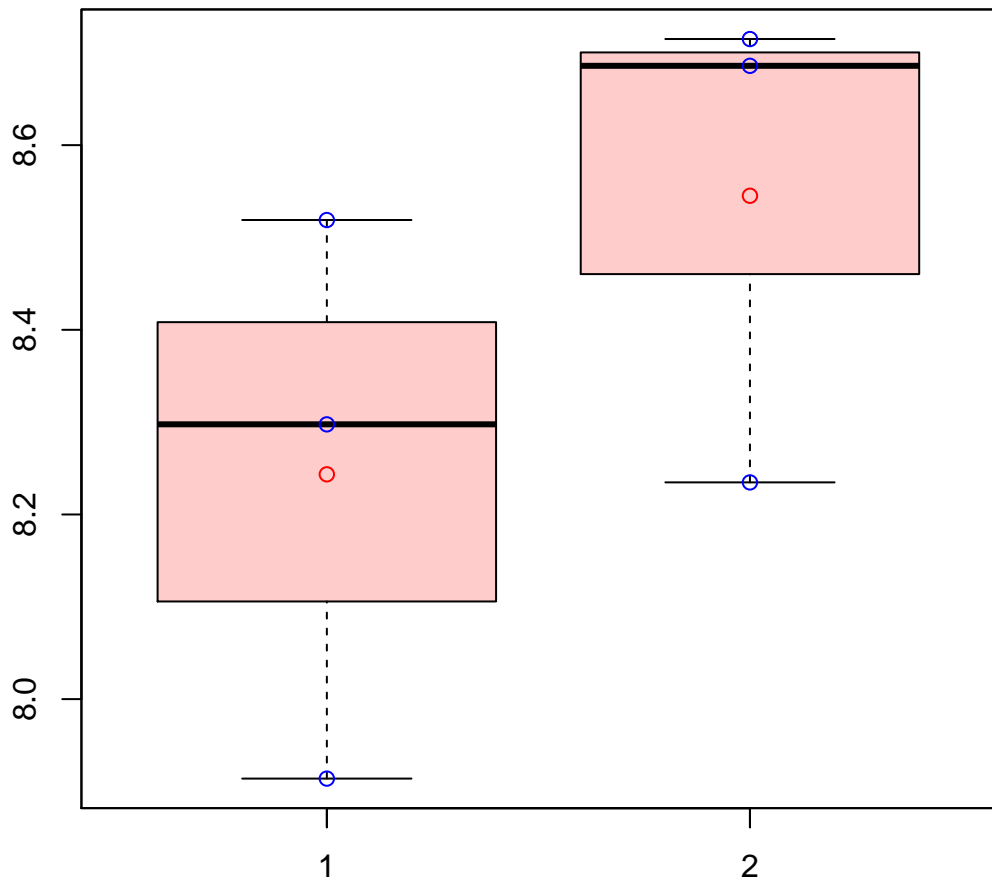

t-Test: p-value = 0.27



# CL1158Contig3|CL1158Contig3

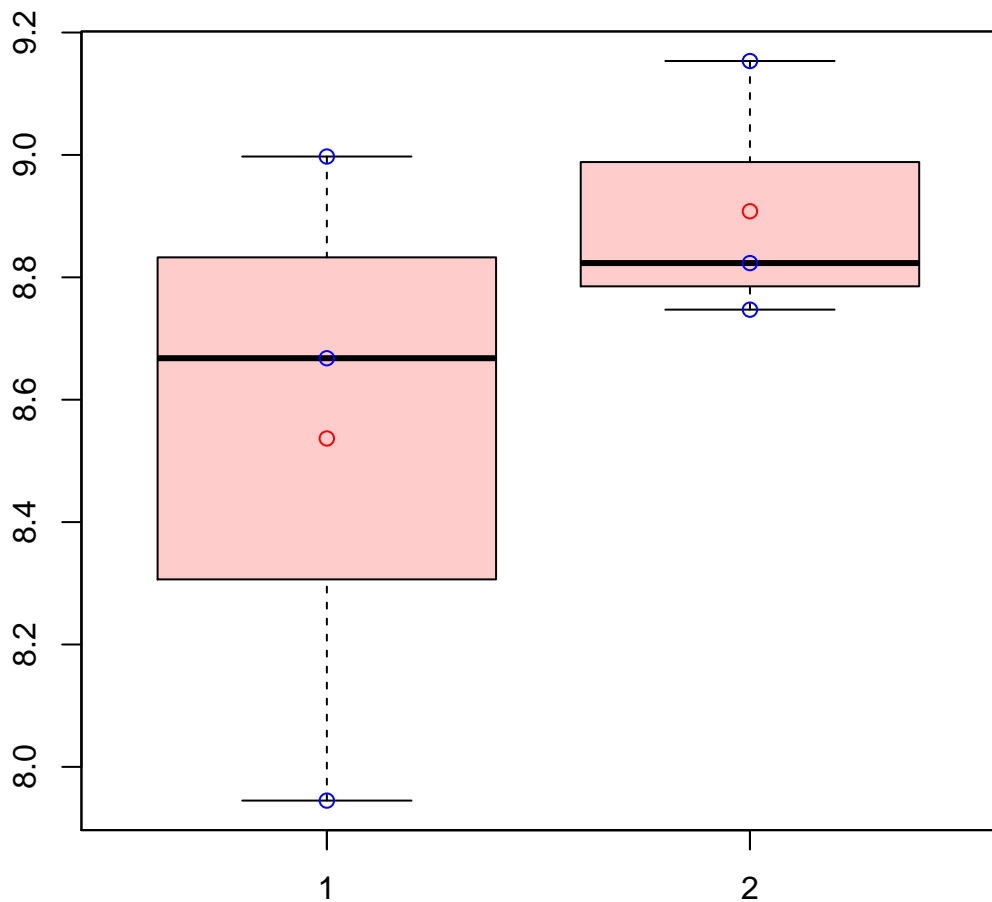

t-Test: p-value = 0.36

# CL1158Contig4|CL1158Contig4



t-Test: p-value = 0.36

# CL11598Contig1|CL11598Contig1

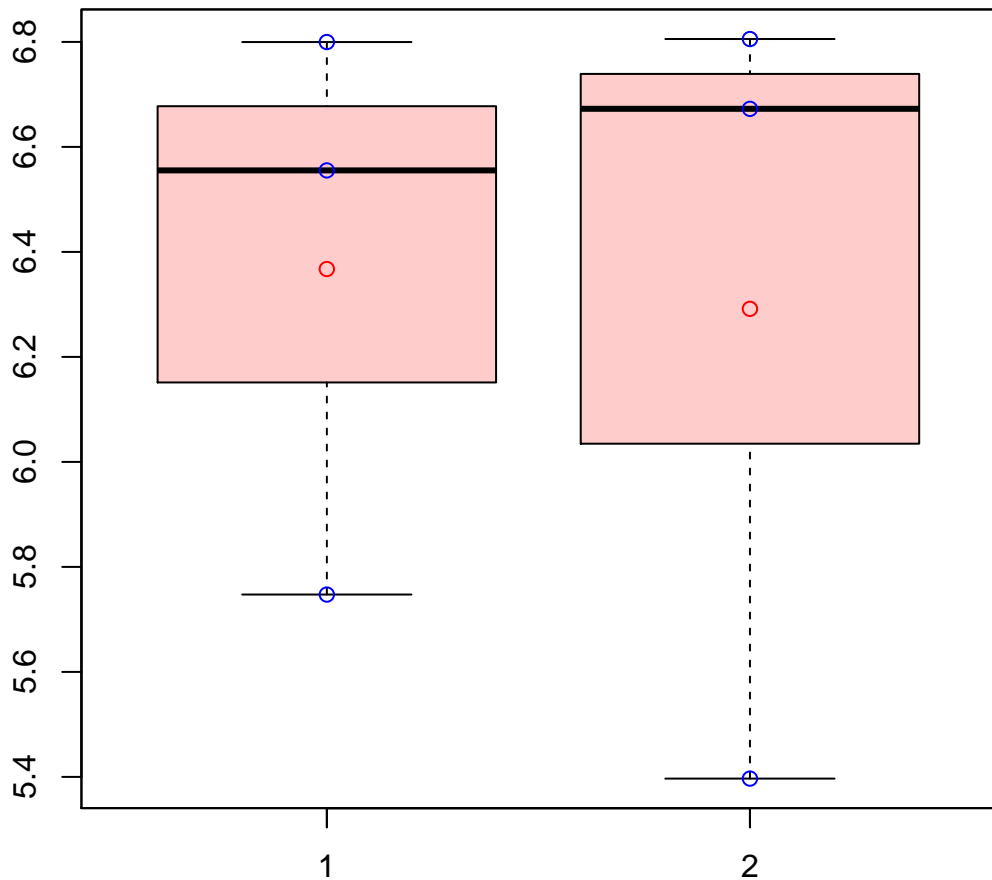

t-Test: p-value = 0.9

# CL115Contig10|CL115Contig10

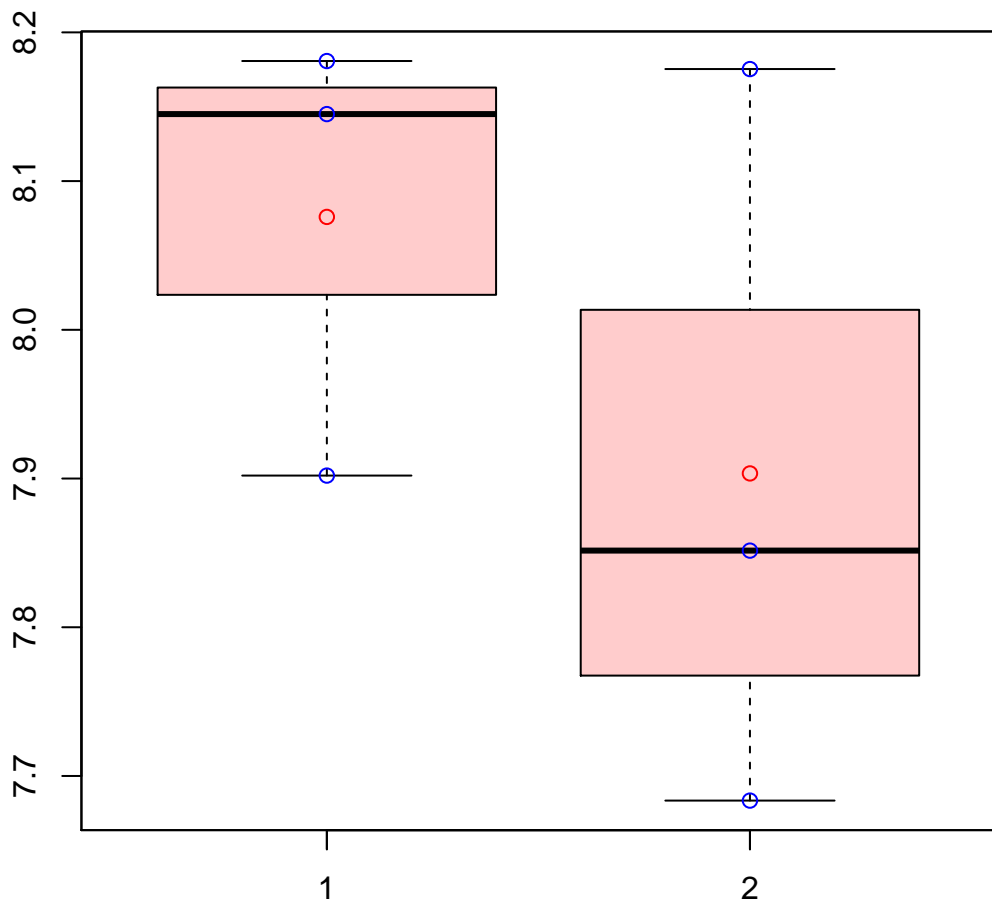

t-Test: p-value = 0.38

# CL115Contig18|CL115Contig18

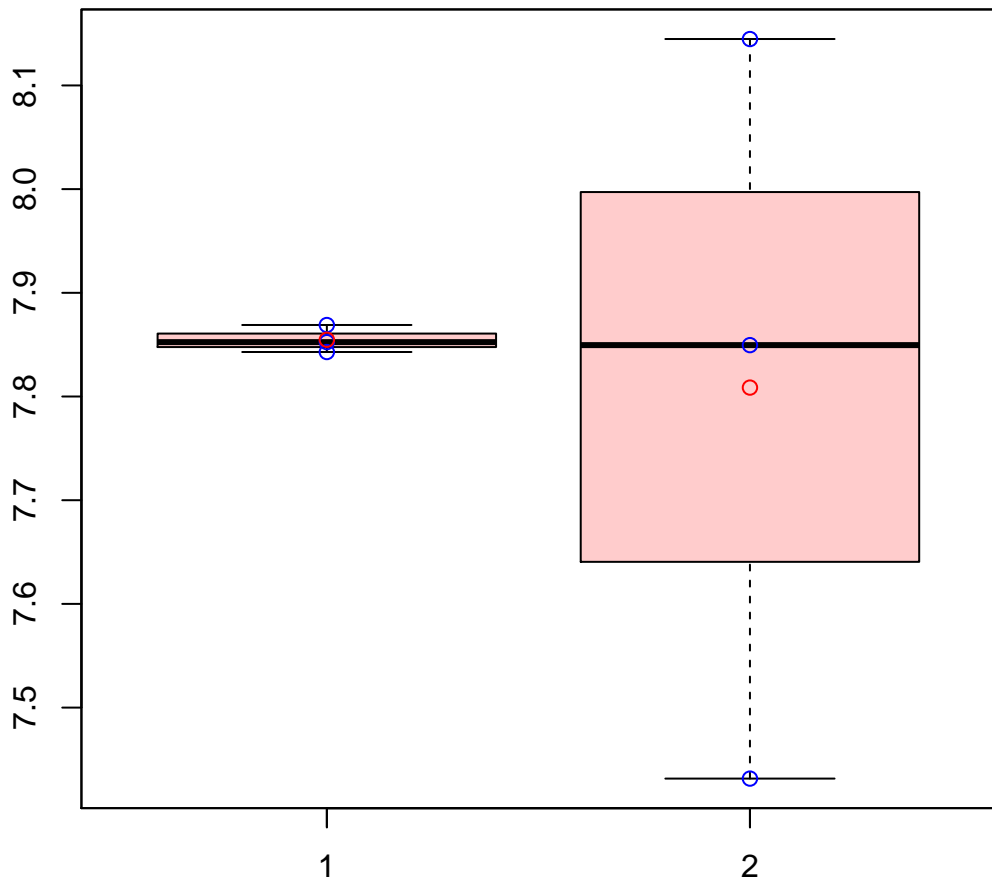

t-Test: p-value = 0.84

# CL115Contig5|CL115Contig5

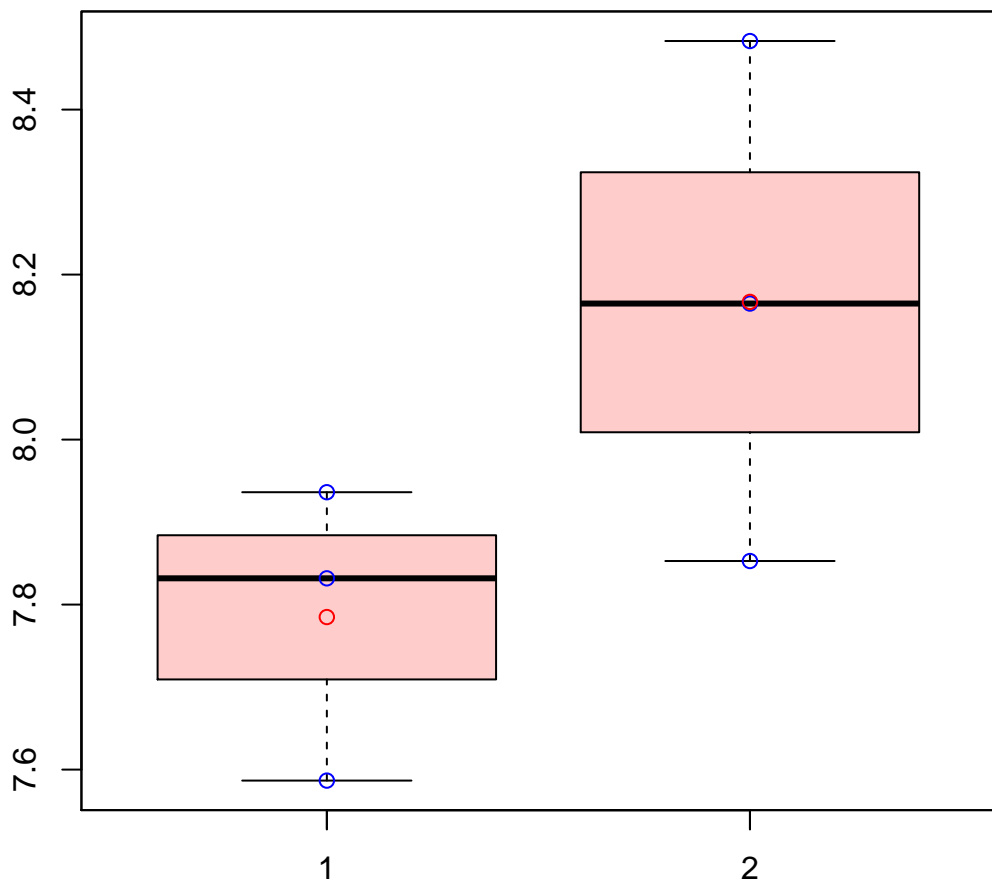

t-Test: p-value = 0.16

# CL115Contig7|CL115Contig7

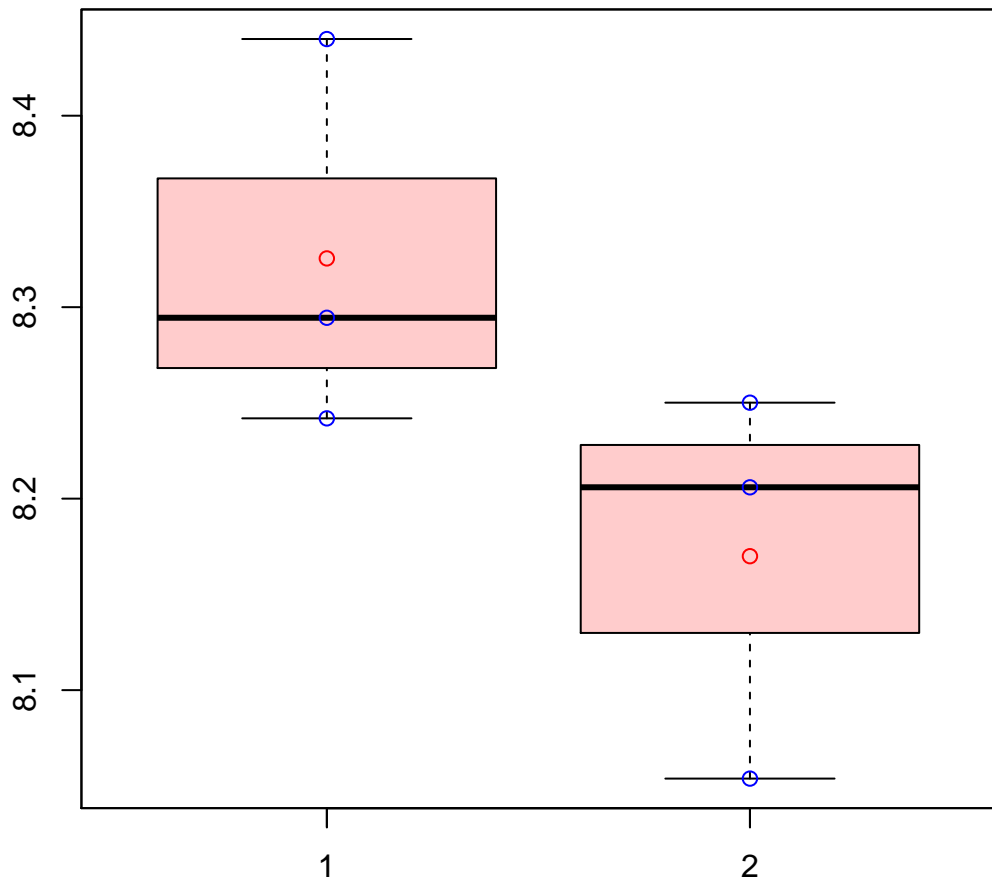

t-Test: p-value = 0.14

# CL11604Contig1|CL11604Contig1

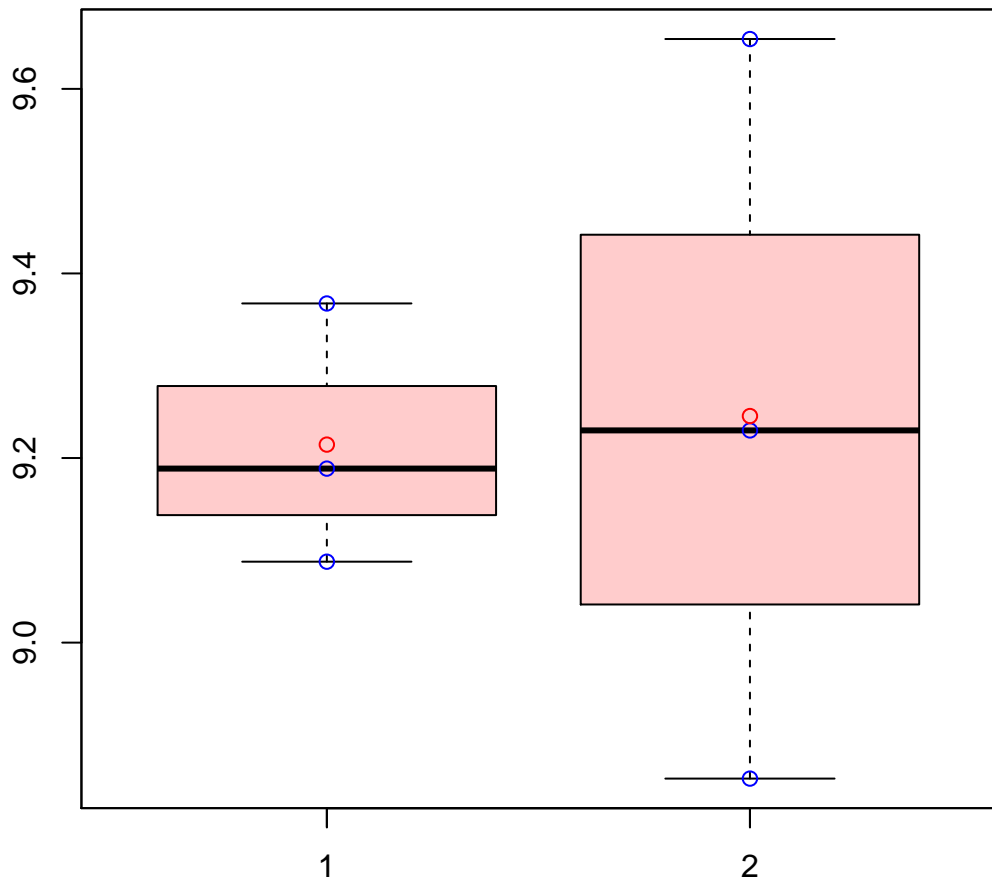

t-Test: p-value = 0.91



# CL11607Contig2|CL11607Contig2

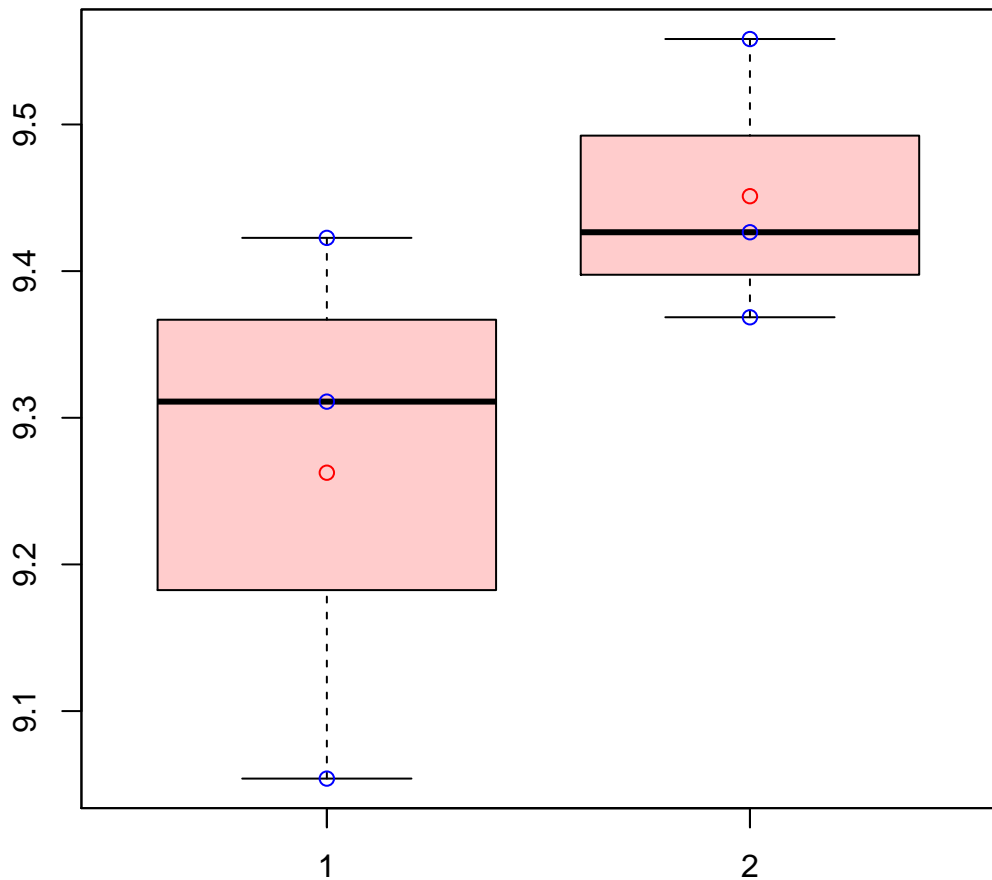

t-Test: p-value = 0.22

# CL11608Contig1|CL11608Contig1

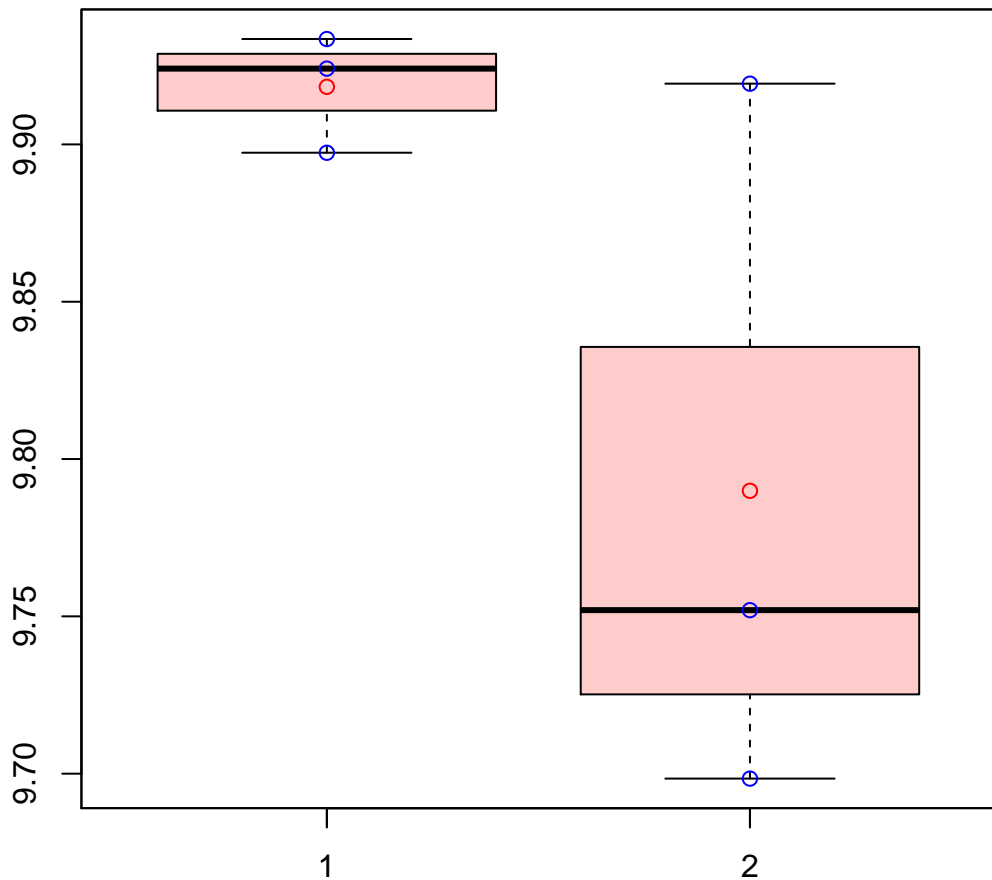

t-Test: p-value = 0.19

# CL1160Contig1|CL1160Contig1

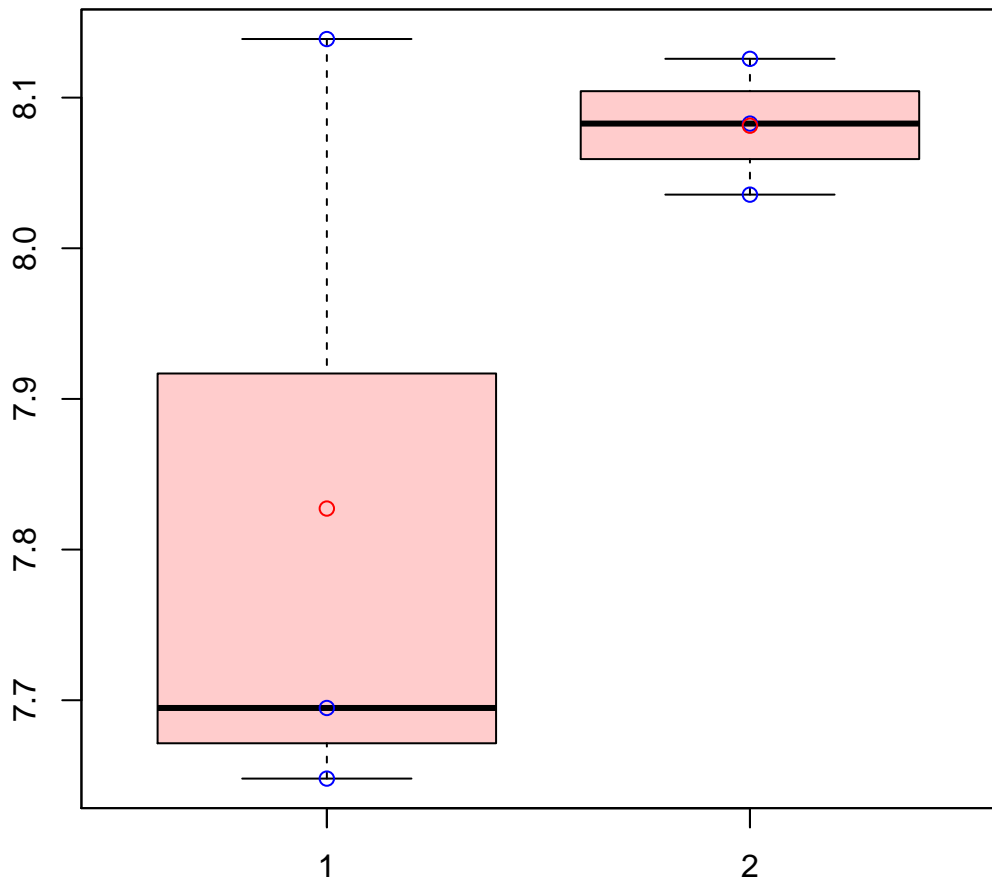

t-Test: p-value = 0.24

# CL11619Contig1|CL11619Contig1

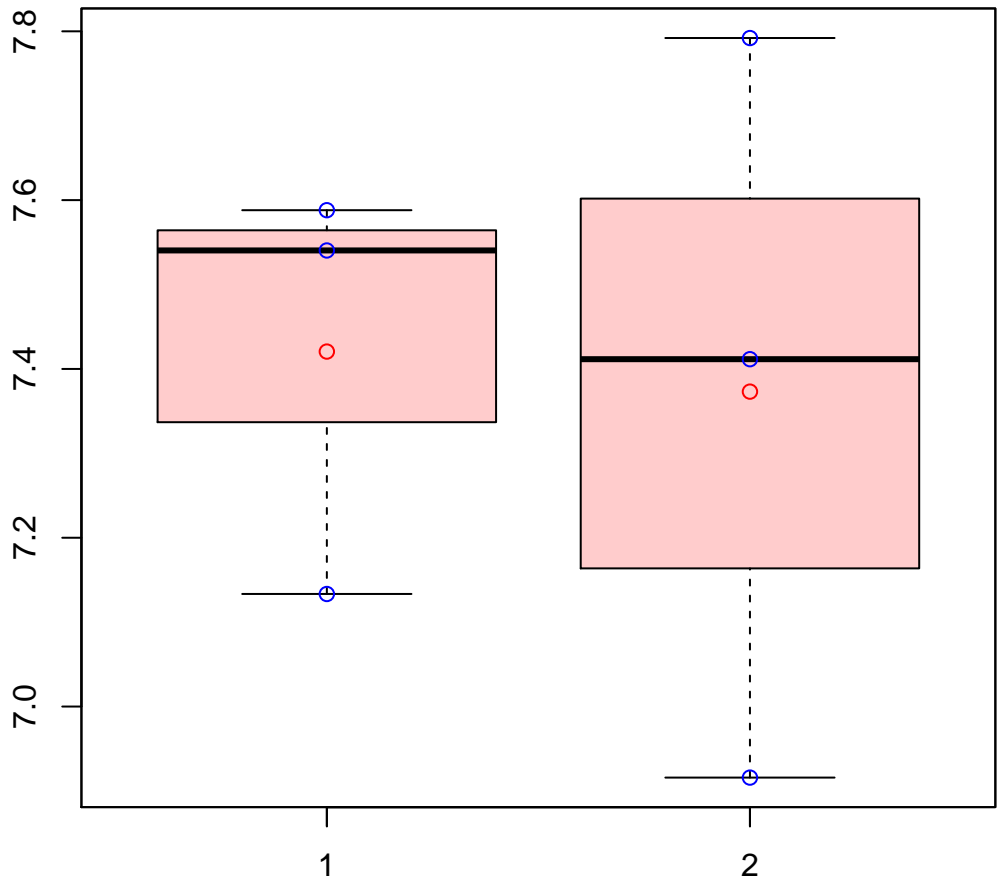

t-Test: p-value = 0.88

# CL1162Contig4|CL1162Contig4

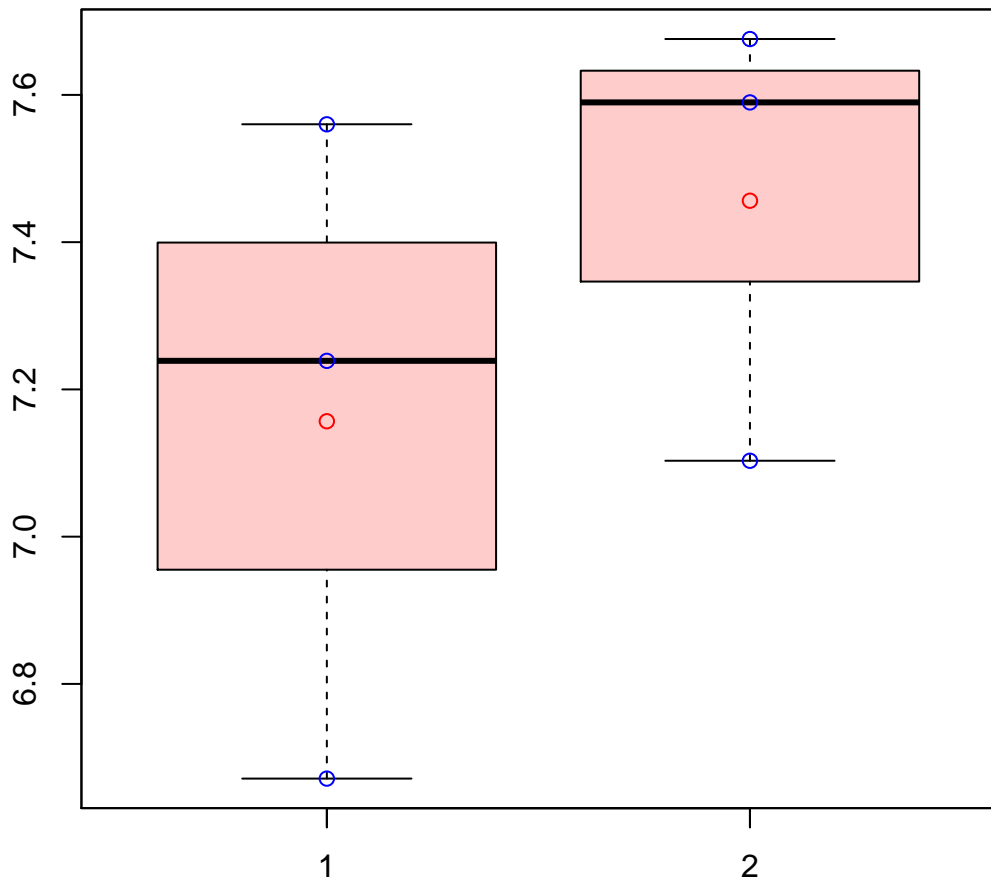

t-Test: p-value = 0.4

# CL1164Contig1|CL1164Contig1

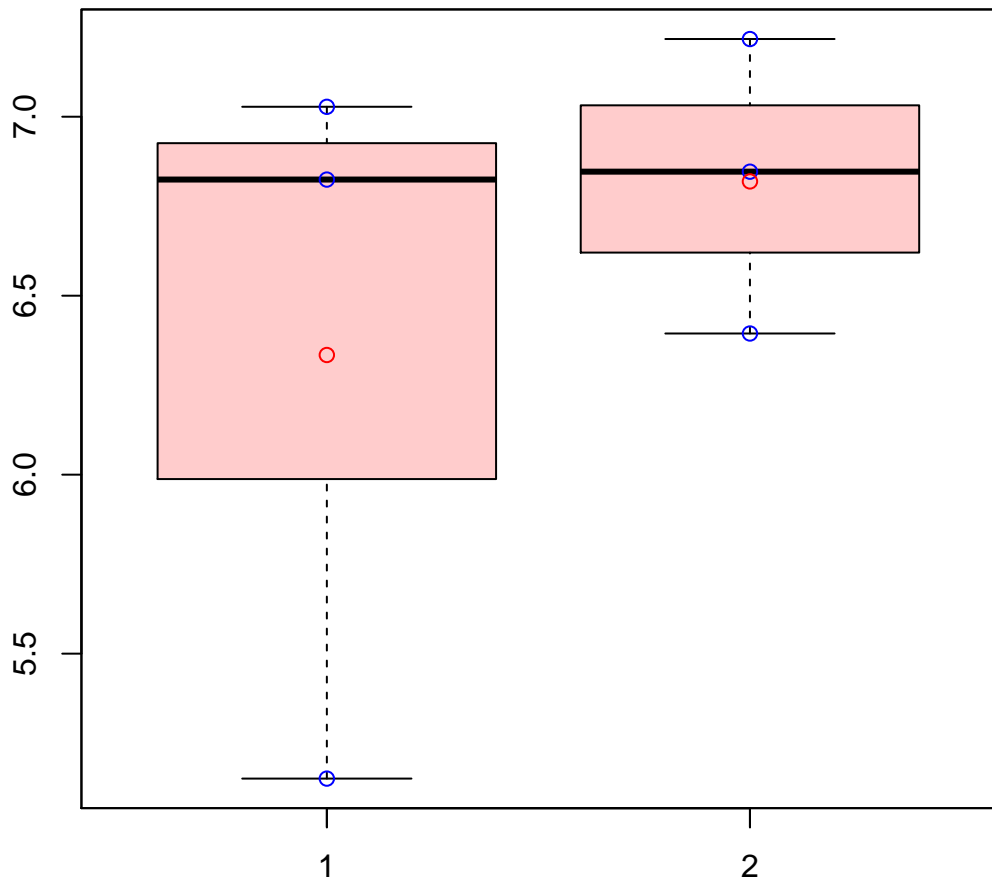

t-Test: p-value = 0.51

# CL11652Contig2|CL11652Contig2

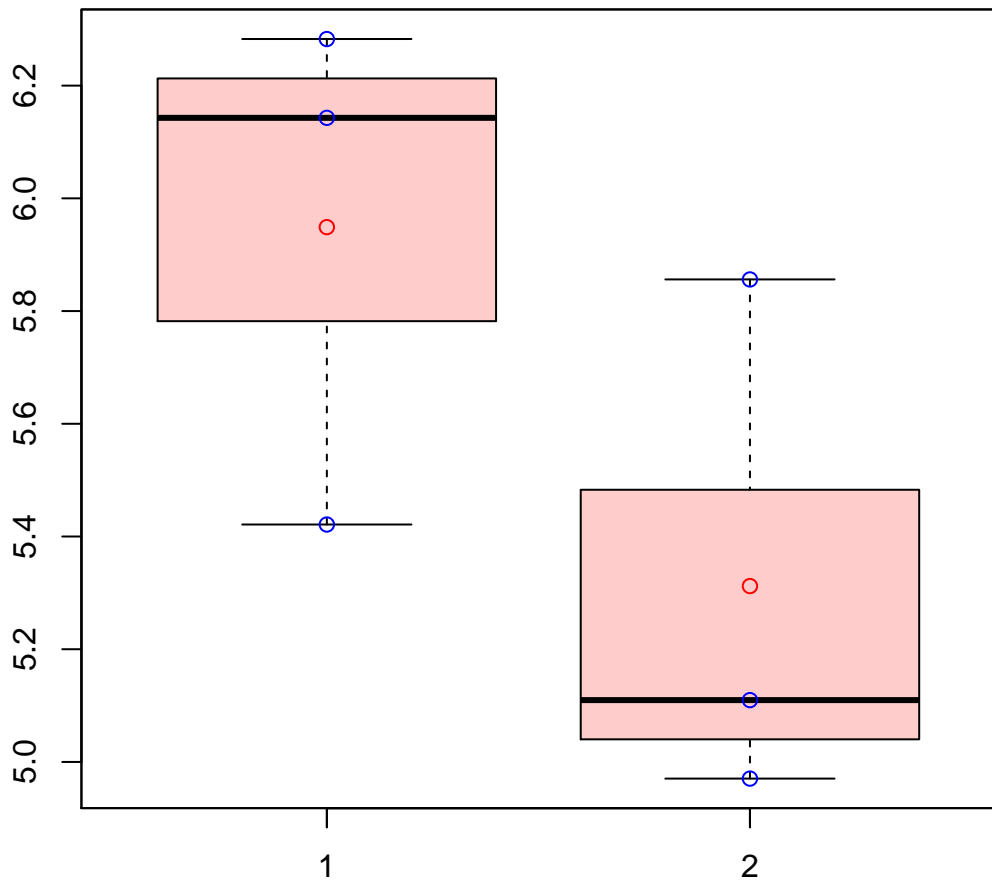

t-Test: p-value = 0.17

# CL11653Contig2|CL11653Contig2

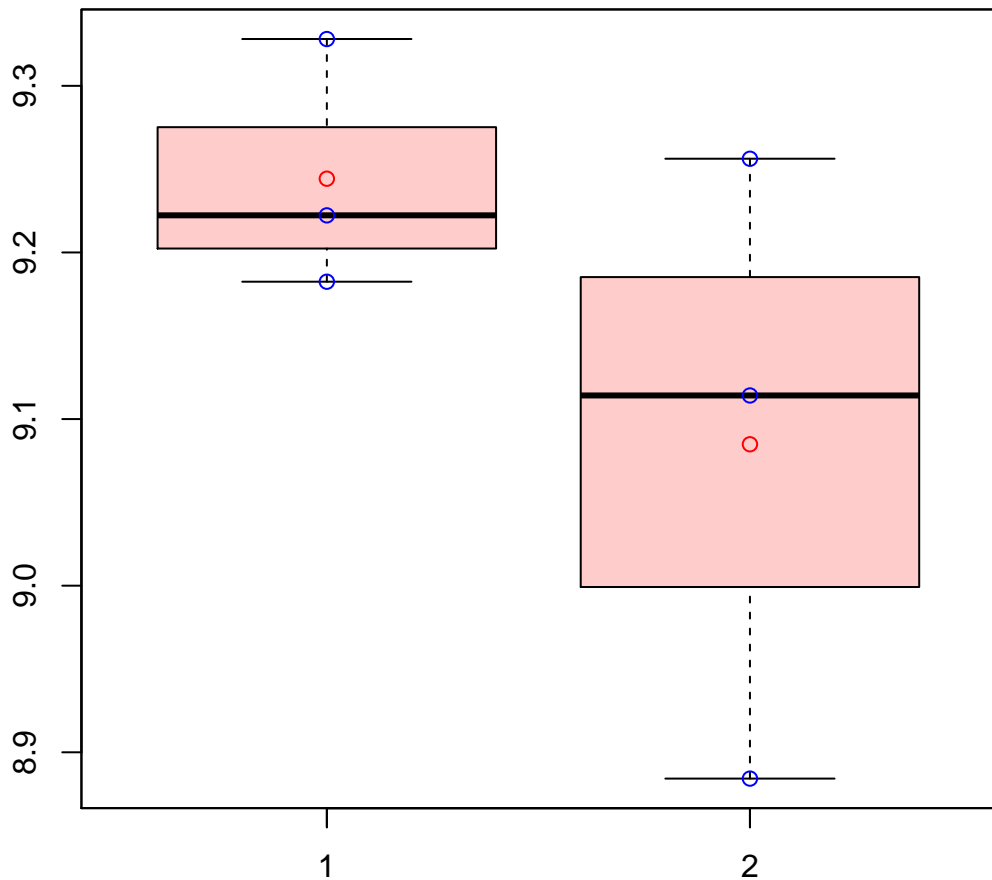

t-Test: p-value = 0.28



# CL1165Contig1|CL1165Contig1

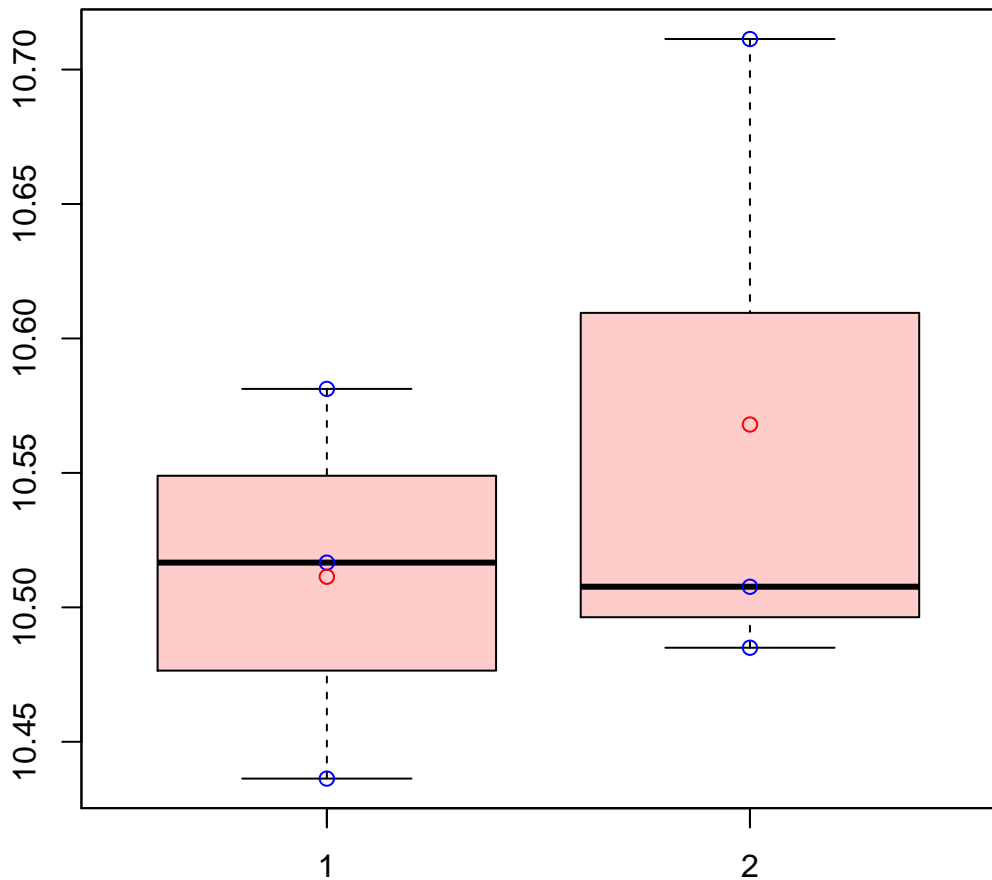

t-Test: p-value = 0.54

# CL1167Contig2|CL1167Contig2

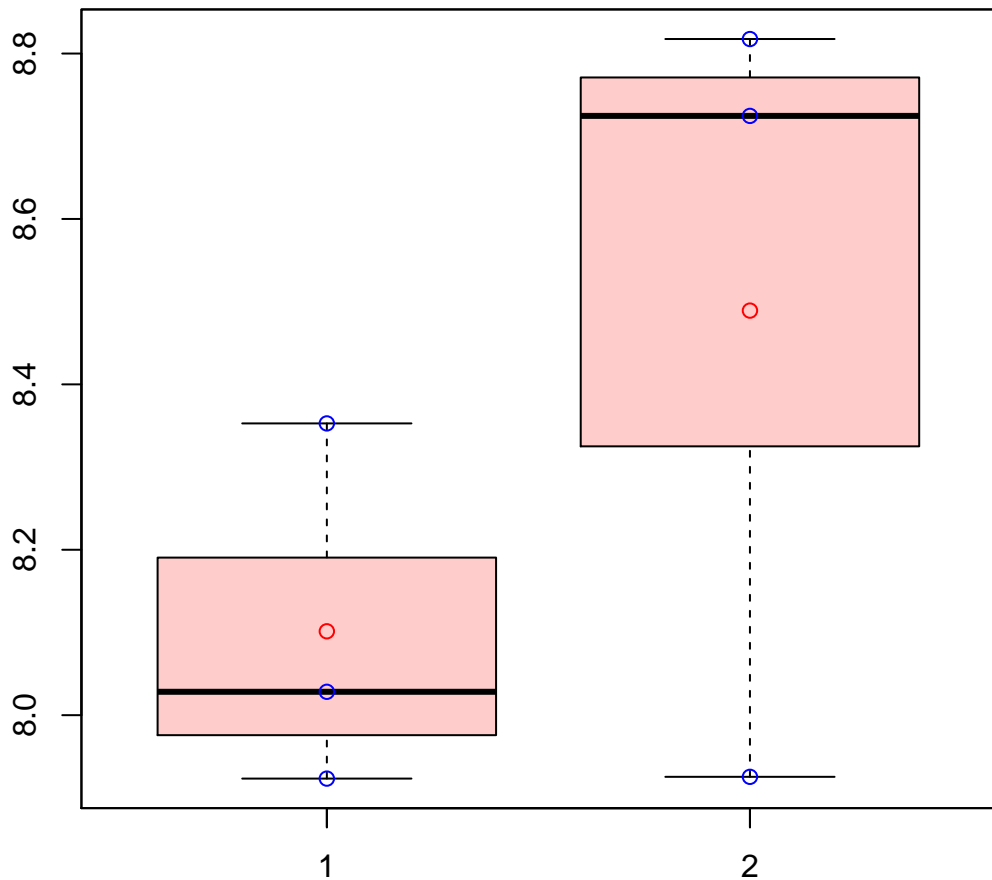

t-Test: p-value = 0.31

# CL116Contig18|CL116Contig18

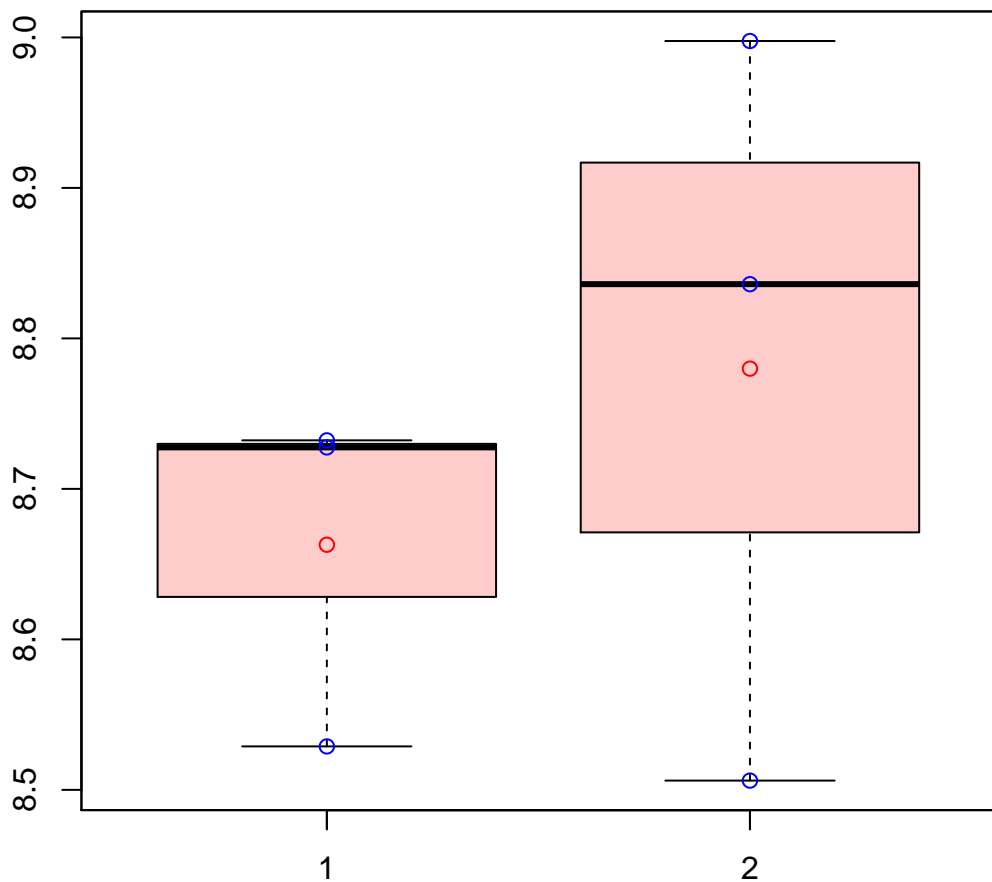

t-Test: p-value = 0.52

# CL116Contig3|CL116Contig3

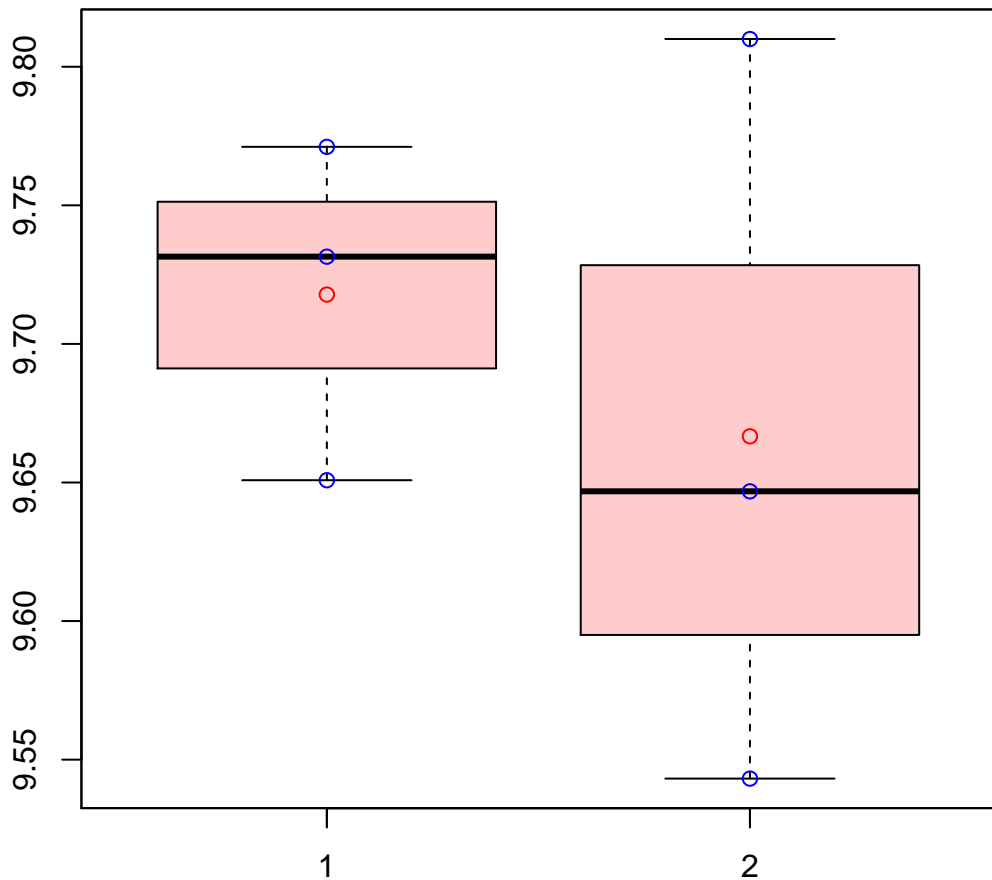

t-Test: p-value = 0.59

# CL11711Contig1|CL11711Contig1

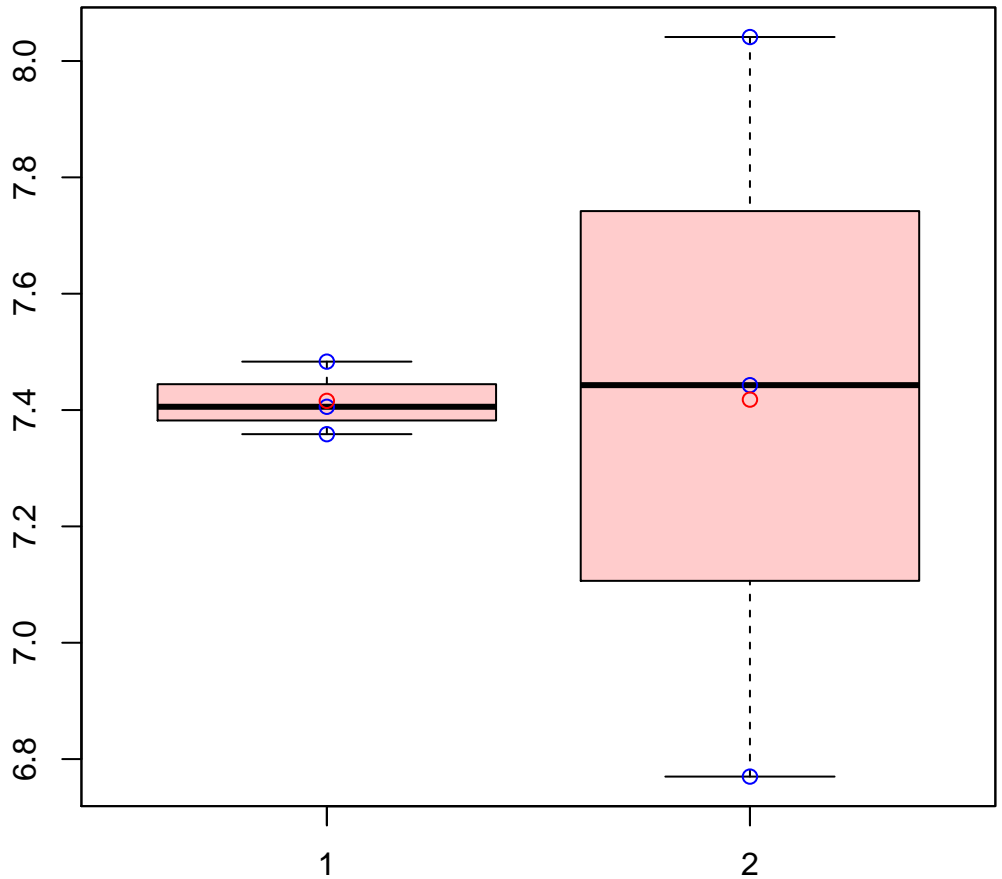

t-Test: p-value = 1

# CL1172Contig2|CL1172Contig2

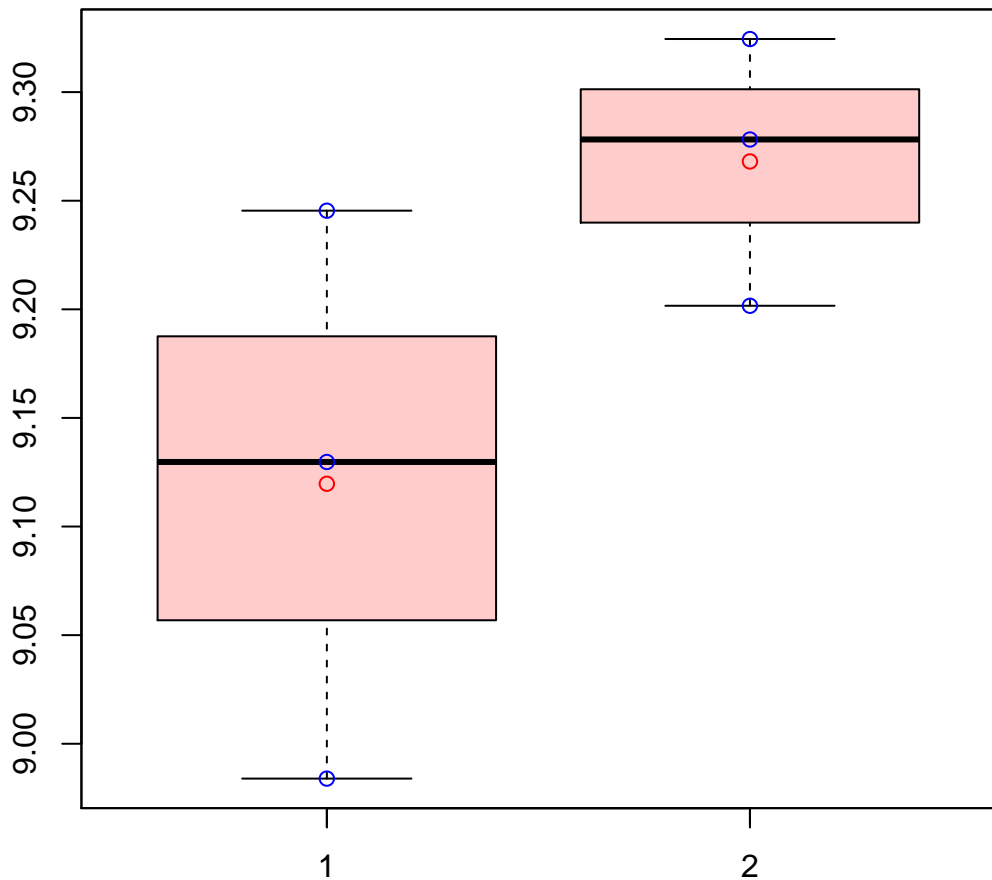

t-Test: p-value = 0.18

# CL11731Contig1|CL11731Contig1

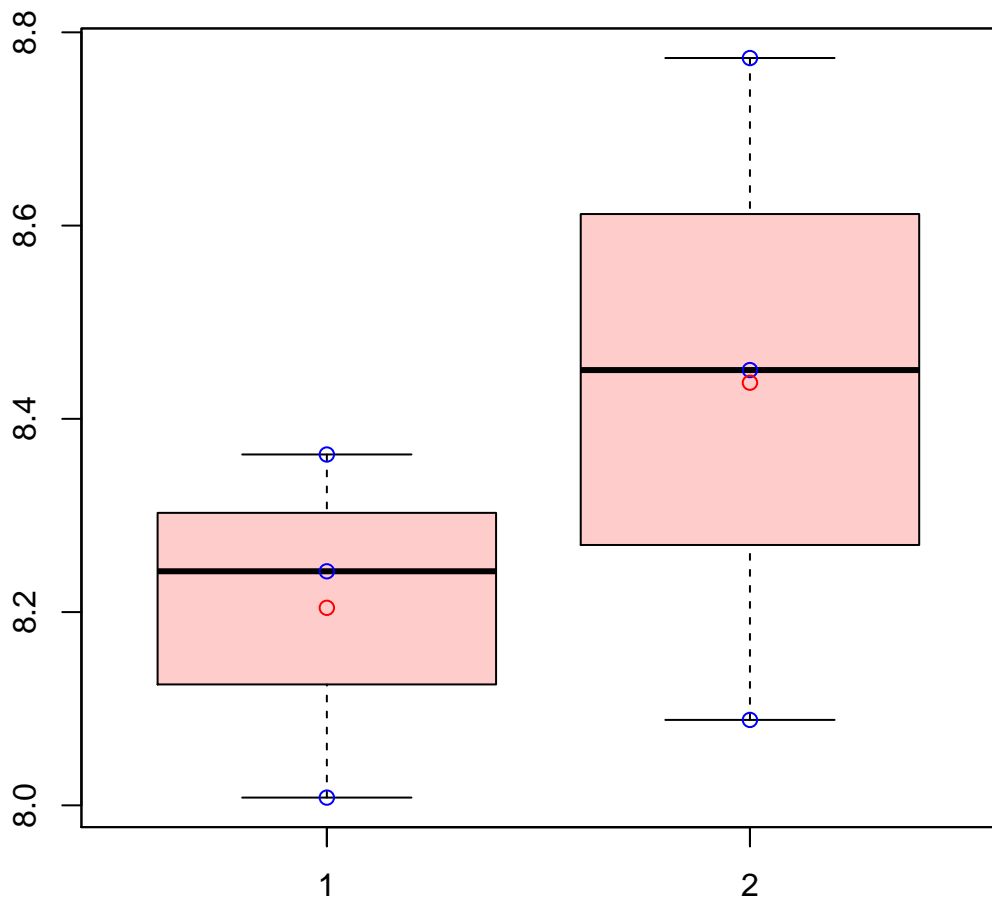

t-Test: p-value = 0.37

# CL1173Contig12|CL1173Contig12

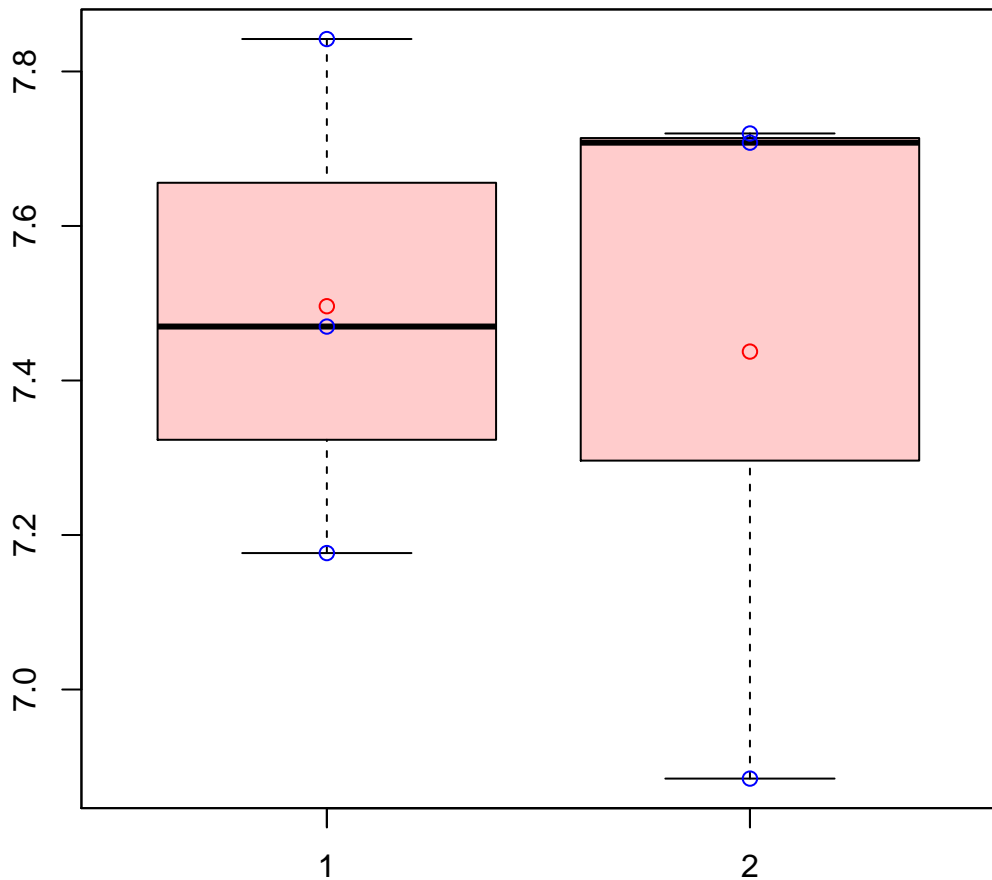

t-Test: p-value = 0.87



# CL11741Contig1|CL11741Contig1

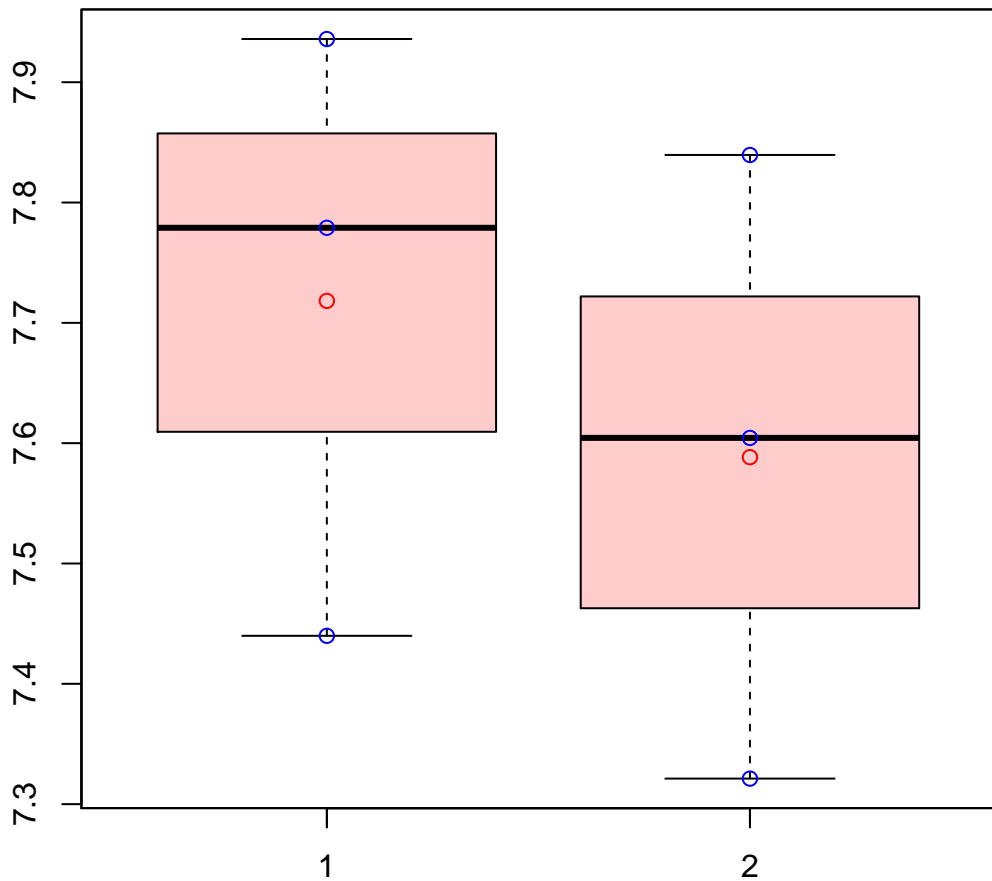

t-Test: p-value = 0.57

# CL11756Contig1|CL11756Contig1

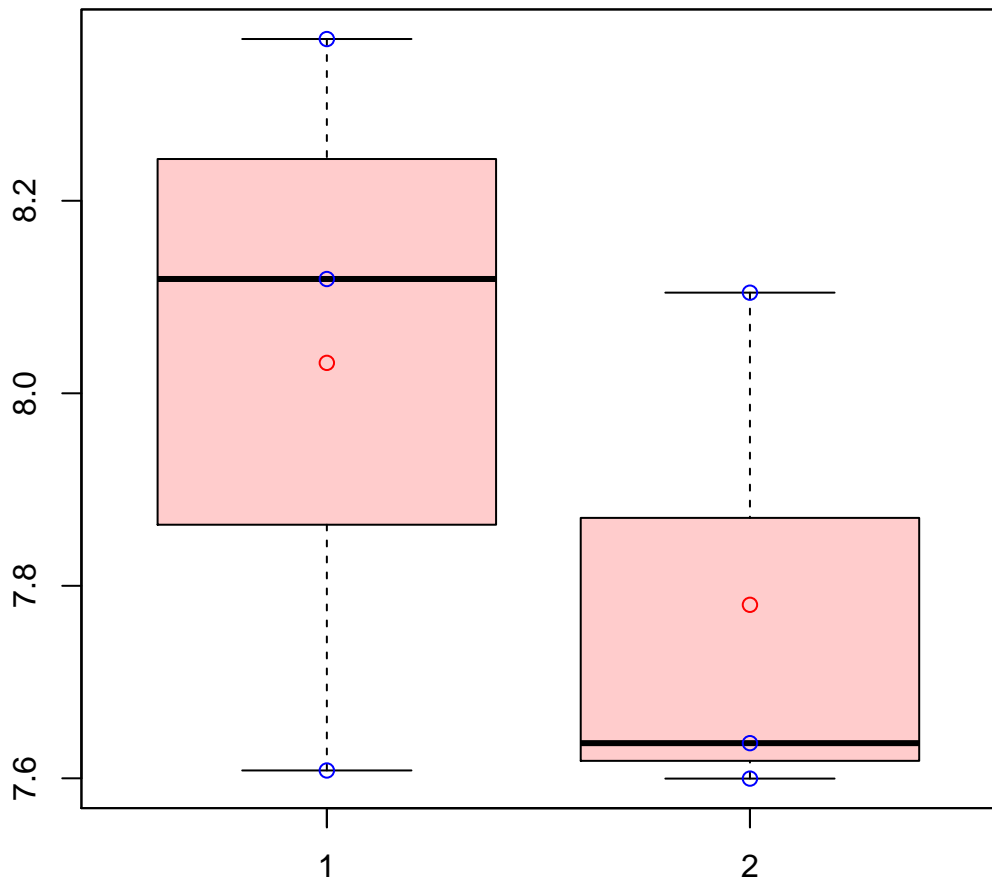

t-Test: p-value = 0.42

# CL1177Contig3|CL1177Contig3

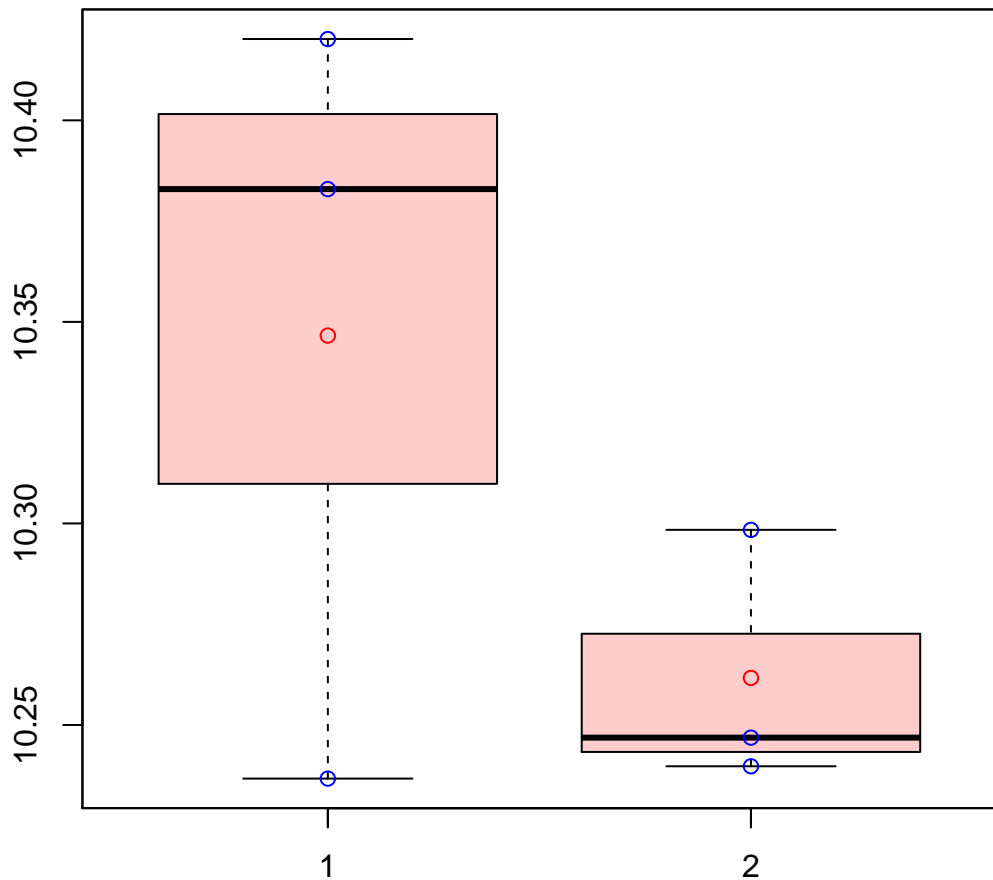

t-Test: p-value = 0.27

# CL1177Contig4|CL1177Contig4

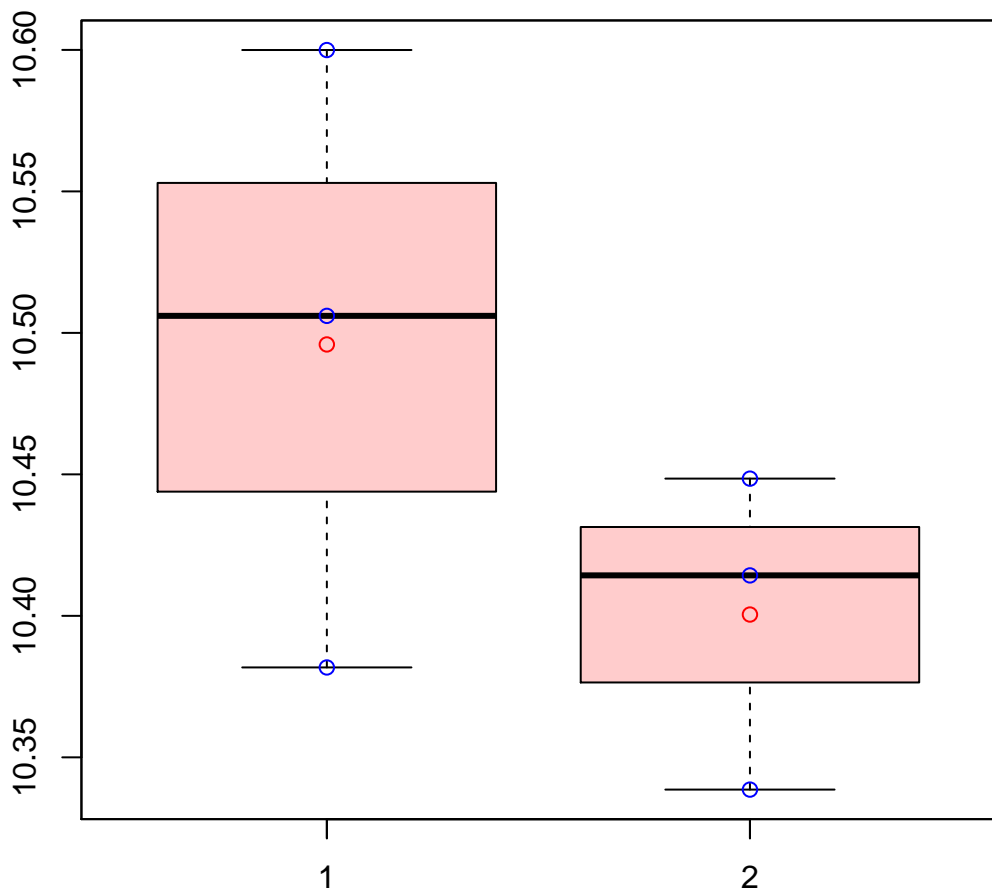

t-Test: p-value = 0.27

# CL1177Contig6|CL1177Contig6

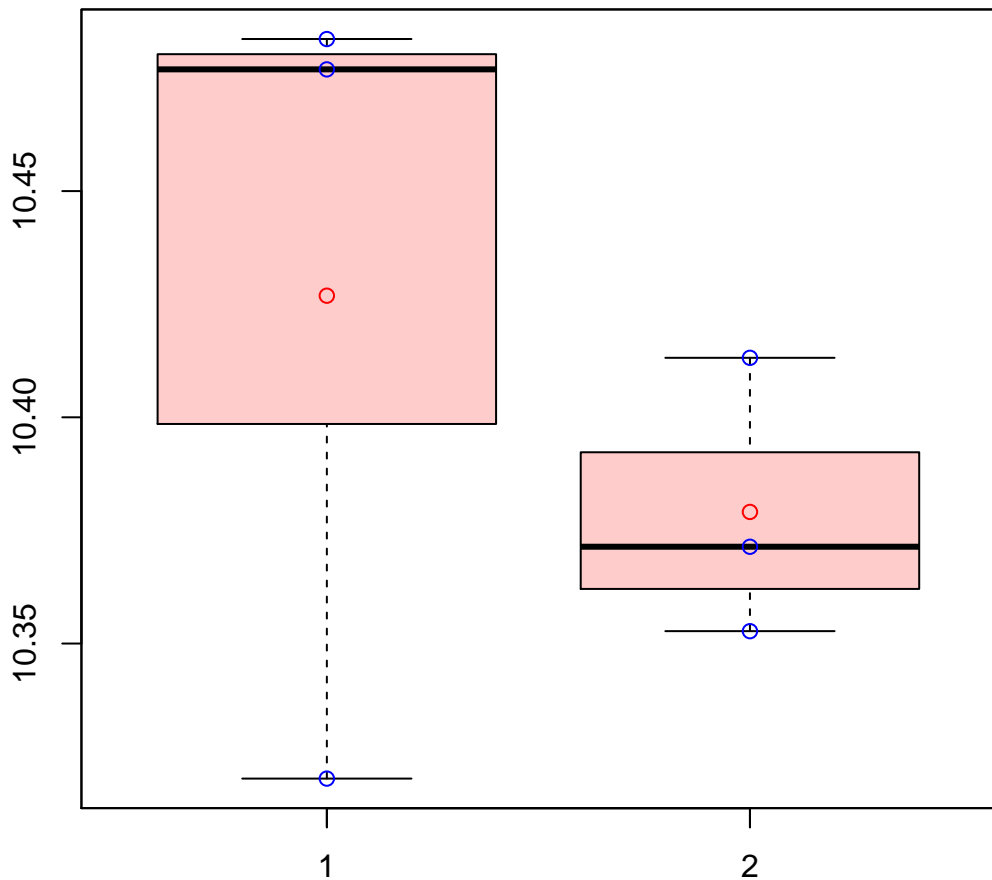

t-Test: p-value = 0.47

# CL11786Contig1|CL11786Contig1

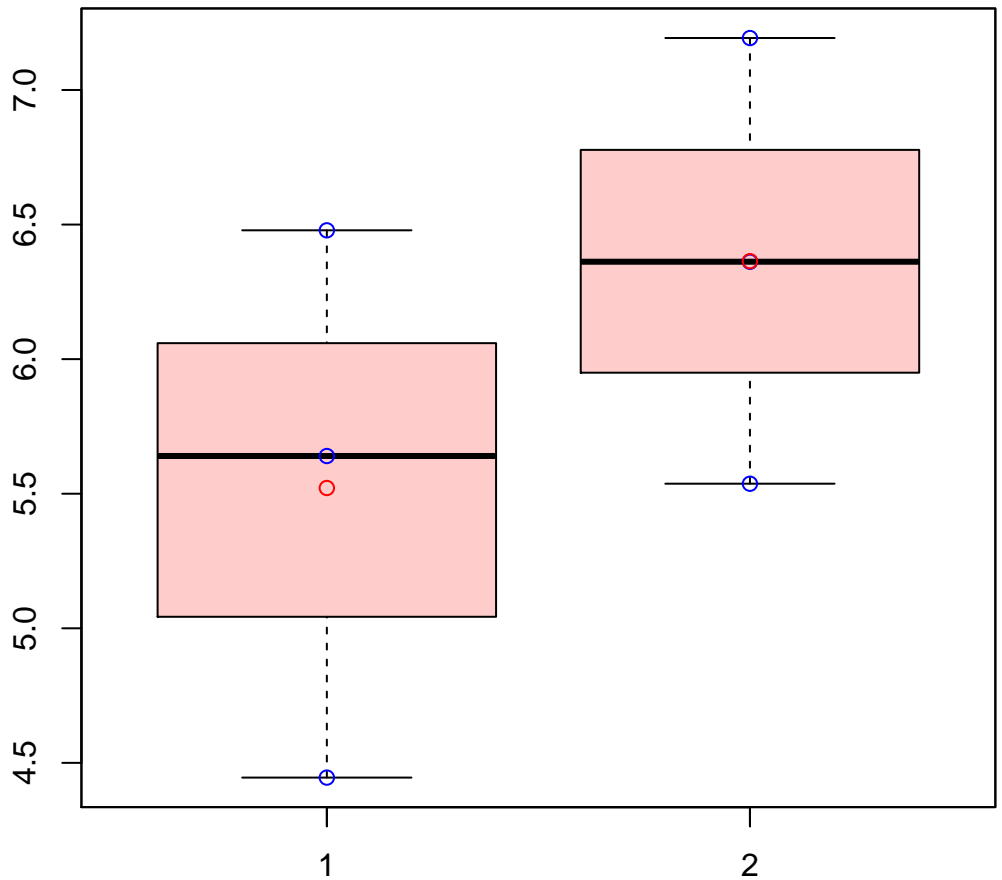

t-Test: p-value = 0.33

# CL11786Contig2|CL11786Contig2

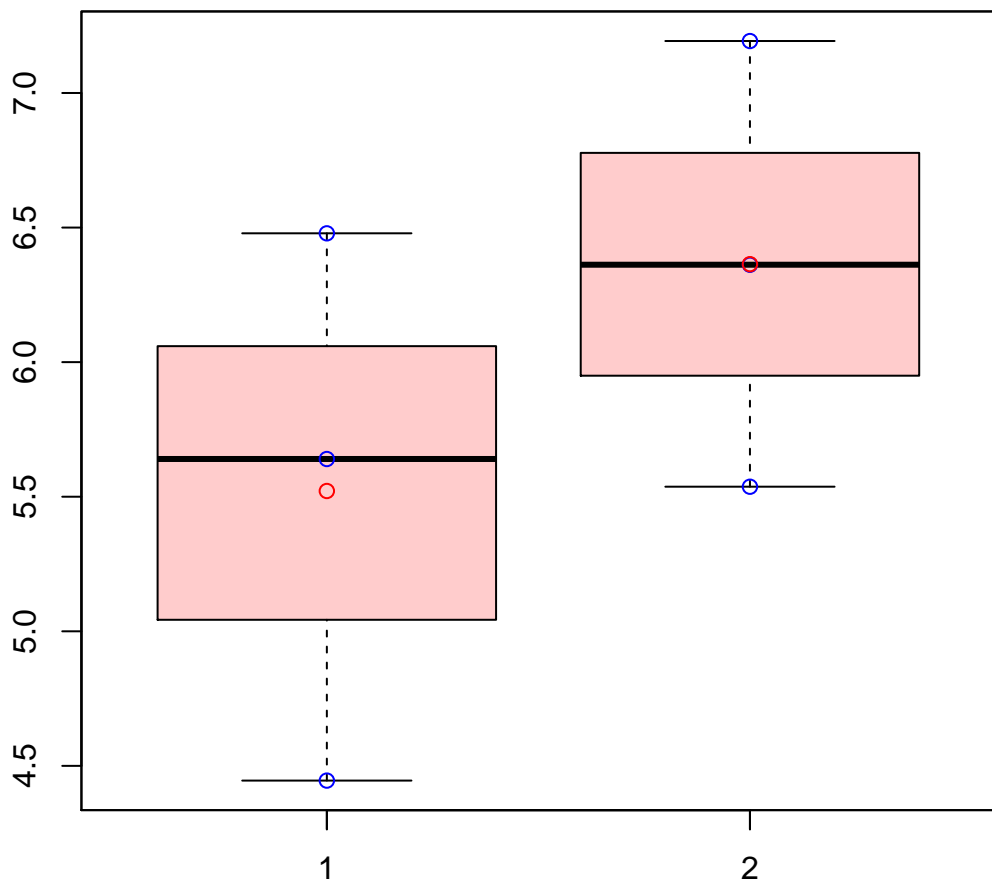

t-Test: p-value = 0.33

# CL1179Contig1|CL1179Contig1

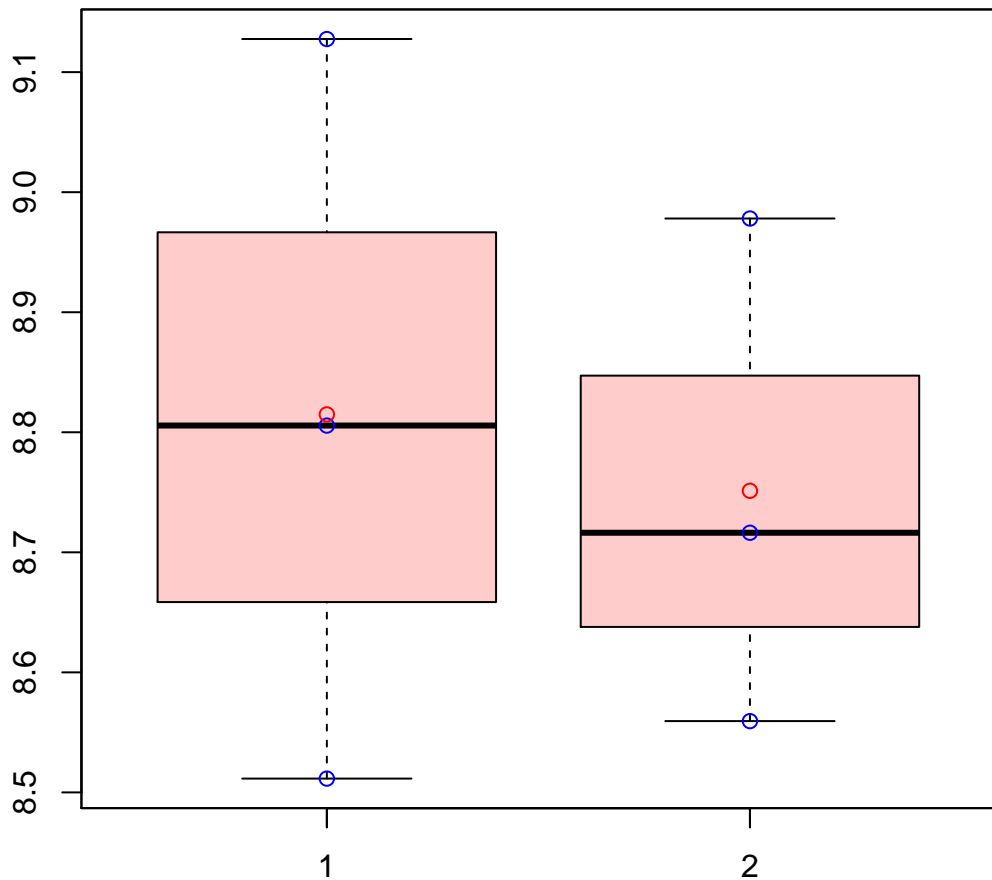

t-Test: p-value = 0.78



# CL1179Contig2|CL1179Contig2

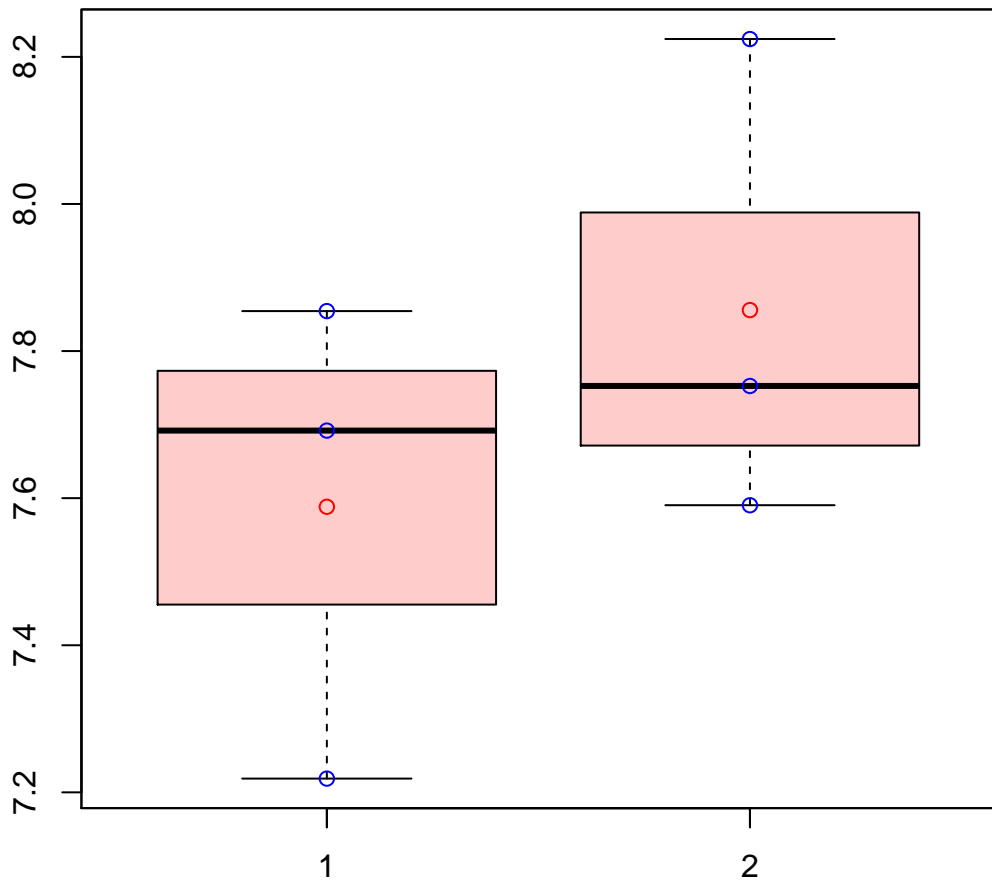

t-Test: p-value = 0.38

# CL1179Contig3|CL1179Contig3

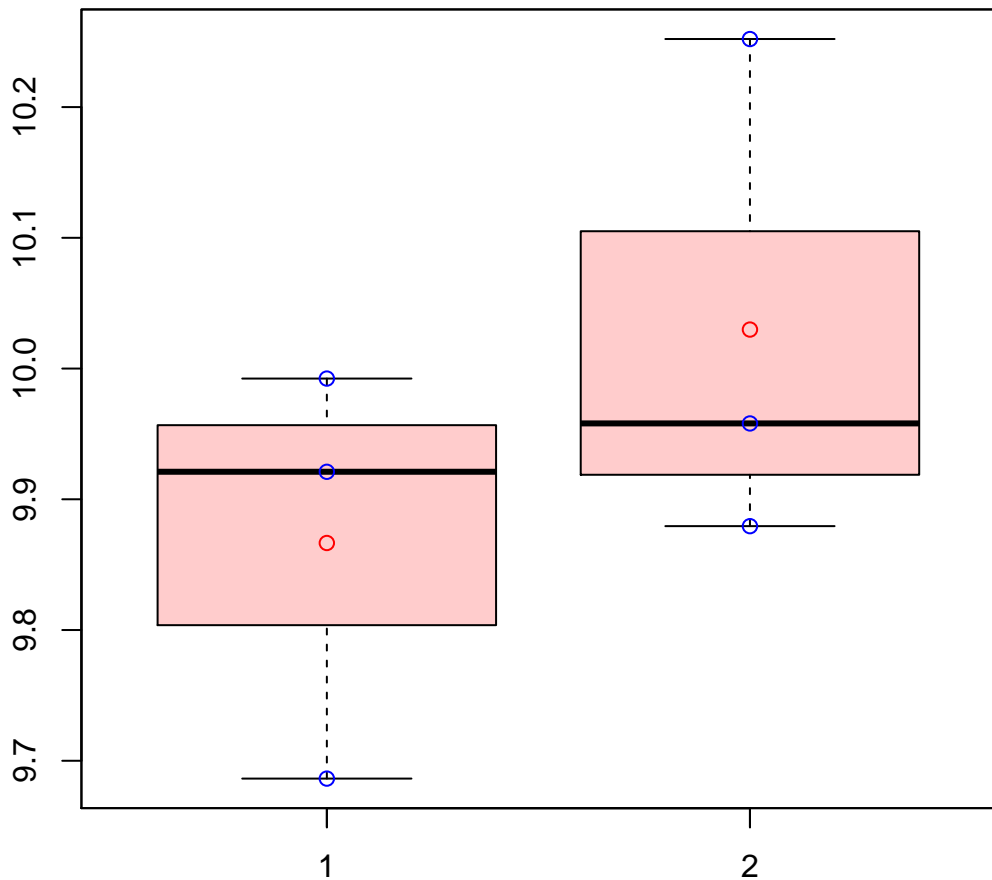

t-Test: p-value = 0.33

# CL1179Contig6|CL1179Contig6



t-Test: p-value = 0.78

# CL11824Contig1|CL11824Contig1

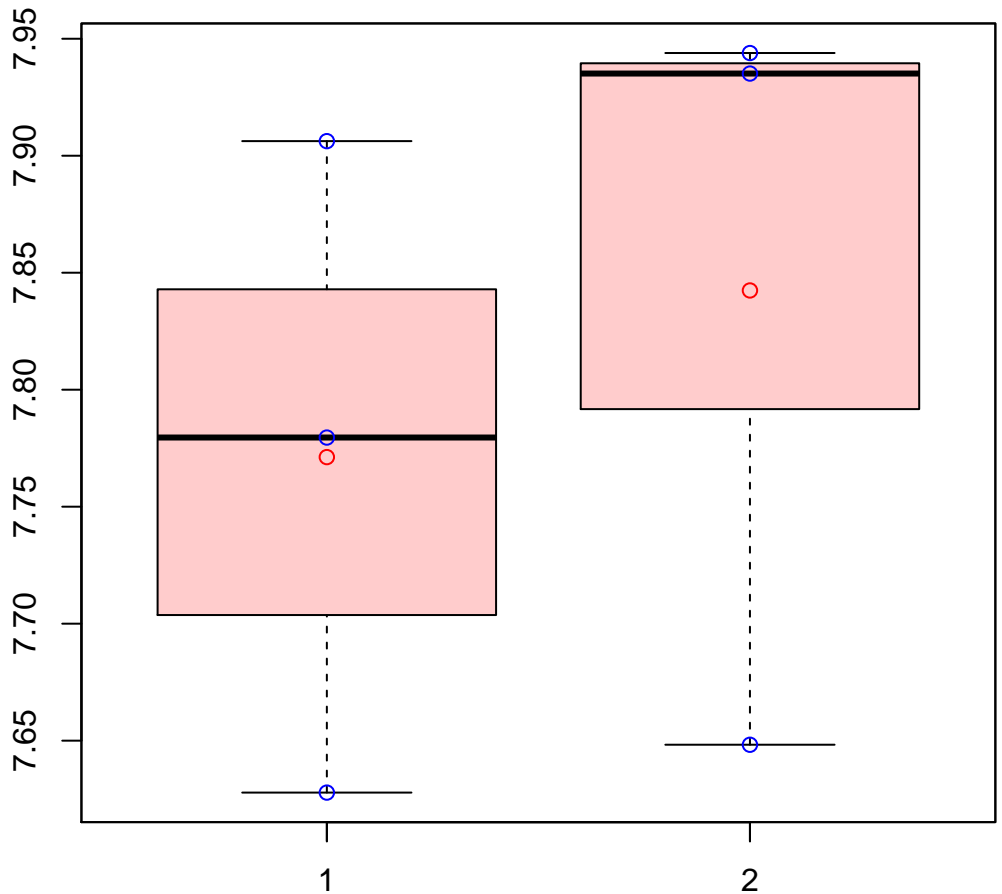

t-Test: p-value = 0.6

# CL11835Contig1|CL11835Contig1

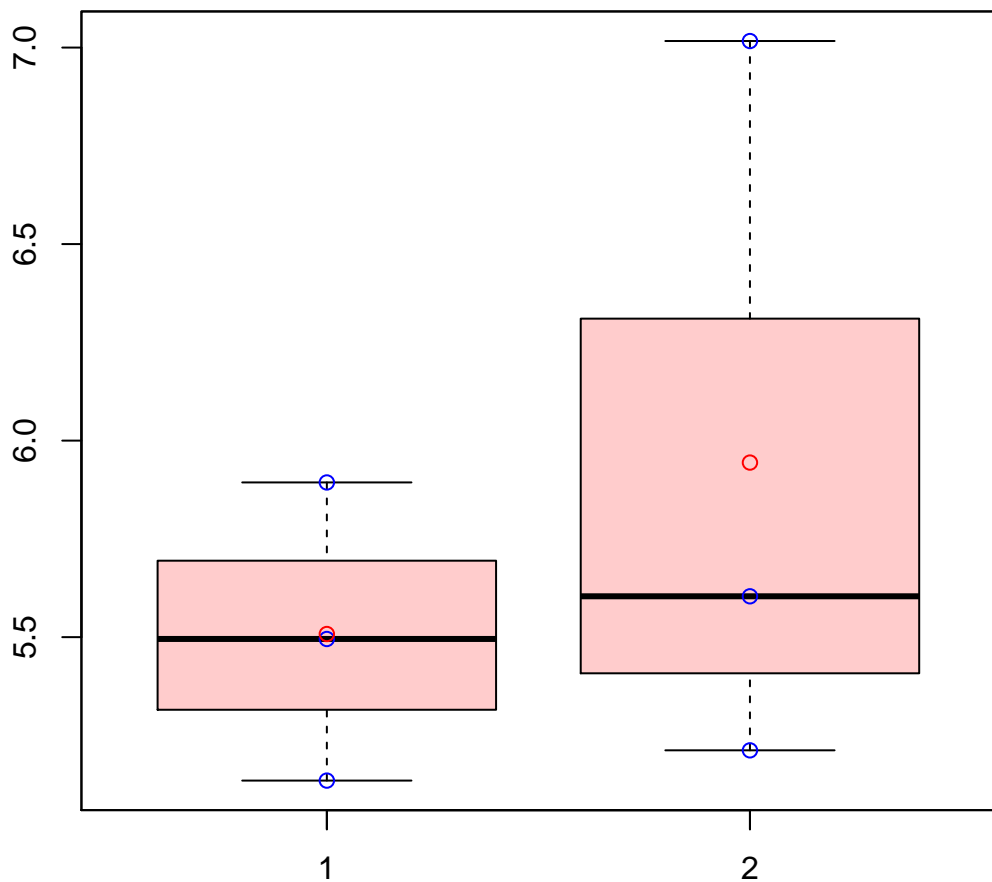

t-Test: p-value = 0.52

# CL1183Contig5|CL1183Contig5

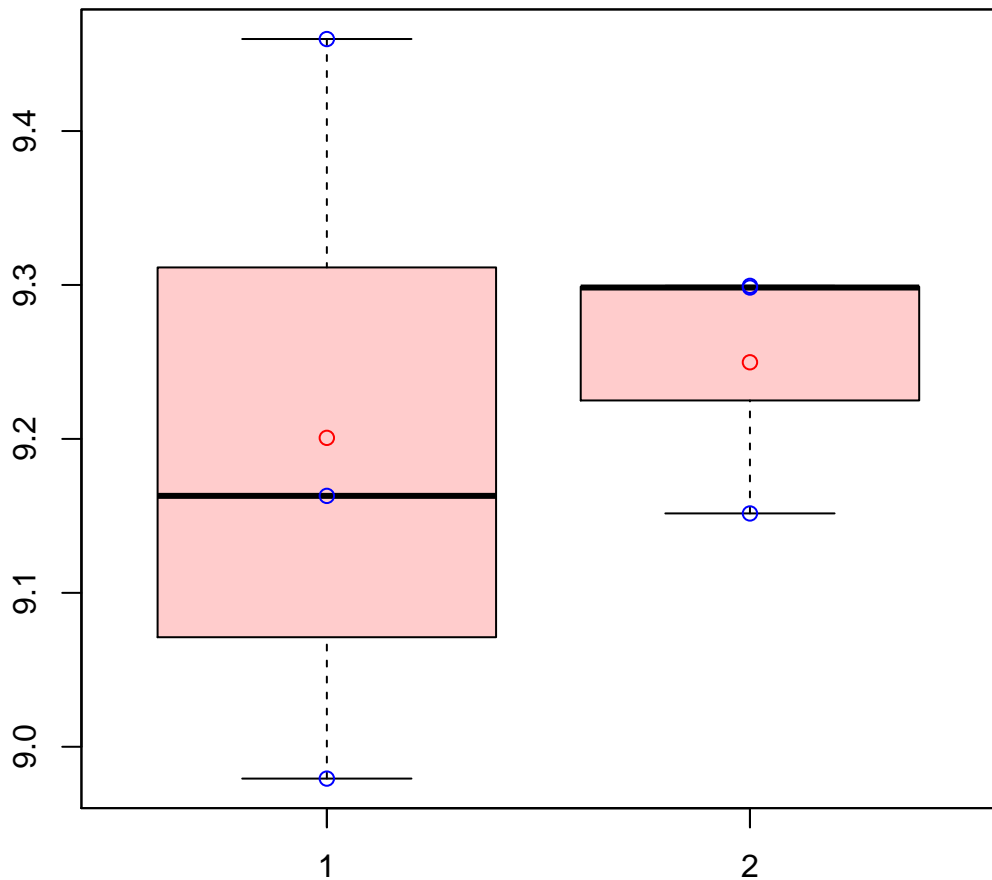

t-Test: p-value = 0.77

# CL1187Contig11|CL1187Contig11

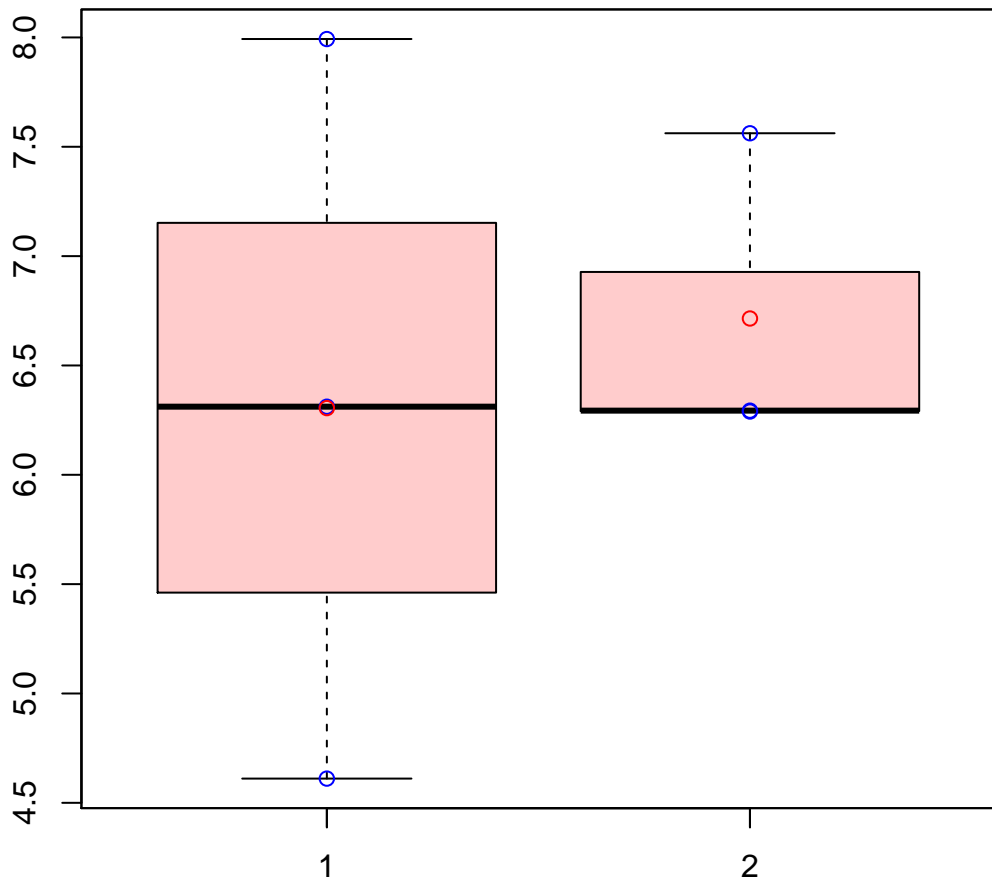

t-Test: p-value = 0.73

# CL1187Contig1|CL1187Contig1

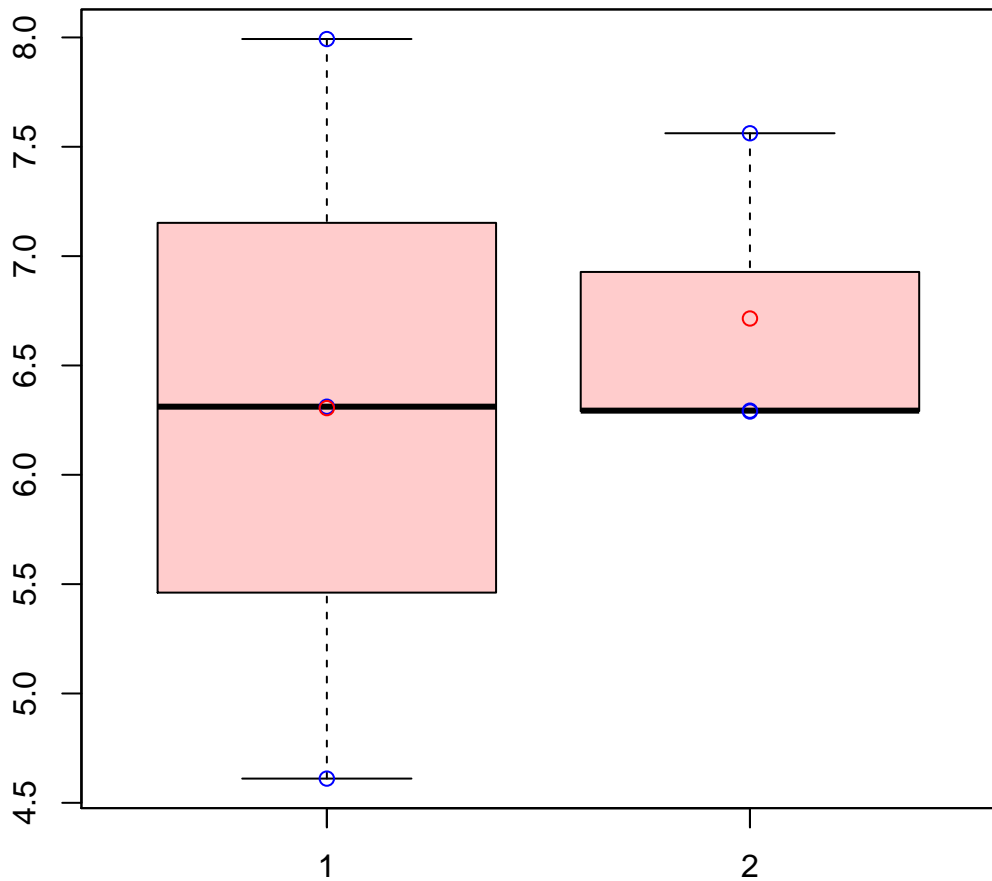

t-Test: p-value = 0.73



# CL1187Contig4|CL1187Contig4



t-Test: p-value = 0.73

# CL1187Contig9|CL1187Contig9



t-Test: p-value = 0.73

# CL11887Contig1|CL11887Contig1

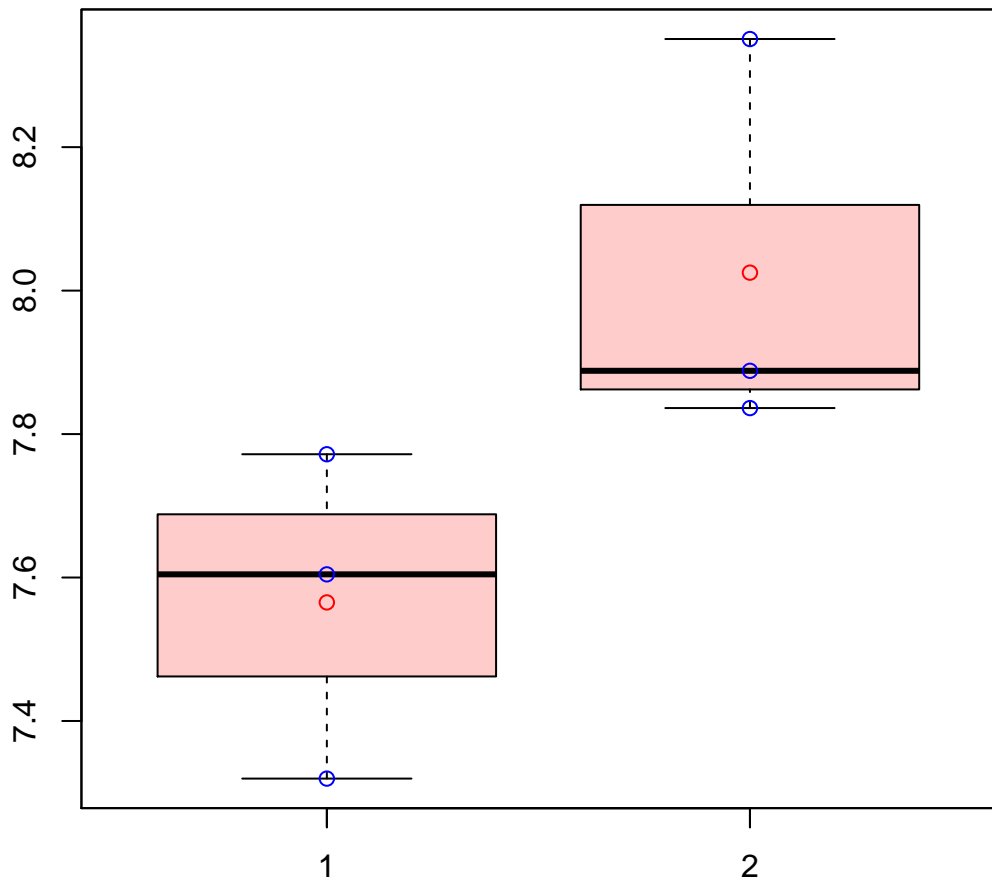

t-Test: p-value = 0.1

# CL11887Contig2|CL11887Contig2



t-Test: p-value = 0.1

# CL1189Contig1|CL1189Contig1

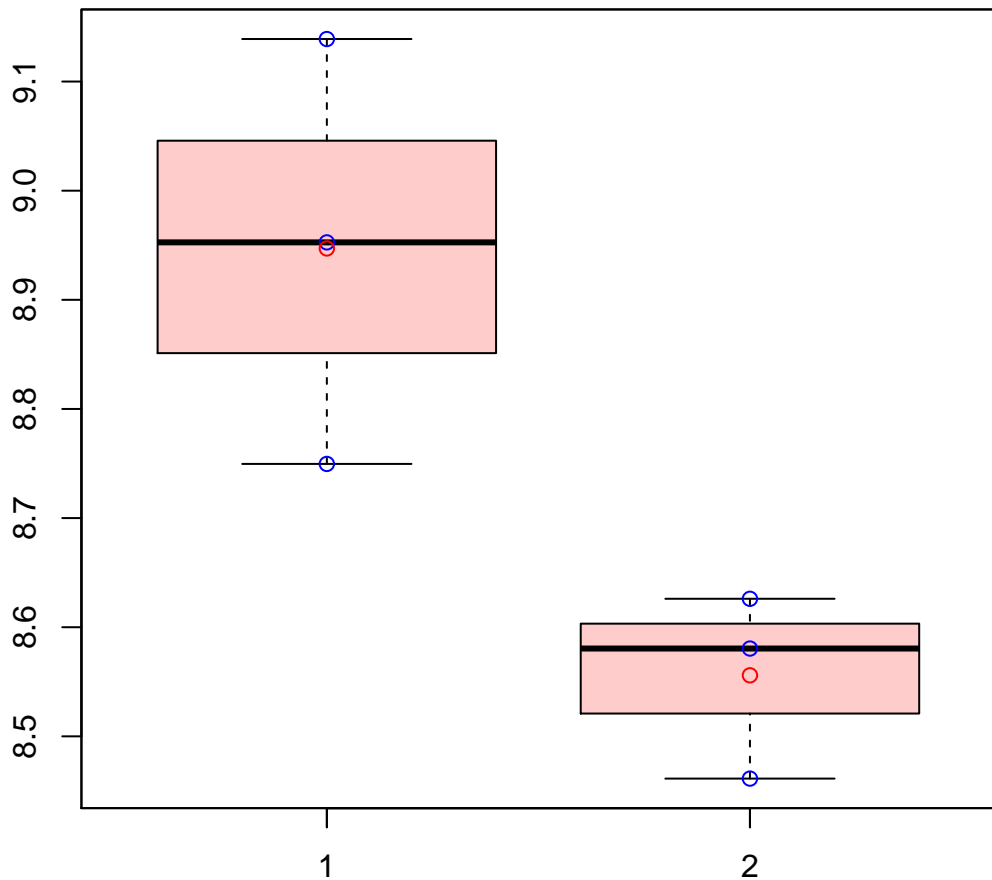

t-Test: p-value = 0.06

# CL118Contig5|CL118Contig5

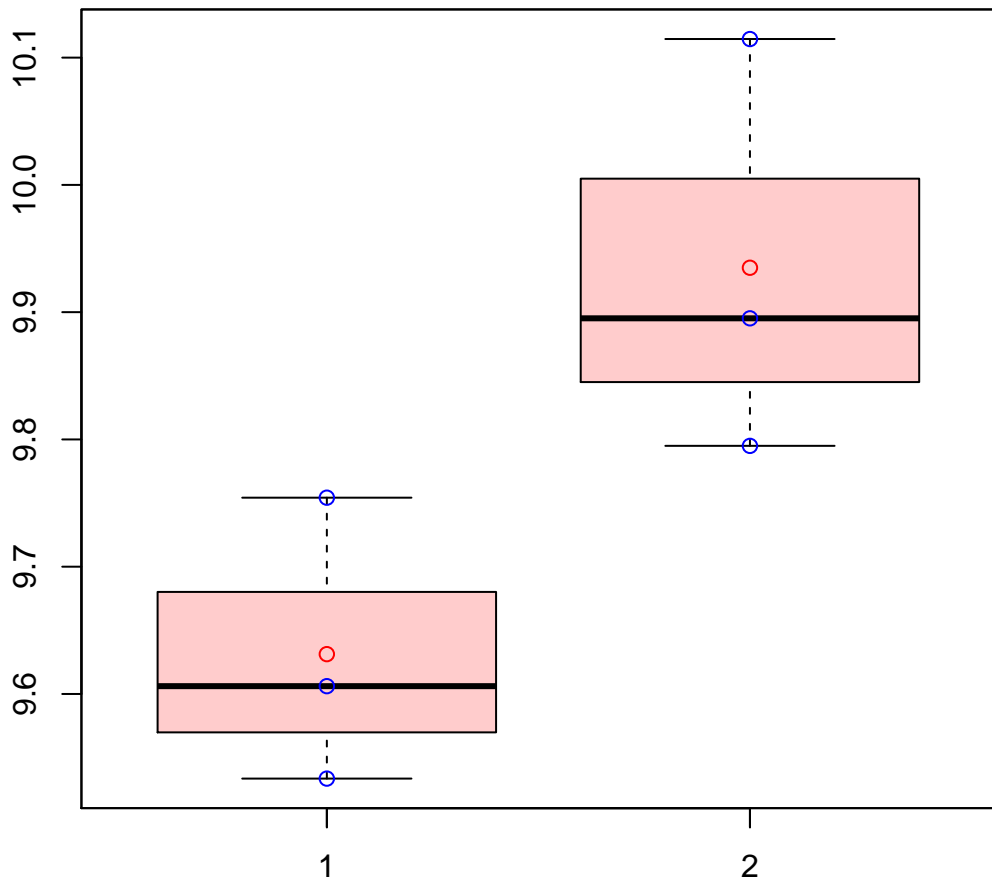

t-Test: p-value = 0.06

# CL118Contig6|CL118Contig6

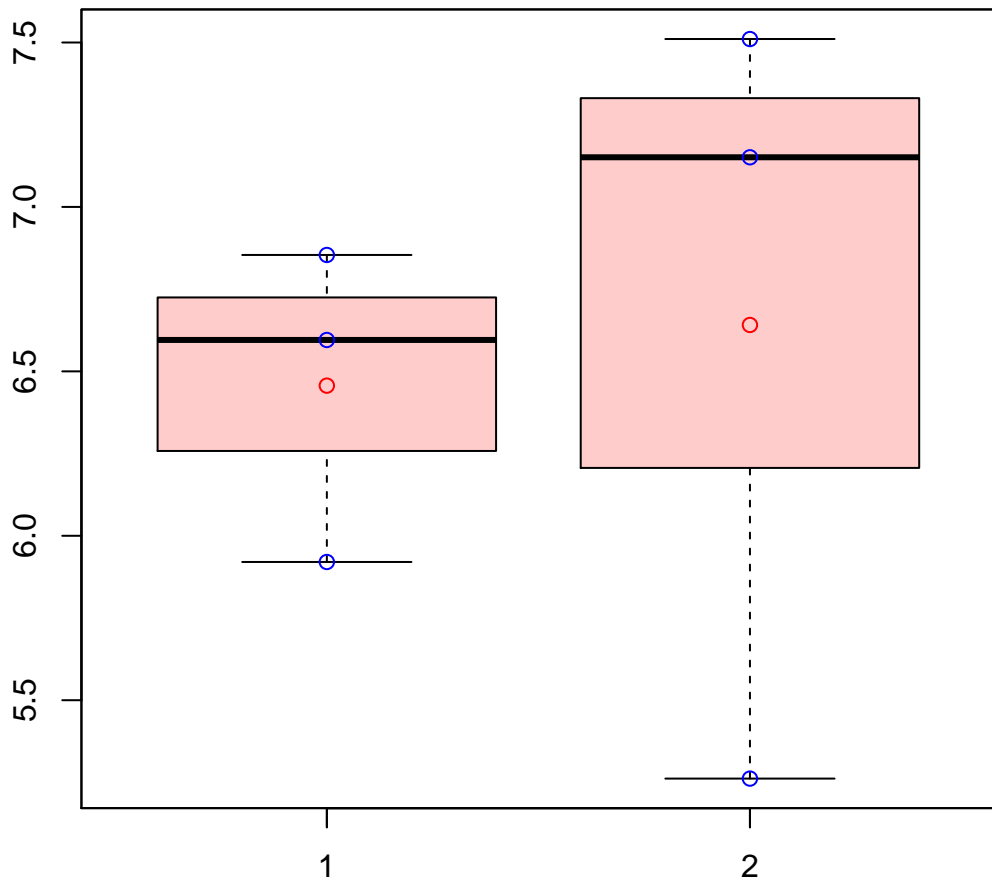

t-Test: p-value = 0.82

# CL11911Contig1|CL11911Contig1



t-Test: p-value = 0.67



# CL11931Contig1|CL11931Contig1

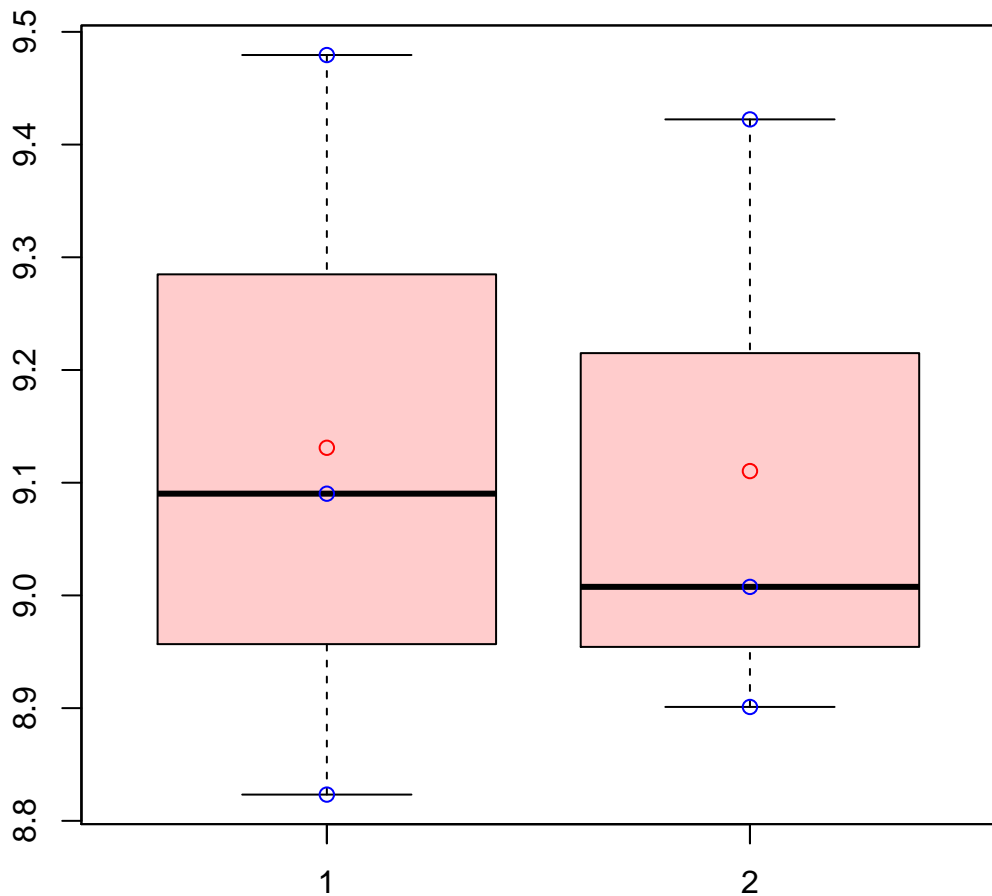

t-Test: p-value = 0.94

# CL11933Contig1|CL11933Contig1

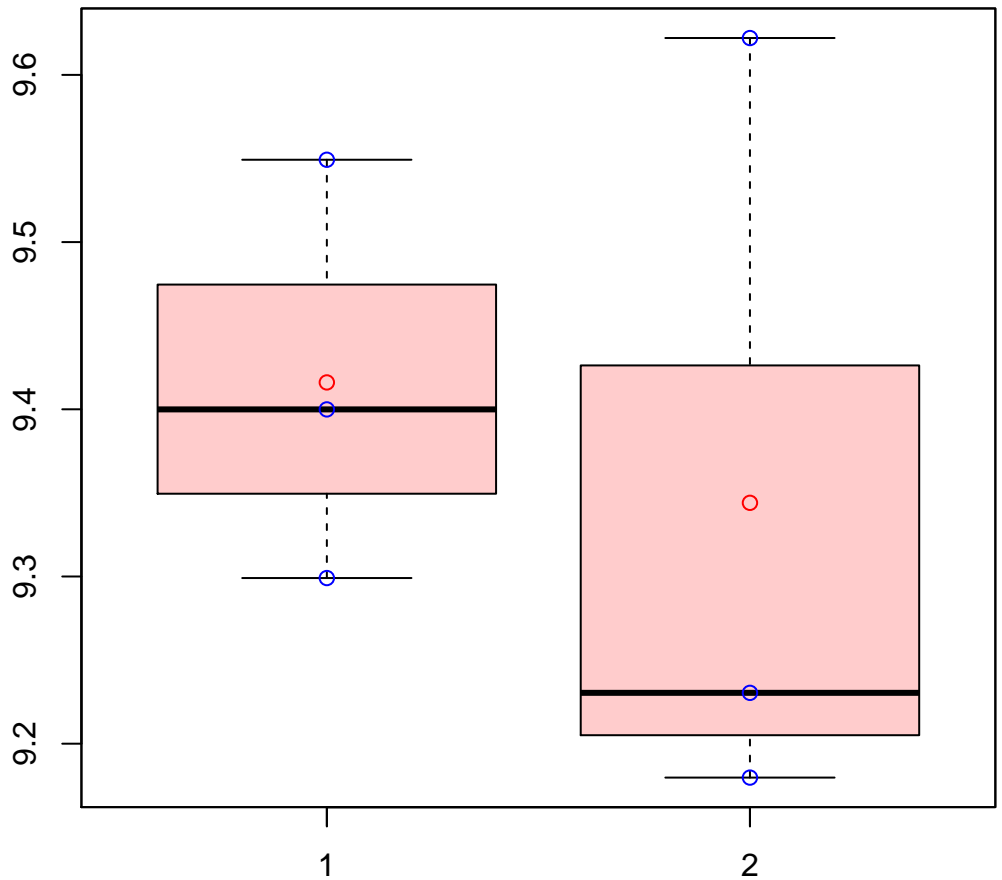

t-Test: p-value = 0.68

# CL1193Contig5|CL1193Contig5

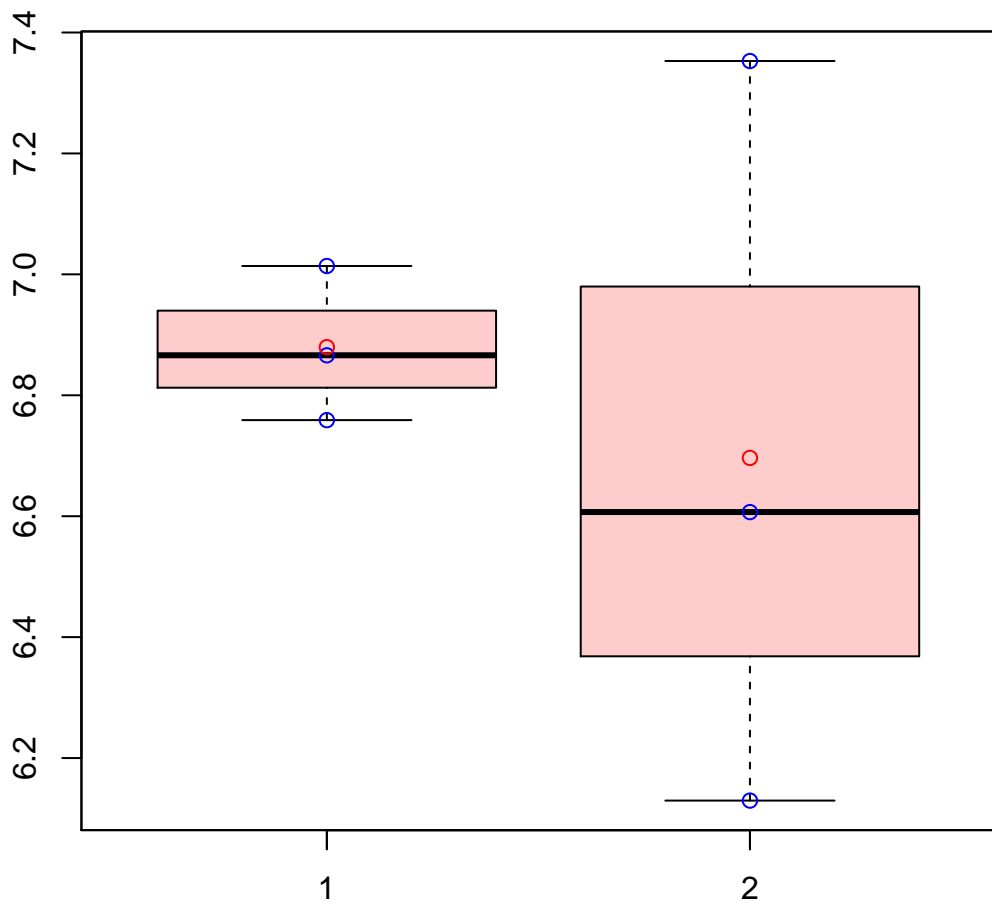

t-Test: p-value = 0.66

# CL1194Contig8|CL1194Contig8



t-Test: p-value = 0.68

# CL1195Contig15|CL1195Contig15

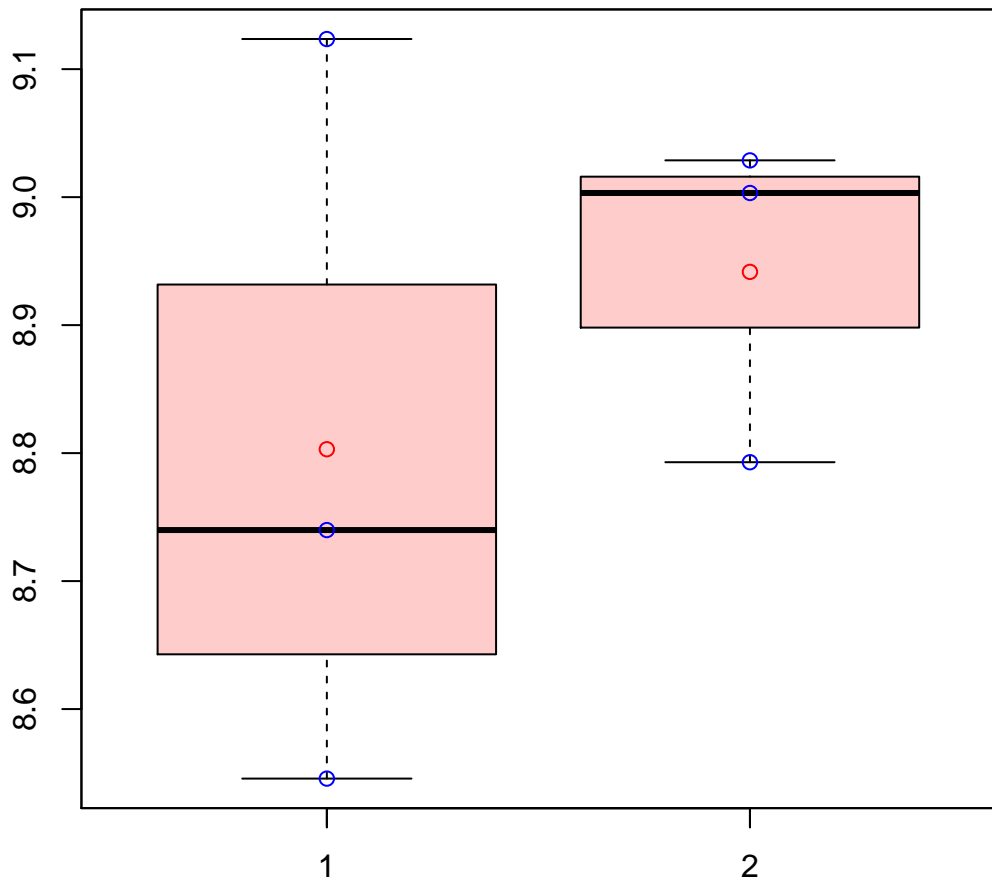

t-Test: p-value = 0.51

# CL1195Contig6|CL1195Contig6

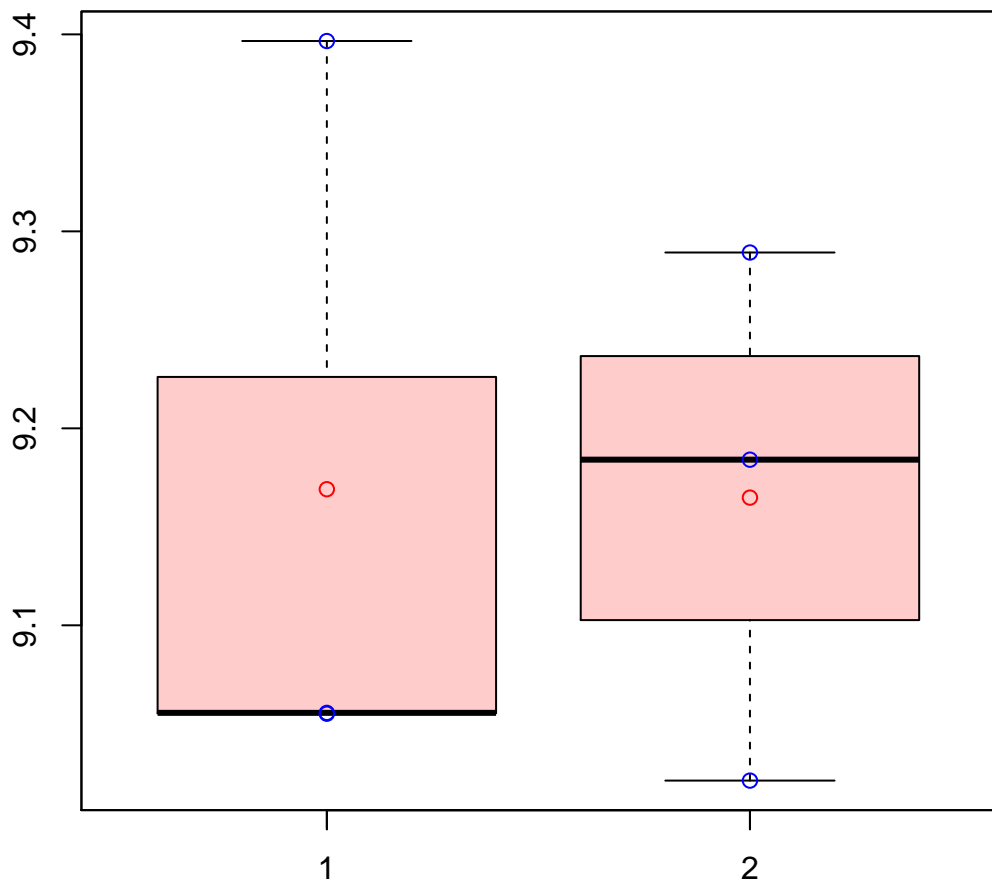

t-Test: p-value = 0.98

# CL1195Contig7|CL1195Contig7



t-Test: p-value = 0.98

# CL11967Contig1|CL11967Contig1

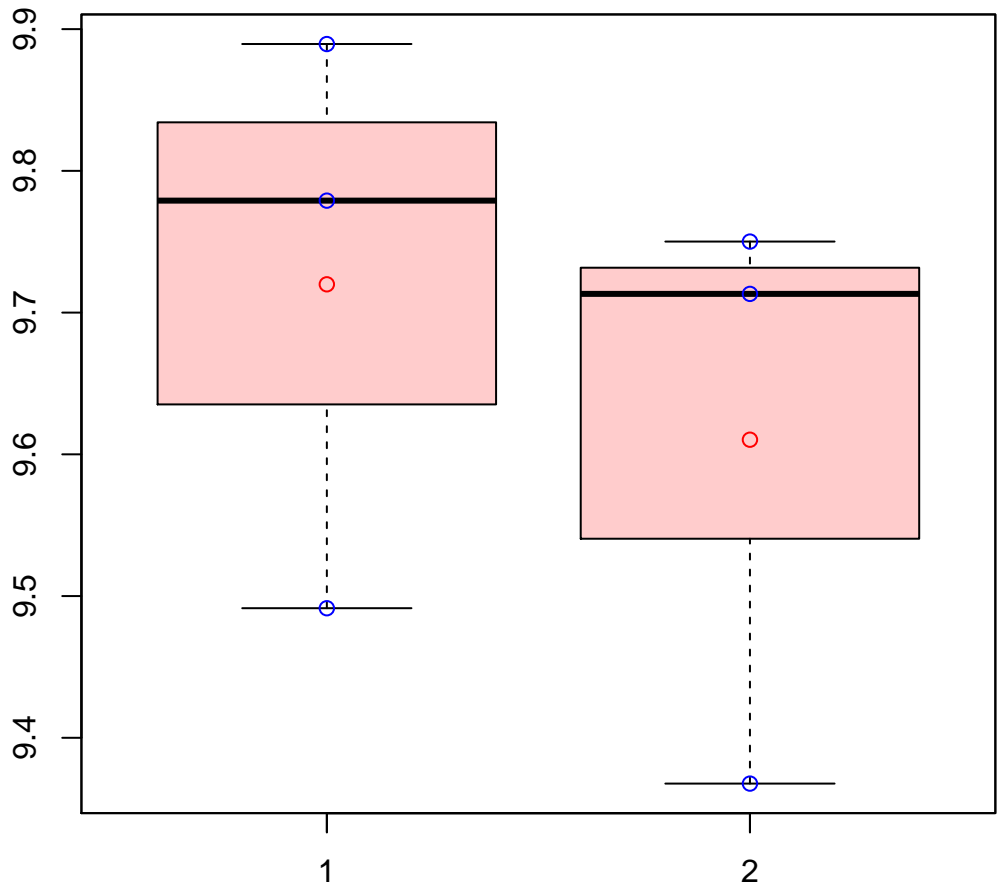

t-Test: p-value = 0.55



# CL11970Contig1|CL11970Contig1

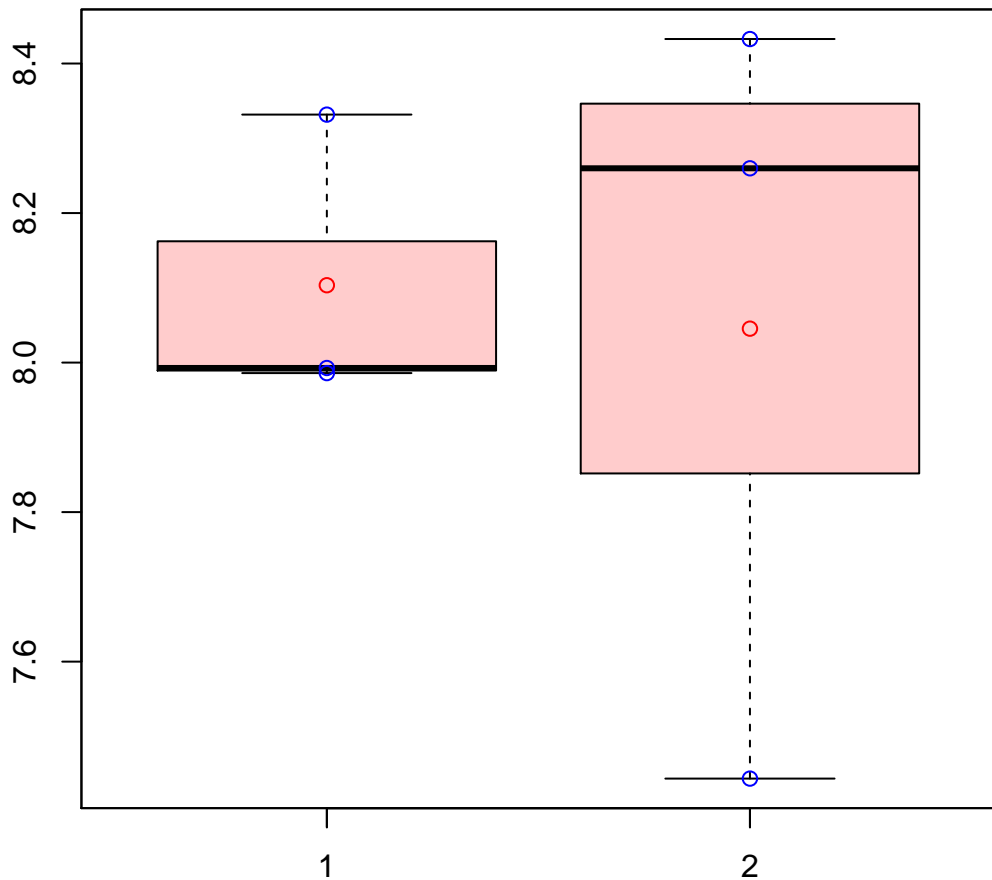

t-Test: p-value = 0.87

# CL11972Contig1|CL11972Contig1

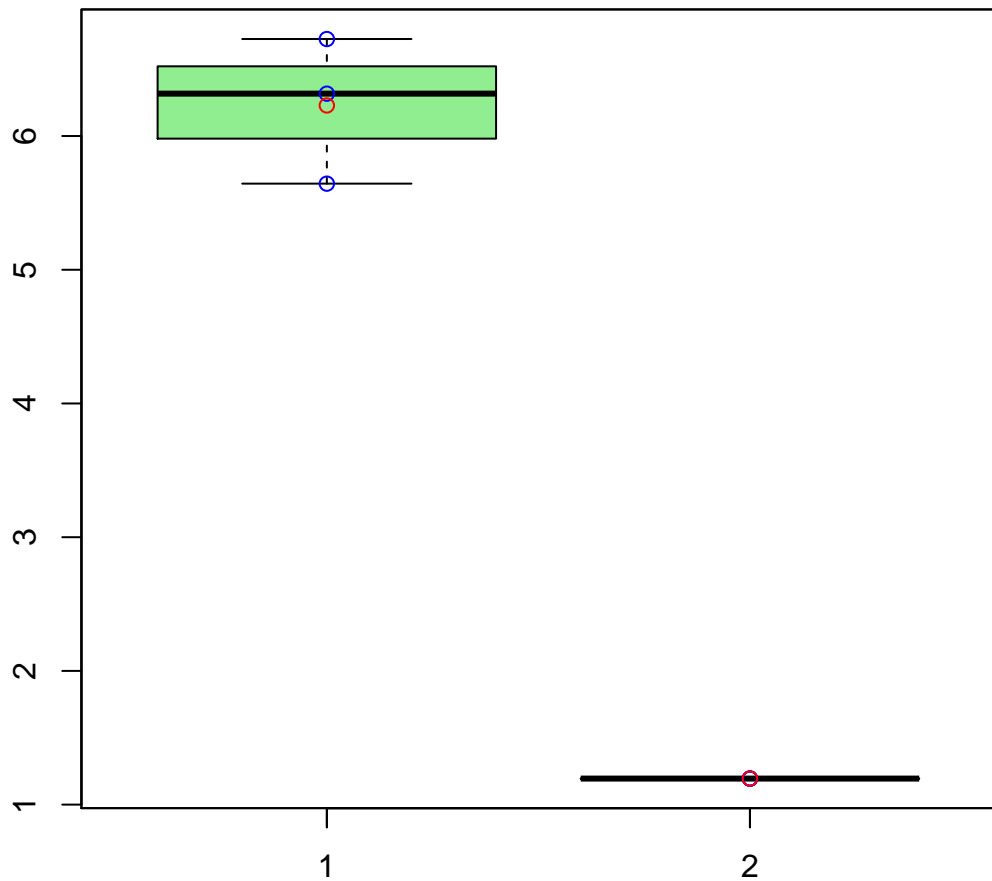

t-Test: p-value = 0

# CL11973Contig1|CL11973Contig1

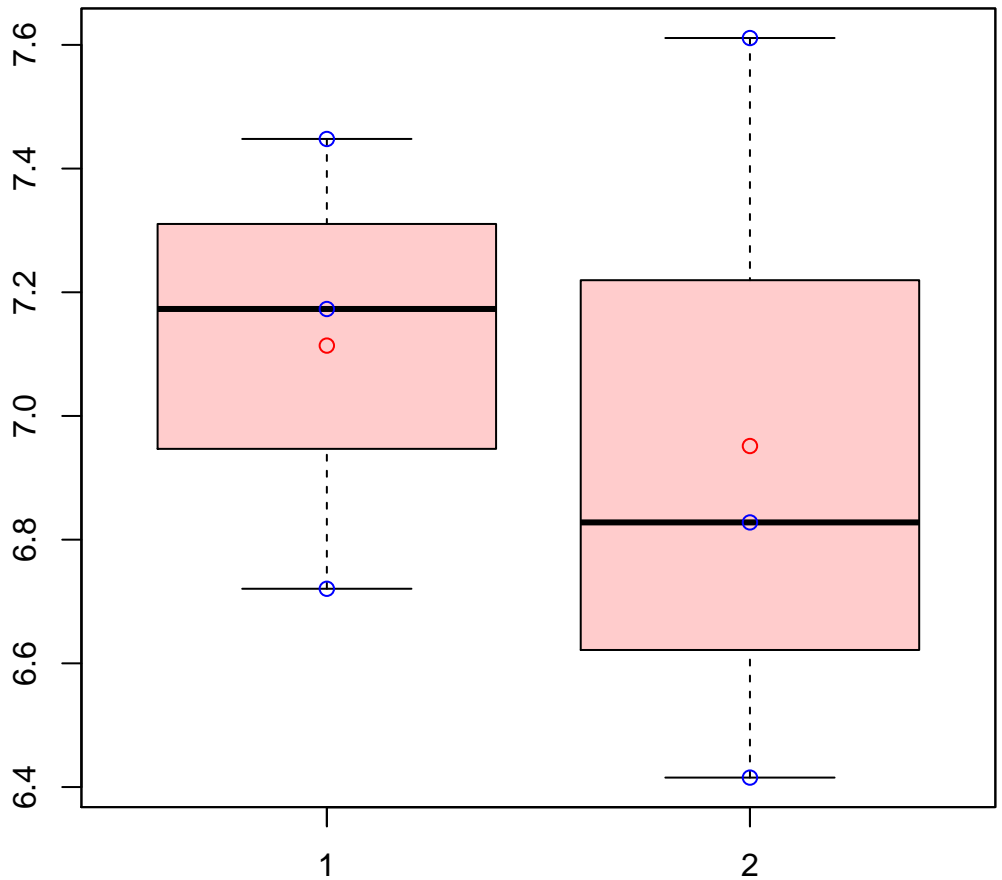

t-Test: p-value = 0.72

# CL11974Contig1|CL11974Contig1

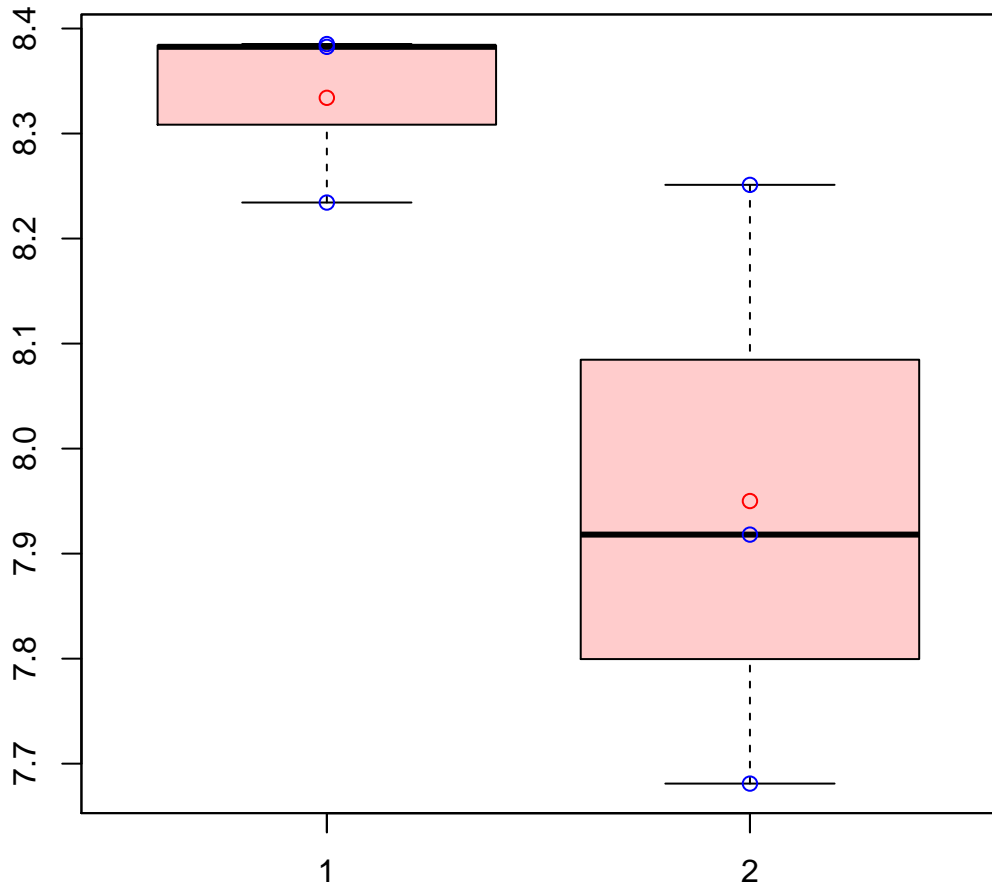

t-Test: p-value = 0.14

# CL11986Contig1|CL11986Contig1



t-Test: p-value = 0.66

# CL119Contig20|CL119Contig20

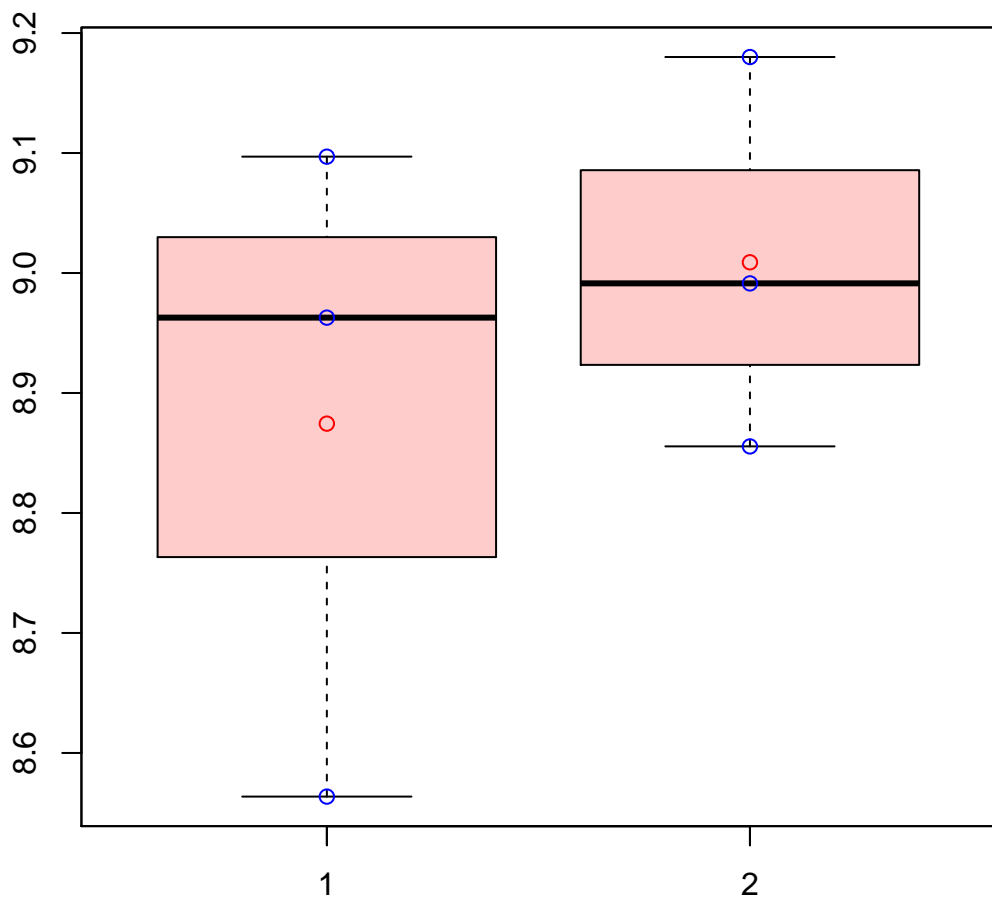

t-Test: p-value = 0.52

# CL119Contig7|CL119Contig7

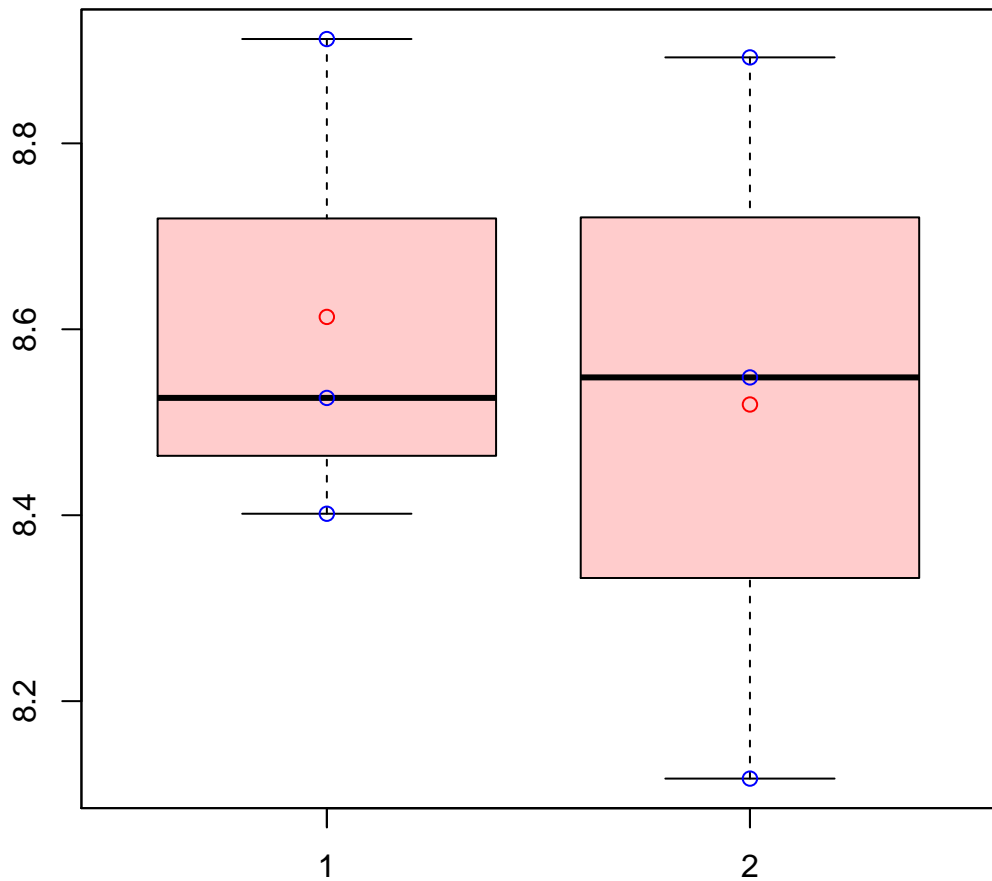

t-Test: p-value = 0.75

# CL11Contig17|CL11Contig17

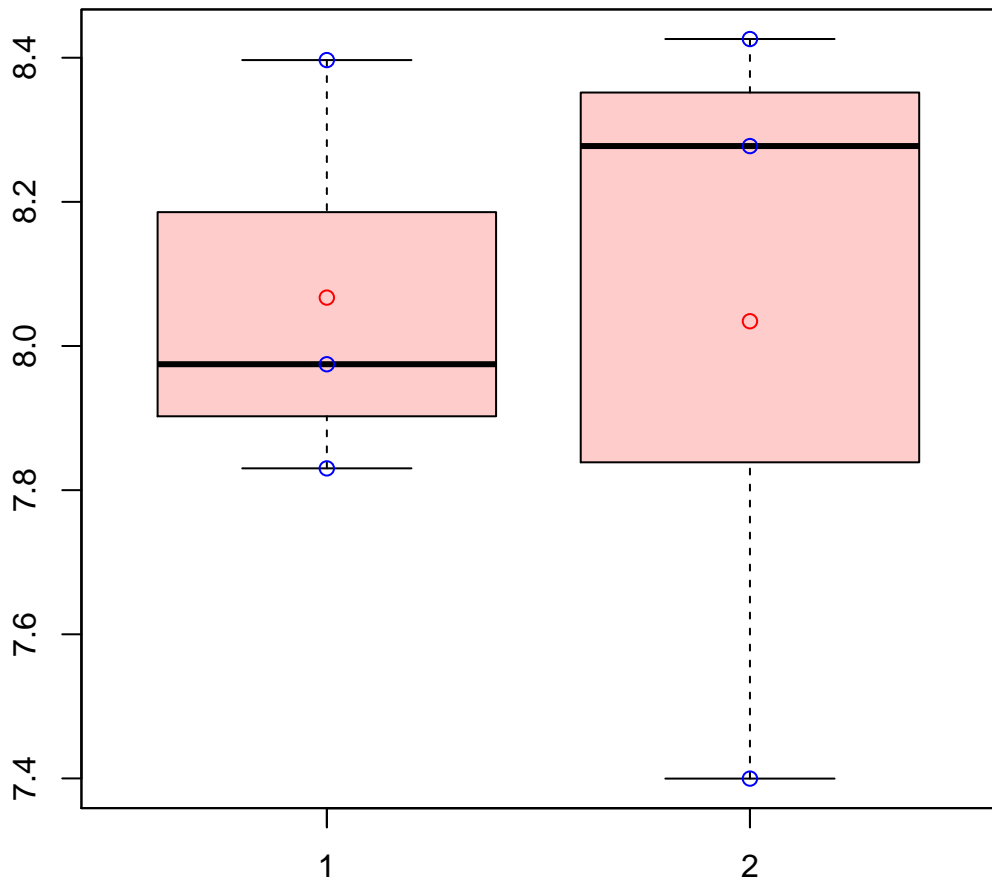

t-Test: p-value = 0.93



# CL11Contig29|CL11Contig29

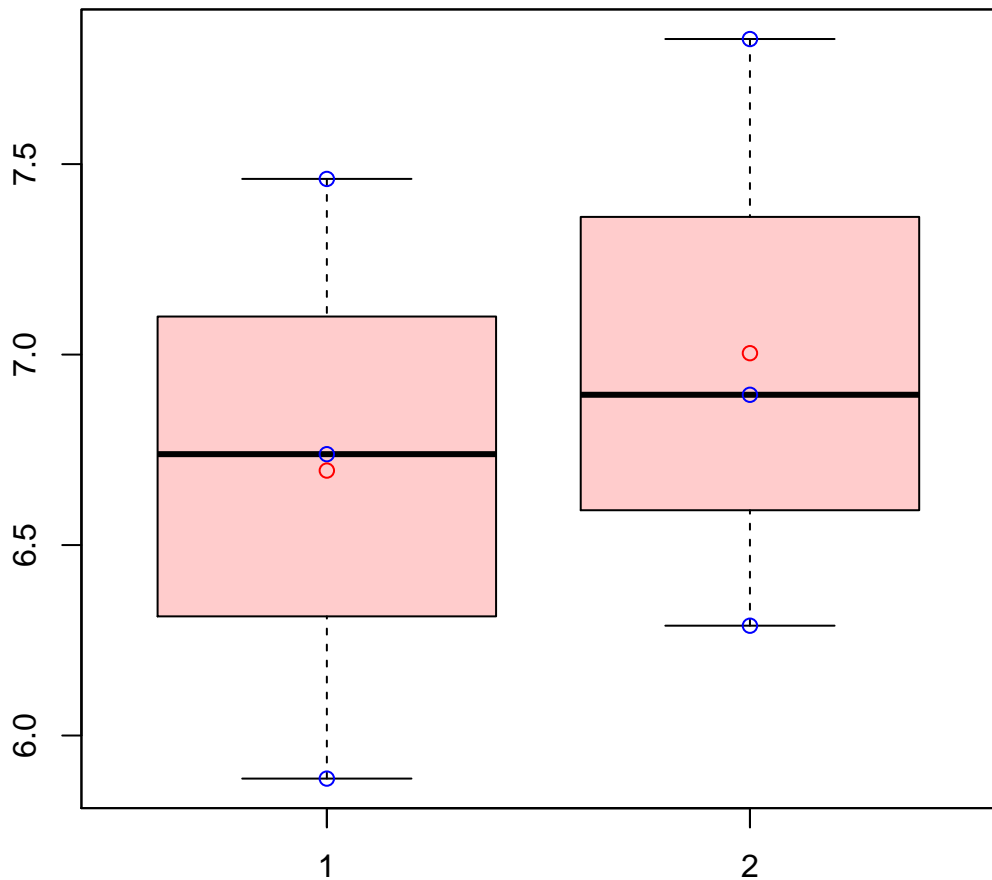

t-Test: p-value = 0.65

# CL11Contig53|CL11Contig53

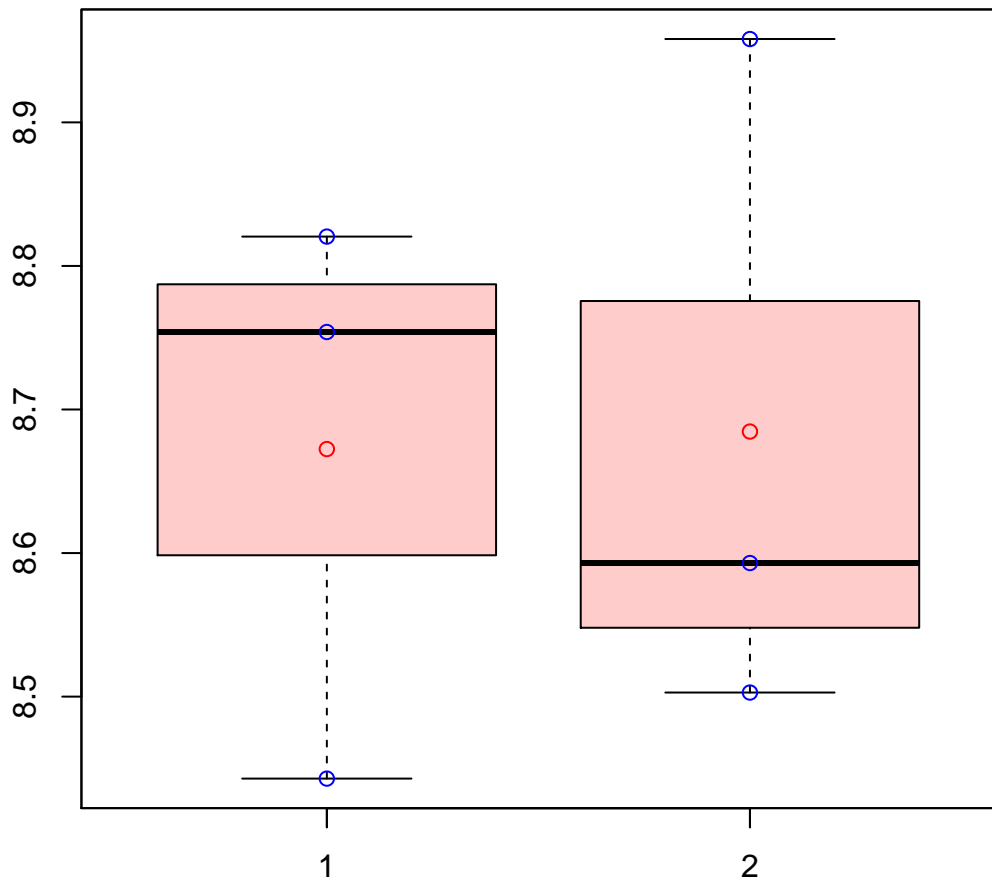

t-Test: p-value = 0.95

# CL11Contig9|CL11Contig9



t-Test: p-value = 0.67

# CL12000Contig1|CL12000Contig1

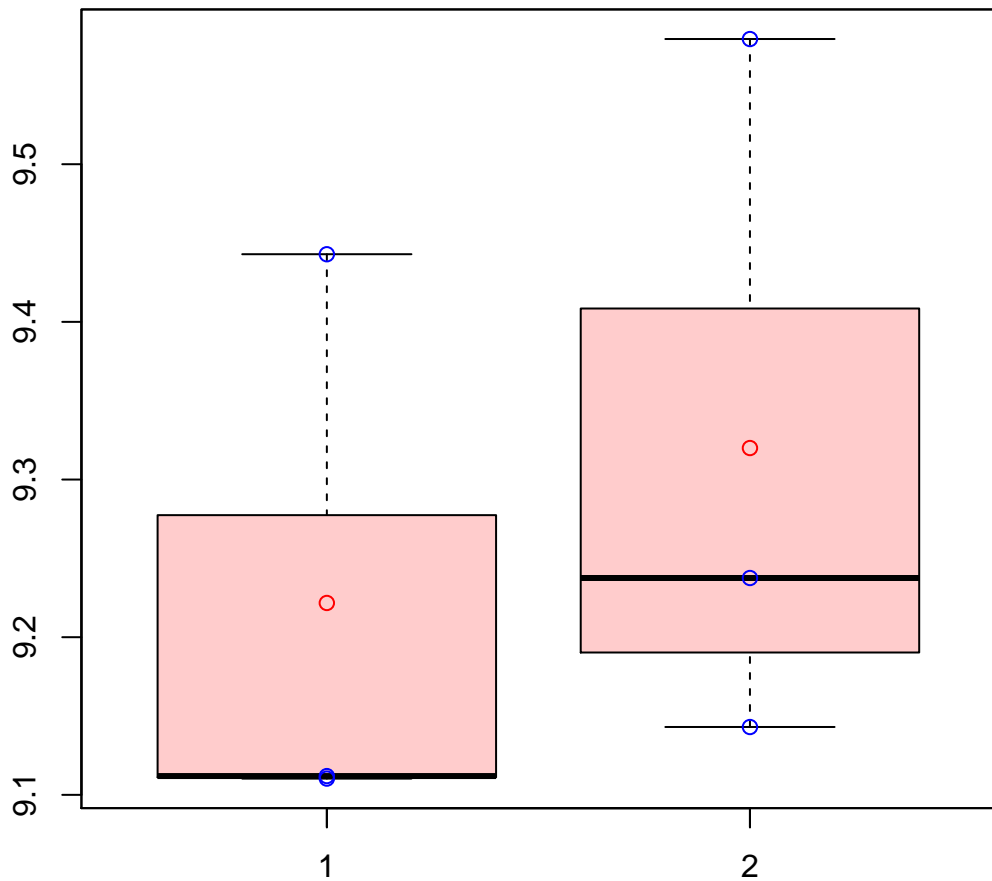

t-Test: p-value = 0.6

# CL12005Contig1|CL12005Contig1

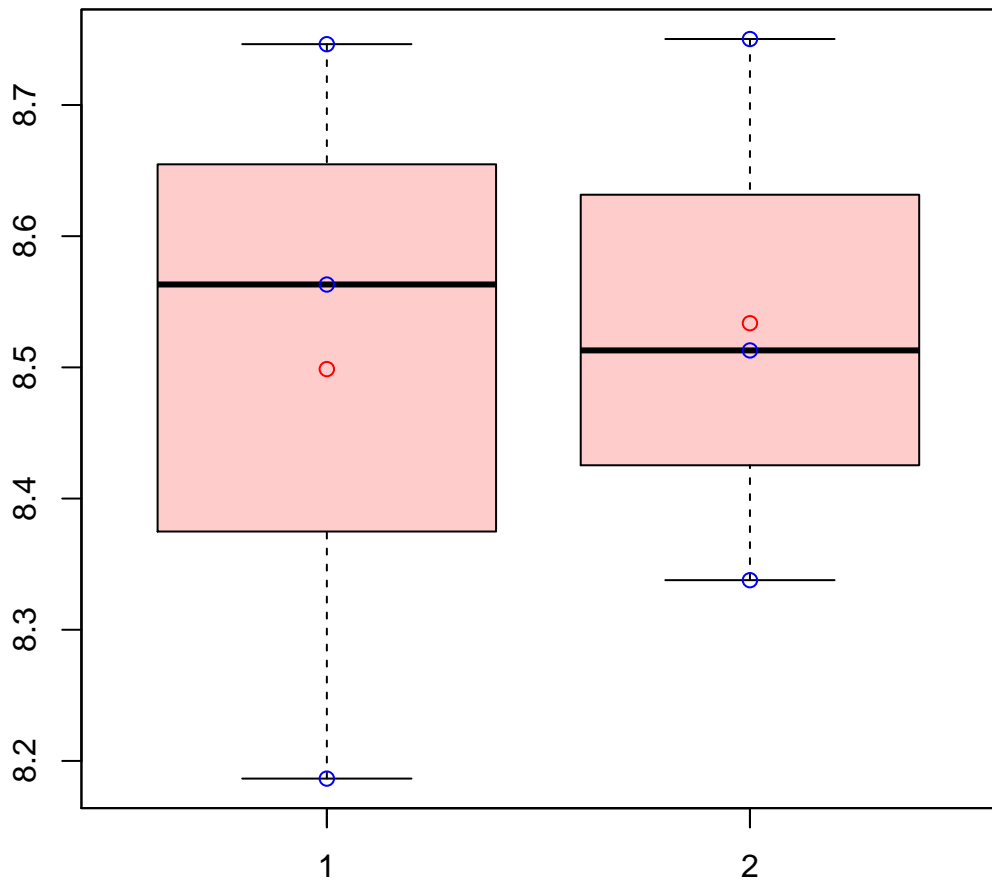

t-Test: p-value = 0.87

# CL12009Contig1|CL12009Contig1

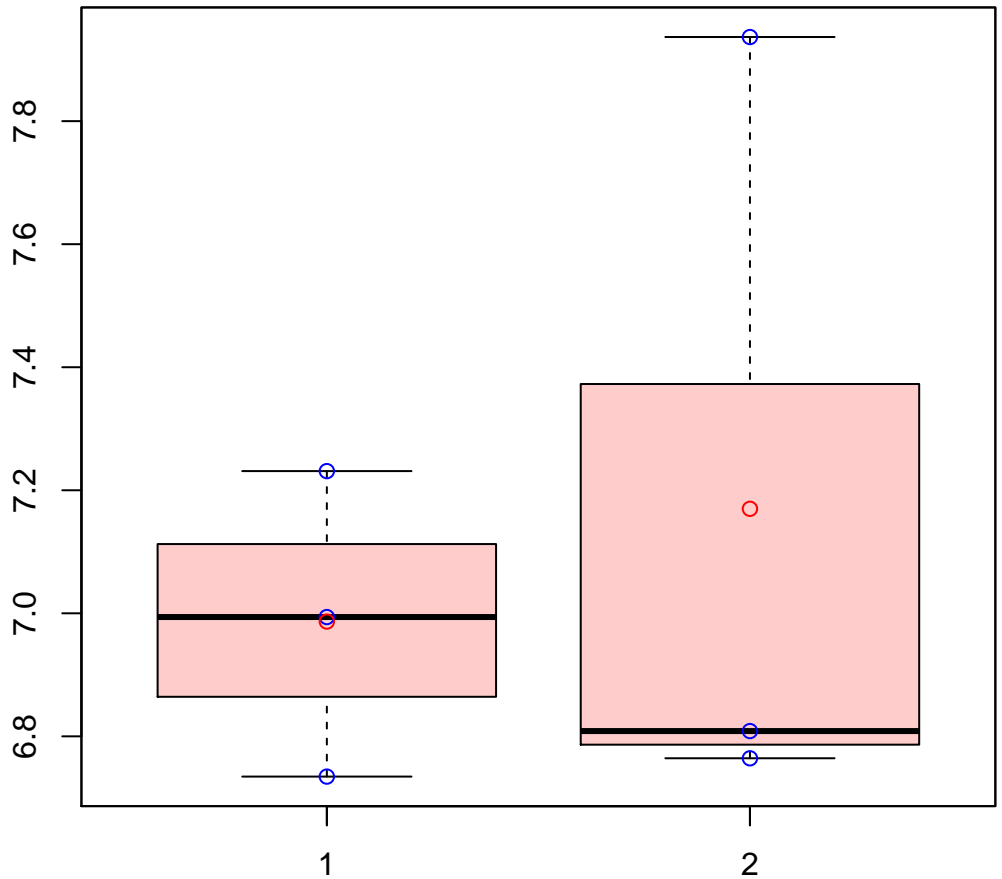

t-Test: p-value = 0.69

# CL12009Contig2|CL12009Contig2



t-Test: p-value = 0.69

# CL1200Contig1|CL1200Contig1

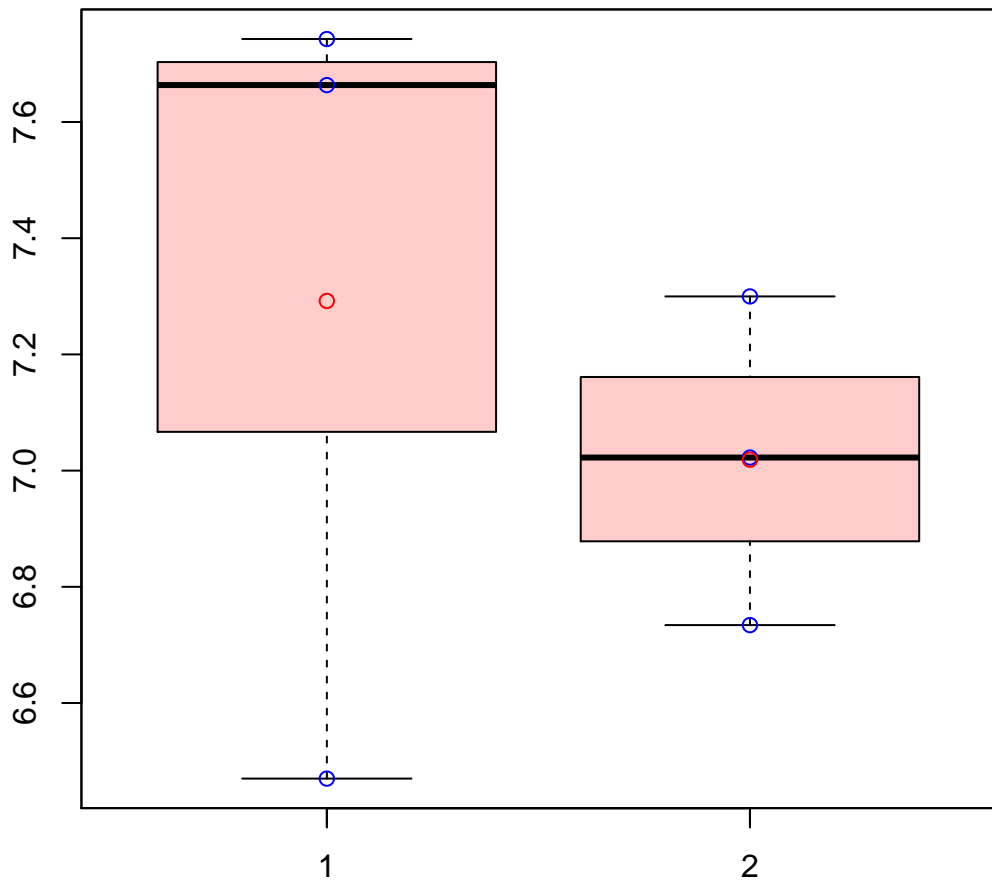

t-Test: p-value = 0.59



# CL1200Contig3|CL1200Contig3

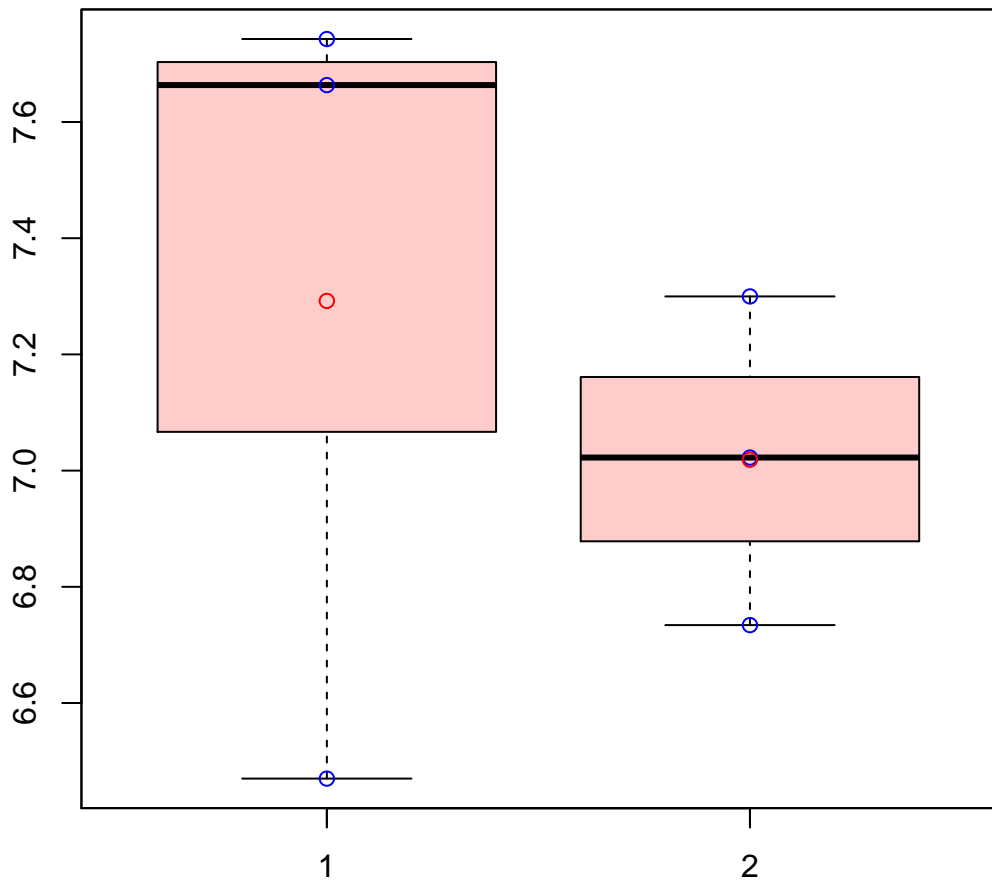

t-Test: p-value = 0.59

# CL12016Contig1|CL12016Contig1

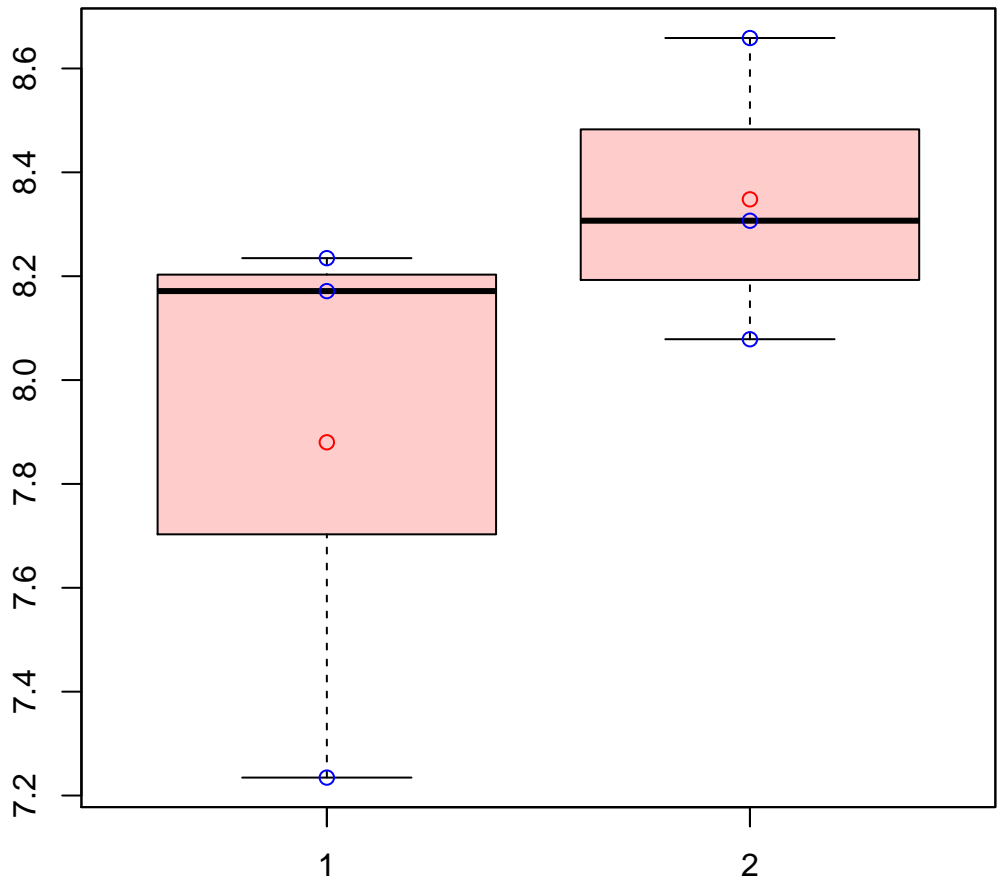

t-Test: p-value = 0.29

# CL1201Contig16|CL1201Contig16

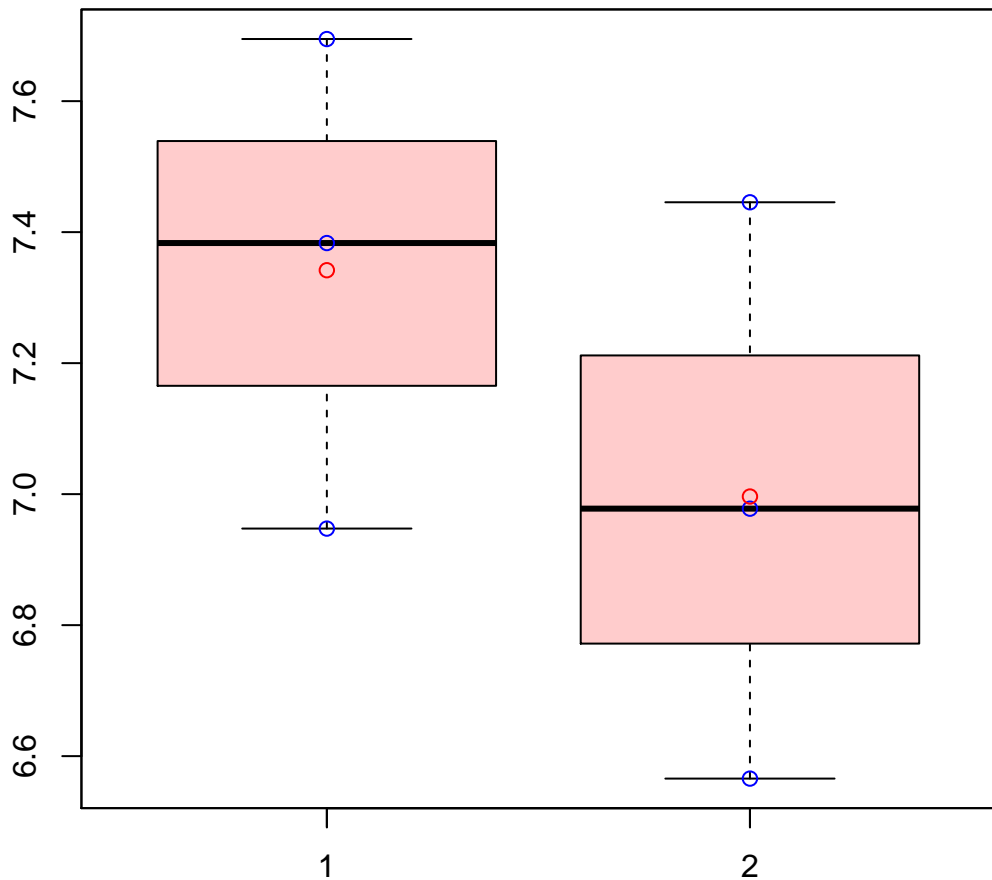

t-Test: p-value = 0.36

# CL1201Contig18|CL1201Contig18

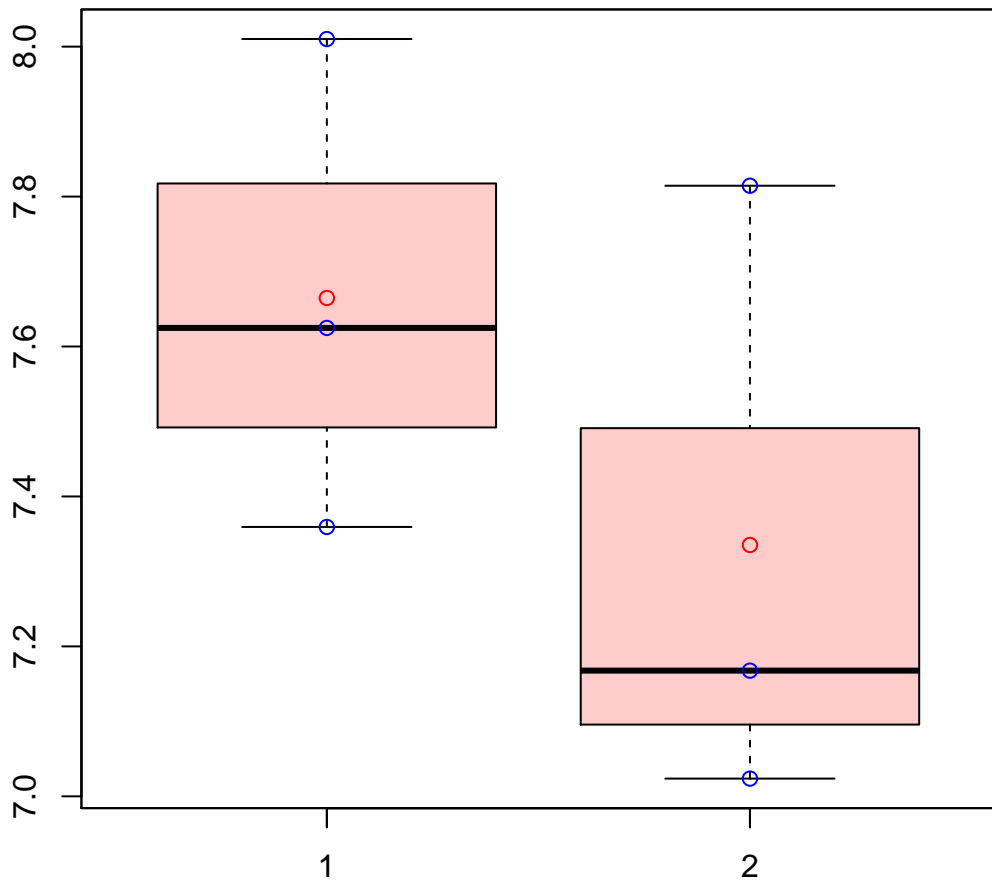

t-Test: p-value = 0.35

# CL1201Contig19|CL1201Contig19



t-Test: p-value = 0.36

# CL1201Contig1|CL1201Contig1



t-Test: p-value = 0.35

# CL1201Contig20|CL1201Contig20



t-Test: p-value = 0.35

# CL12027Contig1|CL12027Contig1



t-Test: p-value = 0.78



# CL1202Contig3|CL1202Contig3

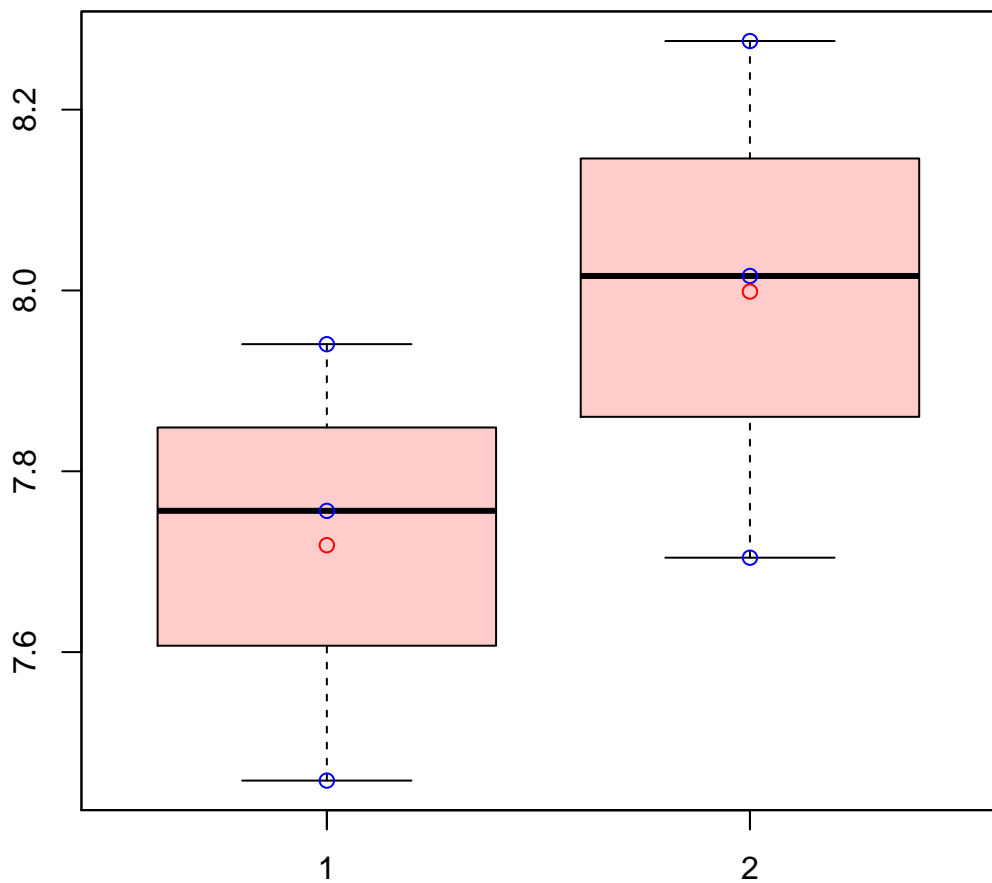

t-Test: p-value = 0.27

# CL120Contig16|CL120Contig16

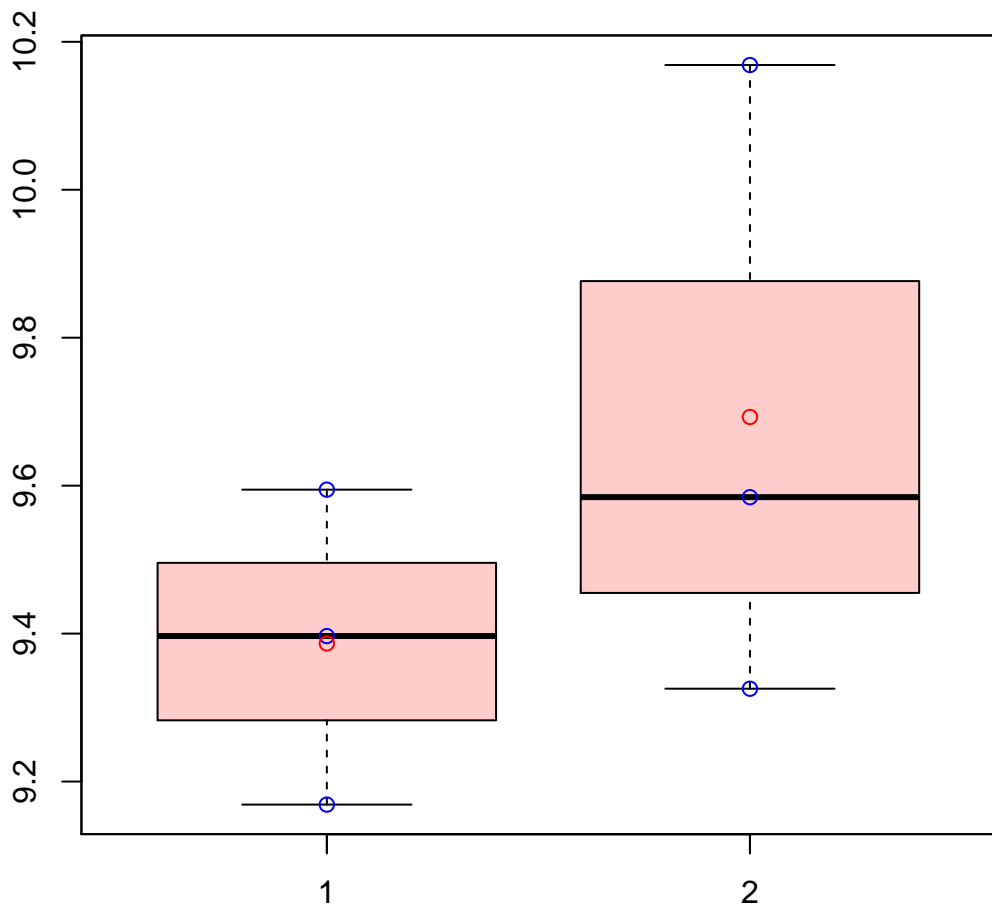

t-Test: p-value = 0.35

# CL120Contig26|CL120Contig26

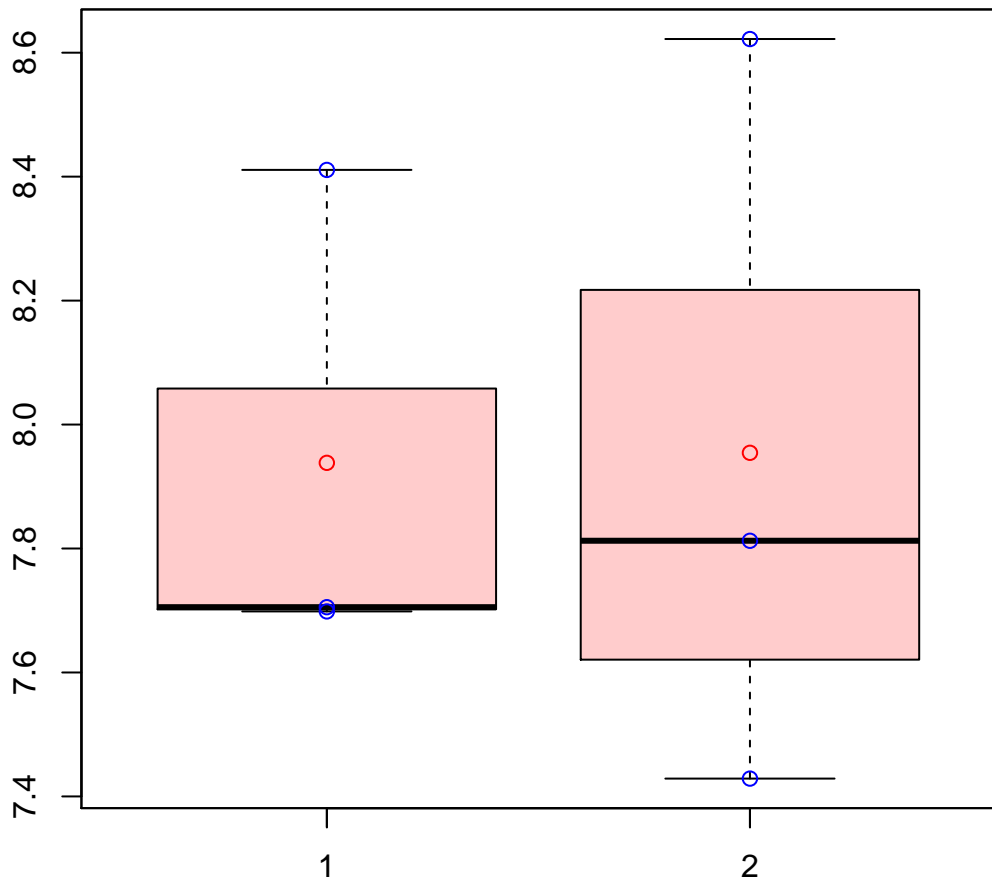

t-Test: p-value = 0.97

# CL120Contig9|CL120Contig9

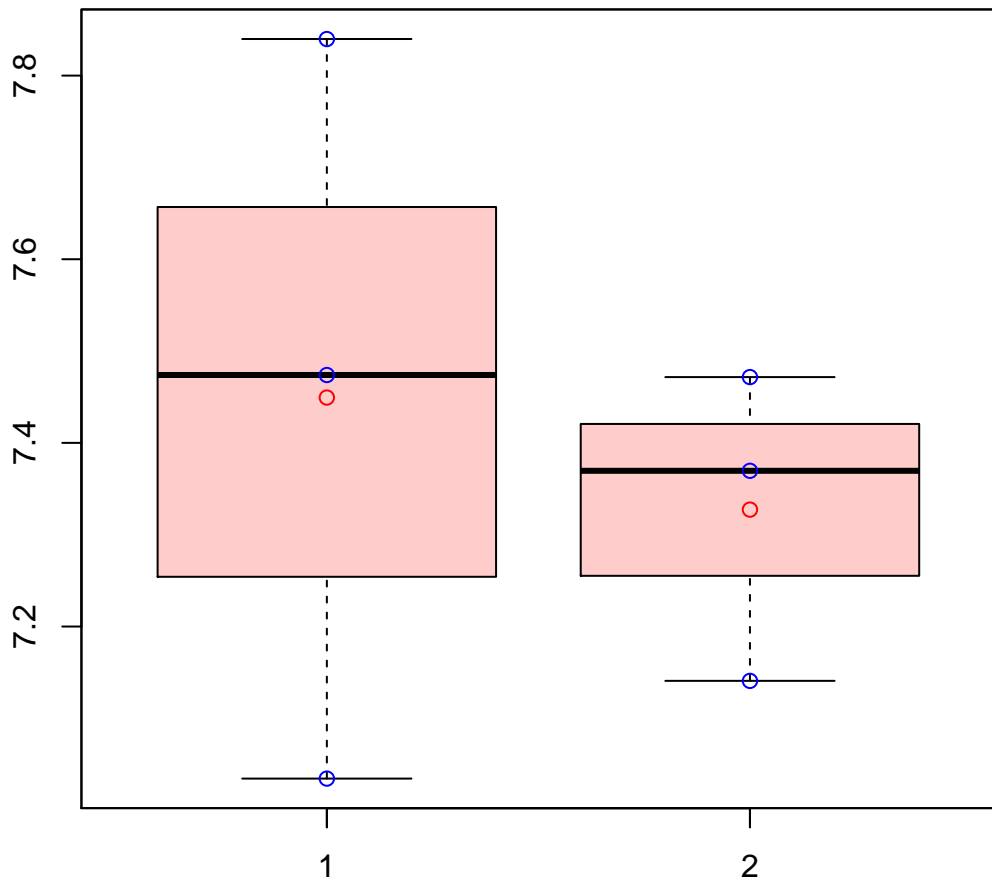

t-Test: p-value = 0.67

# CL12131Contig1|CL12131Contig1

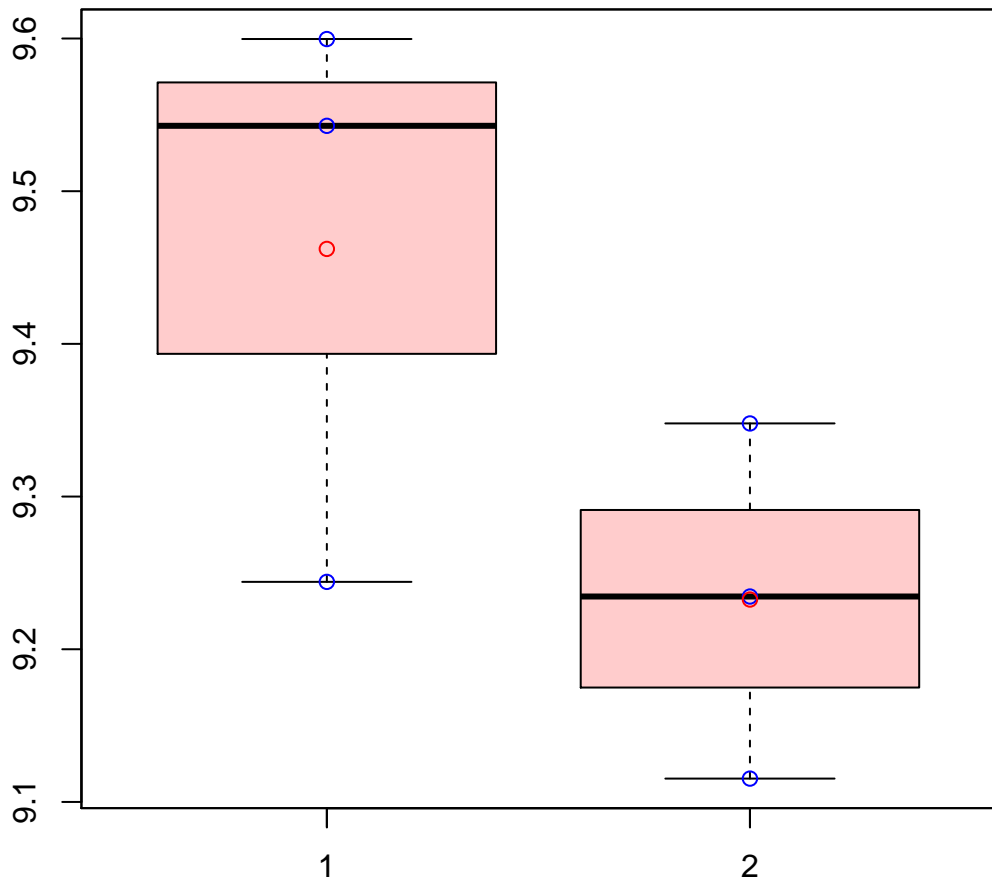

t-Test: p-value = 0.16

# CL1215Contig1|CL1215Contig1

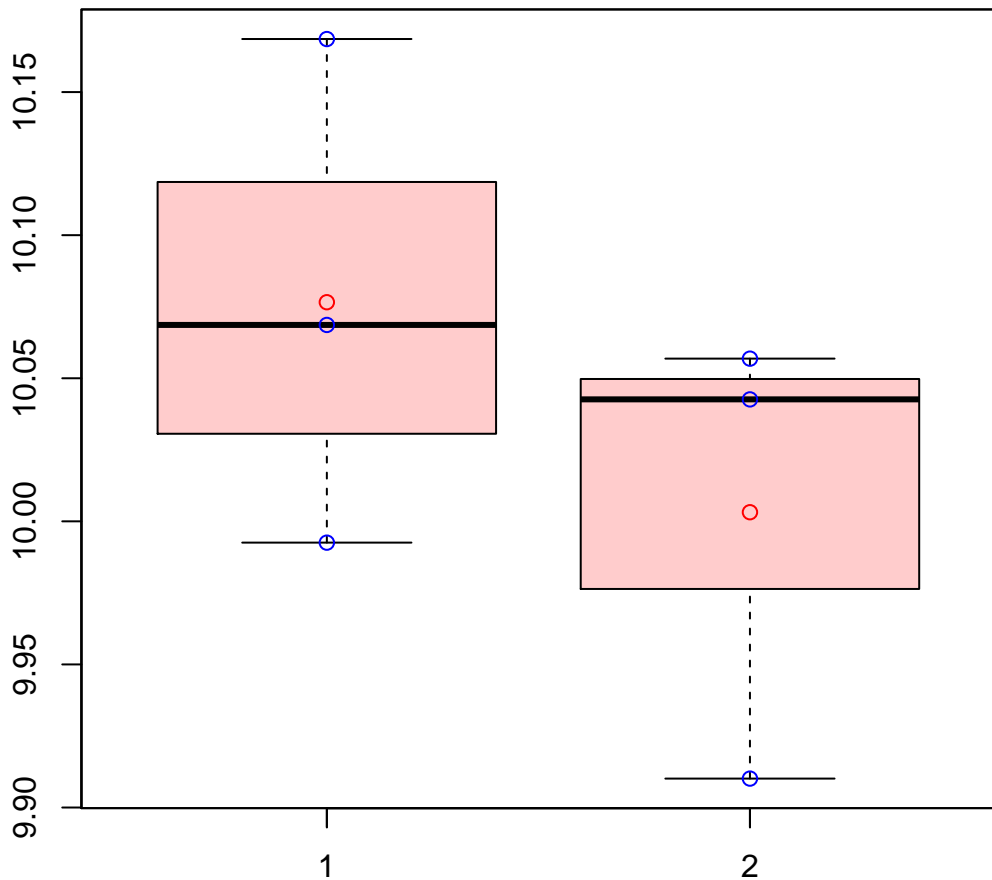

t-Test: p-value = 0.35

# CL1215Contig3|CL1215Contig3

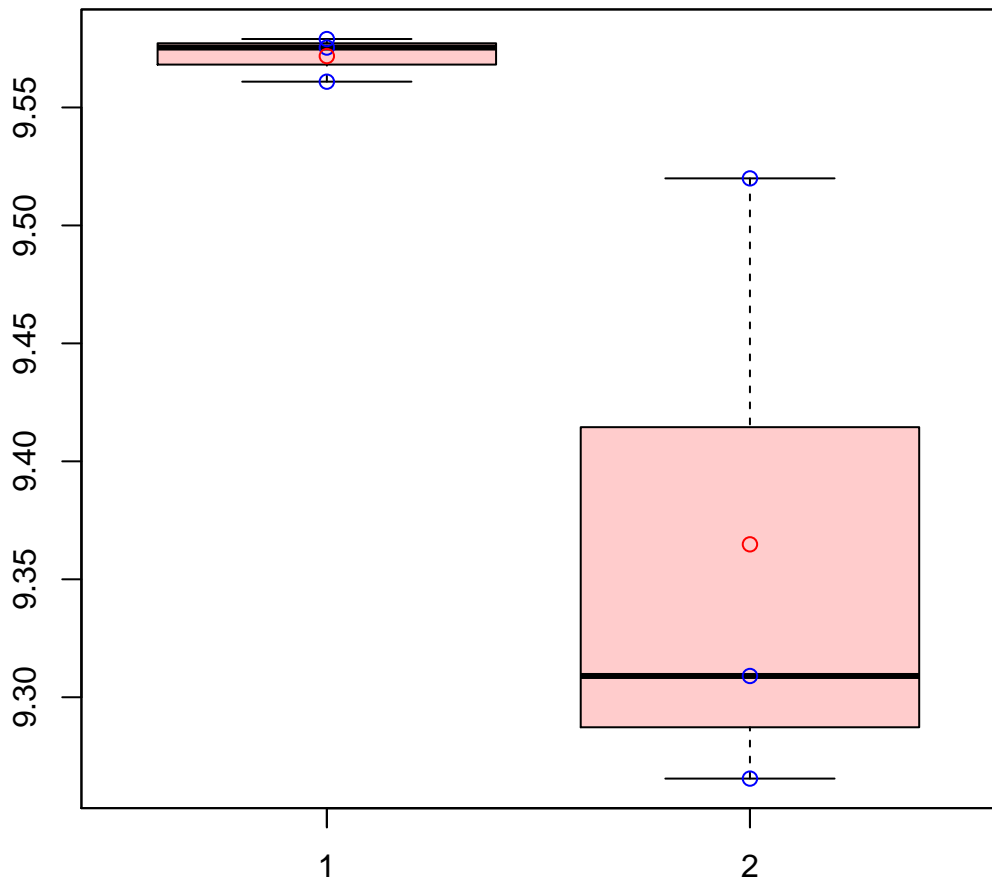

t-Test: p-value = 0.12

# CL12161Contig1|CL12161Contig1

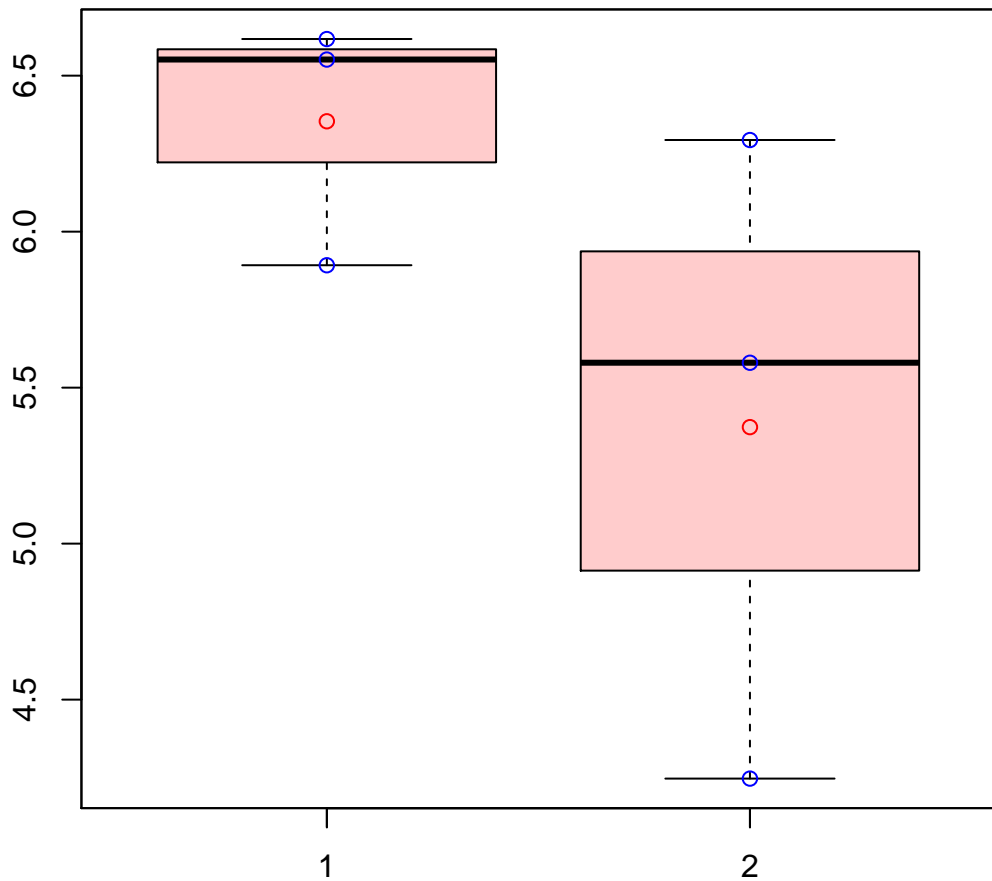

t-Test: p-value = 0.24



# CL12175Contig2|CL12175Contig2

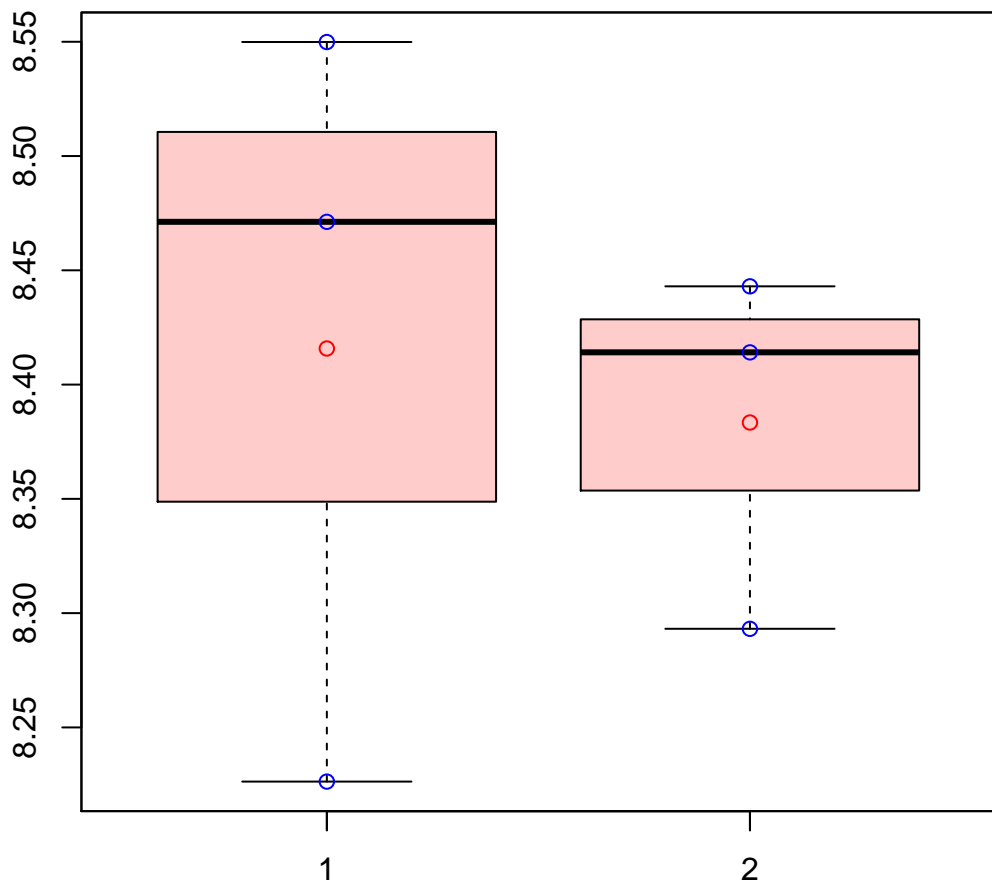

t-Test: p-value = 0.78

# CL1217Contig1|CL1217Contig1

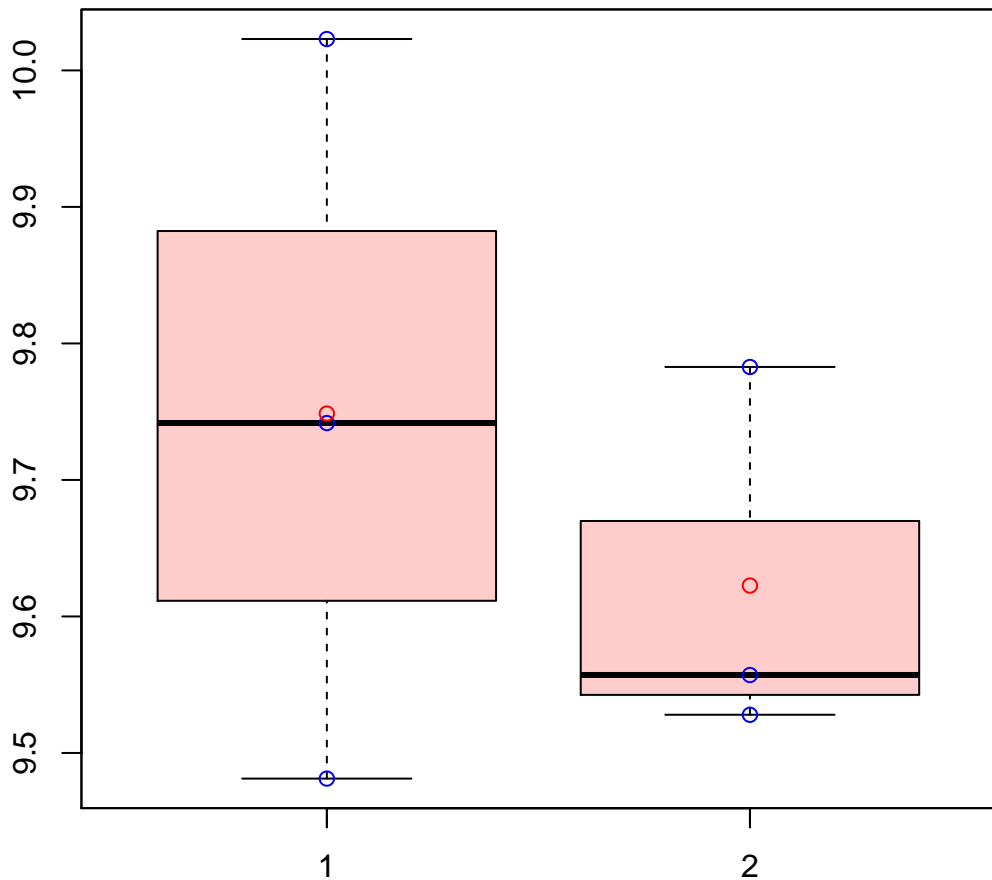

t-Test: p-value = 0.53

# CL1217Contig3|CL1217Contig3

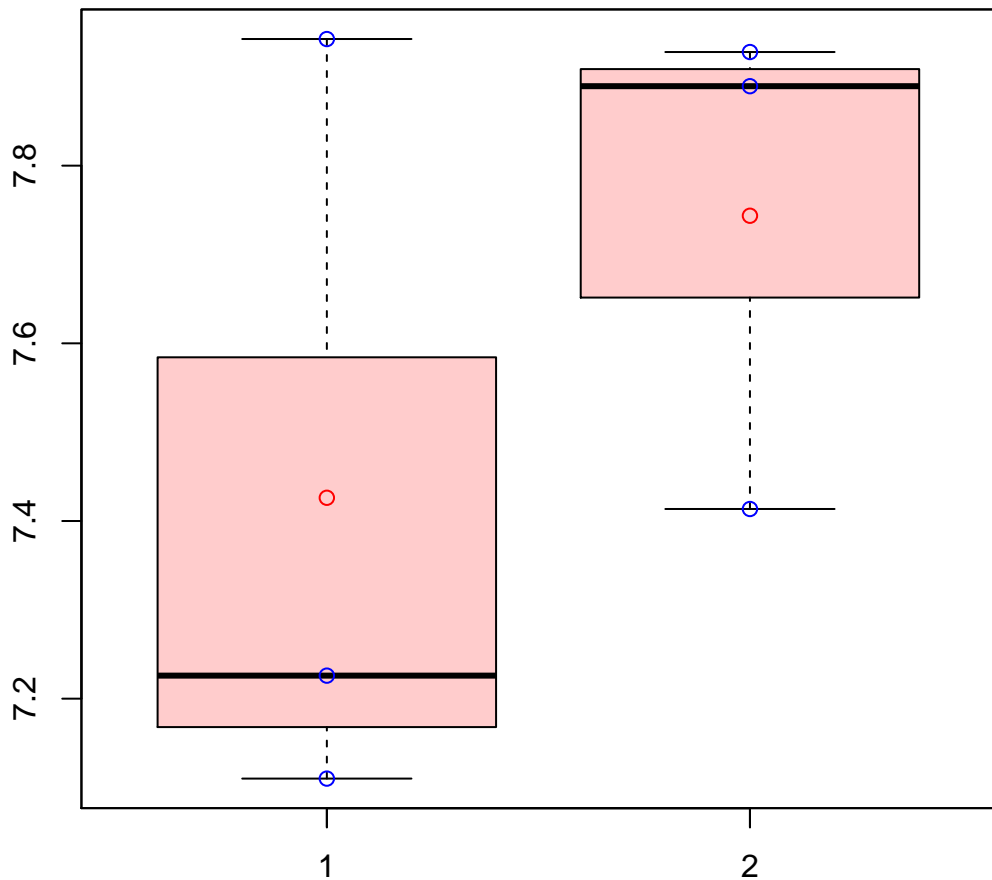

t-Test: p-value = 0.37

# CL1217Contig4|CL1217Contig4

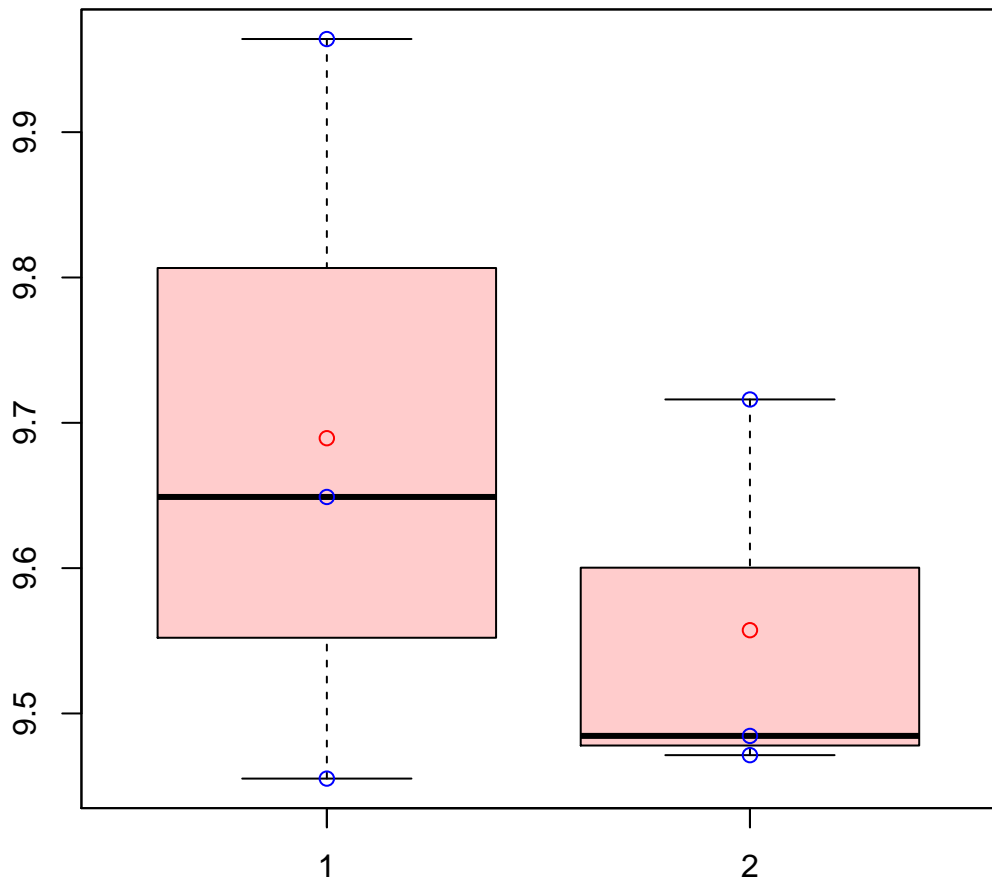

t-Test: p-value = 0.49

# CL12182Contig1|CL12182Contig1

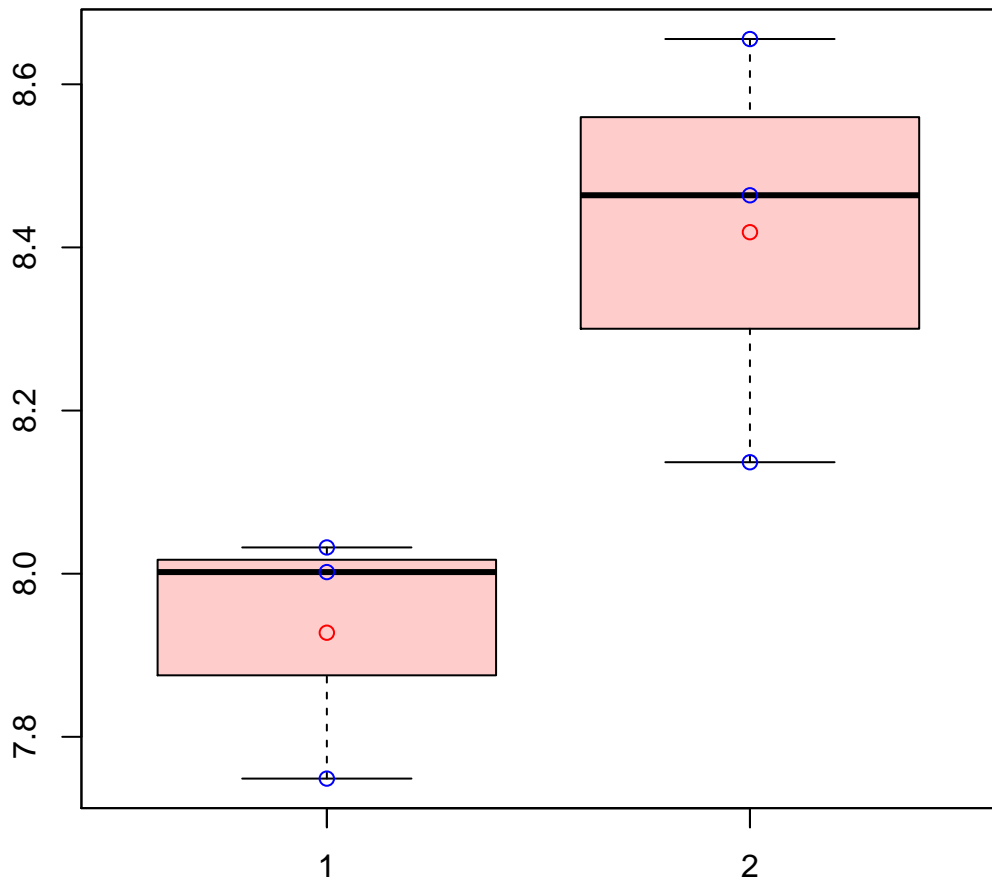

t-Test: p-value = 0.06

# CL1218Contig1|CL1218Contig1

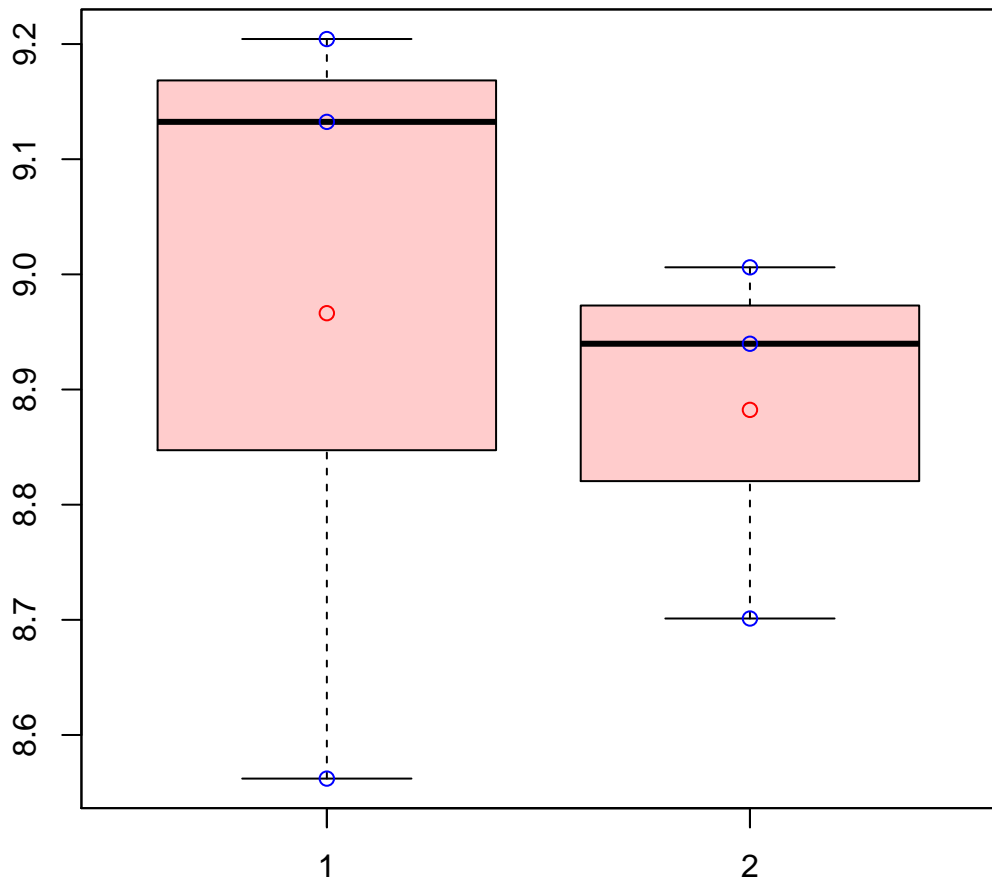

t-Test: p-value = 0.73

# CL1218Contig2|CL1218Contig2



t-Test: p-value = 0.73

# CL1218Contig4|CL1218Contig4

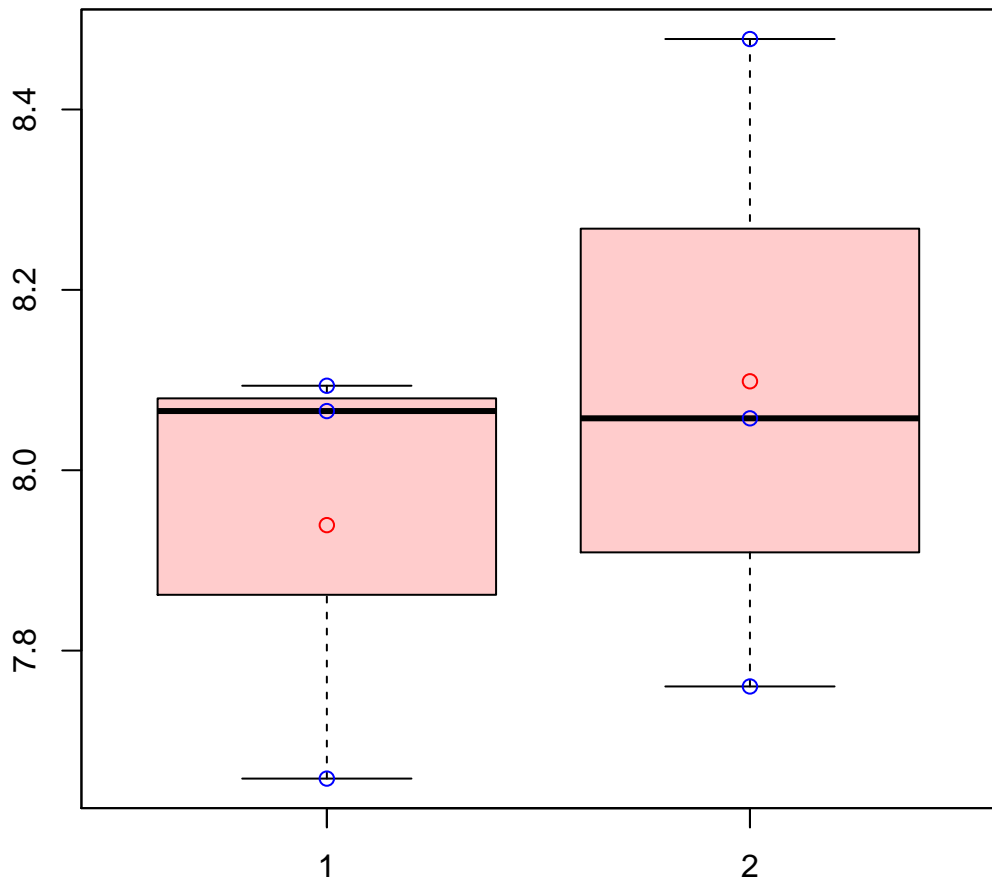

t-Test: p-value = 0.56



# CL1218Contig5|CL1218Contig5

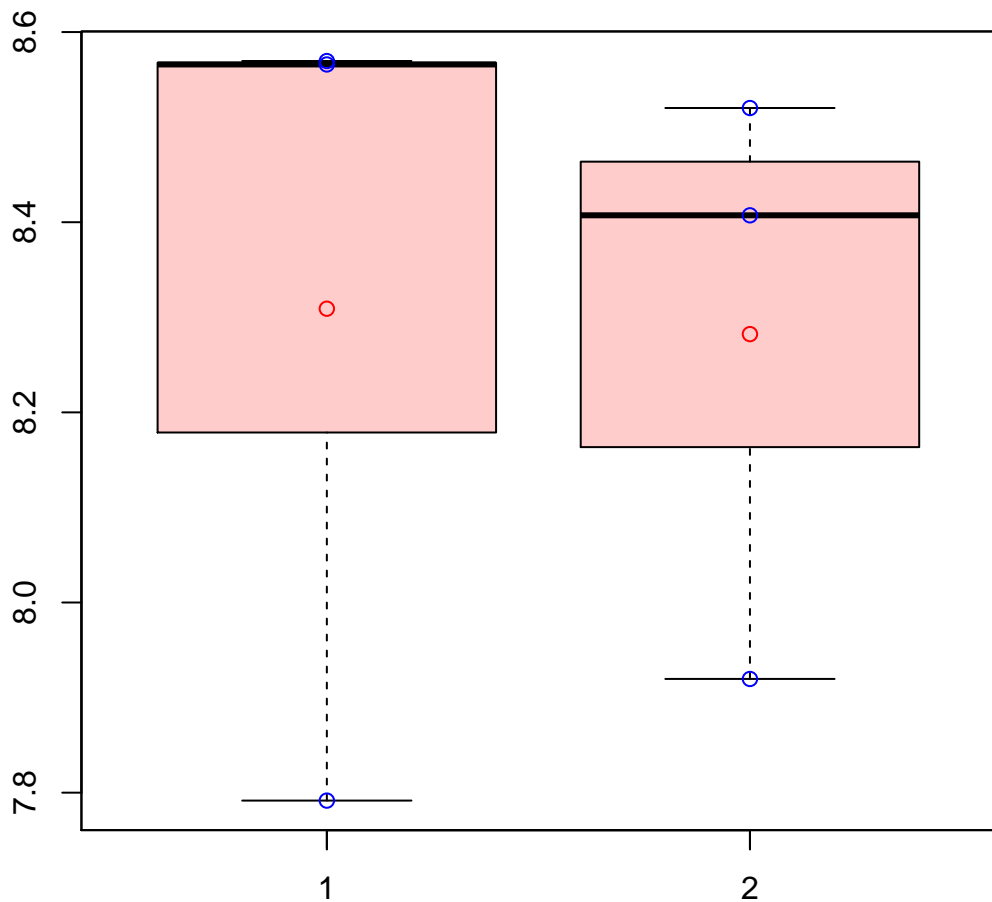

t-Test: p-value = 0.94

# CL121Contig1|CL121Contig1

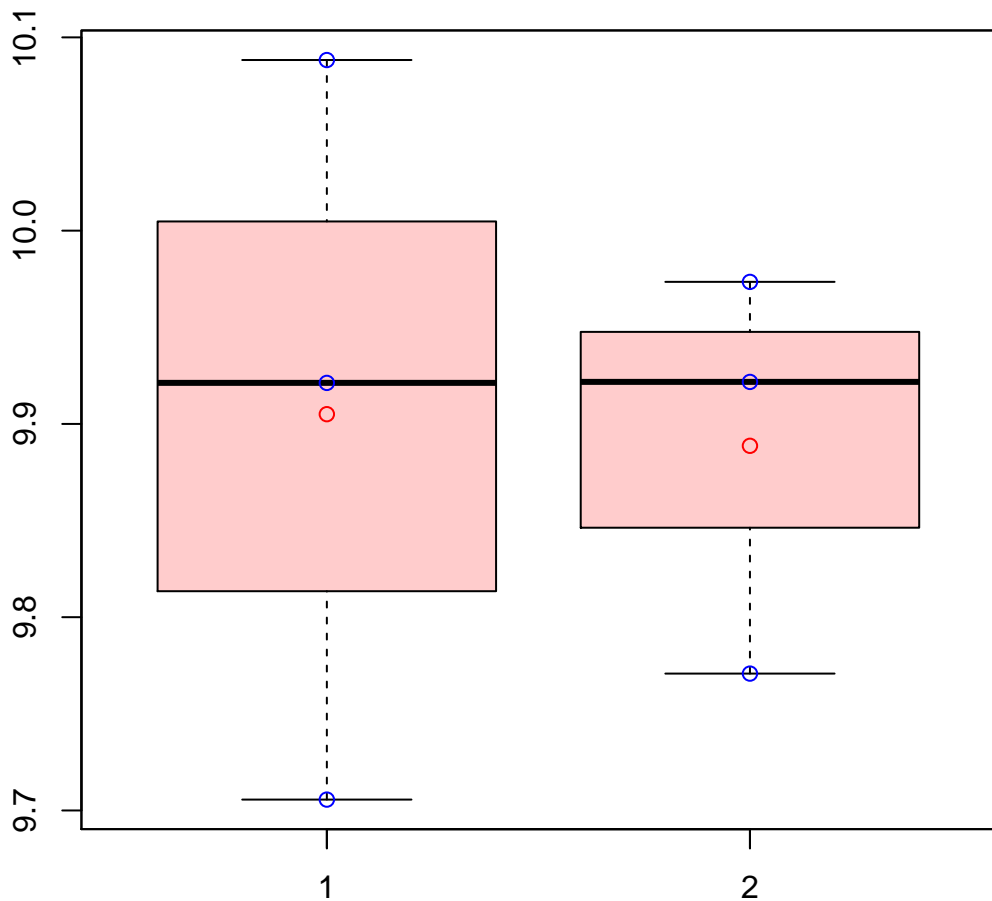

t-Test: p-value = 0.9

# CL12213Contig1|CL12213Contig1

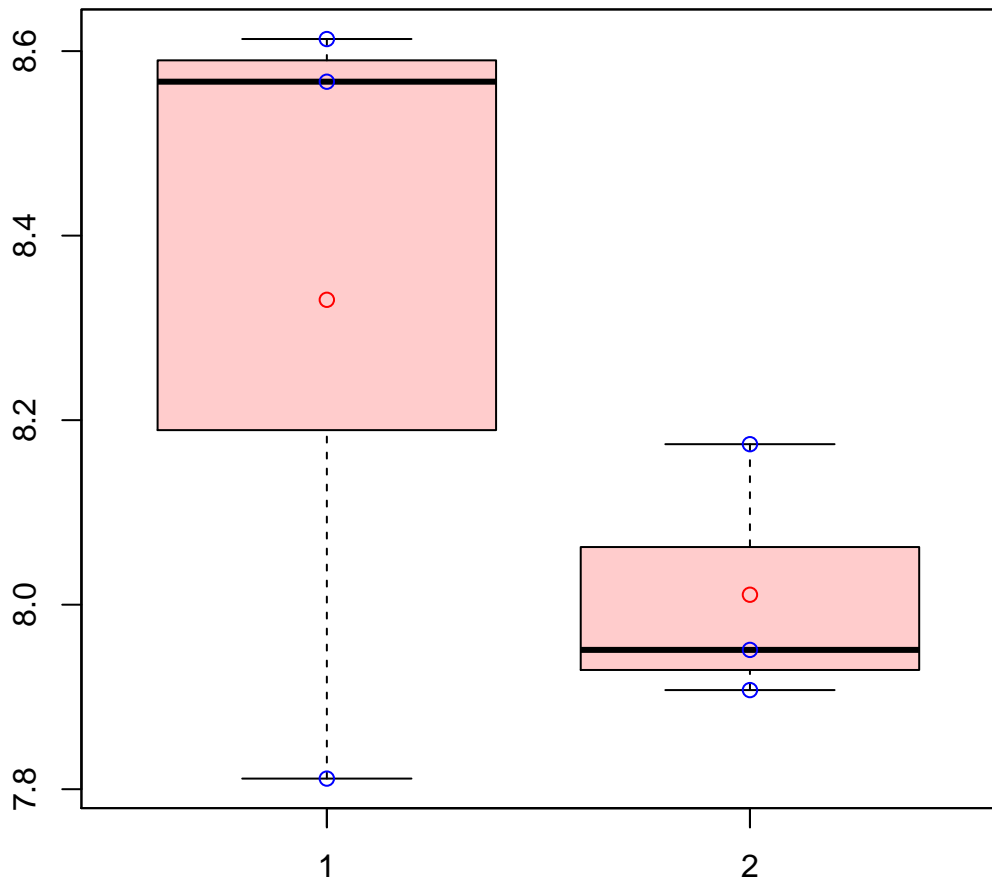

t-Test: p-value = 0.34

# CL12217Contig1|CL12217Contig1

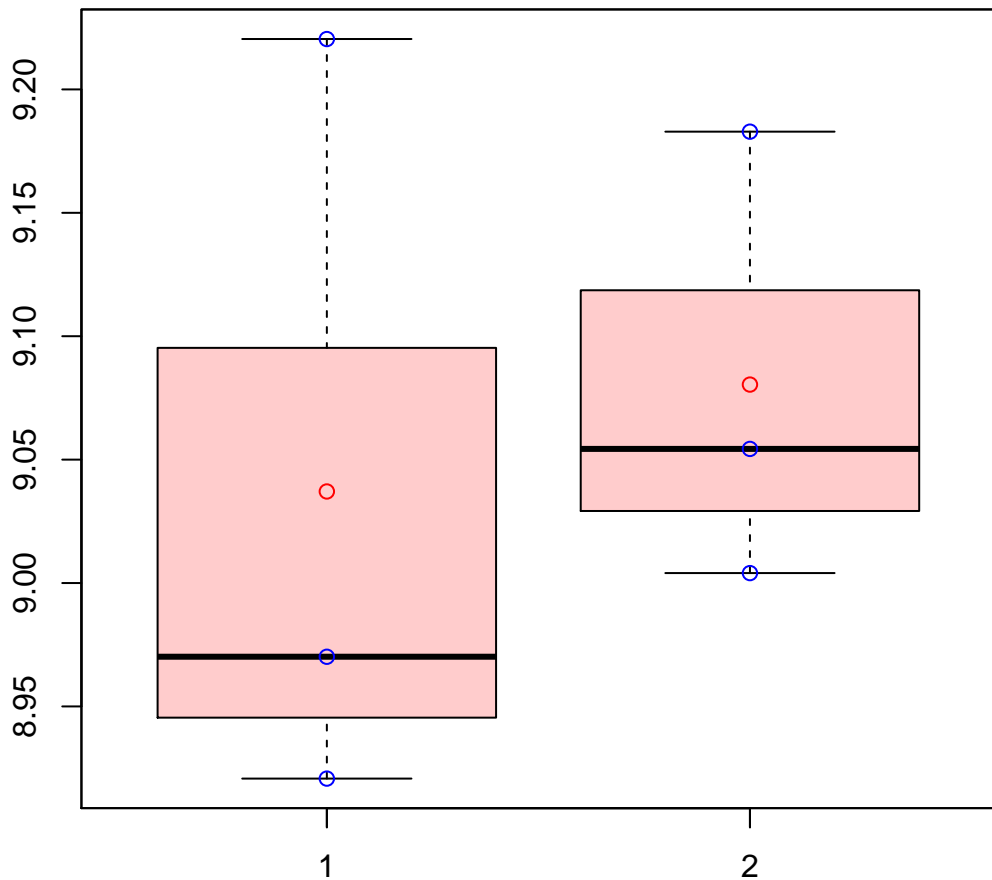

t-Test: p-value = 0.71

# CL12233Contig1|CL12233Contig1

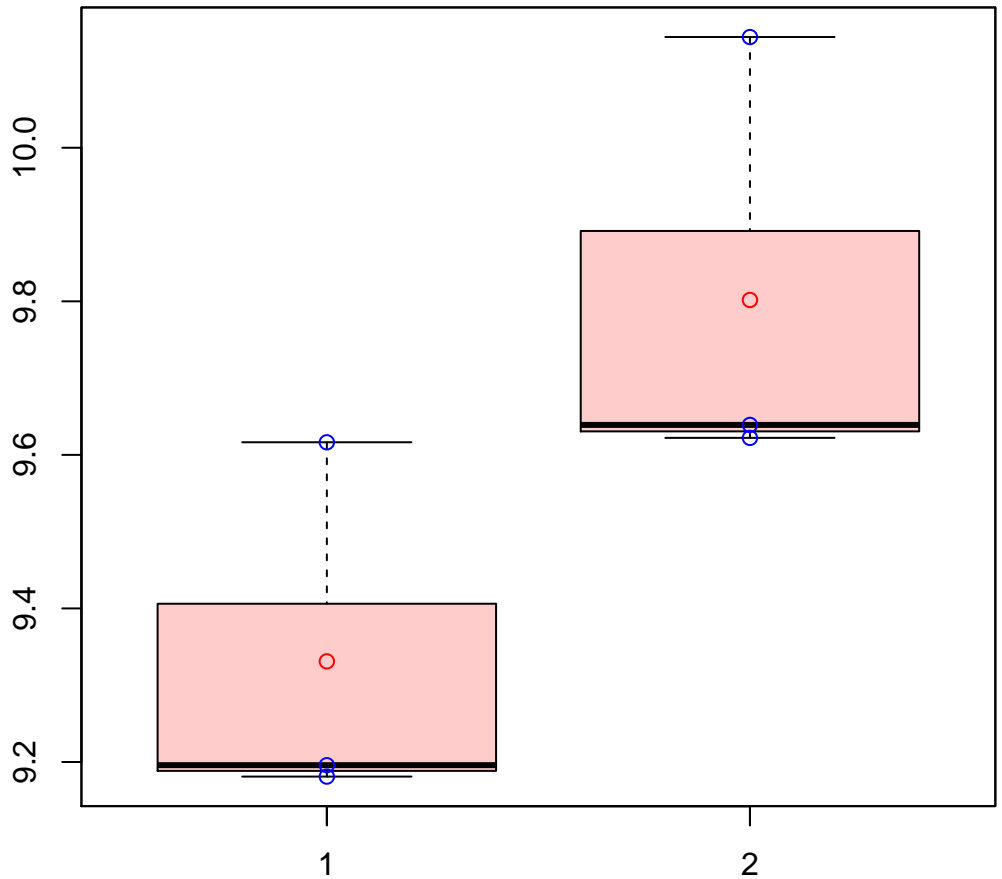

t-Test: p-value = 0.1

# CL12233Contig2|CL12233Contig2

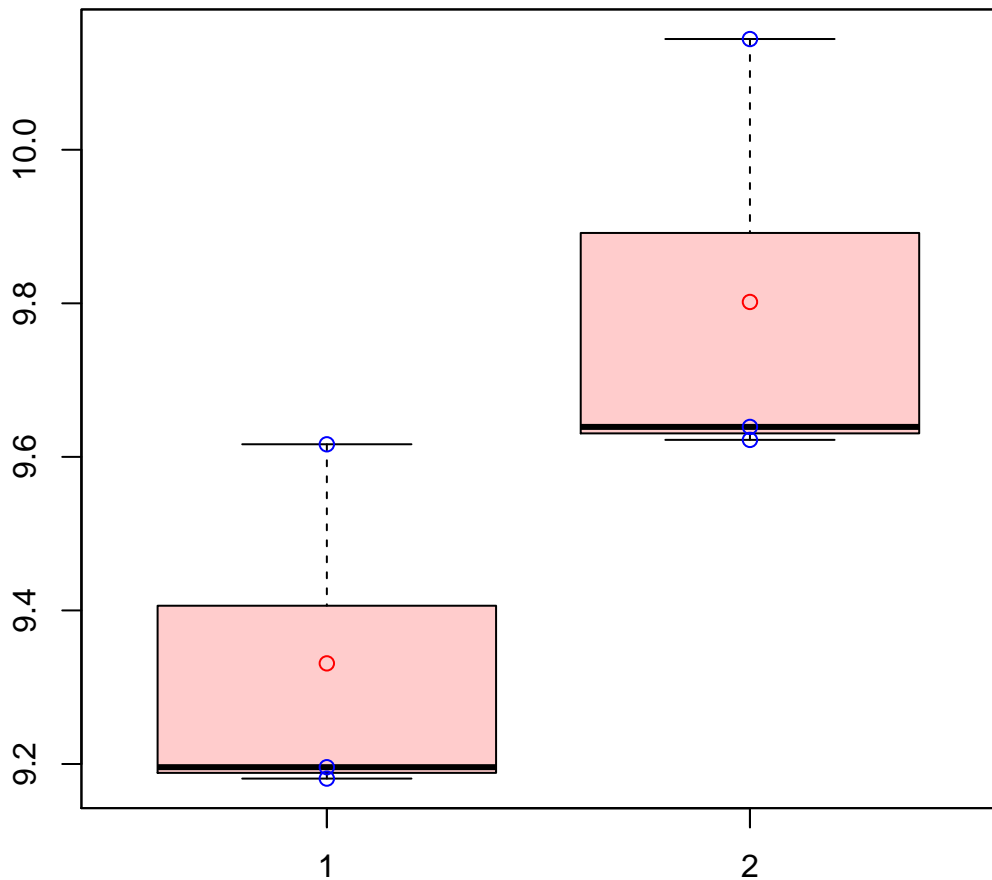

t-Test: p-value = 0.1

# CL1224Contig2|CL1224Contig2

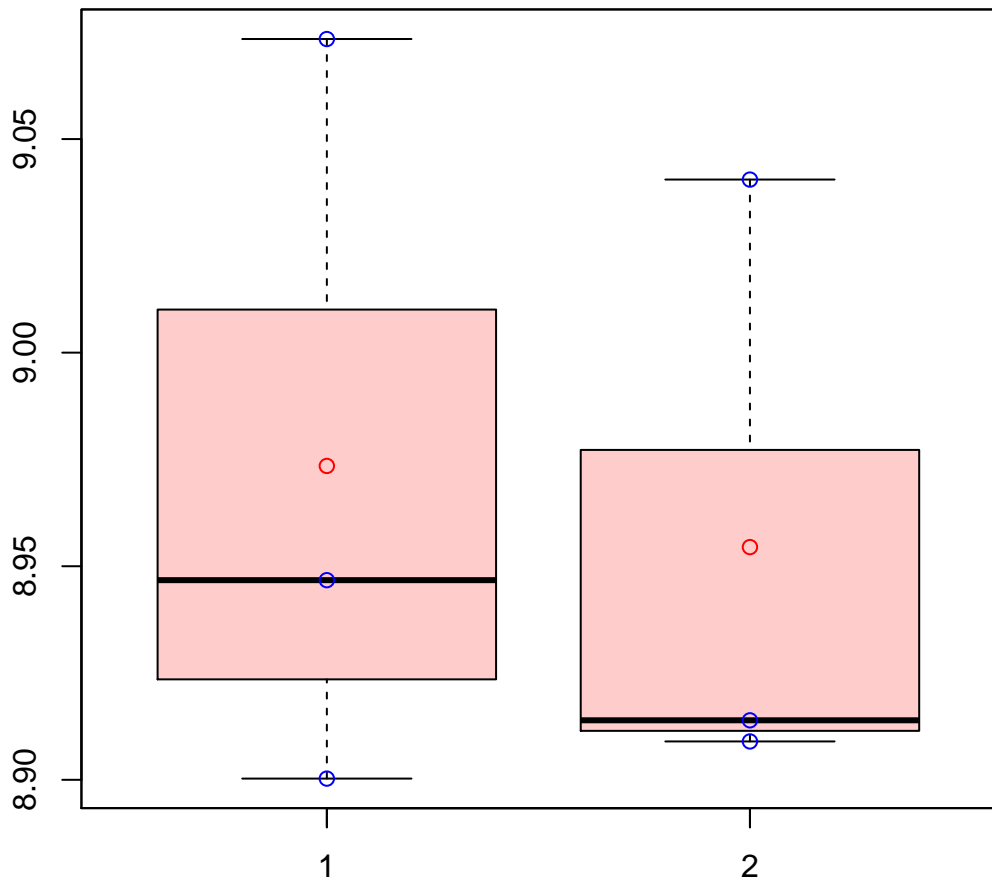

t-Test: p-value = 0.79

# CL1224Contig4|CL1224Contig4

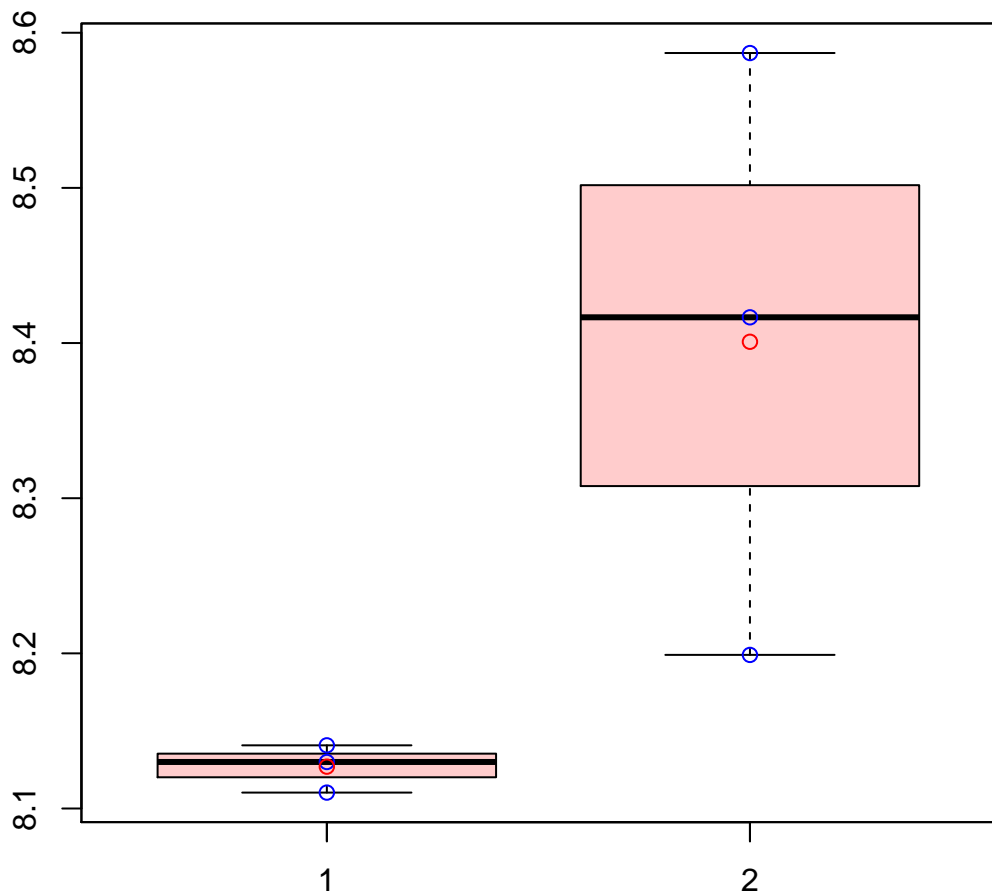

t-Test: p-value = 0.13



# CL1224Contig6|CL1224Contig6

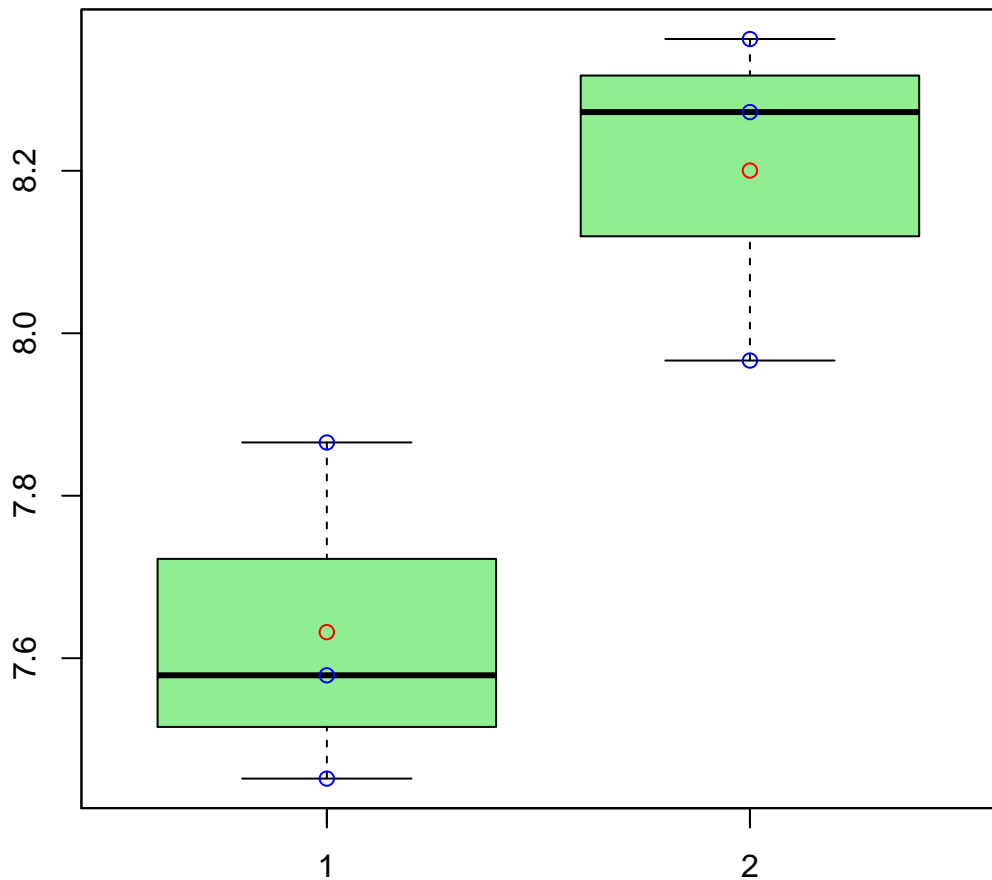

t-Test: p-value = 0.03

# CL1224Contig8|CL1224Contig8

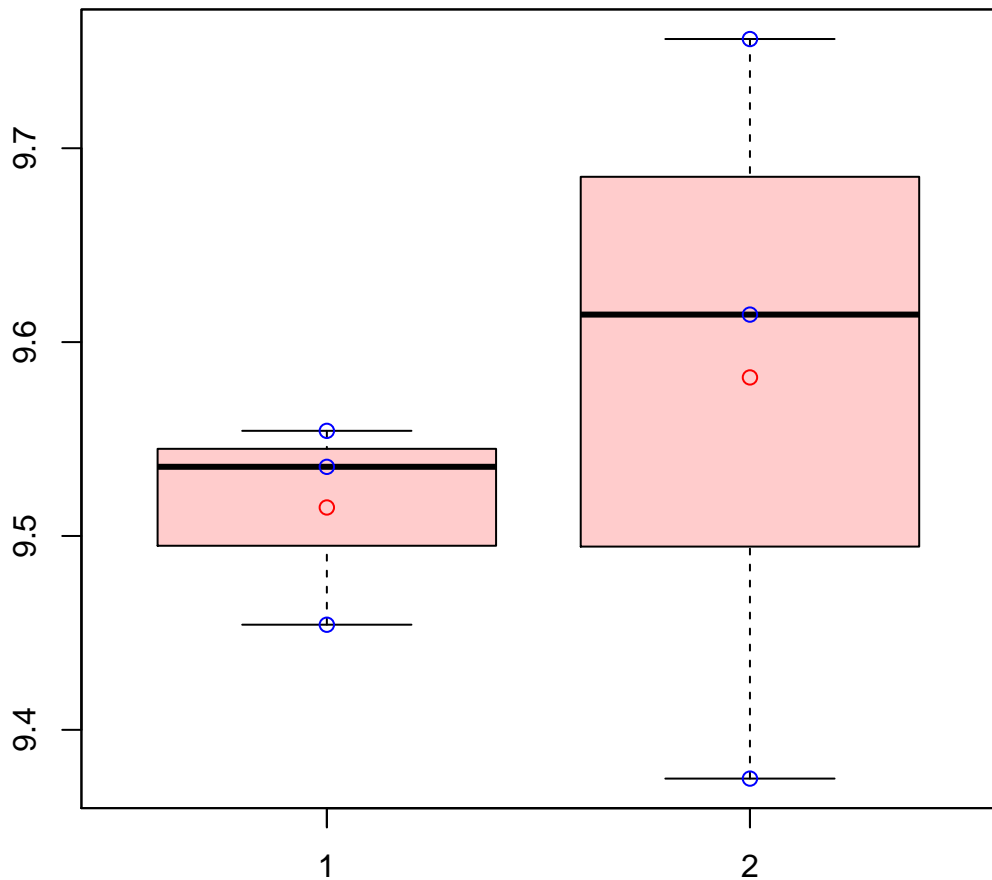

t-Test: p-value = 0.61

# CL1225Contig7|CL1225Contig7

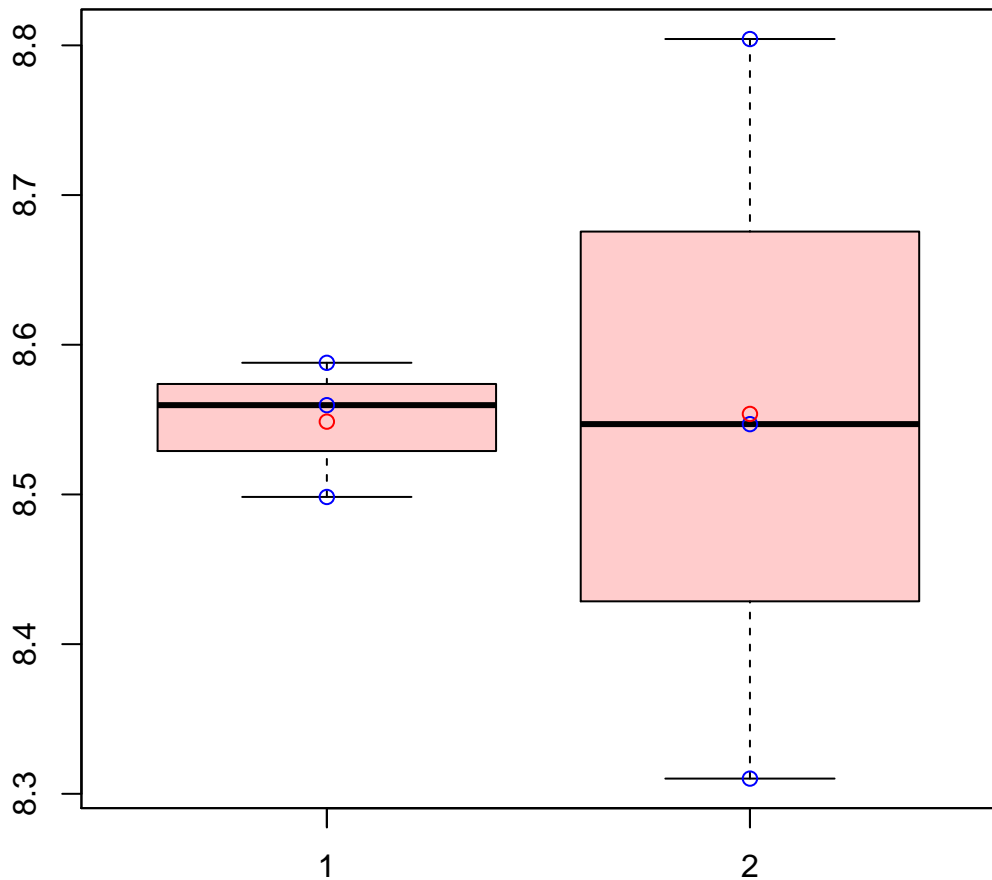

t-Test: p-value = 0.97

# CL12260Contig1|CL12260Contig1

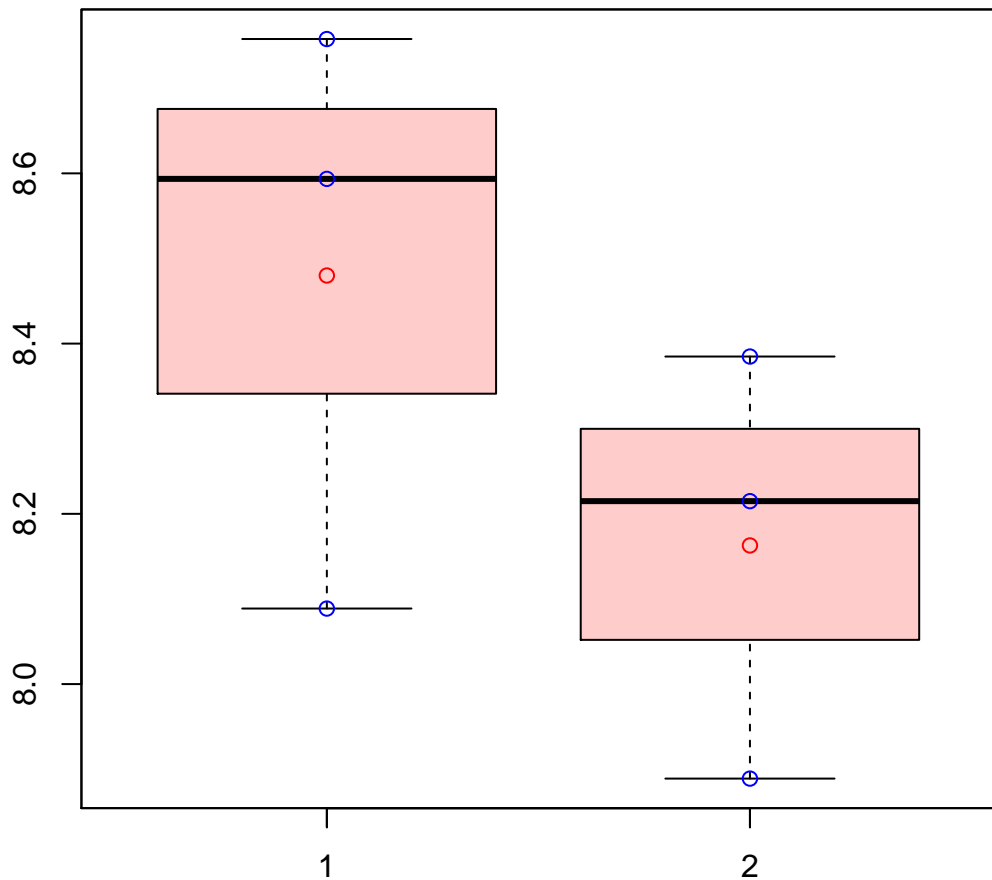

t-Test: p-value = 0.28

# CL12277Contig2|CL12277Contig2

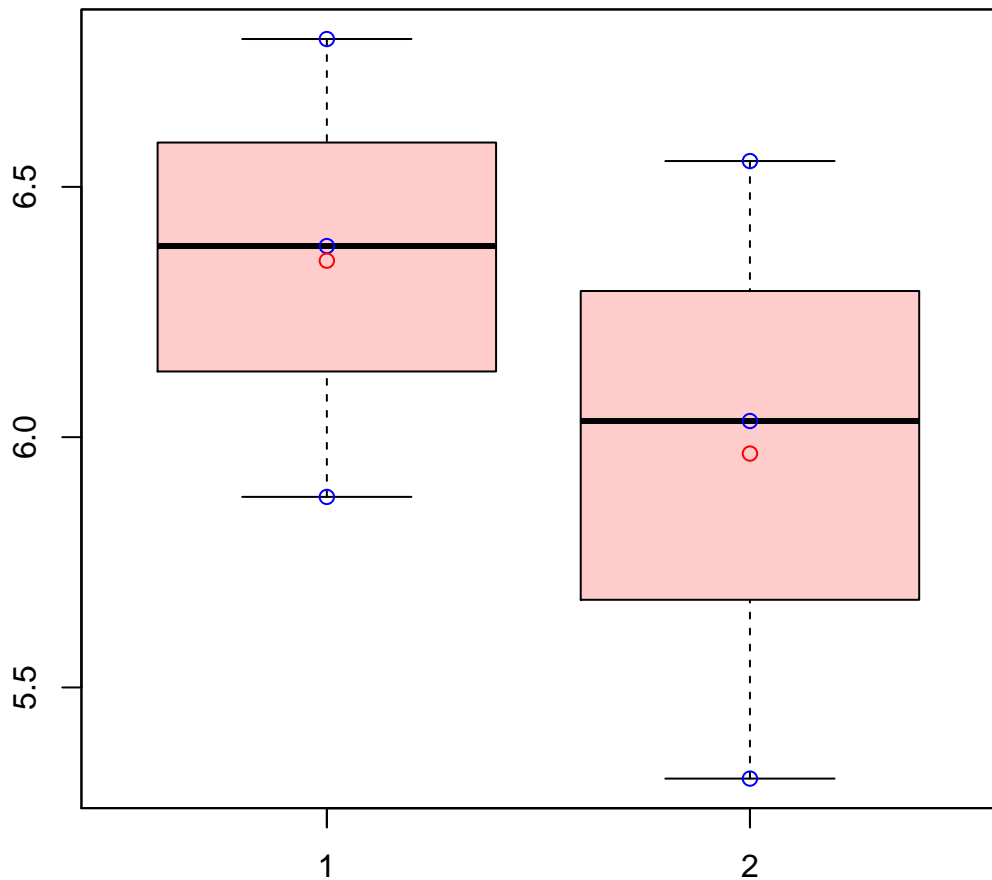

t-Test: p-value = 0.44

# CL12285Contig1|CL12285Contig1

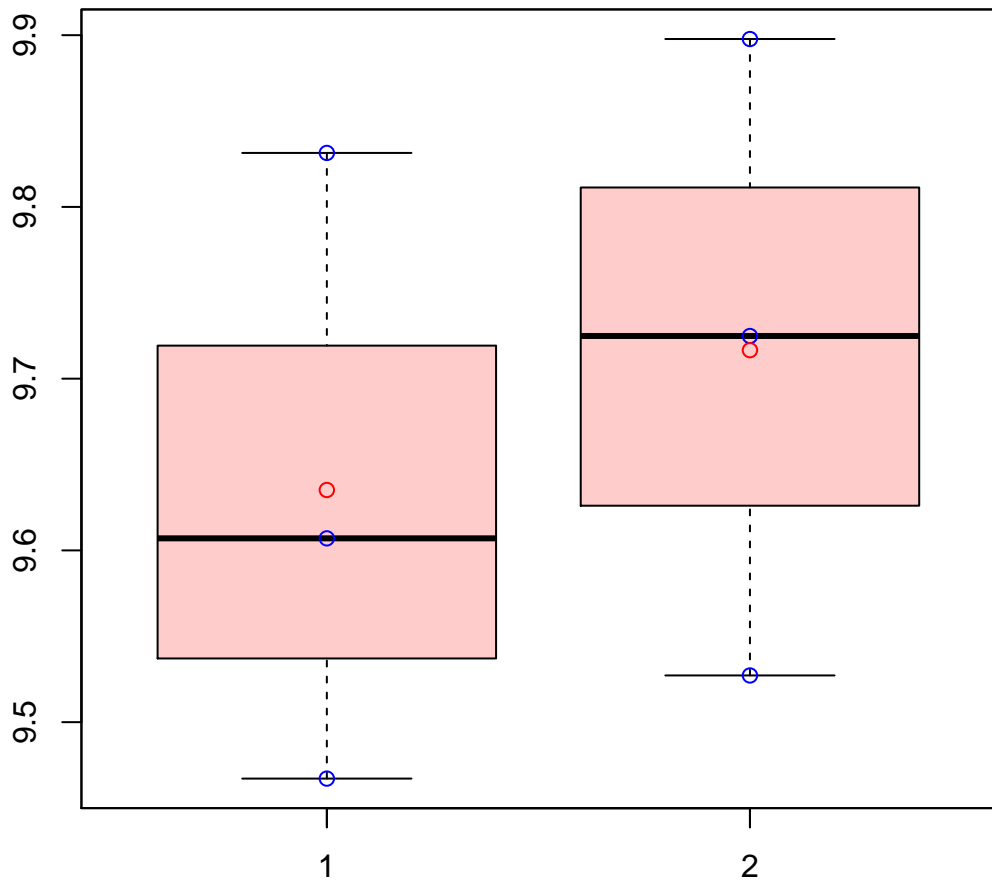

t-Test: p-value = 0.62

# CL1228Contig9|CL1228Contig9

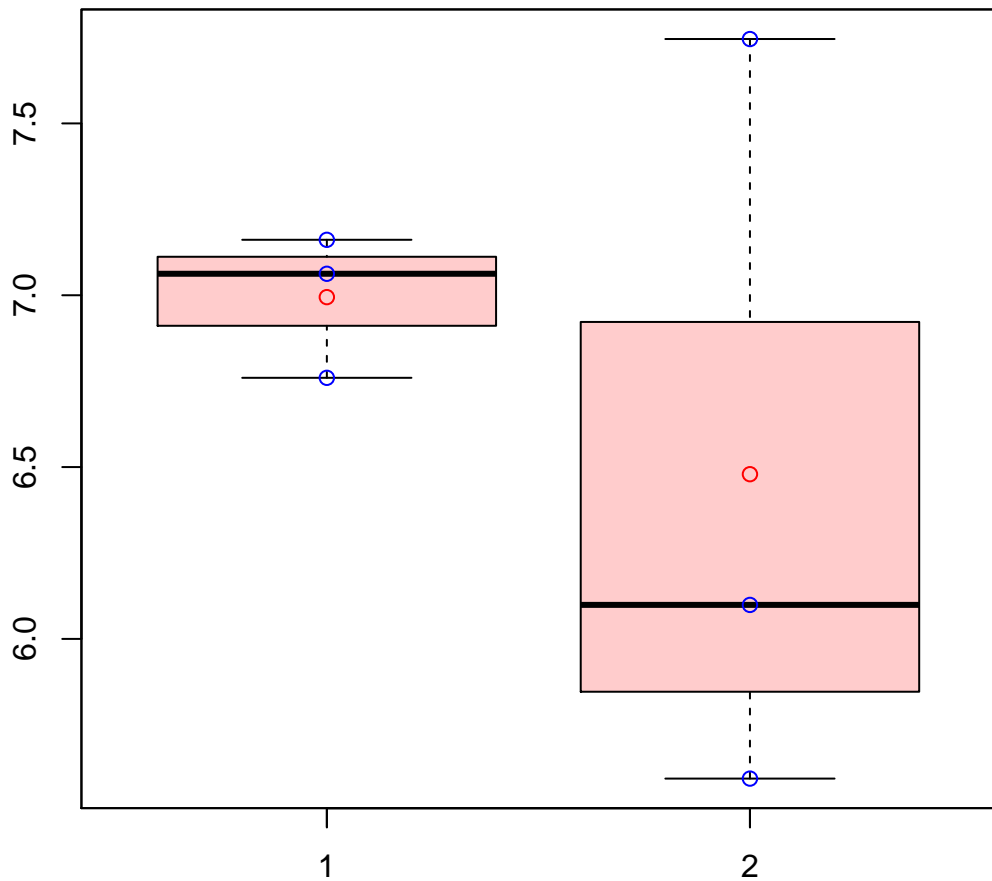

t-Test: p-value = 0.51

# CL122Contig10|CL122Contig10

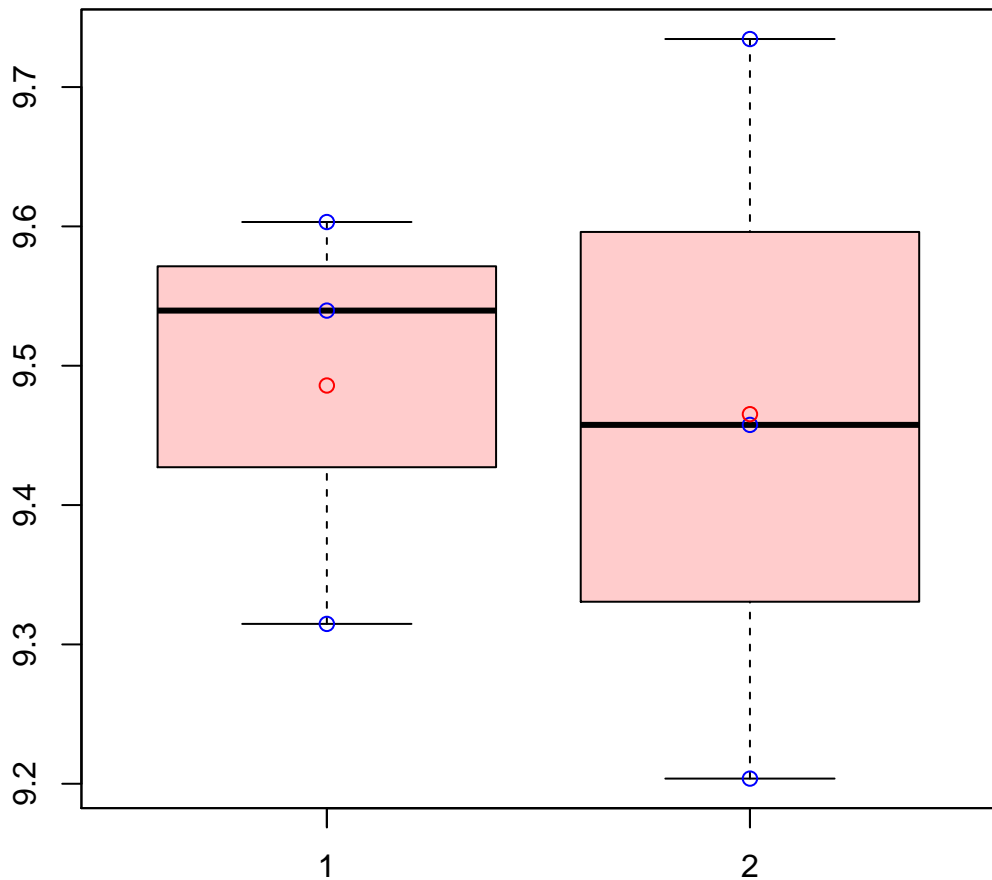

t-Test: p-value = 0.91



# CL122Contig13|CL122Contig13

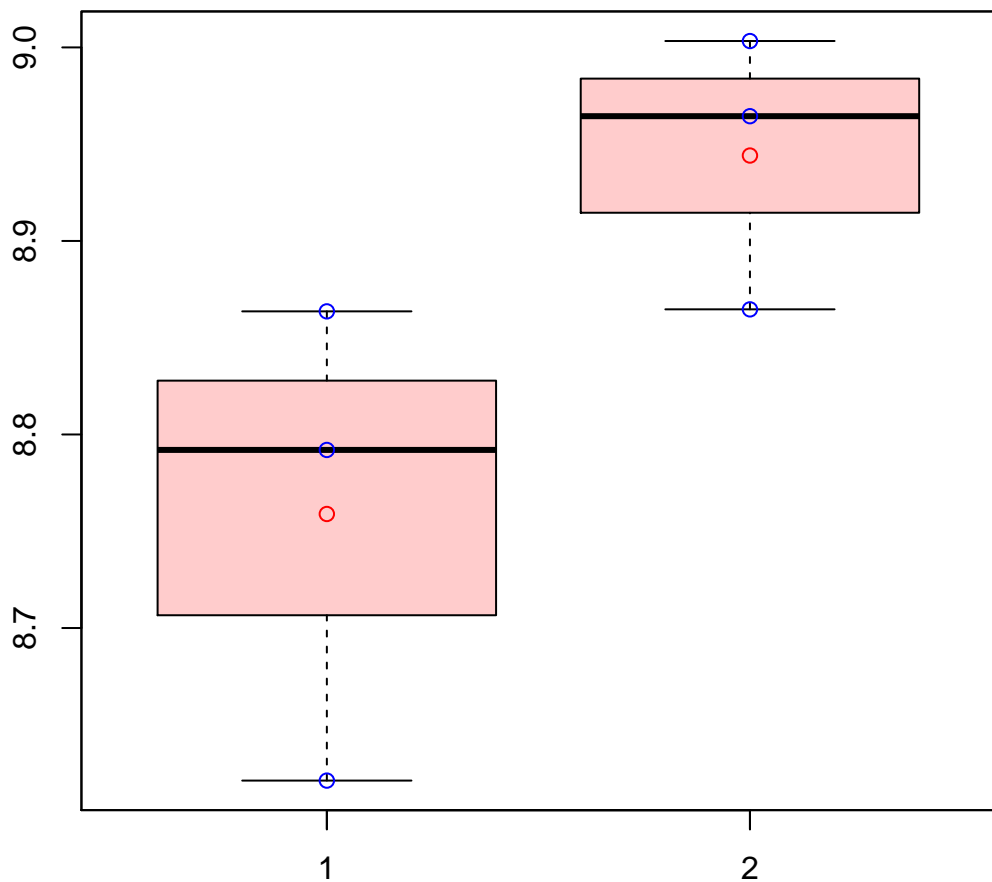

t-Test: p-value = 0.11

# CL122Contig6|CL122Contig6

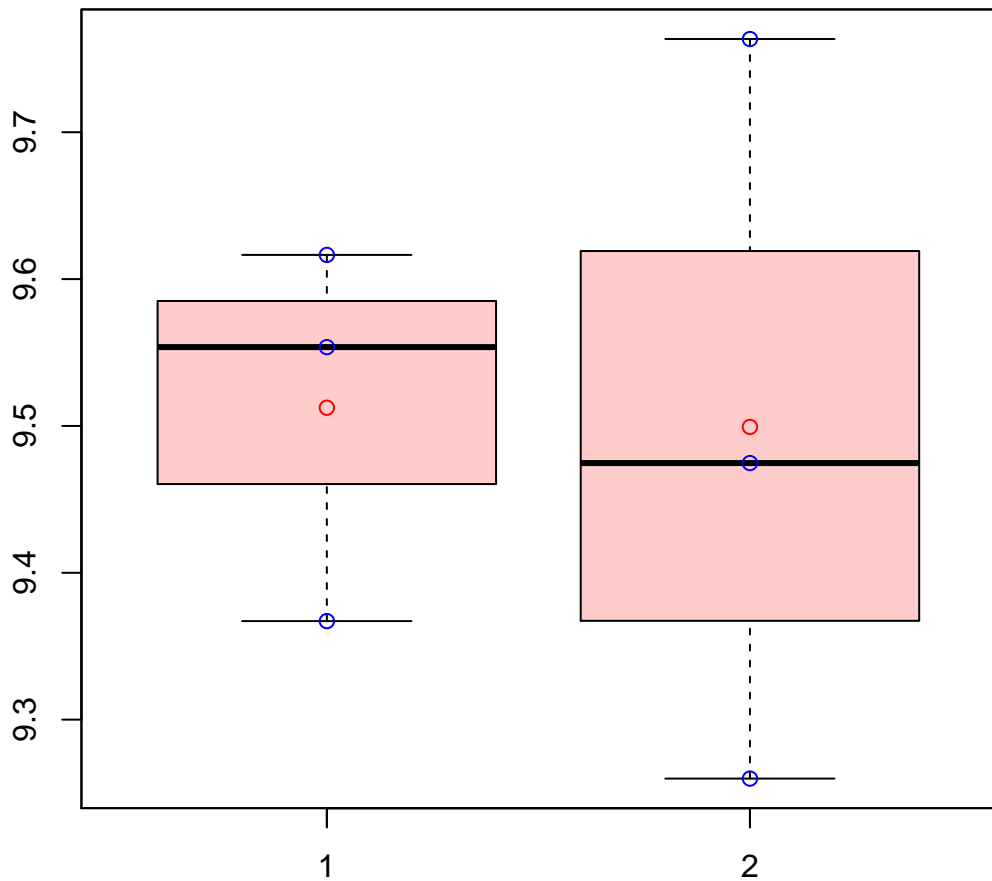

t-Test: p-value = 0.94

# CL122Contig8|CL122Contig8

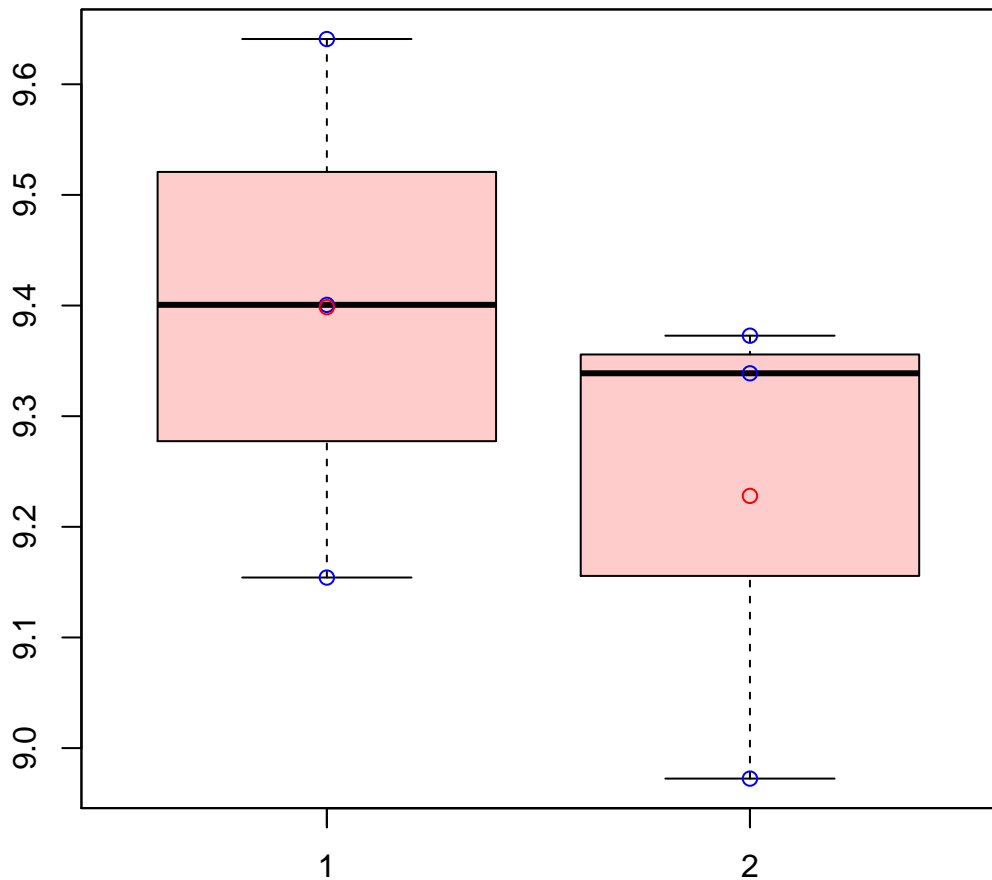

t-Test: p-value = 0.42

# CL122Contig9|CL122Contig9

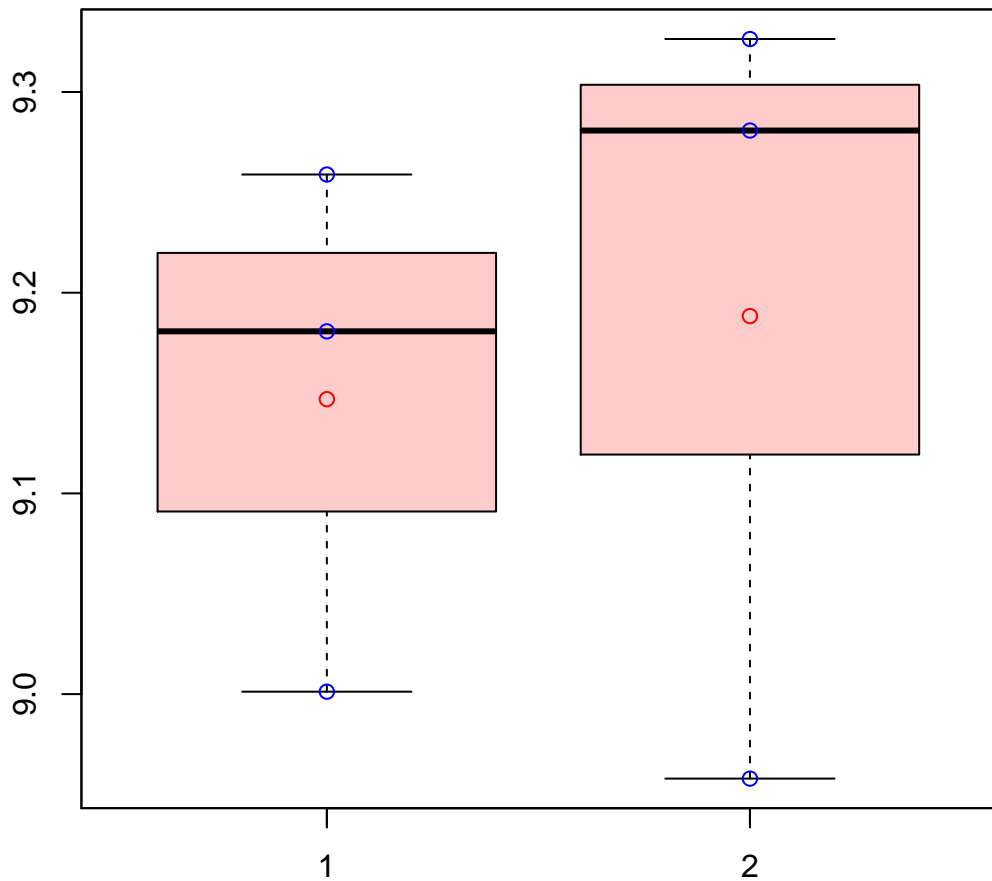

t-Test: p-value = 0.78

# CL1230Contig5|CL1230Contig5

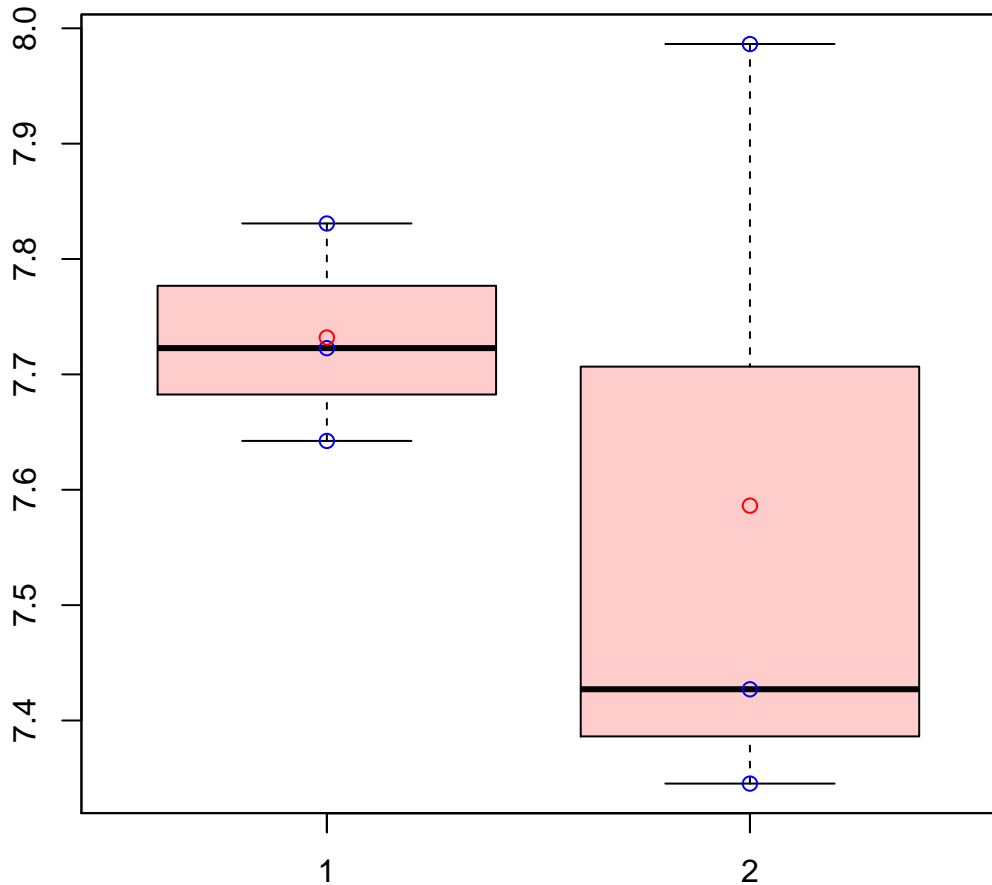

t-Test: p-value = 0.55

# CL1230Contig6|CL1230Contig6

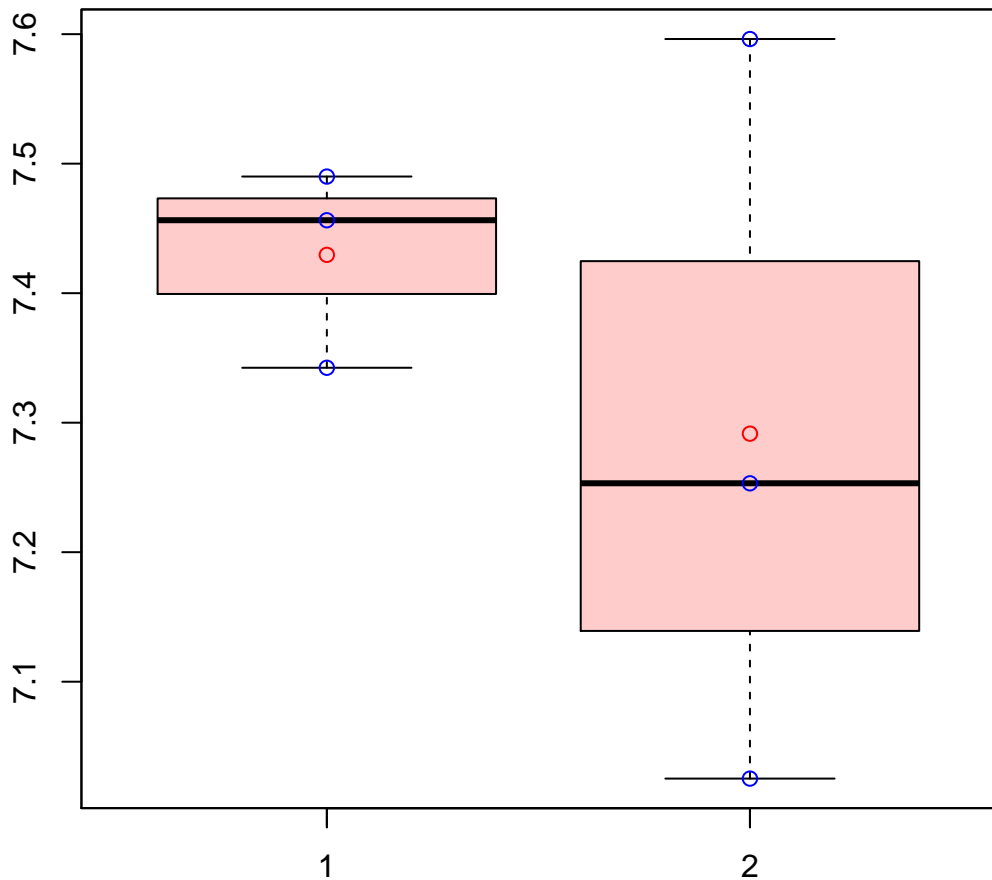

t-Test: p-value = 0.5

# CL1230Contig7|CL1230Contig7



t-Test: p-value = 0.55

# CL12326Contig1|CL12326Contig1

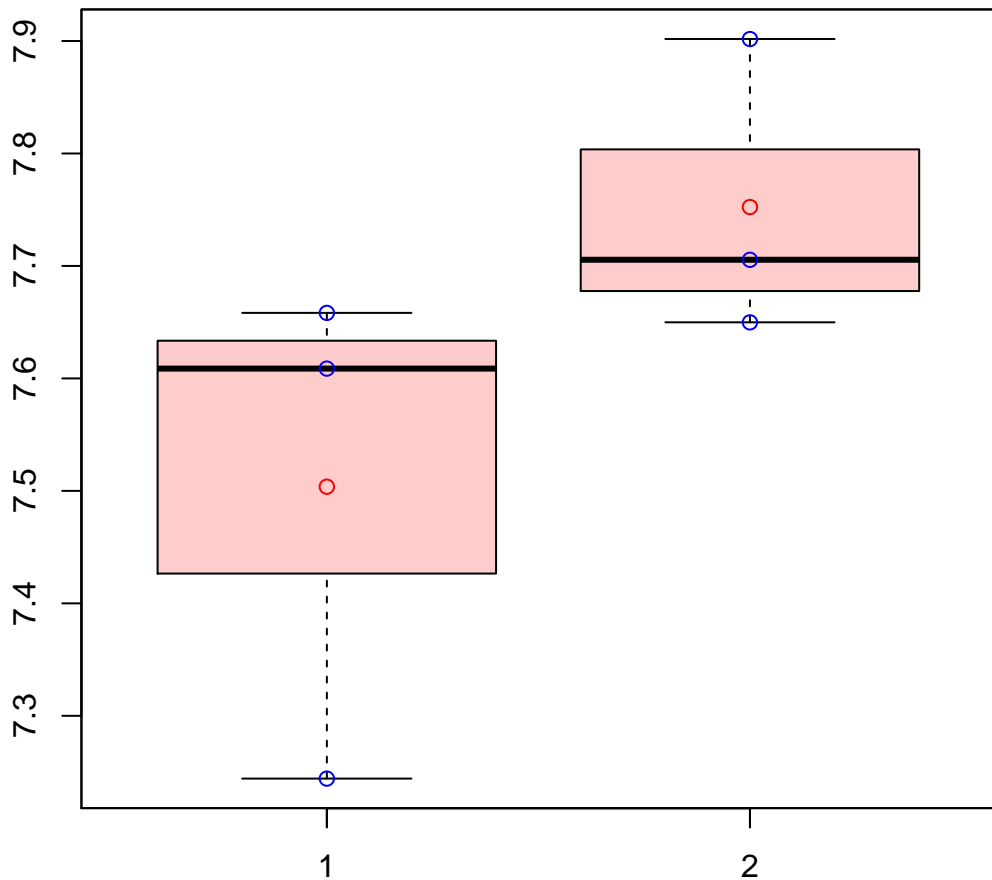

t-Test: p-value = 0.19



# CL12328Contig2|CL12328Contig2

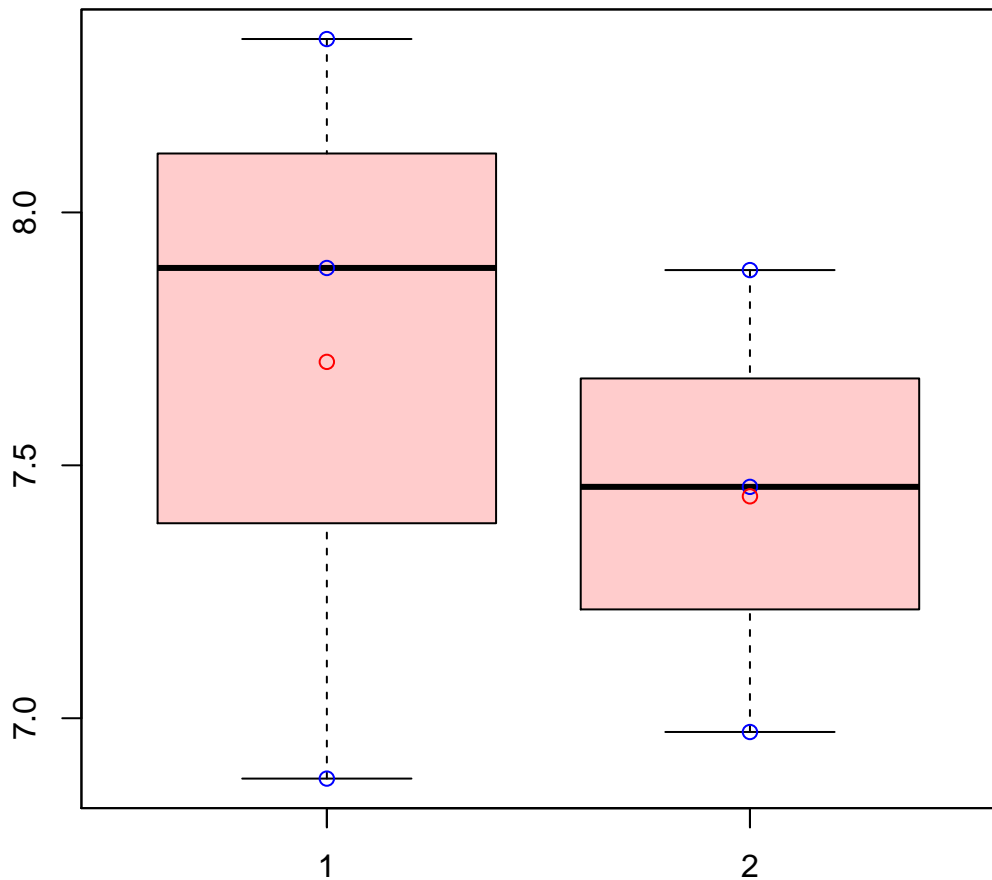

t-Test: p-value = 0.63

# CL12340Contig1|CL12340Contig1

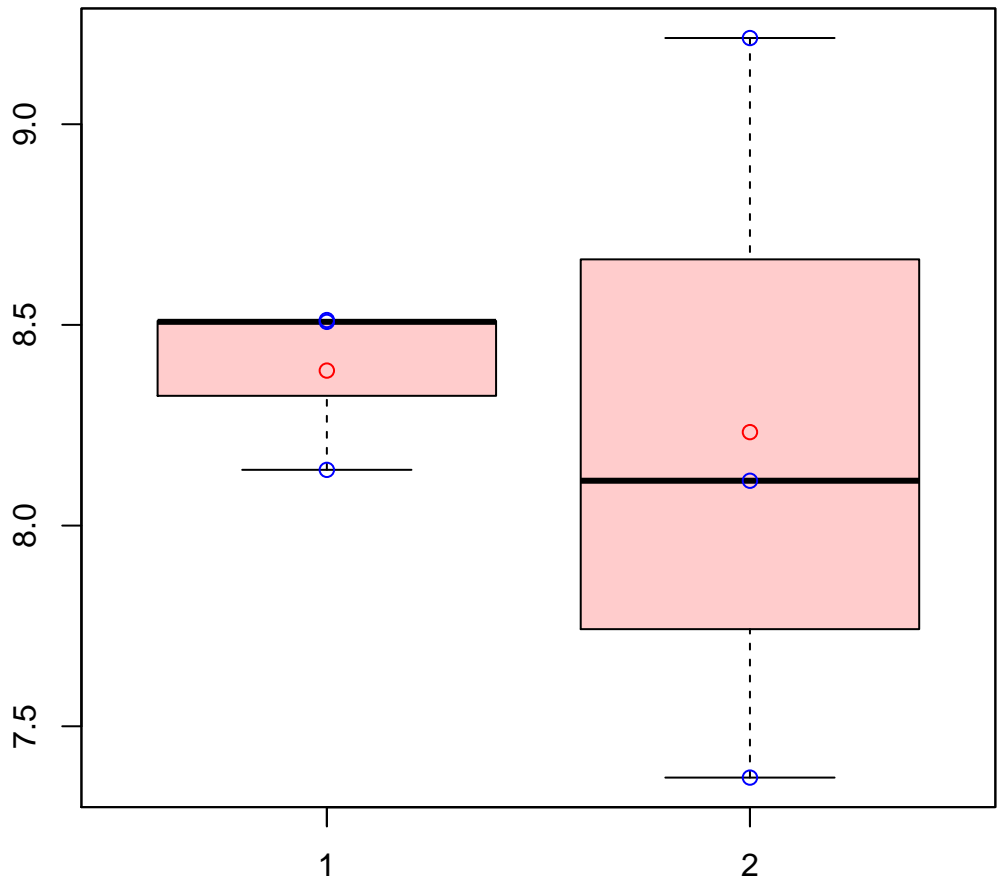

t-Test: p-value = 0.8

# CL12343Contig1|CL12343Contig1

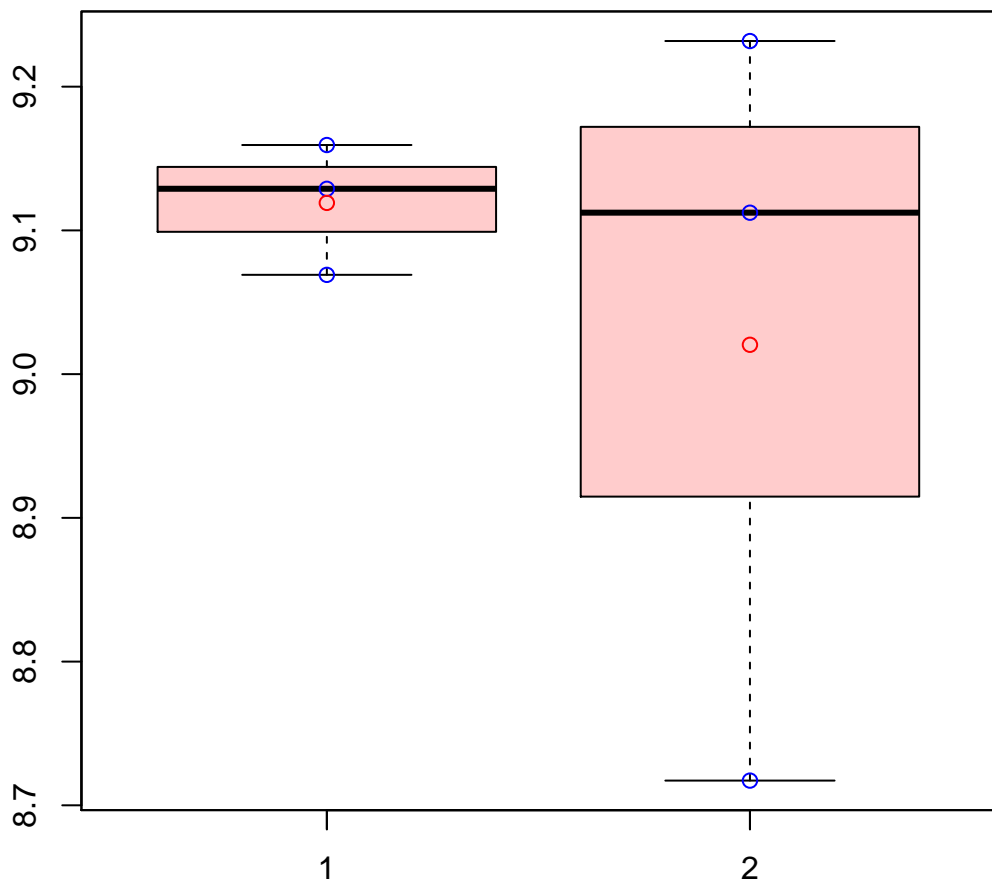

t-Test: p-value = 0.59

# CL1239Contig4|CL1239Contig4

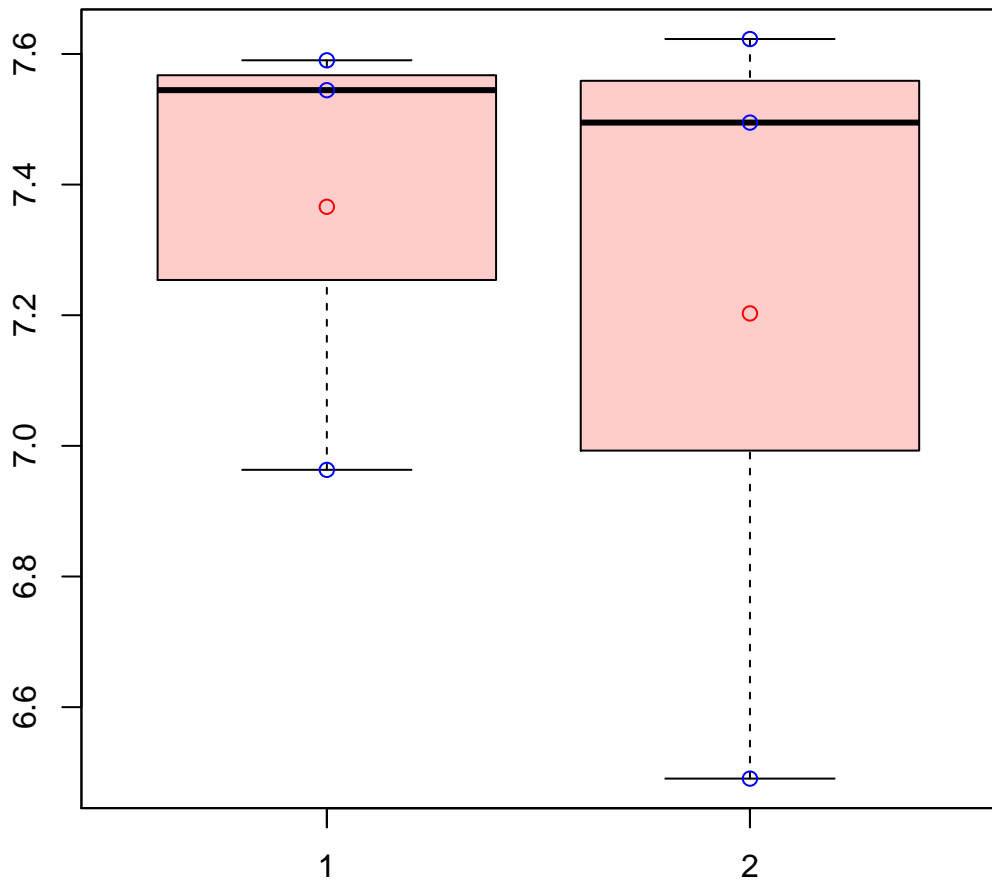

t-Test: p-value = 0.72

# CL1239Contig5|CL1239Contig5

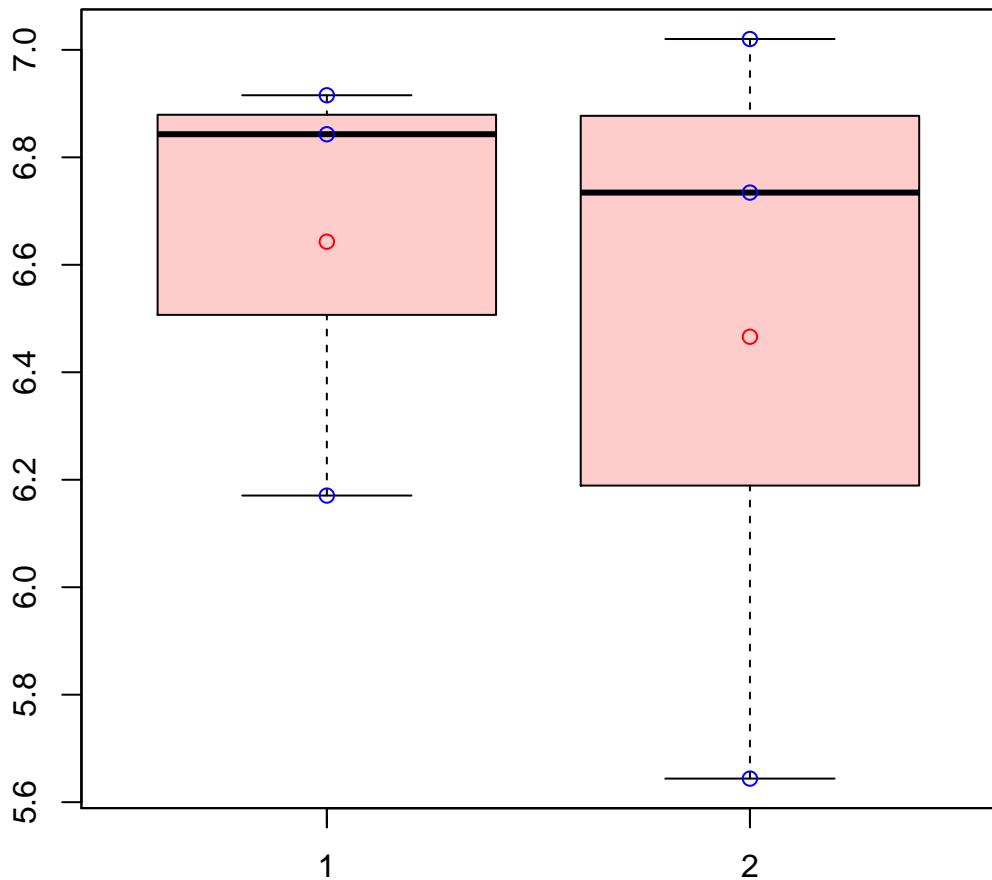

t-Test: p-value = 0.74

# CL1239Contig9|CL1239Contig9



t-Test: p-value = 0.74

# CL123Contig10|CL123Contig10

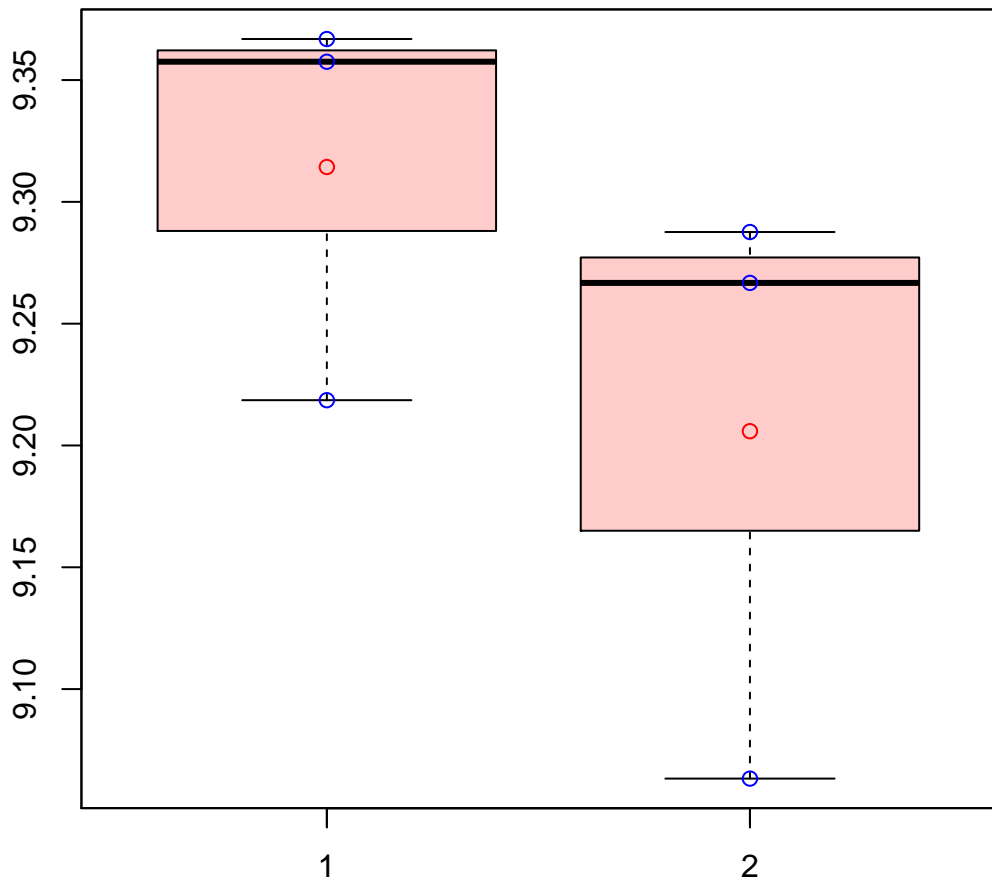

t-Test: p-value = 0.29

# CL123Contig14|CL123Contig14

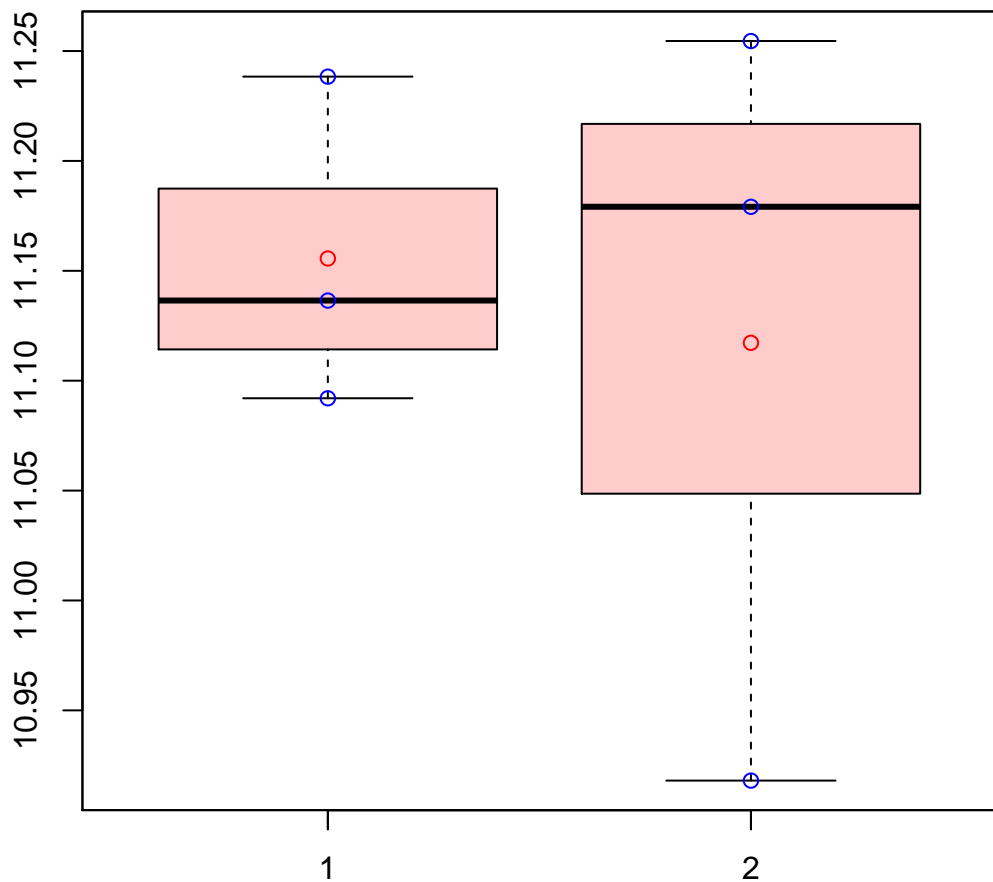

t-Test: p-value = 0.75



# CL123Contig15|CL123Contig15

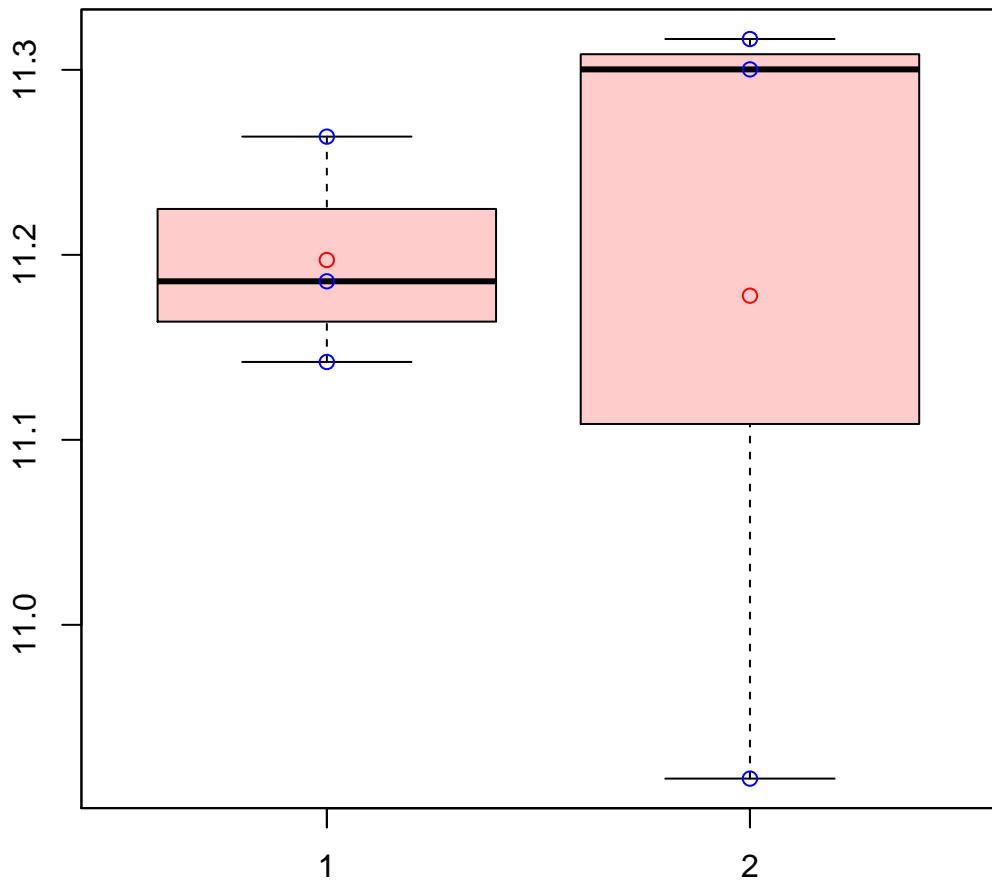

t-Test: p-value = 0.9

# CL123Contig21|CL123Contig21

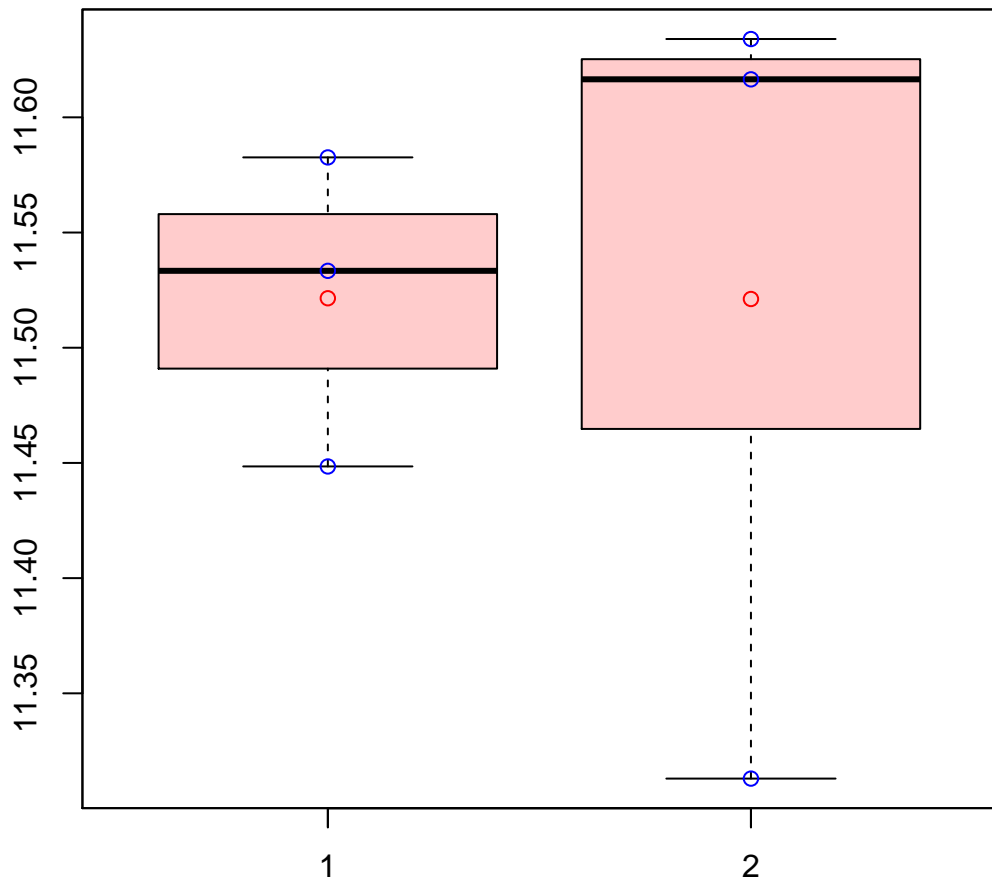

t-Test: p-value = 1

# CL123Contig22|CL123Contig22

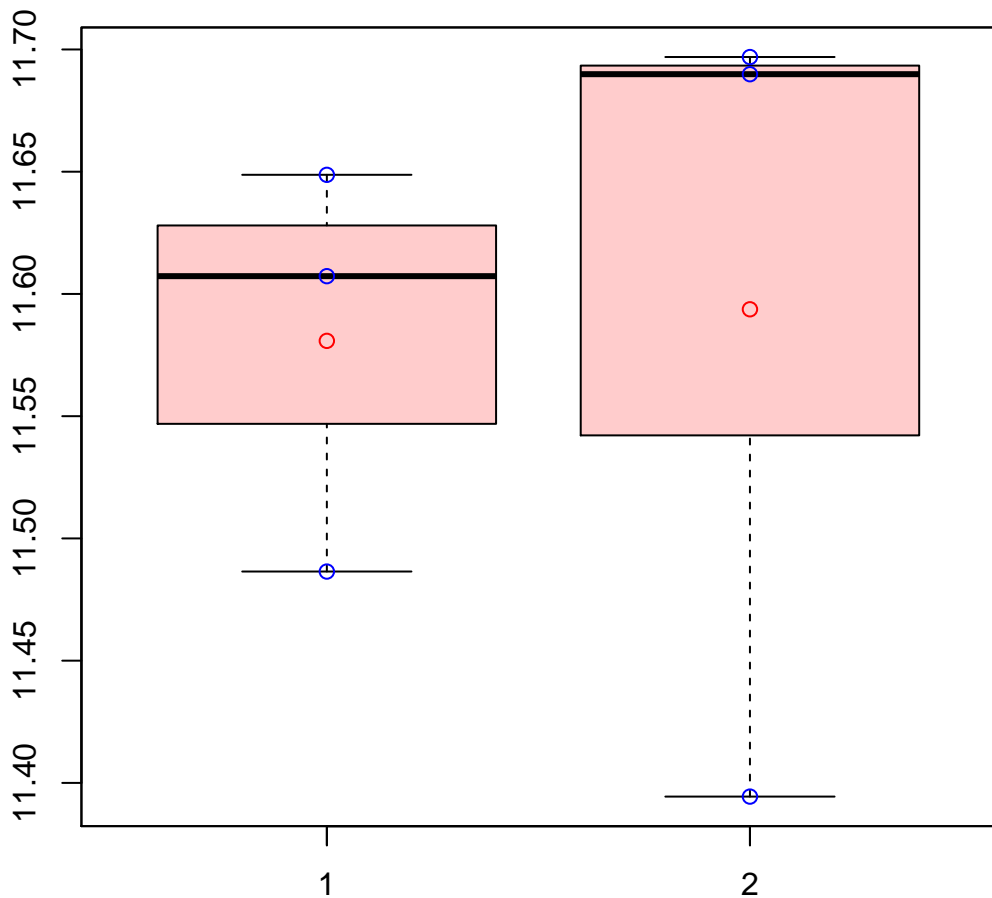

t-Test: p-value = 0.91

# CL123Contig26|CL123Contig26

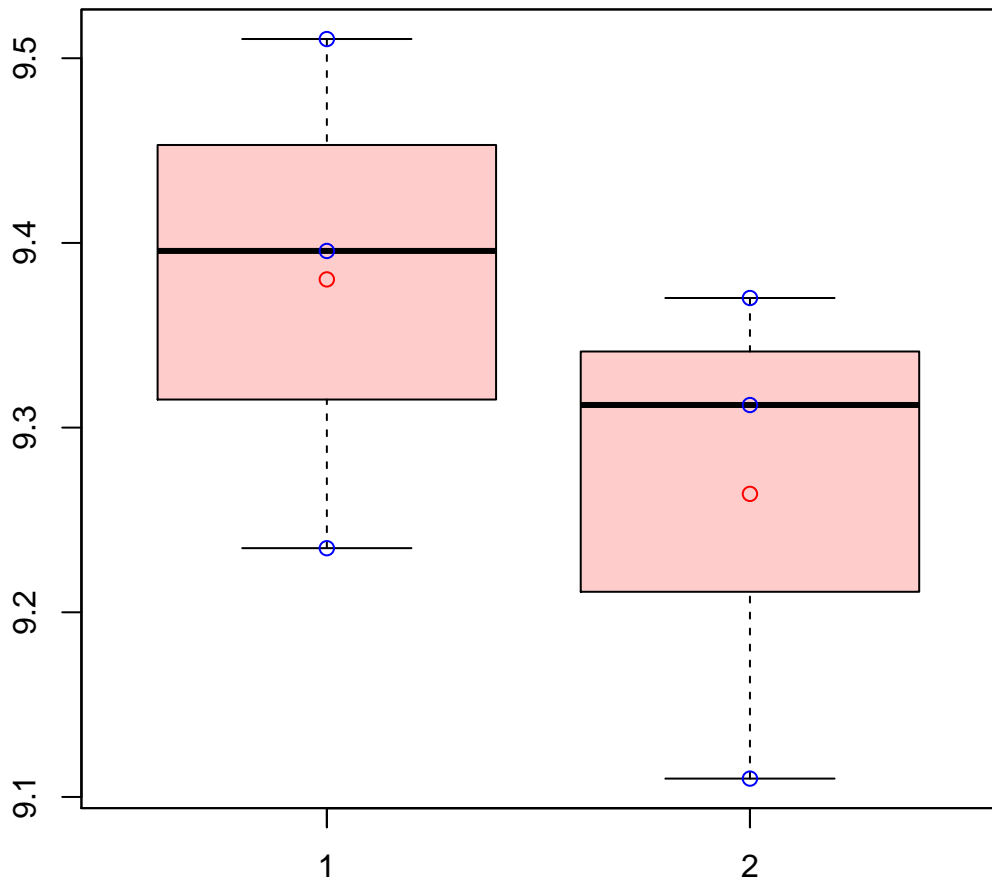

t-Test: p-value = 0.36

# CL123Contig27|CL123Contig27

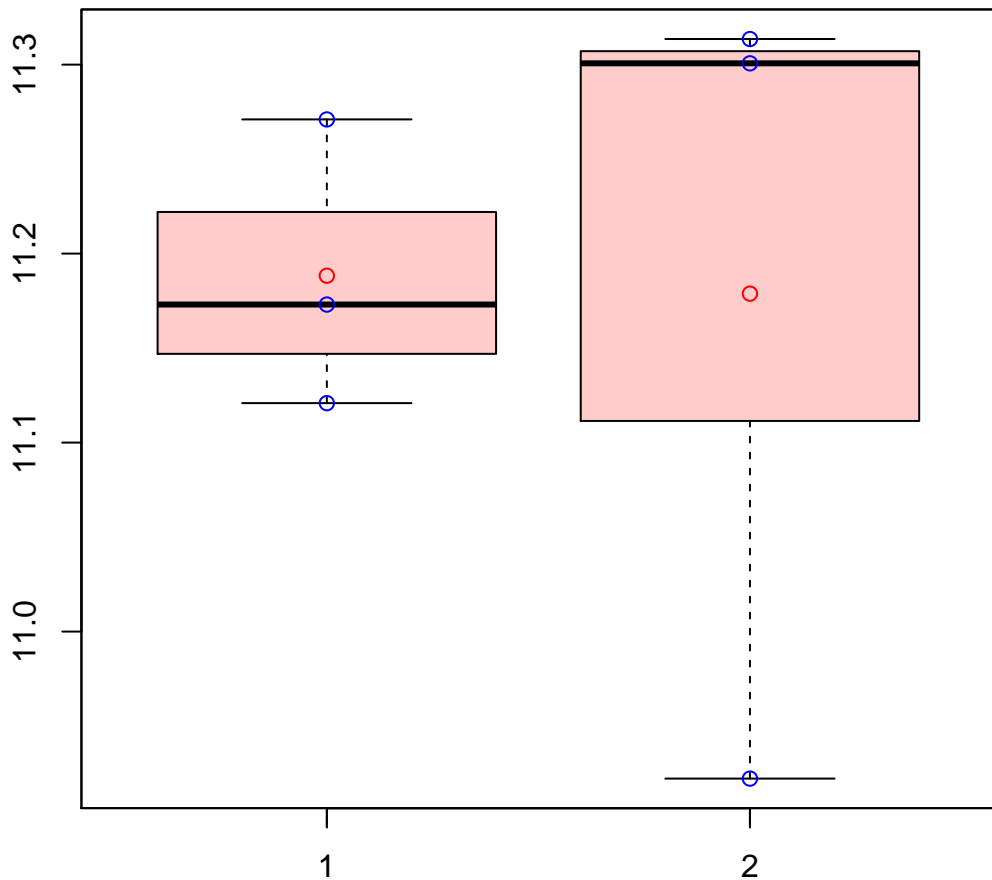

t-Test: p-value = 0.95

# CL123Contig29|CL123Contig29

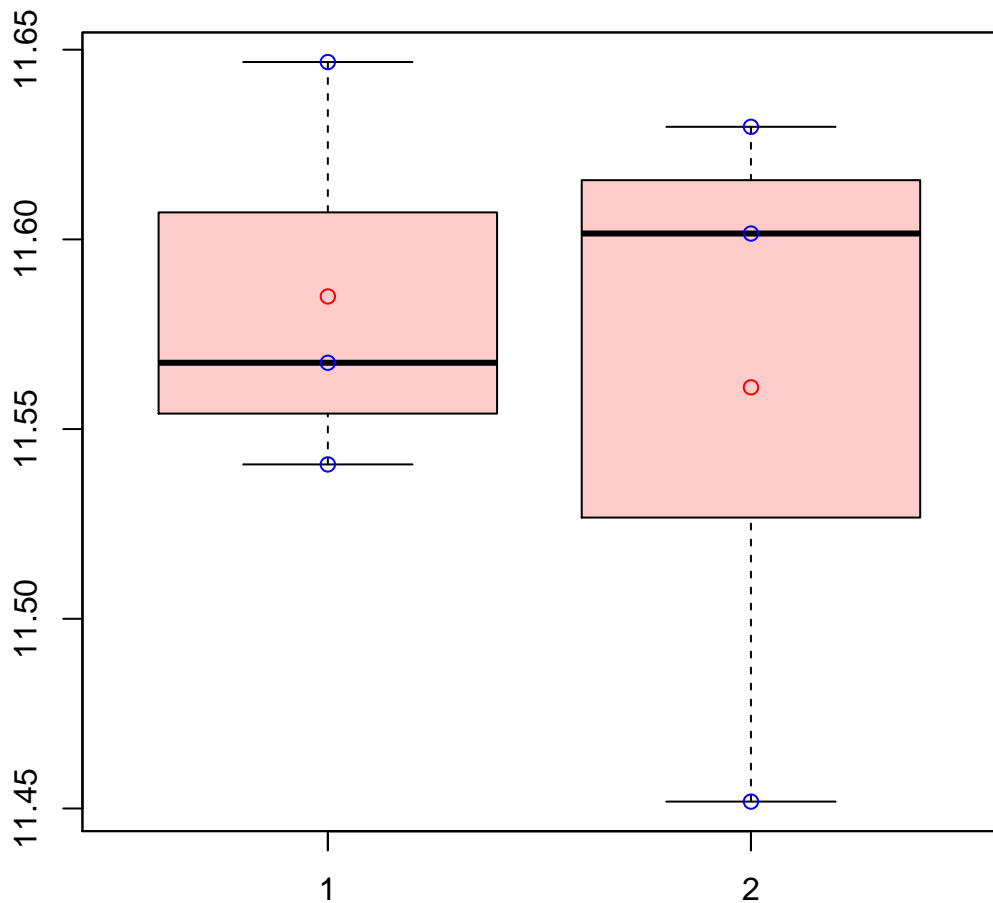

t-Test: p-value = 0.73

# CL123Contig30|CL123Contig30

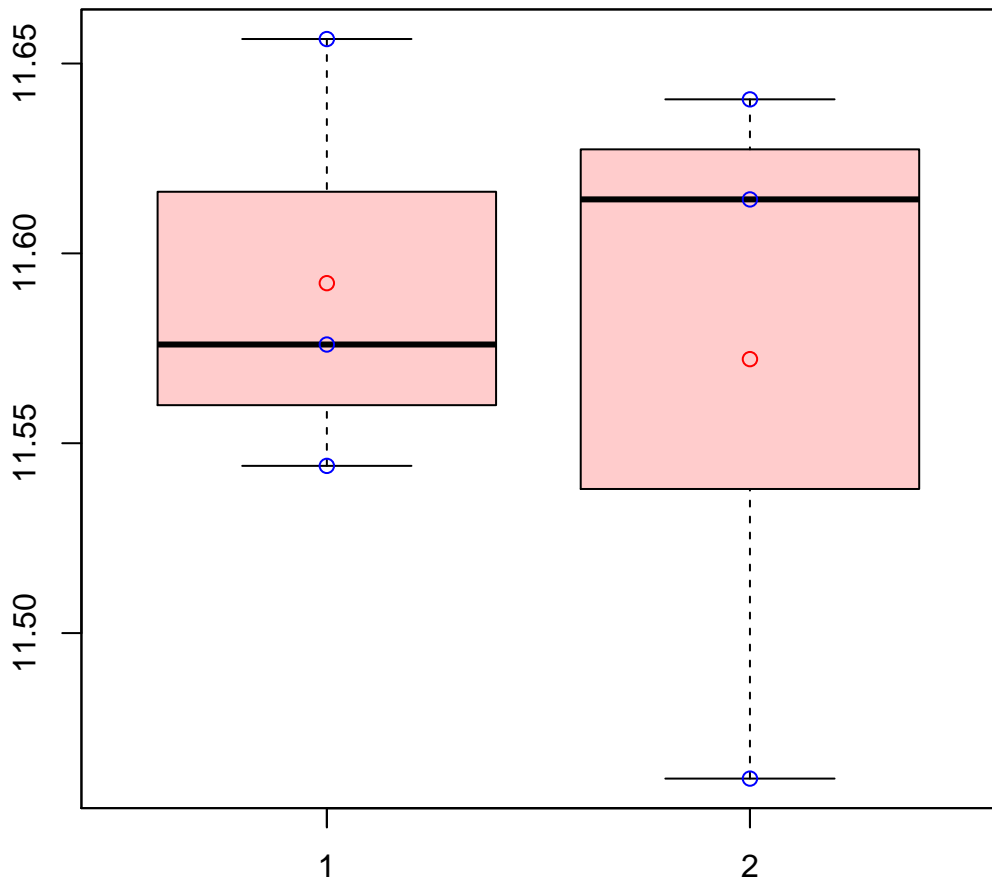

t-Test: p-value = 0.78

# CL123Contig6|CL123Contig6

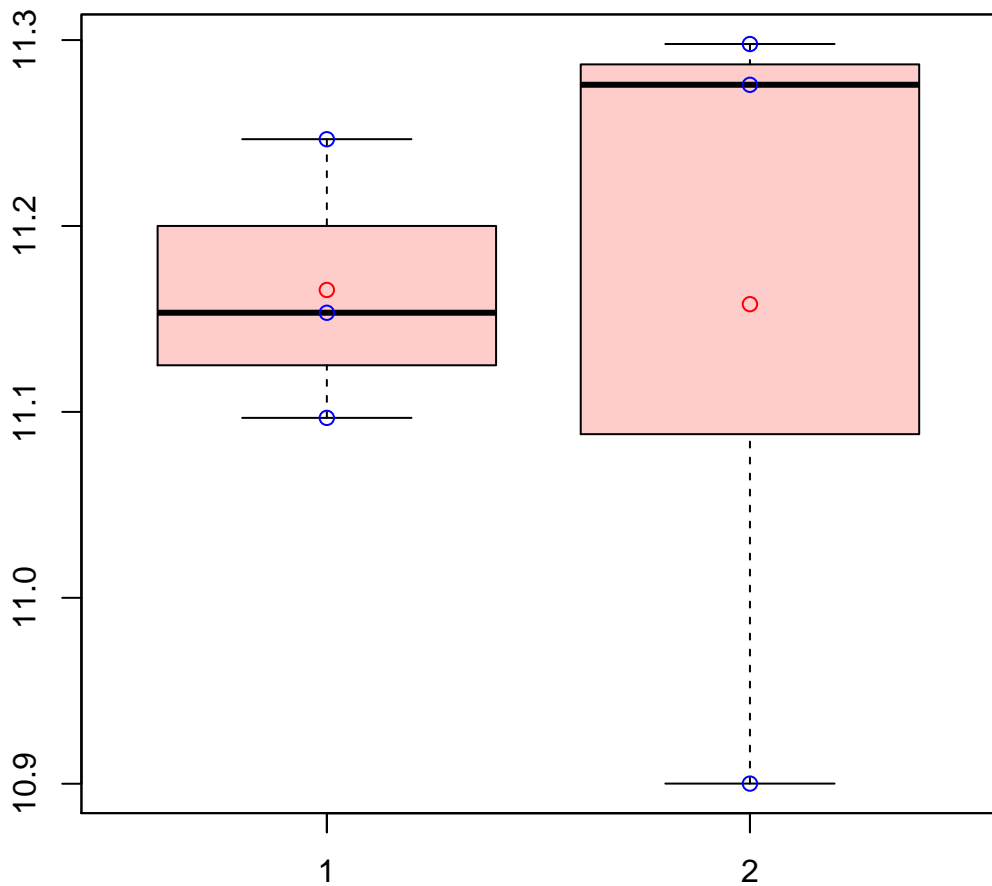

t-Test: p-value = 0.96



# CL12405Contig2|CL12405Contig2

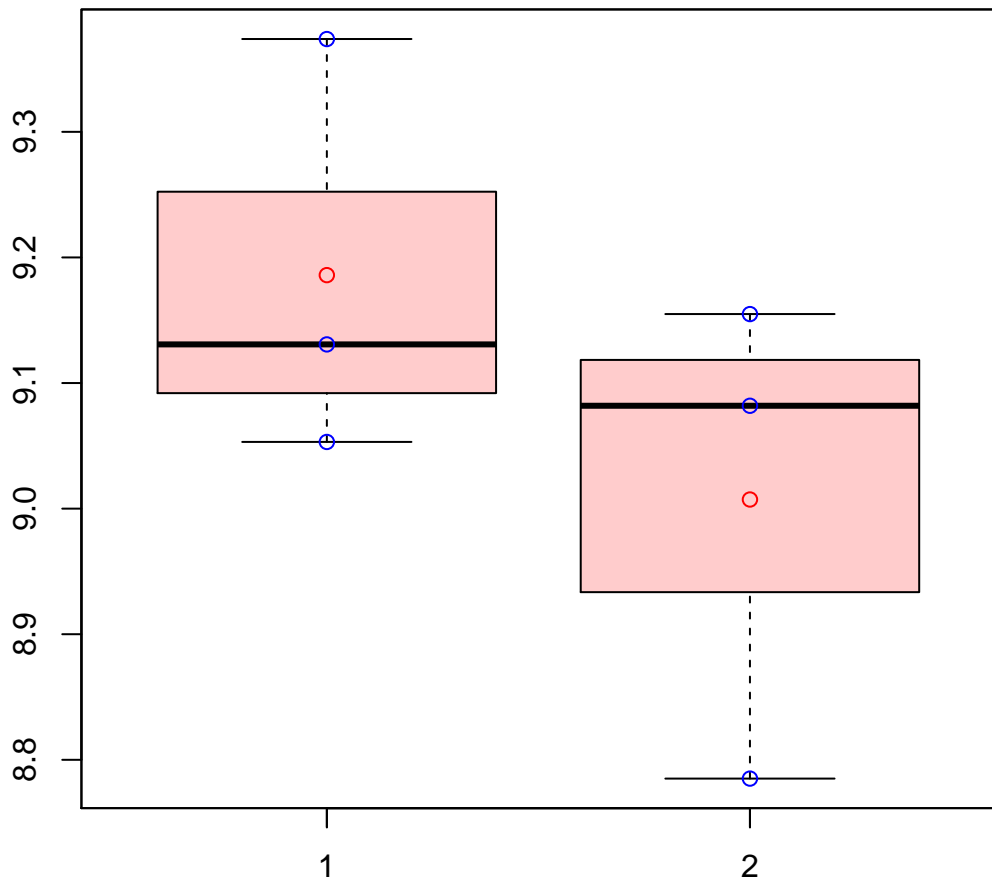

t-Test: p-value = 0.3

# CL1241Contig2|CL1241Contig2

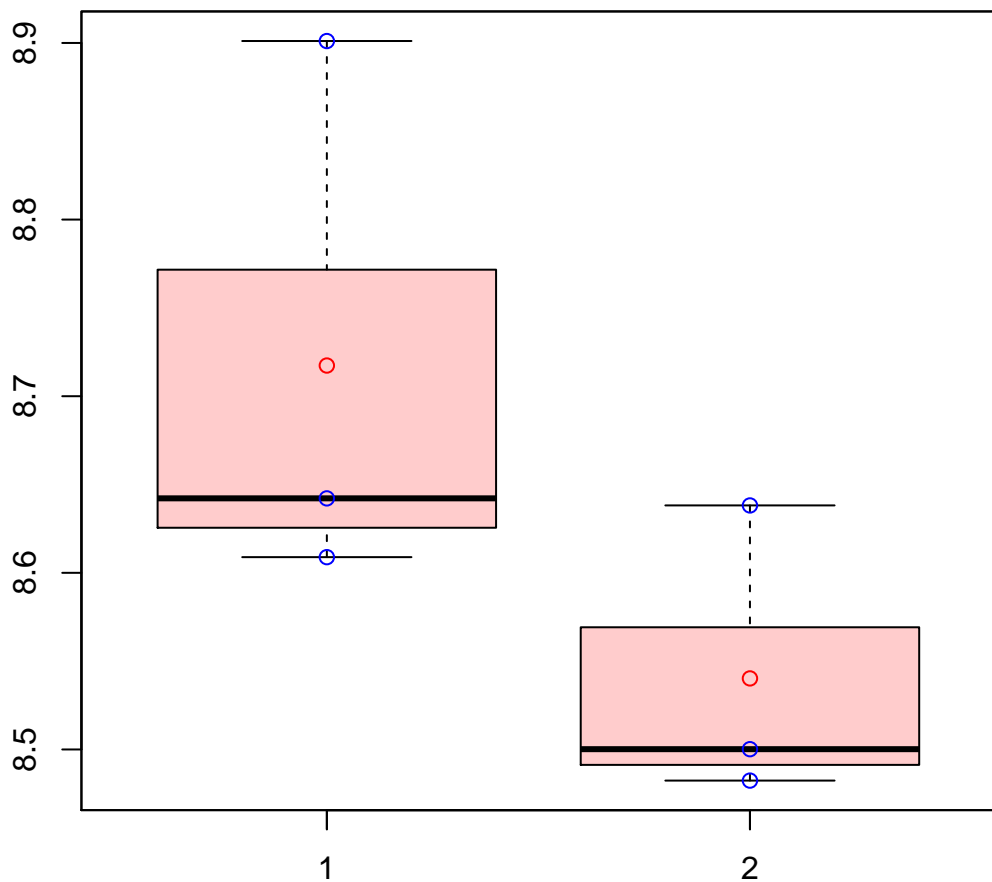

t-Test: p-value = 0.19

# CL12448Contig1|CL12448Contig1

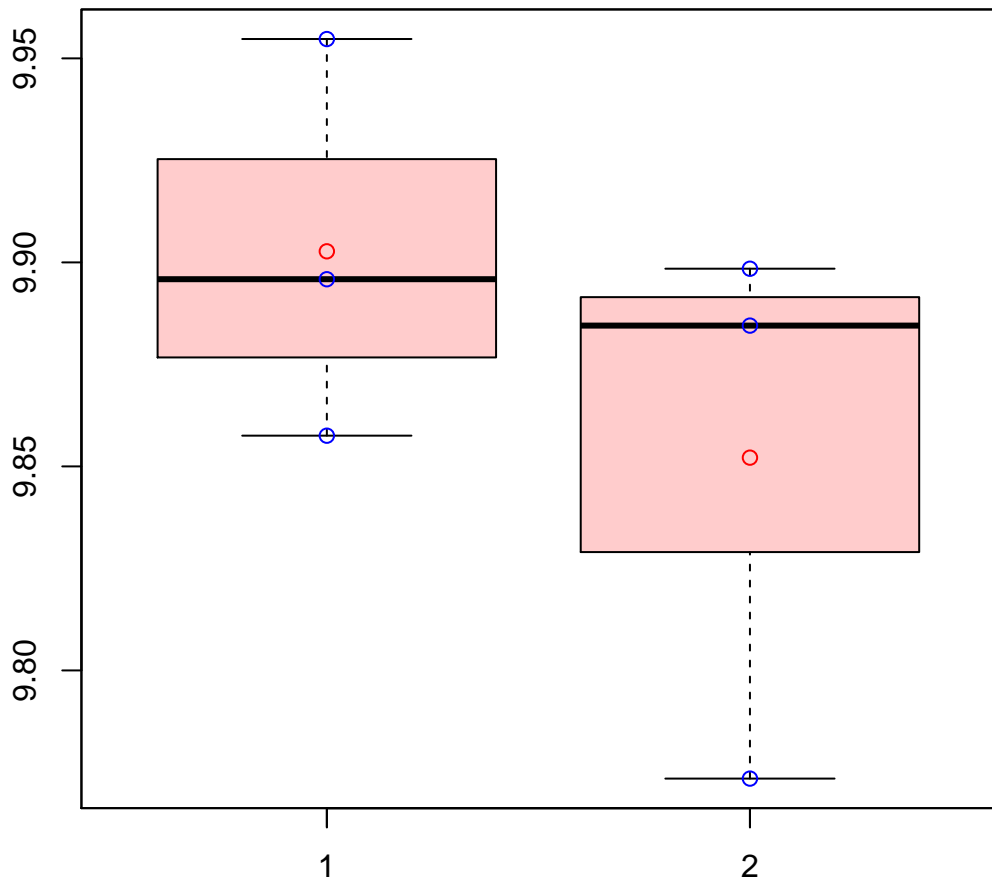

t-Test: p-value = 0.36

# CL1246Contig3|CL1246Contig3

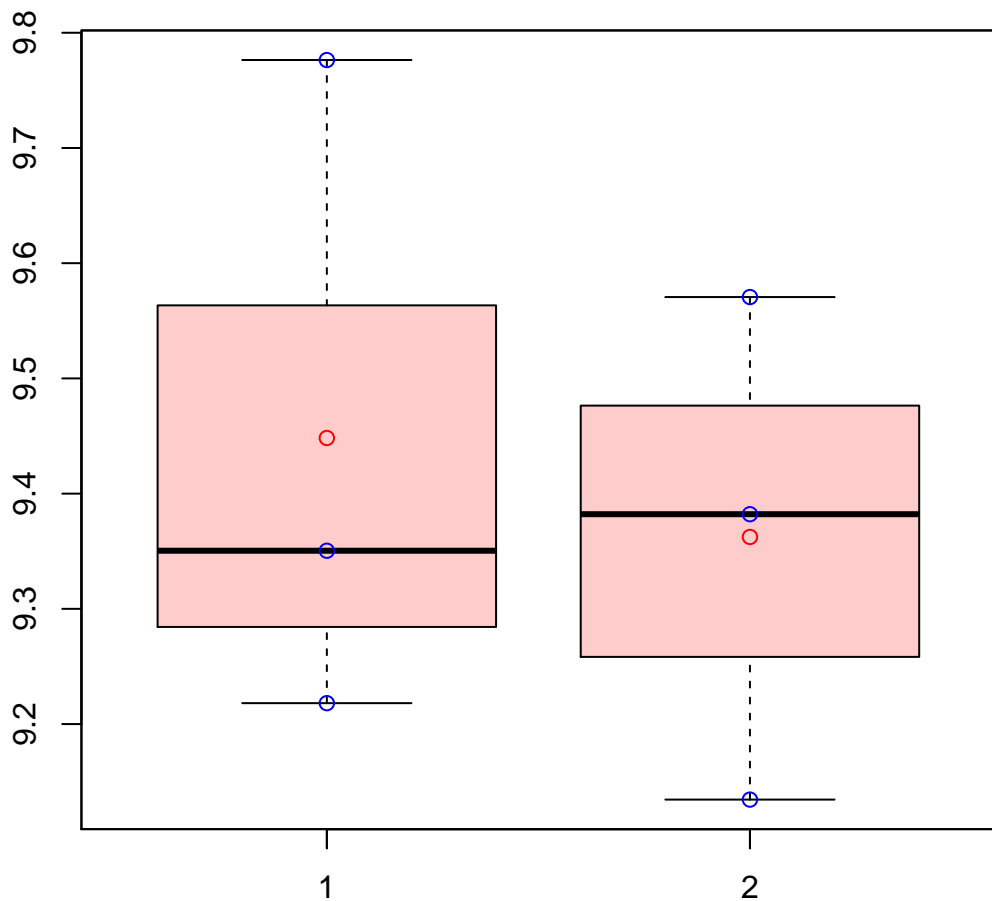

t-Test: p-value = 0.71

# CL1248Contig10|CL1248Contig10

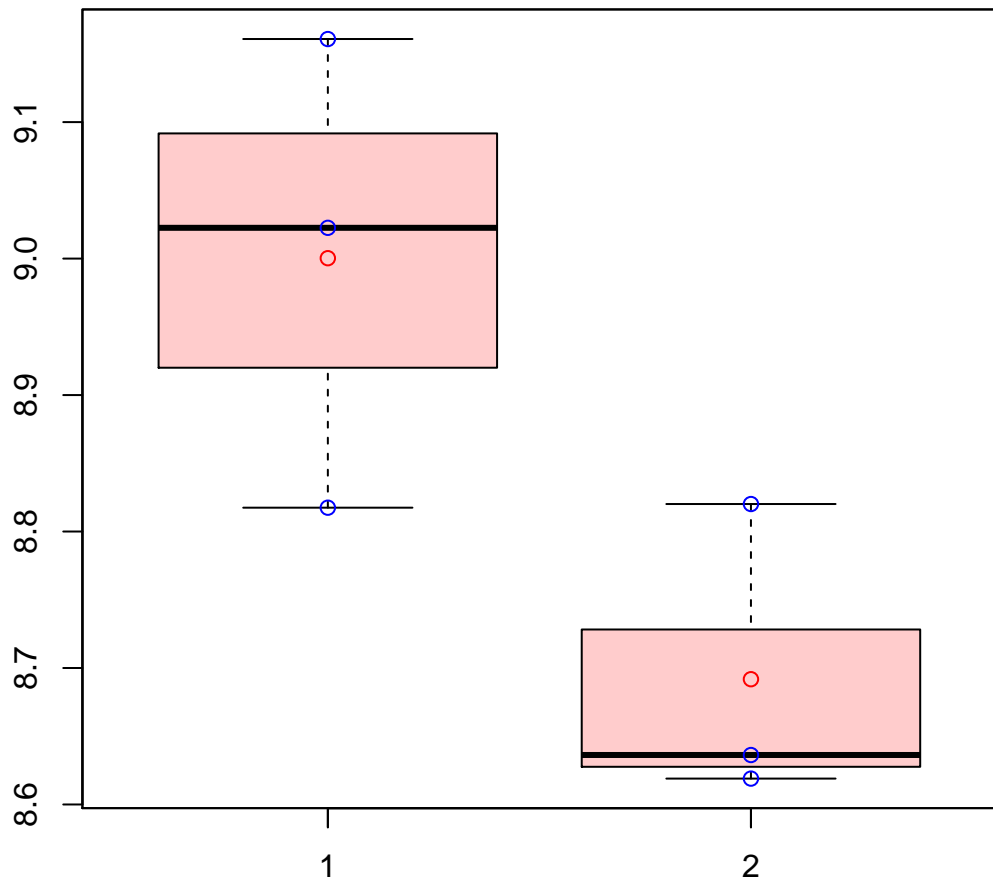

t-Test: p-value = 0.07

# CL1248Contig11|CL1248Contig11

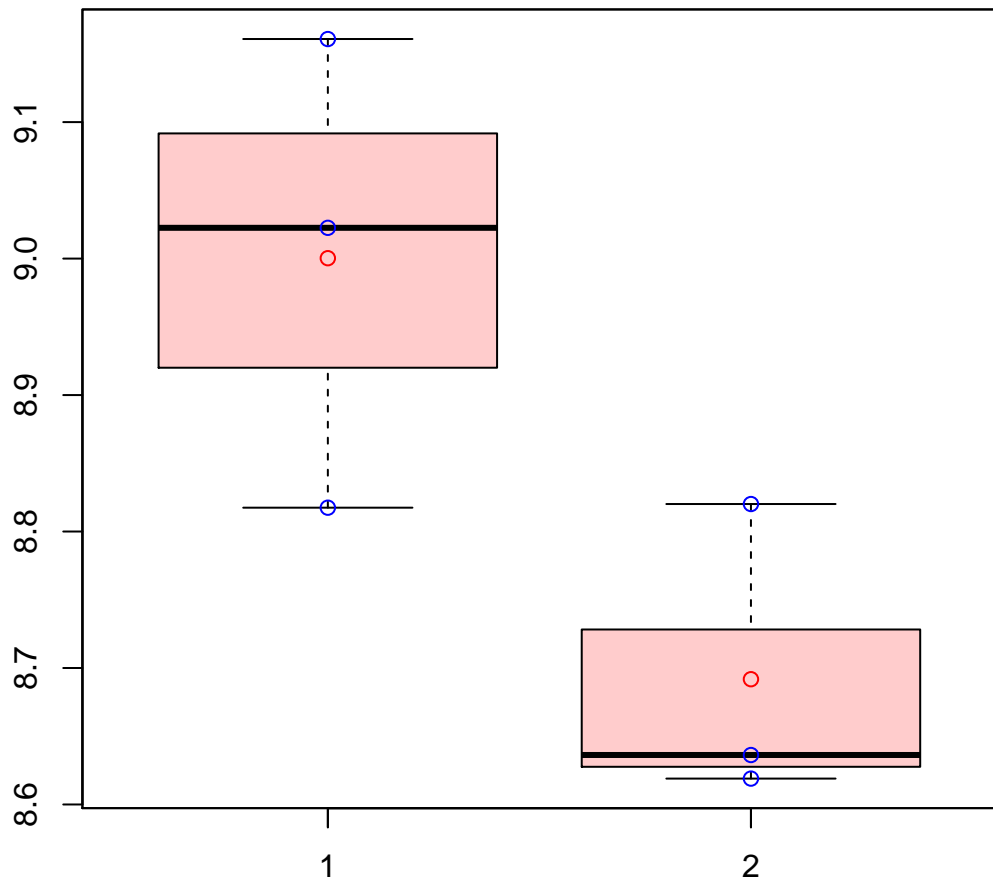

t-Test: p-value = 0.07

# CL12496Contig1|CL12496Contig1

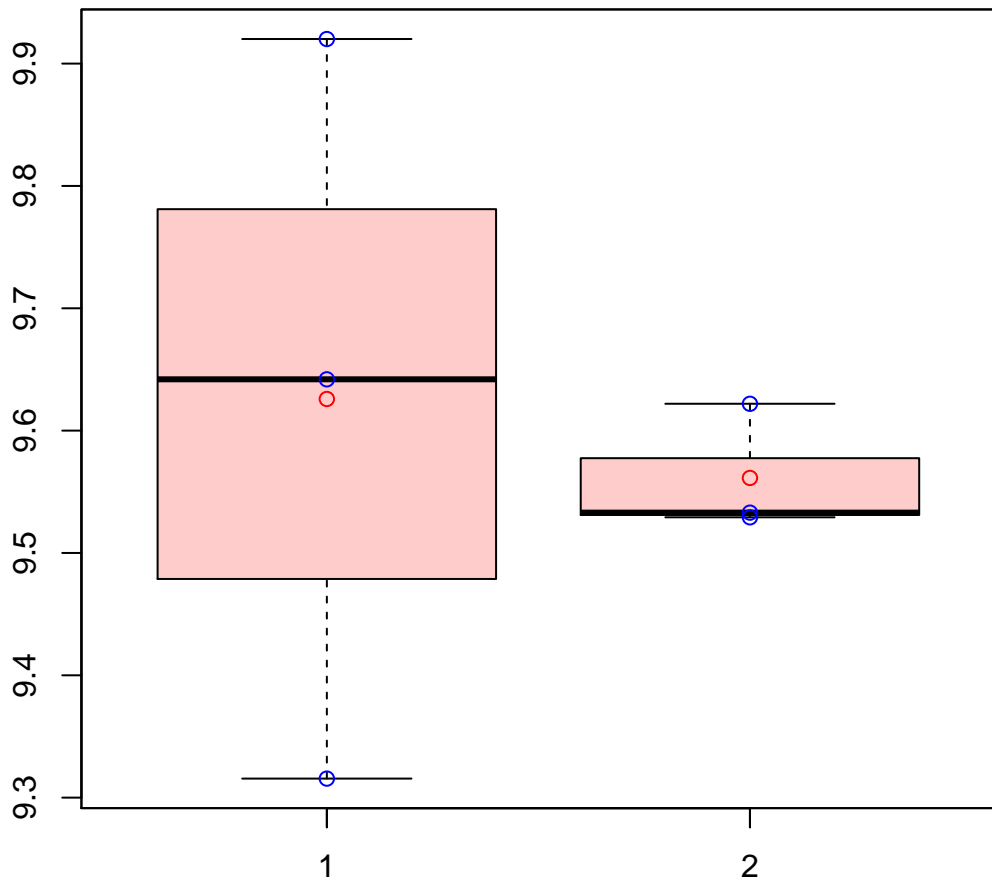

t-Test: p-value = 0.75

# CL1249Contig1|CL1249Contig1

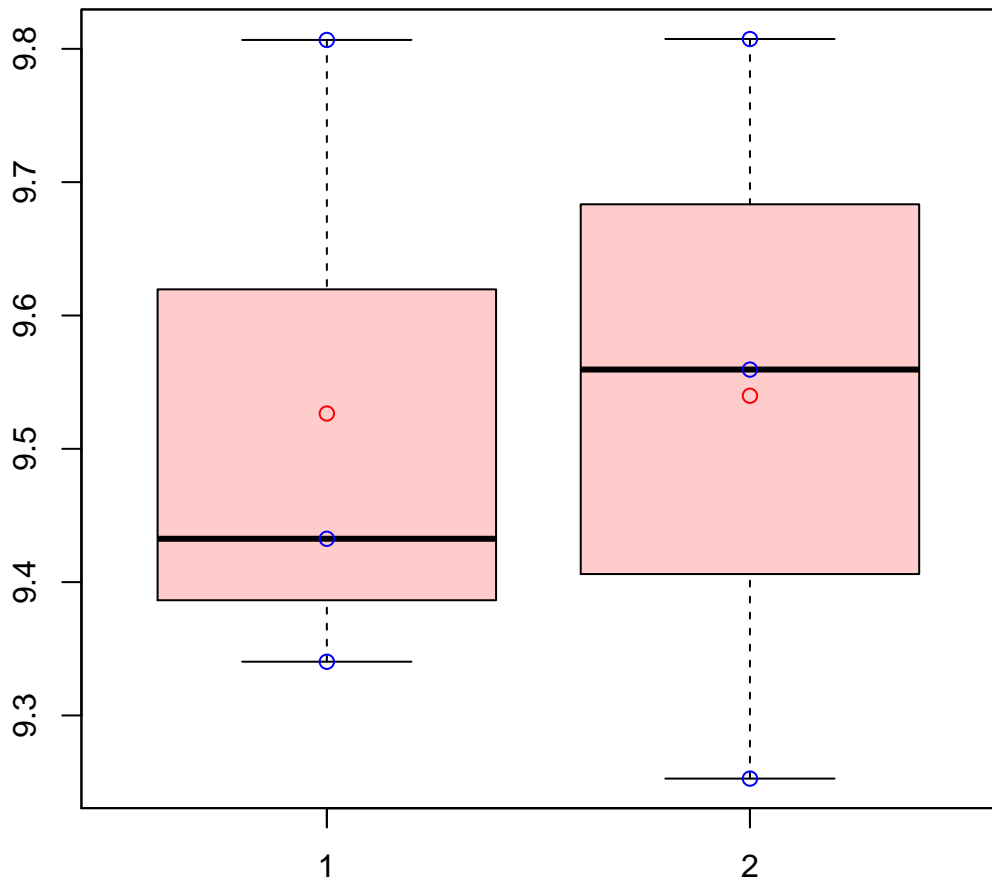

t-Test: p-value = 0.95



# CL1249Contig6|CL1249Contig6

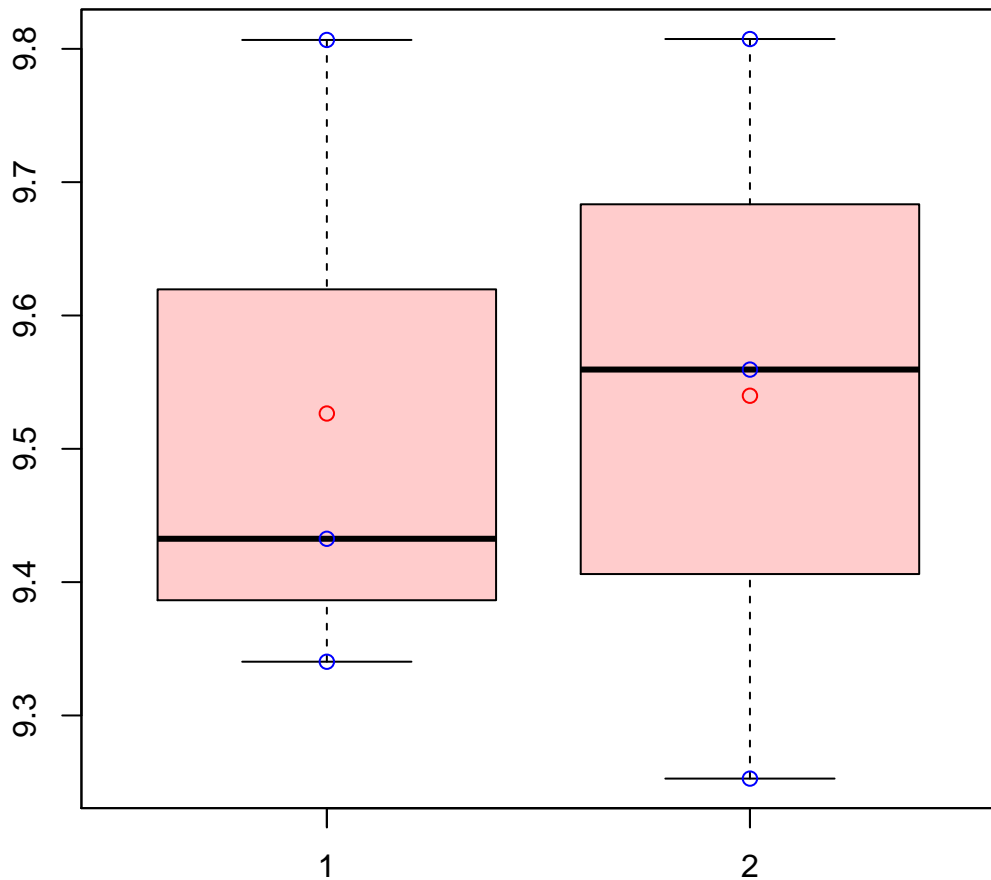

t-Test: p-value = 0.95

# CL124Contig13|CL124Contig13

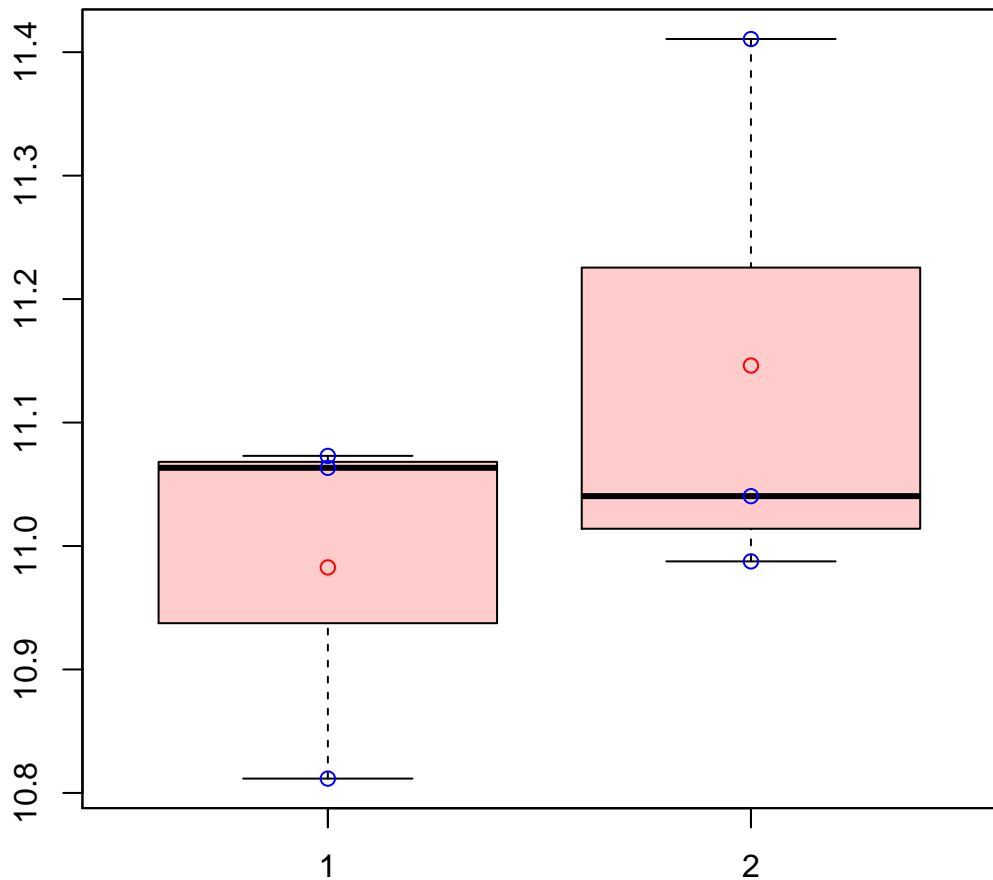

t-Test: p-value = 0.37

# CL124Contig14|CL124Contig14

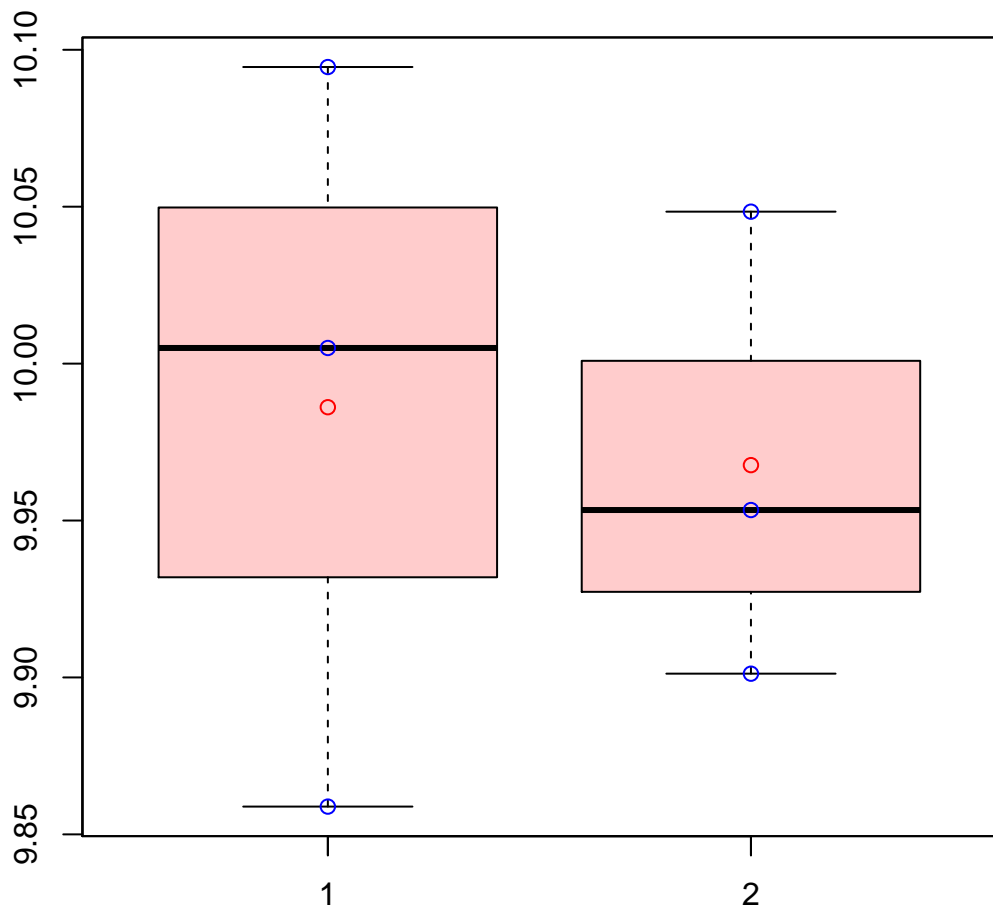

t-Test: p-value = 0.83

# CL124Contig16|CL124Contig16

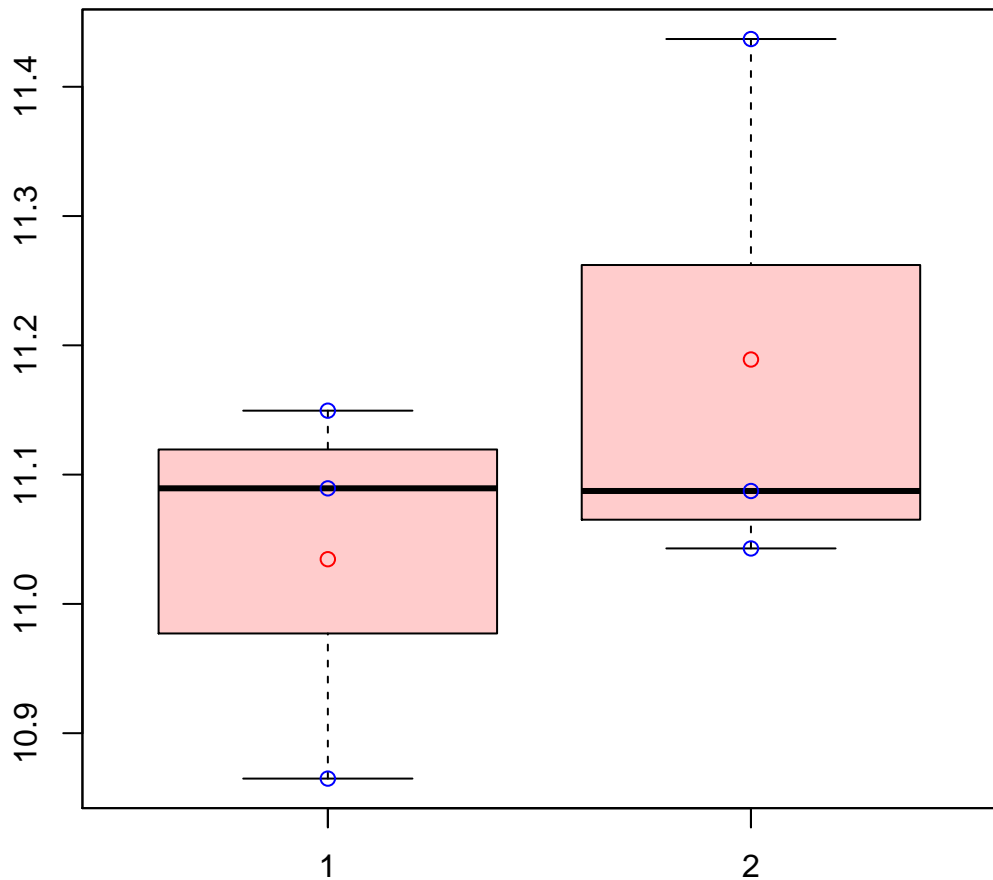

t-Test: p-value = 0.37

# CL124Contig17|CL124Contig17



t-Test: p-value = 0.37

# CL124Contig19|CL124Contig19

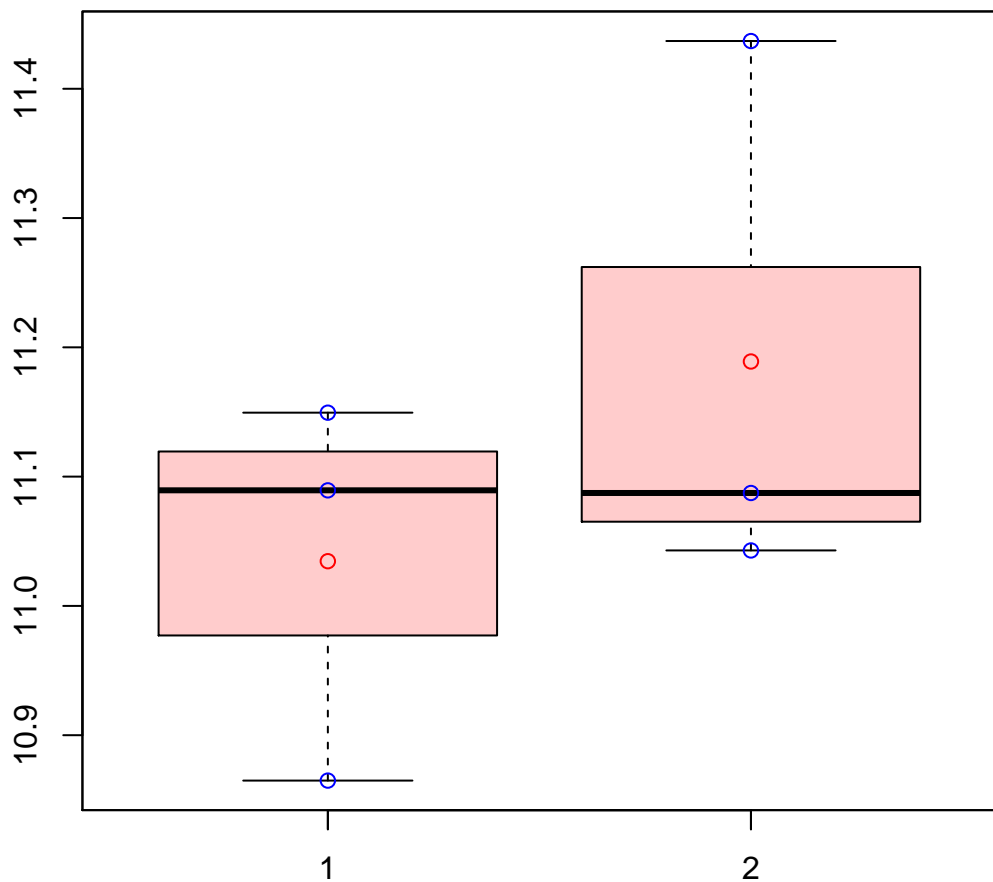

t-Test: p-value = 0.37

# CL124Contig1|CL124Contig1

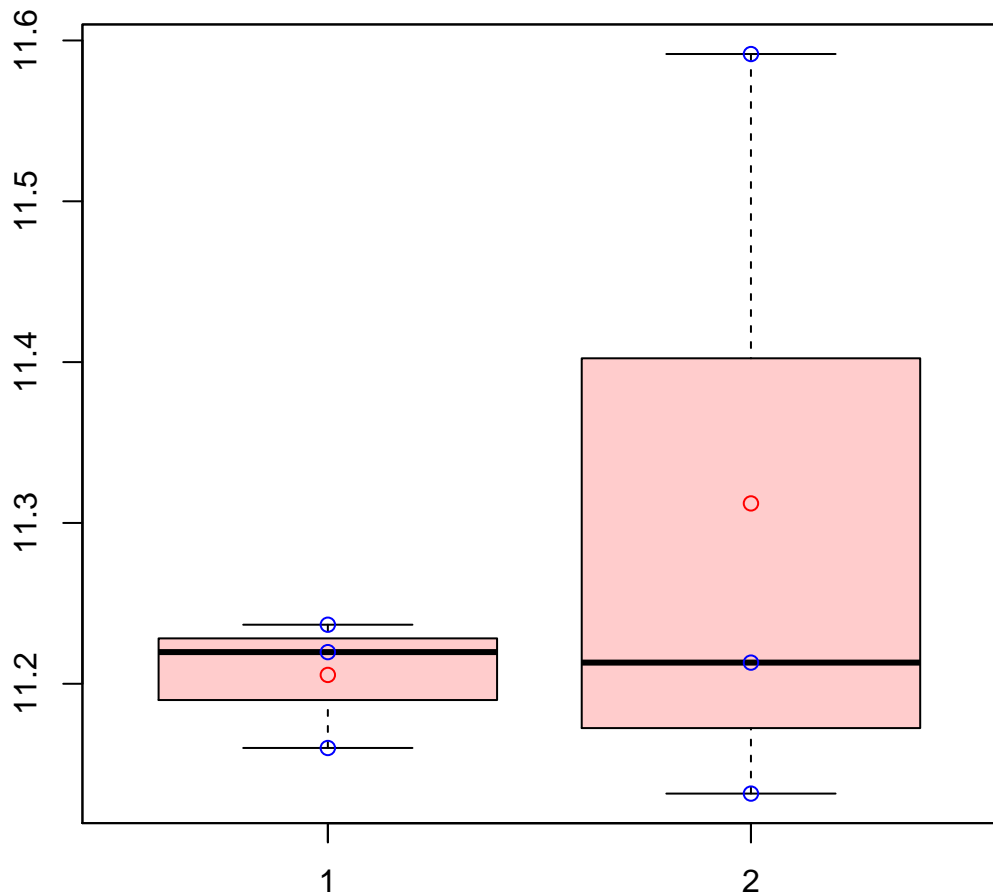

t-Test: p-value = 0.53

# CL124Contig25|CL124Contig25

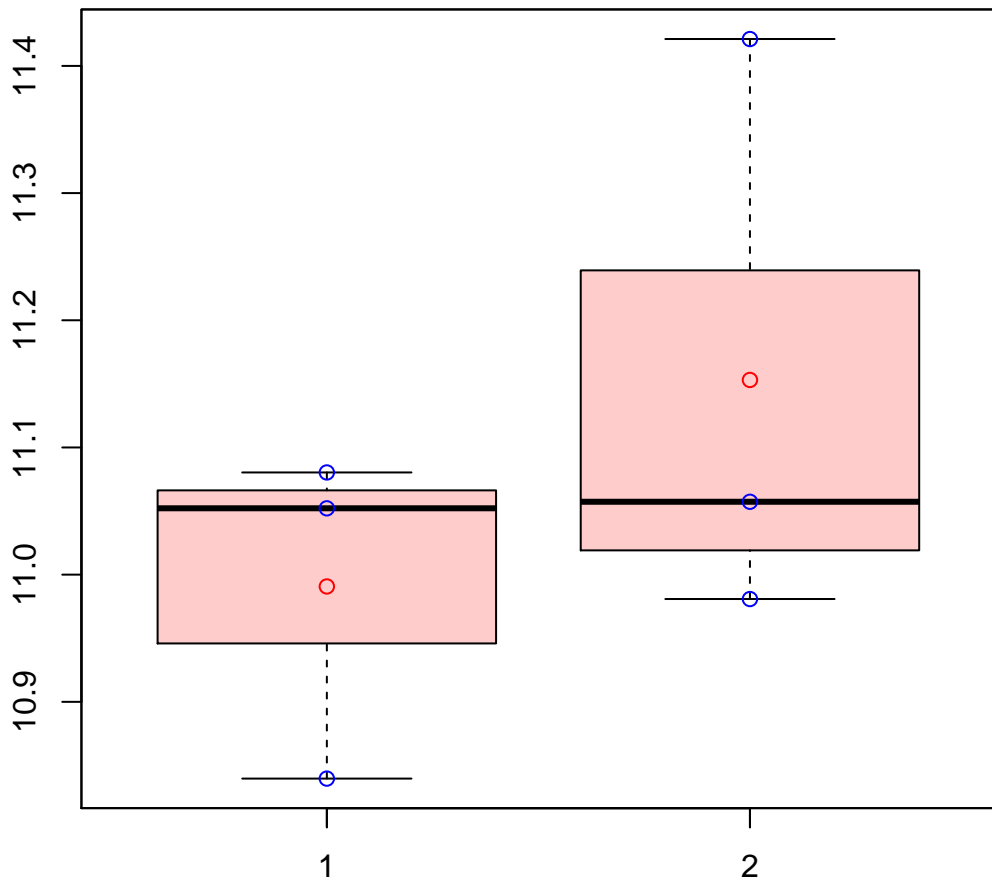

t-Test: p-value = 0.37



## CL124Contig2|CL124Contig2

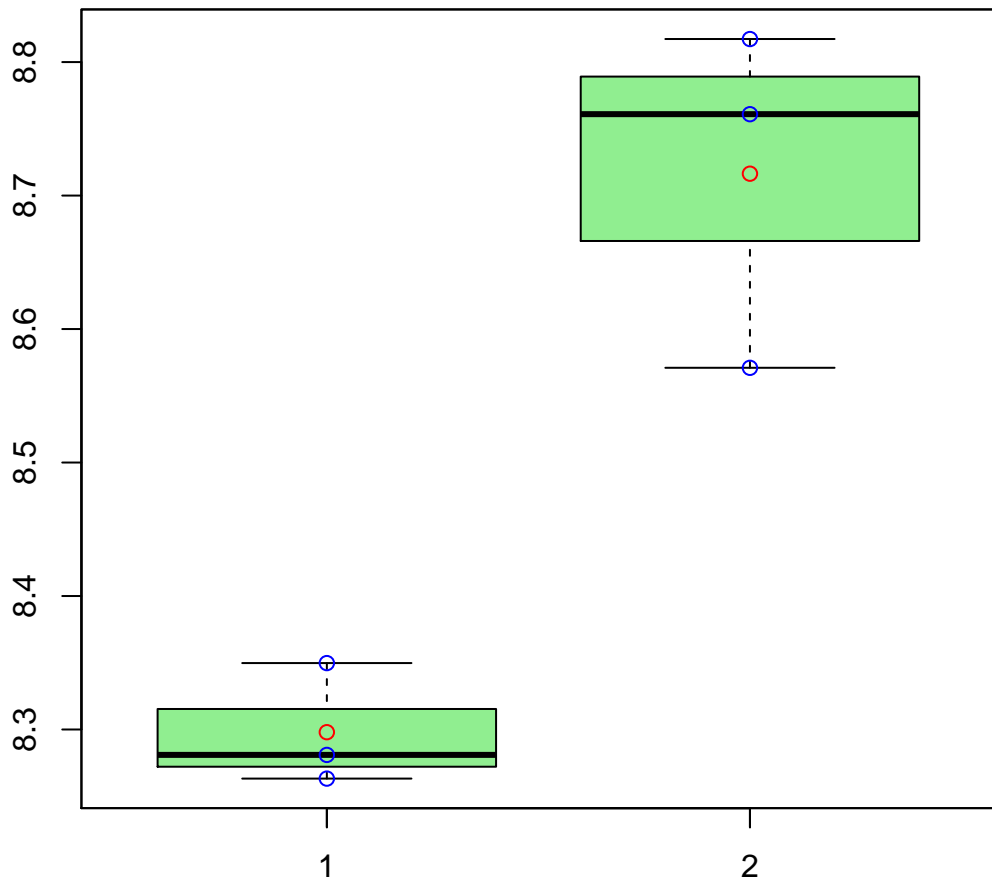

t-Test: p-value = 0.02

# CL124Contig6|CL124Contig6

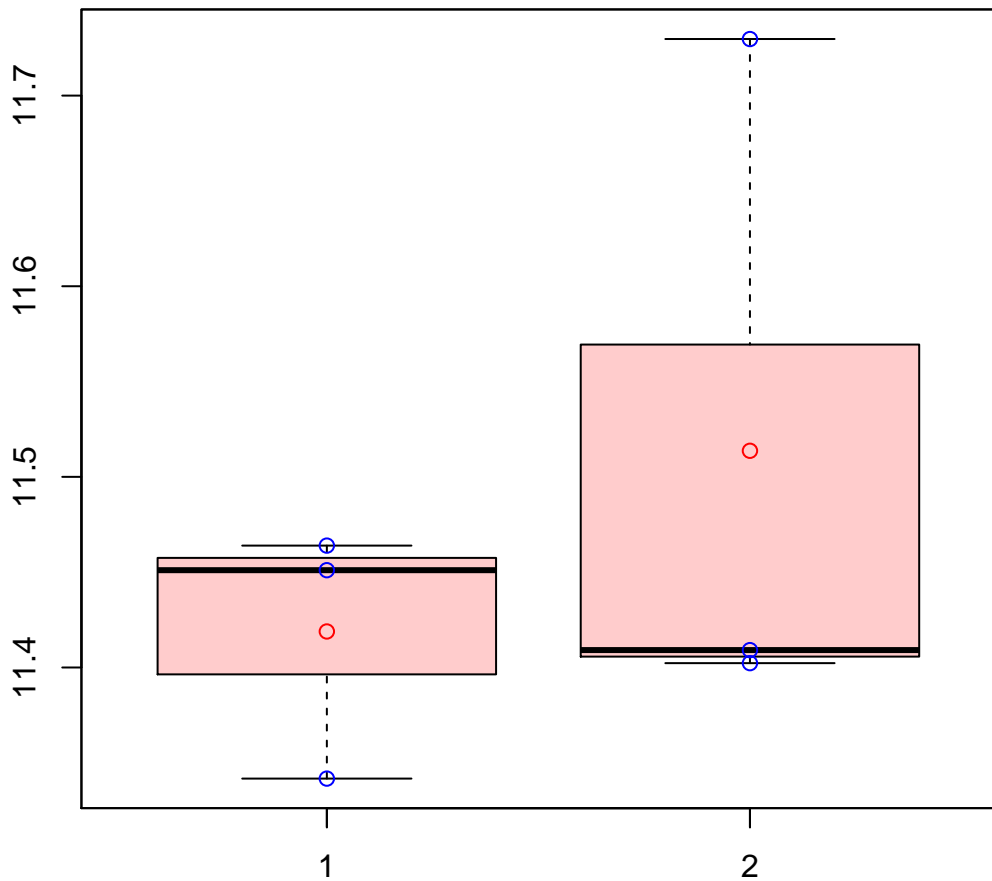

t-Test: p-value = 0.48

# CL124Contig7|CL124Contig7

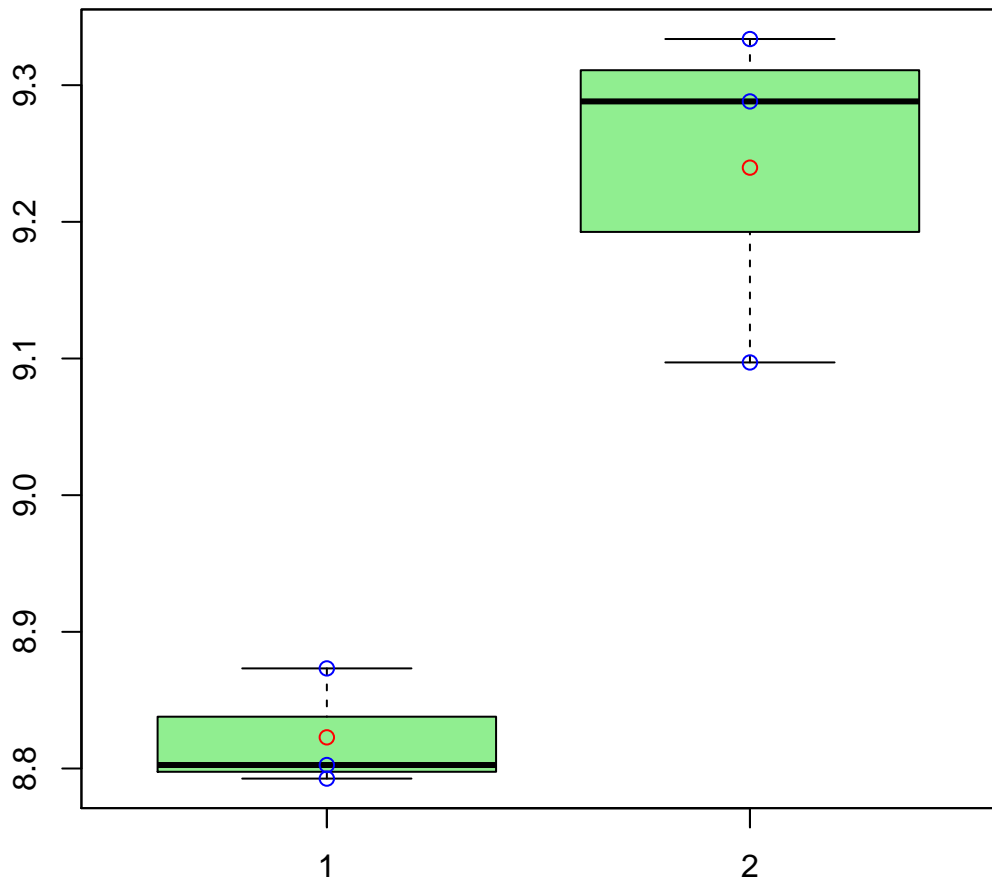

t-Test: p-value = 0.02

# CL1251Contig2|CL1251Contig2

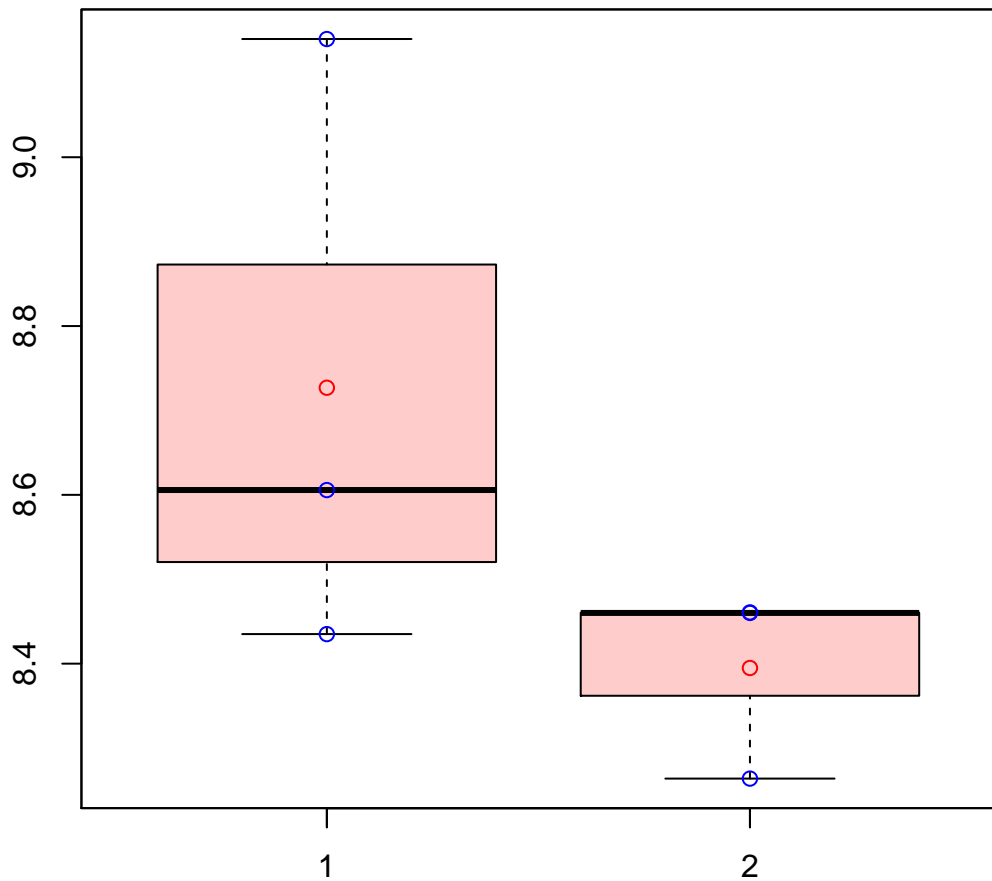

t-Test: p-value = 0.25

# CL12530Contig2|CL12530Contig2

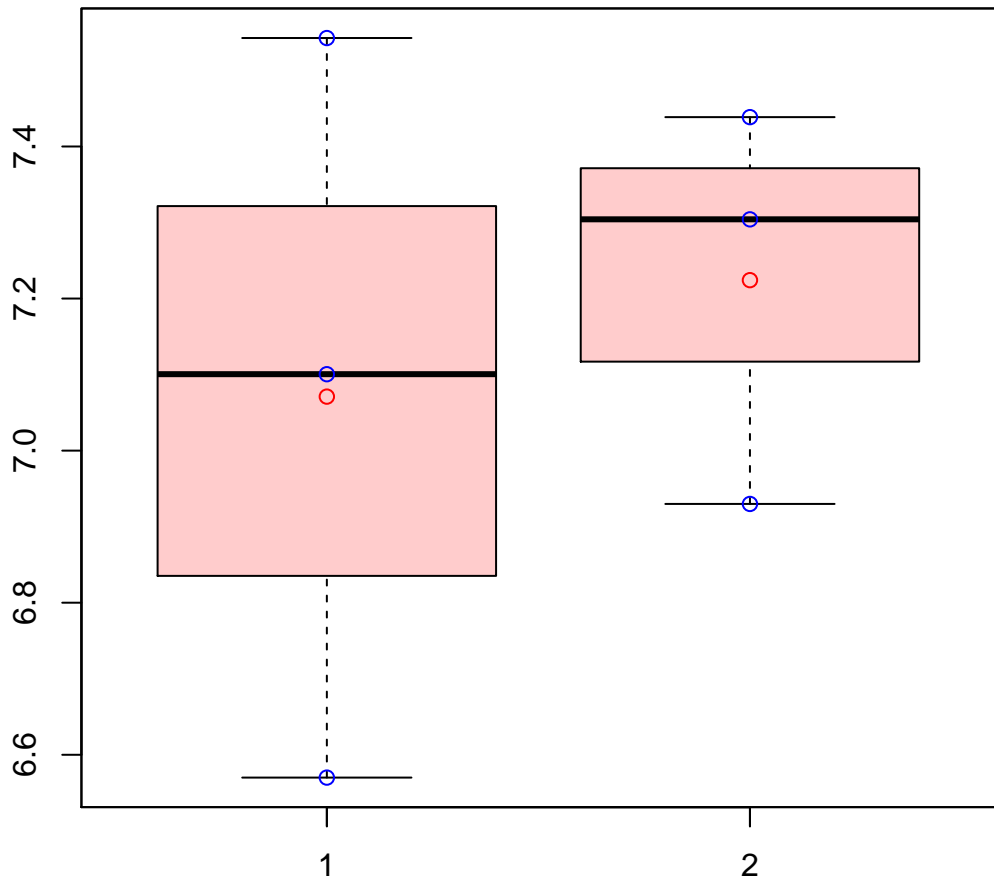

t-Test: p-value = 0.66

# CL12534Contig2|CL12534Contig2

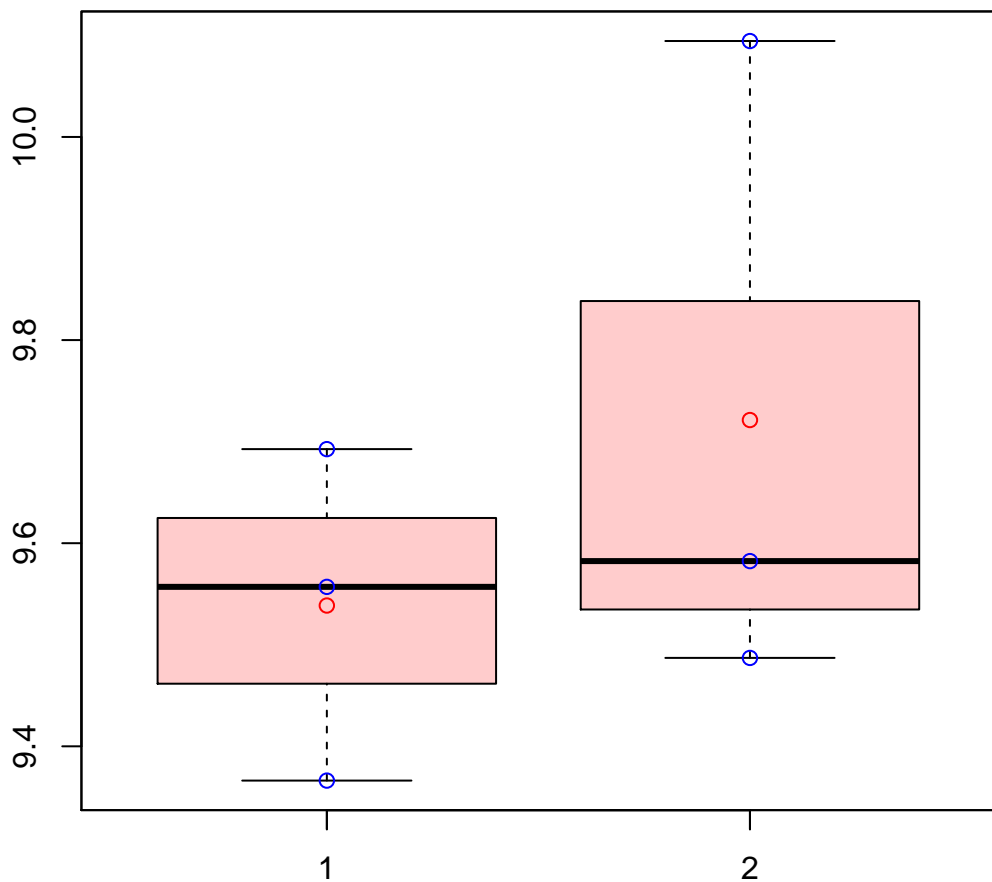

t-Test: p-value = 0.45

# CL1253Contig4|CL1253Contig4

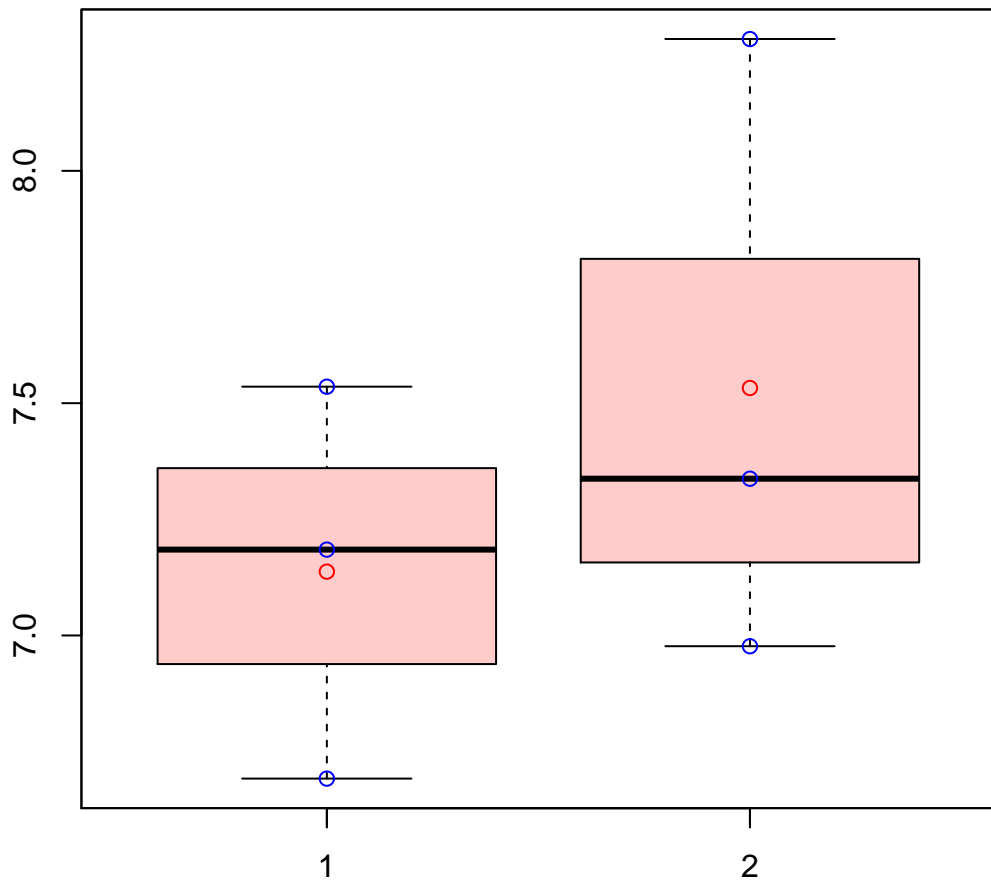

t-Test: p-value = 0.45

# CL12545Contig1|CL12545Contig1

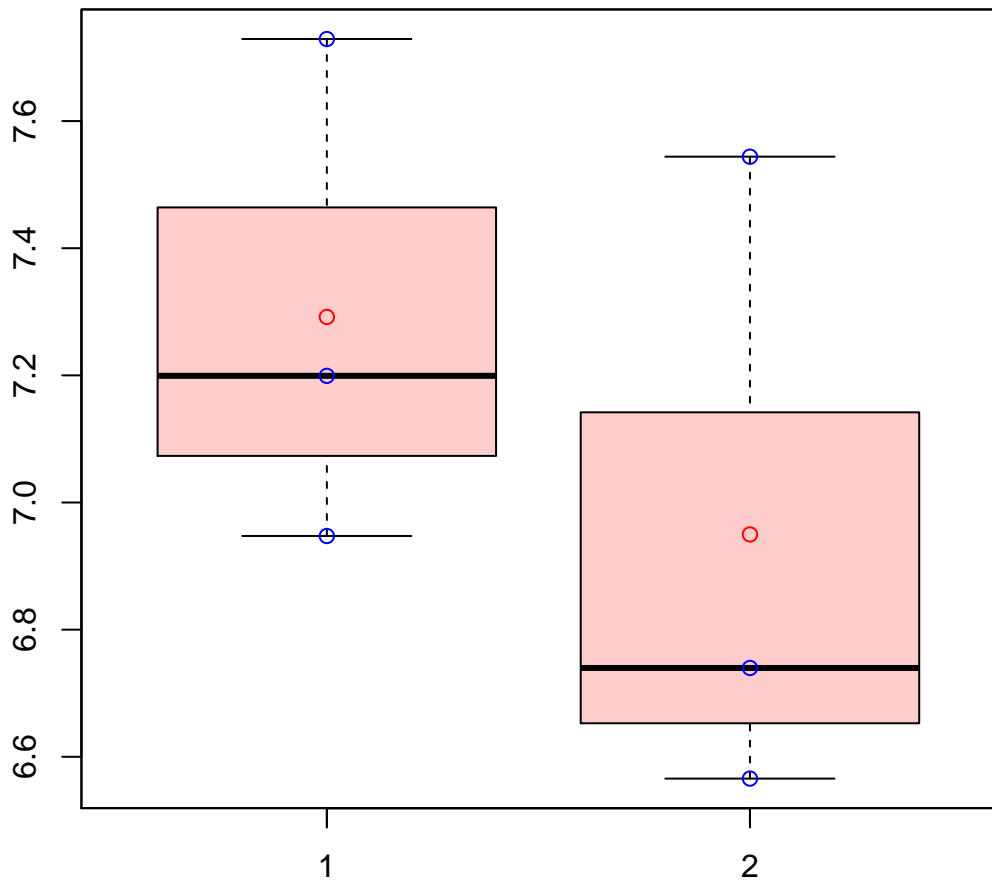

t-Test: p-value = 0.42



# CL12548Contig1|CL12548Contig1

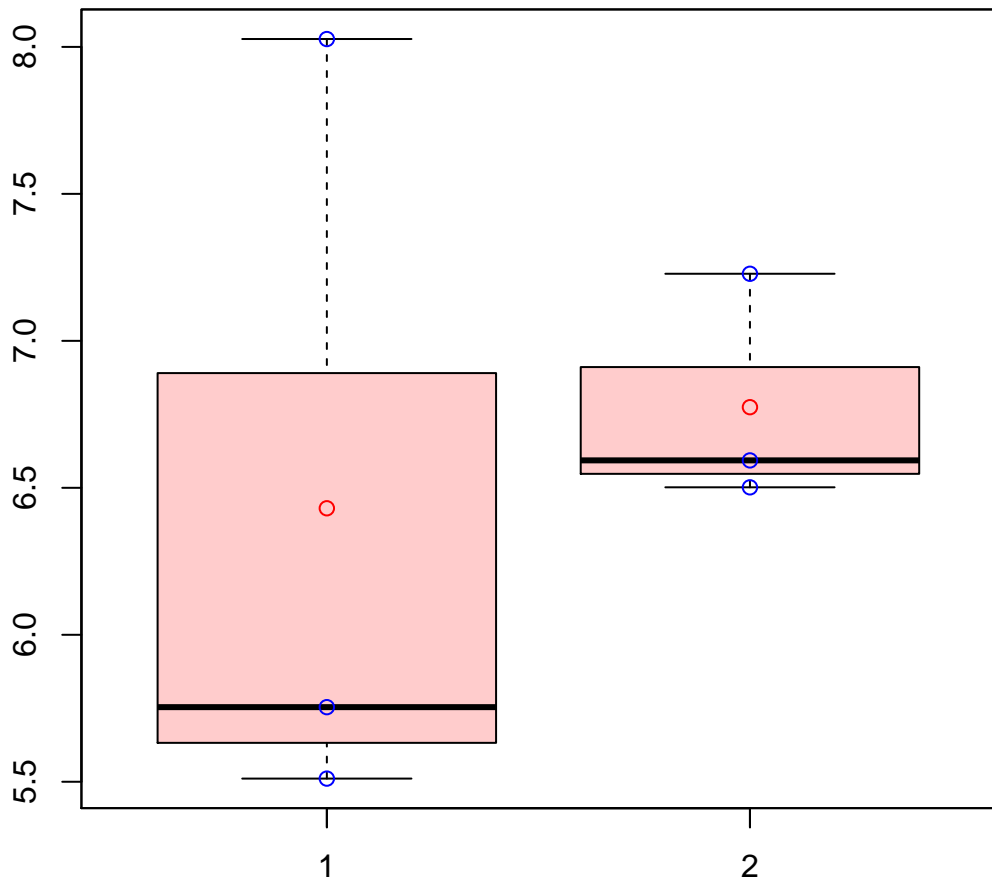

t-Test: p-value = 0.71

# CL1254Contig1|CL1254Contig1



t-Test: p-value = 0.9

# CL12558Contig1|CL12558Contig1

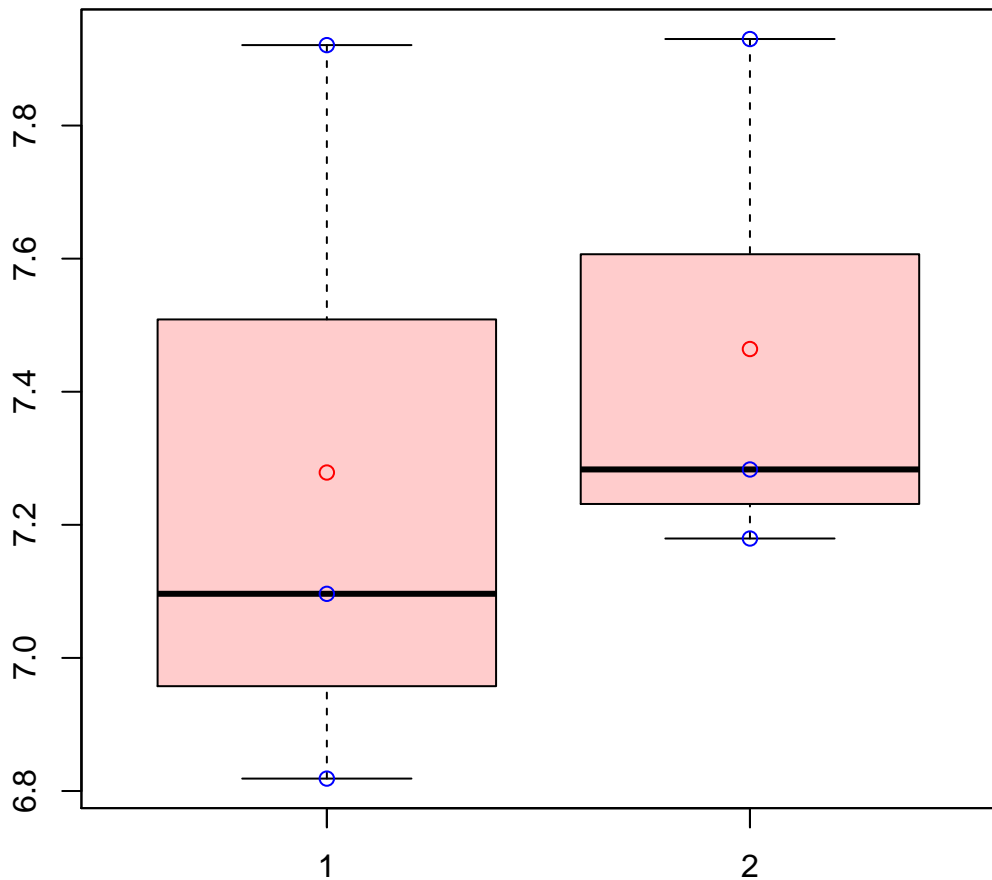

t-Test: p-value = 0.67

# CL1256Contig8|CL1256Contig8

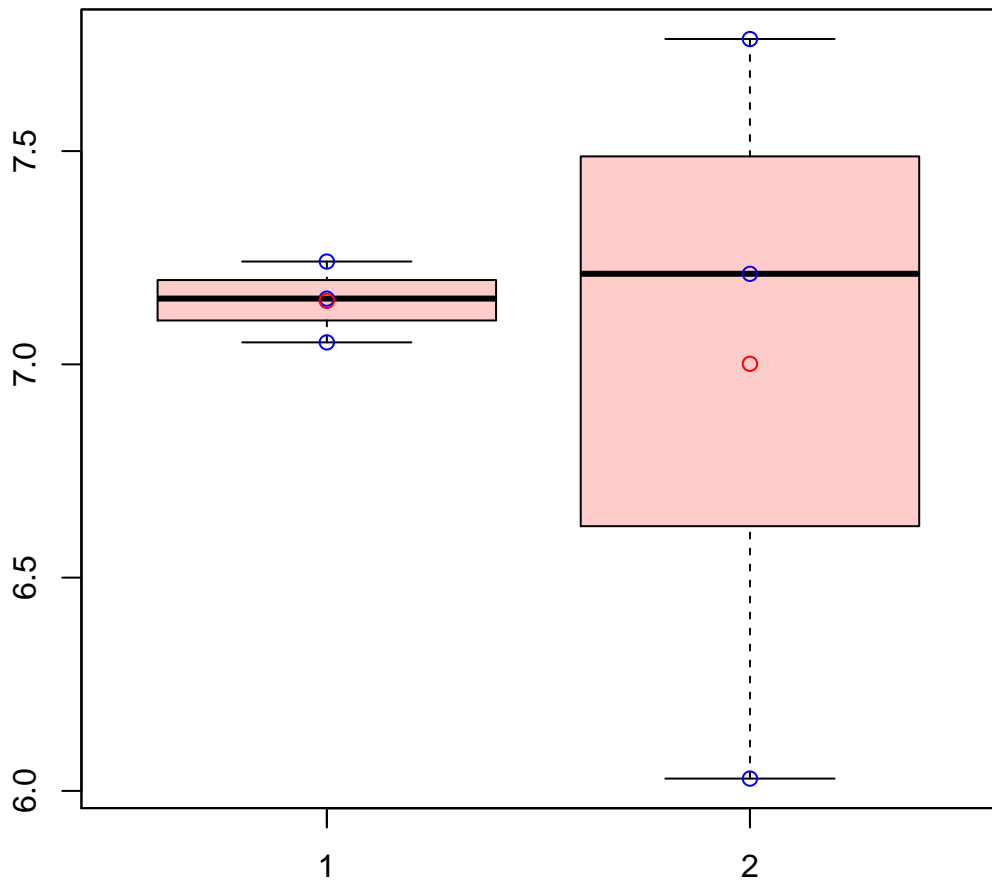

t-Test: p-value = 0.8

# CL1259Contig1|CL1259Contig1

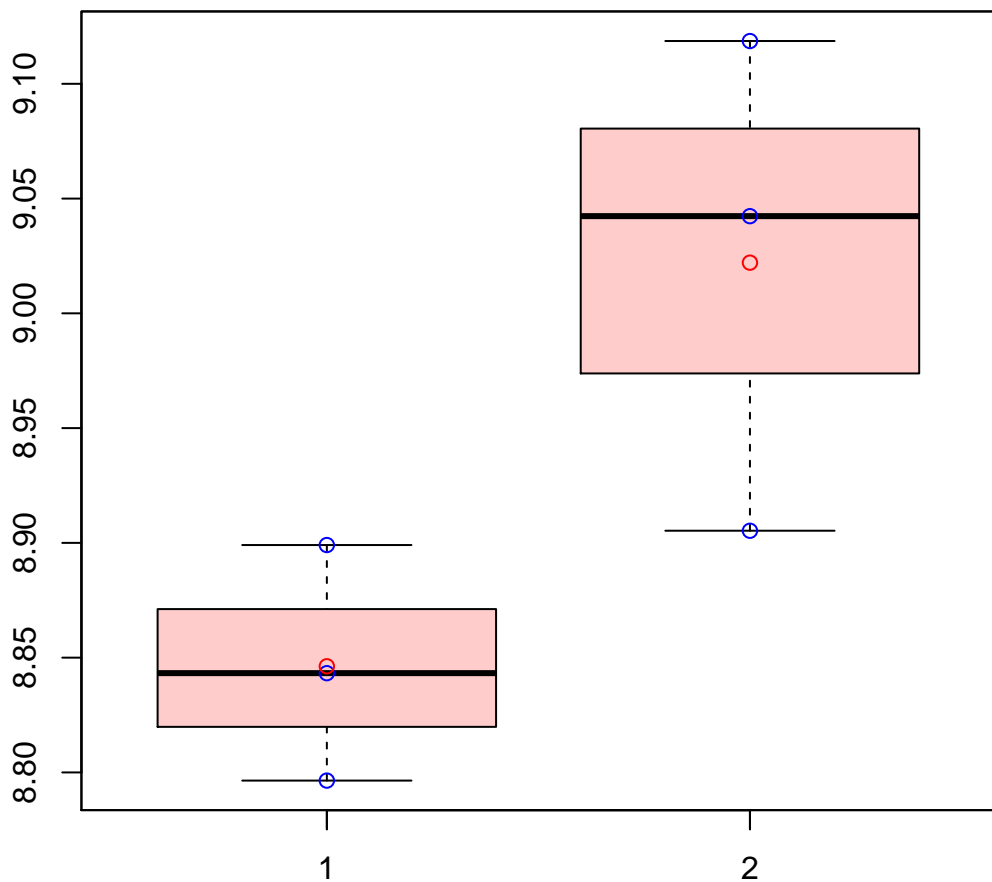

t-Test: p-value = 0.09

# CL125Contig1|CL125Contig1

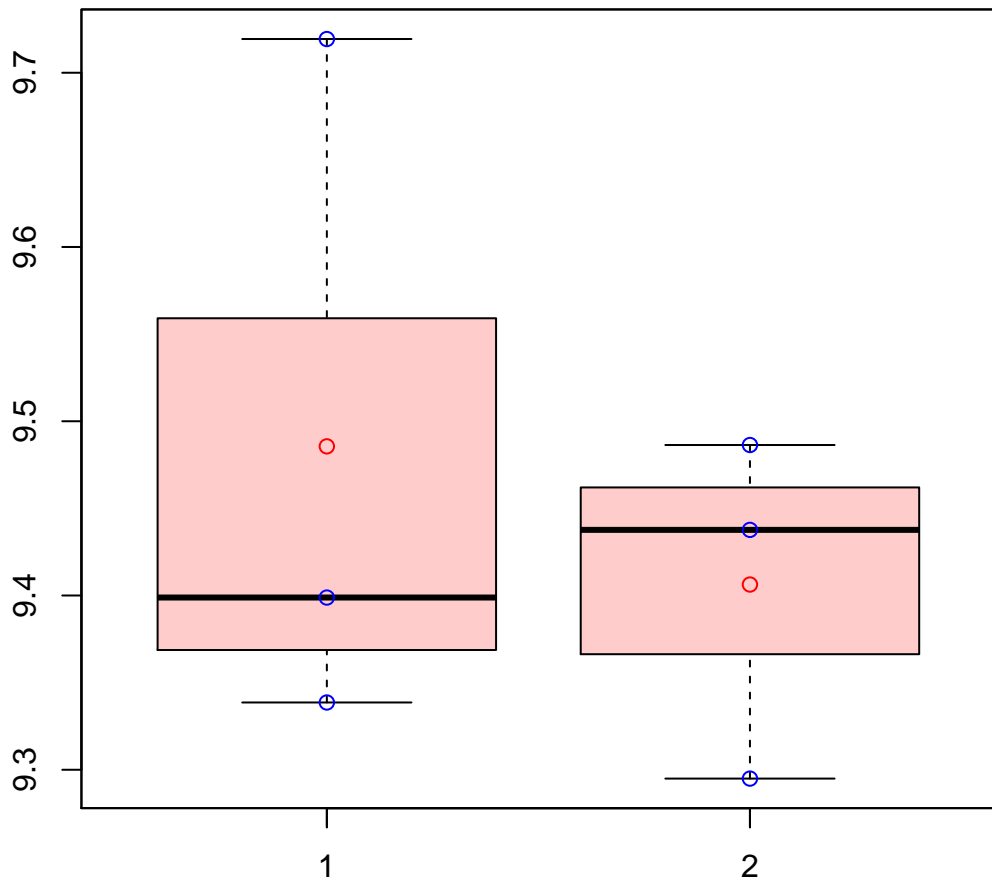

t-Test: p-value = 0.59

# CL125Contig2|CL125Contig2

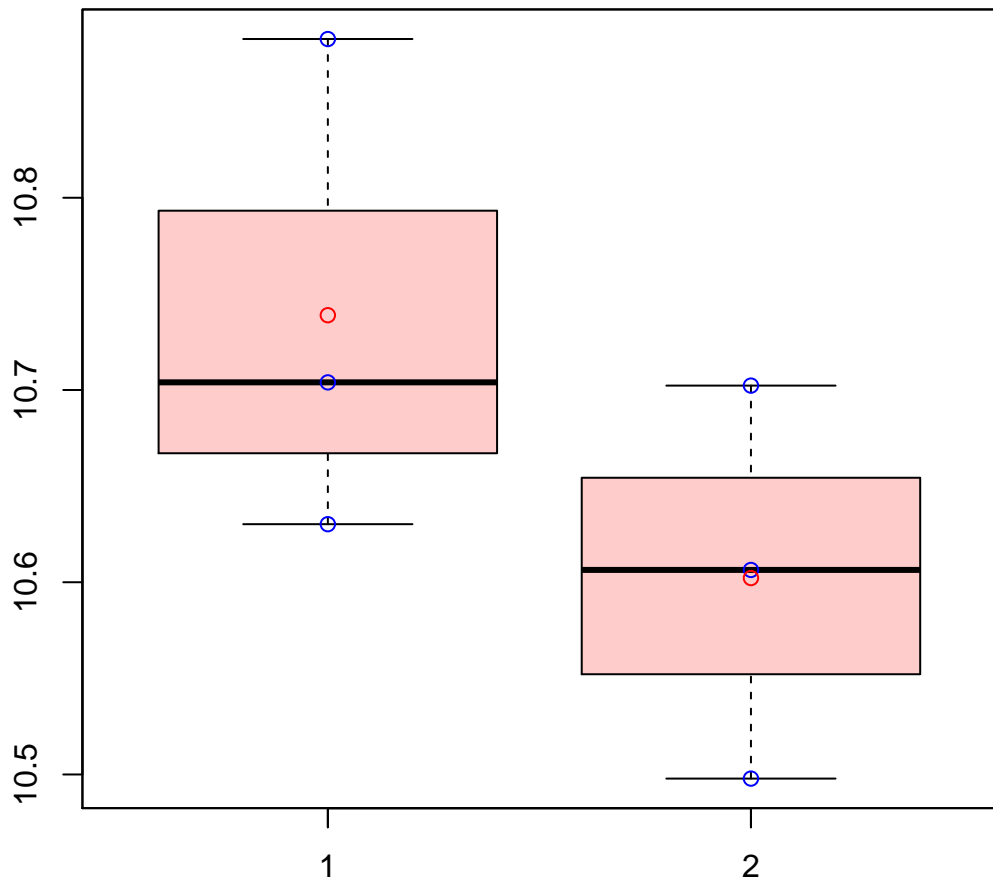

t-Test: p-value = 0.23

# CL125Contig3|CL125Contig3

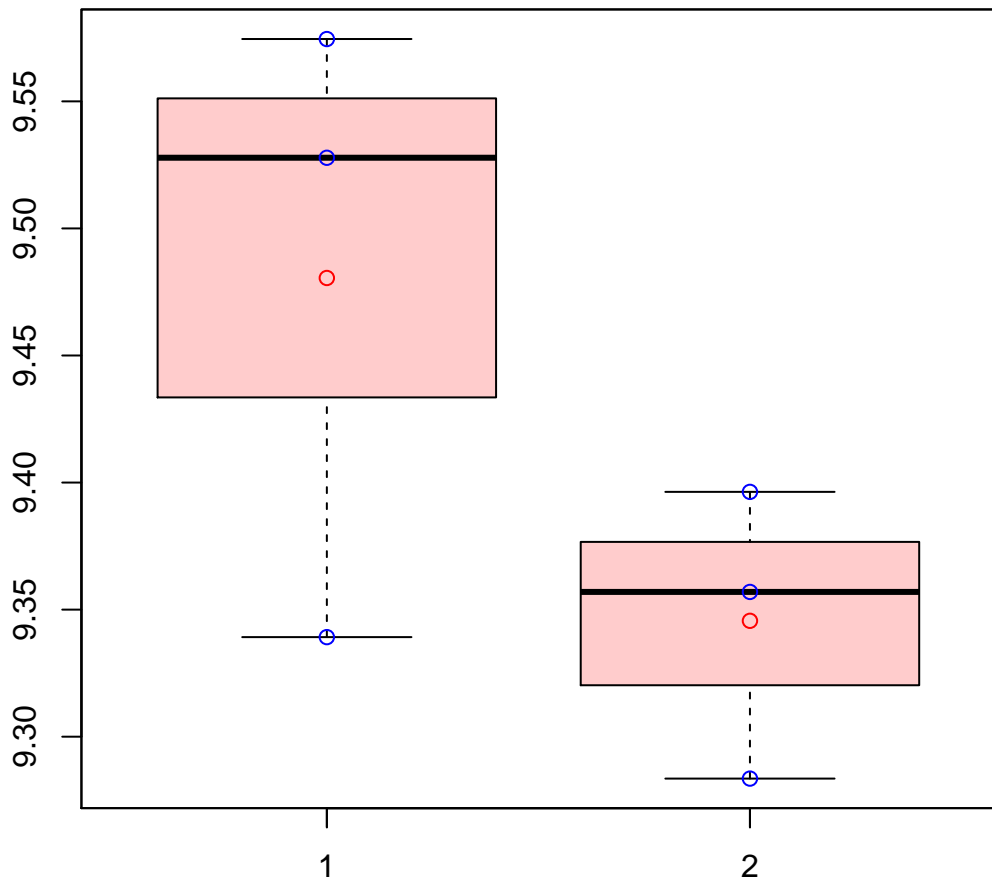

t-Test: p-value = 0.19



# CL125Contig4|CL125Contig4

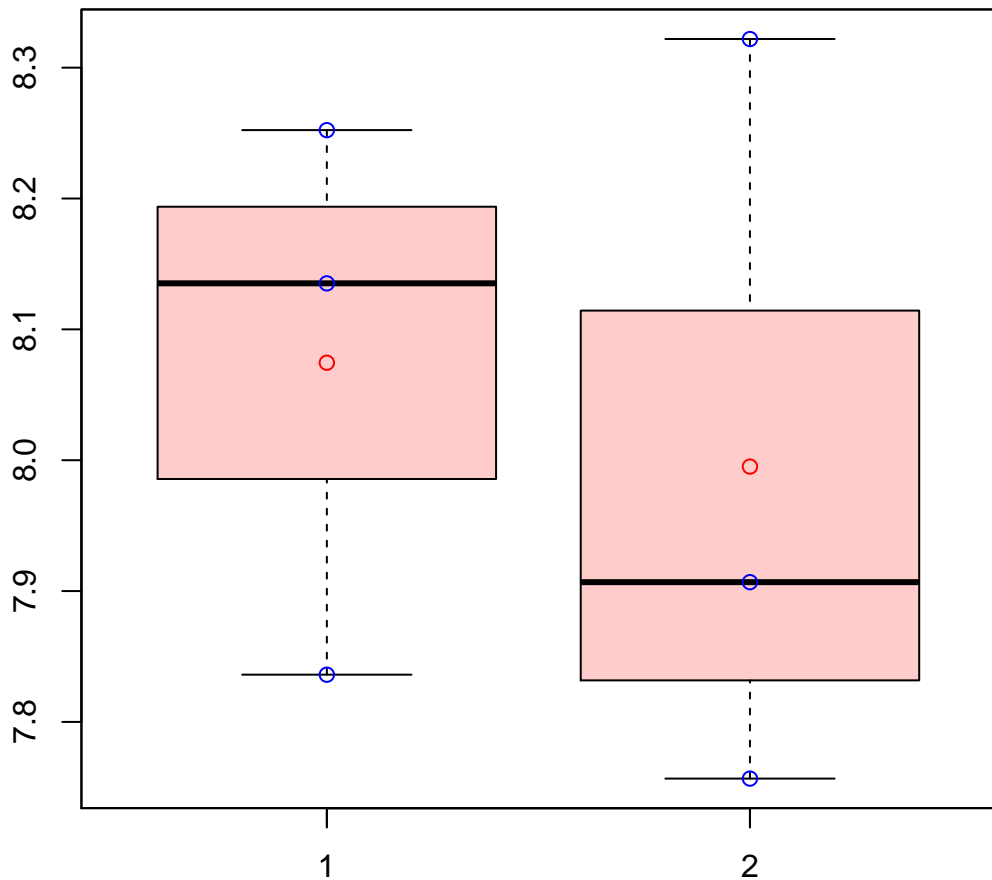

t-Test: p-value = 0.73

# CL1261Contig10|CL1261Contig10

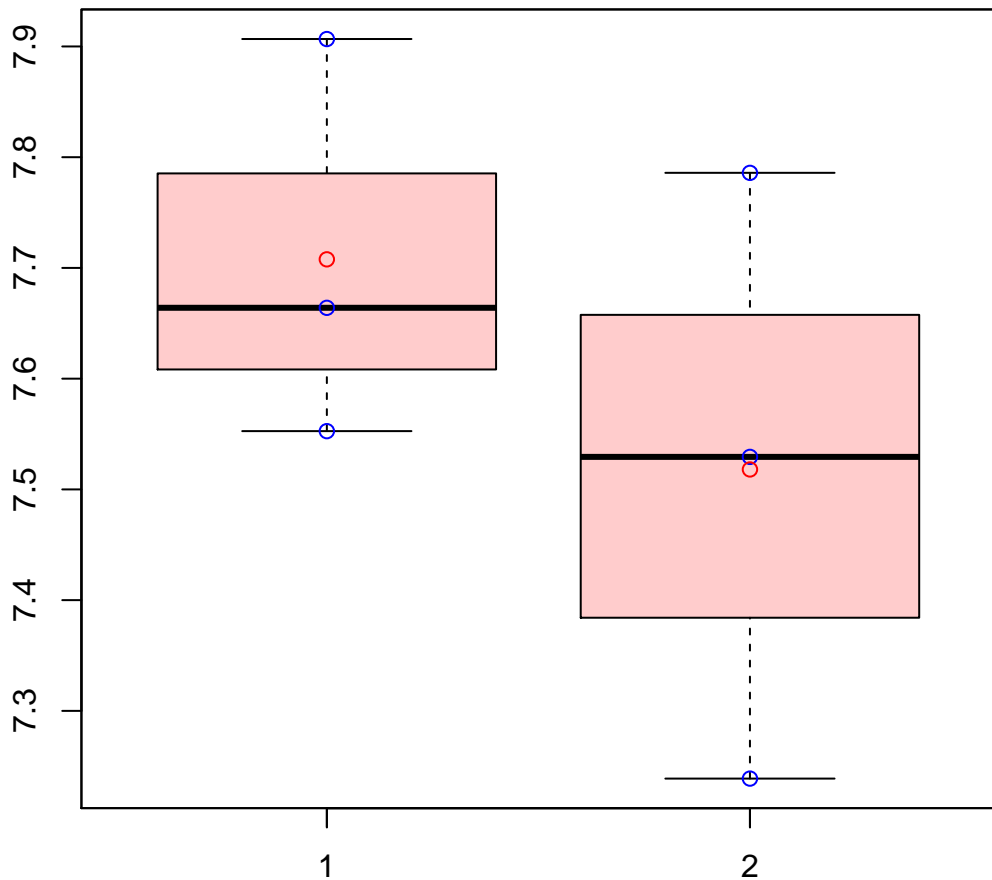

t-Test: p-value = 0.38

# CL12623Contig1|CL12623Contig1

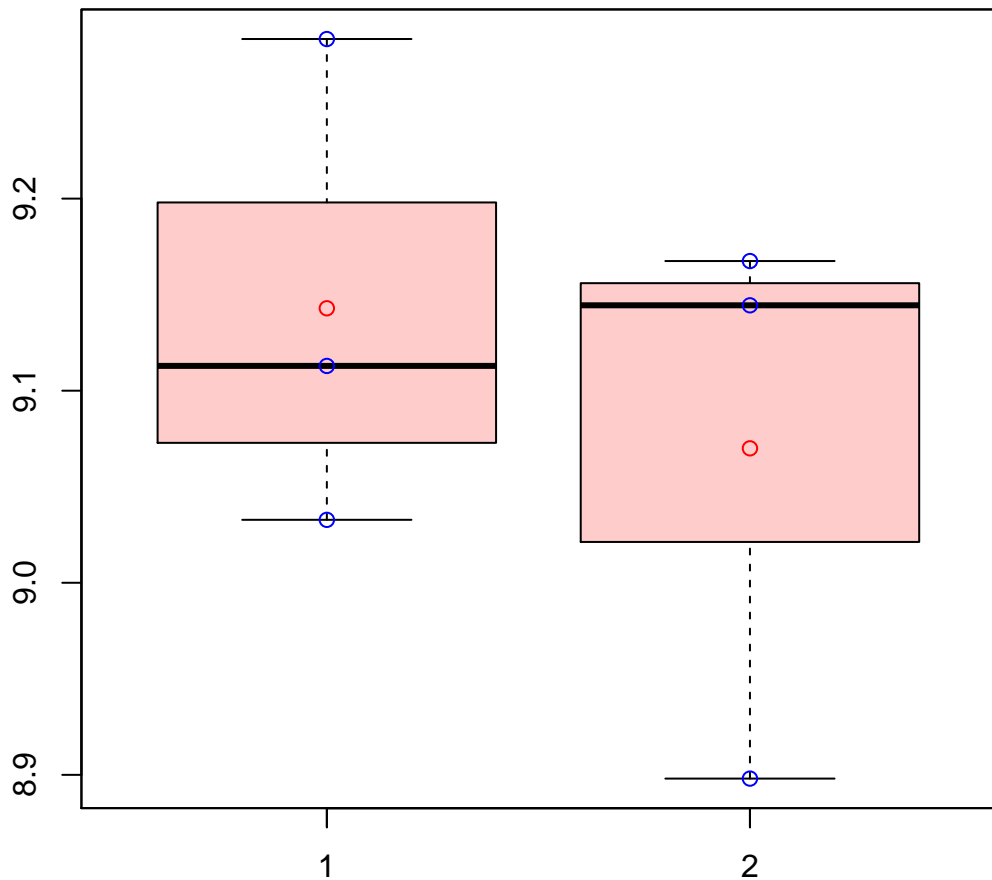

t-Test: p-value = 0.56

# CL1262Contig13|CL1262Contig13

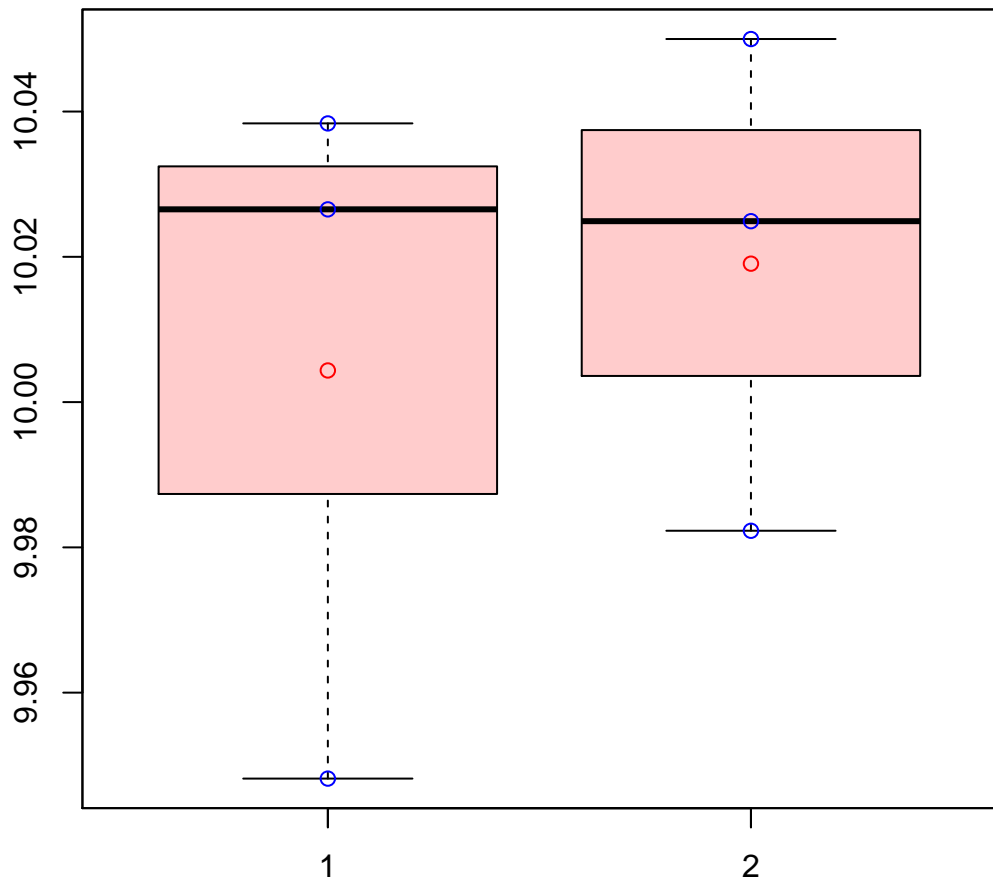

t-Test: p-value = 0.69

# CL12638Contig1|CL12638Contig1

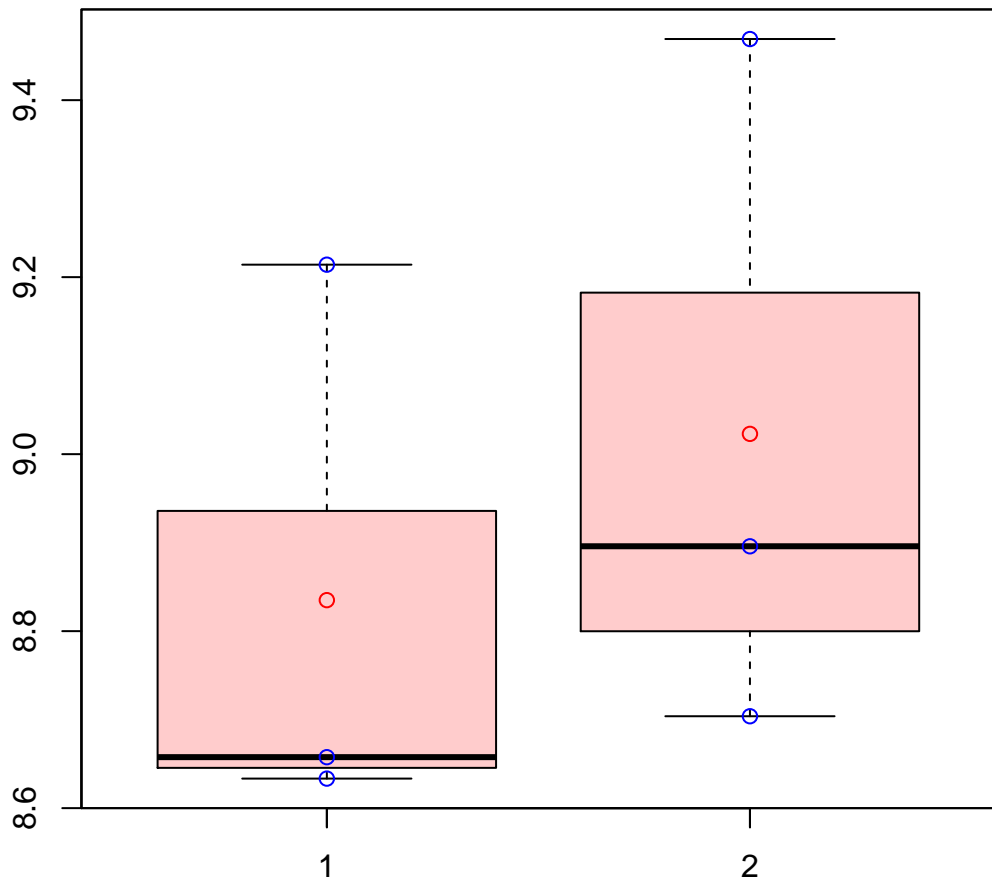

t-Test: p-value = 0.56

# CL1264Contig6|CL1264Contig6

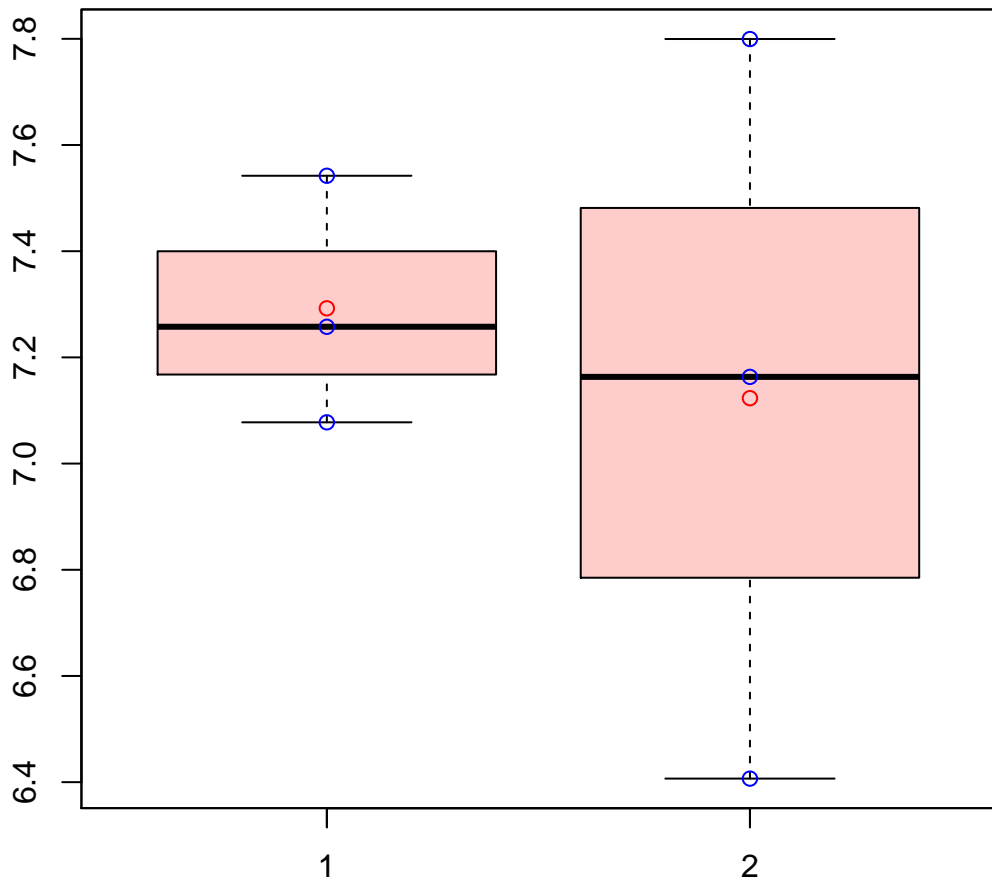

t-Test: p-value = 0.72

# CL12657Contig1|CL12657Contig1

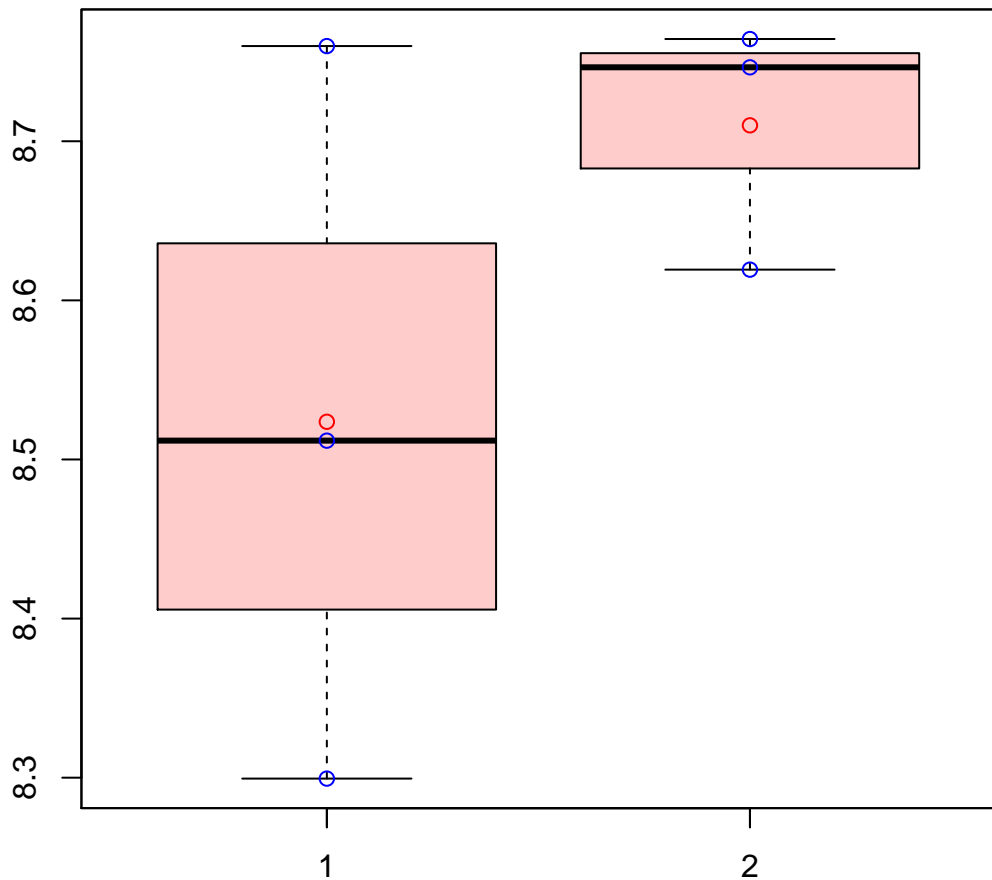

t-Test: p-value = 0.29

# CL12658Contig1|CL12658Contig1

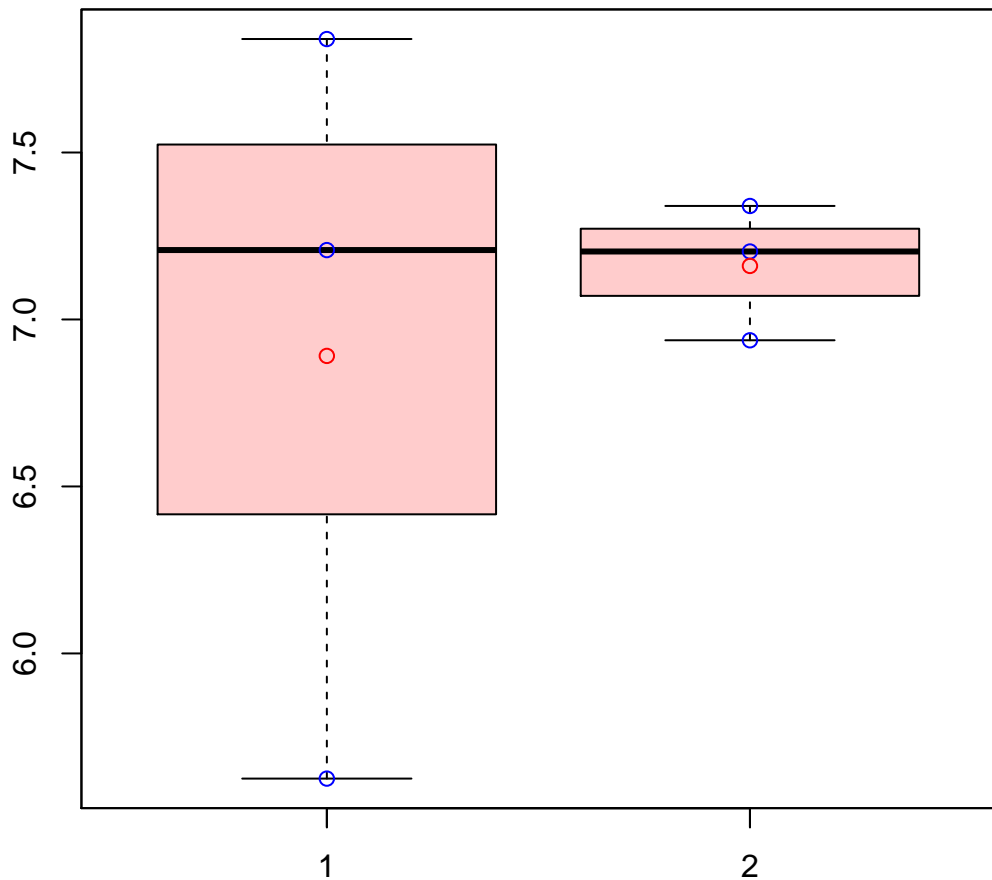

t-Test: p-value = 0.72



# CL12659Contig1|CL12659Contig1

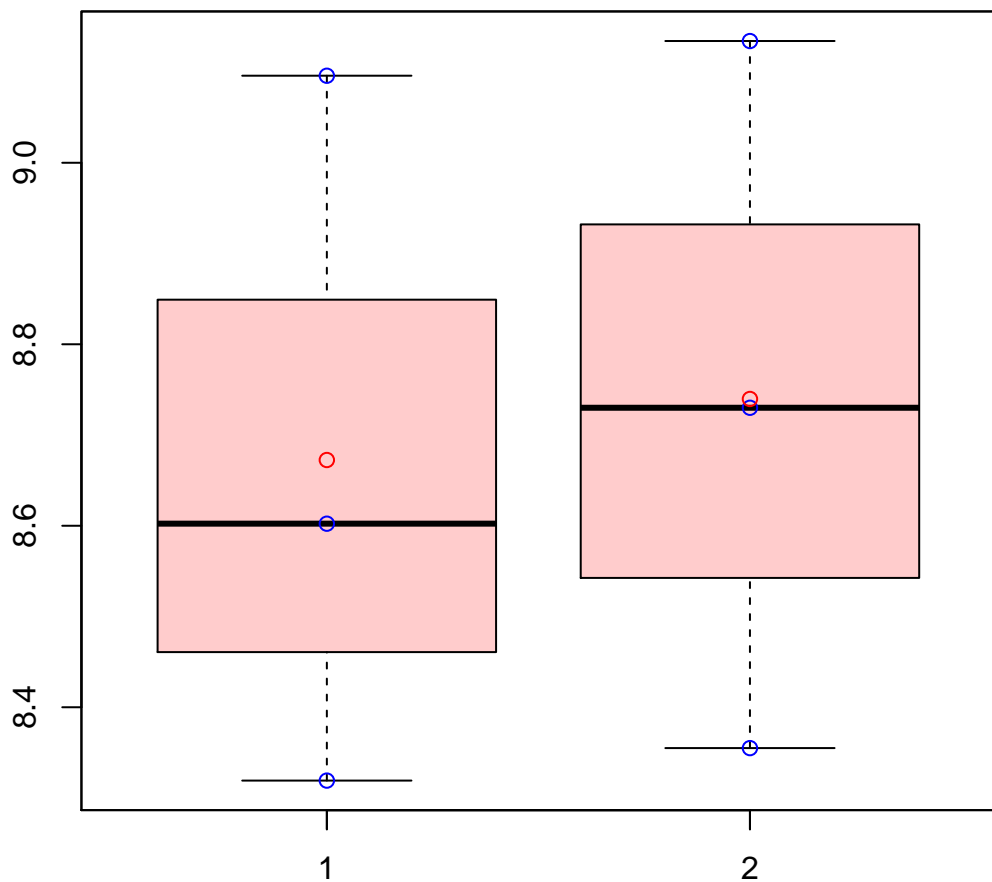

t-Test: p-value = 0.84

# CL12666Contig1|CL12666Contig1

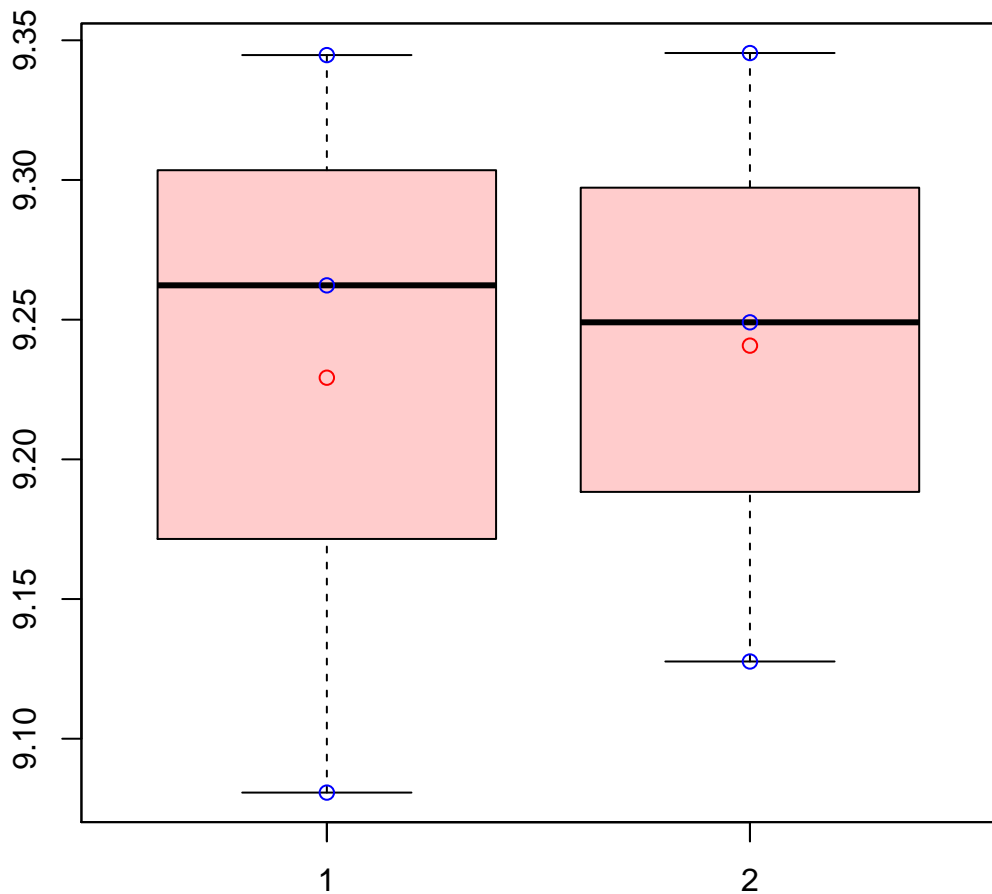

t-Test: p-value = 0.91

# CL12677Contig1|CL12677Contig1

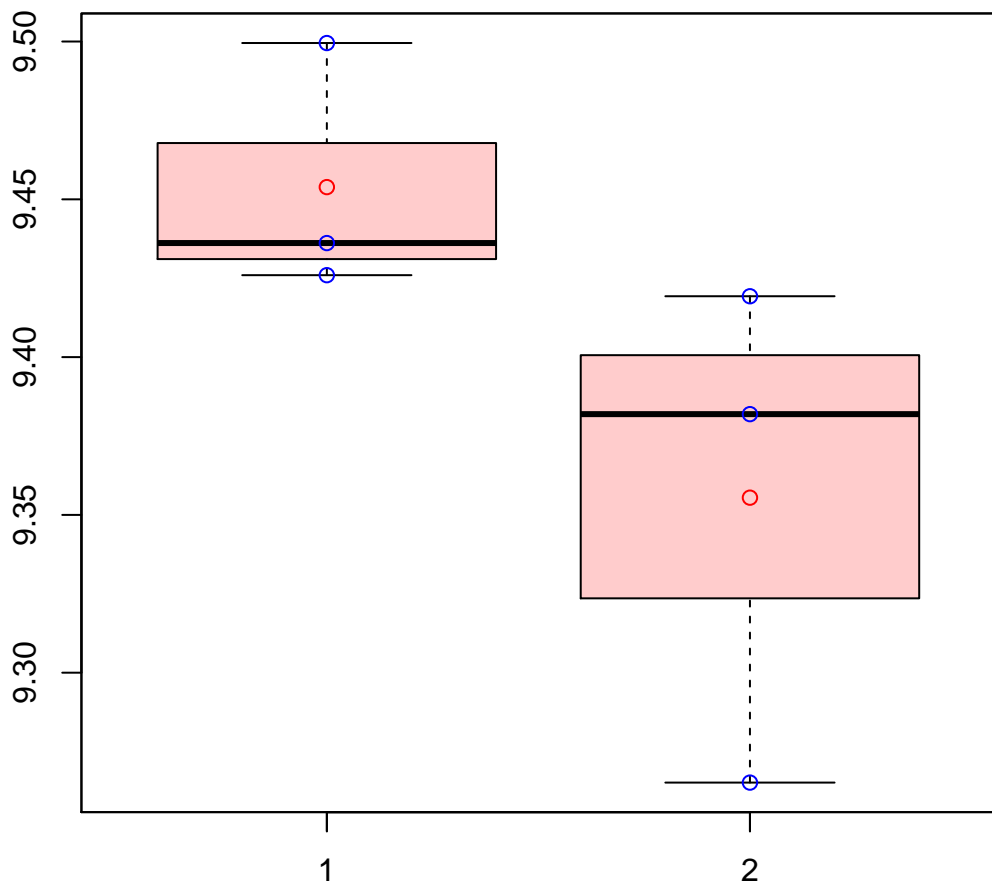

t-Test: p-value = 0.16

# CL12677Contig2|CL12677Contig2

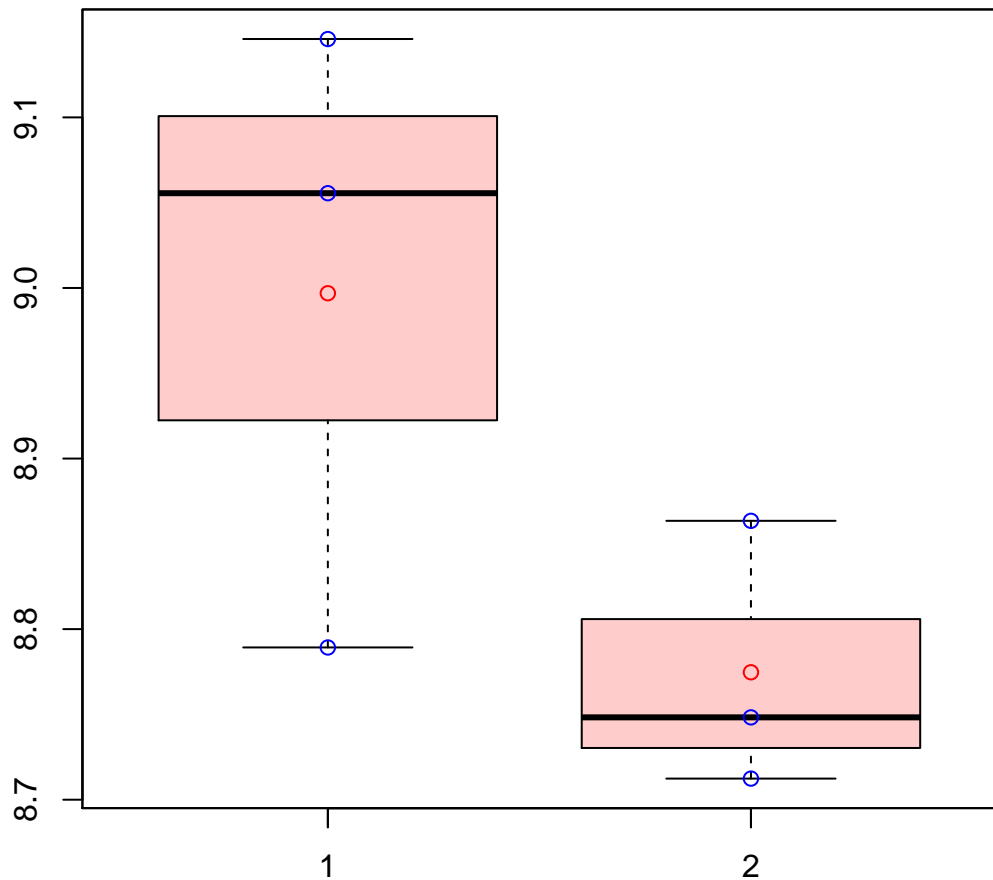

t-Test: p-value = 0.16

# CL1269Contig8|CL1269Contig8

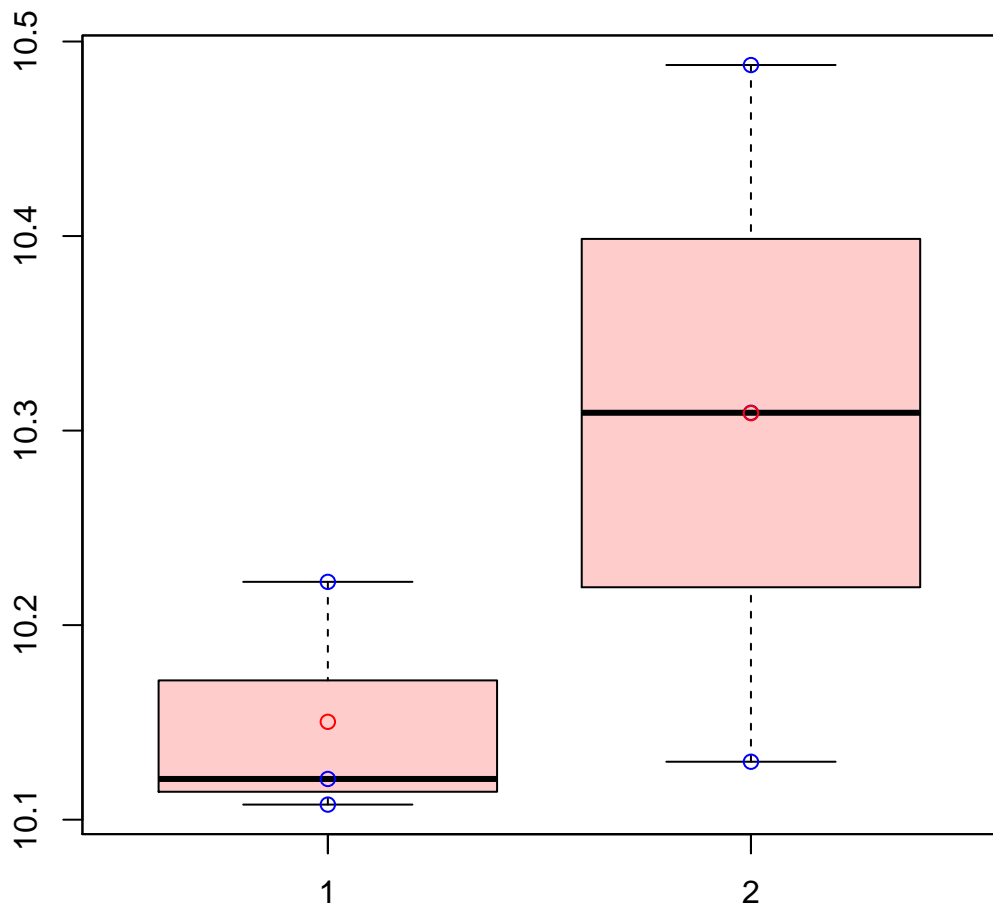

t-Test: p-value = 0.26

# CL1269Contig9|CL1269Contig9

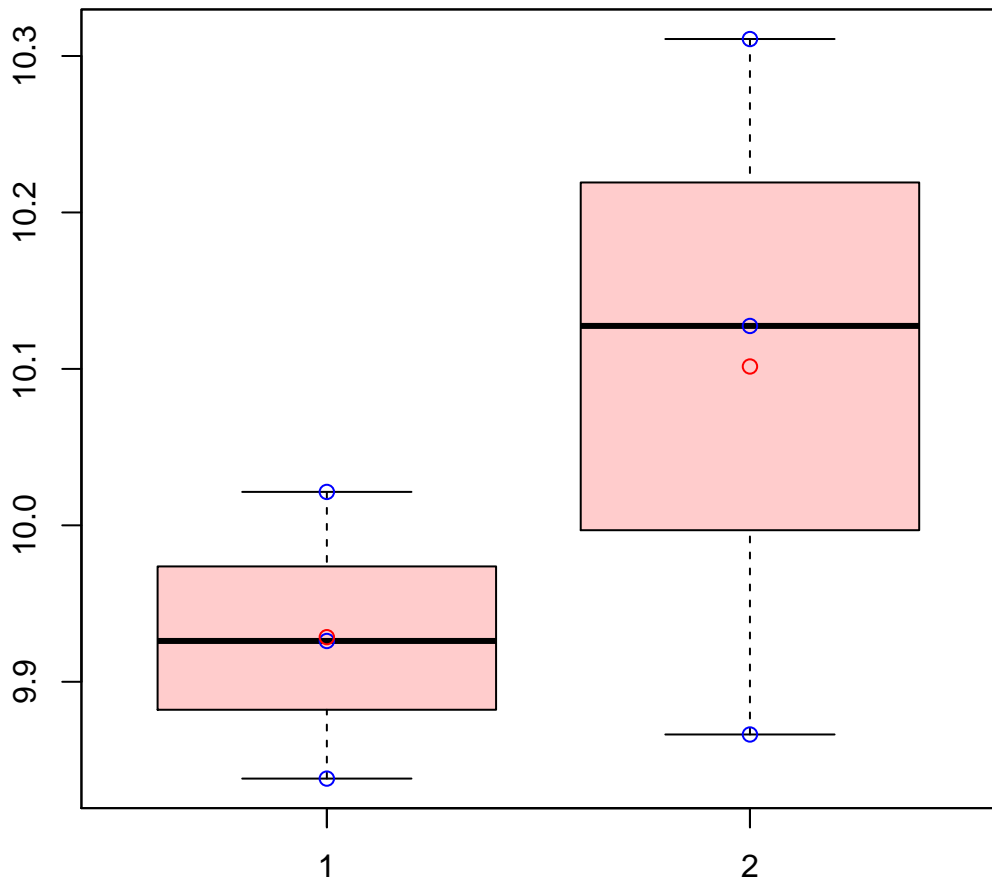

t-Test: p-value = 0.31

# CL126Contig14|CL126Contig14

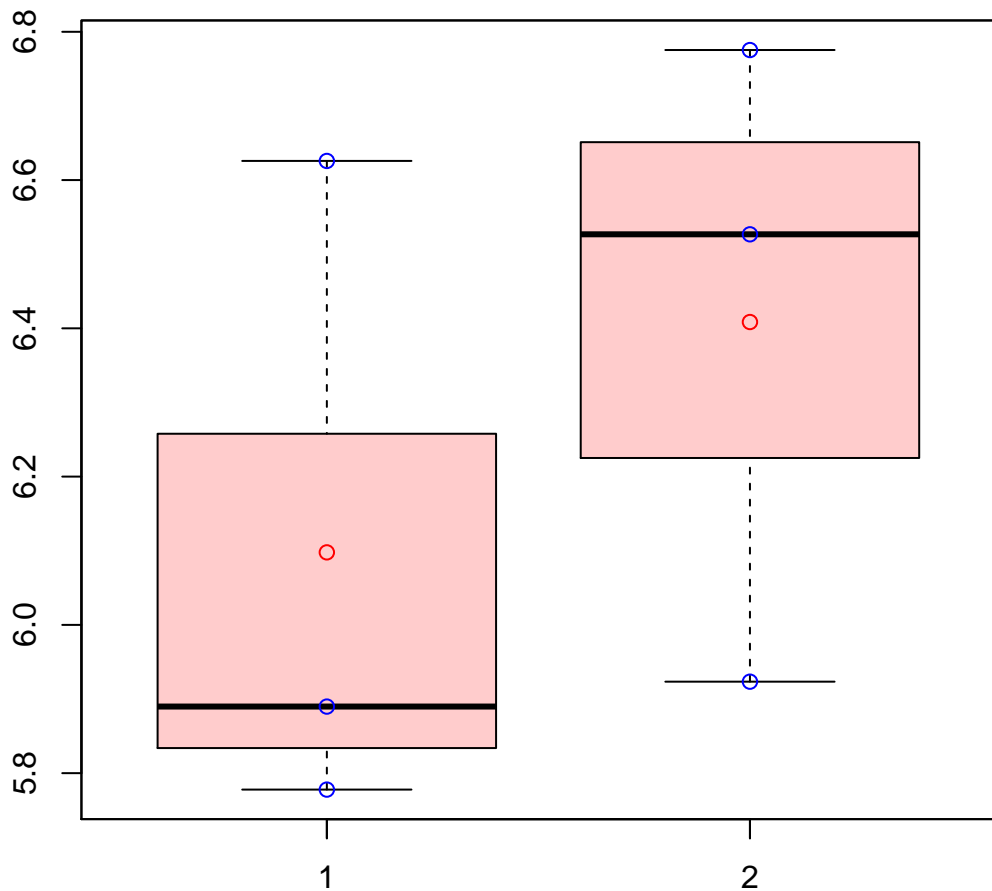

t-Test: p-value = 0.45

# CL12712Contig1|CL12712Contig1

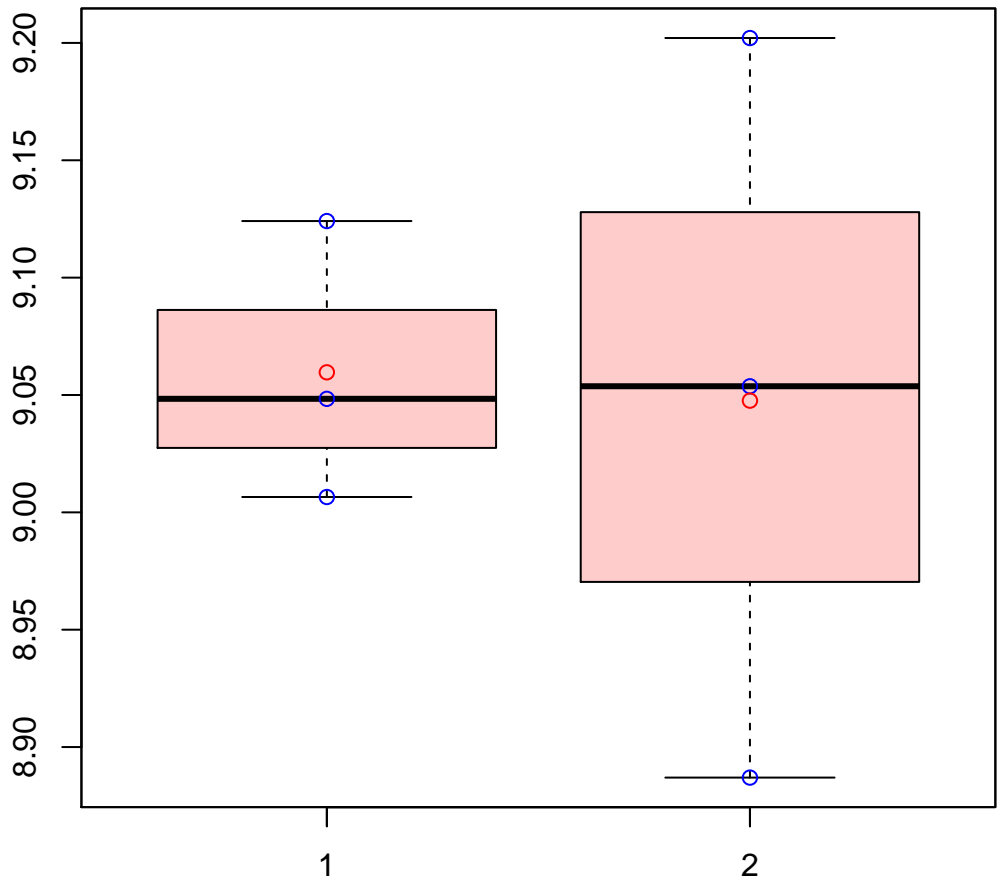

t-Test: p-value = 0.91



# CL12723Contig1|CL12723Contig1

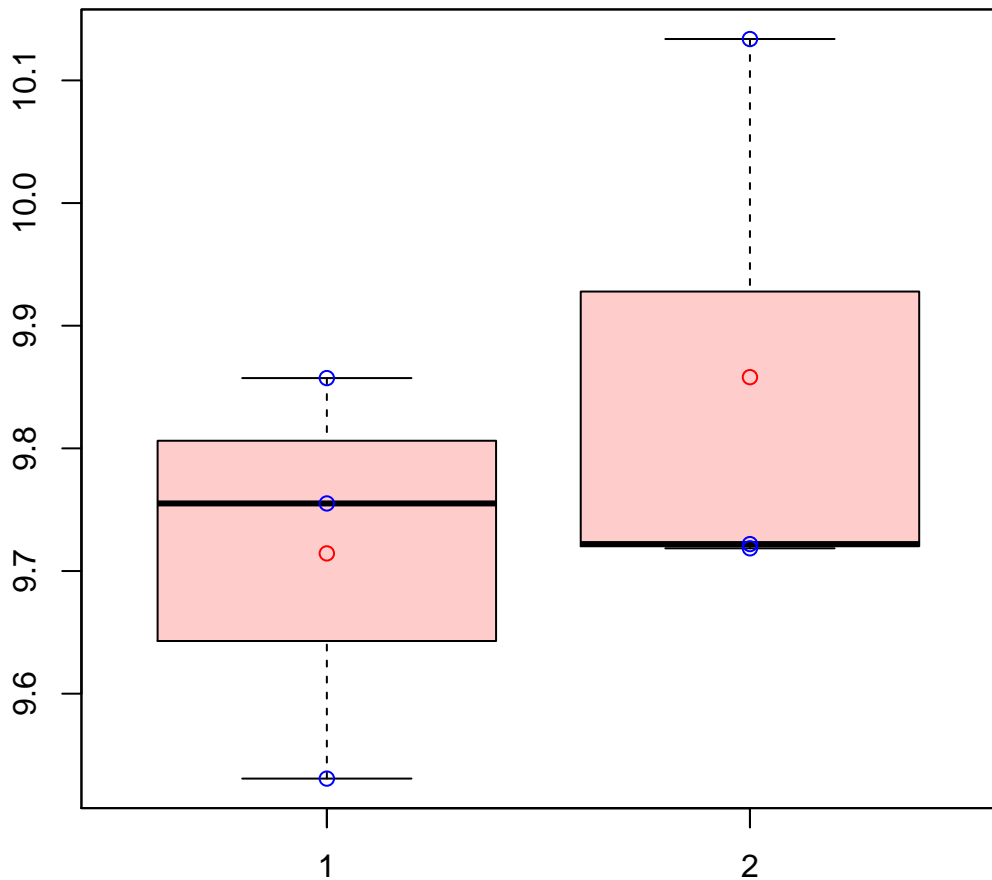

t-Test: p-value = 0.45

# CL1272Contig4|CL1272Contig4

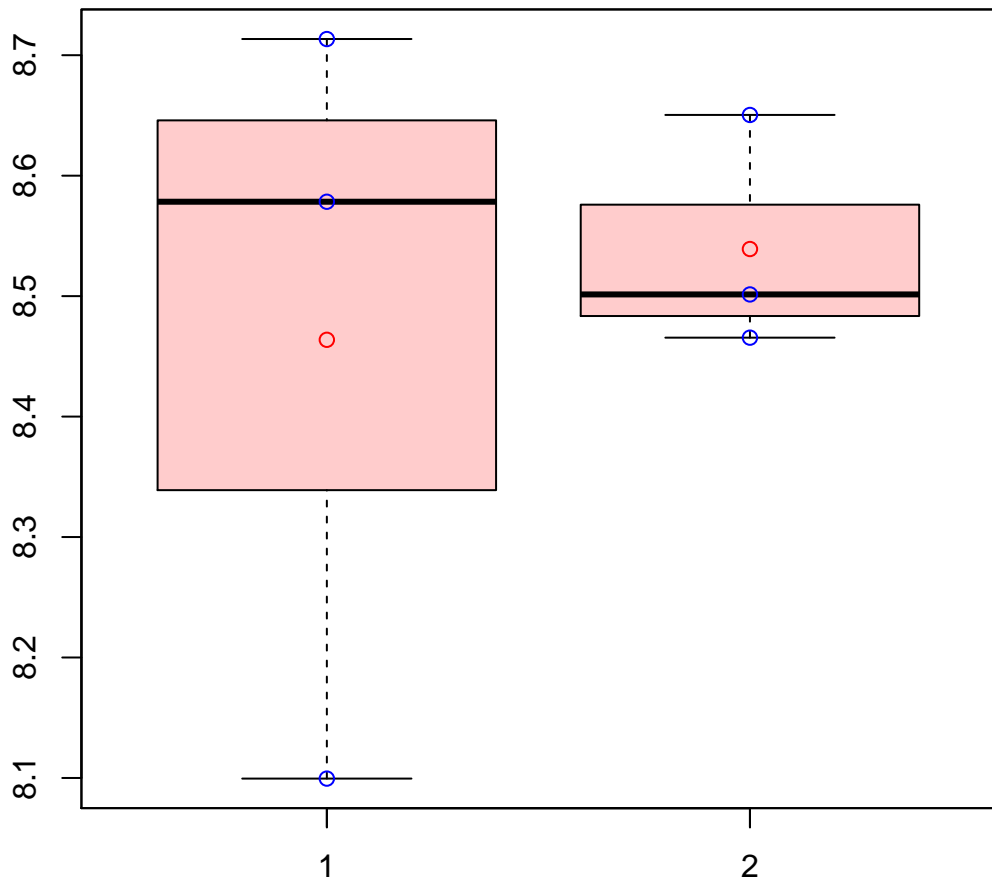

t-Test: p-value = 0.73

# CL1273Contig4|CL1273Contig4

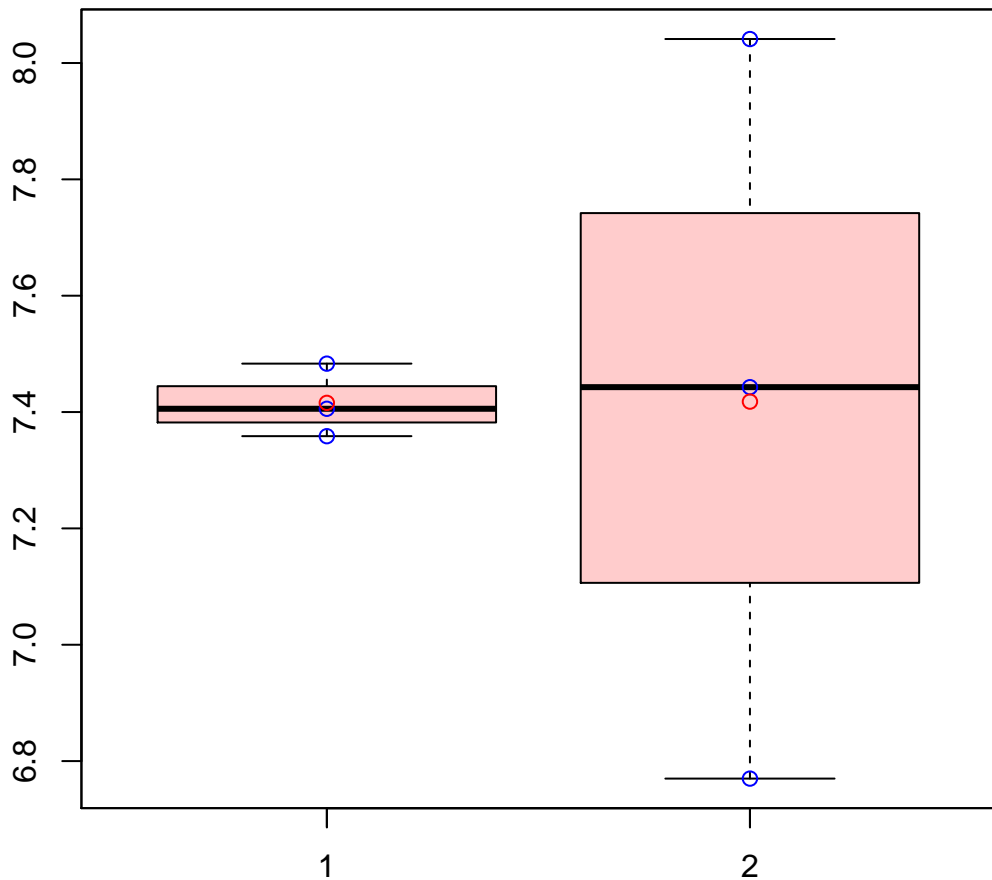

t-Test: p-value = 1

# CL12771Contig1|CL12771Contig1

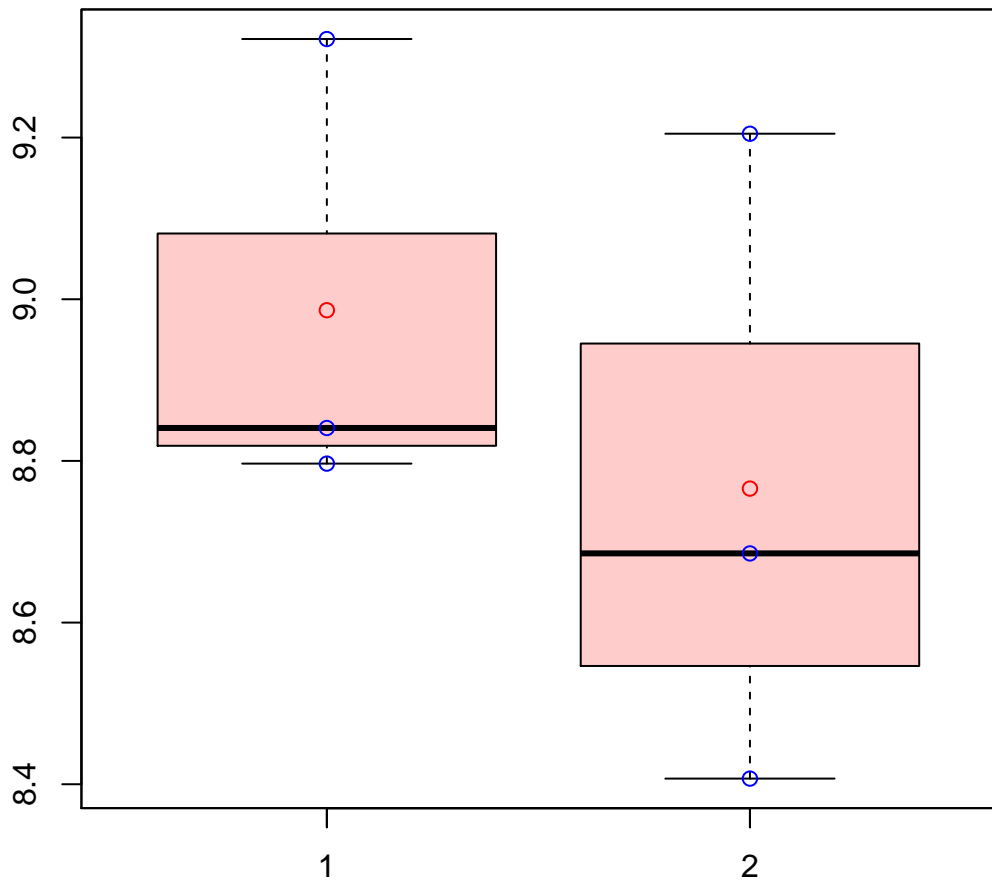

t-Test: p-value = 0.49

# CL1279Contig11|CL1279Contig11

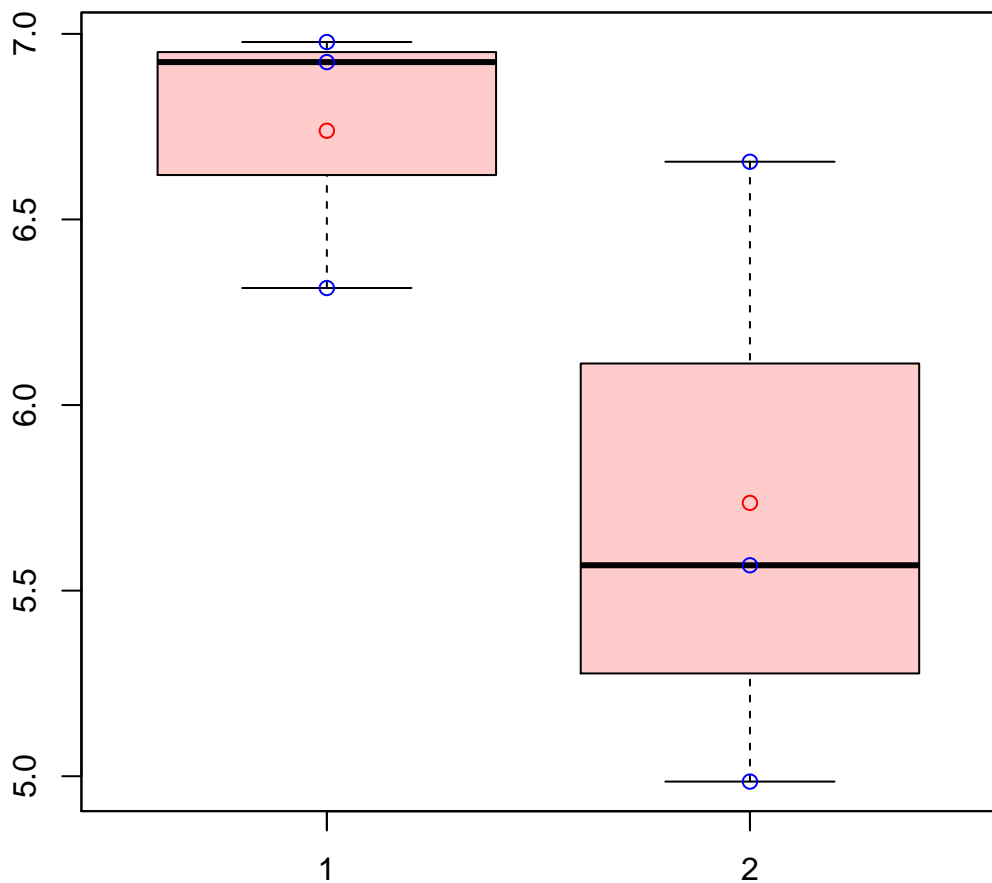

t-Test: p-value = 0.17

# CL12809Contig1|CL12809Contig1

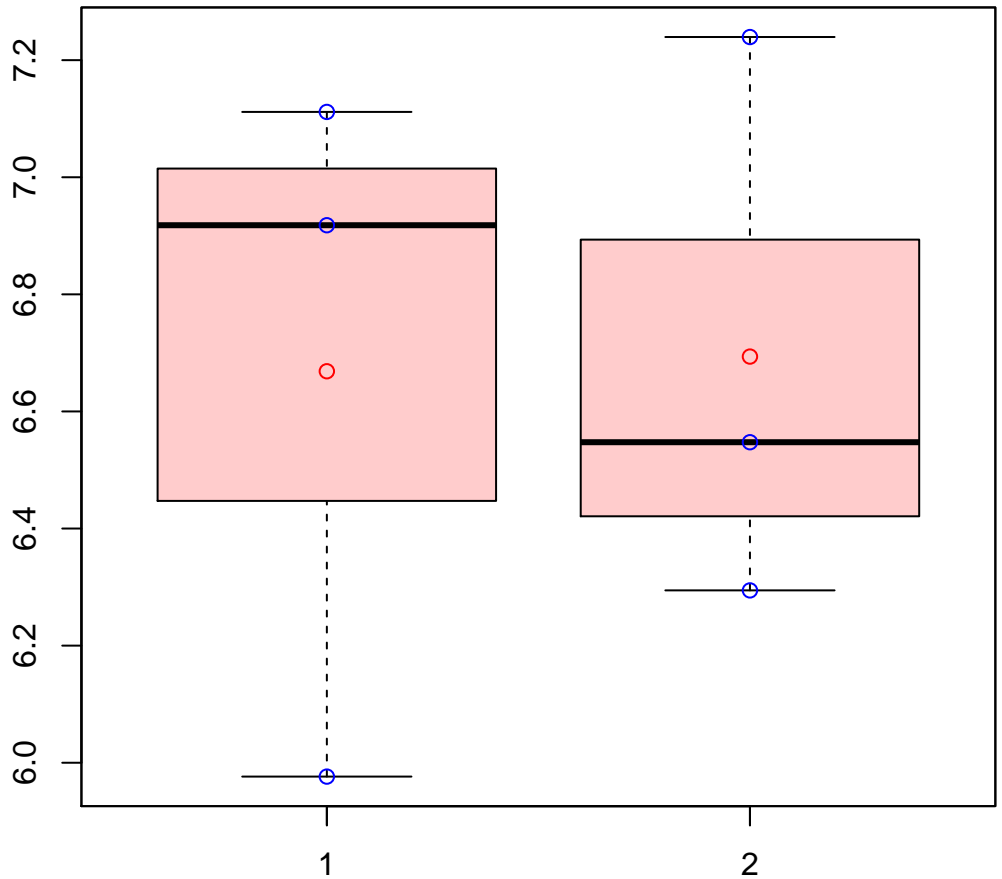

t-Test: p-value = 0.96

# CL1280Contig12|CL1280Contig12

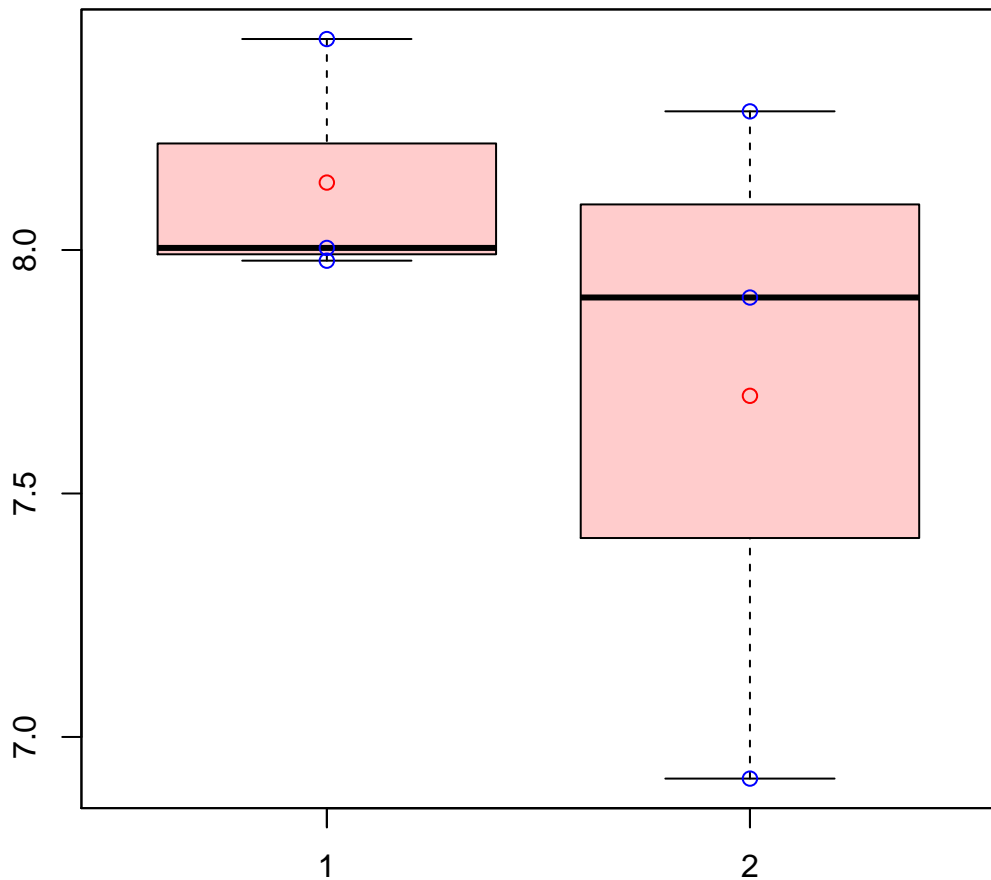

t-Test: p-value = 0.4

# CL1280Contig2|CL1280Contig2

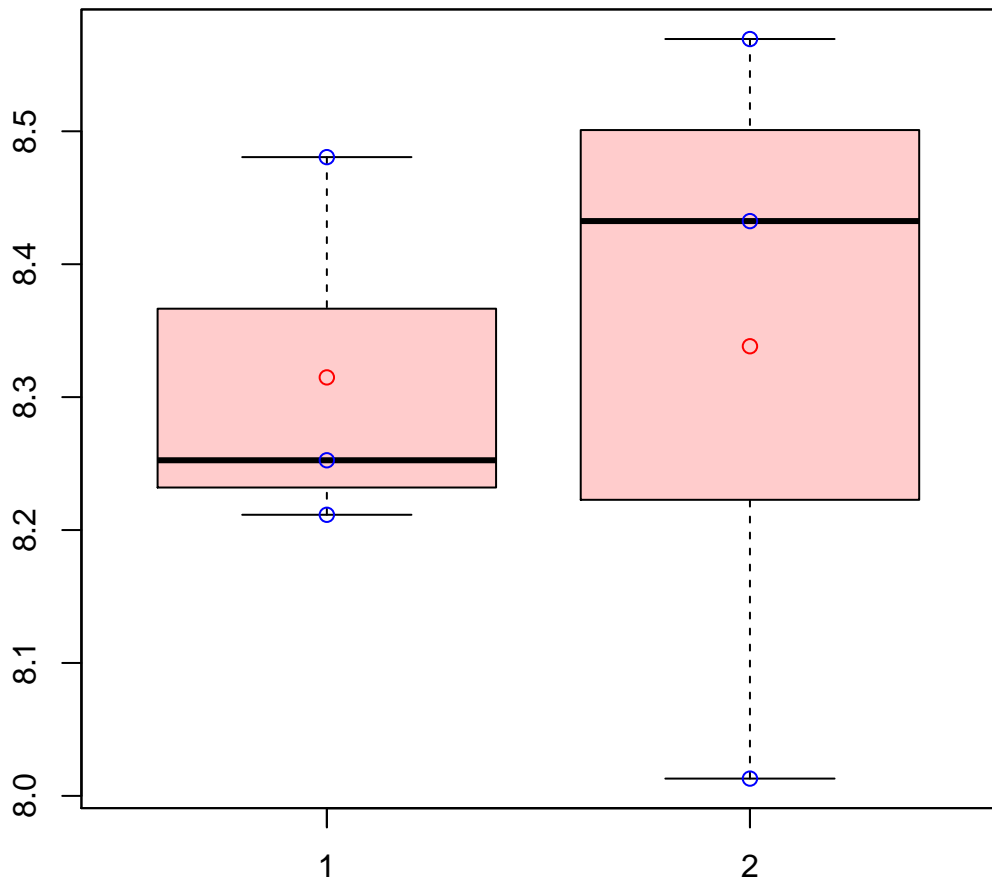

t-Test: p-value = 0.91



# CL1280Contig9|CL1280Contig9

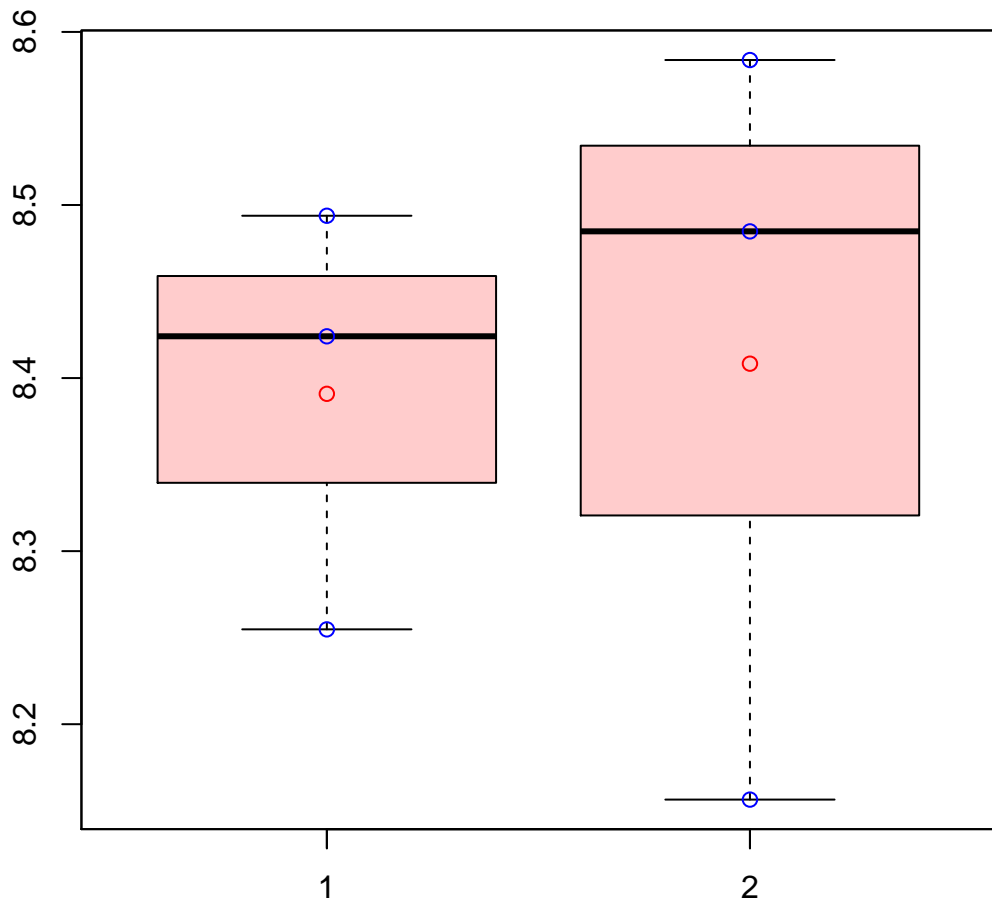

t-Test: p-value = 0.91

# CL12834Contig2|CL12834Contig2

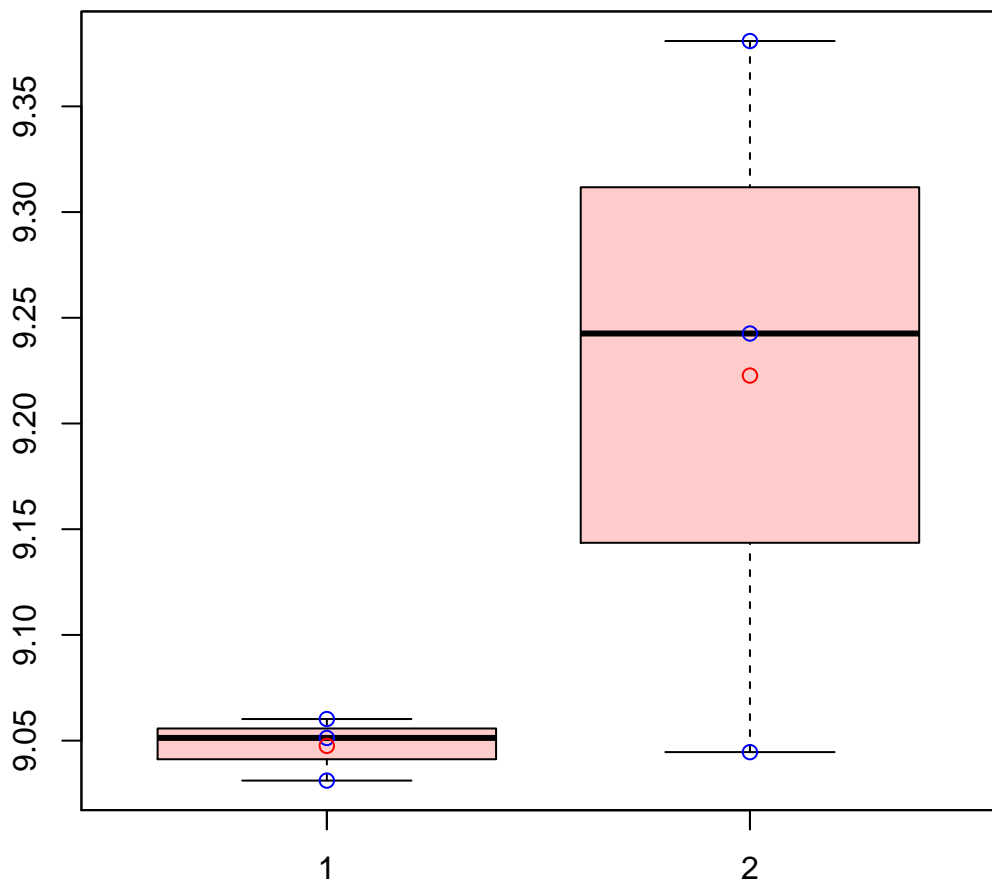

t-Test: p-value = 0.21

# CL12843Contig1|CL12843Contig1



t-Test: p-value = 0.42

# CL1285Contig3|CL1285Contig3

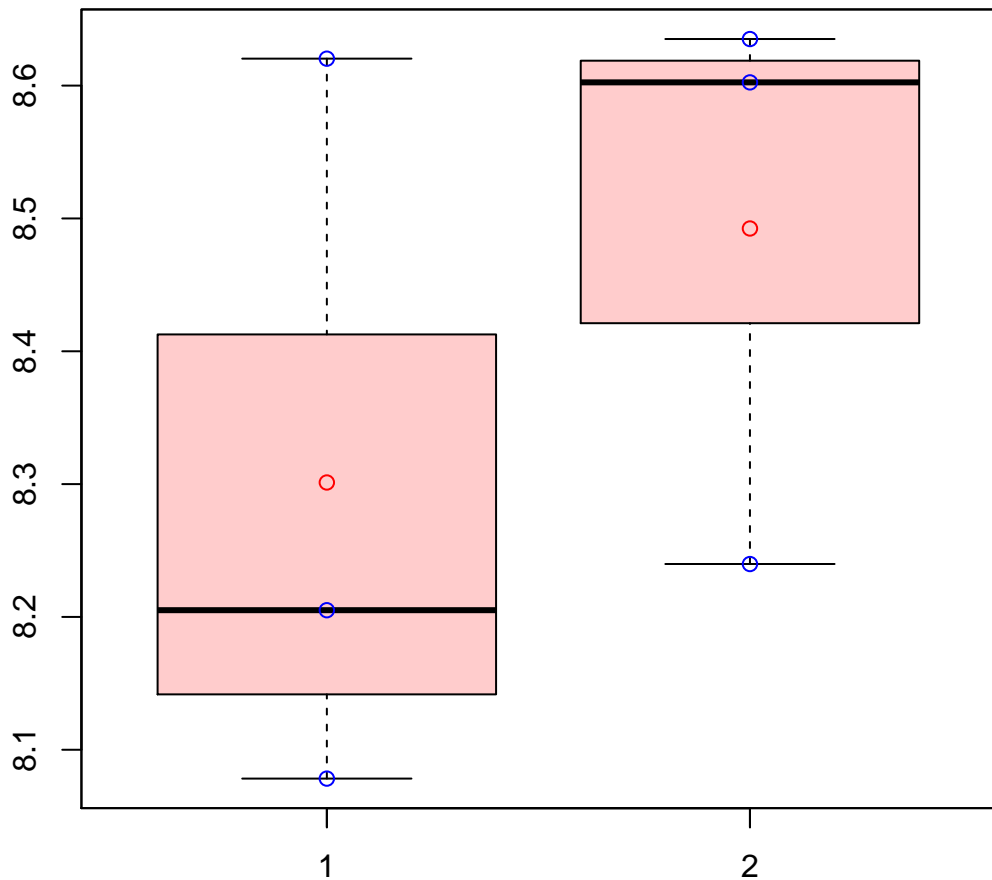

t-Test: p-value = 0.41

# CL12863Contig1|CL12863Contig1

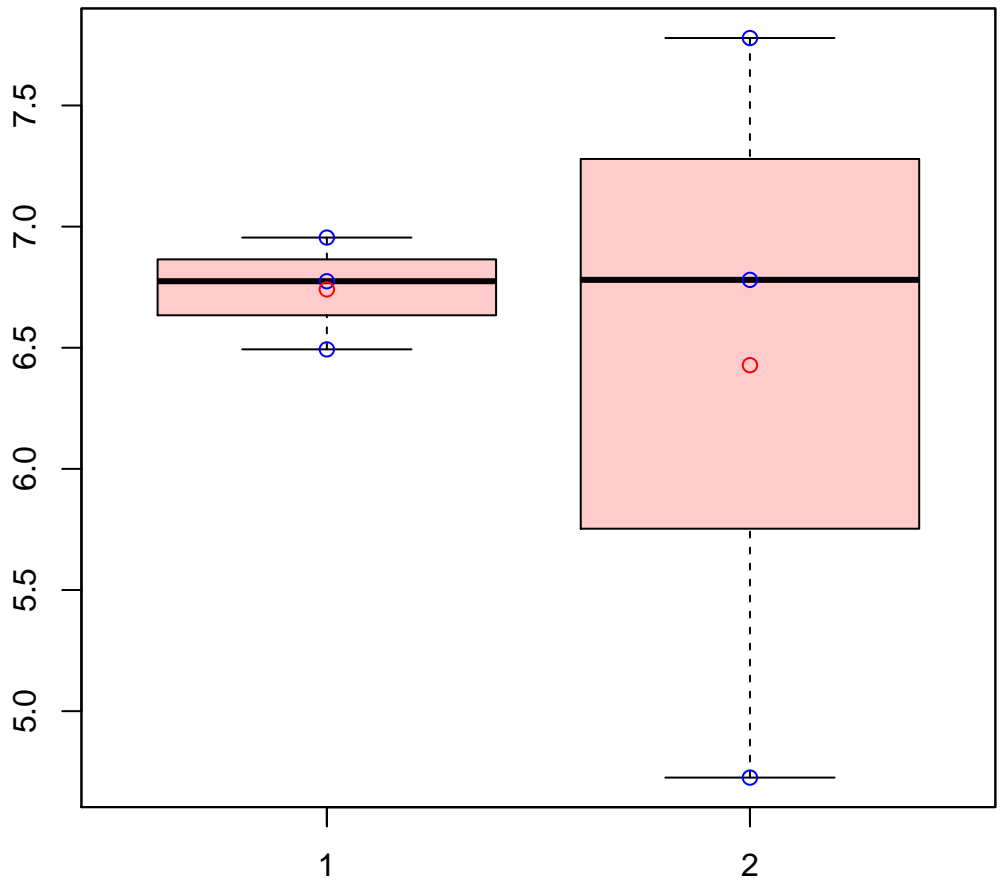

t-Test: p-value = 0.76

# CL12883Contig1|CL12883Contig1



t-Test: p-value = 0.9

# CL12926Contig1|CL12926Contig1

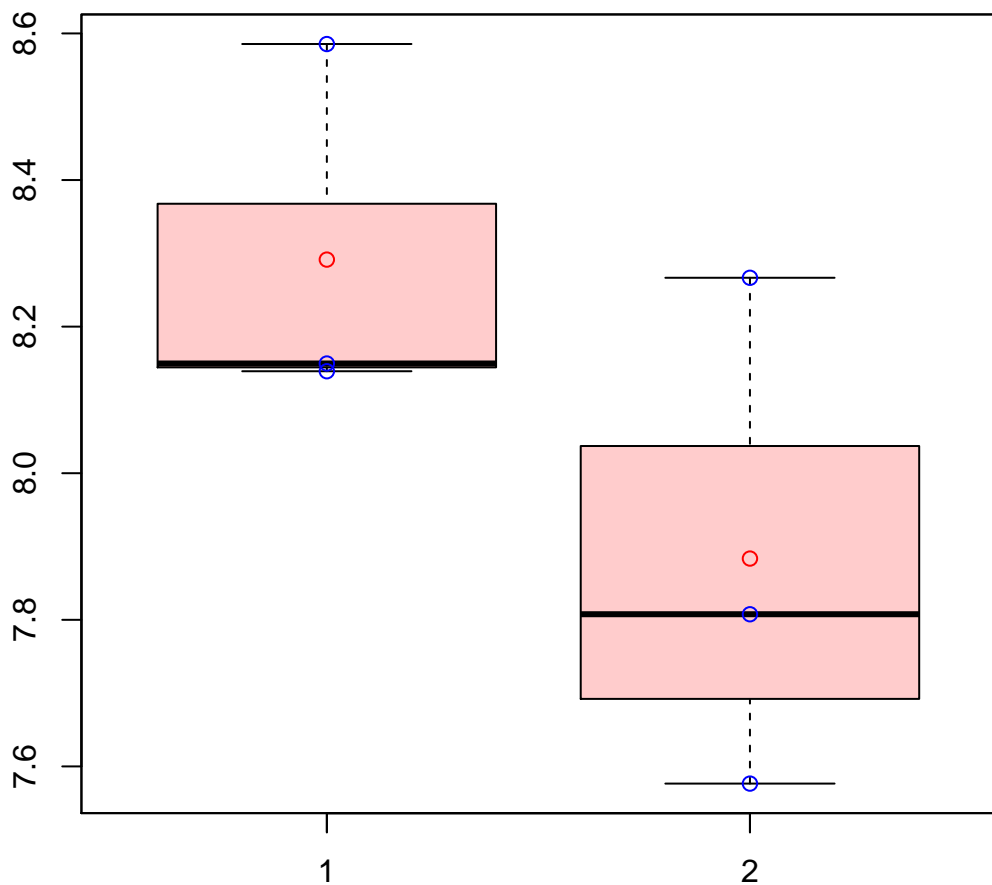

t-Test: p-value = 0.19

# CL12933Contig1|CL12933Contig1

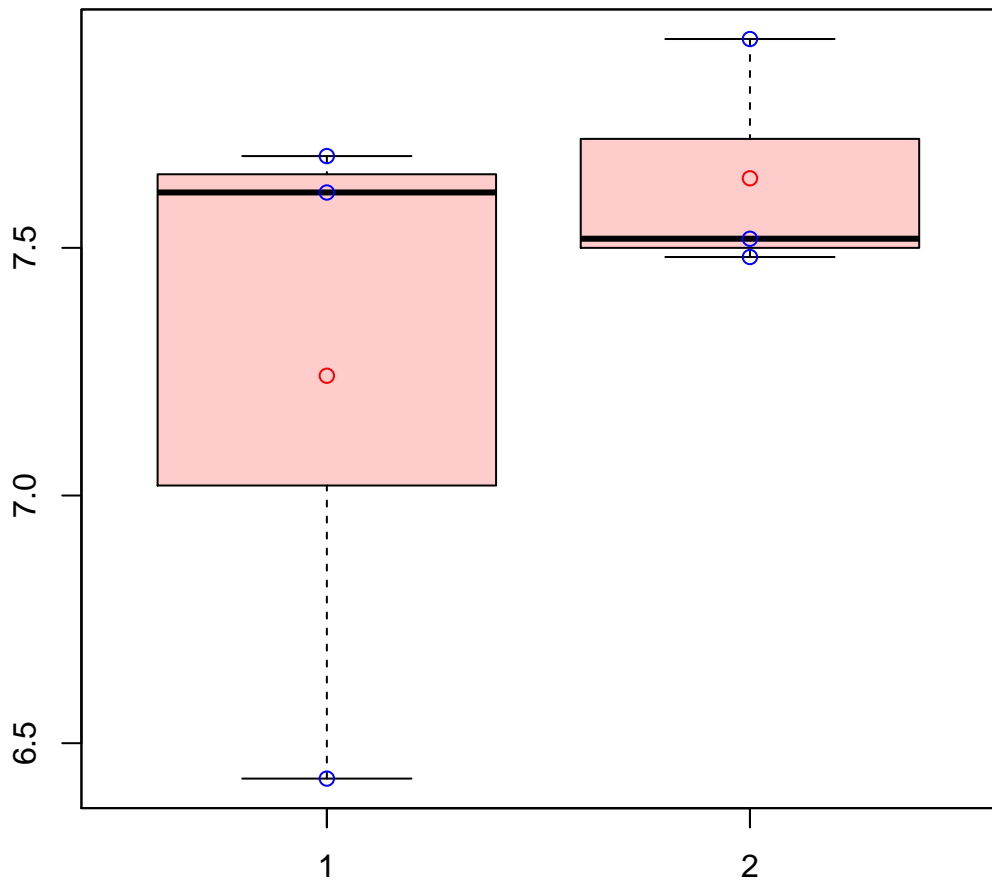

t-Test: p-value = 0.44



# CL1295Contig1|CL1295Contig1

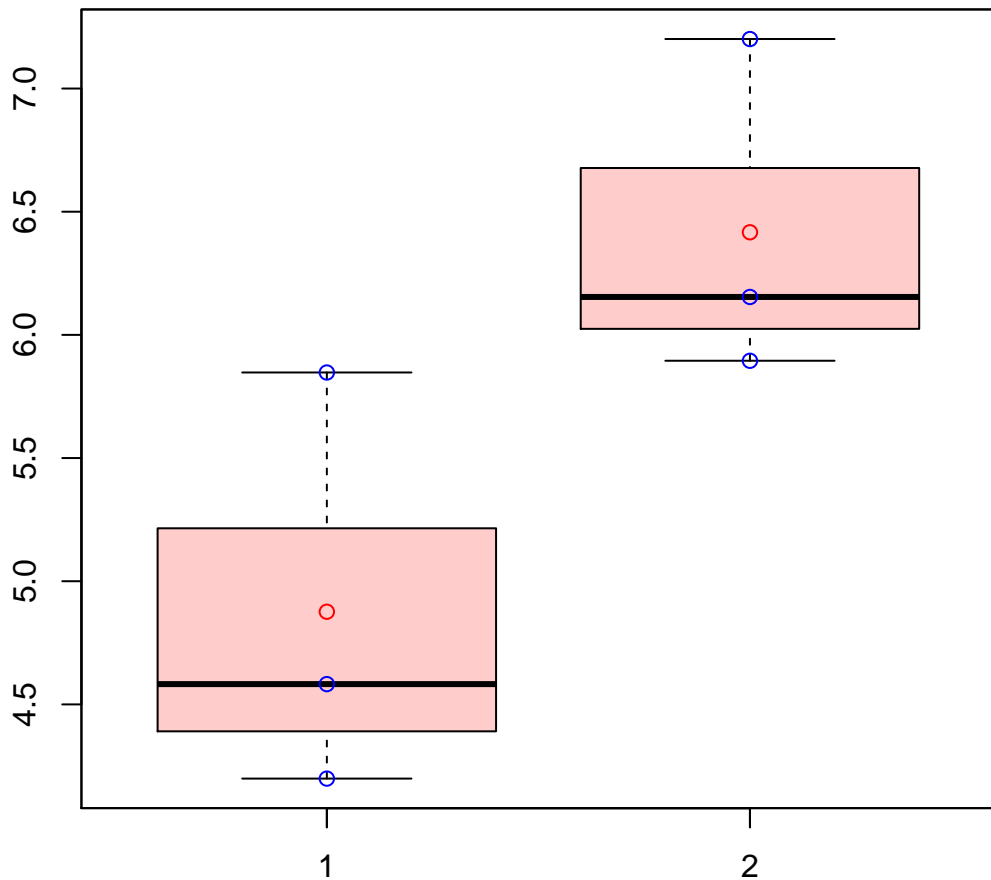

t-Test: p-value = 0.08

# CL1295Contig2|CL1295Contig2

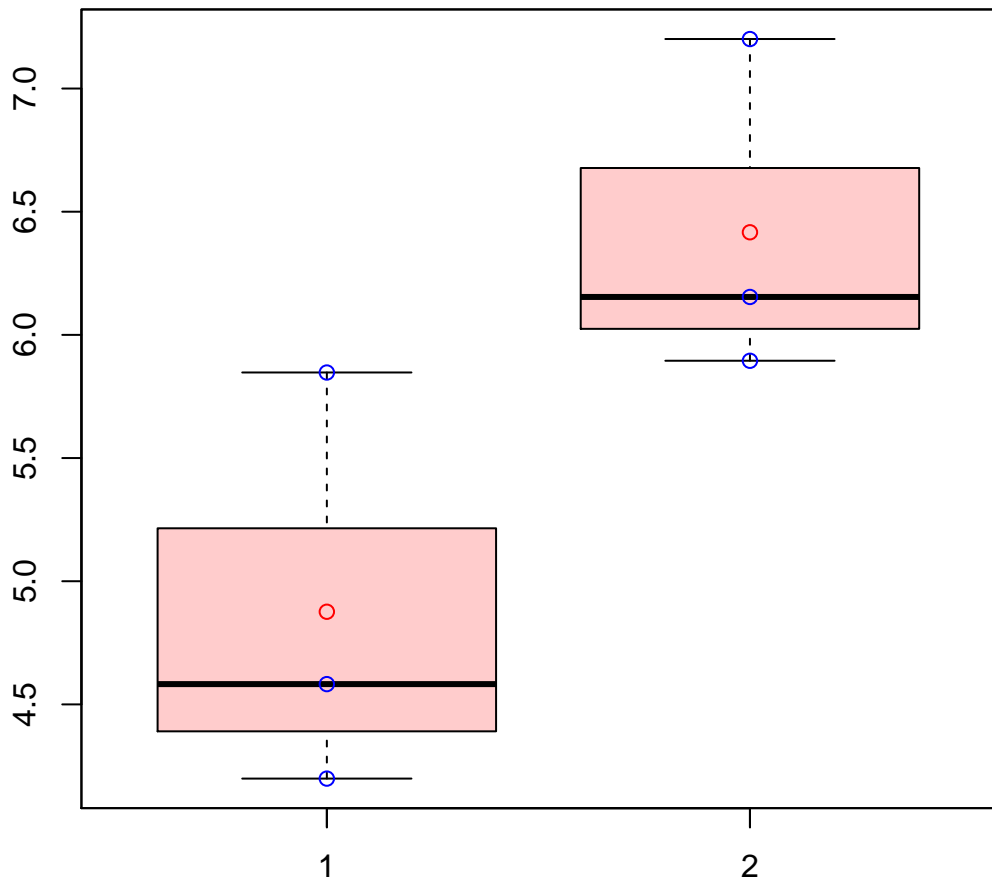

t-Test: p-value = 0.08

# CL1295Contig7|CL1295Contig7



t-Test: p-value = 0.08

# CL12967Contig1|CL12967Contig1

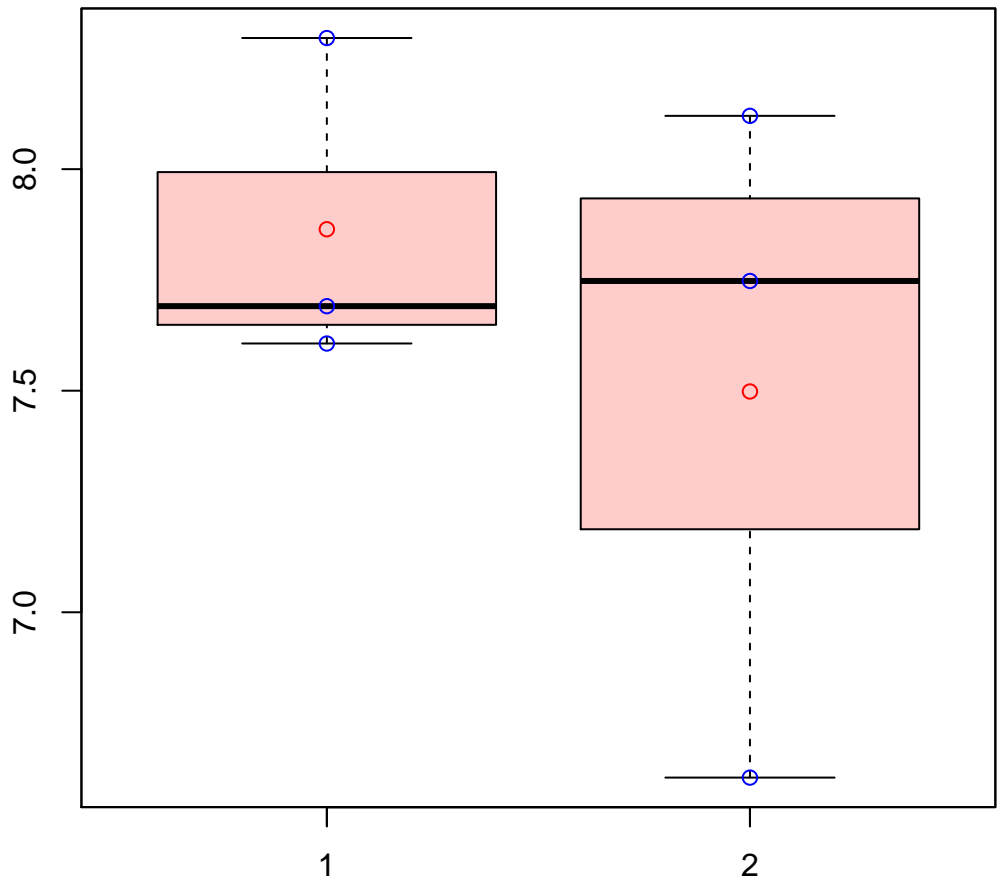

t-Test: p-value = 0.52

# CL1297Contig2|CL1297Contig2

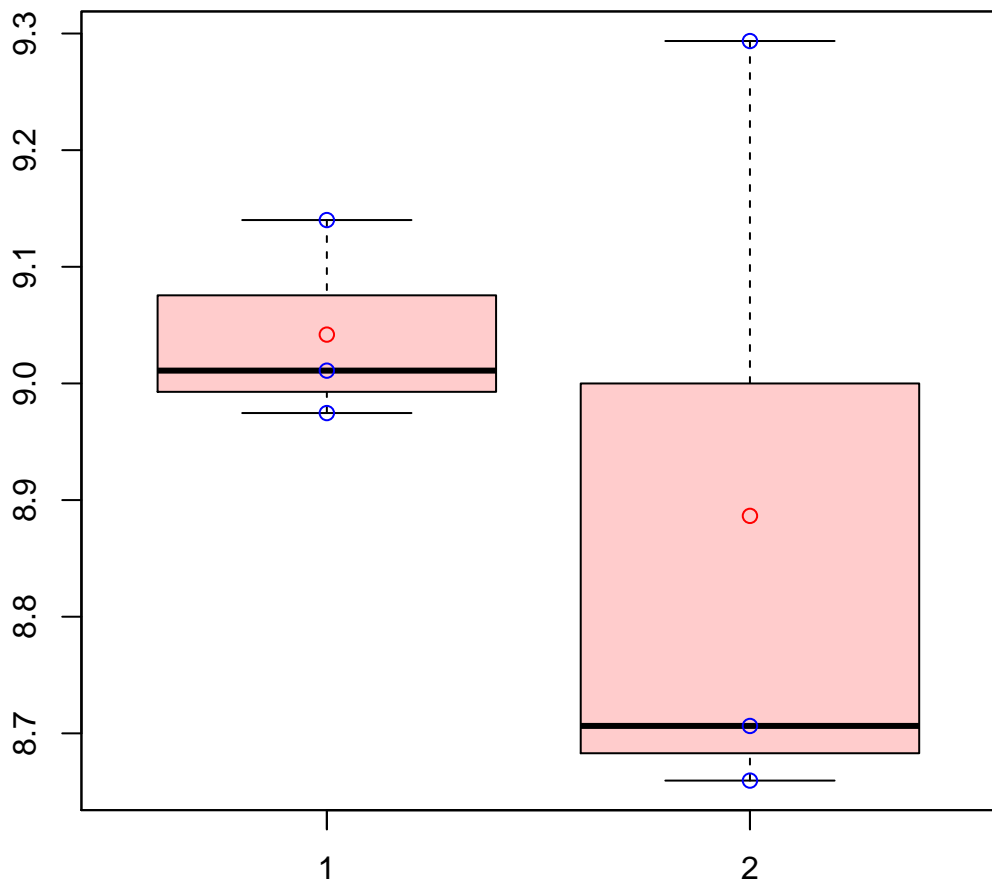

t-Test: p-value = 0.53

# CL12988Contig1|CL12988Contig1

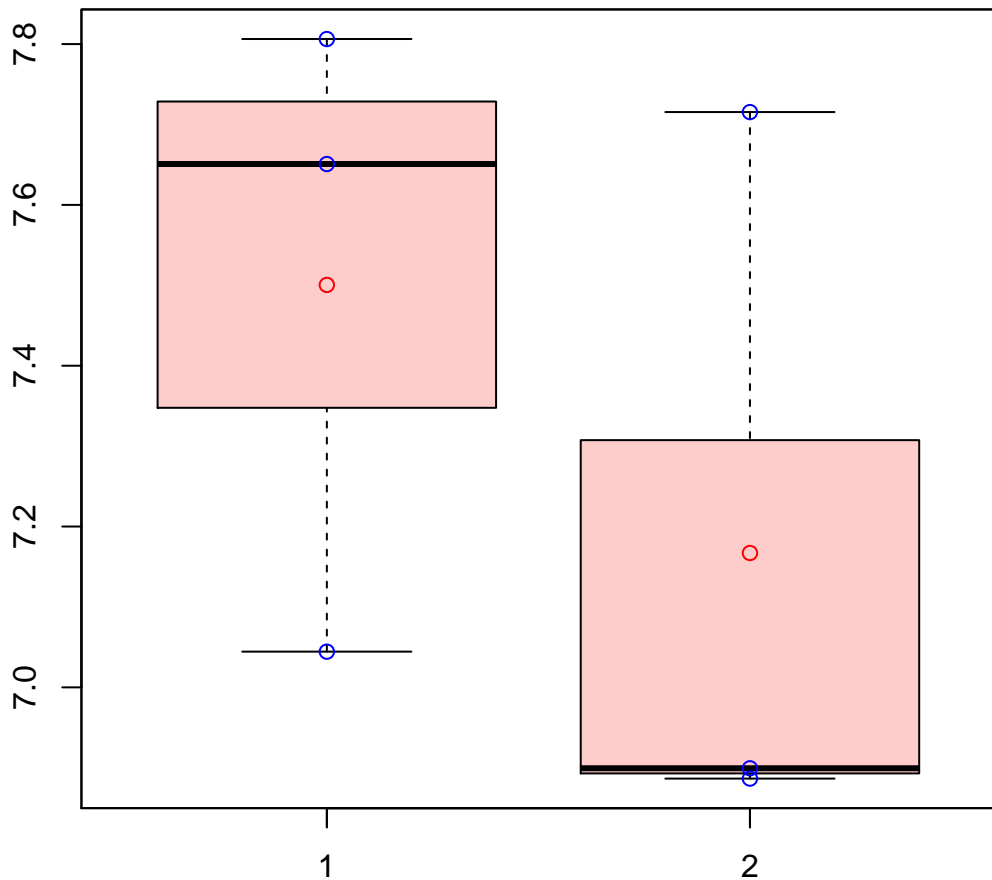

t-Test: p-value = 0.41

# CL129Contig9|CL129Contig9

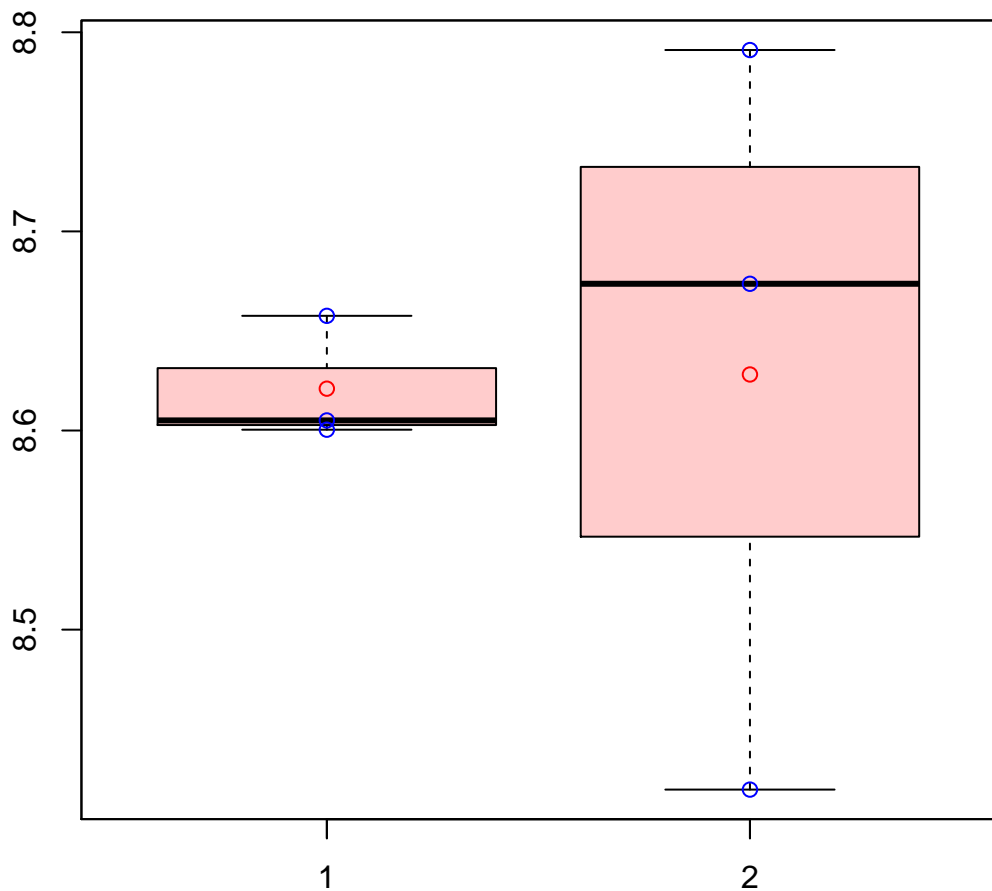

t-Test: p-value = 0.95

# CL1301Contig2|CL1301Contig2

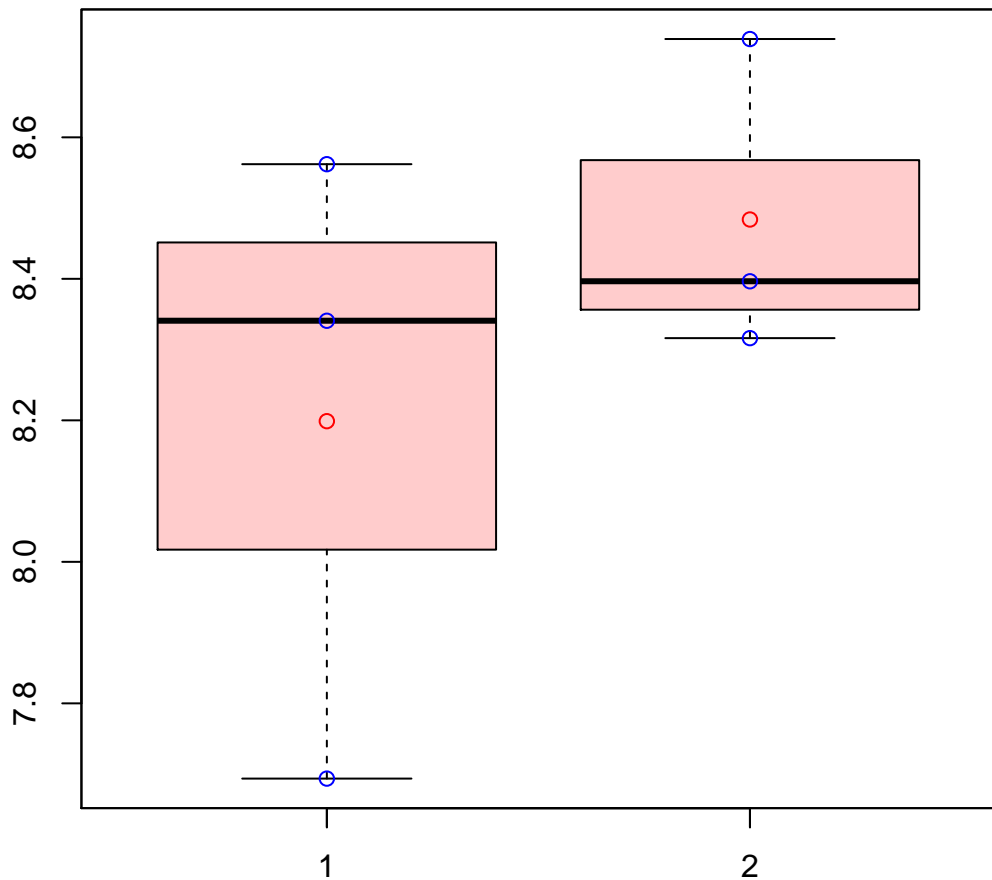

t-Test: p-value = 0.4



# CL1303Contig4|CL1303Contig4

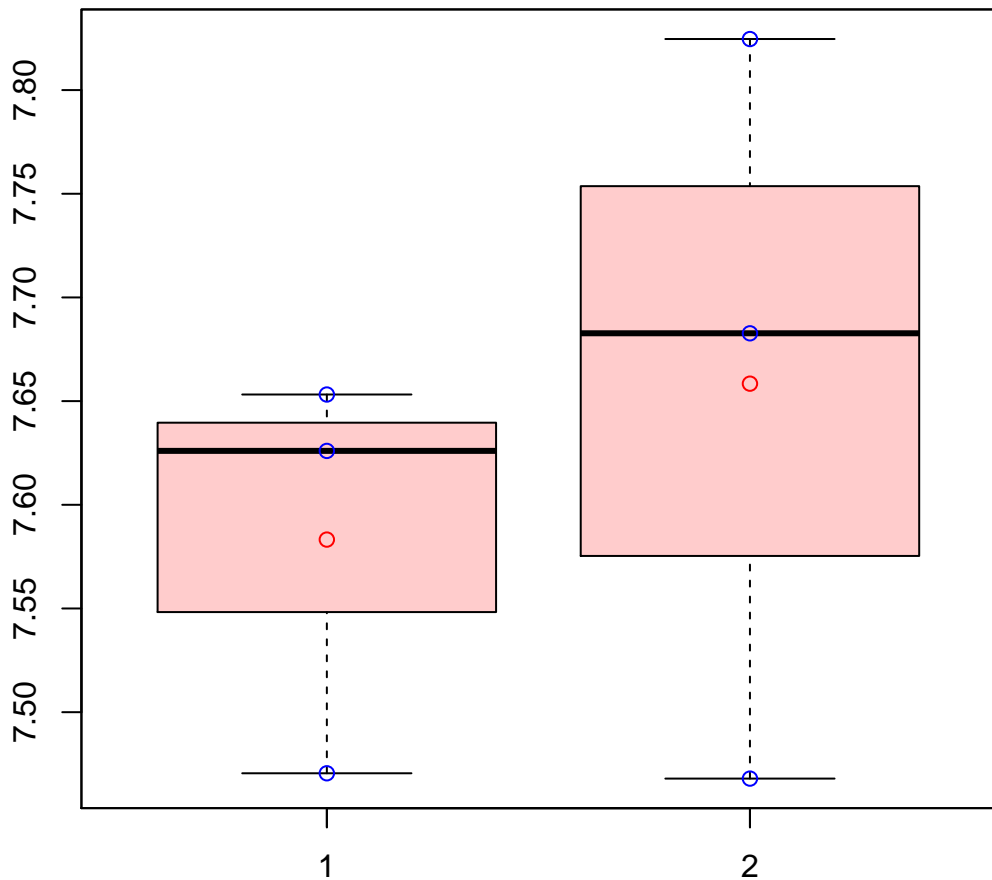

t-Test: p-value = 0.57

# CL13040Contig1|CL13040Contig1

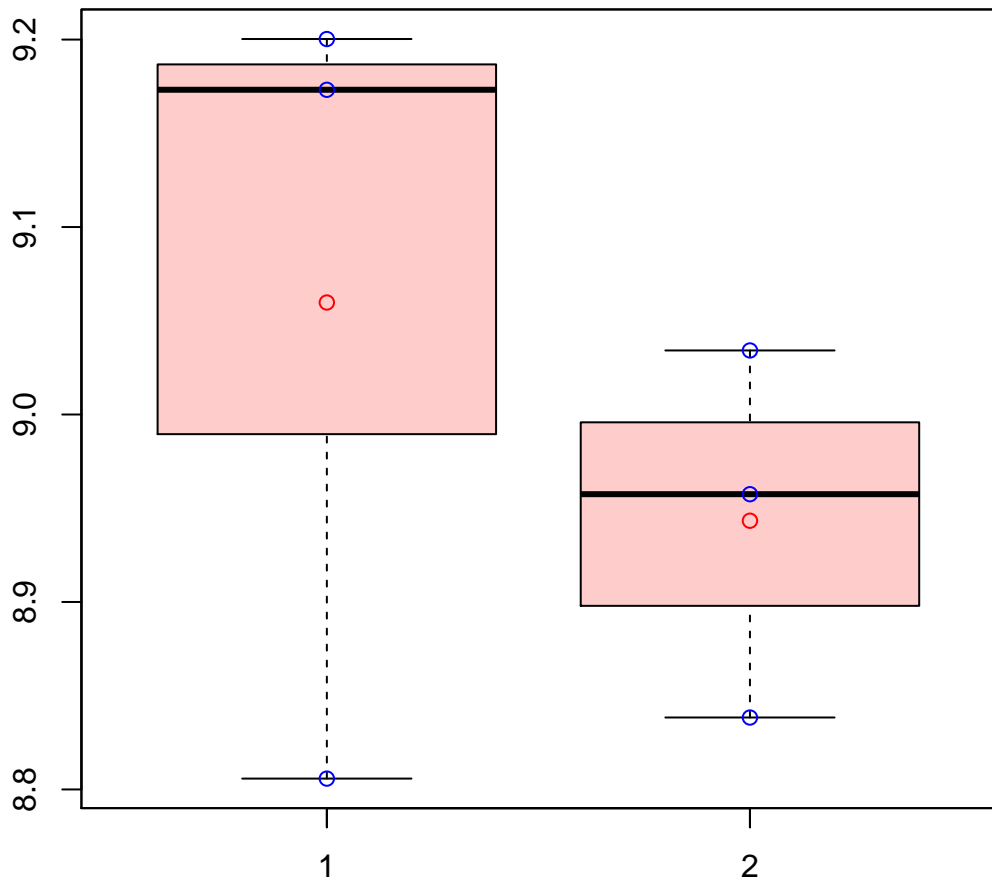

t-Test: p-value = 0.47

# CL1304Contig9|CL1304Contig9

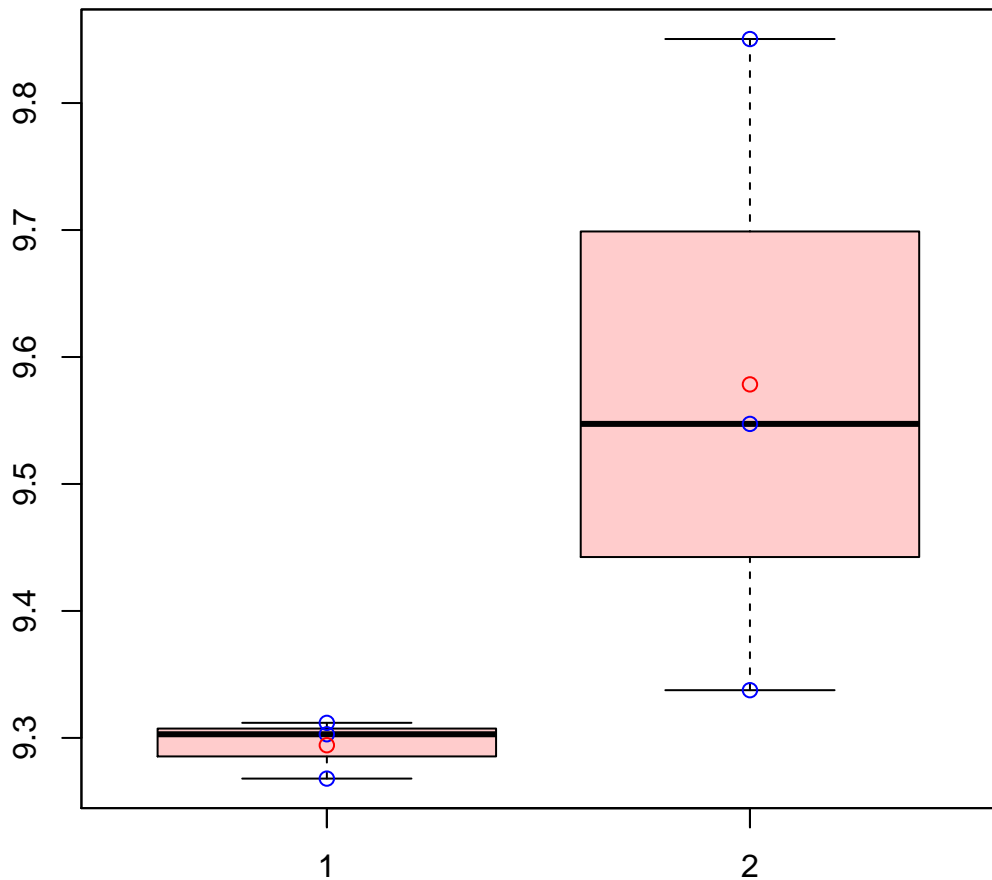

t-Test: p-value = 0.2

# CL13052Contig1|CL13052Contig1

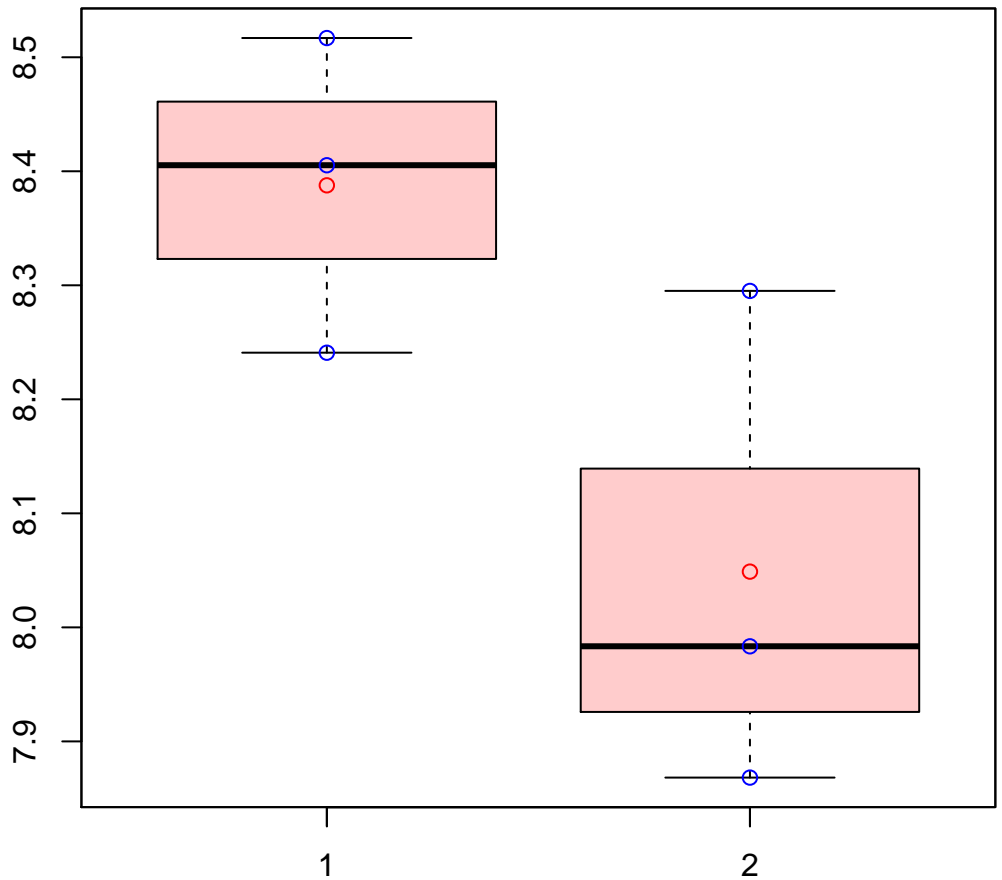

t-Test: p-value = 0.1

# CL1305Contig4|CL1305Contig4

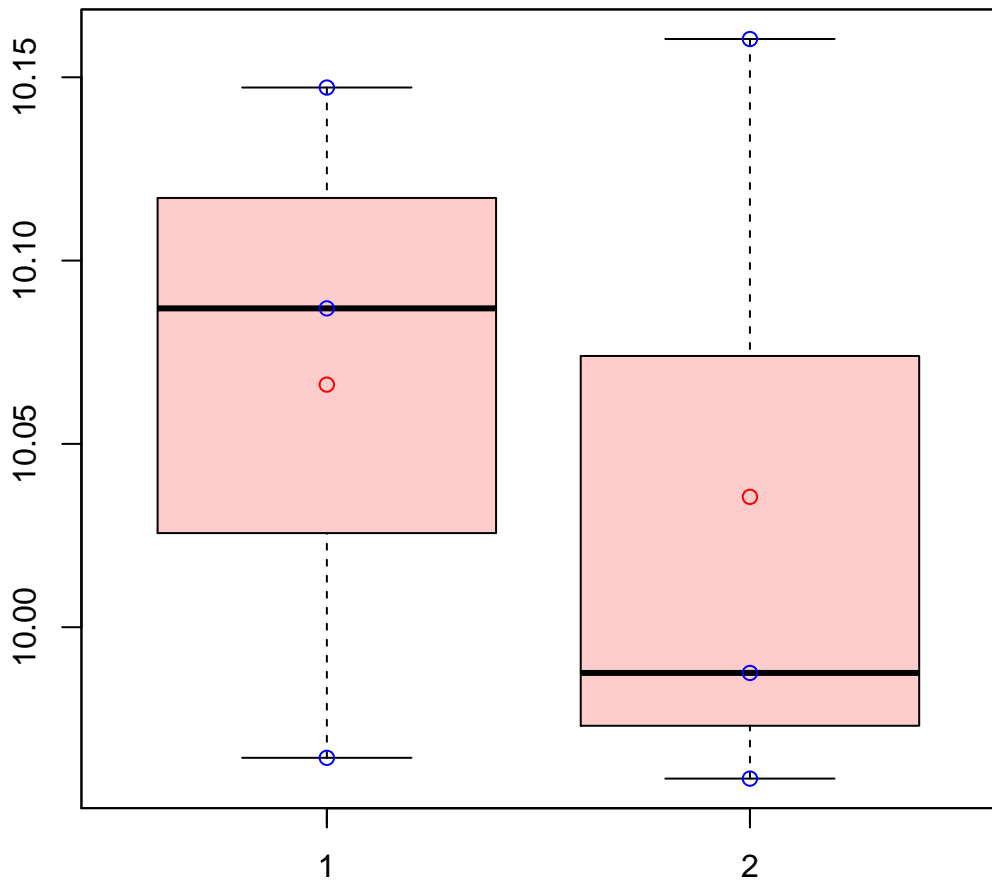

t-Test: p-value = 0.73

# CL1305Contig5|CL1305Contig5



t-Test: p-value = 0.73

# CL1307Contig3|CL1307Contig3

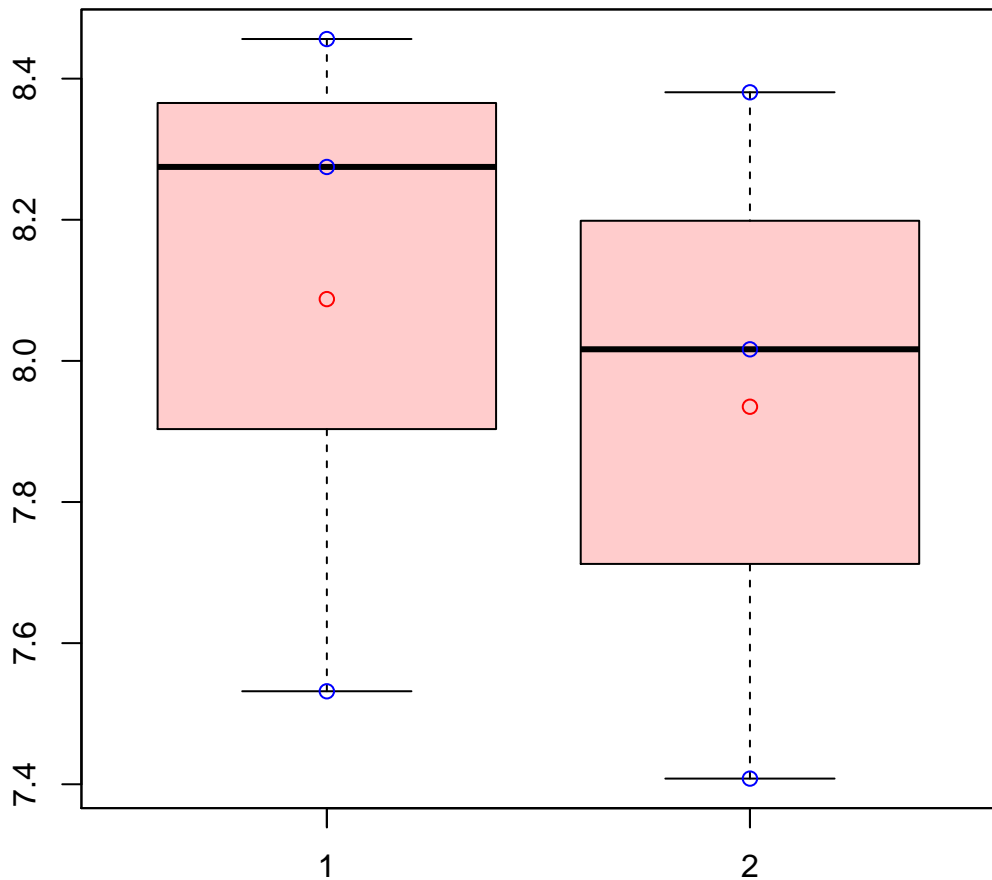

t-Test: p-value = 0.72

# CL1309Contig10|CL1309Contig10

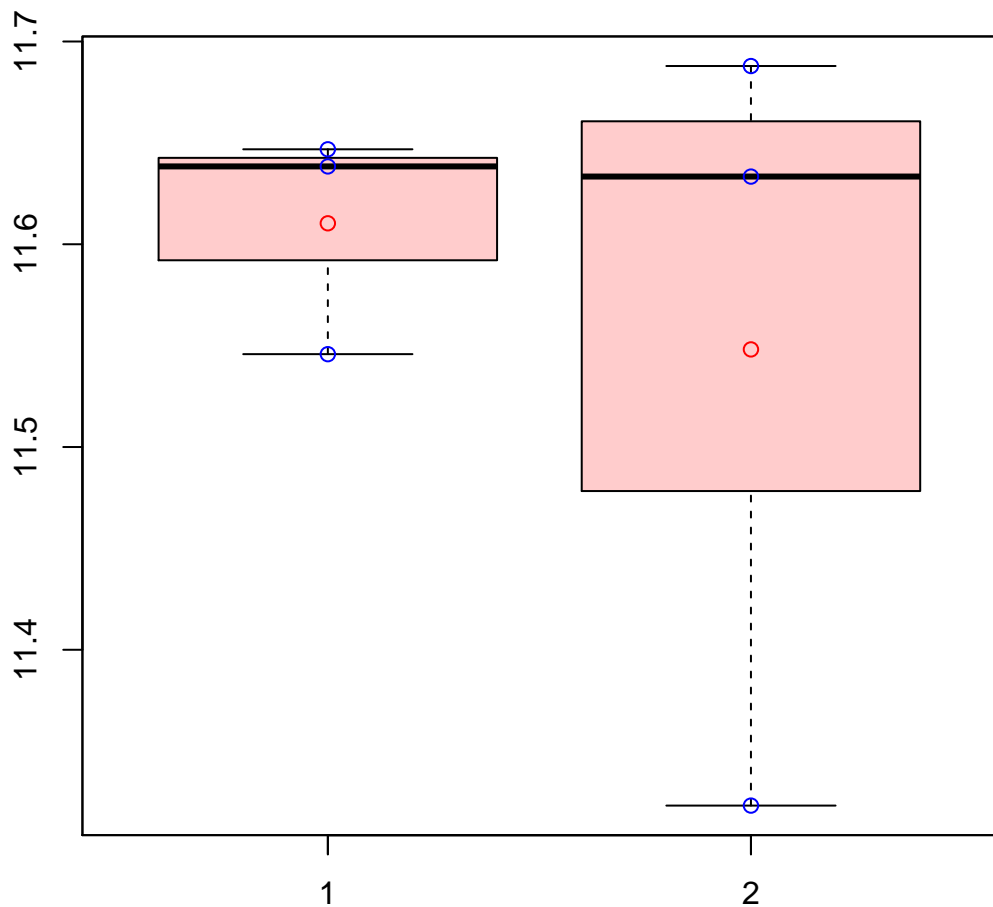

t-Test: p-value = 0.64



# CL1309Contig11|CL1309Contig11

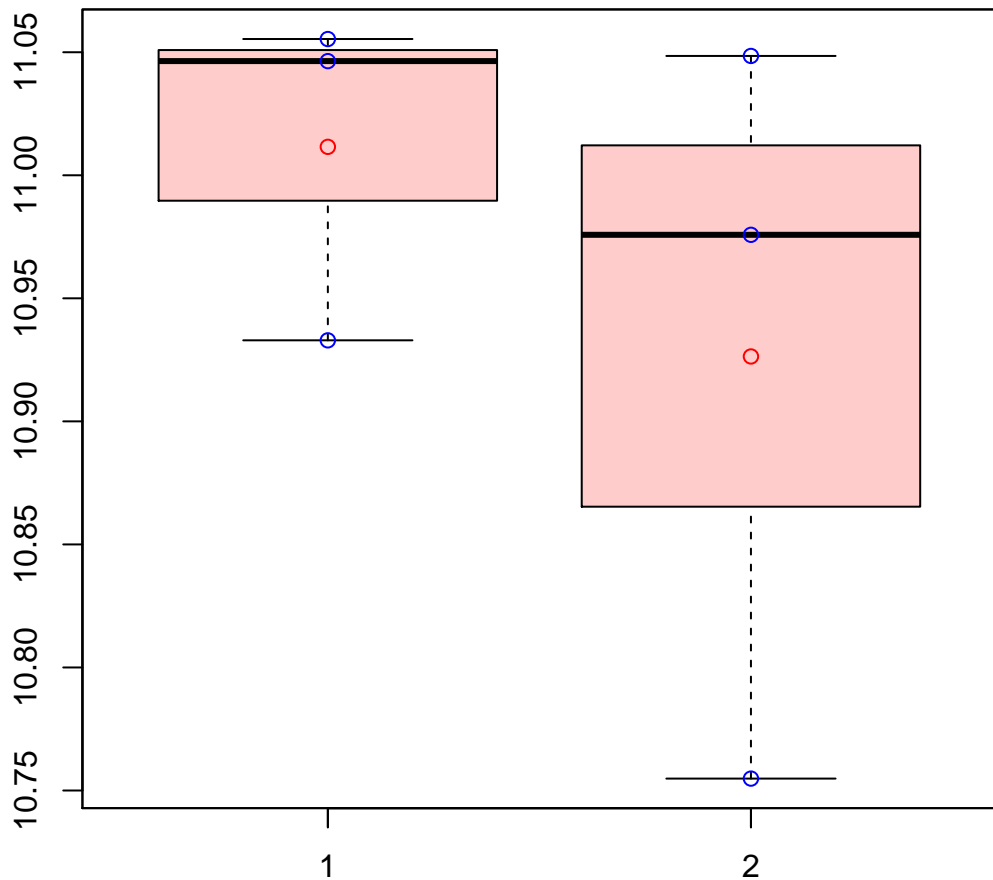

t-Test: p-value = 0.45

# CL1309Contig12|CL1309Contig12

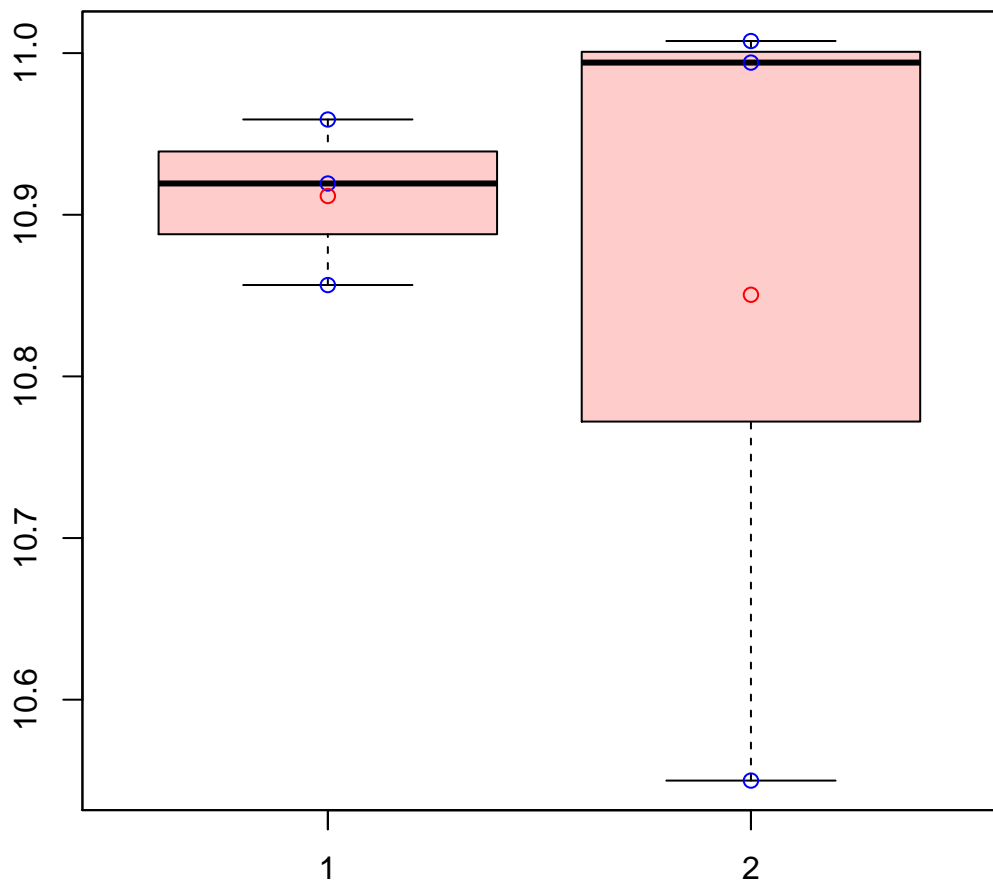

t-Test: p-value = 0.73

# CL1309Contig13|CL1309Contig13

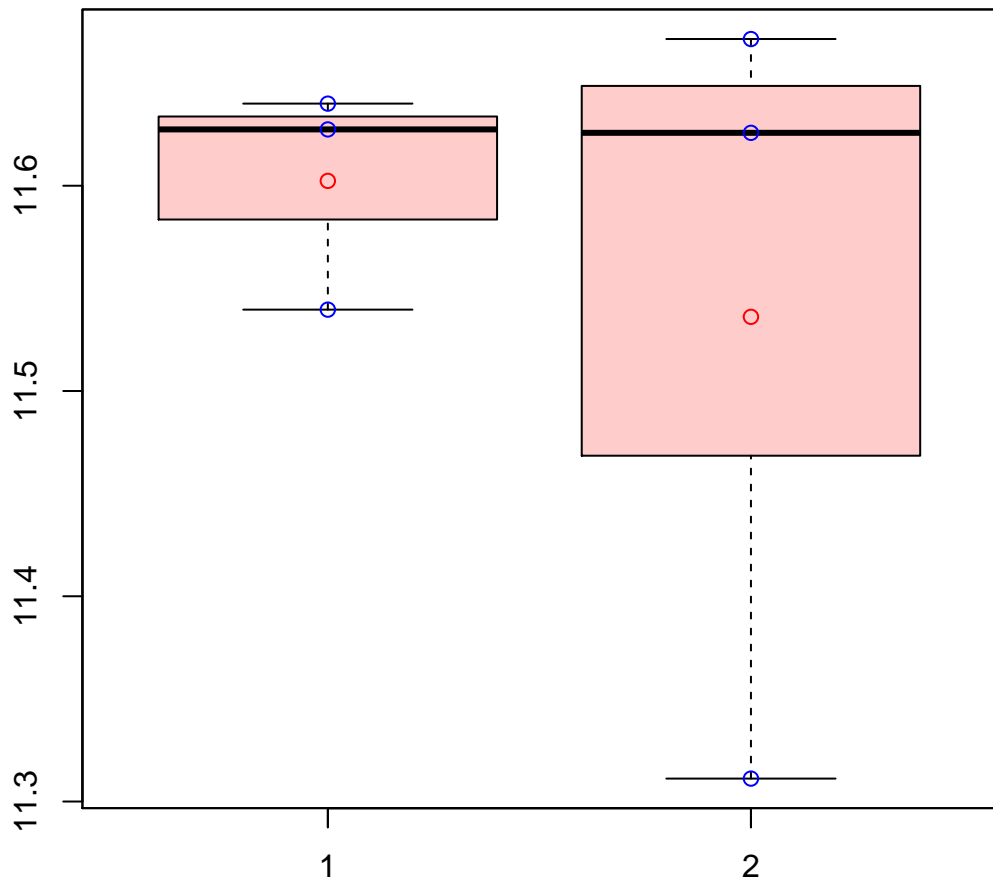

t-Test: p-value = 0.62

# CL1309Contig16|CL1309Contig16

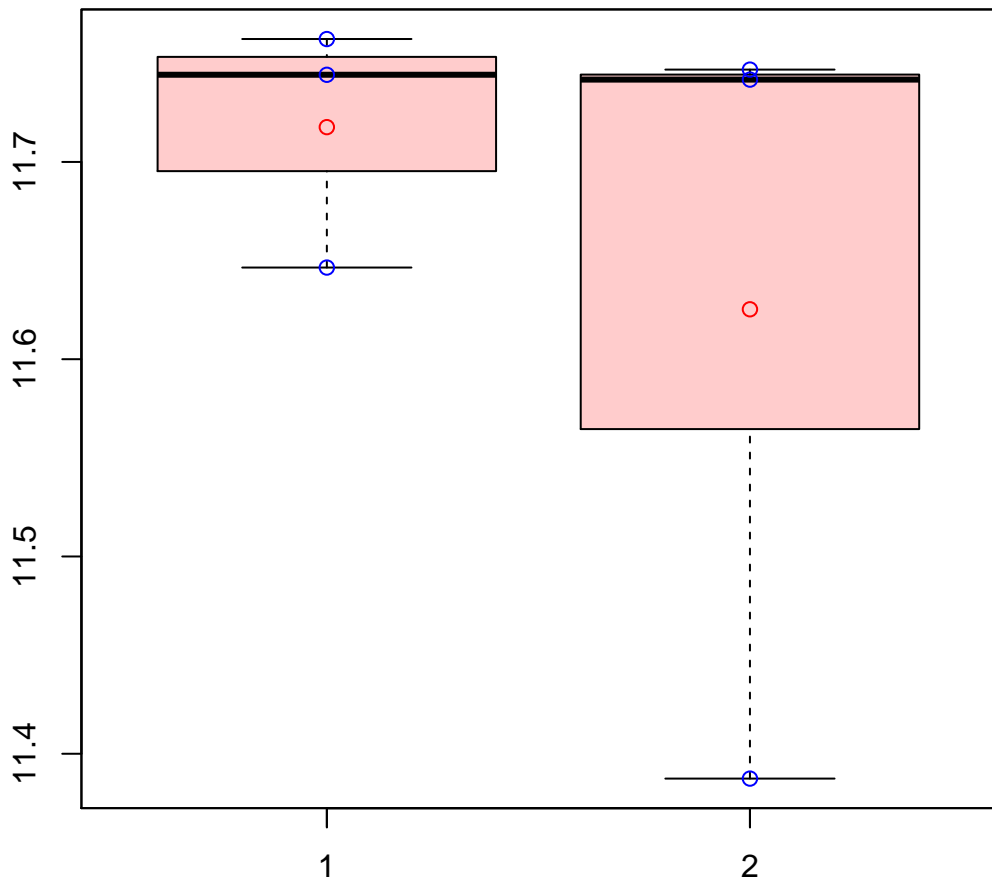

t-Test: p-value = 0.52

# CL1309Contig17|CL1309Contig17

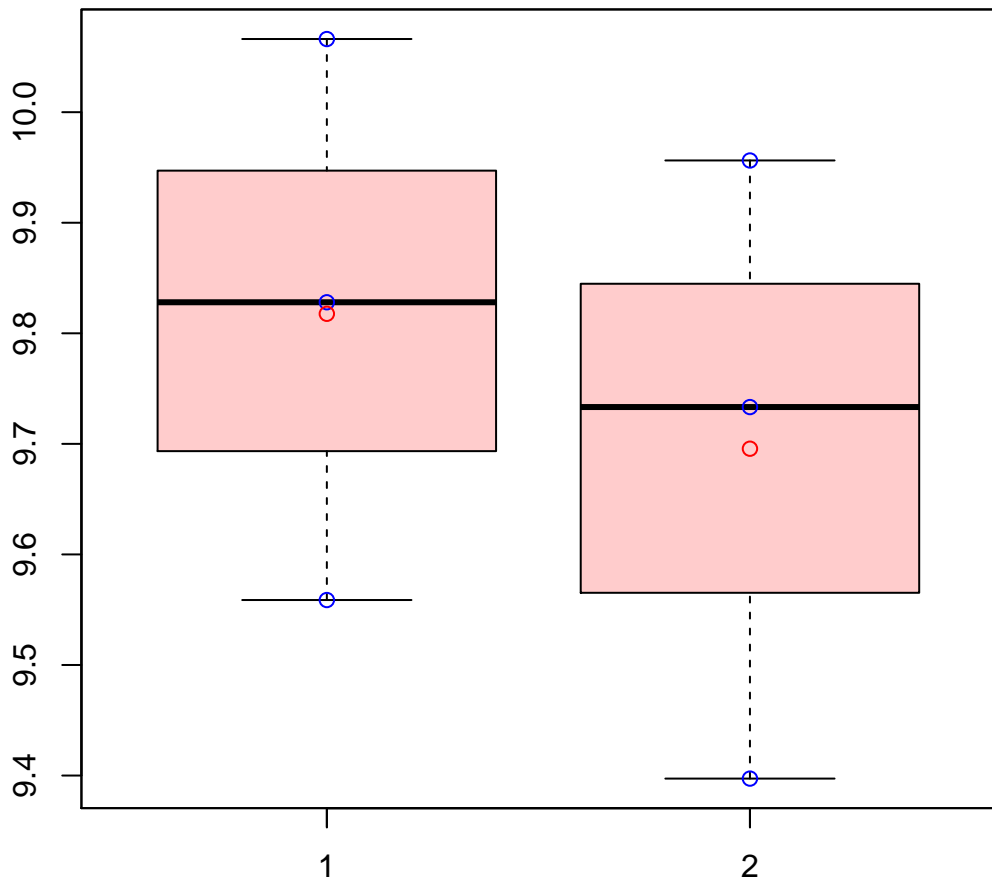

t-Test: p-value = 0.61

# CL1309Contig18|CL1309Contig18

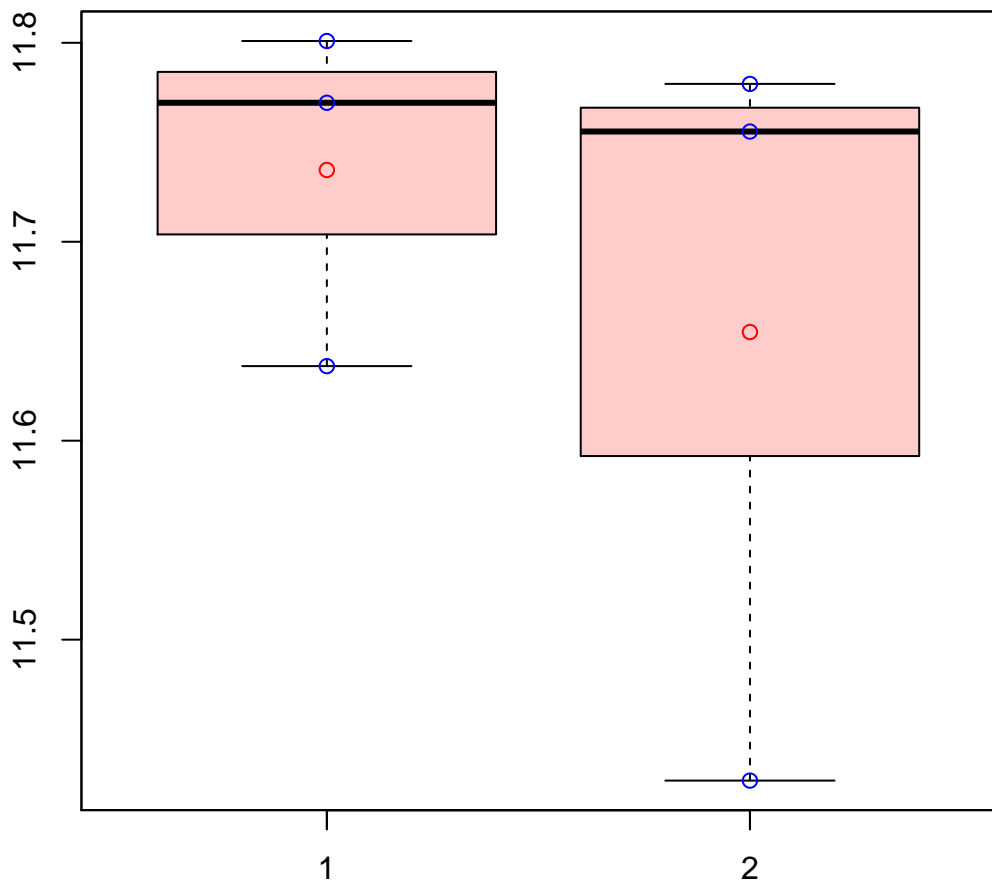

t-Test: p-value = 0.56

# CL1309Contig3|CL1309Contig3

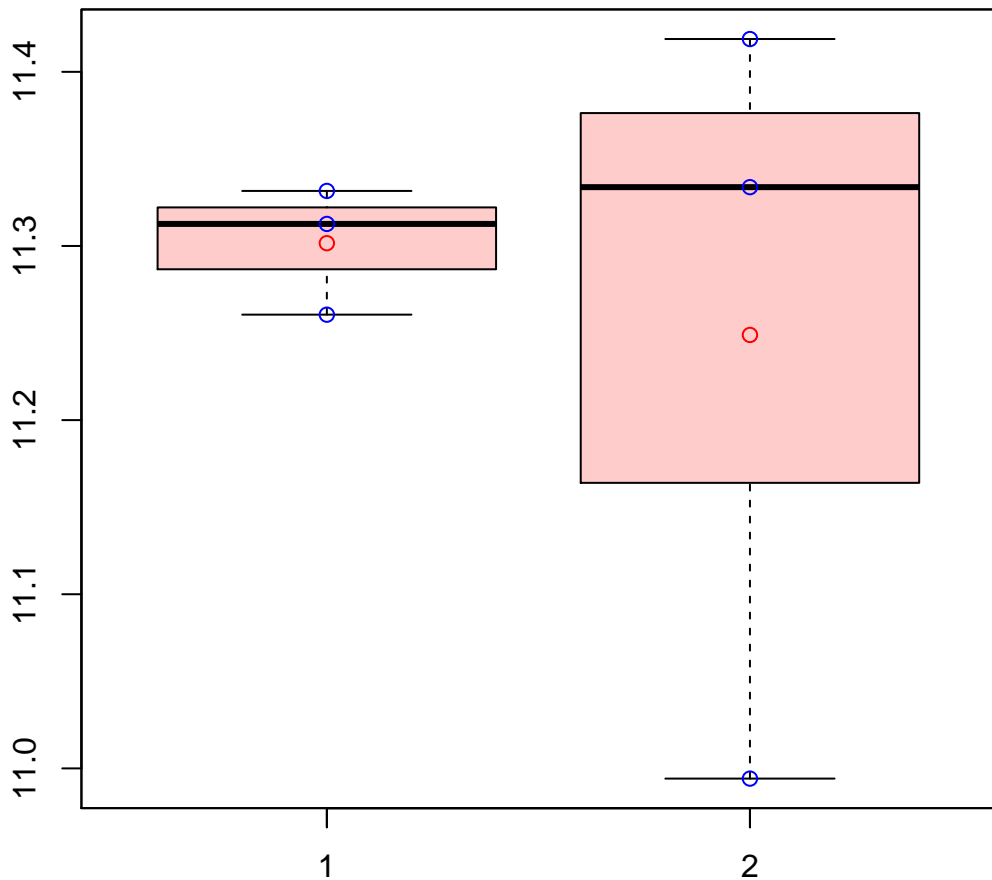

t-Test: p-value = 0.73

# CL1309Contig4|CL1309Contig4



t-Test: p-value = 0.73



# CL1309Contig5|CL1309Contig5

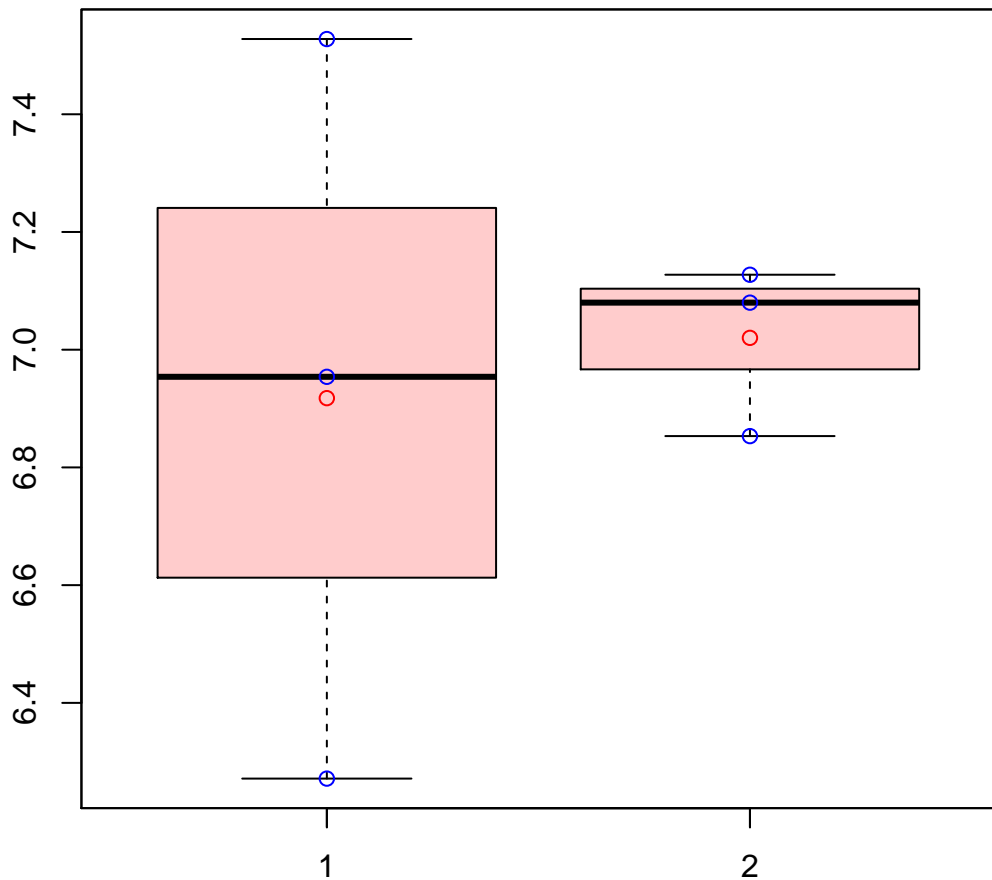

t-Test: p-value = 0.81

# CL1309Contig6|CL1309Contig6

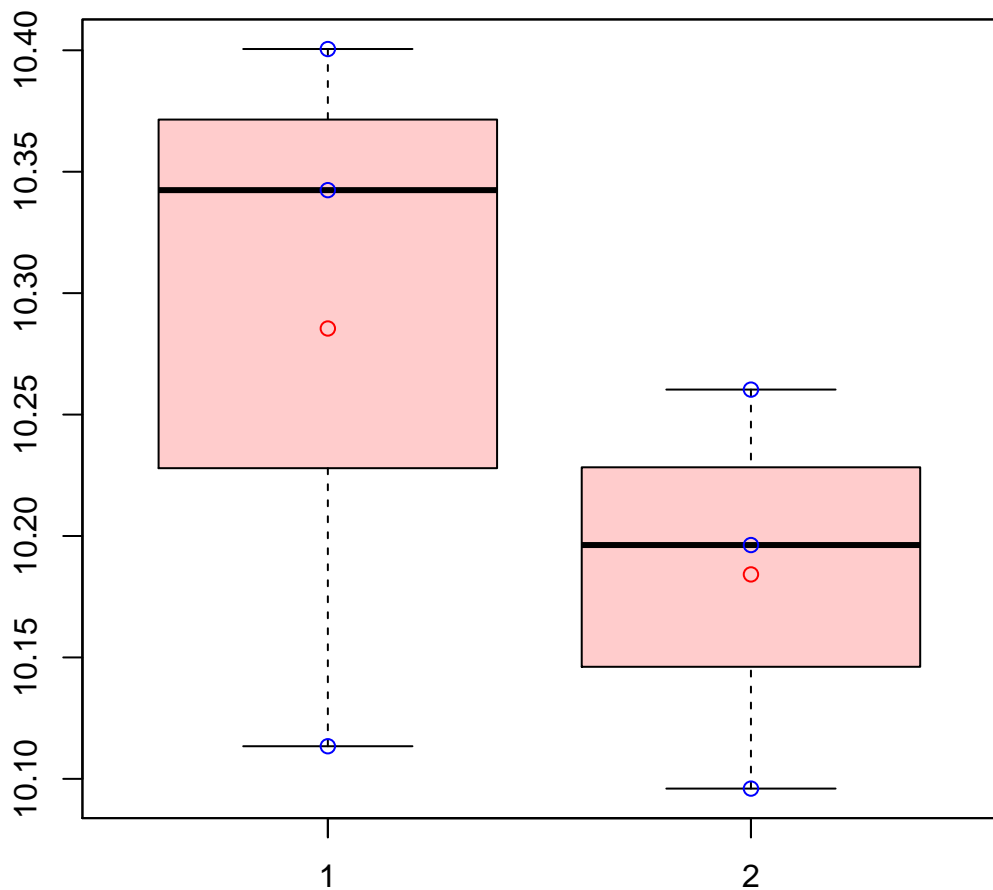

t-Test: p-value = 0.38

# CL1309Contig7|CL1309Contig7

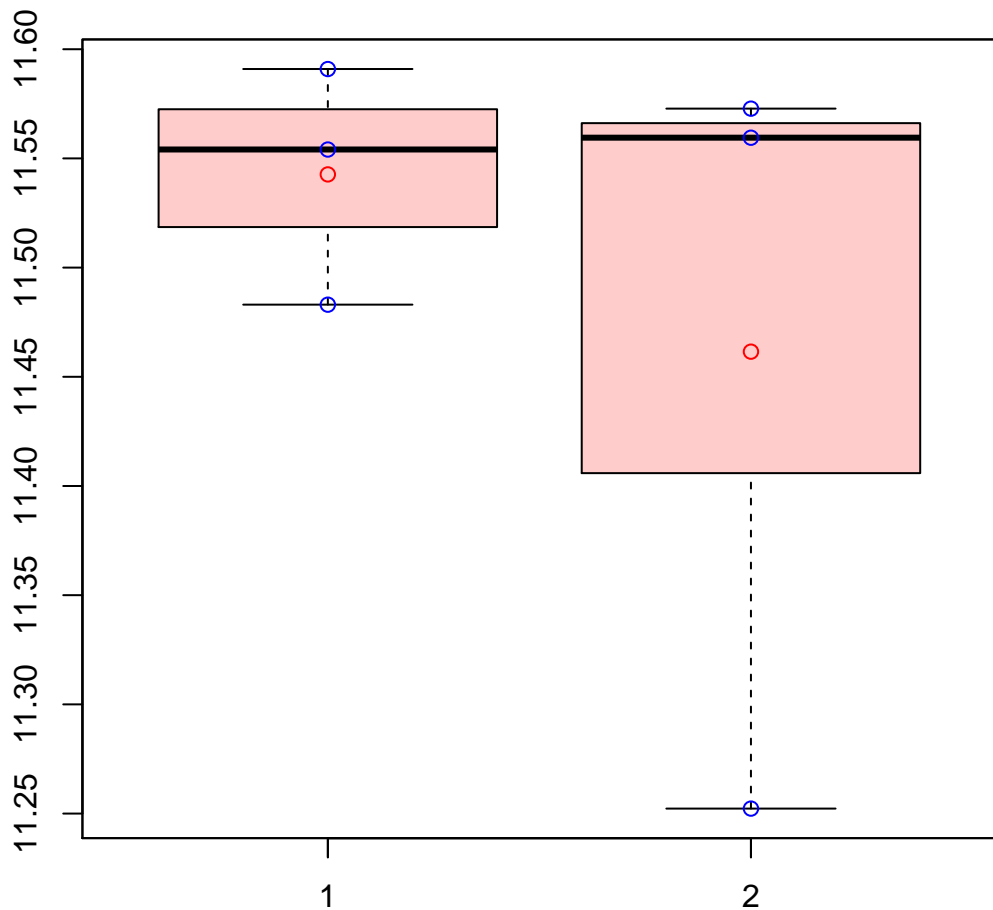

t-Test: p-value = 0.52

# CL1309Contig8|CL1309Contig8

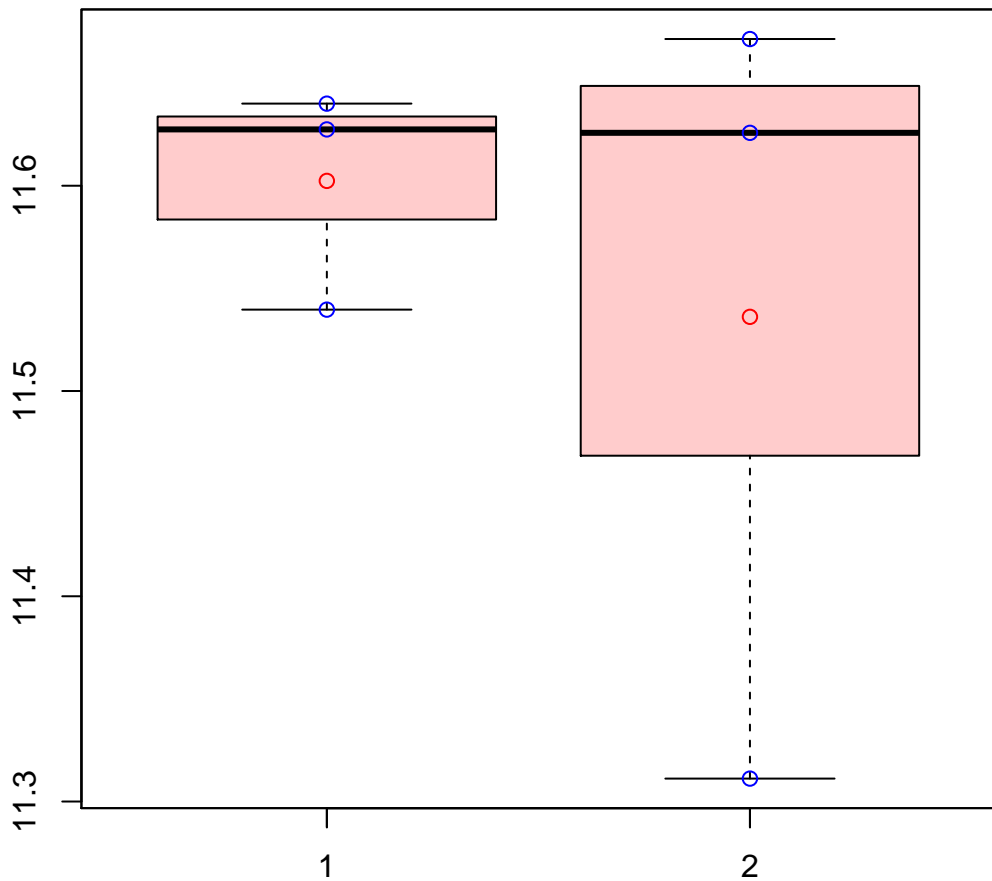

t-Test: p-value = 0.62

# CL1309Contig9|CL1309Contig9

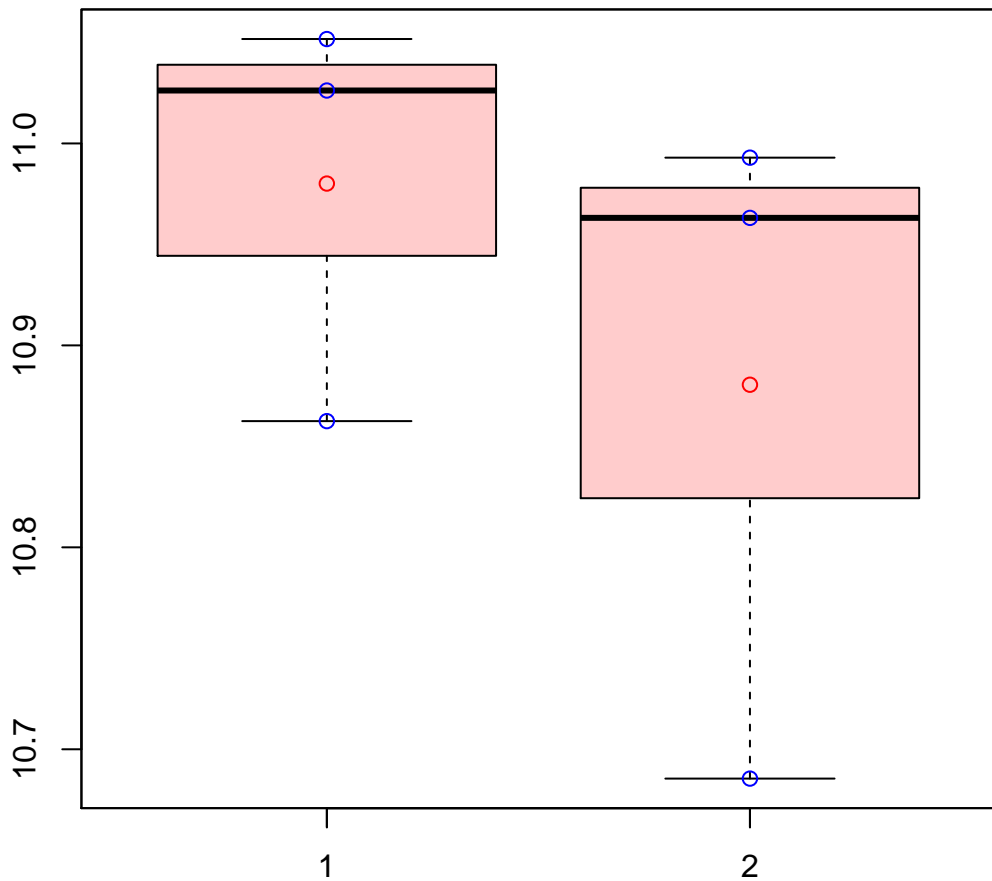

t-Test: p-value = 0.44

# CL130Contig11|CL130Contig11

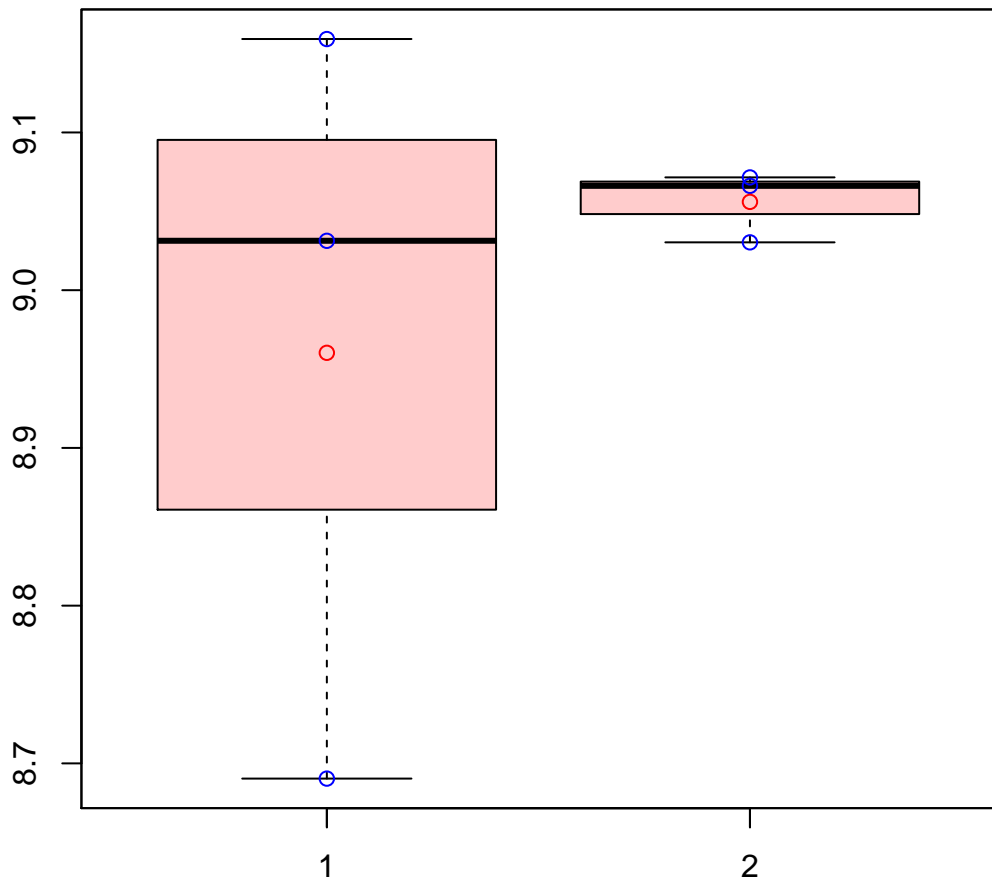

t-Test: p-value = 0.57

# CL130Contig16|CL130Contig16

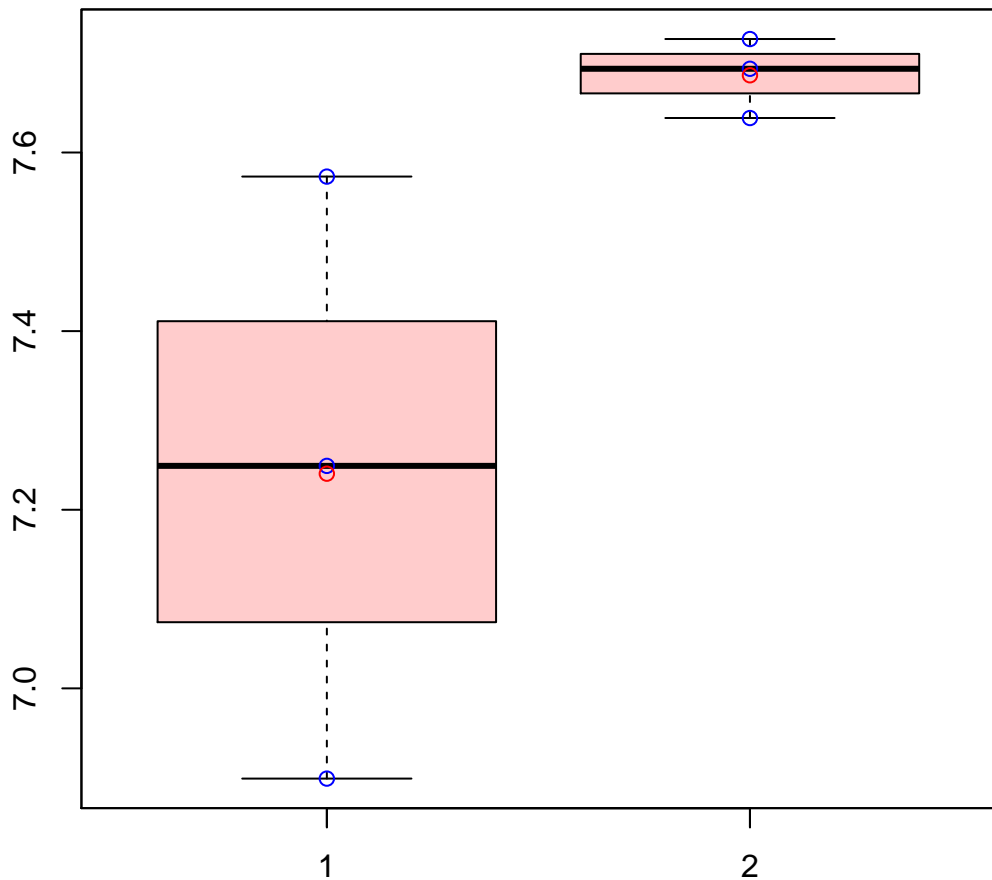

t-Test: p-value = 0.15

# CL13107Contig1|CL13107Contig1

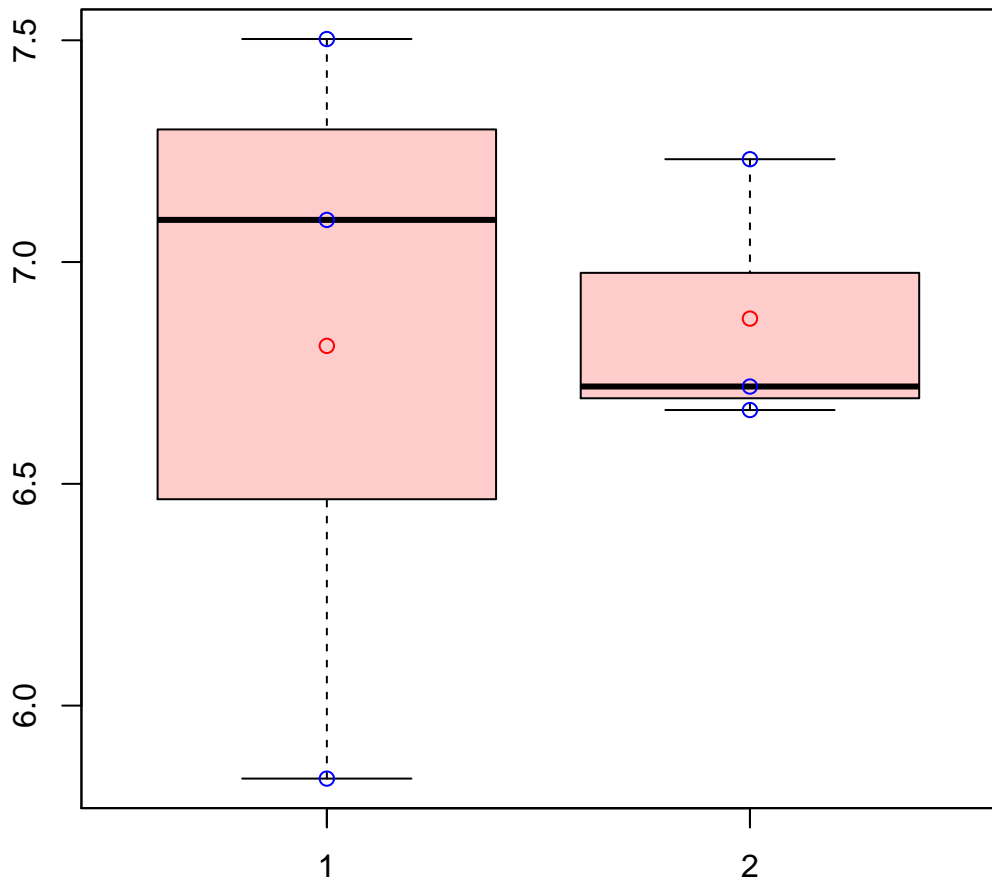

t-Test: p-value = 0.92



# CL13126Contig1|CL13126Contig1

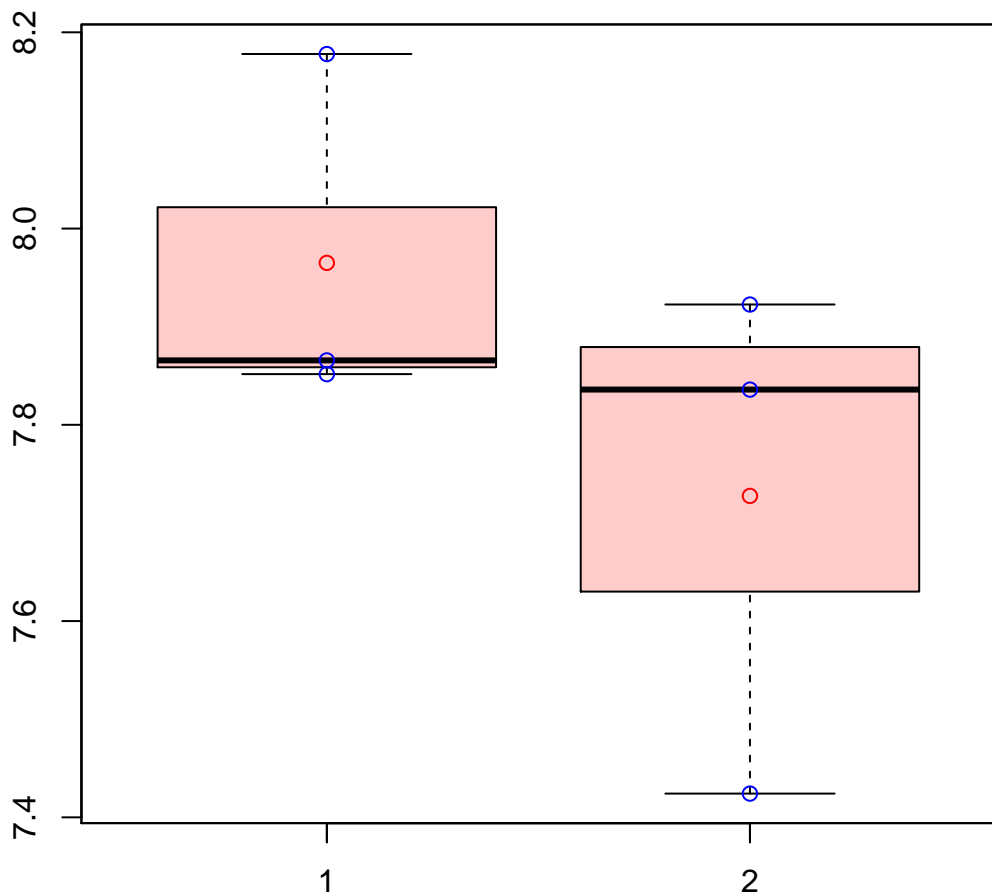

t-Test: p-value = 0.28

# CL1312Contig11|CL1312Contig11

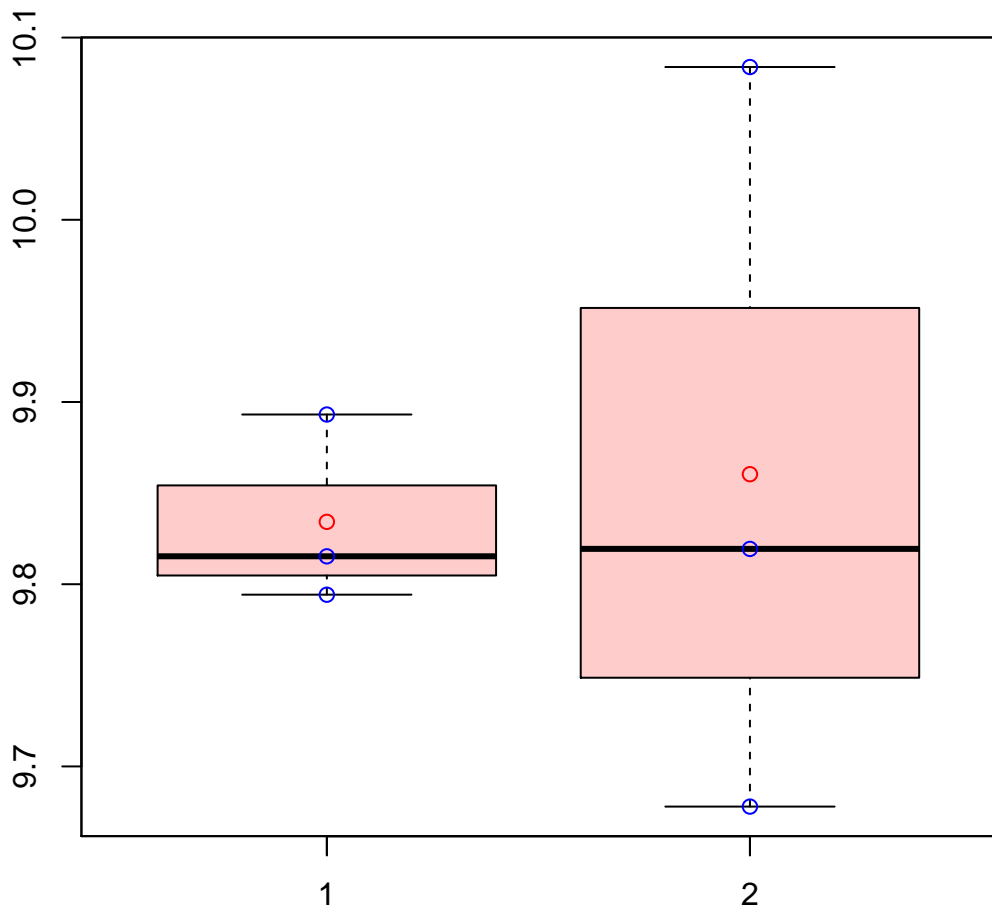

t-Test: p-value = 0.85

# CL1312Contig1|CL1312Contig1

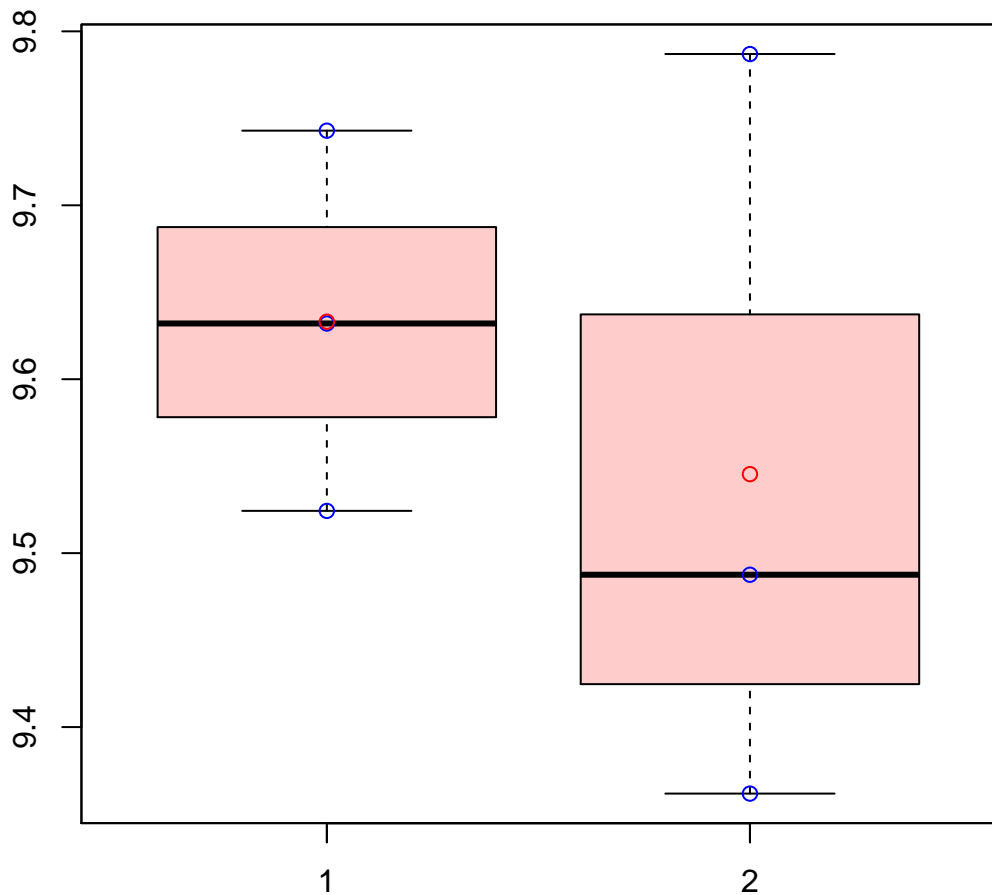

t-Test: p-value = 0.58

# CL1312Contig5|CL1312Contig5



t-Test: p-value = 0.85

# CL13136Contig1|CL13136Contig1

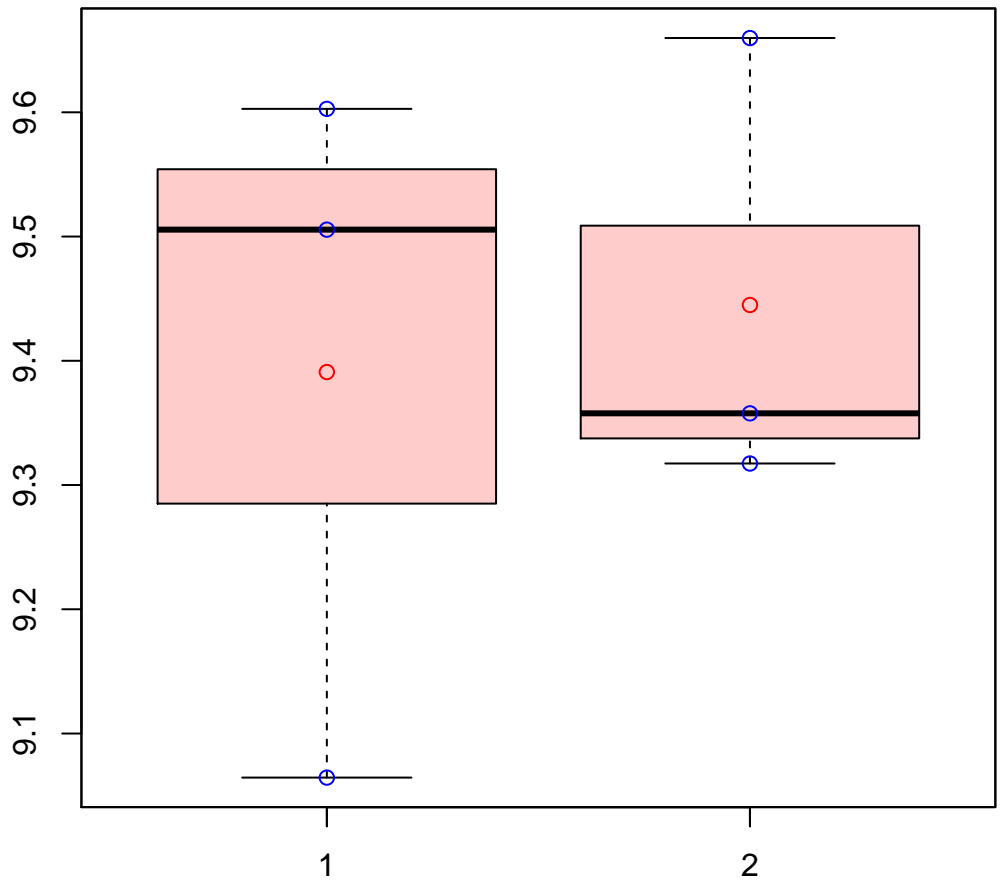

t-Test: p-value = 0.8

# CL13174Contig1|CL13174Contig1

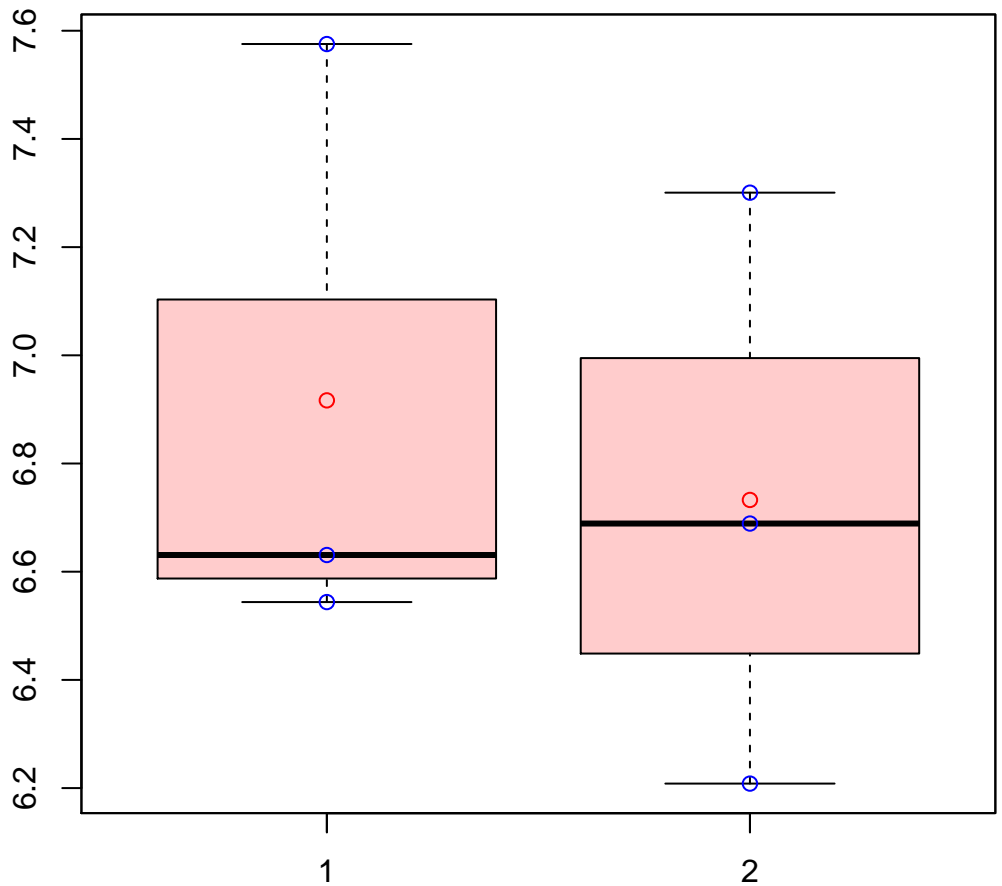

t-Test: p-value = 0.71

# CL1317Contig1|CL1317Contig1

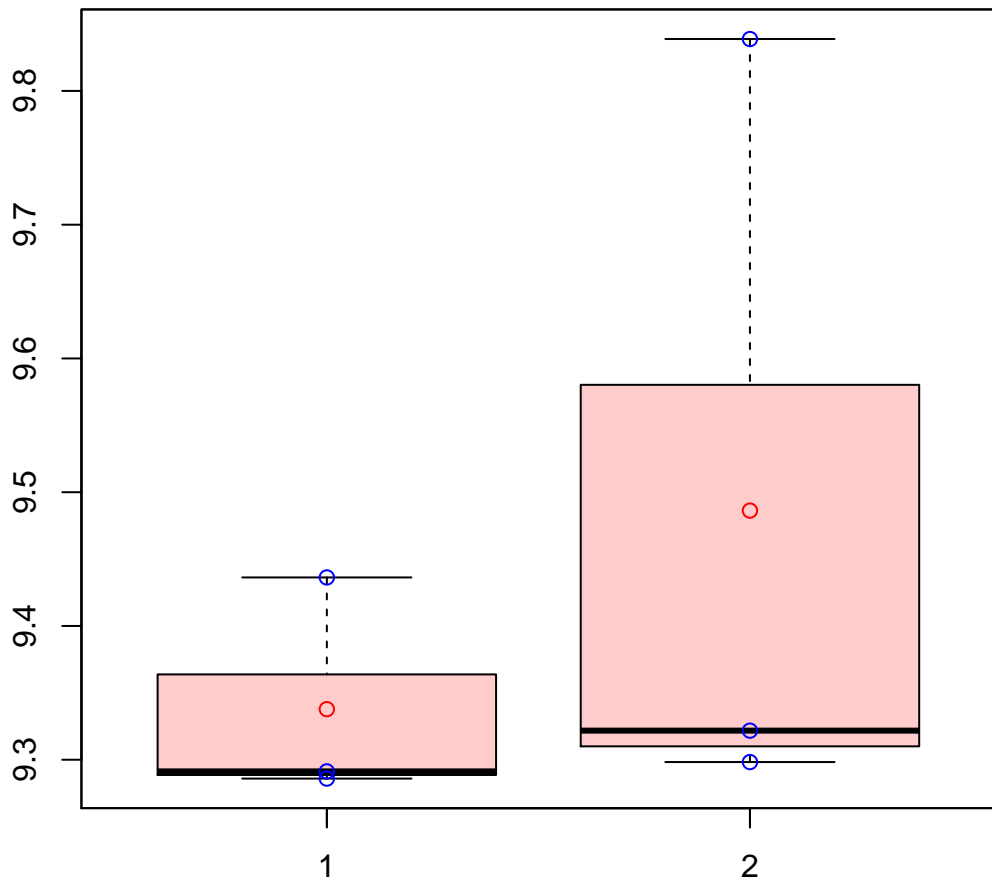

t-Test: p-value = 0.49

# CL1317Contig2|CL1317Contig2

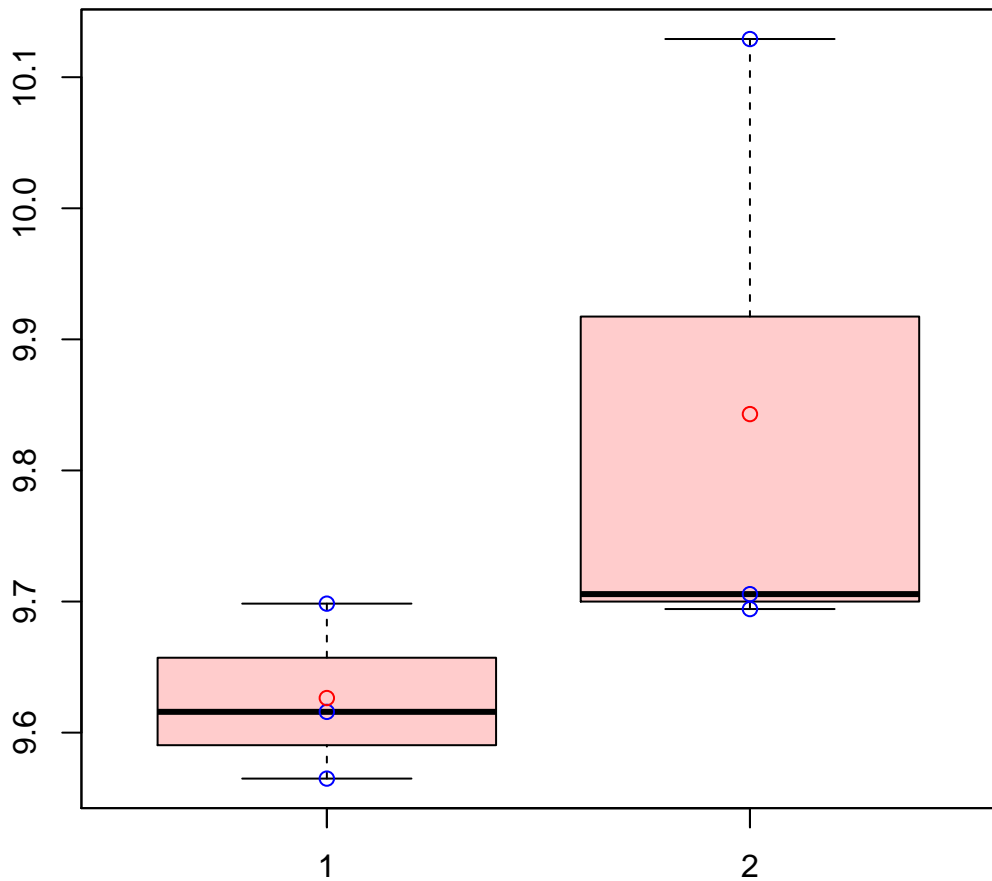

t-Test: p-value = 0.27



# CL1317Contig3|CL1317Contig3

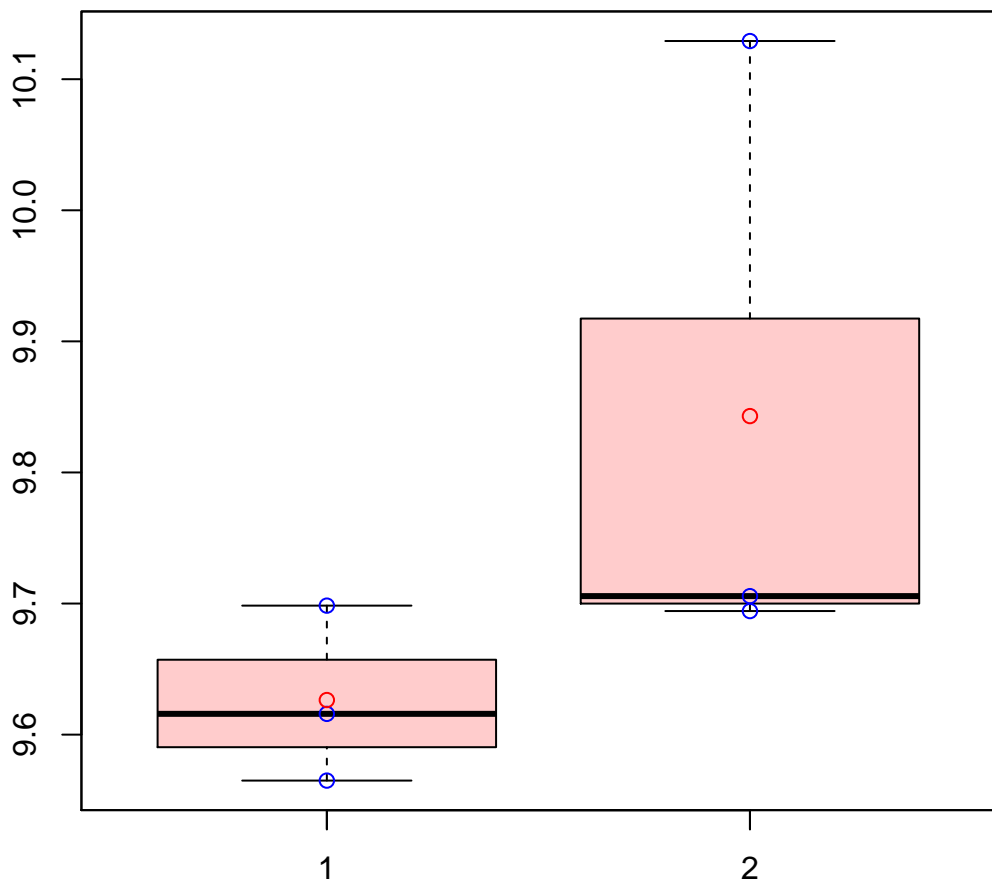

t-Test: p-value = 0.27

# CL1317Contig5|CL1317Contig5



t-Test: p-value = 0.49

# CL1317Contig6|CL1317Contig6

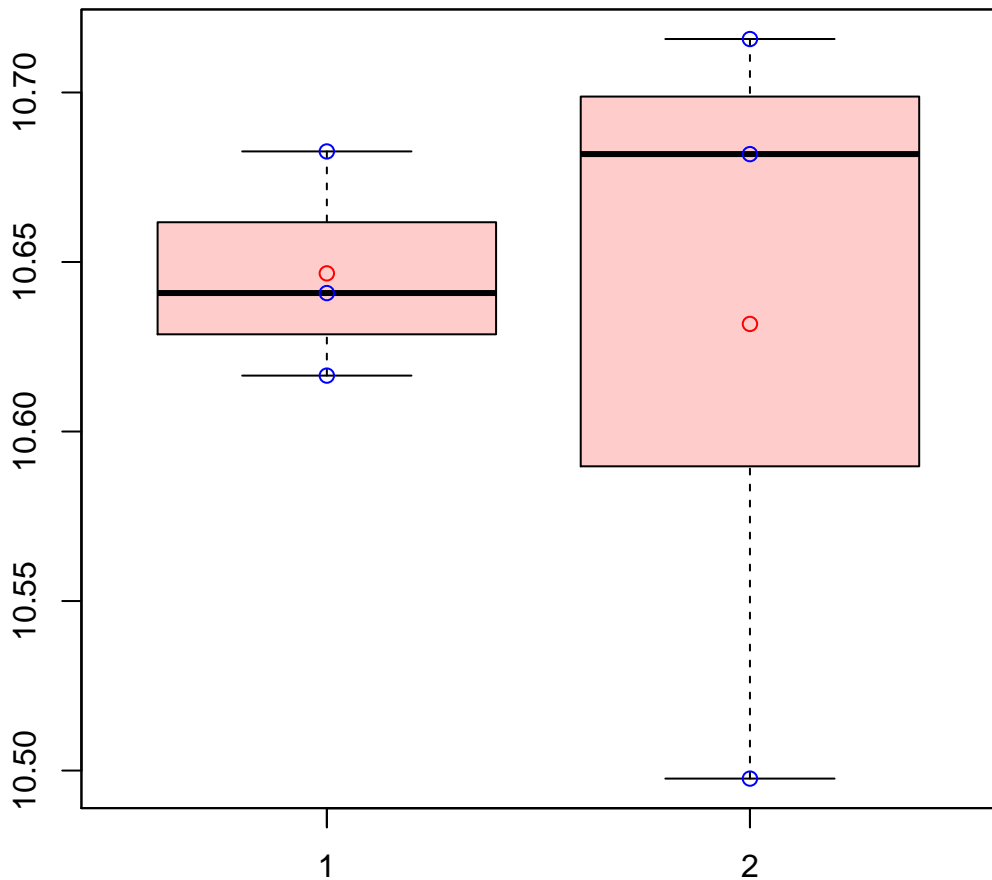

t-Test: p-value = 0.85

# CL1317Contig7|CL1317Contig7

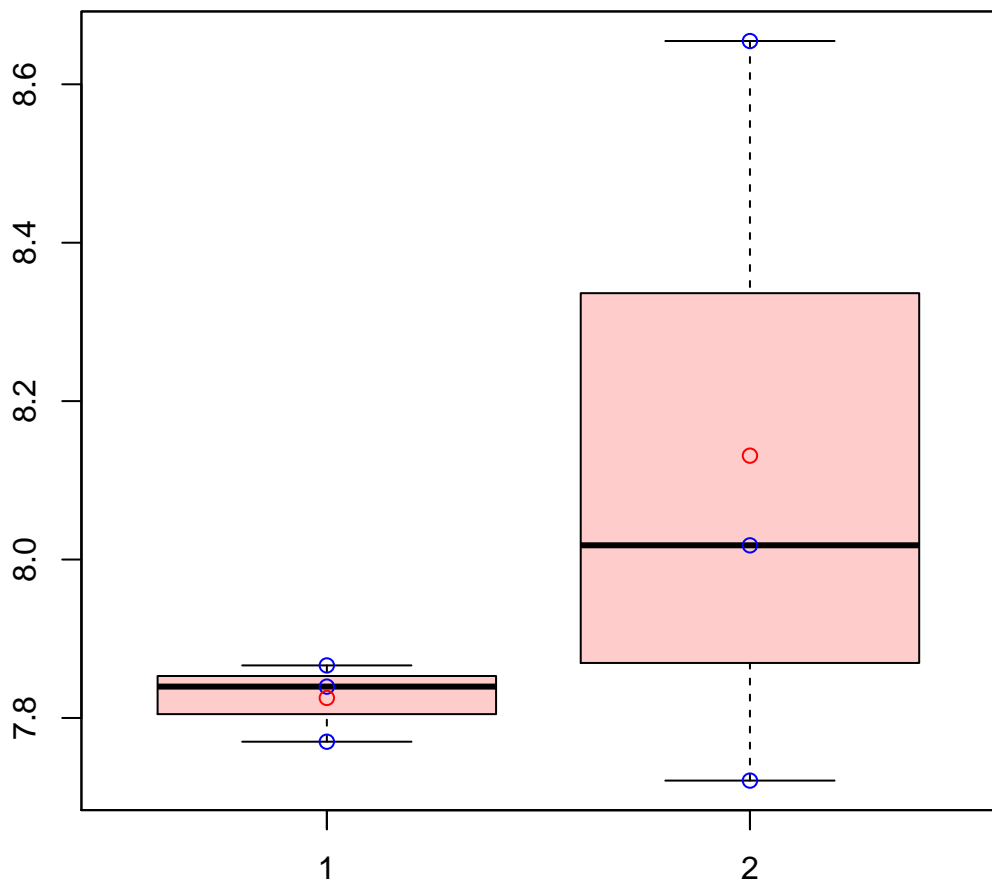

t-Test: p-value = 0.38

# CL131Contig9|CL131Contig9

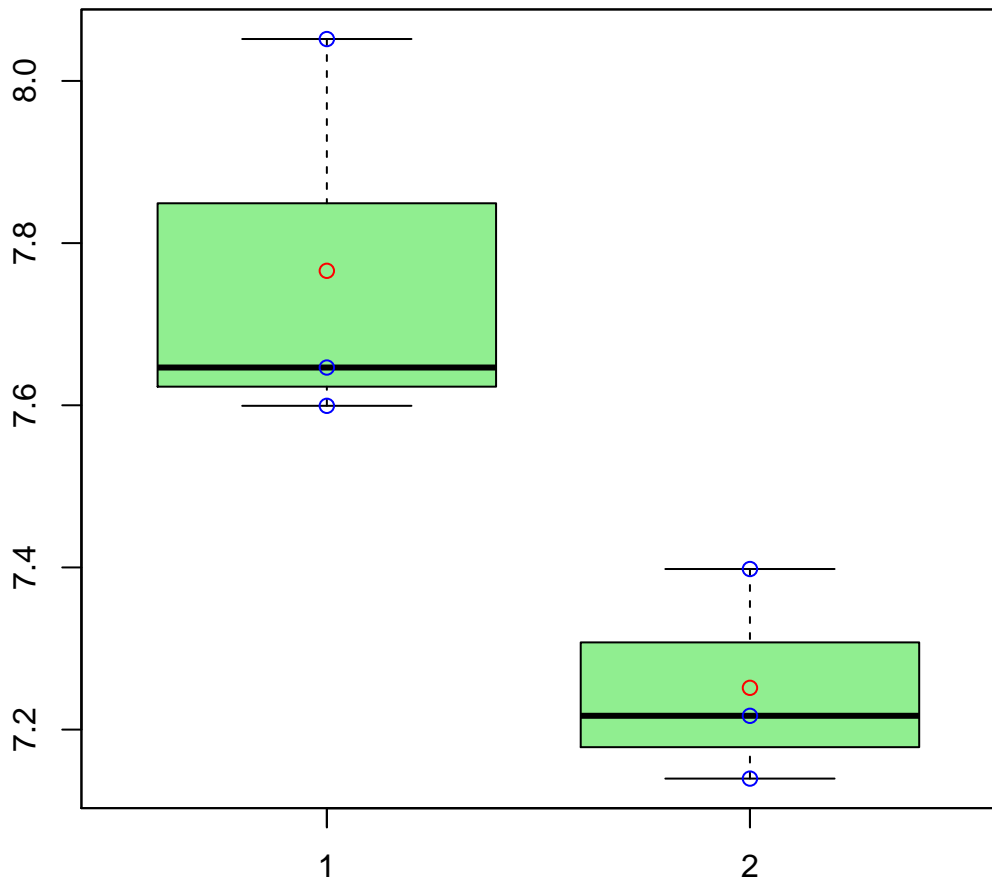

t-Test: p-value = 0.05

# CL13200Contig1|CL13200Contig1

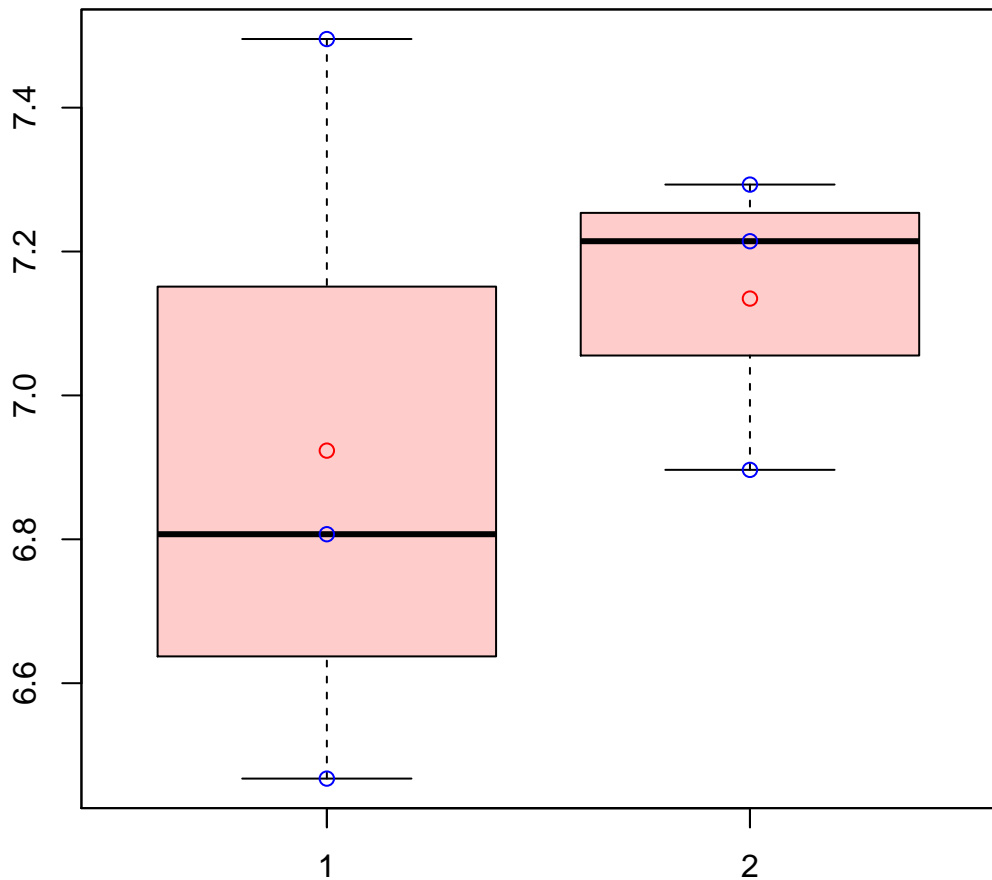

t-Test: p-value = 0.57

# CL13221Contig1|CL13221Contig1

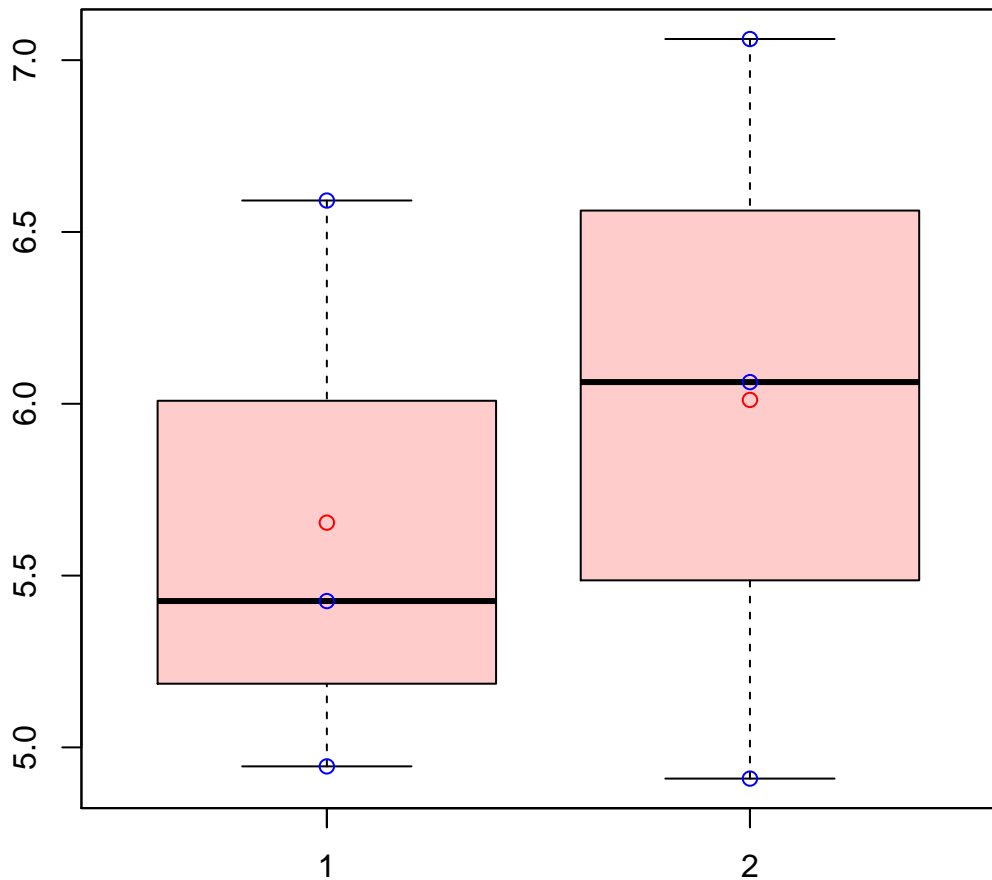

t-Test: p-value = 0.68

# CL1322Contig2|CL1322Contig2

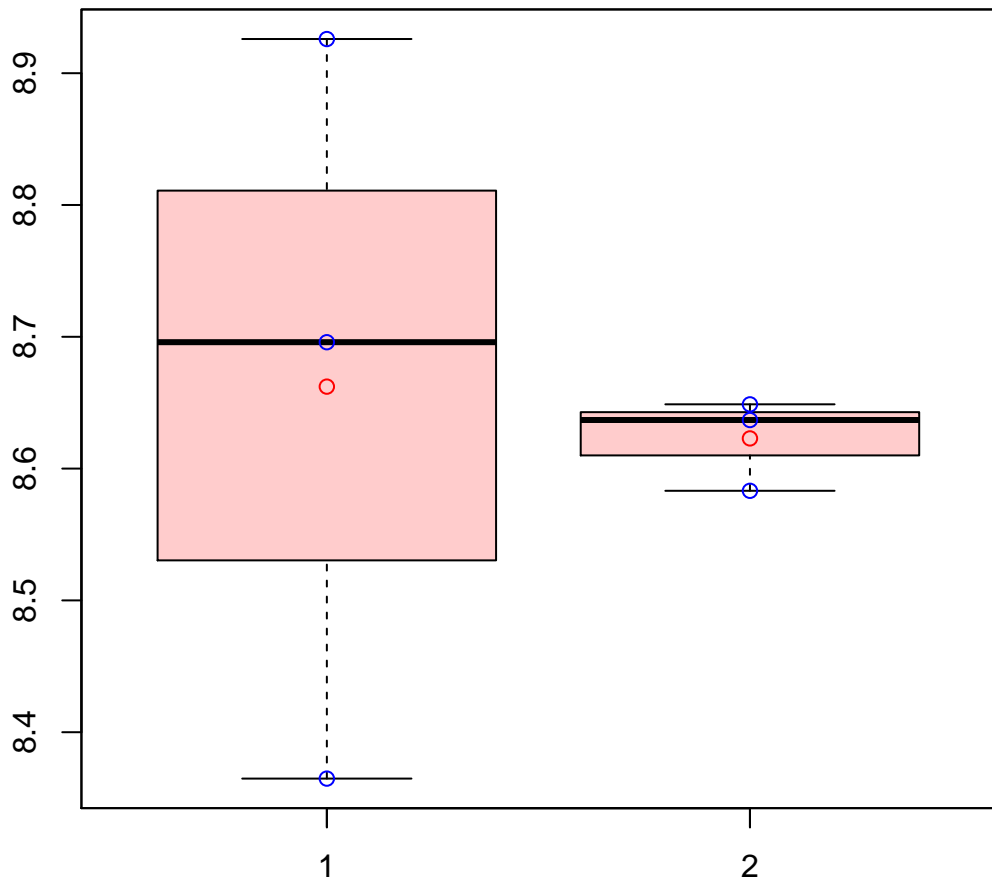

t-Test: p-value = 0.83



# CL1322Contig3|CL1322Contig3

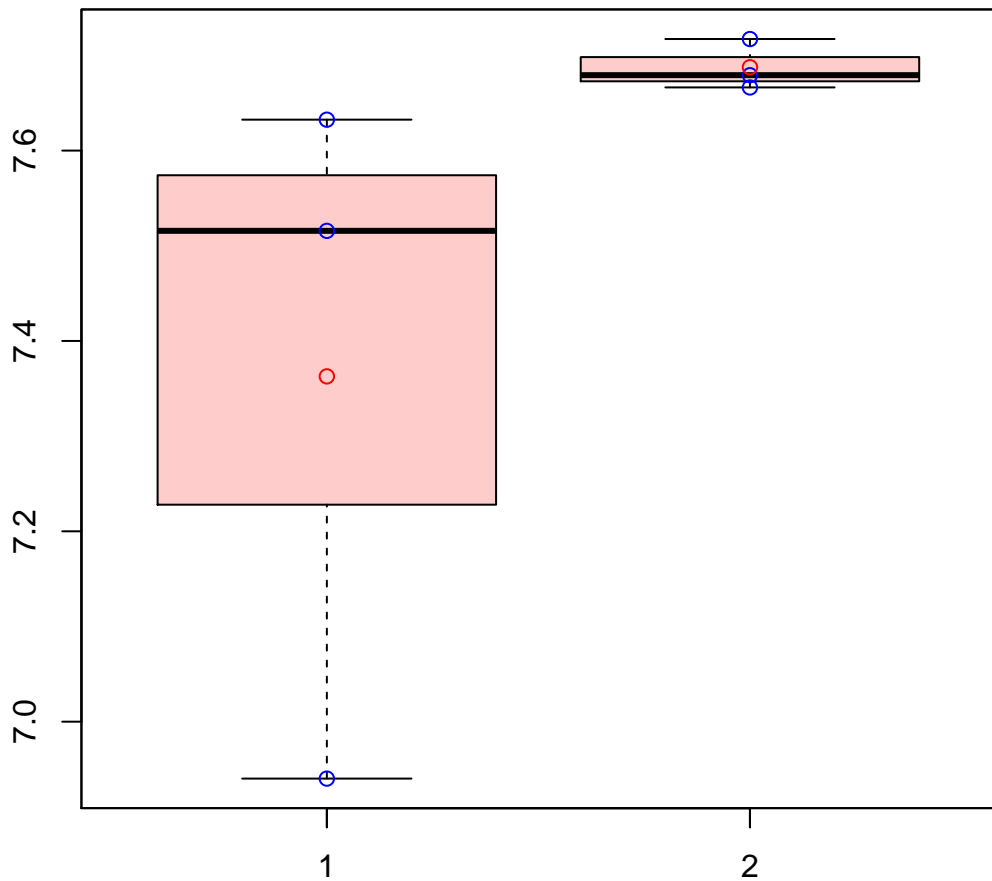

t-Test: p-value = 0.27

# CL1322Contig4|CL1322Contig4

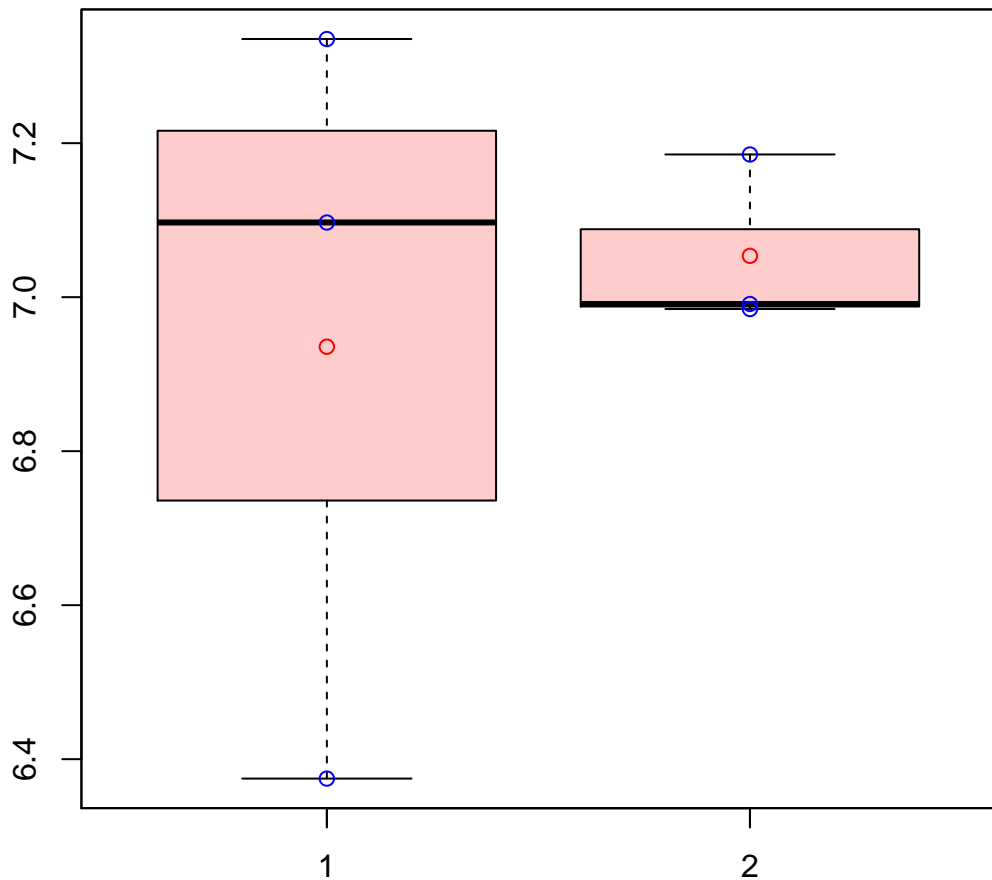

t-Test: p-value = 0.73

# CL1322Contig5|CL1322Contig5

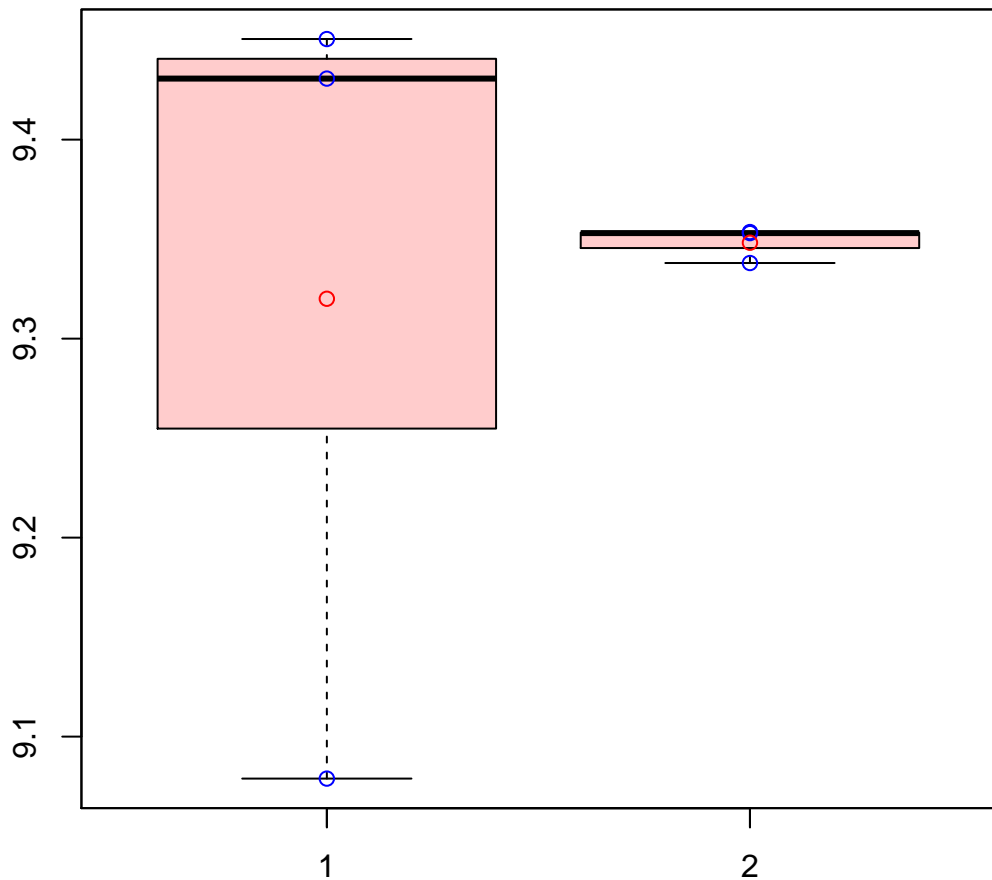

t-Test: p-value = 0.84

# CL1323Contig2|CL1323Contig2



t-Test: p-value = 0.52

# CL13244Contig1|CL13244Contig1

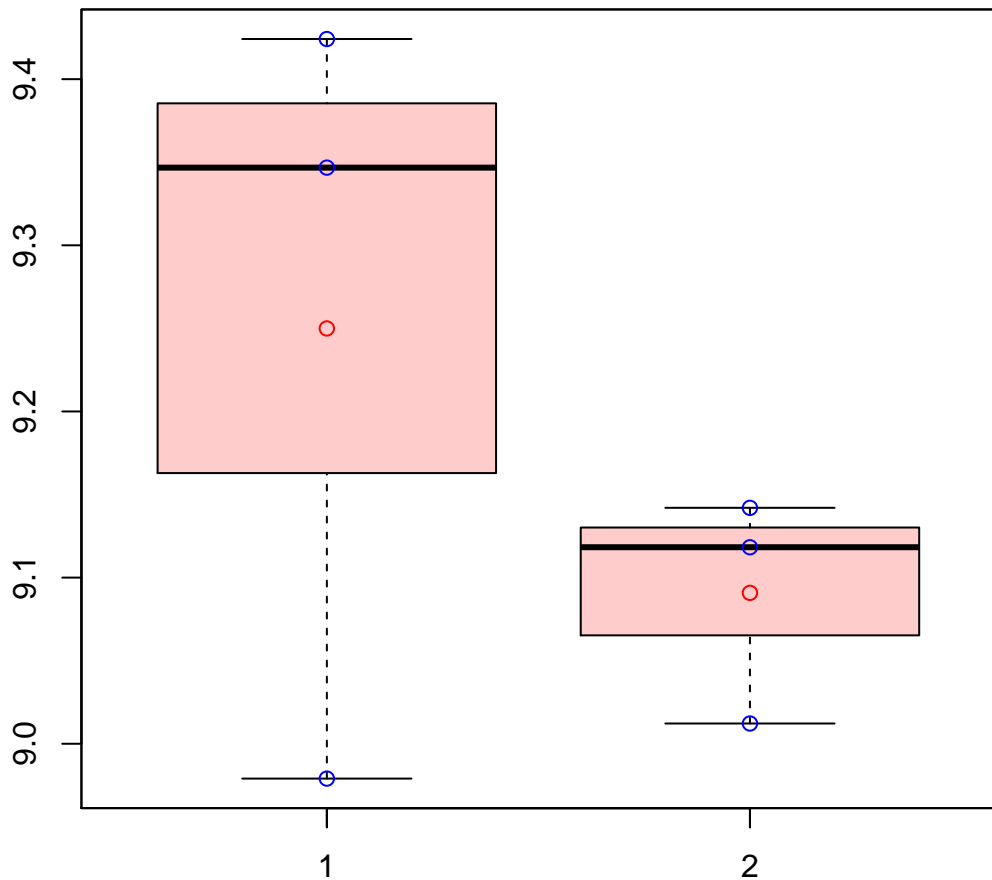

t-Test: p-value = 0.37

# CL13261Contig2|CL13261Contig2

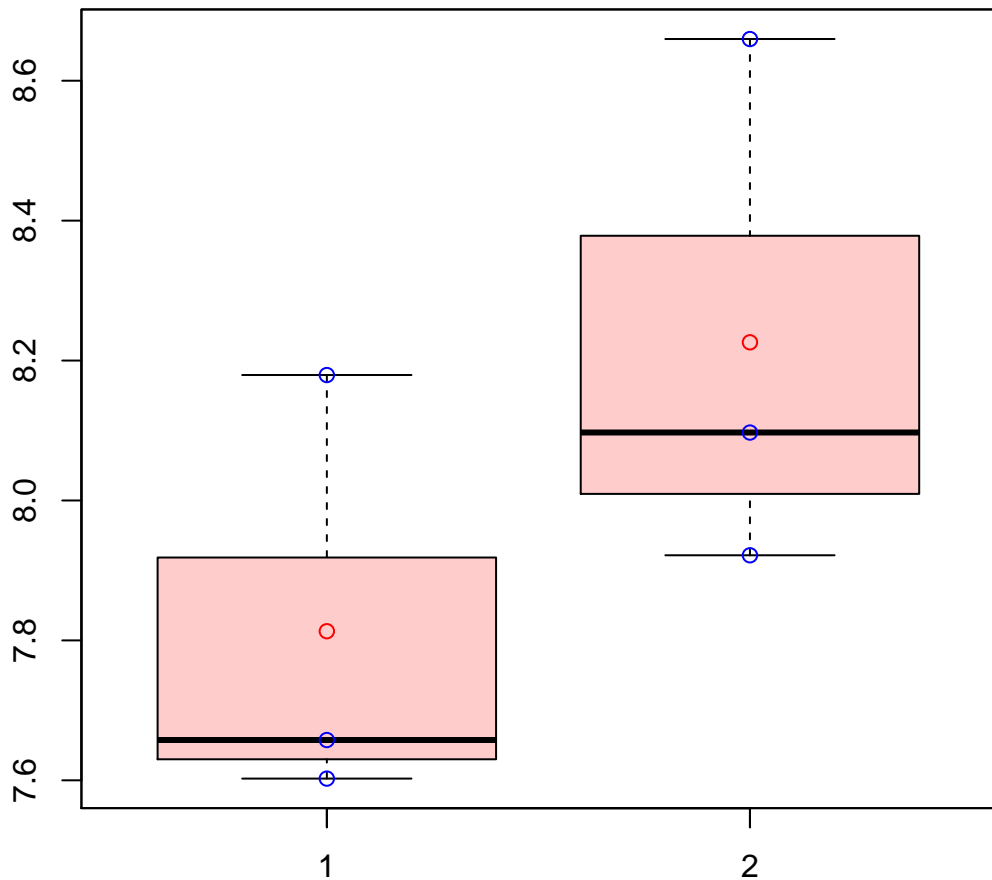

t-Test: p-value = 0.23

# CL1326Contig6|CL1326Contig6

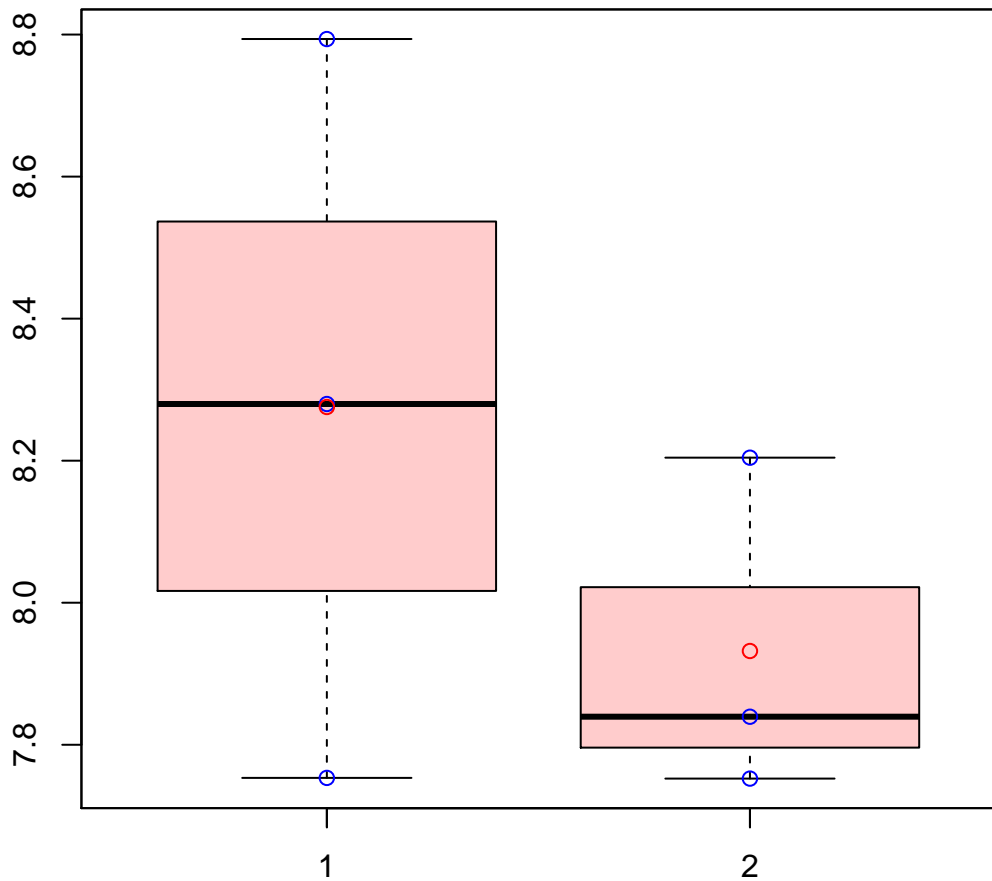

t-Test: p-value = 0.38

# CL13289Contig1|CL13289Contig1

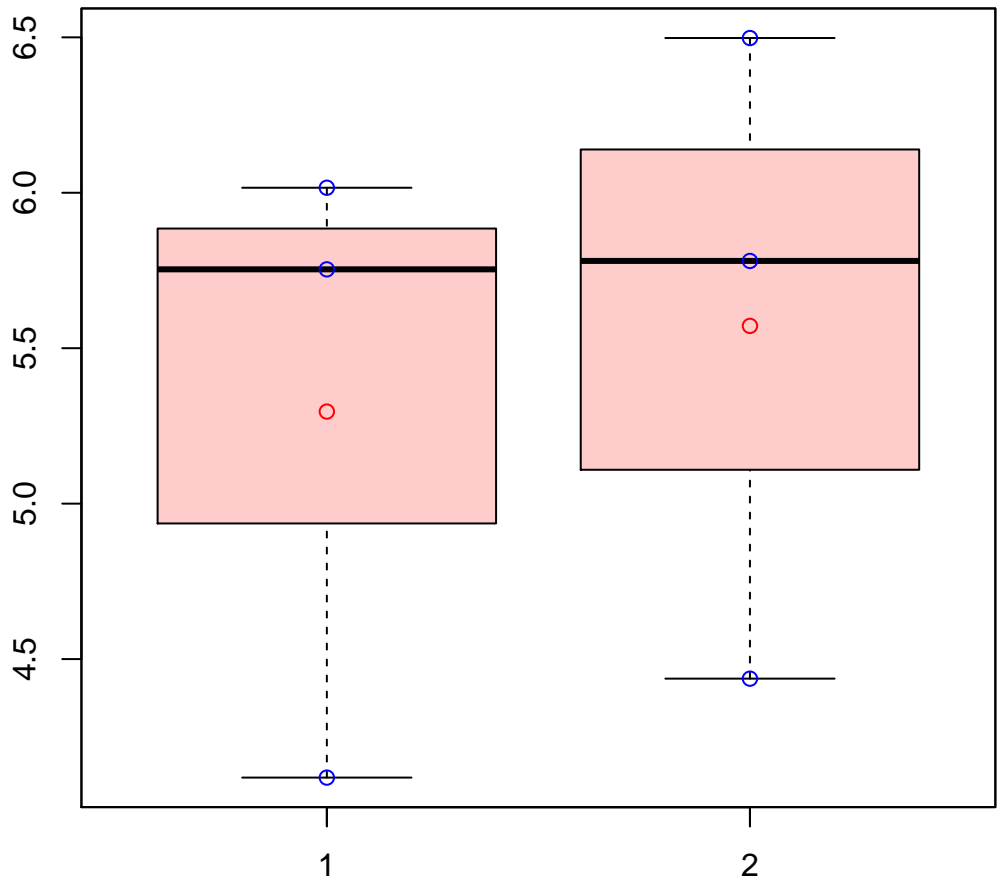

t-Test: p-value = 0.76



# CL1328Contig3|CL1328Contig3

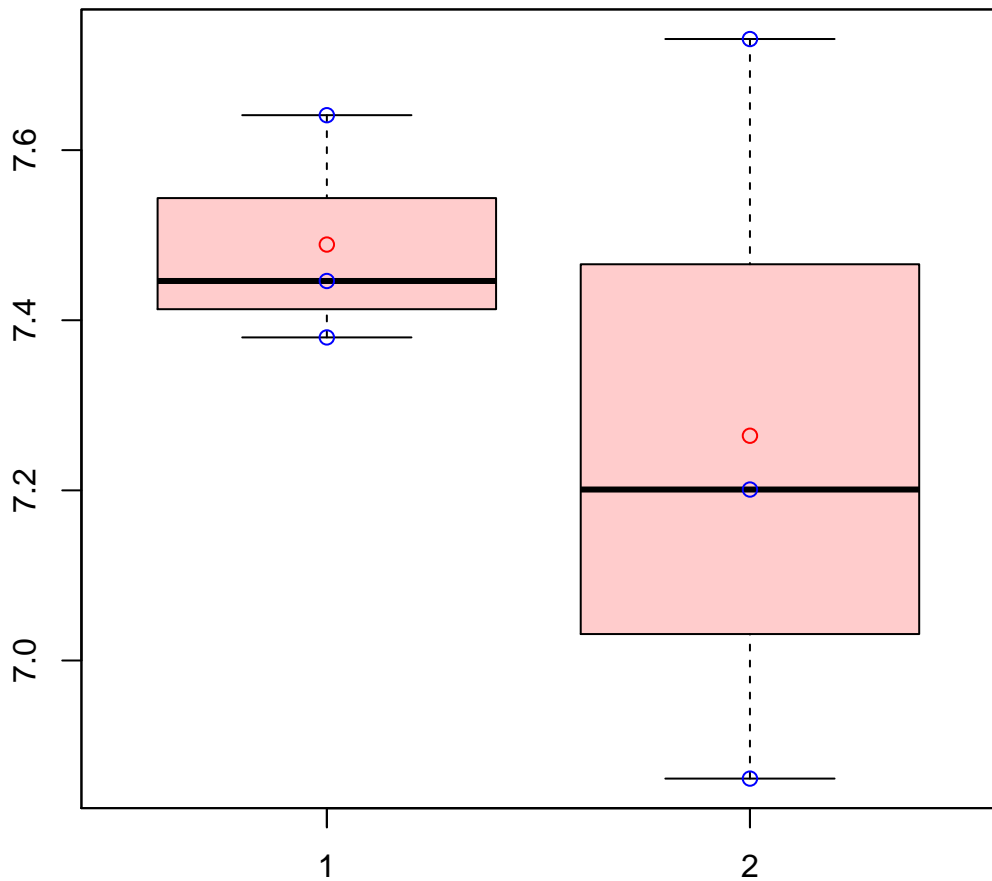

t-Test: p-value = 0.47

# CL1328Contig5|CL1328Contig5

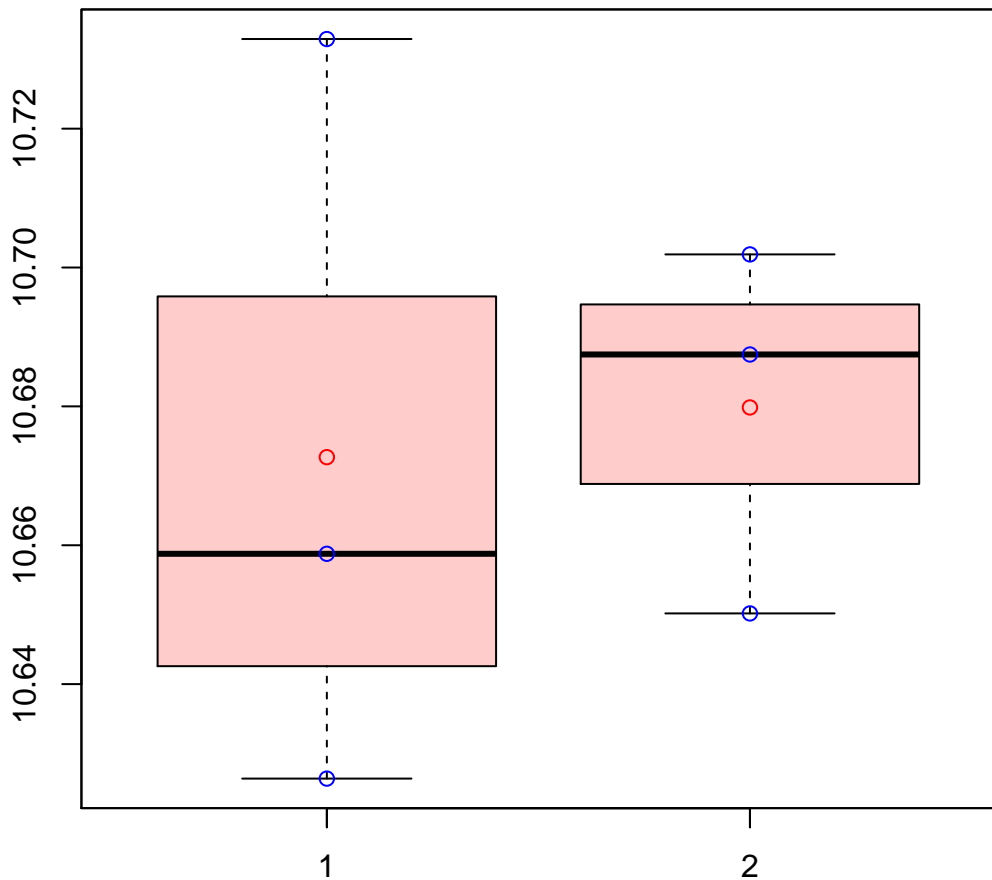

t-Test: p-value = 0.85

# CL1330Contig3|CL1330Contig3

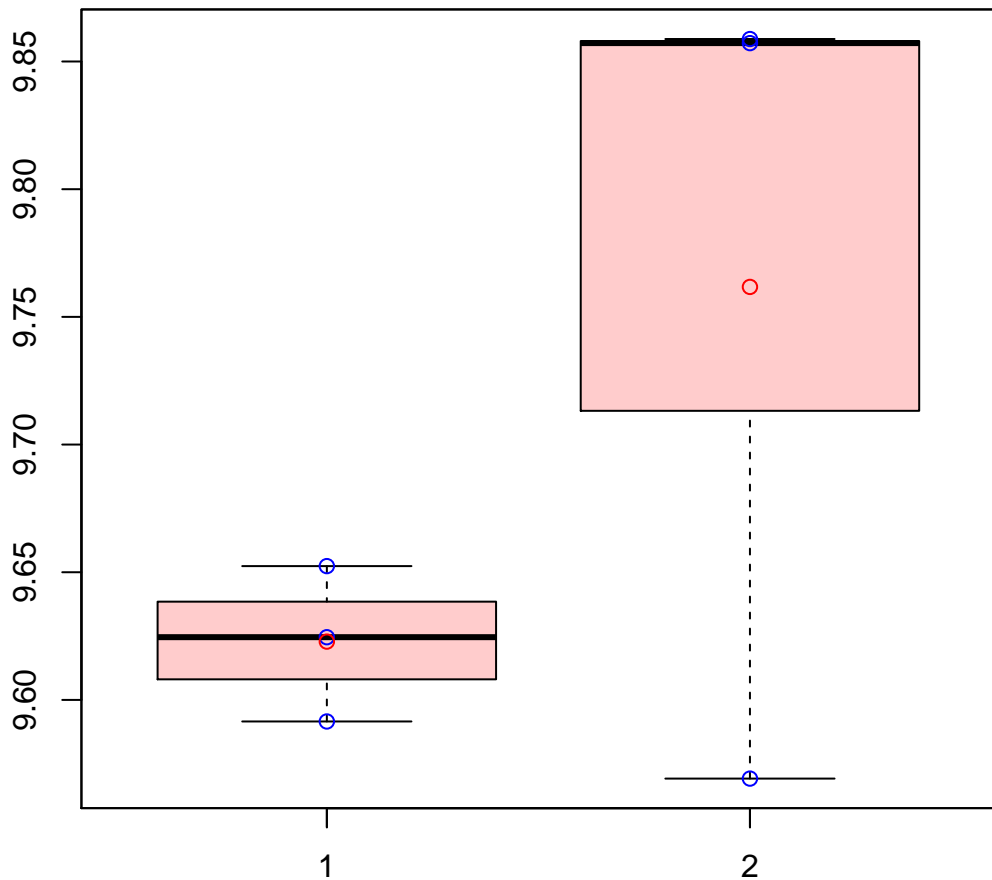

t-Test: p-value = 0.28

# CL1330Contig4|CL1330Contig4



t-Test: p-value = 0.28

# CL13319Contig2|CL13319Contig2

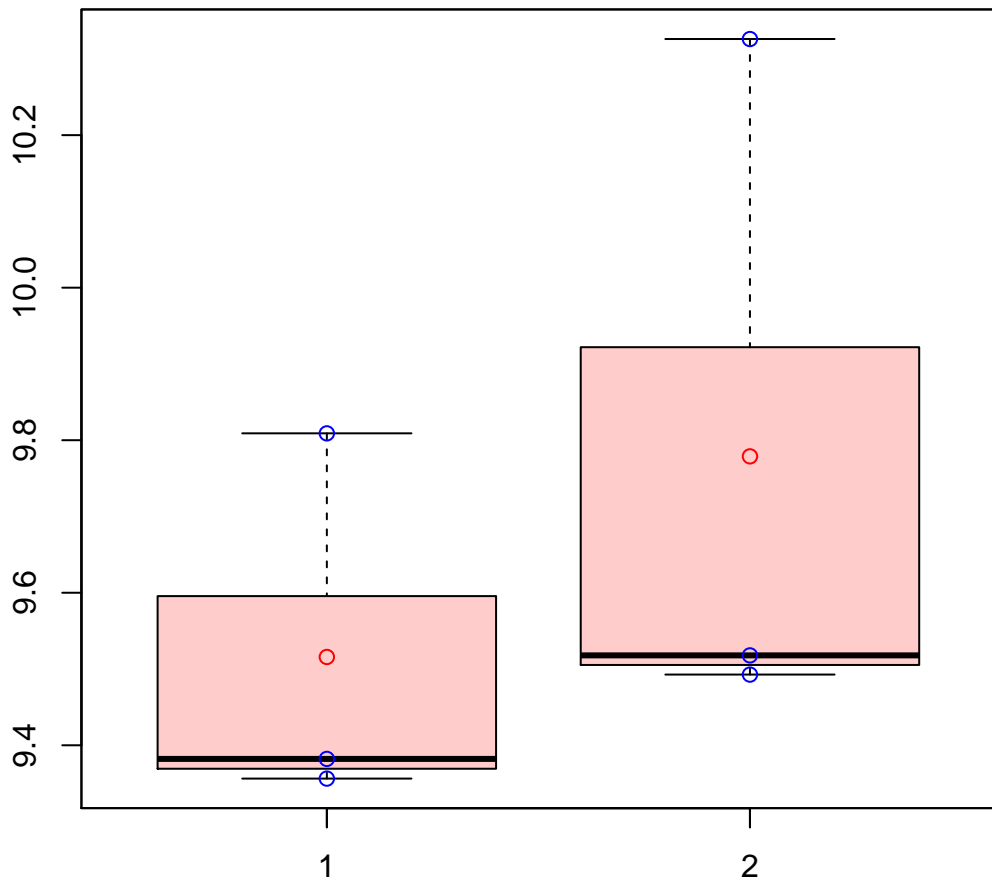

t-Test: p-value = 0.46

# CL1331Contig1|CL1331Contig1

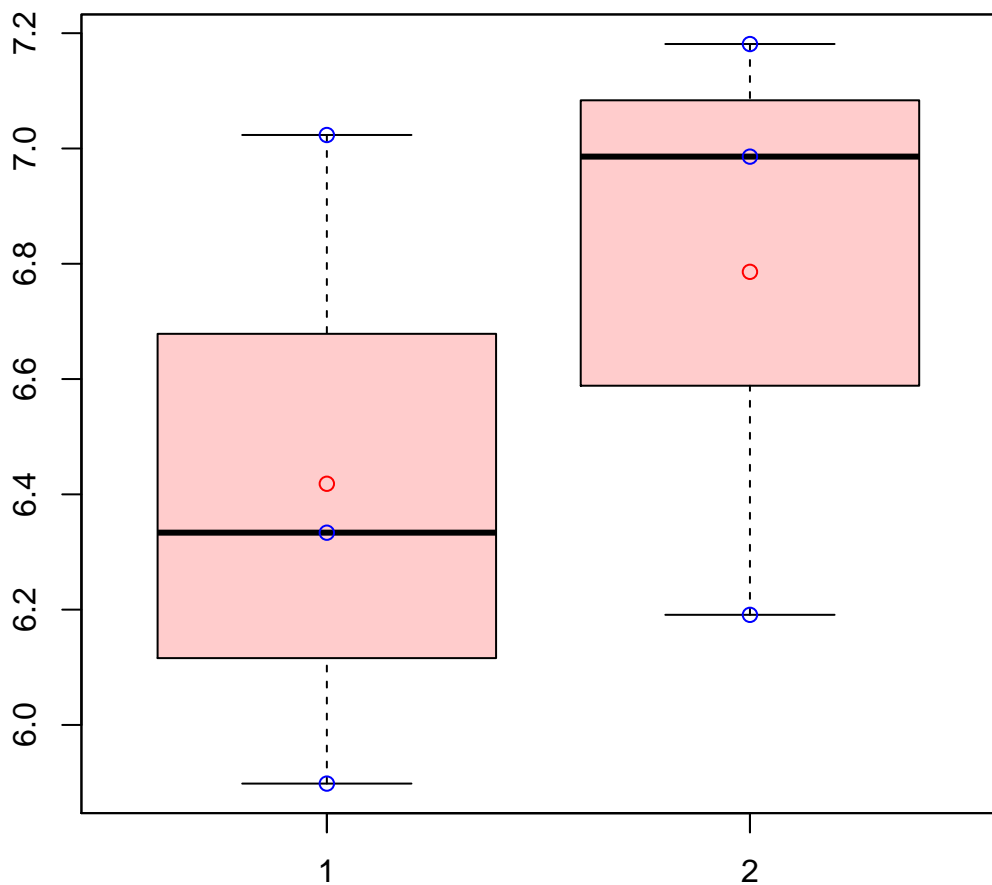

t-Test: p-value = 0.46

# CL1332Contig11|CL1332Contig11

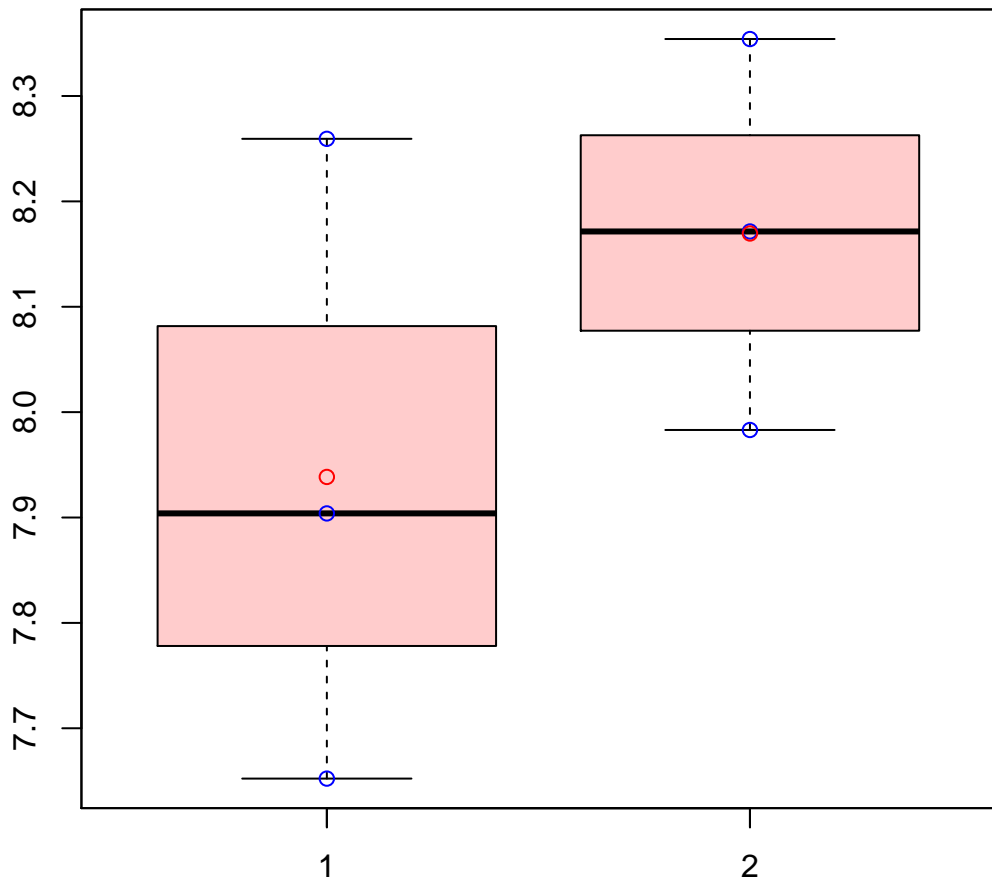

t-Test: p-value = 0.34

# CL1332Contig12|CL1332Contig12

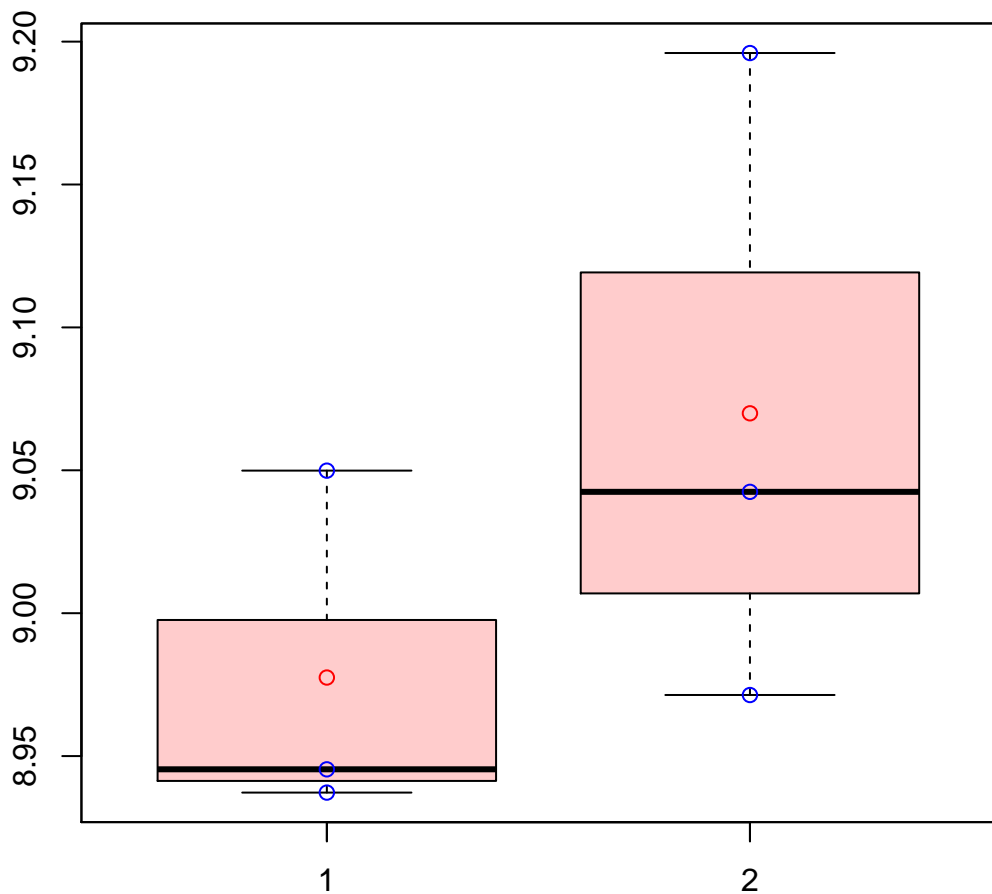

t-Test: p-value = 0.31



# CL1332Contig8|CL1332Contig8

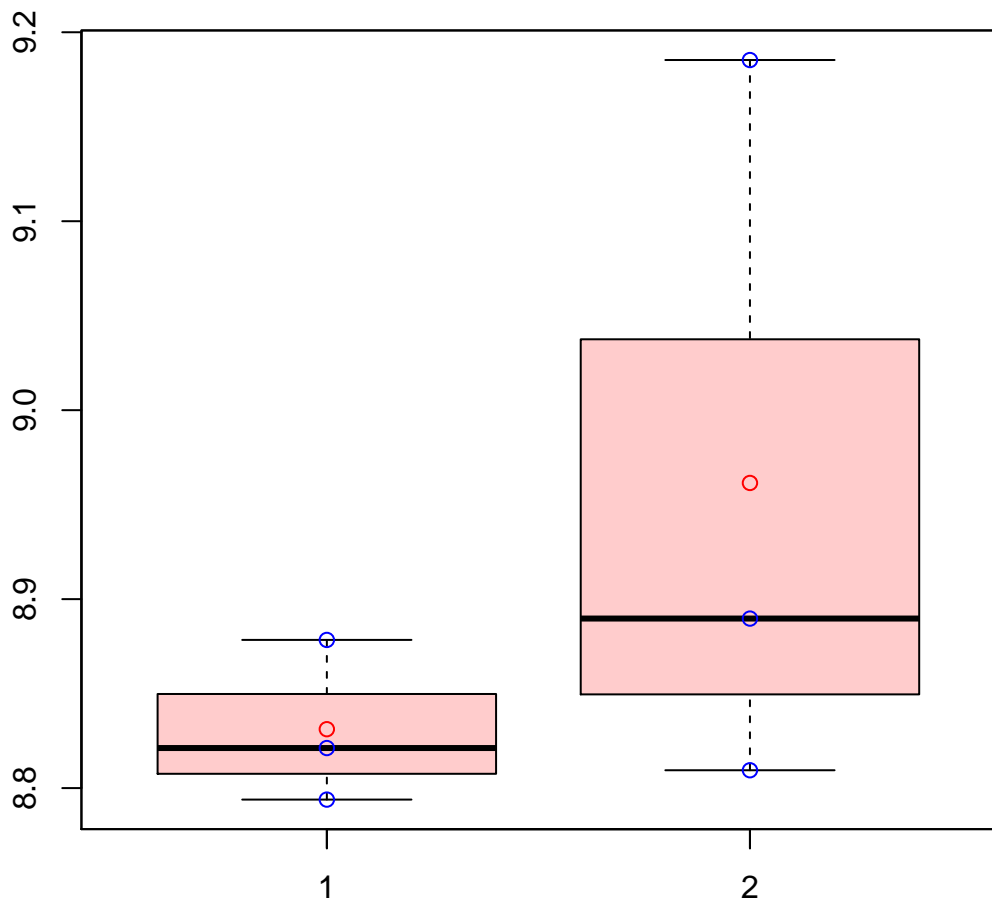

t-Test: p-value = 0.37

# CL1332Contig9|CL1332Contig9



t-Test: p-value = 0.37

# CL13341Contig1|CL13341Contig1

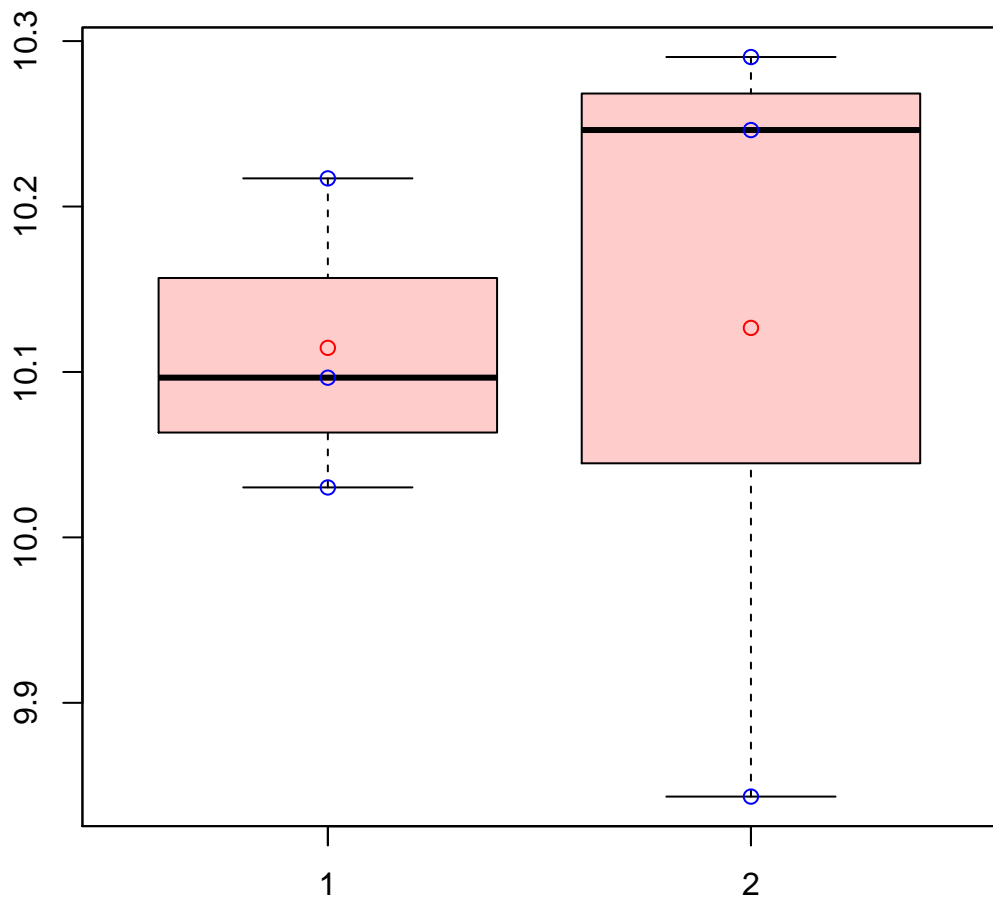

t-Test: p-value = 0.94

# CL13354Contig1|CL13354Contig1

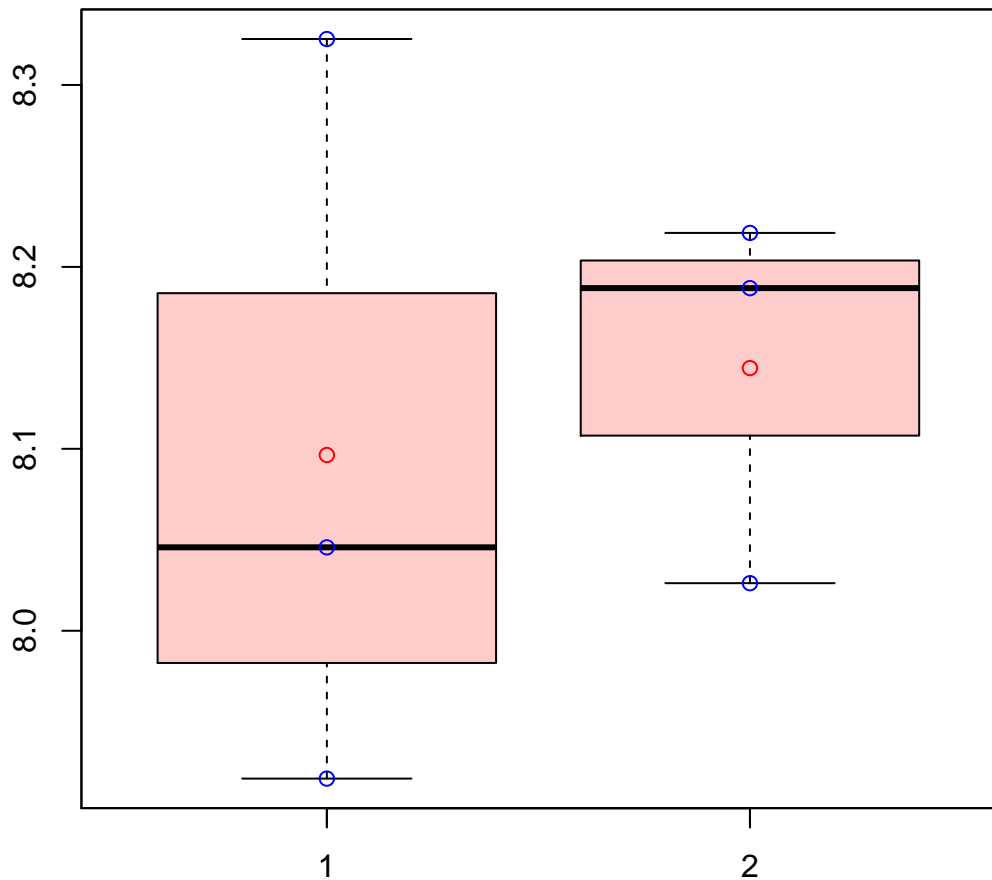

t-Test: p-value = 0.75

# CL1335Contig11|CL1335Contig11

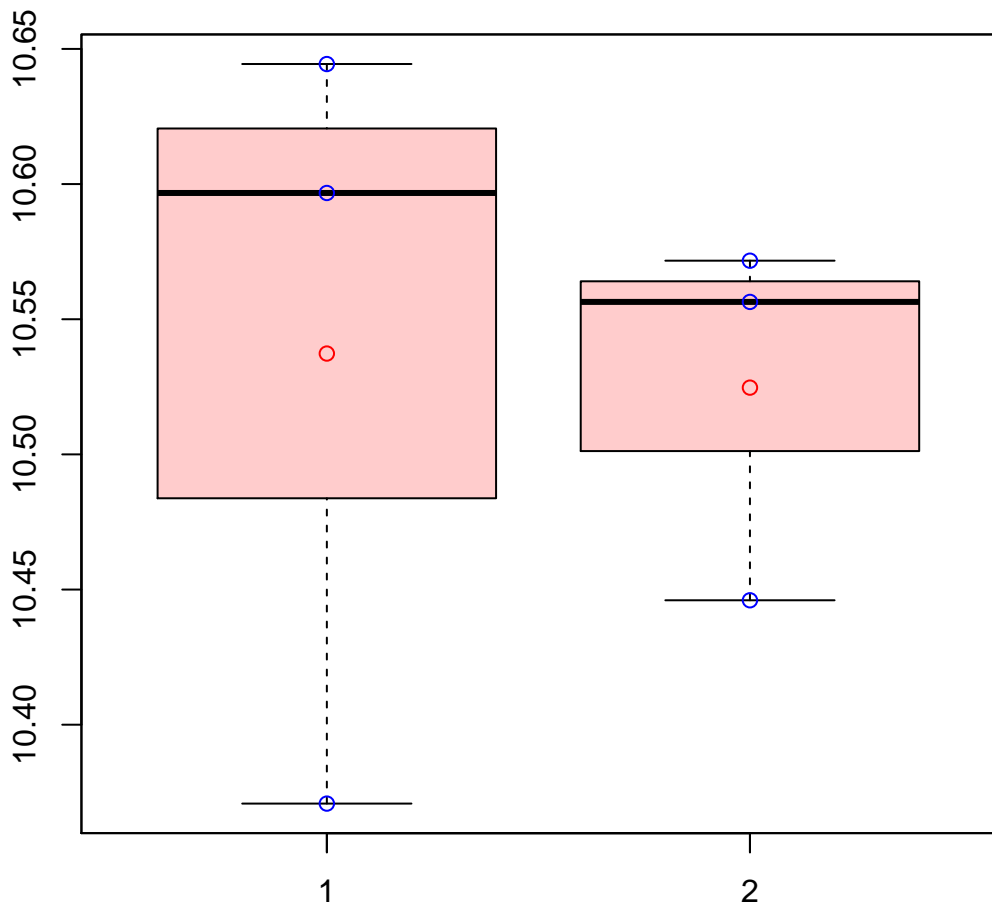

t-Test: p-value = 0.9

# CL1335Contig12|CL1335Contig12

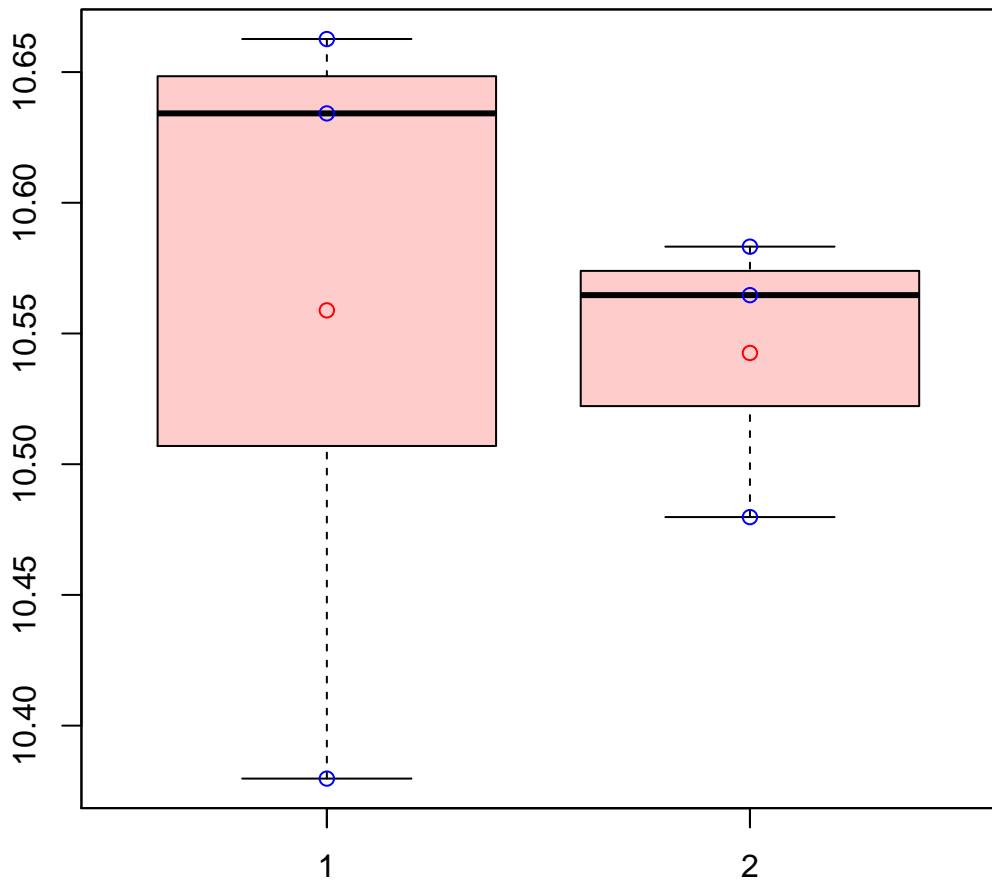

t-Test: p-value = 0.88

# CL1335Contig1|CL1335Contig1

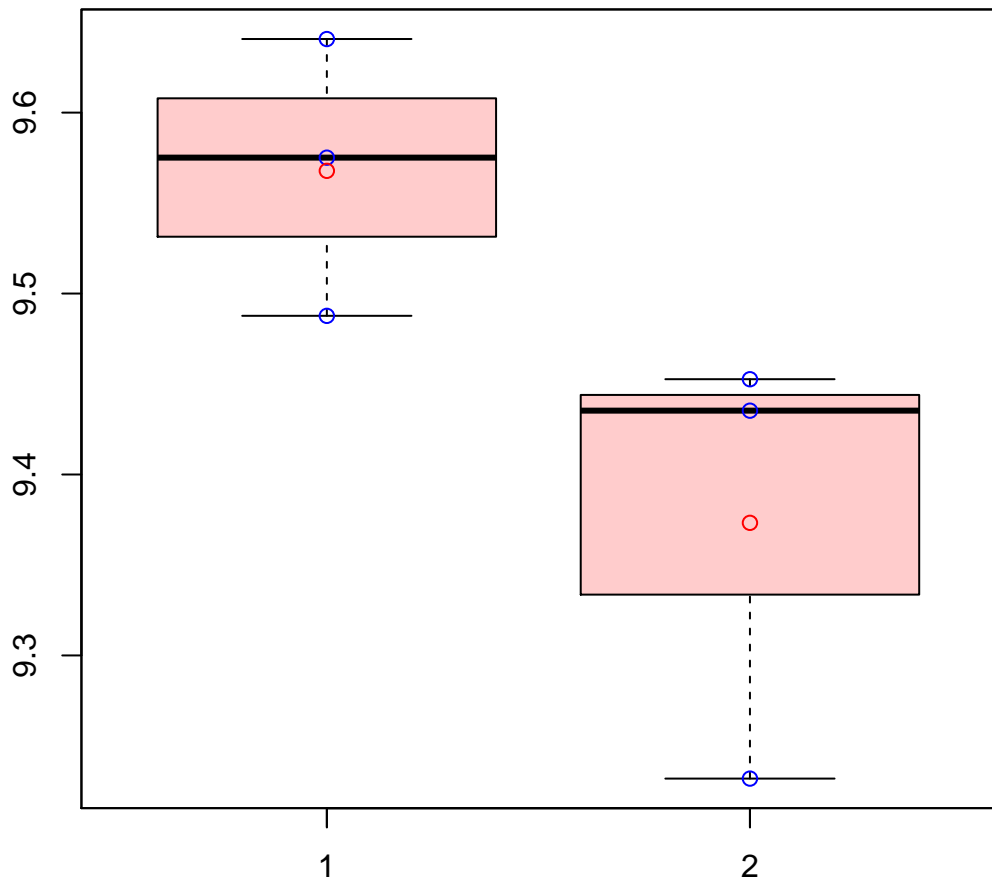

t-Test: p-value = 0.09

# CL1335Contig2|CL1335Contig2

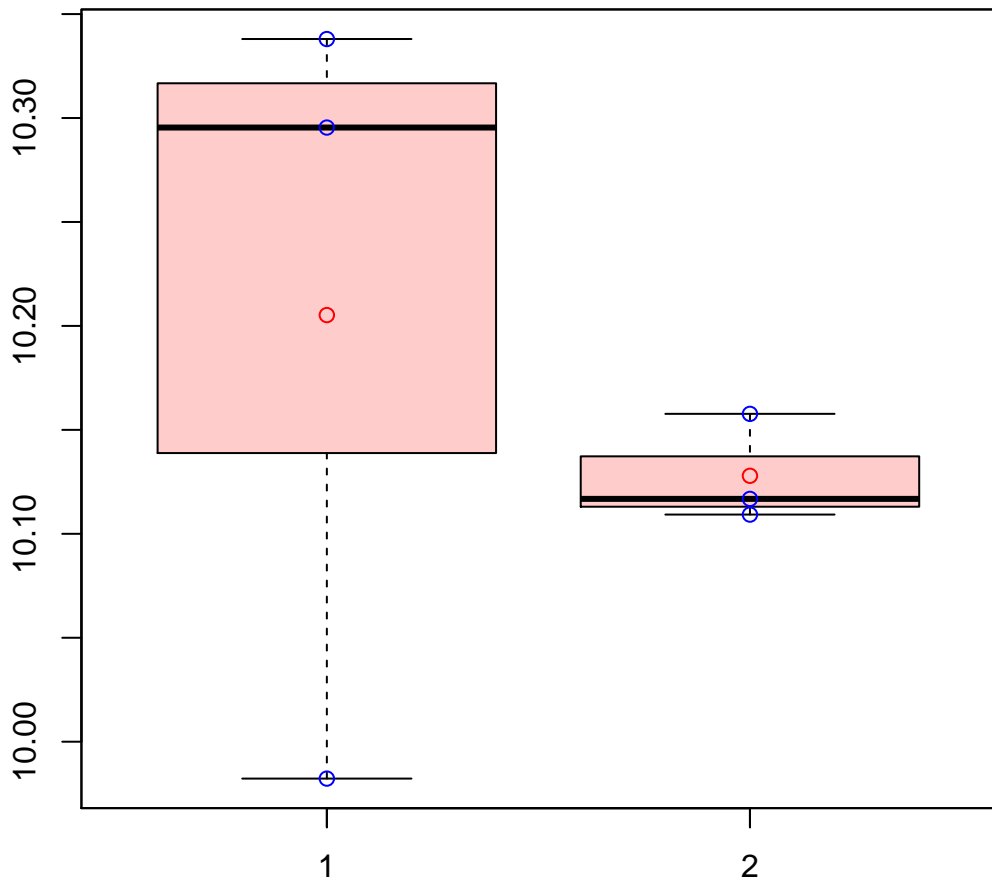

t-Test: p-value = 0.56



# CL1335Contig5|CL1335Contig5

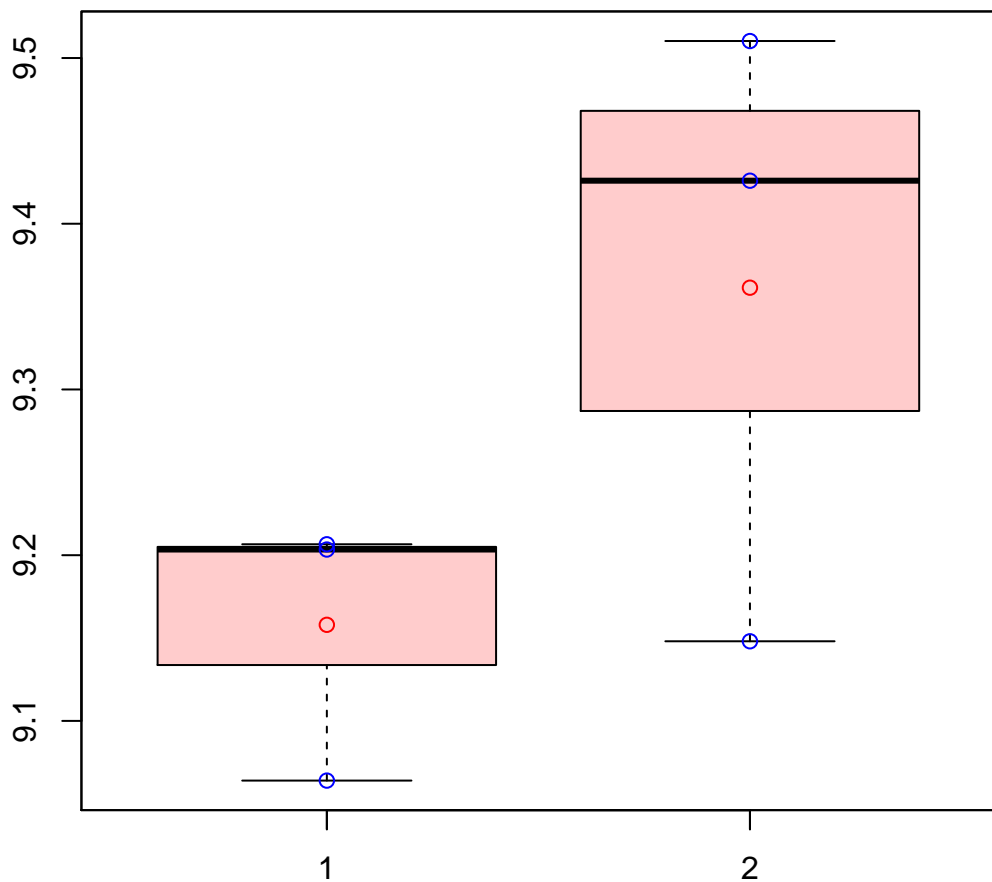

t-Test: p-value = 0.2

# CL1335Contig6|CL1335Contig6

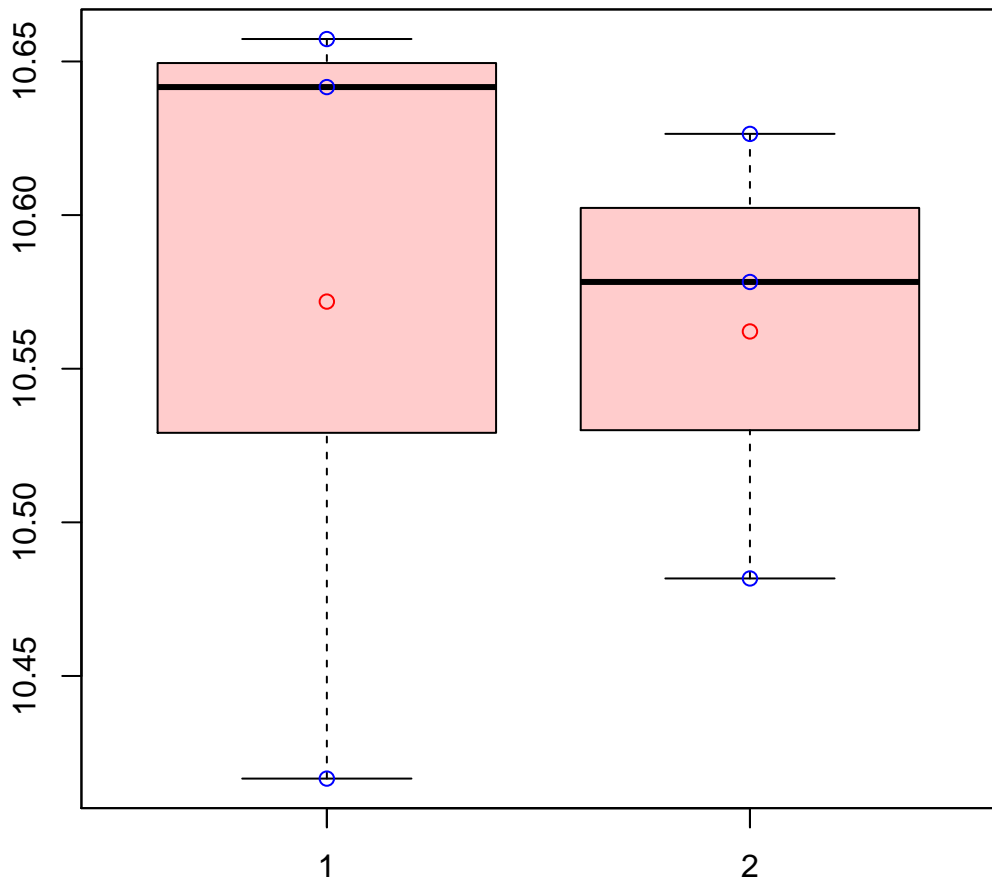

t-Test: p-value = 0.92

# CL13380Contig2|CL13380Contig2

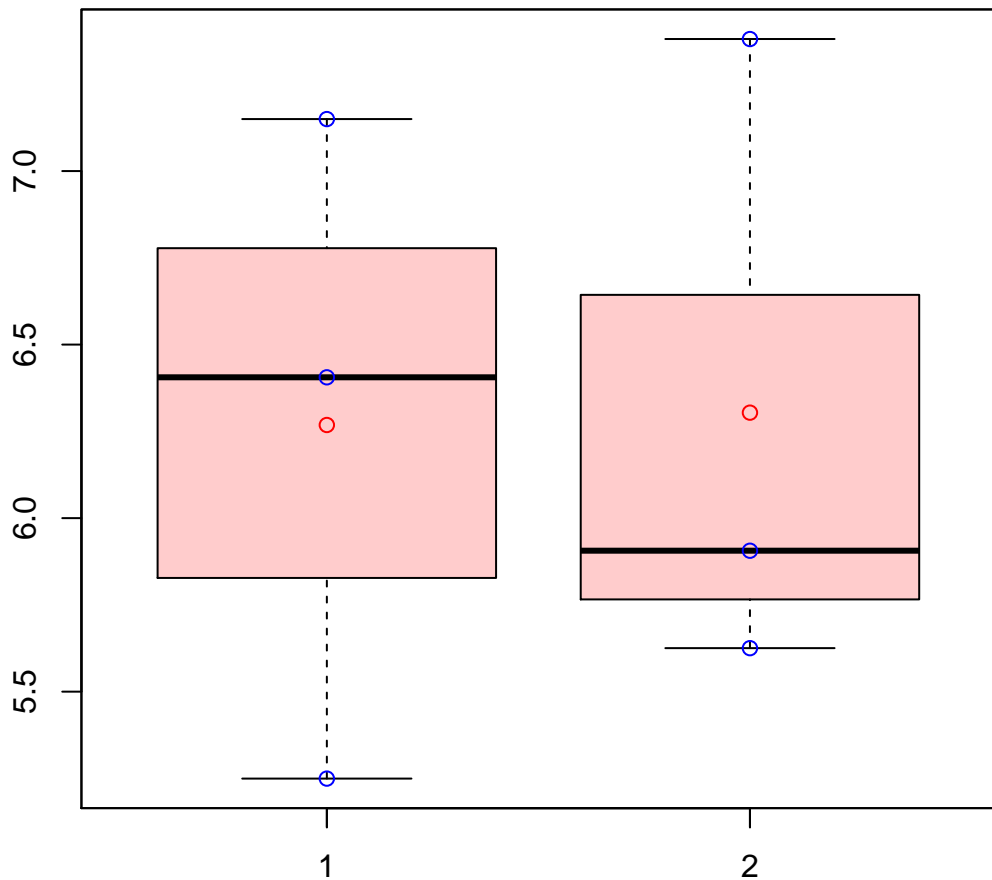

t-Test: p-value = 0.97

# CL13386Contig1|CL13386Contig1

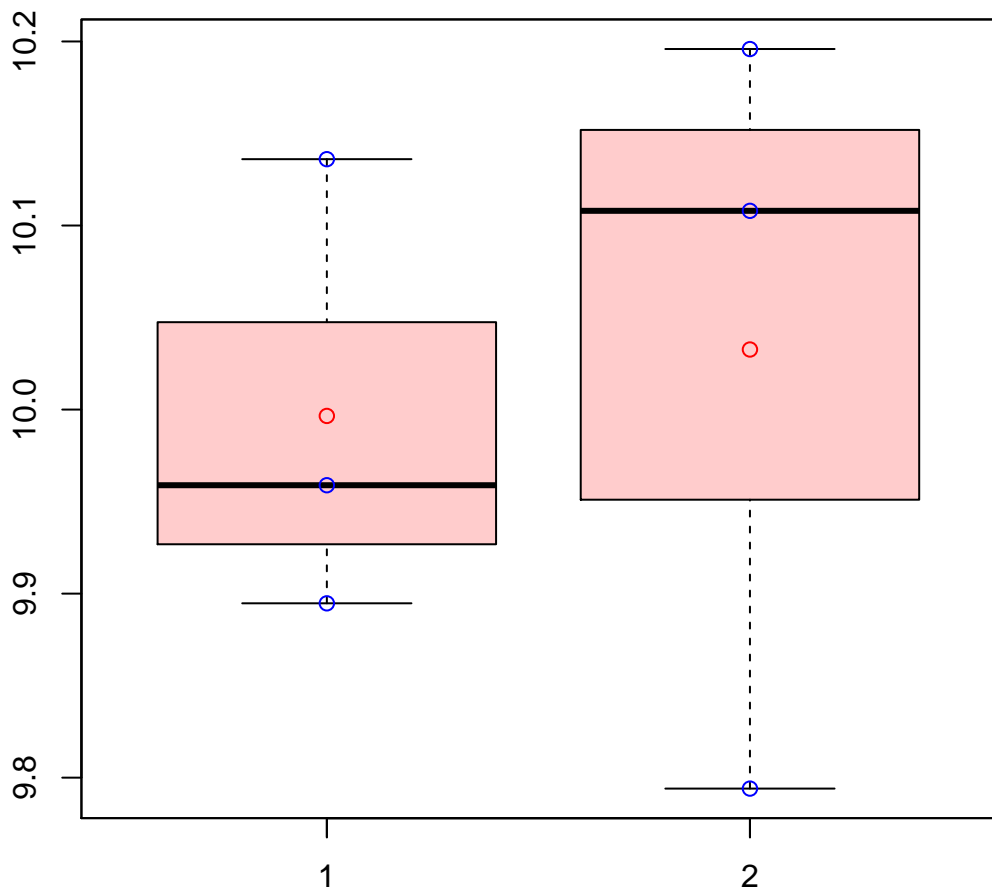

t-Test: p-value = 0.81

# CL133Contig8|CL133Contig8

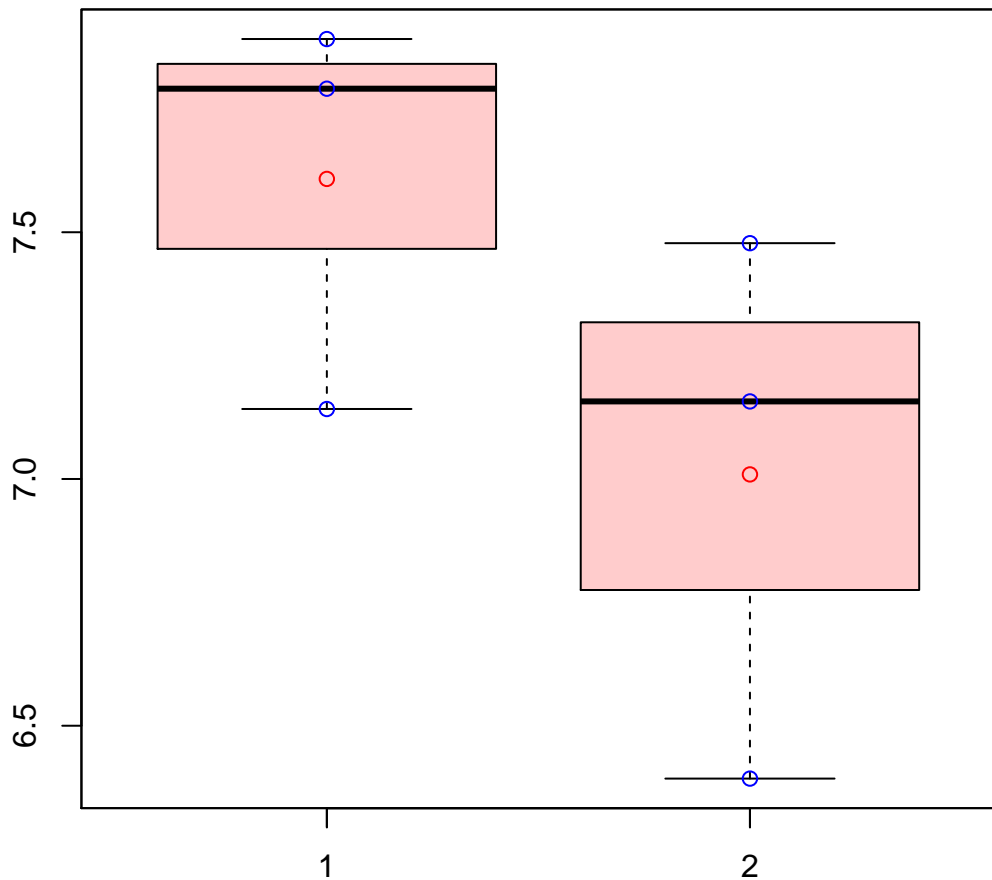

t-Test: p-value = 0.21

# CL13409Contig1|CL13409Contig1

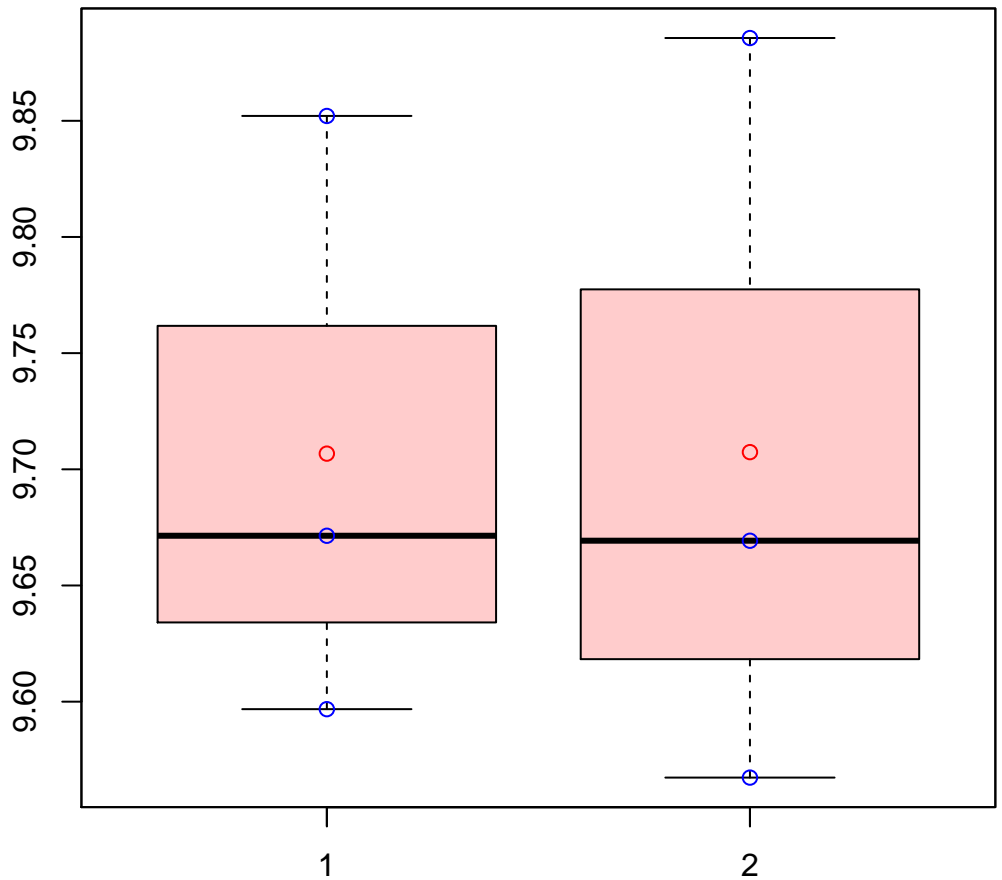

t-Test: p-value = 1

# CL13413Contig1|CL13413Contig1

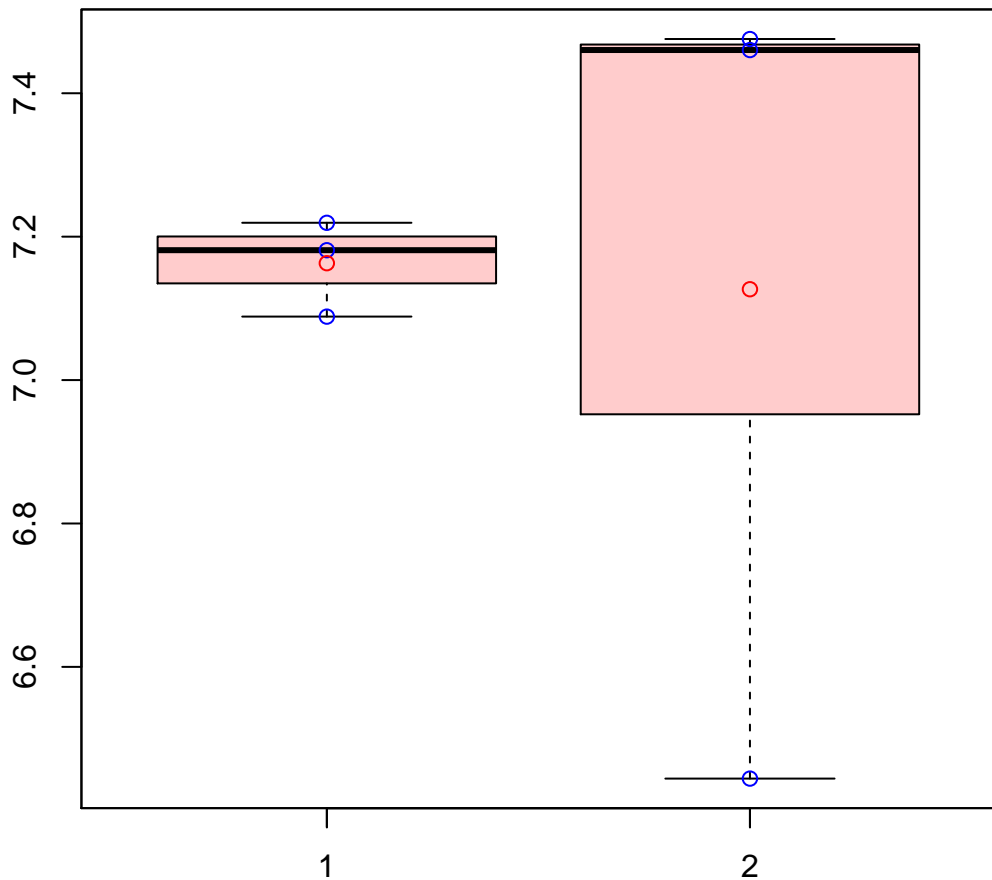

t-Test: p-value = 0.93

# CL13427Contig1|CL13427Contig1

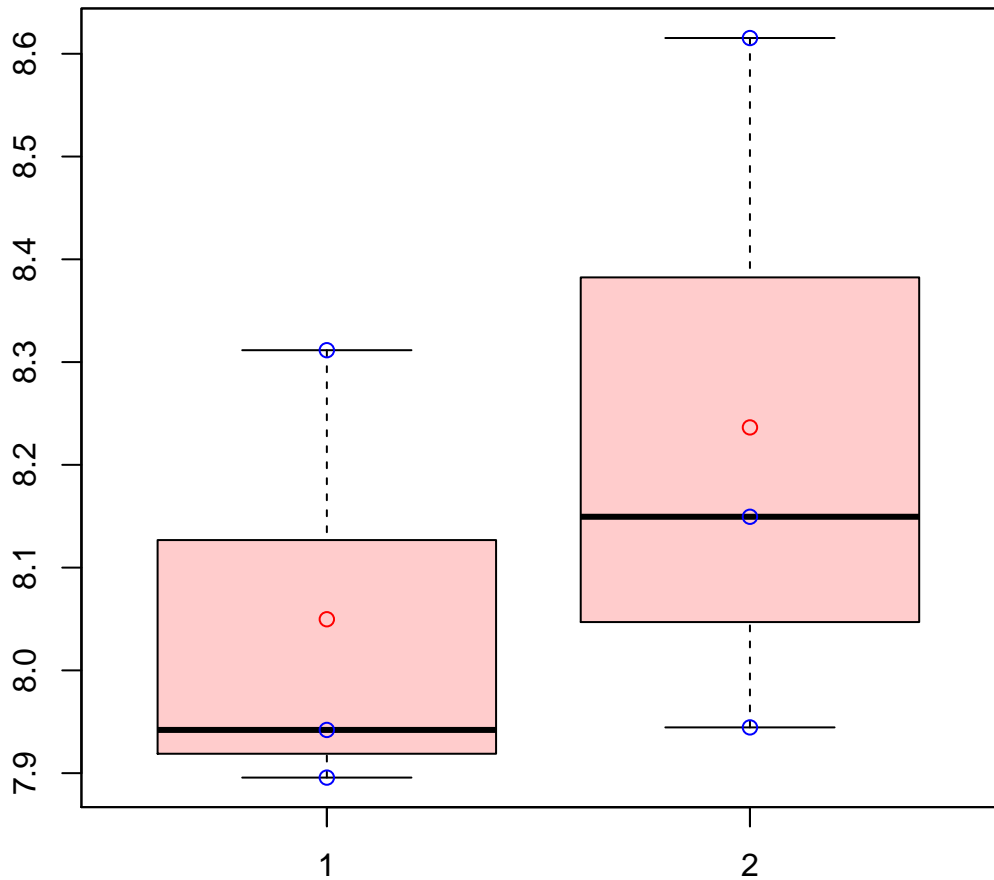

t-Test: p-value = 0.48



# CL13432Contig1|CL13432Contig1

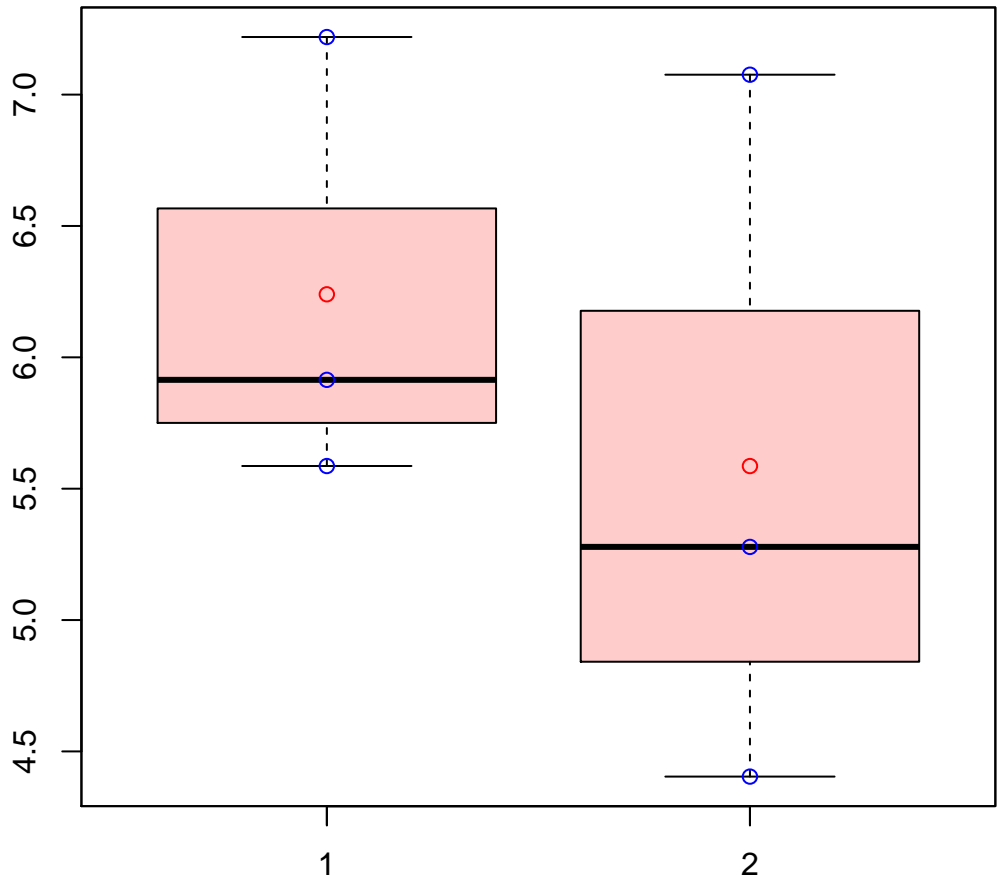

t-Test: p-value = 0.53

# CL13434Contig1|CL13434Contig1

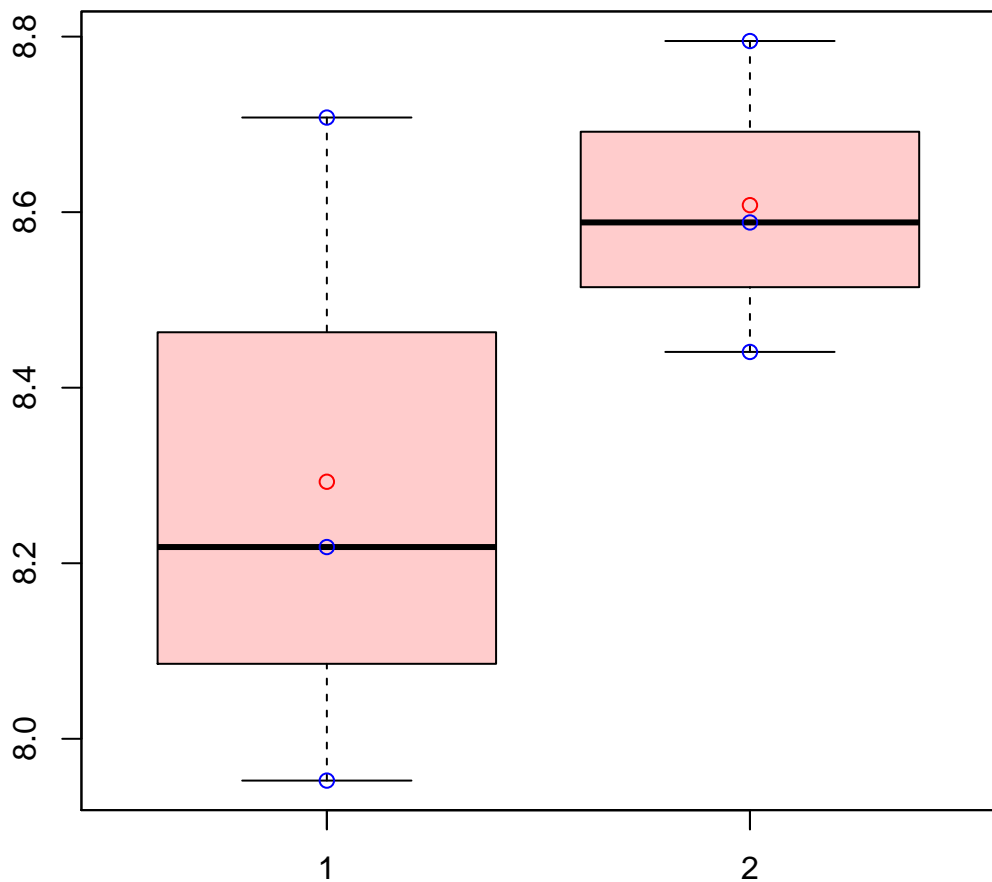

t-Test: p-value = 0.29

# CL13481Contig1|CL13481Contig1

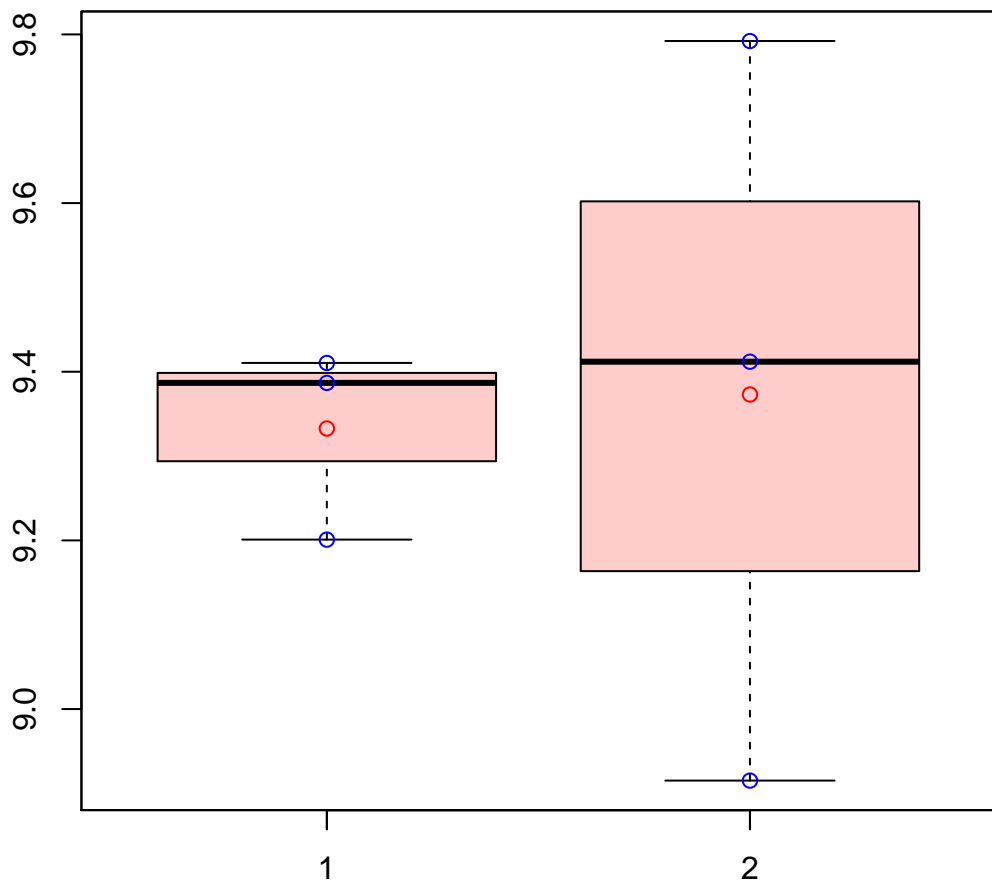

t-Test: p-value = 0.89

# CL1349Contig1|CL1349Contig1

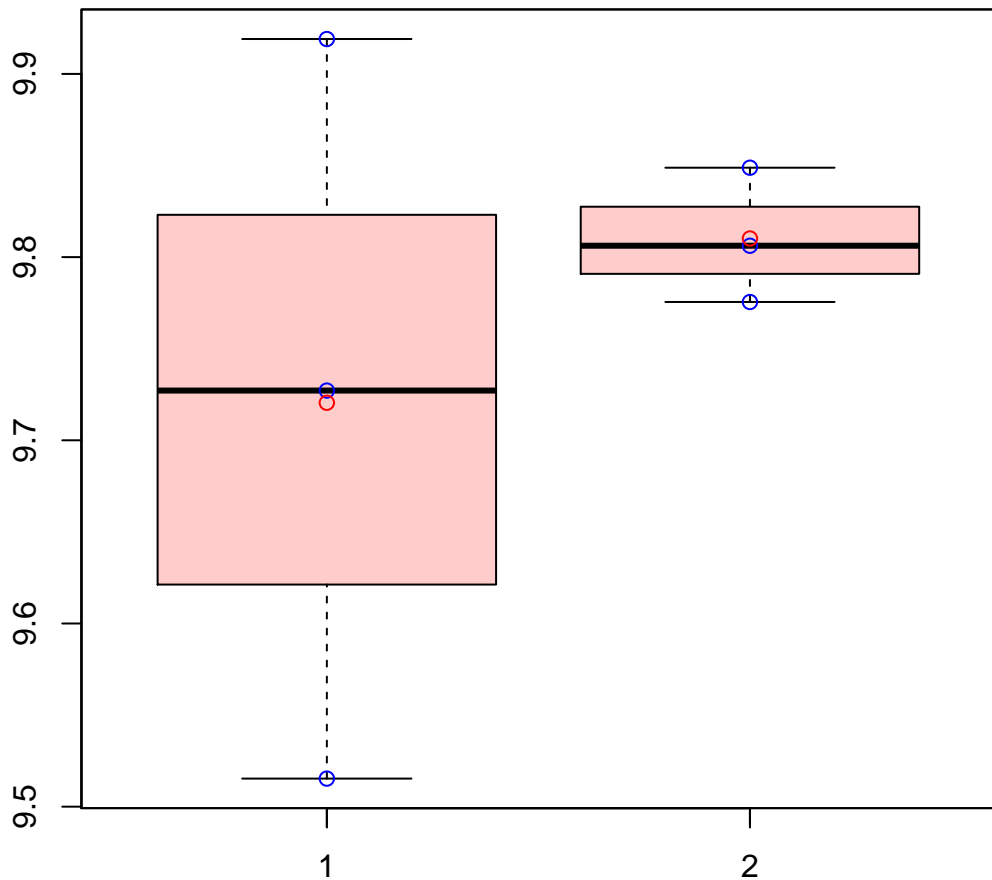

t-Test: p-value = 0.52

# CL1349Contig2|CL1349Contig2

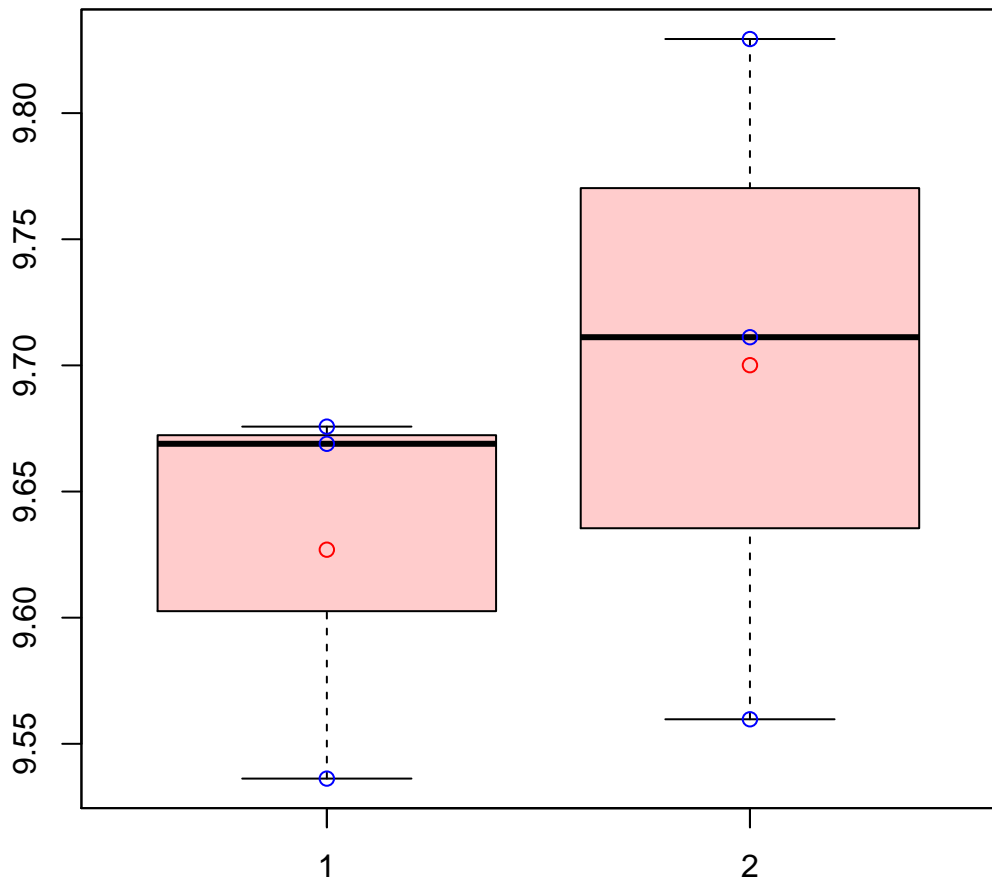

t-Test: p-value = 0.47

# CL1349Contig3|CL1349Contig3

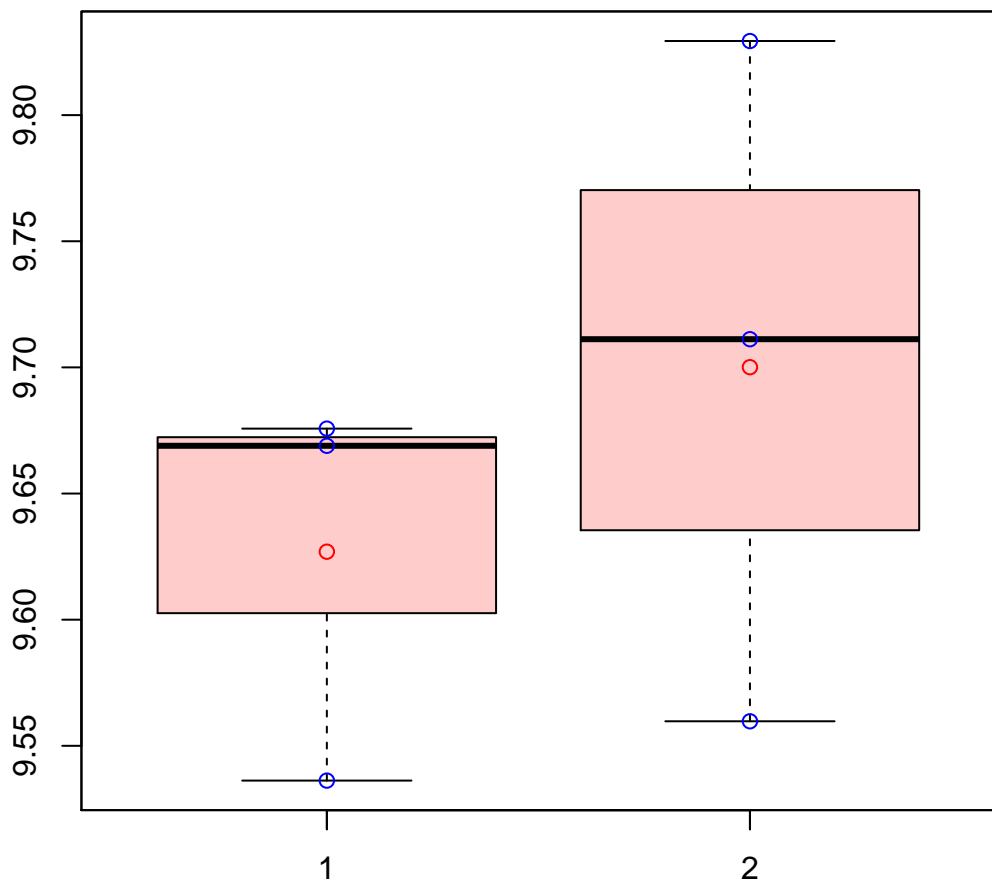

t-Test: p-value = 0.47

# CL1349Contig4|CL1349Contig4



t-Test: p-value = 0.47

# CL134Contig12|CL134Contig12

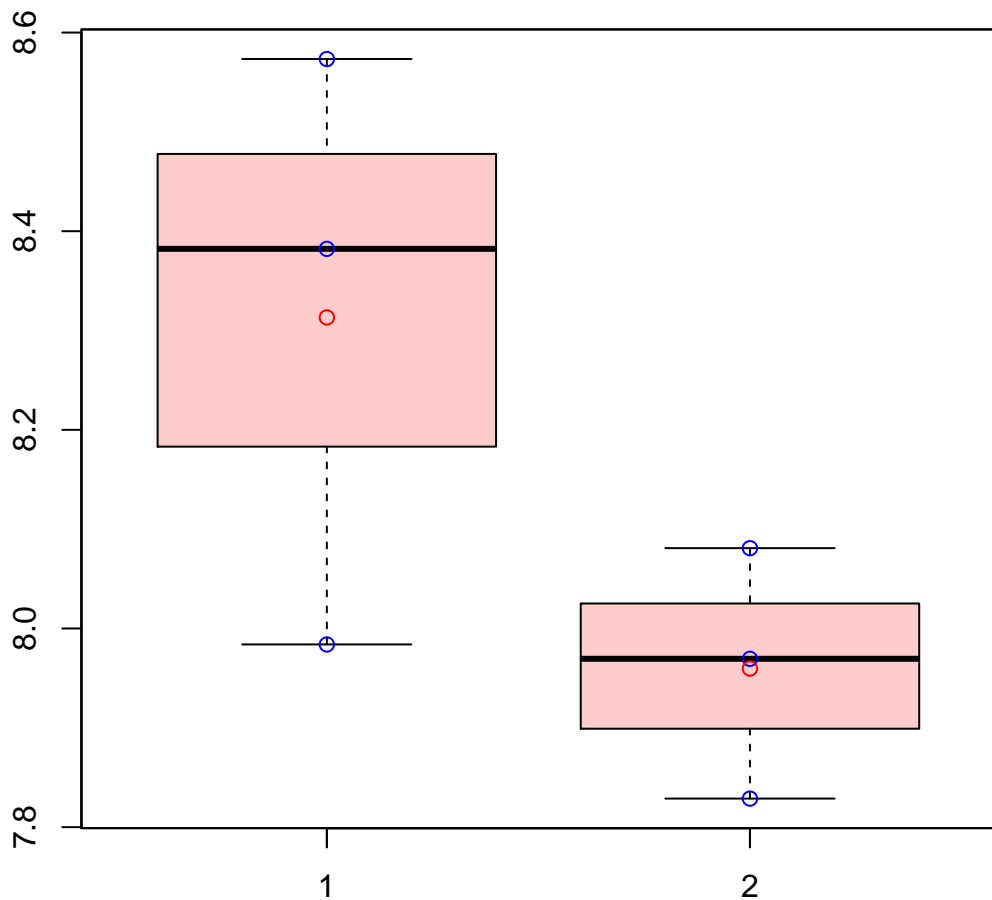

t-Test: p-value = 0.17



# CL134Contig17|CL134Contig17

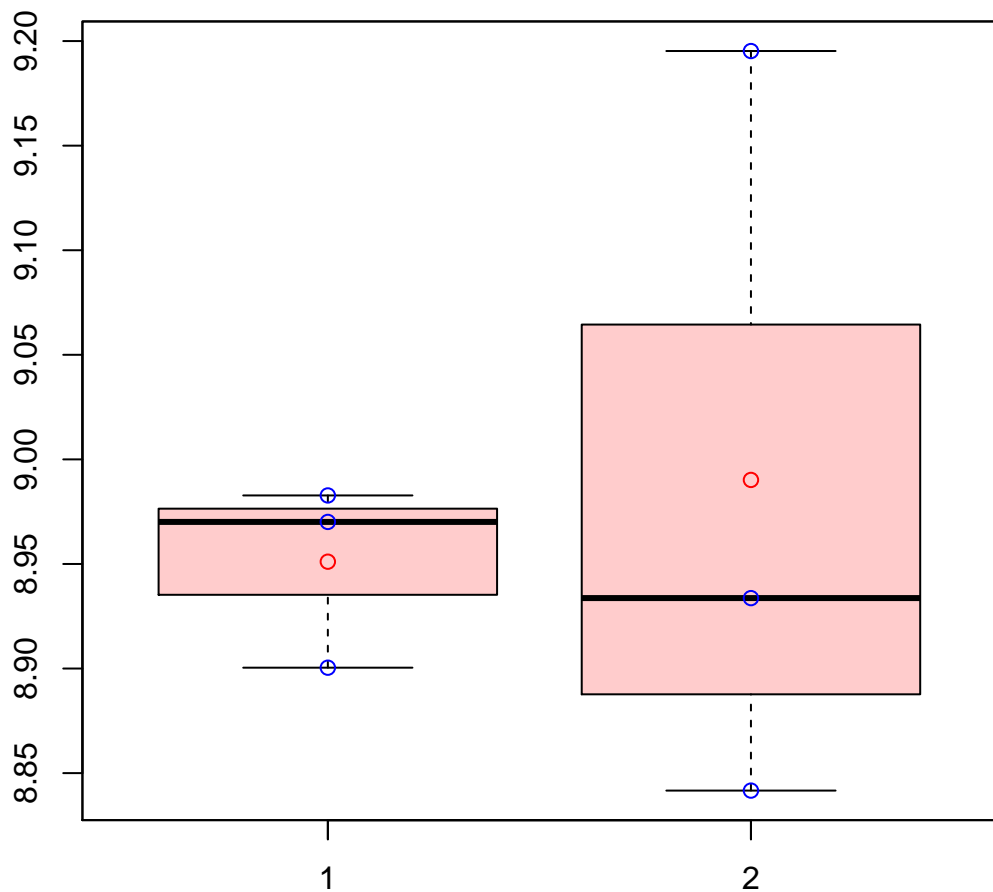

t-Test: p-value = 0.75

# CL134Contig4|CL134Contig4

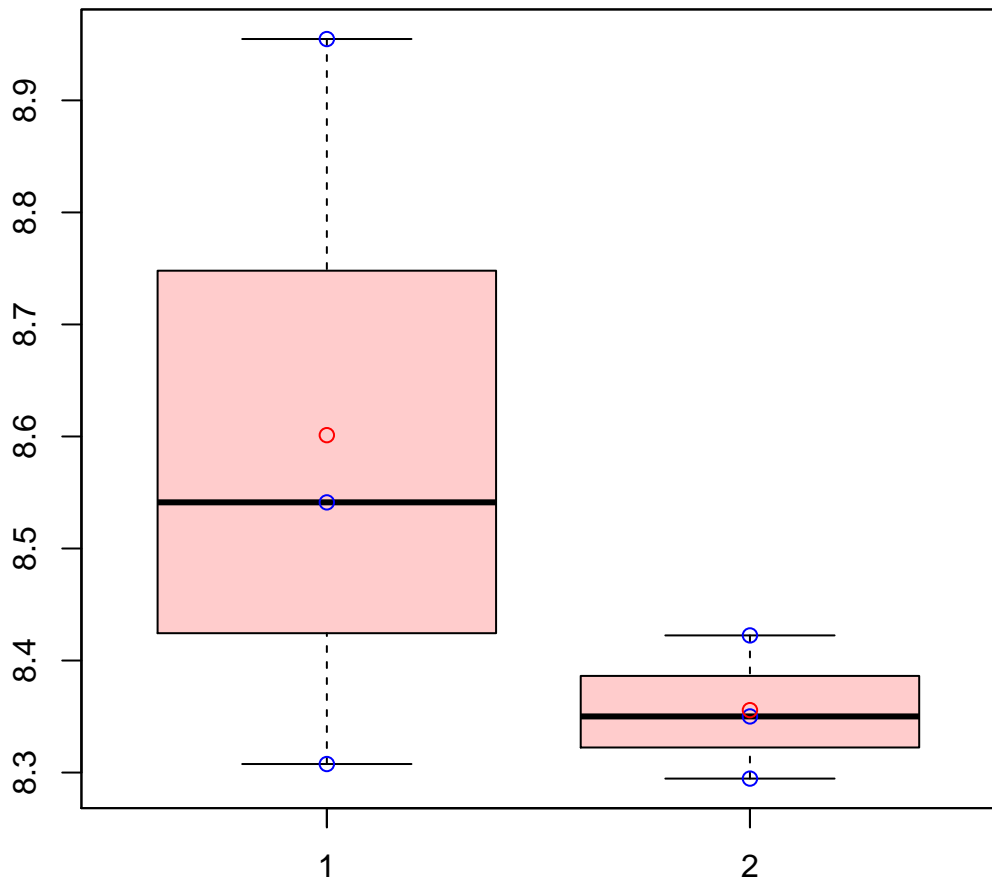

t-Test: p-value = 0.32

# CL134Contig6|CL134Contig6



t-Test: p-value = 0.17

# CL13504Contig1|CL13504Contig1

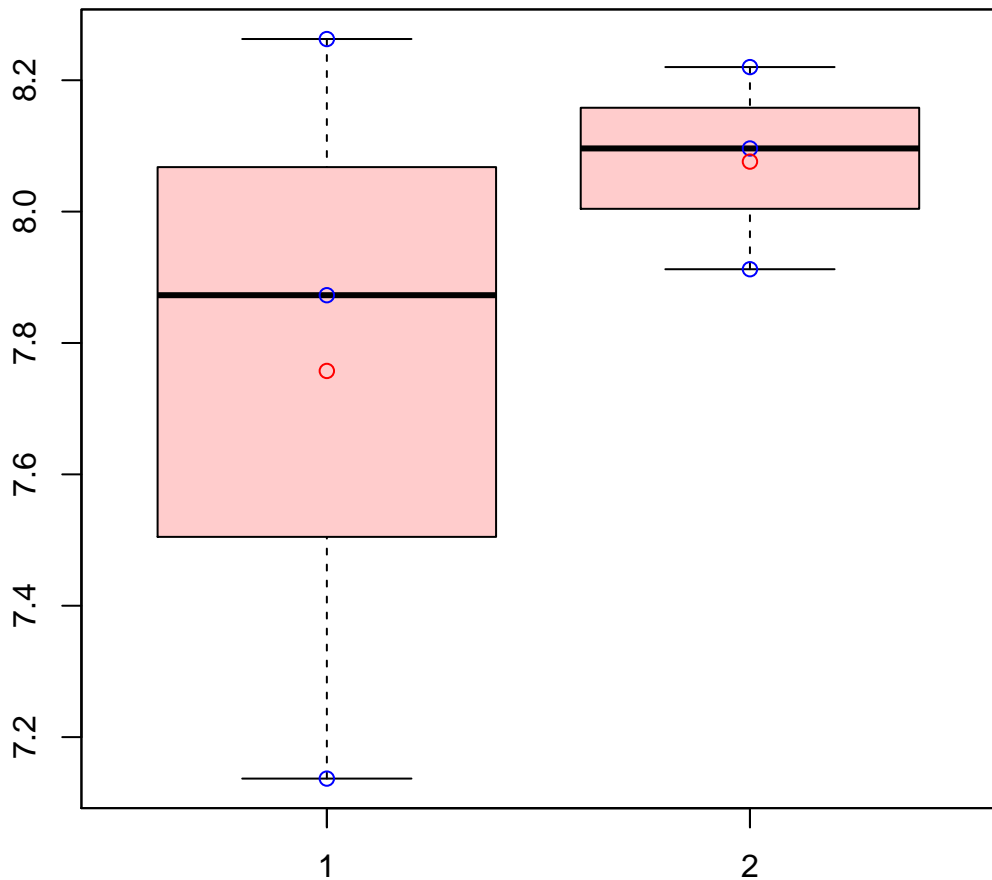

t-Test: p-value = 0.44

# CL1350Contig4|CL1350Contig4

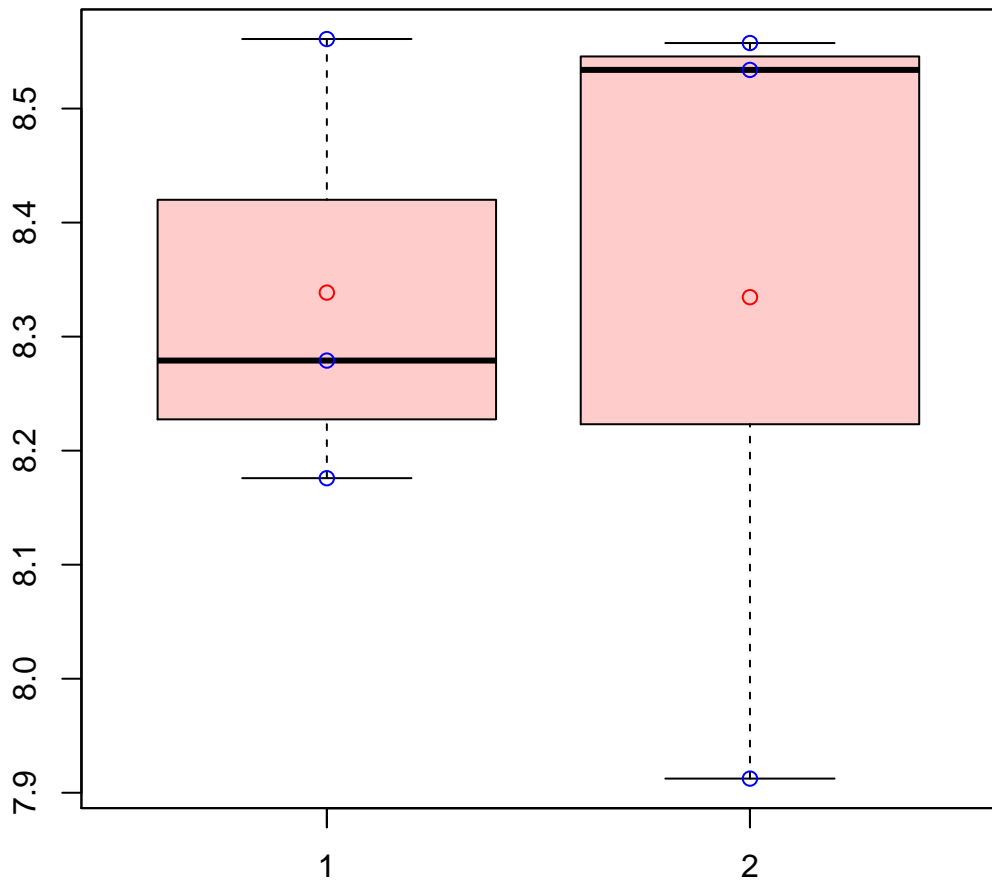

t-Test: p-value = 0.99

# CL1350Contig8|CL1350Contig8

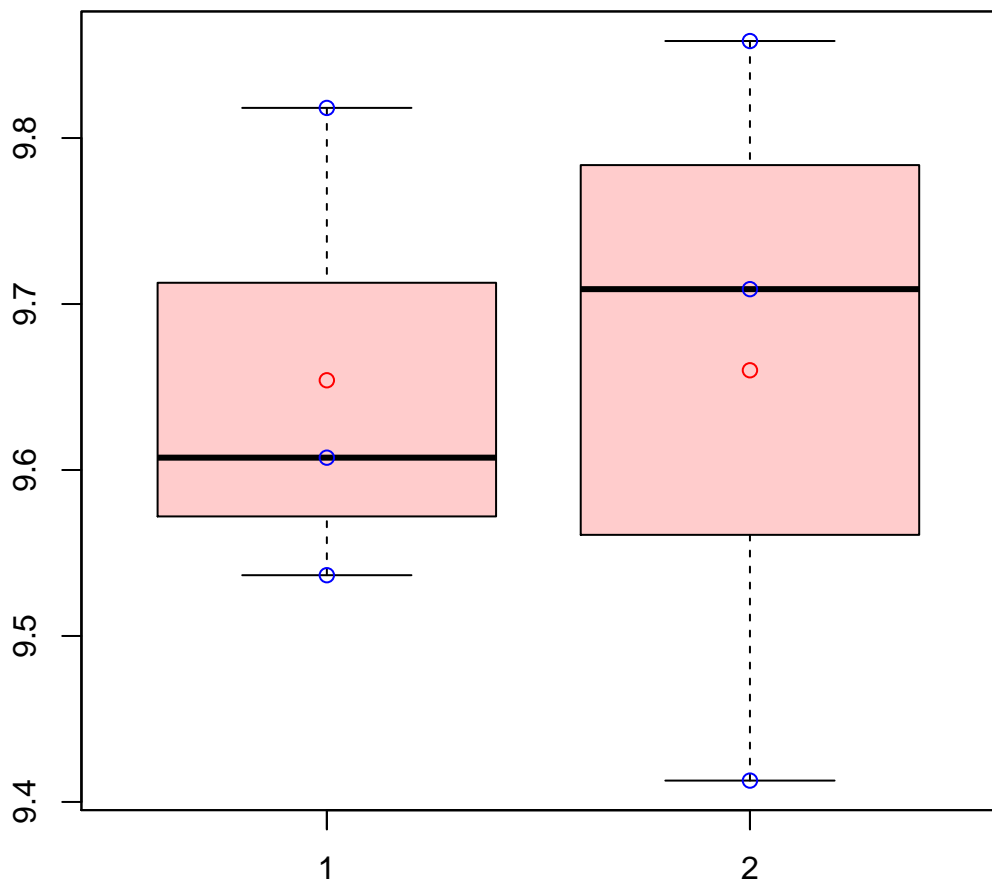

t-Test: p-value = 0.97

# CL13525Contig1|CL13525Contig1

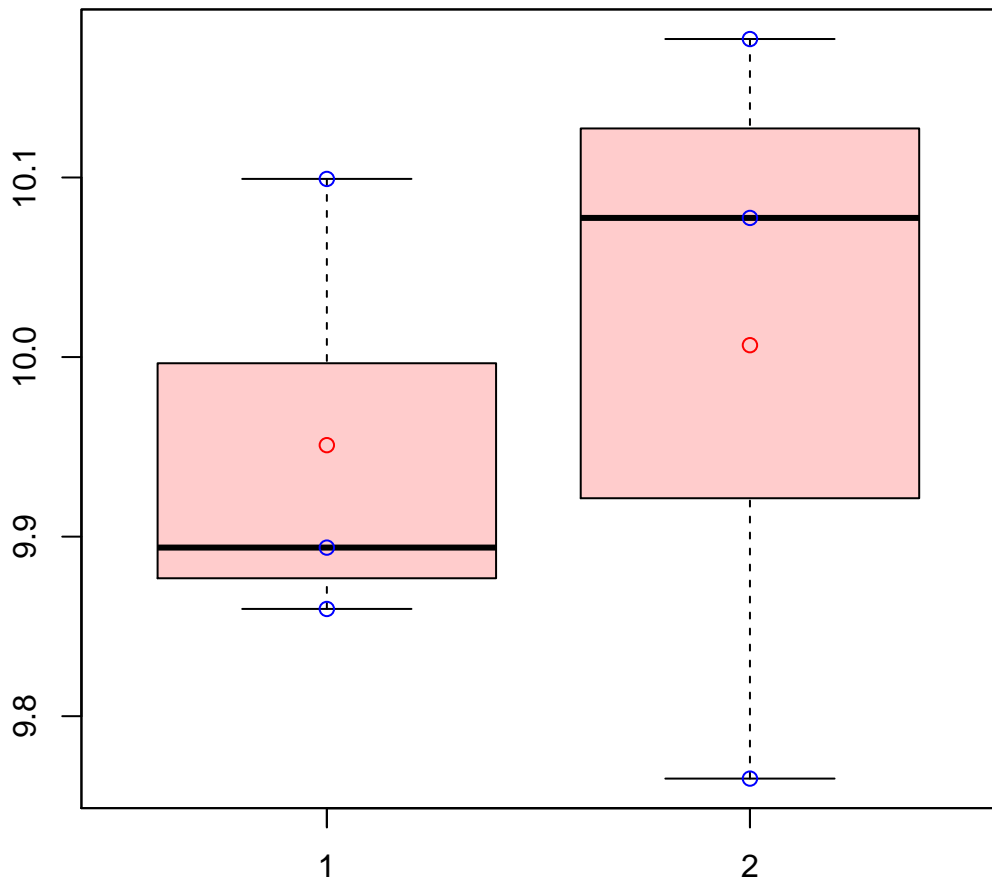

t-Test: p-value = 0.72

# CL1353Contig1|CL1353Contig1

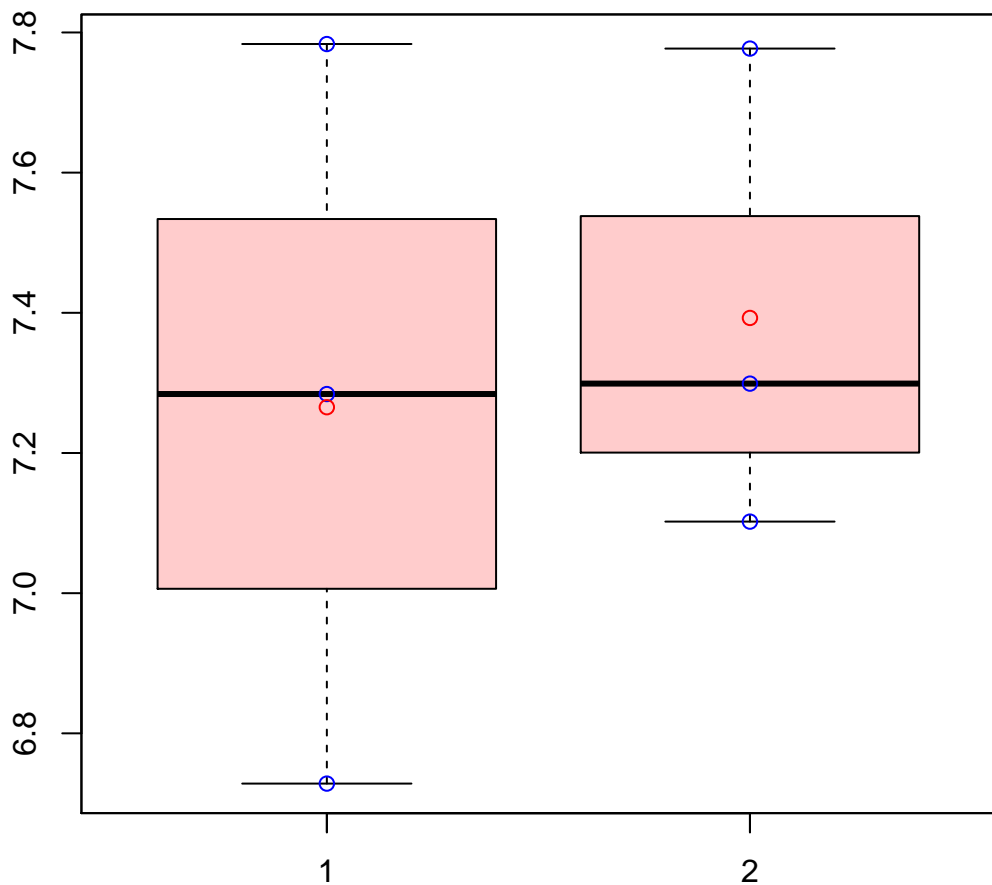

t-Test: p-value = 0.75



# CL1353Contig2|CL1353Contig2

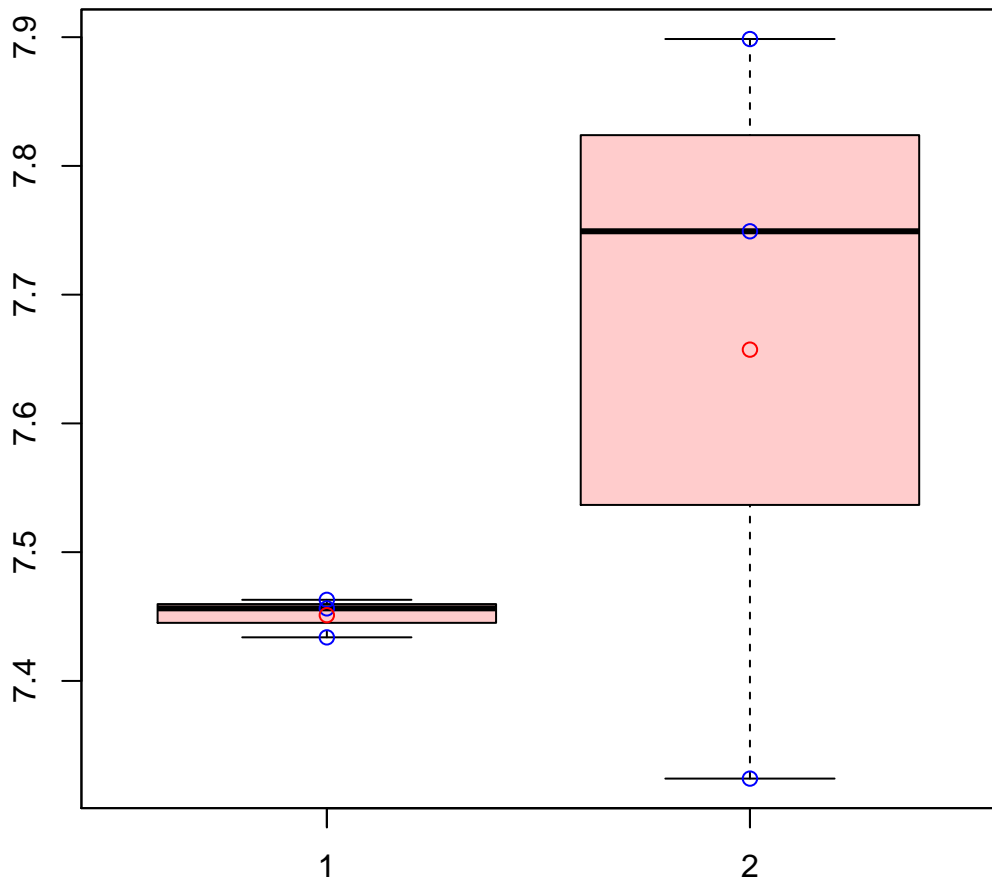

t-Test: p-value = 0.35

# CL1353Contig3|CL1353Contig3

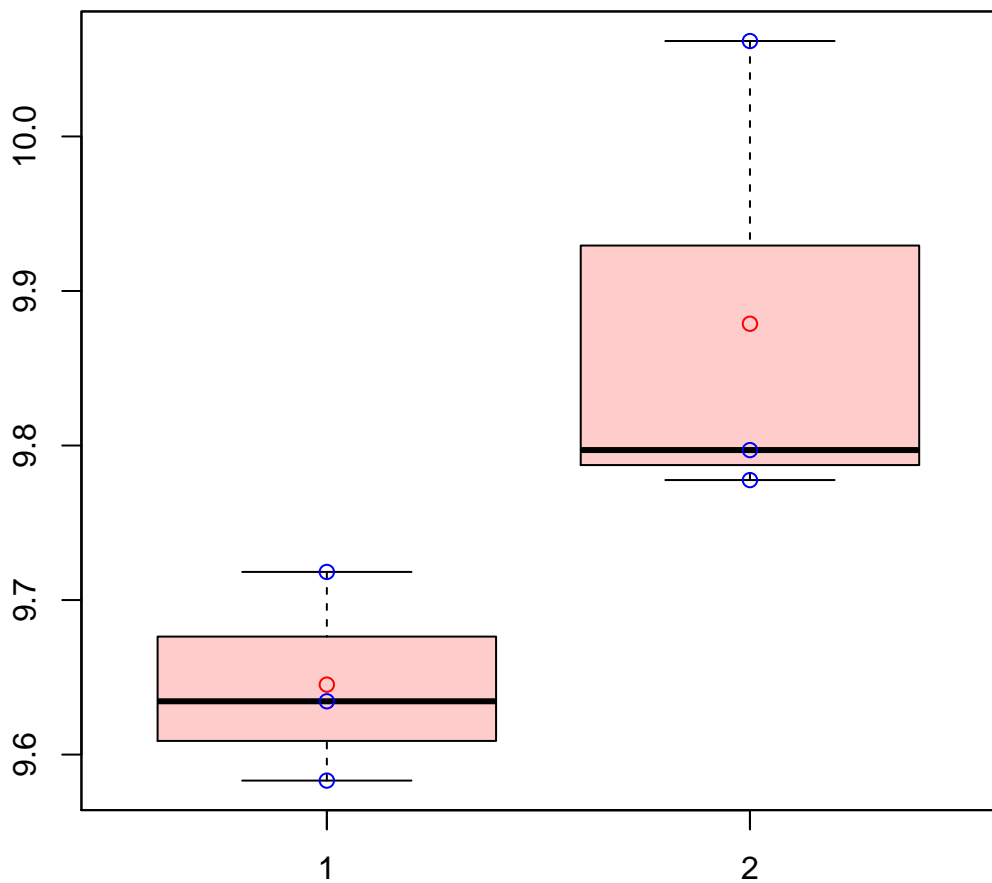

t-Test: p-value = 0.11

# CL1353Contig4|CL1353Contig4

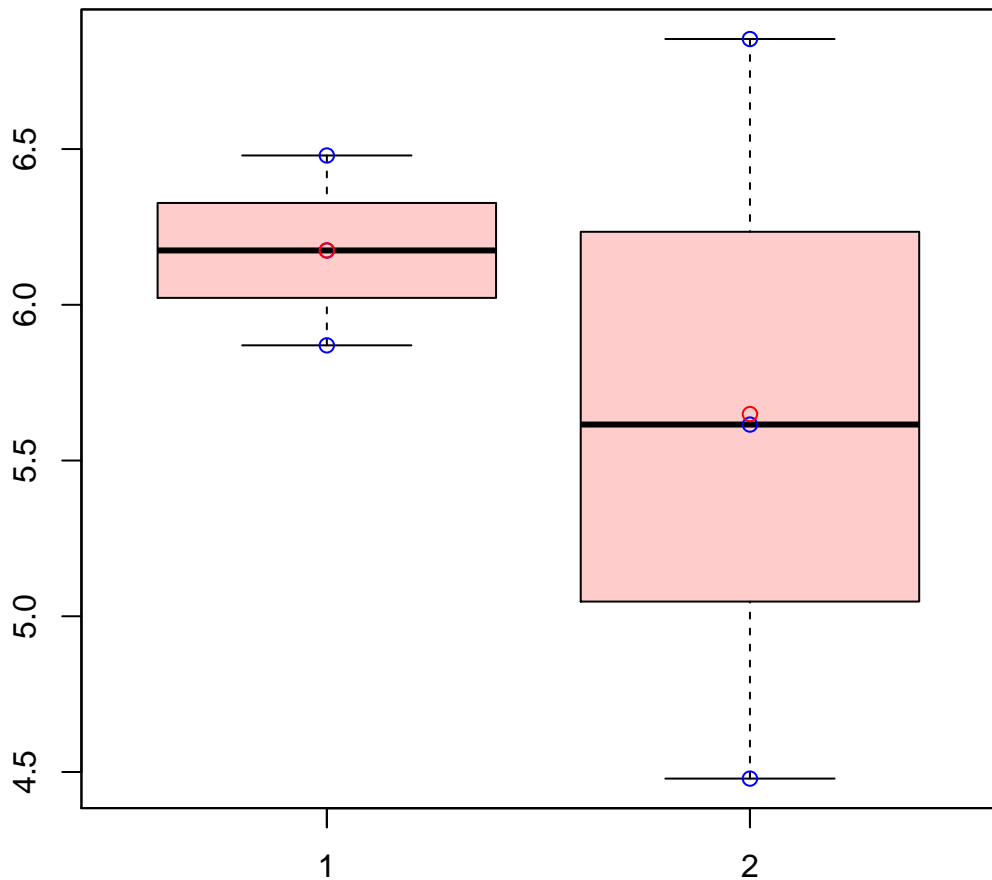

t-Test: p-value = 0.53

# CL1354Contig10|CL1354Contig10

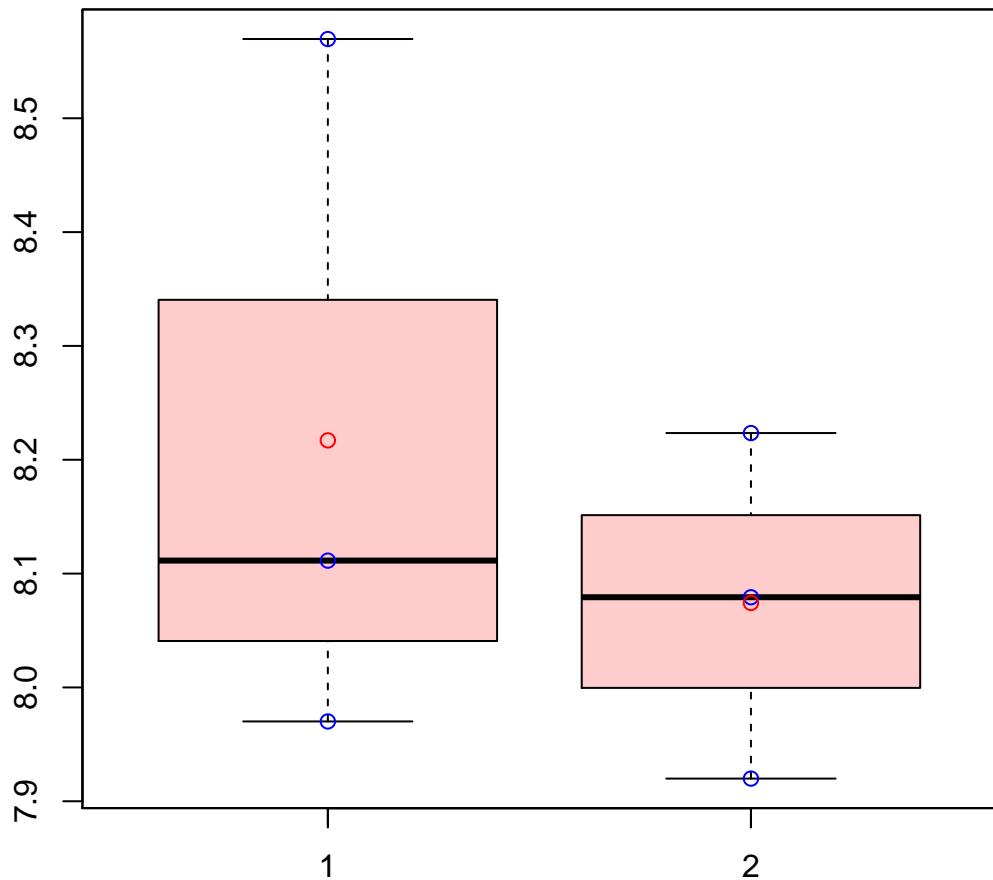

t-Test: p-value = 0.53

# CL1354Contig13|CL1354Contig13

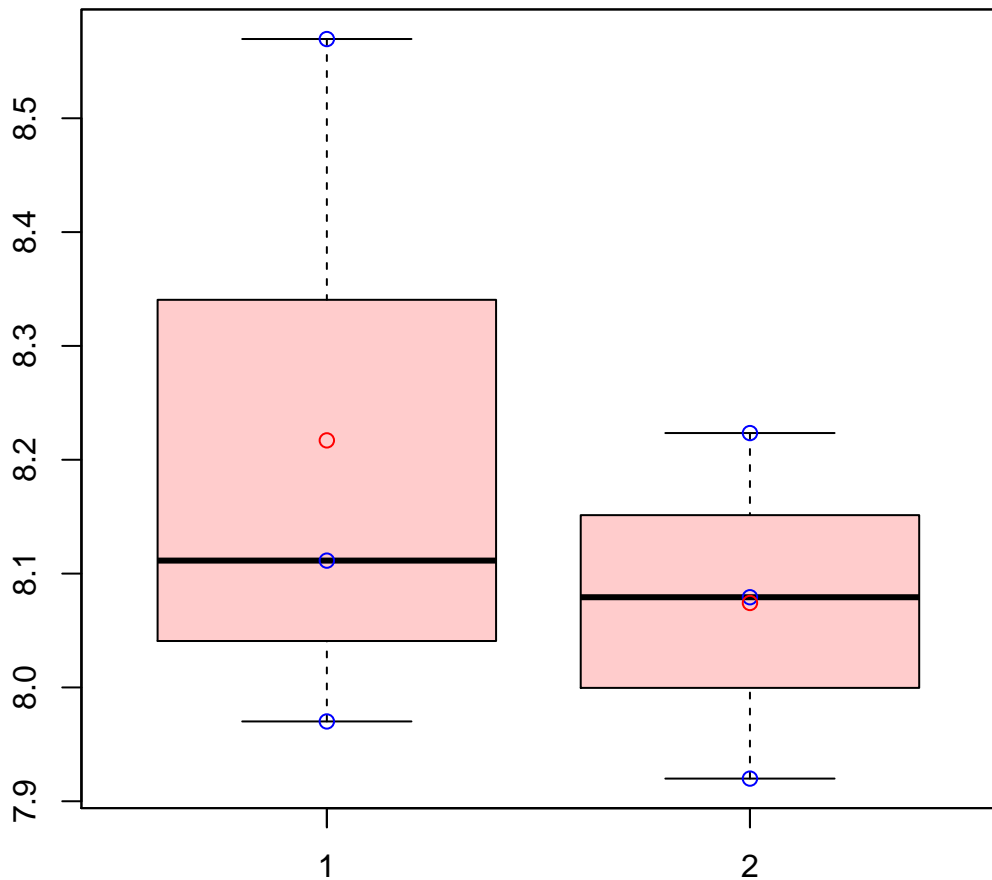

t-Test: p-value = 0.53

# CL135Contig7|CL135Contig7

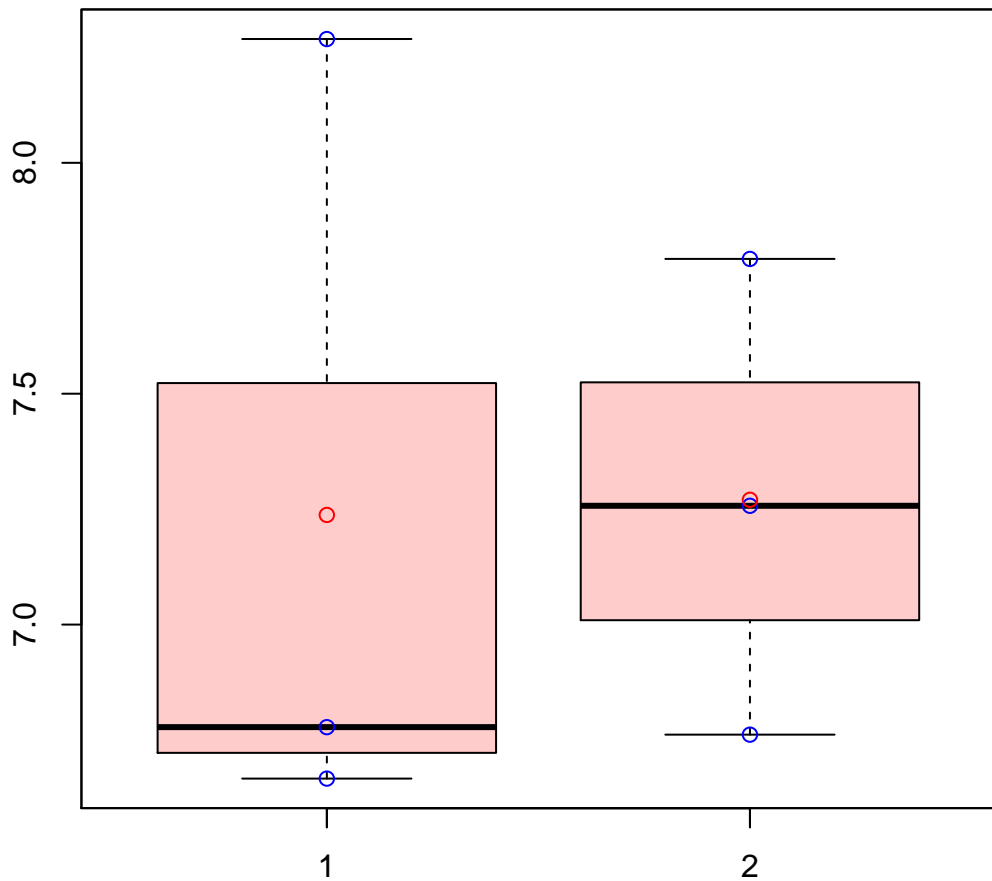

t-Test: p-value = 0.96

# CL13605Contig1|CL13605Contig1

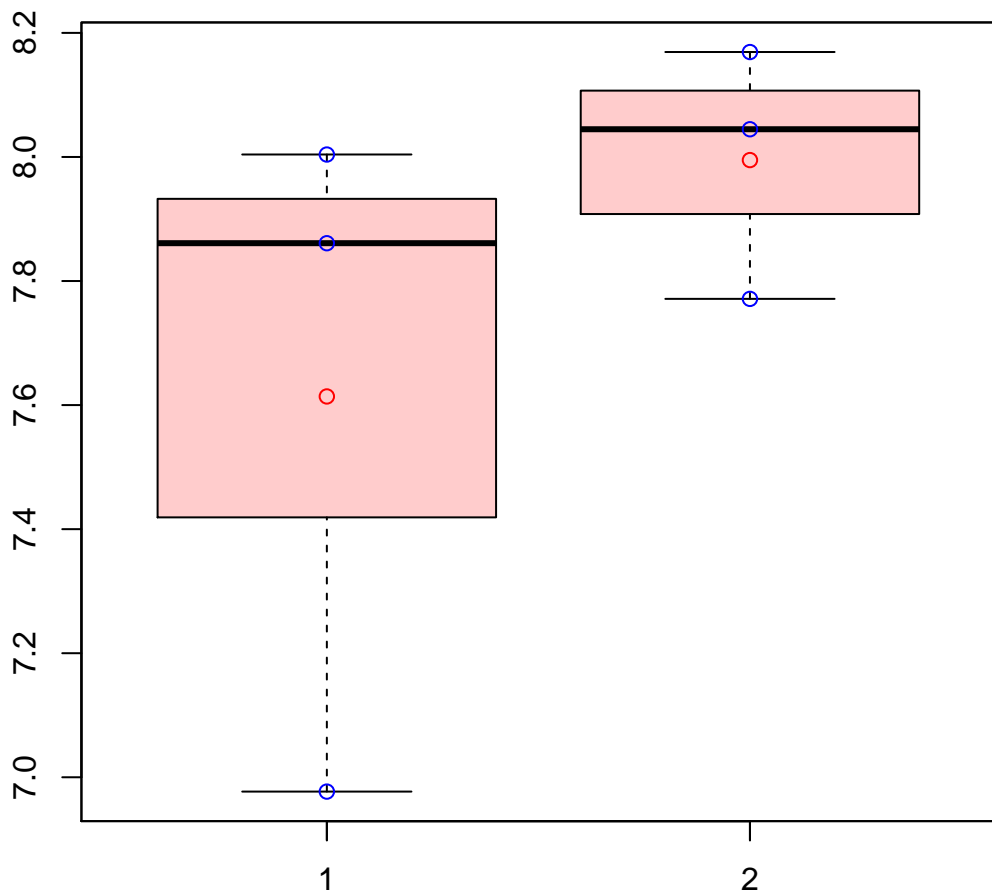

t-Test: p-value = 0.36

# CL1361Contig6|CL1361Contig6

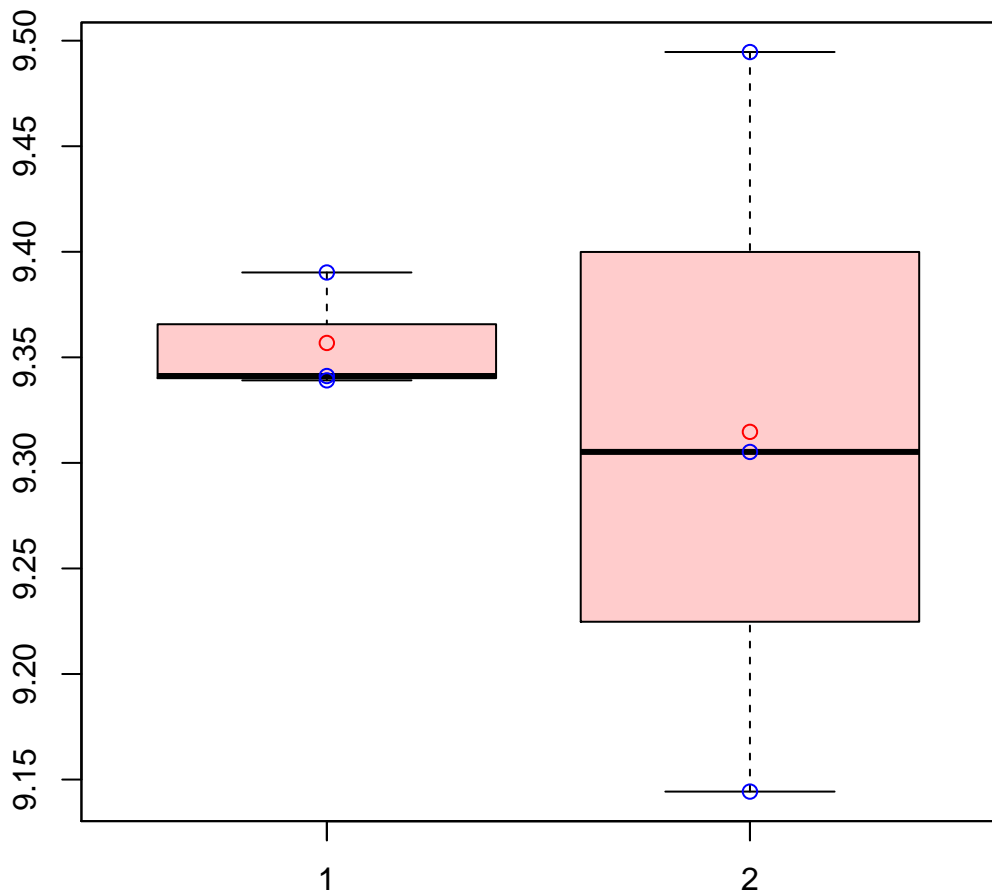

t-Test: p-value = 0.72



# CL1363Contig3|CL1363Contig3

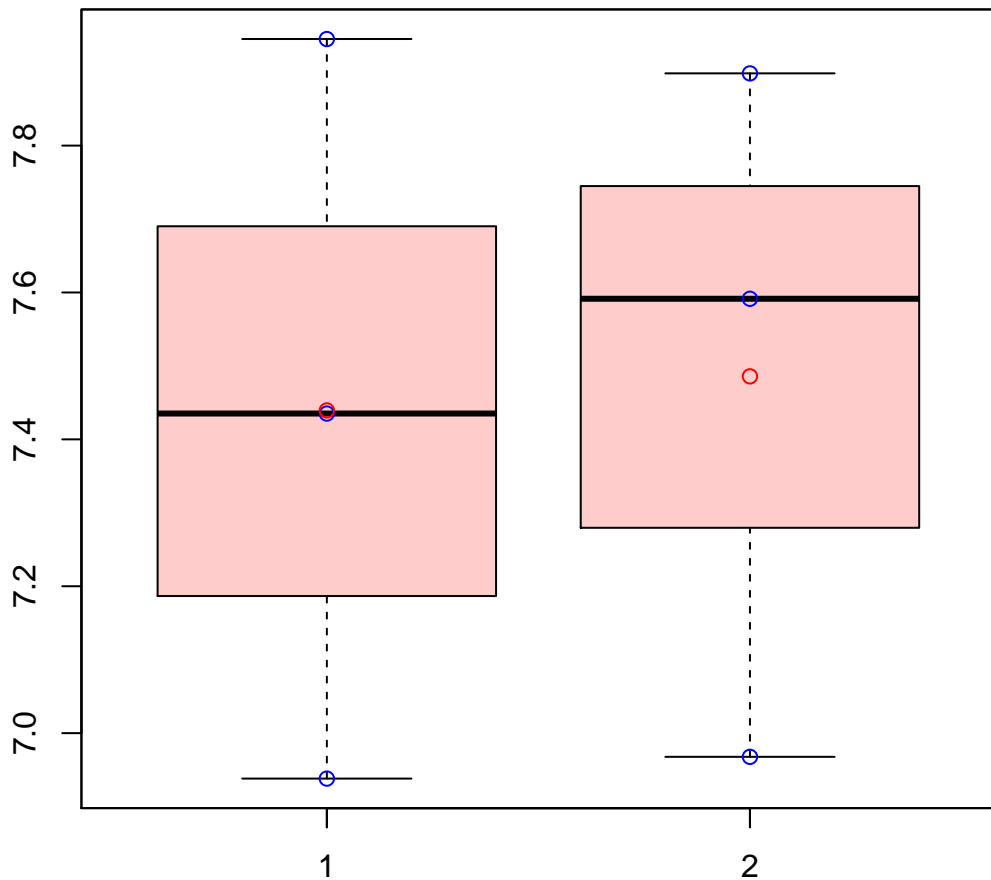

t-Test: p-value = 0.91

# CL13640Contig1|CL13640Contig1

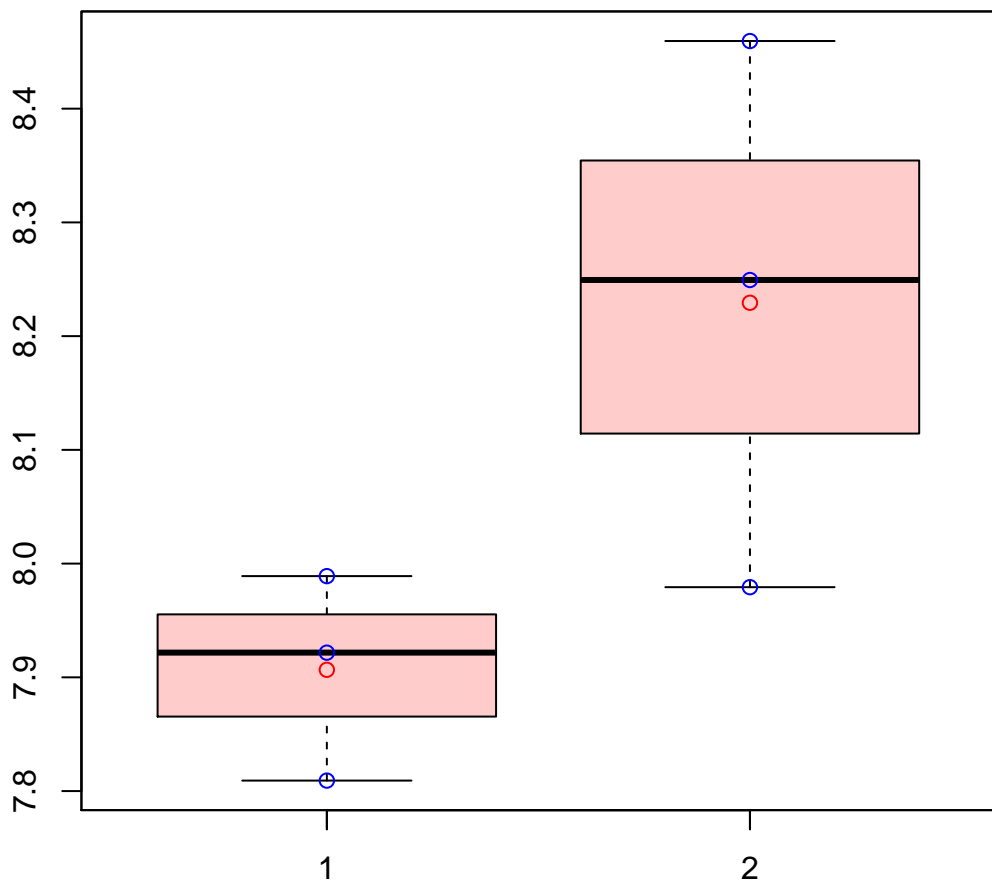

t-Test: p-value = 0.13

# CL13655Contig1|CL13655Contig1

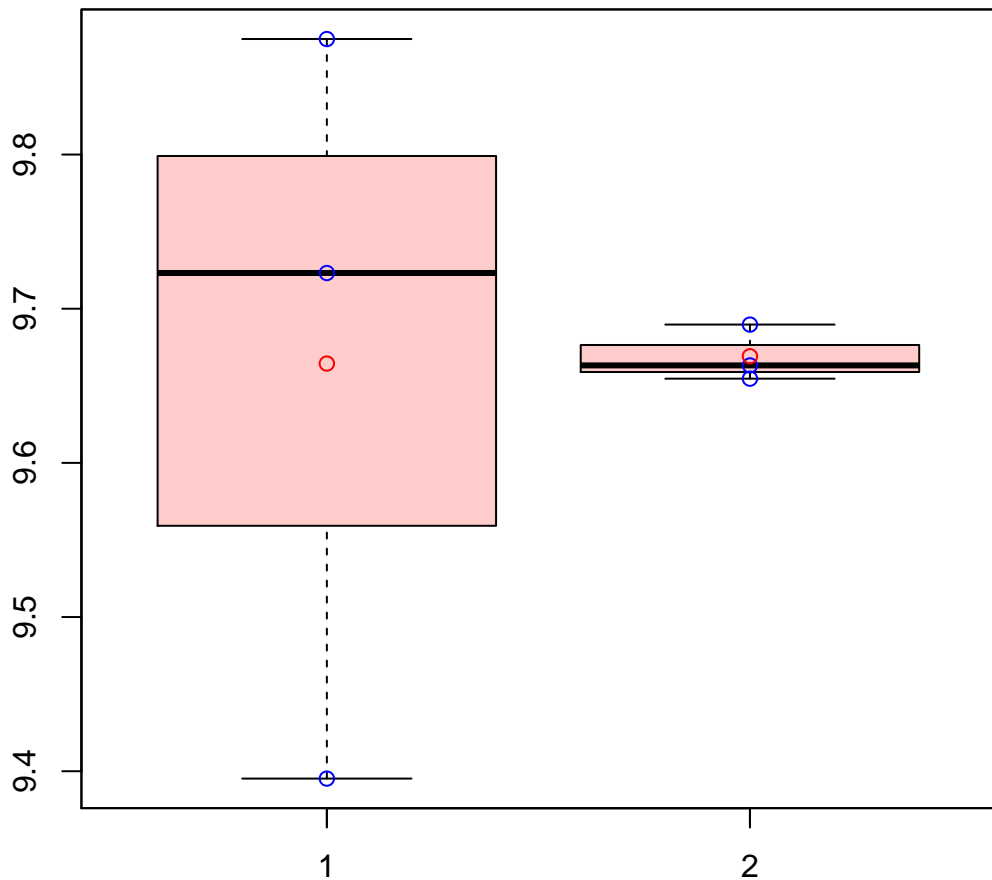

t-Test: p-value = 0.98

# CL1365Contig1|CL1365Contig1

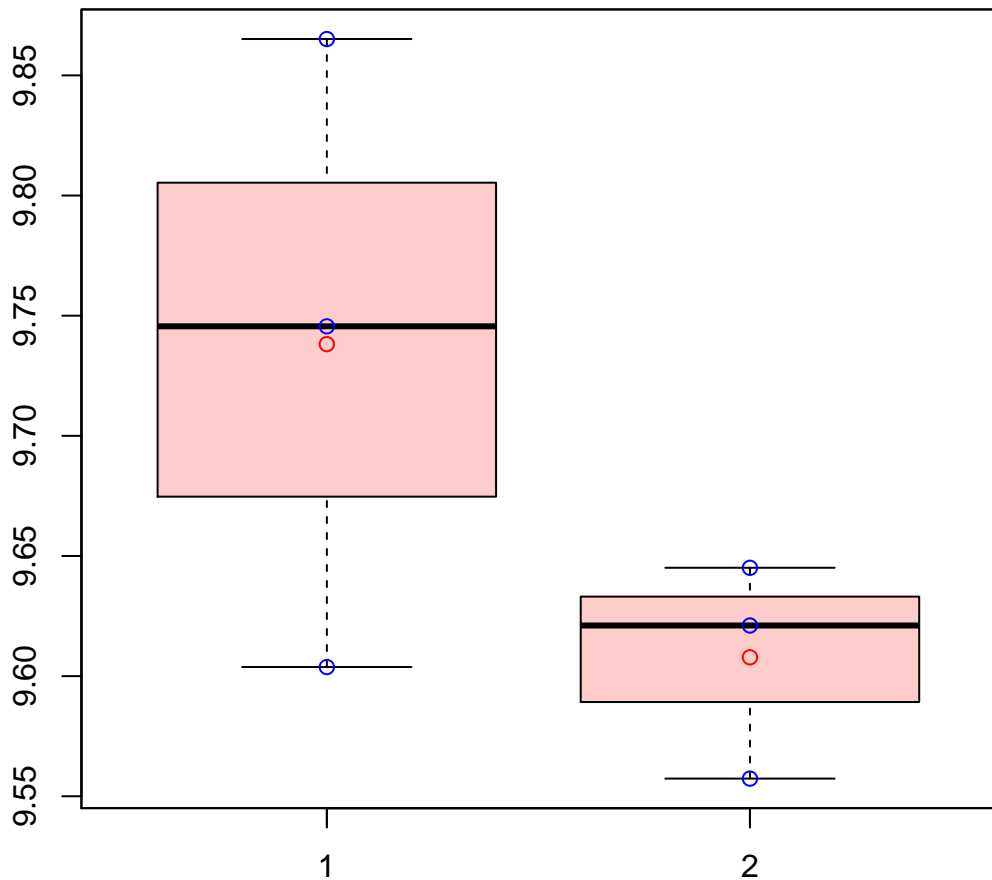

t-Test: p-value = 0.22

# CL1365Contig3|CL1365Contig3

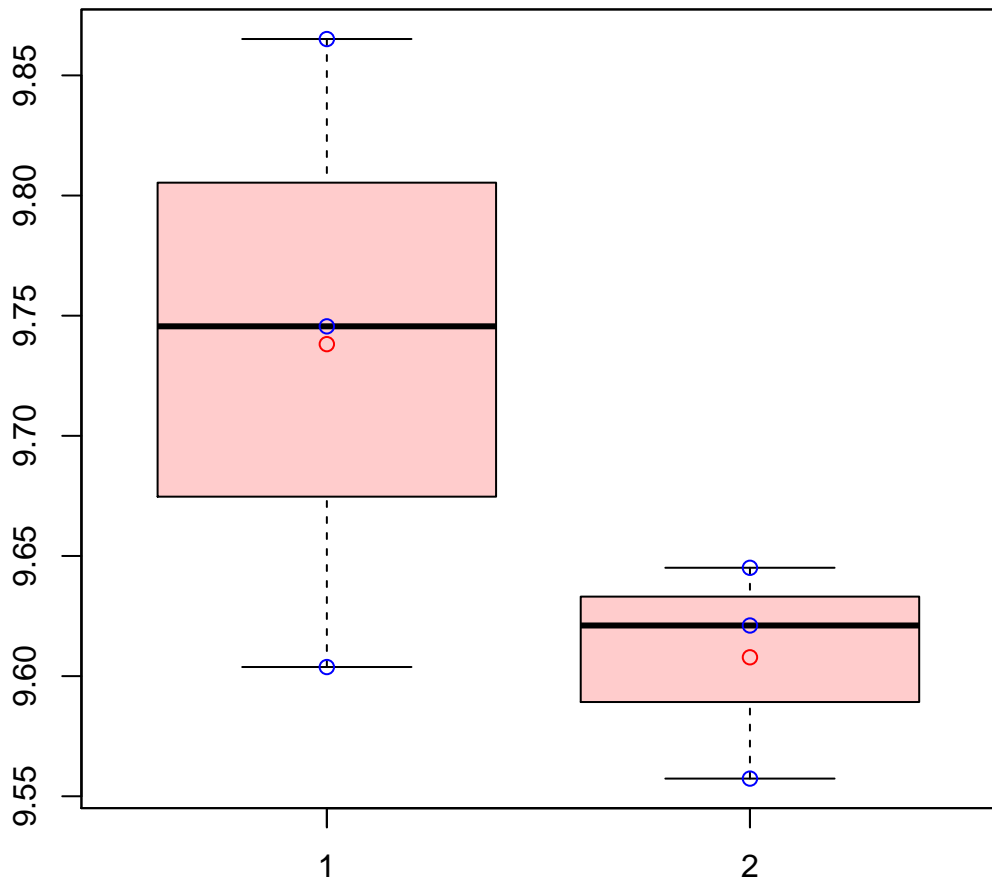

t-Test: p-value = 0.22

# CL1365Contig4|CL1365Contig4



t-Test: p-value = 0.22

# CL1365Contig6|CL1365Contig6



t-Test: p-value = 0.22

# CL1367Contig5|CL1367Contig5

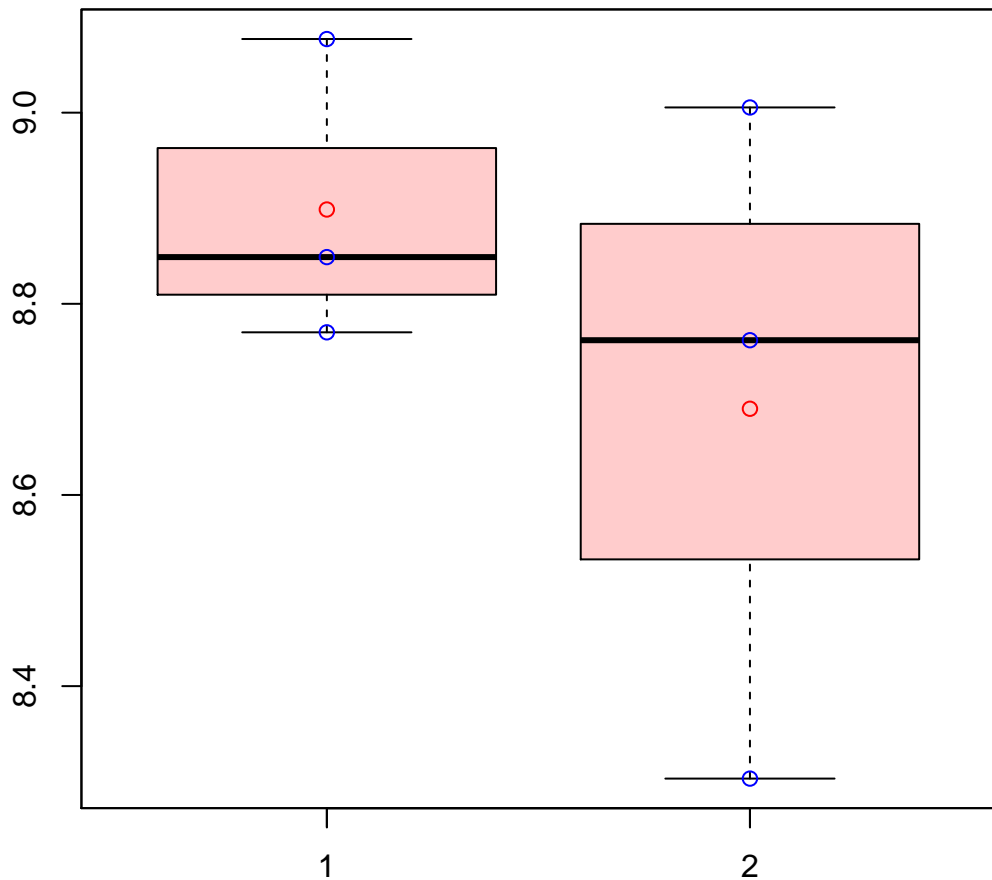

t-Test: p-value = 0.43



# CL1367Contig7|CL1367Contig7



t-Test: p-value = 0.43

# CL1369Contig1|CL1369Contig1

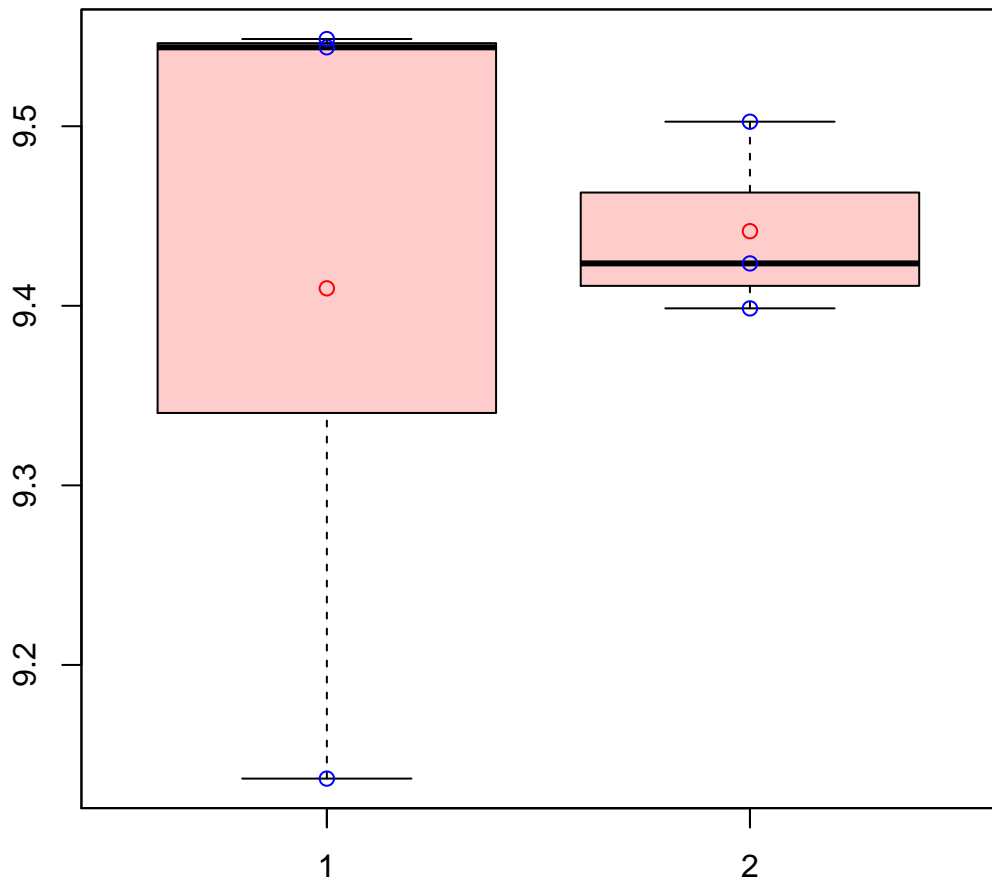

t-Test: p-value = 0.84

# CL136Contig16|CL136Contig16

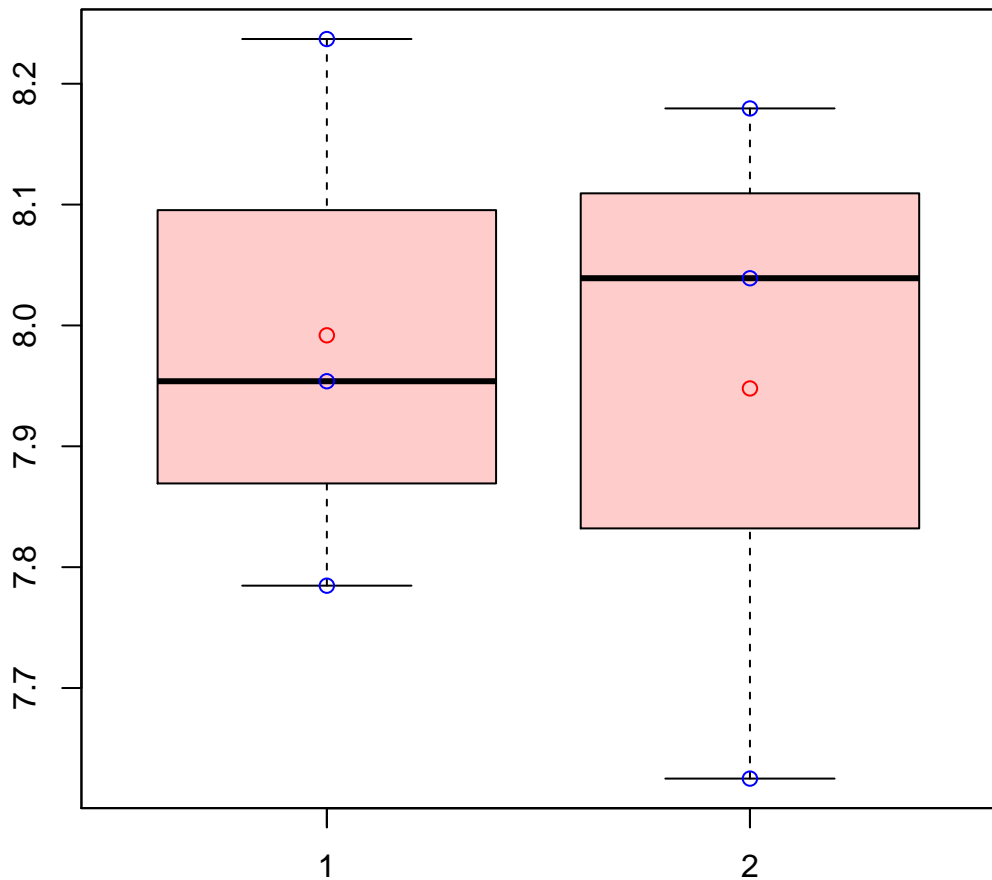

t-Test: p-value = 0.85

# CL136Contig17|CL136Contig17

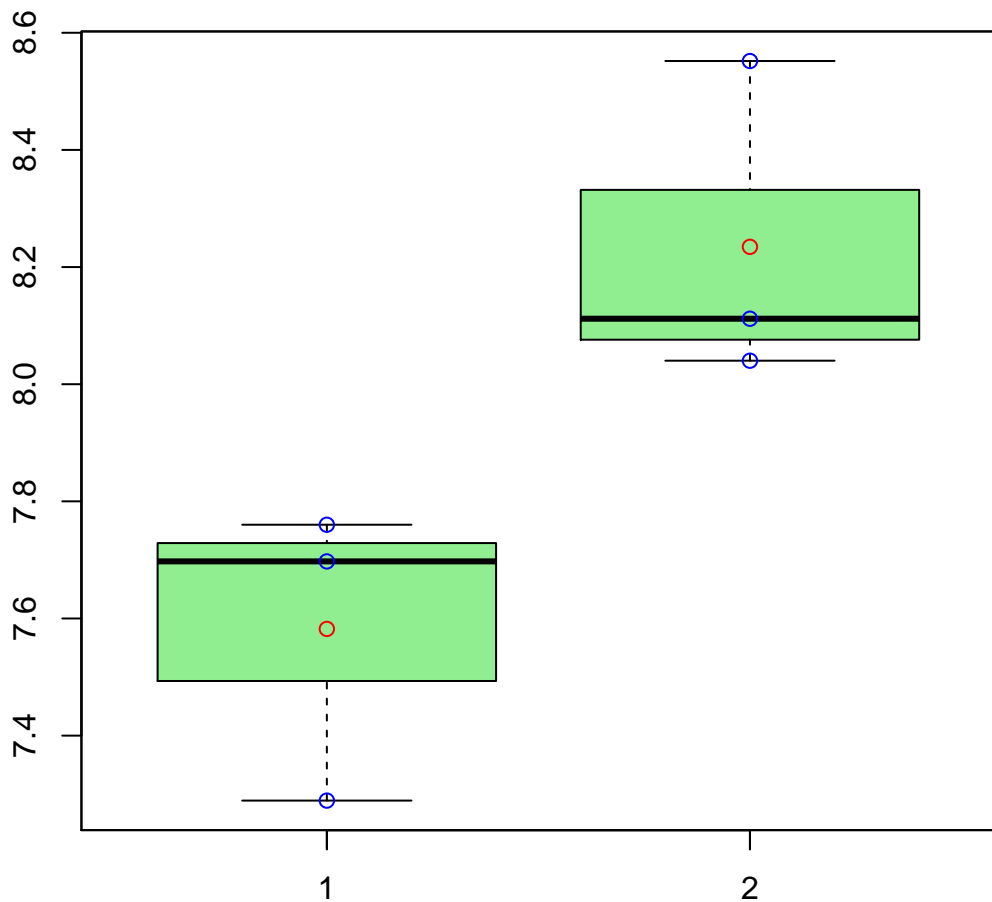

t-Test: p-value = 0.04

# CL136Contig18|CL136Contig18

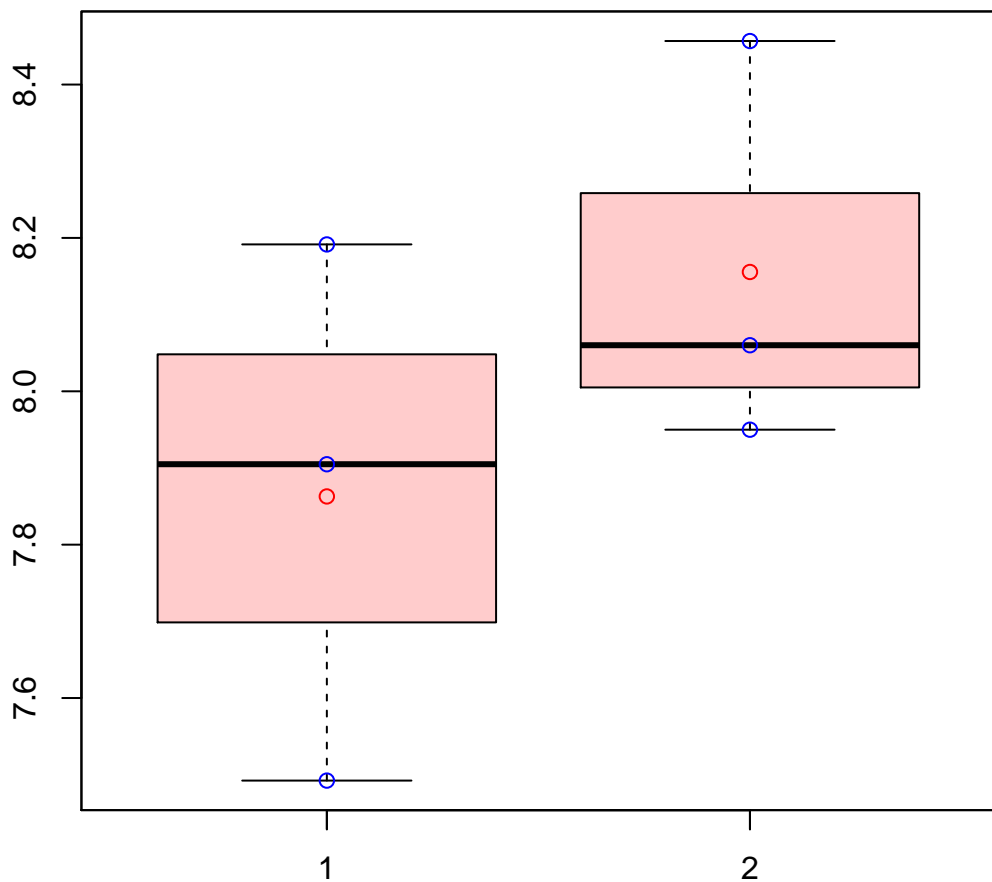

t-Test: p-value = 0.32

# CL1371Contig3|CL1371Contig3

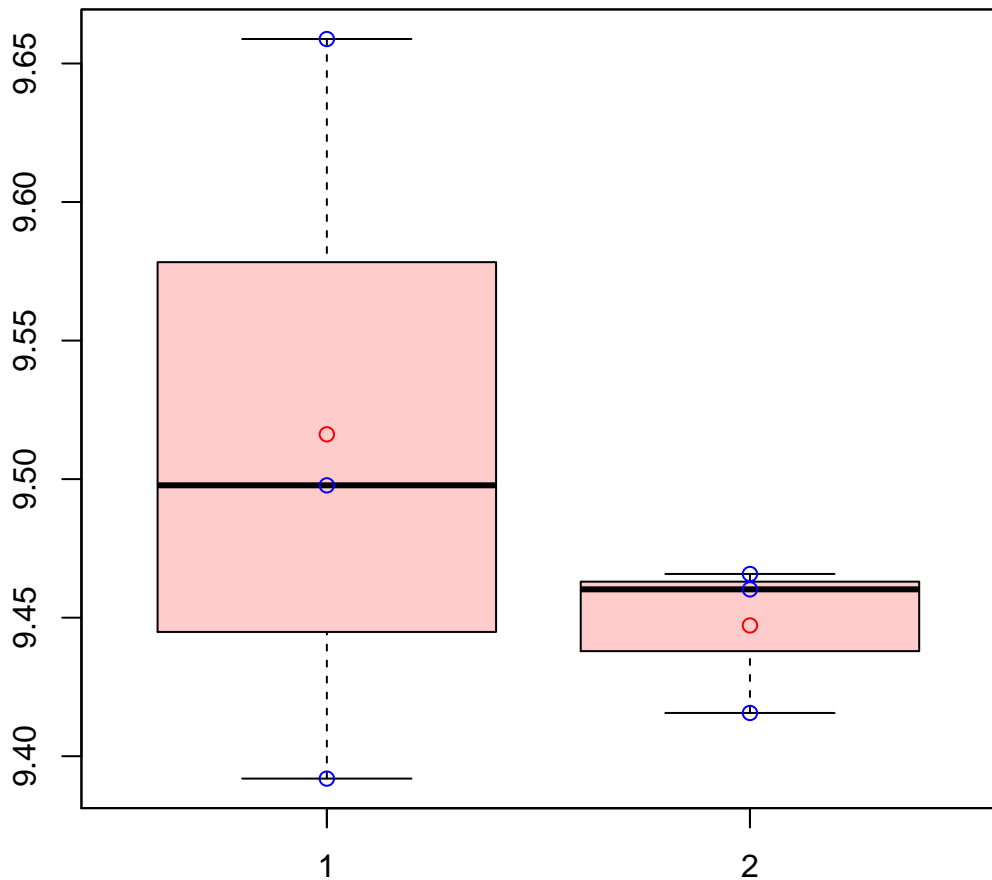

t-Test: p-value = 0.47

# CL1371Contig4|CL1371Contig4



t-Test: p-value = 0.47

# CL1371Contig5|CL1371Contig5

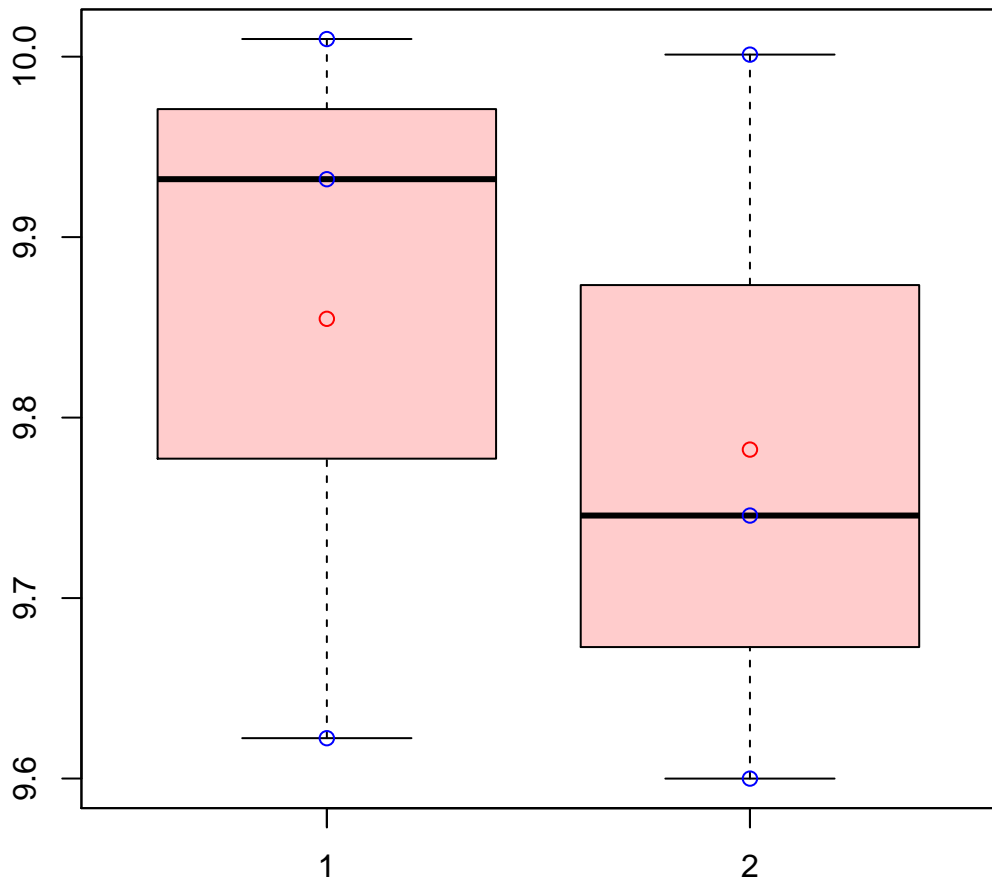

t-Test: p-value = 0.69



# CL1372Contig3|CL1372Contig3

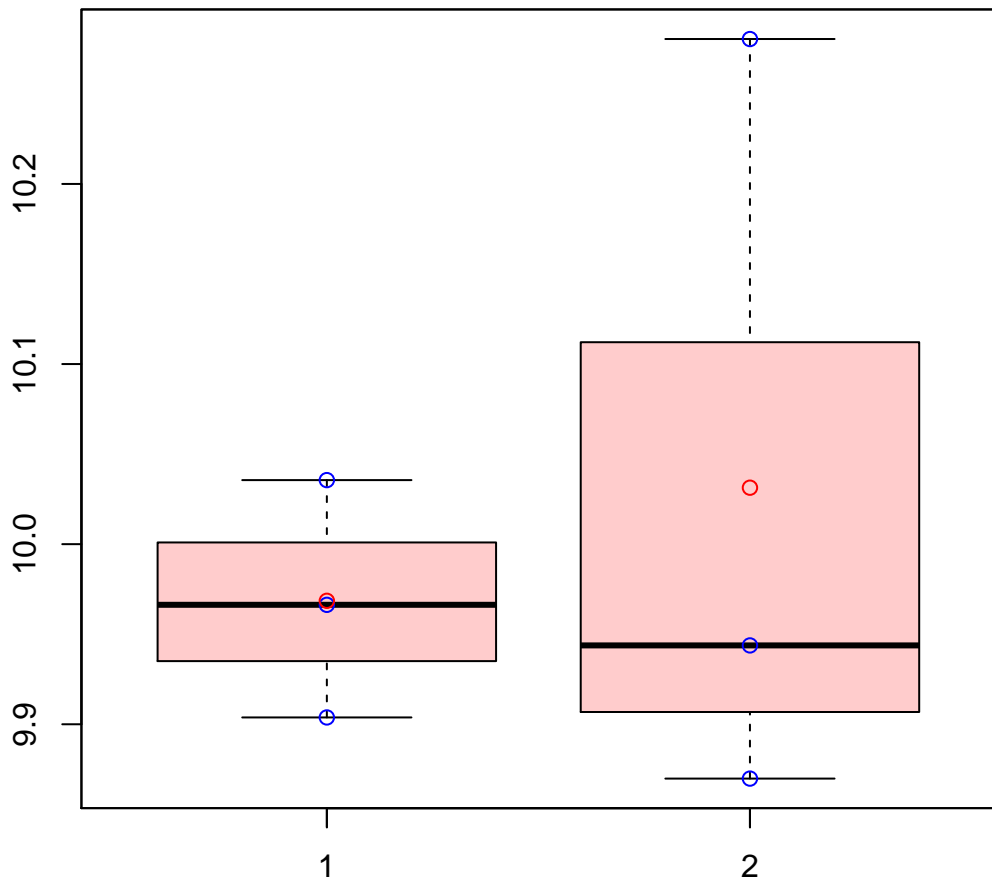

t-Test: p-value = 0.67

# CL13746Contig1|CL13746Contig1

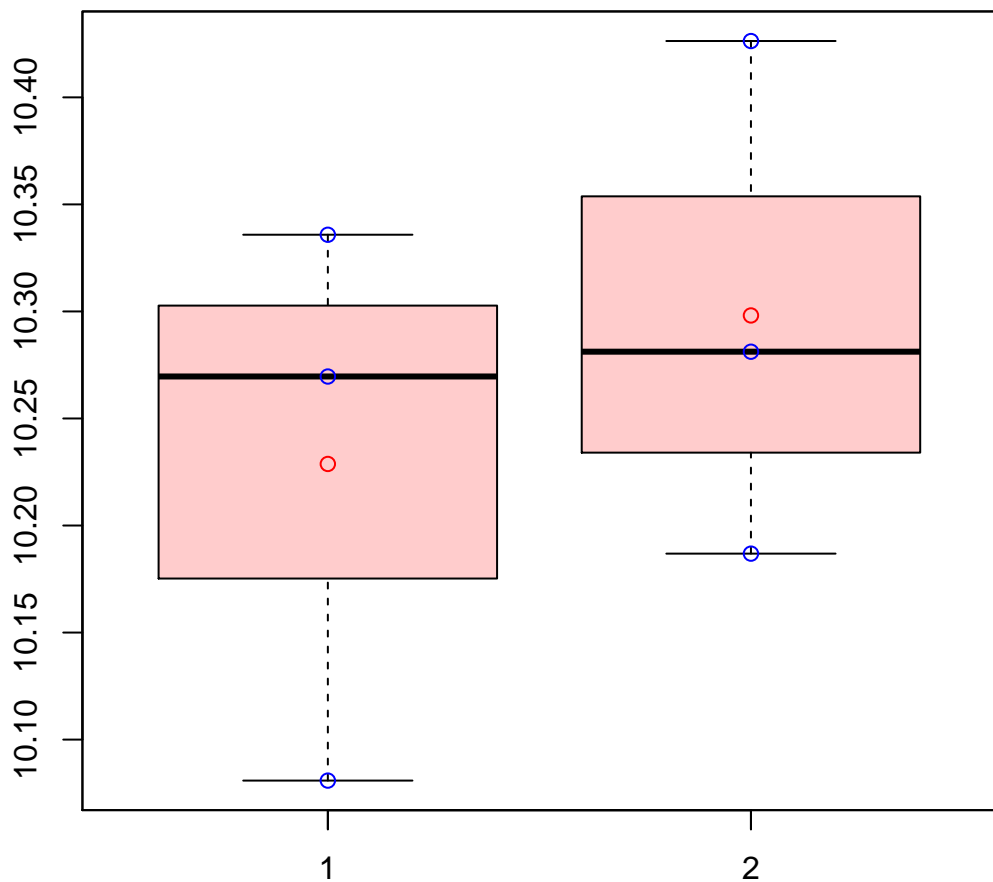

t-Test: p-value = 0.54

# CL1374Contig1|CL1374Contig1

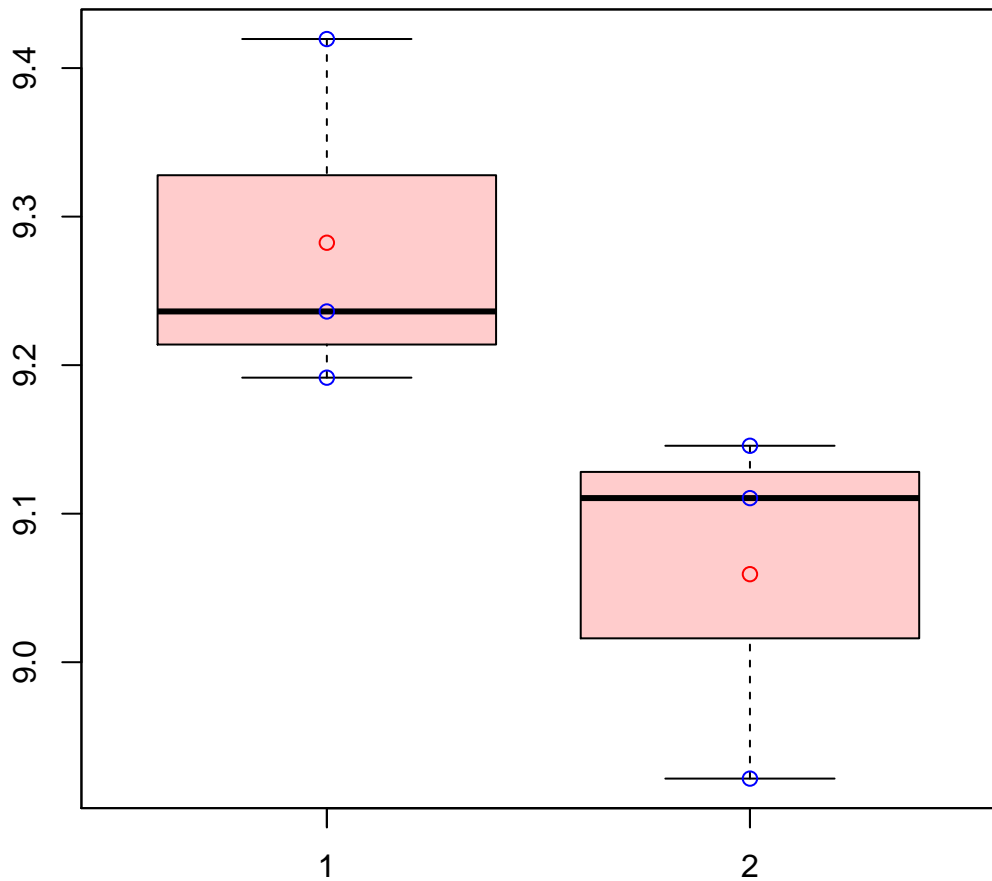

t-Test: p-value = 0.09

# CL1375Contig6|CL1375Contig6

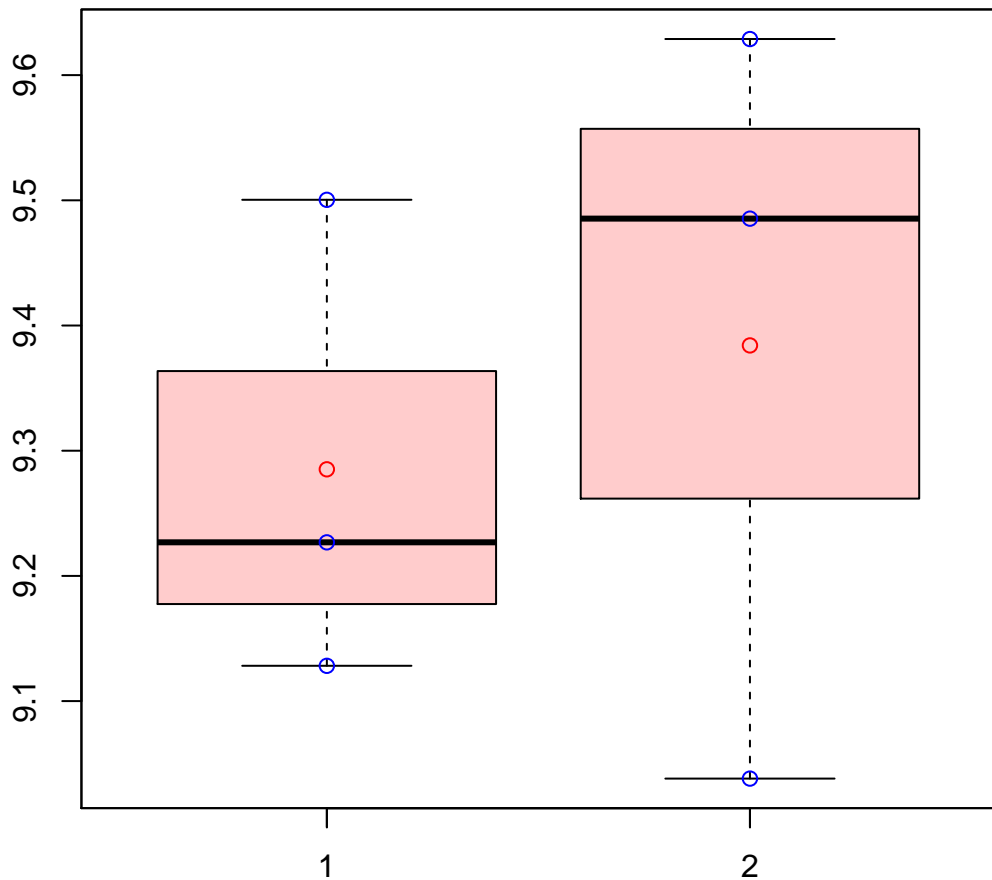

t-Test: p-value = 0.67

# CL13775Contig1|CL13775Contig1

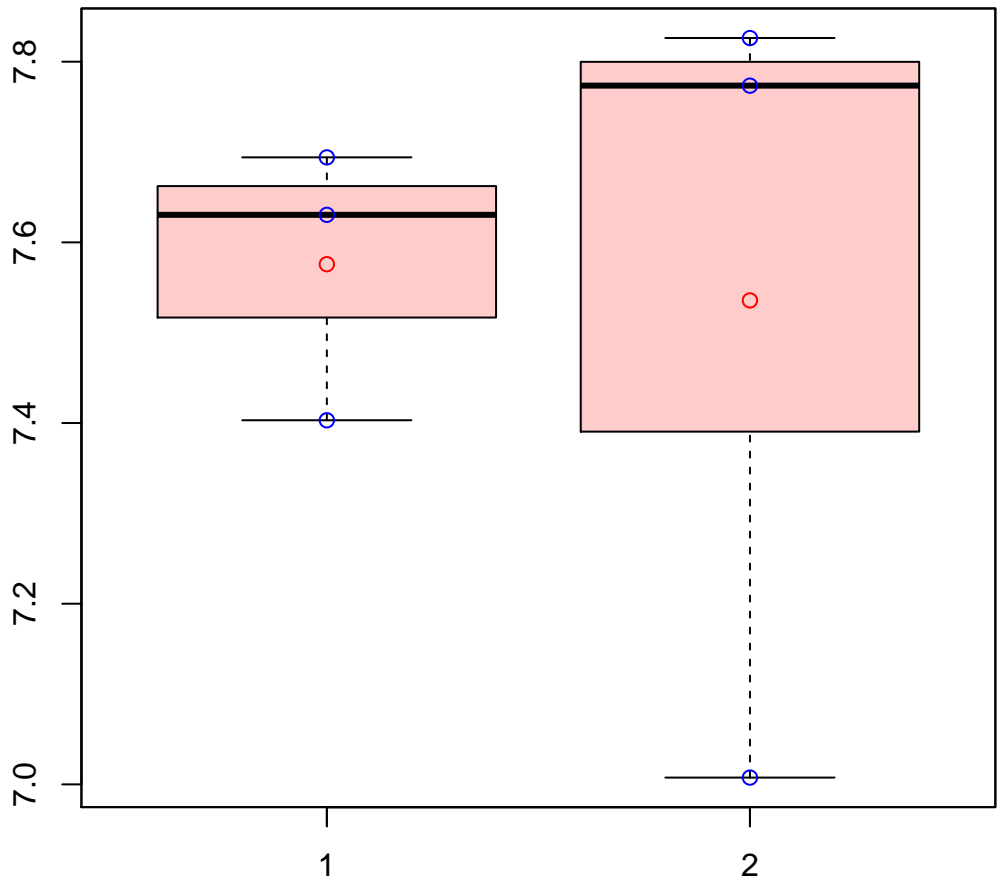

t-Test: p-value = 0.9

# CL1377Contig4|CL1377Contig4

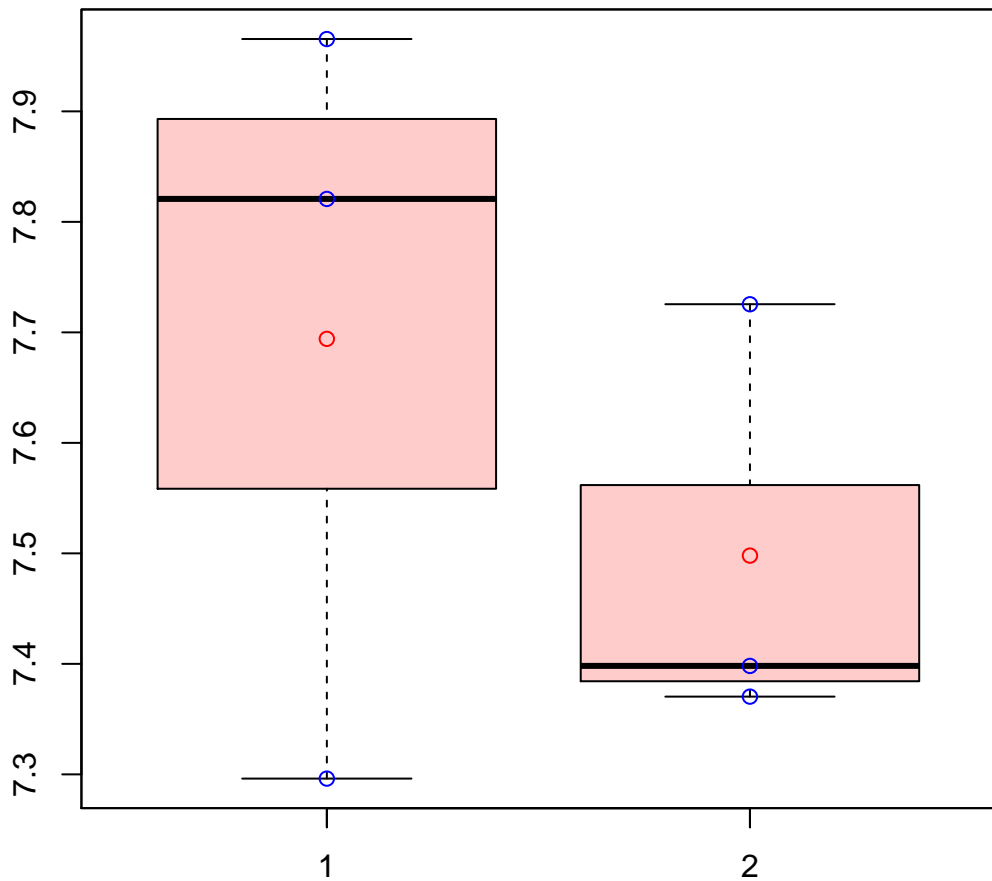

t-Test: p-value = 0.46

# CL13802Contig1|CL13802Contig1

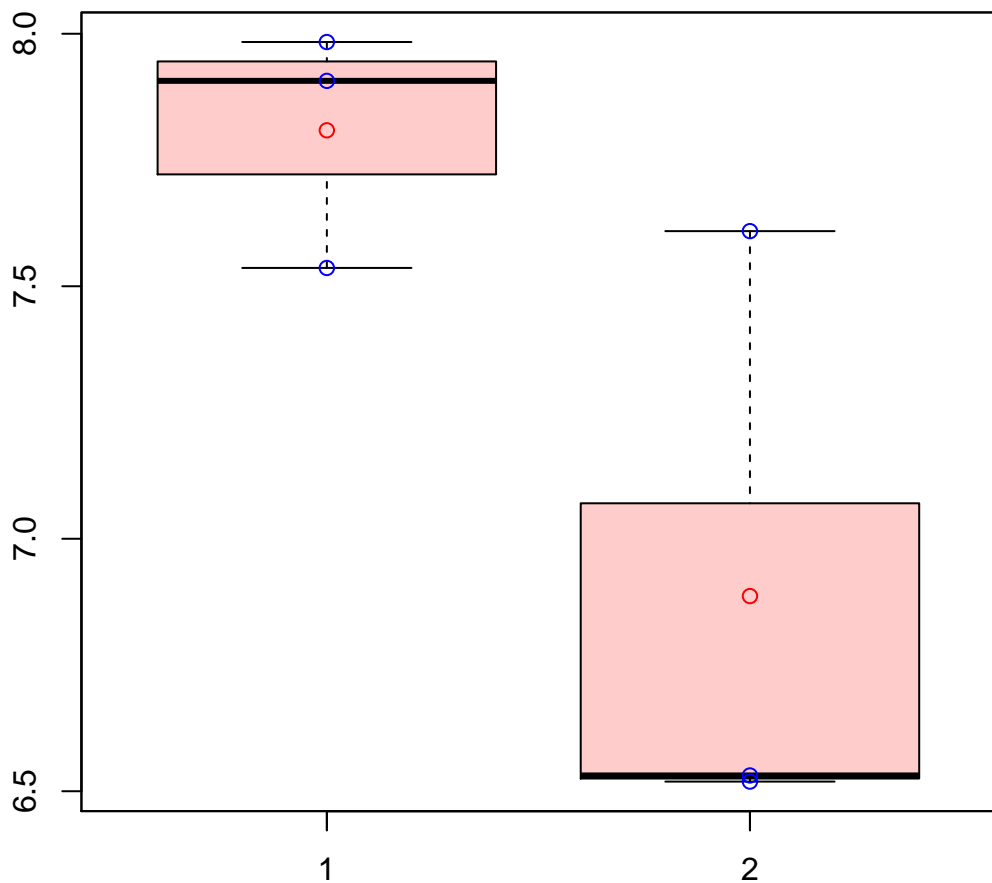

t-Test: p-value = 0.11

# CL1380Contig1|CL1380Contig1

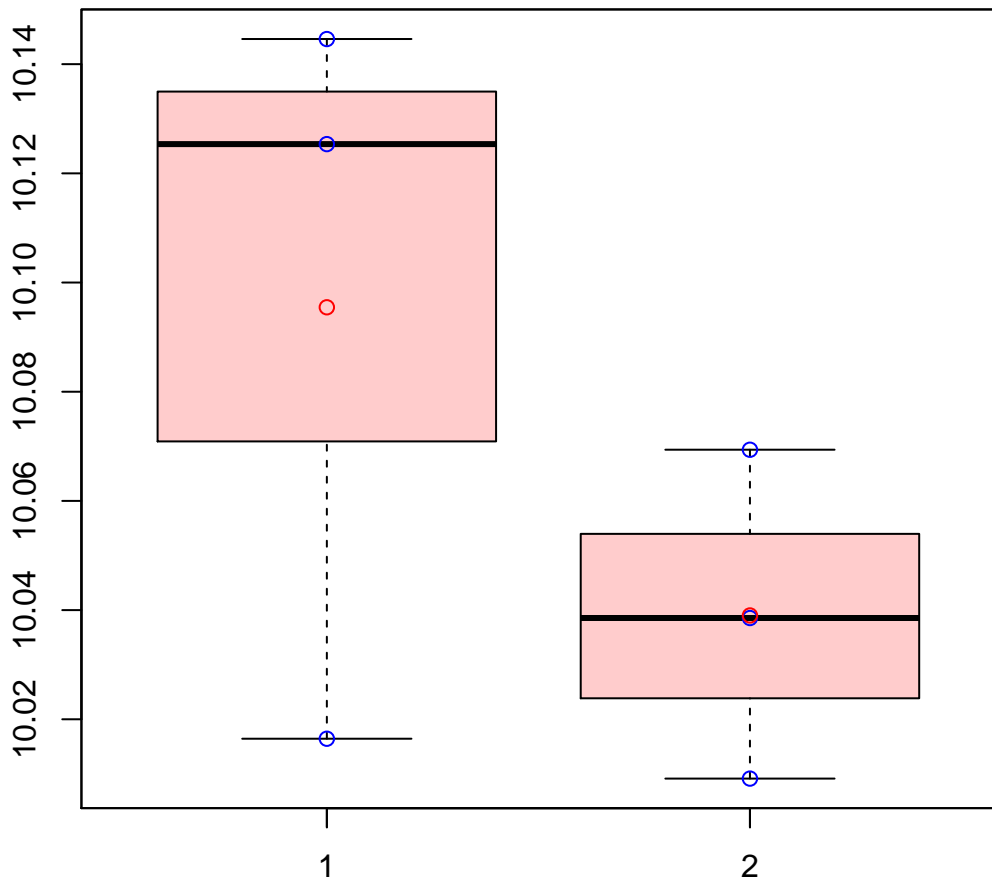

t-Test: p-value = 0.29



# CL13819Contig1|CL13819Contig1



t-Test: p-value = 0.66

# CL13849Contig1|CL13849Contig1

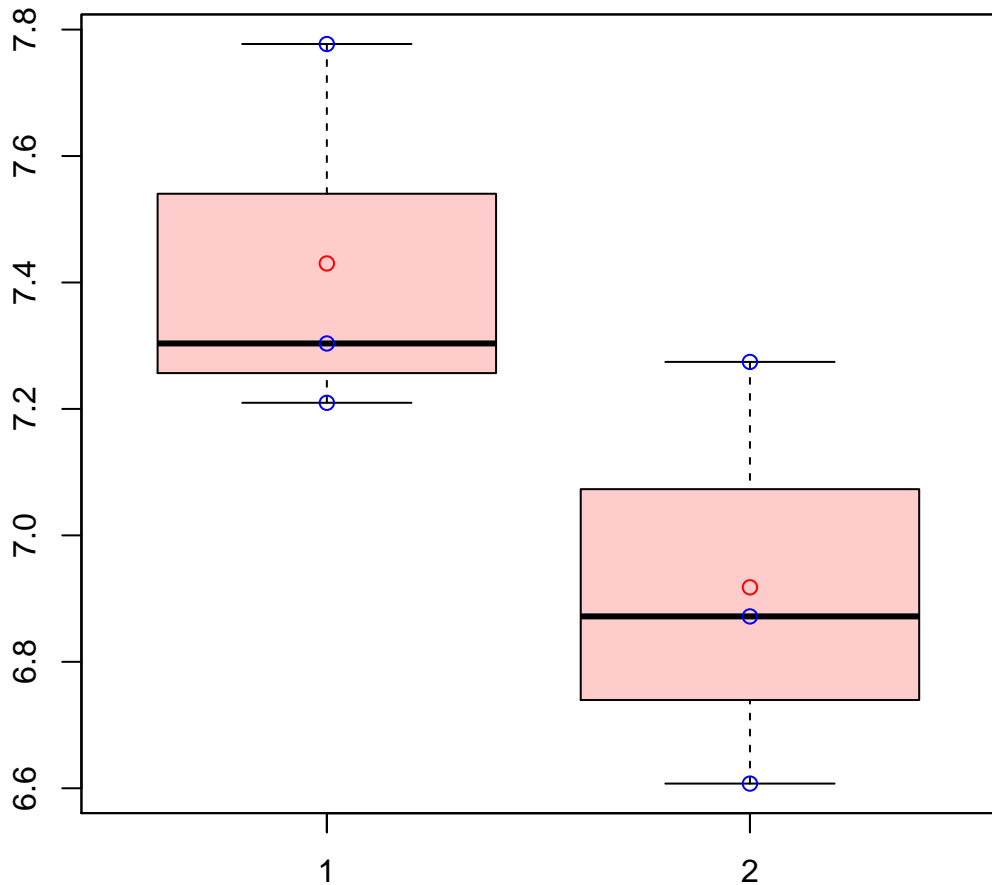

t-Test: p-value = 0.12

# CL1385Contig2|CL1385Contig2

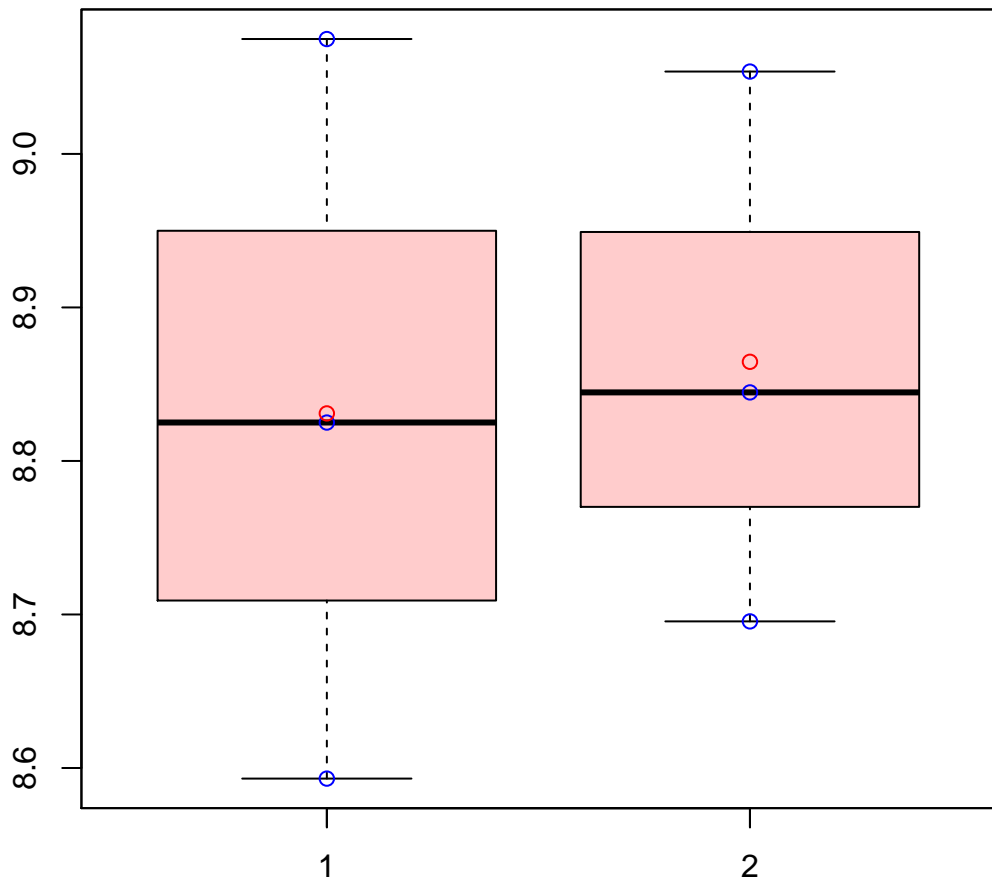

t-Test: p-value = 0.86

# CL13873Contig1|CL13873Contig1

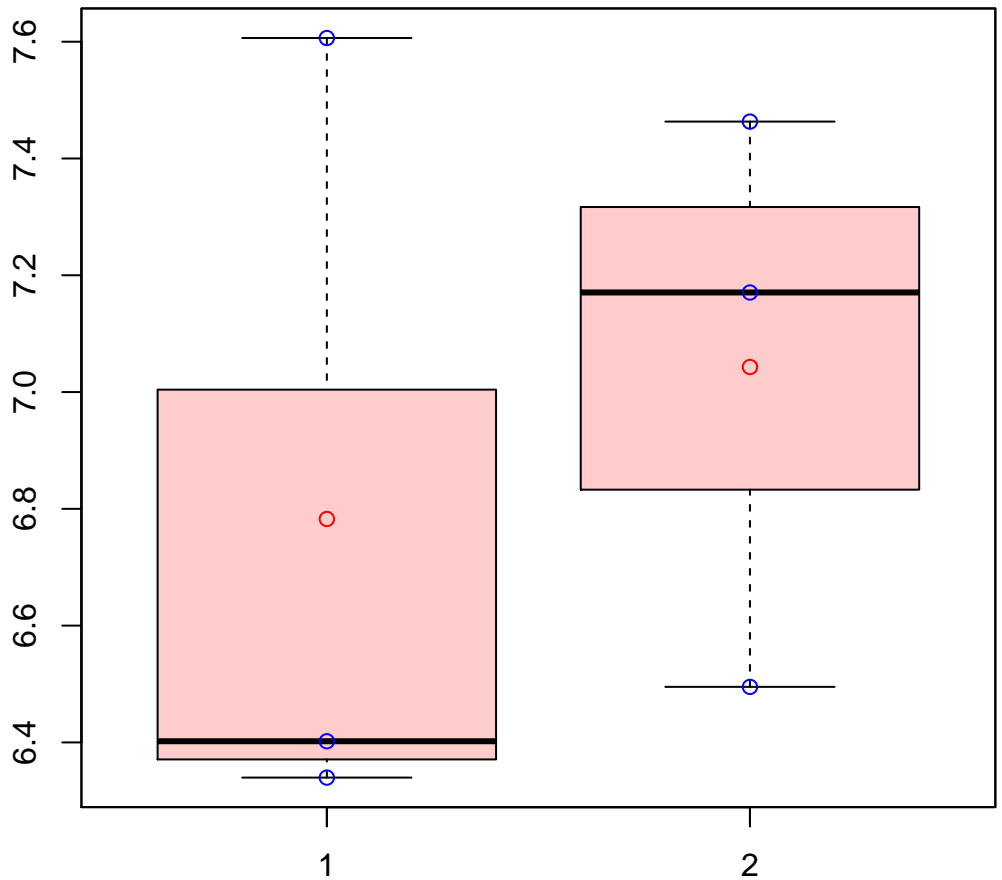

t-Test: p-value = 0.63

# CL13875Contig1|CL13875Contig1

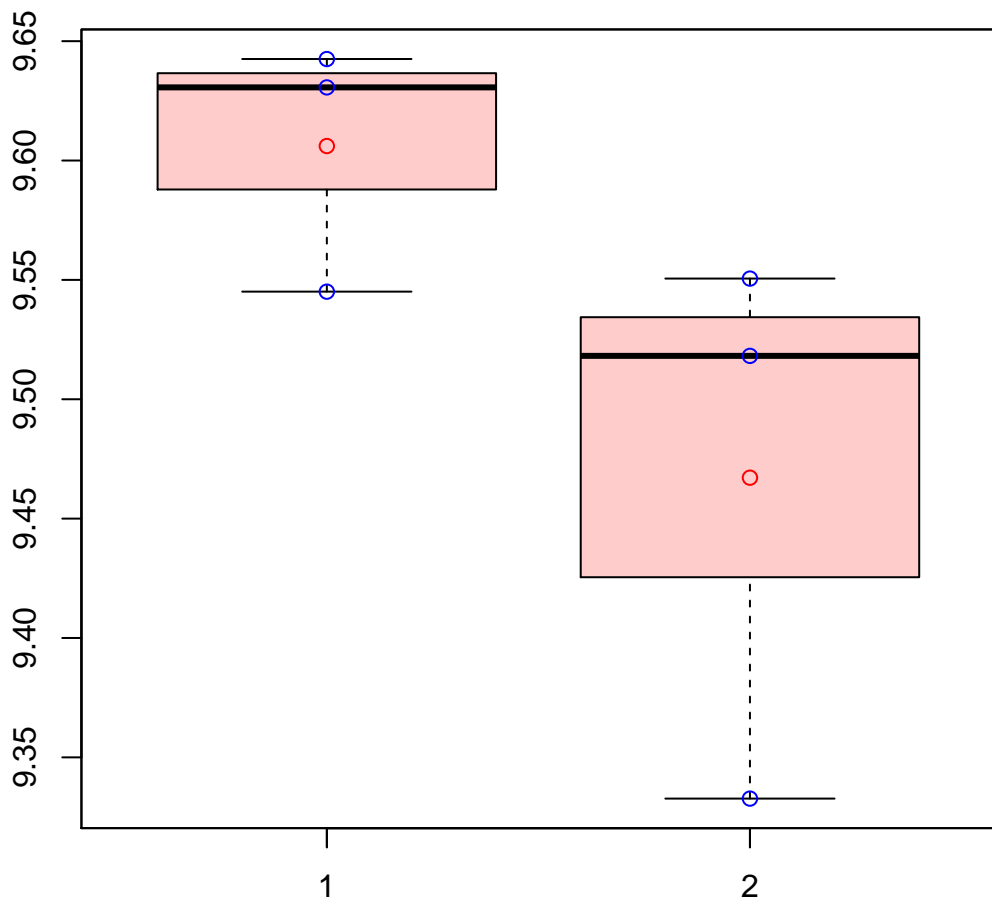

t-Test: p-value = 0.17

# CL138Contig18|CL138Contig18

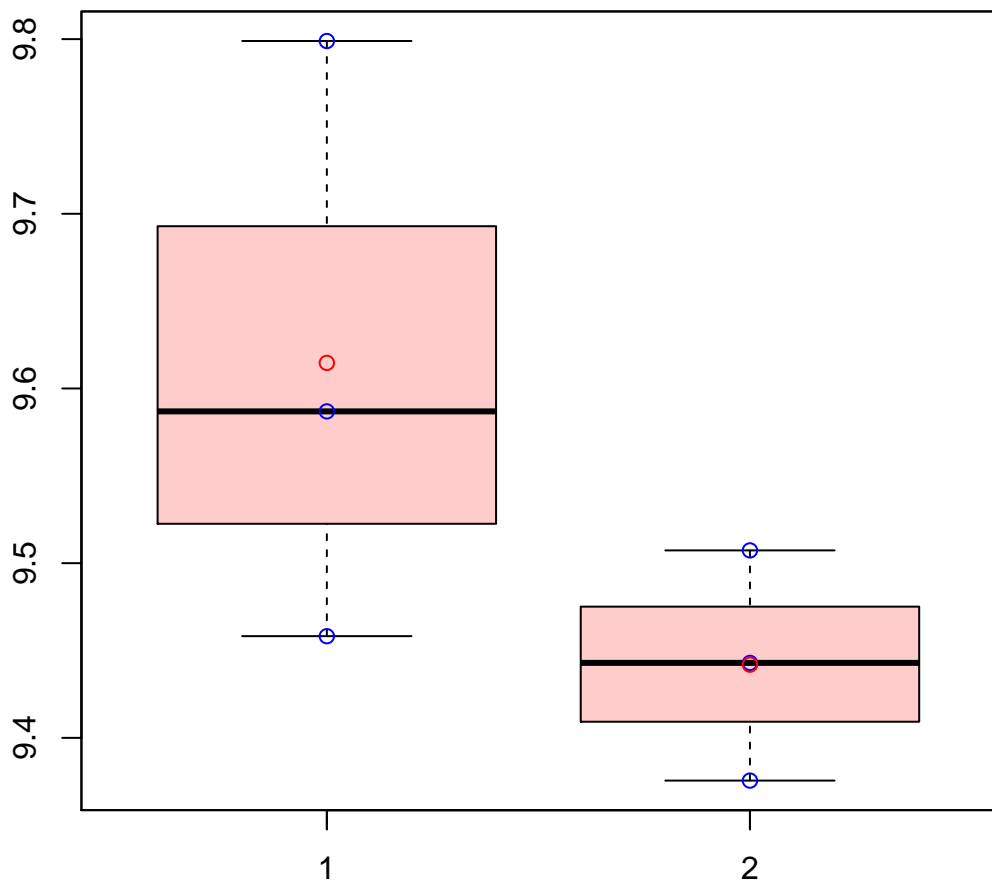

t-Test: p-value = 0.22

# CL138Contig6|CL138Contig6

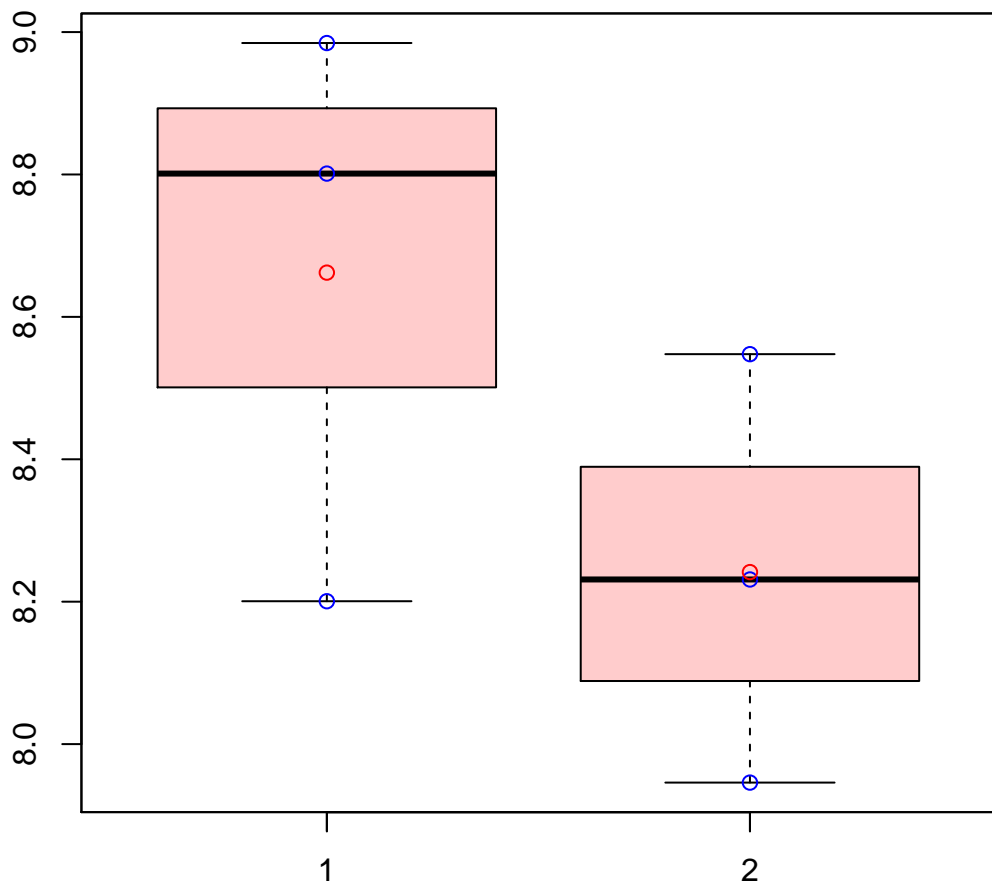

t-Test: p-value = 0.23

# CL138Contig8|CL138Contig8

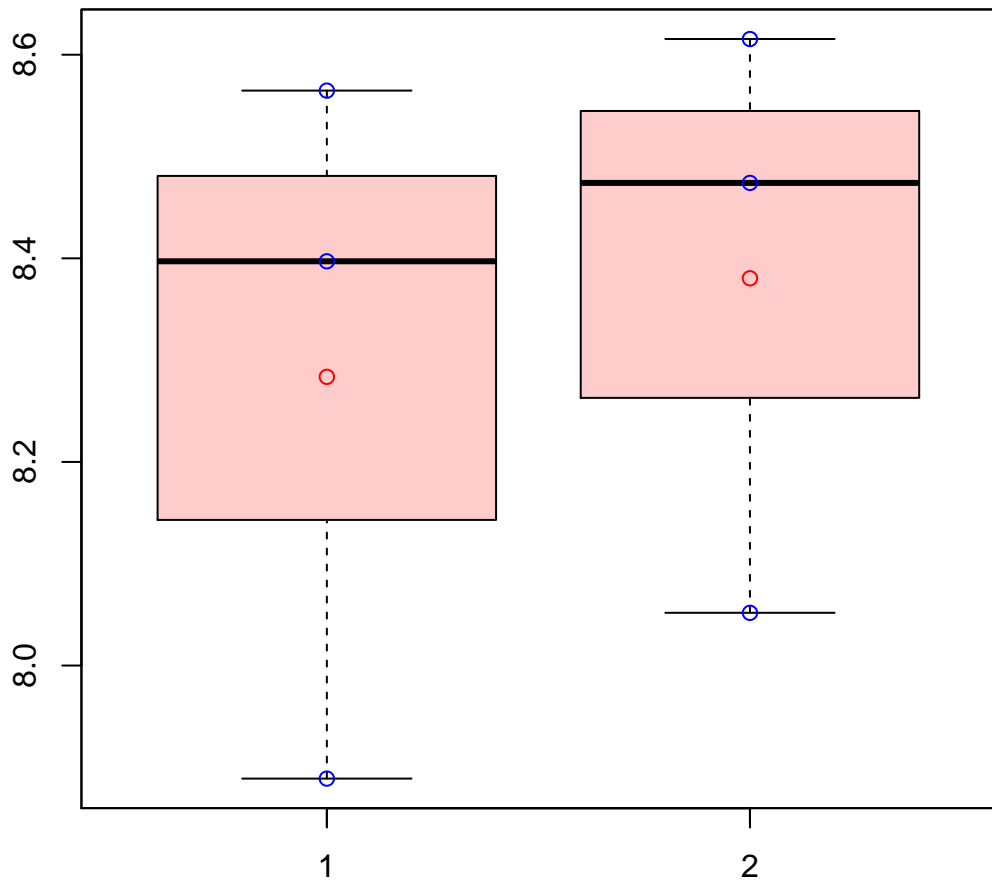

t-Test: p-value = 0.73



# CL138Contig9|CL138Contig9

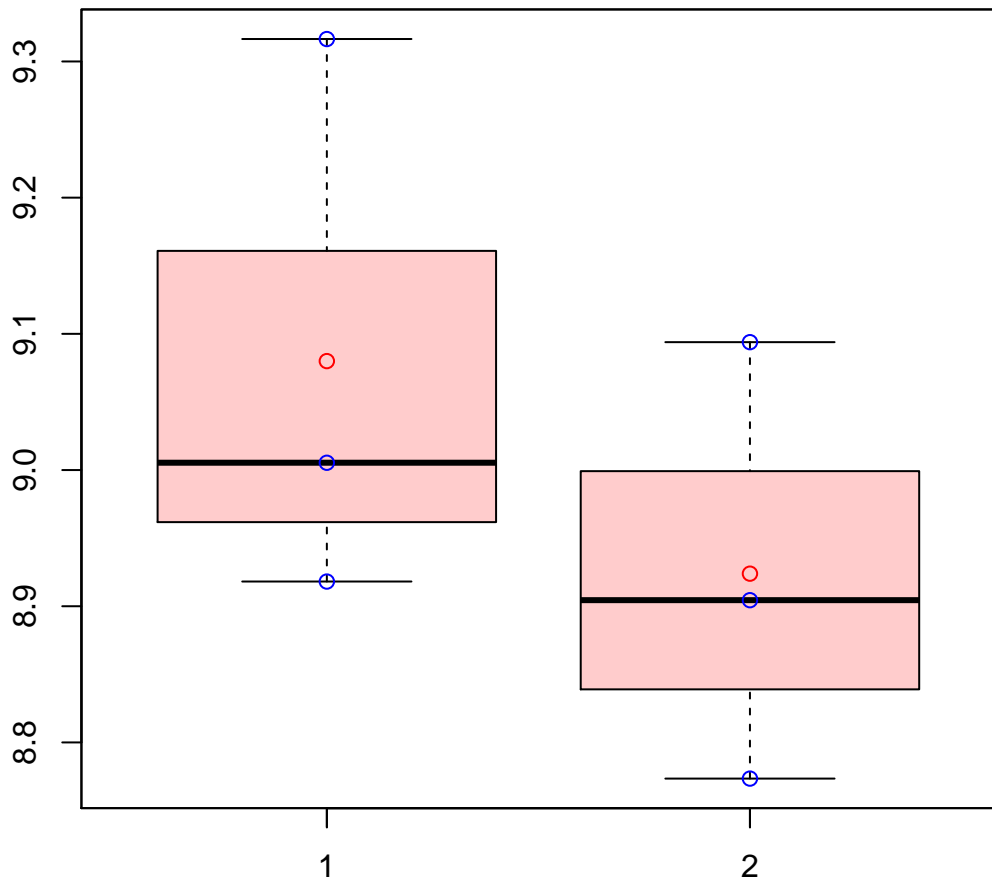

t-Test: p-value = 0.37

# CL1390Contig1|CL1390Contig1

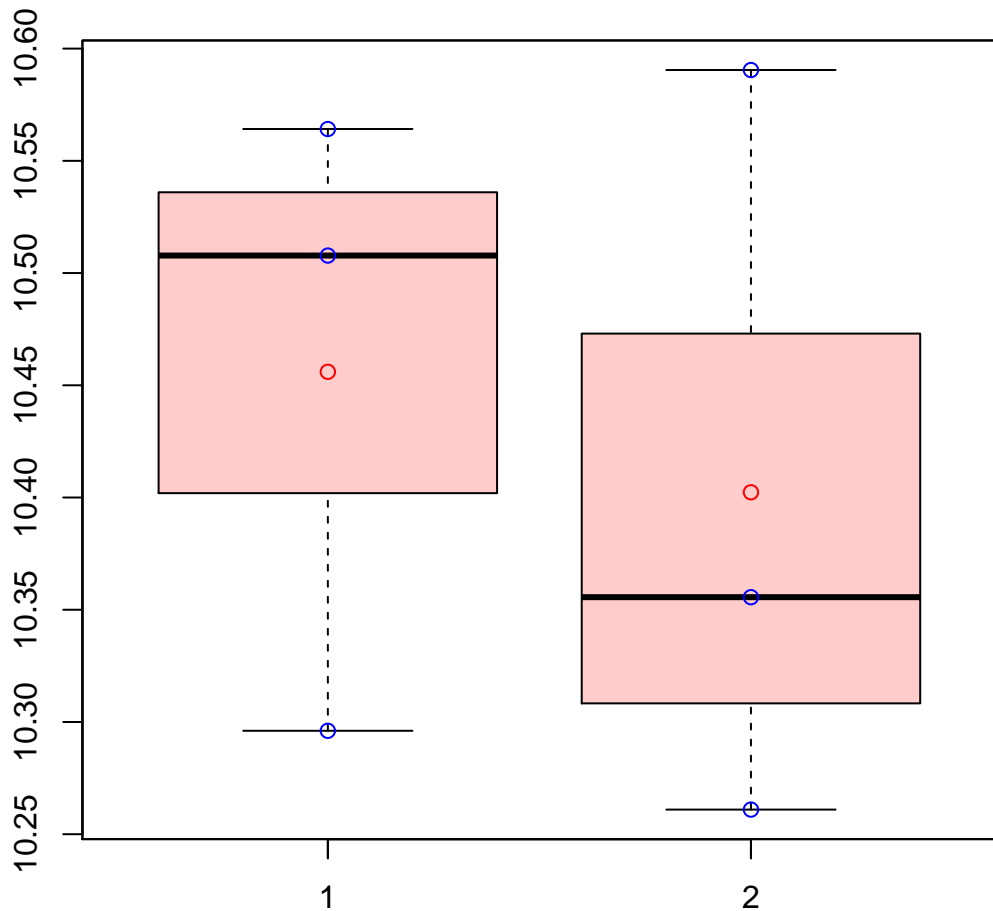

t-Test: p-value = 0.7

# CL1390Contig2|CL1390Contig2



t-Test: p-value = 0.7

# CL1390Contig4|CL1390Contig4

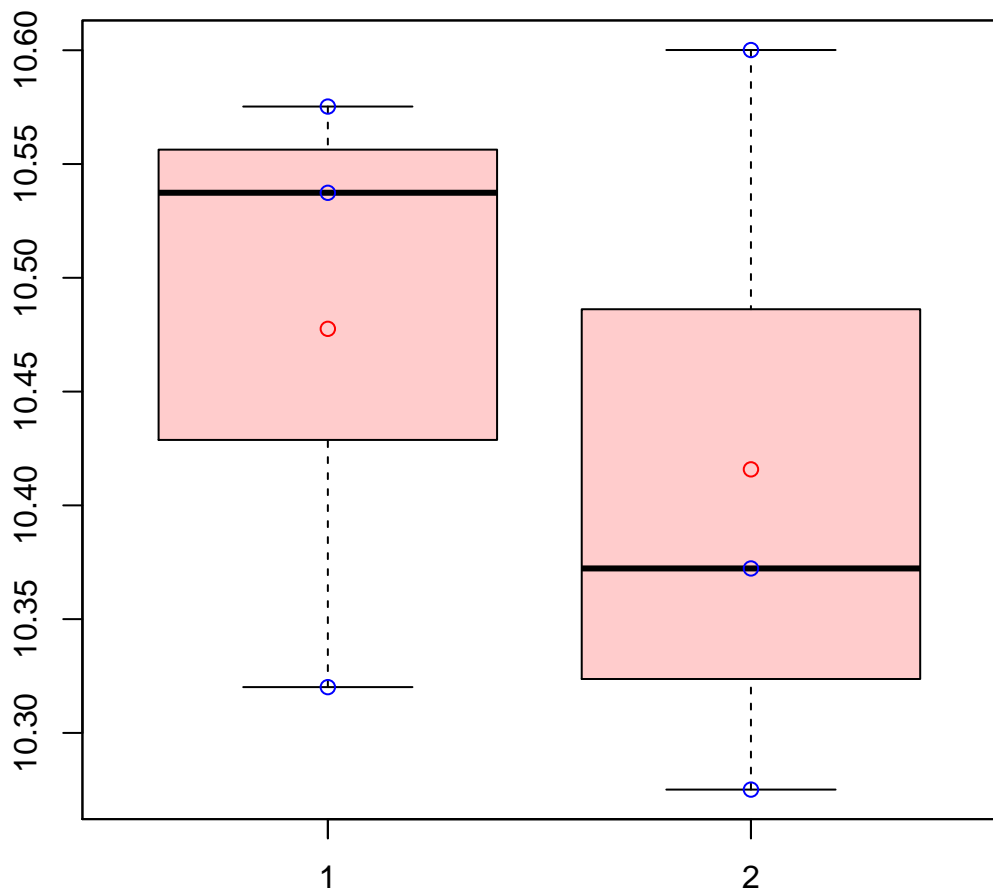

t-Test: p-value = 0.65

# CL1390Contig5|CL1390Contig5

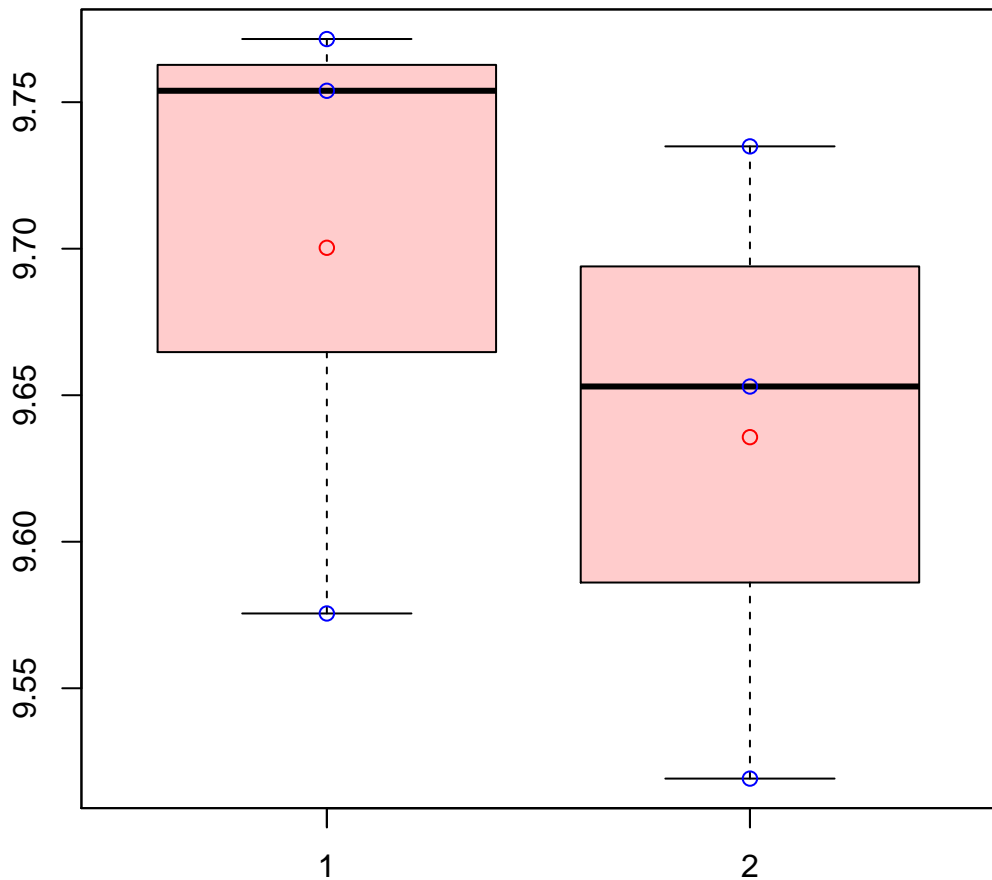

t-Test: p-value = 0.51

# CL1392Contig3|CL1392Contig3

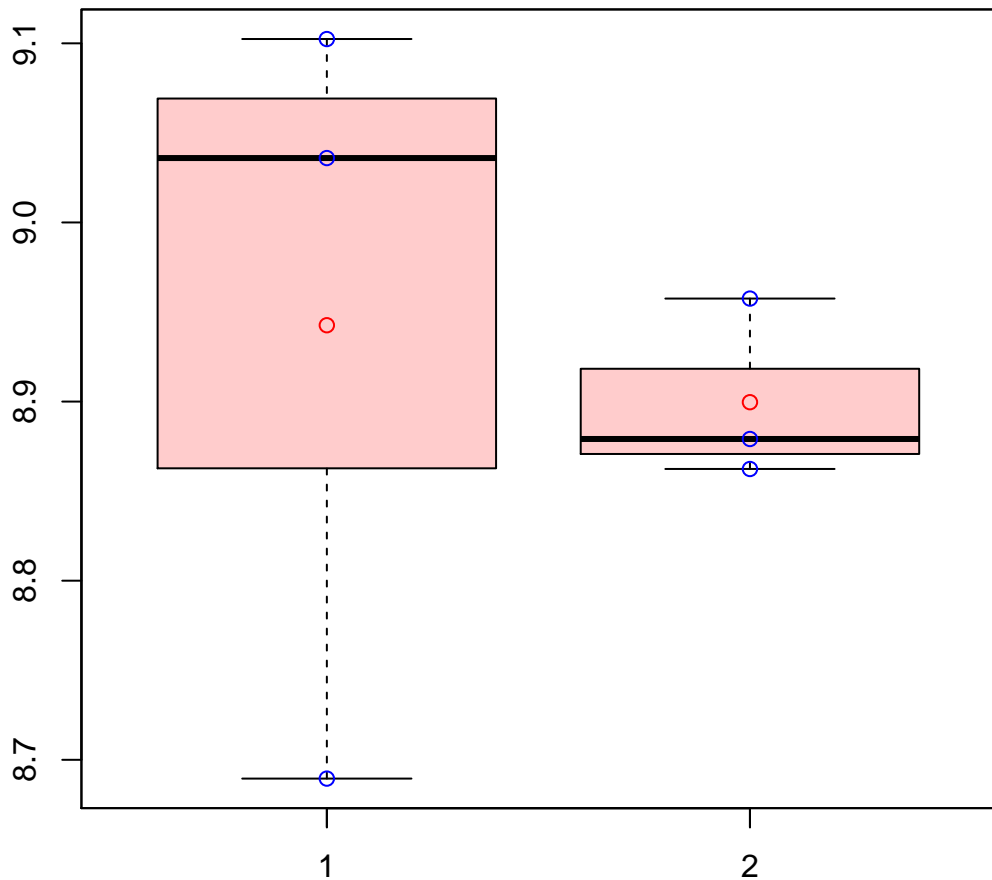

t-Test: p-value = 0.77

# CL13950Contig1|CL13950Contig1

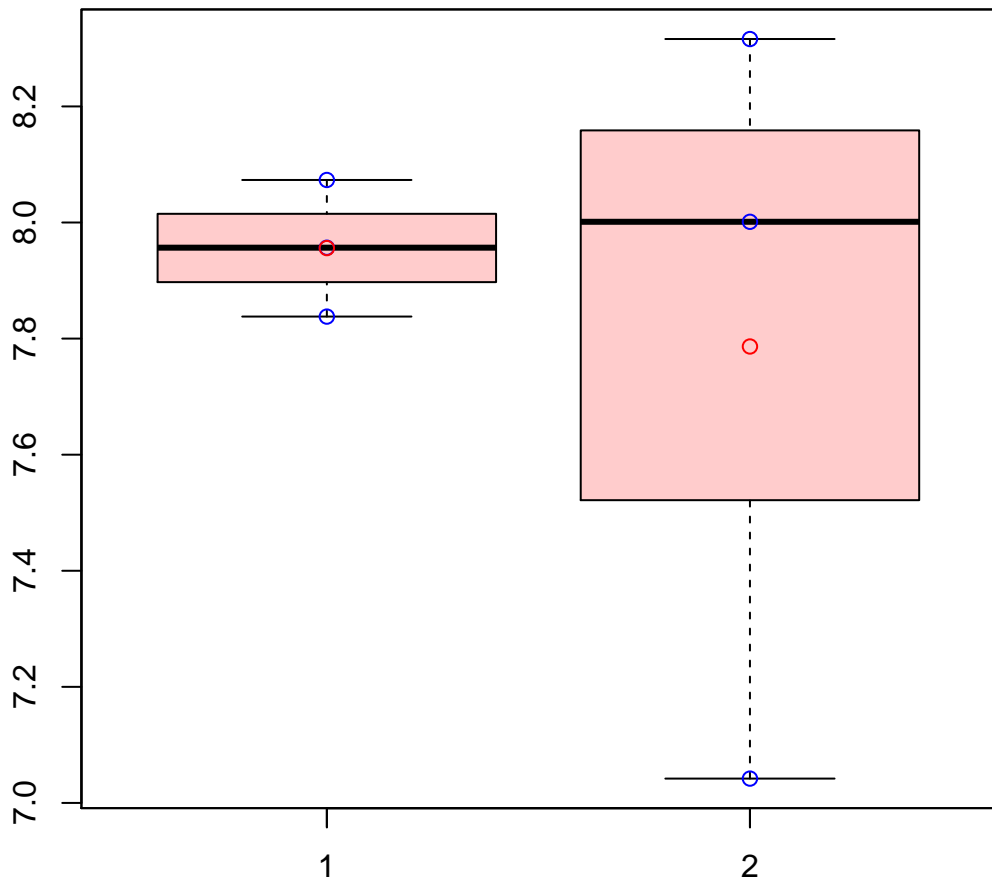

t-Test: p-value = 0.7

# CL13957Contig1|CL13957Contig1

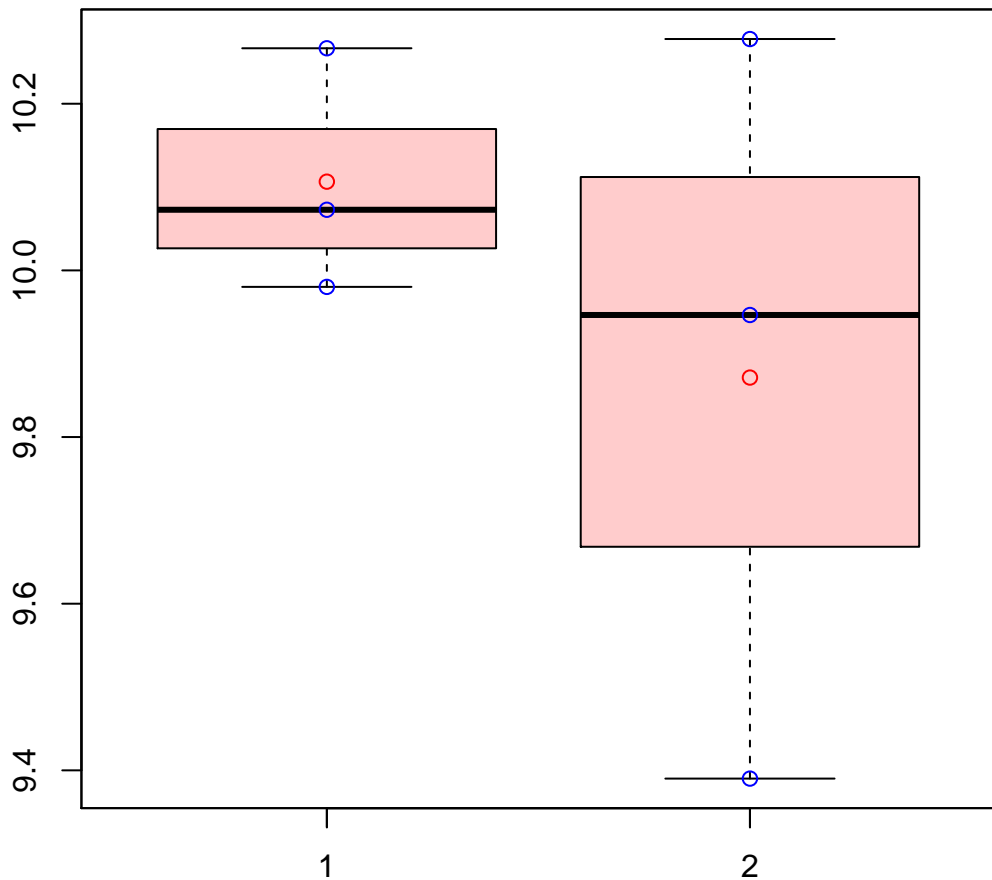

t-Test: p-value = 0.47



# CL13962Contig1|CL13962Contig1

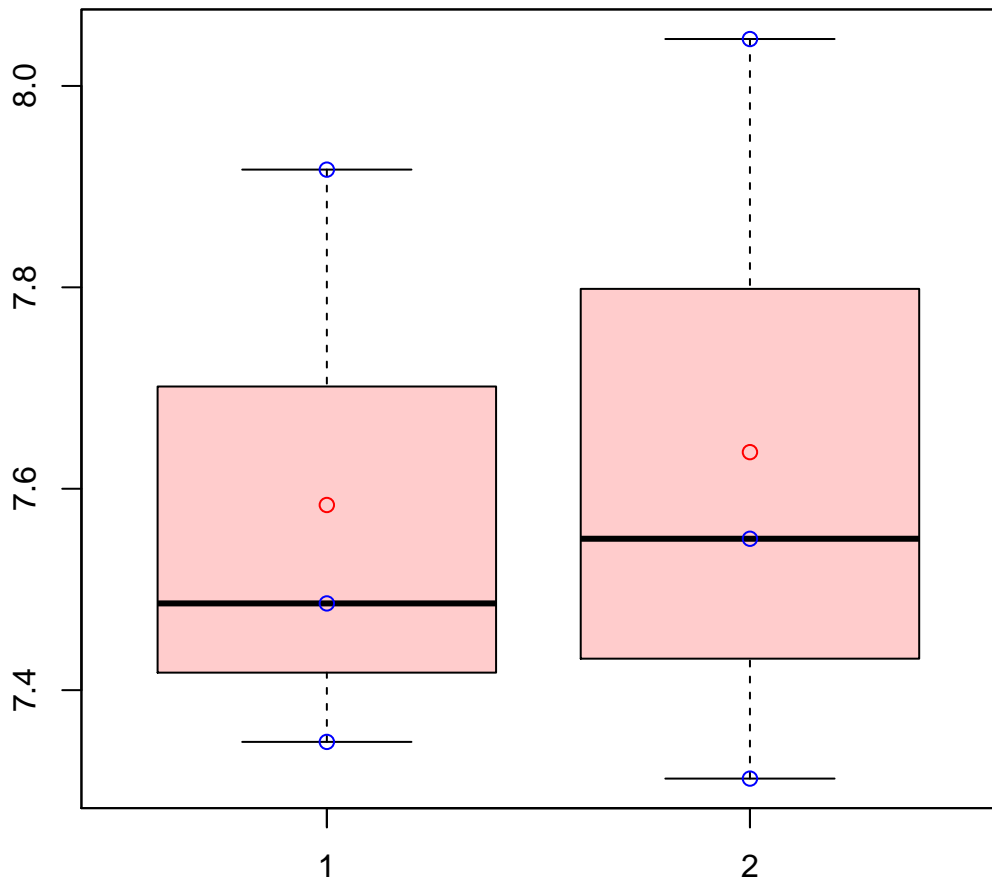

t-Test: p-value = 0.86

# CL13963Contig1|CL13963Contig1

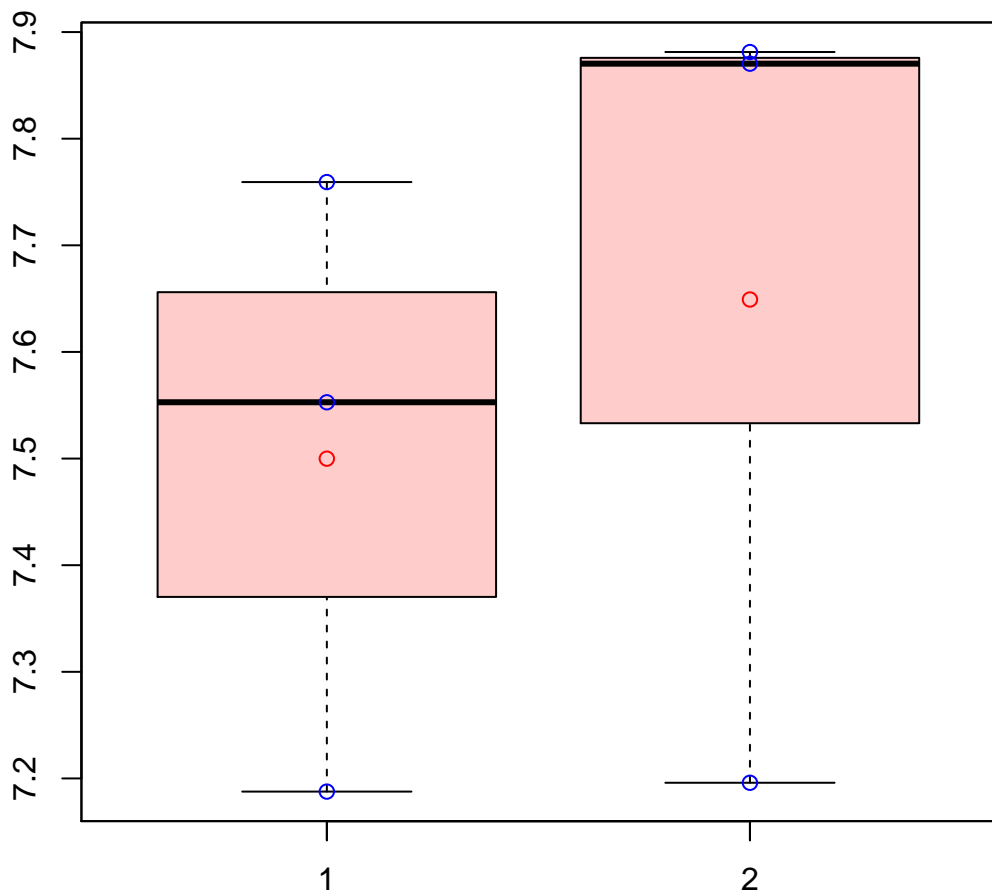

t-Test: p-value = 0.63

# CL13969Contig1|CL13969Contig1

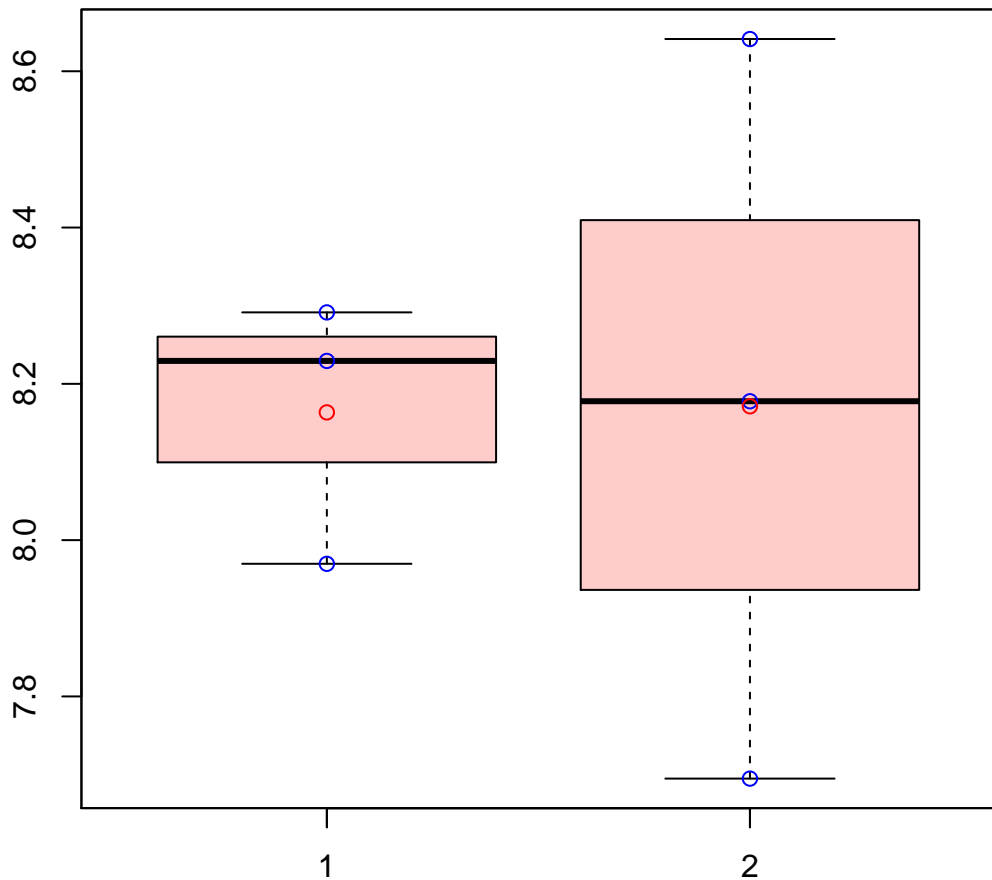

t-Test: p-value = 0.98

# CL1397Contig1|CL1397Contig1

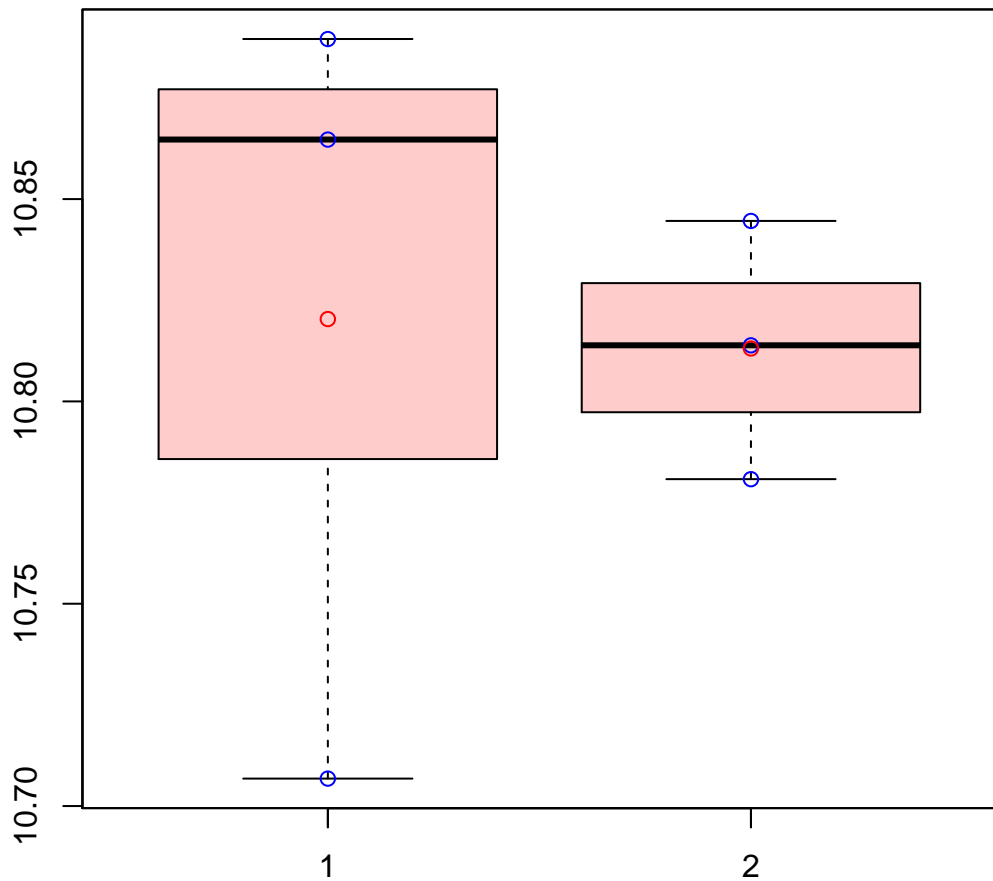

t-Test: p-value = 0.91

# CL1397Contig2|CL1397Contig2

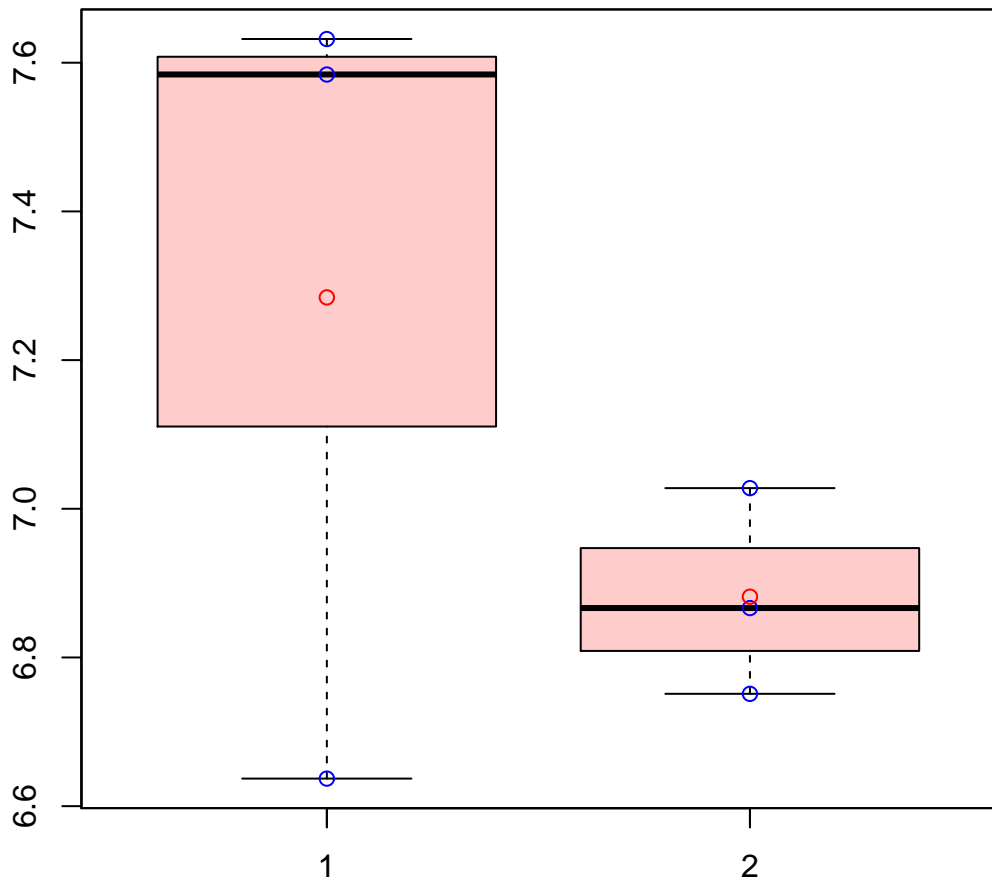

t-Test: p-value = 0.34

# CL1397Contig3|CL1397Contig3

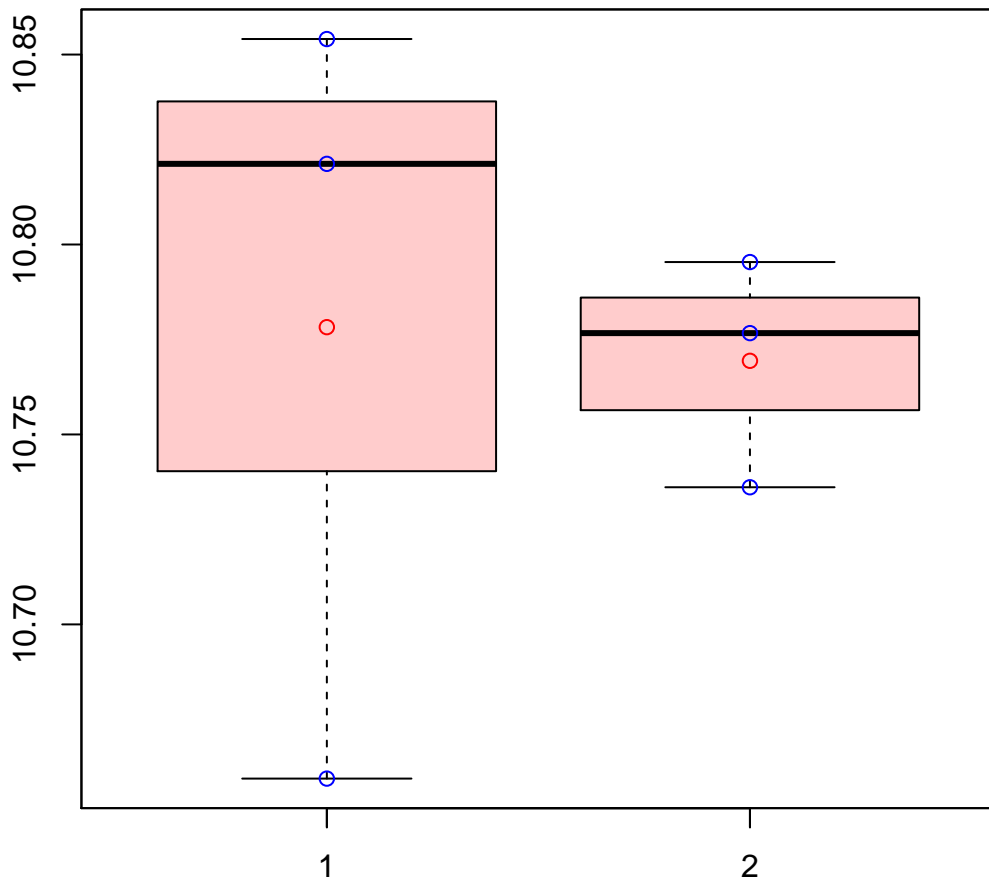

t-Test: p-value = 0.9

# CL1397Contig4|CL1397Contig4

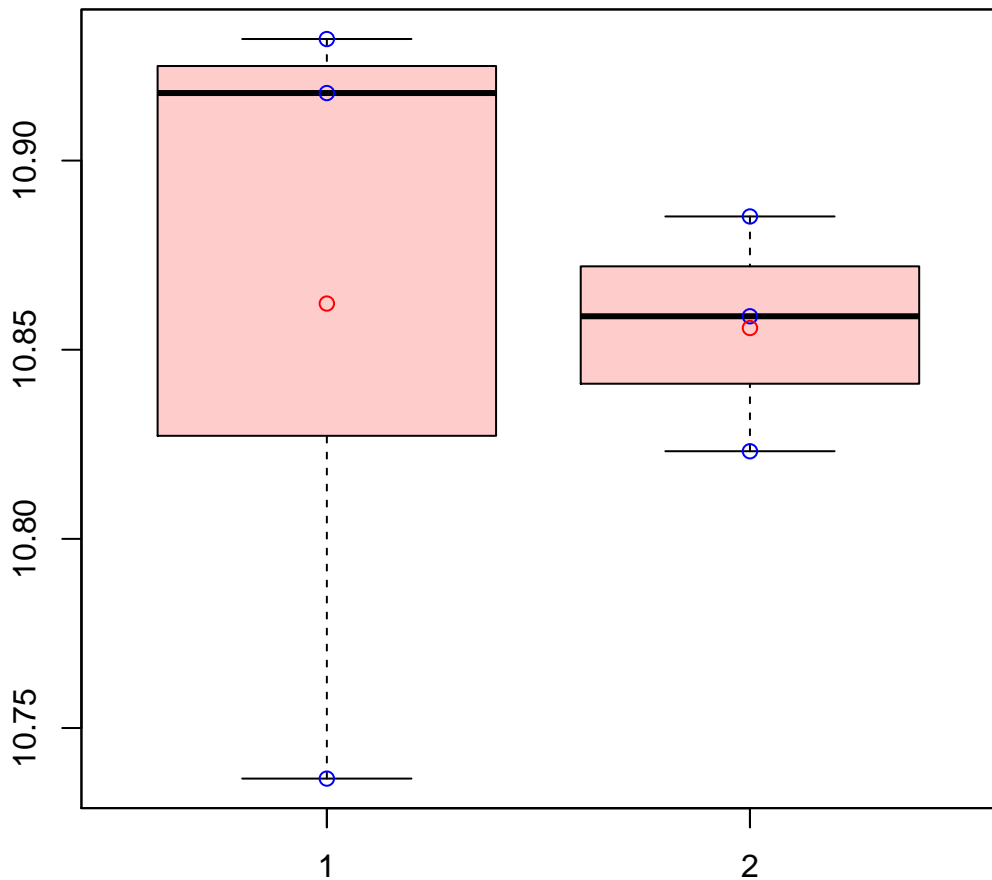

t-Test: p-value = 0.93

# CL139Contig10|CL139Contig10



t-Test: p-value = 1



# CL13Contig10|CL13Contig10

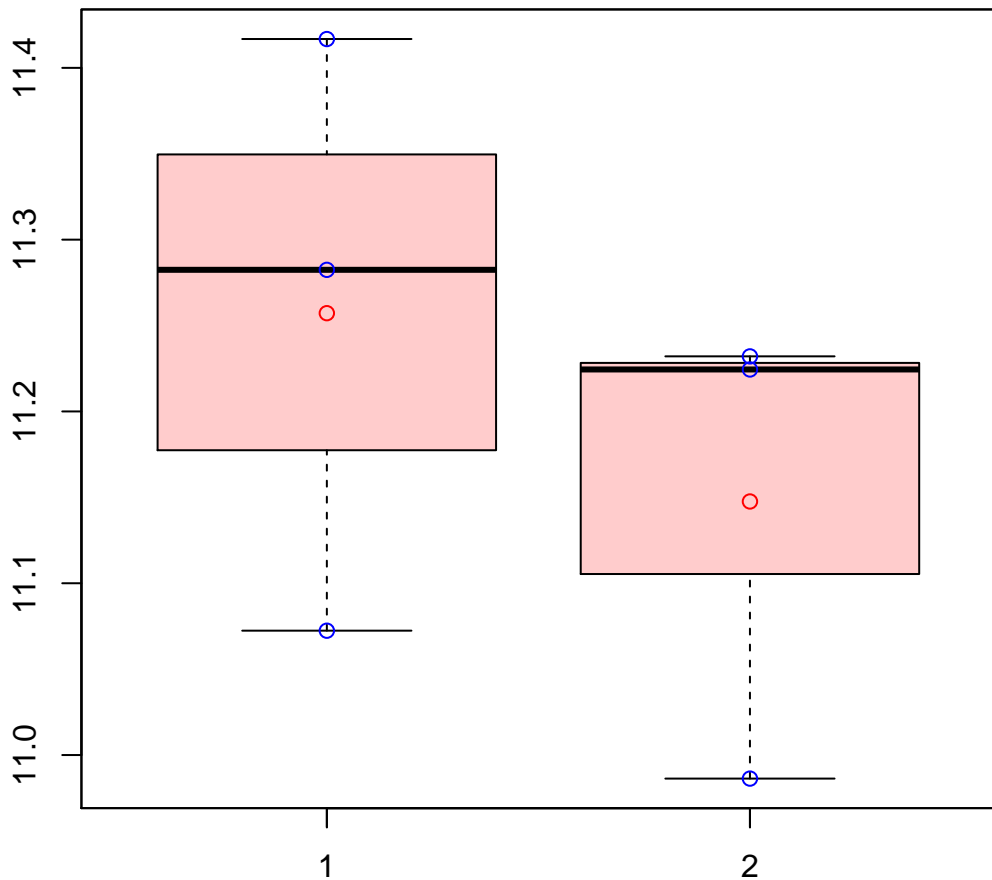

t-Test: p-value = 0.44

# CL13Contig11|CL13Contig11



t-Test: p-value = 0.44

# CL13Contig12|CL13Contig12

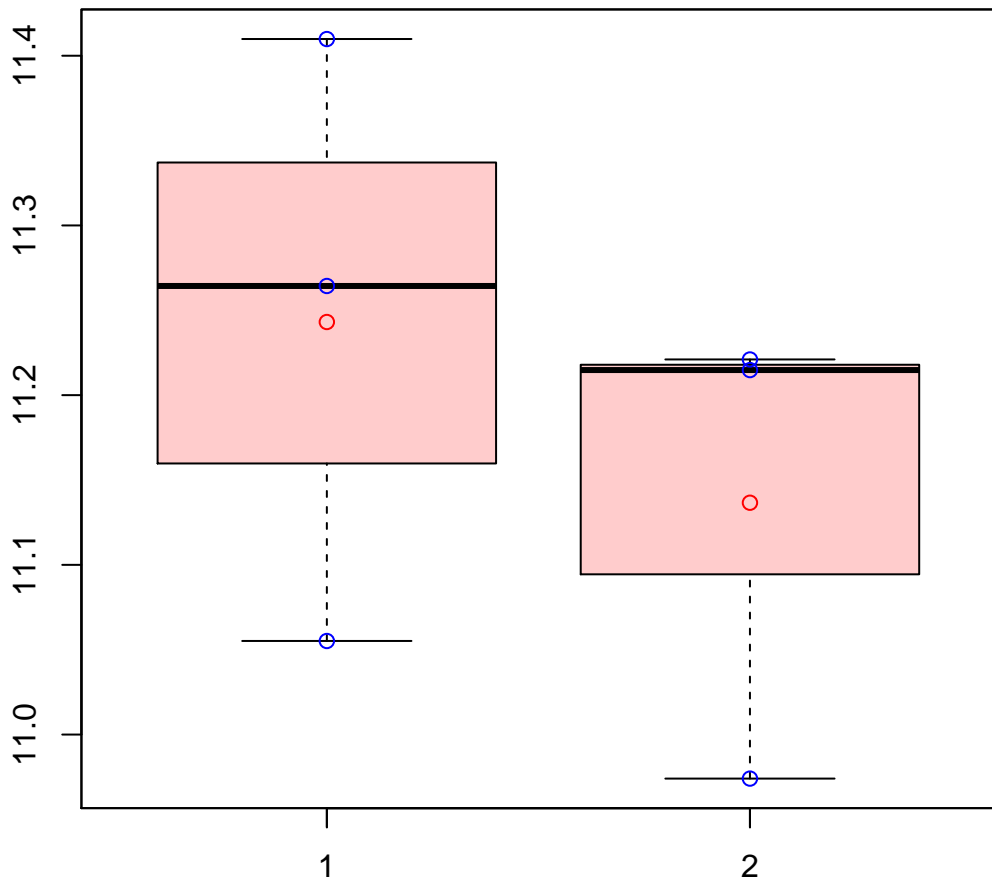

t-Test: p-value = 0.46

# CL13Contig25|CL13Contig25

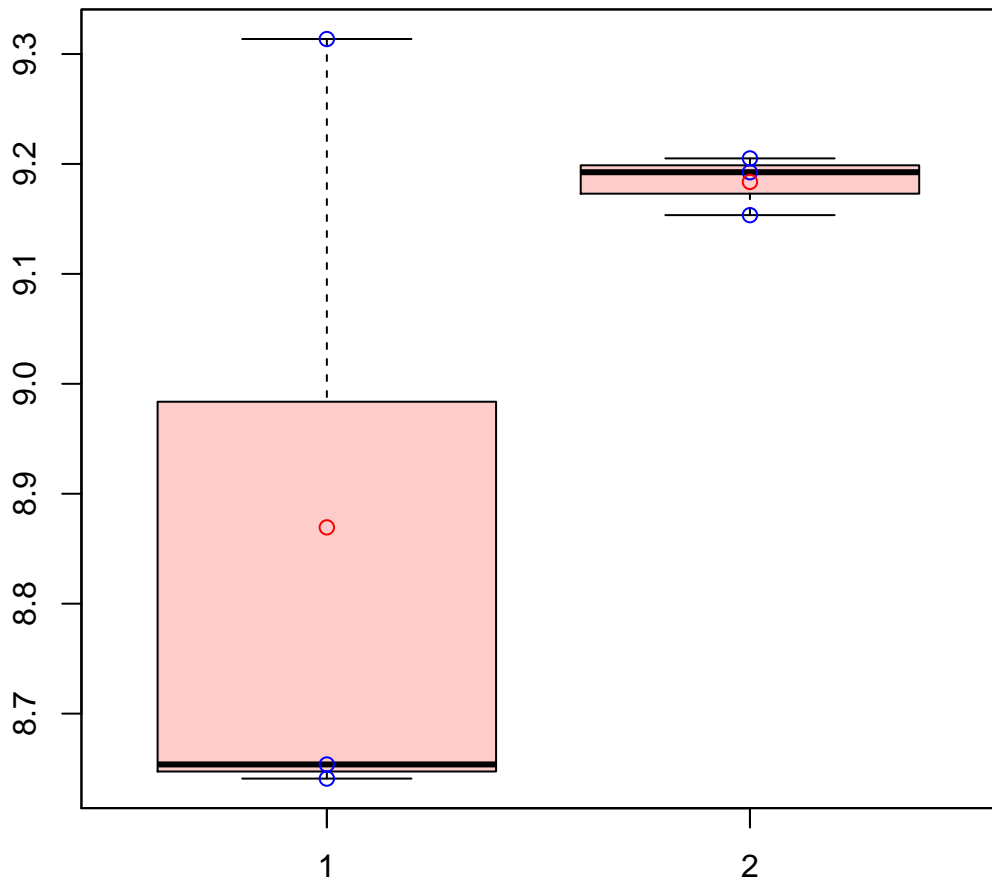

t-Test: p-value = 0.29

# CL13Contig30|CL13Contig30

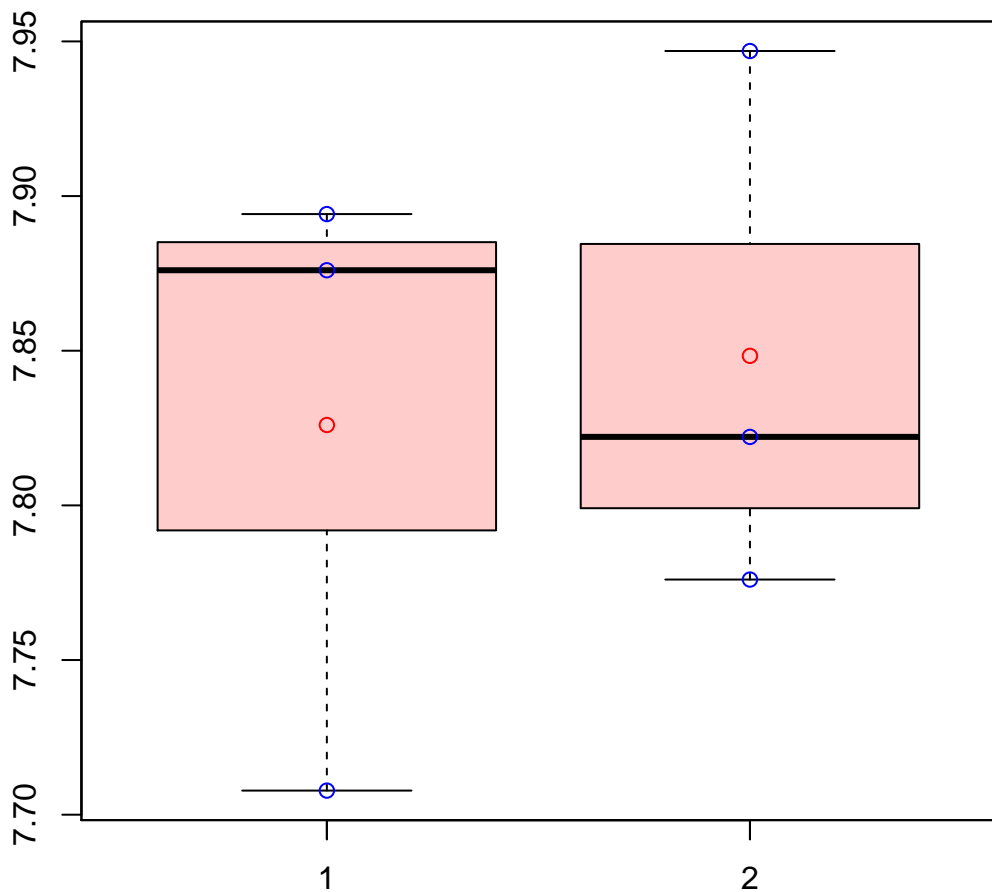

t-Test: p-value = 0.79

# CL13Contig39|CL13Contig39

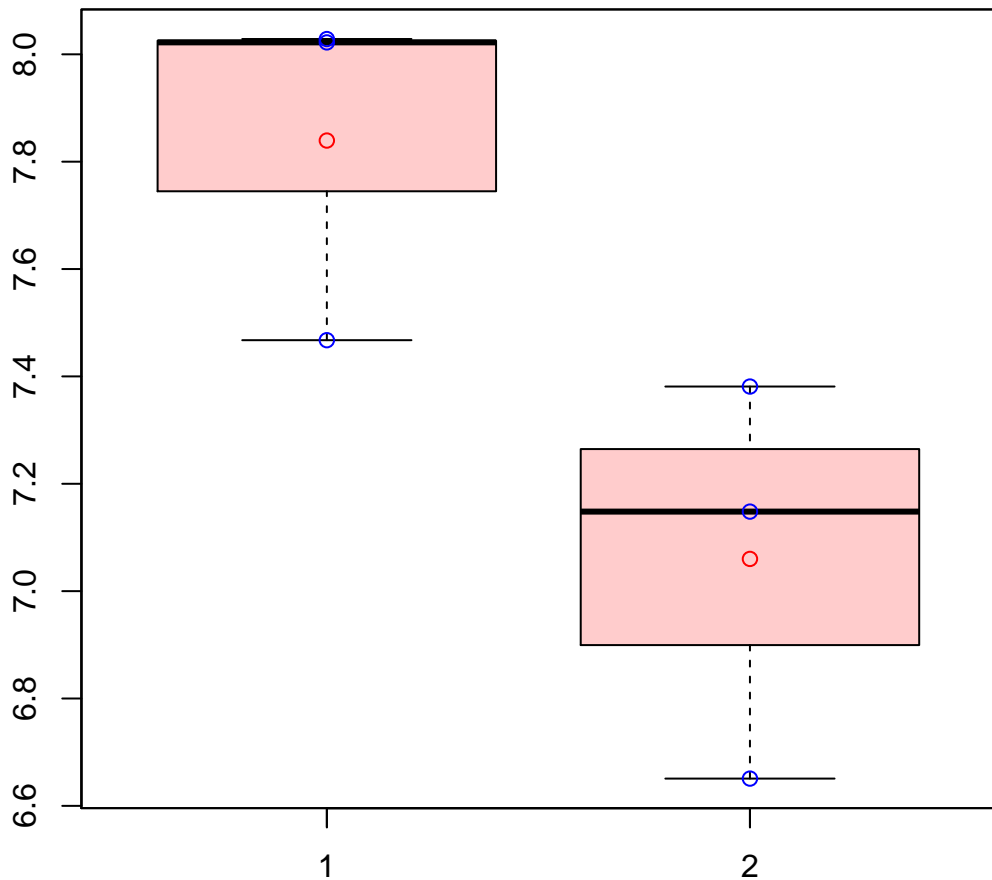

t-Test: p-value = 0.05

# CL13Contig40|CL13Contig40

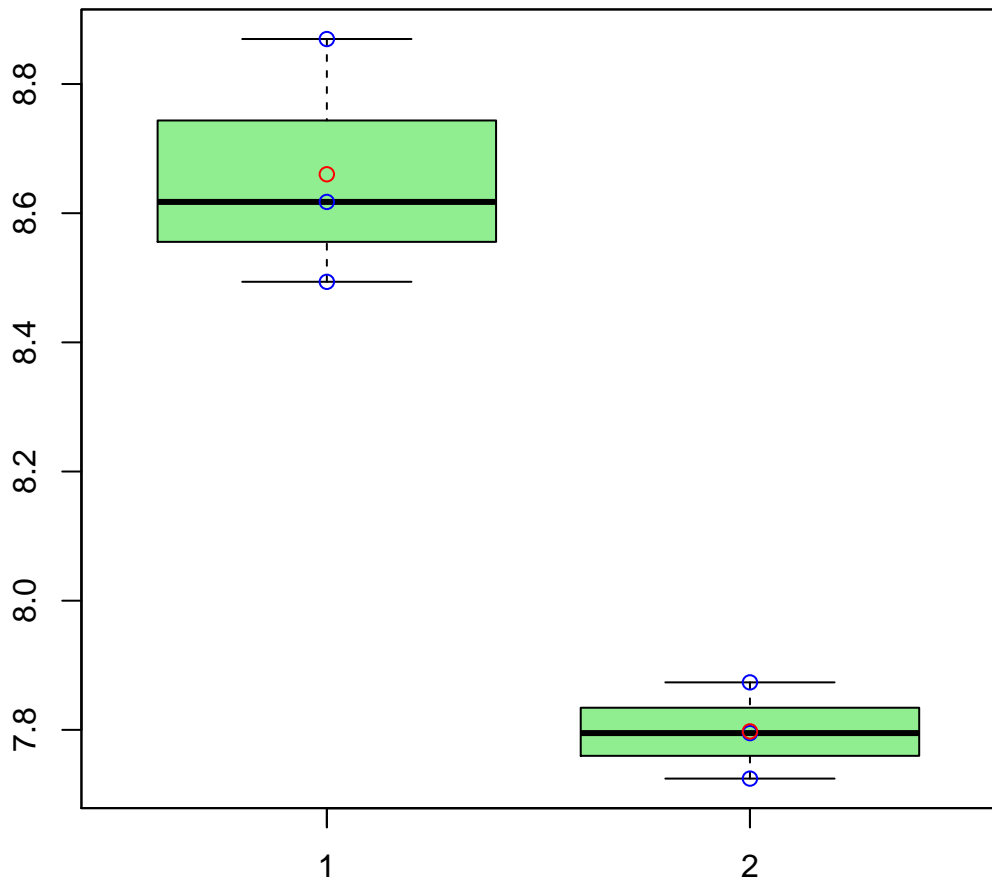

t-Test: p-value = 0.01

# CL13Contig41|CL13Contig41



t-Test: p-value = 0.05



# CL13Contig42|CL13Contig42



t-Test: p-value = 0.05

# CL13Contig53|CL13Contig53

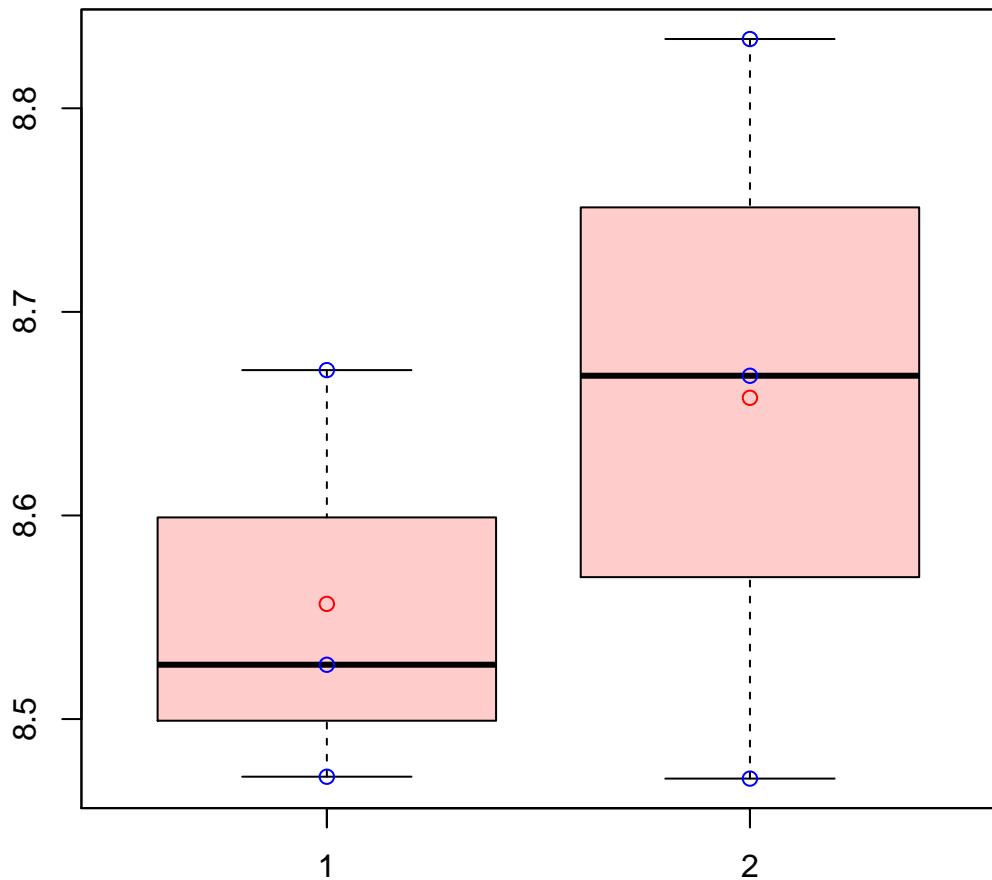

t-Test: p-value = 0.46

# CL13Contig55|CL13Contig55

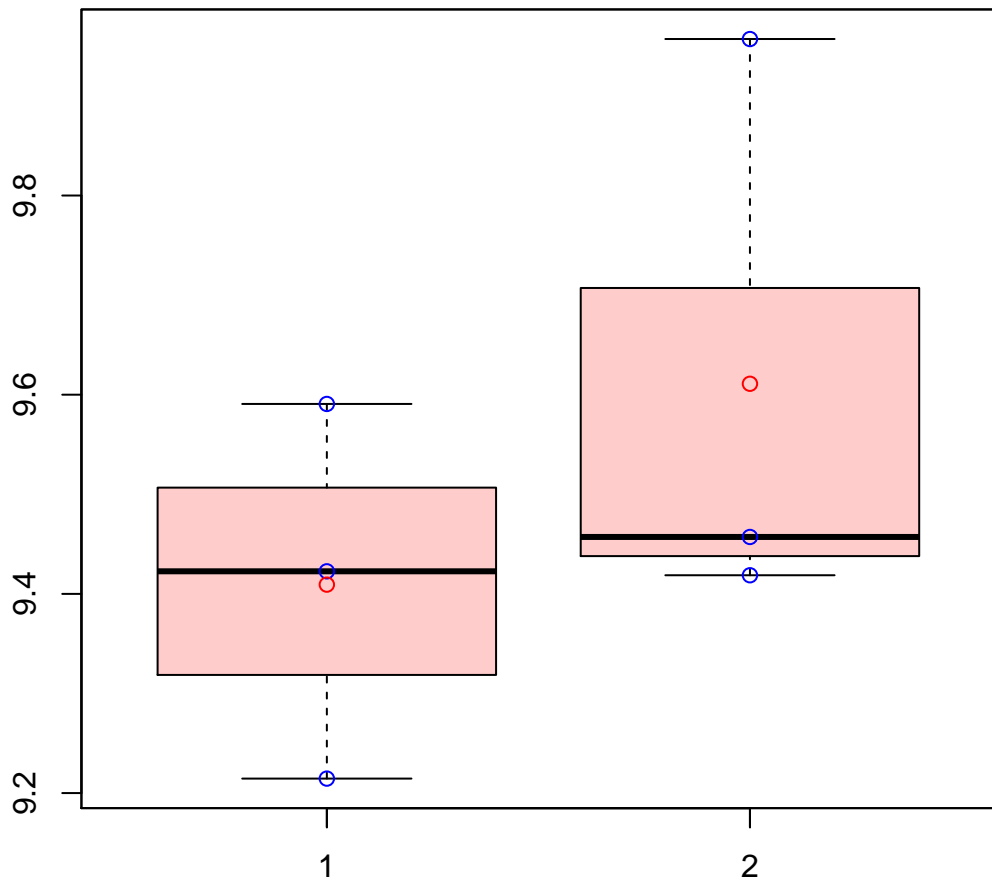

t-Test: p-value = 0.39

# CL13Contig8|CL13Contig8

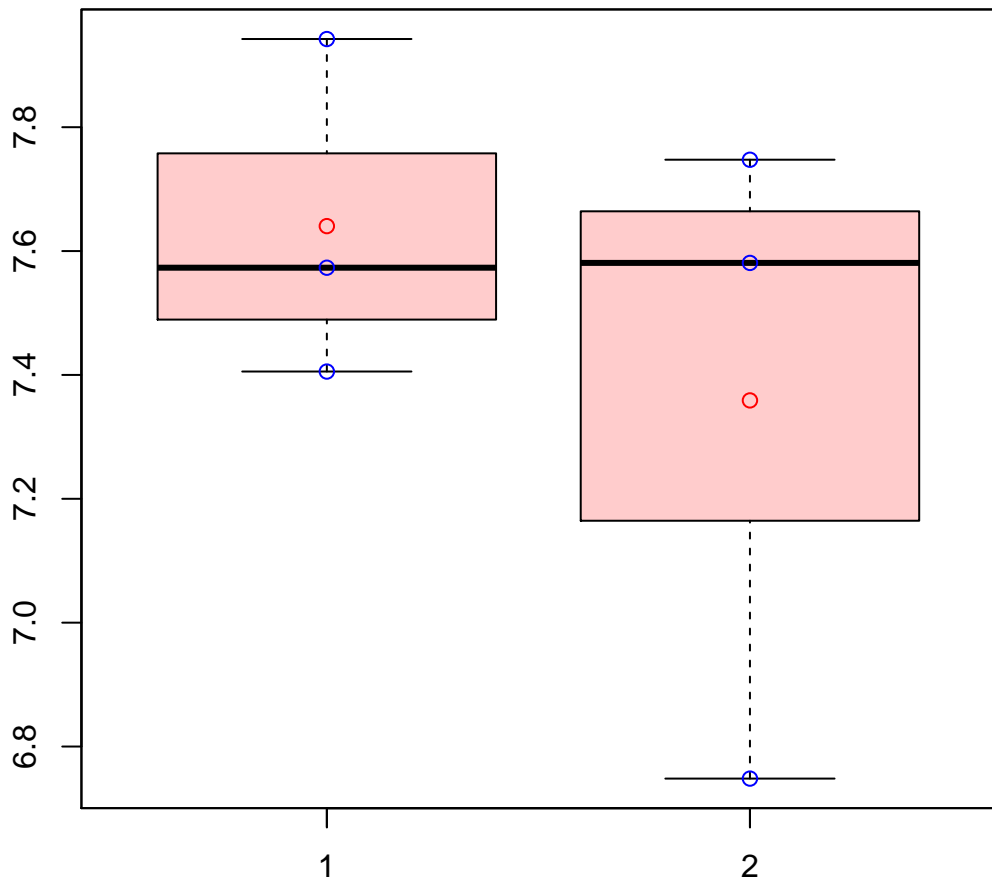

t-Test: p-value = 0.48

# CL1400Contig3|CL1400Contig3

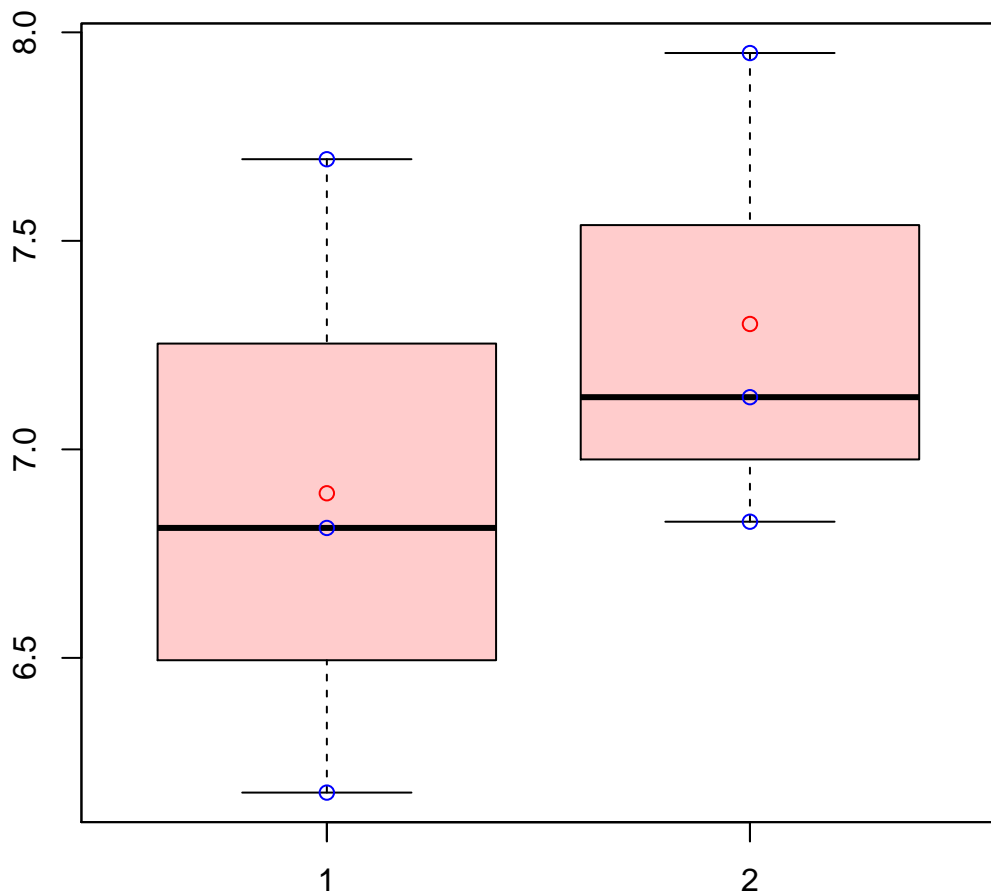

t-Test: p-value = 0.51

# CL1400Contig5|CL1400Contig5

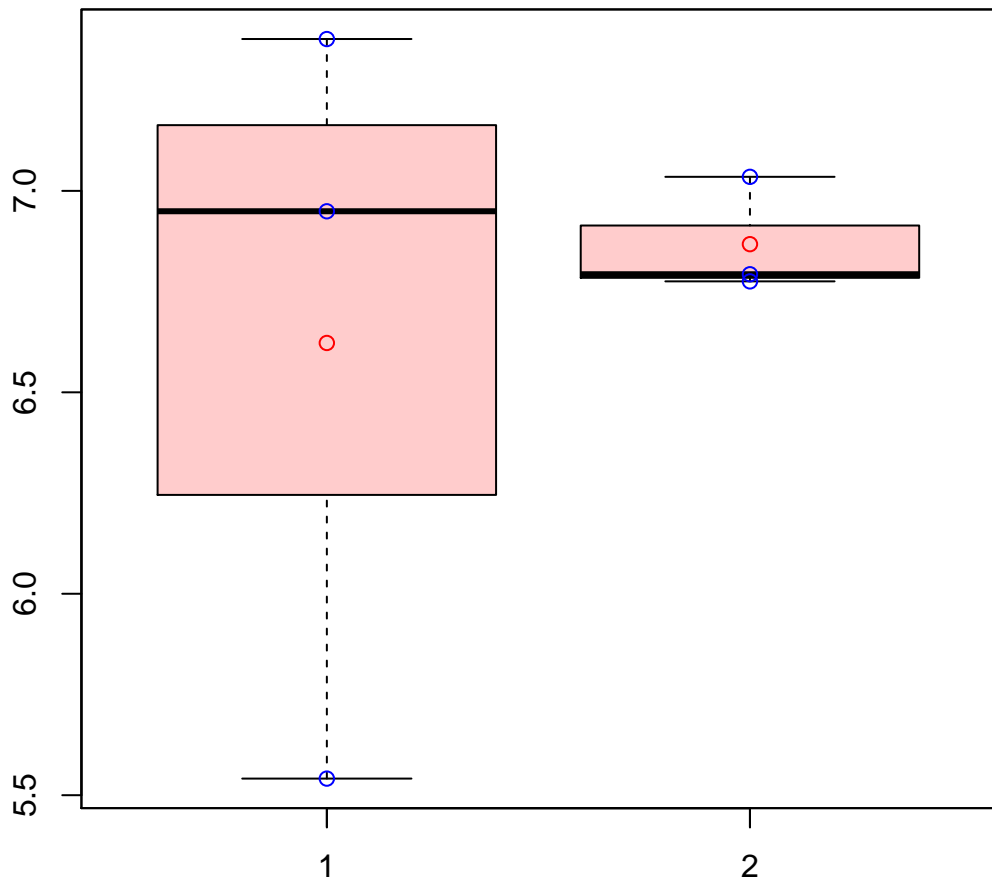

t-Test: p-value = 0.7

# CL1402Contig4|CL1402Contig4

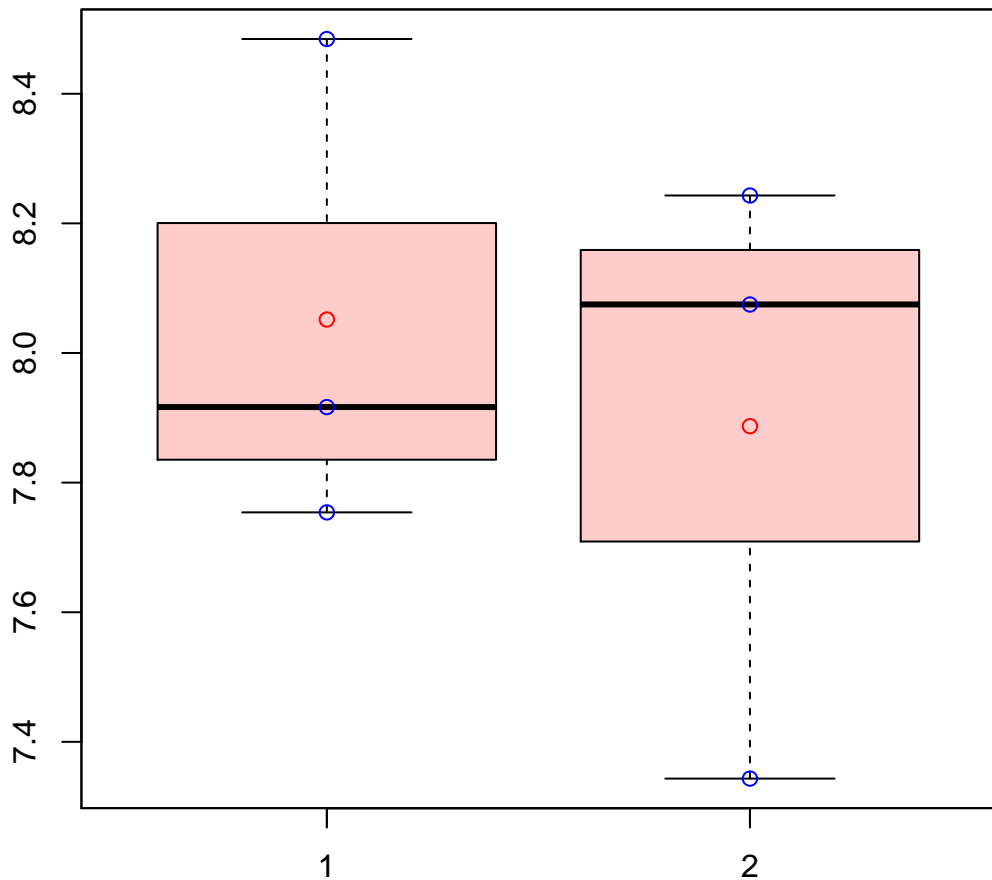

t-Test: p-value = 0.67

# CL140Contig10|CL140Contig10

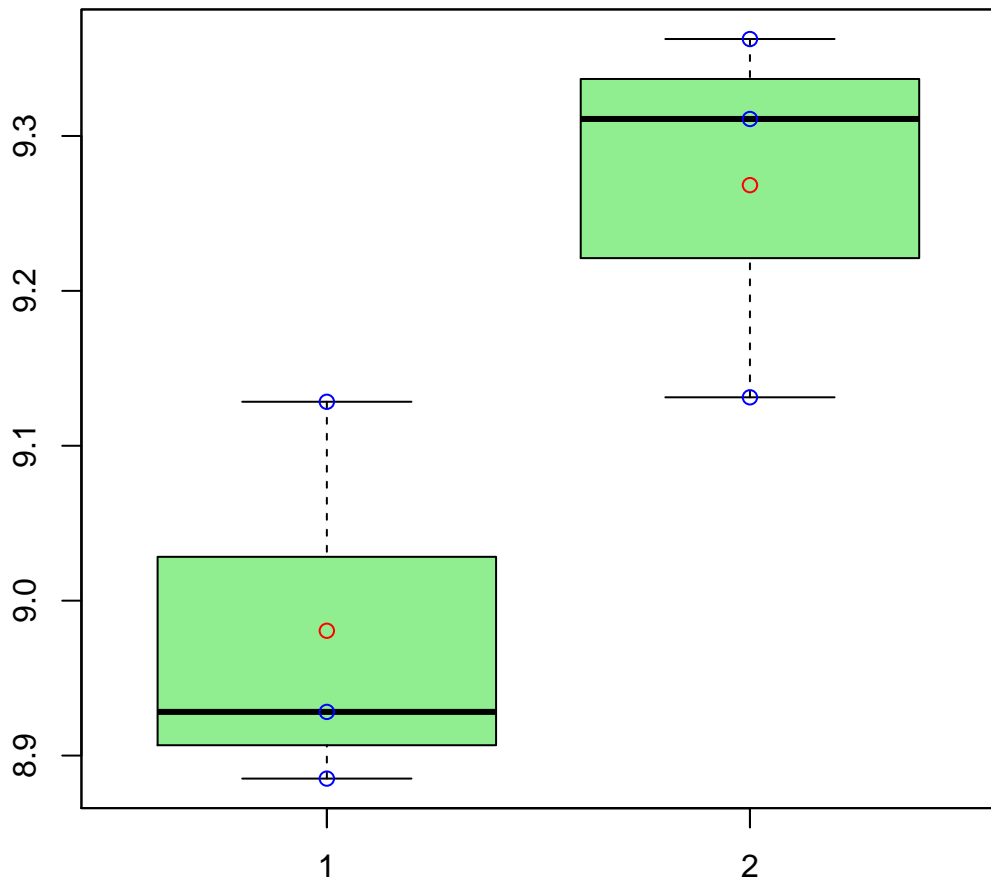

t-Test: p-value = 0.05



# CL140Contig12|CL140Contig12

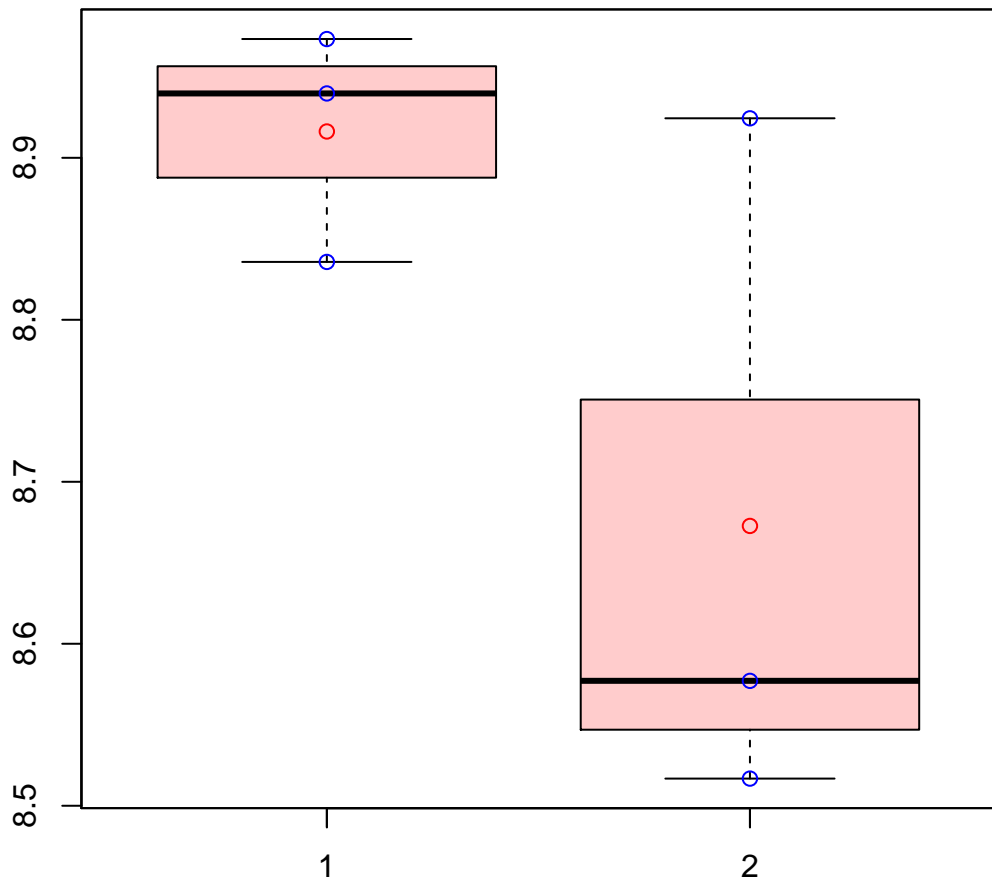

t-Test: p-value = 0.19

# CL140Contig4|CL140Contig4

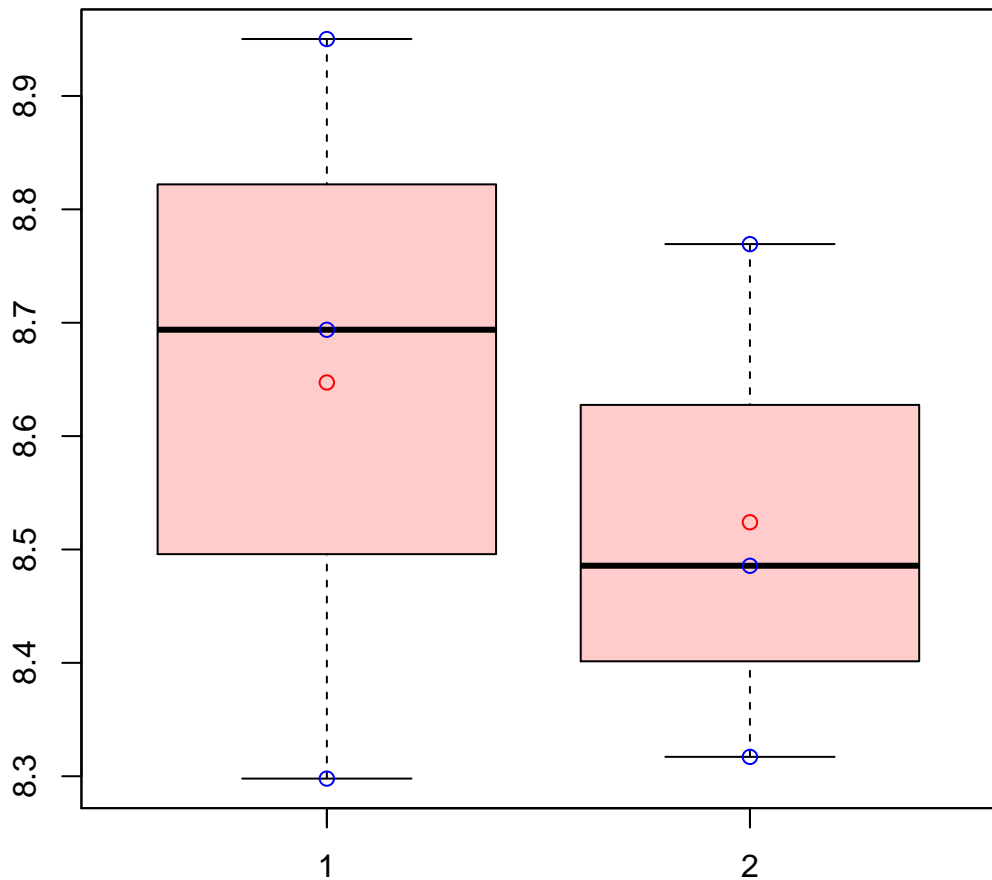

t-Test: p-value = 0.63

# CL14128Contig1|CL14128Contig1

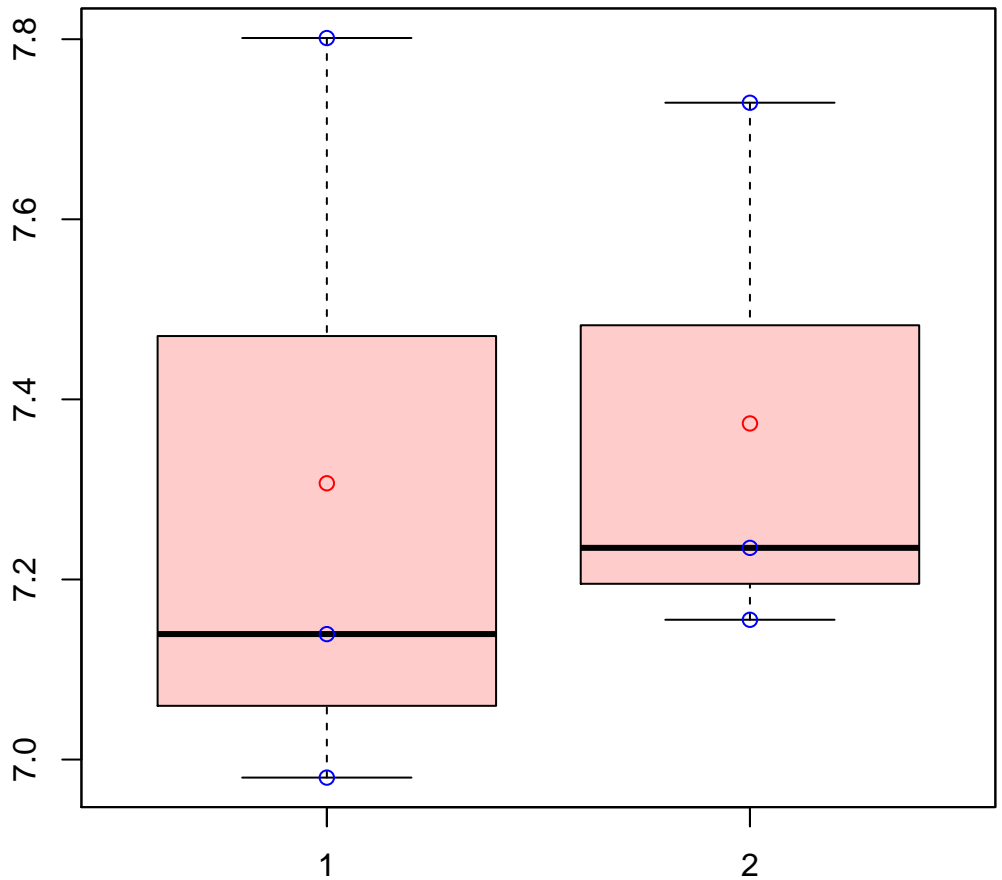

t-Test: p-value = 0.84

# CL14137Contig1|CL14137Contig1

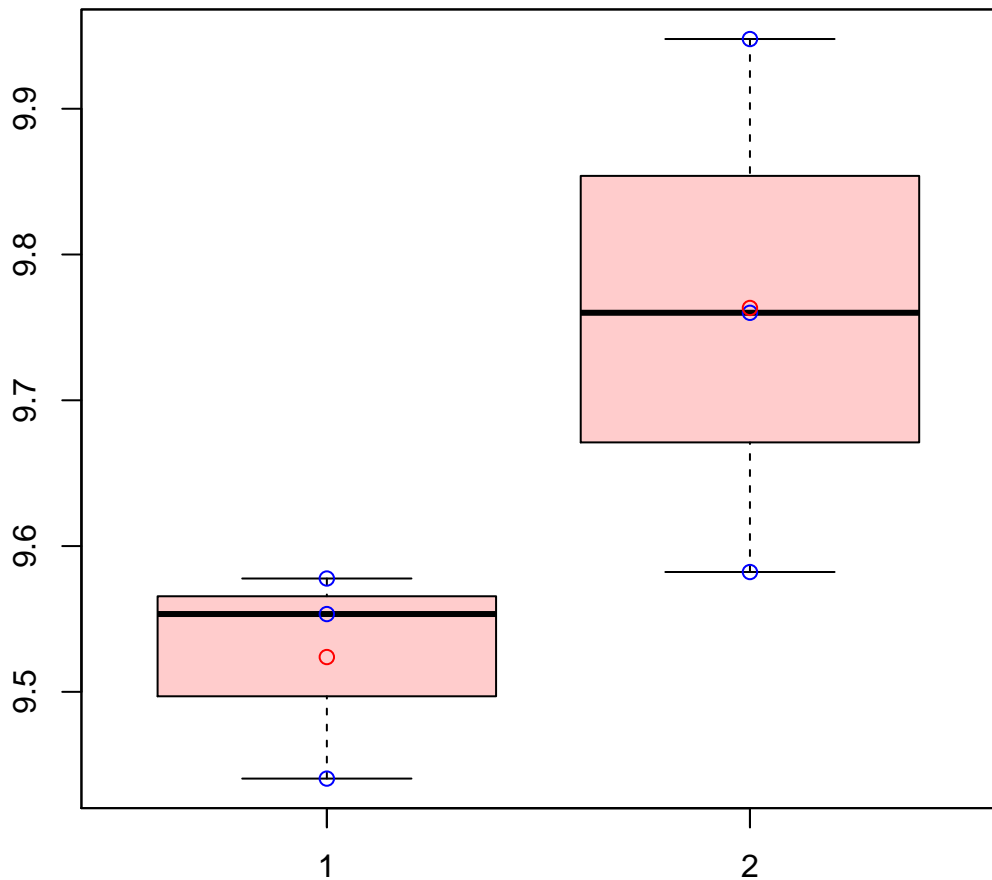

t-Test: p-value = 0.14

# CL1413Contig3|CL1413Contig3

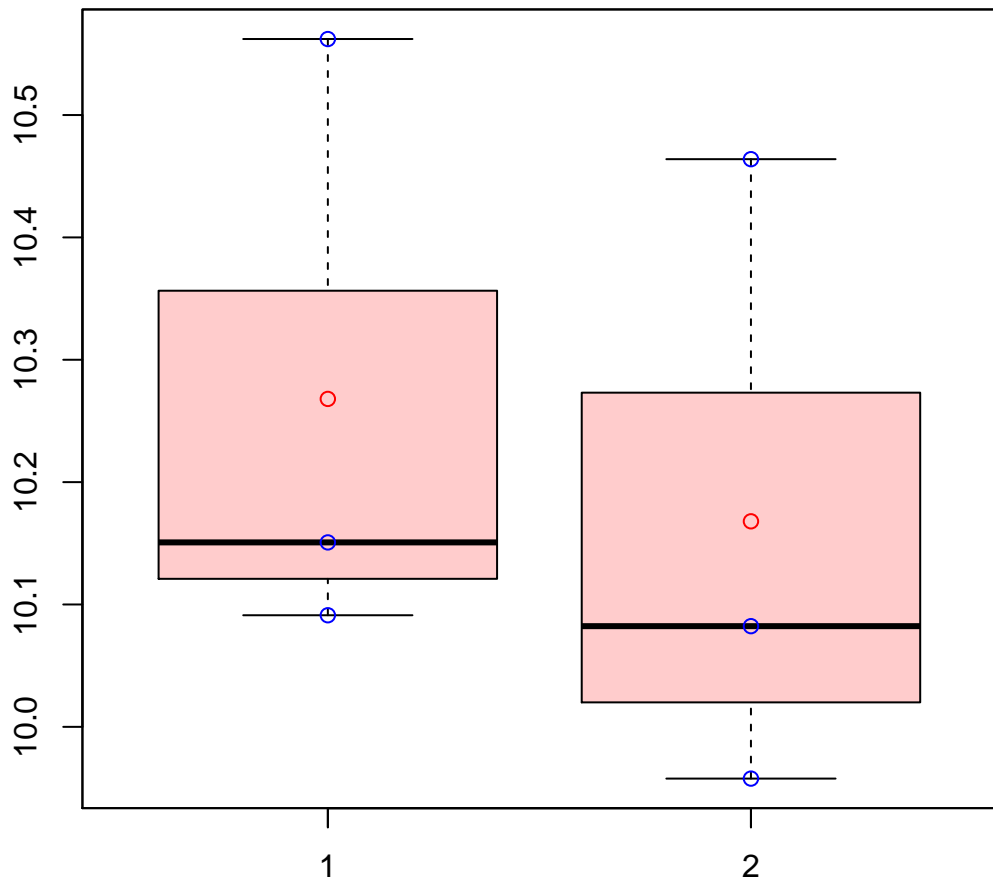

t-Test: p-value = 0.66

# CL1414Contig3|CL1414Contig3

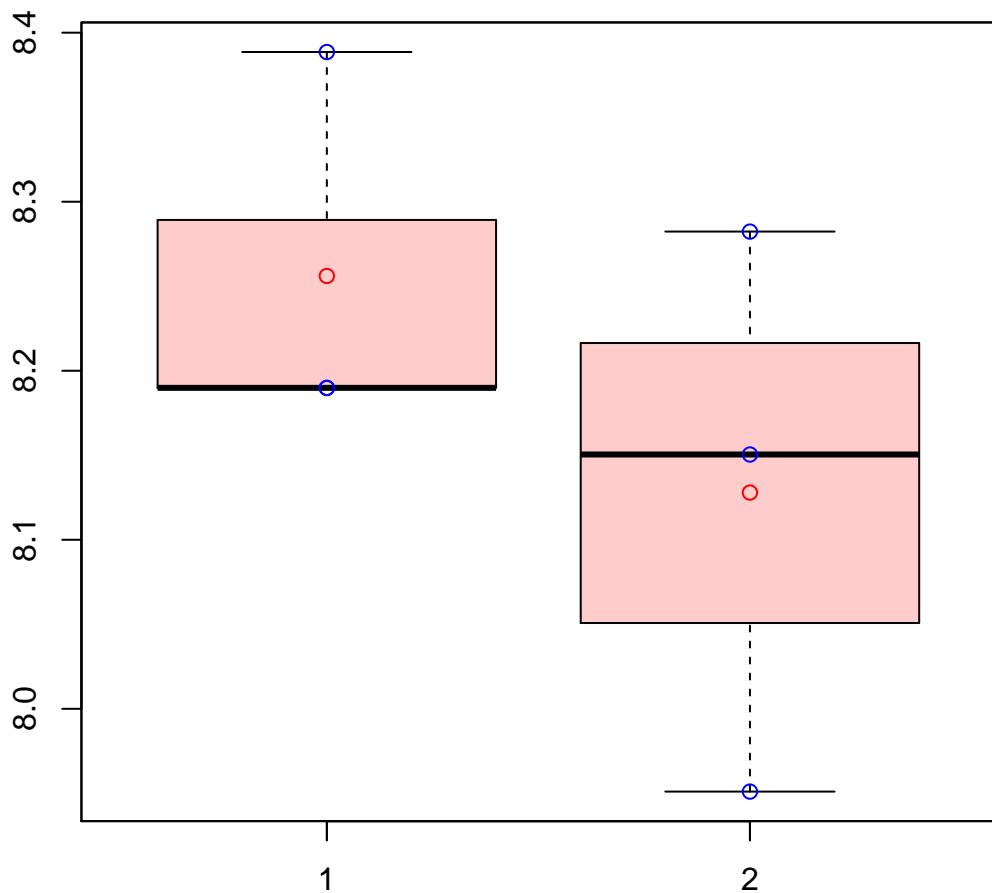

t-Test: p-value = 0.34

# CL14157Contig1|CL14157Contig1

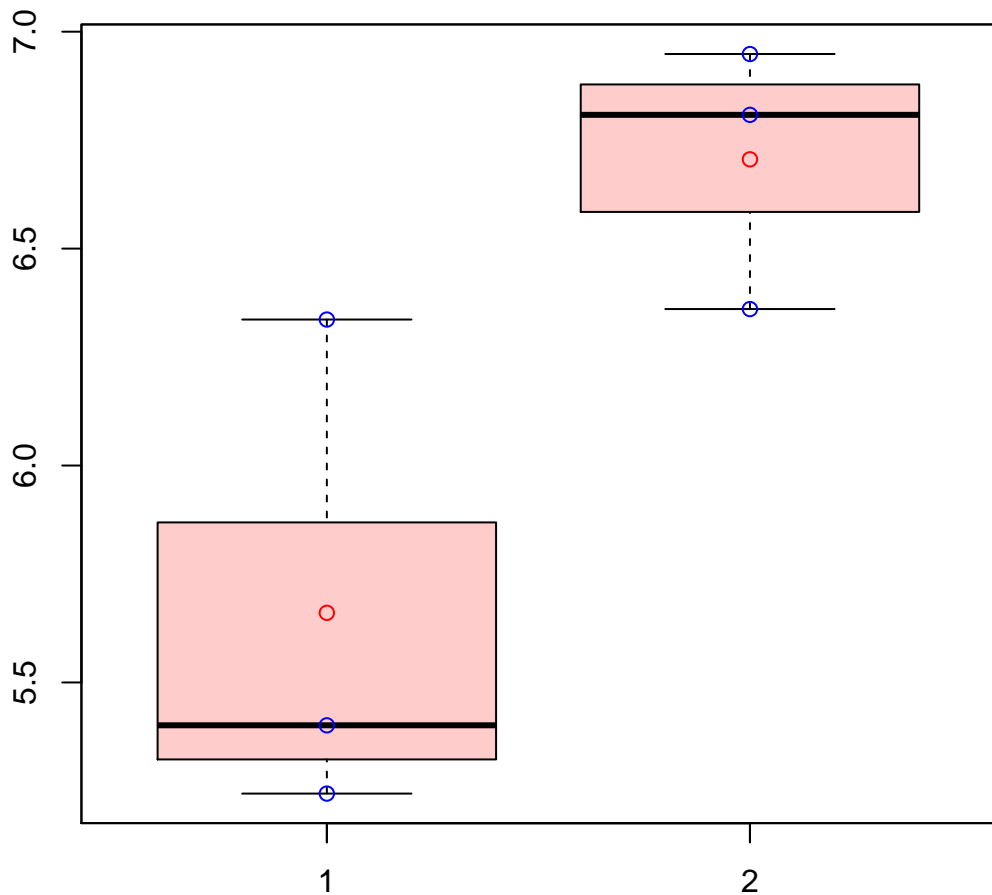

t-Test: p-value = 0.07

# CL1417Contig3|CL1417Contig3

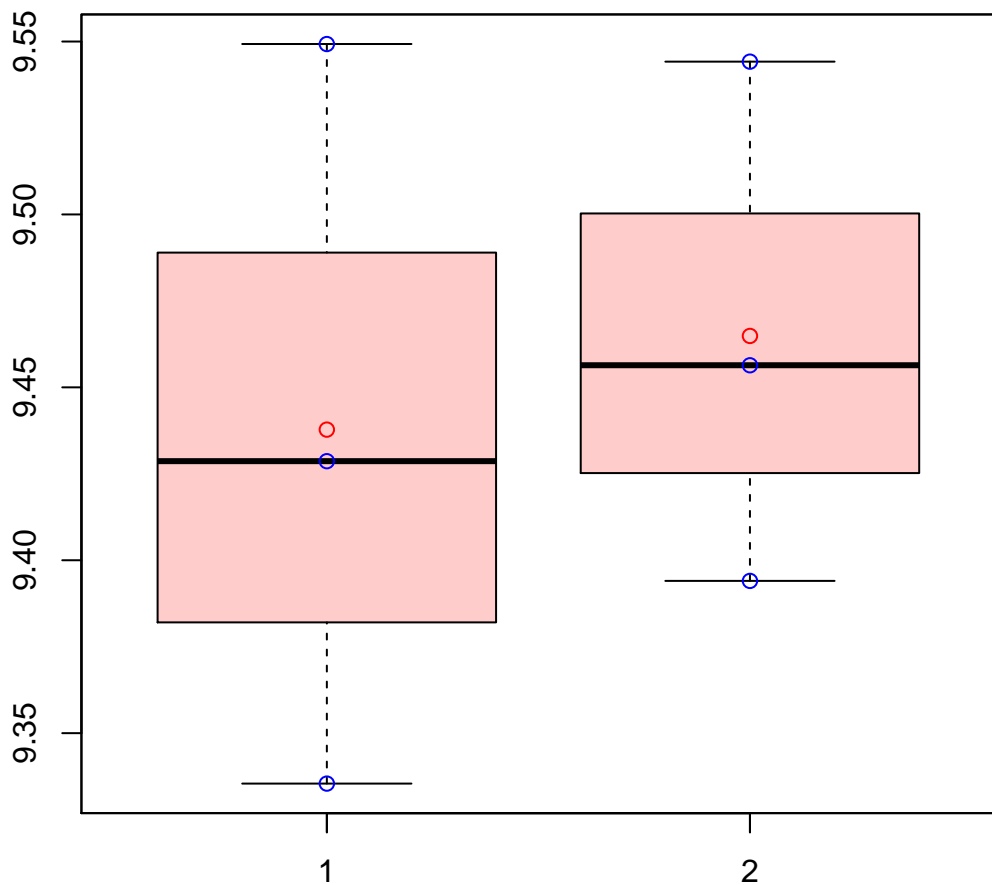

t-Test: p-value = 0.74



# CL141Contig6|CL141Contig6

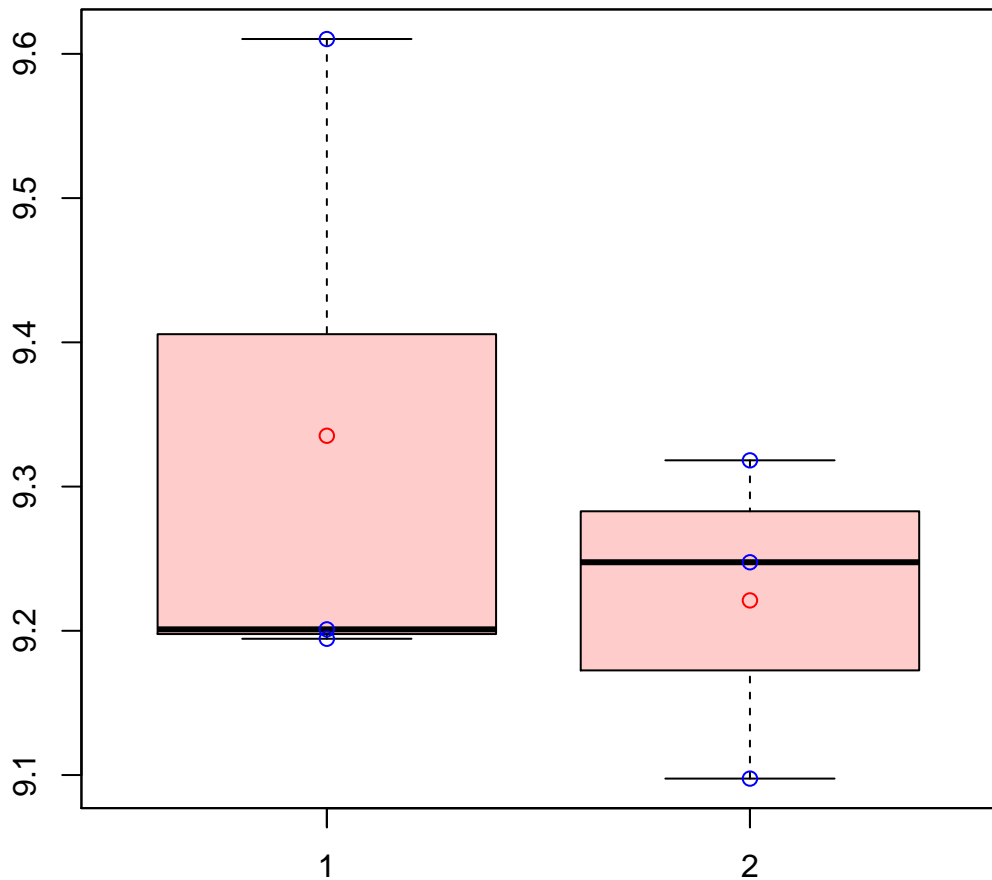

t-Test: p-value = 0.51

# CL1420Contig1|CL1420Contig1

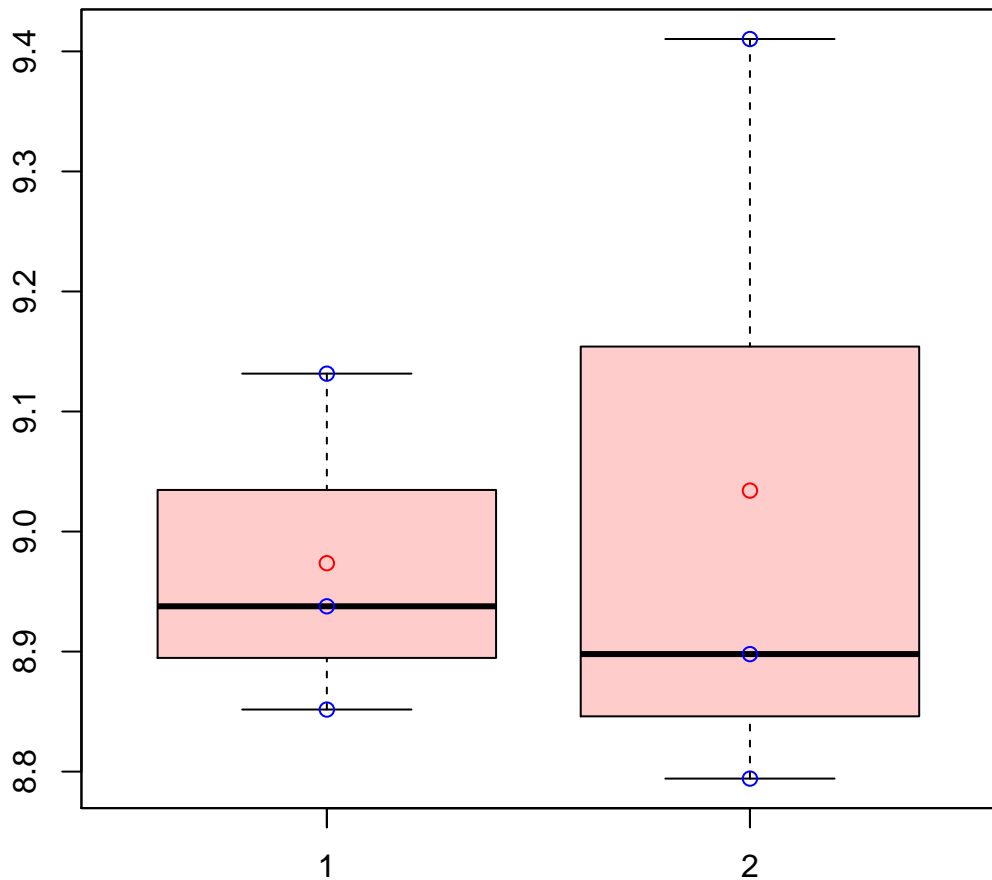

t-Test: p-value = 0.79

# CL1421Contig2|CL1421Contig2

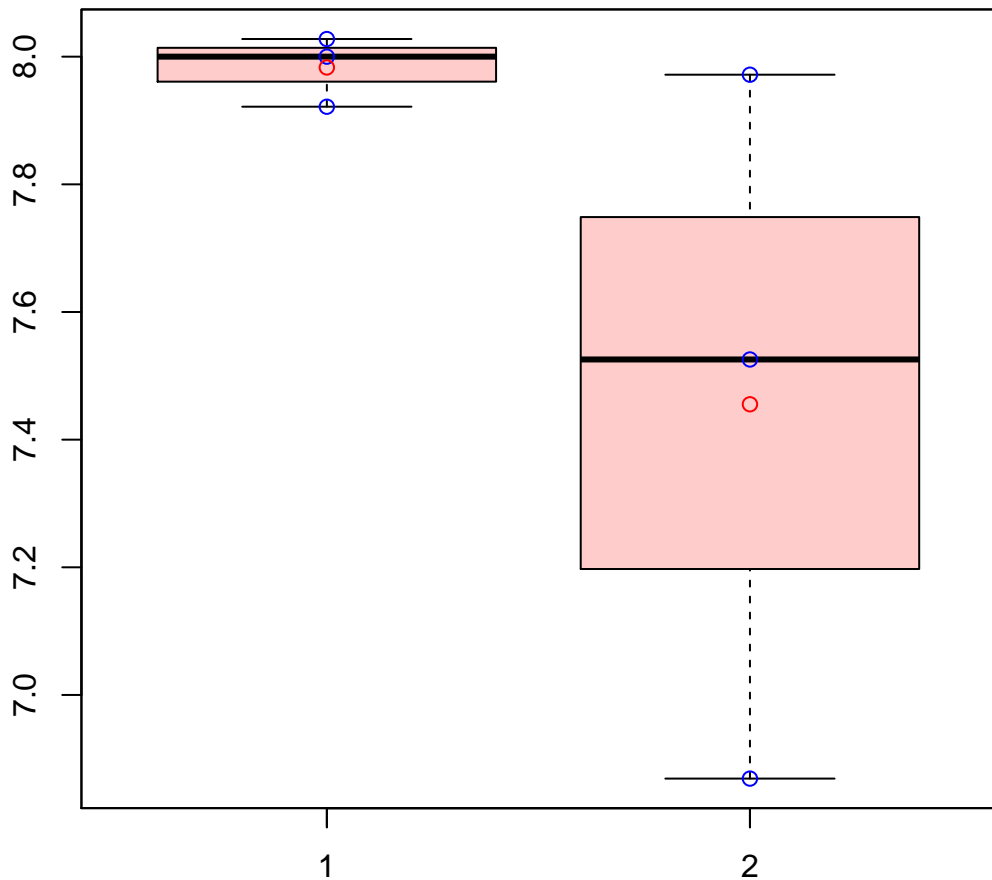

t-Test: p-value = 0.24

# CL14225Contig1|CL14225Contig1

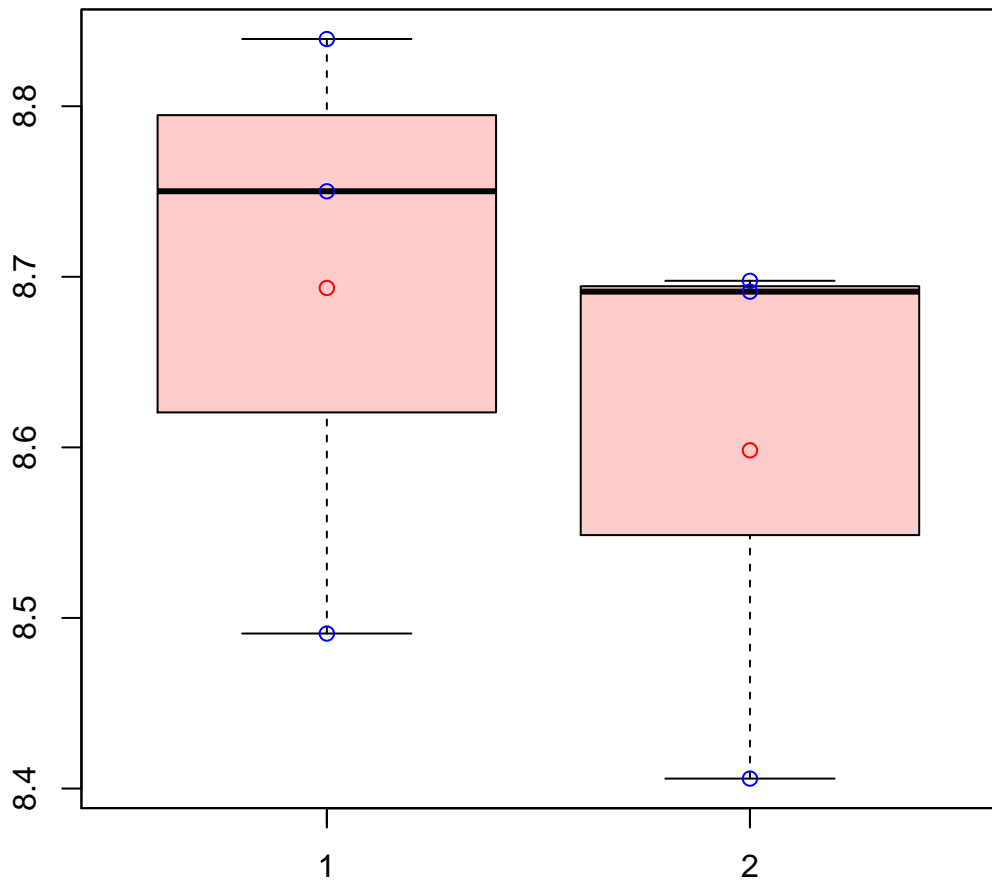

t-Test: p-value = 0.54

# CL14229Contig1|CL14229Contig1

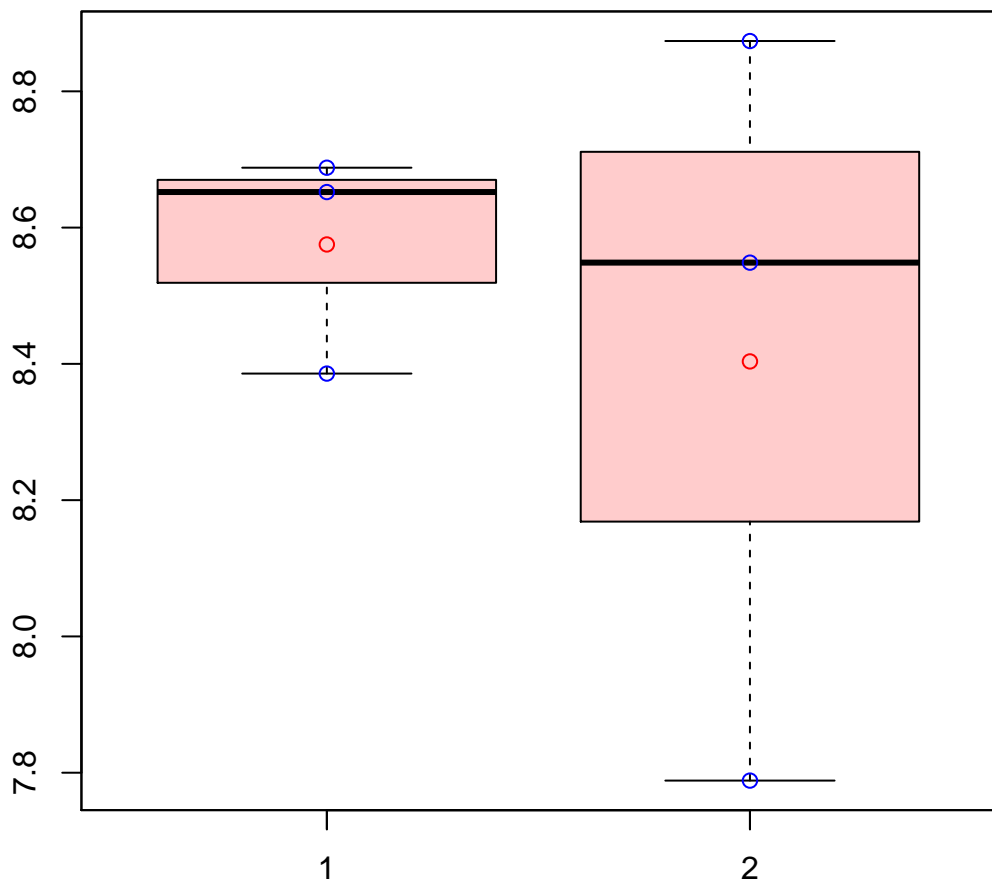

t-Test: p-value = 0.65

# CL1422Contig9|CL1422Contig9

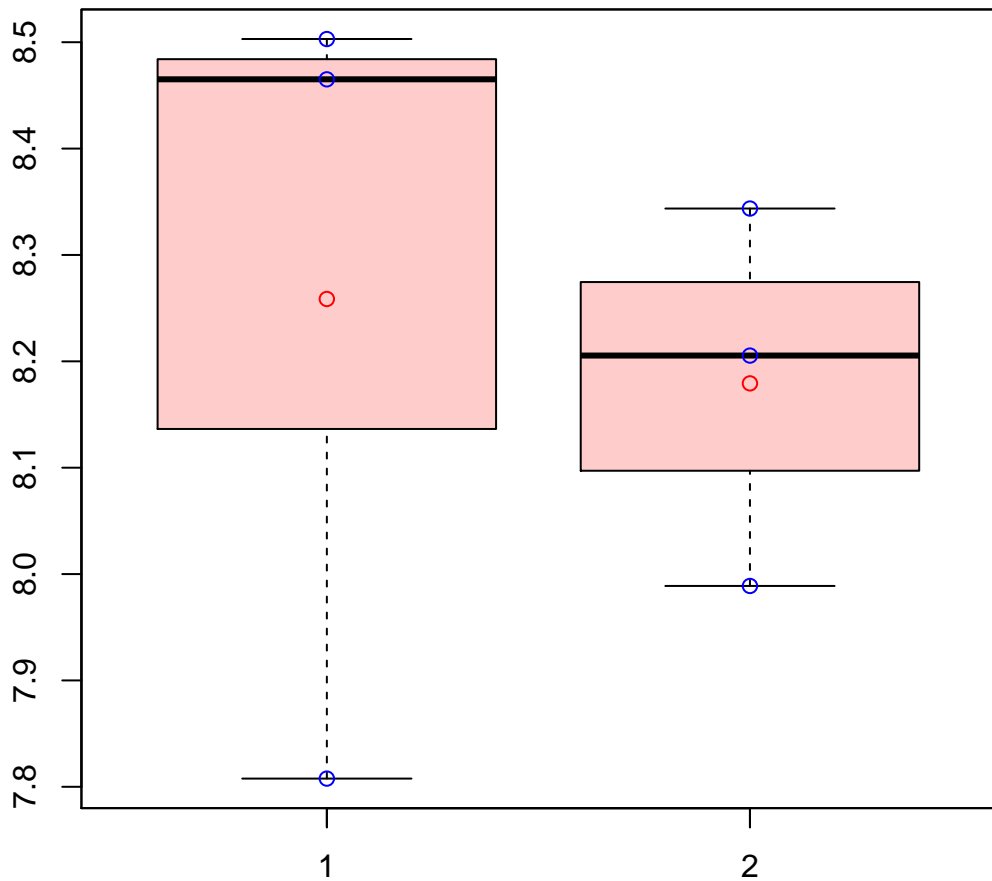

t-Test: p-value = 0.77

# CL1423Contig3|CL1423Contig3

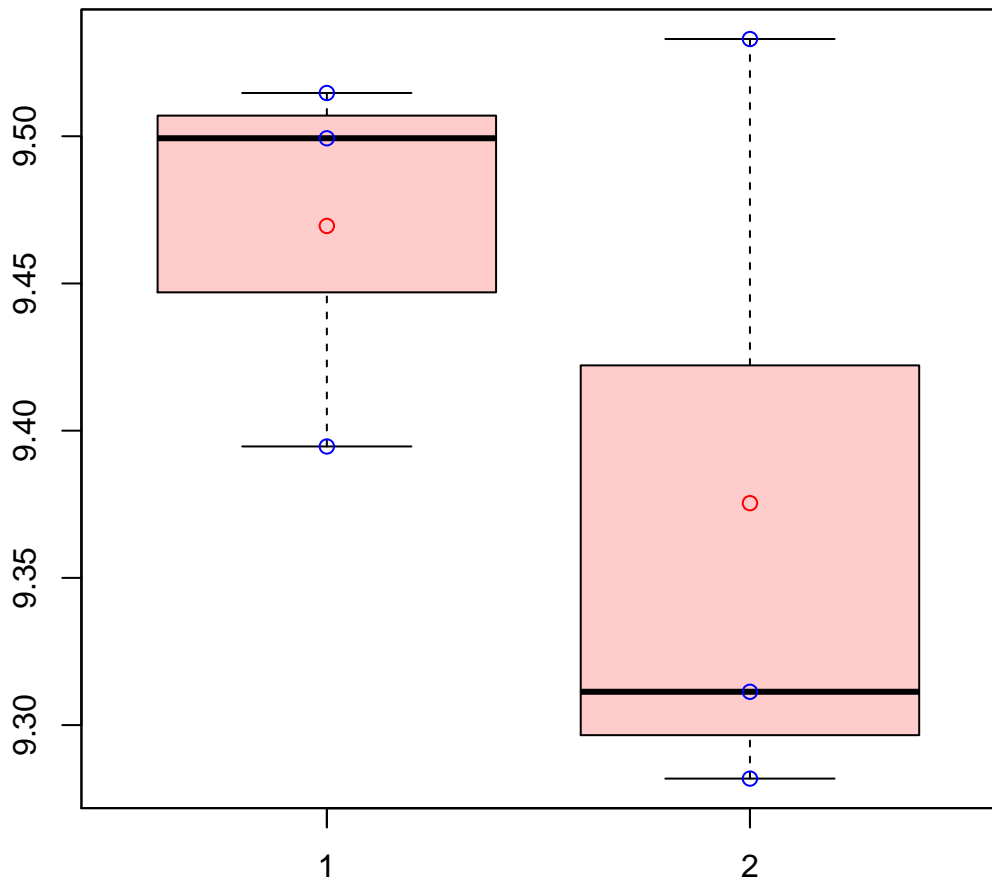

t-Test: p-value = 0.37

# CL14245Contig1|CL14245Contig1

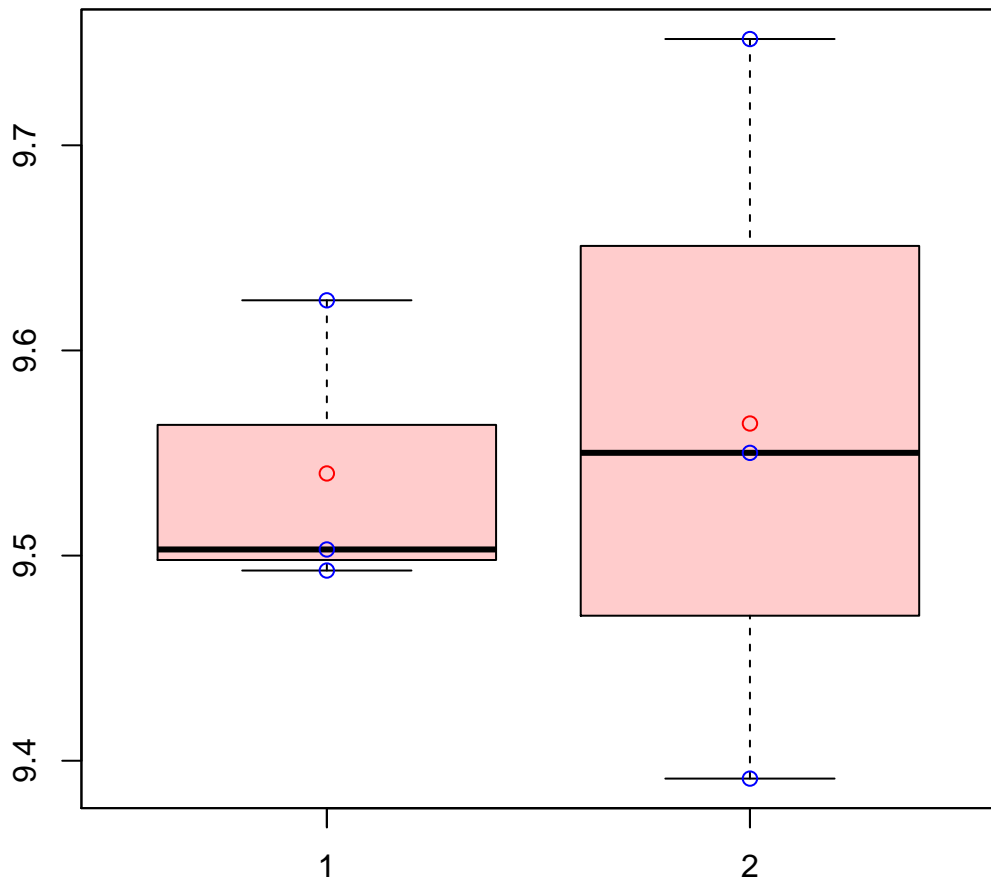

t-Test: p-value = 0.84



# CL14247Contig1|CL14247Contig1

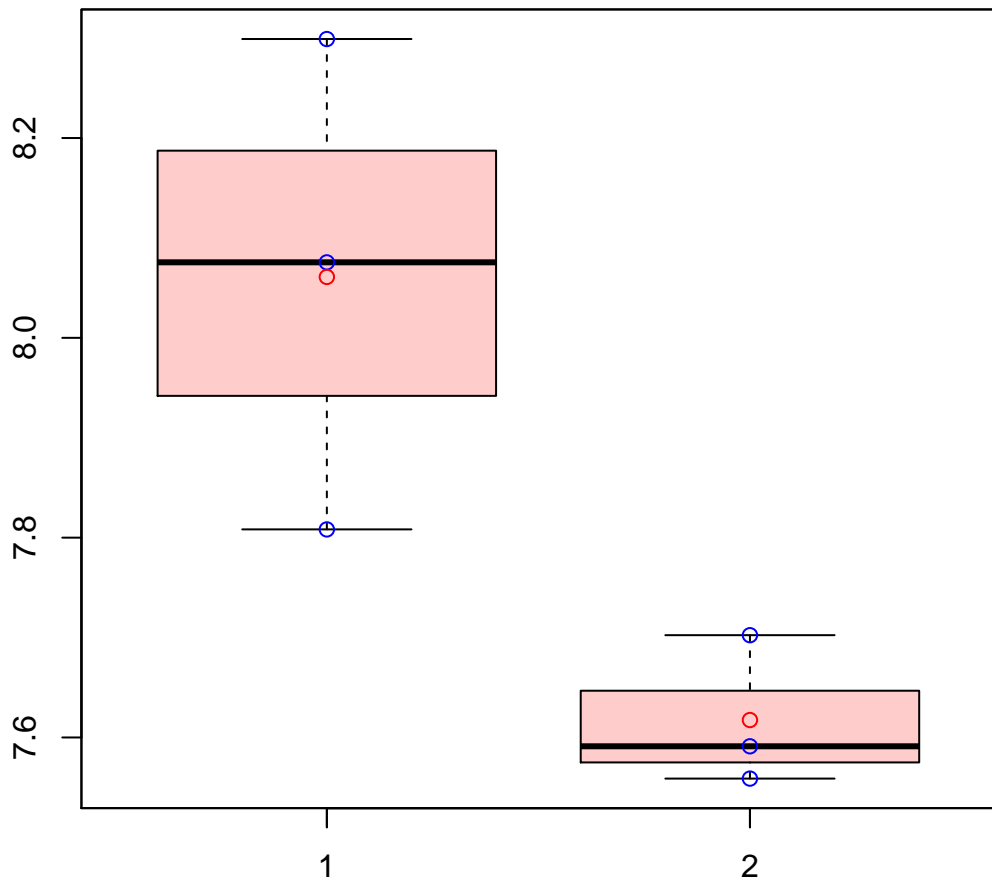

t-Test: p-value = 0.08

# CL14247Contig2|CL14247Contig2

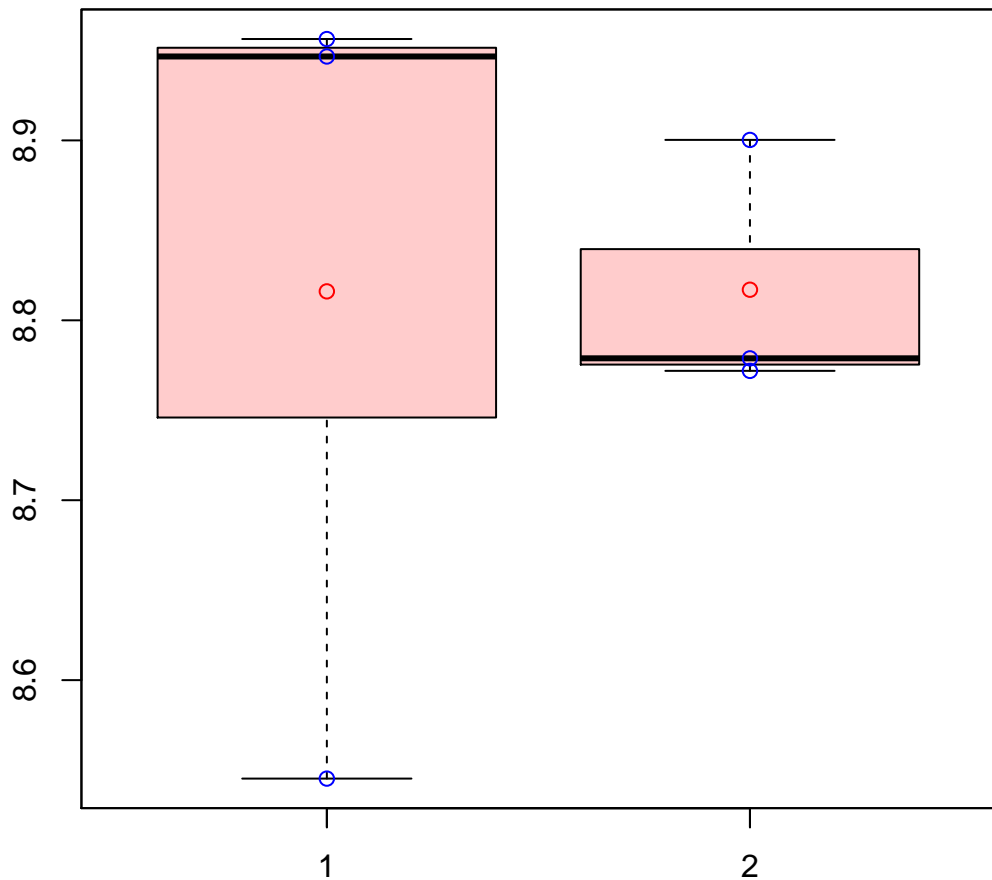

t-Test: p-value = 1

# CL1424Contig4|CL1424Contig4

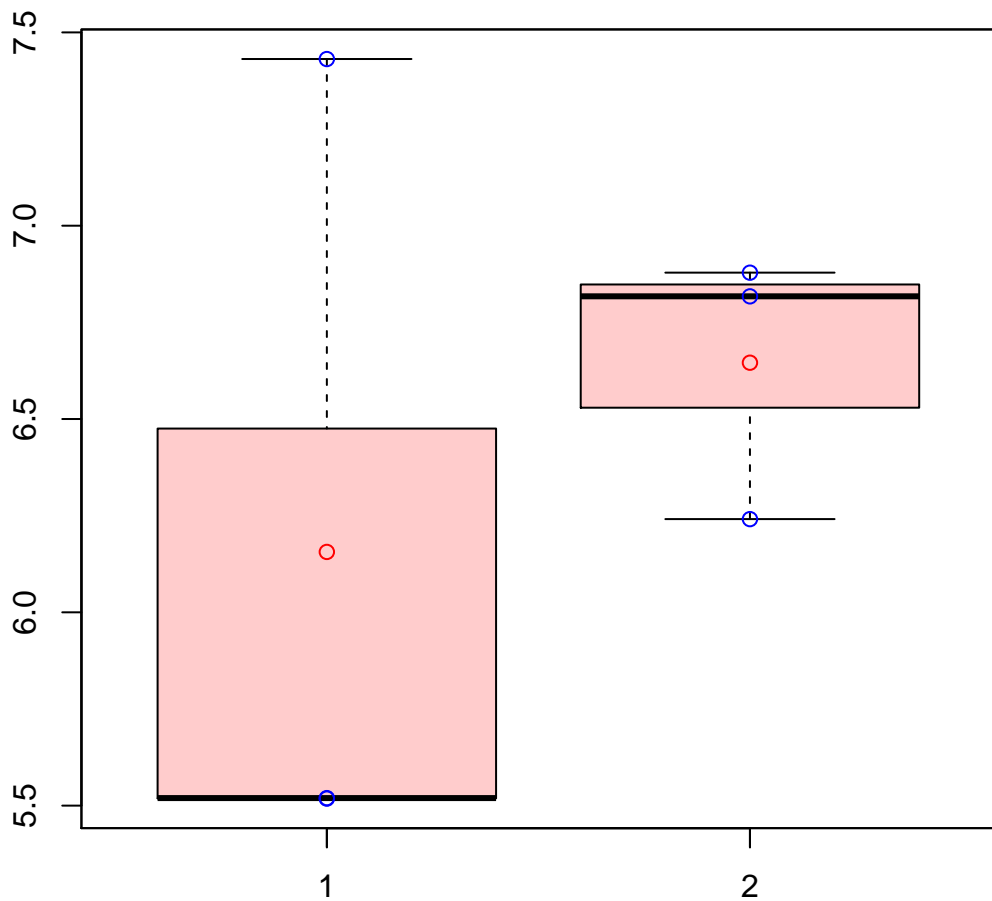

t-Test: p-value = 0.53

# CL14251Contig1|CL14251Contig1

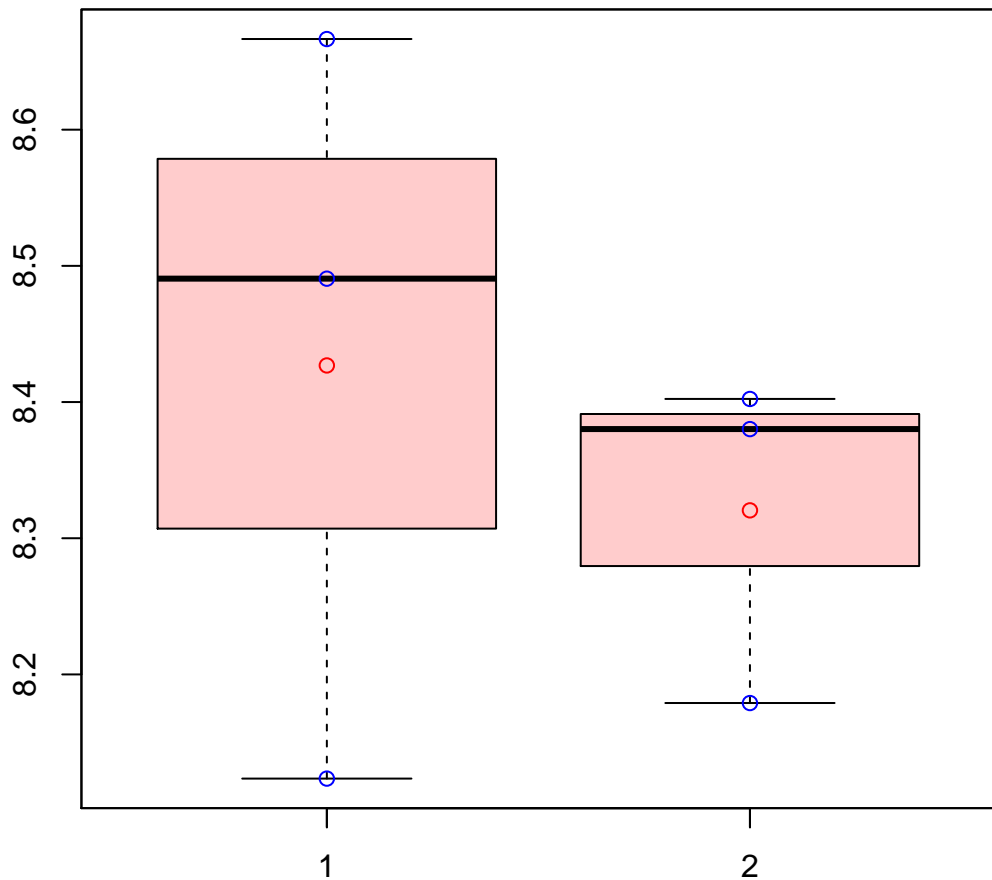

t-Test: p-value = 0.59

# CL14264Contig1|CL14264Contig1

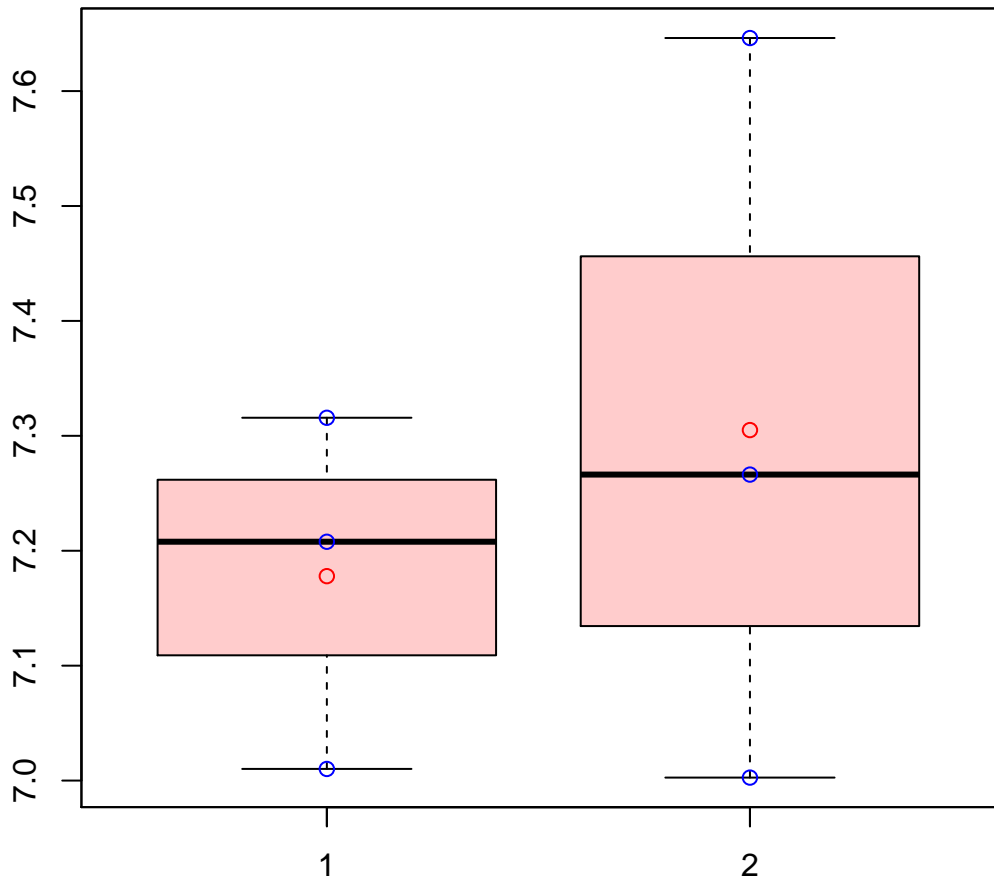

t-Test: p-value = 0.58

# CL1426Contig5|CL1426Contig5

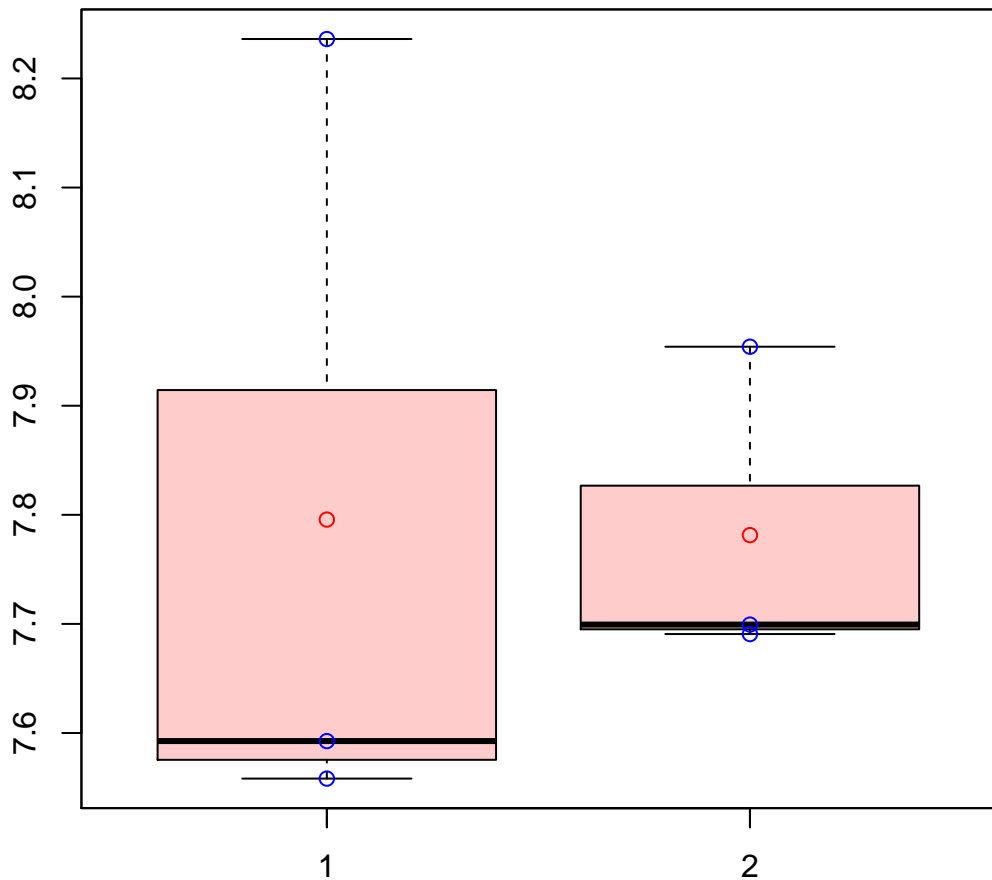

t-Test: p-value = 0.96

# CL1426Contig6|CL1426Contig6

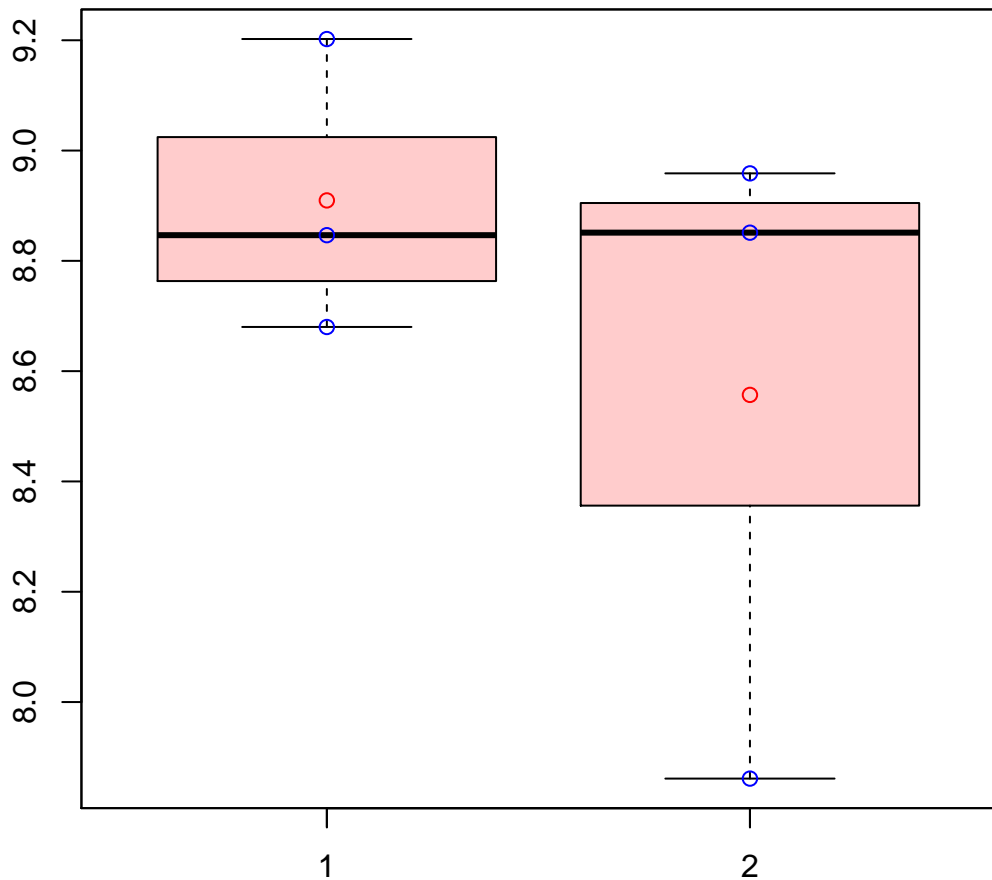

t-Test: p-value = 0.43

# CL142Contig15|CL142Contig15

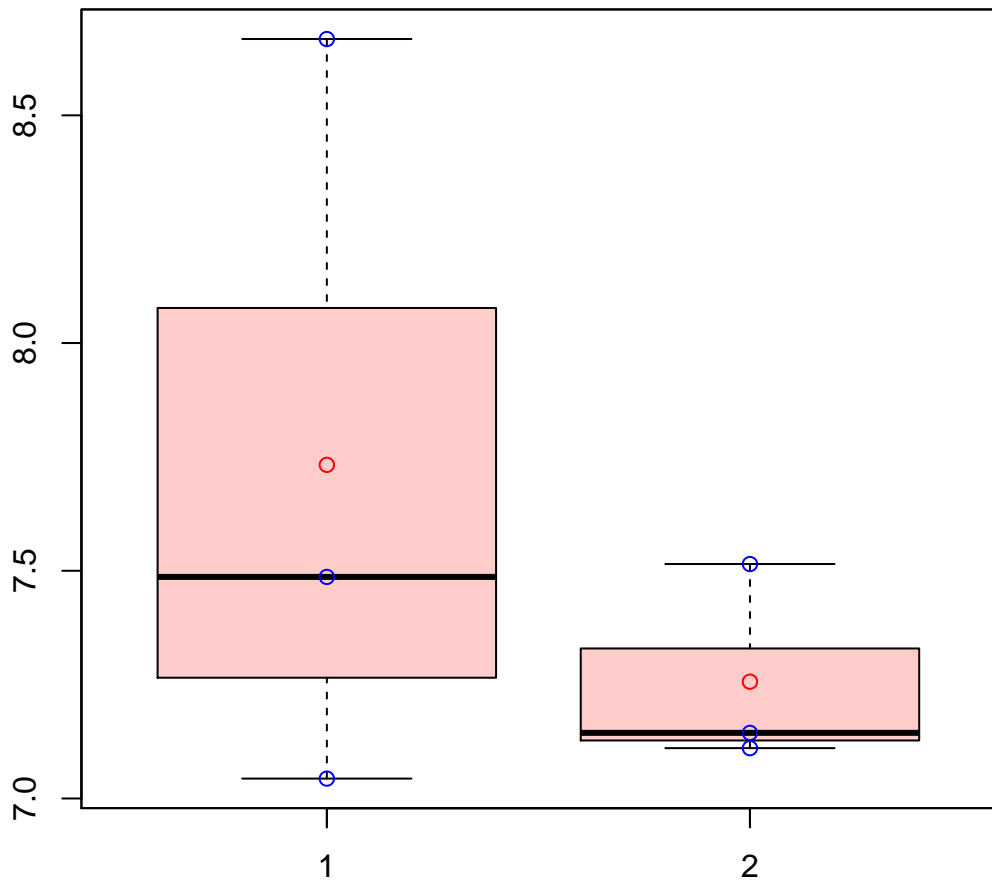

t-Test: p-value = 0.43



# CL142Contig16|CL142Contig16

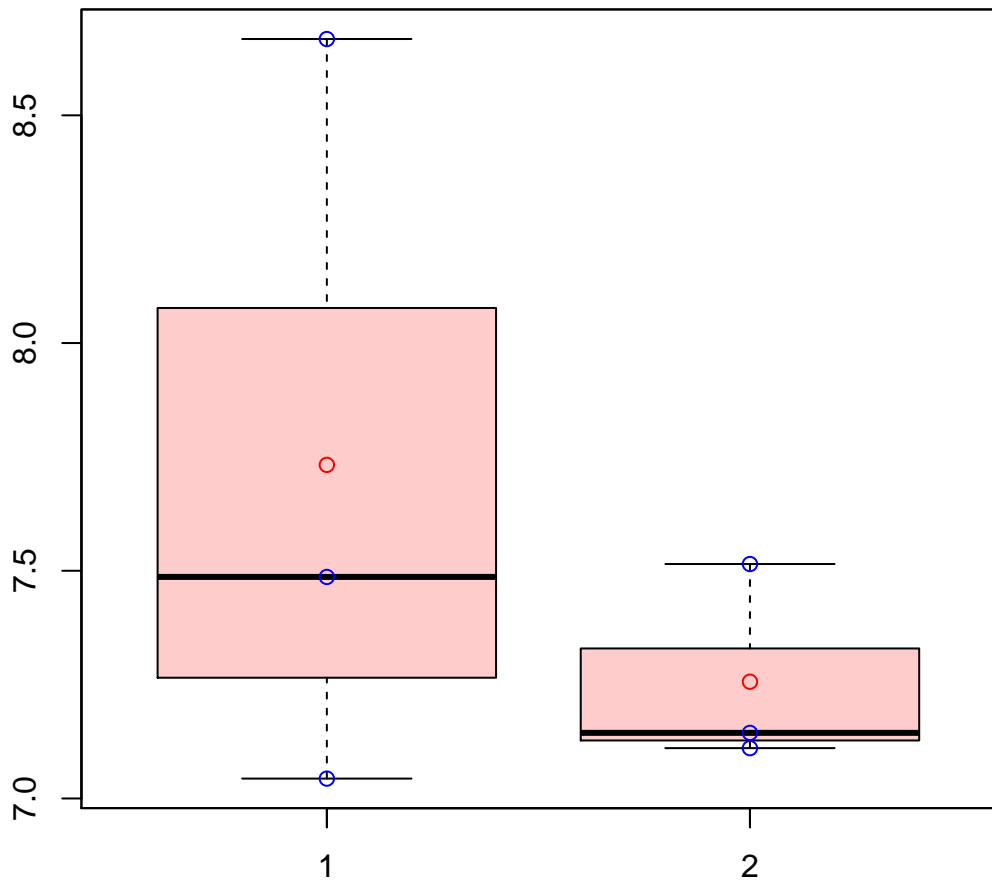

t-Test: p-value = 0.43

# CL142Contig27|CL142Contig27

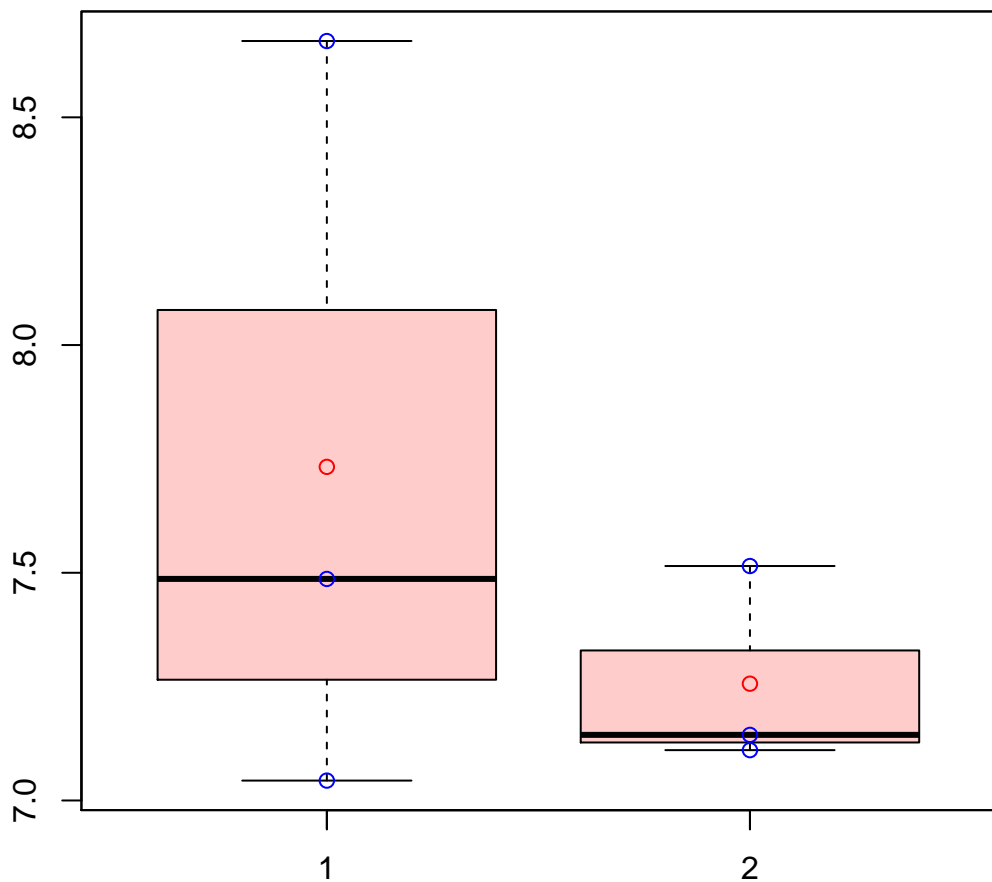

t-Test: p-value = 0.43

# CL142Contig2|CL142Contig2

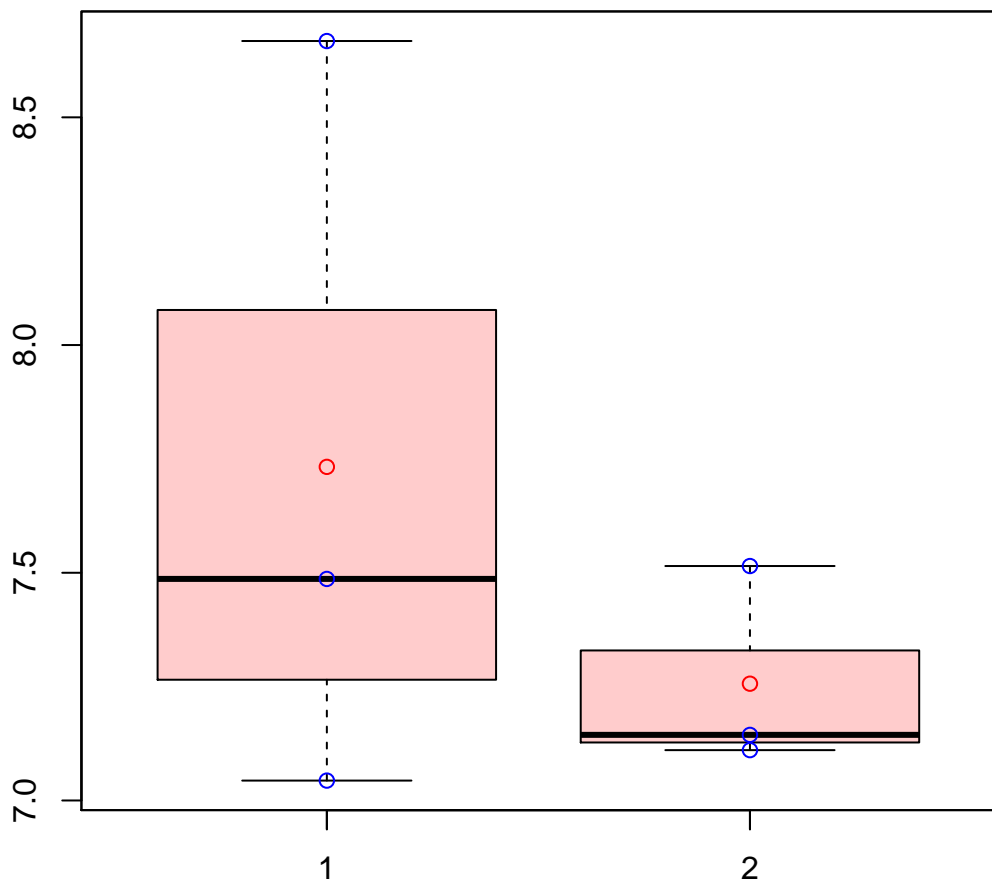

t-Test: p-value = 0.43

# CL1432Contig2|CL1432Contig2

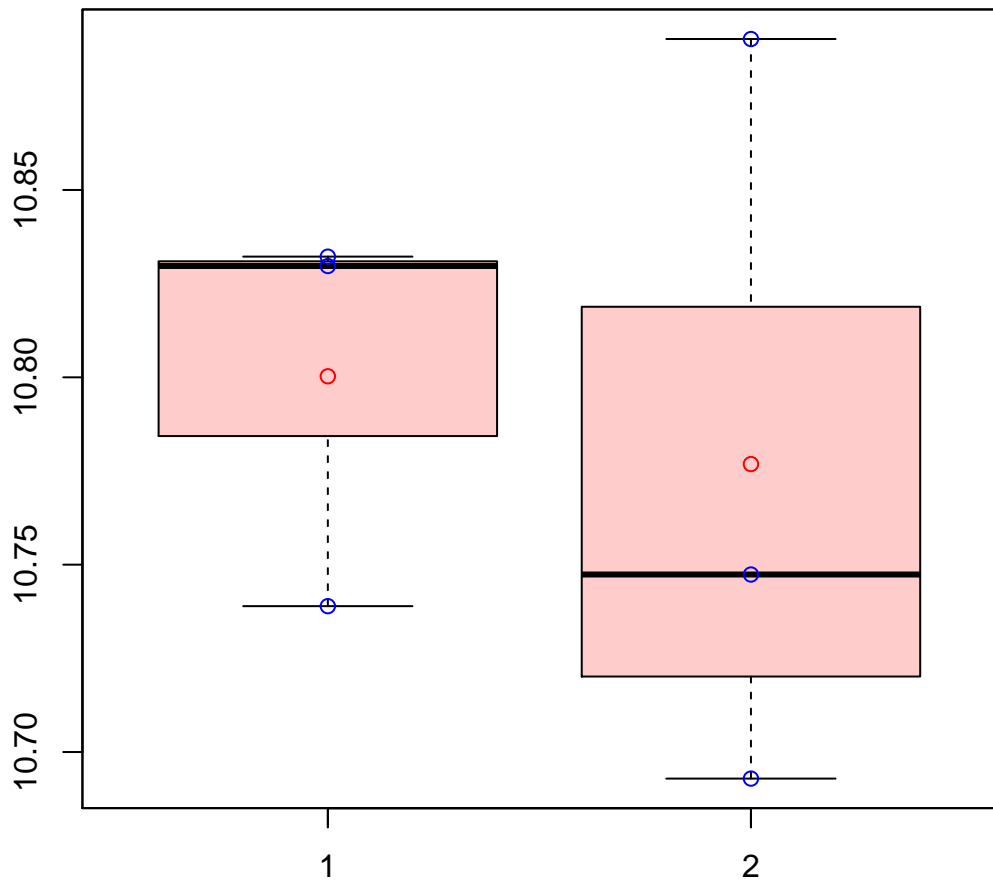

t-Test: p-value = 0.75

# CL1432Contig4|CL1432Contig4

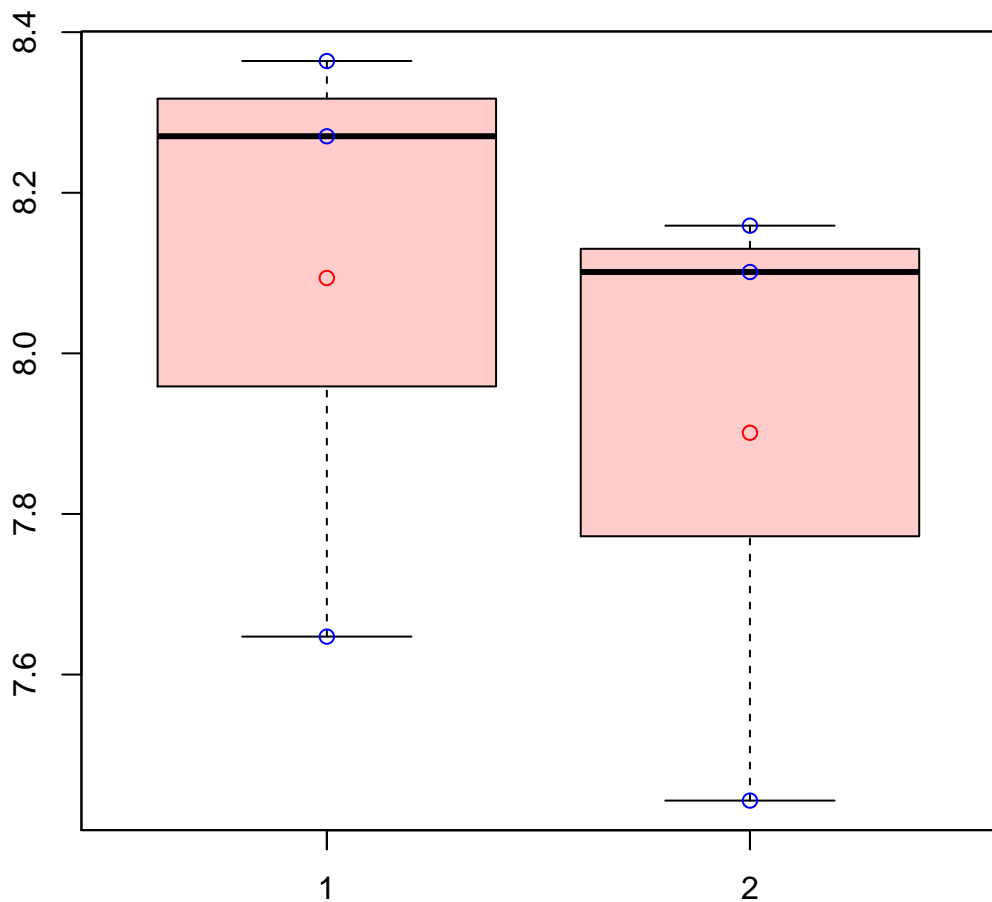

t-Test: p-value = 0.58

# CL1432Contig6|CL1432Contig6

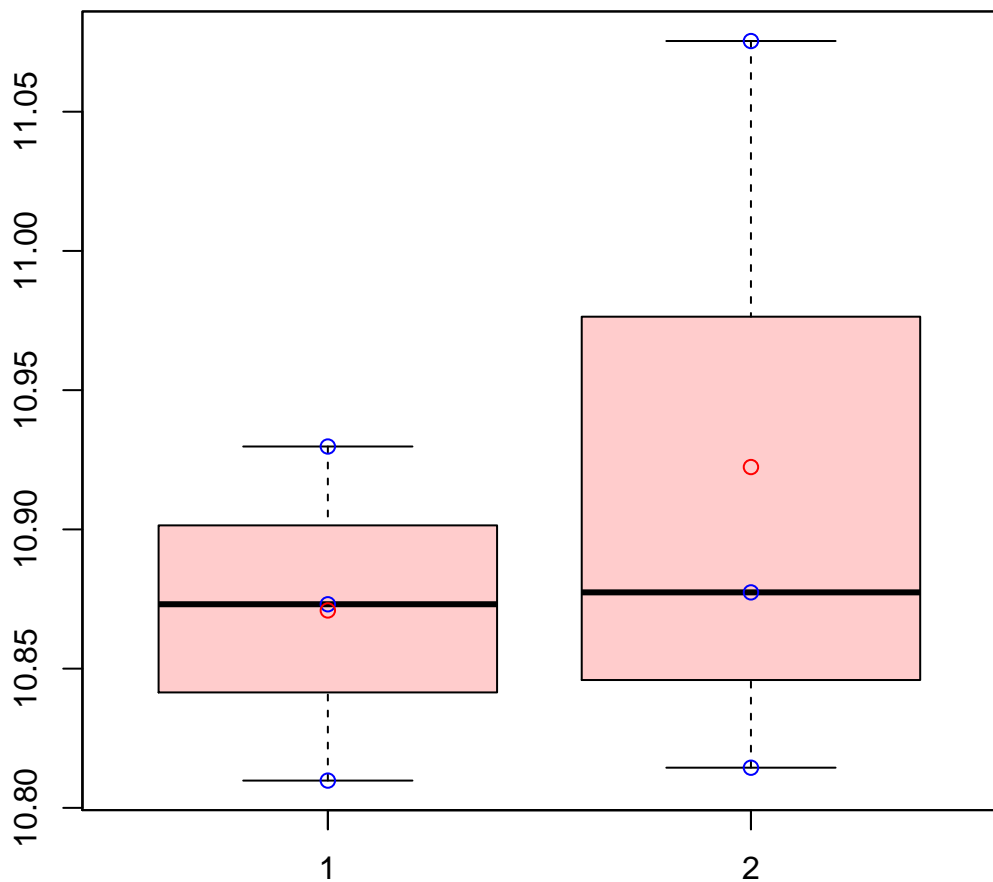

t-Test: p-value = 0.59

# CL1432Contig7|CL1432Contig7

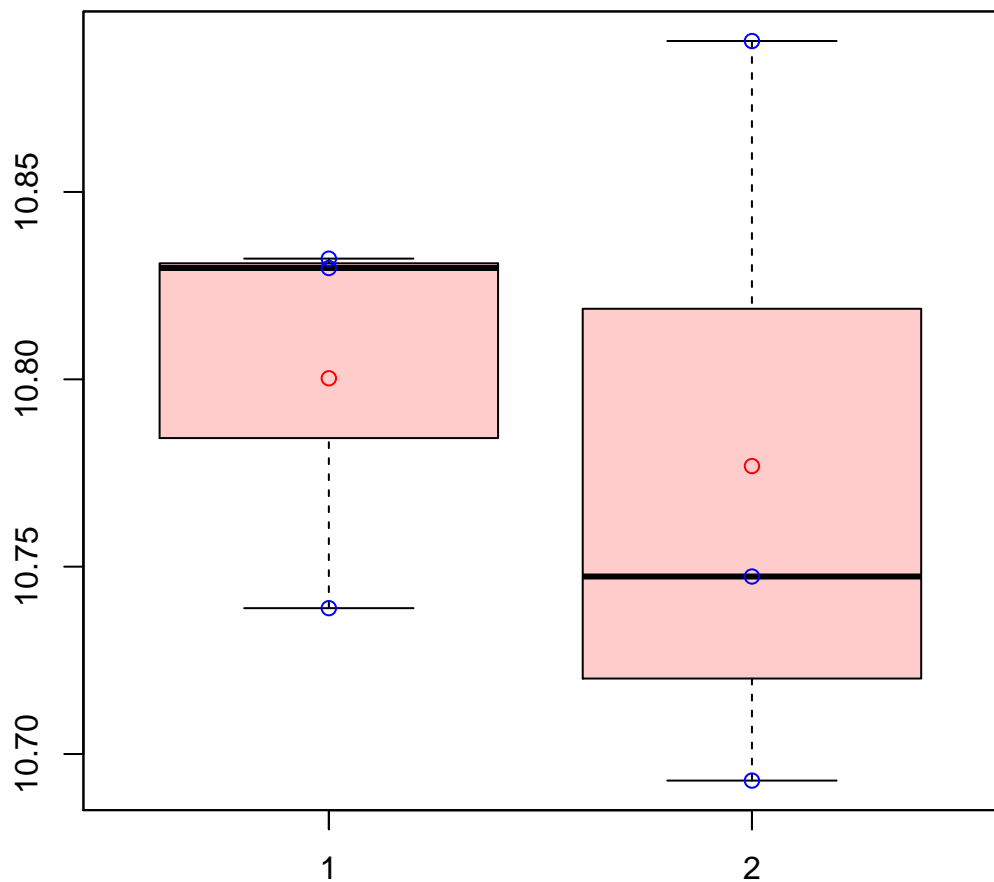

t-Test: p-value = 0.75

# CL1433Contig9|CL1433Contig9

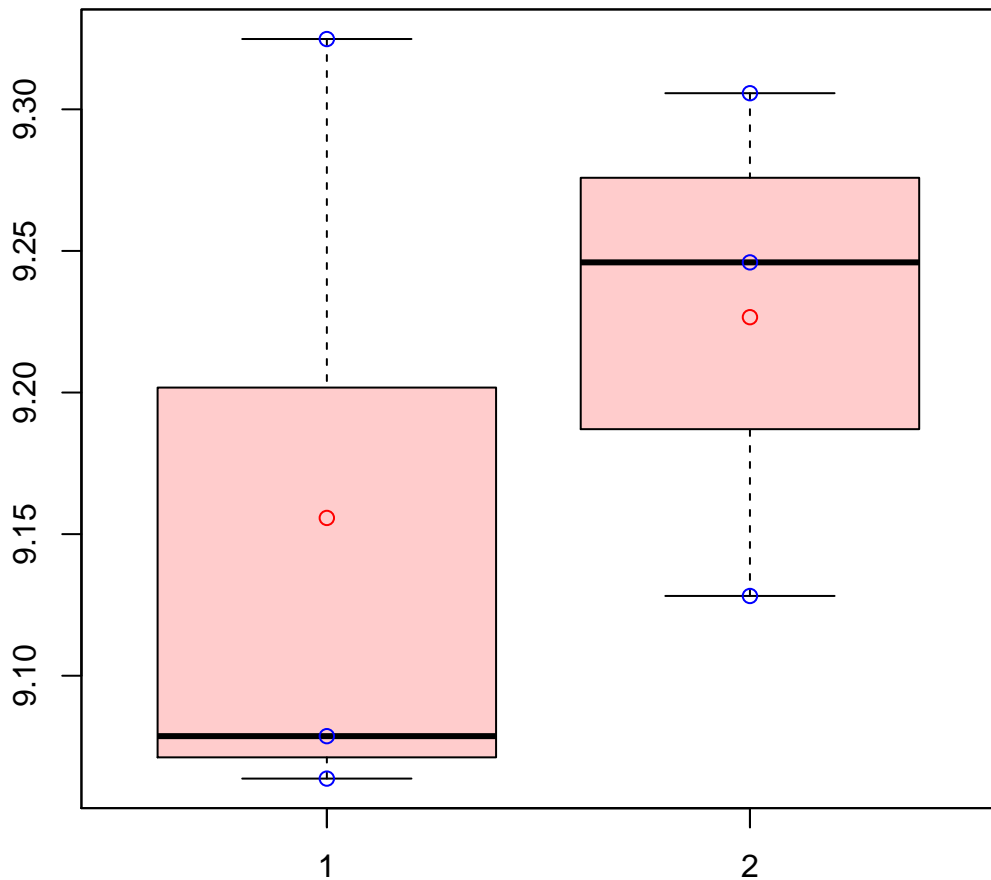

t-Test: p-value = 0.52



# CL1436Contig1|CL1436Contig1

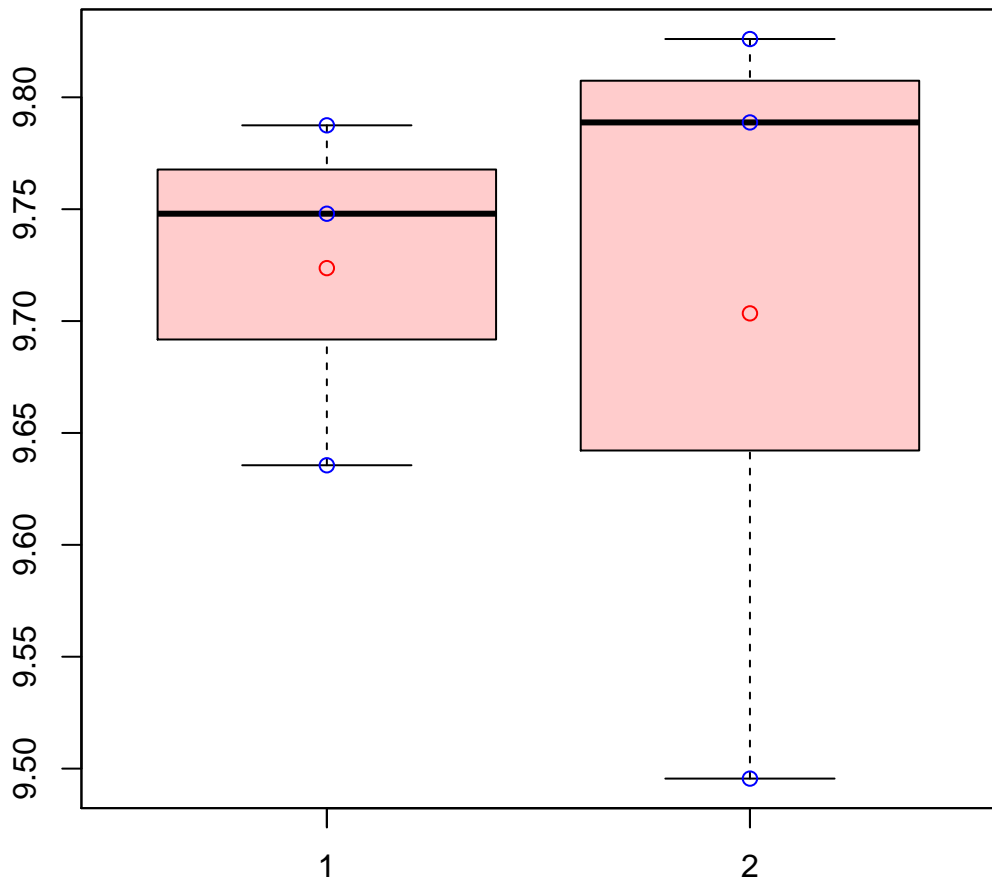

t-Test: p-value = 0.87

# CL1438Contig3|CL1438Contig3

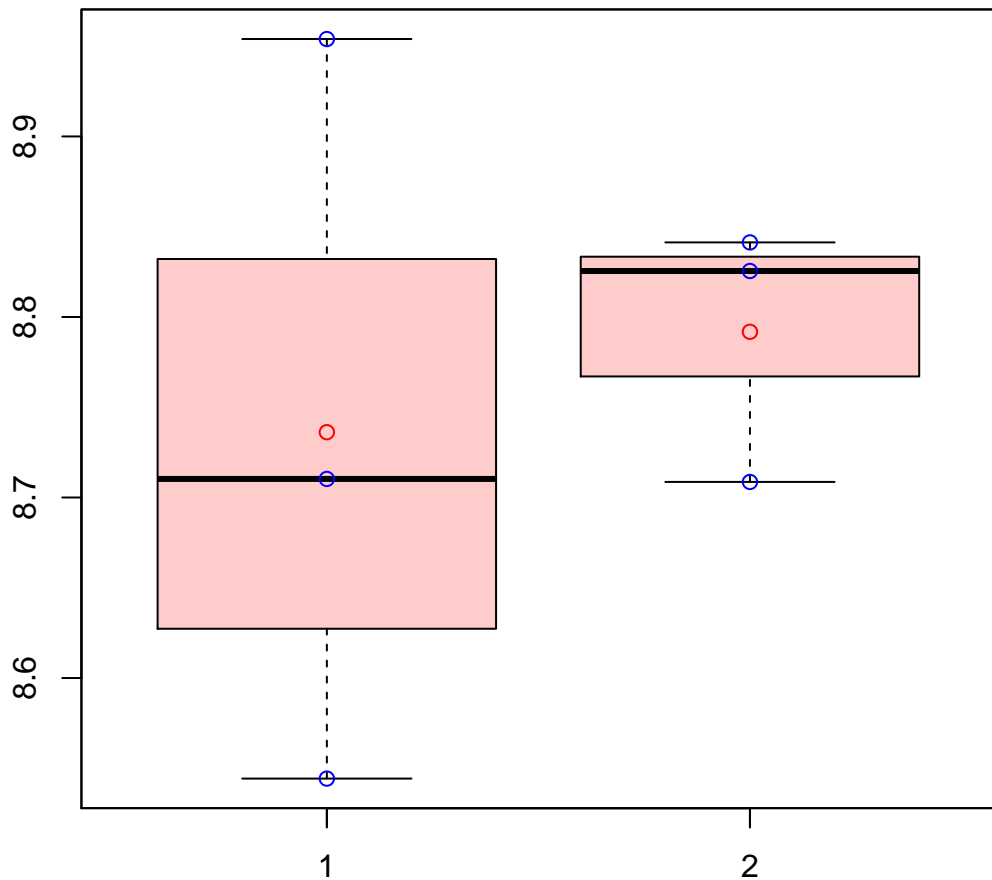

t-Test: p-value = 0.69

# CL1438Contig4|CL1438Contig4

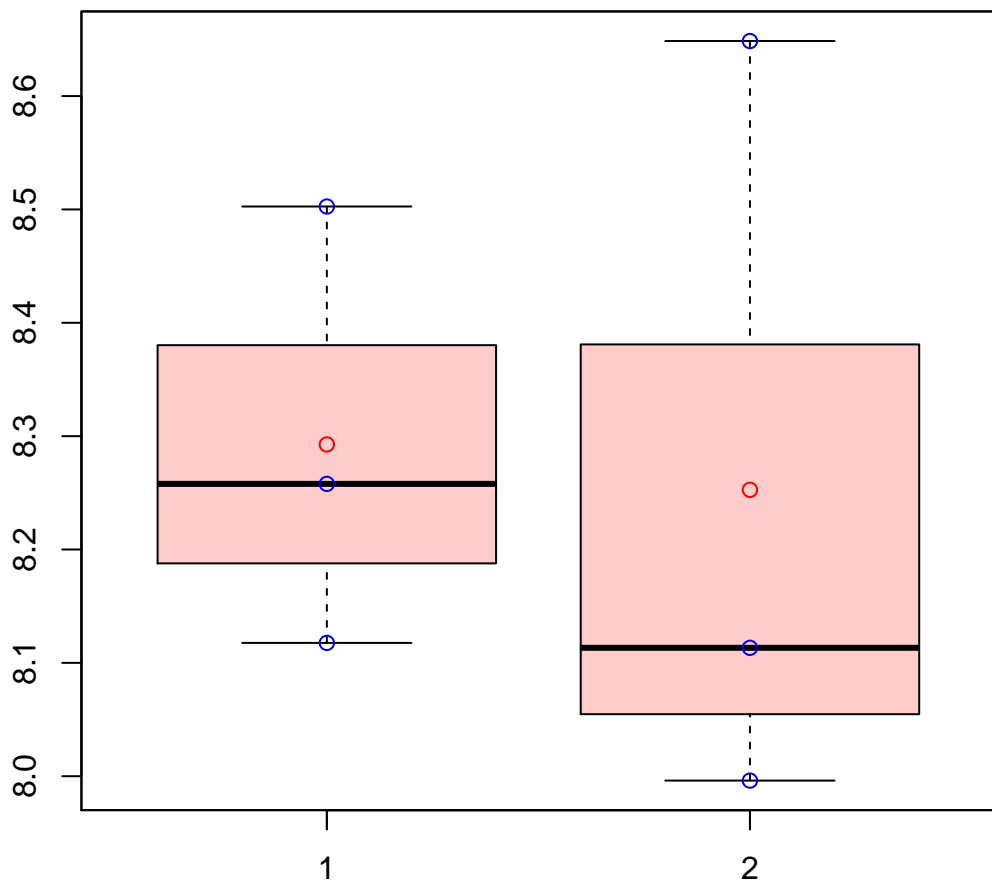

t-Test: p-value = 0.87

# CL14439Contig1|CL14439Contig1

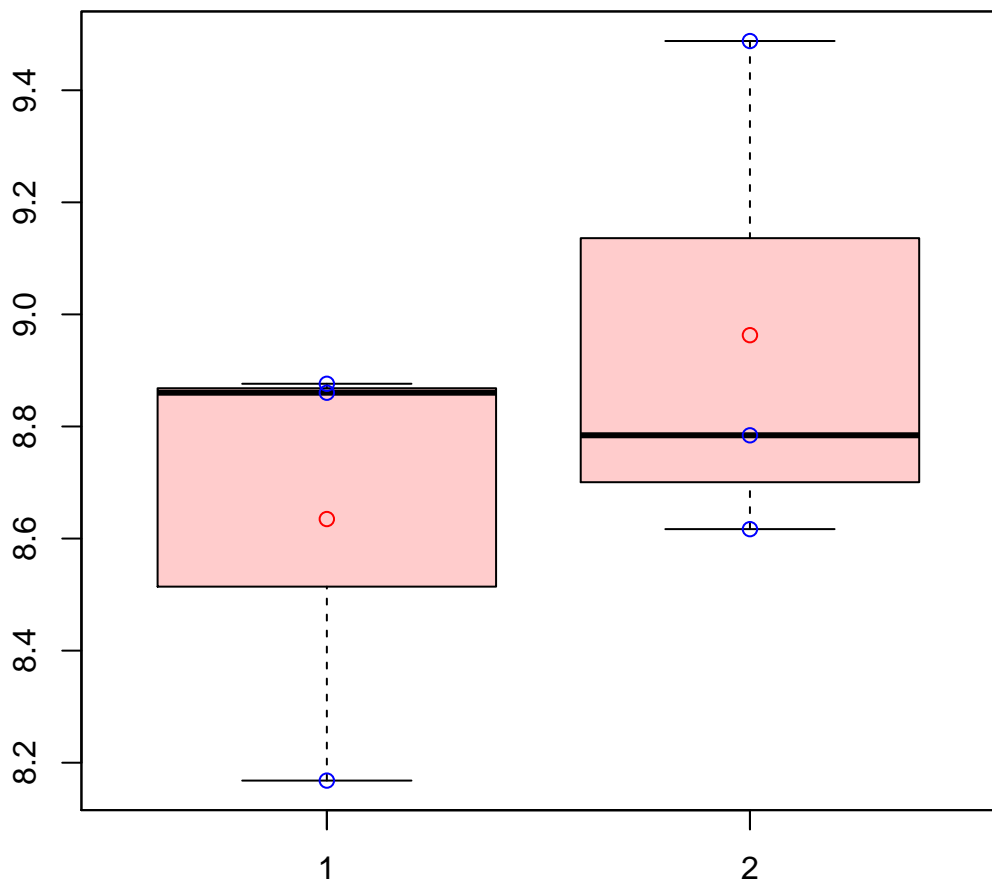

t-Test: p-value = 0.41

# CL14447Contig1|CL14447Contig1

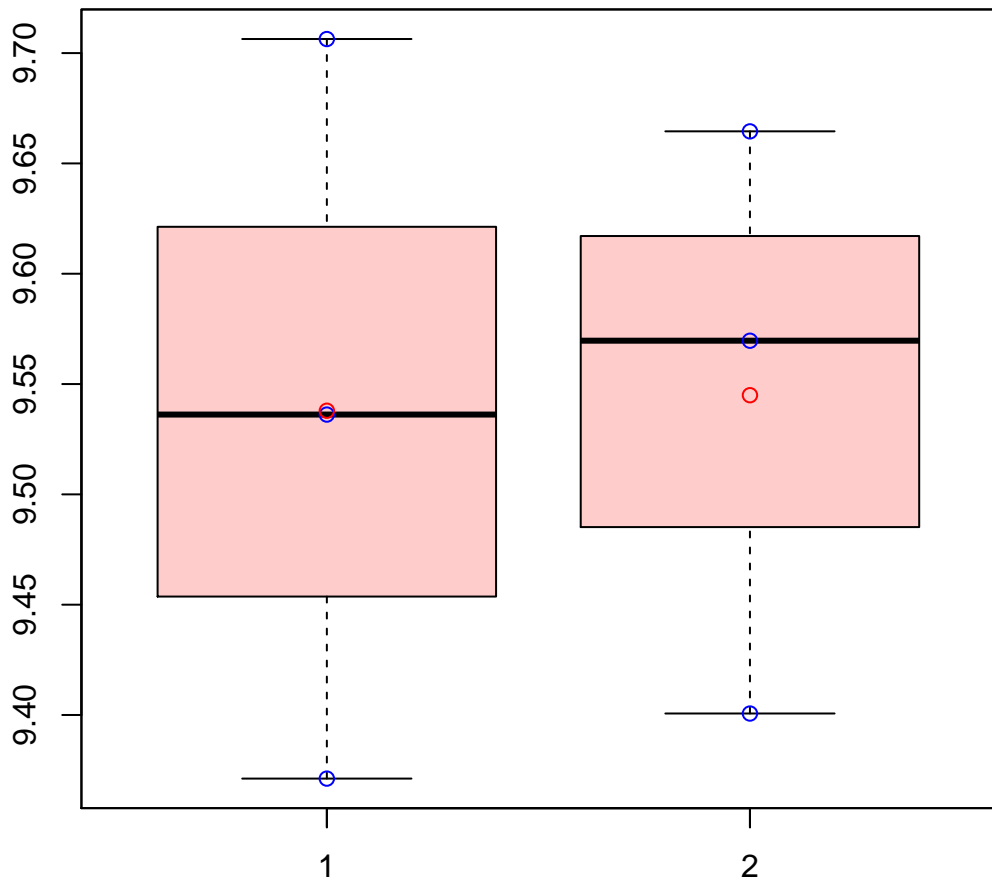

t-Test: p-value = 0.96

# CL14467Contig1|CL14467Contig1

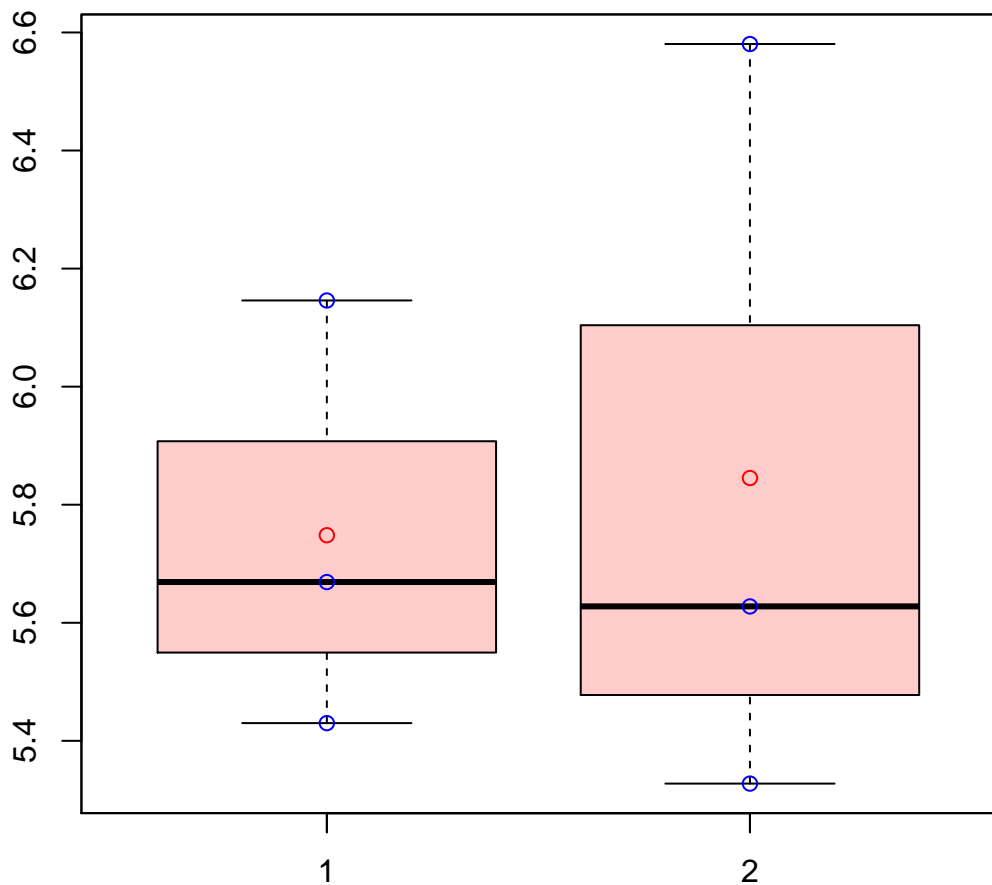

t-Test: p-value = 0.84

# CL1447Contig10|CL1447Contig10

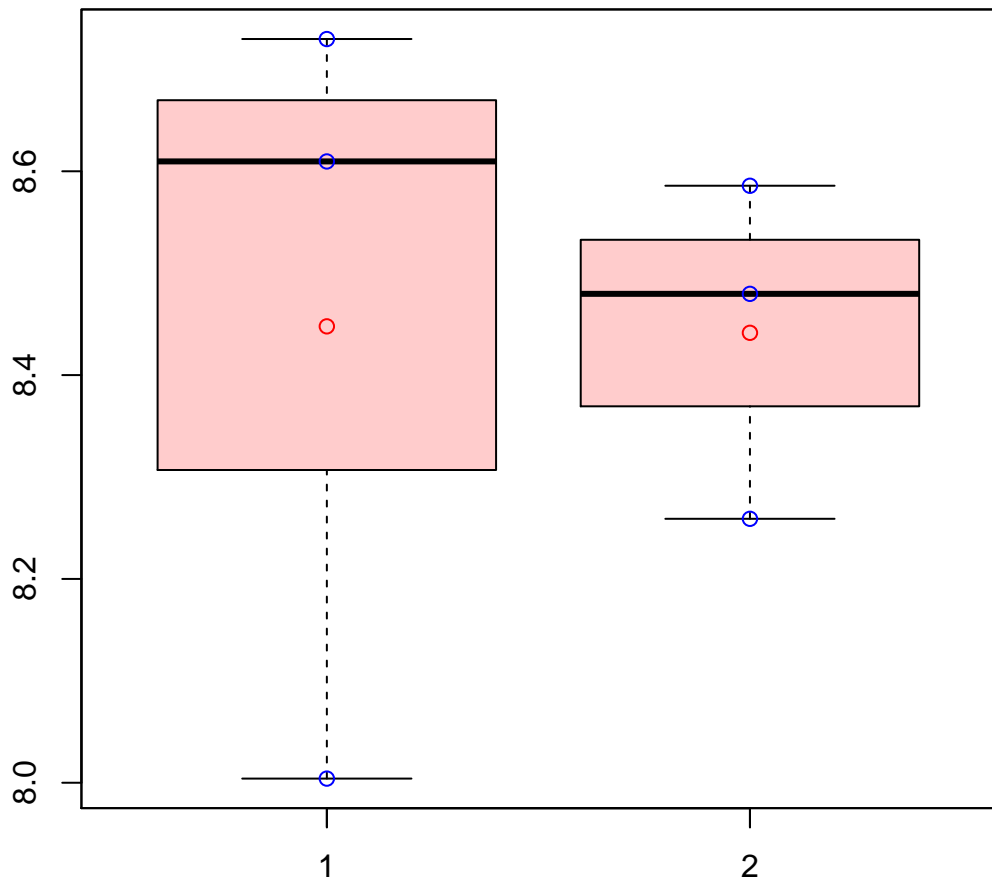

t-Test: p-value = 0.98

# CL1447Contig11|CL1447Contig11

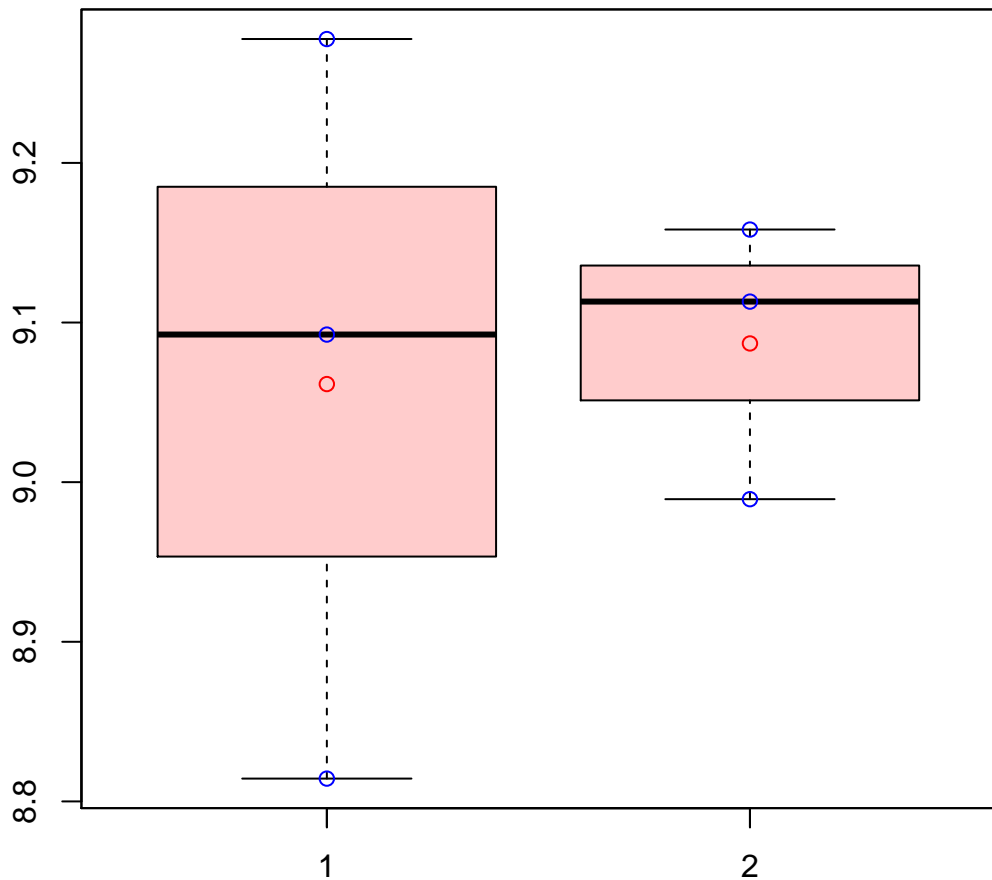

t-Test: p-value = 0.87



# CL1447Contig12|CL1447Contig12



t-Test: p-value = 0.87

# CL1447Contig13|CL1447Contig13

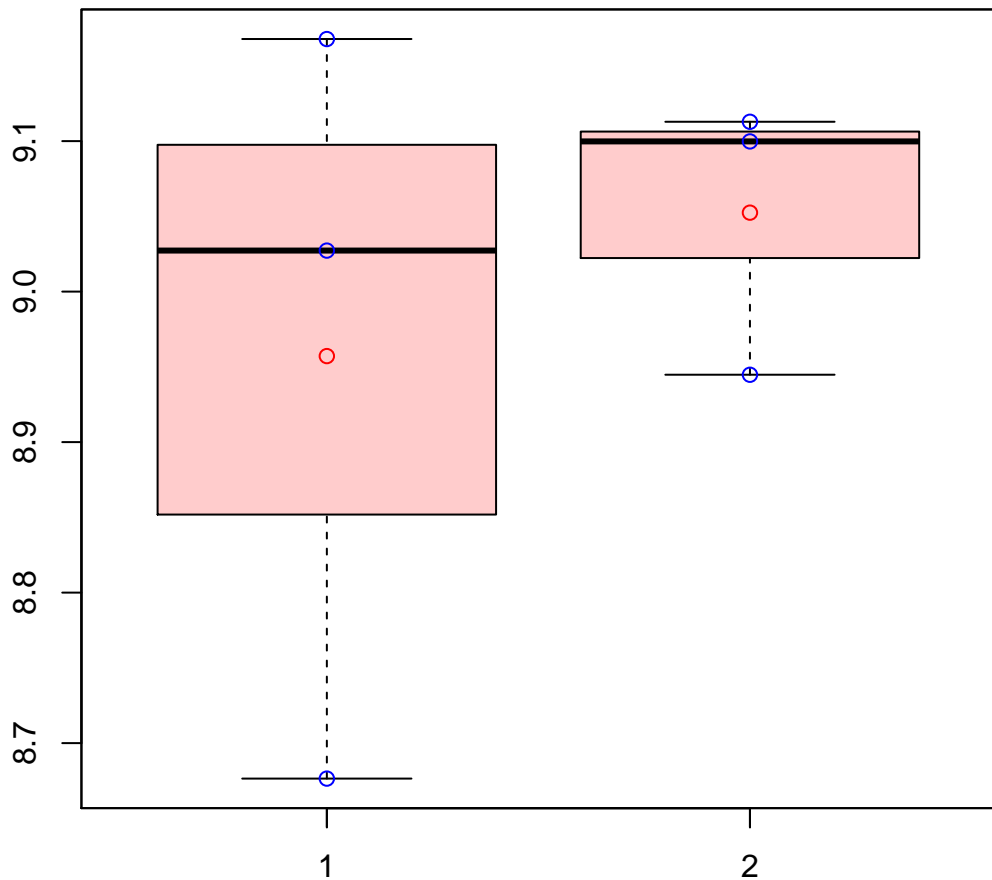

t-Test: p-value = 0.59

# CL1447Contig3|CL1447Contig3



t-Test: p-value = 0.87

# CL1447Contig6|CL1447Contig6



t-Test: p-value = 0.98

# CL1448Contig1|CL1448Contig1

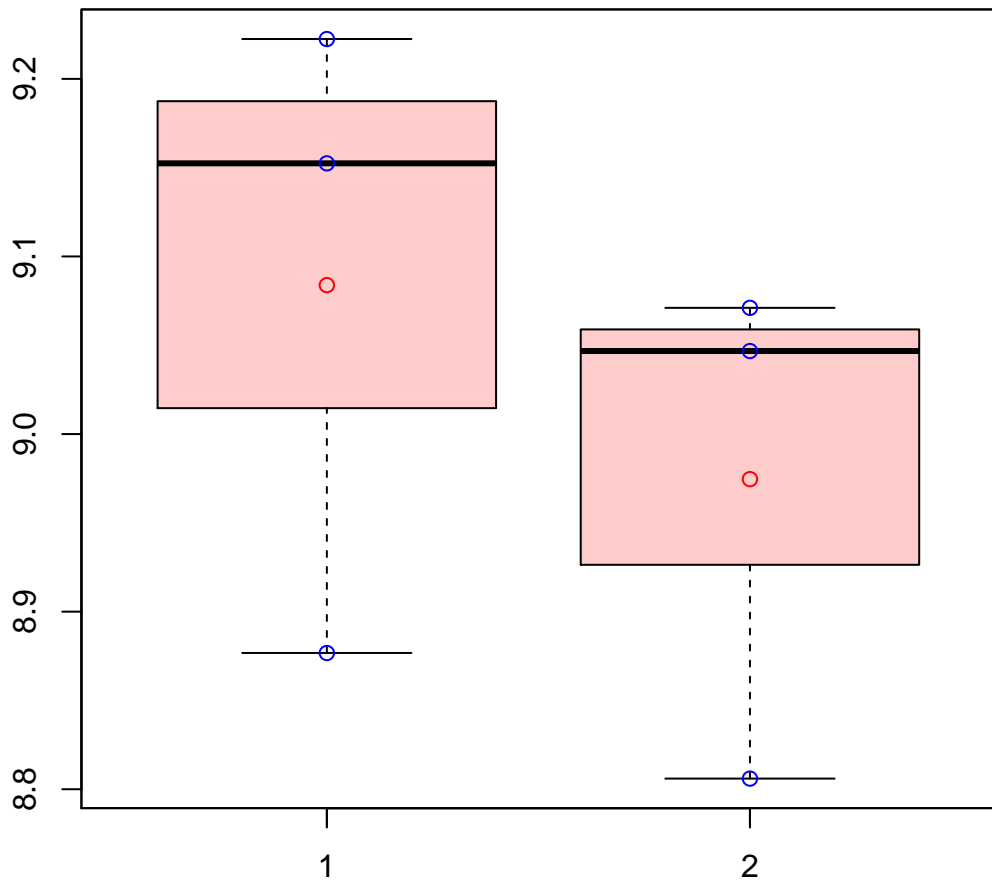

t-Test: p-value = 0.47

# CL1448Contig2|CL1448Contig2



t-Test: p-value = 0.47

# CL1448Contig5|CL1448Contig5

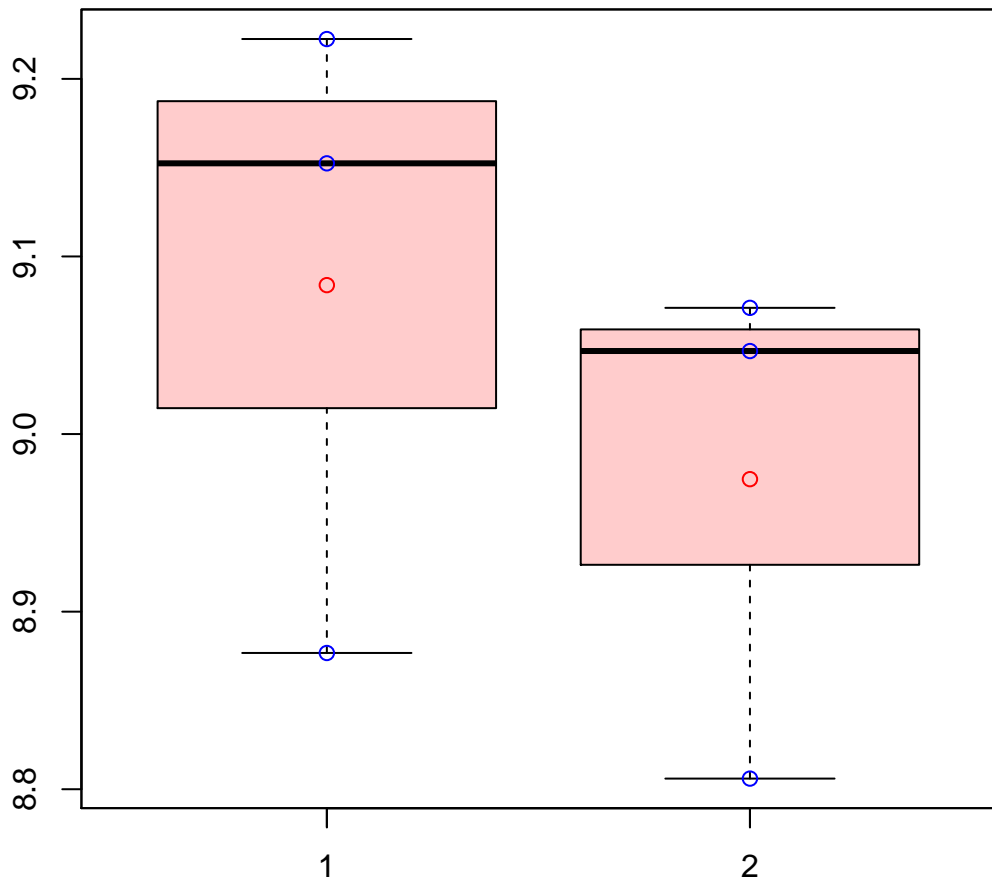

t-Test: p-value = 0.47

# CL1448Contig6|CL1448Contig6

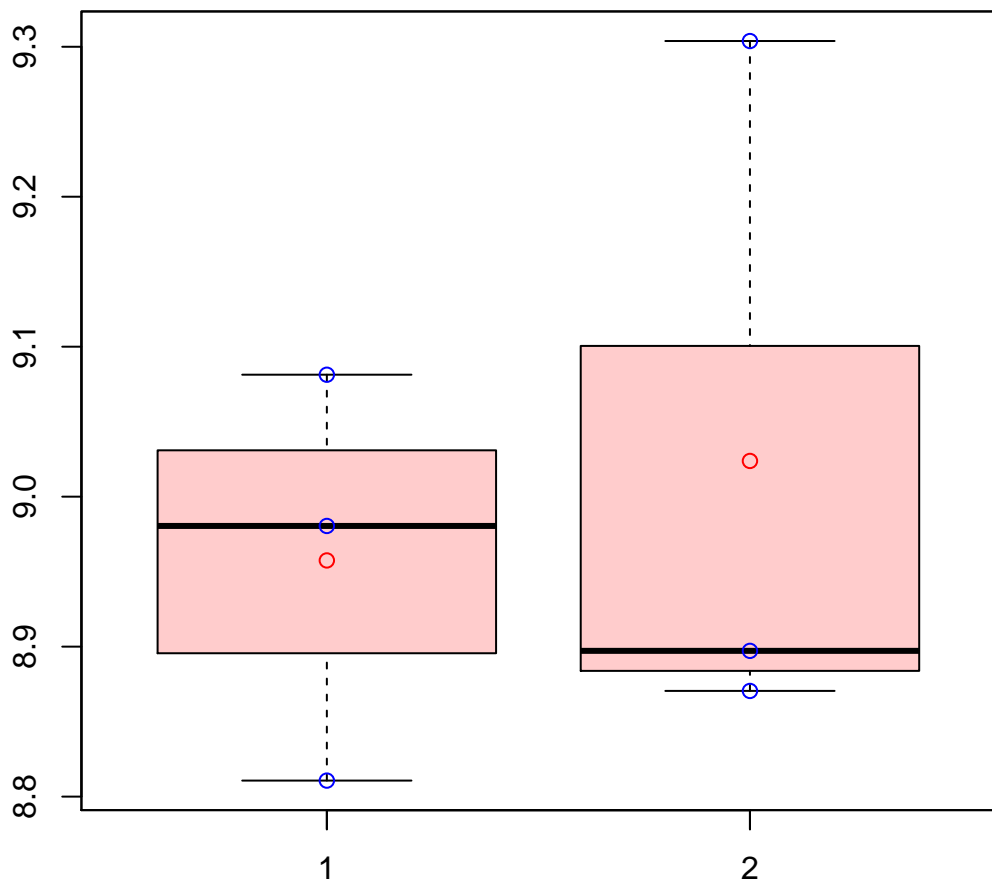

t-Test: p-value = 0.71



# CL14493Contig1|CL14493Contig1

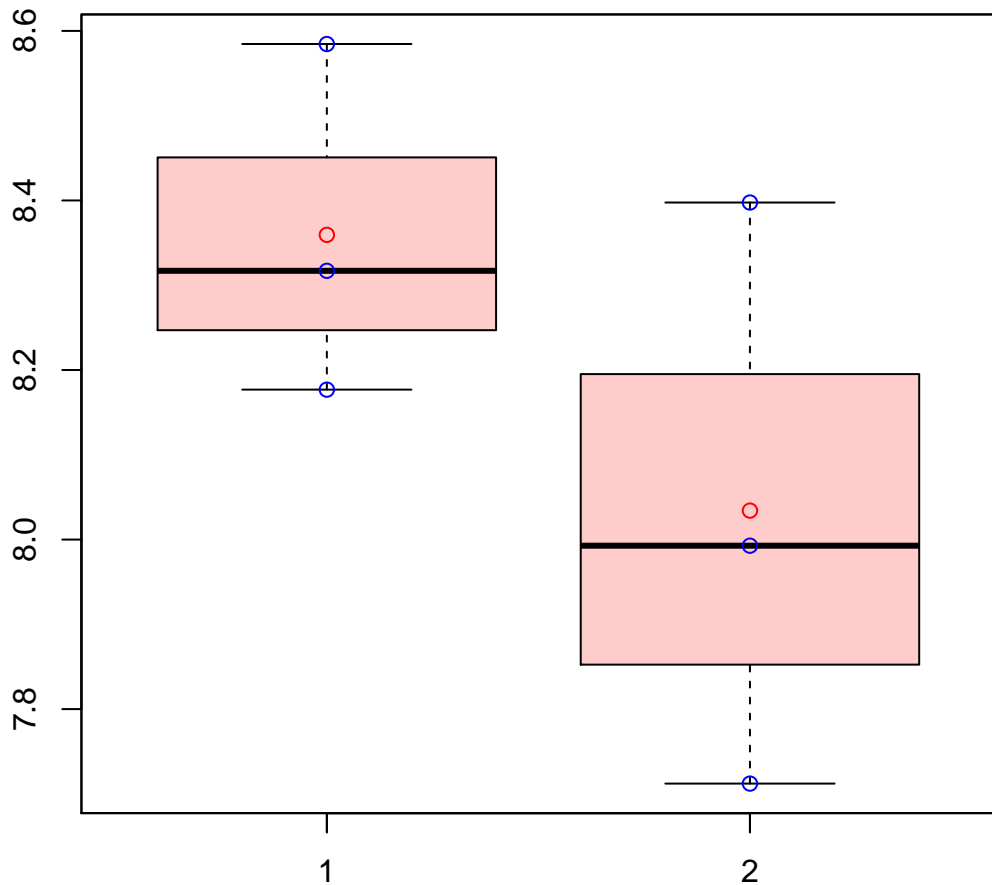

t-Test: p-value = 0.25

# CL14499Contig1|CL14499Contig1

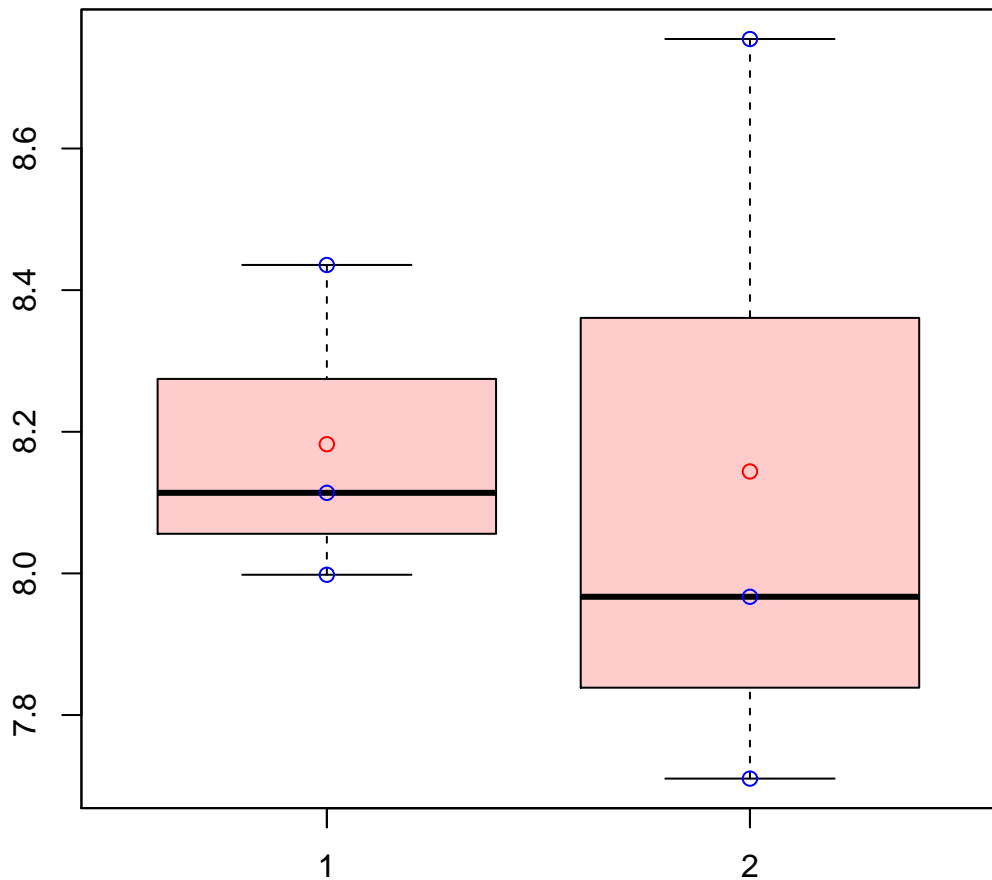

t-Test: p-value = 0.92

# CL144Contig2|CL144Contig2

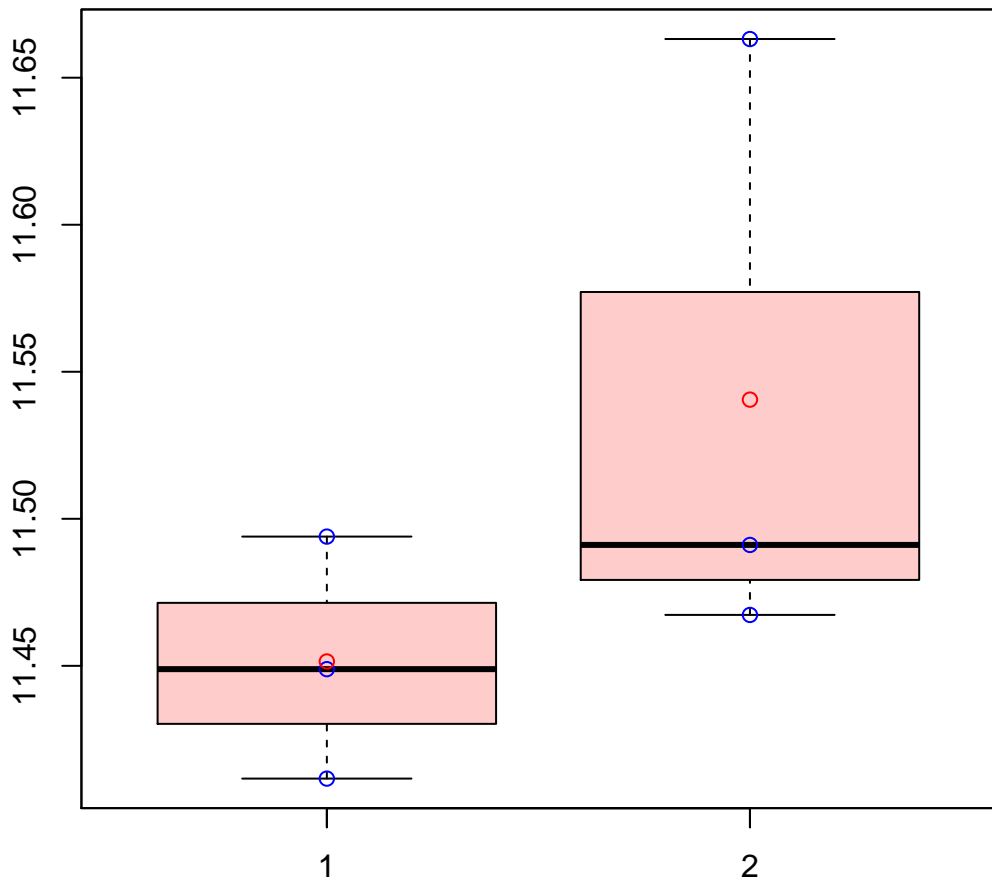

t-Test: p-value = 0.28

# CL144Contig4|CL144Contig4

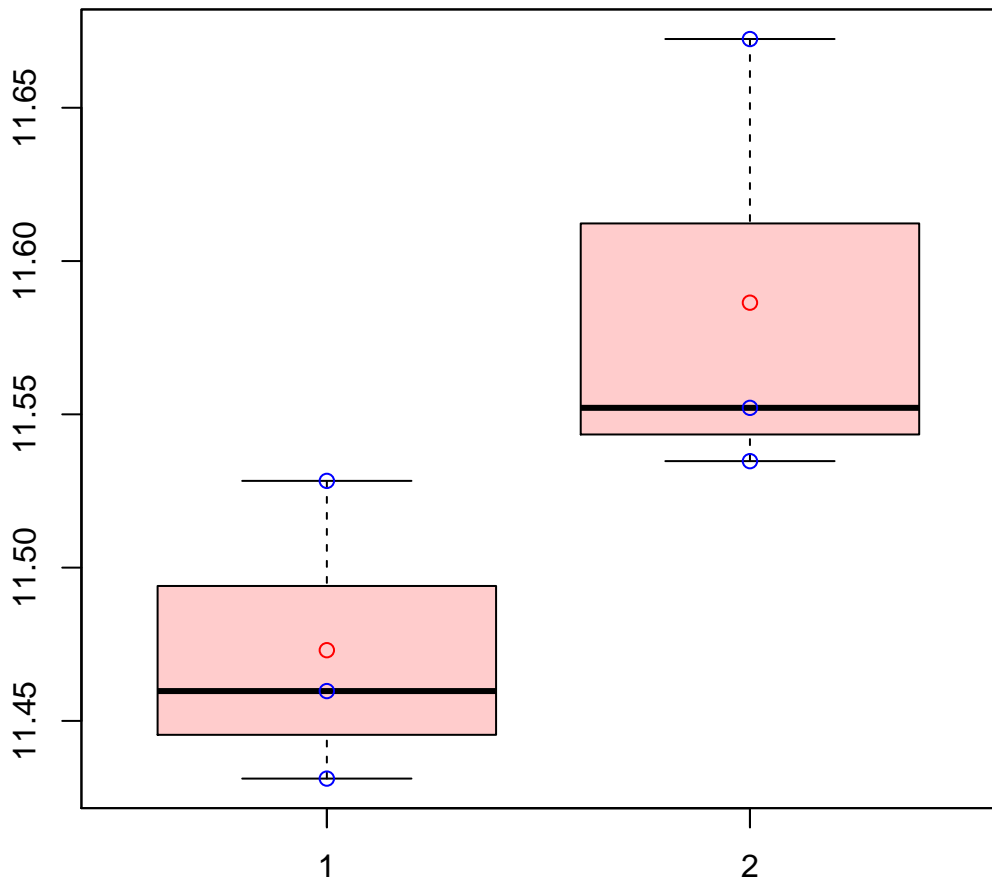

t-Test: p-value = 0.1

# CL1450Contig1|CL1450Contig1

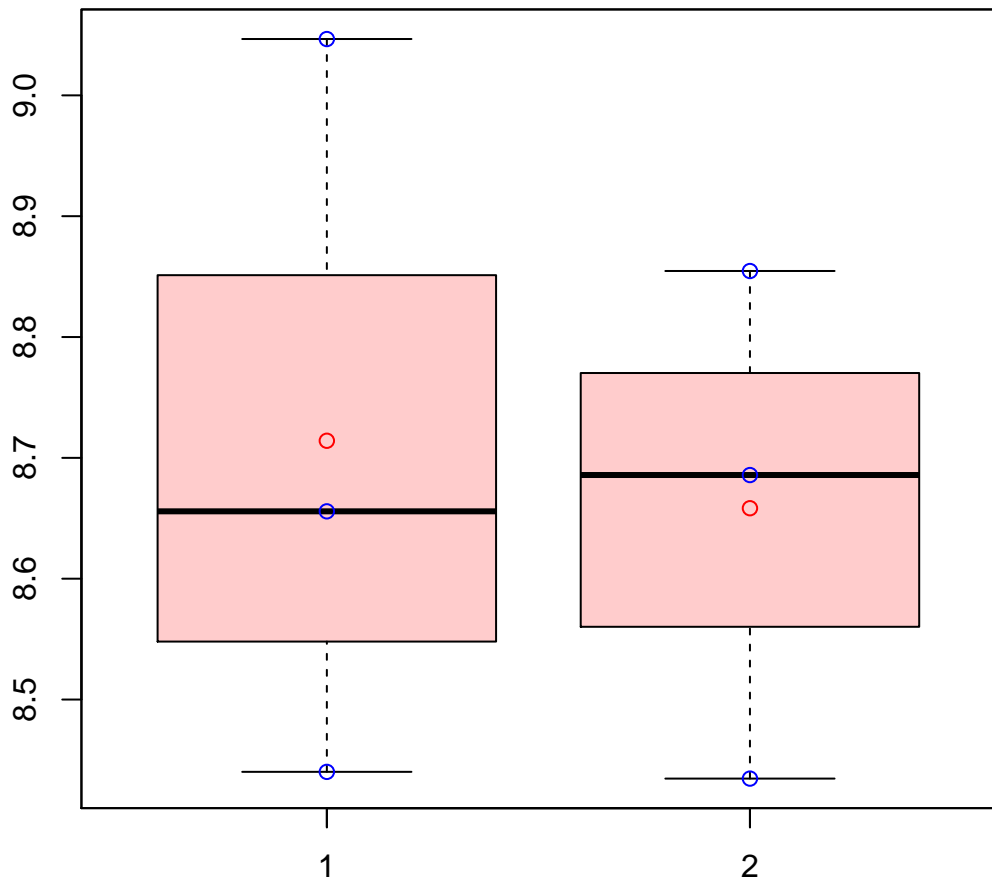

t-Test: p-value = 0.81

# CL1450Contig2|CL1450Contig2

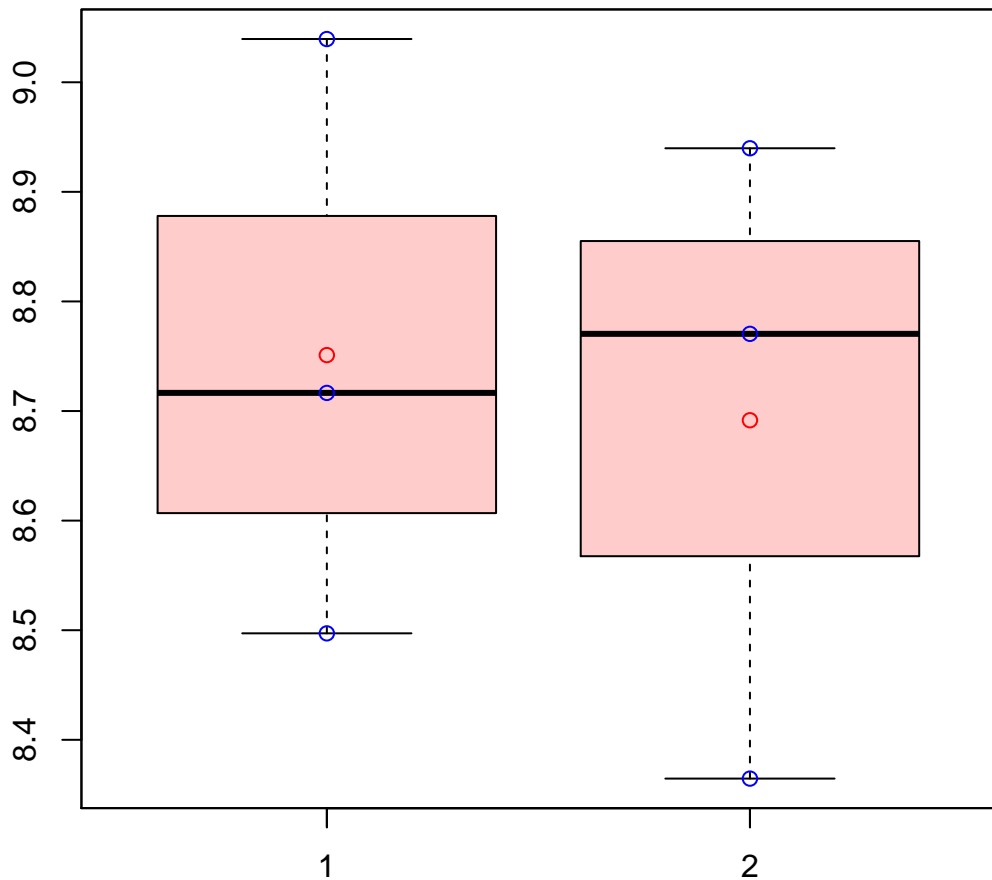

t-Test: p-value = 0.81

# CL1450Contig3|CL1450Contig3



t-Test: p-value = 0.81

# CL1450Contig4|CL1450Contig4

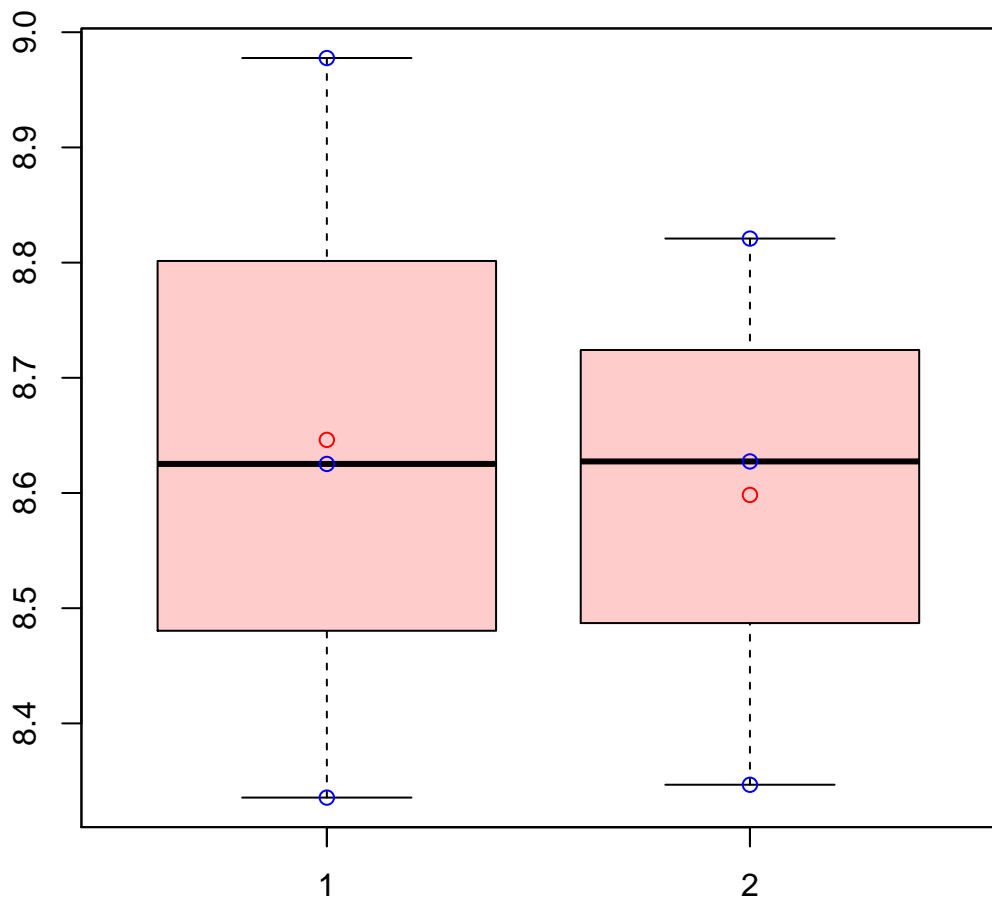

t-Test: p-value = 0.85



# CL1451Contig1|CL1451Contig1

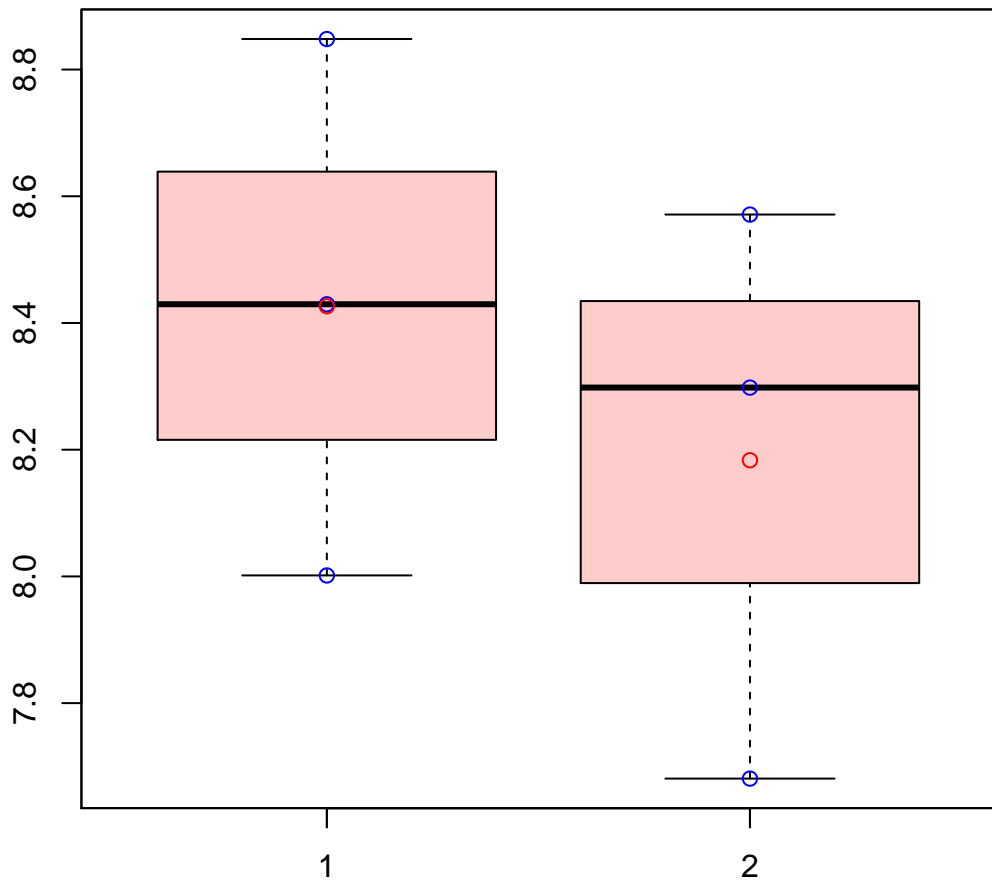

t-Test: p-value = 0.54

# CL1451Contig2|CL1451Contig2



t-Test: p-value = 0.54

# CL1451Contig5|CL1451Contig5

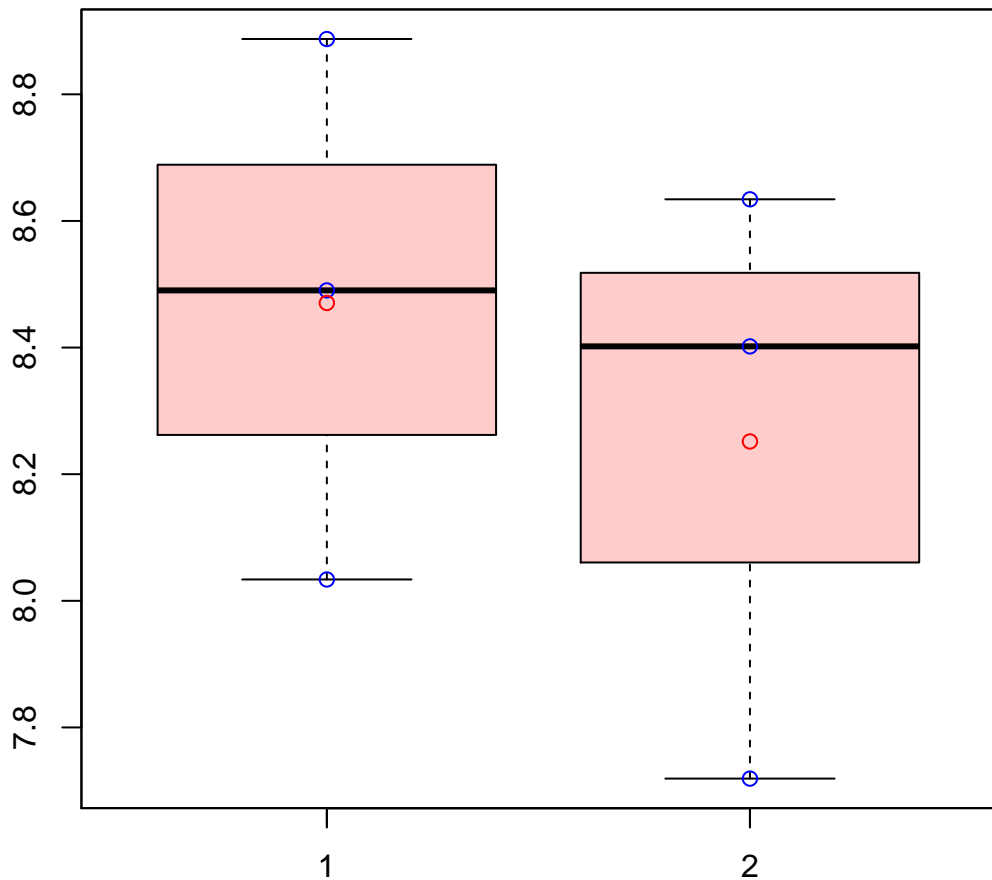

t-Test: p-value = 0.59

# CL1452Contig10|CL1452Contig10

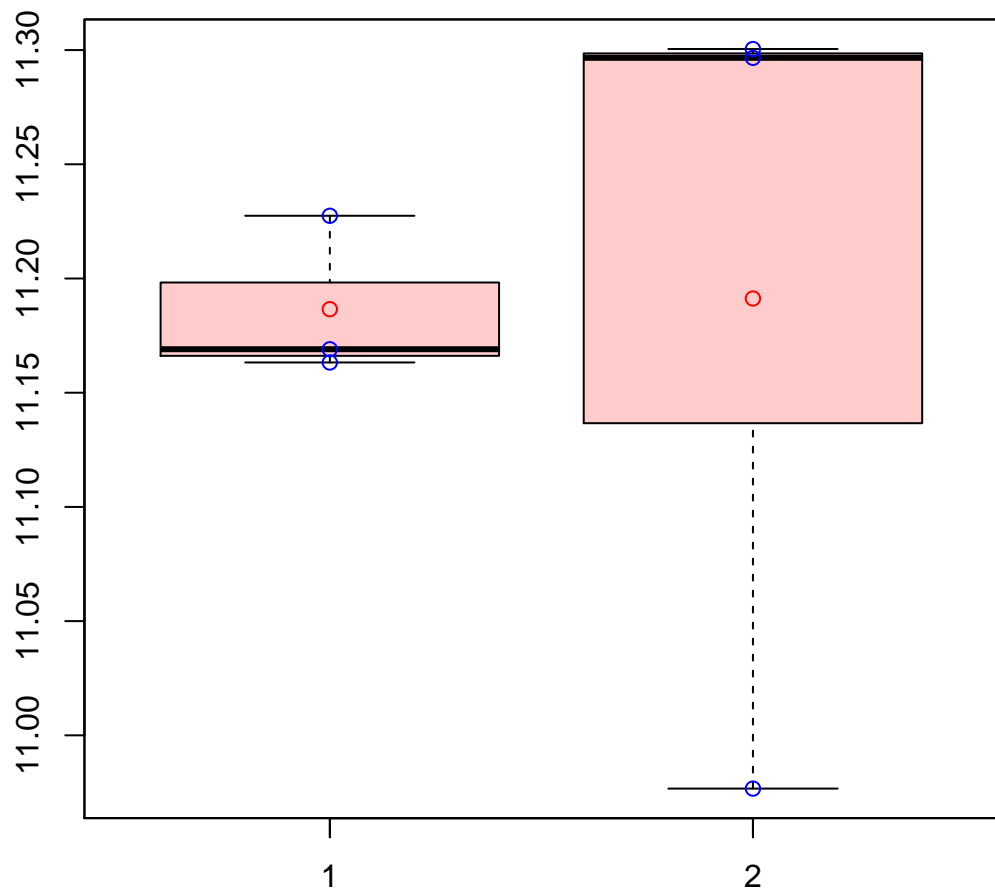

t-Test: p-value = 0.97

# CL1452Contig2|CL1452Contig2

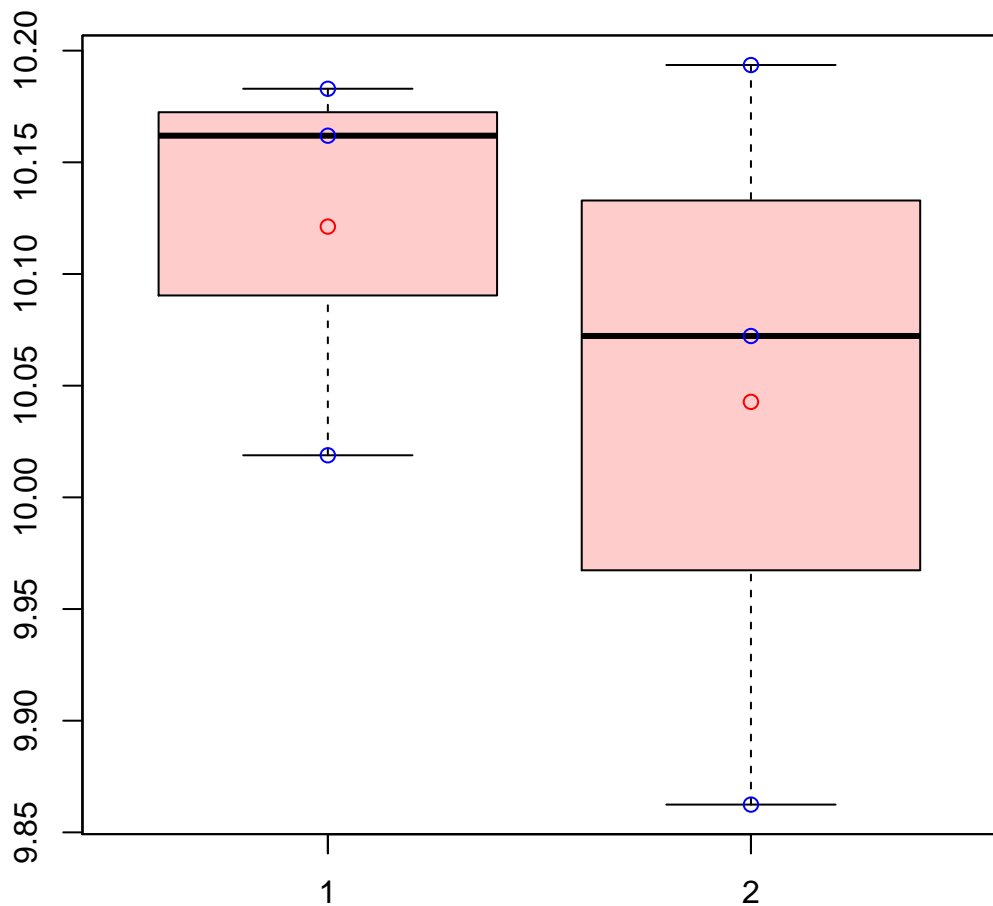

t-Test: p-value = 0.52

# CL1452Contig4|CL1452Contig4

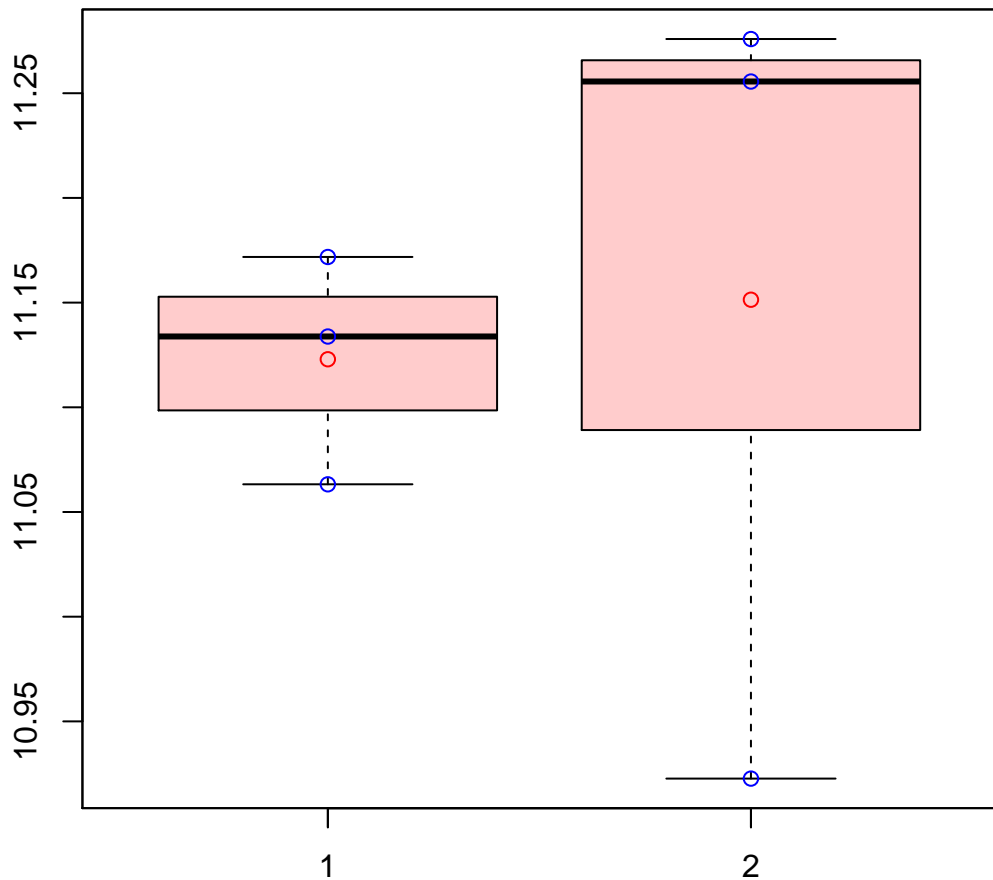

t-Test: p-value = 0.83

# CL1452Contig5|CL1452Contig5

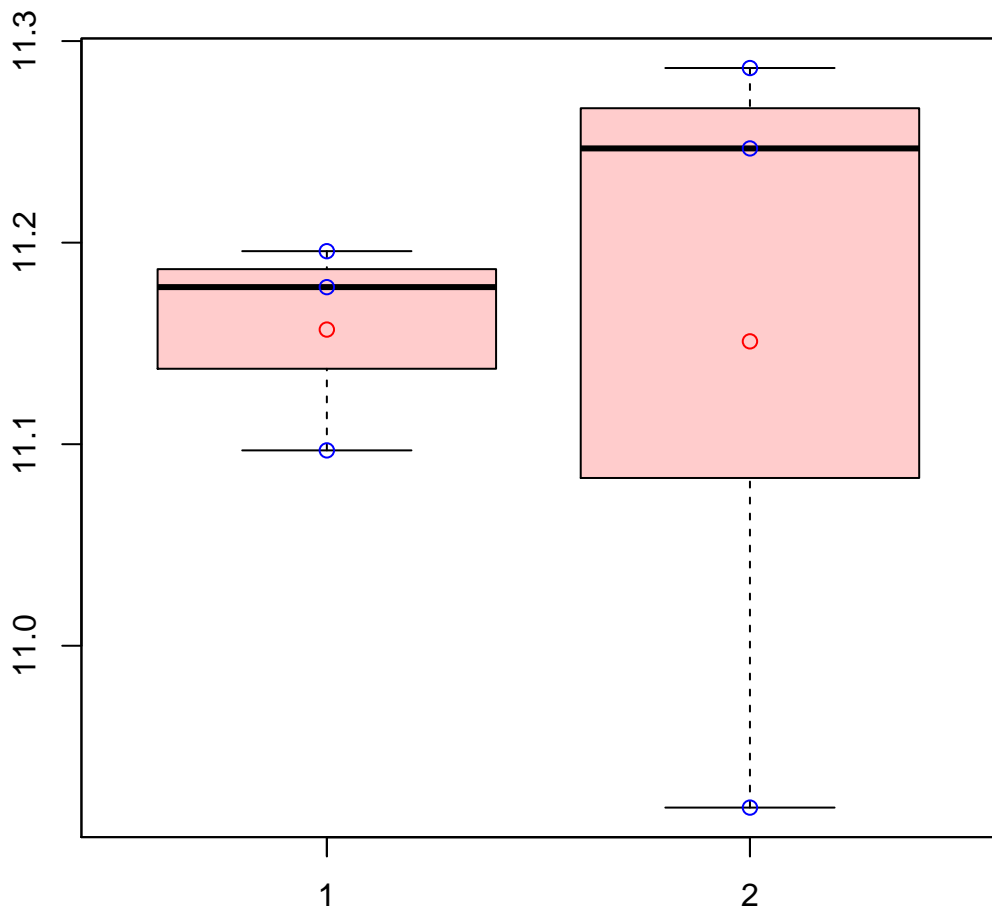

t-Test: p-value = 0.97

# CL1452Contig7|CL1452Contig7

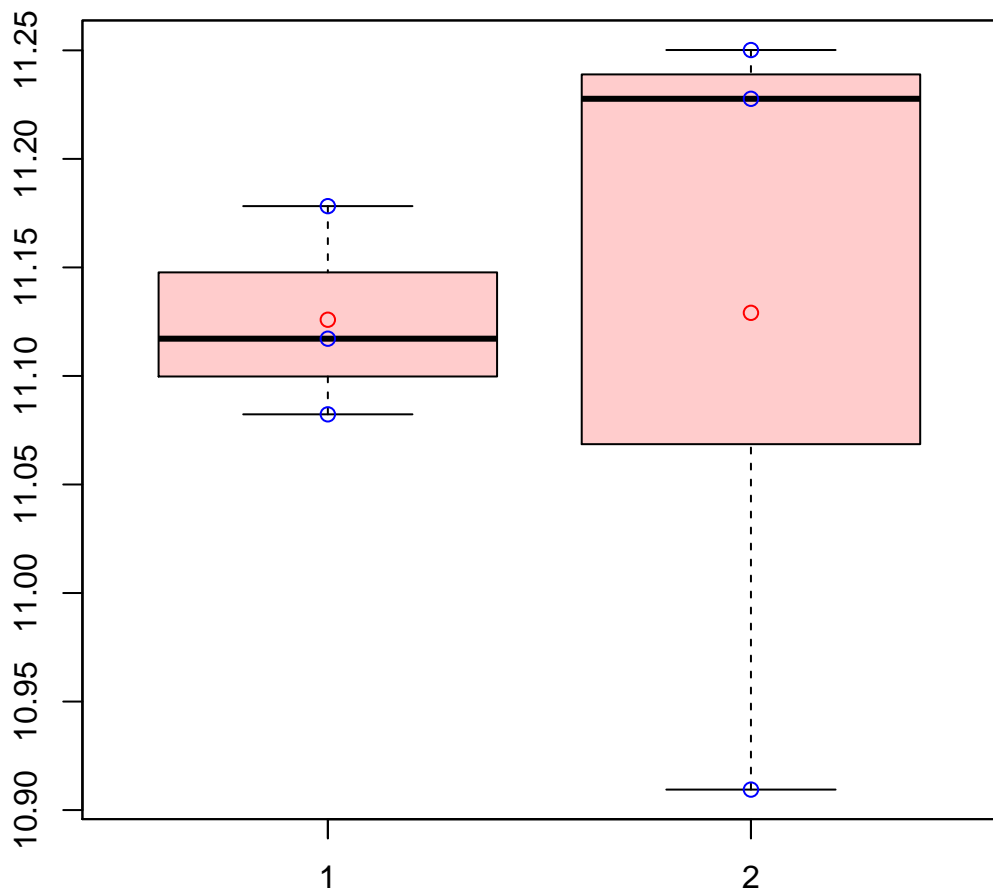

t-Test: p-value = 0.98



# CL1452Contig8|CL1452Contig8

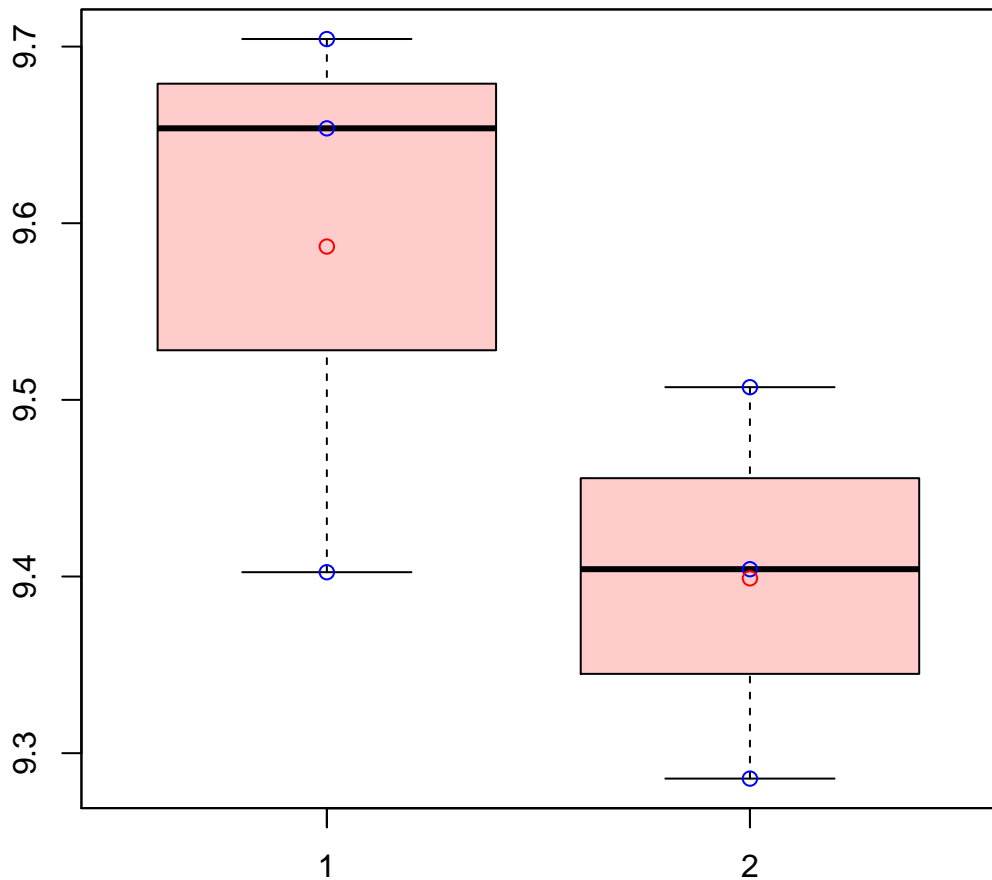

t-Test: p-value = 0.18

# CL14544Contig1|CL14544Contig1

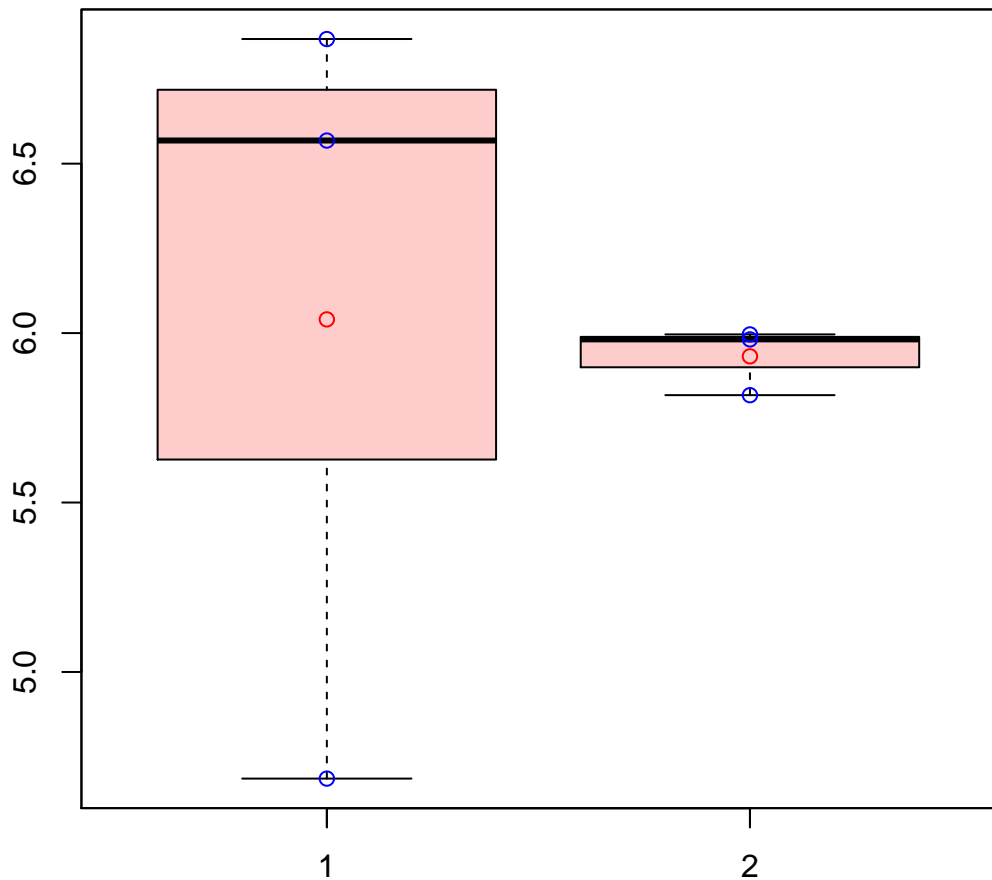

t-Test: p-value = 0.89

# CL14555Contig1|CL14555Contig1

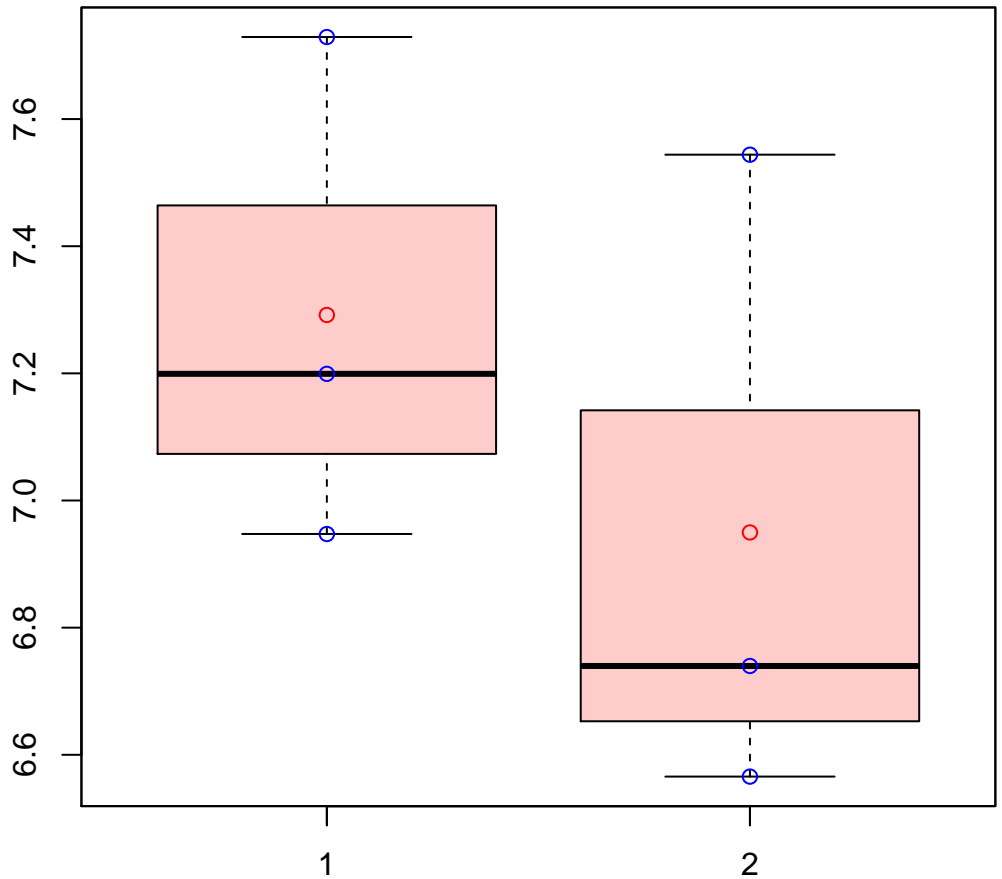

t-Test: p-value = 0.42

# CL1456Contig11|CL1456Contig11

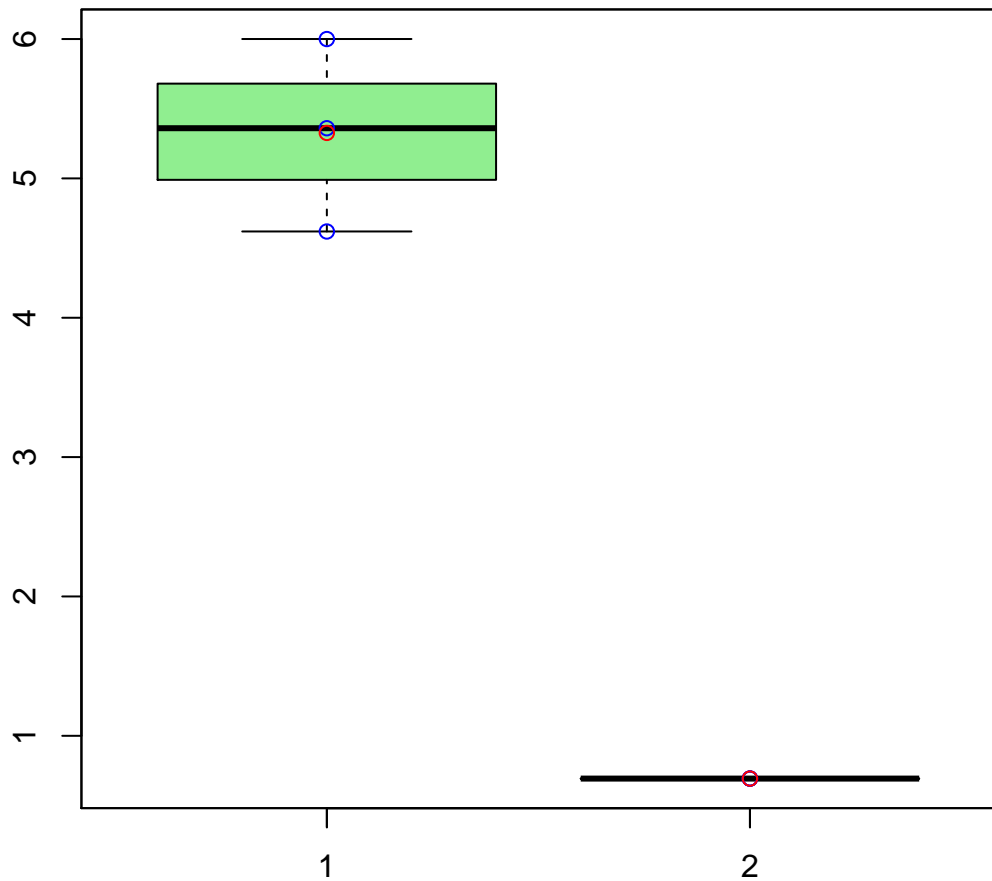

t-Test: p-value = 0.01

# CL1456Contig12|CL1456Contig12

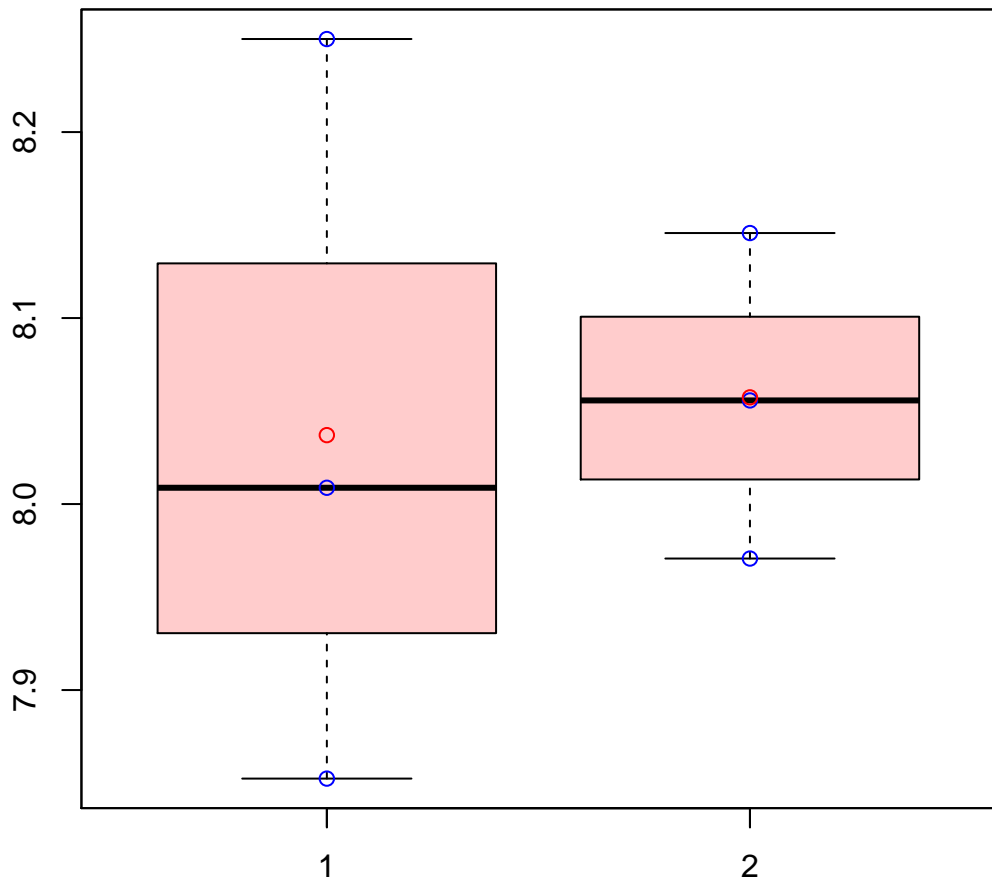

t-Test: p-value = 0.88

# CL1456Contig1|CL1456Contig1

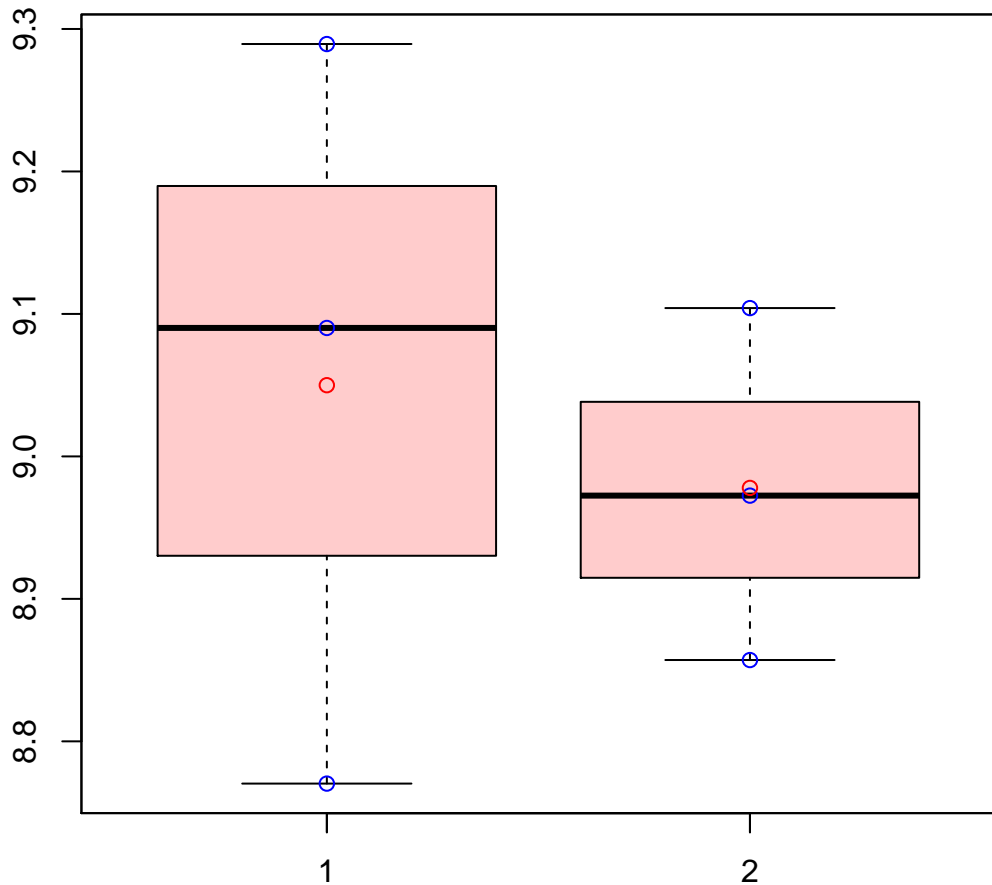

t-Test: p-value = 0.7

# CL1456Contig2|CL1456Contig2

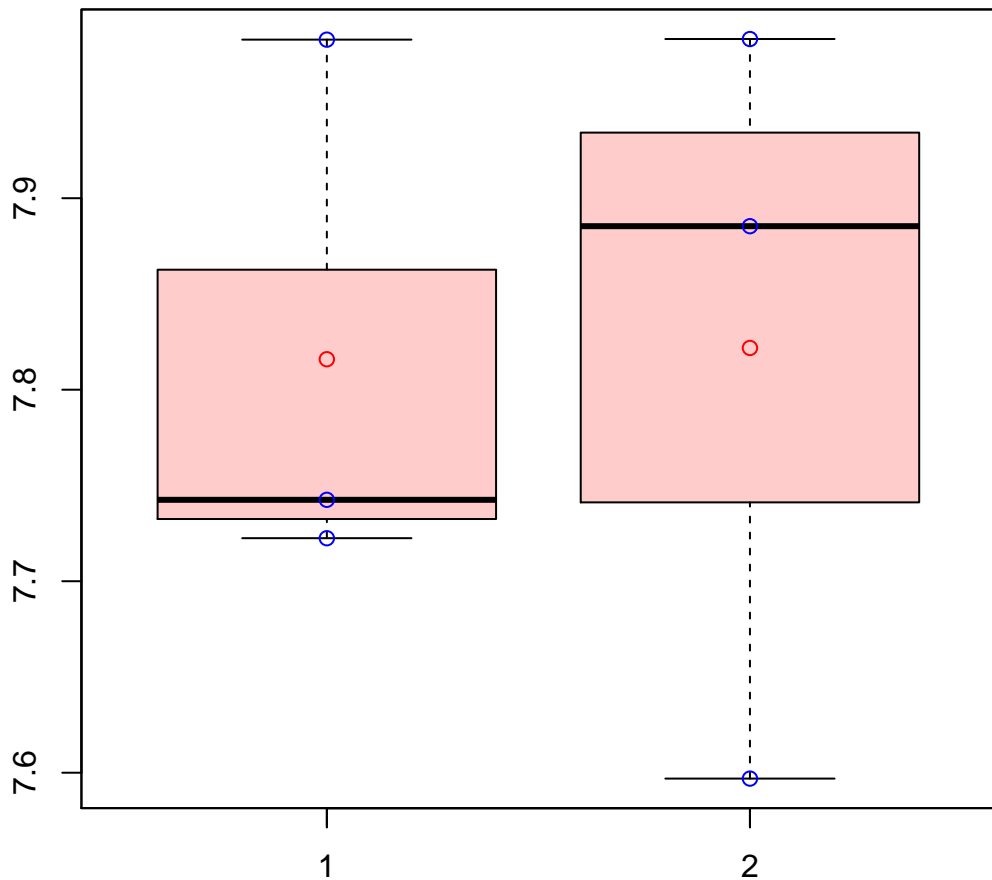

t-Test: p-value = 0.97

# CL1456Contig3|CL1456Contig3

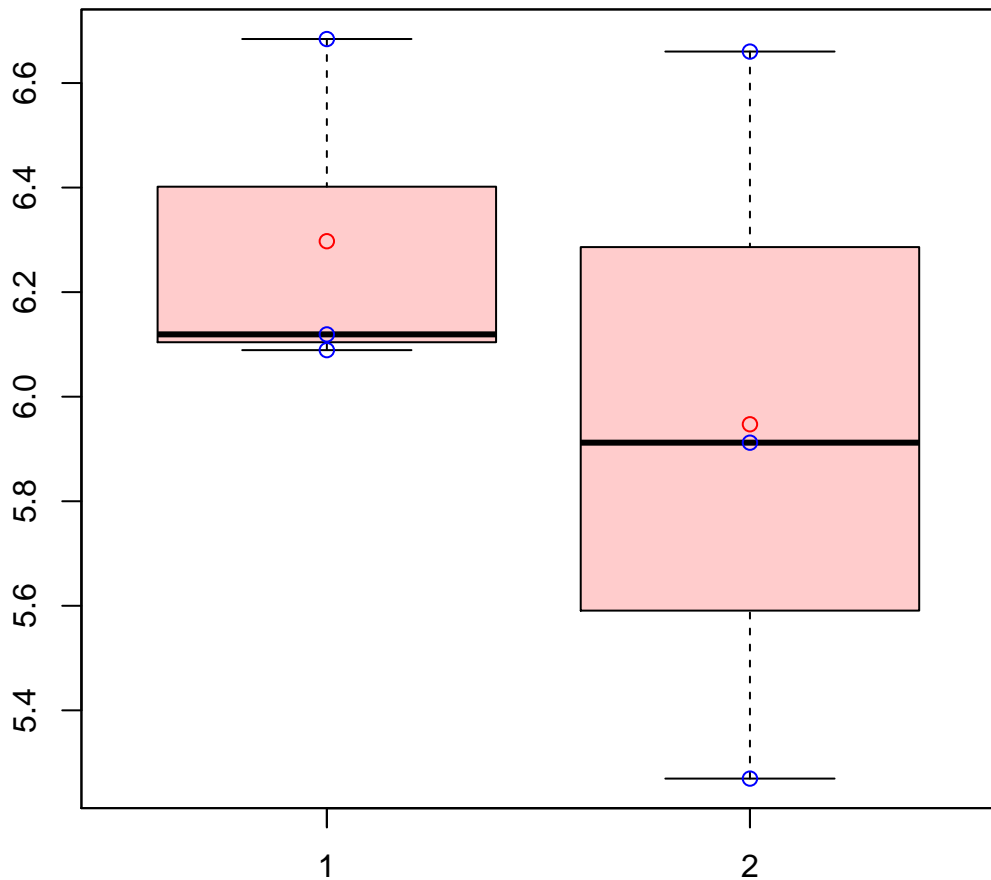

t-Test: p-value = 0.49



# CL1456Contig4|CL1456Contig4

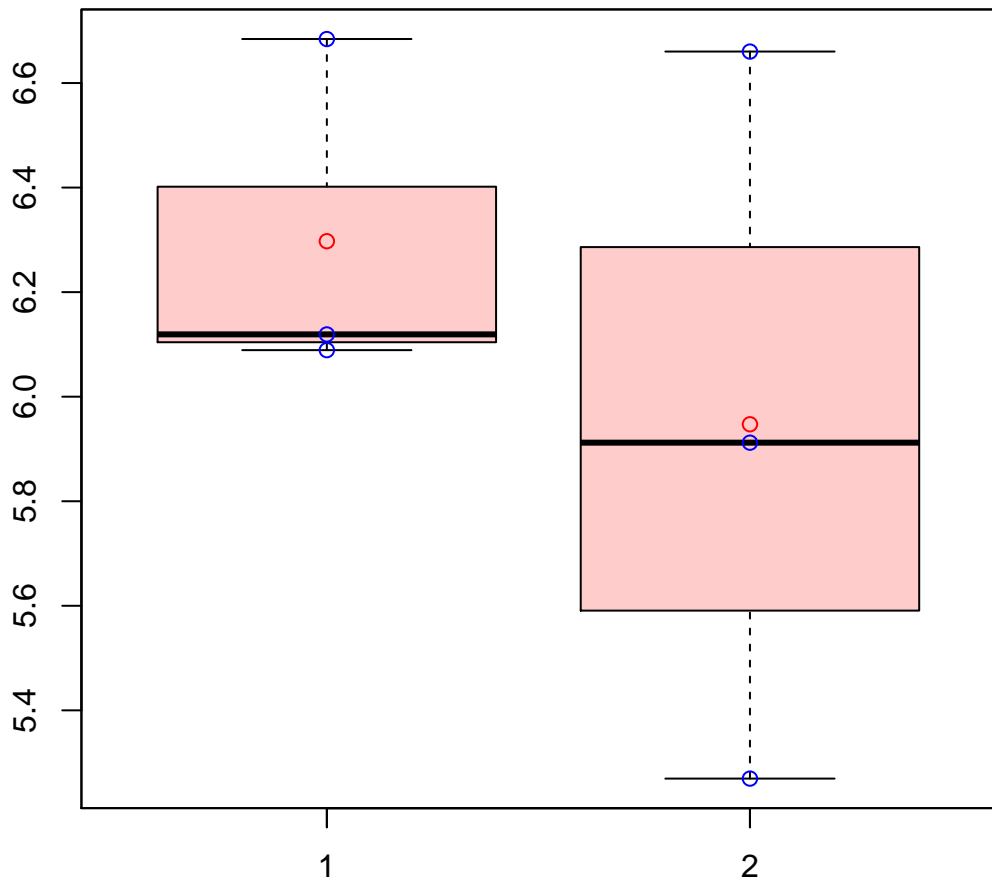

t-Test: p-value = 0.49

# CL1456Contig5|CL1456Contig5



t-Test: p-value = 0.7

# CL1456Contig6|CL1456Contig6



t-Test: p-value = 0.7

# CL1456Contig7|CL1456Contig7



t-Test: p-value = 0.97

# CL1456Contig8|CL1456Contig8



t-Test: p-value = 0.01

# CL1456Contig9|CL1456Contig9



t-Test: p-value = 0.49

# CL1460Contig3|CL1460Contig3

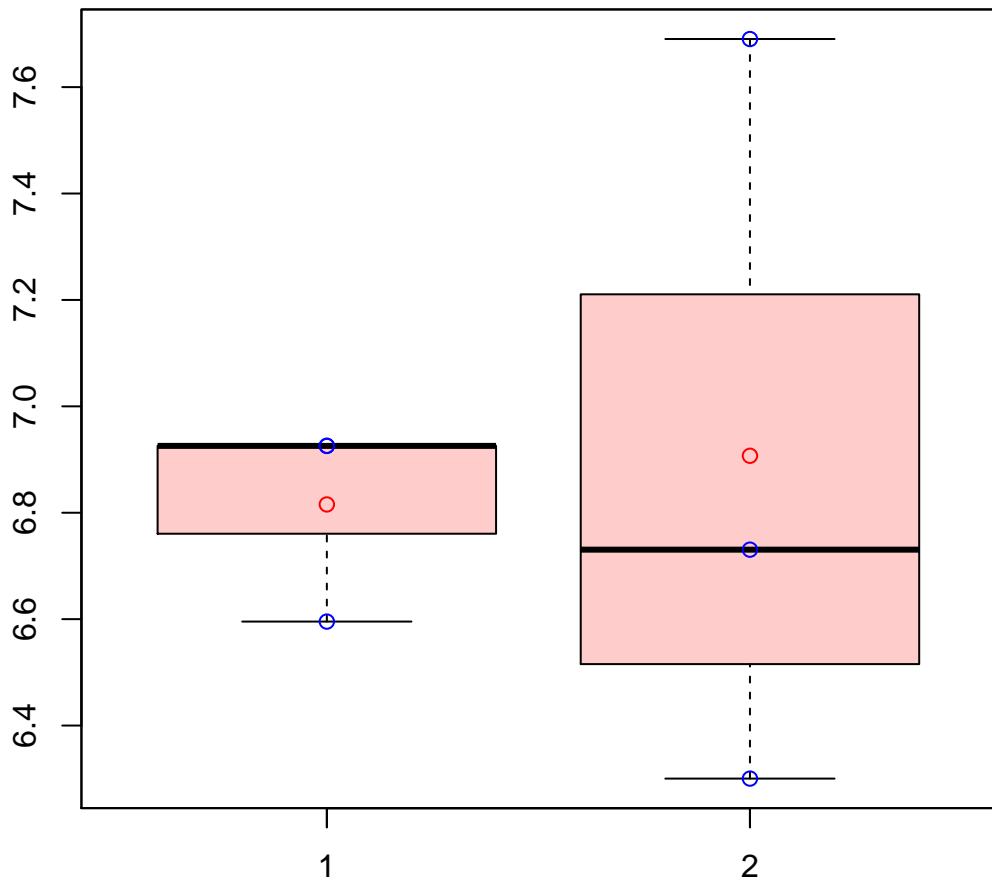

t-Test: p-value = 0.85

# CL14612Contig1|CL14612Contig1

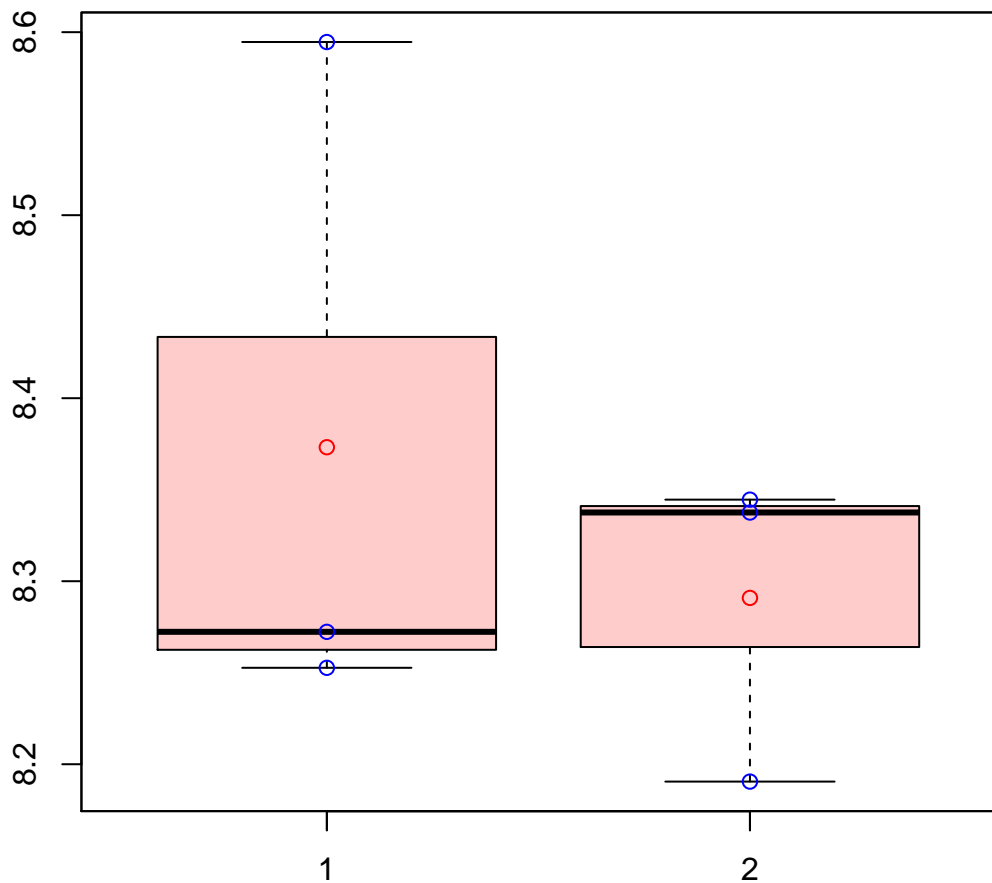

t-Test: p-value = 0.55



# CL14614Contig1|CL14614Contig1

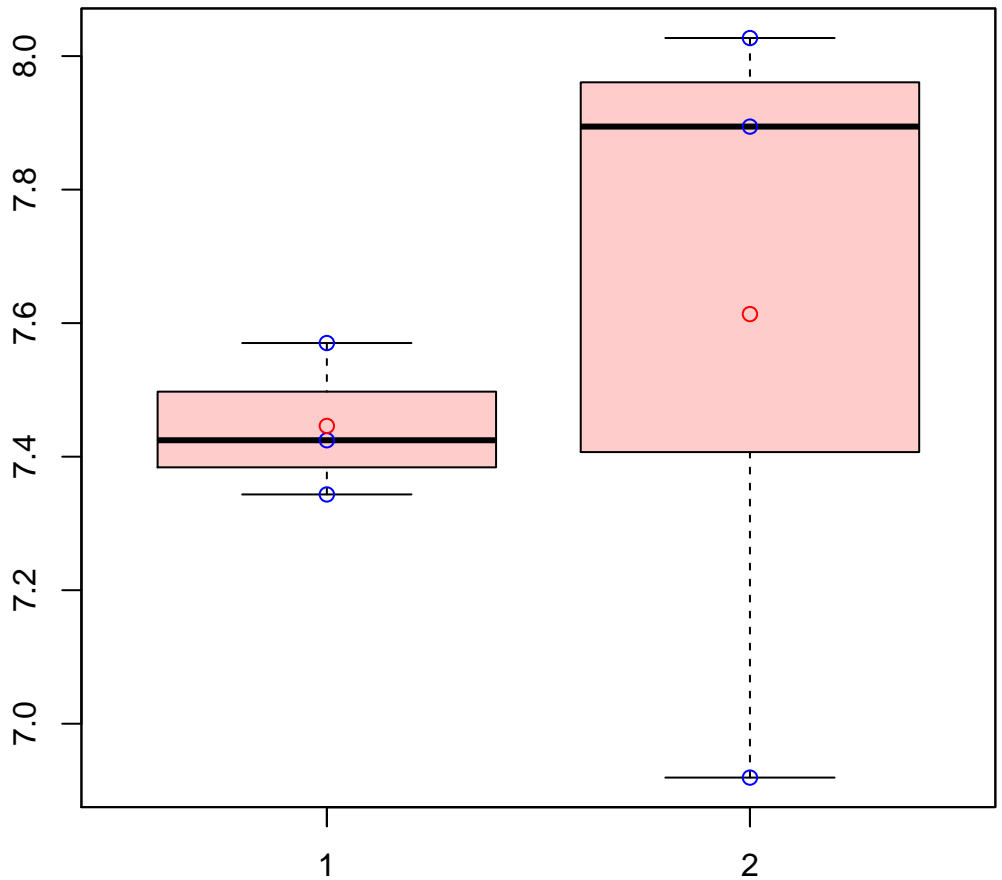

t-Test: p-value = 0.68

# CL14615Contig1|CL14615Contig1

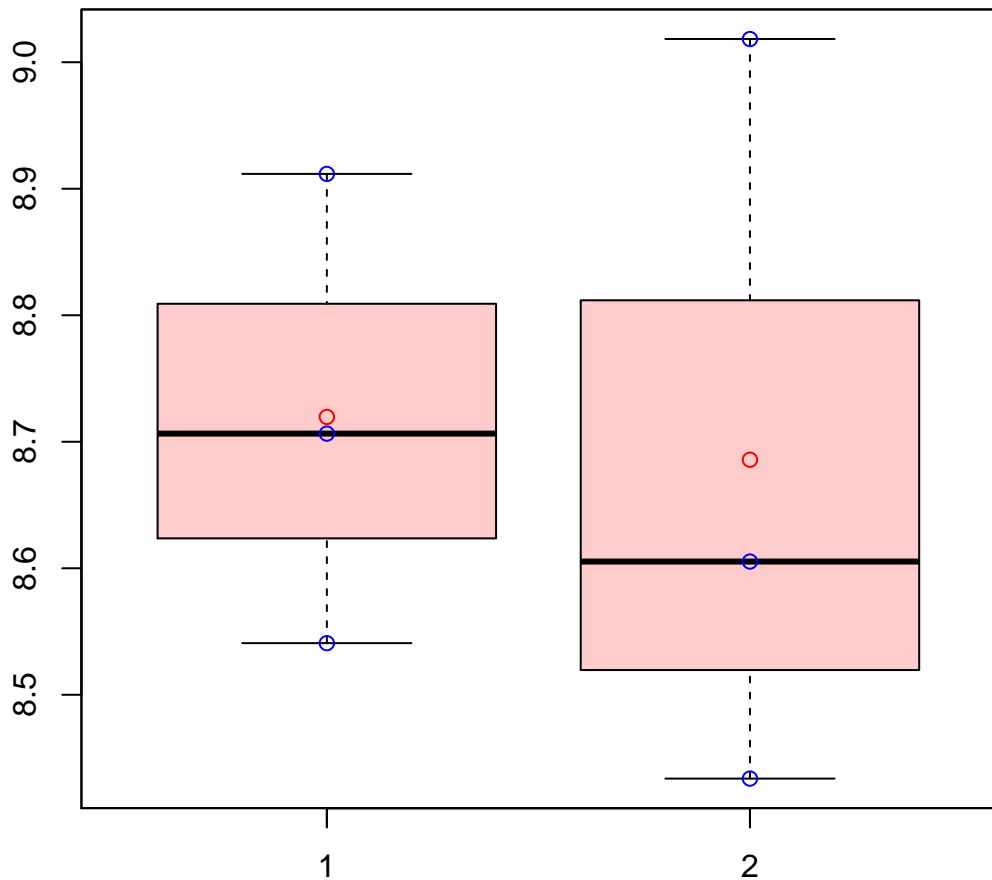

t-Test: p-value = 0.88

# CL14623Contig1|CL14623Contig1

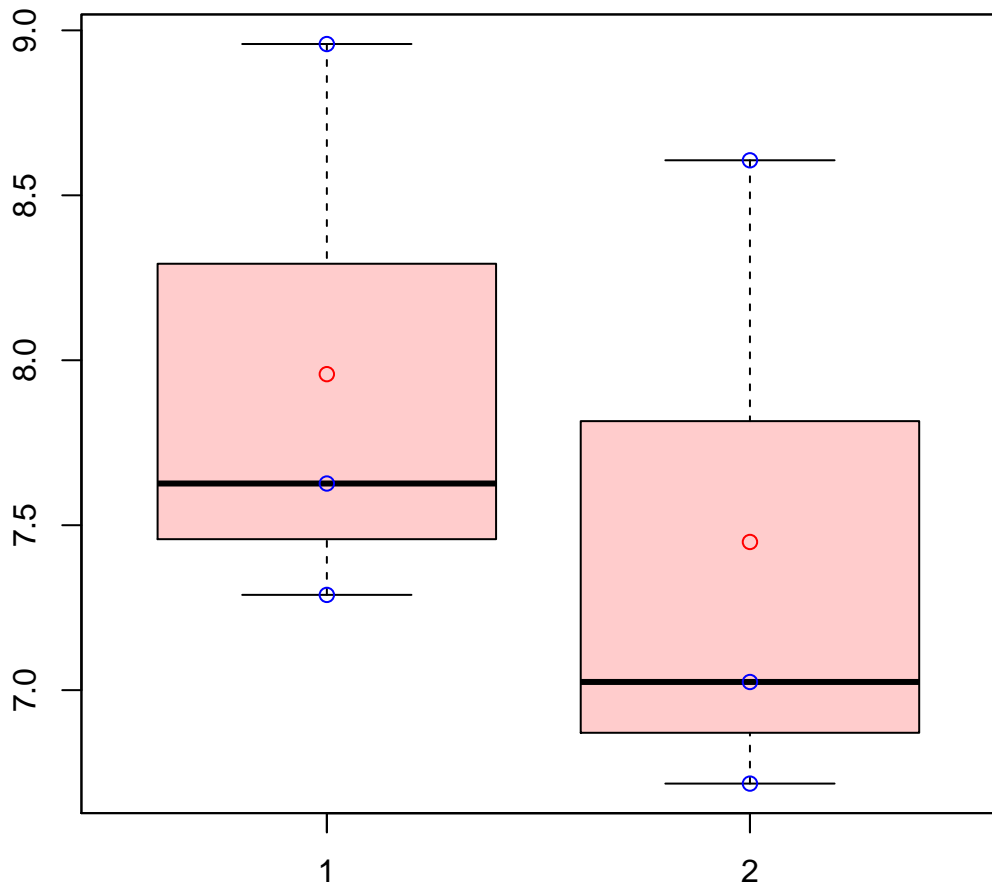

t-Test: p-value = 0.55

# CL1464Contig1|CL1464Contig1

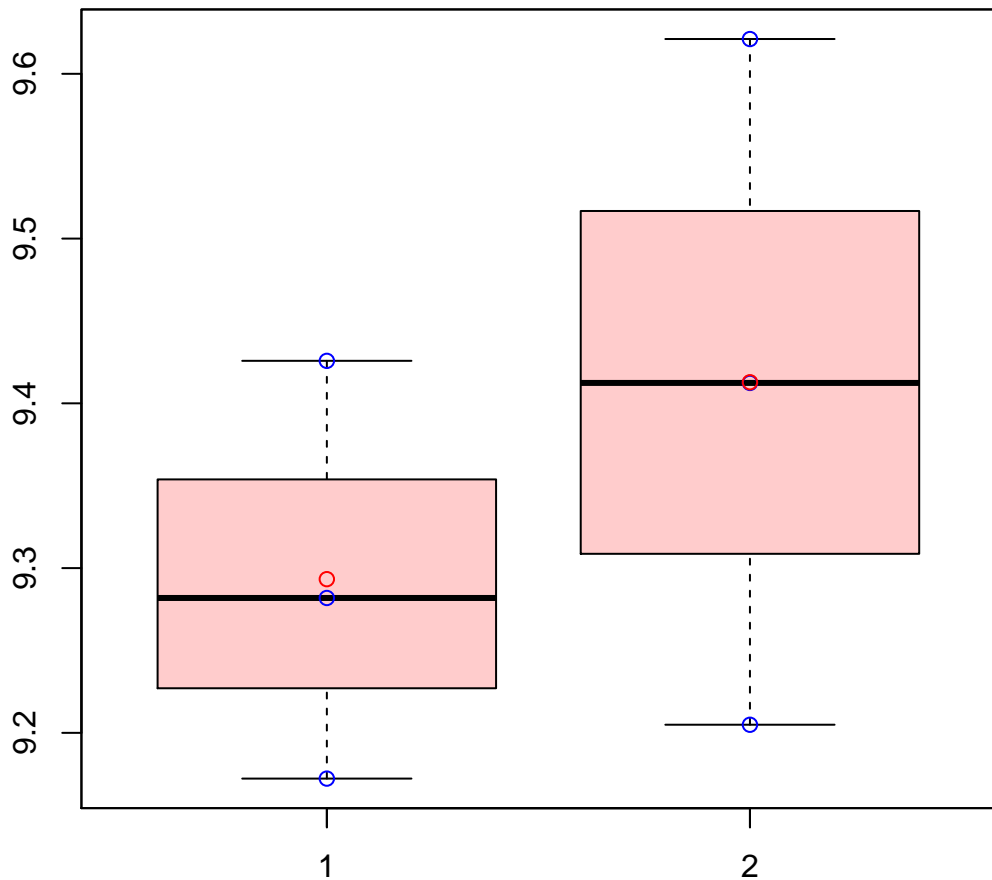

t-Test: p-value = 0.45

# CL1465Contig4|CL1465Contig4

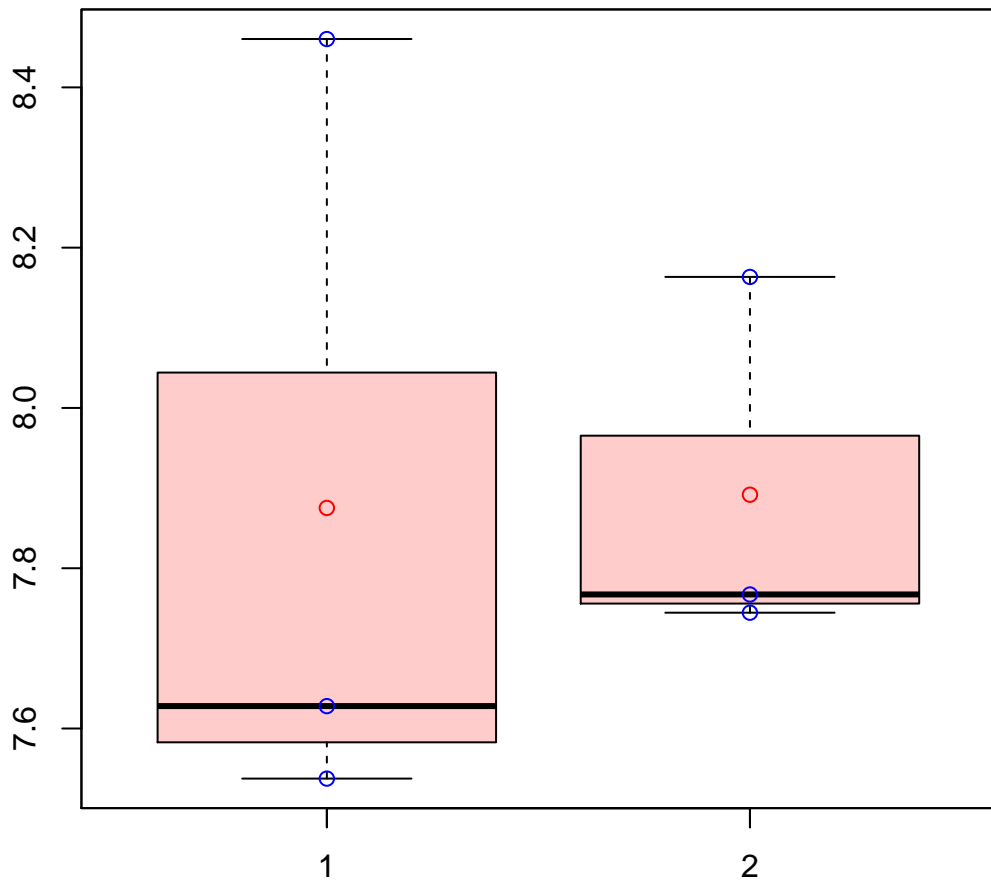

t-Test: p-value = 0.96

# CL14672Contig1|CL14672Contig1

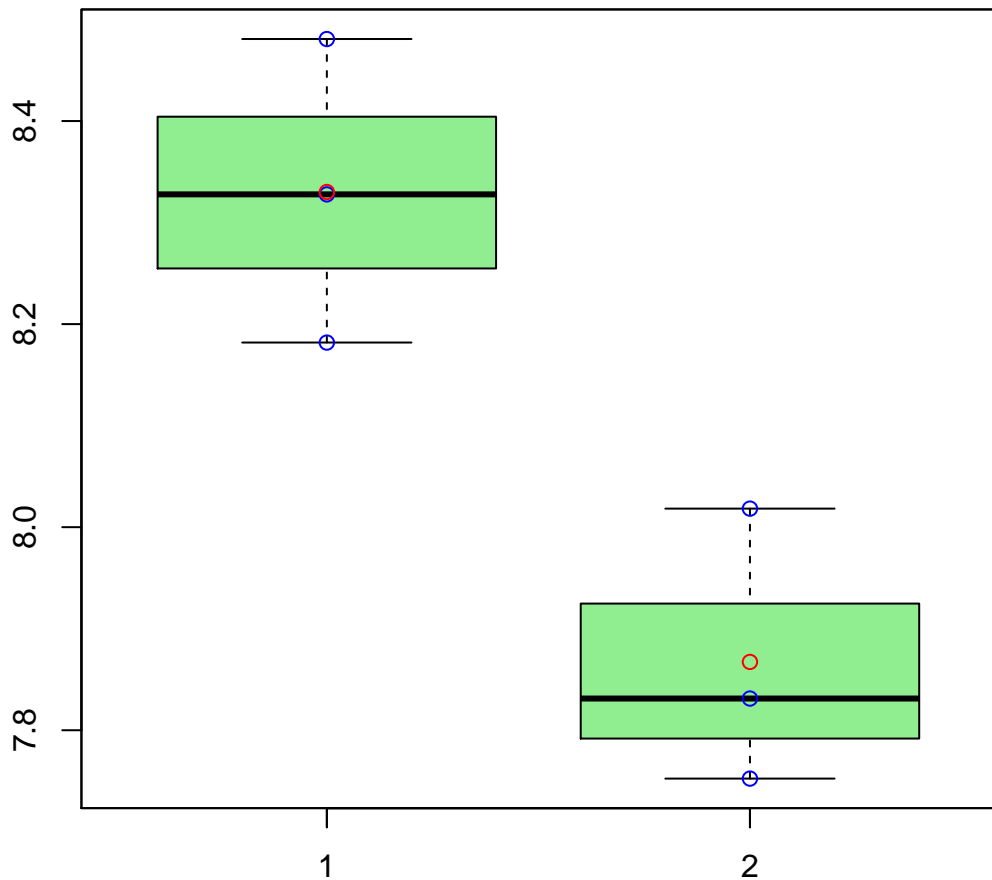

t-Test: p-value = 0.02

# CL14686Contig1|CL14686Contig1

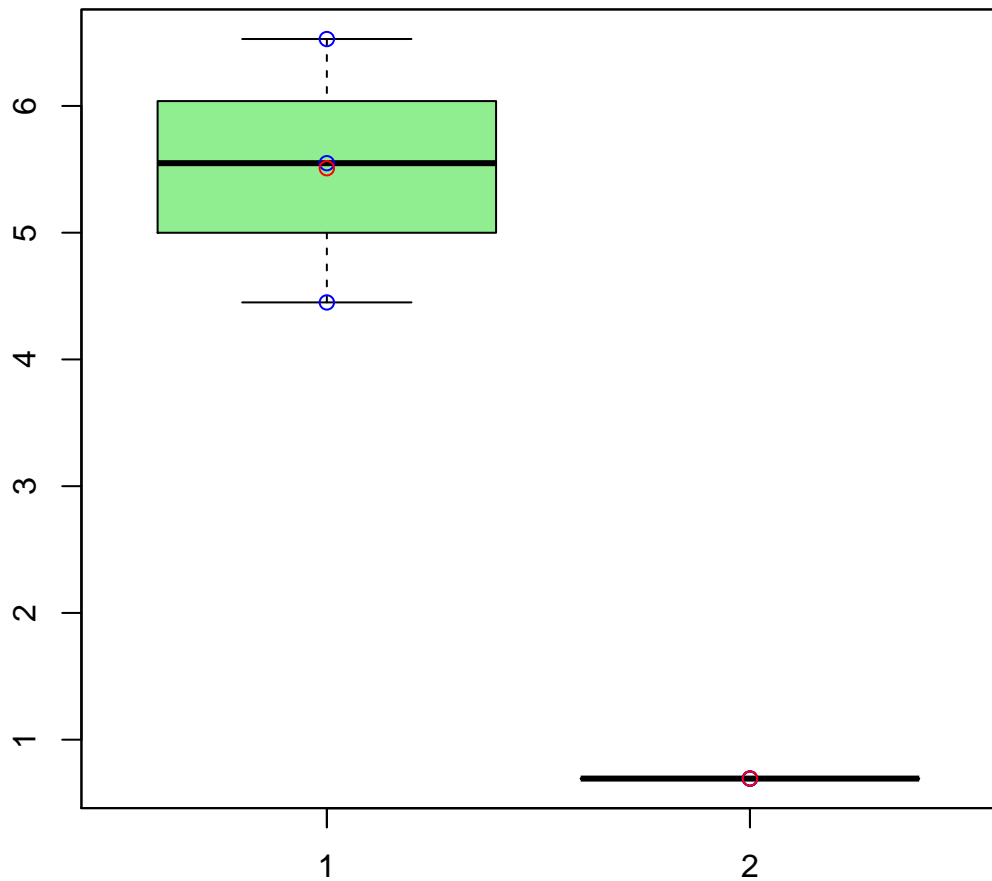

t-Test: p-value = 0.02

# CL1471Contig3|CL1471Contig3

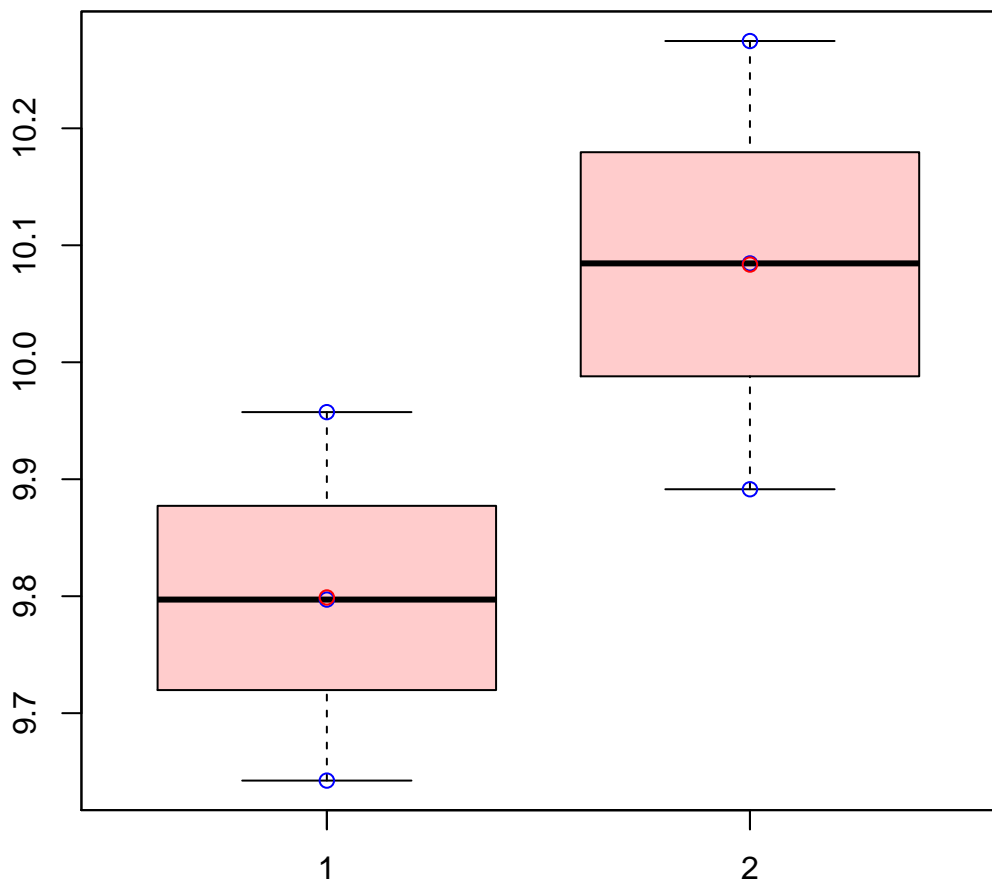

t-Test: p-value = 0.12



# CL1474Contig7|CL1474Contig7

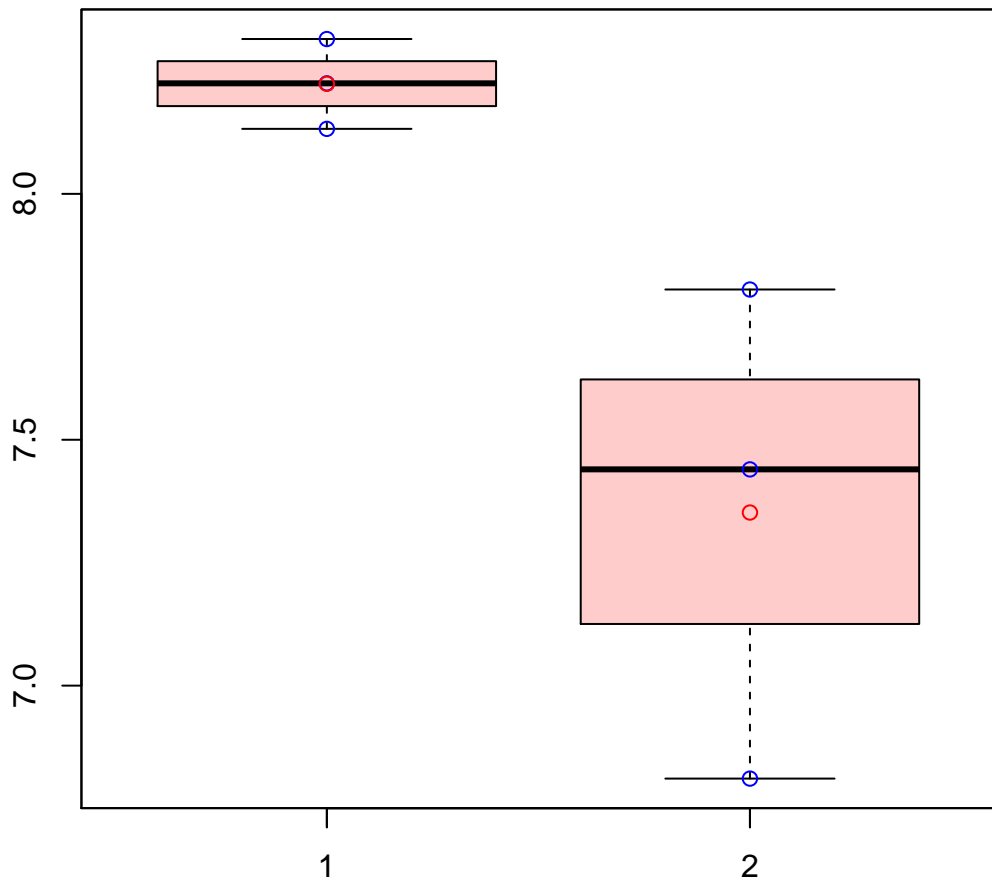

t-Test: p-value = 0.09

# CL14759Contig1|CL14759Contig1

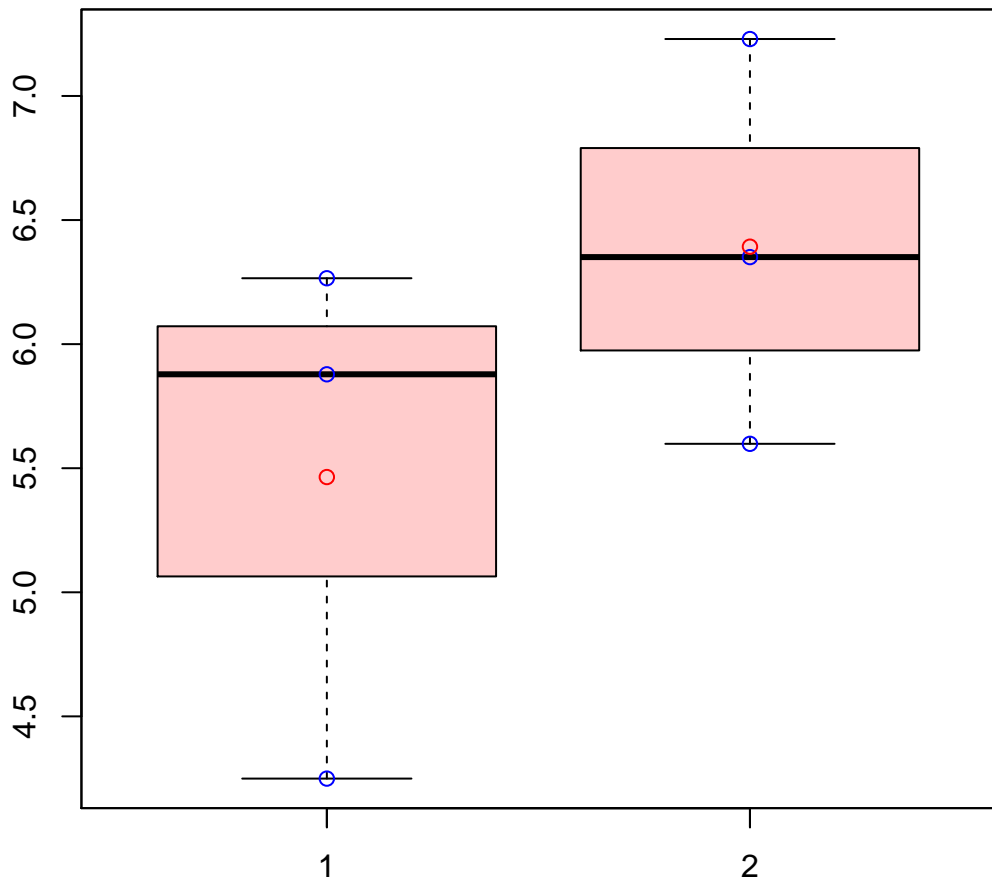

t-Test: p-value = 0.3

# CL1475Contig1|CL1475Contig1

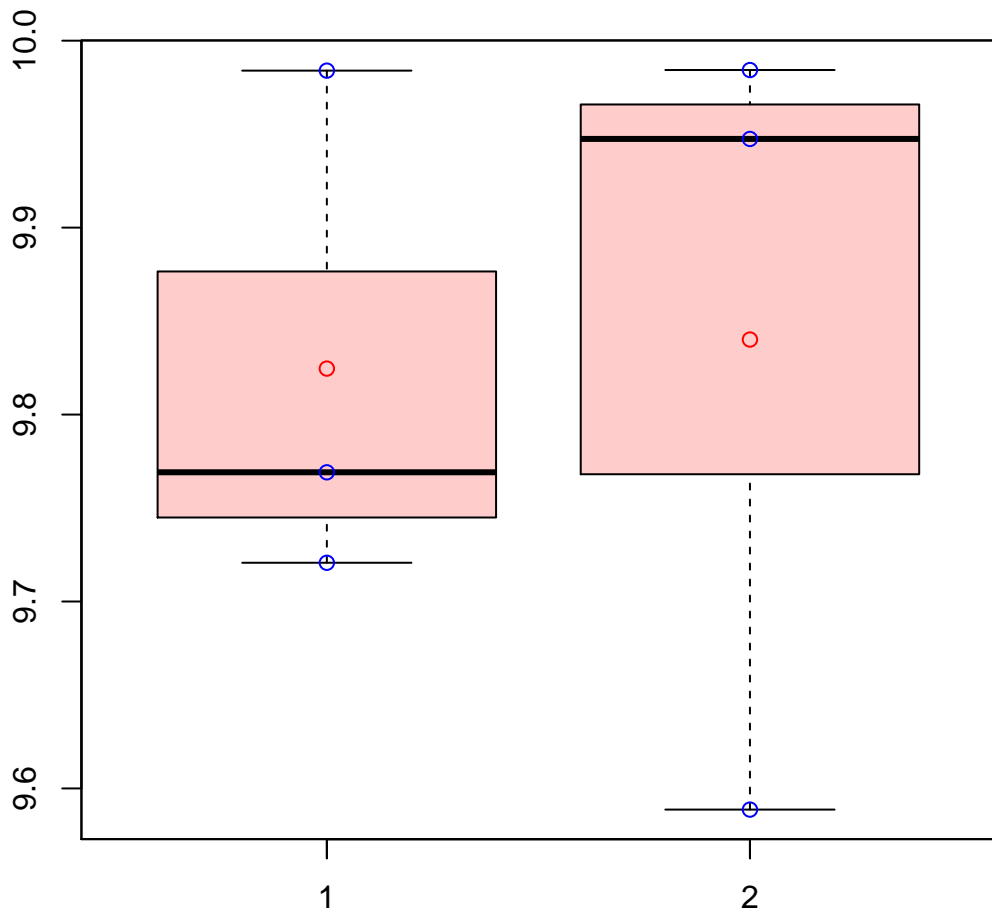

t-Test: p-value = 0.92

# CL1475Contig2|CL1475Contig2

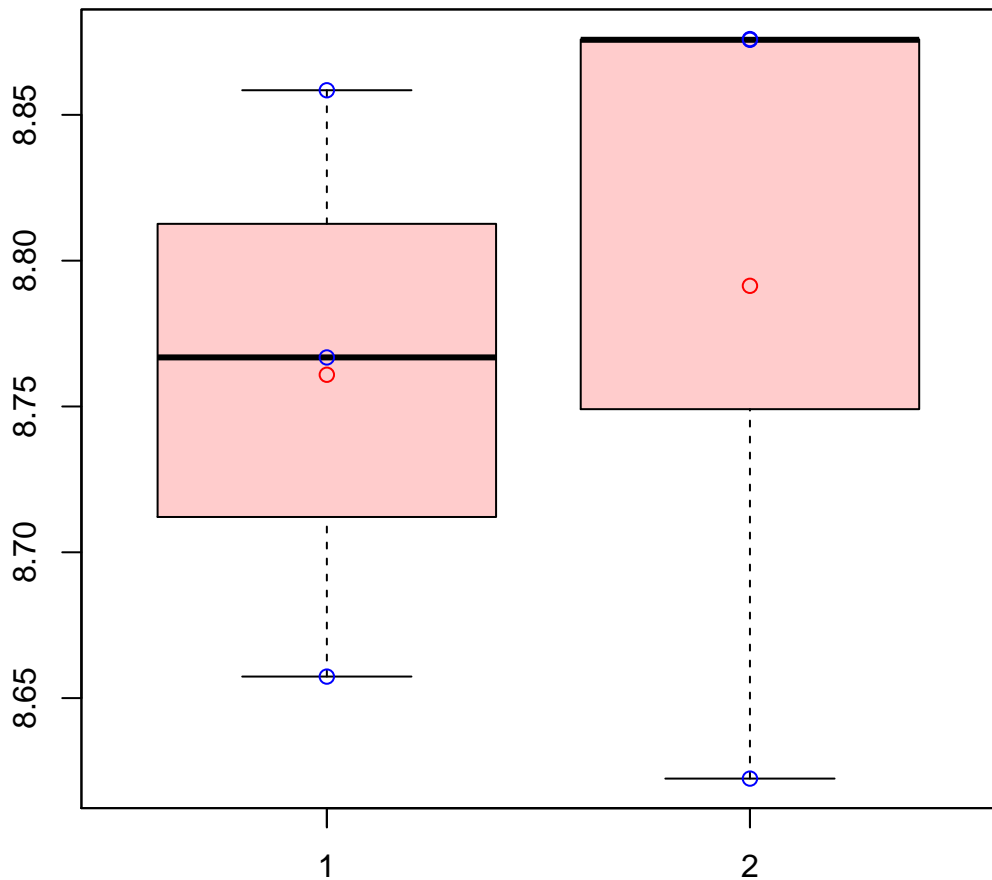

t-Test: p-value = 0.78

# CL1475Contig3|CL1475Contig3

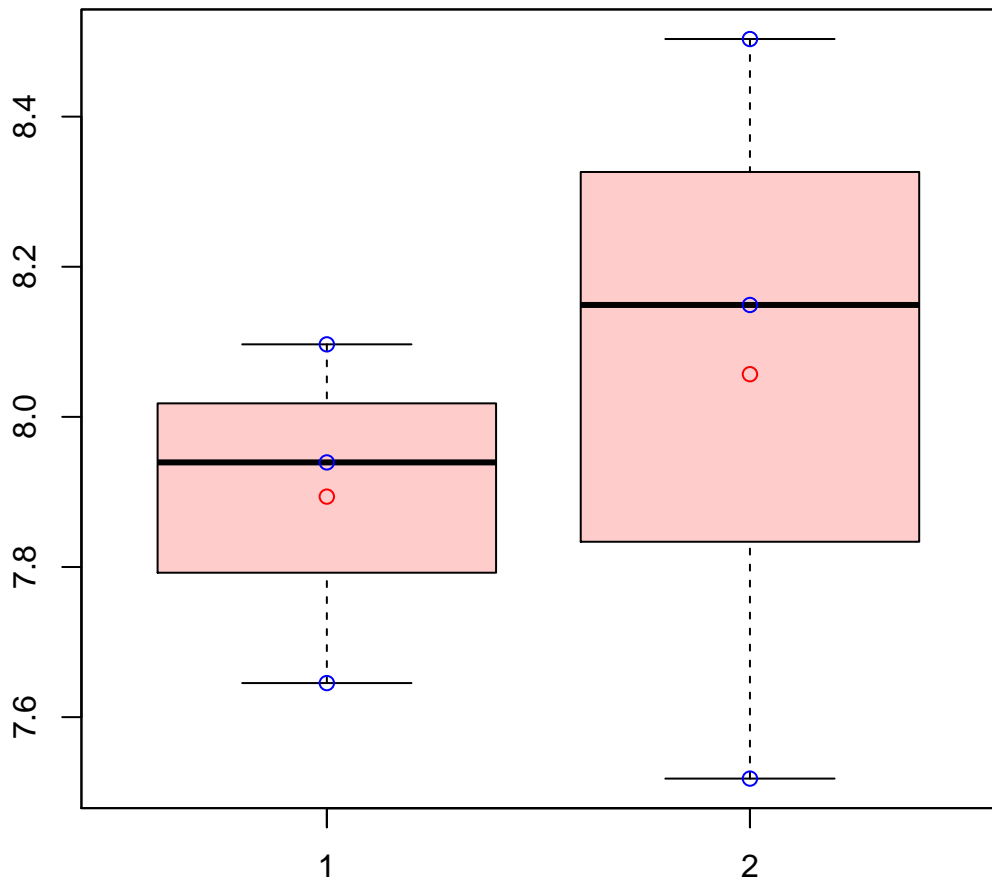

t-Test: p-value = 0.64

# CL1475Contig5|CL1475Contig5



t-Test: p-value = 0.64

# CL1476Contig1|CL1476Contig1



t-Test: p-value = 0.67

# CL1476Contig3|CL1476Contig3

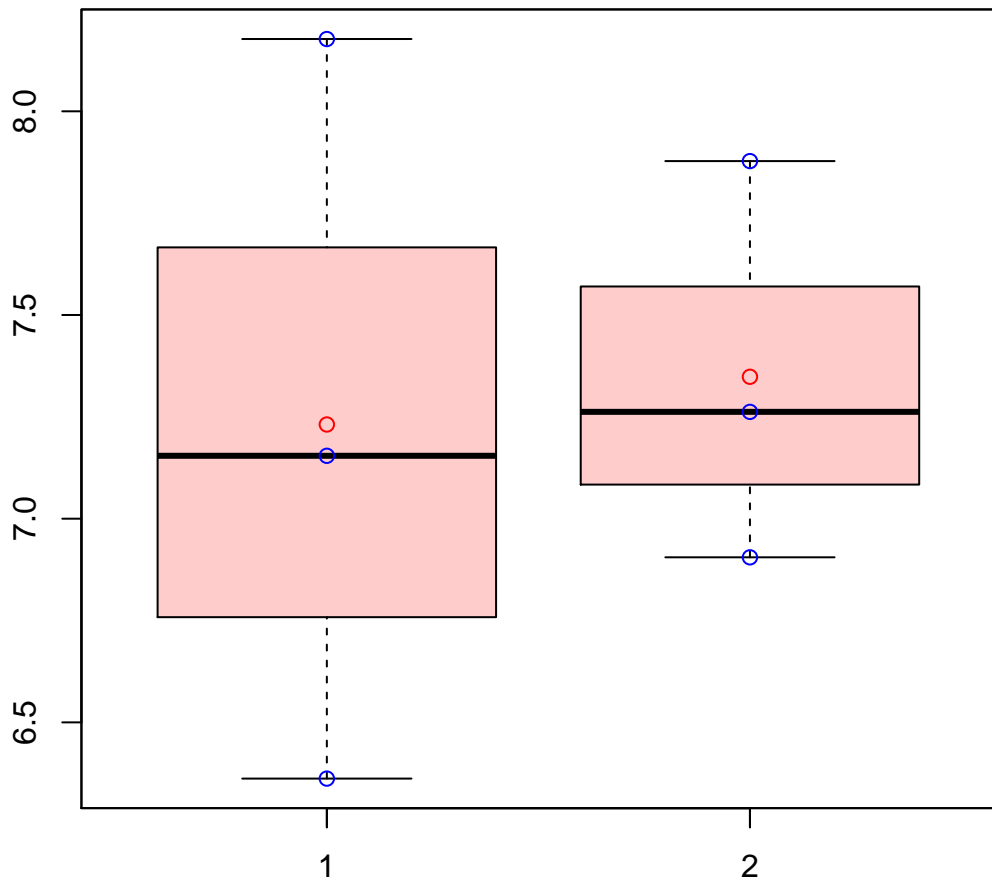

t-Test: p-value = 0.86



# CL1476Contig4|CL1476Contig4



t-Test: p-value = 0.67

# CL1476Contig5|CL1476Contig5



t-Test: p-value = 0.67

# CL1476Contig9|CL1476Contig9



t-Test: p-value = 0.67

# CL1478Contig2|CL1478Contig2

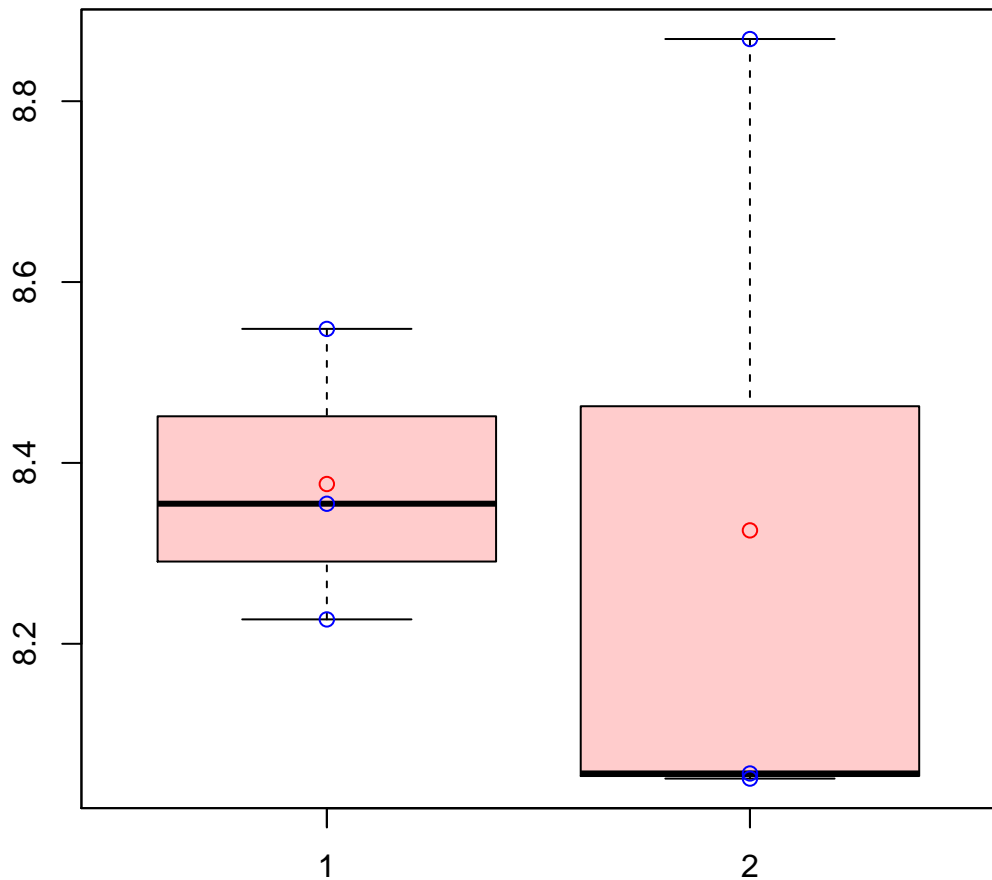

t-Test: p-value = 0.87

# CL147Contig10|CL147Contig10

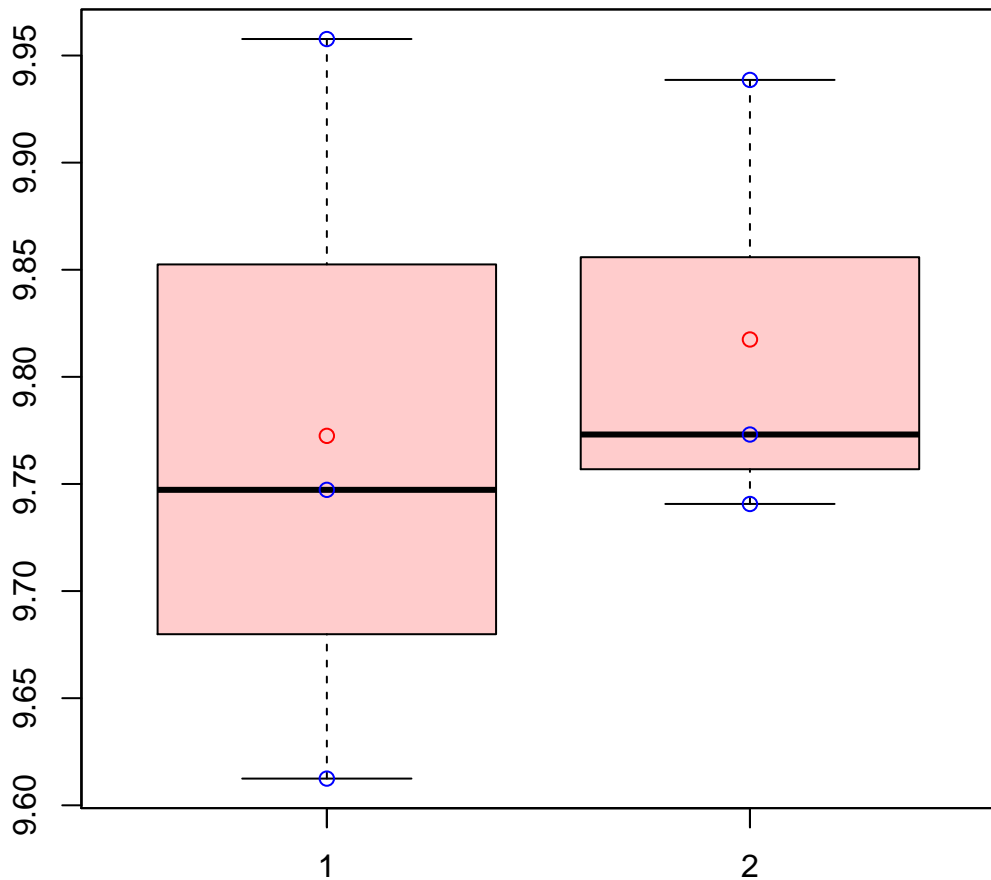

t-Test: p-value = 0.73

# CL147Contig1|CL147Contig1

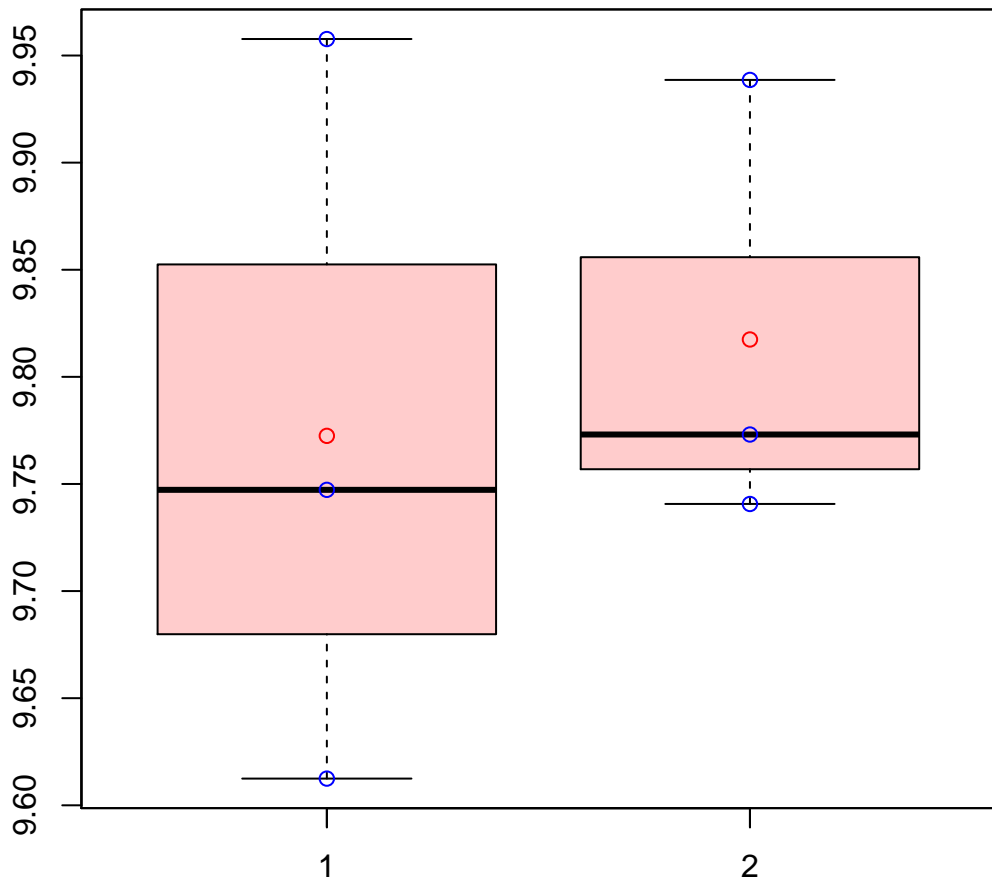

t-Test: p-value = 0.73

# CL1481Contig1|CL1481Contig1

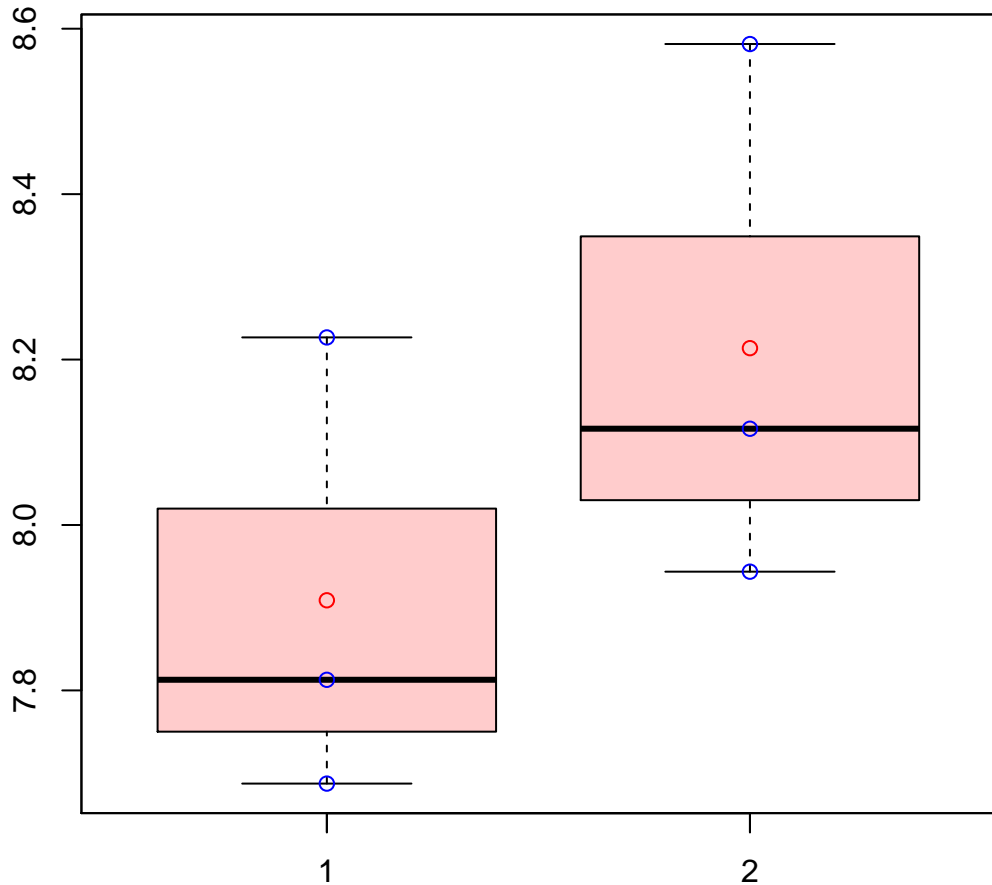

t-Test: p-value = 0.29

# CL1481Contig2|CL1481Contig2

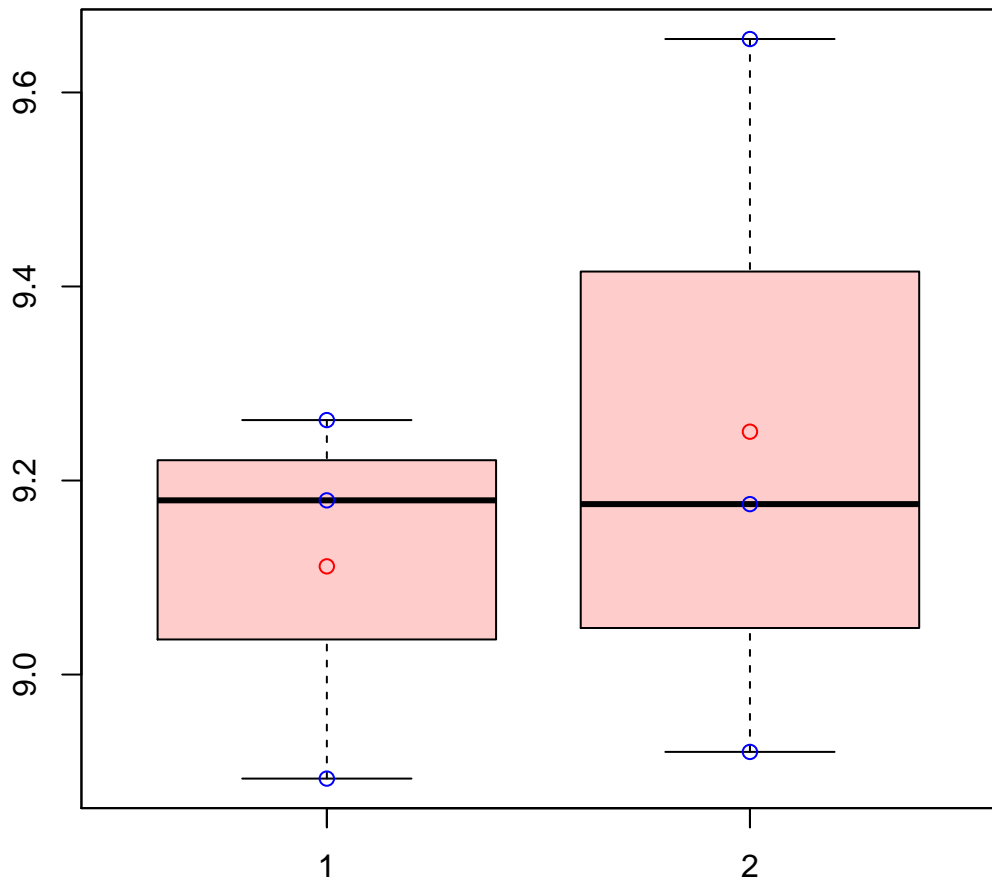

t-Test: p-value = 0.61



# CL14850Contig1|CL14850Contig1



t-Test: p-value = 0.39

# CL1485Contig10|CL1485Contig10

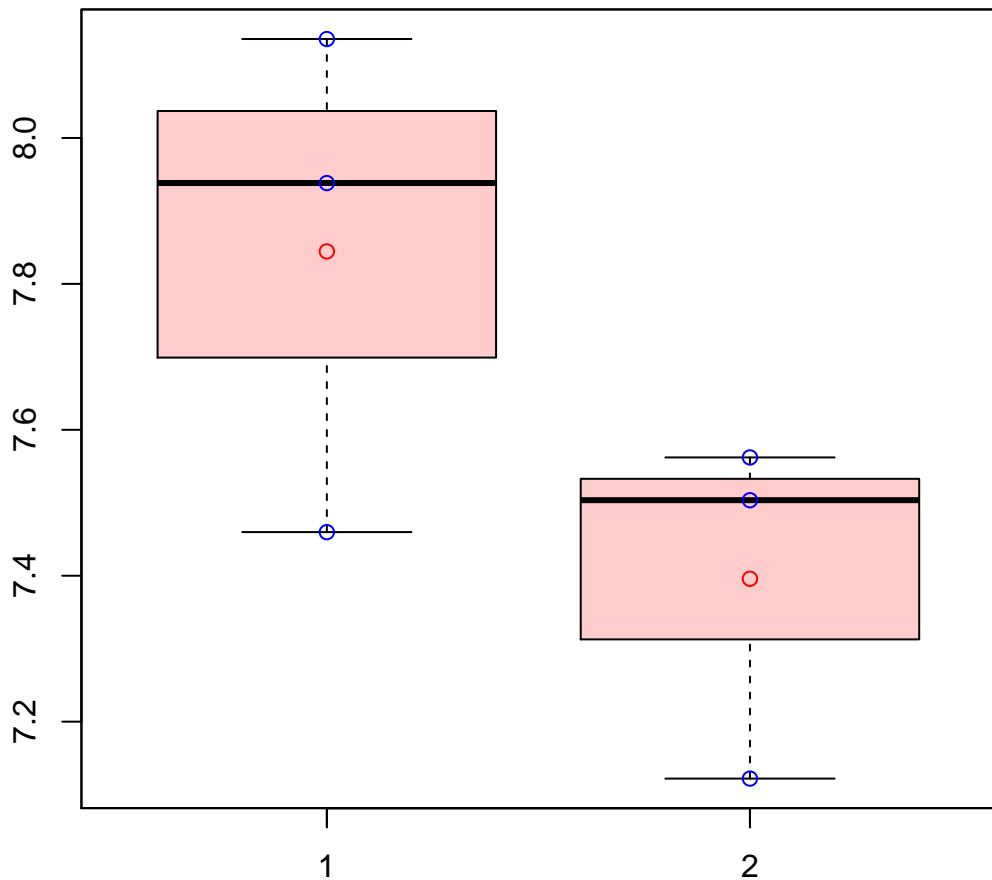

t-Test: p-value = 0.15

# CL14873Contig1|CL14873Contig1

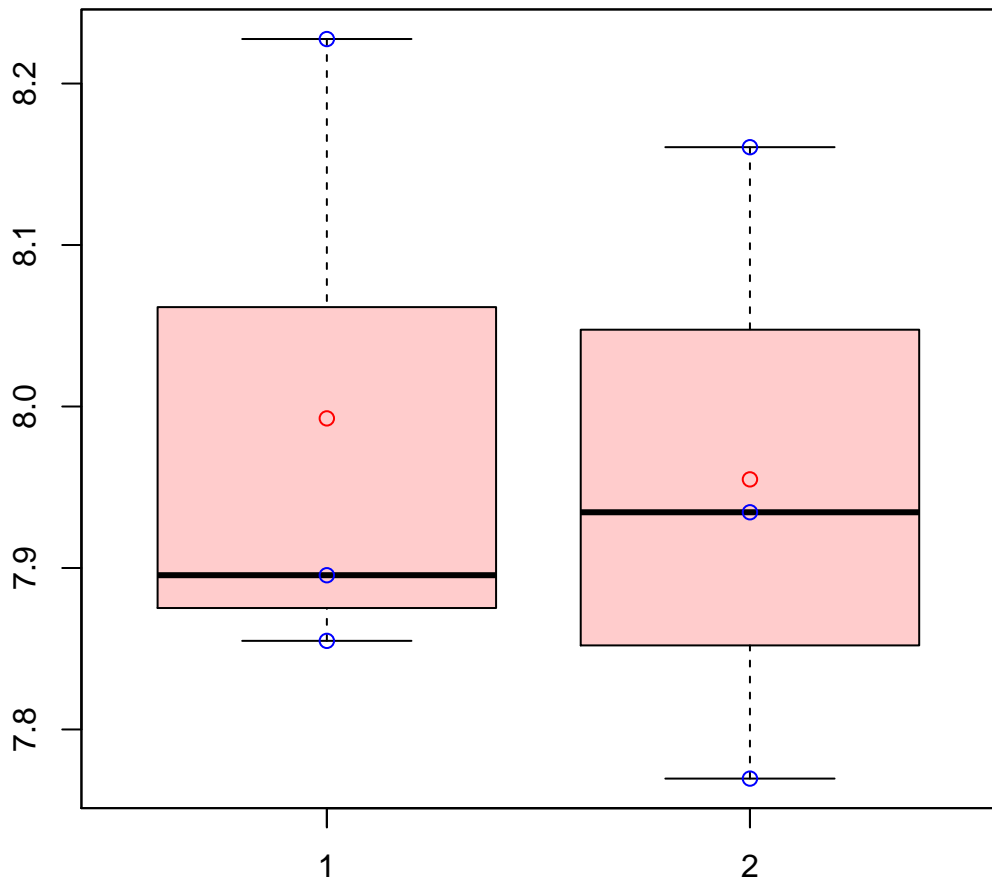

t-Test: p-value = 0.83

# CL14878Contig1|CL14878Contig1

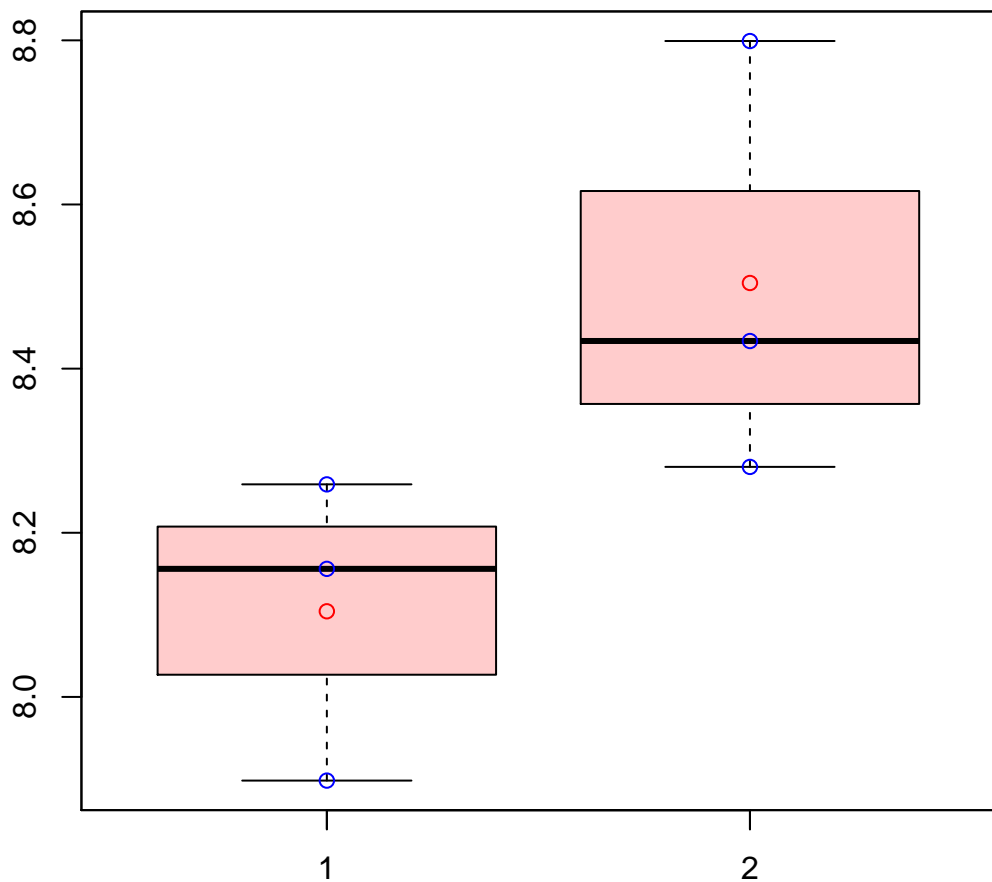

t-Test: p-value = 0.11

# CL14897Contig1|CL14897Contig1

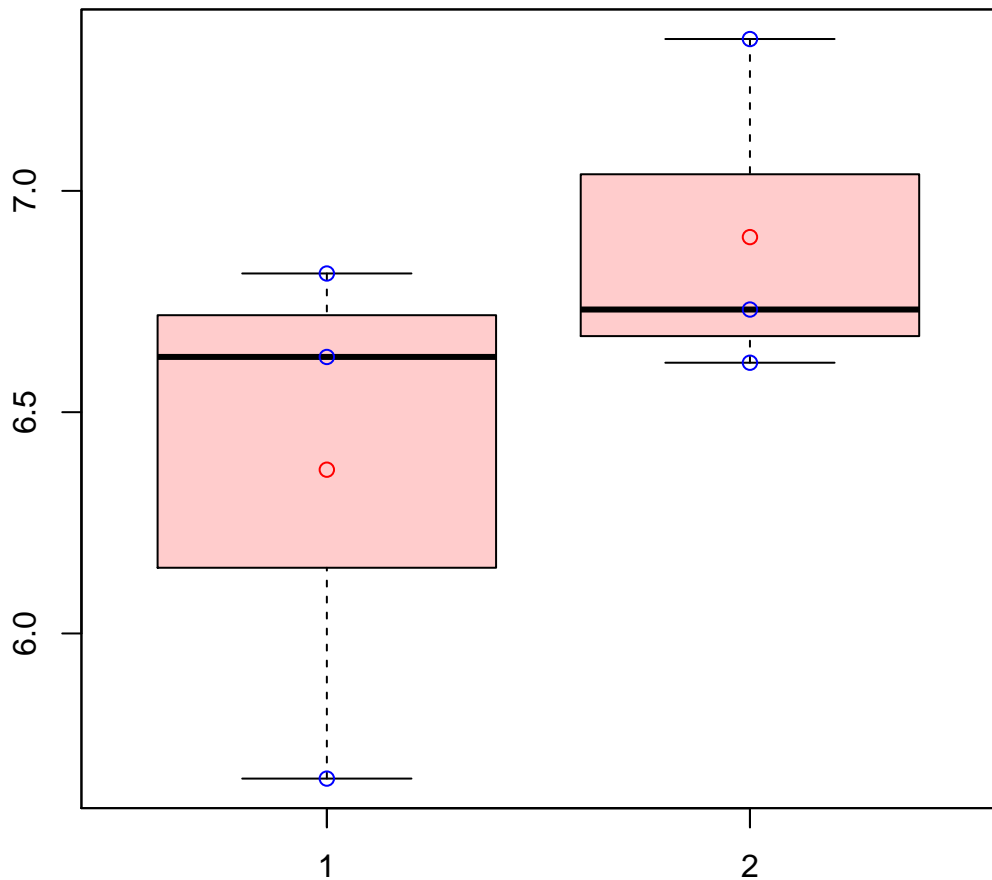

t-Test: p-value = 0.29

# CL1493Contig1|CL1493Contig1

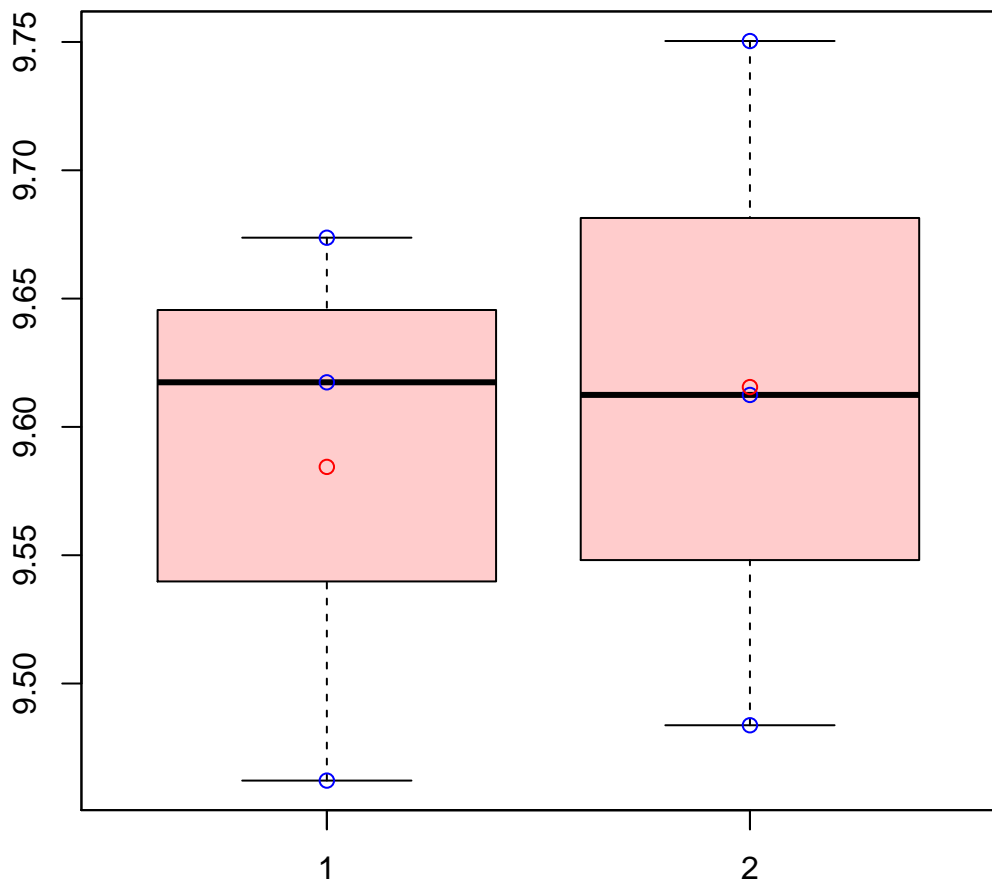

t-Test: p-value = 0.77

# CL1493Contig3|CL1493Contig3

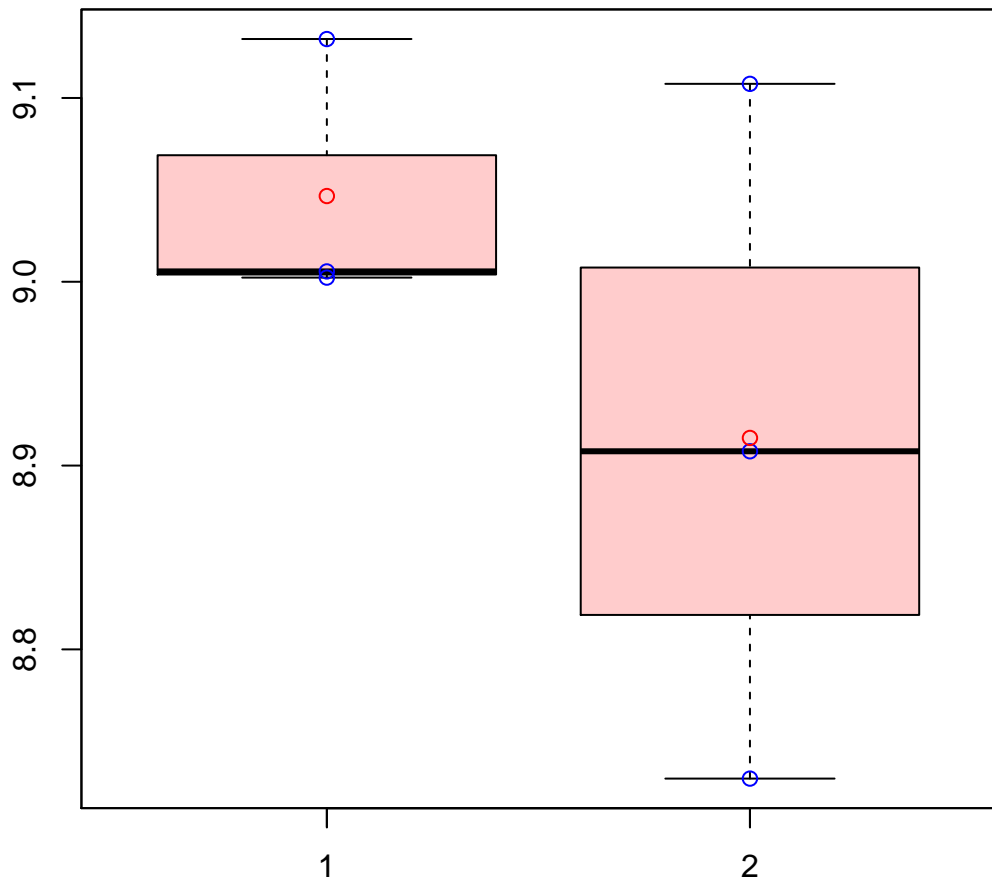

t-Test: p-value = 0.35

# CL1493Contig5|CL1493Contig5

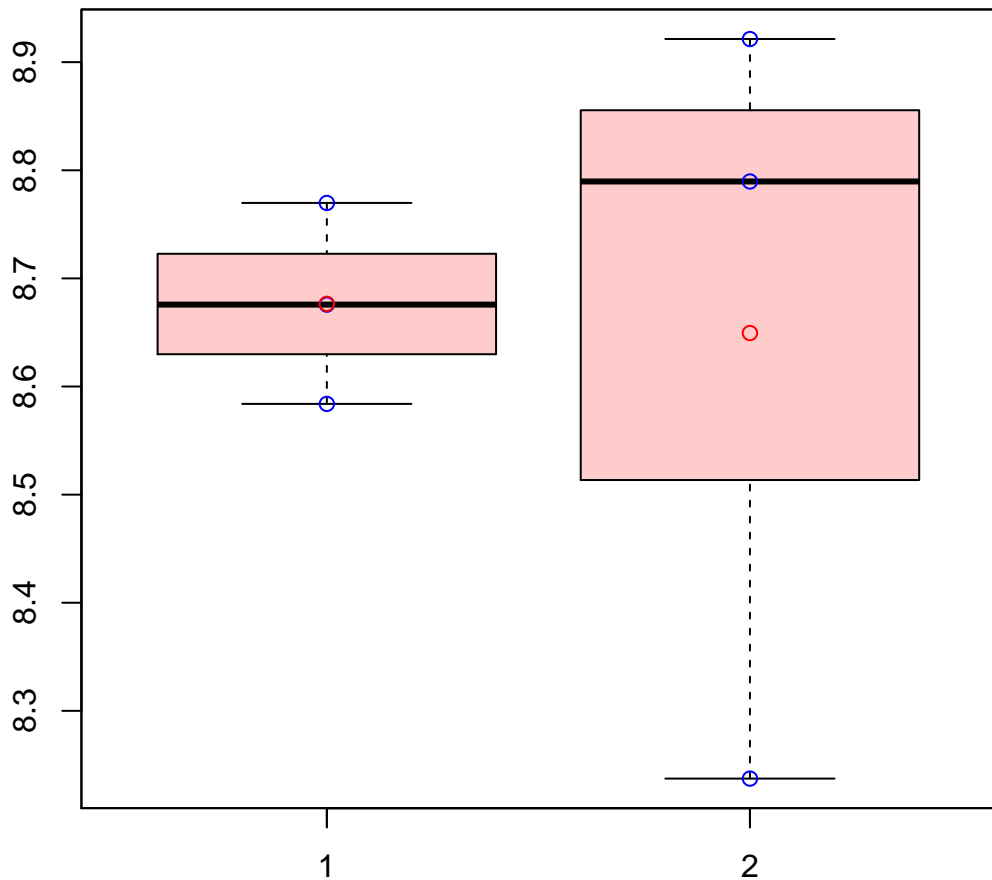

t-Test: p-value = 0.91



# CL1495Contig1|CL1495Contig1

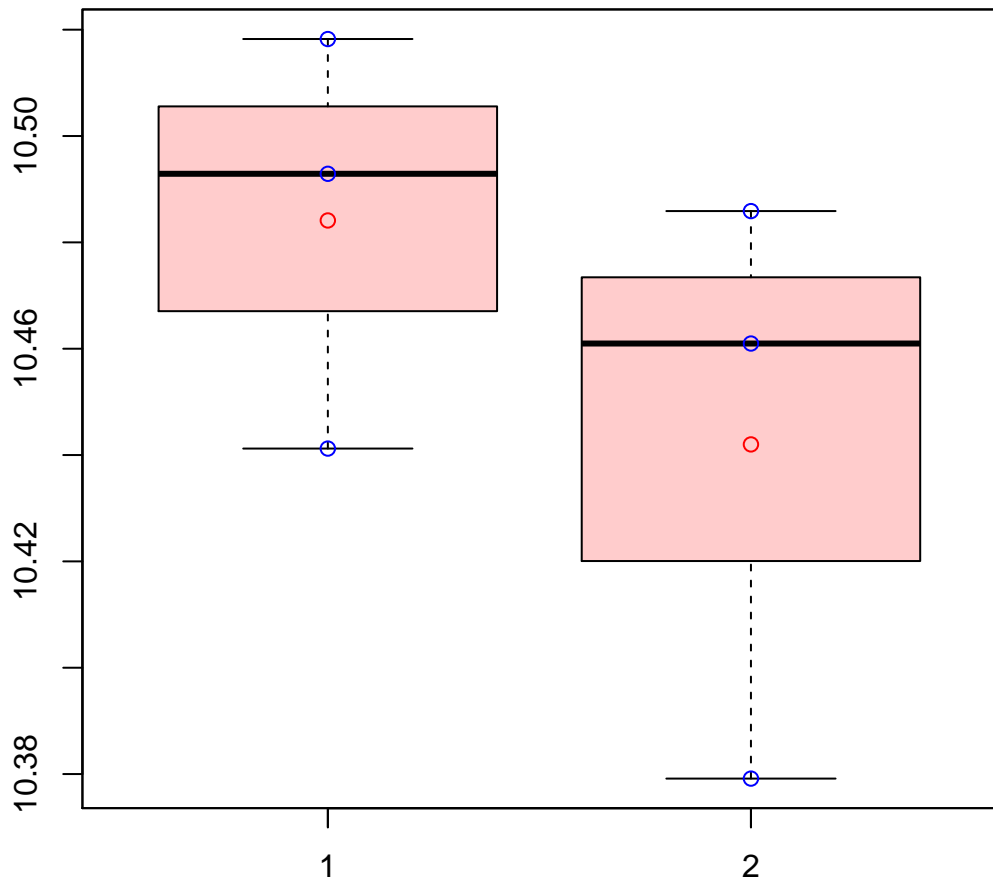

t-Test: p-value = 0.35

# CL1495Contig2|CL1495Contig2

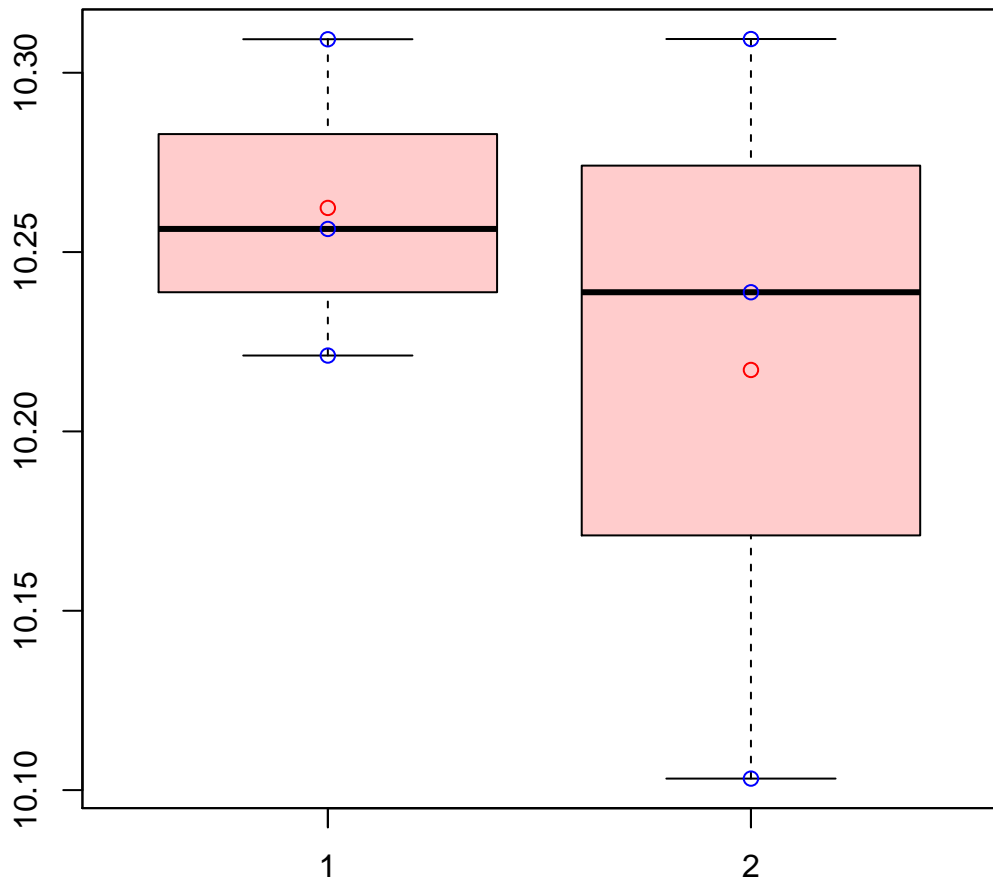

t-Test: p-value = 0.55

# CL1495Contig3|CL1495Contig3

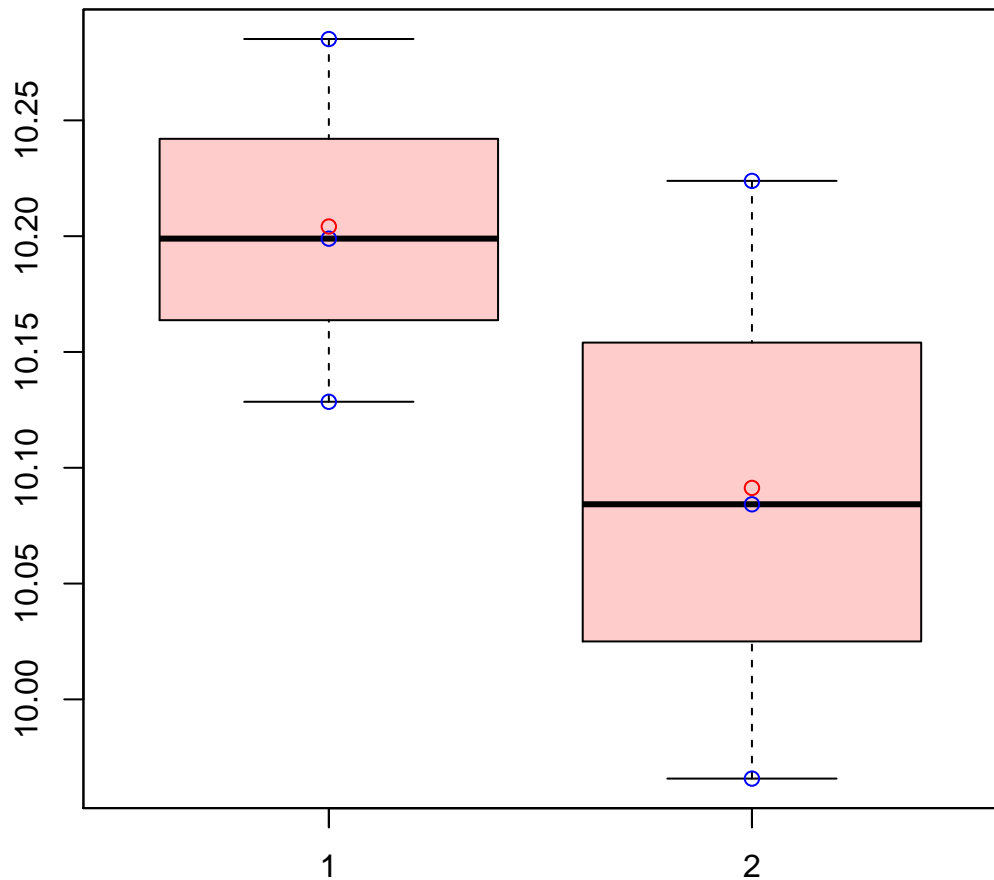

t-Test: p-value = 0.28

# CL14972Contig1|CL14972Contig1

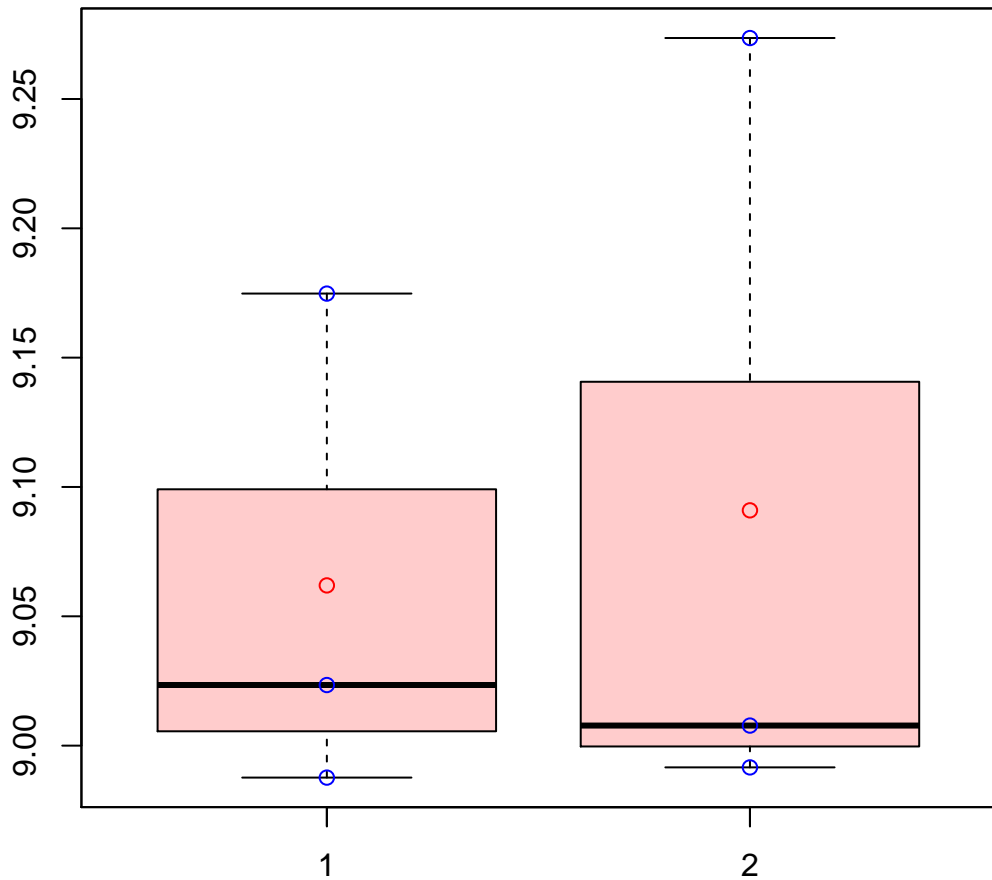

t-Test: p-value = 0.8

# CL1497Contig1|CL1497Contig1

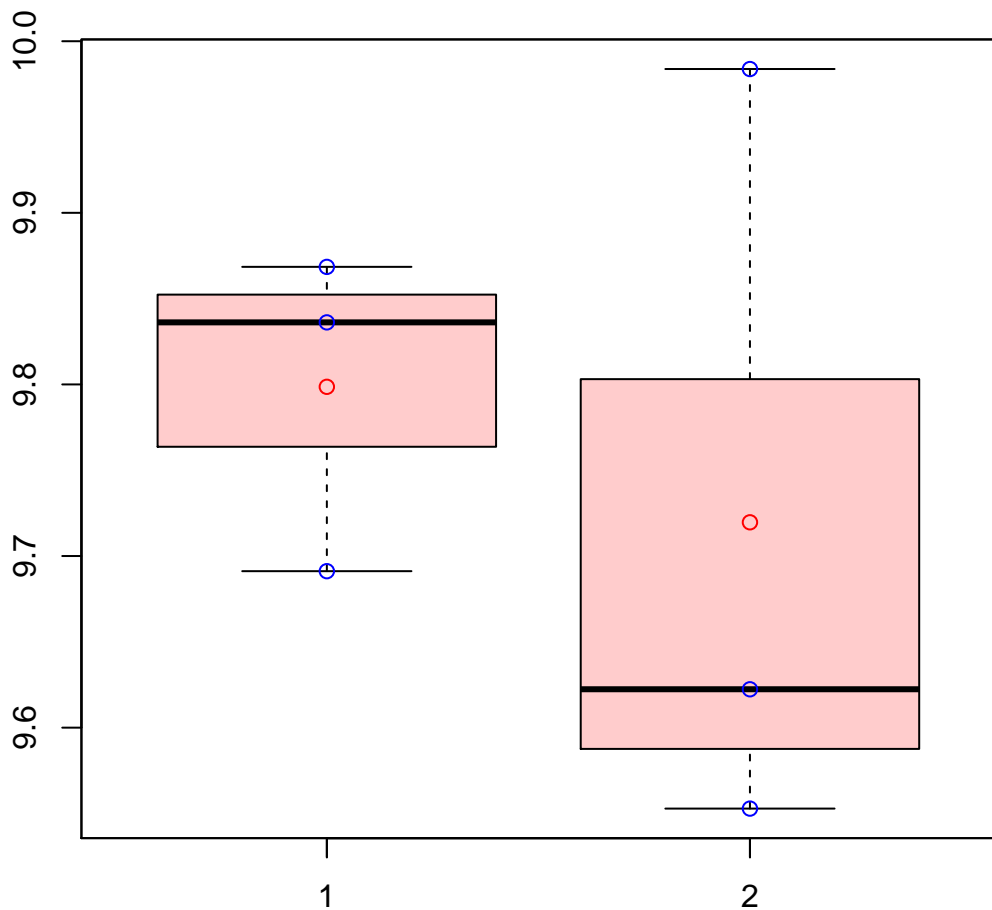

t-Test: p-value = 0.63

# CL1497Contig2|CL1497Contig2

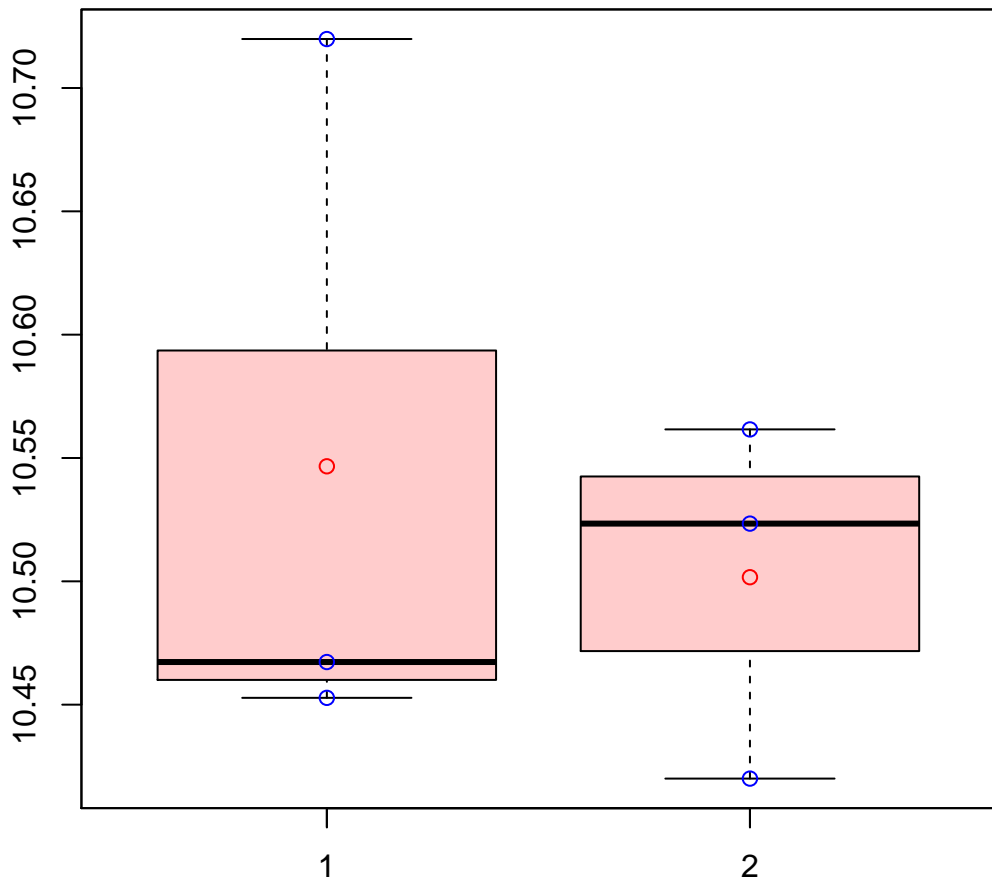

t-Test: p-value = 0.67

# CL1497Contig4|CL1497Contig4

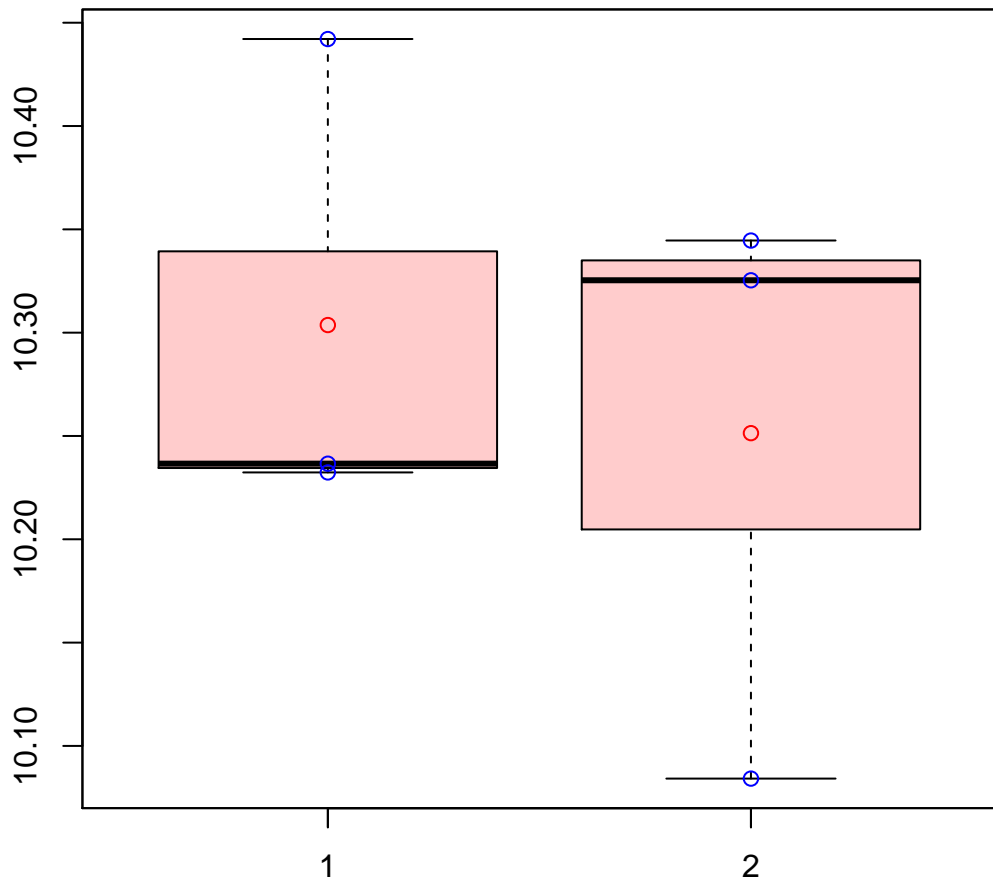

t-Test: p-value = 0.66

# CL1497Contig5|CL1497Contig5

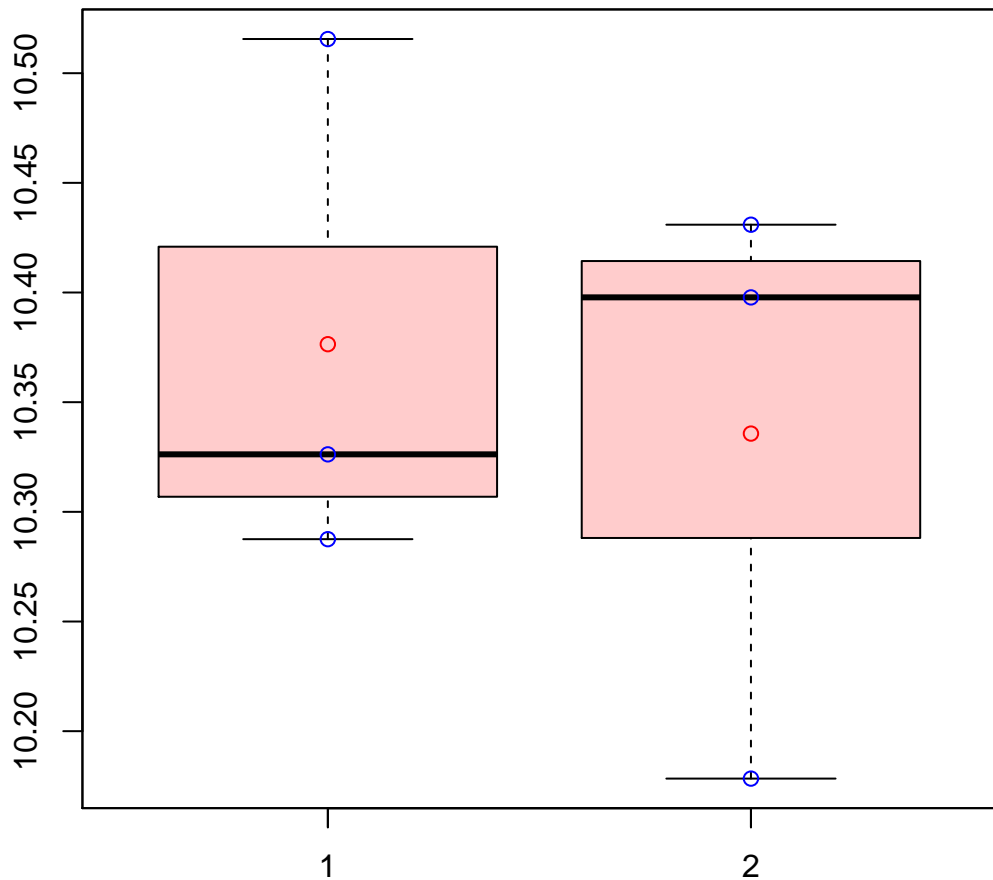

t-Test: p-value = 0.72



# CL1498Contig4|CL1498Contig4

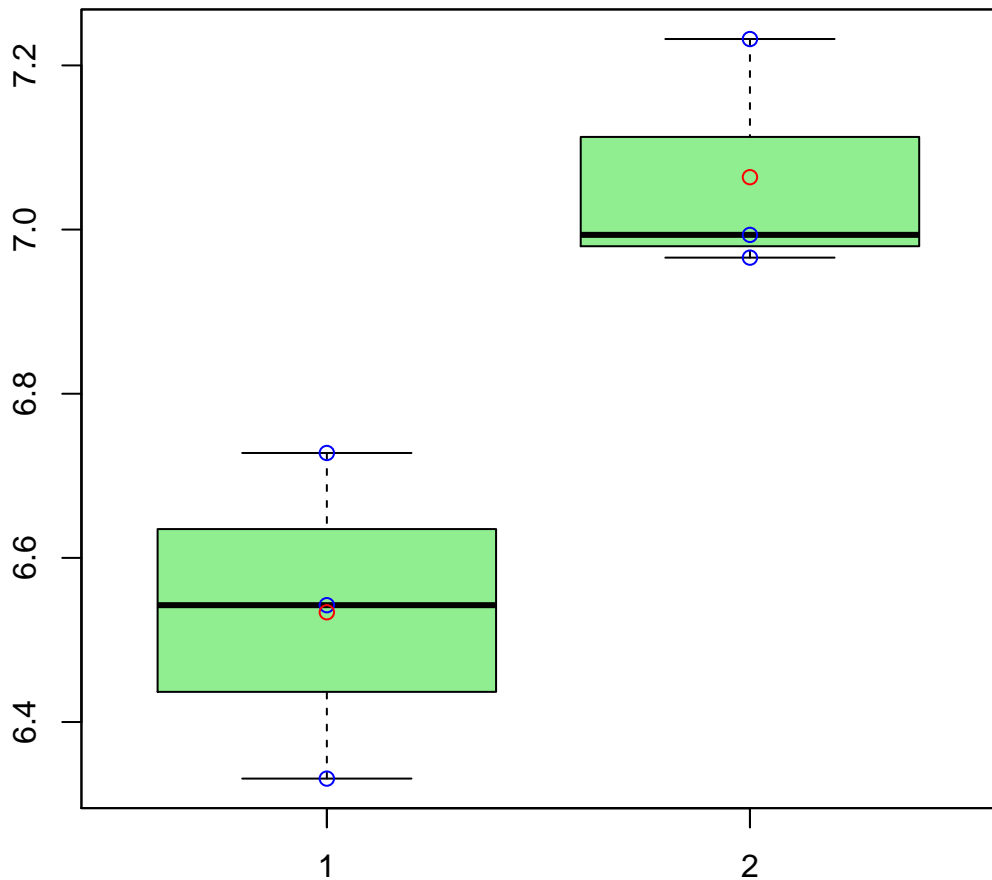

t-Test: p-value = 0.02

# CL1498Contig5|CL1498Contig5



t-Test: p-value = 0.02

# CL1498Contig7|CL1498Contig7

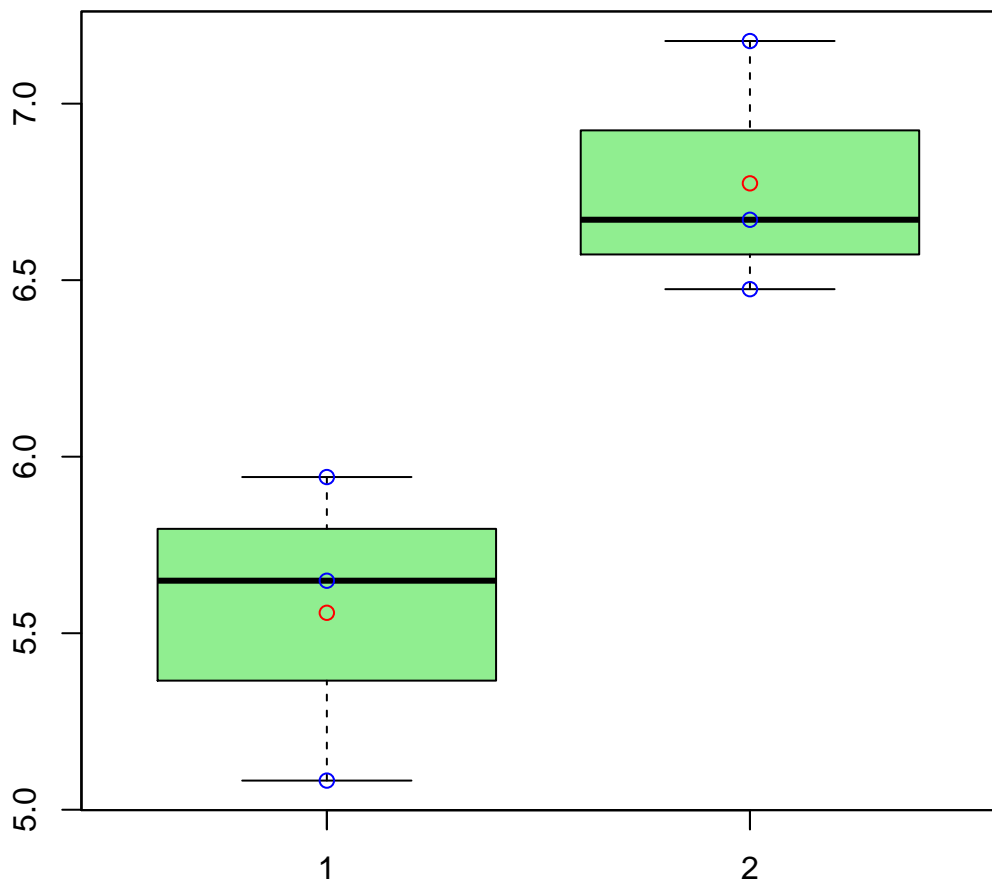

t-Test: p-value = 0.02

# CL1499Contig3|CL1499Contig3

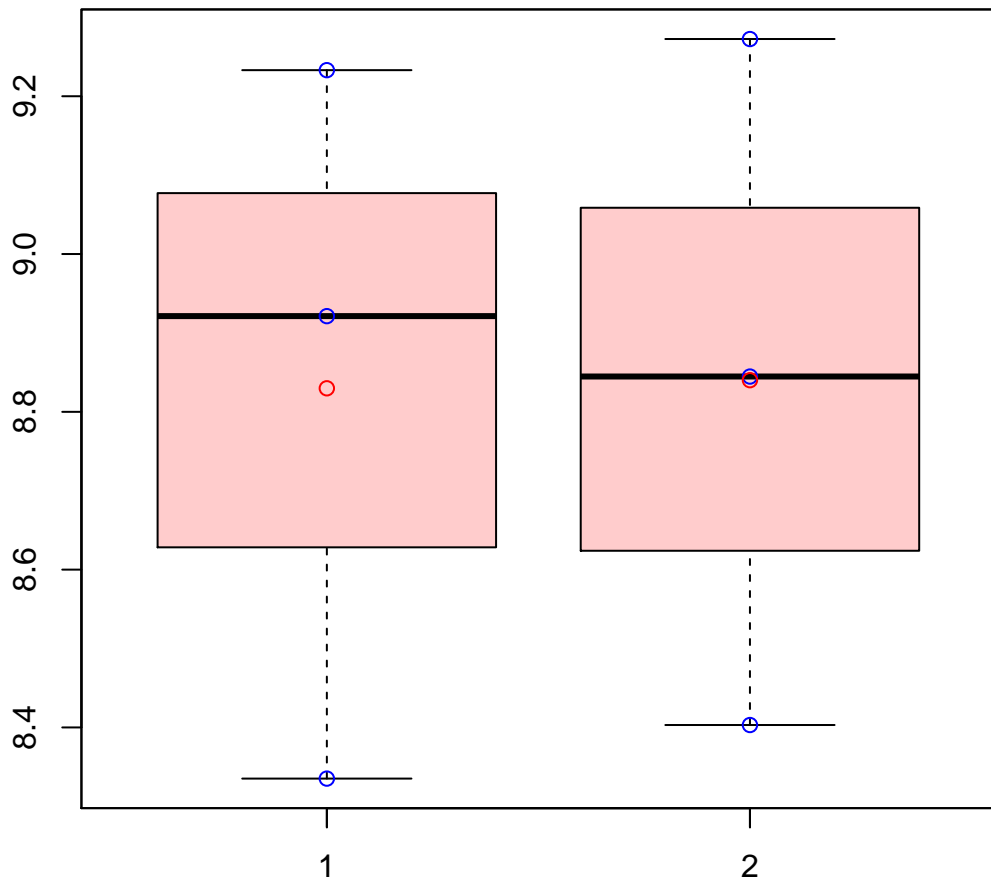

t-Test: p-value = 0.98

# CL1499Contig4|CL1499Contig4

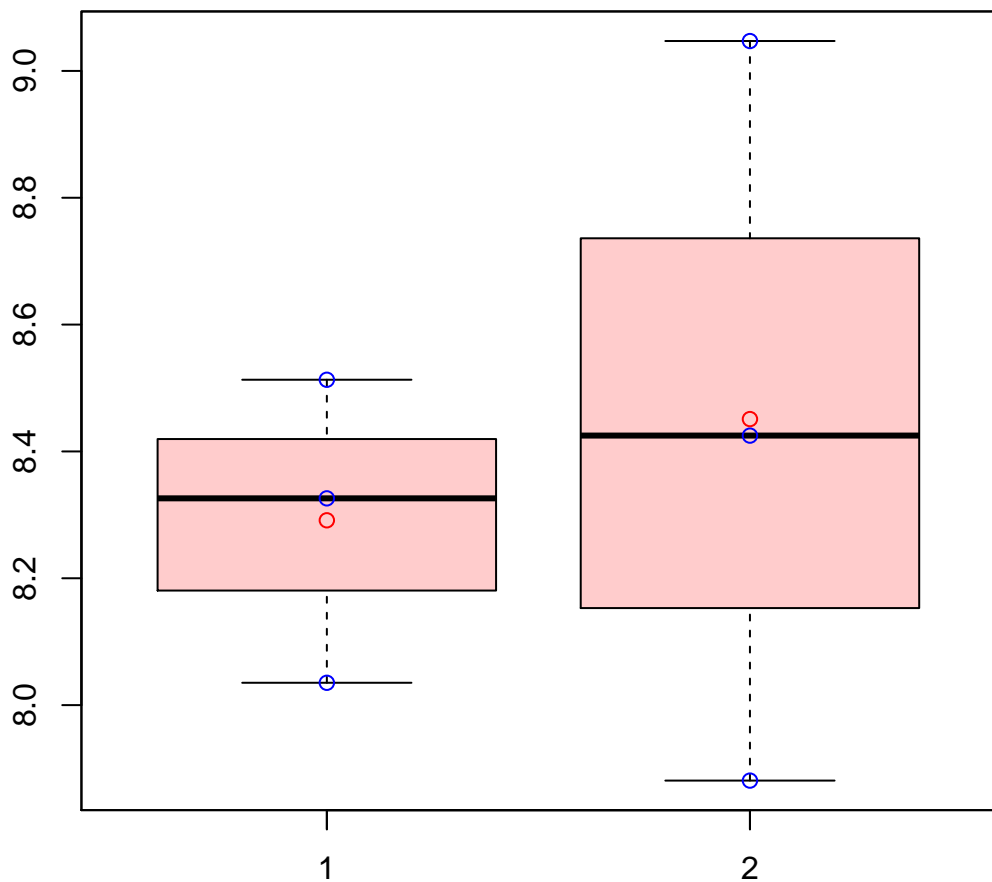

t-Test: p-value = 0.69

# CL1499Contig5|CL1499Contig5

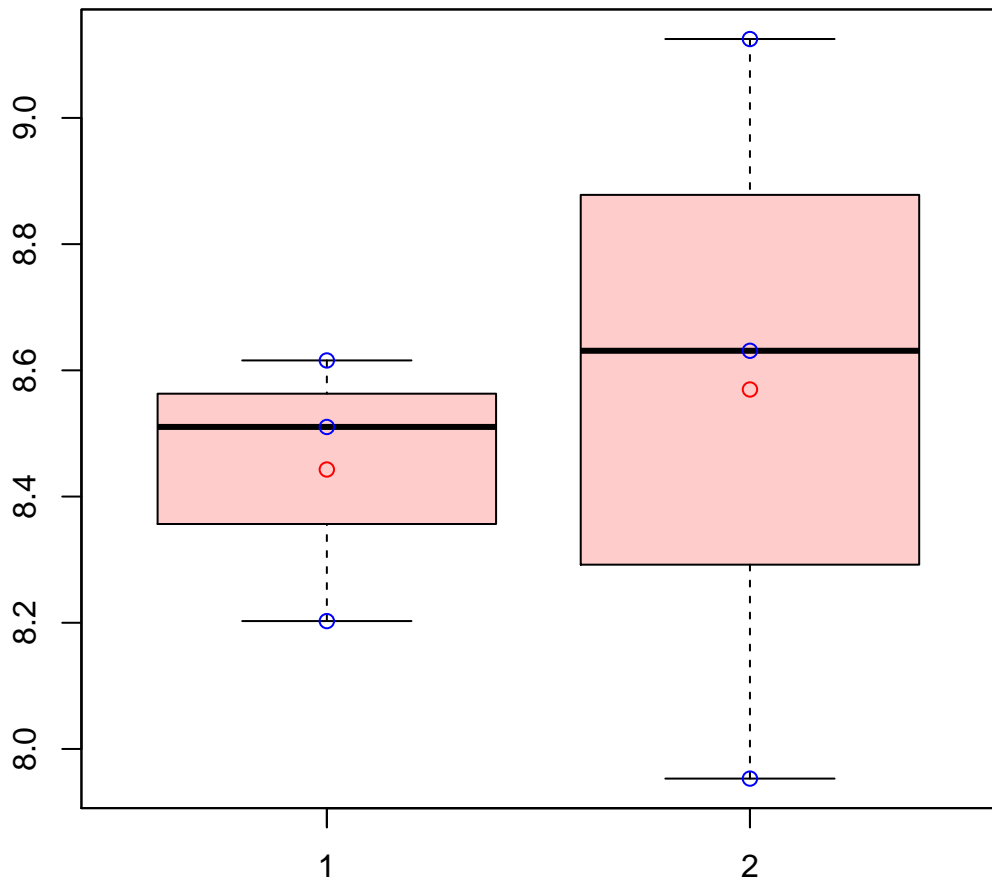

t-Test: p-value = 0.75

# CL1499Contig8|CL1499Contig8

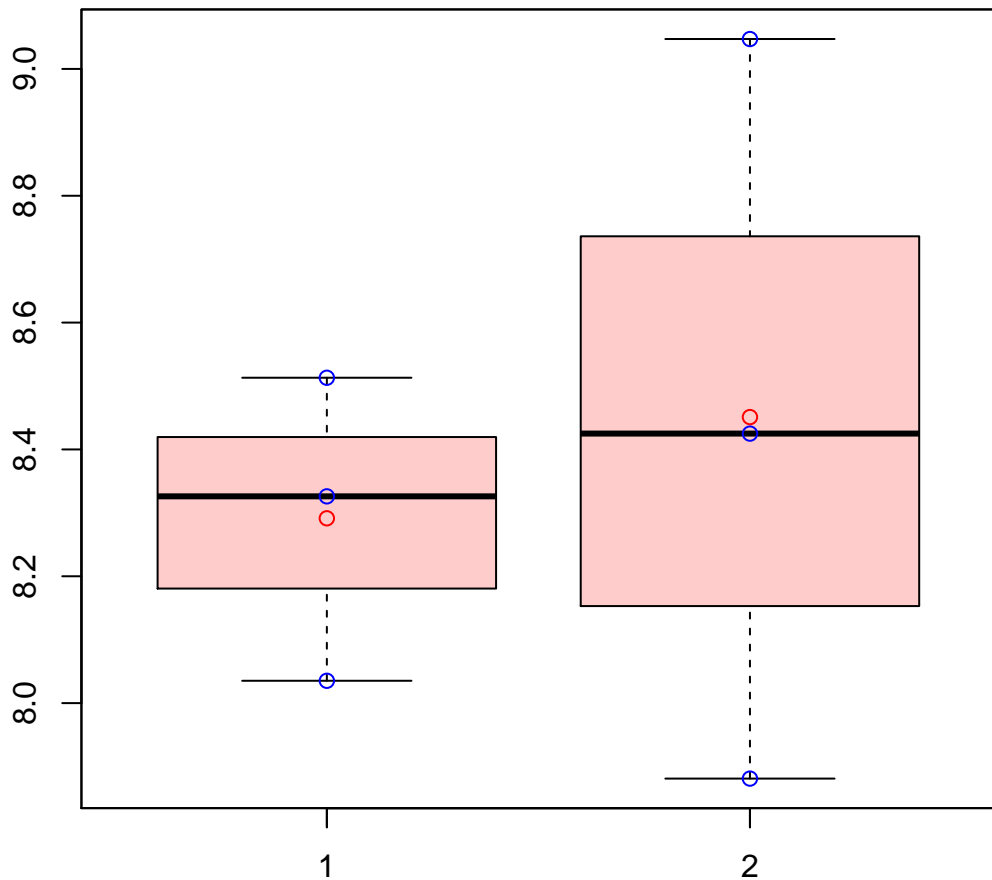

t-Test: p-value = 0.69

# CL149Contig5|CL149Contig5

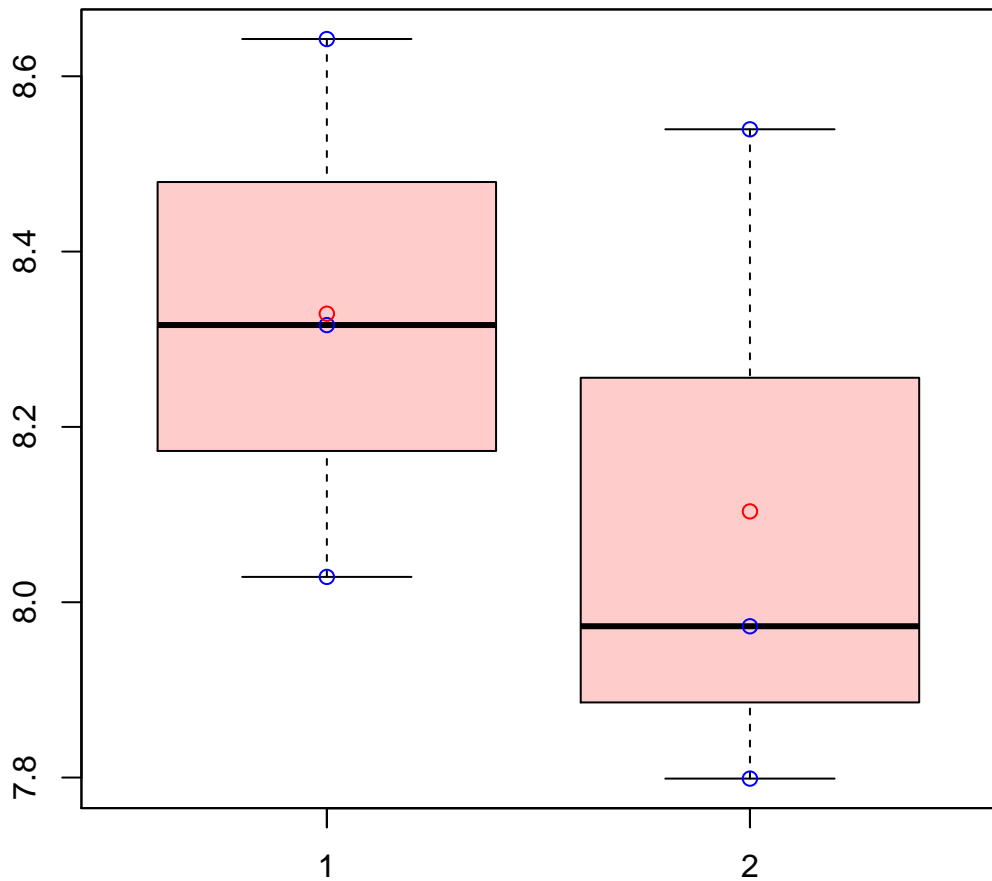

t-Test: p-value = 0.48



# CL149Contig9|CL149Contig9

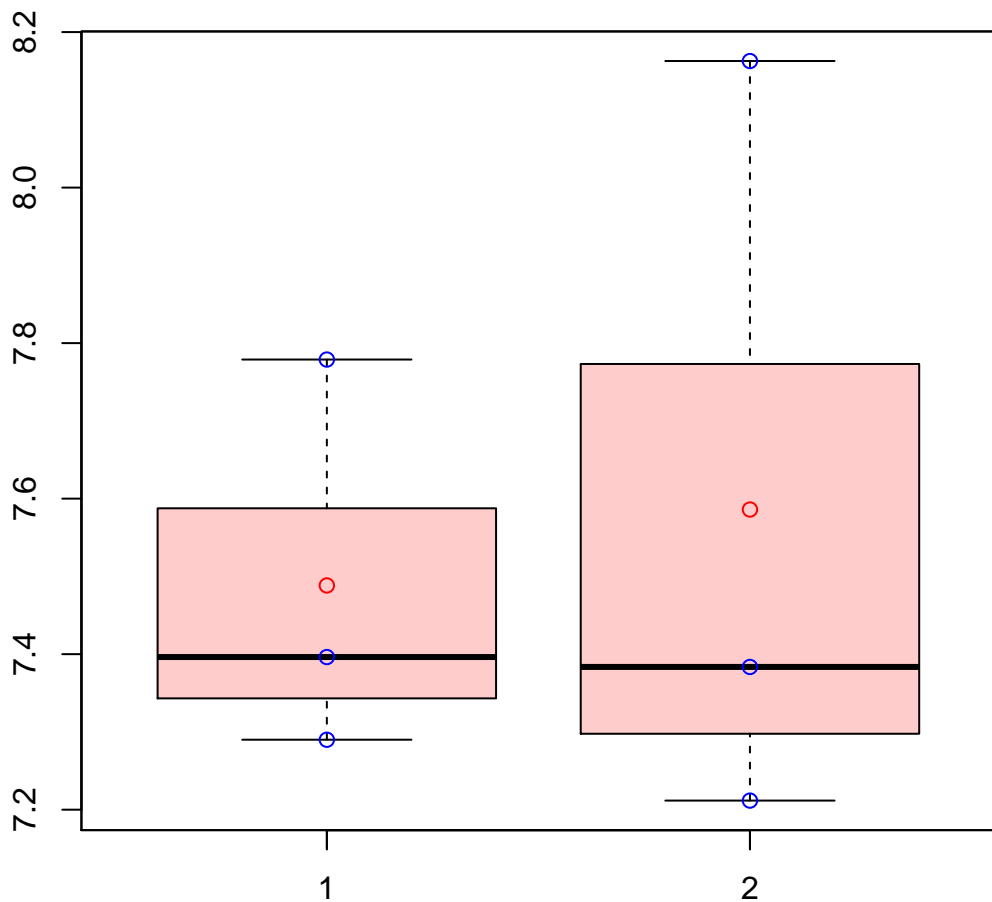

t-Test: p-value = 0.79

# CL14Contig12|CL14Contig12

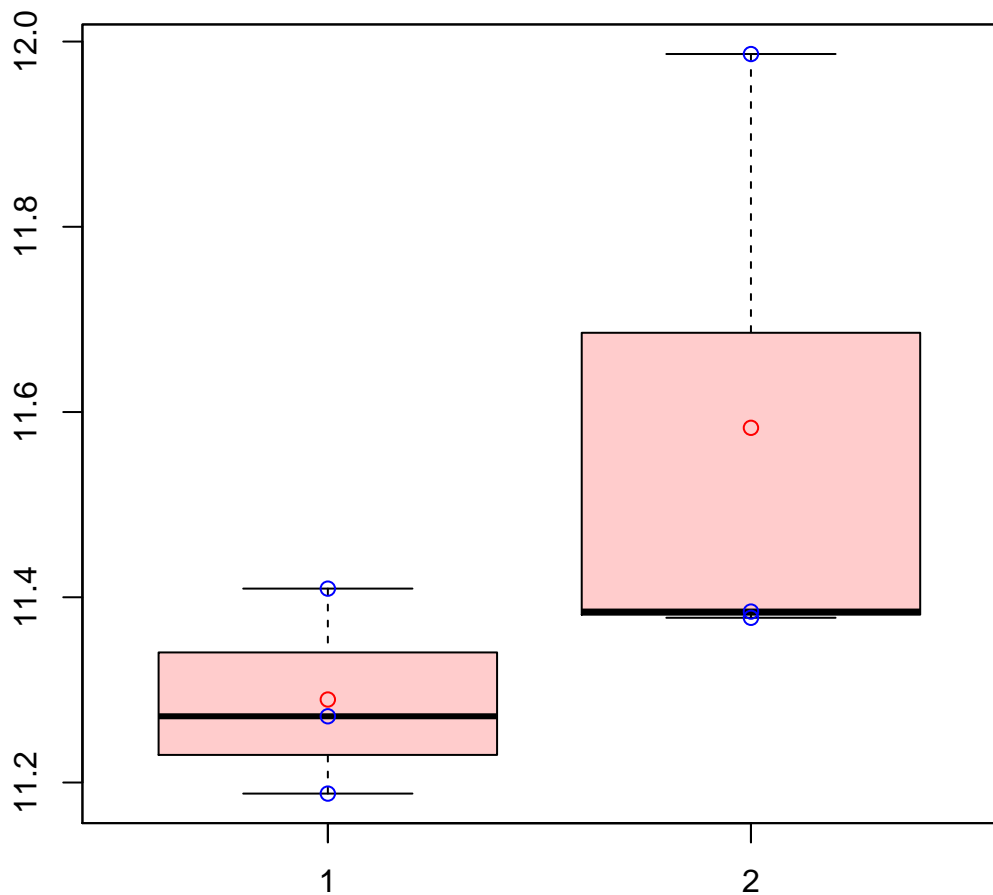

t-Test: p-value = 0.28

# CL14Contig15|CL14Contig15

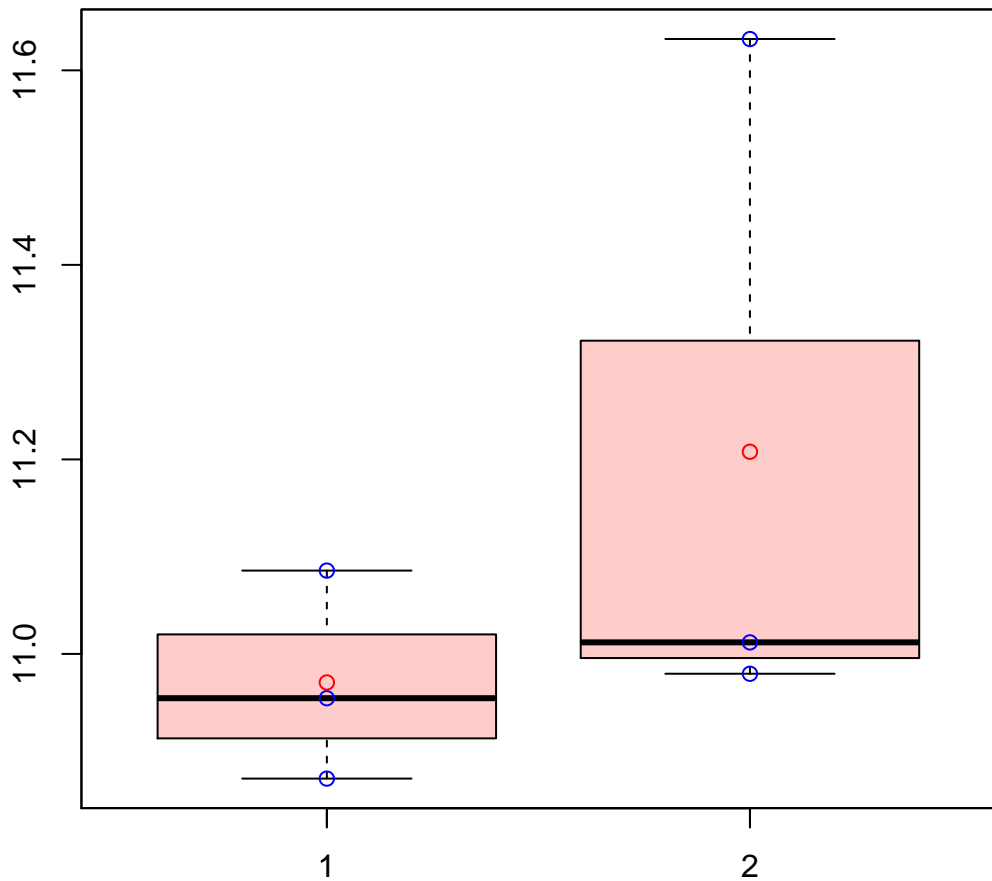

t-Test: p-value = 0.38

# CL14Contig17|CL14Contig17

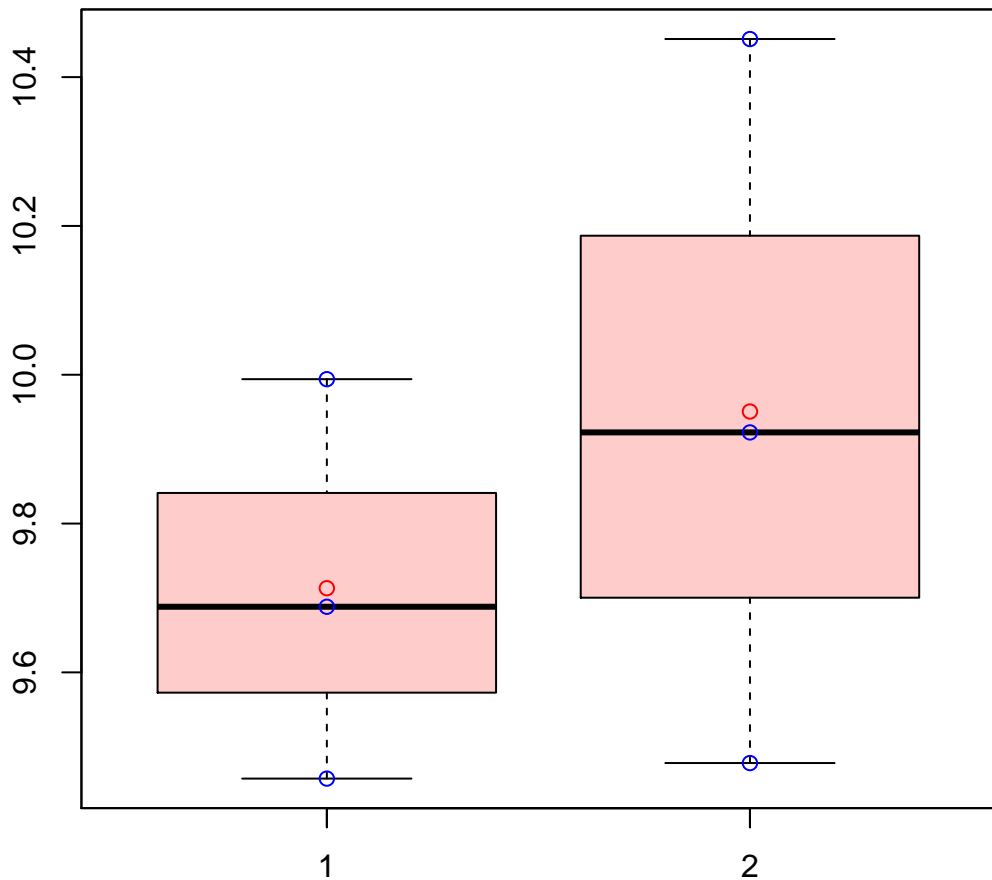

t-Test: p-value = 0.51

# CL14Contig1|CL14Contig1

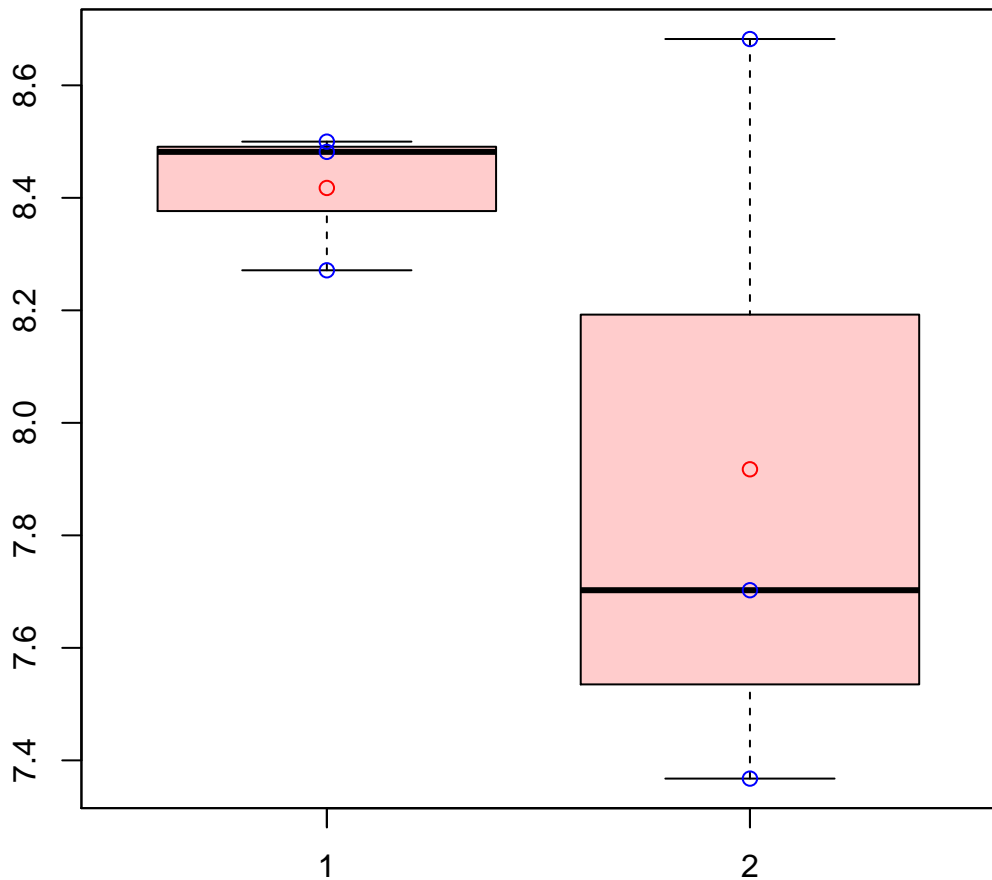

t-Test: p-value = 0.33

# CL14Contig20|CL14Contig20

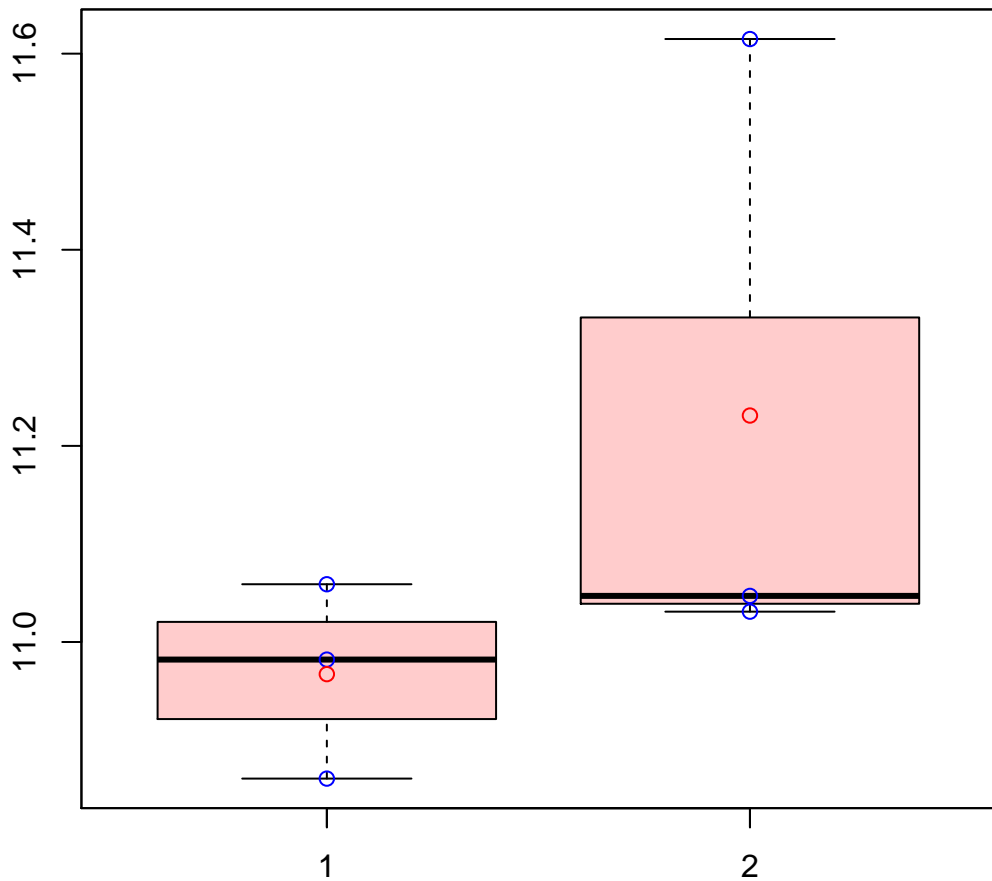

t-Test: p-value = 0.3

# CL14Contig21|CL14Contig21

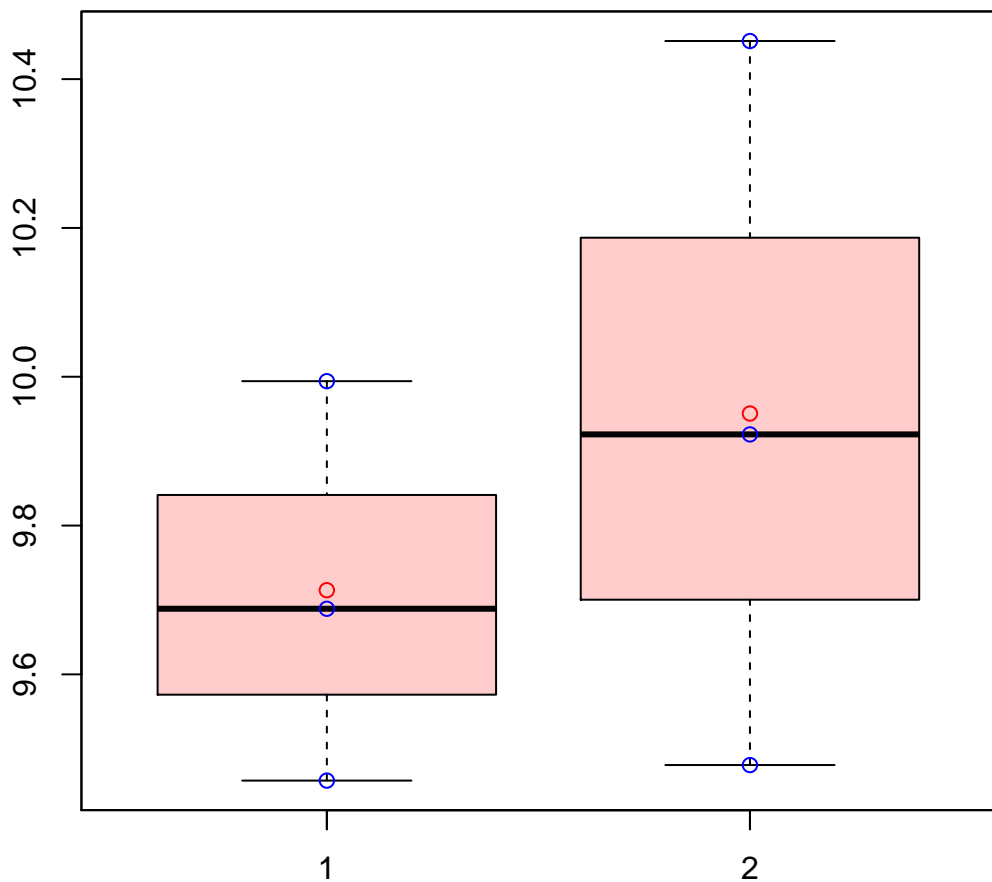

t-Test: p-value = 0.51

# CL14Contig23|CL14Contig23

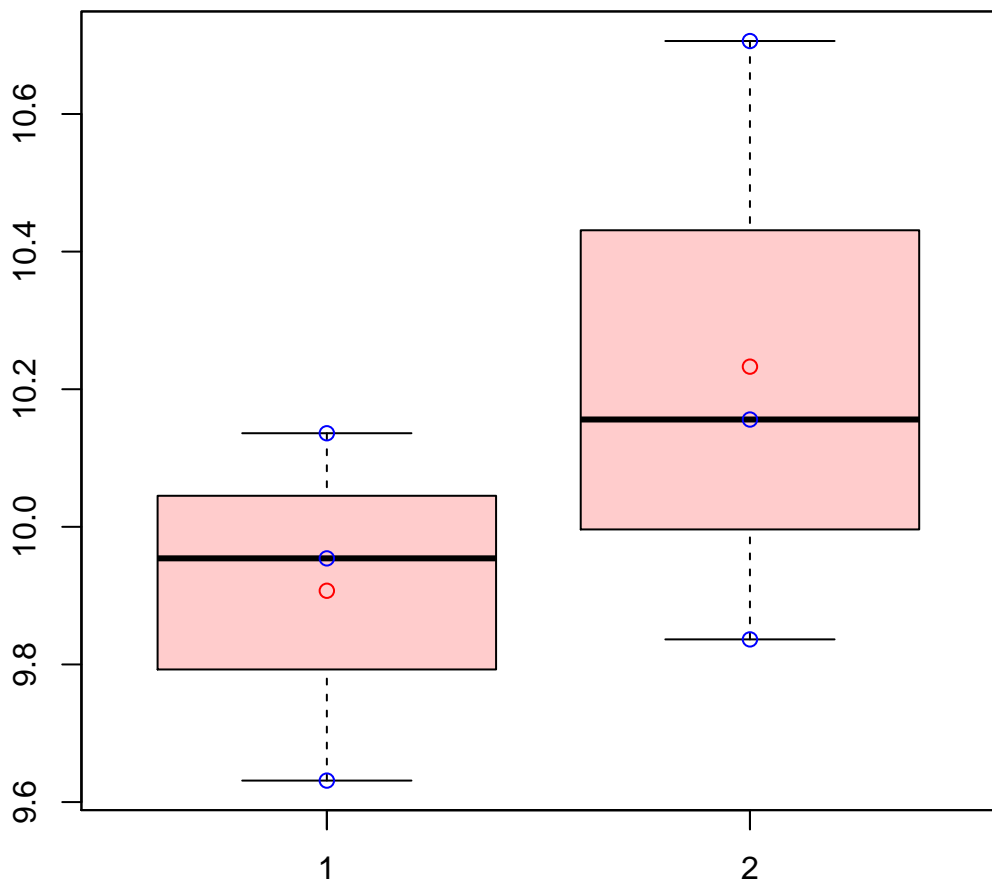

t-Test: p-value = 0.34



# CL14Contig24|CL14Contig24

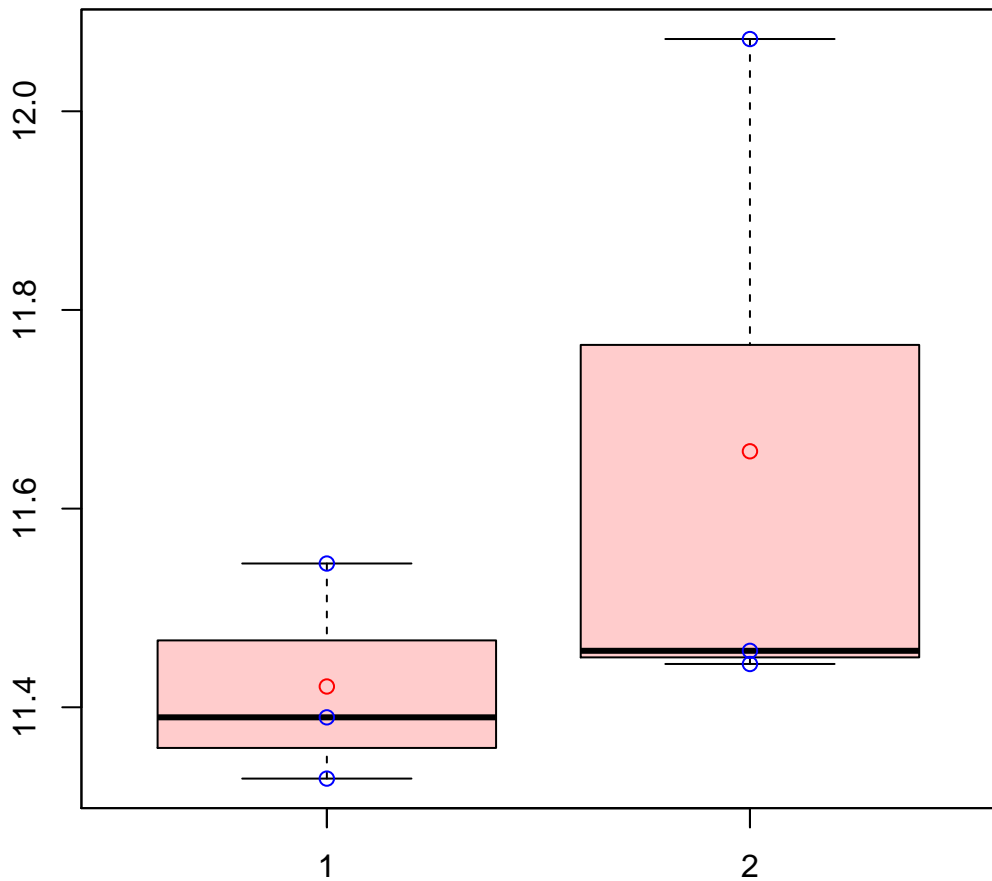

t-Test: p-value = 0.37

# CL14Contig27|CL14Contig27

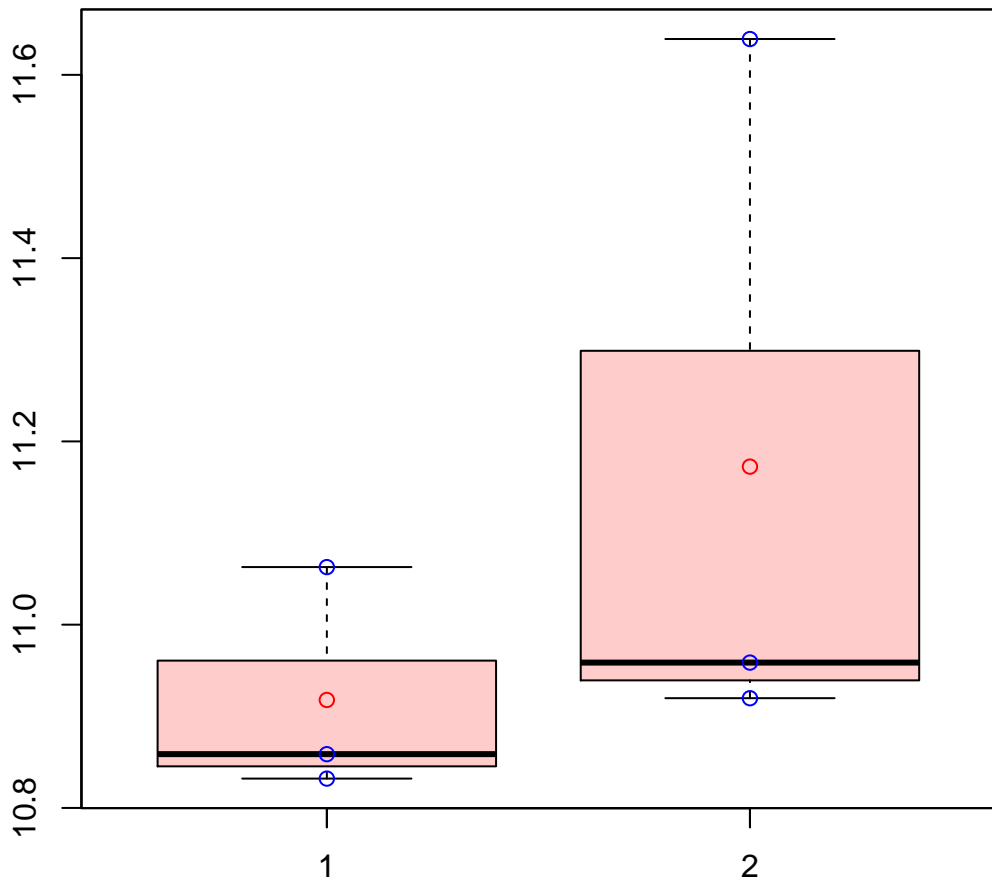

t-Test: p-value = 0.39

# CL14Contig29|CL14Contig29

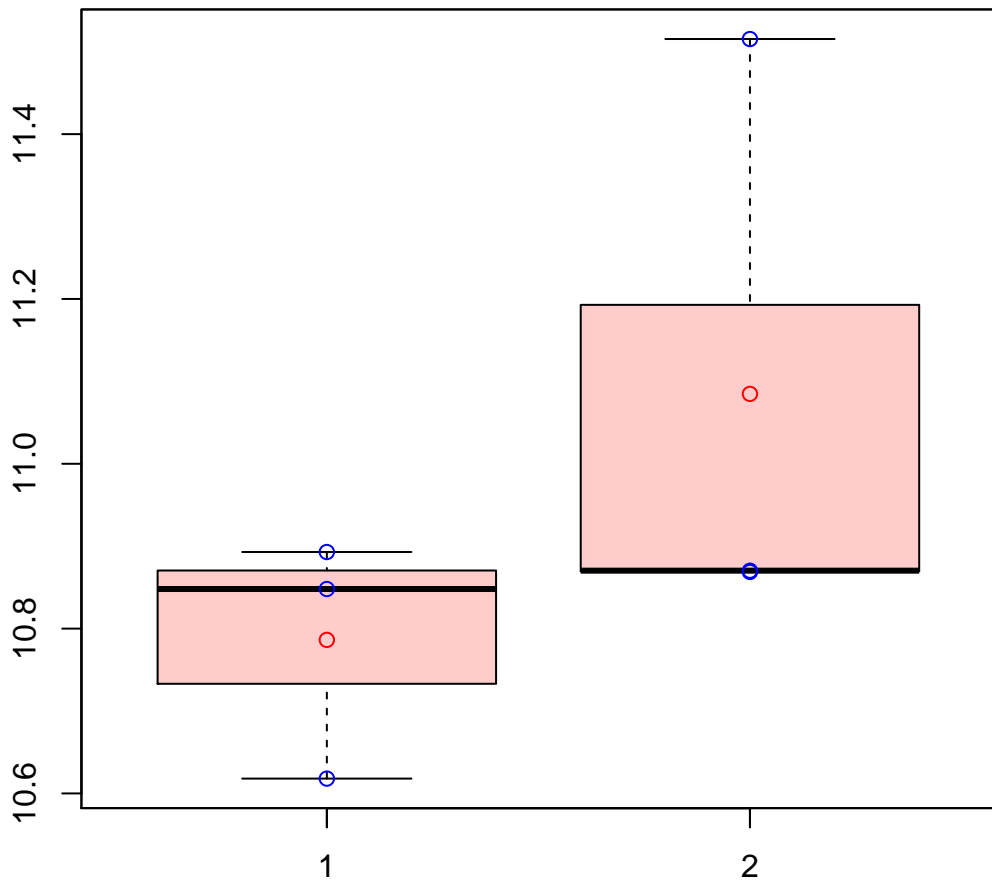

t-Test: p-value = 0.3

# CL14Contig2|CL14Contig2

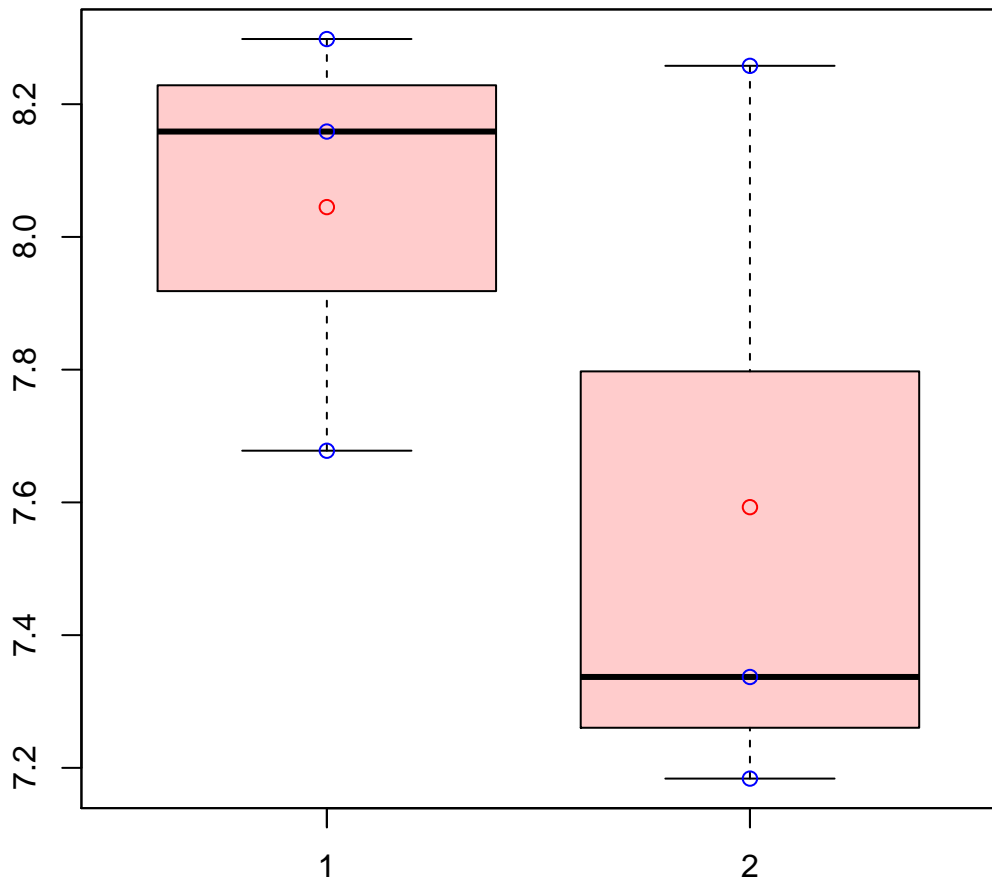

t-Test: p-value = 0.32

# CL14Contig30|CL14Contig30



t-Test: p-value = 0.27

# CL14Contig4|CL14Contig4

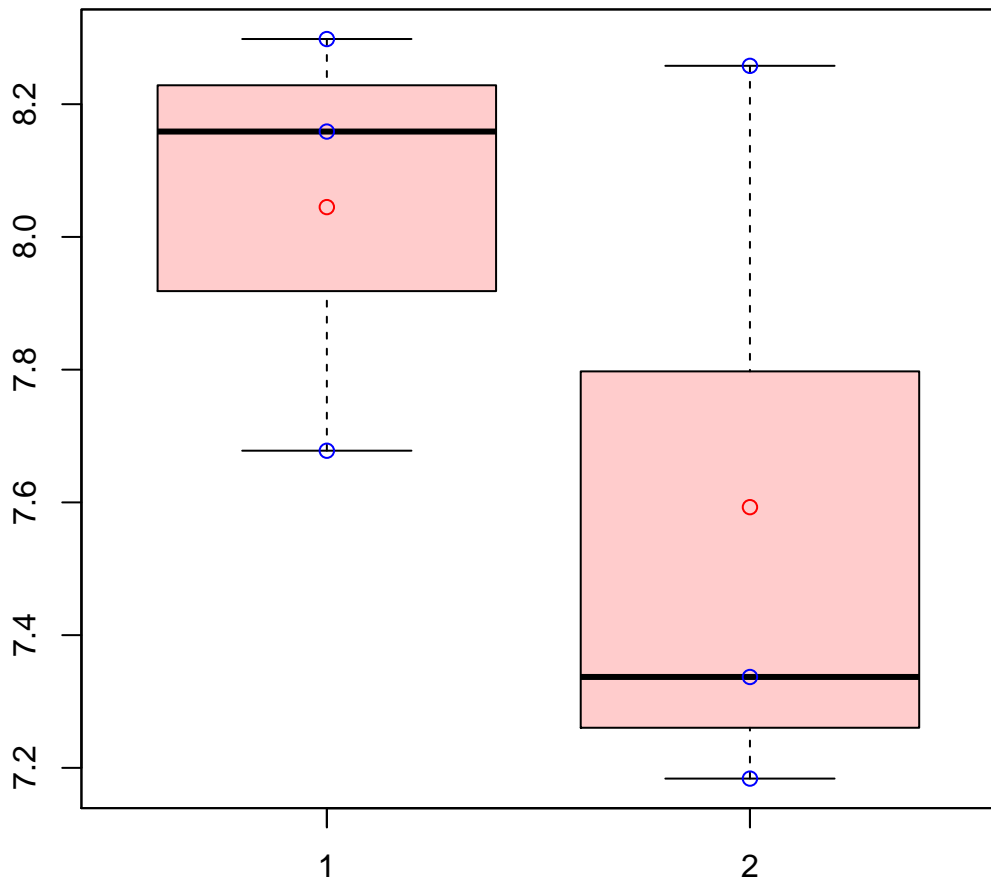

t-Test: p-value = 0.32

# CL14Contig9|CL14Contig9

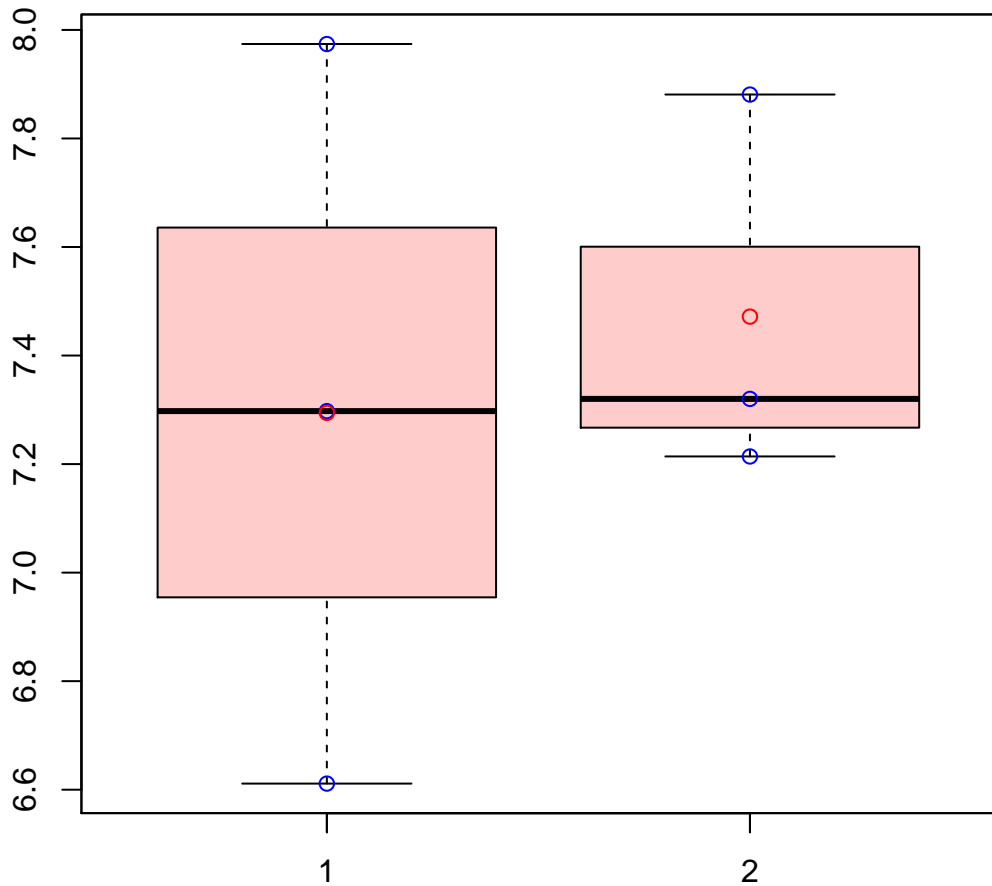

t-Test: p-value = 0.72

# CL15033Contig1|CL15033Contig1

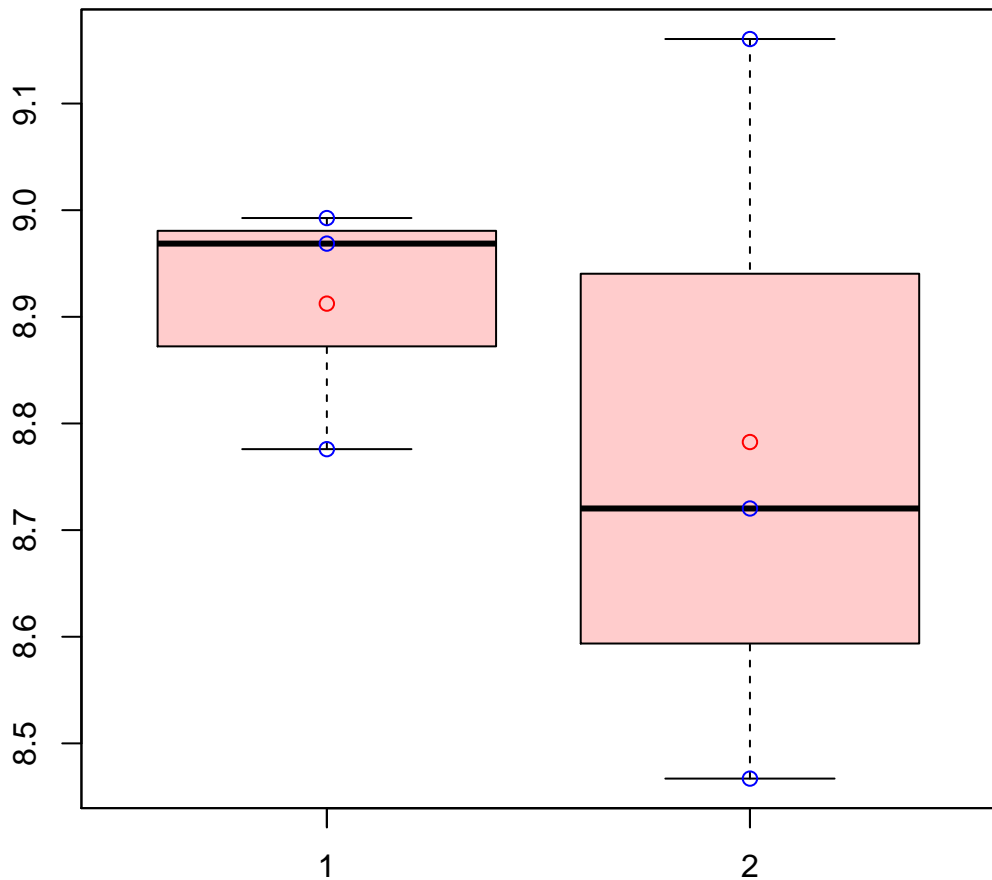

t-Test: p-value = 0.6



# CL1507Contig2|CL1507Contig2

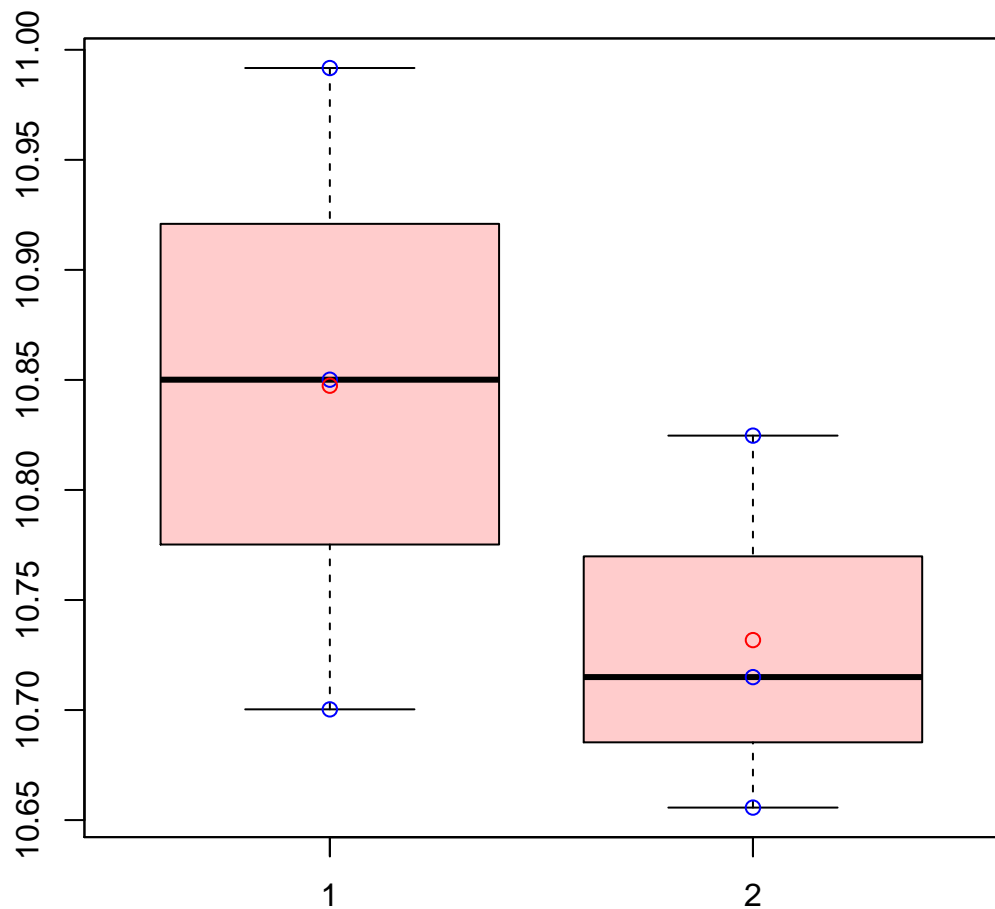

t-Test: p-value = 0.32

# CL1507Contig3|CL1507Contig3

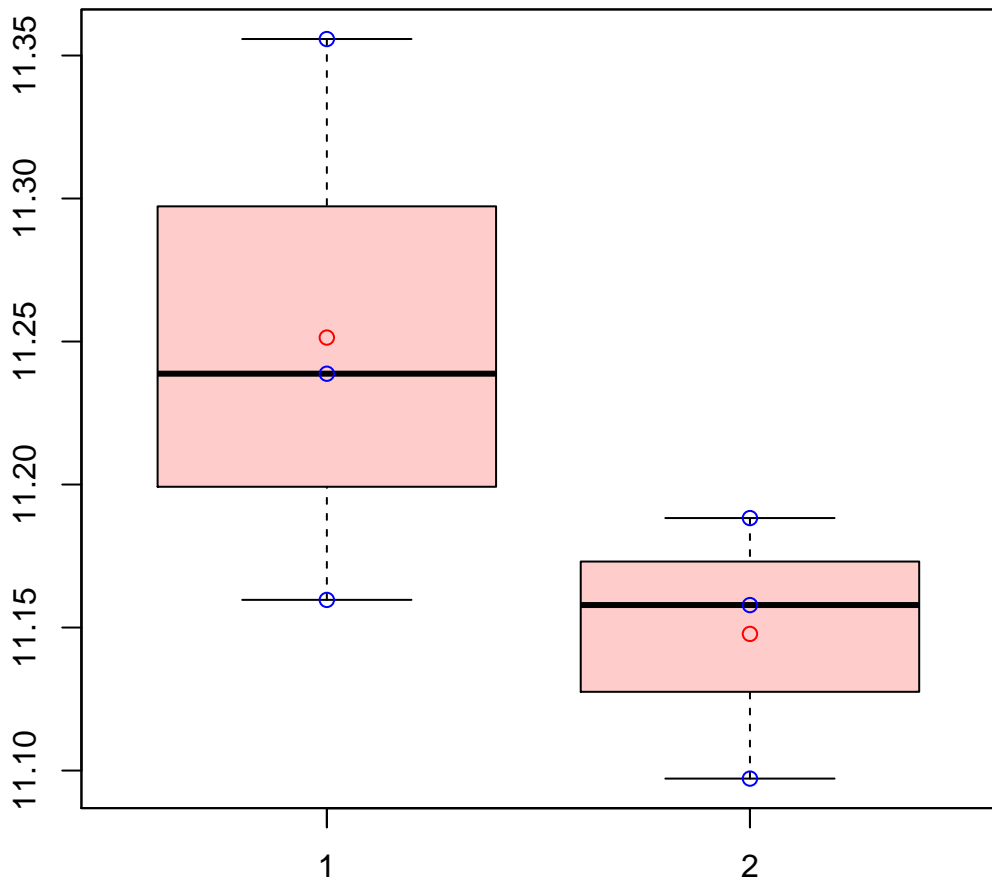

t-Test: p-value = 0.2

# CL1508Contig1|CL1508Contig1

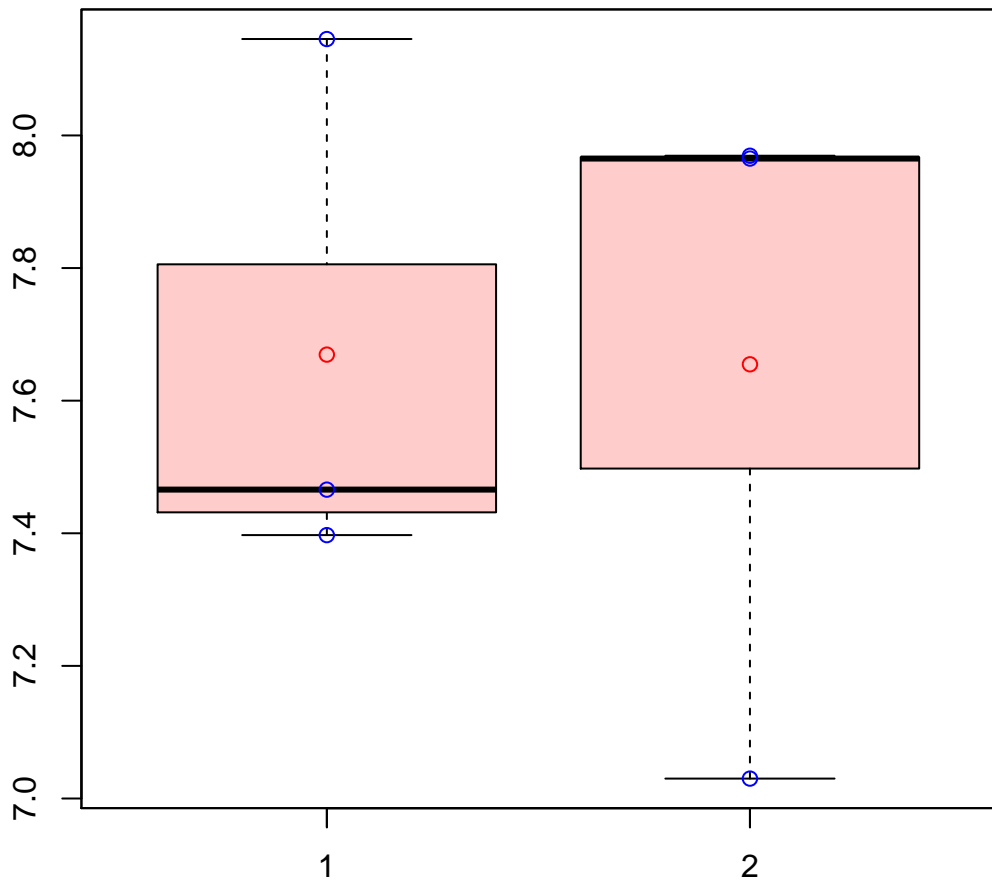

t-Test: p-value = 0.97

# CL1508Contig2|CL1508Contig2

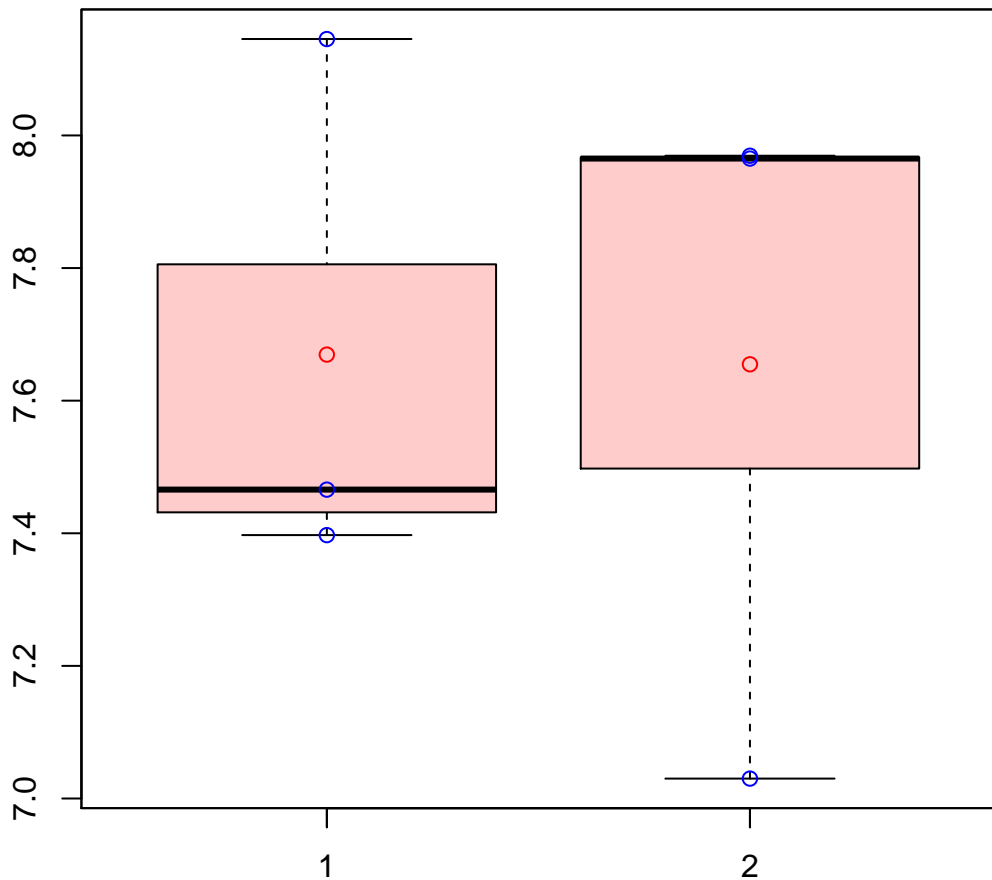

t-Test: p-value = 0.97

# CL1508Contig4|CL1508Contig4

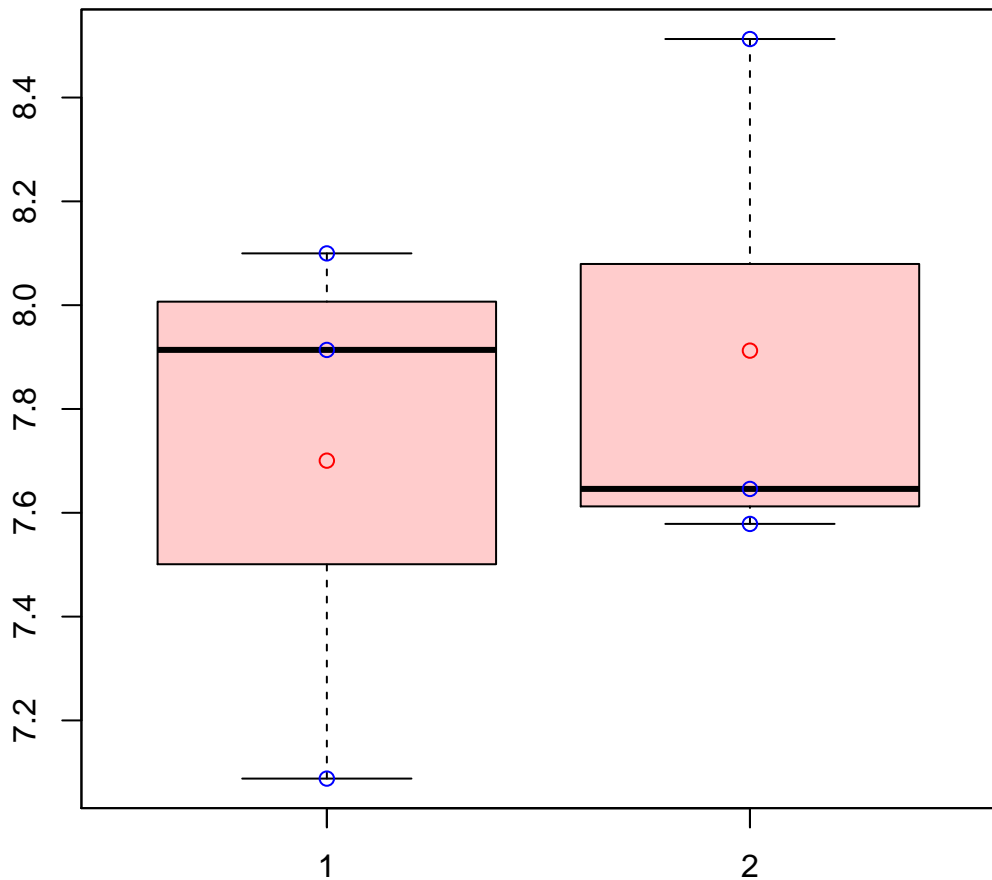

t-Test: p-value = 0.65

# CL1508Contig7|CL1508Contig7

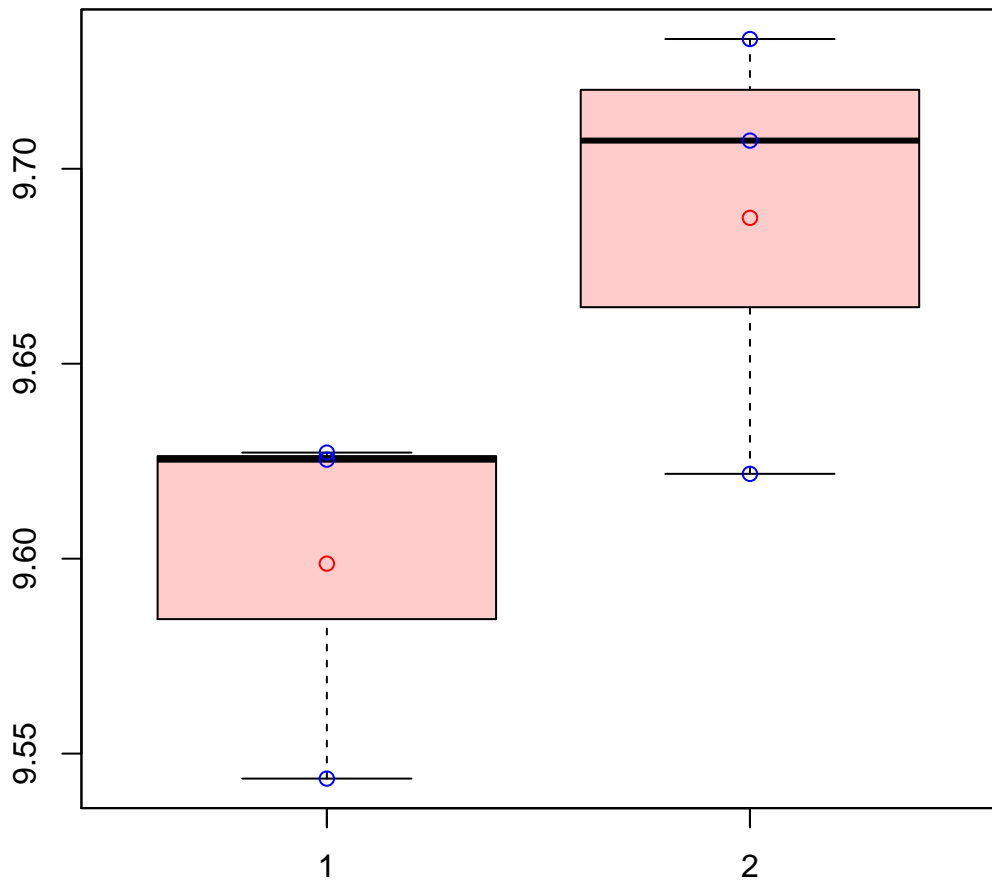

t-Test: p-value = 0.11

# CL150Contig11|CL150Contig11

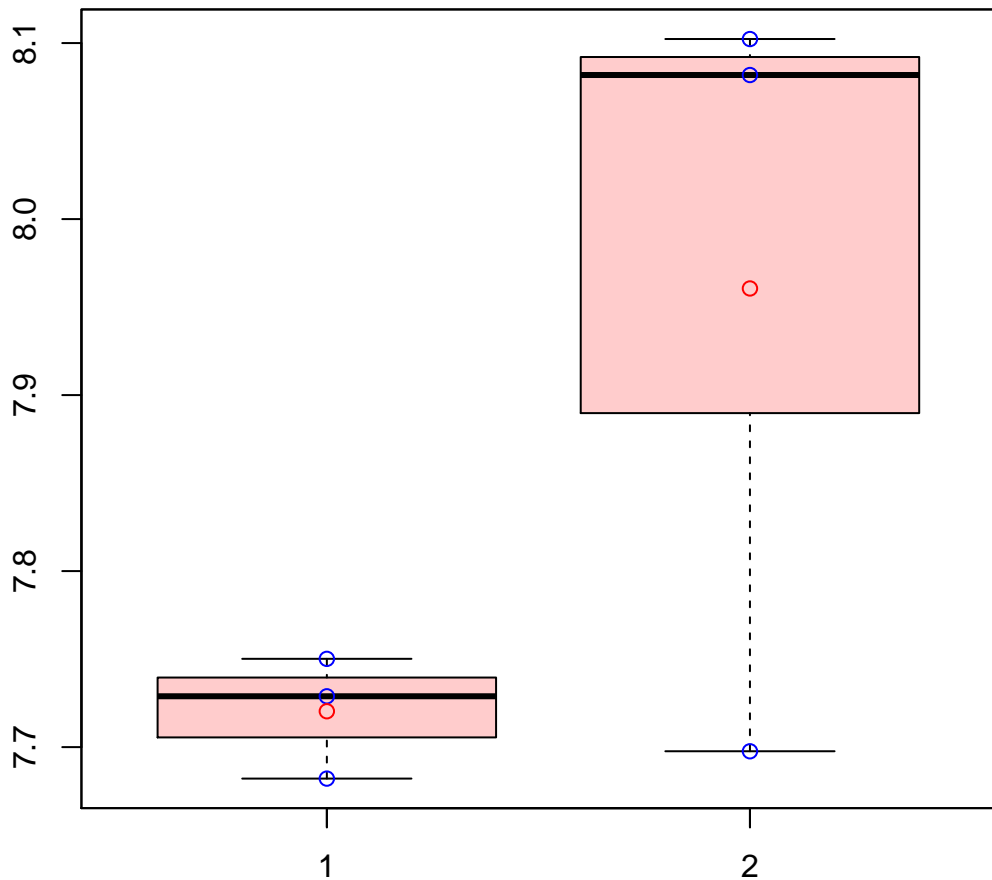

t-Test: p-value = 0.21

# CL150Contig14|CL150Contig14

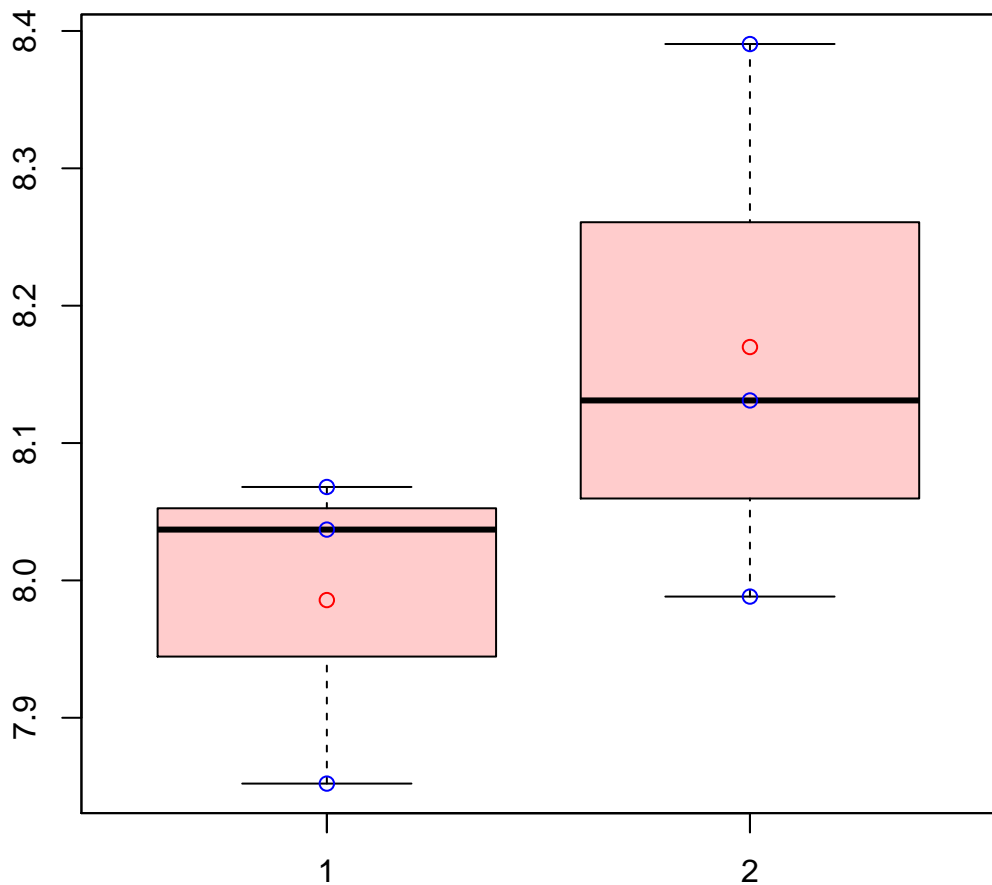

t-Test: p-value = 0.26



# CL150Contig15|CL150Contig15



t-Test: p-value = 0.21

# CL1510Contig1|CL1510Contig1

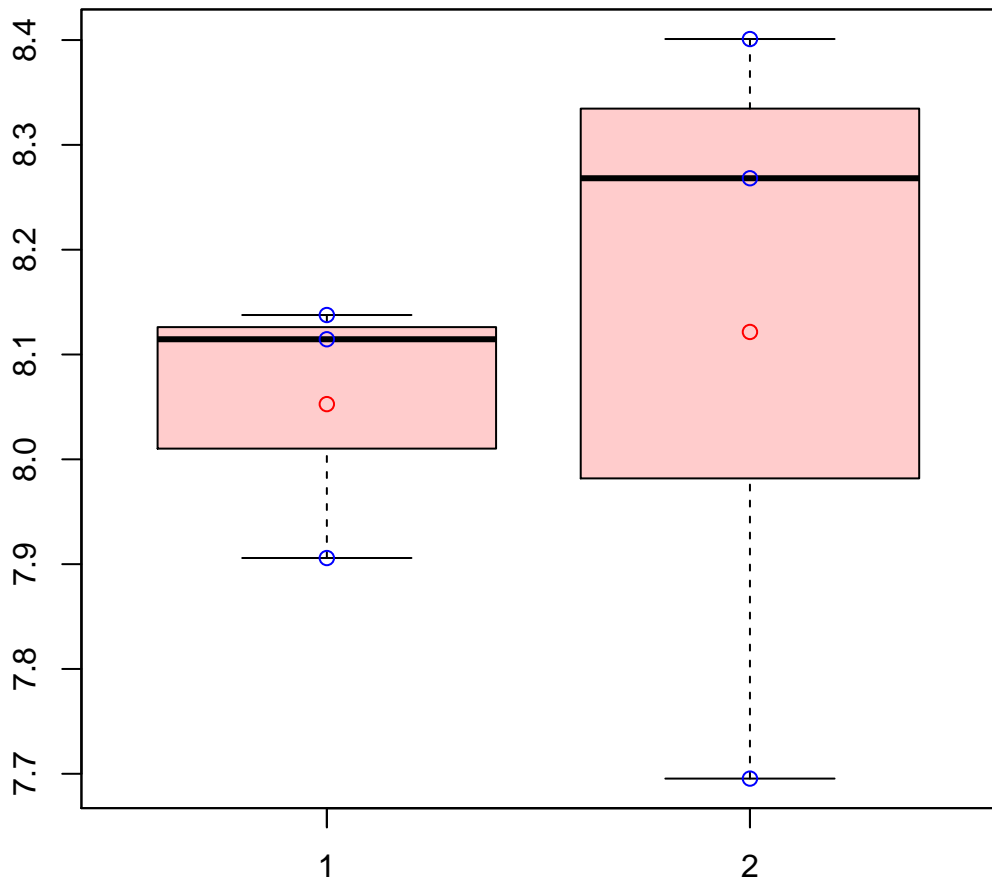

t-Test: p-value = 0.79

# CL1511Contig2|CL1511Contig2

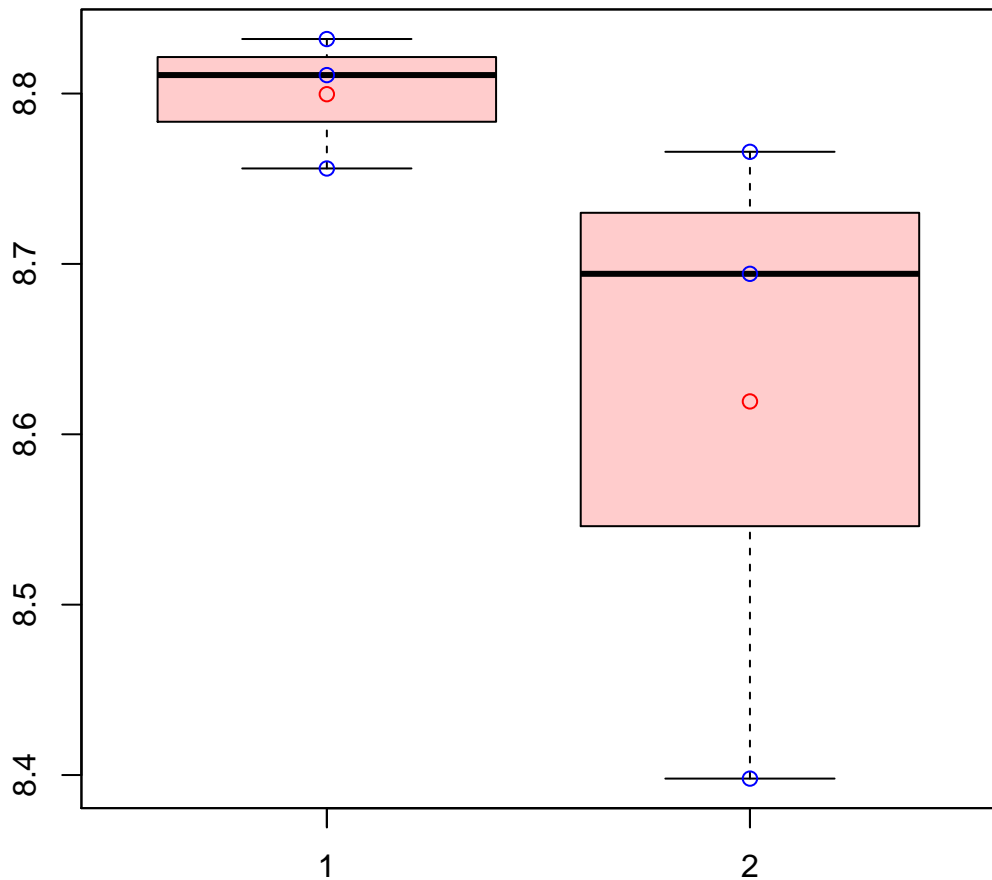

t-Test: p-value = 0.25

# CL15138Contig1|CL15138Contig1

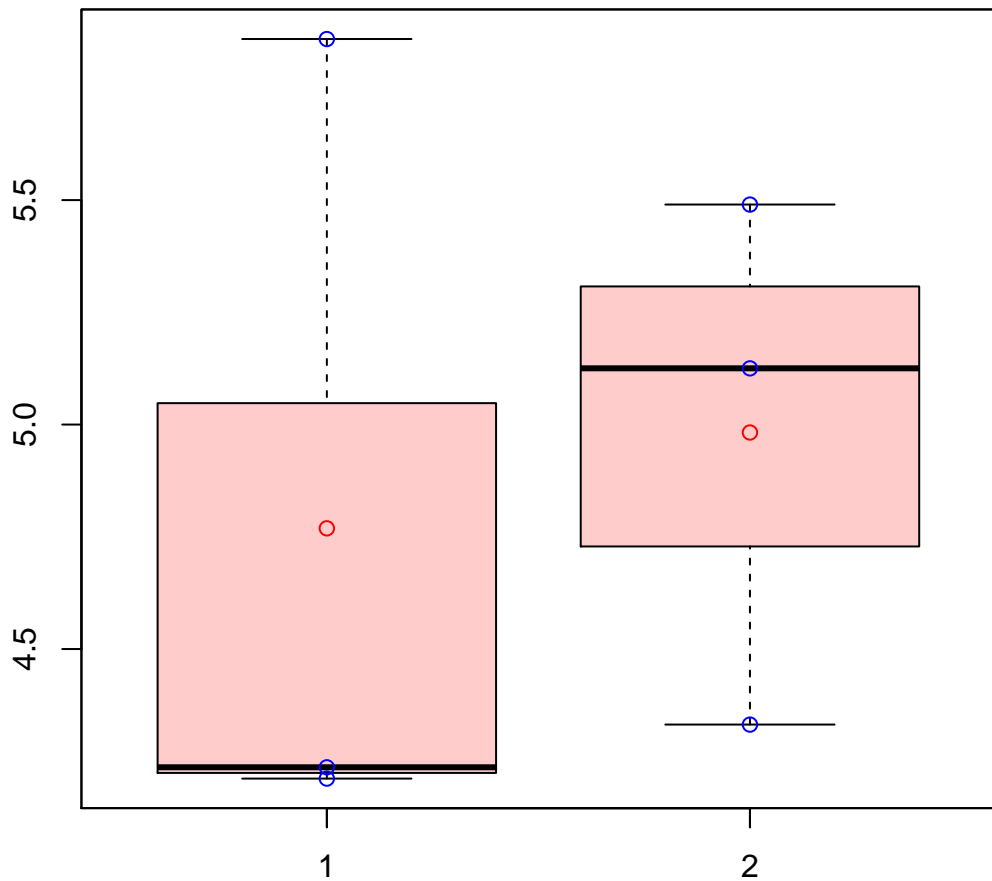

t-Test: p-value = 0.76

# CL15152Contig2|CL15152Contig2

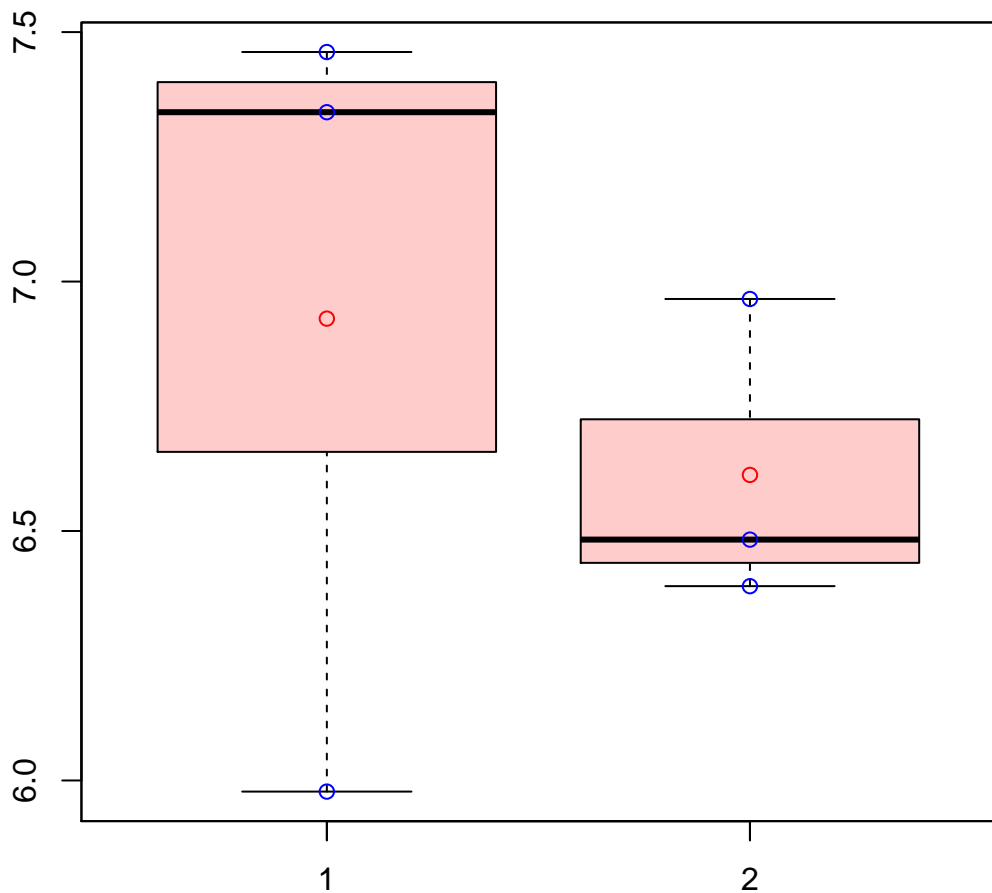

t-Test: p-value = 0.59

# CL1516Contig5|CL1516Contig5

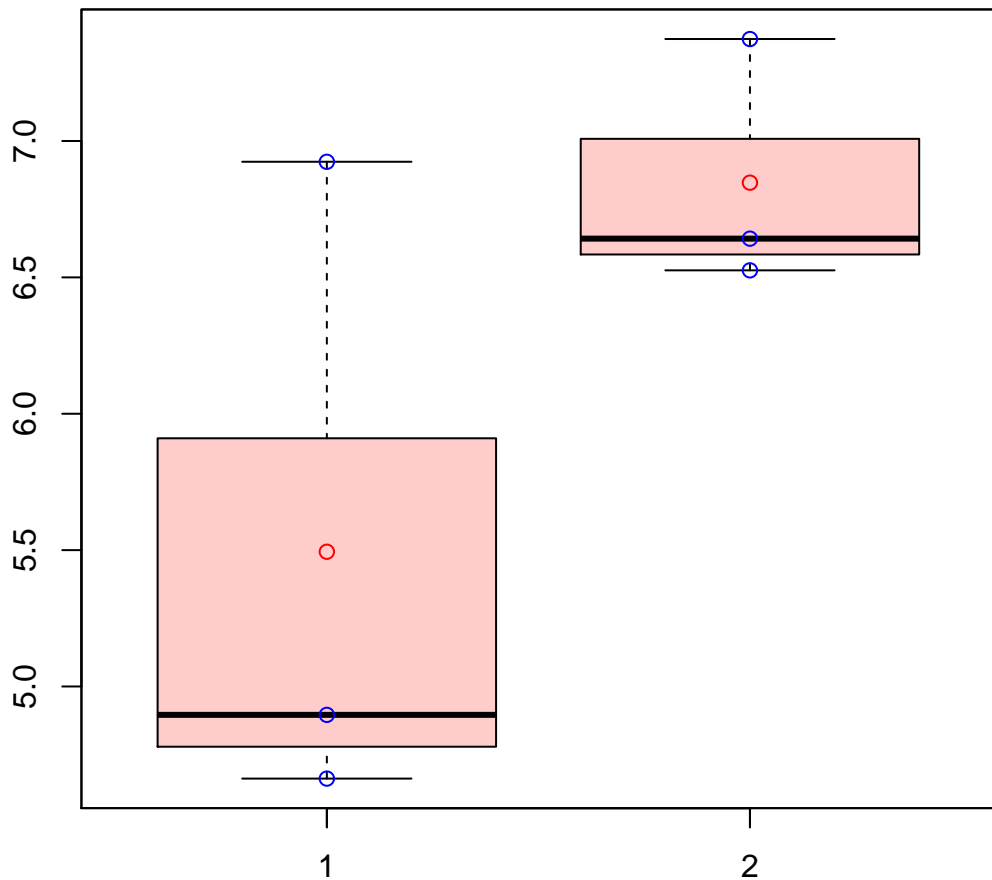

t-Test: p-value = 0.19

# CL151Contig13|CL151Contig13

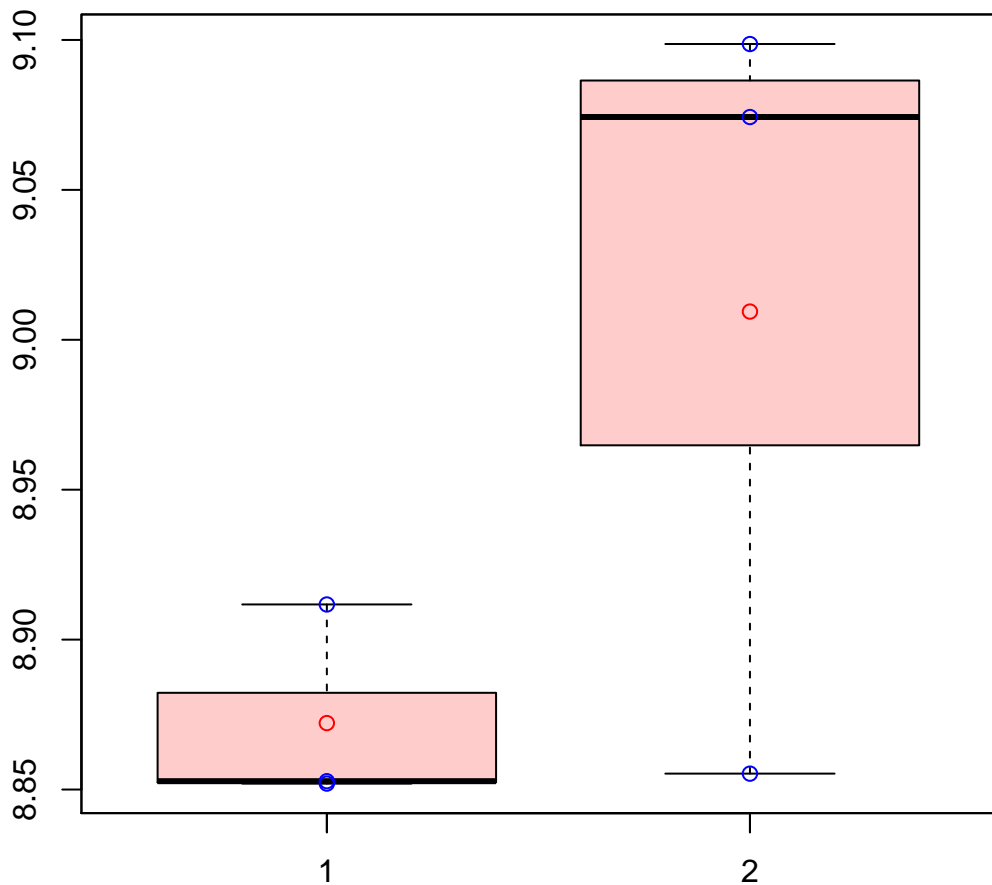

t-Test: p-value = 0.21

# CL151Contig1|CL151Contig1

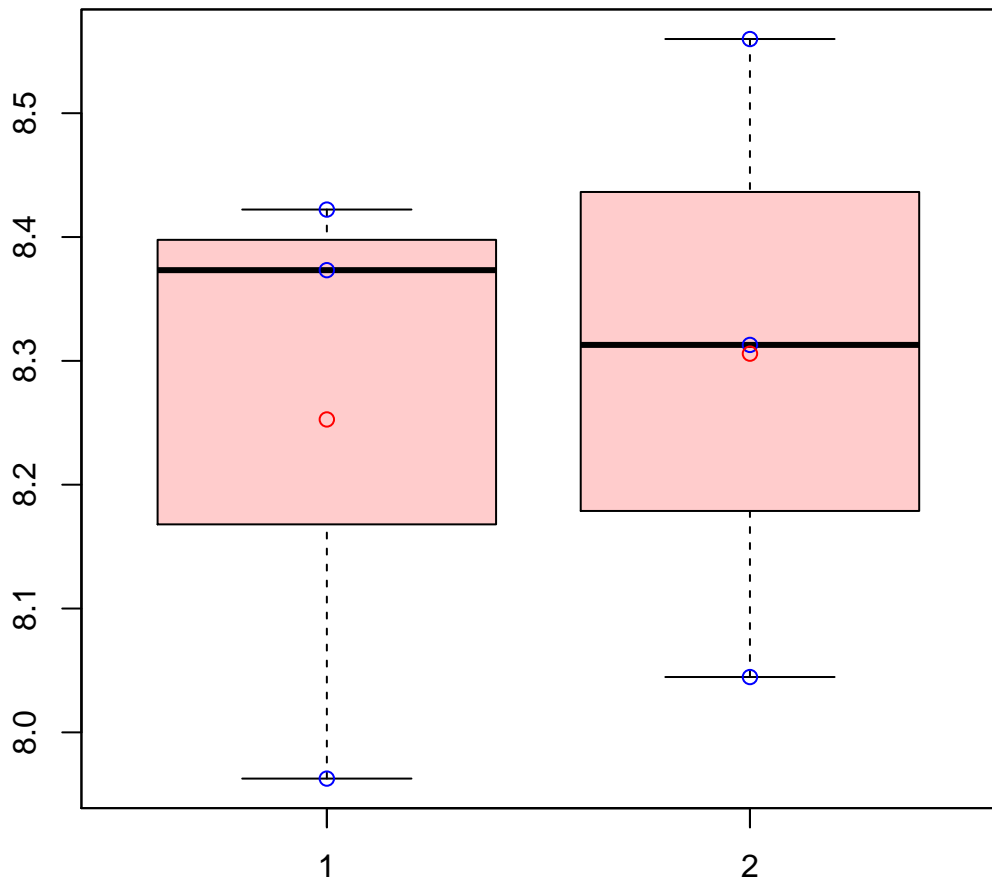

t-Test: p-value = 0.81



# CL151Contig2|CL151Contig2

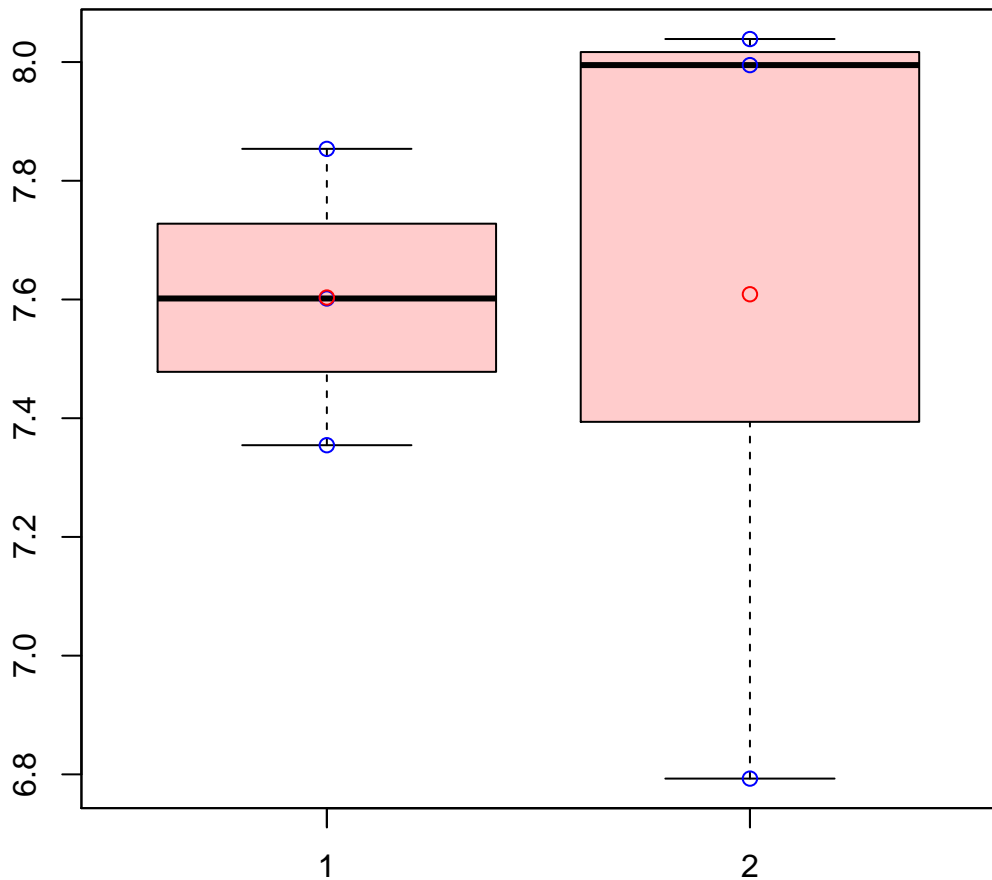

t-Test: p-value = 0.99

# CL1521Contig4|CL1521Contig4

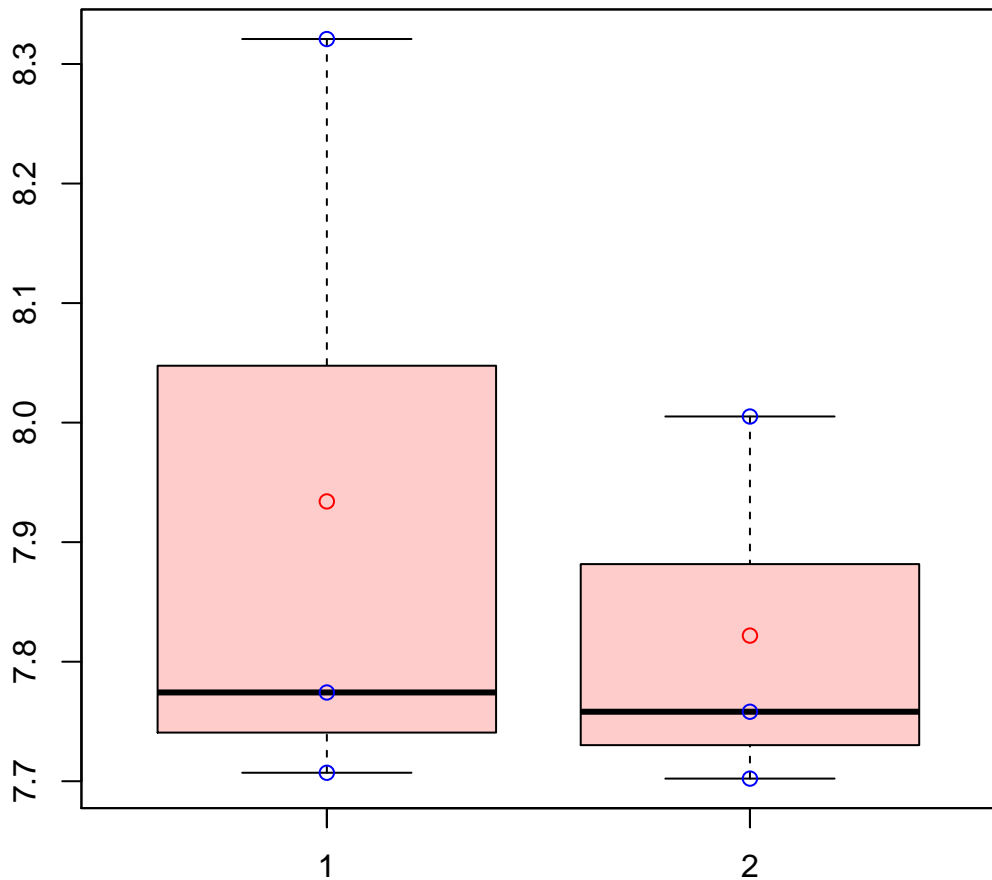

t-Test: p-value = 0.64

# CL1523Contig5|CL1523Contig5

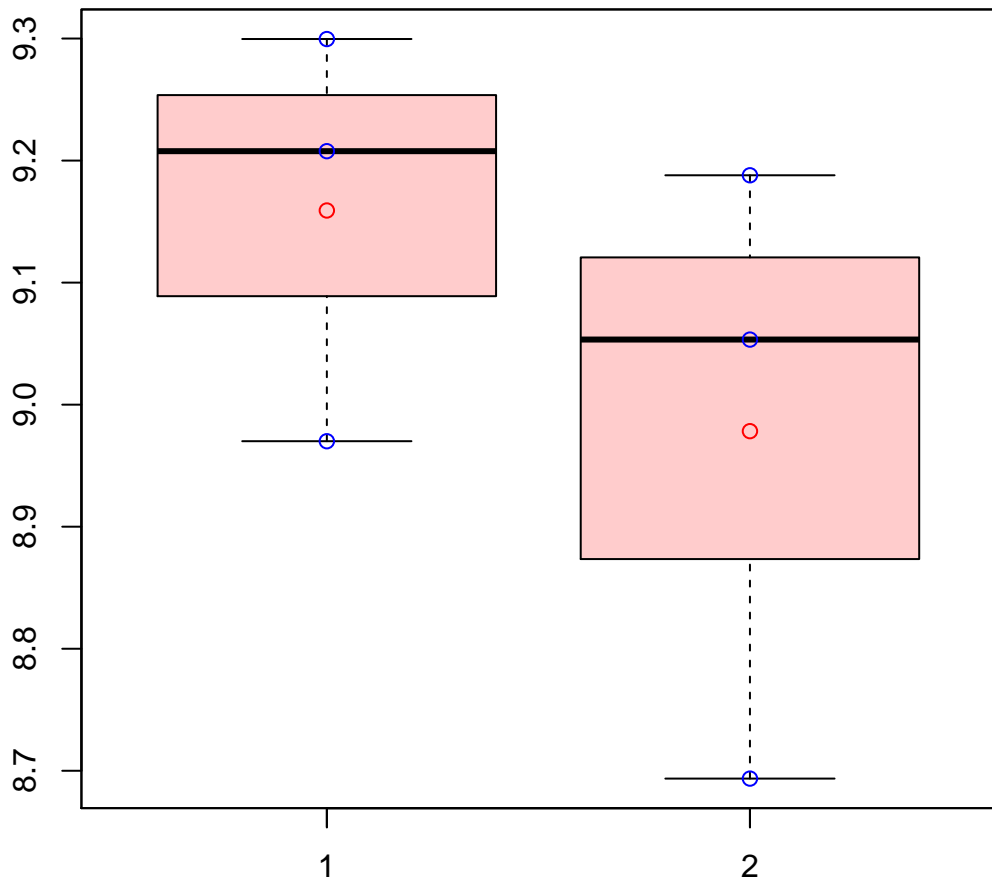

t-Test: p-value = 0.37

# CL1526Contig1|CL1526Contig1

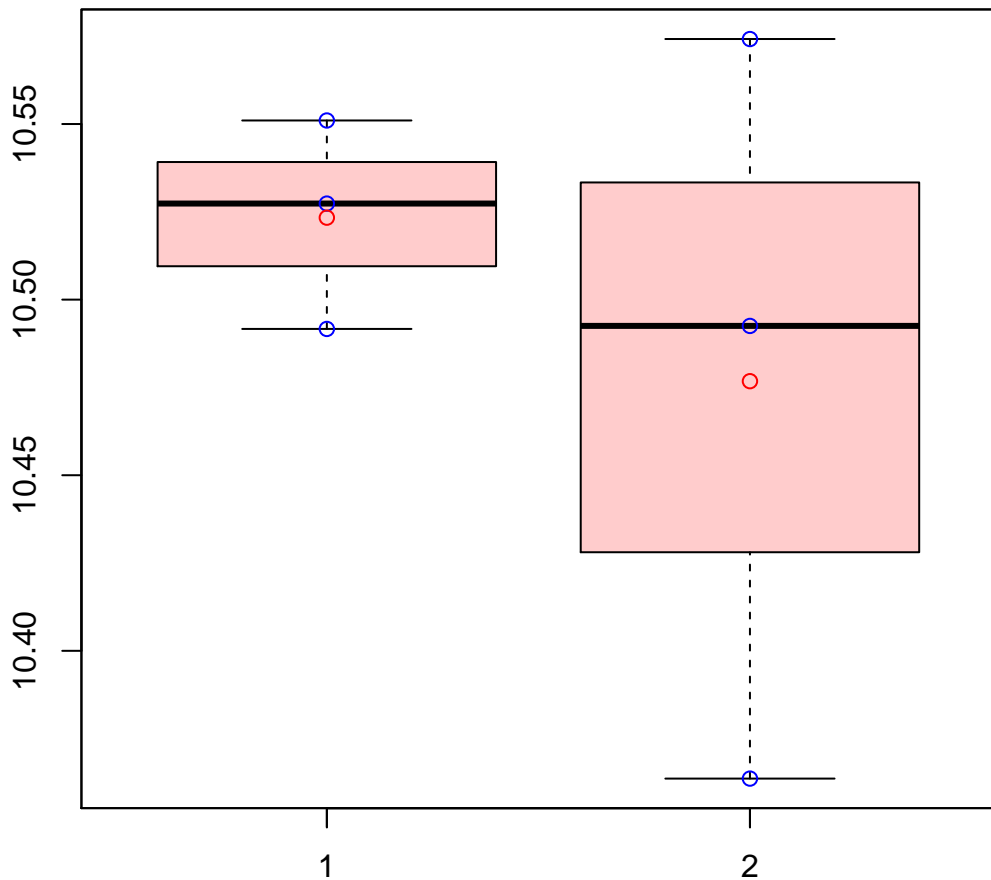

t-Test: p-value = 0.53

# CL1526Contig4|CL1526Contig4

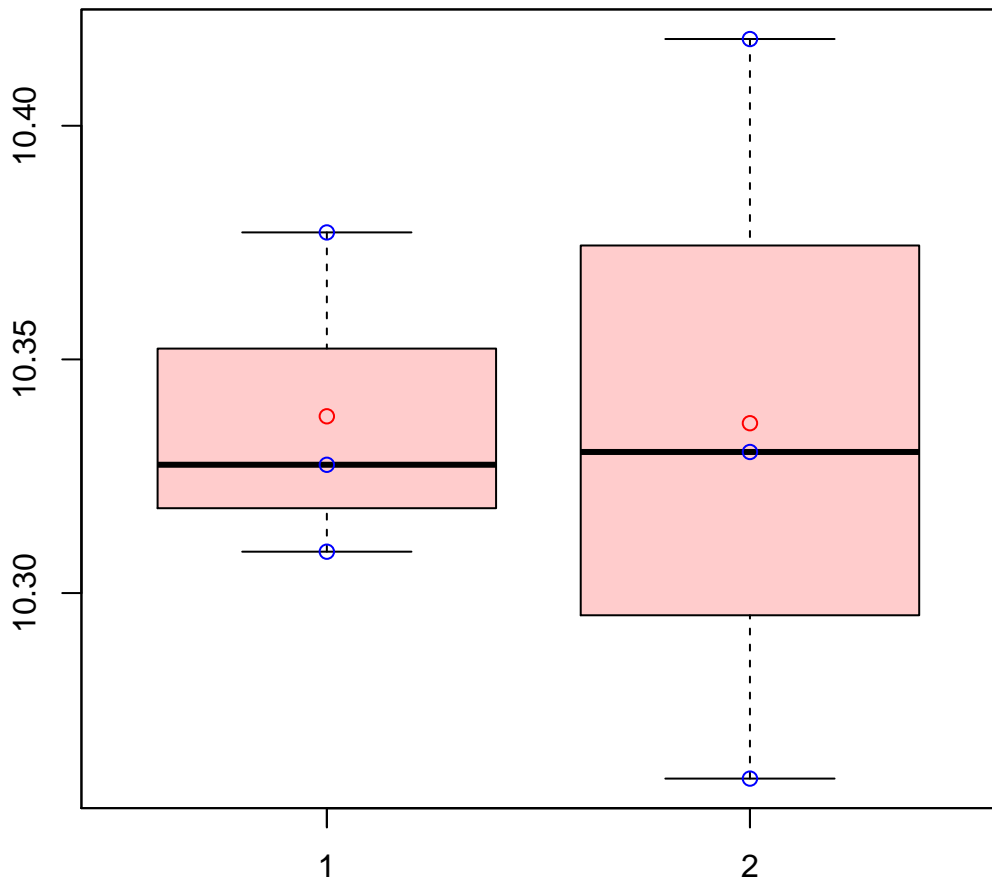

t-Test: p-value = 0.98

# CL1530Contig2|CL1530Contig2

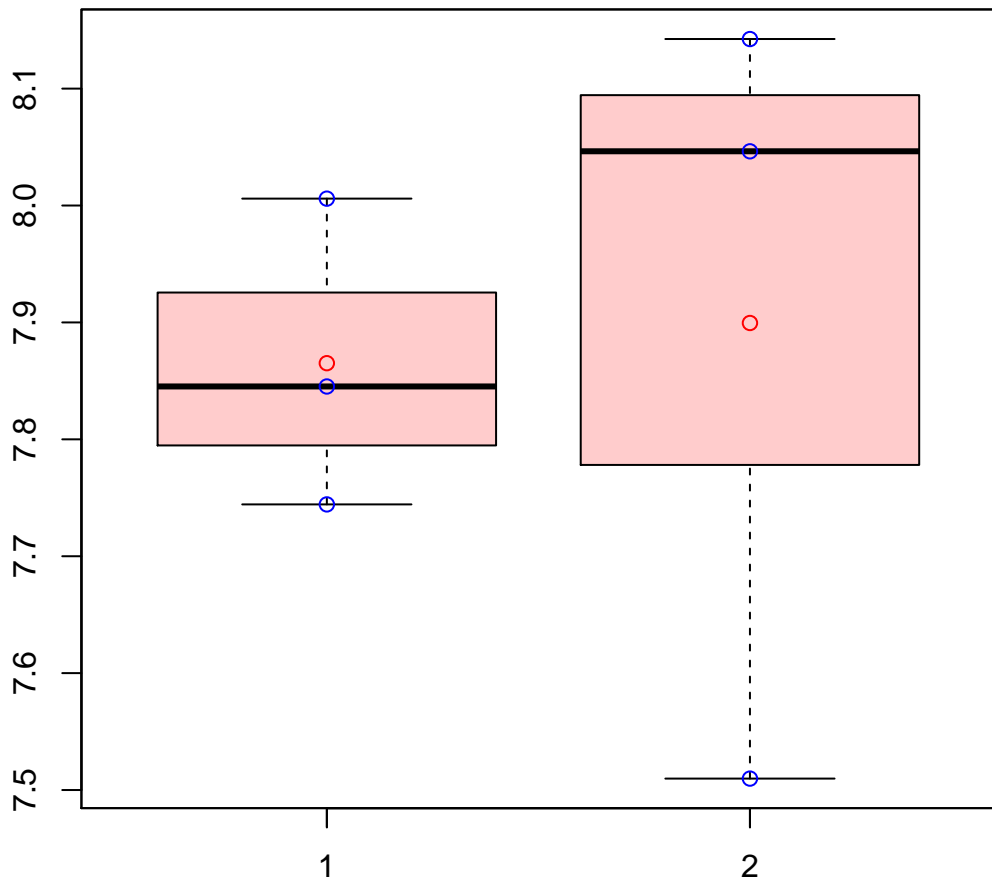

t-Test: p-value = 0.88

# CL1531Contig5|CL1531Contig5

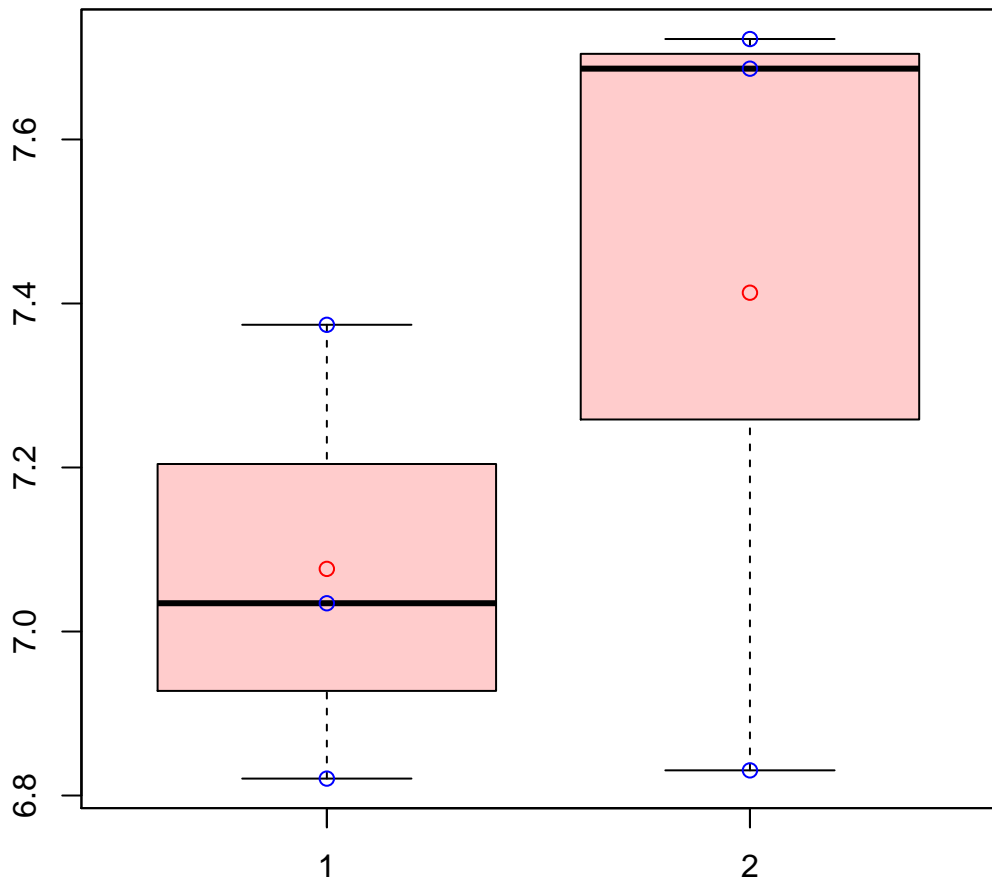

t-Test: p-value = 0.38

# CL1533Contig11|CL1533Contig11

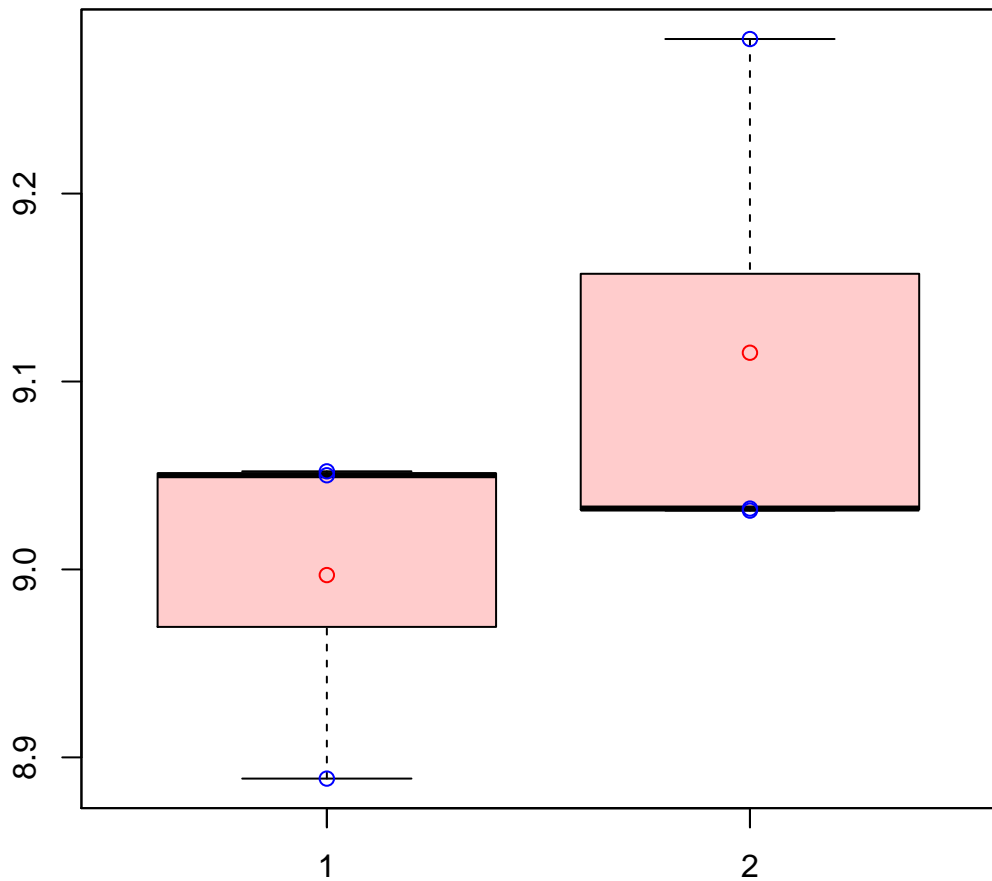

t-Test: p-value = 0.31



# CL1533Contig12|CL1533Contig12

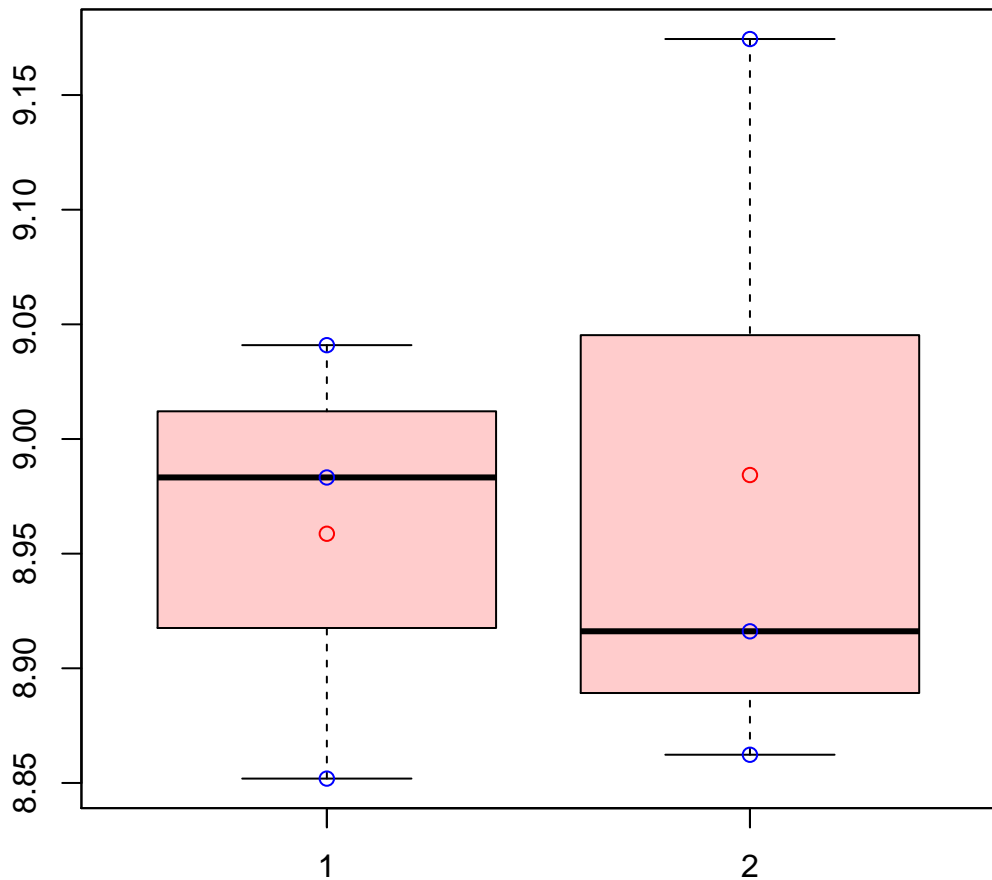

t-Test: p-value = 0.83

CL1533Contig2|CL1533Contig2

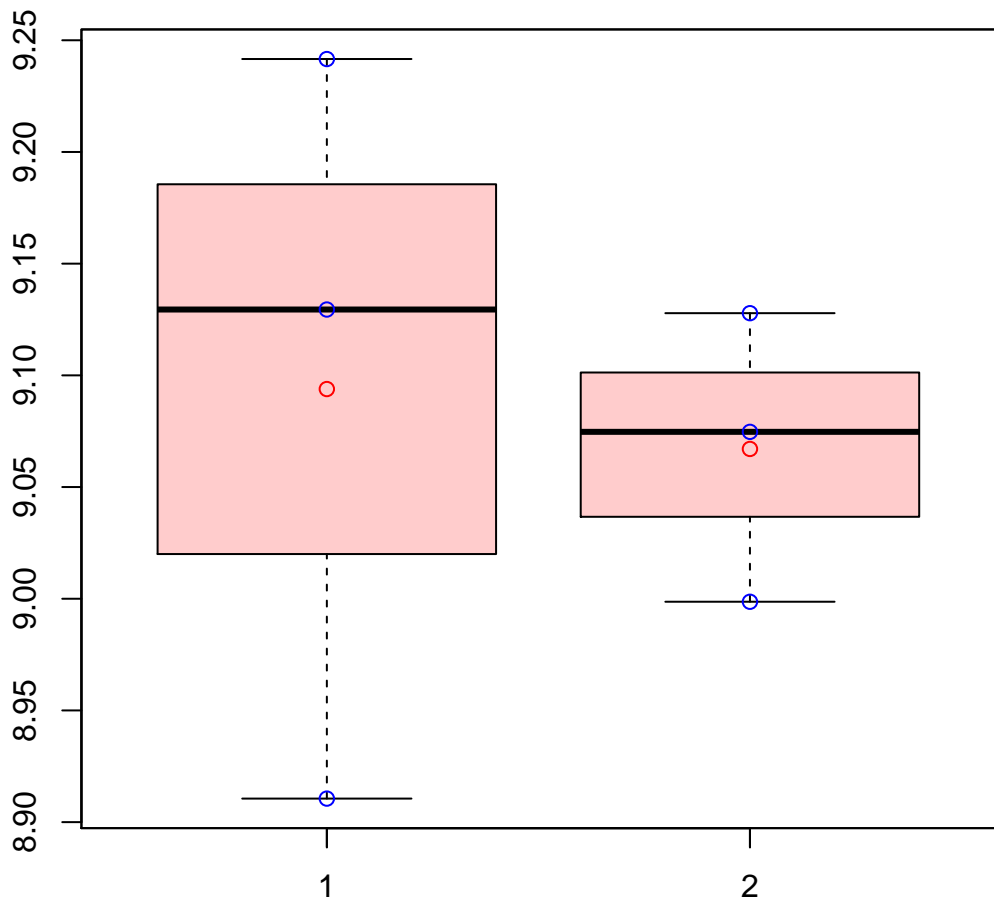

t-Test: p-value = 0.82

# CL1533Contig3|CL1533Contig3

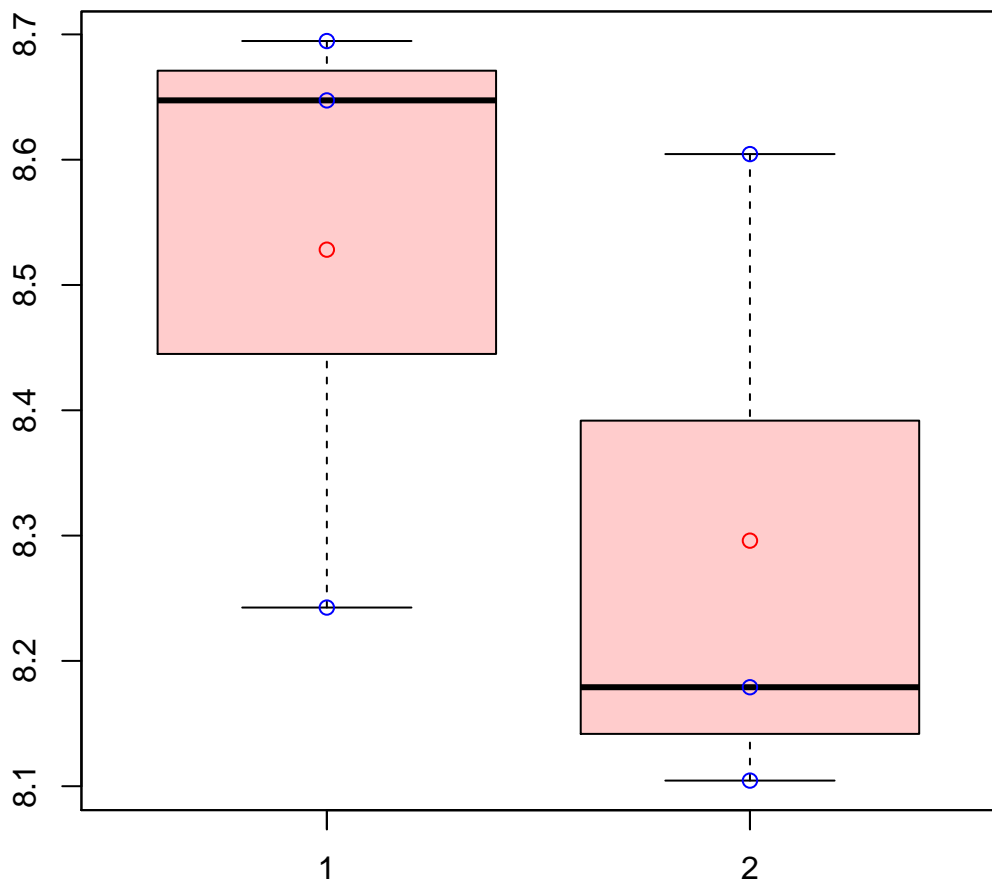

t-Test: p-value = 0.33

# CL1533Contig4|CL1533Contig4

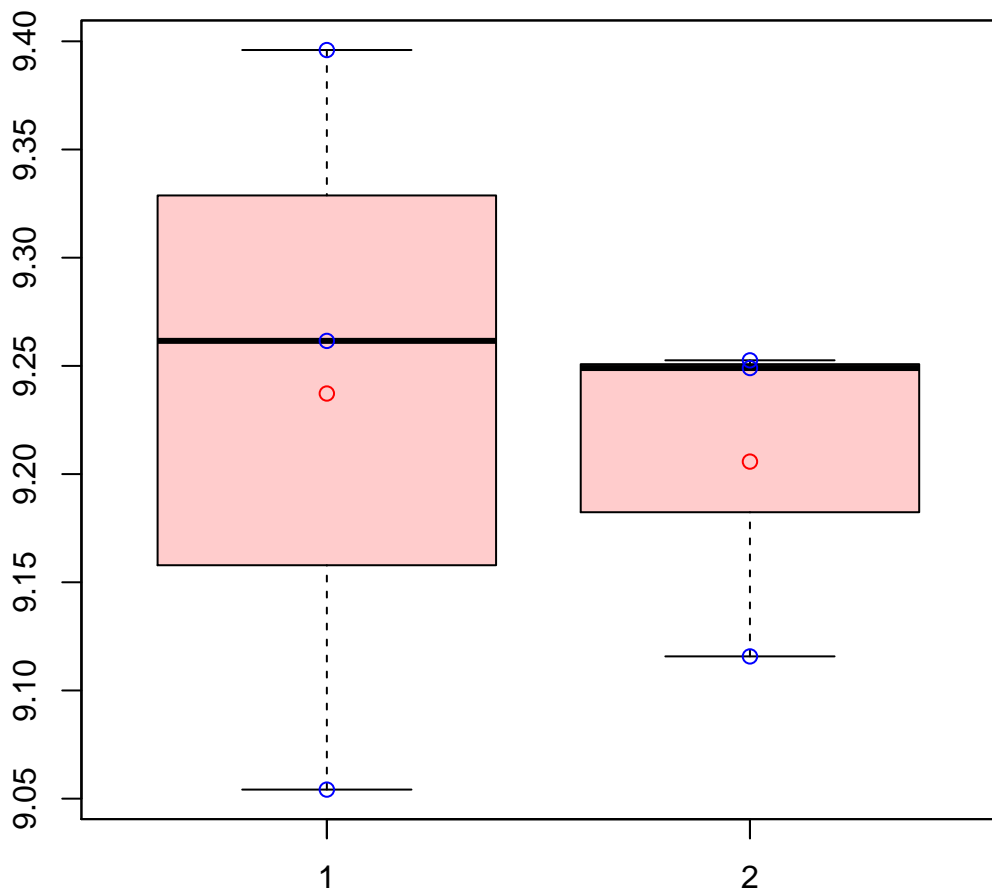

t-Test: p-value = 0.79

# CL1533Contig5|CL1533Contig5

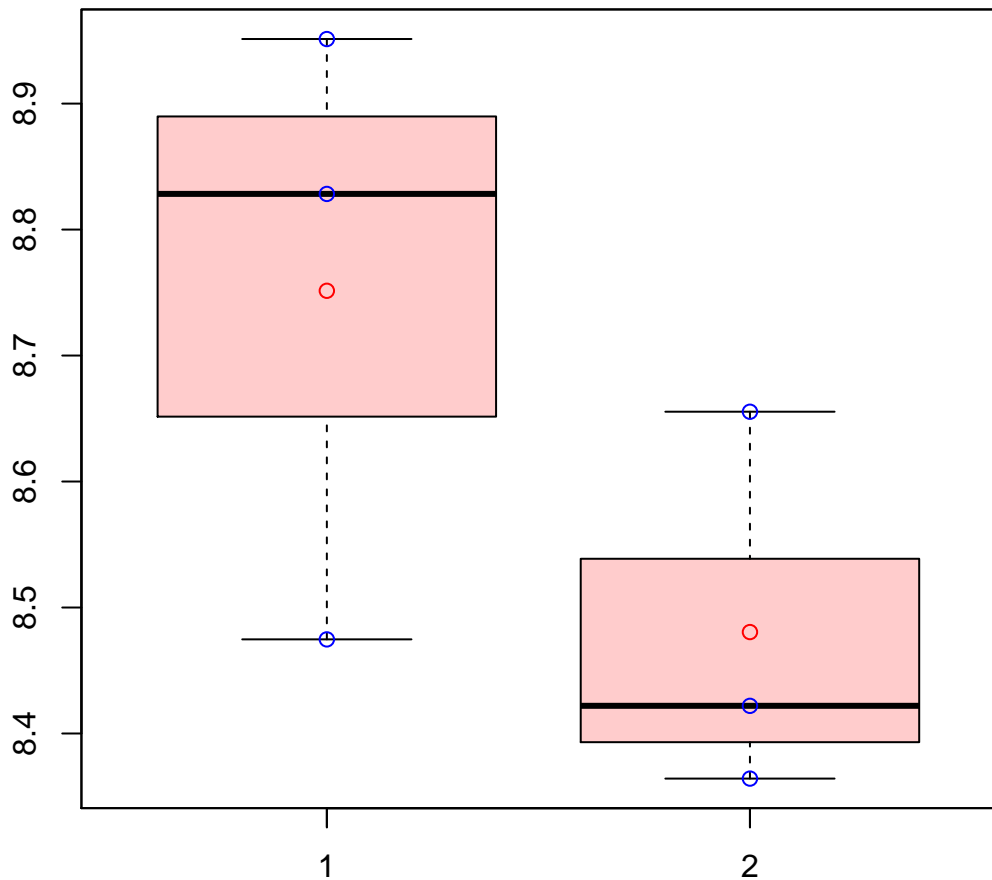

t-Test: p-value = 0.2

# CL1533Contig6|CL1533Contig6

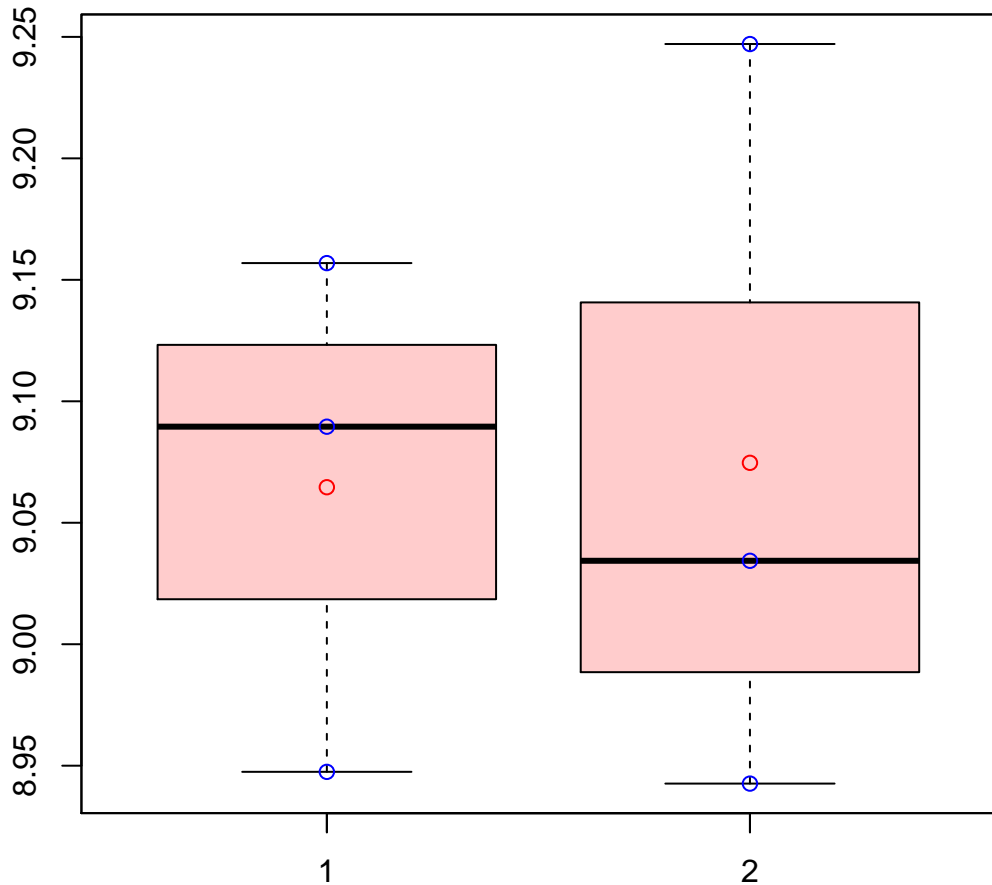

t-Test: p-value = 0.93

# CL15344Contig1|CL15344Contig1

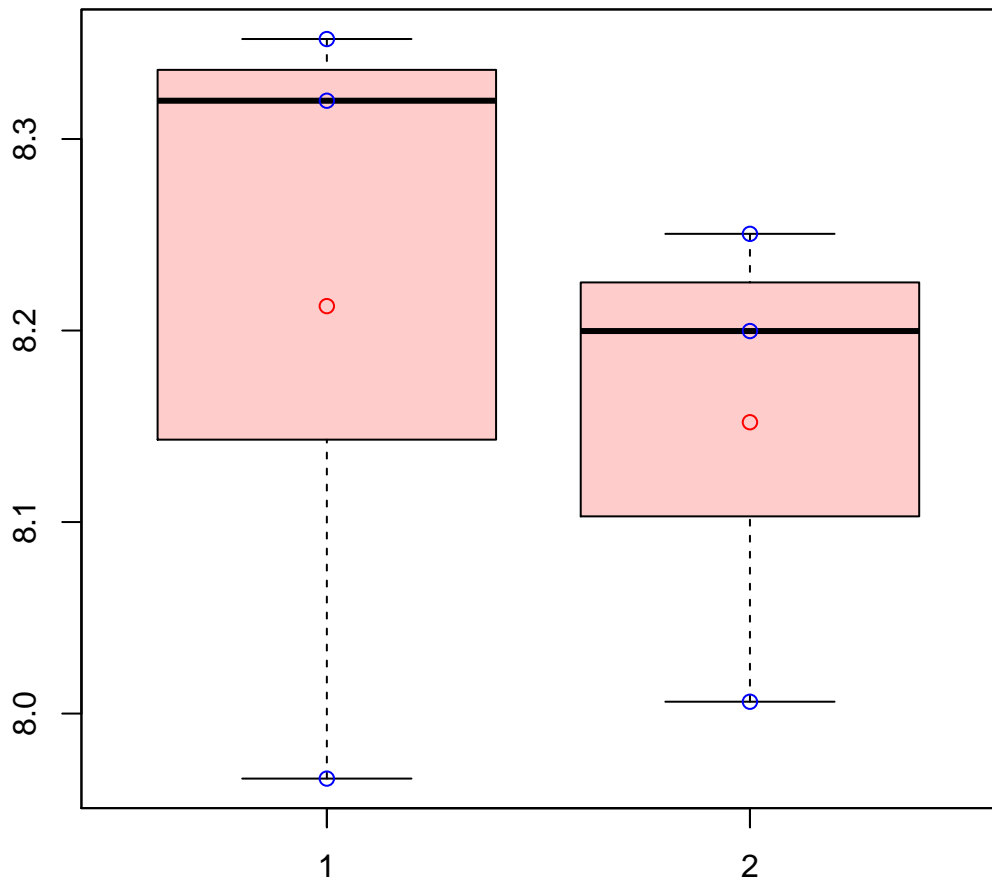

t-Test: p-value = 0.7

# CL15348Contig1|CL15348Contig1

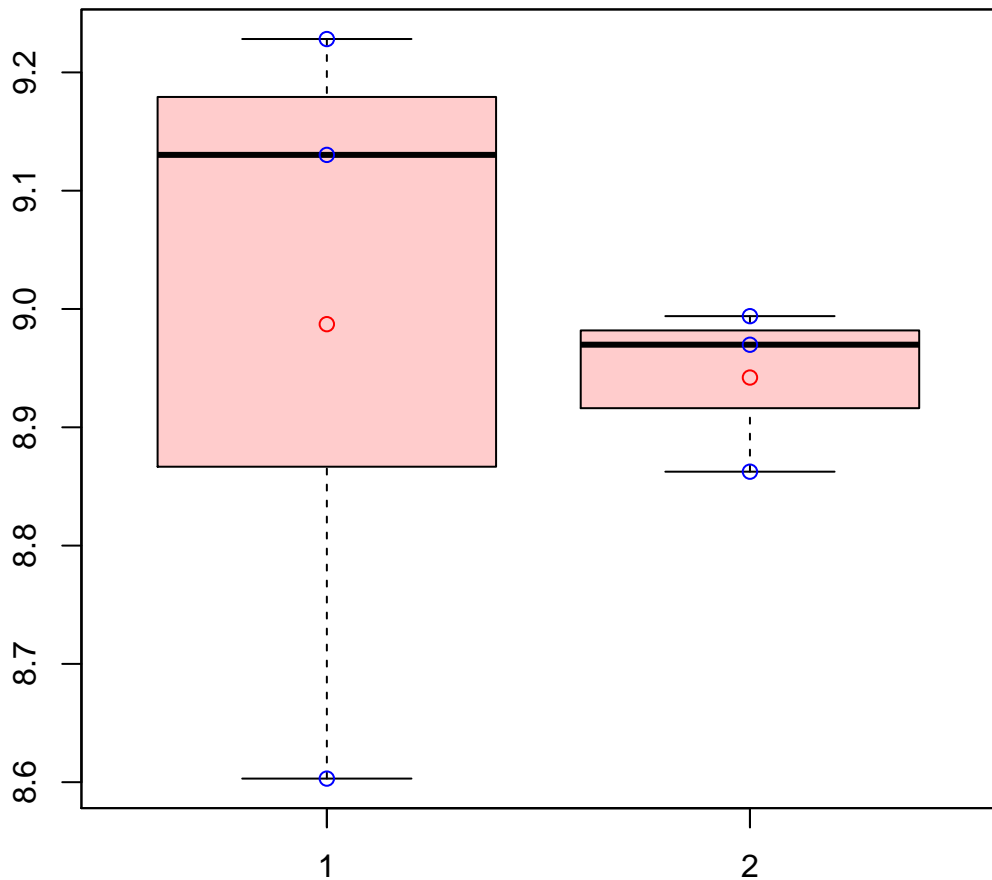

t-Test: p-value = 0.84



# CL1534Contig2|CL1534Contig2

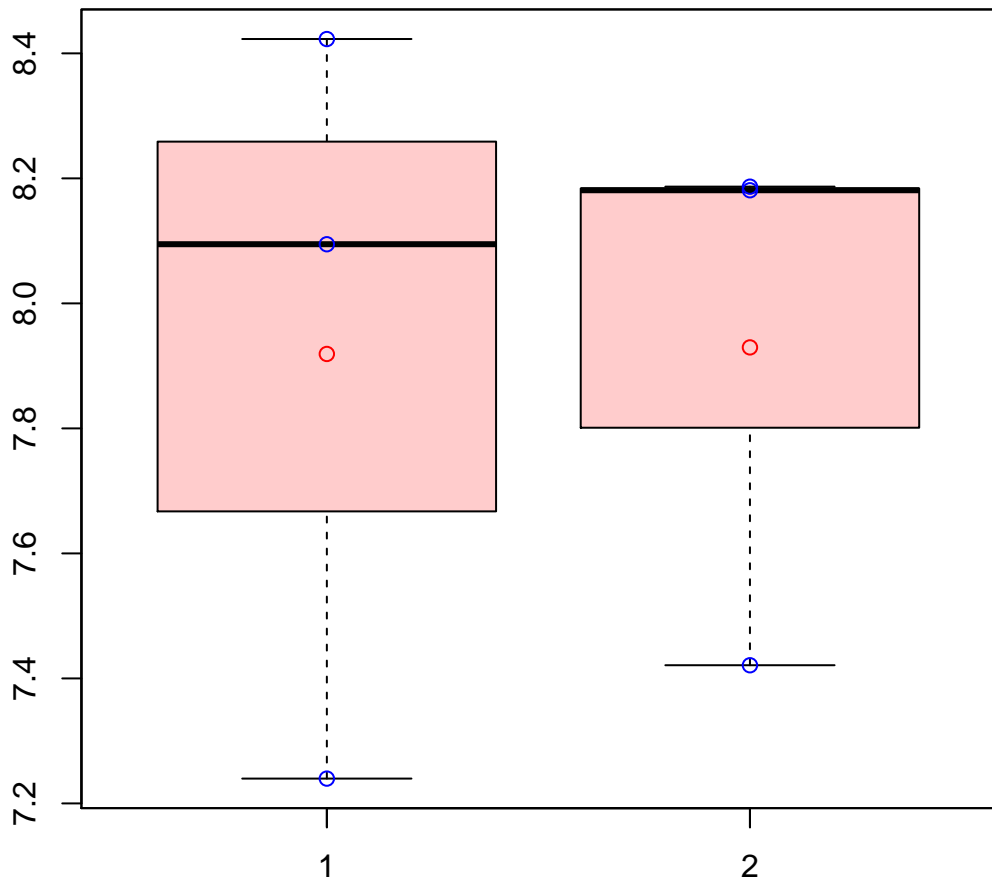

t-Test: p-value = 0.98

# CL15398Contig1|CL15398Contig1

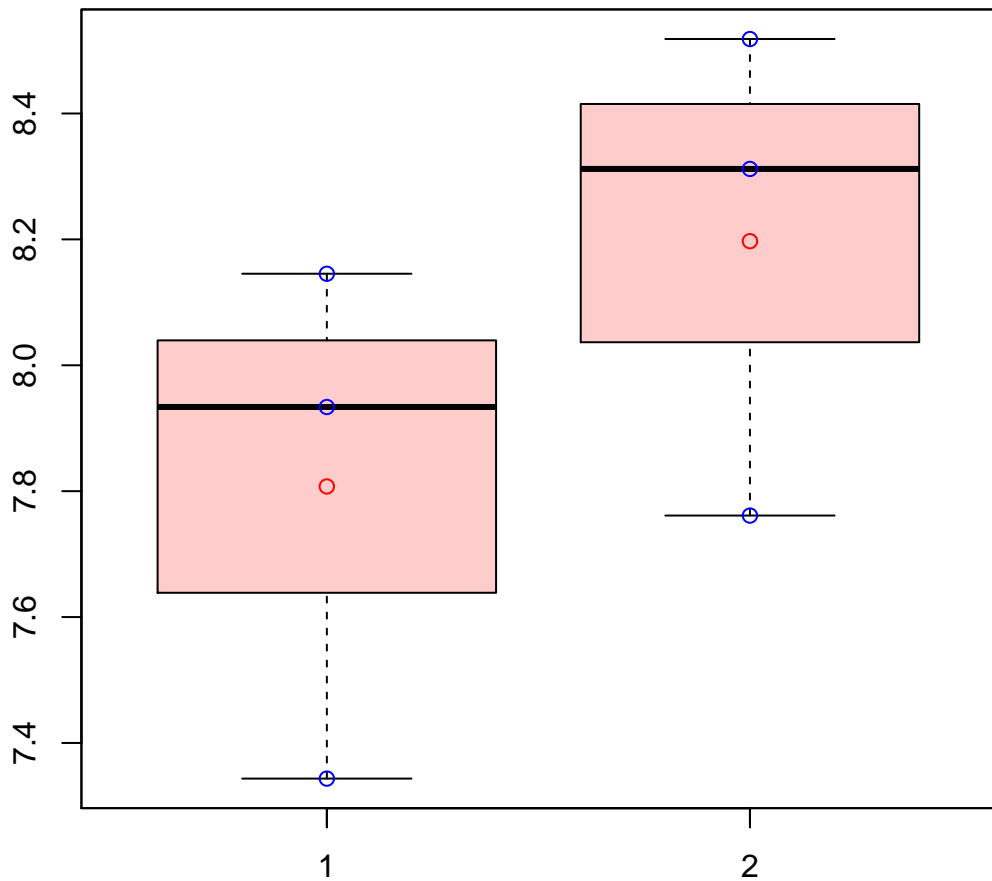

t-Test: p-value = 0.3

# CL153Contig9|CL153Contig9

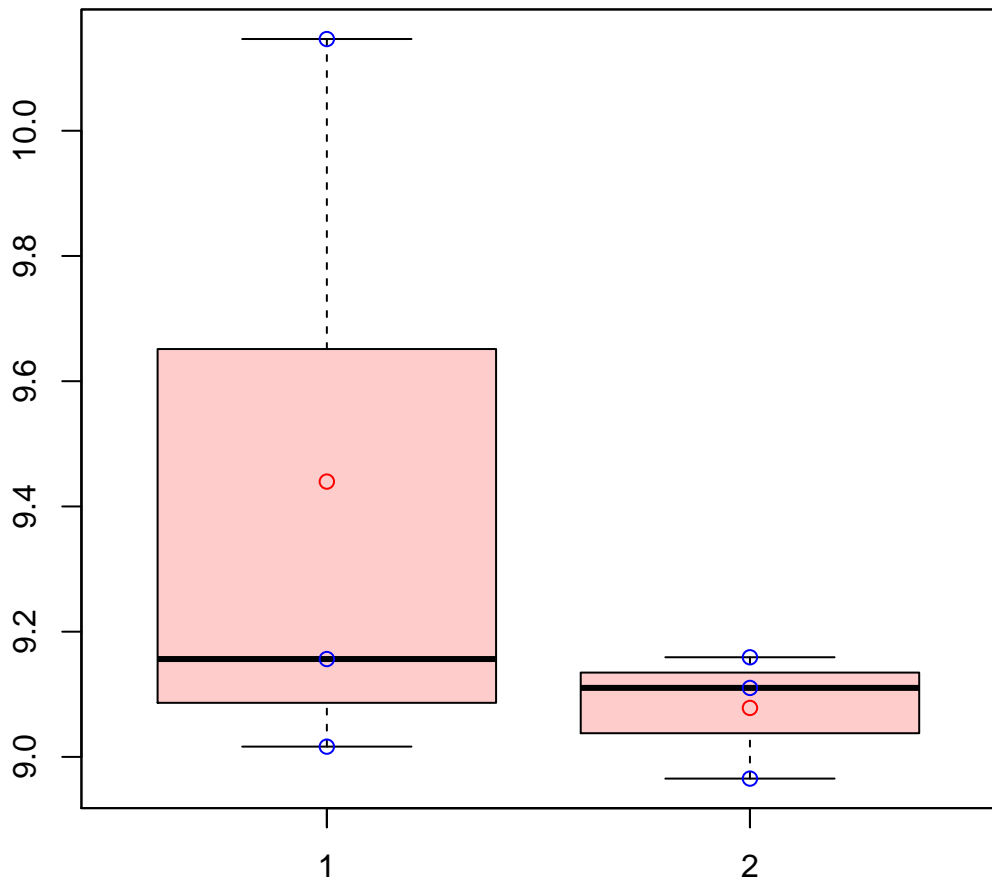

t-Test: p-value = 0.42

# CL15427Contig1|CL15427Contig1

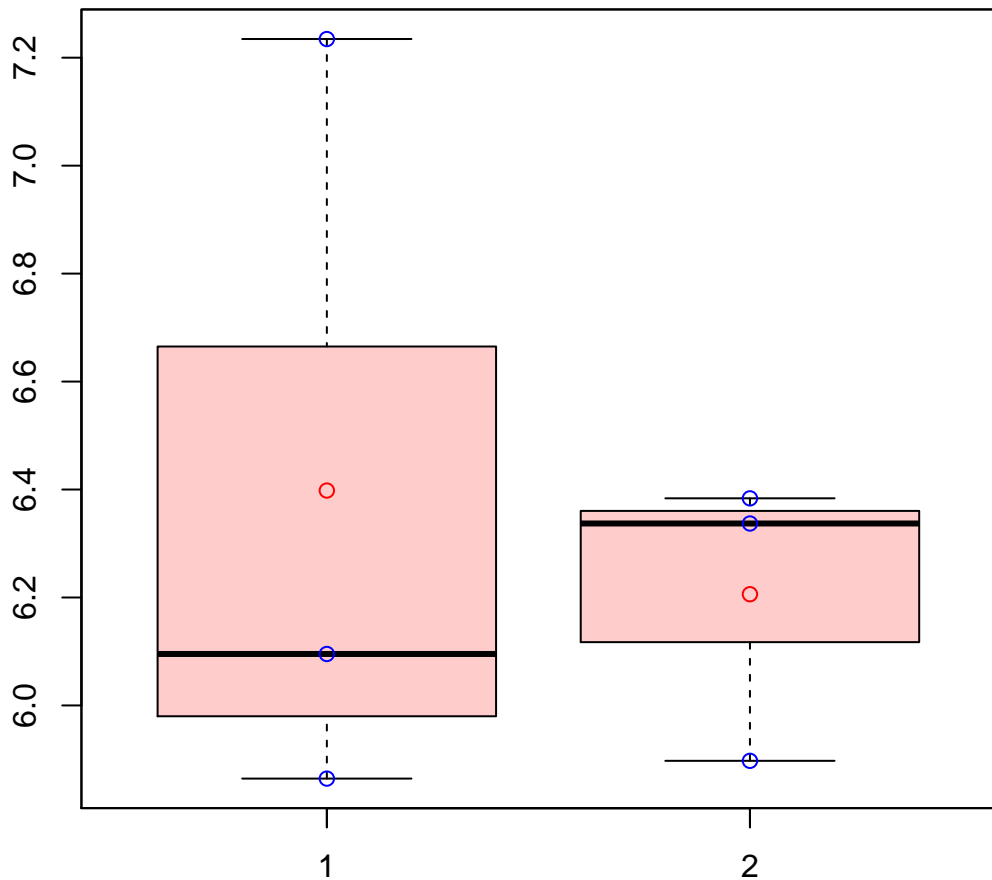

t-Test: p-value = 0.7

# CL15434Contig1|CL15434Contig1

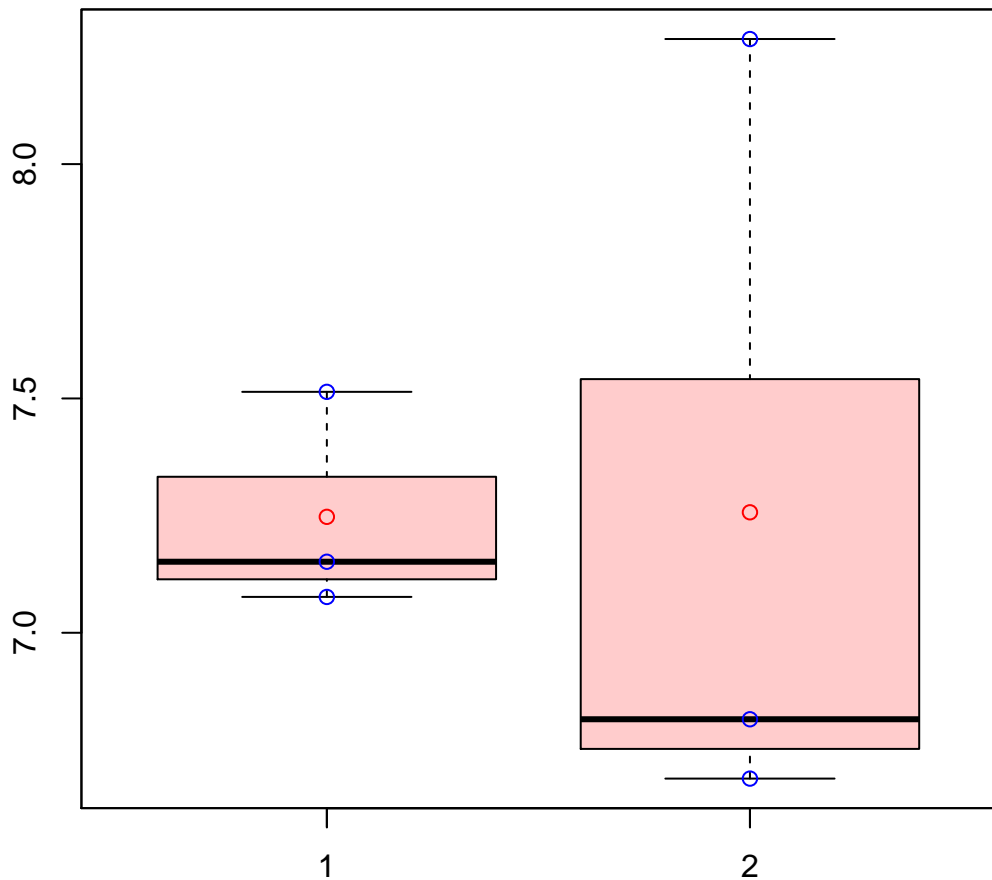

t-Test: p-value = 0.99

# CL15444Contig1|CL15444Contig1

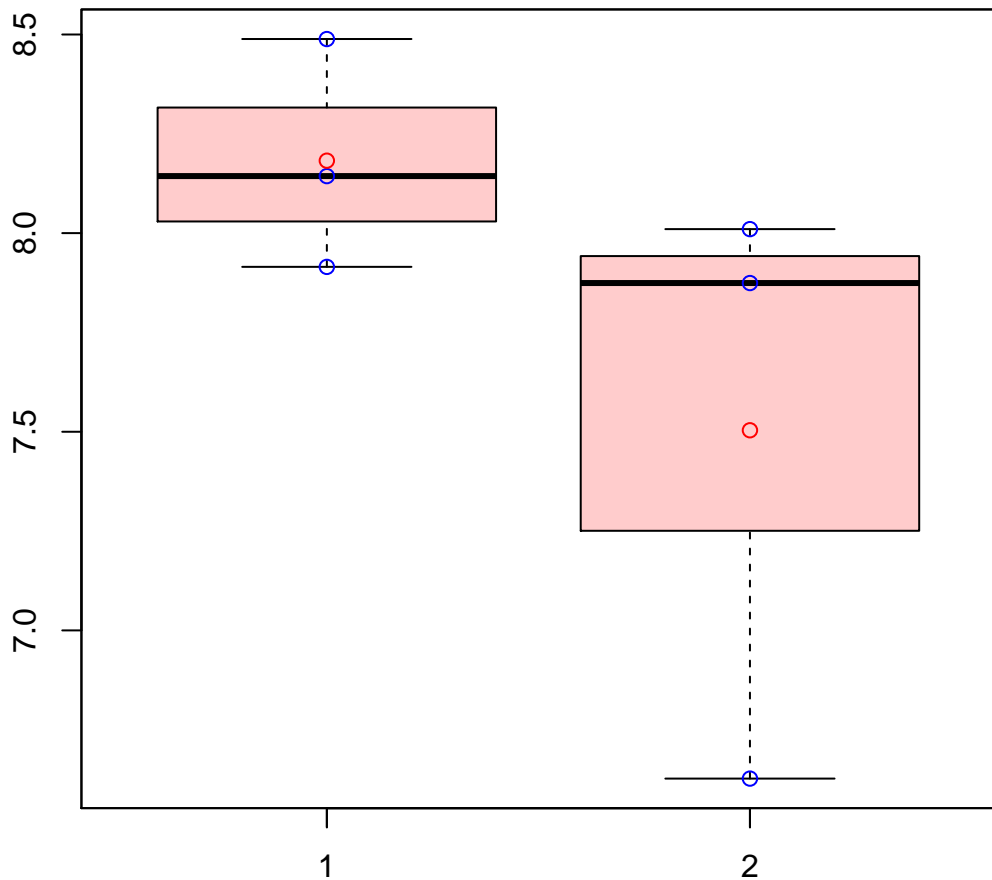

t-Test: p-value = 0.26

# CL1544Contig1|CL1544Contig1

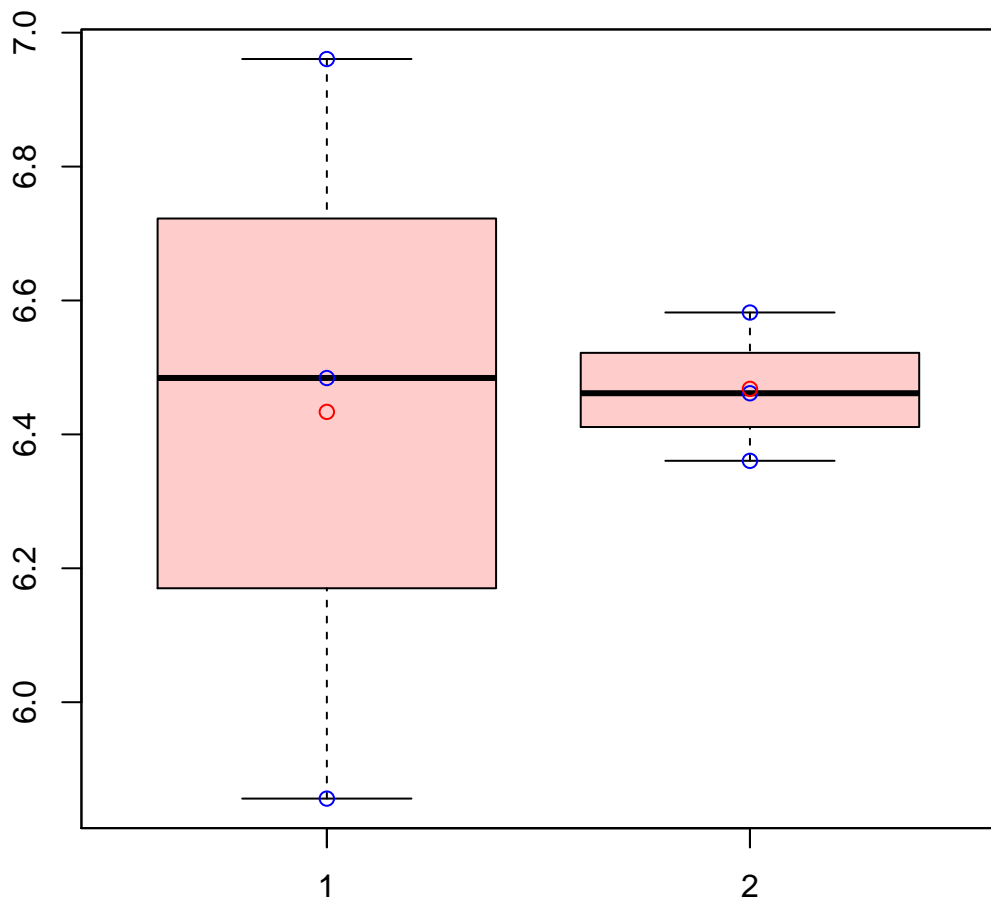

t-Test: p-value = 0.93

## CL1545Contig2|CL1545Contig2

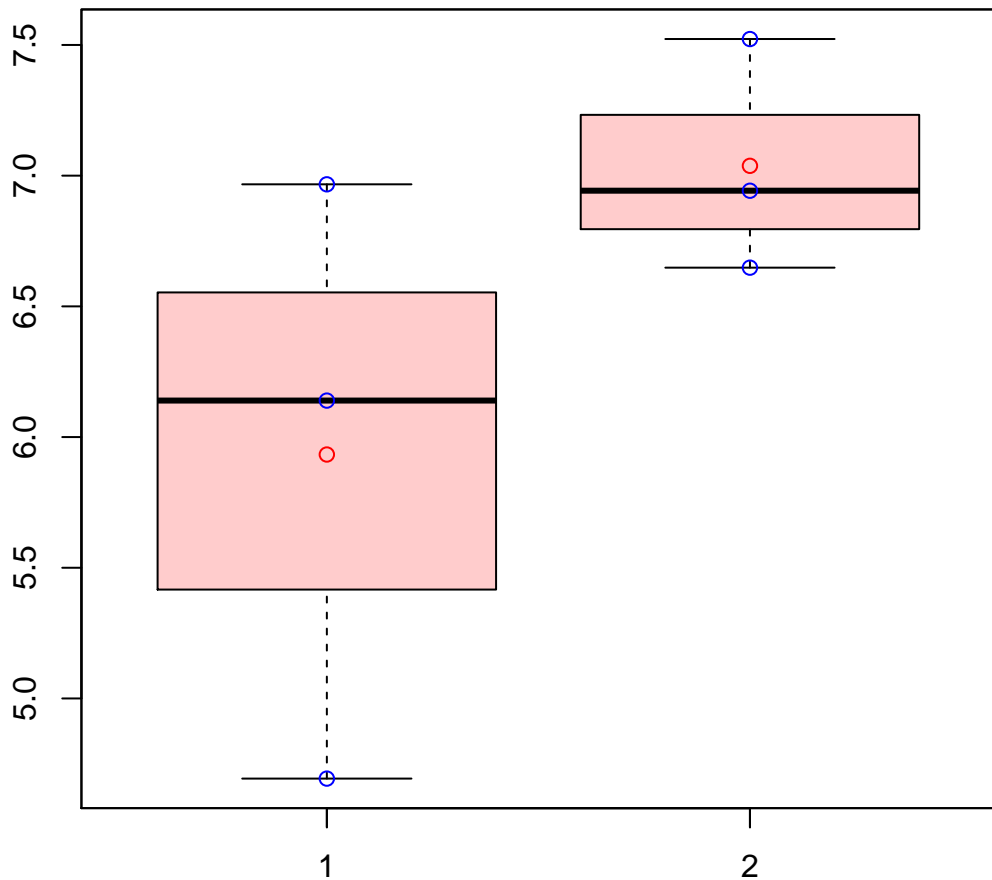

t-Test: p-value = 0.23



# CL1545Contig4|CL1545Contig4



t-Test: p-value = 0.23

# CL1547Contig5|CL1547Contig5

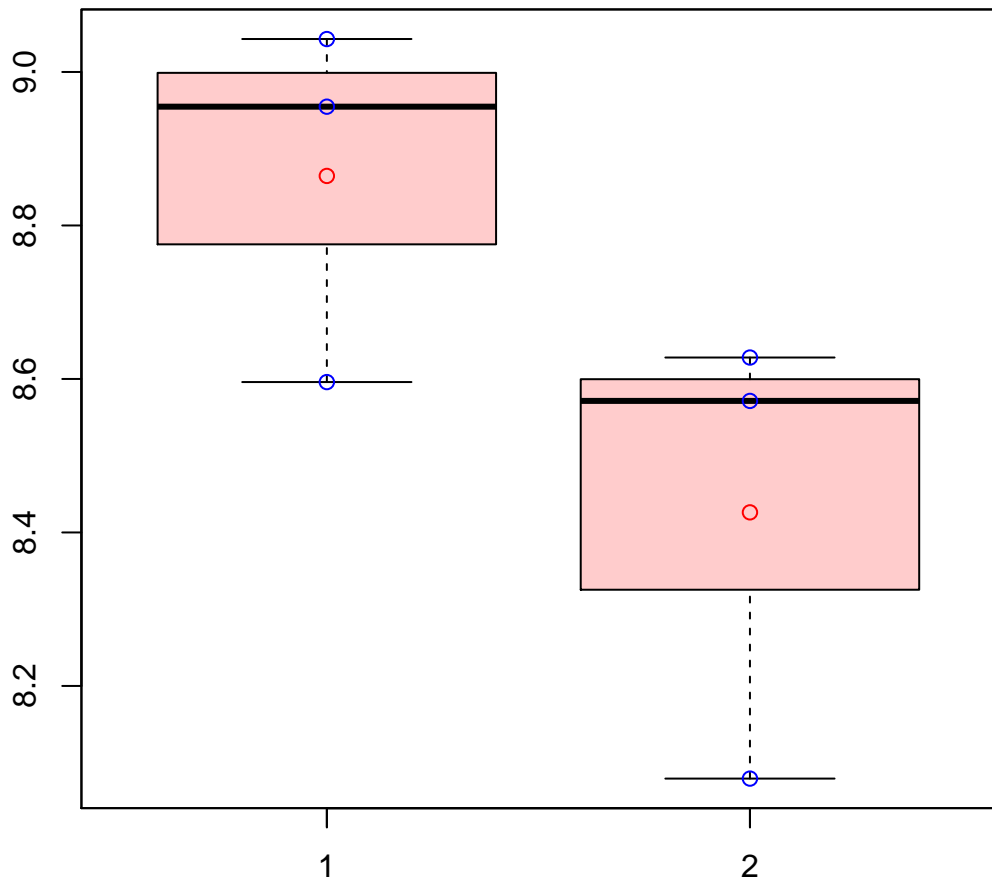

t-Test: p-value = 0.12

# CL154Contig18|CL154Contig18

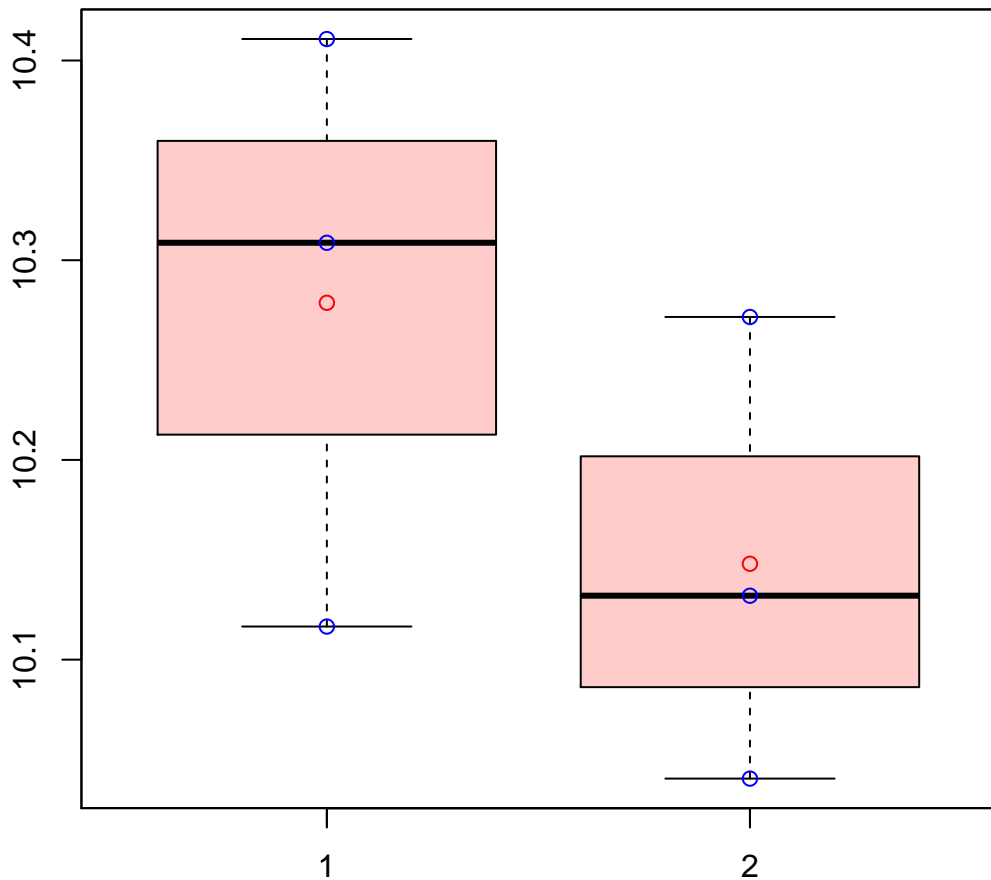

t-Test: p-value = 0.3

# CL154Contig2|CL154Contig2

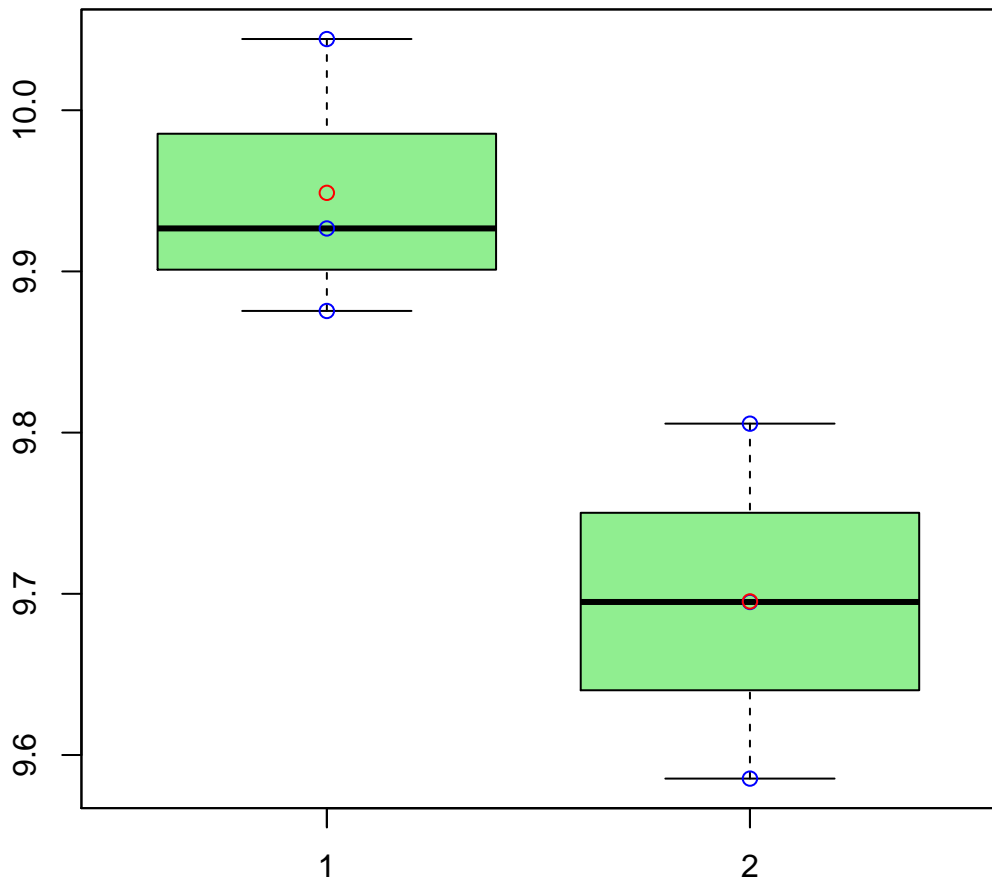

t-Test: p-value = 0.04

# CL1550Contig1|CL1550Contig1

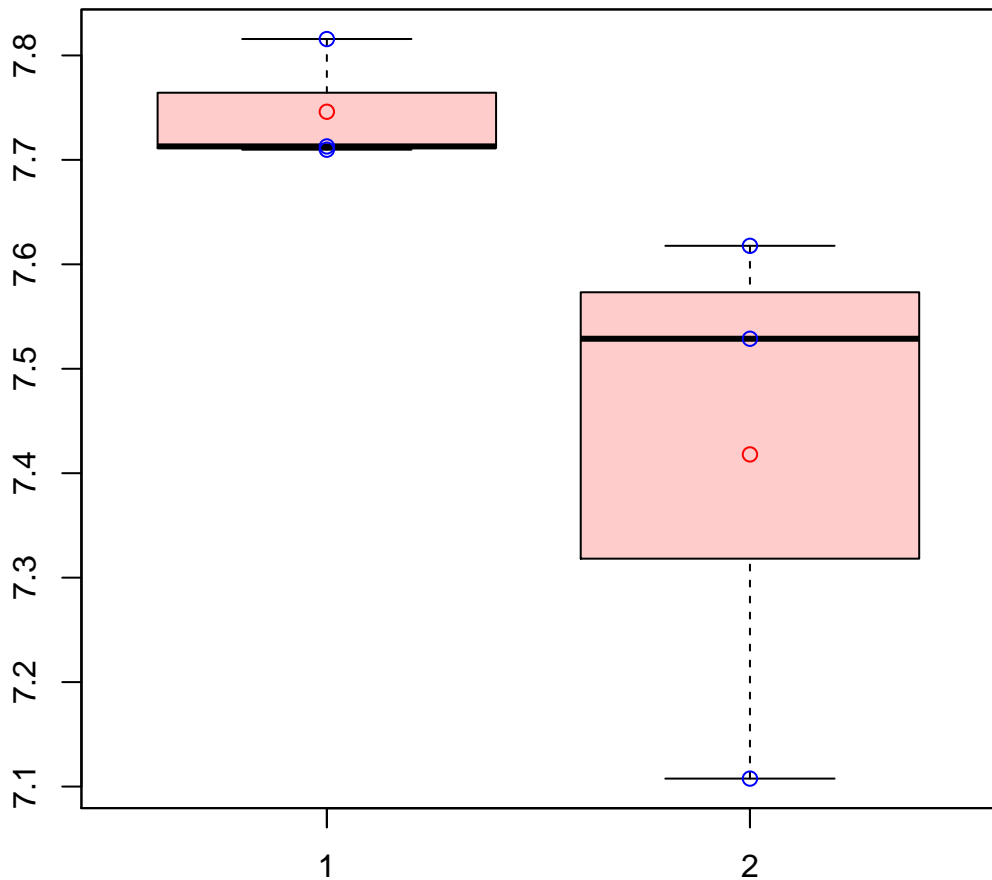

t-Test: p-value = 0.17

# CL15511Contig1|CL15511Contig1

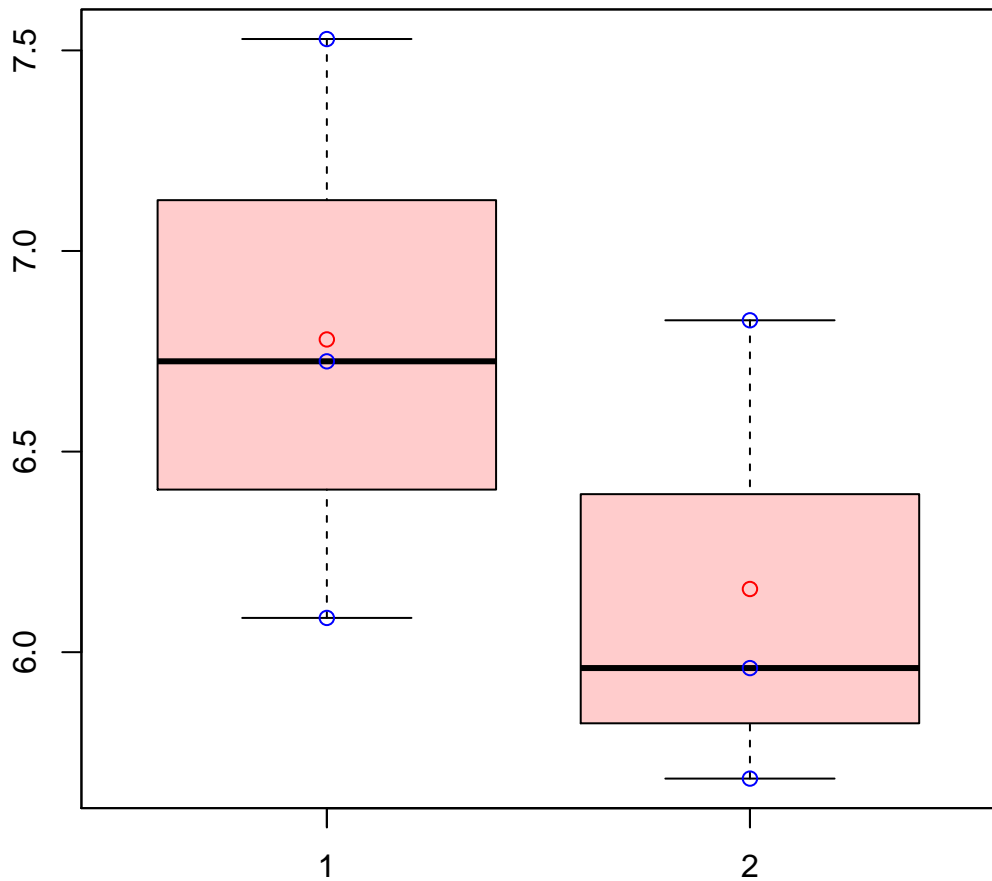

t-Test: p-value = 0.32

# CL1551Contig4|CL1551Contig4

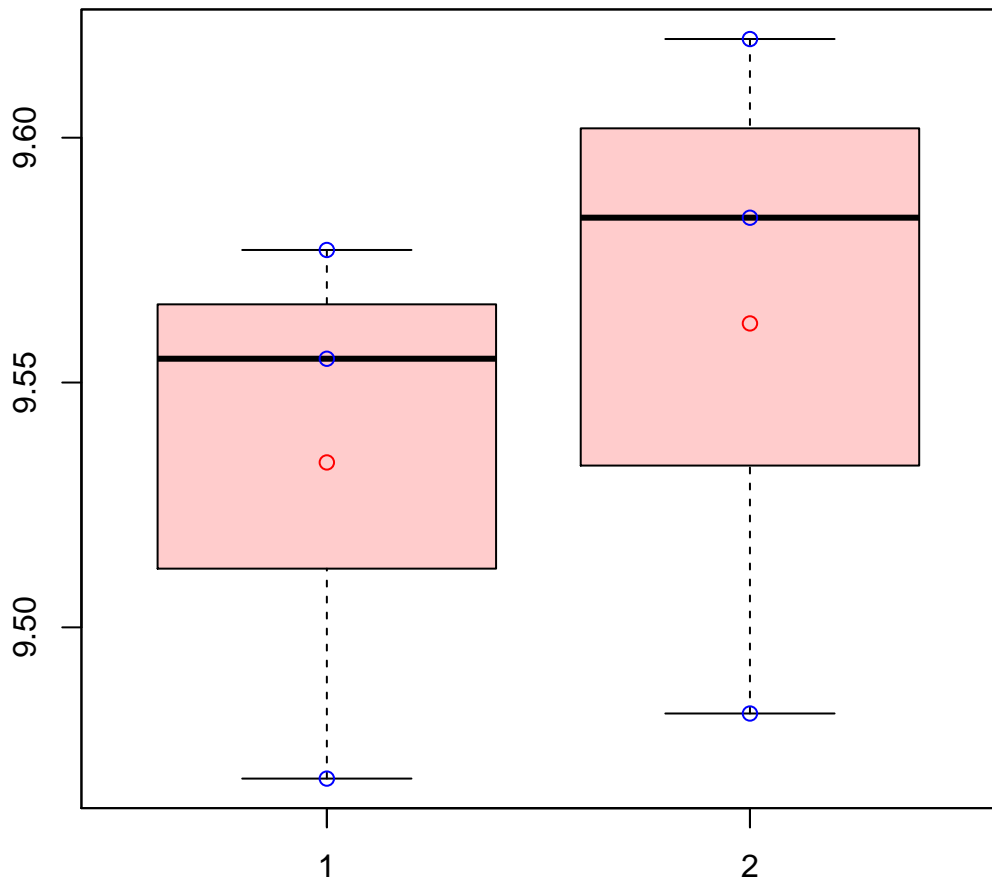

t-Test: p-value = 0.62

# CL1553Contig6|CL1553Contig6

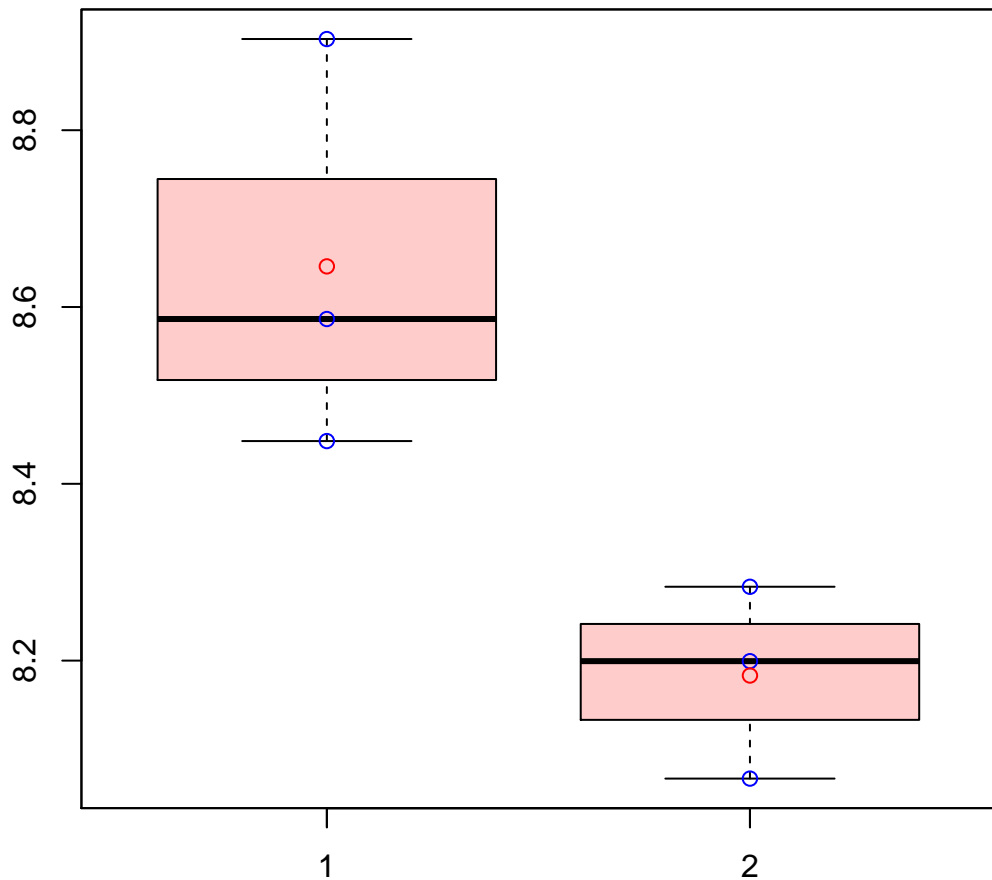

t-Test: p-value = 0.06



# CL15545Contig1|CL15545Contig1

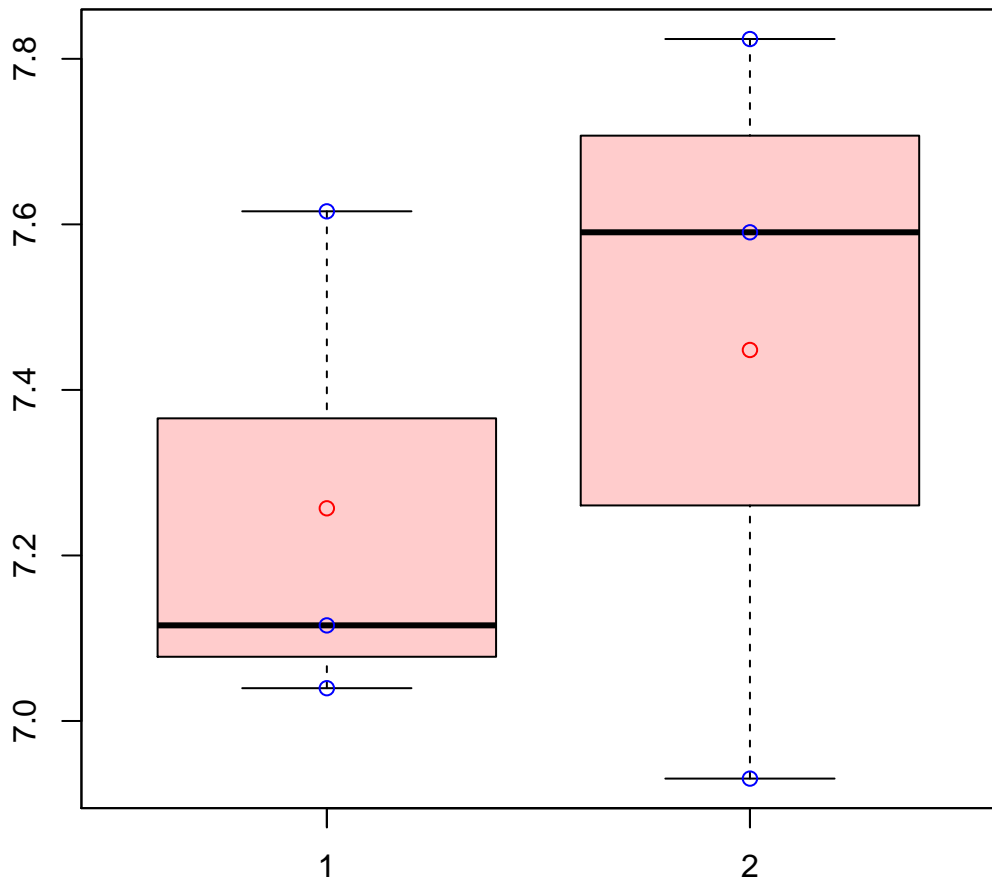

t-Test: p-value = 0.59

# CL15554Contig1|CL15554Contig1

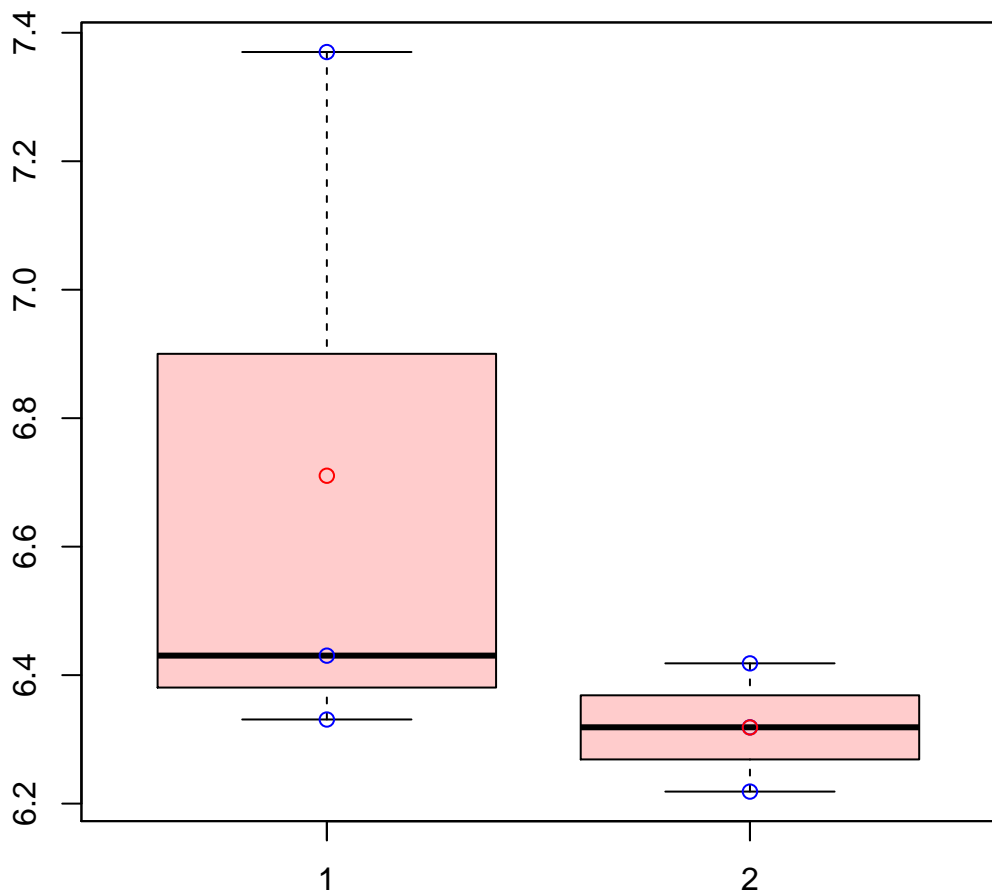

t-Test: p-value = 0.36

# CL15557Contig1|CL15557Contig1

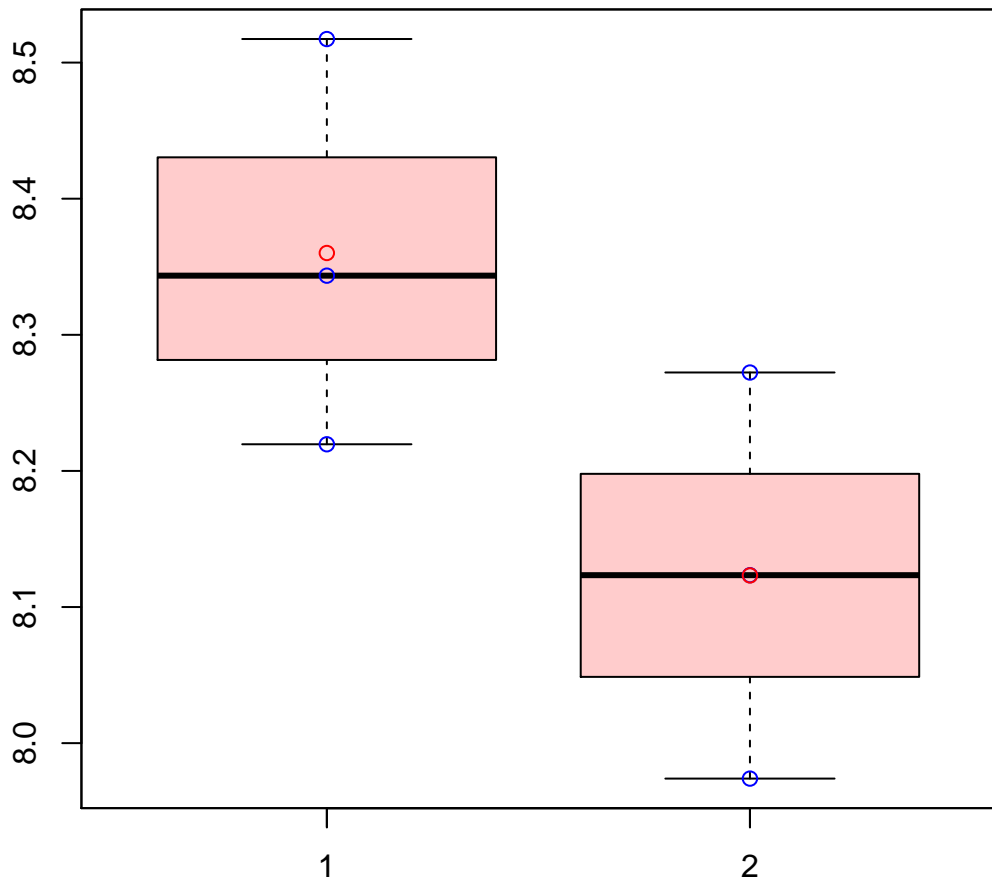

t-Test: p-value = 0.12

# CL155Contig29|CL155Contig29

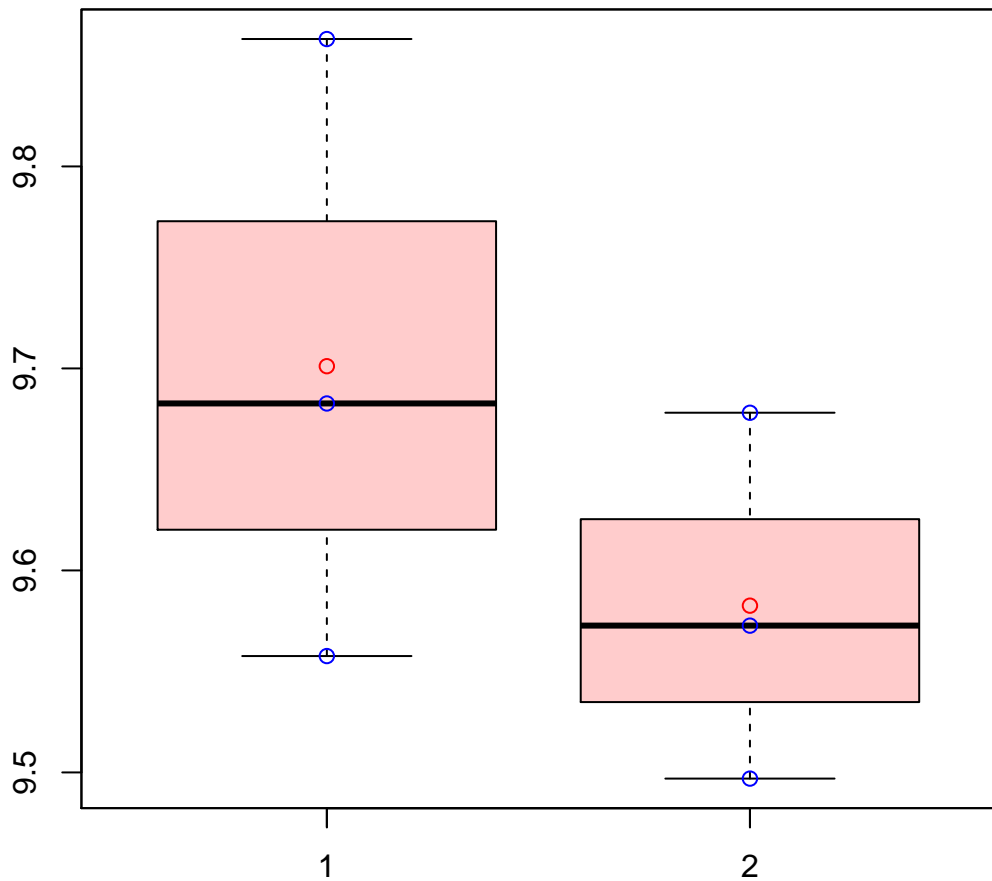

t-Test: p-value = 0.33

# CL155Contig6|CL155Contig6

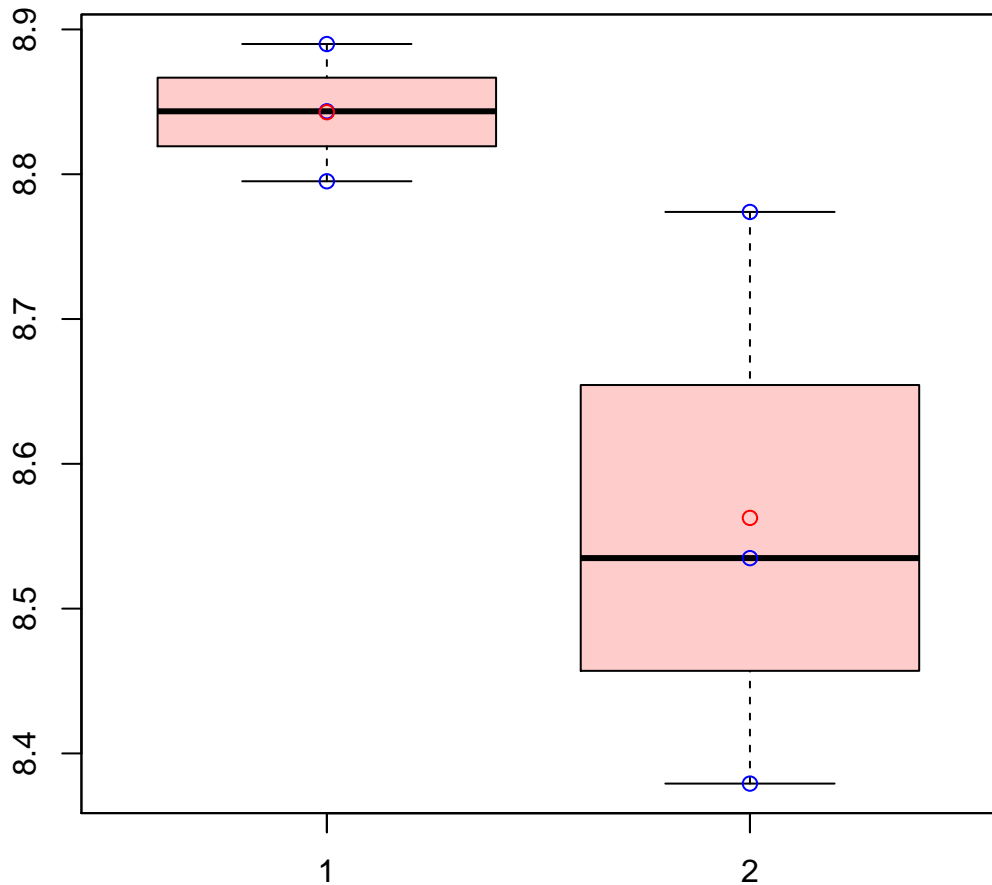

t-Test: p-value = 0.13

# CL155Contig7|CL155Contig7

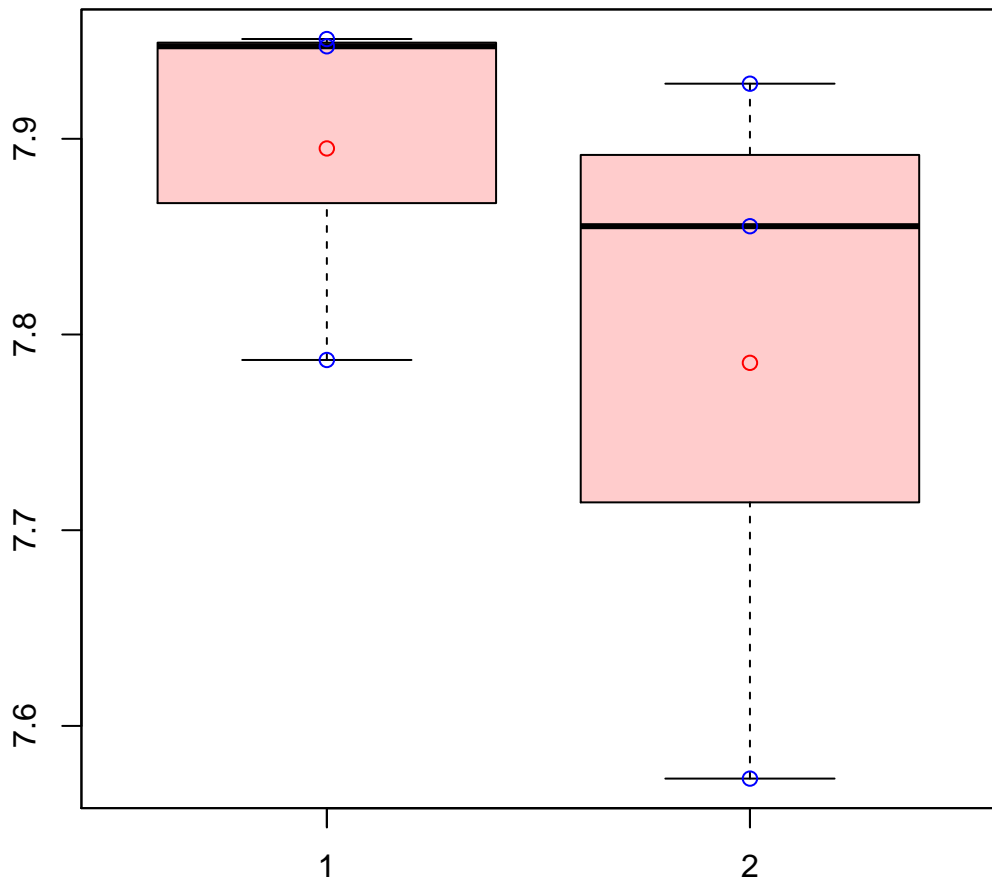

t-Test: p-value = 0.43

# CL1563Contig3|CL1563Contig3

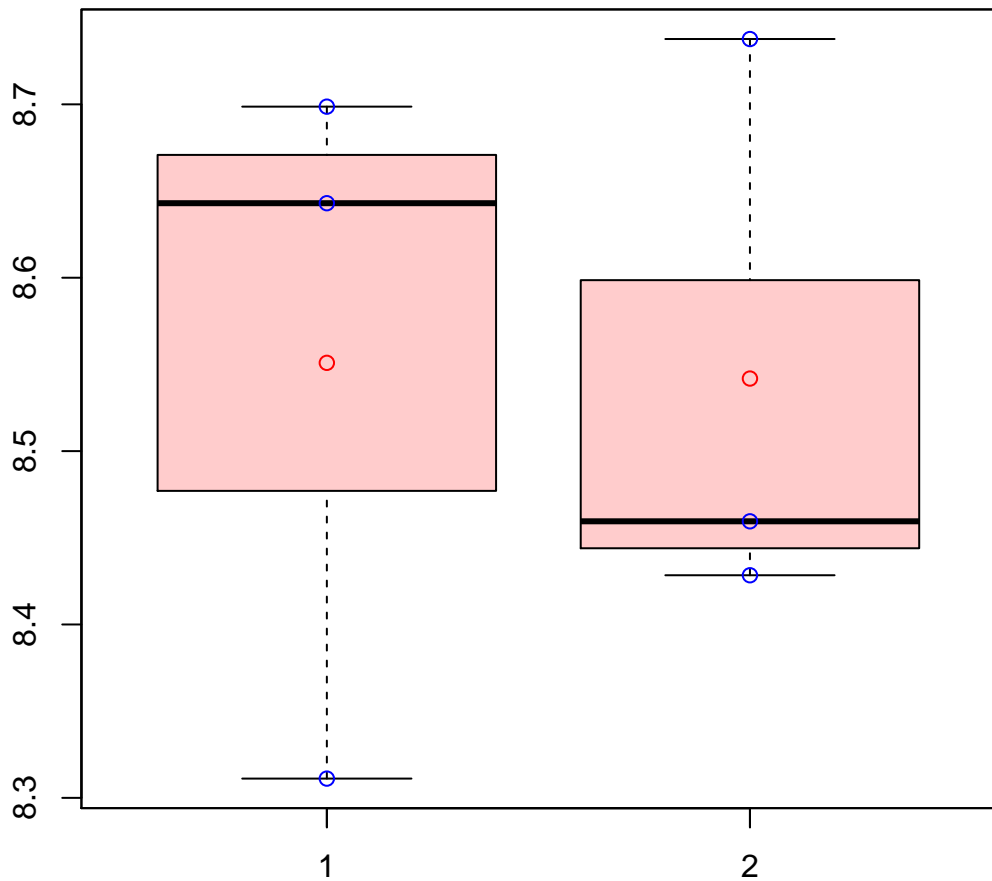

t-Test: p-value = 0.96

# CL1564Contig7|CL1564Contig7

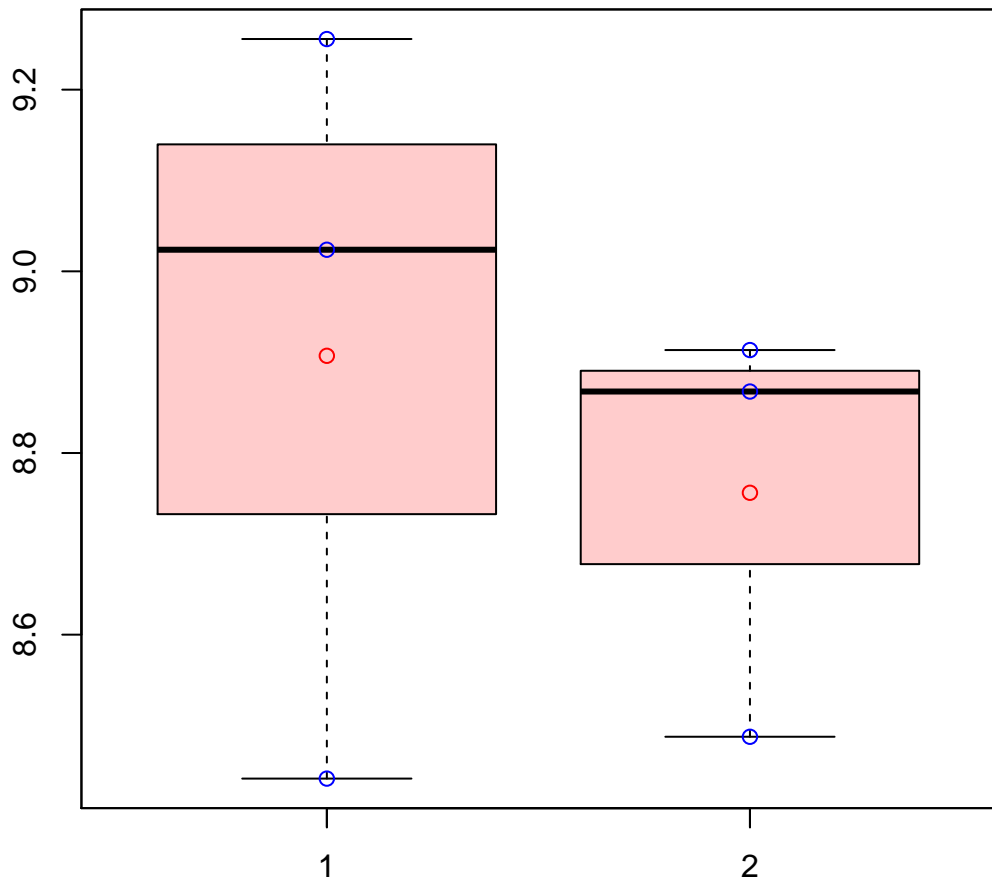

t-Test: p-value = 0.62



# CL1567Contig1|CL1567Contig1

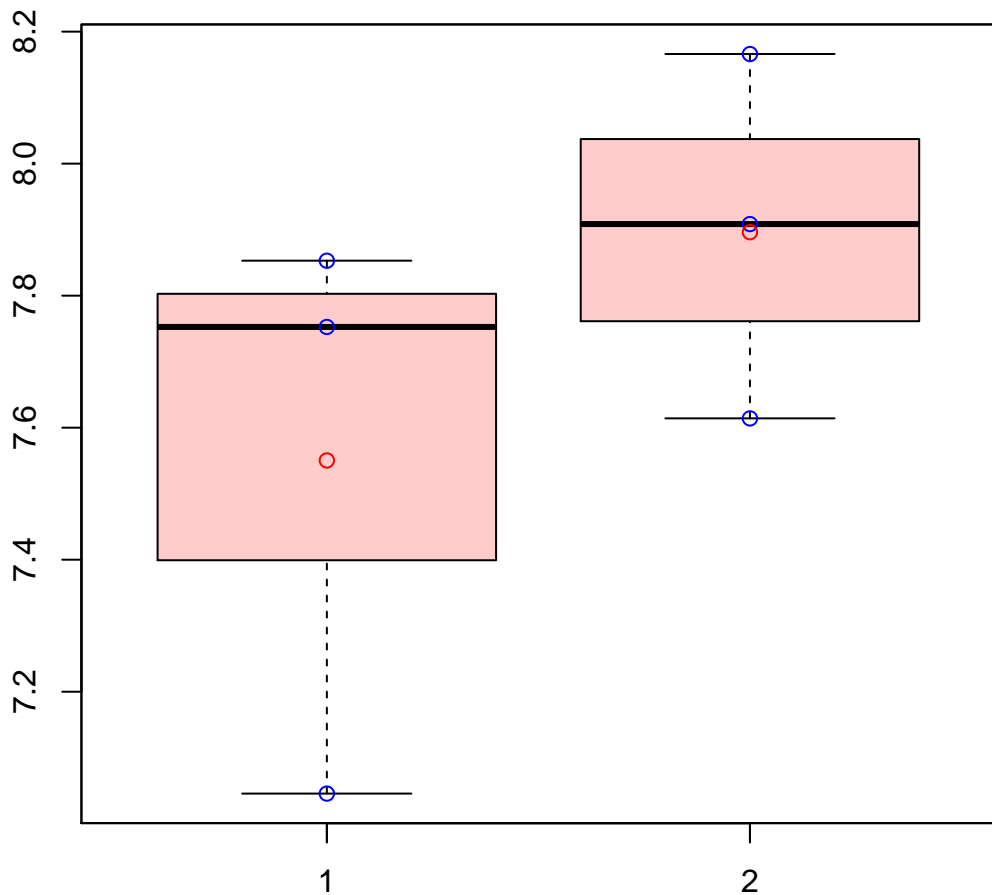

t-Test: p-value = 0.32

# CL1567Contig2|CL1567Contig2

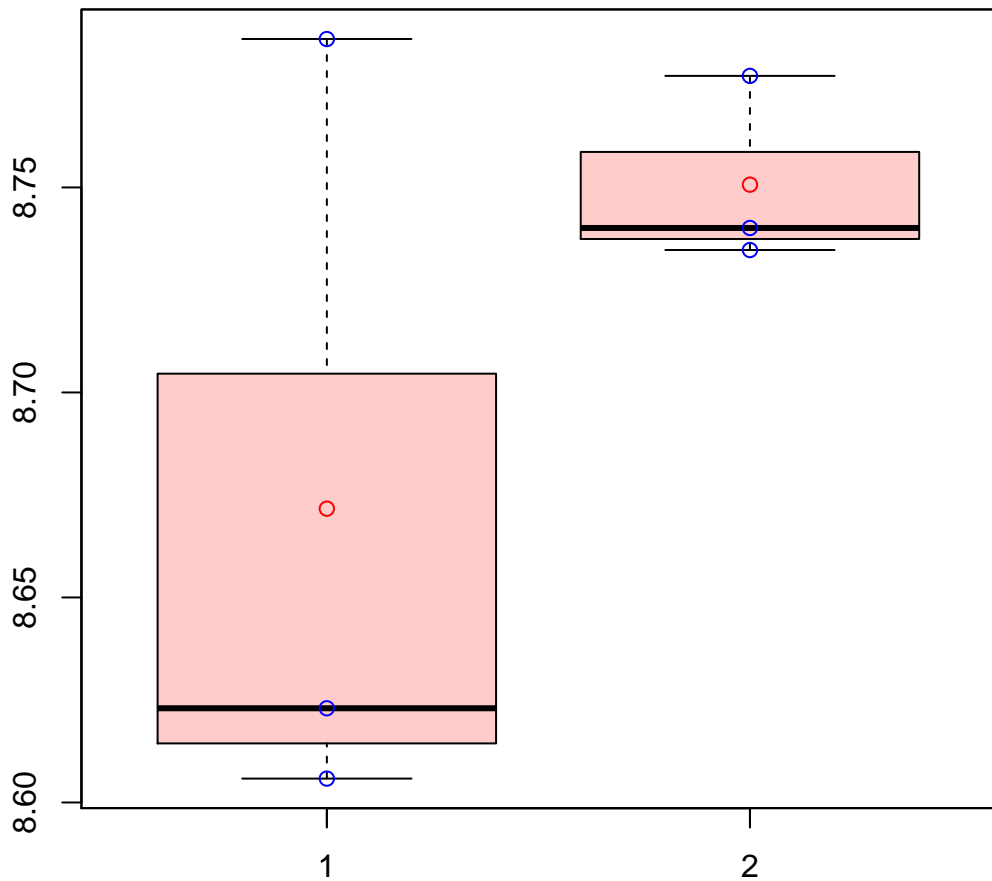

t-Test: p-value = 0.3

# CL1568Contig11|CL1568Contig11

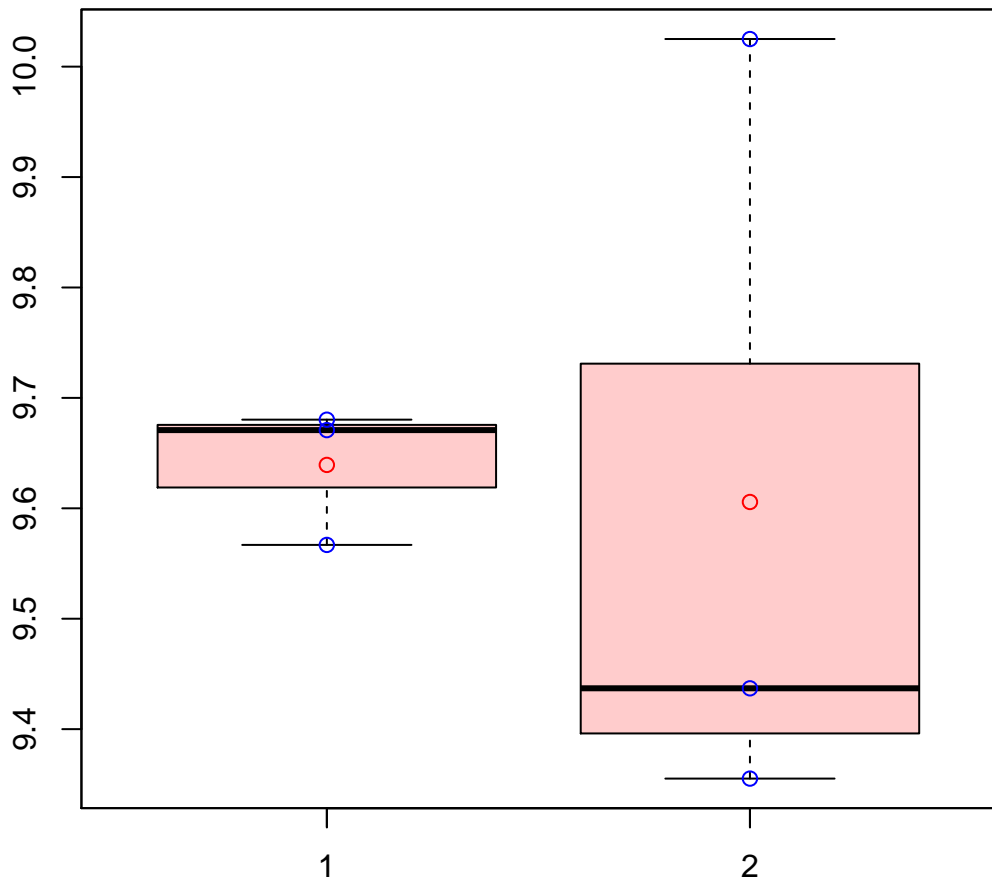

t-Test: p-value = 0.89

# CL1568Contig1|CL1568Contig1



t-Test: p-value = 0.89

# CL1569Contig1|CL1569Contig1

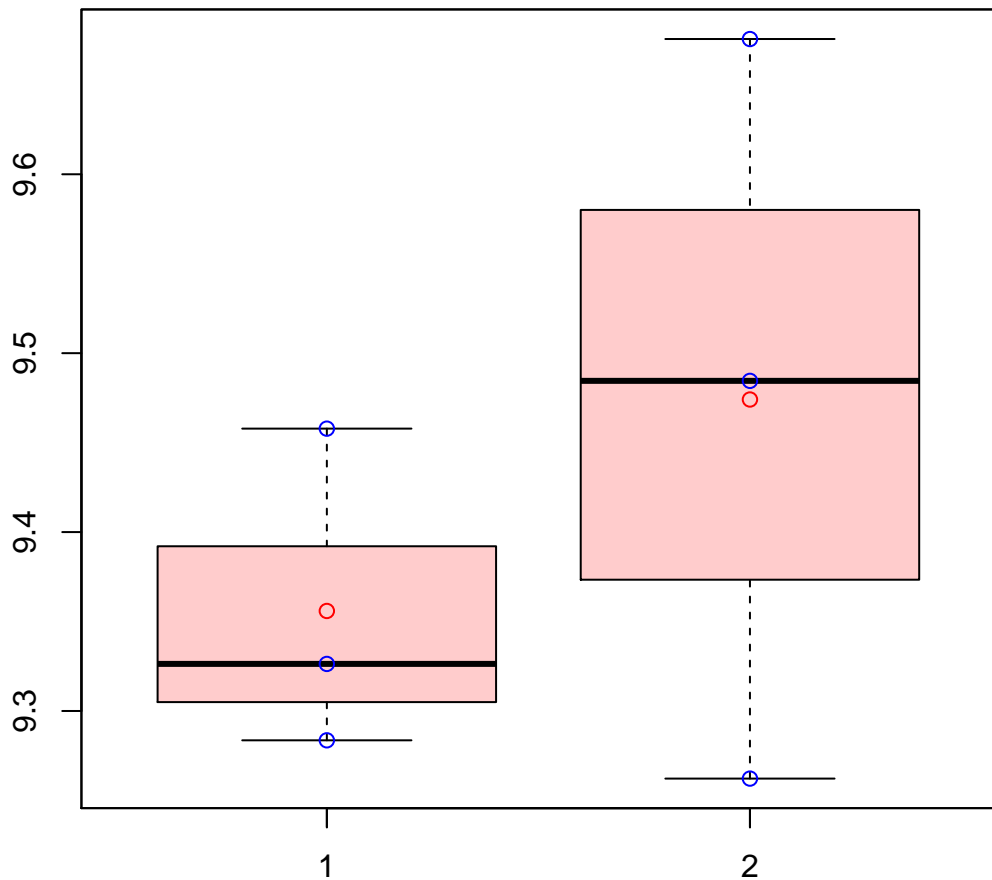

t-Test: p-value = 0.44

# CL1569Contig2|CL1569Contig2

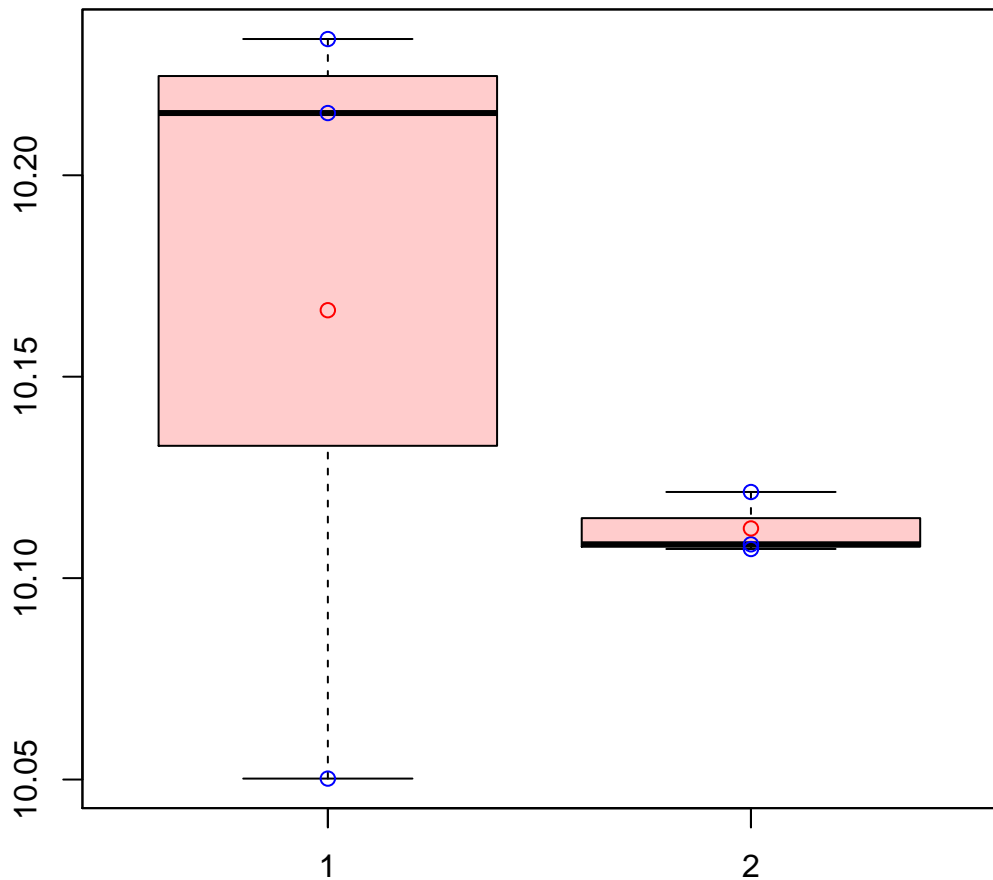

t-Test: p-value = 0.45

# CL1569Contig3|CL1569Contig3

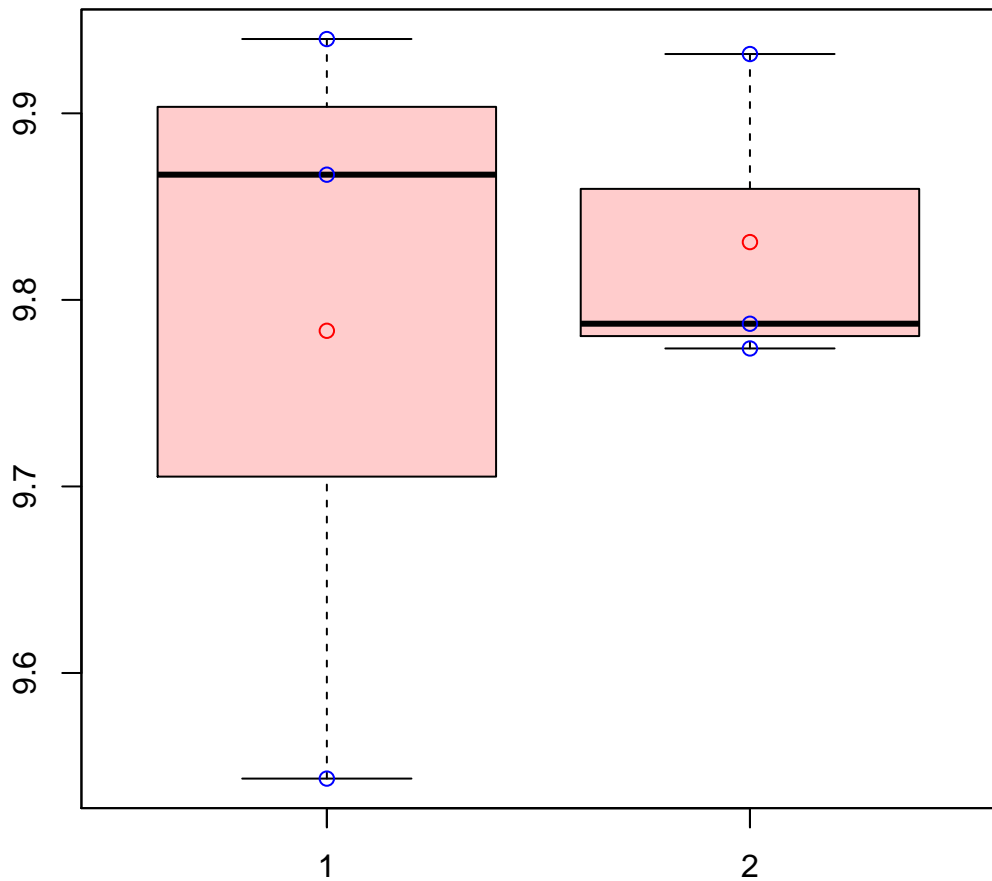

t-Test: p-value = 0.75

# CL156Contig8|CL156Contig8

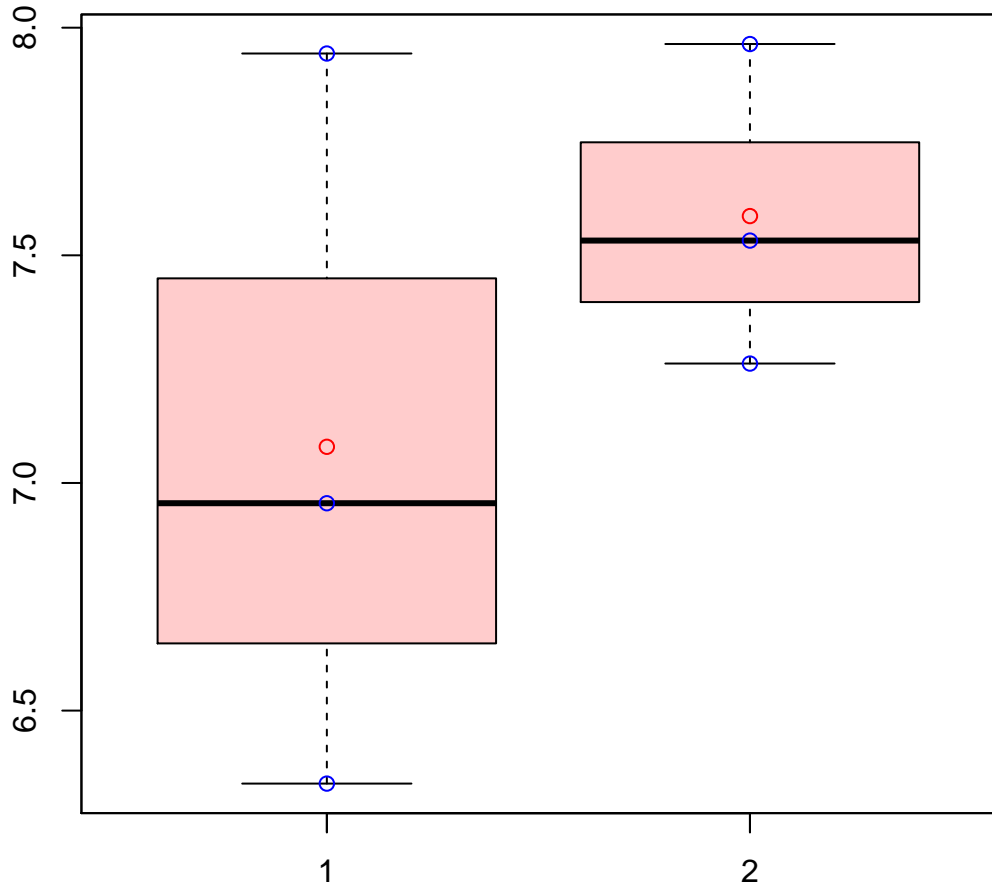

t-Test: p-value = 0.4



# CL1570Contig1|CL1570Contig1

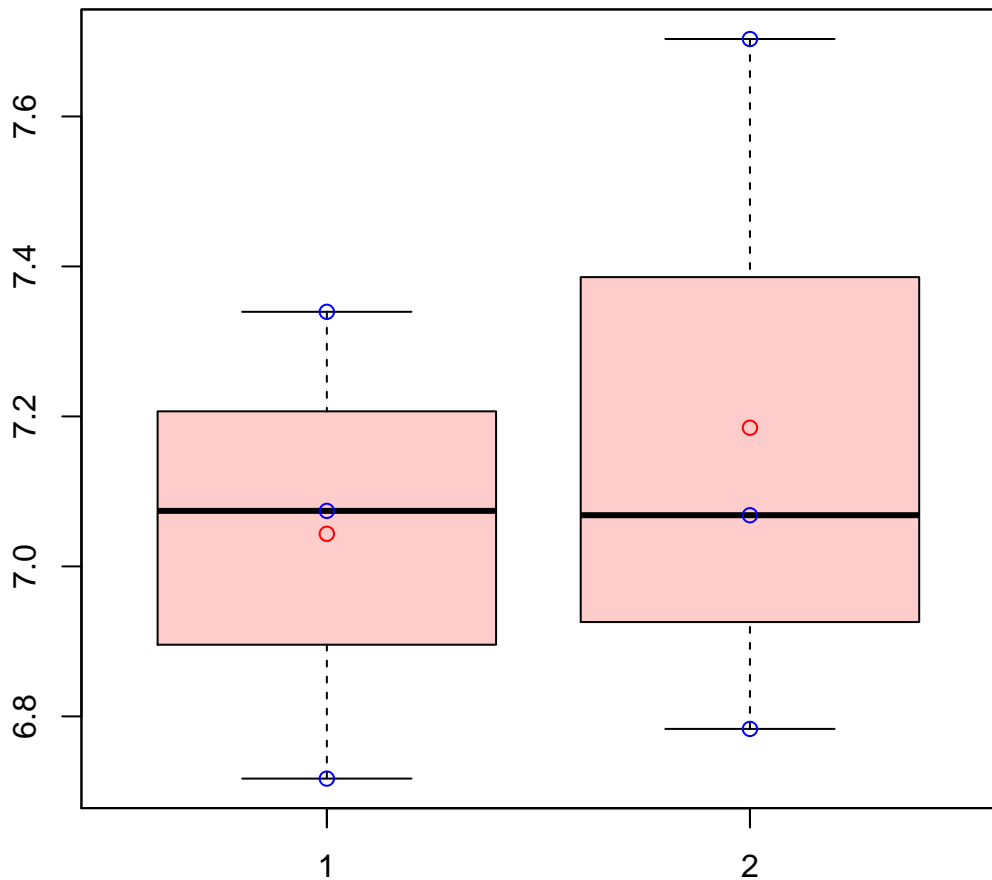

t-Test: p-value = 0.69

# CL1570Contig4|CL1570Contig4

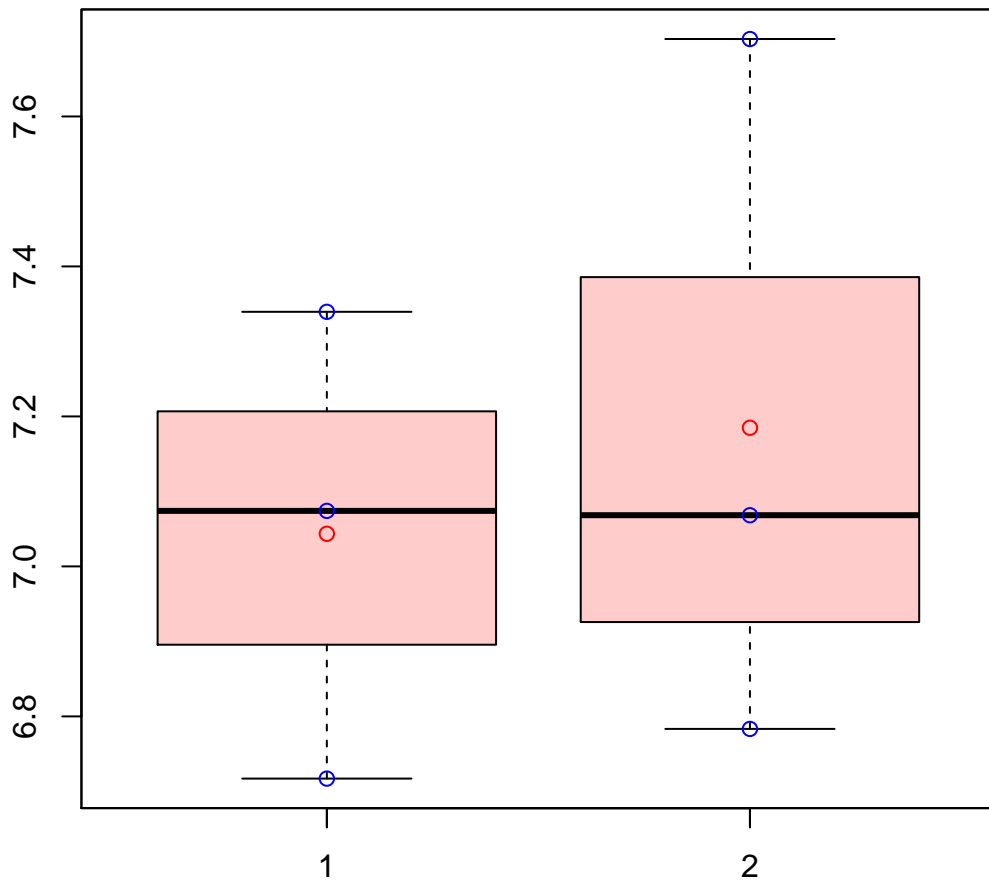

t-Test: p-value = 0.69

# CL1571Contig5|CL1571Contig5

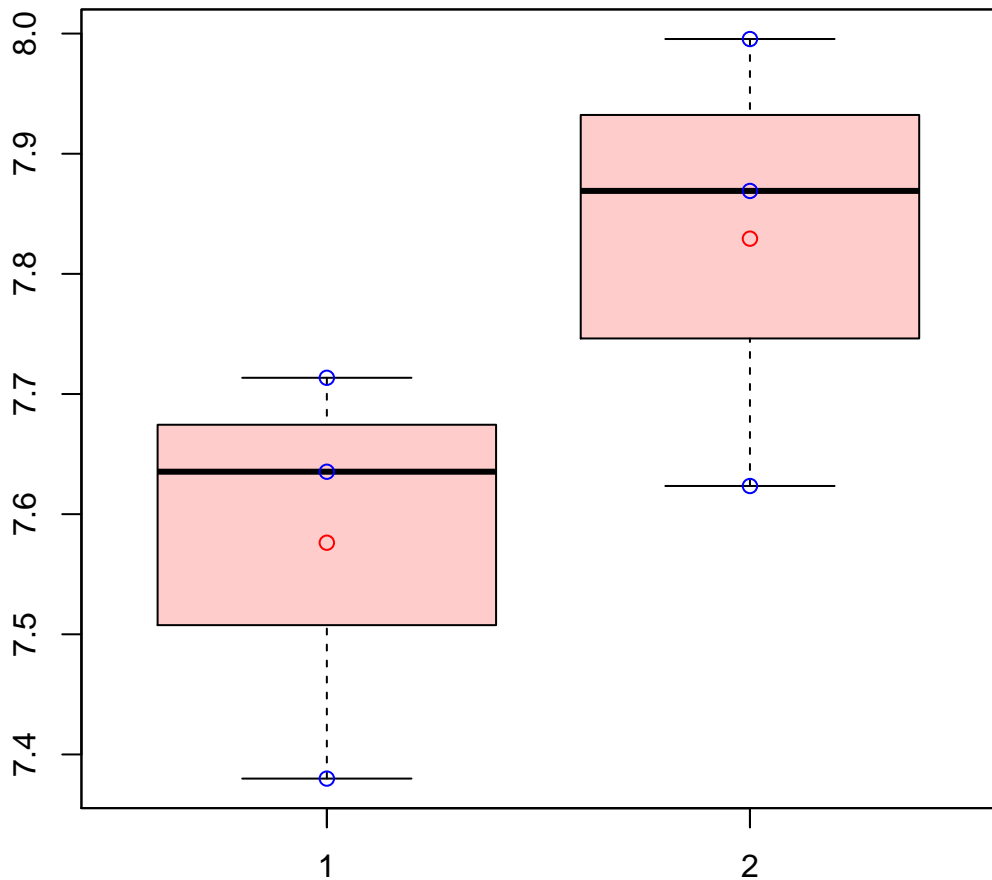

t-Test: p-value = 0.16

# CL15738Contig1|CL15738Contig1

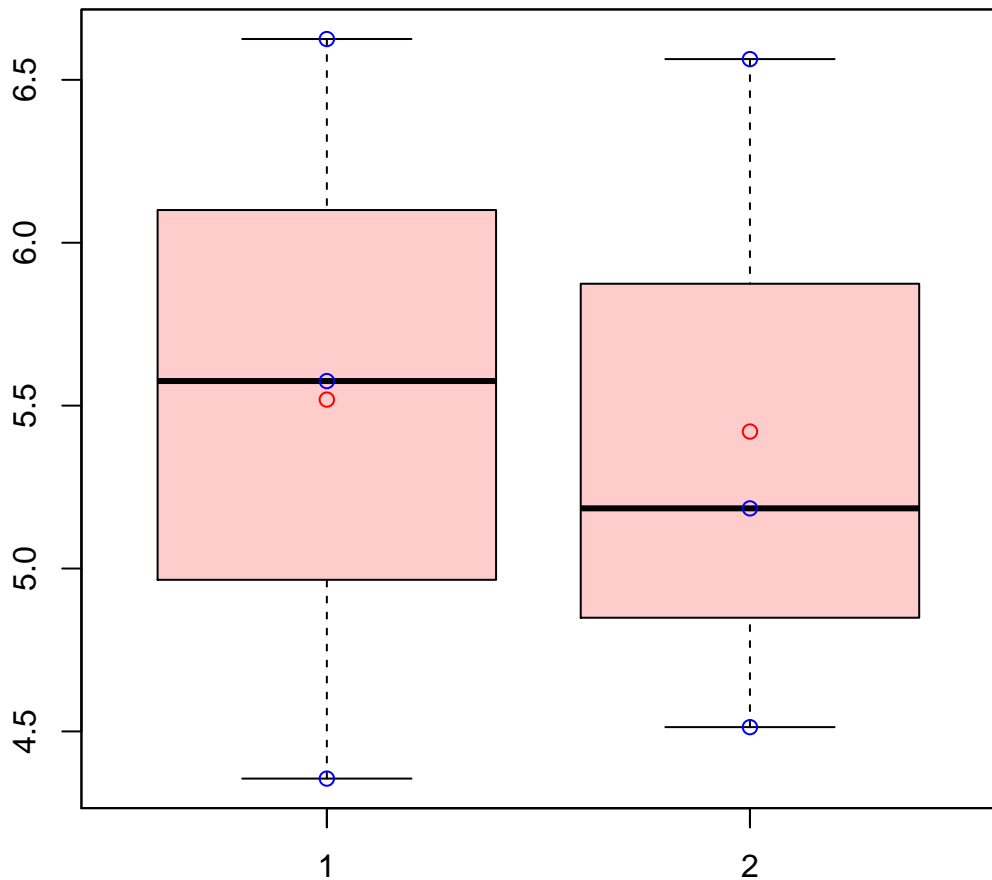

t-Test: p-value = 0.92

# CL1573Contig3|CL1573Contig3

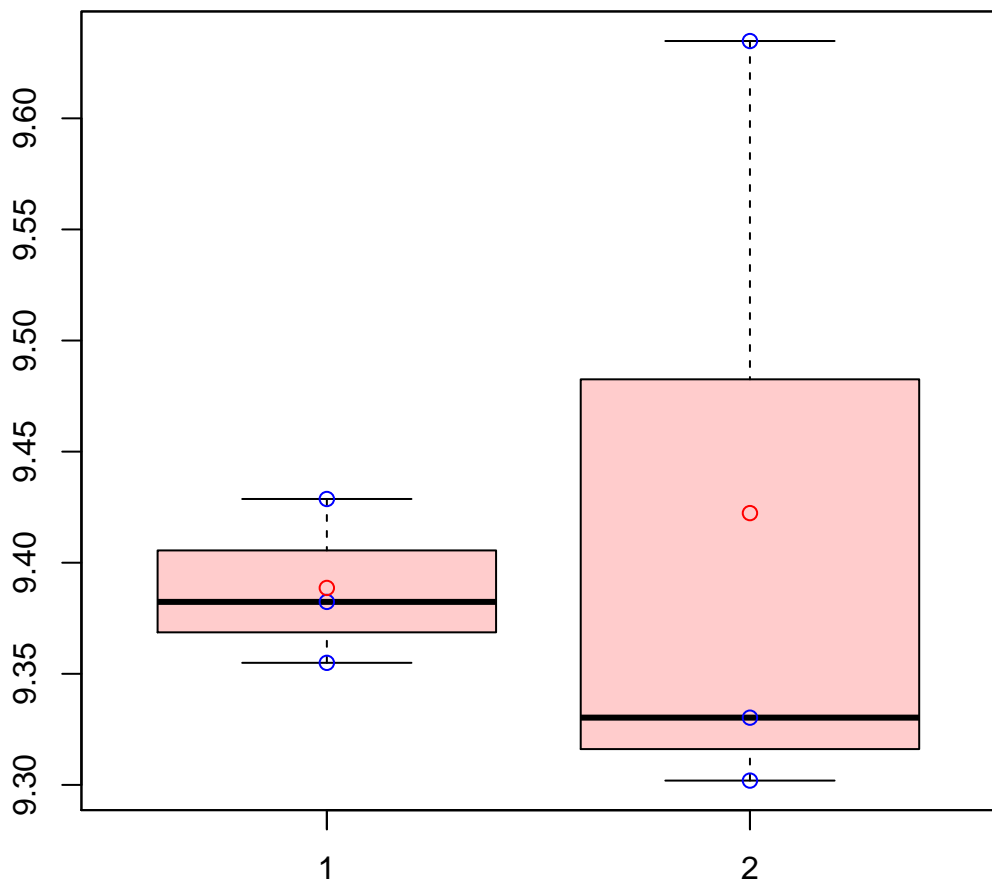

t-Test: p-value = 0.78

# CL15782Contig1|CL15782Contig1

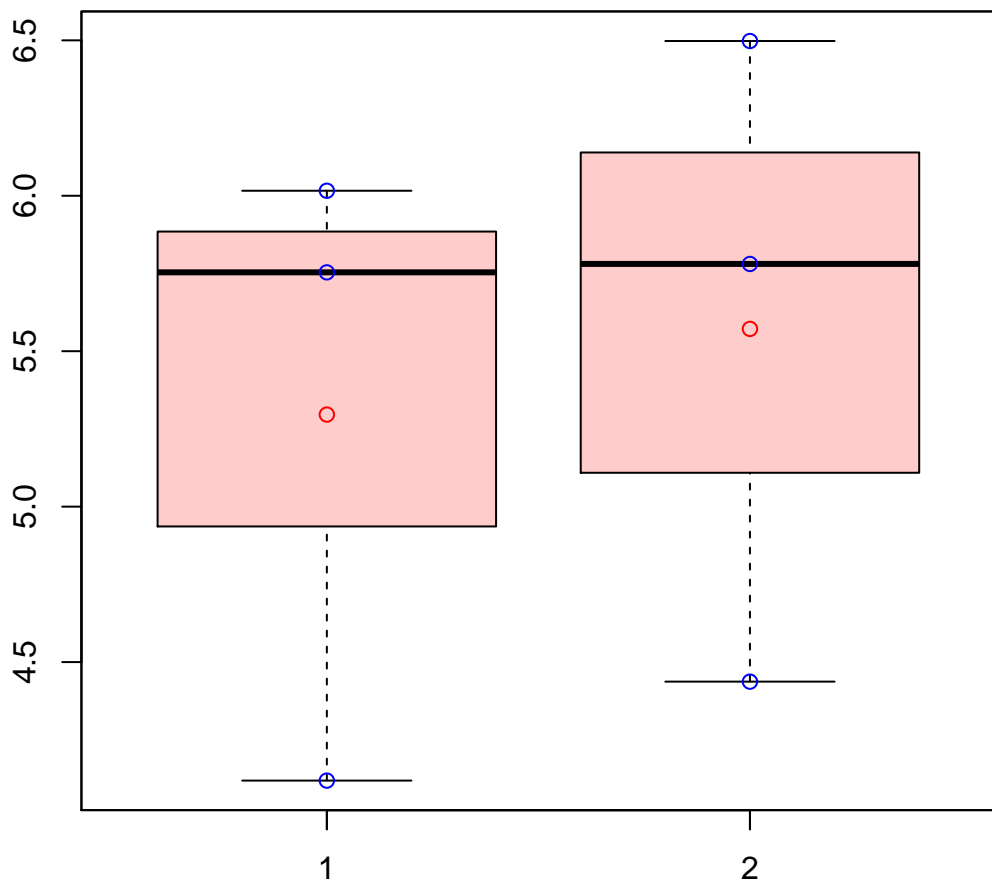

t-Test: p-value = 0.76

# CL1578Contig2|CL1578Contig2

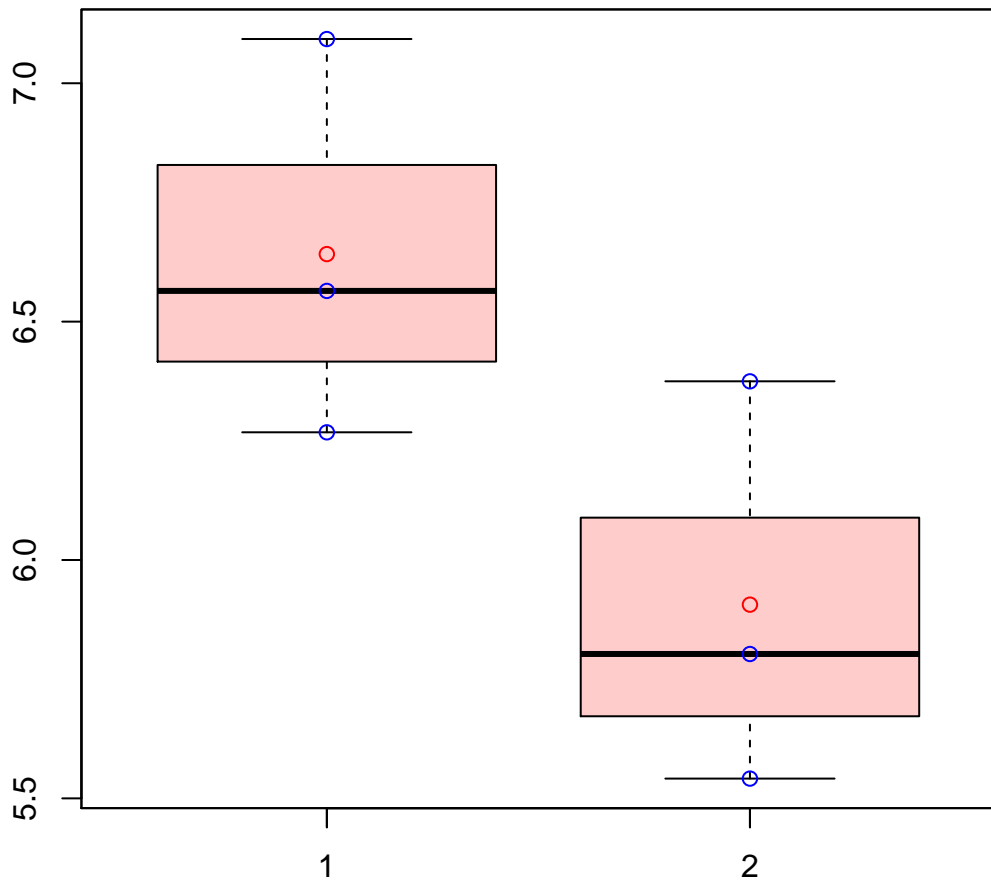

t-Test: p-value = 0.1

# CL157Contig4|CL157Contig4

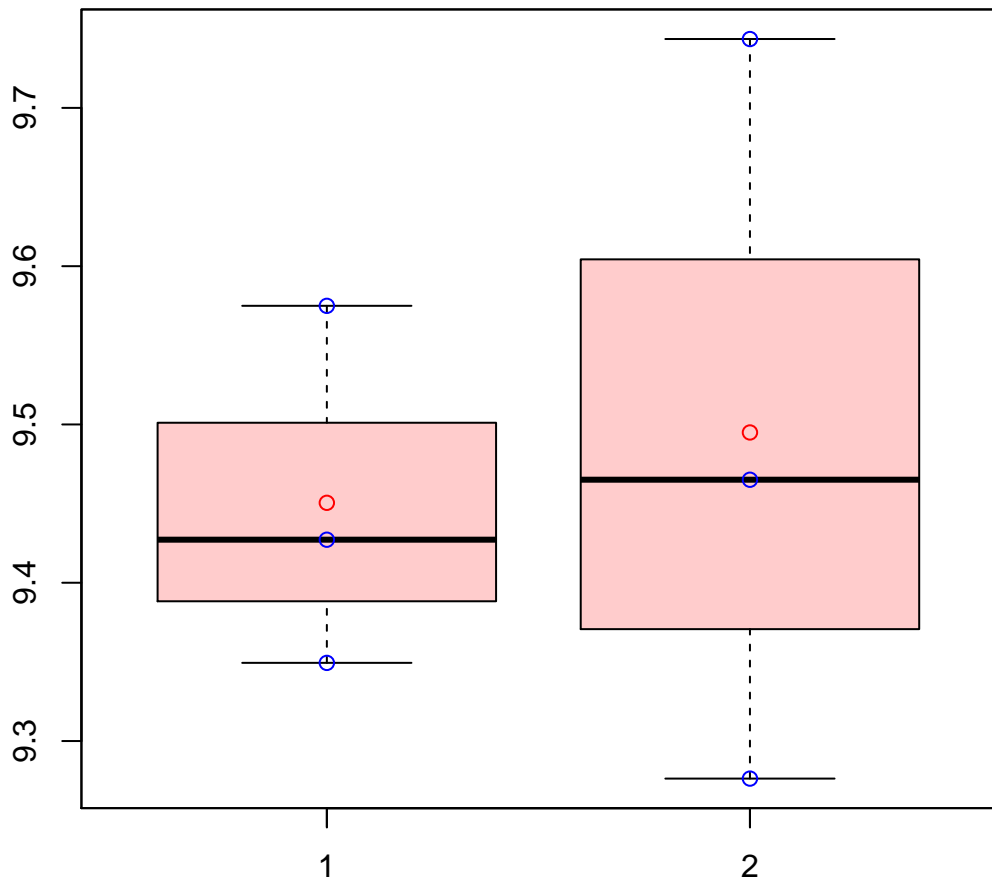

t-Test: p-value = 0.79



# CL1580Contig2|CL1580Contig2

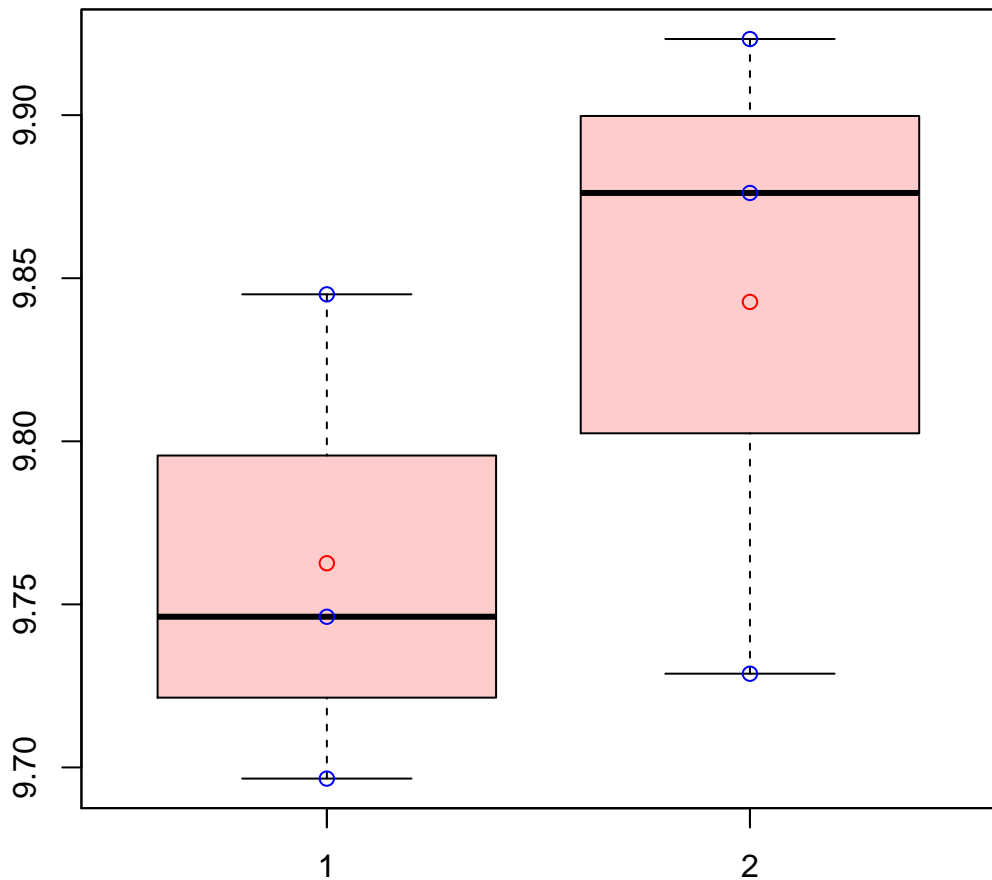

t-Test: p-value = 0.34

# CL1584Contig1|CL1584Contig1

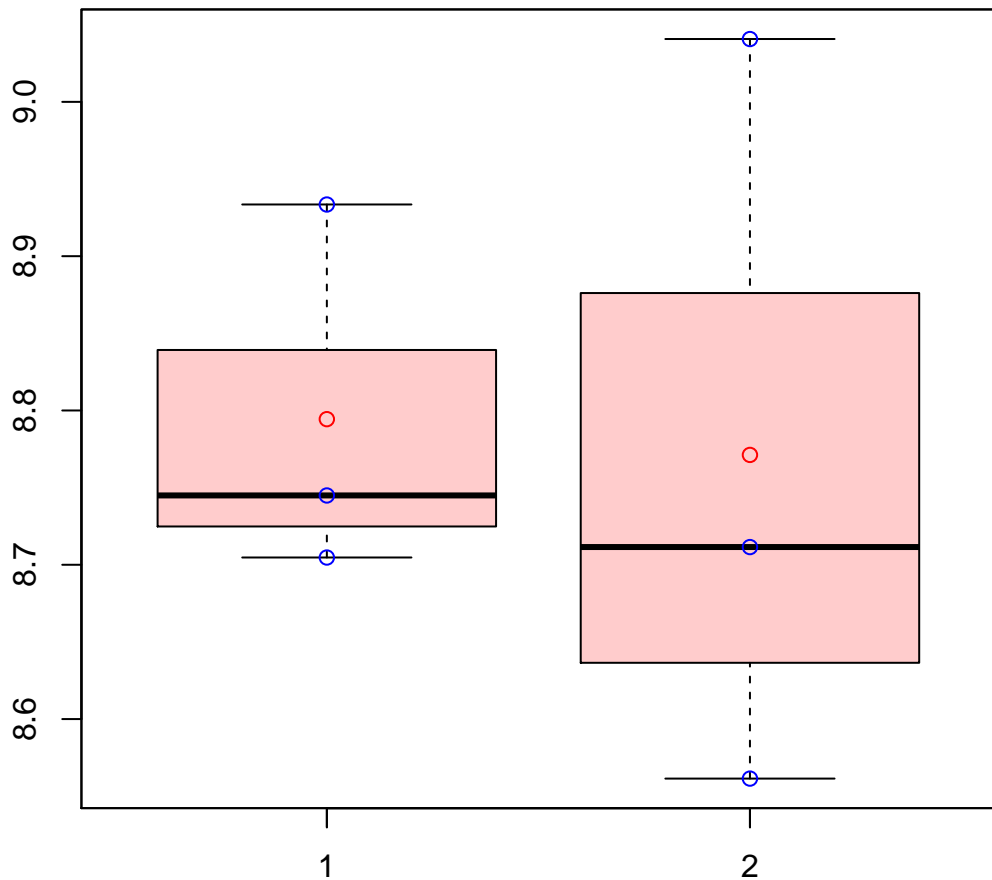

t-Test: p-value = 0.89

# CL1584Contig5|CL1584Contig5

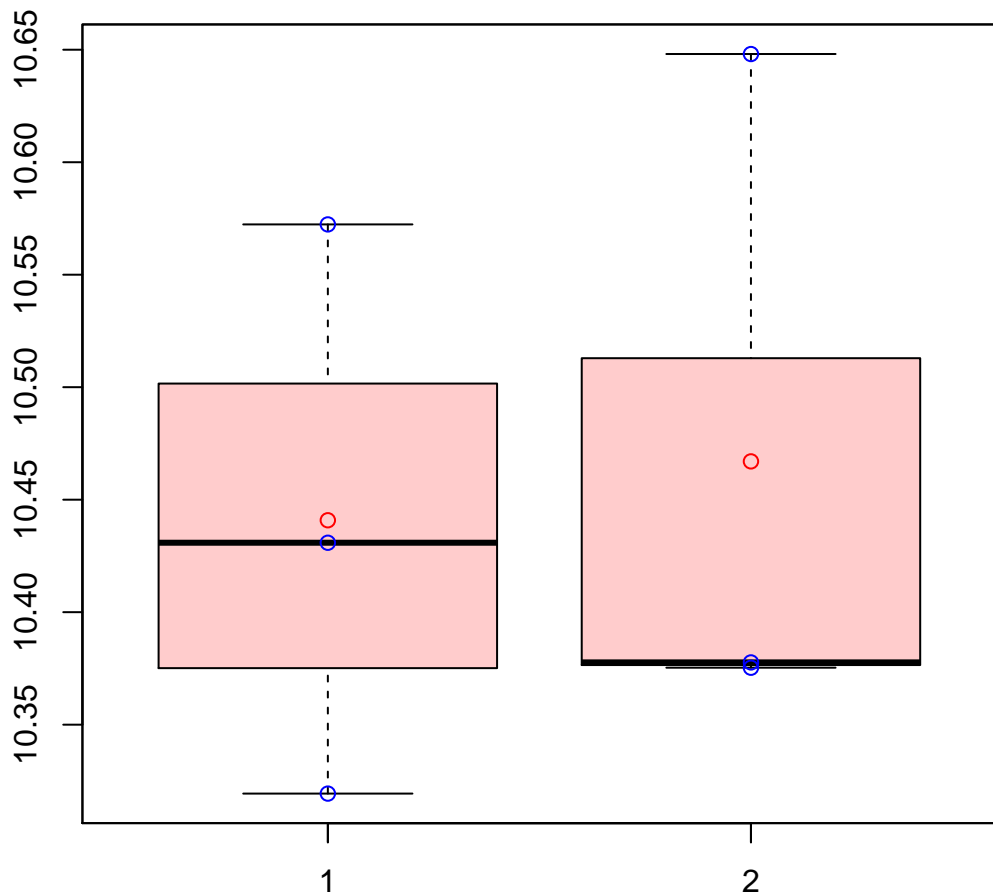

t-Test: p-value = 0.83

# CL15873Contig1|CL15873Contig1

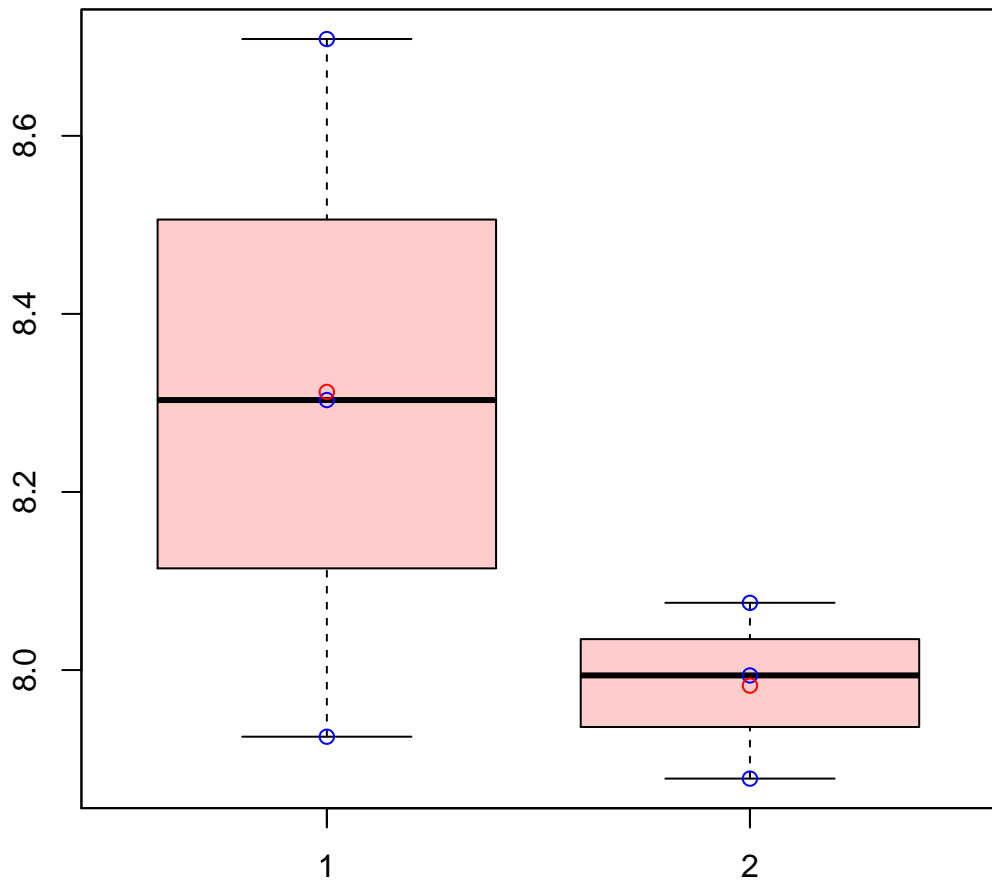

t-Test: p-value = 0.28

# CL1588Contig1|CL1588Contig1

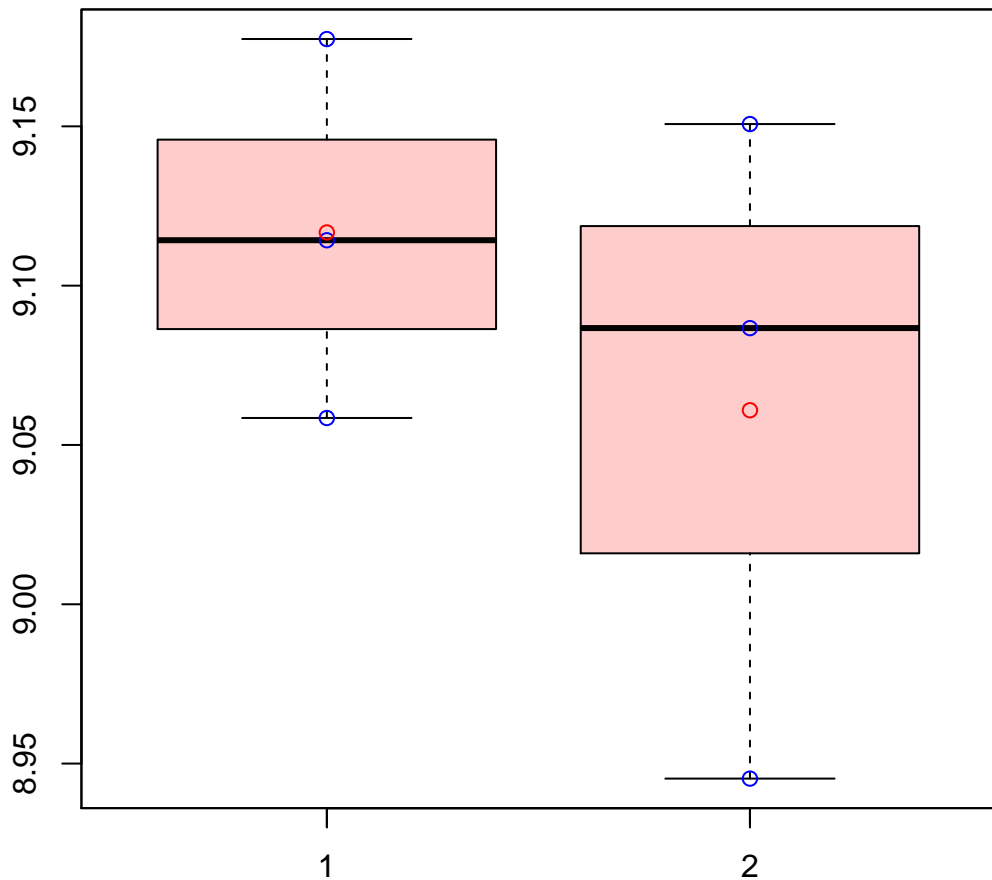

t-Test: p-value = 0.48

# CL1589Contig3|CL1589Contig3

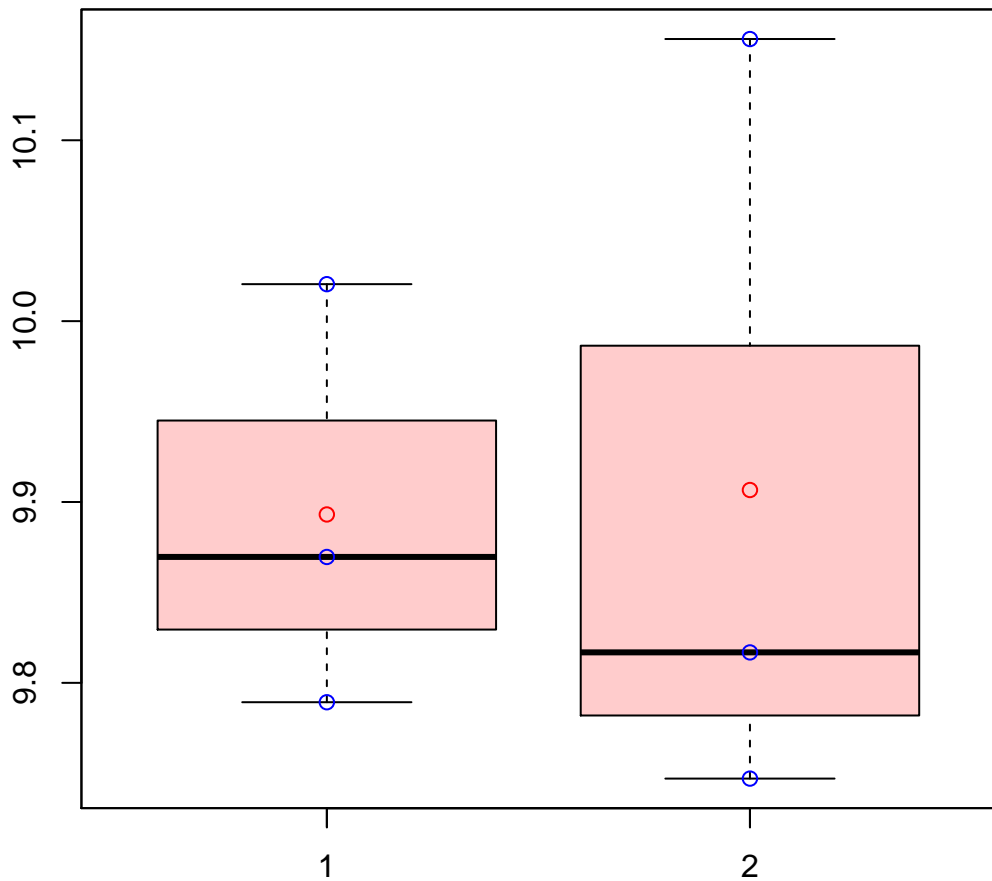

t-Test: p-value = 0.93

# CL1590Contig3|CL1590Contig3

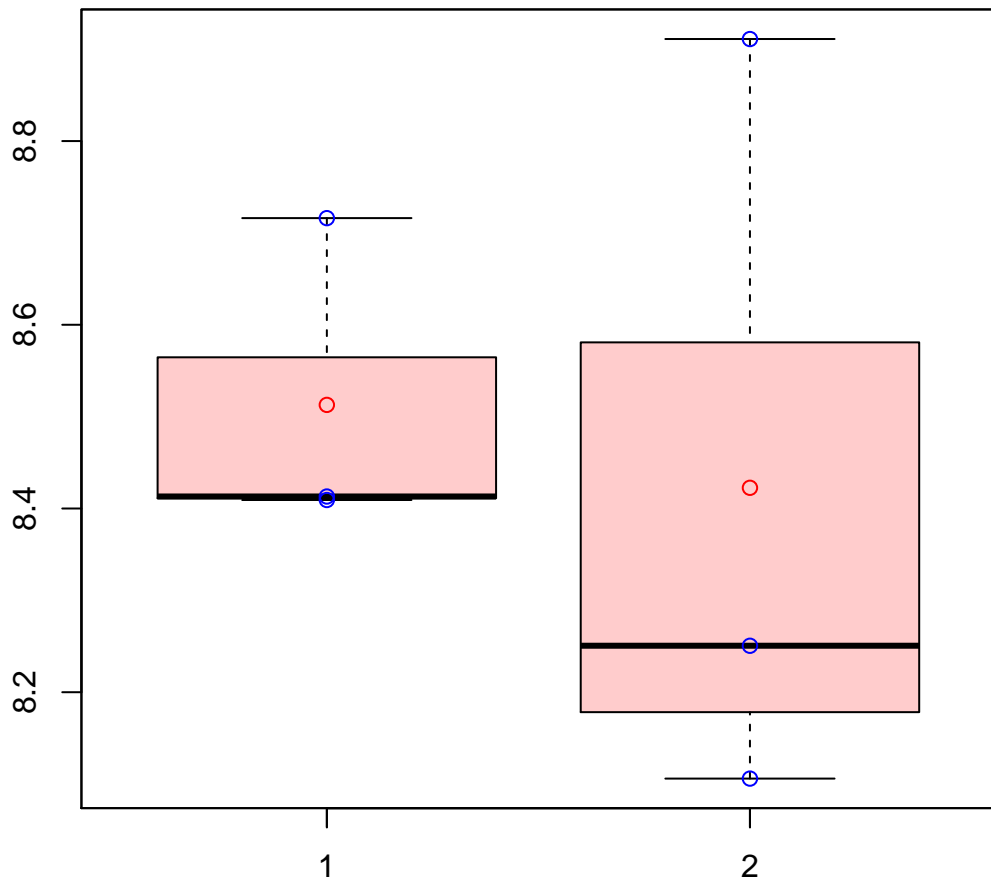

t-Test: p-value = 0.76

# CL1594Contig2|CL1594Contig2

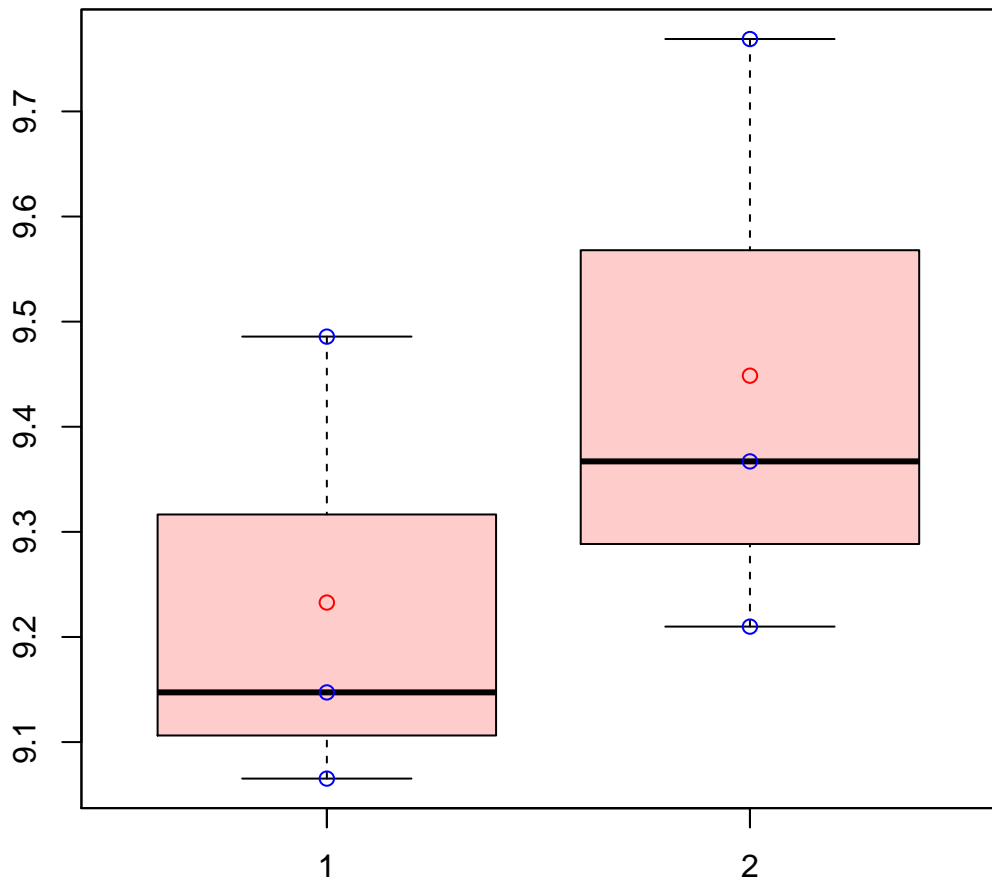

t-Test: p-value = 0.37



# CL1595Contig2|CL1595Contig2

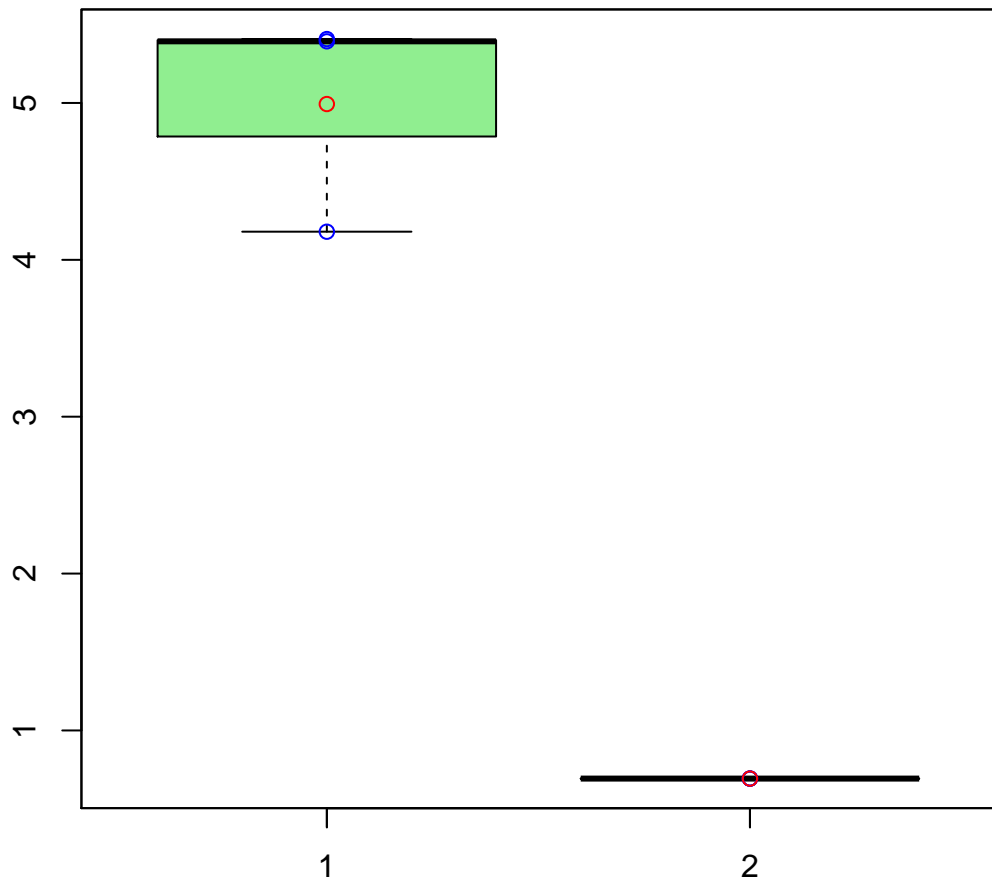

t-Test: p-value = 0.01

# CL1596Contig3|CL1596Contig3

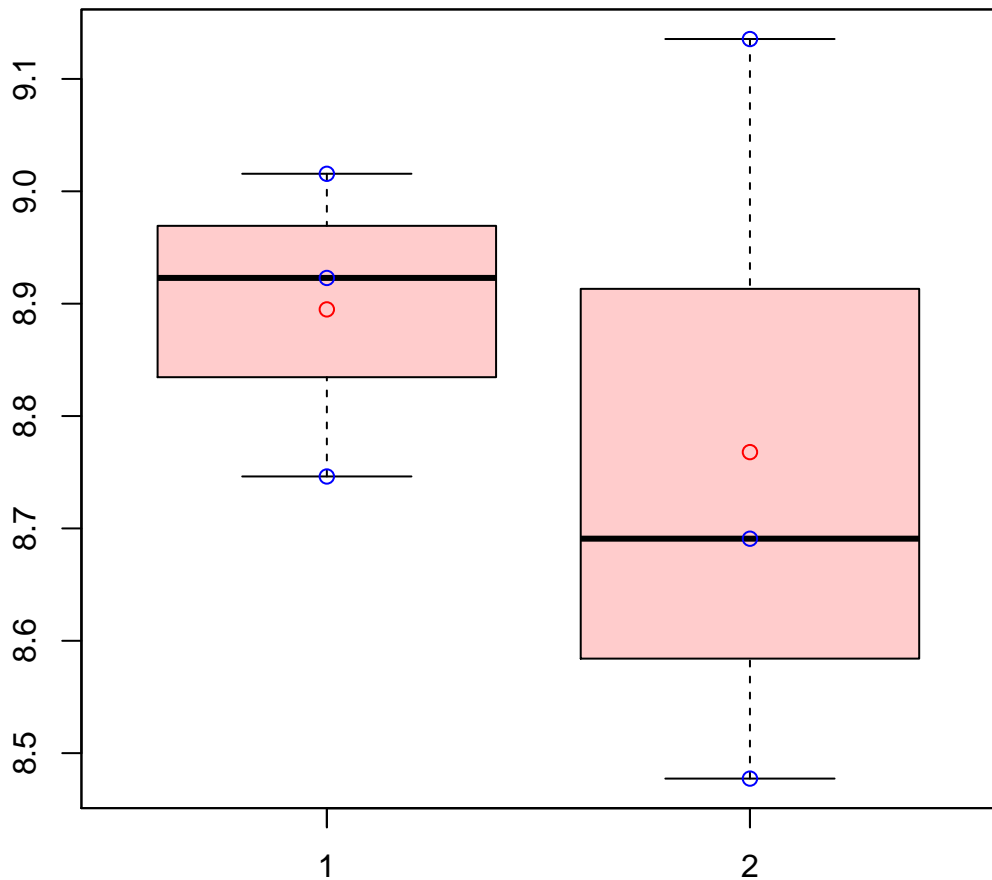

t-Test: p-value = 0.59

# CL15Contig21|CL15Contig21

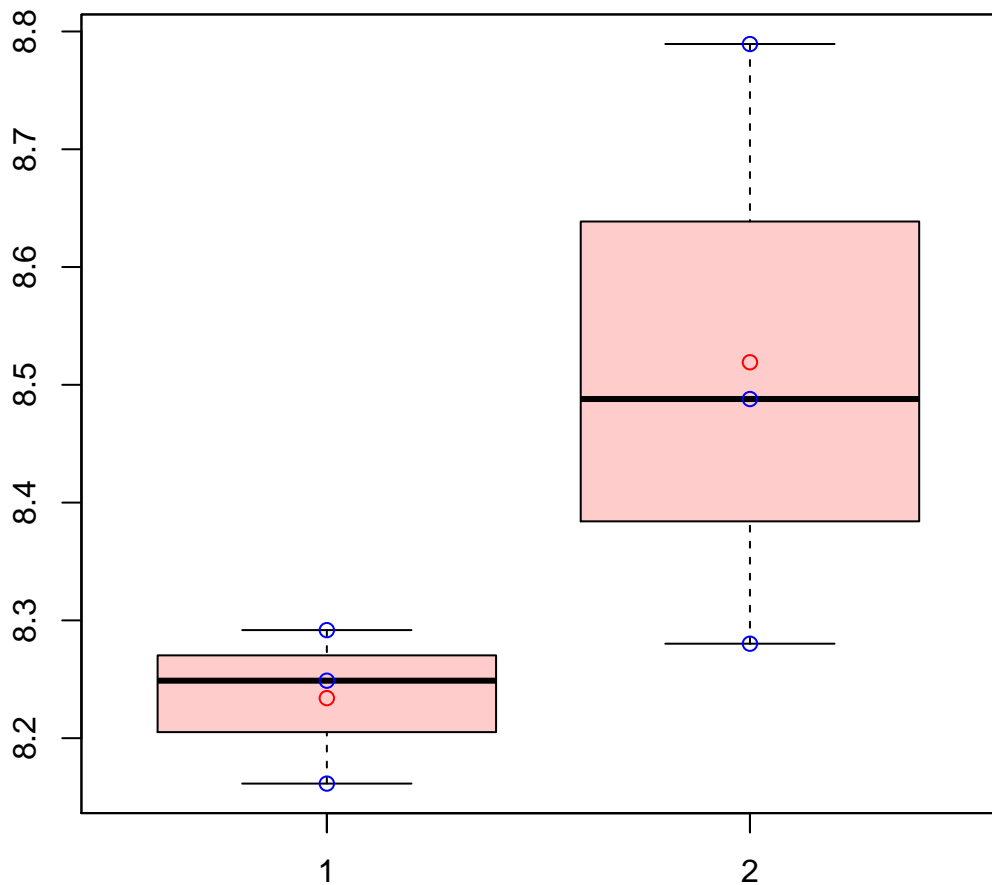

t-Test: p-value = 0.19

# CL15Contig25|CL15Contig25

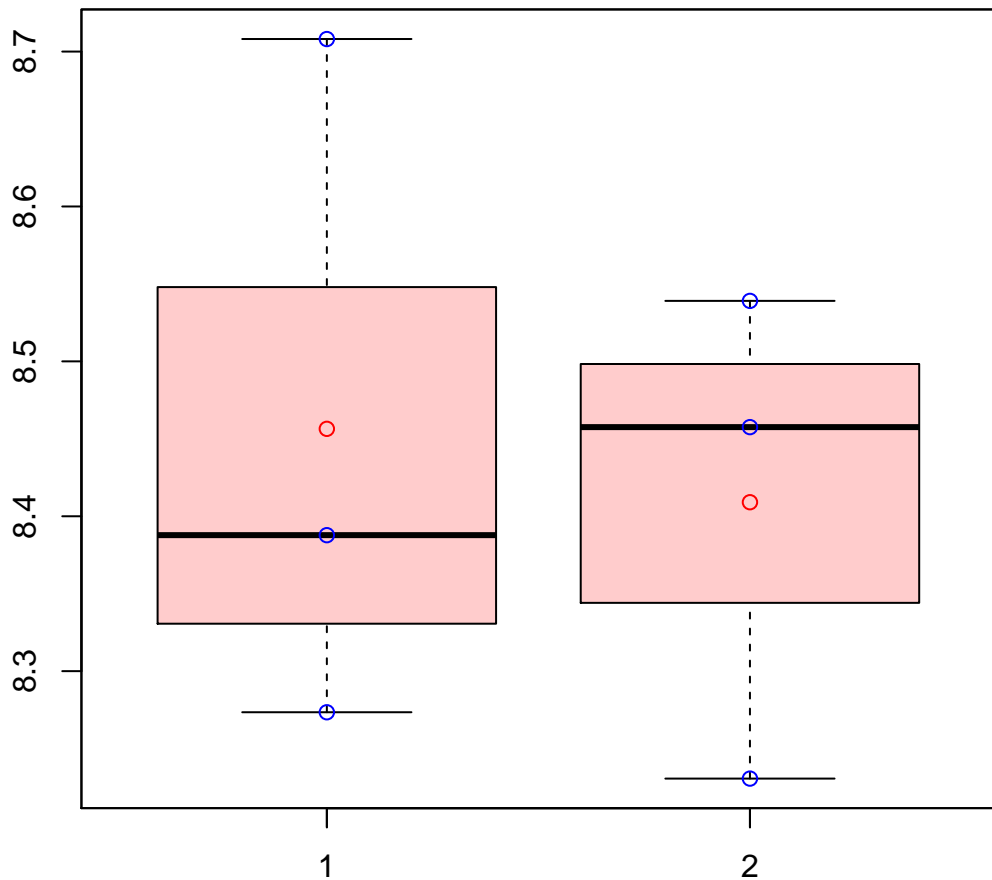

t-Test: p-value = 0.78

# CL15Contig32|CL15Contig32

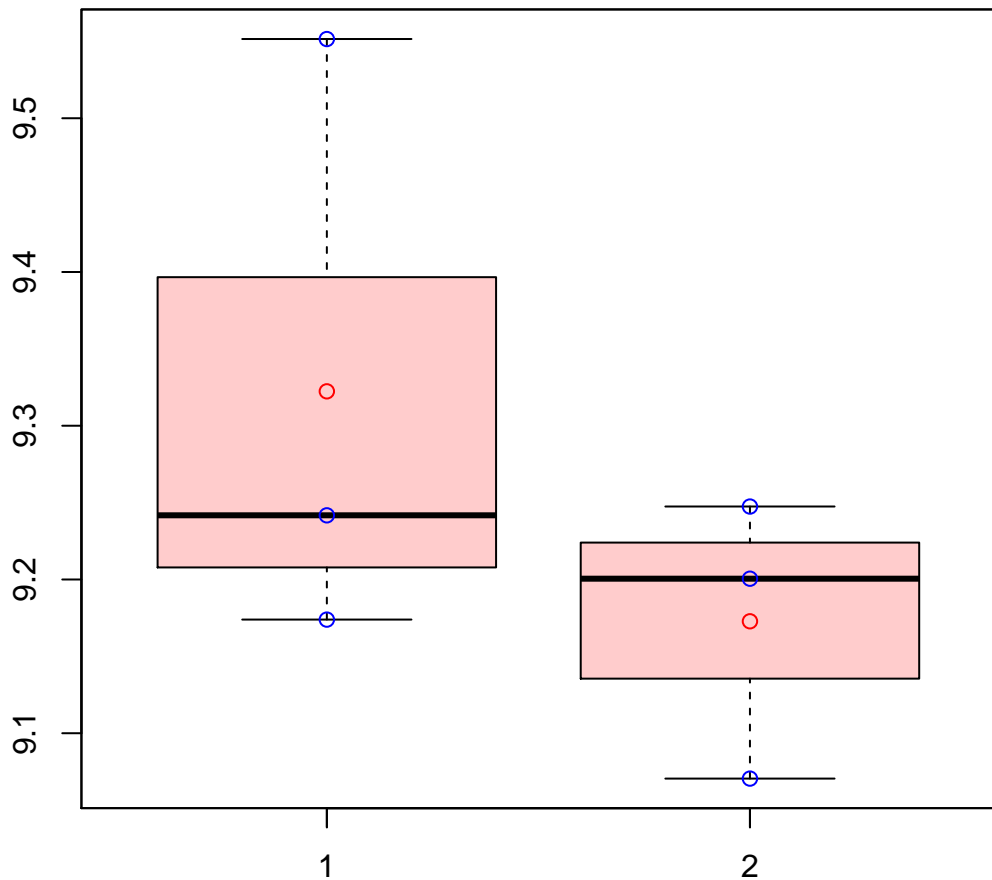

t-Test: p-value = 0.33

# CL1600Contig4|CL1600Contig4

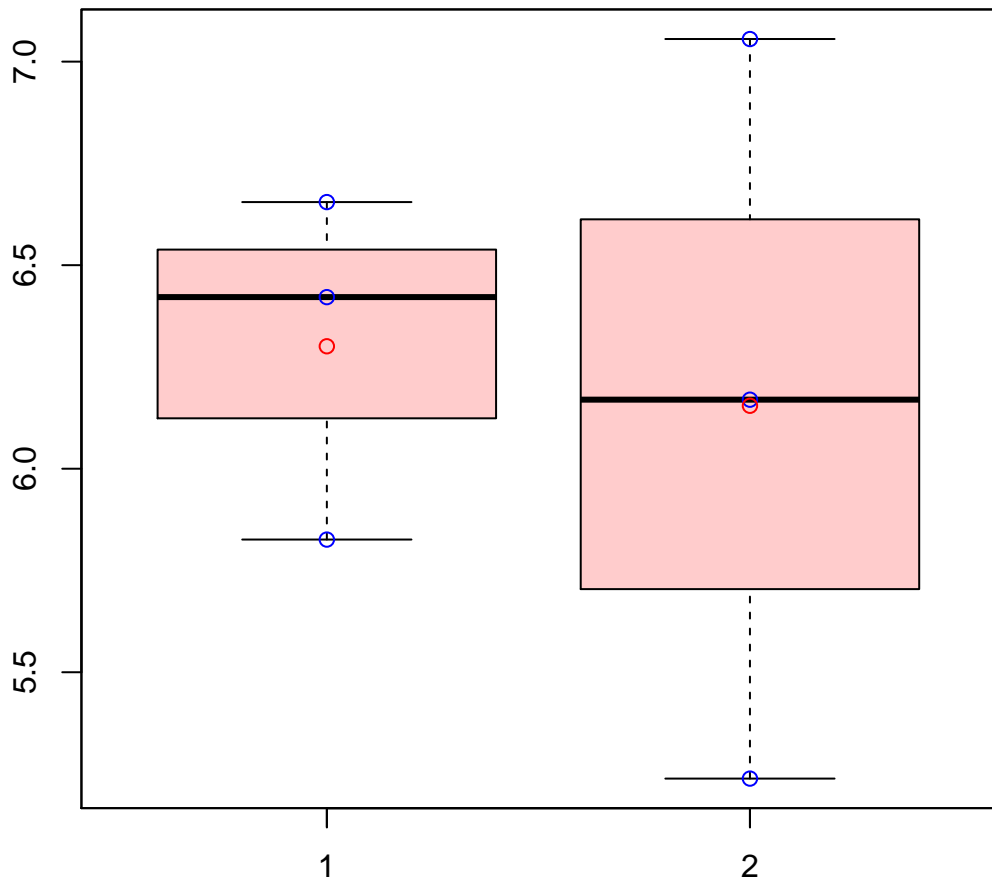

t-Test: p-value = 0.82

# CL16014Contig1|CL16014Contig1

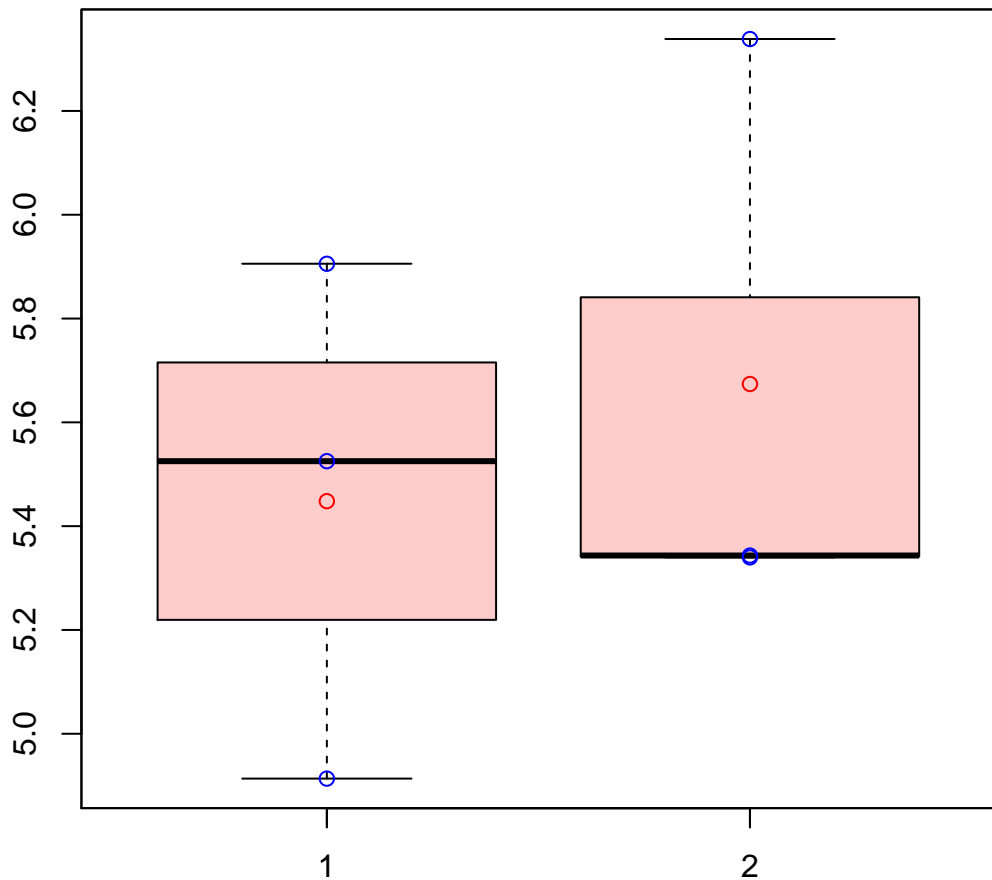

t-Test: p-value = 0.64

# CL1601Contig2|CL1601Contig2

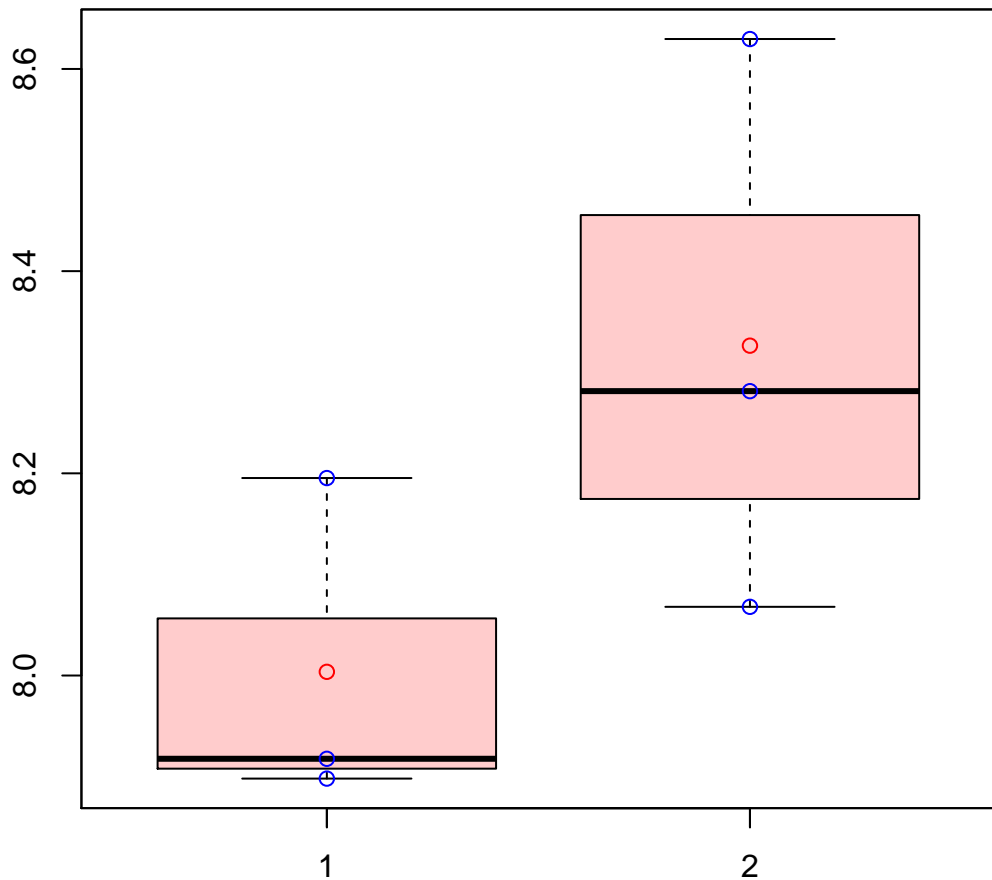

t-Test: p-value = 0.18



# CL1601Contig3|CL1601Contig3



t-Test: p-value = 0.18

# CL1603Contig2|CL1603Contig2

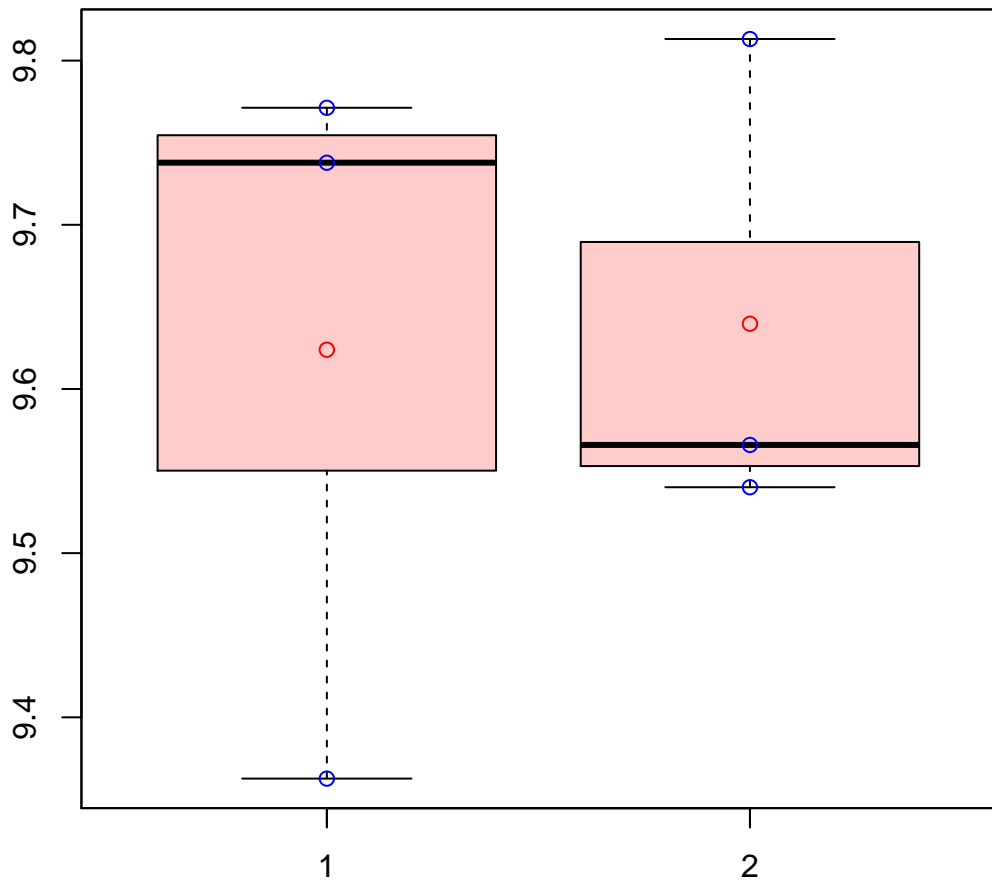

t-Test: p-value = 0.93

# CL1603Contig3|CL1603Contig3



t-Test: p-value = 0.93

# CL1603Contig5|CL1603Contig5

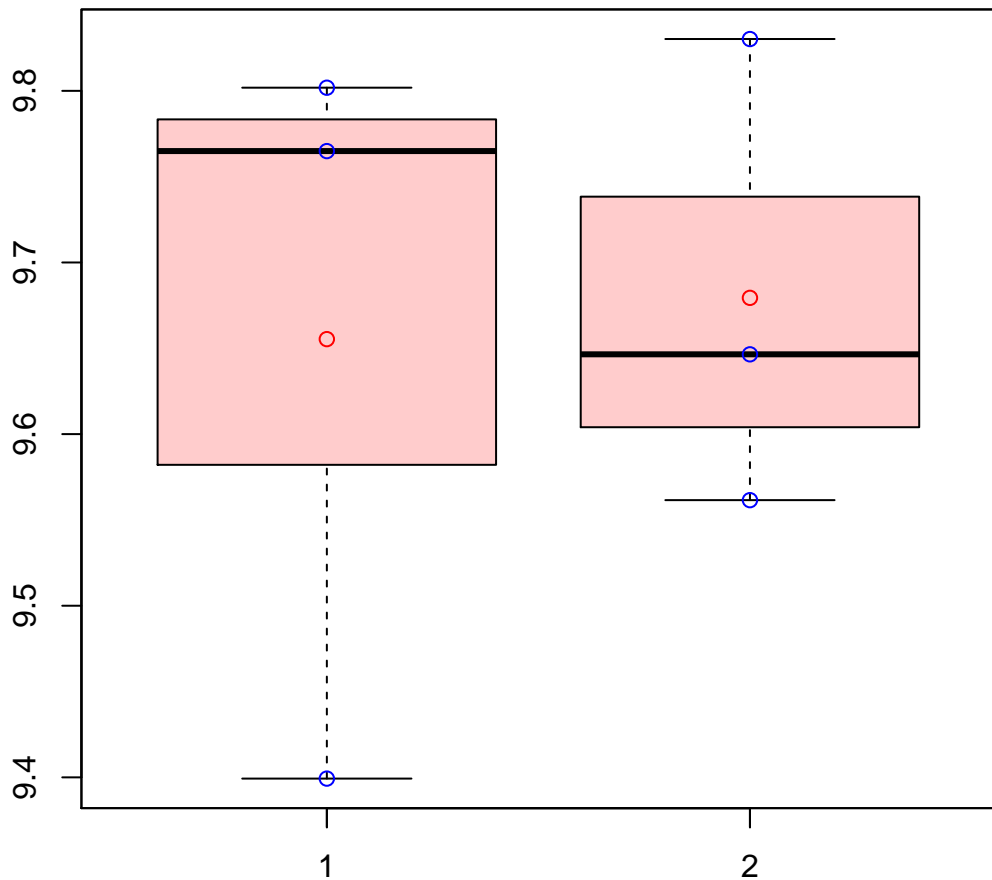

t-Test: p-value = 0.88

# CL1603Contig6|CL1603Contig6



t-Test: p-value = 0.93

# CL1603Contig7|CL1603Contig7



t-Test: p-value = 0.93

# CL16065Contig1|CL16065Contig1

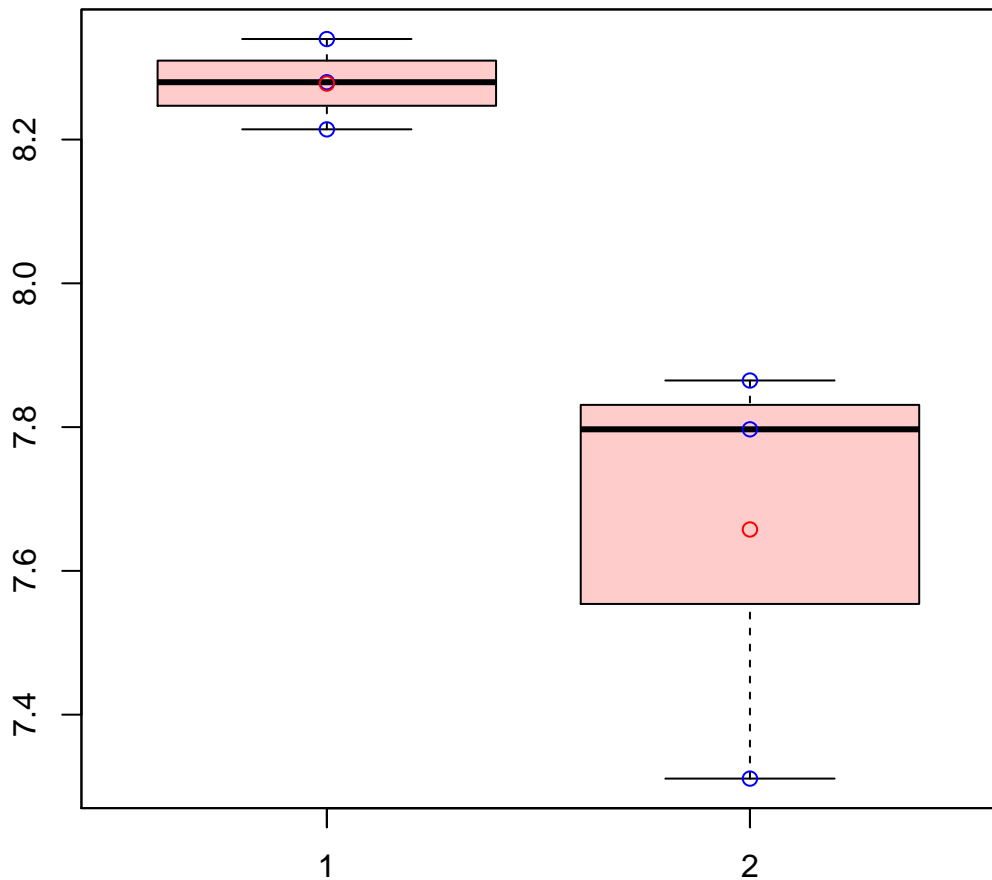

t-Test: p-value = 0.07

# CL16095Contig1|CL16095Contig1

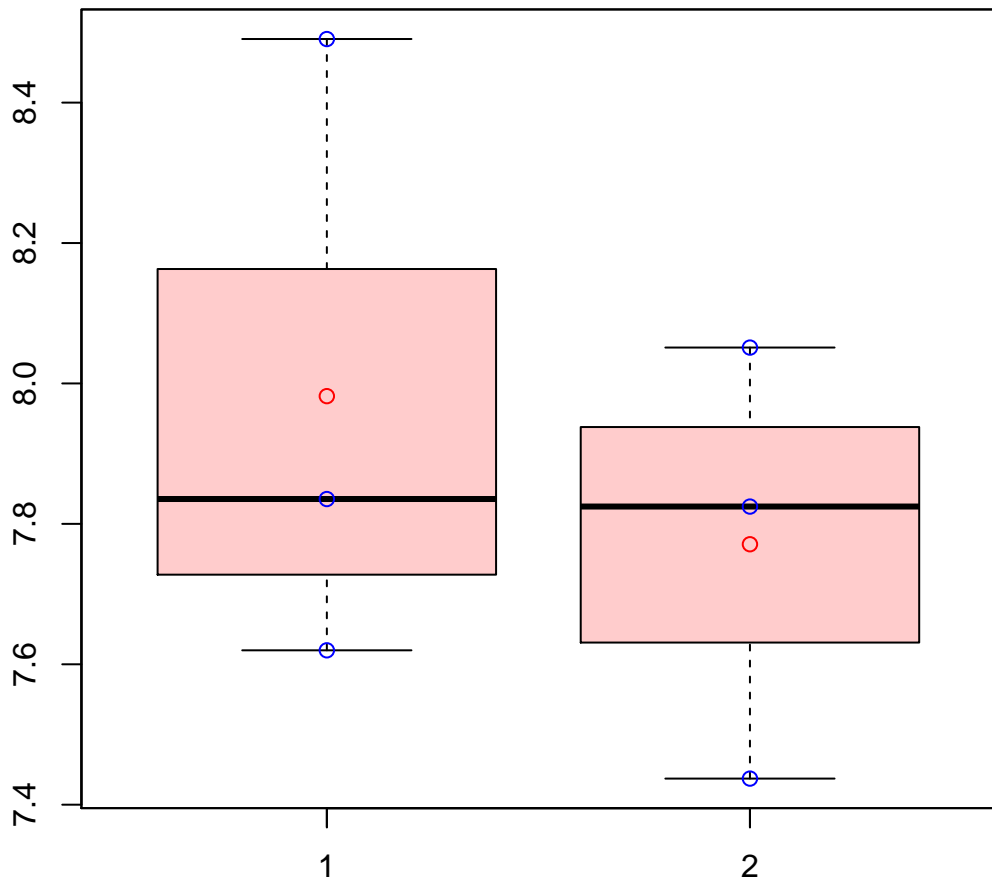

t-Test: p-value = 0.55



# CL1610Contig2|CL1610Contig2

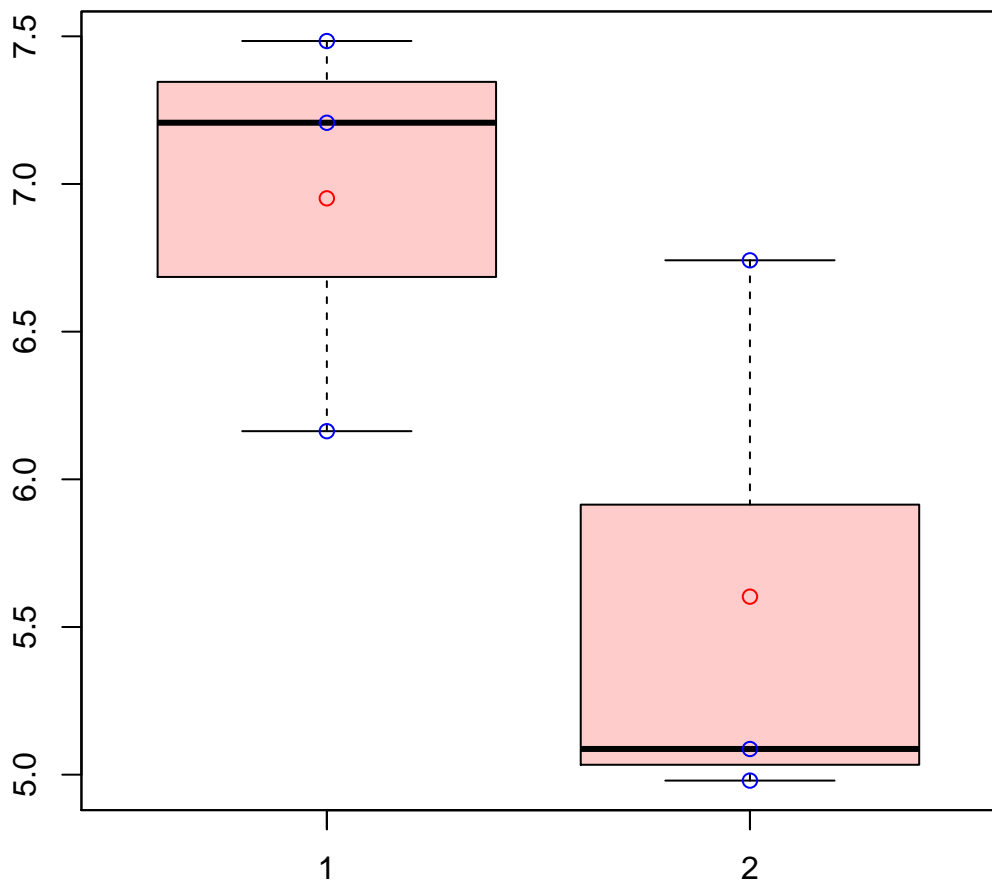

t-Test: p-value = 0.13

# CL16110Contig1|CL16110Contig1

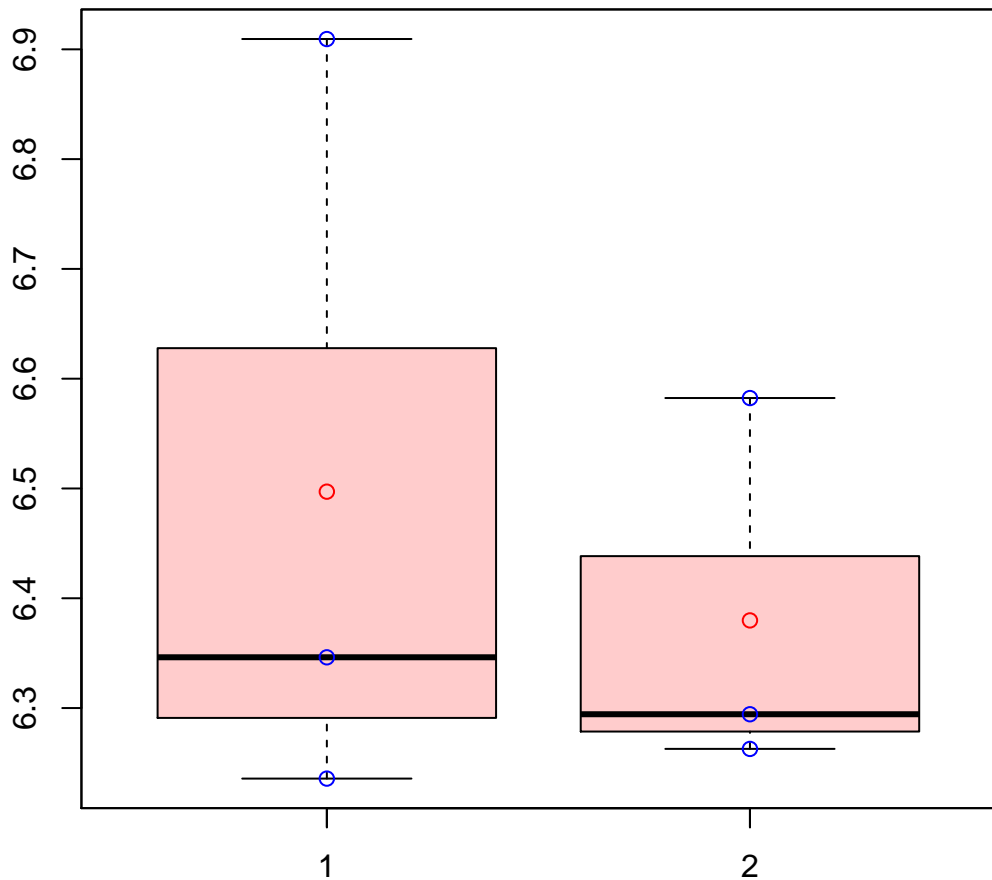

t-Test: p-value = 0.65

# CL16118Contig1|CL16118Contig1

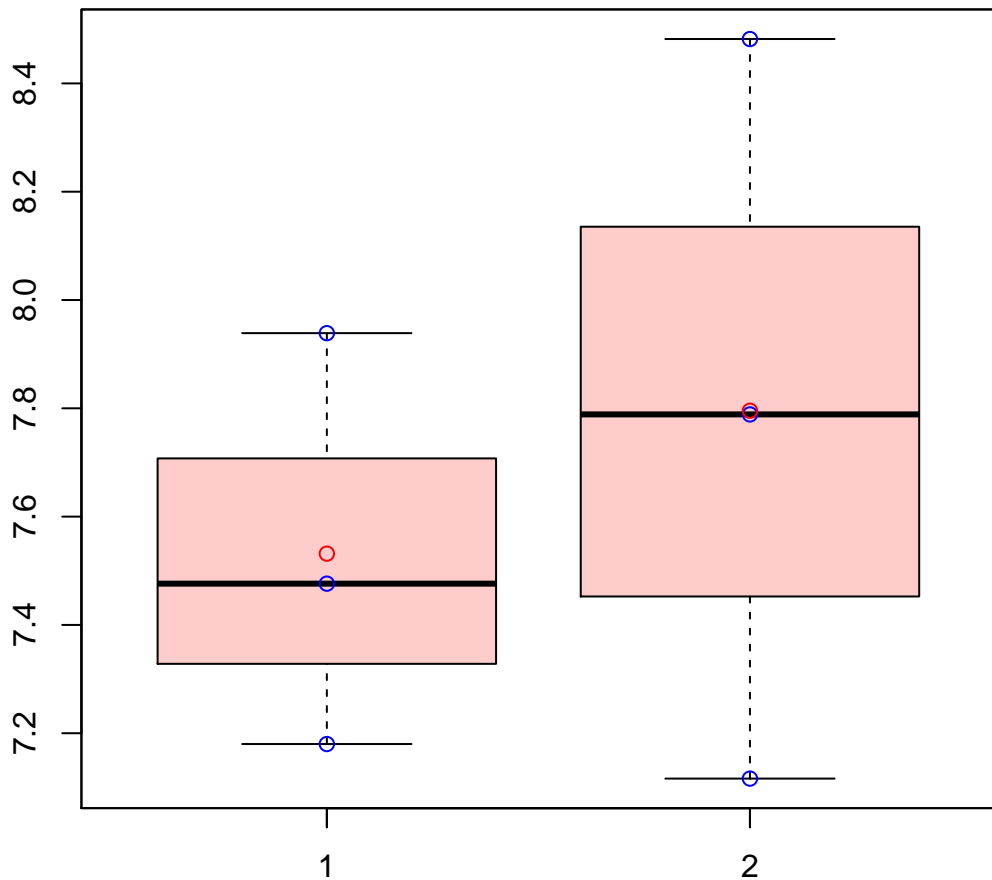

t-Test: p-value = 0.6

# CL16120Contig1|CL16120Contig1

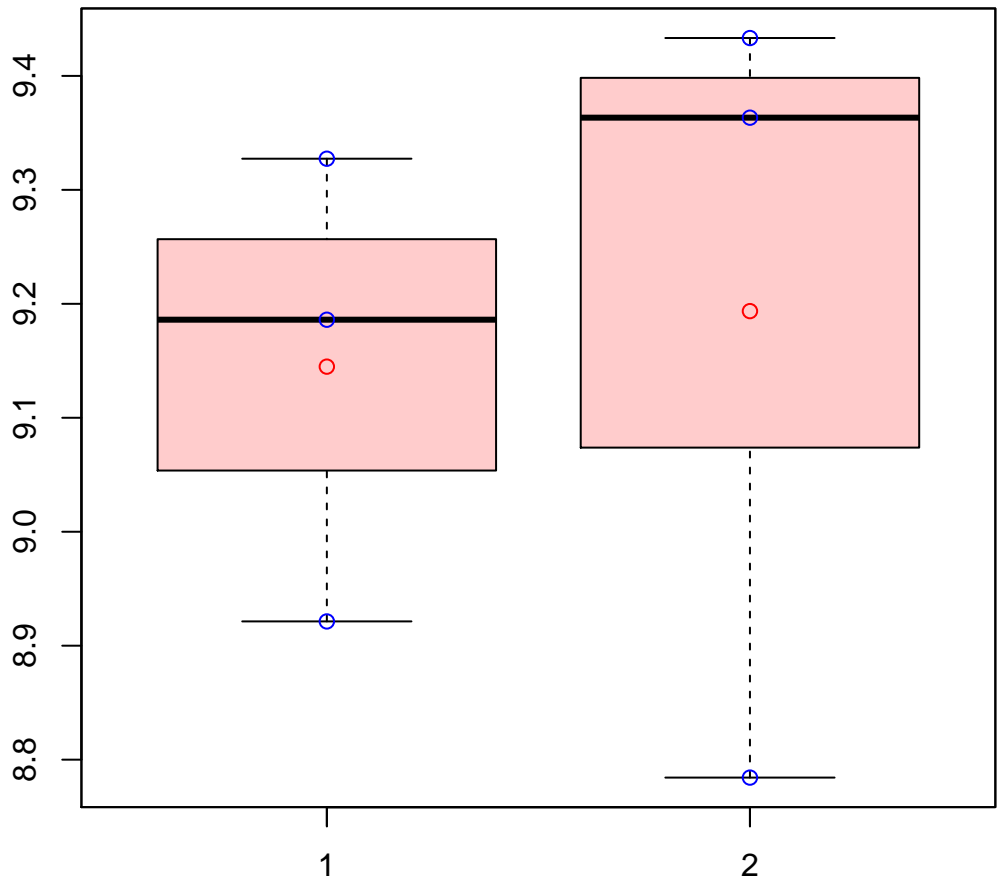

t-Test: p-value = 0.85

# CL16127Contig1|CL16127Contig1

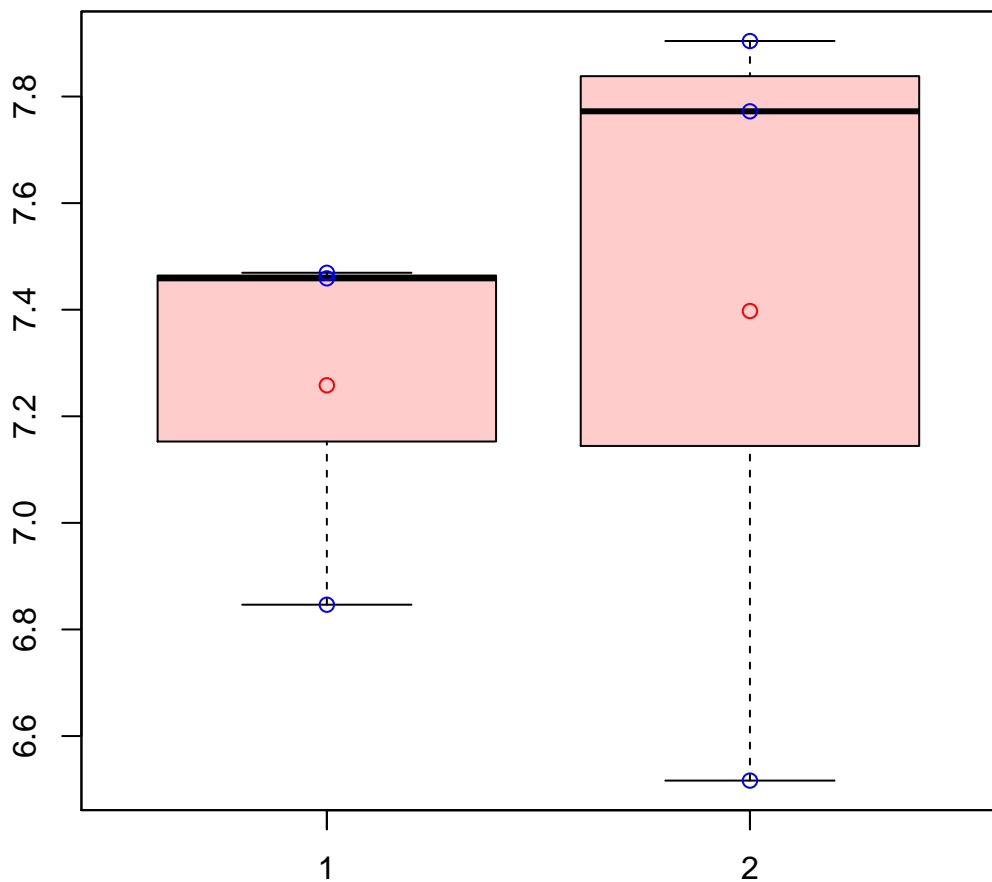

t-Test: p-value = 0.79

# CL16131Contig1|CL16131Contig1



t-Test: p-value = 0.02

# CL16163Contig1|CL16163Contig1

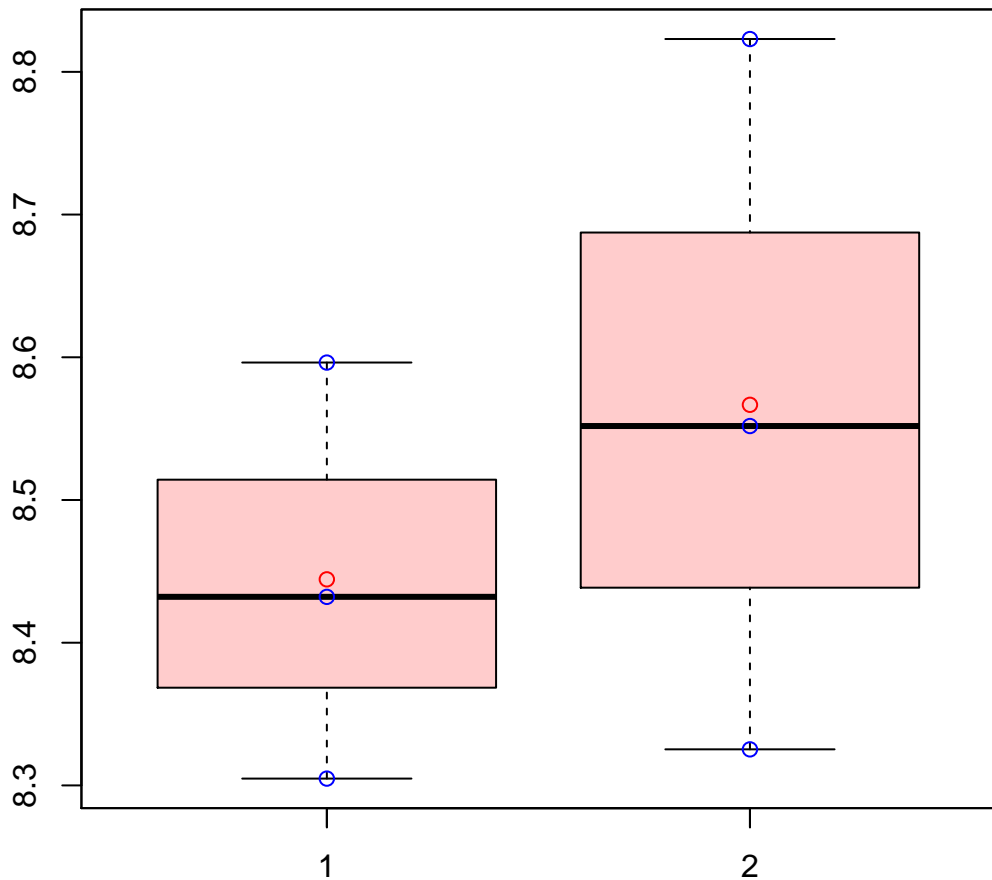

t-Test: p-value = 0.51

# CL16167Contig1|CL16167Contig1



t-Test: p-value = 0.79



# CL161Contig10|CL161Contig10

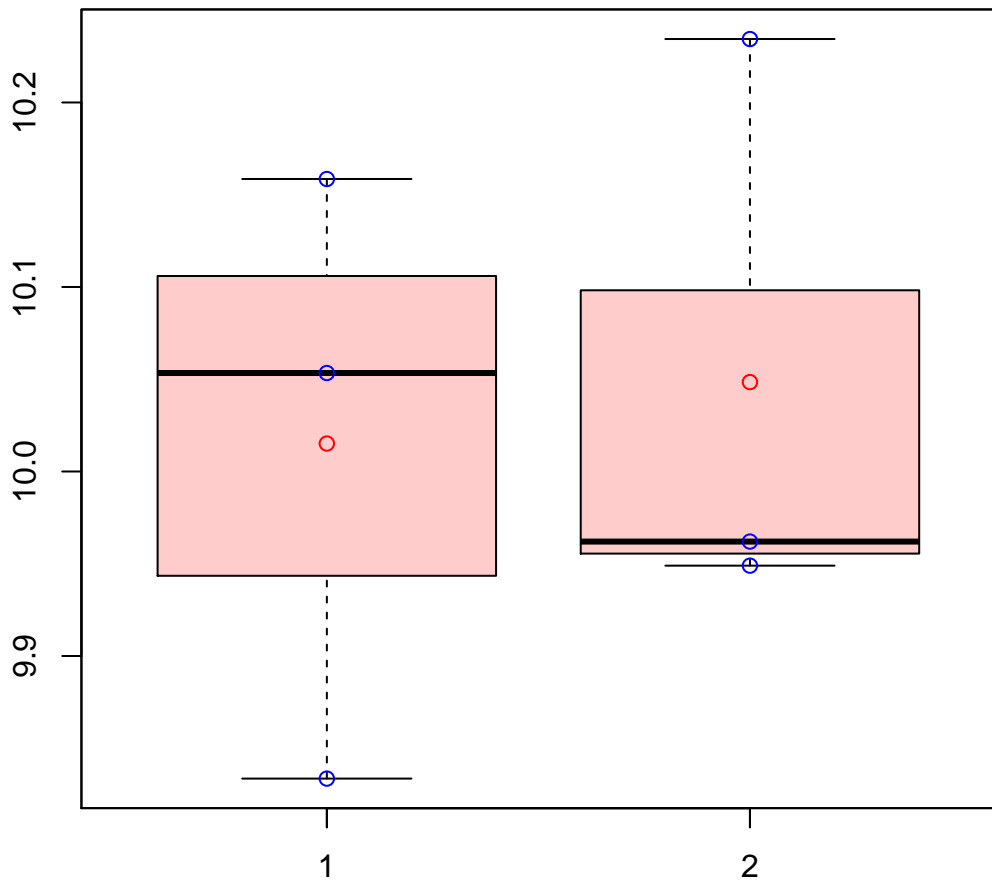

t-Test: p-value = 0.82

# CL16208Contig1|CL16208Contig1

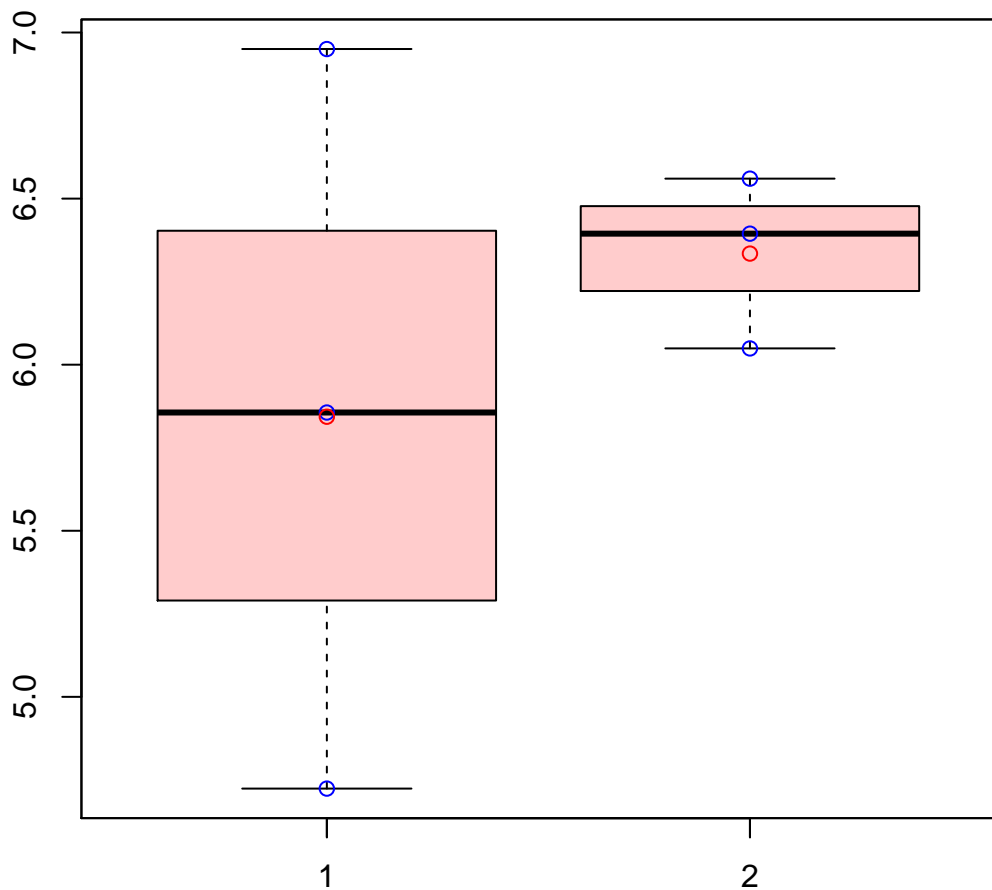

t-Test: p-value = 0.53

# CL1620Contig1|CL1620Contig1

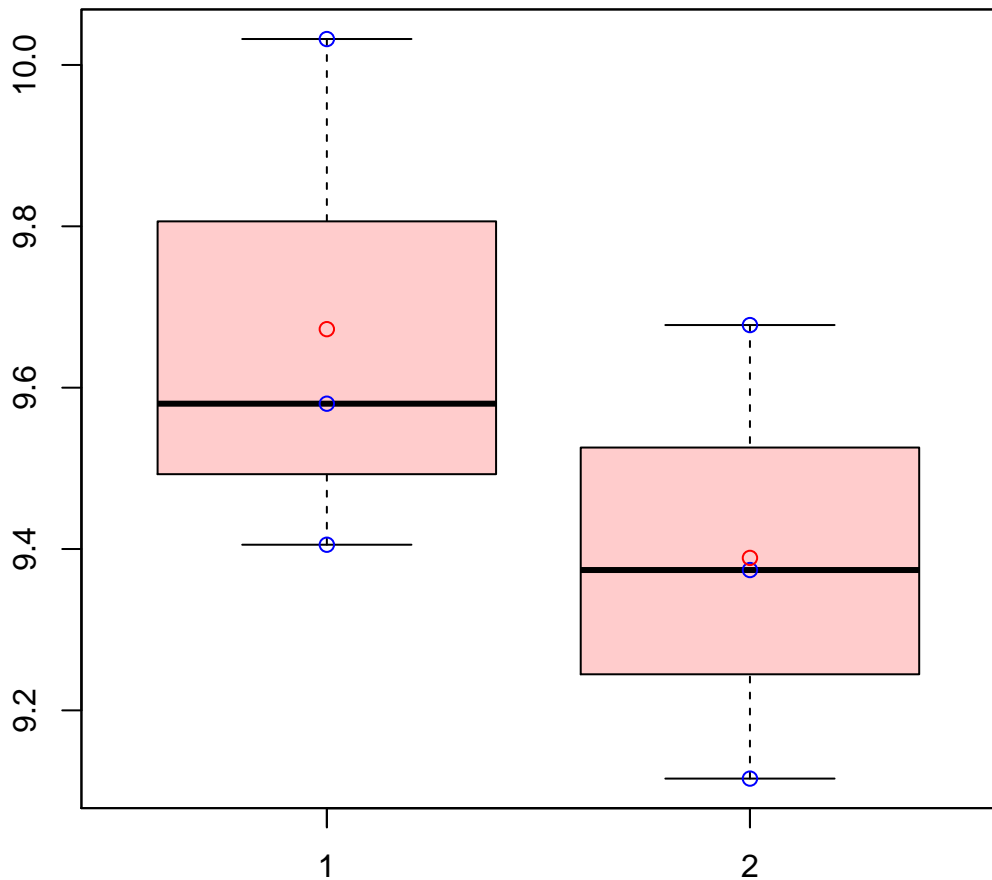

t-Test: p-value = 0.32

# CL1623Contig1|CL1623Contig1

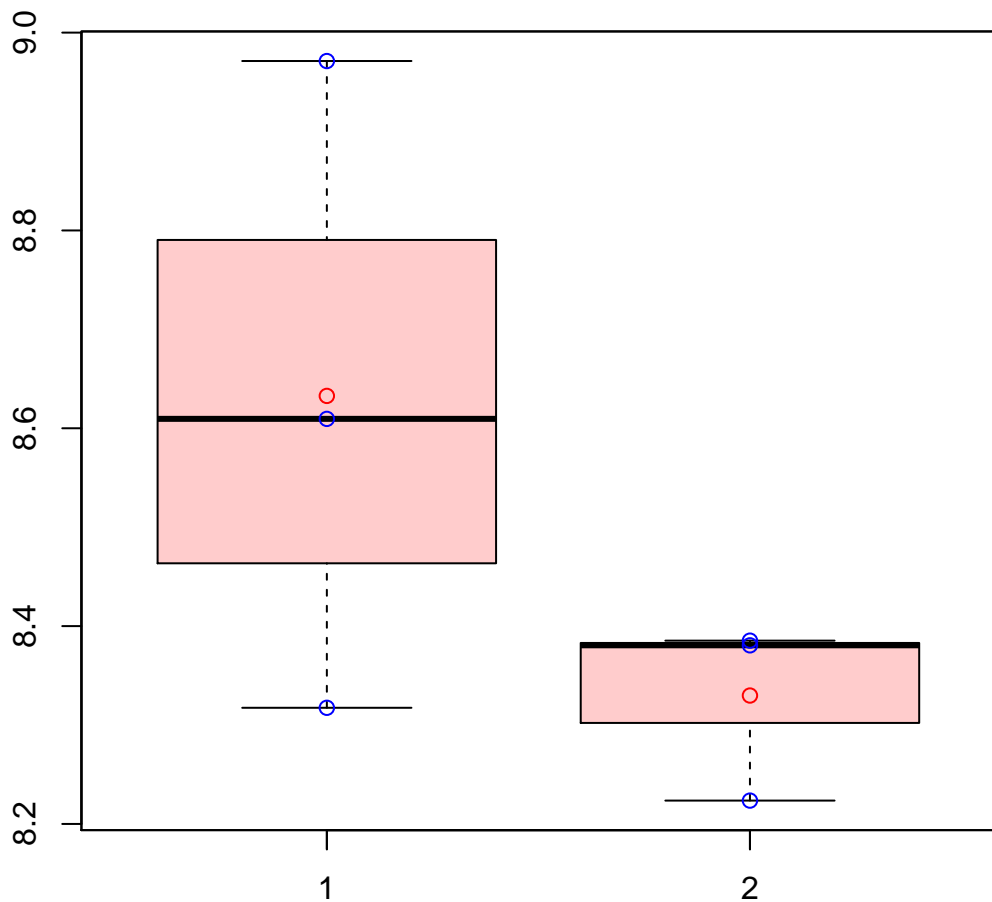

t-Test: p-value = 0.25

# CL1623Contig4|CL1623Contig4

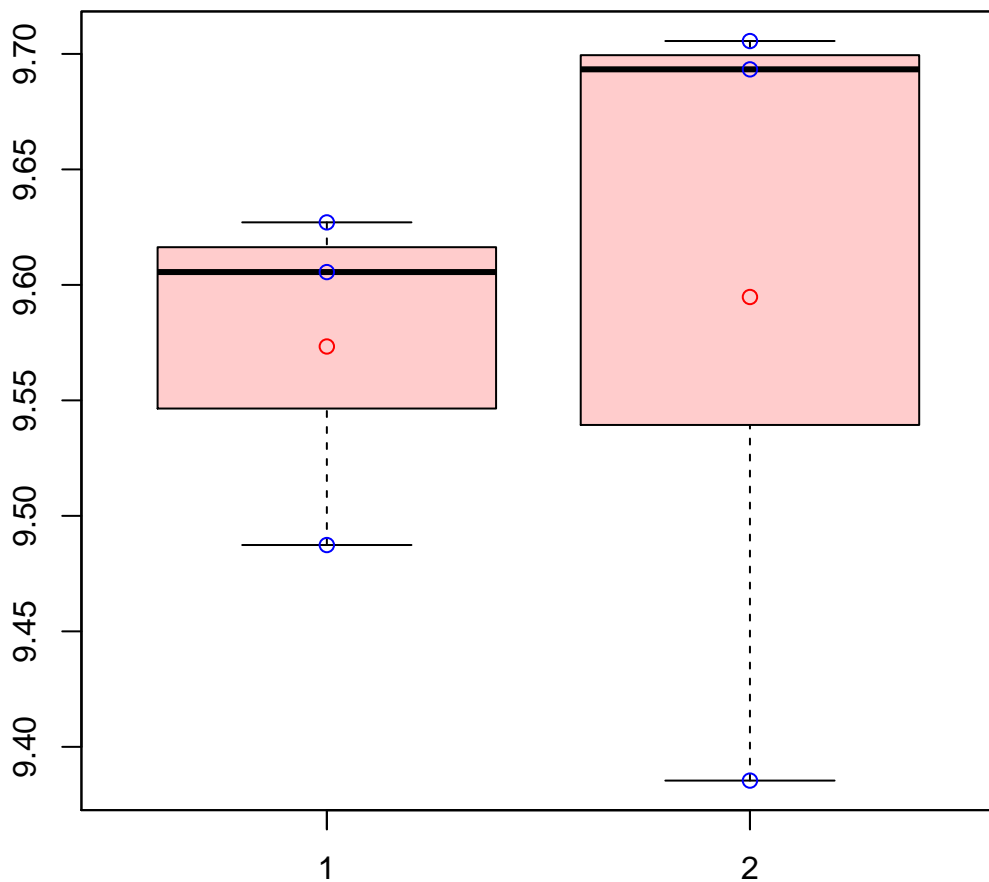

t-Test: p-value = 0.86

# CL1625Contig4|CL1625Contig4

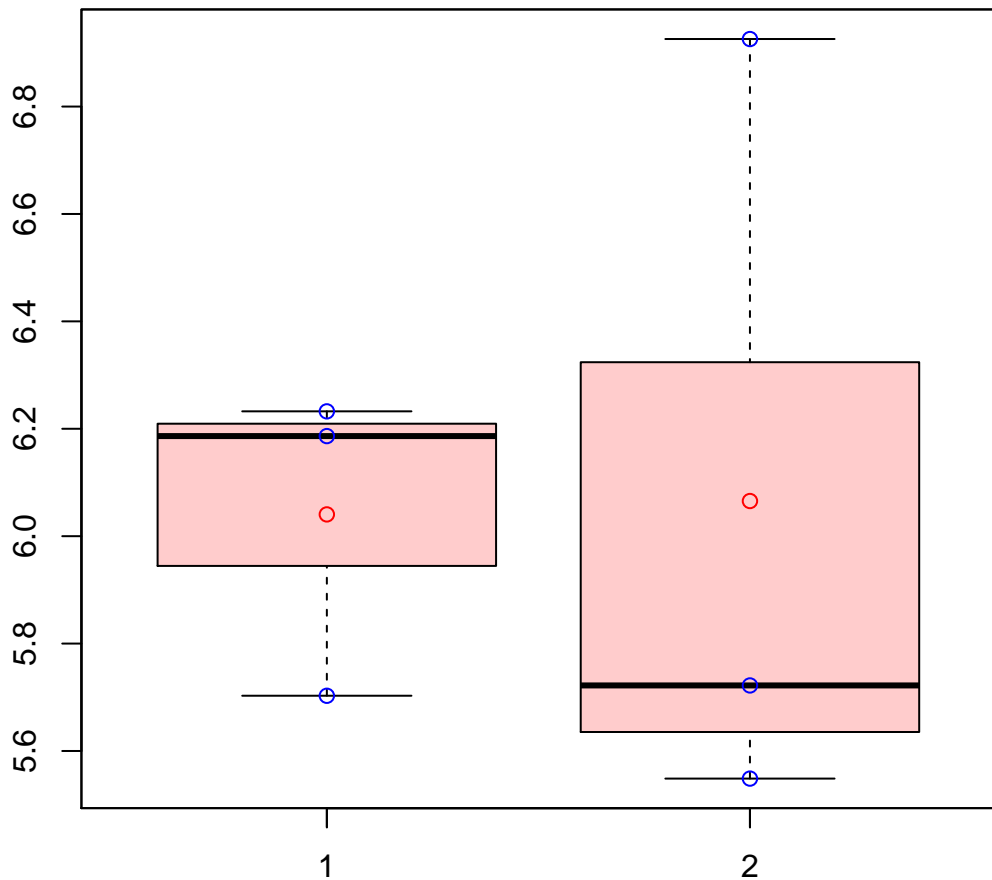

t-Test: p-value = 0.96

# CL1629Contig1|CL1629Contig1

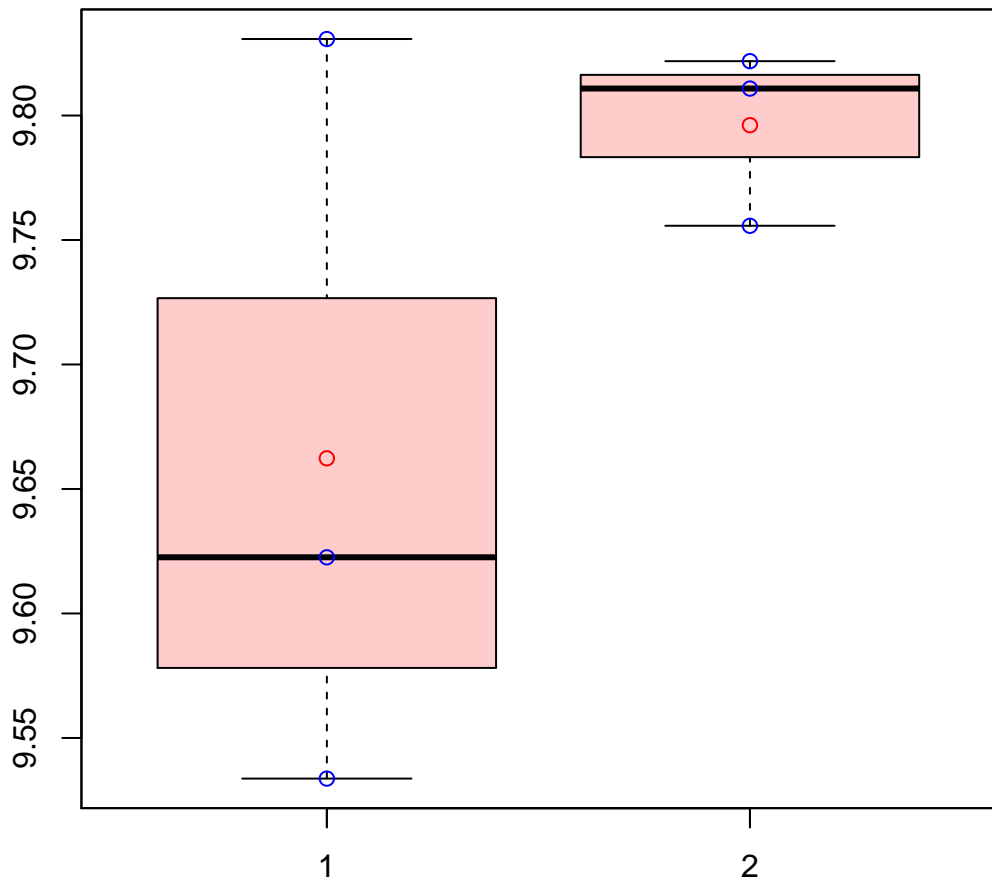

t-Test: p-value = 0.27

# CL1629Contig2|CL1629Contig2

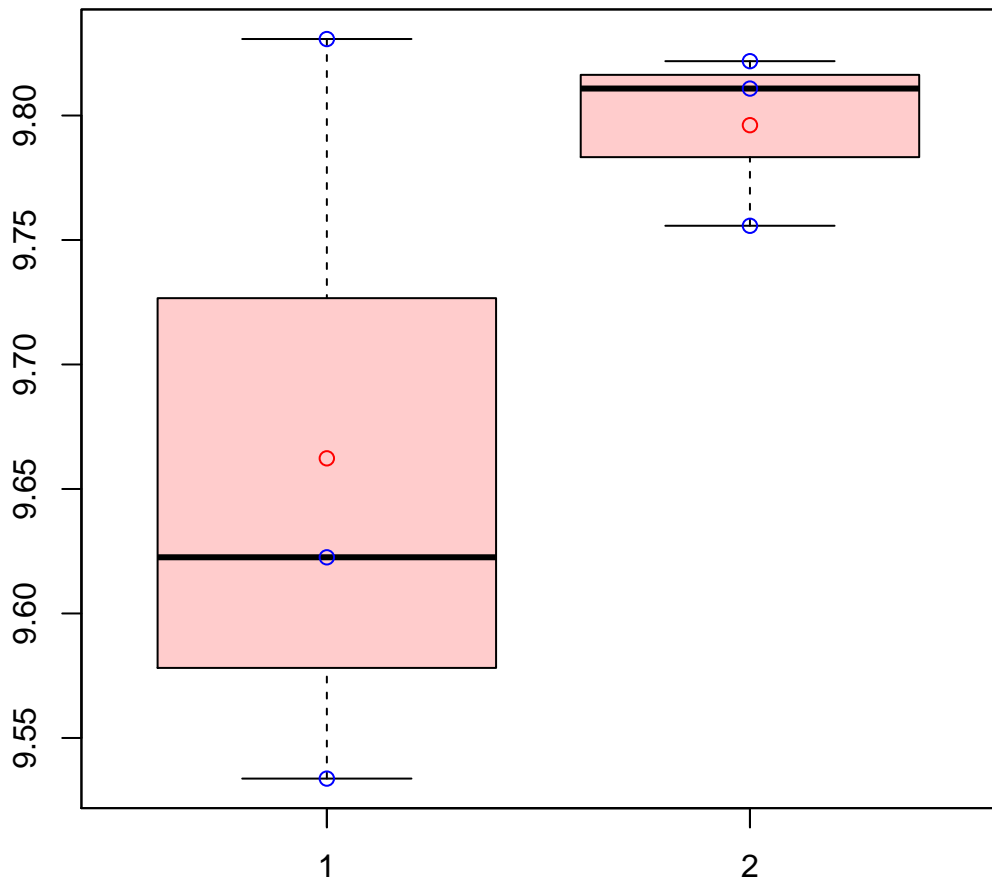

t-Test: p-value = 0.27



# CL1629Contig3|CL1629Contig3

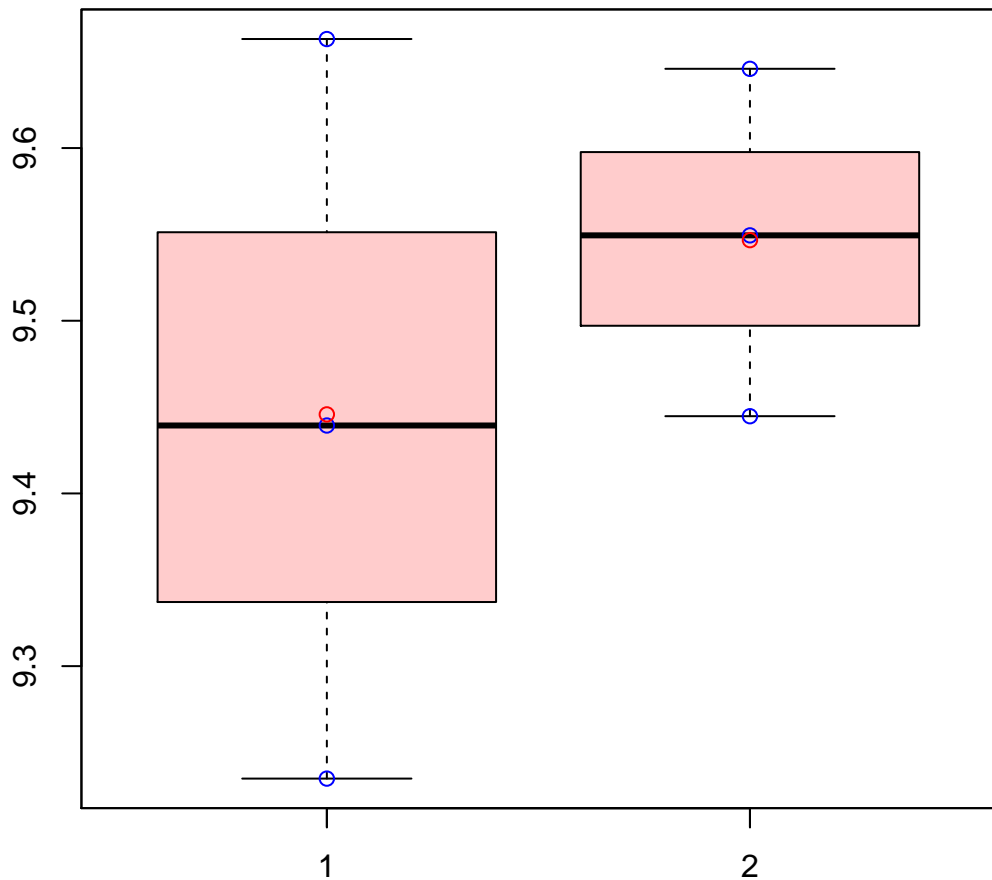

t-Test: p-value = 0.52

# CL1629Contig4|CL1629Contig4

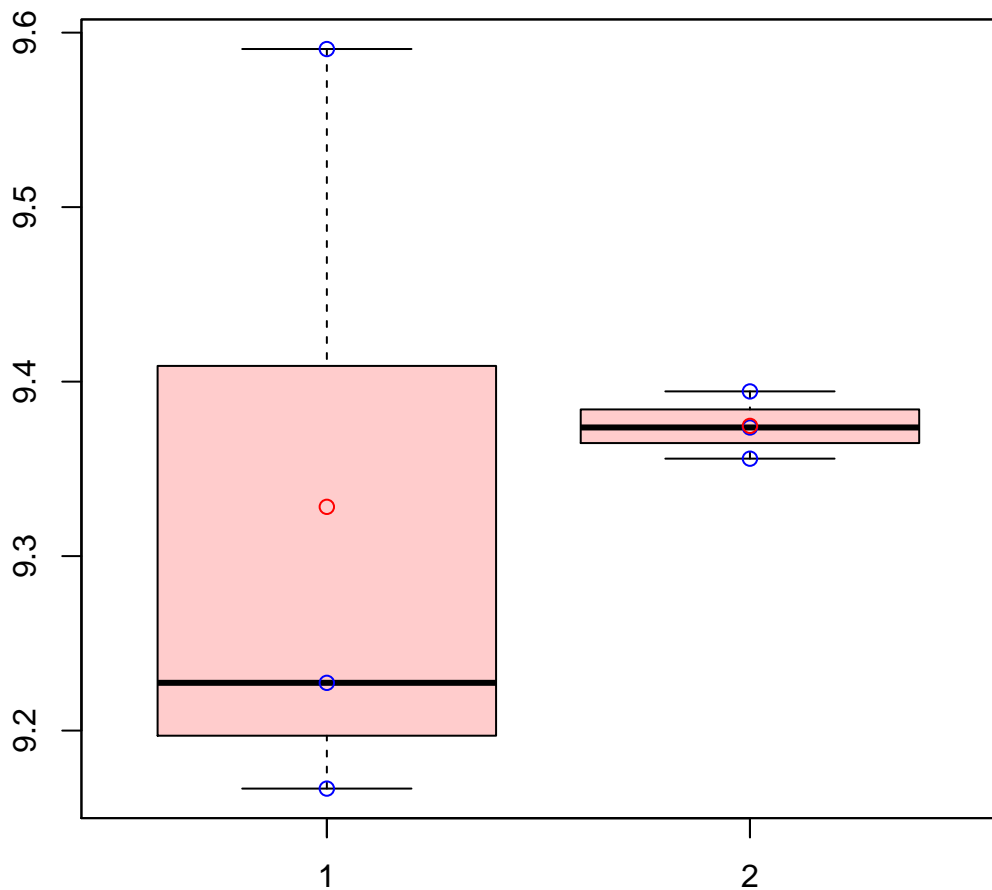

t-Test: p-value = 0.76

# CL1629Contig5|CL1629Contig5

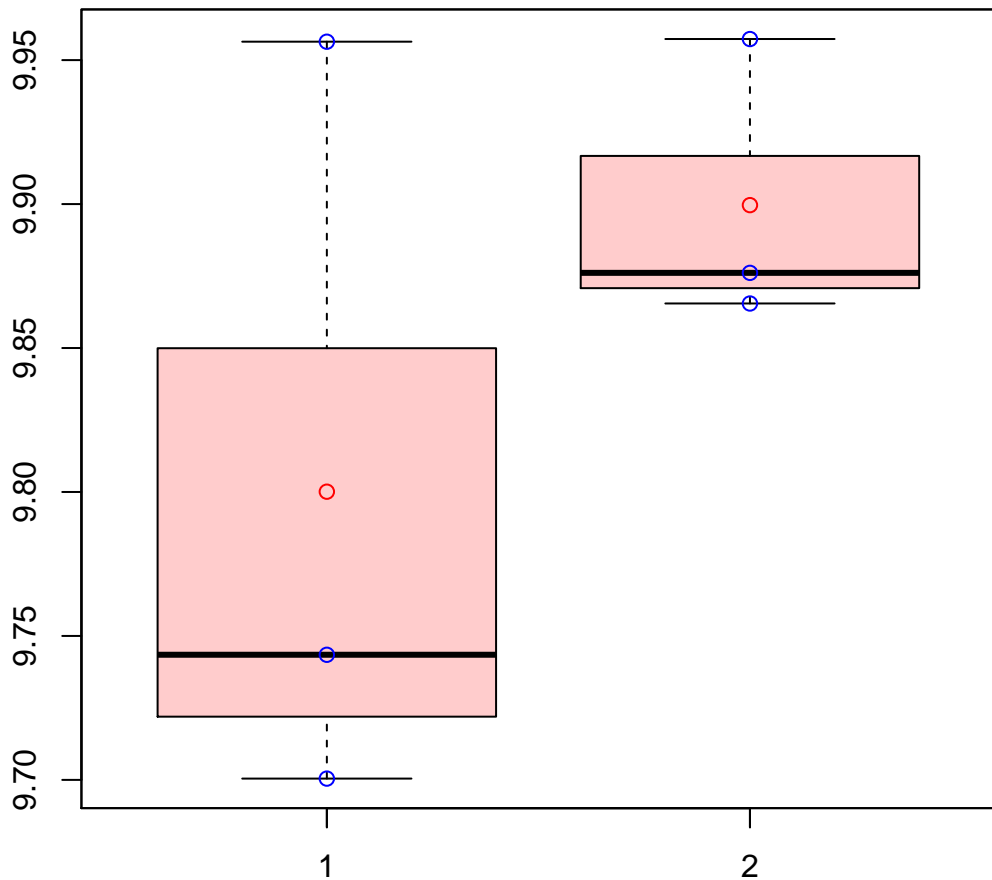

t-Test: p-value = 0.34

# CL1629Contig6|CL1629Contig6

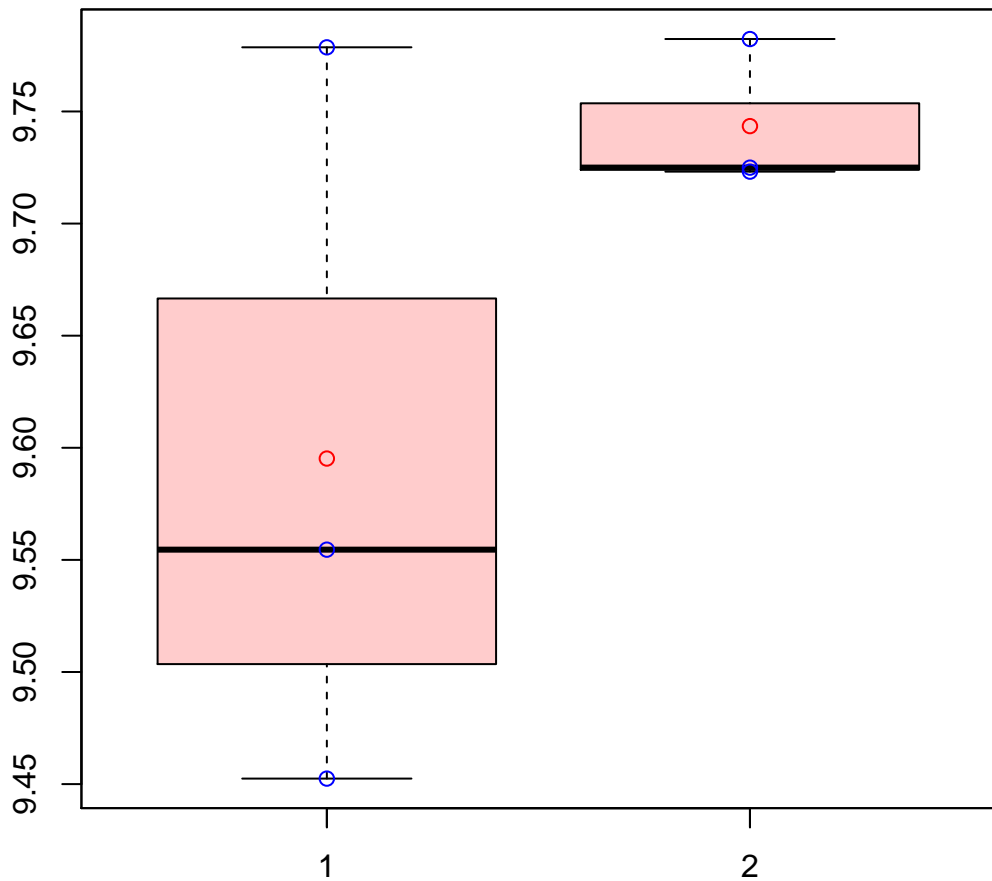

t-Test: p-value = 0.26

# CL1629Contig7|CL1629Contig7

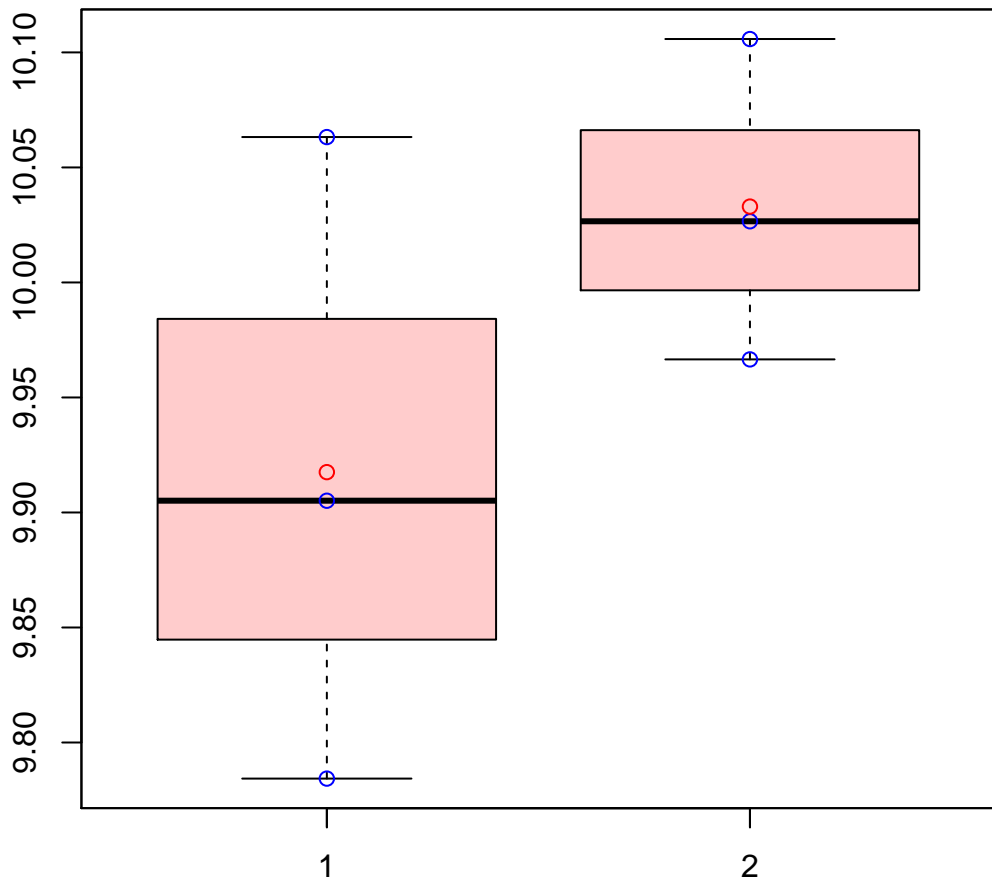

t-Test: p-value = 0.29

# CL1629Contig8|CL1629Contig8

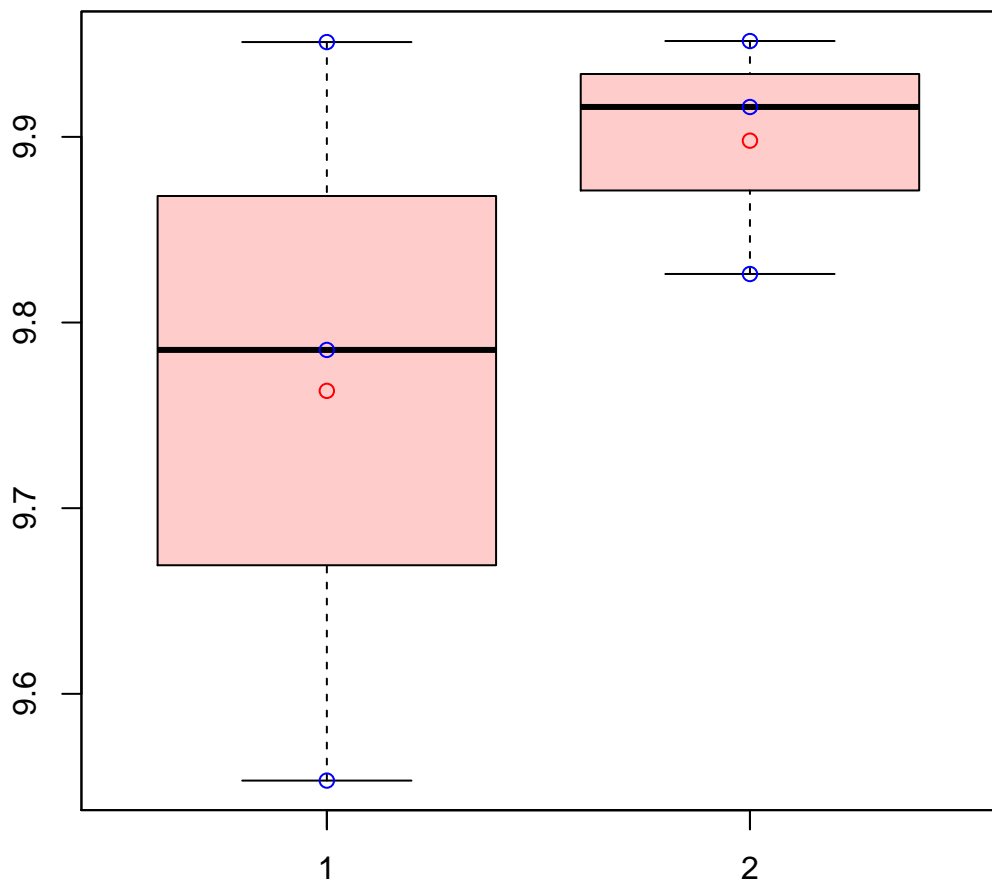

t-Test: p-value = 0.36

# CL1629Contig9|CL1629Contig9

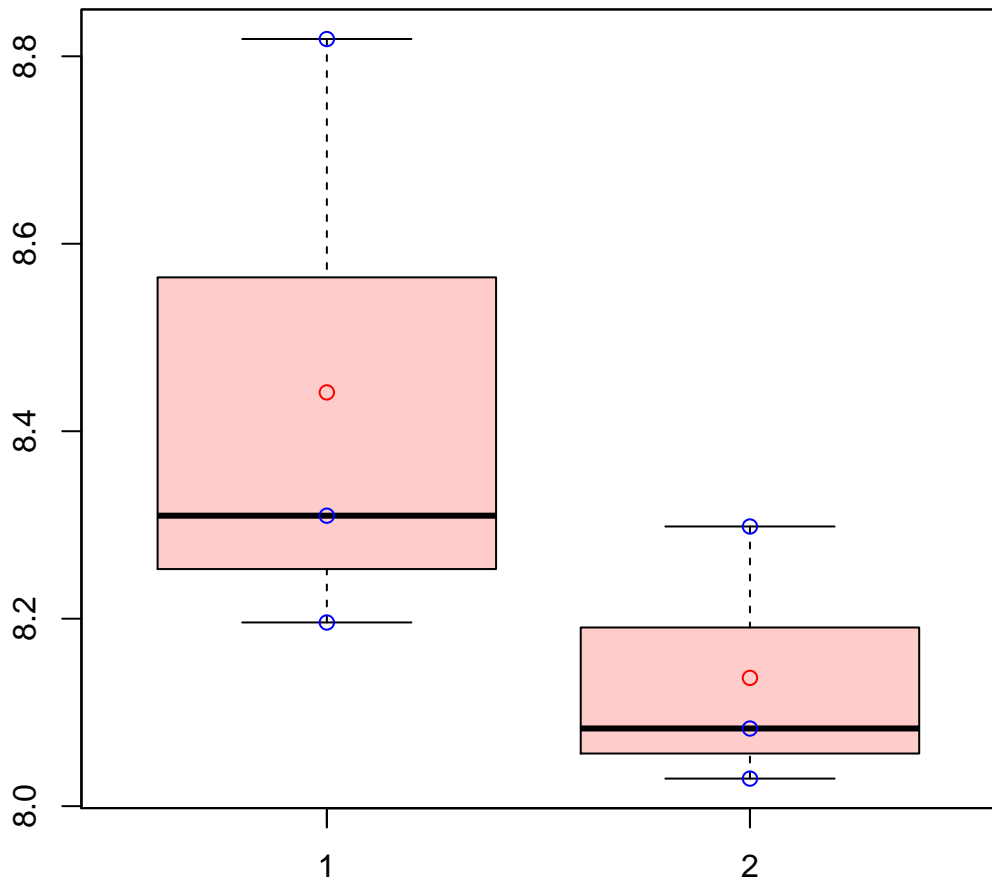

t-Test: p-value = 0.25

# CL162Contig12|CL162Contig12

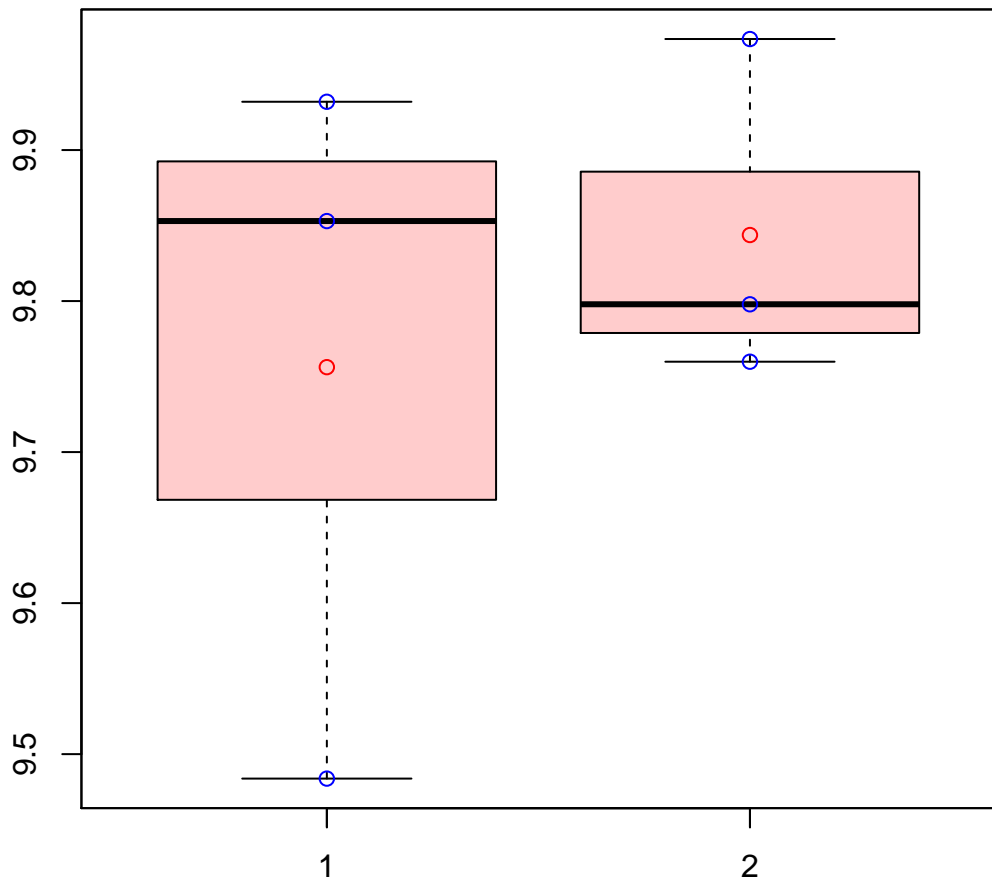

t-Test: p-value = 0.61



# CL162Contig2|CL162Contig2

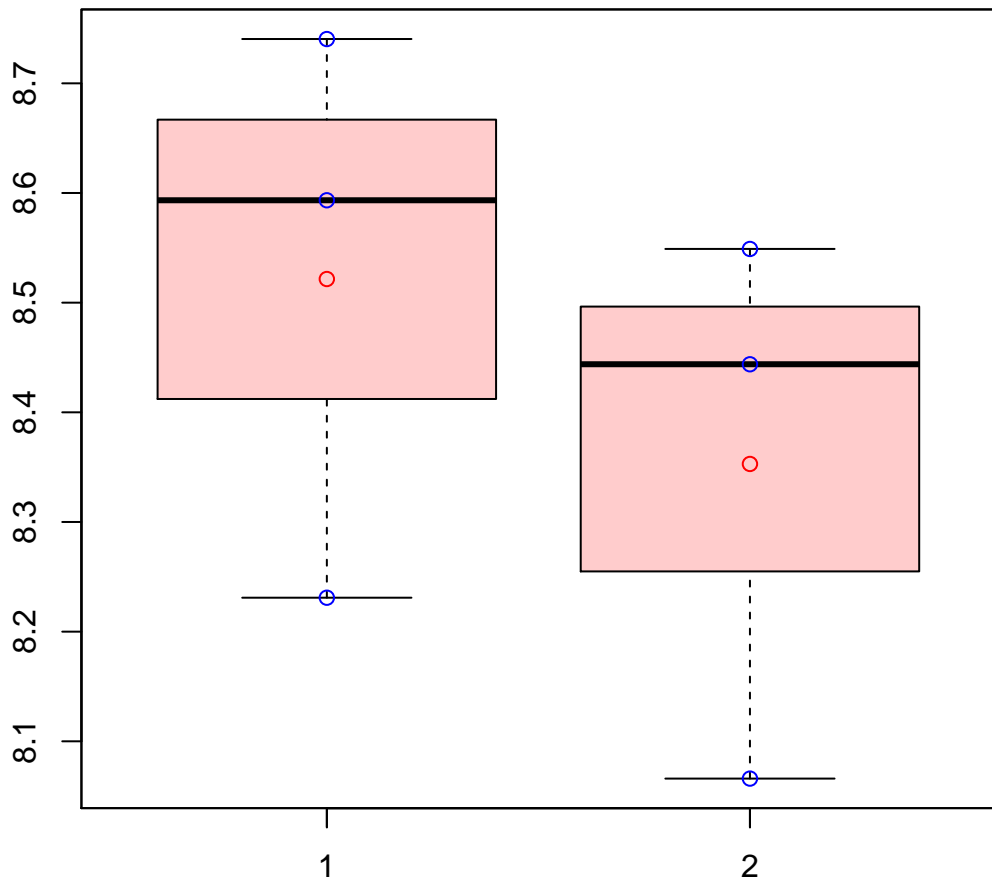

t-Test: p-value = 0.47

# CL1630Contig1|CL1630Contig1

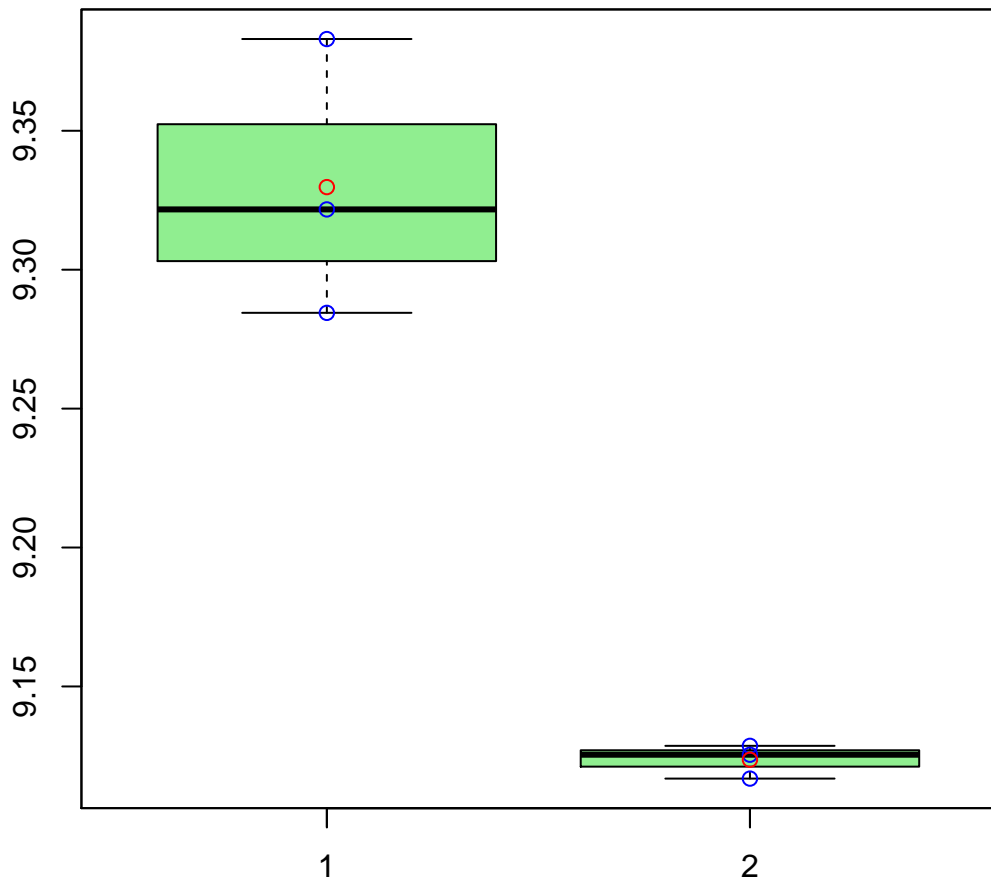

t-Test: p-value = 0.02

# CL1630Contig2|CL1630Contig2

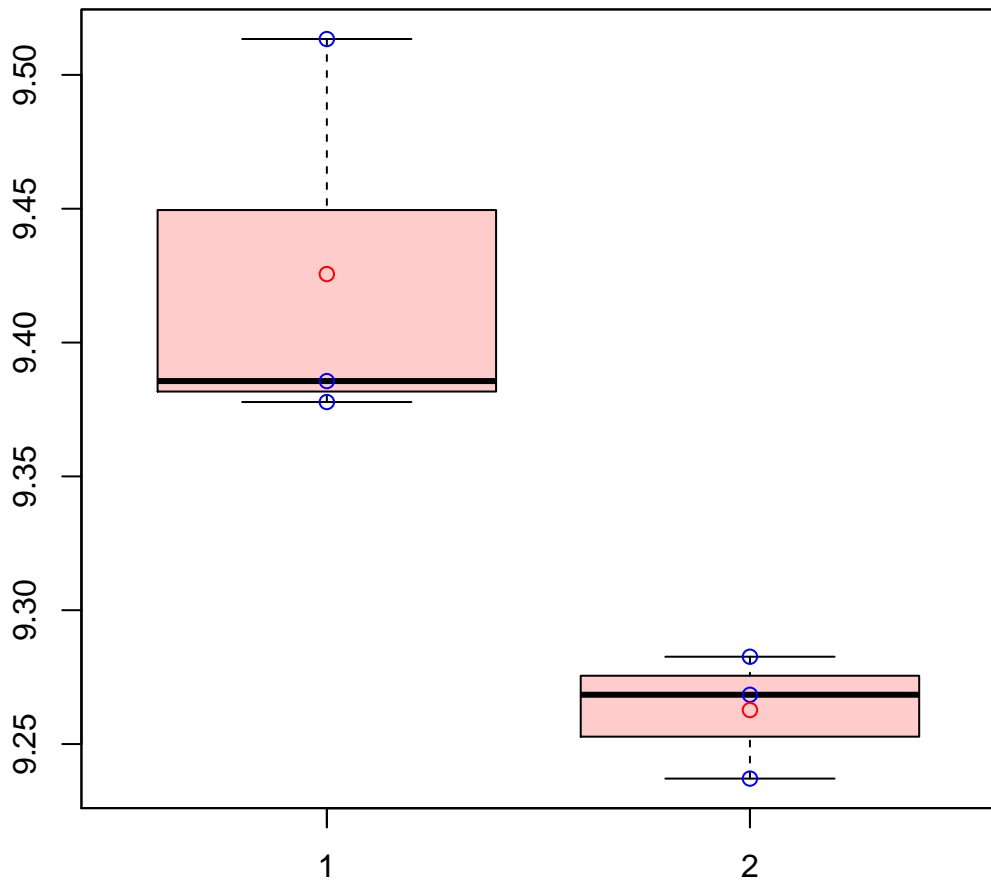

t-Test: p-value = 0.06

# CL1630Contig4|CL1630Contig4

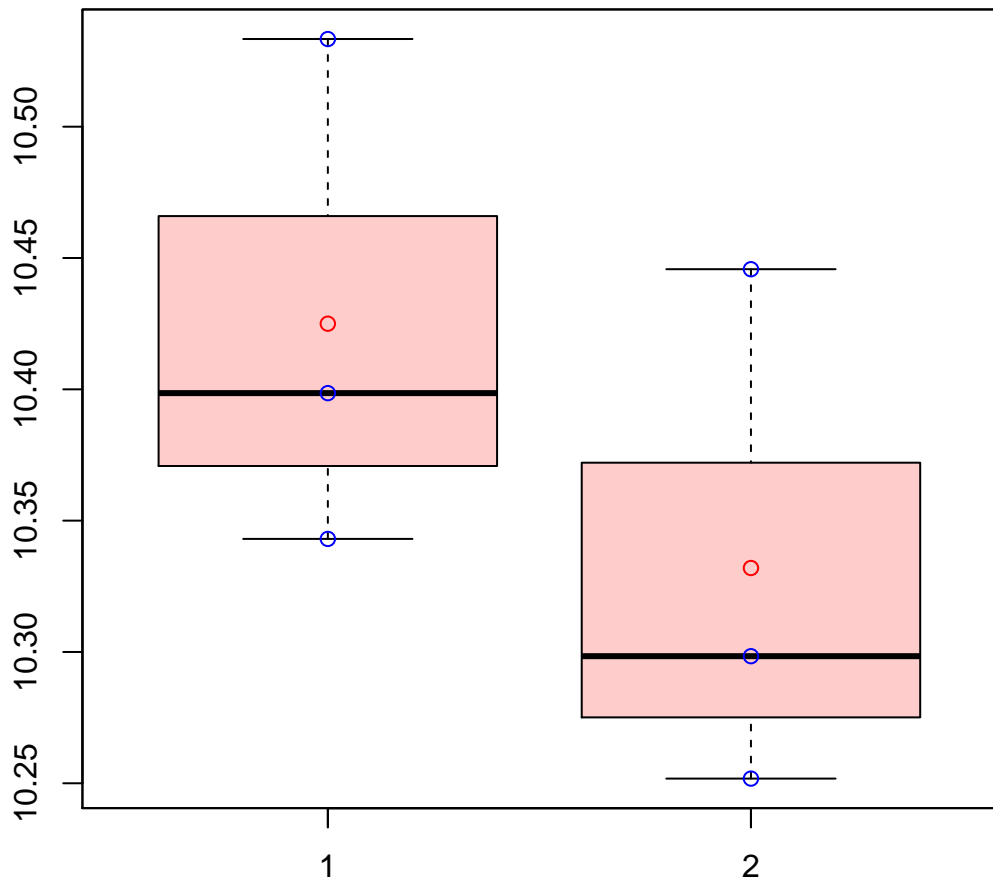

t-Test: p-value = 0.32

# CL1631Contig2|CL1631Contig2

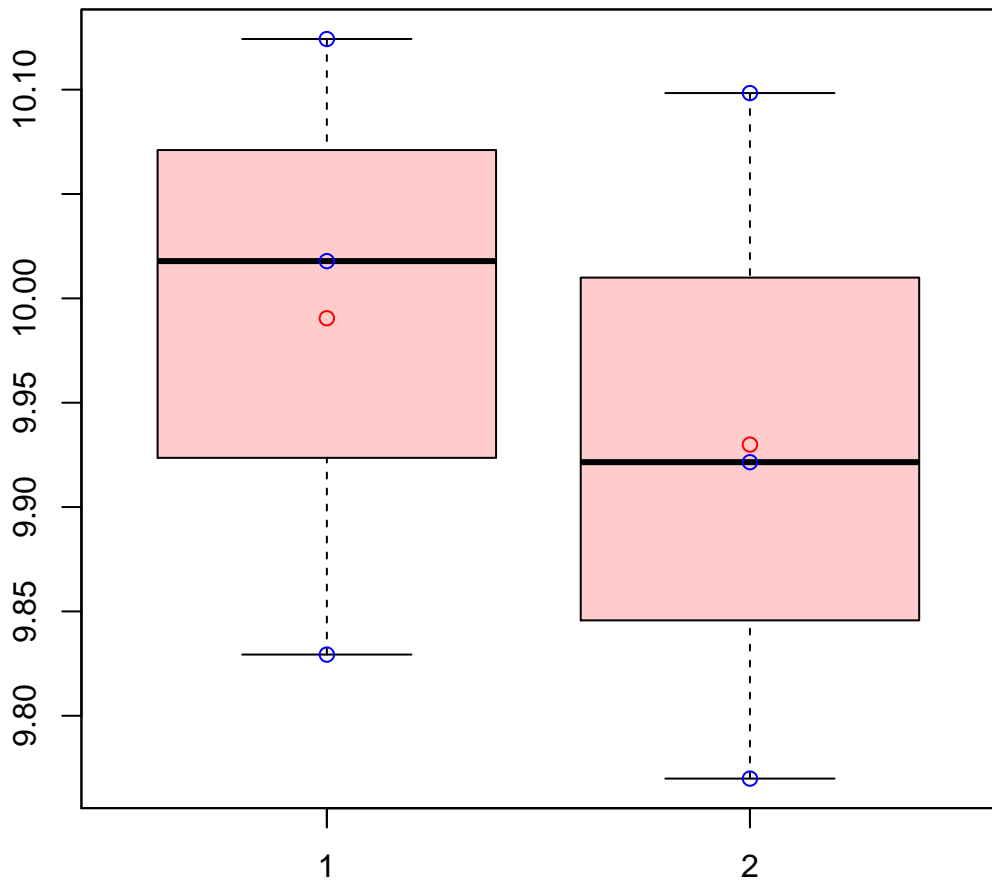

t-Test: p-value = 0.66

# CL1636Contig2|CL1636Contig2

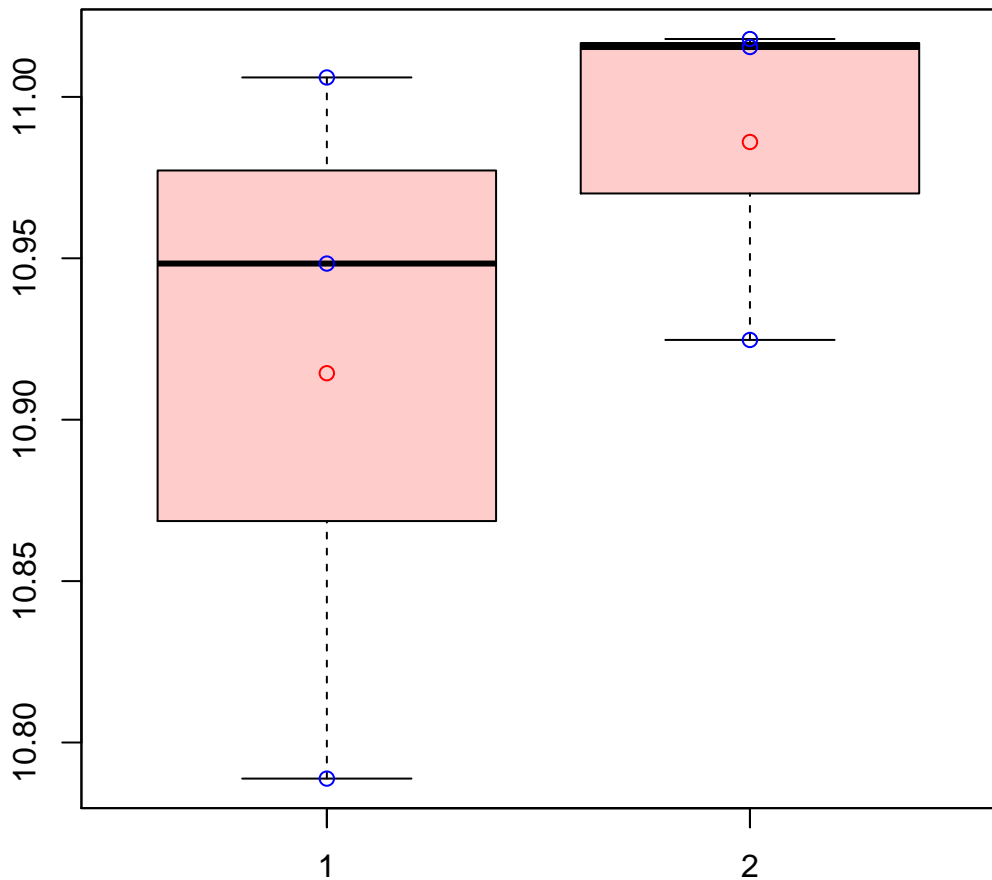

t-Test: p-value = 0.4

# CL1637Contig4|CL1637Contig4

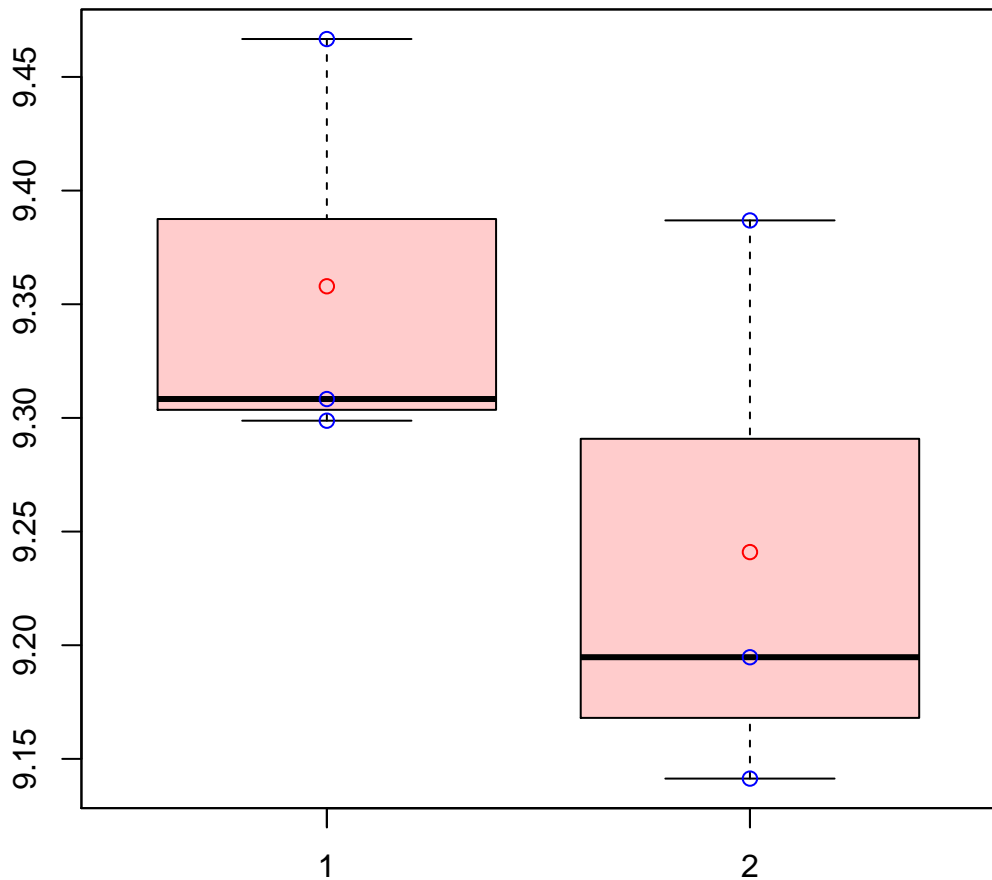

t-Test: p-value = 0.28

# CL1646Contig1|CL1646Contig1

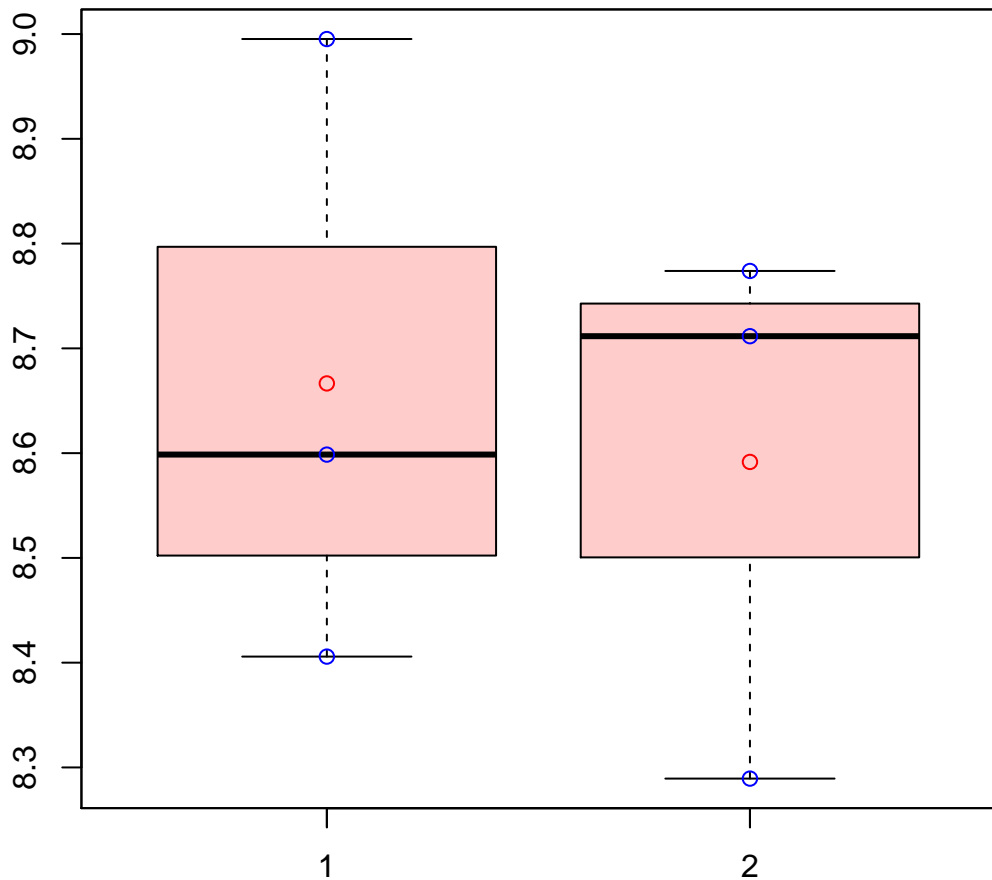

t-Test: p-value = 0.76



# CL1646Contig2|CL1646Contig2

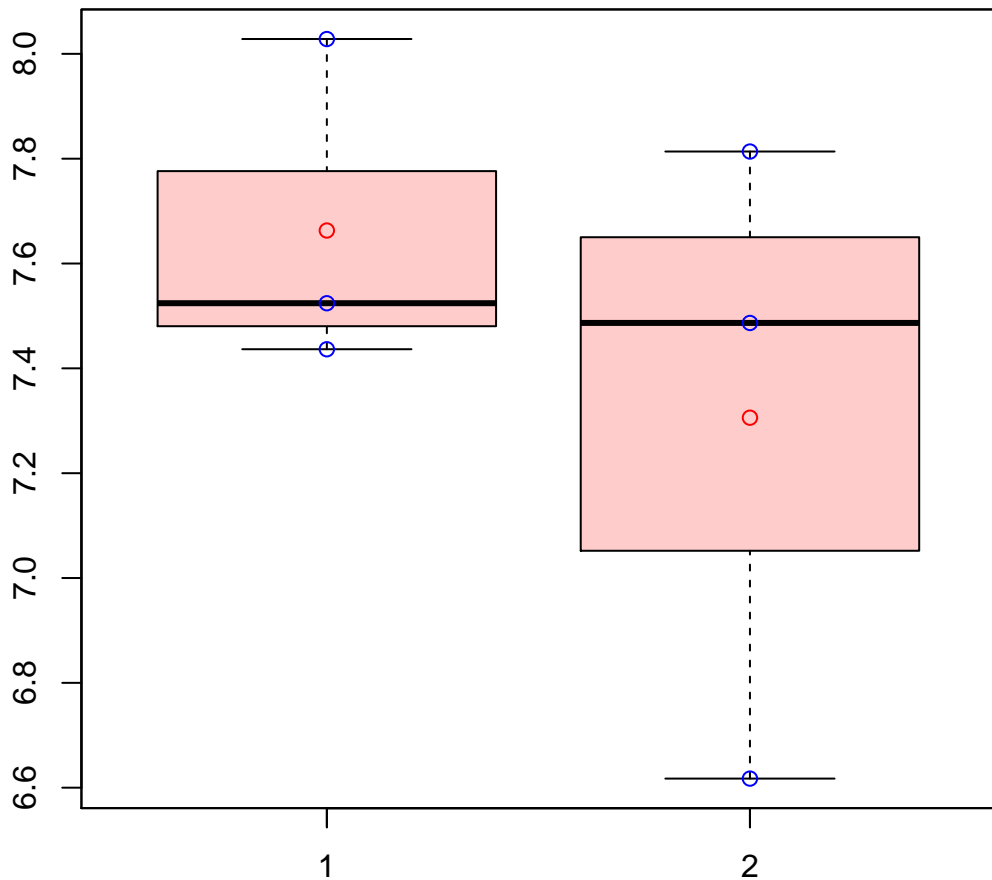

t-Test: p-value = 0.44

# CL16476Contig1|CL16476Contig1

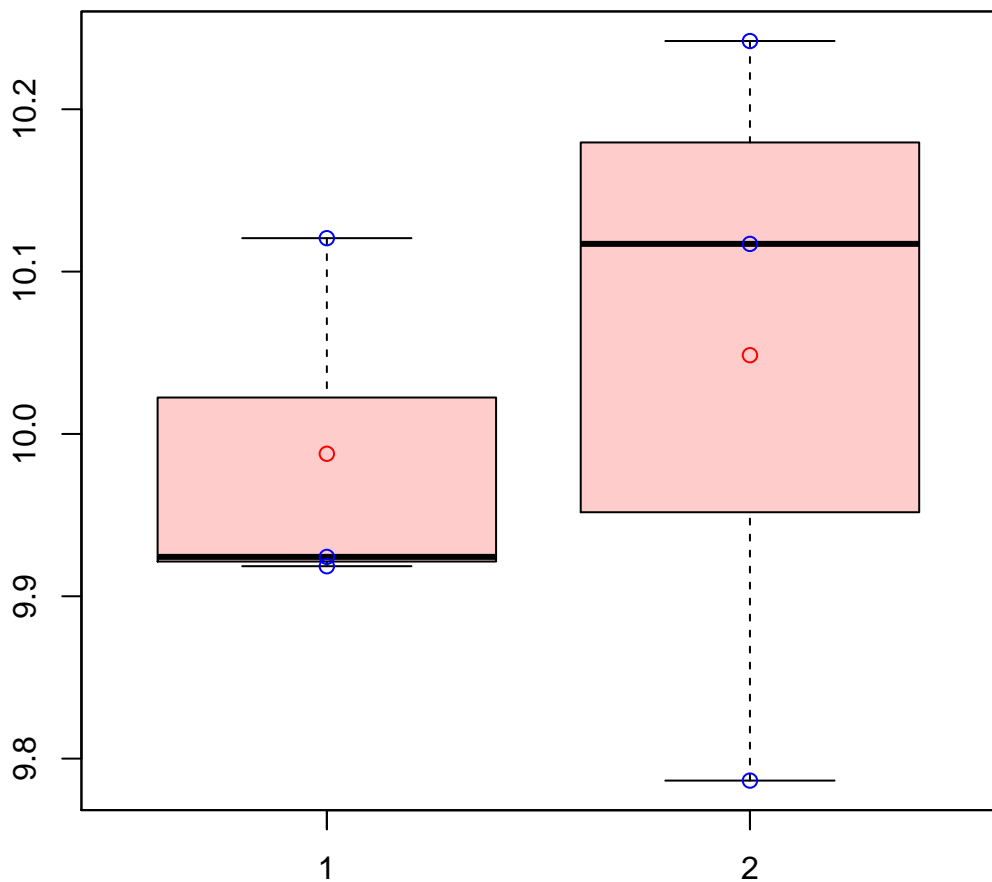

t-Test: p-value = 0.72

# CL1649Contig2|CL1649Contig2

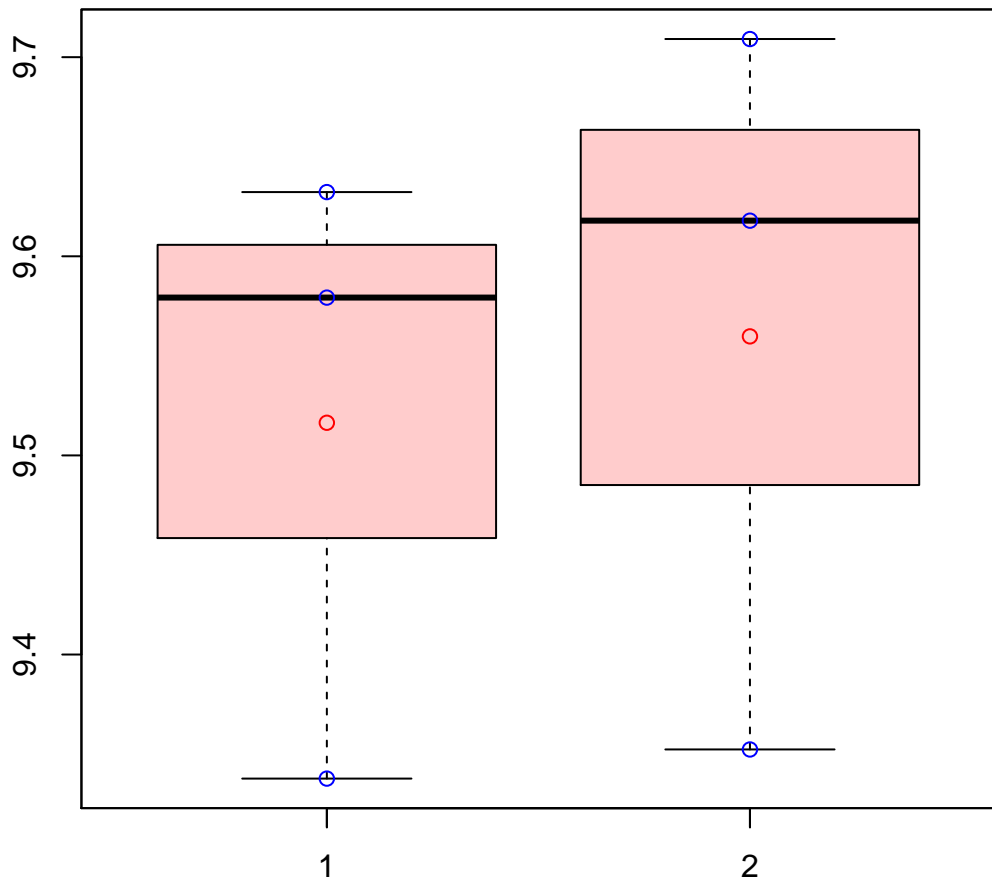

t-Test: p-value = 0.77

# CL16519Contig1|CL16519Contig1

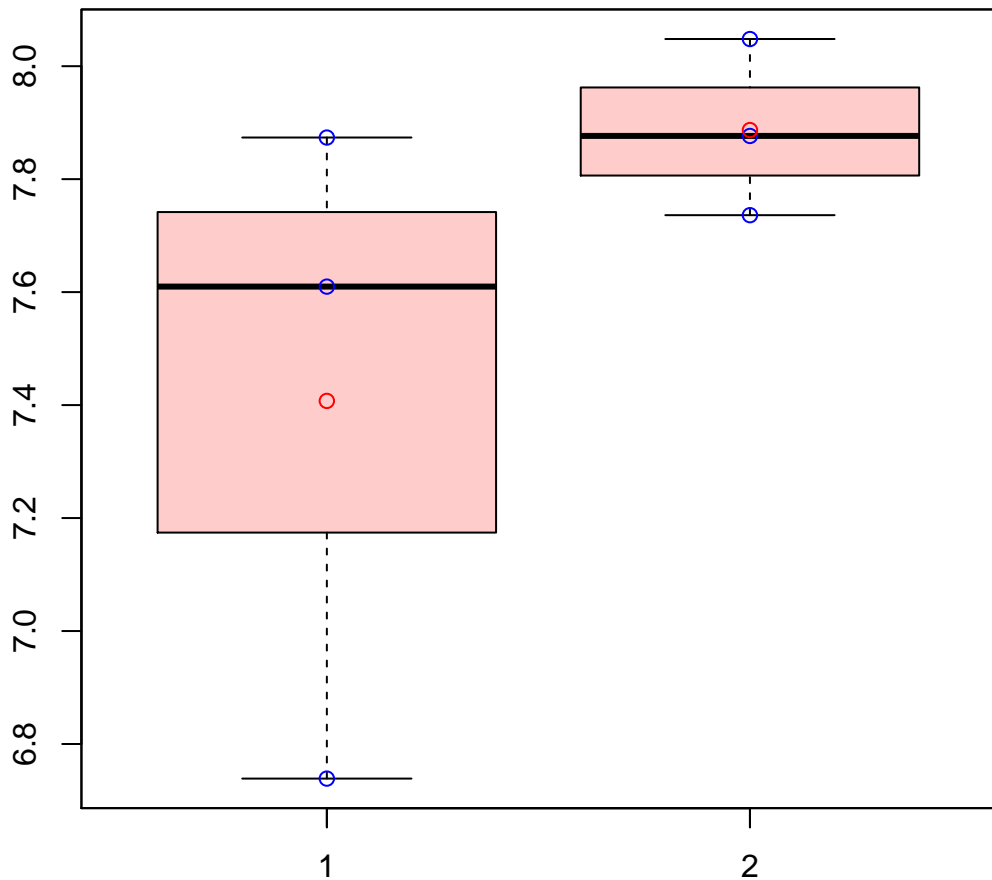

t-Test: p-value = 0.29

# CL1651Contig3|CL1651Contig3



t-Test: p-value = 0.38

# CL1651Contig9|CL1651Contig9

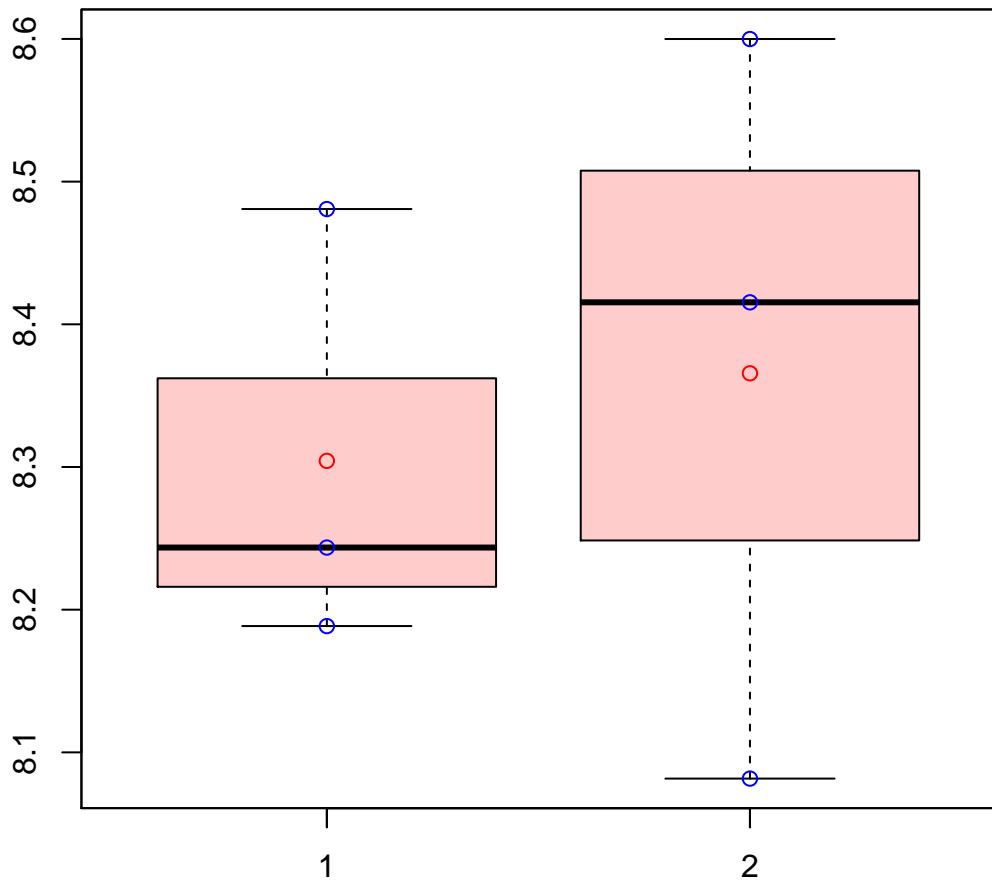

t-Test: p-value = 0.75

# CL1655Contig1|CL1655Contig1

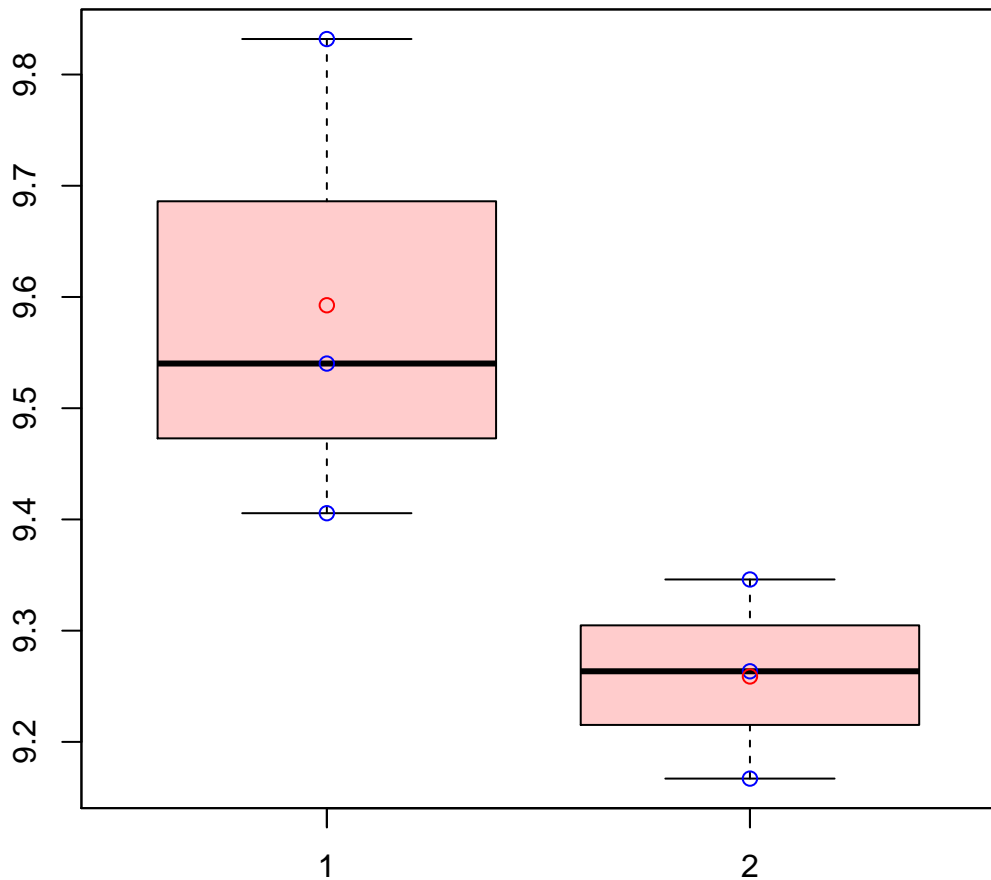

t-Test: p-value = 0.1

# CL1655Contig2|CL1655Contig2

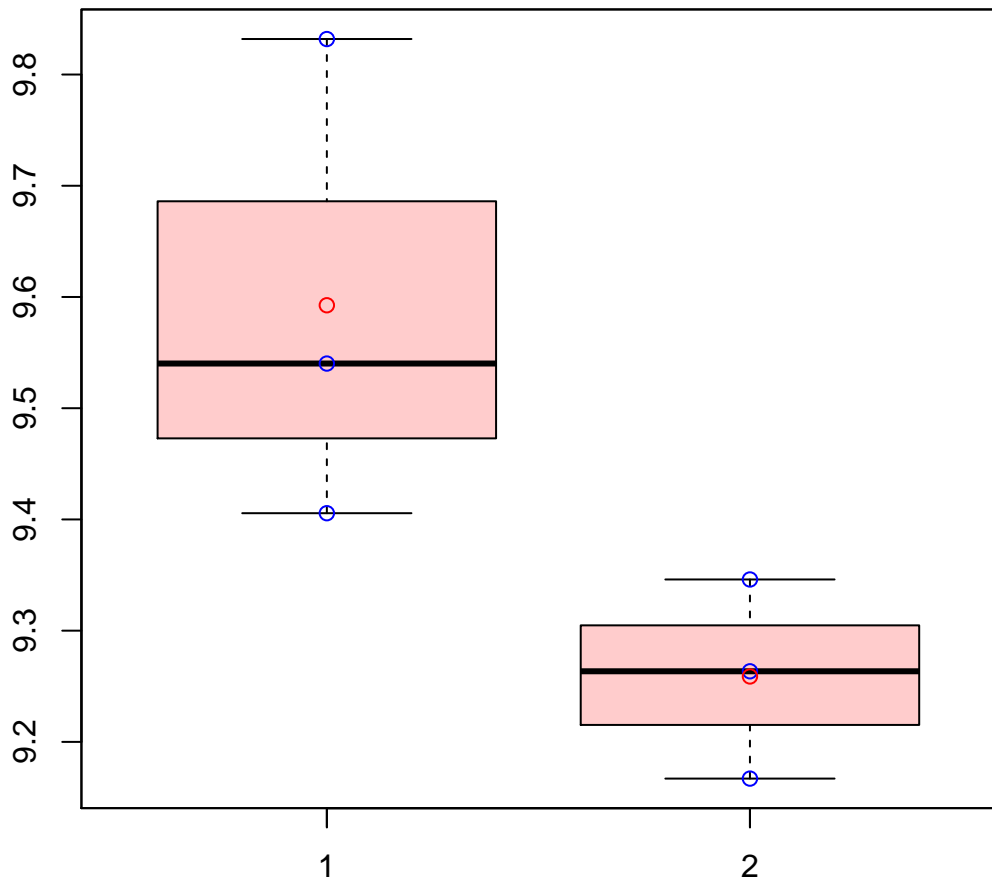

t-Test: p-value = 0.1



# CL1656Contig7|CL1656Contig7

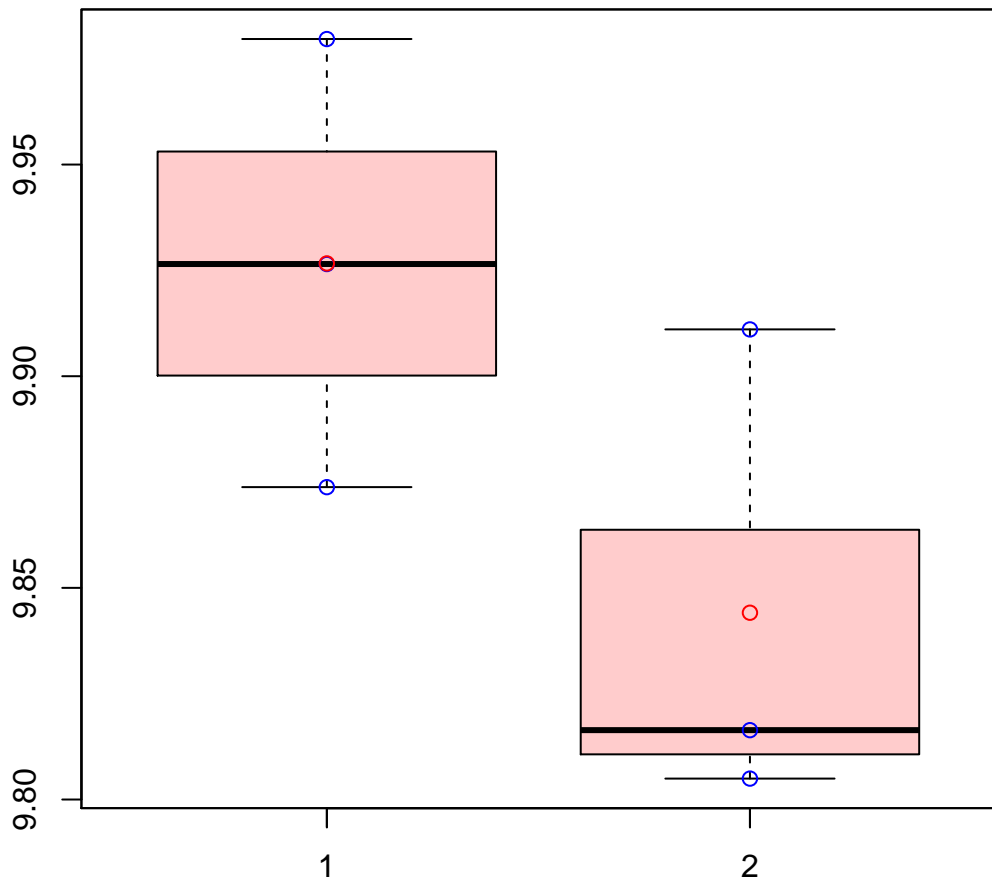

t-Test: p-value = 0.14

# CL1658Contig10|CL1658Contig10

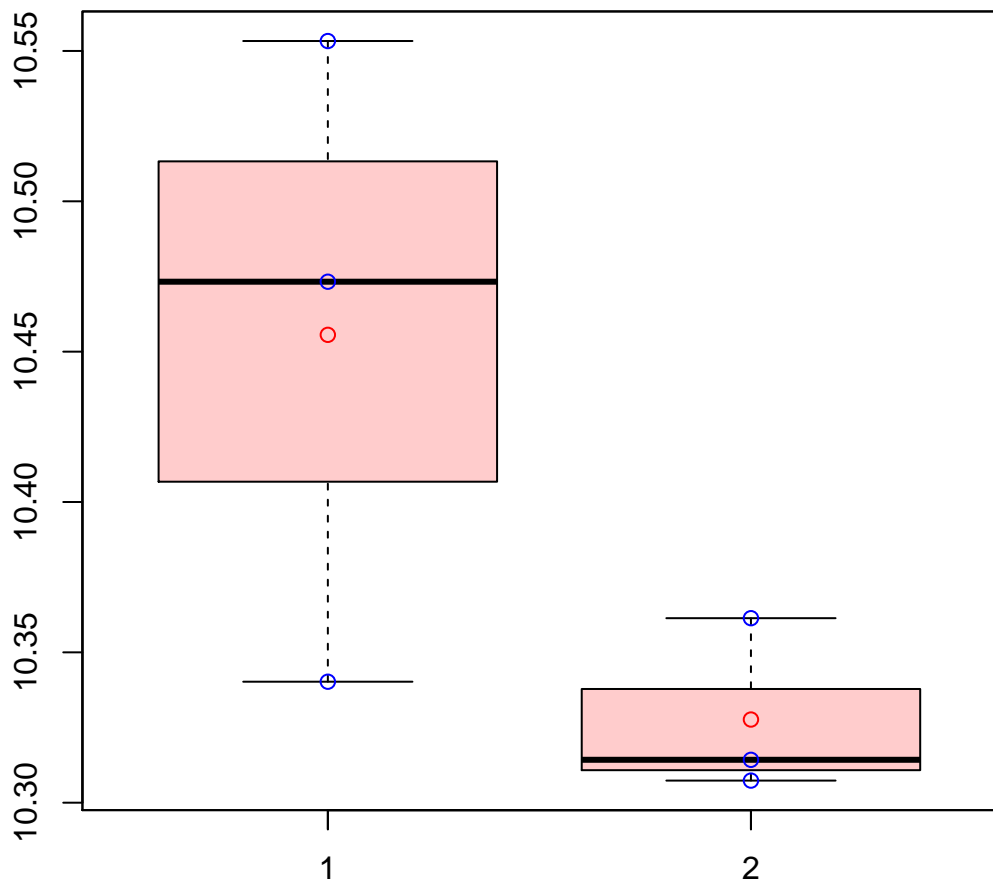

t-Test: p-value = 0.17

# CL1658Contig11|CL1658Contig11

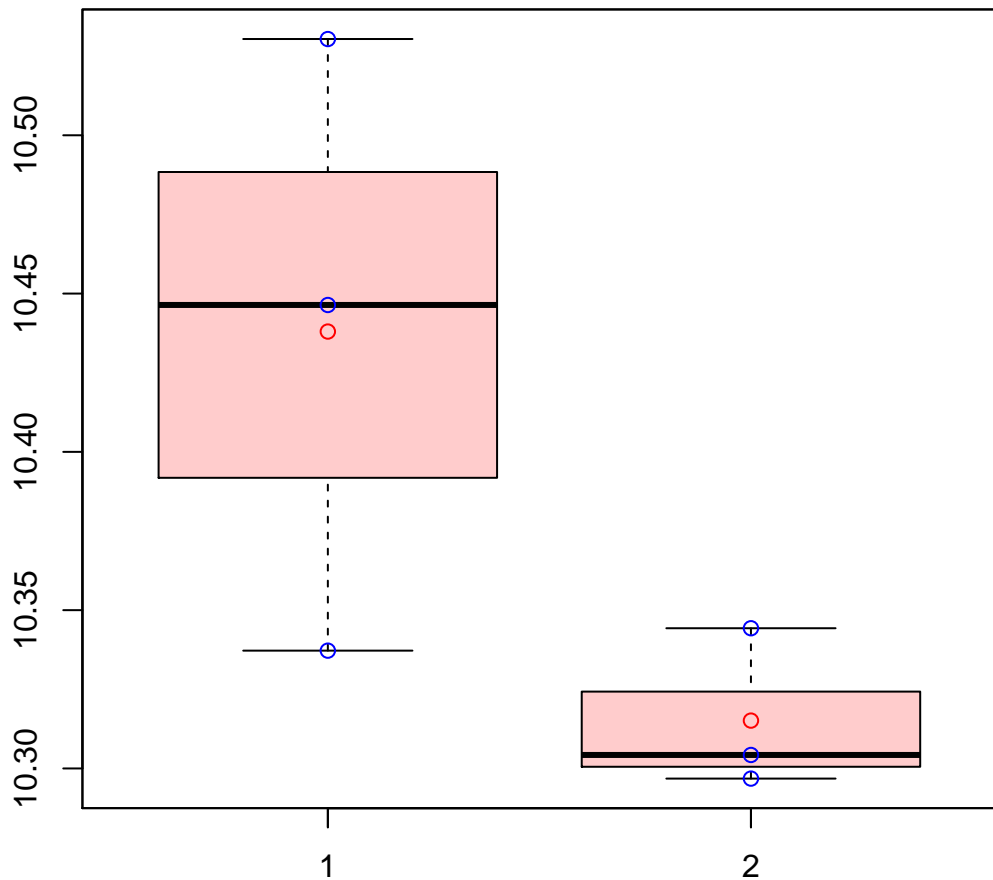

t-Test: p-value = 0.15

# CL1658Contig12|CL1658Contig12



t-Test: p-value = 0.15

# CL1658Contig13|CL1658Contig13

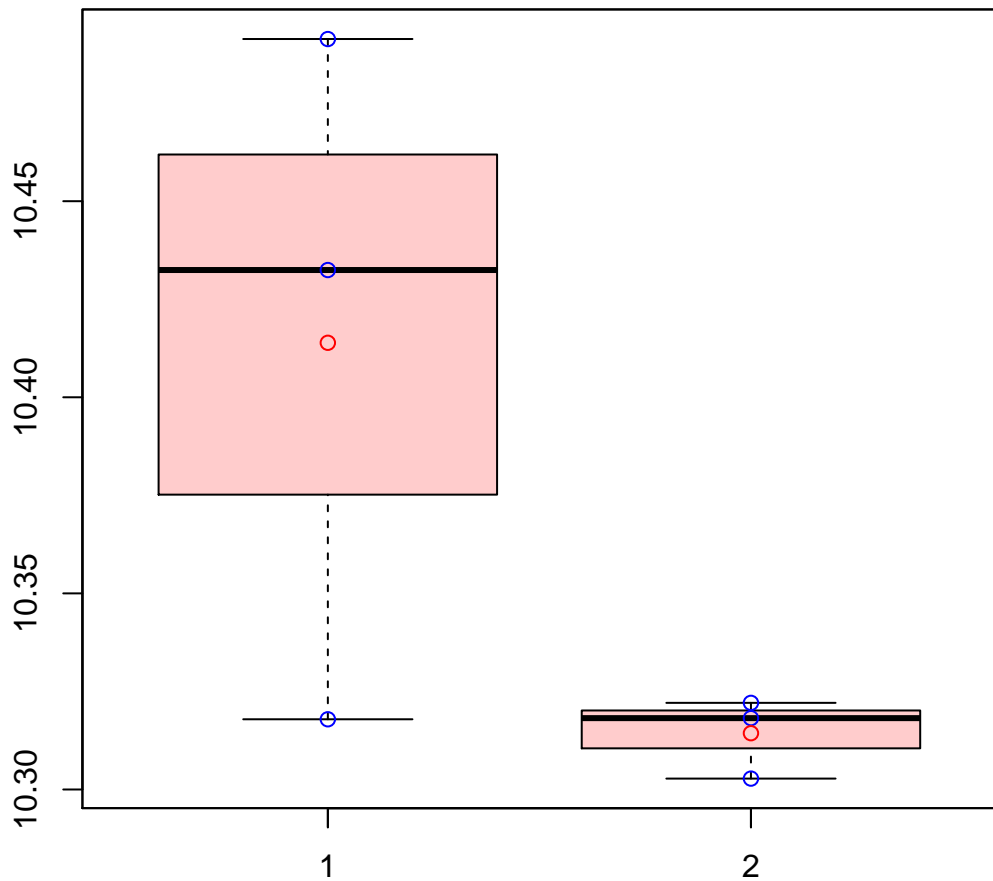

t-Test: p-value = 0.19

# CL1658Contig2|CL1658Contig2

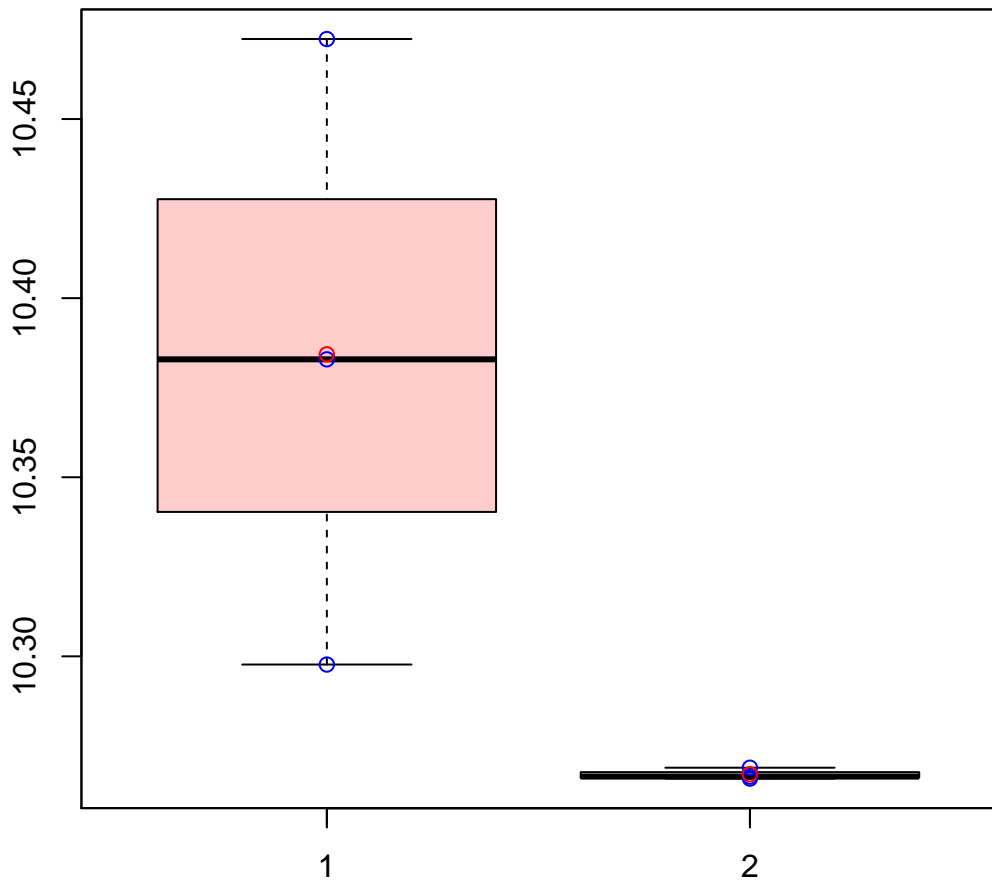

t-Test: p-value = 0.15

# CL1658Contig3|CL1658Contig3

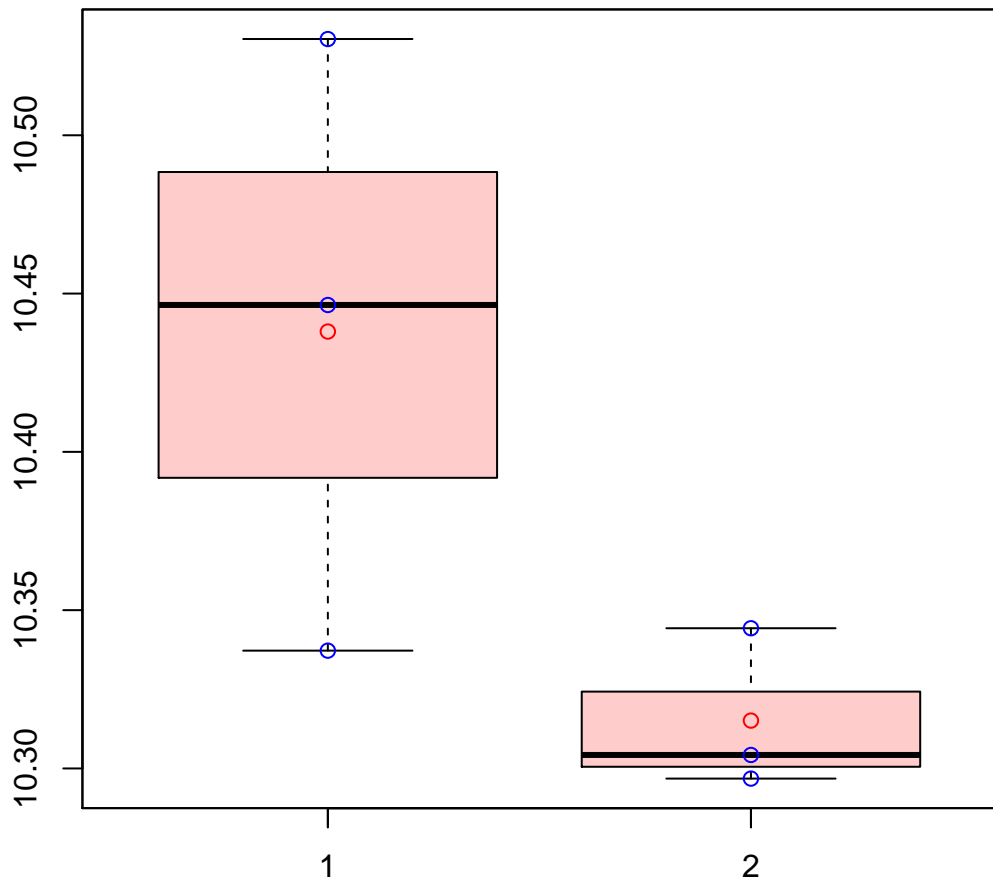

t-Test: p-value = 0.15

# CL1658Contig4|CL1658Contig4



t-Test: p-value = 0.15



# CL1658Contig5|CL1658Contig5



t-Test: p-value = 0.15

# CL1658Contig6|CL1658Contig6



t-Test: p-value = 0.15

# CL1658Contig8|CL1658Contig8



t-Test: p-value = 0.15

# CL1658Contig9|CL1658Contig9

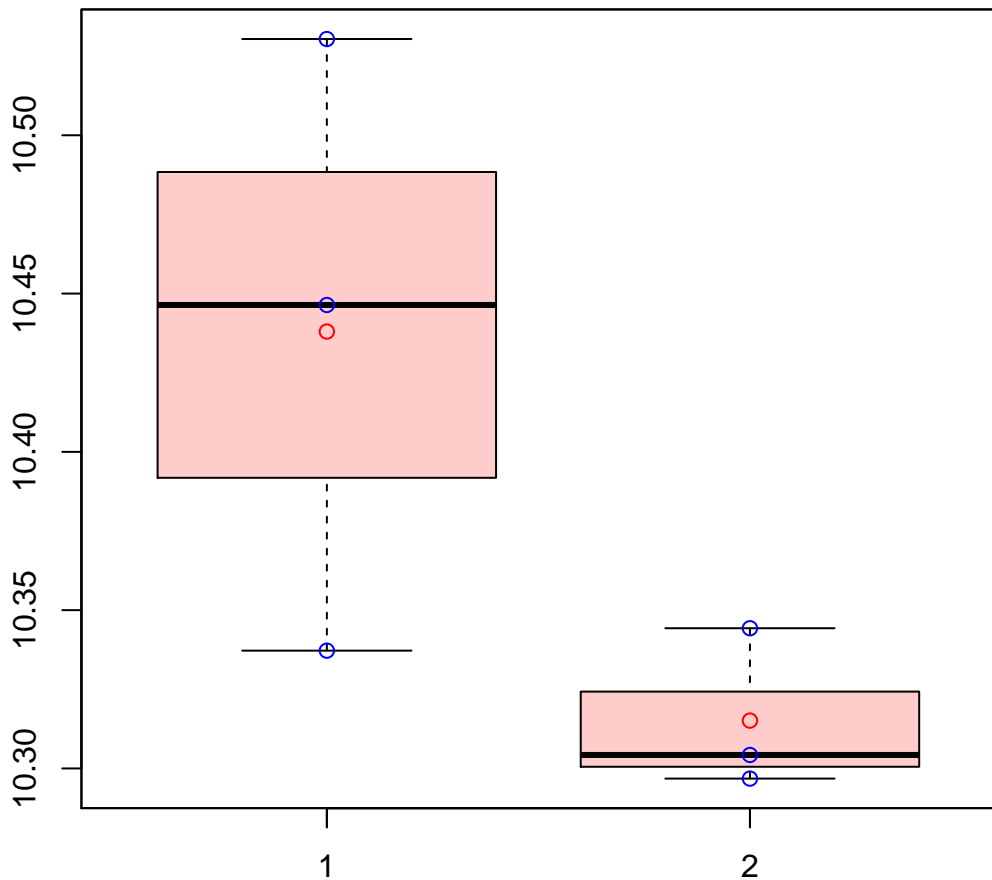

t-Test: p-value = 0.15

# CL1662Contig3|CL1662Contig3

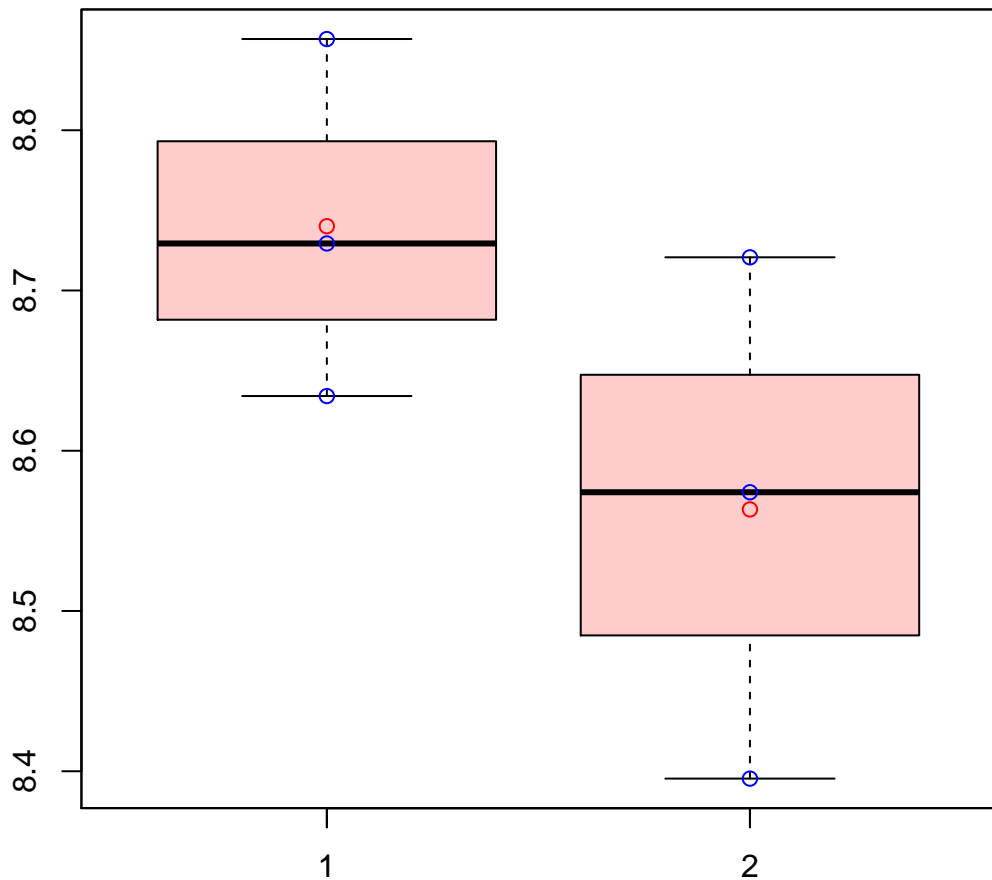

t-Test: p-value = 0.21

# CL1665Contig1|CL1665Contig1

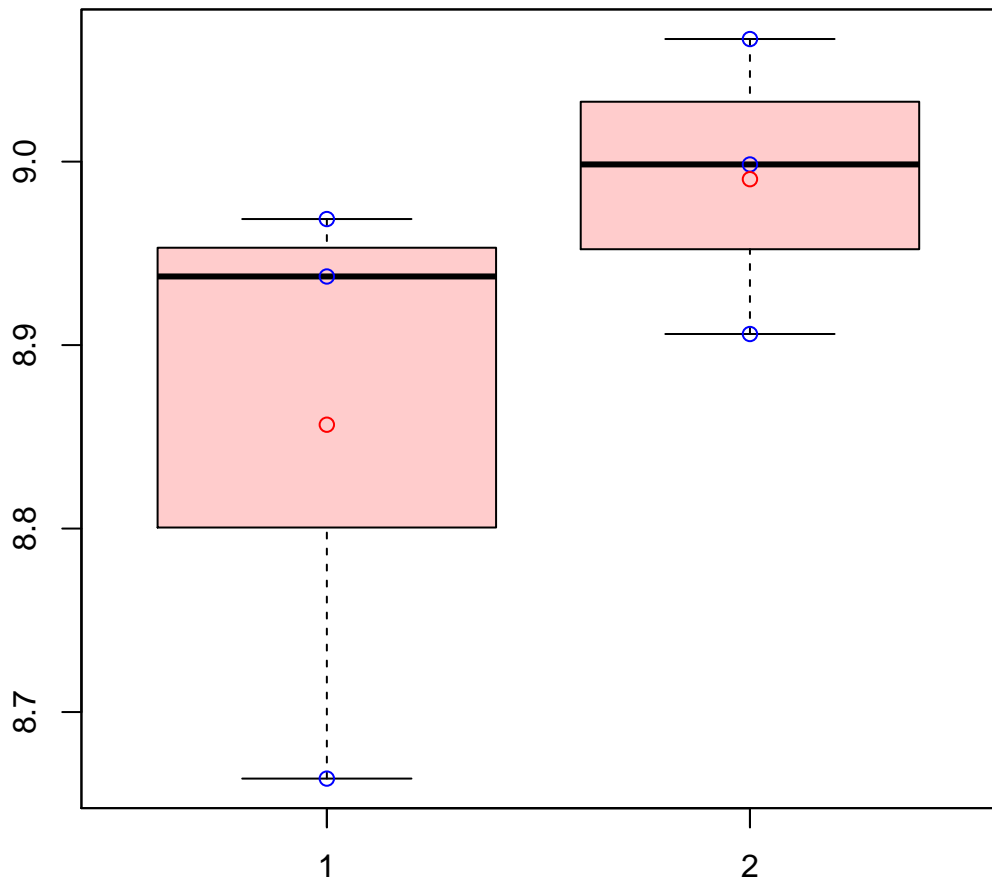

t-Test: p-value = 0.3

# CL1665Contig4|CL1665Contig4

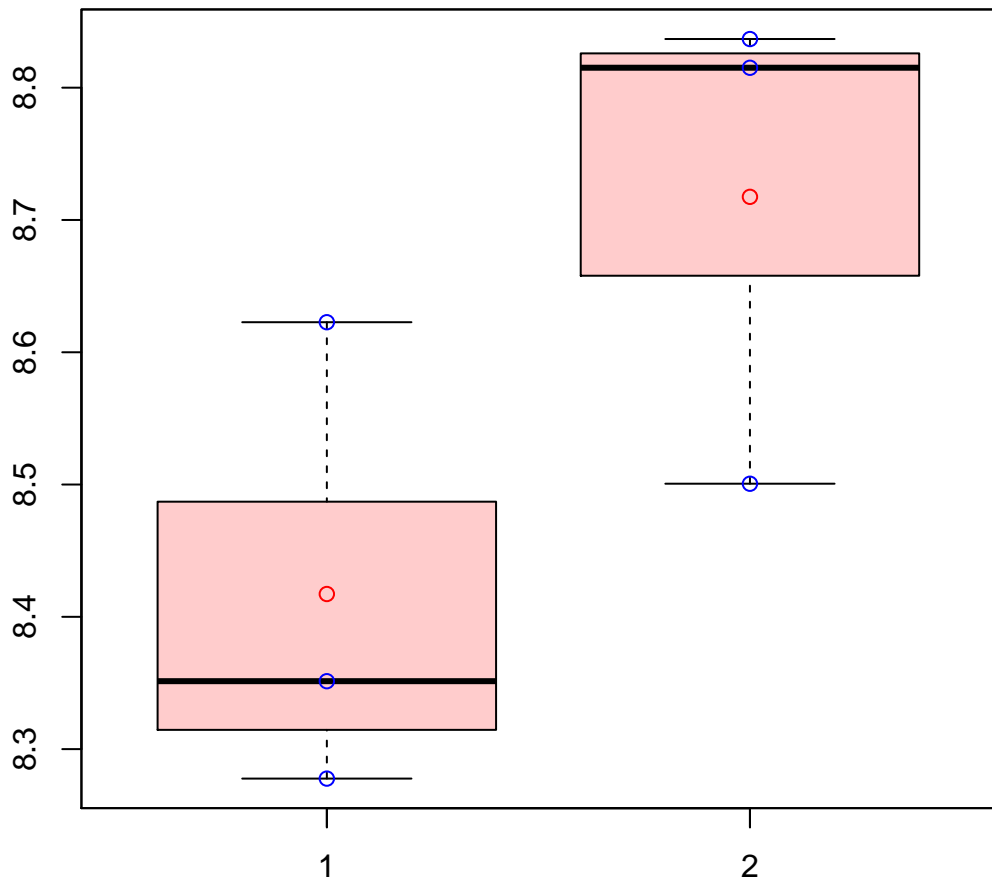

t-Test: p-value = 0.12

# CL1665Contig5|CL1665Contig5

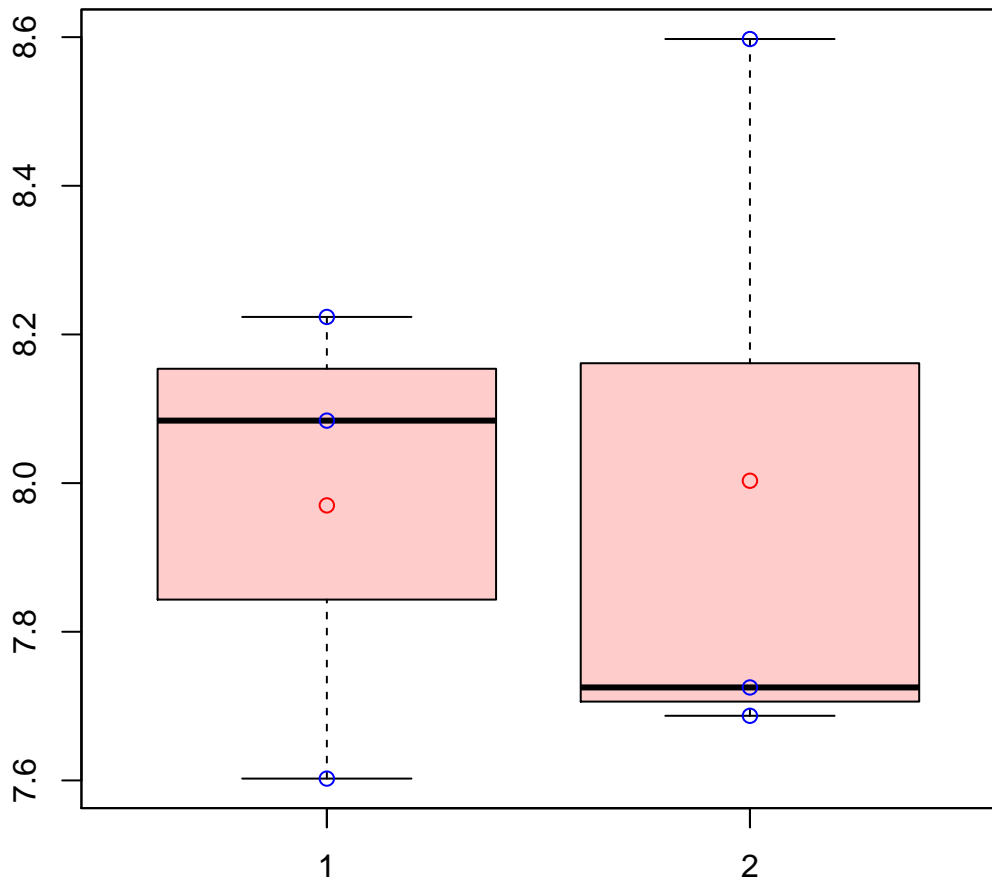

t-Test: p-value = 0.93



# CL1665Contig8|CL1665Contig8

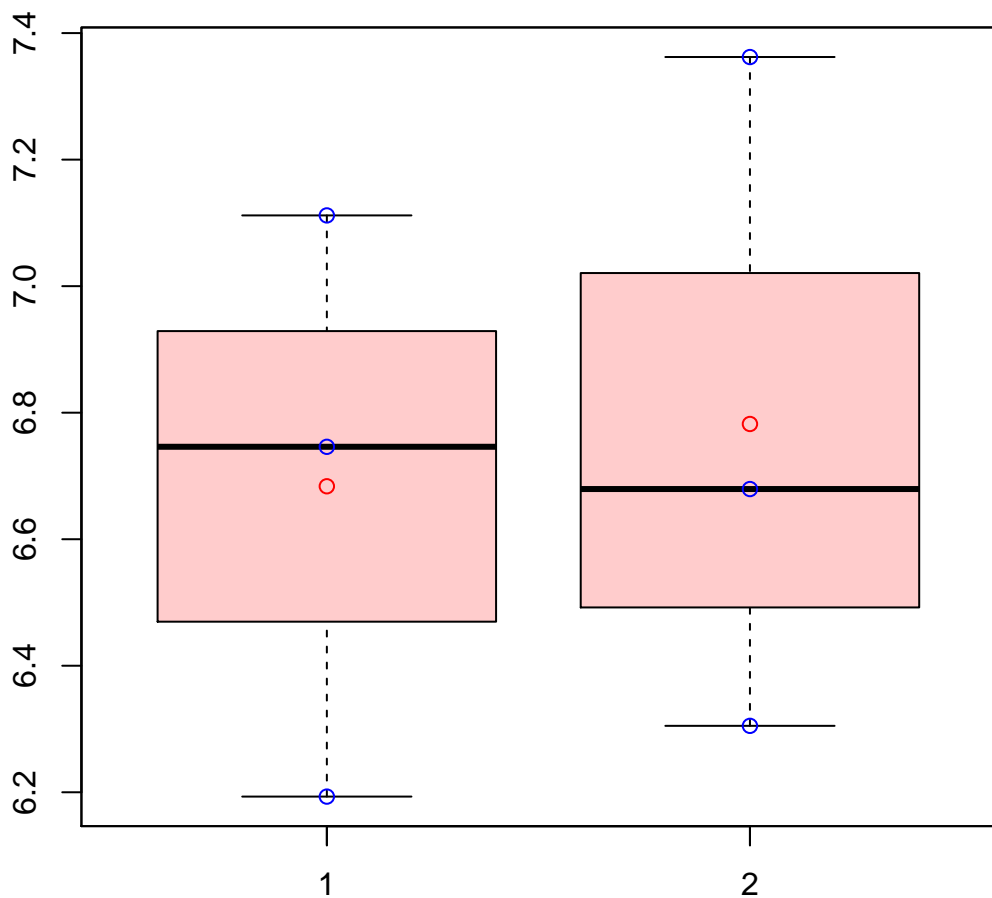

t-Test: p-value = 0.82

# CL1666Contig10|CL1666Contig10

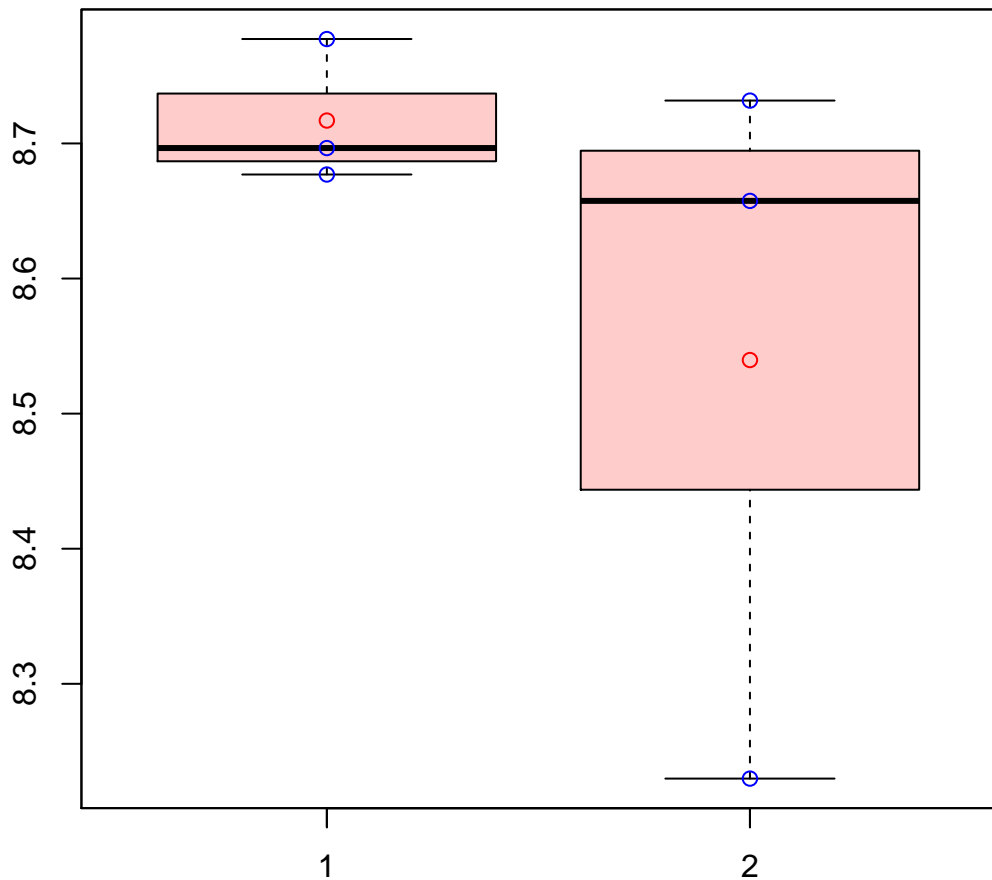

t-Test: p-value = 0.37

# CL1666Contig12|CL1666Contig12

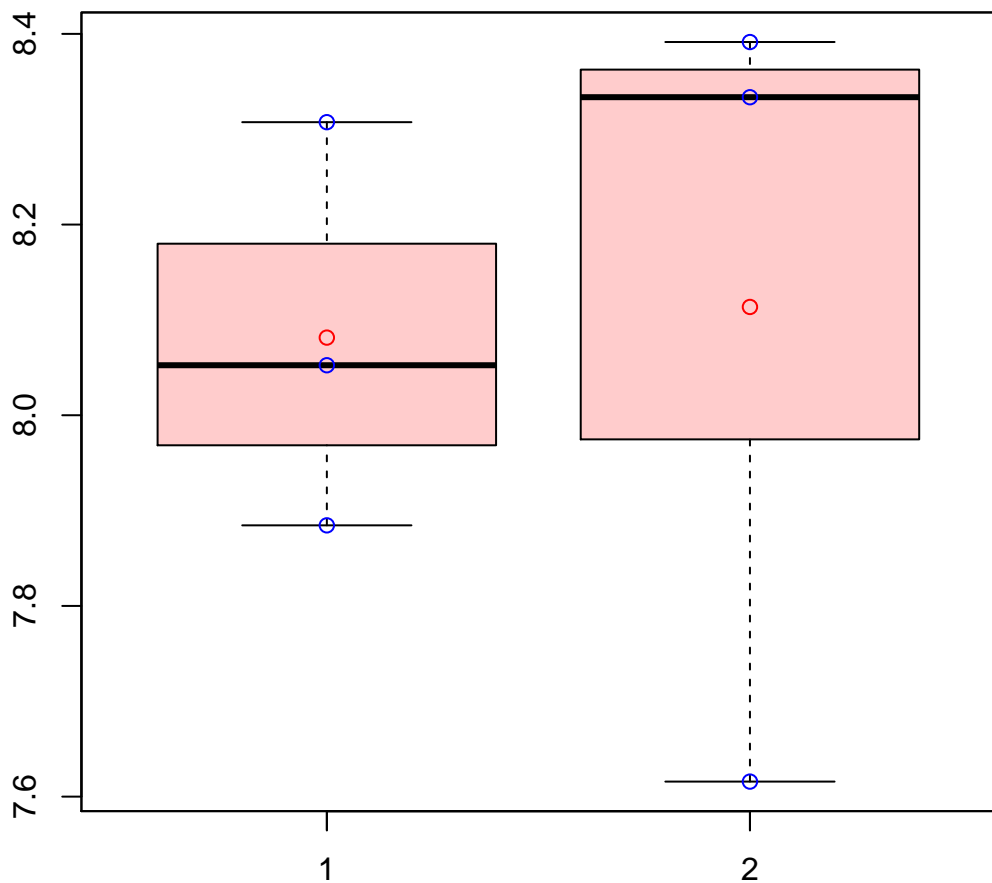

t-Test: p-value = 0.92

# CL1666Contig7|CL1666Contig7

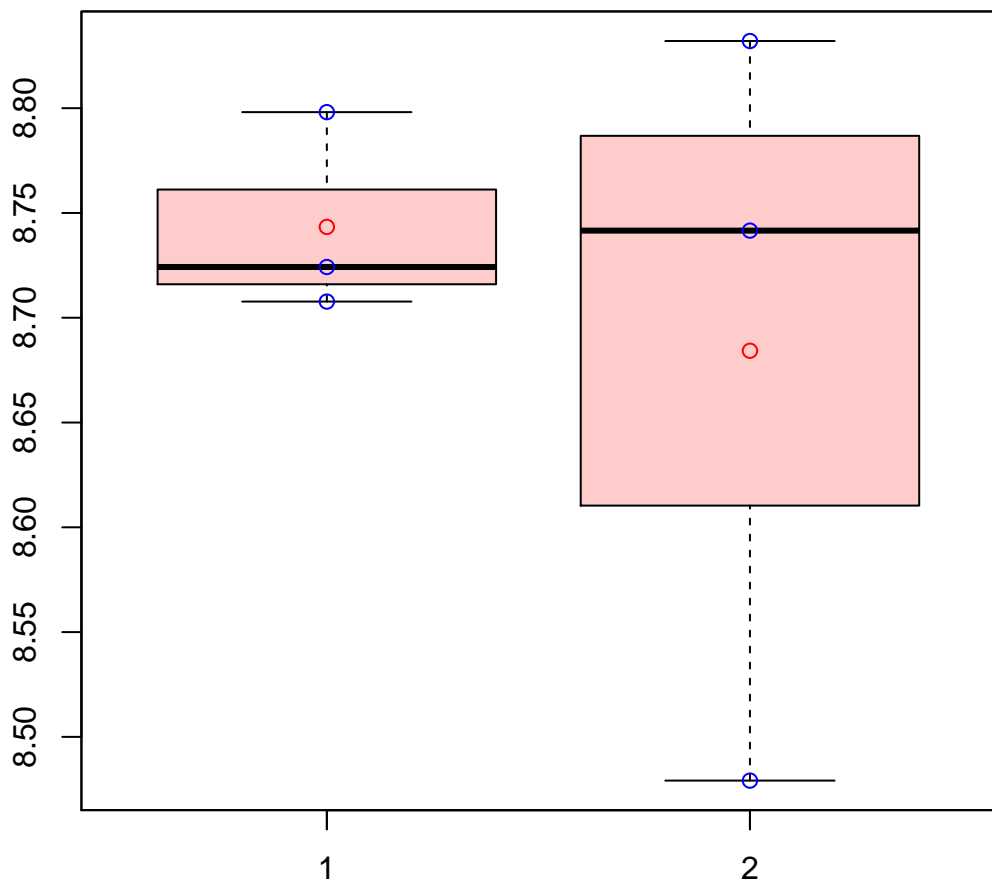

t-Test: p-value = 0.64

# CL1666Contig8|CL1666Contig8

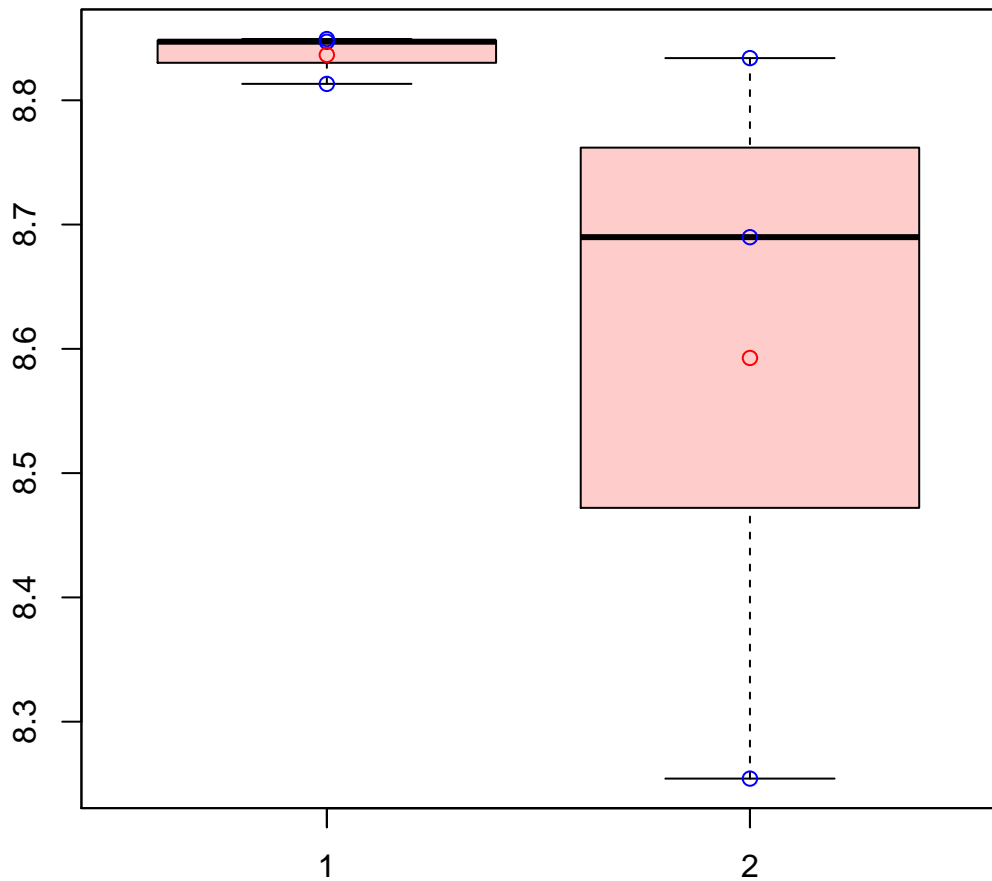

t-Test: p-value = 0.3

# CL1666Contig9|CL1666Contig9

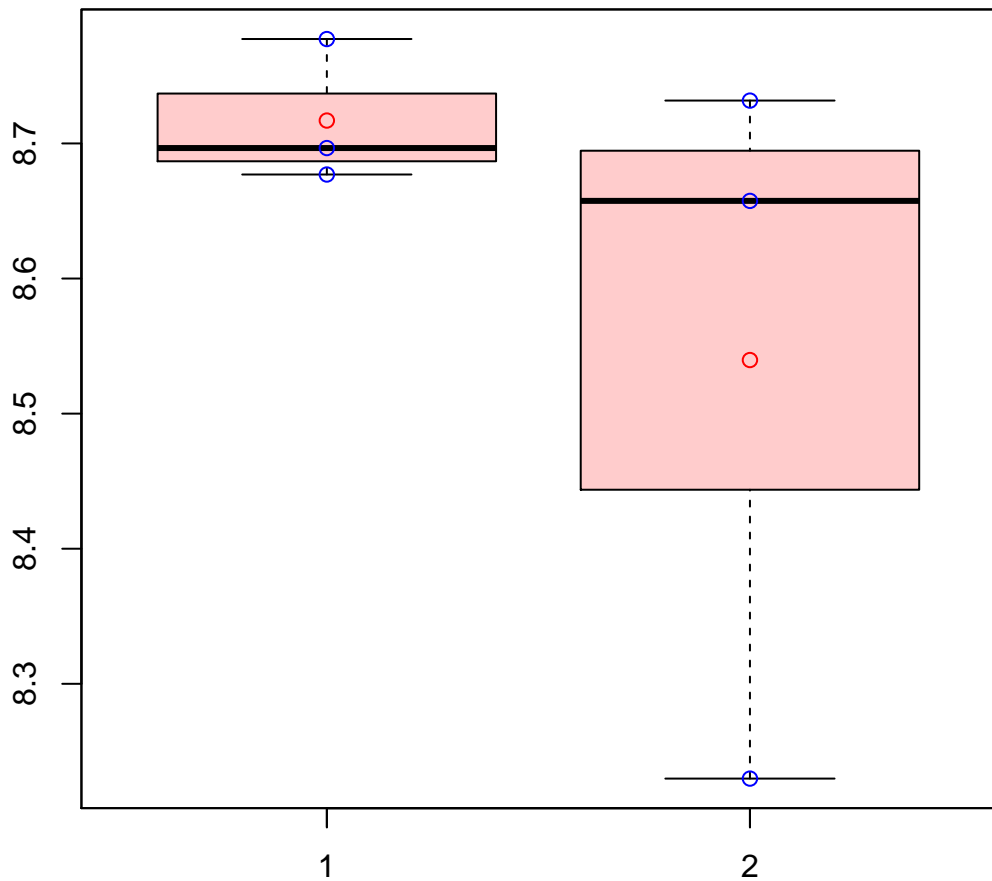

t-Test: p-value = 0.37

# CL1667Contig1|CL1667Contig1

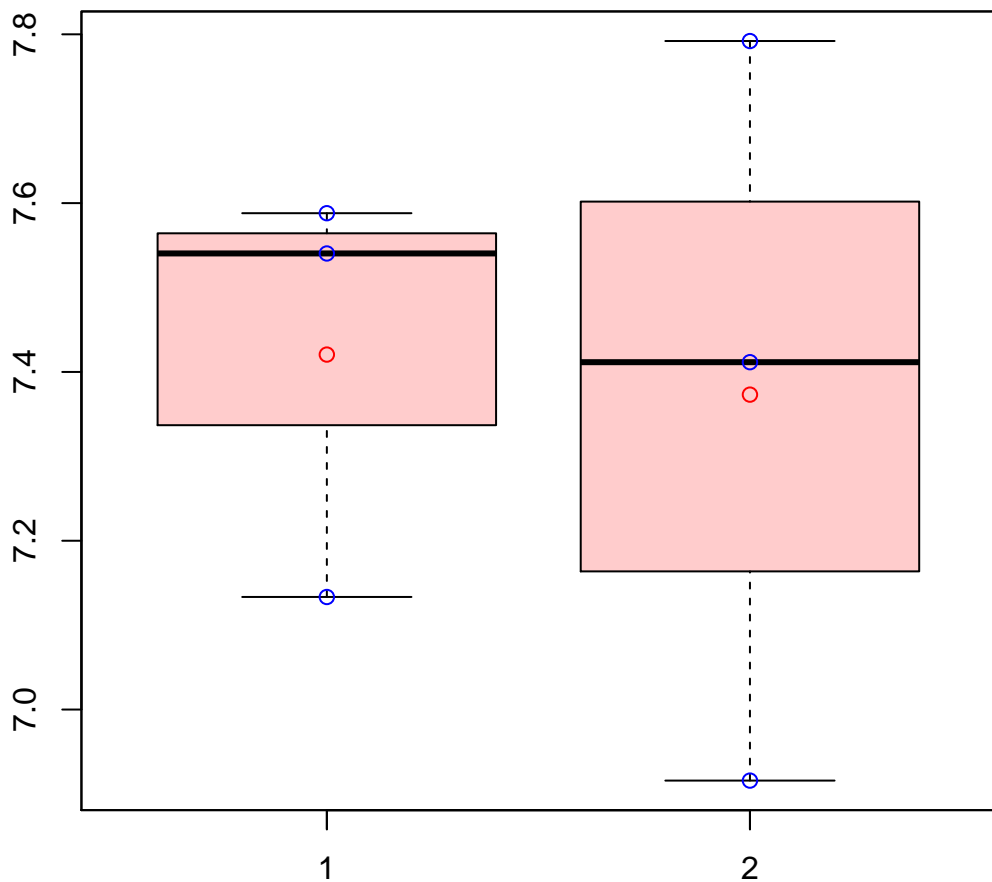

t-Test: p-value = 0.88

# CL1667Contig4|CL1667Contig4



t-Test: p-value = 0.88



# CL1667Contig6|CL1667Contig6



t-Test: p-value = 0.88

# CL16694Contig1|CL16694Contig1

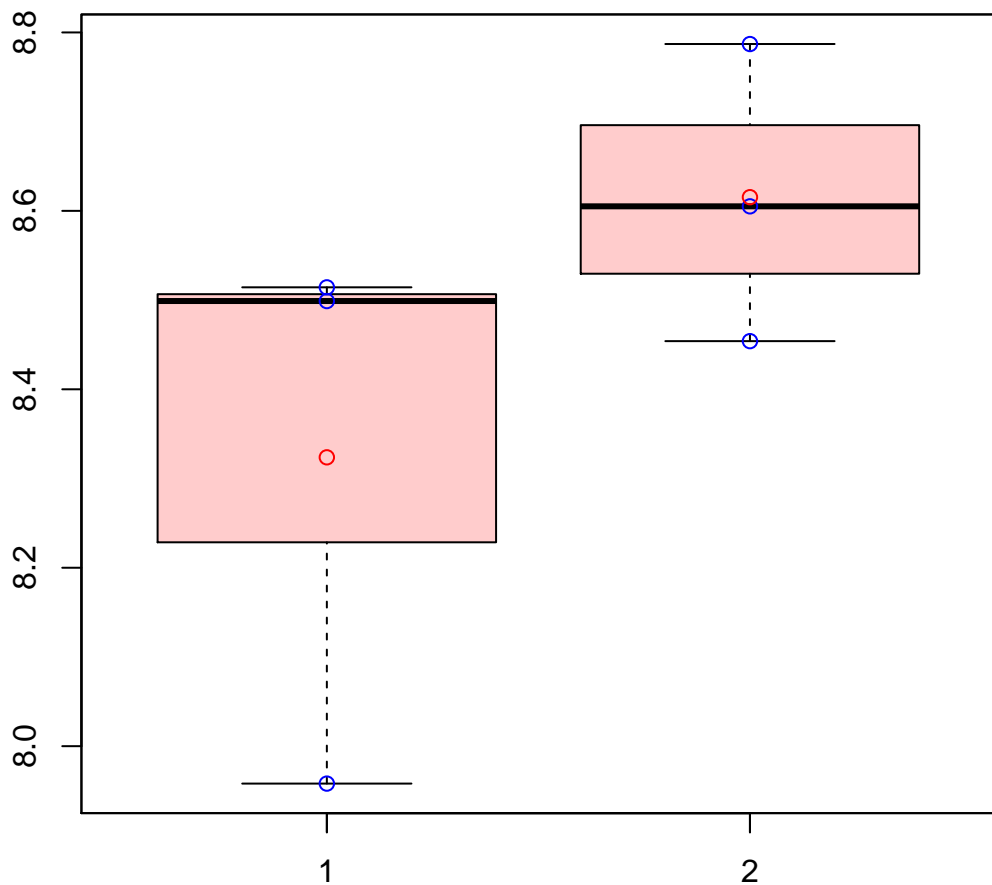

t-Test: p-value = 0.25

# CL16703Contig1|CL16703Contig1

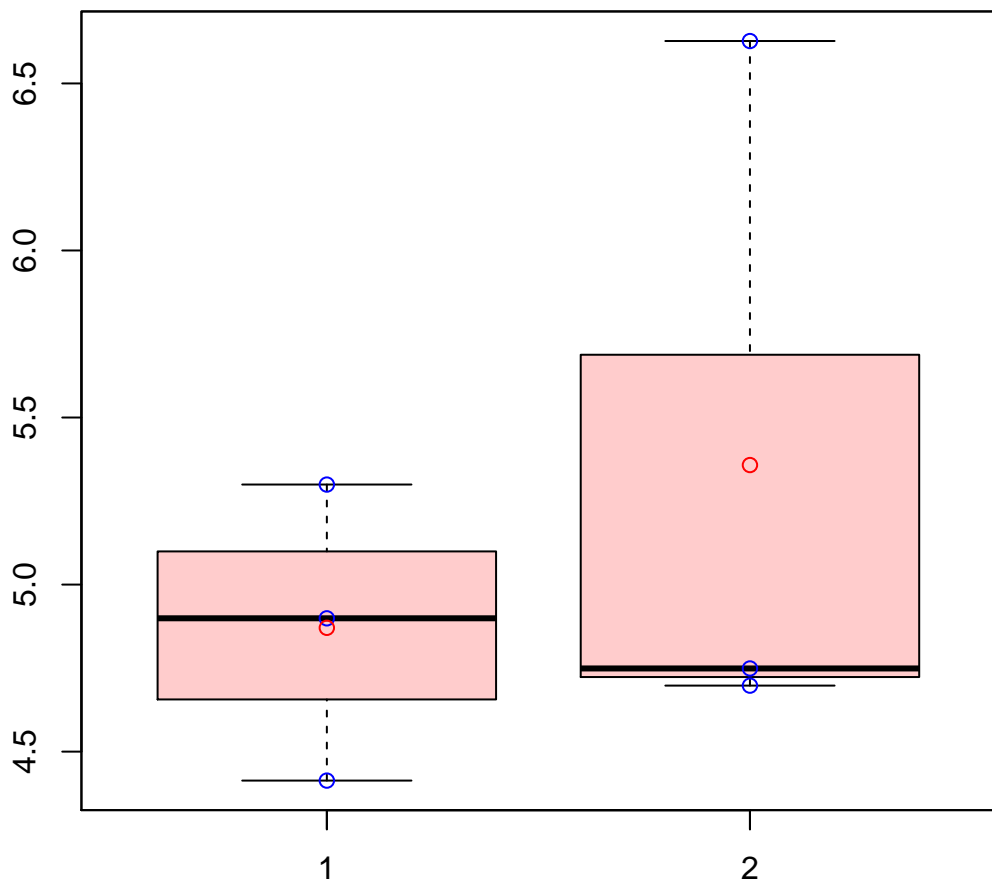

t-Test: p-value = 0.53

# CL1670Contig2|CL1670Contig2

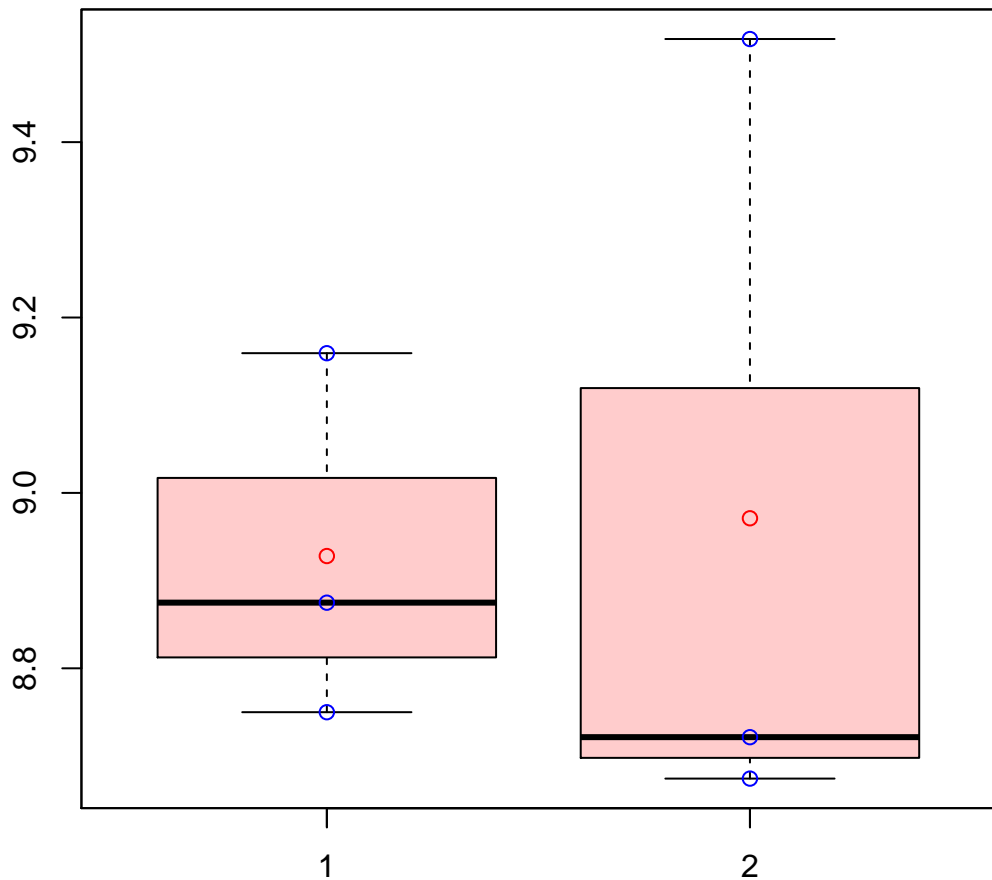

t-Test: p-value = 0.9

# CL1674Contig1|CL1674Contig1

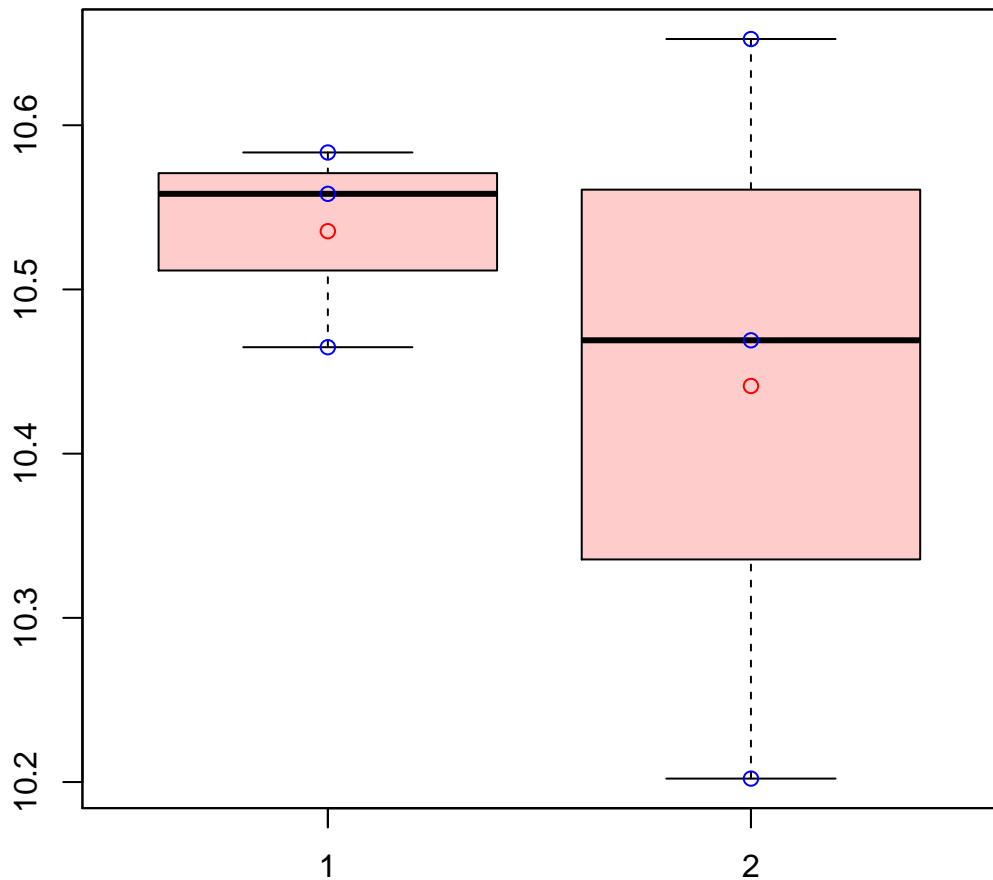

t-Test: p-value = 0.55

# CL1674Contig3|CL1674Contig3

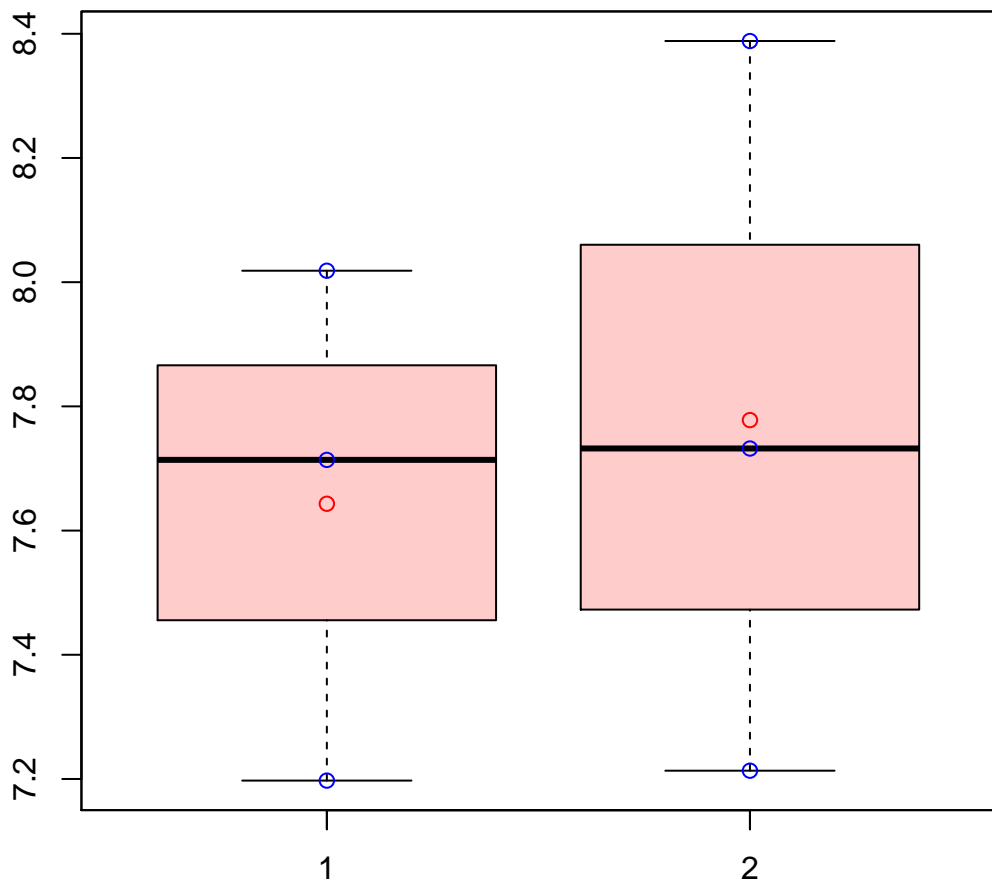

t-Test: p-value = 0.76

# CL1676Contig5|CL1676Contig5

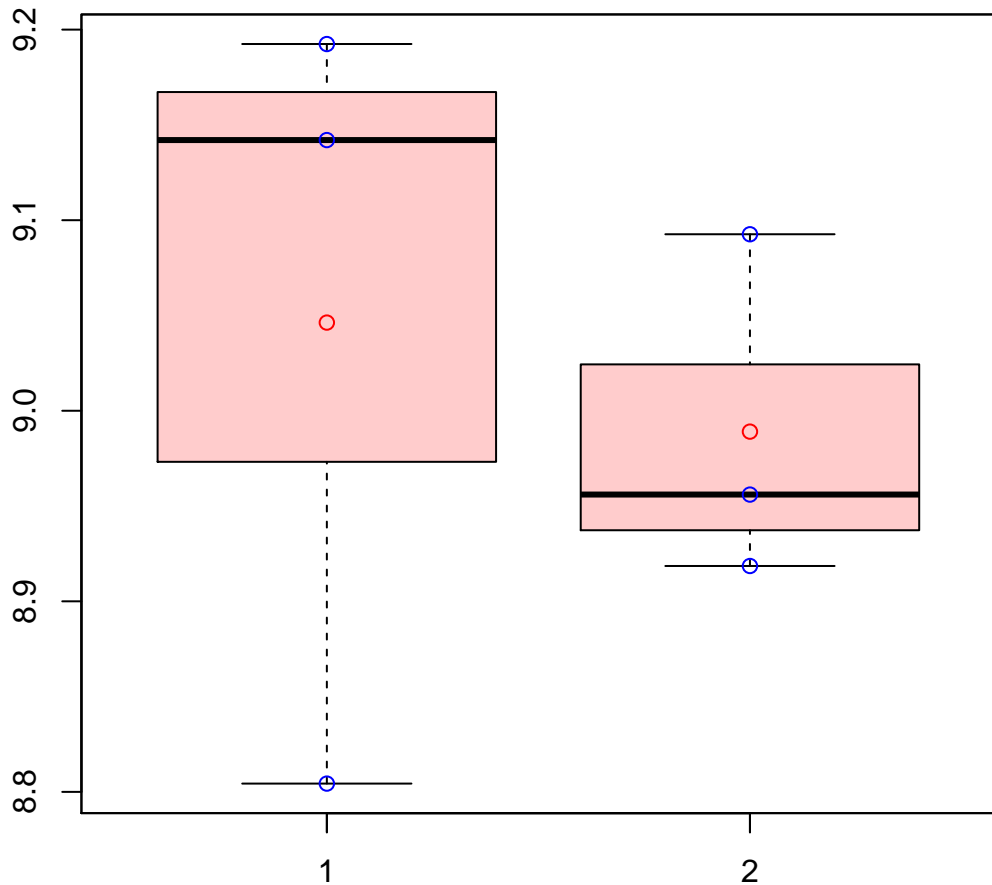

t-Test: p-value = 0.7

# CL1676Contig8|CL1676Contig8

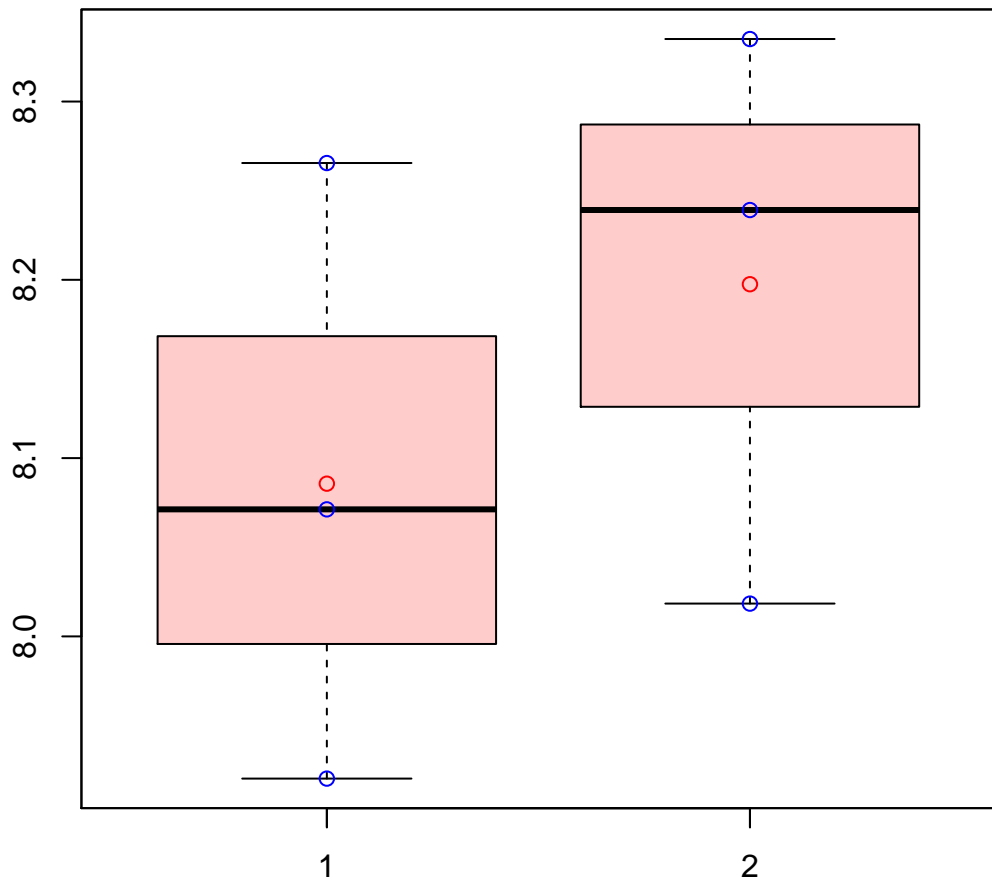

t-Test: p-value = 0.46



# CL1678Contig1|CL1678Contig1

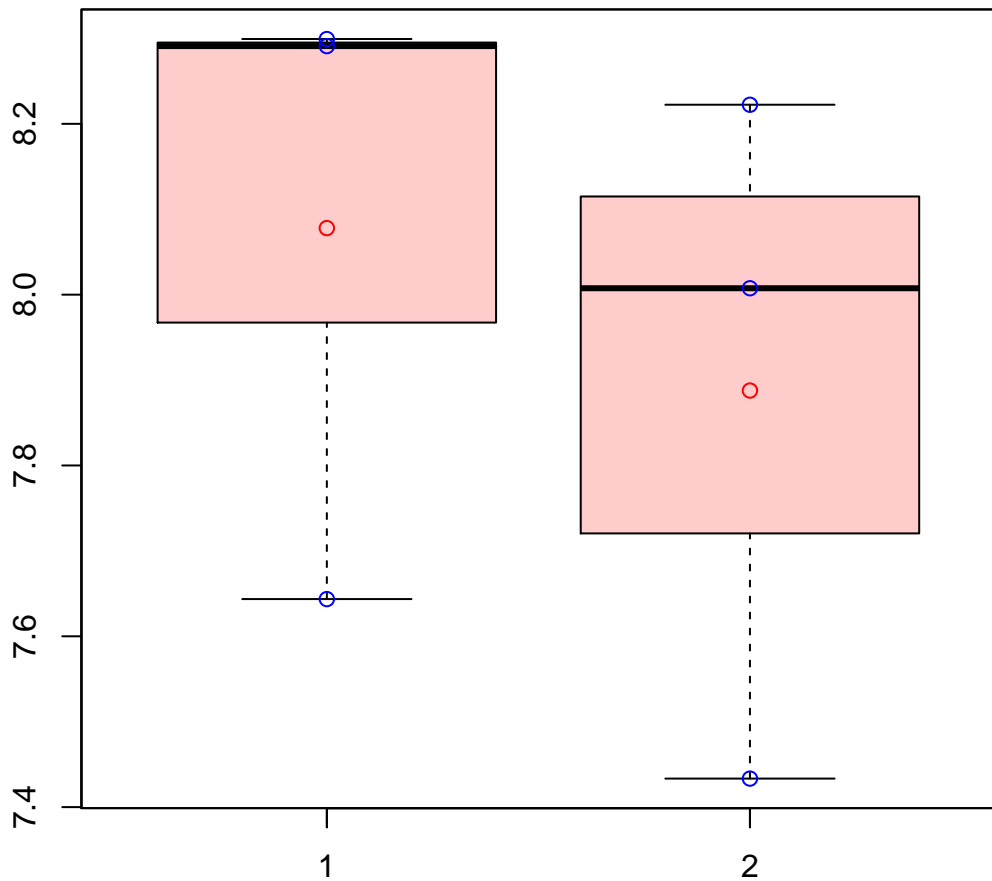

t-Test: p-value = 0.58

# CL1678Contig2|CL1678Contig2

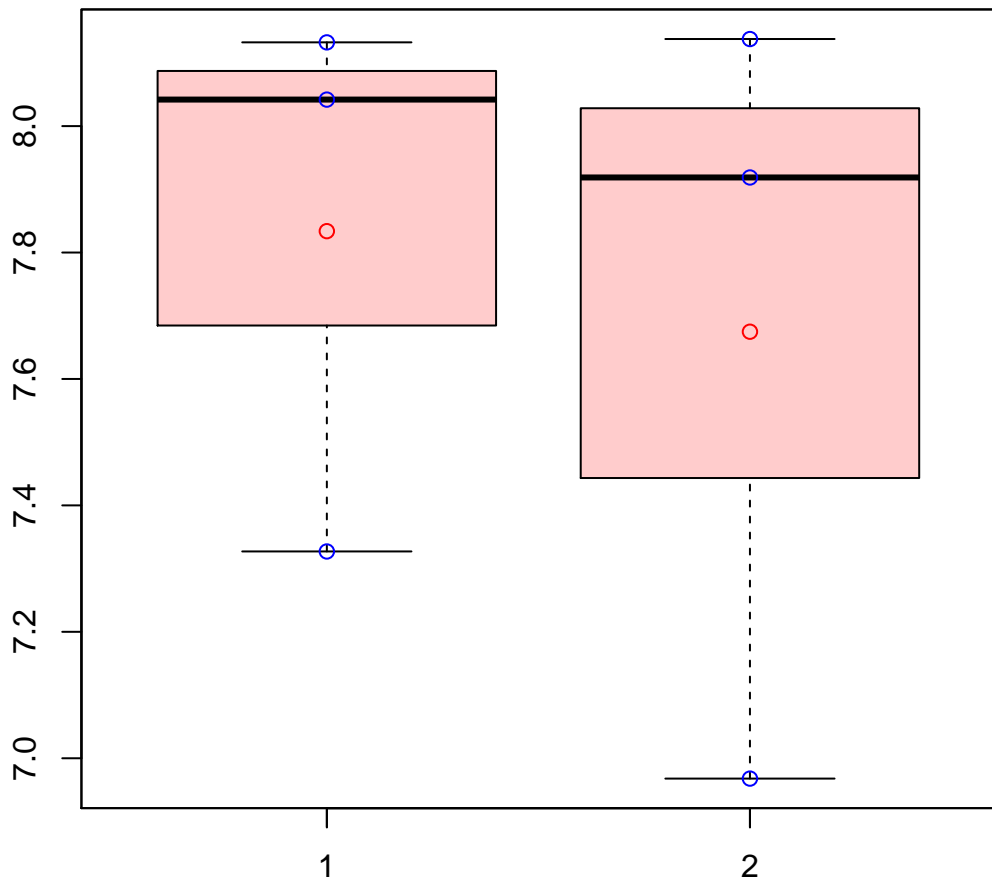

t-Test: p-value = 0.74

# CL1678Contig3|CL1678Contig3



t-Test: p-value = 0.74

# CL1678Contig4|CL1678Contig4



t-Test: p-value = 0.74

# CL1679Contig2|CL1679Contig2

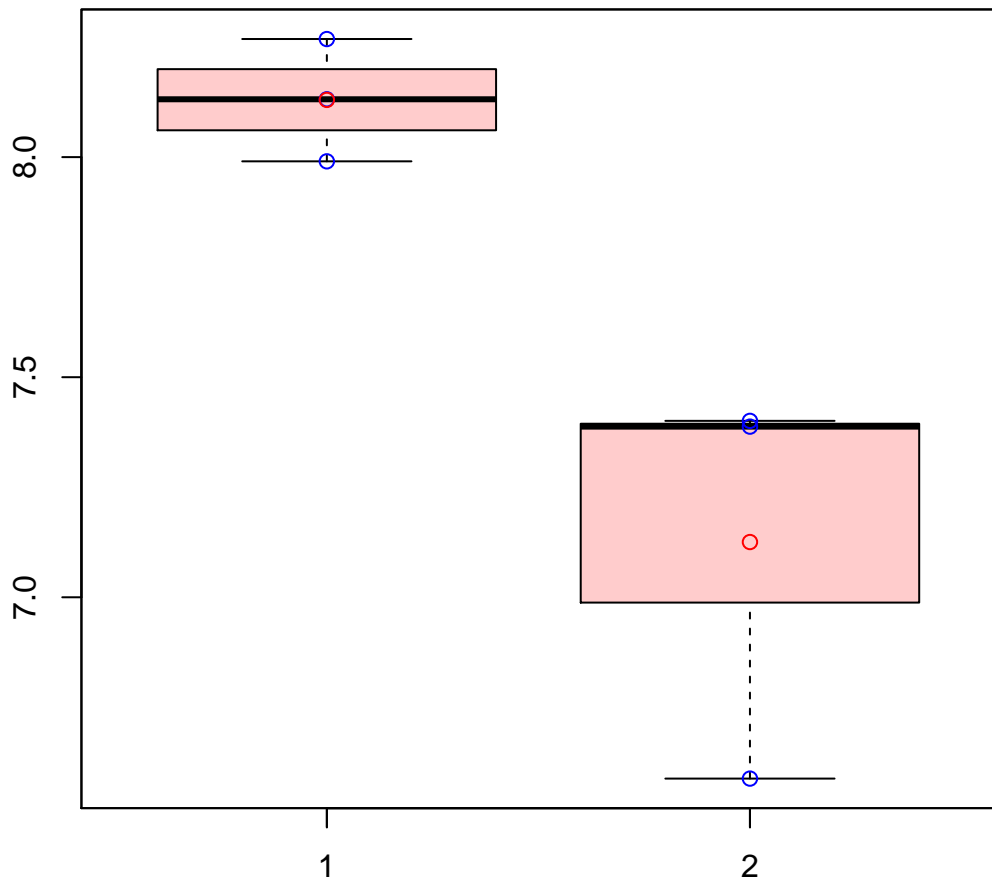

t-Test: p-value = 0.05

# CL1679Contig3|CL1679Contig3

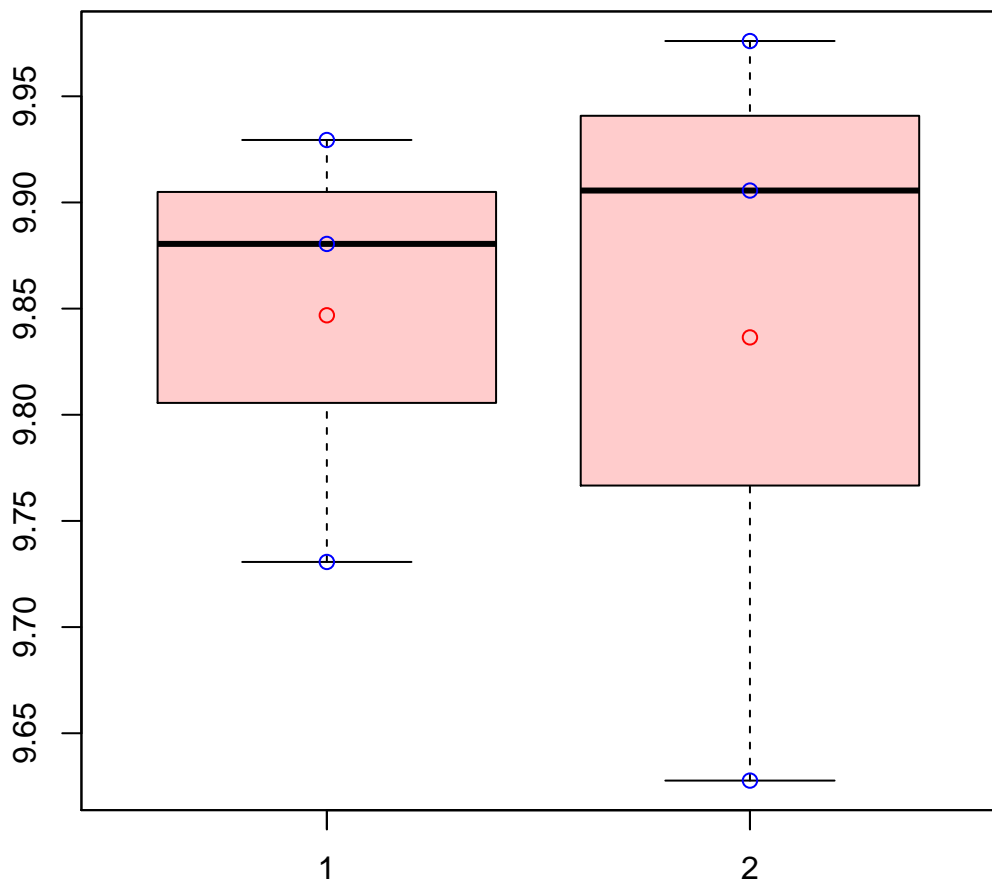

t-Test: p-value = 0.94

# CL16803Contig1|CL16803Contig1

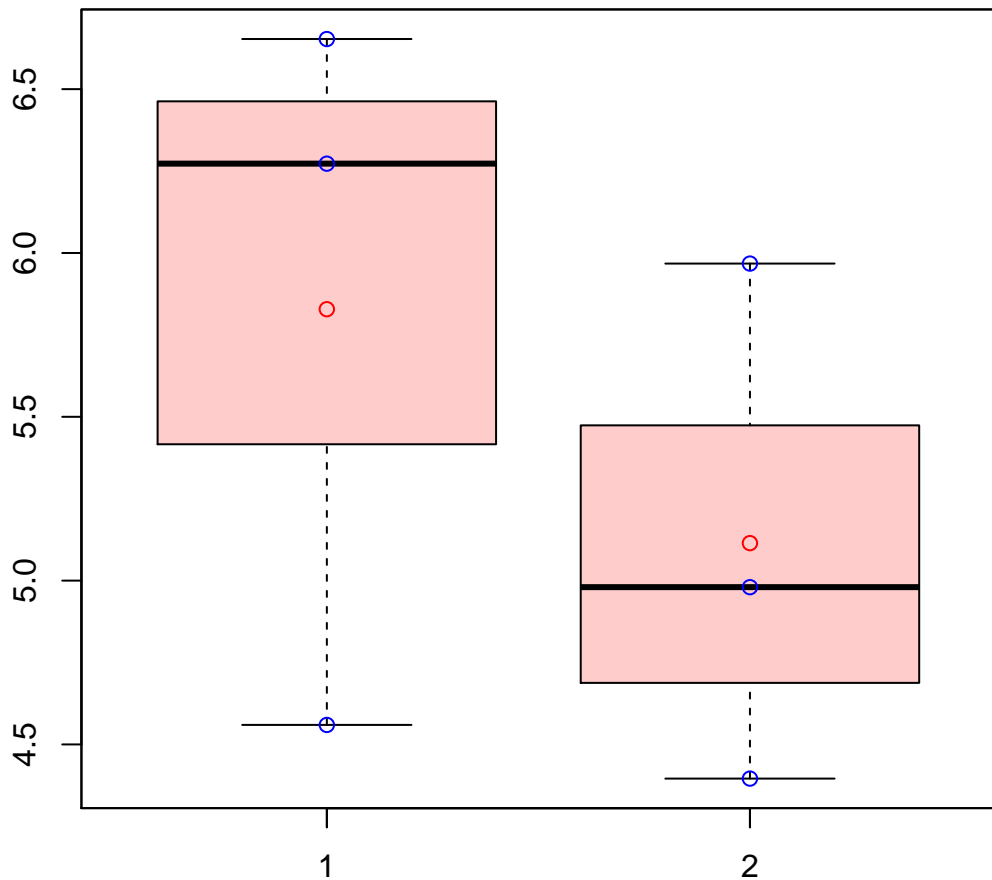

t-Test: p-value = 0.42

# CL1681Contig2|CL1681Contig2

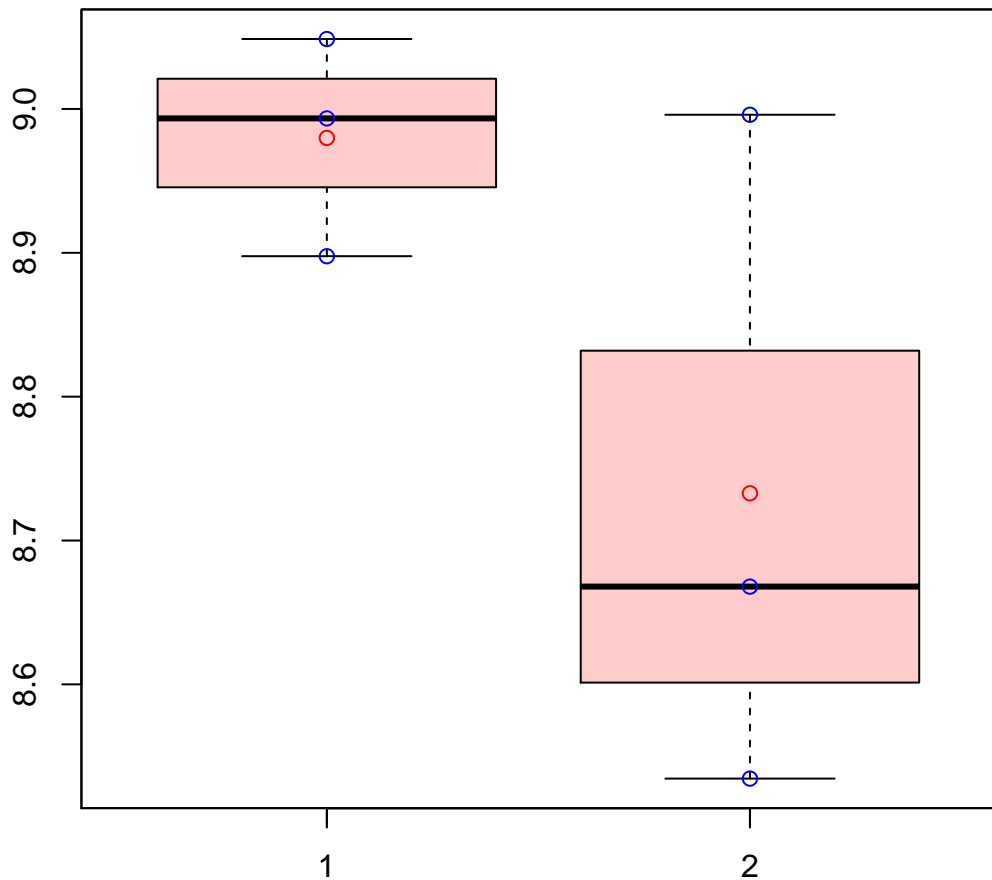

t-Test: p-value = 0.21



# CL1685Contig1|CL1685Contig1

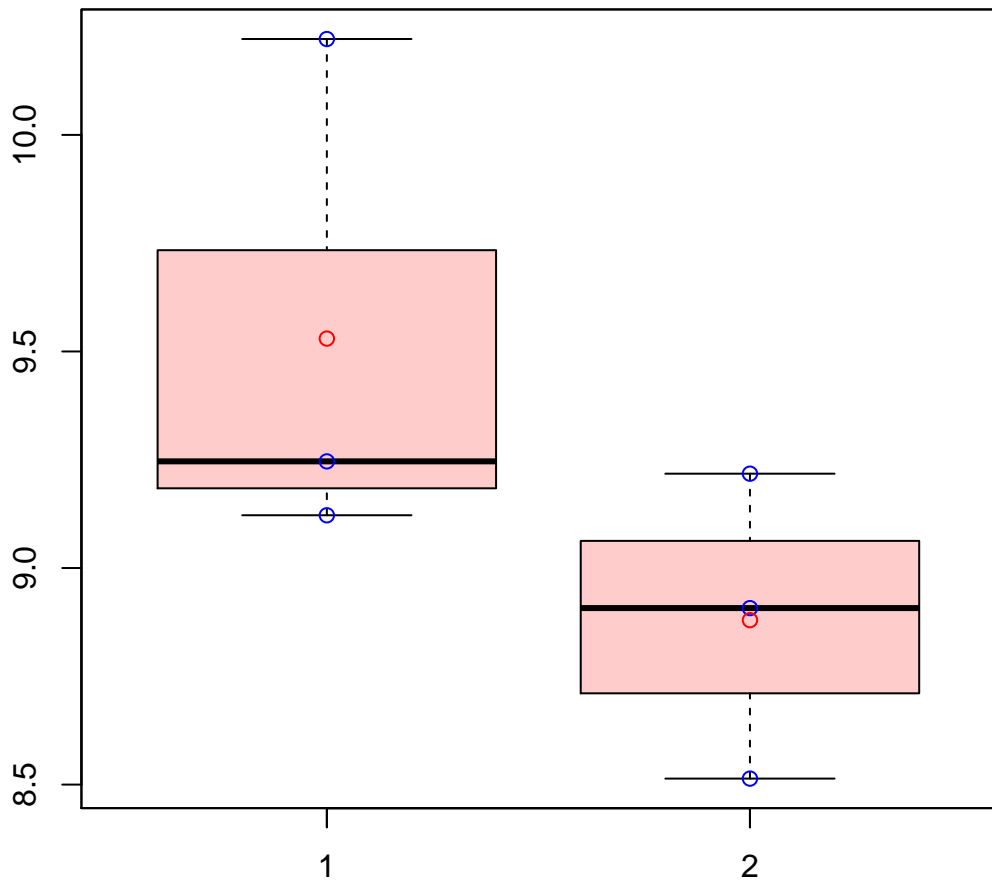

t-Test: p-value = 0.2

# CL1685Contig2|CL1685Contig2

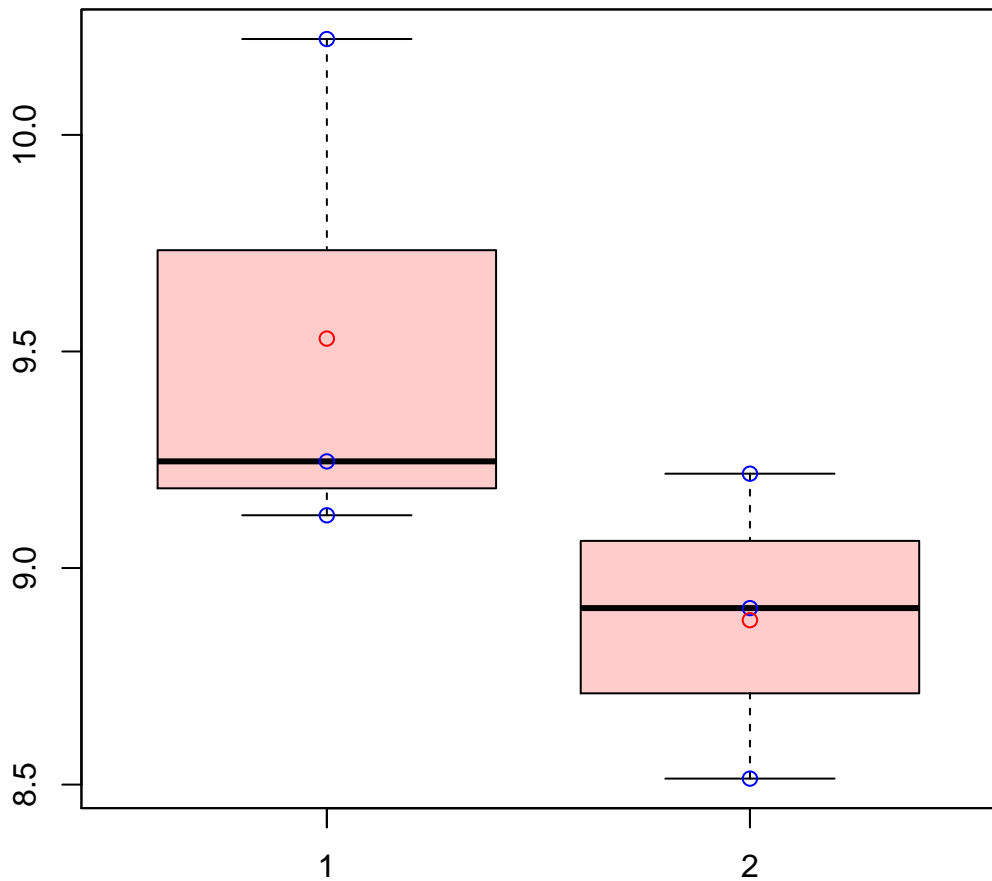

t-Test: p-value = 0.2

# CL168Contig10|CL168Contig10

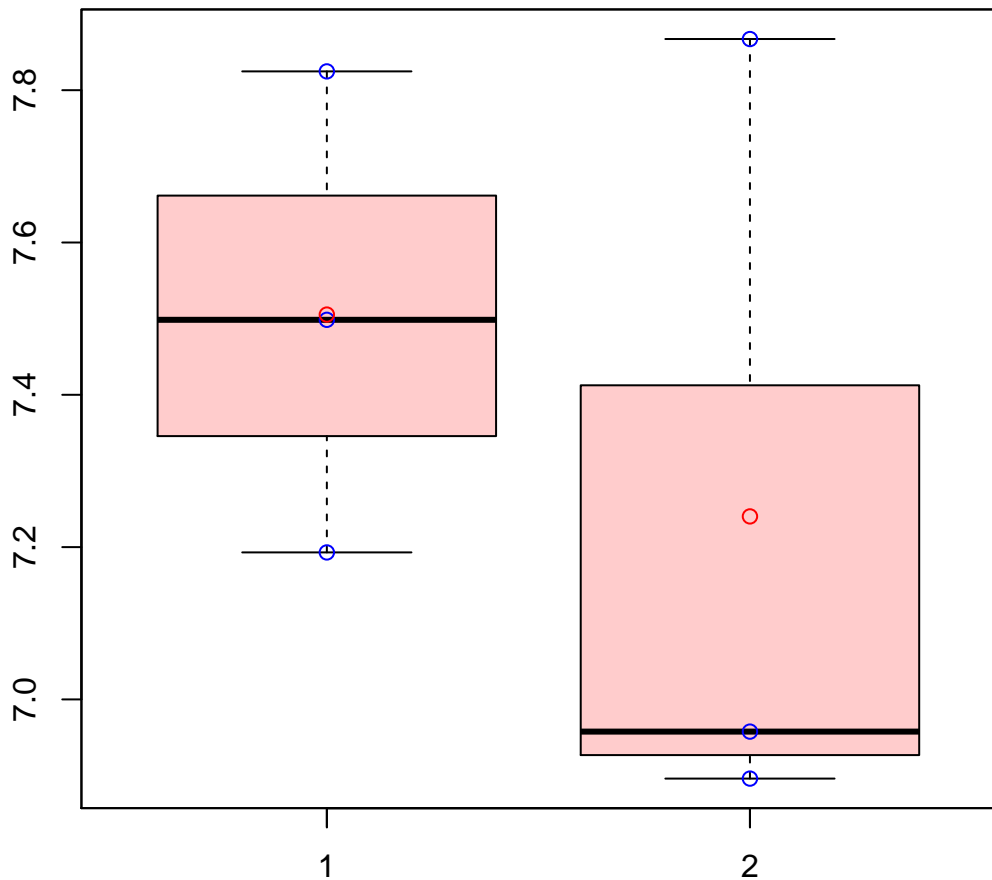

t-Test: p-value = 0.51

## CL168Contig2|CL168Contig2

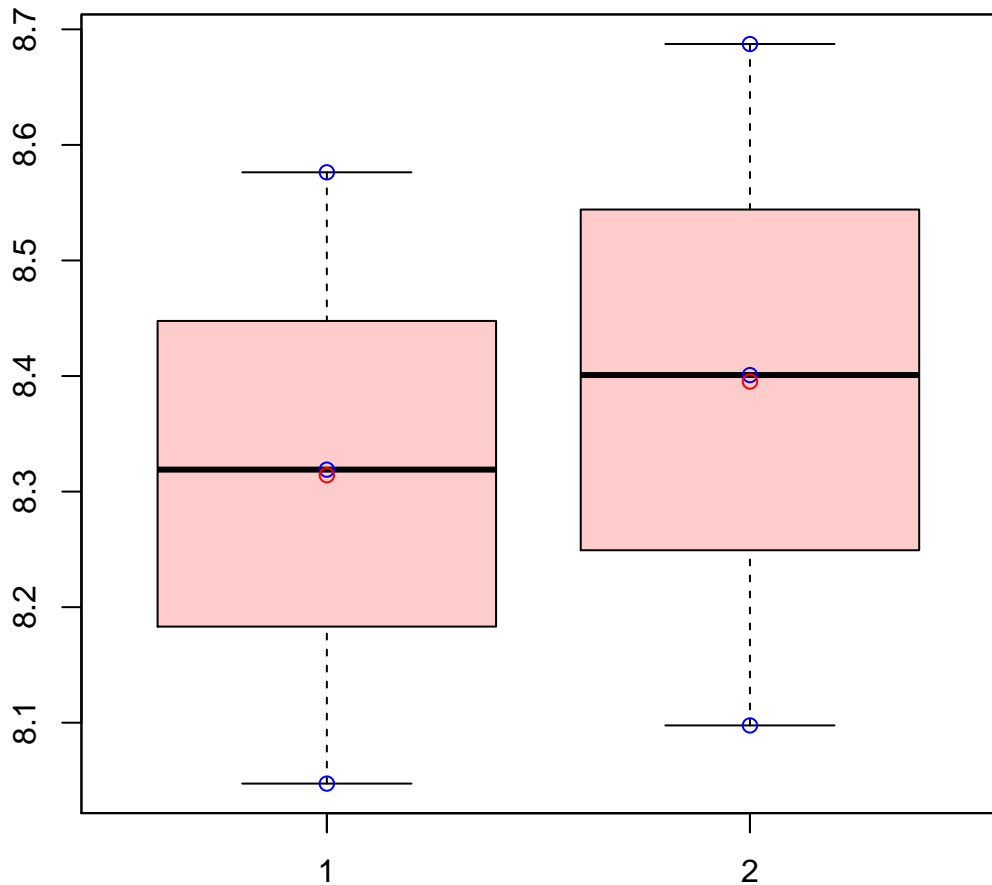

t-Test: p-value = 0.74

# CL168Contig6|CL168Contig6

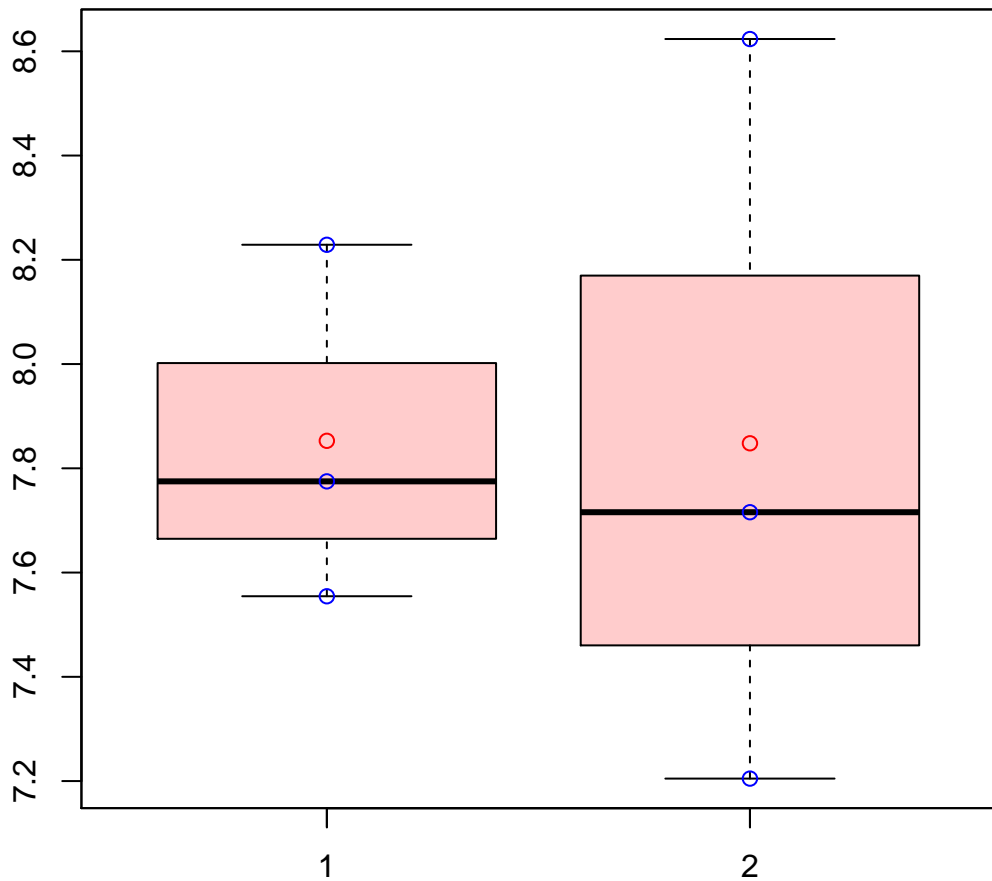

t-Test: p-value = 0.99

# CL16903Contig1|CL16903Contig1

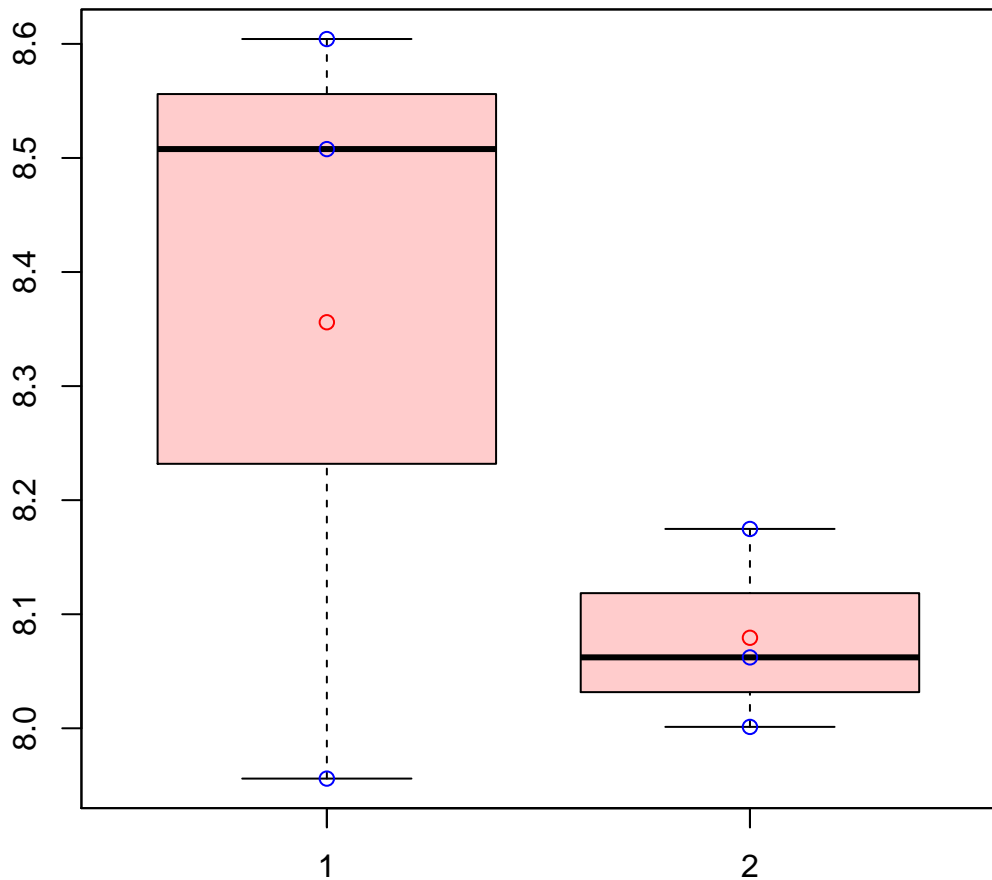

t-Test: p-value = 0.3

# CL1692Contig5|CL1692Contig5

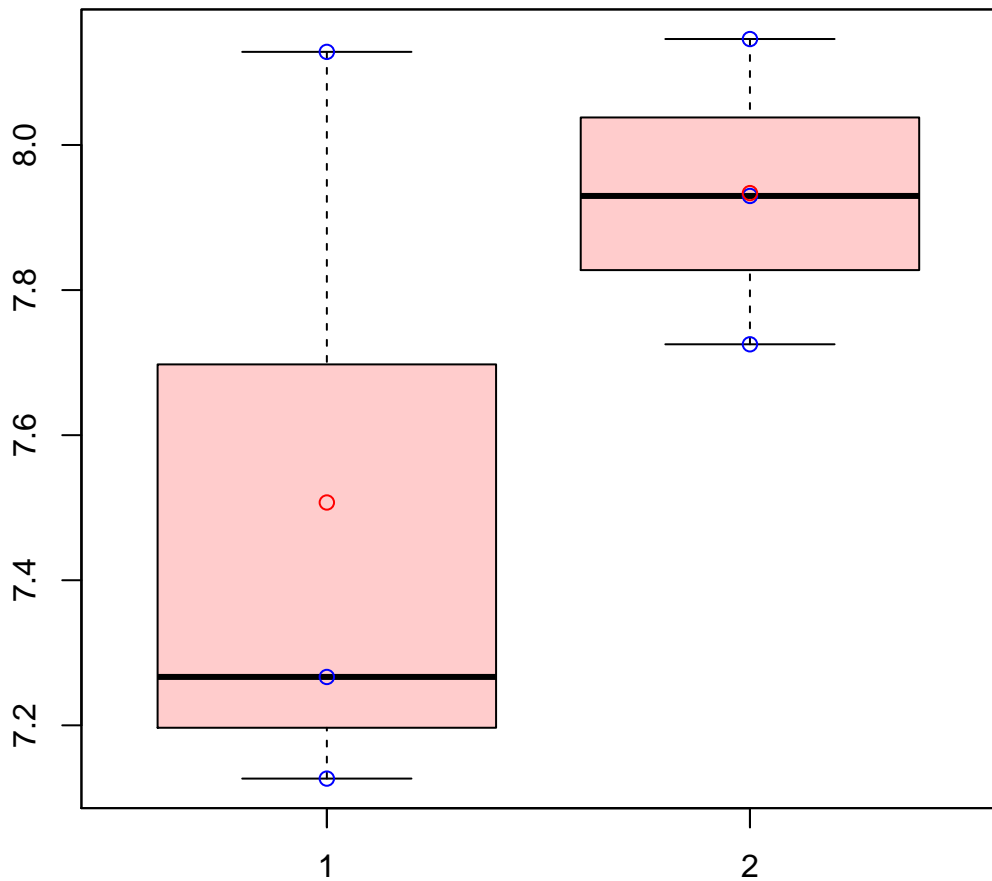

t-Test: p-value = 0.31

# CL16961Contig1|CL16961Contig1

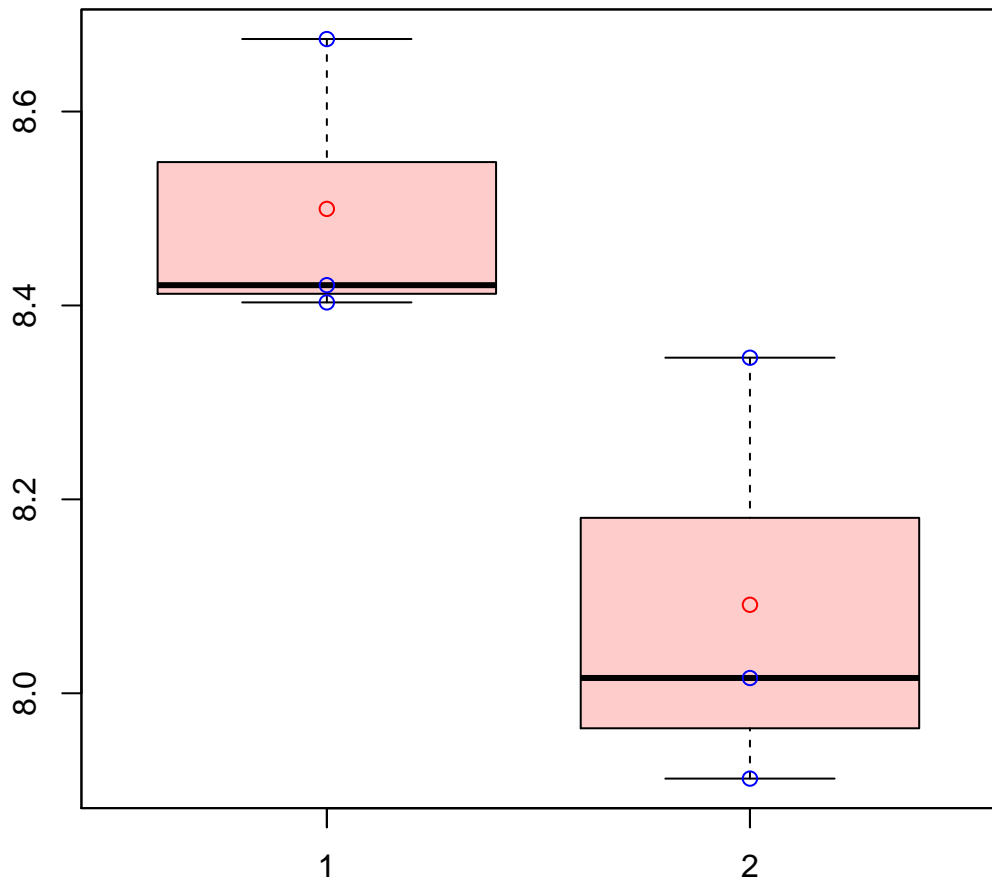

t-Test: p-value = 0.07



# CL1696Contig3|CL1696Contig3

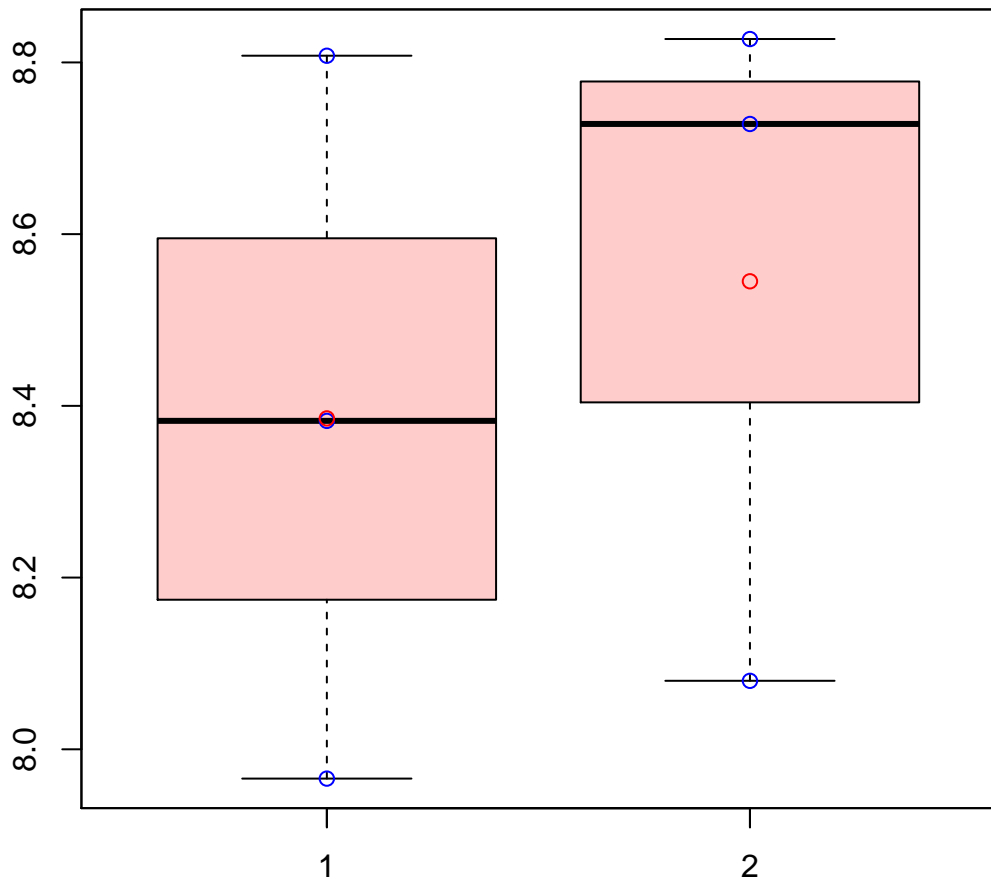

t-Test: p-value = 0.66

# CL169Contig11|CL169Contig11

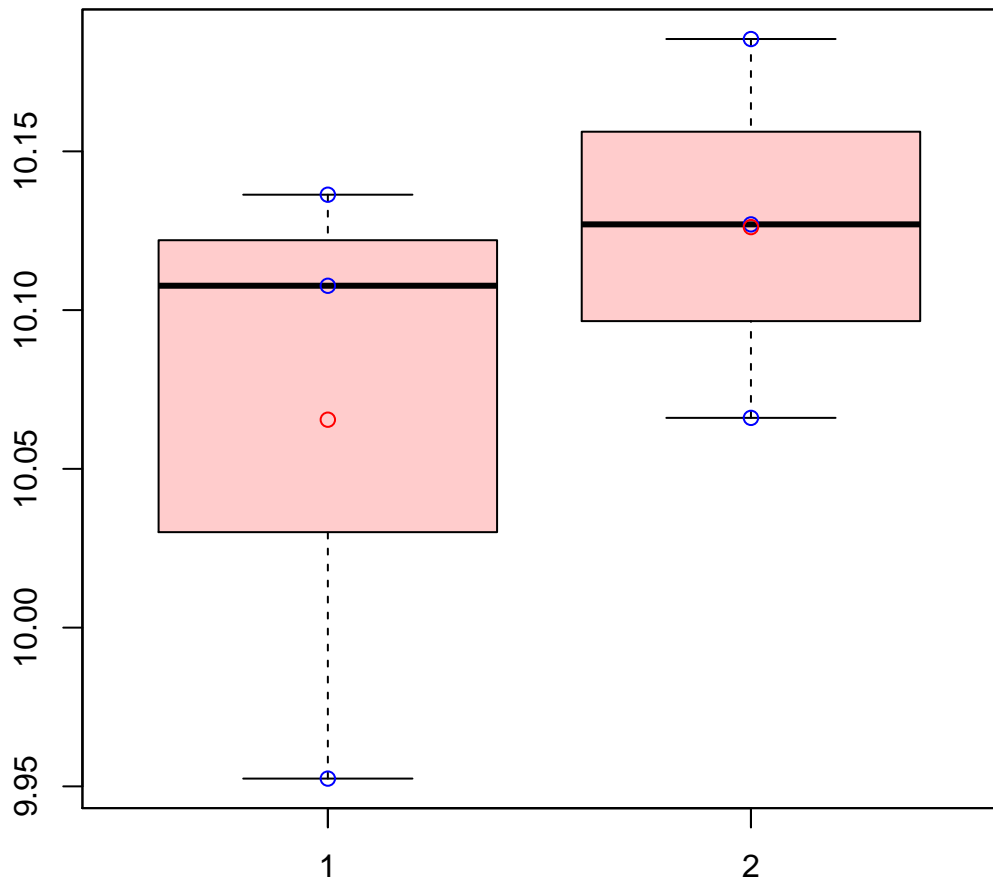

t-Test: p-value = 0.42

# CL16Contig12|CL16Contig12

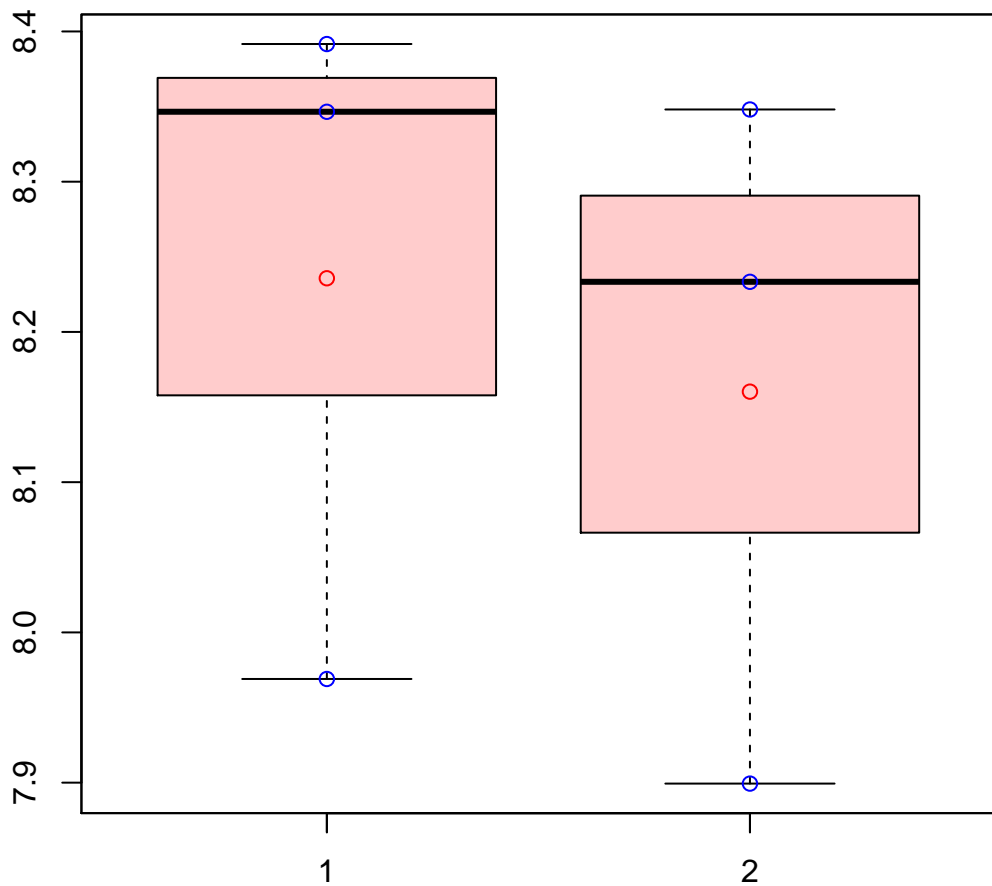

t-Test: p-value = 0.71

# CL16Contig23|CL16Contig23

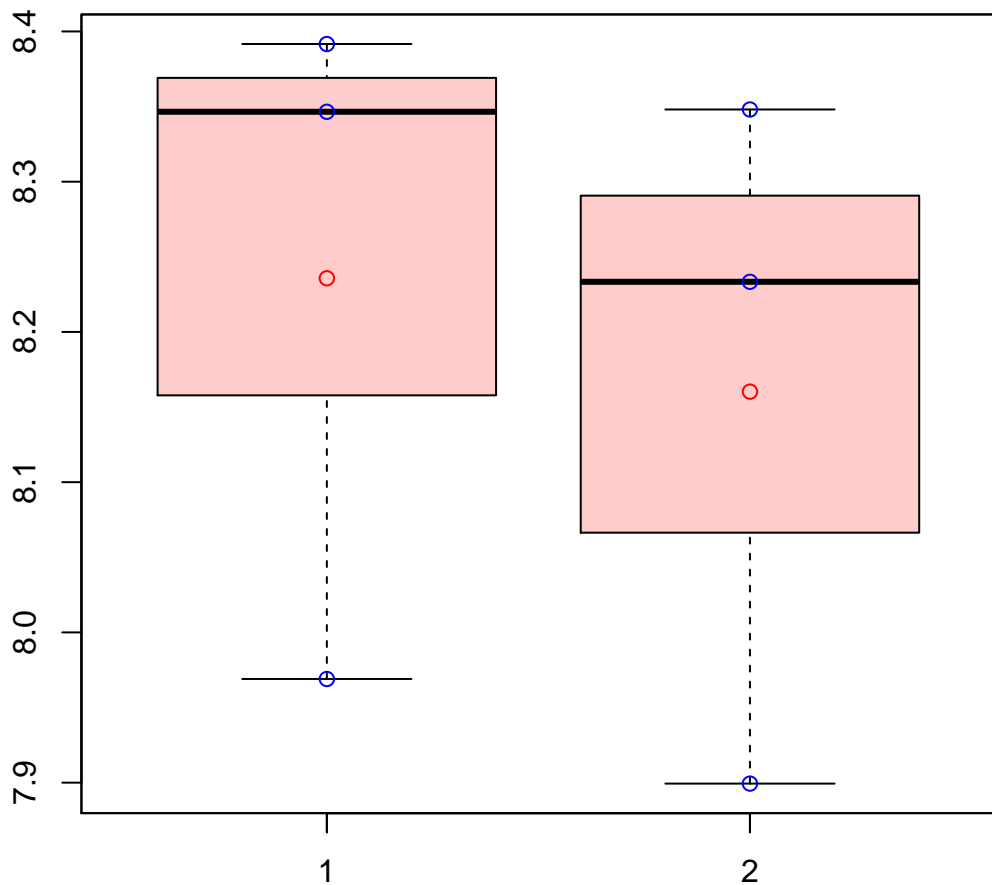

t-Test: p-value = 0.71

# CL1701Contig2|CL1701Contig2

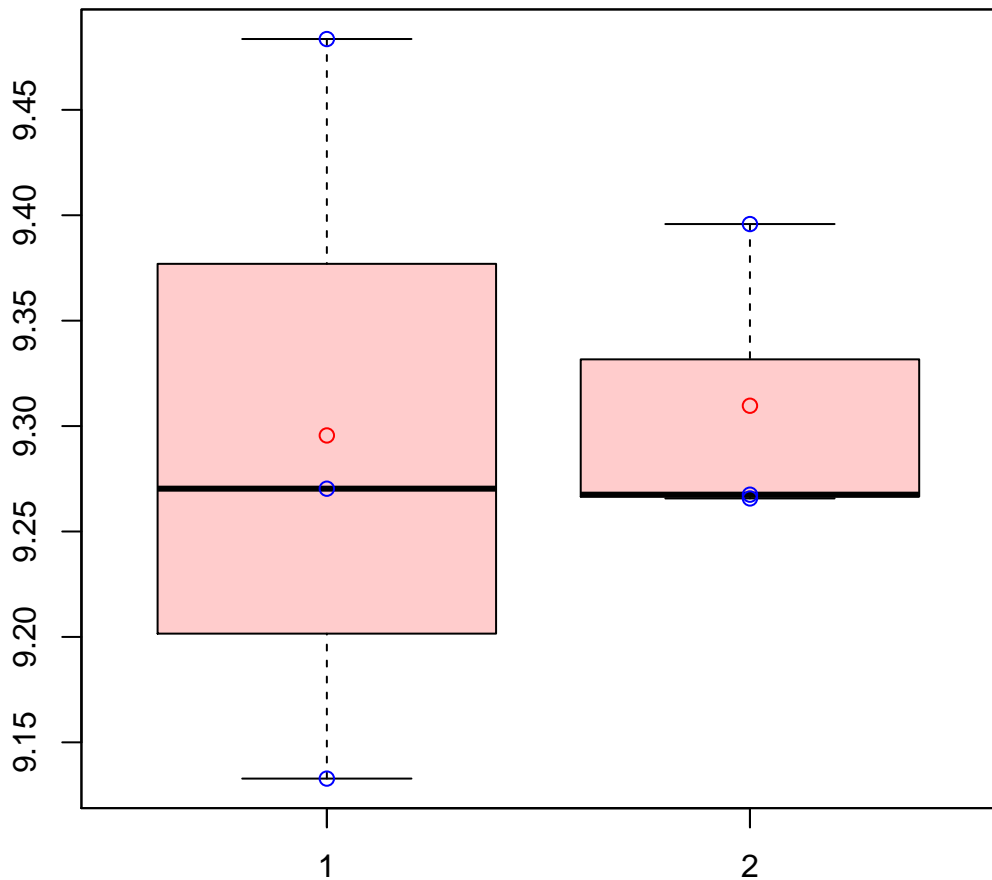

t-Test: p-value = 0.91

# CL1707Contig1|CL1707Contig1

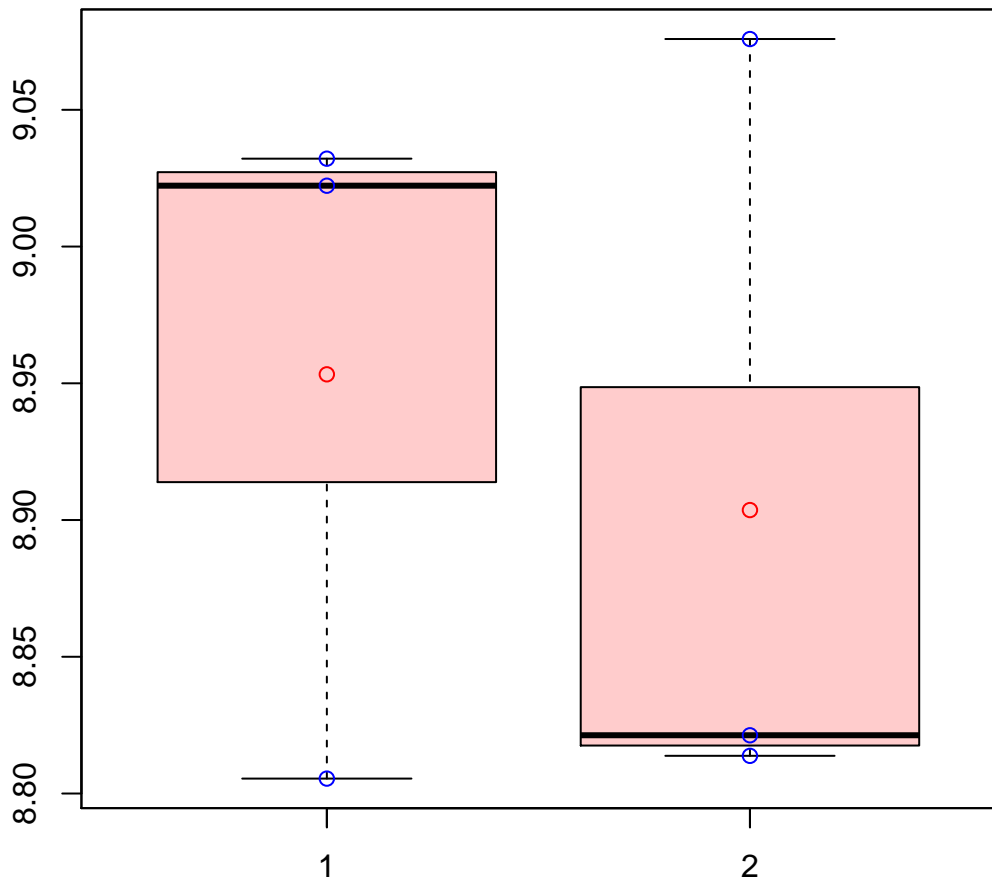

t-Test: p-value = 0.69

# CL1707Contig2|CL1707Contig2

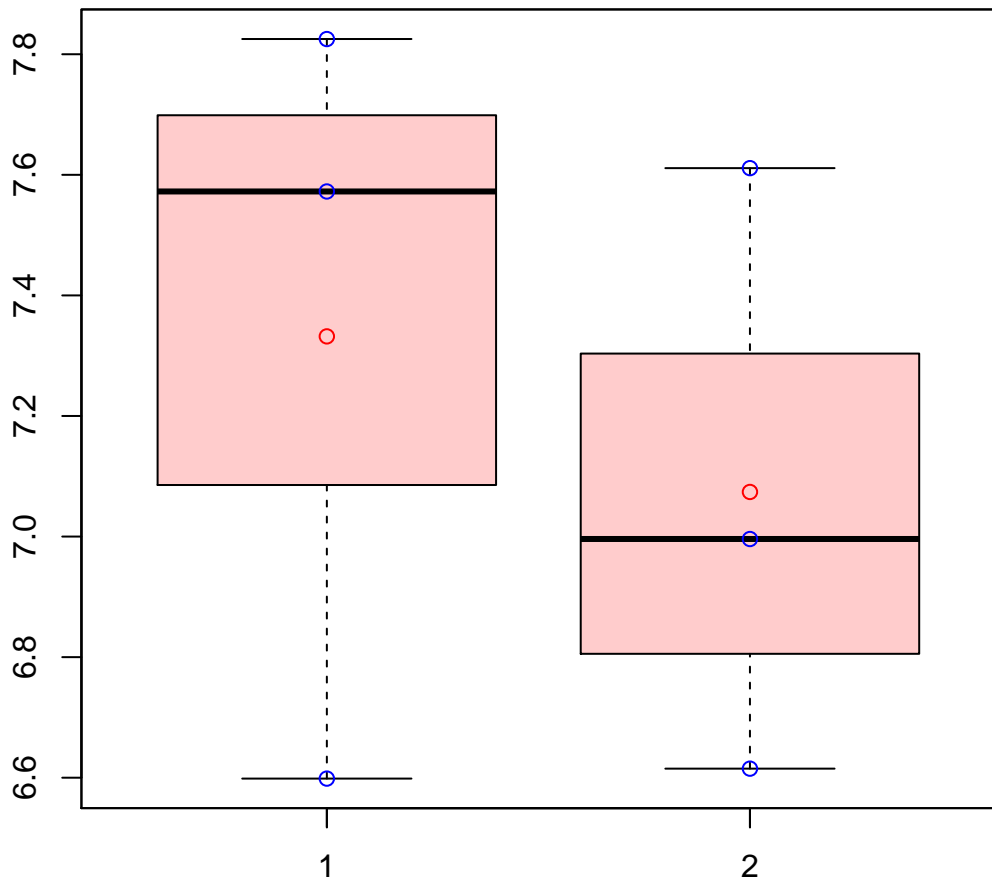

t-Test: p-value = 0.62

# CL17087Contig1|CL17087Contig1

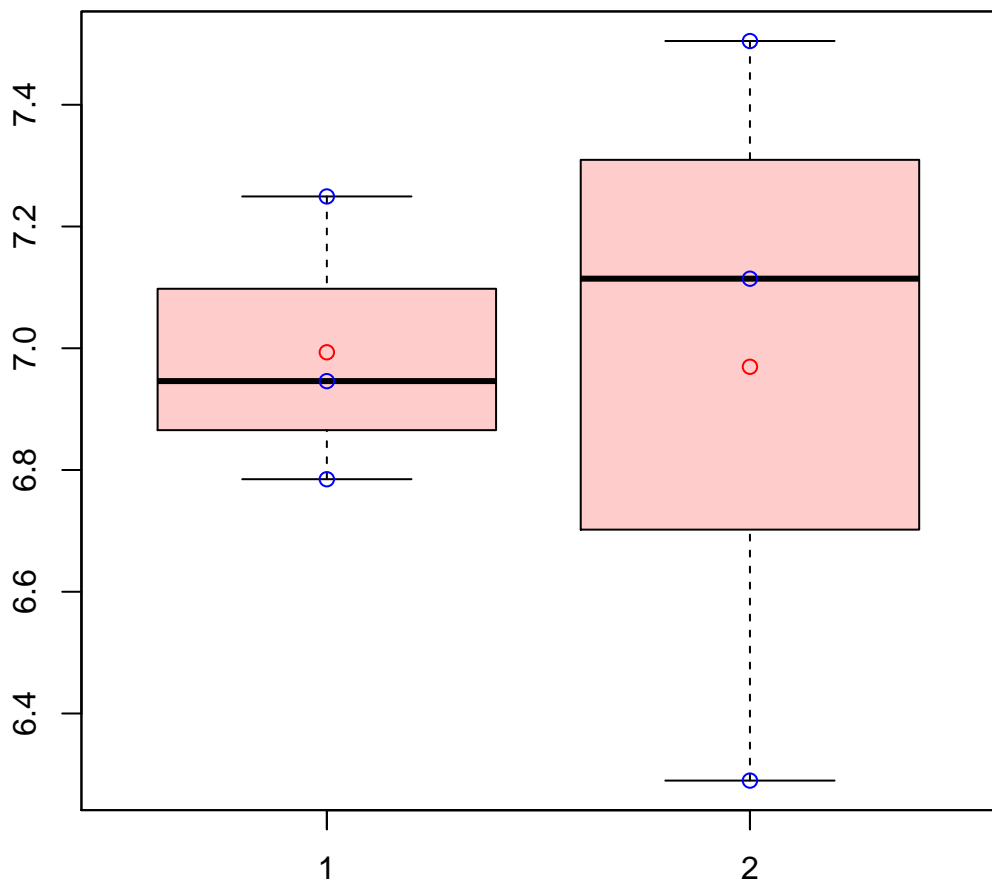

t-Test: p-value = 0.95



# CL170Contig20|CL170Contig20

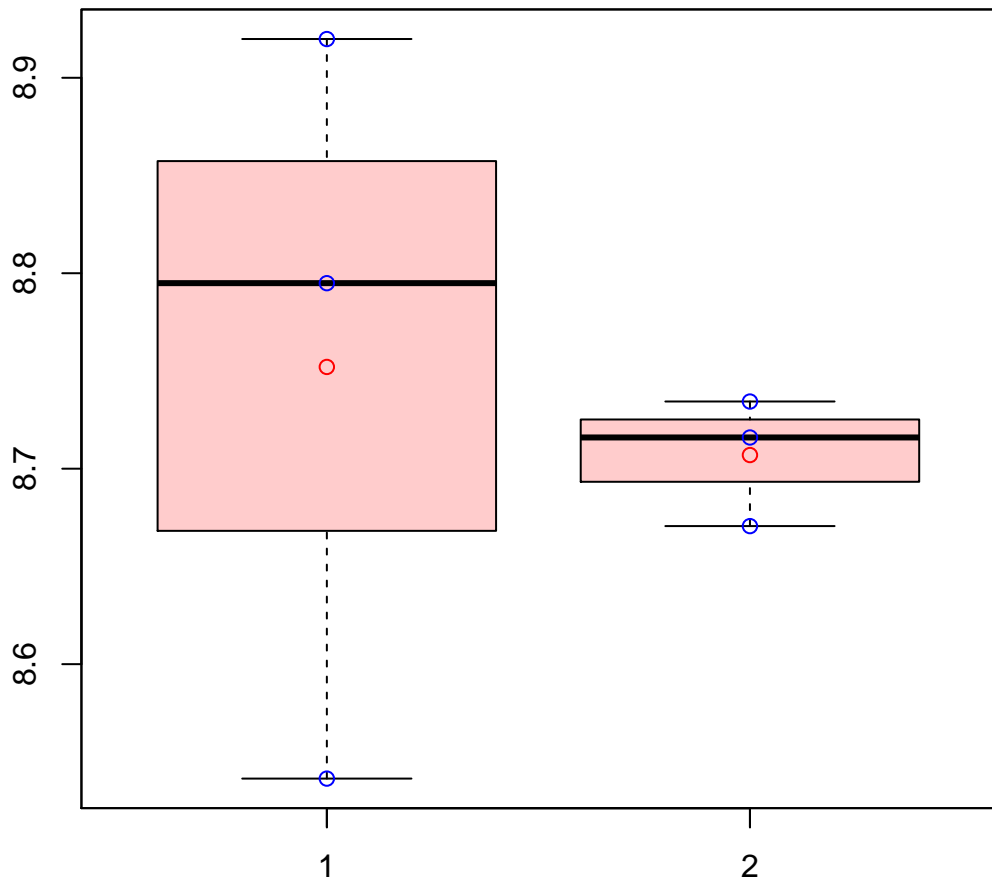

t-Test: p-value = 0.73

# CL1710Contig3|CL1710Contig3

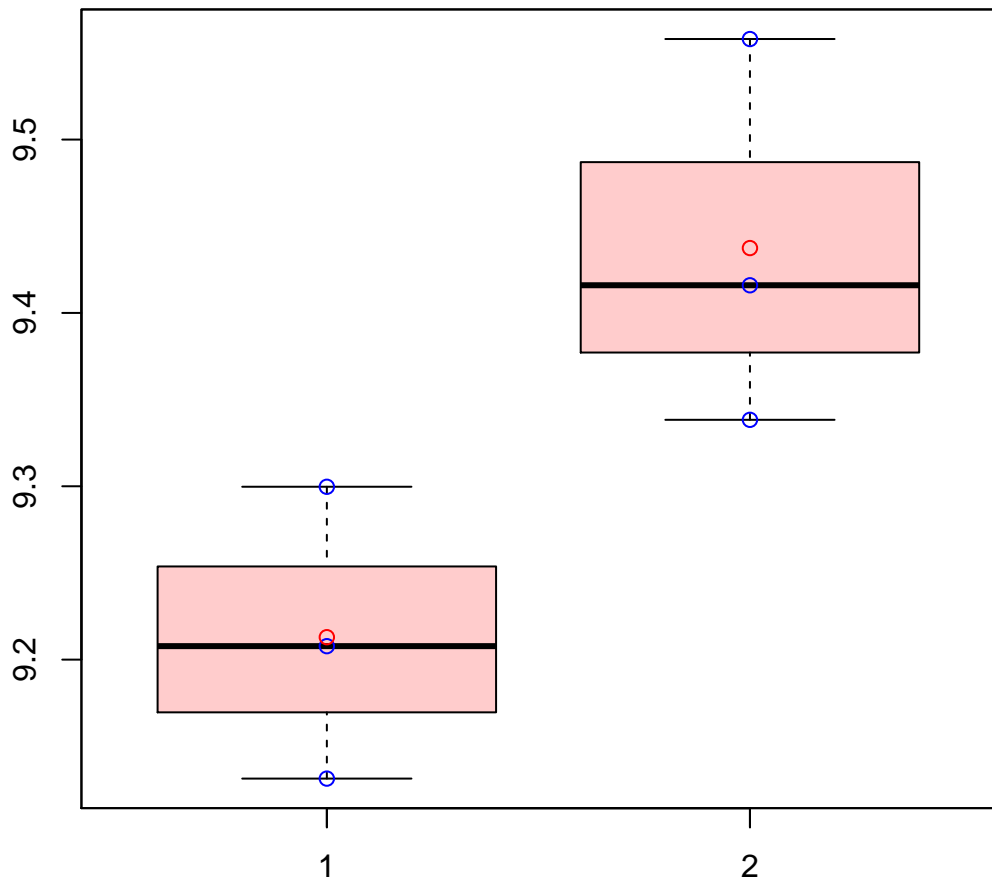

t-Test: p-value = 0.05

# CL1710Contig4|CL1710Contig4

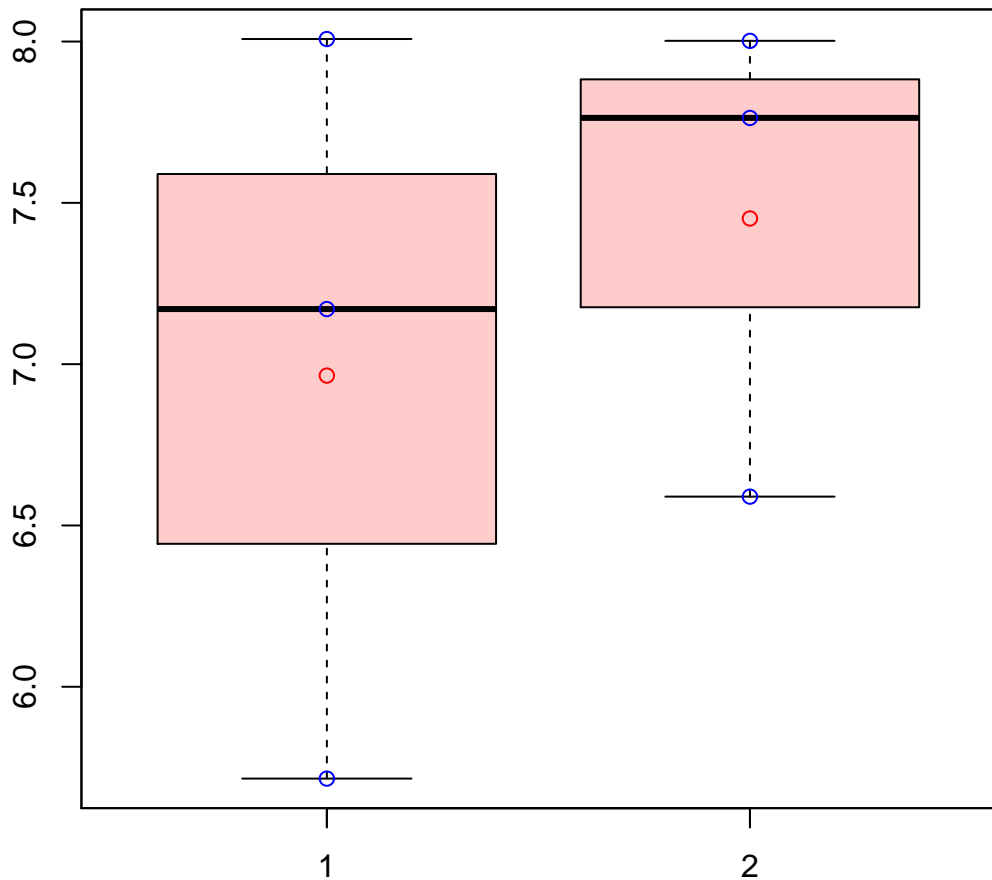

t-Test: p-value = 0.58

# CL1711Contig10|CL1711Contig10

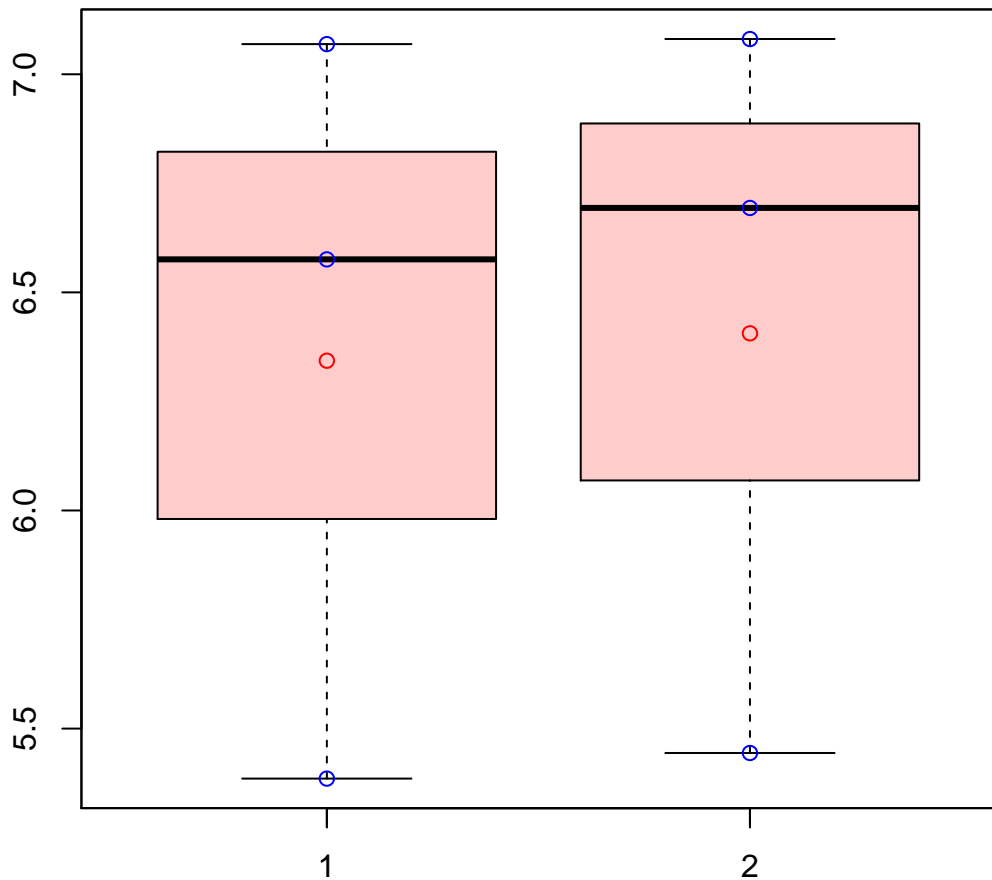

t-Test: p-value = 0.93

# CL1712Contig1|CL1712Contig1

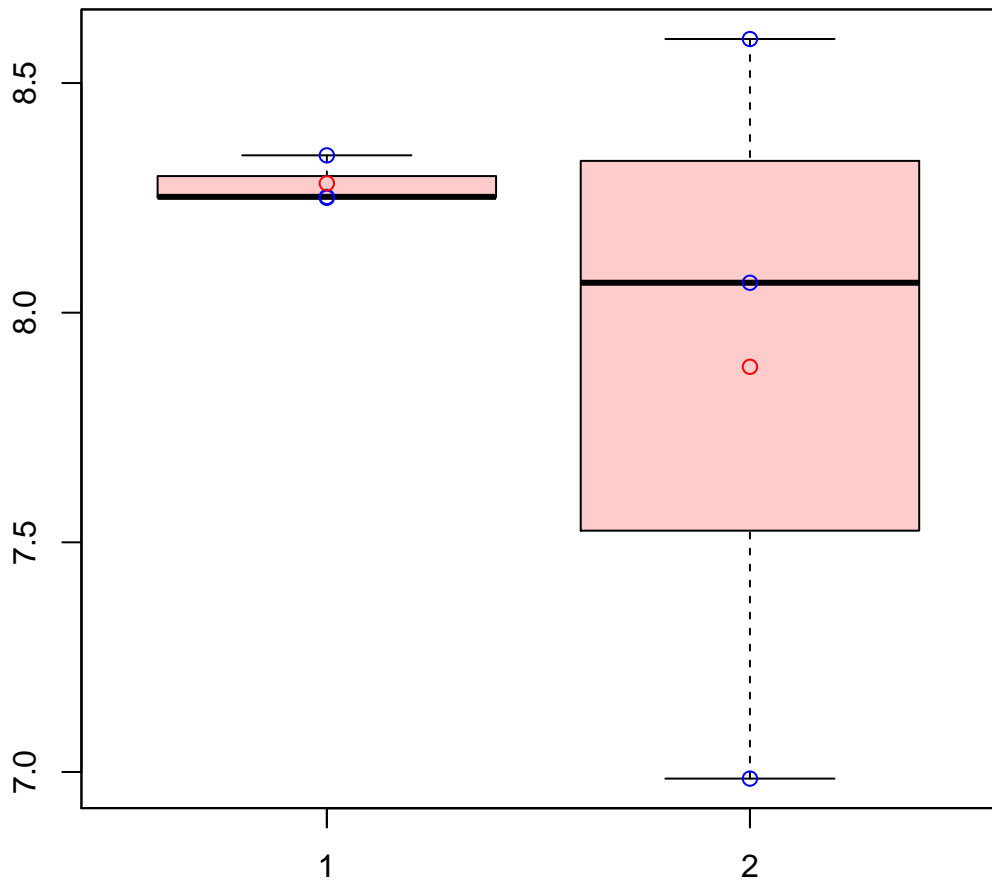

t-Test: p-value = 0.49

# CL1712Contig2|CL1712Contig2



t-Test: p-value = 0.49

# CL1712Contig3|CL1712Contig3

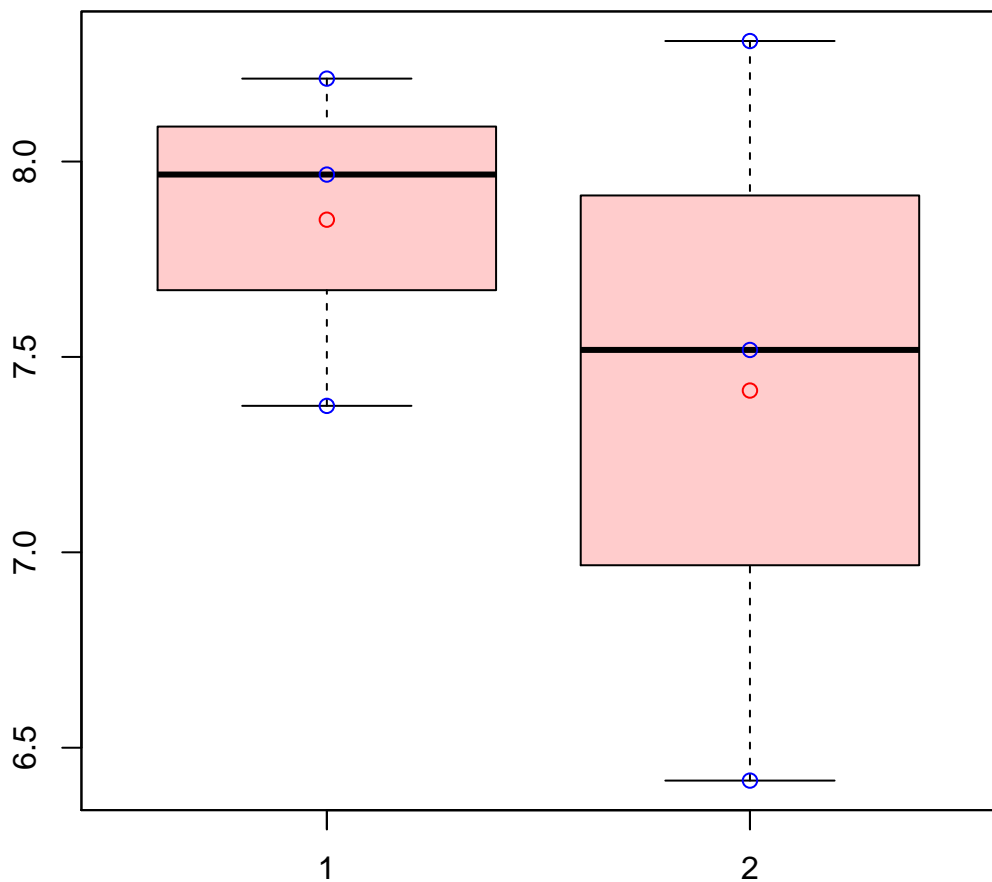

t-Test: p-value = 0.52

# CL1715Contig11|CL1715Contig11

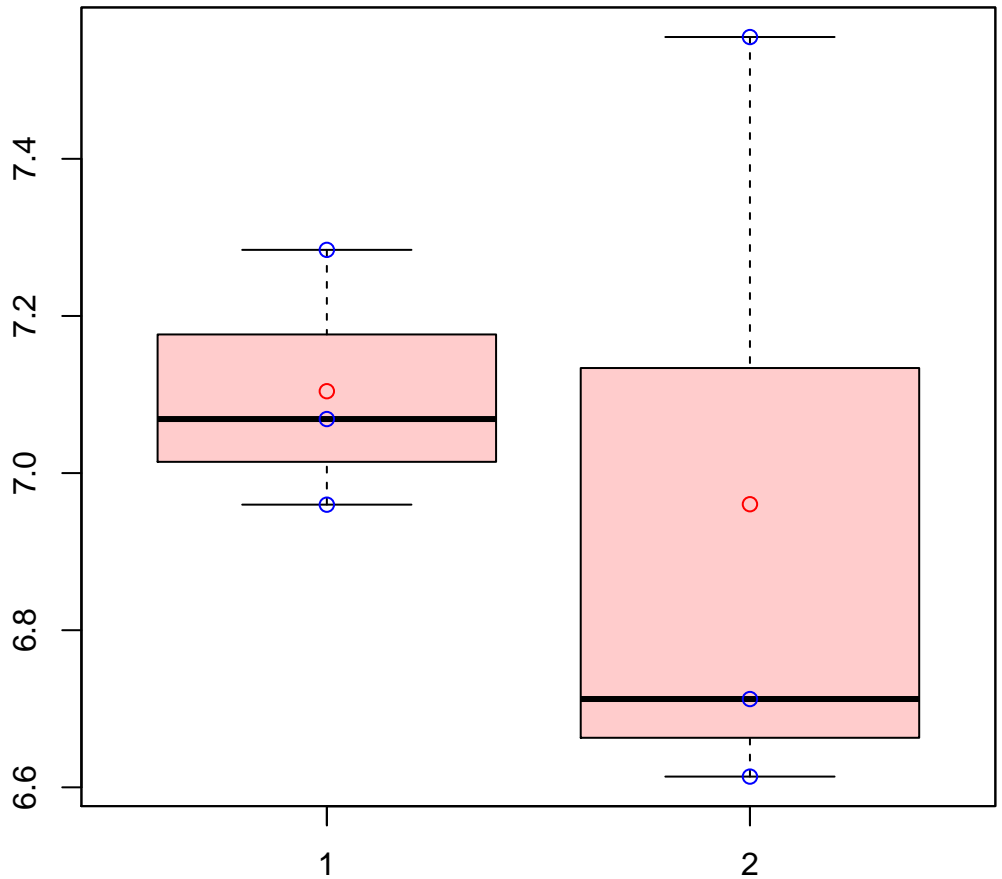

t-Test: p-value = 0.68



# CL1715Contig12|CL1715Contig12

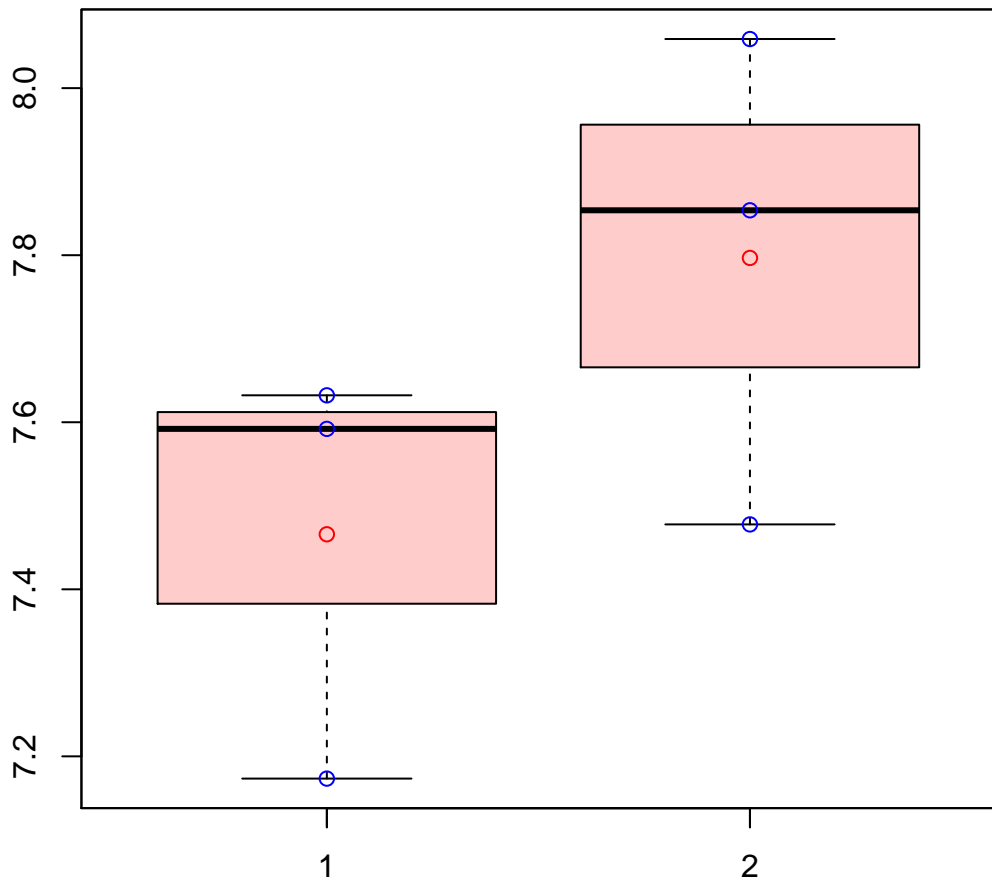

t-Test: p-value = 0.22

# CL1715Contig13|CL1715Contig13

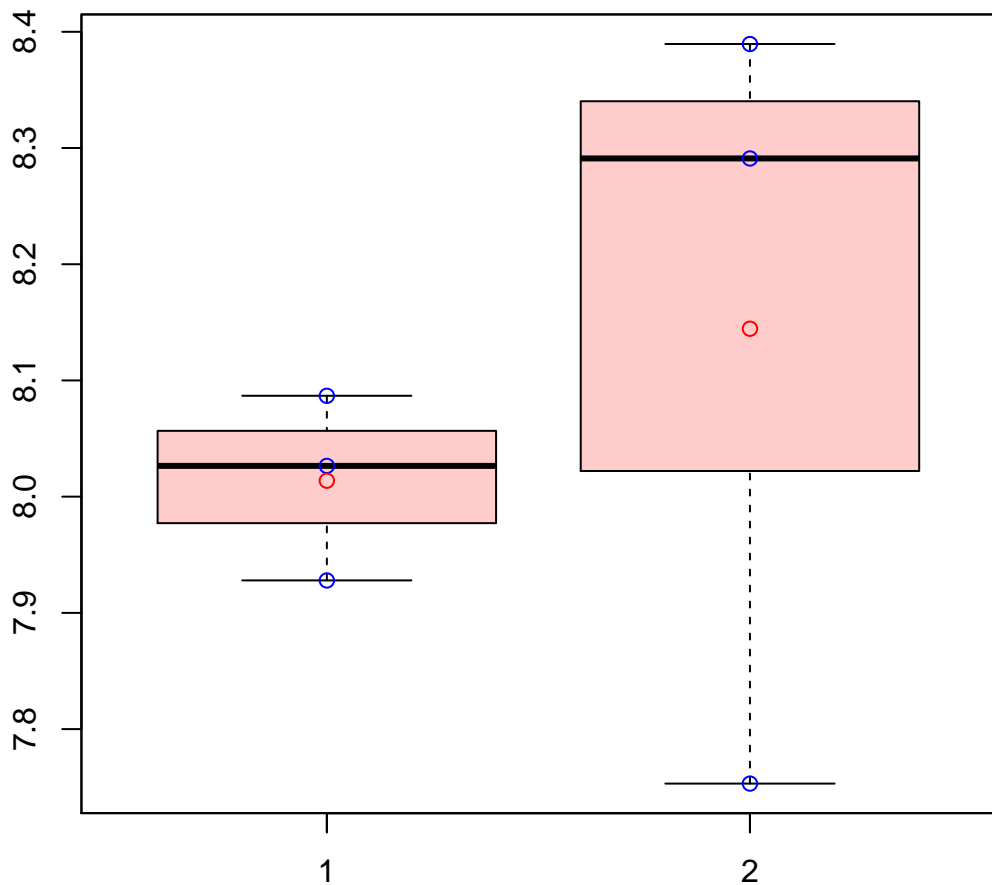

t-Test: p-value = 0.58

# CL1715Contig14|CL1715Contig14

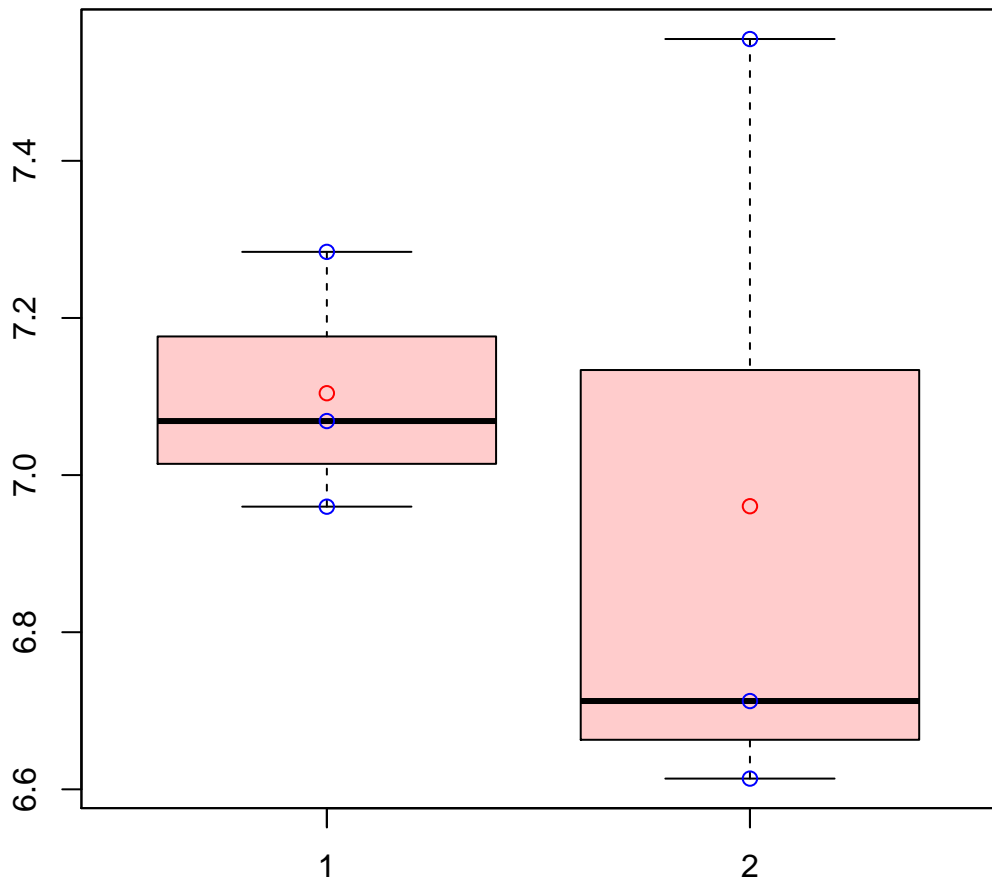

t-Test: p-value = 0.68

# CL1715Contig4|CL1715Contig4



t-Test: p-value = 0.58

# CL1715Contig7|CL1715Contig7

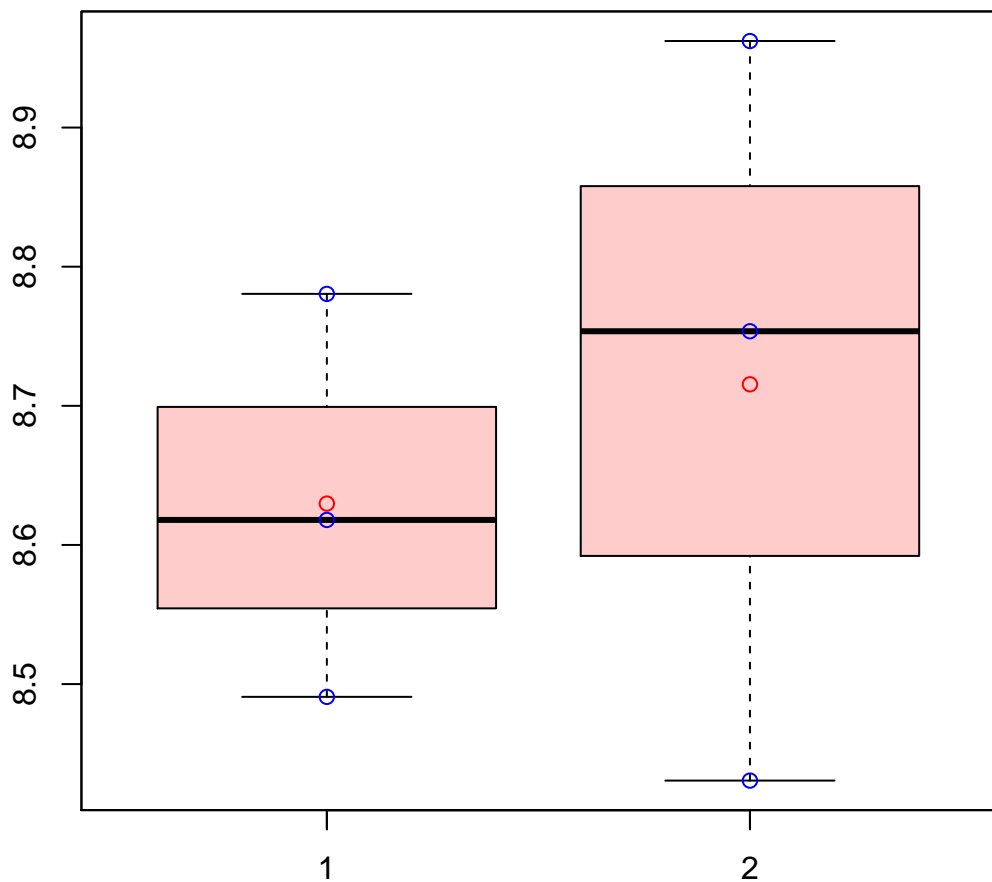

t-Test: p-value = 0.66

# CL1715Contig8|CL1715Contig8

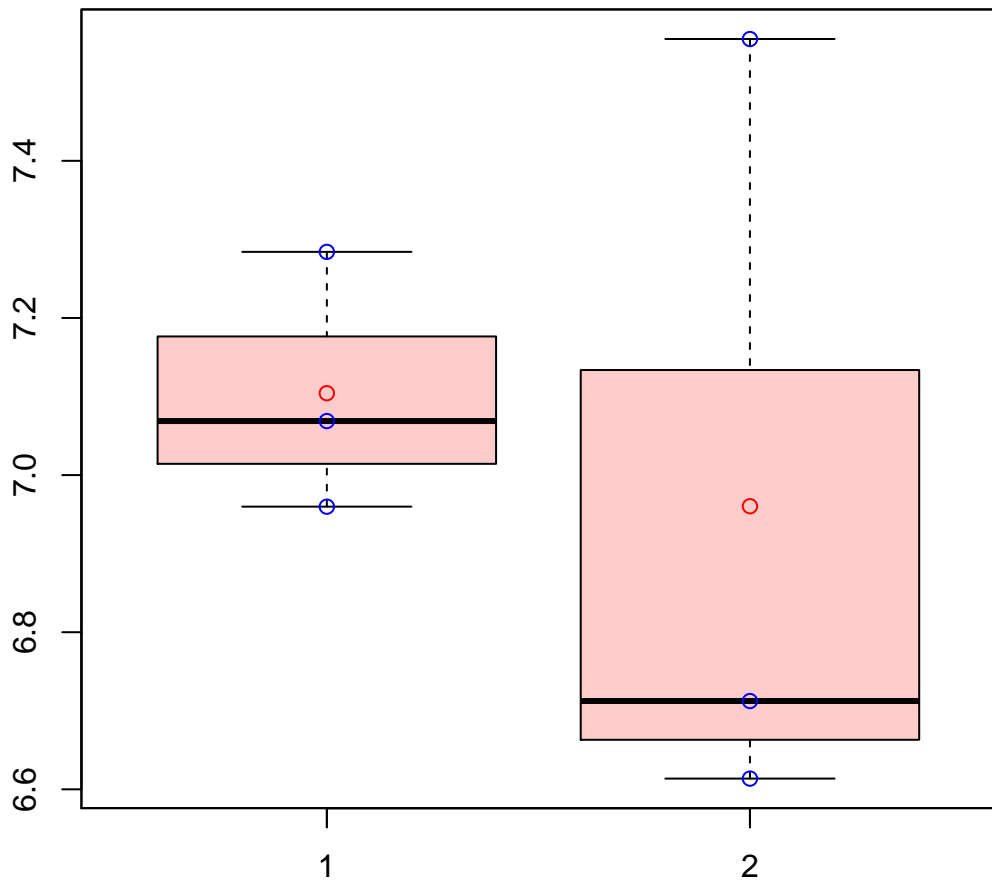

t-Test: p-value = 0.68

# CL1715Contig9|CL1715Contig9



t-Test: p-value = 0.68

# CL1719Contig2|CL1719Contig2

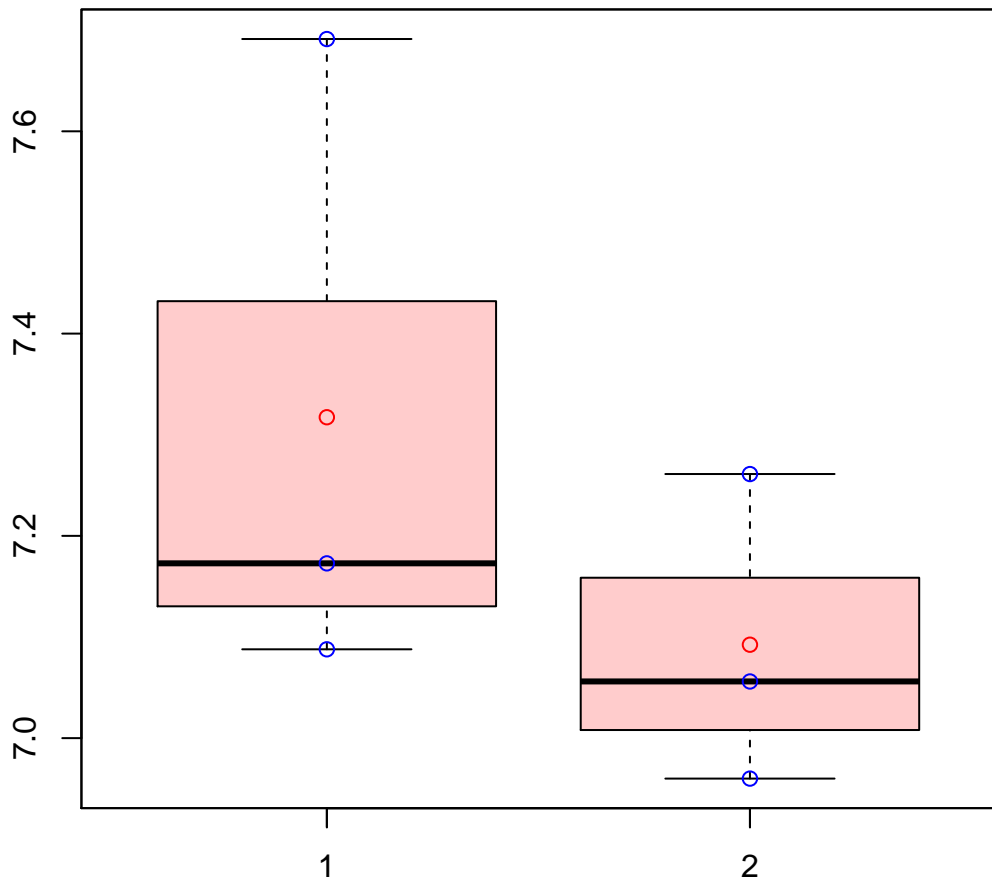

t-Test: p-value = 0.36



# CL1722Contig3|CL1722Contig3

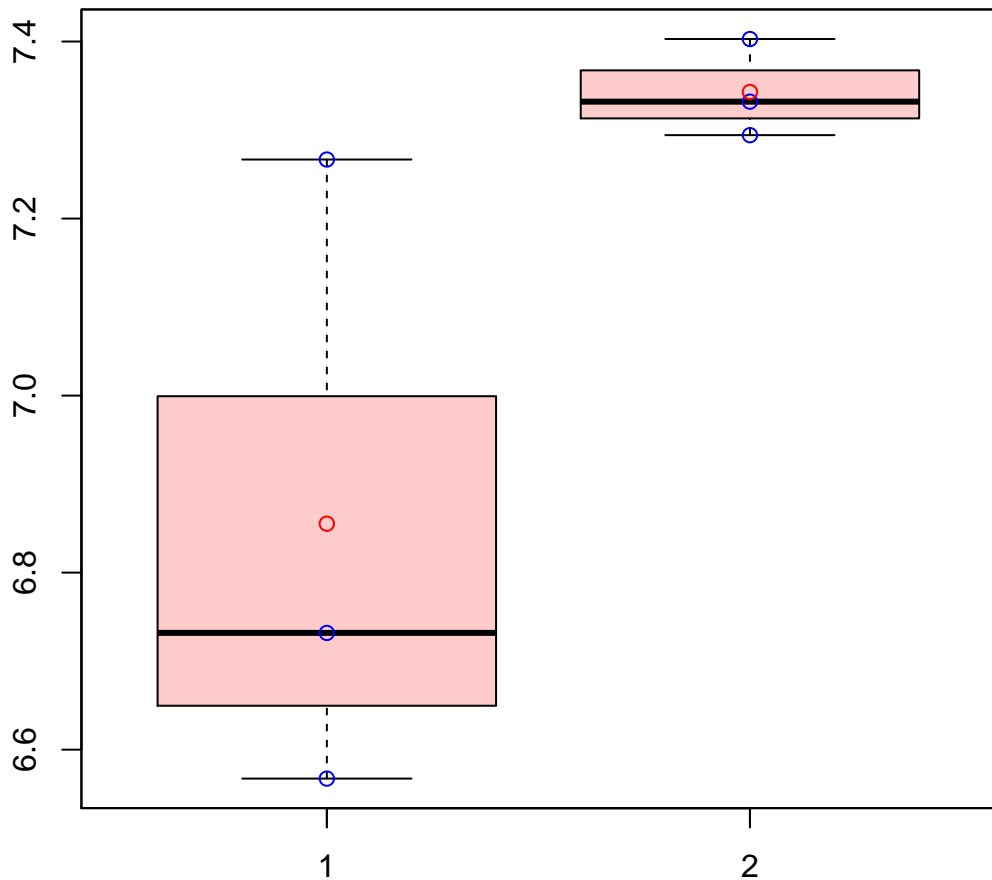

t-Test: p-value = 0.14

# CL1722Contig8|CL1722Contig8

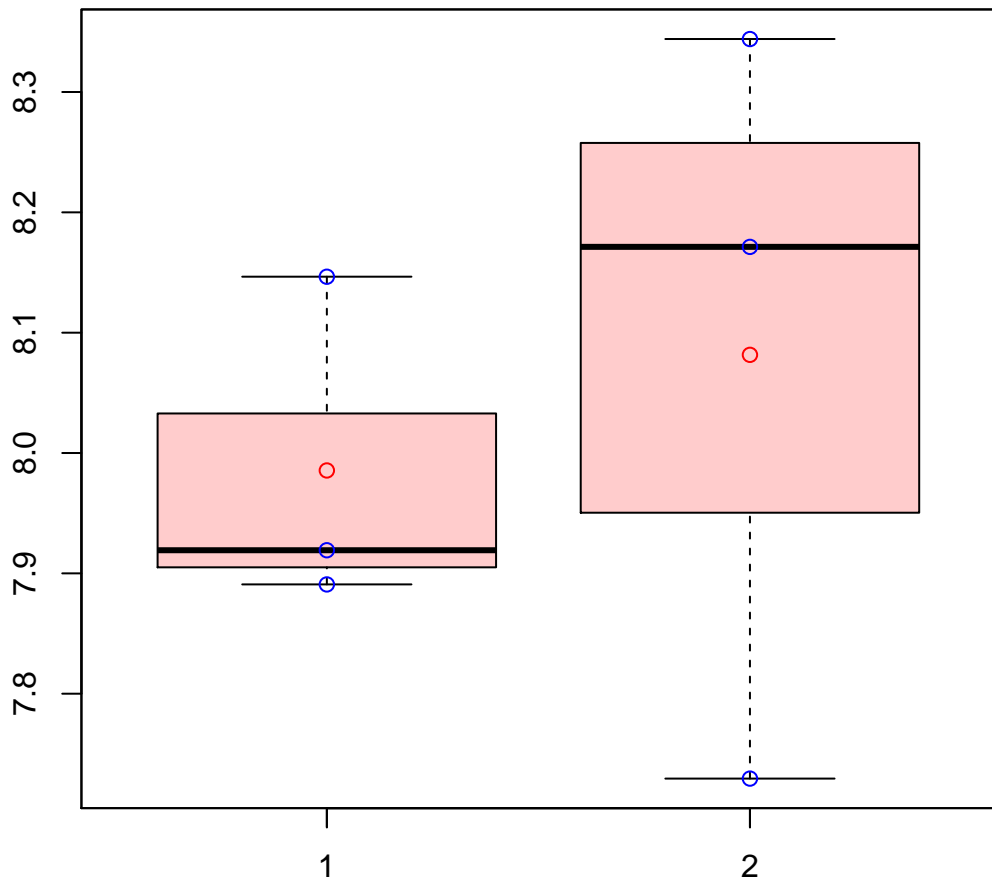

t-Test: p-value = 0.67

# CL1723Contig10|CL1723Contig10

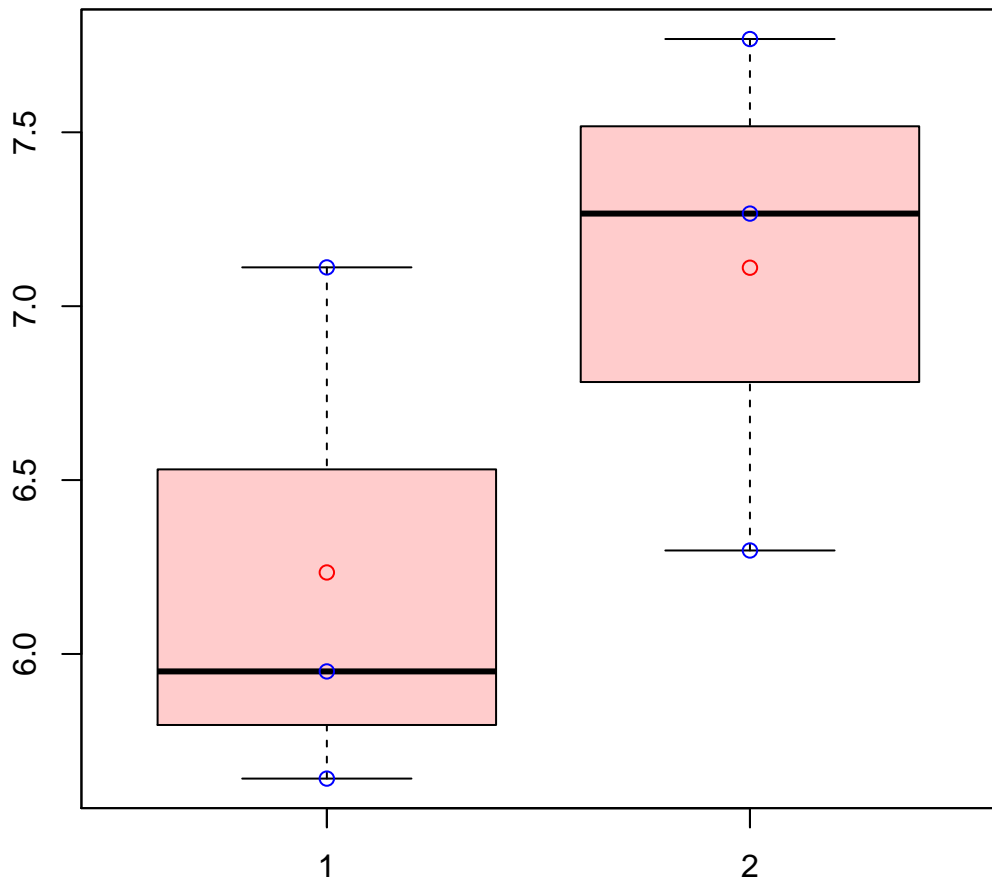

t-Test: p-value = 0.23

# CL1723Contig3|CL1723Contig3

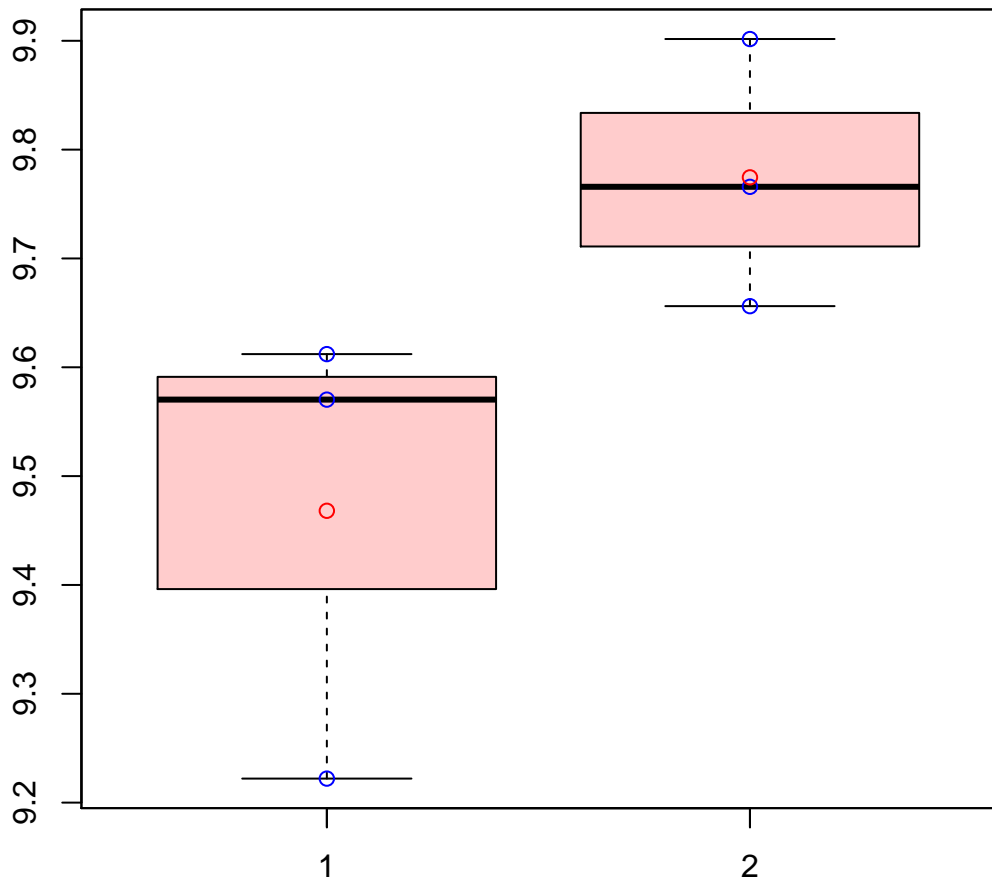

t-Test: p-value = 0.12

# CL1723Contig5|CL1723Contig5

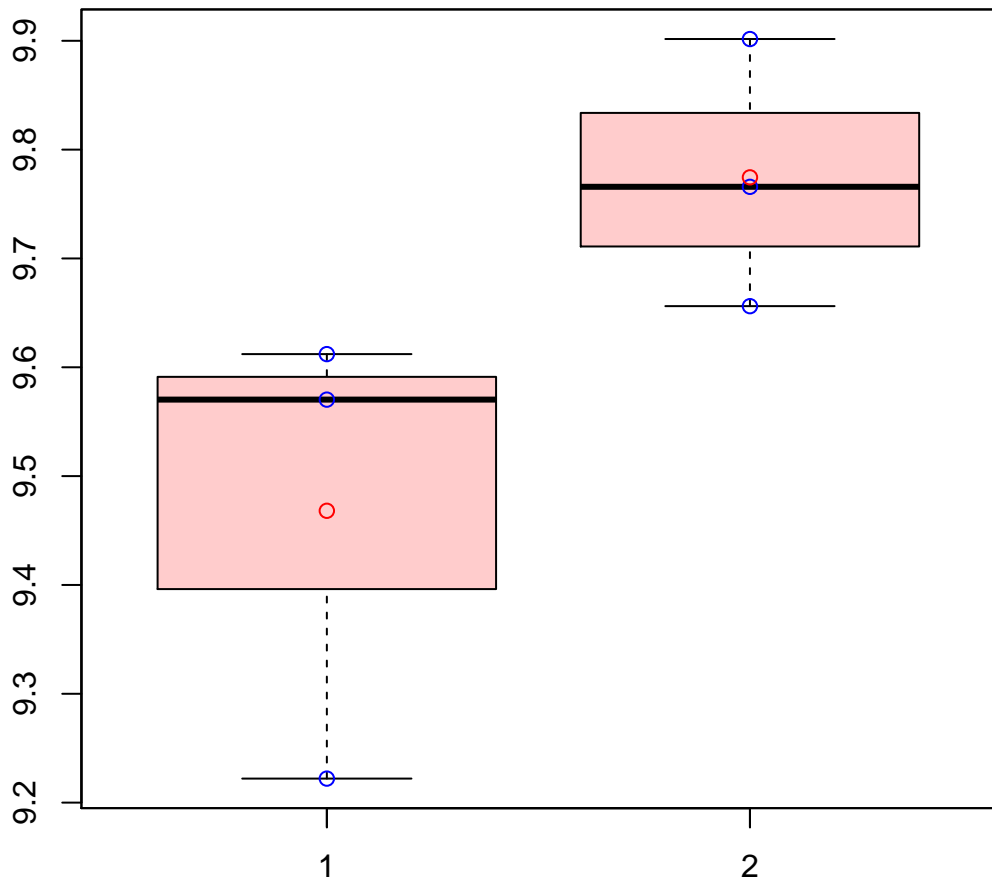

t-Test: p-value = 0.12

# CL1723Contig6|CL1723Contig6

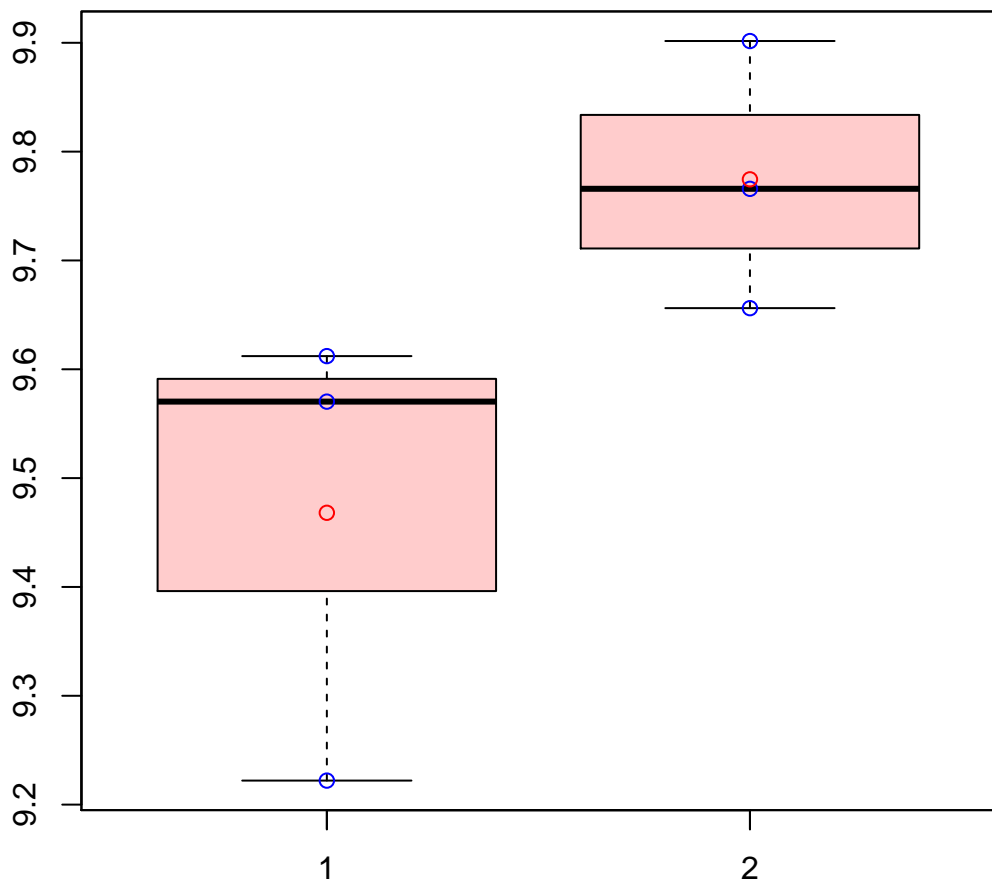

t-Test: p-value = 0.12

# CL1723Contig7|CL1723Contig7

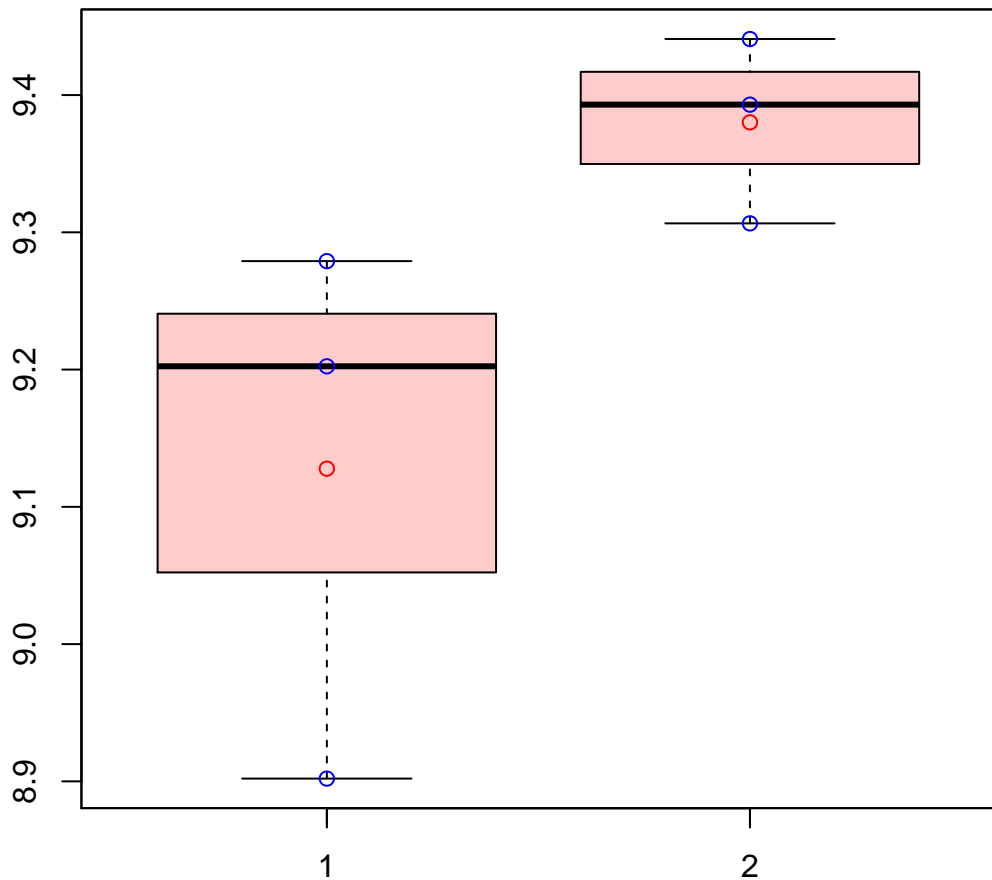

t-Test: p-value = 0.15

# CL1723Contig8|CL1723Contig8

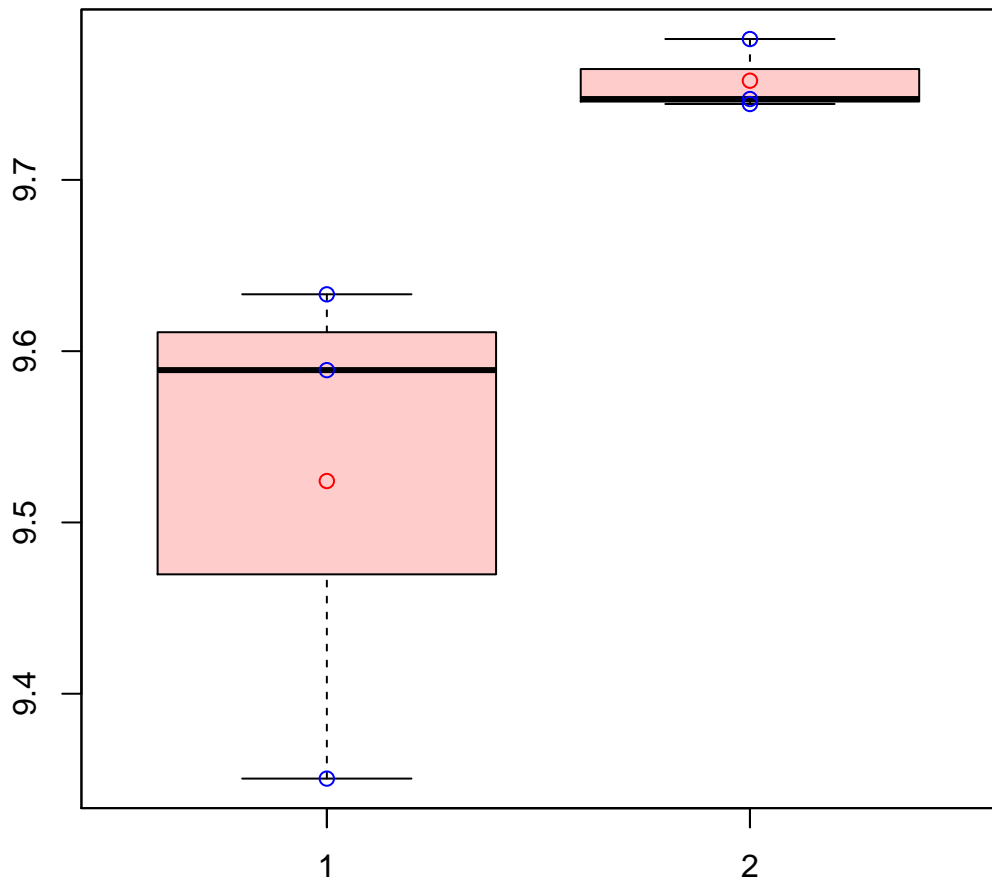

t-Test: p-value = 0.11



# CL1723Contig9|CL1723Contig9

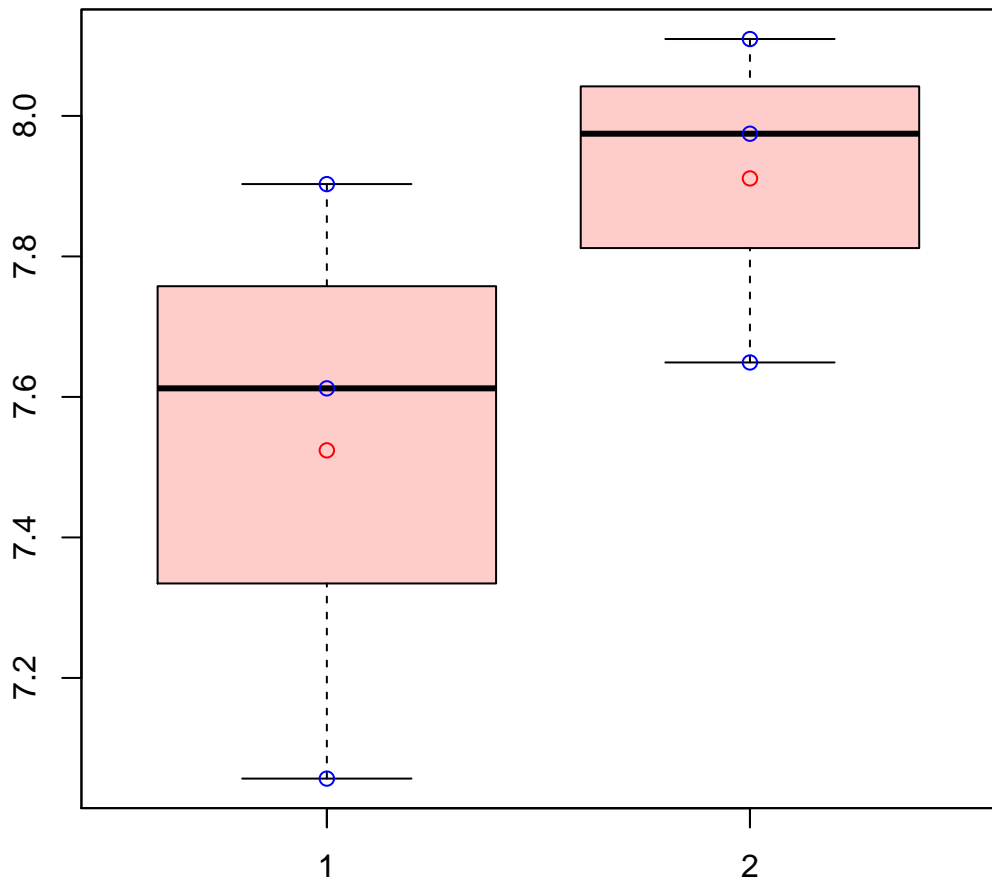

t-Test: p-value = 0.26

# CL1725Contig1|CL1725Contig1

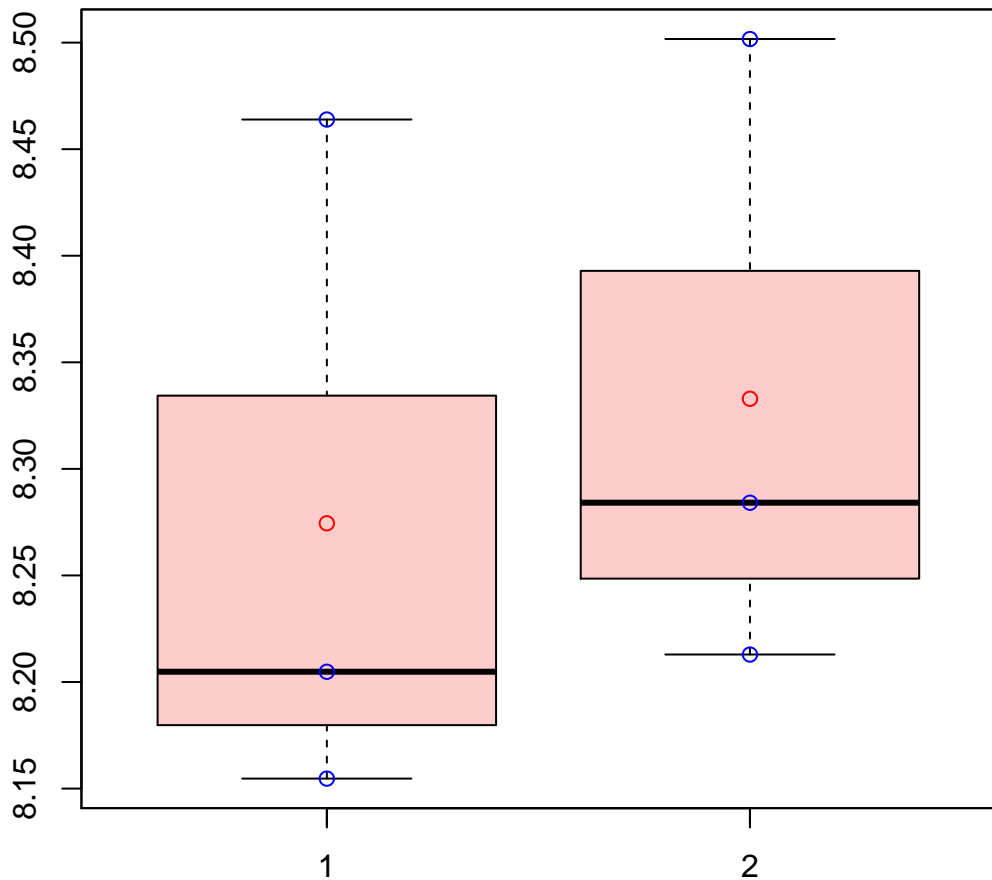

t-Test: p-value = 0.68

# CL1725Contig2|CL1725Contig2

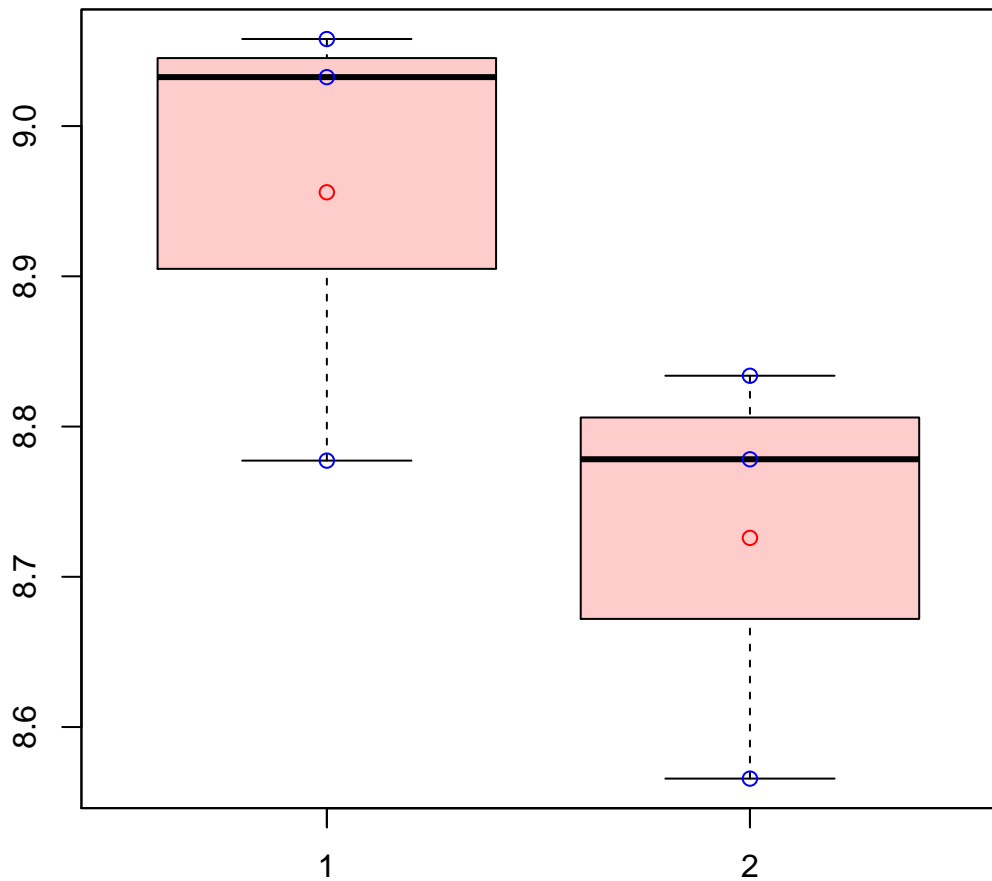

t-Test: p-value = 0.13

# CL17262Contig1|CL17262Contig1

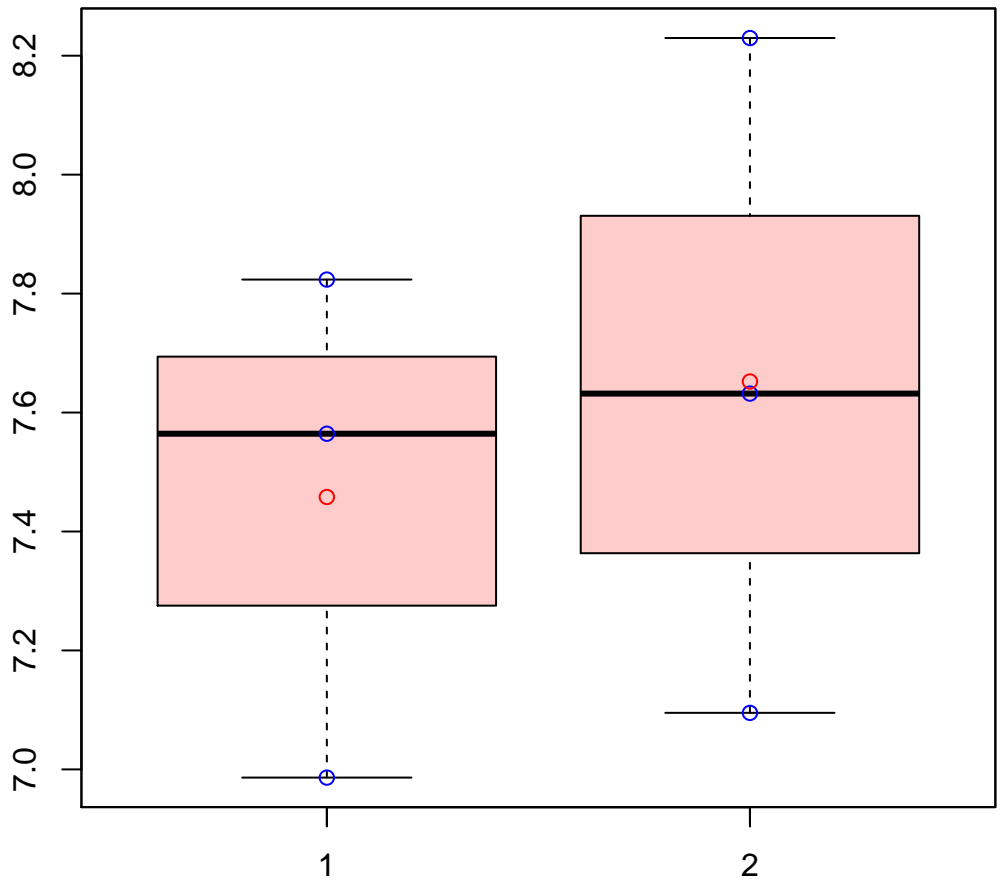

t-Test: p-value = 0.66

# CL1729Contig2|CL1729Contig2

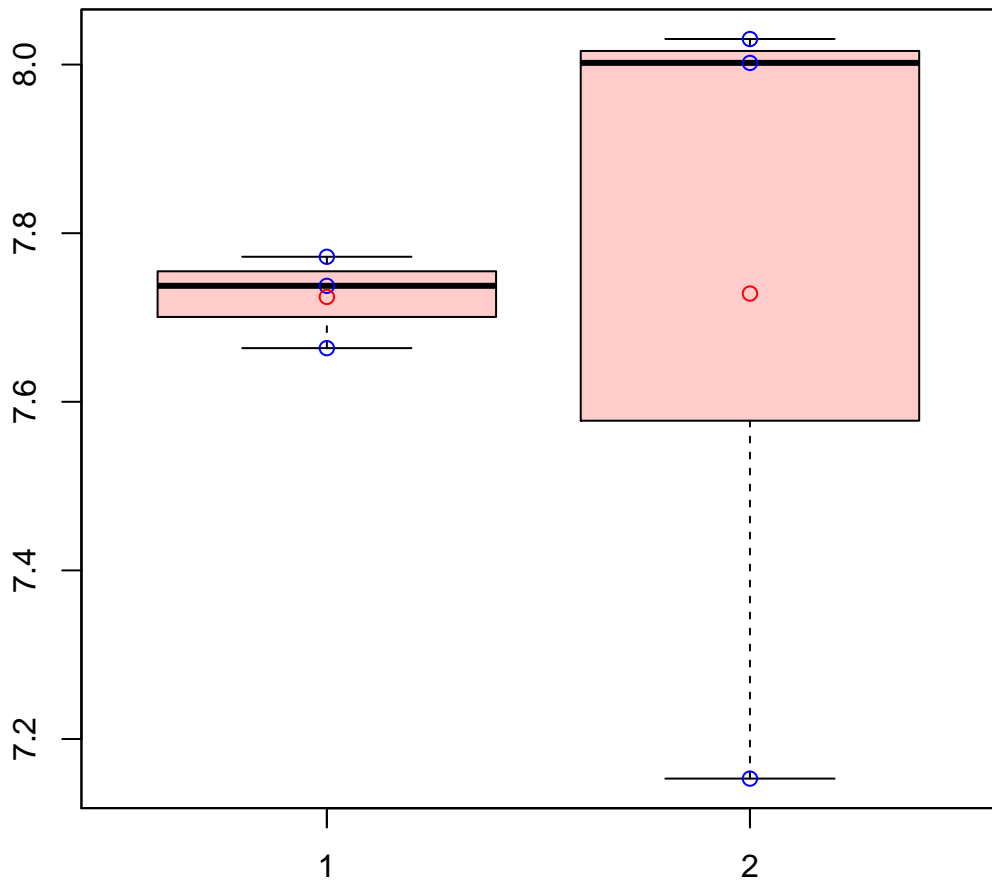

t-Test: p-value = 0.99

# CL172Contig11|CL172Contig11

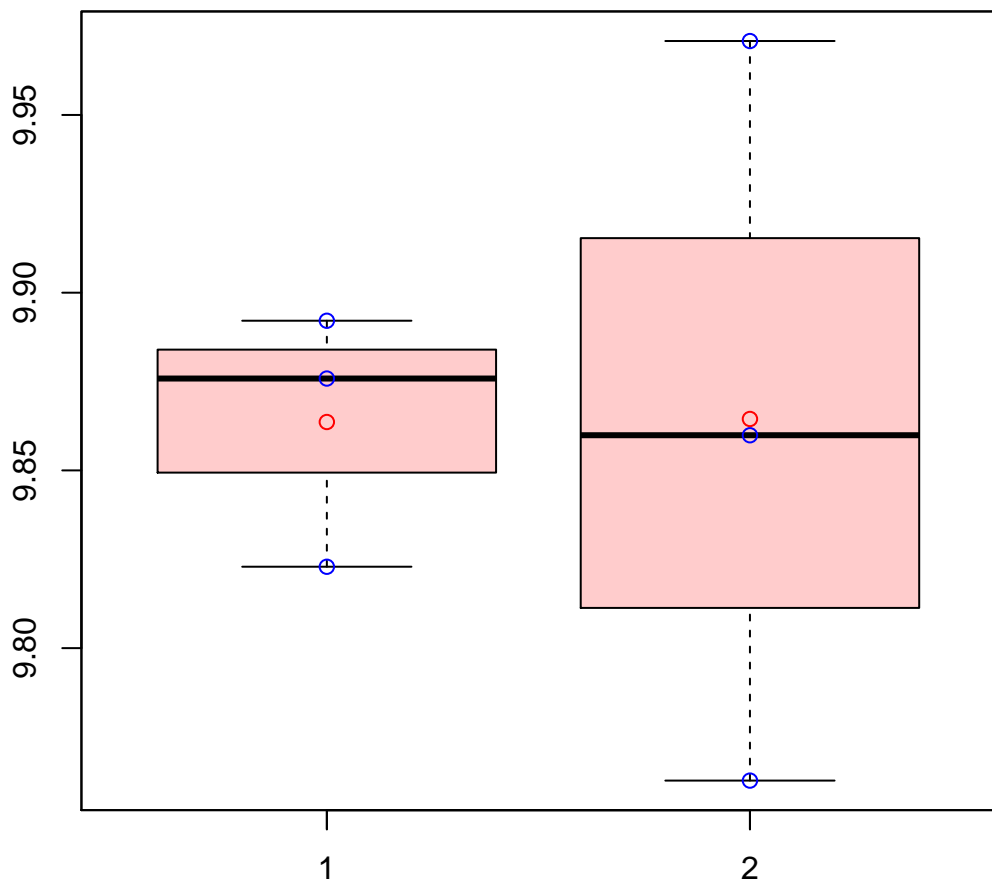

t-Test: p-value = 0.99

# CL172Contig13|CL172Contig13

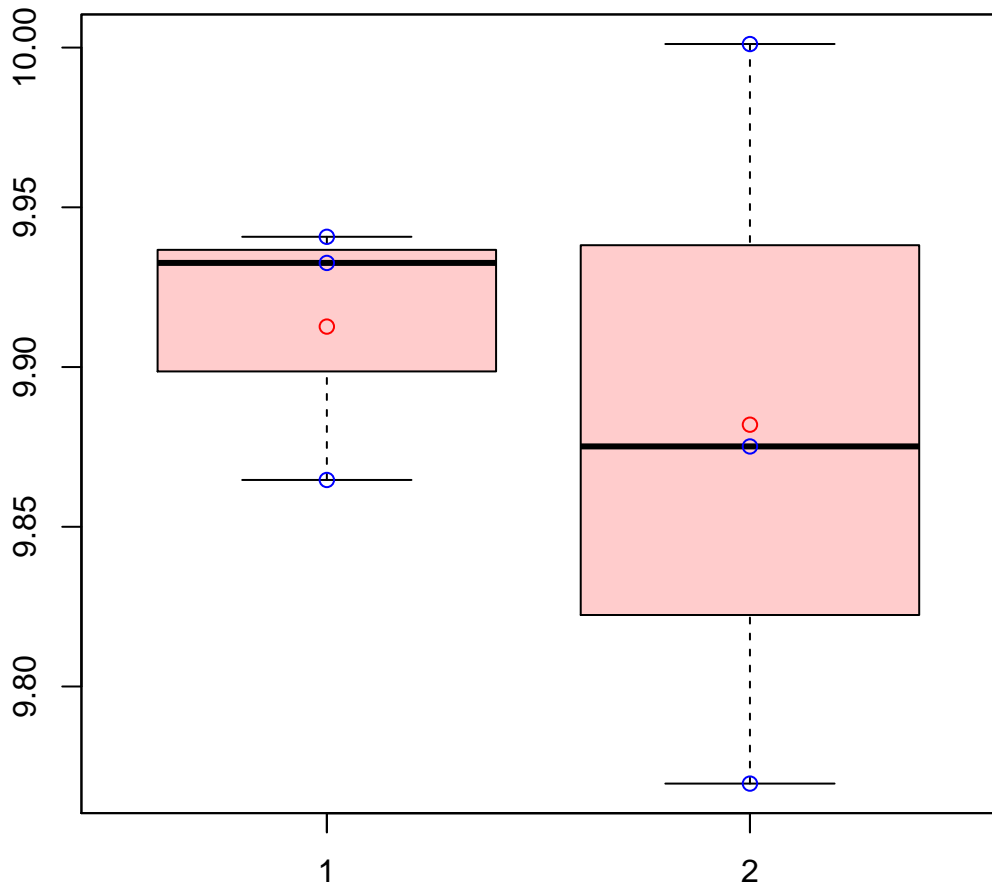

t-Test: p-value = 0.7

# CL172Contig1|CL172Contig1

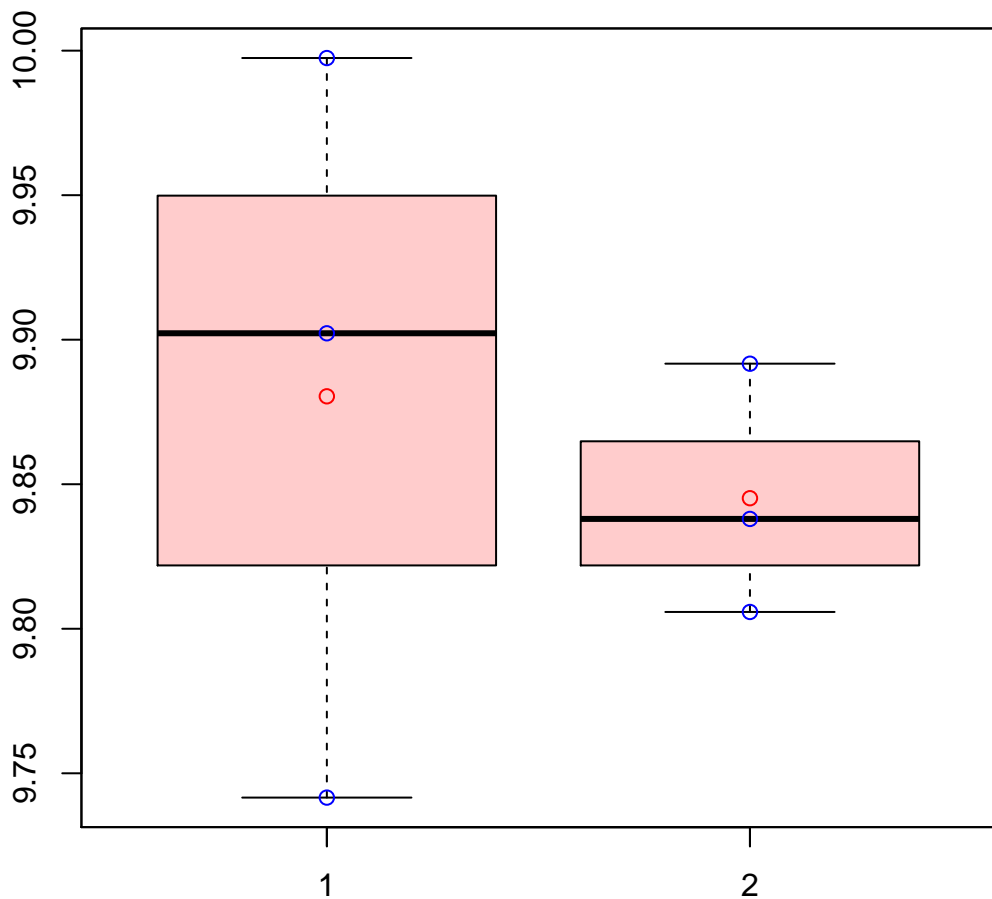

t-Test: p-value = 0.69



# CL172Contig3|CL172Contig3

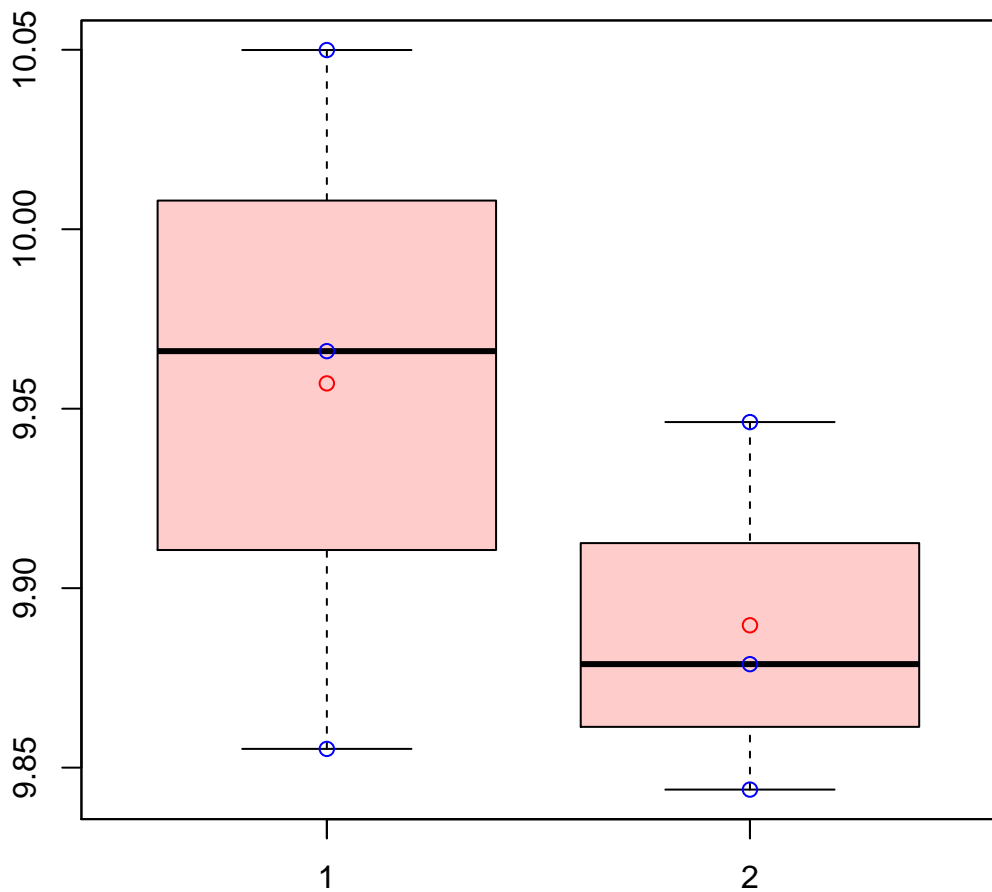

t-Test: p-value = 0.37

# CL172Contig9|CL172Contig9

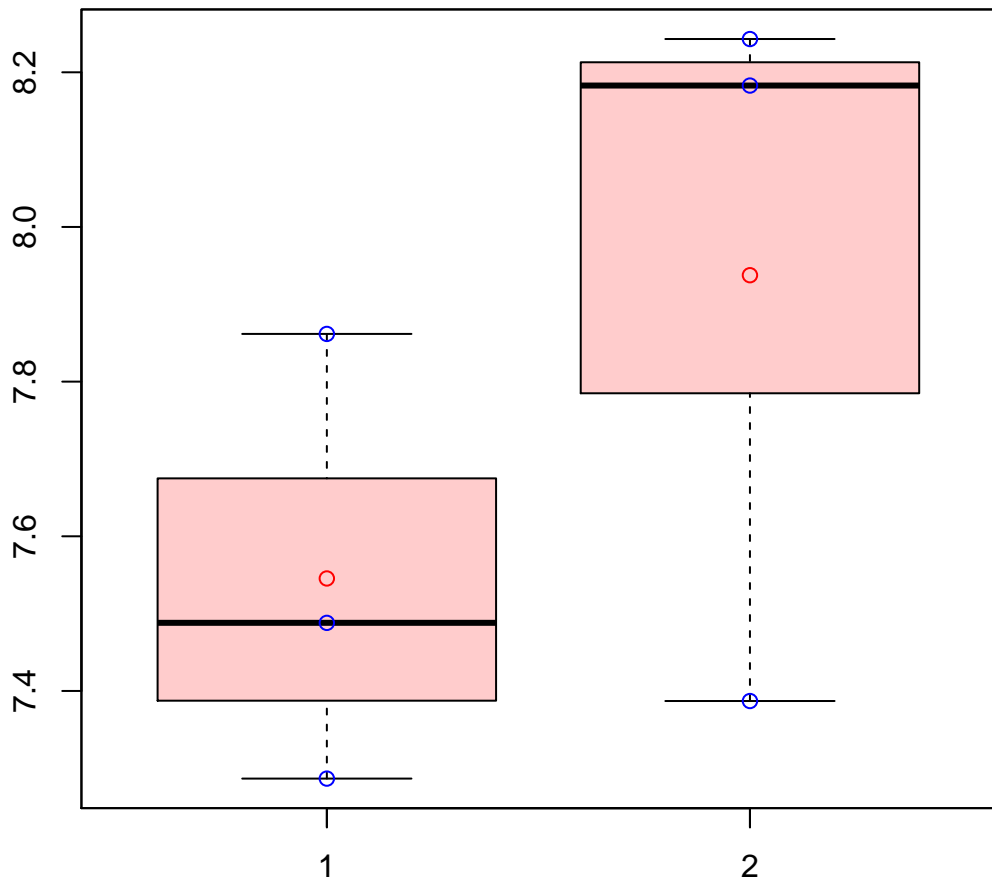

t-Test: p-value = 0.3

# CL1730Contig1|CL1730Contig1

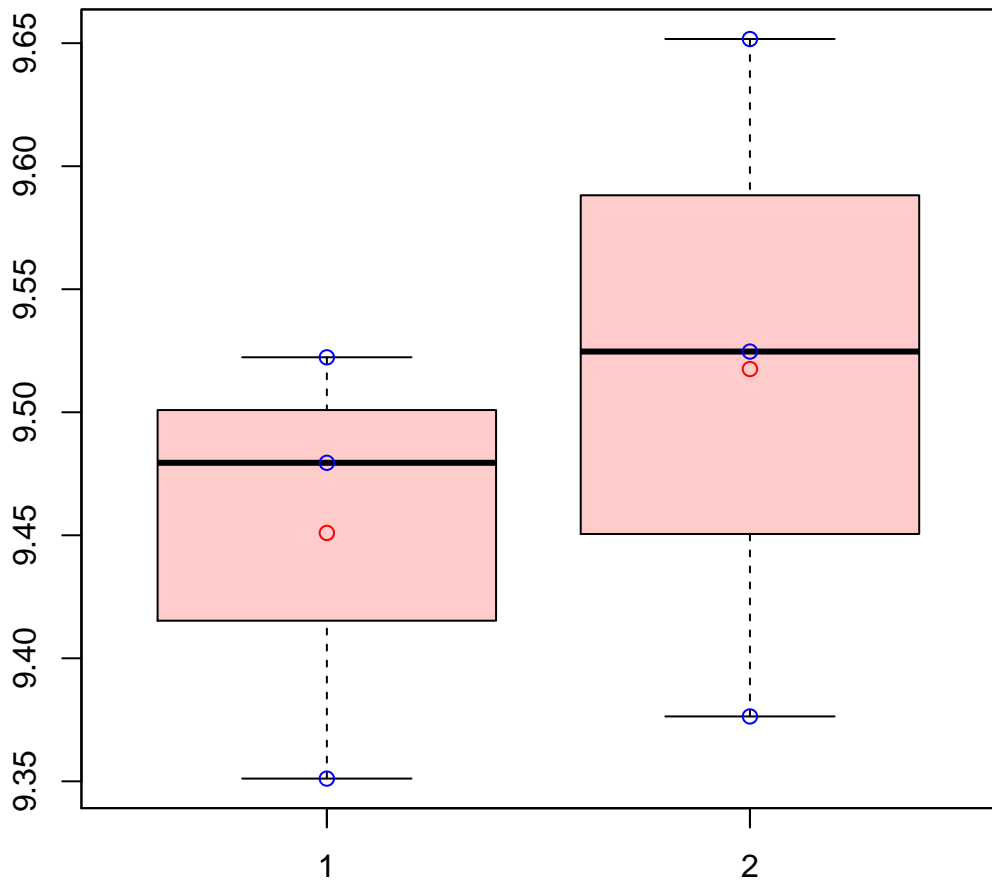

t-Test: p-value = 0.53

# CL1730Contig6|CL1730Contig6

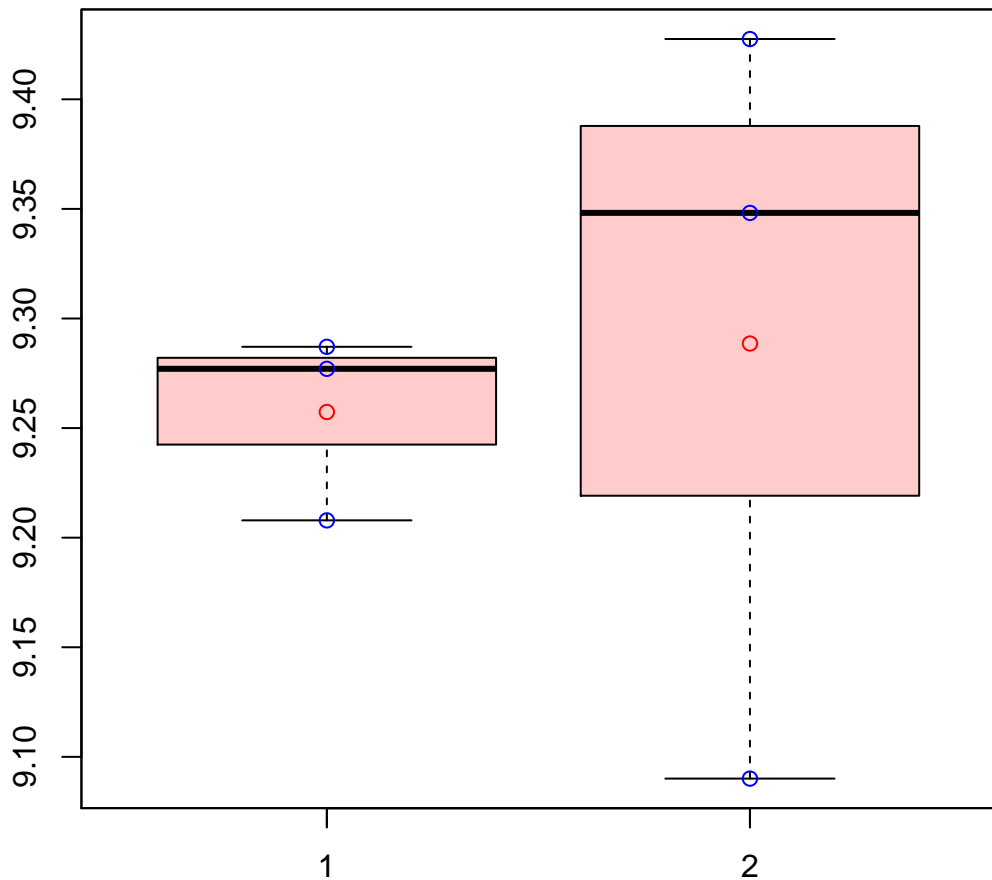

t-Test: p-value = 0.79

# CL1731Contig1|CL1731Contig1

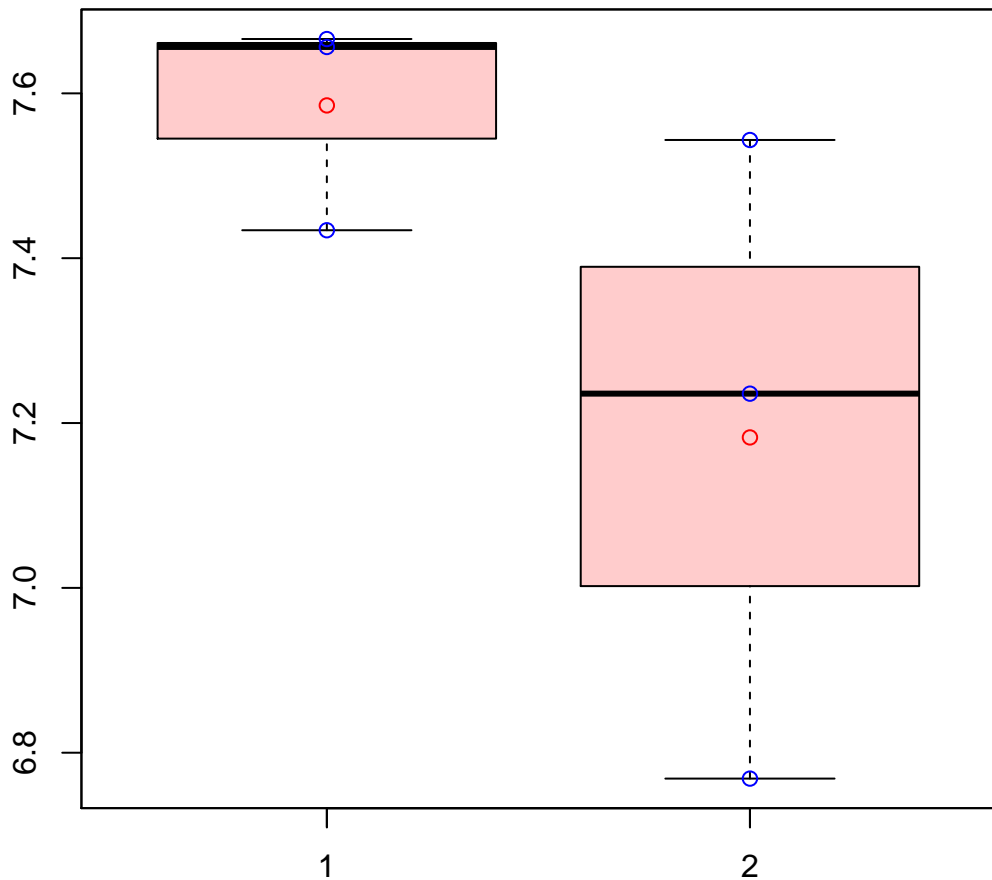

t-Test: p-value = 0.21

# CL1732Contig4|CL1732Contig4

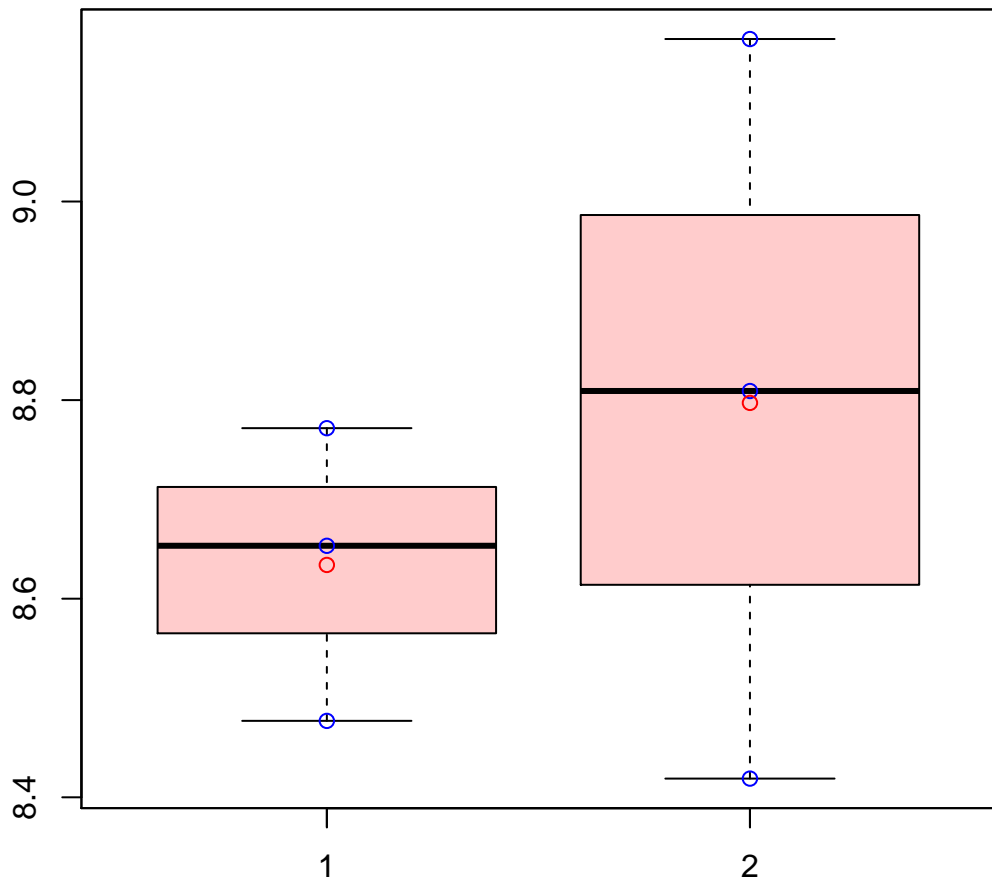

t-Test: p-value = 0.54

# CL1733Contig2|CL1733Contig2

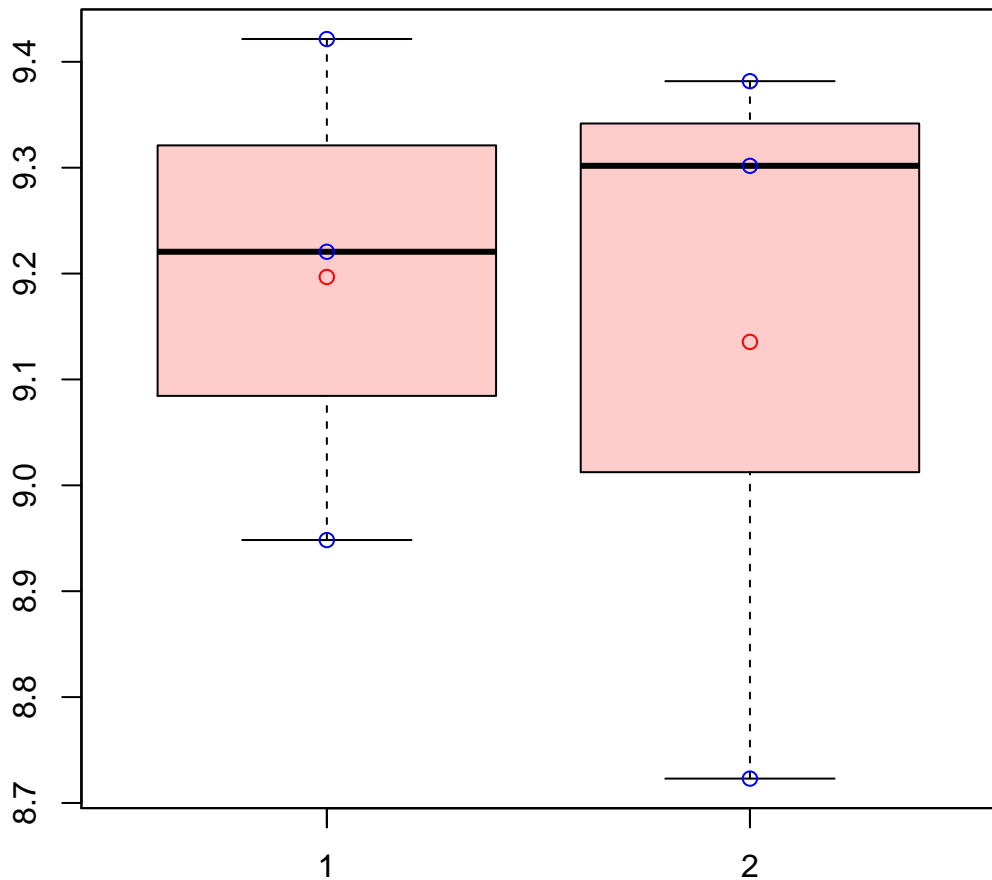

t-Test: p-value = 0.82

# CL1734Contig4|CL1734Contig4

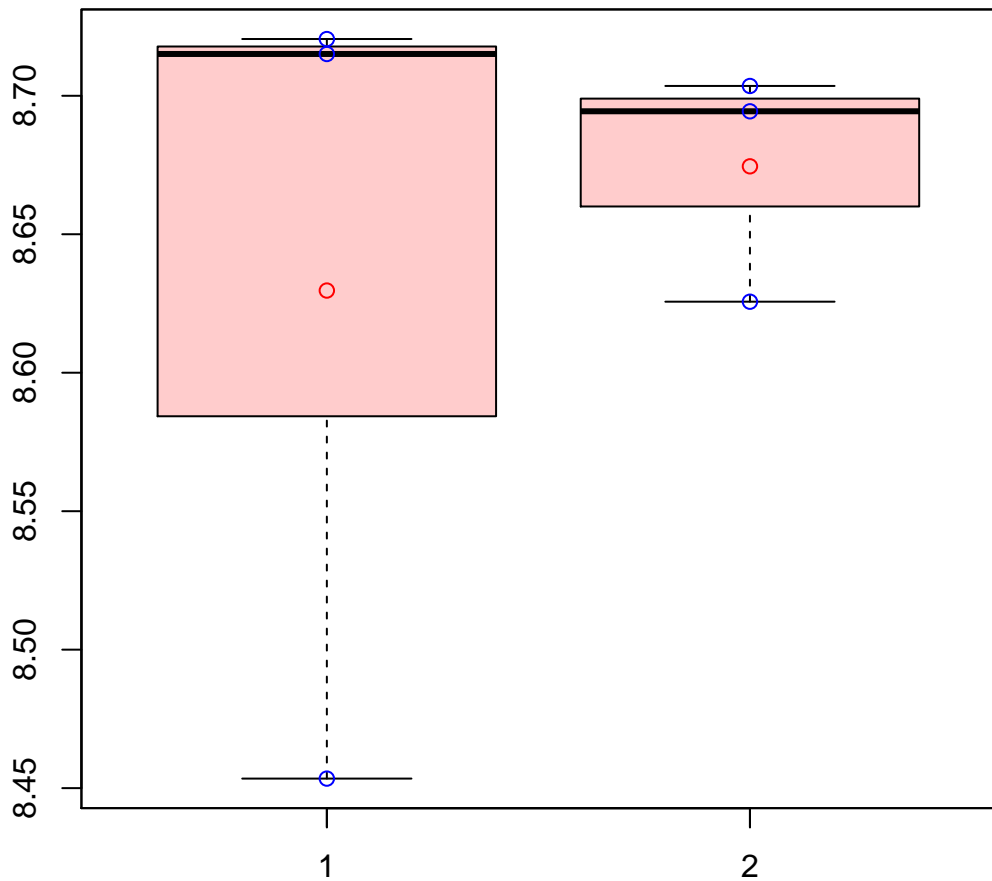

t-Test: p-value = 0.67



# CL17357Contig1|CL17357Contig1



t-Test: p-value = 0.72

# CL1736Contig3|CL1736Contig3

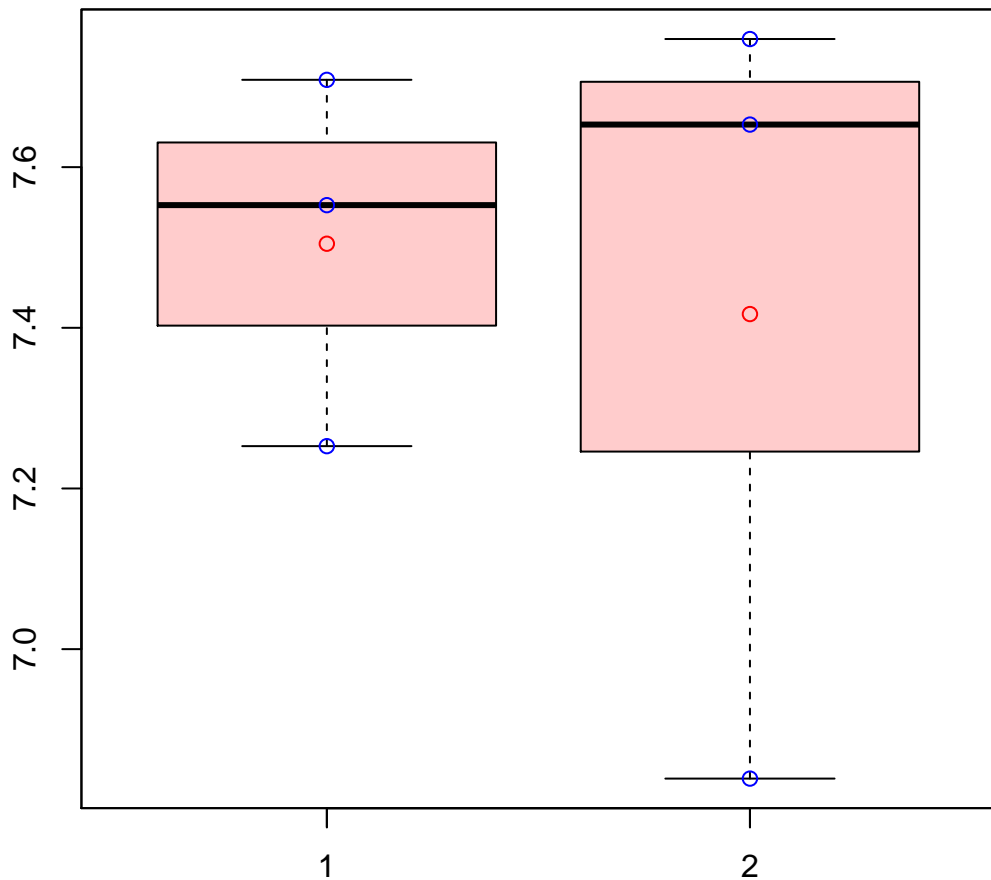

t-Test: p-value = 0.8

# CL17375Contig1|CL17375Contig1

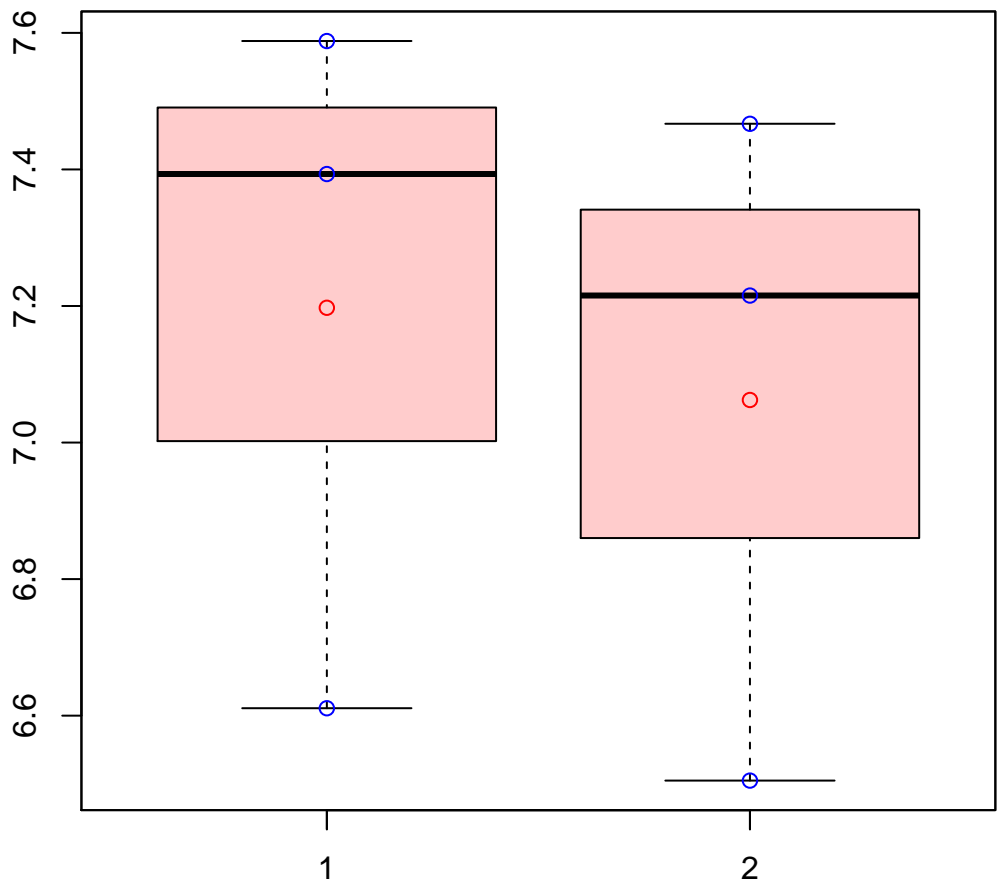

t-Test: p-value = 0.76

# CL1739Contig2|CL1739Contig2

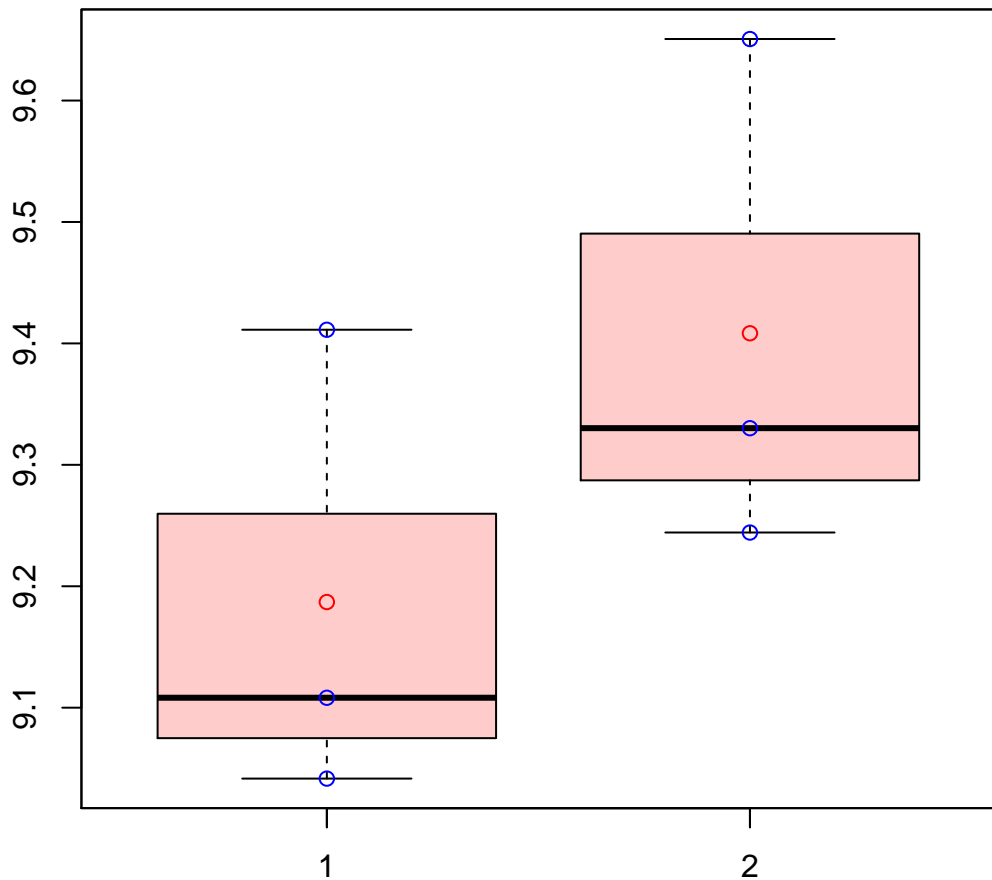

t-Test: p-value = 0.26

# CL1742Contig1|CL1742Contig1

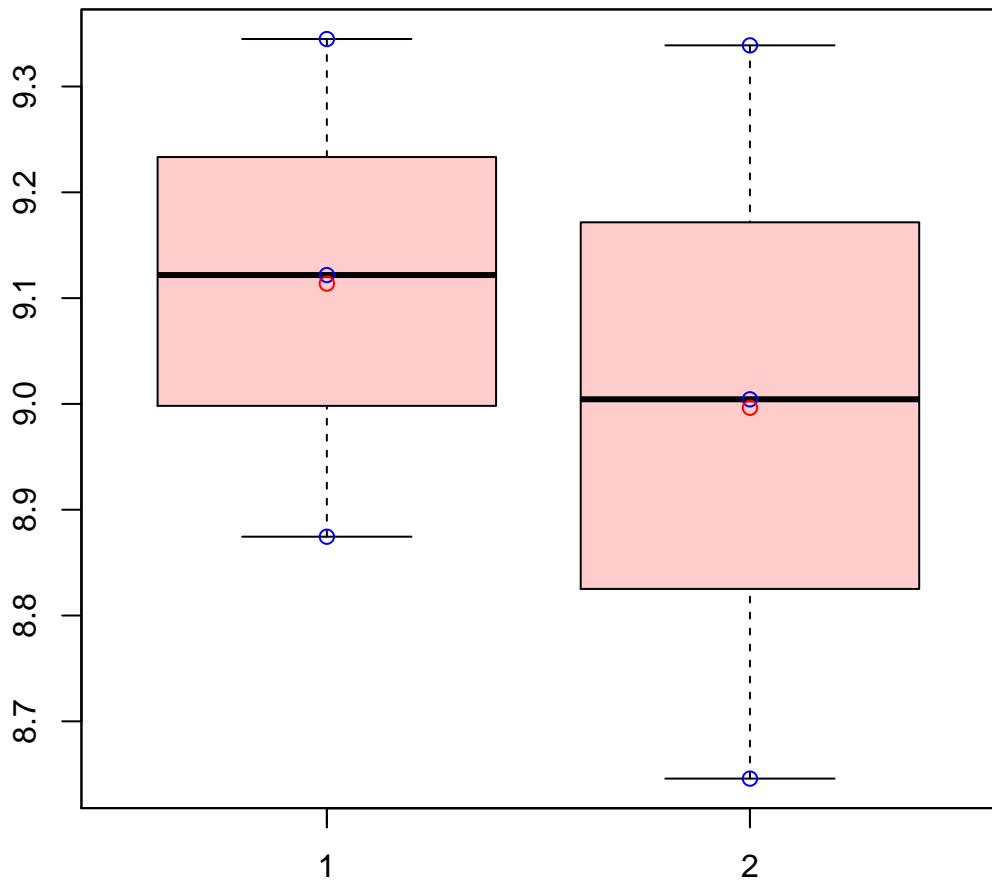

t-Test: p-value = 0.66

# CL1746Contig2|CL1746Contig2

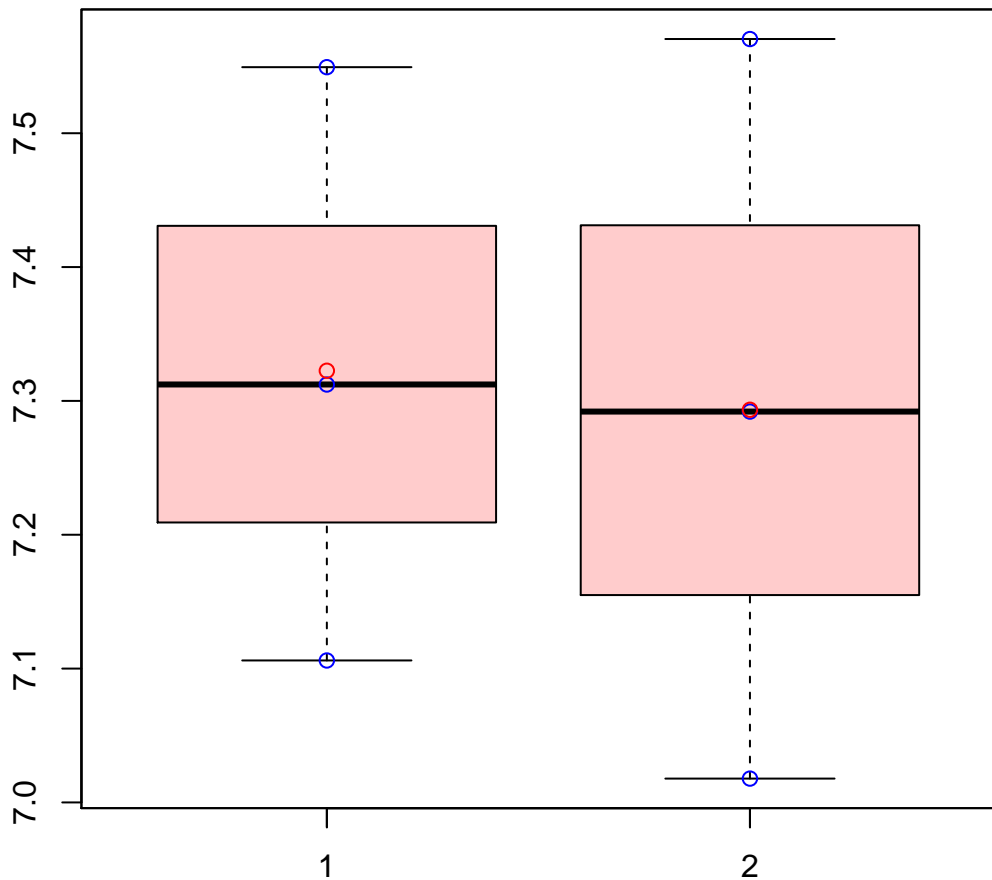

t-Test: p-value = 0.89

# CL1747Contig3|CL1747Contig3

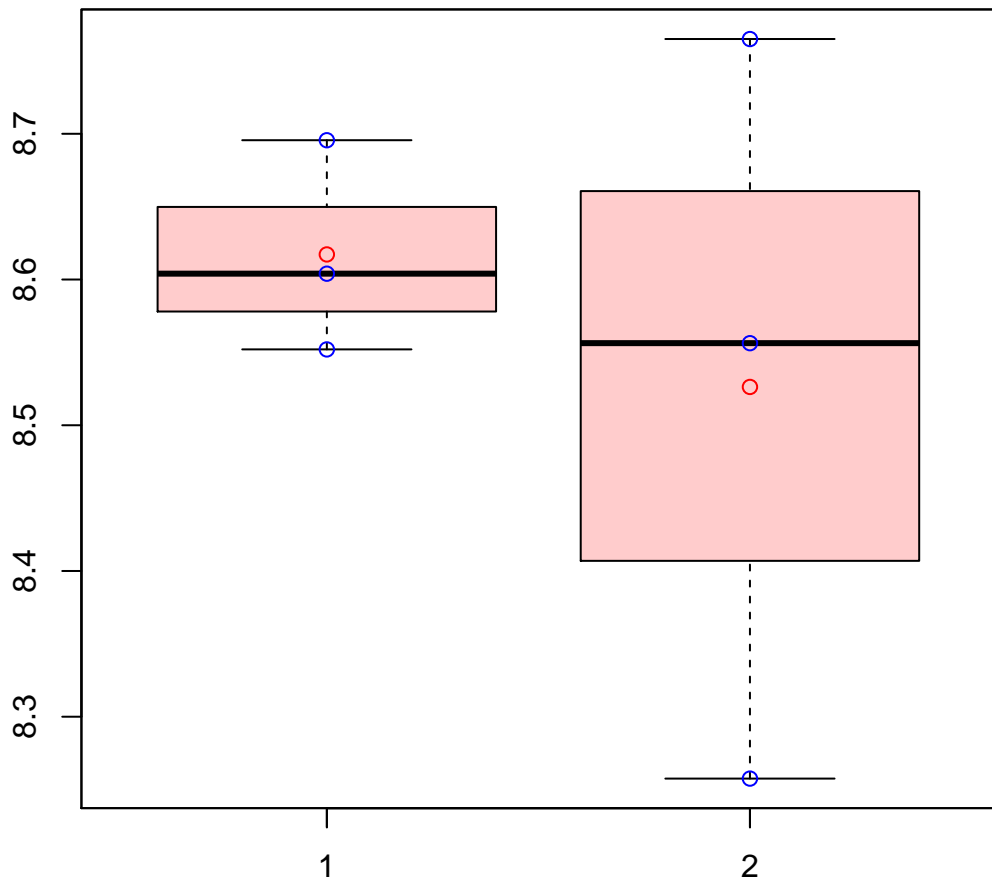

t-Test: p-value = 0.61

# CL1747Contig4|CL1747Contig4

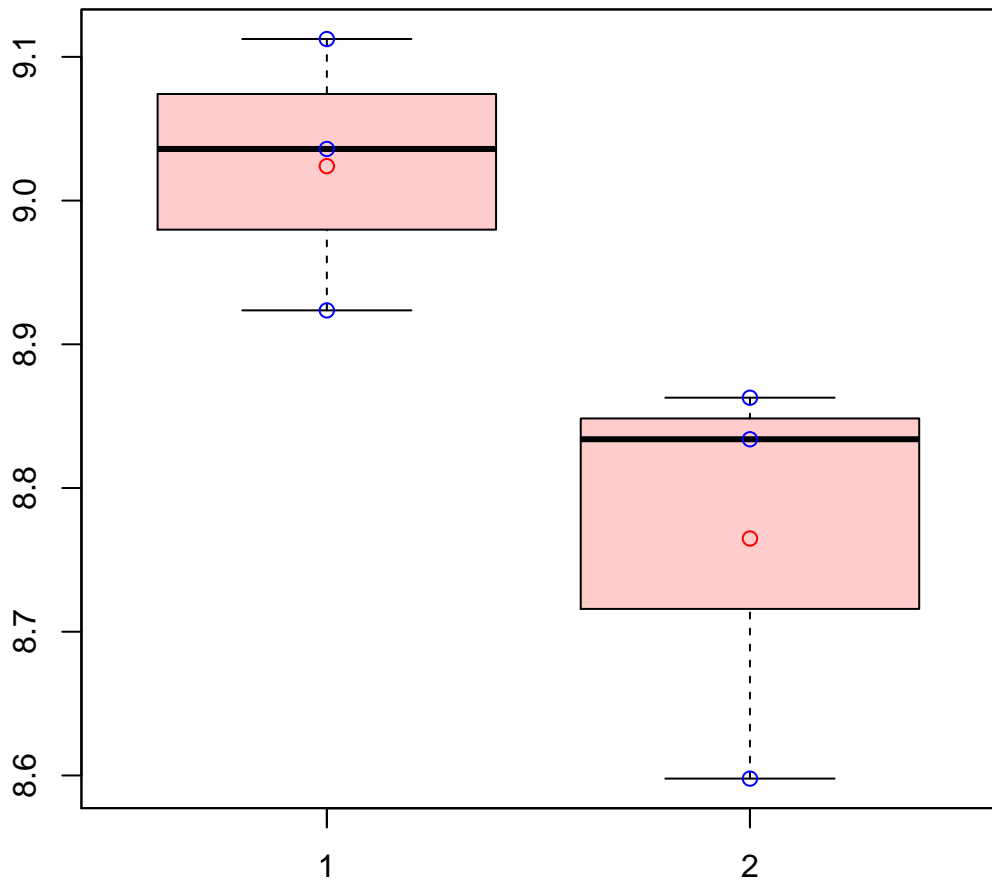

t-Test: p-value = 0.07



# CL1747Contig6|CL1747Contig6

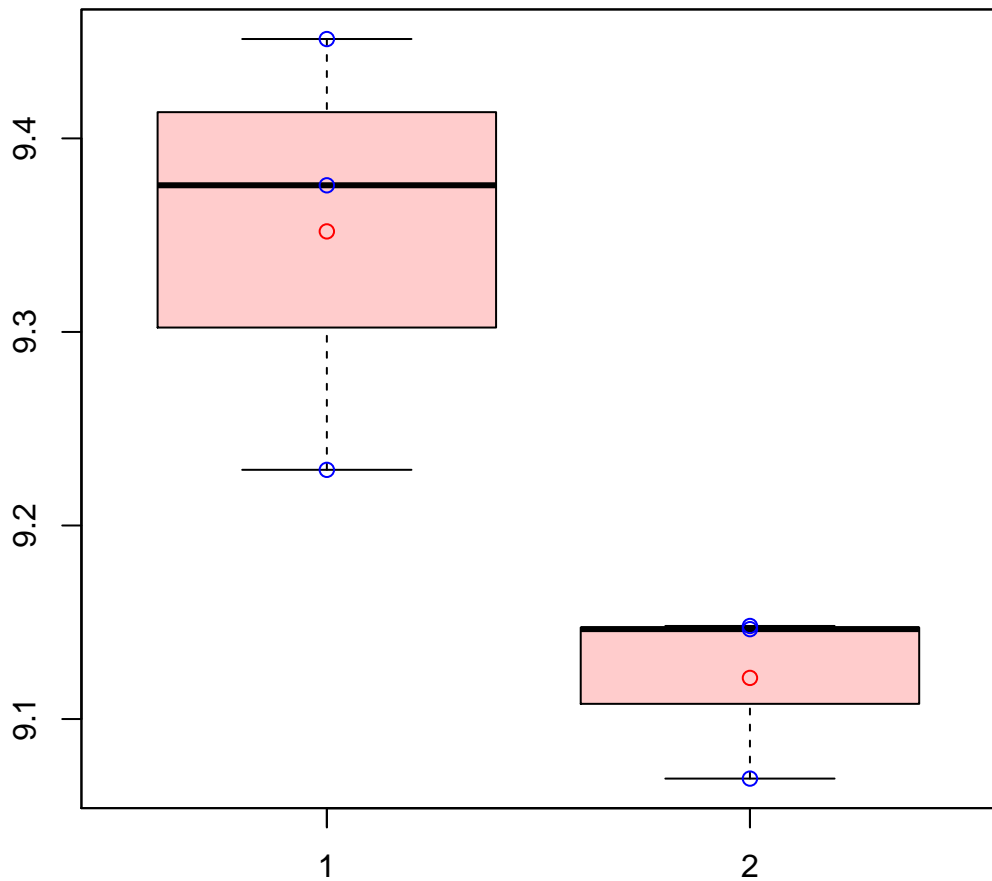

t-Test: p-value = 0.06

# CL1747Contig7|CL1747Contig7



t-Test: p-value = 0.61

# CL174Contig18|CL174Contig18

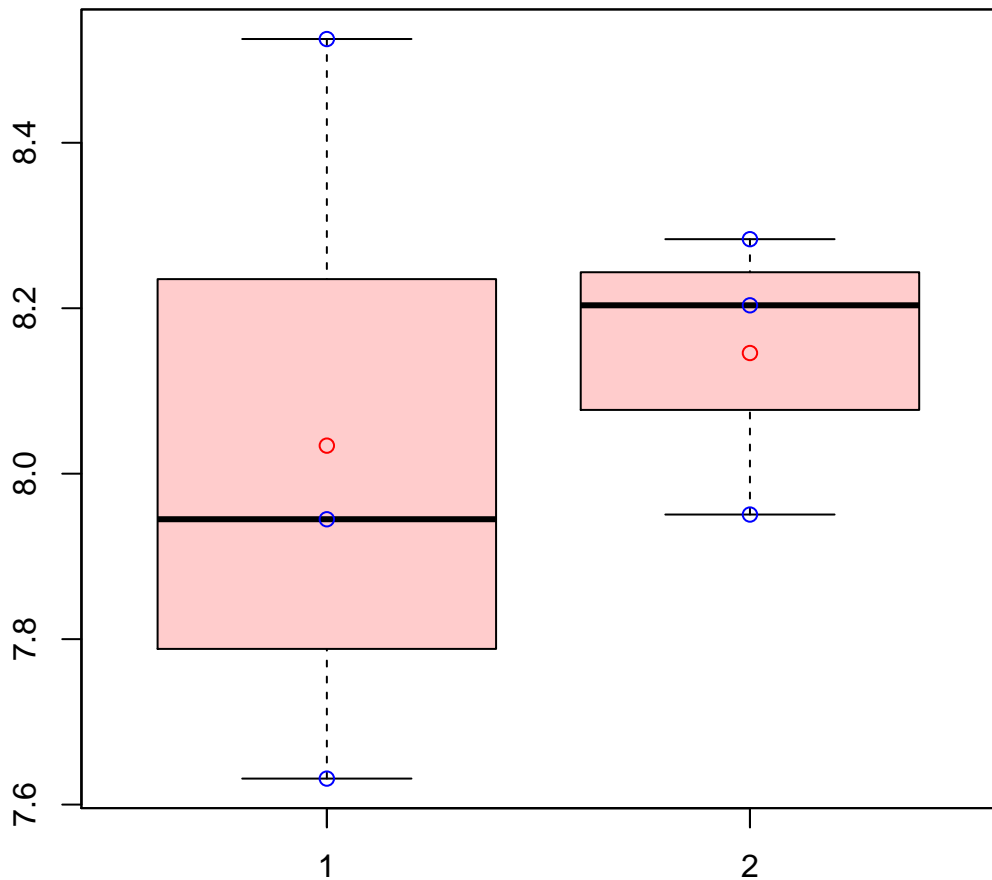

t-Test: p-value = 0.72

# CL174Contig19|CL174Contig19

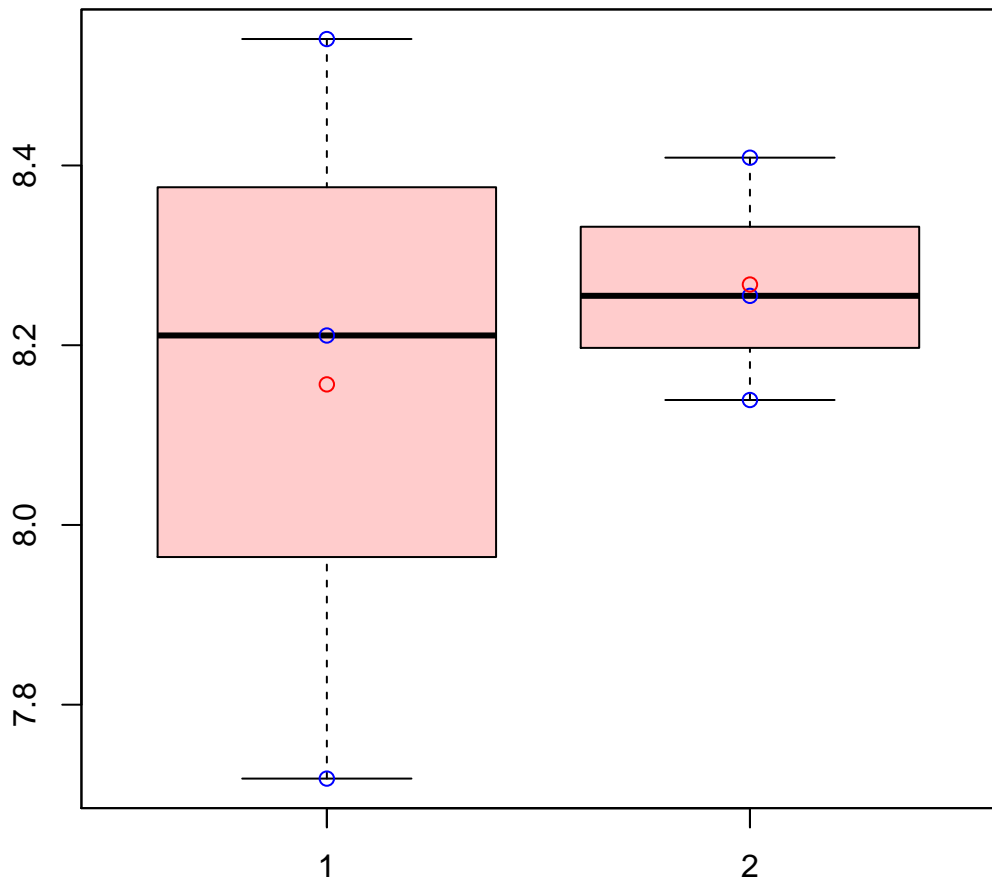

t-Test: p-value = 0.7

# CL174Contig1|CL174Contig1

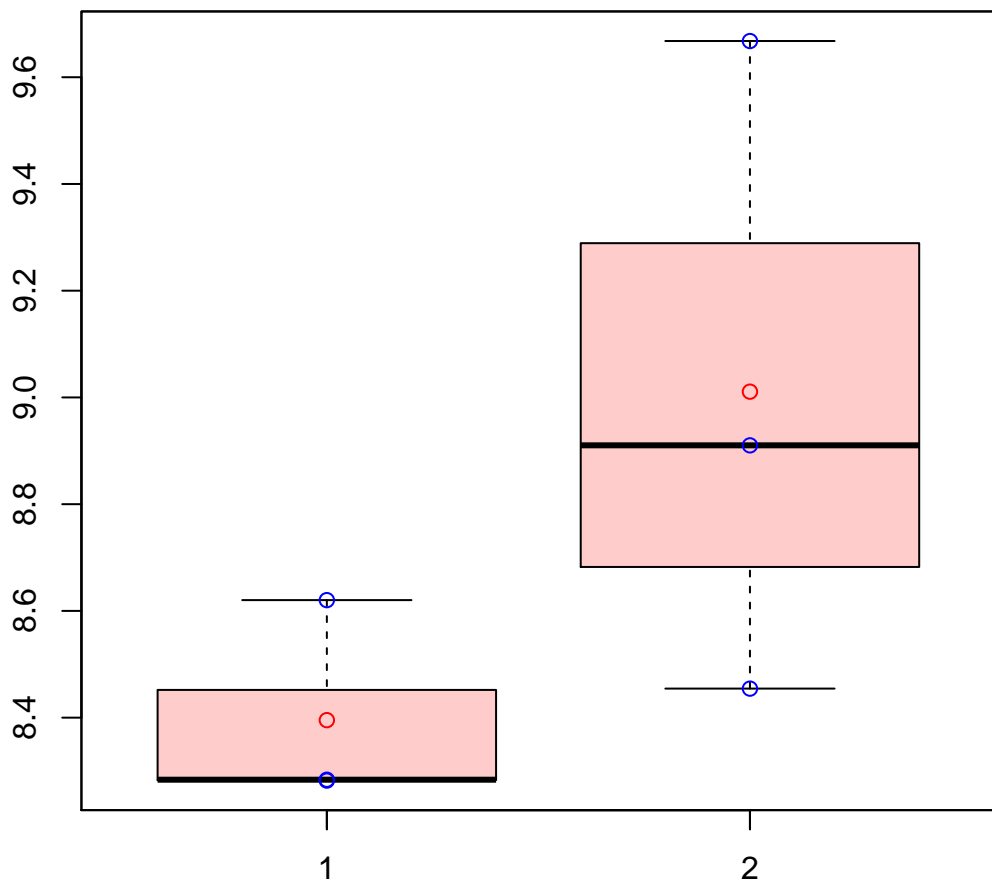

t-Test: p-value = 0.22

# CL174Contig20|CL174Contig20

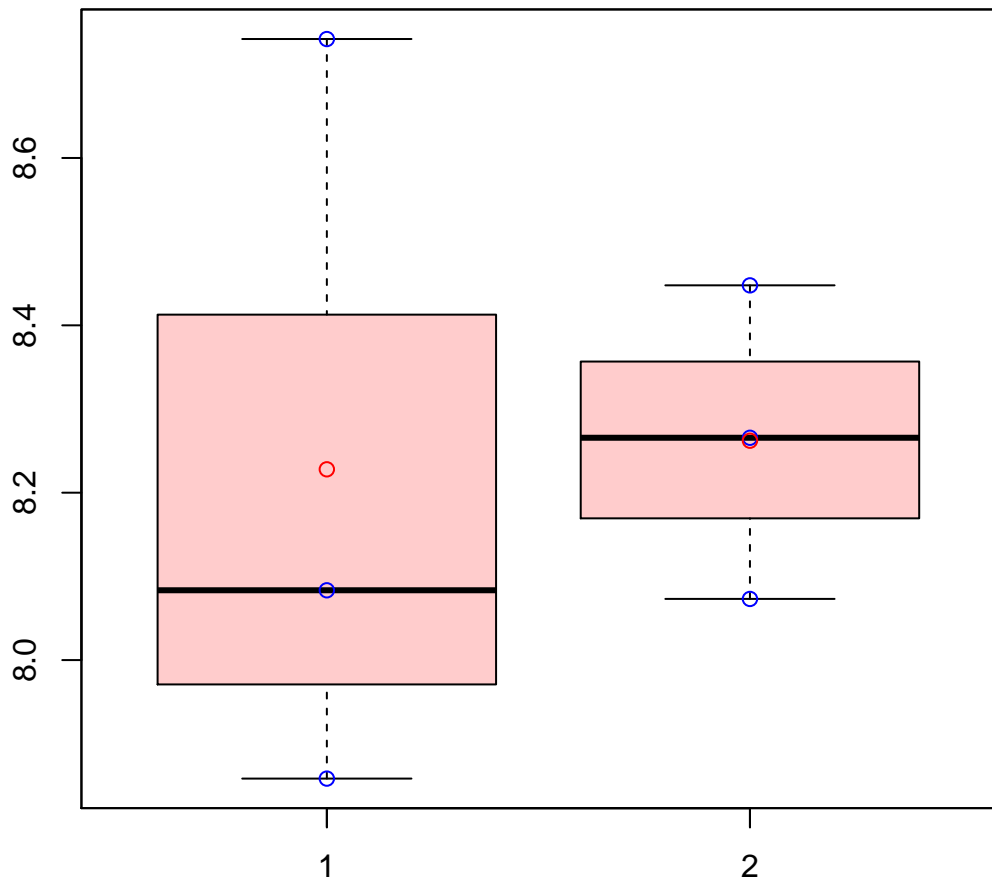

t-Test: p-value = 0.91

# CL174Contig21|CL174Contig21

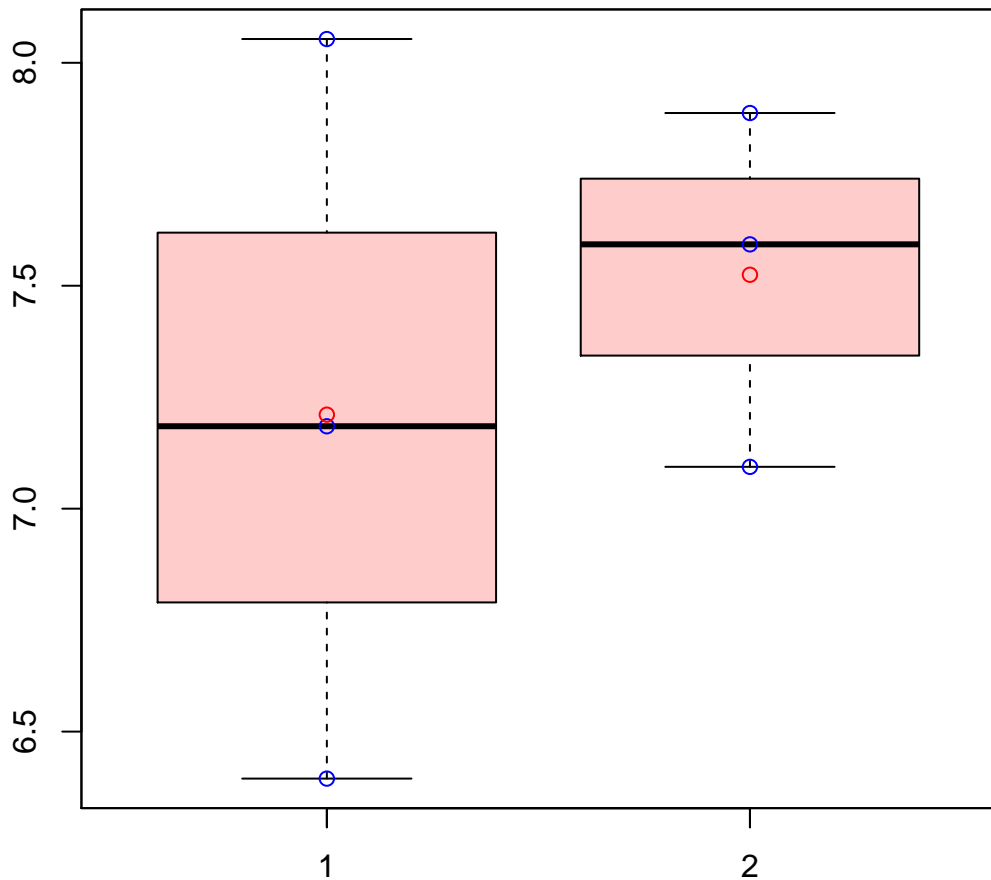

t-Test: p-value = 0.6

# CL174Contig22|CL174Contig22

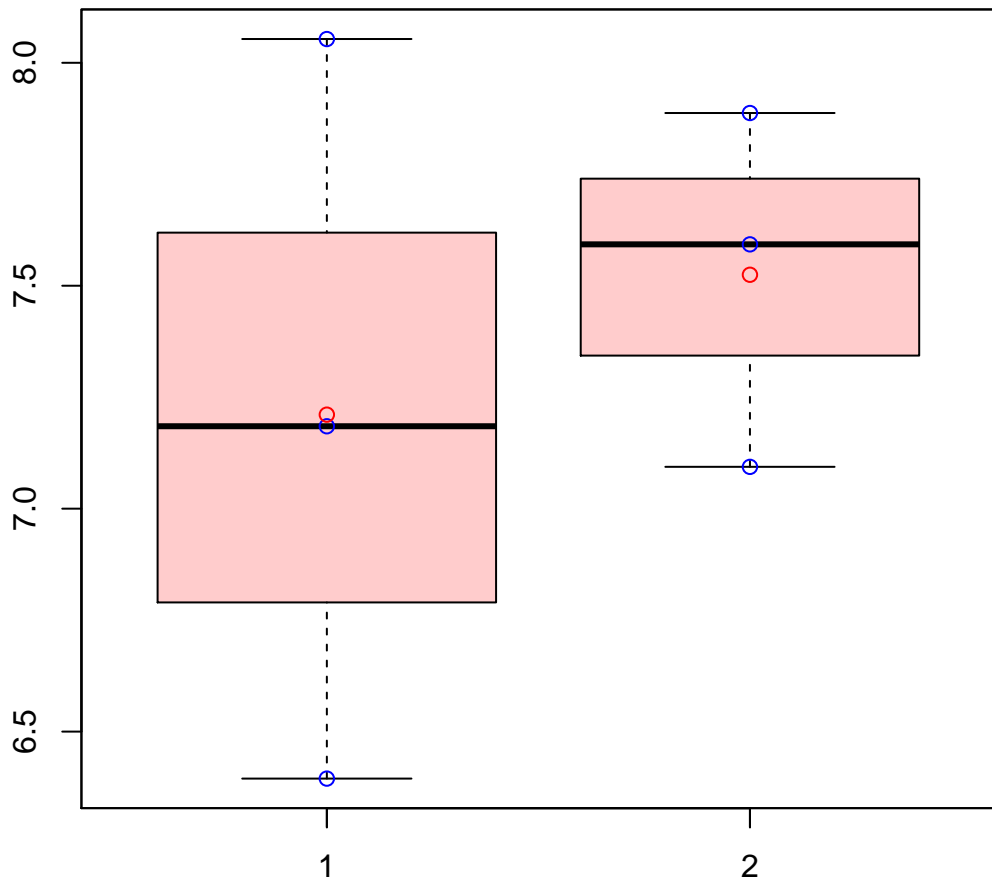

t-Test: p-value = 0.6



# CL174Contig24|CL174Contig24

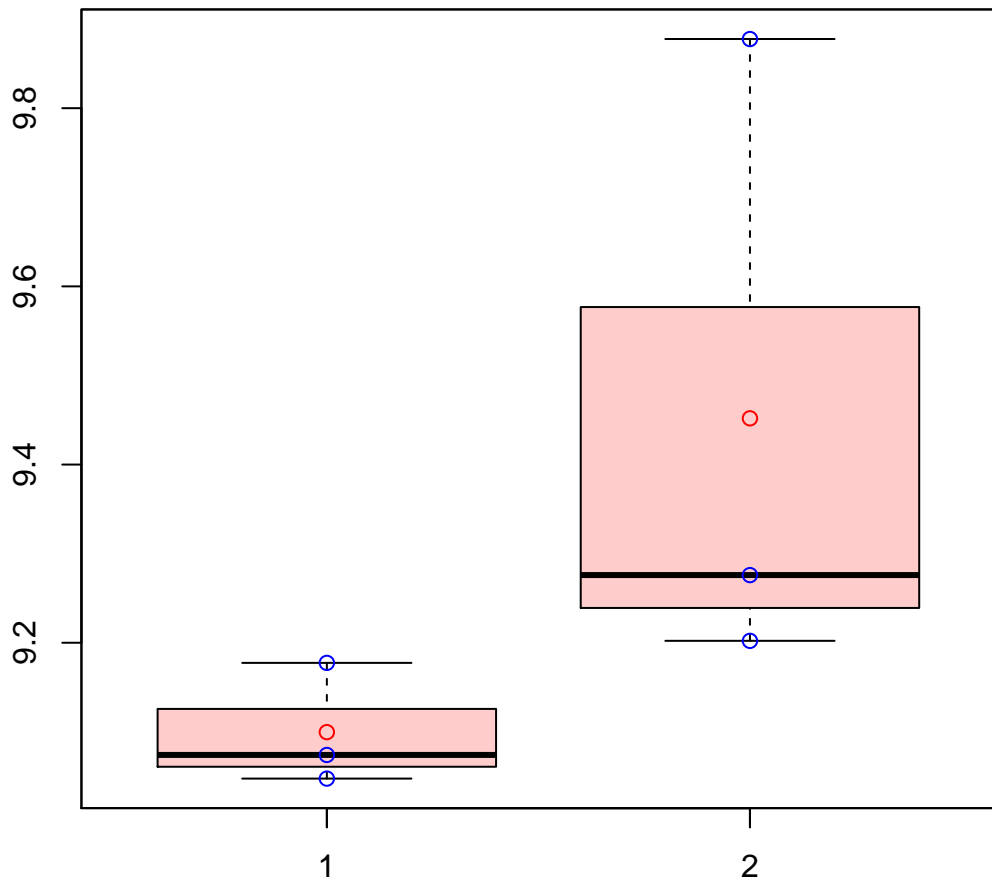

t-Test: p-value = 0.24

# CL174Contig25|CL174Contig25

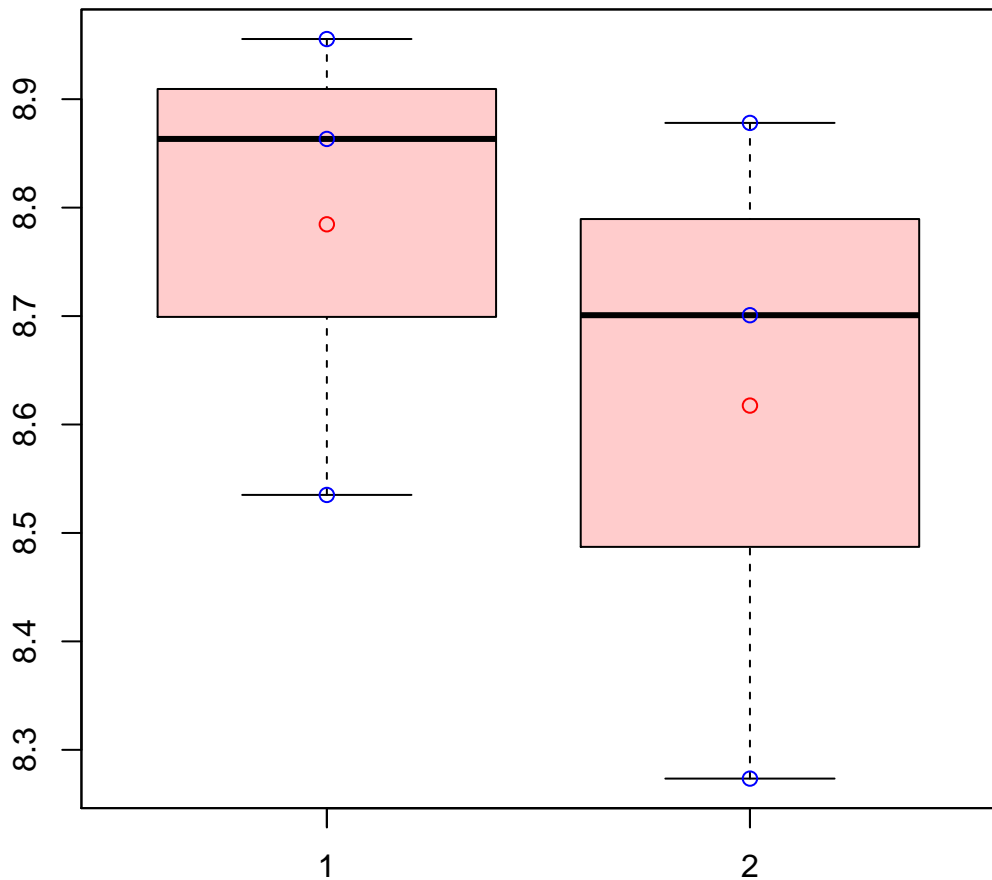

t-Test: p-value = 0.49

# CL174Contig26|CL174Contig26



t-Test: p-value = 0.49

# CL174Contig28|CL174Contig28

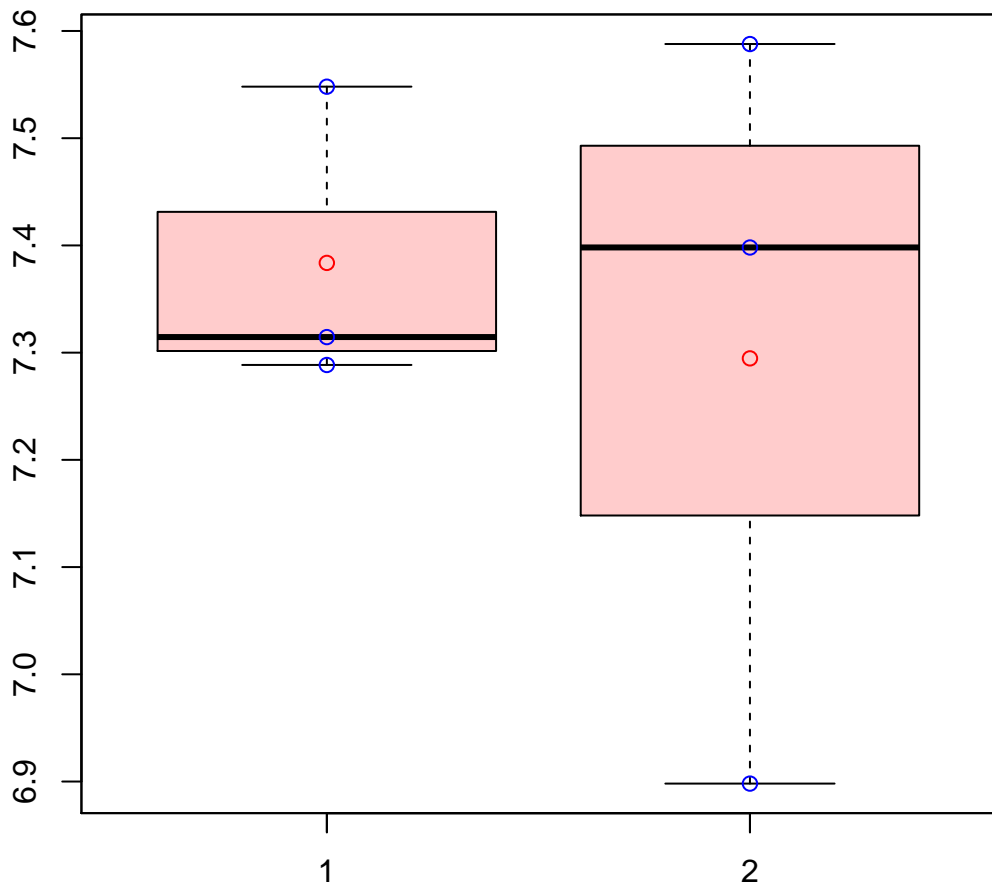

t-Test: p-value = 0.72

# CL174Contig9|CL174Contig9

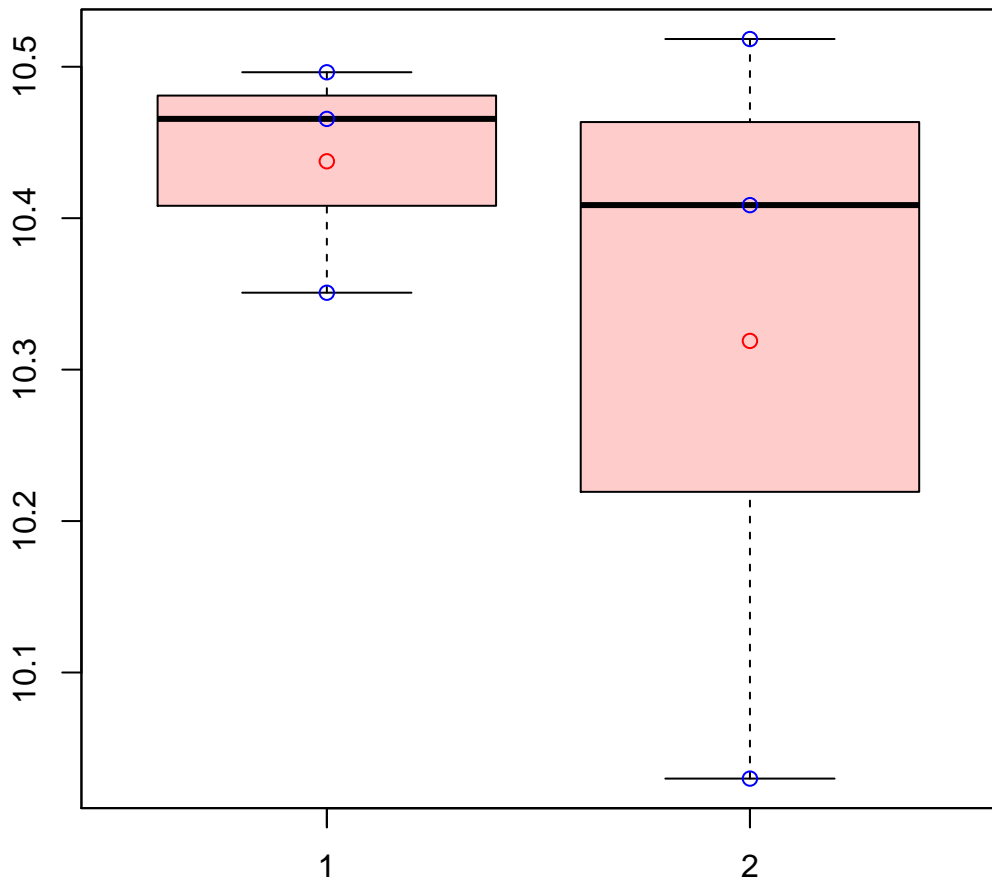

t-Test: p-value = 0.51

# CL17528Contig1|CL17528Contig1

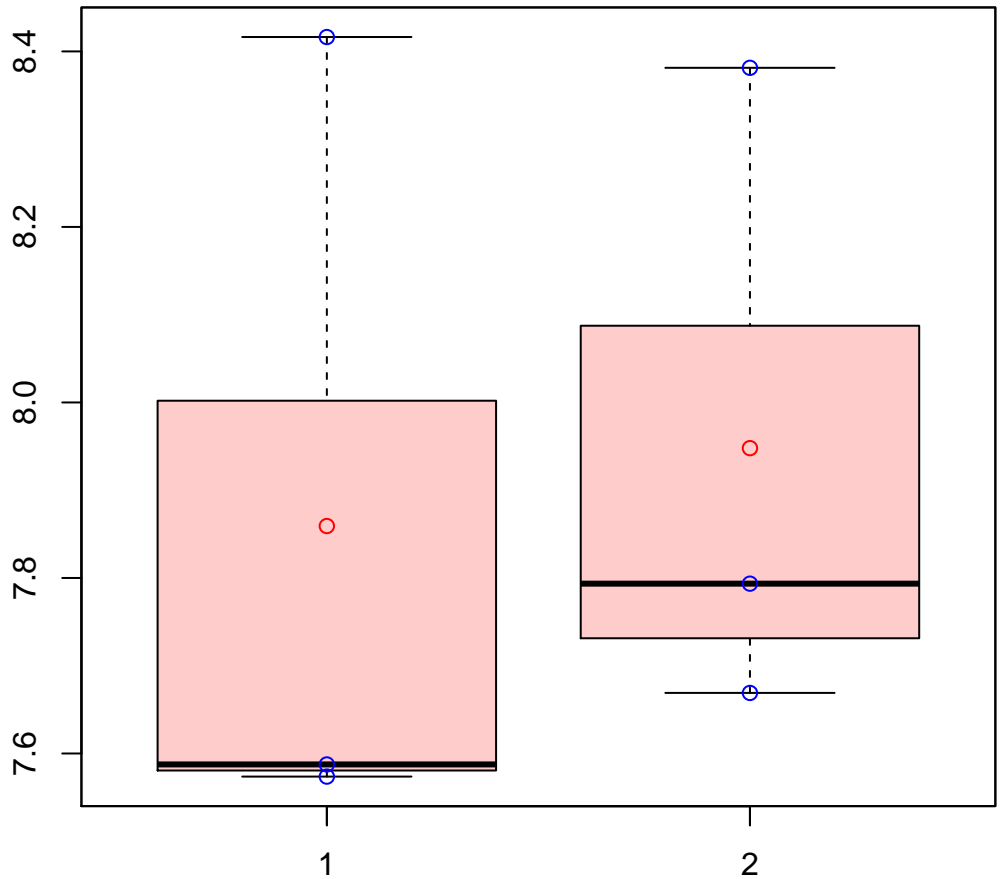

t-Test: p-value = 0.82

# CL17541Contig1|CL17541Contig1

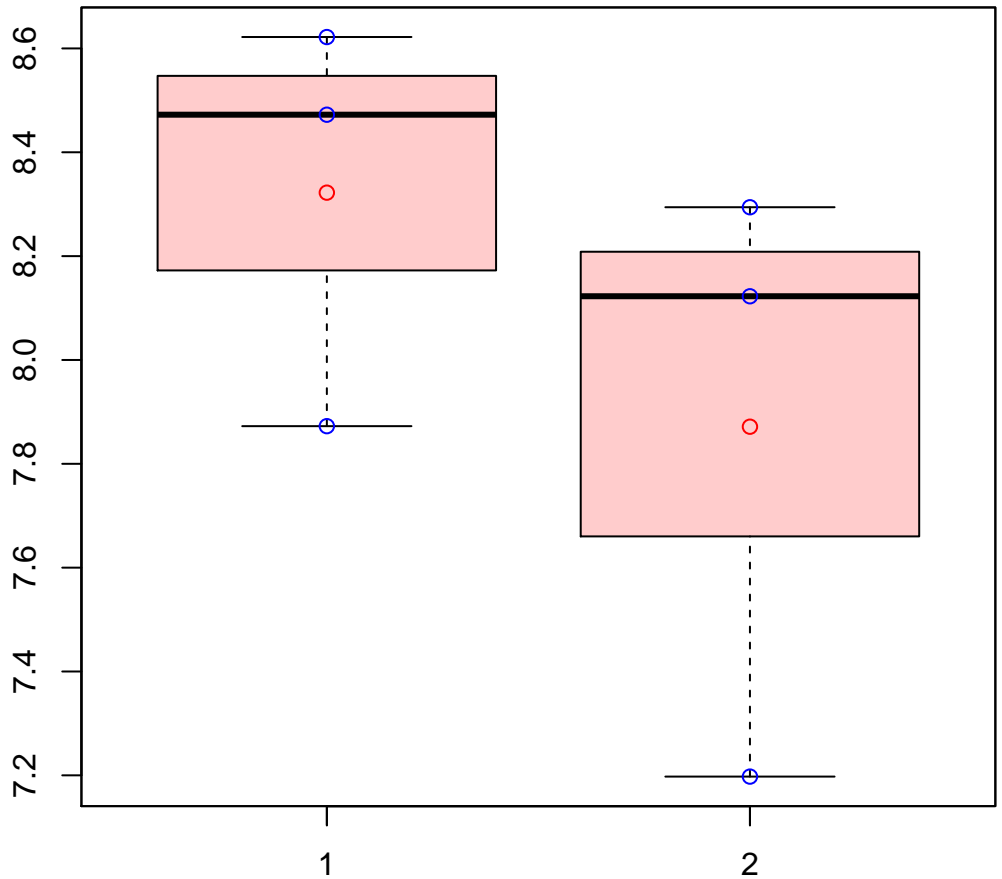

t-Test: p-value = 0.34

# CL1758Contig2|CL1758Contig2

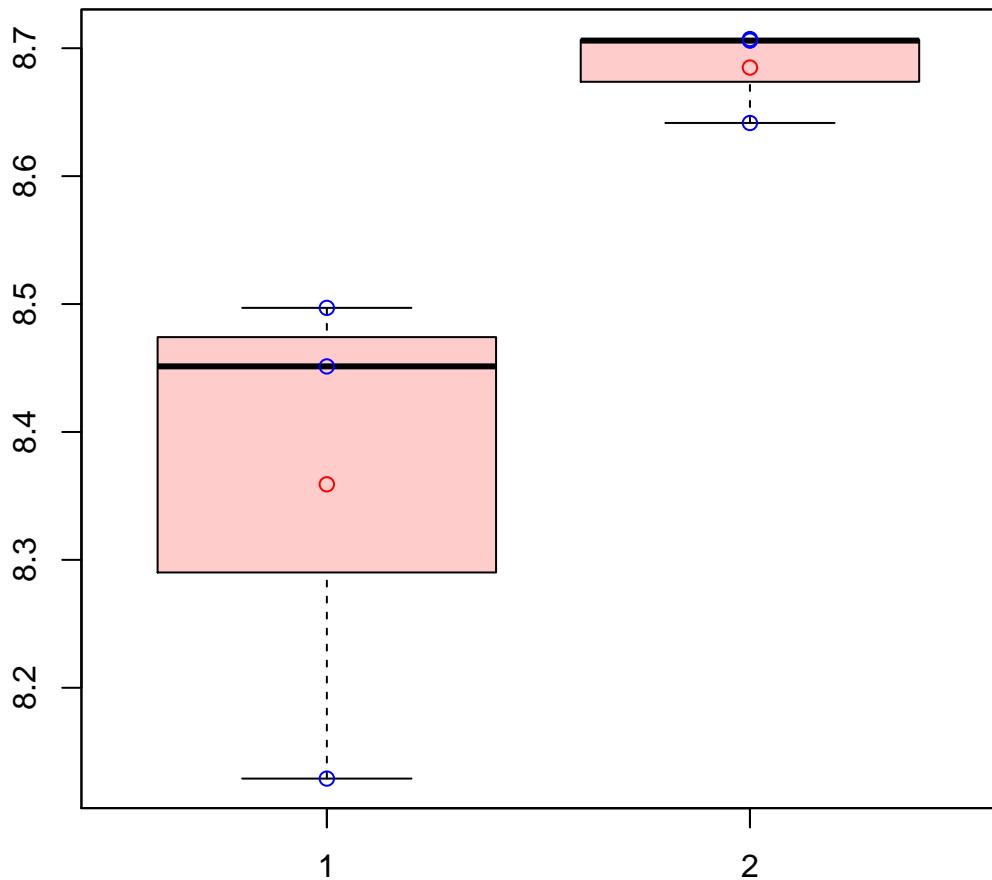

t-Test: p-value = 0.1



# CL1758Contig4|CL1758Contig4

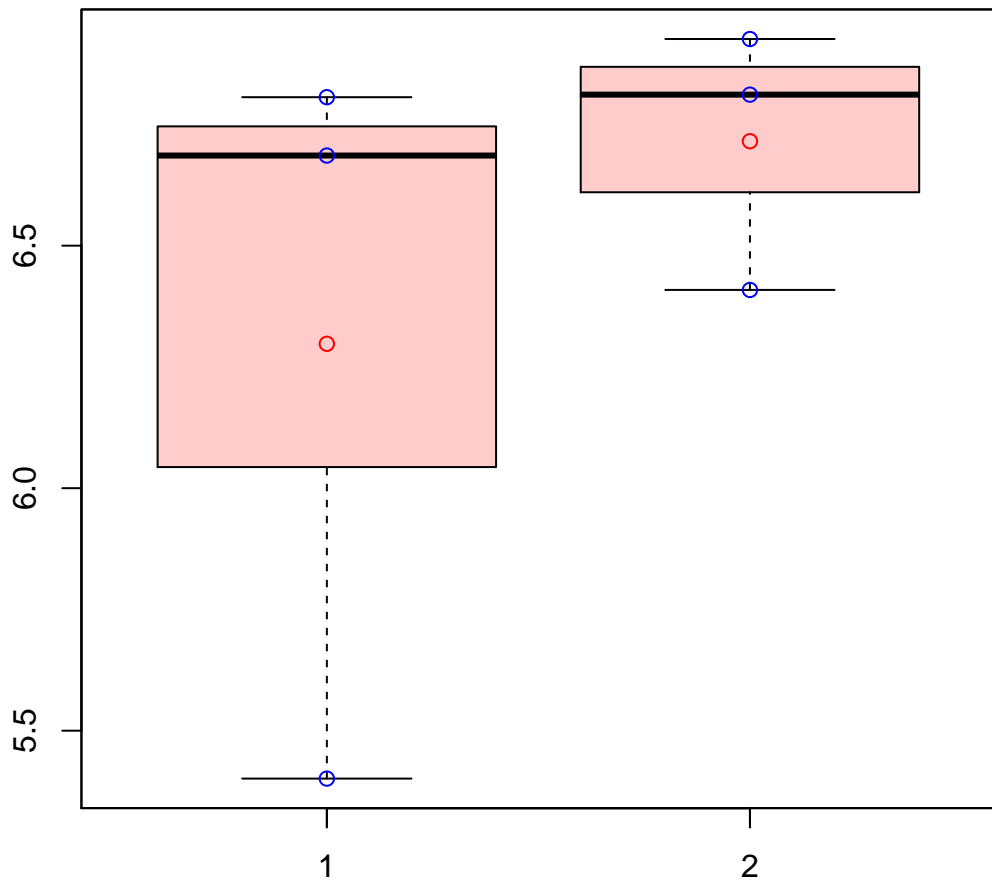

t-Test: p-value = 0.46

# CL1758Contig6|CL1758Contig6

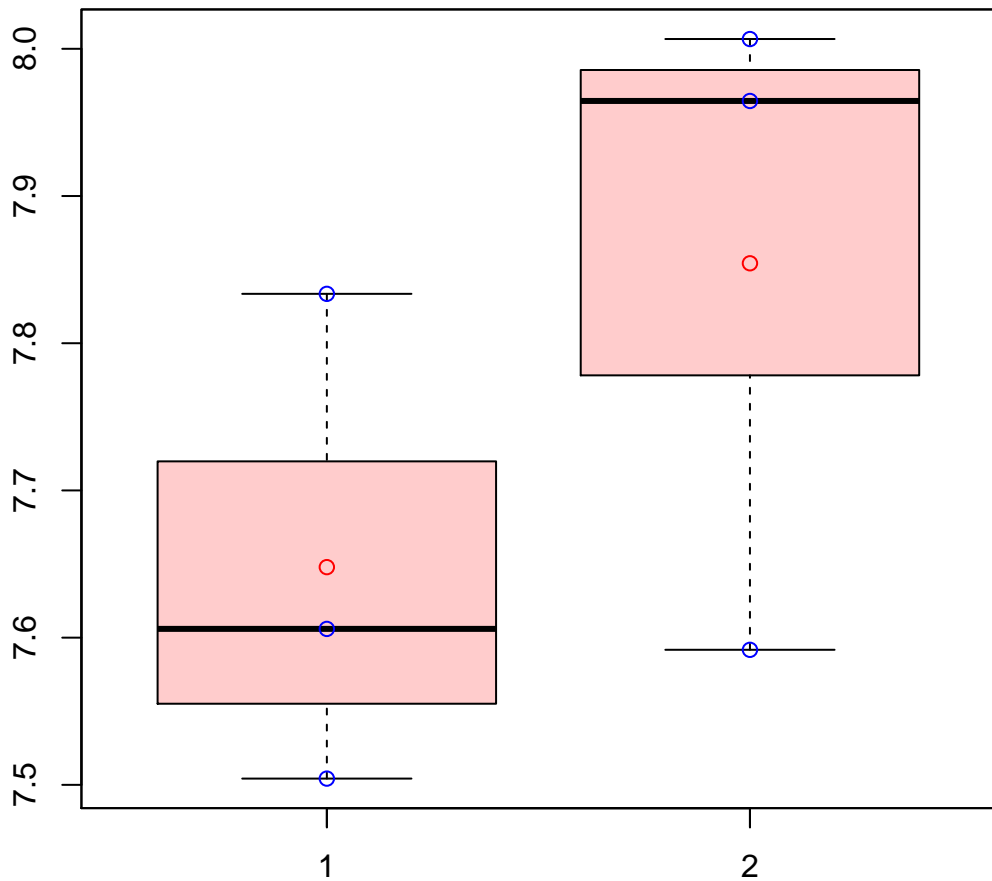

t-Test: p-value = 0.28

# CL1759Contig3|CL1759Contig3

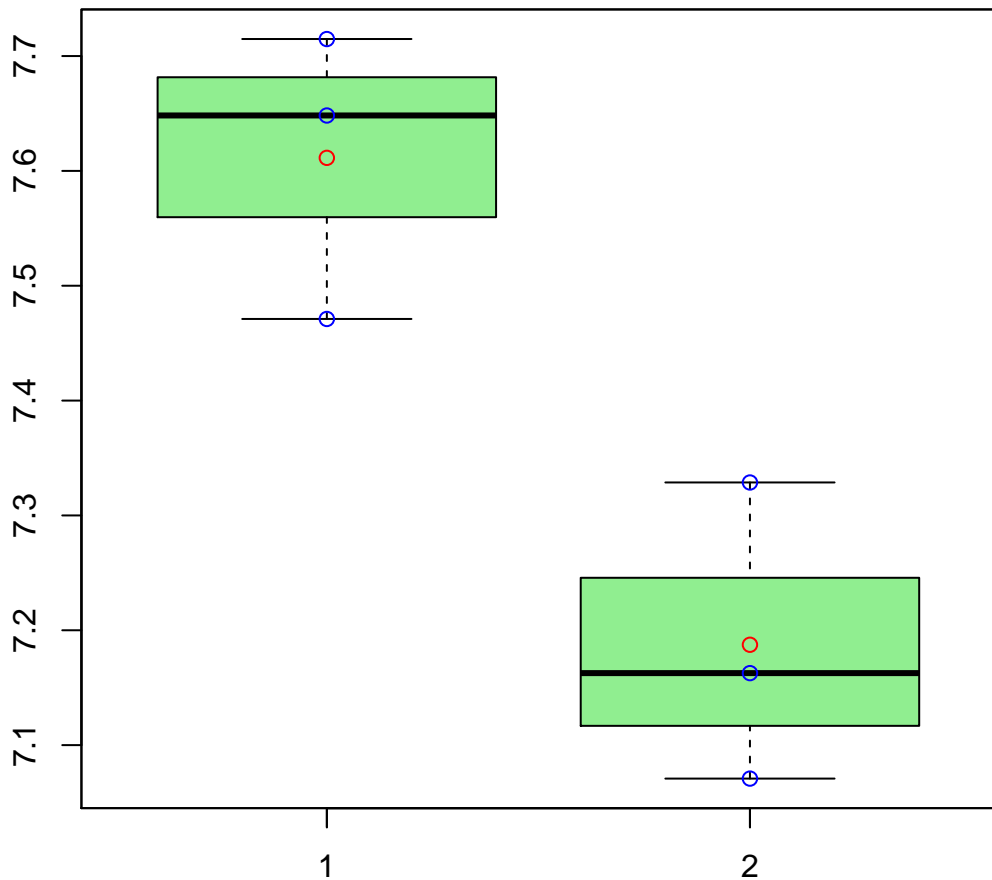

t-Test: p-value = 0.02

# CL175Contig13|CL175Contig13

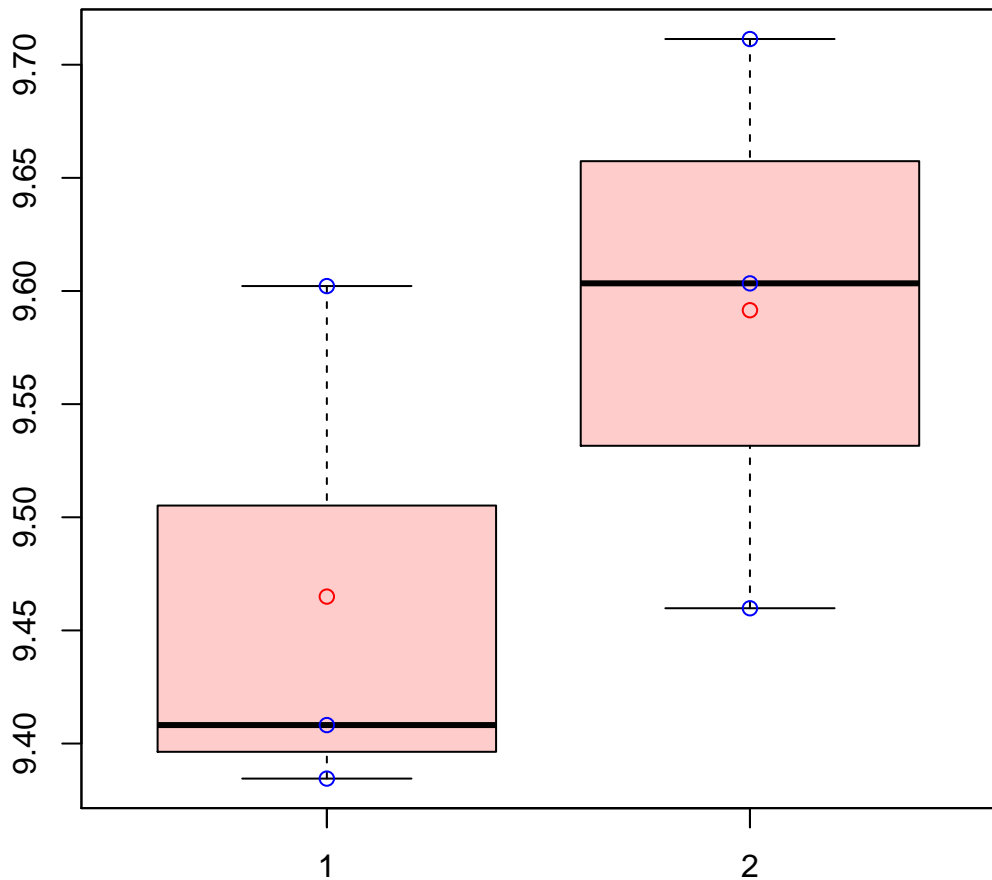

t-Test: p-value = 0.28

# CL175Contig4|CL175Contig4

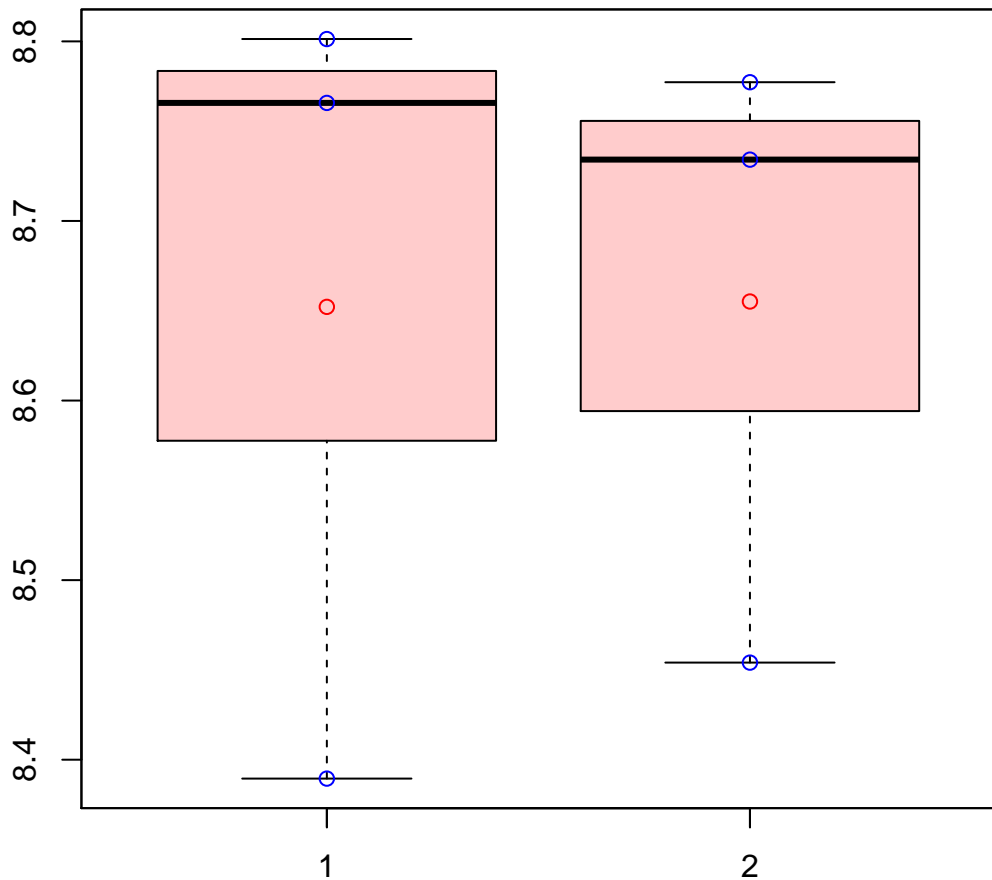

t-Test: p-value = 0.99

# CL17651Contig1|CL17651Contig1

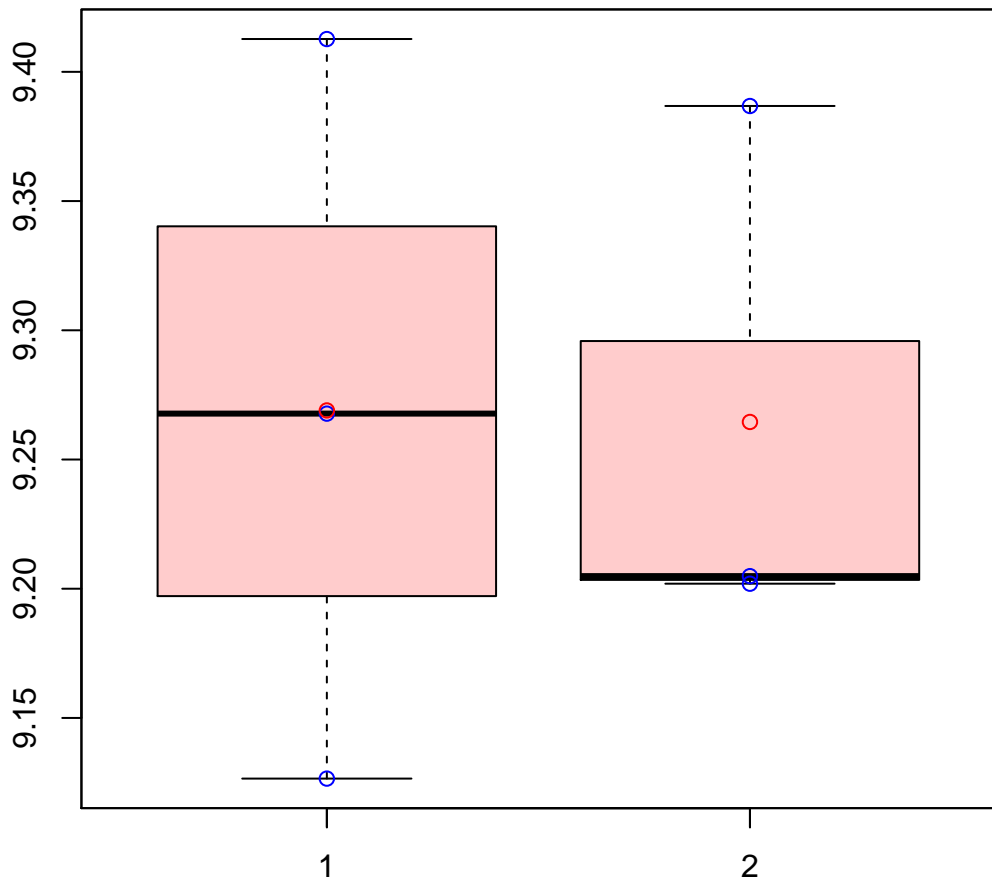

t-Test: p-value = 0.97

# CL17711Contig1|CL17711Contig1

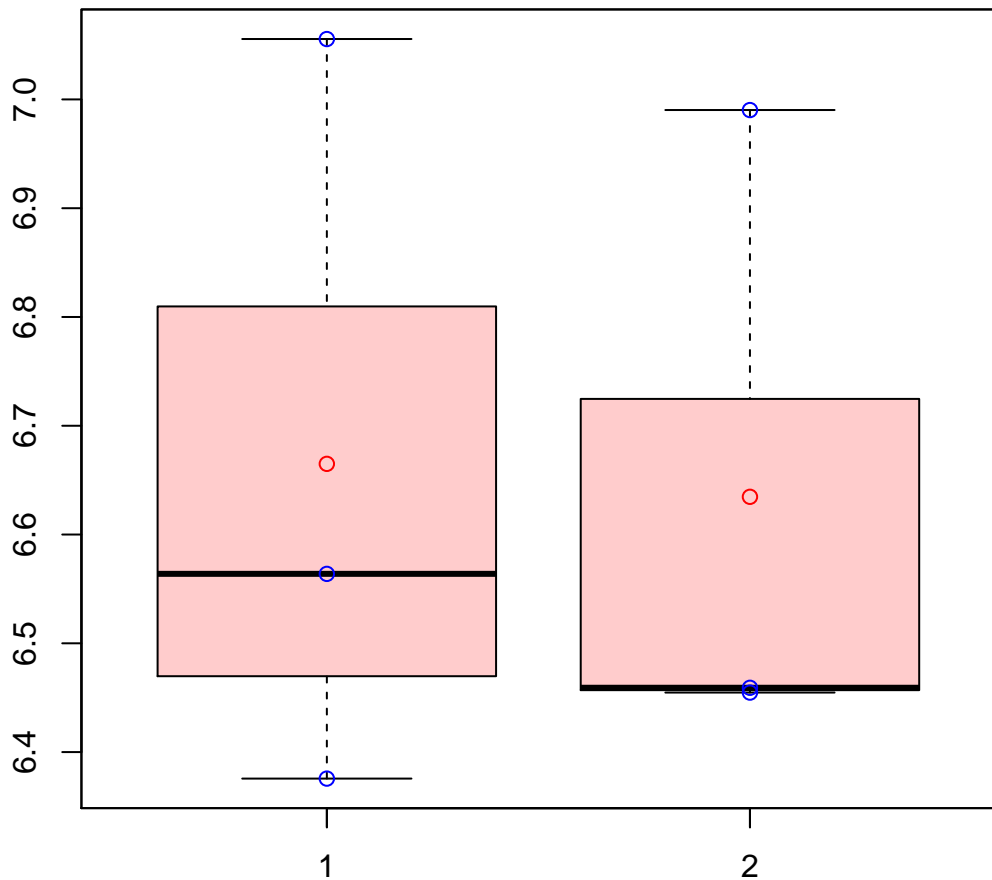

t-Test: p-value = 0.92

# CL1772Contig1|CL1772Contig1

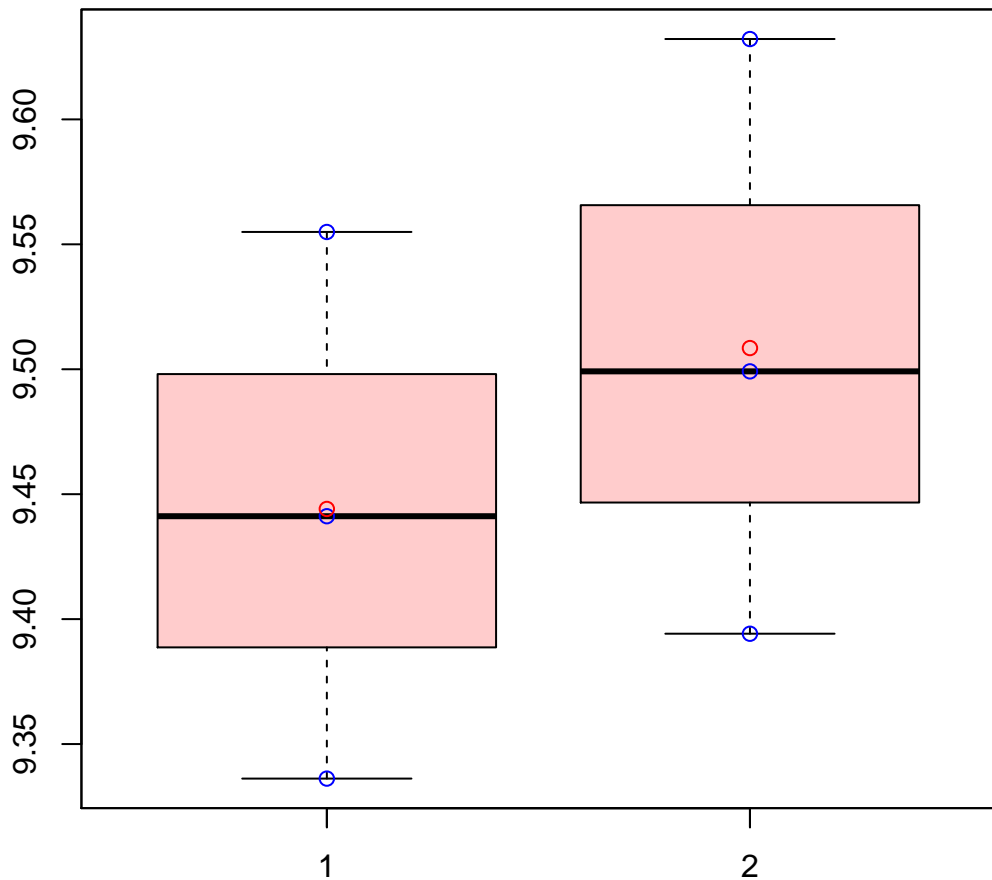

t-Test: p-value = 0.53



# CL1772Contig7|CL1772Contig7

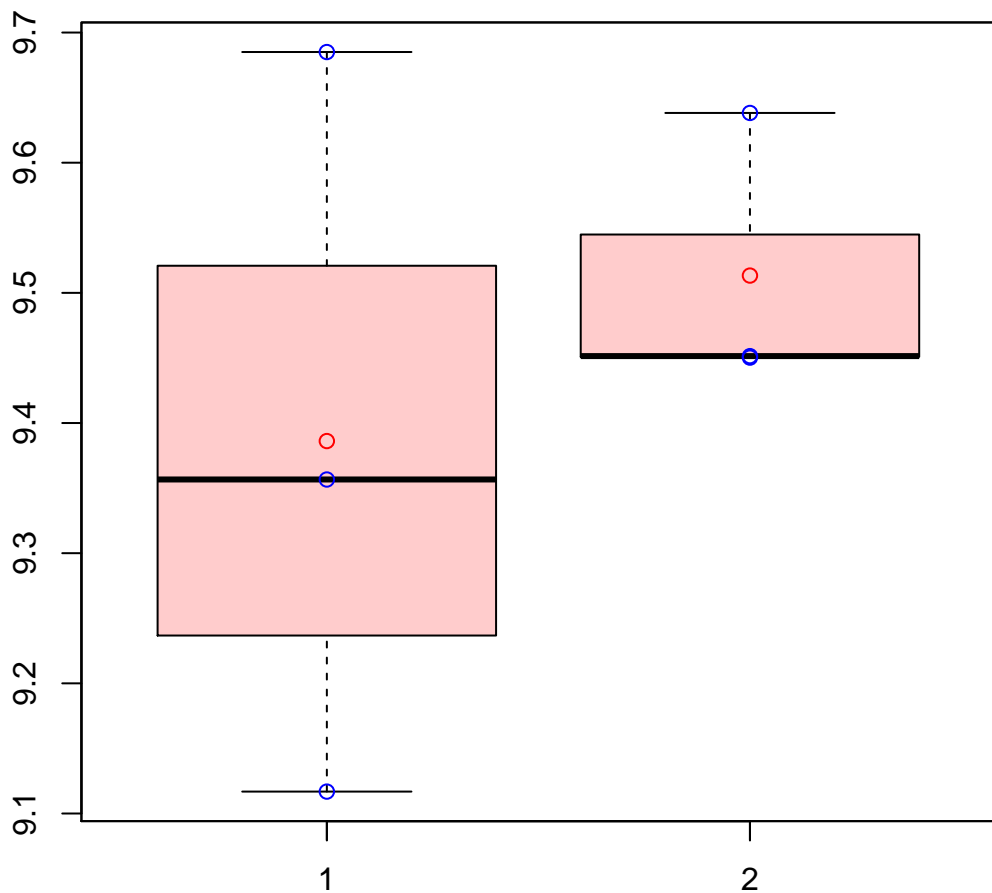

t-Test: p-value = 0.53

# CL1774Contig1|CL1774Contig1

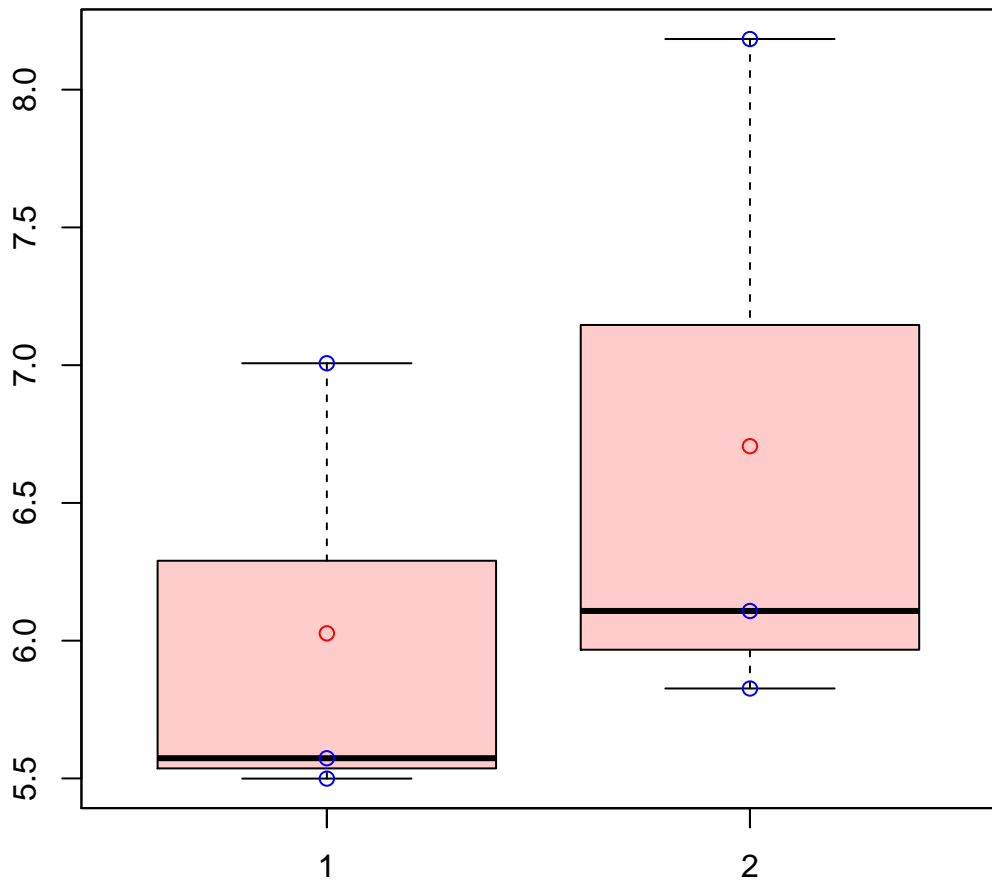

t-Test: p-value = 0.49

# CL177Contig17|CL177Contig17

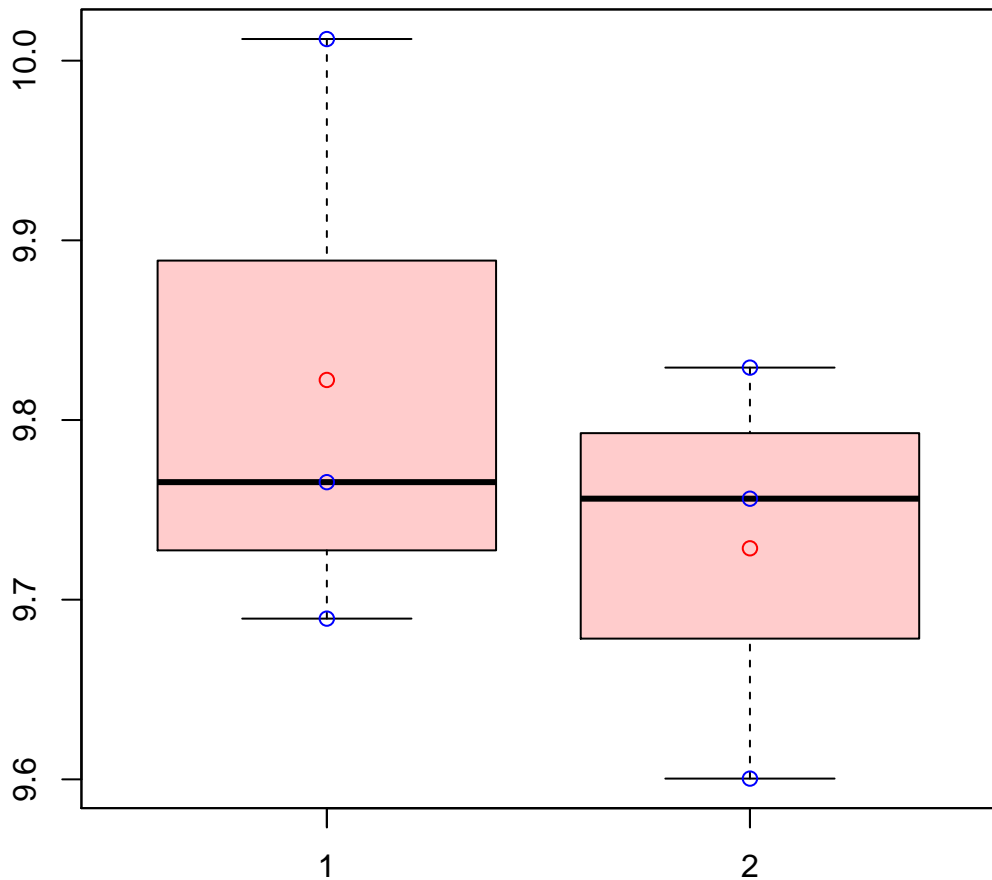

t-Test: p-value = 0.48

# CL1785Contig3|CL1785Contig3

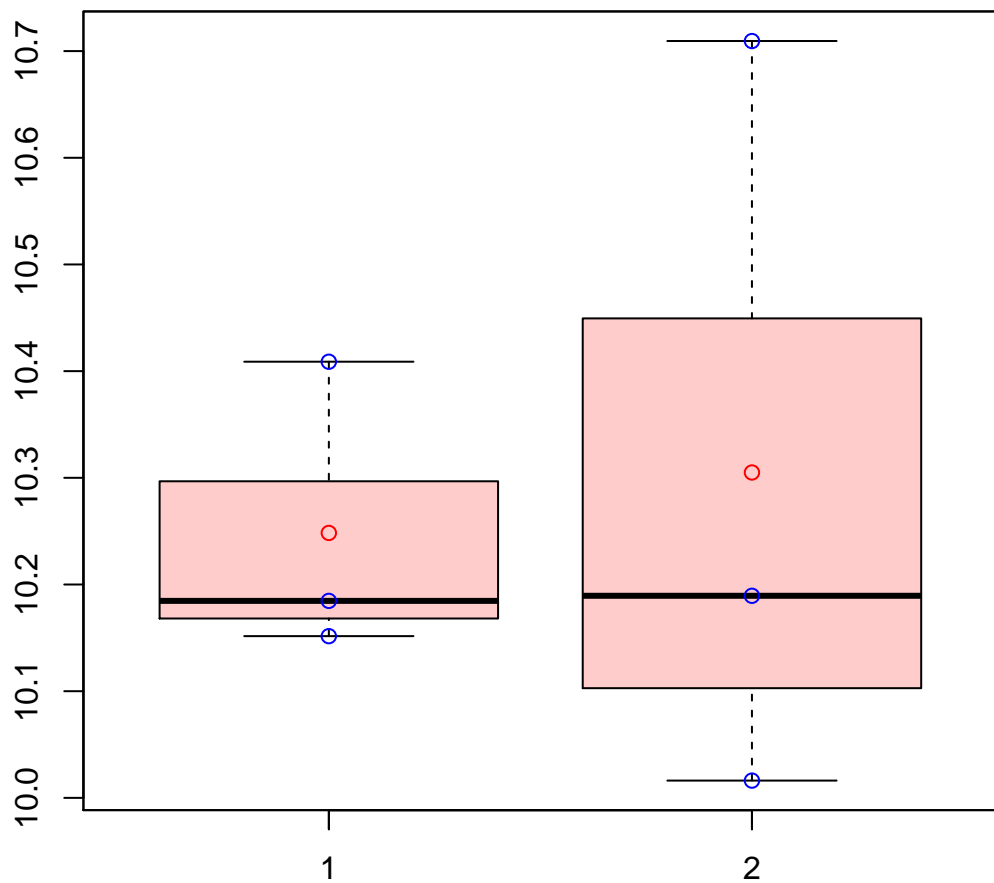

t-Test: p-value = 0.82

# CL1785Contig4|CL1785Contig4

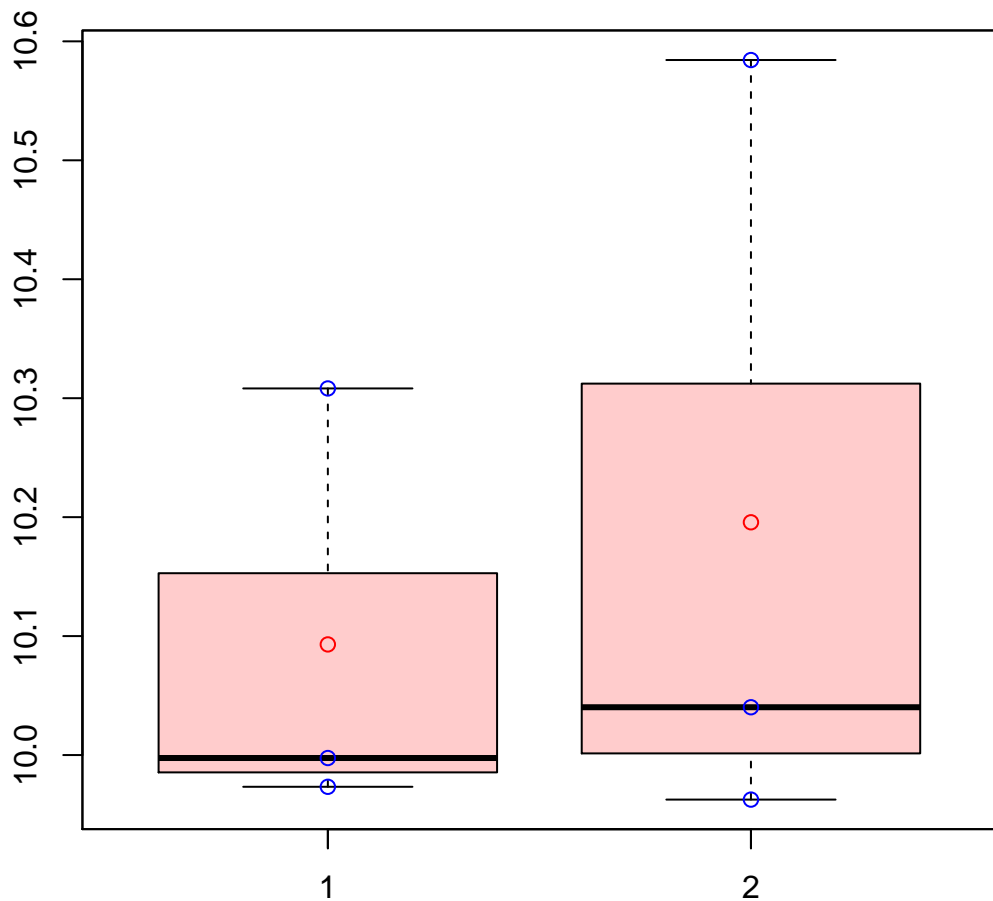

t-Test: p-value = 0.68

# CL1786Contig2|CL1786Contig2

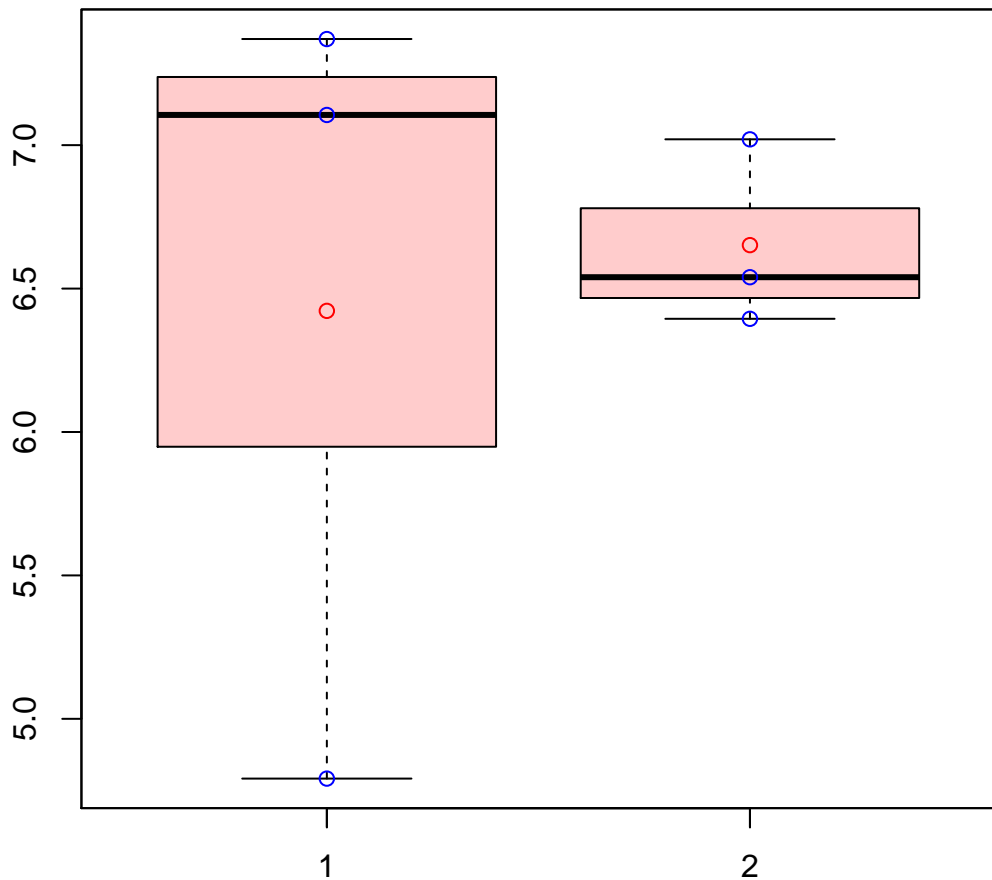

t-Test: p-value = 0.81

# CL1786Contig3|CL1786Contig3

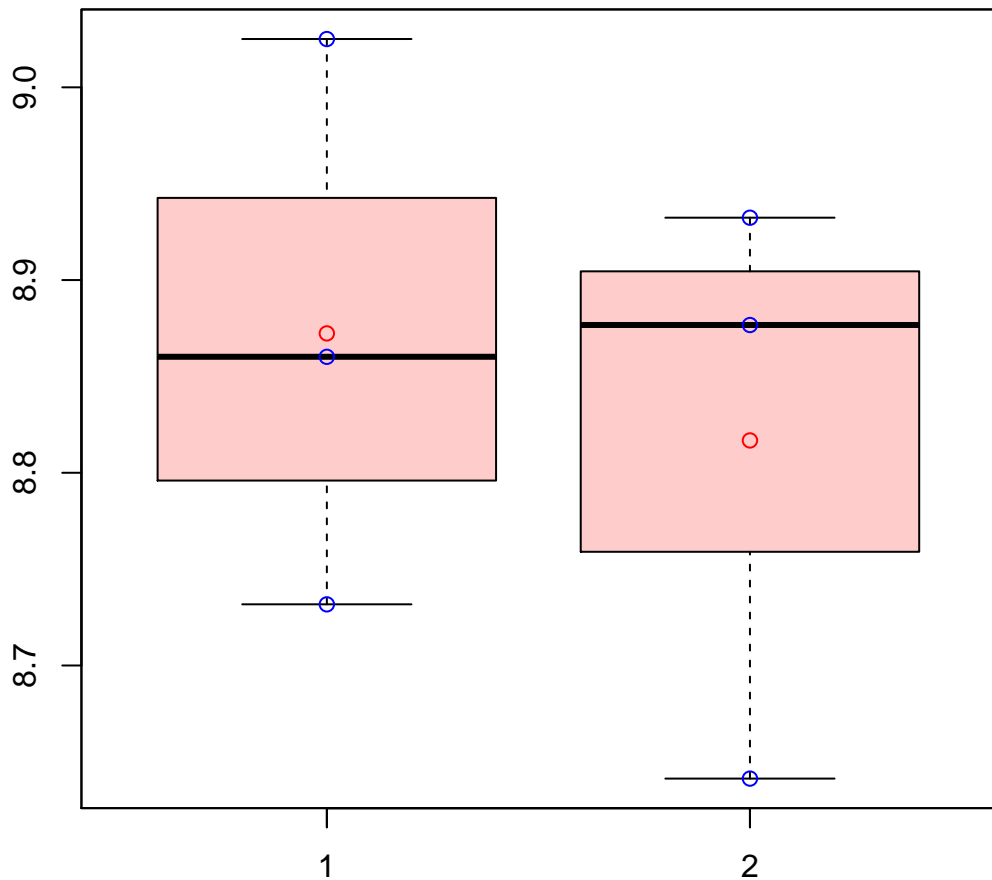

t-Test: p-value = 0.68

# CL1786Contig7|CL1786Contig7



t-Test: p-value = 0.81



# CL1787Contig2|CL1787Contig2

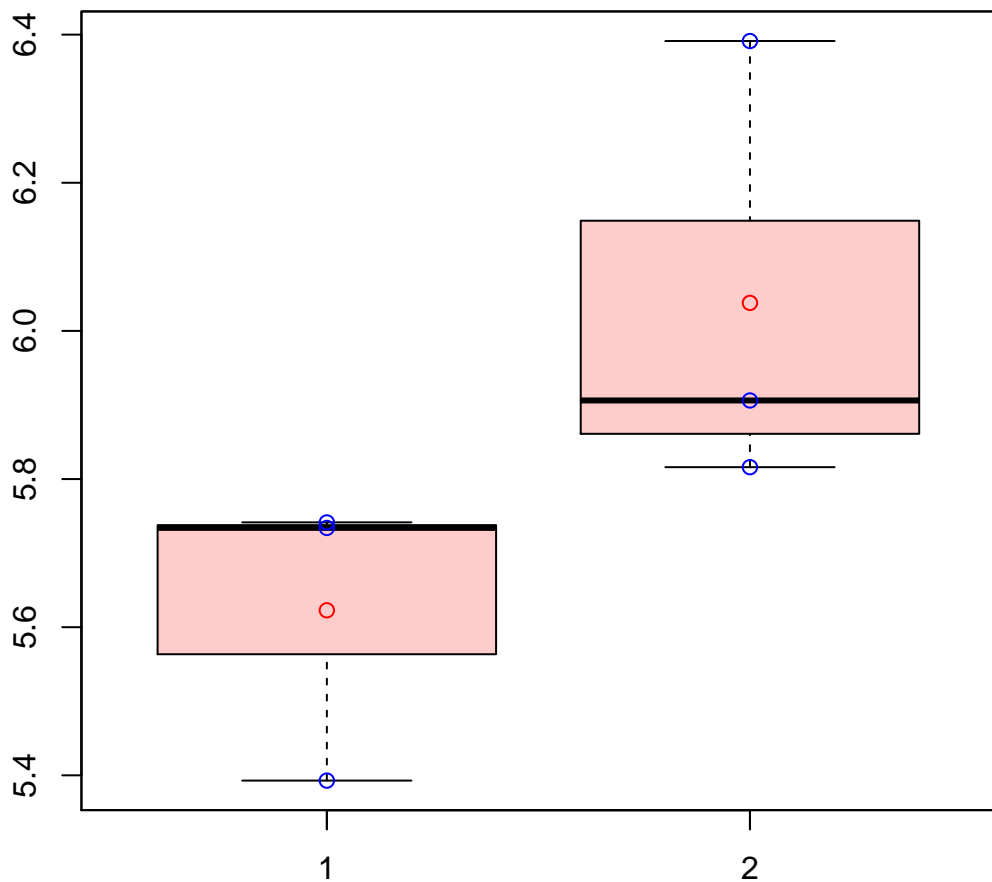

t-Test: p-value = 0.13

# CL1795Contig4|CL1795Contig4

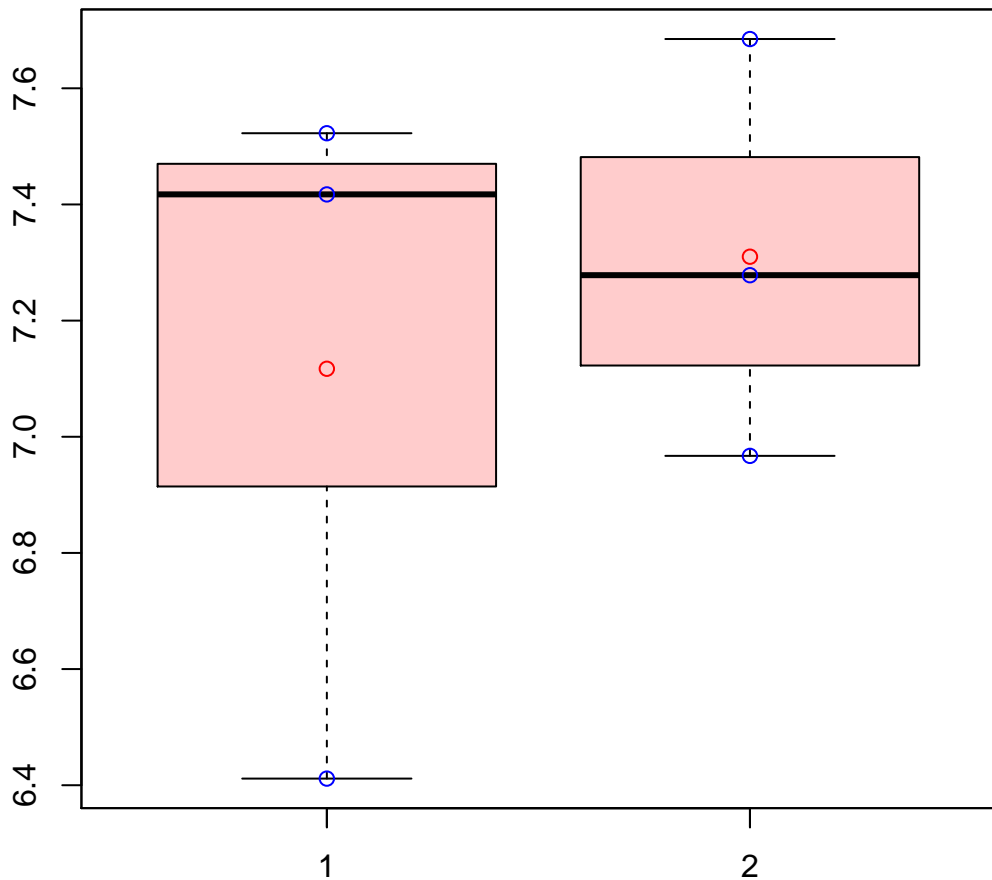

t-Test: p-value = 0.67

# CL1795Contig5|CL1795Contig5



t-Test: p-value = 0.67

# CL1795Contig6|CL1795Contig6

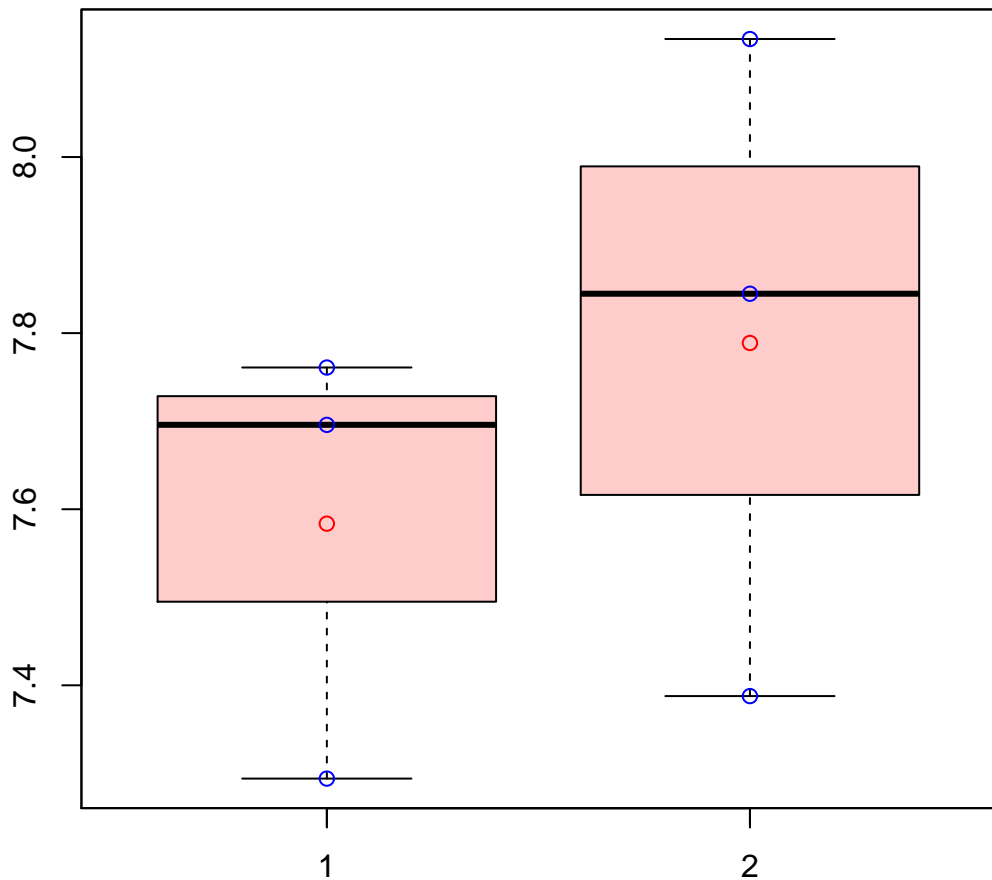

t-Test: p-value = 0.48

# CL1798Contig1|CL1798Contig1

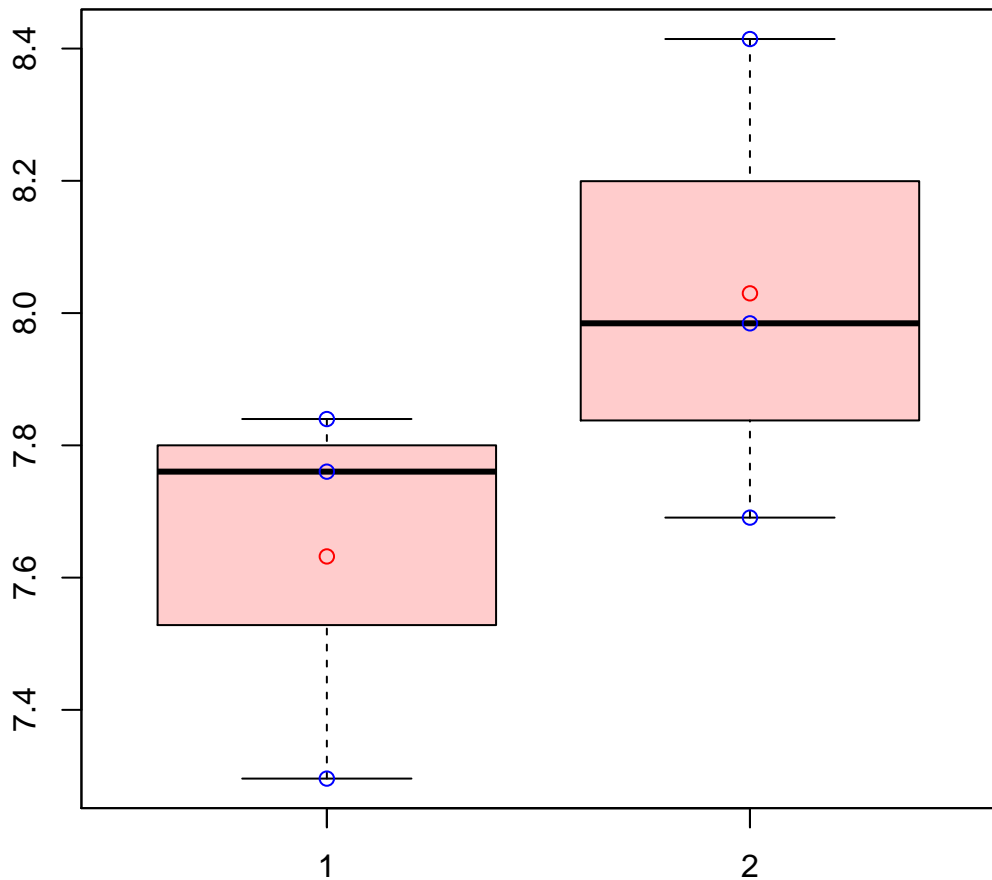

t-Test: p-value = 0.22

# CL17Contig10|CL17Contig10

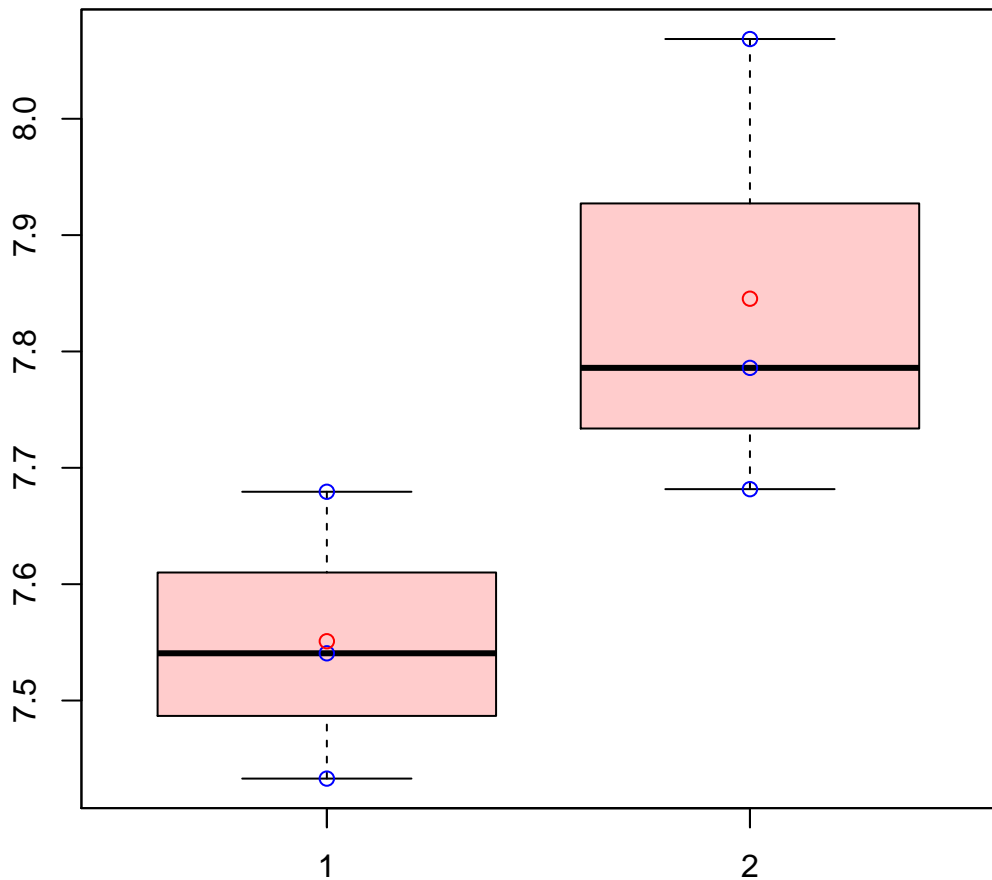

t-Test: p-value = 0.11

# CL17Contig1|CL17Contig1

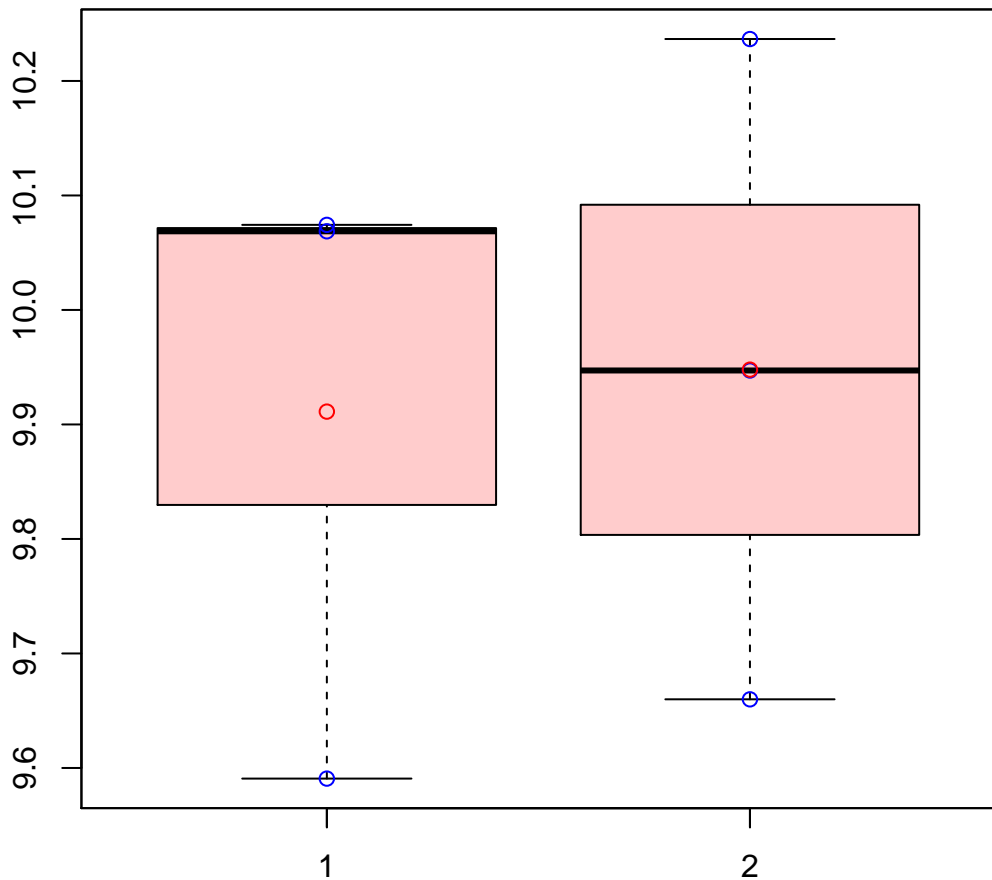

t-Test: p-value = 0.88

# CL1800Contig1|CL1800Contig1

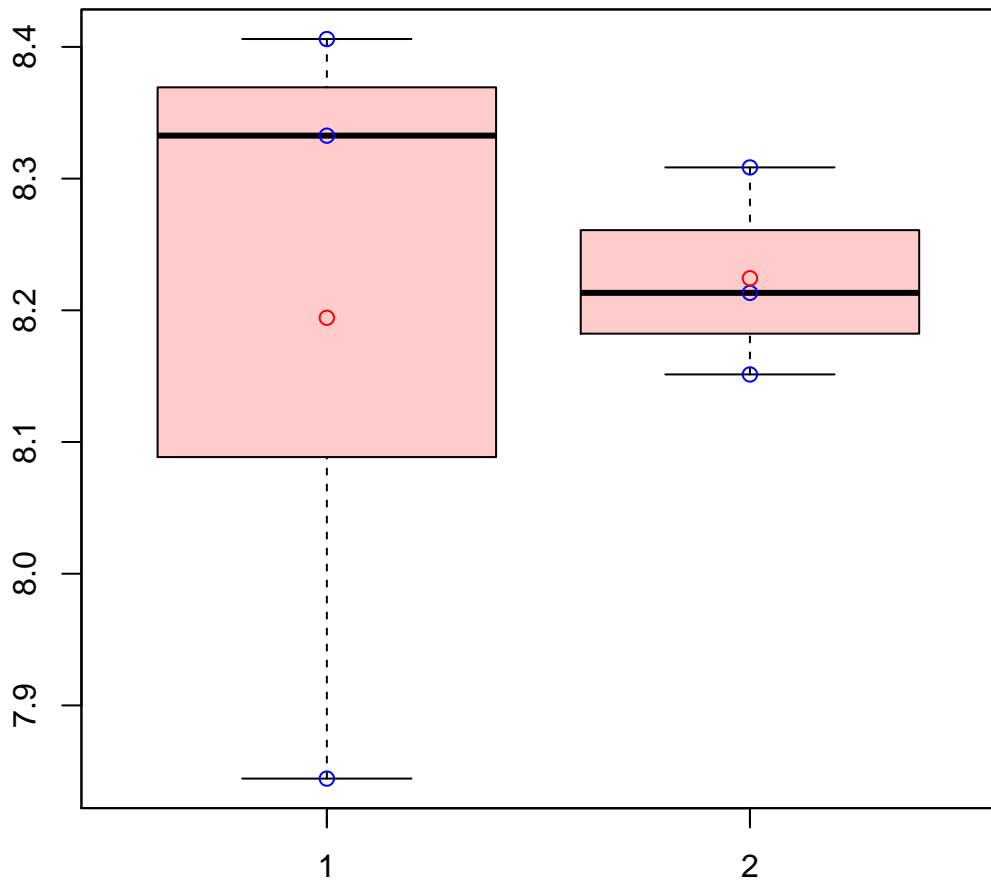

t-Test: p-value = 0.88



# CL1800Contig6|CL1800Contig6

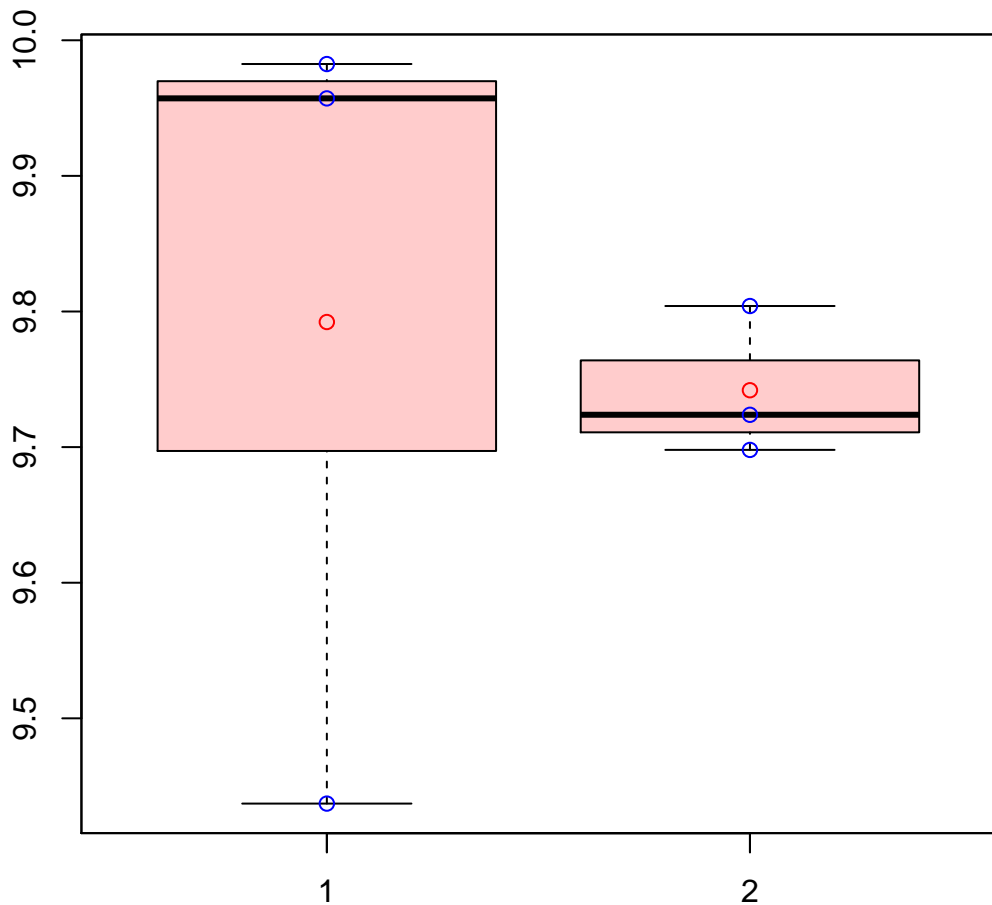

t-Test: p-value = 0.81

# CL1802Contig13|CL1802Contig13

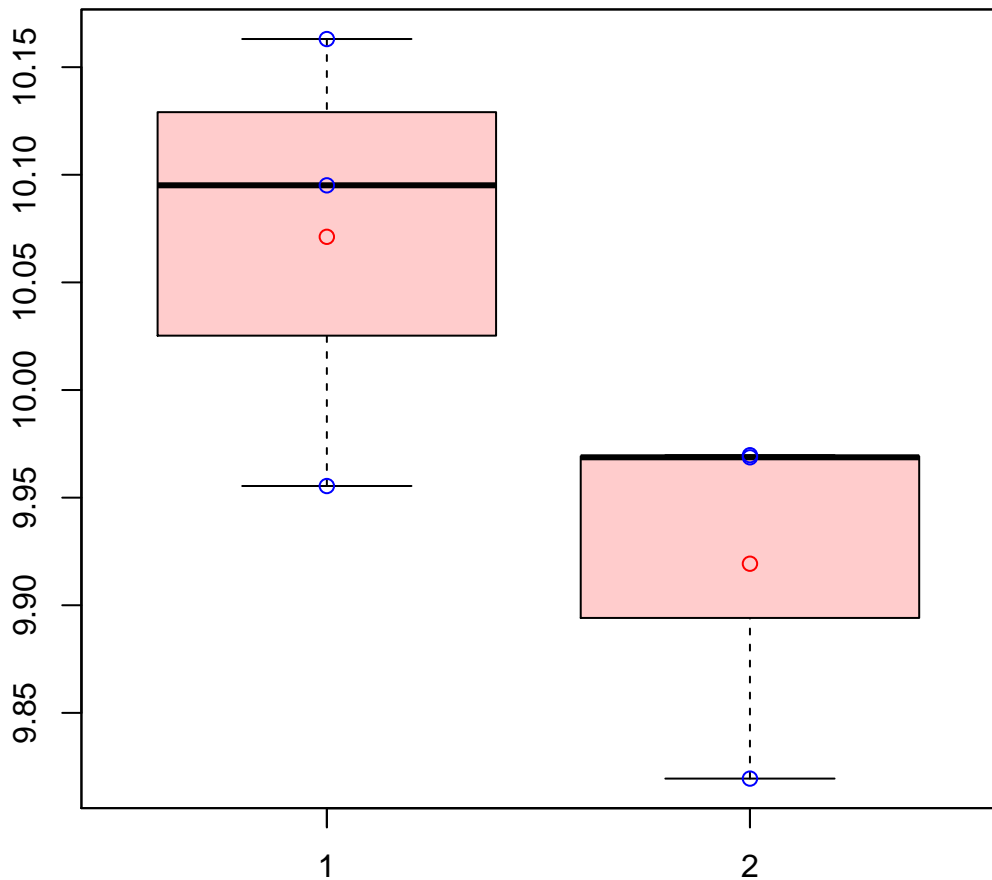

t-Test: p-value = 0.13

# CL1802Contig1|CL1802Contig1

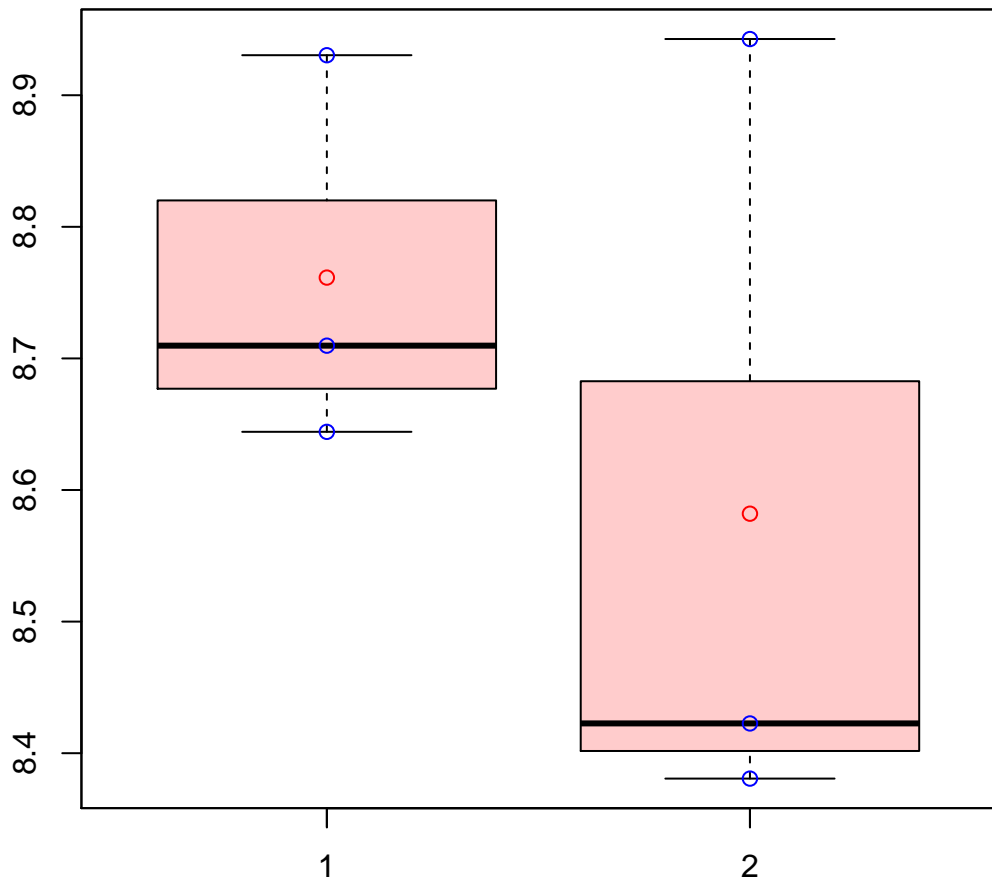

t-Test: p-value = 0.44

# CL1802Contig6|CL1802Contig6

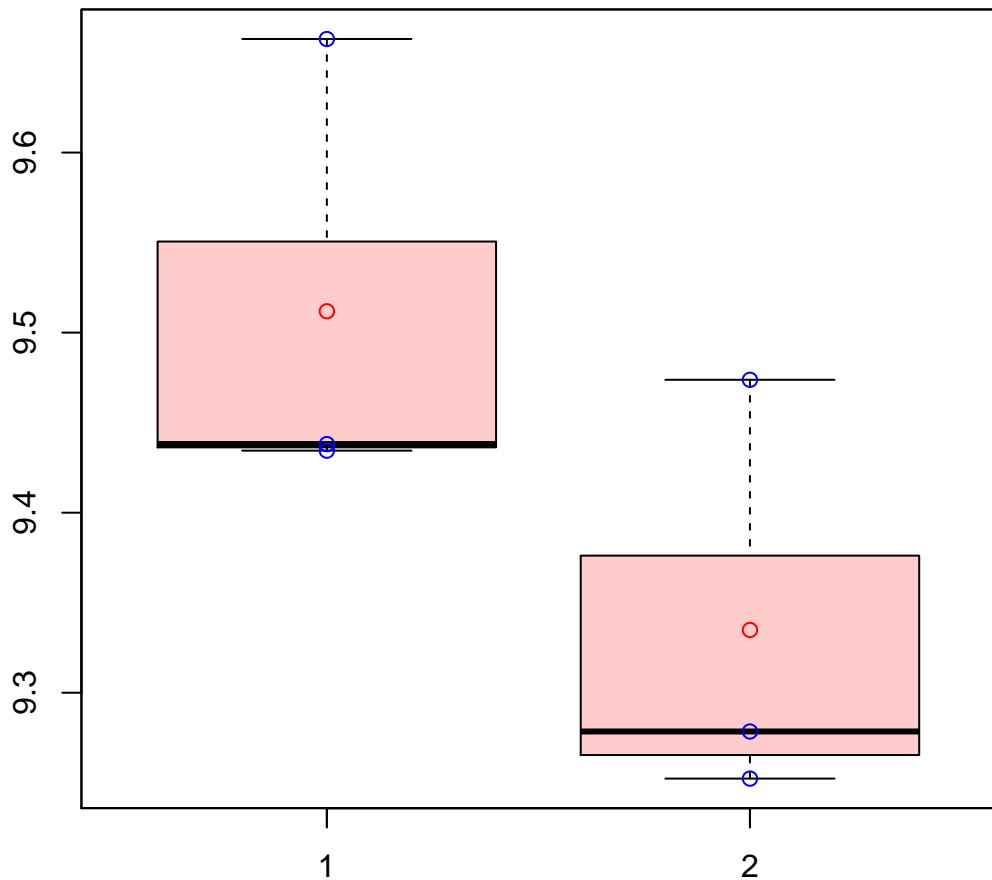

t-Test: p-value = 0.16

# CL18053Contig1|CL18053Contig1

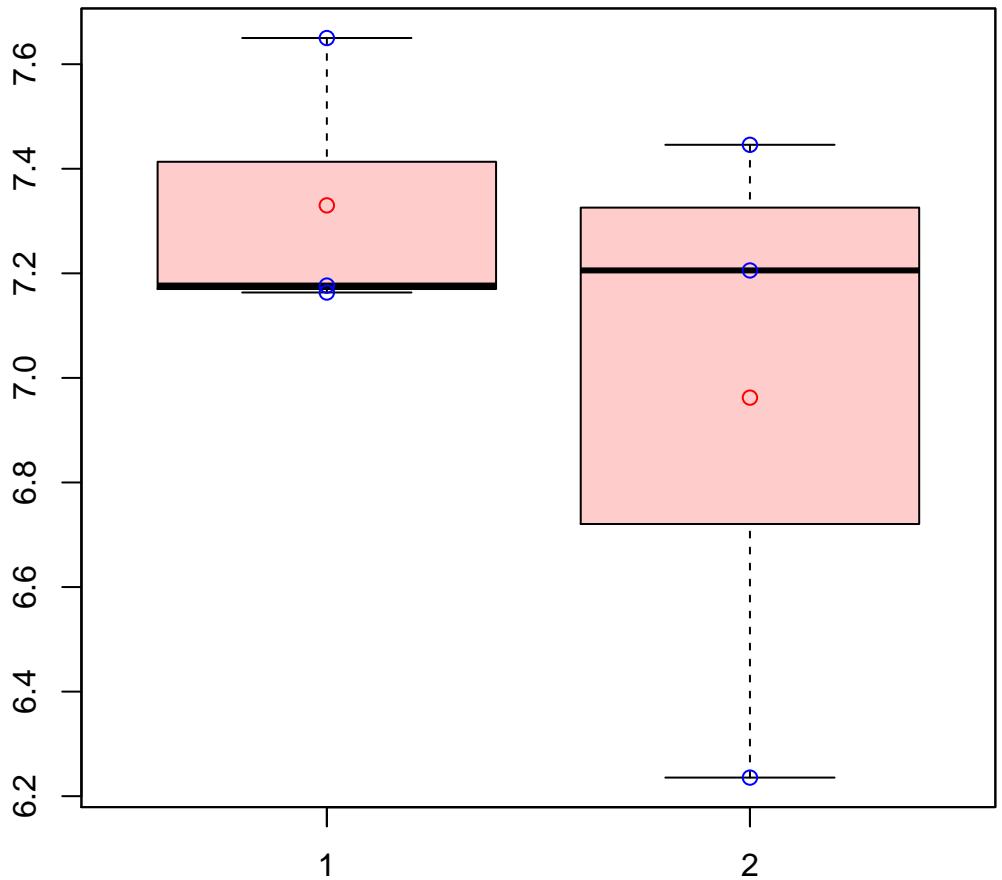

t-Test: p-value = 0.44

# CL1805Contig10|CL1805Contig10

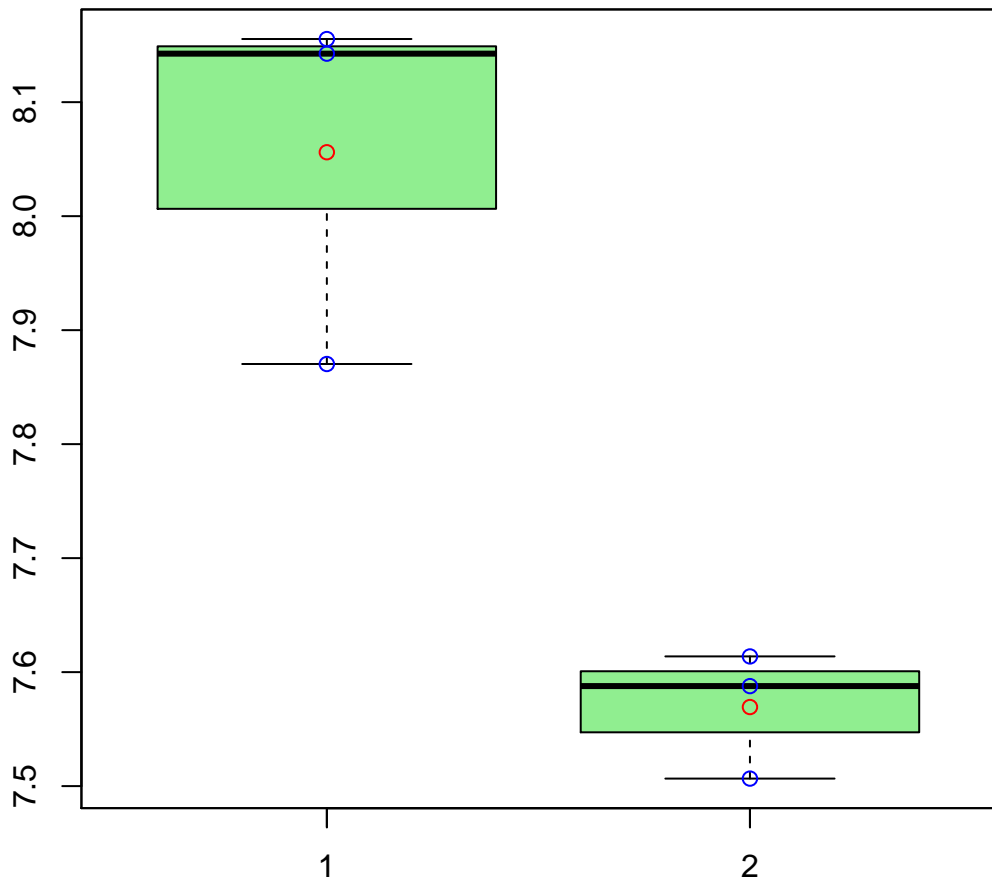

t-Test: p-value = 0.02

# CL1805Contig11|CL1805Contig11

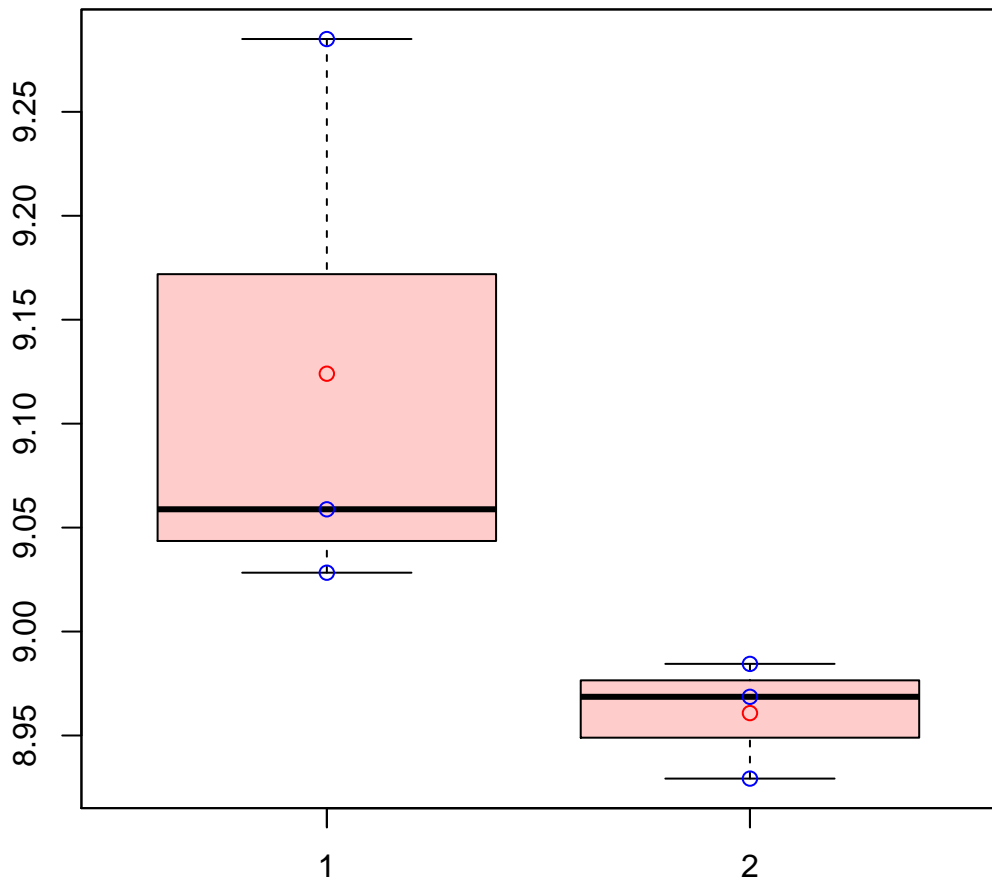

t-Test: p-value = 0.18

# CL1805Contig1|CL1805Contig1

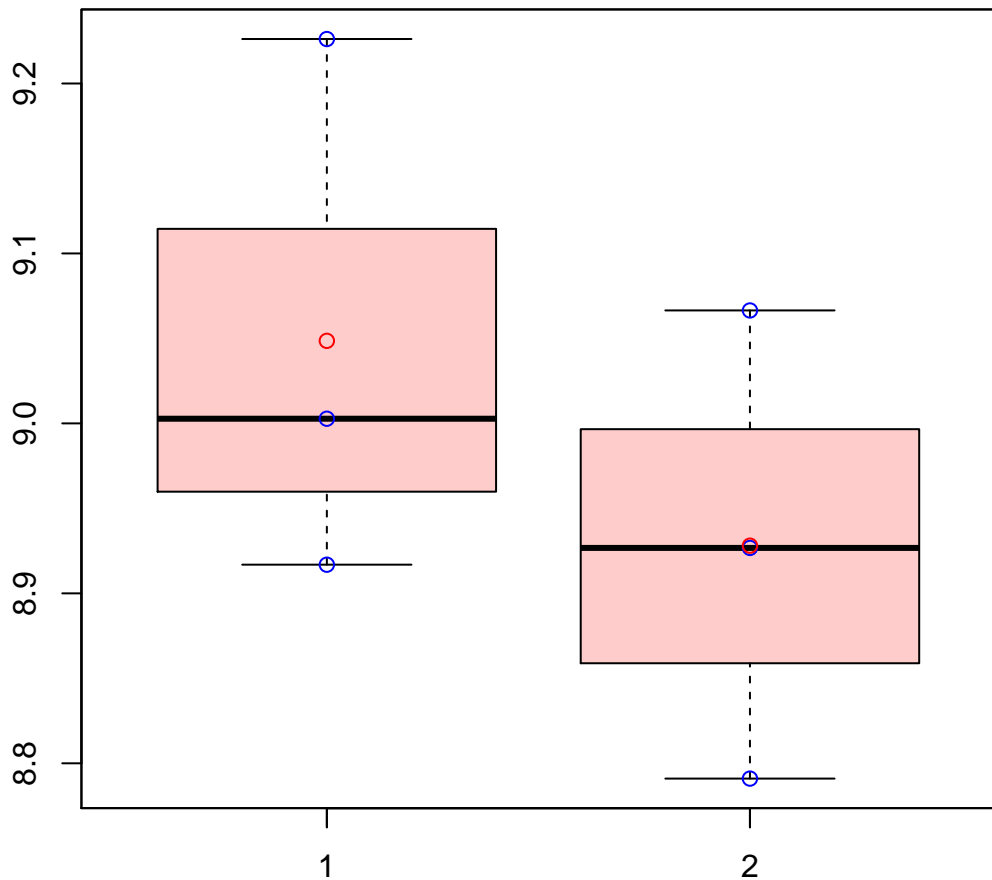

t-Test: p-value = 0.38



# CL1805Contig2|CL1805Contig2



t-Test: p-value = 0.02

# CL1805Contig6|CL1805Contig6



t-Test: p-value = 0.38

# CL1805Contig7|CL1805Contig7



t-Test: p-value = 0.18

# CL1805Contig8|CL1805Contig8



t-Test: p-value = 0.18

# CL1805Contig9|CL1805Contig9



t-Test: p-value = 0.18

# CL1808Contig1|CL1808Contig1

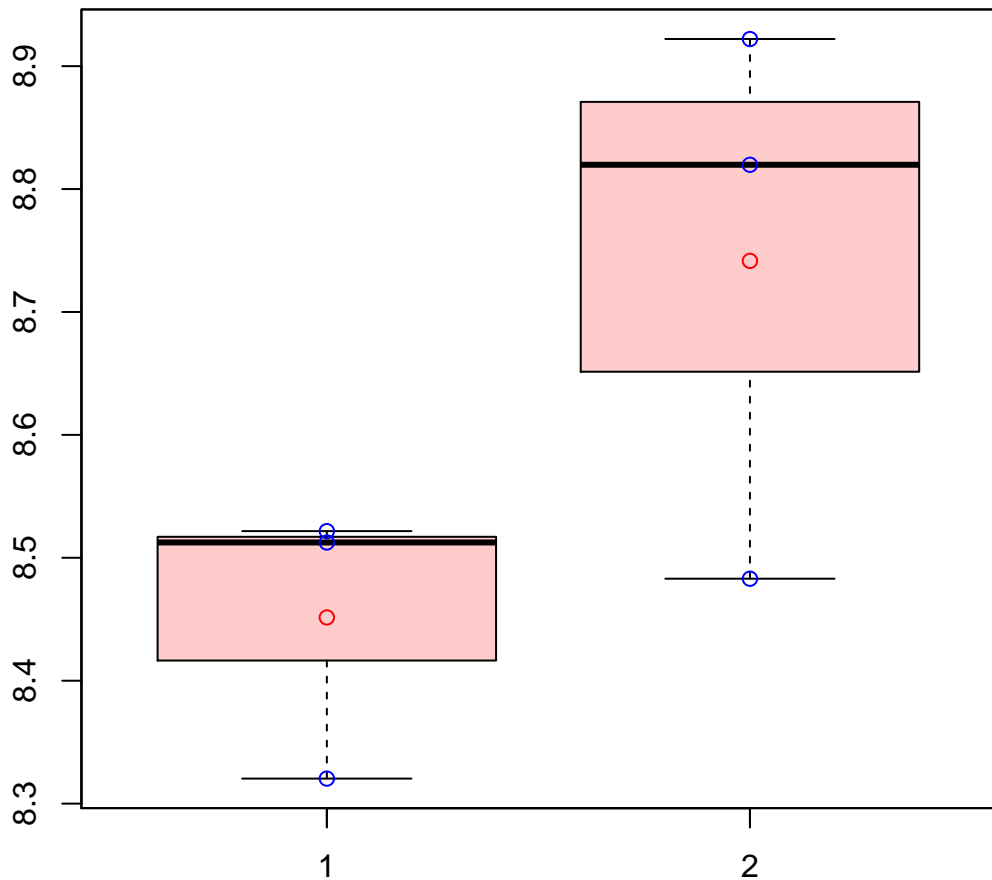

t-Test: p-value = 0.15

# CL18095Contig1|CL18095Contig1

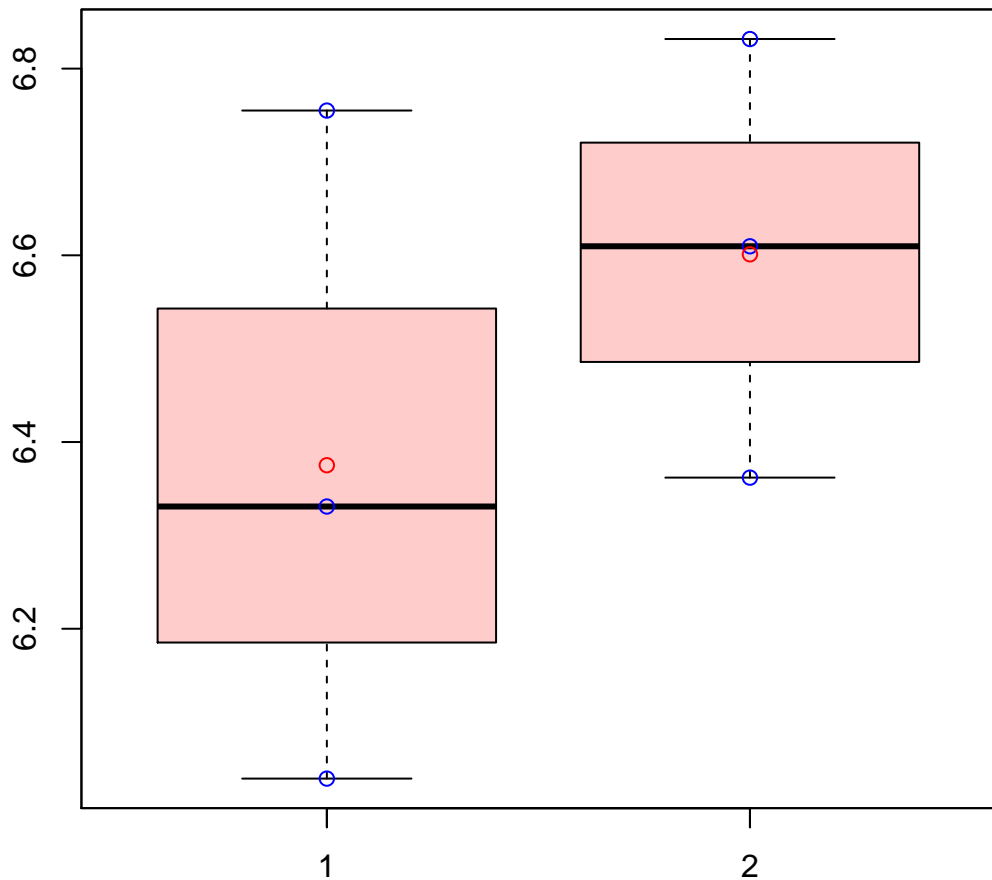

t-Test: p-value = 0.42

# CL18099Contig1|CL18099Contig1

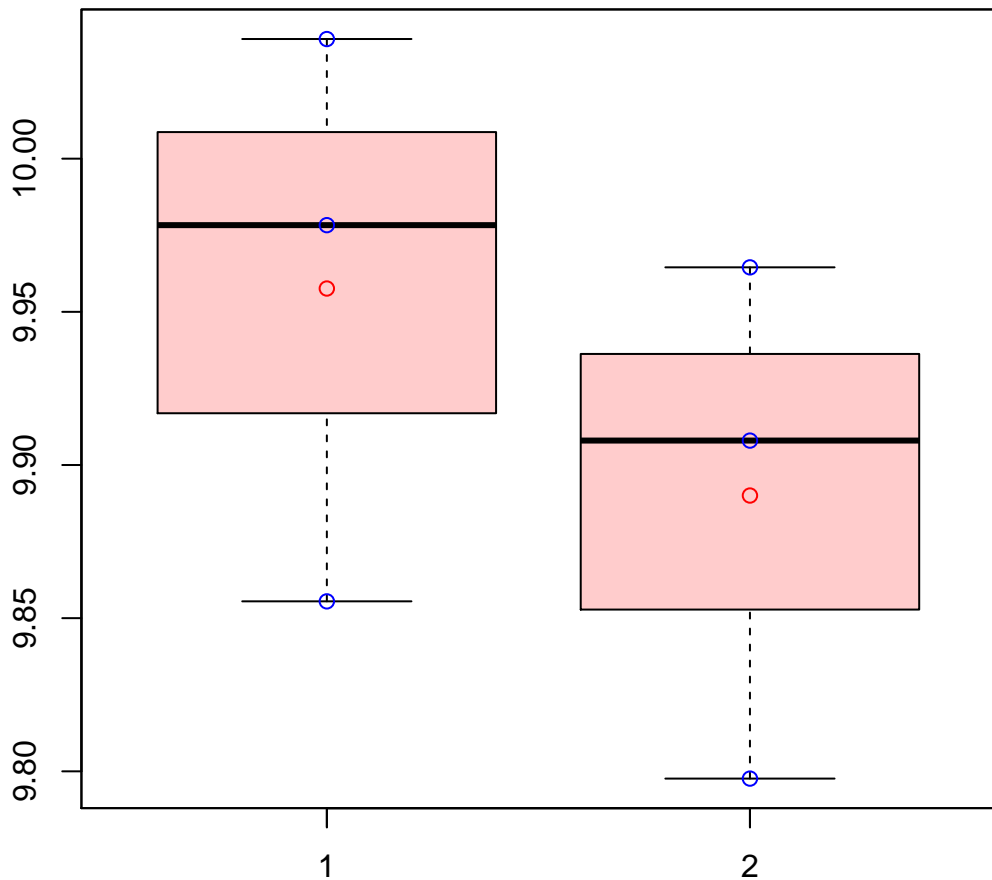

t-Test: p-value = 0.41



# CL180Contig10|CL180Contig10

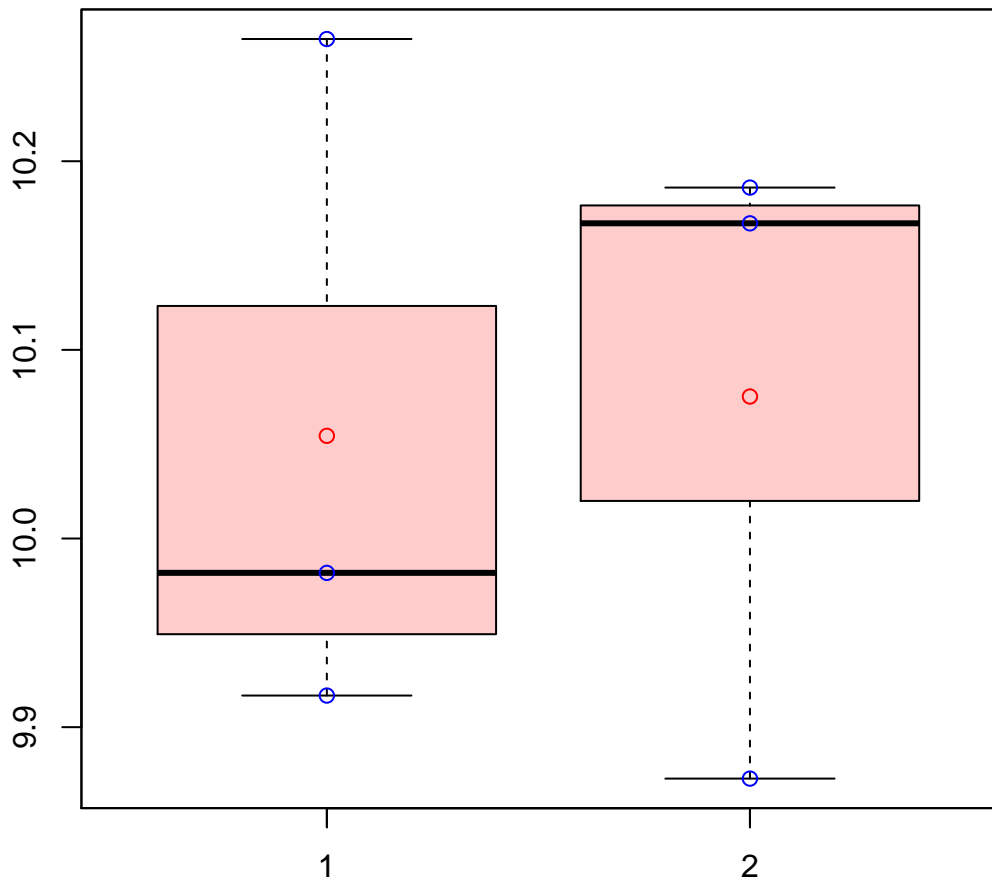

t-Test: p-value = 0.89

# CL180Contig11|CL180Contig11

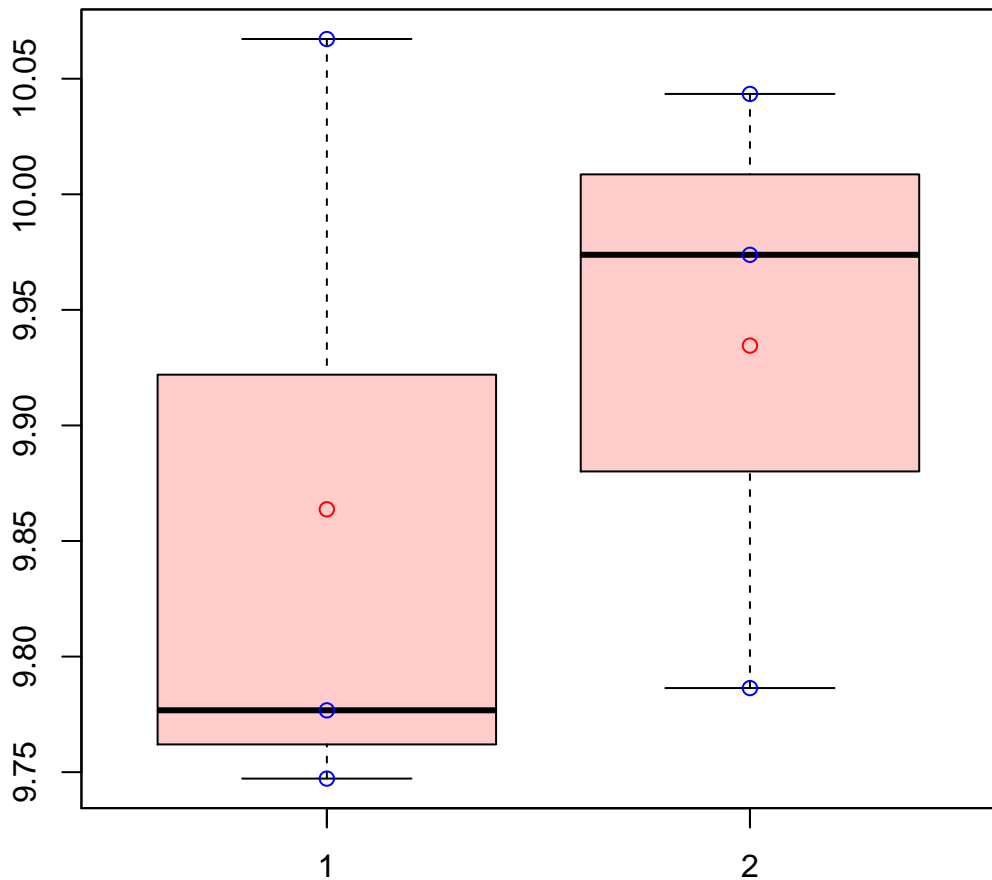

t-Test: p-value = 0.61

# CL180Contig14|CL180Contig14

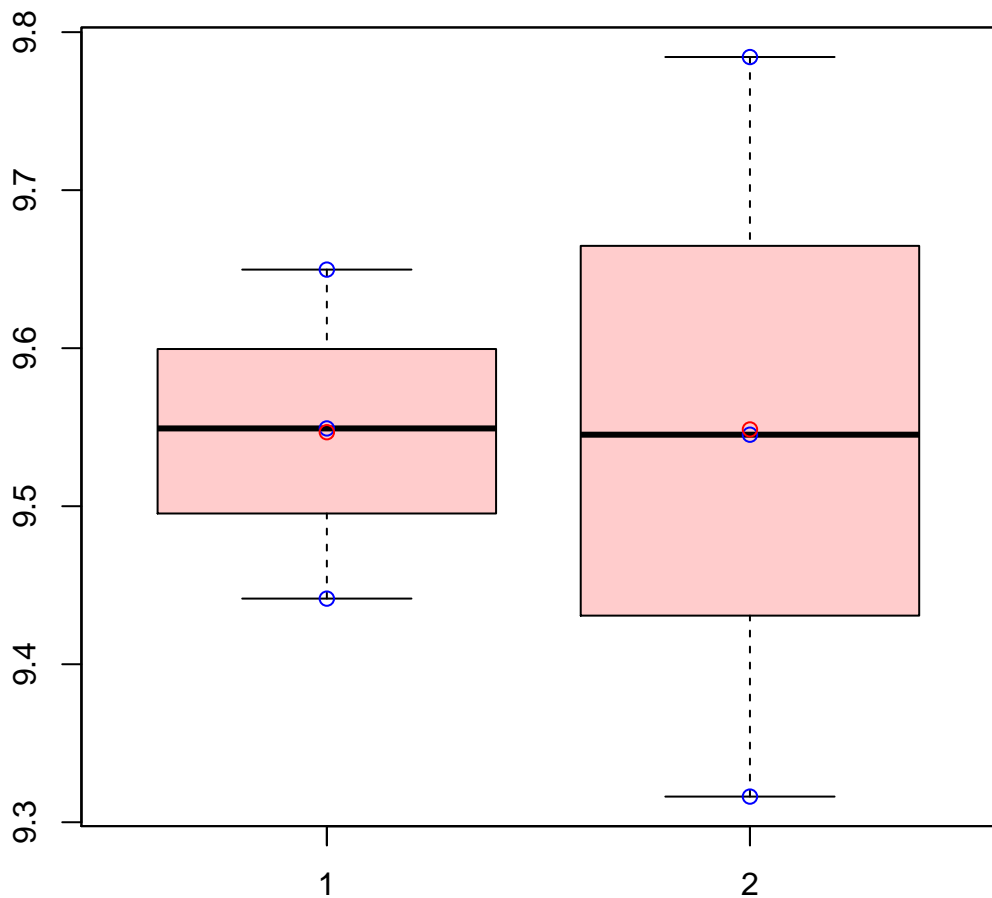

t-Test: p-value = 0.99

# CL180Contig21|CL180Contig21



t-Test: p-value = 0.61

# CL180Contig23|CL180Contig23



t-Test: p-value = 0.99

# CL180Contig8|CL180Contig8

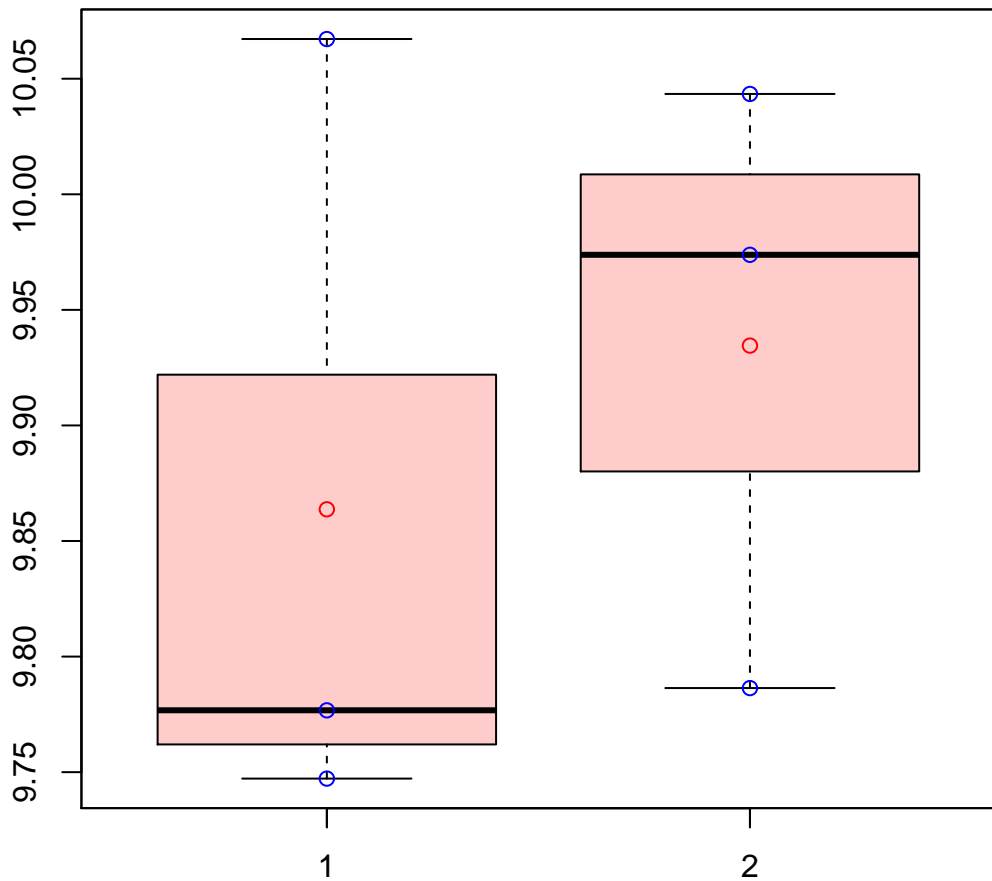

t-Test: p-value = 0.61

# CL180Contig9|CL180Contig9

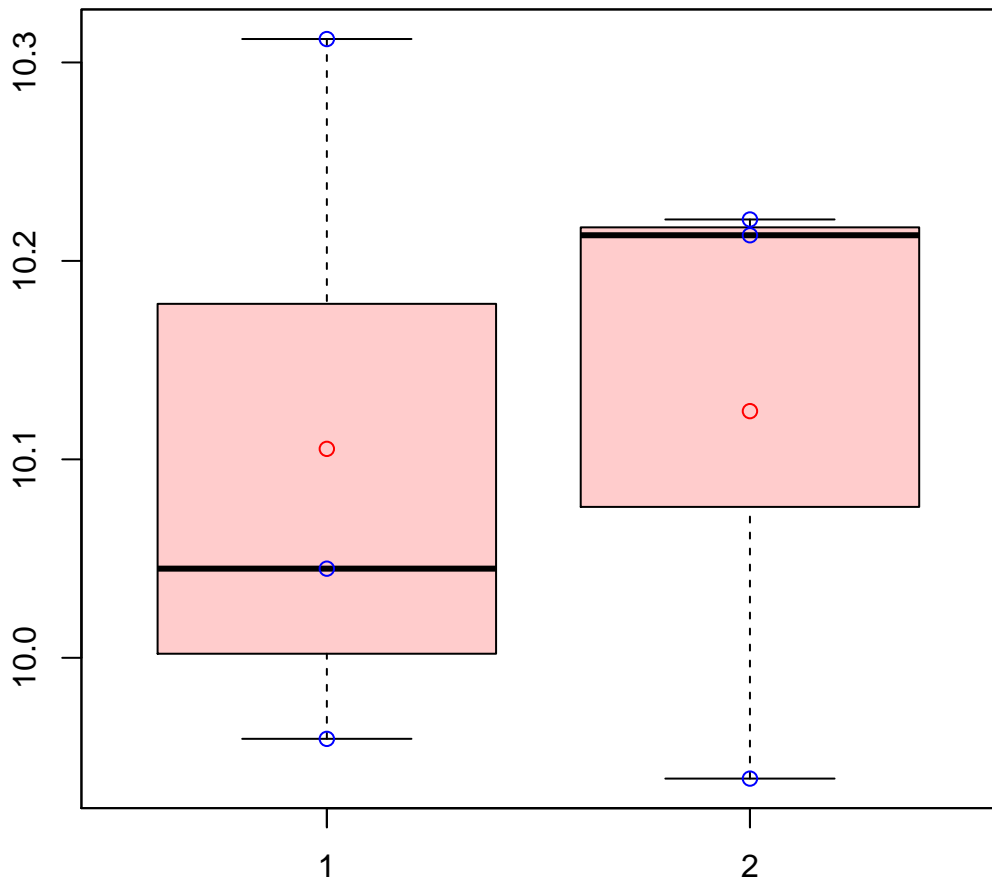

t-Test: p-value = 0.9

# CL1814Contig1|CL1814Contig1

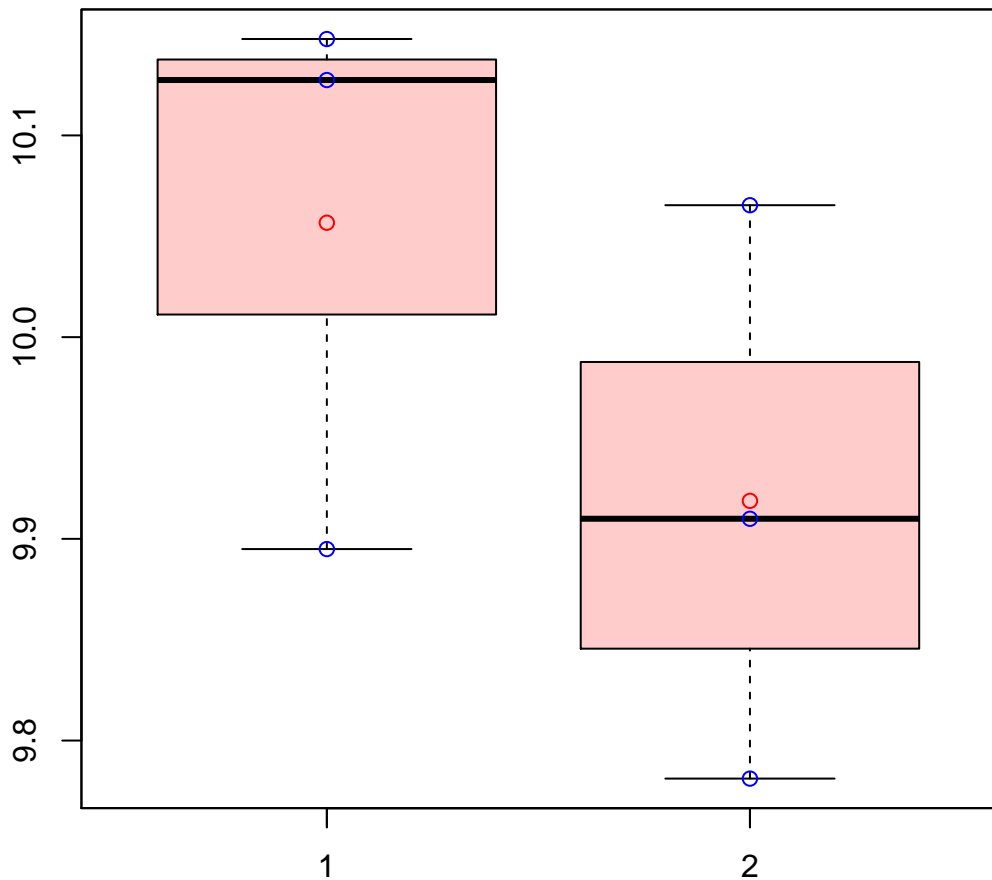

t-Test: p-value = 0.3



# CL1815Contig6|CL1815Contig6

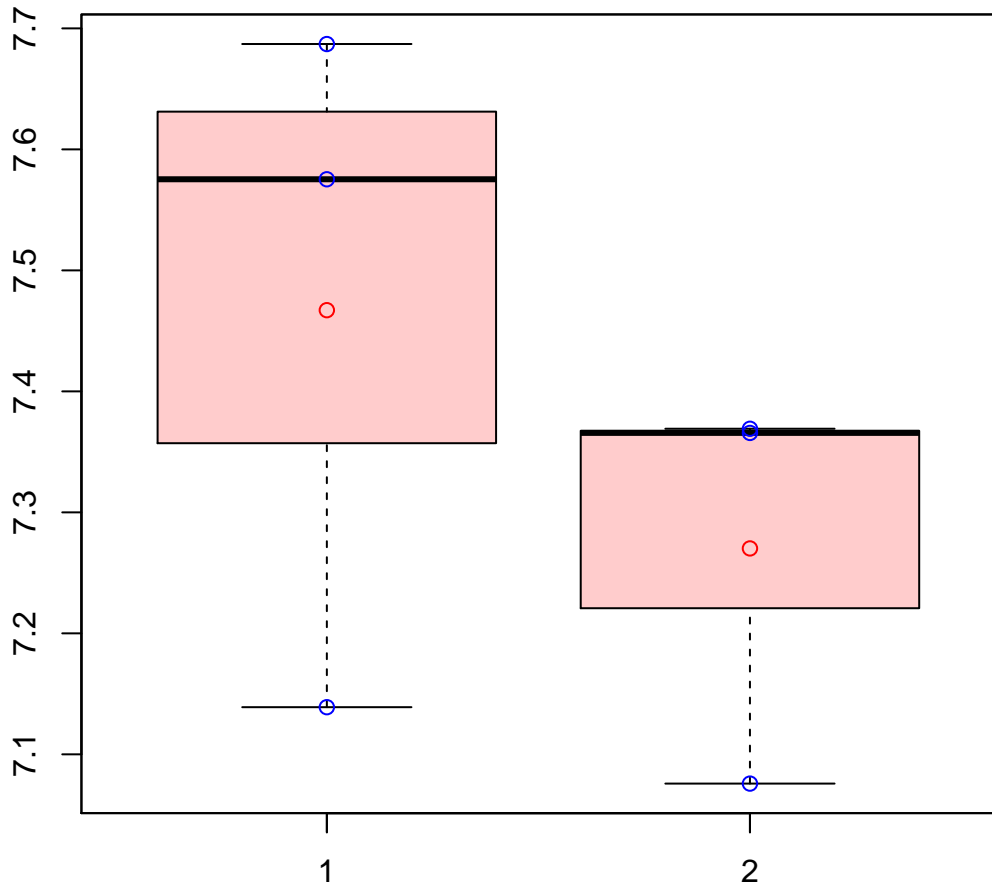

t-Test: p-value = 0.38

# CL1816Contig2|CL1816Contig2

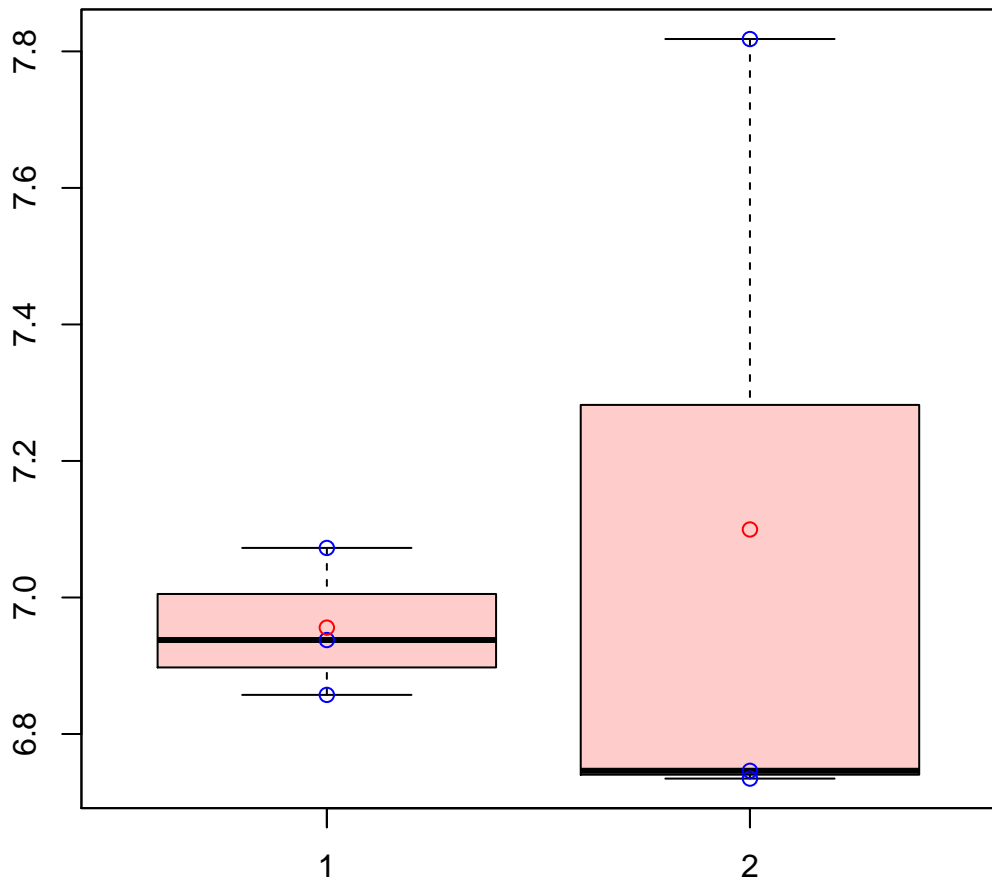

t-Test: p-value = 0.73

# CL1816Contig8|CL1816Contig8

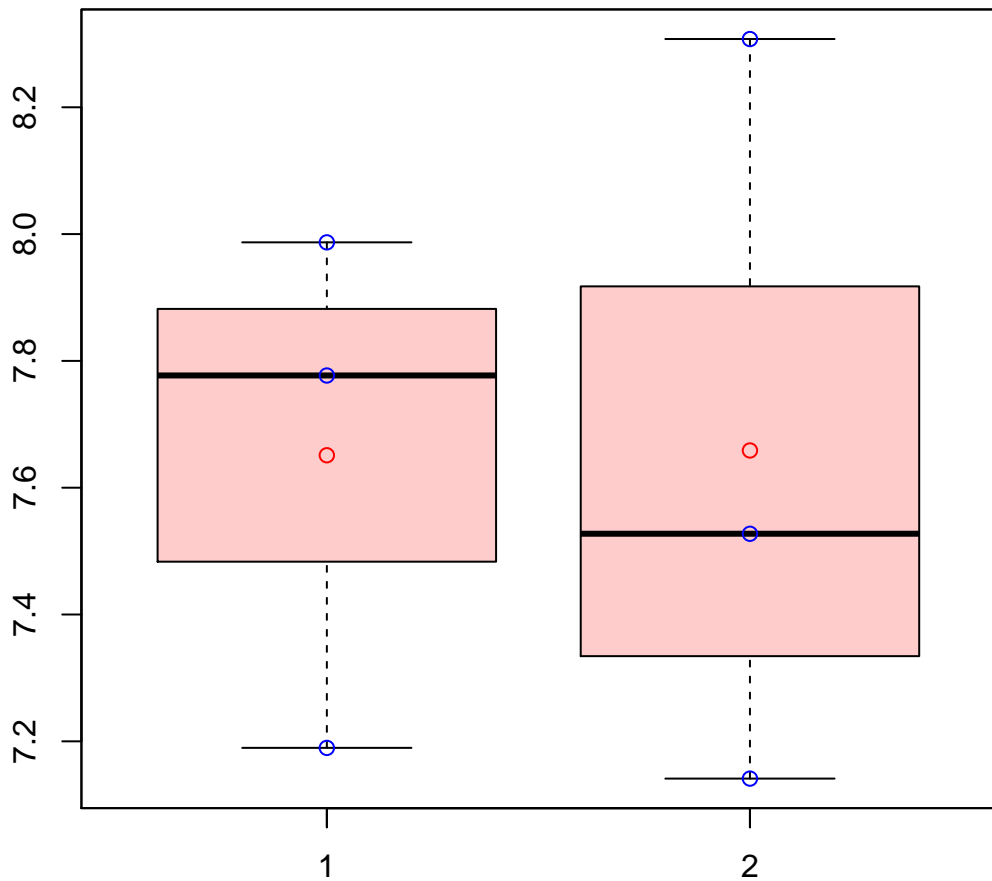

t-Test: p-value = 0.99

# CL18202Contig1|CL18202Contig1

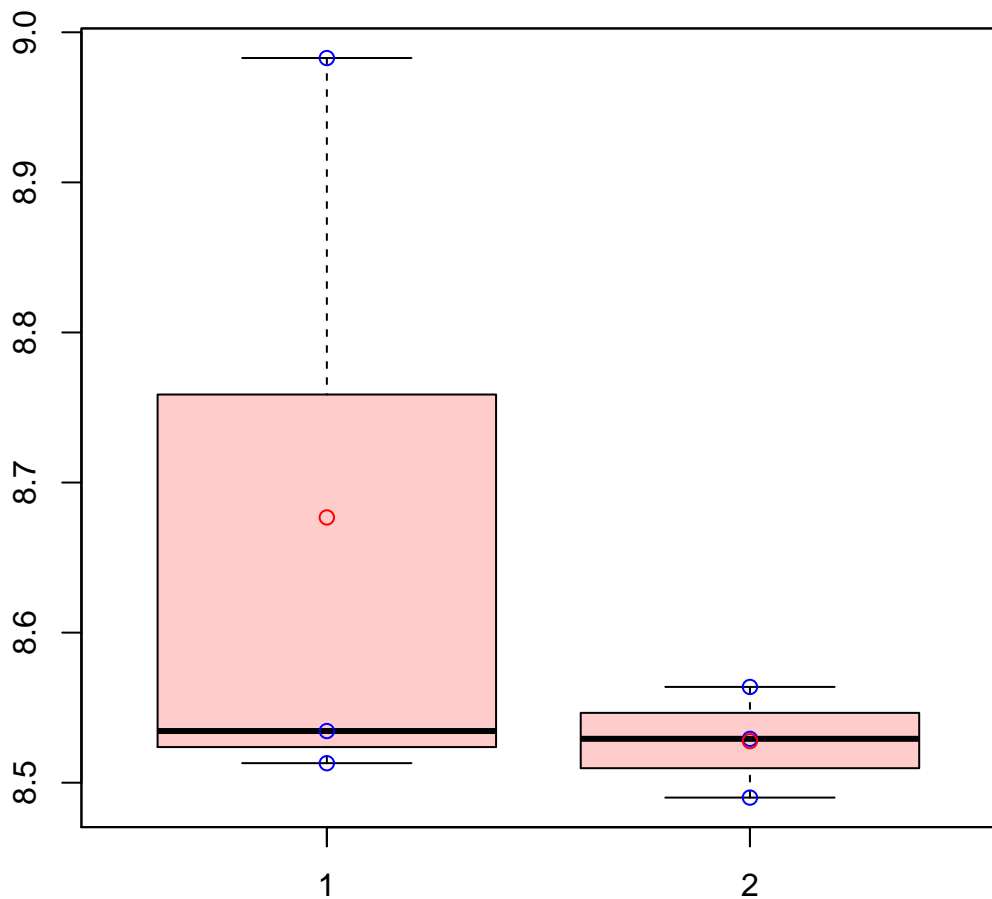

t-Test: p-value = 0.43

# CL1820Contig1|CL1820Contig1

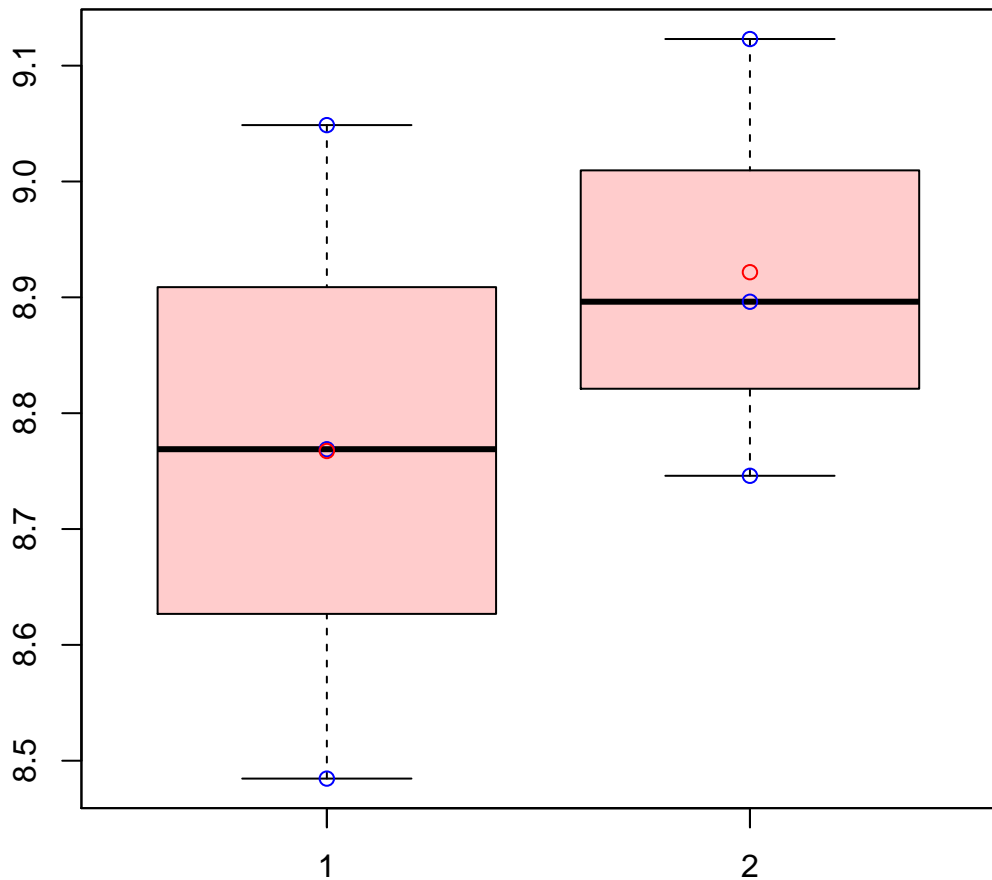

t-Test: p-value = 0.48

# CL1820Contig2|CL1820Contig2

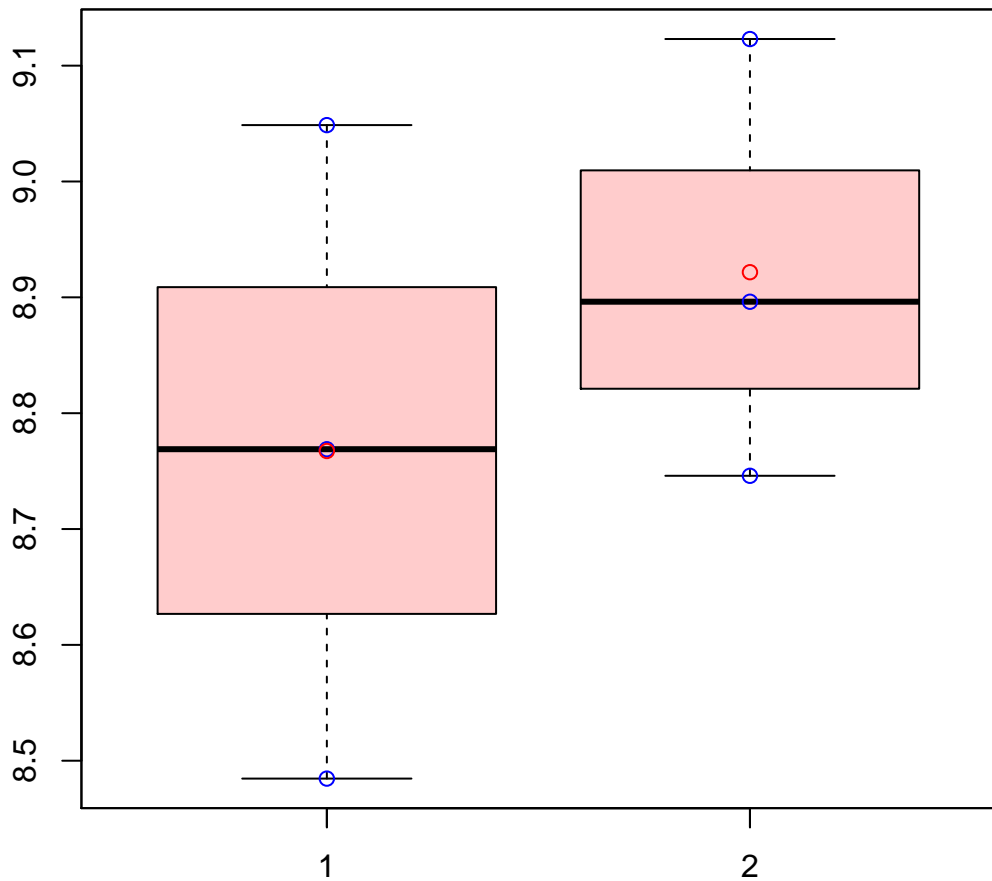

t-Test: p-value = 0.48

# CL1820Contig3|CL1820Contig3



t-Test: p-value = 0.48

# CL1821Contig5|CL1821Contig5



t-Test: p-value = 0.52



# CL1825Contig1|CL1825Contig1

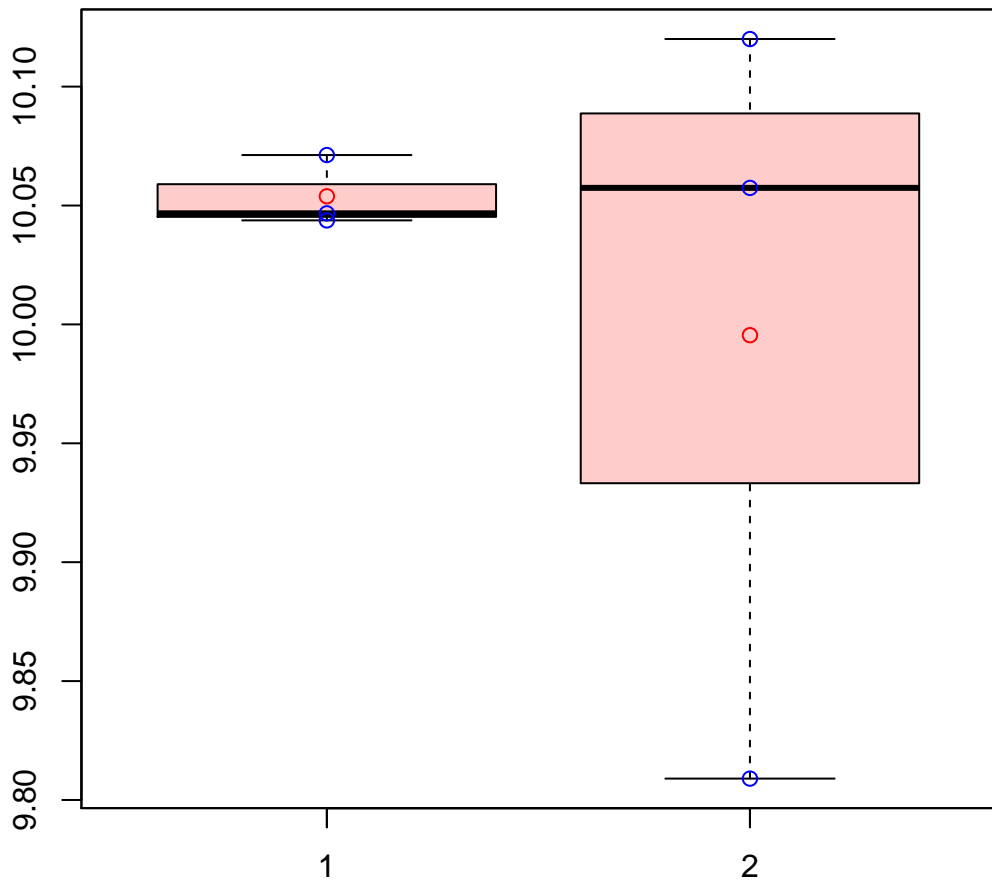

t-Test: p-value = 0.6

# CL1827Contig2|CL1827Contig2

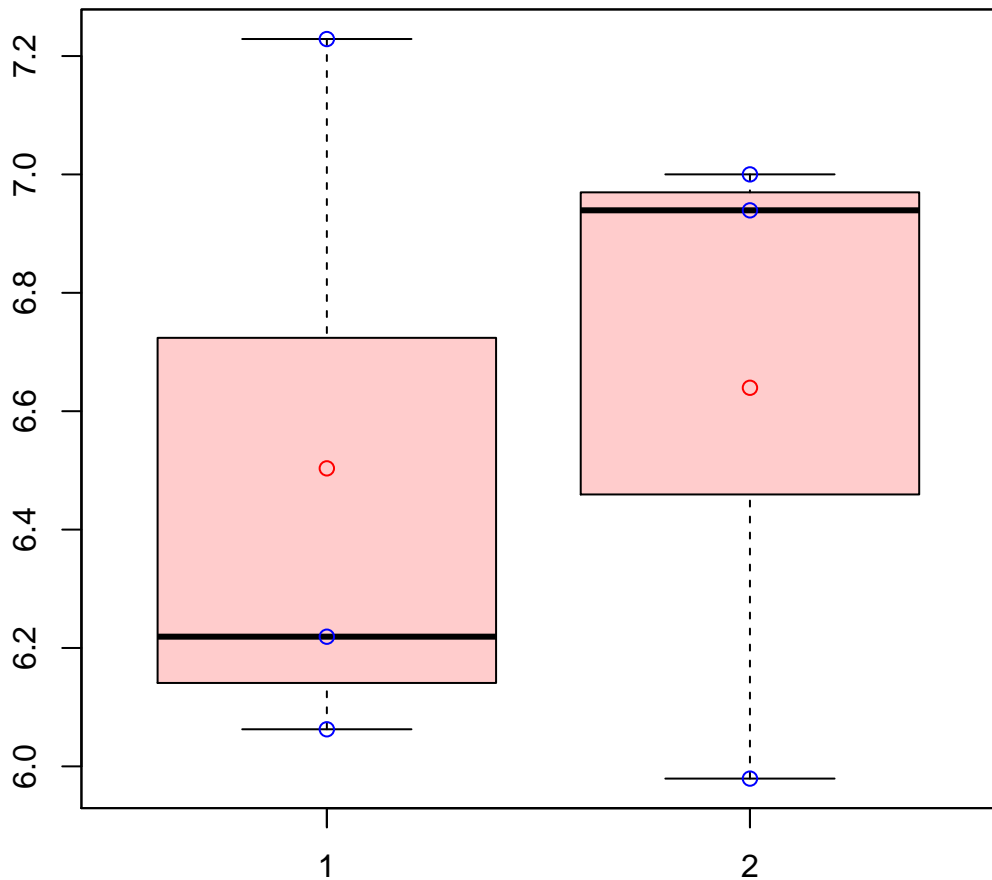

t-Test: p-value = 0.8

# CL1827Contig7|CL1827Contig7



t-Test: p-value = 0.8

# CL1829Contig1|CL1829Contig1

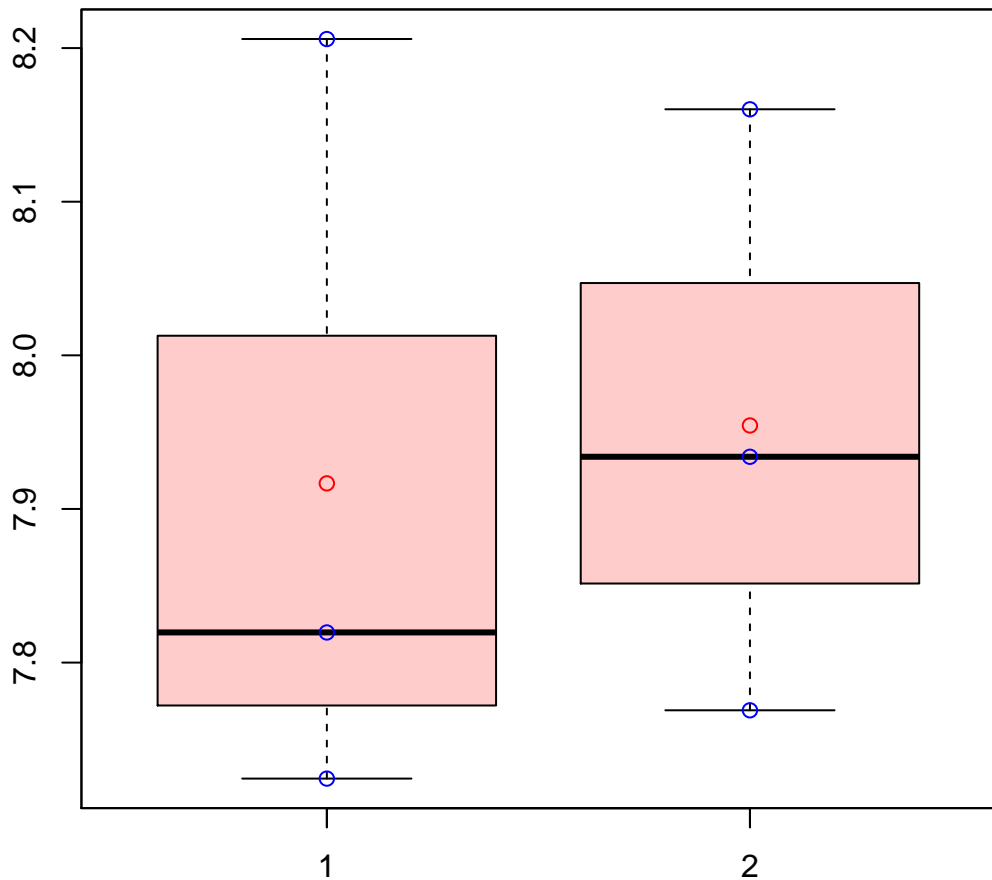

t-Test: p-value = 0.85

# CL182Contig17|CL182Contig17

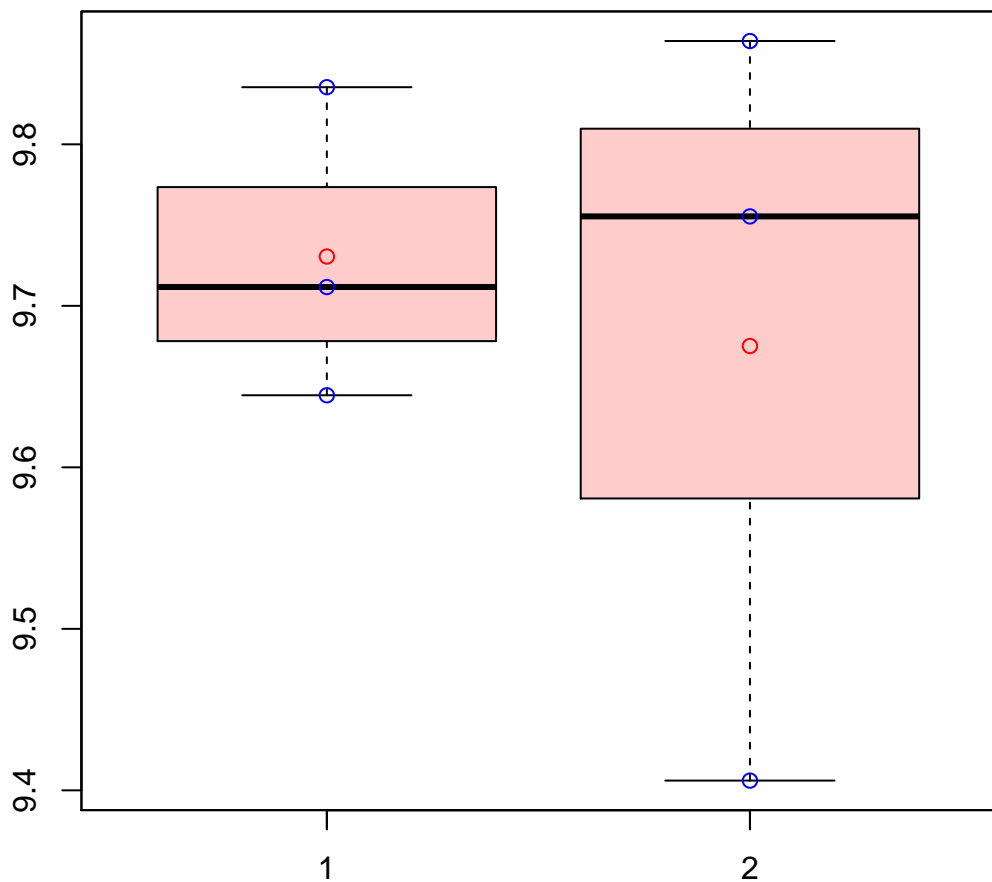

t-Test: p-value = 0.74

# CL182Contig4|CL182Contig4

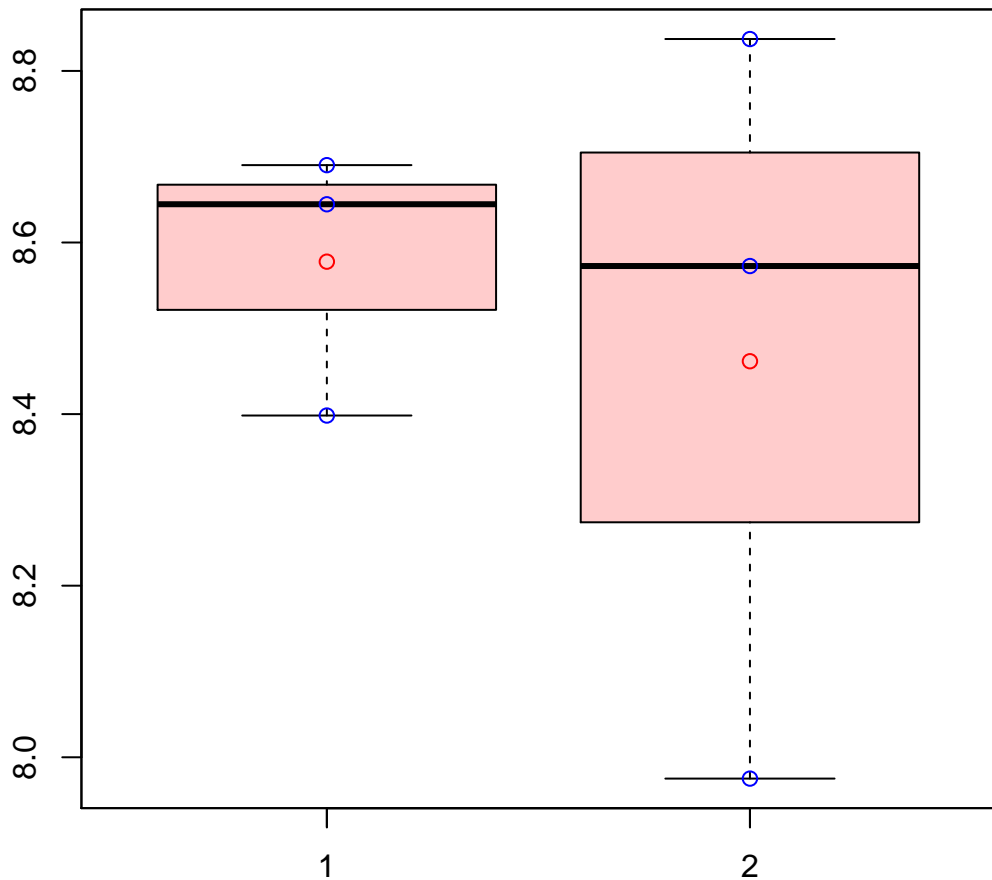

t-Test: p-value = 0.7

# CL1830Contig7|CL1830Contig7

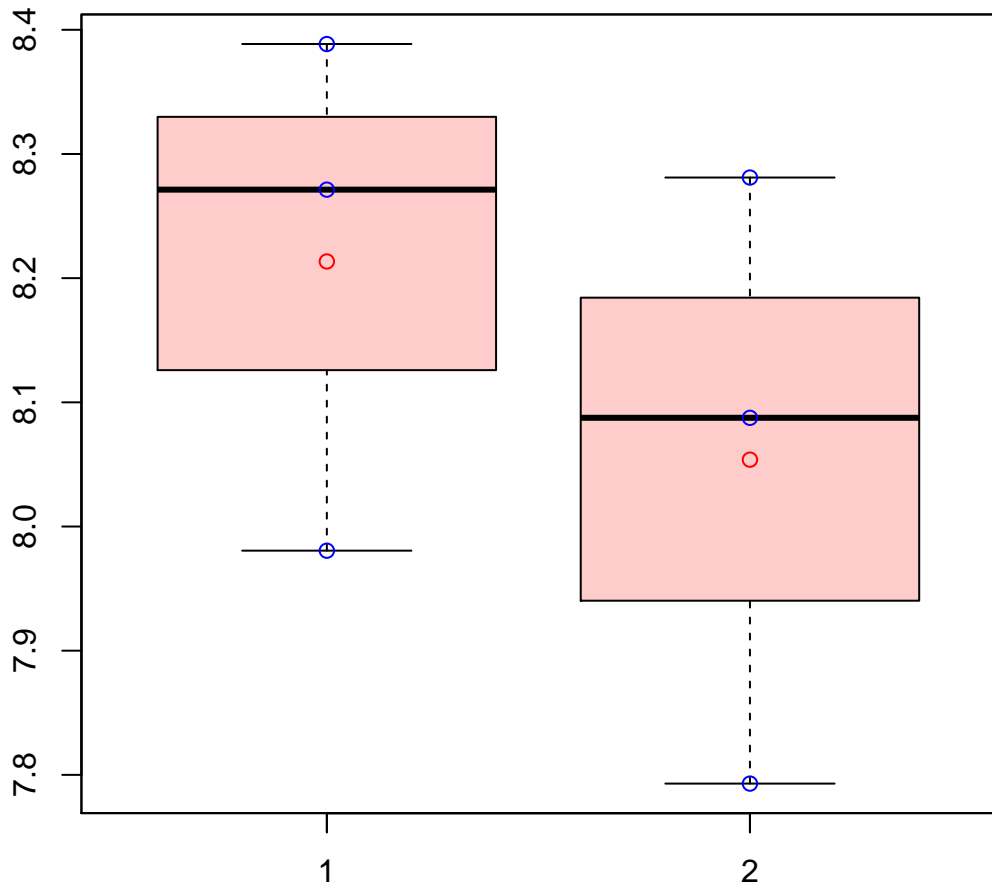

t-Test: p-value = 0.44

# CL18333Contig1|CL18333Contig1

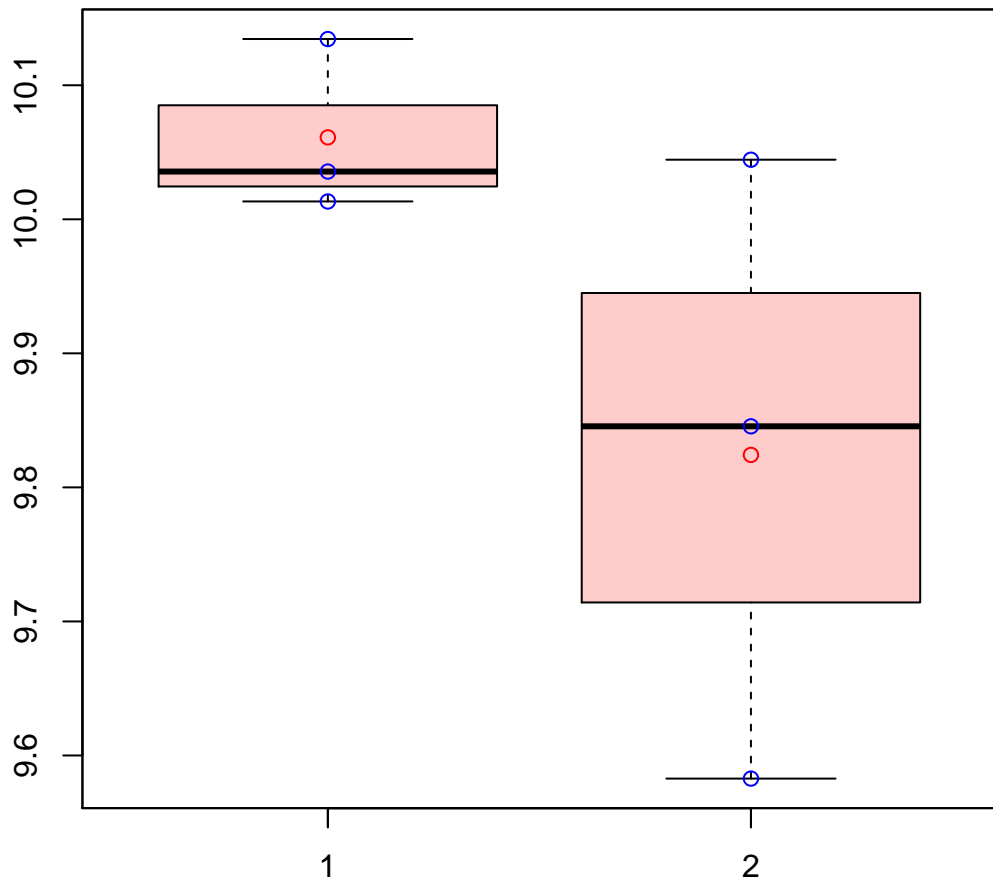

t-Test: p-value = 0.21



# CL1839Contig1|CL1839Contig1

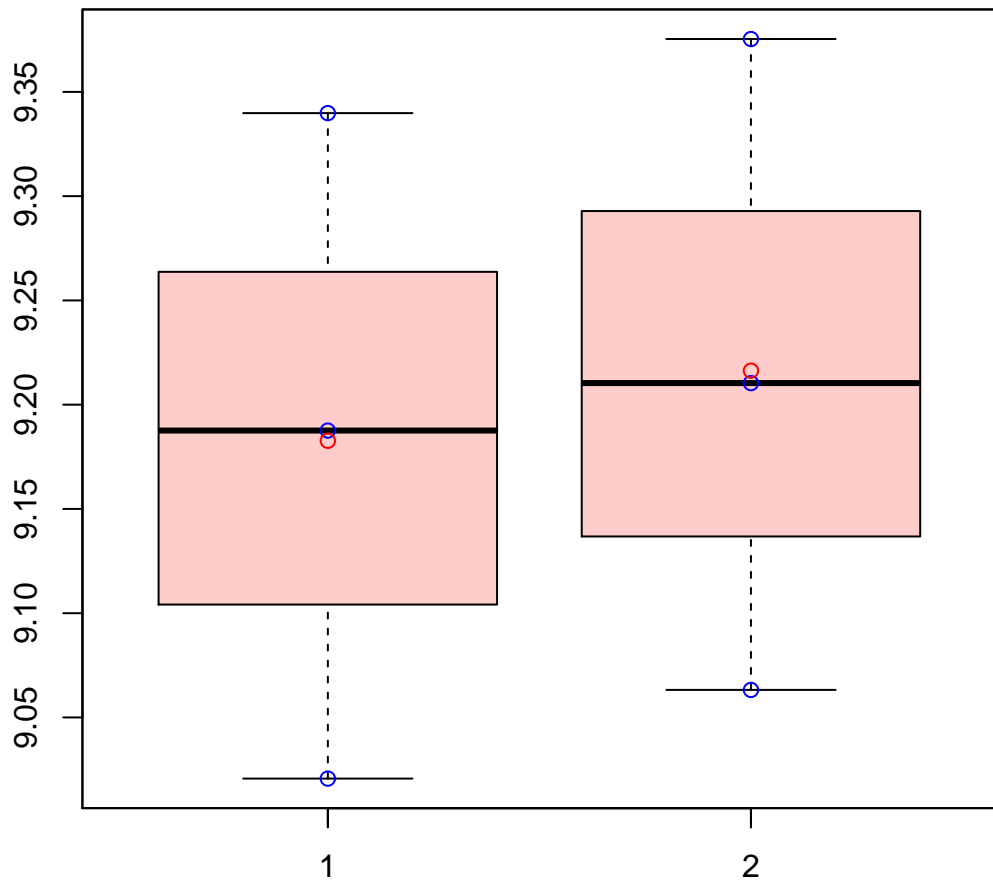

t-Test: p-value = 0.81

# CL183Contig14|CL183Contig14

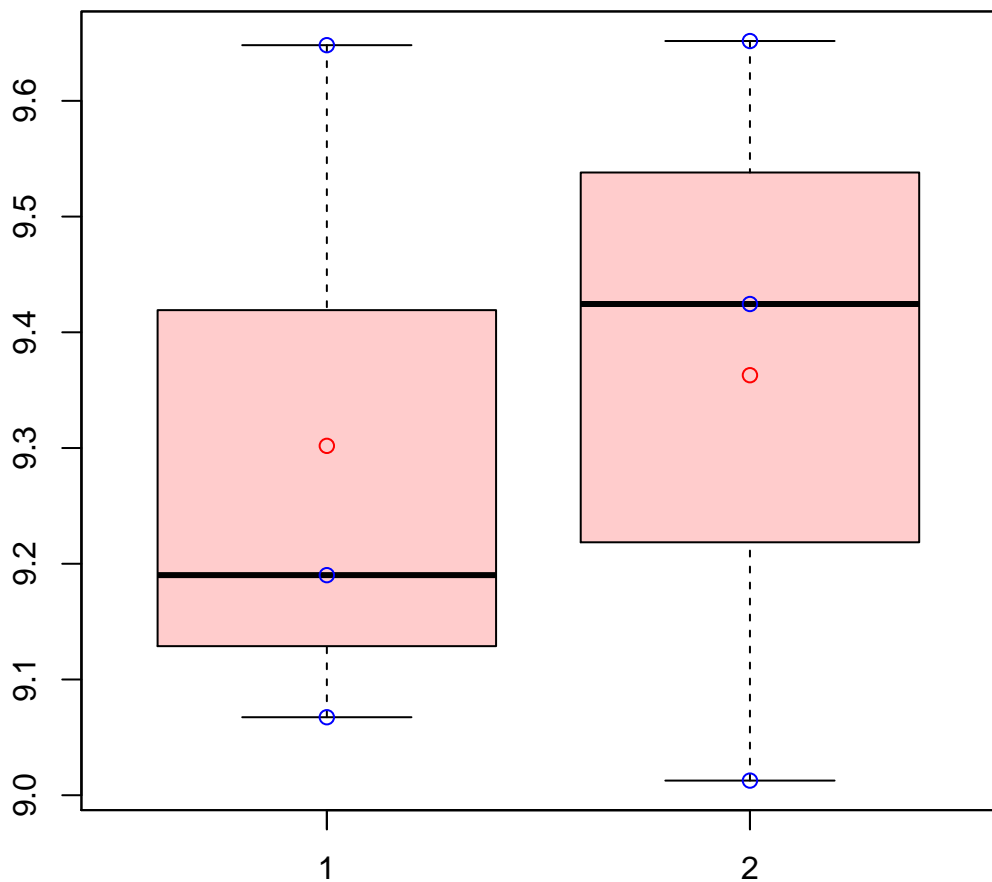

t-Test: p-value = 0.82

# CL183Contig15|CL183Contig15

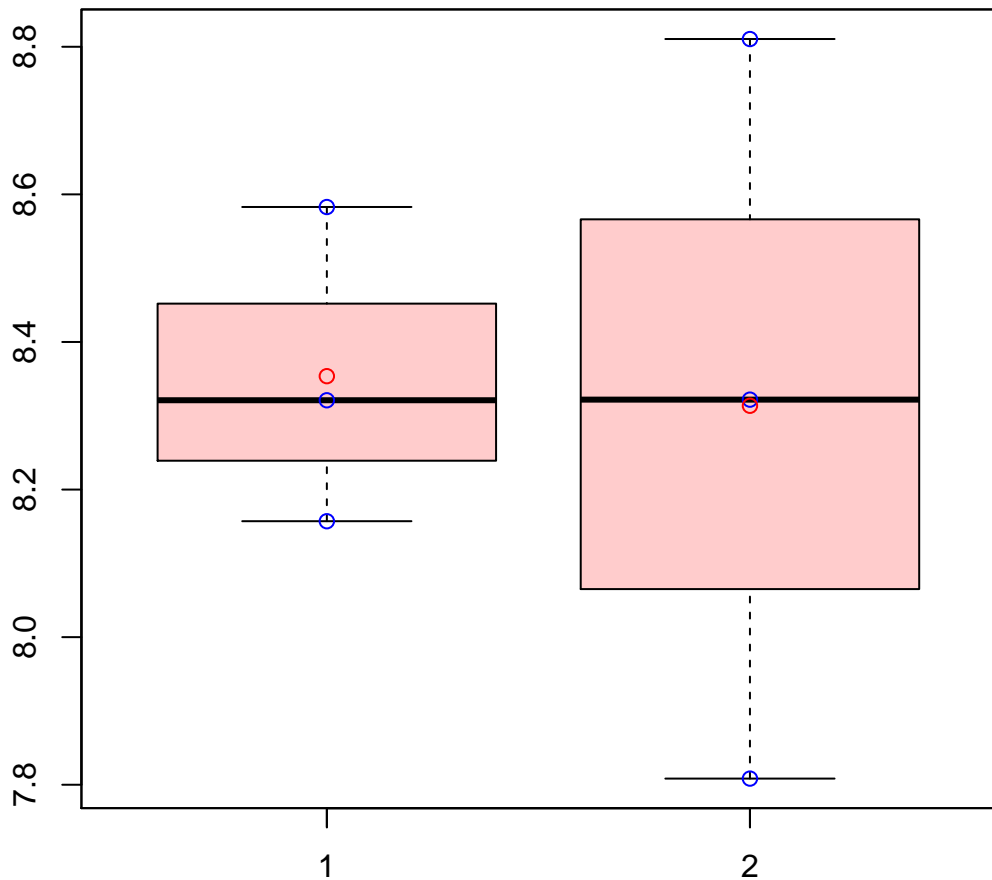

t-Test: p-value = 0.91

# CL183Contig18|CL183Contig18

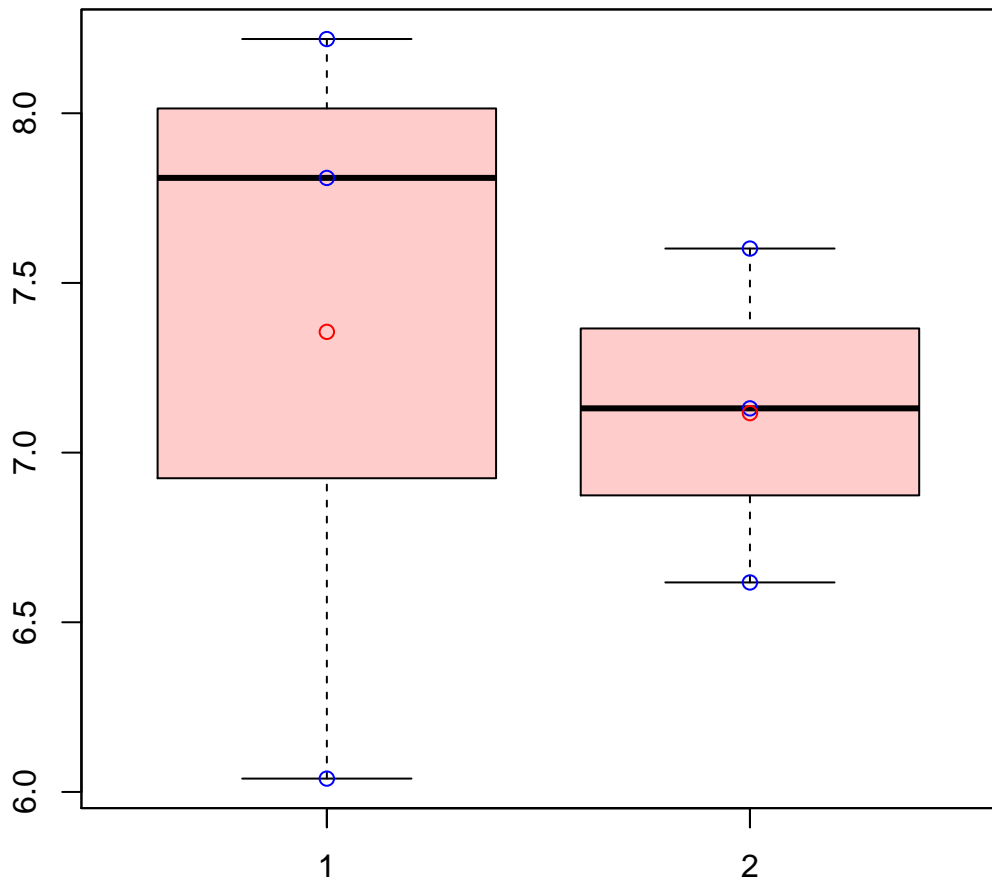

t-Test: p-value = 0.77

# CL183Contig19|CL183Contig19

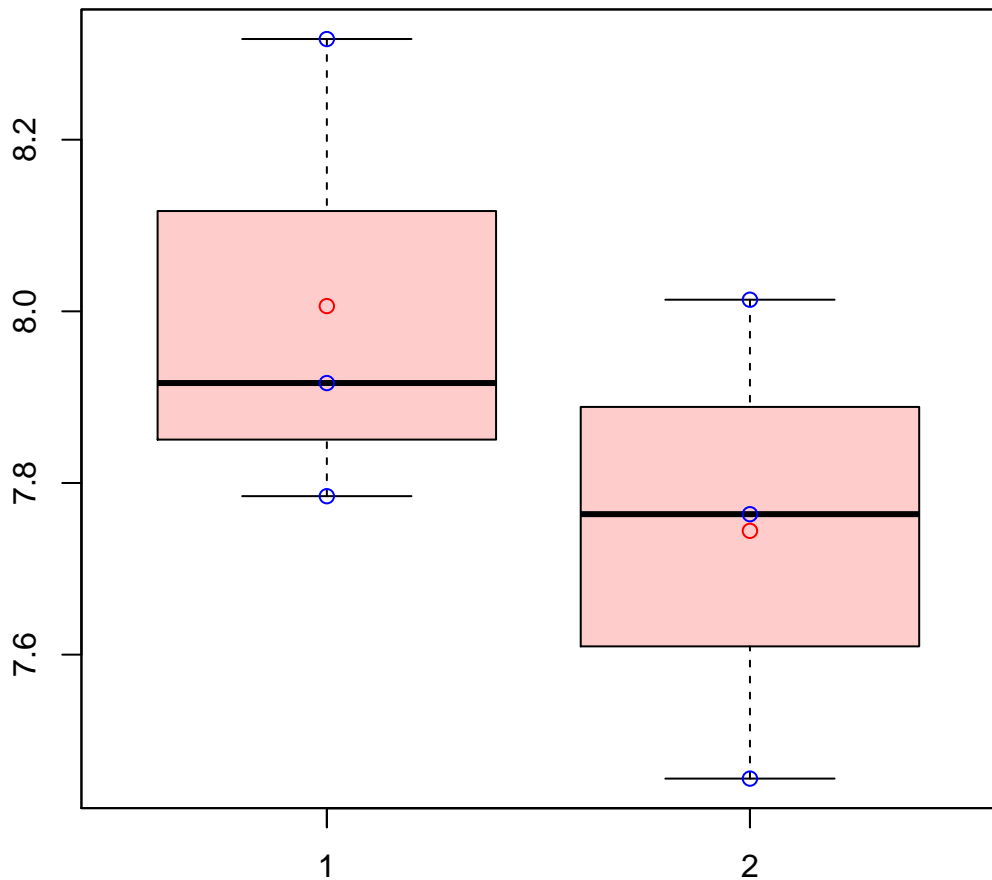

t-Test: p-value = 0.31

# CL183Contig1|CL183Contig1

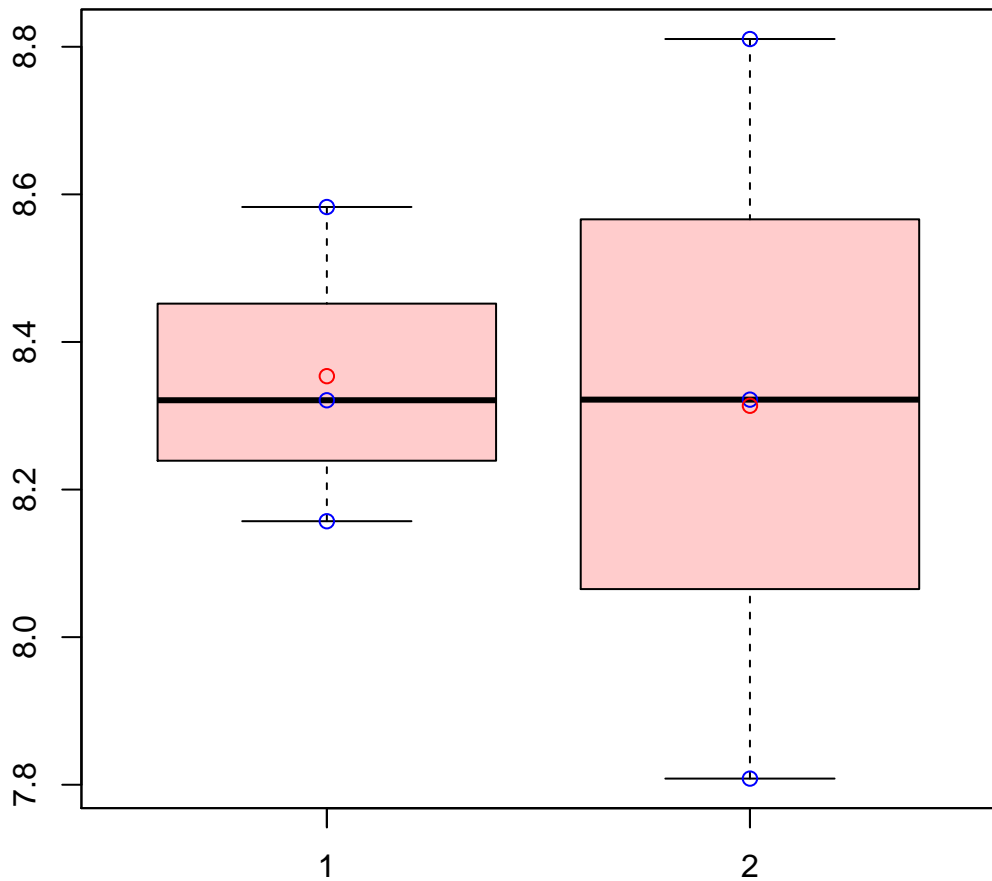

t-Test: p-value = 0.91

# CL183Contig5|CL183Contig5

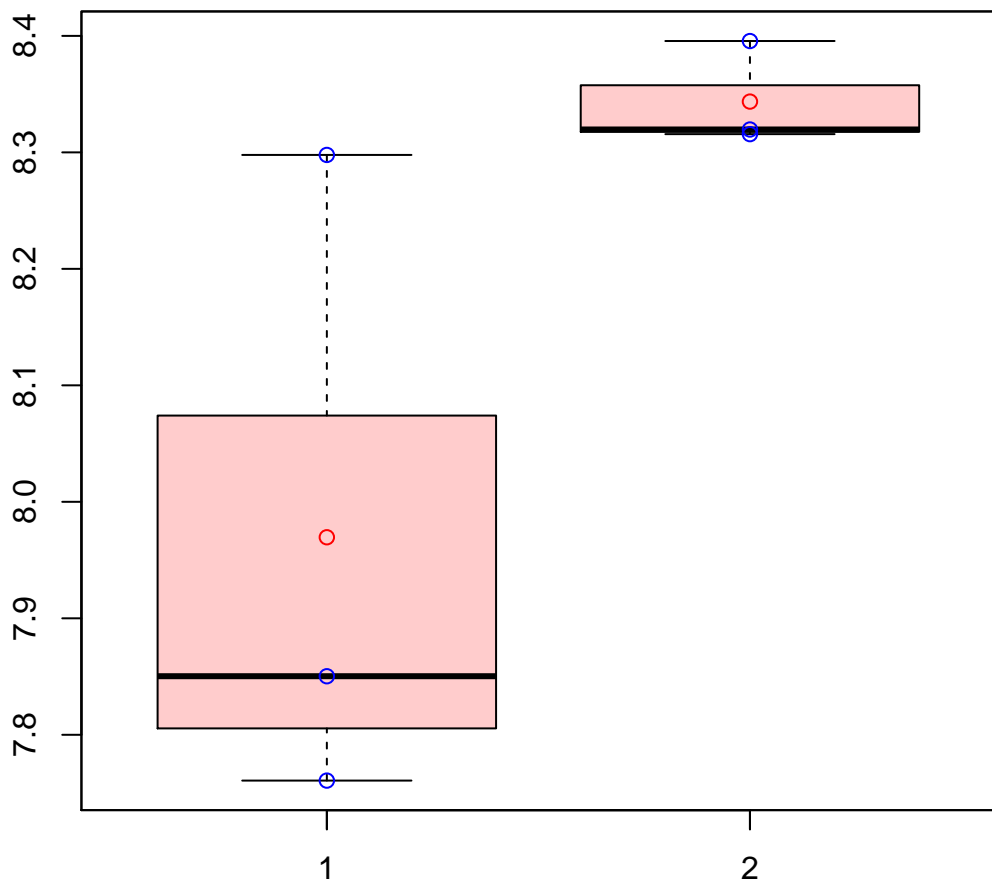

t-Test: p-value = 0.15

# CL18426Contig1|CL18426Contig1

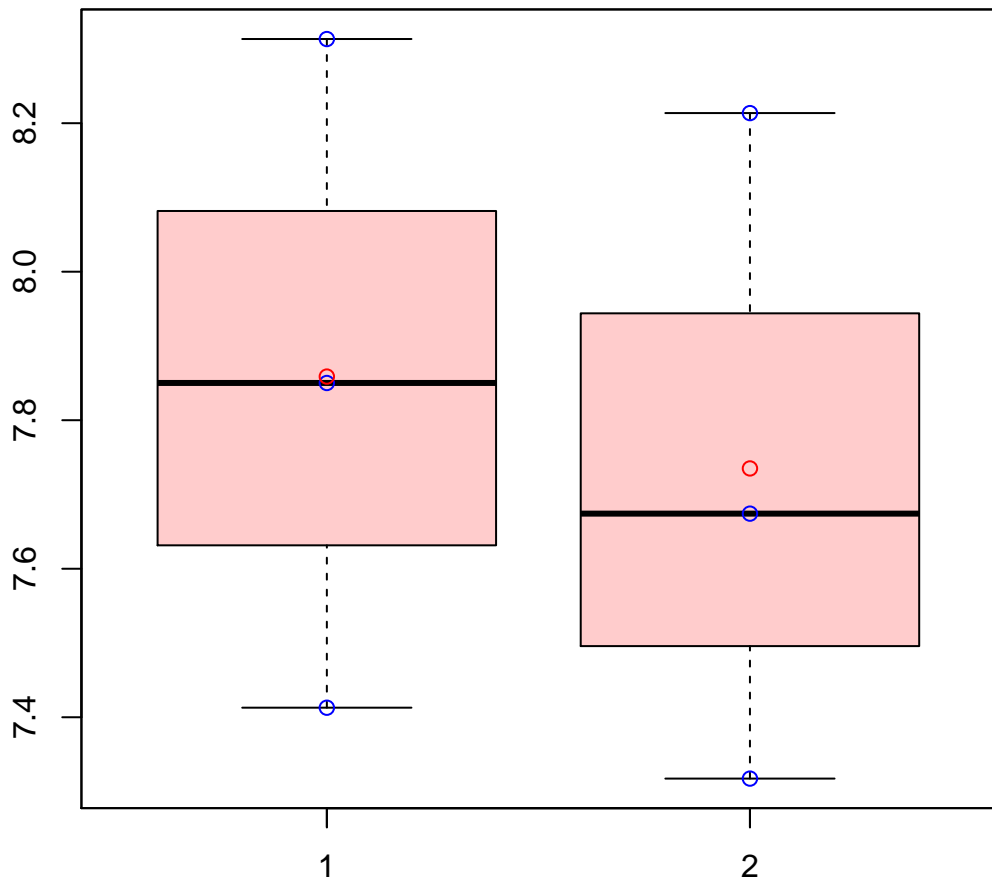

t-Test: p-value = 0.75



# CL18449Contig1|CL18449Contig1

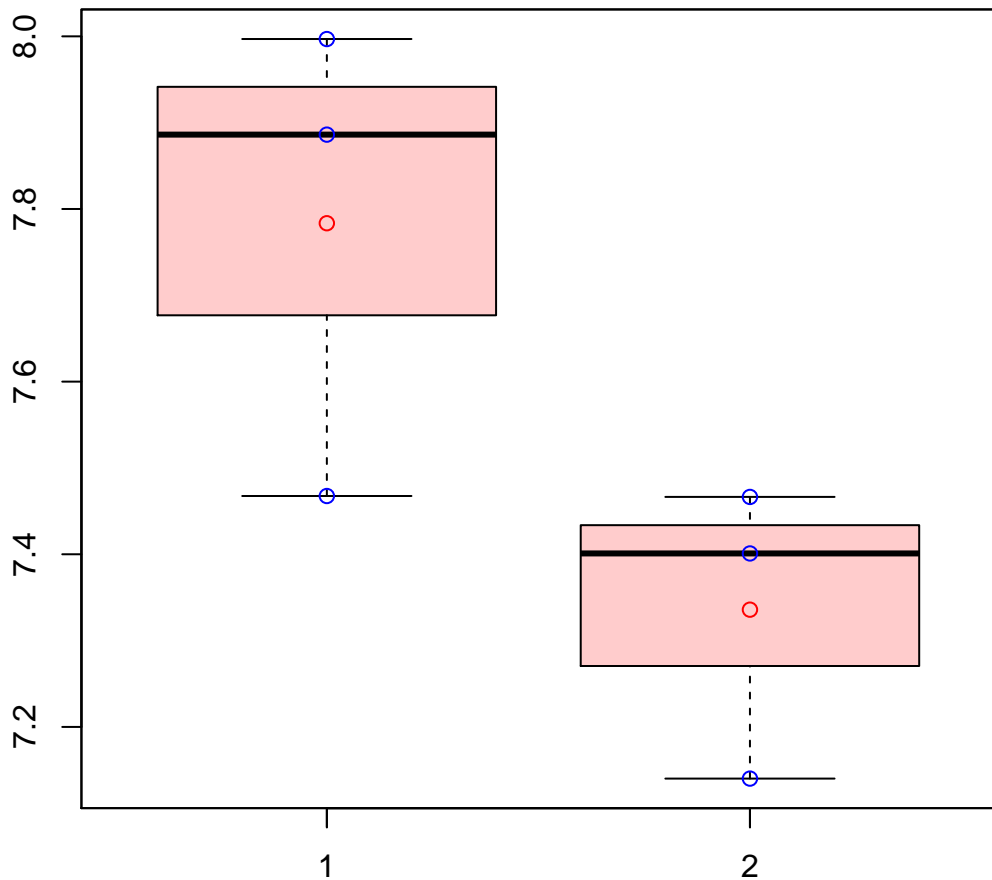

t-Test: p-value = 0.09

# CL1847Contig1|CL1847Contig1

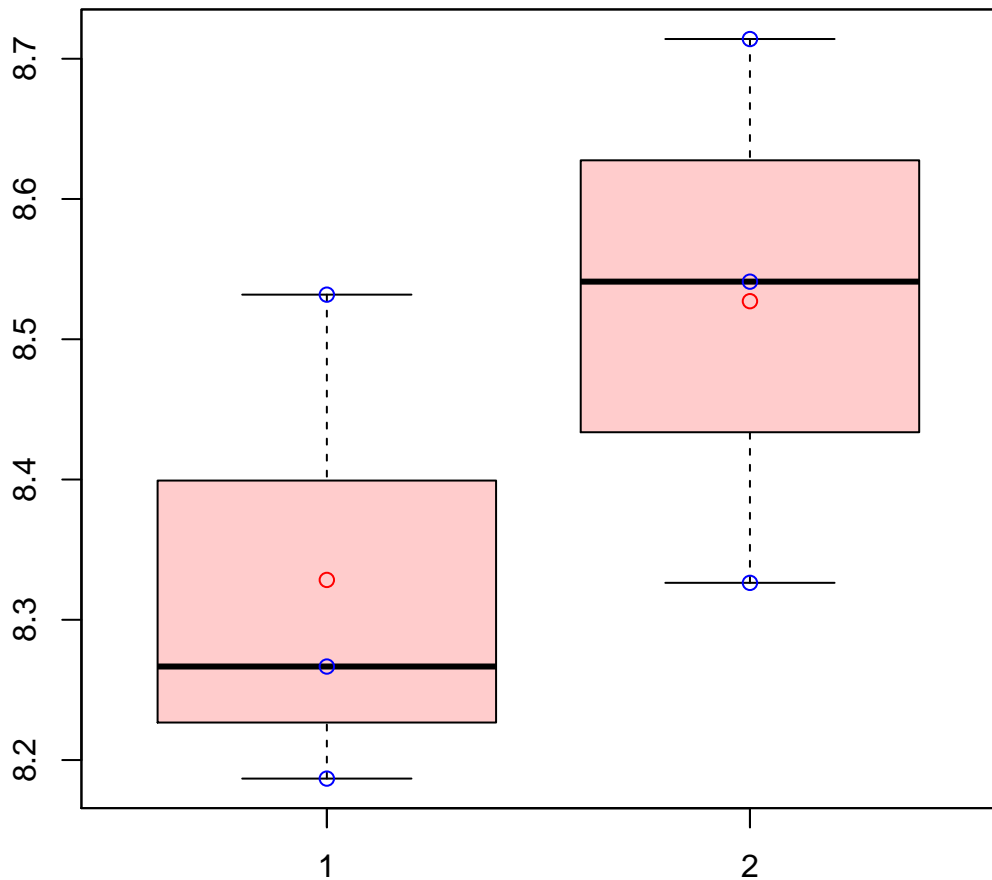

t-Test: p-value = 0.26

## CL1847Contig2|CL1847Contig2

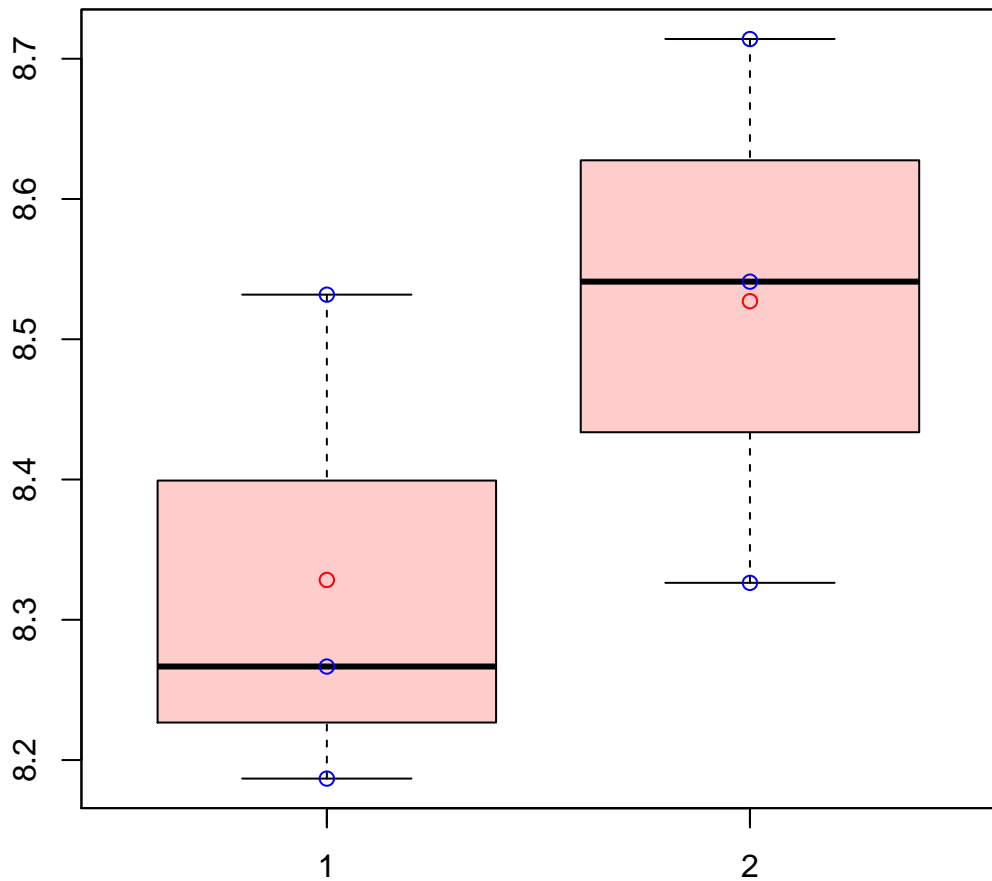

t-Test: p-value = 0.26

# CL1847Contig4|CL1847Contig4



t-Test: p-value = 0.26

# CL1848Contig12|CL1848Contig12

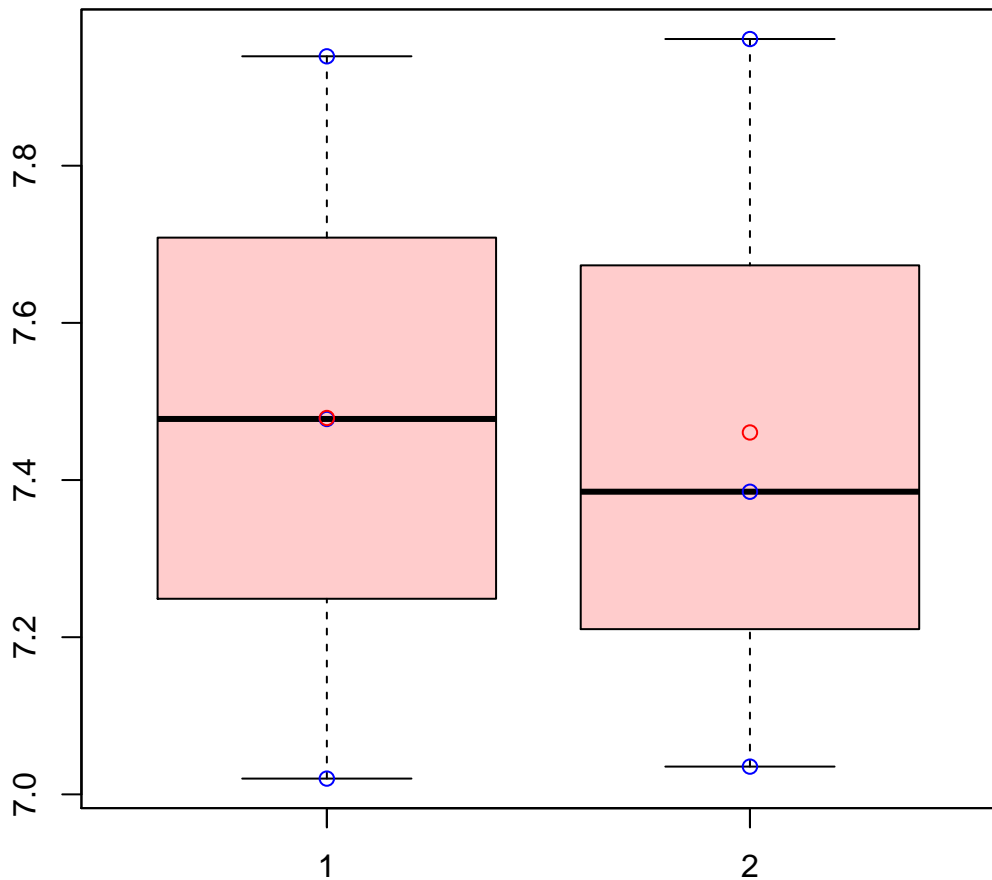

t-Test: p-value = 0.96

# CL184Contig7|CL184Contig7

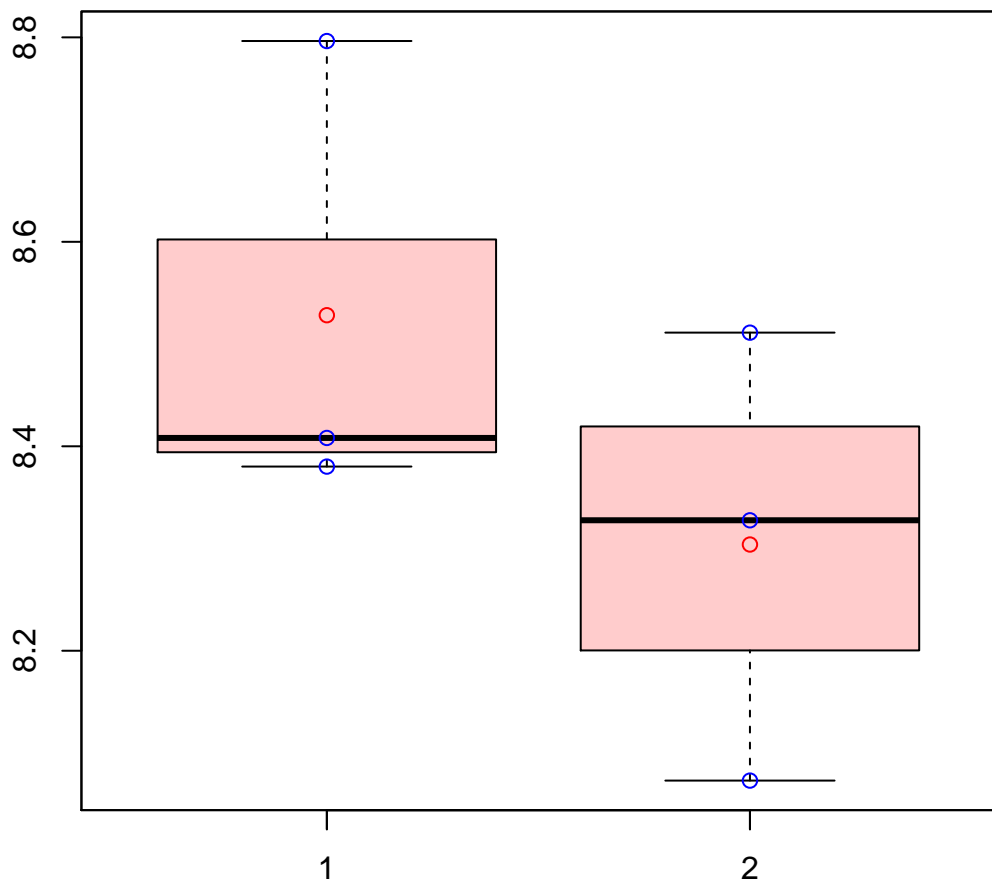

t-Test: p-value = 0.29

# CL18501Contig1|CL18501Contig1

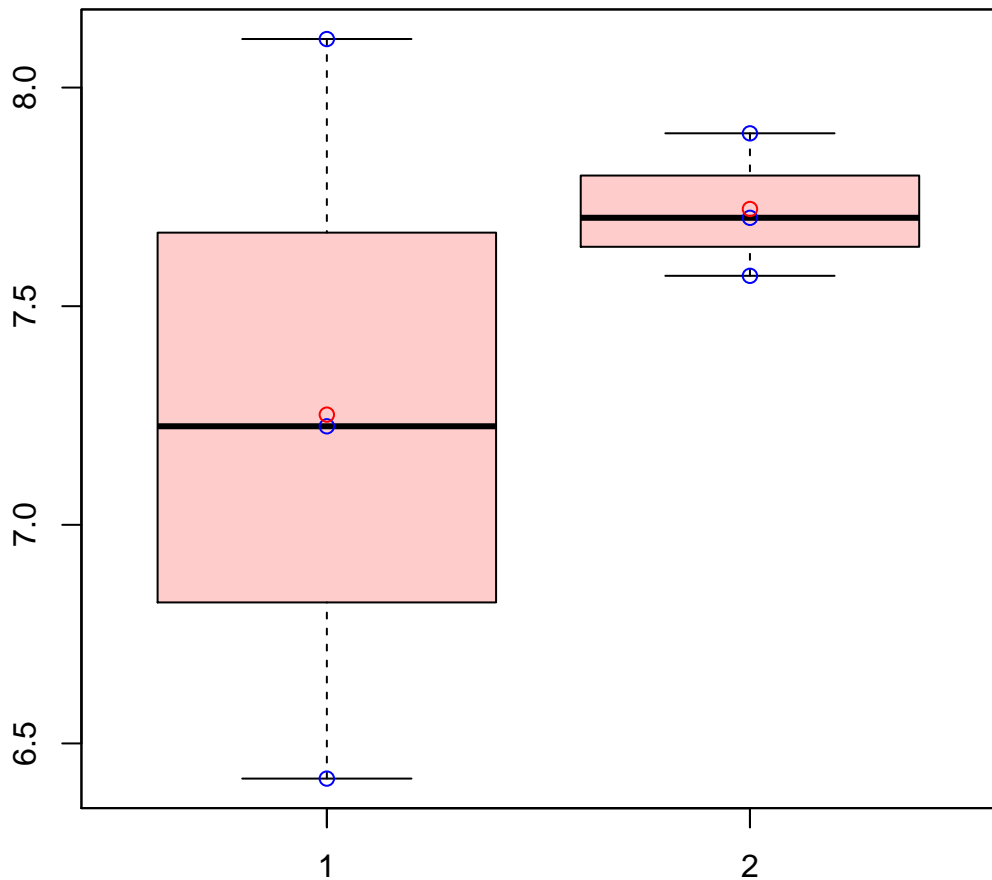

t-Test: p-value = 0.44

# CL18518Contig1|CL18518Contig1

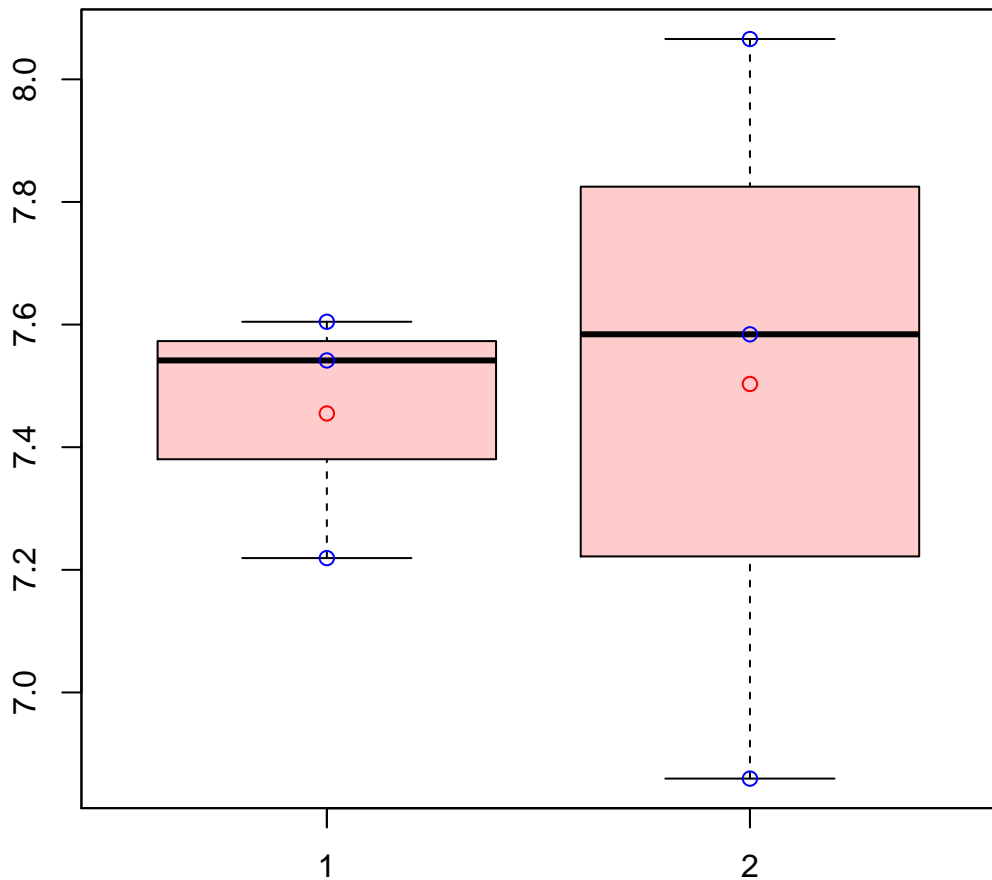

t-Test: p-value = 0.91



# CL1851Contig1|CL1851Contig1

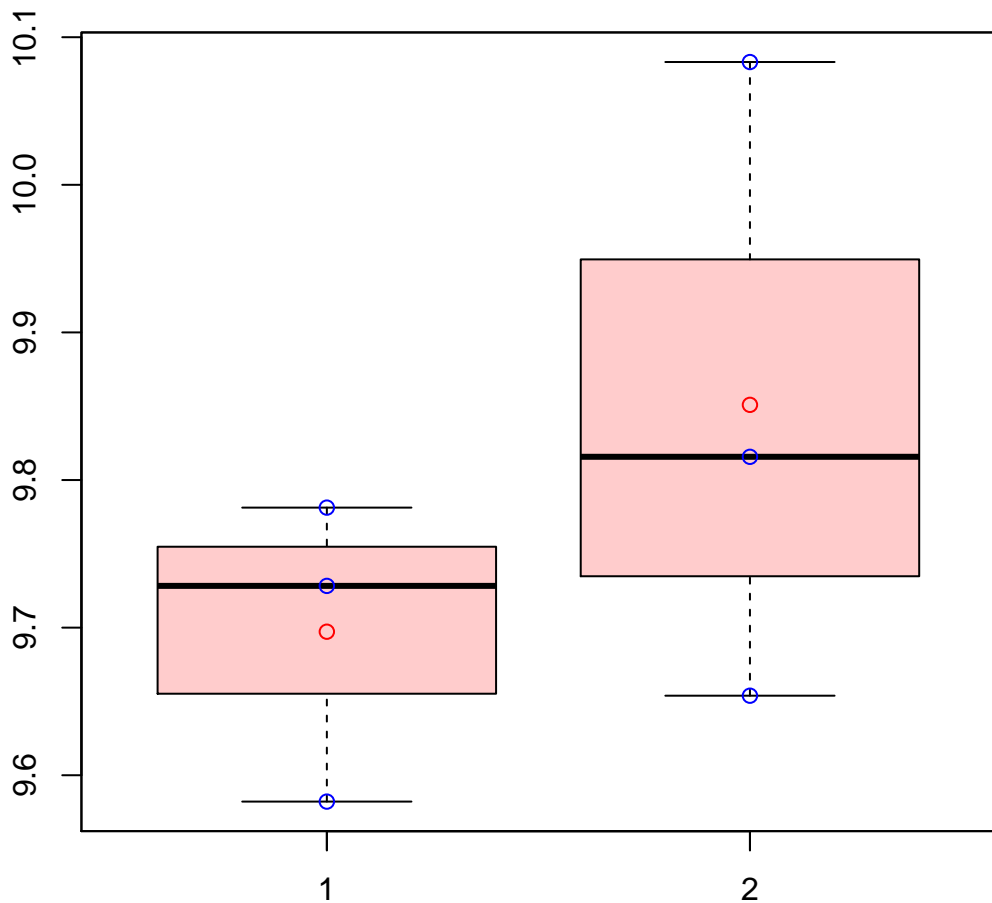

t-Test: p-value = 0.35

# CL1852Contig1|CL1852Contig1

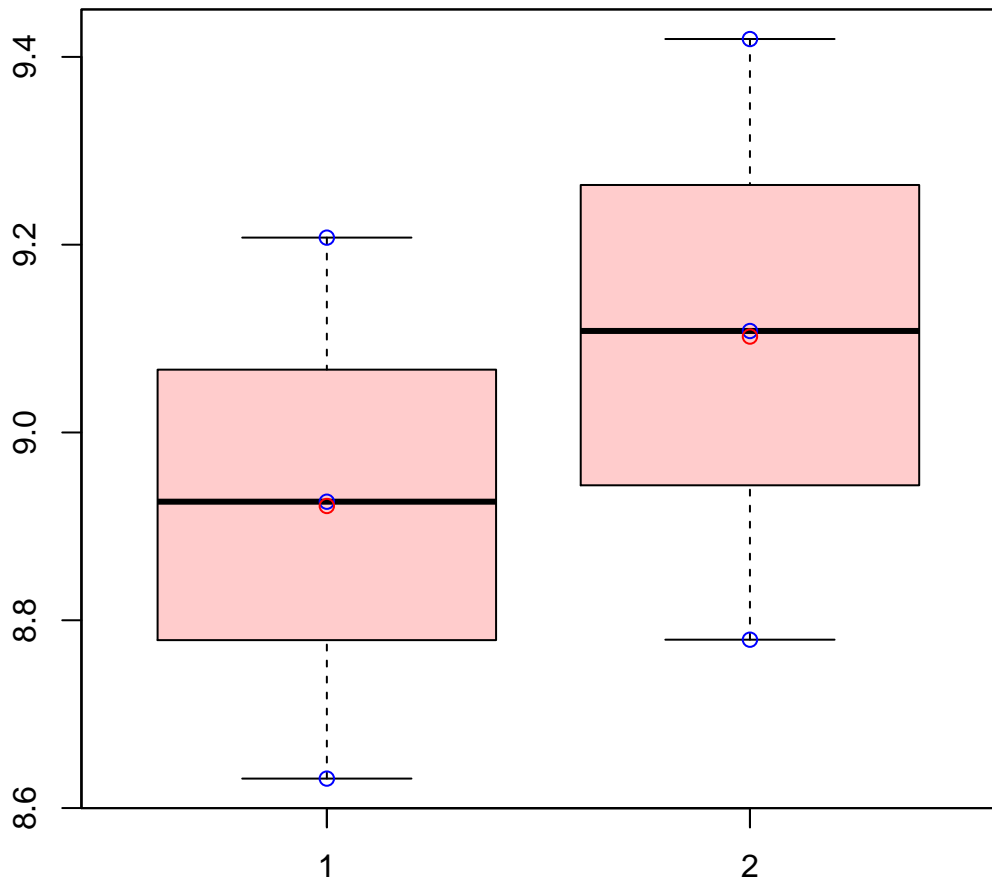

t-Test: p-value = 0.51

# CL1853Contig1|CL1853Contig1

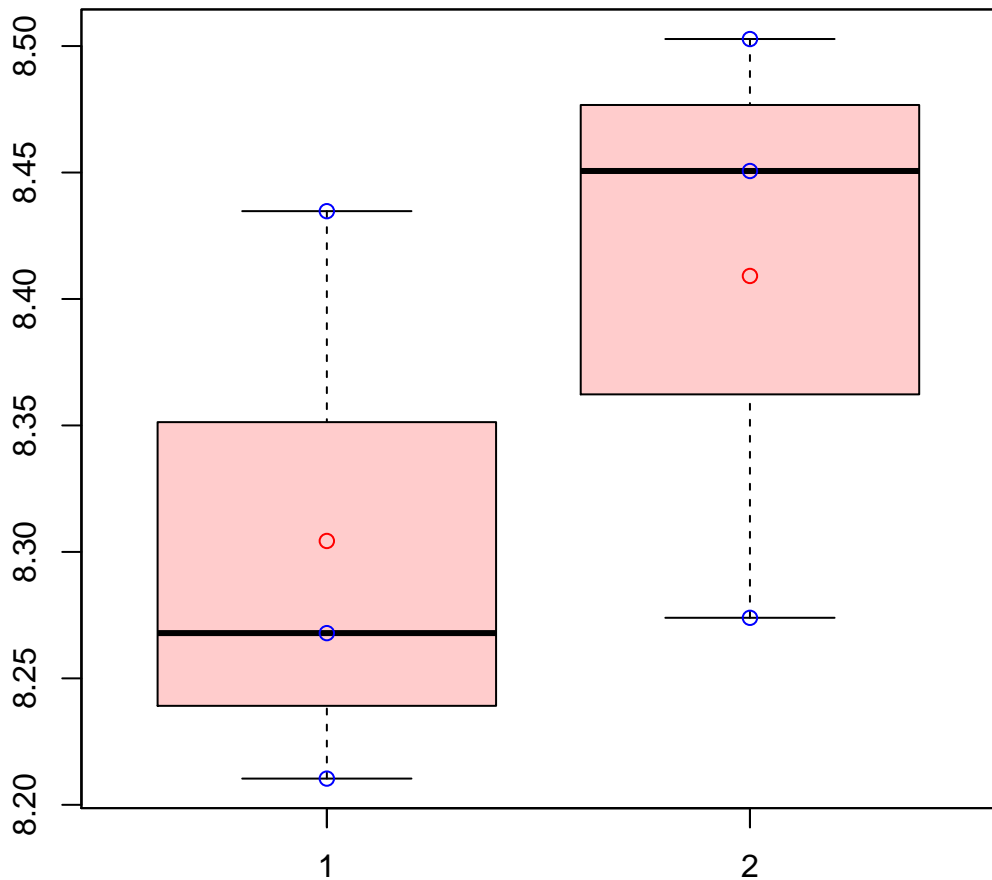

t-Test: p-value = 0.34

# CL18569Contig1|CL18569Contig1

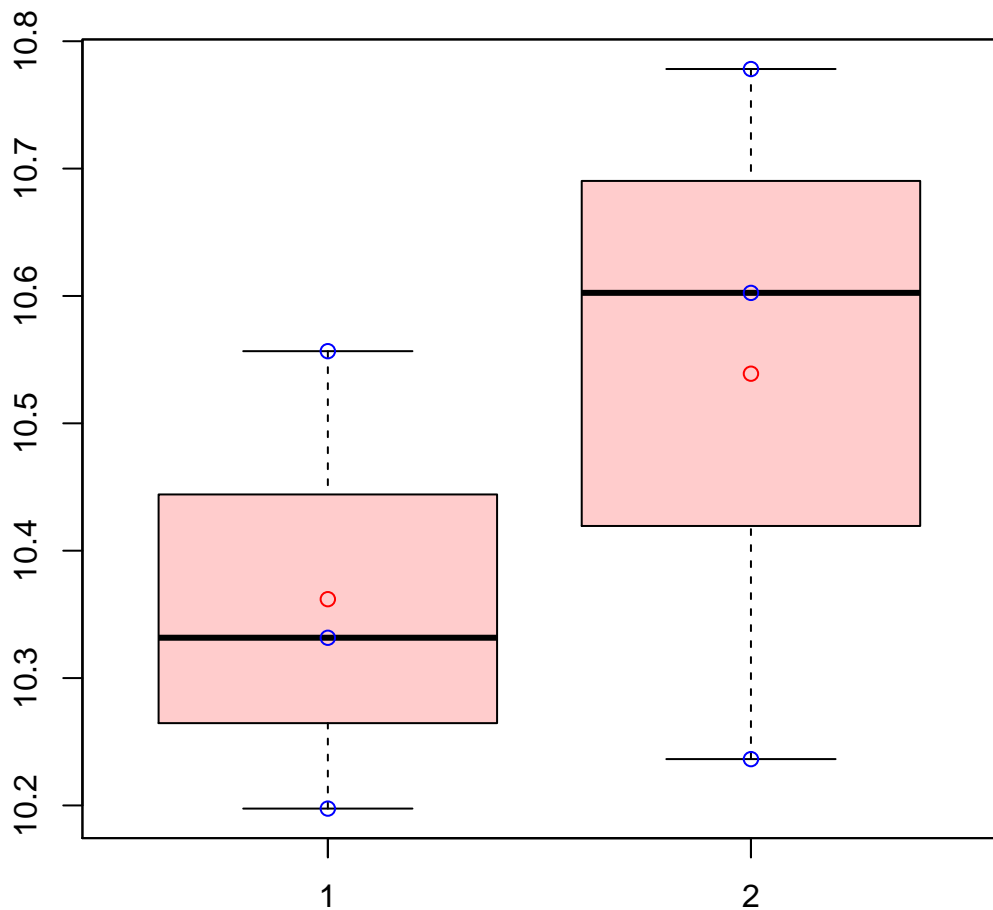

t-Test: p-value = 0.41

# CL1856Contig1|CL1856Contig1

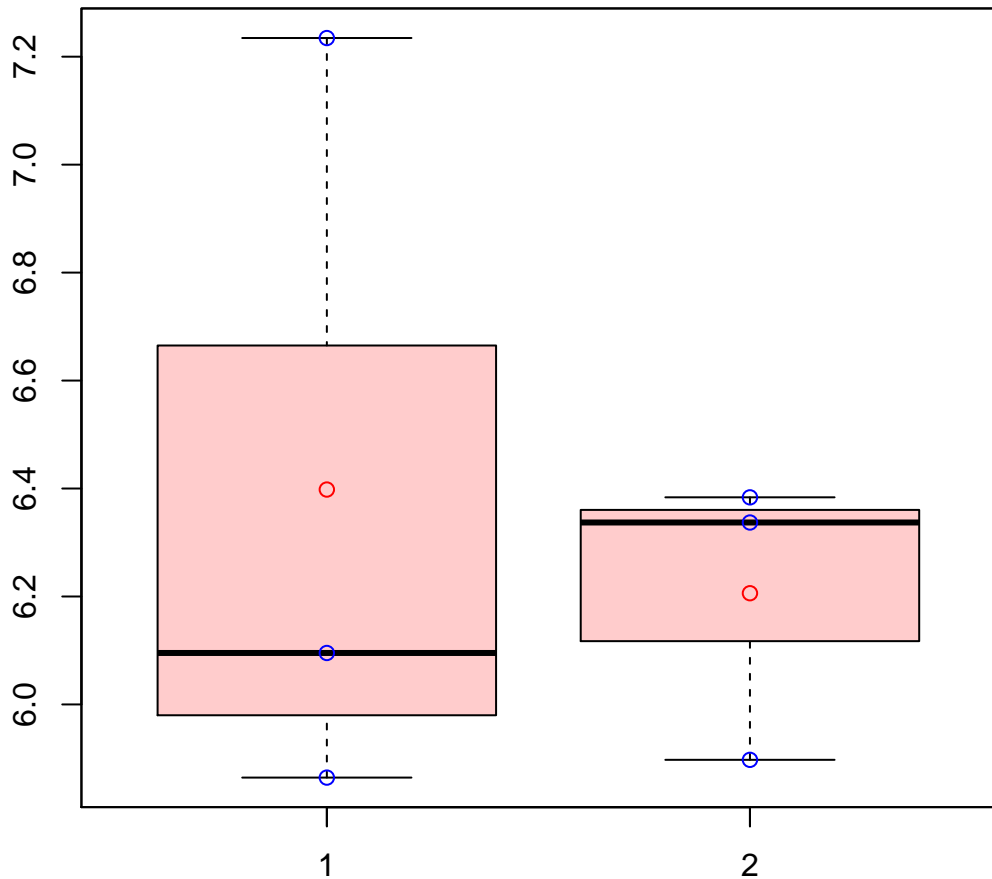

t-Test: p-value = 0.7

# CL1859Contig3|CL1859Contig3

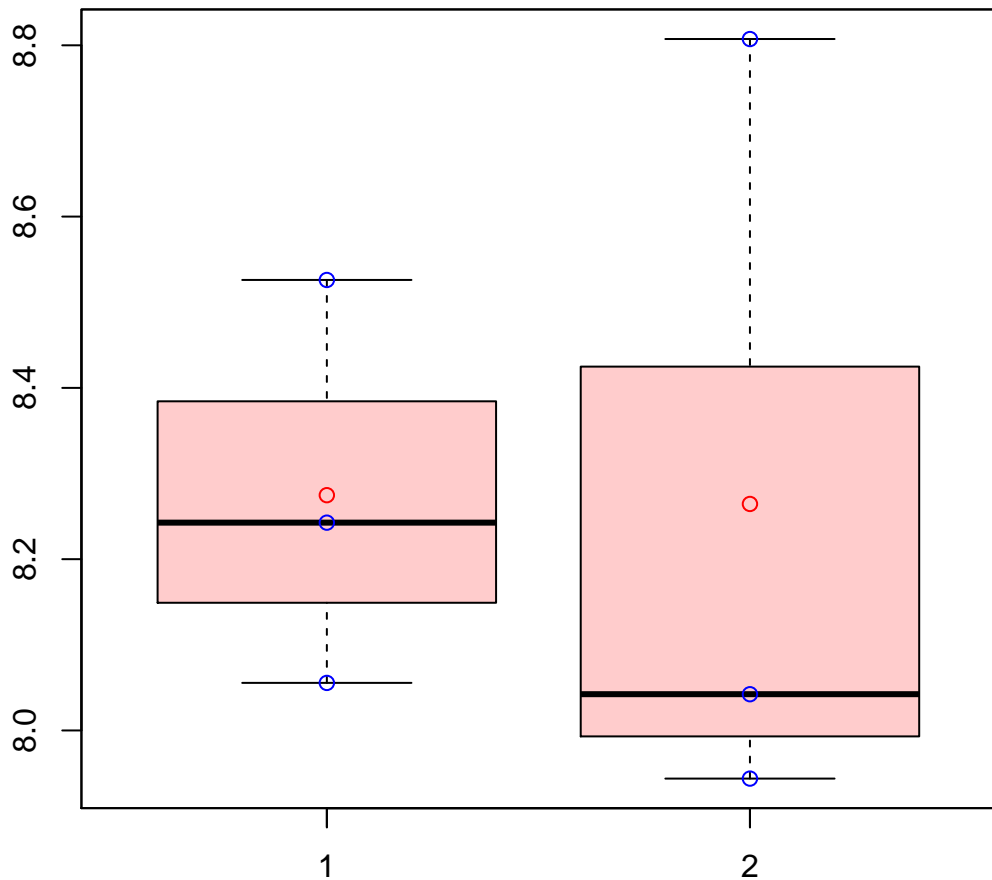

t-Test: p-value = 0.98

# CL185Contig19|CL185Contig19

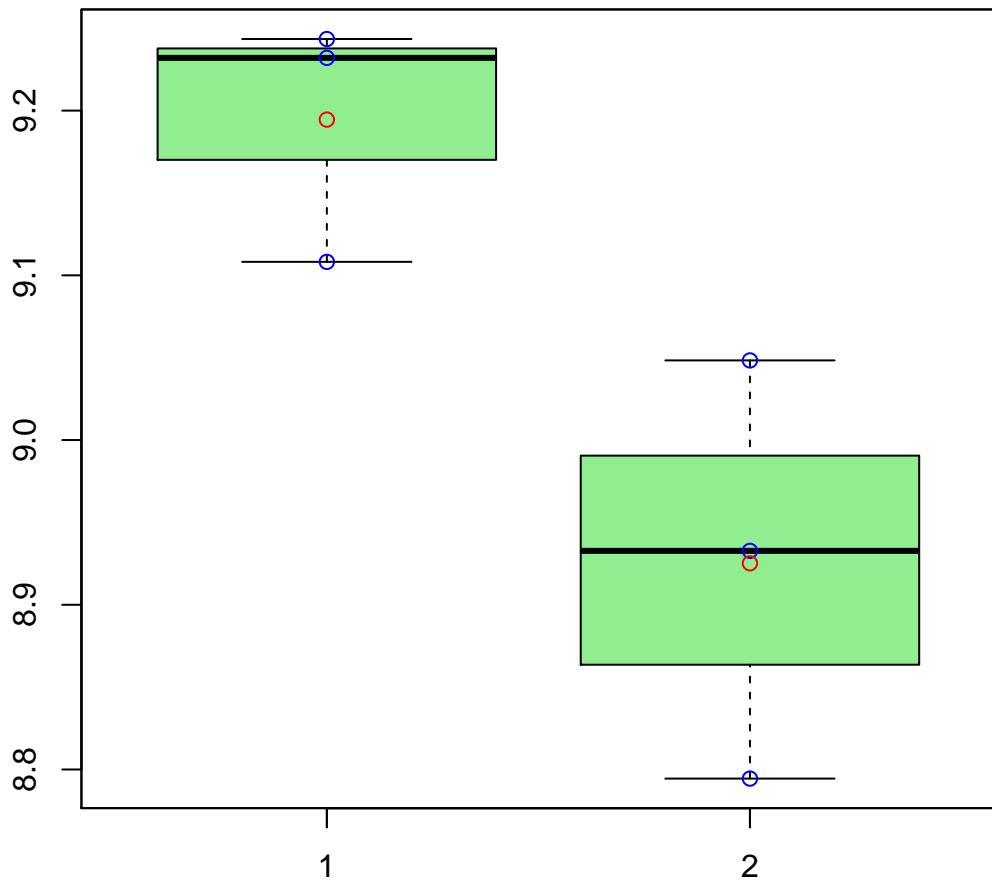

t-Test: p-value = 0.05

# CL185Contig1|CL185Contig1

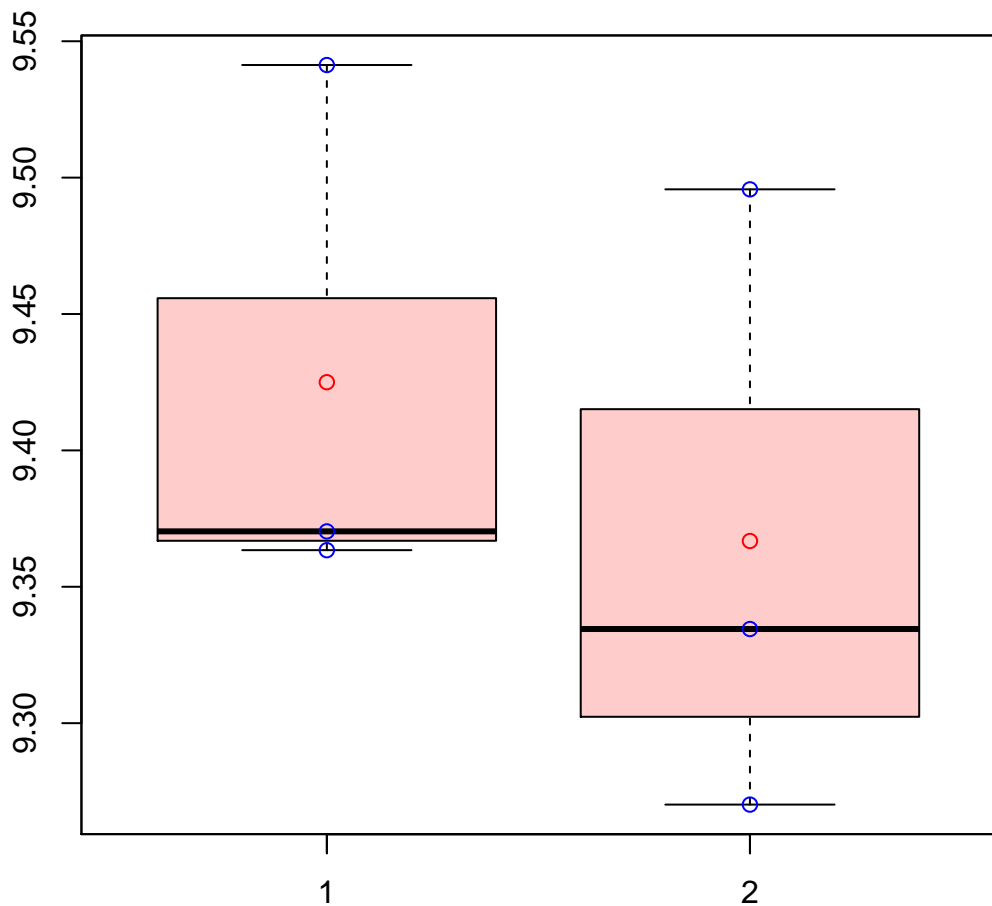

t-Test: p-value = 0.55



# CL1860Contig3|CL1860Contig3

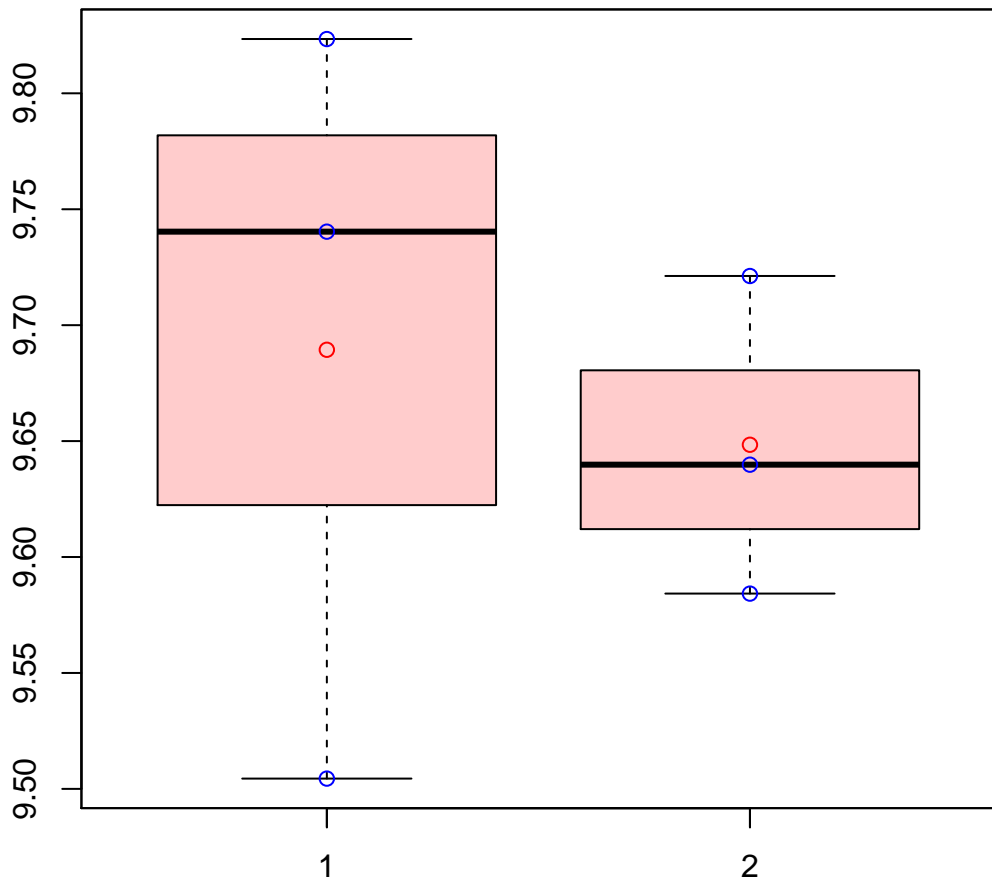

t-Test: p-value = 0.72

# CL1861Contig10|CL1861Contig10

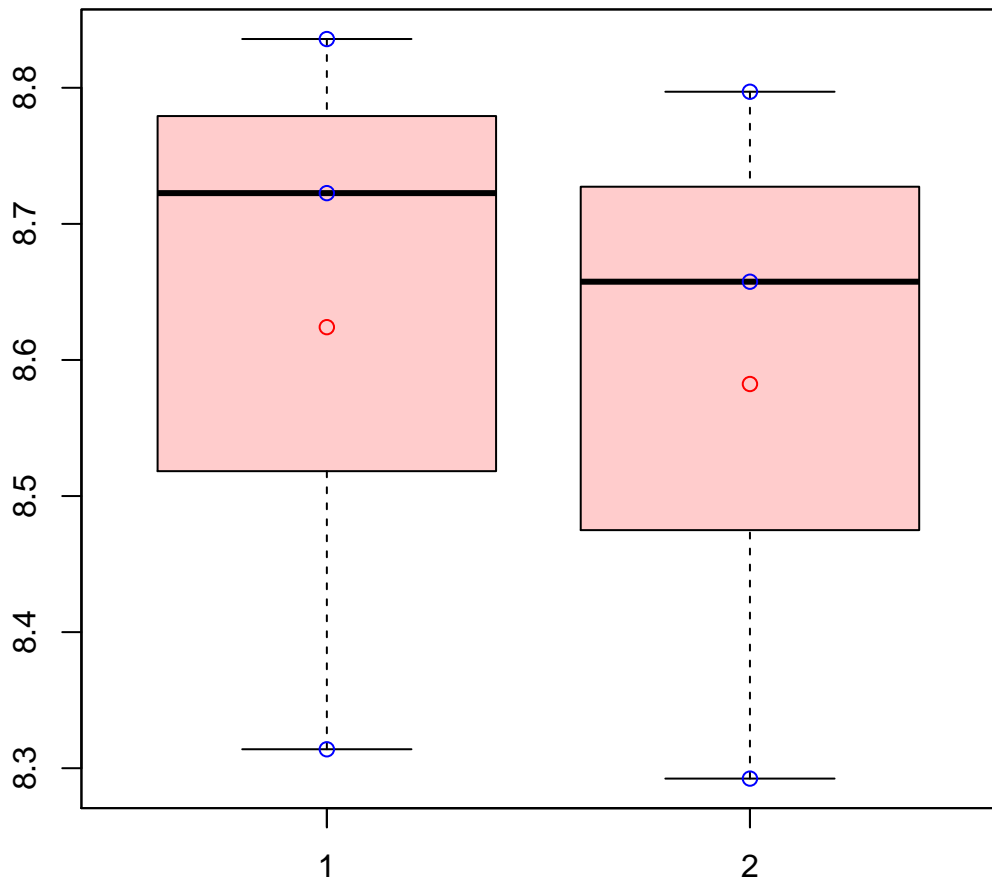

t-Test: p-value = 0.86

# CL1861Contig11|CL1861Contig11

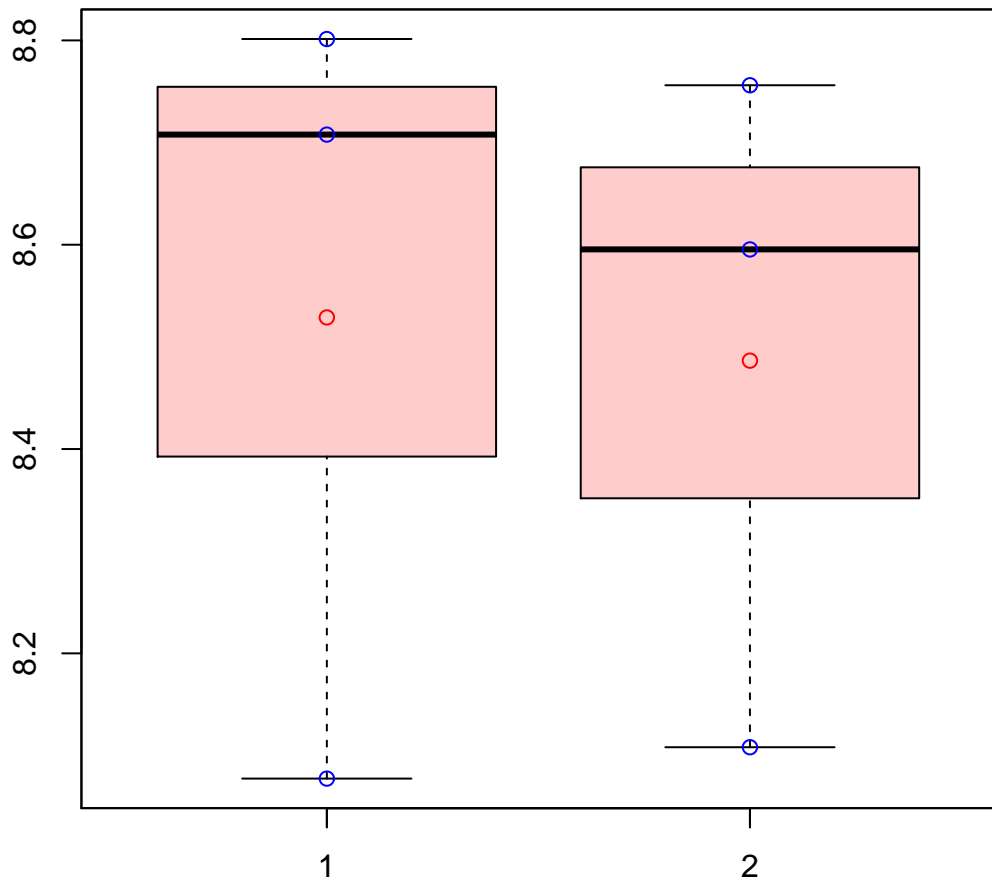

t-Test: p-value = 0.89

# CL1861Contig5|CL1861Contig5

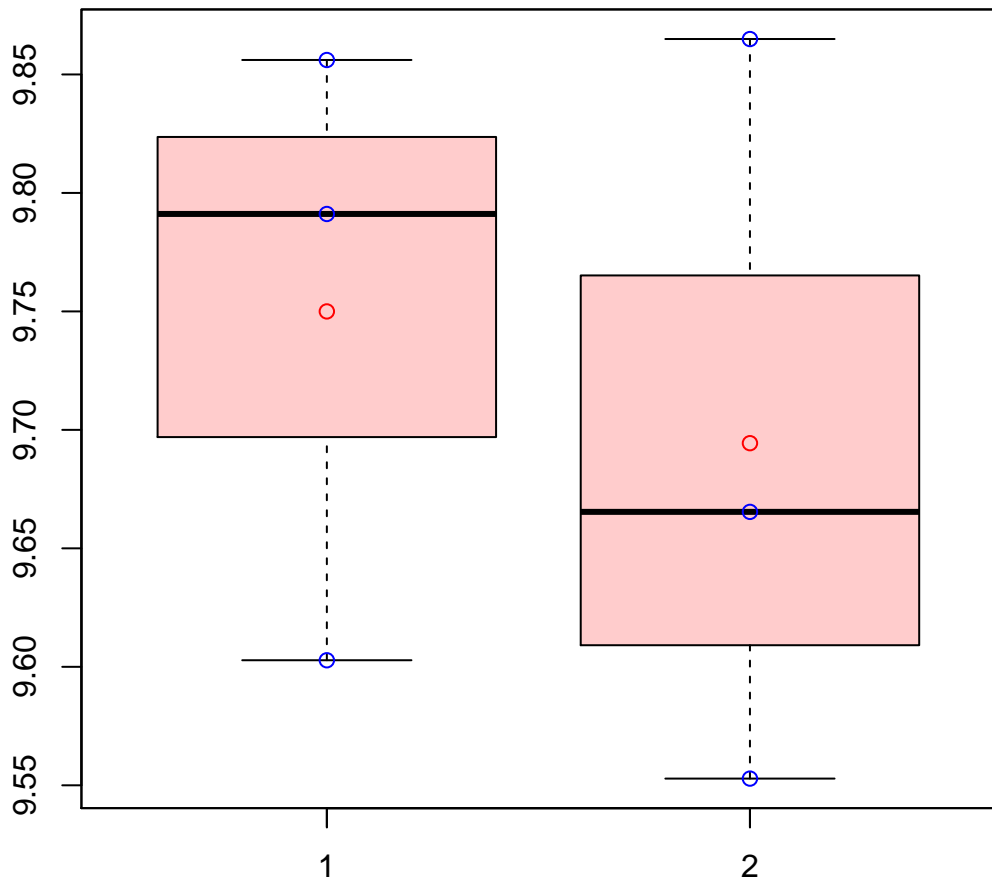

t-Test: p-value = 0.66

# CL1861Contig6|CL1861Contig6

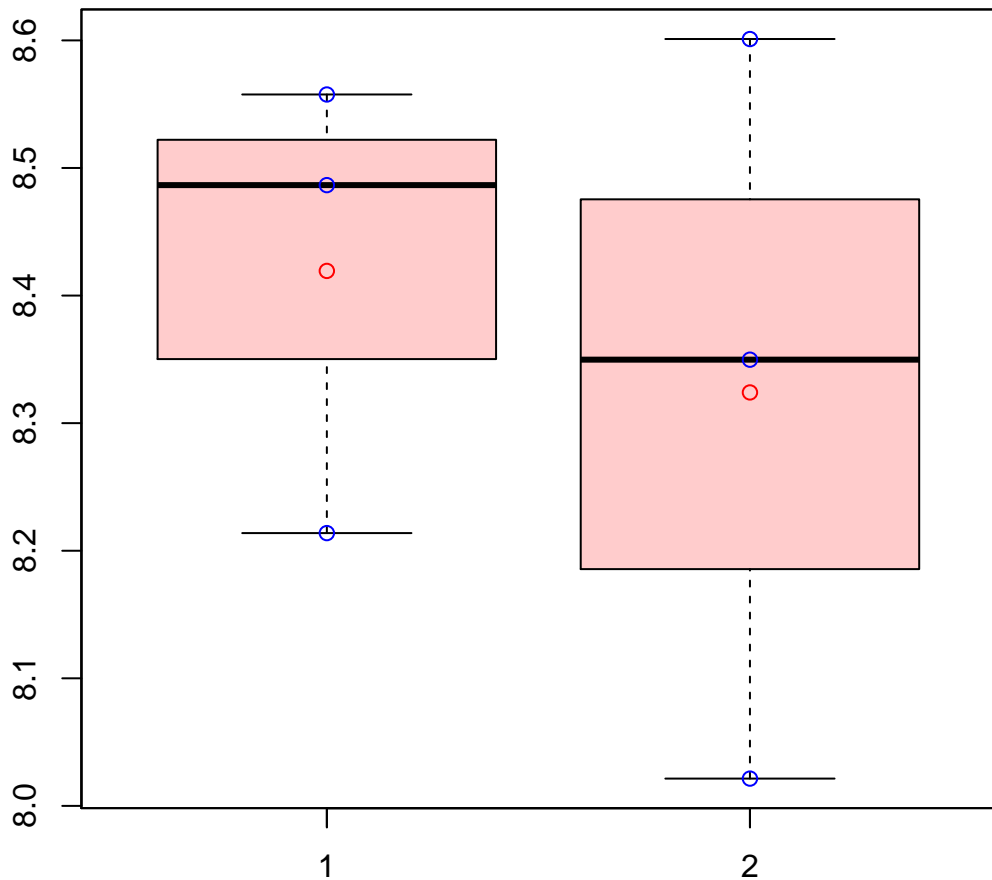

t-Test: p-value = 0.66

# CL1862Contig1|CL1862Contig1

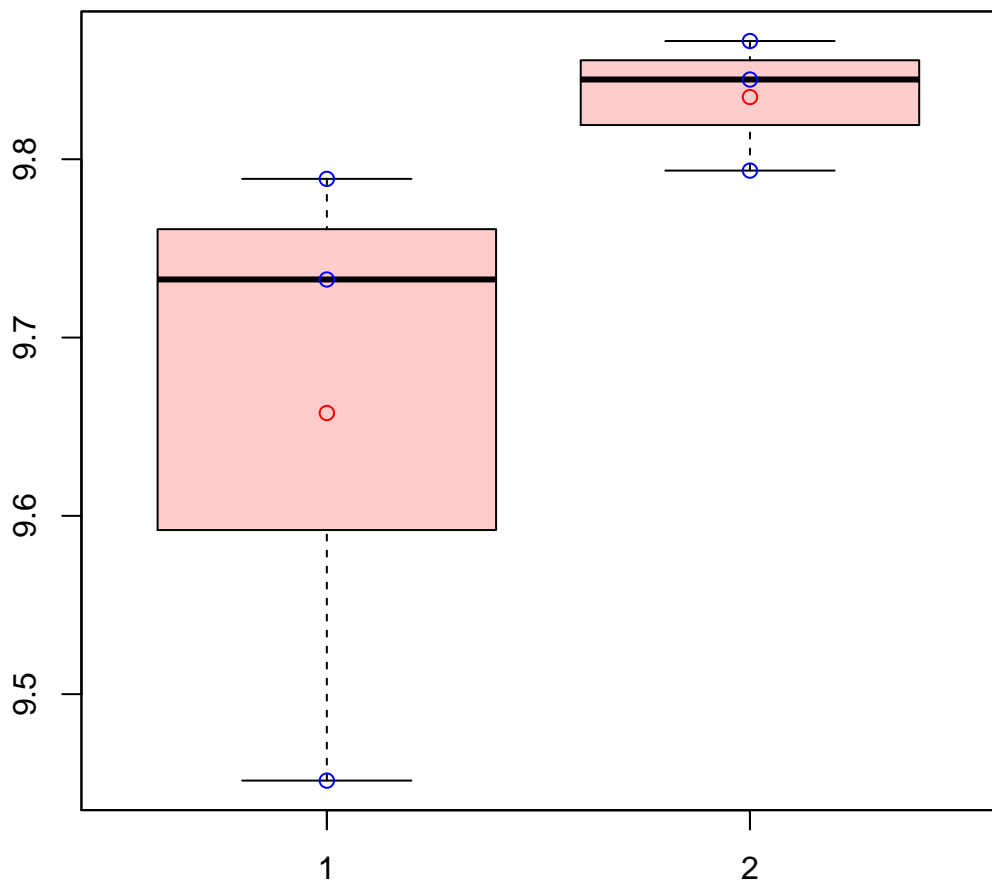

t-Test: p-value = 0.23

# CL1862Contig2|CL1862Contig2

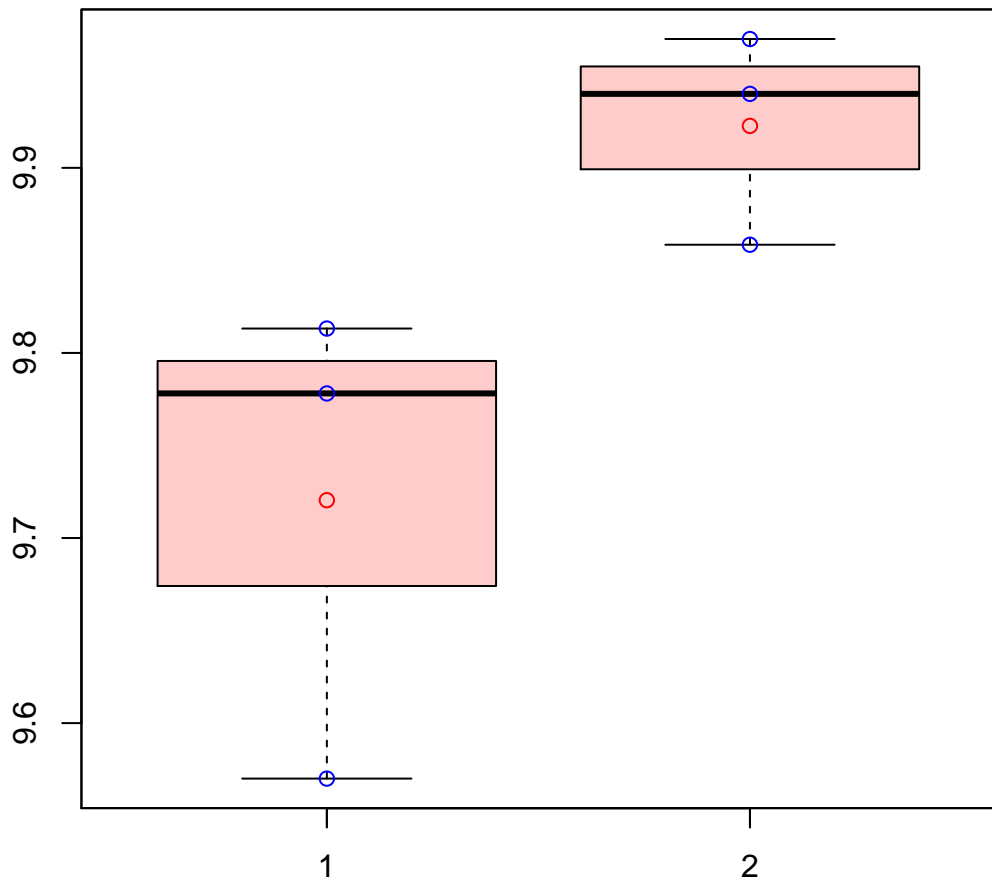

t-Test: p-value = 0.1

# CL1865Contig3|CL1865Contig3

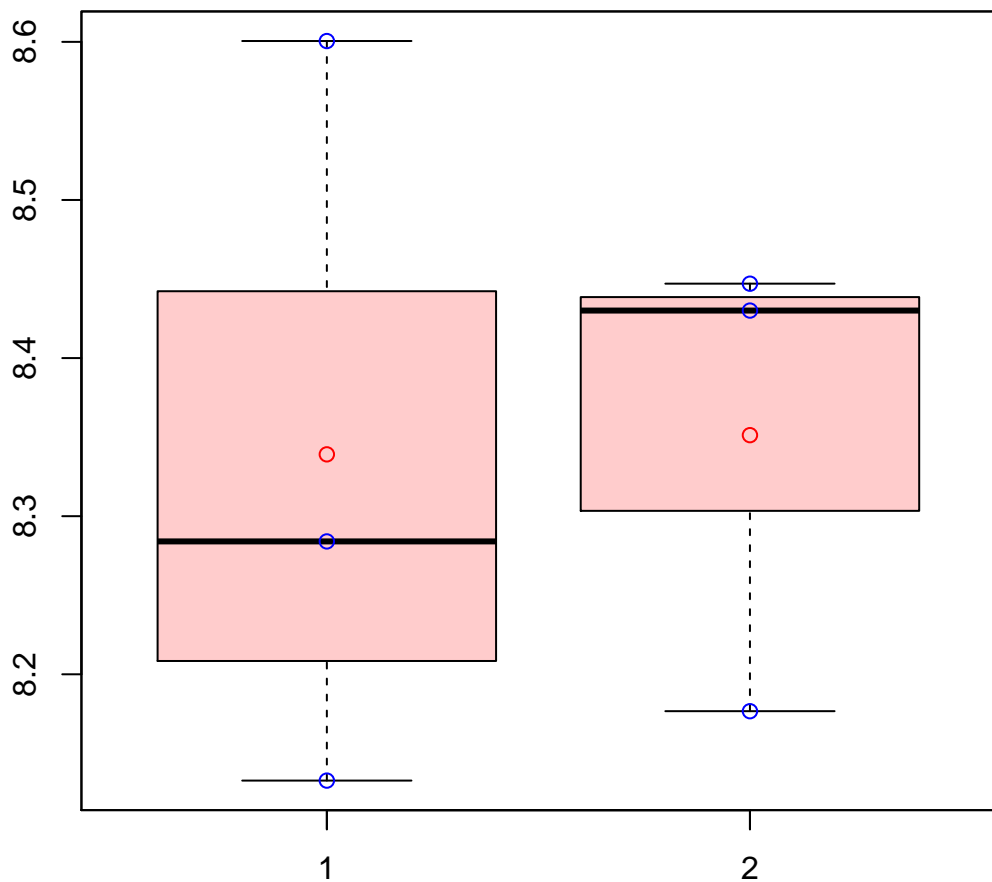

t-Test: p-value = 0.94



# CL1867Contig1|CL1867Contig1

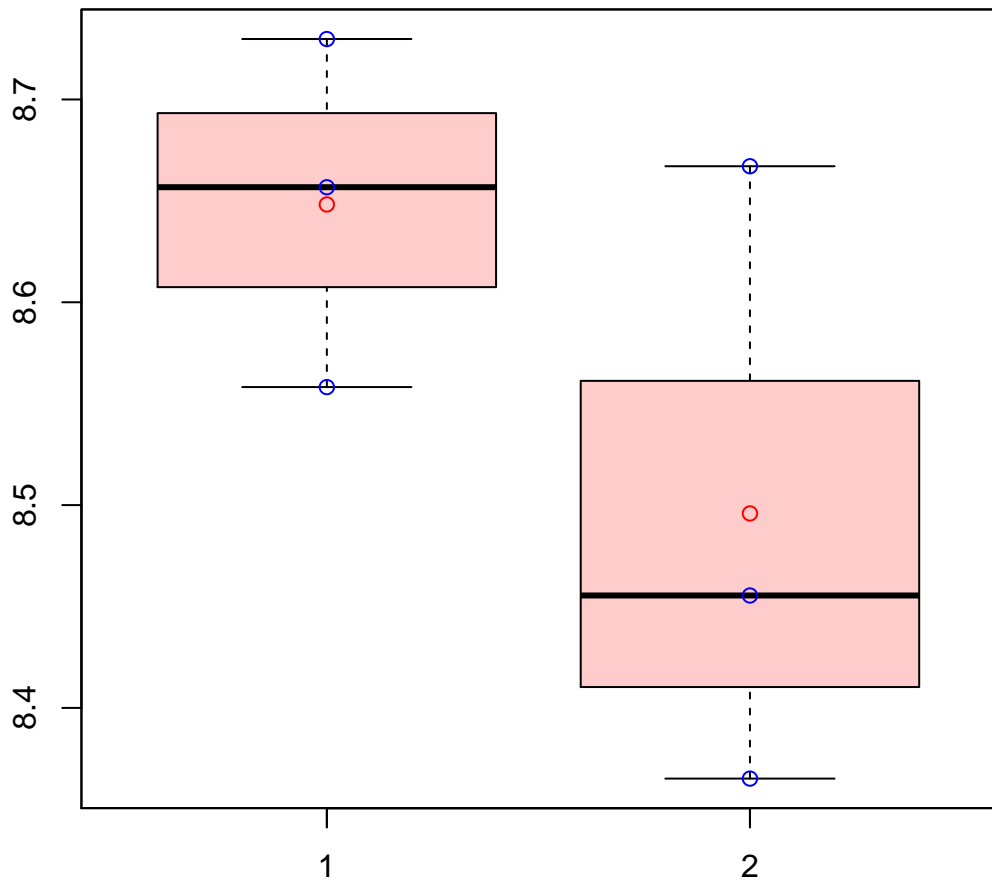

t-Test: p-value = 0.23

# CL1867Contig7|CL1867Contig7

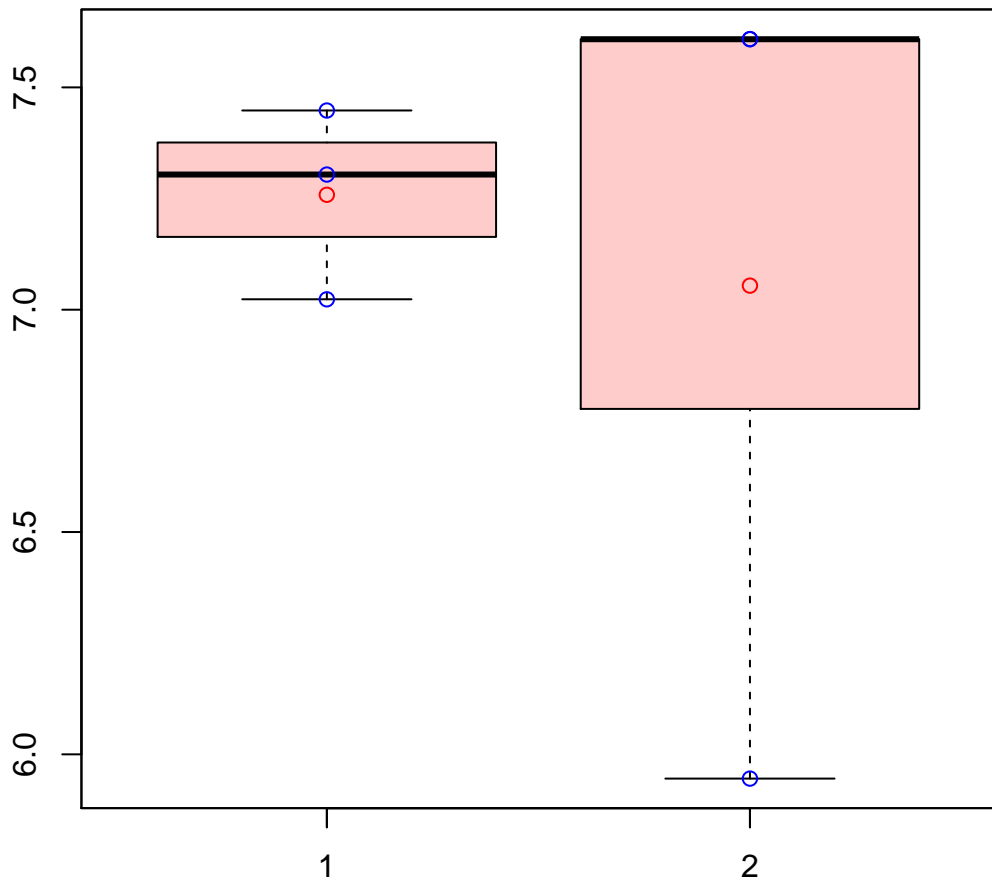

t-Test: p-value = 0.75

# CL1868Contig3|CL1868Contig3

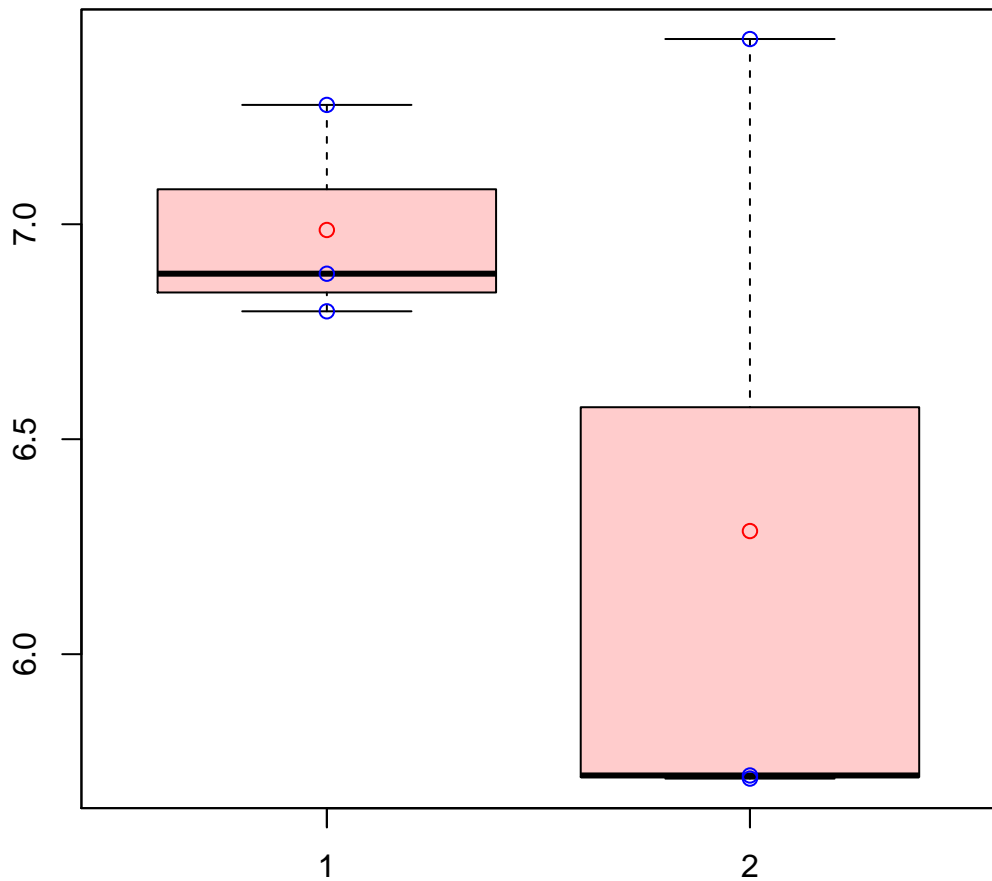

t-Test: p-value = 0.35

# CL1868Contig5|CL1868Contig5

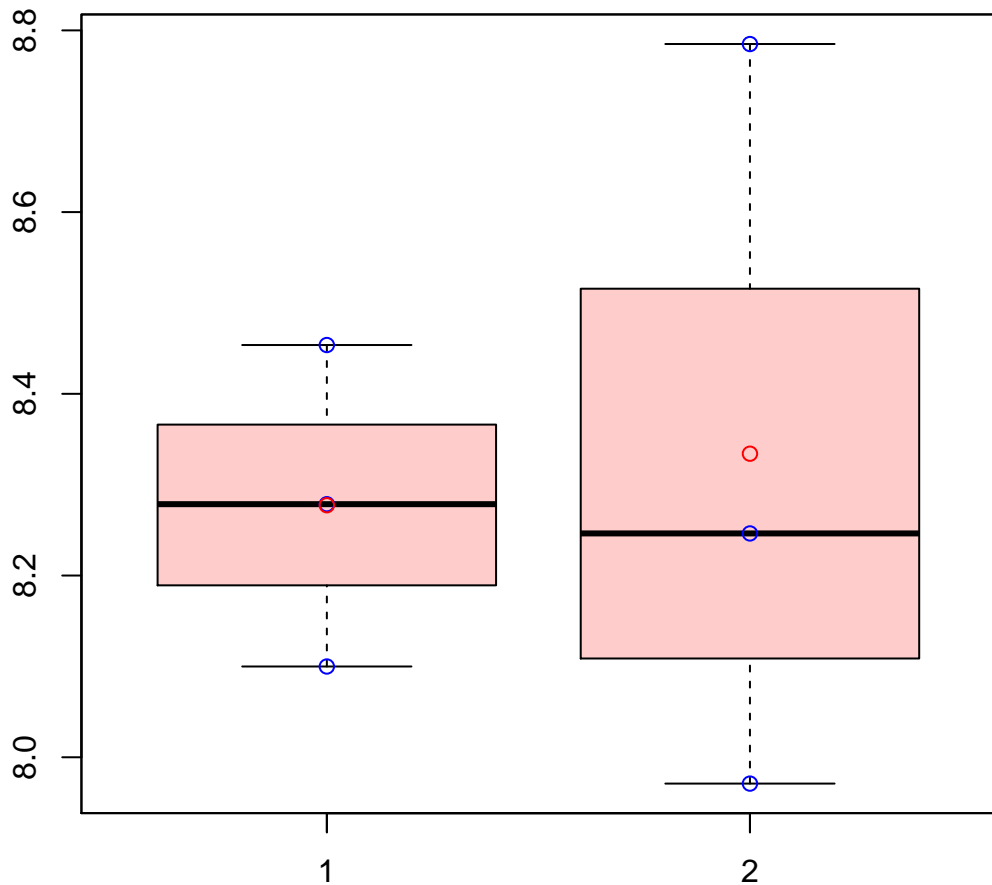

t-Test: p-value = 0.84

# CL186Contig6|CL186Contig6

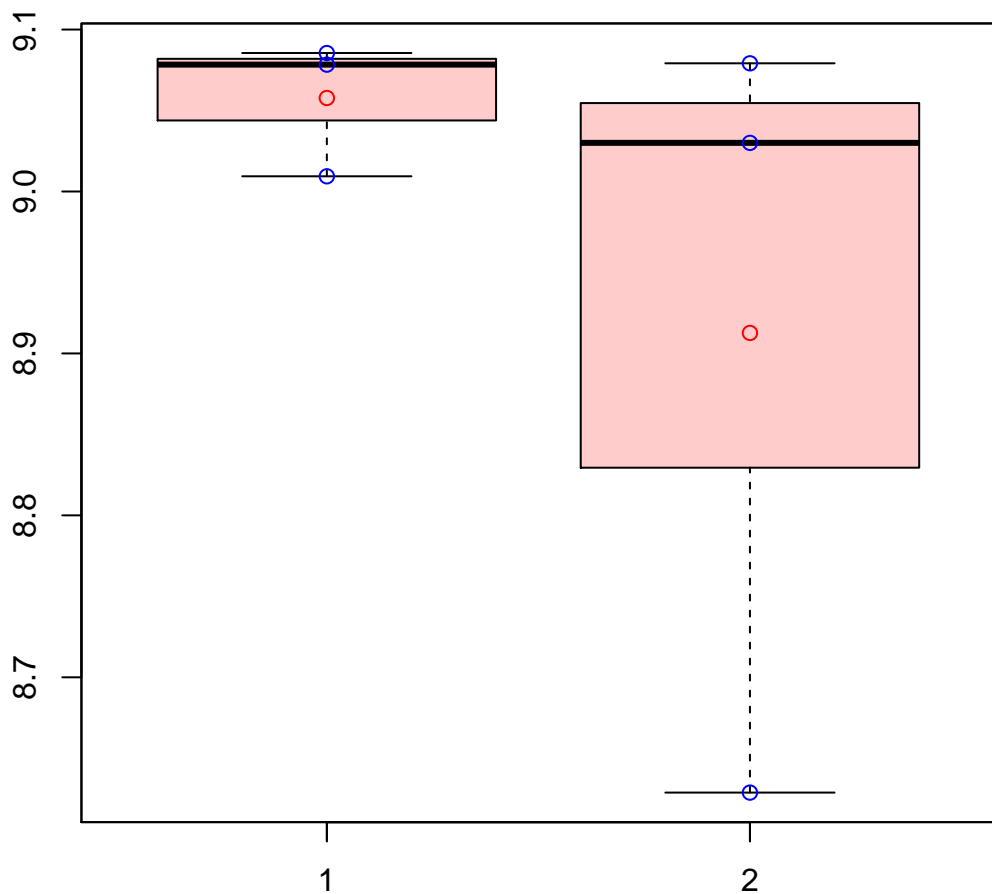

t-Test: p-value = 0.42

# CL1871Contig4|CL1871Contig4

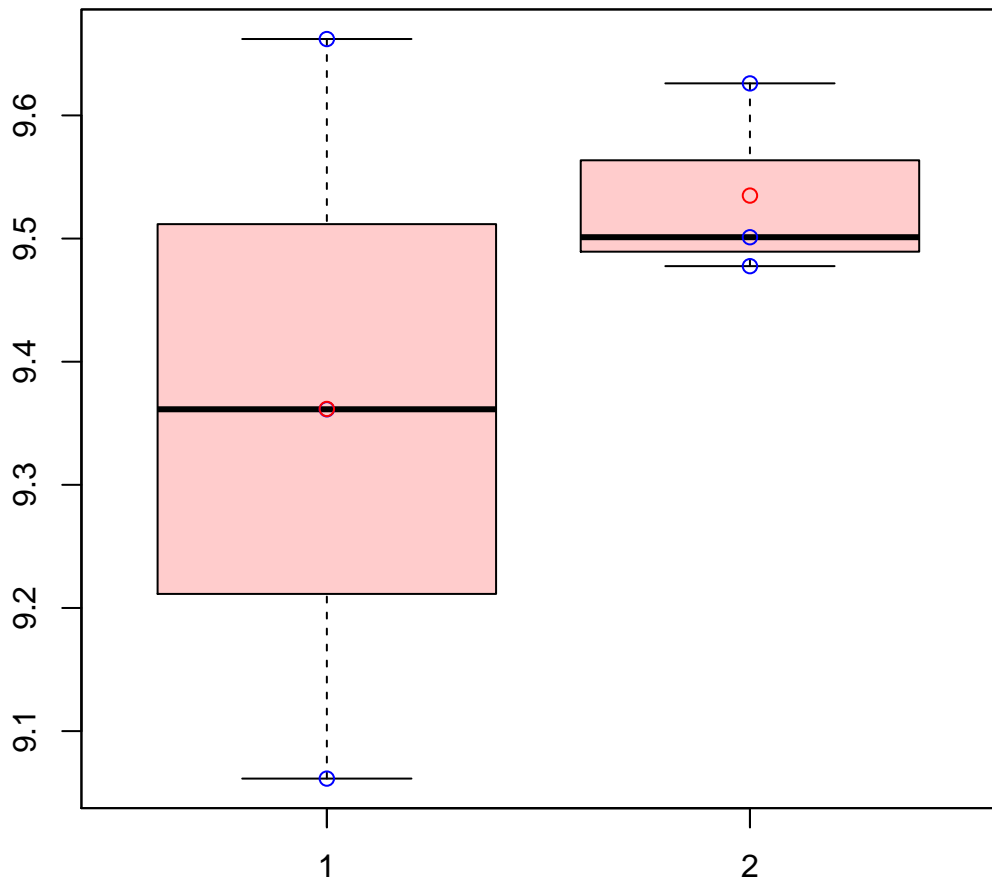

t-Test: p-value = 0.43

# CL1876Contig4|CL1876Contig4

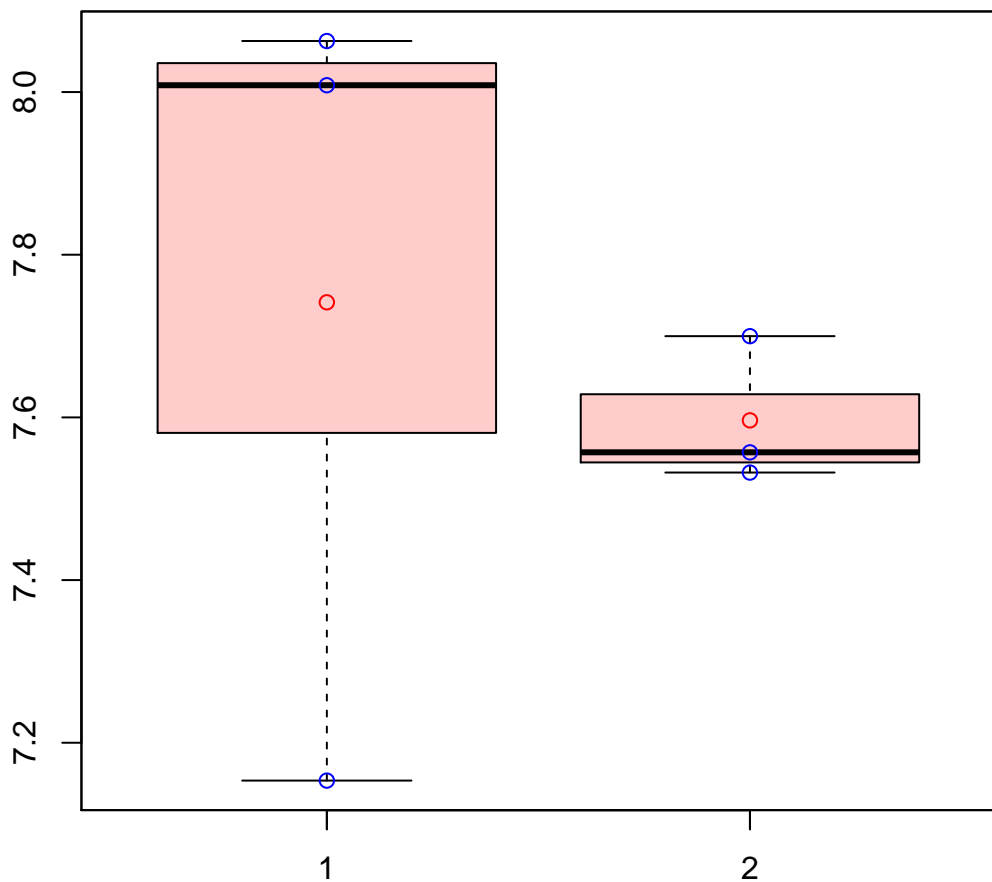

t-Test: p-value = 0.67

# CL1878Contig4|CL1878Contig4

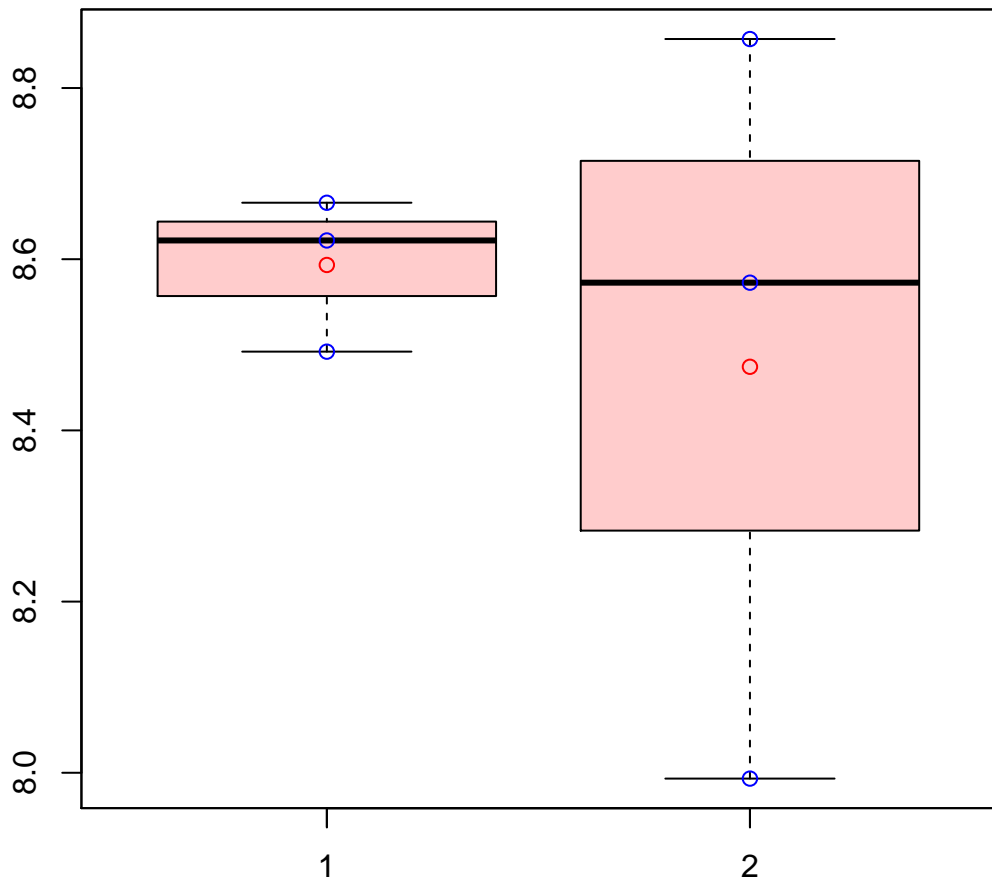

t-Test: p-value = 0.69



# CL1879Contig1|CL1879Contig1

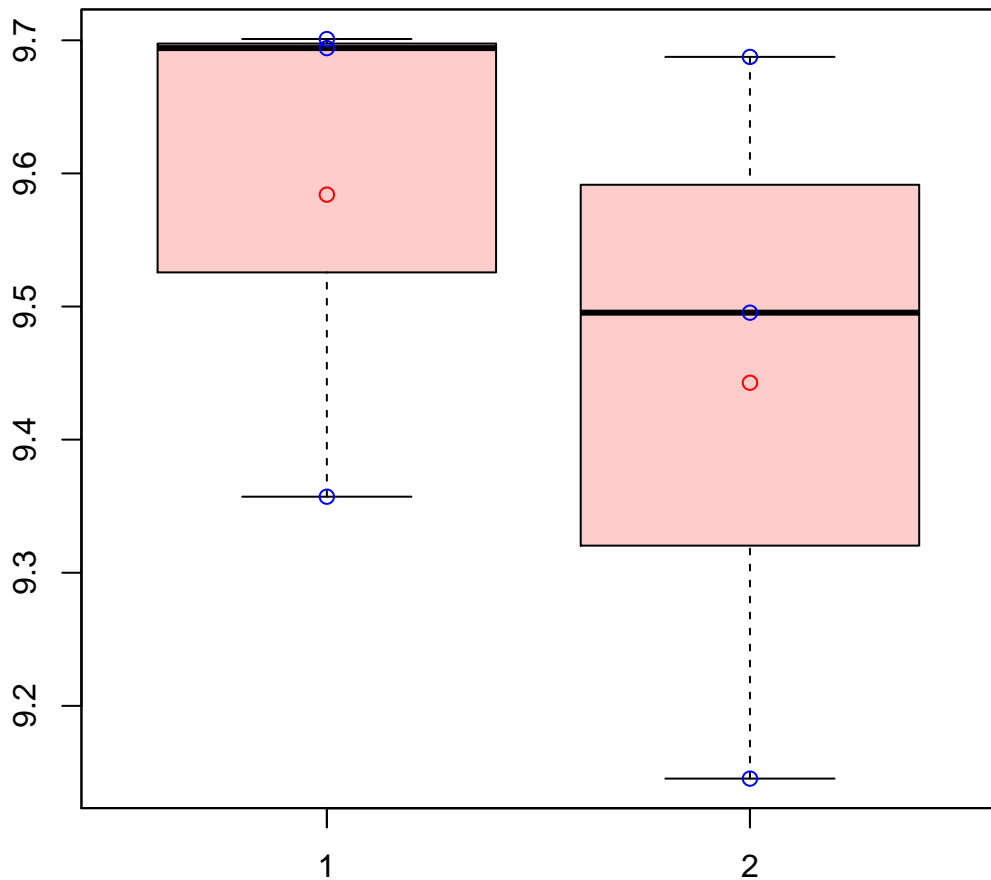

t-Test: p-value = 0.51

# CL187Contig12|CL187Contig12

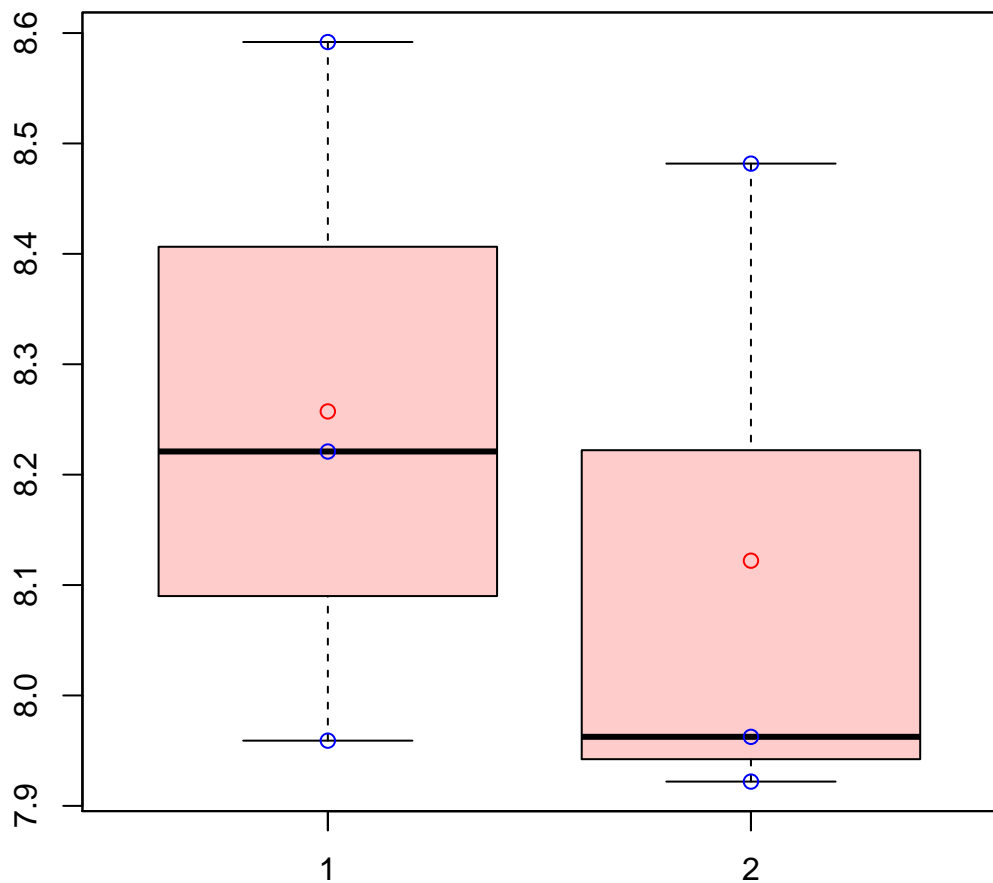

t-Test: p-value = 0.63

# CL187Contig4|CL187Contig4

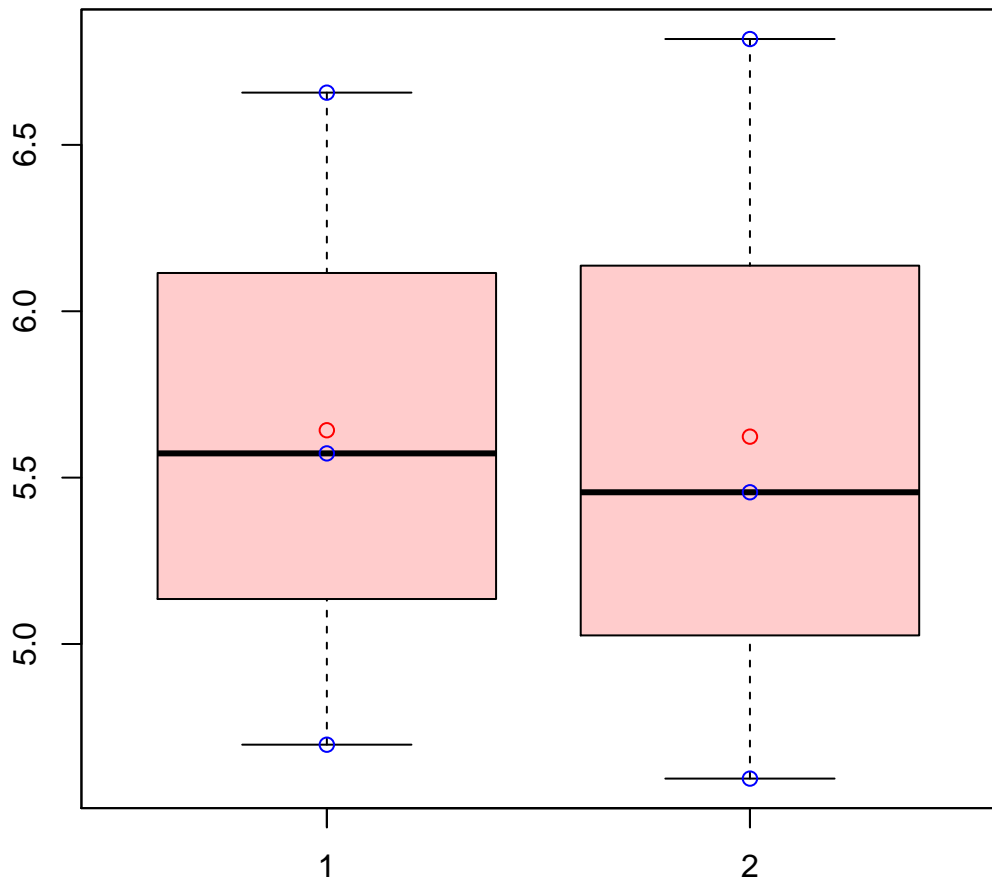

t-Test: p-value = 0.98

# CL187Contig7|CL187Contig7

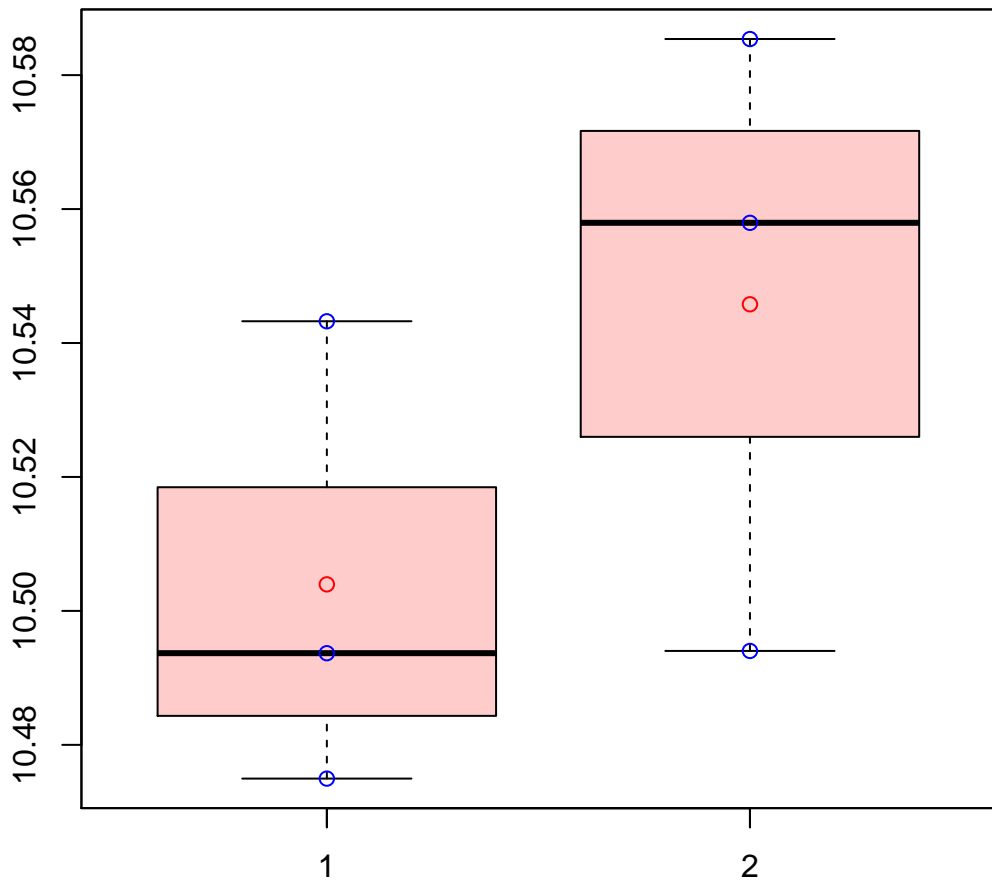

t-Test: p-value = 0.29

# CL1881Contig2|CL1881Contig2

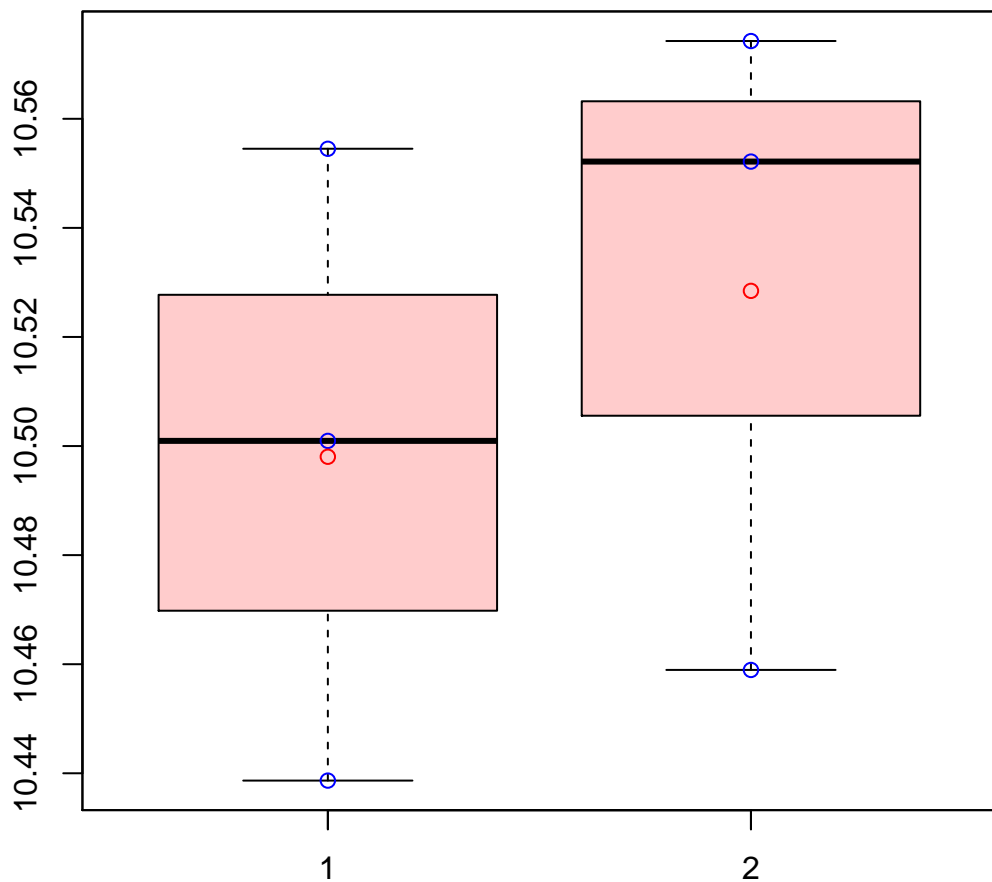

t-Test: p-value = 0.57

# CL1881Contig3|CL1881Contig3

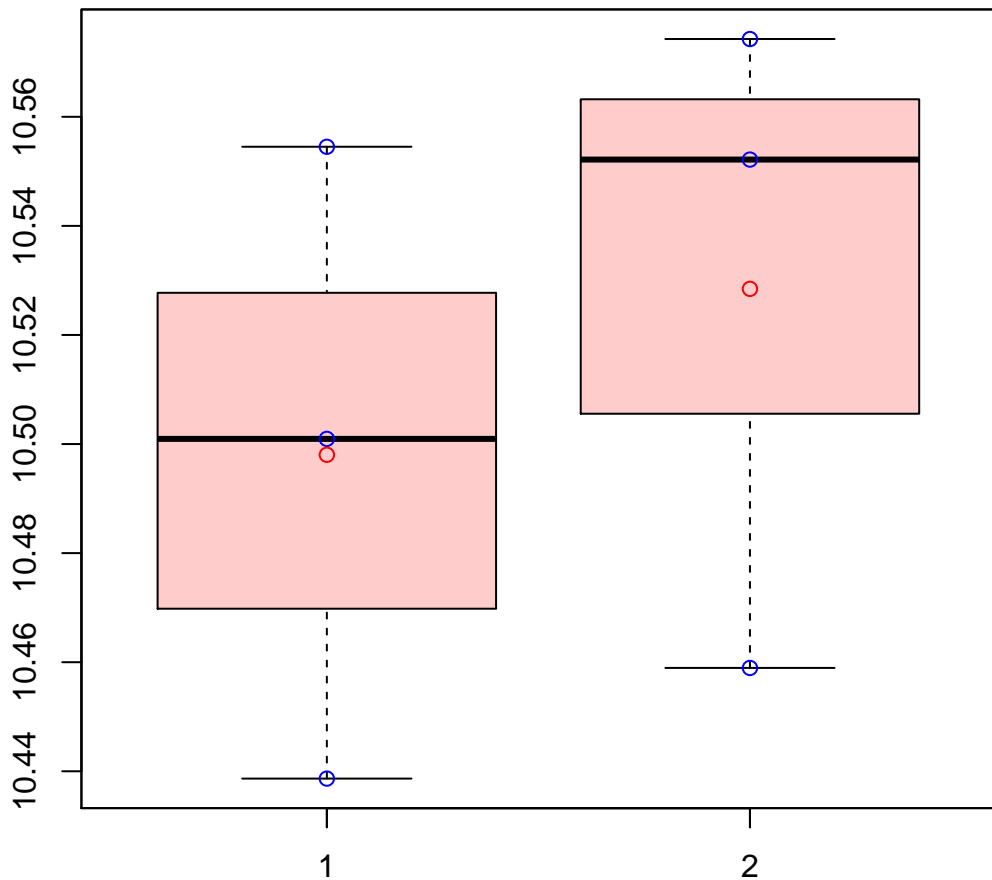

t-Test: p-value = 0.57

# CL1883Contig3|CL1883Contig3

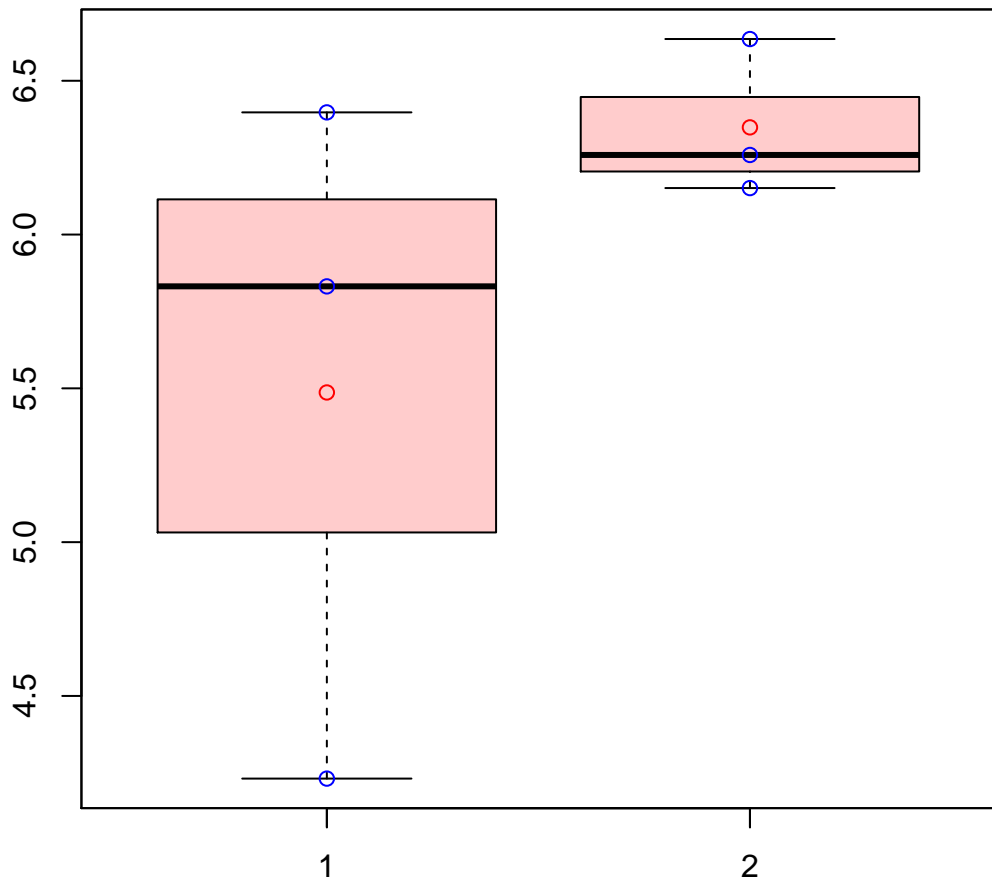

t-Test: p-value = 0.31

# CL1883Contig4|CL1883Contig4



t-Test: p-value = 0.31



# CL18849Contig1|CL18849Contig1

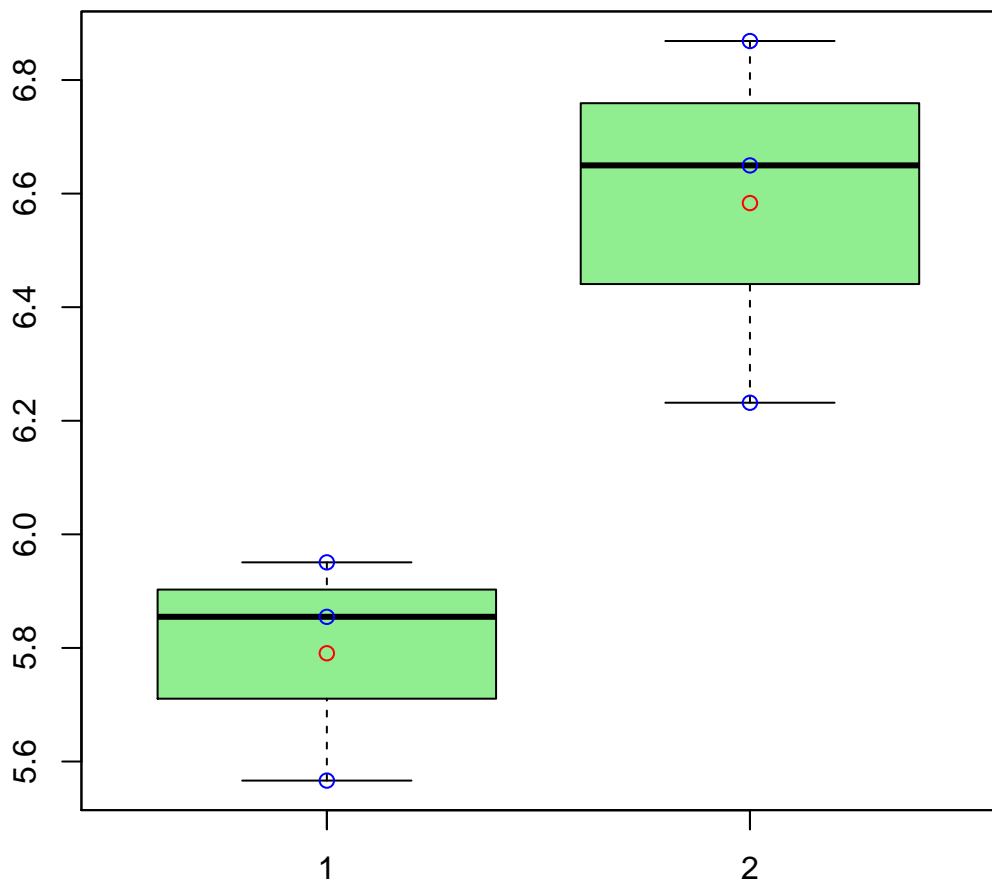

t-Test: p-value = 0.03

# CL1885Contig2|CL1885Contig2

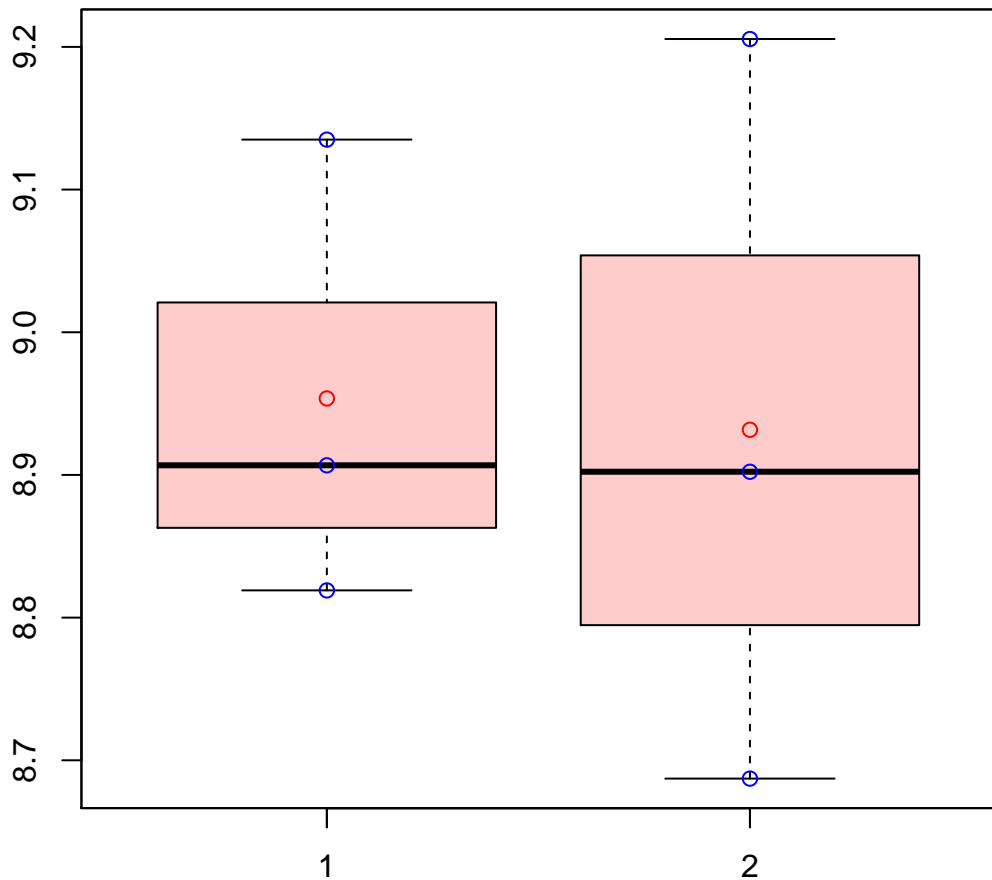

t-Test: p-value = 0.91

# CL1888Contig1|CL1888Contig1

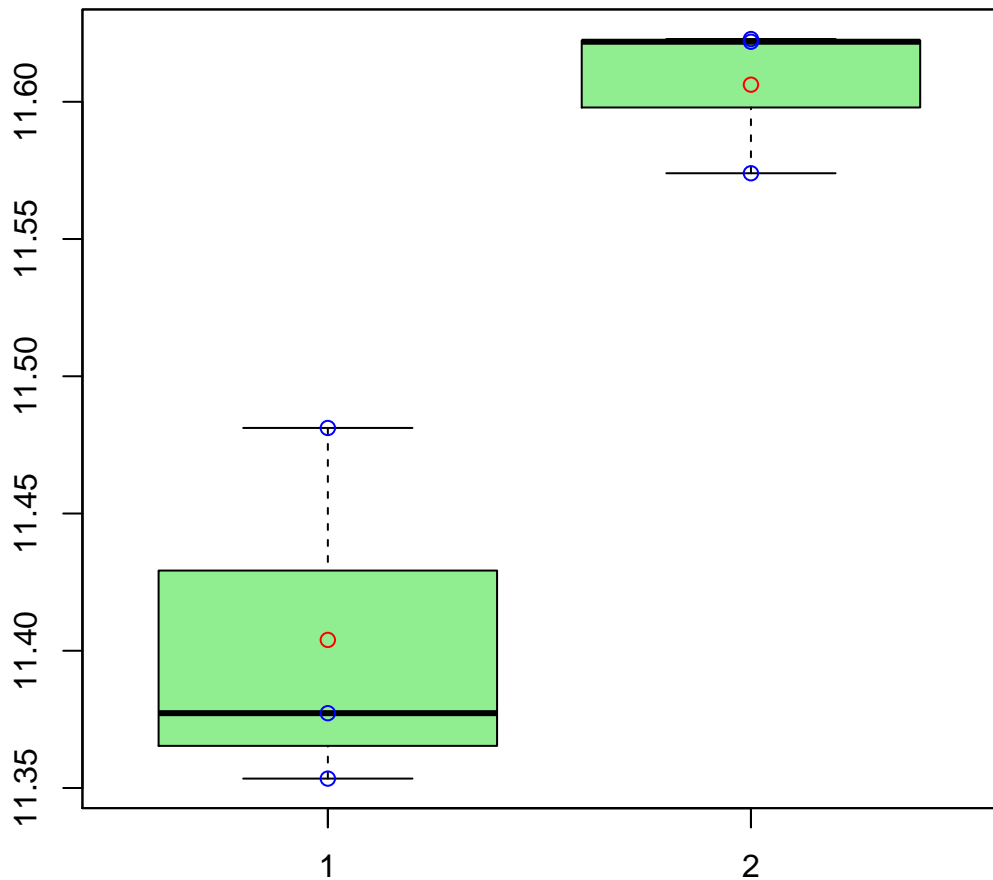

t-Test: p-value = 0.02

# CL1888Contig2|CL1888Contig2



t-Test: p-value = 0.02

# CL1889Contig1|CL1889Contig1

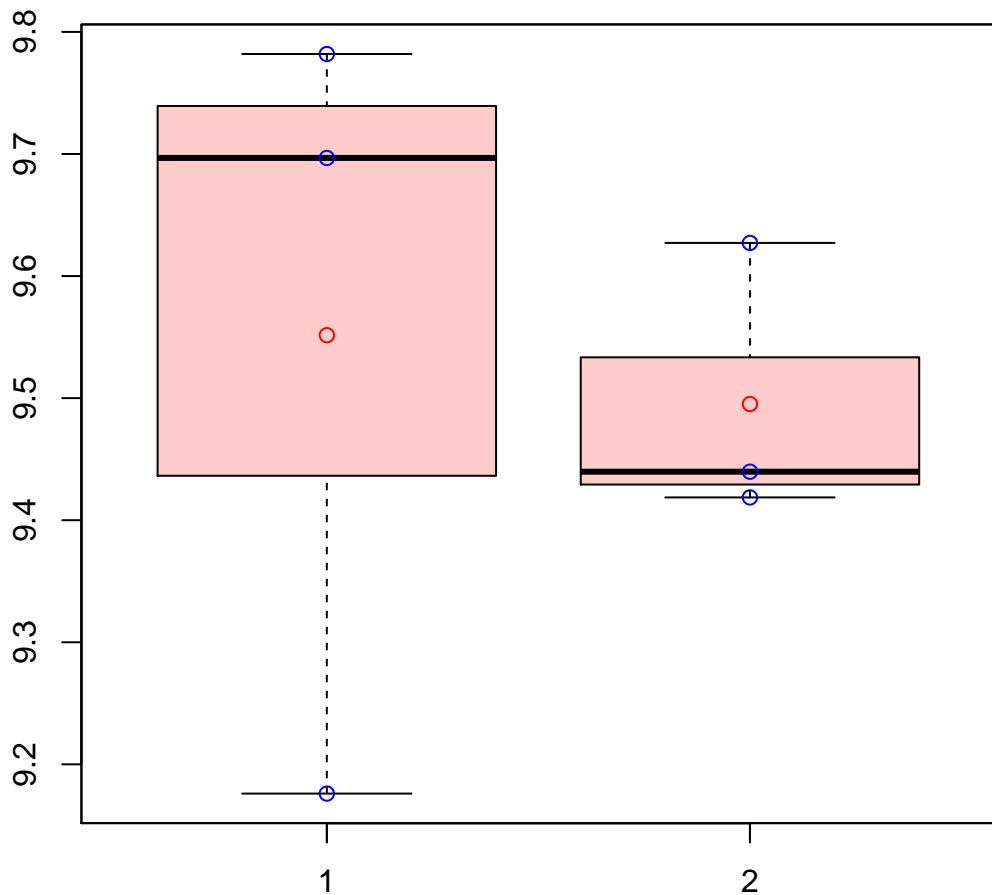

t-Test: p-value = 0.8

# CL1889Contig3|CL1889Contig3

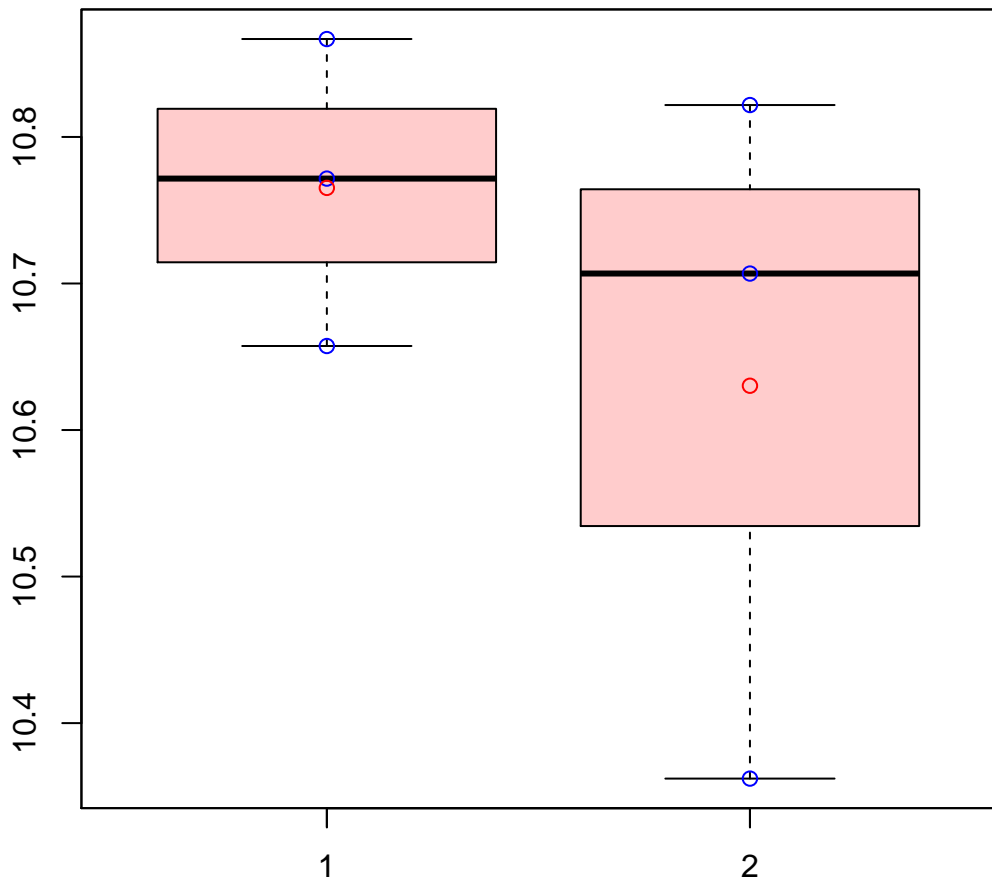

t-Test: p-value = 0.44

# CL1889Contig4|CL1889Contig4

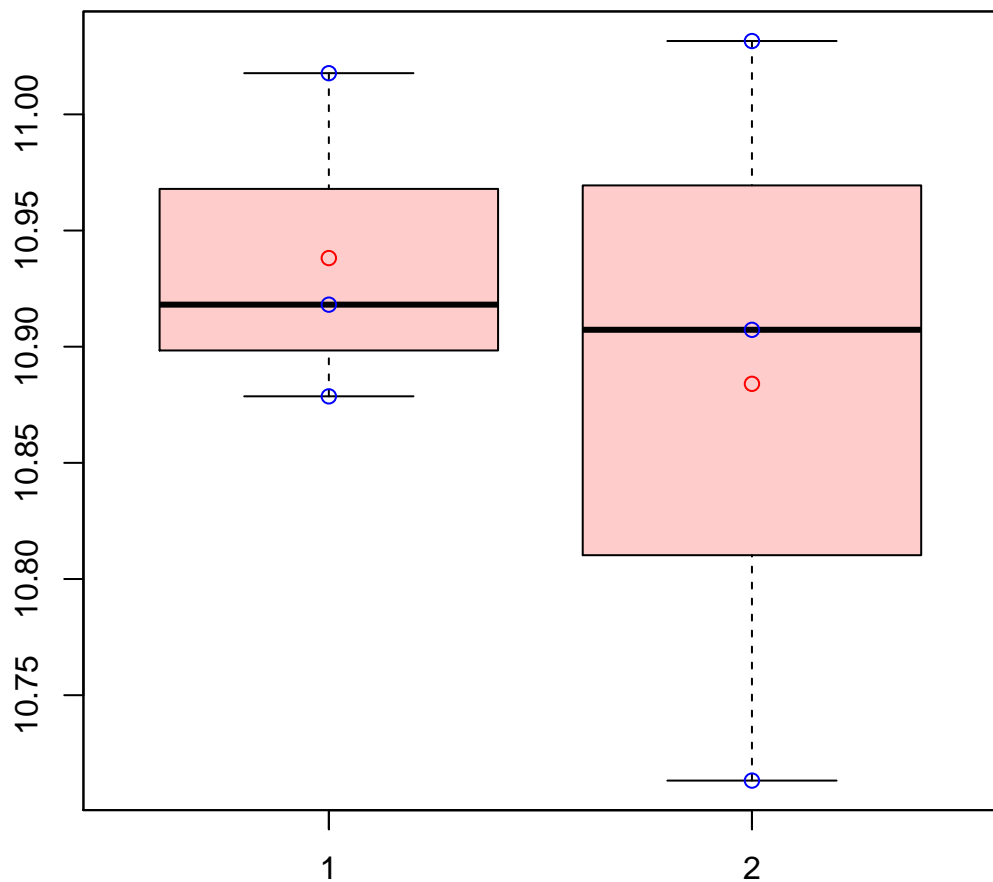

t-Test: p-value = 0.63

# CL1889Contig5|CL1889Contig5

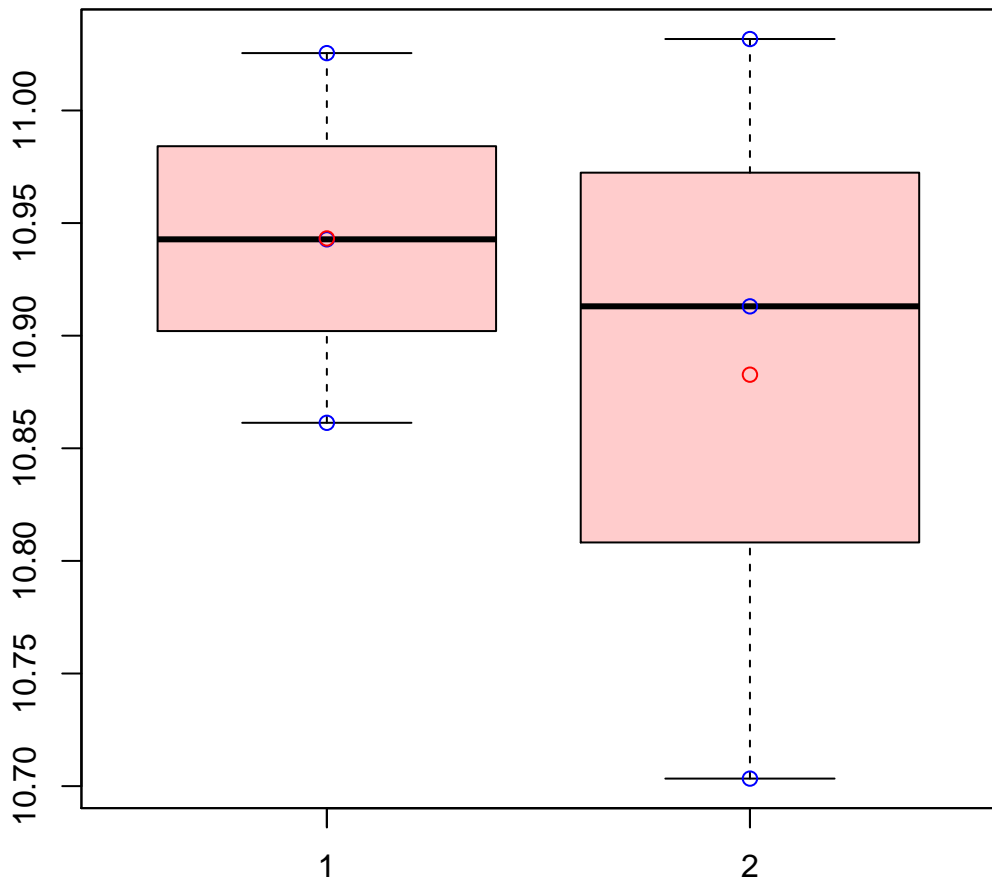

t-Test: p-value = 0.61



# CL1889Contig6|CL1889Contig6

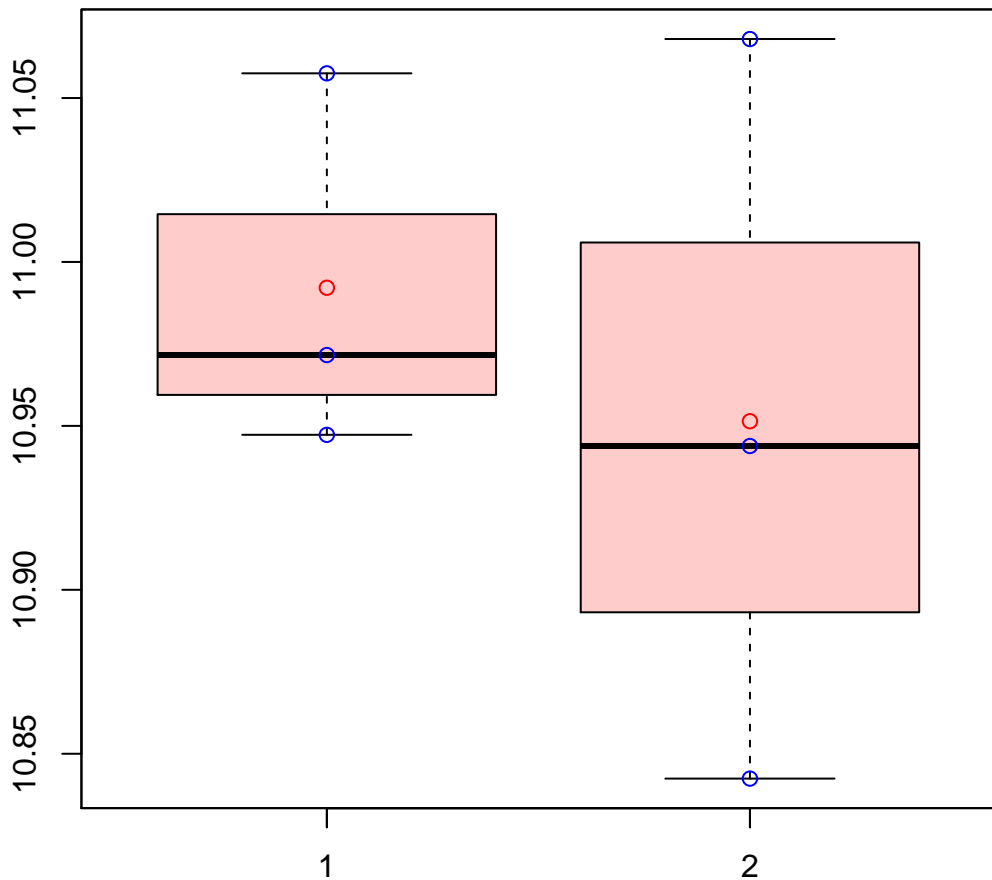

t-Test: p-value = 0.62

# CL1889Contig7|CL1889Contig7

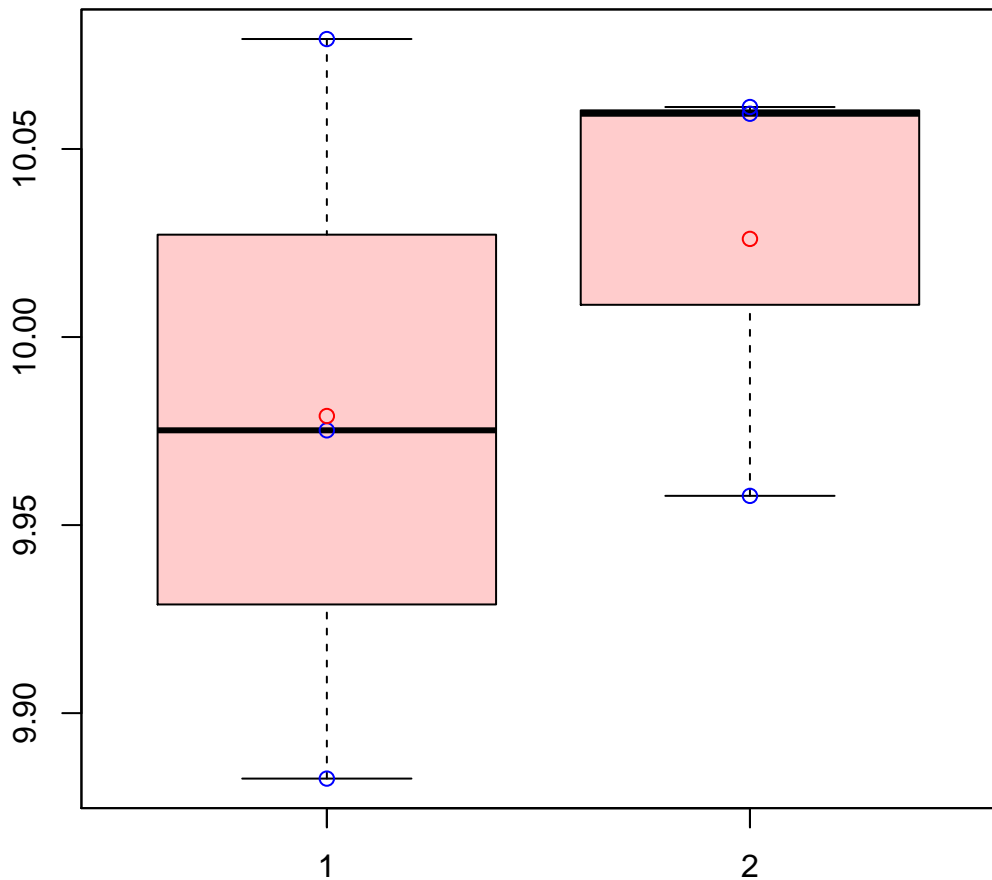

t-Test: p-value = 0.52

# CL1889Contig9|CL1889Contig9

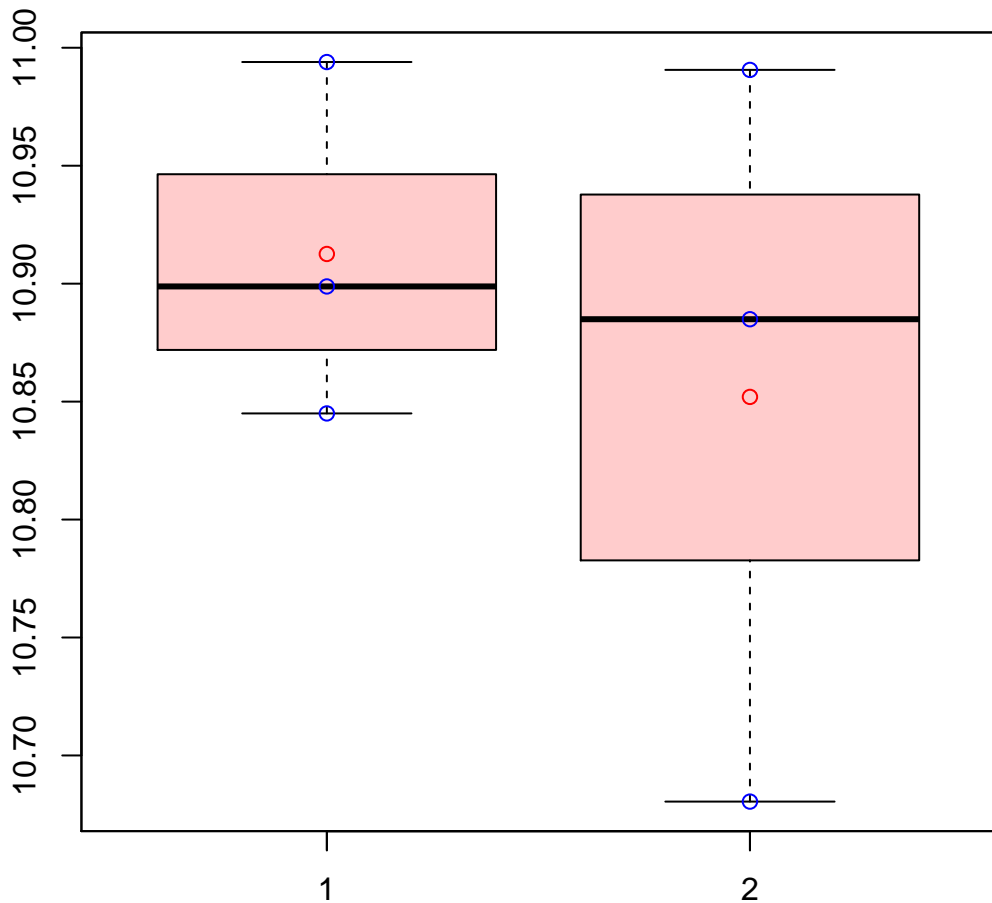

t-Test: p-value = 0.59

# CL188Contig21|CL188Contig21

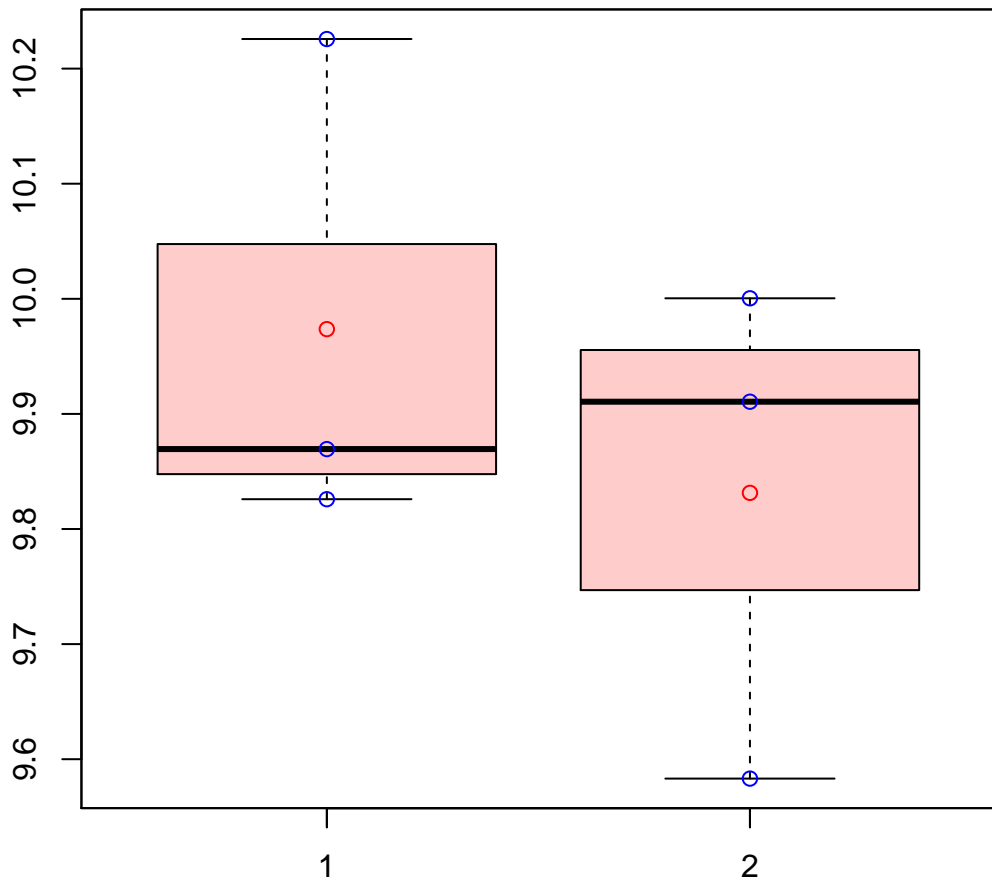

t-Test: p-value = 0.47

# CL188Contig4|CL188Contig4

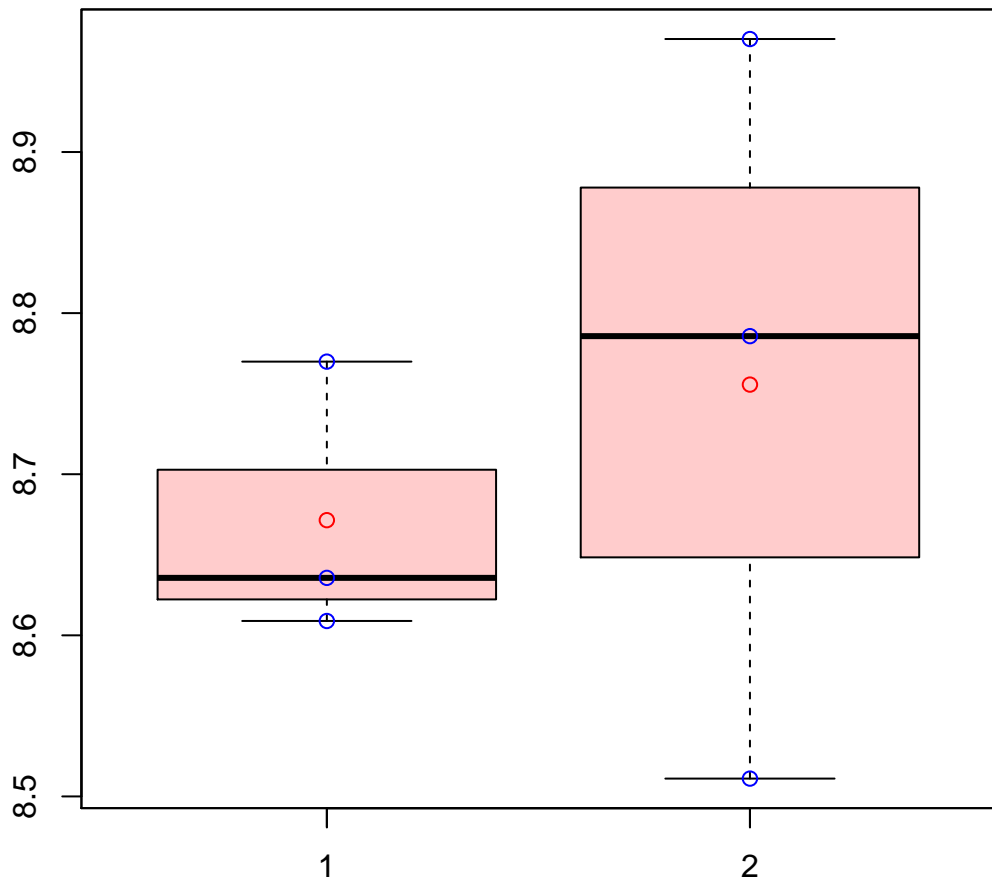

t-Test: p-value = 0.6

# CL1891Contig2|CL1891Contig2

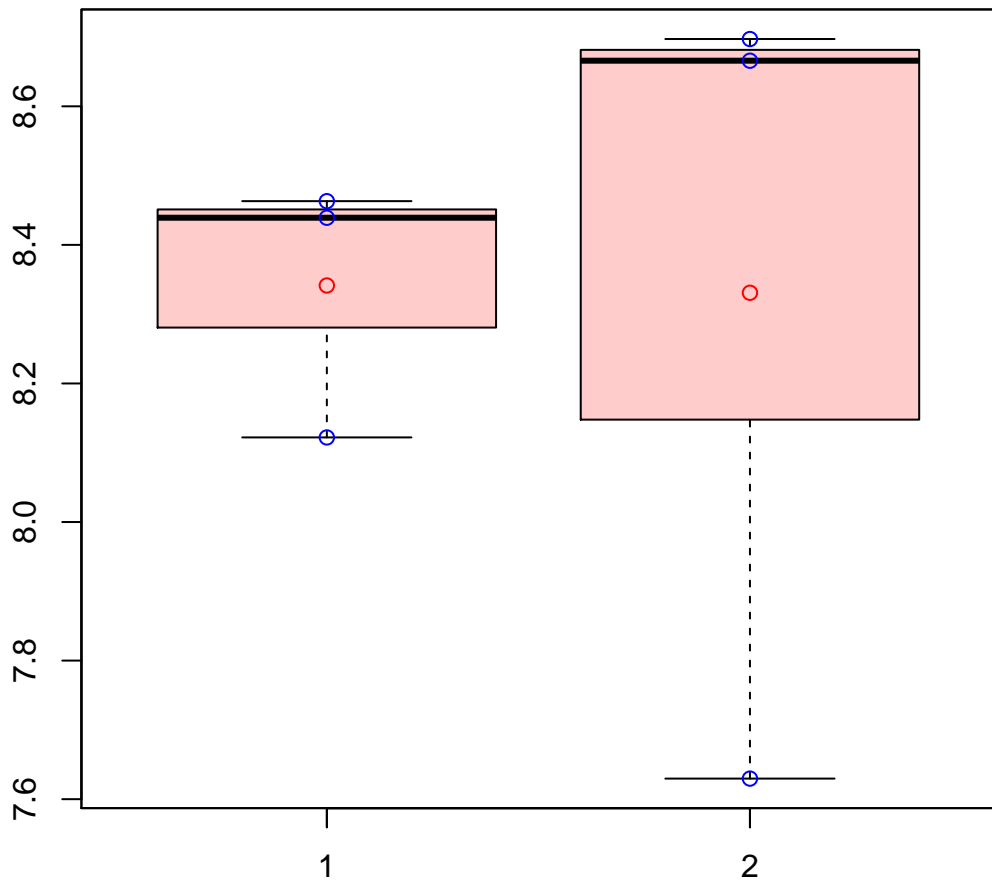

t-Test: p-value = 0.98

# CL1891Contig4|CL1891Contig4

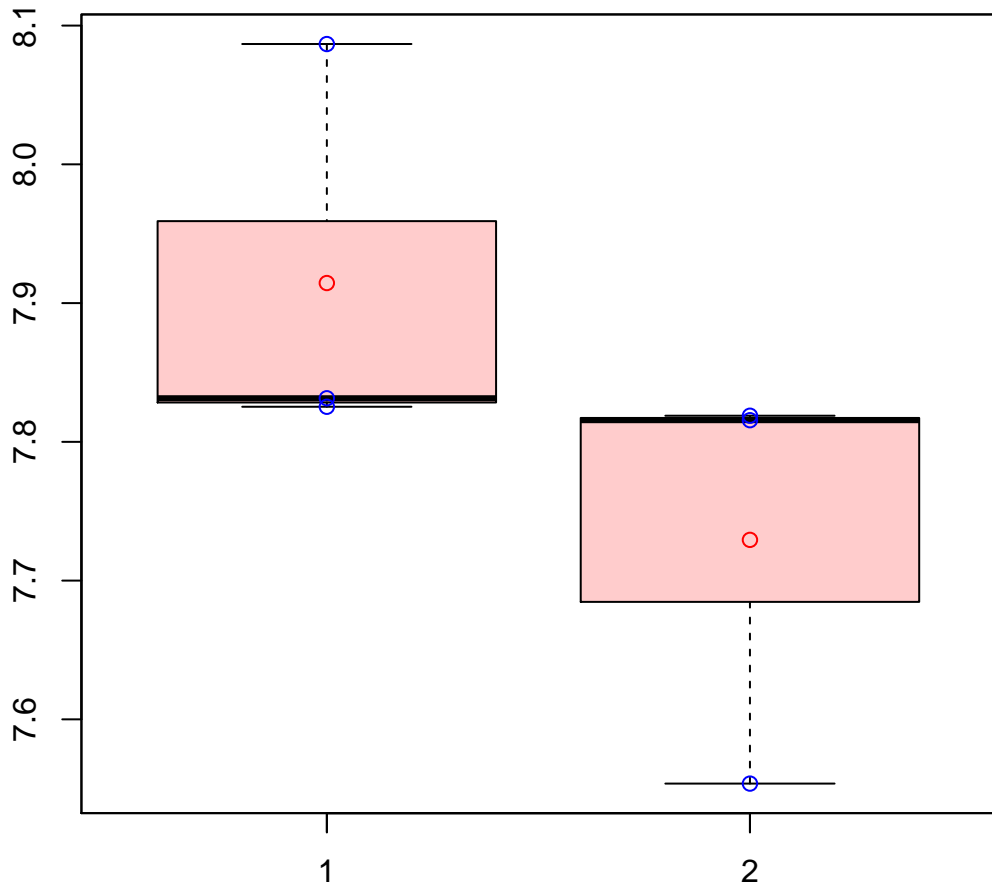

t-Test: p-value = 0.21

# CL189Contig5|CL189Contig5

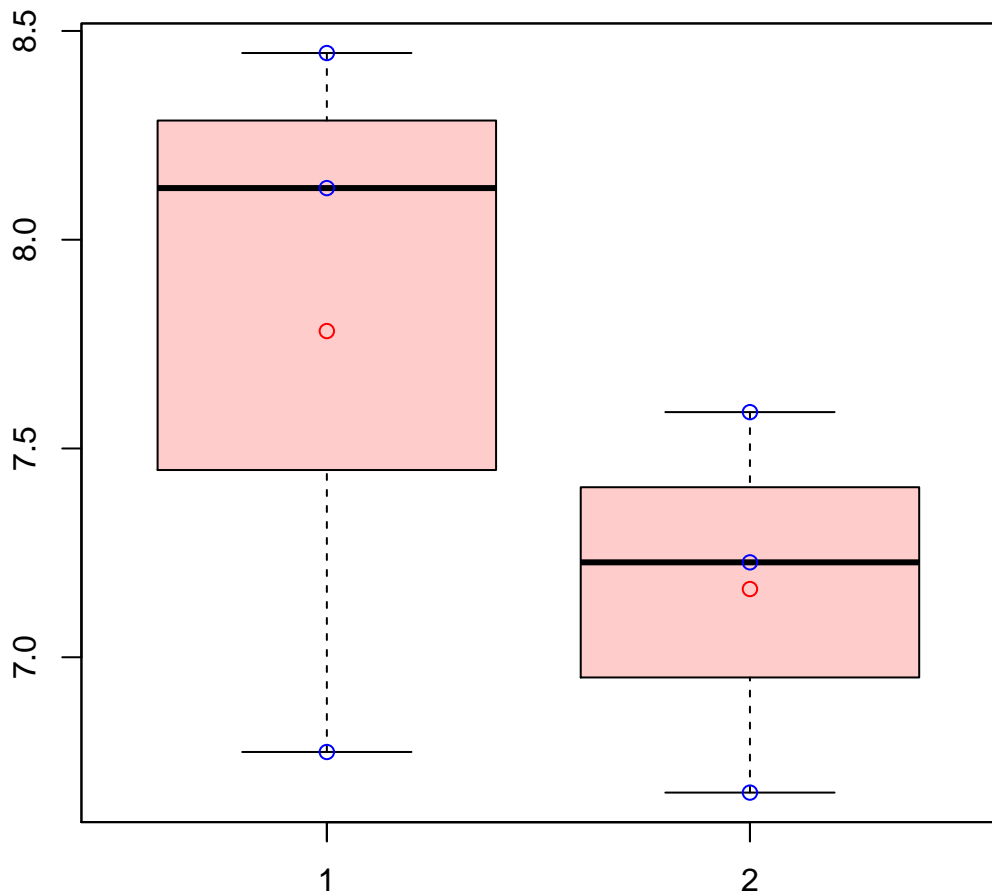

t-Test: p-value = 0.36



# CL189Contig9|CL189Contig9

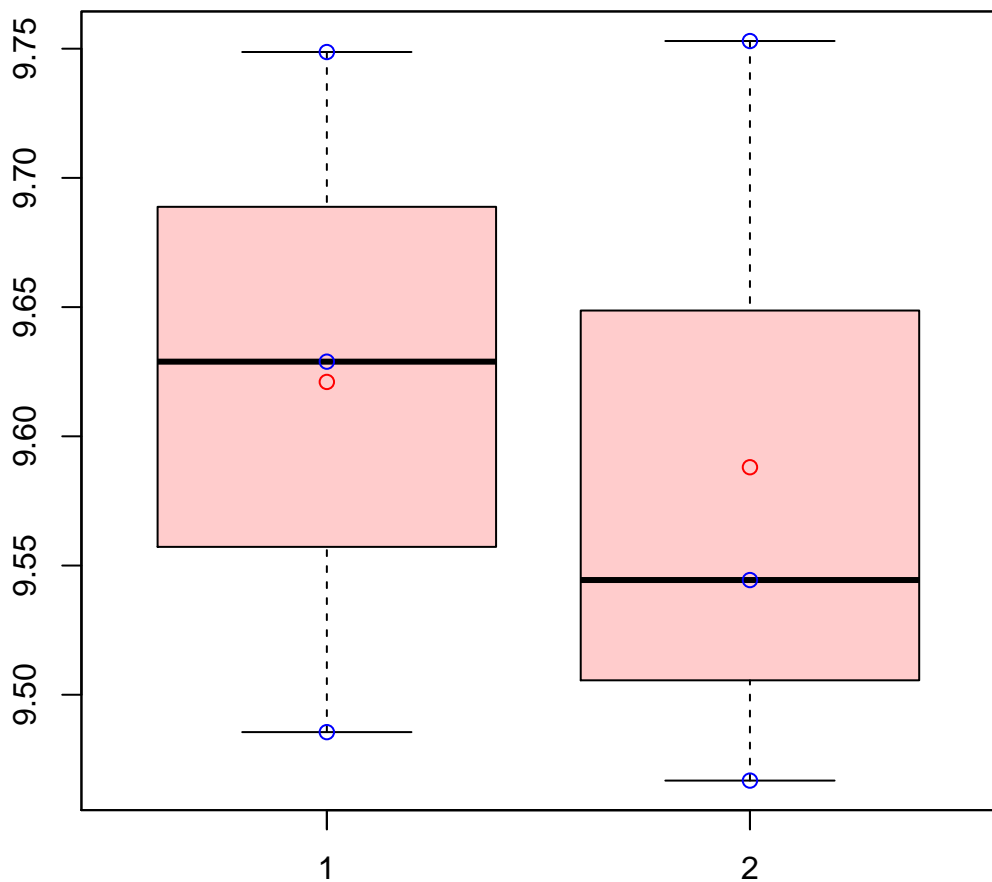

t-Test: p-value = 0.79

# CL18Contig18|CL18Contig18

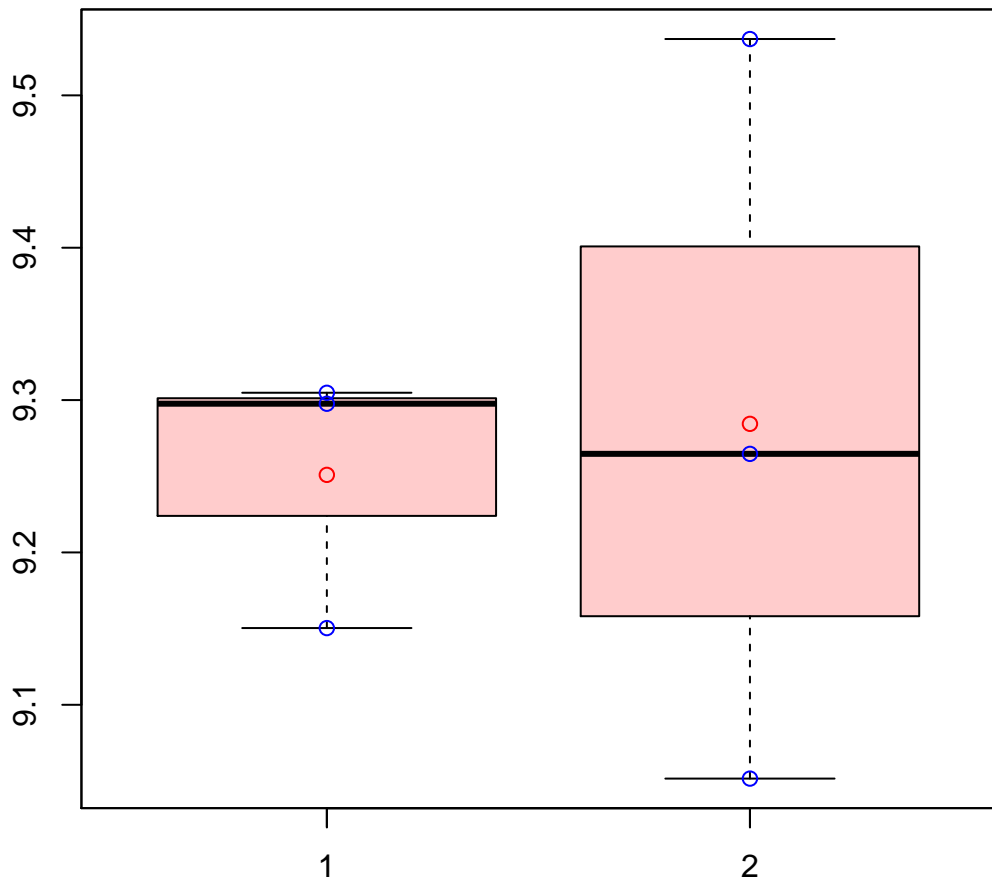

t-Test: p-value = 0.84

# CL18Contig23|CL18Contig23

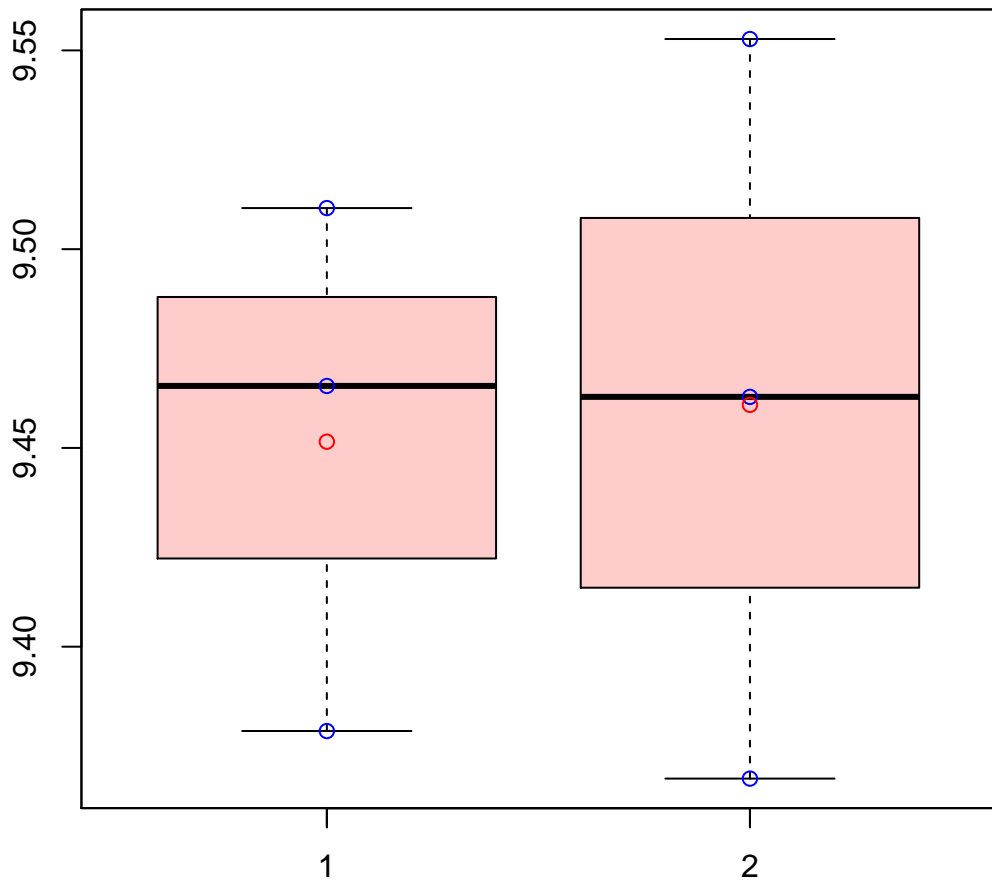

t-Test: p-value = 0.9

# CL18Contig8|CL18Contig8

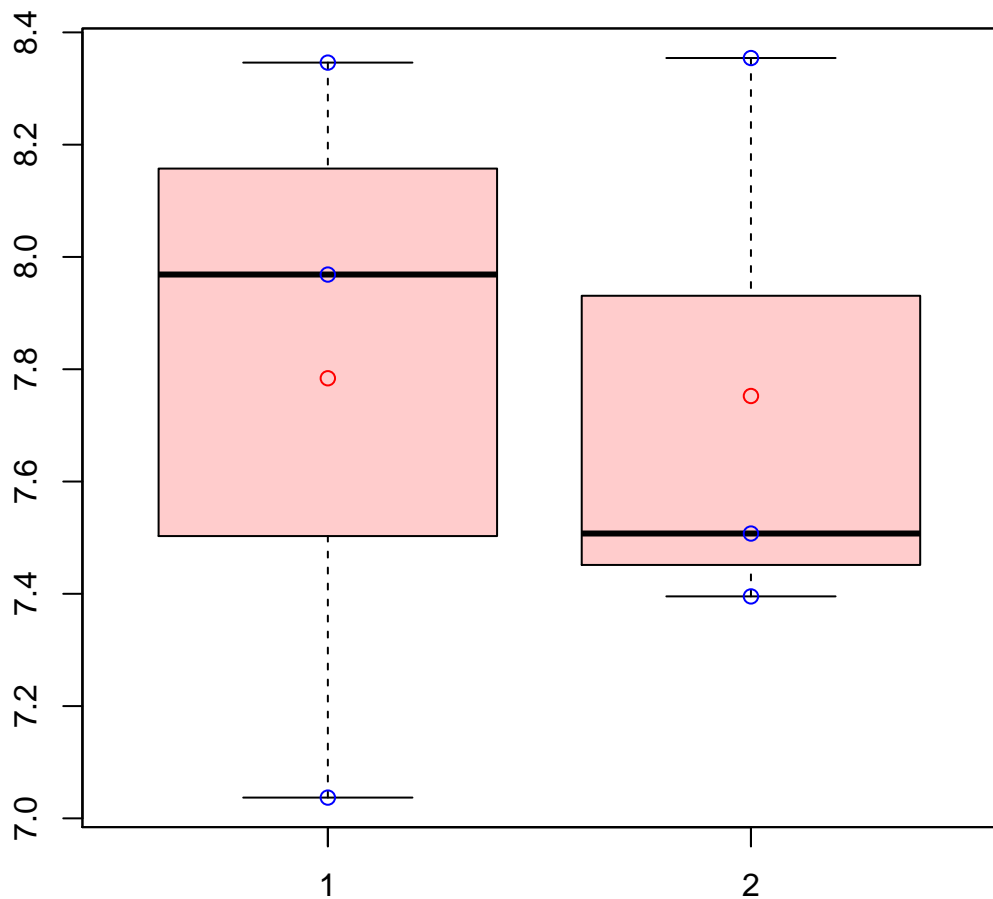

t-Test: p-value = 0.95

# CL1904Contig1|CL1904Contig1

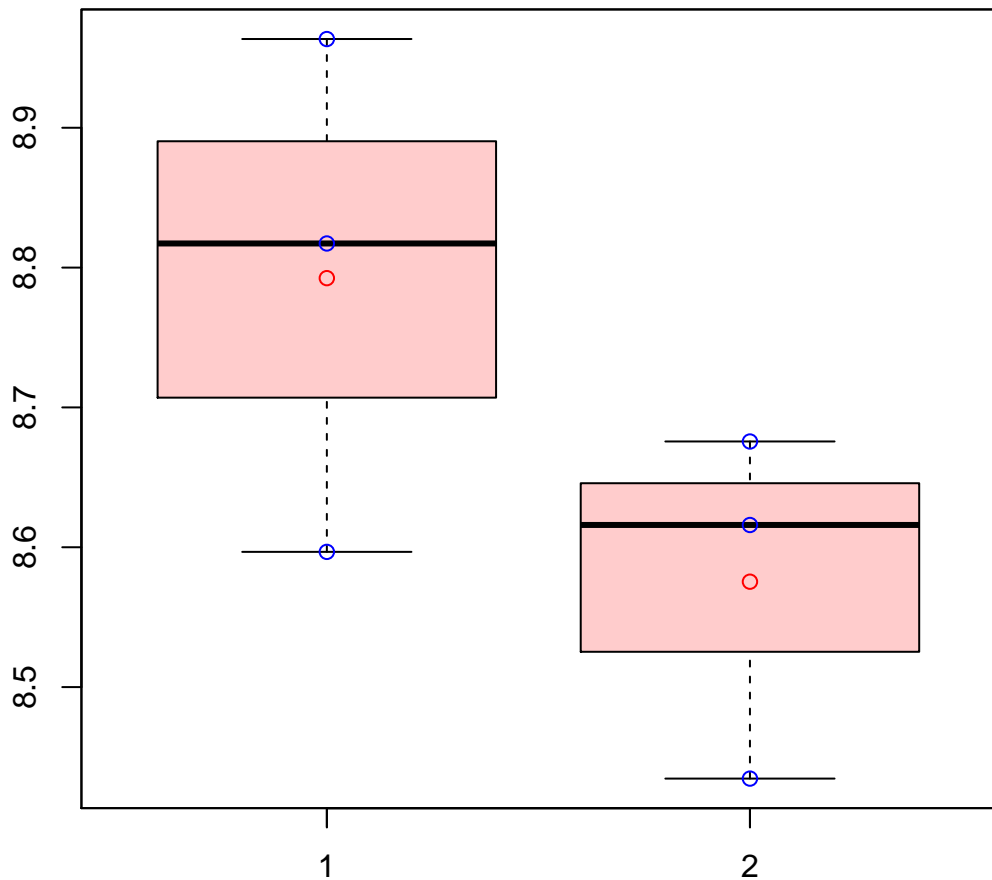

t-Test: p-value = 0.18

# CL1904Contig4|CL1904Contig4

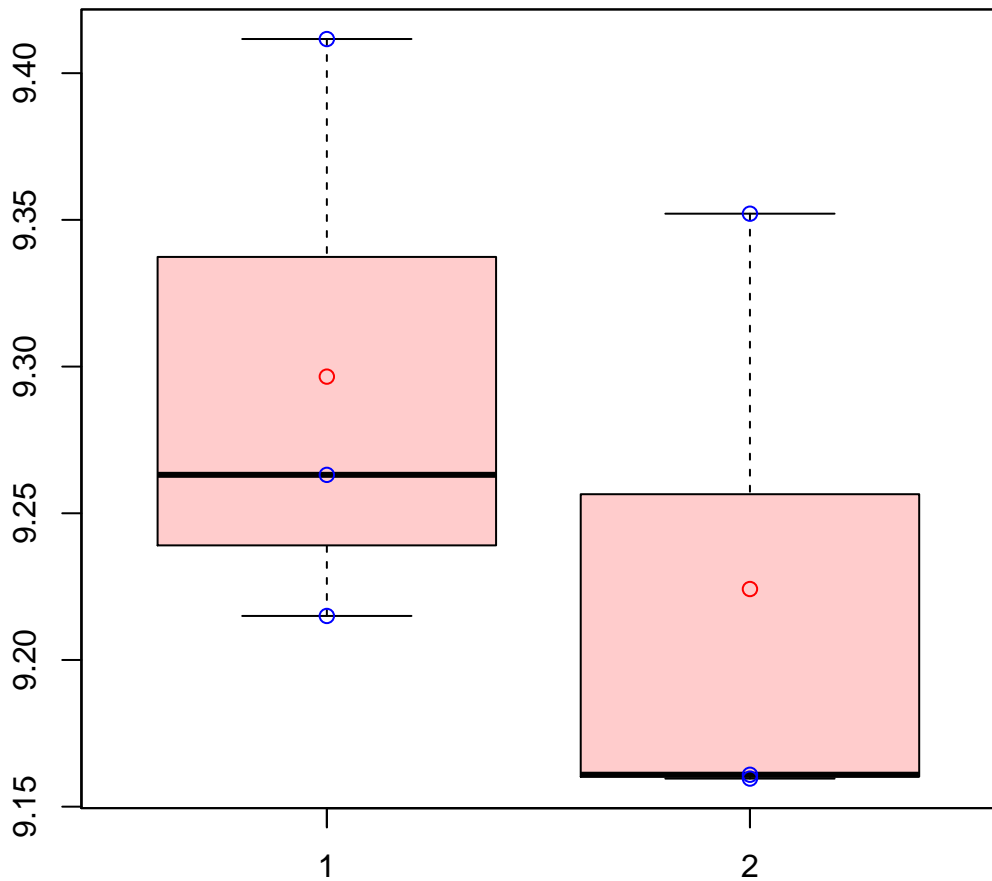

t-Test: p-value = 0.45

# CL190Contig11|CL190Contig11

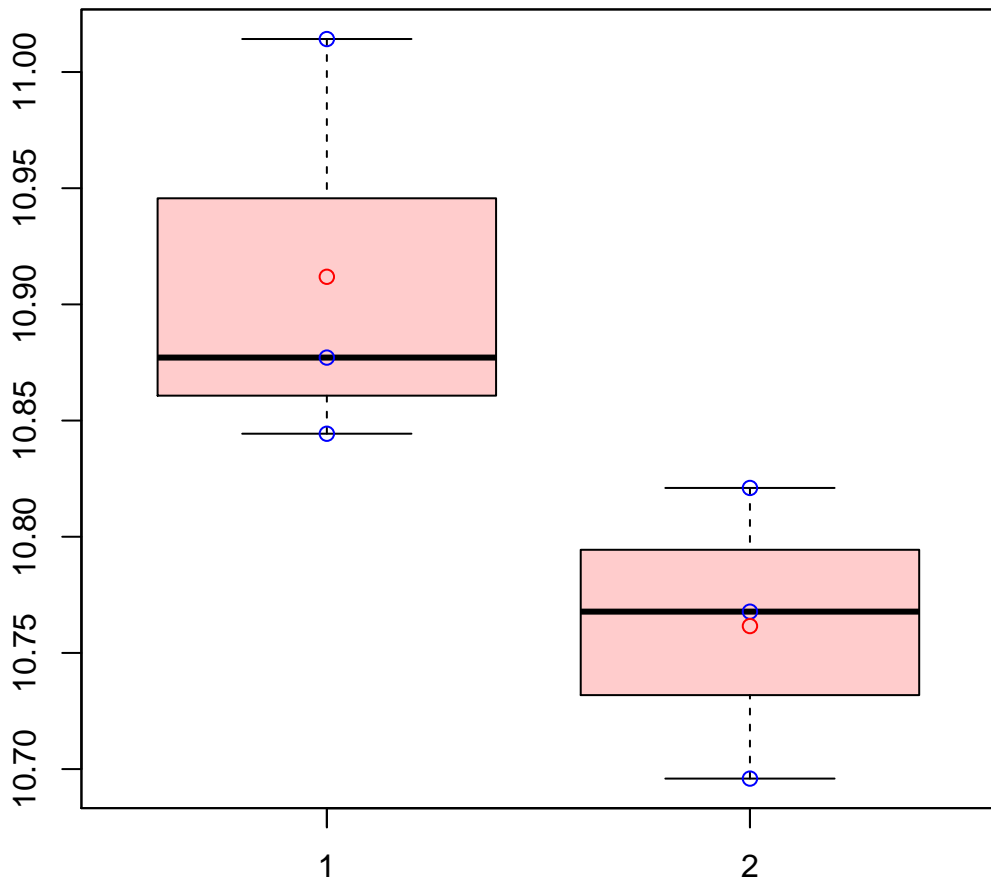

t-Test: p-value = 0.08

# CL190Contig18|CL190Contig18

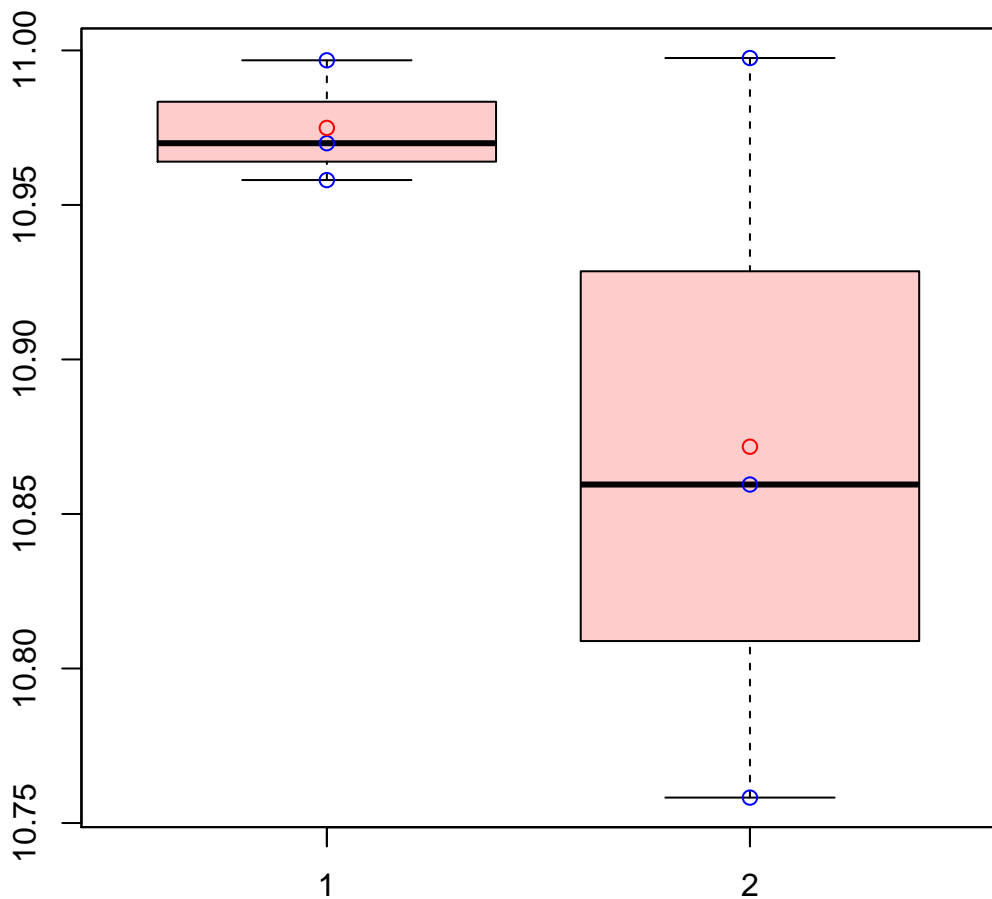

t-Test: p-value = 0.27



# CL190Contig21|CL190Contig21

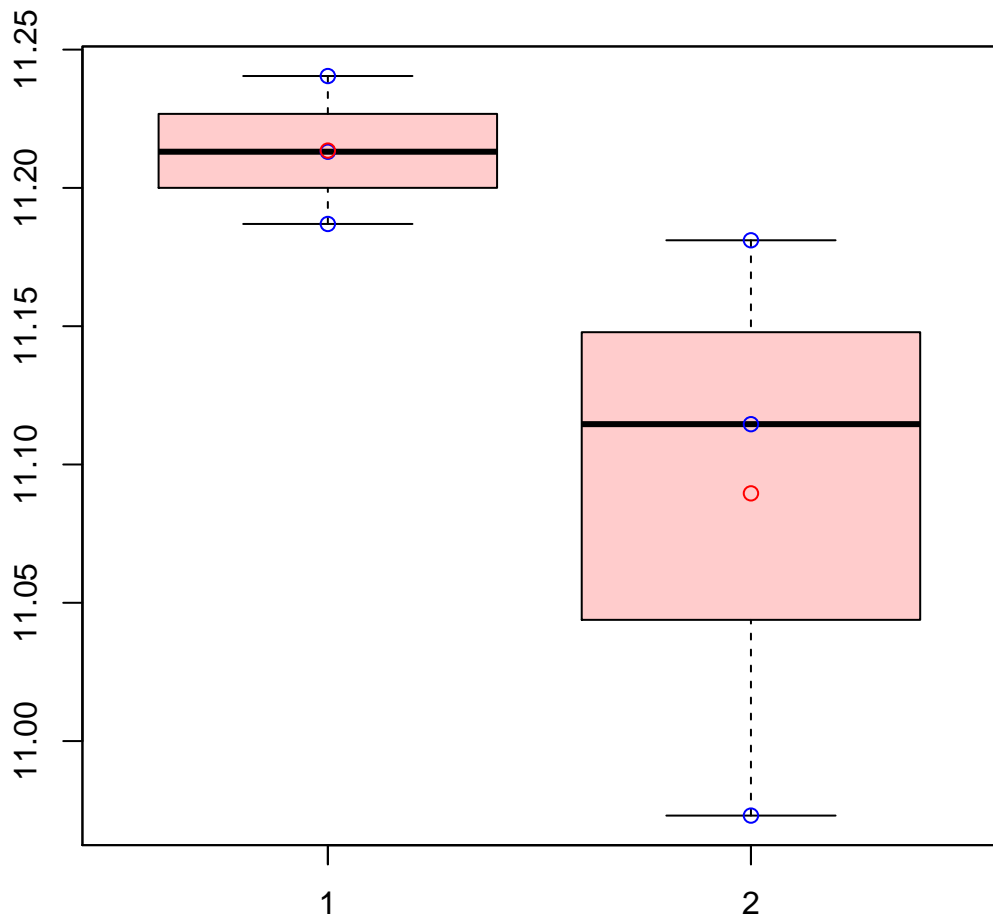

t-Test: p-value = 0.17

# CL190Contig3|CL190Contig3

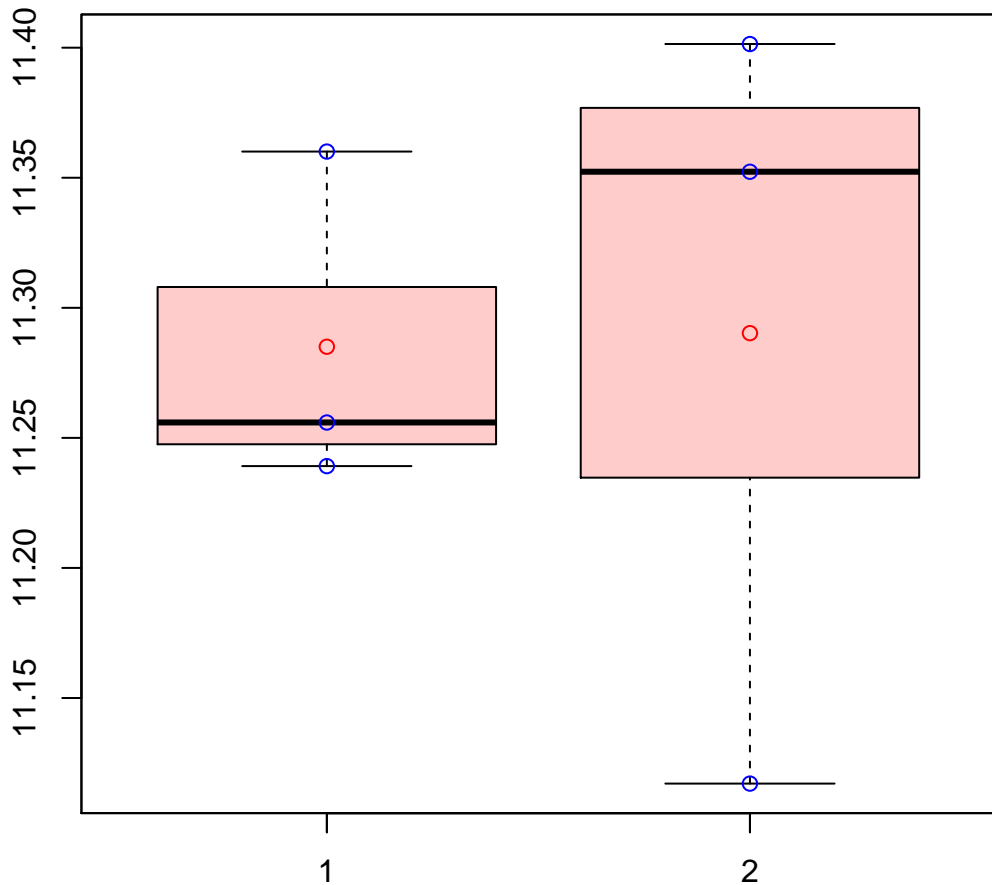

t-Test: p-value = 0.96

# CL190Contig5|CL190Contig5

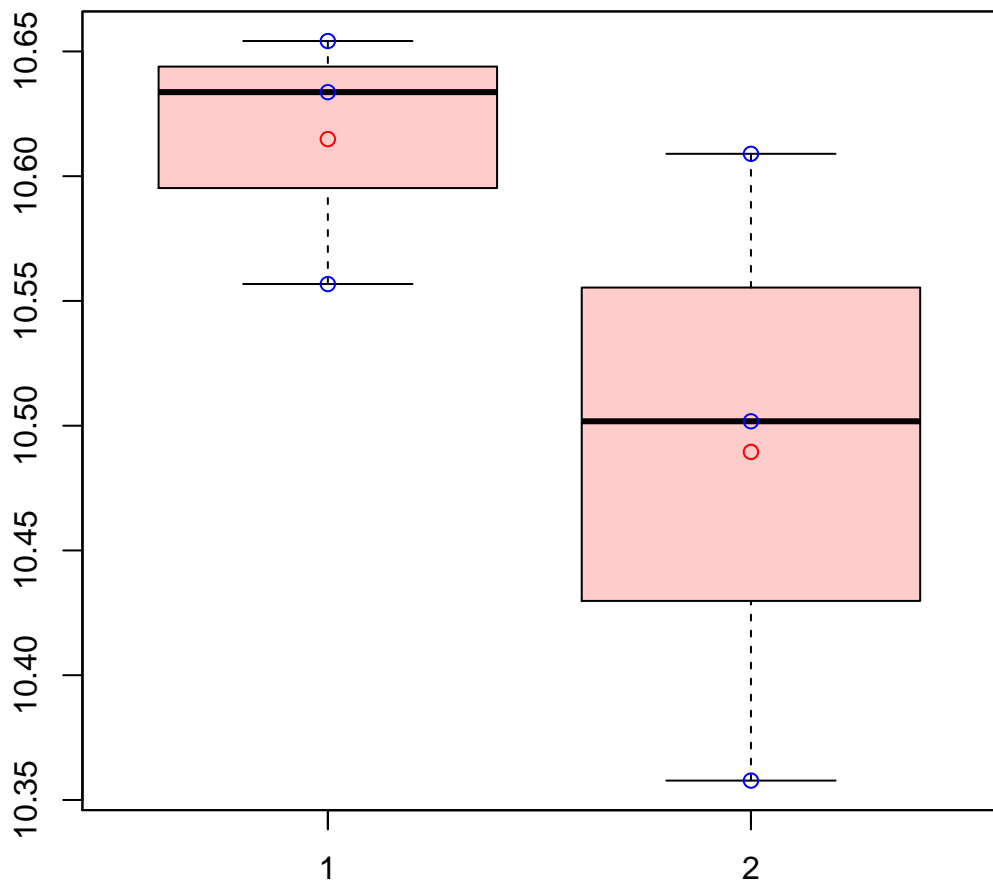

t-Test: p-value = 0.22

# CL1911Contig2|CL1911Contig2

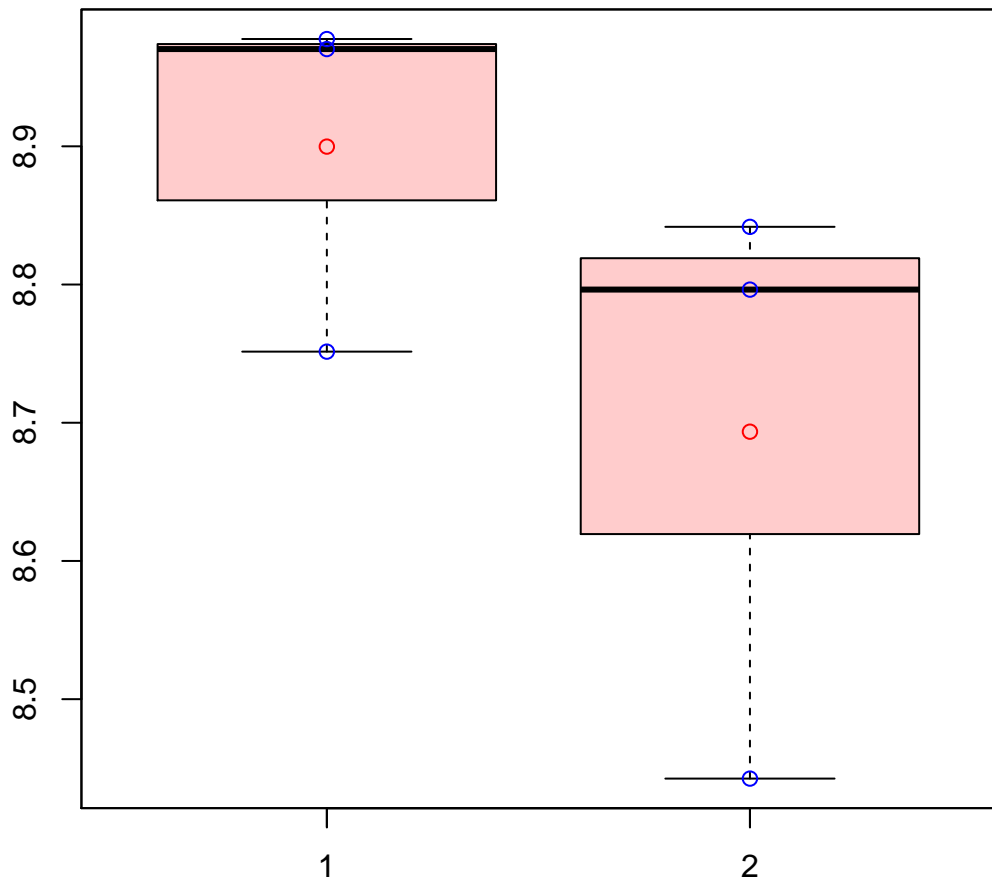

t-Test: p-value = 0.25

# CL1911Contig5|CL1911Contig5

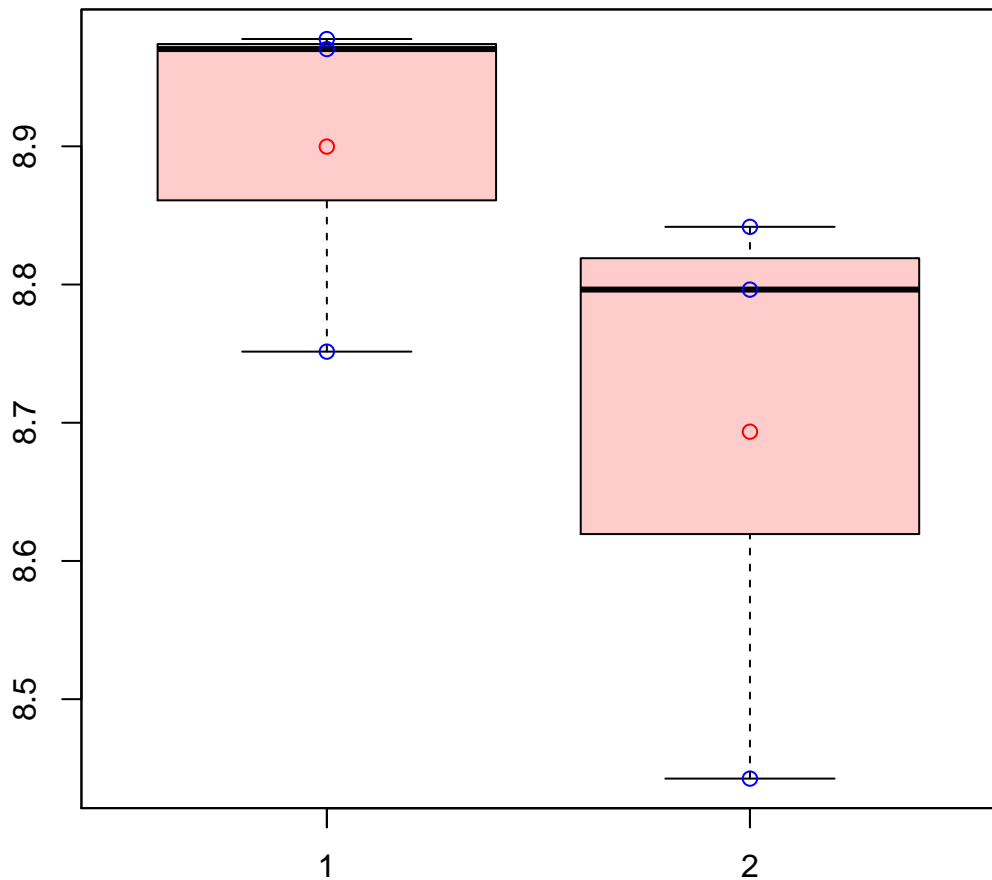

t-Test: p-value = 0.25

# CL1915Contig1|CL1915Contig1



t-Test: p-value = 0.69

# CL1917Contig1|CL1917Contig1

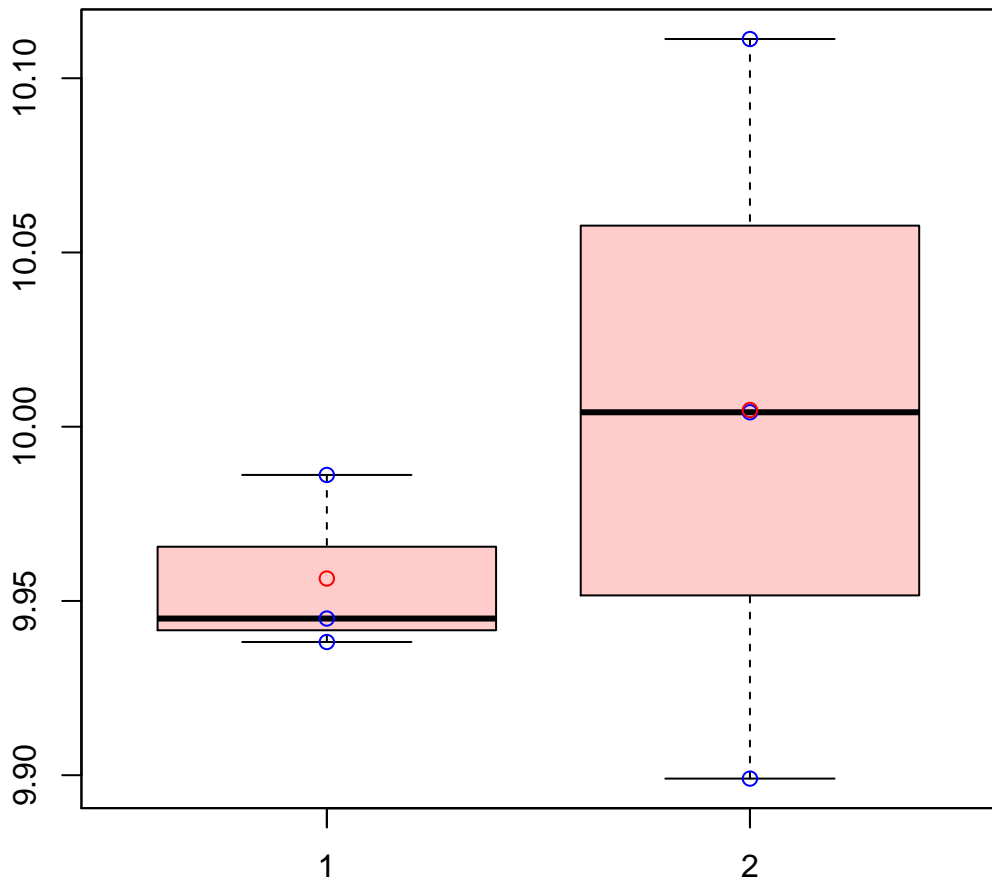

t-Test: p-value = 0.52

# CL1917Contig3|CL1917Contig3

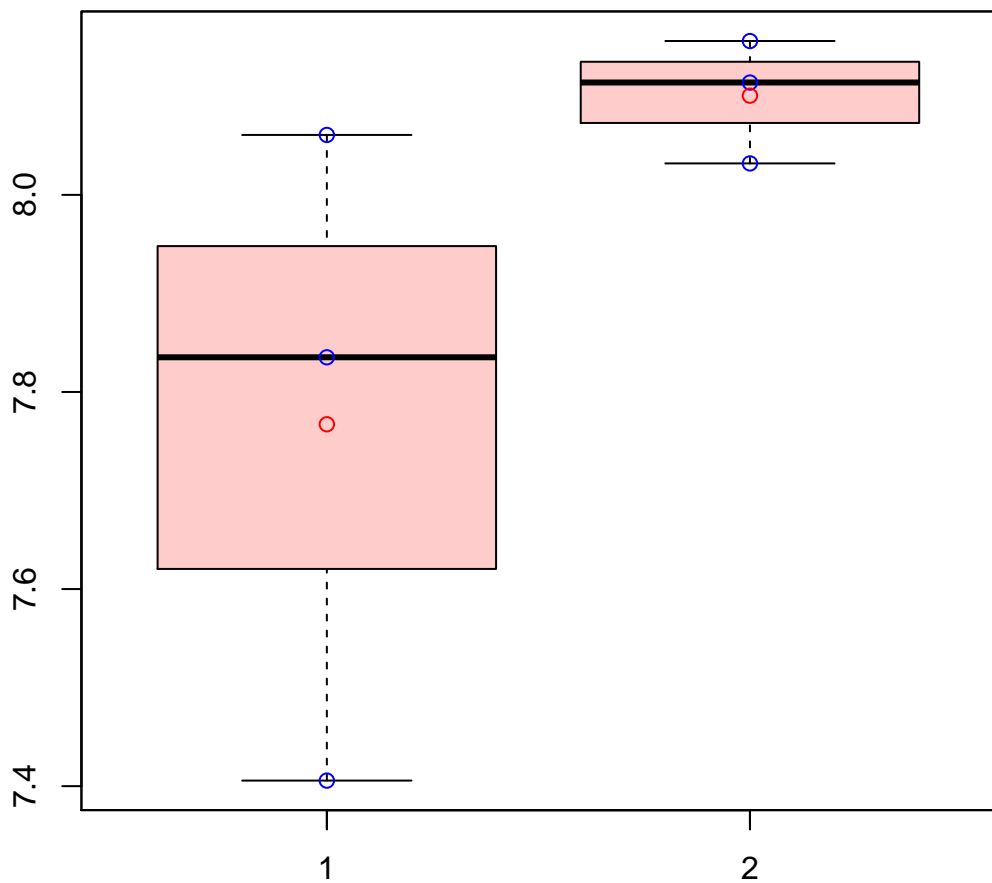

t-Test: p-value = 0.22



# CL1919Contig1|CL1919Contig1

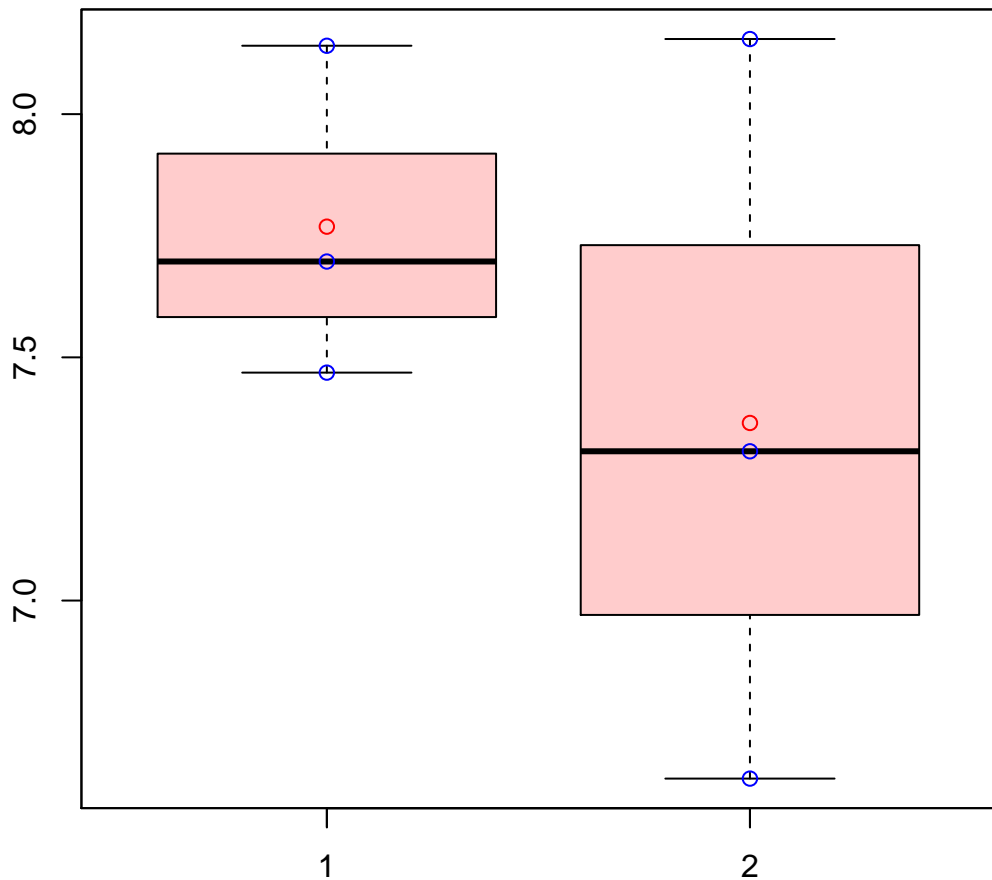

t-Test: p-value = 0.47

# CL1919Contig3|CL1919Contig3

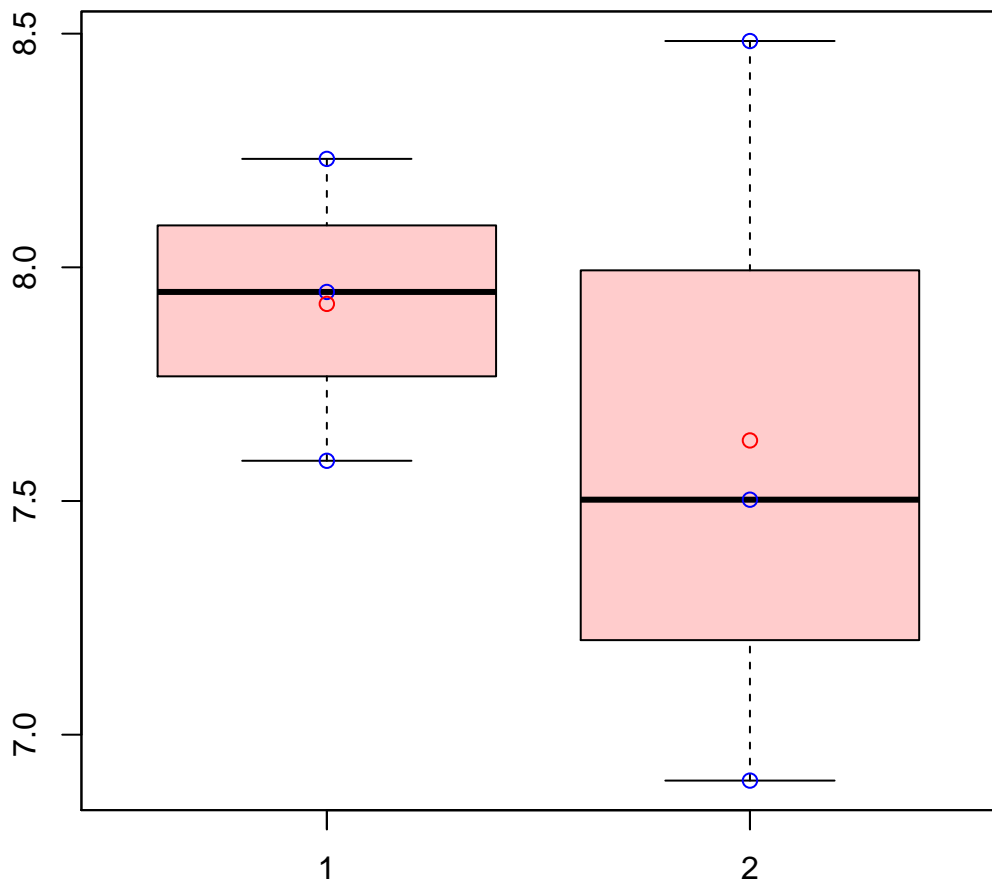

t-Test: p-value = 0.6

# CL191Contig15|CL191Contig15

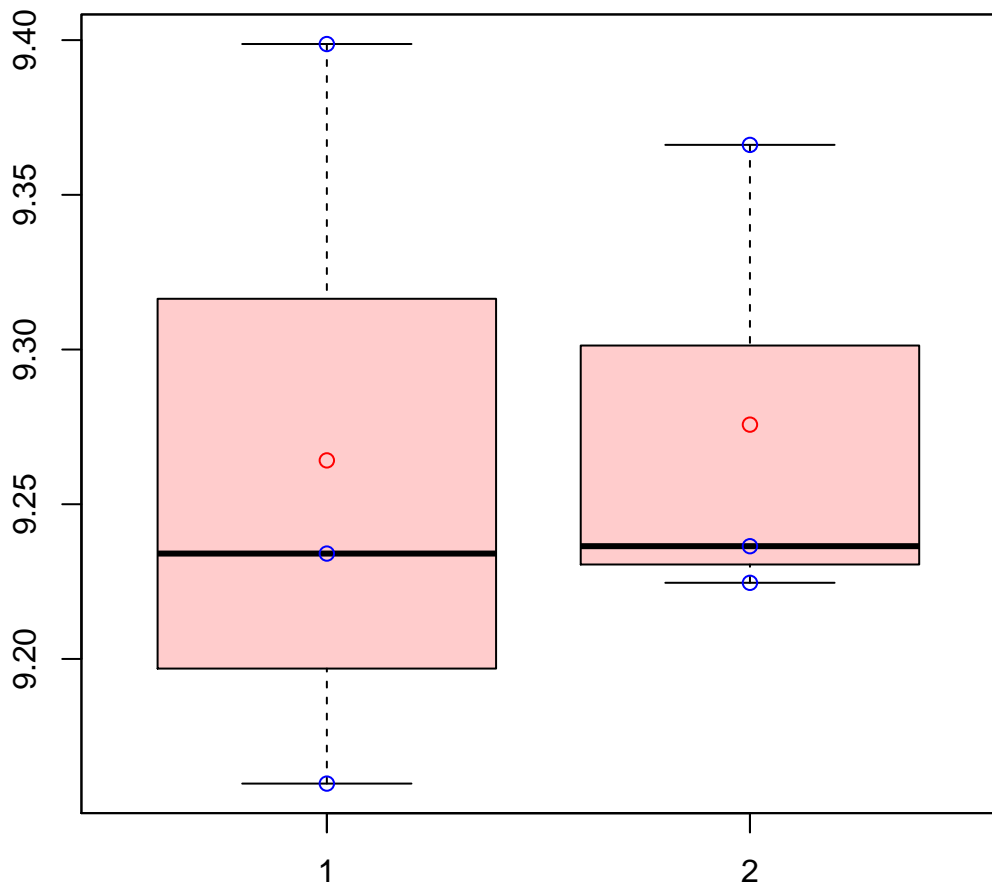

t-Test: p-value = 0.9

# CL1922Contig5|CL1922Contig5

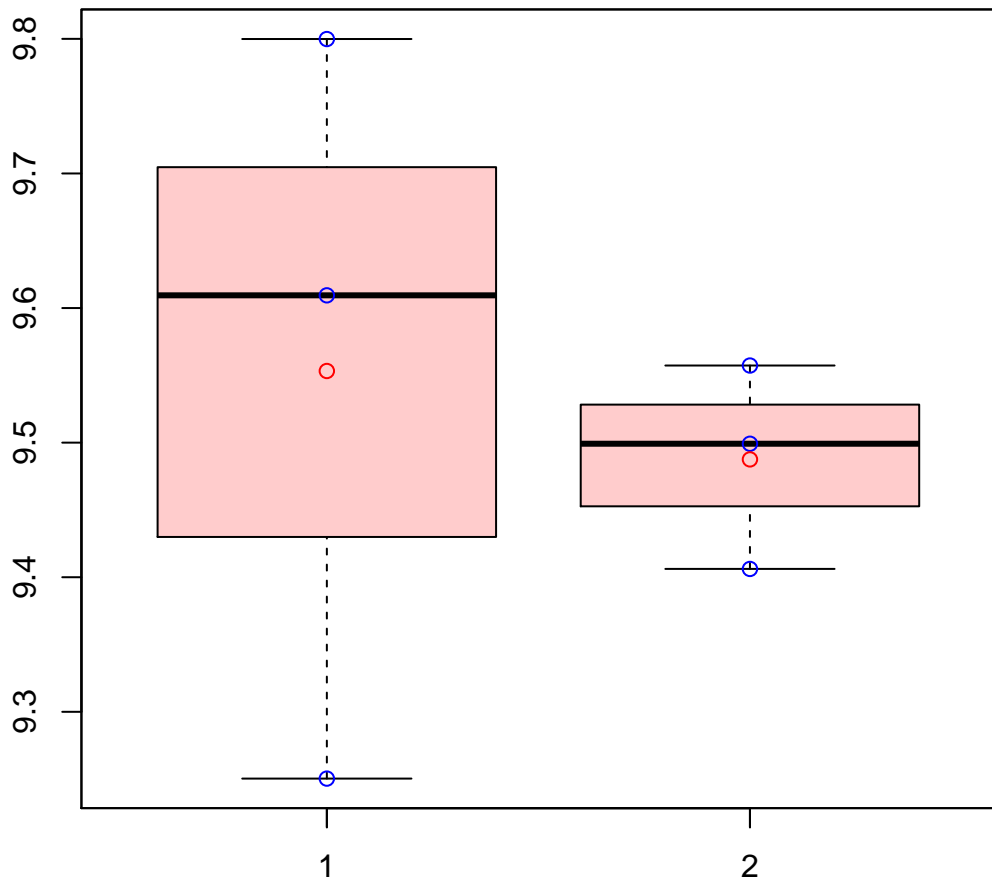

t-Test: p-value = 0.73

# CL1922Contig7|CL1922Contig7

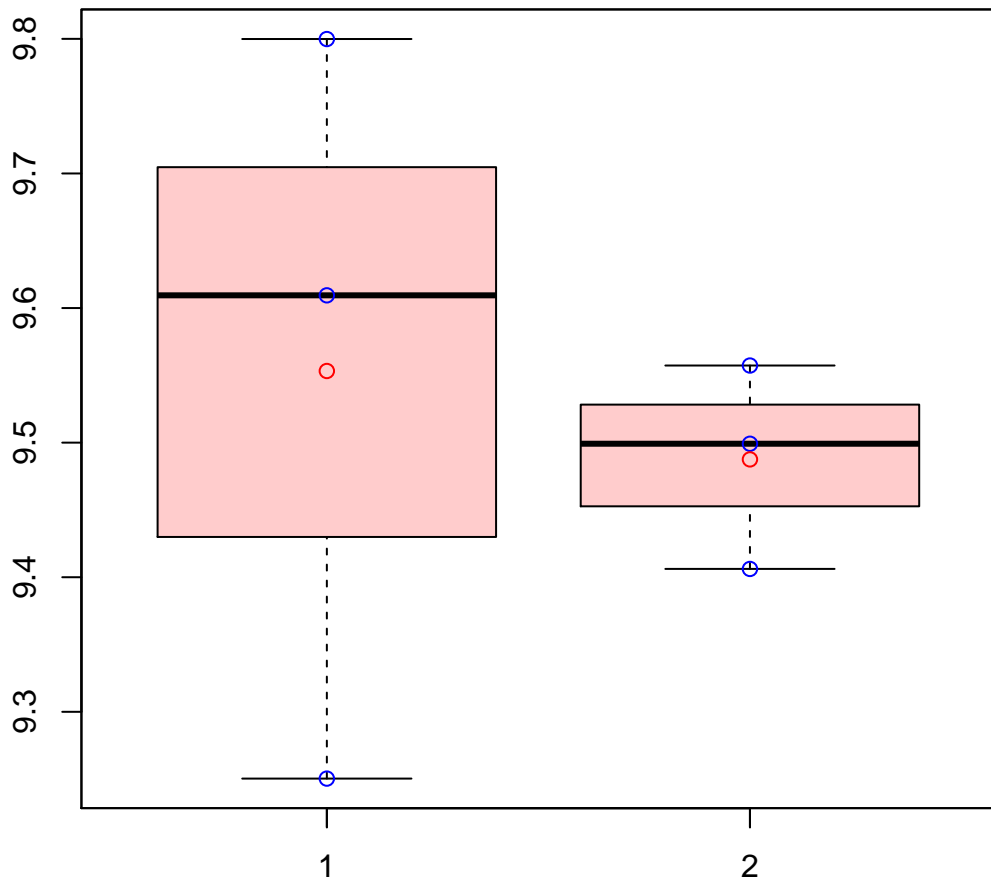

t-Test: p-value = 0.73

# CL1923Contig1|CL1923Contig1

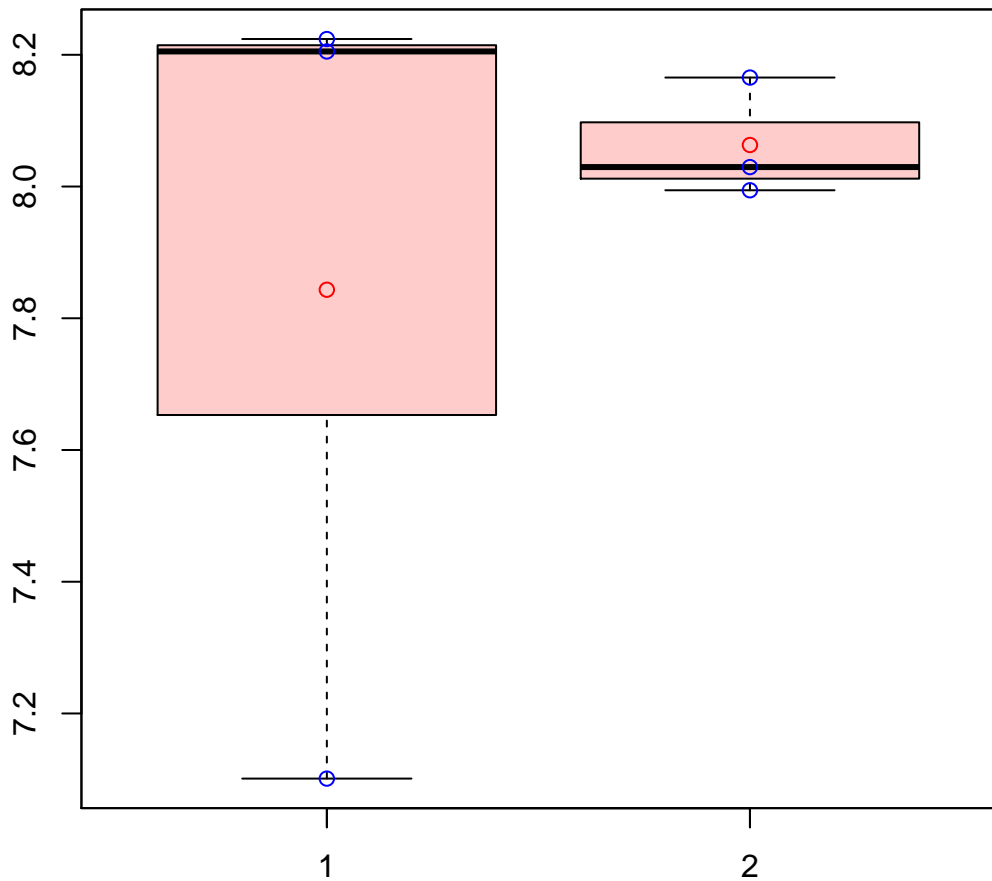

t-Test: p-value = 0.62

# CL1924Contig1|CL1924Contig1

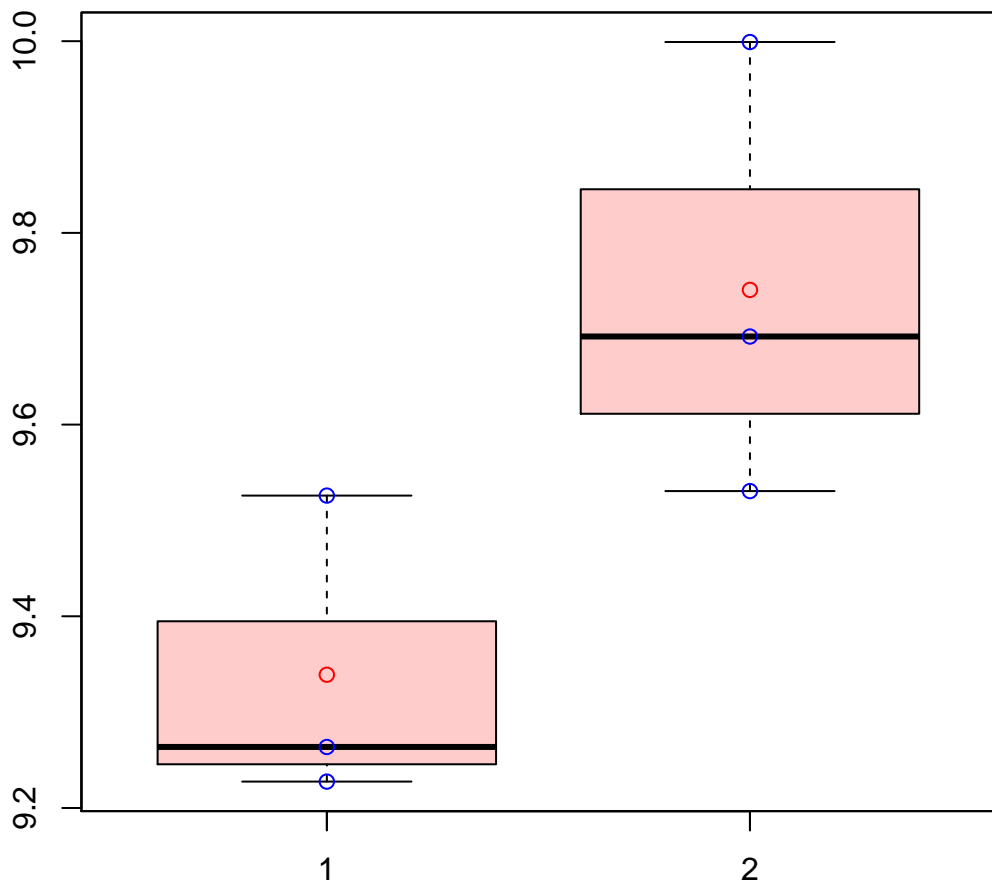

t-Test: p-value = 0.08

# CL192Contig10|CL192Contig10

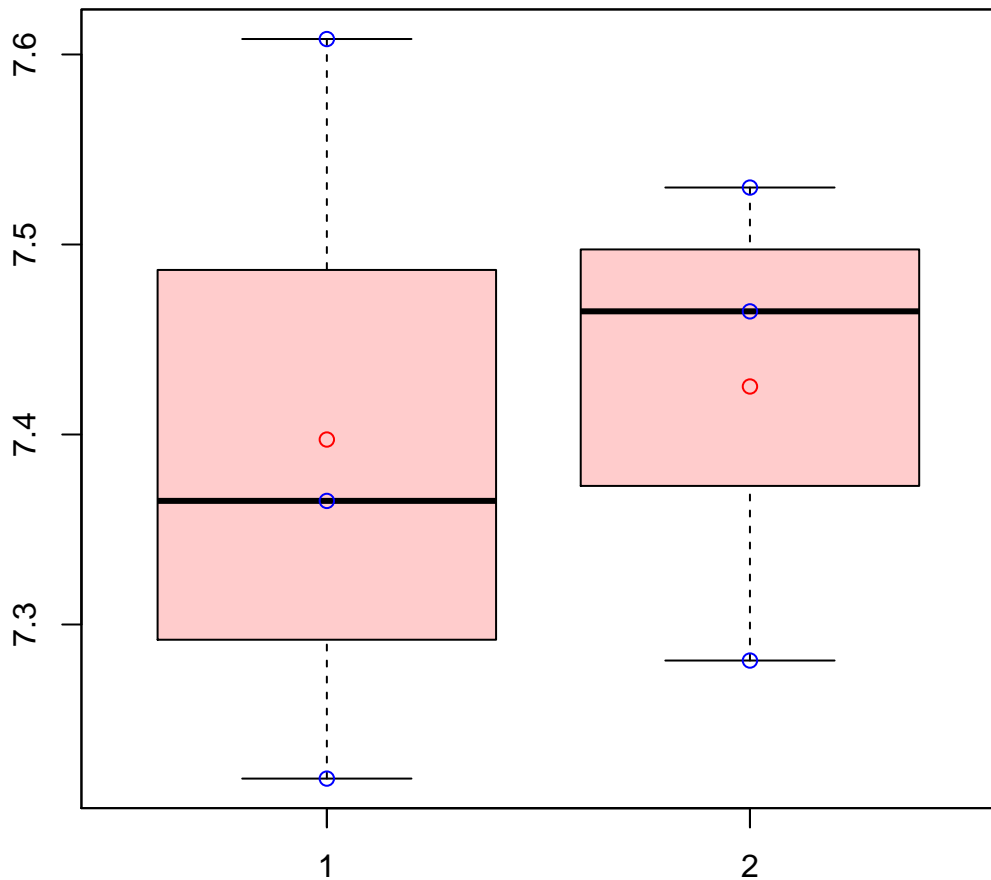

t-Test: p-value = 0.85



# CL19309Contig1|CL19309Contig1

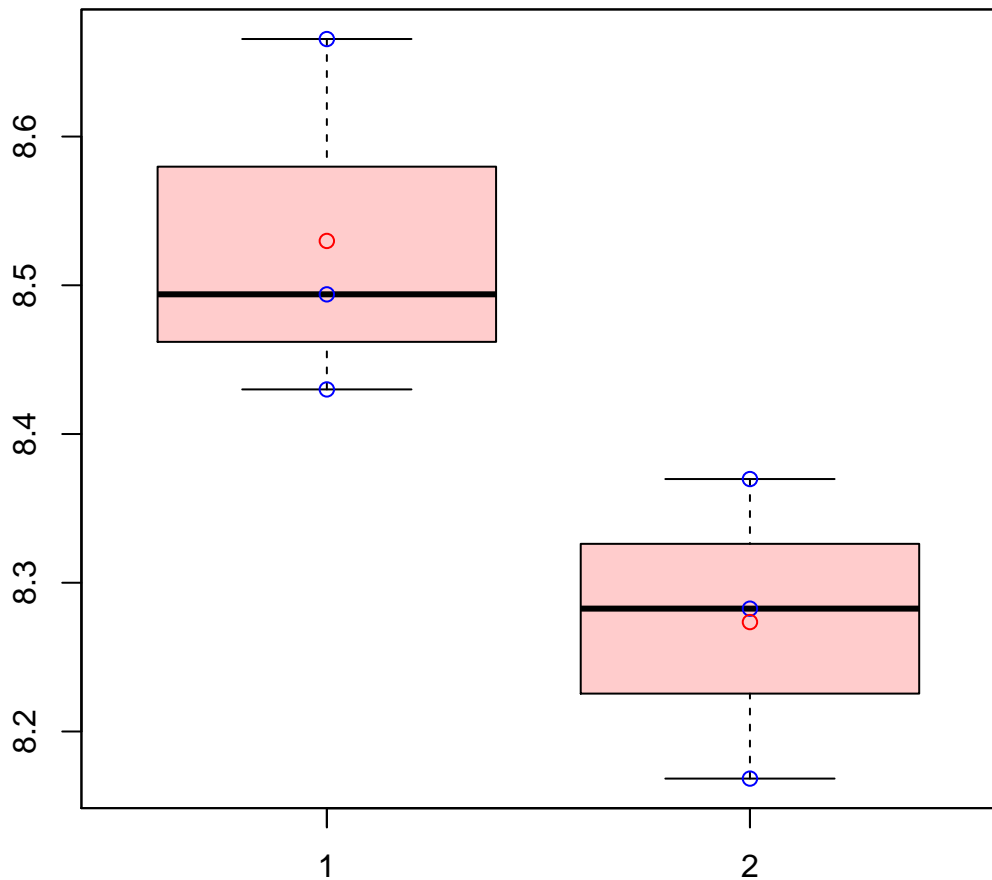

t-Test: p-value = 0.05

# CL1930Contig3|CL1930Contig3



t-Test: p-value = 0.9

# CL1937Contig3|CL1937Contig3

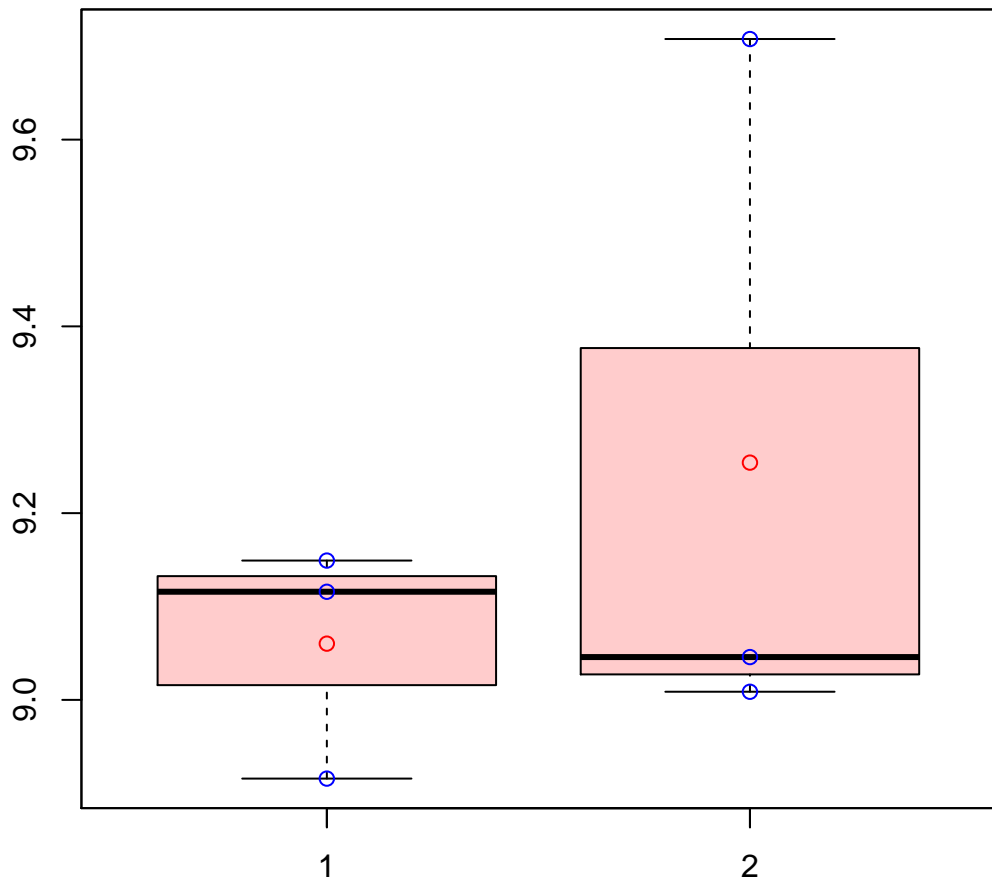

t-Test: p-value = 0.49

# CL1937Contig4|CL1937Contig4



t-Test: p-value = 0.49

# CL1937Contig7|CL1937Contig7

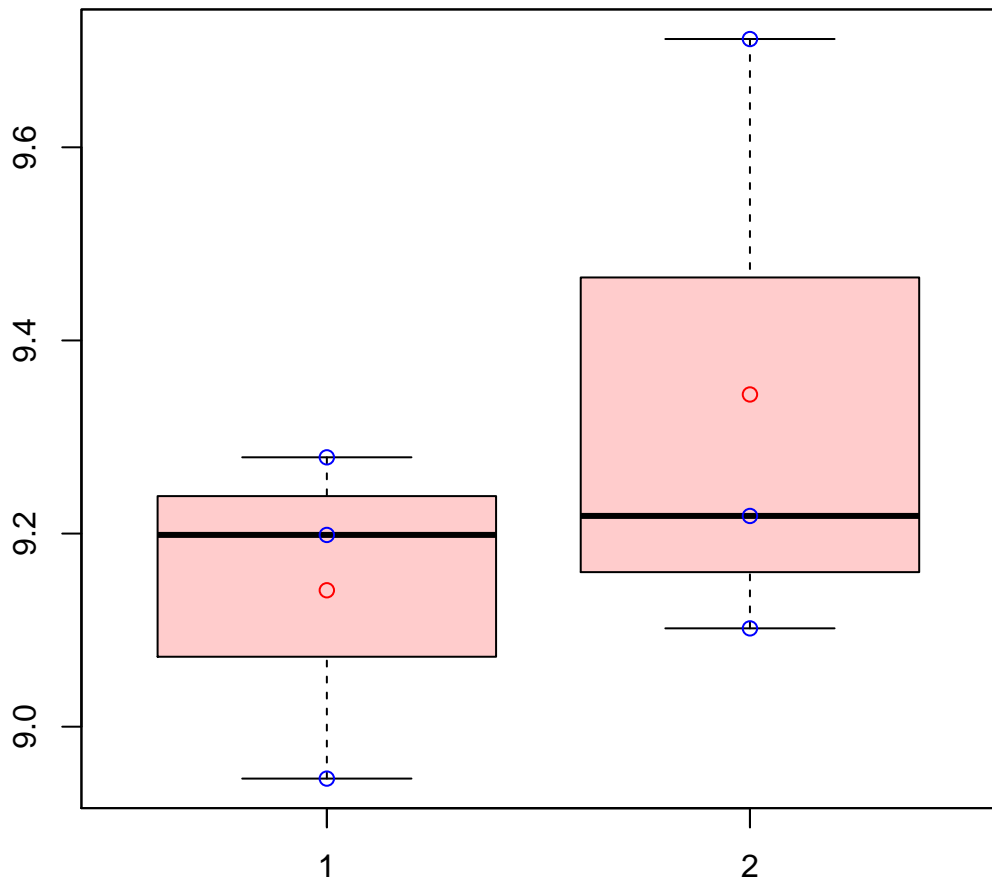

t-Test: p-value = 0.41

# CL1938Contig2|CL1938Contig2

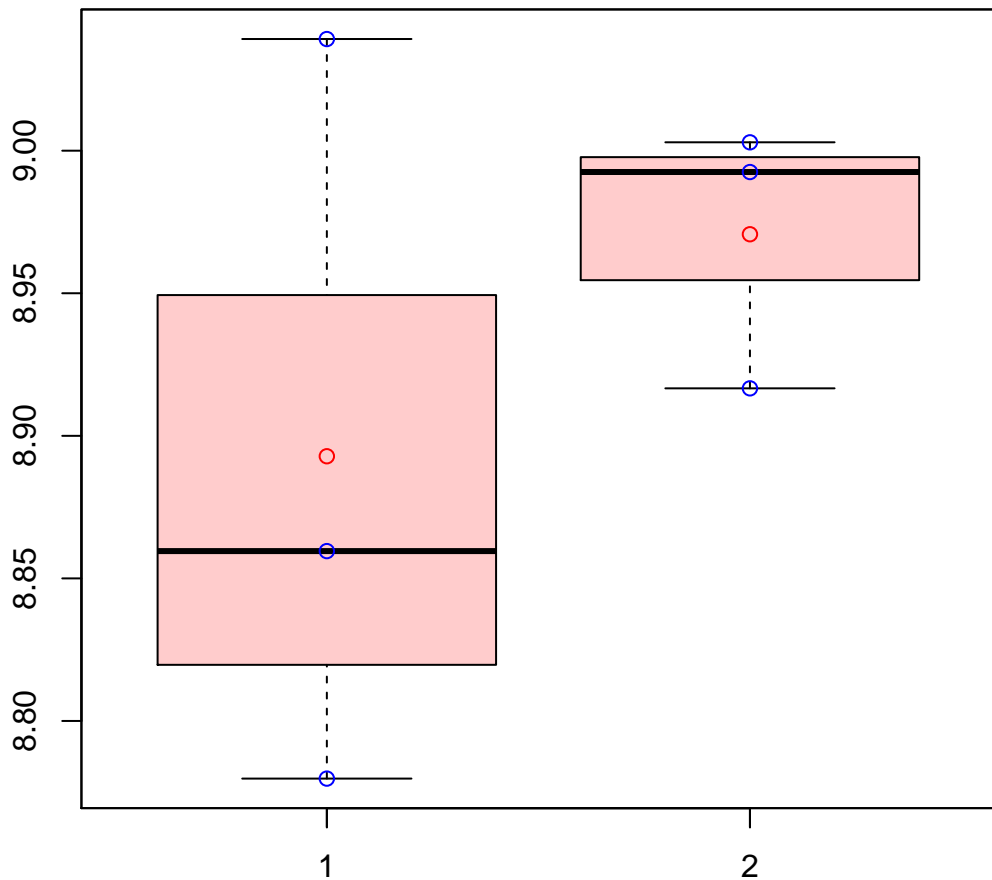

t-Test: p-value = 0.42

# CL1939Contig3|CL1939Contig3

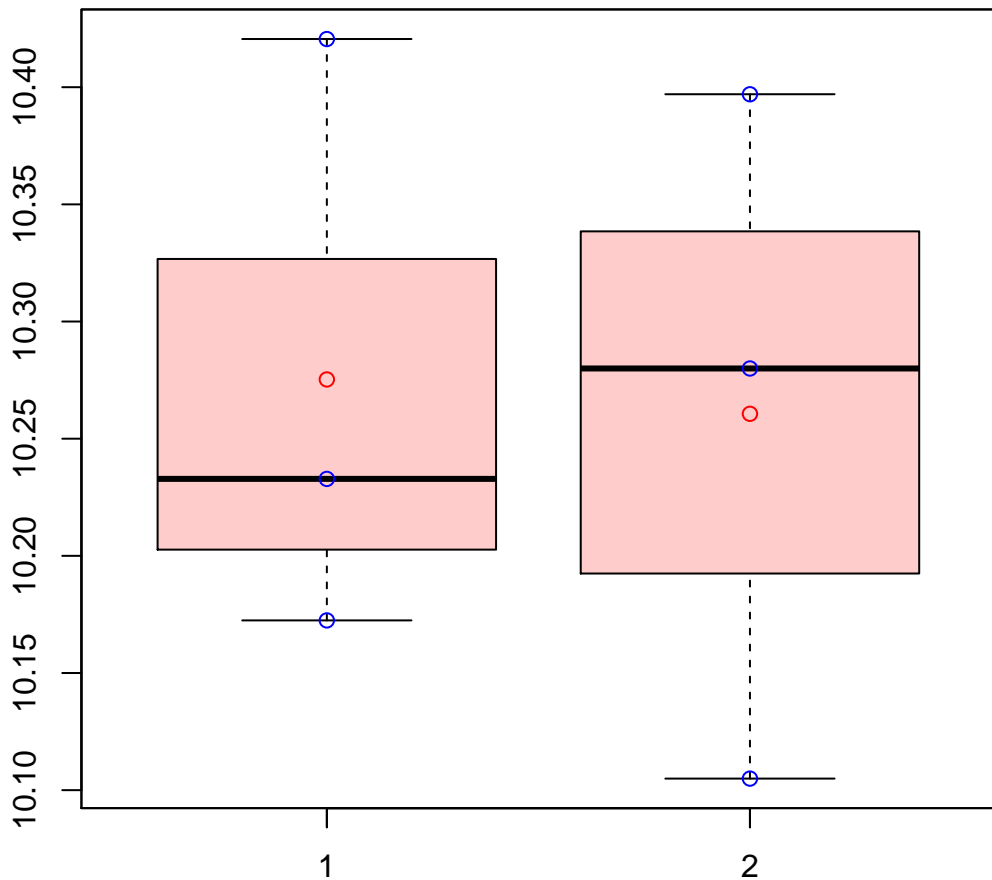

t-Test: p-value = 0.9

# CL1942Contig1|CL1942Contig1

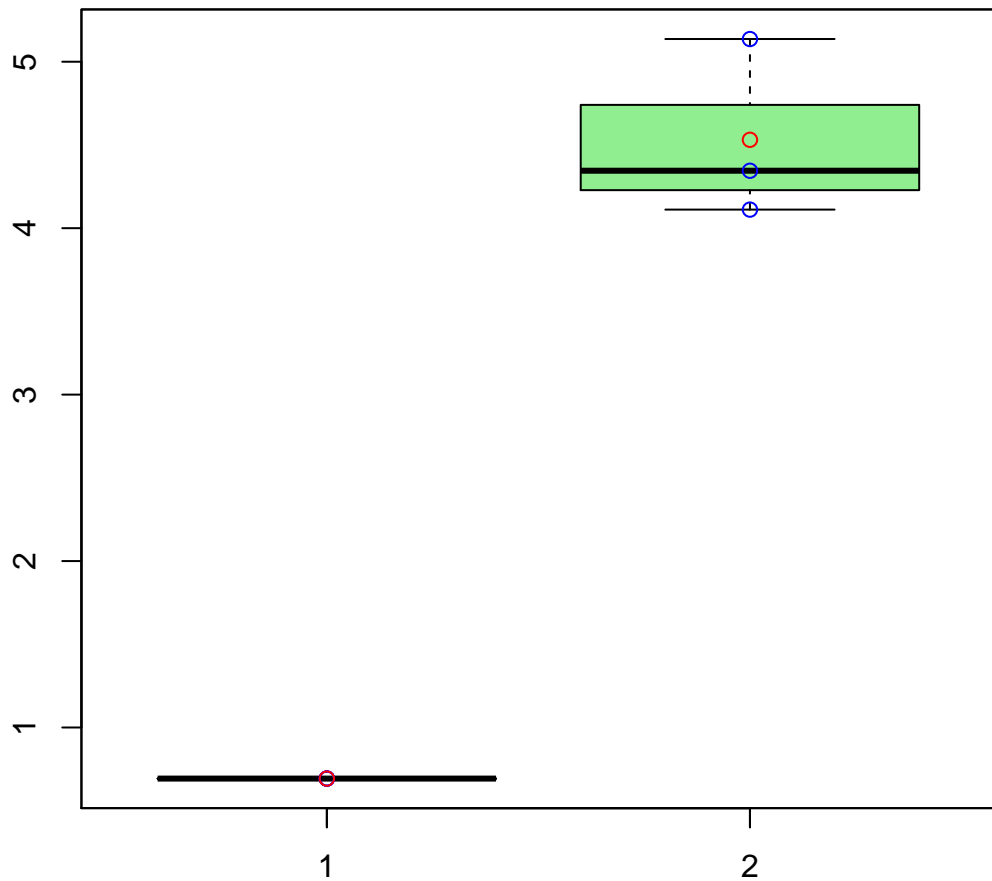

t-Test: p-value = 0.01



# CL1945Contig11|CL1945Contig11

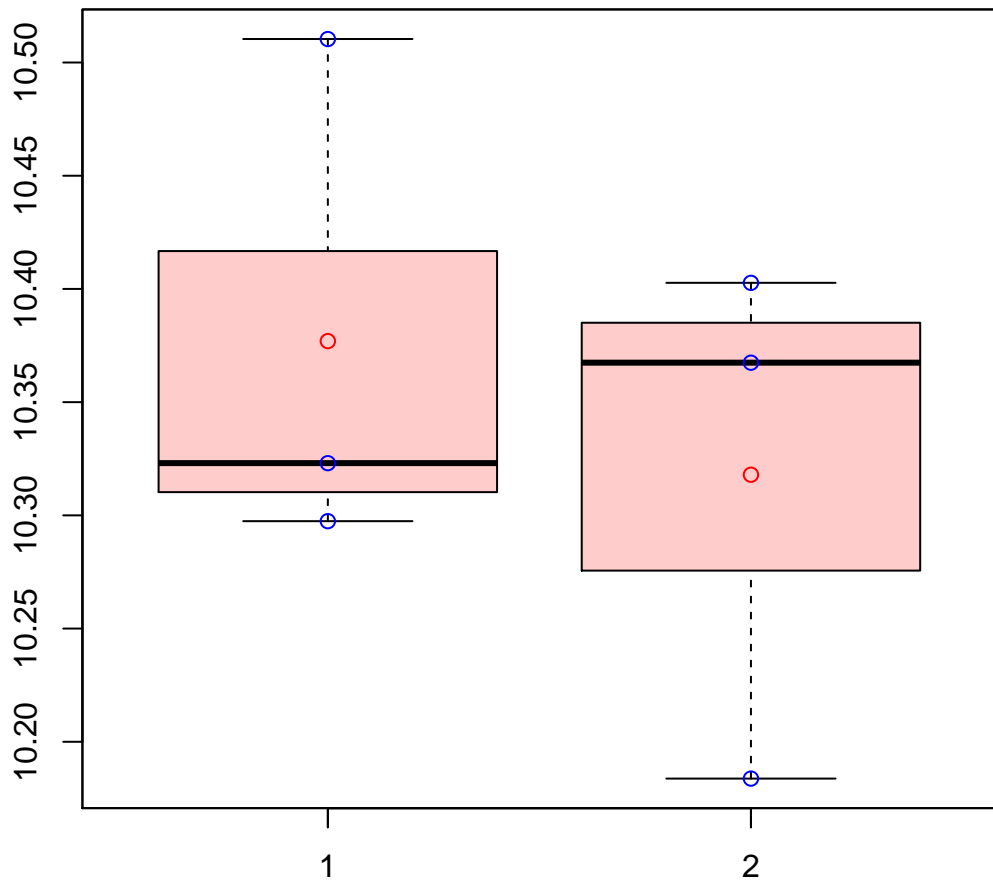

t-Test: p-value = 0.57

# CL1945Contig3|CL1945Contig3

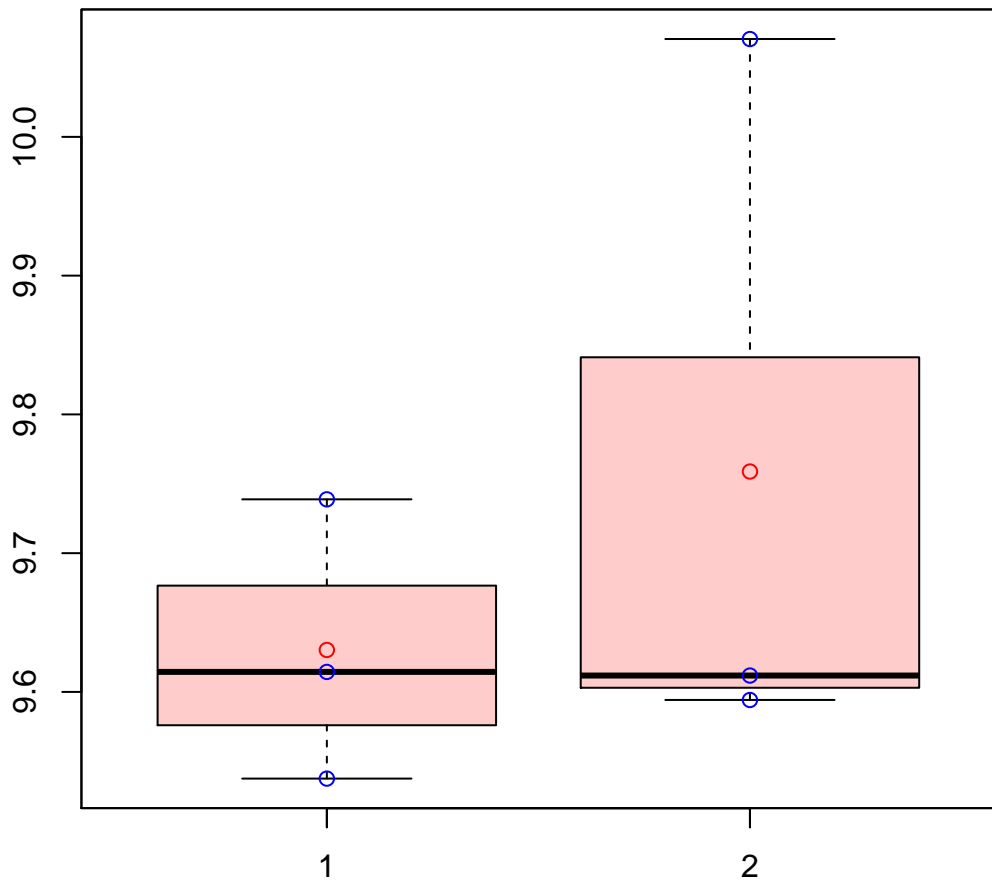

t-Test: p-value = 0.51

# CL1945Contig6|CL1945Contig6

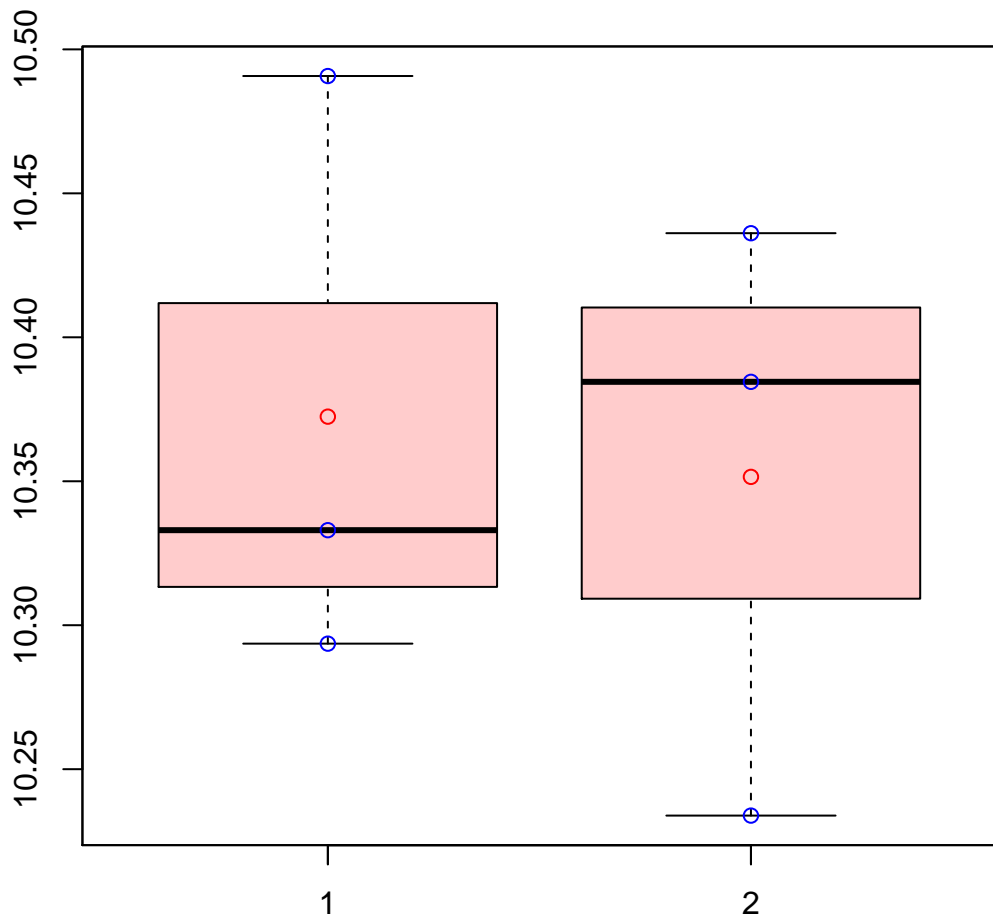

t-Test: p-value = 0.82

# CL1948Contig4|CL1948Contig4

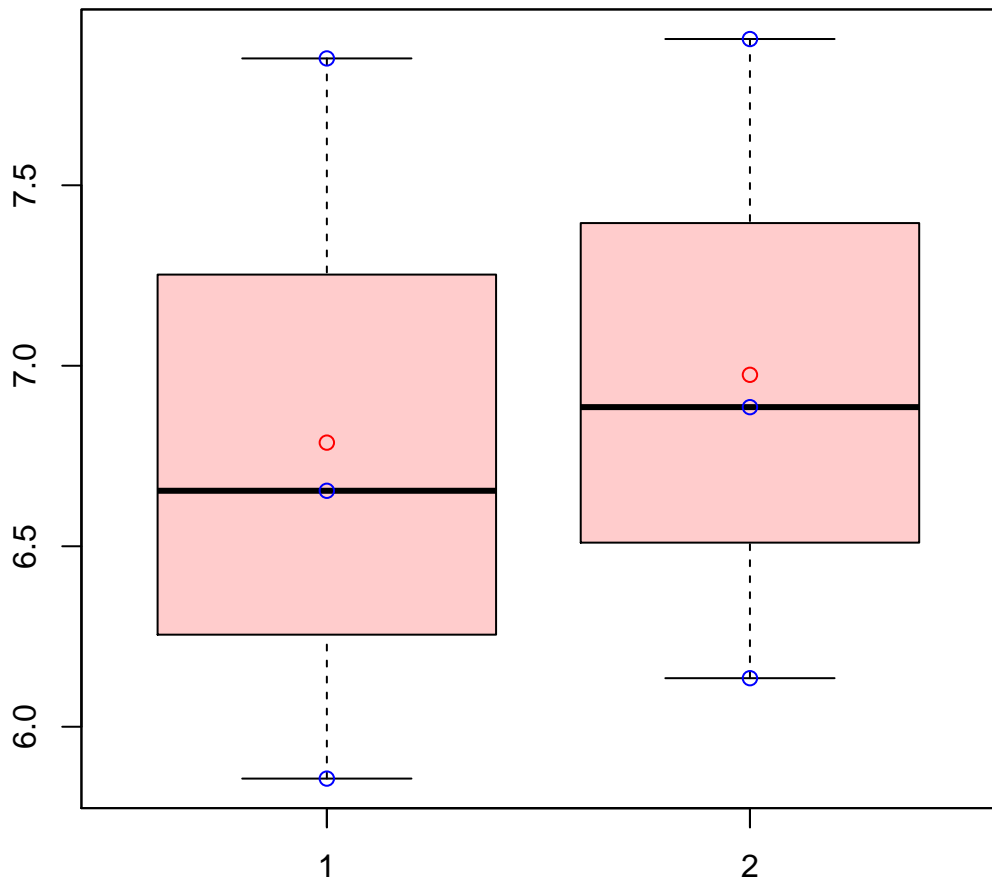

t-Test: p-value = 0.82

# CL194Contig12|CL194Contig12

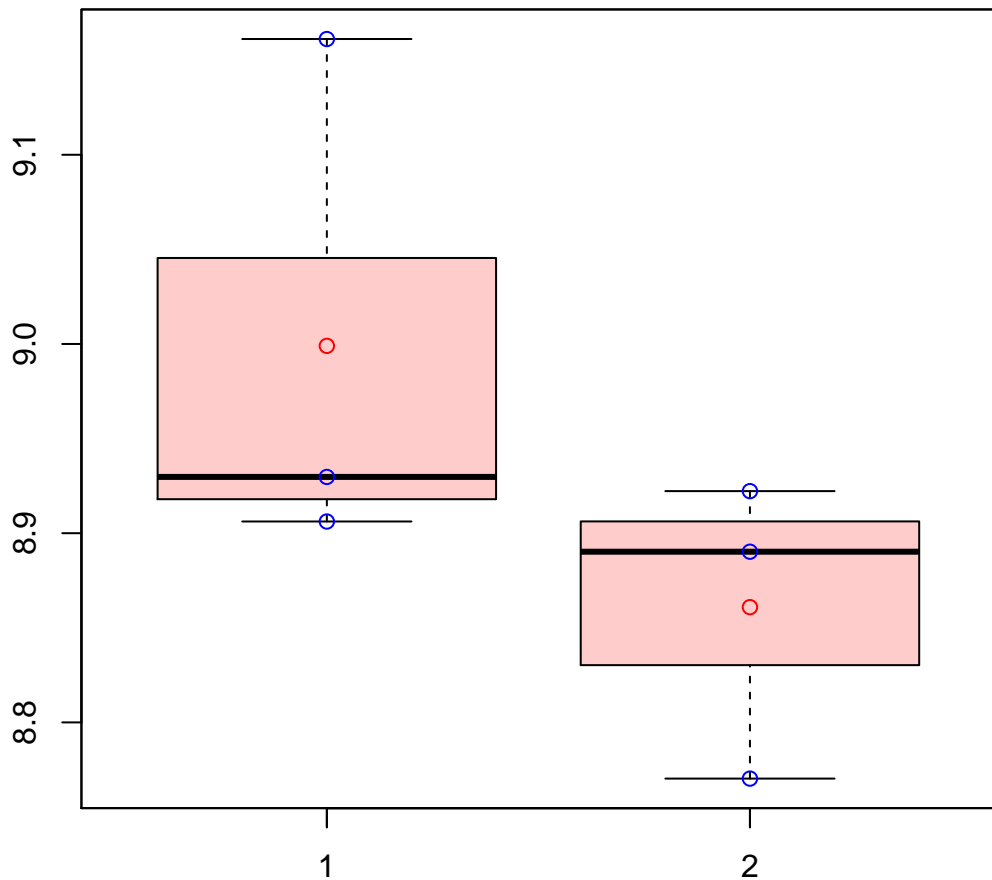

t-Test: p-value = 0.23

# CL194Contig7|CL194Contig7

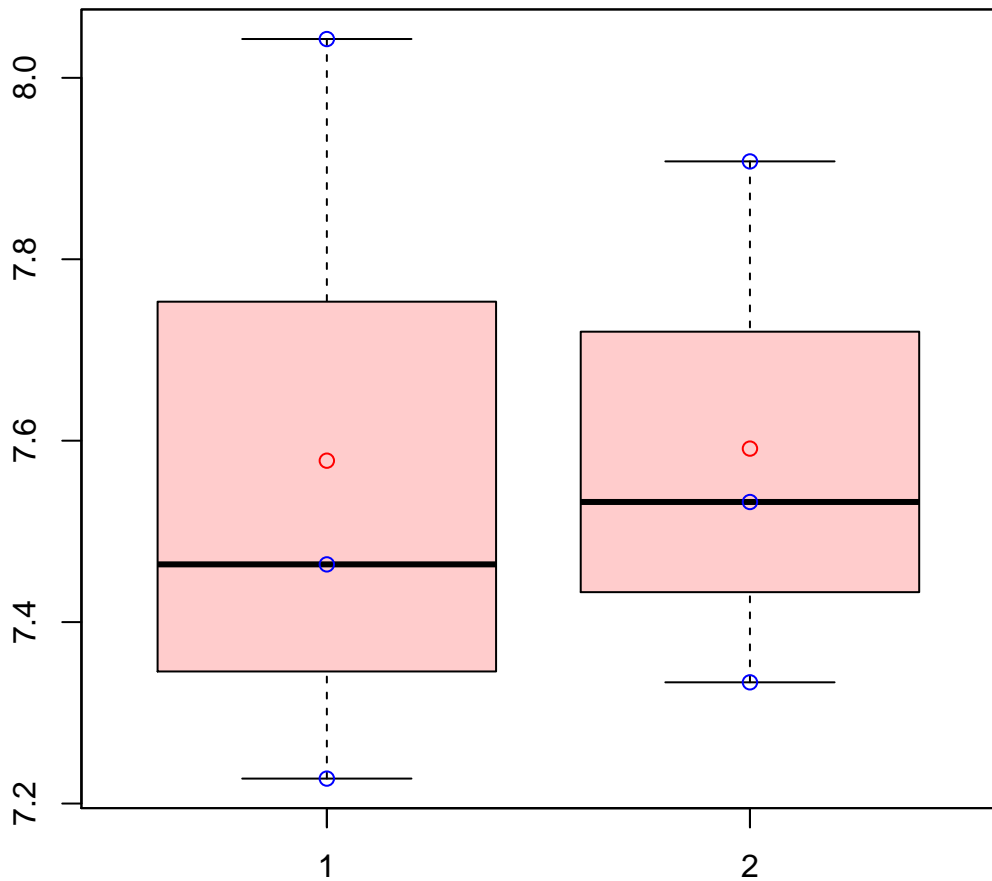

t-Test: p-value = 0.97

# CL1950Contig4|CL1950Contig4

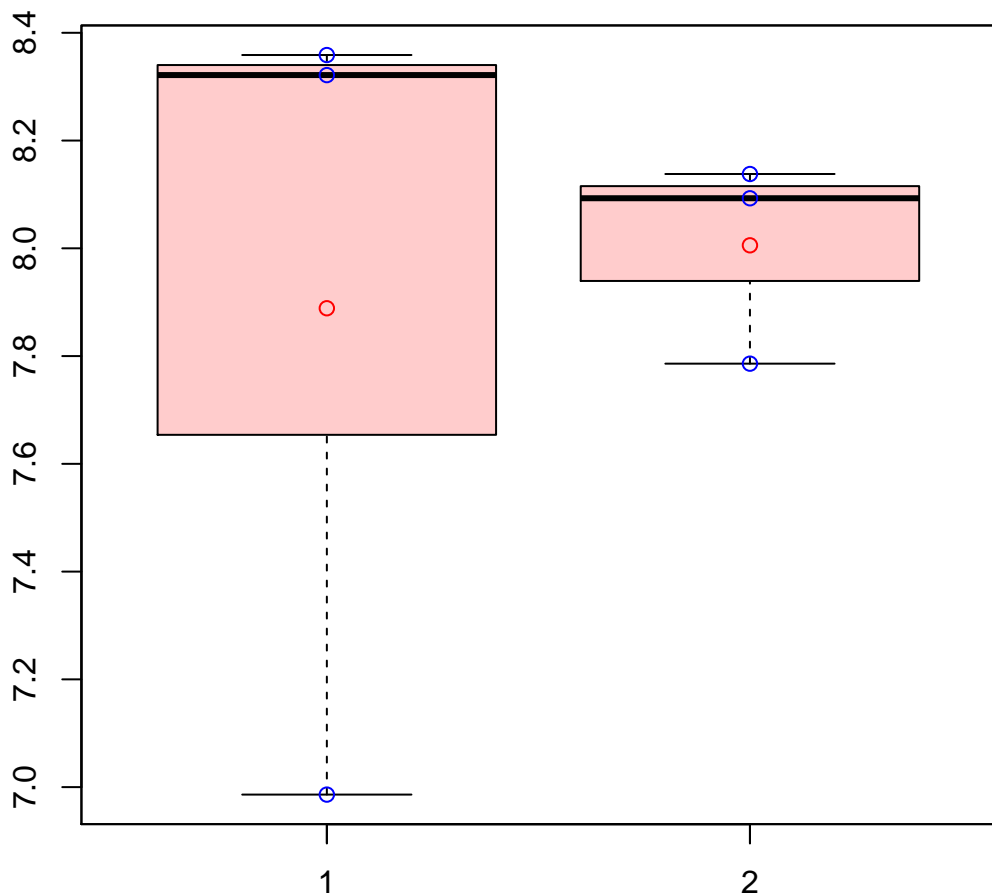

t-Test: p-value = 0.82

# CL1950Contig5|CL1950Contig5



t-Test: p-value = 0.82



# CL1953Contig2|CL1953Contig2

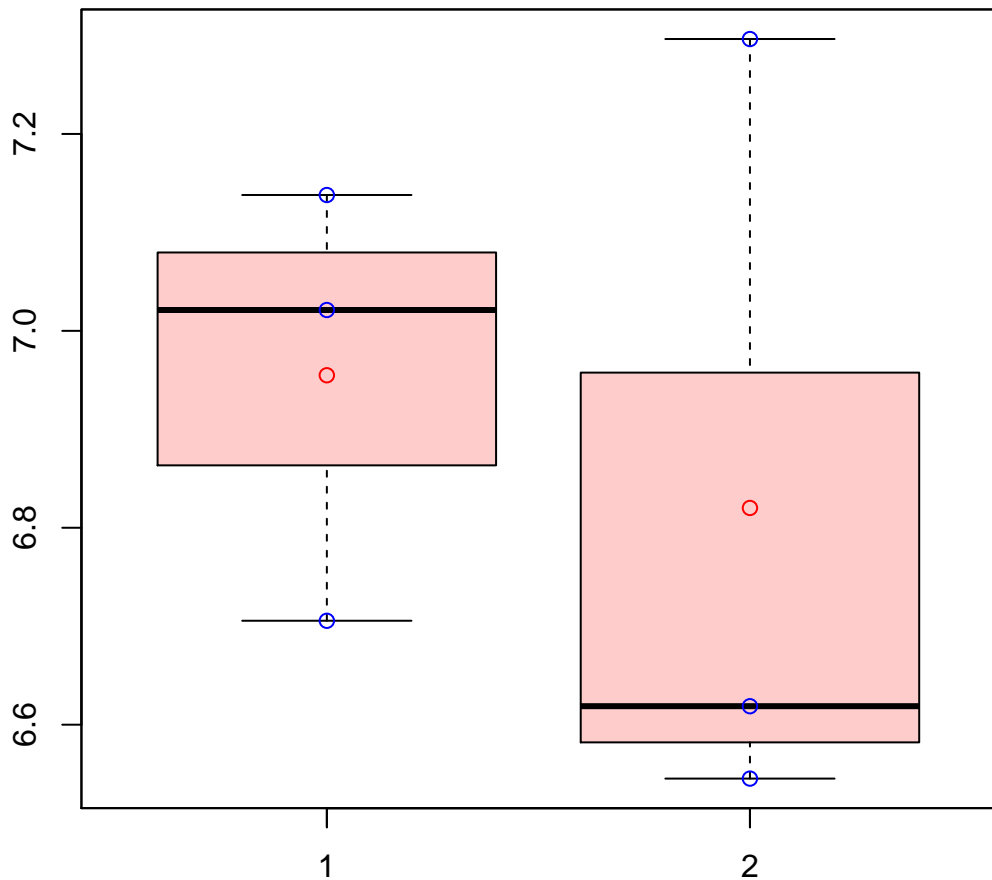

t-Test: p-value = 0.65

# CL19554Contig1|CL19554Contig1

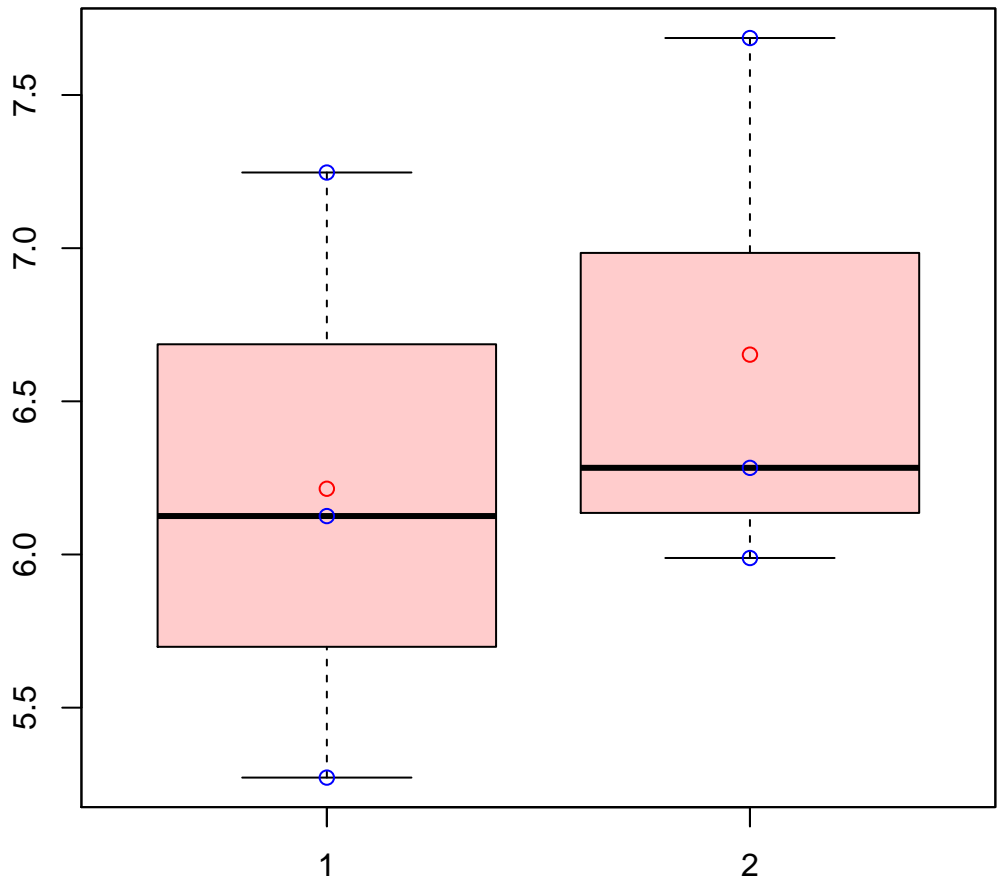

t-Test: p-value = 0.6

# CL1958Contig1|CL1958Contig1

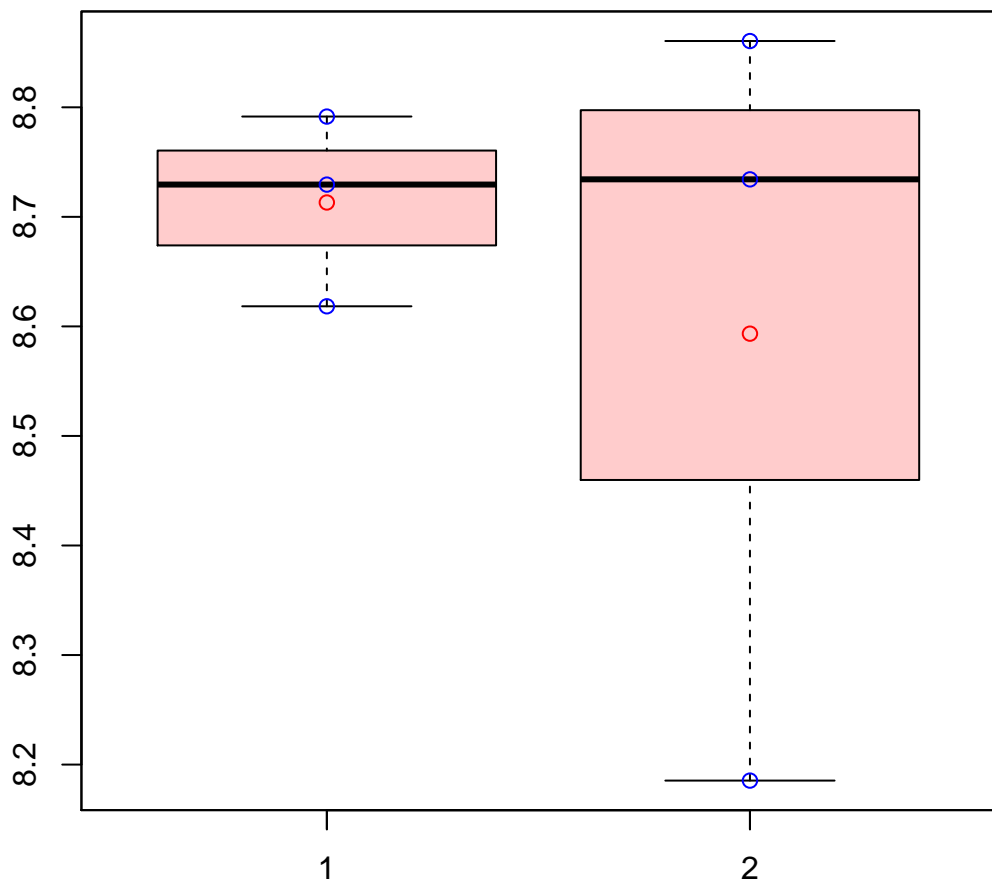

t-Test: p-value = 0.63

# CL1960Contig3|CL1960Contig3



t-Test: p-value = 0.67

# CL19644Contig1|CL19644Contig1

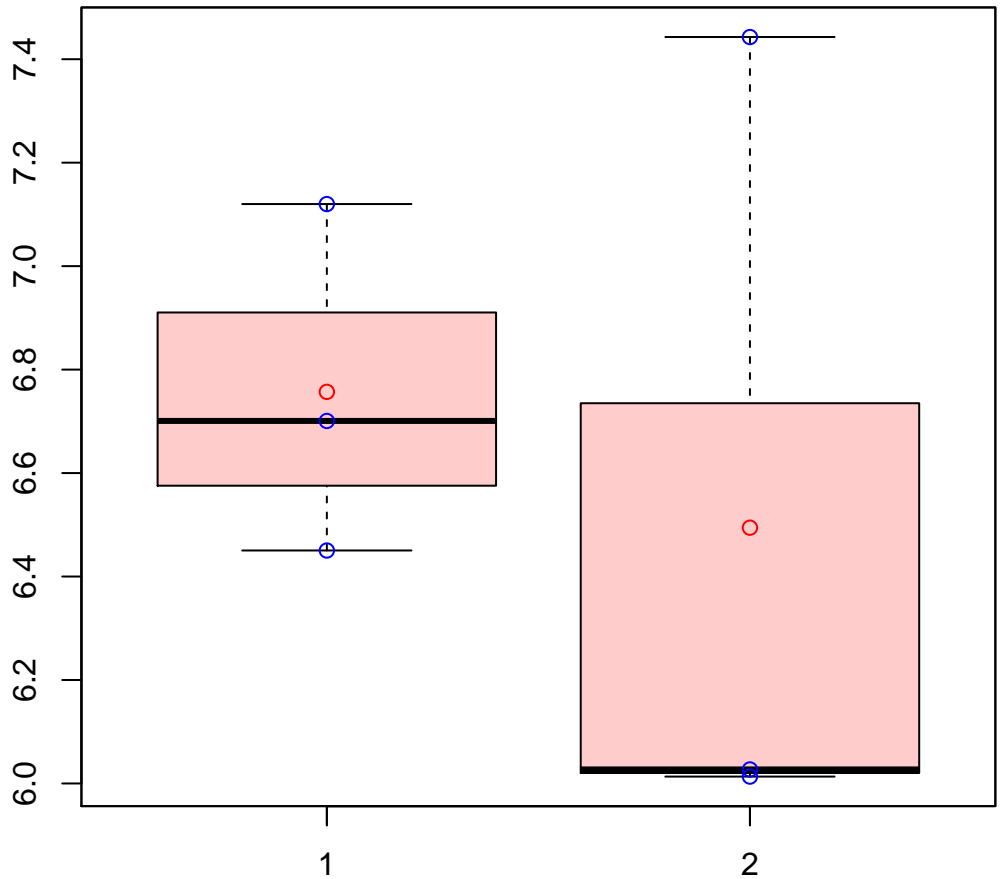

t-Test: p-value = 0.65

# CL1965Contig1|CL1965Contig1

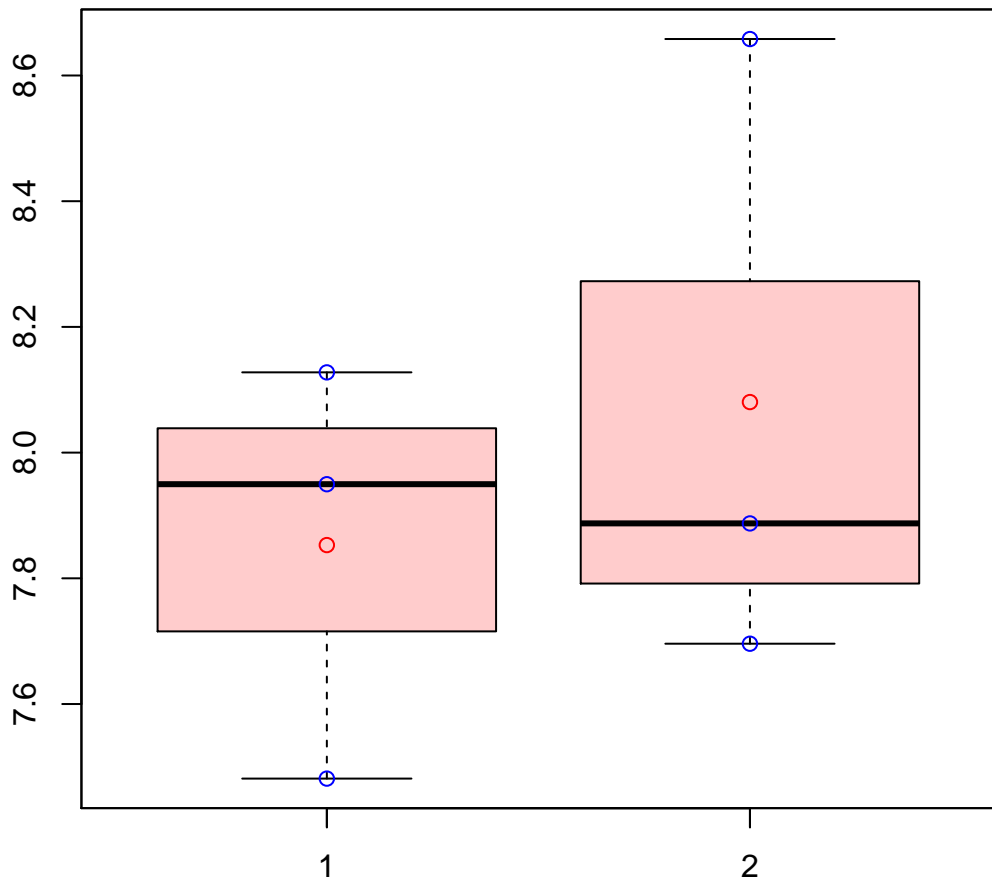

t-Test: p-value = 0.56

# CL1965Contig5|CL1965Contig5



t-Test: p-value = 0.56

# CL1965Contig8|CL1965Contig8

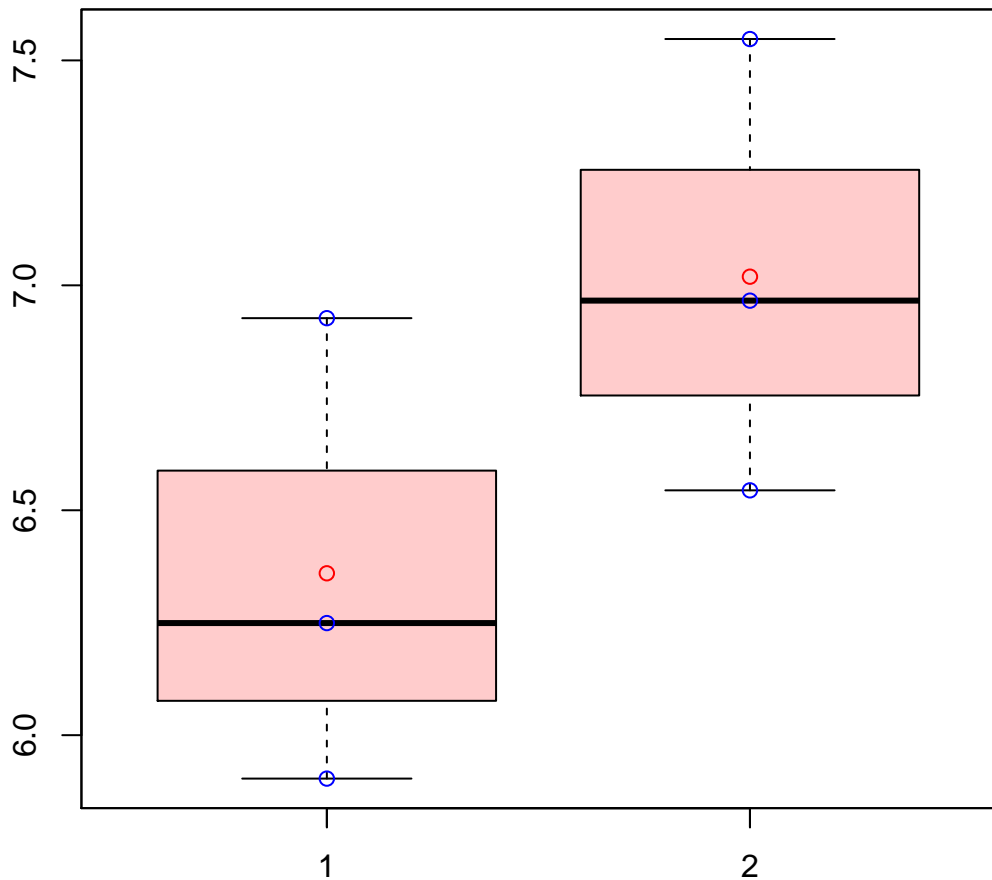

t-Test: p-value = 0.19



# CL1971Contig1|CL1971Contig1

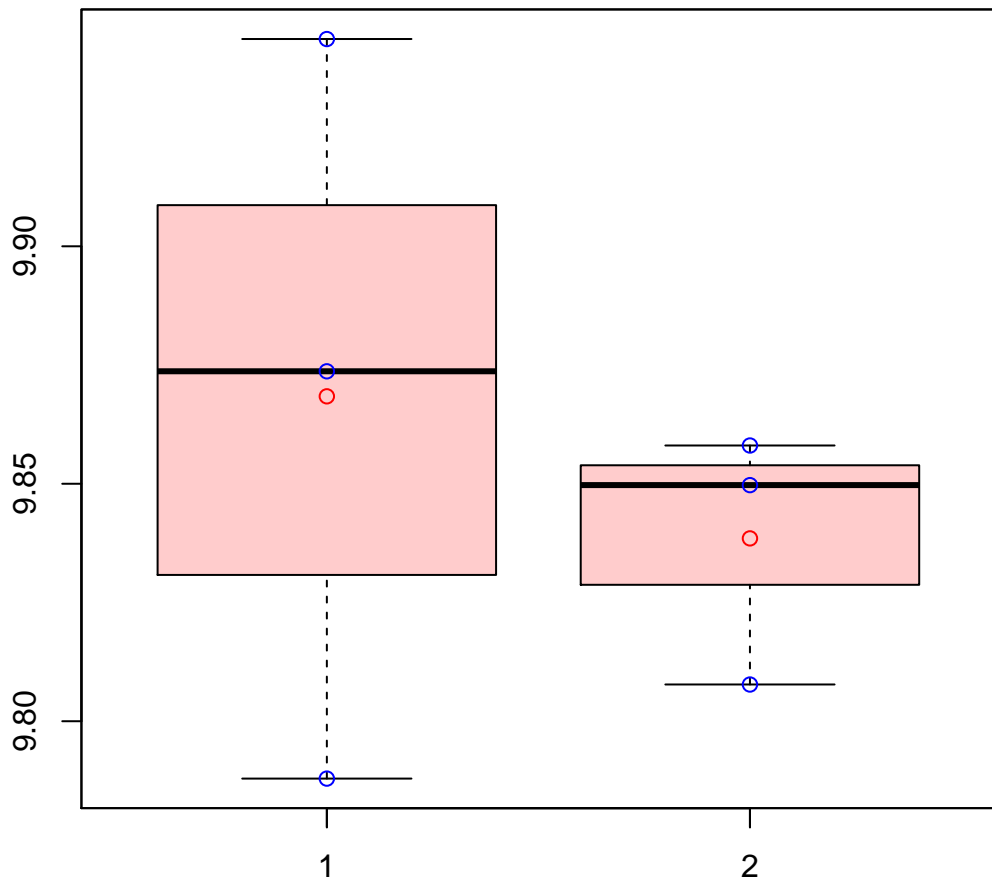

t-Test: p-value = 0.58

# CL1971Contig7|CL1971Contig7

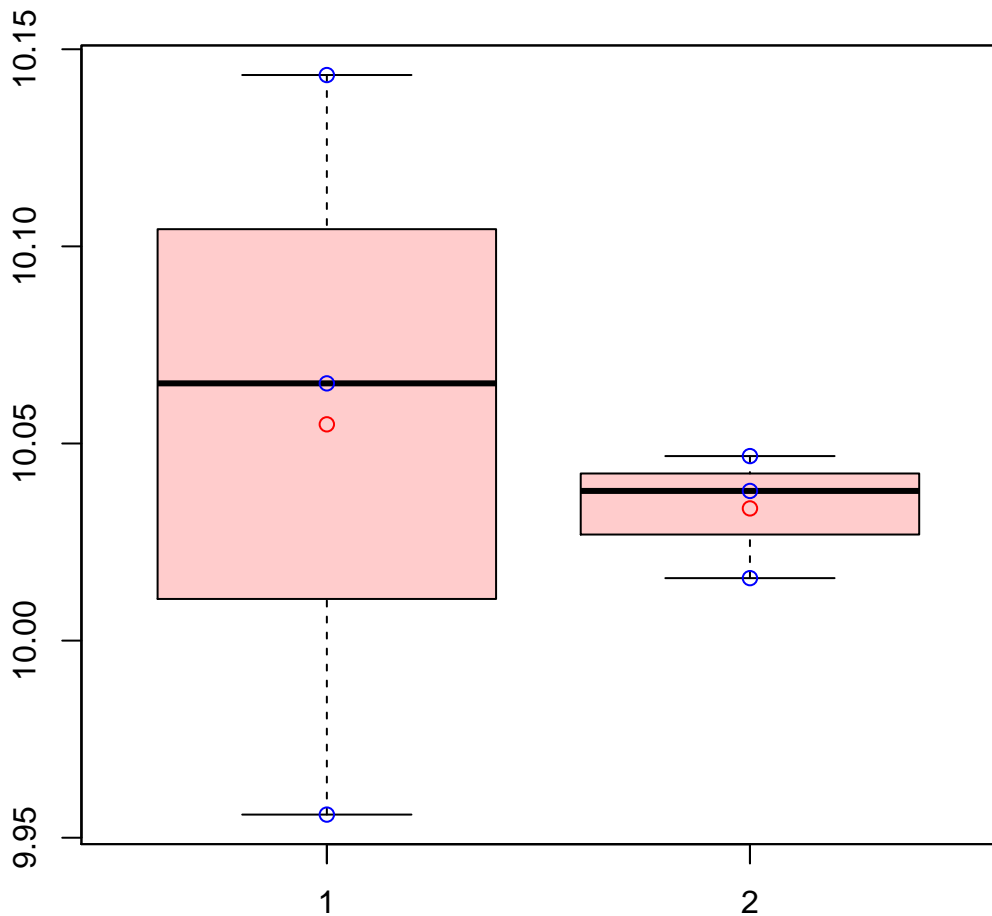

t-Test: p-value = 0.73

# CL1973Contig4|CL1973Contig4

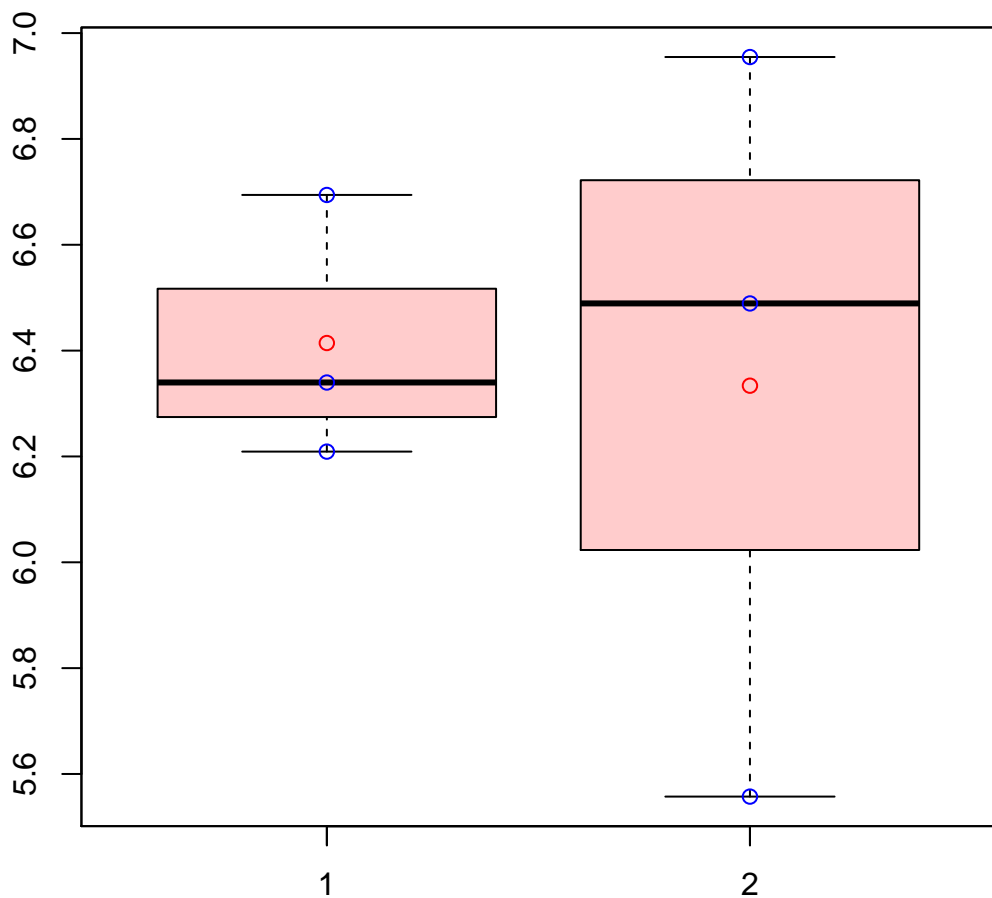

t-Test: p-value = 0.87

# CL1976Contig2|CL1976Contig2

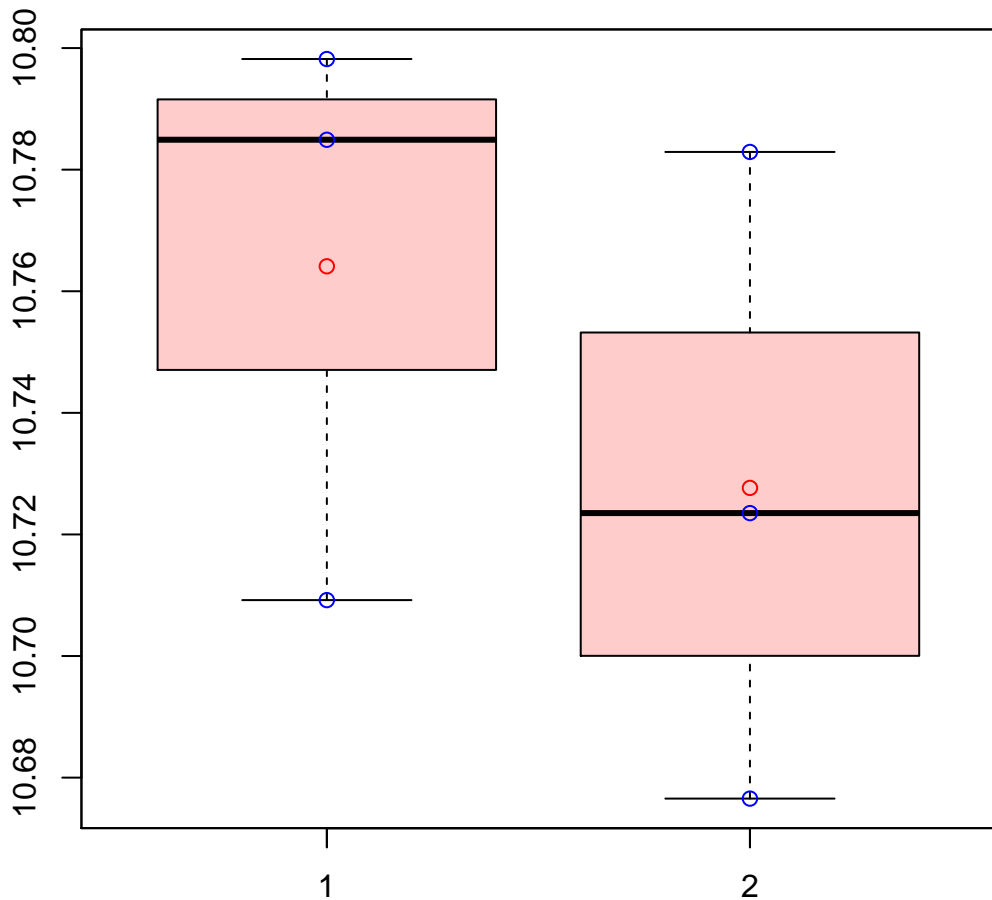

t-Test: p-value = 0.43

# CL1976Contig3|CL1976Contig3

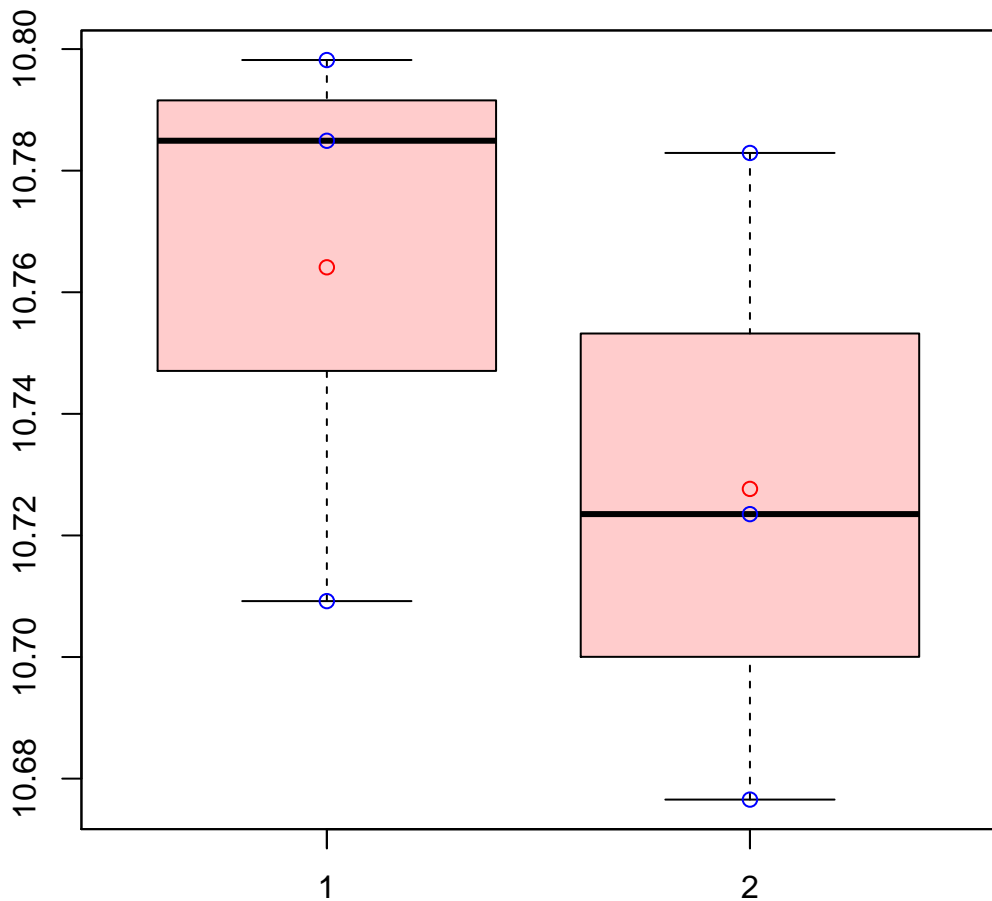

t-Test: p-value = 0.43

# CL1980Contig1|CL1980Contig1

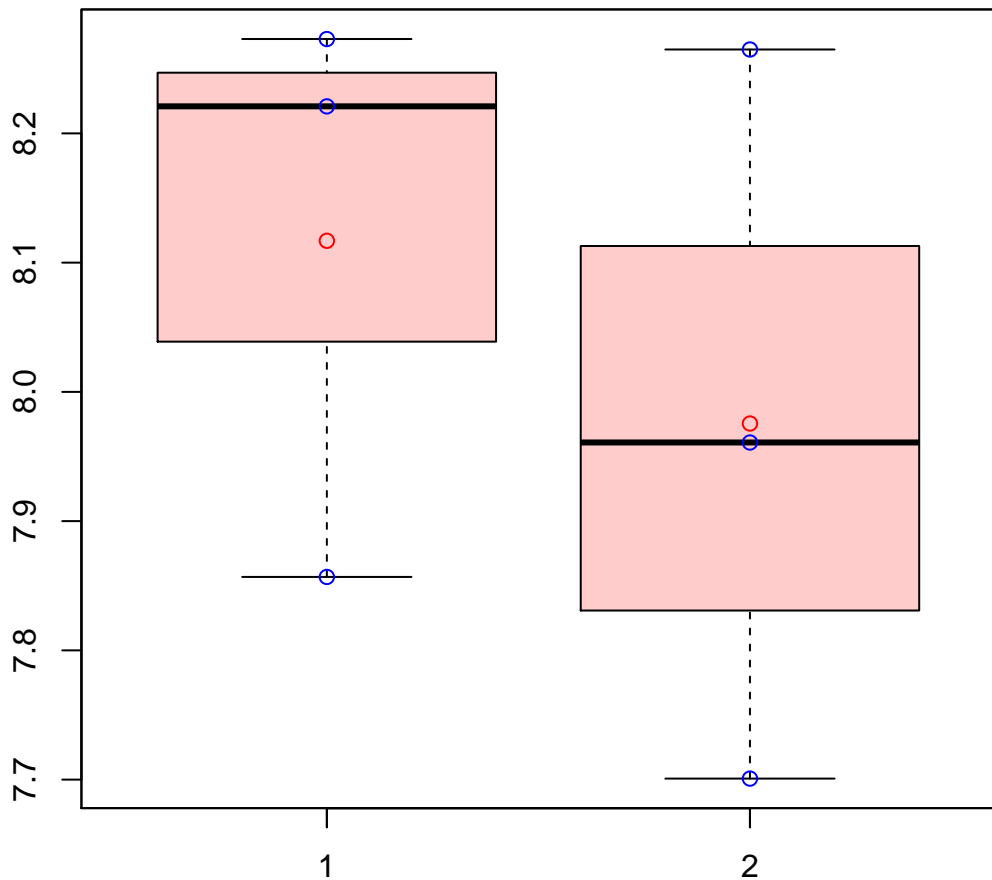

t-Test: p-value = 0.54

# CL1981Contig1|CL1981Contig1

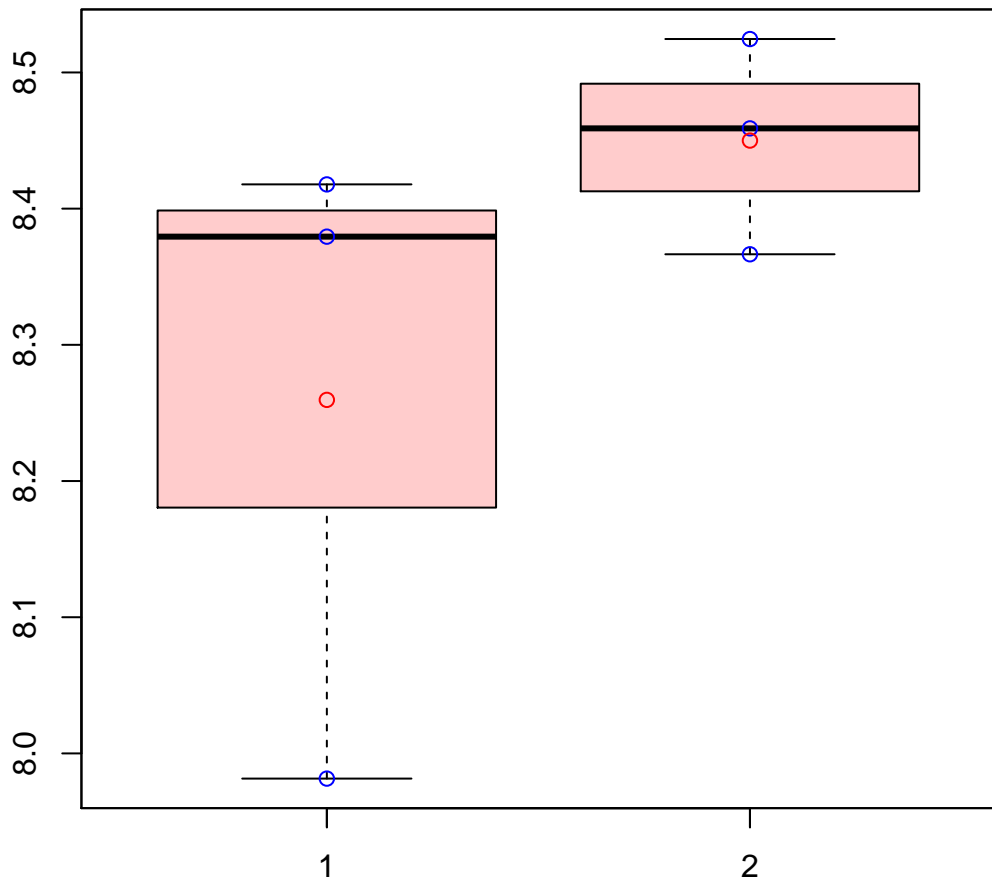

t-Test: p-value = 0.3

# CL1982Contig3|CL1982Contig3

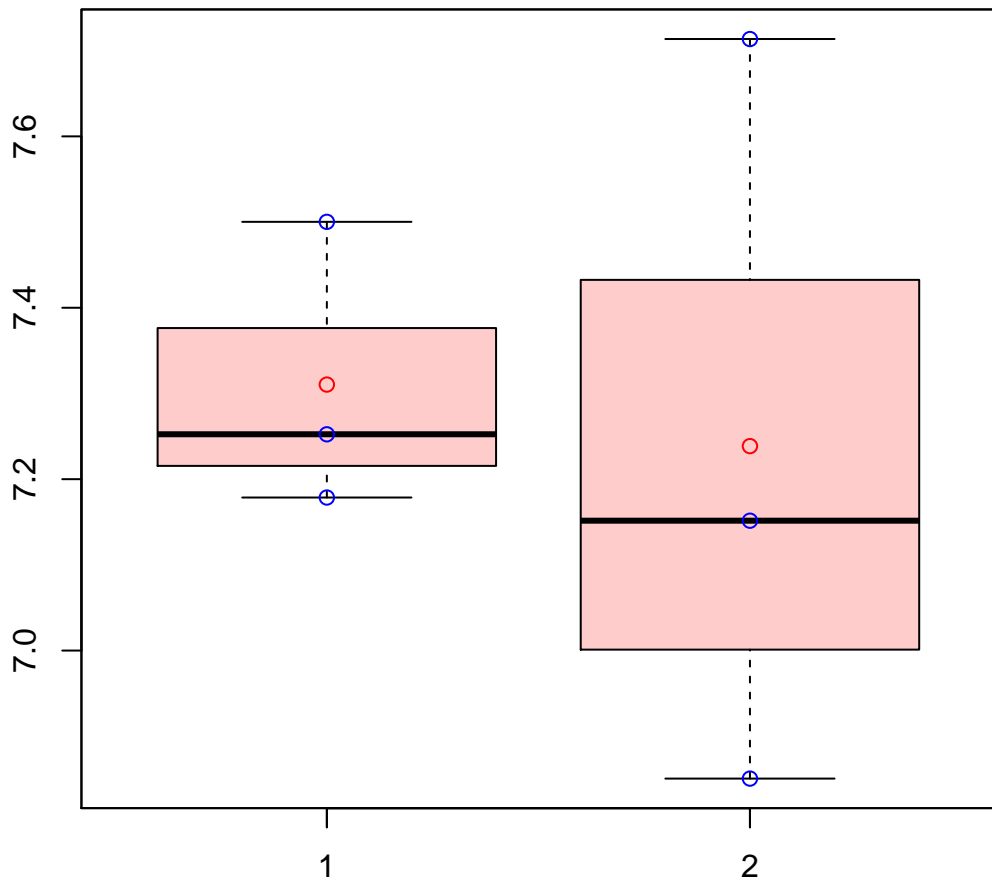

t-Test: p-value = 0.81



# CL1984Contig1|CL1984Contig1

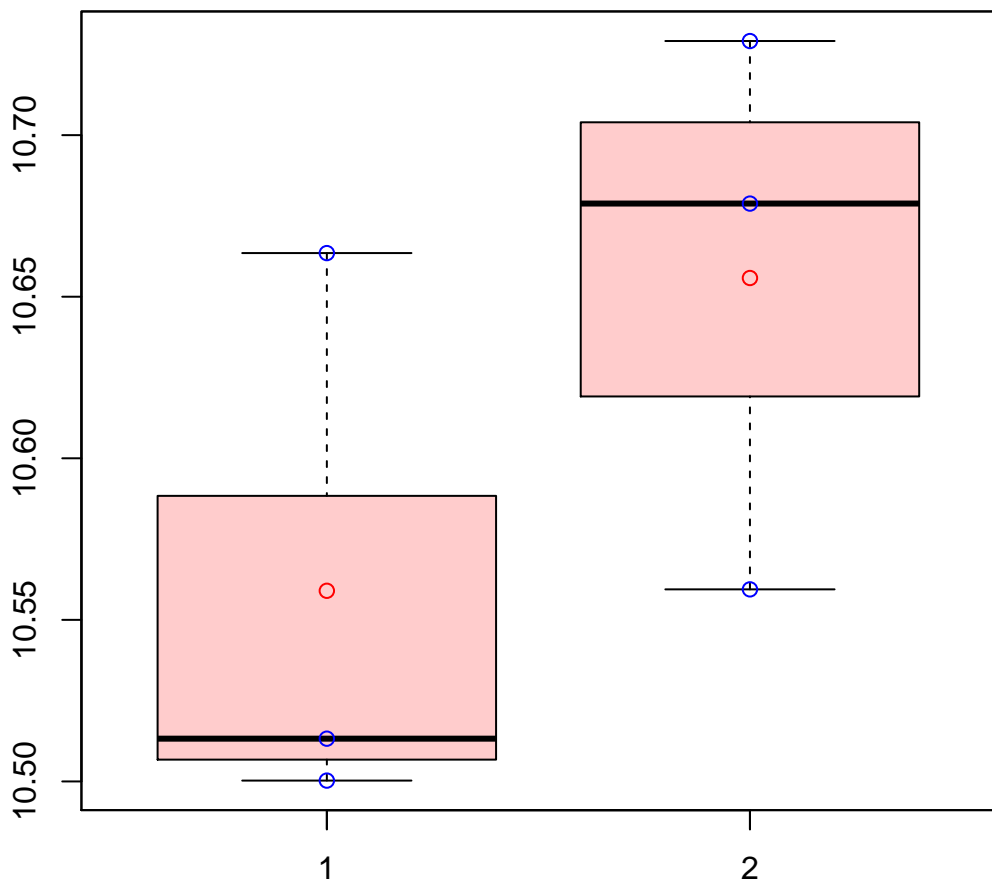

t-Test: p-value = 0.25

# CL1984Contig2|CL1984Contig2

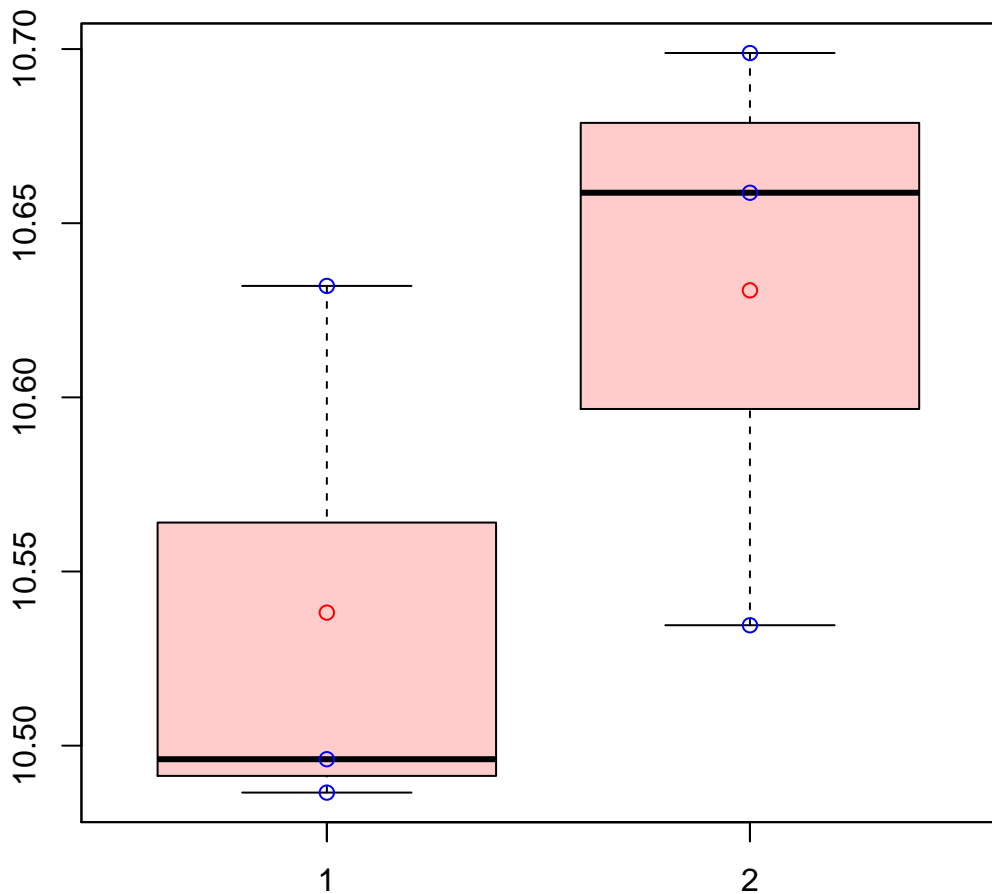

t-Test: p-value = 0.25

# CL1984Contig3|CL1984Contig3

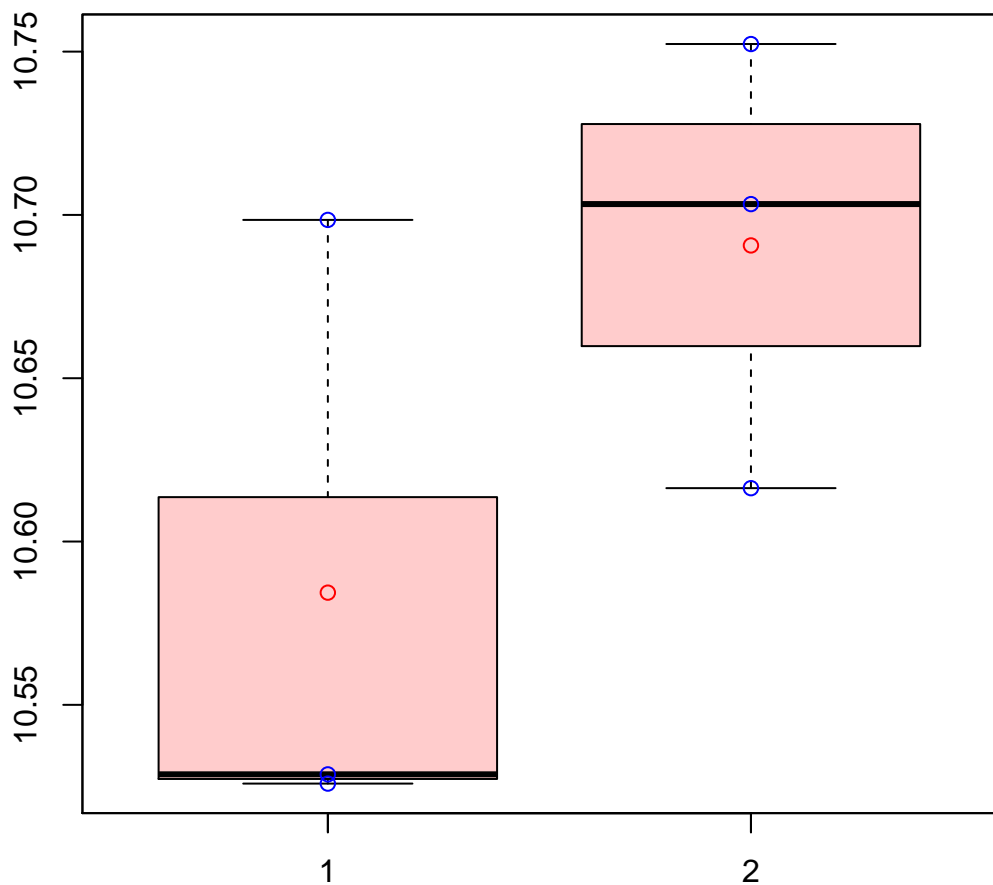

t-Test: p-value = 0.21

# CL1984Contig4|CL1984Contig4

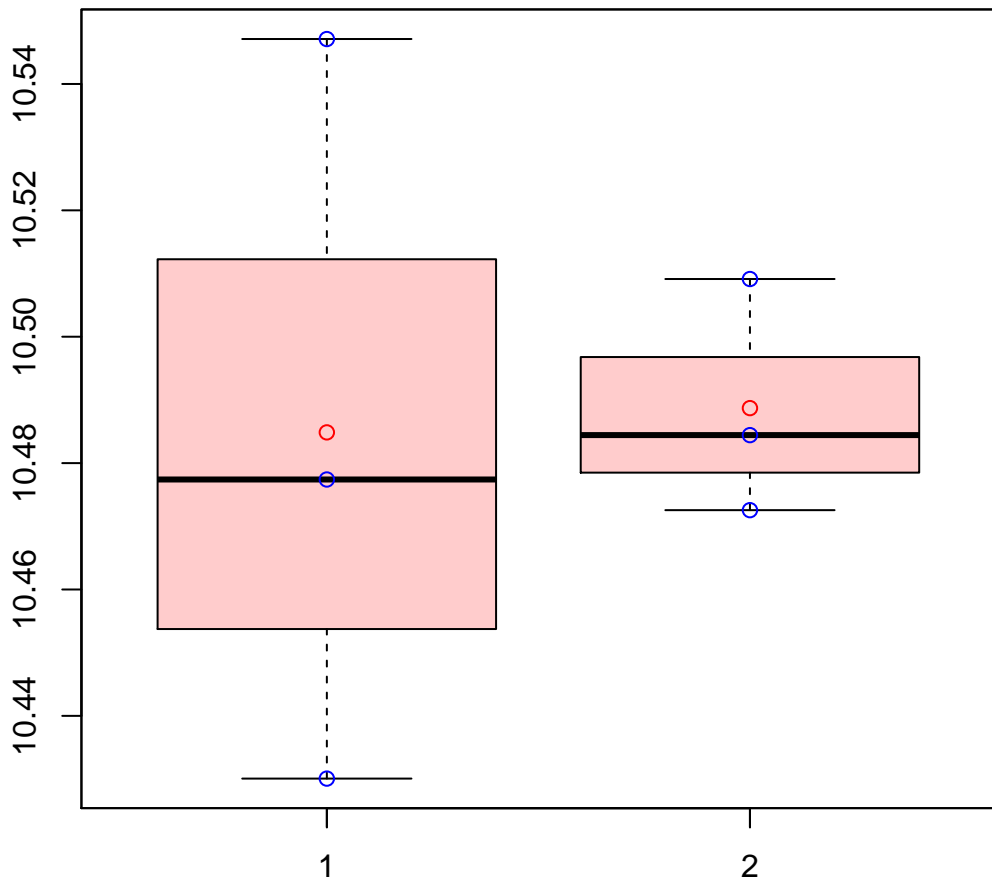

t-Test: p-value = 0.92

# CL19885Contig1|CL19885Contig1

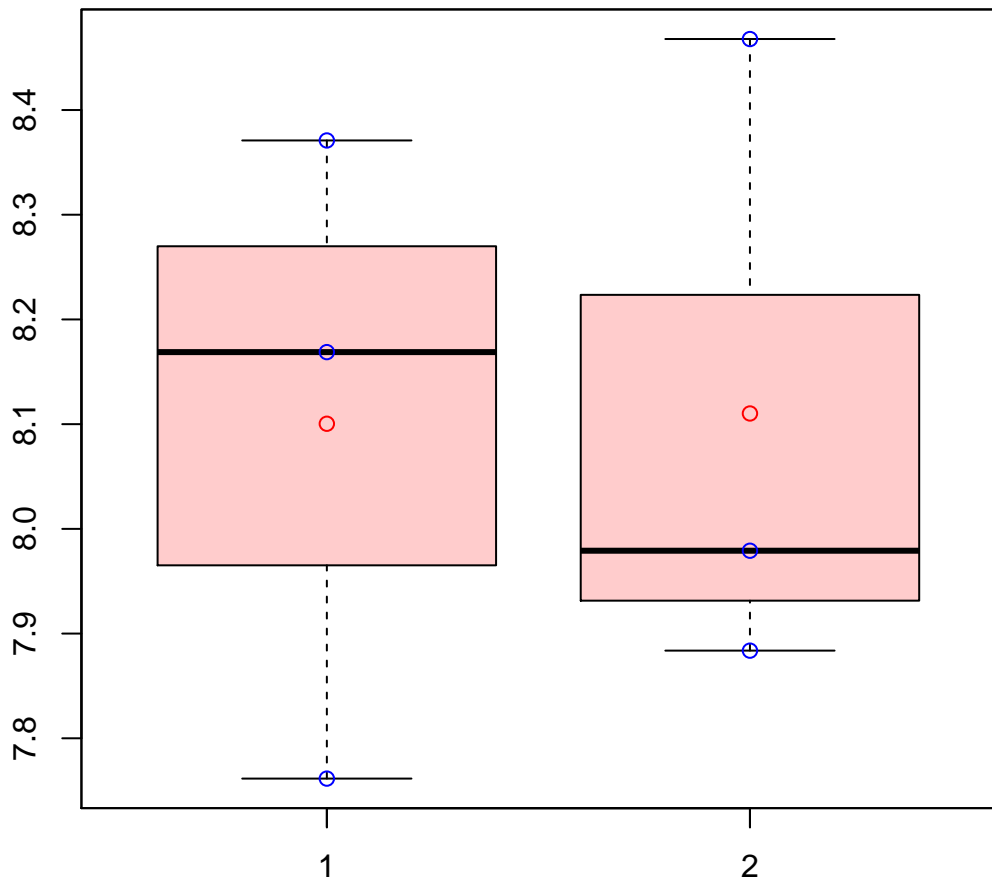

t-Test: p-value = 0.97

# CL1993Contig2|CL1993Contig2

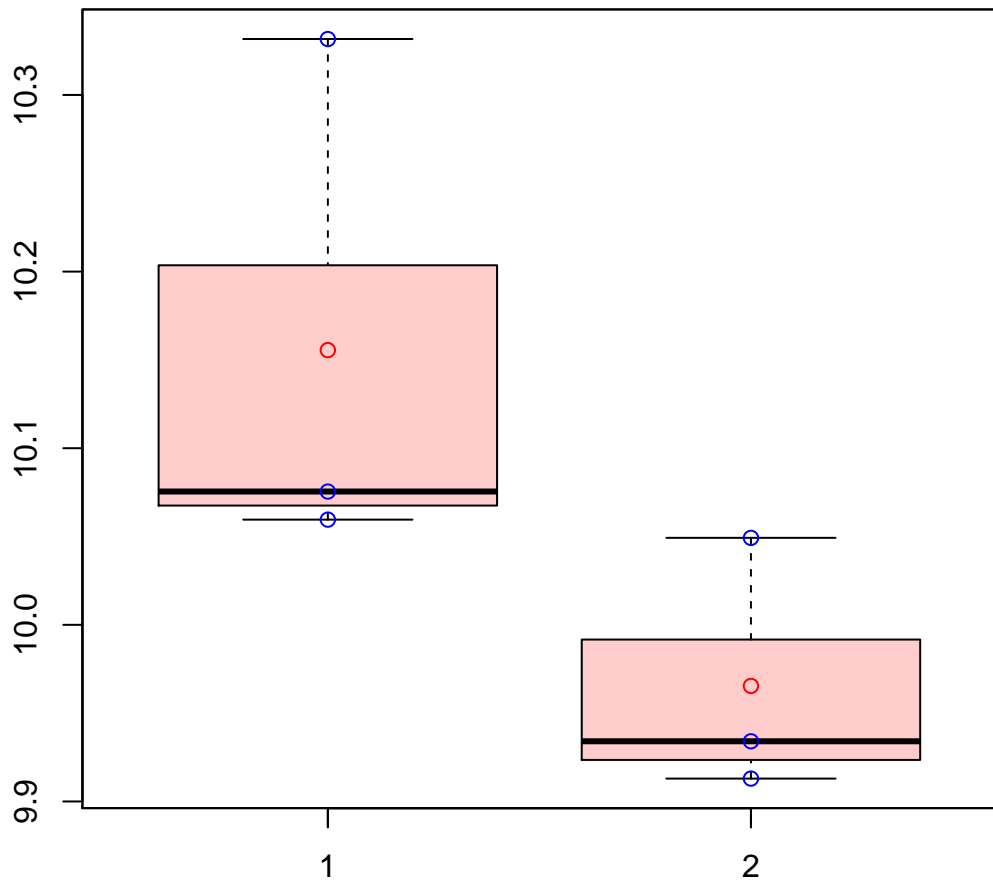

t-Test: p-value = 0.15

# CL19943Contig1|CL19943Contig1

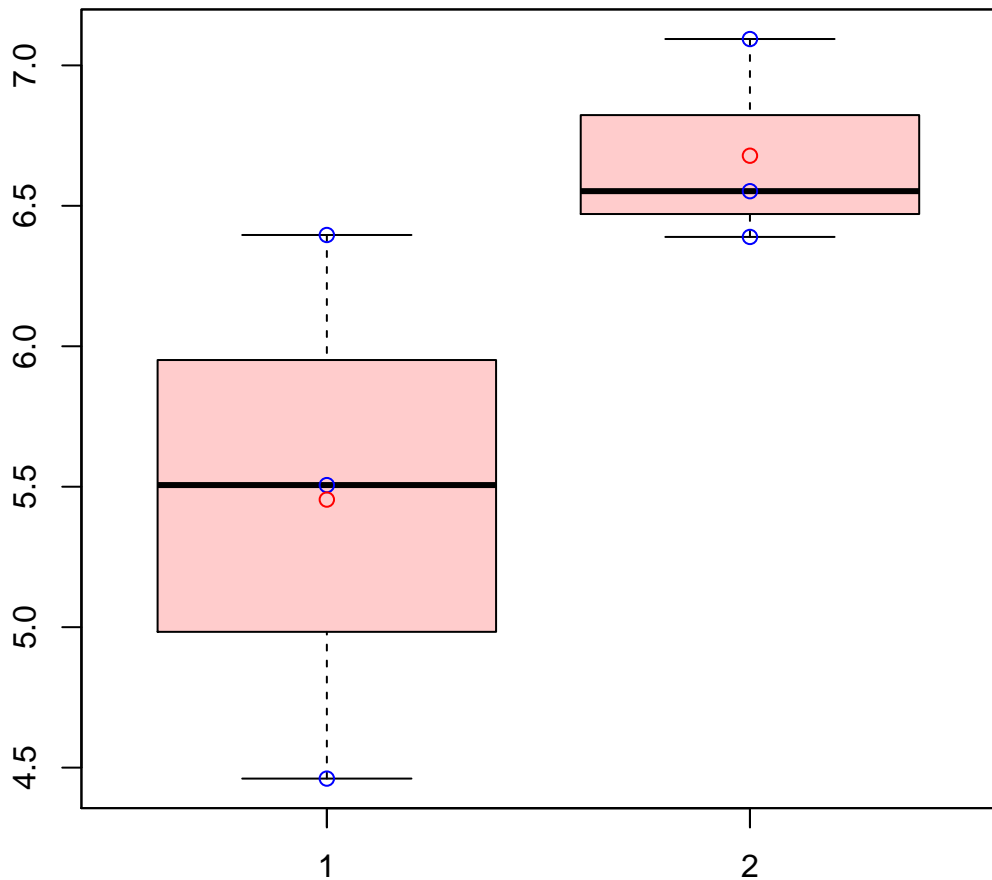

t-Test: p-value = 0.15

# CL1994Contig1|CL1994Contig1

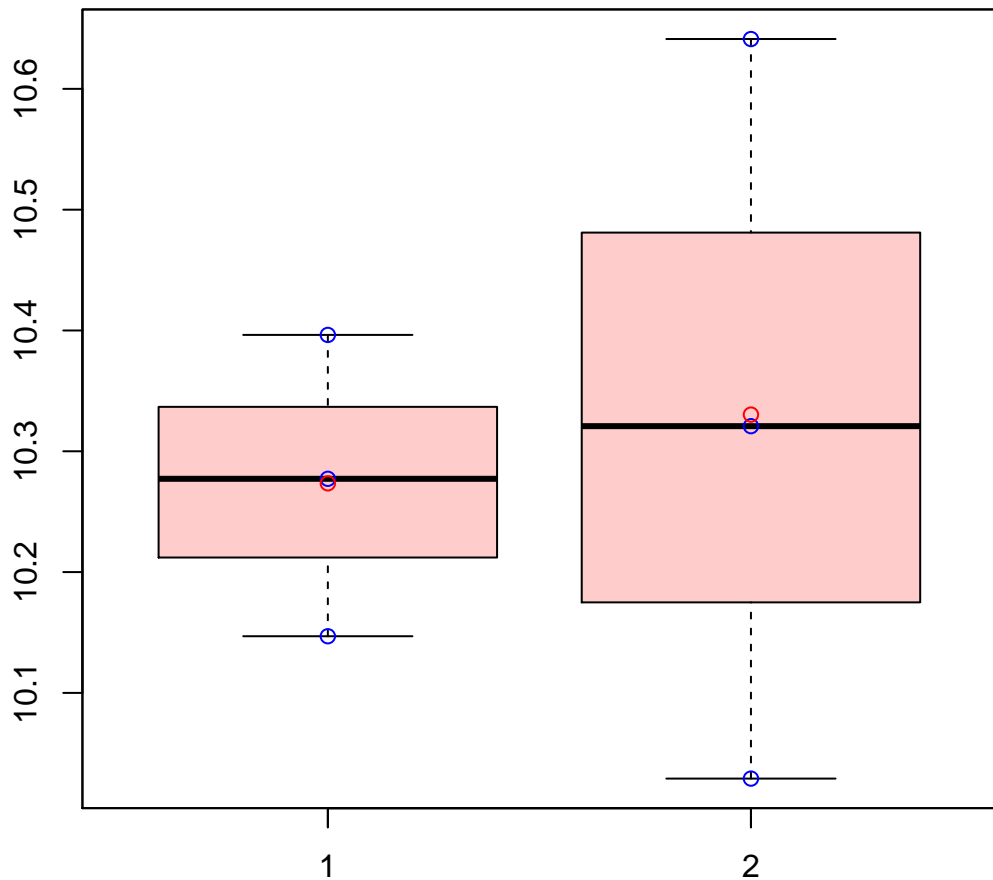

t-Test: p-value = 0.79



# CL1995Contig2|CL1995Contig2

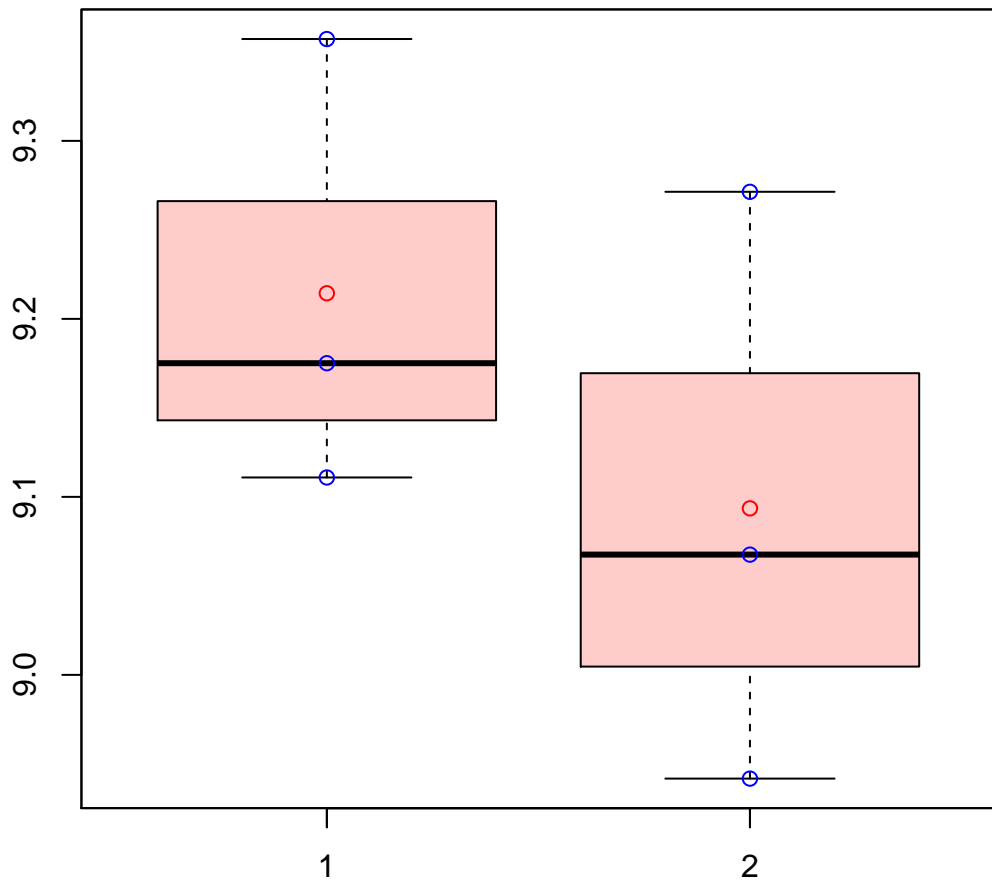

t-Test: p-value = 0.38

# CL1996Contig1|CL1996Contig1

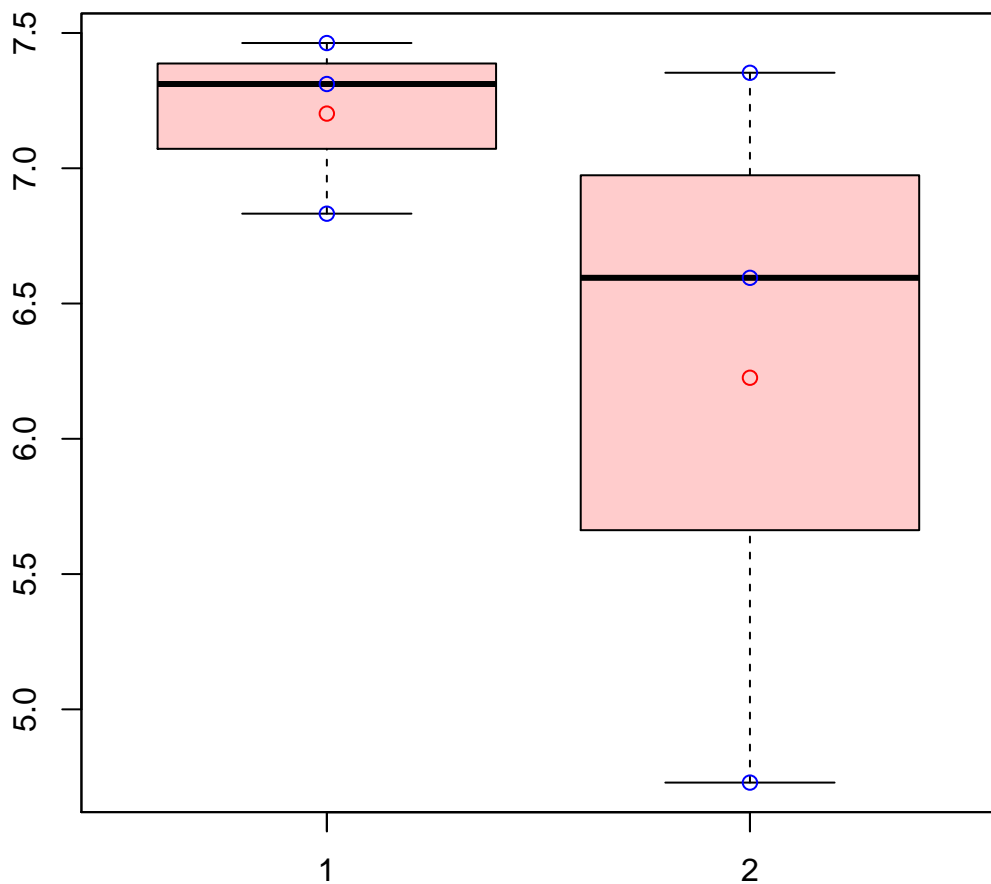

t-Test: p-value = 0.34

# CL1997Contig8|CL1997Contig8

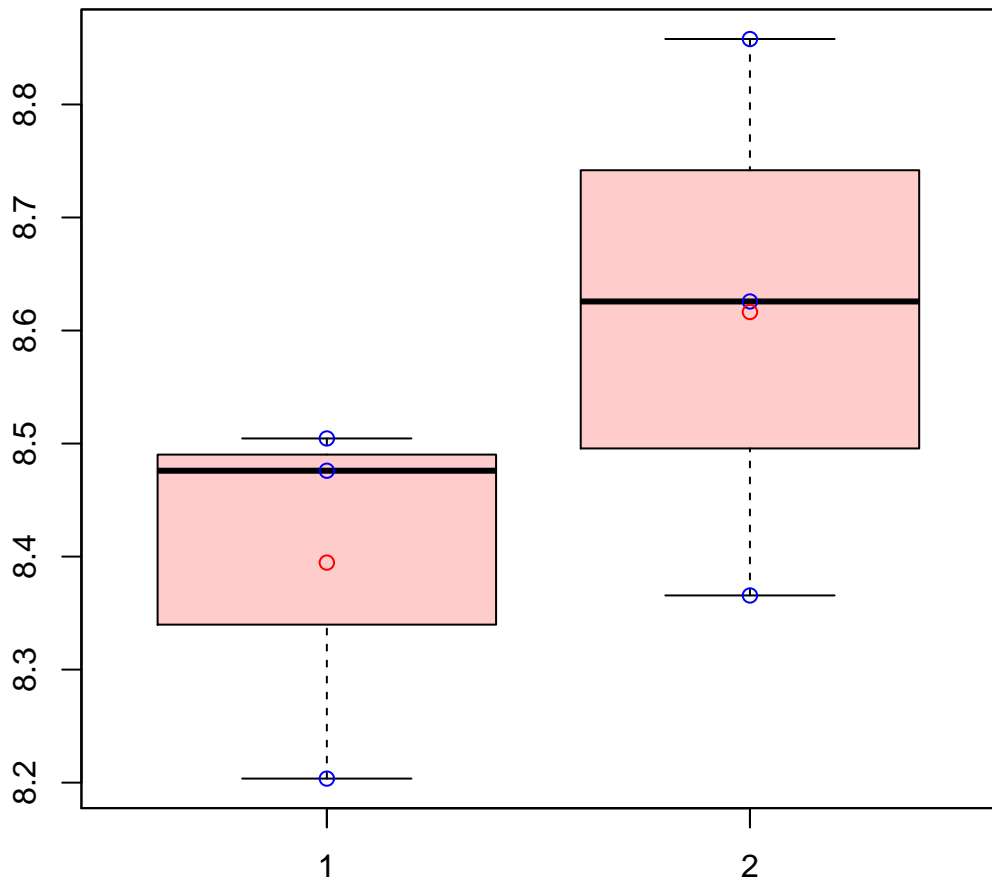

t-Test: p-value = 0.27

# CL1999Contig10|CL1999Contig10

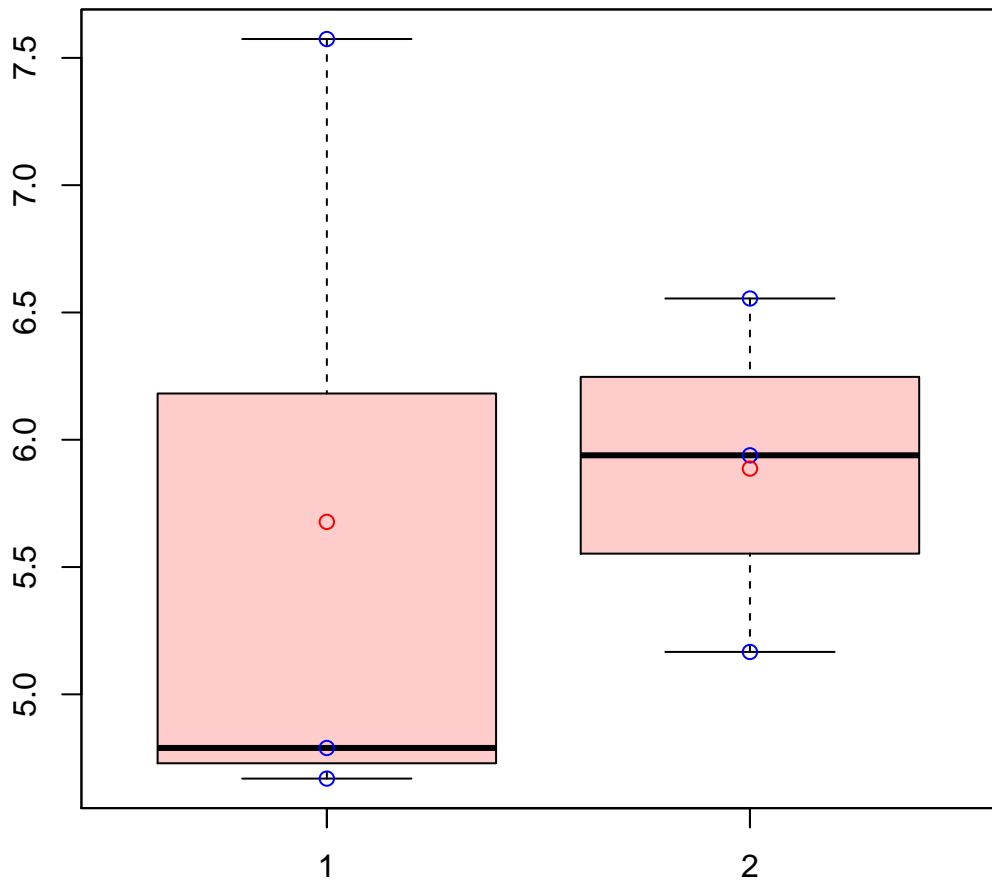

t-Test: p-value = 0.85

# CL199Contig3|CL199Contig3

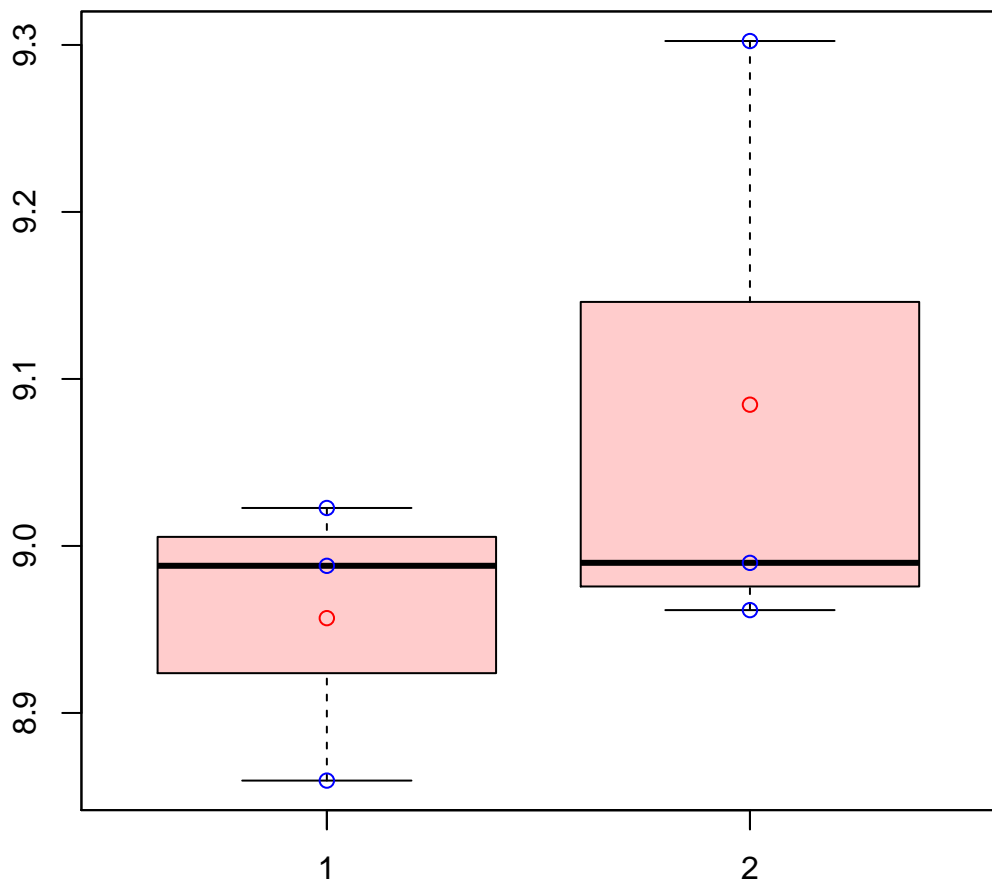

t-Test: p-value = 0.37

# CL19Contig25|CL19Contig25

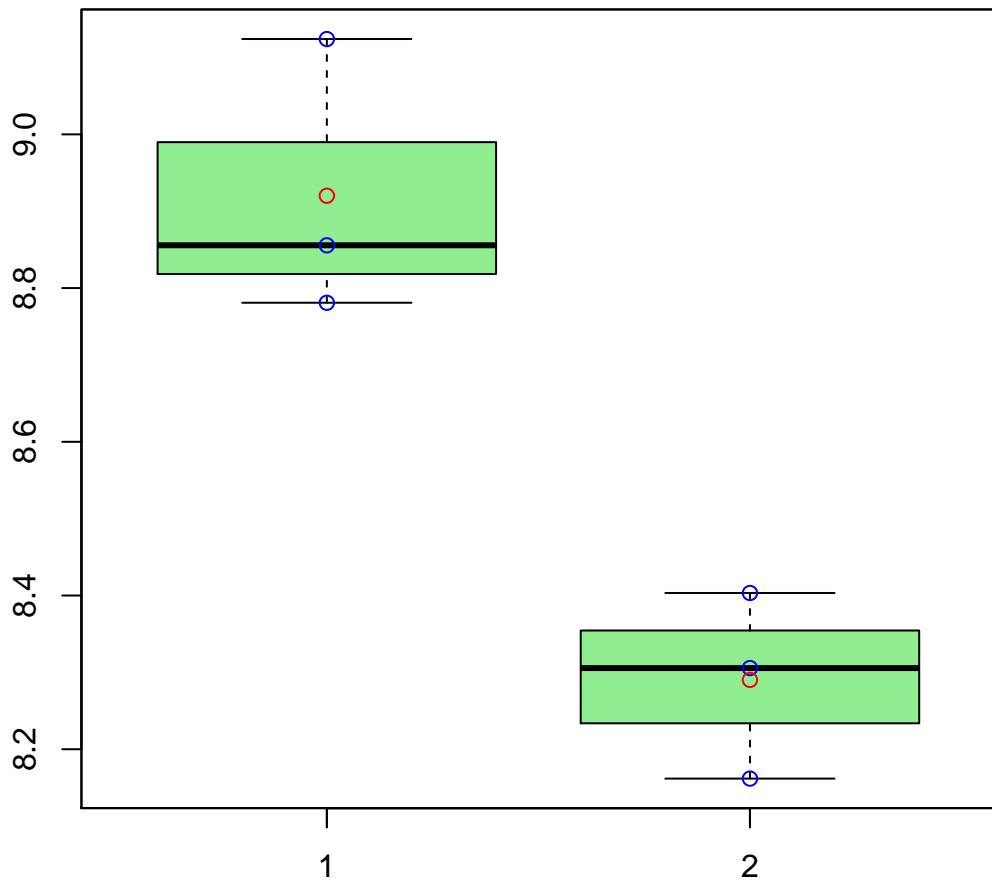

t-Test: p-value = 0.01

# CL1Contig10006|CL1Contig10006

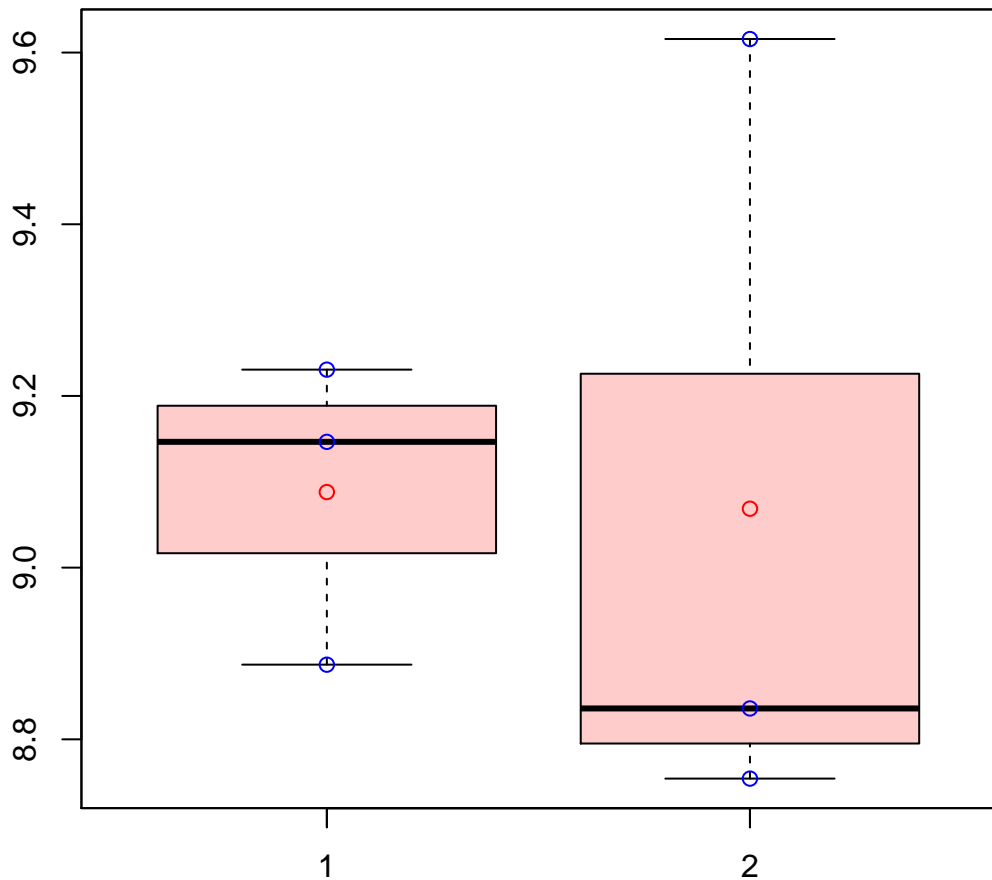

t-Test: p-value = 0.95

# CL1Contig10009|CL1Contig10009

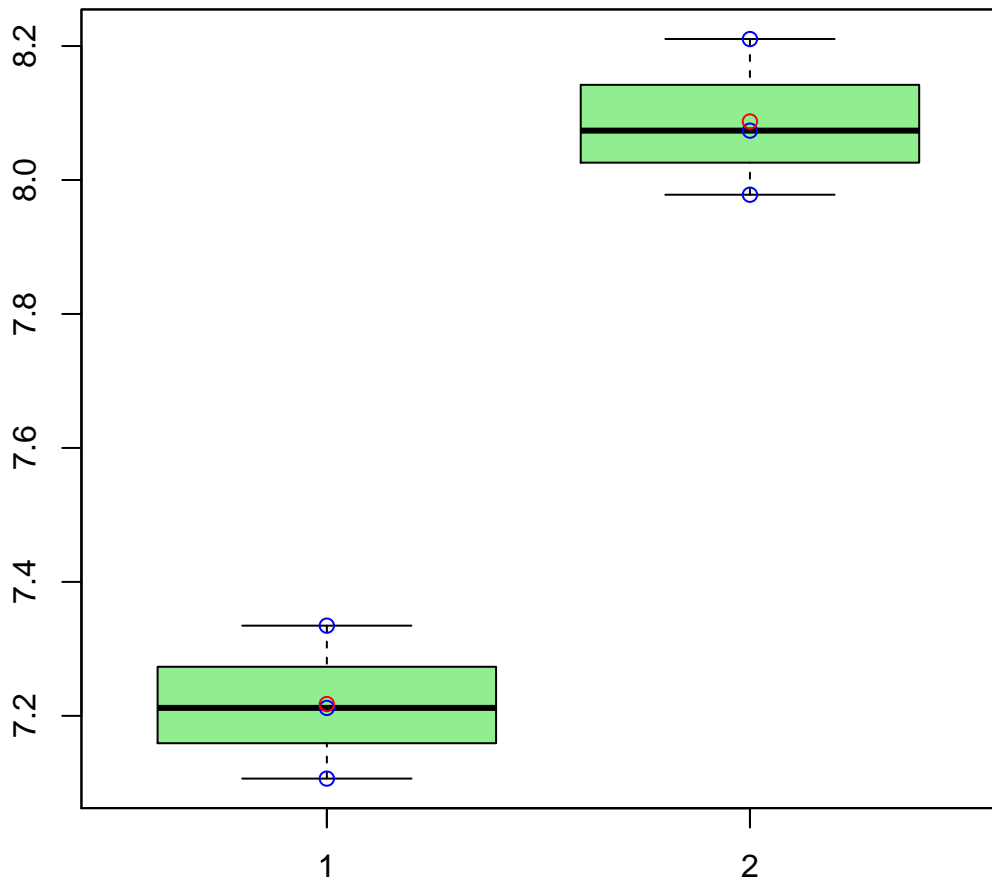

t-Test: p-value = 0



# CL1Contig10019|CL1Contig10019

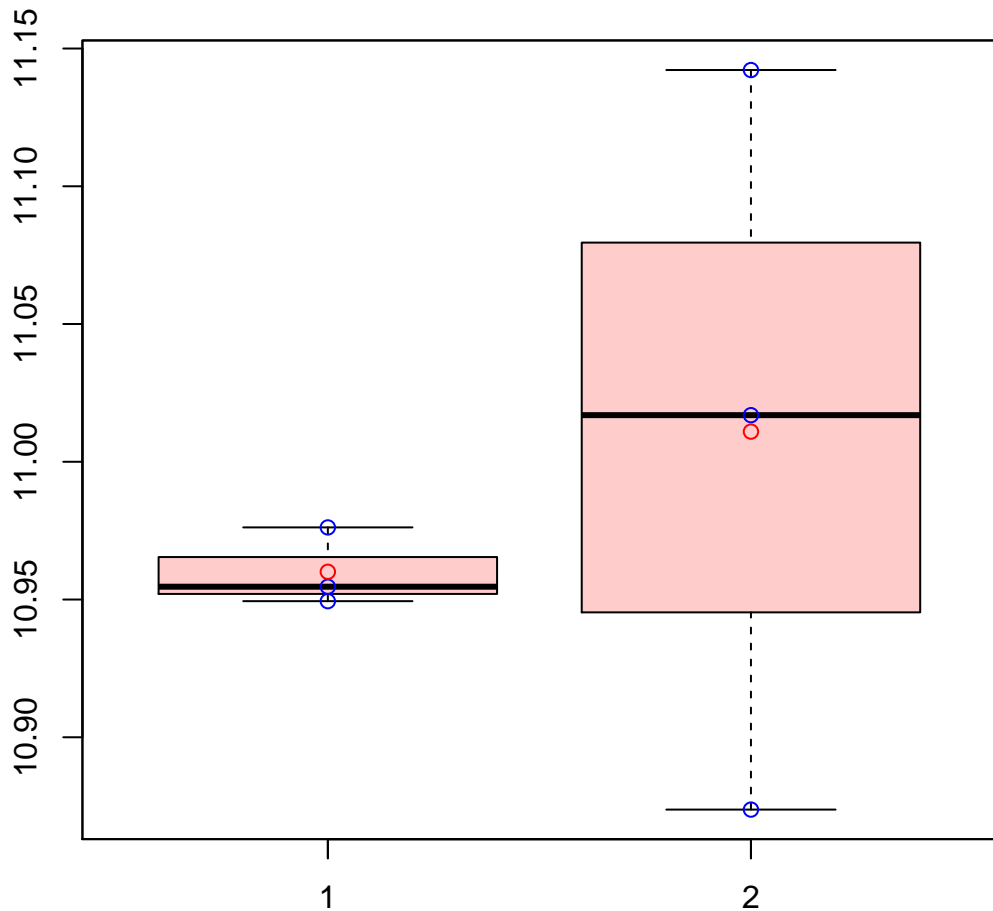

t-Test: p-value = 0.58

# CL1Contig1002|CL1Contig1002

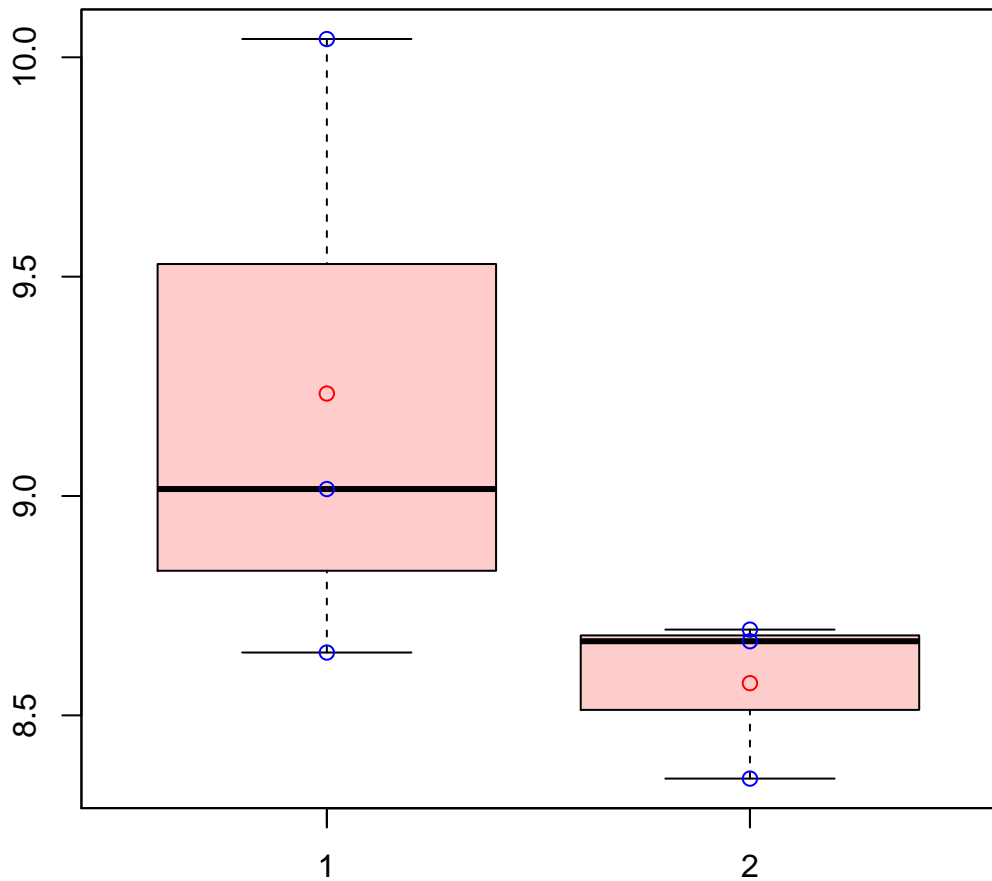

t-Test: p-value = 0.25

# CL1Contig10037|CL1Contig10037



t-Test: p-value = 0.22

# CL1Contig10045|CL1Contig10045

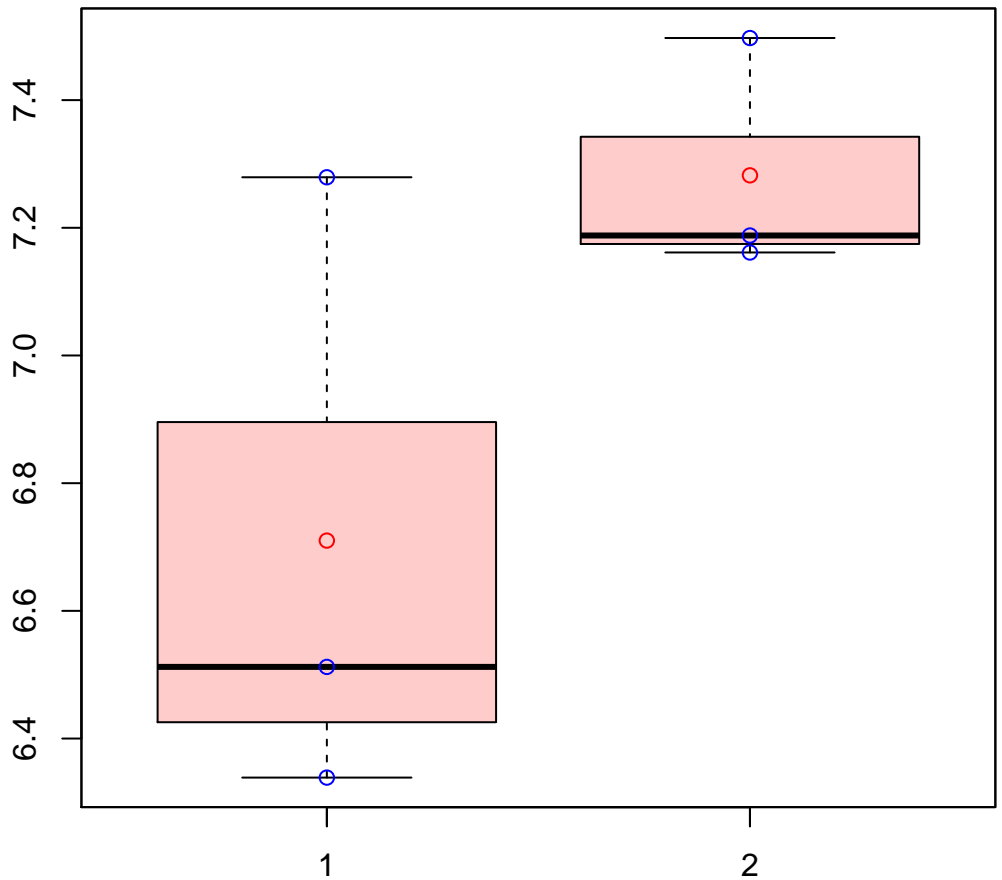

t-Test: p-value = 0.18

# CL1Contig10064|CL1Contig10064

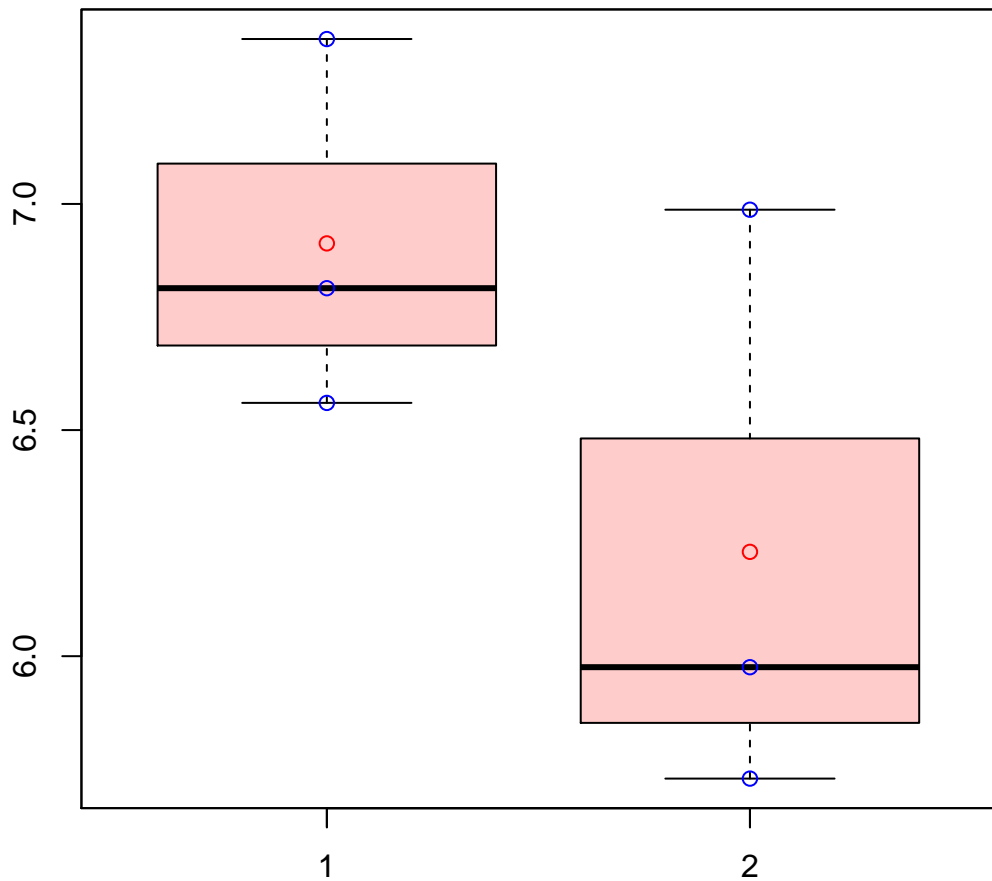

t-Test: p-value = 0.22

# CL1Contig10090|CL1Contig10090

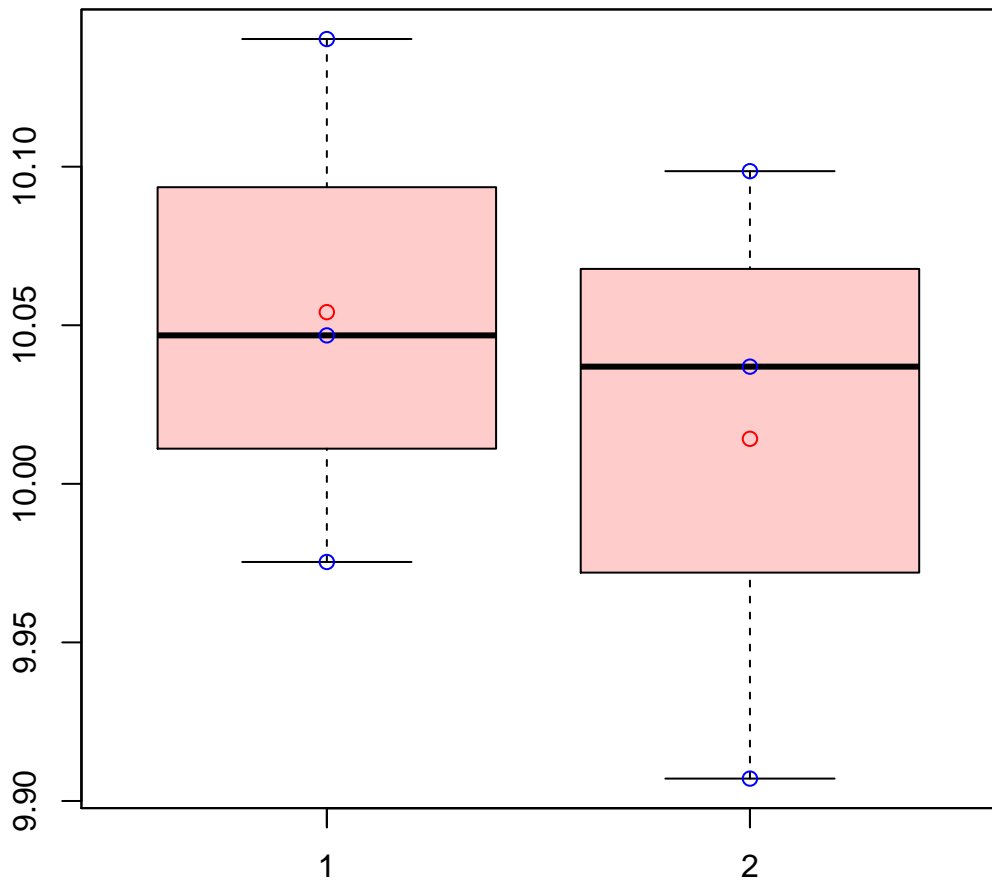

t-Test: p-value = 0.62

# CL1Contig10093|CL1Contig10093

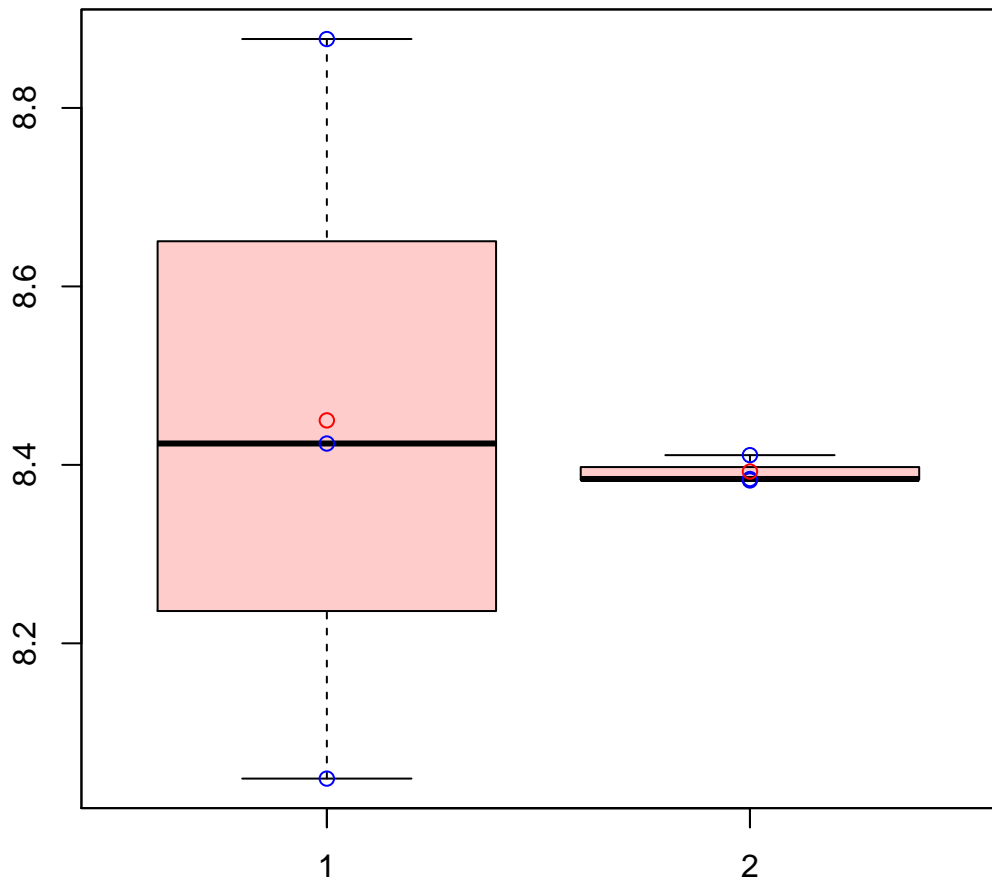

t-Test: p-value = 0.83

# CL1Contig10107|CL1Contig10107

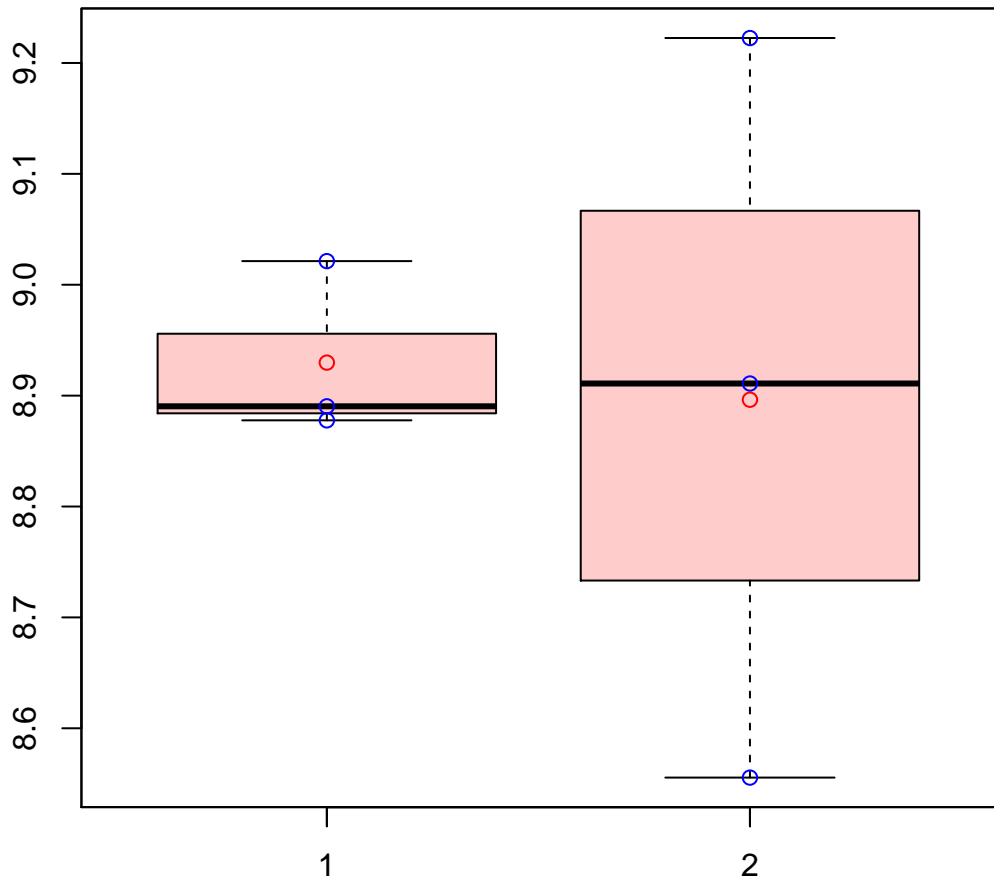

t-Test: p-value = 0.88



# CL1Contig10114|CL1Contig10114

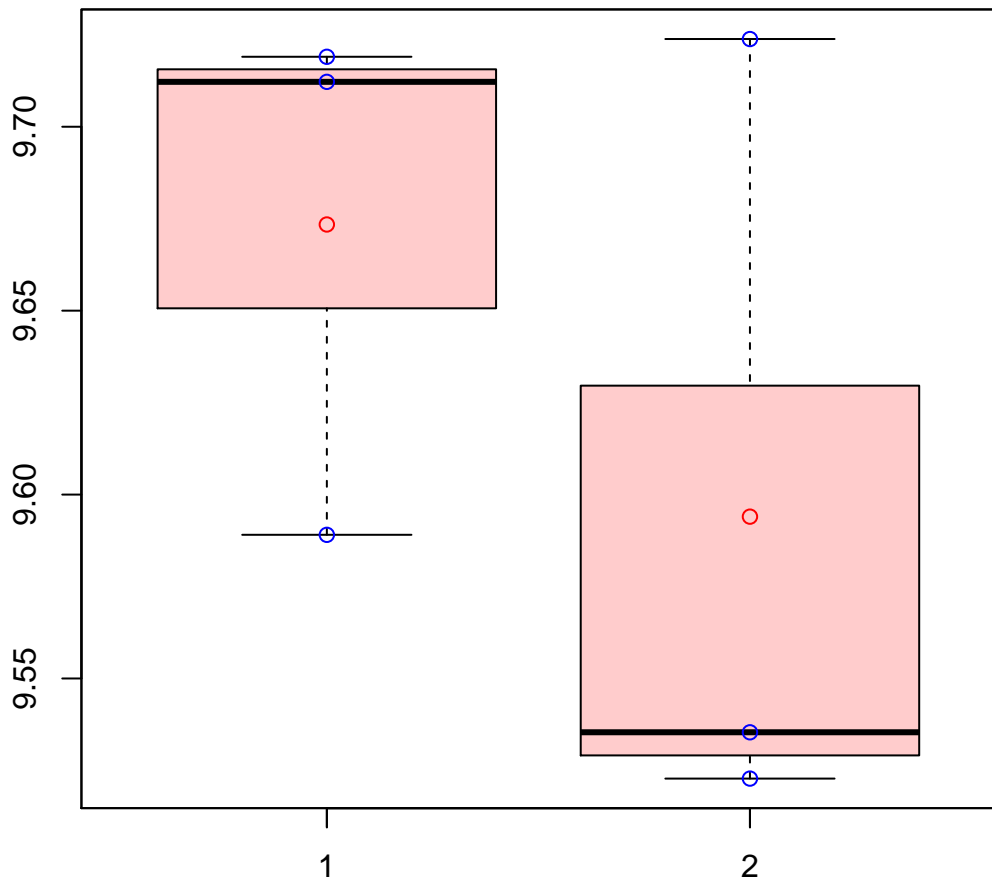

t-Test: p-value = 0.37

# CL1Contig10141|CL1Contig10141

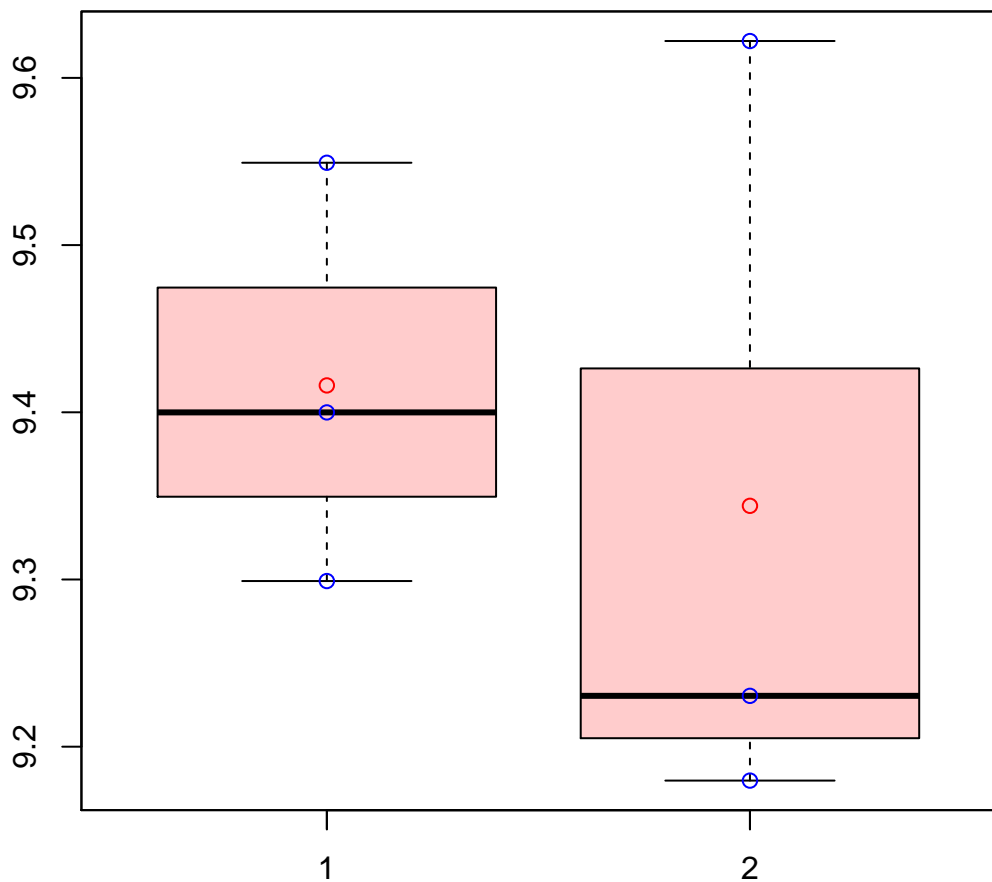

t-Test: p-value = 0.68

# CL1Contig10150|CL1Contig10150

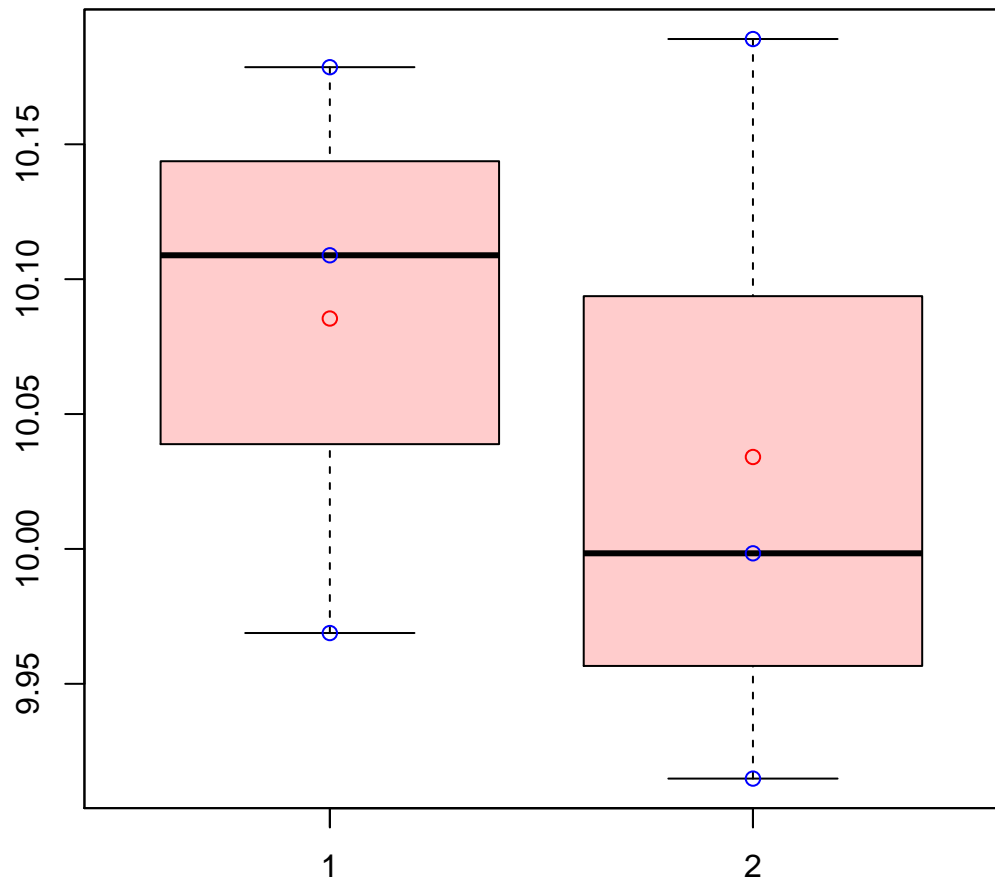

t-Test: p-value = 0.64

# CL1Contig10179|CL1Contig10179

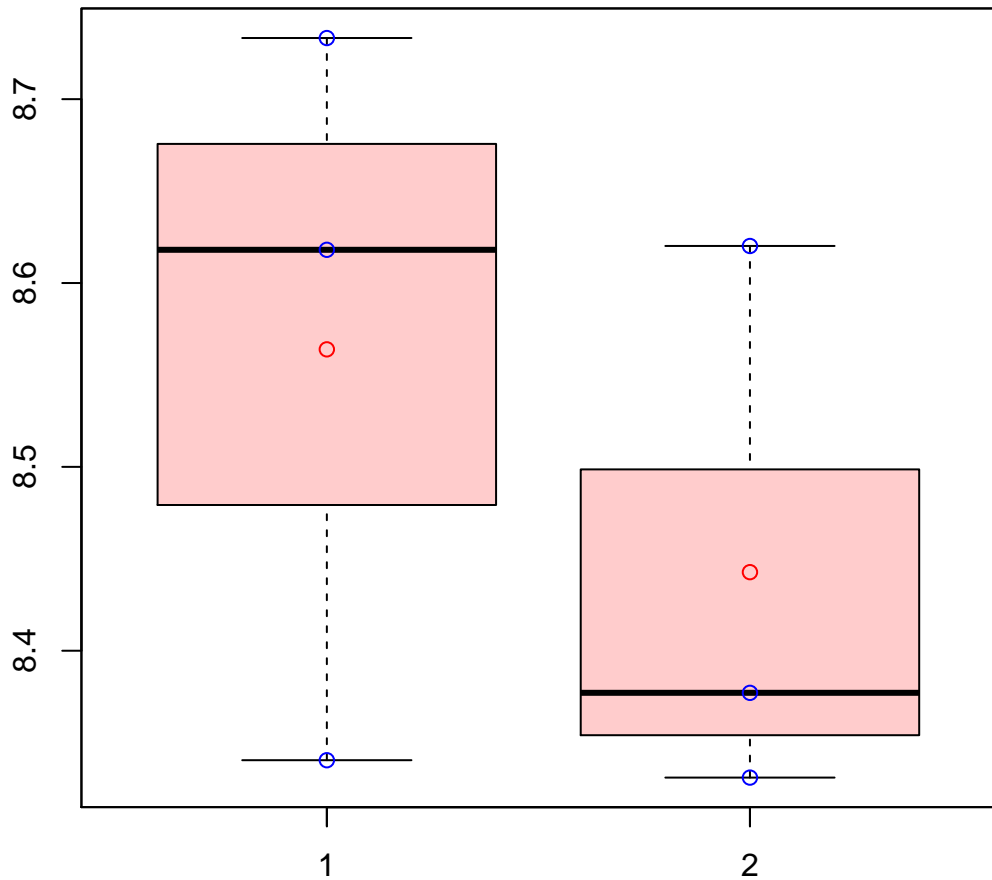

t-Test: p-value = 0.46

# CL1Contig10194|CL1Contig10194

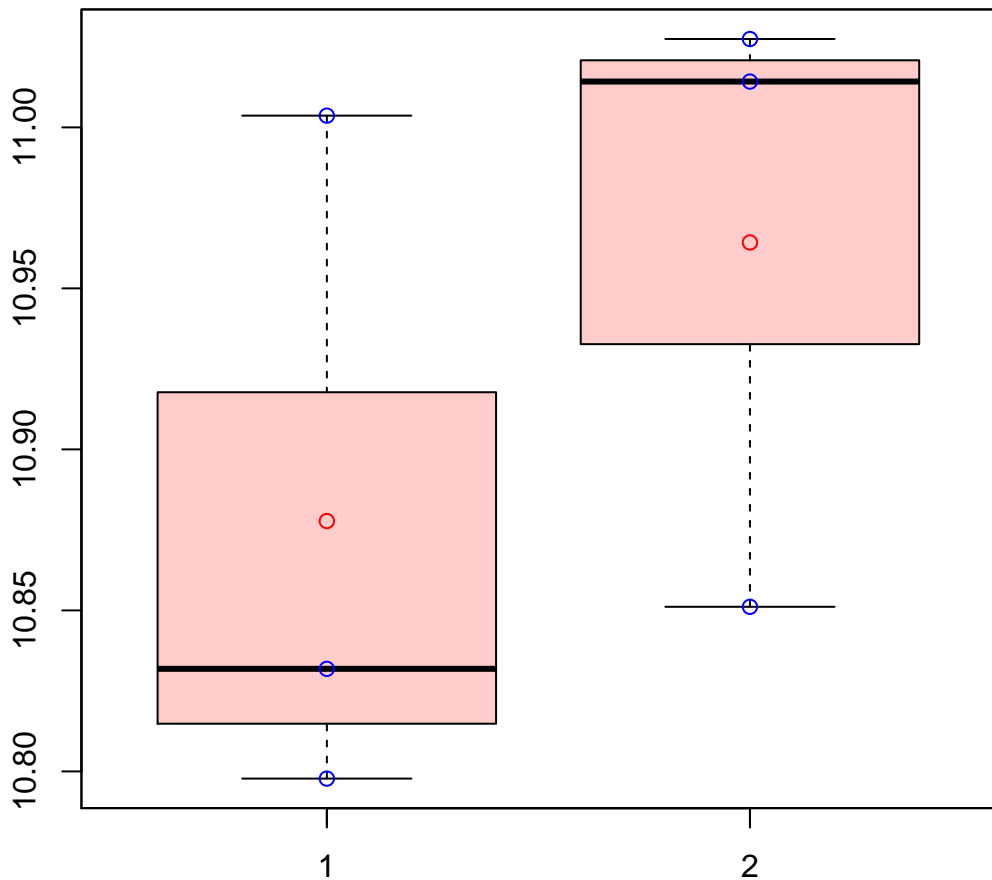

t-Test: p-value = 0.37

# CL1Contig10202|CL1Contig10202



t-Test: p-value = 0.79

# CL1Contig10228|CL1Contig10228

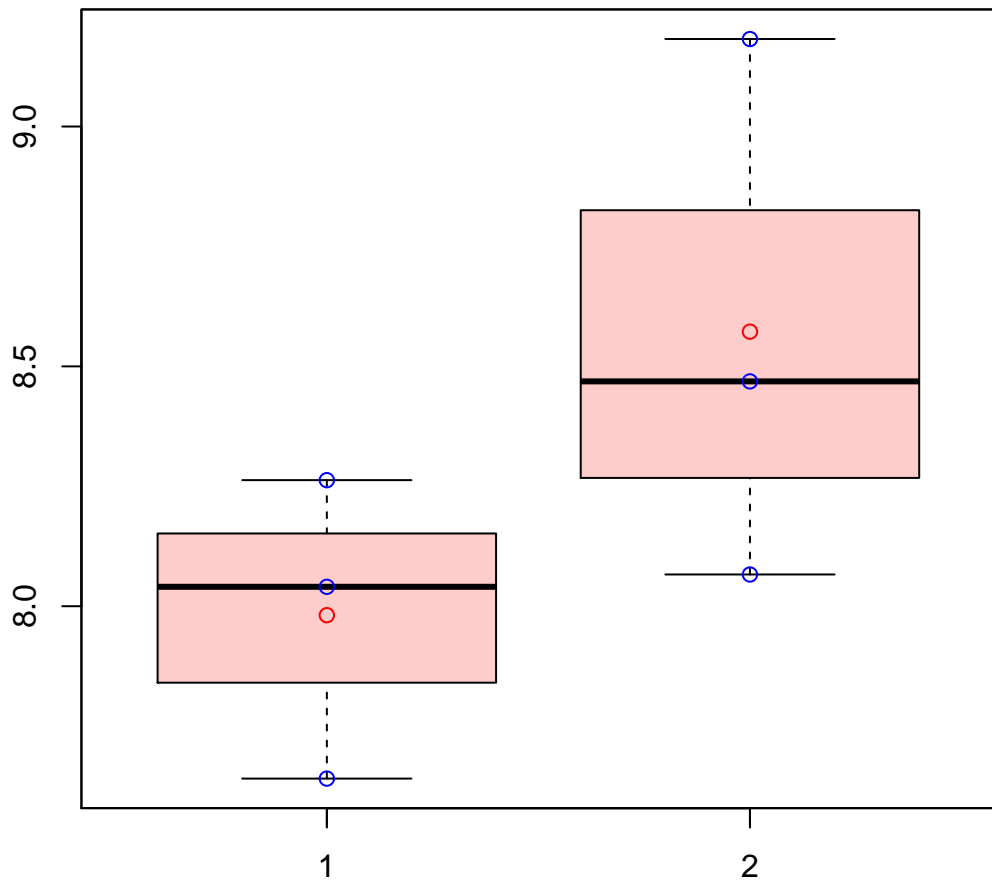

t-Test: p-value = 0.21

# CL1Contig10283|CL1Contig10283



t-Test: p-value = 0.68



# CL1Contig1029|CL1Contig1029

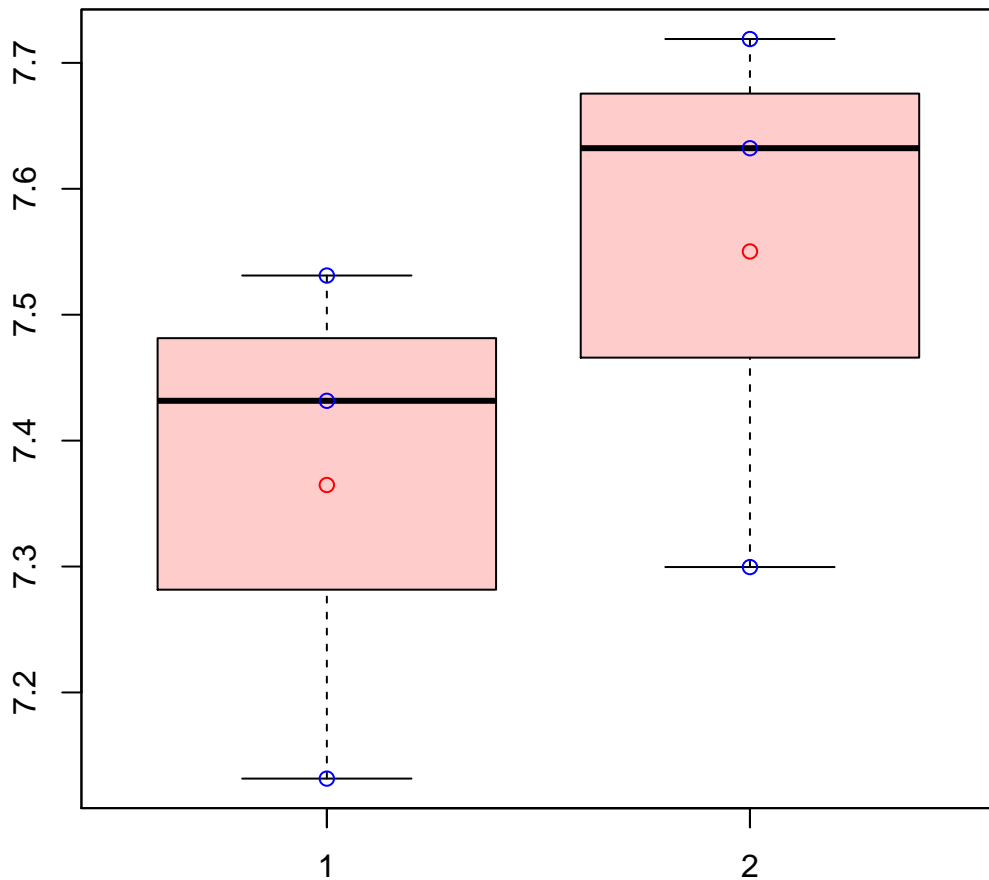

t-Test: p-value = 0.35

# CL1Contig10314|CL1Contig10314

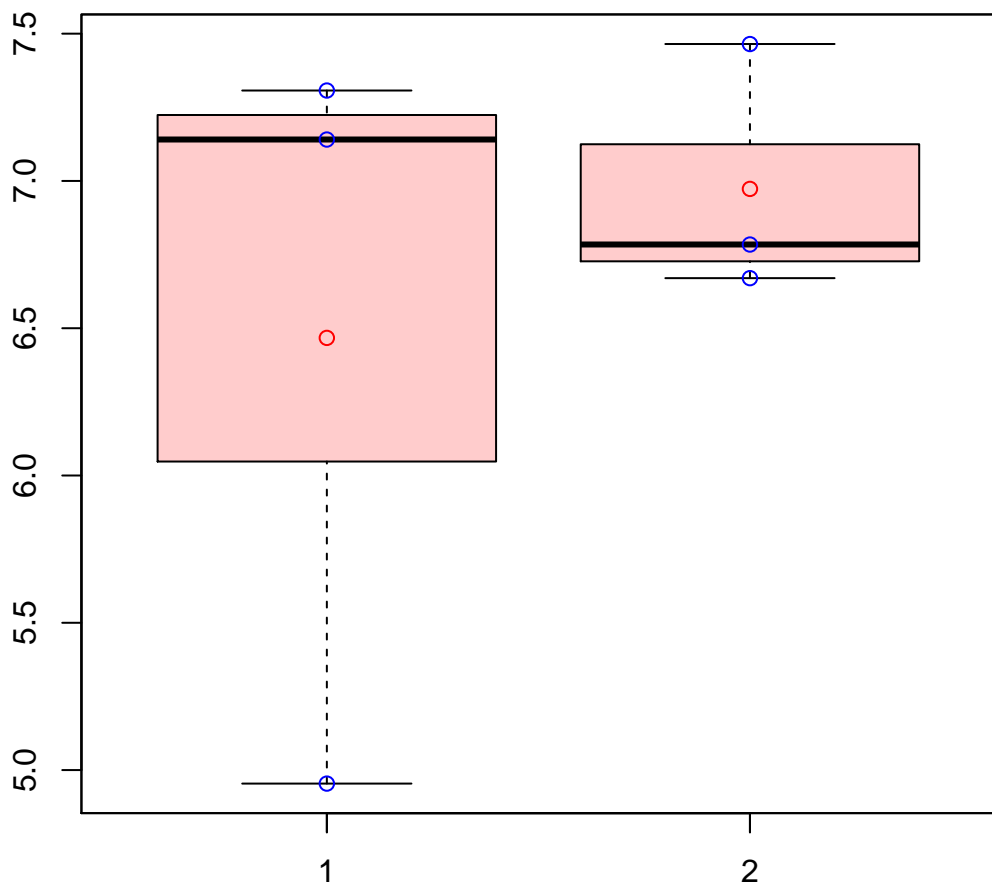

t-Test: p-value = 0.58

# CL1Contig10324|CL1Contig10324

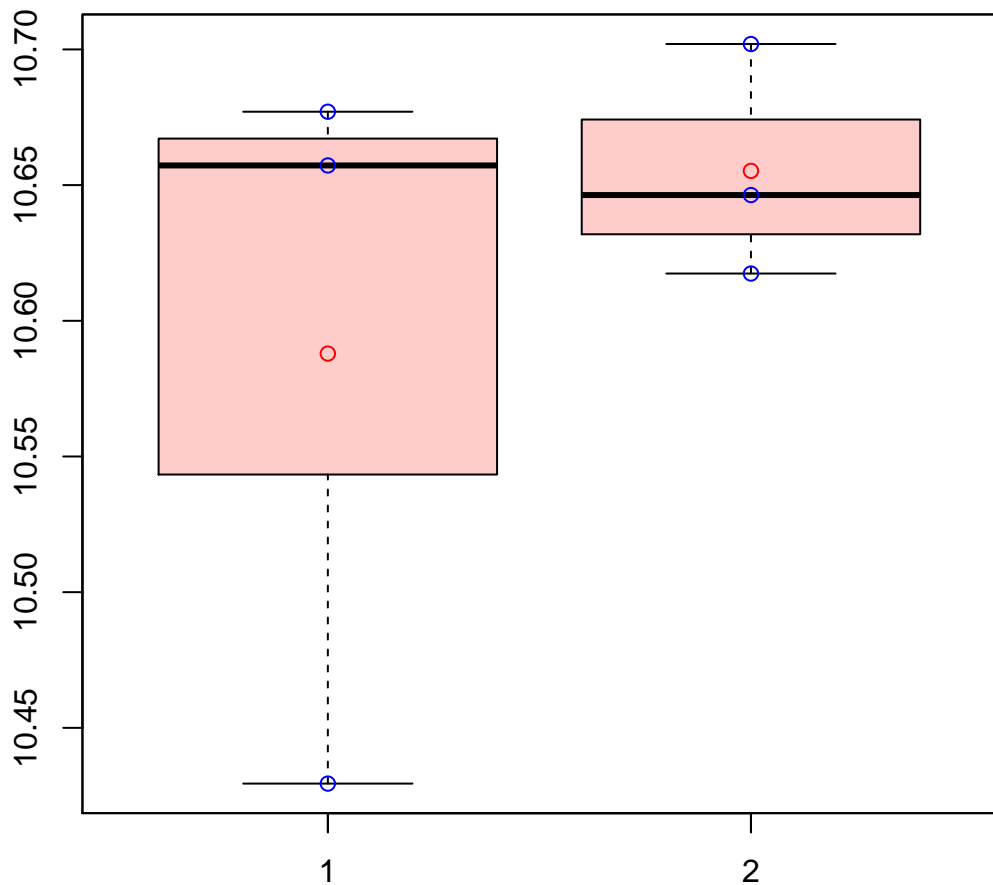

t-Test: p-value = 0.49

# CL1Contig10334|CL1Contig10334

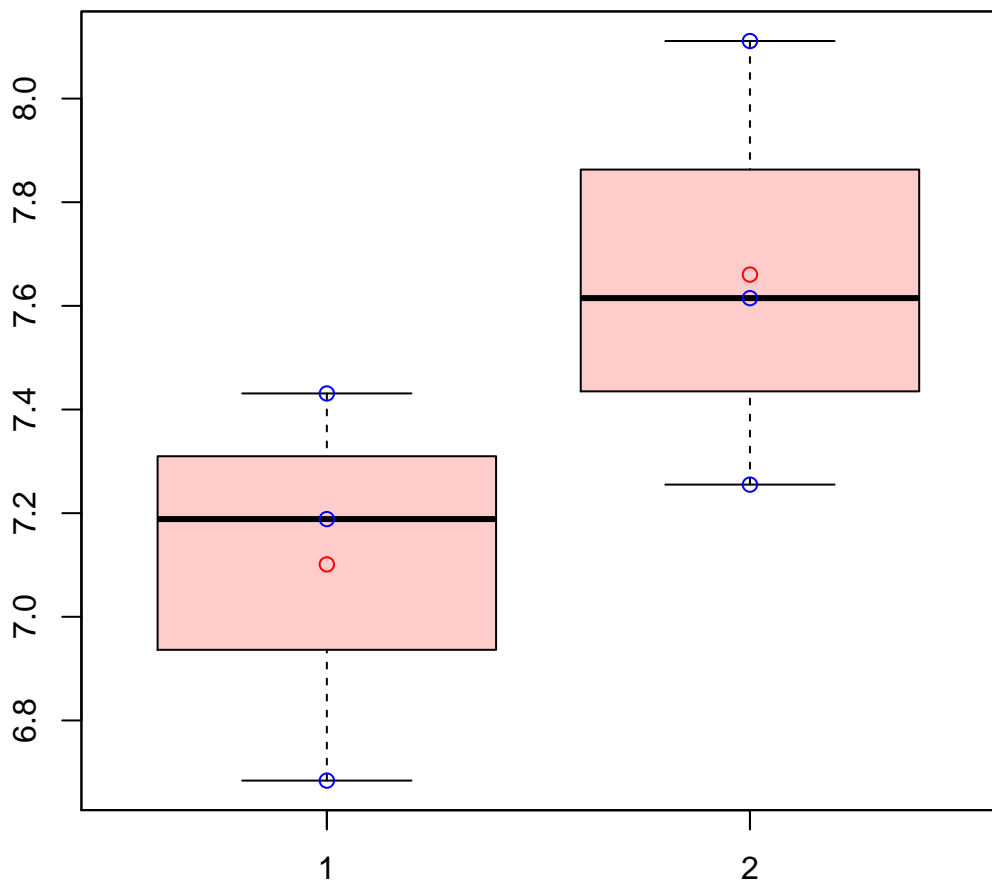

t-Test: p-value = 0.17

# CL1Contig10367|CL1Contig10367

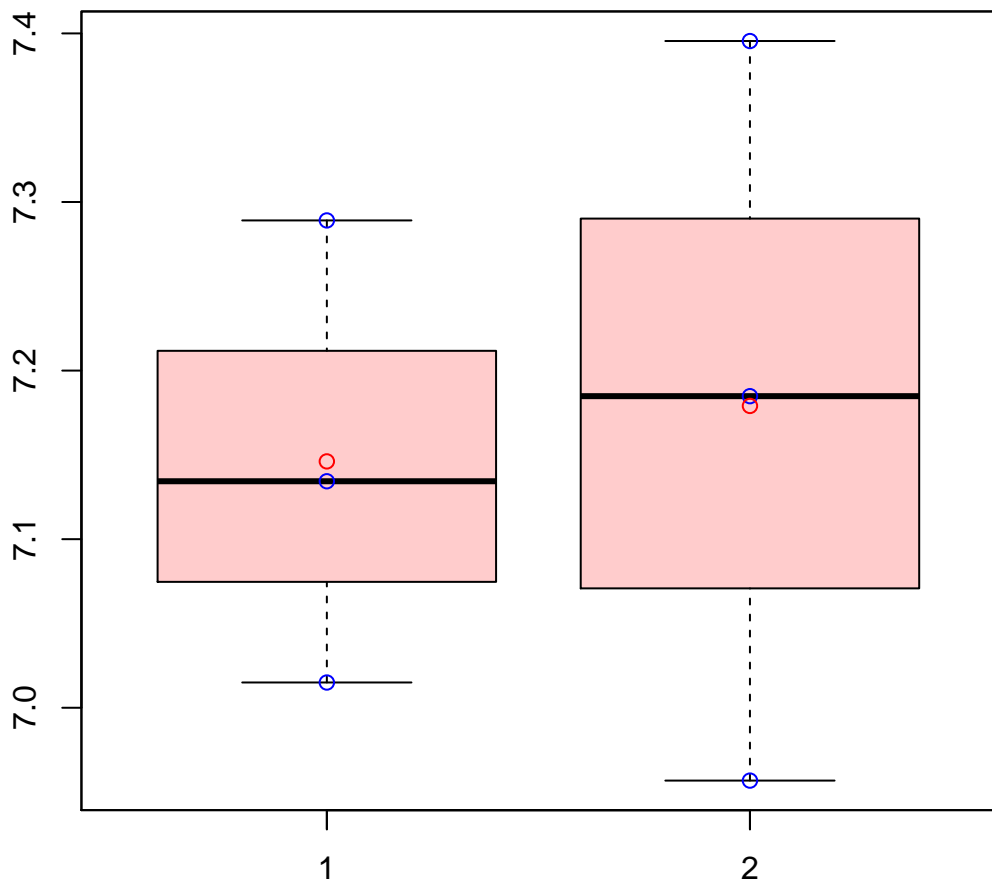

t-Test: p-value = 0.84

# CL1Contig10368|CL1Contig10368

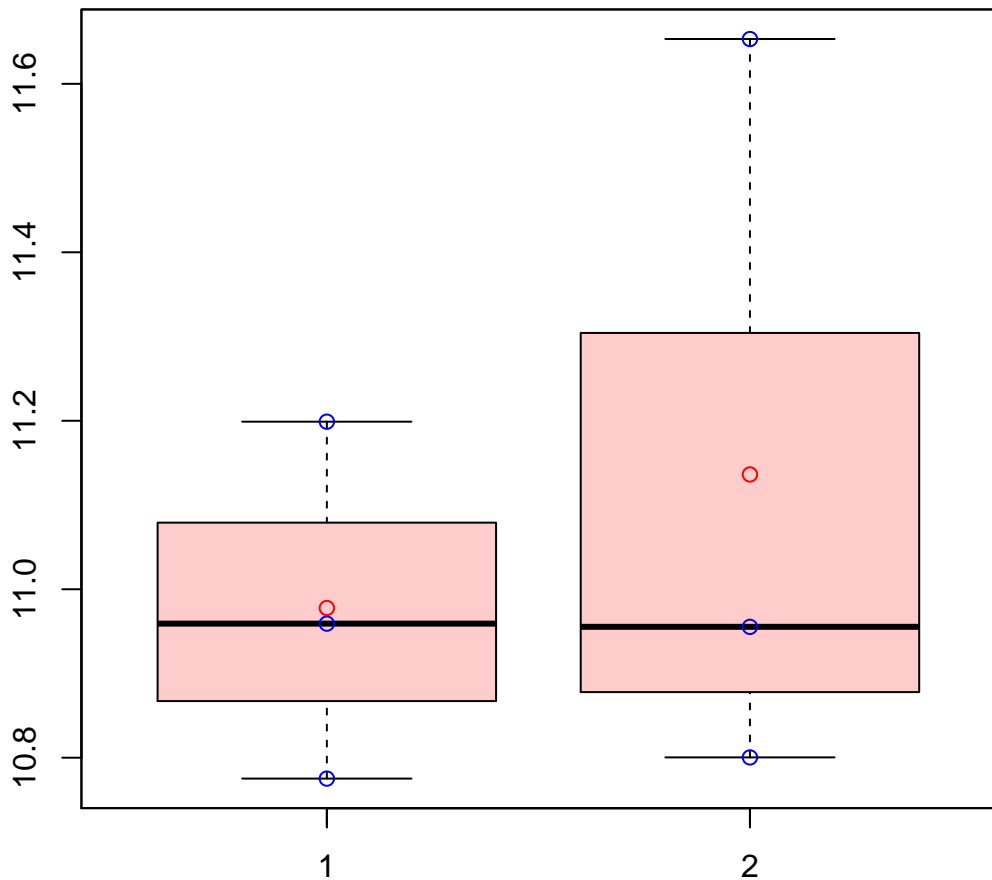

t-Test: p-value = 0.62

# CL1Contig1037|CL1Contig1037

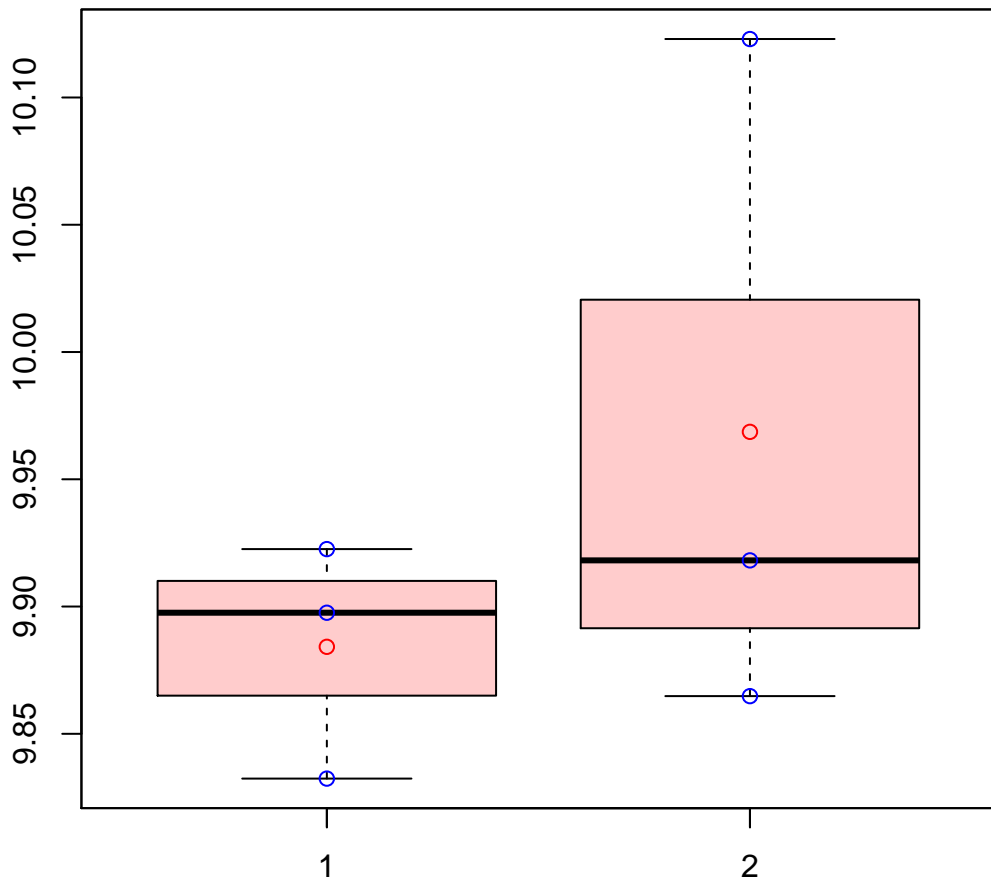

t-Test: p-value = 0.4

# CL1Contig10380|CL1Contig10380

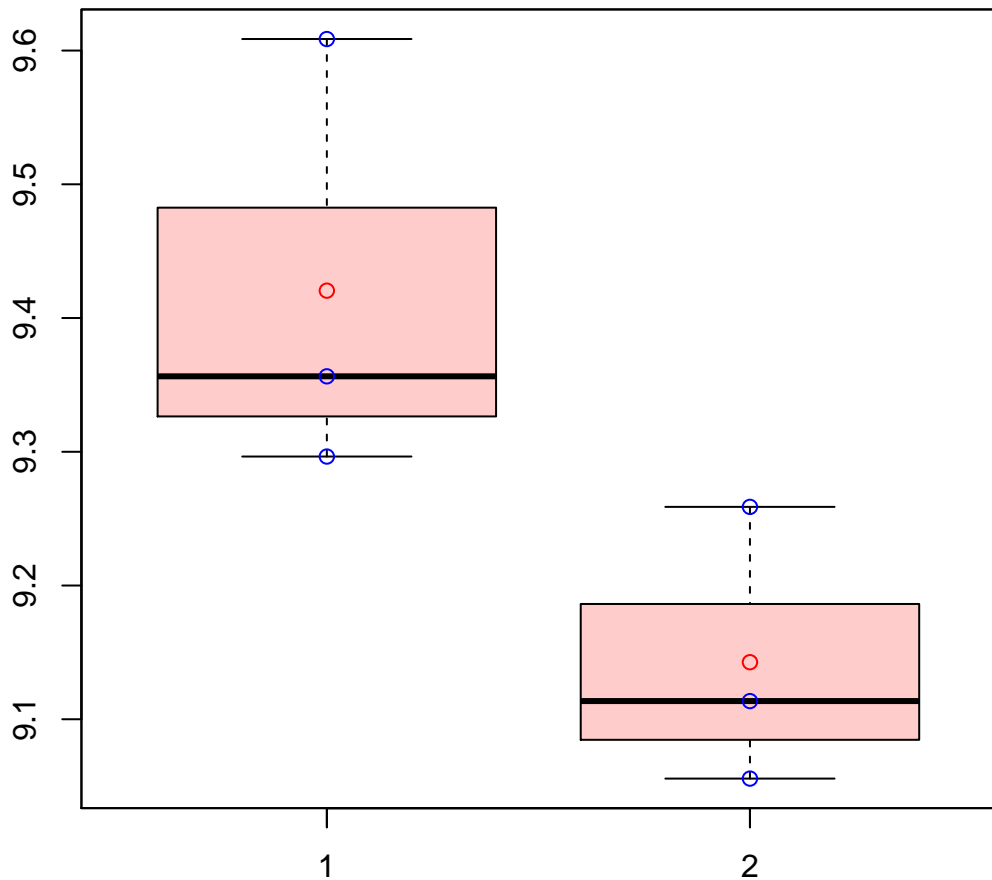

t-Test: p-value = 0.08



# CL1Contig10381|CL1Contig10381

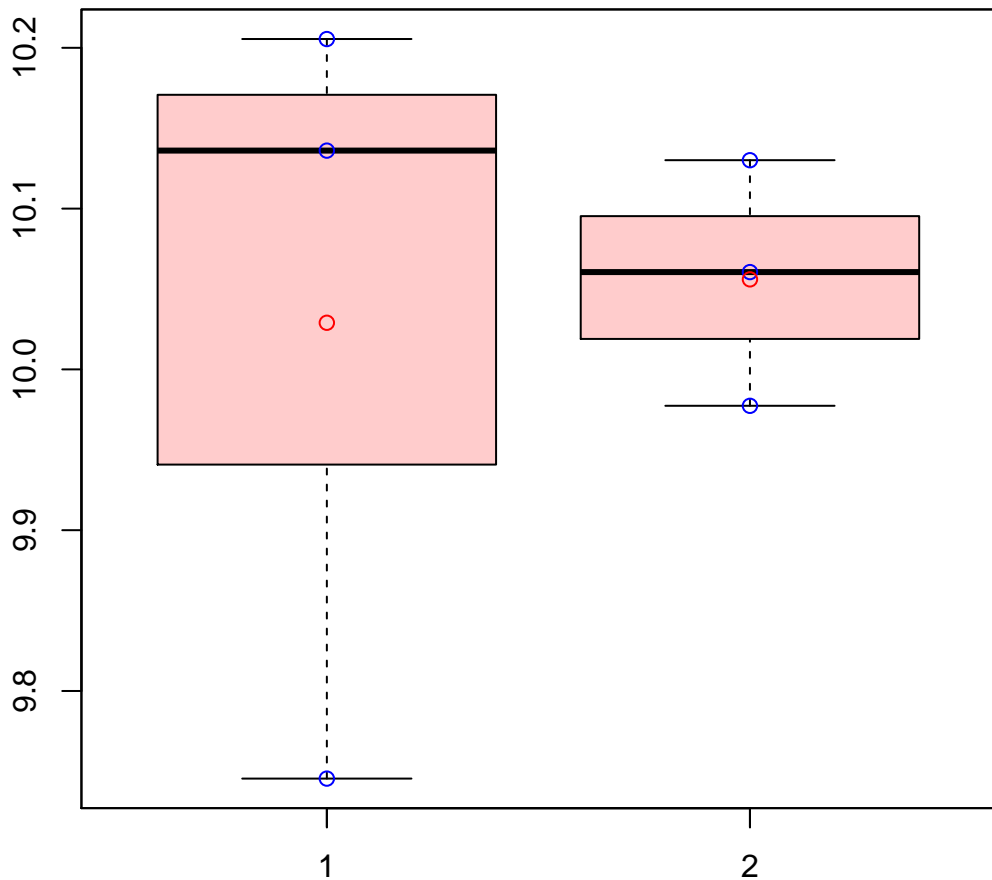

t-Test: p-value = 0.87

# CL1Contig1038|CL1Contig1038

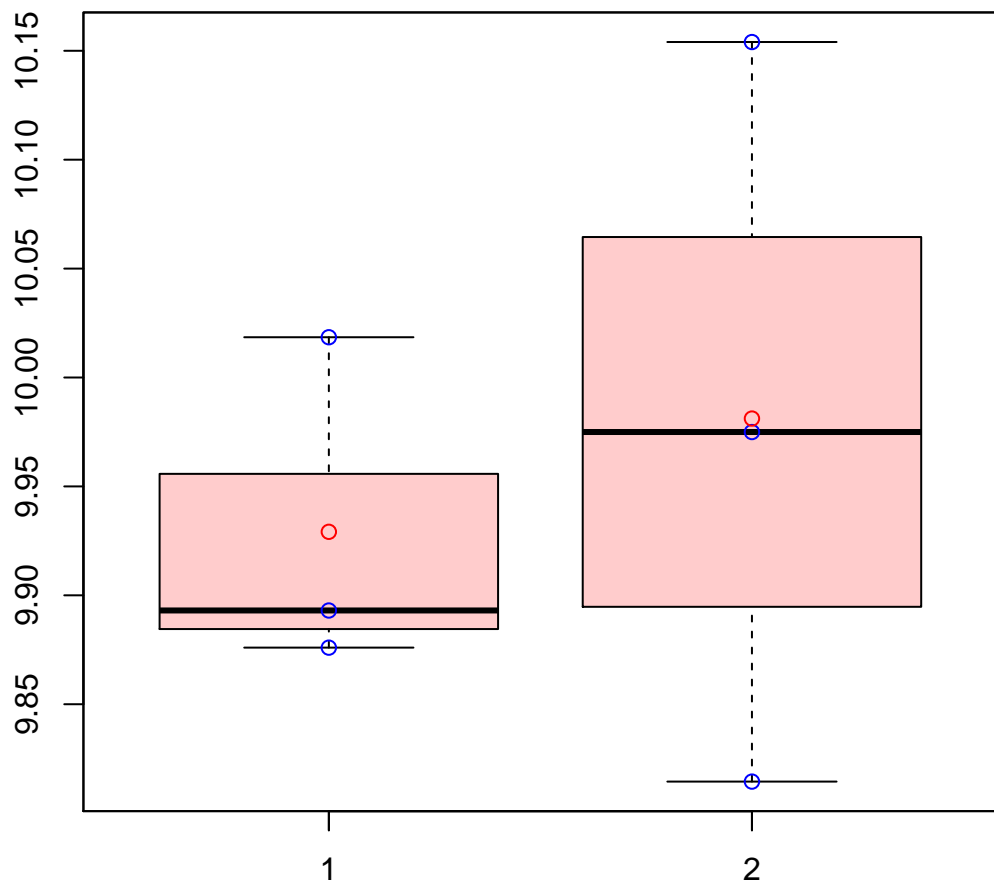

t-Test: p-value = 0.66

# CL1Contig10393|CL1Contig10393

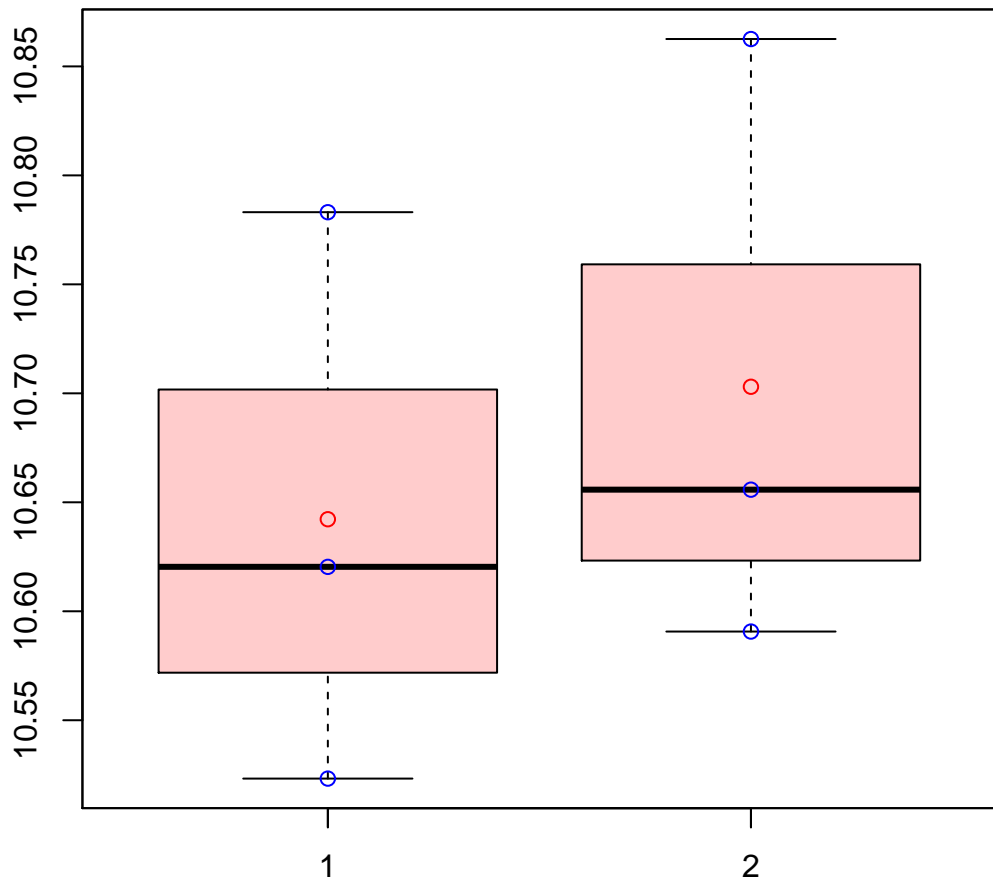

t-Test: p-value = 0.62

# CL1Contig10394|CL1Contig10394

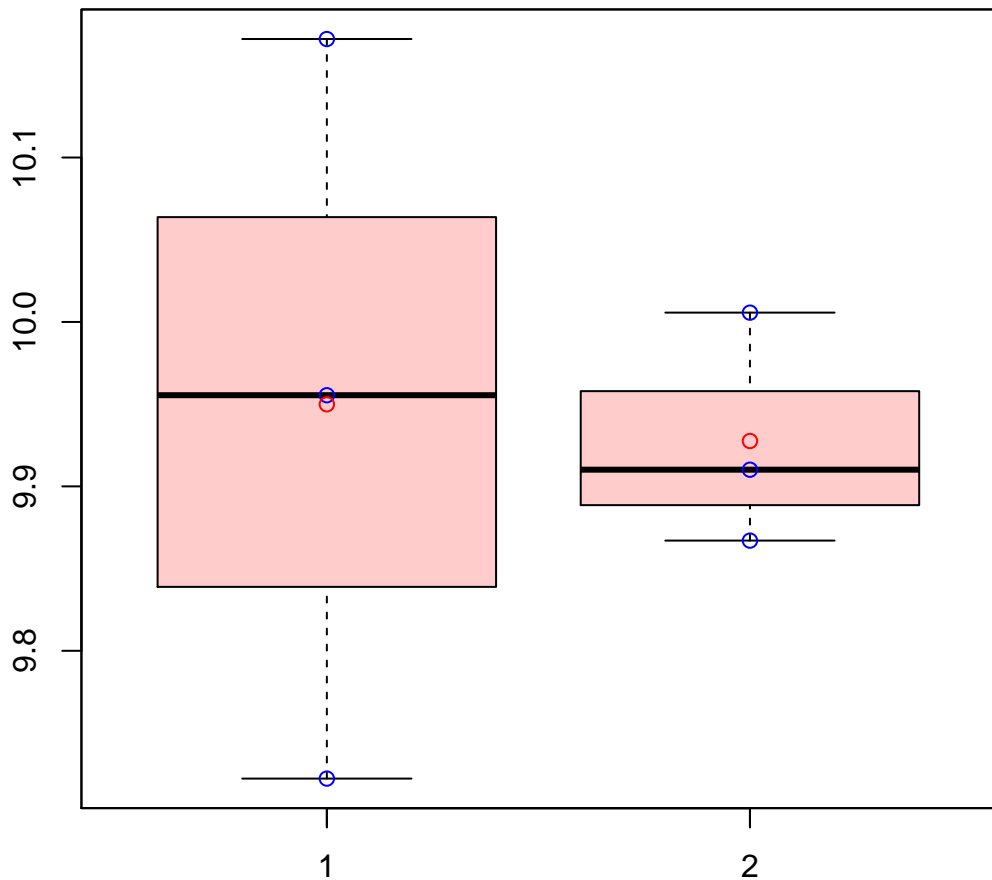

t-Test: p-value = 0.88

# CL1Contig1039|CL1Contig1039

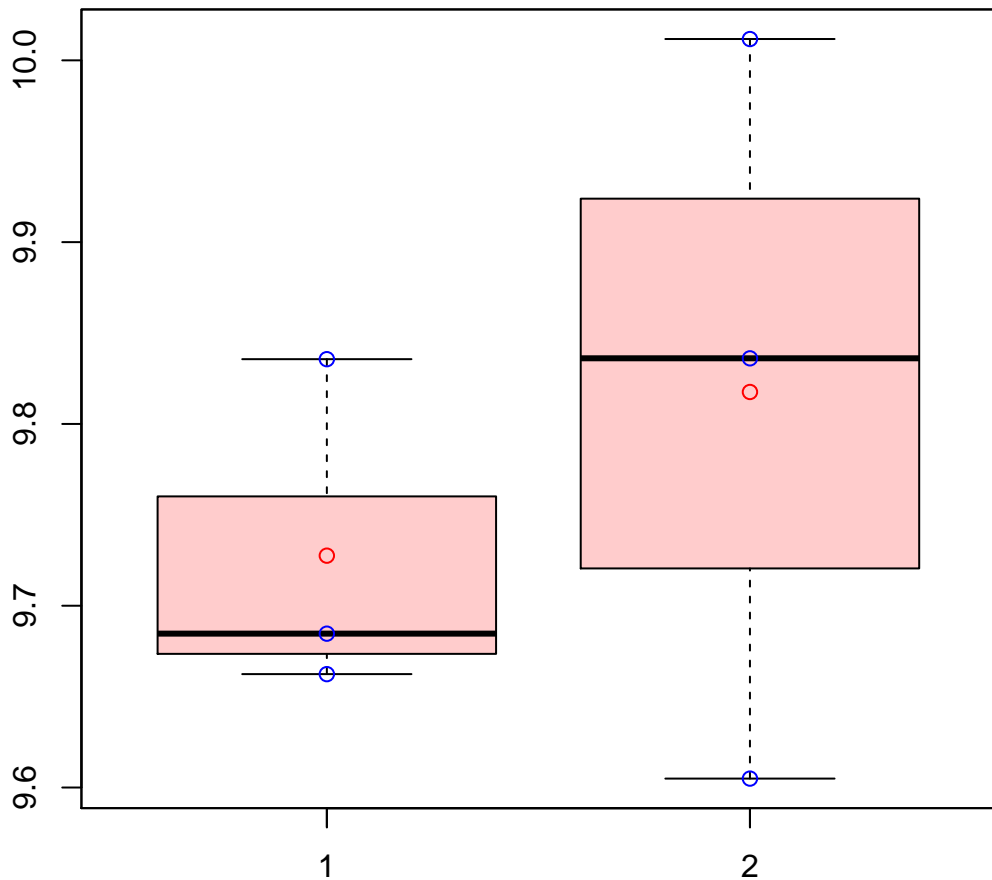

t-Test: p-value = 0.54

# CL1Contig1040|CL1Contig1040

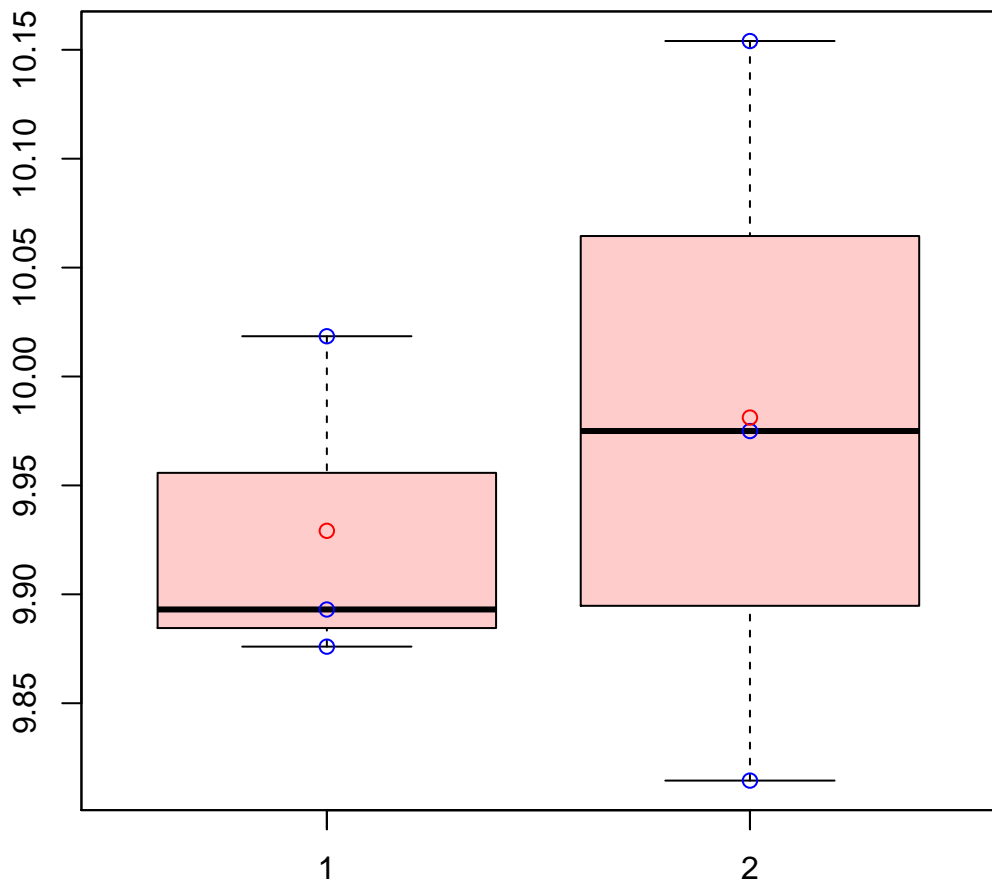

t-Test: p-value = 0.66

# CL1Contig1041|CL1Contig1041

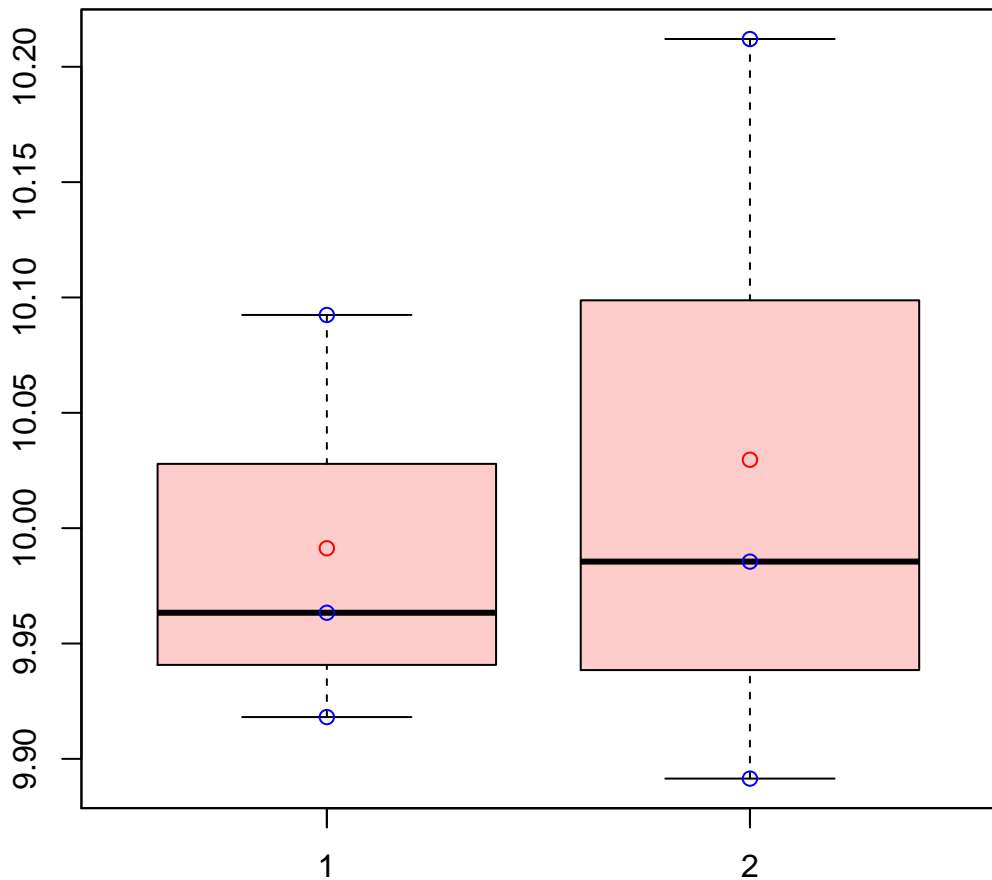

t-Test: p-value = 0.75

# CL1Contig1042|CL1Contig1042

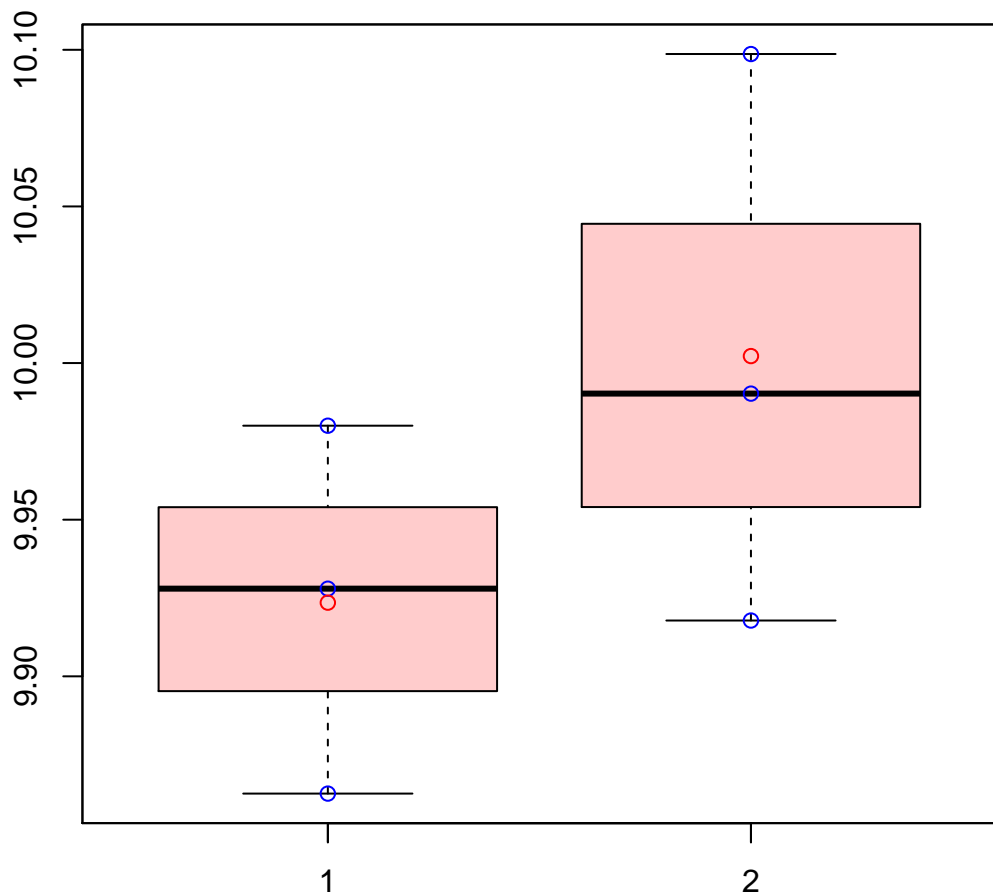

t-Test: p-value = 0.29



# CL1Contig10445|CL1Contig10445

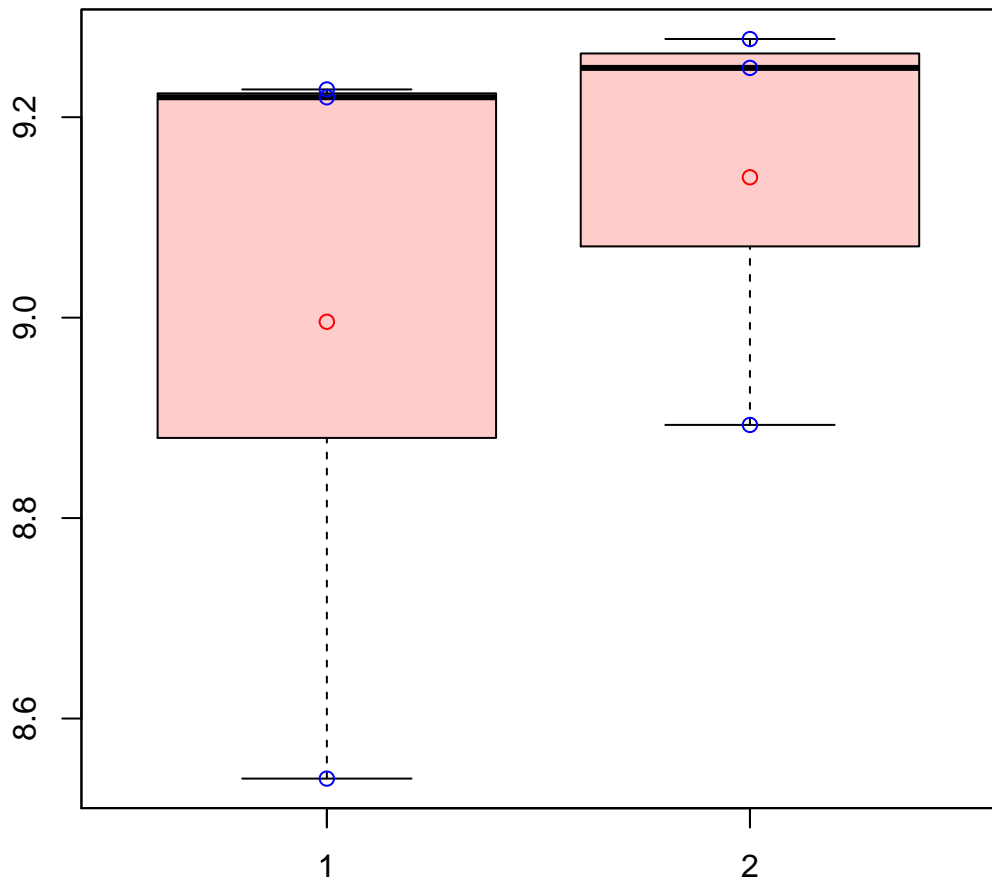

t-Test: p-value = 0.62

# CL1Contig10446|CL1Contig10446

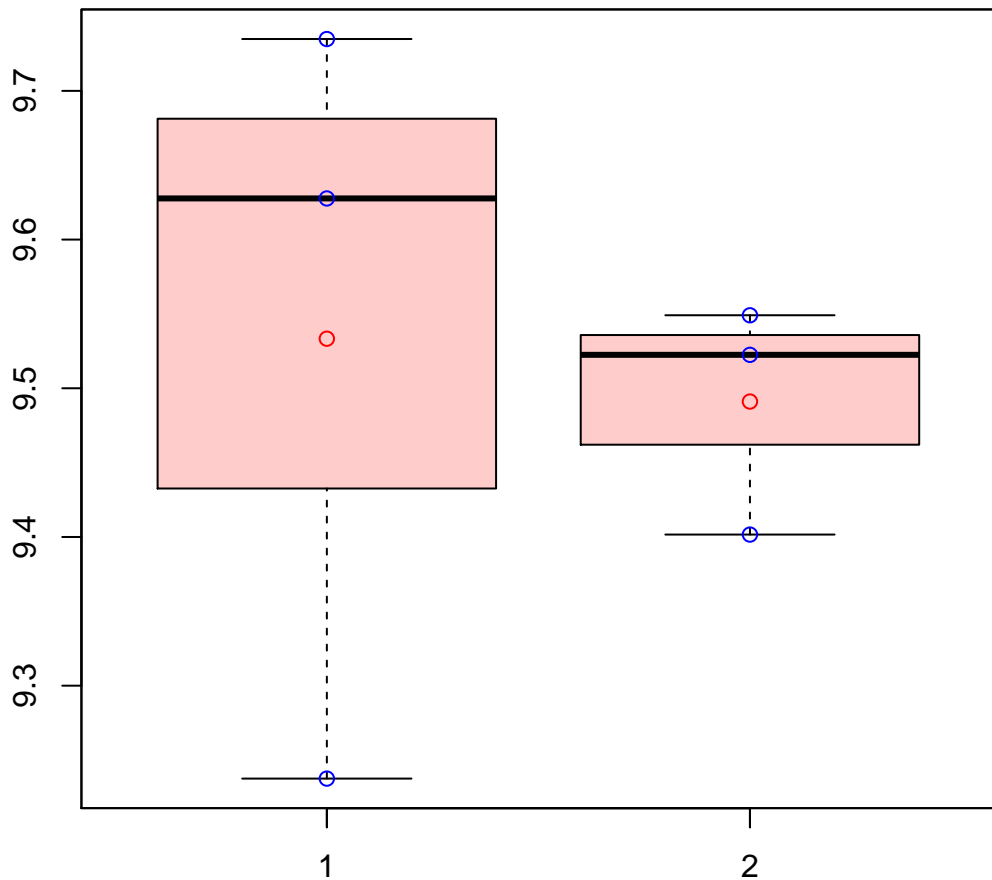

t-Test: p-value = 0.81

# CL1Contig10447|CL1Contig10447



t-Test: p-value = 0.62

# CL1Contig10448|CL1Contig10448



t-Test: p-value = 0.81

# CL1Contig10449|CL1Contig10449

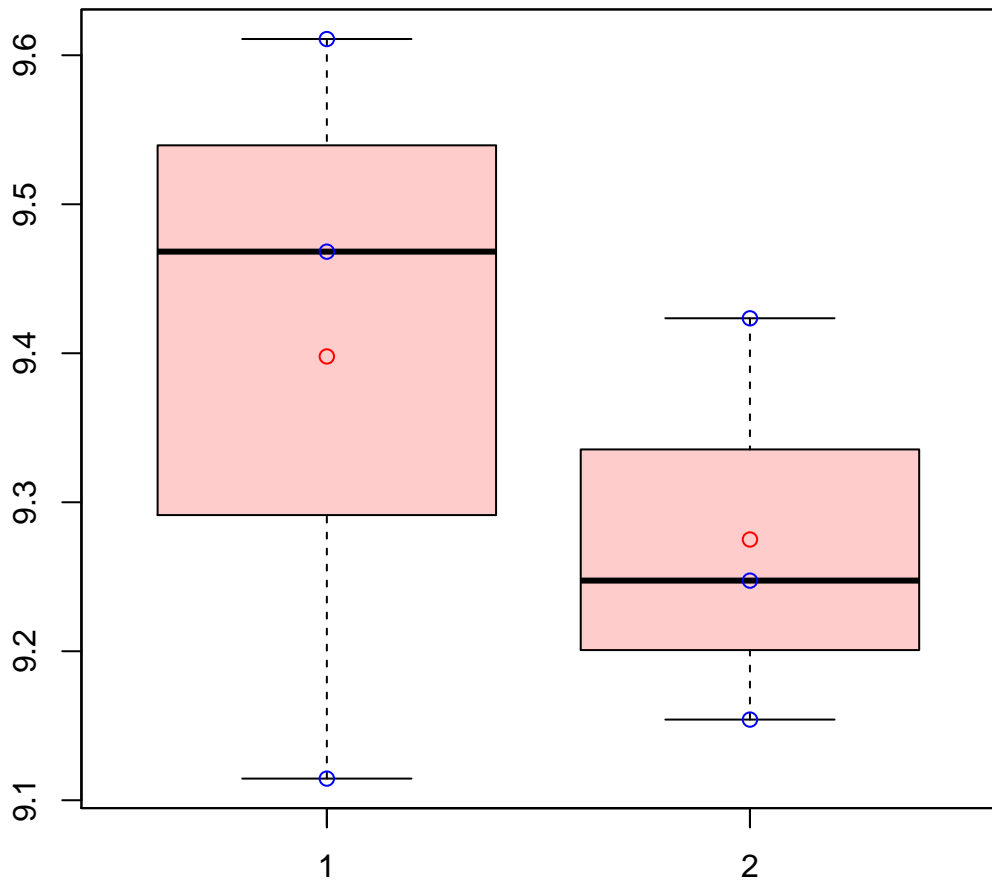

t-Test: p-value = 0.52

# CL1Contig1044|CL1Contig1044

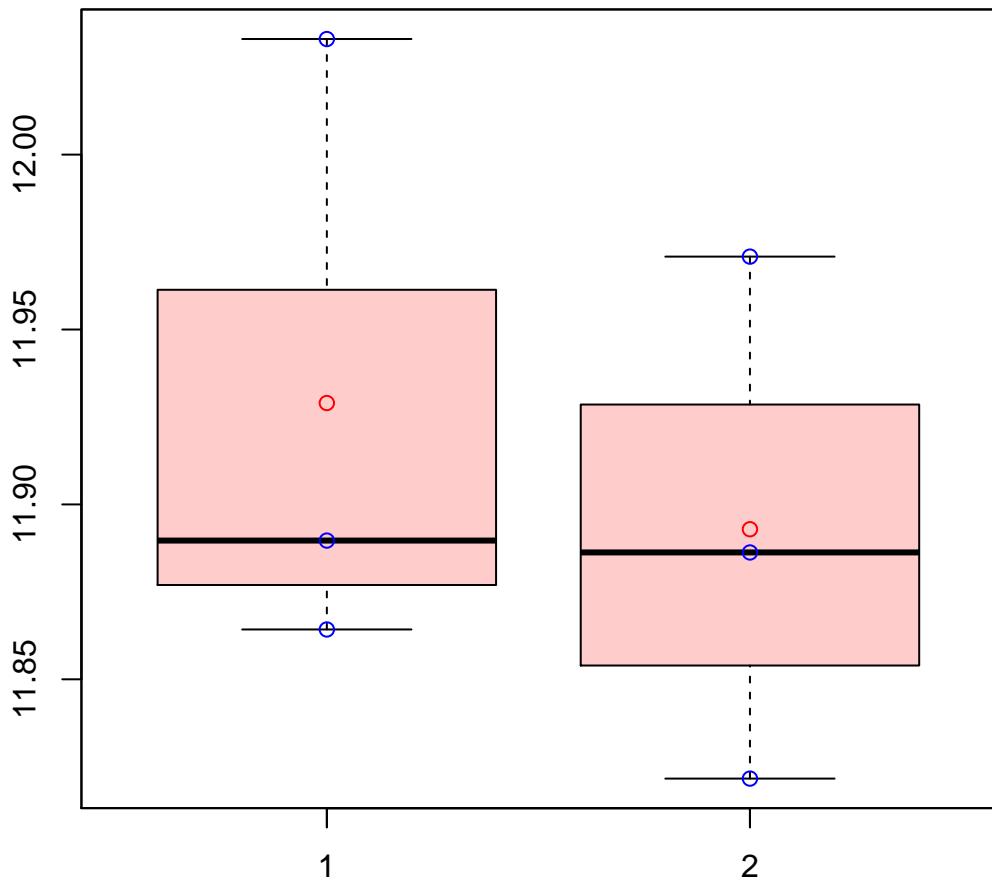

t-Test: p-value = 0.62

# CL1Contig10450|CL1Contig10450



t-Test: p-value = 0.52

# CL1Contig10451|CL1Contig10451



t-Test: p-value = 0.62



# CL1Contig10452|CL1Contig10452



t-Test: p-value = 0.52

# CL1Contig10453|CL1Contig10453

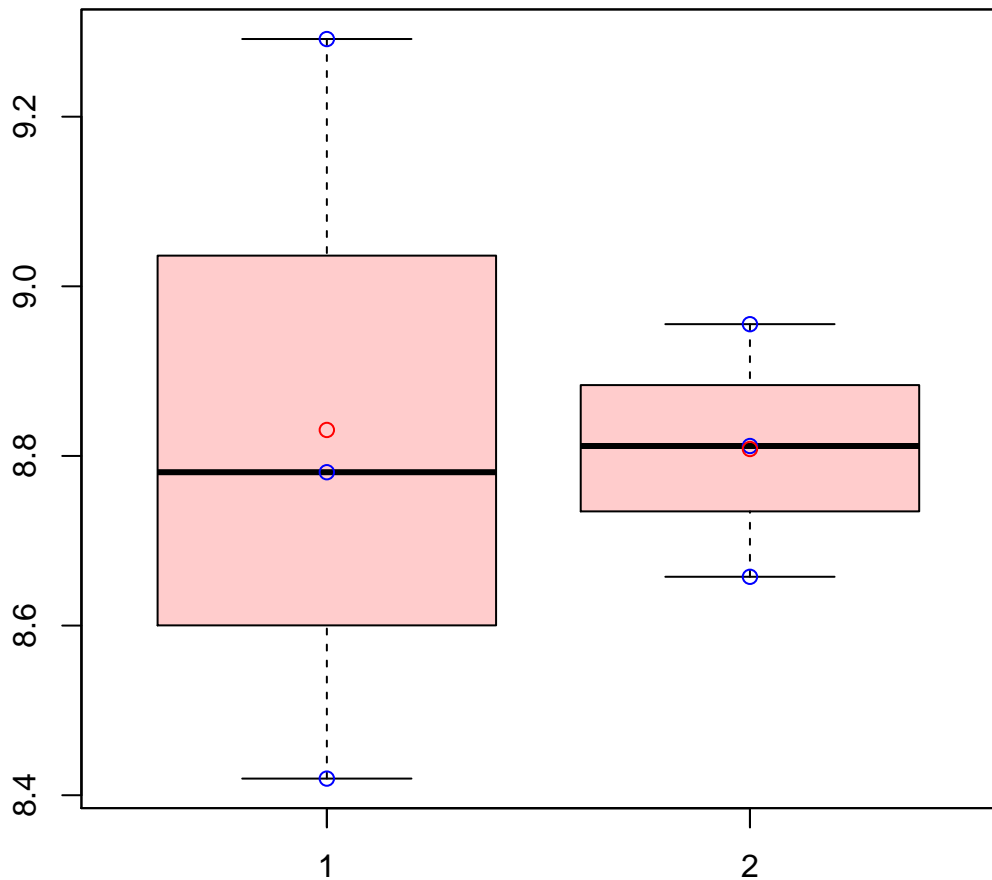

t-Test: p-value = 0.94

# CL1Contig1045|CL1Contig1045

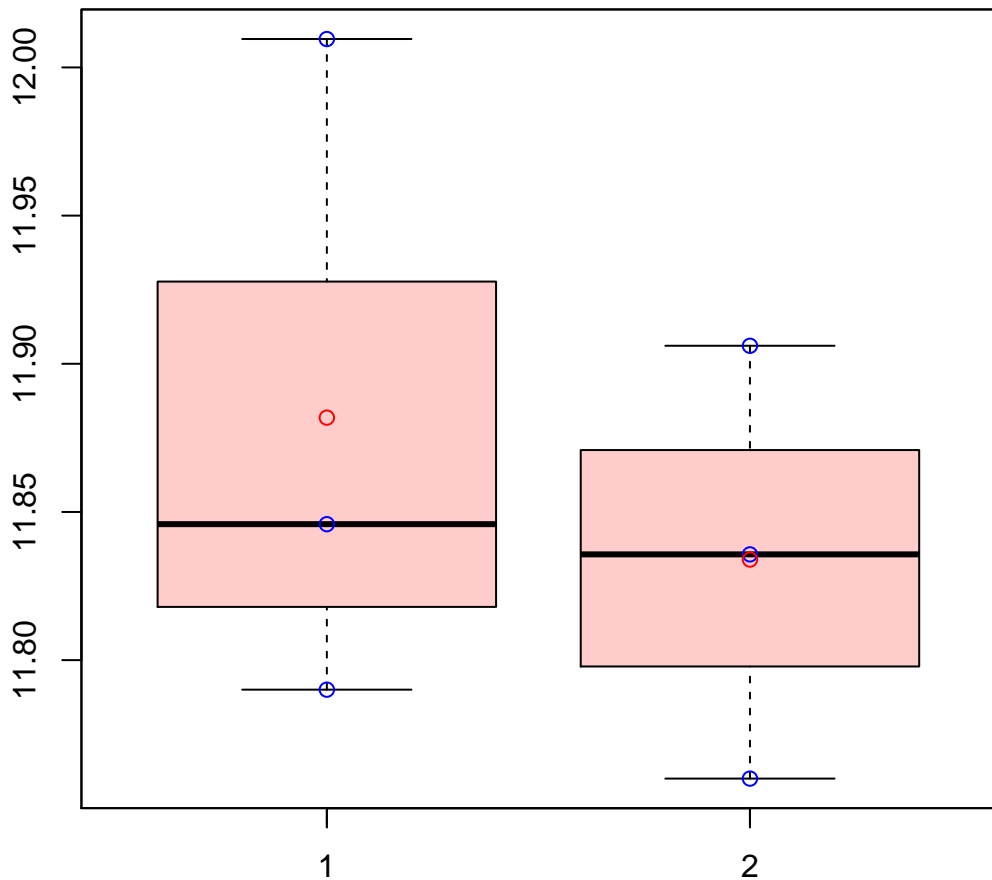

t-Test: p-value = 0.58

# CL1Contig10463|CL1Contig10463

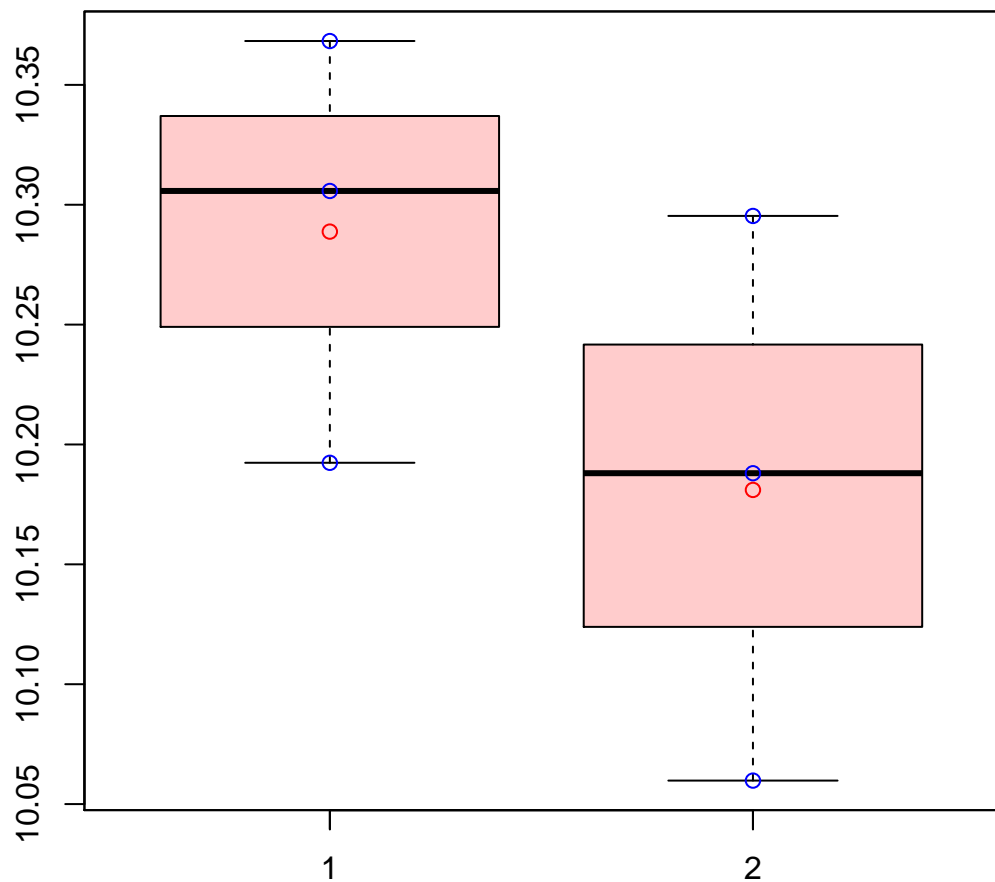

t-Test: p-value = 0.28

# CL1Contig1048|CL1Contig1048

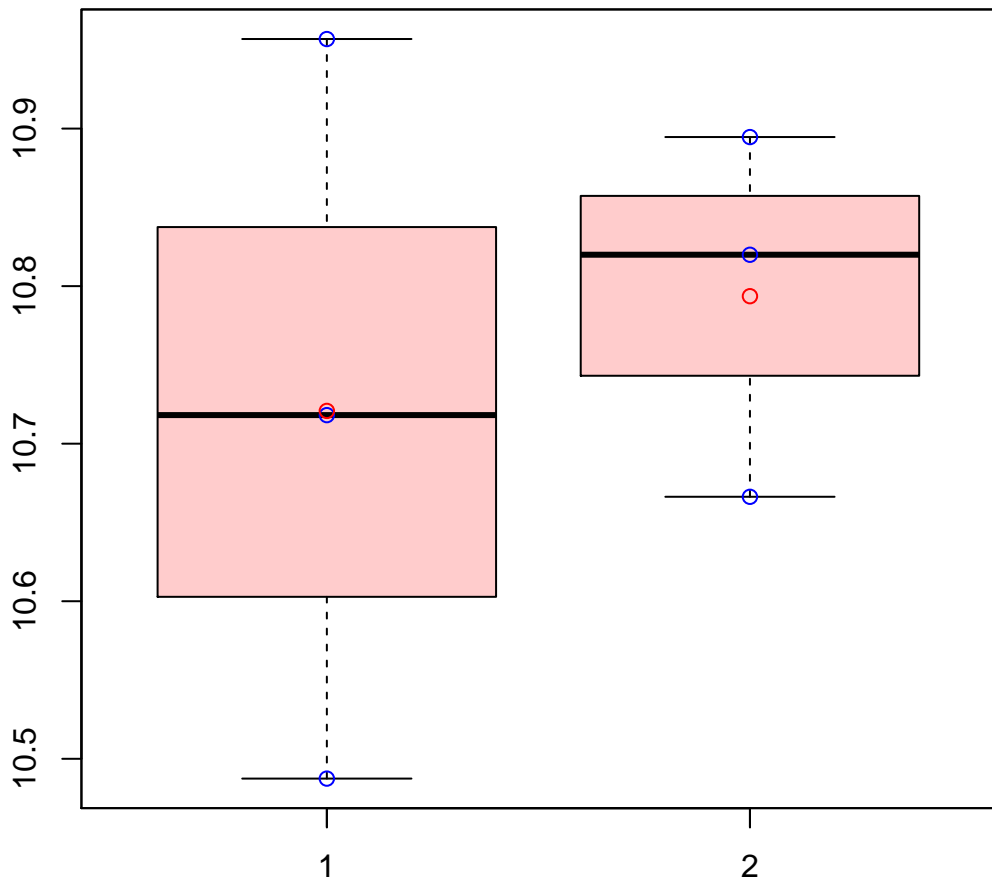

t-Test: p-value = 0.66

# CL1Contig10495|CL1Contig10495

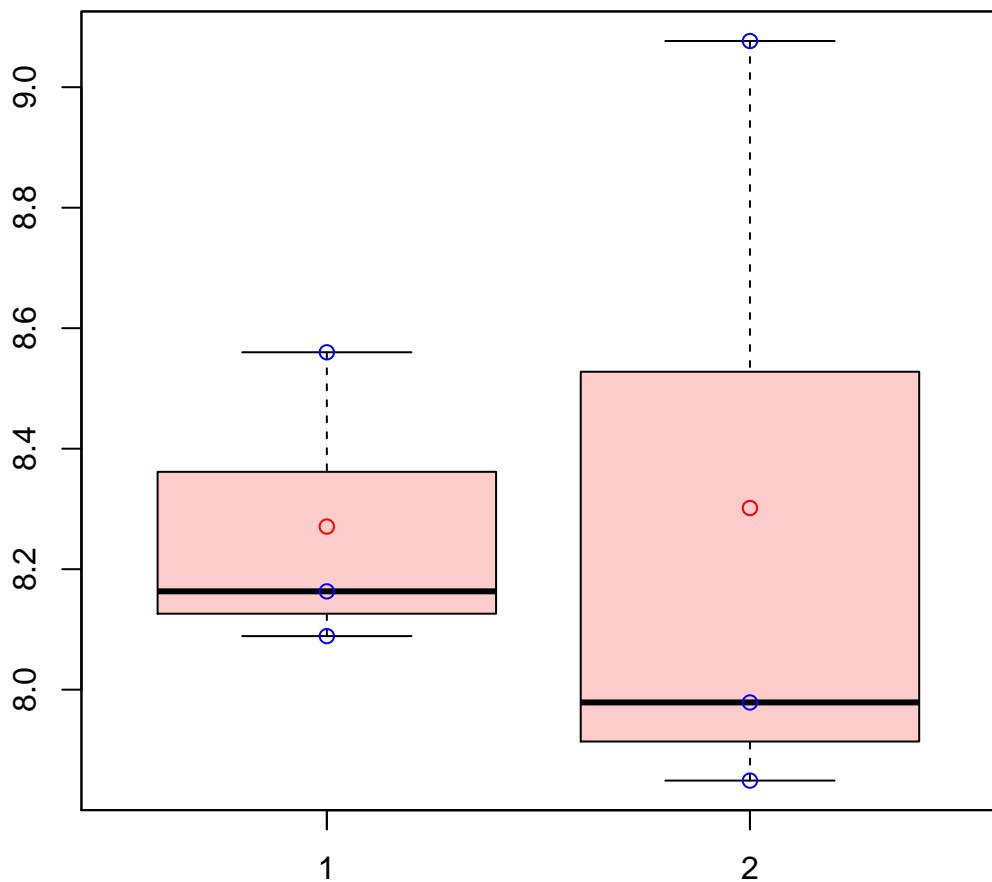

t-Test: p-value = 0.95

# CL1Contig10513|CL1Contig10513

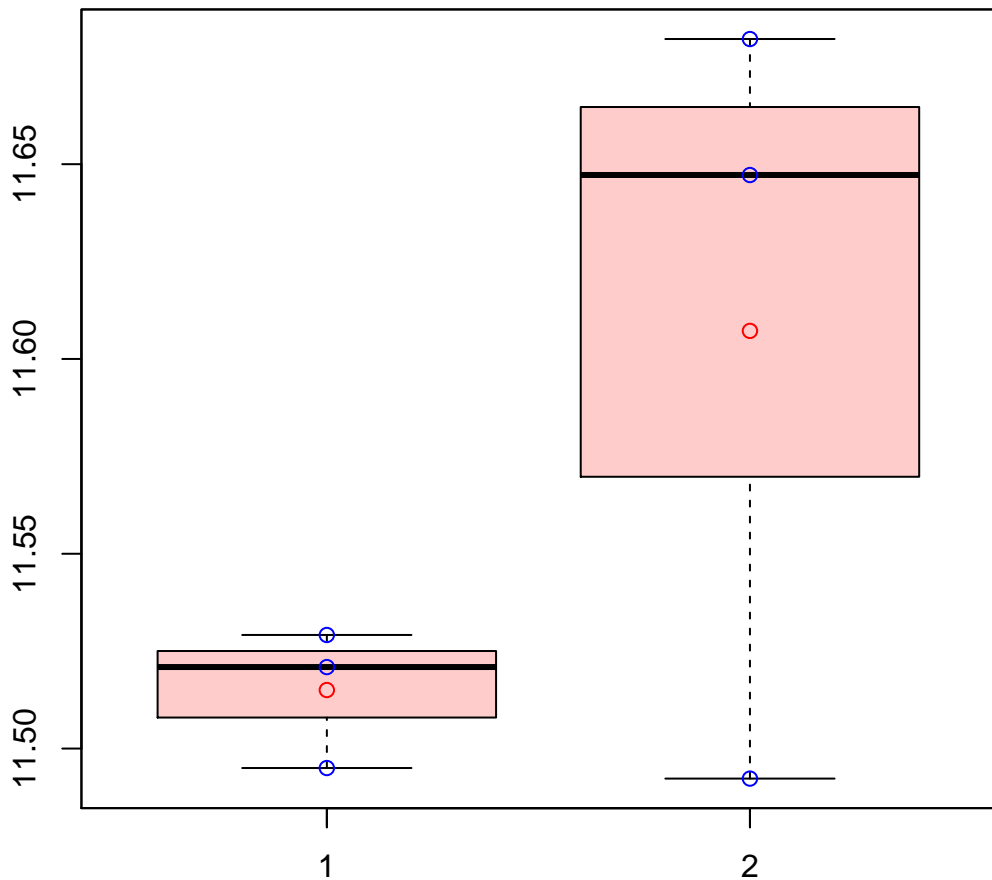

t-Test: p-value = 0.25

# CL1Contig10514|CL1Contig10514

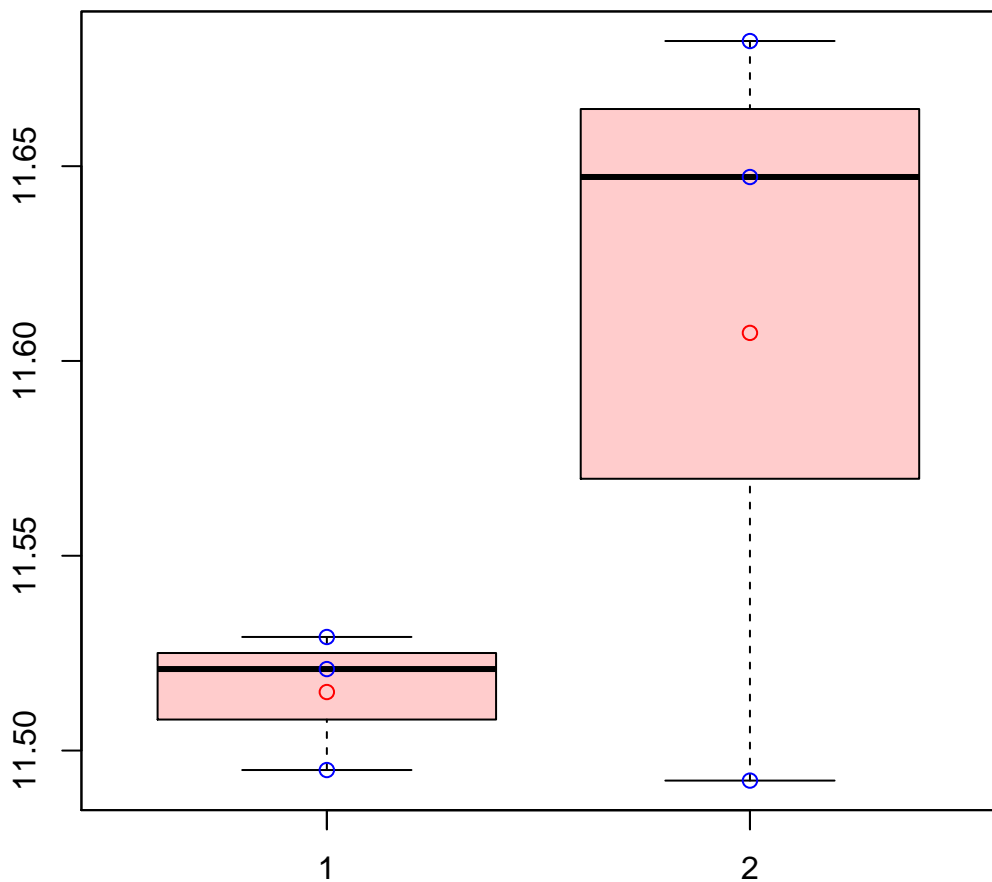

t-Test: p-value = 0.25



# CL1Contig10518|CL1Contig10518

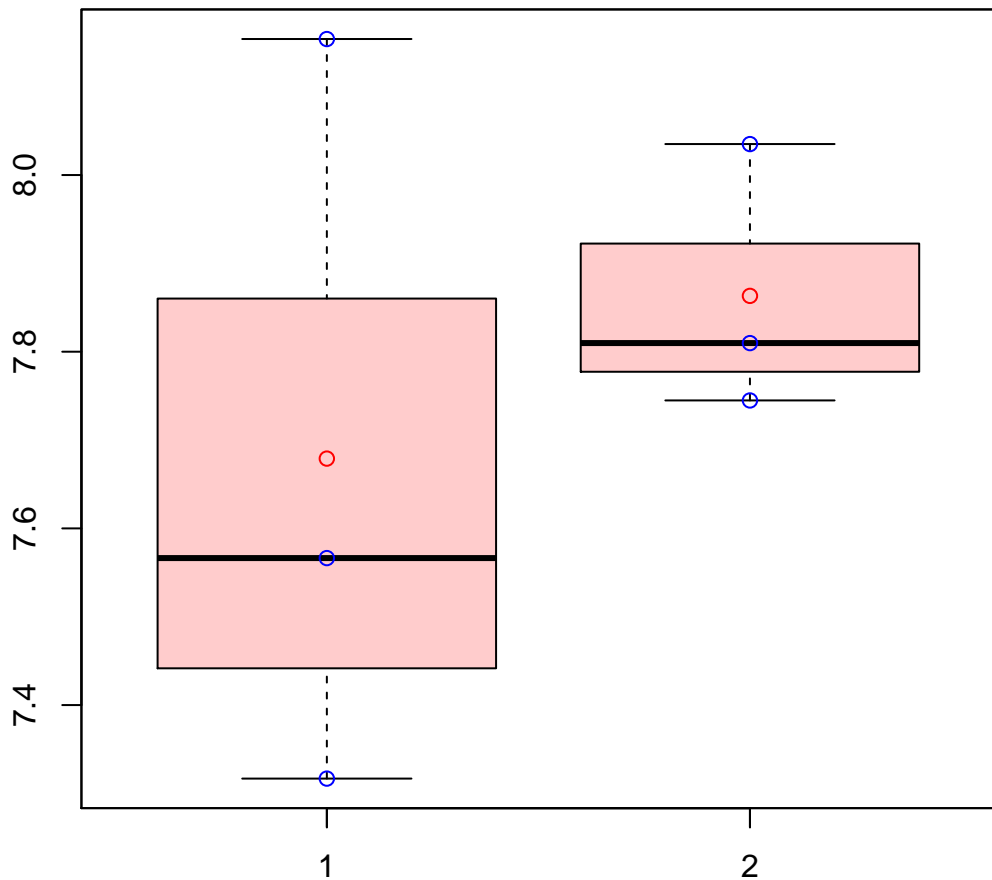

t-Test: p-value = 0.54

# CL1Contig1051|CL1Contig1051

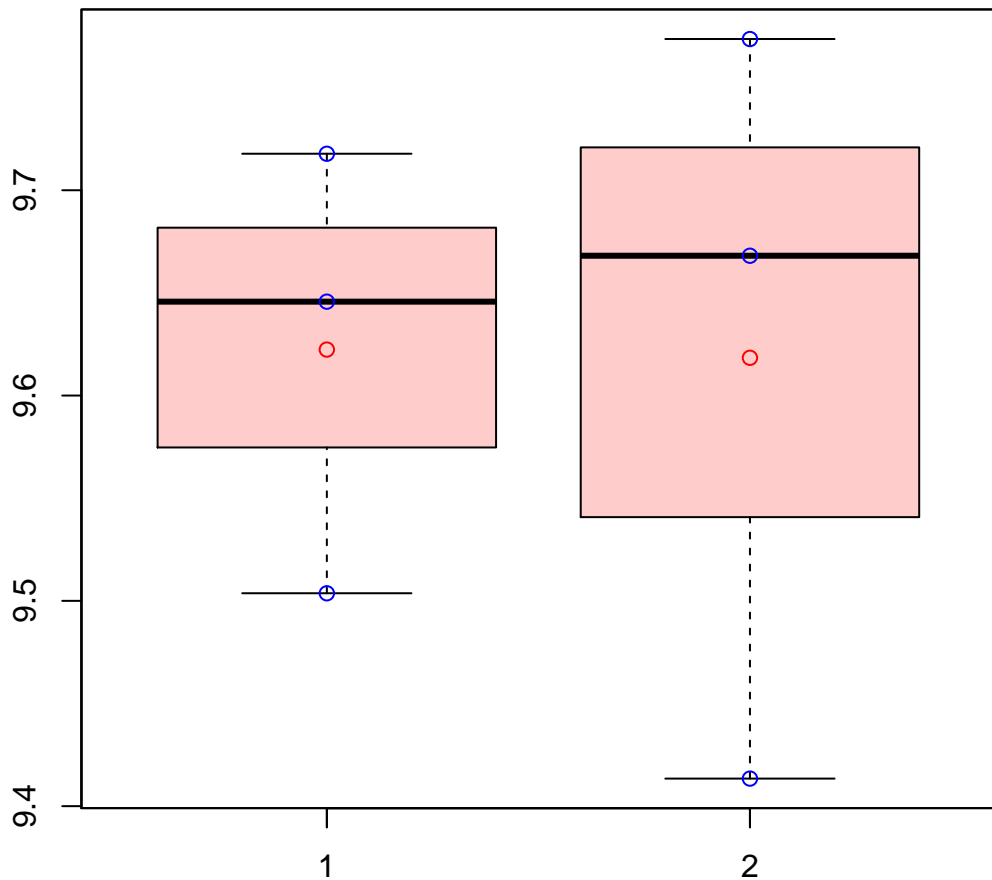

t-Test: p-value = 0.98

# CL1Contig10521|CL1Contig10521

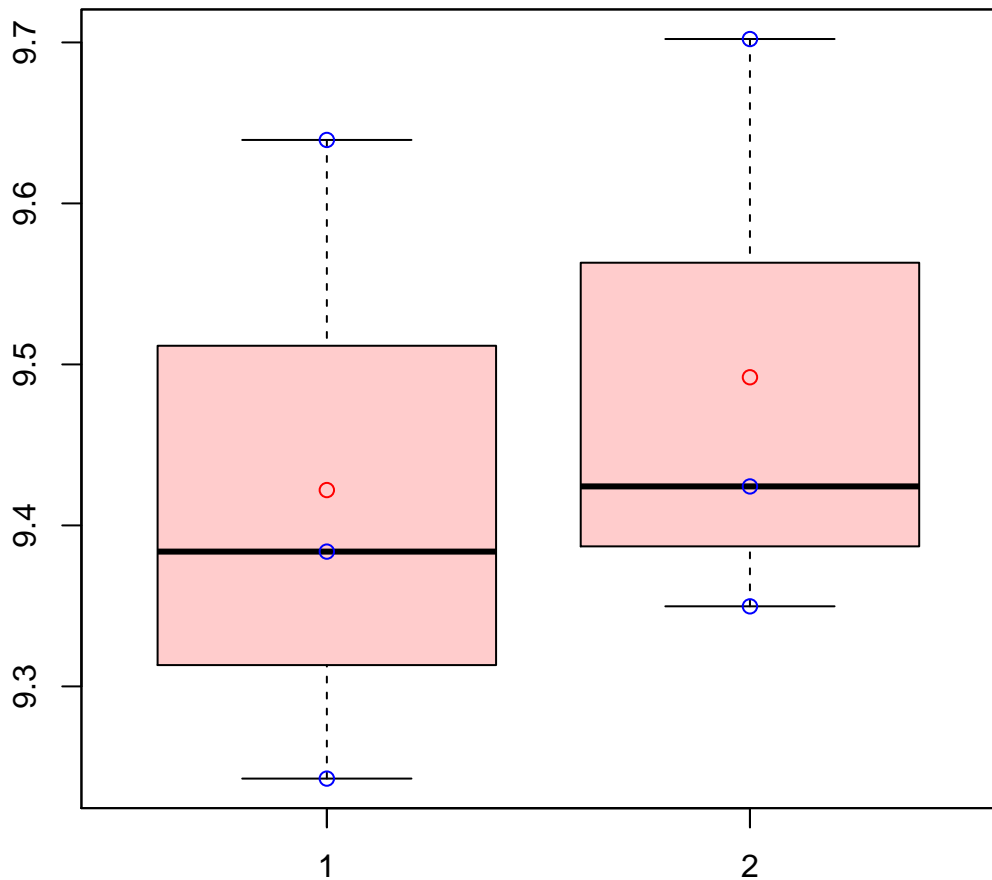

t-Test: p-value = 0.68

# CL1Contig10570|CL1Contig10570

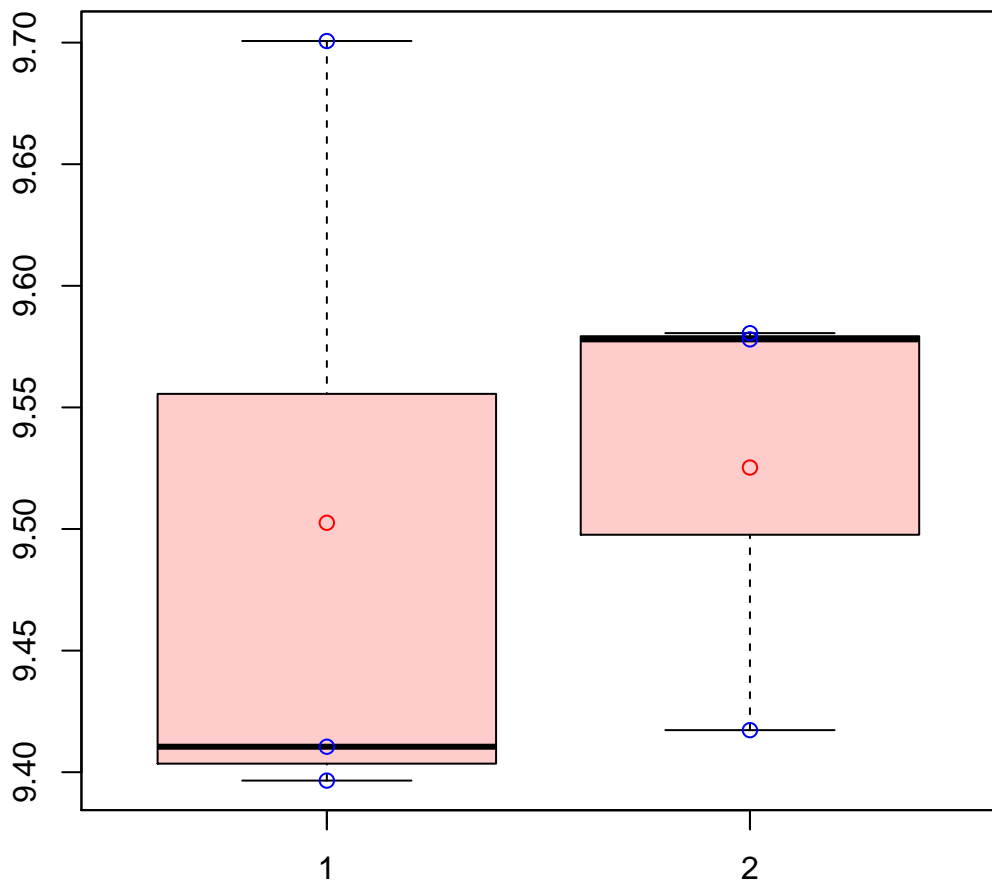

t-Test: p-value = 0.85

# CL1Contig10598|CL1Contig10598

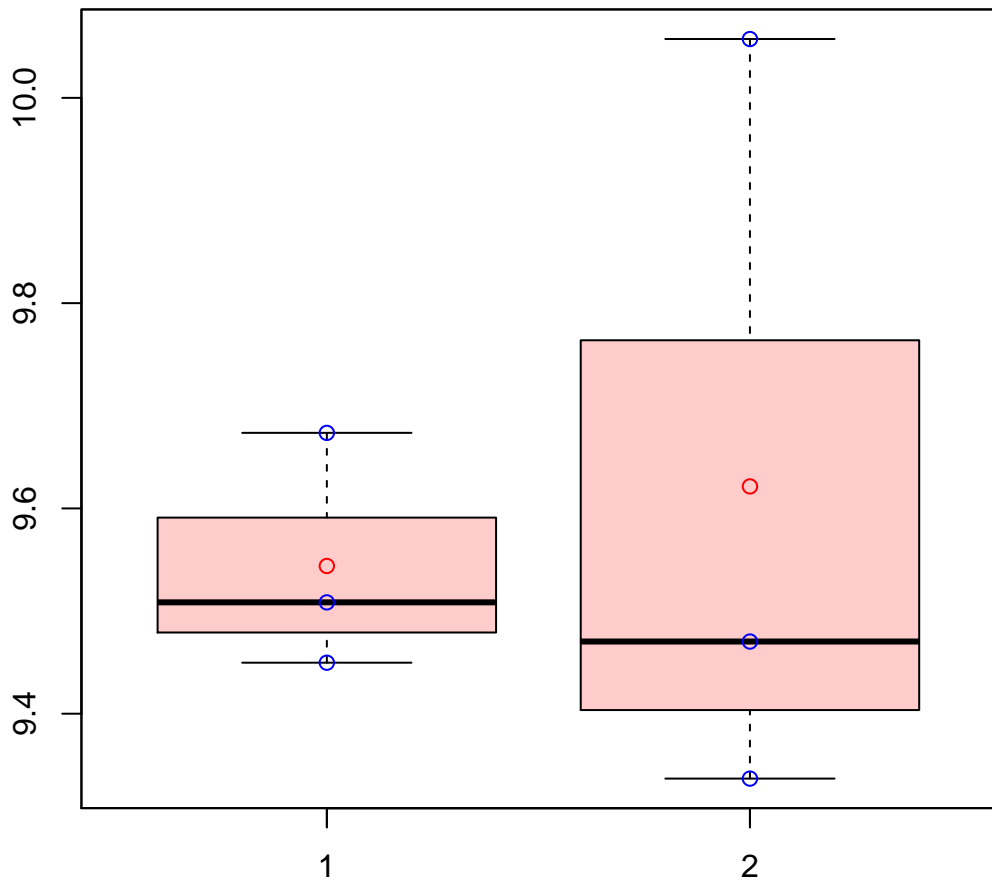

t-Test: p-value = 0.76

# CL1Contig10599|CL1Contig10599



t-Test: p-value = 0.76

# CL1Contig10600|CL1Contig10600

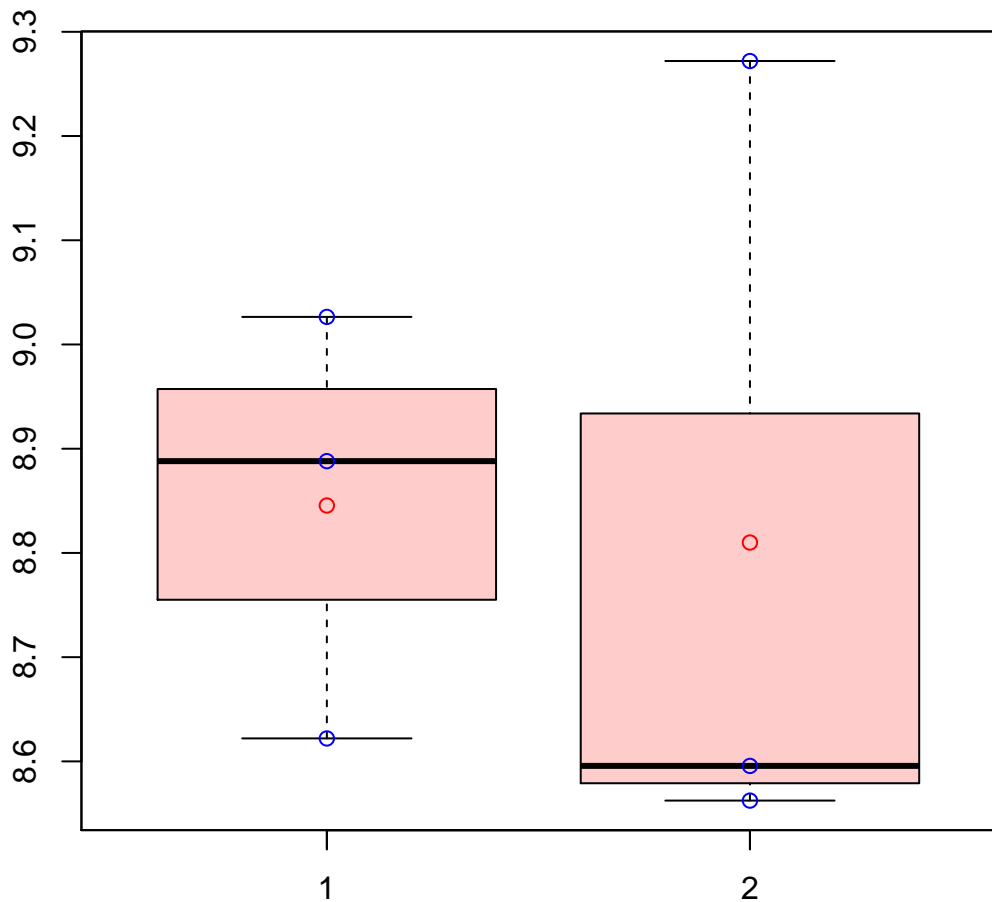

t-Test: p-value = 0.9

# CL1Contig10614|CL1Contig10614

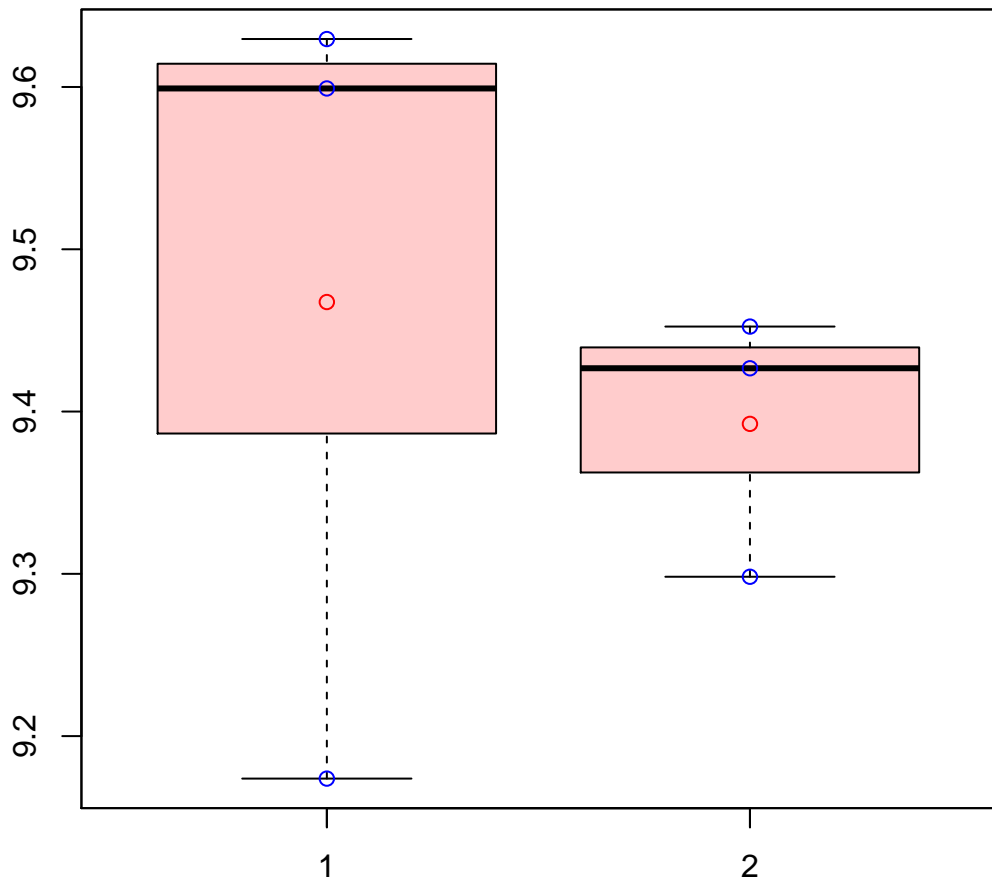

t-Test: p-value = 0.67



# CL1Contig10616|CL1Contig10616

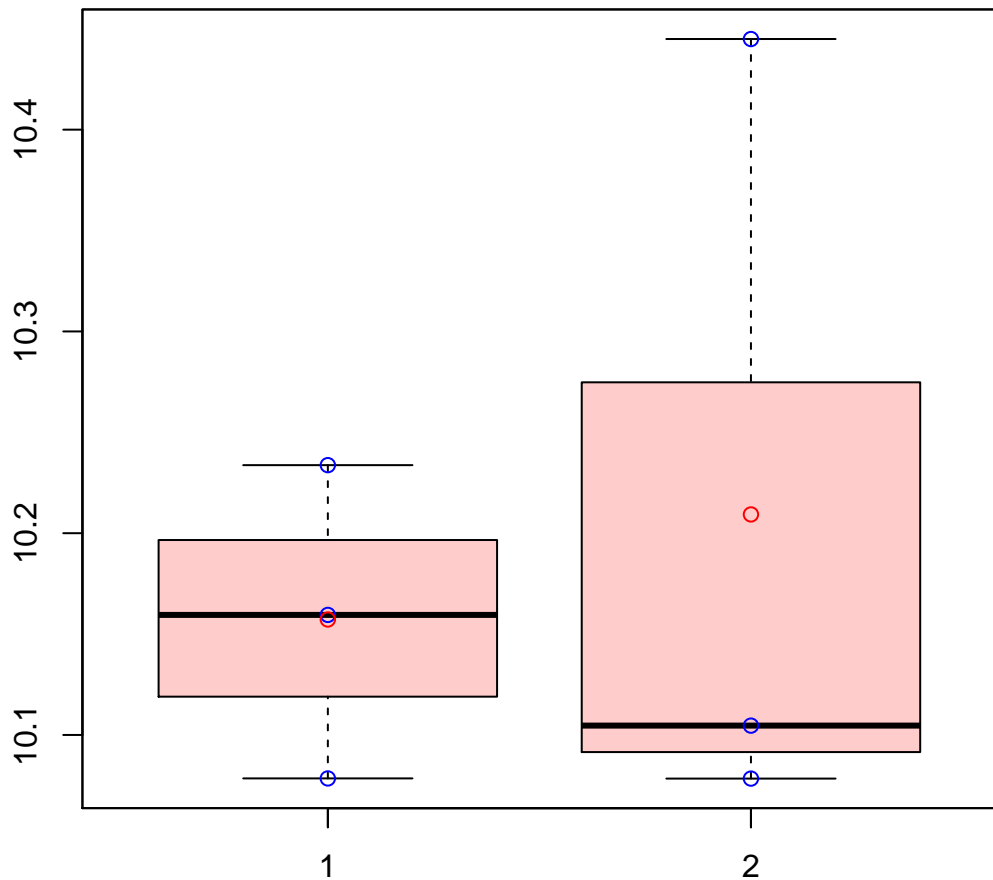

t-Test: p-value = 0.71

# CL1Contig1061|CL1Contig1061

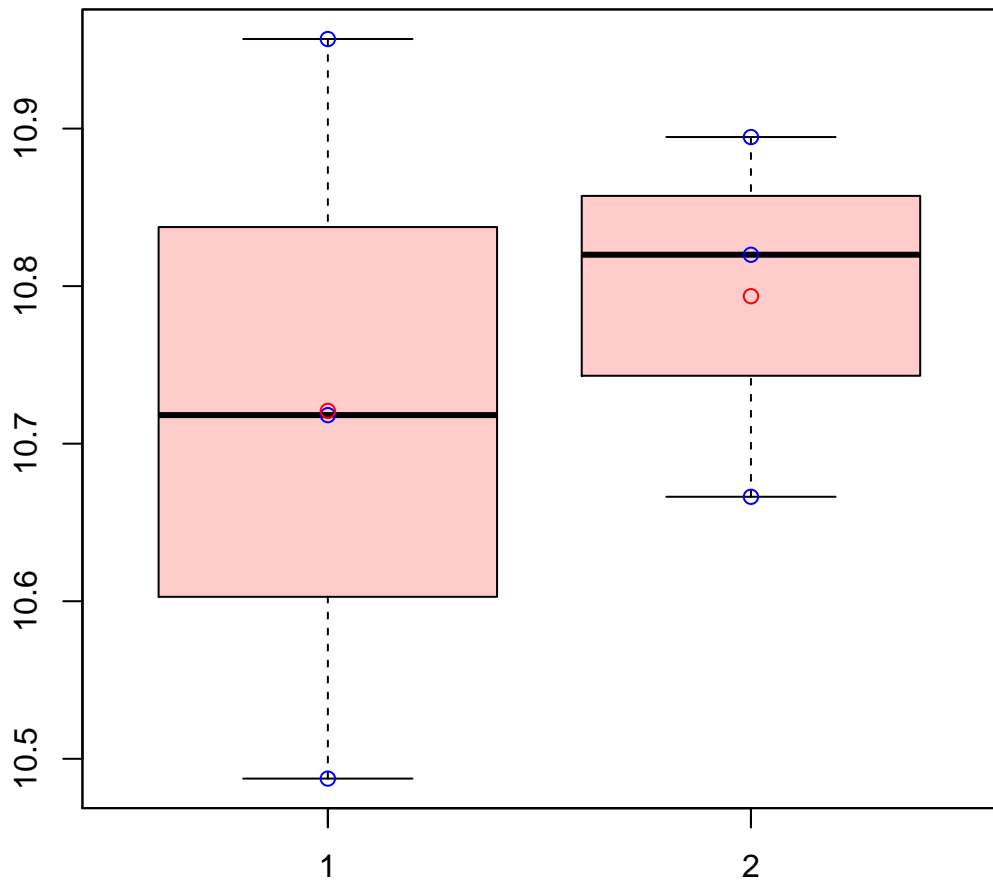

t-Test: p-value = 0.66

# CL1Contig10624|CL1Contig10624

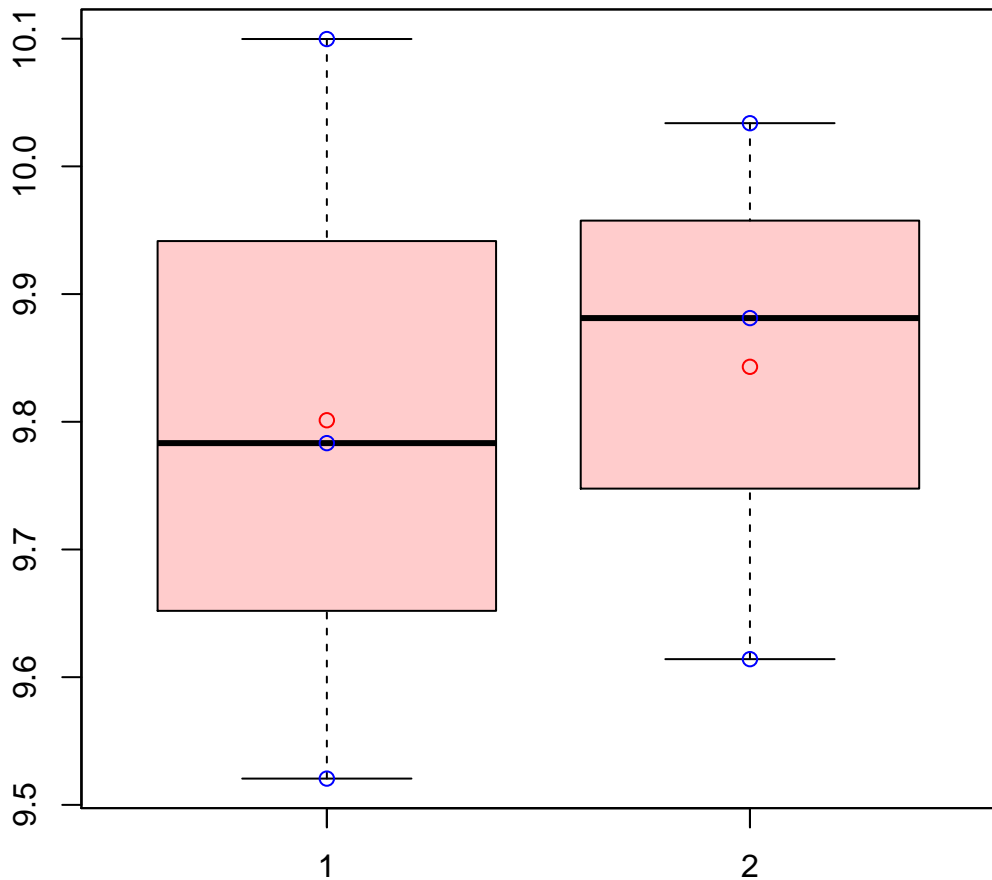

t-Test: p-value = 0.85

# CL1Contig10638|CL1Contig10638

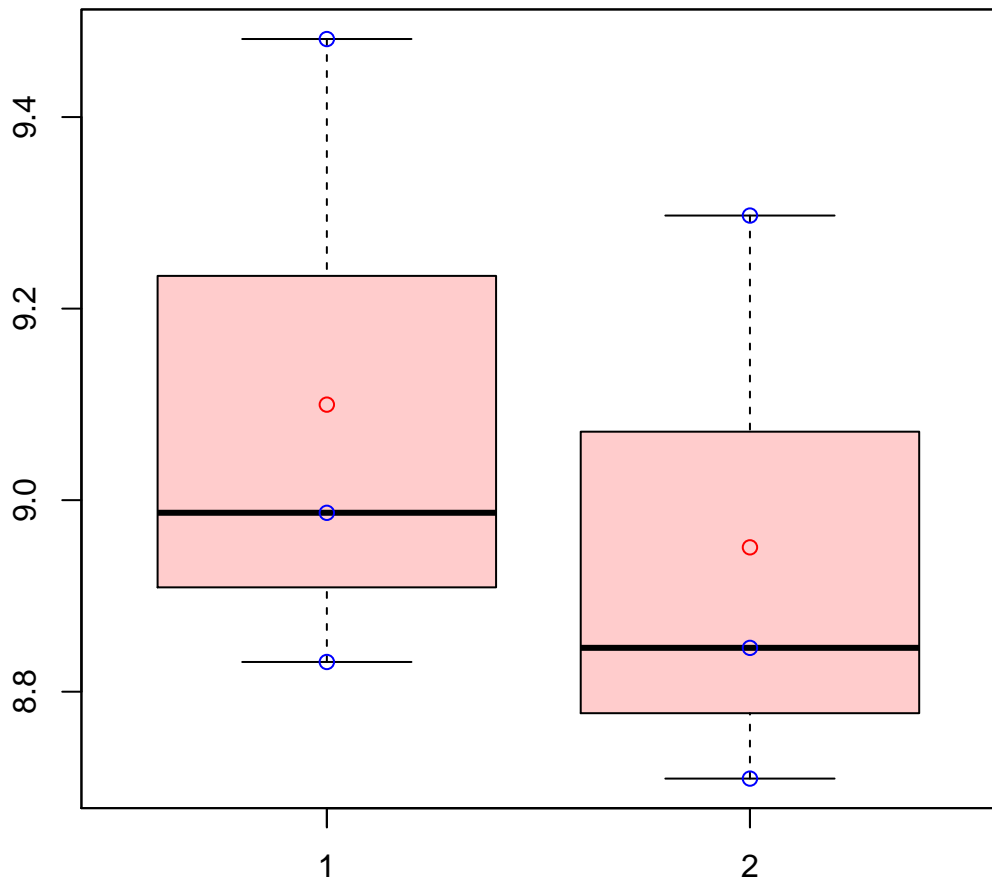

t-Test: p-value = 0.6

# CL1Contig10658|CL1Contig10658

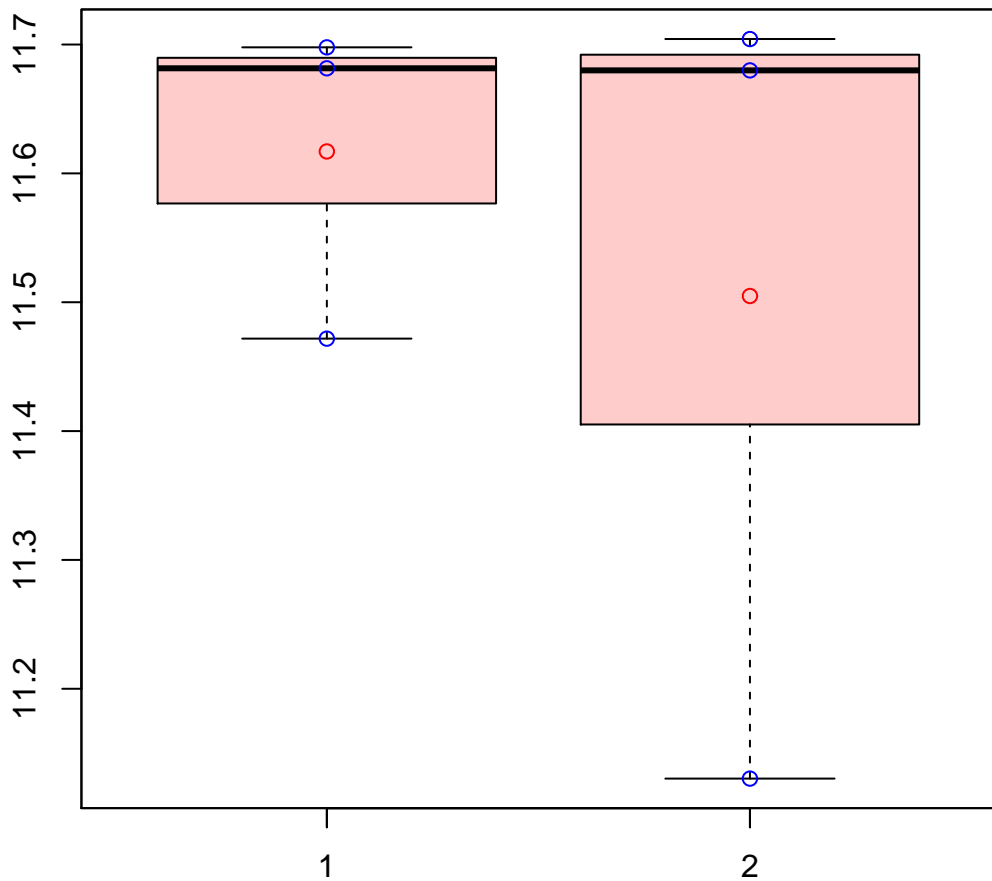

t-Test: p-value = 0.62

# CL1Contig10662|CL1Contig10662

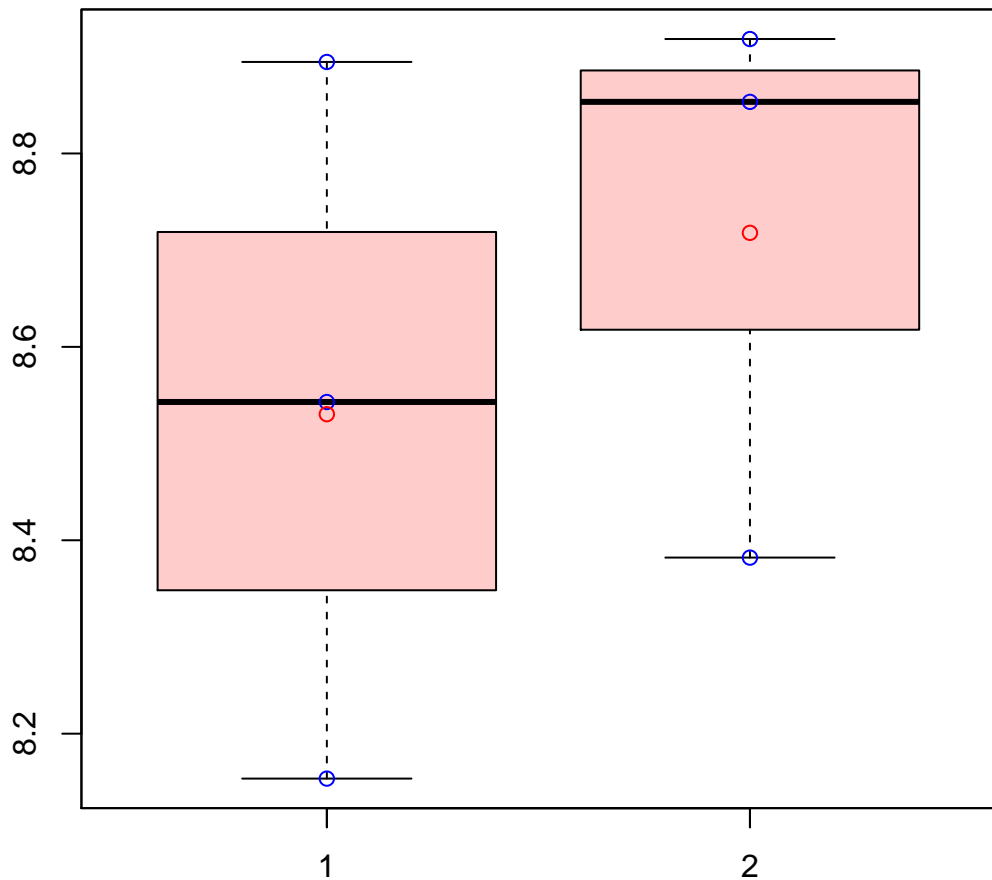

t-Test: p-value = 0.53

# CL1Contig10673|CL1Contig10673

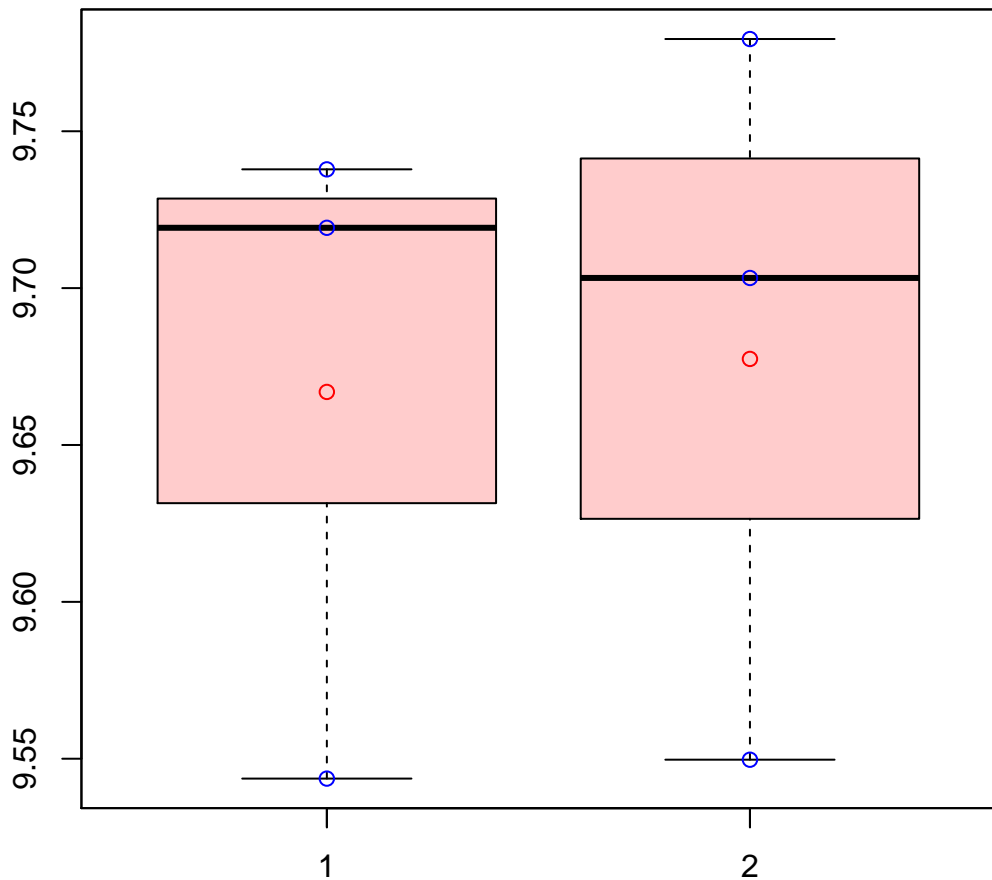

t-Test: p-value = 0.91

# CL1Contig10680|CL1Contig10680

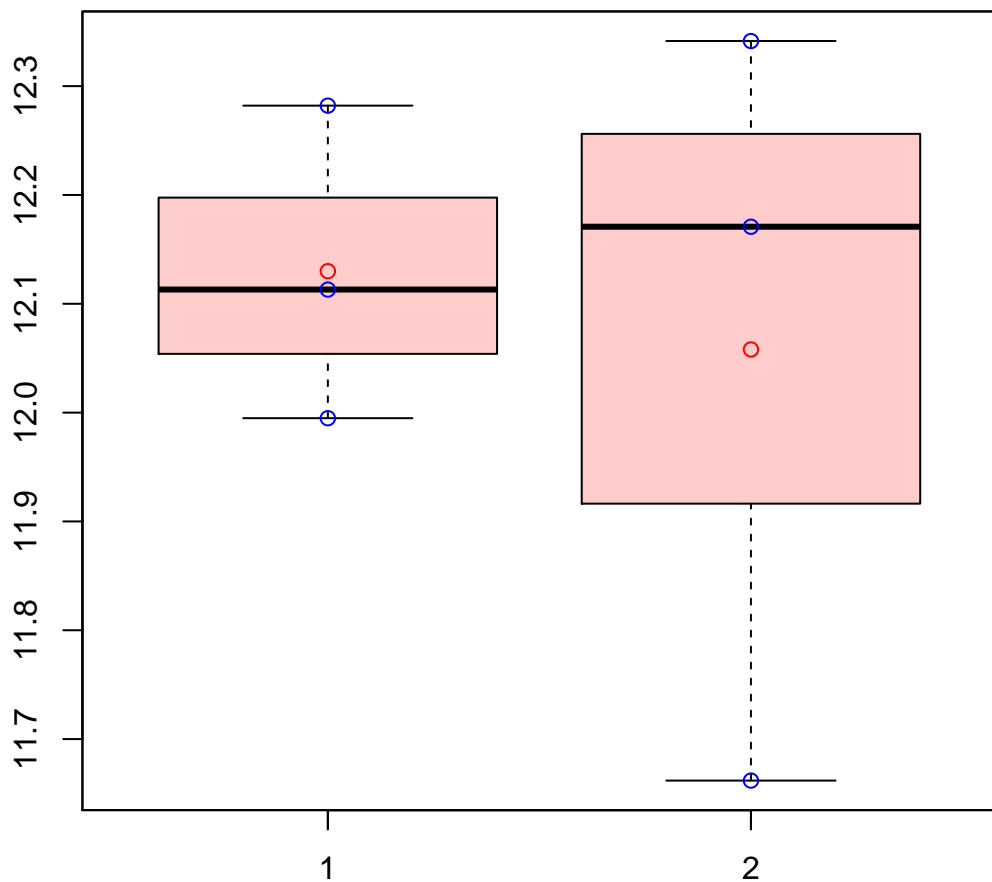

t-Test: p-value = 0.77



# CL1Contig10682|CL1Contig10682

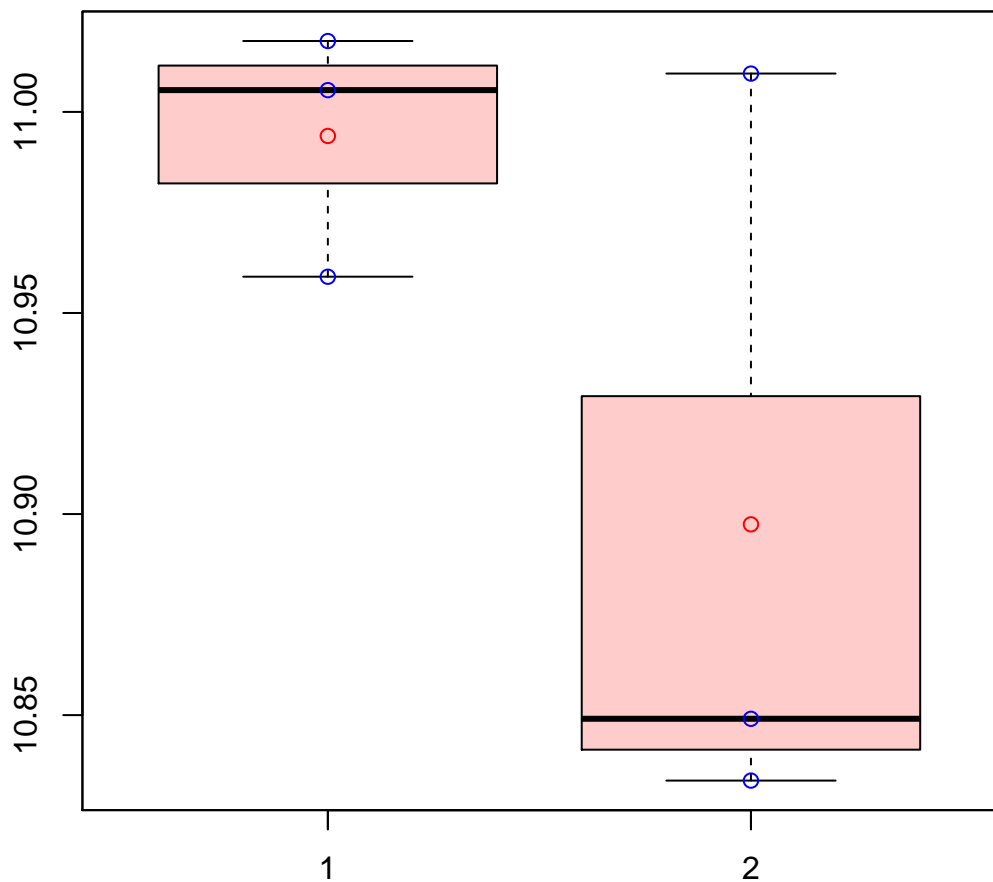

t-Test: p-value = 0.22

# CL1Contig10683|CL1Contig10683

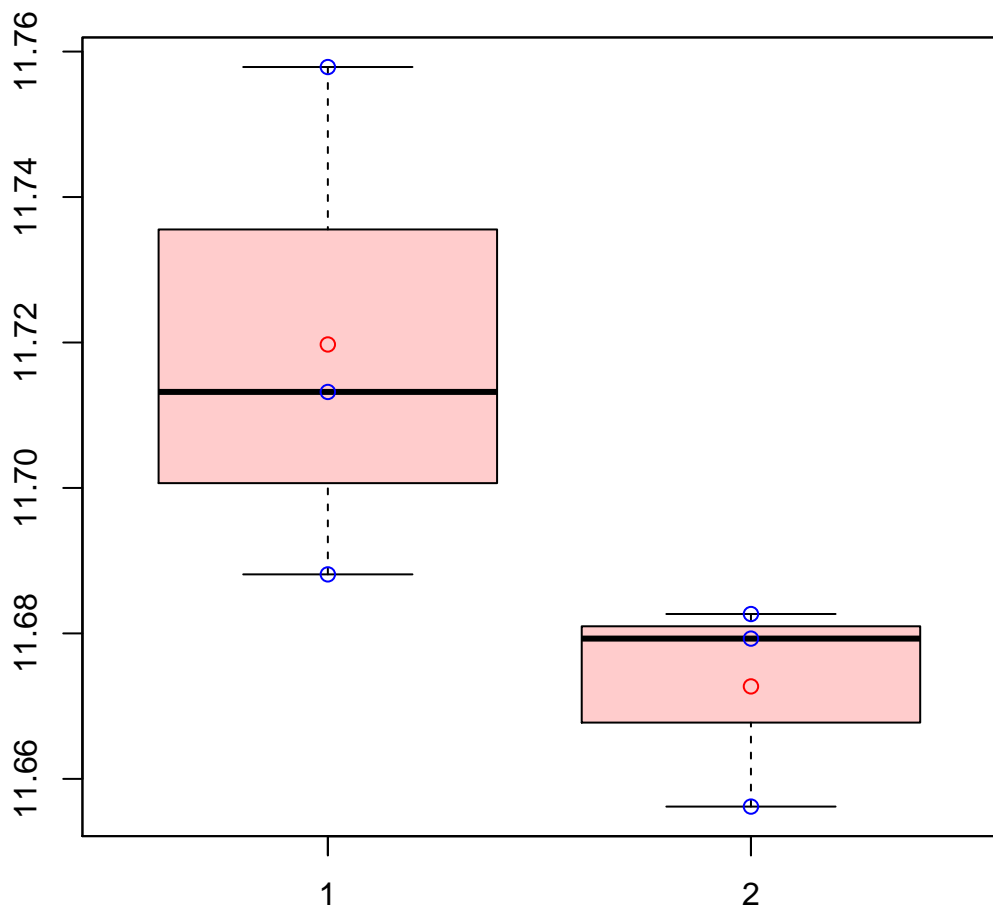

t-Test: p-value = 0.13

# CL1Contig10707|CL1Contig10707

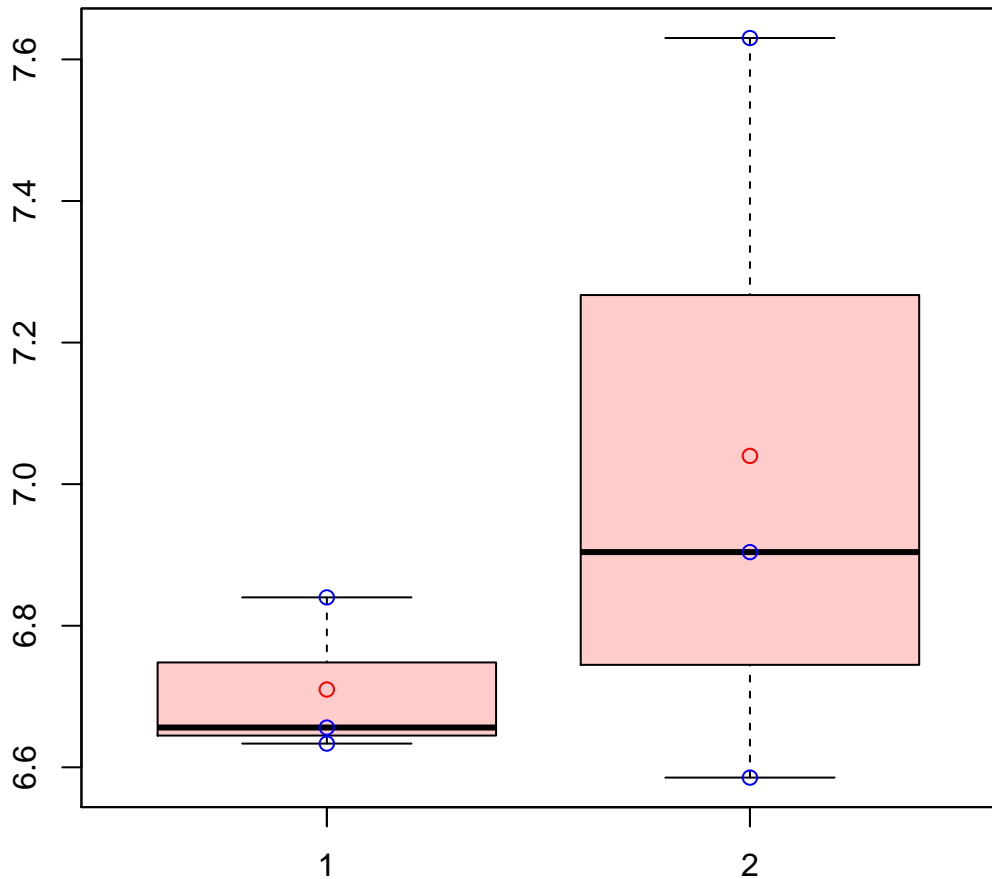

t-Test: p-value = 0.4

# CL1Contig10729|CL1Contig10729

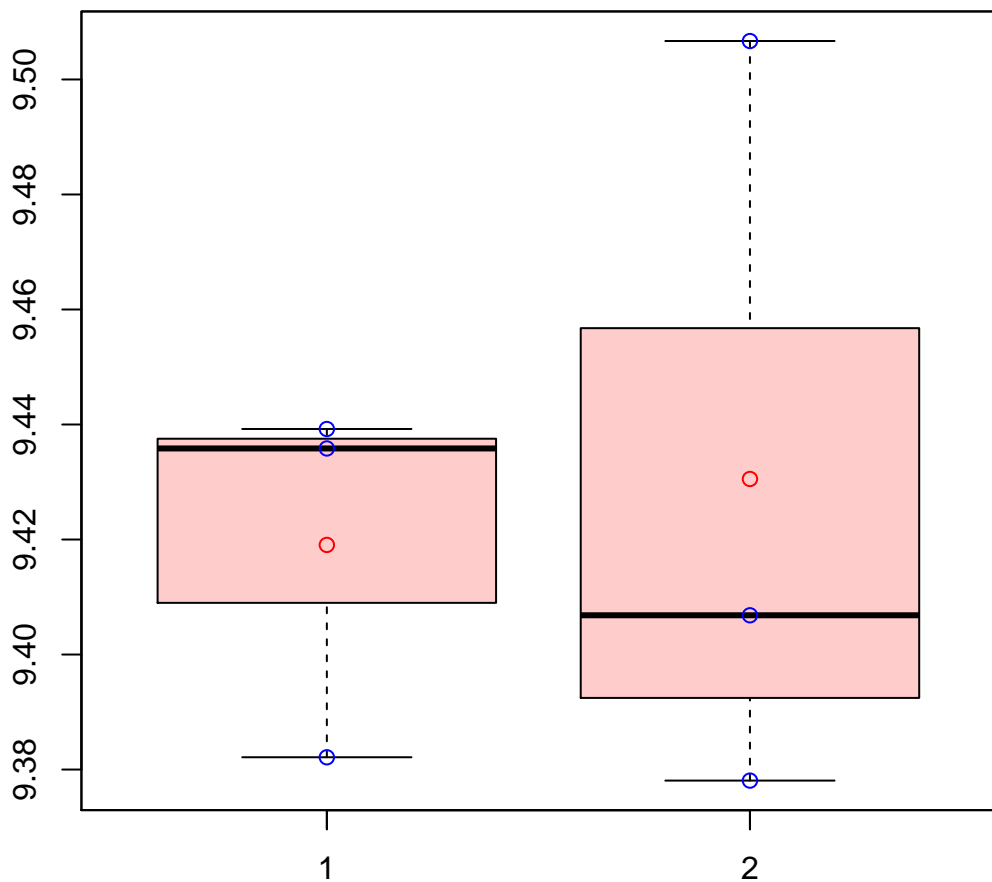

t-Test: p-value = 0.81

# CL1Contig10732|CL1Contig10732

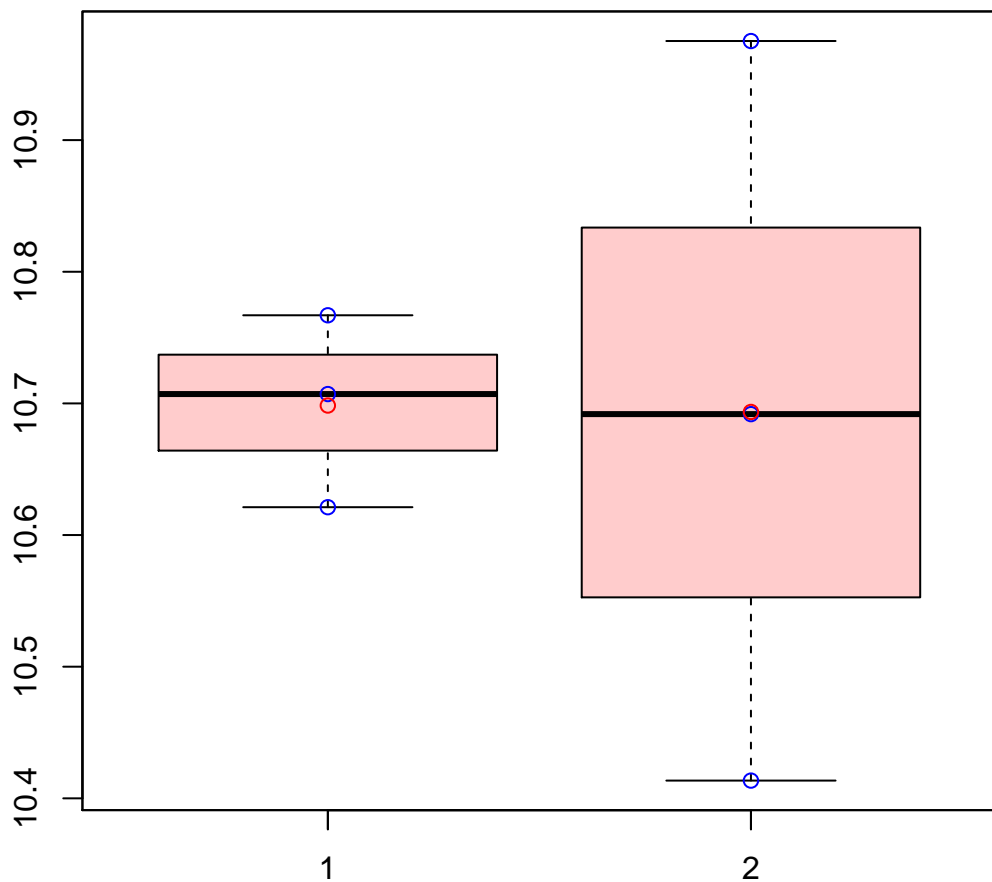

t-Test: p-value = 0.98

# CL1Contig1082|CL1Contig1082

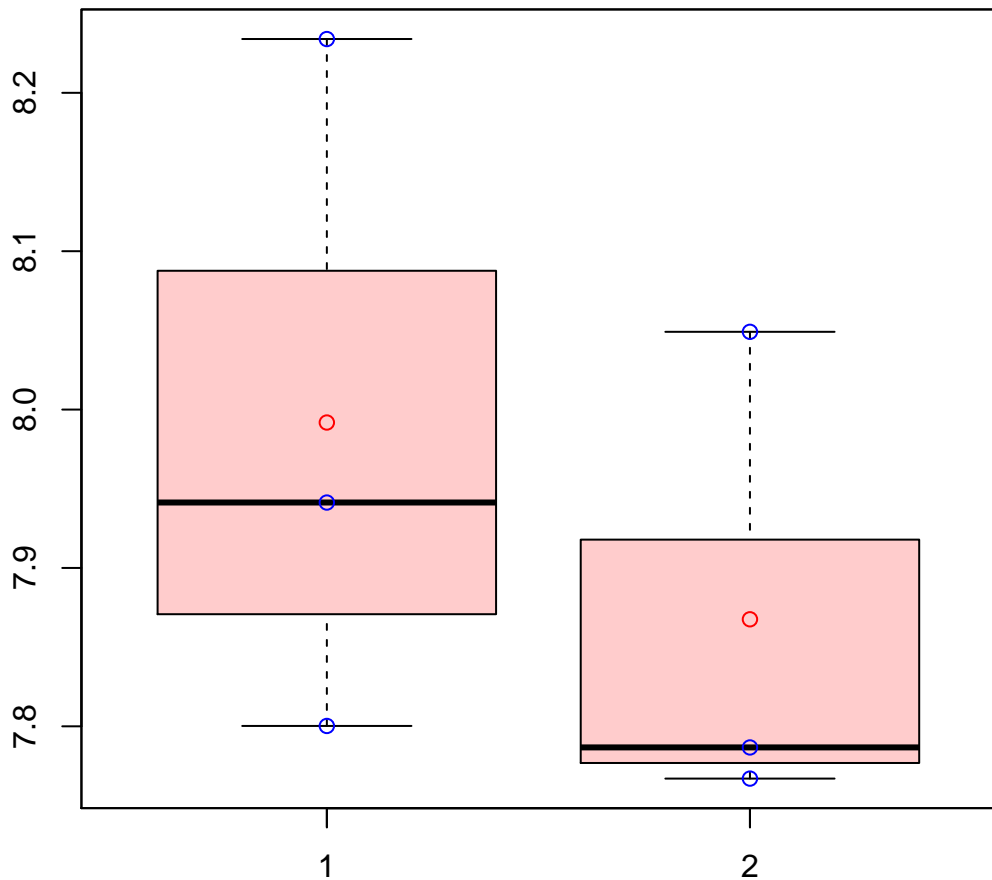

t-Test: p-value = 0.48

# CL1Contig1083|CL1Contig1083

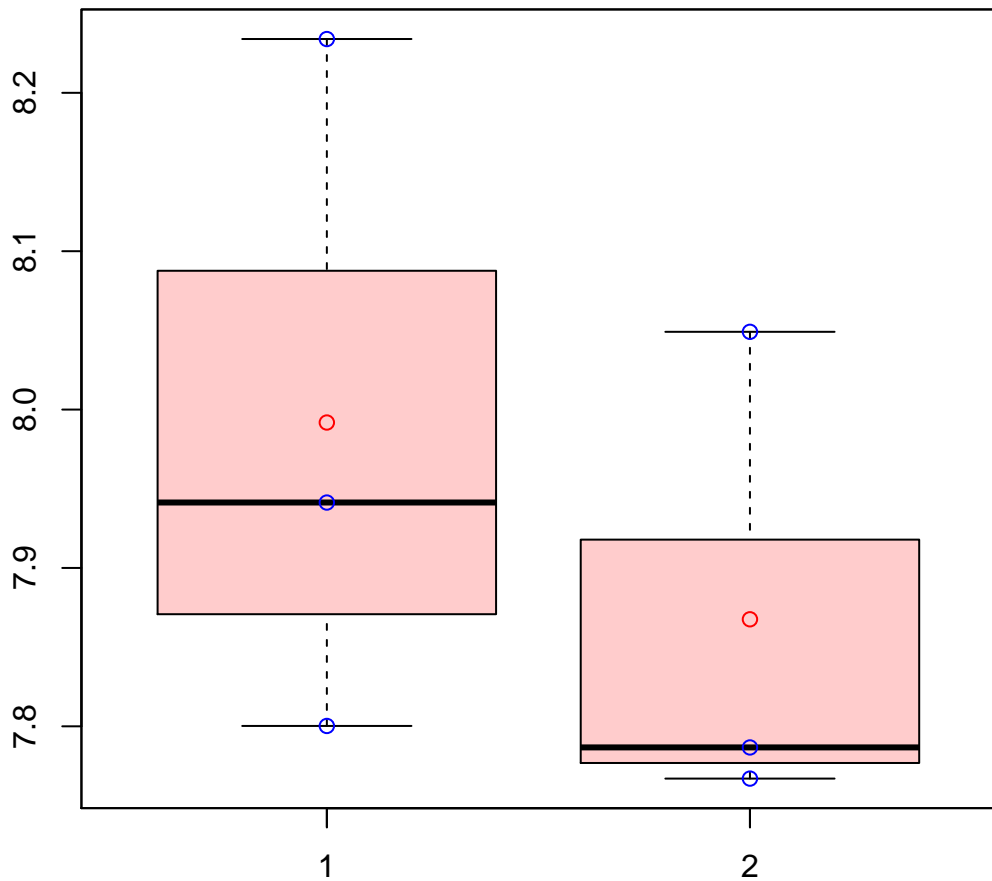

t-Test: p-value = 0.48

# CL1Contig110|CL1Contig110

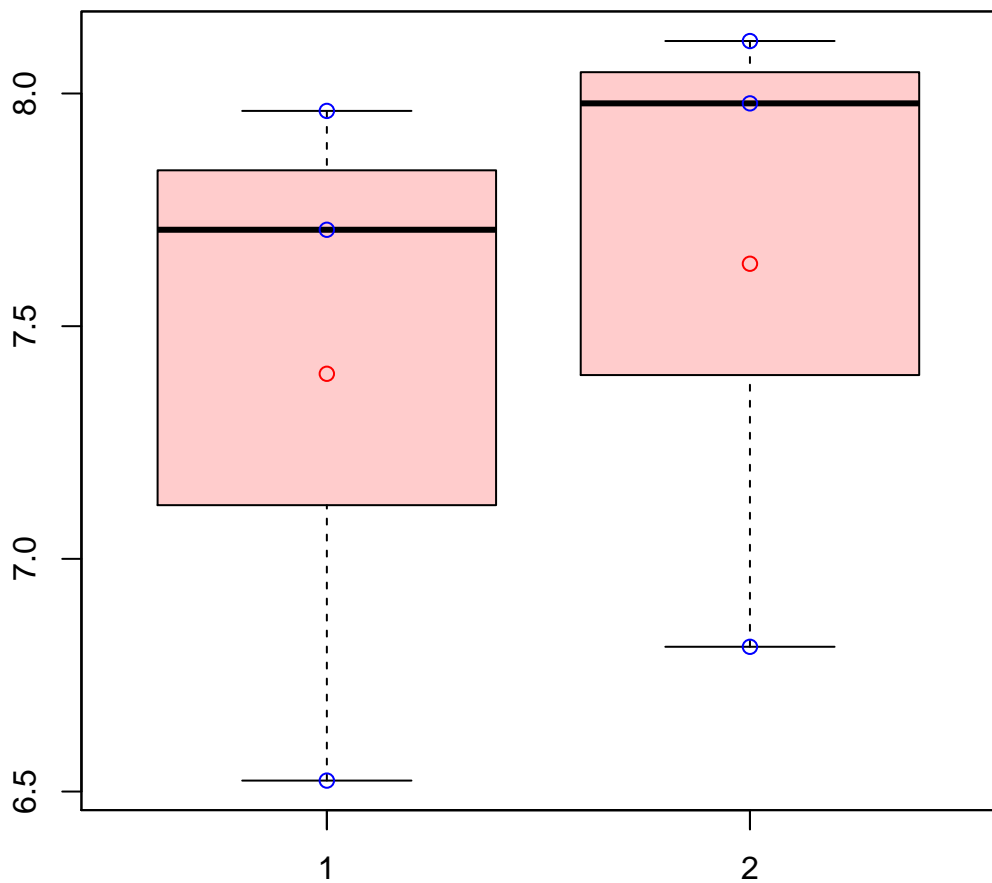

t-Test: p-value = 0.72



# CL1Contig1125|CL1Contig1125

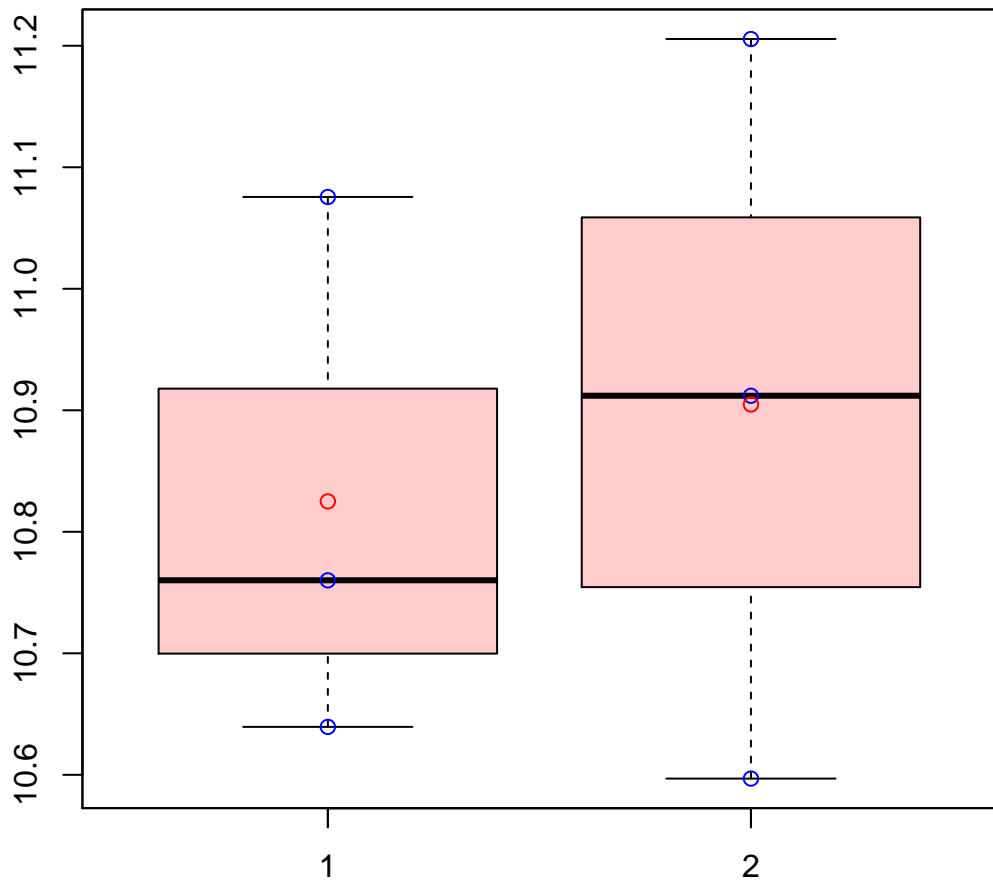

t-Test: p-value = 0.74

# CL1Contig1126|CL1Contig1126

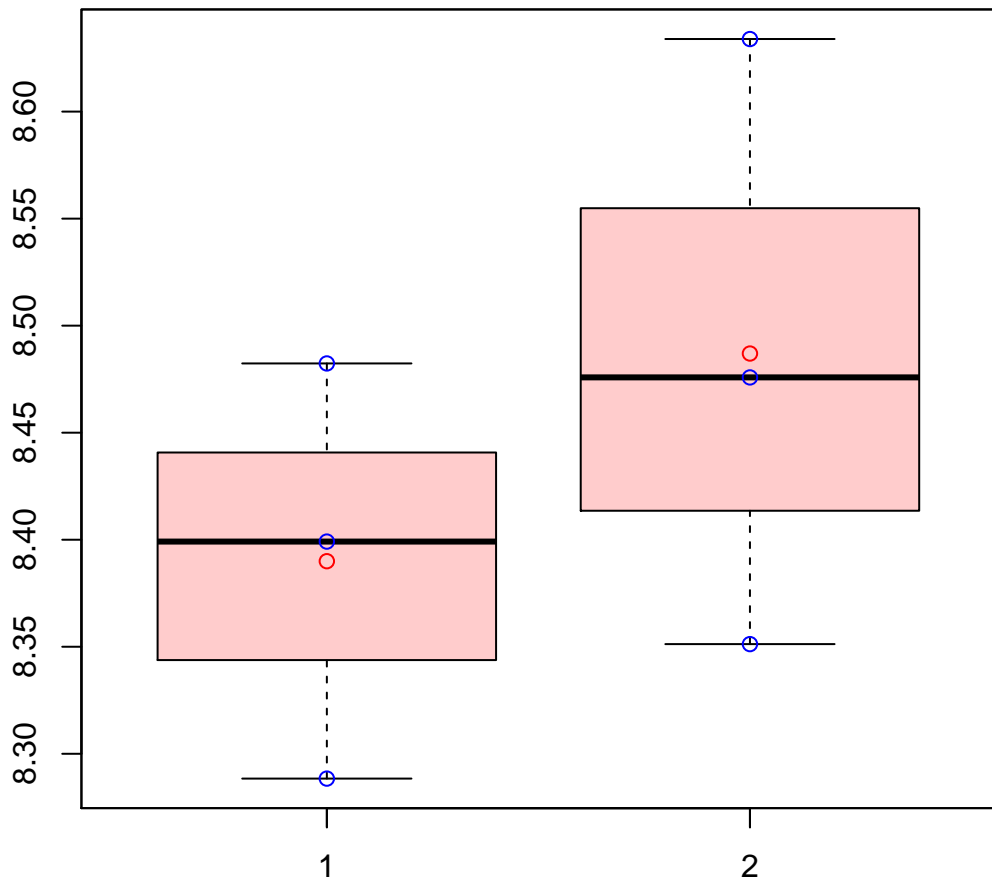

t-Test: p-value = 0.39

# CL1Contig113|CL1Contig113

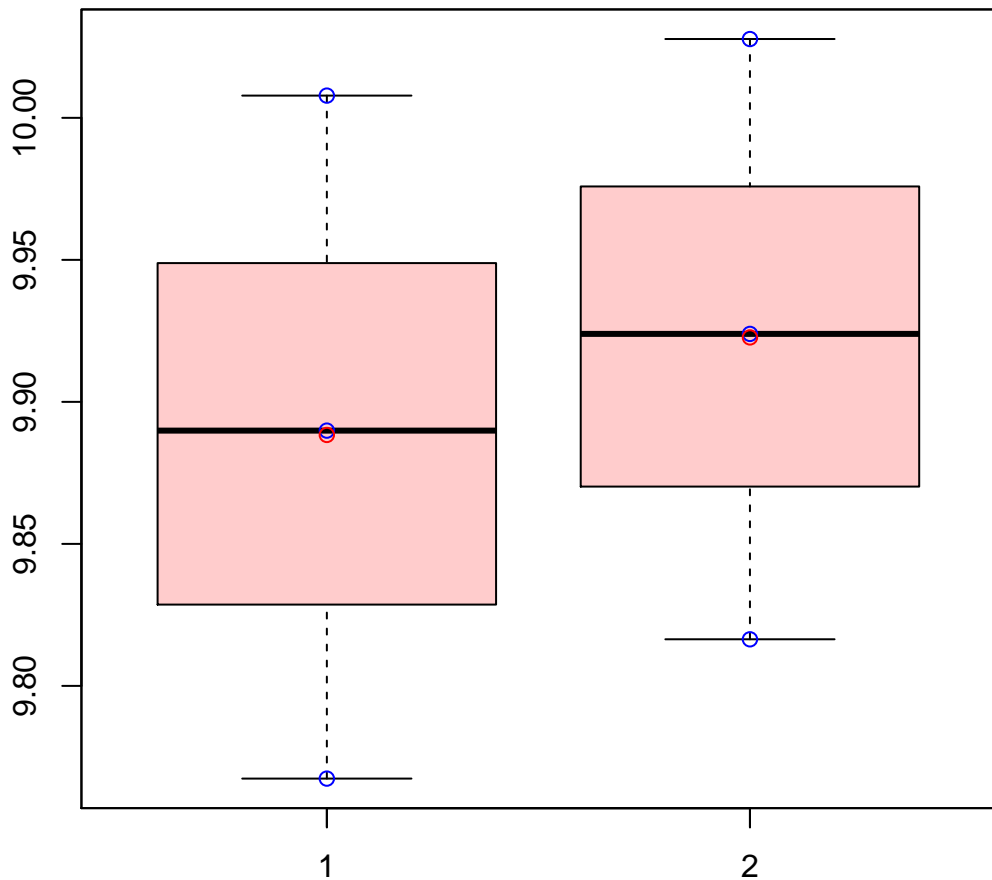

t-Test: p-value = 0.73

# CL1Contig1147|CL1Contig1147

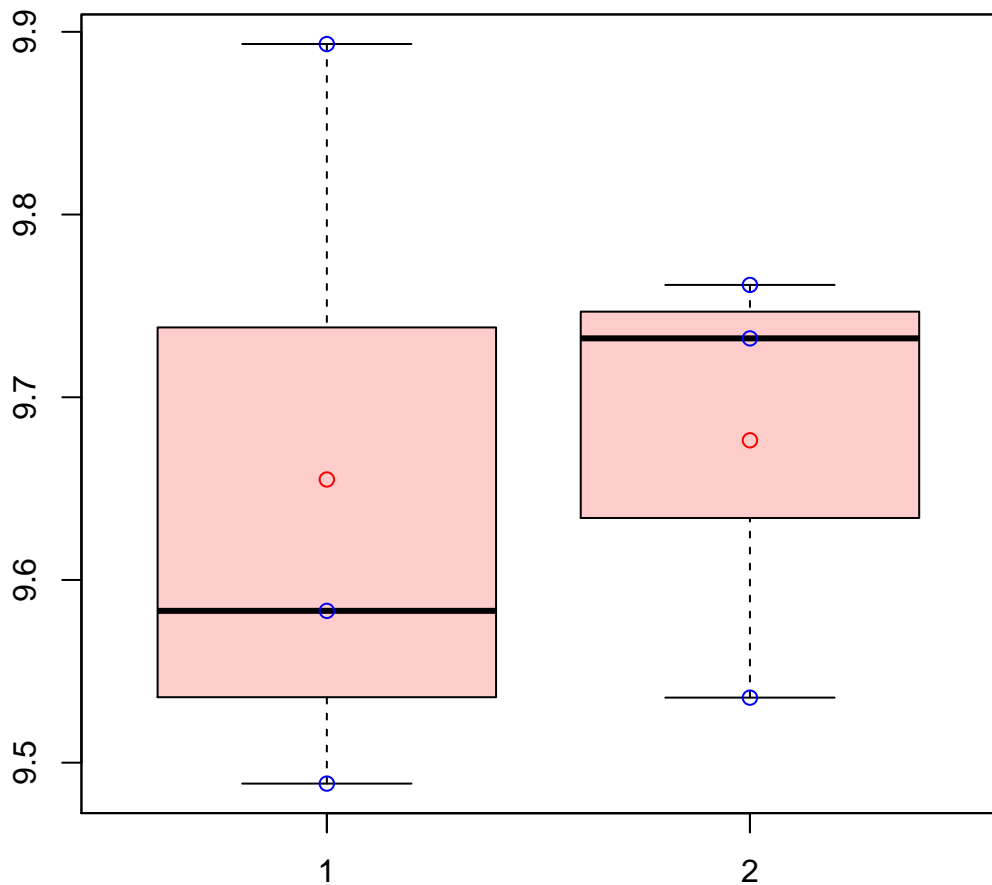

t-Test: p-value = 0.89

# CL1Contig1149|CL1Contig1149

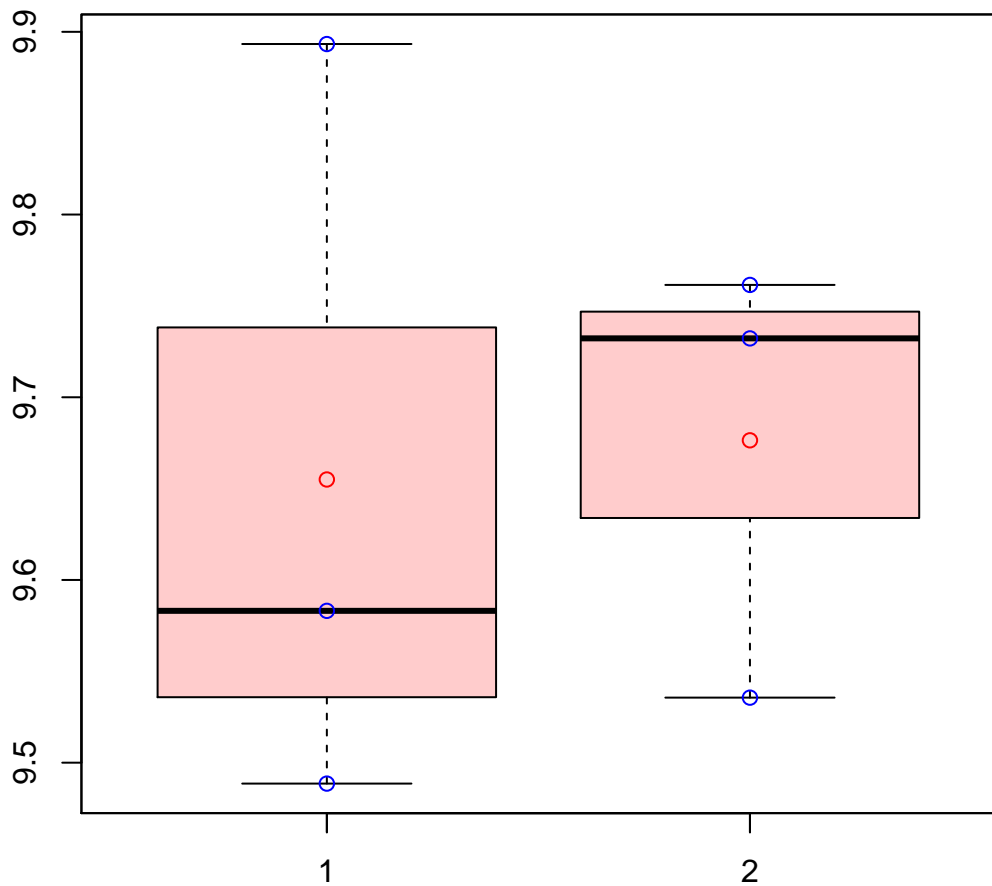

t-Test: p-value = 0.89

# CL1Contig1151|CL1Contig1151

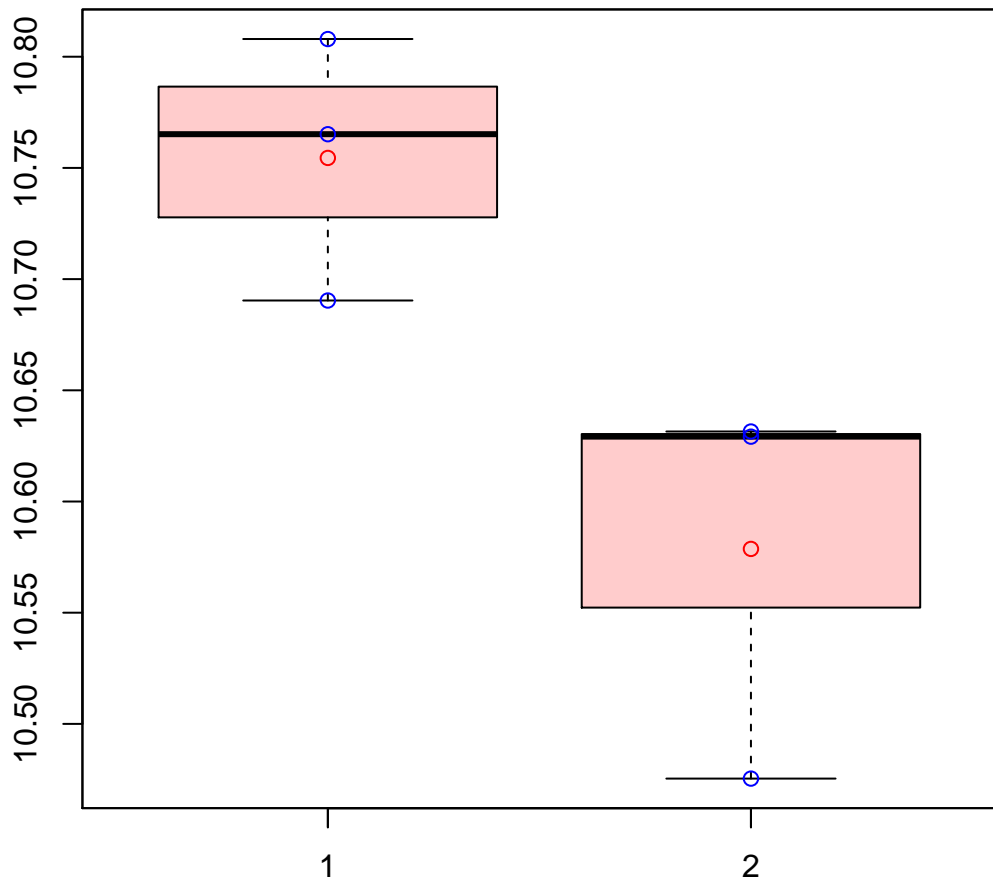

t-Test: p-value = 0.06

# CL1Contig1165|CL1Contig1165

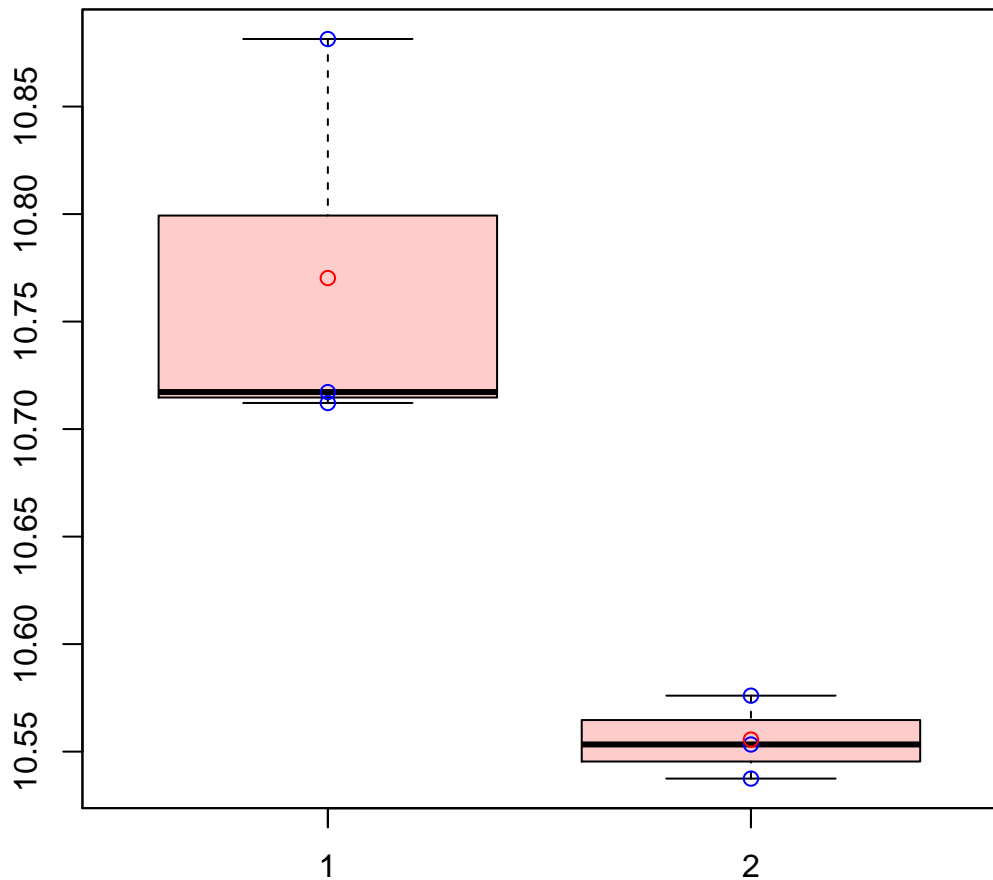

t-Test: p-value = 0.06

# CL1Contig1174|CL1Contig1174

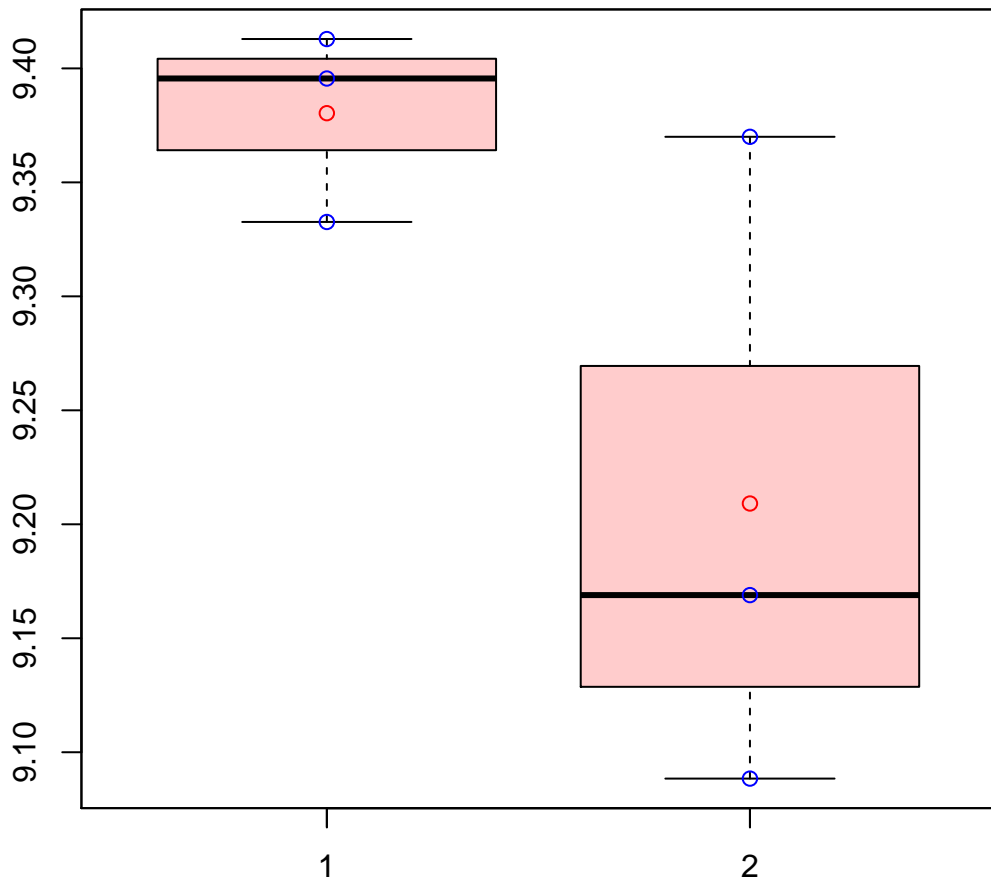

t-Test: p-value = 0.17



# CL1Contig1177|CL1Contig1177

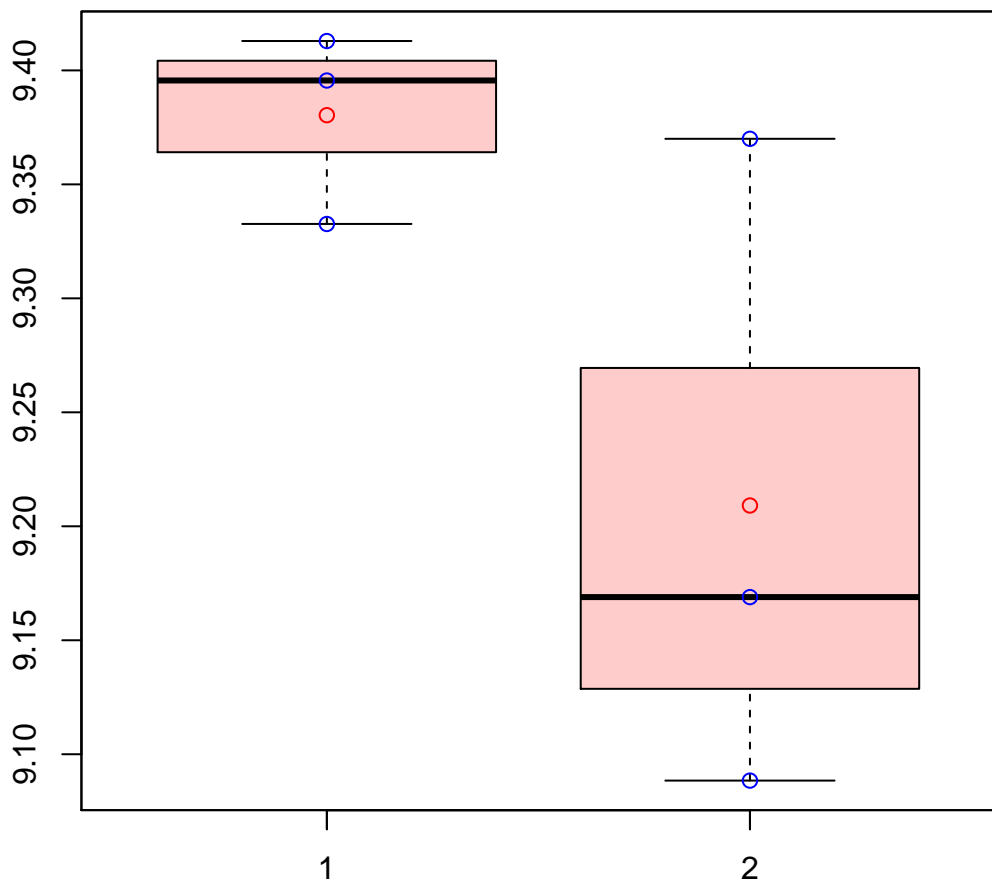

t-Test: p-value = 0.17

# CL1Contig1184|CL1Contig1184

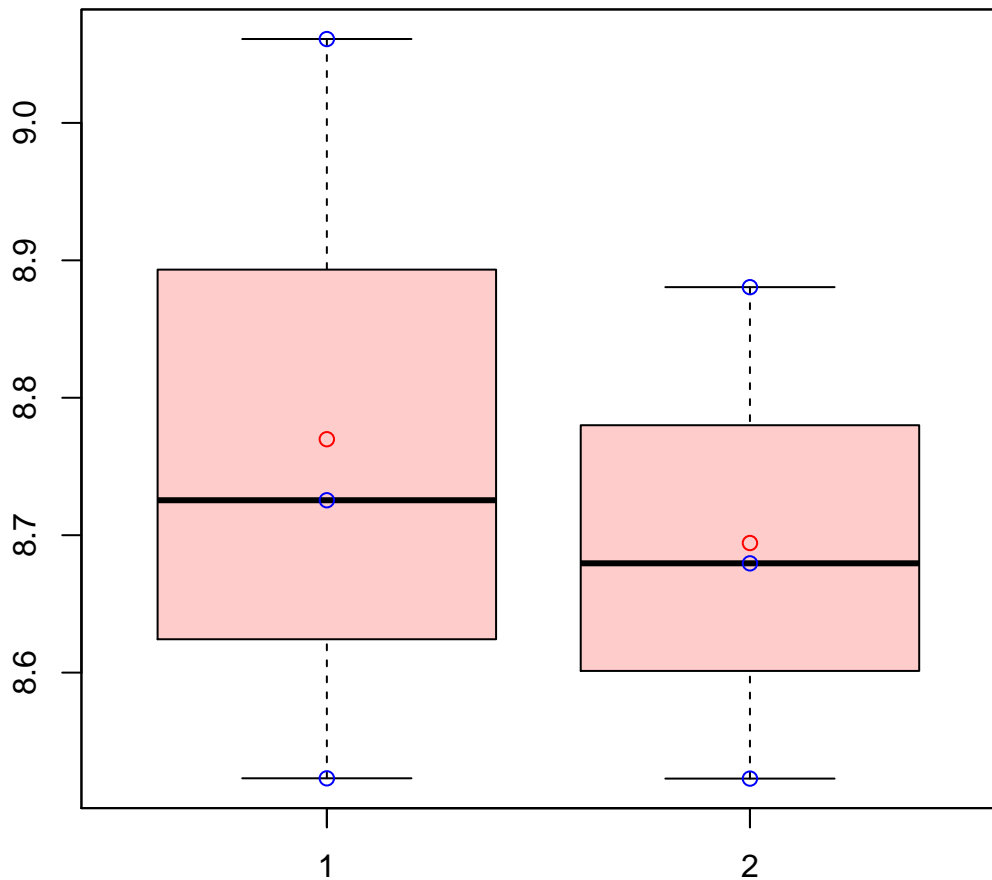

t-Test: p-value = 0.71

# CL1Contig1222|CL1Contig1222

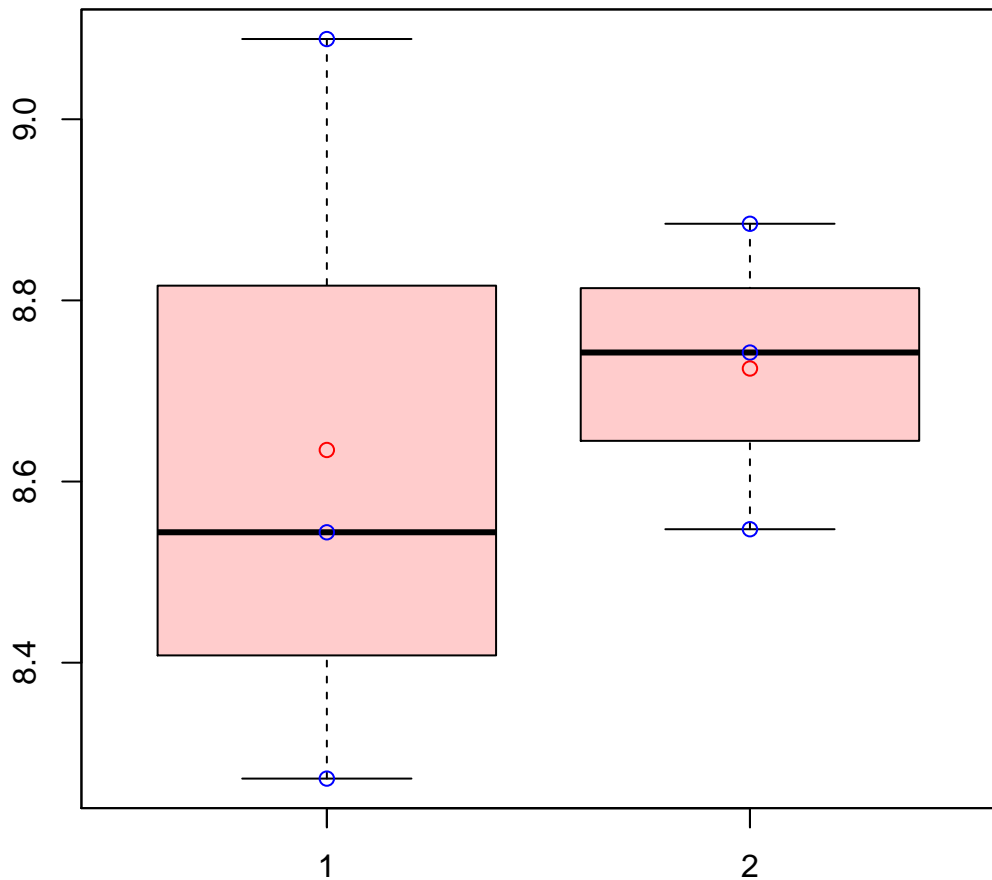

t-Test: p-value = 0.75

# CL1Contig1227|CL1Contig1227

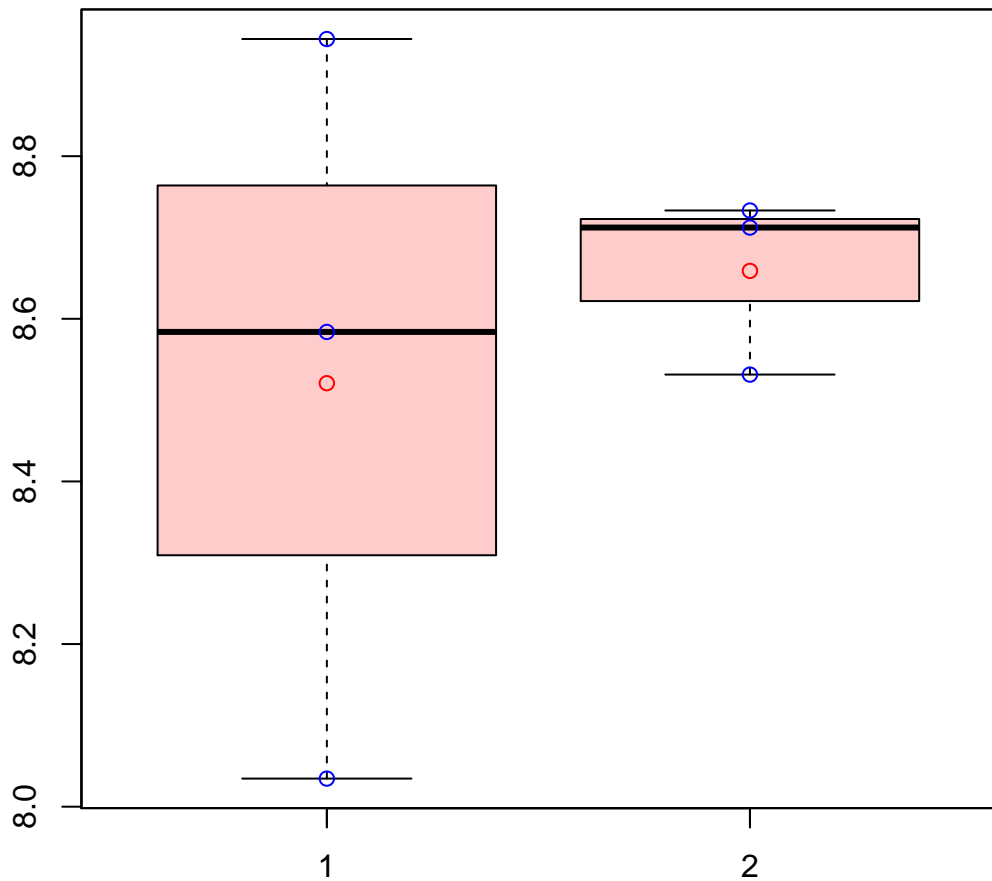

t-Test: p-value = 0.66

# CL1Contig1272|CL1Contig1272

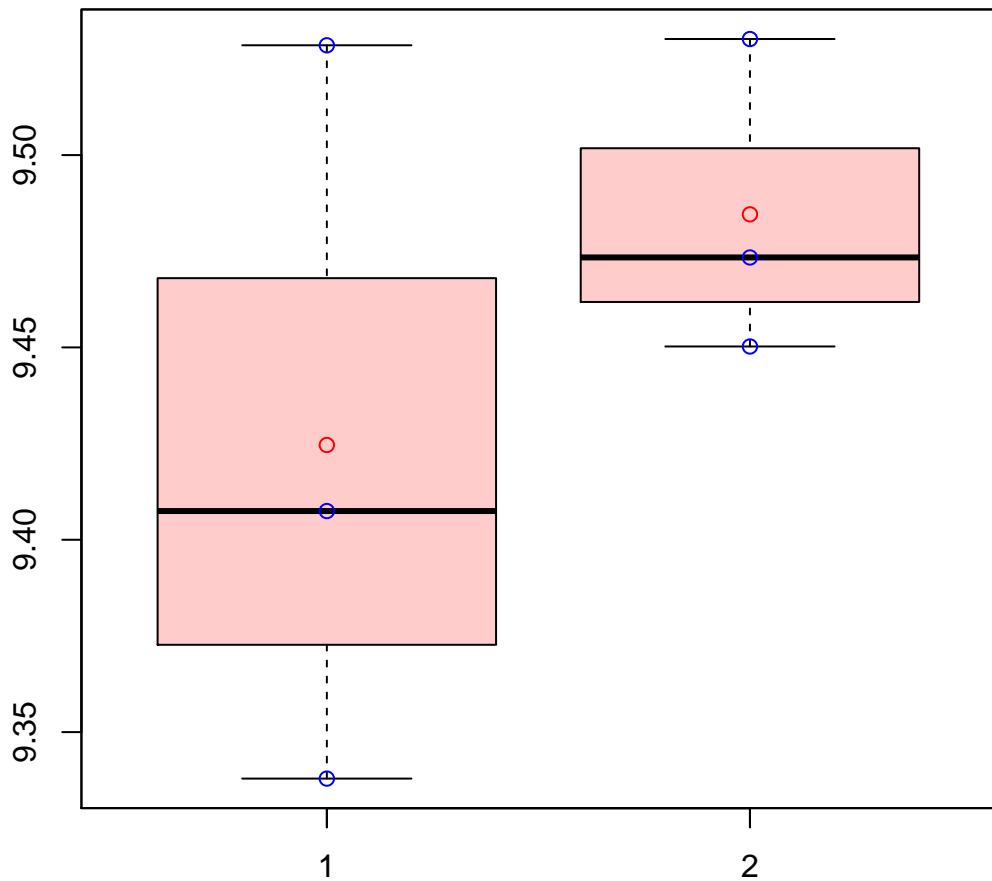

t-Test: p-value = 0.4

# CL1Contig1281|CL1Contig1281

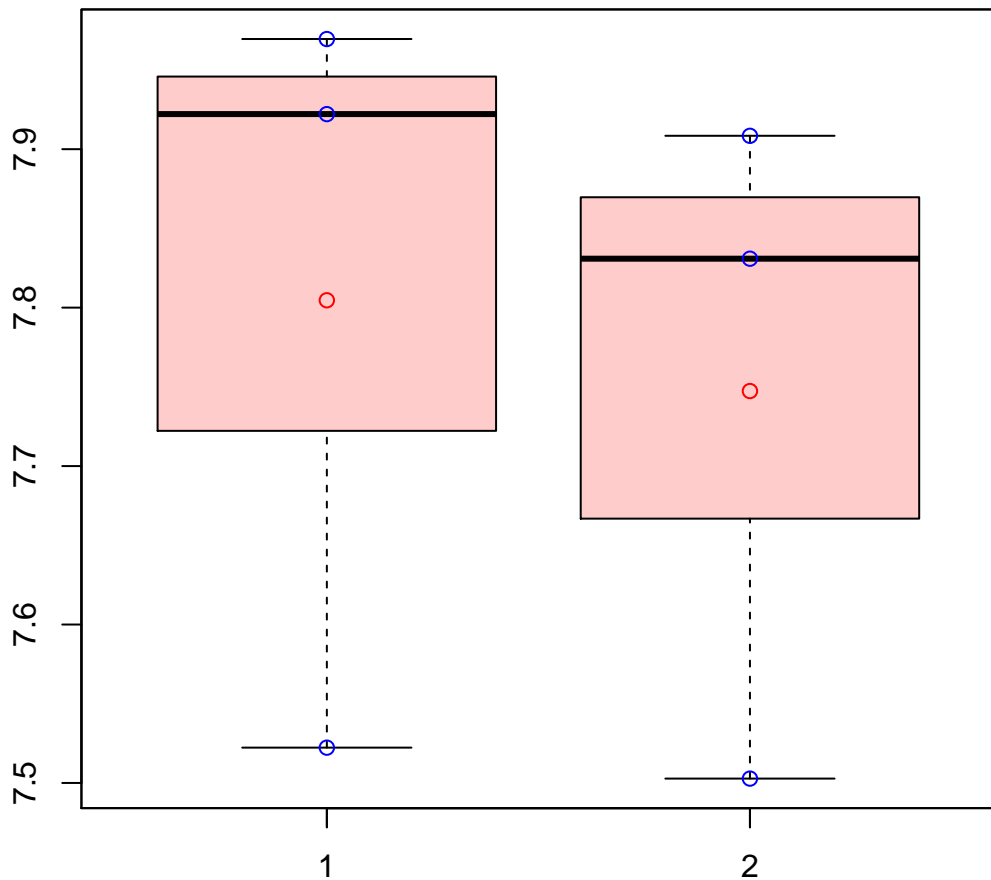

t-Test: p-value = 0.78

# CL1Contig1299|CL1Contig1299

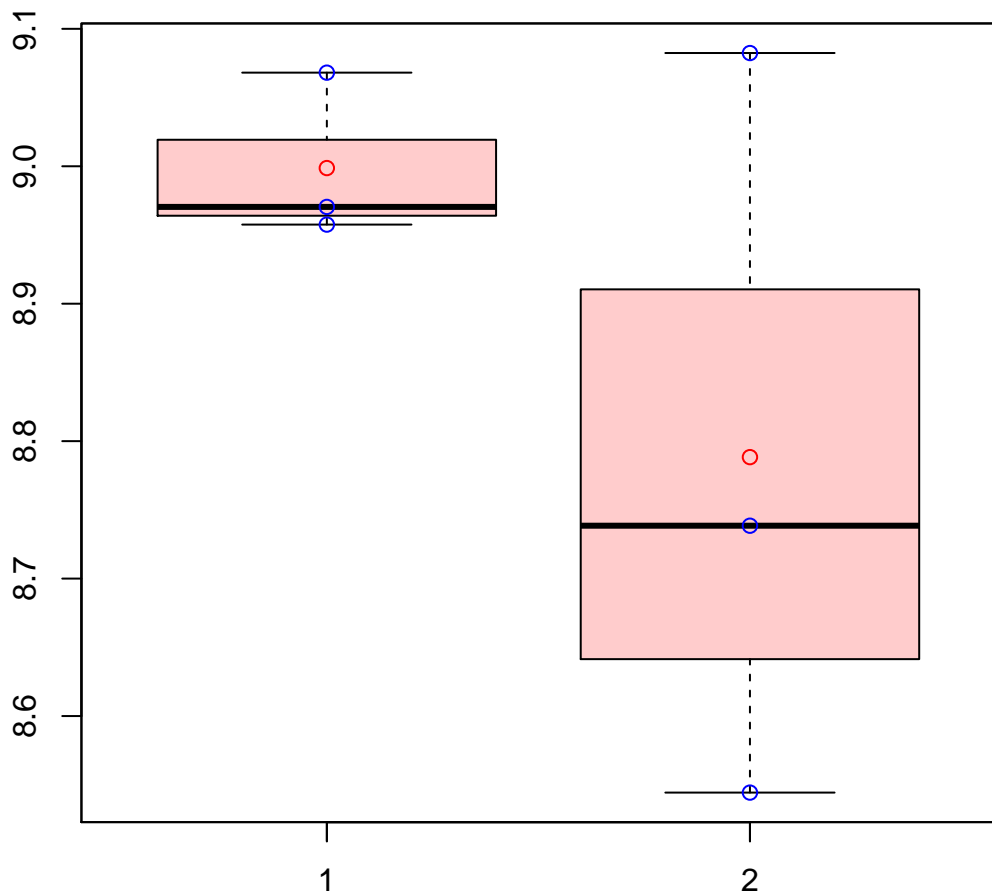

t-Test: p-value = 0.31

# CL1Contig1301|CL1Contig1301



t-Test: p-value = 0.31



# CL1Contig1307|CL1Contig1307



t-Test: p-value = 0.37

# CL1Contig1312|CL1Contig1312



t-Test: p-value = 0.66

# CL1Contig1327|CL1Contig1327

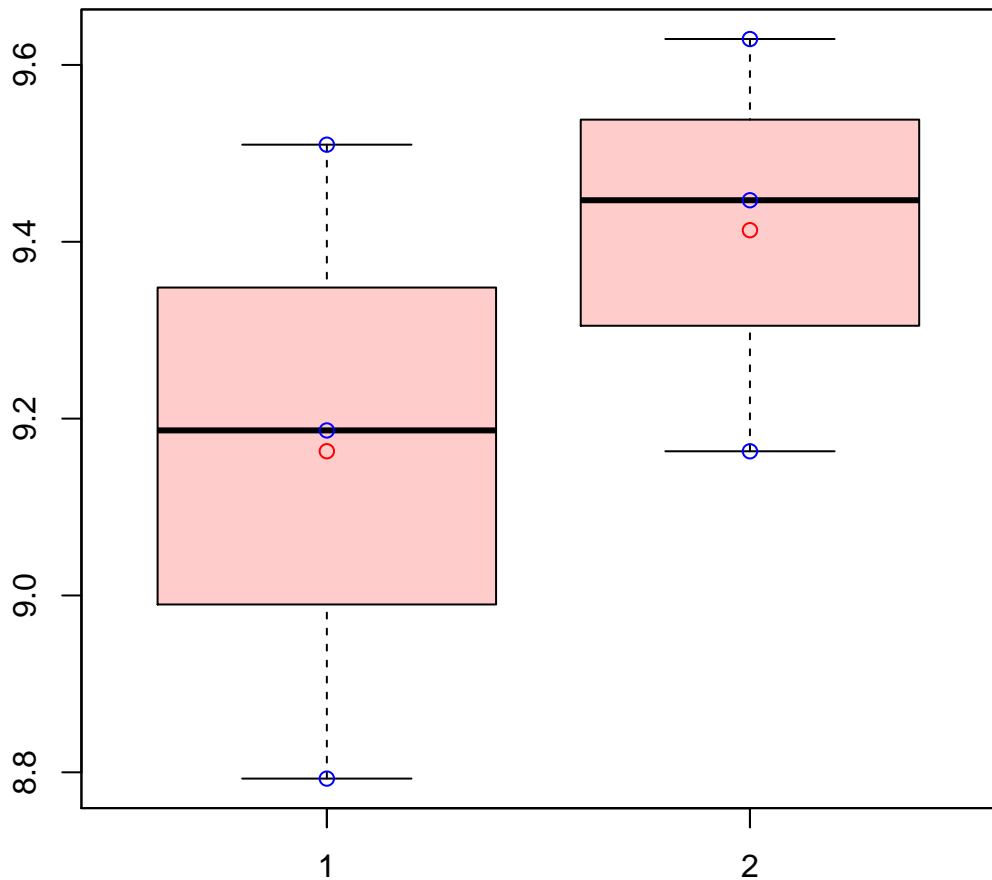

t-Test: p-value = 0.38

# CL1Contig1363|CL1Contig1363

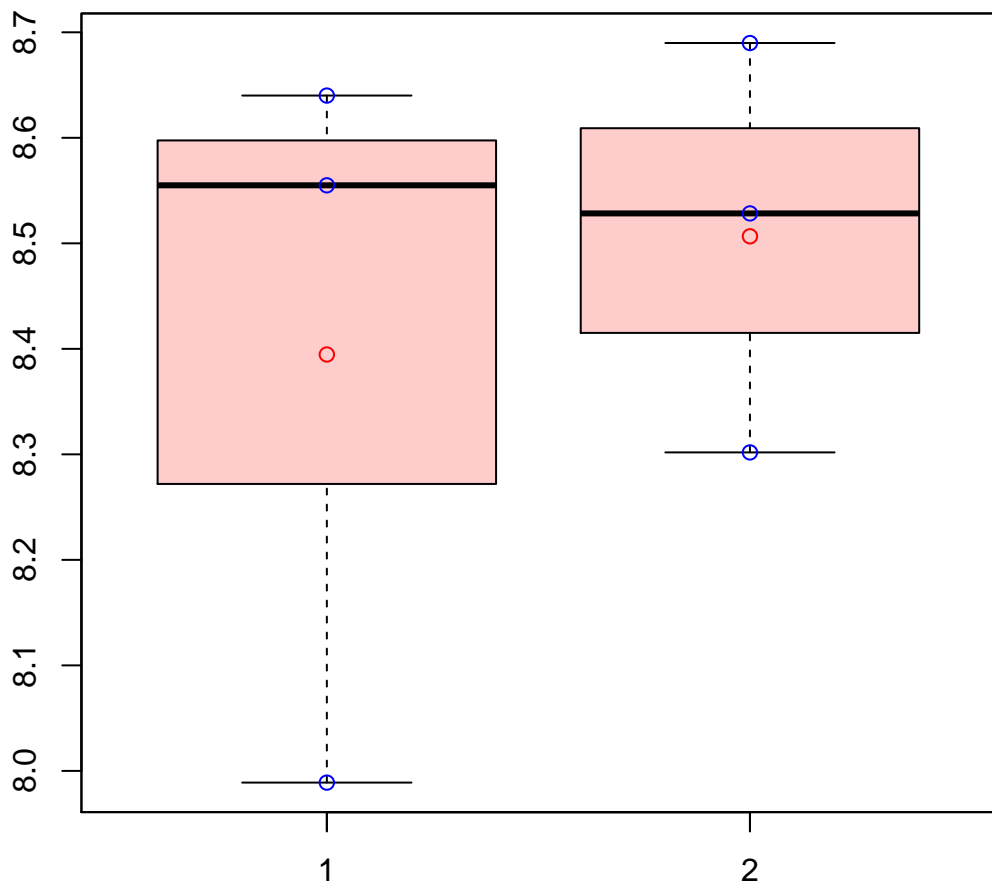

t-Test: p-value = 0.66

# CL1Contig1382|CL1Contig1382

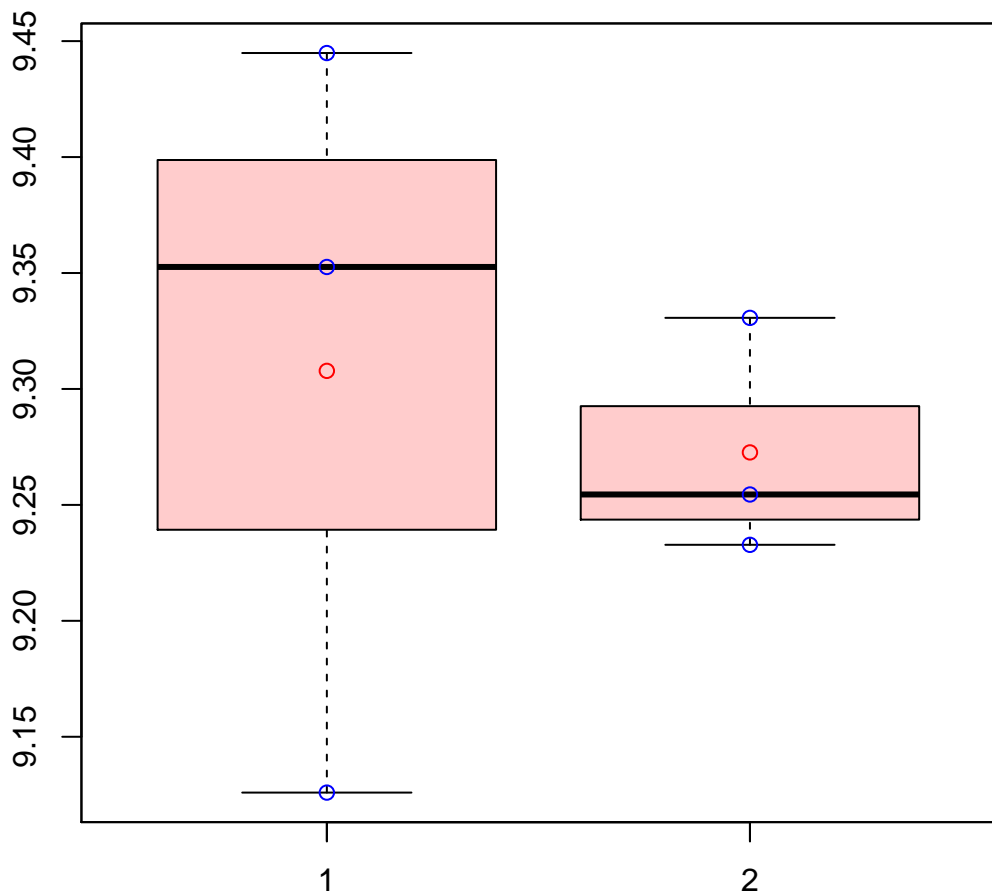

t-Test: p-value = 0.75

# CL1Contig1408|CL1Contig1408

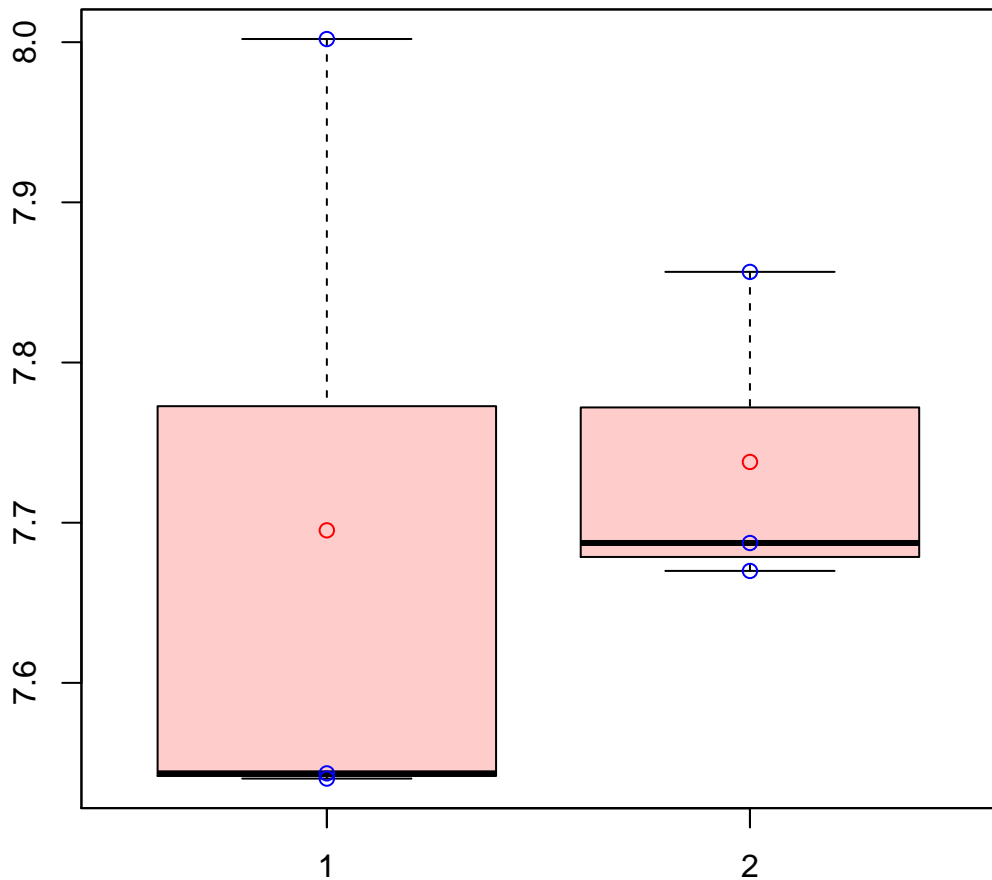

t-Test: p-value = 0.81

# CL1Contig1418|CL1Contig1418

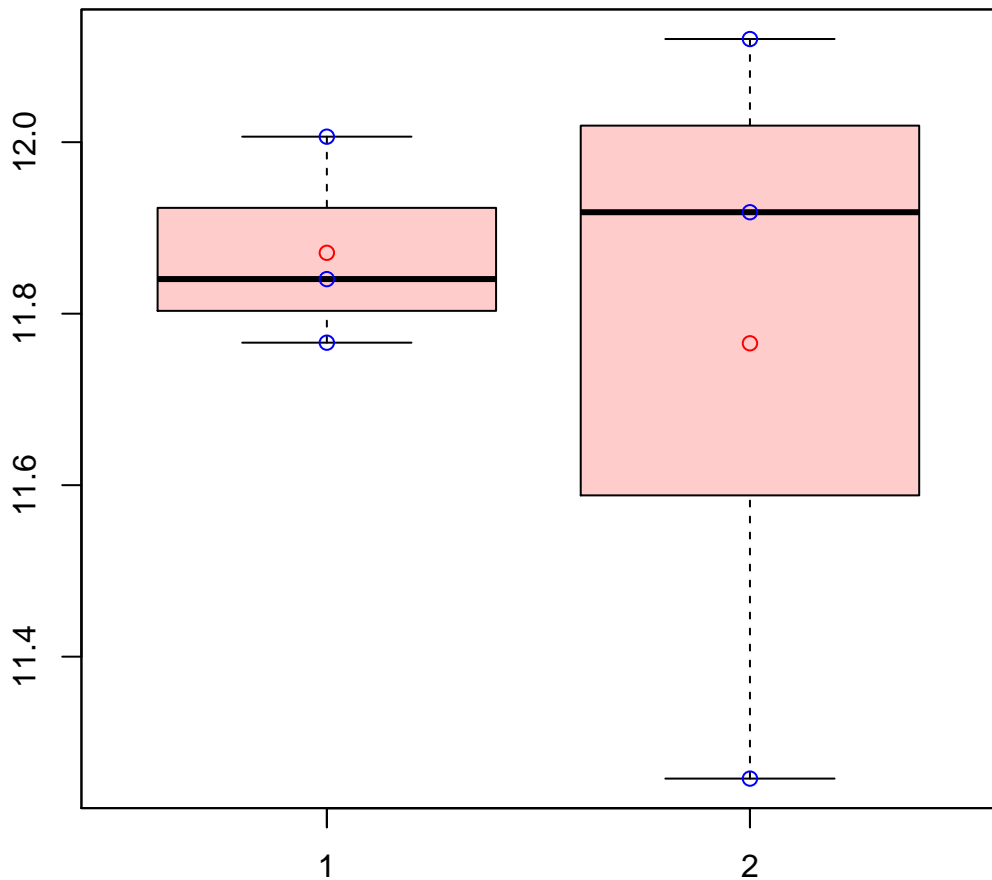

t-Test: p-value = 0.73

# CL1Contig1420|CL1Contig1420

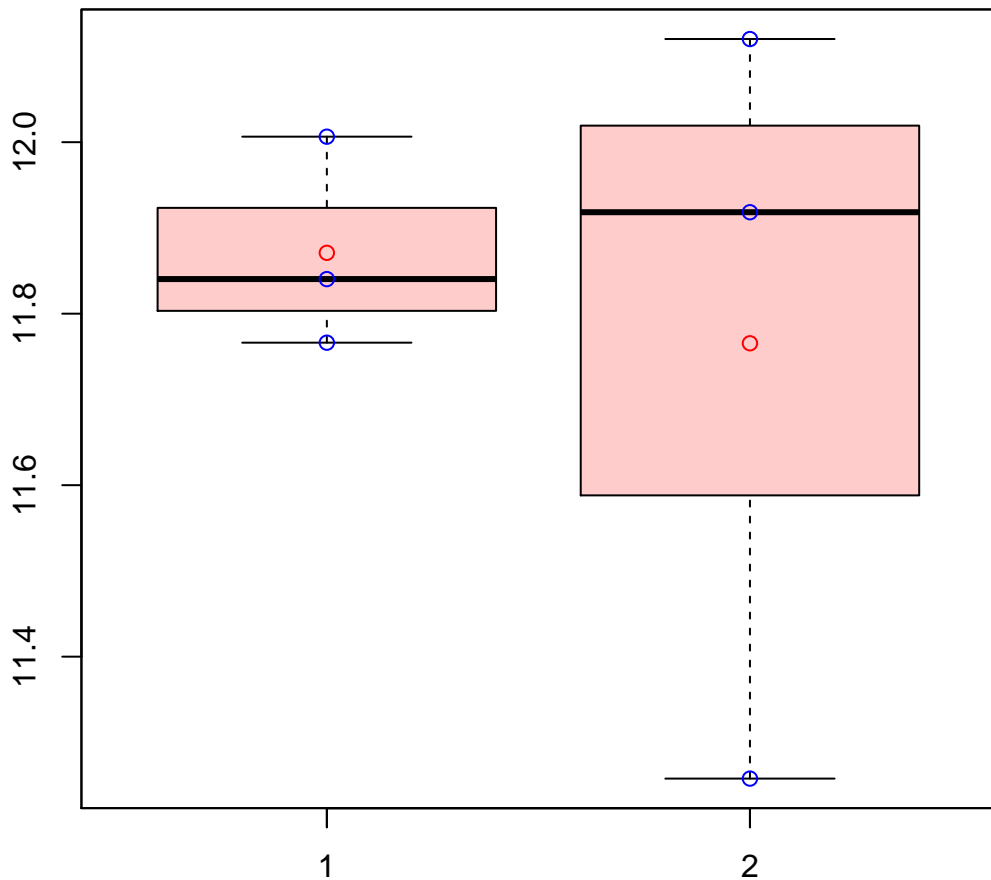

t-Test: p-value = 0.73



# CL1Contig1424|CL1Contig1424

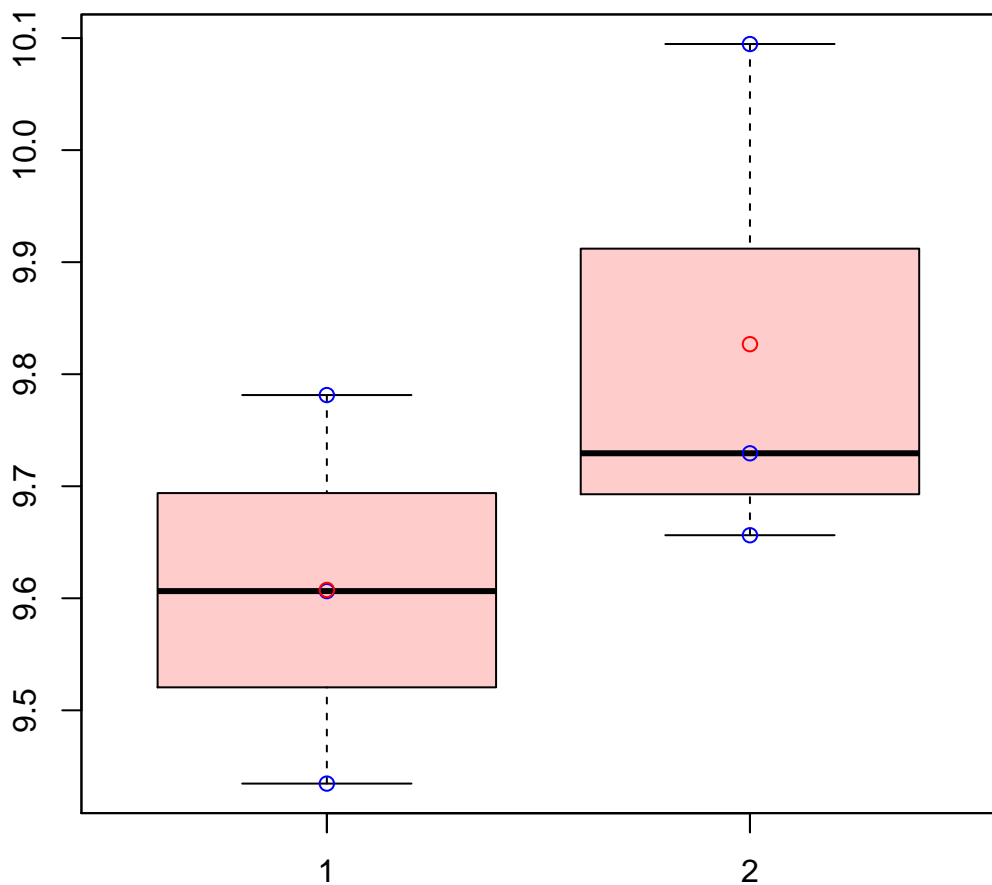

t-Test: p-value = 0.27

# CL1Contig1451|CL1Contig1451

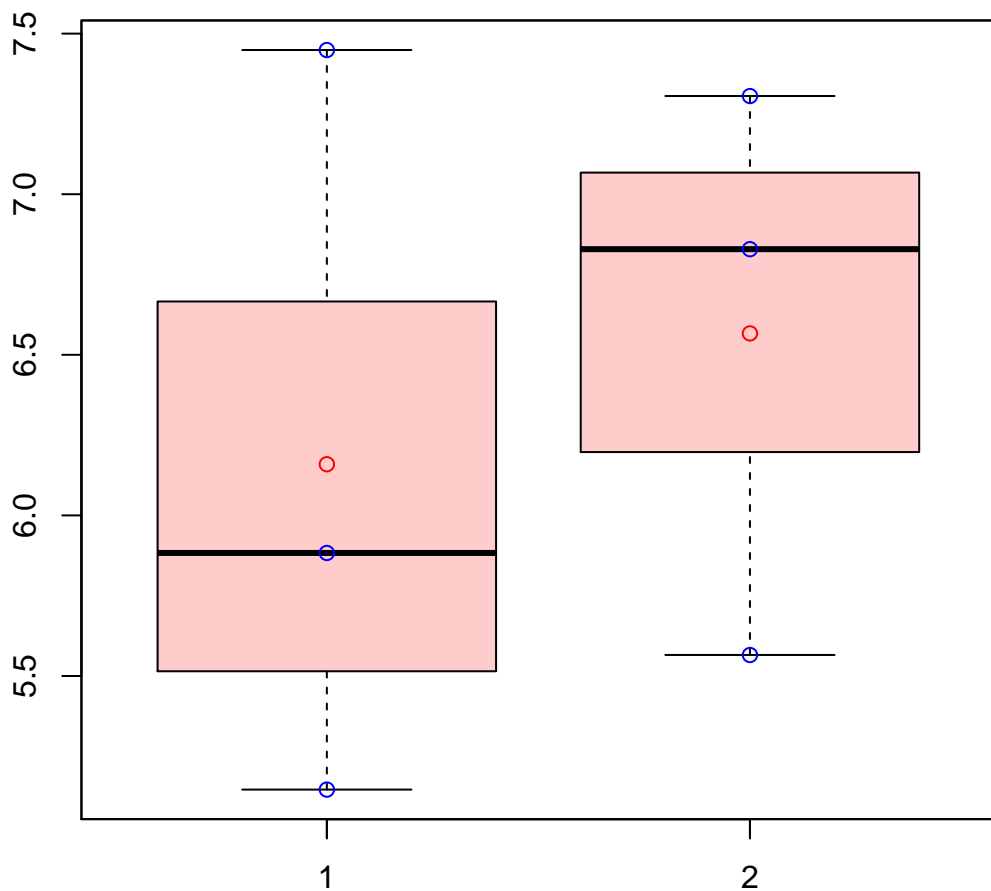

t-Test: p-value = 0.66

# CL1Contig1453|CL1Contig1453

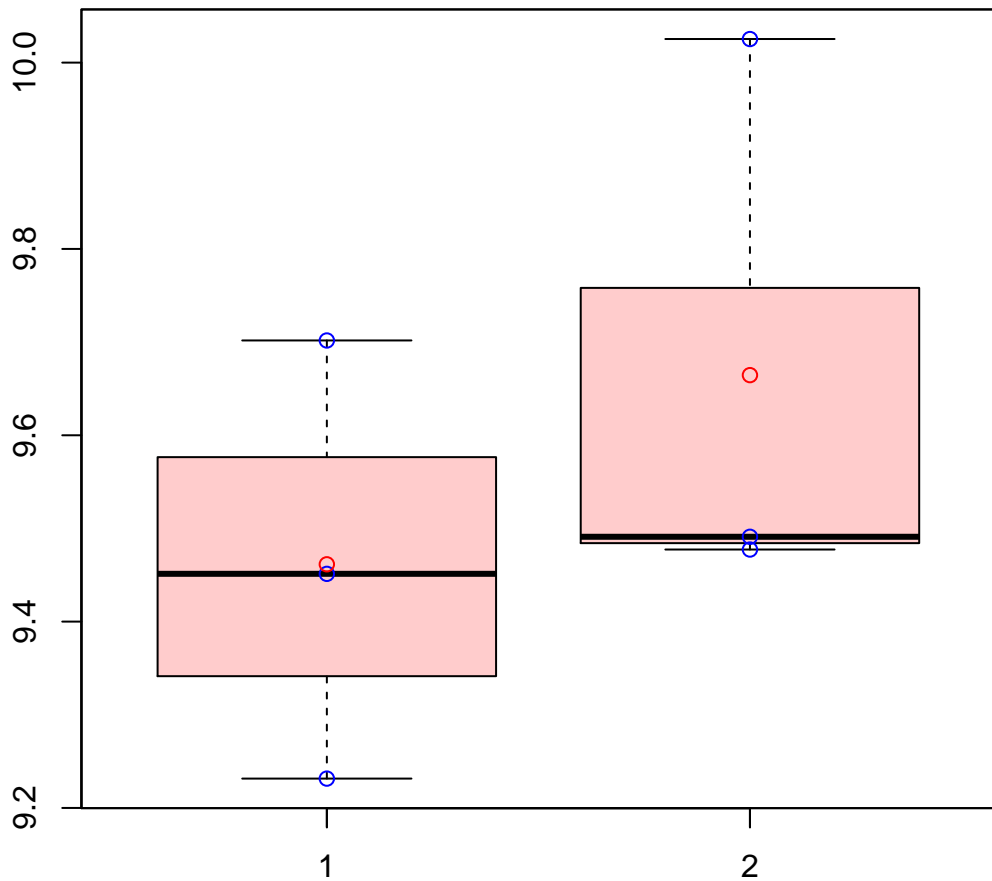

t-Test: p-value = 0.42

# CL1Contig1458|CL1Contig1458

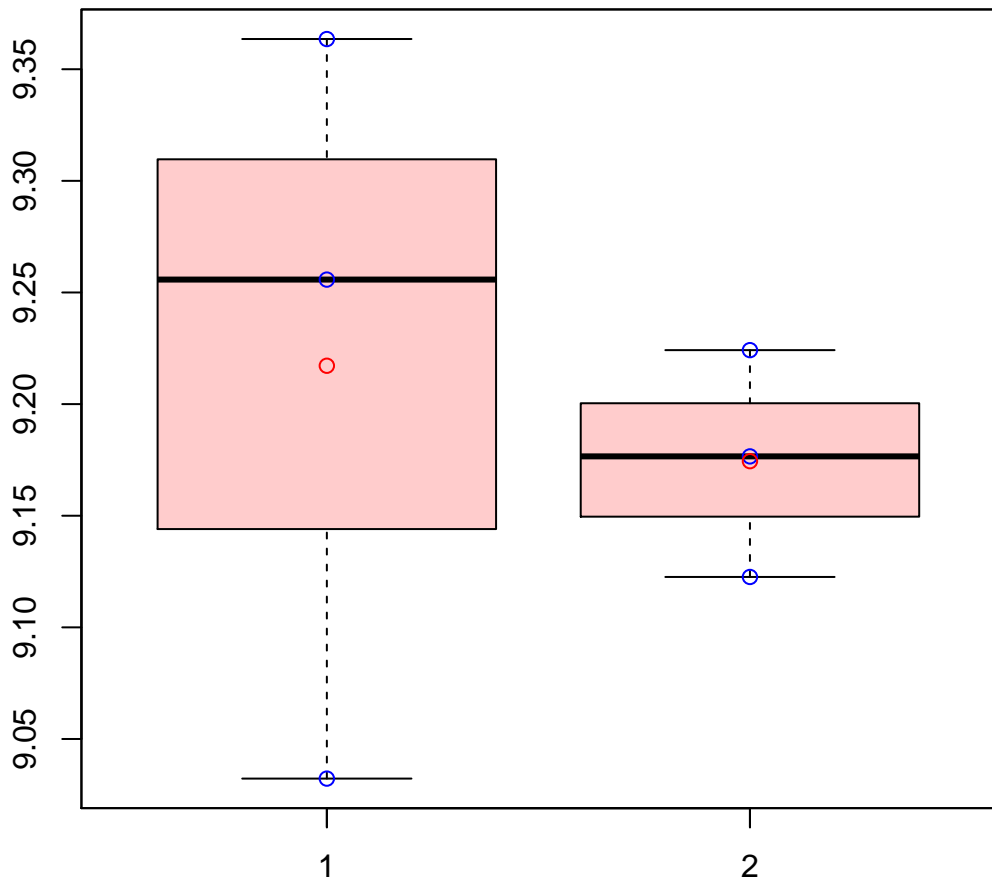

t-Test: p-value = 0.71

# CL1Contig149|CL1Contig149

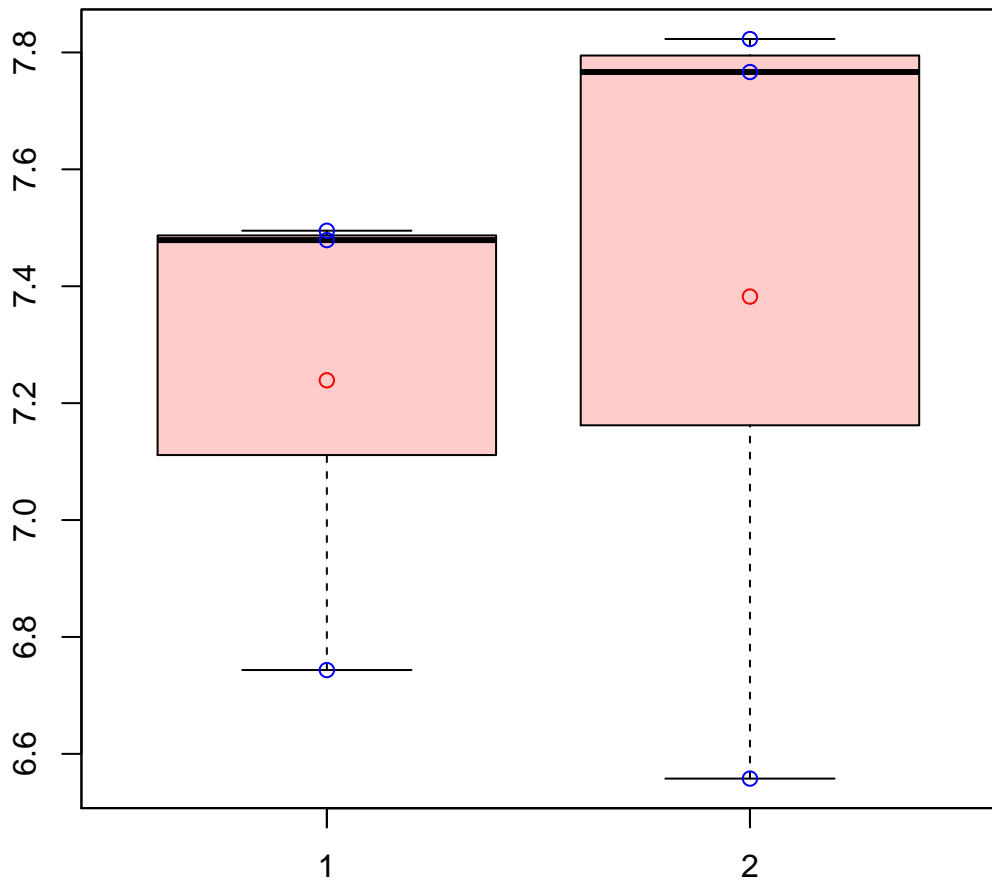

t-Test: p-value = 0.78

# CL1Contig152|CL1Contig152

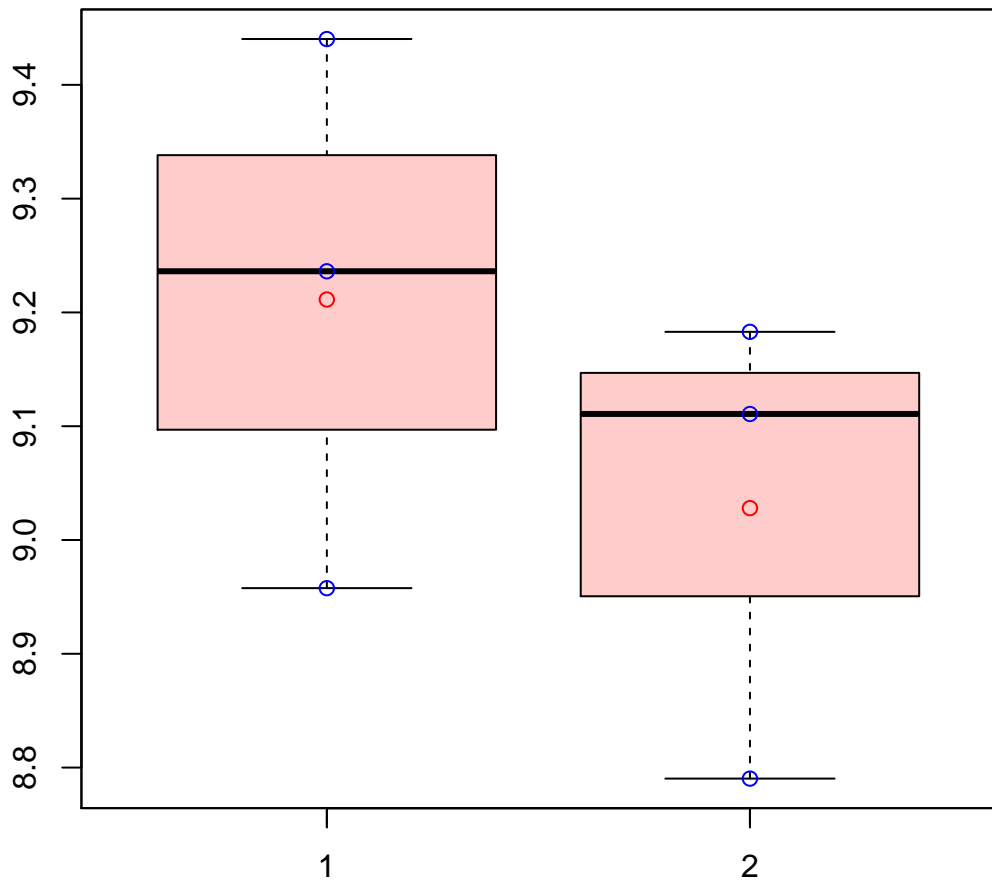

t-Test: p-value = 0.38

# CL1Contig1537|CL1Contig1537

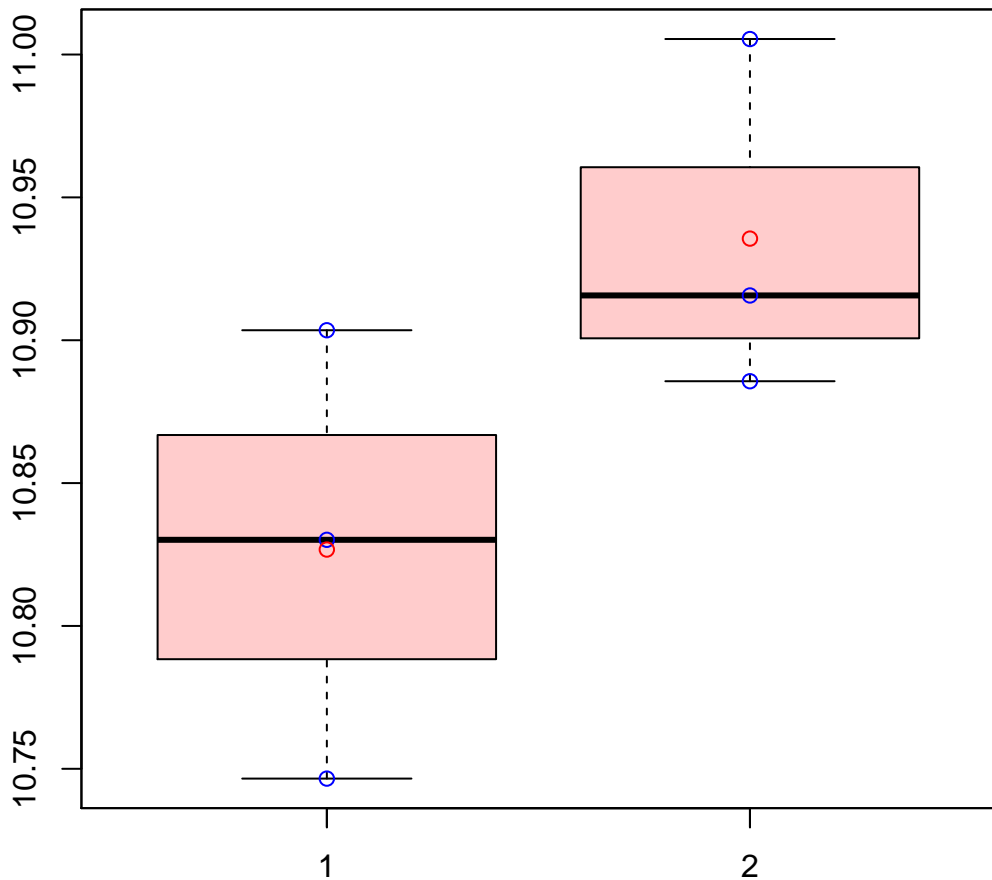

t-Test: p-value = 0.14

# CL1Contig1541|CL1Contig1541

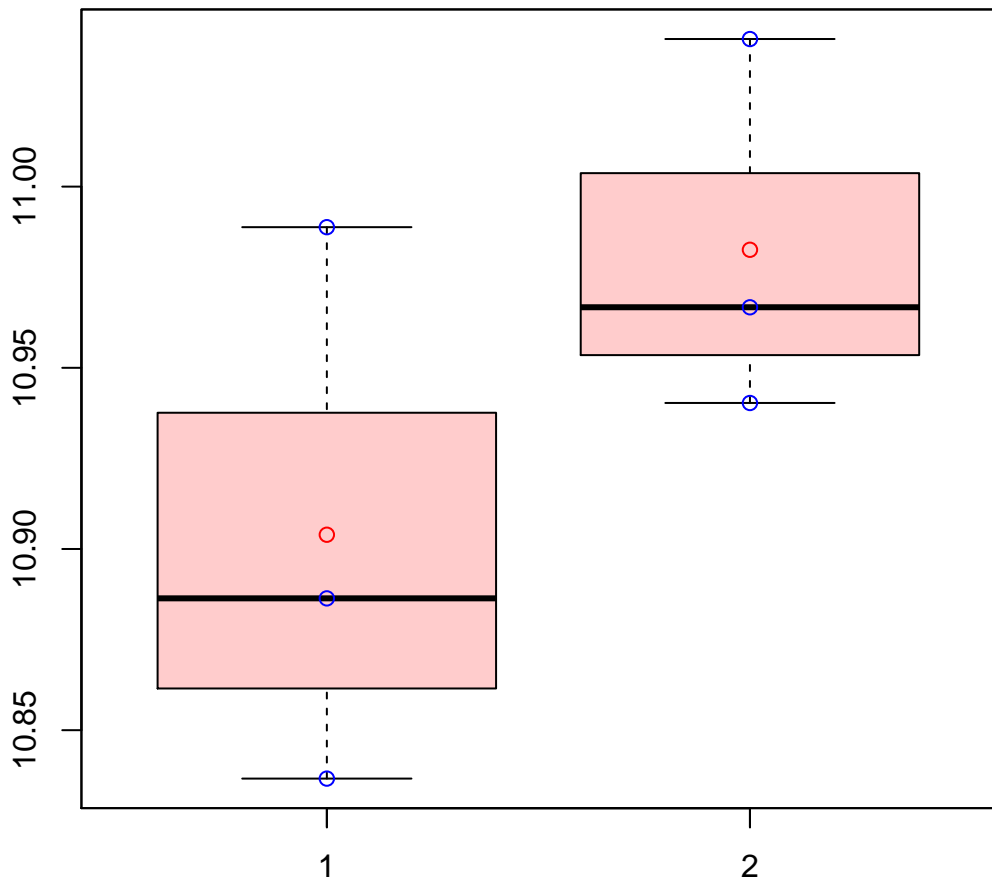

t-Test: p-value = 0.23



# CL1Contig1571|CL1Contig1571

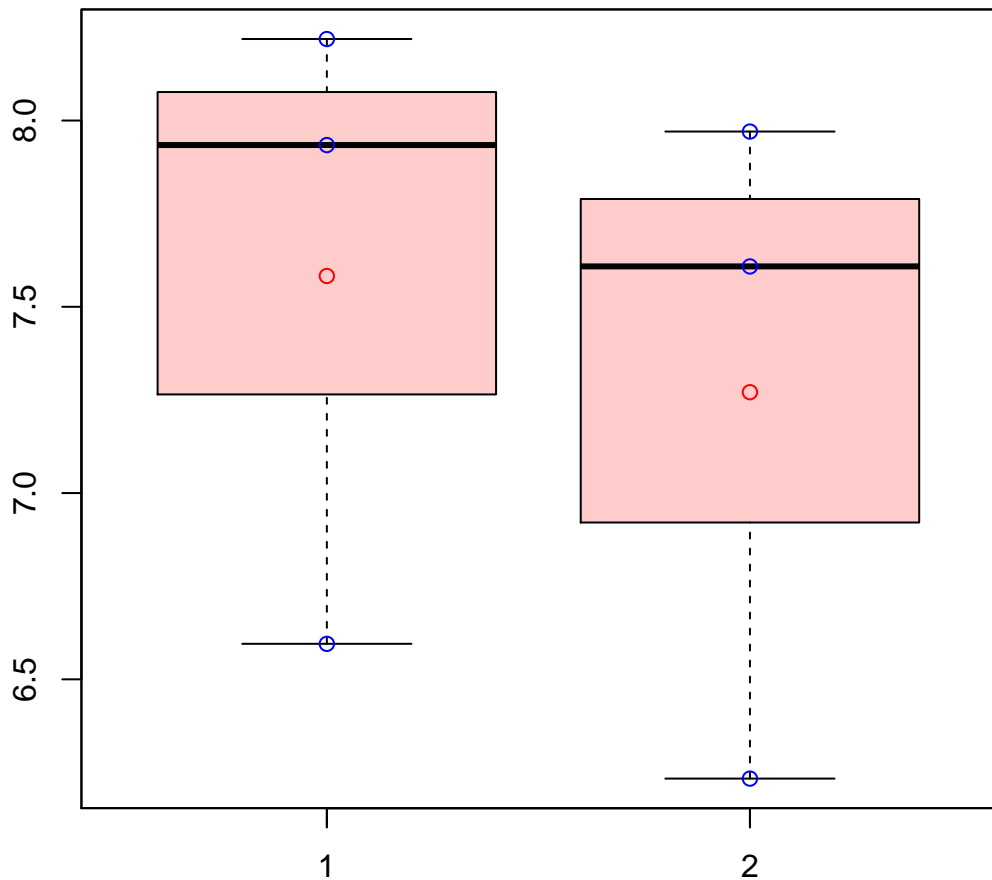

t-Test: p-value = 0.69

# CL1Contig1576|CL1Contig1576

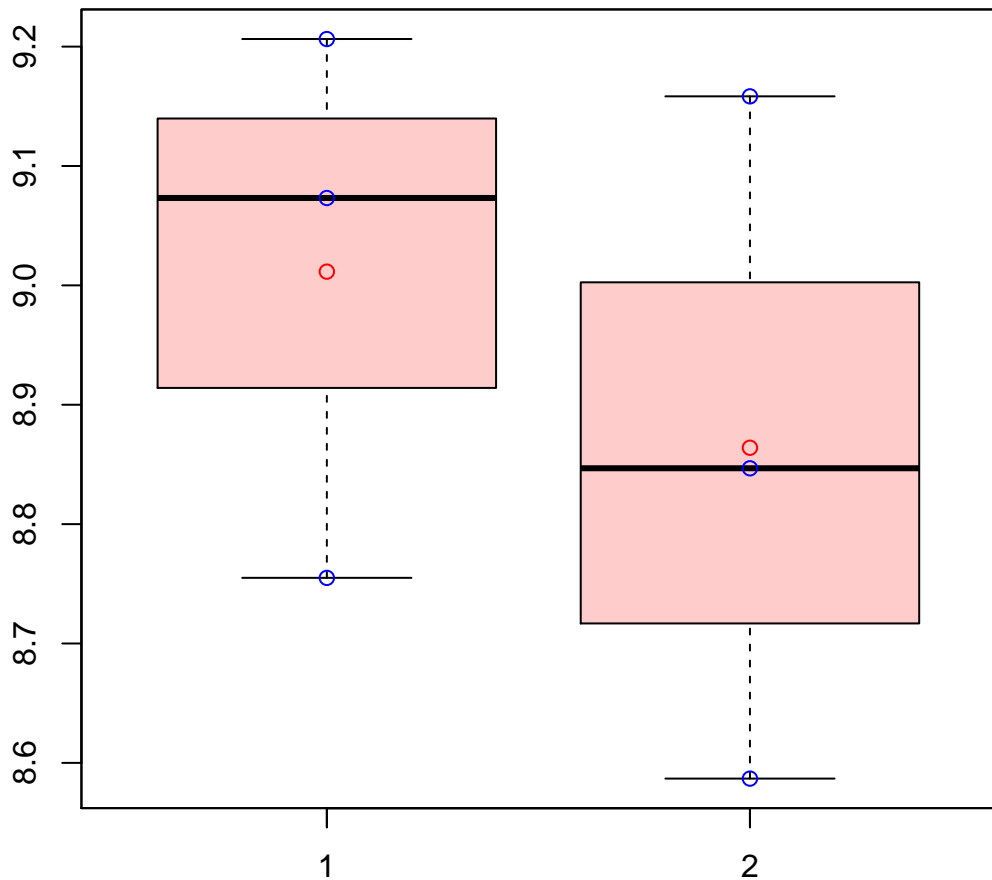

t-Test: p-value = 0.53

# CL1Contig1577|CL1Contig1577

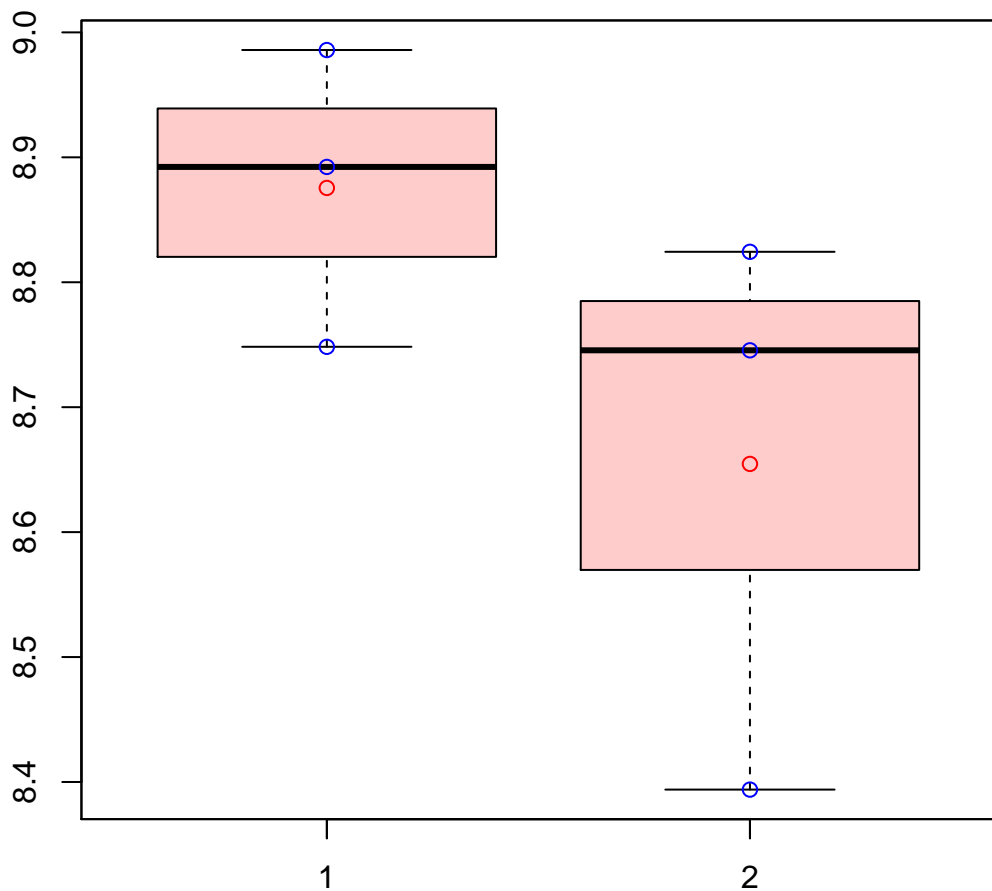

t-Test: p-value = 0.24

# CL1Contig1579|CL1Contig1579



t-Test: p-value = 0.24

# CL1Contig1609|CL1Contig1609

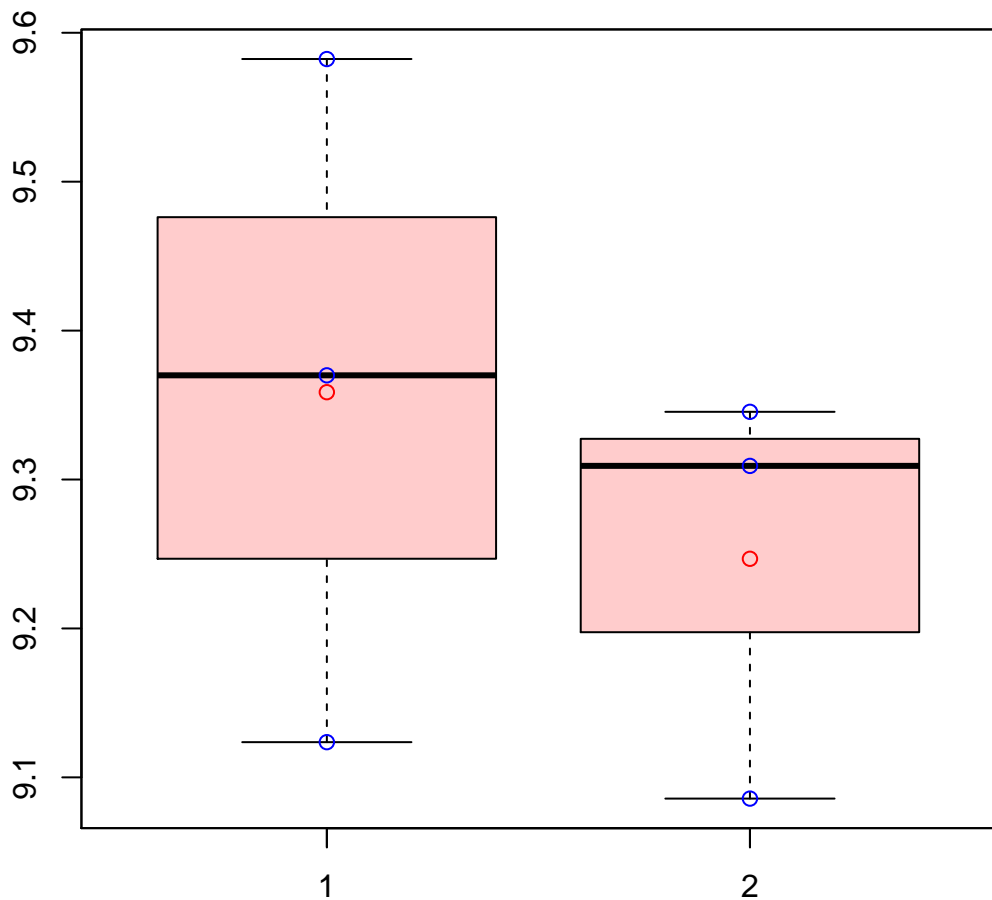

t-Test: p-value = 0.52

# CL1Contig1641|CL1Contig1641

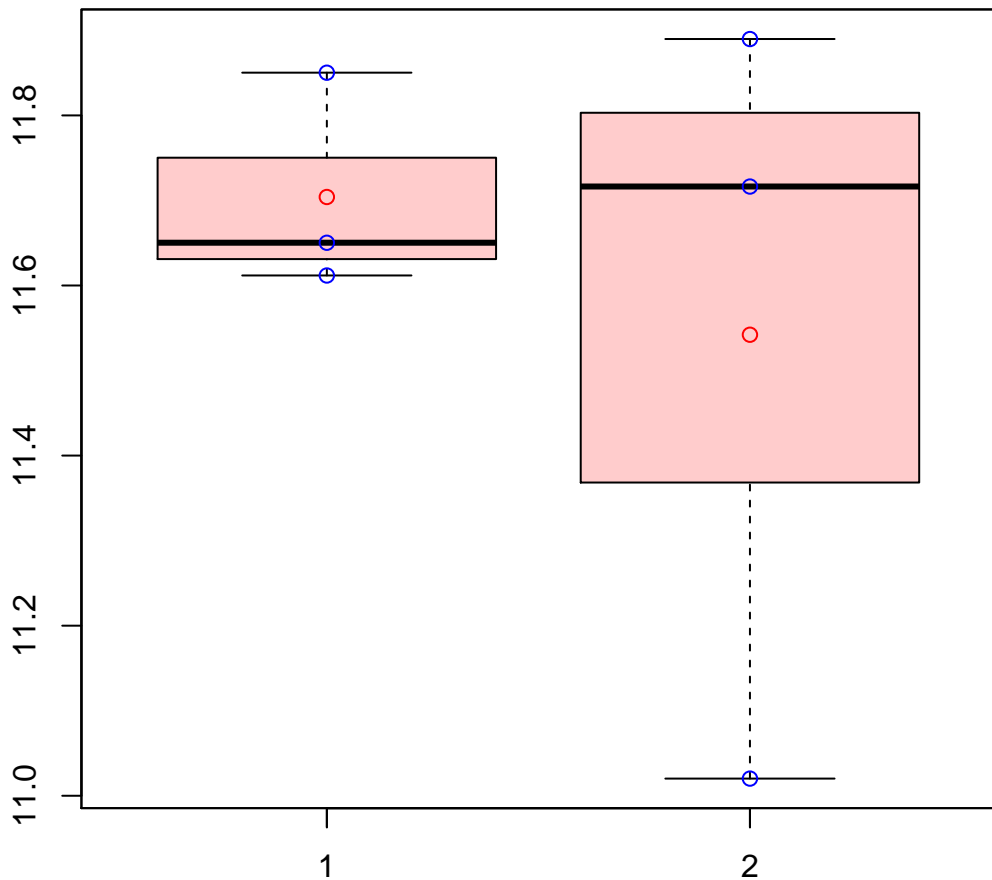

t-Test: p-value = 0.61

# CL1Contig1642|CL1Contig1642



t-Test: p-value = 0.24

# CL1Contig1643|CL1Contig1643

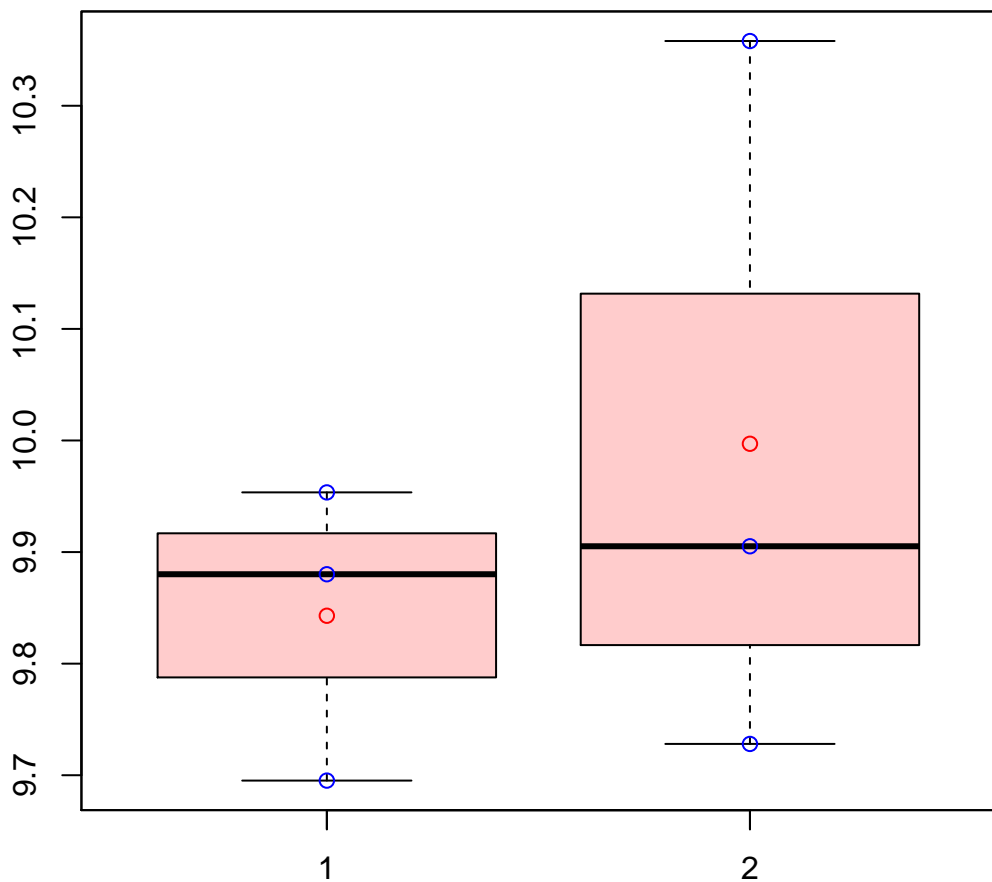

t-Test: p-value = 0.51



# CL1Contig1644|CL1Contig1644

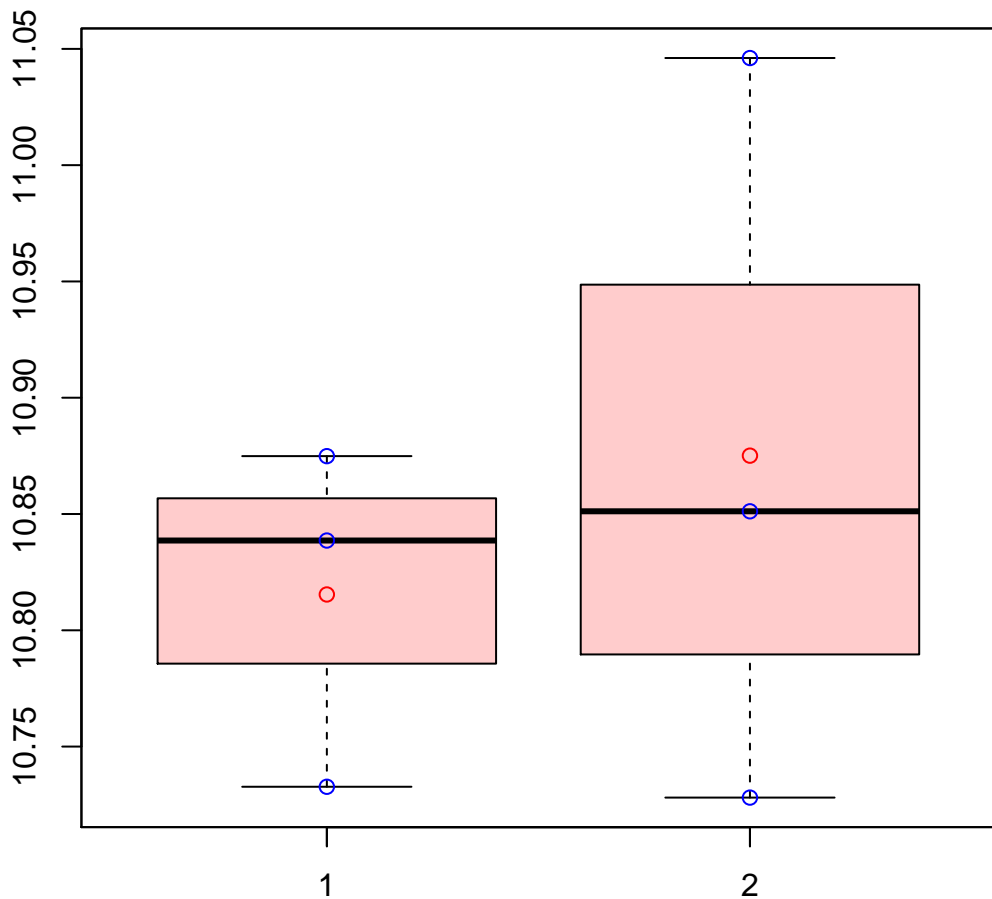

t-Test: p-value = 0.6

# CL1Contig1664|CL1Contig1664

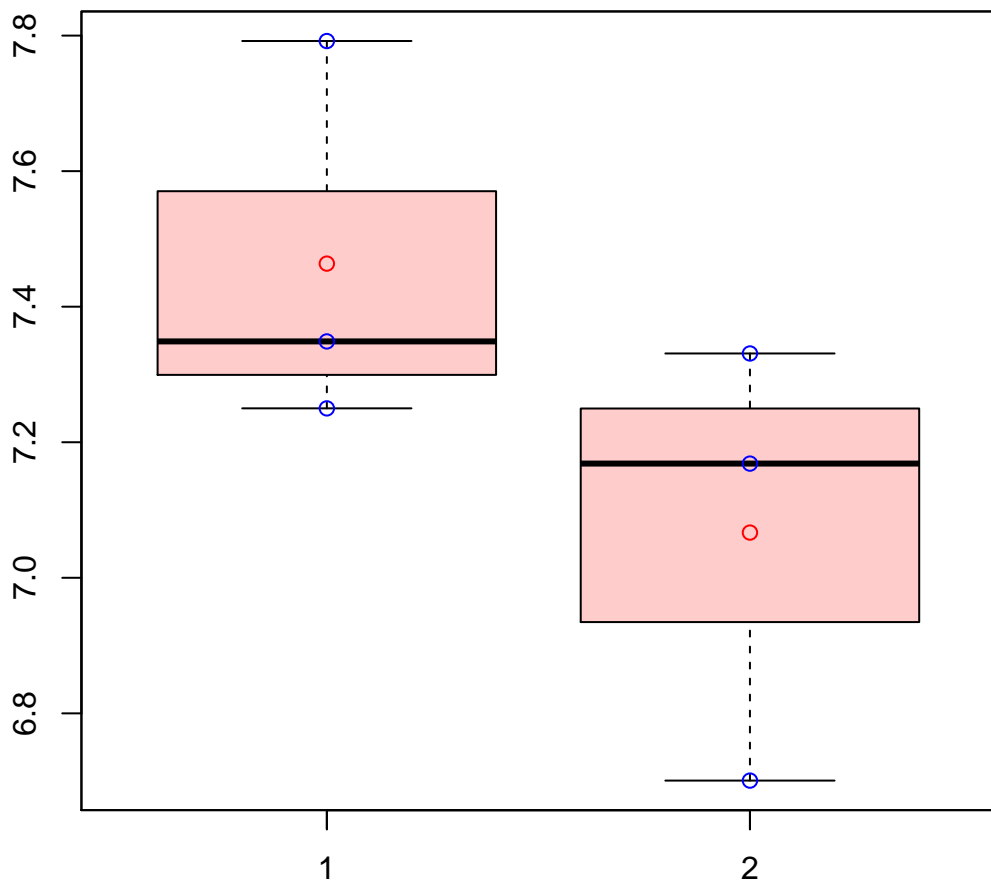

t-Test: p-value = 0.19

# CL1Contig1673|CL1Contig1673

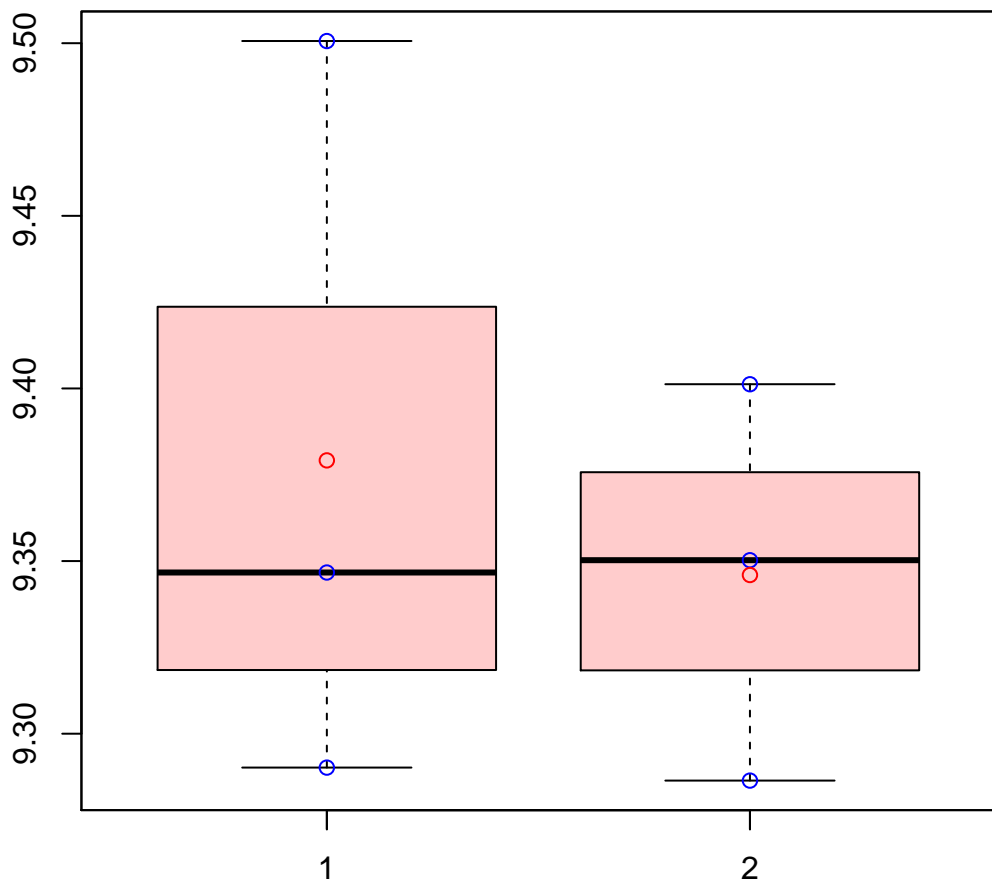

t-Test: p-value = 0.67

# CL1Contig167|CL1Contig167

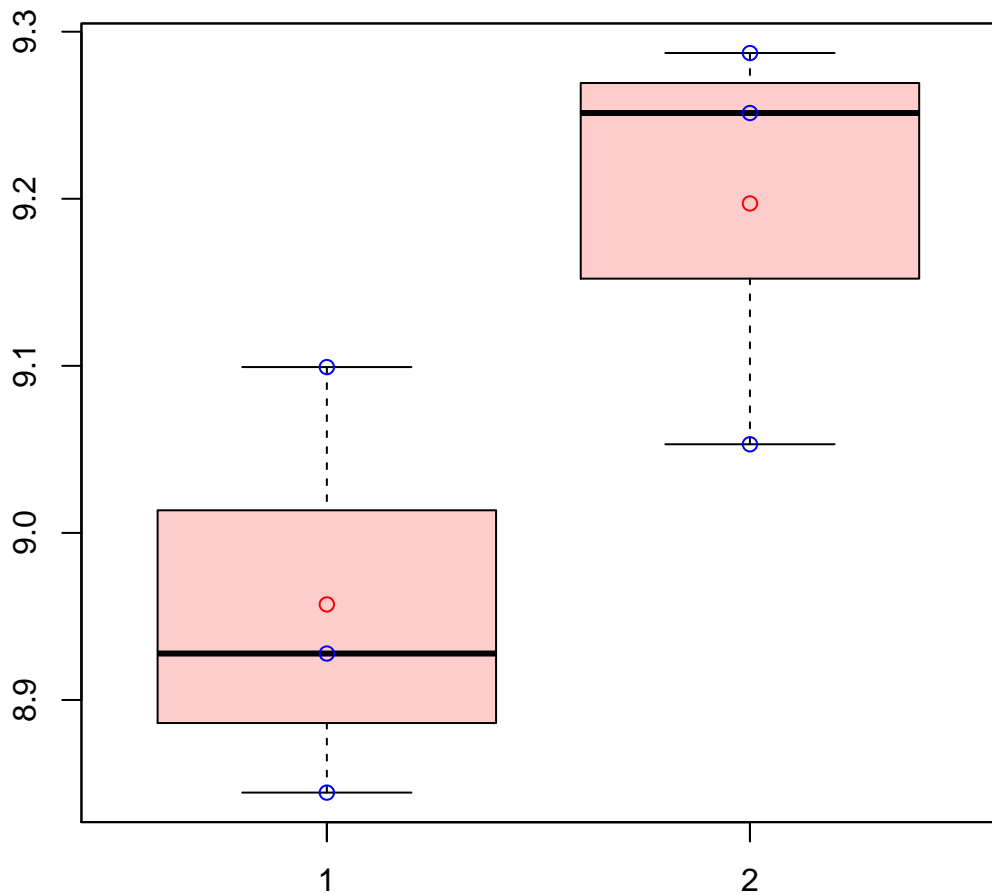

t-Test: p-value = 0.08

# CL1Contig168|CL1Contig168

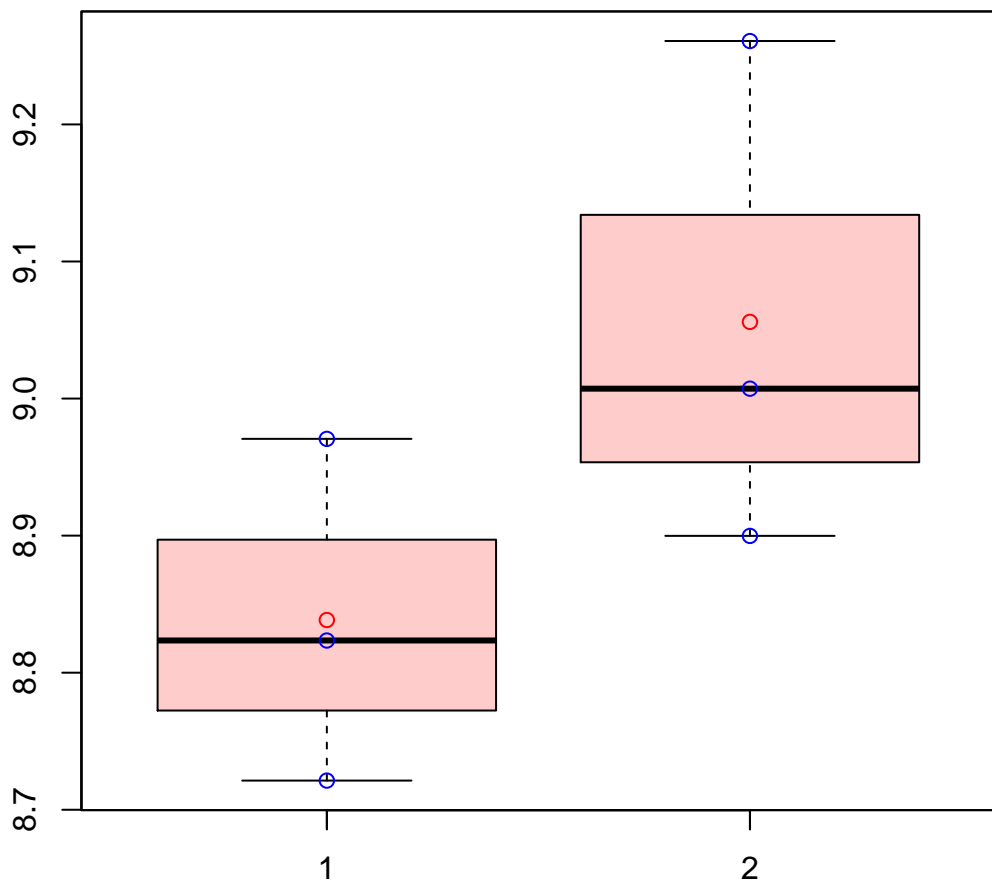

t-Test: p-value = 0.18

# CL1Contig1692|CL1Contig1692

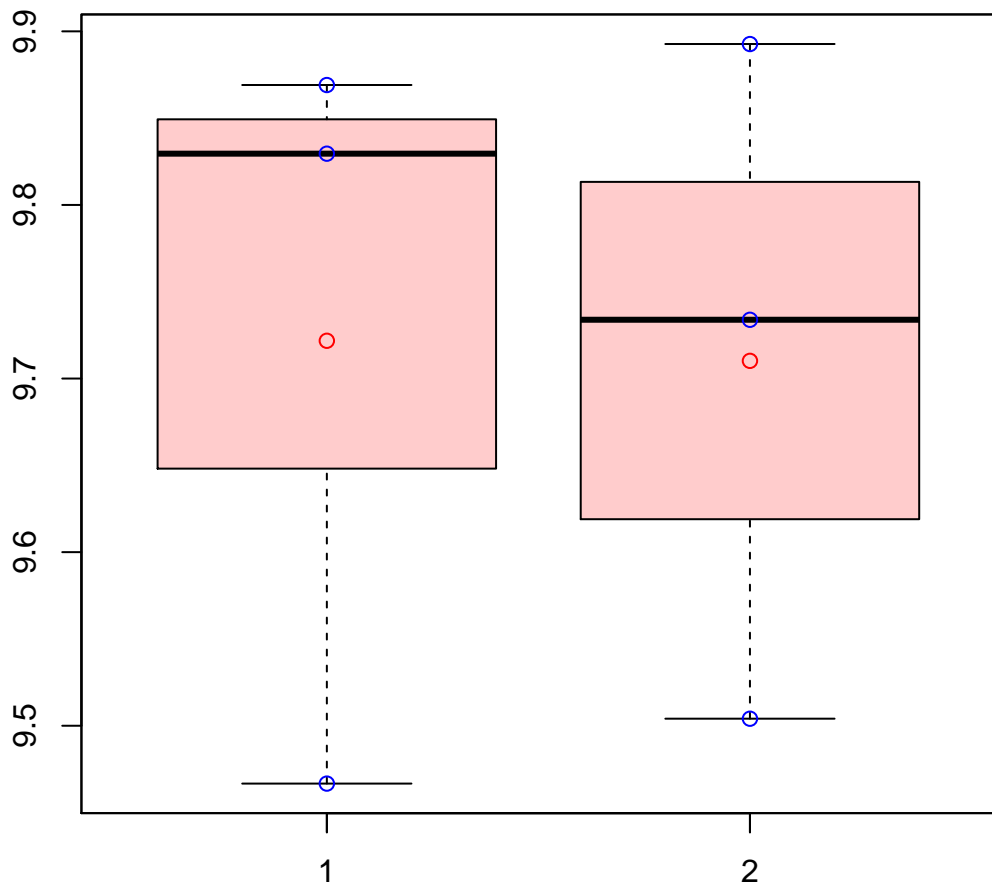

t-Test: p-value = 0.95

# CL1Contig1710|CL1Contig1710

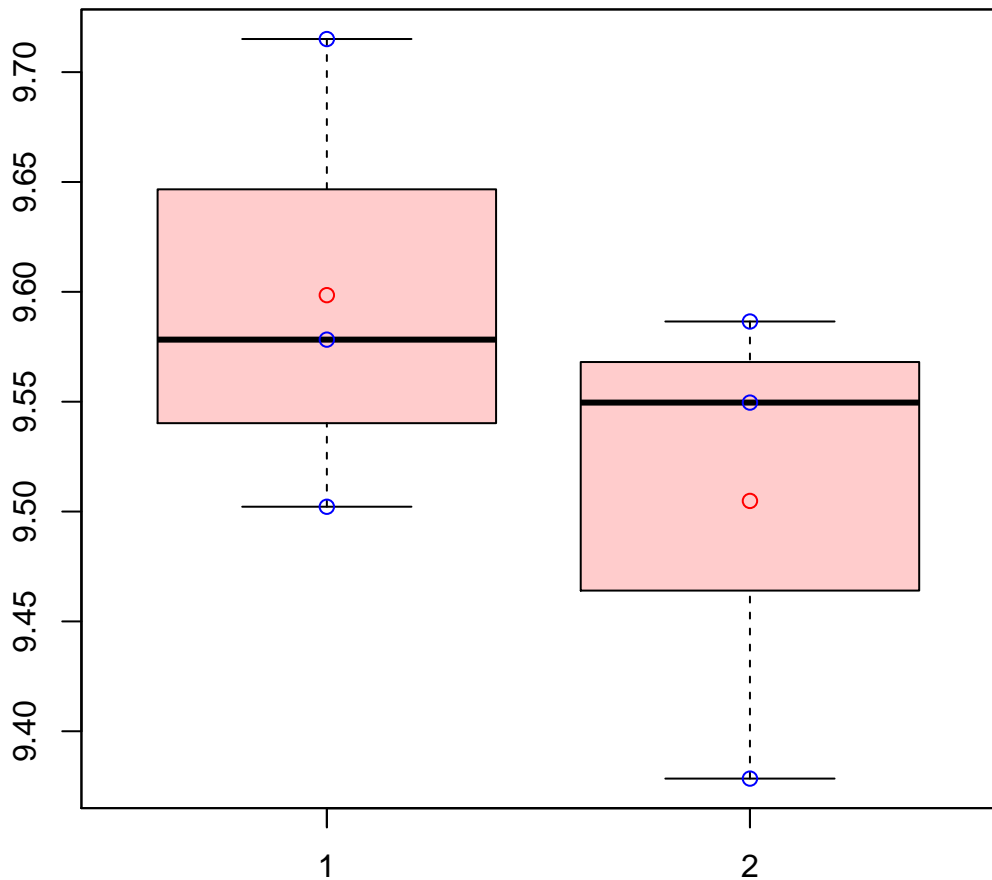

t-Test: p-value = 0.35

# CL1Contig1711|CL1Contig1711

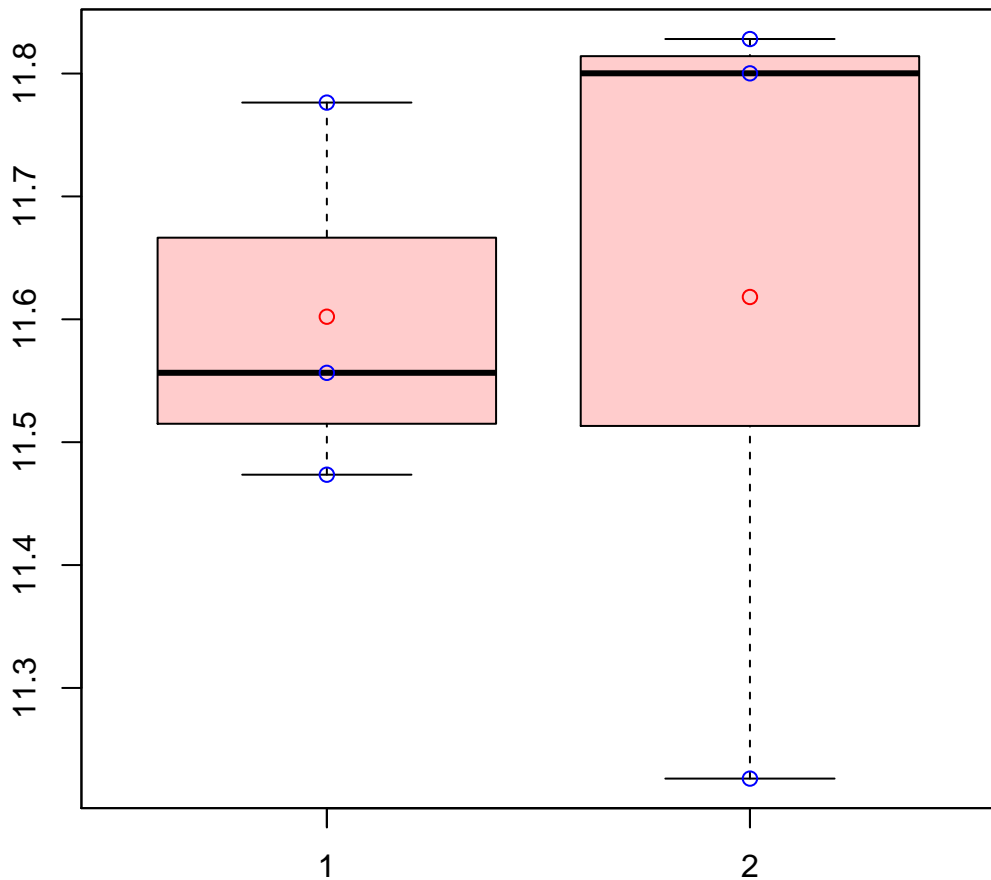

t-Test: p-value = 0.95



# CL1Contig1720|CL1Contig1720

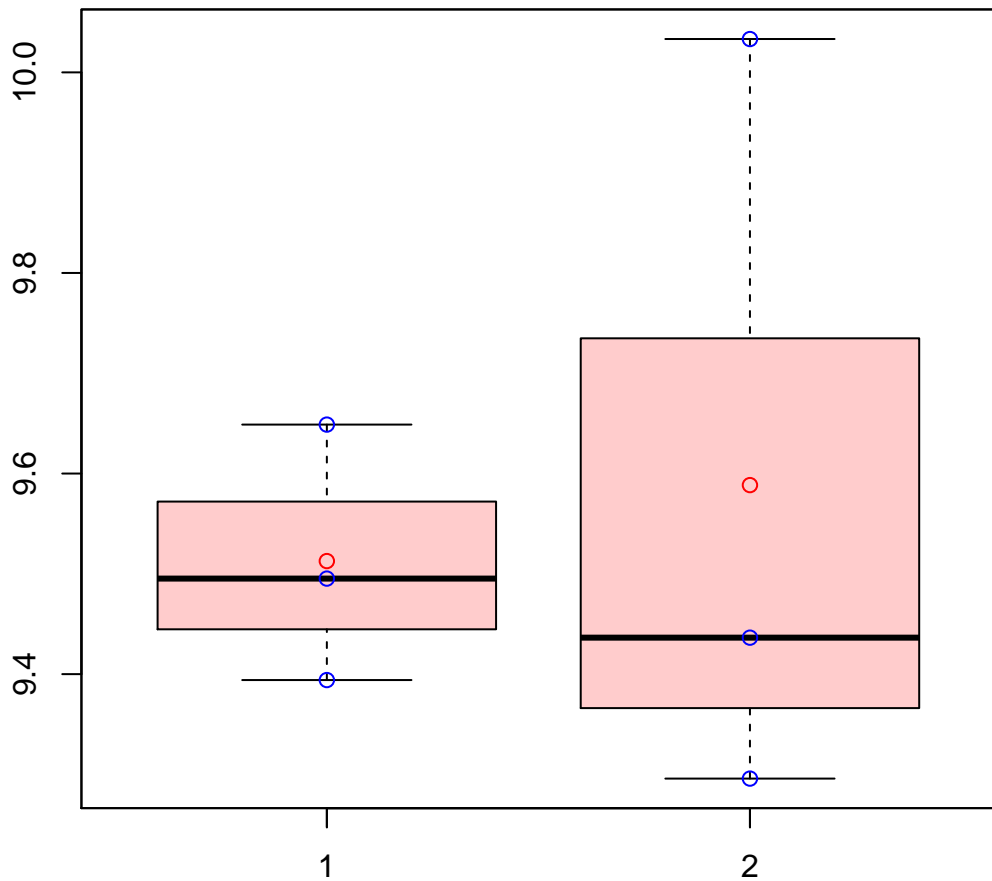

t-Test: p-value = 0.78

# CL1Contig1730|CL1Contig1730



t-Test: p-value = 0.39

# CL1Contig1769|CL1Contig1769

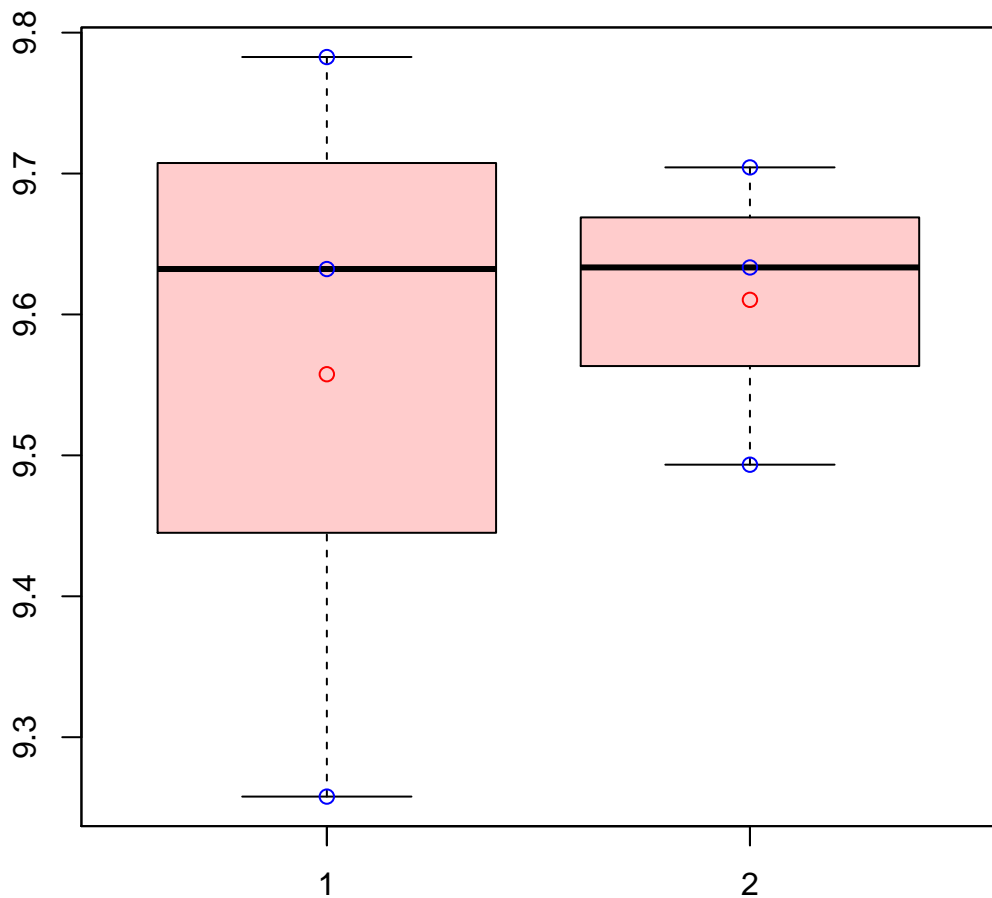

t-Test: p-value = 0.78

# CL1Contig1776|CL1Contig1776

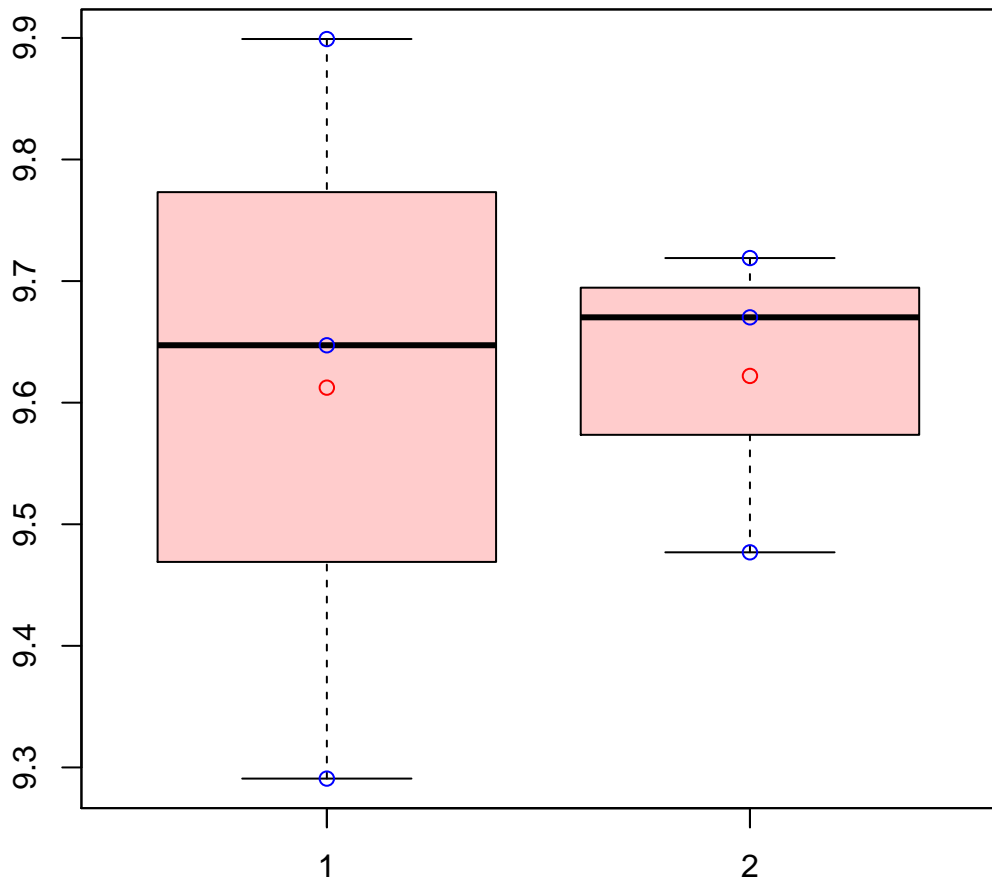

t-Test: p-value = 0.96

# CL1Contig178|CL1Contig178

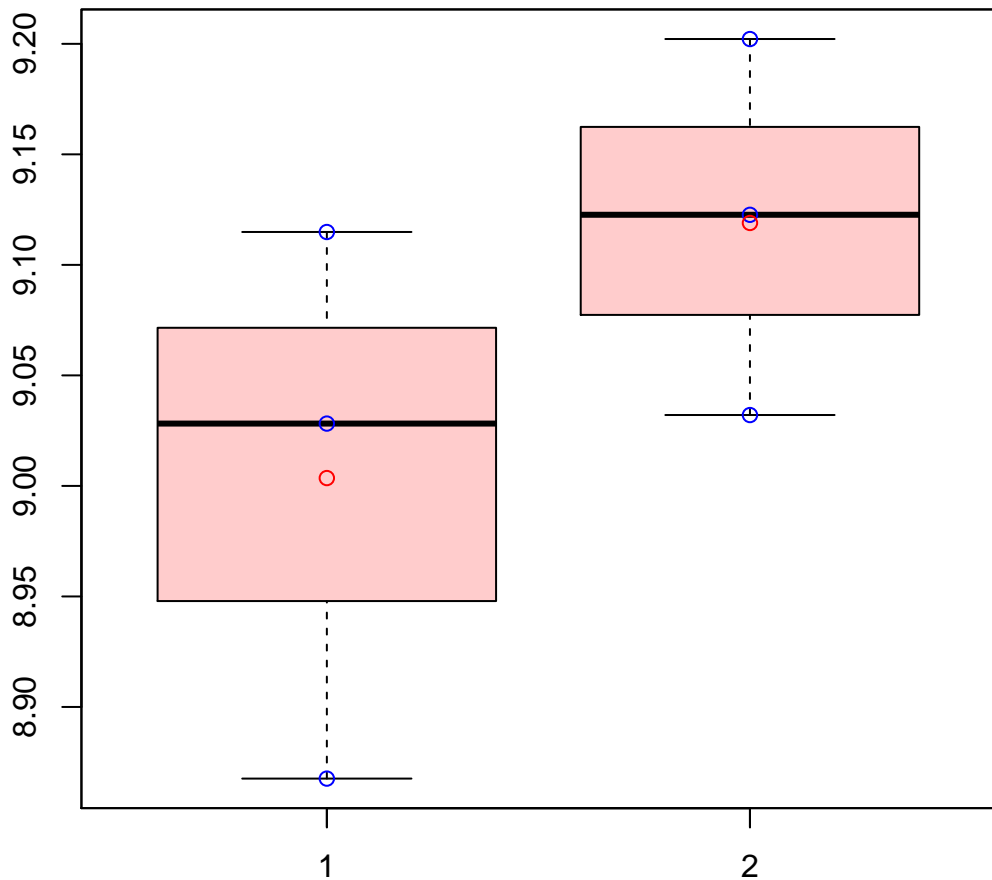

t-Test: p-value = 0.27

# CL1Contig1833|CL1Contig1833

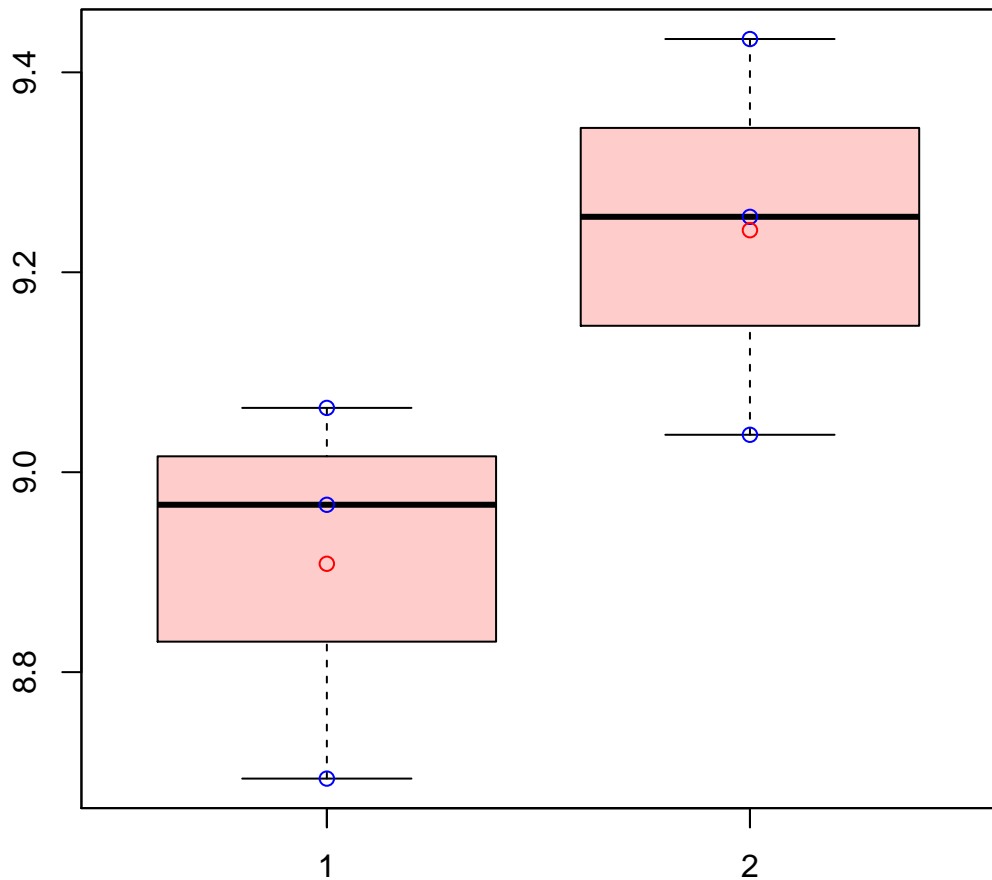

t-Test: p-value = 0.1

# CL1Contig1865|CL1Contig1865

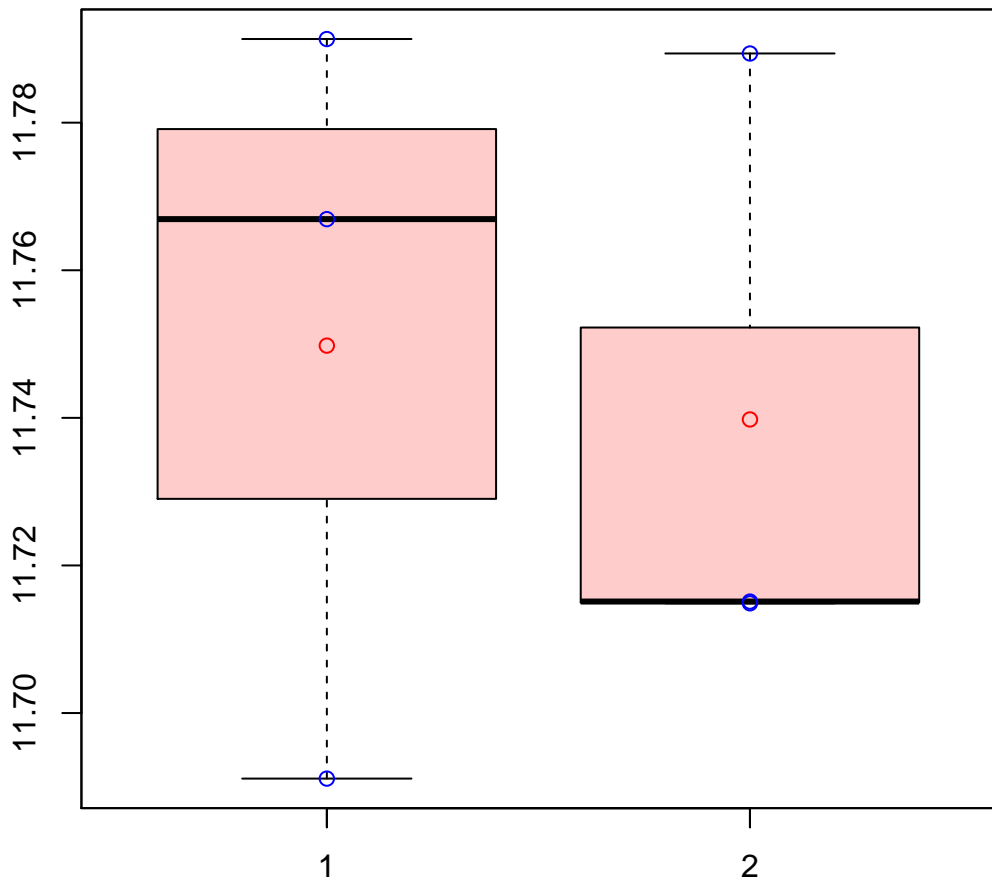

t-Test: p-value = 0.81

# CL1Contig1869|CL1Contig1869

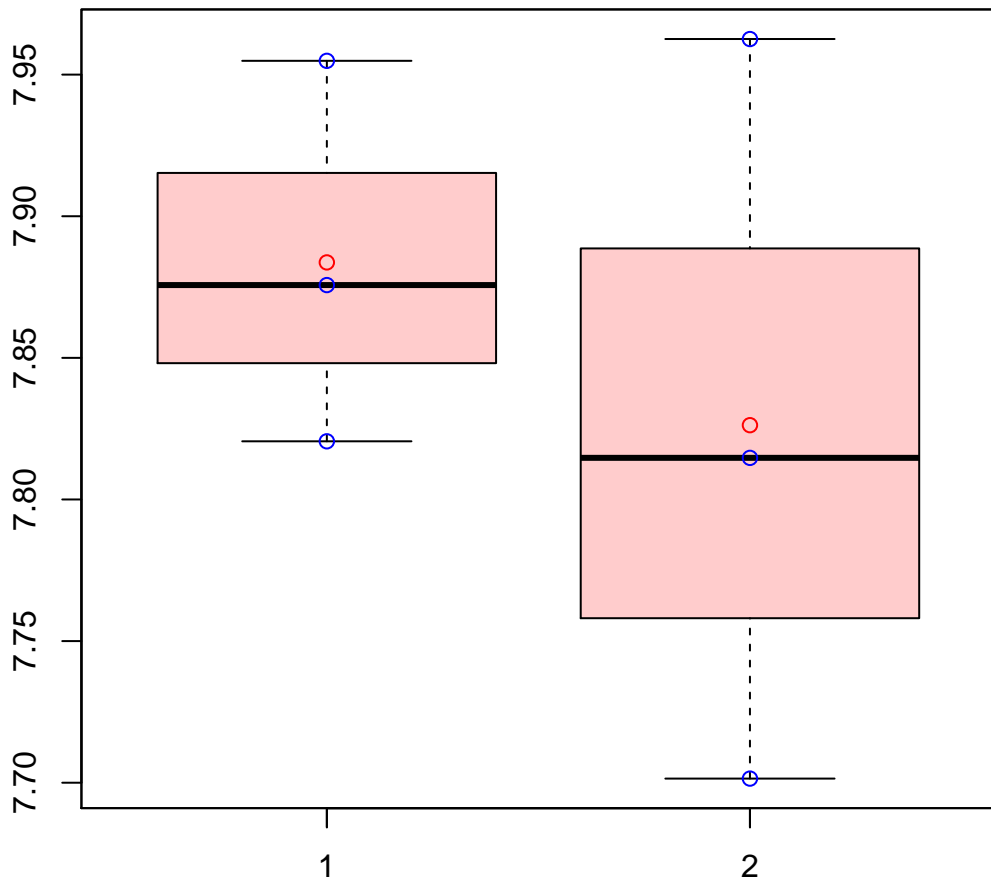

t-Test: p-value = 0.55



# CL1Contig1876|CL1Contig1876

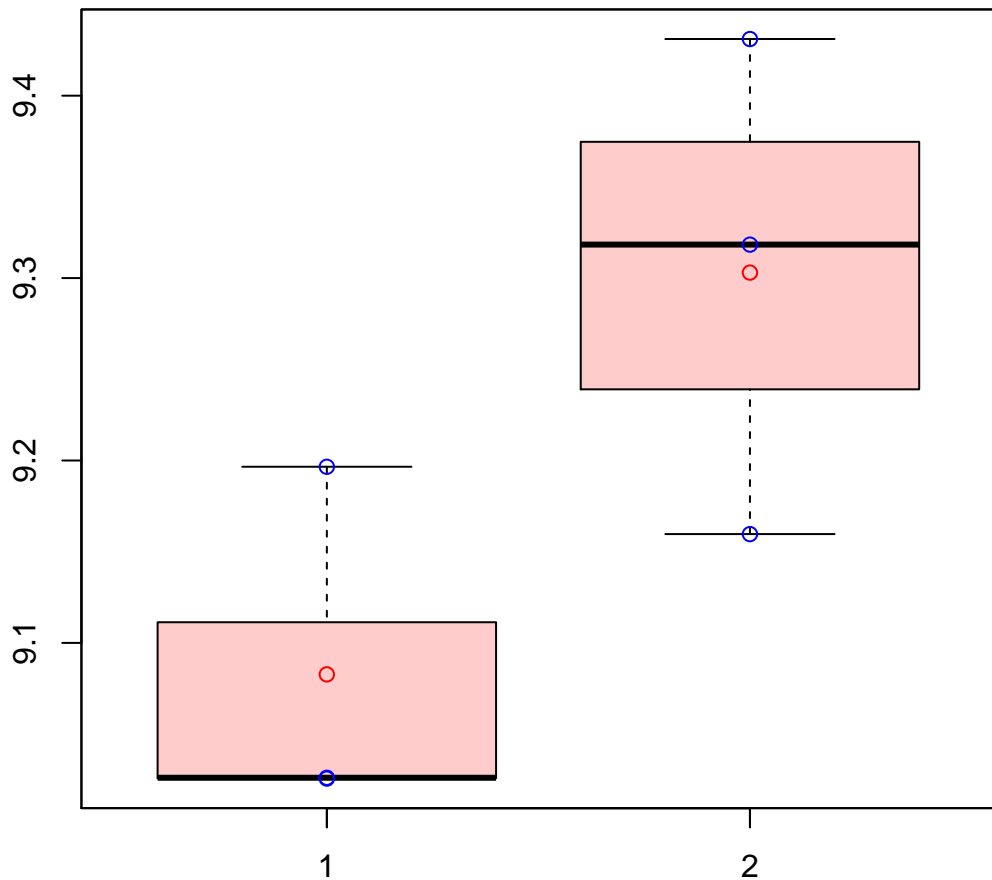

t-Test: p-value = 0.09

# CL1Contig1877|CL1Contig1877



t-Test: p-value = 0.09

# CL1Contig1881|CL1Contig1881



t-Test: p-value = 0.7

# CL1Contig1882|CL1Contig1882



t-Test: p-value = 0.67

# CL1Contig1892|CL1Contig1892

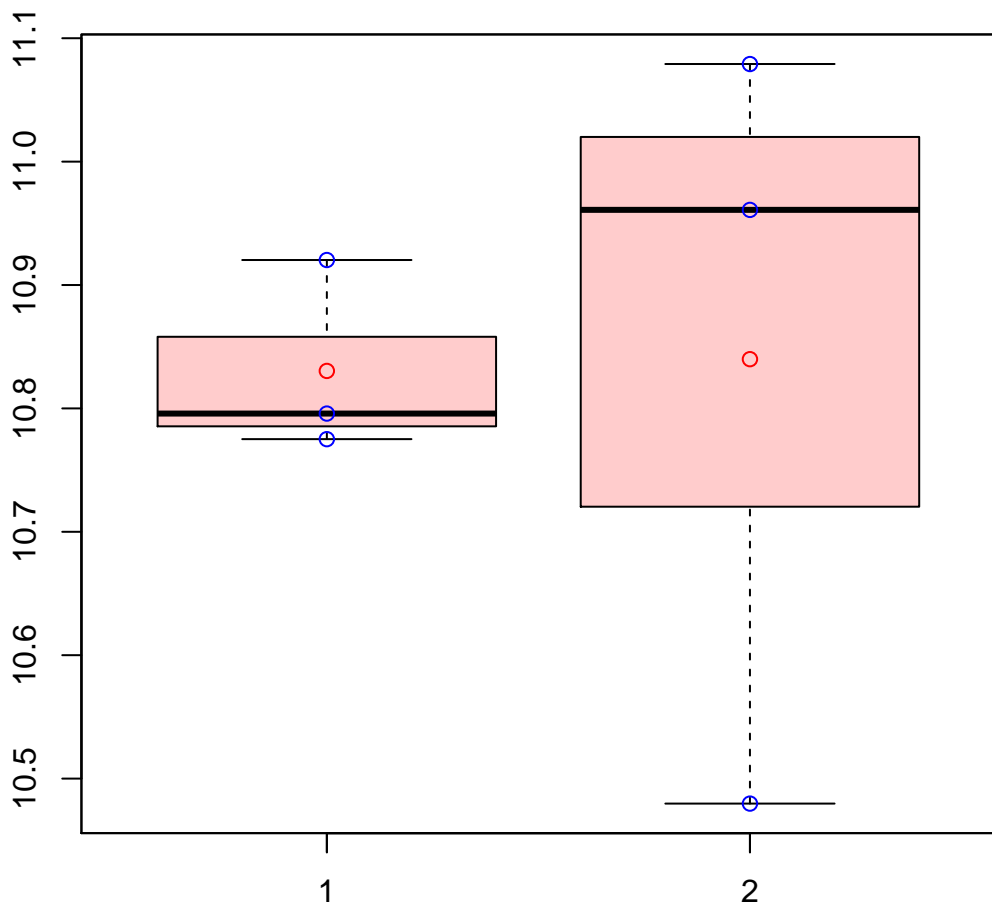

t-Test: p-value = 0.96

# CL1Contig1903|CL1Contig1903

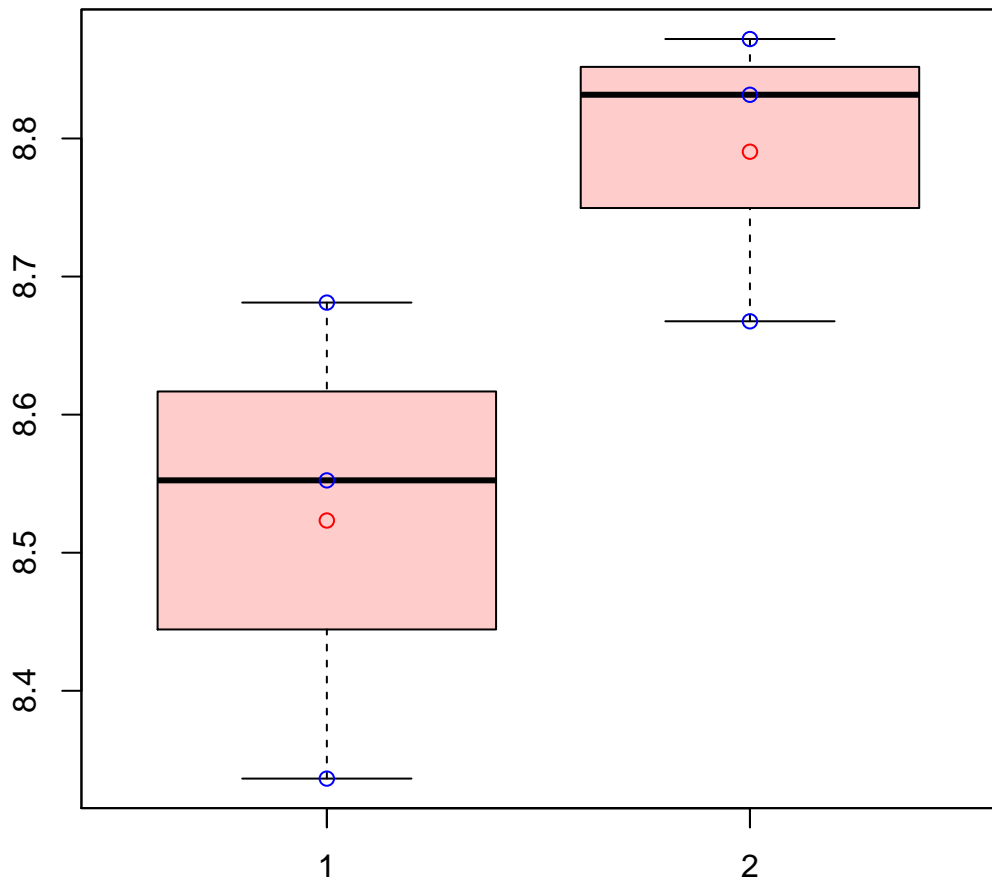

t-Test: p-value = 0.1

# CL1Contig1915|CL1Contig1915

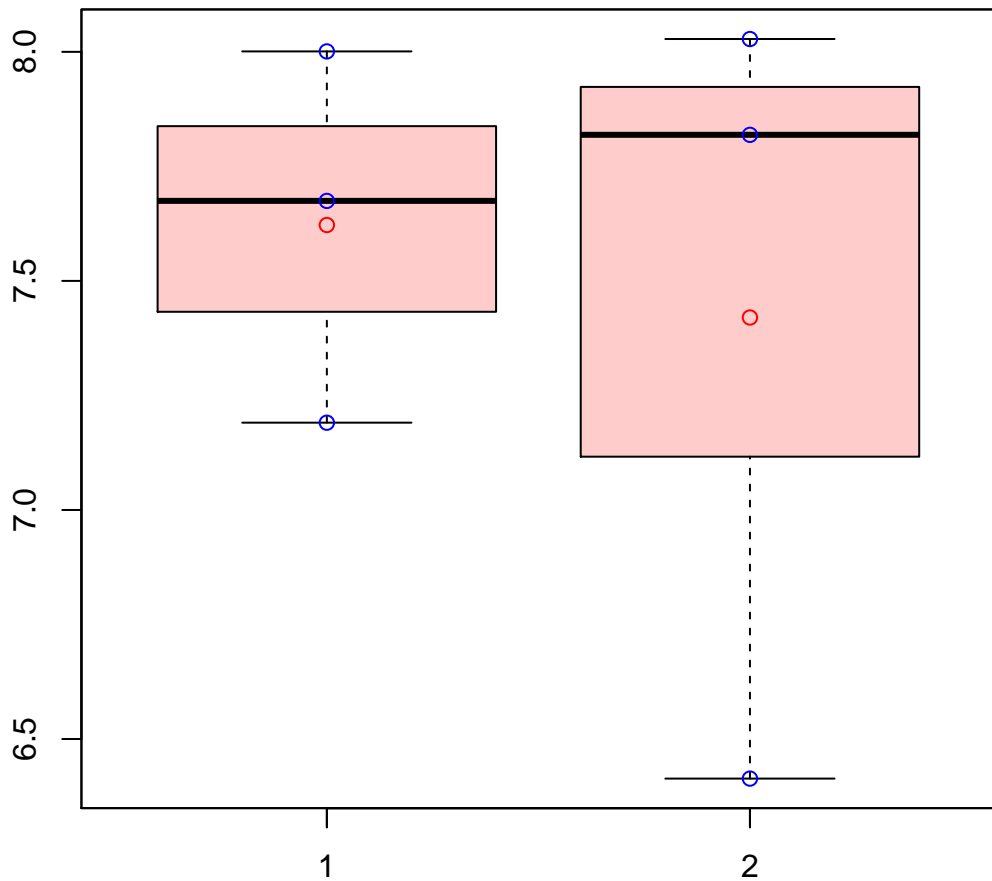

t-Test: p-value = 0.74

# CL1Contig1926|CL1Contig1926

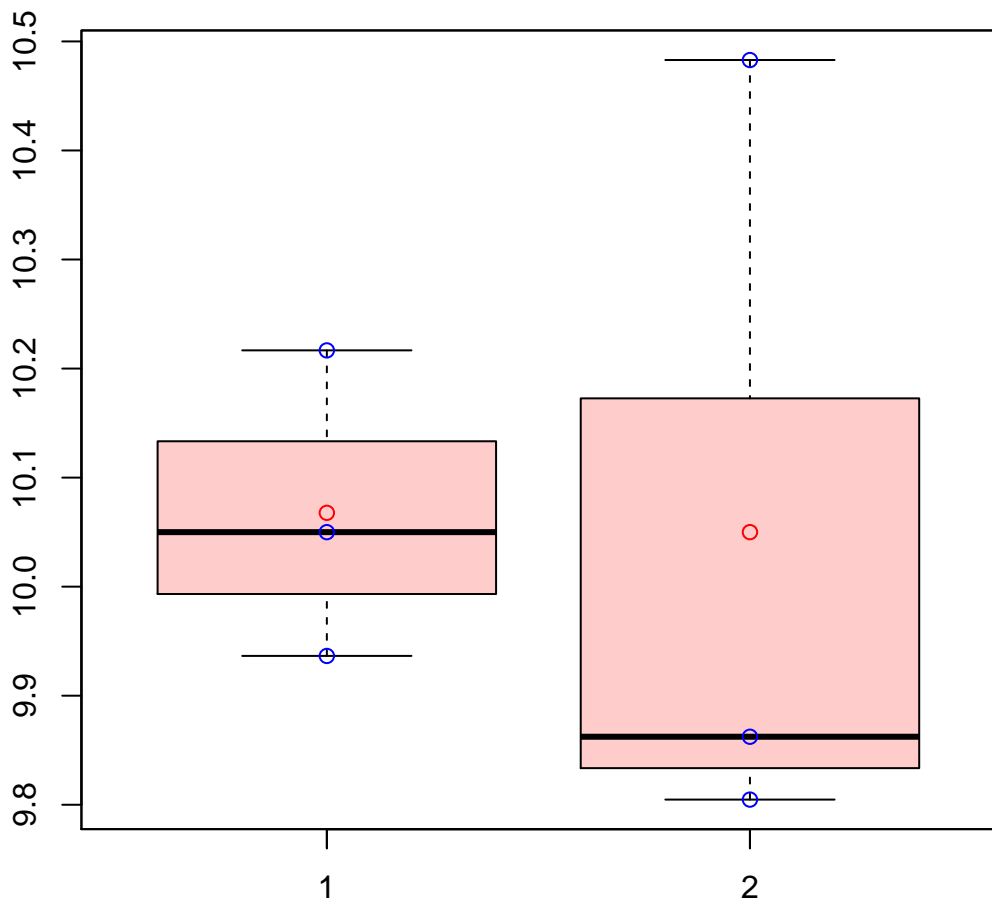

t-Test: p-value = 0.94



# CL1Contig192|CL1Contig192

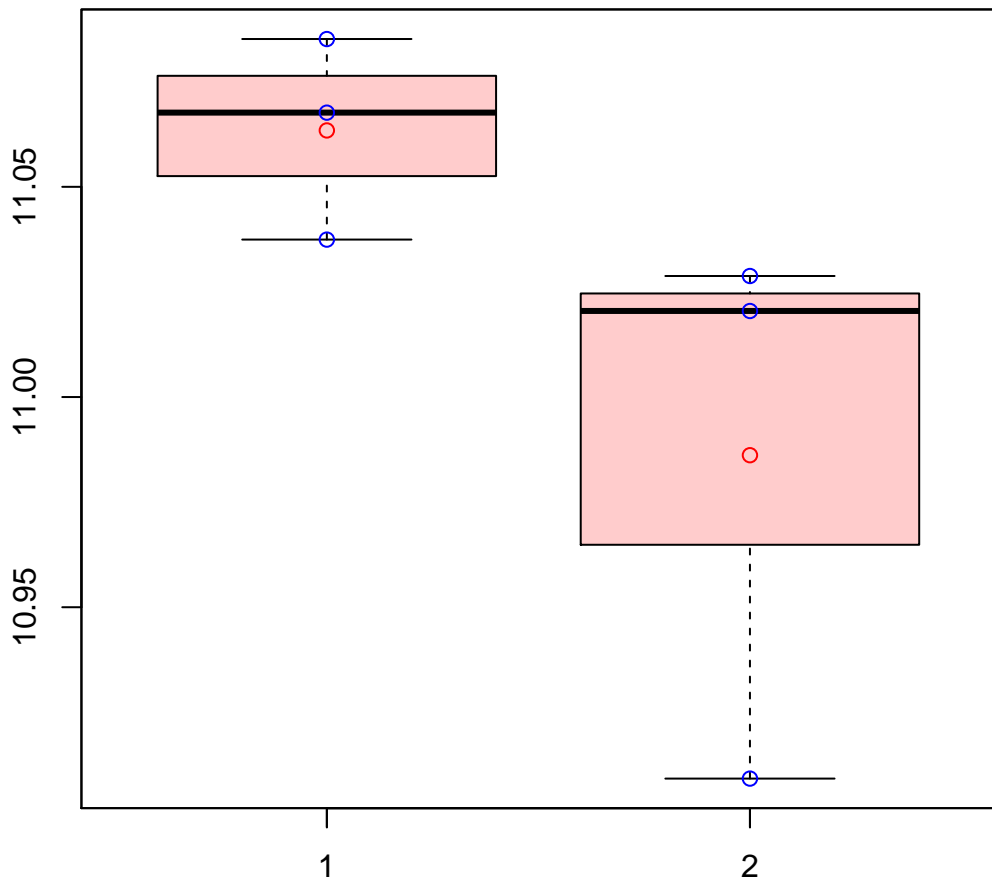

t-Test: p-value = 0.17

# CL1Contig193|CL1Contig193

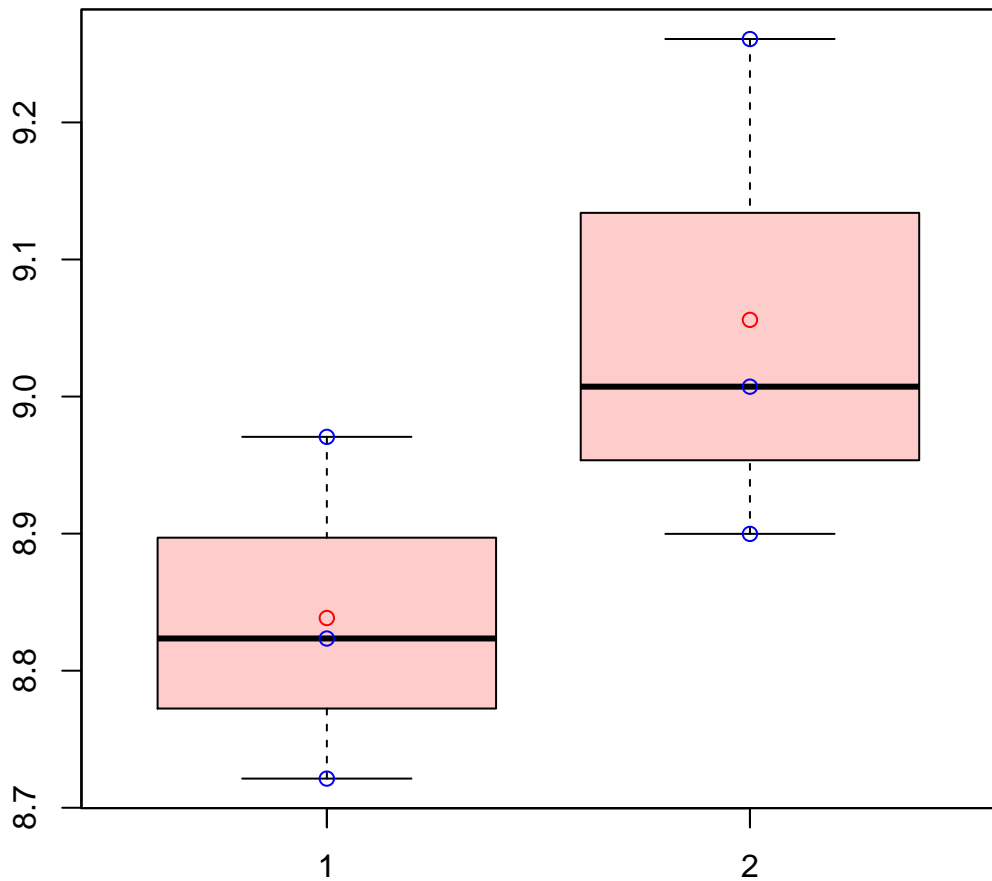

t-Test: p-value = 0.18

# CL1Contig1981|CL1Contig1981

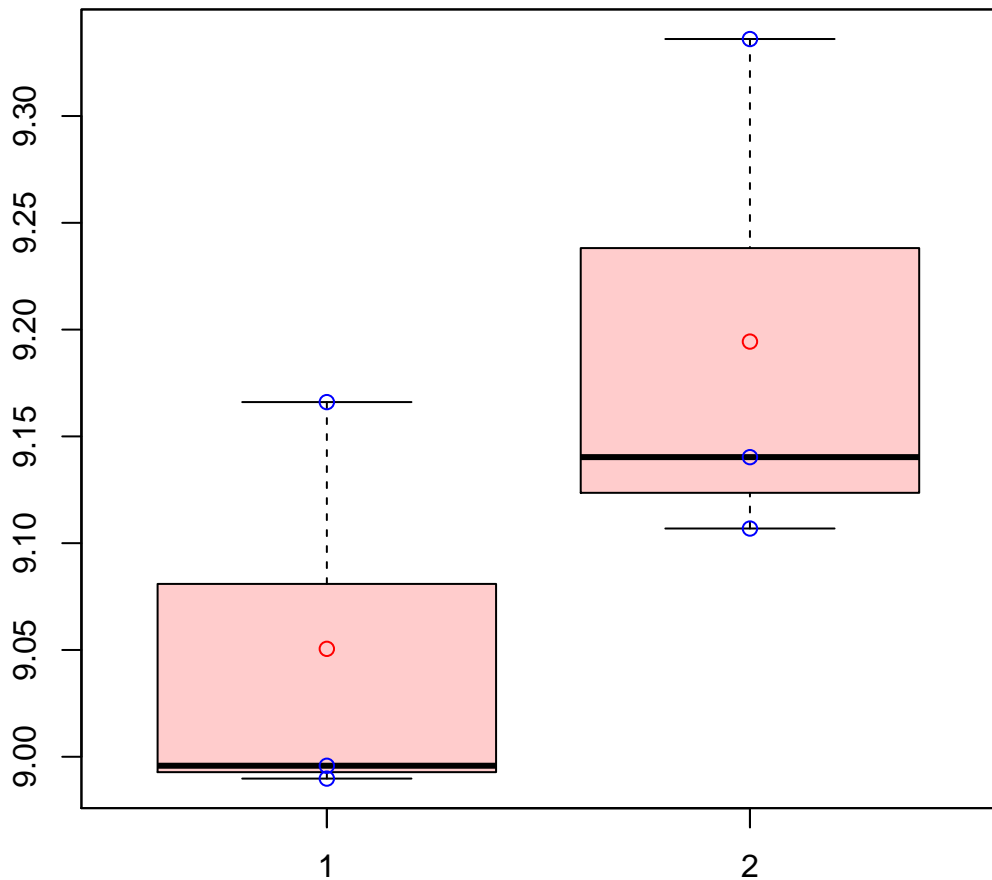

t-Test: p-value = 0.2

# CL1Contig1993|CL1Contig1993

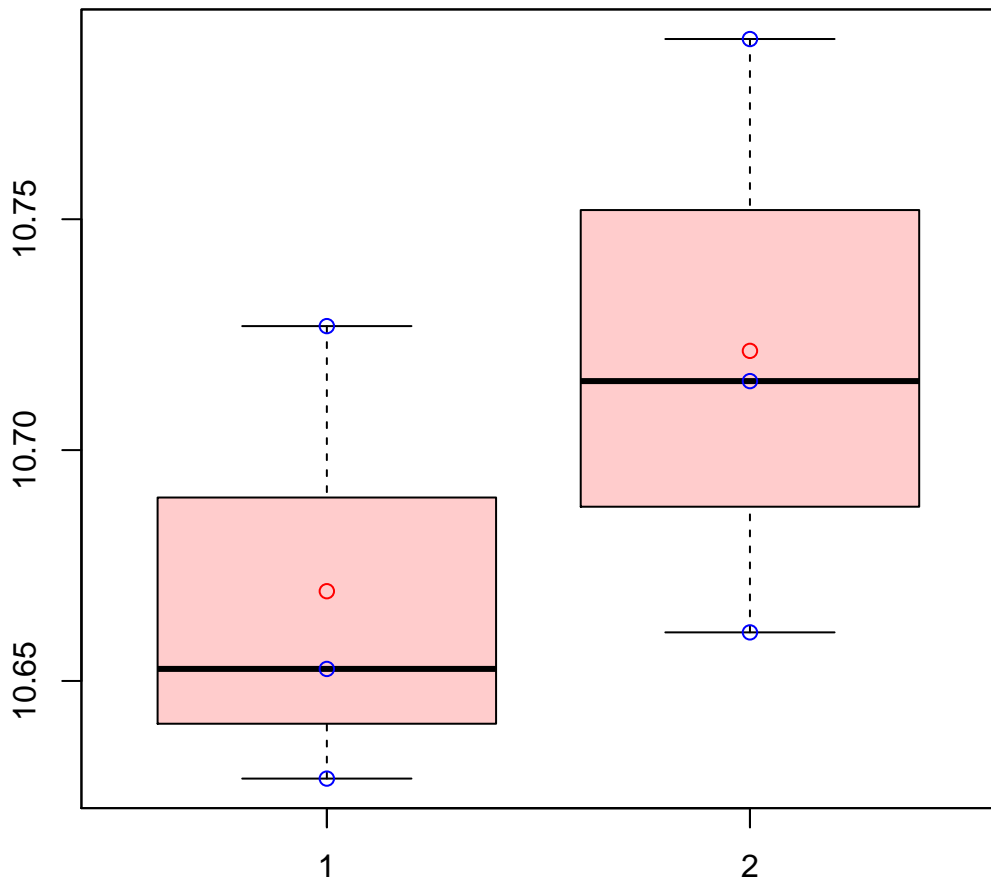

t-Test: p-value = 0.34

# CL1Contig1997|CL1Contig1997

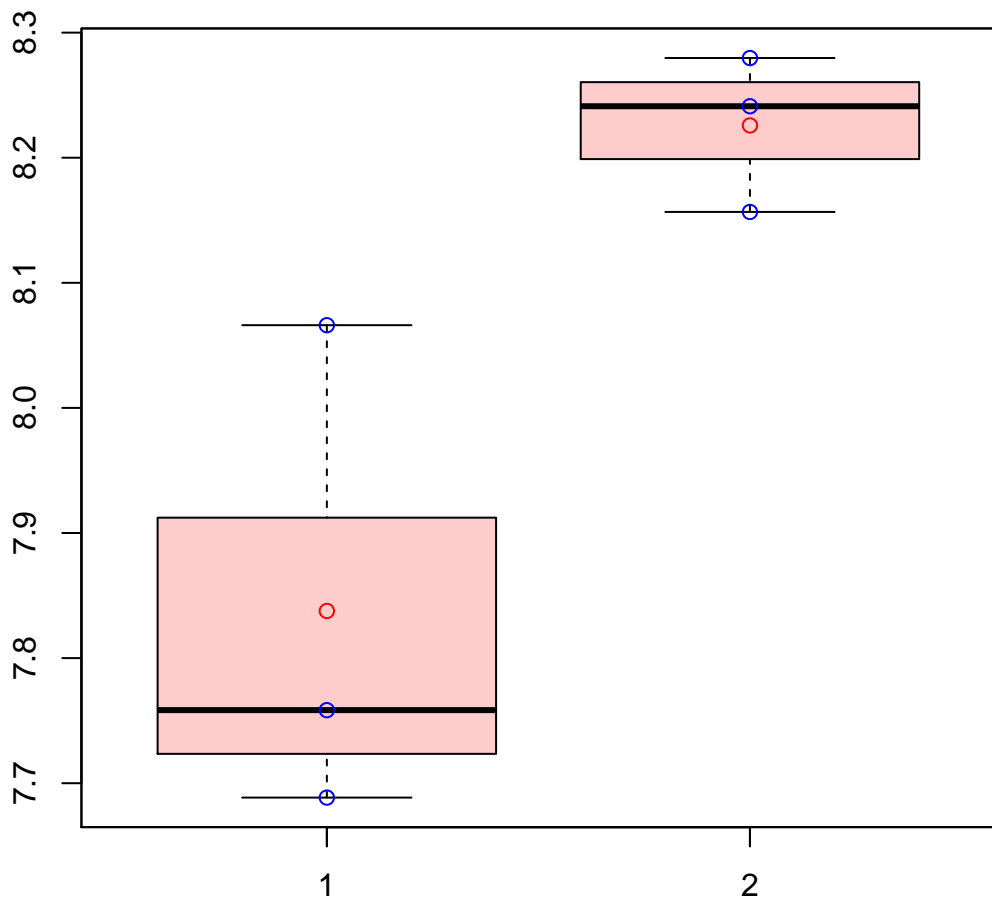

t-Test: p-value = 0.07

# CL1Contig1998|CL1Contig1998

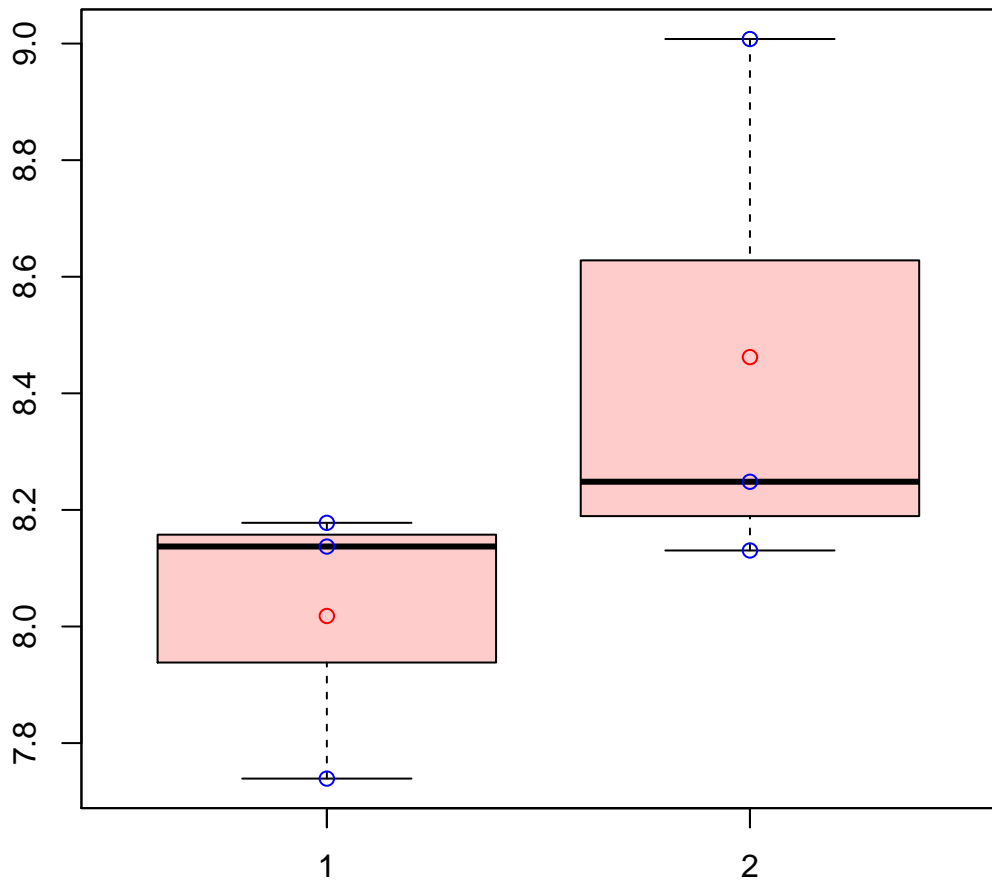

t-Test: p-value = 0.25

# CL1Contig2086|CL1Contig2086

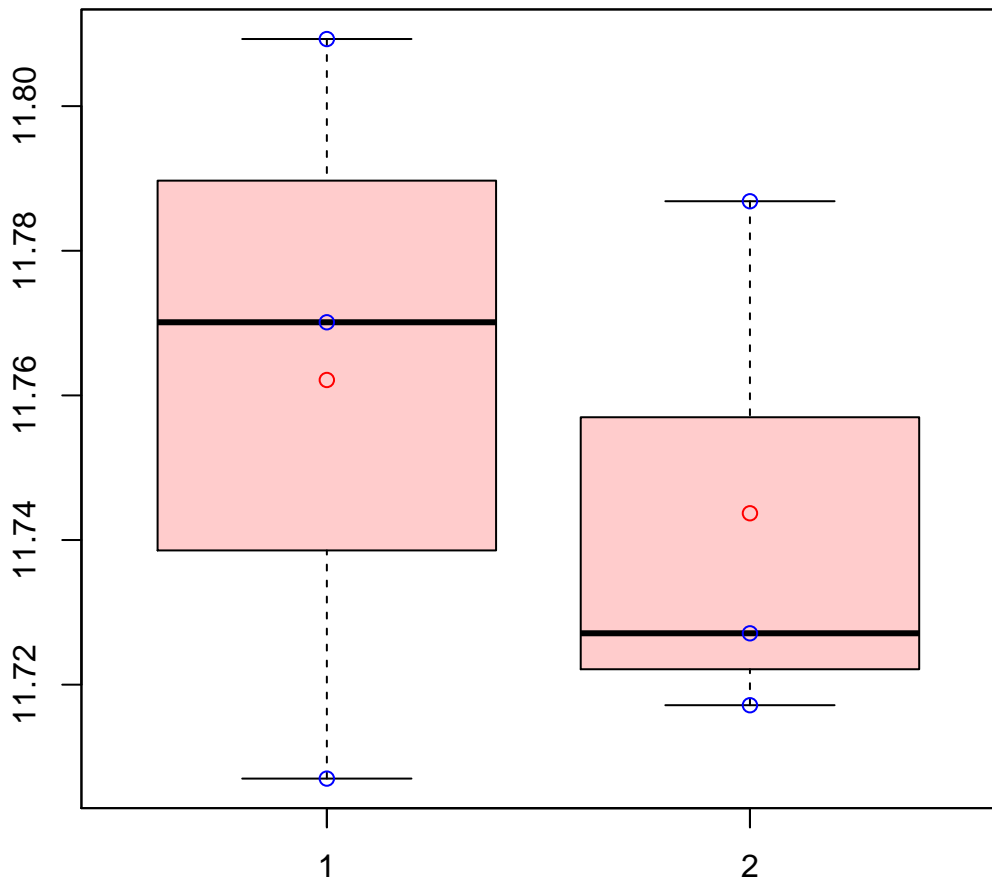

t-Test: p-value = 0.65

# CL1Contig2103|CL1Contig2103

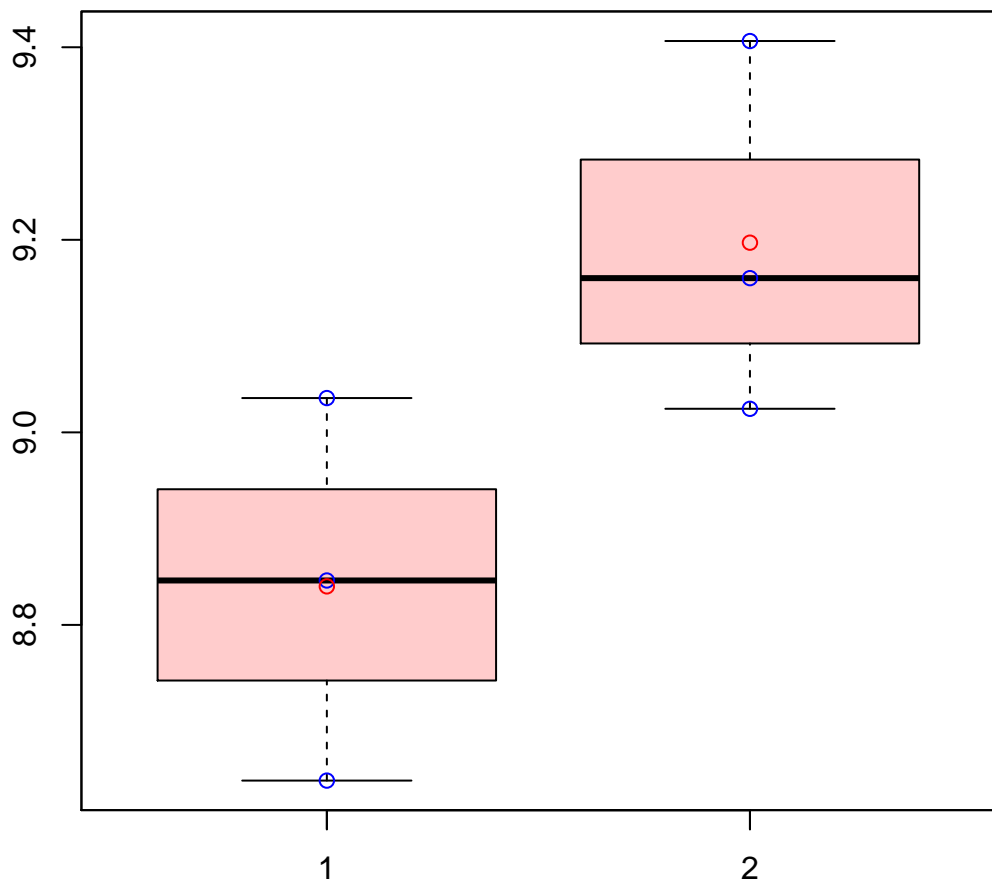

t-Test: p-value = 0.09



# CL1Contig2108|CL1Contig2108

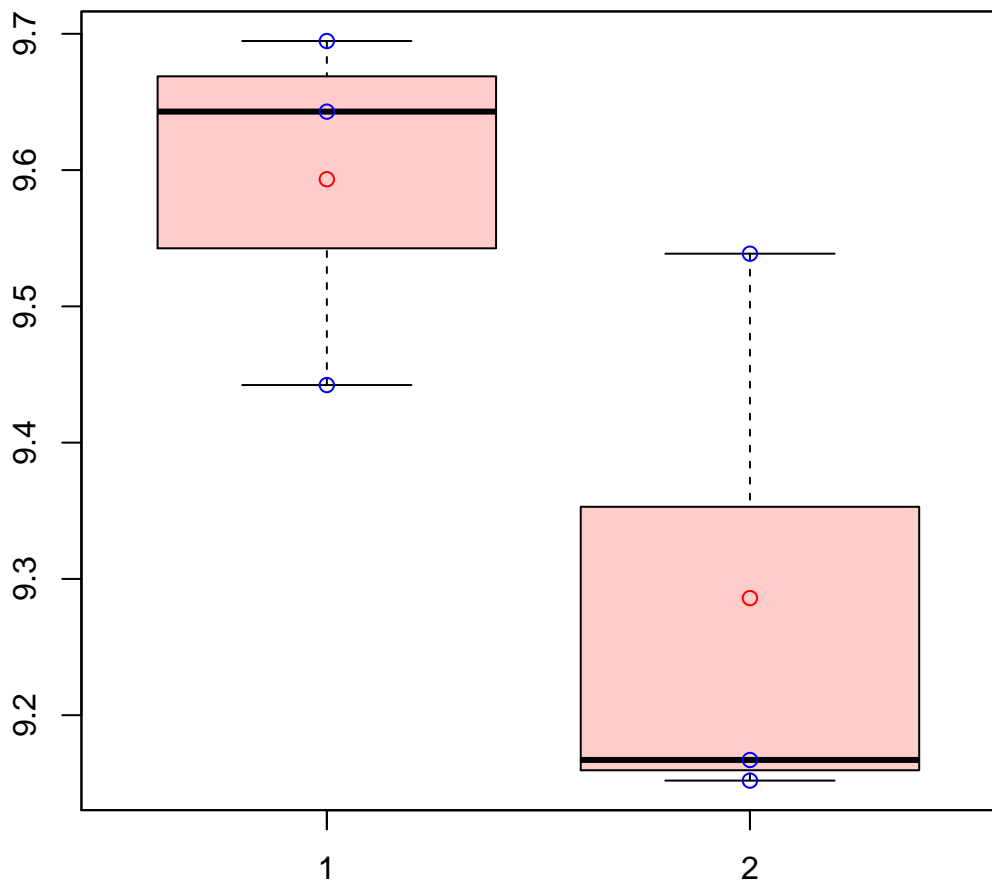

t-Test: p-value = 0.12

# CL1Contig2138|CL1Contig2138

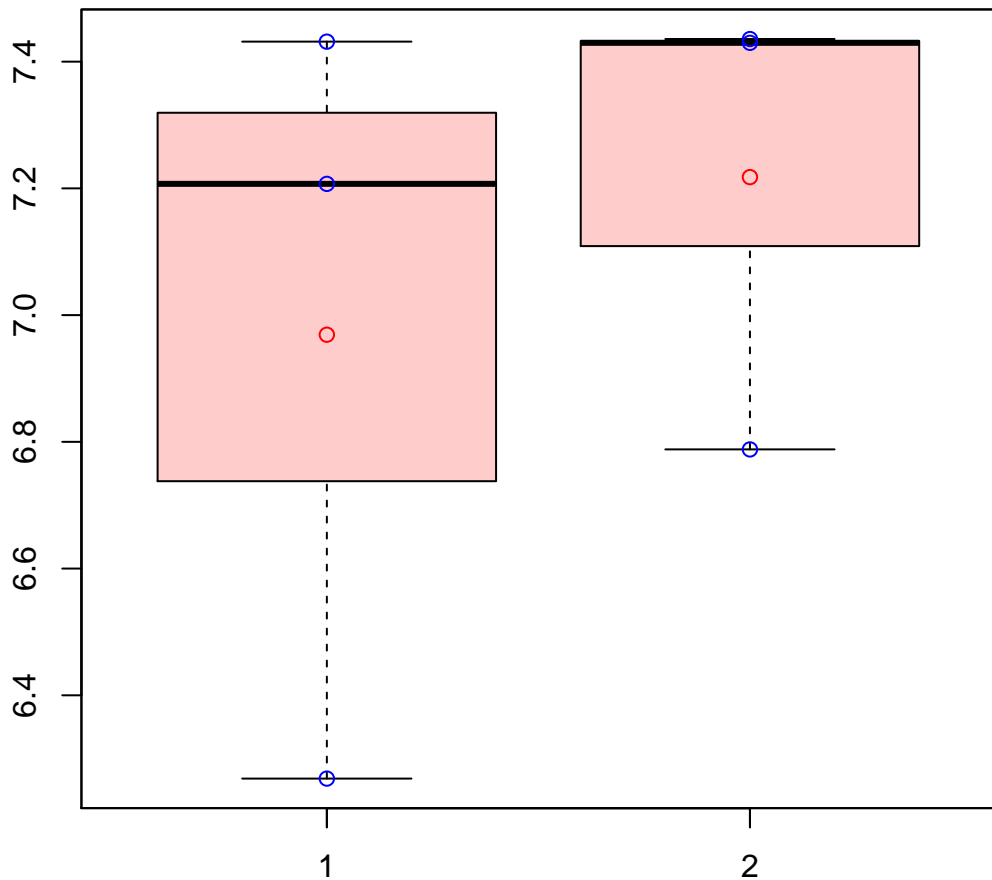

t-Test: p-value = 0.59

# CL1Contig2139|CL1Contig2139

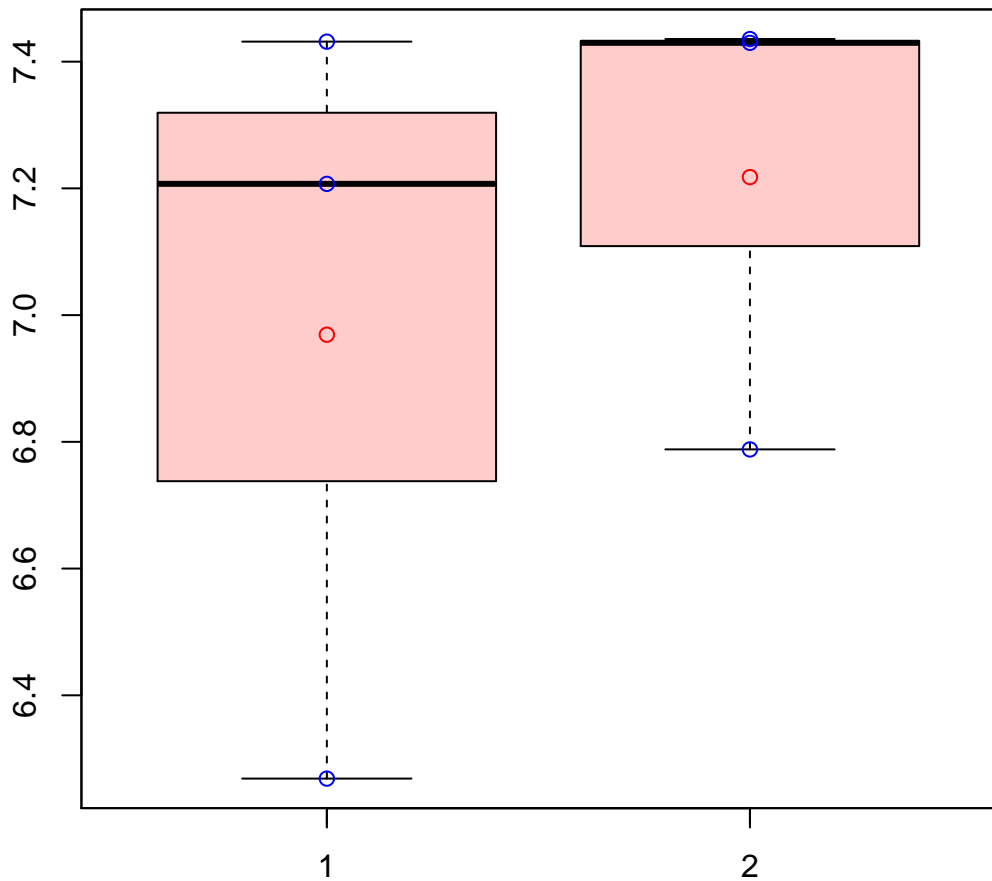

t-Test: p-value = 0.59

# CL1Contig2144|CL1Contig2144

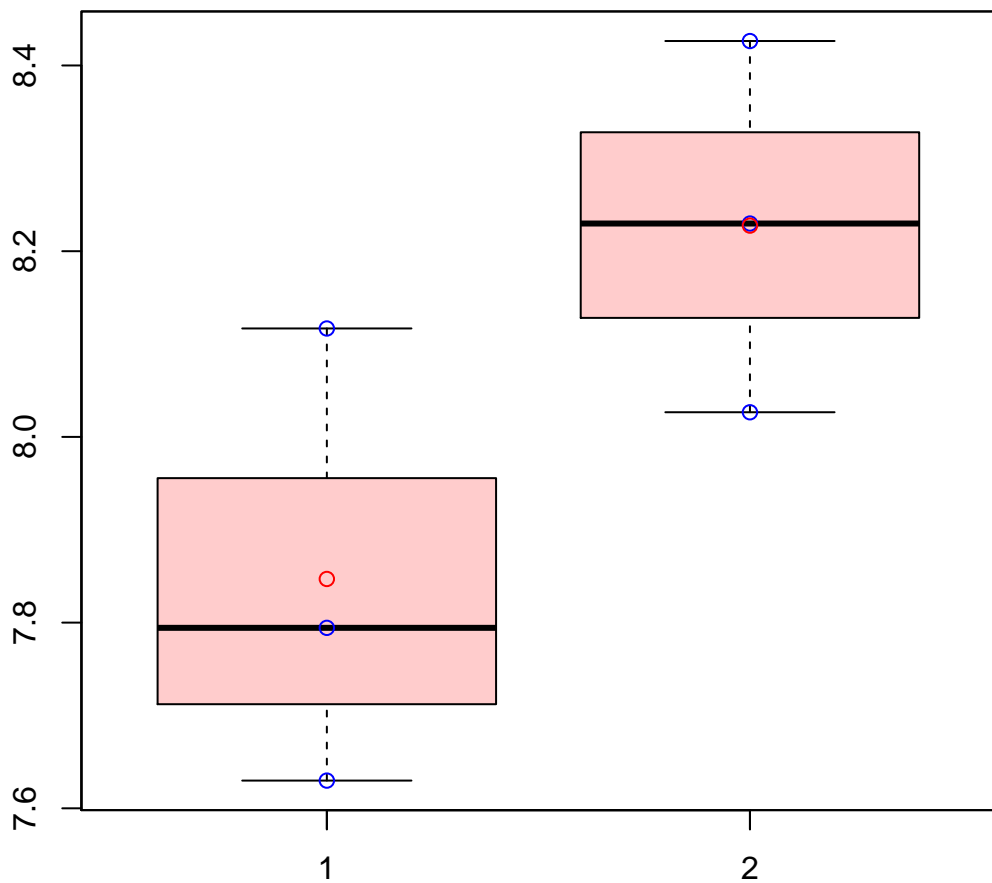

t-Test: p-value = 0.11

# CL1Contig2147|CL1Contig2147

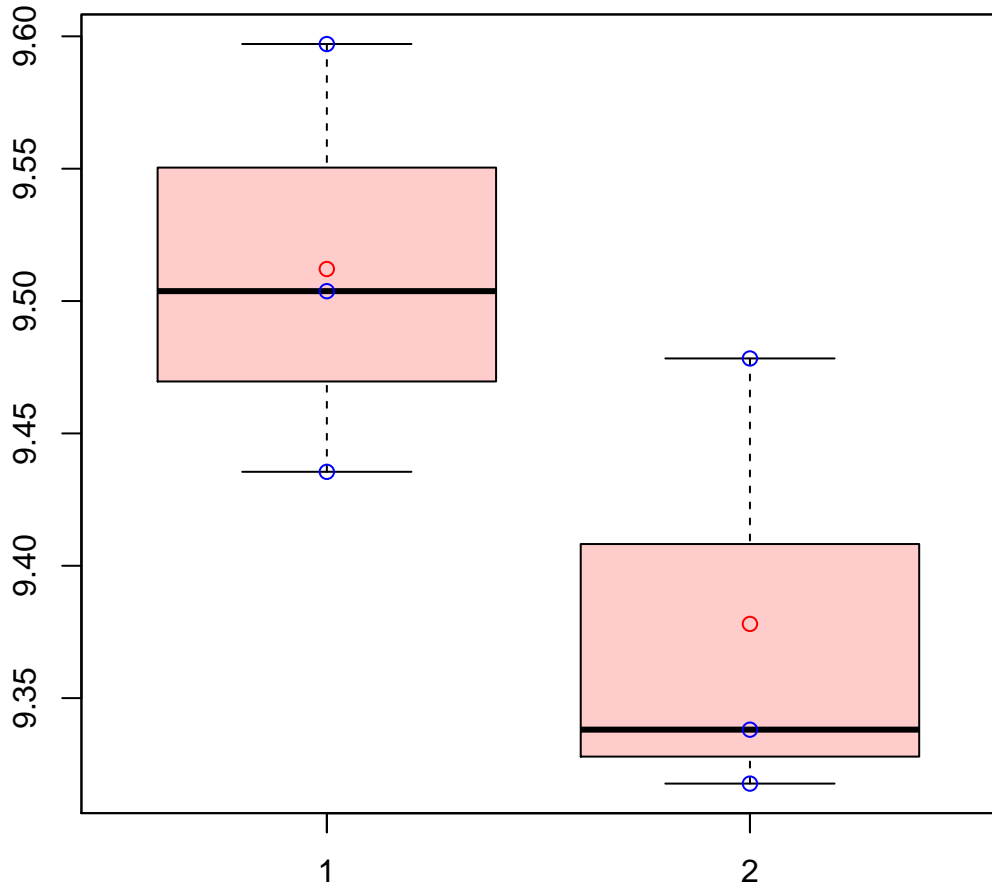

t-Test: p-value = 0.12

# CL1Contig2153|CL1Contig2153

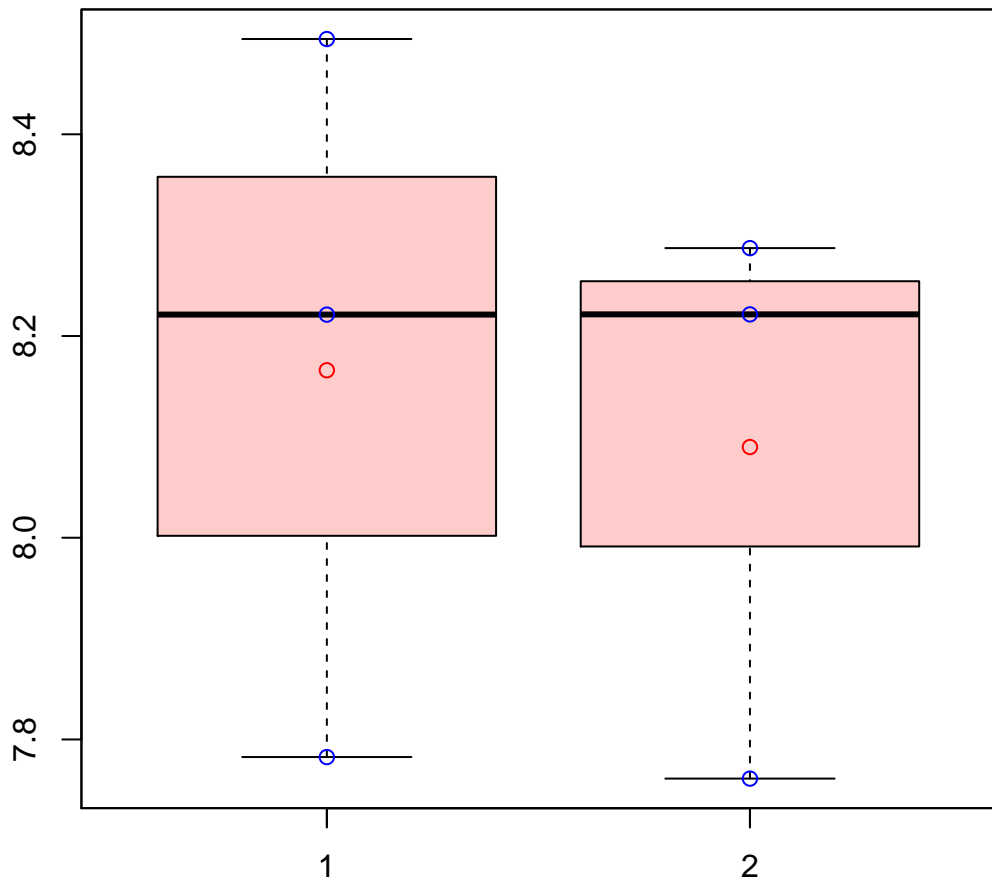

t-Test: p-value = 0.79

# CL1Contig2154|CL1Contig2154

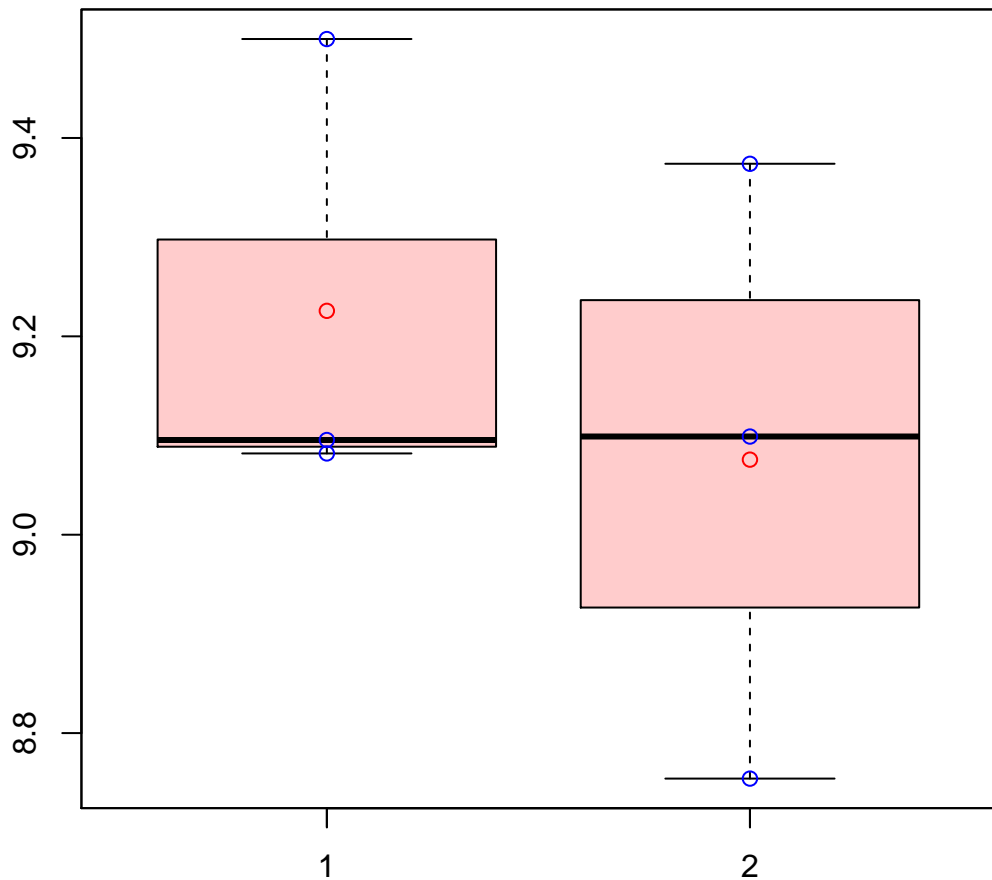

t-Test: p-value = 0.54

# CL1Contig2179|CL1Contig2179

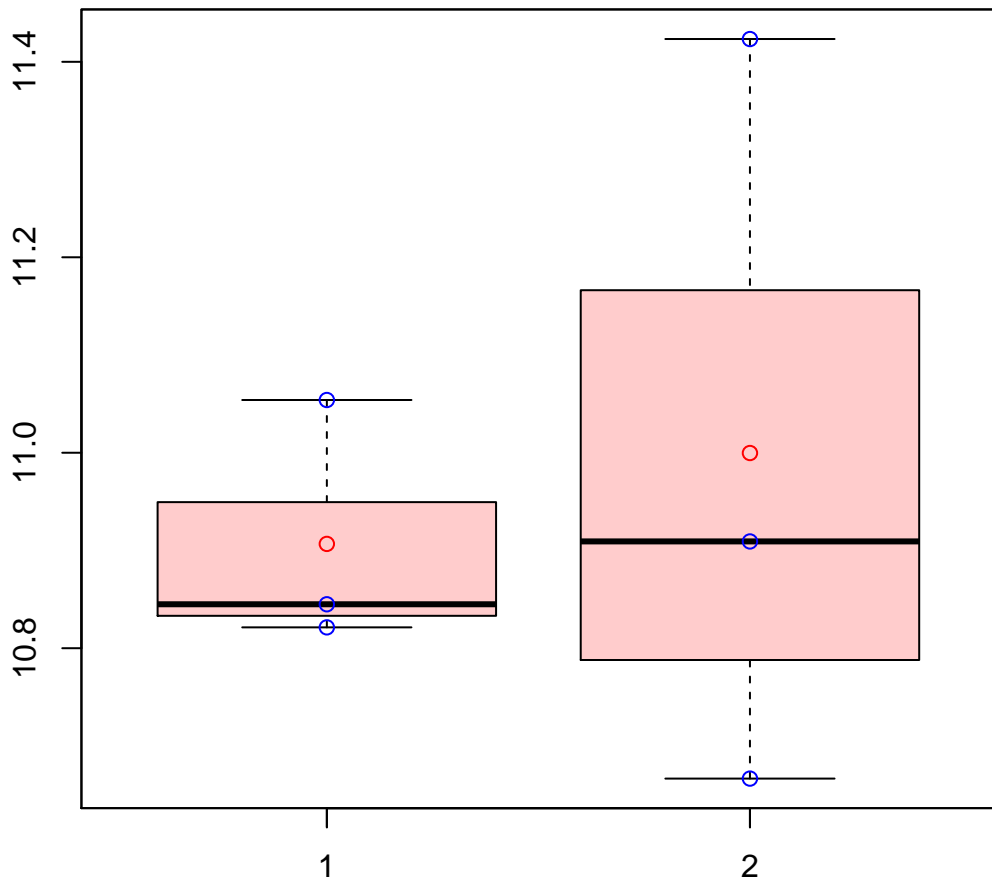

t-Test: p-value = 0.72



# CL1Contig2203|CL1Contig2203

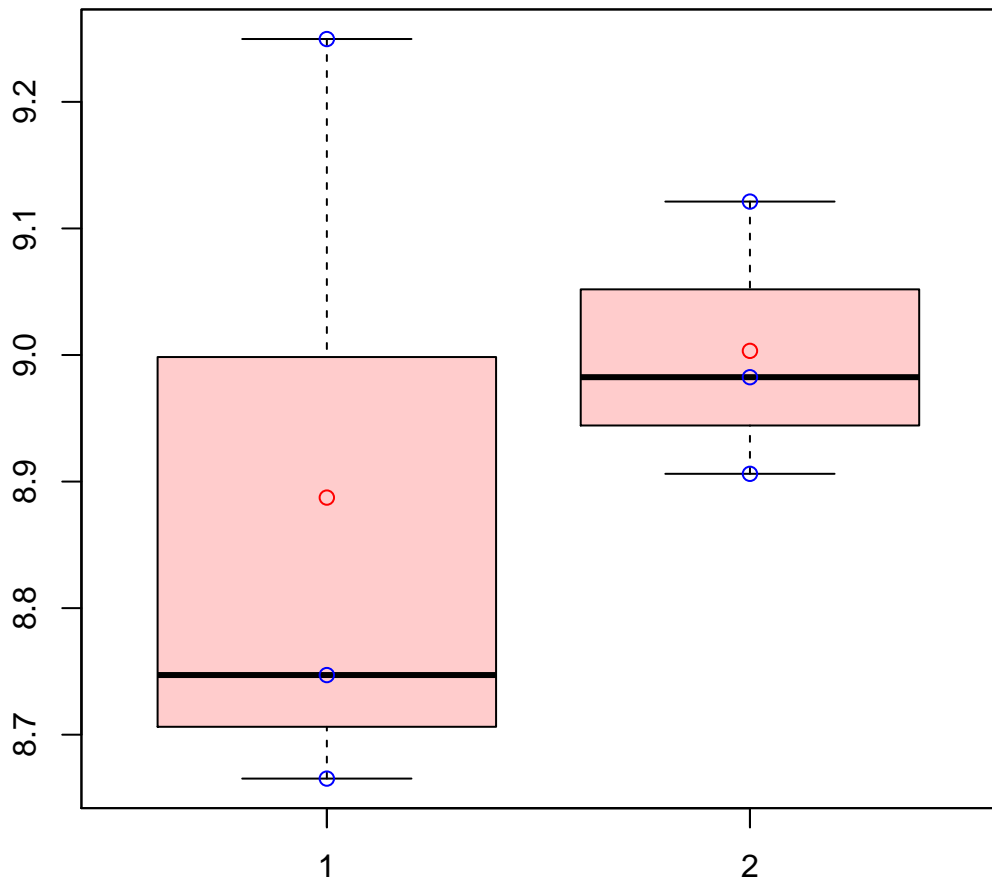

t-Test: p-value = 0.6

# CL1Contig2253|CL1Contig2253

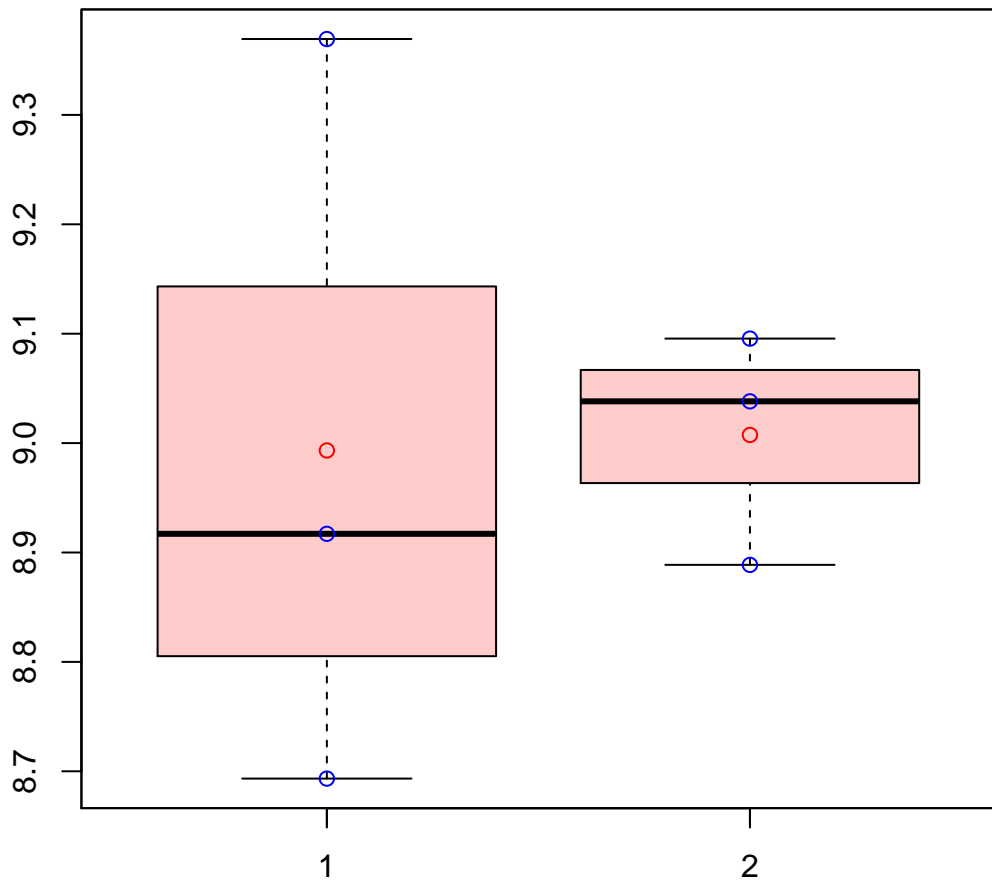

t-Test: p-value = 0.95

# CL1Contig2254|CL1Contig2254

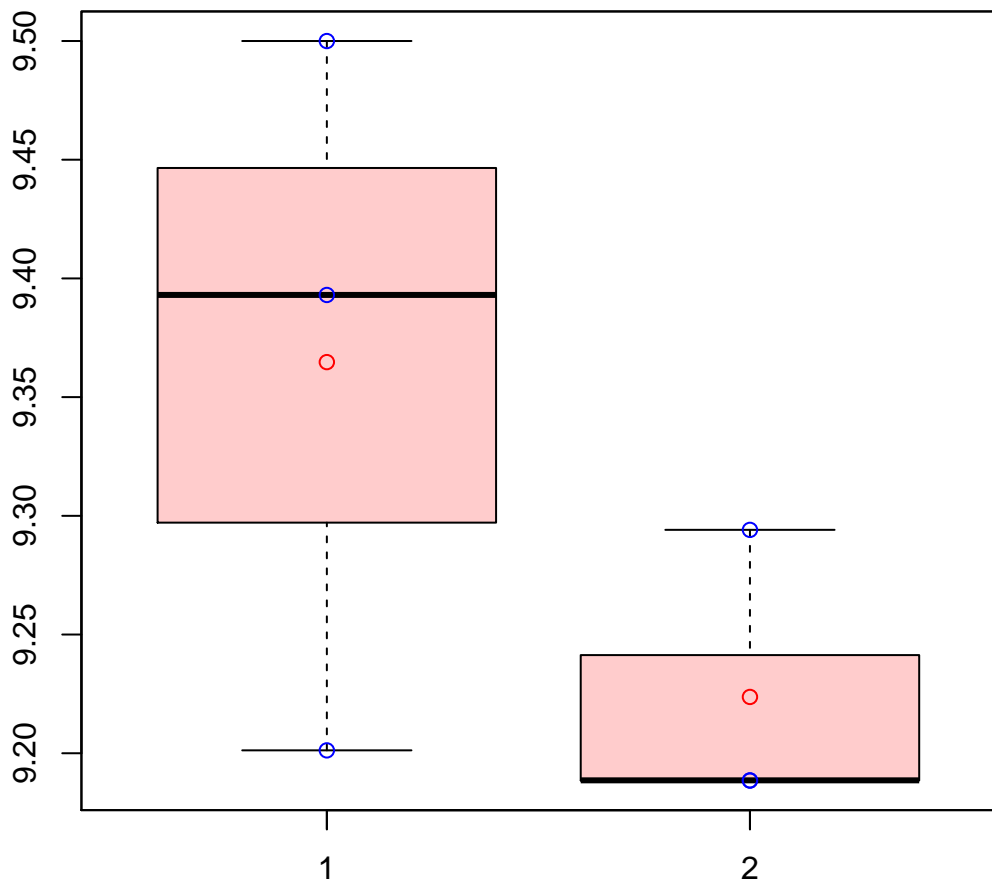

t-Test: p-value = 0.24

# CL1Contig2272|CL1Contig2272

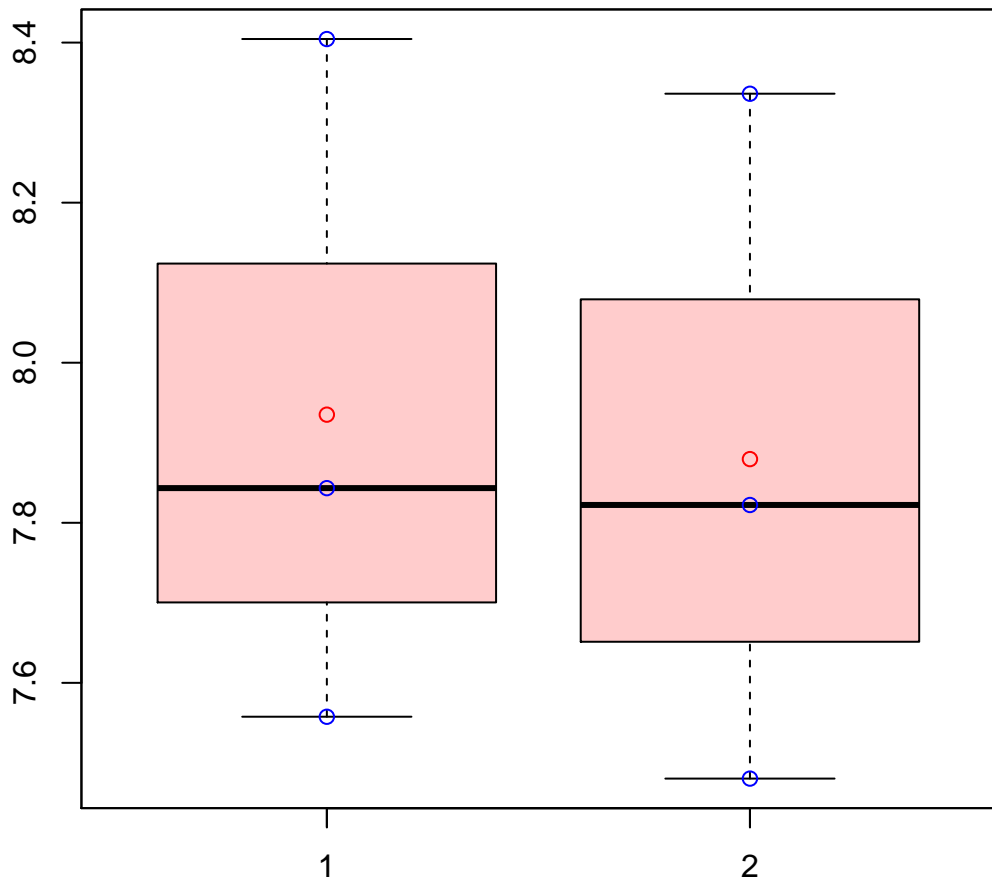

t-Test: p-value = 0.88

# CL1Contig2280|CL1Contig2280

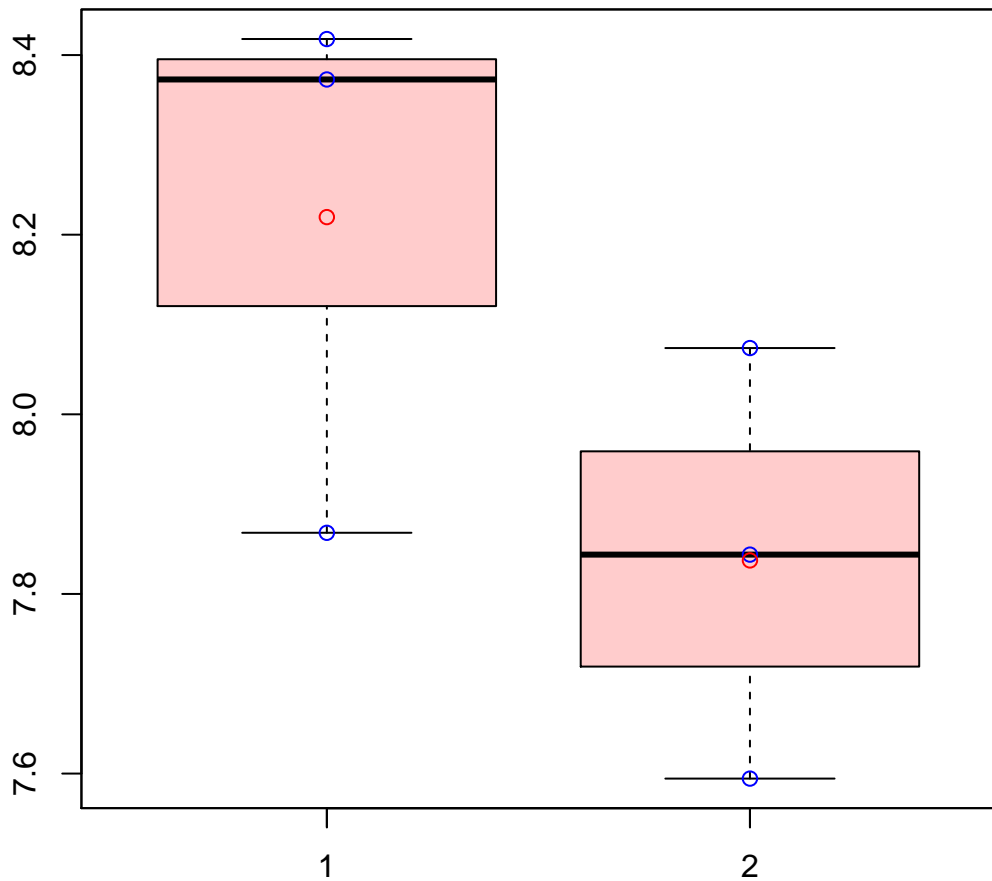

t-Test: p-value = 0.17

# CL1Contig228|CL1Contig228

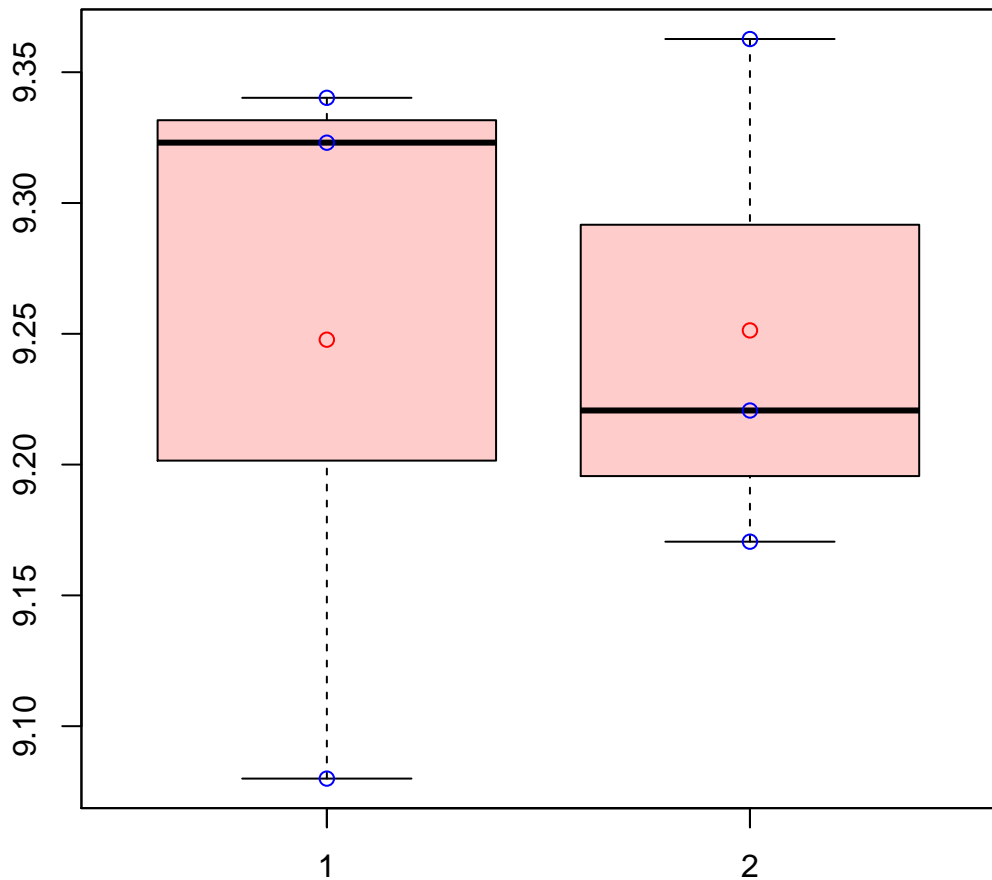

t-Test: p-value = 0.97

# CL1Contig2293|CL1Contig2293

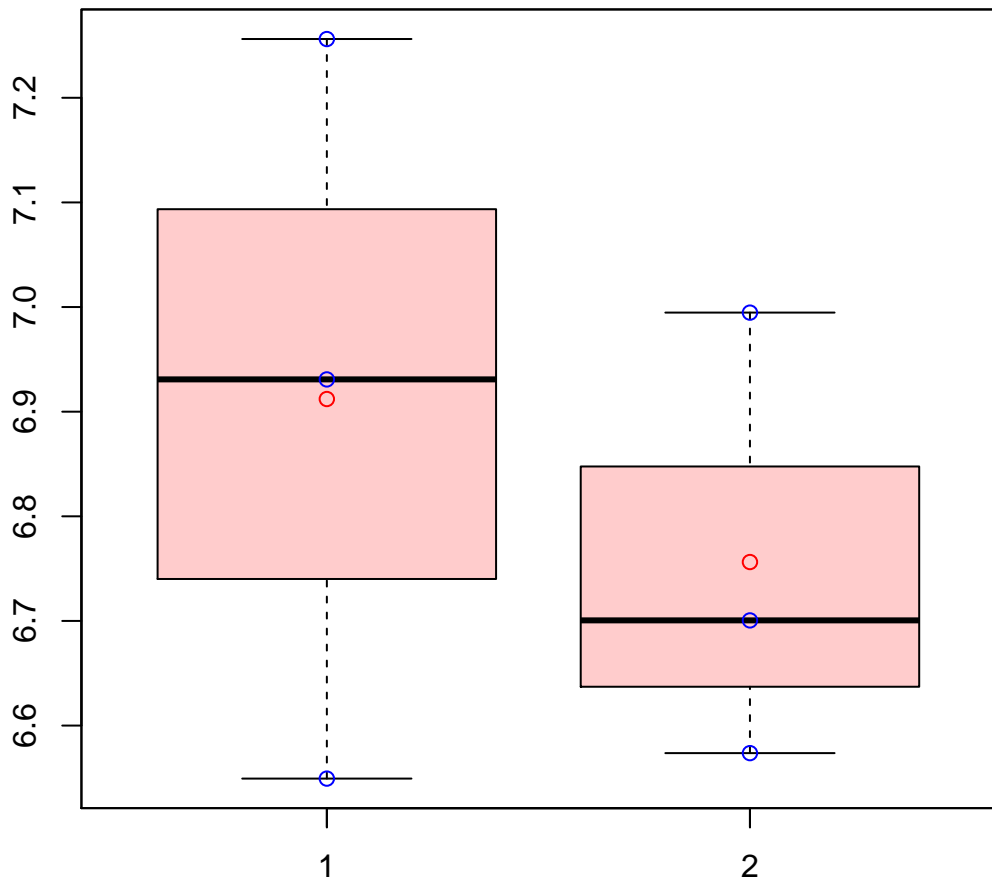

t-Test: p-value = 0.56

# CL1Contig2294|CL1Contig2294

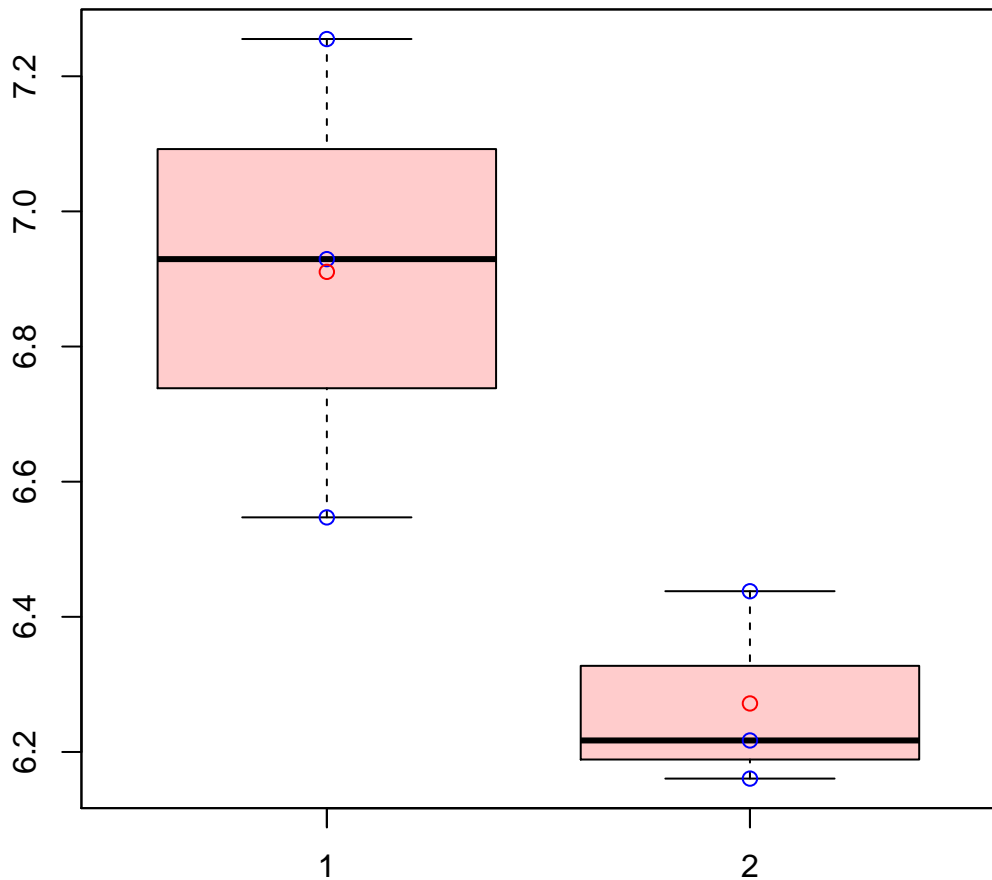

t-Test: p-value = 0.07



# CL1Contig229|CL1Contig229



t-Test: p-value = 0.97

# CL1Contig2302|CL1Contig2302

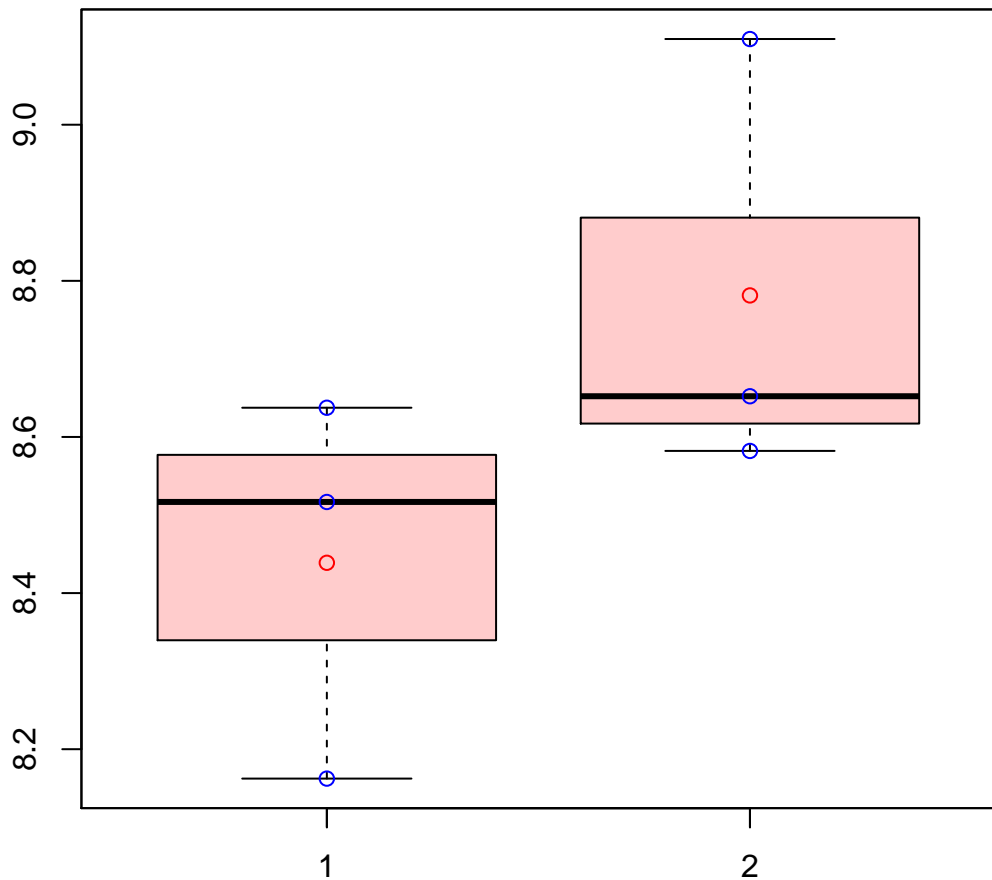

t-Test: p-value = 0.19

# CL1Contig2371|CL1Contig2371

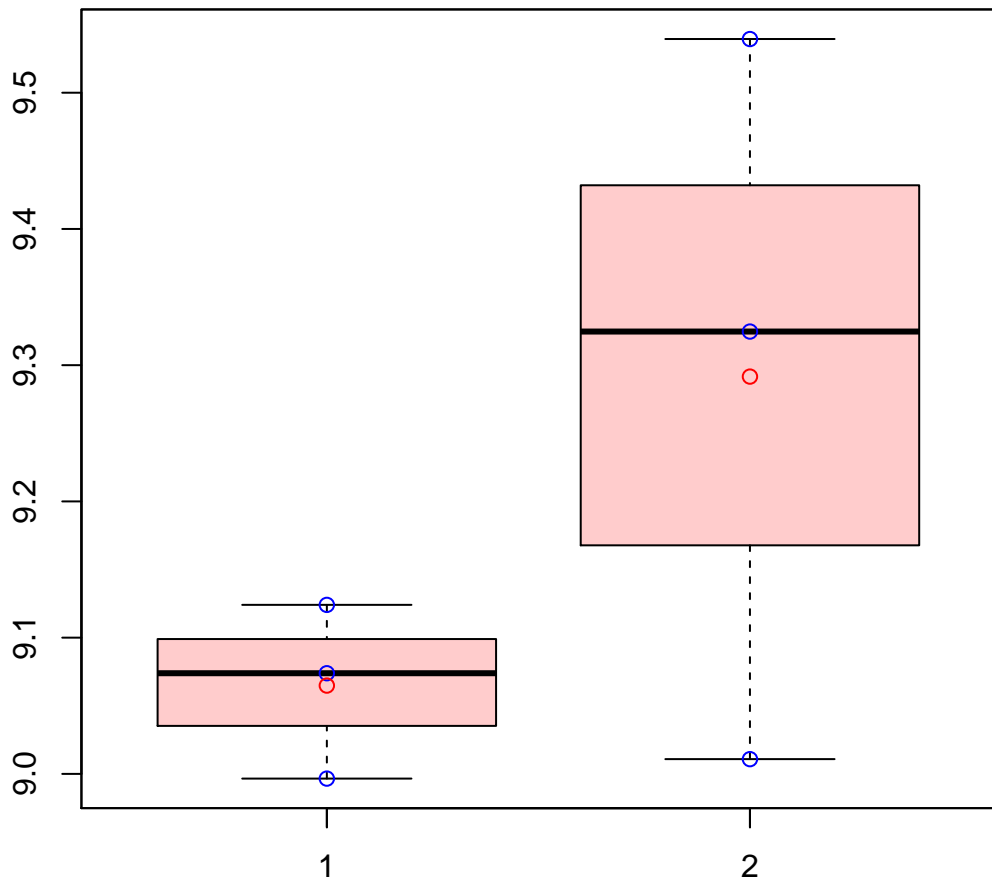

t-Test: p-value = 0.28

# CL1Contig2390|CL1Contig2390

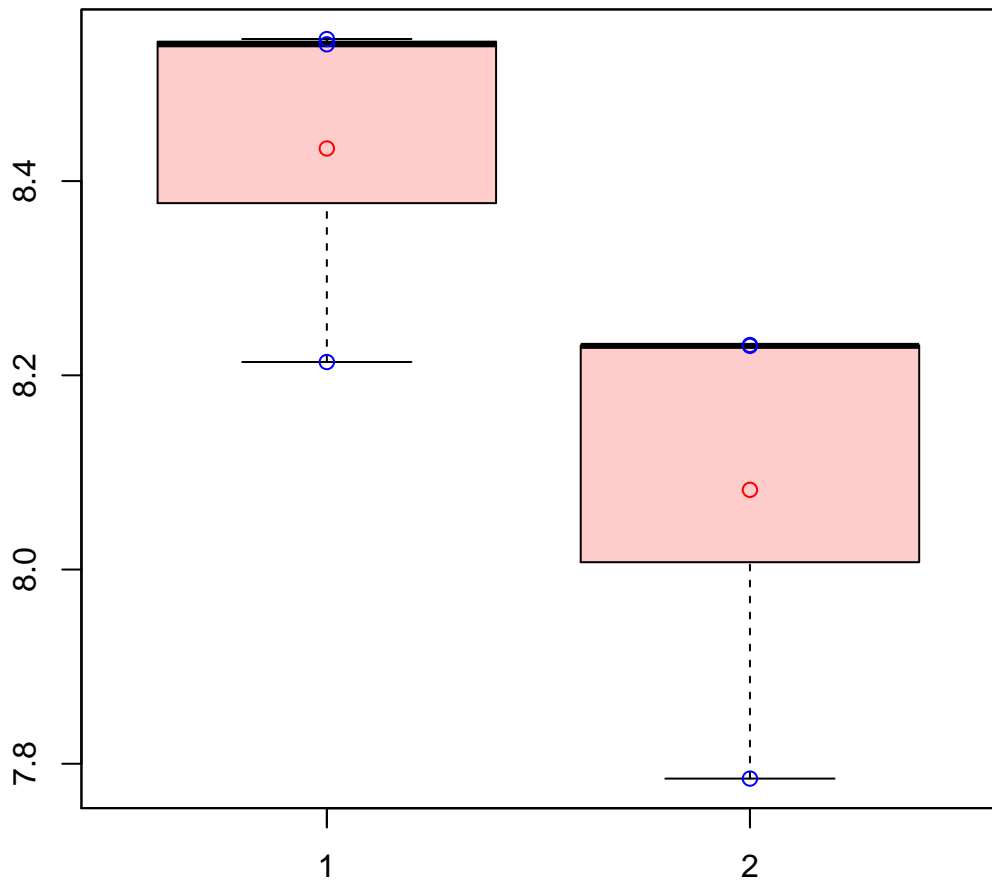

t-Test: p-value = 0.14

# CL1Contig2407|CL1Contig2407

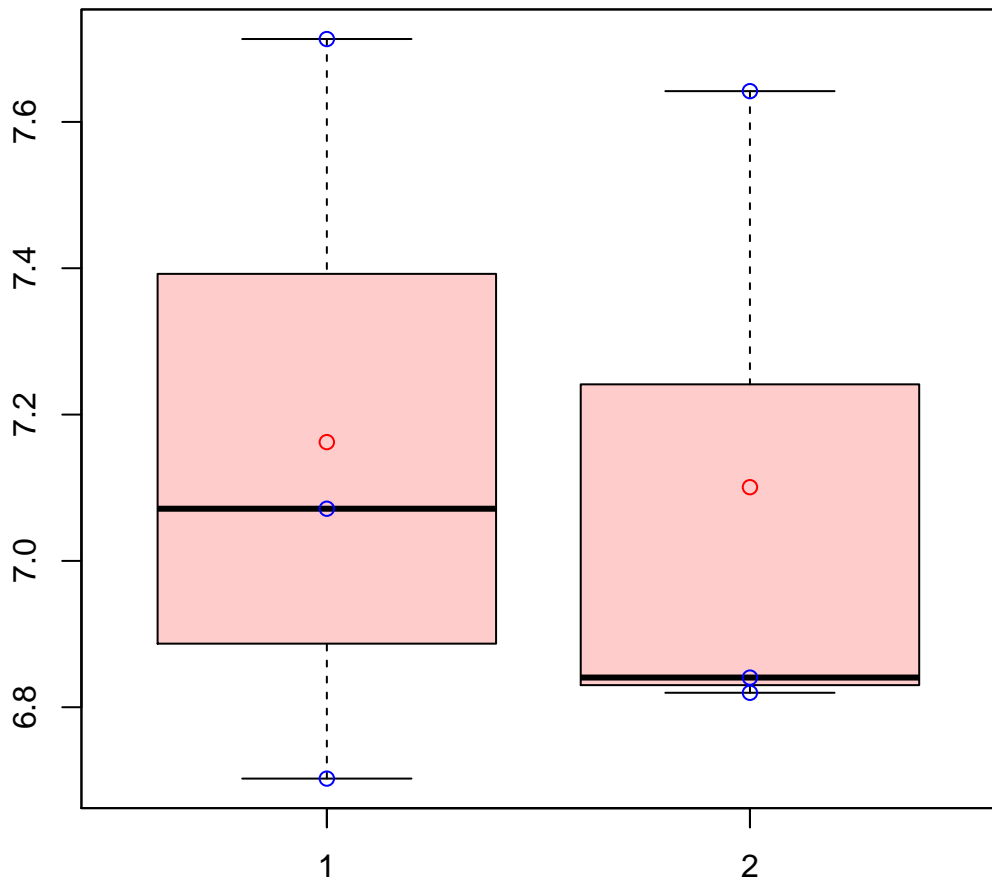

t-Test: p-value = 0.89

# CL1Contig240|CL1Contig240

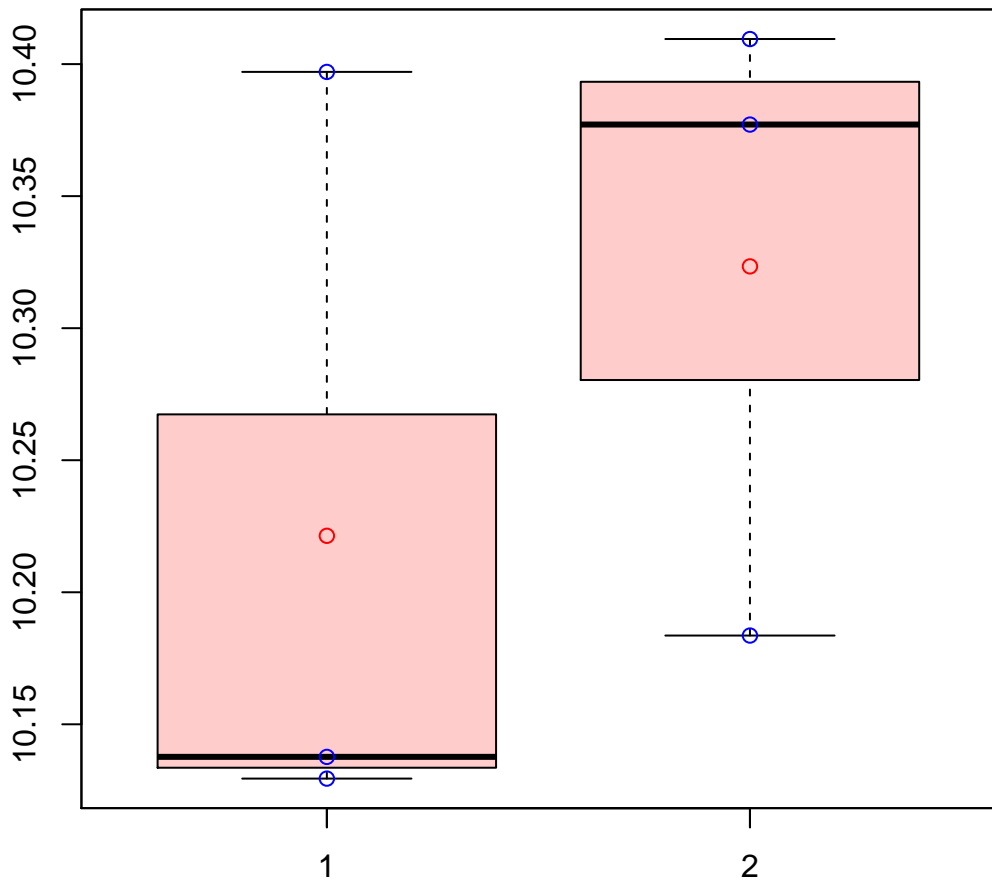

t-Test: p-value = 0.42

# CL1Contig242|CL1Contig242

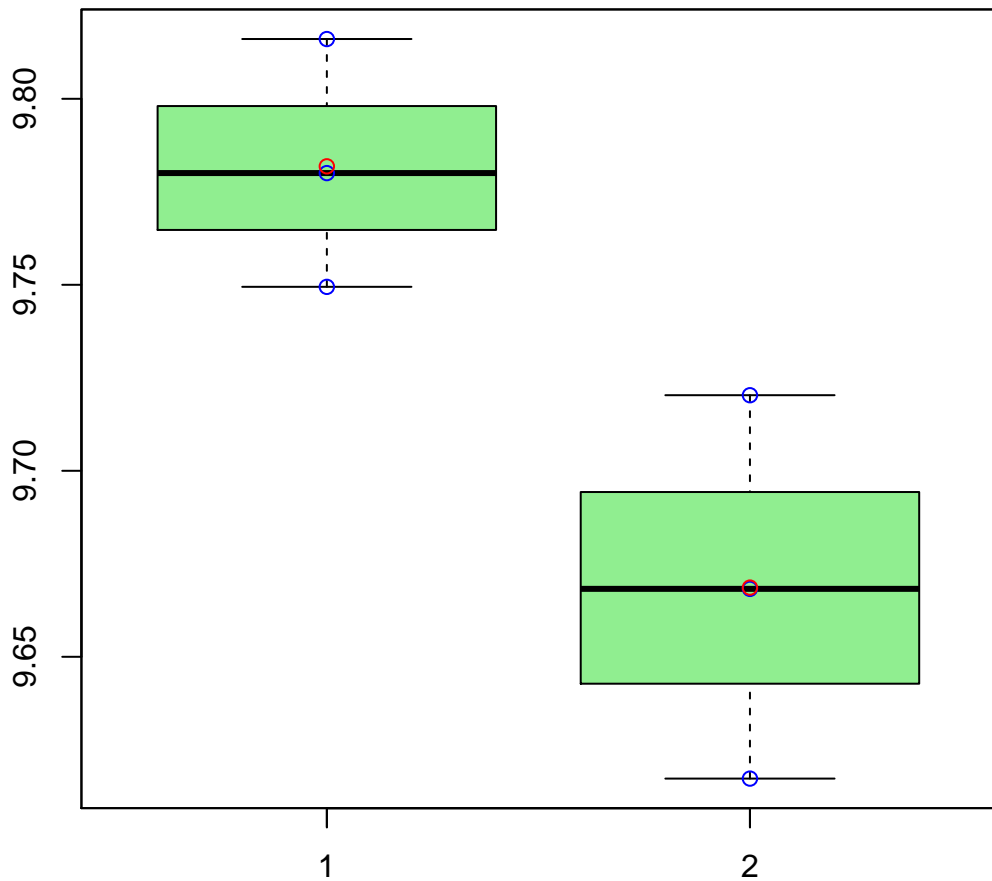

t-Test: p-value = 0.04

# CL1Contig2436|CL1Contig2436

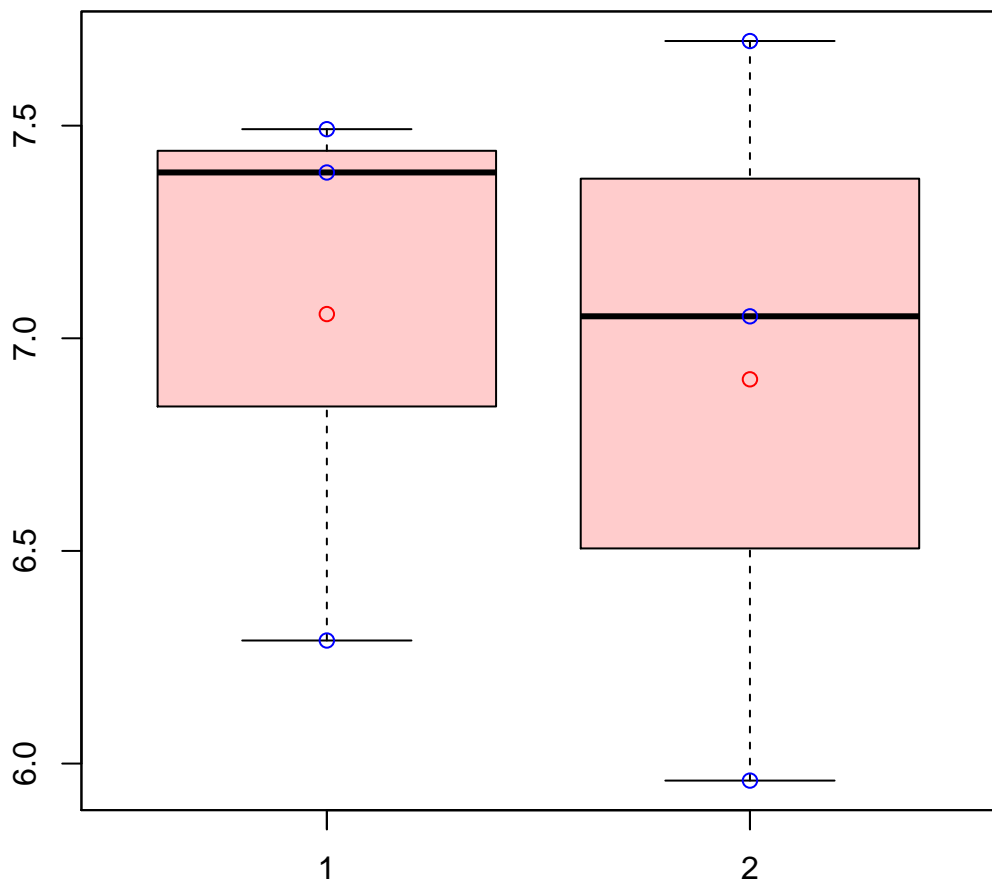

t-Test: p-value = 0.82



# CL1Contig2451|CL1Contig2451

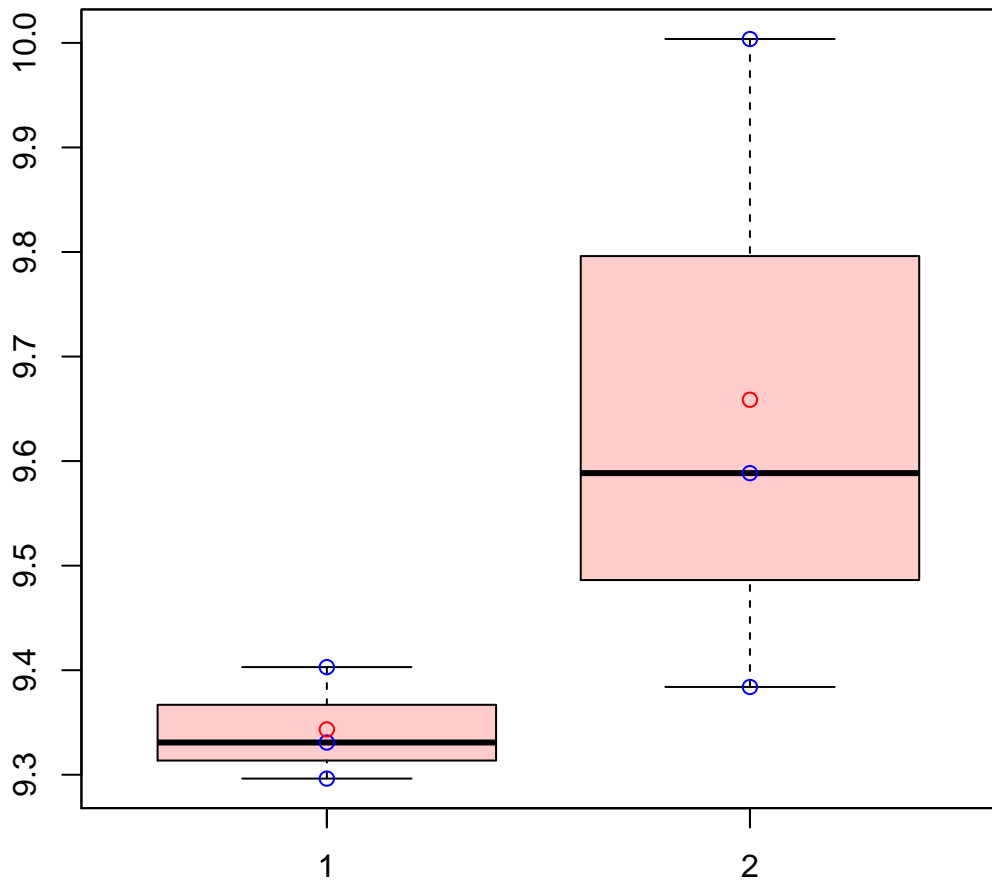

t-Test: p-value = 0.22

# CL1Contig2493|CL1Contig2493



t-Test: p-value = 0.71

# CL1Contig249|CL1Contig249

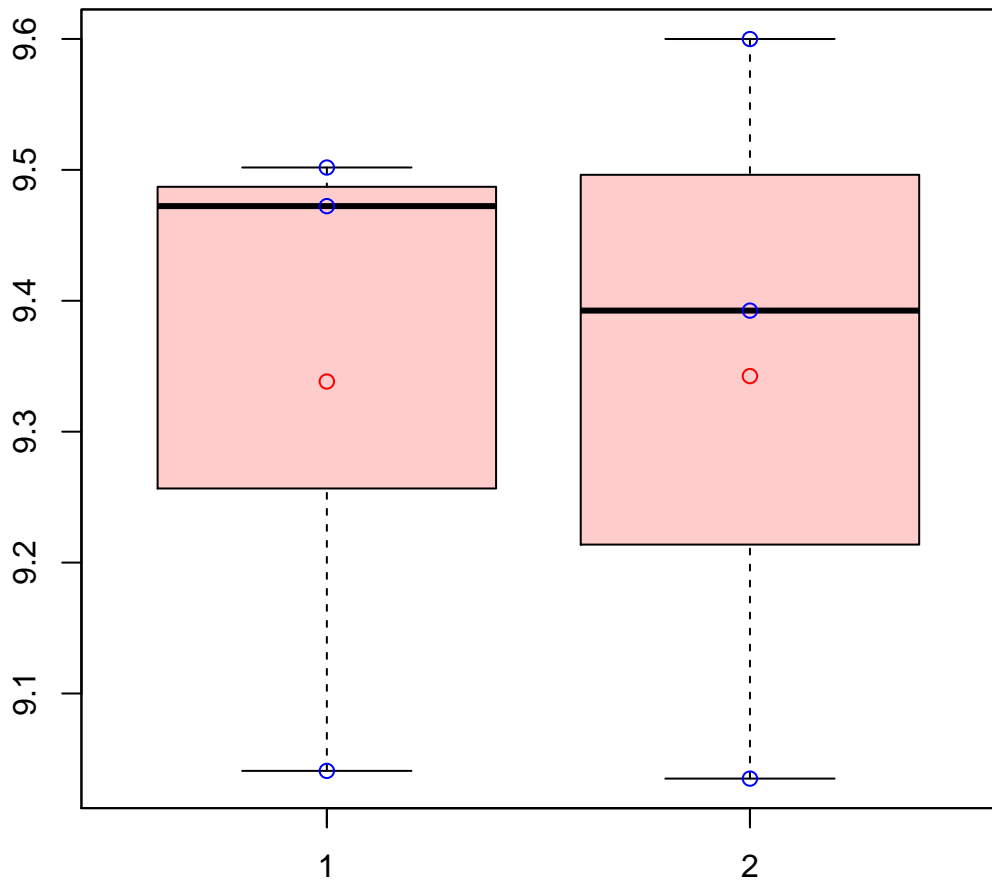

t-Test: p-value = 0.99

# CL1Contig2501|CL1Contig2501

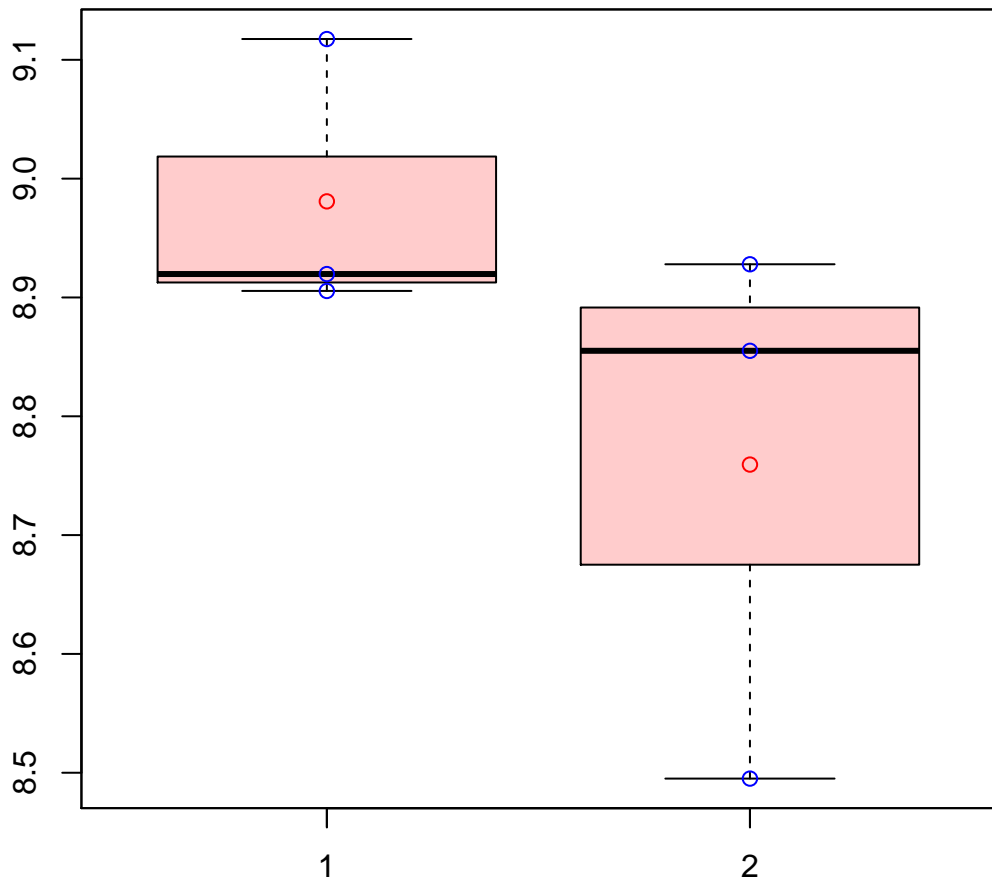

t-Test: p-value = 0.24

# CL1Contig2502|CL1Contig2502

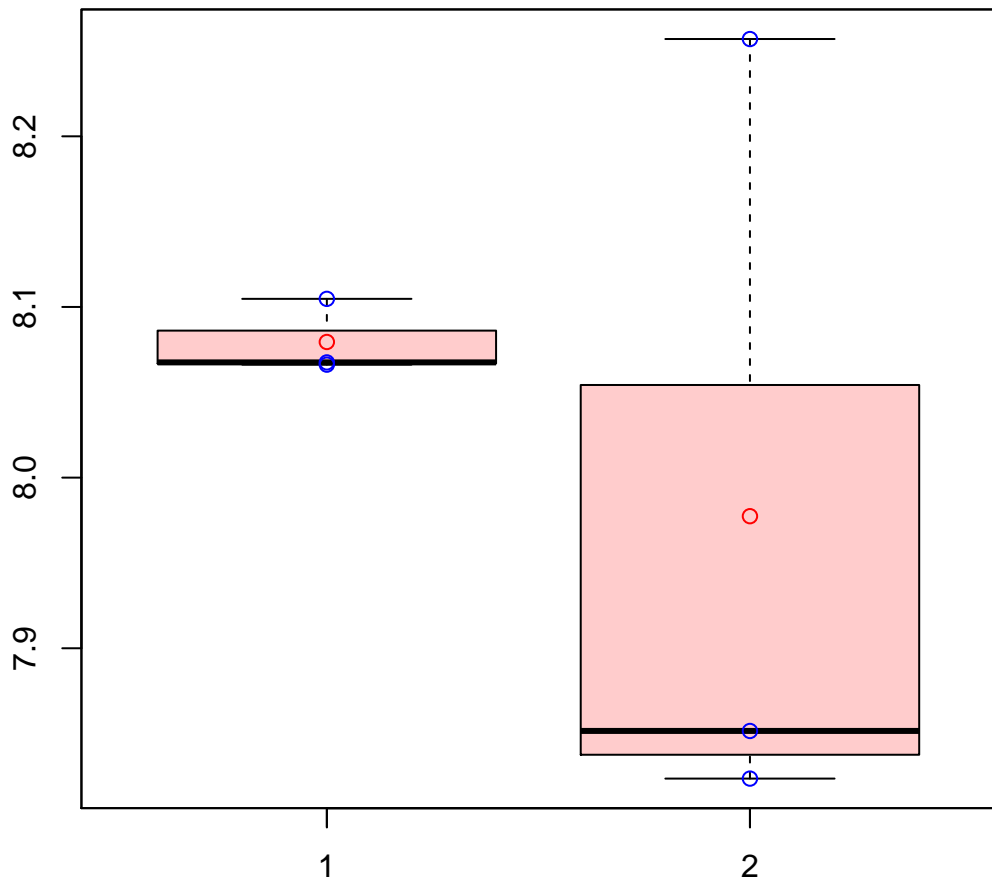

t-Test: p-value = 0.54

# CL1Contig2558|CL1Contig2558

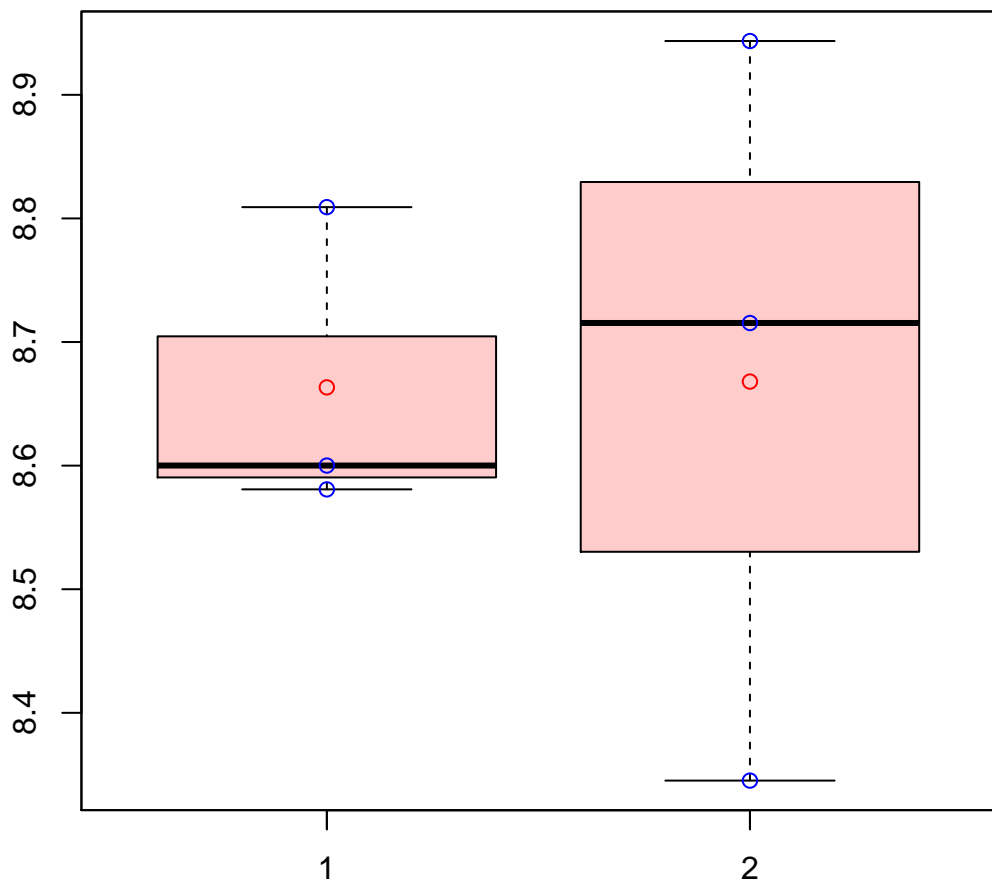

t-Test: p-value = 0.98

# CL1Contig2588|CL1Contig2588

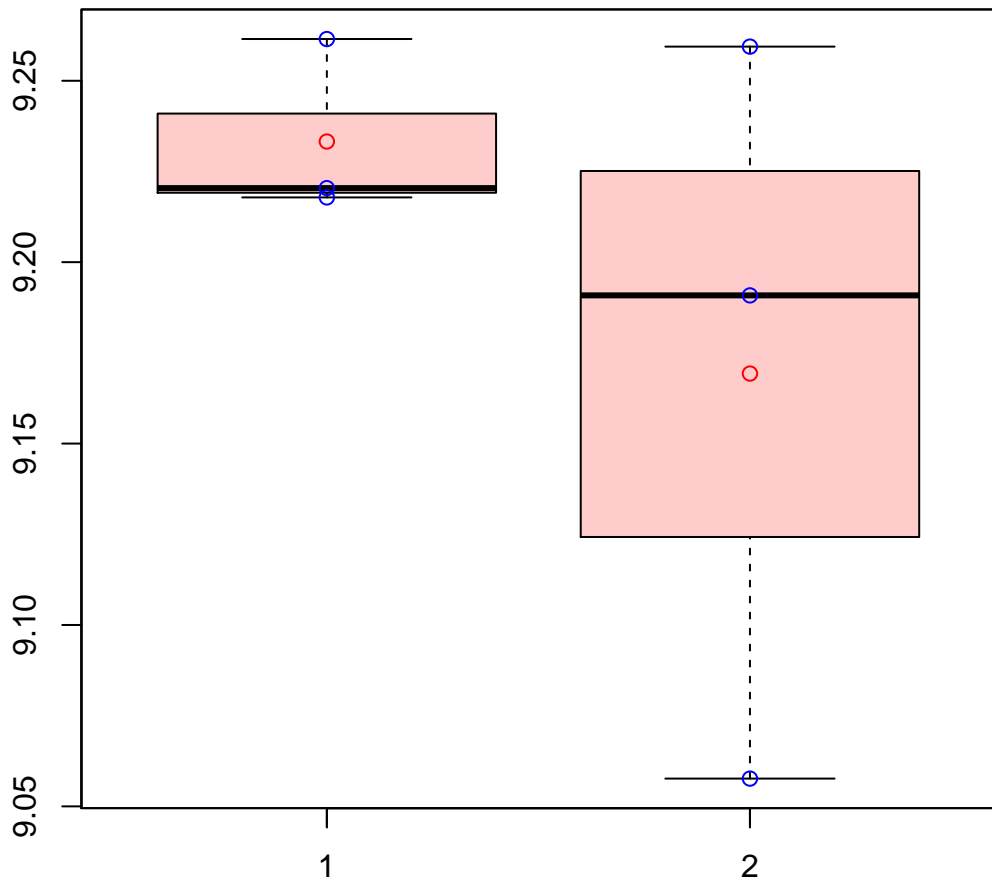

t-Test: p-value = 0.39

# CL1Contig2604|CL1Contig2604

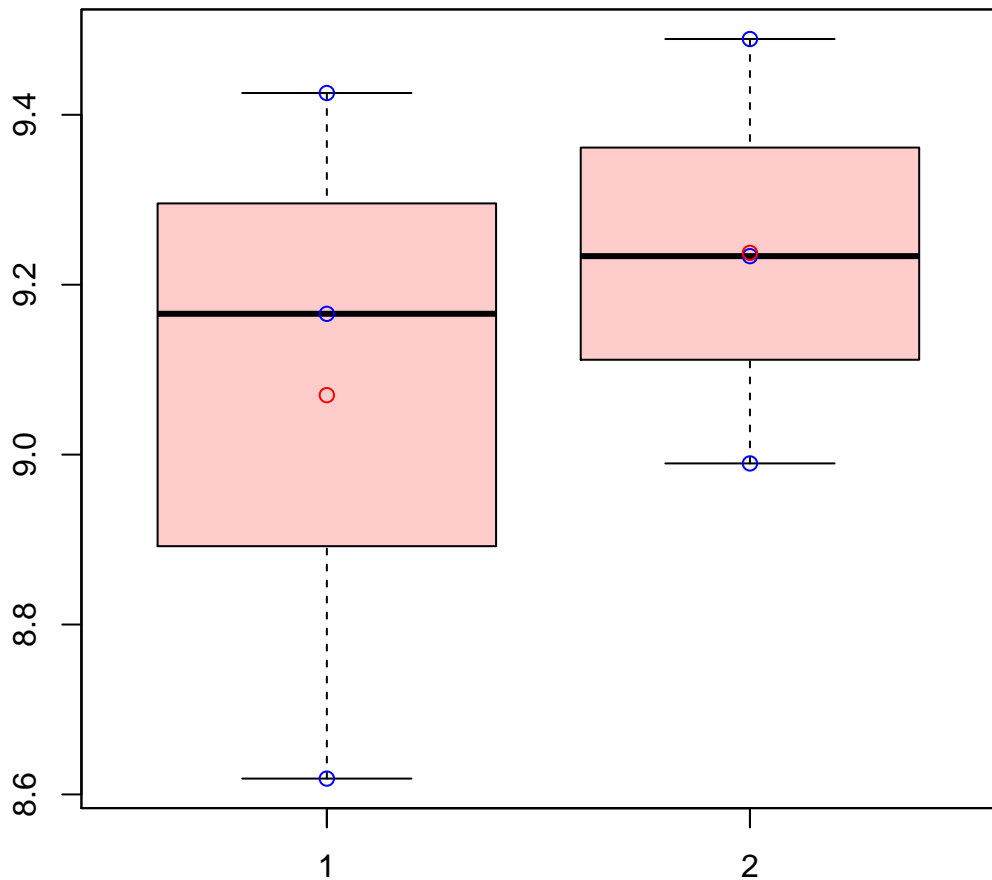

t-Test: p-value = 0.59



# CL1Contig2609|CL1Contig2609

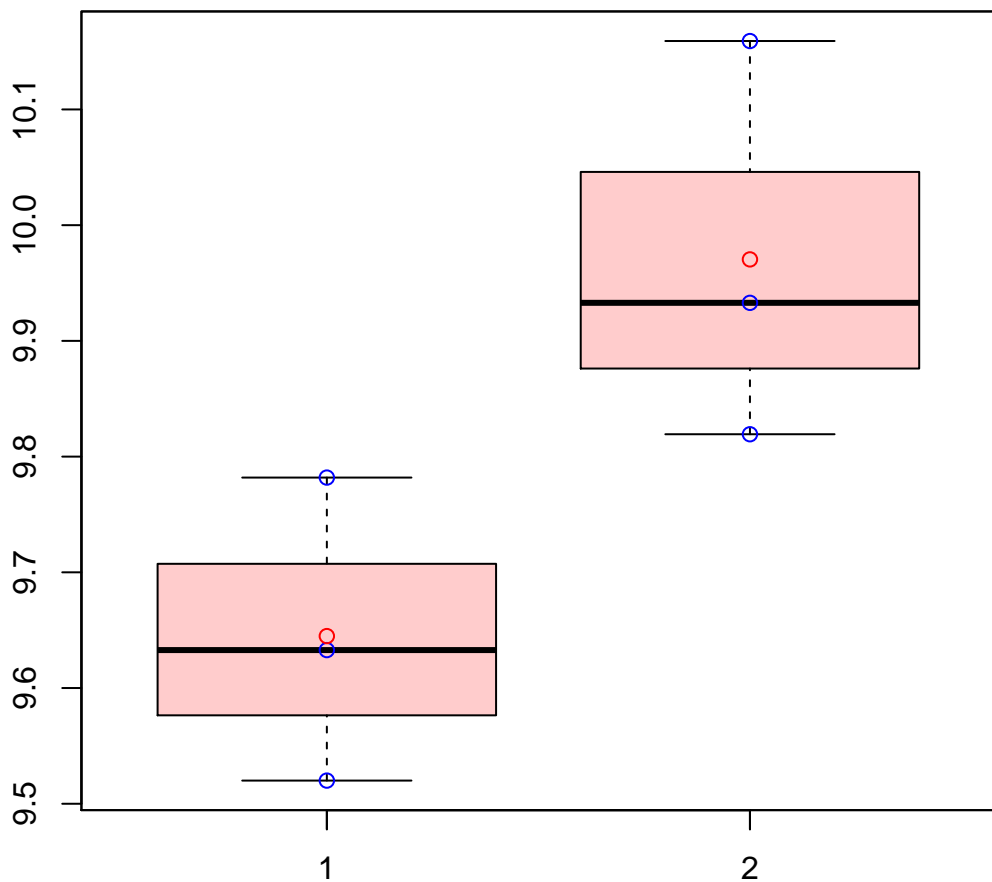

t-Test: p-value = 0.06

# CL1Contig2642|CL1Contig2642

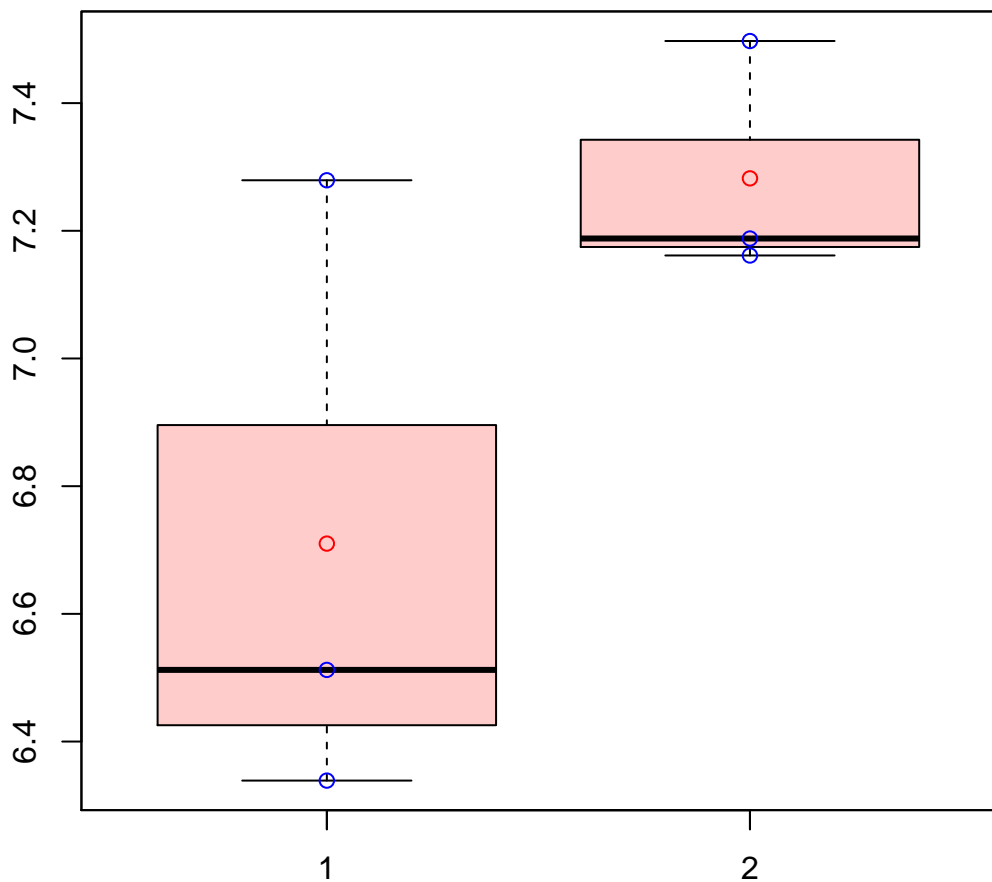

t-Test: p-value = 0.18

# CL1Contig2665|CL1Contig2665

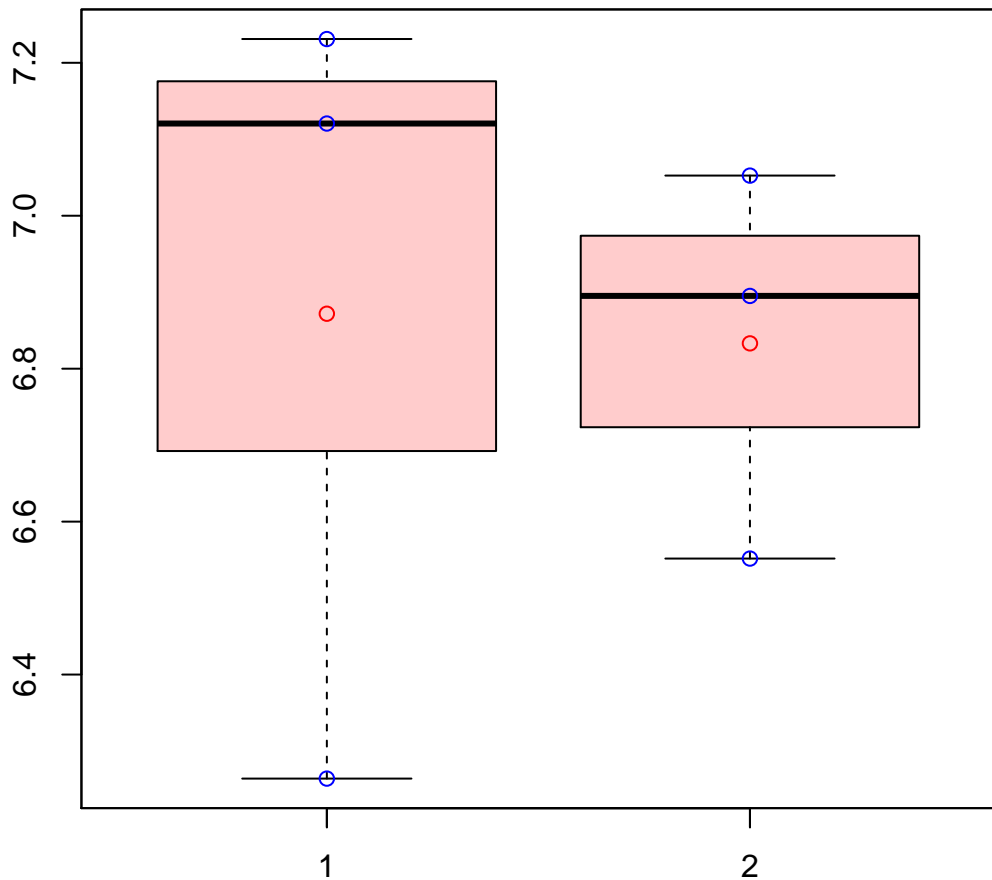

t-Test: p-value = 0.92

# CL1Contig2670|CL1Contig2670

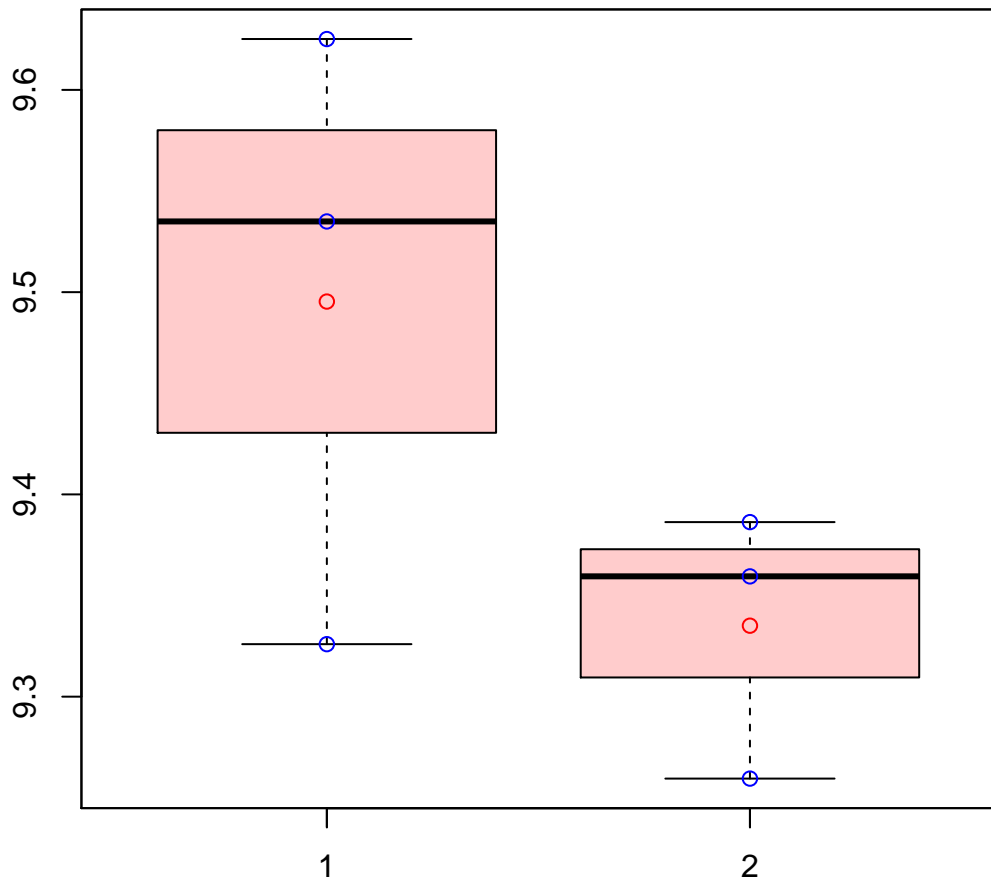

t-Test: p-value = 0.2

# CL1Contig269|CL1Contig269

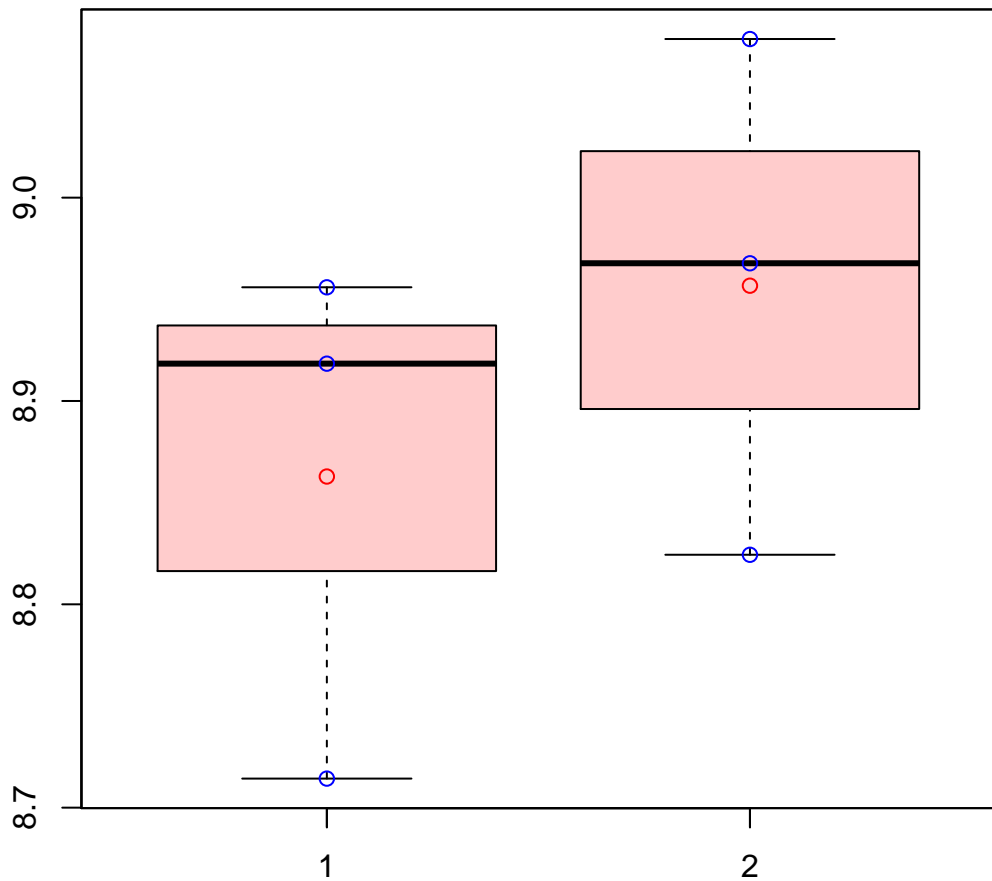

t-Test: p-value = 0.42

# CL1Contig2712|CL1Contig2712

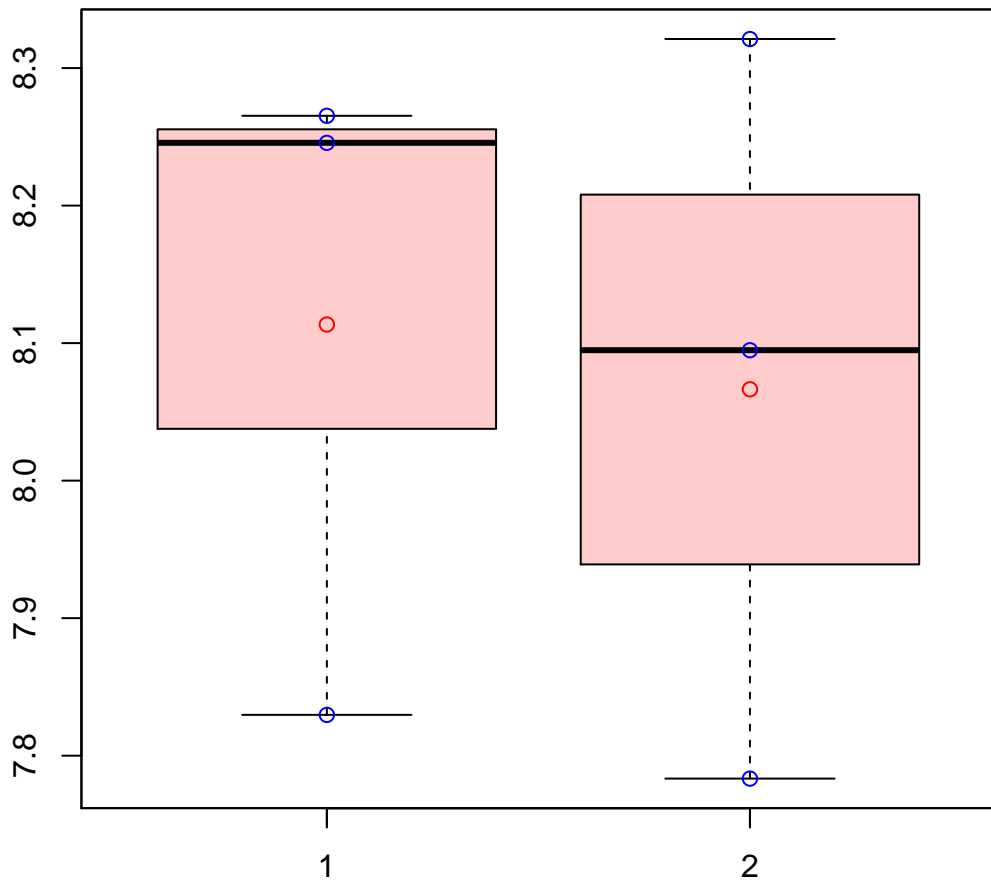

t-Test: p-value = 0.83

# CL1Contig2724|CL1Contig2724

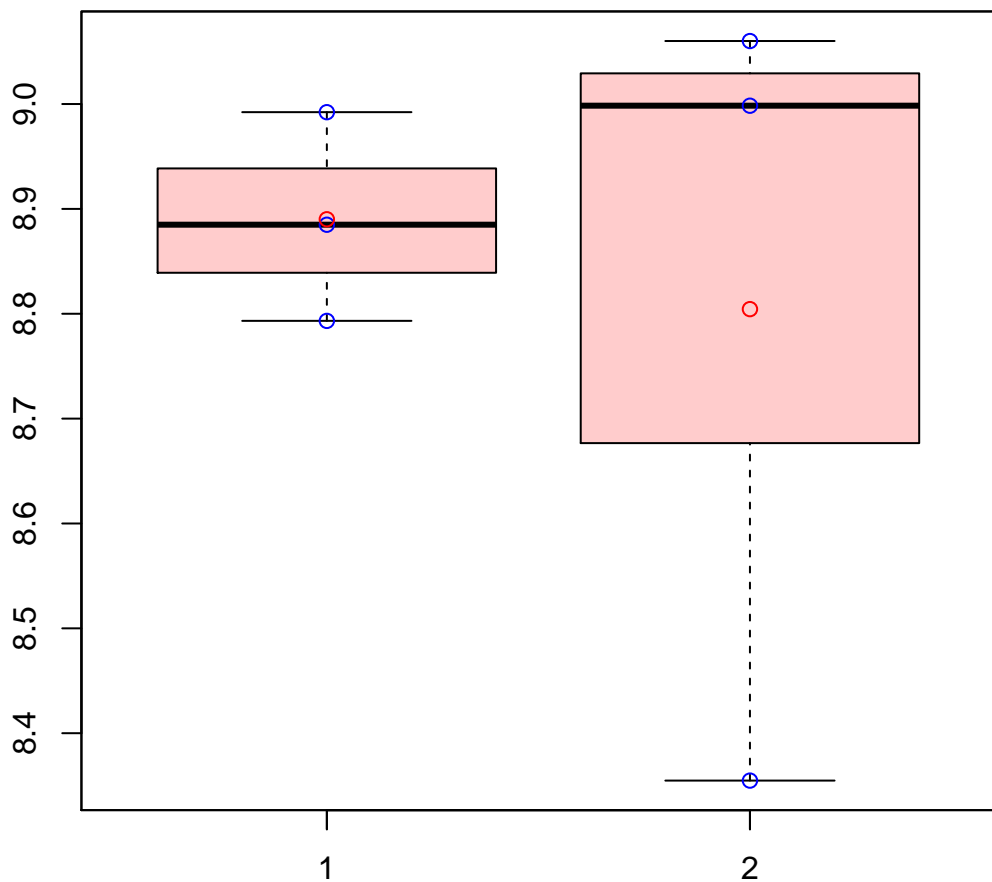

t-Test: p-value = 0.74

# CL1Contig2733|CL1Contig2733

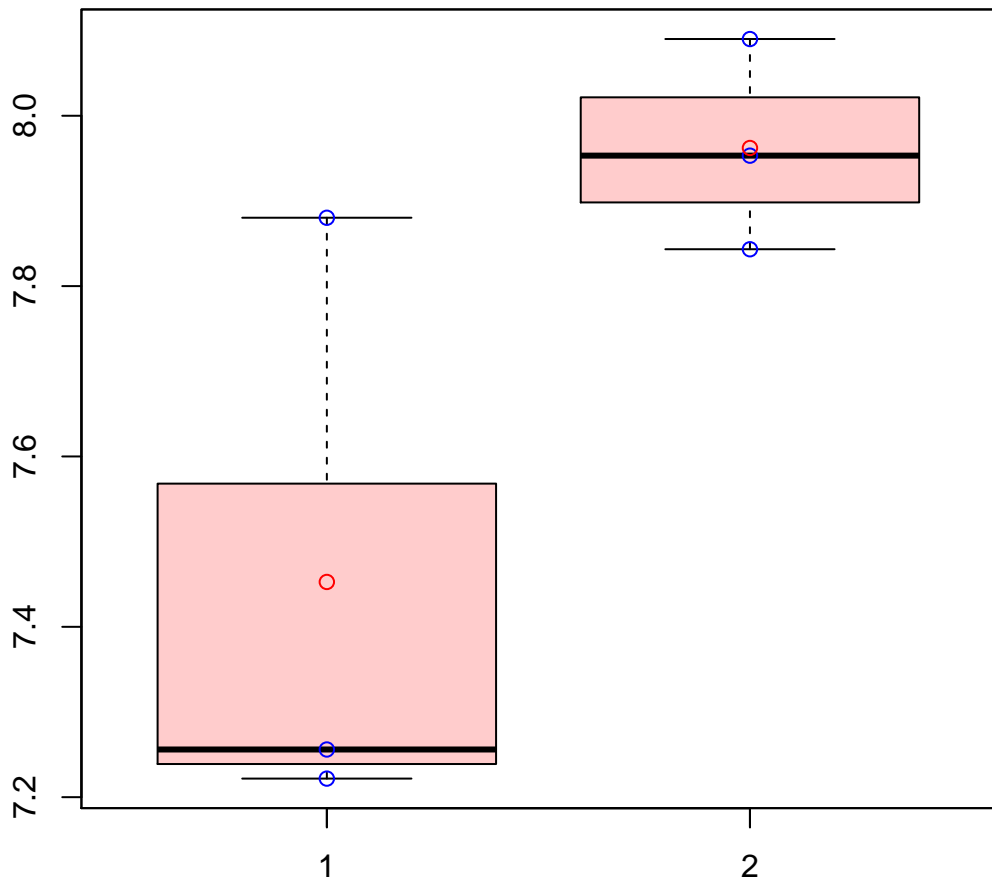

t-Test: p-value = 0.13



# CL1Contig2784|CL1Contig2784

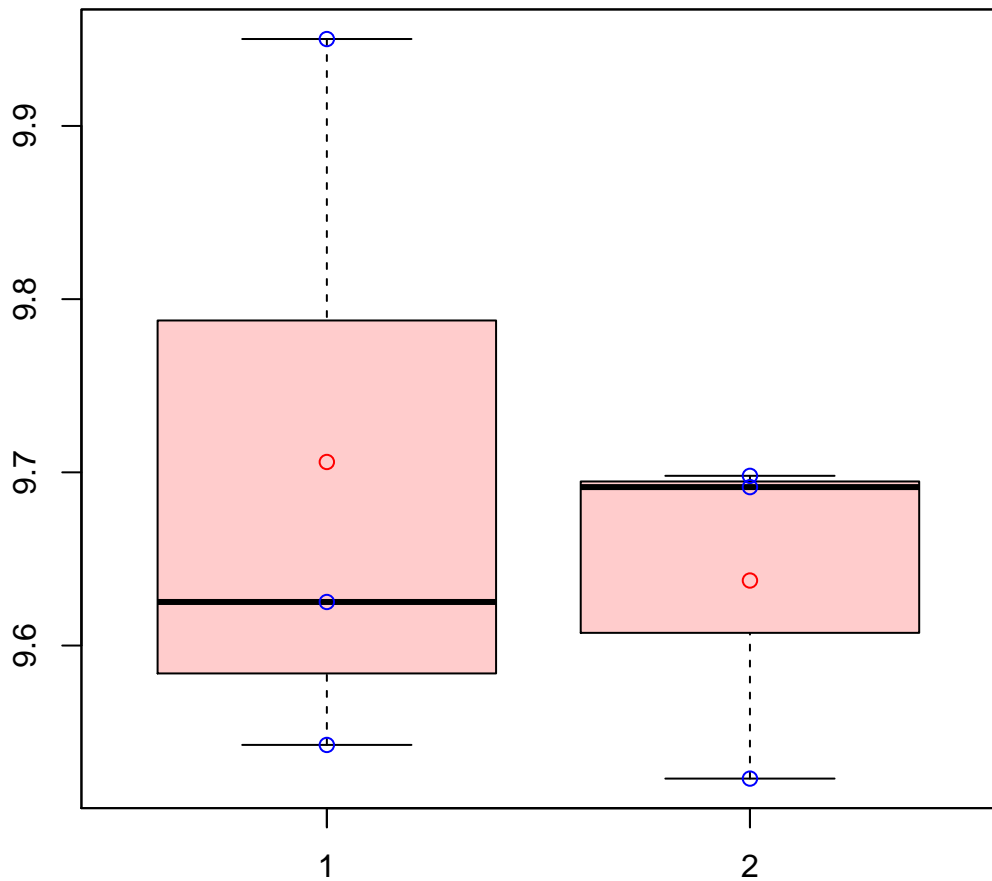

t-Test: p-value = 0.65

# CL1Contig278|CL1Contig278

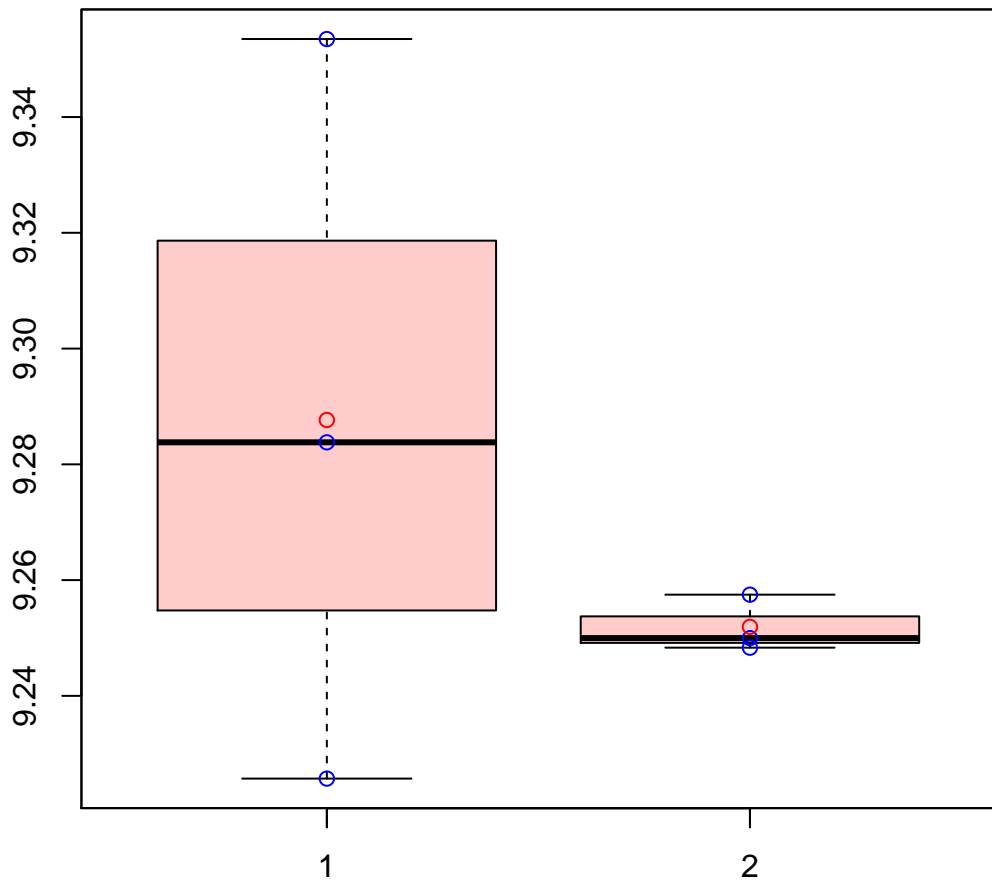

t-Test: p-value = 0.44

# CL1Contig280|CL1Contig280

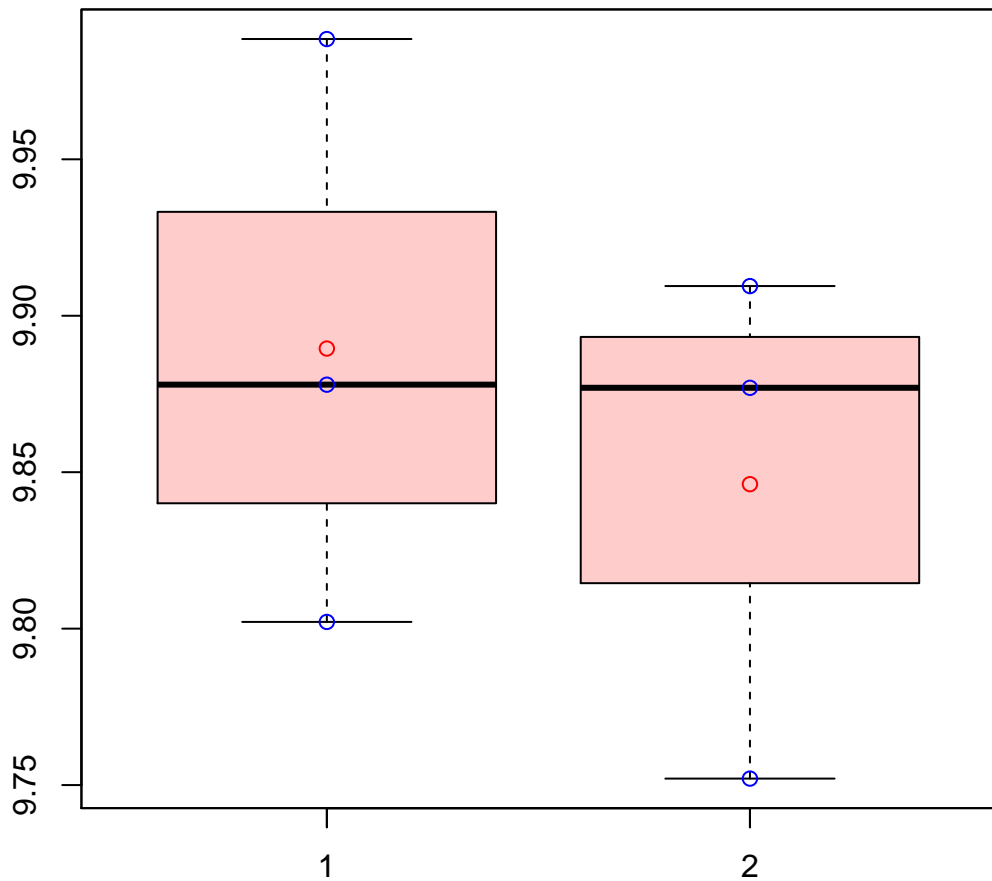

t-Test: p-value = 0.58

# CL1Contig2821|CL1Contig2821

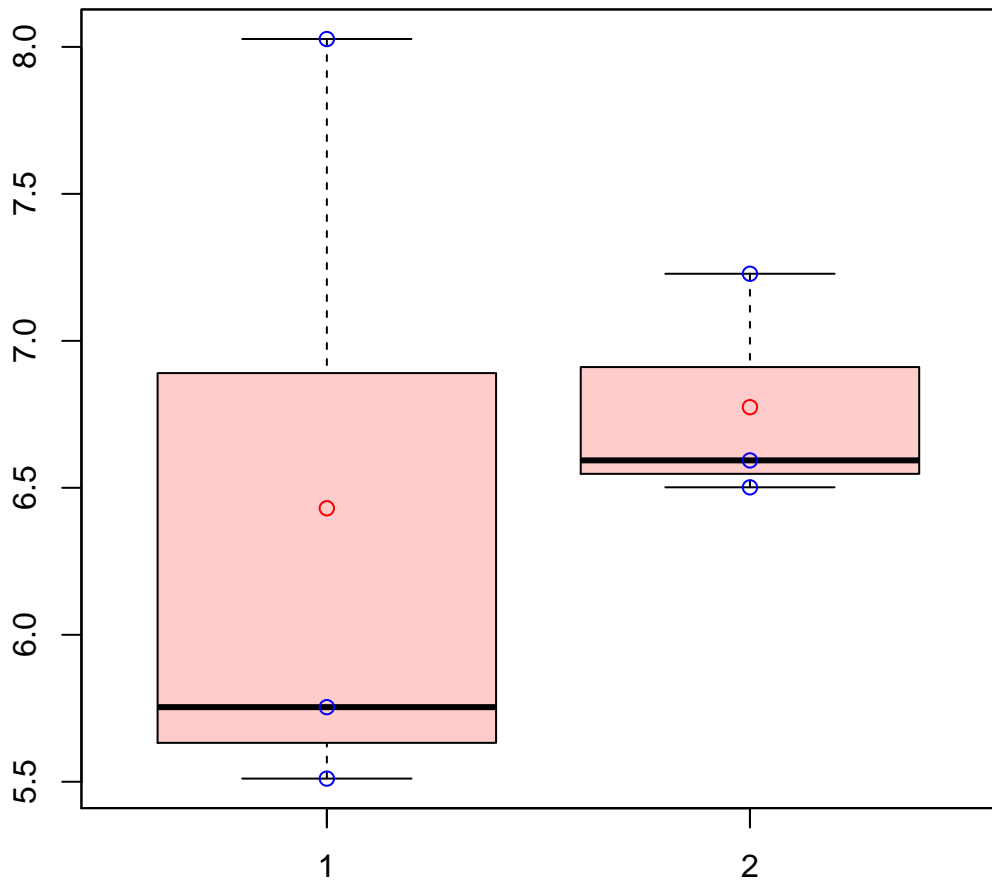

t-Test: p-value = 0.71

# CL1Contig2822|CL1Contig2822

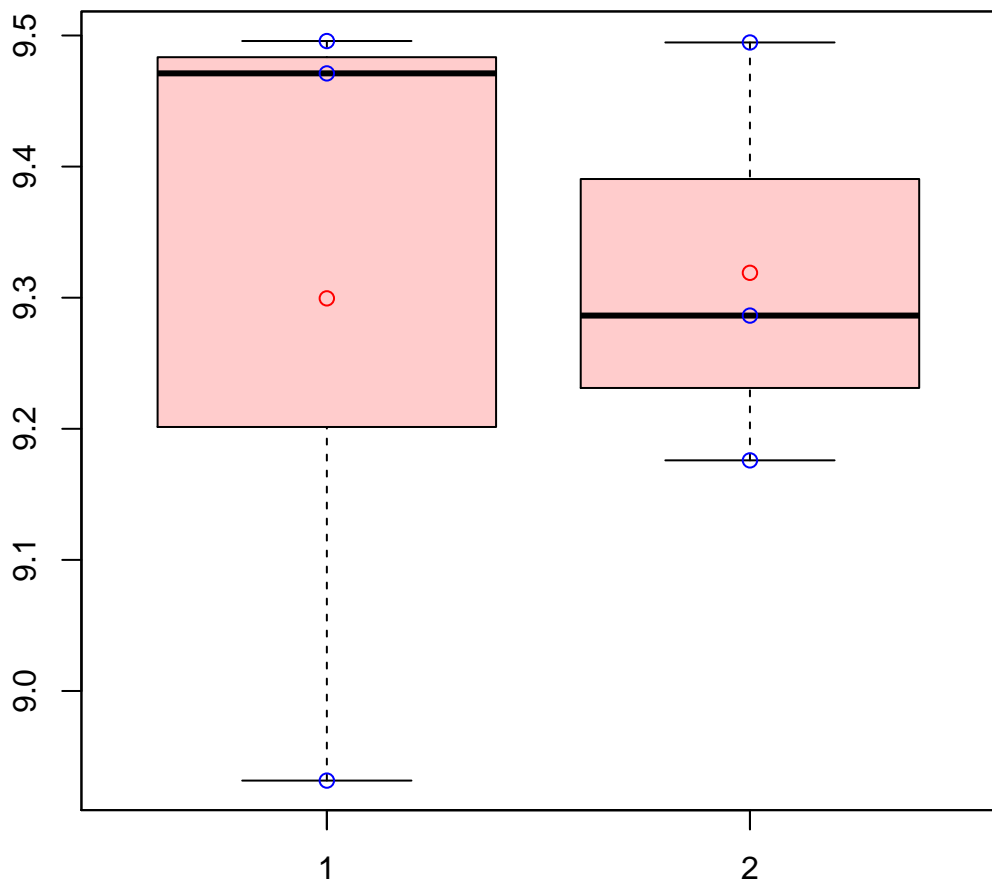

t-Test: p-value = 0.93

# CL1Contig2836|CL1Contig2836

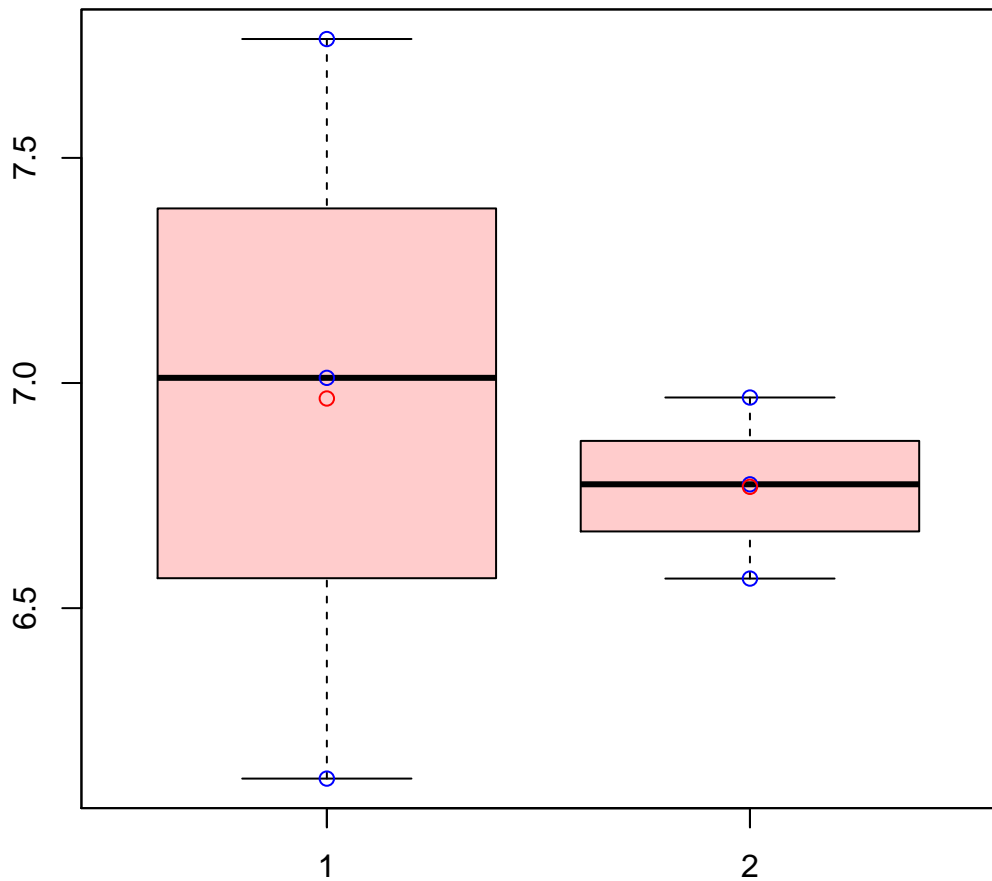

t-Test: p-value = 0.72

# CL1Contig2856|CL1Contig2856

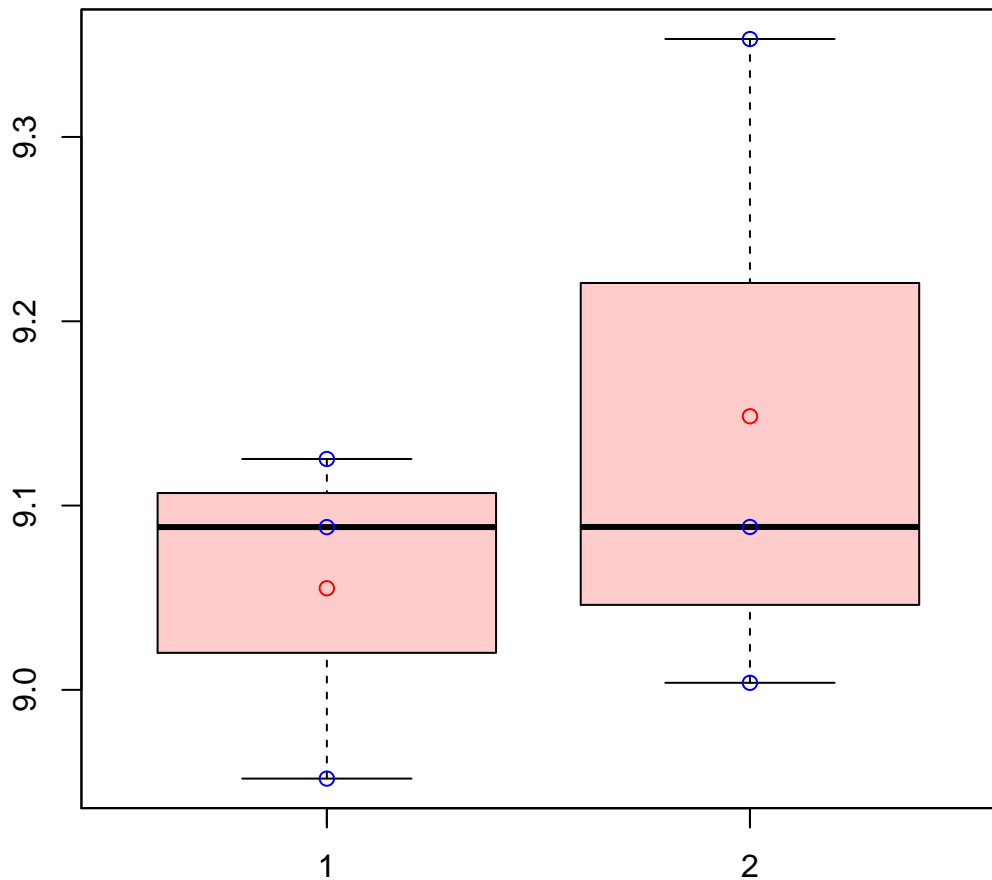

t-Test: p-value = 0.49

# CL1Contig2889|CL1Contig2889

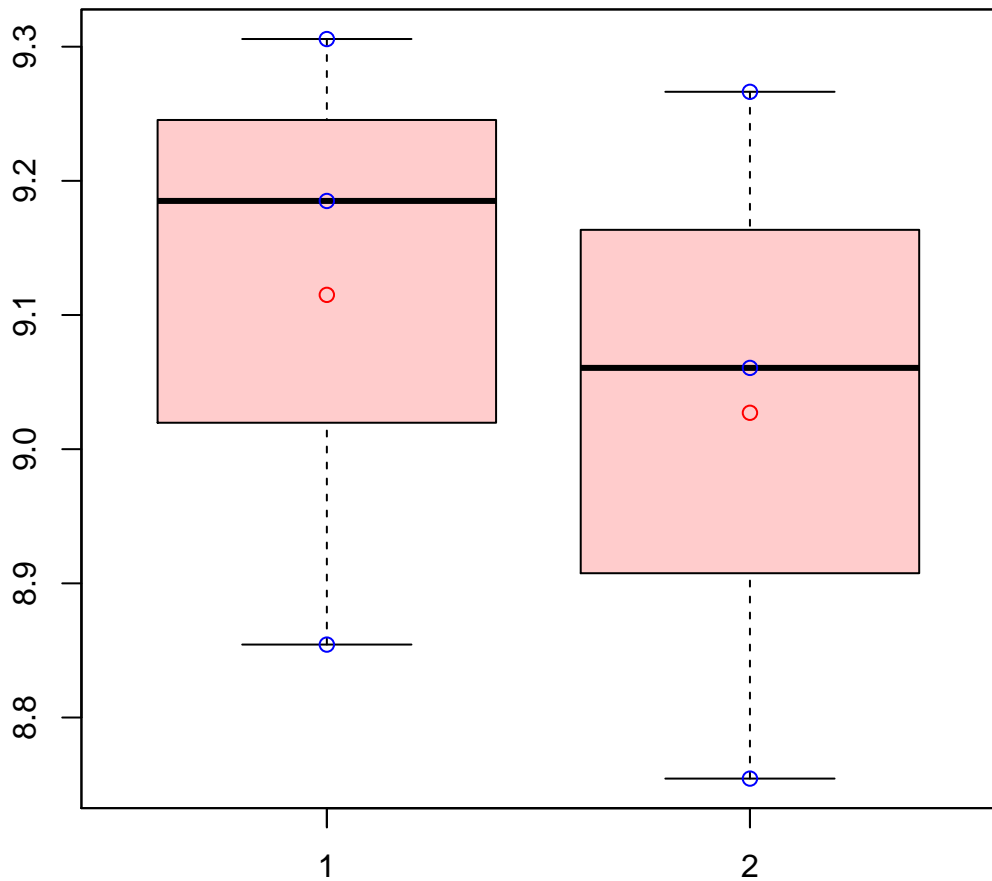

t-Test: p-value = 0.68



# CL1Contig2919|CL1Contig2919

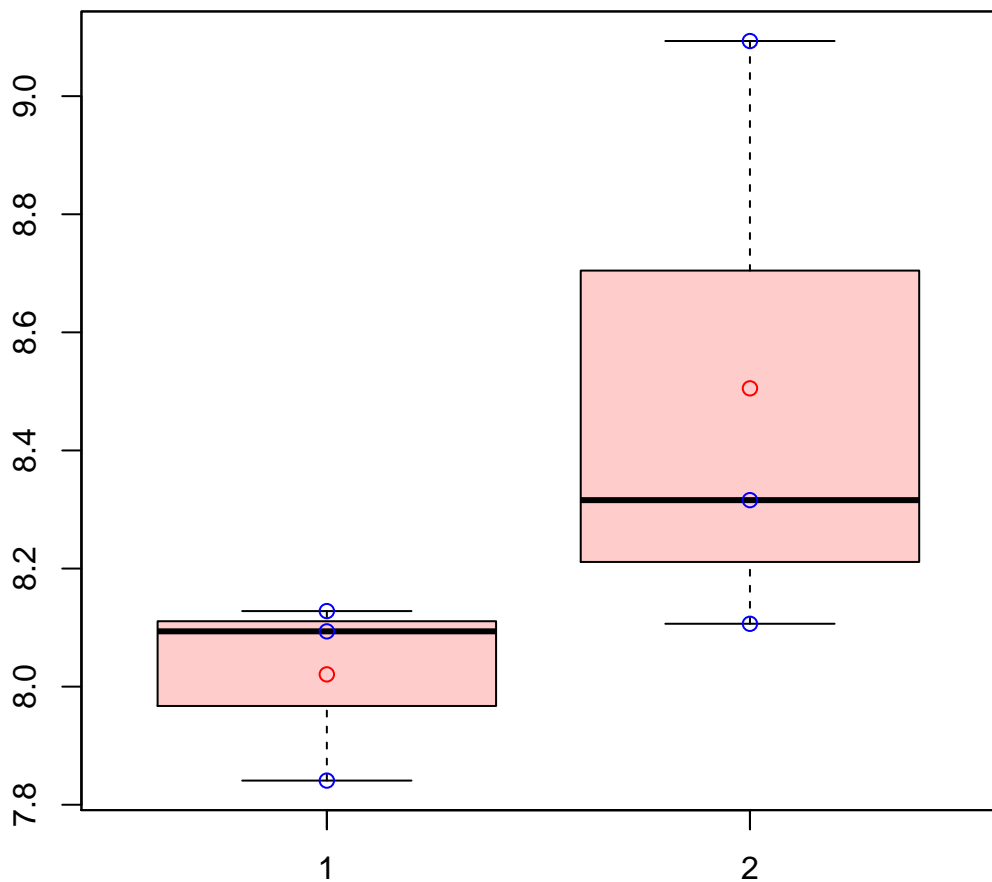

t-Test: p-value = 0.24

# CL1Contig293|CL1Contig293

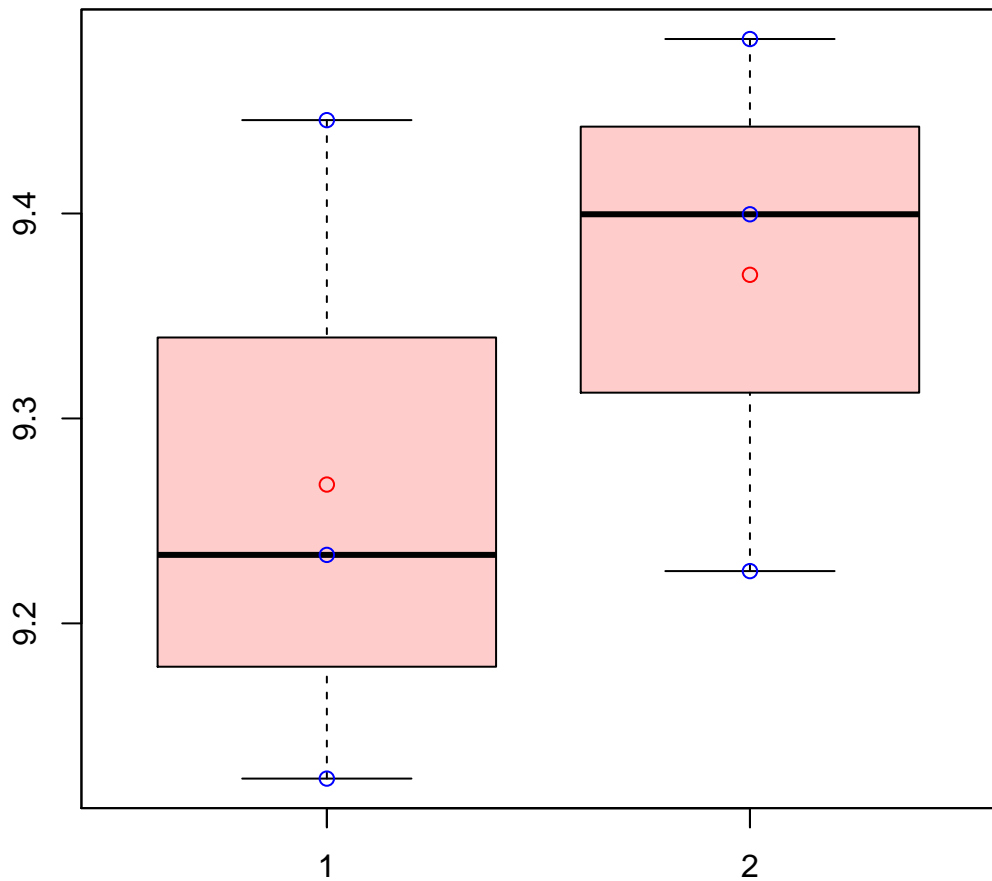

t-Test: p-value = 0.45

# CL1Contig294|CL1Contig294

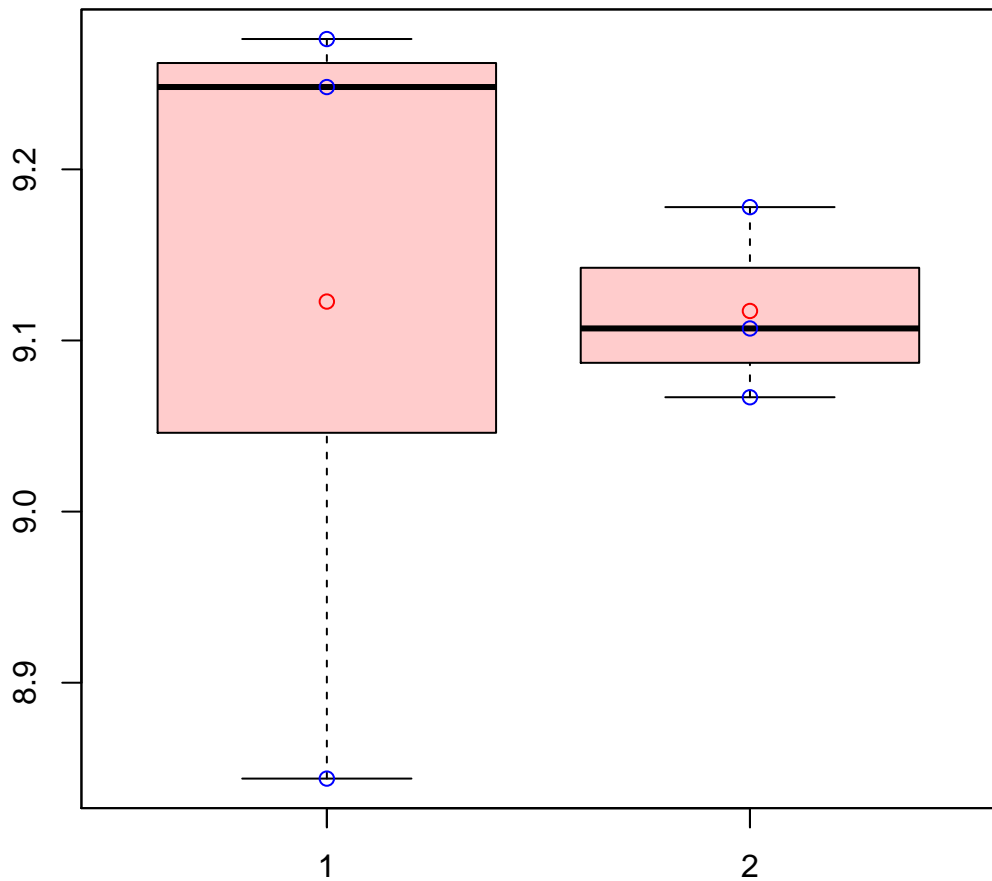

t-Test: p-value = 0.97

# CL1Contig2953|CL1Contig2953

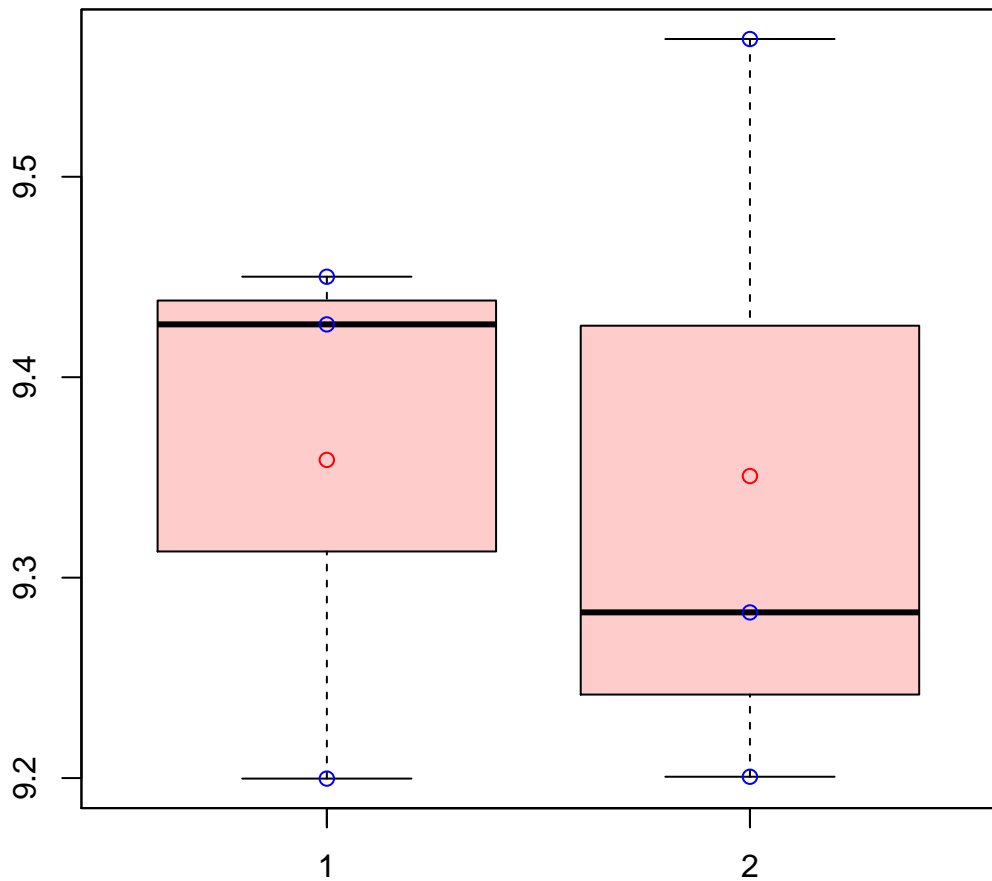

t-Test: p-value = 0.96

# CL1Contig2967|CL1Contig2967

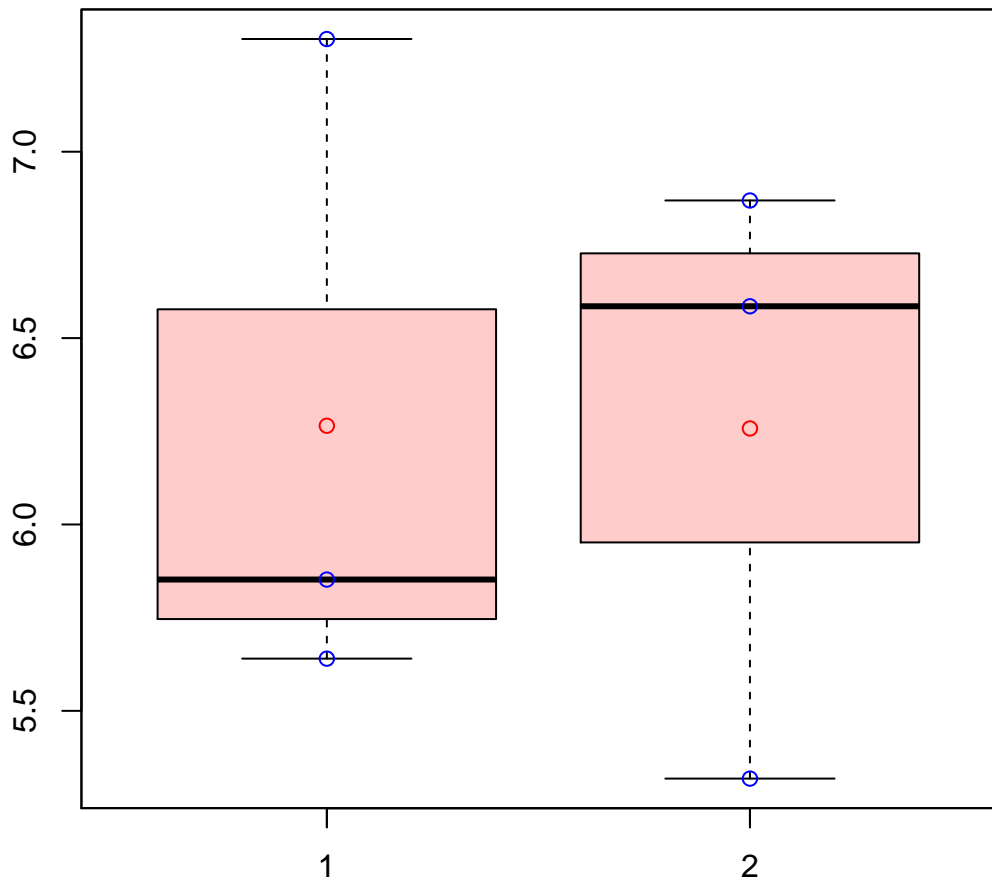

t-Test: p-value = 0.99

# CL1Contig2975|CL1Contig2975

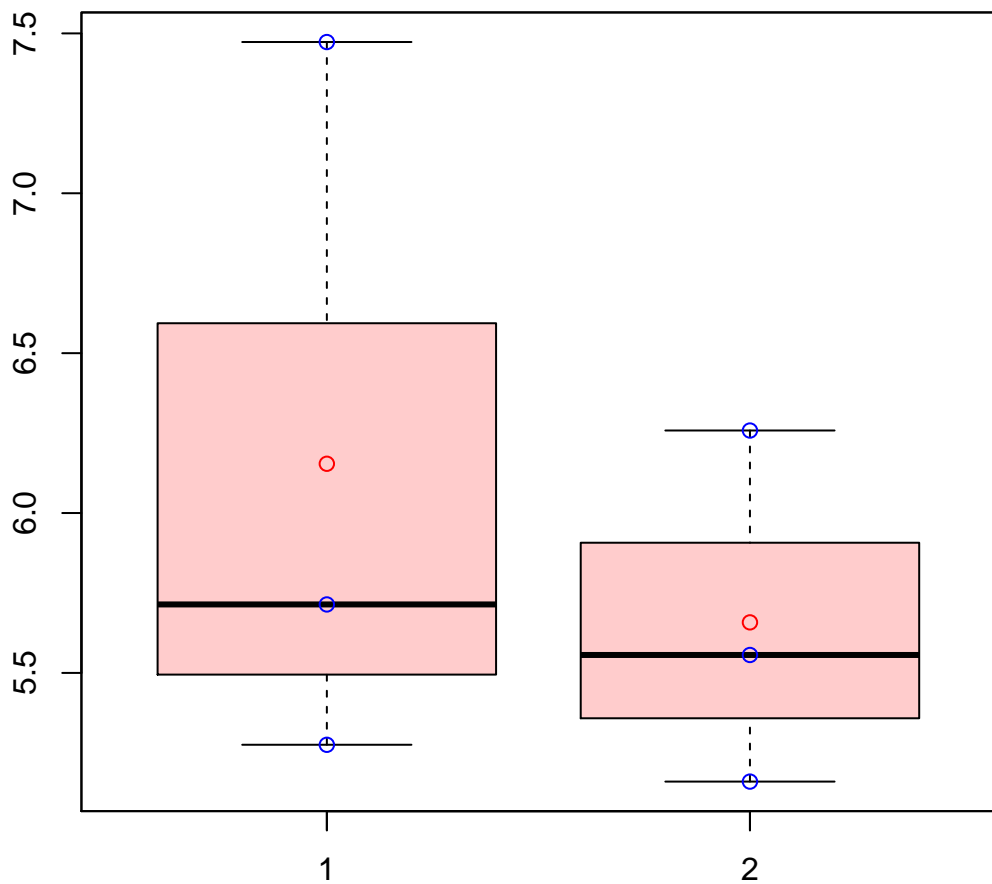

t-Test: p-value = 0.55

# CL1Contig2998|CL1Contig2998

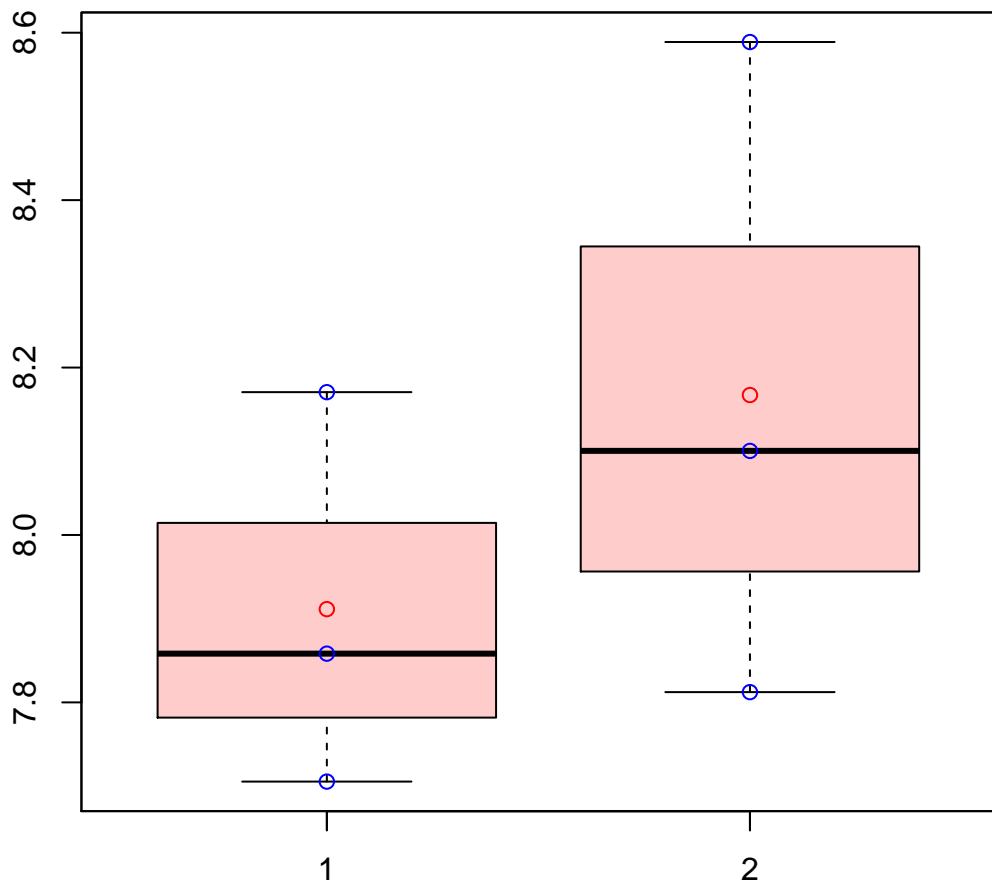

t-Test: p-value = 0.4

# CL1Contig2999|CL1Contig2999

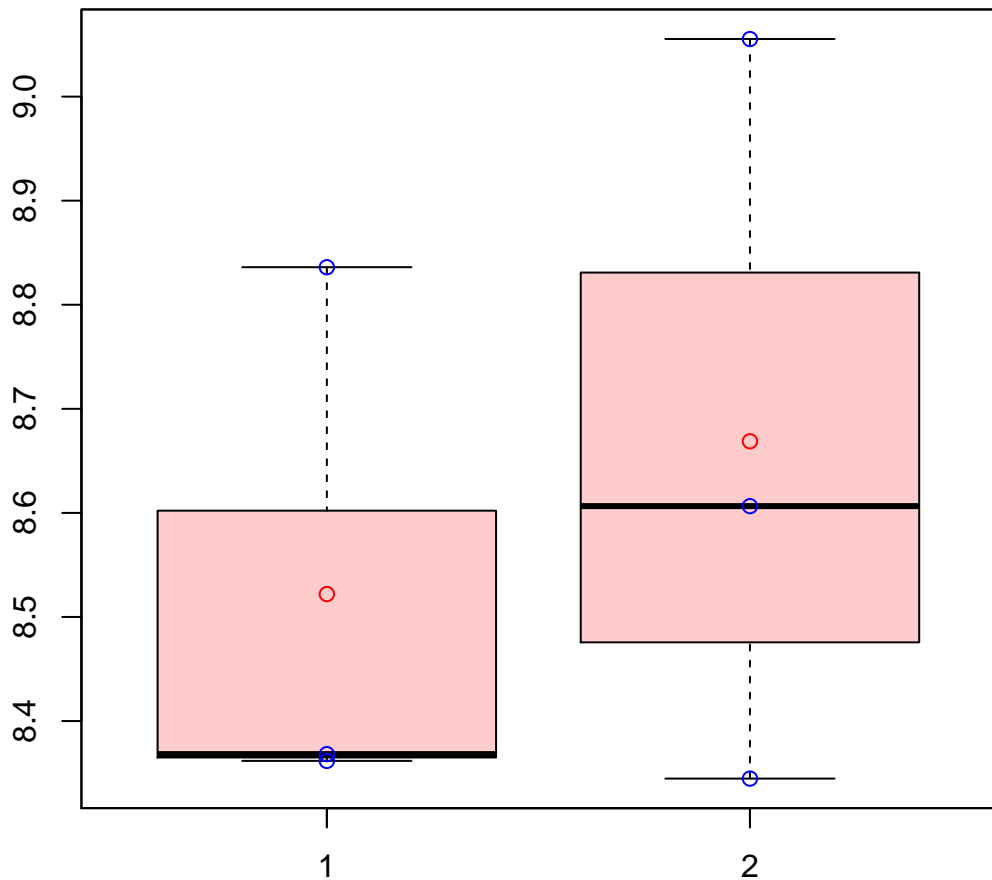

t-Test: p-value = 0.6



# CL1Contig3008|CL1Contig3008

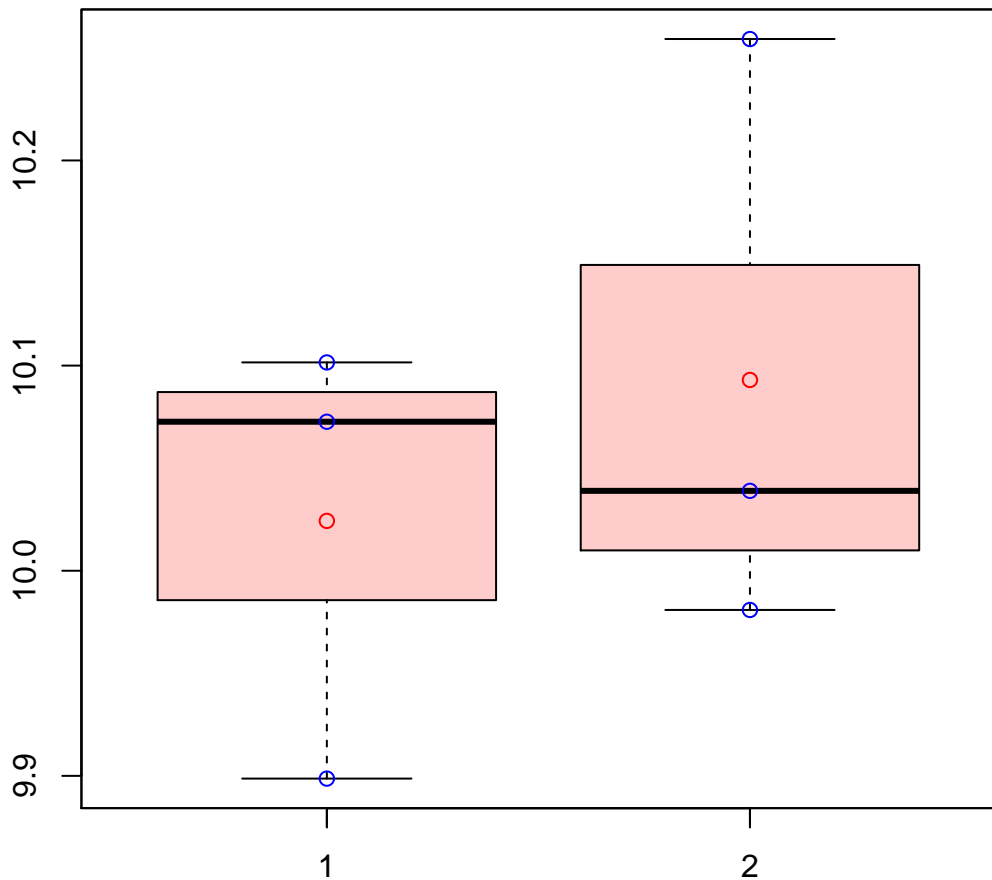

t-Test: p-value = 0.55

# CL1Contig3030|CL1Contig3030

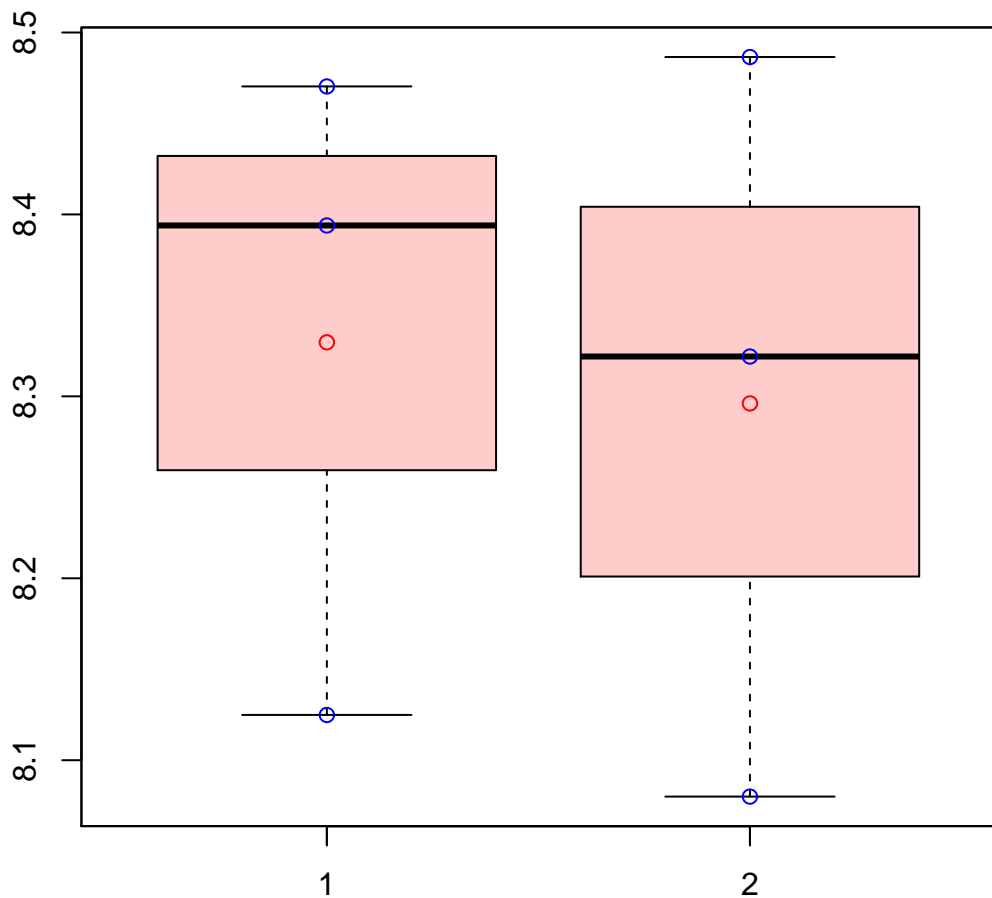

t-Test: p-value = 0.84

# CL1Contig3038|CL1Contig3038

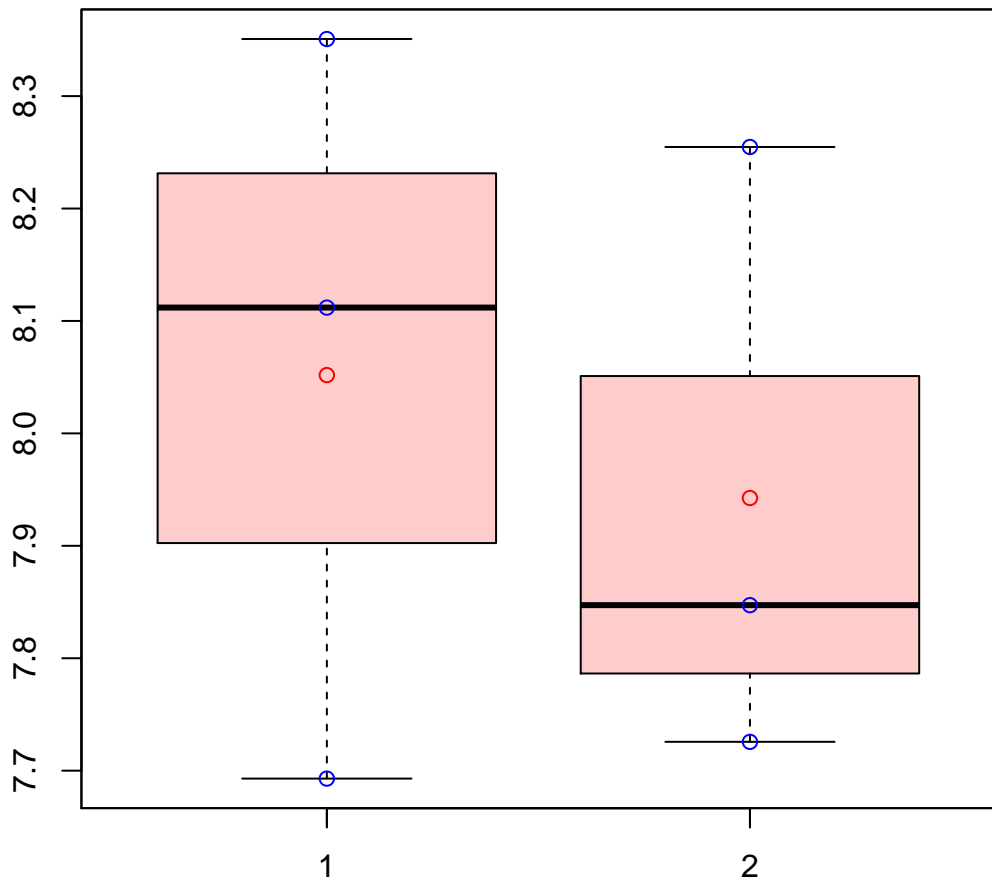

t-Test: p-value = 0.69

# CL1Contig3056|CL1Contig3056

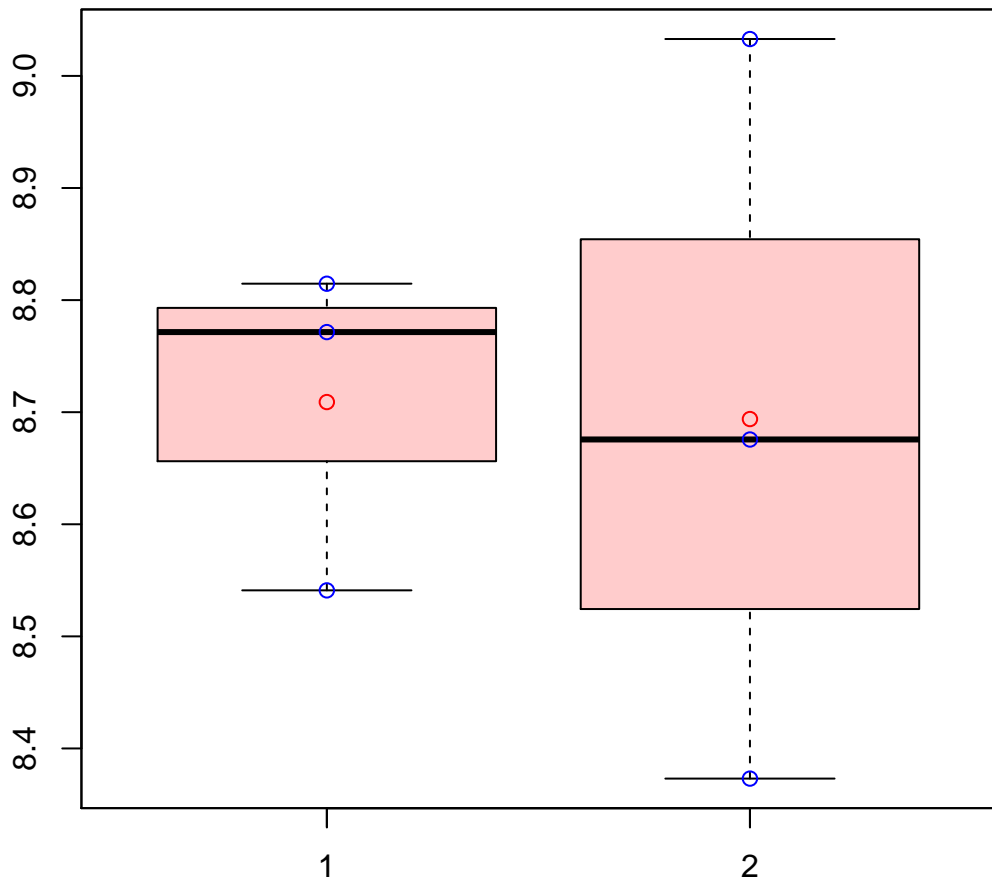

t-Test: p-value = 0.95

# CL1Contig3063|CL1Contig3063

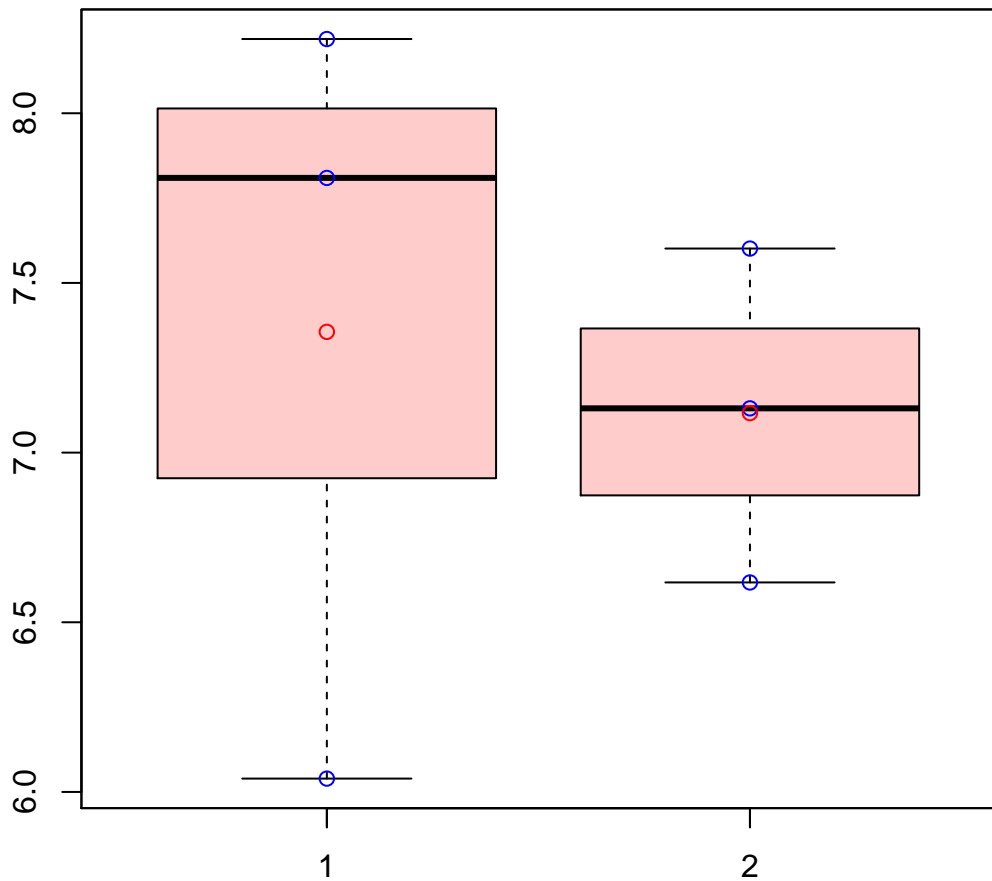

t-Test: p-value = 0.77

# CL1Contig3074|CL1Contig3074

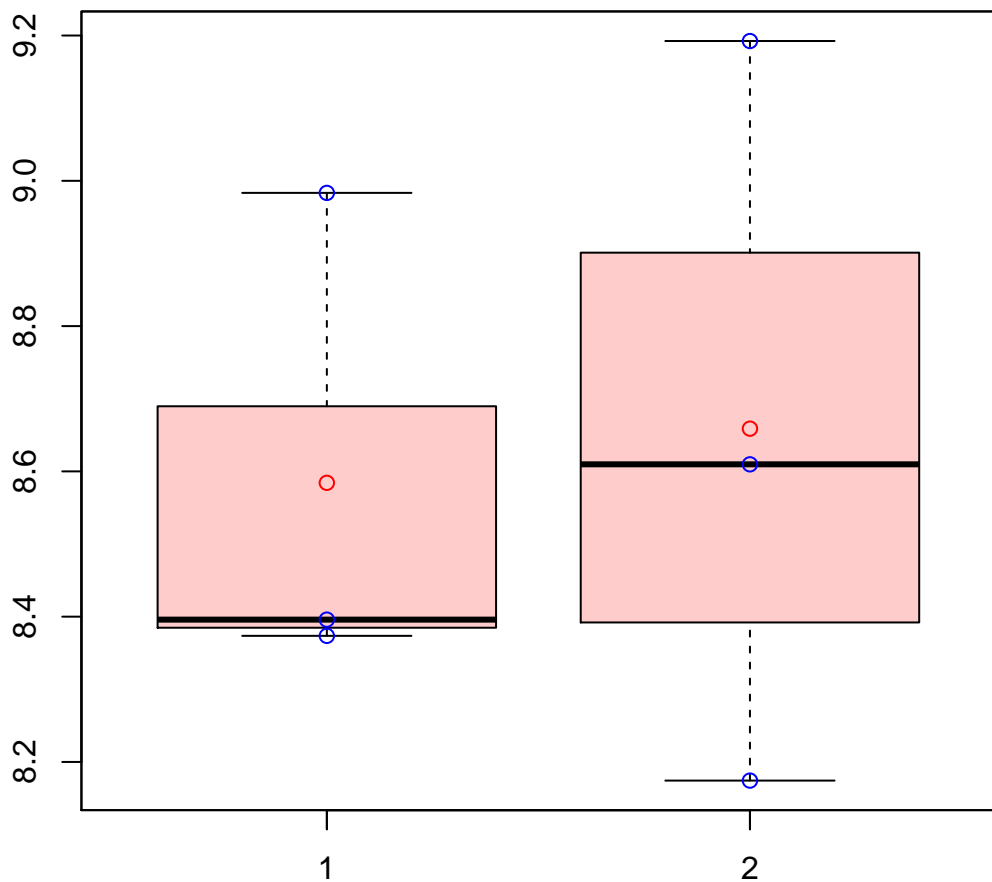

t-Test: p-value = 0.85

# CL1Contig3076|CL1Contig3076

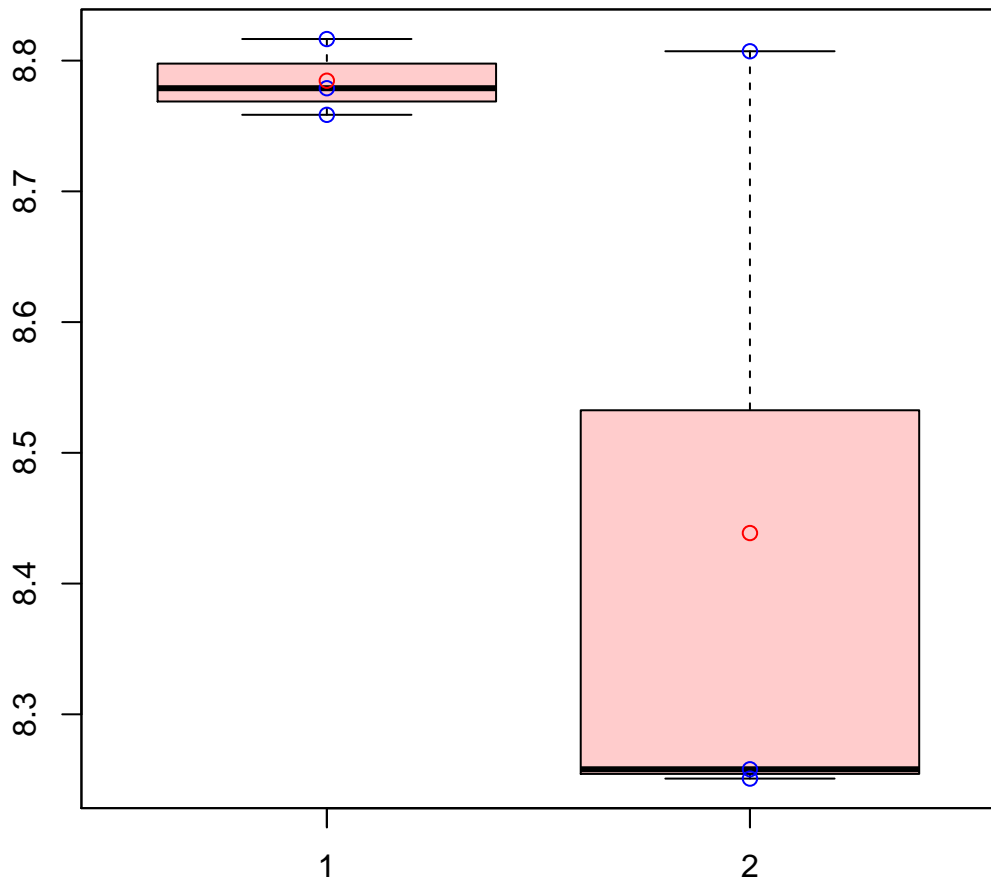

t-Test: p-value = 0.2

# CL1Contig307|CL1Contig307



t-Test: p-value = 0.44



# CL1Contig3083|CL1Contig3083

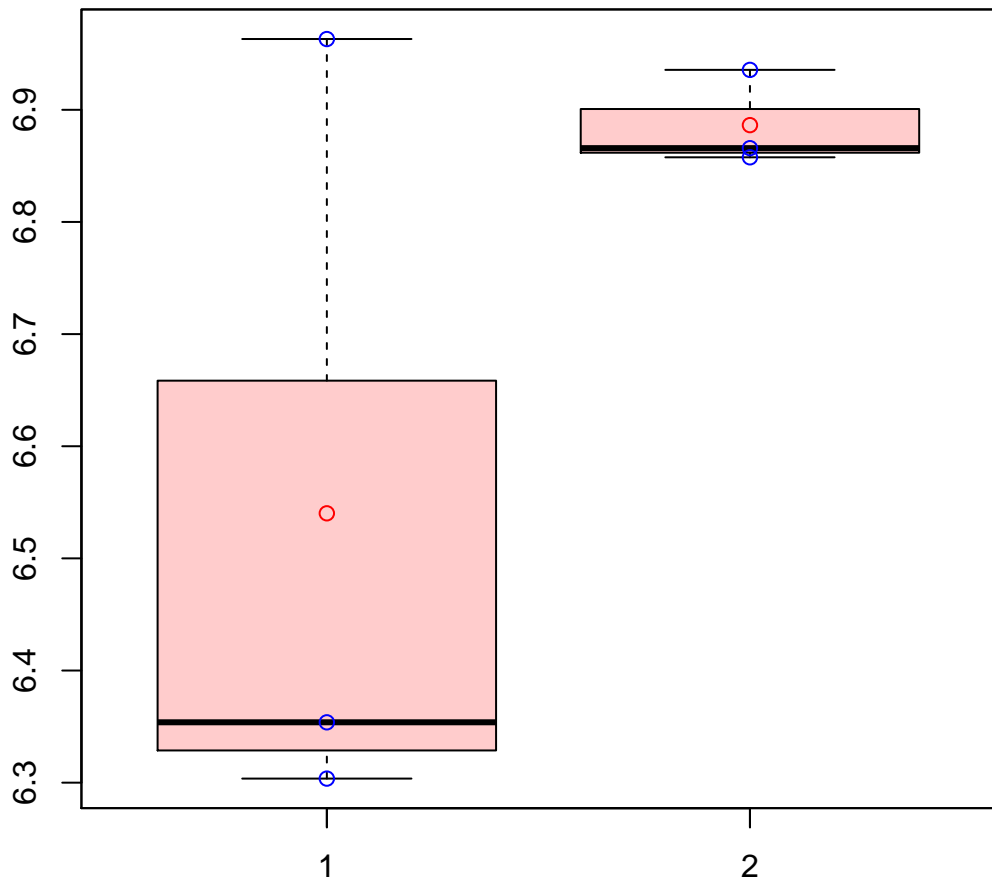

t-Test: p-value = 0.24

# CL1Contig30|CL1Contig30

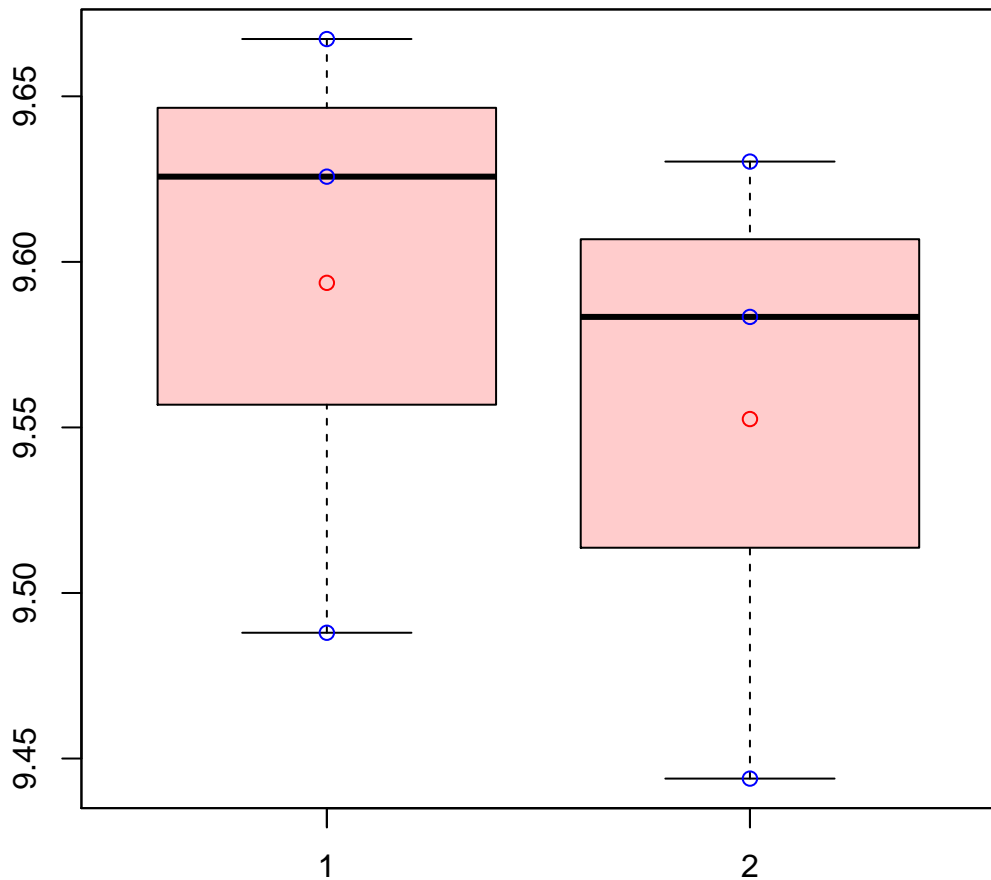

t-Test: p-value = 0.63

# CL1Contig3110|CL1Contig3110

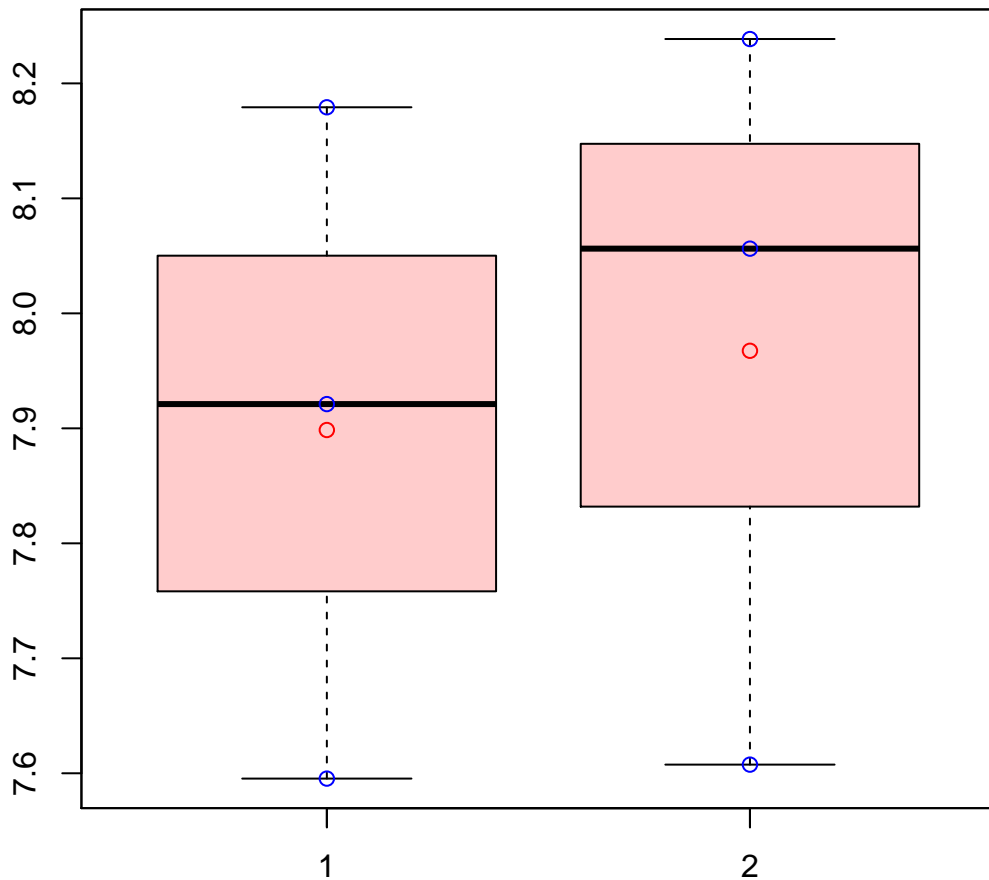

t-Test: p-value = 0.8

# CL1Contig312|CL1Contig312

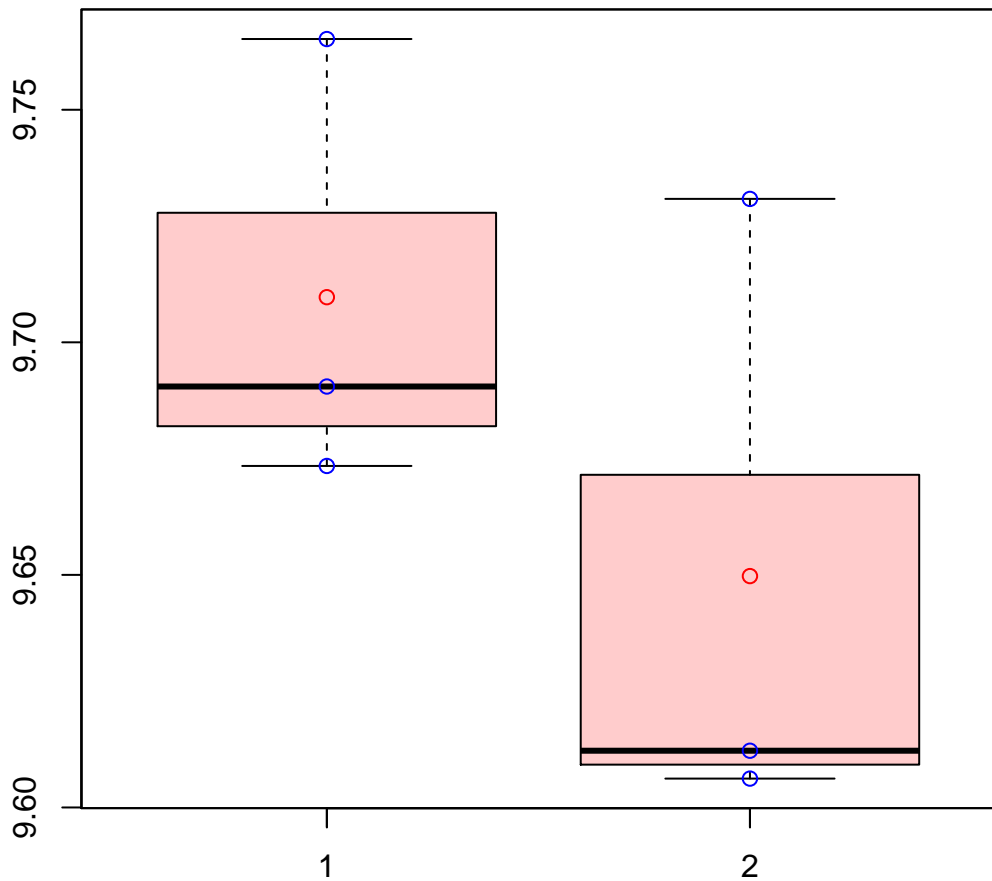

t-Test: p-value = 0.3

# CL1Contig313|CL1Contig313

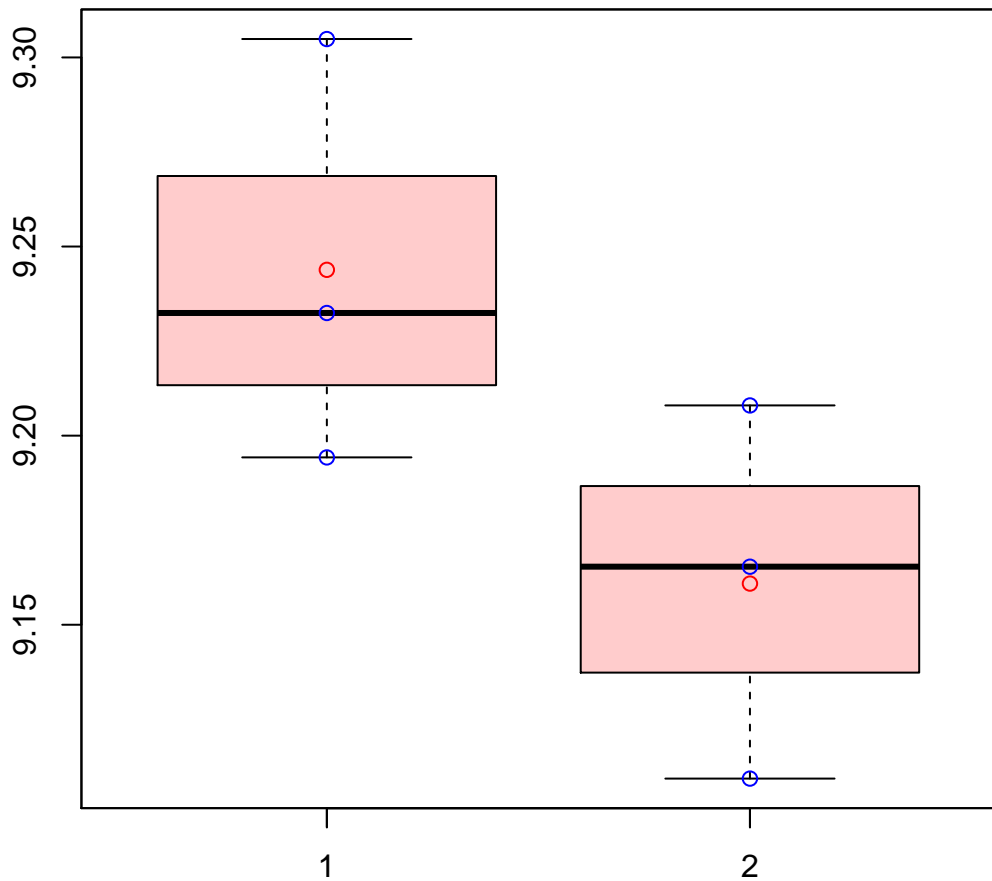

t-Test: p-value = 0.13

# CL1Contig3153|CL1Contig3153



t-Test: p-value = 0.27

# CL1Contig3189|CL1Contig3189

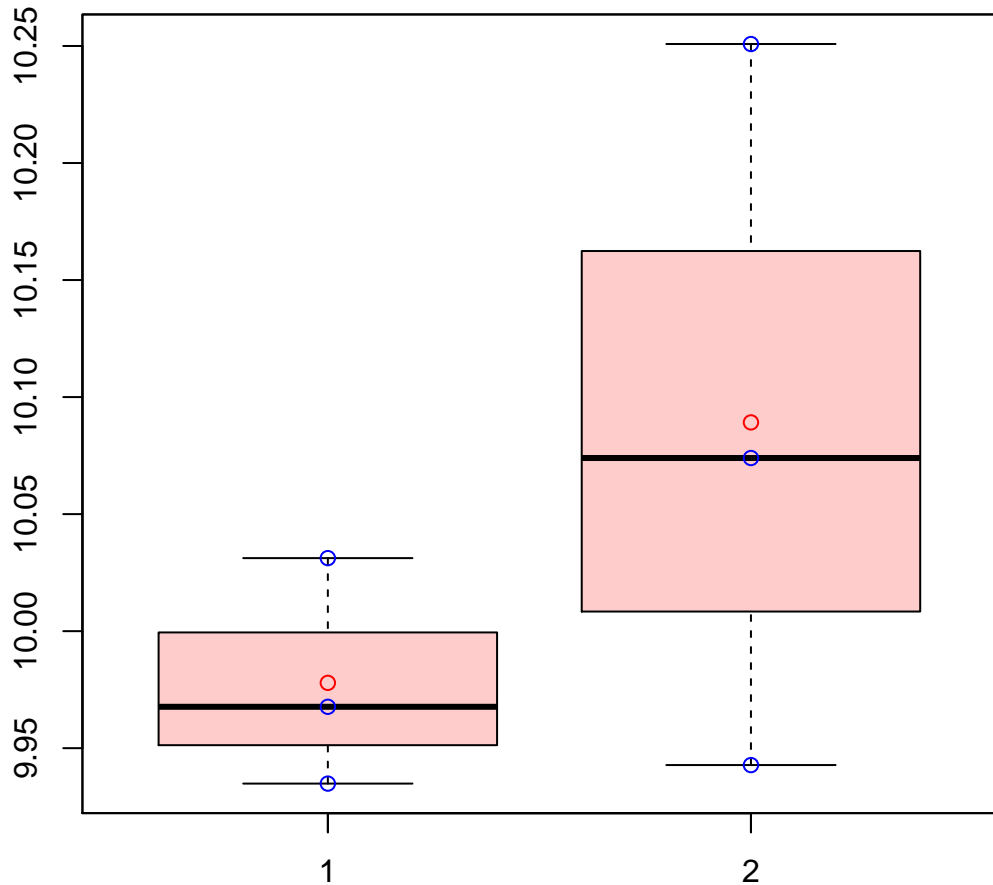

t-Test: p-value = 0.34

# CL1Contig3193|CL1Contig3193

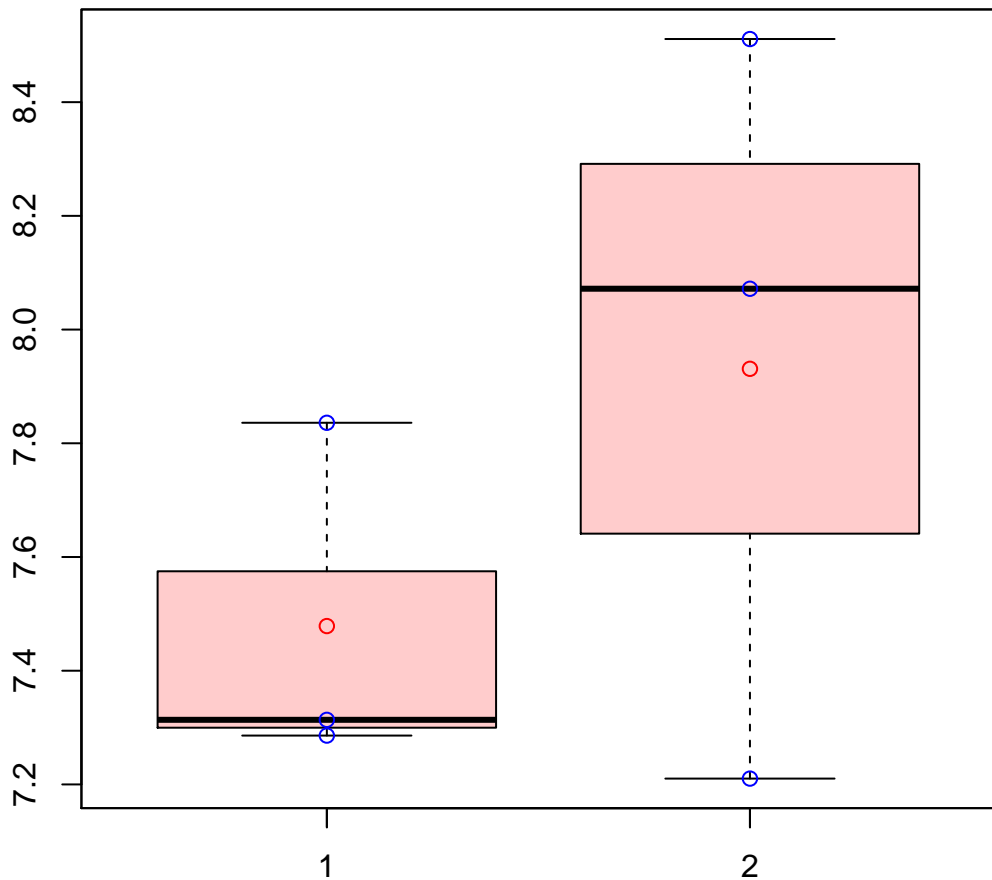

t-Test: p-value = 0.37



# CL1Contig3194|CL1Contig3194

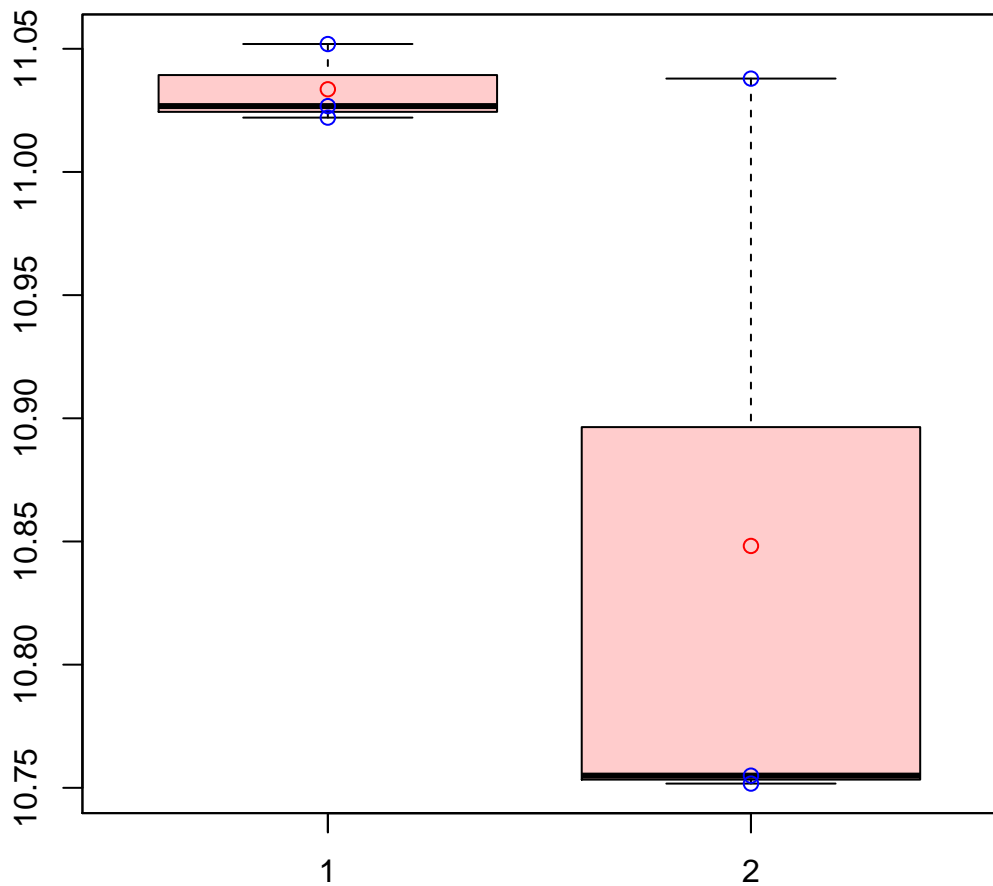

t-Test: p-value = 0.19

# CL1Contig3195|CL1Contig3195

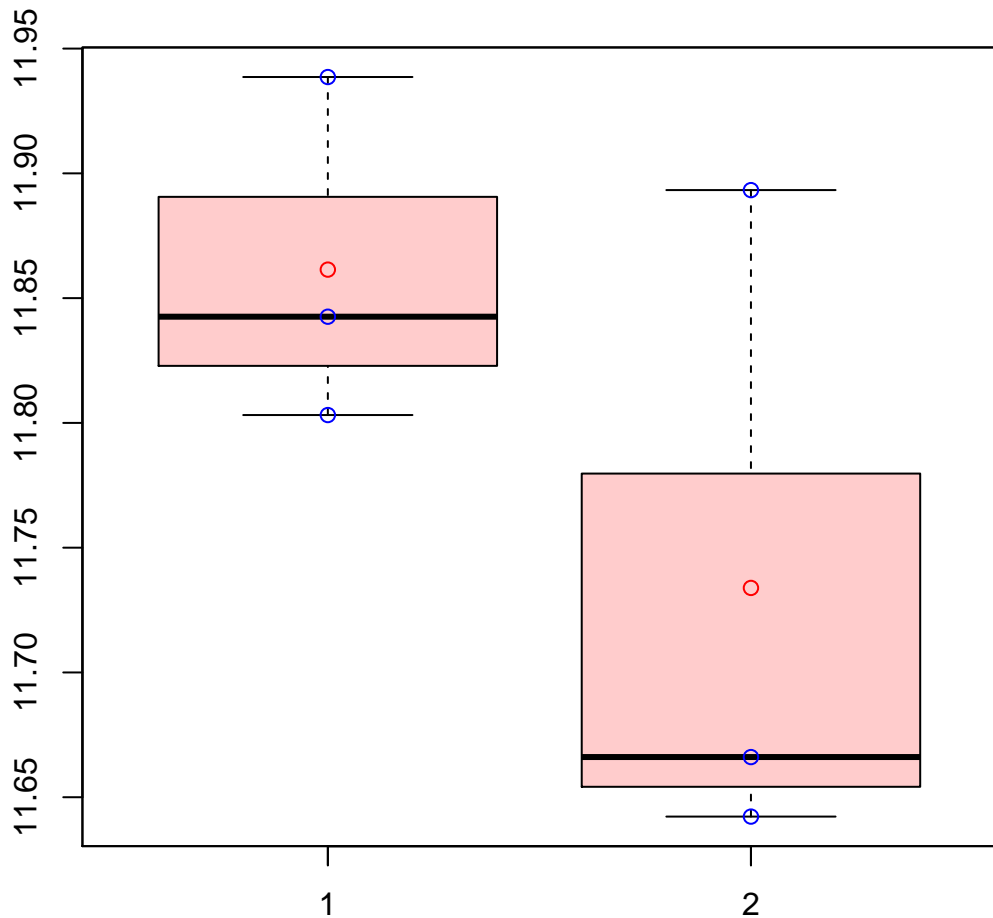

t-Test: p-value = 0.25

# CL1Contig3196|CL1Contig3196

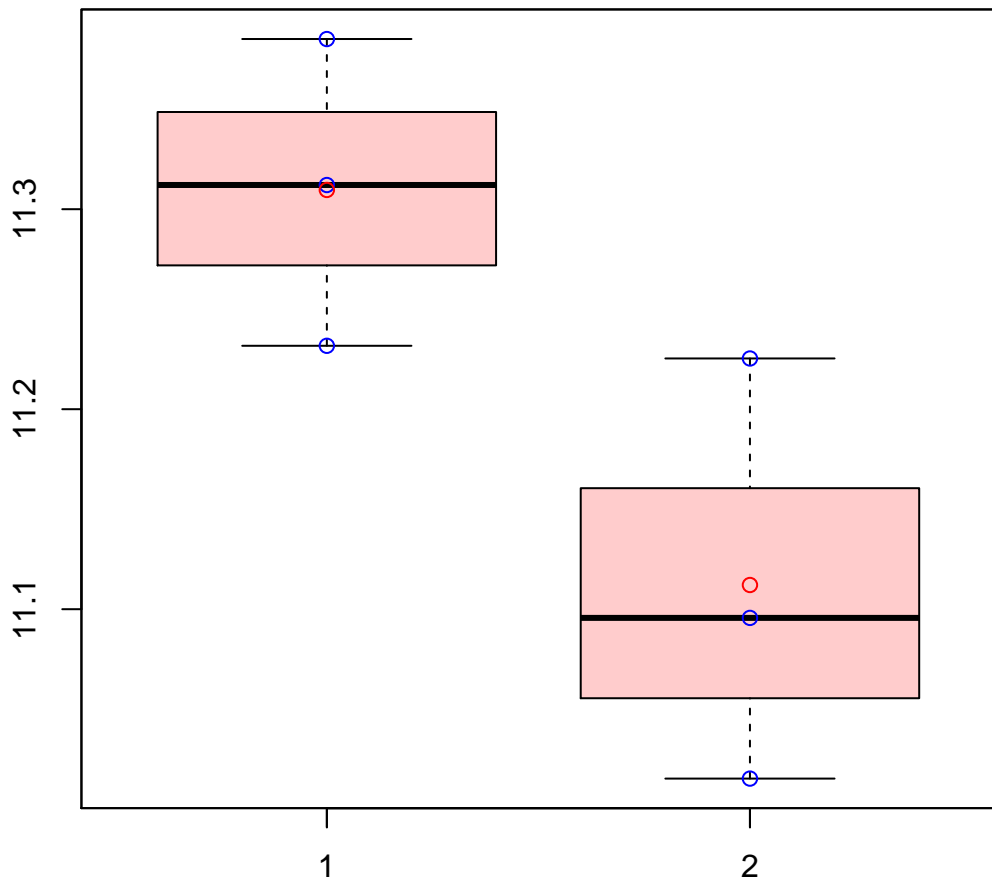

t-Test: p-value = 0.06

# CL1Contig3198|CL1Contig3198

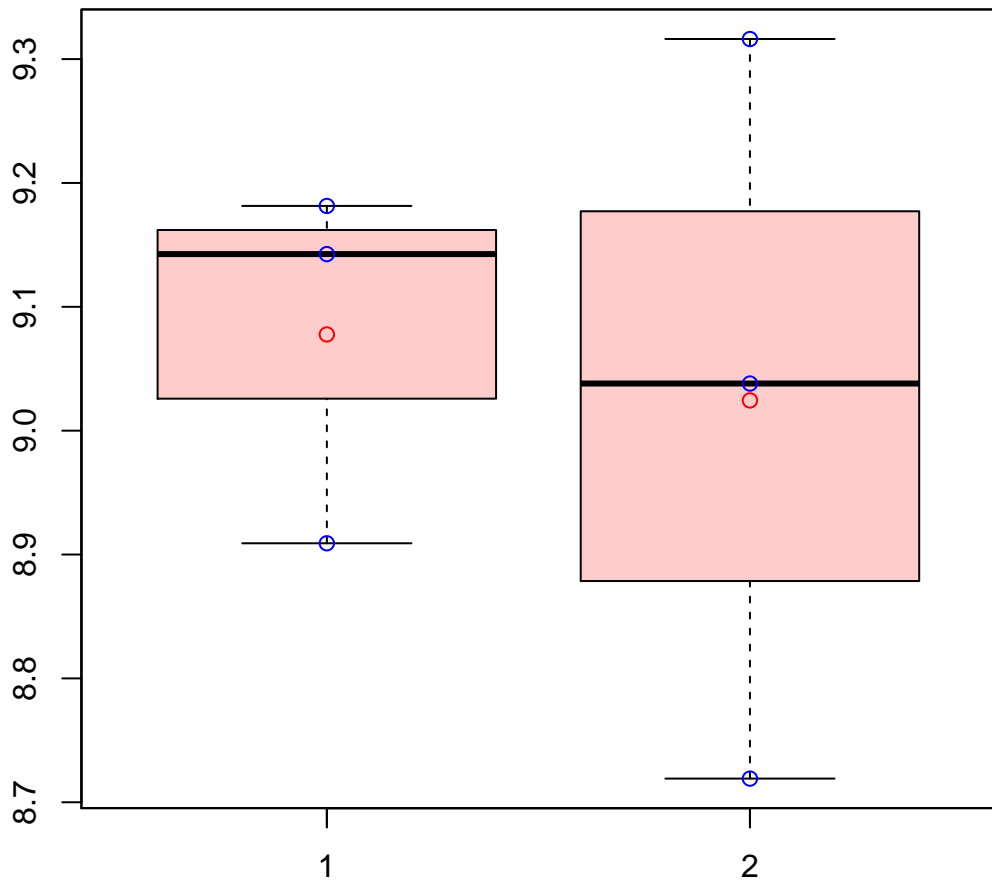

t-Test: p-value = 0.8

# CL1Contig319|CL1Contig319



t-Test: p-value = 0.18

# CL1Contig31|CL1Contig31

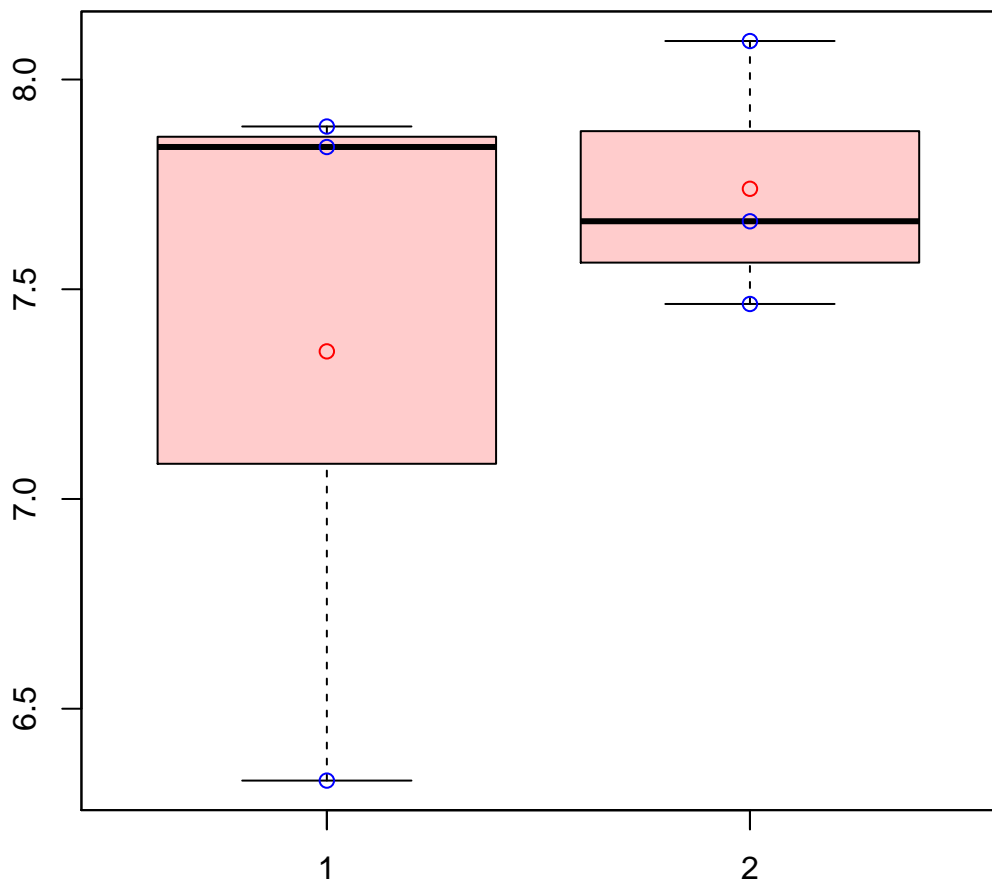

t-Test: p-value = 0.54

# CL1Contig3205|CL1Contig3205

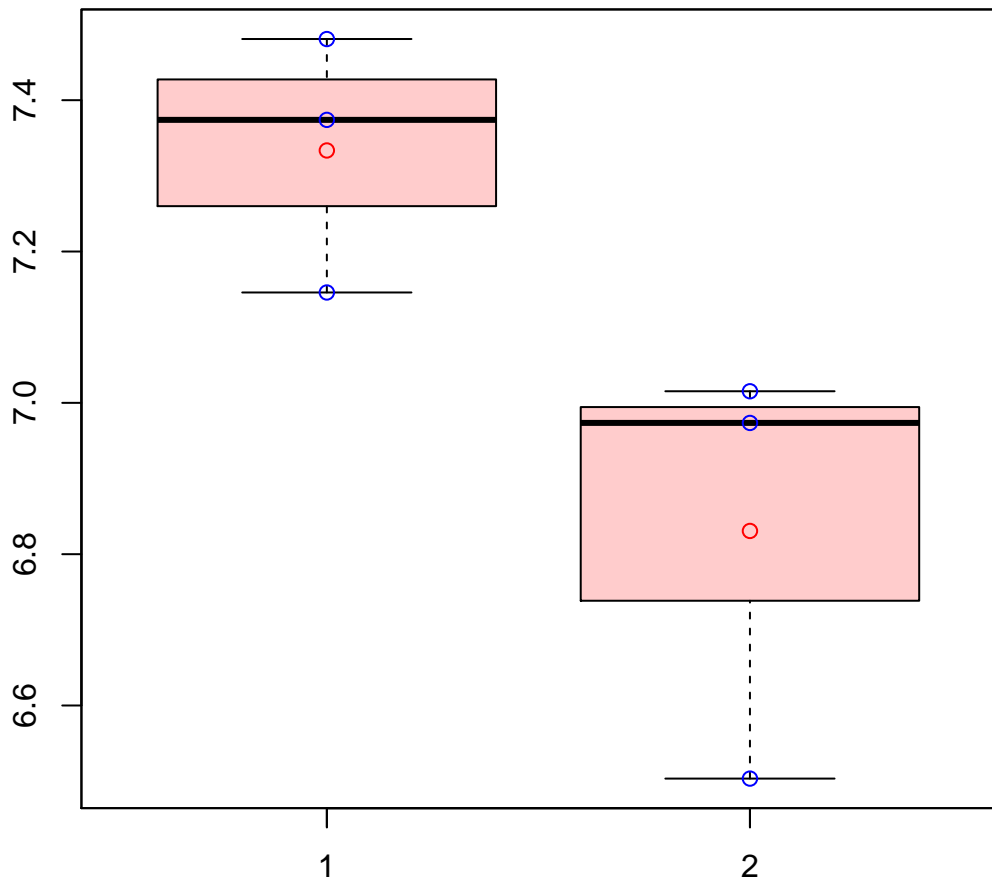

t-Test: p-value = 0.07

# CL1Contig320|CL1Contig320



t-Test: p-value = 0.18



# CL1Contig3215|CL1Contig3215

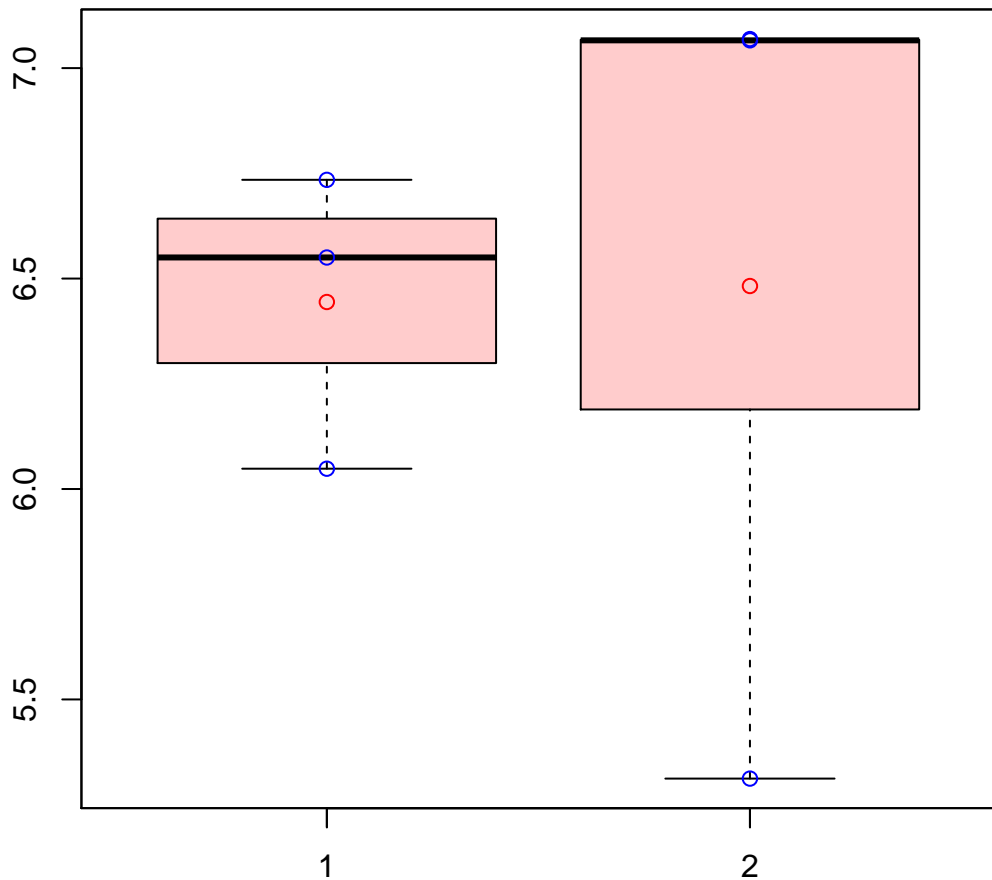

t-Test: p-value = 0.96

# CL1Contig3243|CL1Contig3243

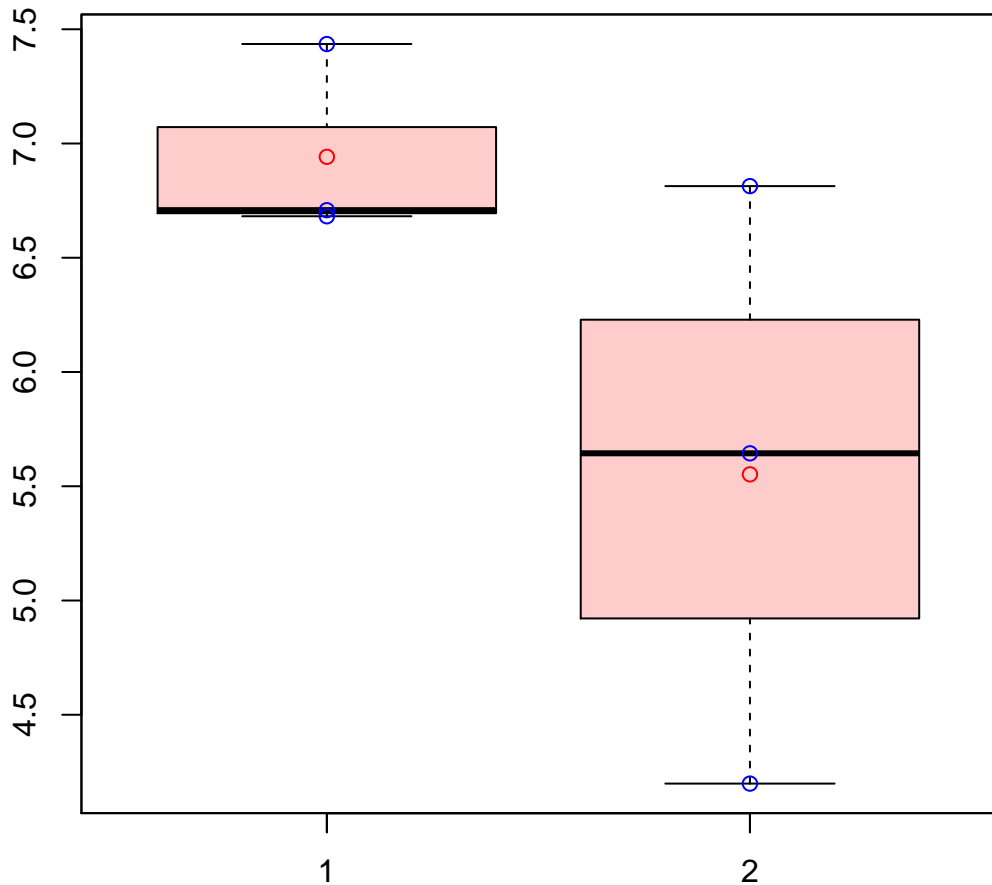

t-Test: p-value = 0.2

# CL1Contig3244|CL1Contig3244

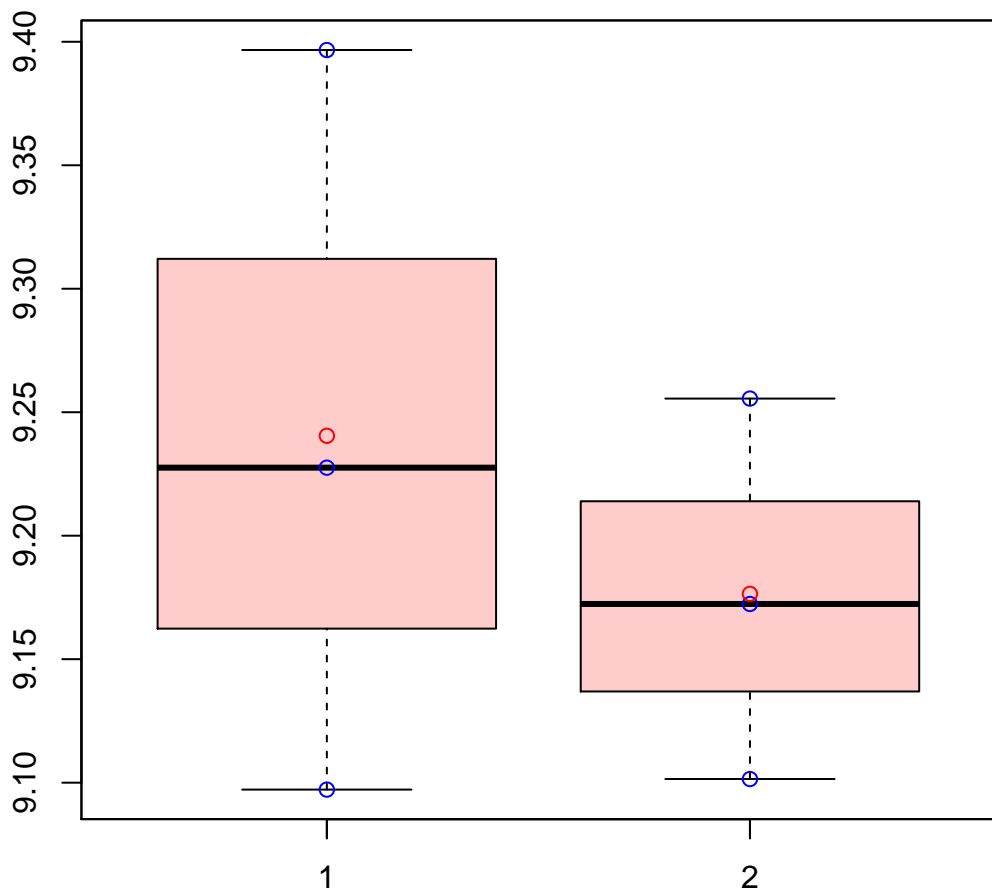

t-Test: p-value = 0.56

# CL1Contig3266|CL1Contig3266

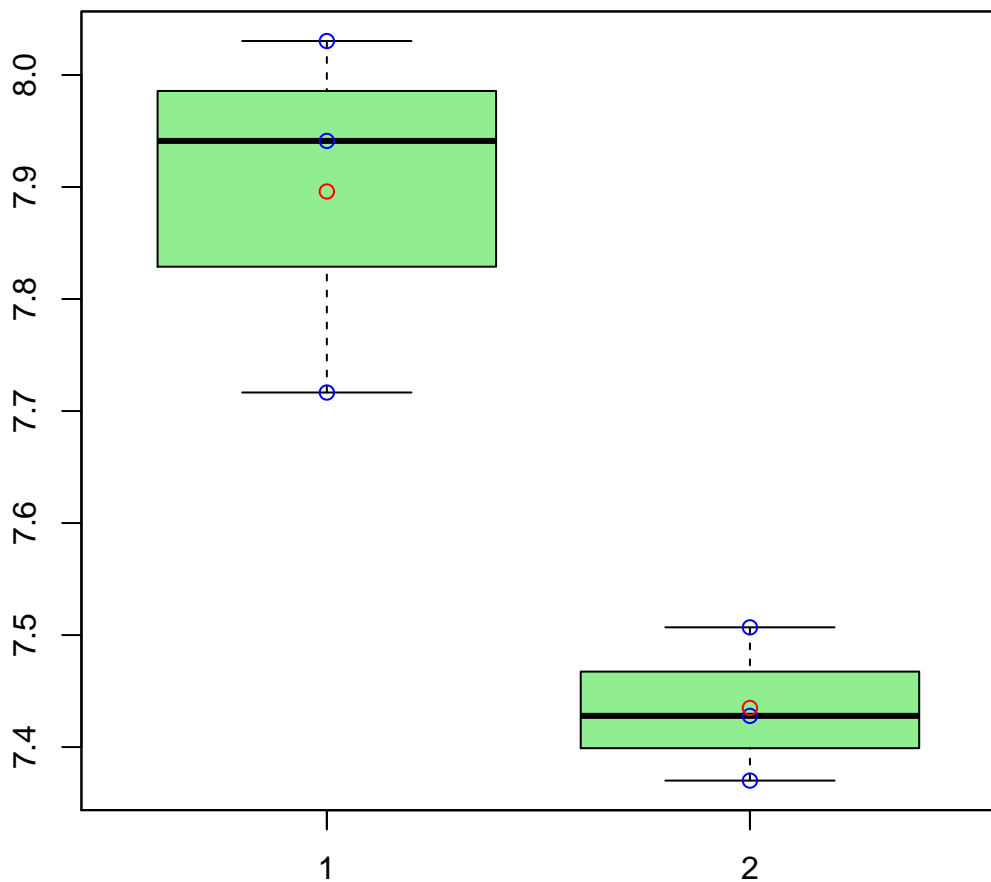

t-Test: p-value = 0.02

# CL1Contig3282|CL1Contig3282

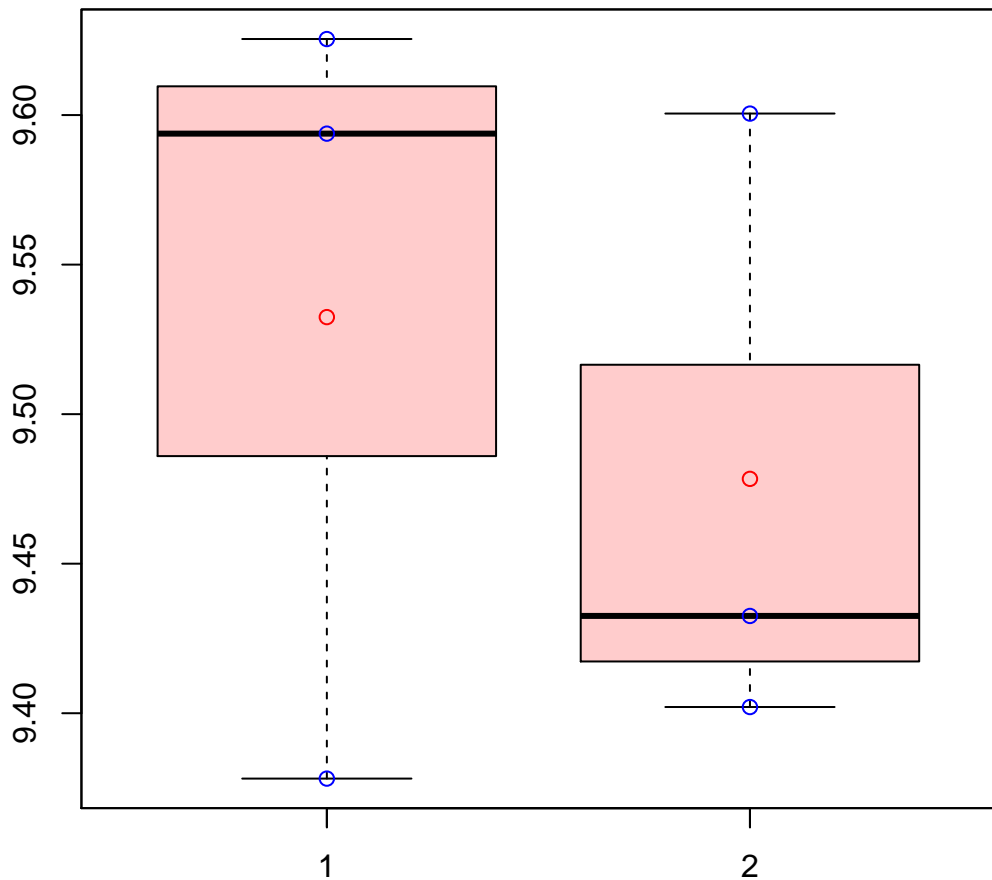

t-Test: p-value = 0.62

# CL1Contig3293|CL1Contig3293

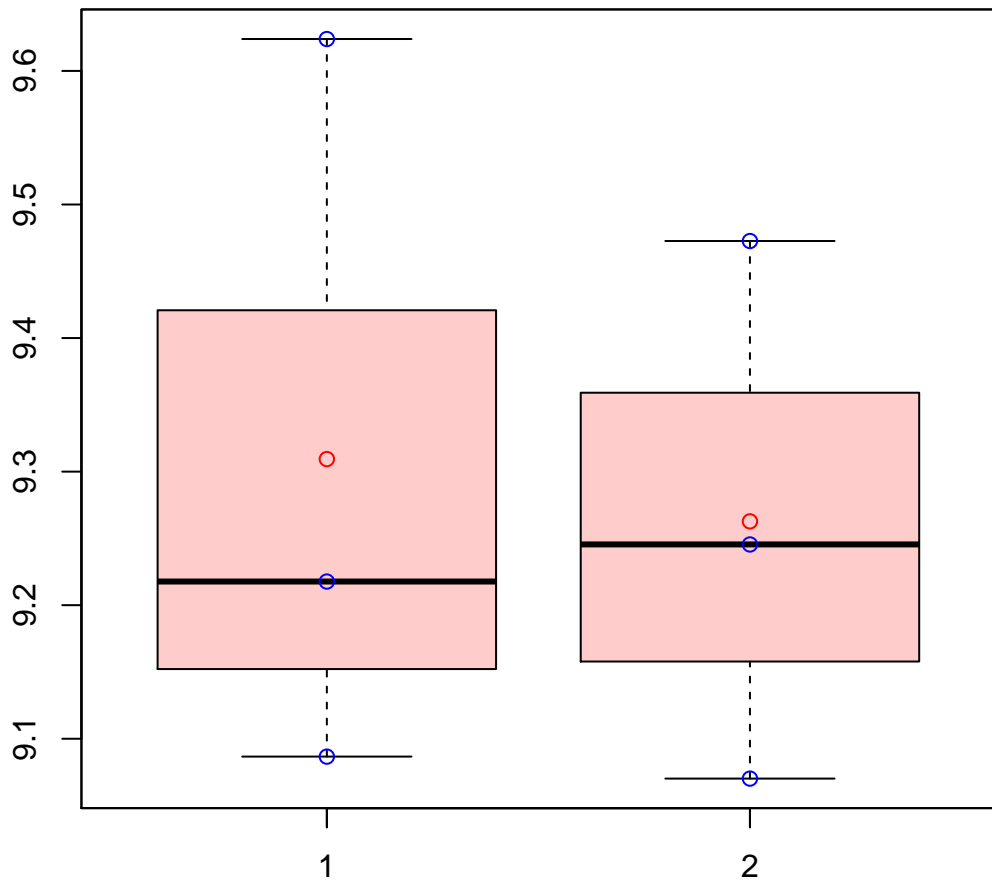

t-Test: p-value = 0.83

# CL1Contig3300|CL1Contig3300

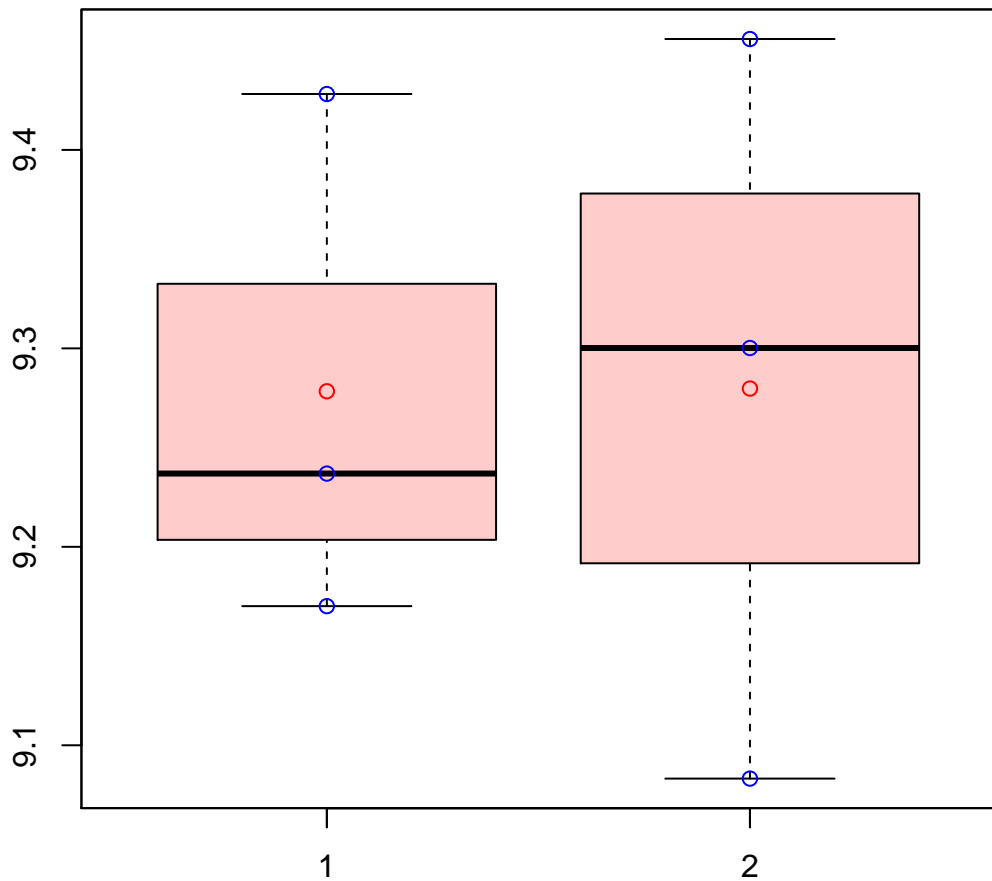

t-Test: p-value = 0.99

# CL1Contig3310|CL1Contig3310

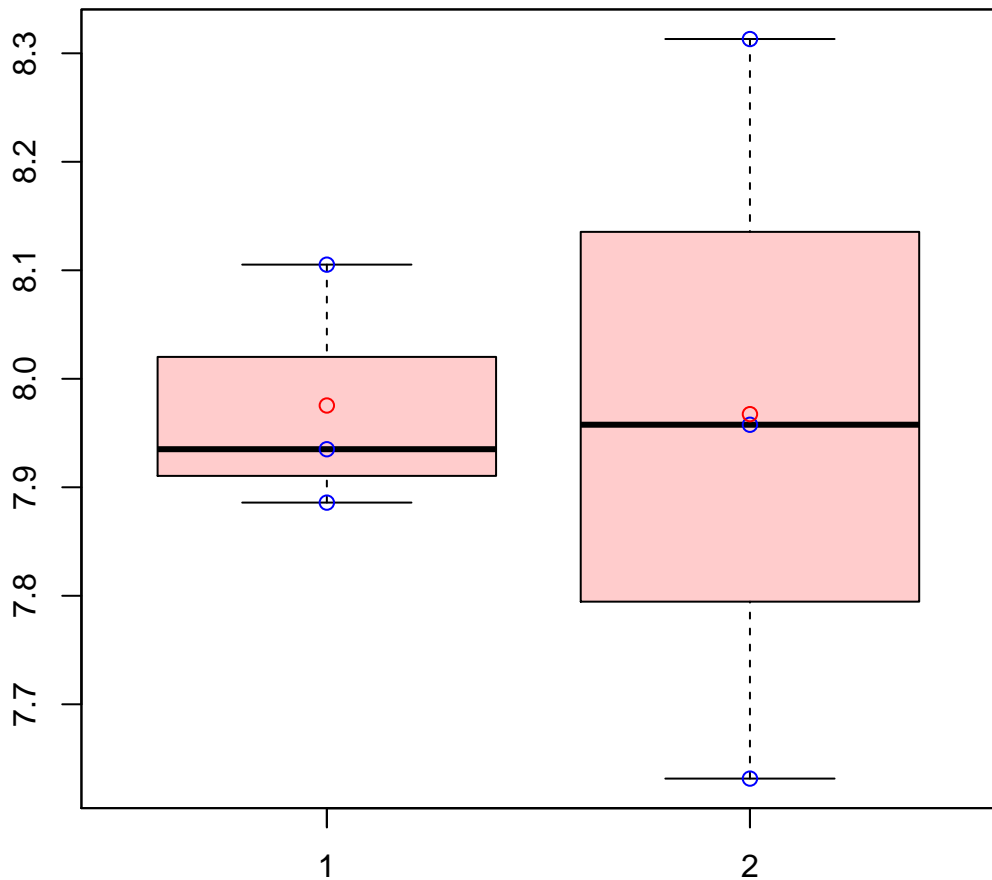

t-Test: p-value = 0.97



# CL1Contig3312|CL1Contig3312

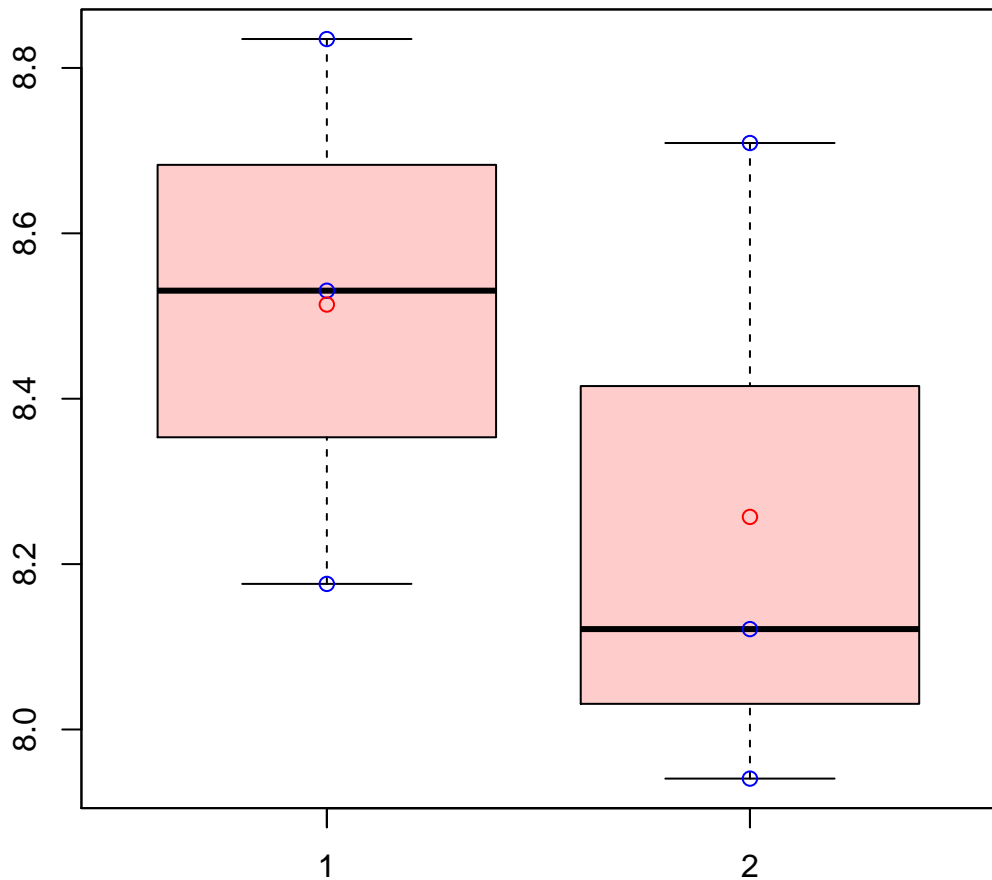

t-Test: p-value = 0.44

# CL1Contig3331|CL1Contig3331

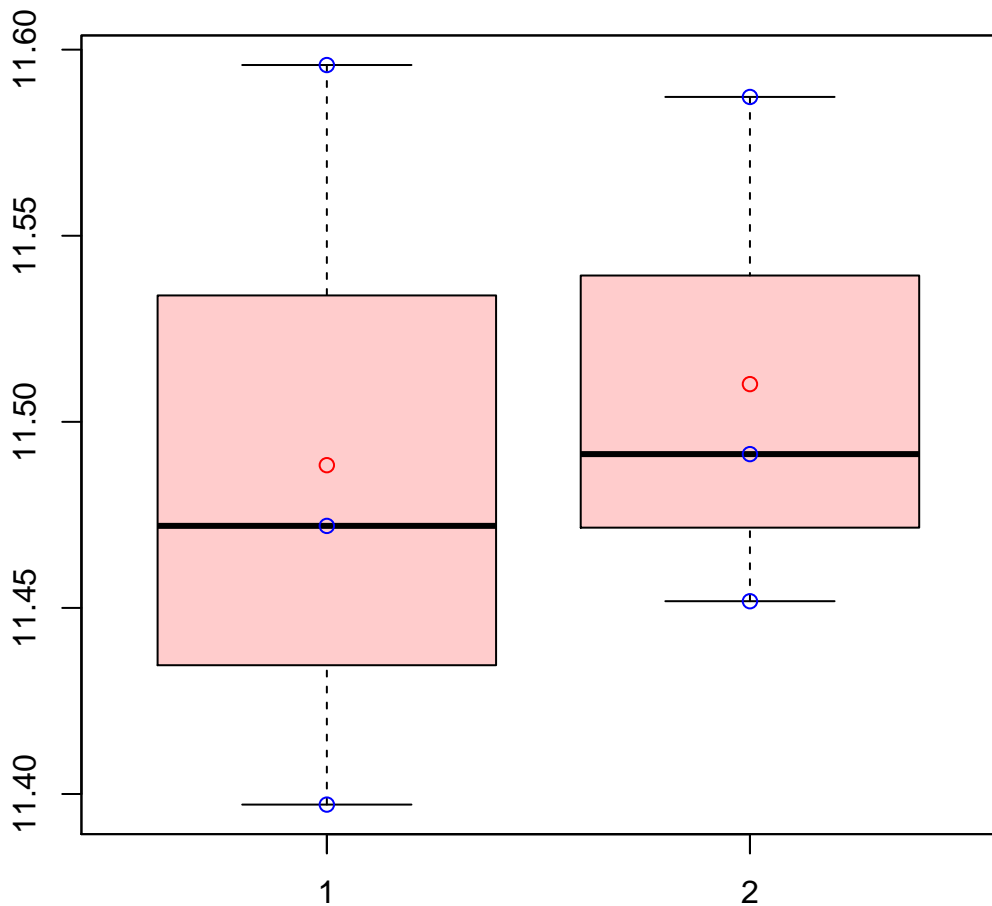

t-Test: p-value = 0.77

# CL1Contig3341|CL1Contig3341

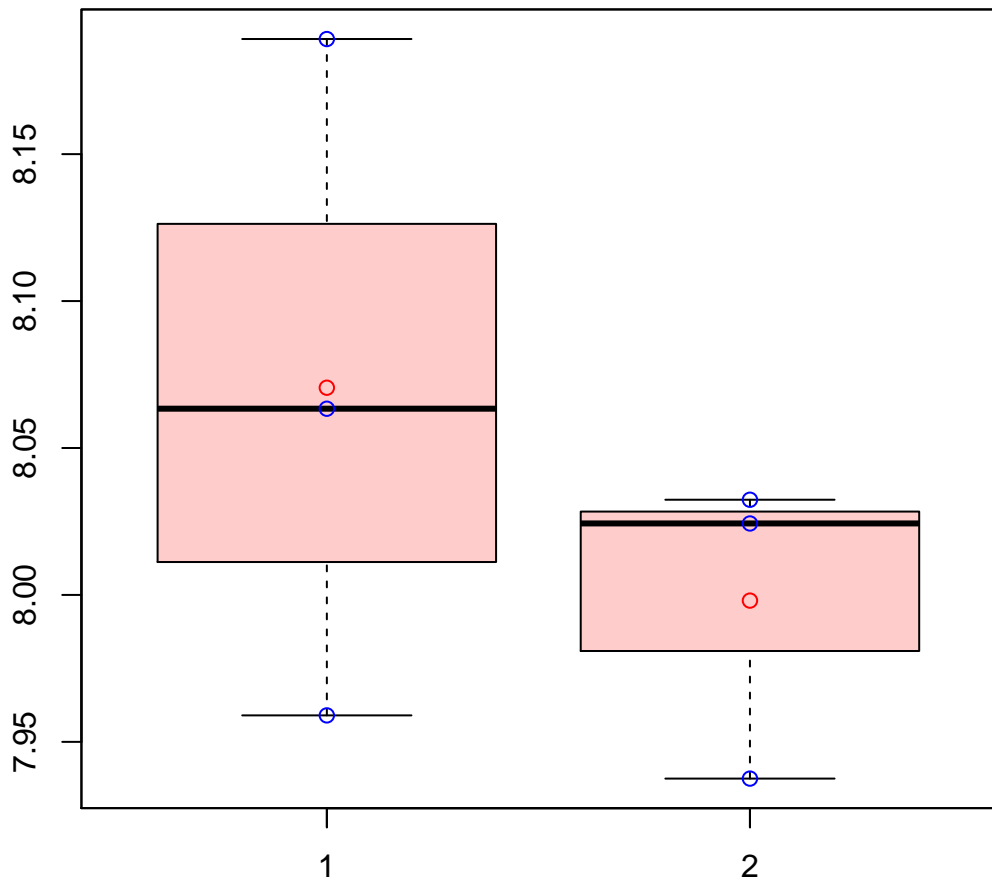

t-Test: p-value = 0.4

# CL1Contig3349|CL1Contig3349

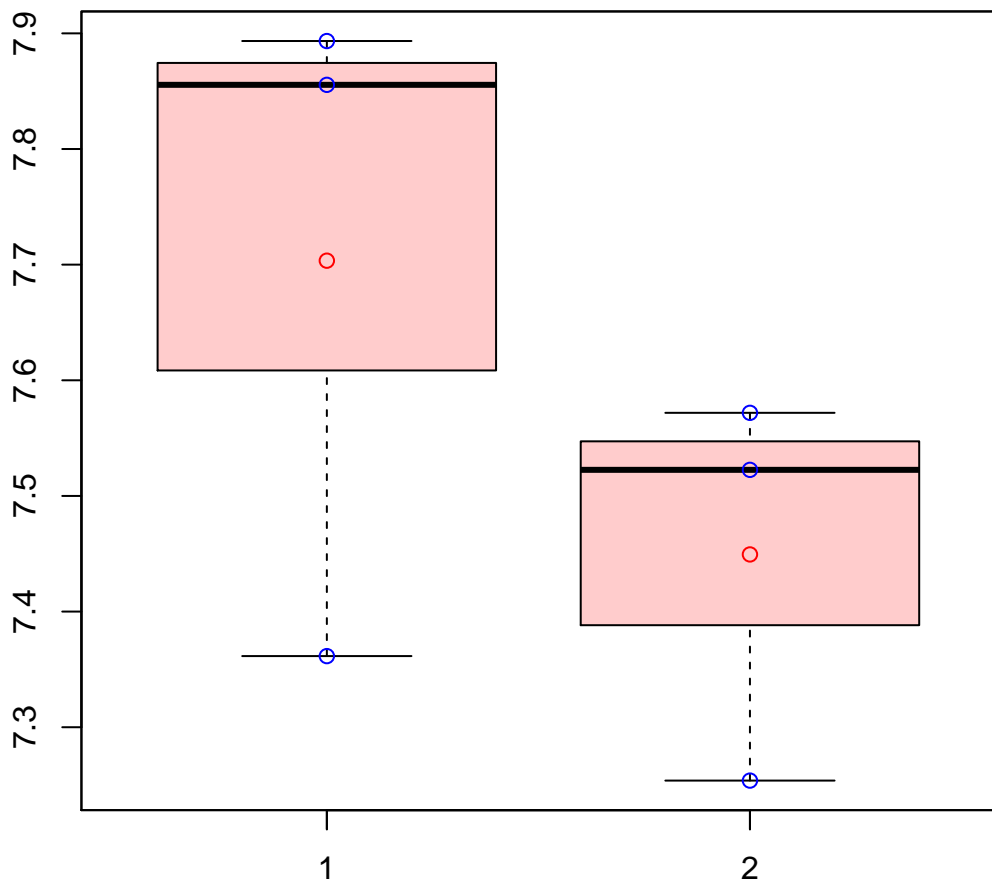

t-Test: p-value = 0.28

# CL1Contig3371|CL1Contig3371

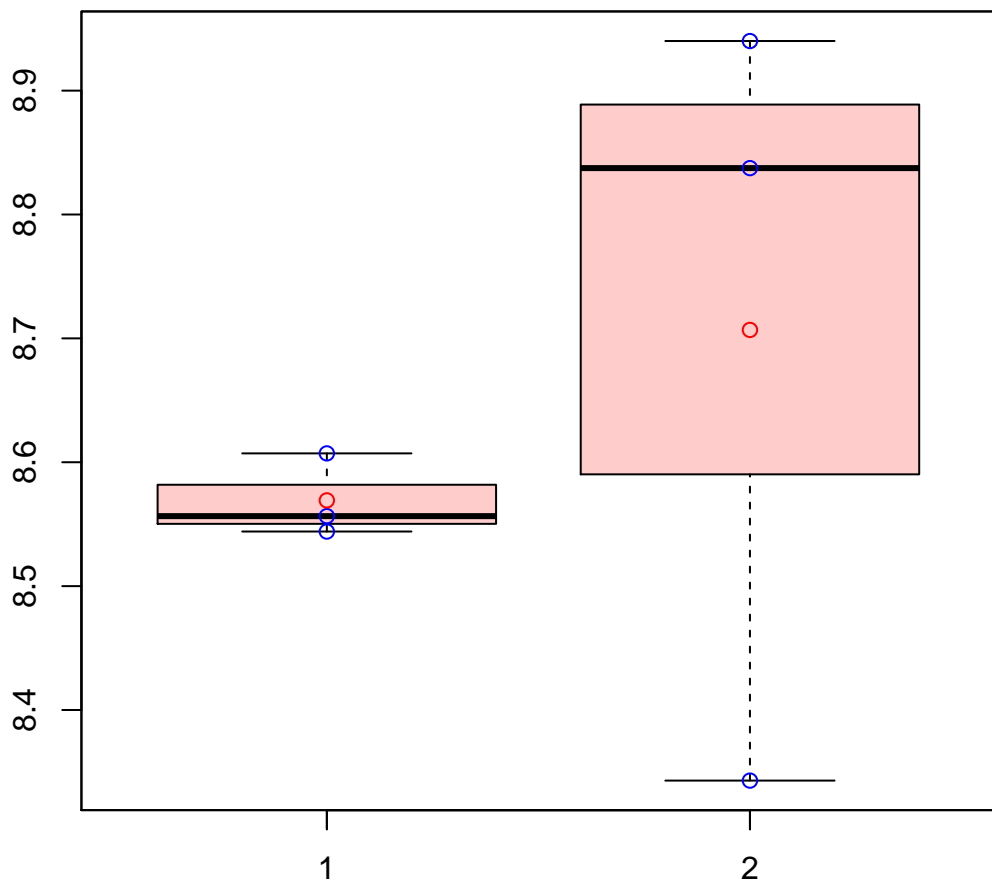

t-Test: p-value = 0.53

# CL1Contig3387|CL1Contig3387

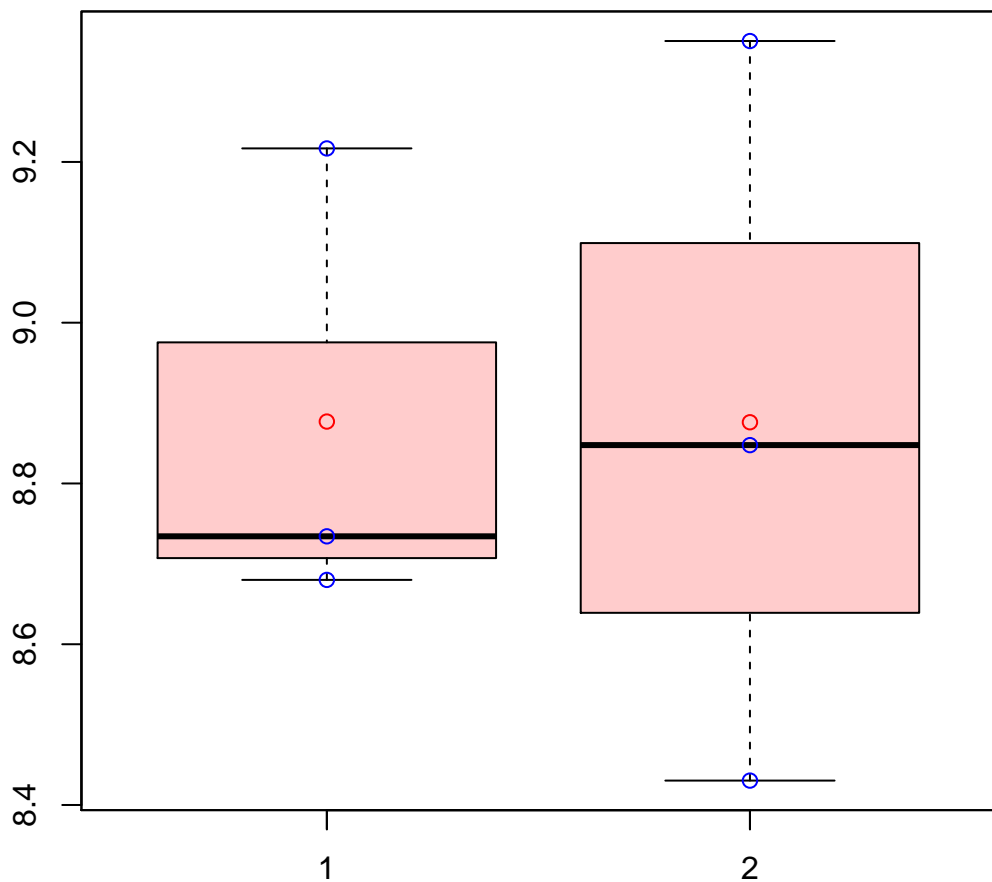

t-Test: p-value = 1

# CL1Contig3388|CL1Contig3388

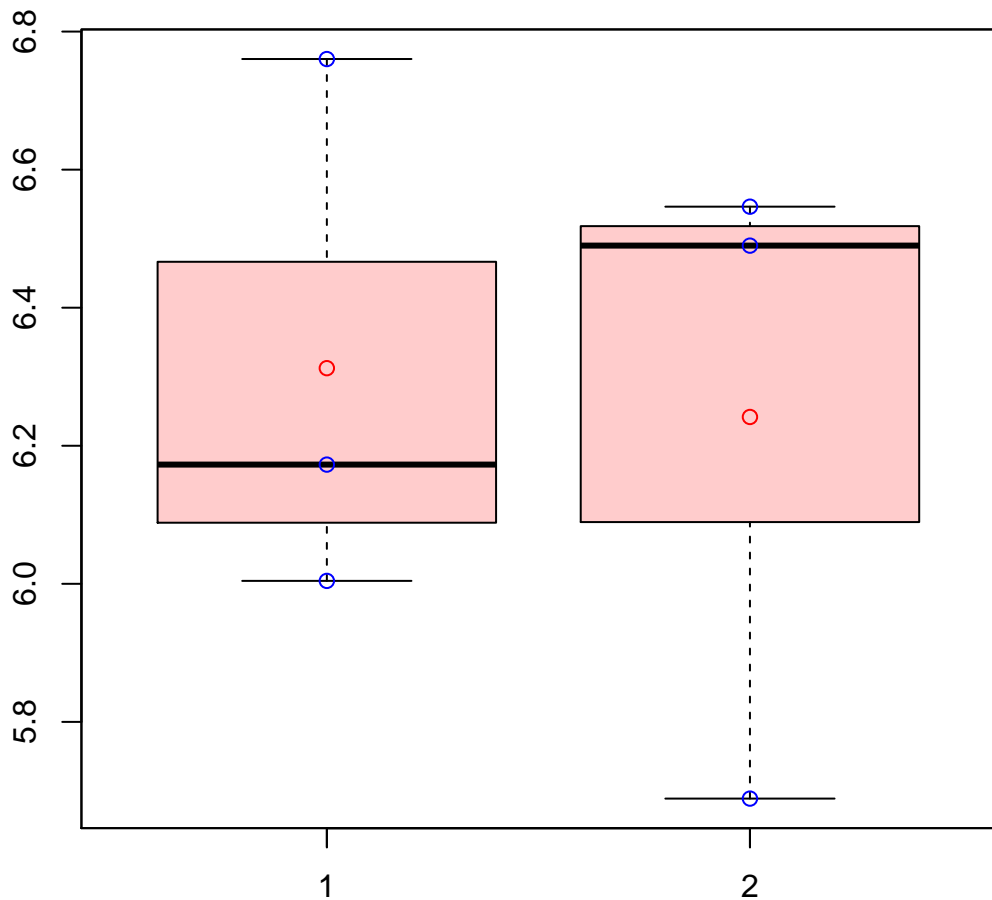

t-Test: p-value = 0.85

# CL1Contig3395|CL1Contig3395

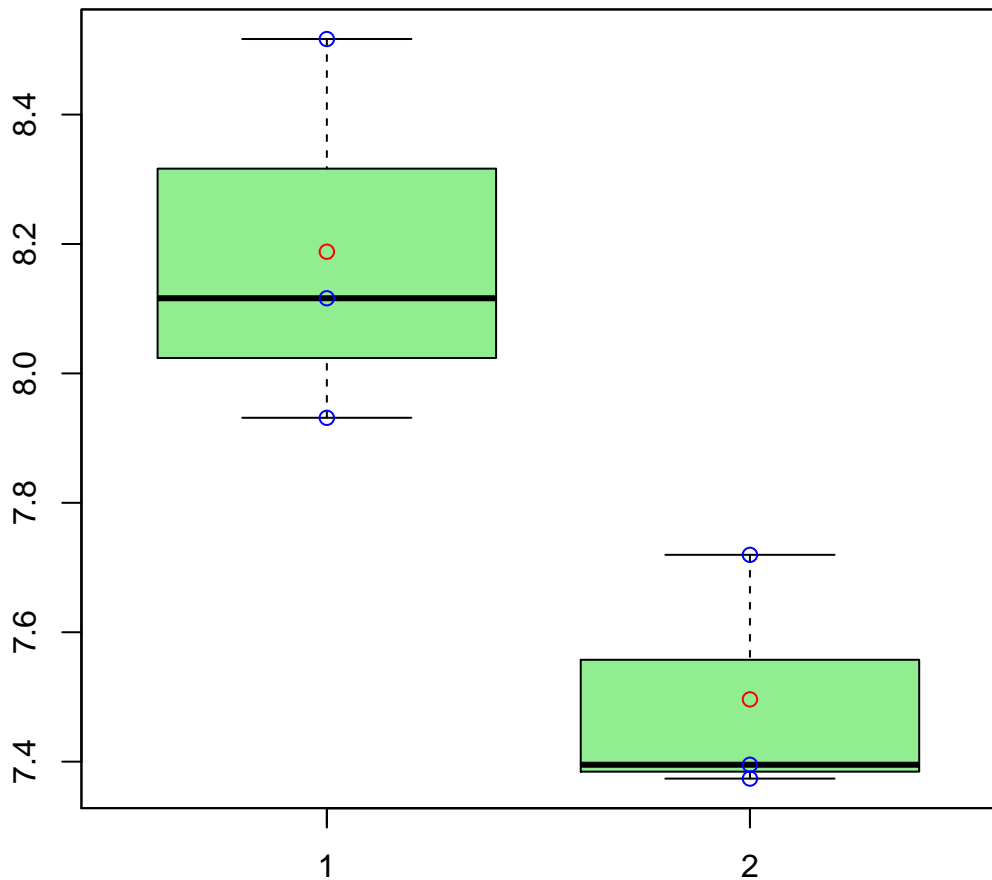

t-Test: p-value = 0.04



# CL1Contig3396|CL1Contig3396



t-Test: p-value = 0.04

# CL1Contig3397|CL1Contig3397



t-Test: p-value = 0.04

# CL1Contig3402|CL1Contig3402

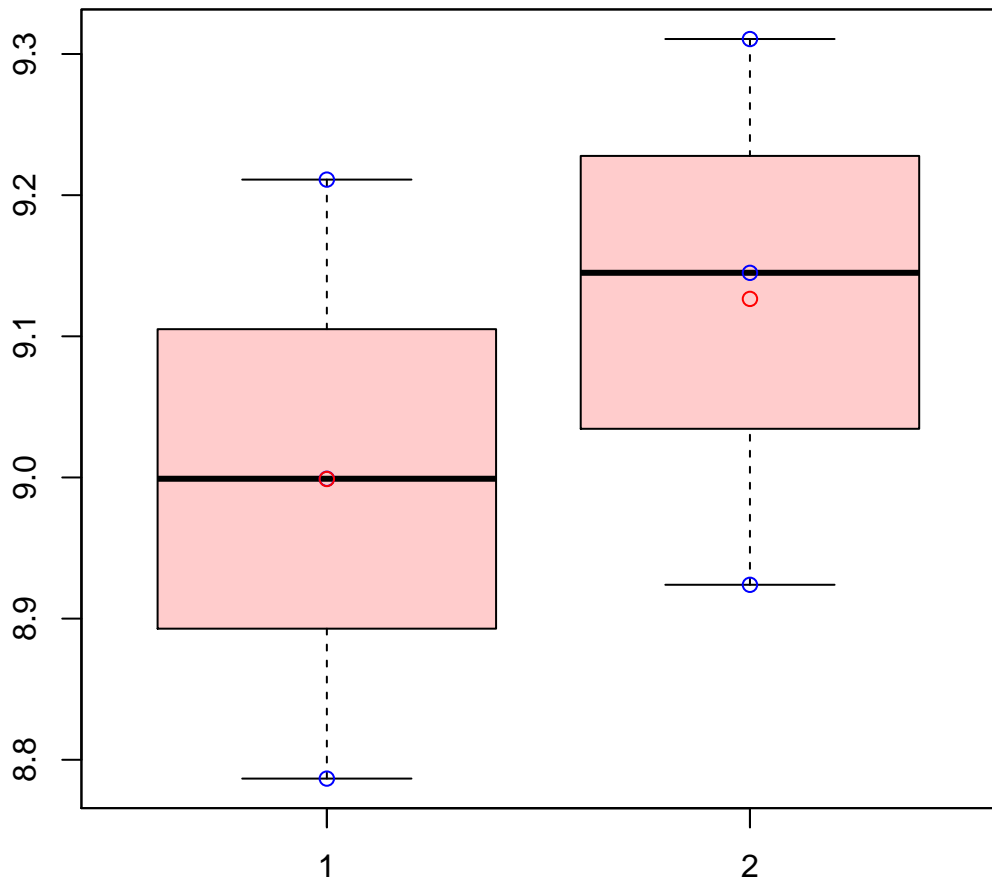

t-Test: p-value = 0.49

# CL1Contig3406|CL1Contig3406

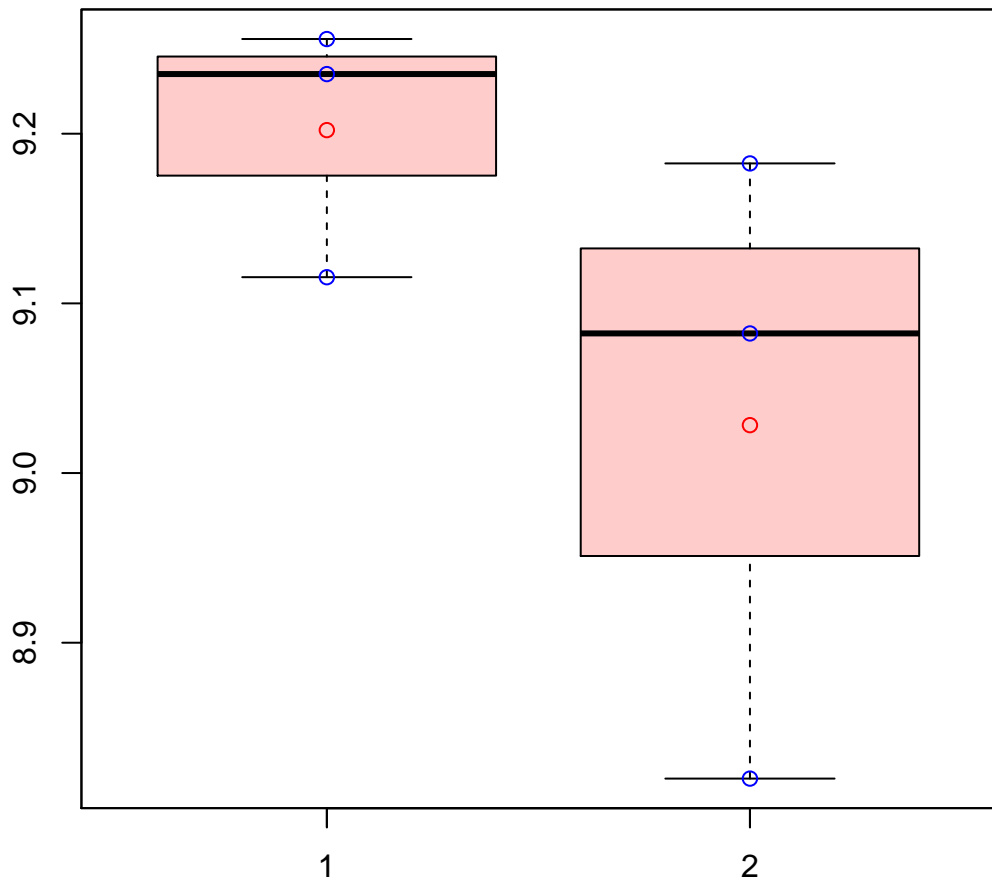

t-Test: p-value = 0.24

# CL1Contig3411|CL1Contig3411

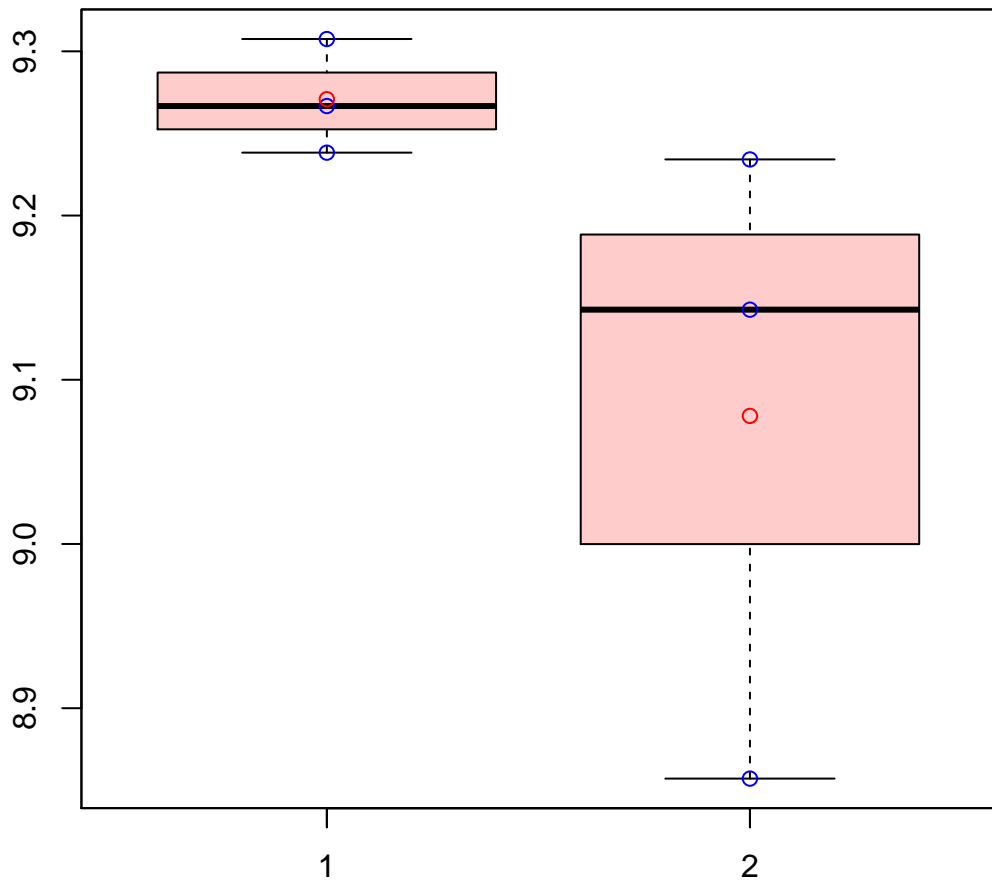

t-Test: p-value = 0.23

# CL1Contig3422|CL1Contig3422

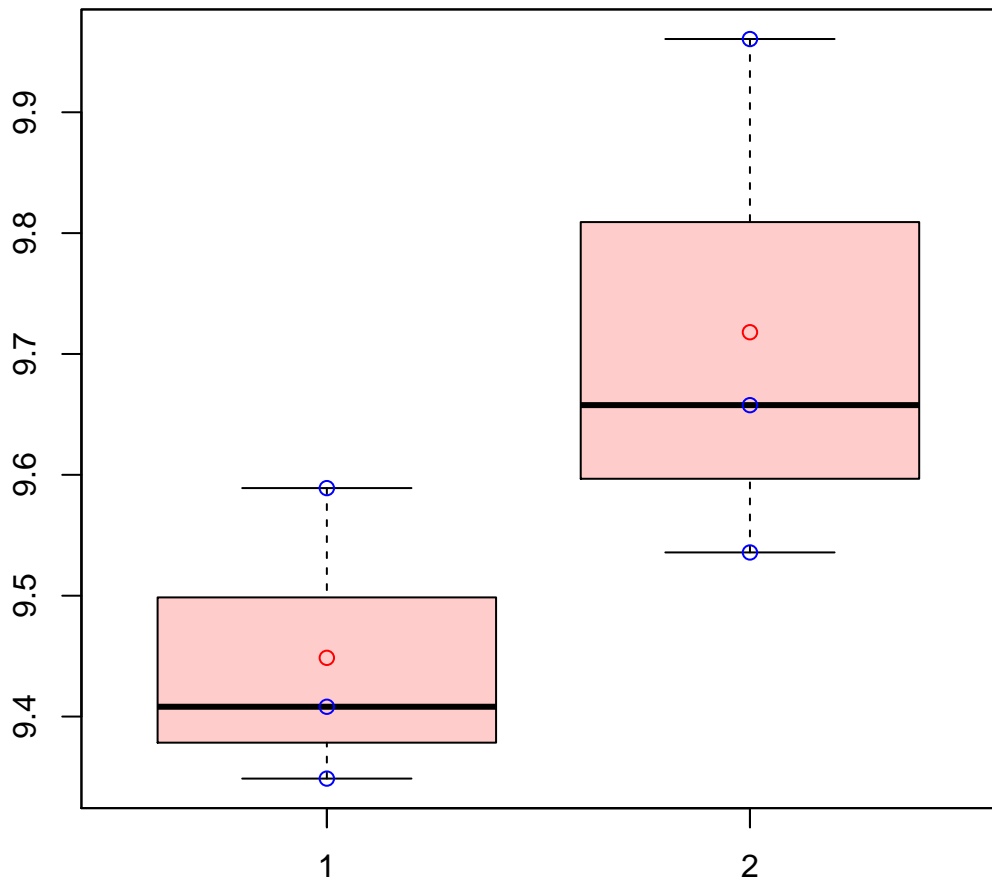

t-Test: p-value = 0.16

# CL1Contig3430|CL1Contig3430

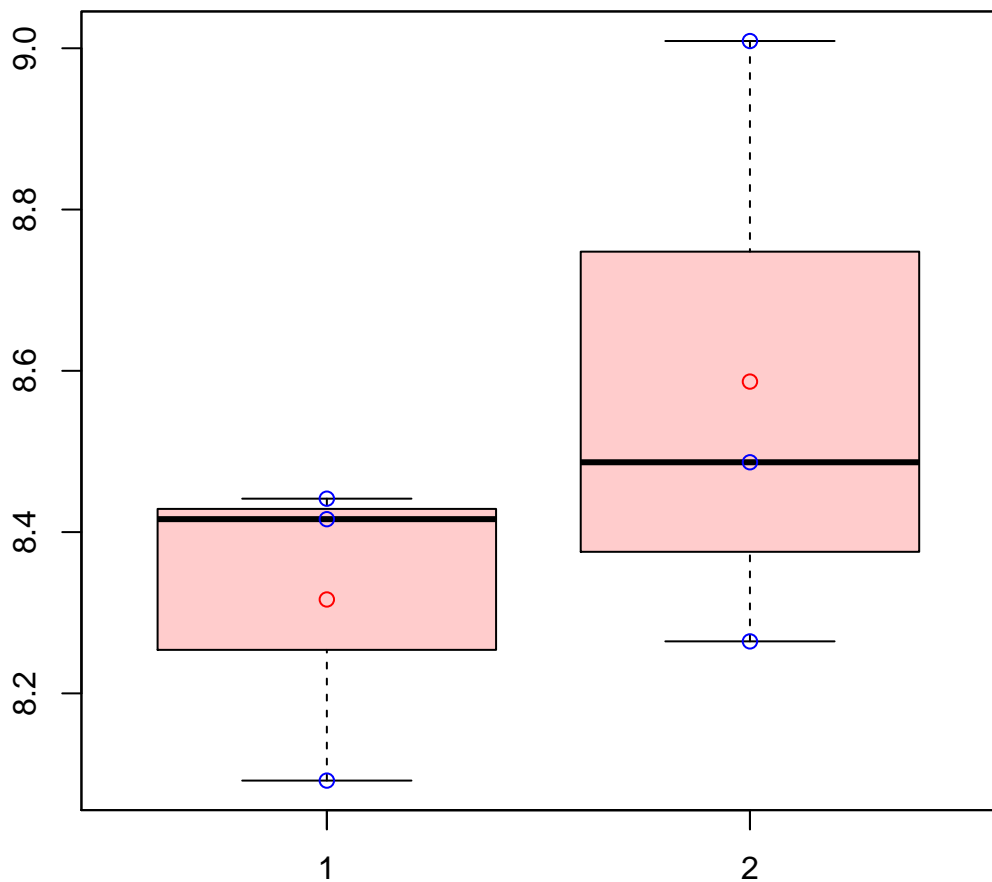

t-Test: p-value = 0.36

# CL1Contig345|CL1Contig345

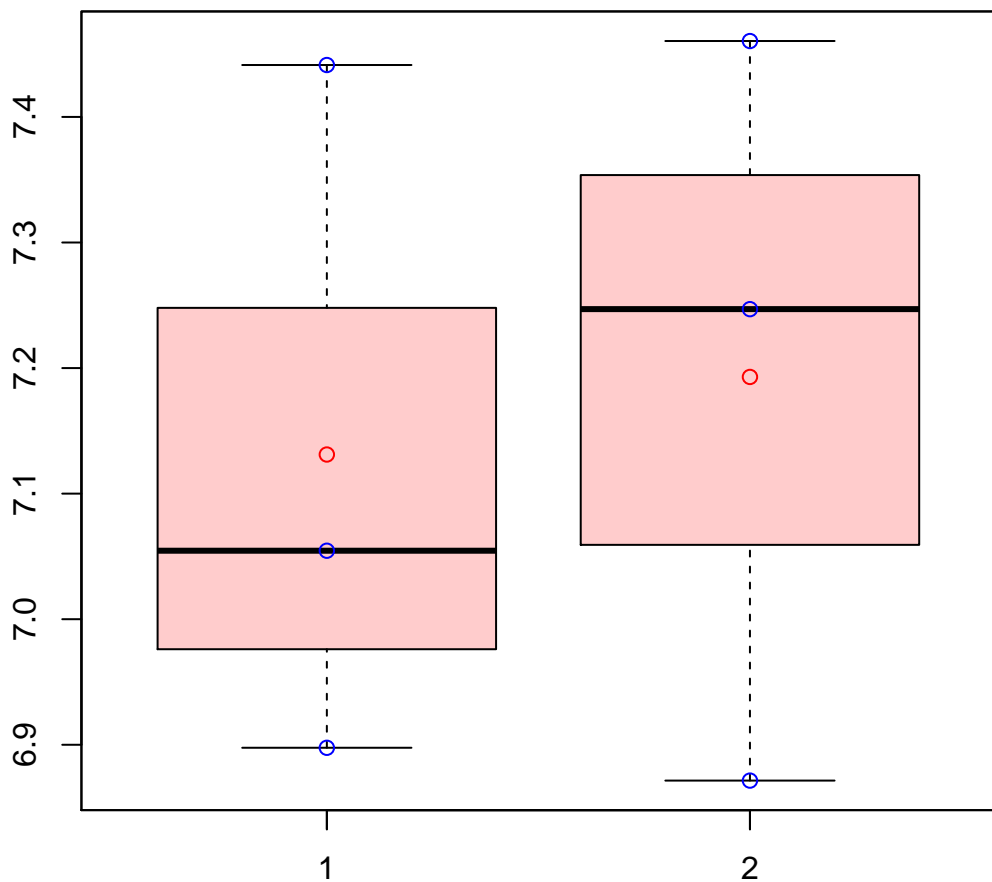

t-Test: p-value = 0.81



# CL1Contig3463|CL1Contig3463

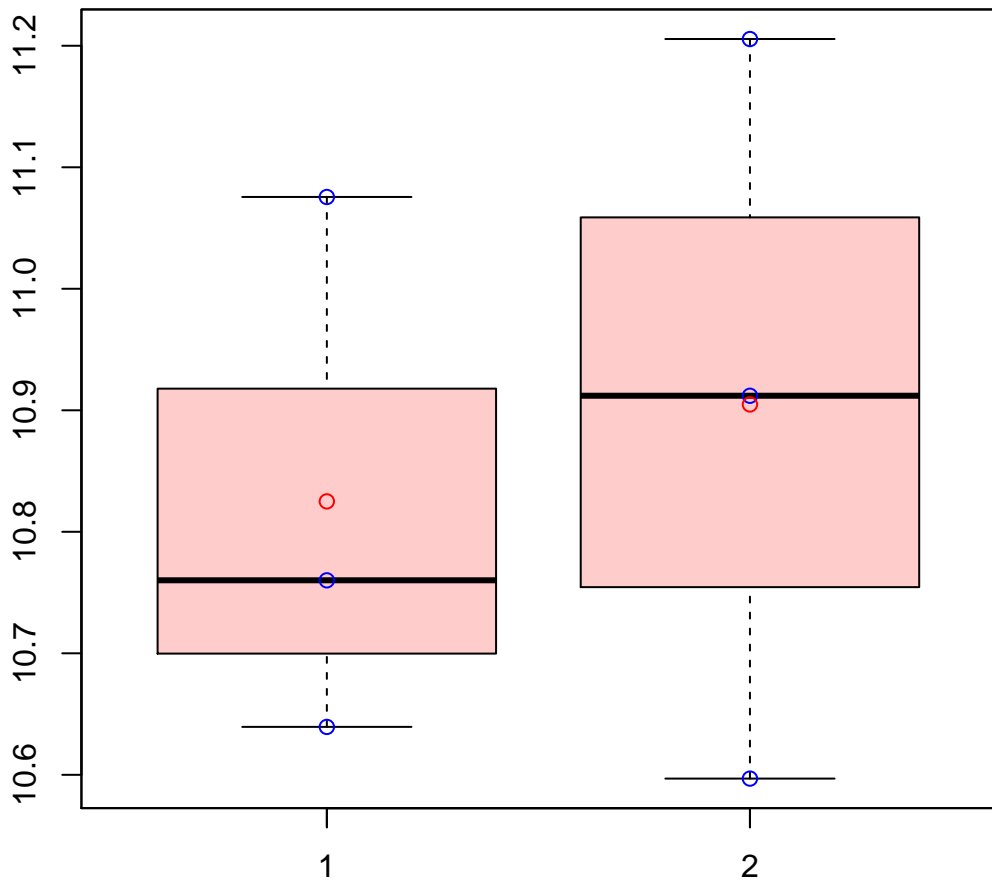

t-Test: p-value = 0.74

# CL1Contig3471|CL1Contig3471

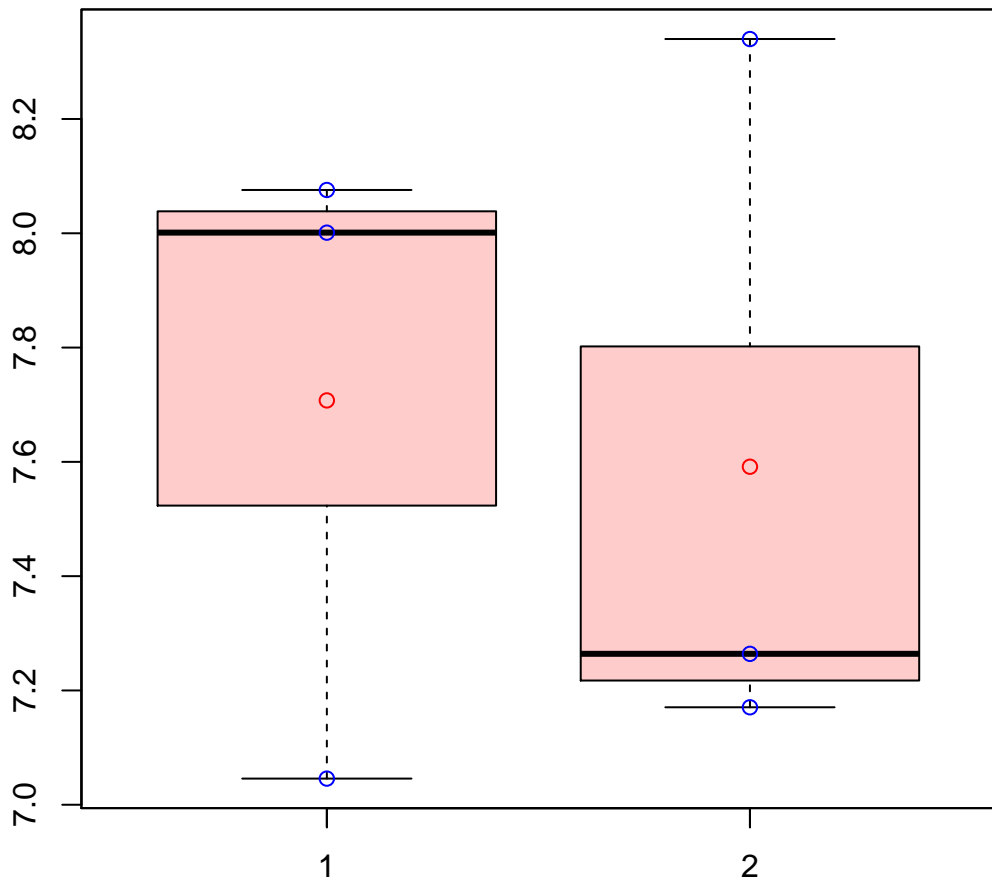

t-Test: p-value = 0.83

# CL1Contig3480|CL1Contig3480

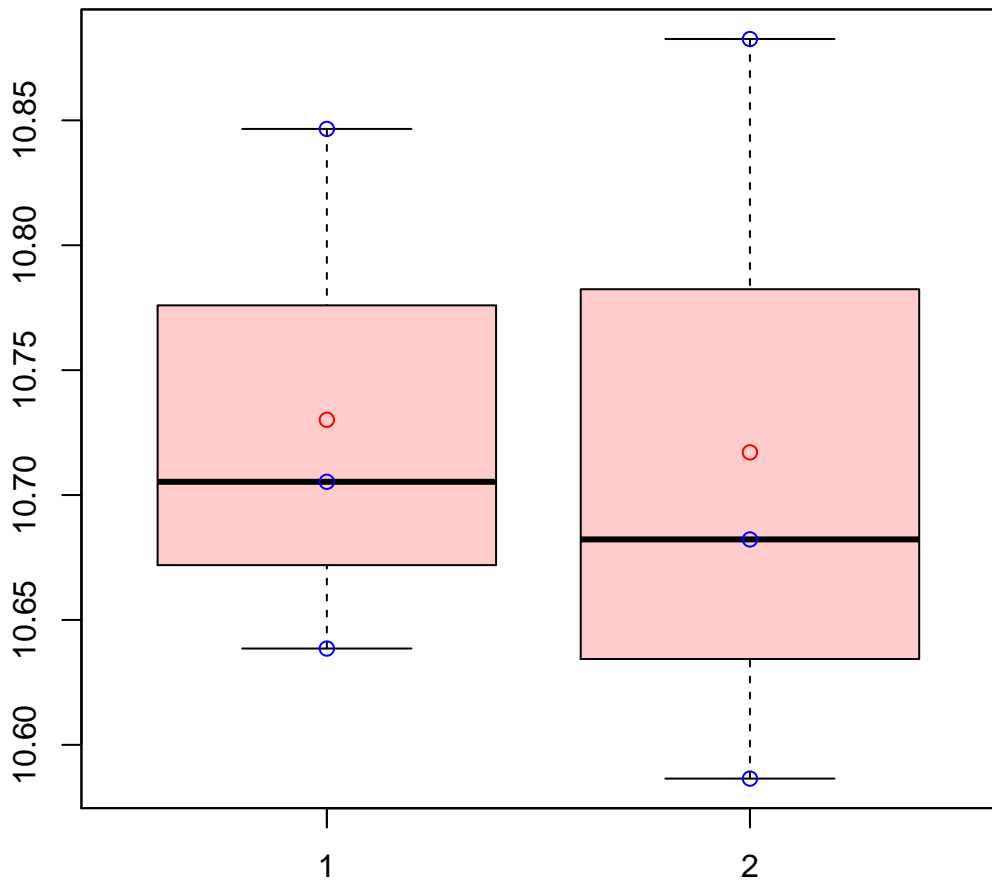

t-Test: p-value = 0.91

# CL1Contig3482|CL1Contig3482

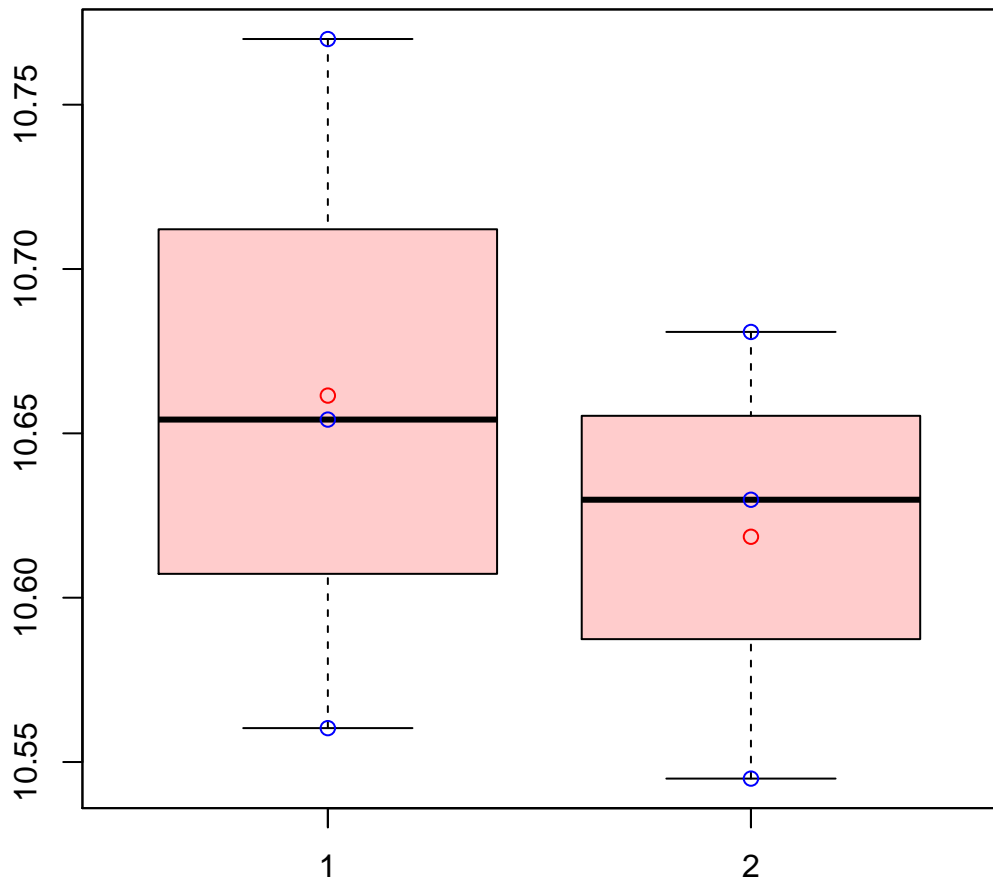

t-Test: p-value = 0.59

# CL1Contig3490|CL1Contig3490

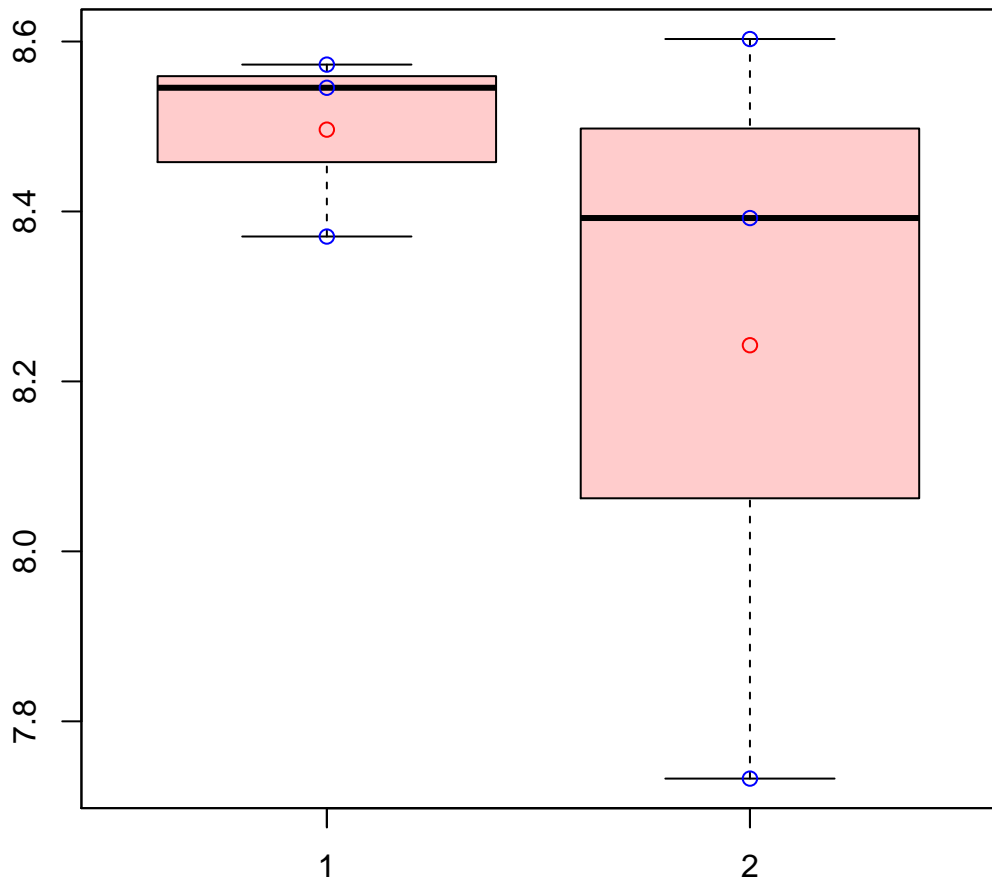

t-Test: p-value = 0.44

# CL1Contig3503|CL1Contig3503

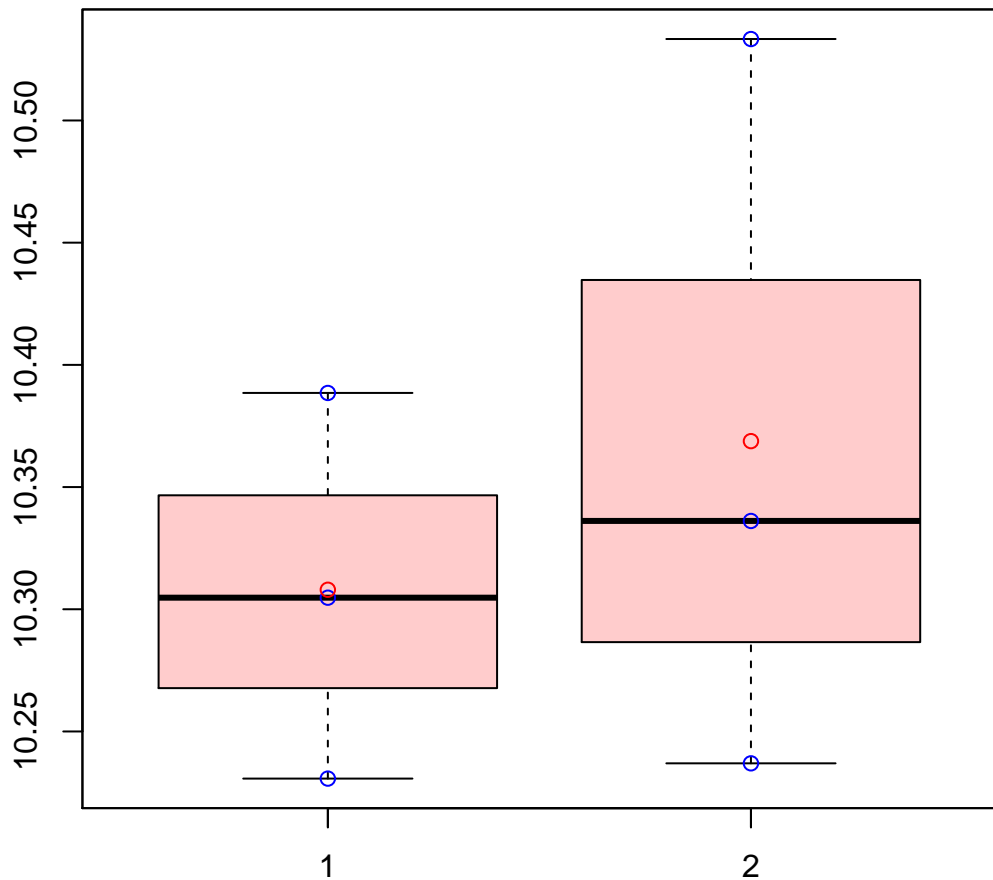

t-Test: p-value = 0.58

# CL1Contig3516|CL1Contig3516

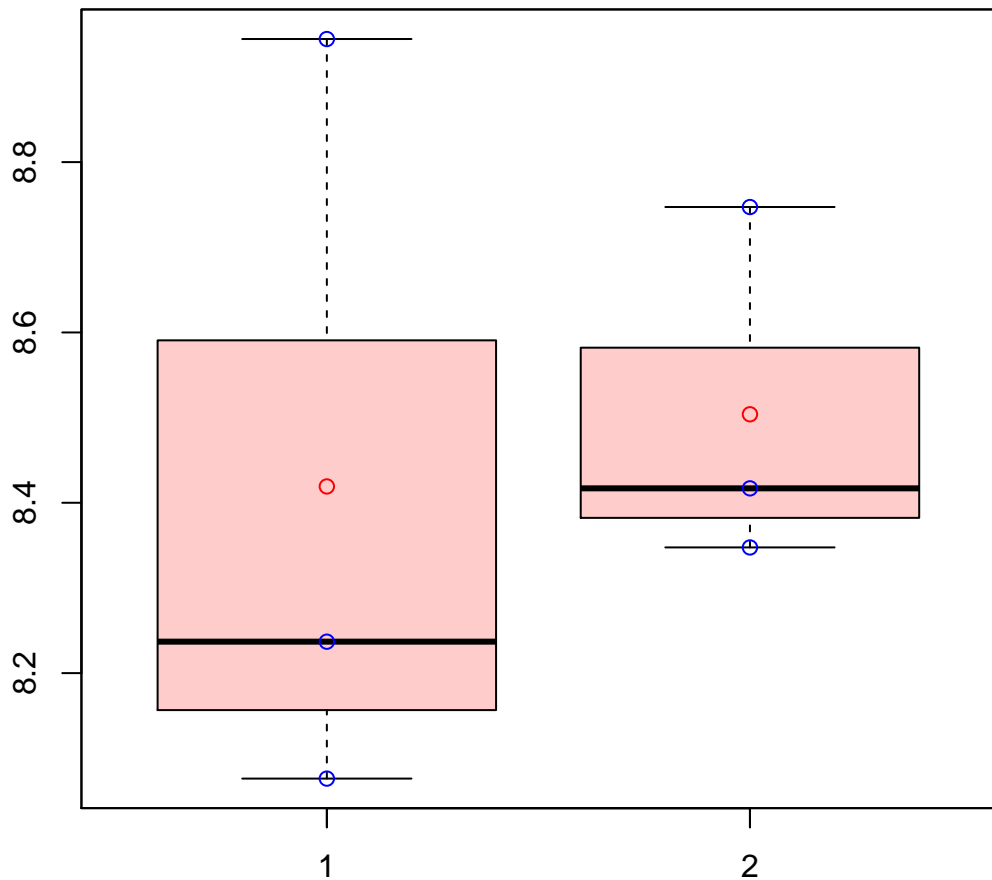

t-Test: p-value = 0.79

# CL1Contig3528|CL1Contig3528

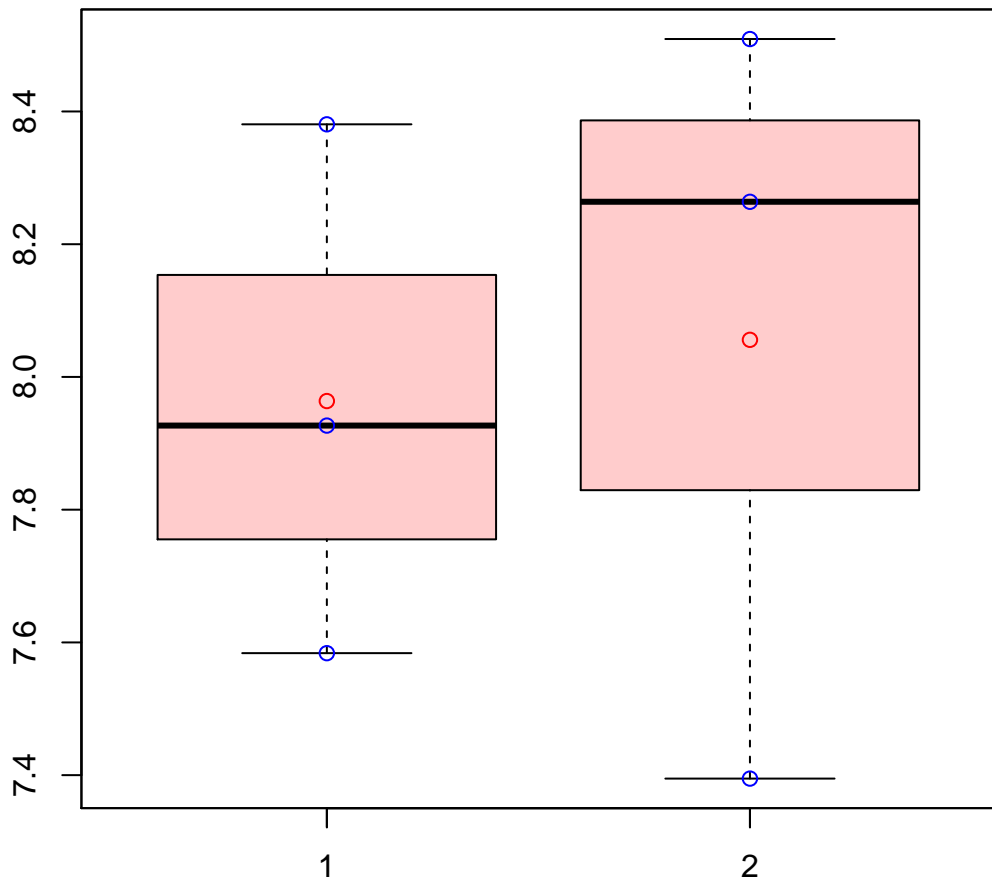

t-Test: p-value = 0.83



# CL1Contig3529|CL1Contig3529

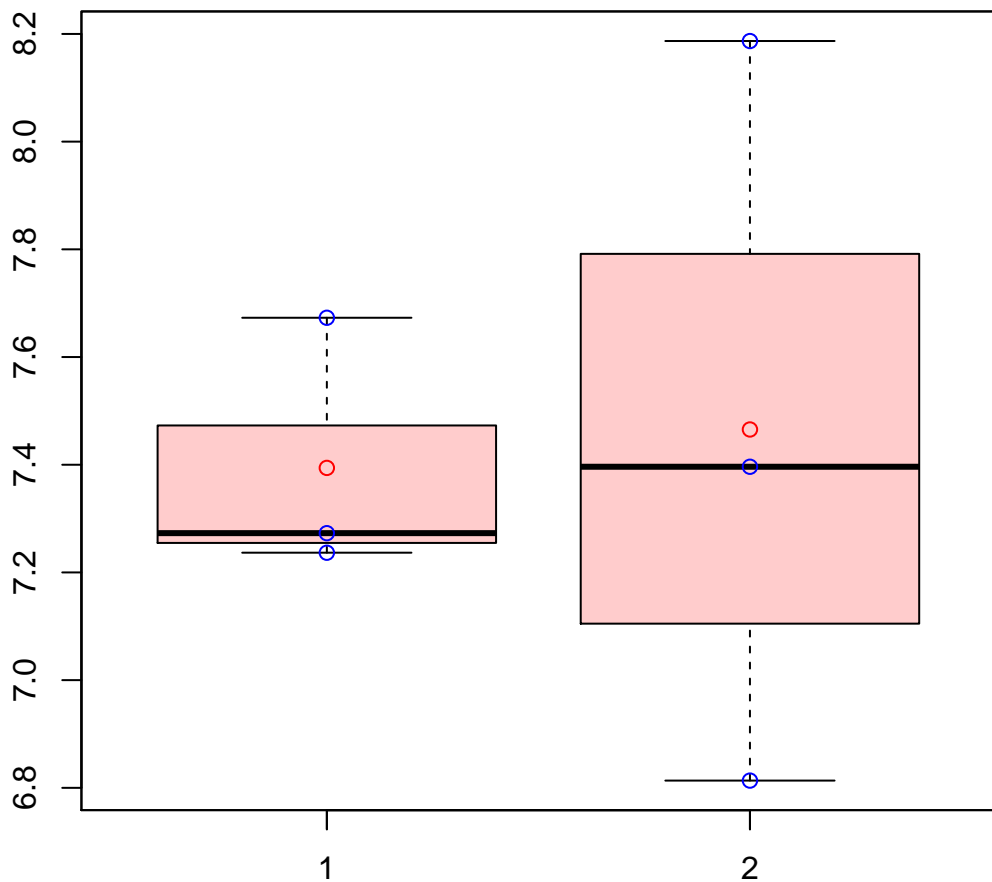

t-Test: p-value = 0.88

# CL1Contig3533|CL1Contig3533

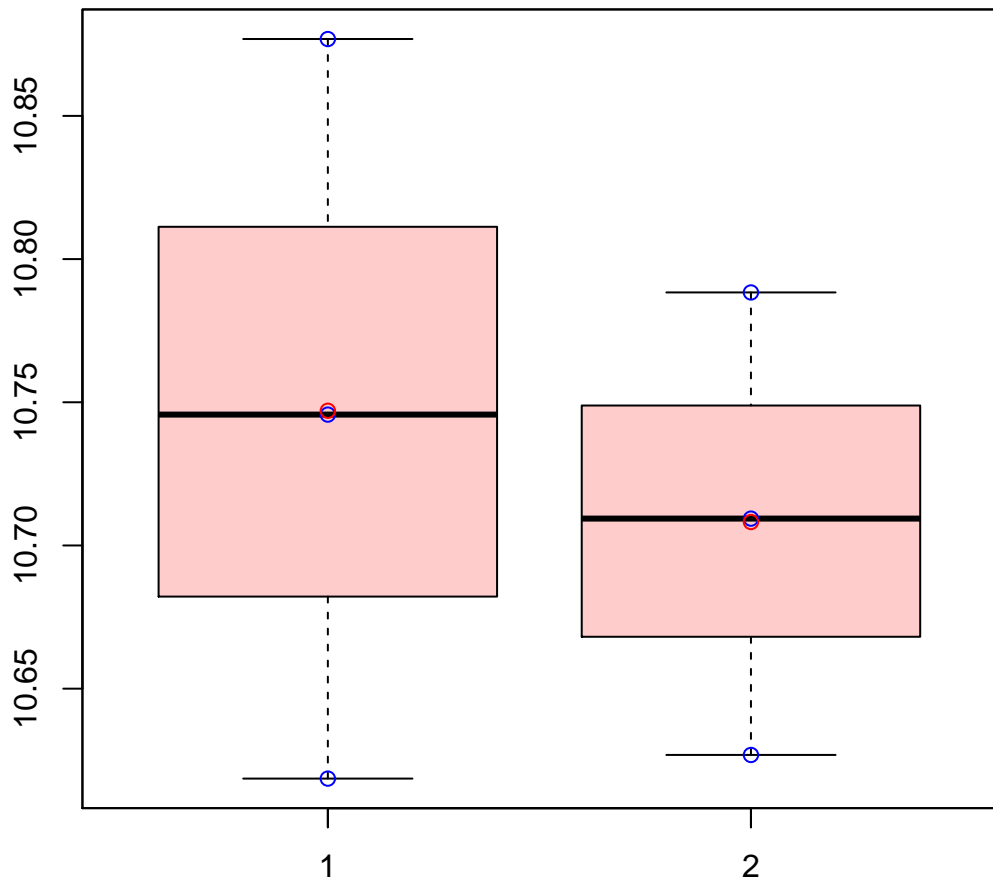

t-Test: p-value = 0.69

# CL1Contig3535|CL1Contig3535

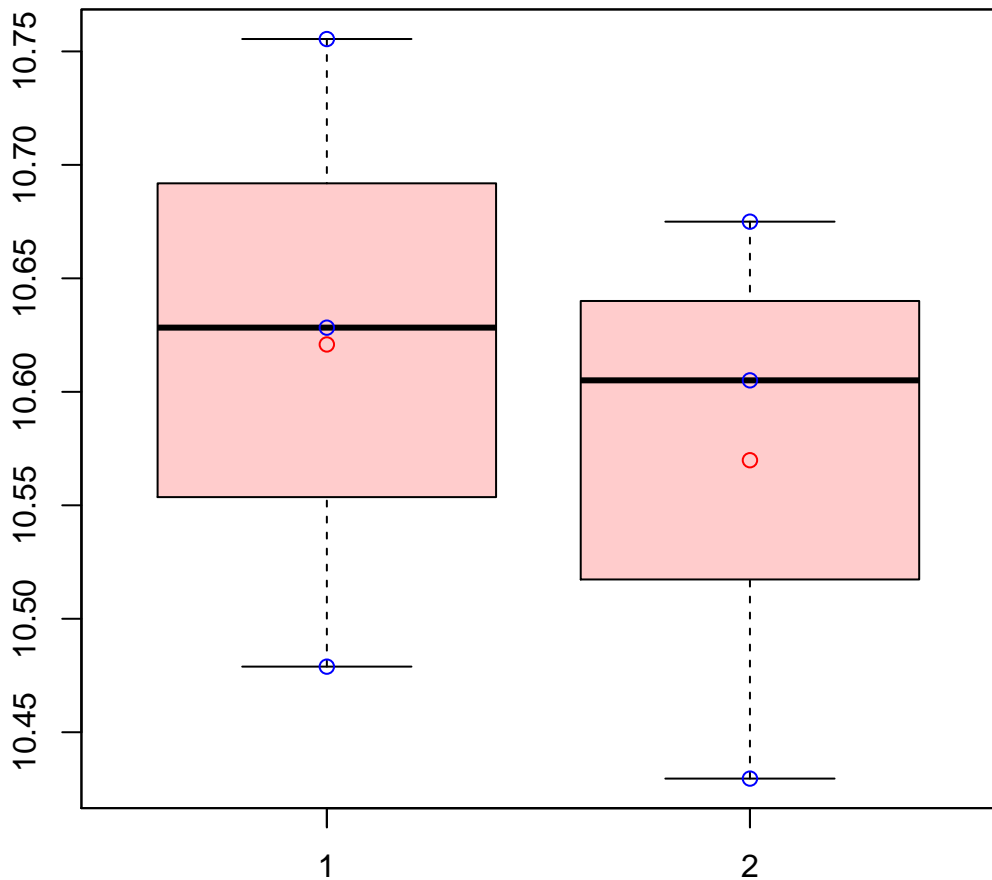

t-Test: p-value = 0.66

# CL1Contig3536|CL1Contig3536

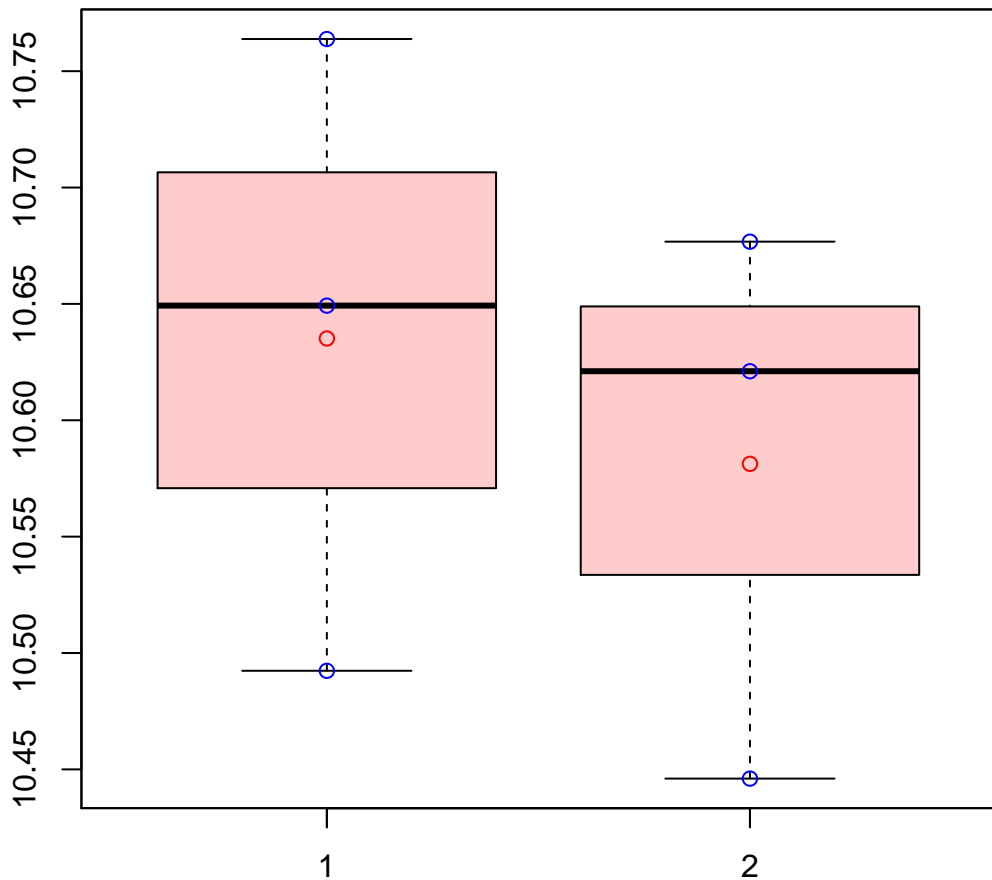

t-Test: p-value = 0.64

# CL1Contig3542|CL1Contig3542

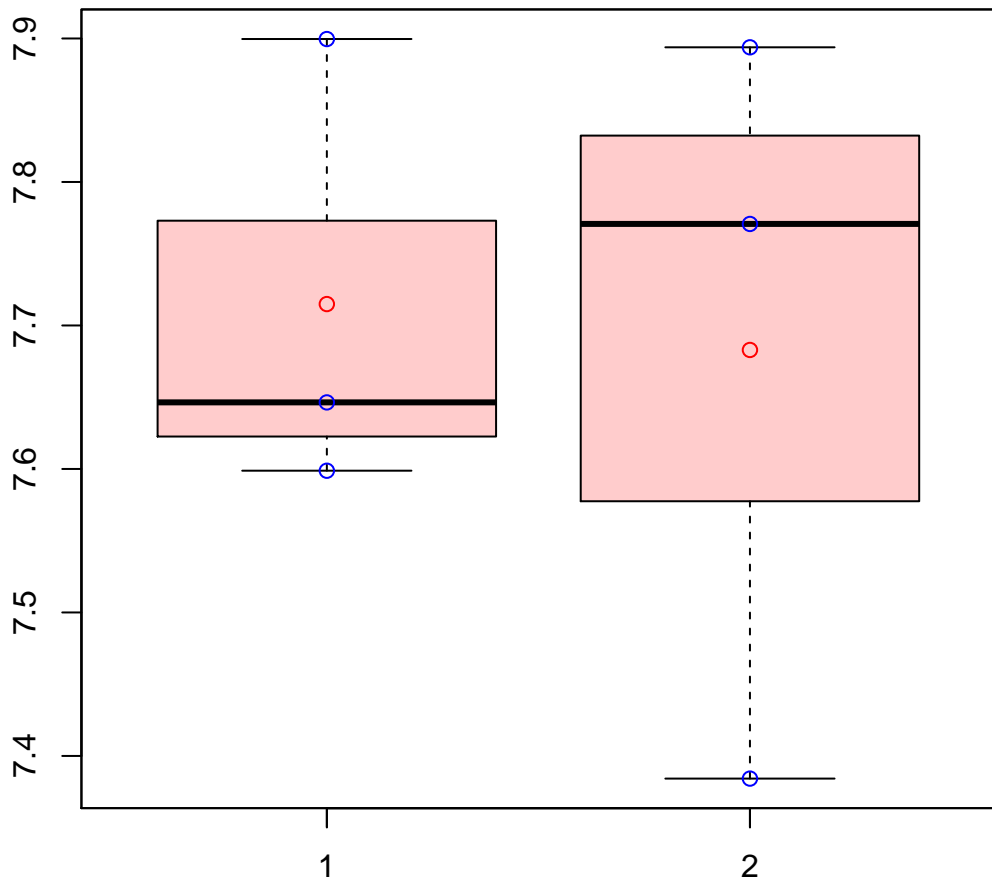

t-Test: p-value = 0.87

# CL1Contig3562|CL1Contig3562

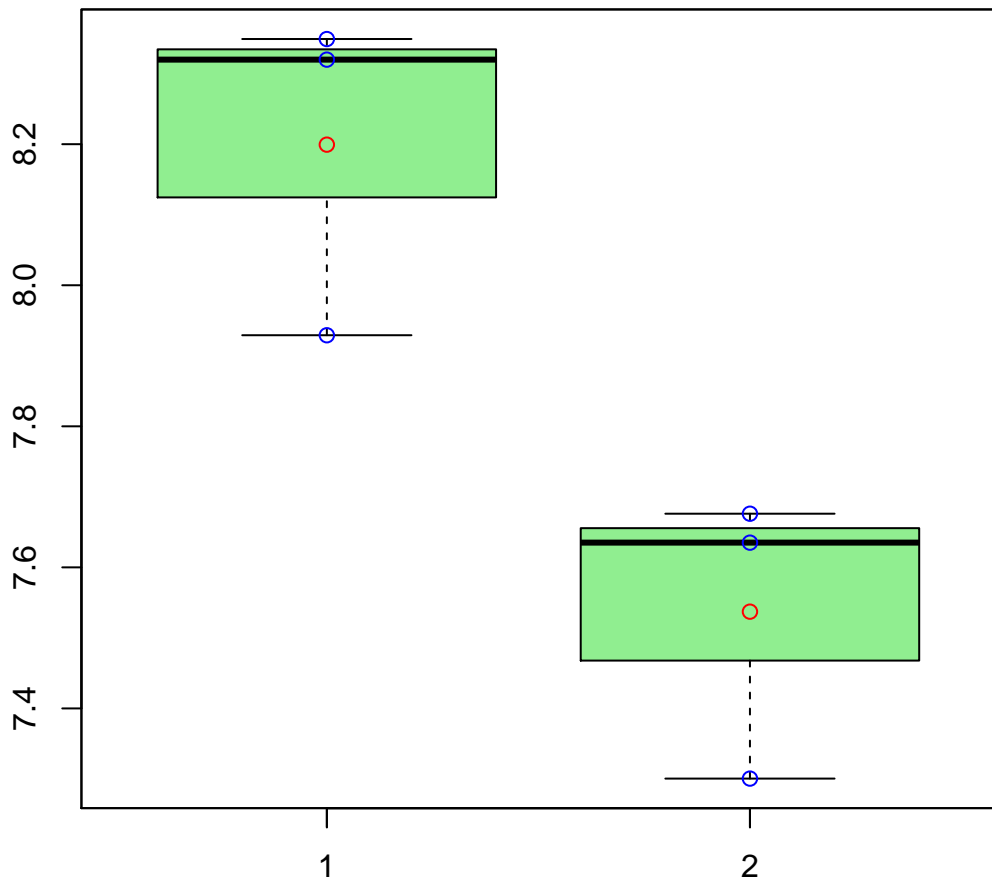

t-Test: p-value = 0.02

# CL1Contig3582|CL1Contig3582

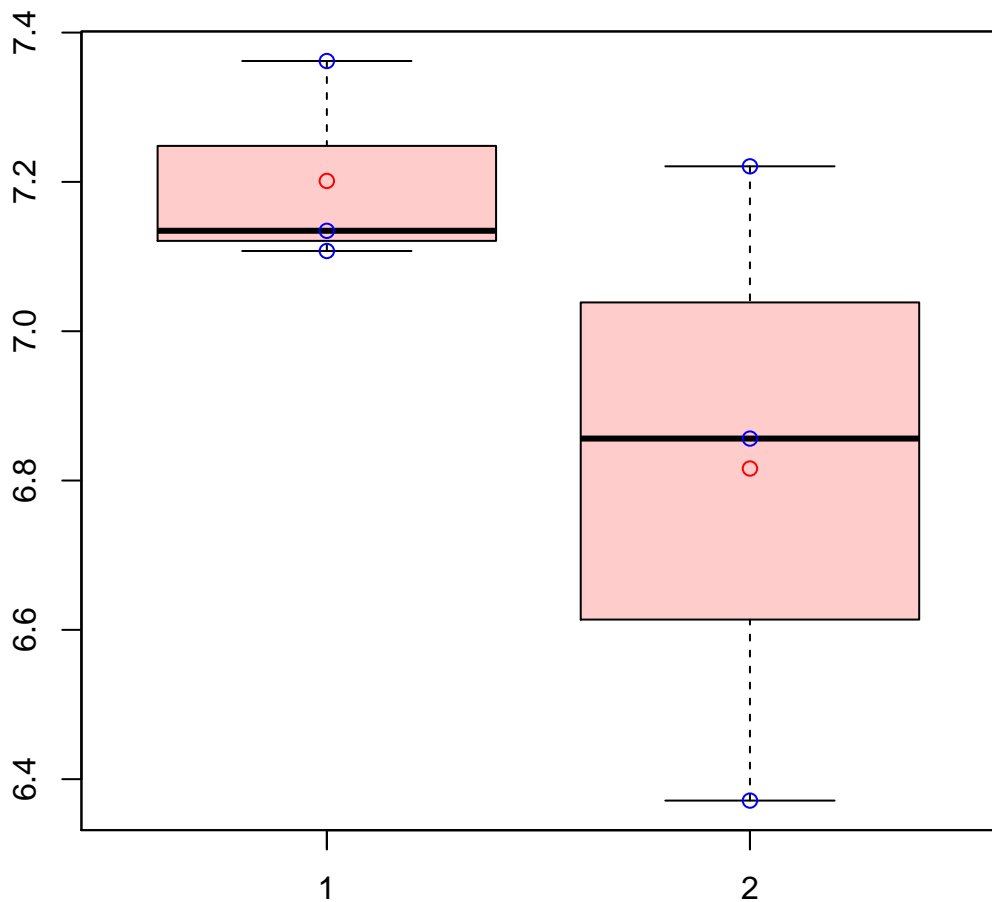

t-Test: p-value = 0.25

# CL1Contig3585|CL1Contig3585

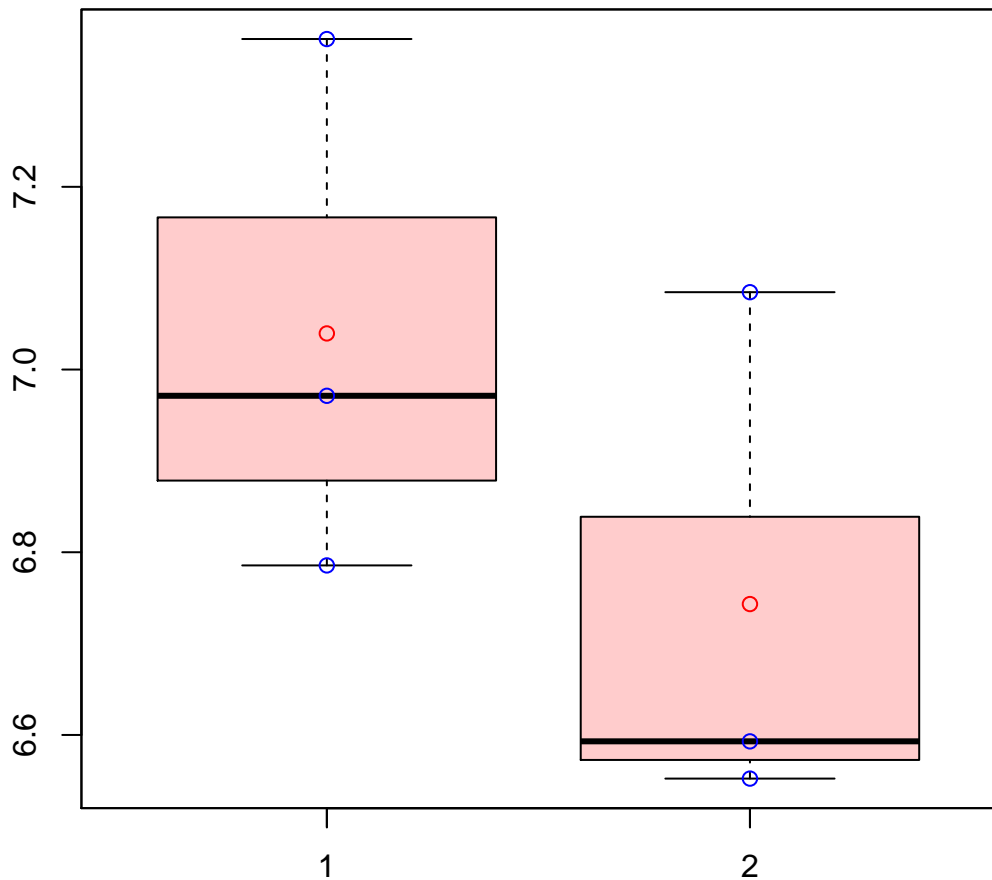

t-Test: p-value = 0.29



# CL1Contig3612|CL1Contig3612

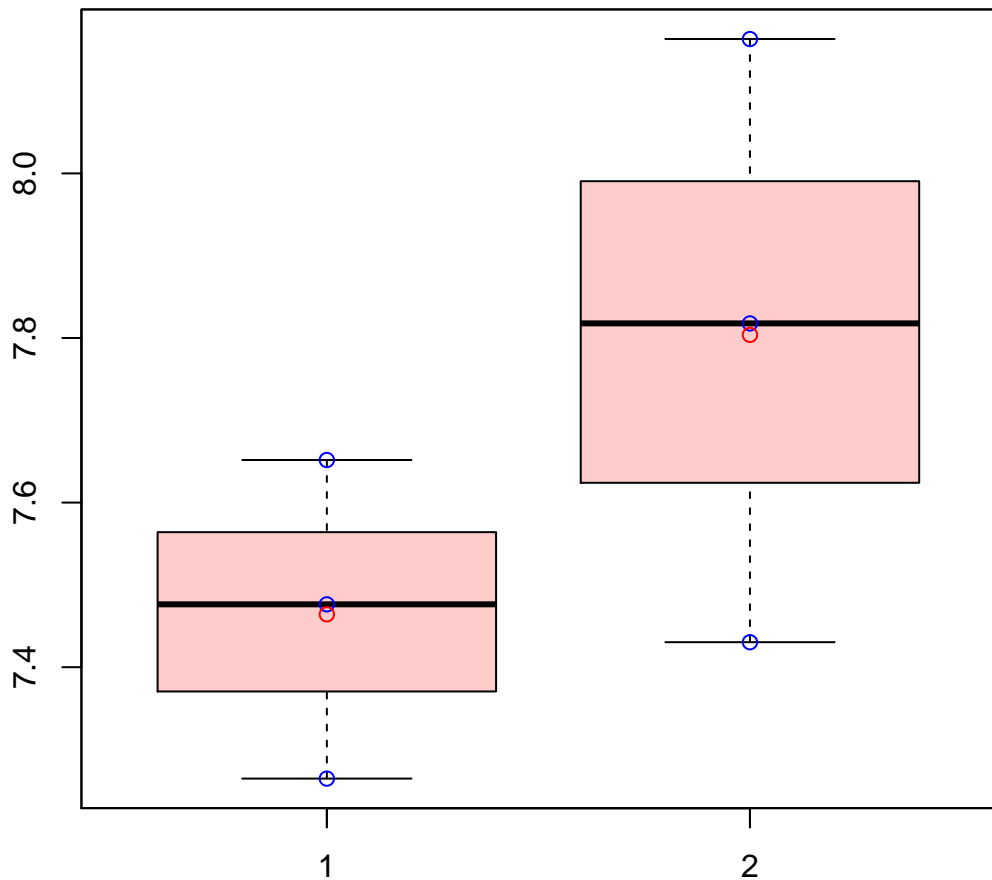

t-Test: p-value = 0.25

# CL1Contig3615|CL1Contig3615

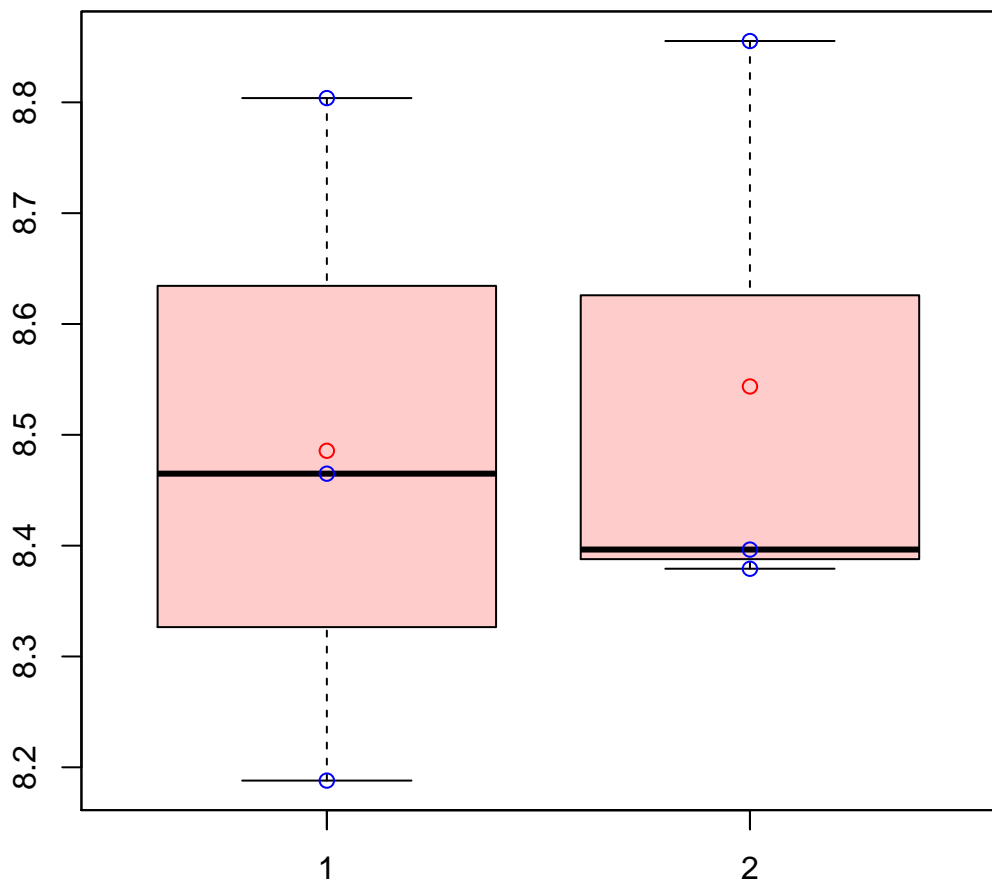

t-Test: p-value = 0.82

# CL1Contig3640|CL1Contig3640

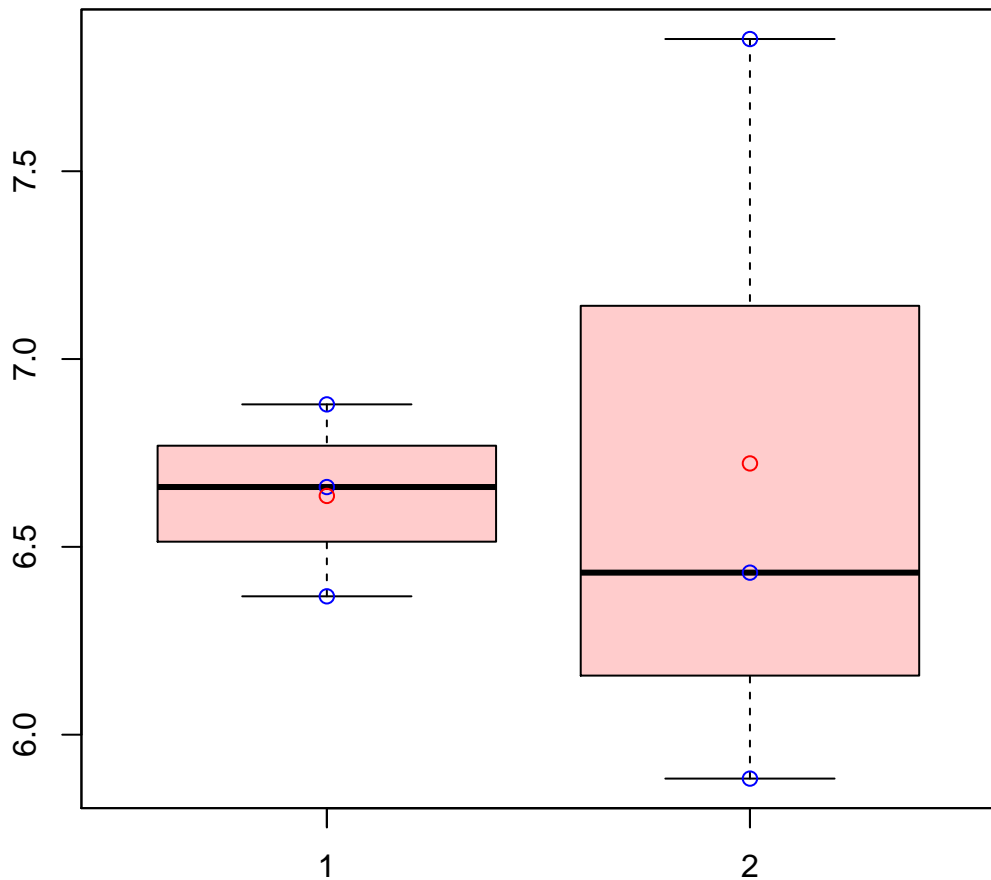

t-Test: p-value = 0.9

# CL1Contig3657|CL1Contig3657

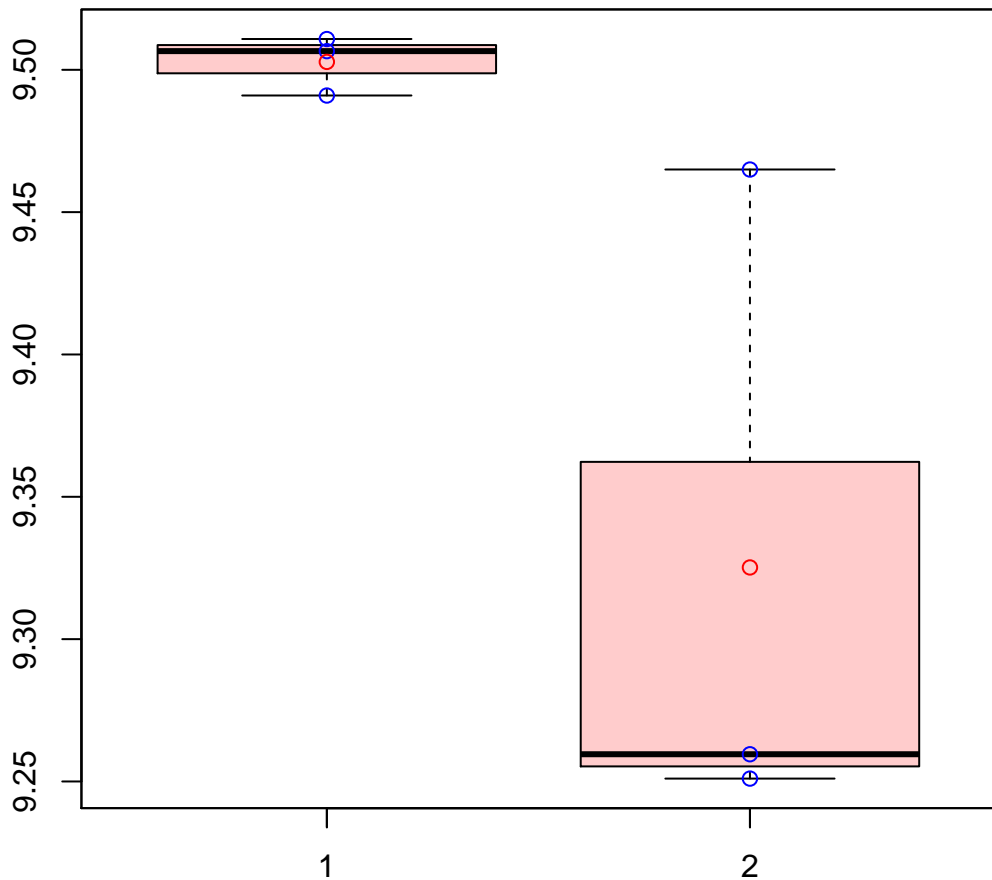

t-Test: p-value = 0.13

# CL1Contig3667|CL1Contig3667

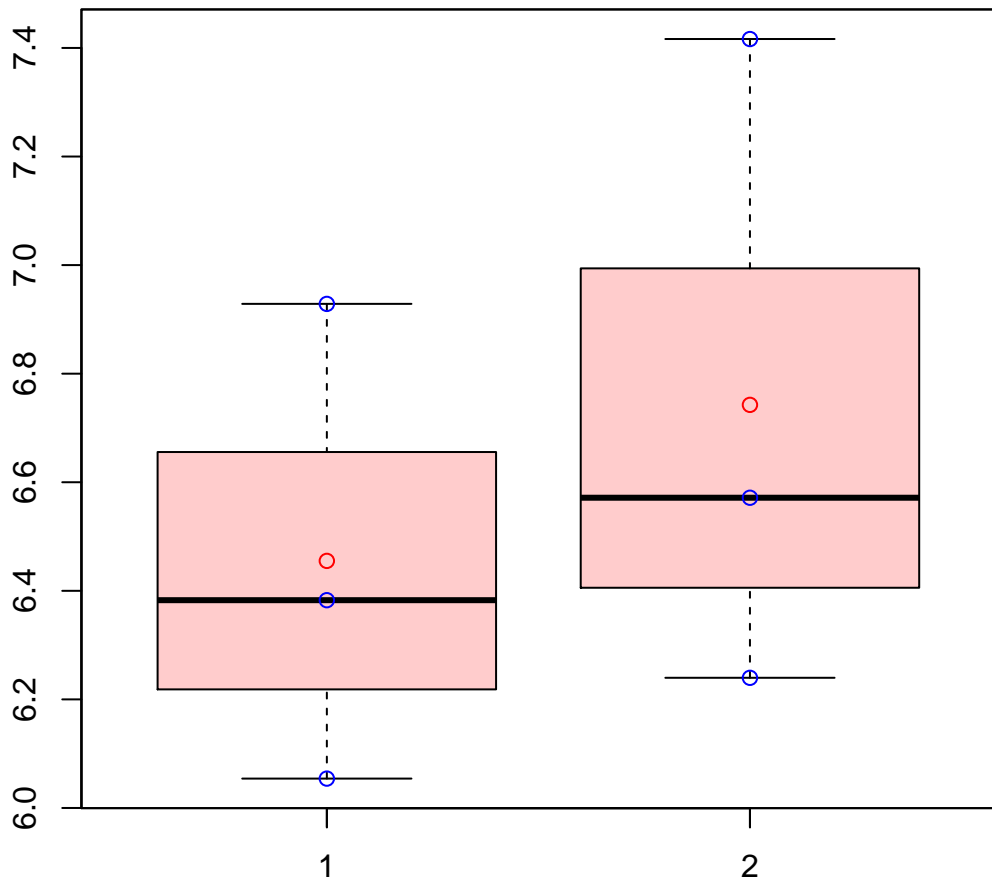

t-Test: p-value = 0.55

# CL1Contig3669|CL1Contig3669

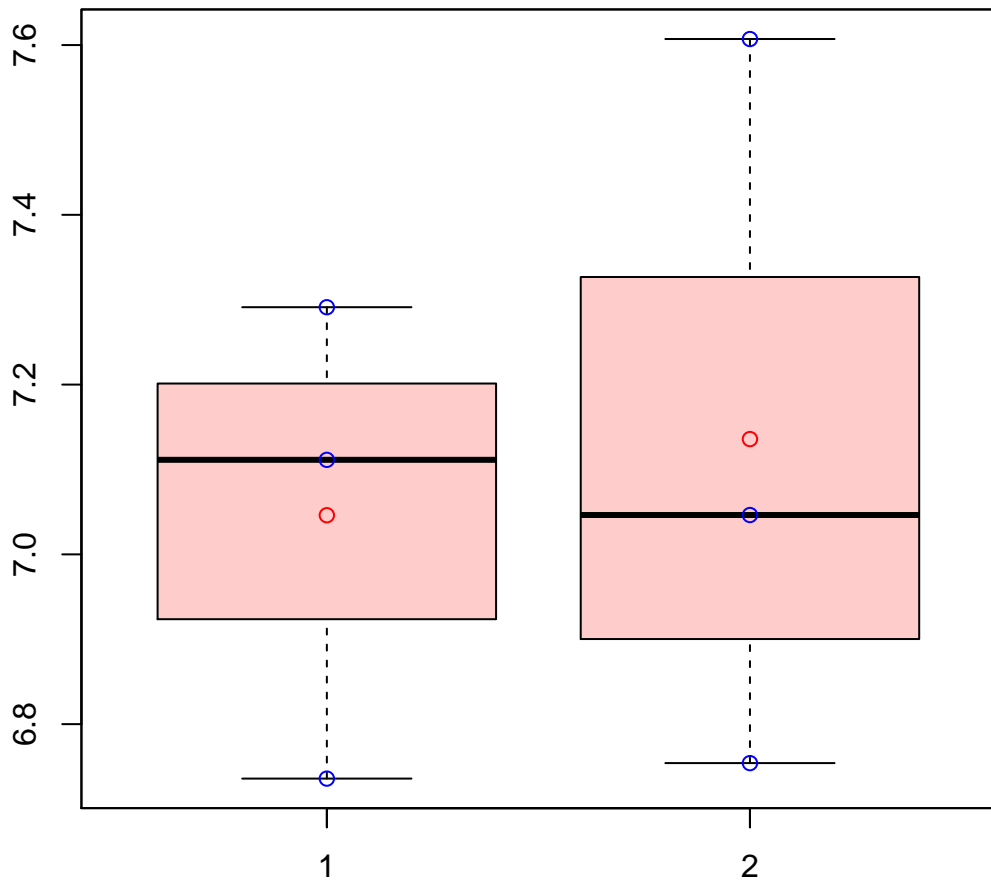

t-Test: p-value = 0.78

# CL1Contig3670|CL1Contig3670

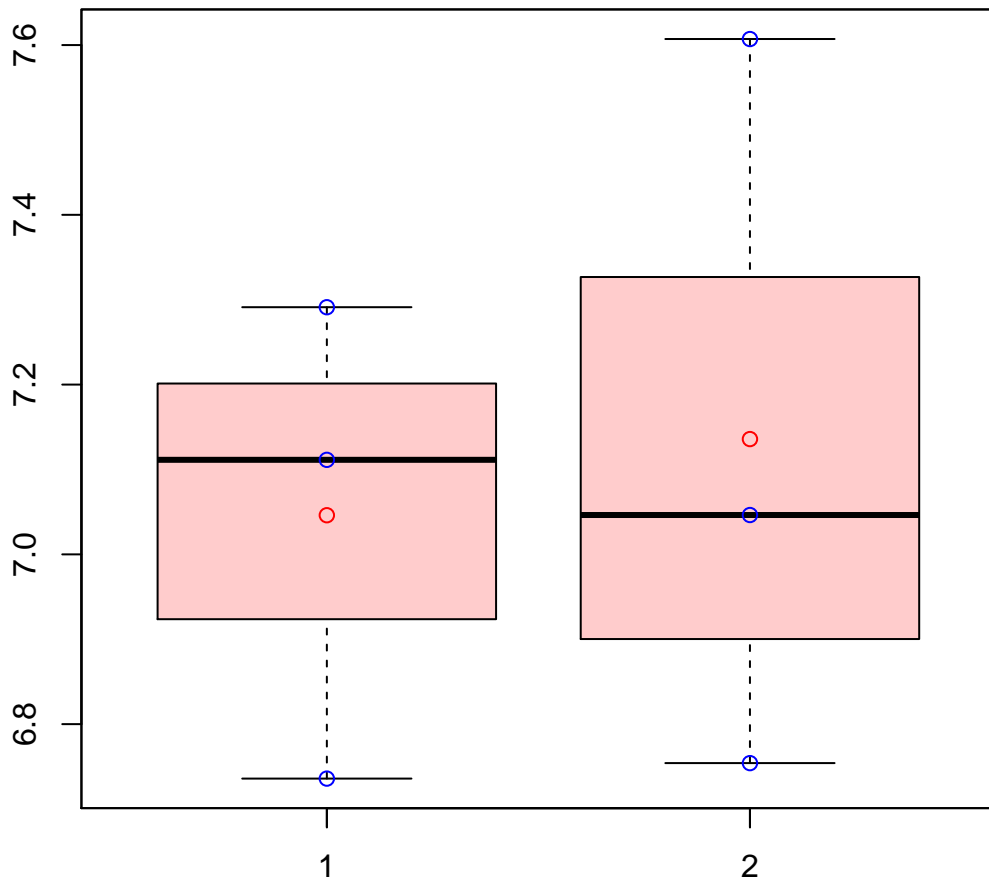

t-Test: p-value = 0.78

# CL1Contig3683|CL1Contig3683



t-Test: p-value = 0.25



# CL1Contig3688|CL1Contig3688



t-Test: p-value = 0.27

# CL1Contig3689|CL1Contig3689



t-Test: p-value = 0.27

# CL1Contig3693|CL1Contig3693



t-Test: p-value = 0.78

# CL1Contig3694|CL1Contig3694



t-Test: p-value = 0.97

# CL1Contig36|CL1Contig36

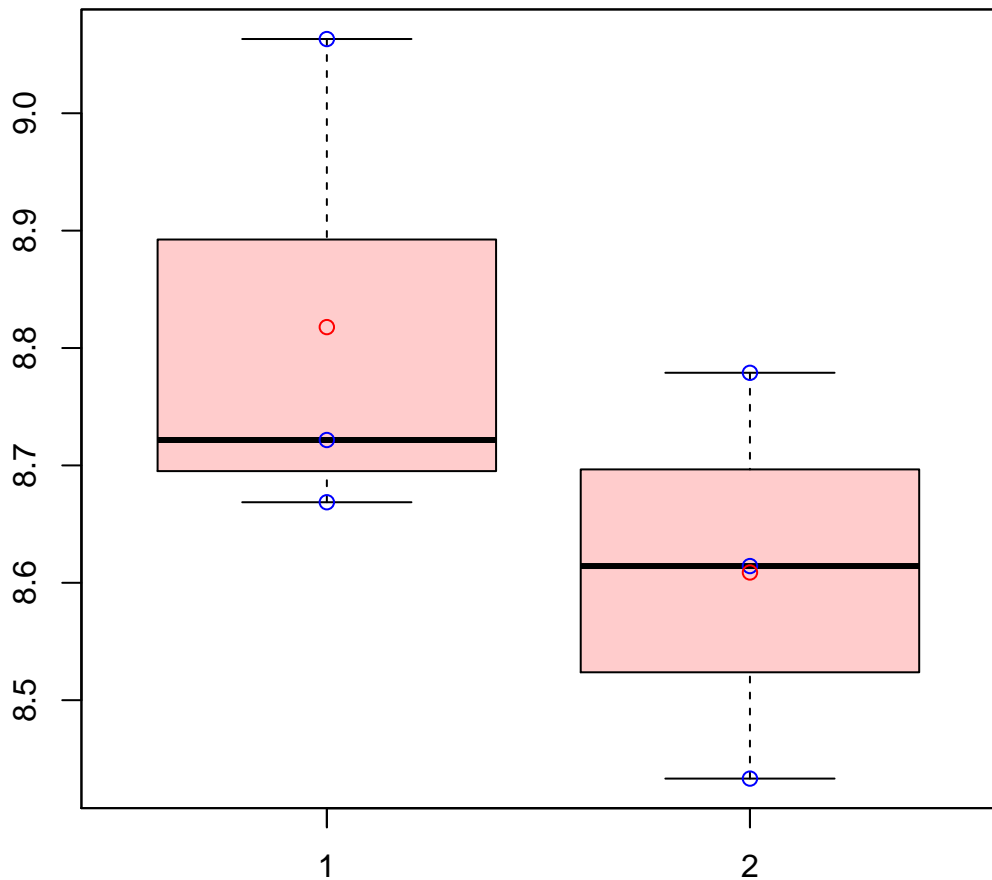

t-Test: p-value = 0.26

# CL1Contig3700|CL1Contig3700

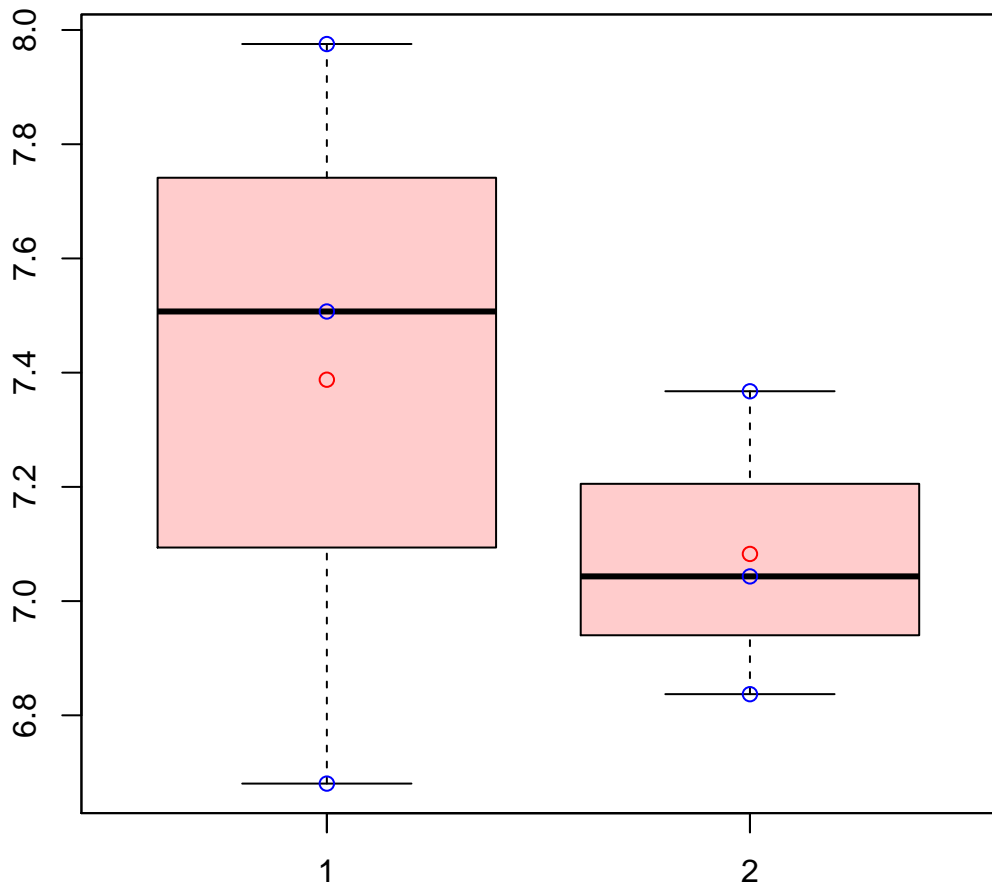

t-Test: p-value = 0.52

# CL1Contig3715|CL1Contig3715

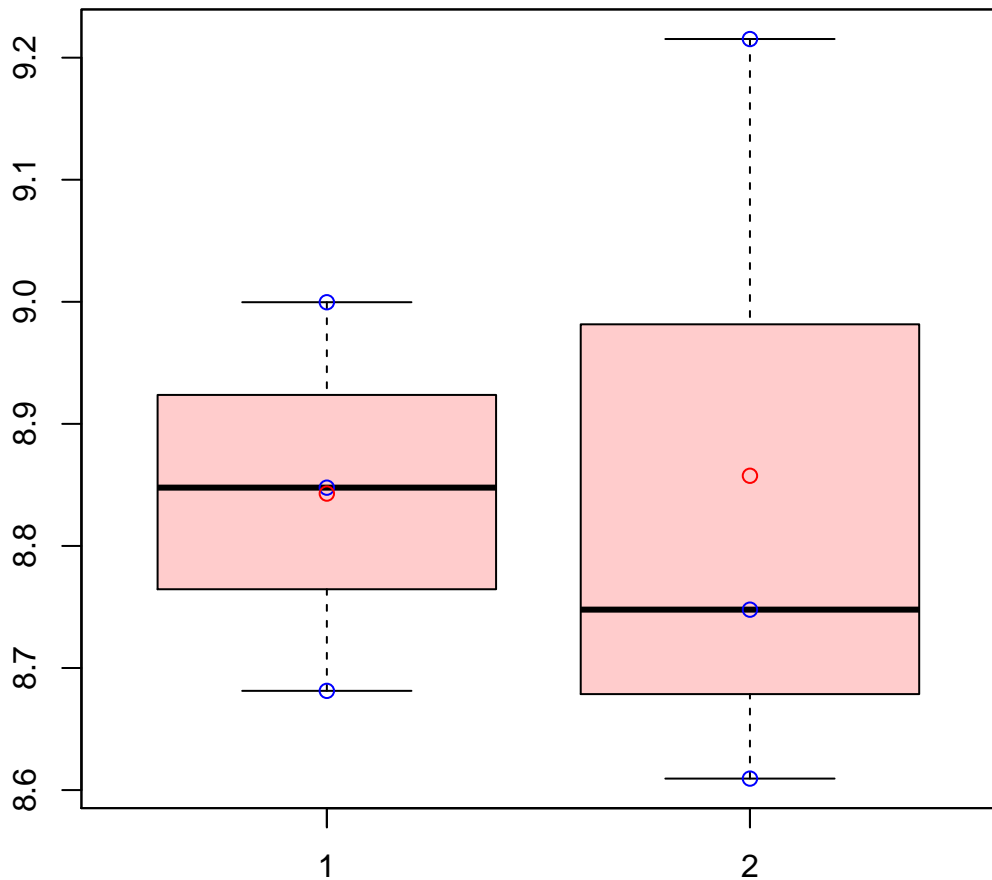

t-Test: p-value = 0.95

# CL1Contig3719|CL1Contig3719

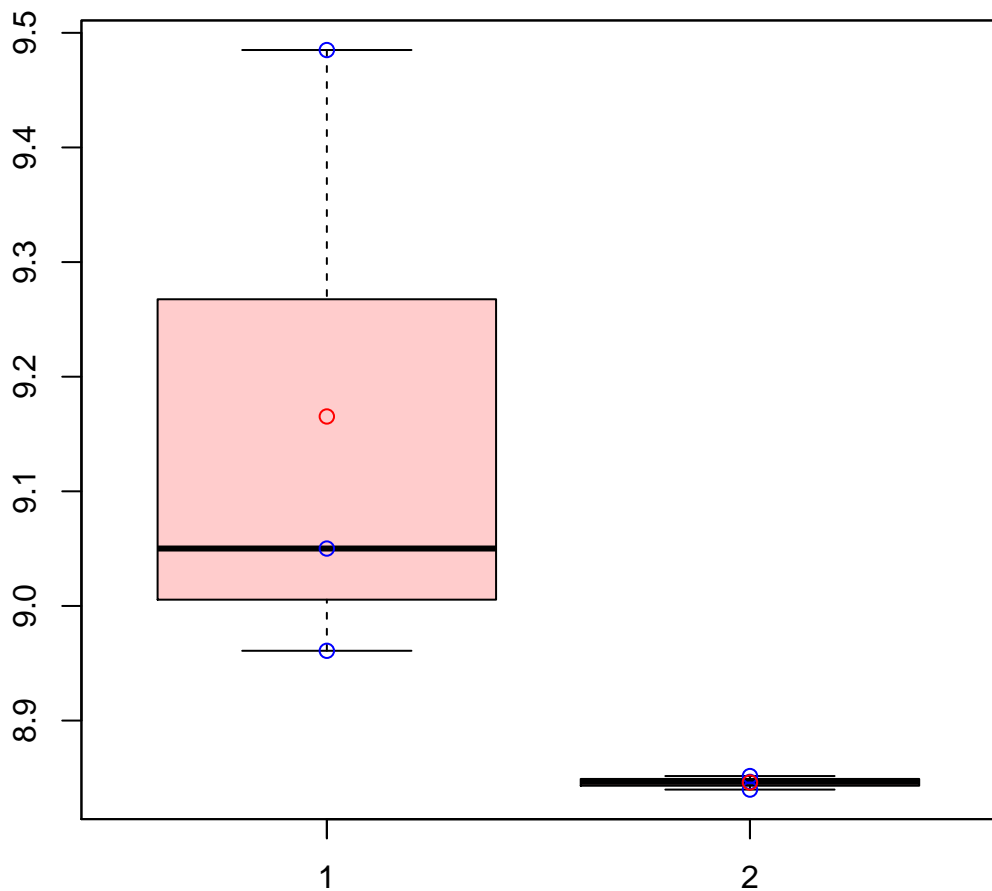

t-Test: p-value = 0.19



# CL1Contig3736|CL1Contig3736

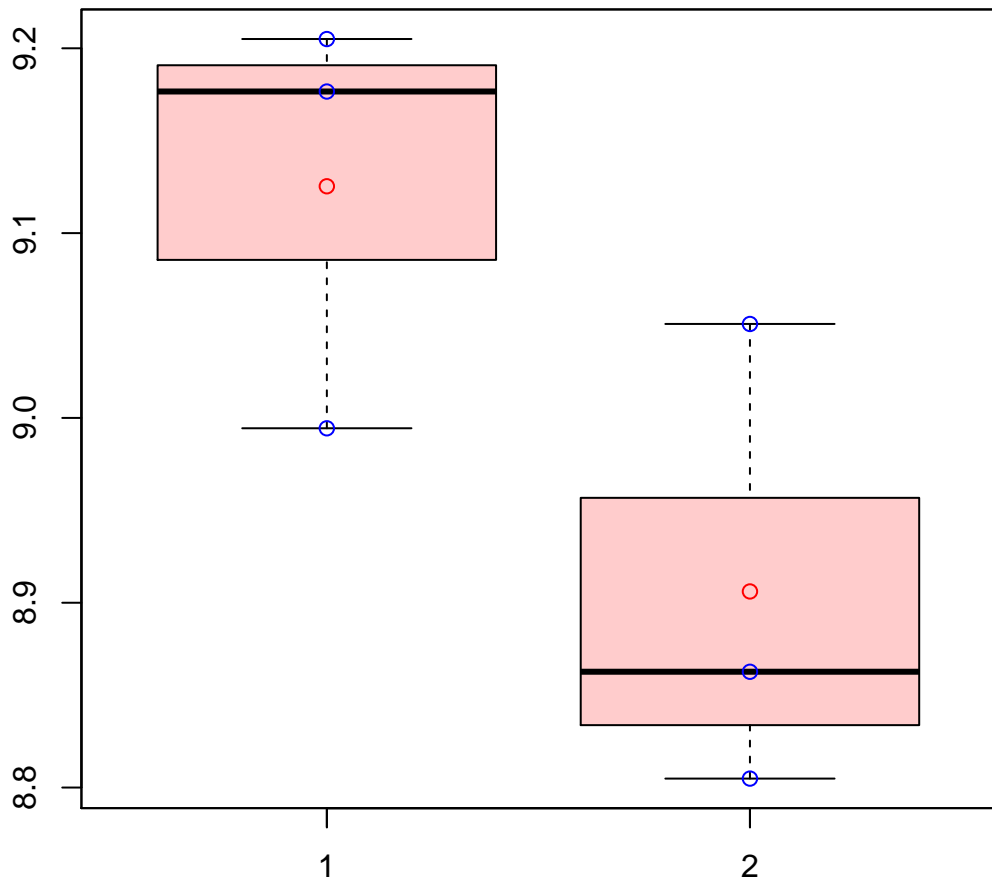

t-Test: p-value = 0.09

# CL1Contig3737|CL1Contig3737

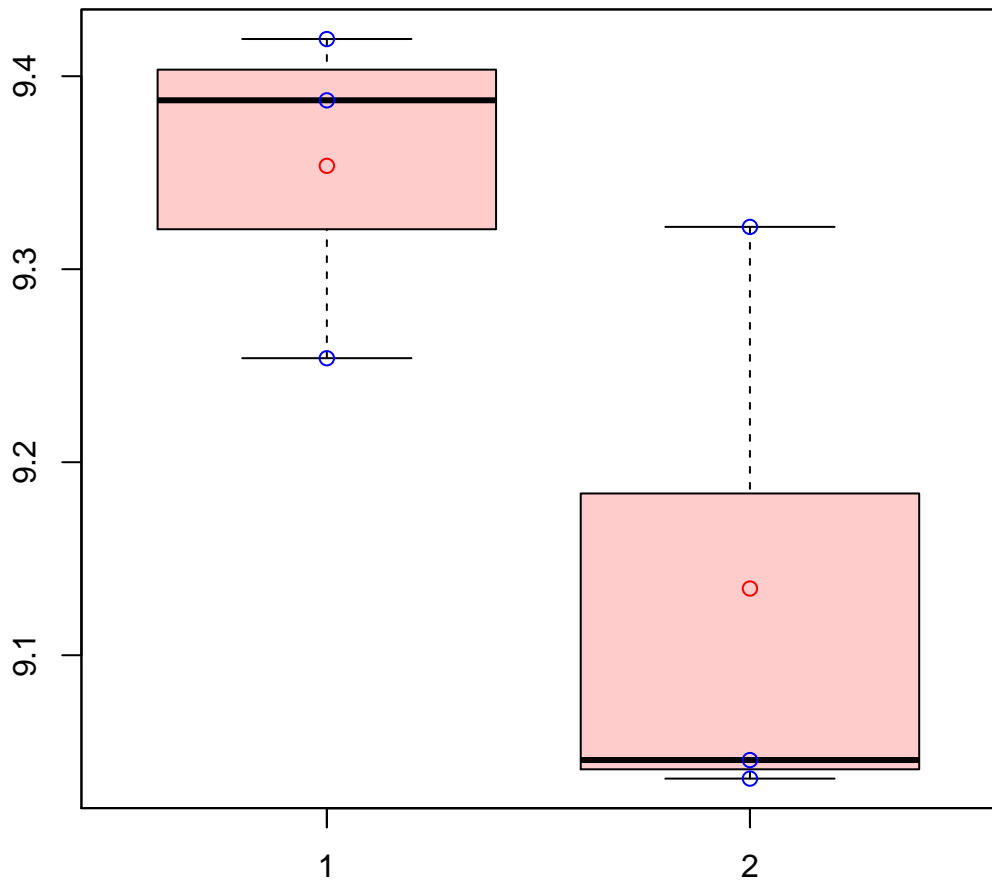

t-Test: p-value = 0.13

# CL1Contig3738|CL1Contig3738

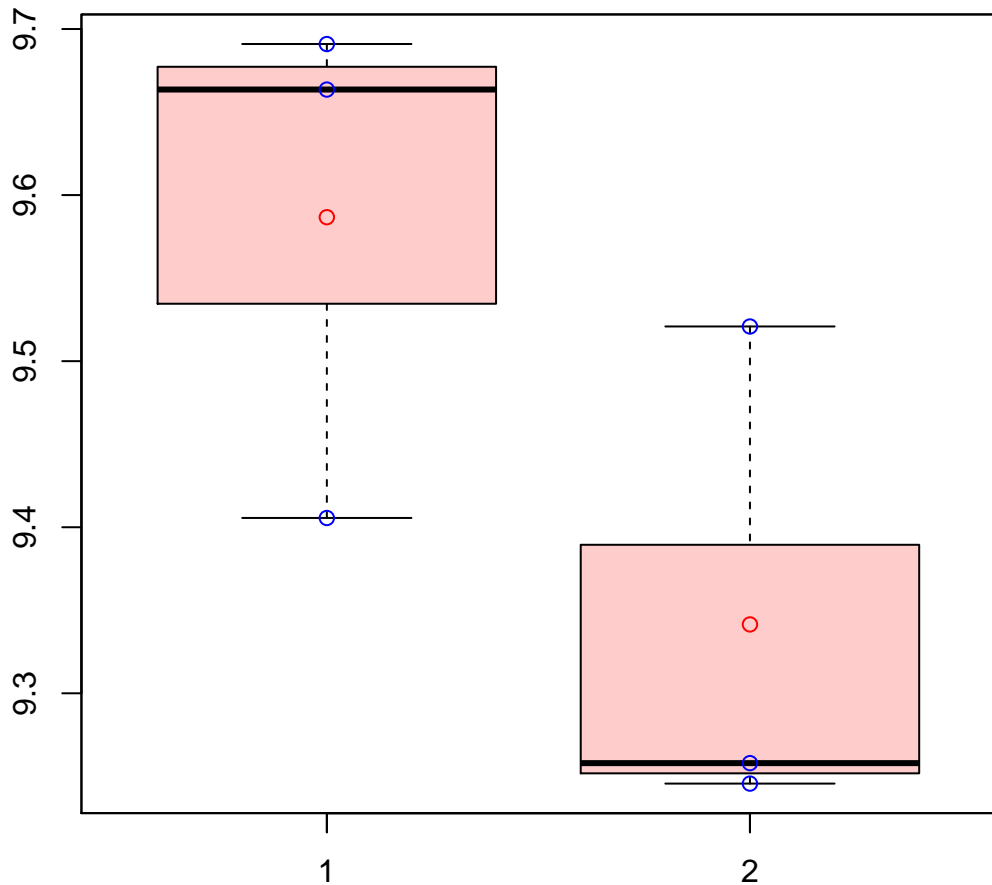

t-Test: p-value = 0.13

# CL1Contig3739|CL1Contig3739

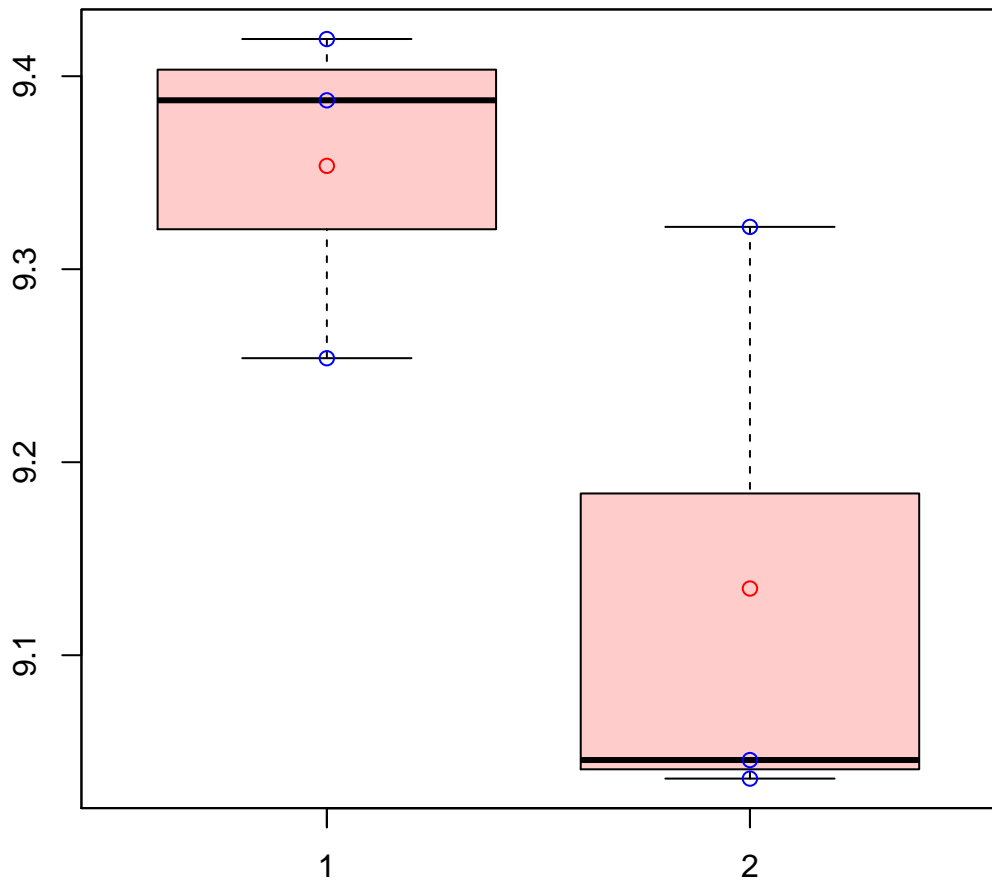

t-Test: p-value = 0.13

# CL1Contig3740|CL1Contig3740

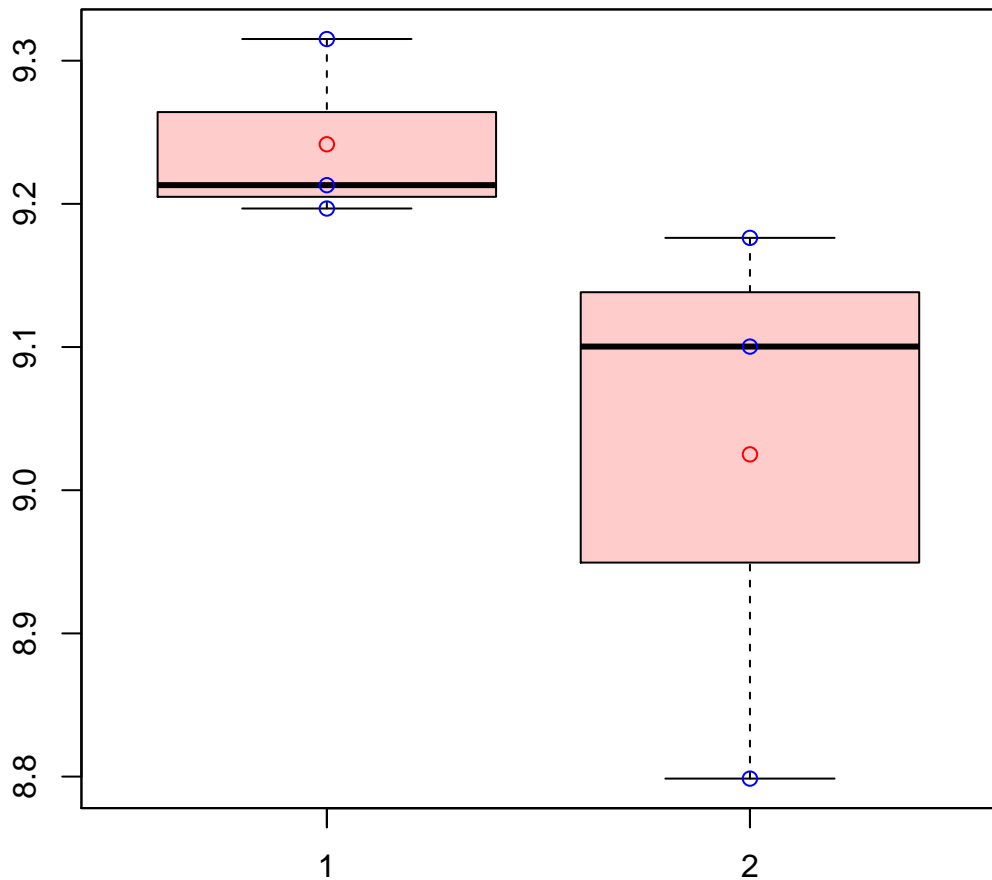

t-Test: p-value = 0.19

# CL1Contig3754|CL1Contig3754

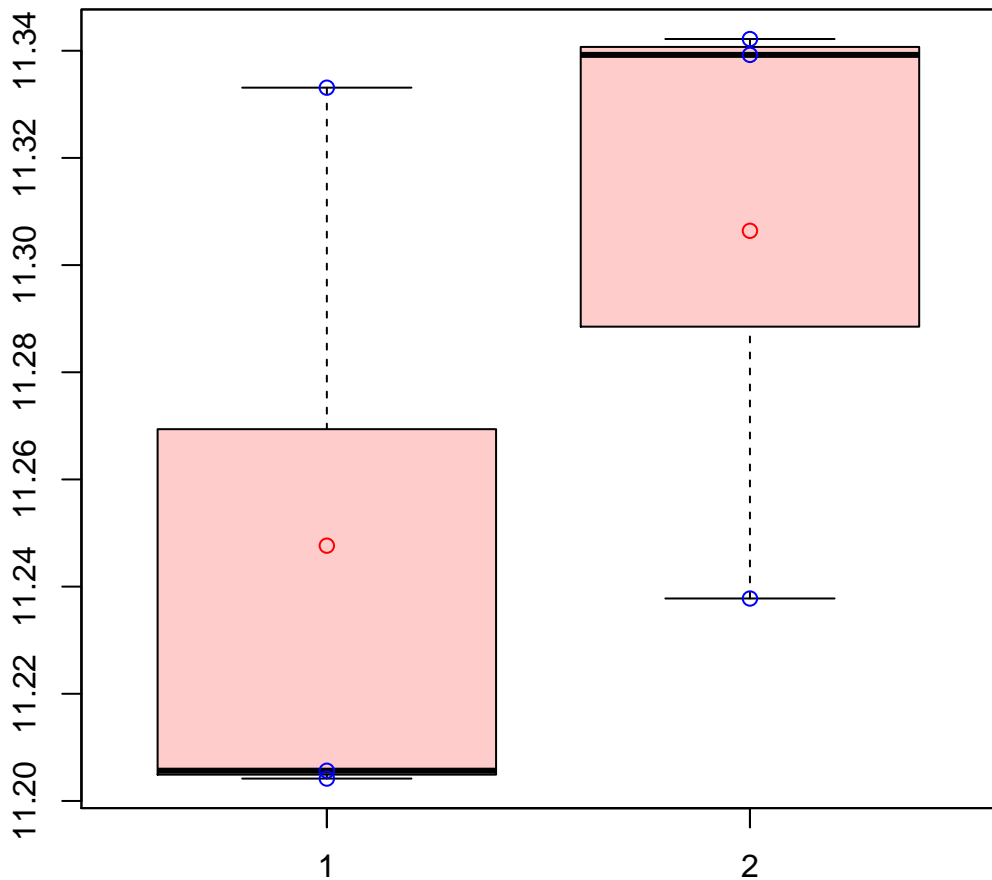

t-Test: p-value = 0.35

# CL1Contig3755|CL1Contig3755



t-Test: p-value = 0.35

# CL1Contig3763|CL1Contig3763

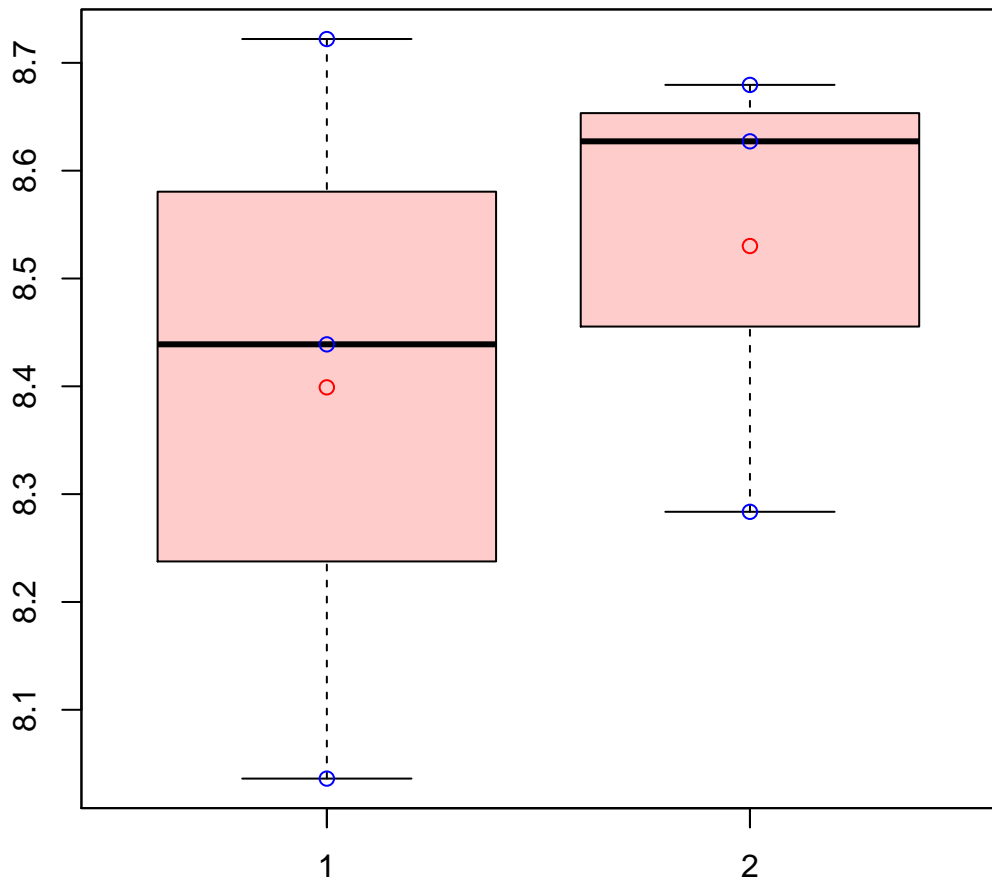

t-Test: p-value = 0.61



# CL1Contig376|CL1Contig376

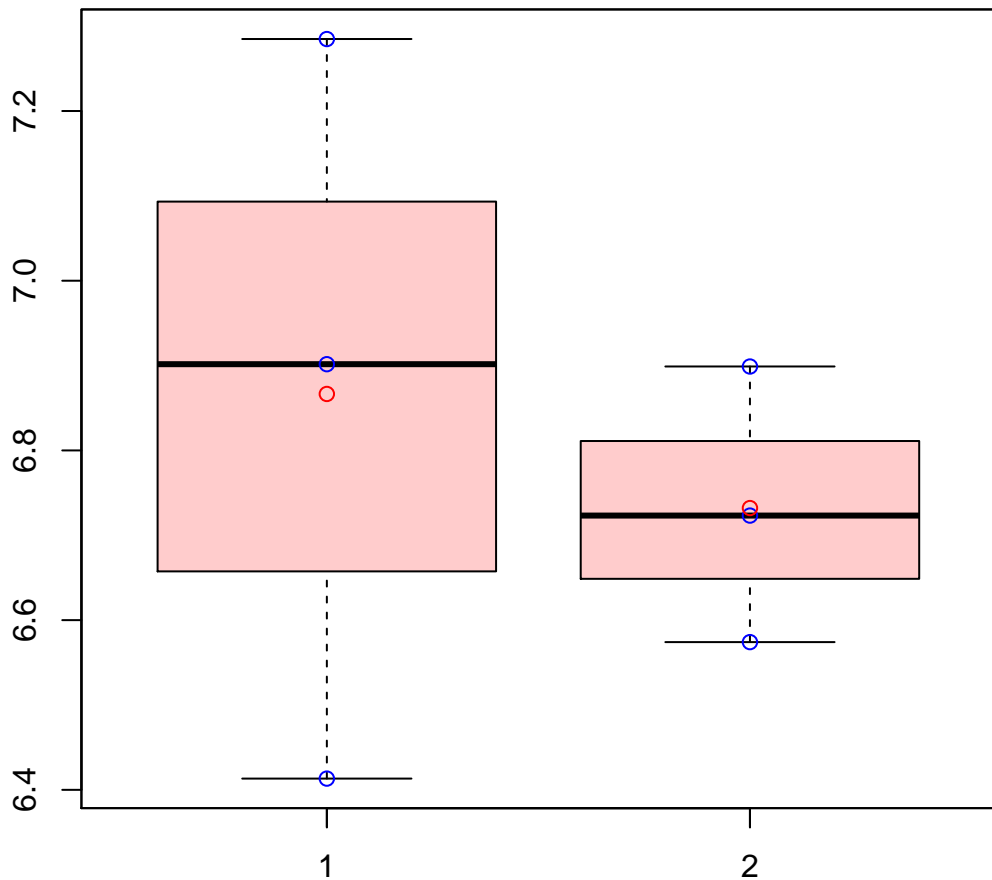

t-Test: p-value = 0.66

# CL1Contig37|CL1Contig37

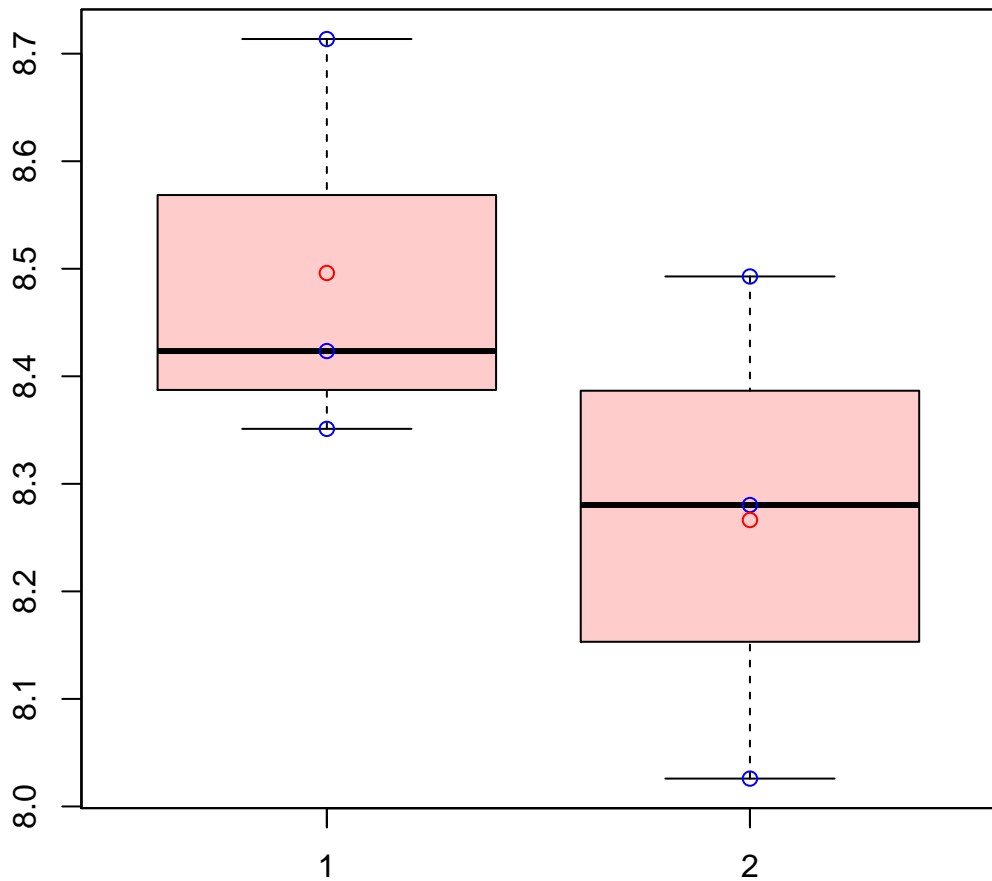

t-Test: p-value = 0.26

# CL1Contig384|CL1Contig384



t-Test: p-value = 0.88

# CL1Contig3875|CL1Contig3875

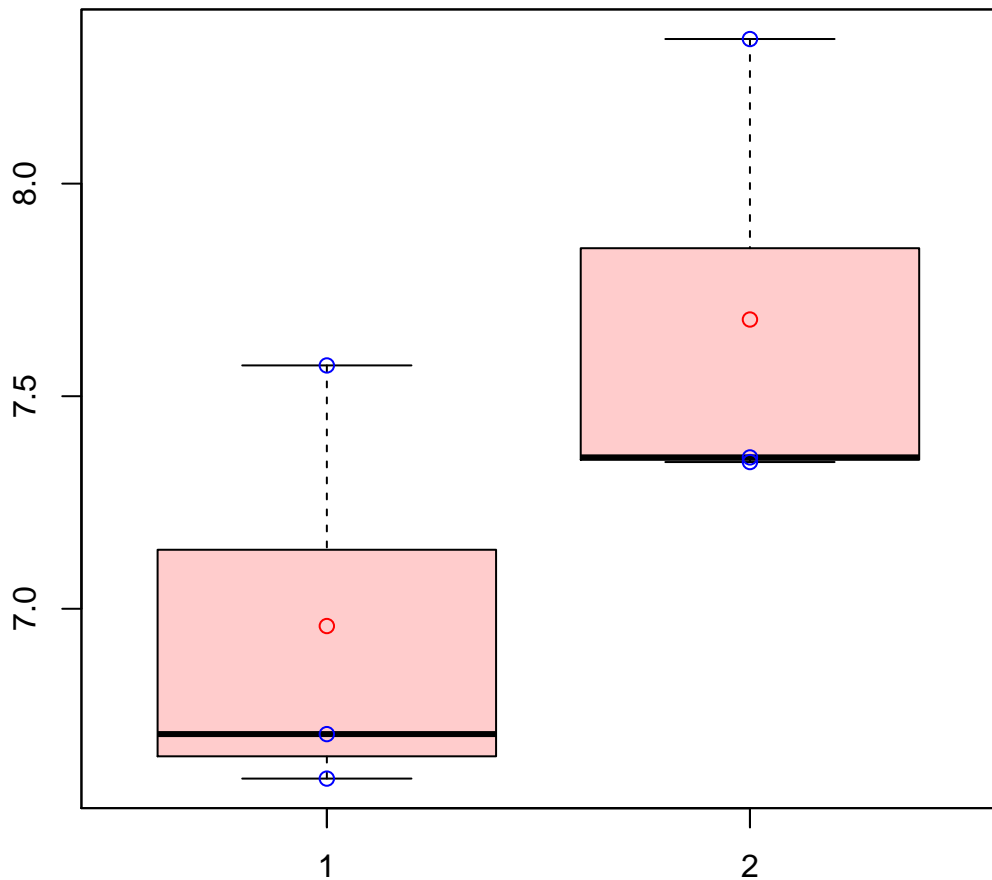

t-Test: p-value = 0.19

# CL1Contig3882|CL1Contig3882

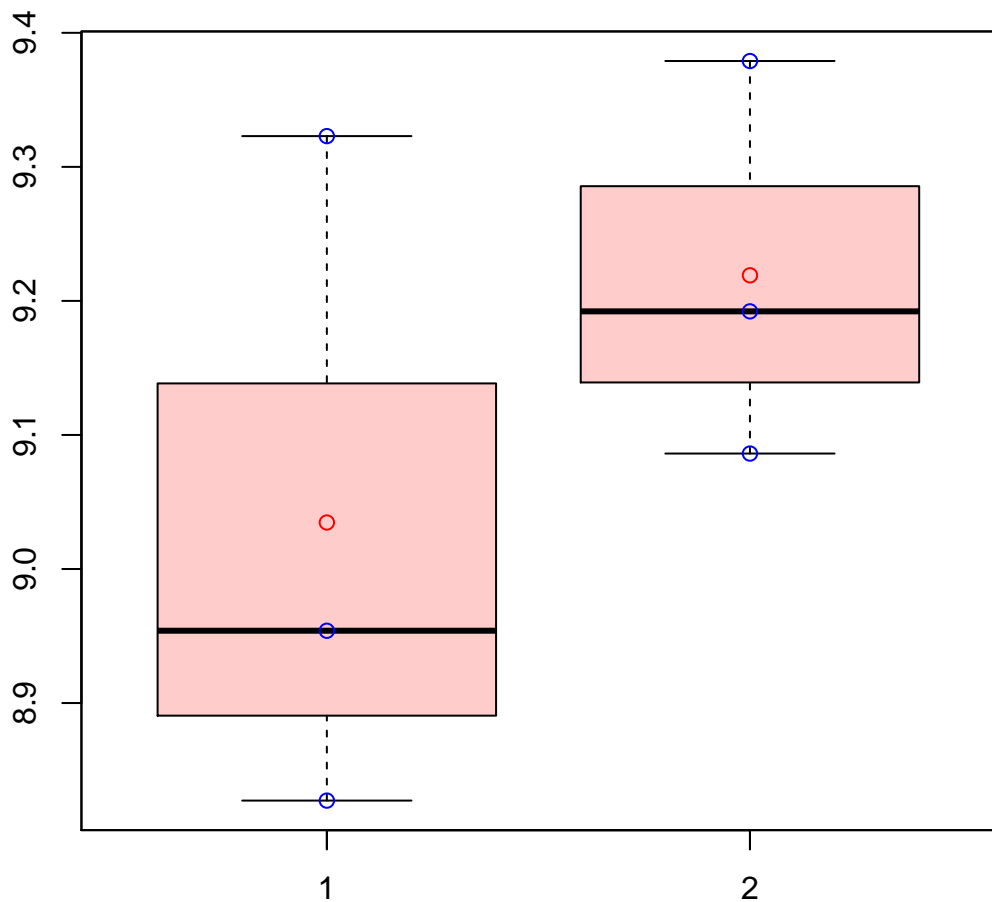

t-Test: p-value = 0.36

# CL1Contig3889|CL1Contig3889

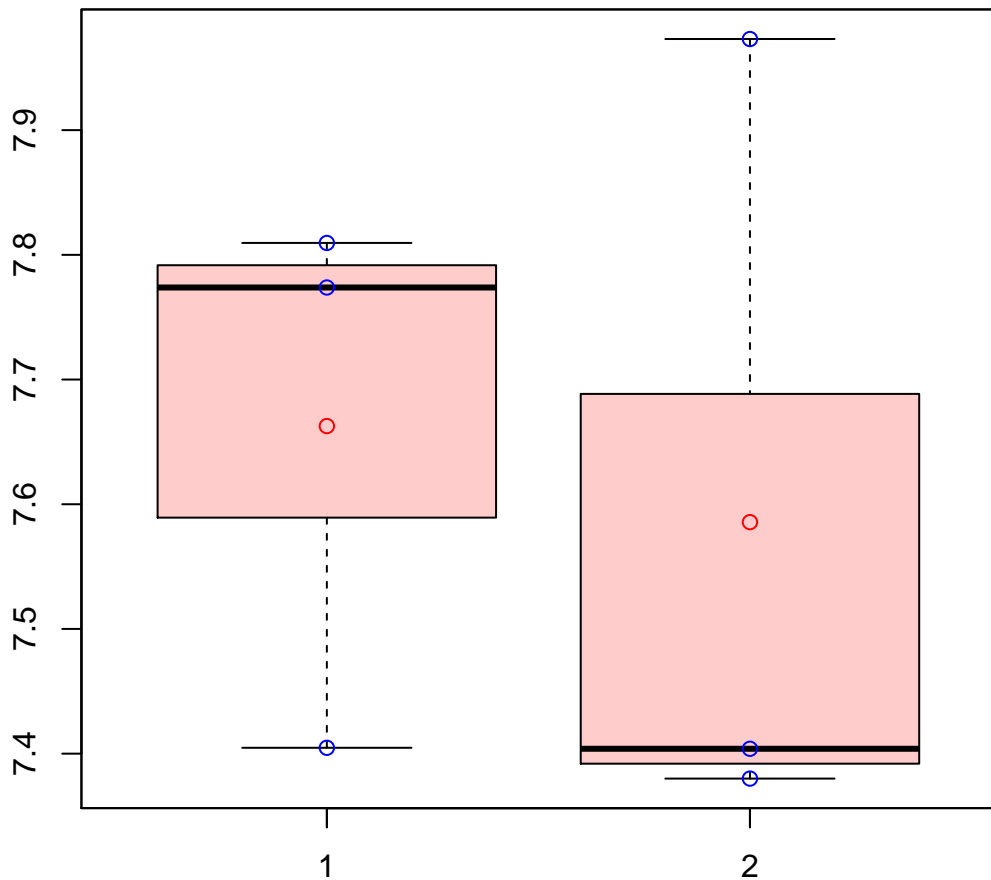

t-Test: p-value = 0.76

# CL1Contig3897|CL1Contig3897

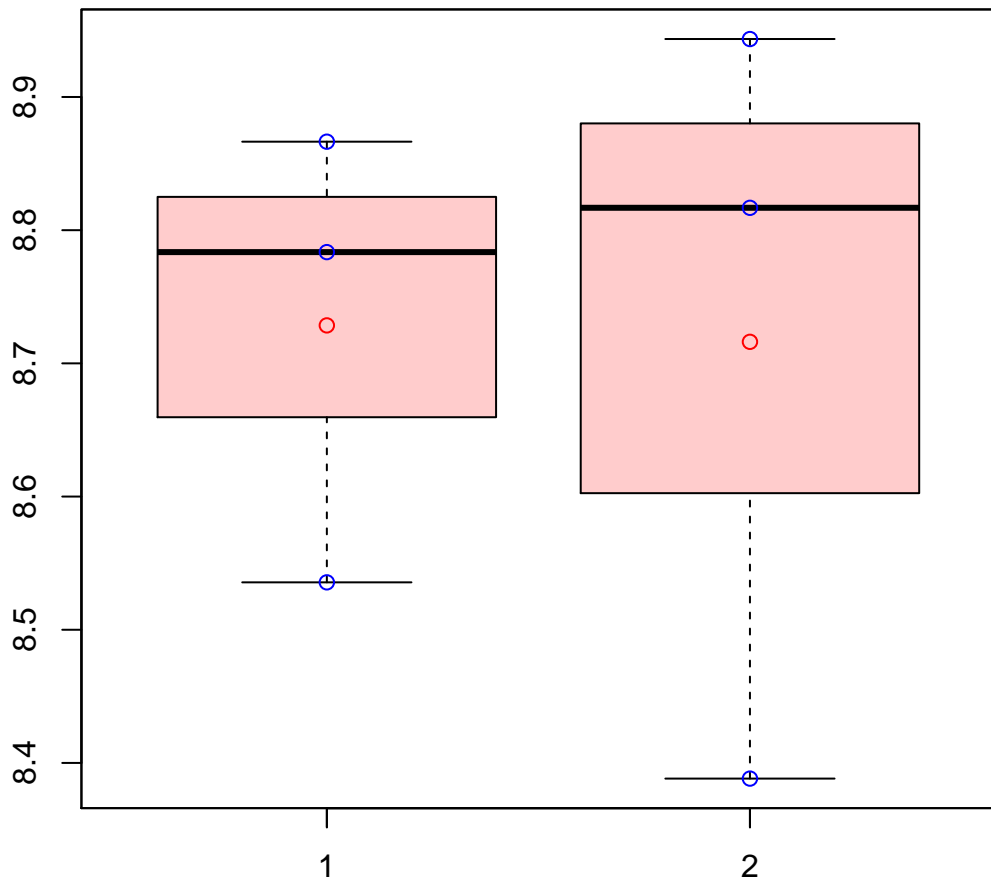

t-Test: p-value = 0.95

# CL1Contig3898|CL1Contig3898

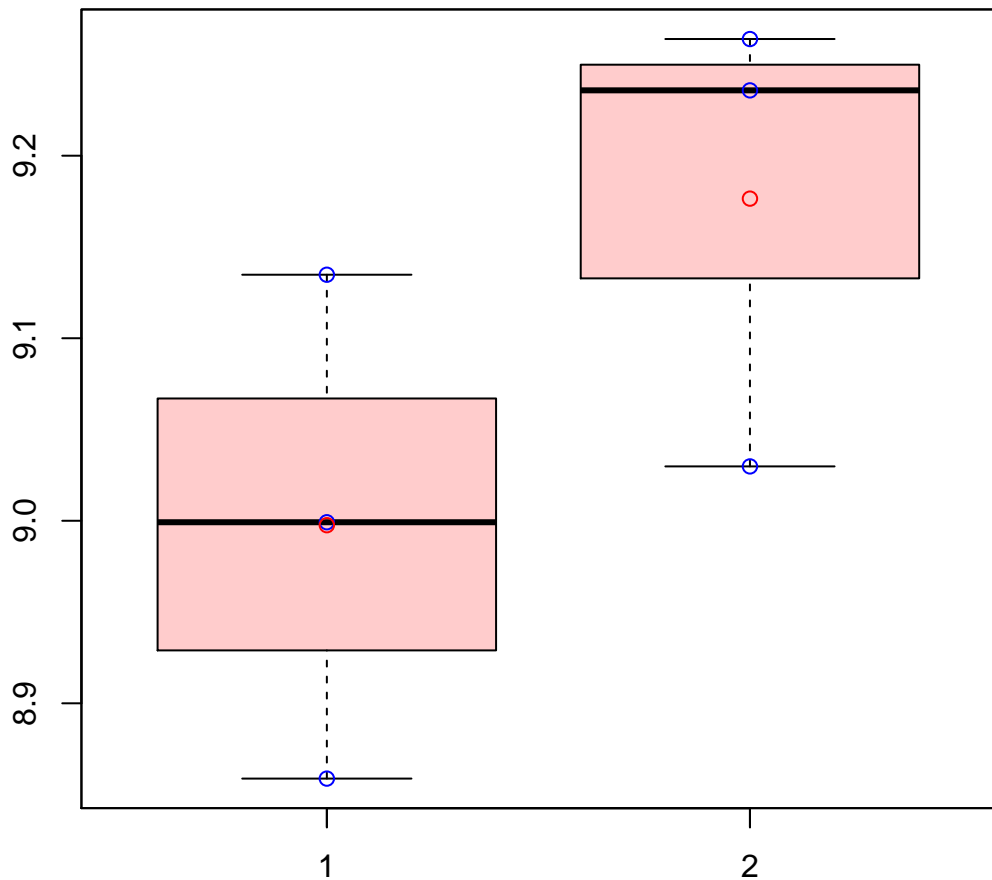

t-Test: p-value = 0.18



# CL1Contig38|CL1Contig38



t-Test: p-value = 0.26

# CL1Contig3900|CL1Contig3900

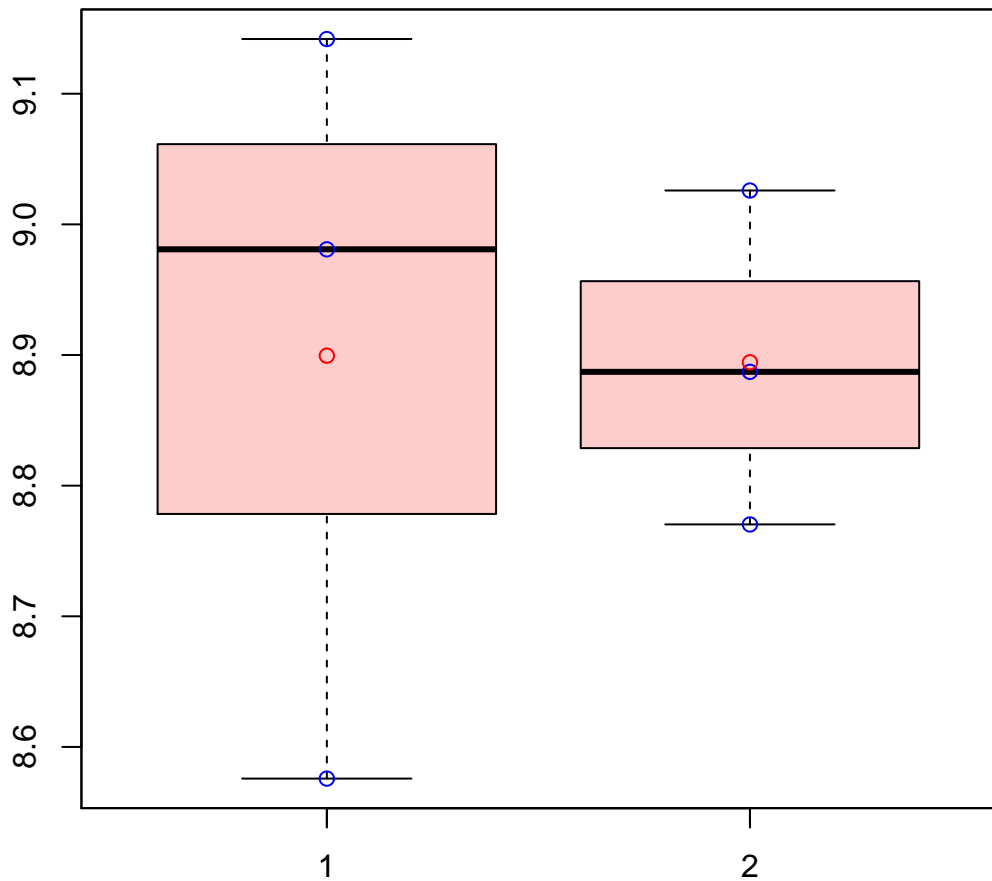

t-Test: p-value = 0.98

# CL1Contig3901|CL1Contig3901

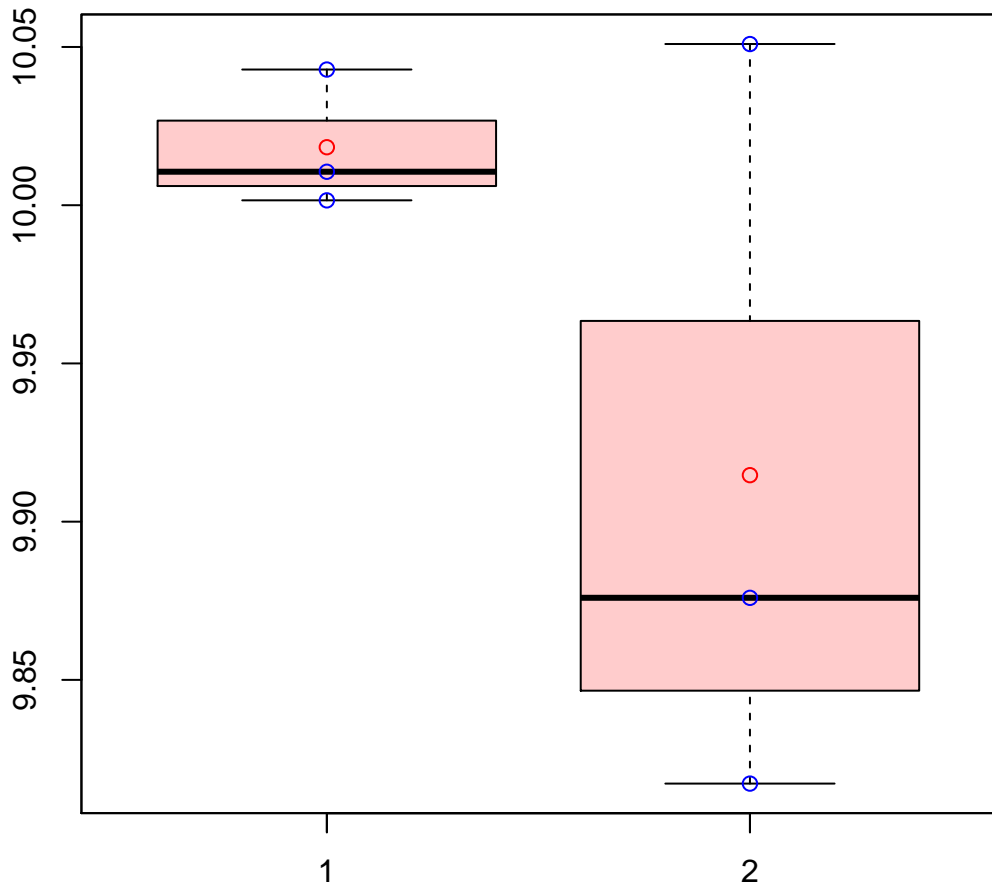

t-Test: p-value = 0.28

# CL1Contig3904|CL1Contig3904

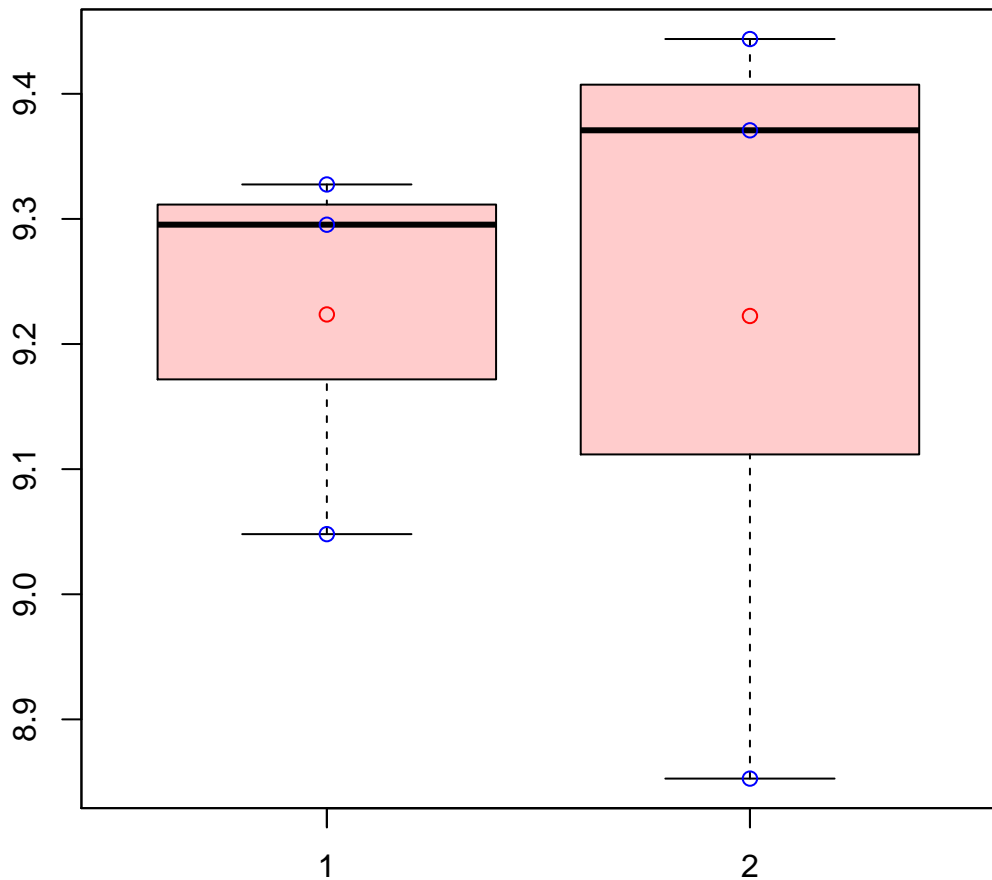

t-Test: p-value = 1

# CL1Contig3934|CL1Contig3934

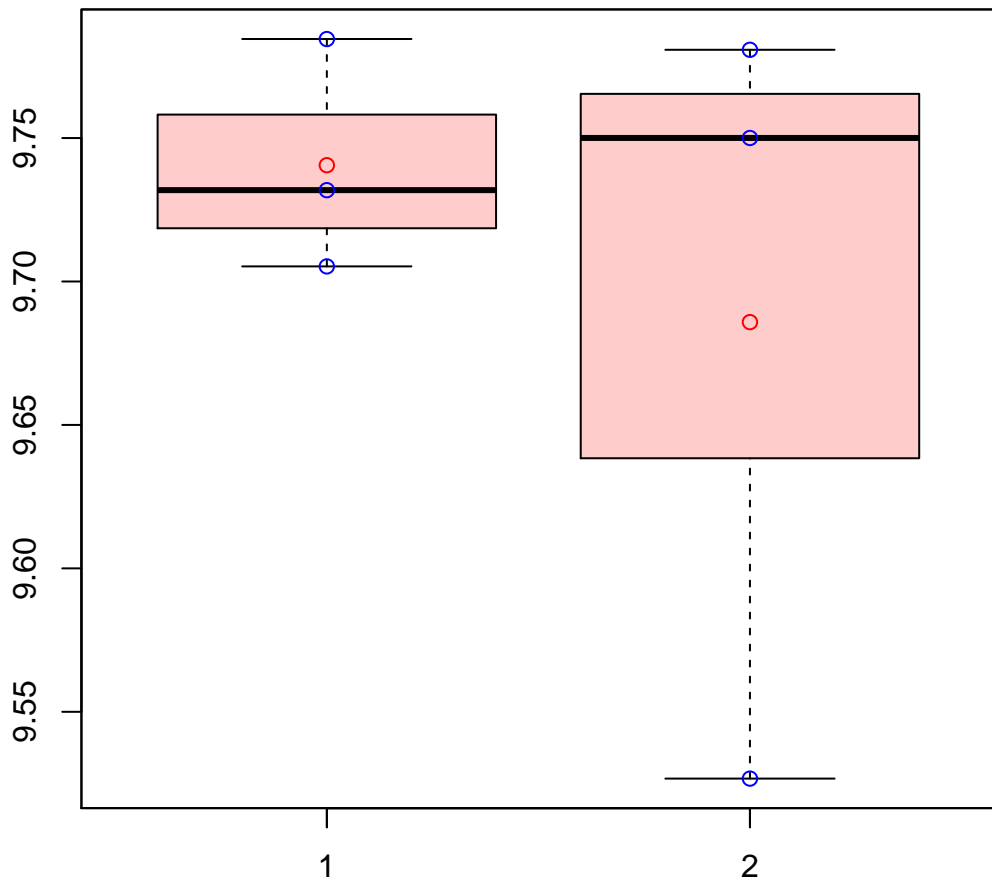

t-Test: p-value = 0.57

# CL1Contig3953|CL1Contig3953

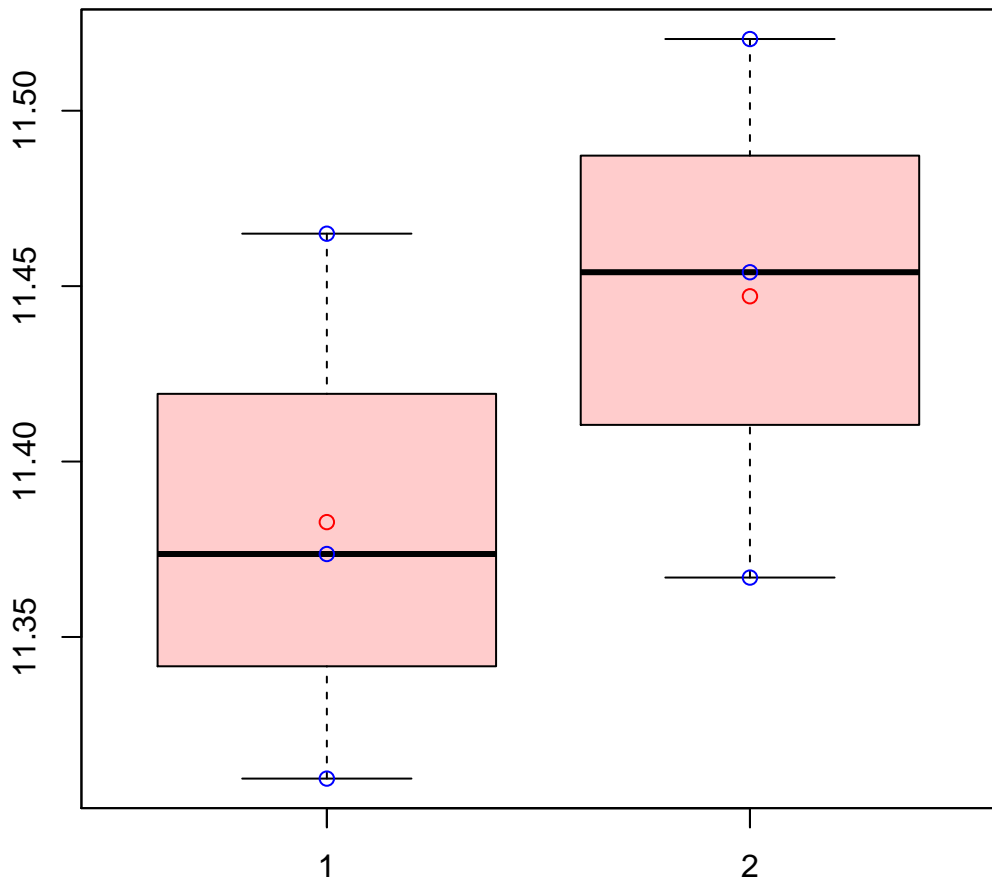

t-Test: p-value = 0.37

# CL1Contig3958|CL1Contig3958

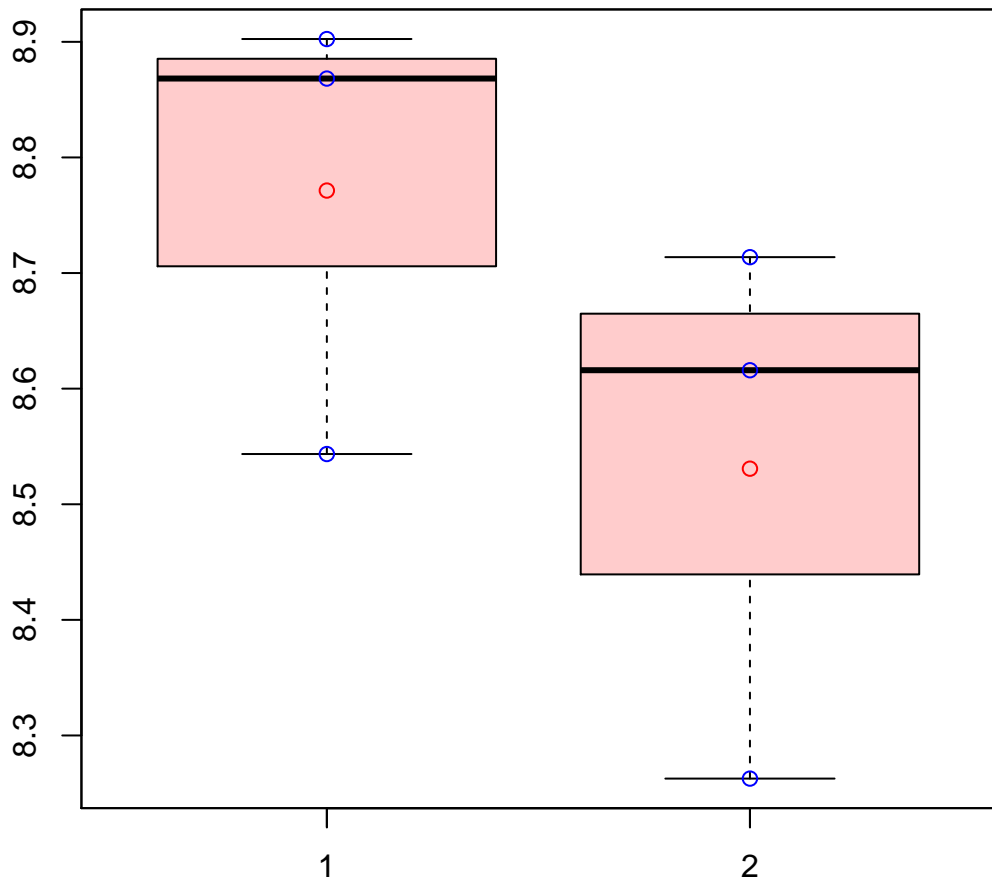

t-Test: p-value = 0.25

# CL1Contig3962|CL1Contig3962

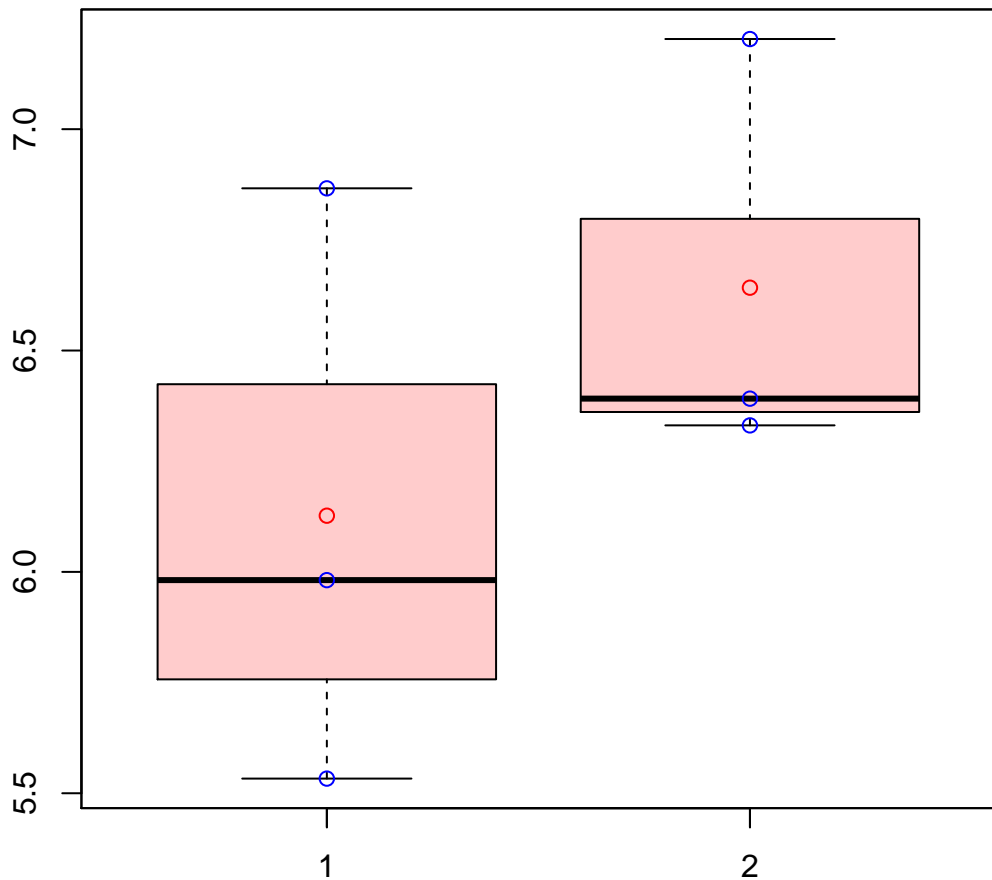

t-Test: p-value = 0.35



# CL1Contig3987|CL1Contig3987

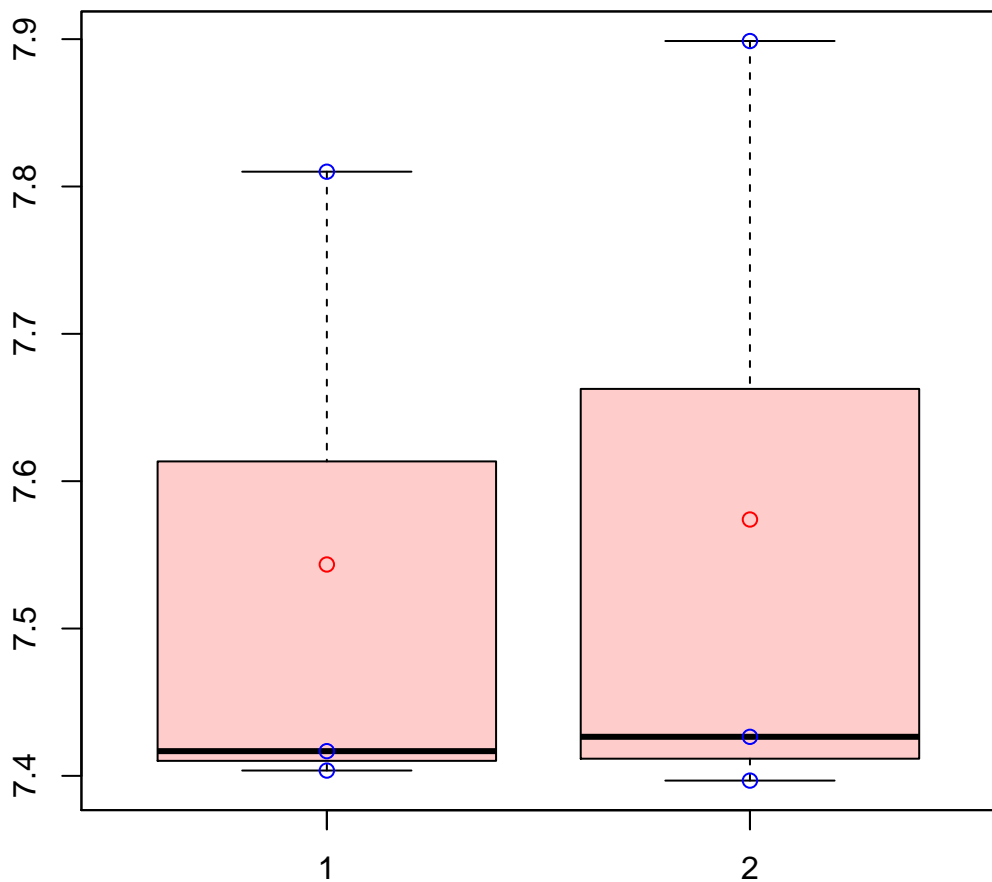

t-Test: p-value = 0.89

# CL1Contig3997|CL1Contig3997

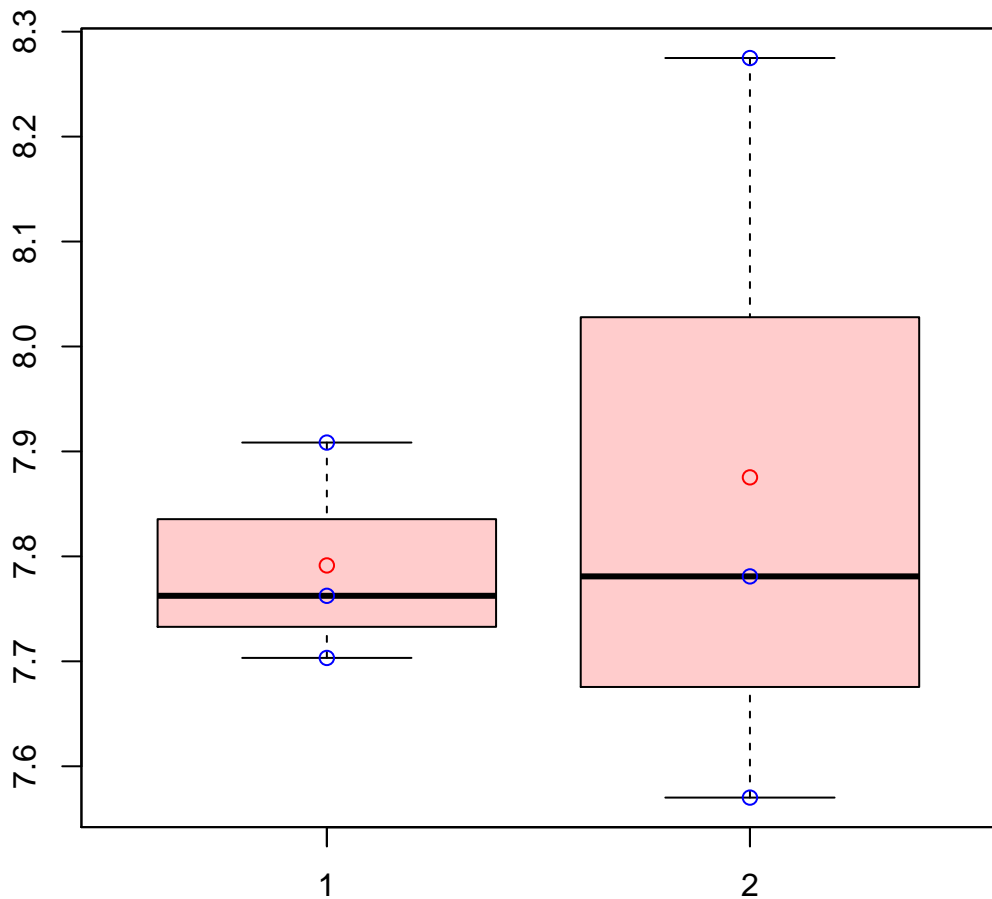

# CL1Contig4018|CL1Contig4018

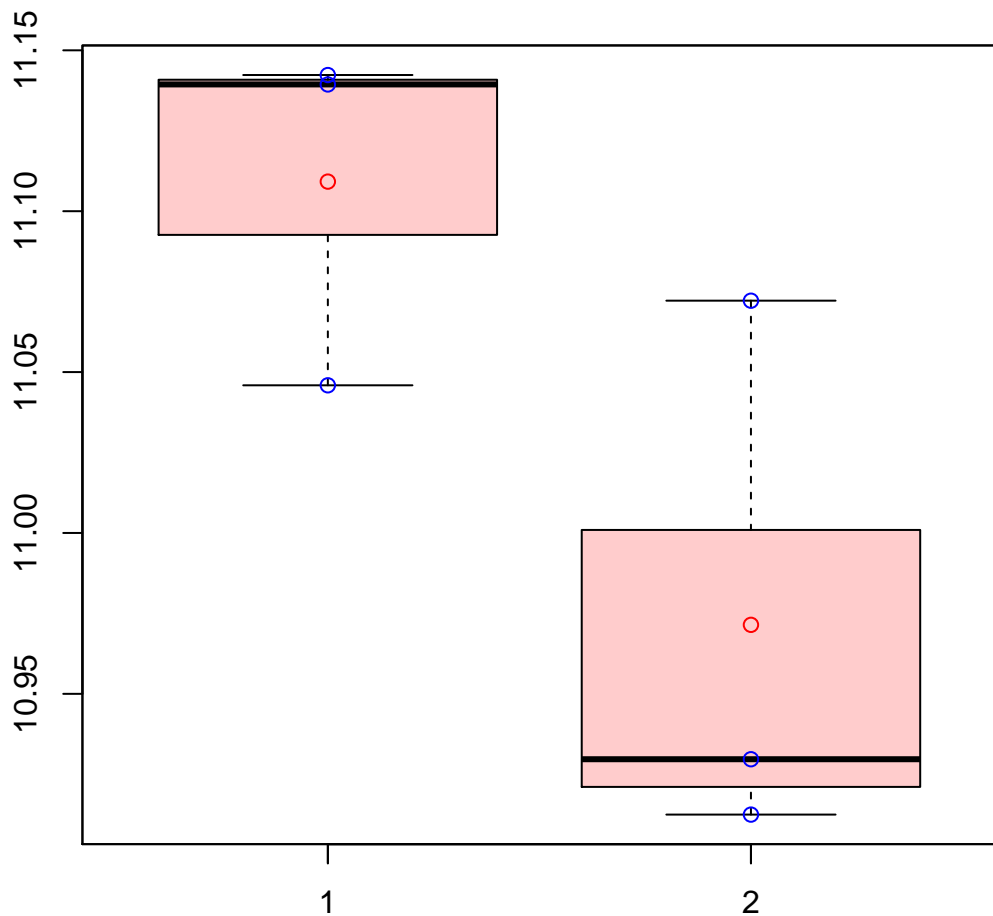

t-Test: p-value = 0.09

# CL1Contig4019|CL1Contig4019

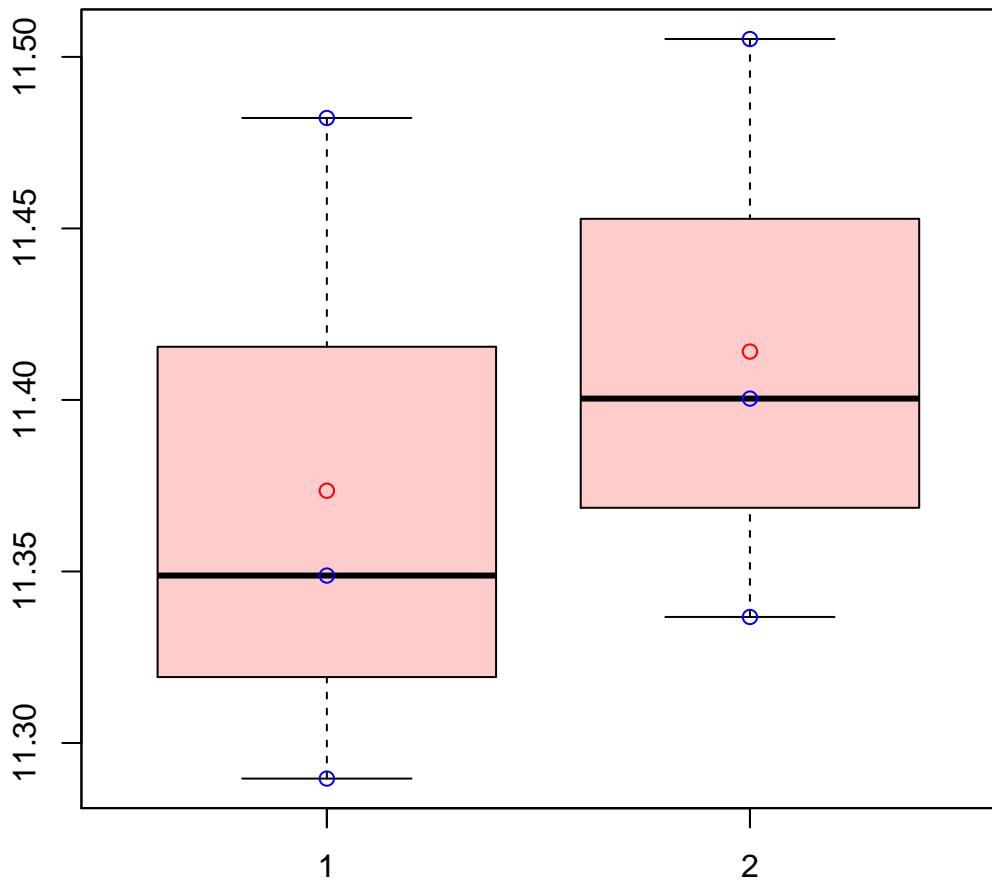

t-Test: p-value = 0.62

# CL1Contig4020|CL1Contig4020

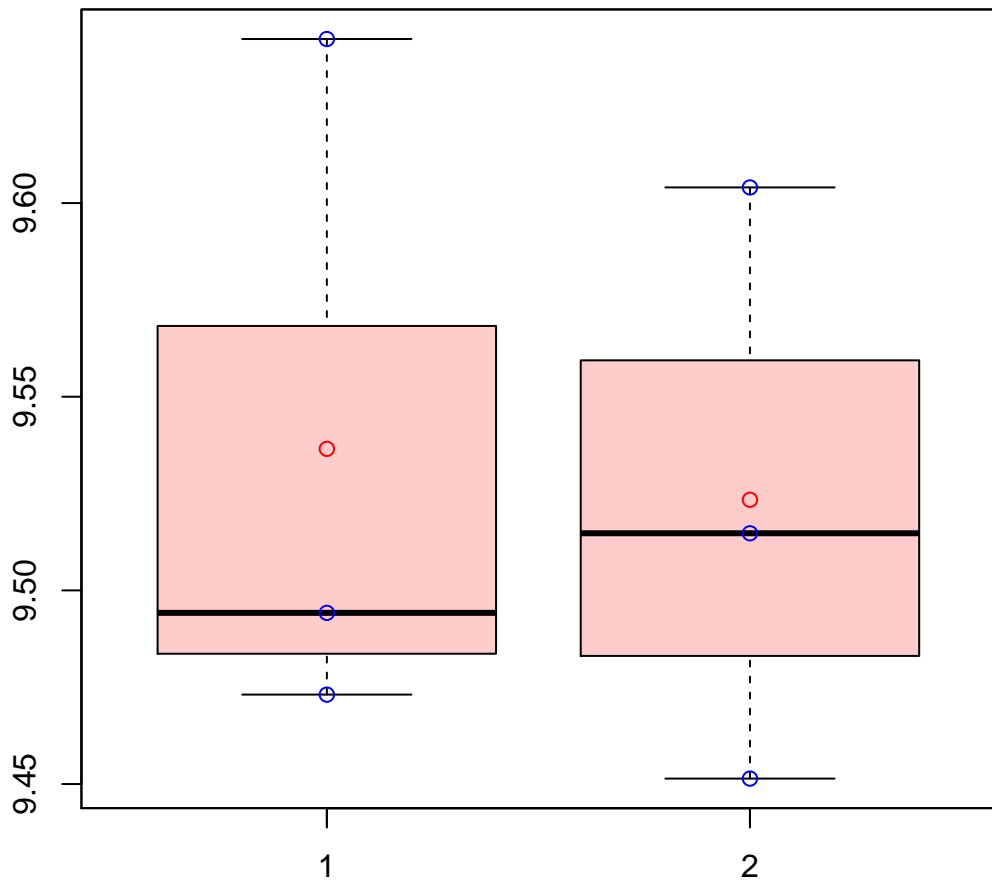

t-Test: p-value = 0.86

# CL1Contig4041|CL1Contig4041

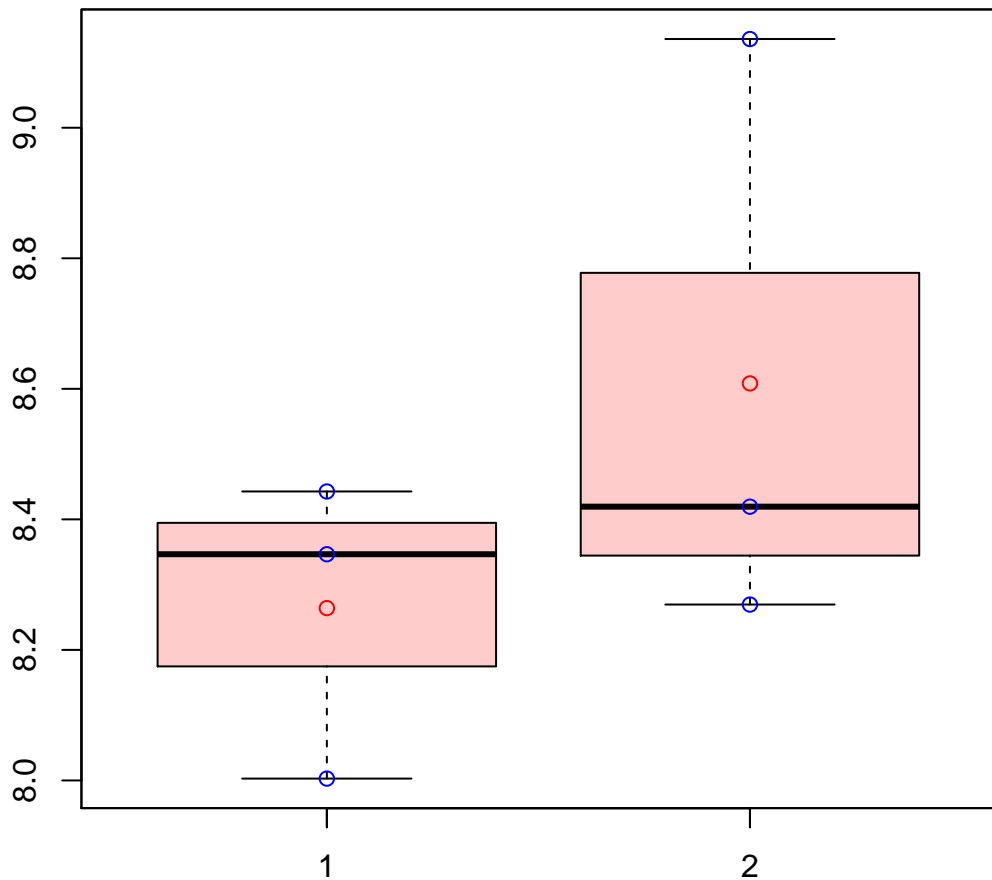

t-Test: p-value = 0.33

# CL1Contig4055|CL1Contig4055

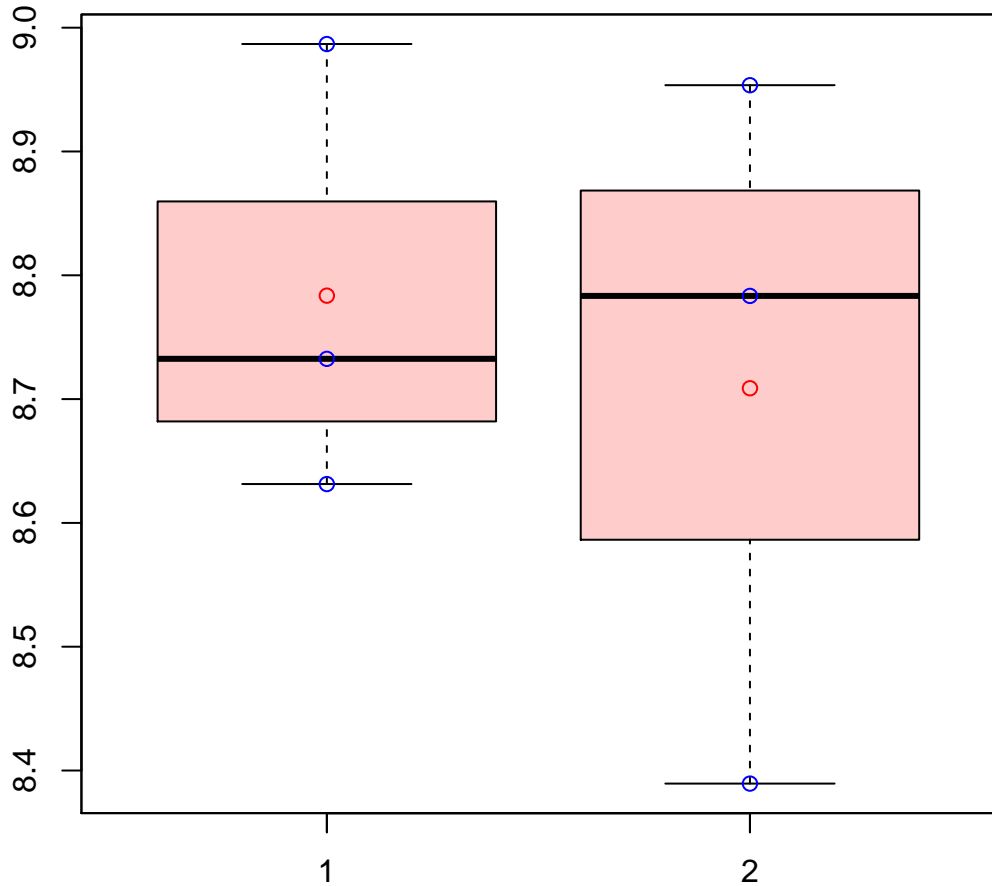

t-Test: p-value = 0.73

# CL1Contig4078|CL1Contig4078

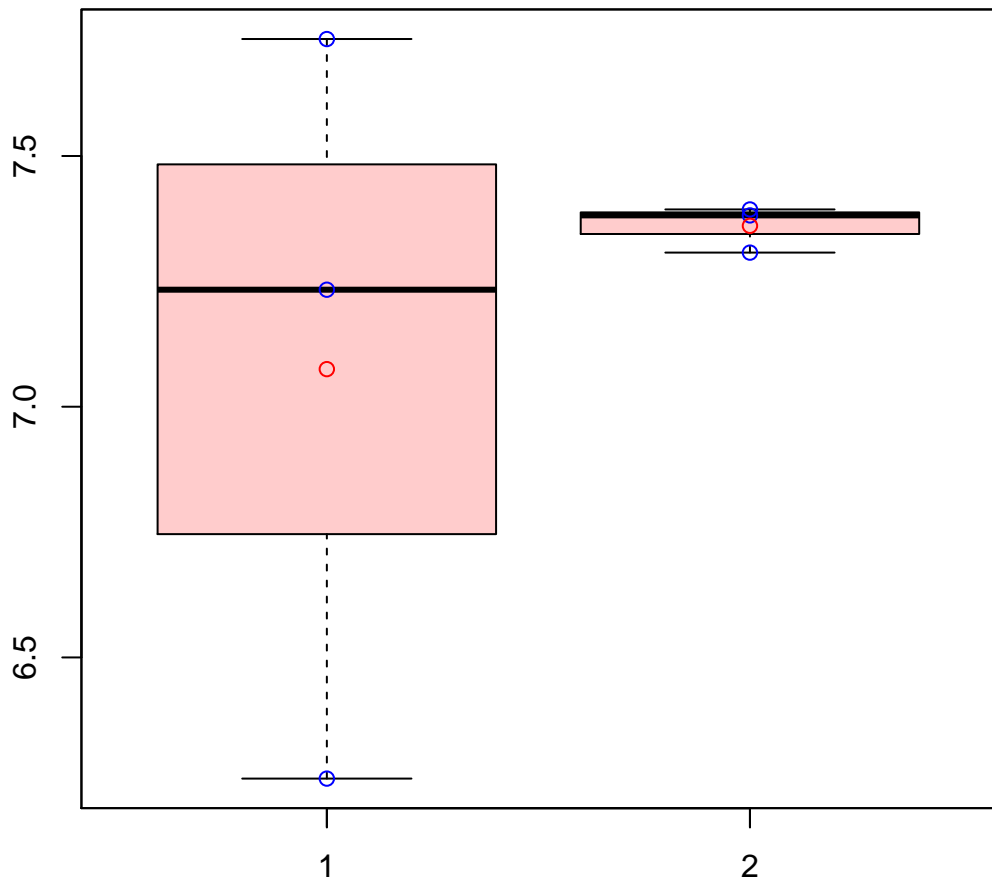

t-Test: p-value = 0.58



# CL1Contig4111|CL1Contig4111

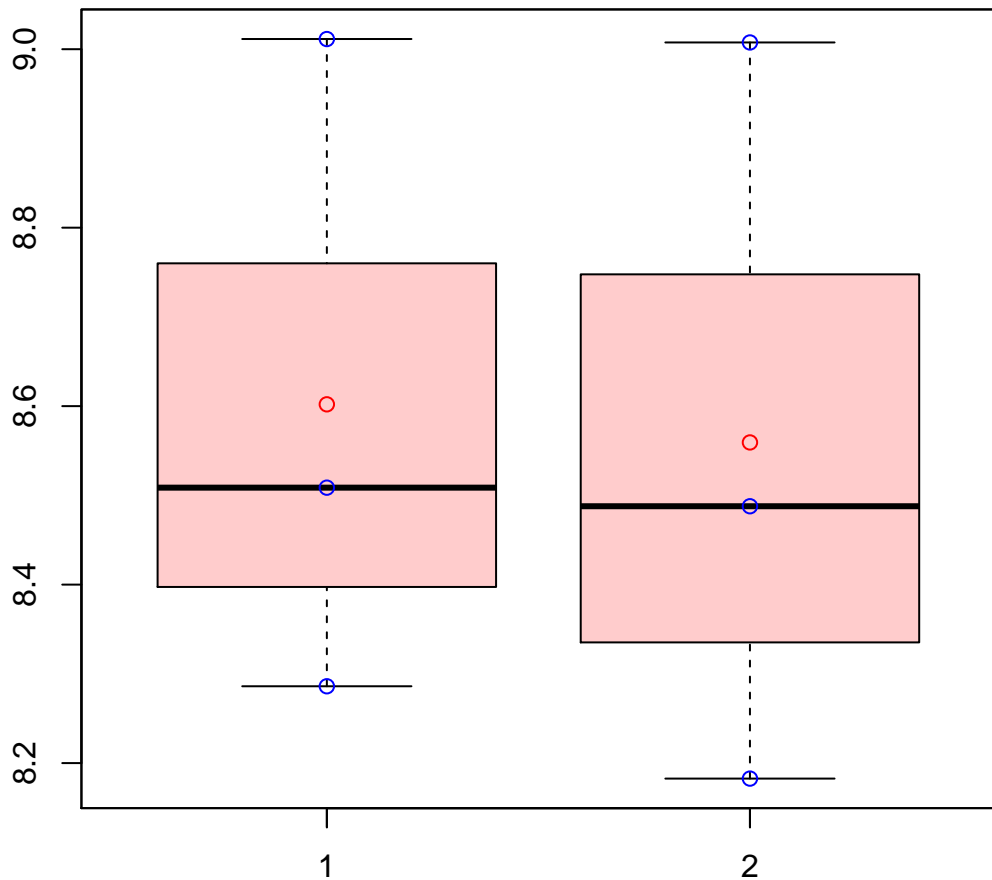

t-Test: p-value = 0.9

# CL1Contig4117|CL1Contig4117

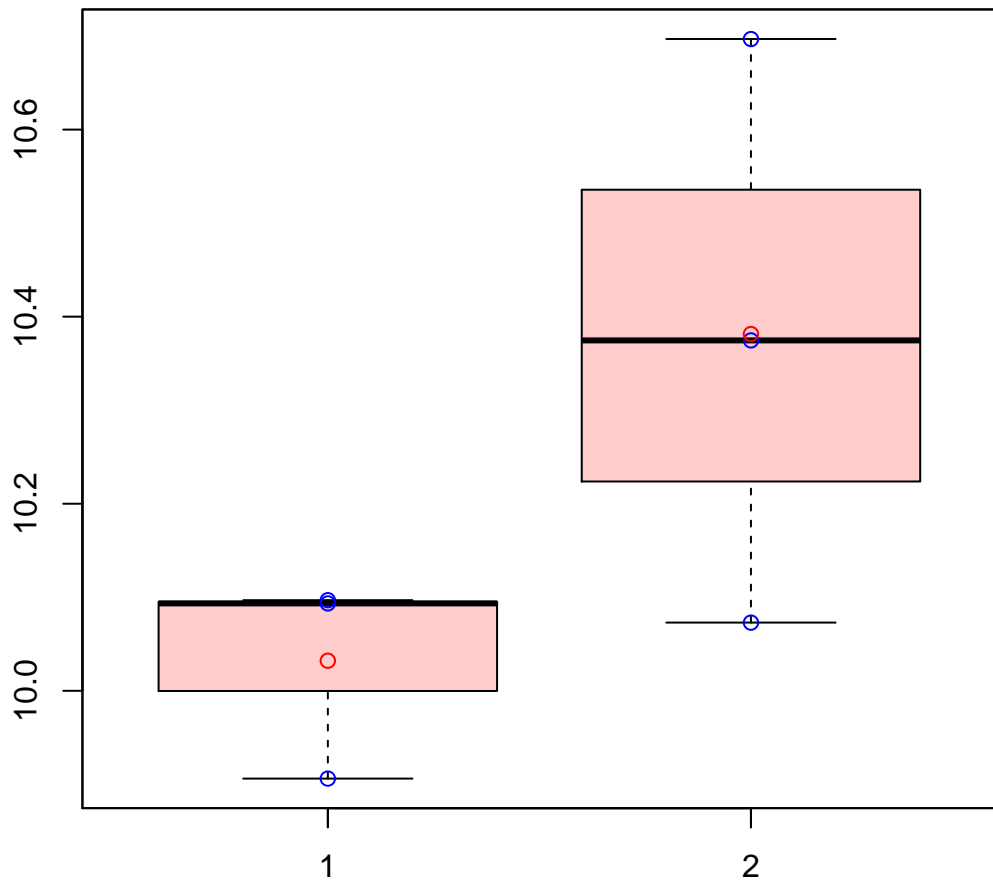

t-Test: p-value = 0.18

# CL1Contig4148|CL1Contig4148

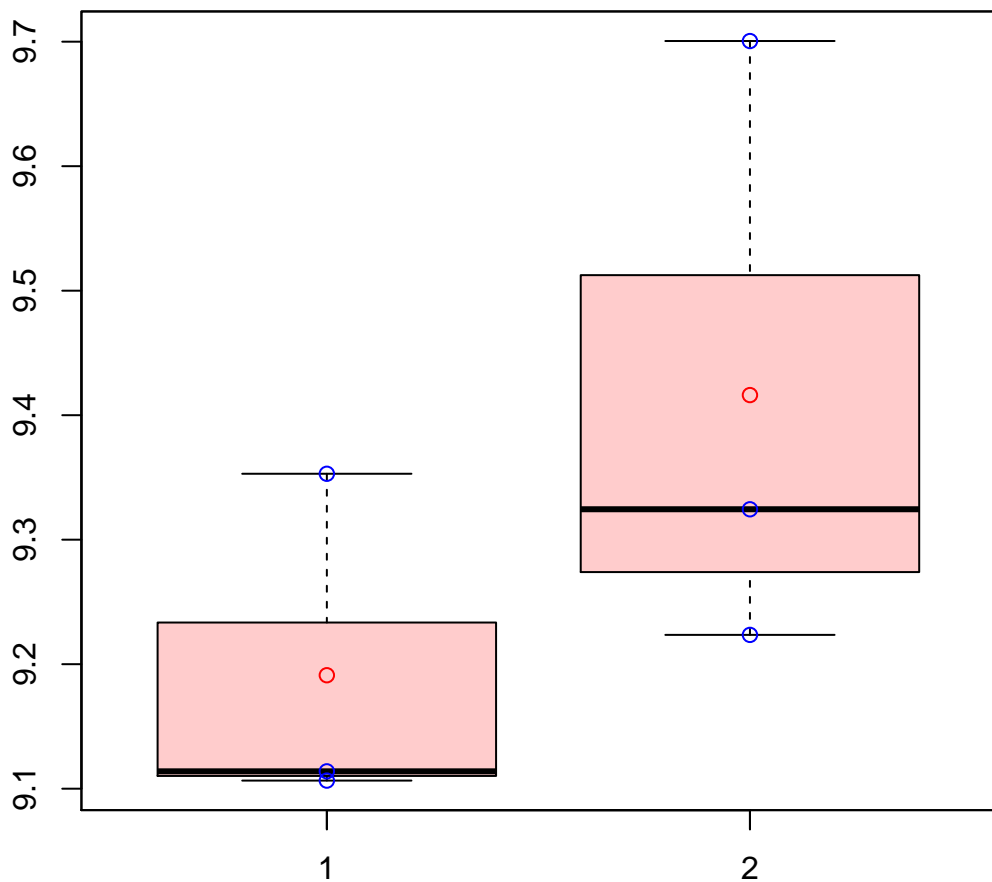

t-Test: p-value = 0.27

# CL1Contig414|CL1Contig414

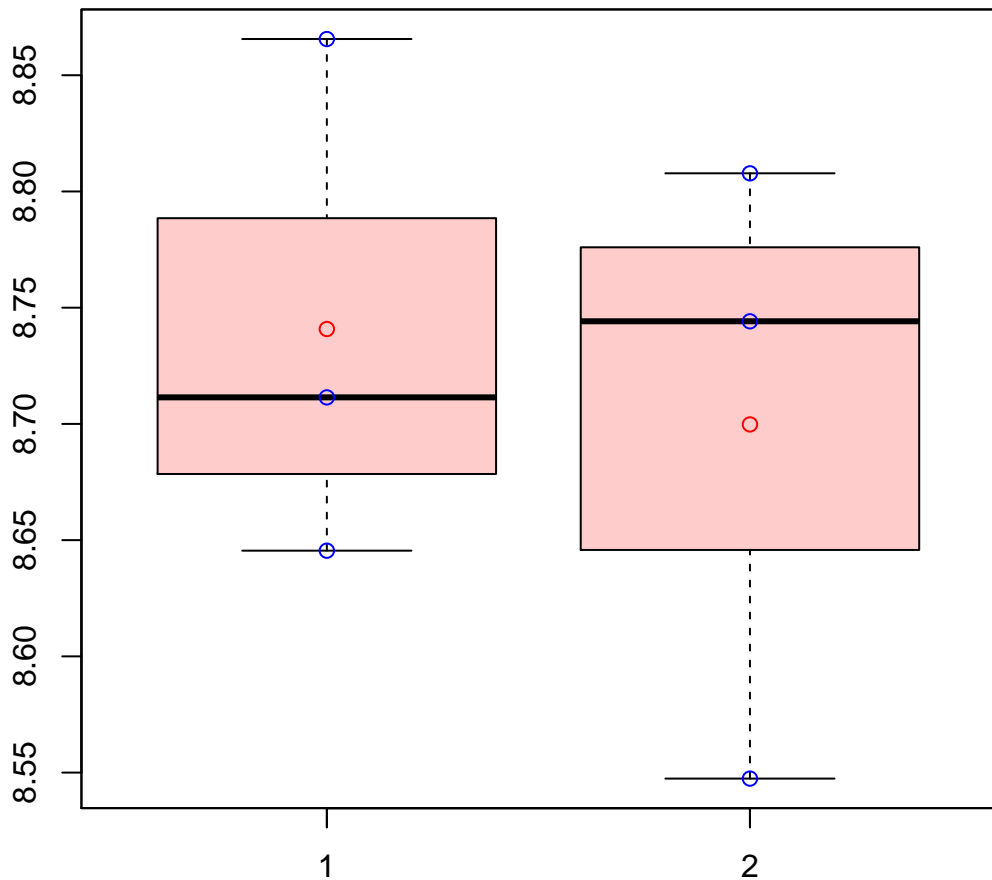

t-Test: p-value = 0.71

# CL1Contig4155|CL1Contig4155

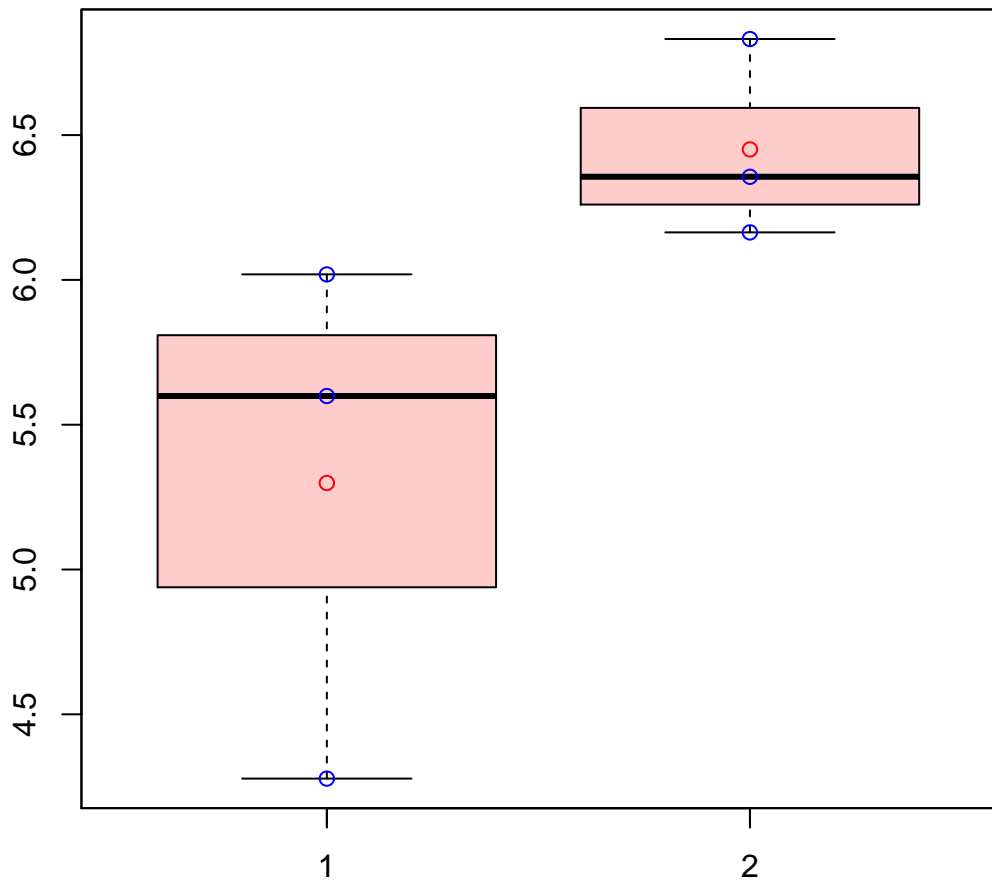

t-Test: p-value = 0.15

# CL1Contig4166|CL1Contig4166

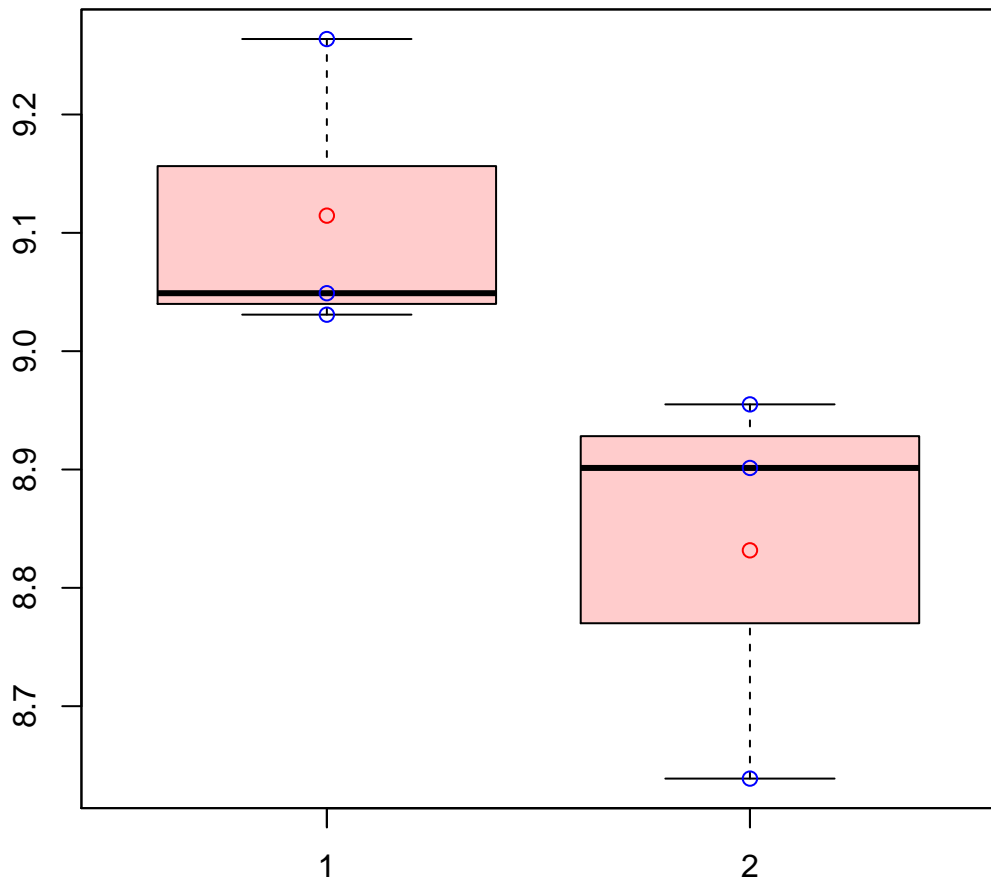

t-Test: p-value = 0.09

# CL1Contig4177|CL1Contig4177

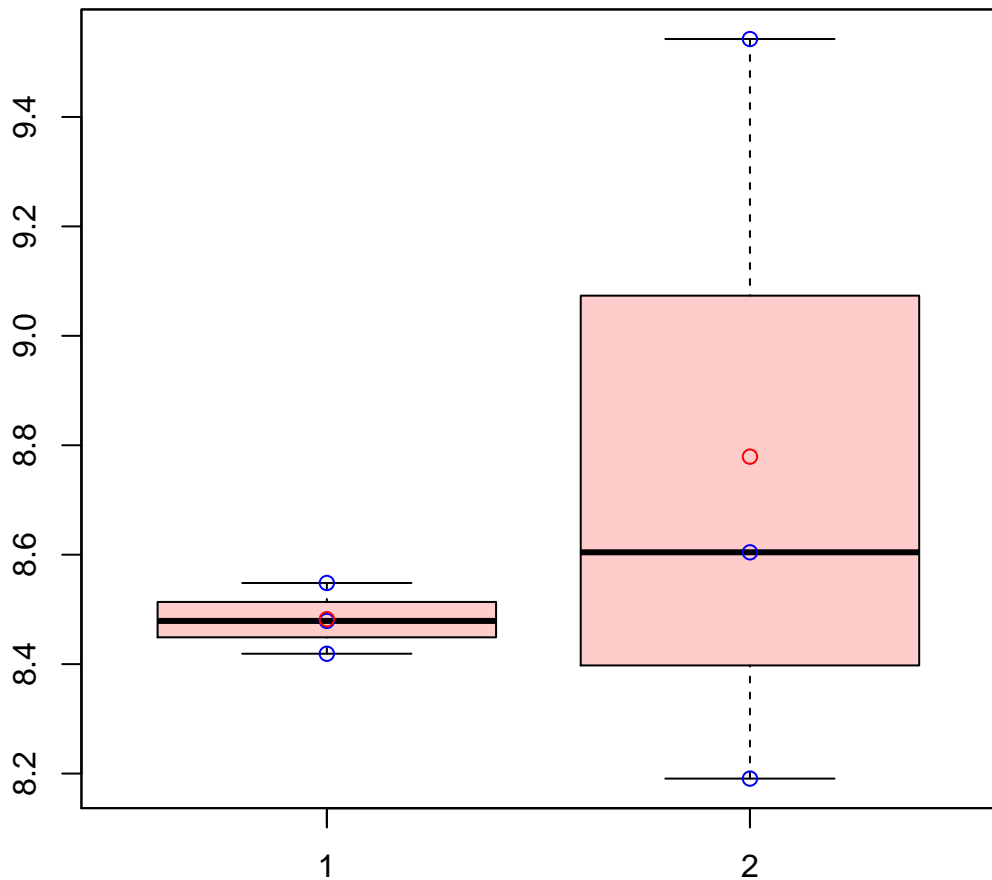

t-Test: p-value = 0.54

# CL1Contig4179|CL1Contig4179

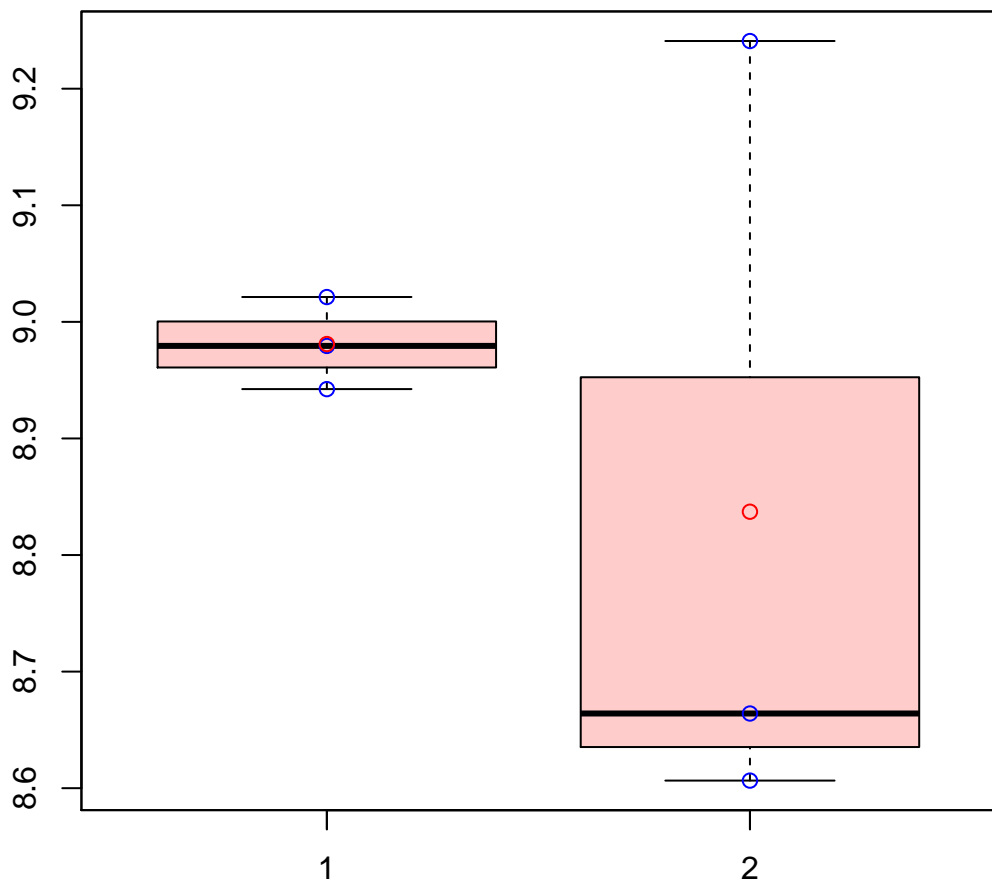

t-Test: p-value = 0.55



# CL1Contig421|CL1Contig421

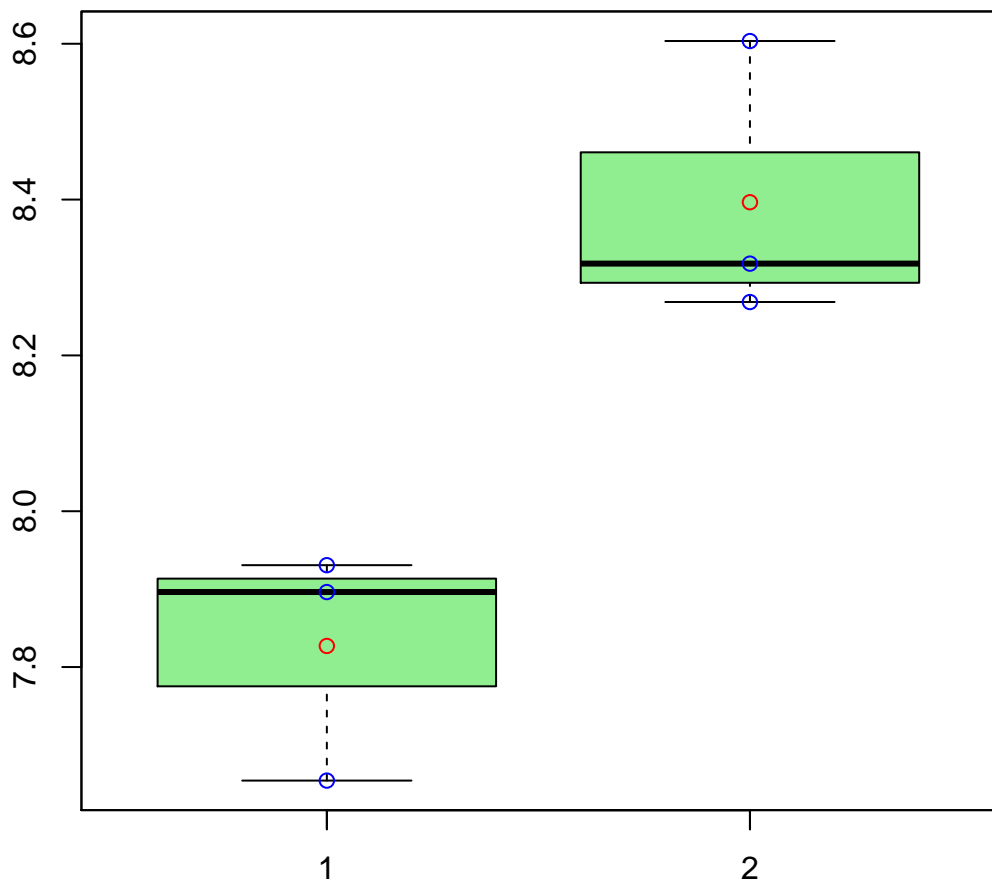

t-Test: p-value = 0.01

# CL1Contig4227|CL1Contig4227

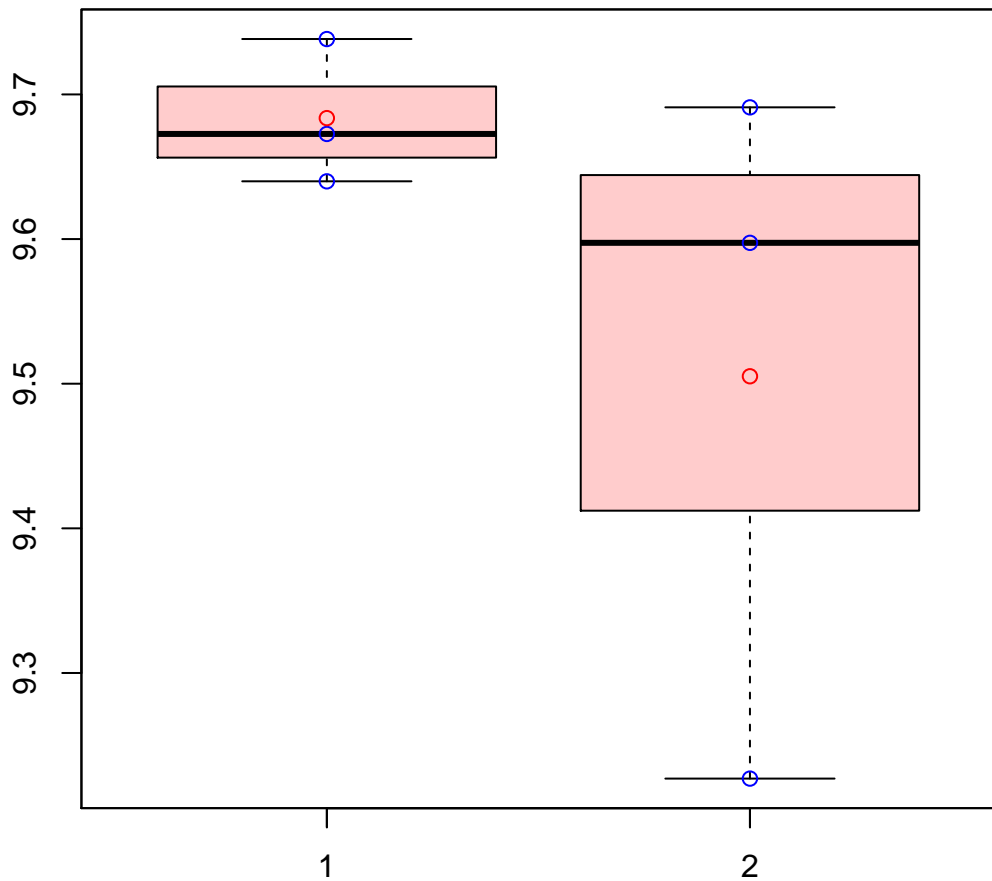

t-Test: p-value = 0.33

# CL1Contig4228|CL1Contig4228

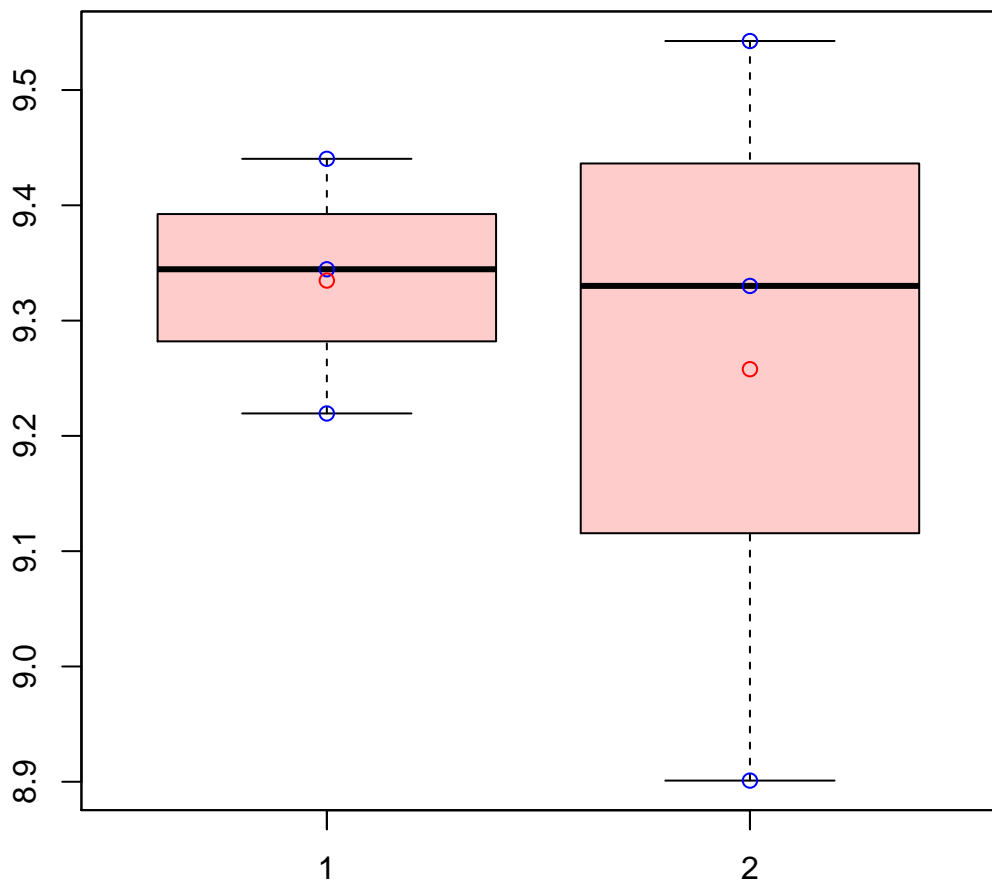

t-Test: p-value = 0.73

# CL1Contig422|CL1Contig422

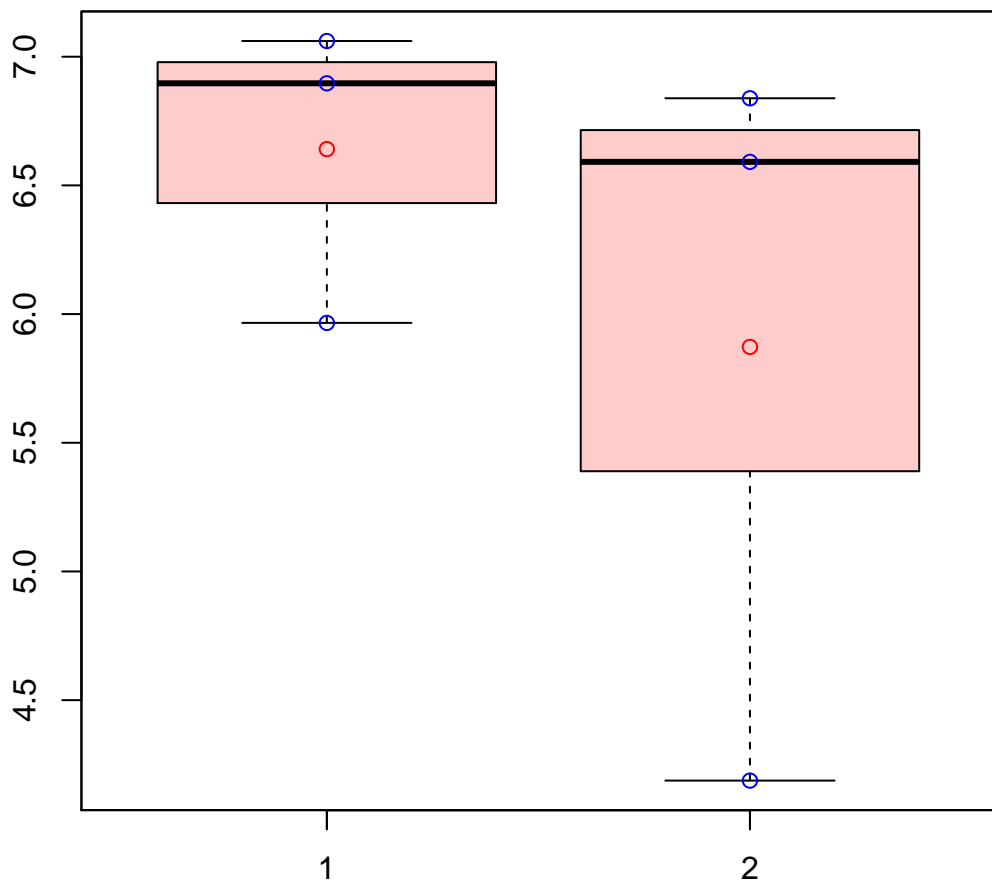

t-Test: p-value = 0.47

# CL1Contig4231|CL1Contig4231

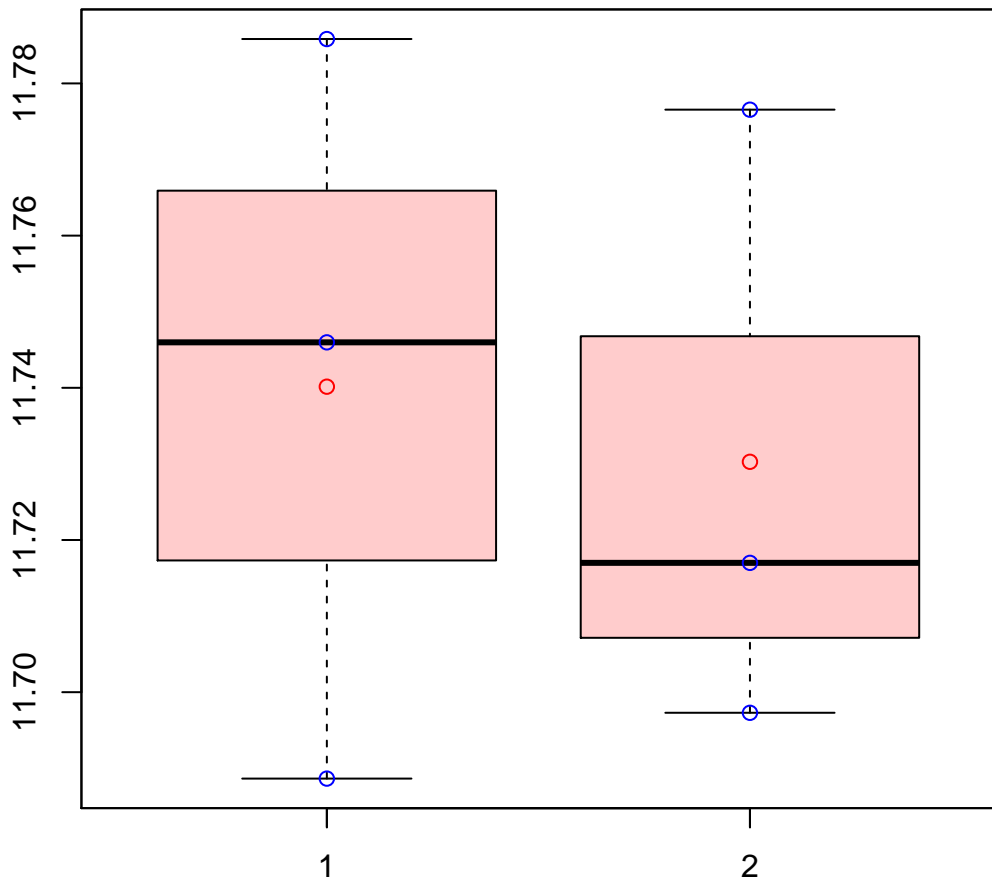

t-Test: p-value = 0.8

# CL1Contig4232|CL1Contig4232



# CL1Contig4233|CL1Contig4233

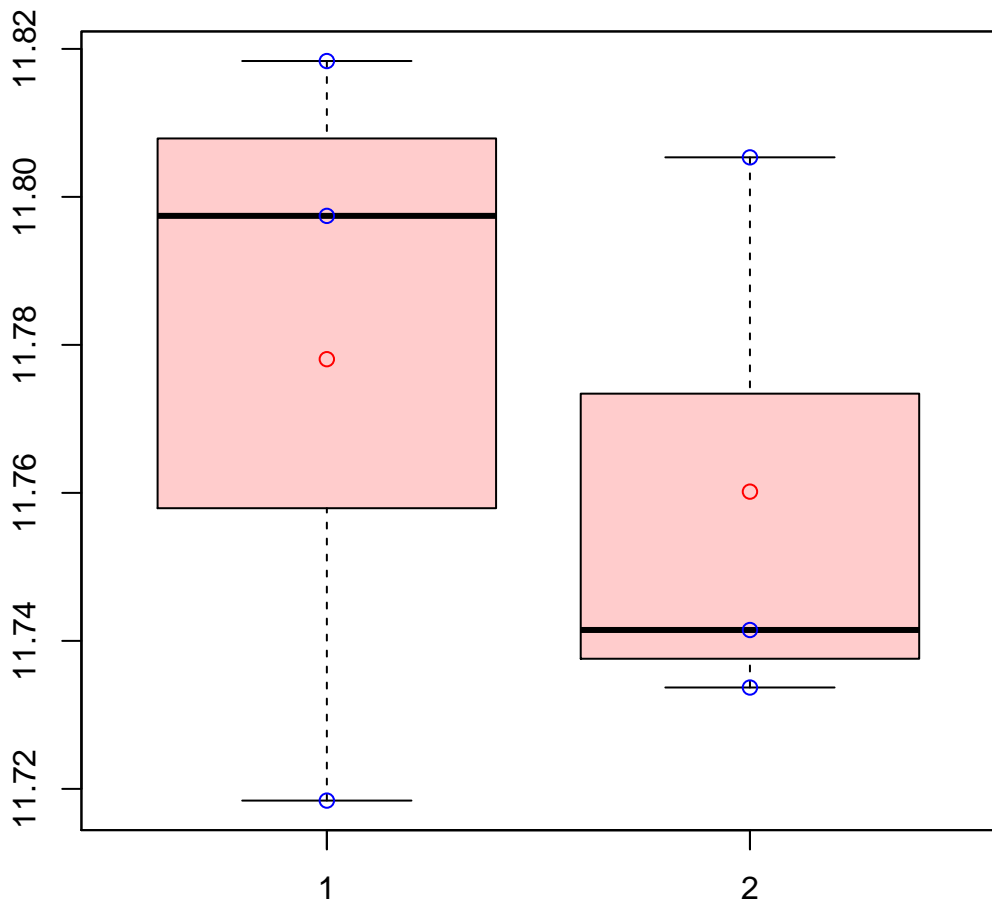

t-Test: p-value = 0.66

# CL1Contig4234|CL1Contig4234

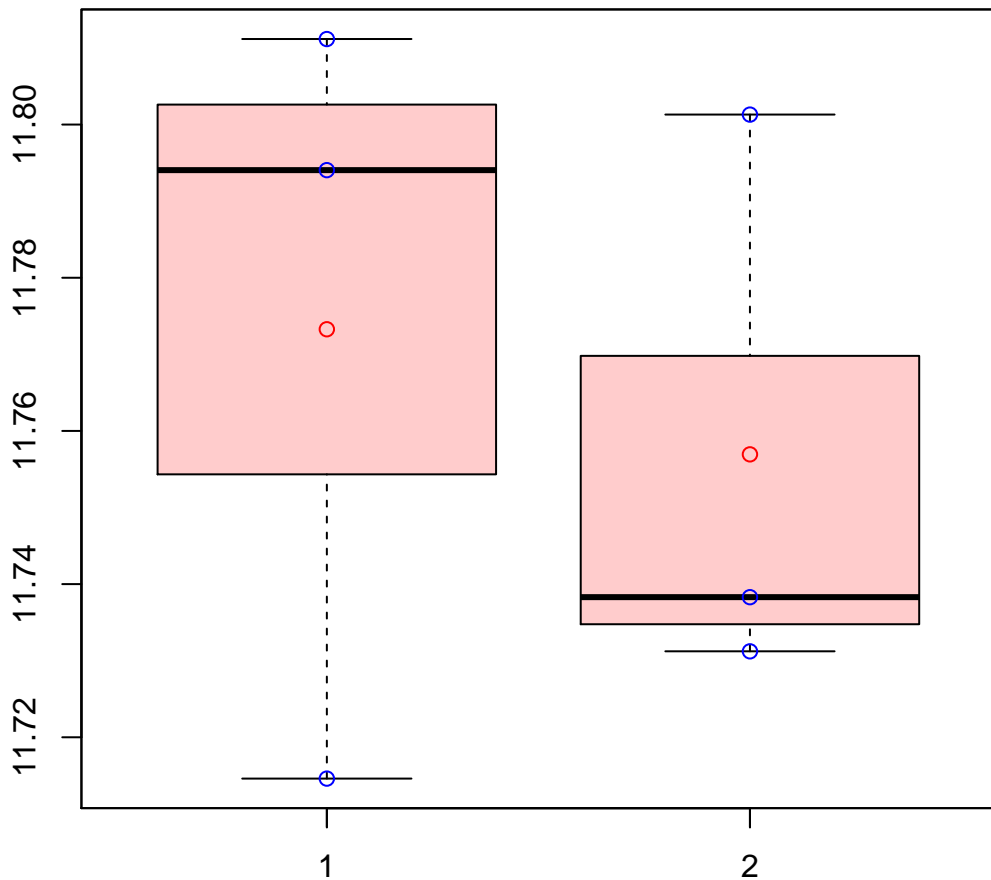

t-Test: p-value = 0.68



# CL1Contig423|CL1Contig423

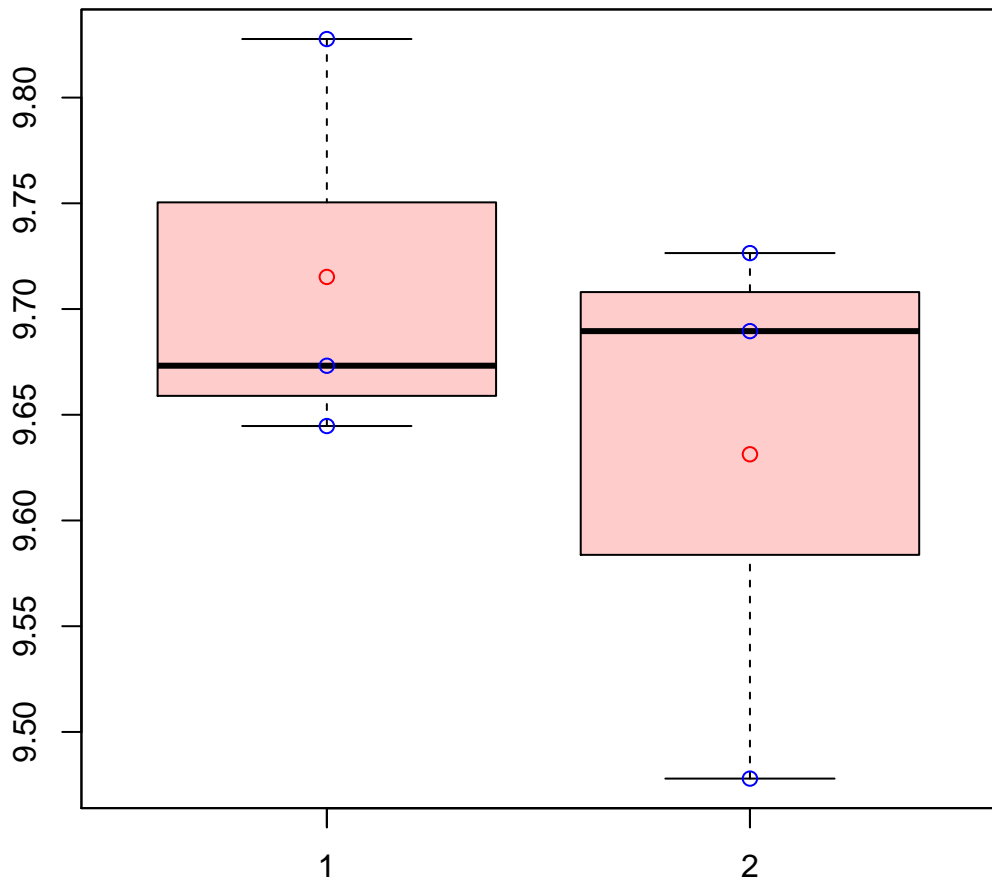

t-Test: p-value = 0.44

# CL1Contig4249|CL1Contig4249

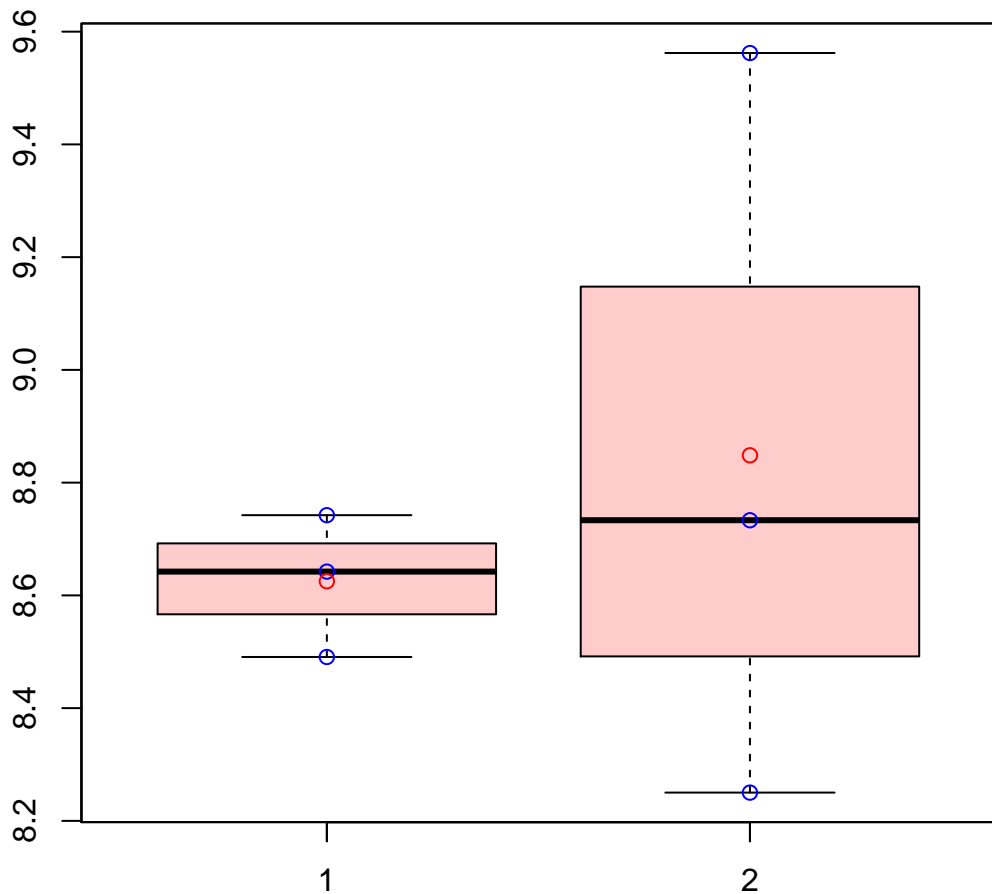

t-Test: p-value = 0.62

# CL1Contig4250|CL1Contig4250

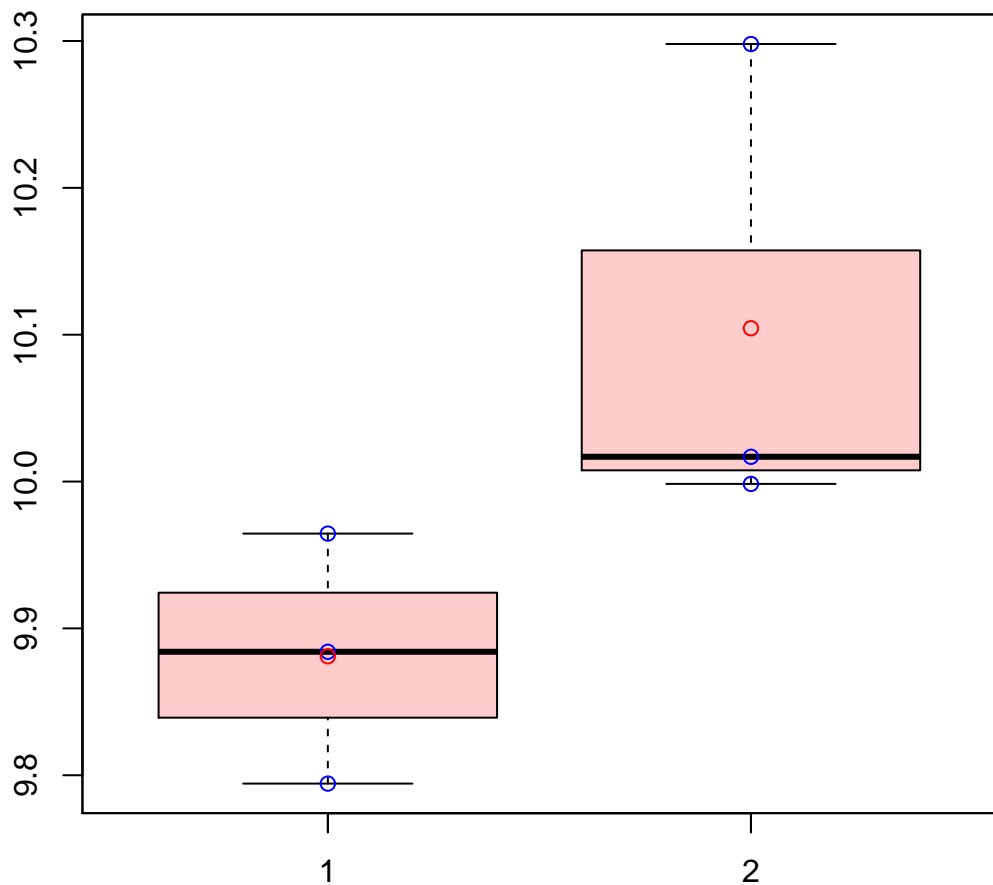

t-Test: p-value = 0.13

# CL1Contig4255|CL1Contig4255

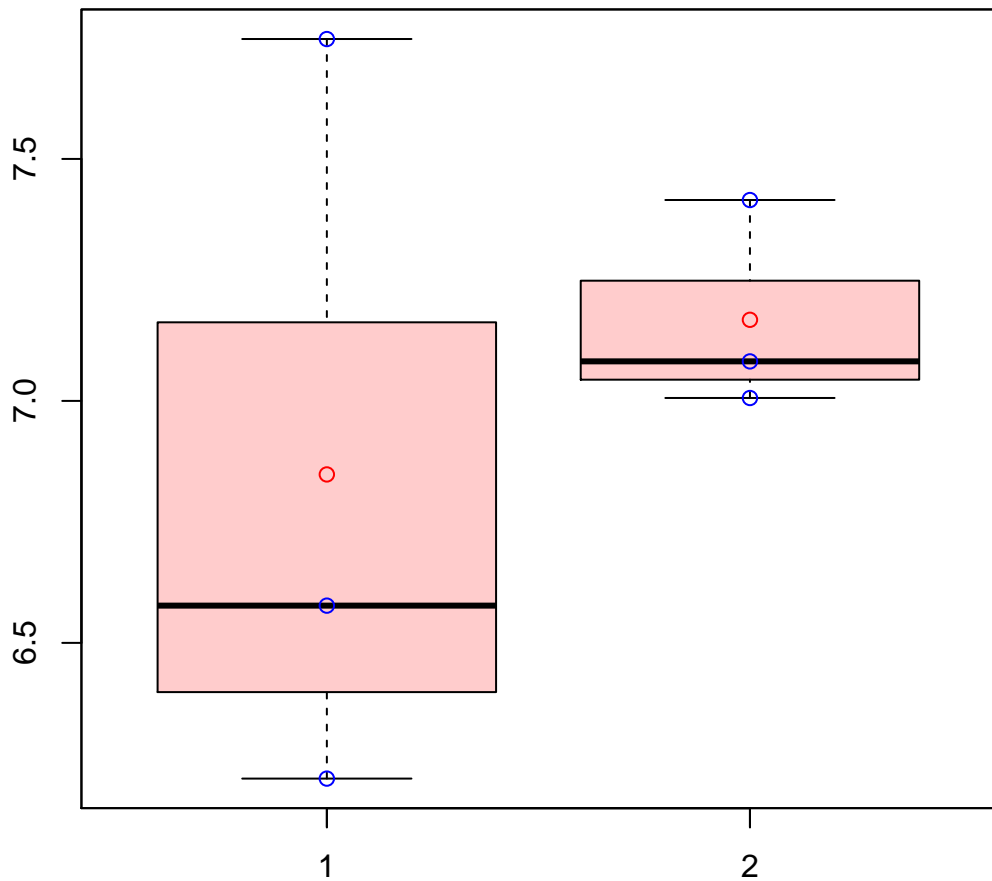

t-Test: p-value = 0.57

# CL1Contig4265|CL1Contig4265

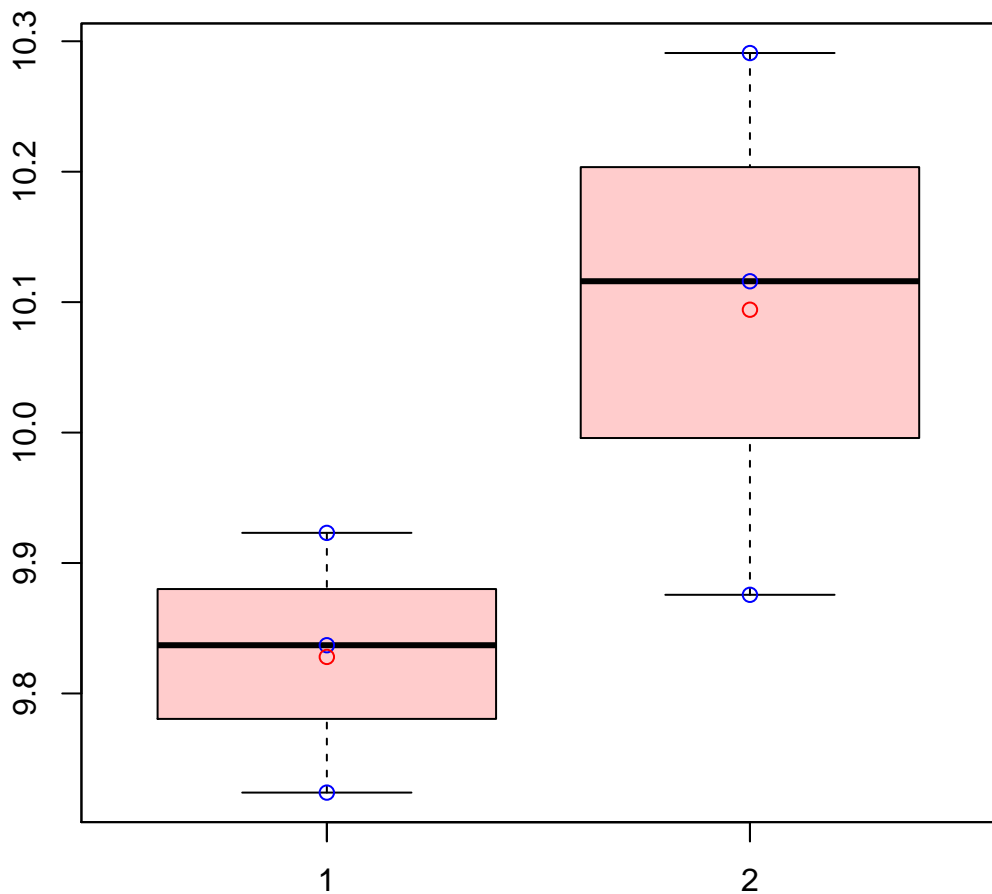

t-Test: p-value = 0.14

# CL1Contig4279|CL1Contig4279

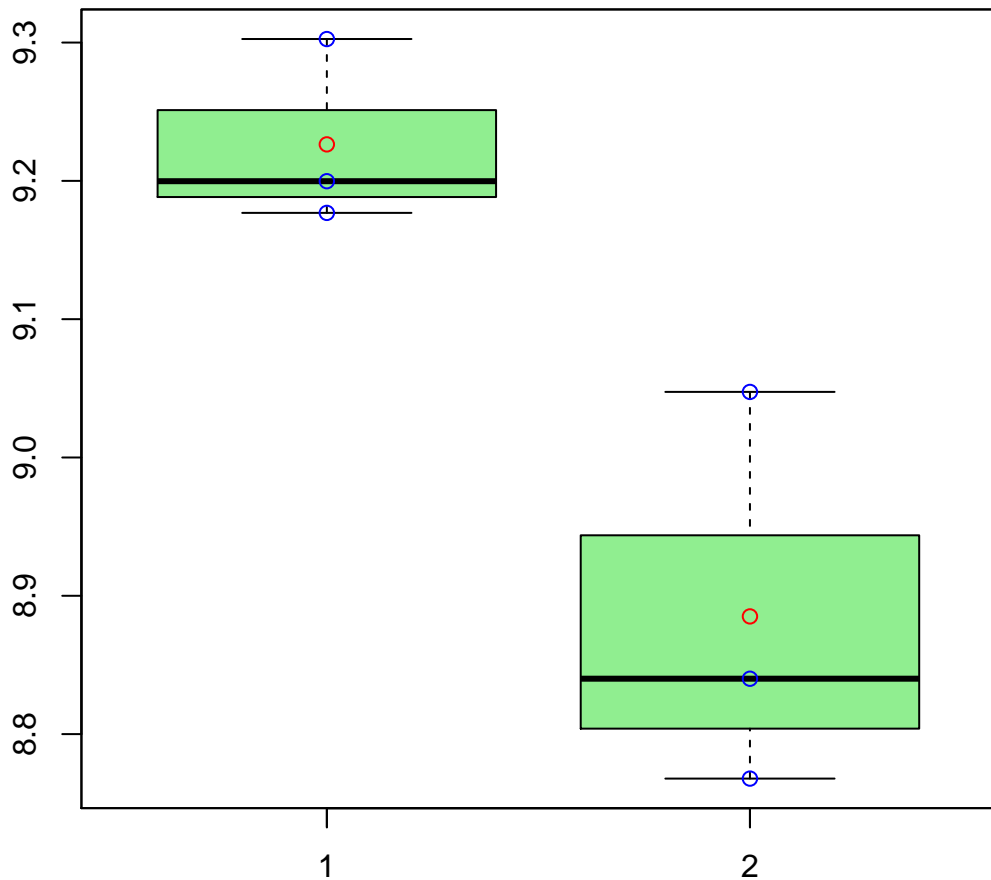

t-Test: p-value = 0.04

# CL1Contig4295|CL1Contig4295



t-Test: p-value = 0.38

# CL1Contig4299|CL1Contig4299

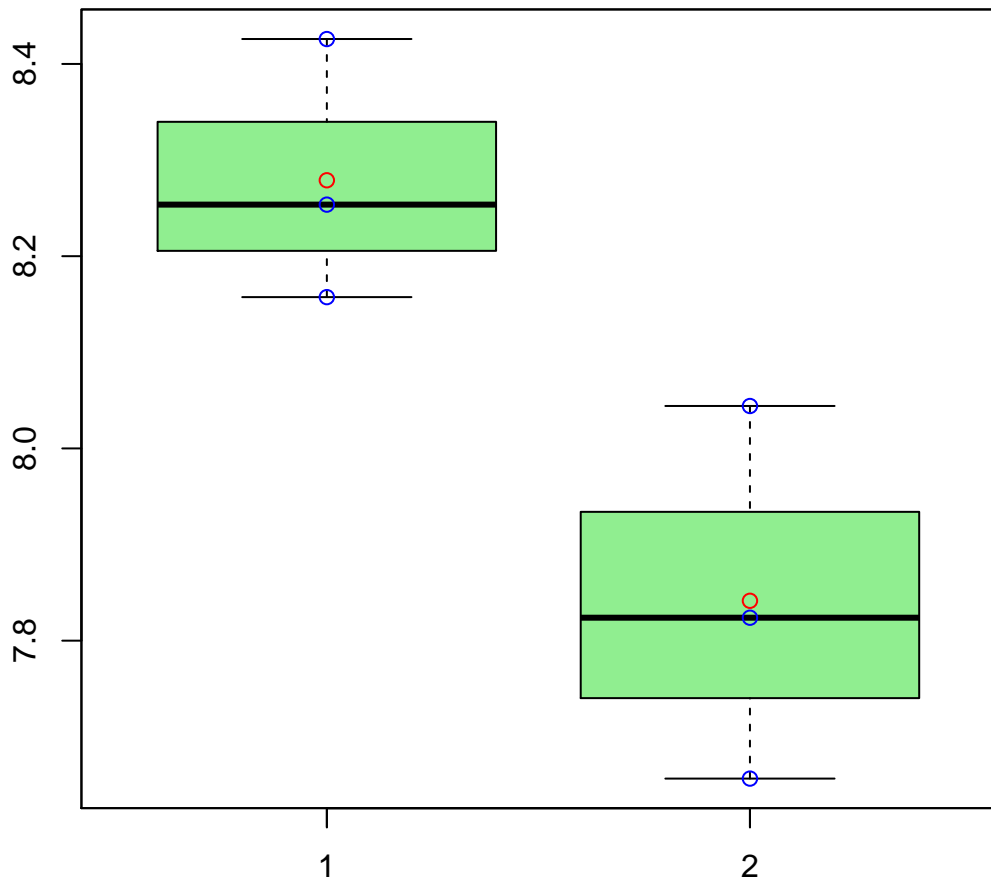

t-Test: p-value = 0.04



# CL1Contig4304|CL1Contig4304



t-Test: p-value = 0.66

# CL1Contig4309|CL1Contig4309

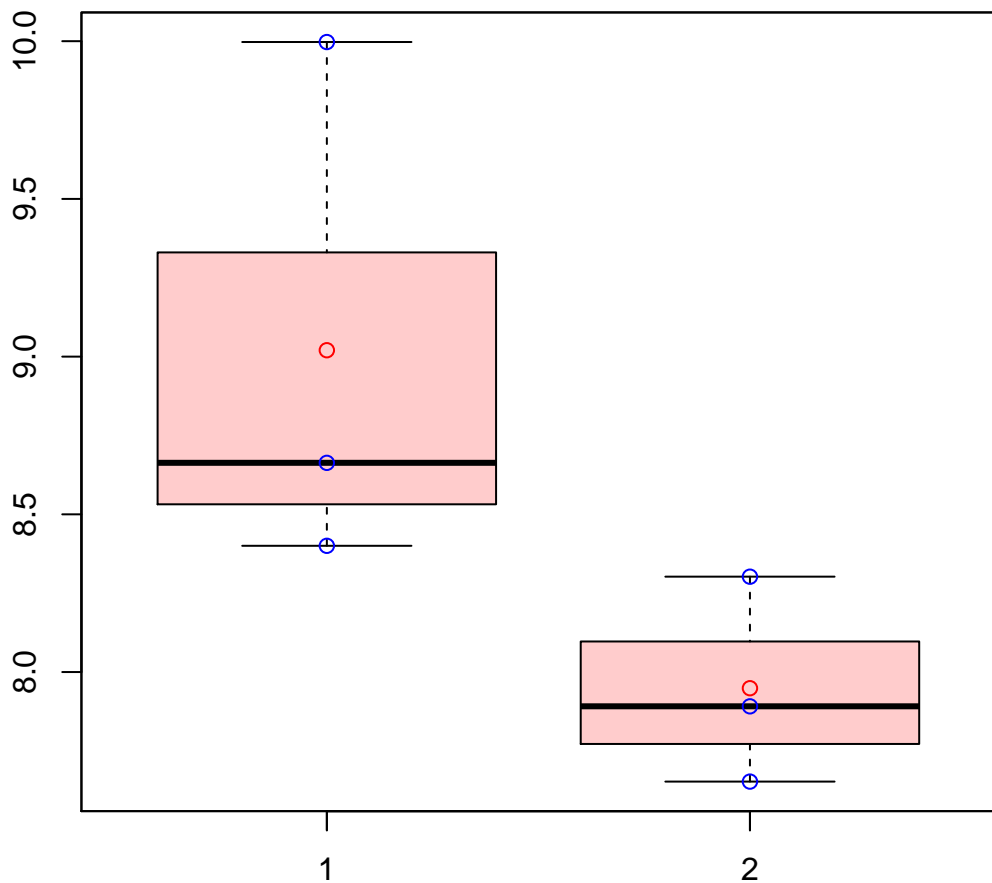

t-Test: p-value = 0.15

# CL1Contig4310|CL1Contig4310

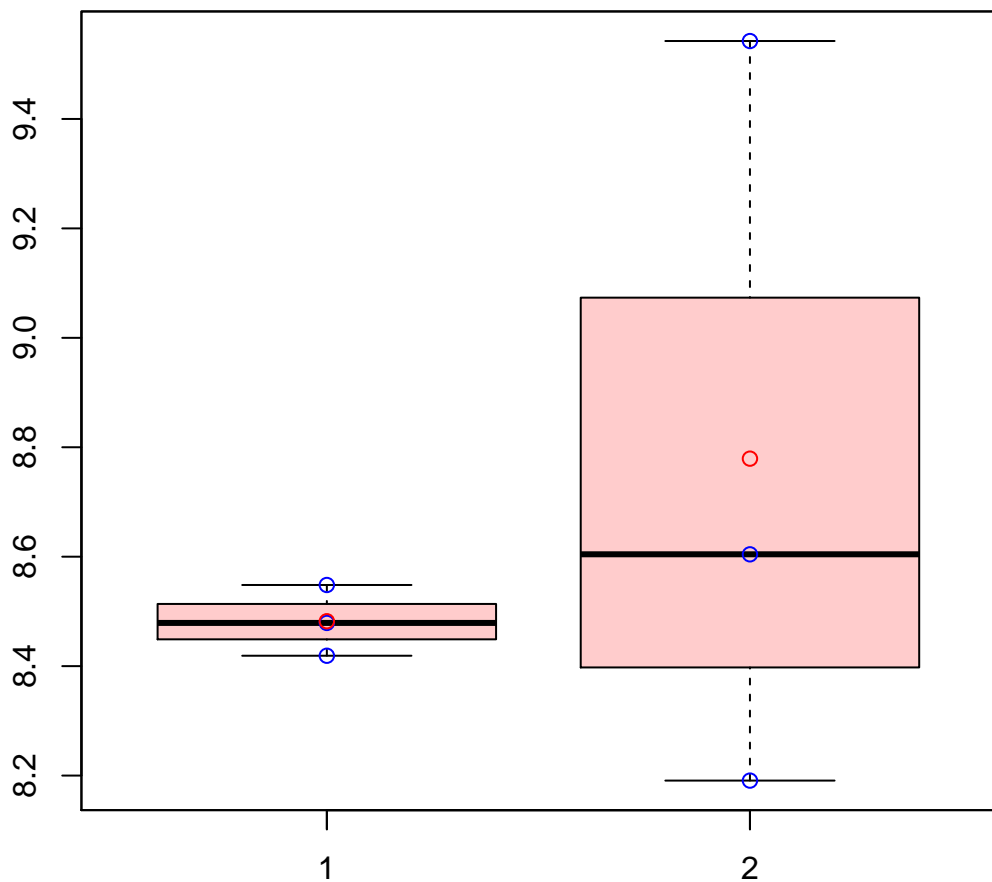

t-Test: p-value = 0.54

# CL1Contig4319|CL1Contig4319

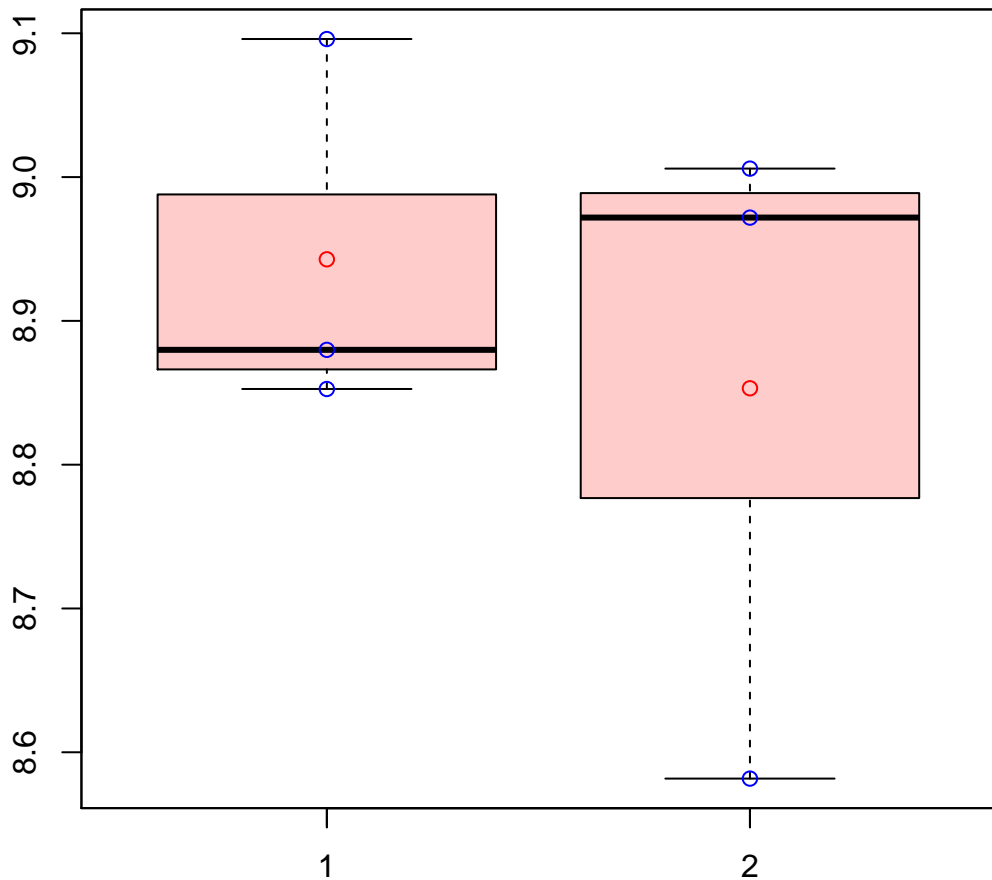

t-Test: p-value = 0.6

# CL1Contig4321|CL1Contig4321

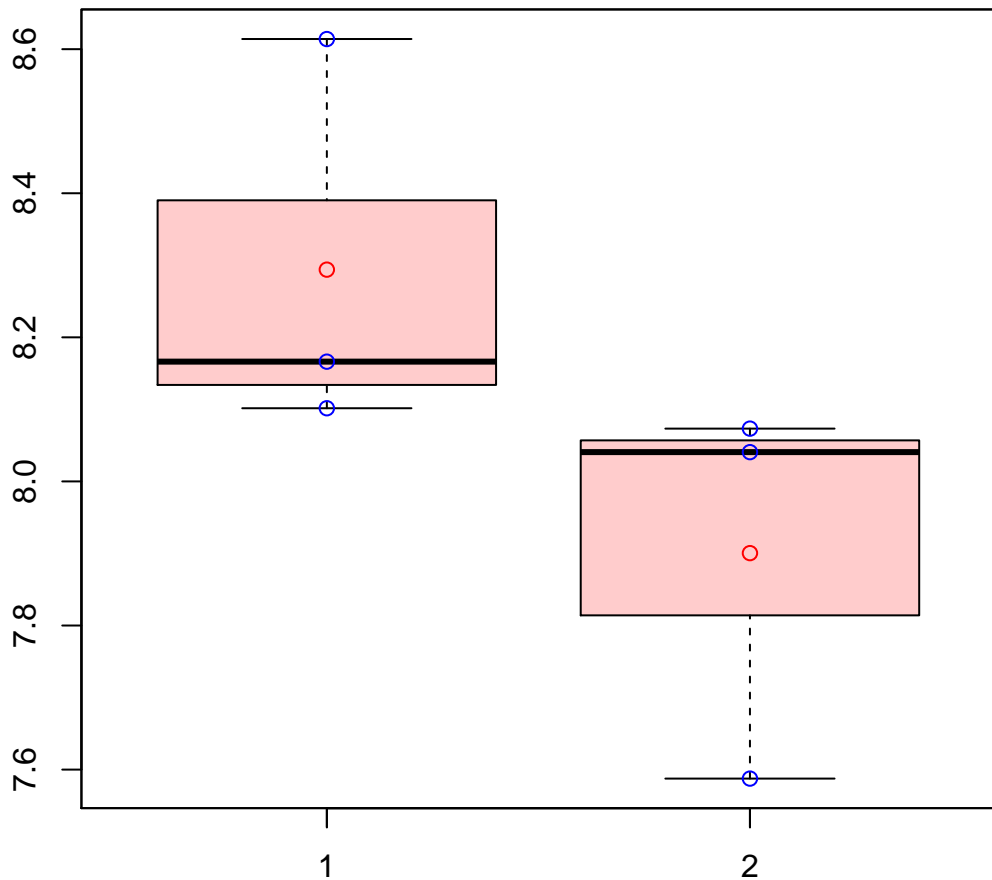

t-Test: p-value = 0.16

# CL1Contig4324|CL1Contig4324

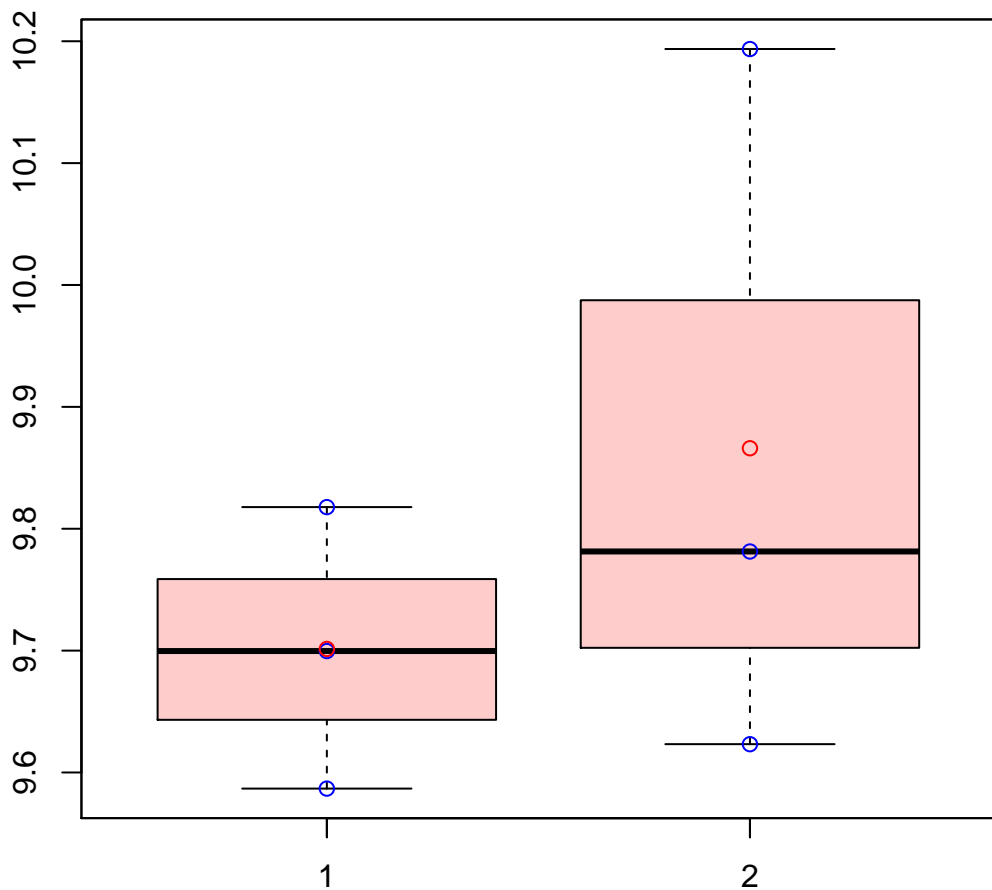

t-Test: p-value = 0.44

# CL1Contig4326|CL1Contig4326

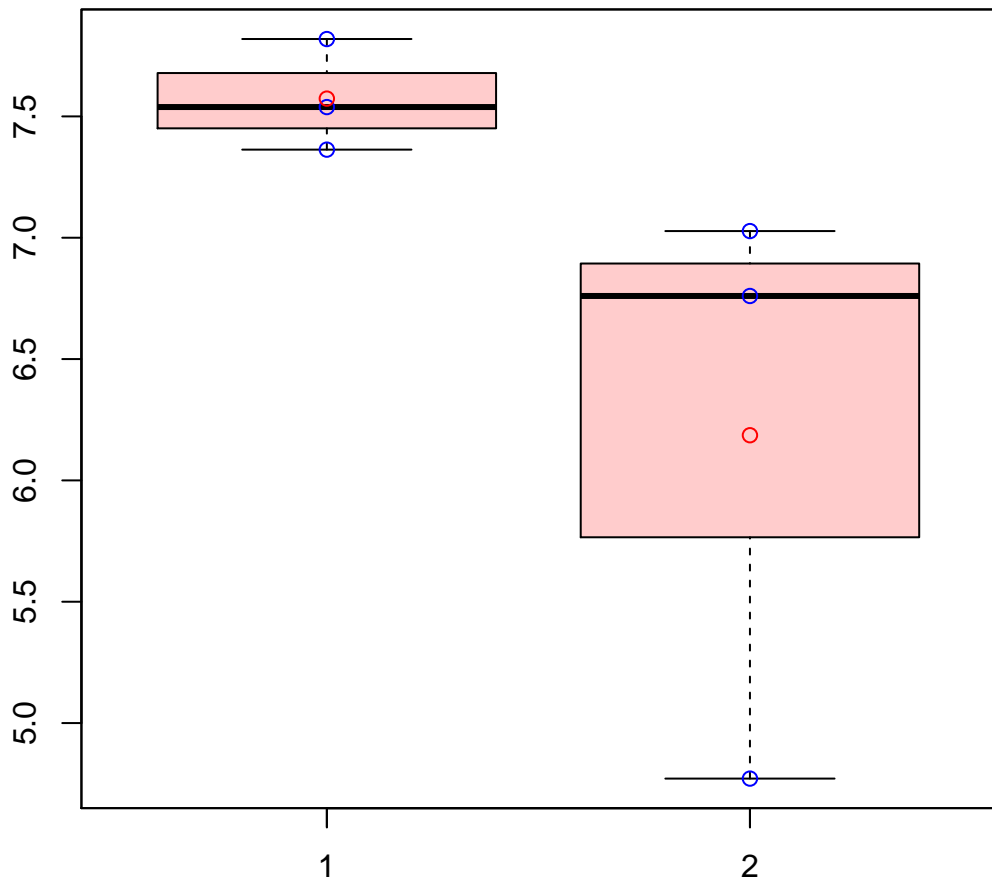

t-Test: p-value = 0.19

# CL1Contig4339|CL1Contig4339

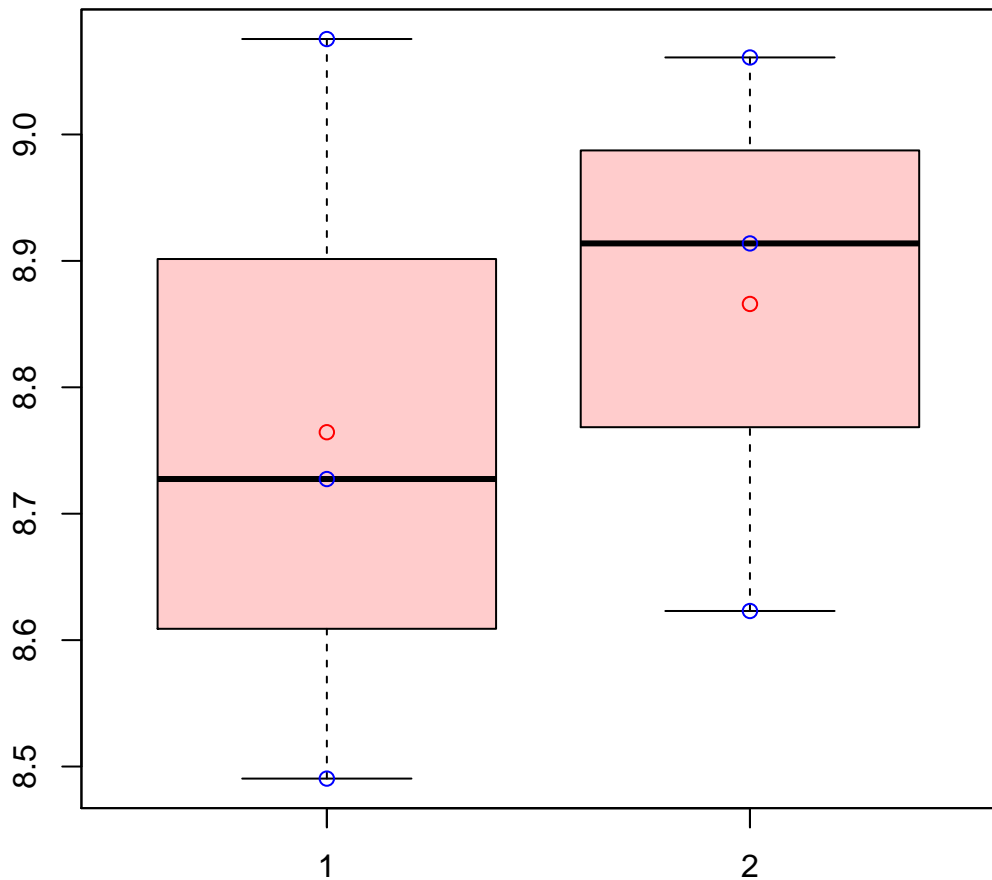

t-Test: p-value = 0.66



# CL1Contig4357|CL1Contig4357

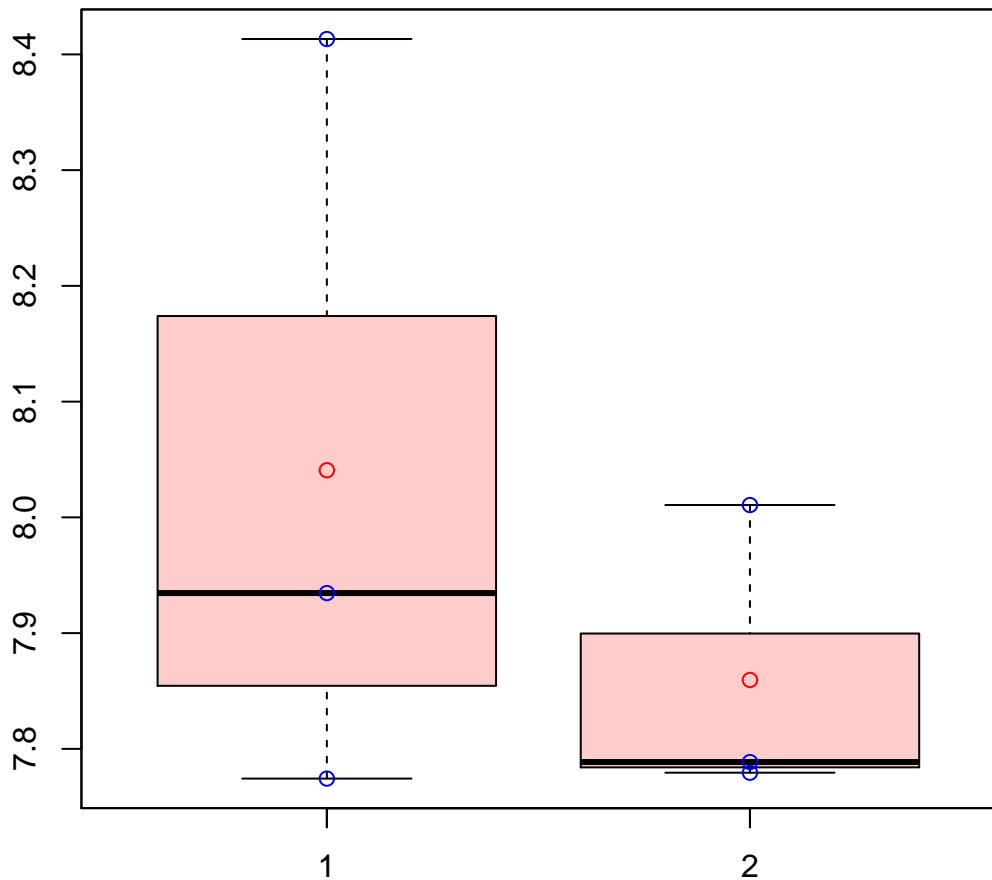

t-Test: p-value = 0.45

# CL1Contig4370|CL1Contig4370

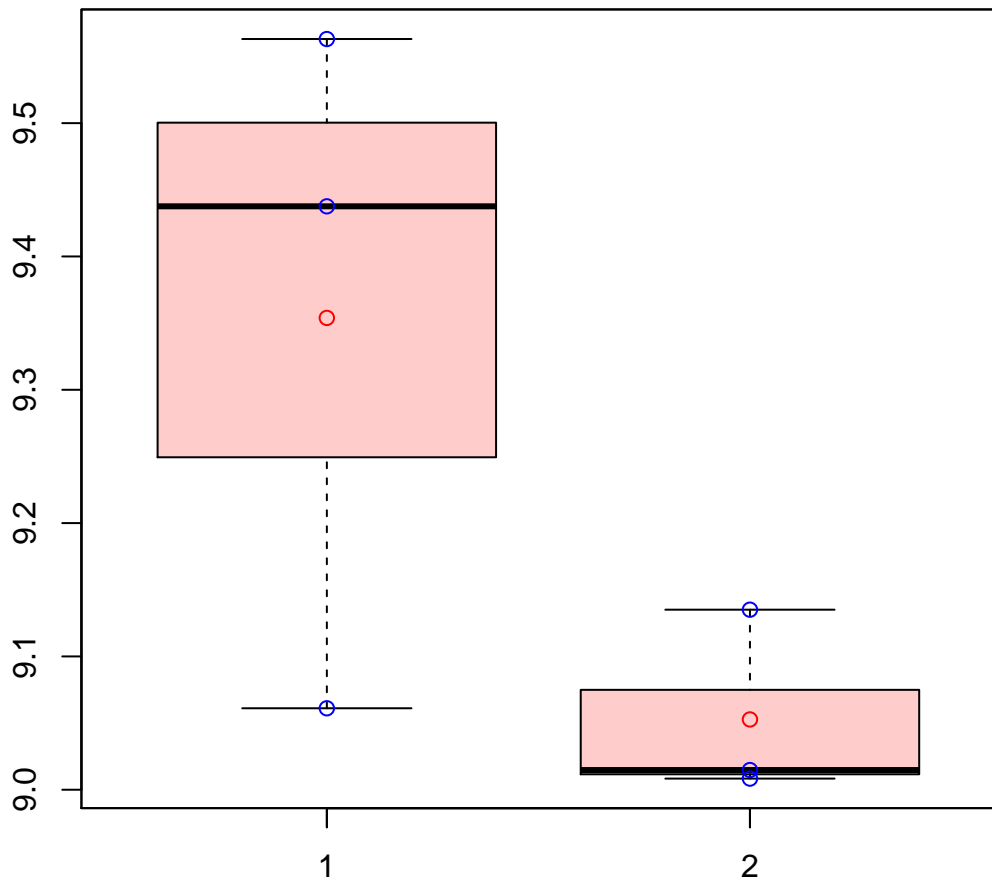

t-Test: p-value = 0.18

# CL1Contig4379|CL1Contig4379

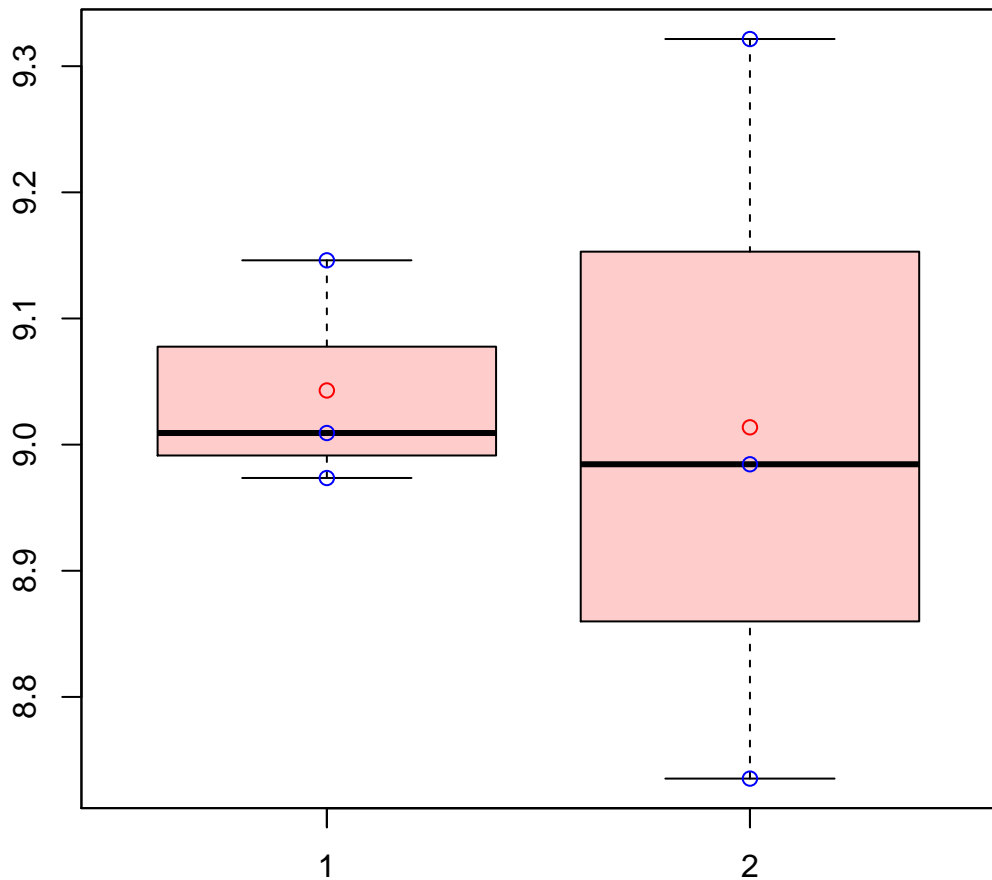

t-Test: p-value = 0.88

# CL1Contig4389|CL1Contig4389

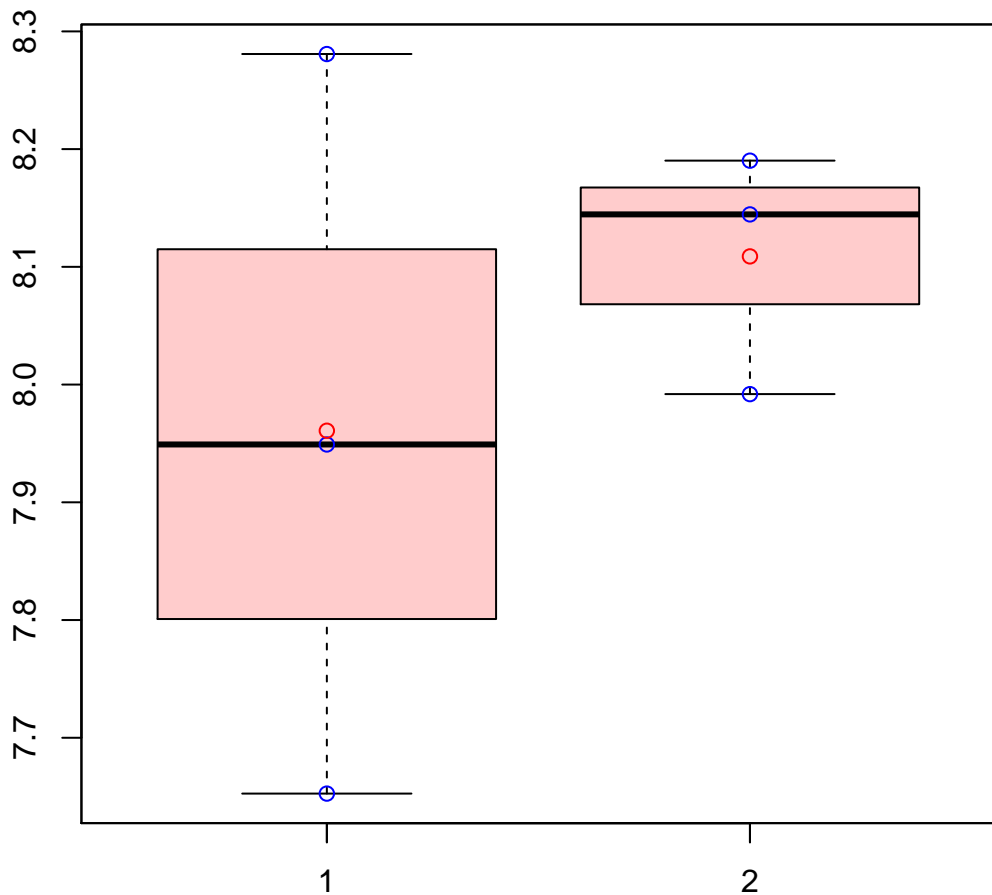

t-Test: p-value = 0.51

# CL1Contig4403|CL1Contig4403

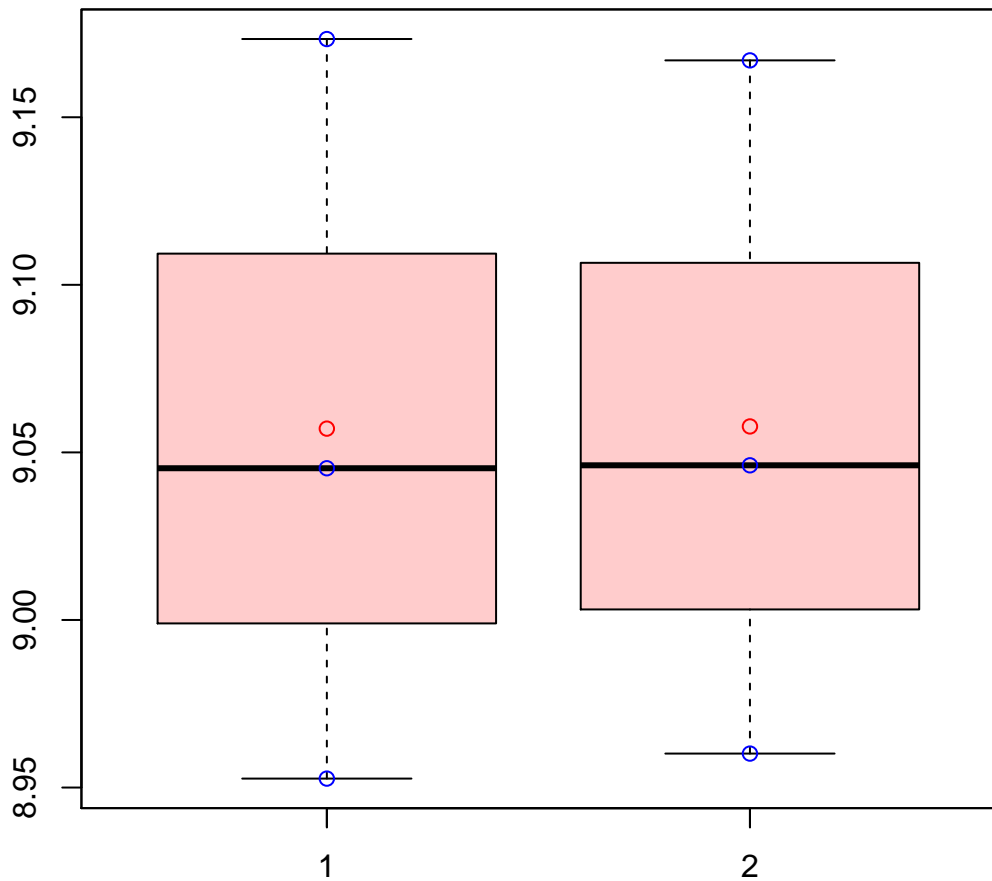

t-Test: p-value = 0.99

# CL1Contig4405|CL1Contig4405



t-Test: p-value = 0.18

# CL1Contig4407|CL1Contig4407



t-Test: p-value = 0.18

# CL1Contig4417|CL1Contig4417

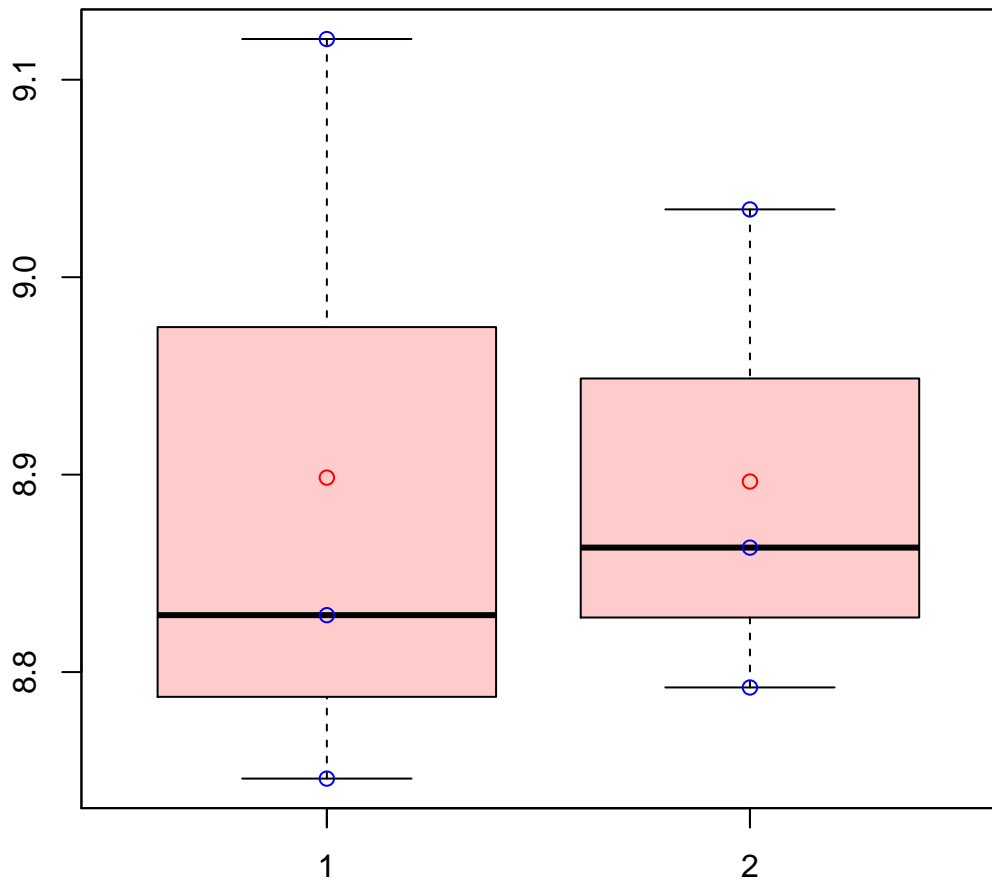

t-Test: p-value = 0.99



# CL1Contig4424|CL1Contig4424

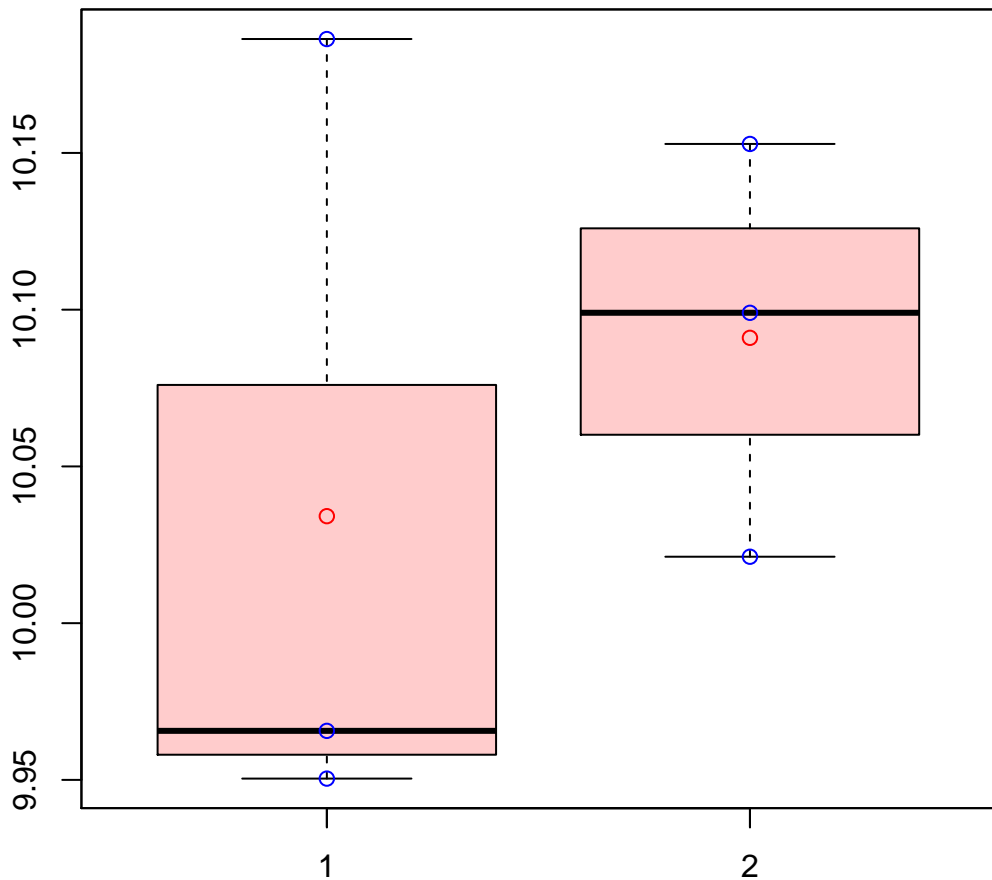

t-Test: p-value = 0.55

# CL1Contig4443|CL1Contig4443

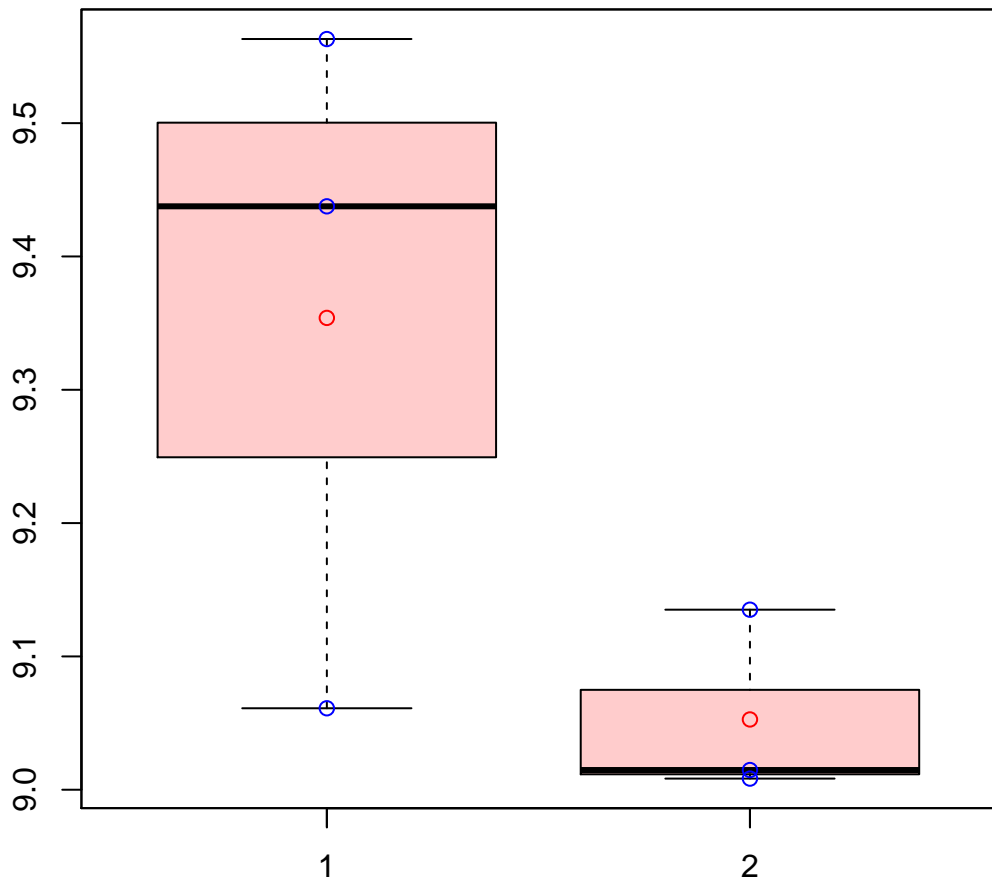

t-Test: p-value = 0.18

# CL1Contig4485|CL1Contig4485

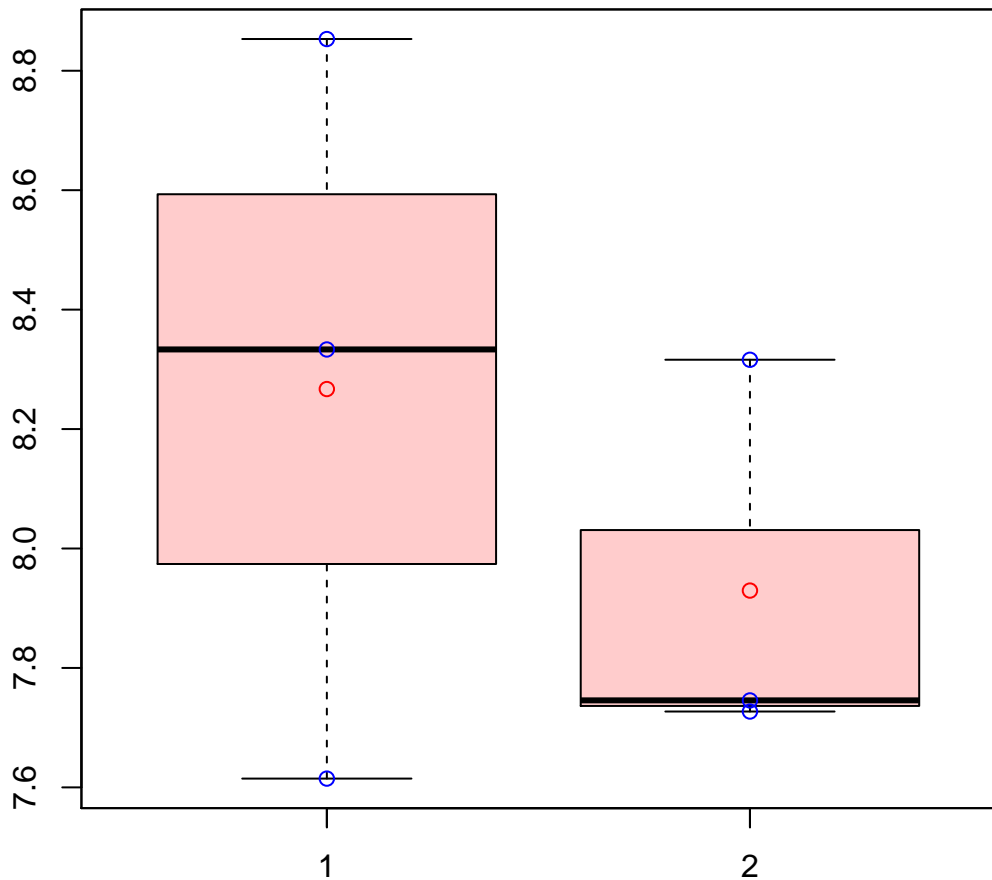

t-Test: p-value = 0.47

# CL1Contig4488|CL1Contig4488

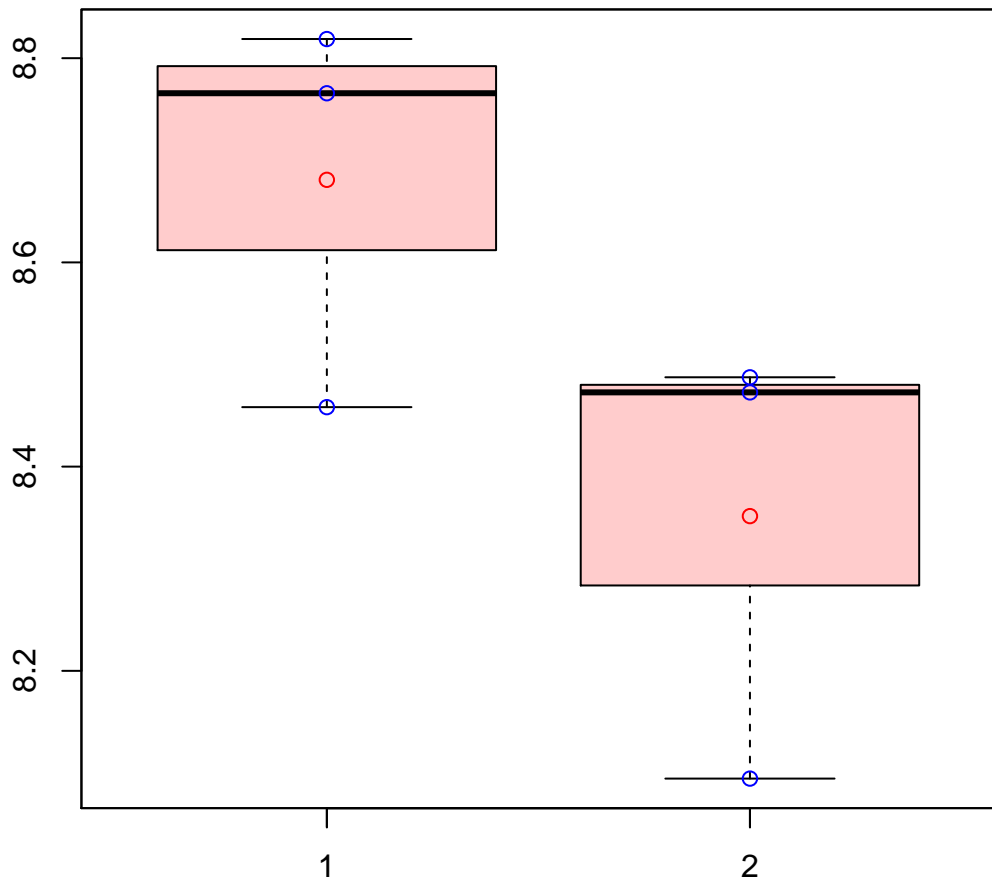

t-Test: p-value = 0.13

# CL1Contig4521|CL1Contig4521

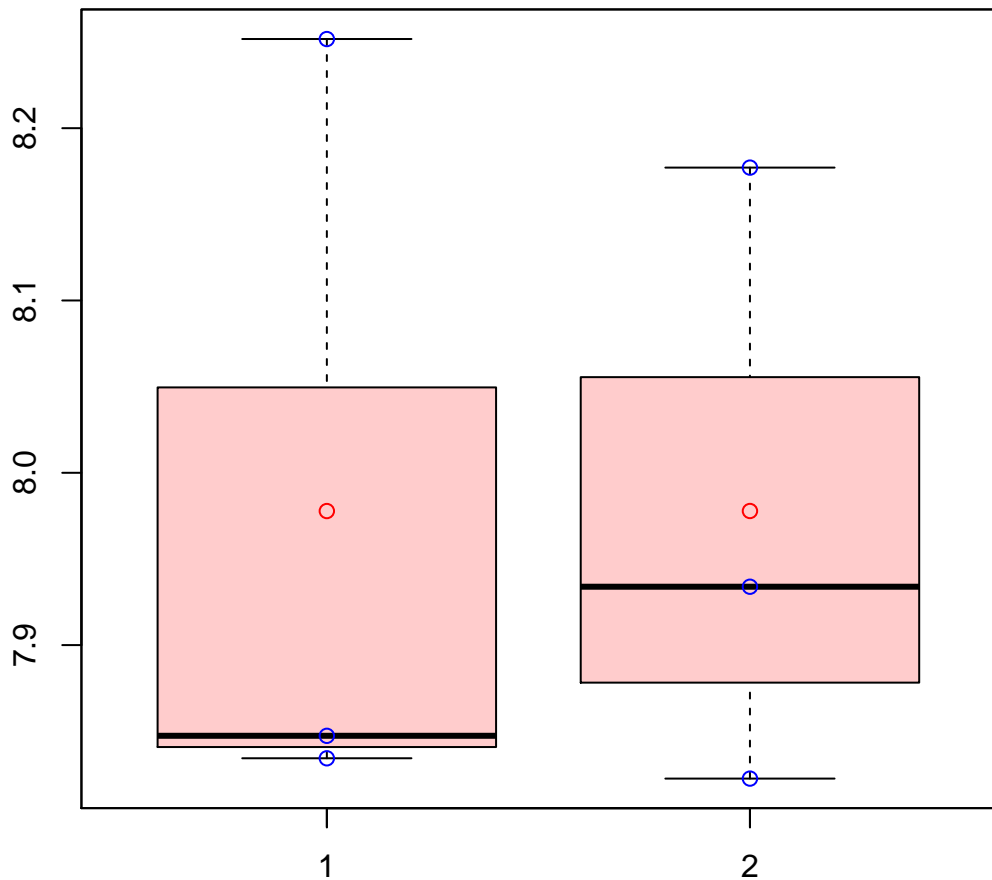

t-Test: p-value = 1

# CL1Contig4528|CL1Contig4528

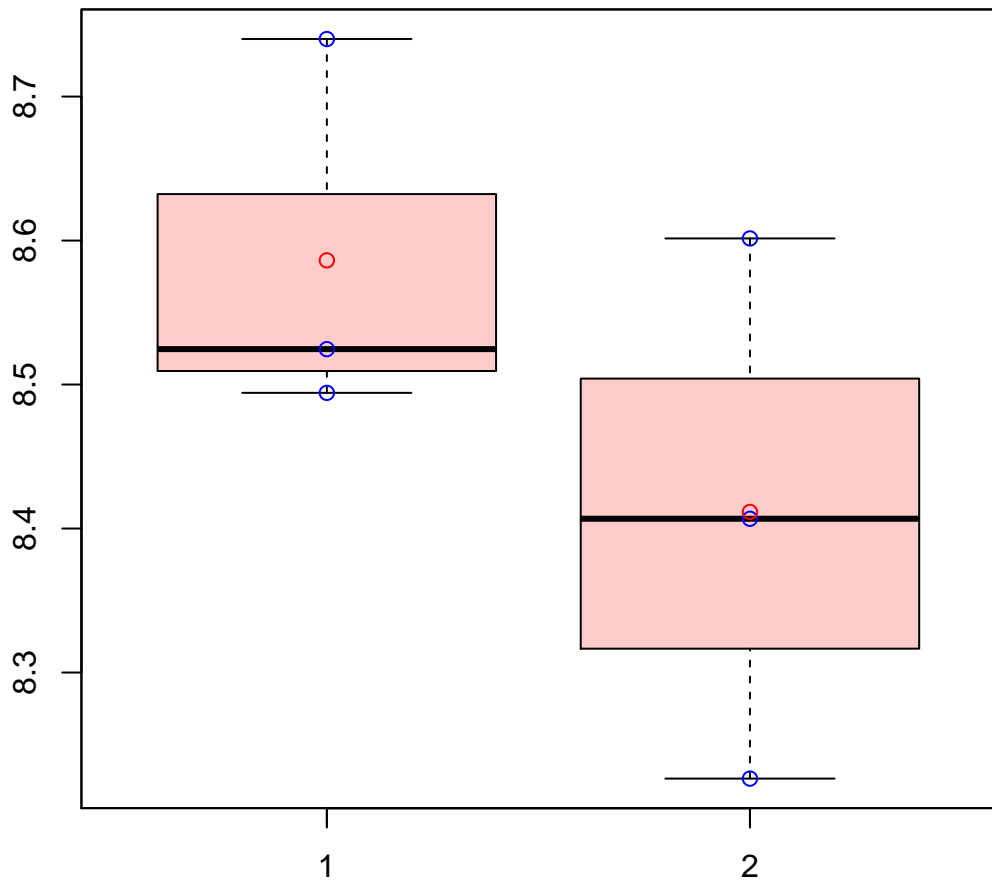

t-Test: p-value = 0.27

# CL1Contig4550|CL1Contig4550

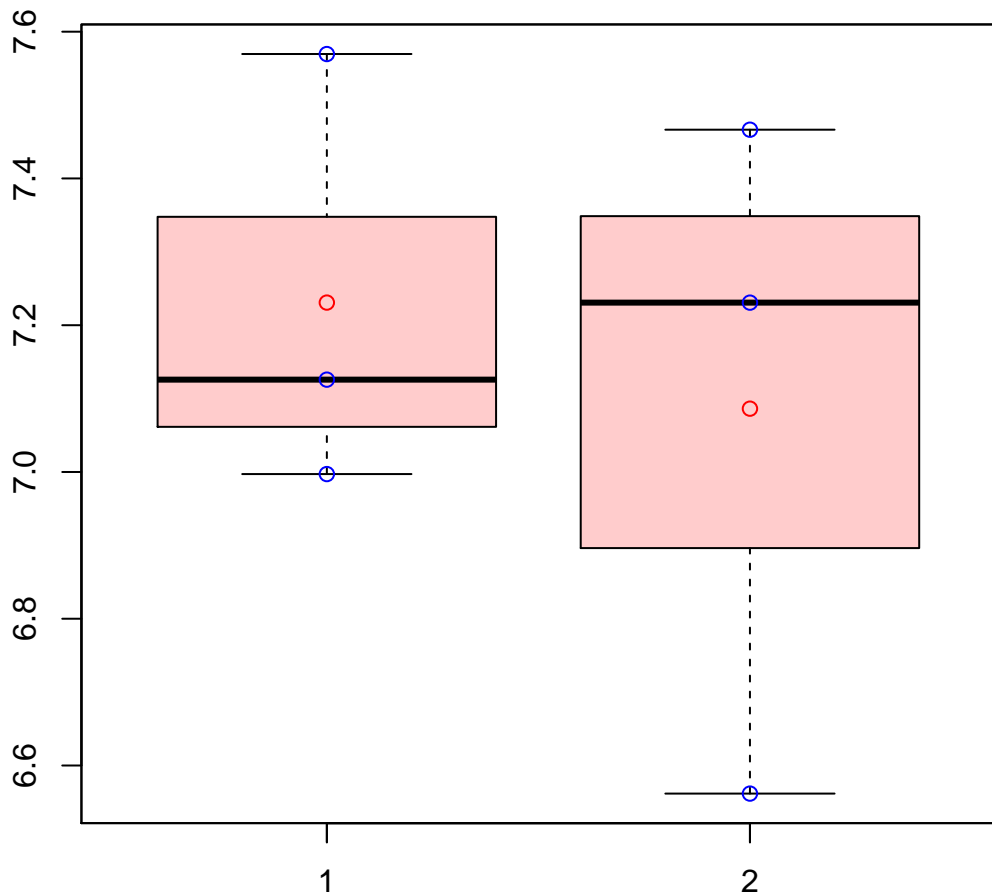

t-Test: p-value = 0.68

# CL1Contig4551|CL1Contig4551

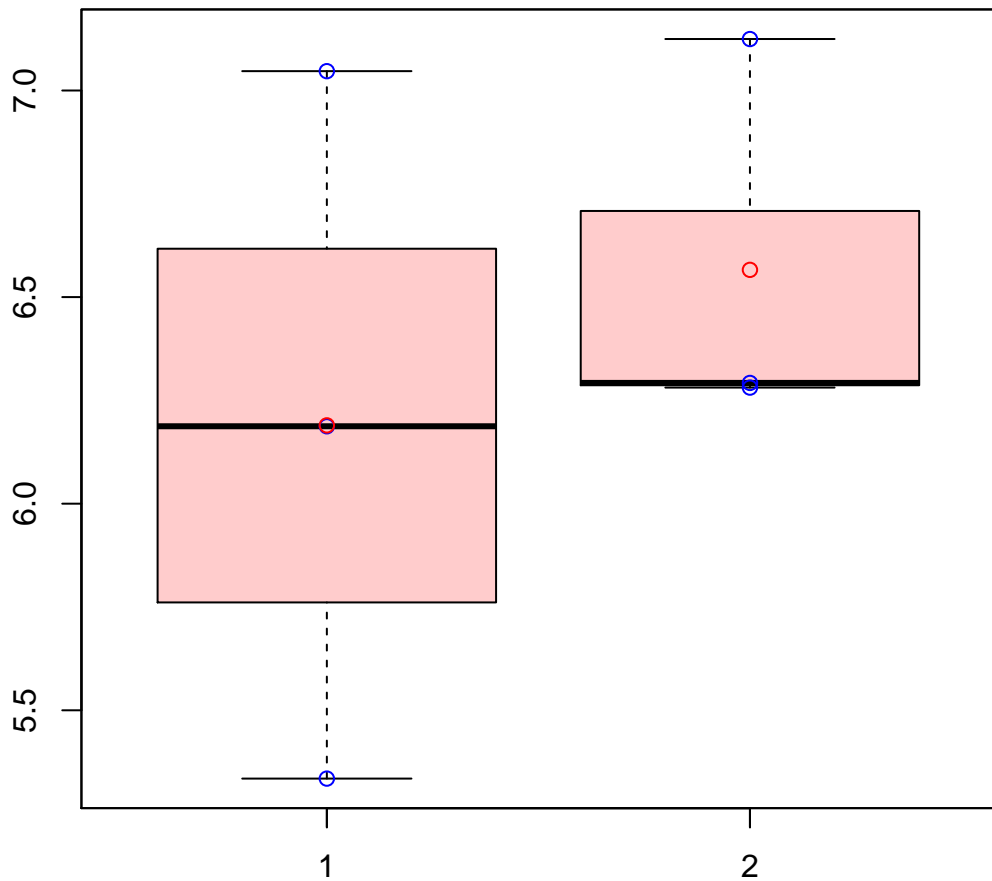

t-Test: p-value = 0.55



# CL1Contig4553|CL1Contig4553

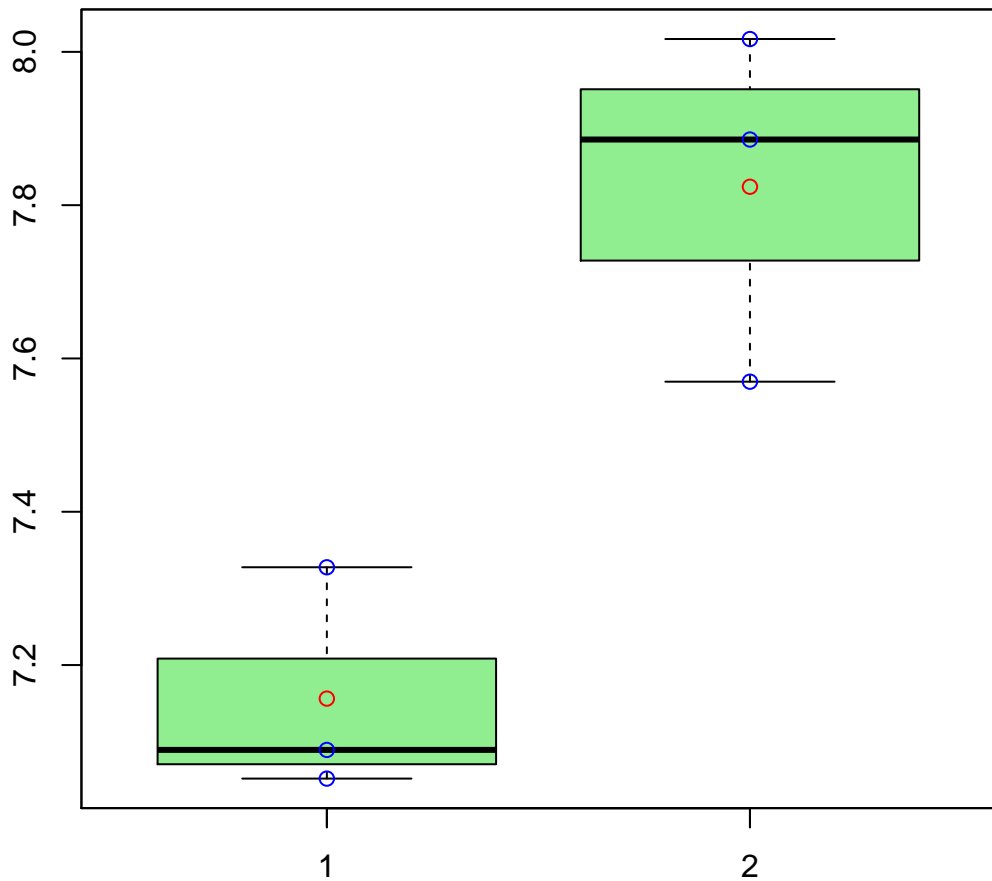

t-Test: p-value = 0.02

# CL1Contig4554|CL1Contig4554



t-Test: p-value = 0.25

# CL1Contig457|CL1Contig457

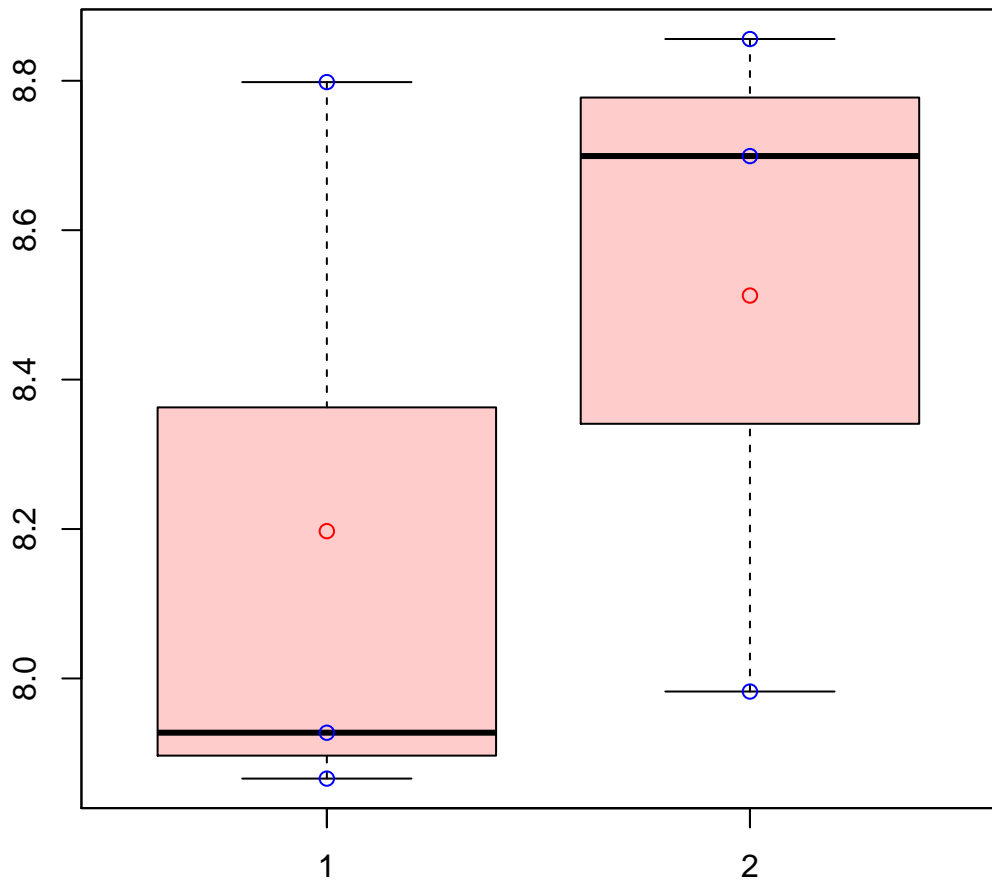

t-Test: p-value = 0.48

# CL1Contig458|CL1Contig458

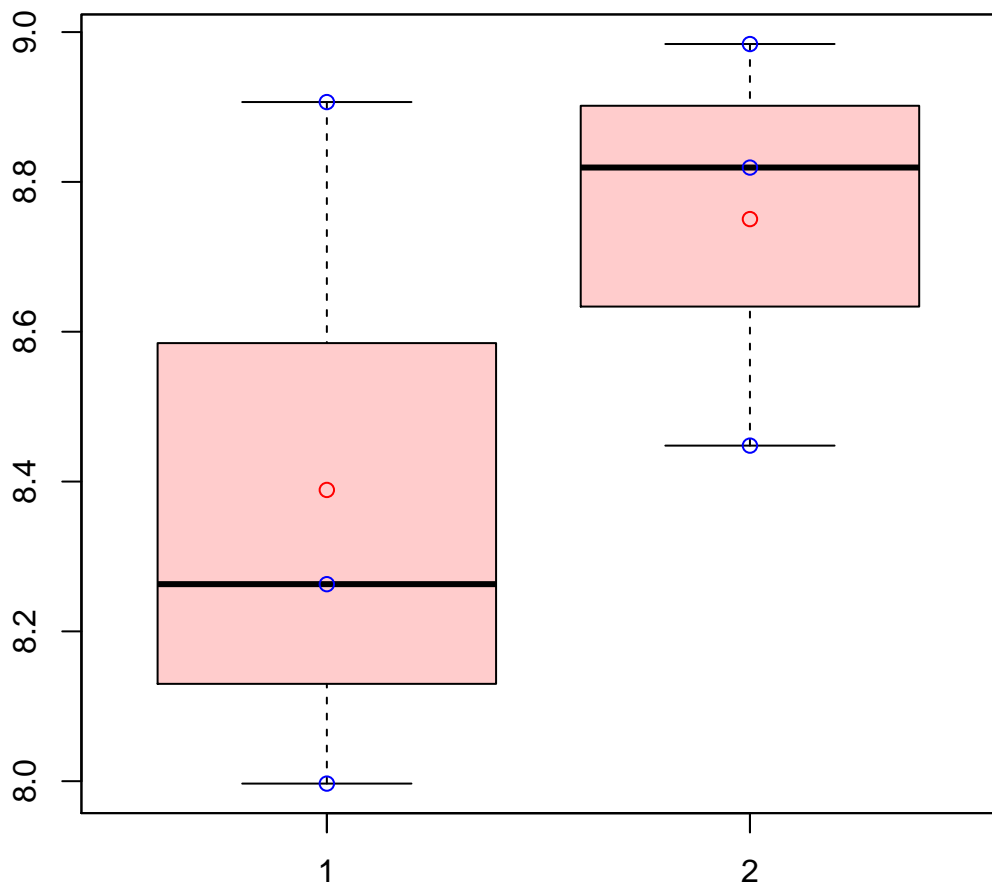

t-Test: p-value = 0.33

# CL1Contig45|CL1Contig45

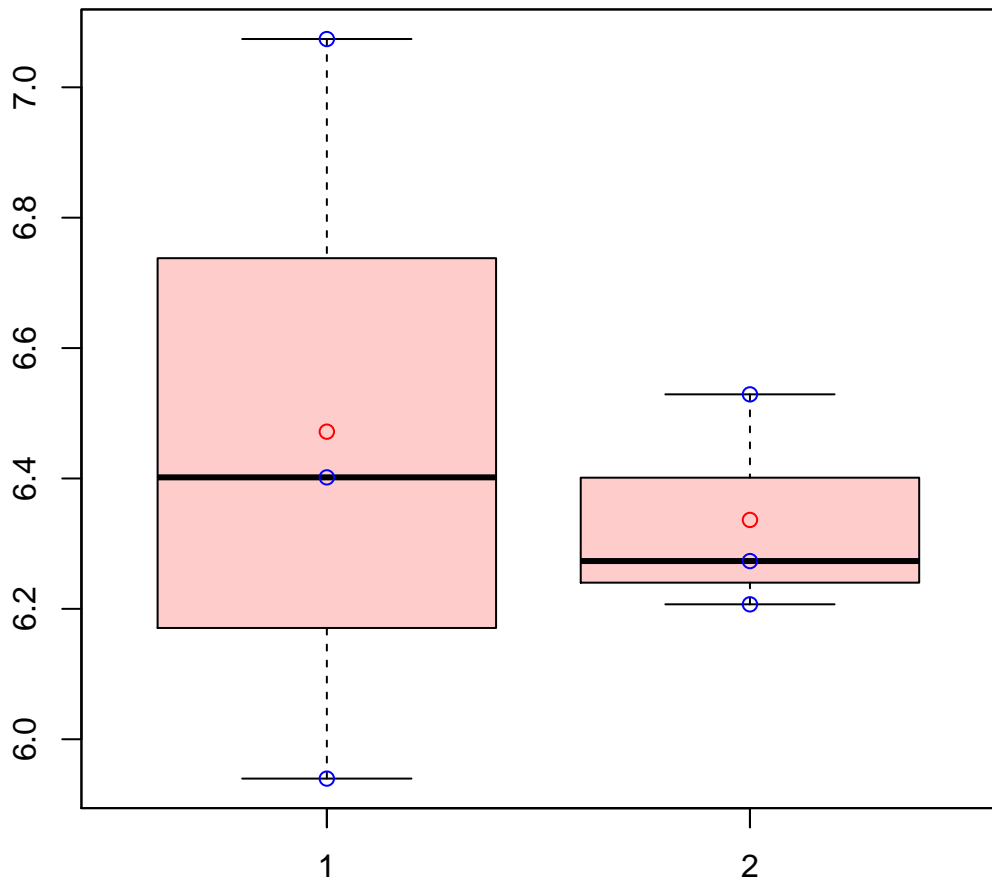

t-Test: p-value = 0.73

# CL1Contig4605|CL1Contig4605



t-Test: p-value = 0.93

# CL1Contig4611|CL1Contig4611

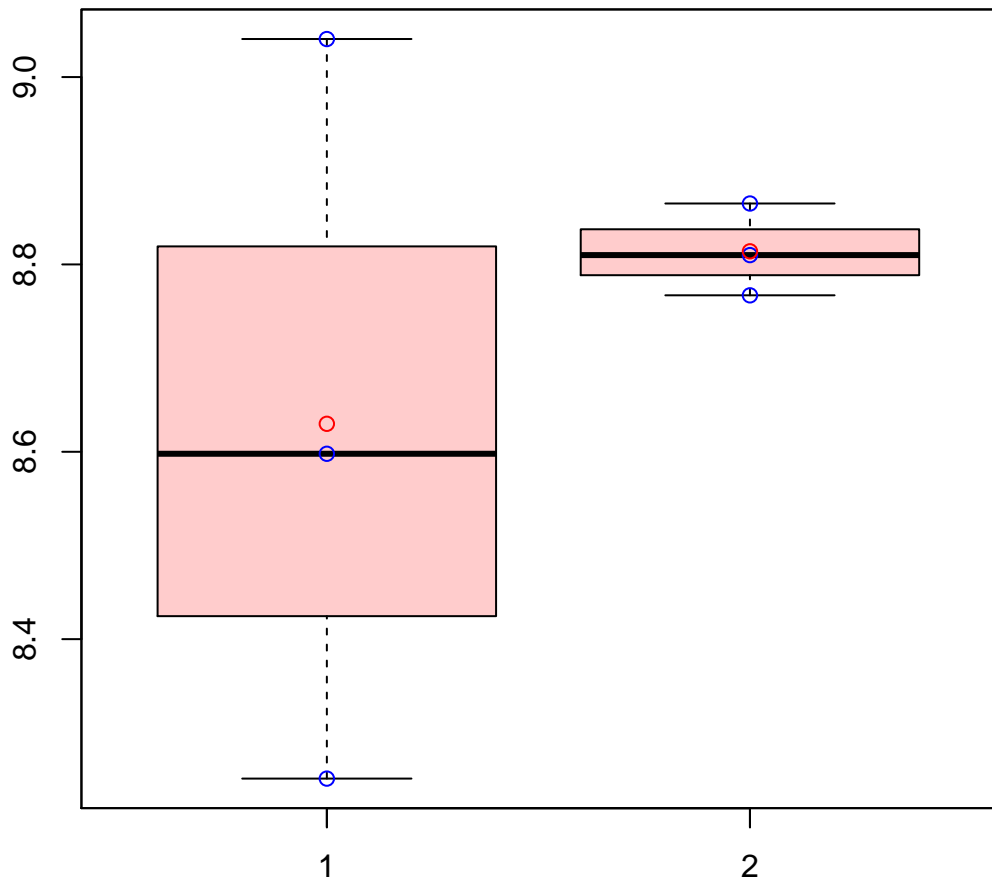

t-Test: p-value = 0.51

# CL1Contig4624|CL1Contig4624

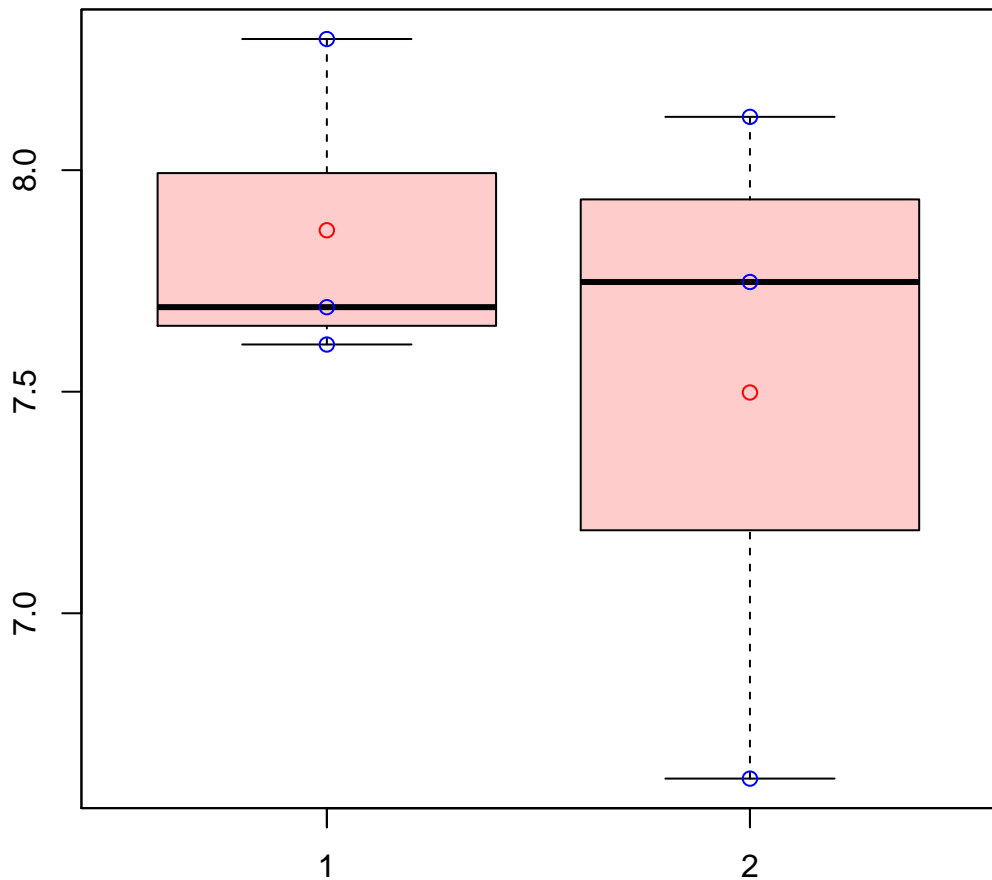

t-Test: p-value = 0.52



# CL1Contig462|CL1Contig462

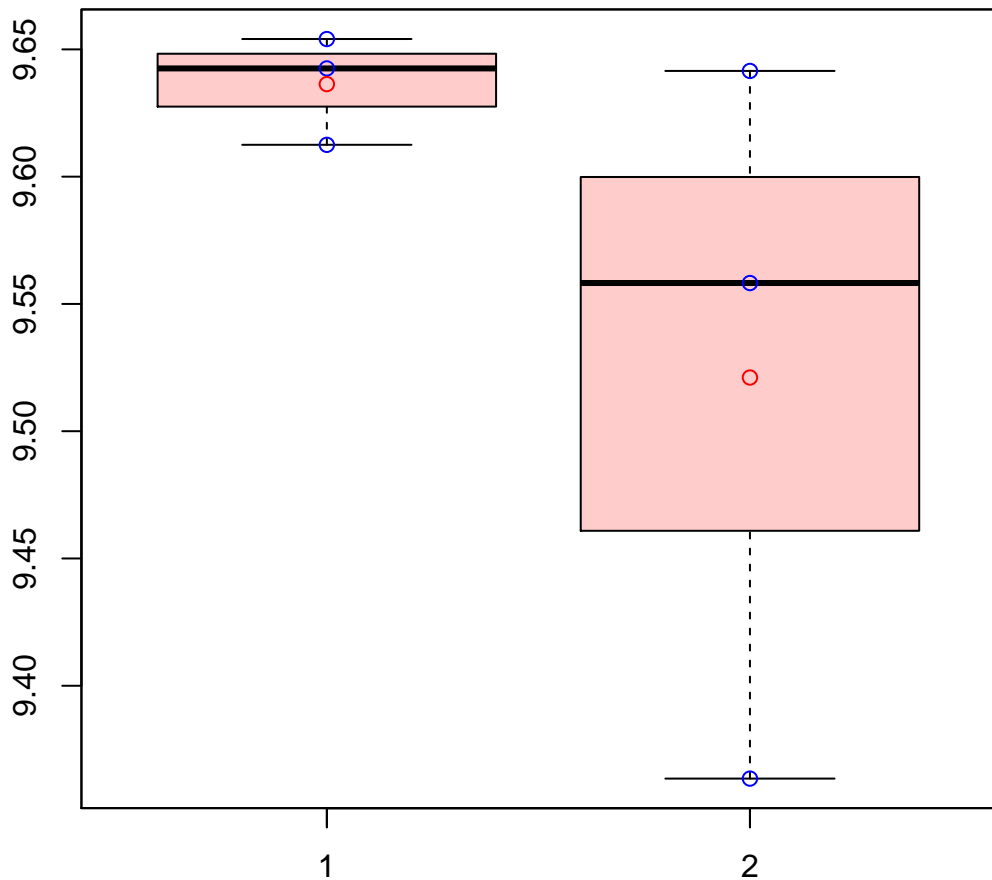

t-Test: p-value = 0.3

# CL1Contig4635|CL1Contig4635

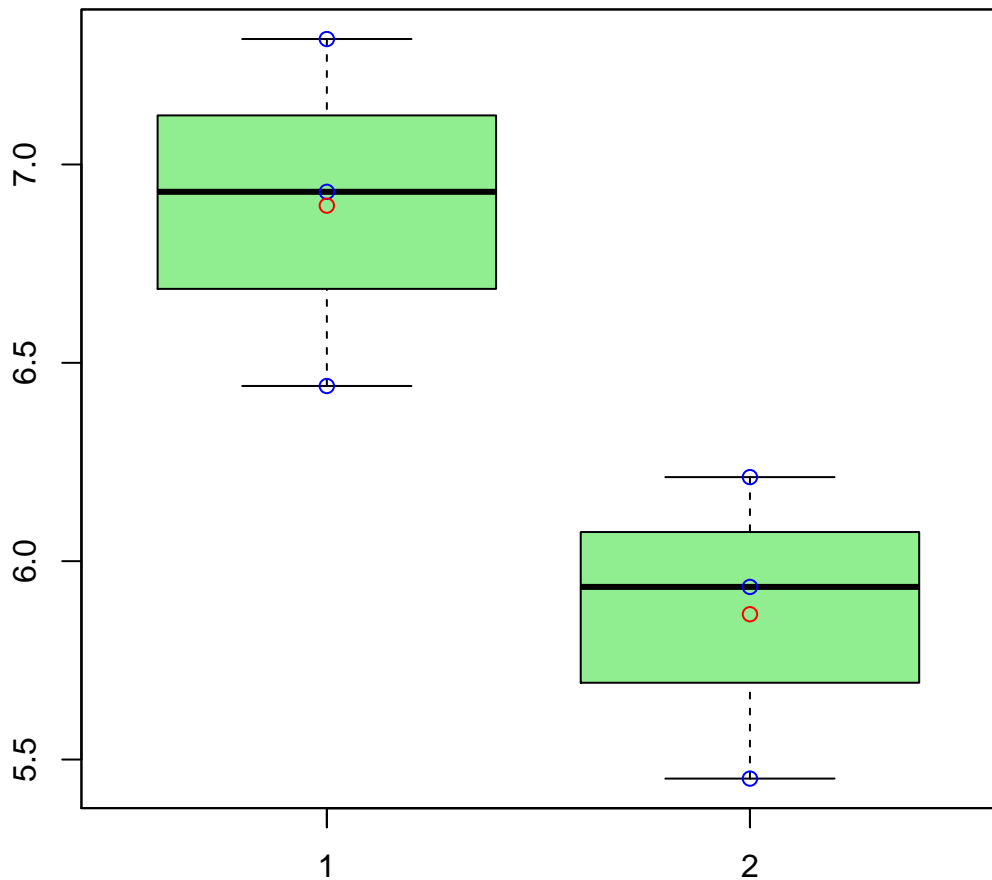

t-Test: p-value = 0.04

# CL1Contig4642|CL1Contig4642

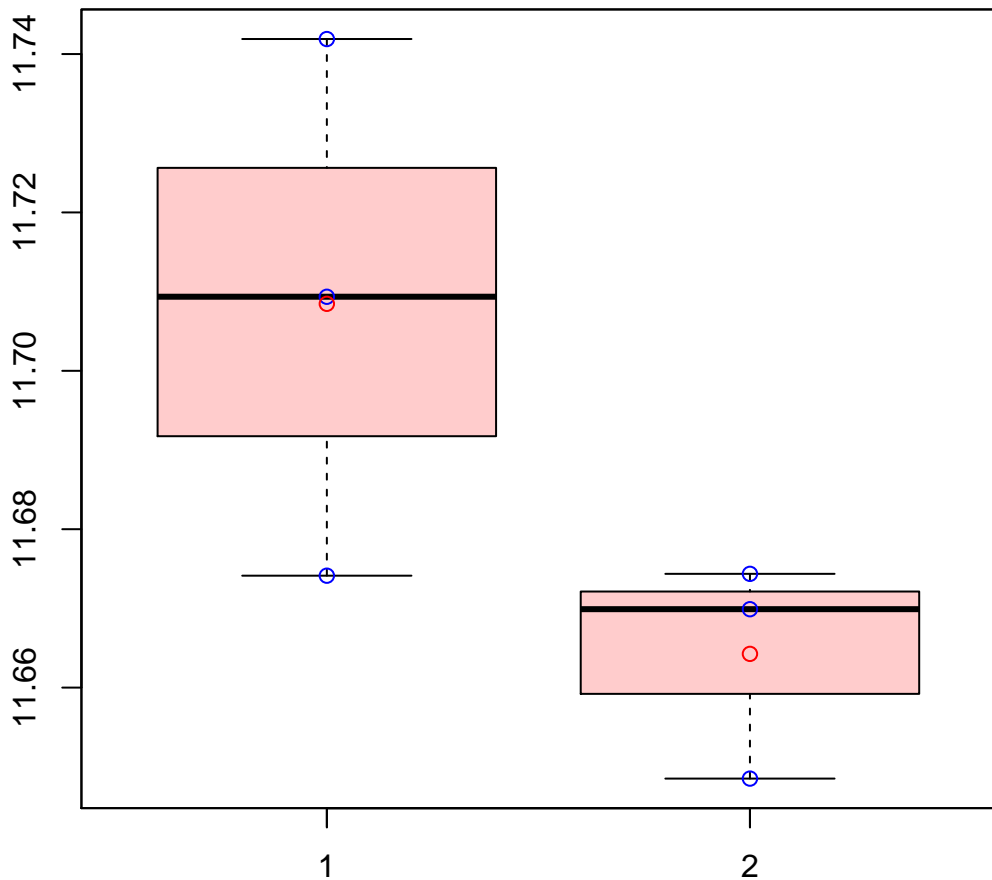

t-Test: p-value = 0.14

# CL1Contig4654|CL1Contig4654

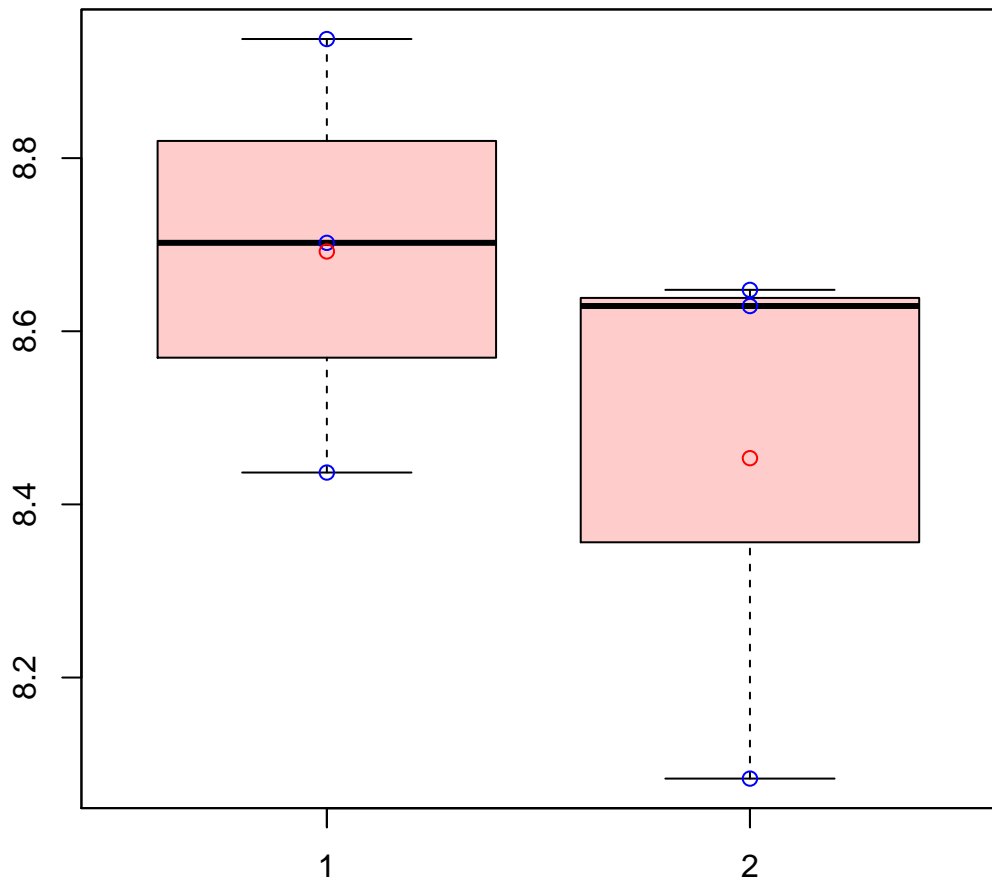

t-Test: p-value = 0.37

# CL1Contig4675|CL1Contig4675

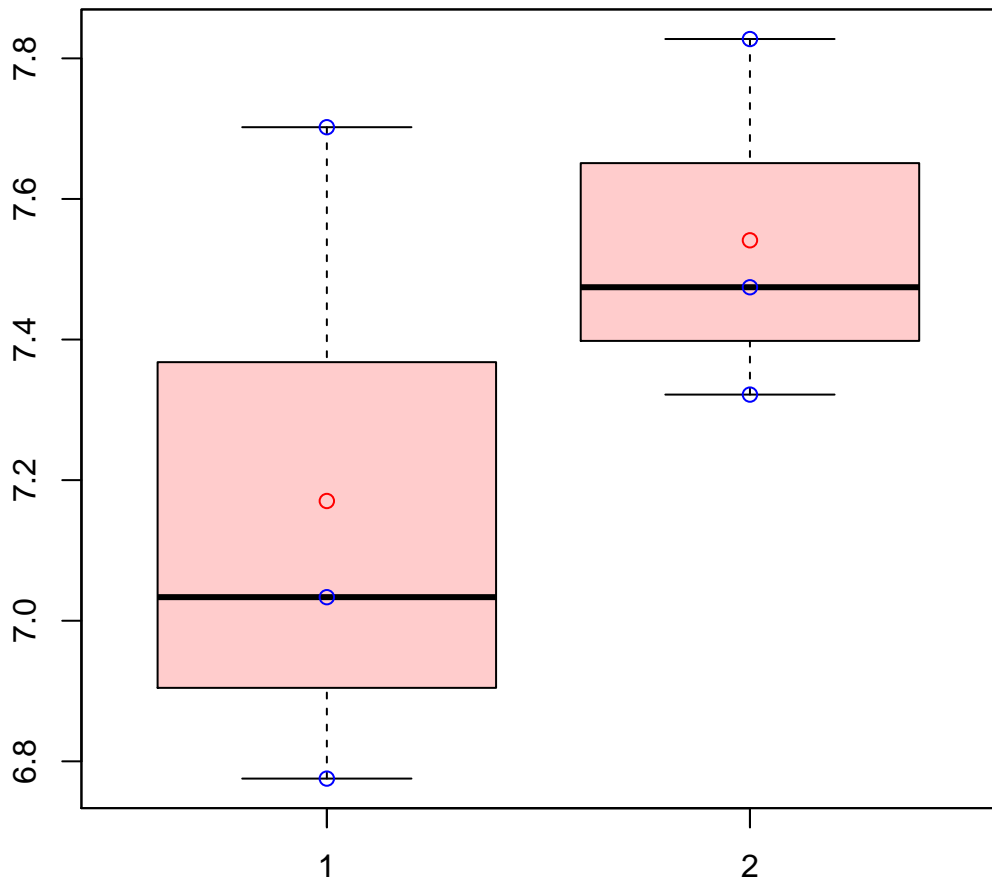

t-Test: p-value = 0.32

# CL1Contig4677|CL1Contig4677

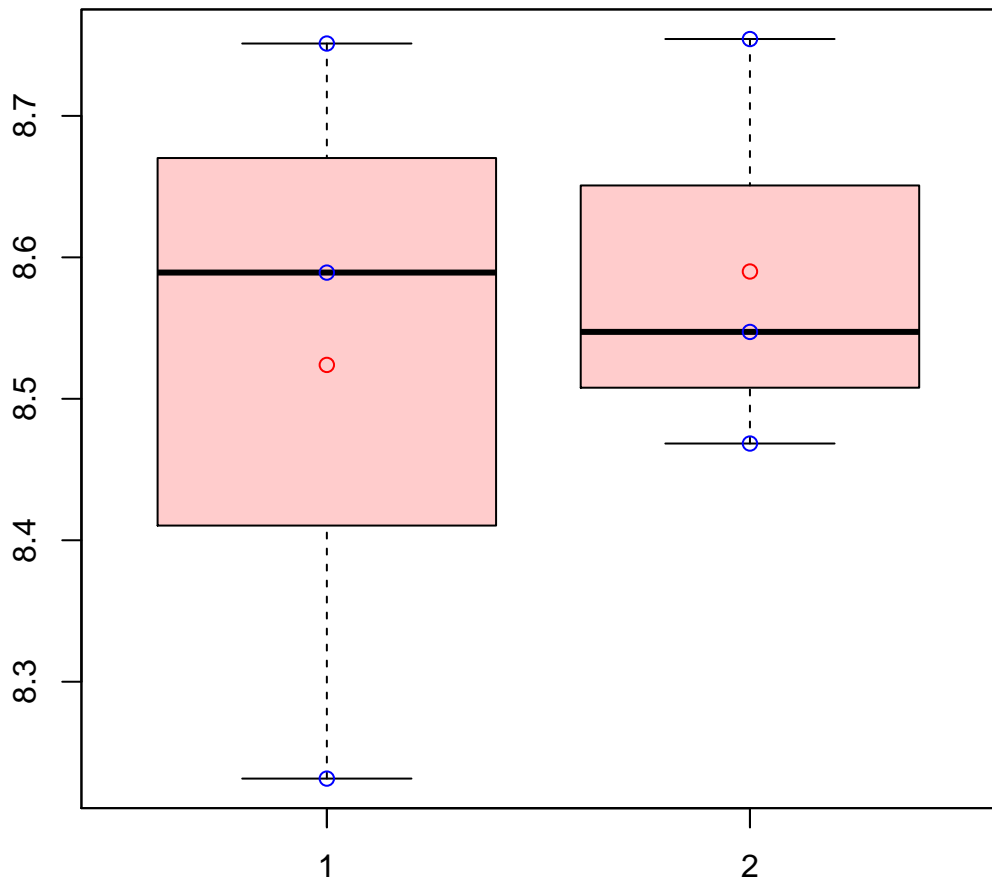

t-Test: p-value = 0.73

# CL1Contig4714|CL1Contig4714

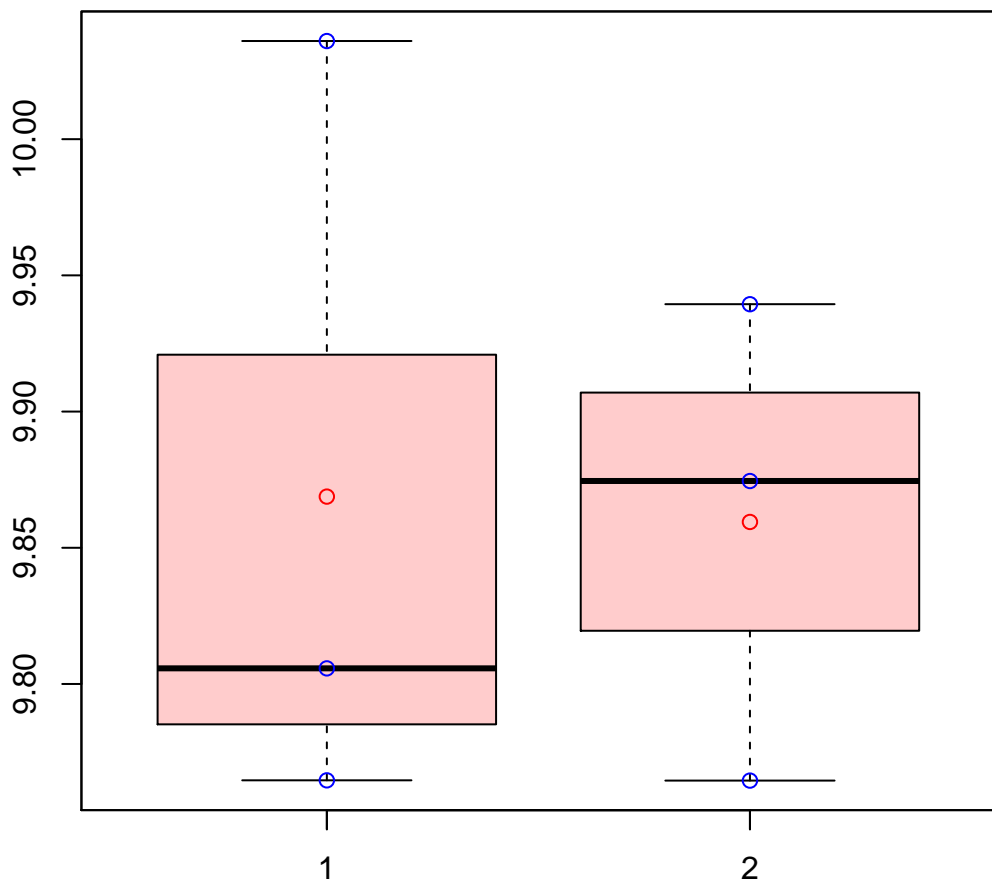

t-Test: p-value = 0.93

# CL1Contig472|CL1Contig472

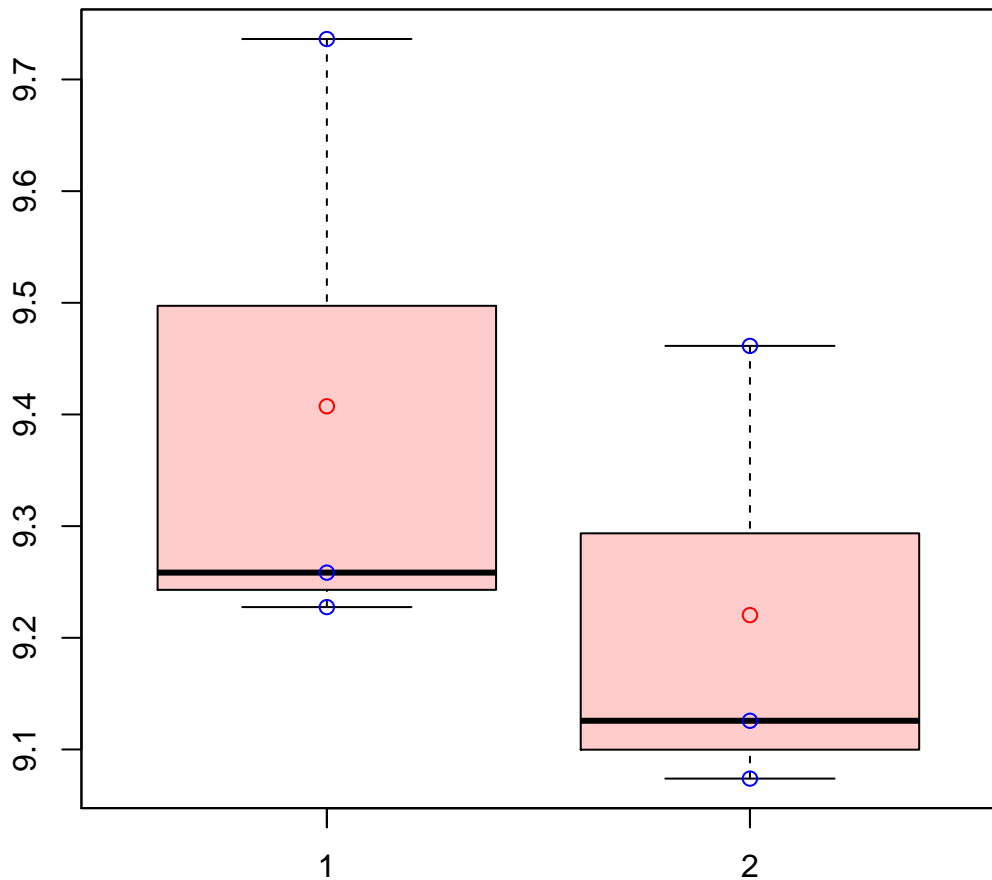

t-Test: p-value = 0.42



# CL1Contig4777|CL1Contig4777

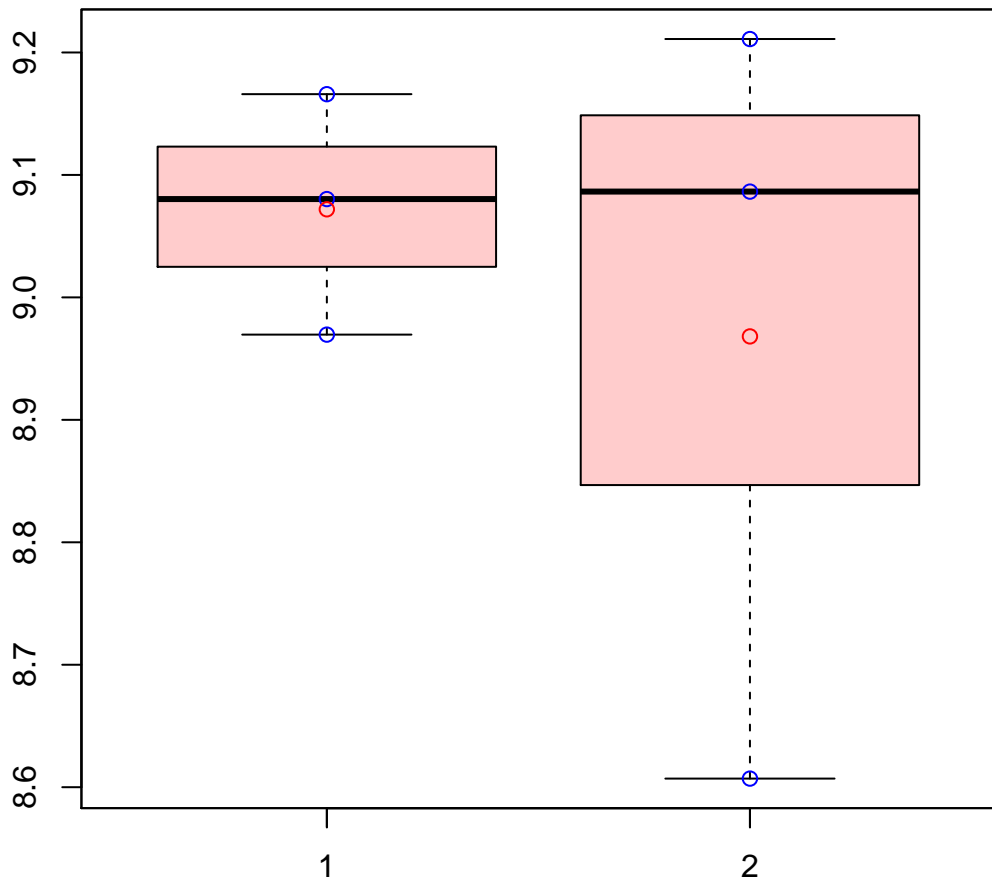

t-Test: p-value = 0.64

# CL1Contig4785|CL1Contig4785

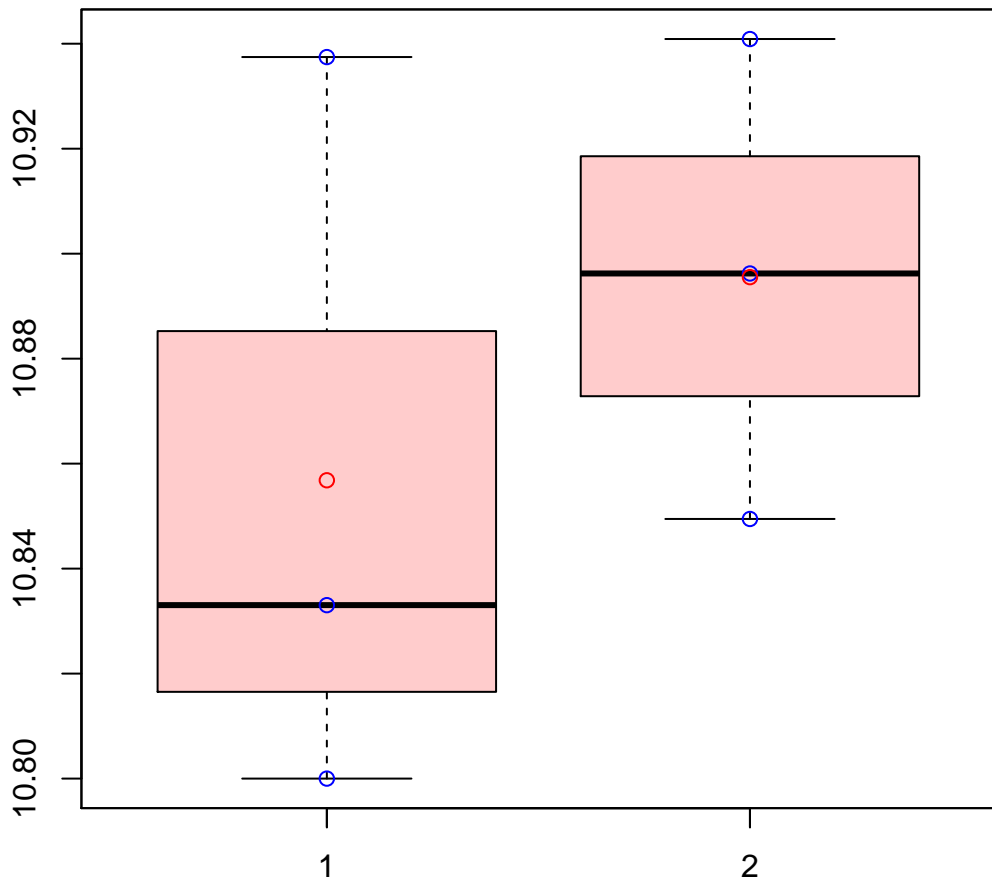

t-Test: p-value = 0.48

# CL1Contig478|CL1Contig478



t-Test: p-value = 0.72

# CL1Contig4804|CL1Contig4804

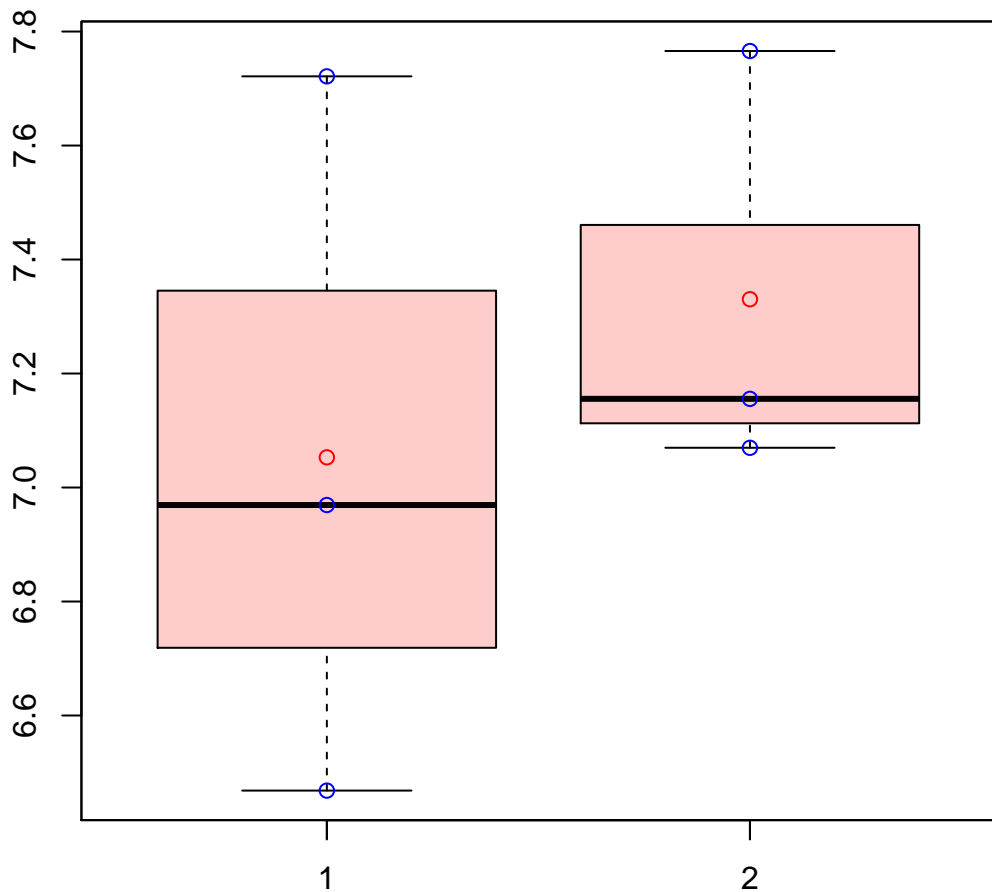

t-Test: p-value = 0.56

# CL1Contig4806|CL1Contig4806

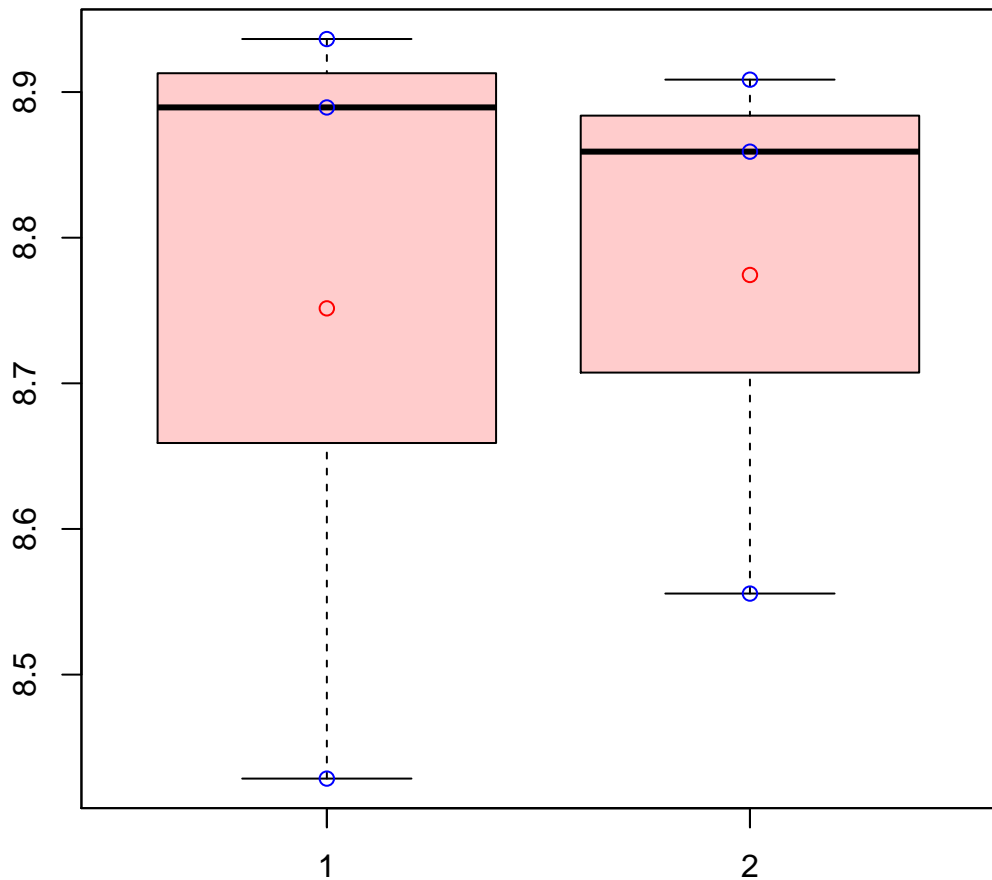

t-Test: p-value = 0.91

# CL1Contig4807|CL1Contig4807

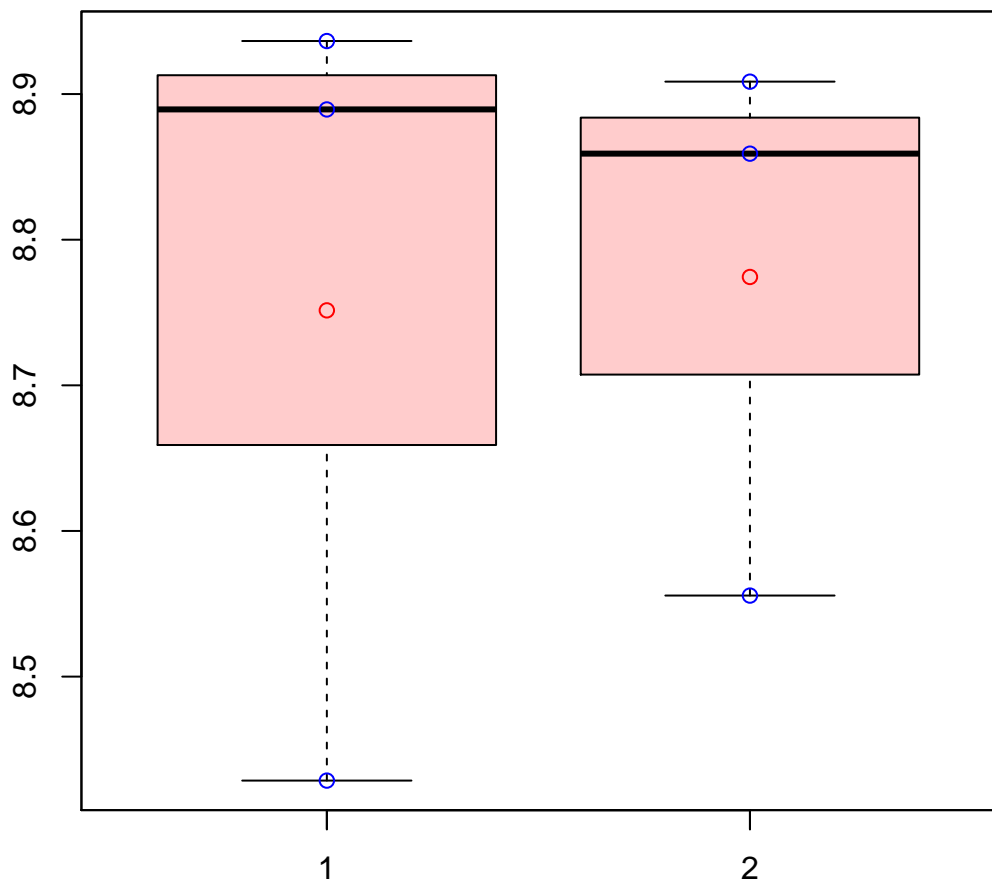

t-Test: p-value = 0.91

# CL1Contig4810|CL1Contig4810

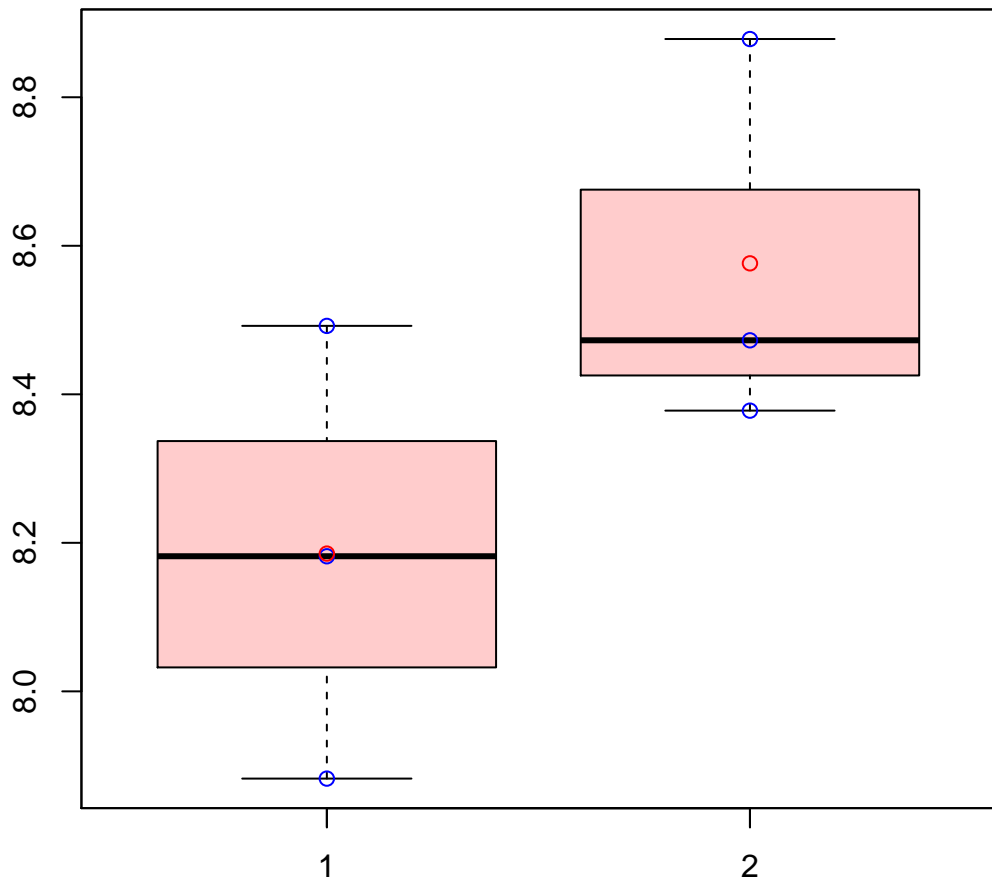

t-Test: p-value = 0.17

# CL1Contig4811|CL1Contig4811



t-Test: p-value = 0.17



# CL1Contig4816|CL1Contig4816

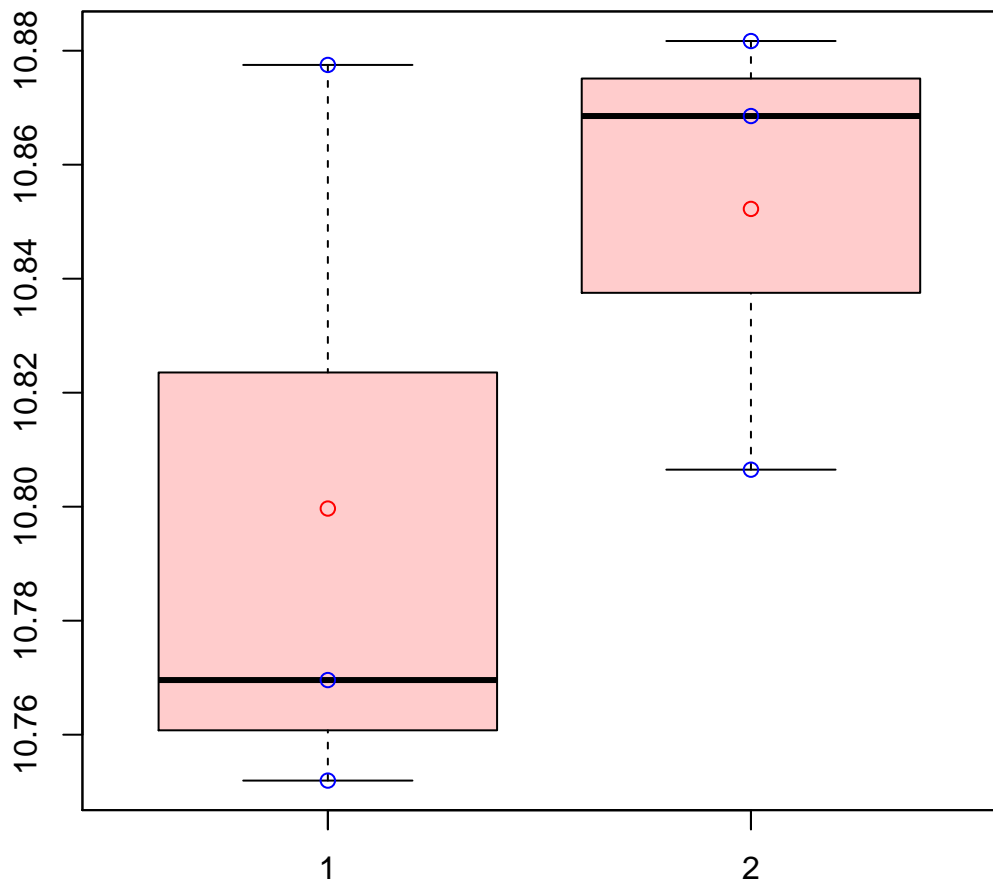

t-Test: p-value = 0.33

# CL1Contig4834|CL1Contig4834

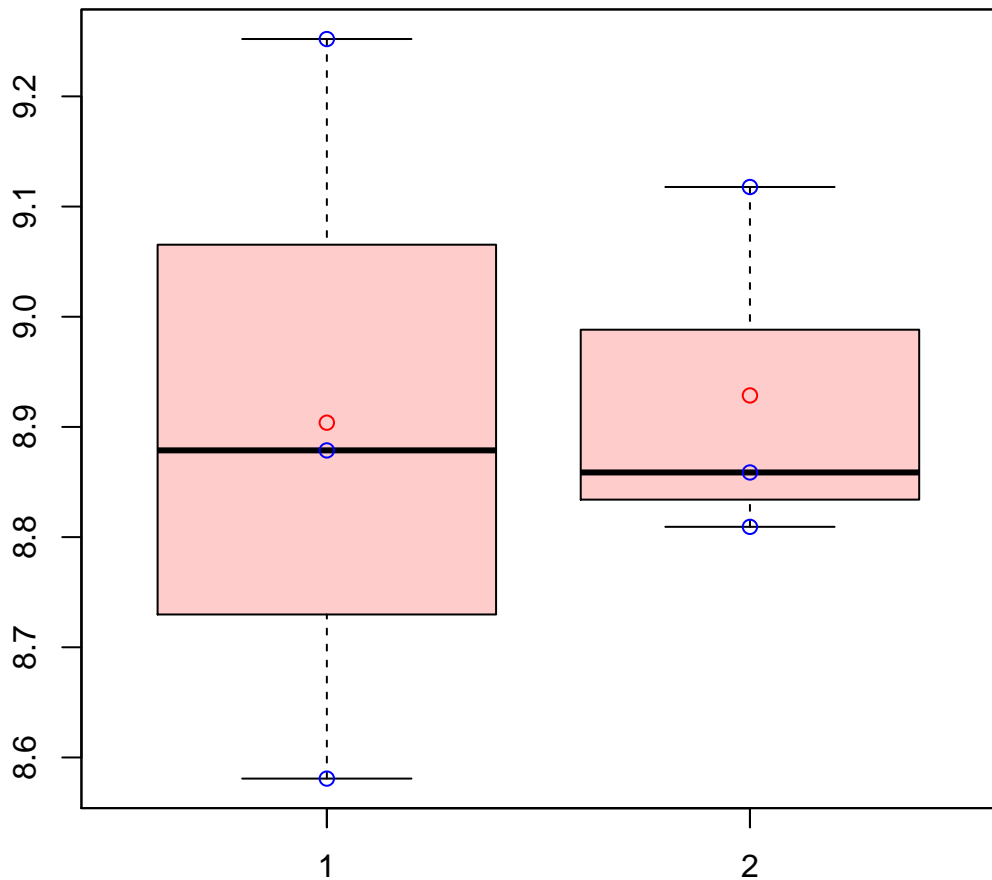

t-Test: p-value = 0.92

# CL1Contig4835|CL1Contig4835



t-Test: p-value = 0.75

# CL1Contig4836|CL1Contig4836

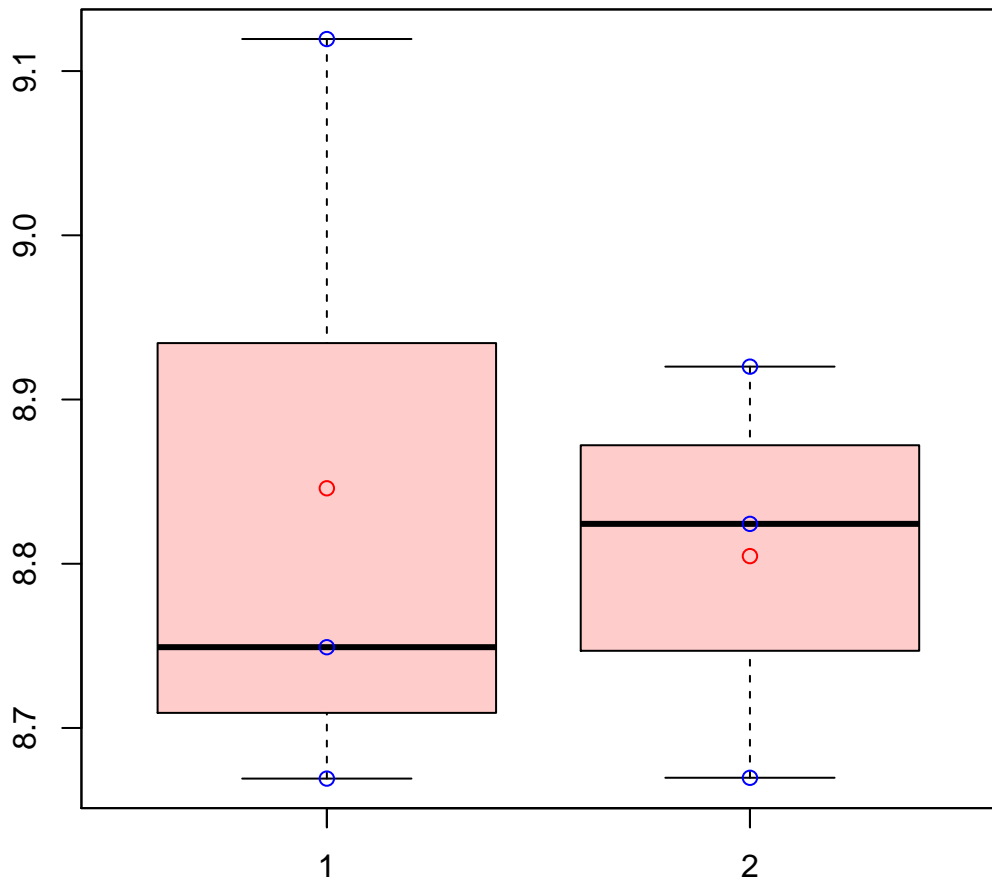

t-Test: p-value = 0.81

# CL1Contig4838|CL1Contig4838

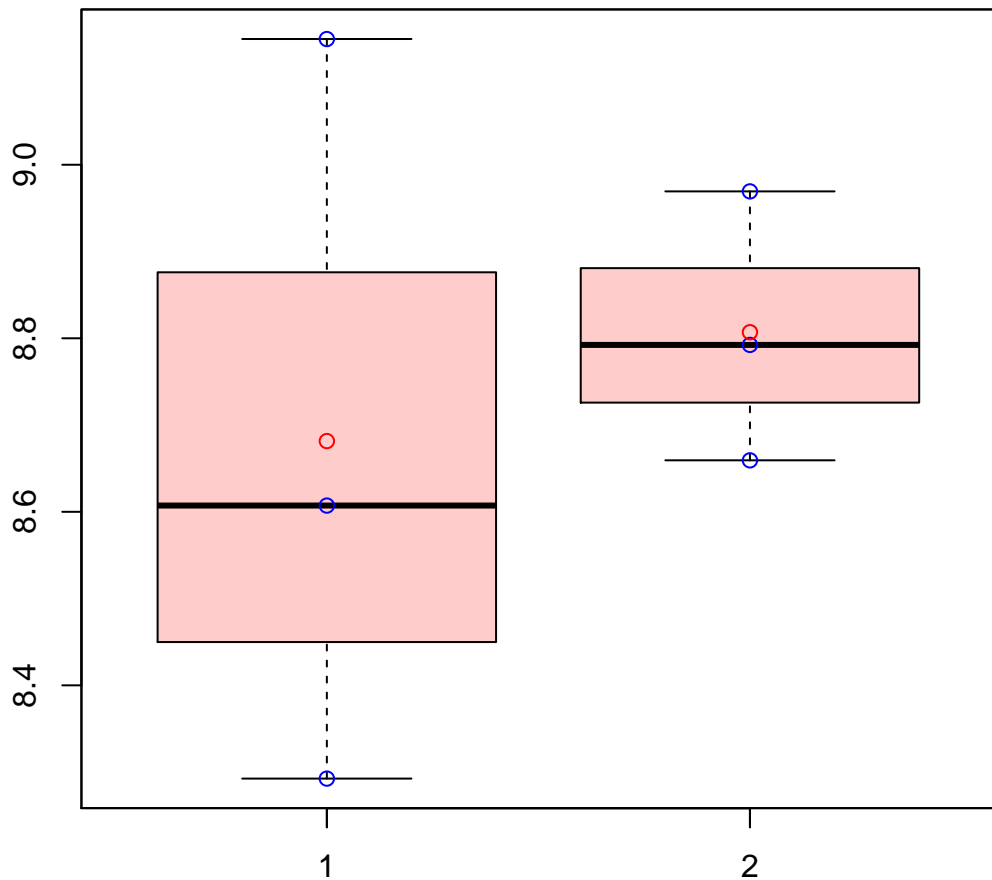

t-Test: p-value = 0.67

# CL1Contig4849|CL1Contig4849



t-Test: p-value = 0.7

# CL1Contig4859|CL1Contig4859

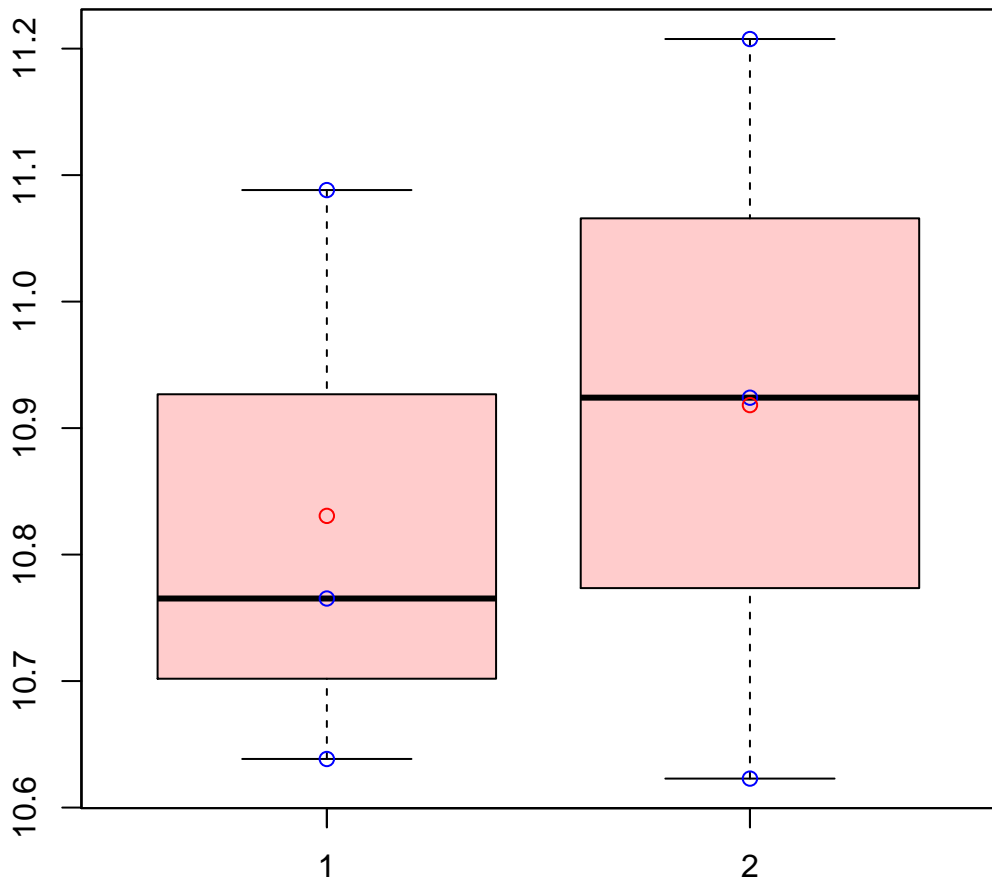

t-Test: p-value = 0.71

# CL1Contig4865|CL1Contig4865

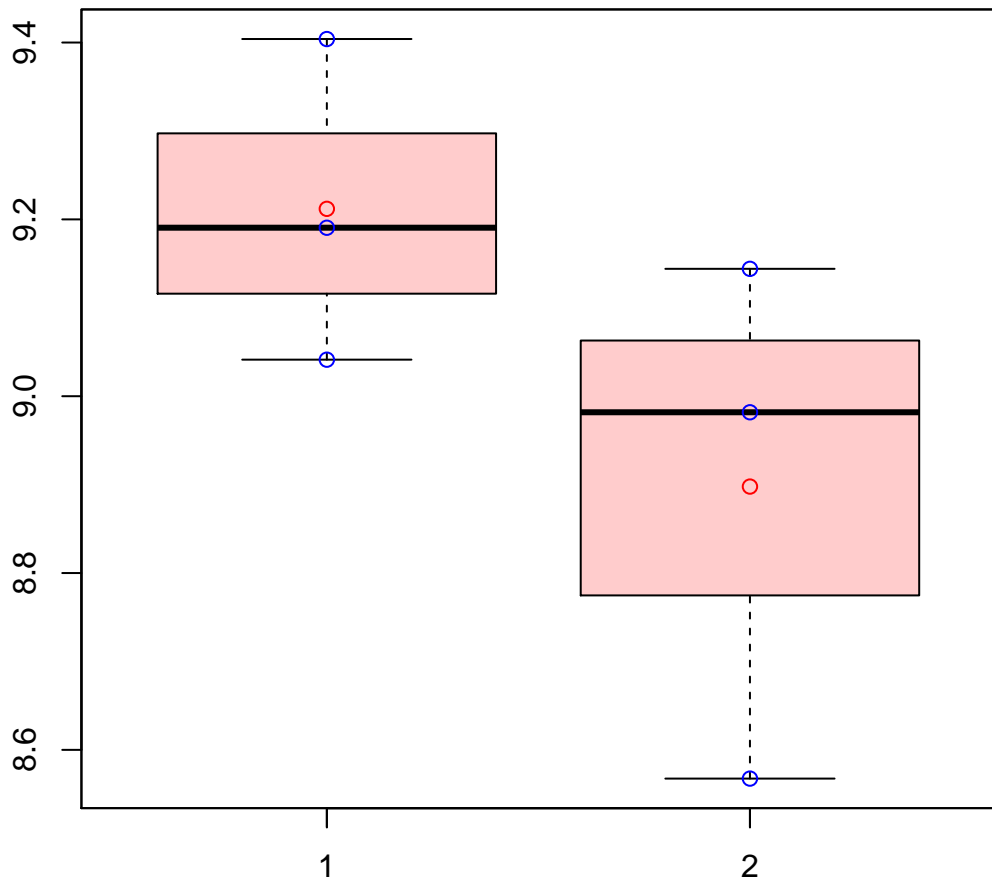

t-Test: p-value = 0.21



# CL1Contig4896|CL1Contig4896

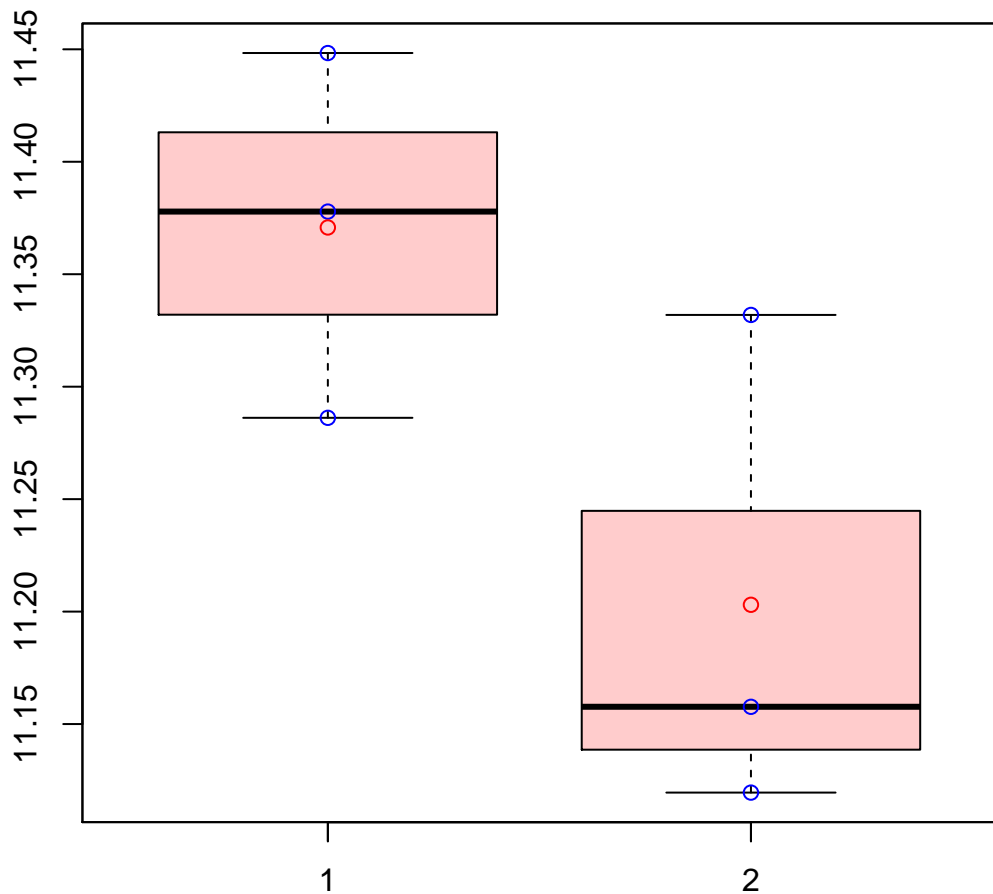

t-Test: p-value = 0.11

# CL1Contig4897|CL1Contig4897

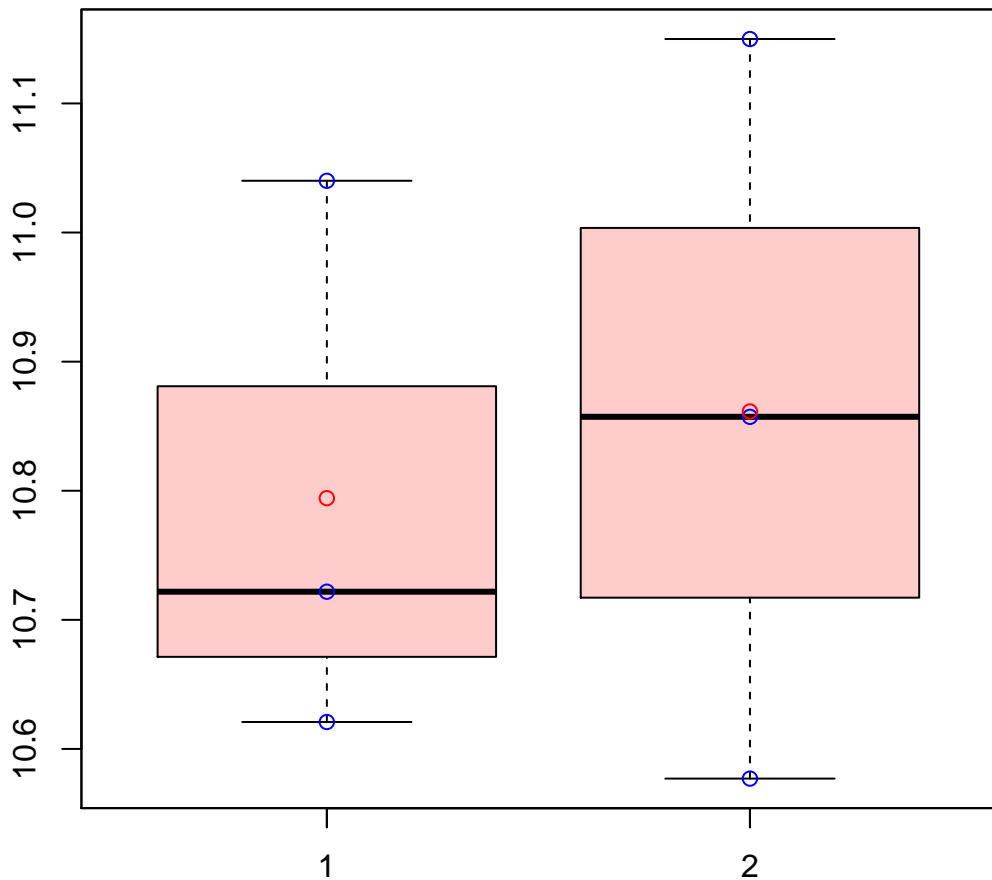

t-Test: p-value = 0.76

# CL1Contig492|CL1Contig492

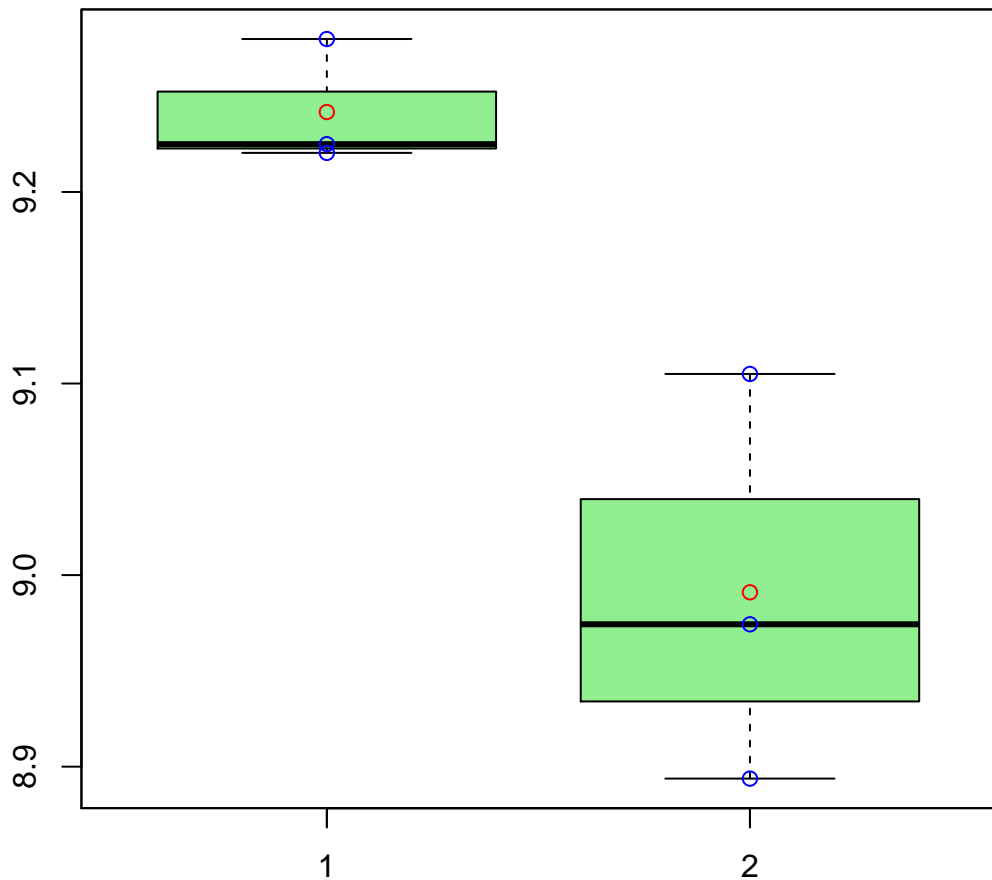

t-Test: p-value = 0.05

# CL1Contig4948|CL1Contig4948

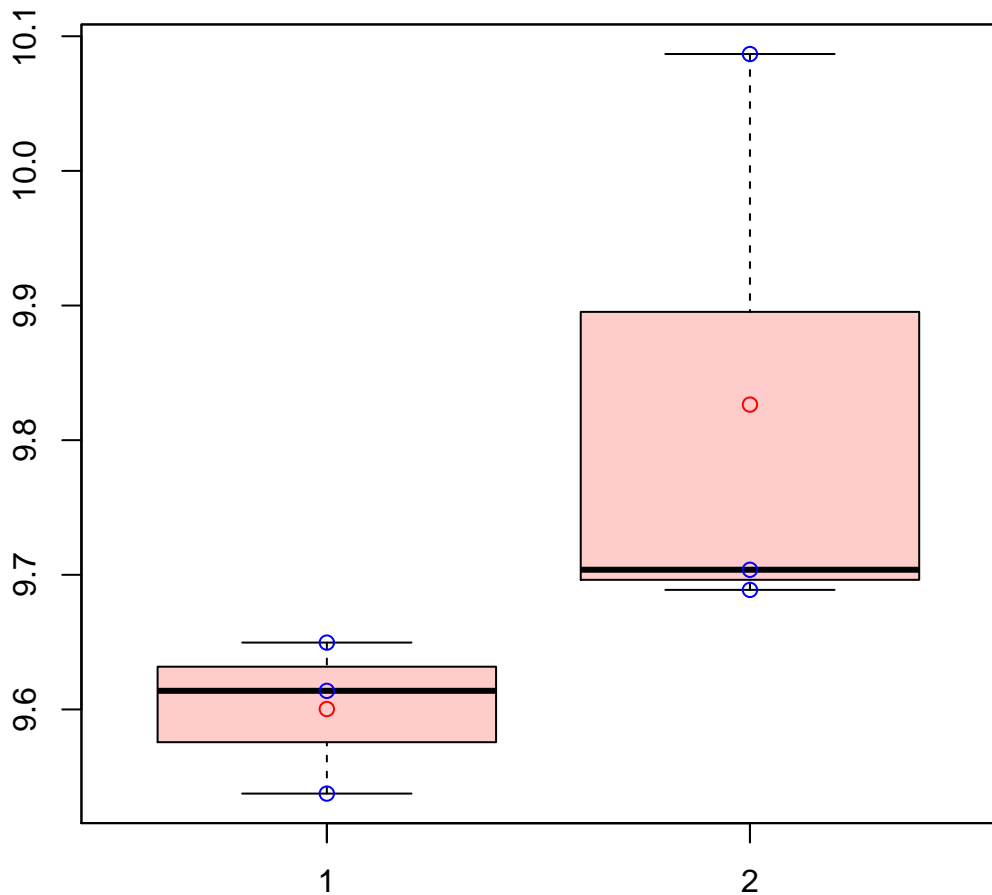

t-Test: p-value = 0.22

# CL1Contig4997|CL1Contig4997

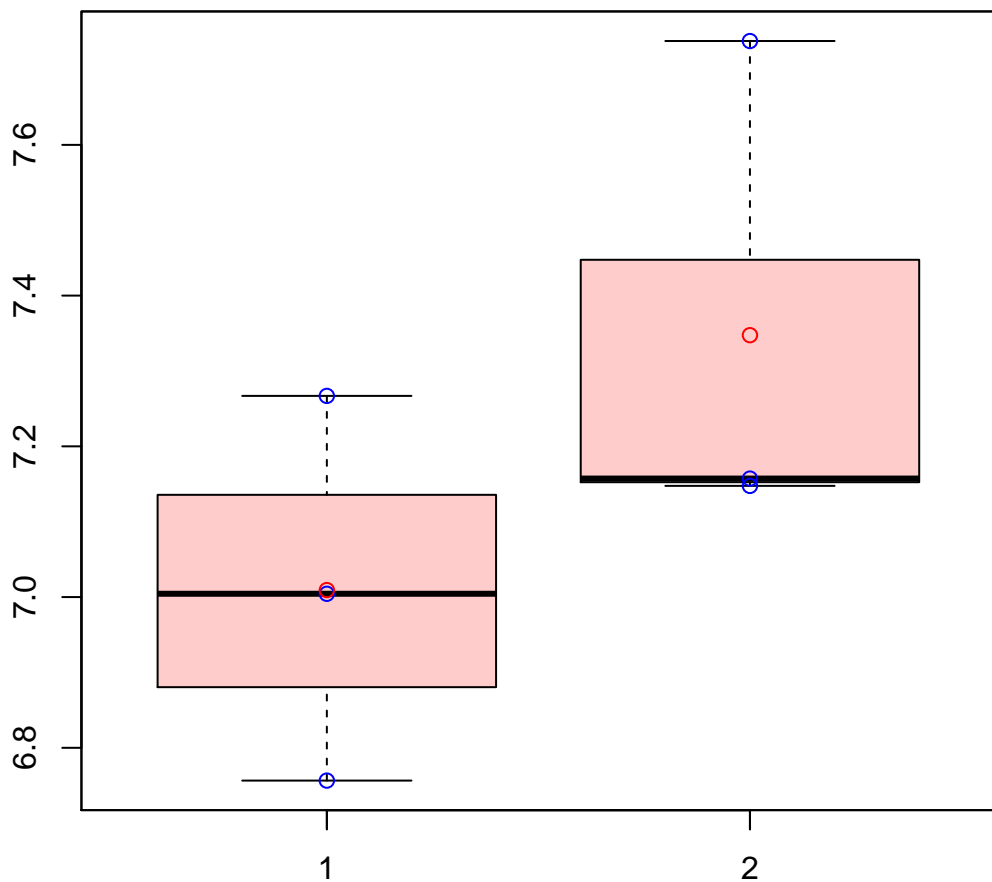

t-Test: p-value = 0.24

# CL1Contig5004|CL1Contig5004

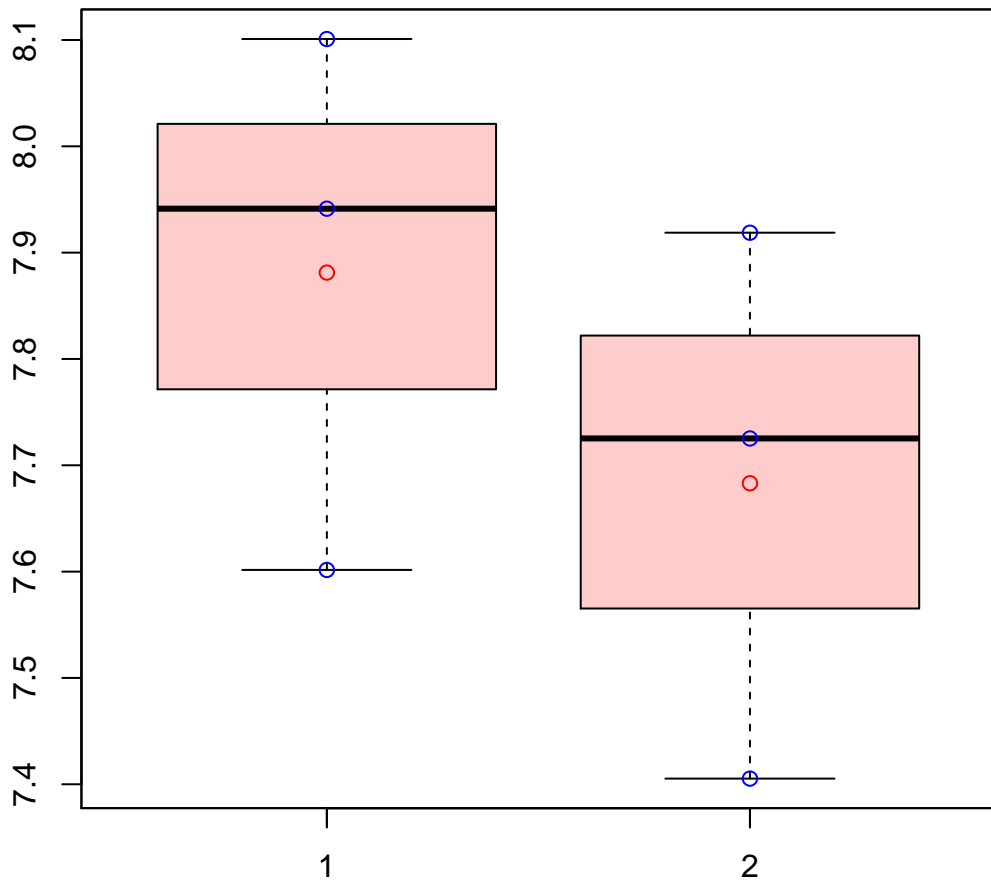

t-Test: p-value = 0.4

# CL1Contig5018|CL1Contig5018

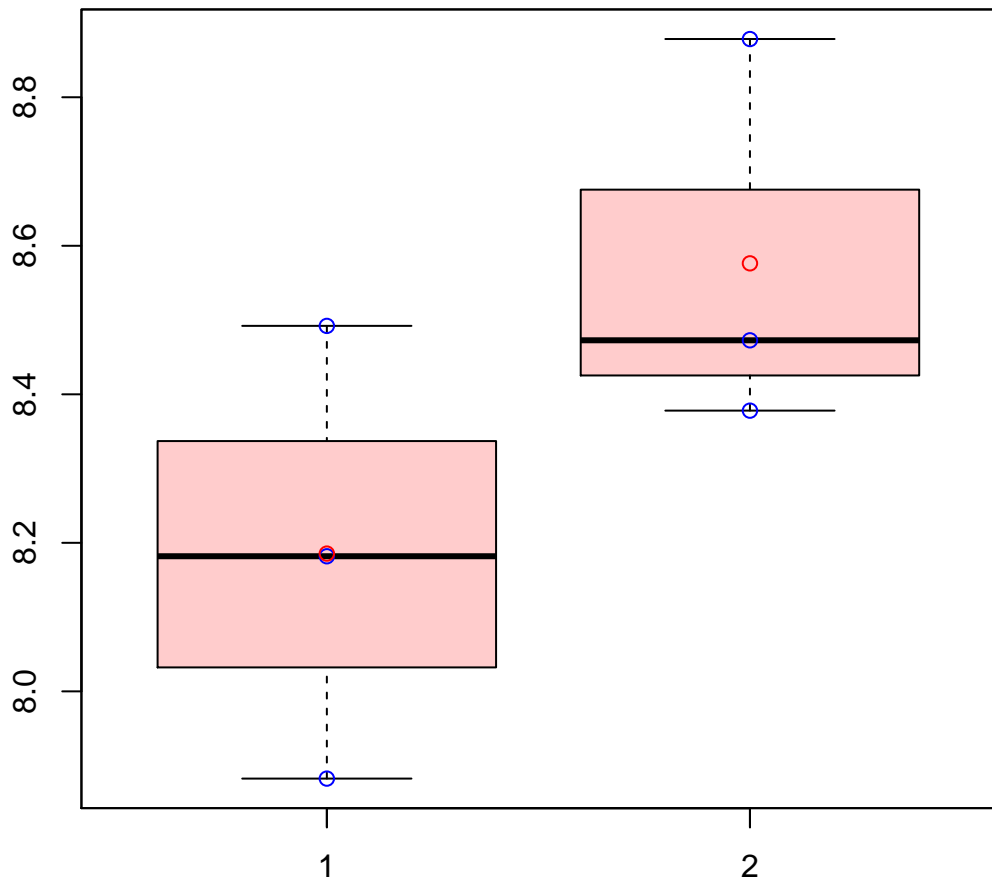

t-Test: p-value = 0.17

# CL1Contig5044|CL1Contig5044

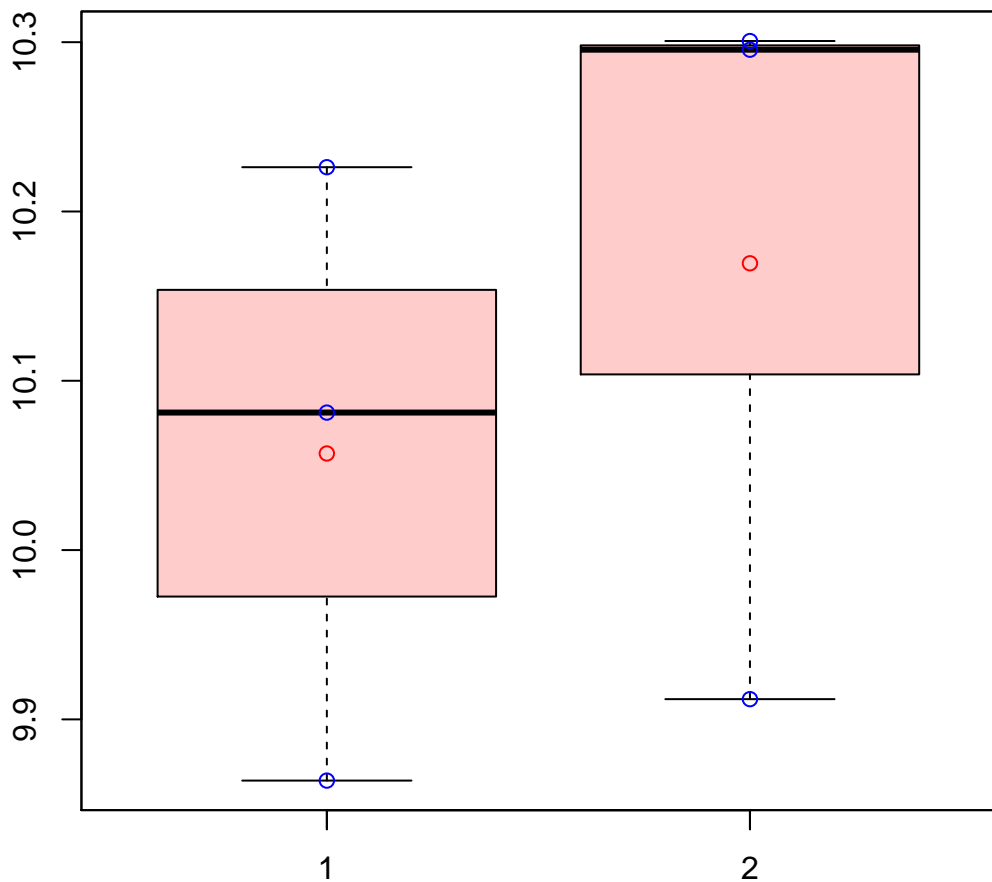

t-Test: p-value = 0.54



# CL1Contig5054|CL1Contig5054

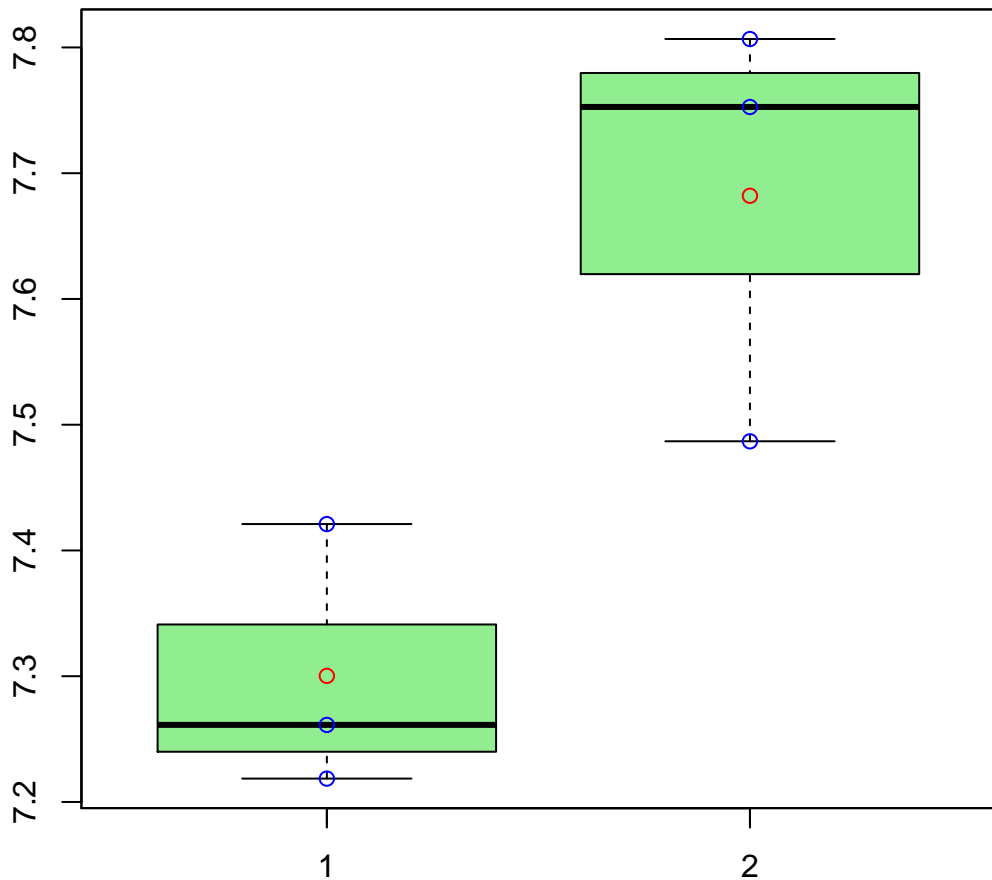

t-Test: p-value = 0.04

# CL1Contig5069|CL1Contig5069

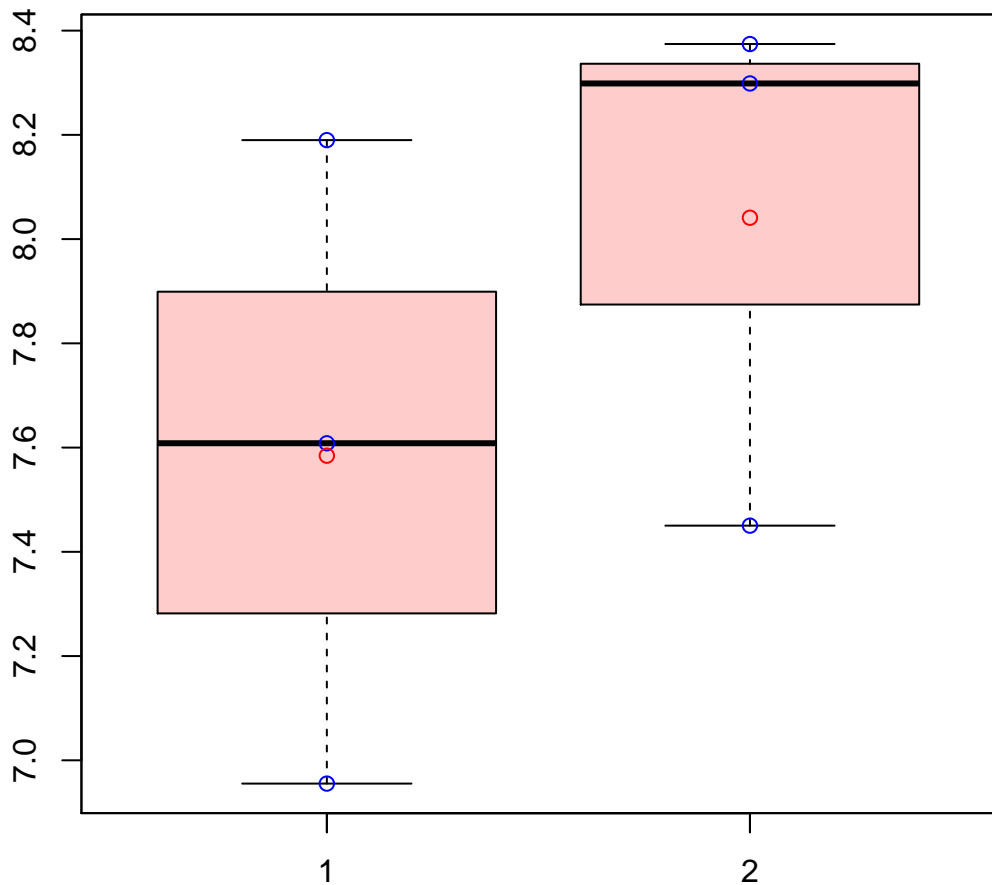

t-Test: p-value = 0.38

# CL1Contig5077|CL1Contig5077

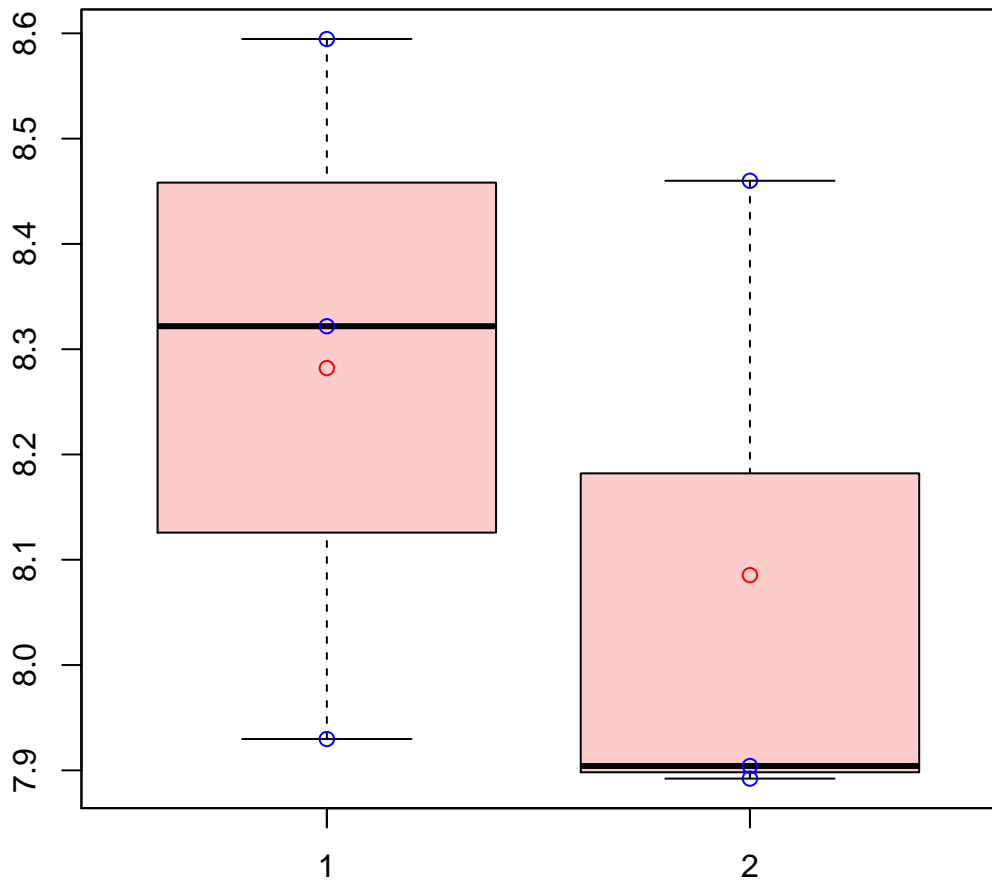

t-Test: p-value = 0.51

# CL1Contig507|CL1Contig507

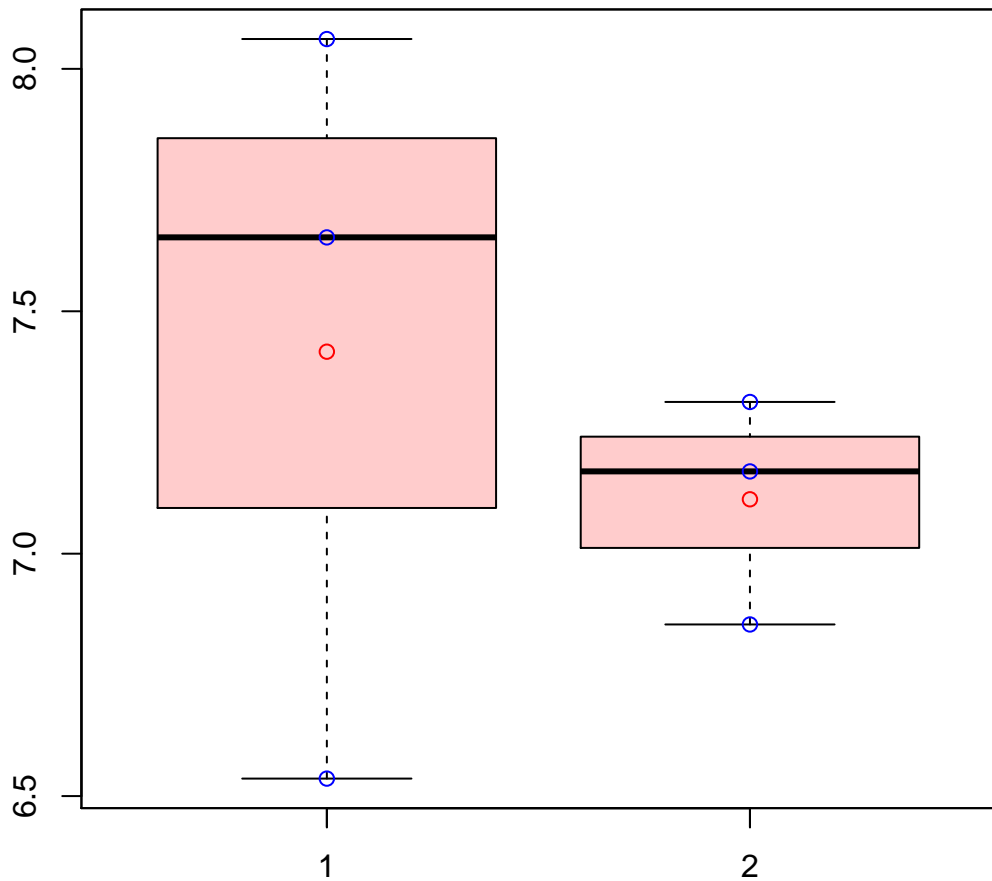

t-Test: p-value = 0.58

# CL1Contig5103|CL1Contig5103

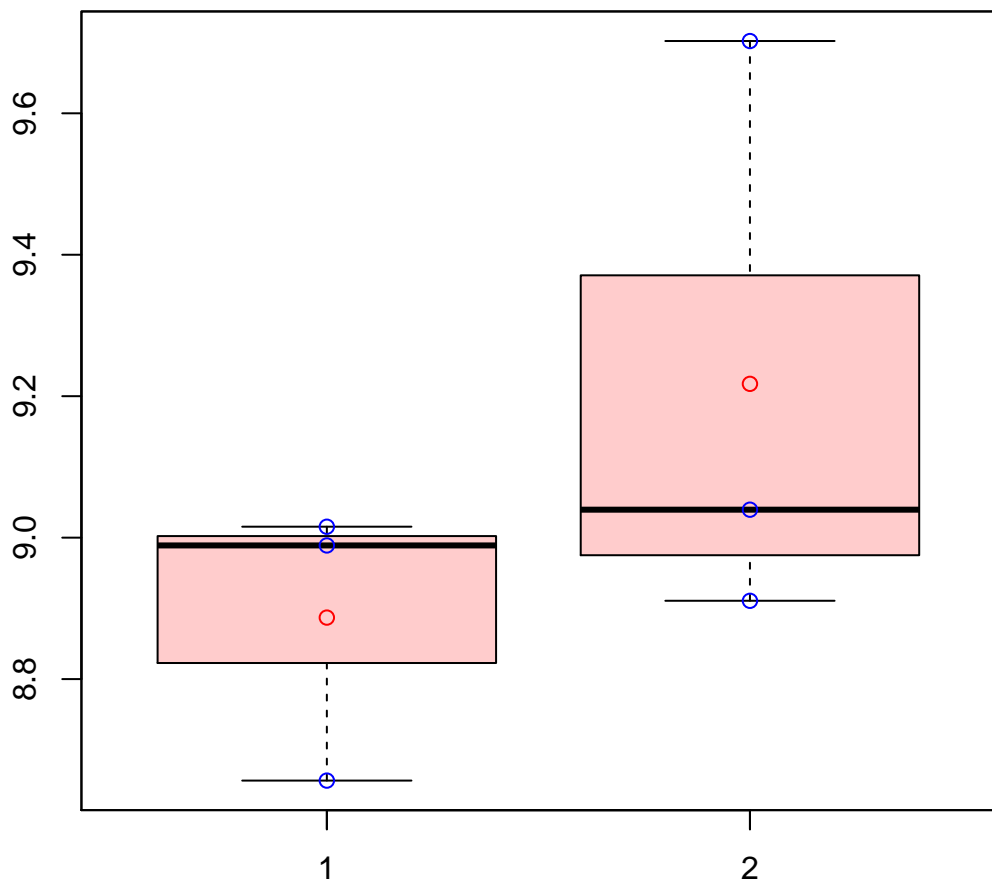

t-Test: p-value = 0.31

# CL1Contig5106|CL1Contig5106

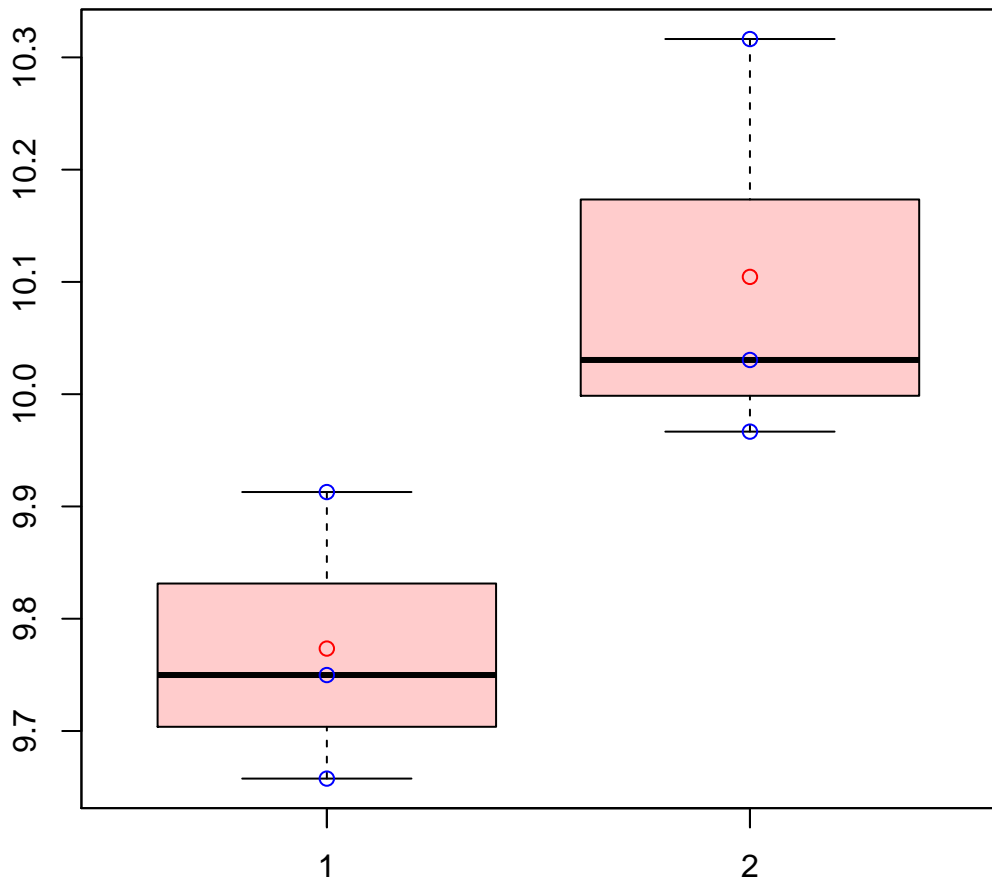

t-Test: p-value = 0.07

# CL1Contig5166|CL1Contig5166

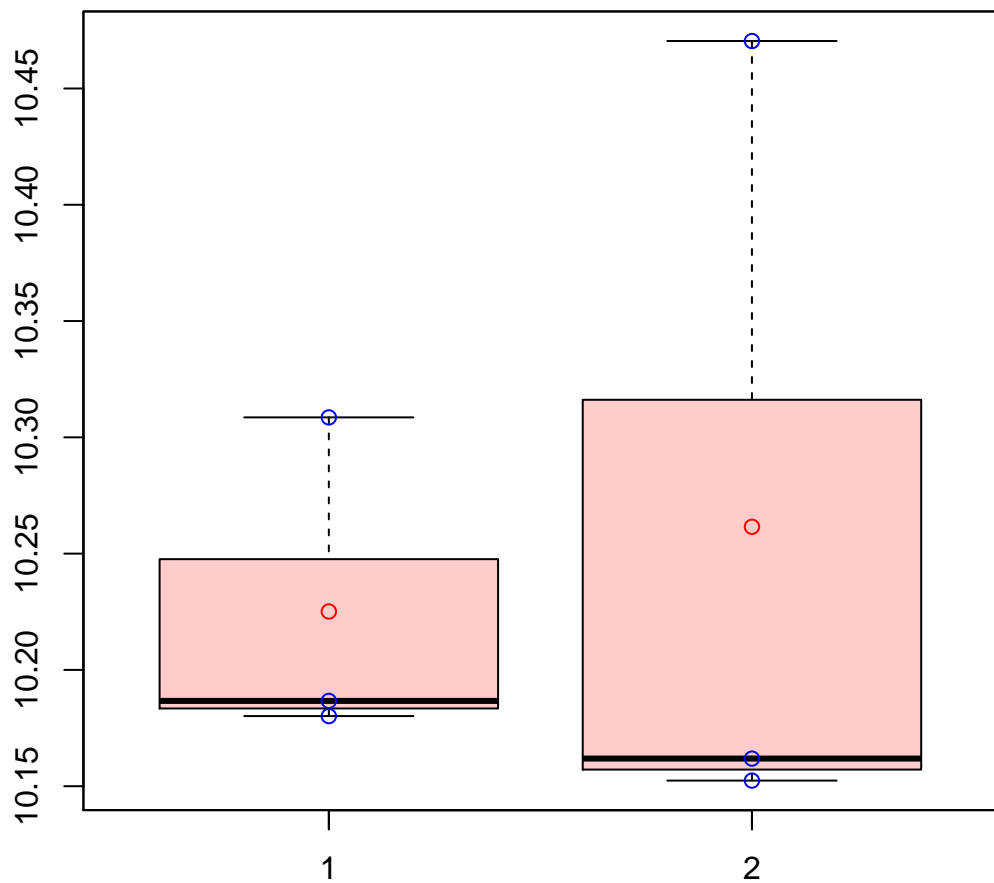

t-Test: p-value = 0.77

# CL1Contig5167|CL1Contig5167

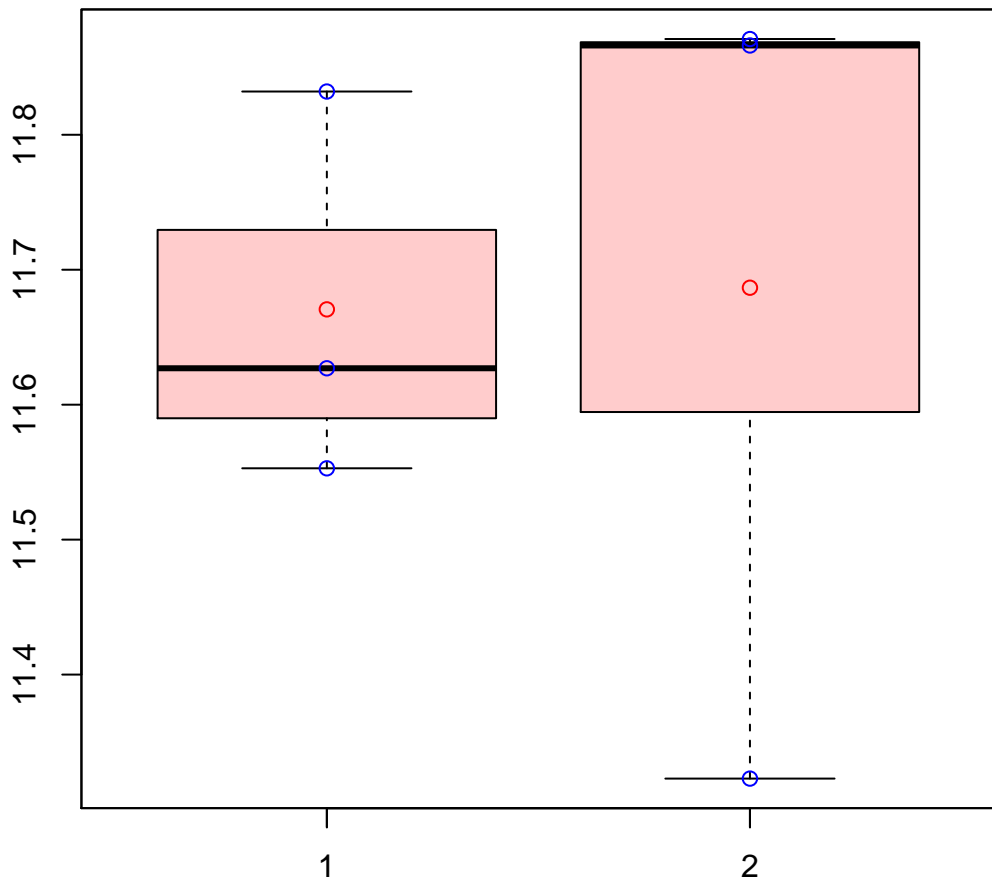

t-Test: p-value = 0.94



# CL1Contig5168|CL1Contig5168

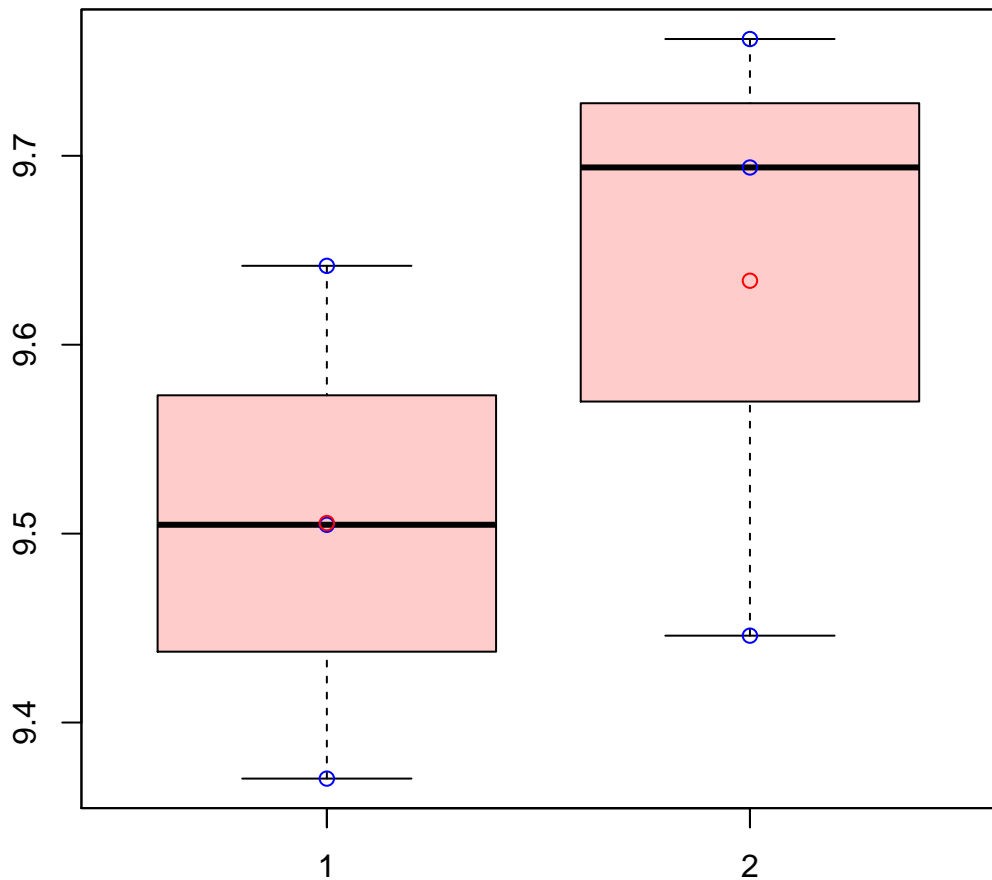

t-Test: p-value = 0.36

# CL1Contig5171|CL1Contig5171

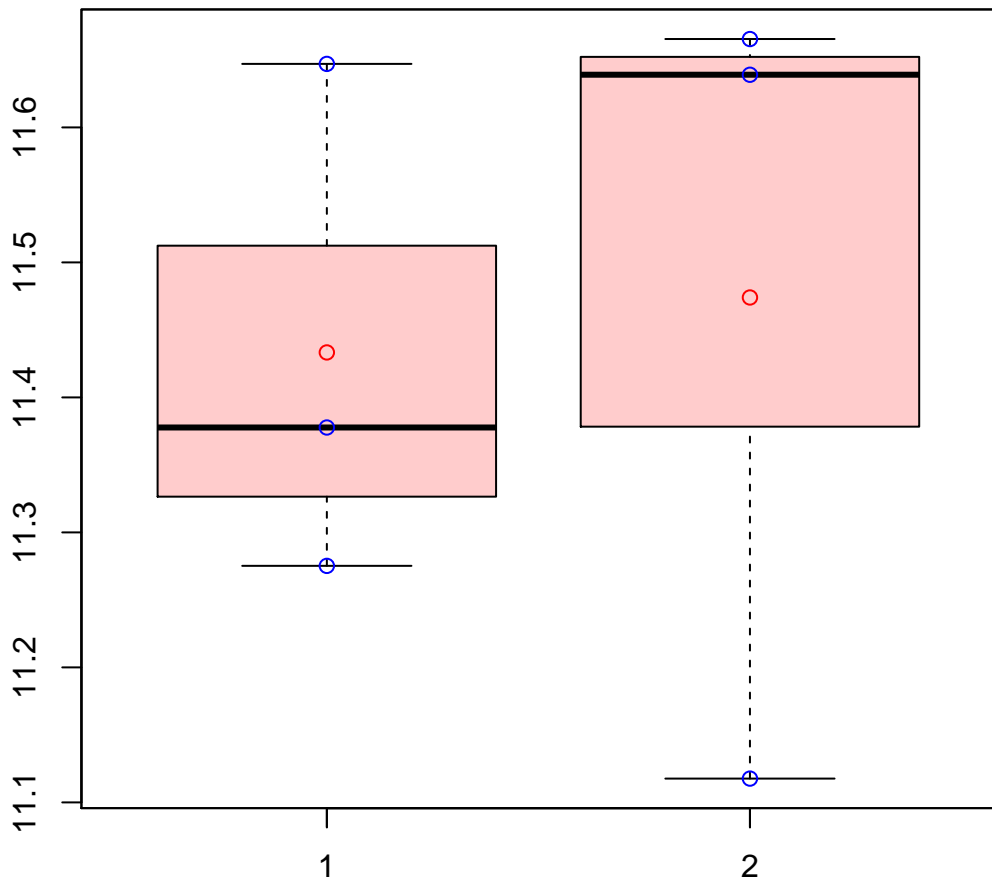

t-Test: p-value = 0.86

# CL1Contig5173|CL1Contig5173

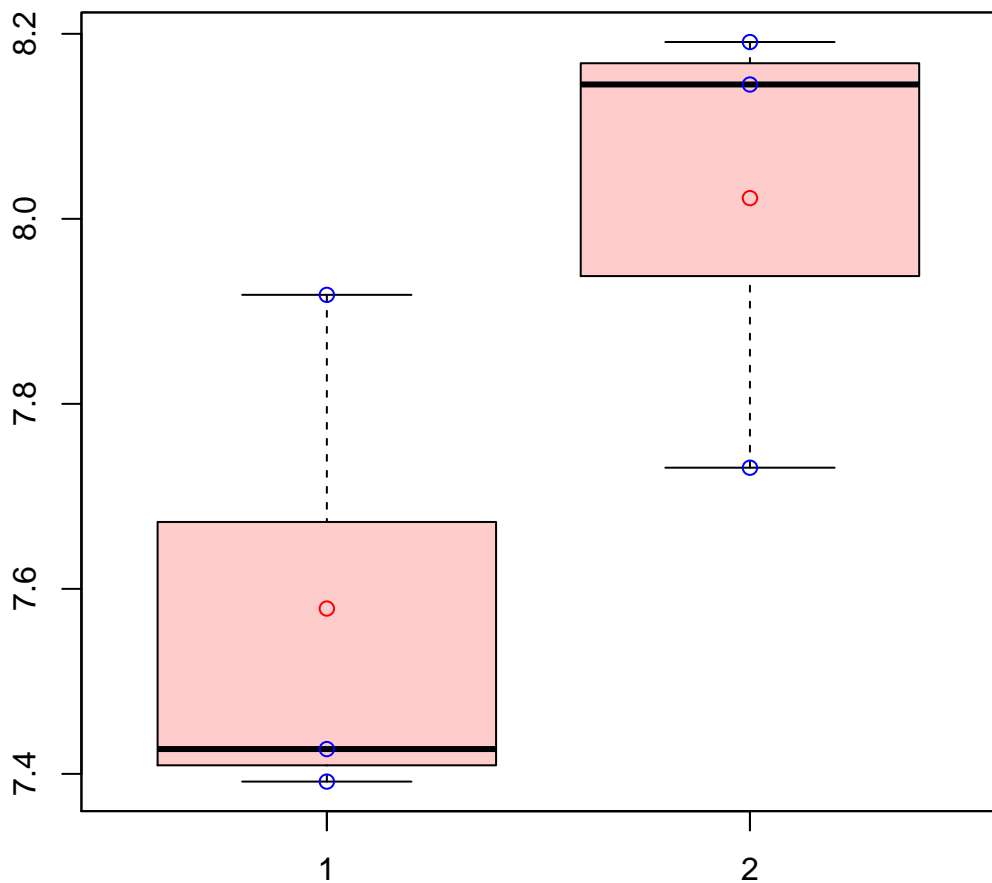

t-Test: p-value = 0.12

# CL1Contig5183|CL1Contig5183

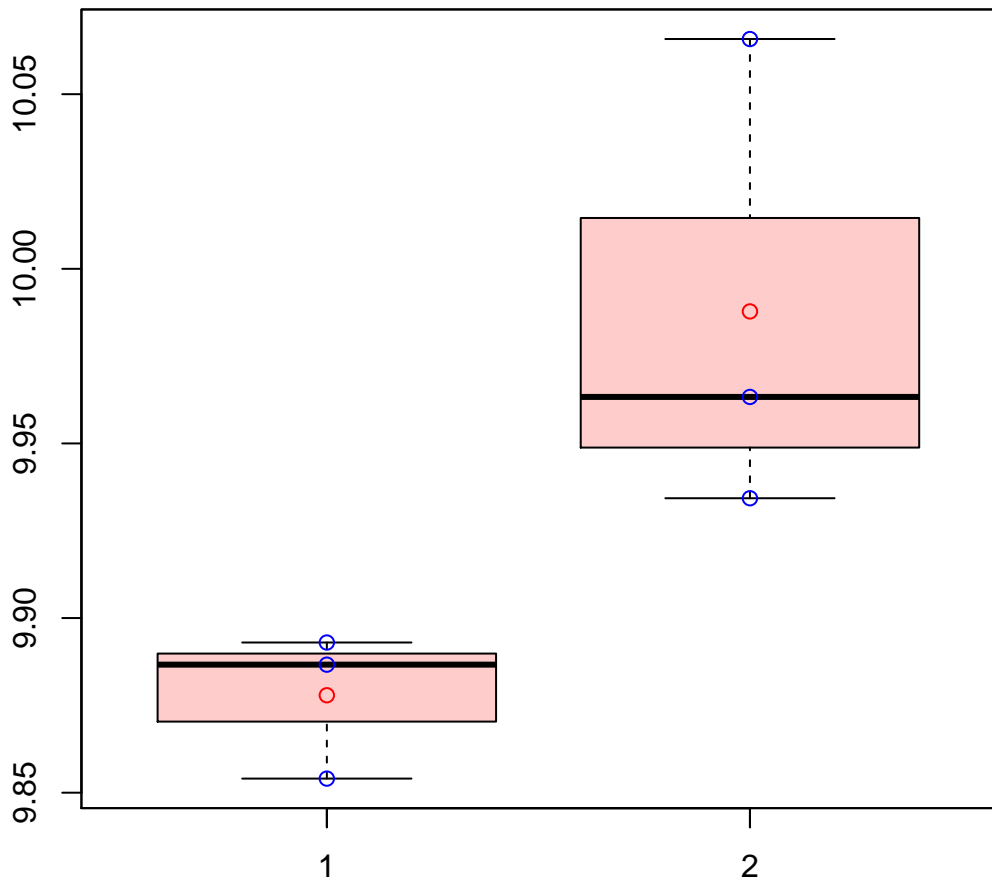

t-Test: p-value = 0.1

# CL1Contig5189|CL1Contig5189

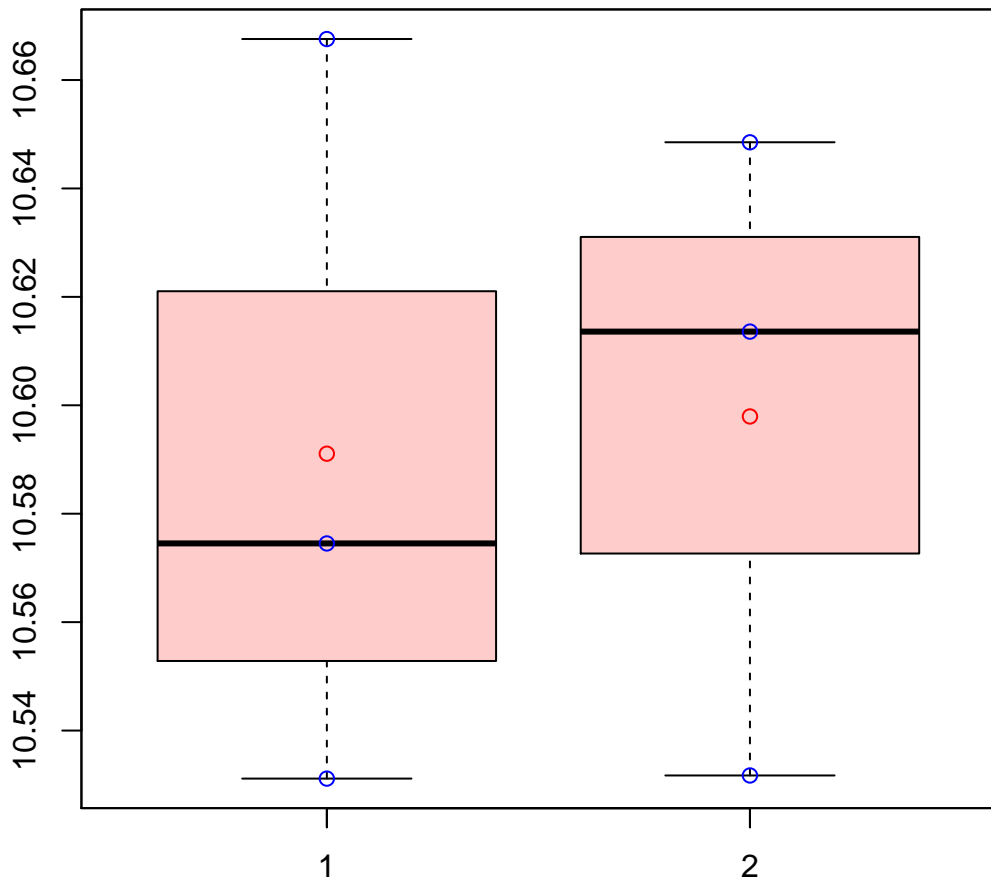

t-Test: p-value = 0.9

# CL1Contig518|CL1Contig518

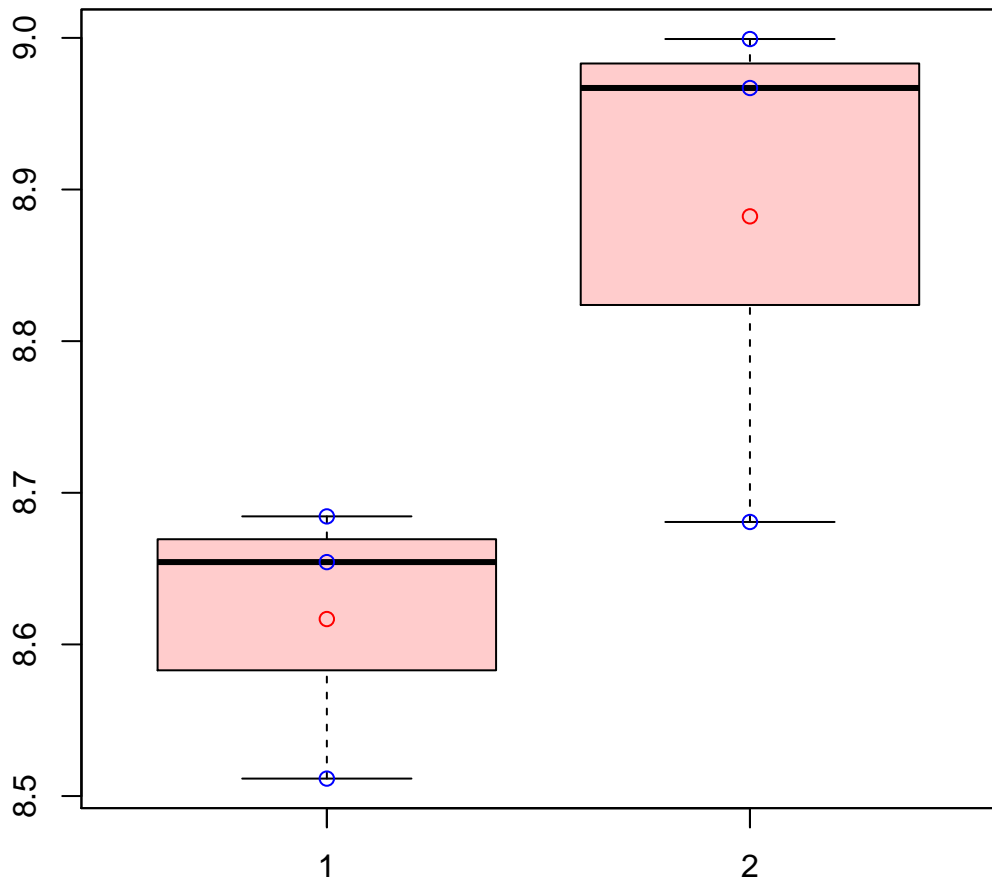

t-Test: p-value = 0.1

# CL1Contig5222|CL1Contig5222

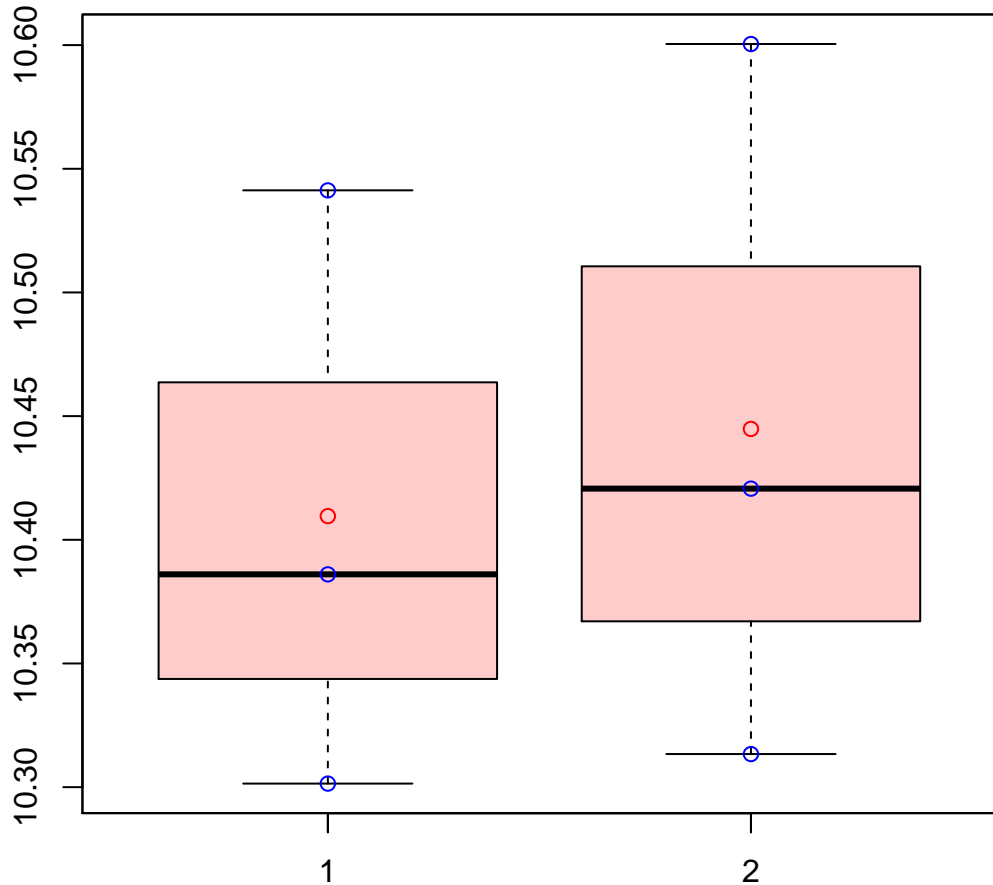

t-Test: p-value = 0.76

# CL1Contig5223|CL1Contig5223

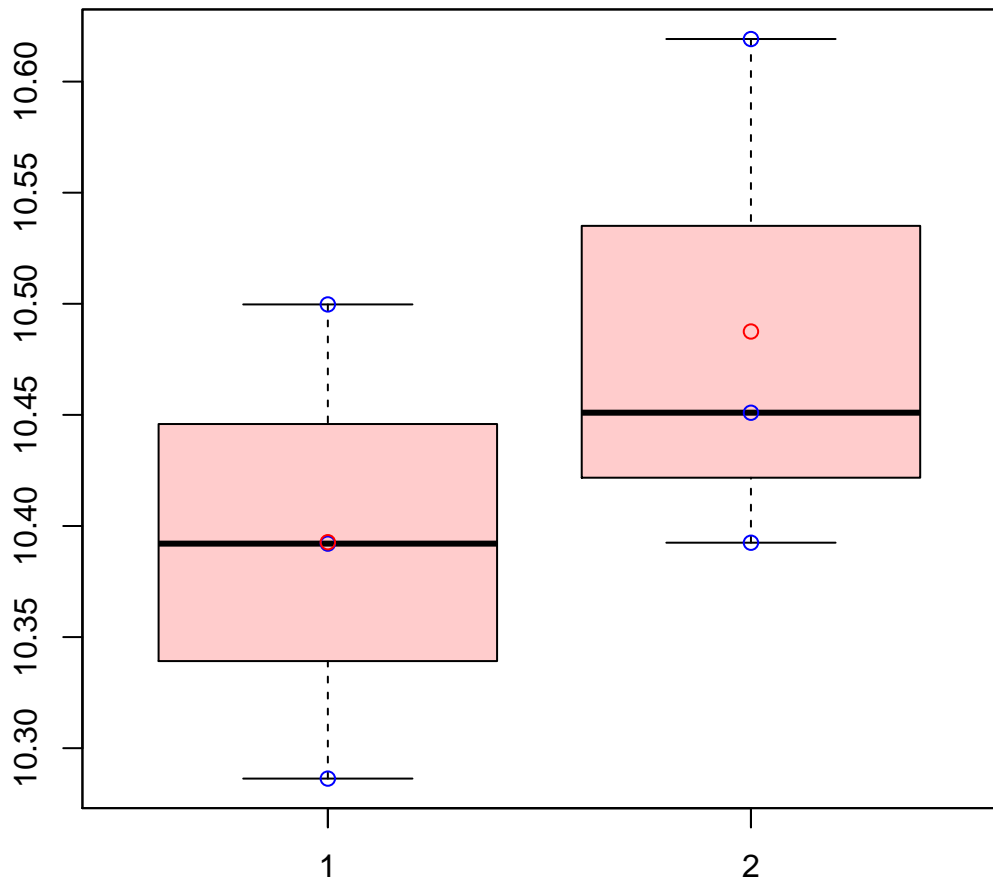

t-Test: p-value = 0.36



# CL1Contig5262|CL1Contig5262

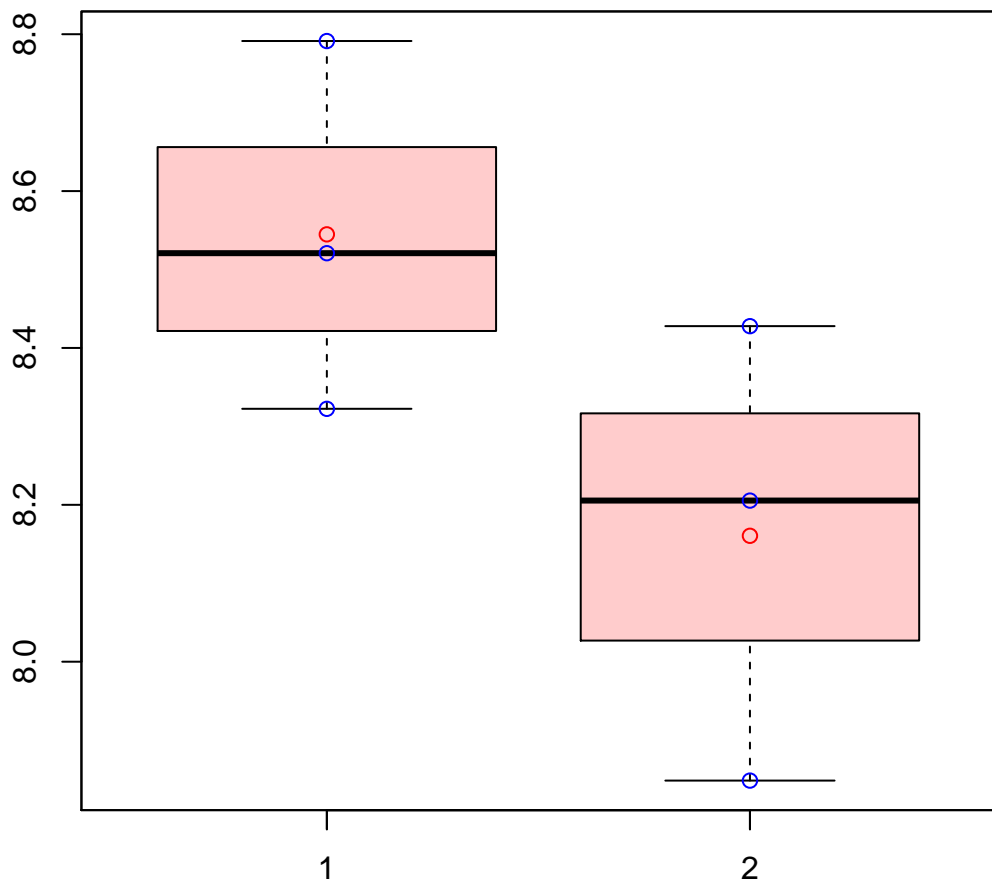

t-Test: p-value = 0.15

# CL1Contig526|CL1Contig526

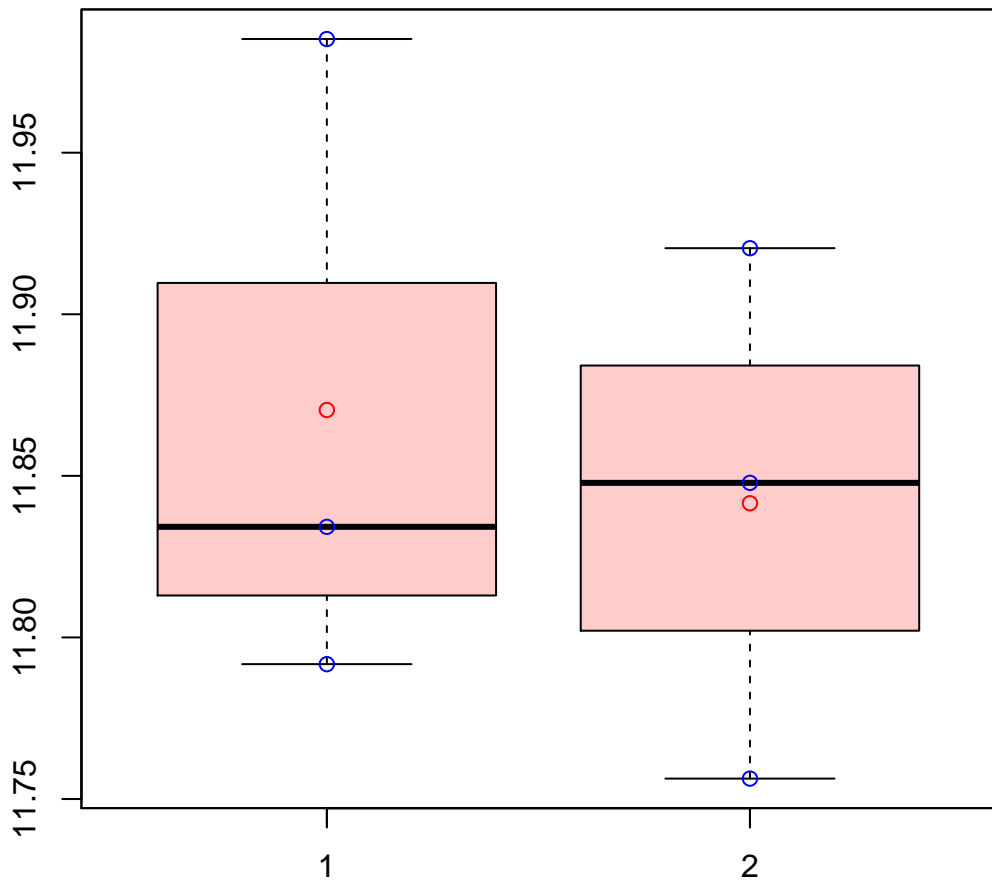

t-Test: p-value = 0.72

# CL1Contig5286|CL1Contig5286

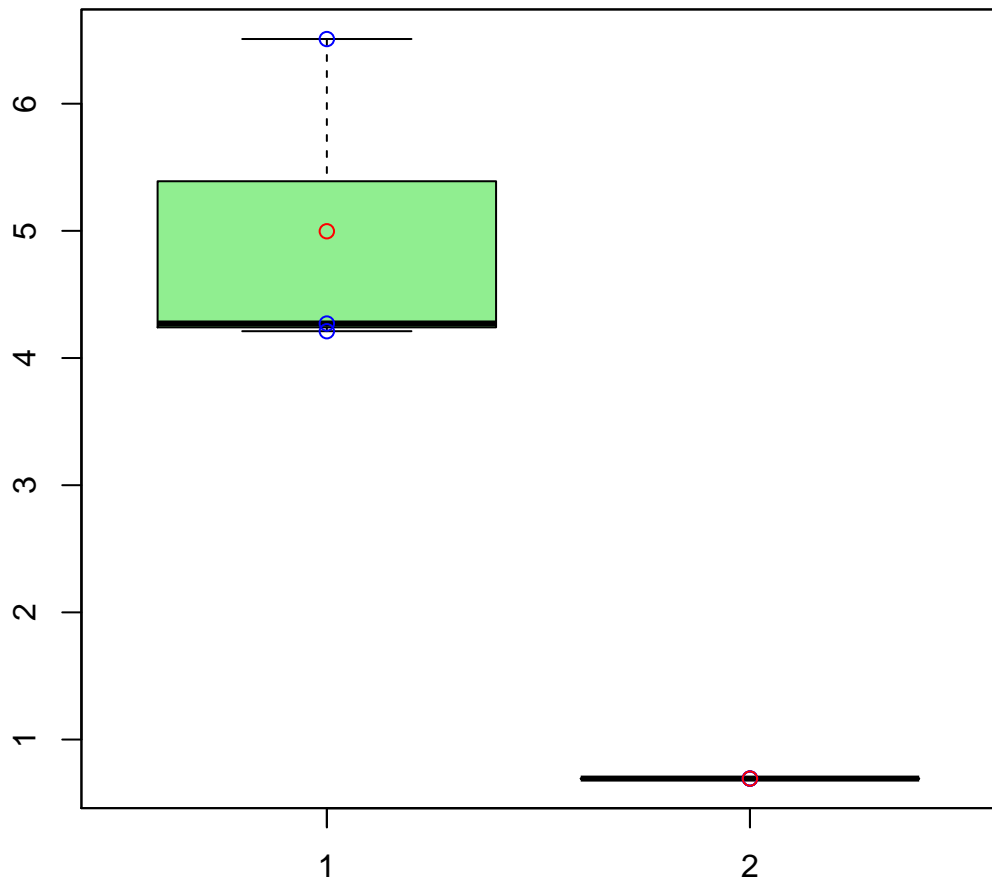

t-Test: p-value = 0.03

# CL1Contig5312|CL1Contig5312

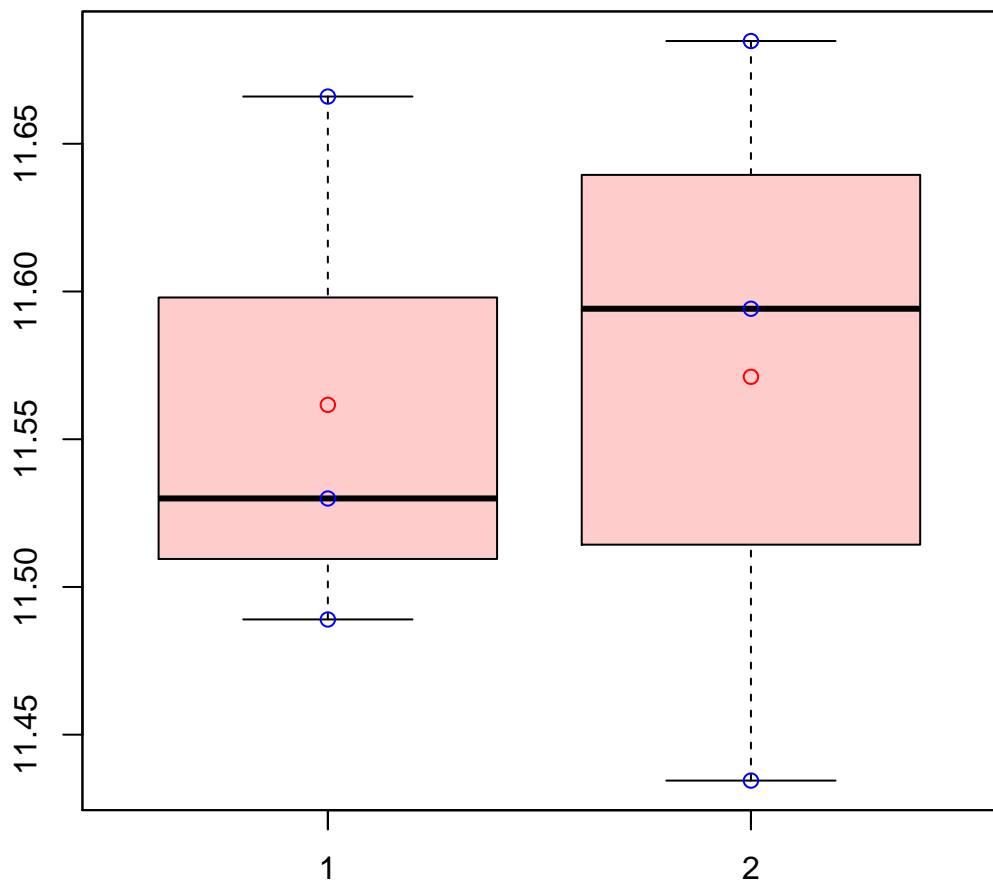

t-Test: p-value = 0.92

# CL1Contig5313|CL1Contig5313

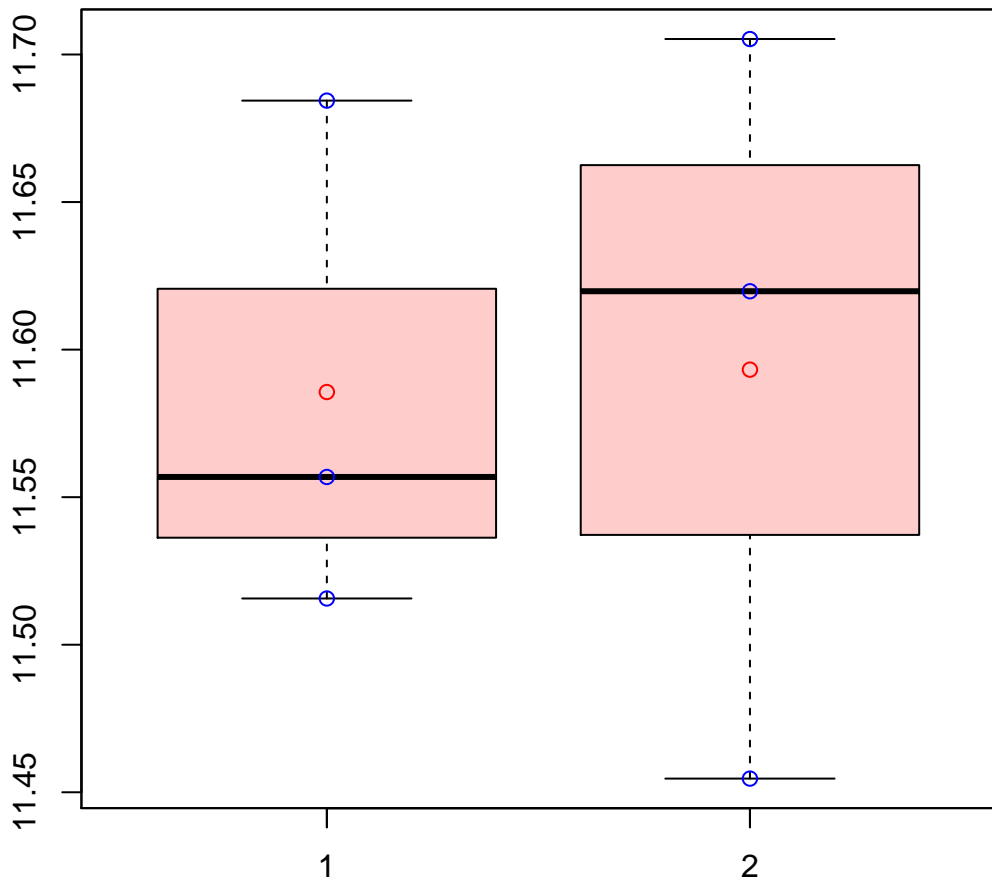

t-Test: p-value = 0.94

# CL1Contig5315|CL1Contig5315

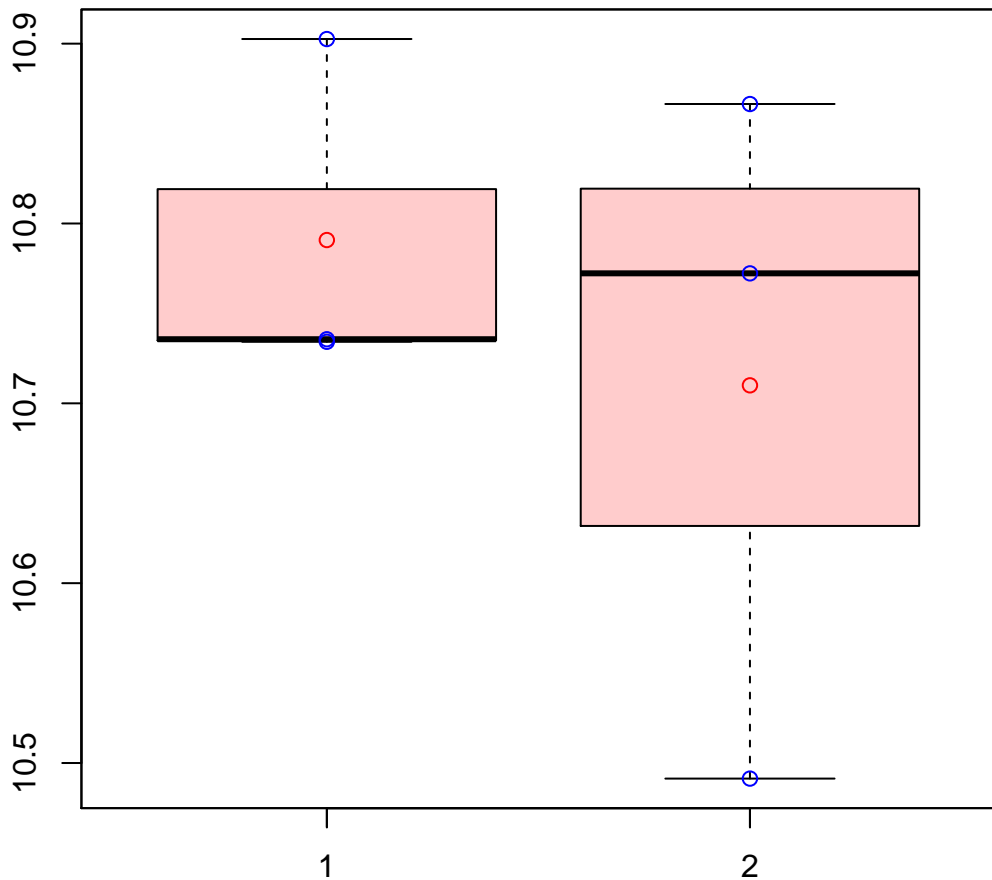

t-Test: p-value = 0.57

# CL1Contig5323|CL1Contig5323

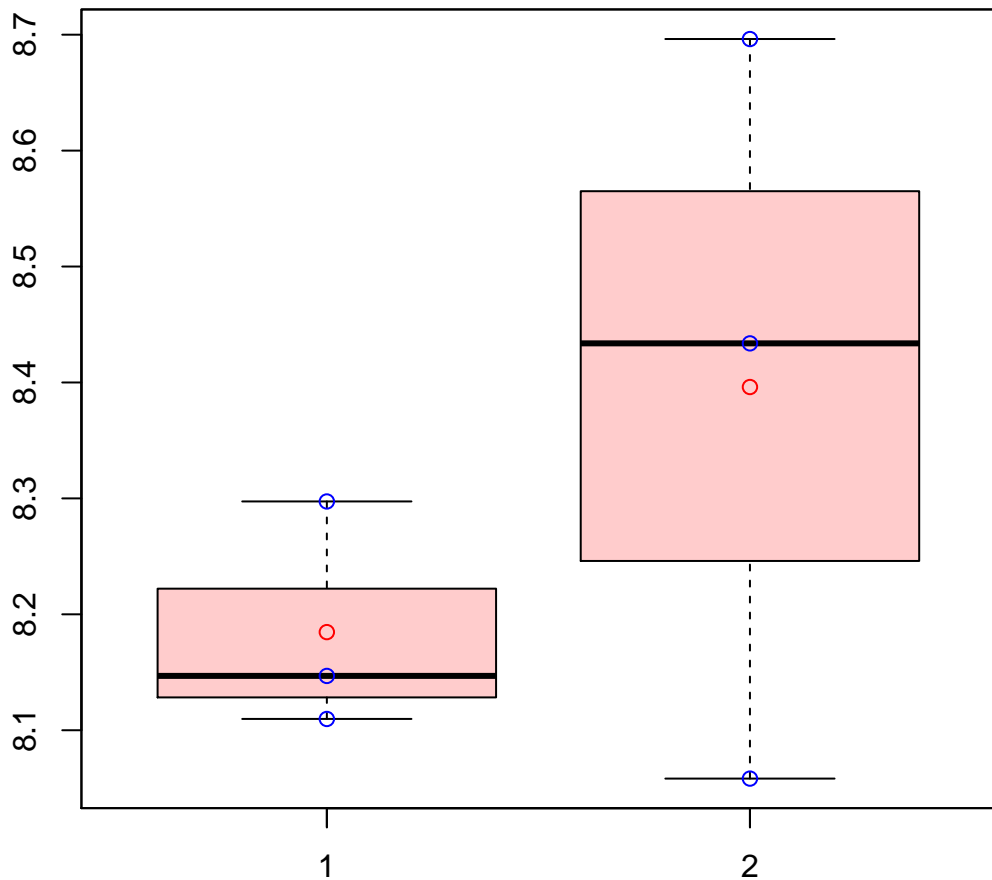

t-Test: p-value = 0.37

# CL1Contig5327|CL1Contig5327

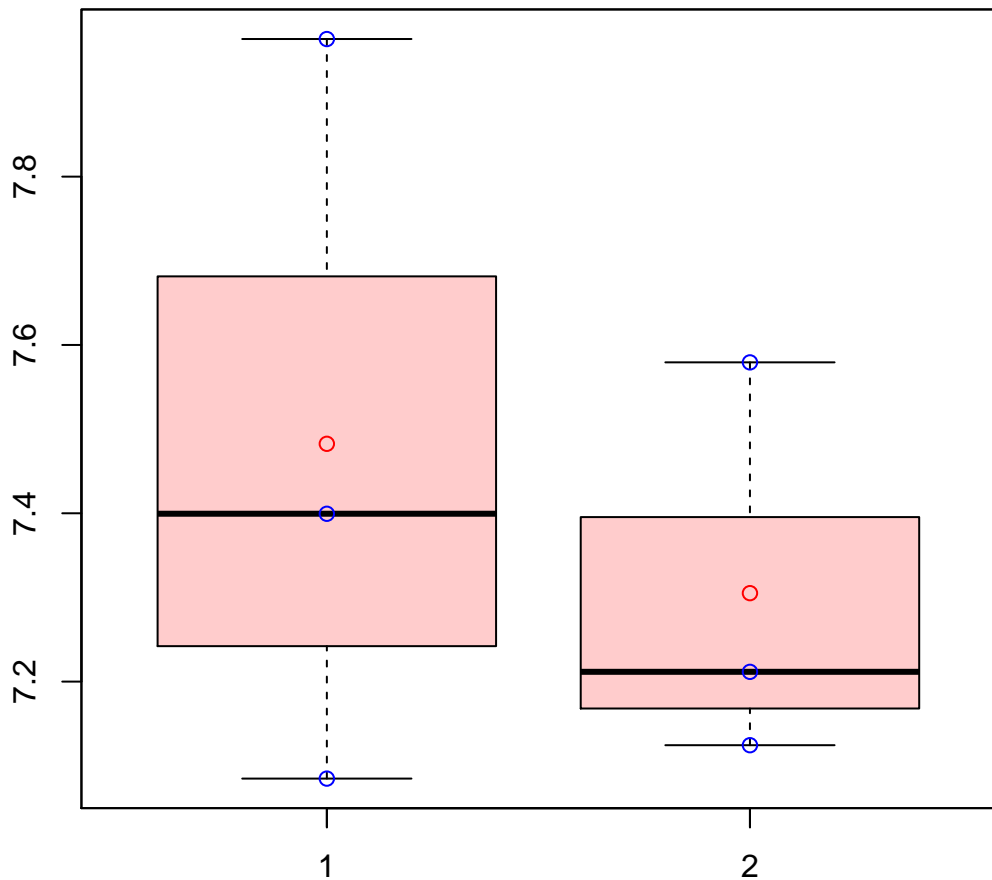

t-Test: p-value = 0.59



# CL1Contig5333|CL1Contig5333

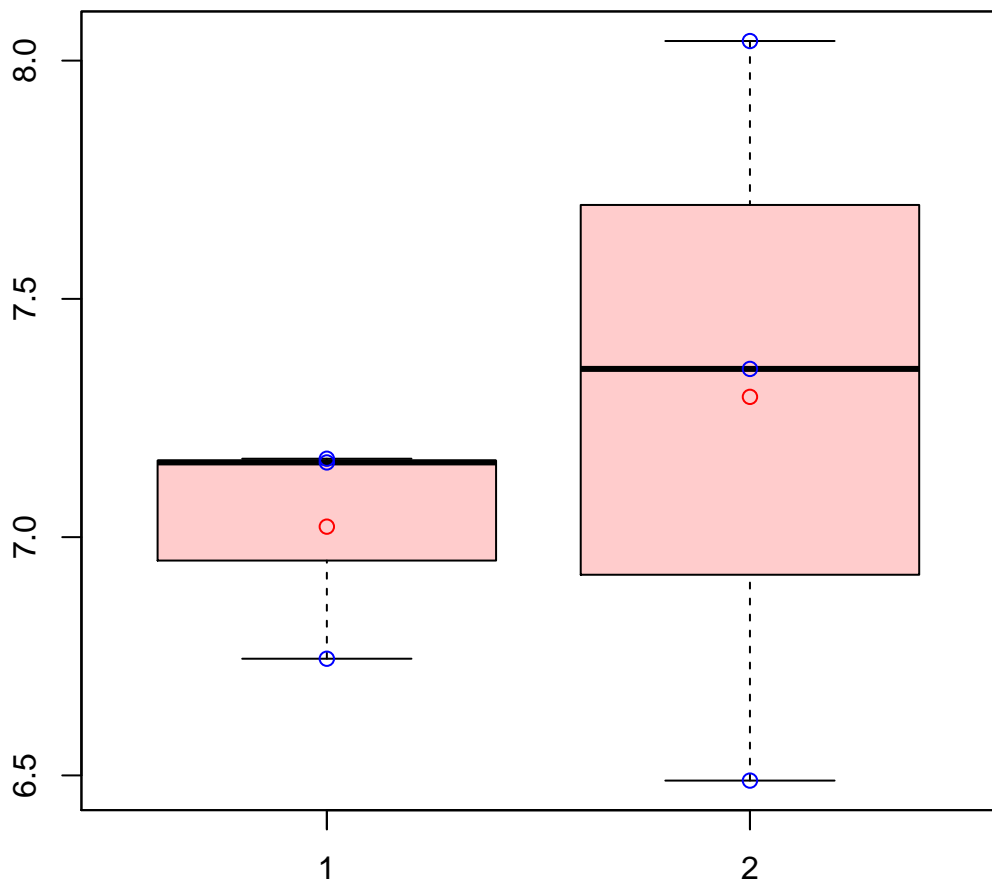

t-Test: p-value = 0.61

# CL1Contig5337|CL1Contig5337

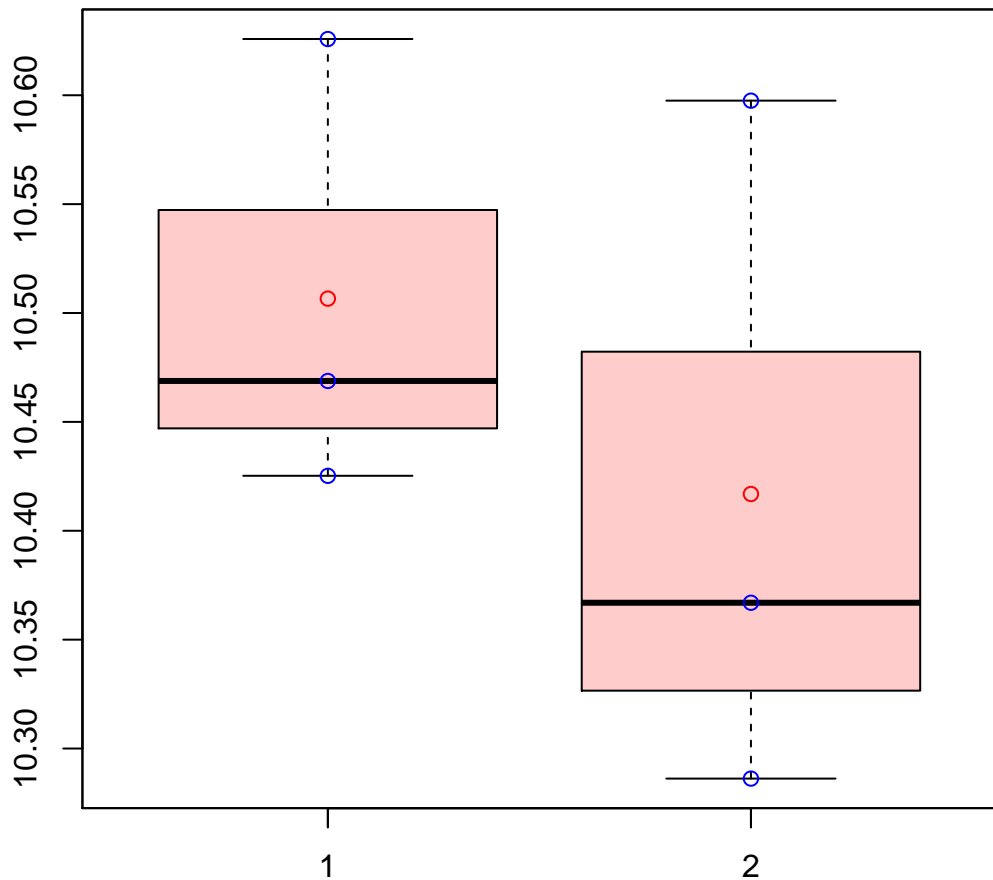

t-Test: p-value = 0.47

# CL1Contig5365|CL1Contig5365

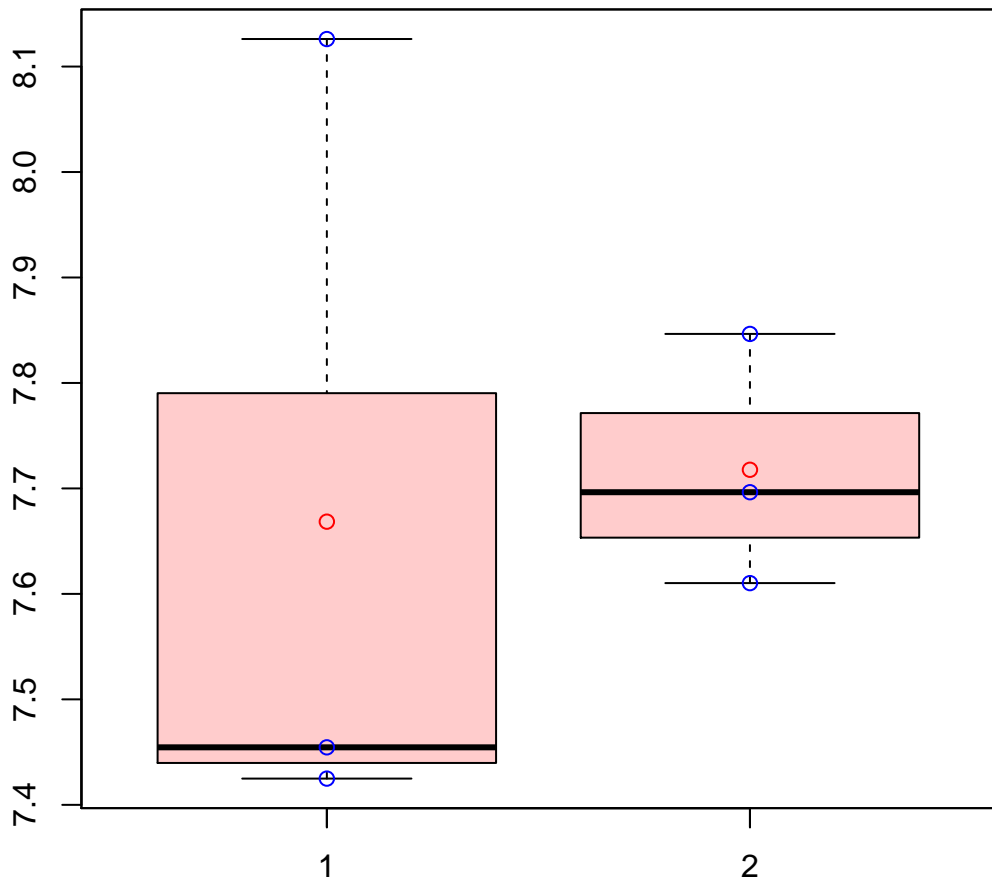

t-Test: p-value = 0.85

# CL1Contig5367|CL1Contig5367

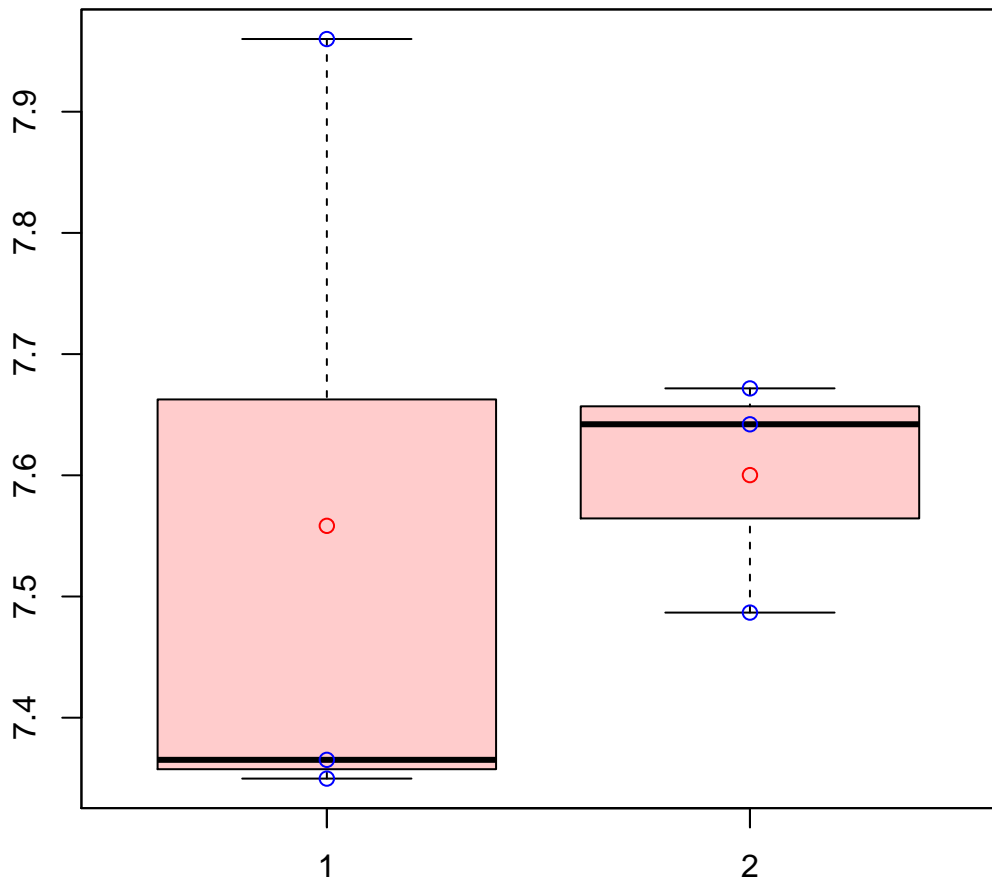

t-Test: p-value = 0.86

# CL1Contig5368|CL1Contig5368



t-Test: p-value = 0.86

# CL1Contig5369|CL1Contig5369



t-Test: p-value = 0.86

# CL1Contig536|CL1Contig536

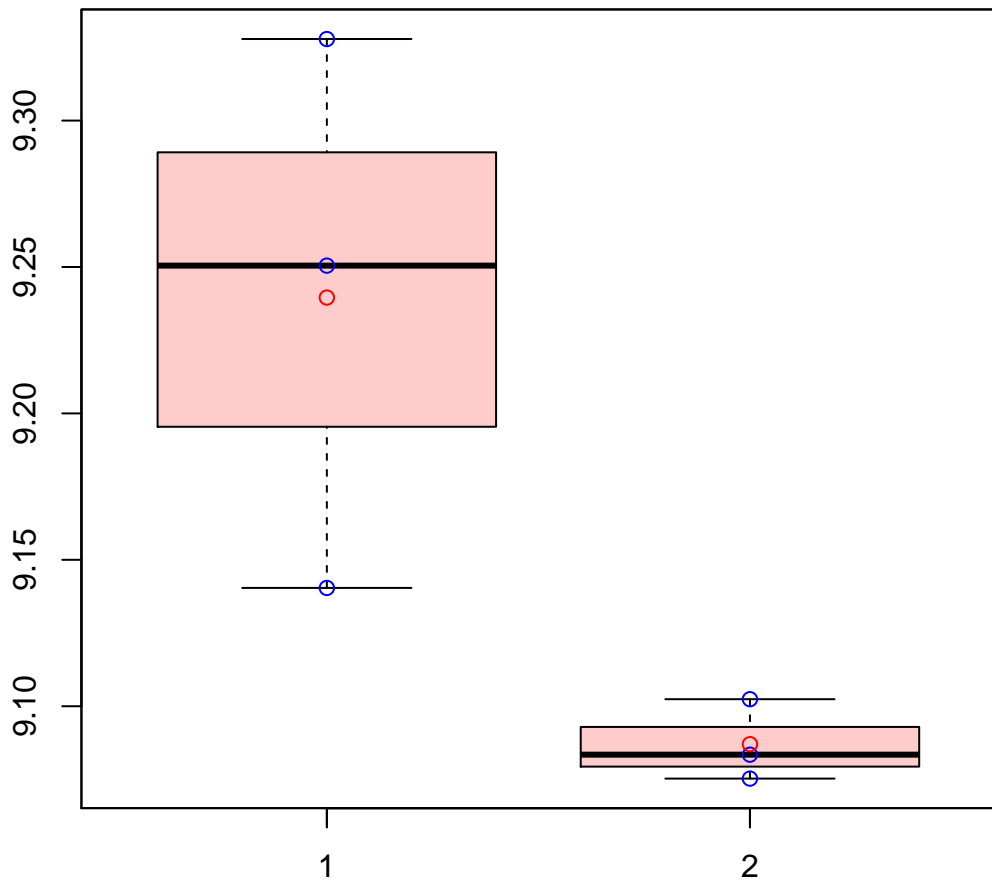

t-Test: p-value = 0.1

# CL1Contig5370|CL1Contig5370



t-Test: p-value = 0.85



# CL1Contig5371|CL1Contig5371

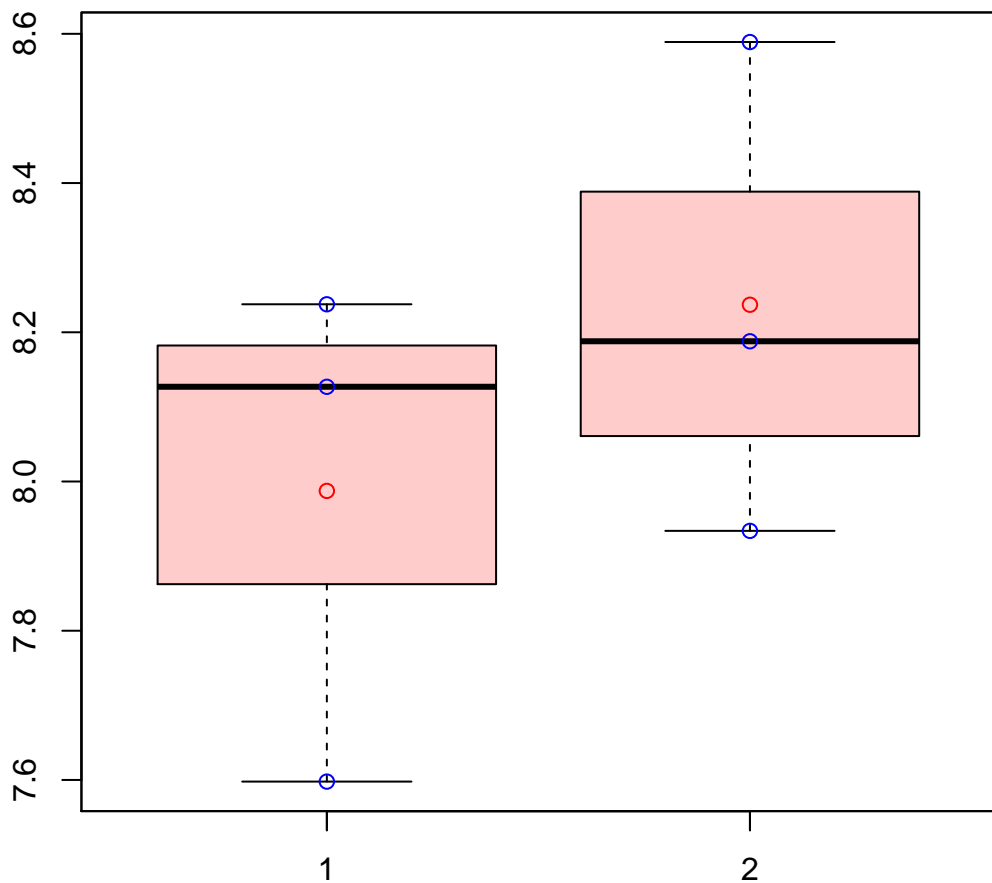

t-Test: p-value = 0.41

# CL1Contig538|CL1Contig538

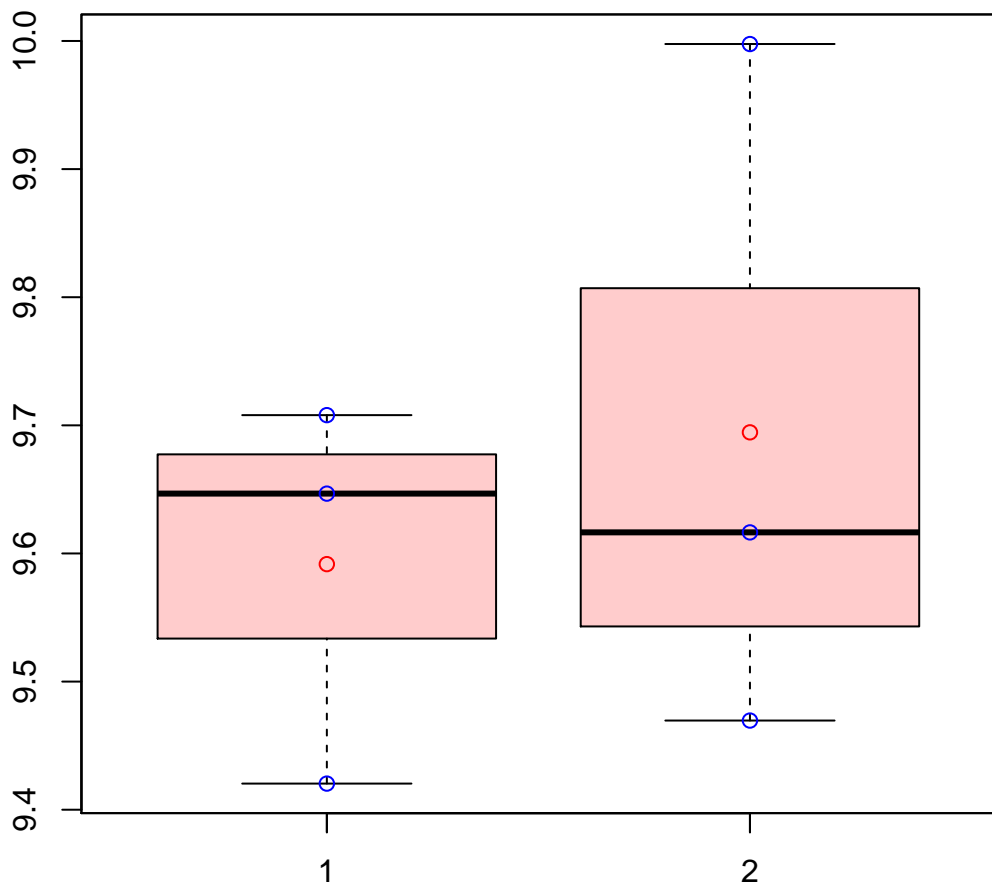

t-Test: p-value = 0.61

# CL1Contig5400|CL1Contig5400

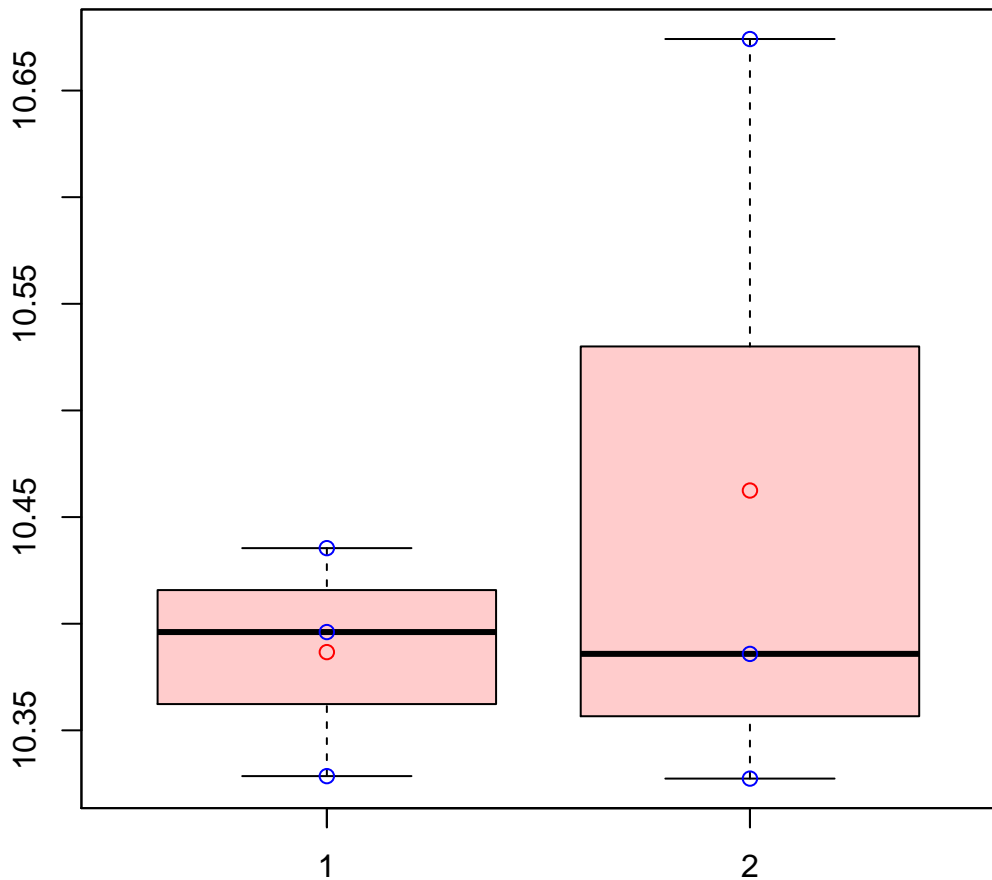

t-Test: p-value = 0.56

# CL1Contig5416|CL1Contig5416

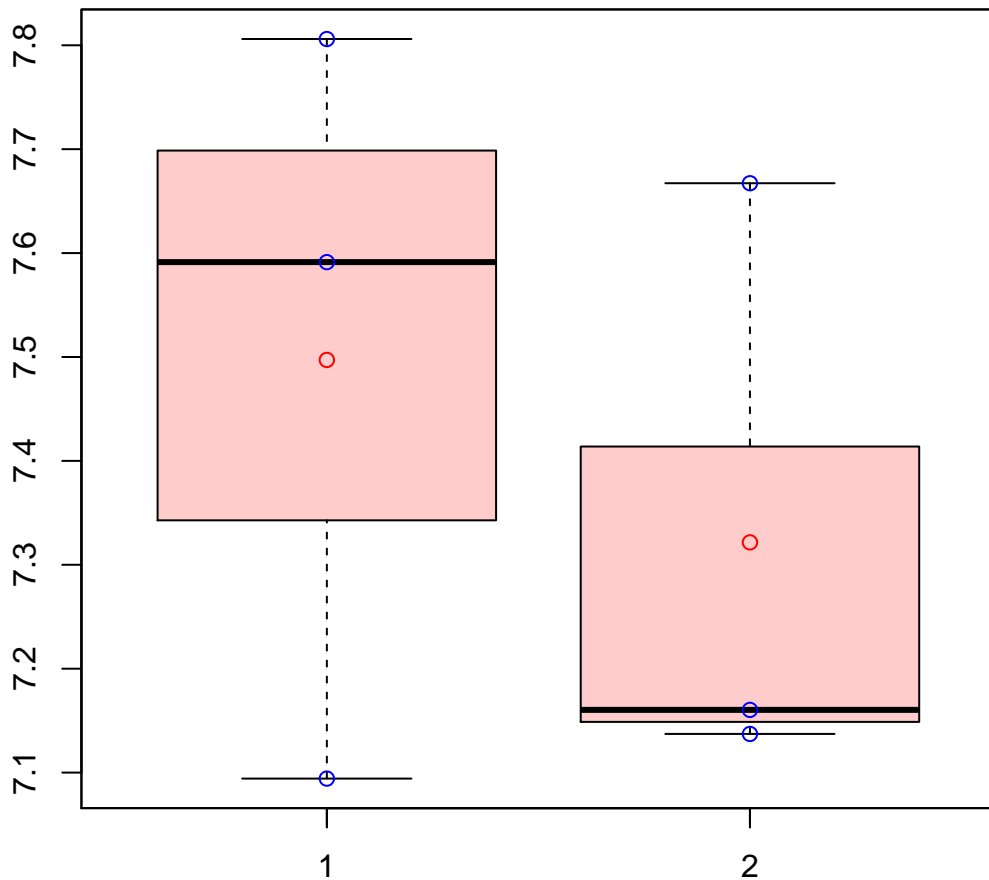

t-Test: p-value = 0.56

# CL1Contig5424|CL1Contig5424

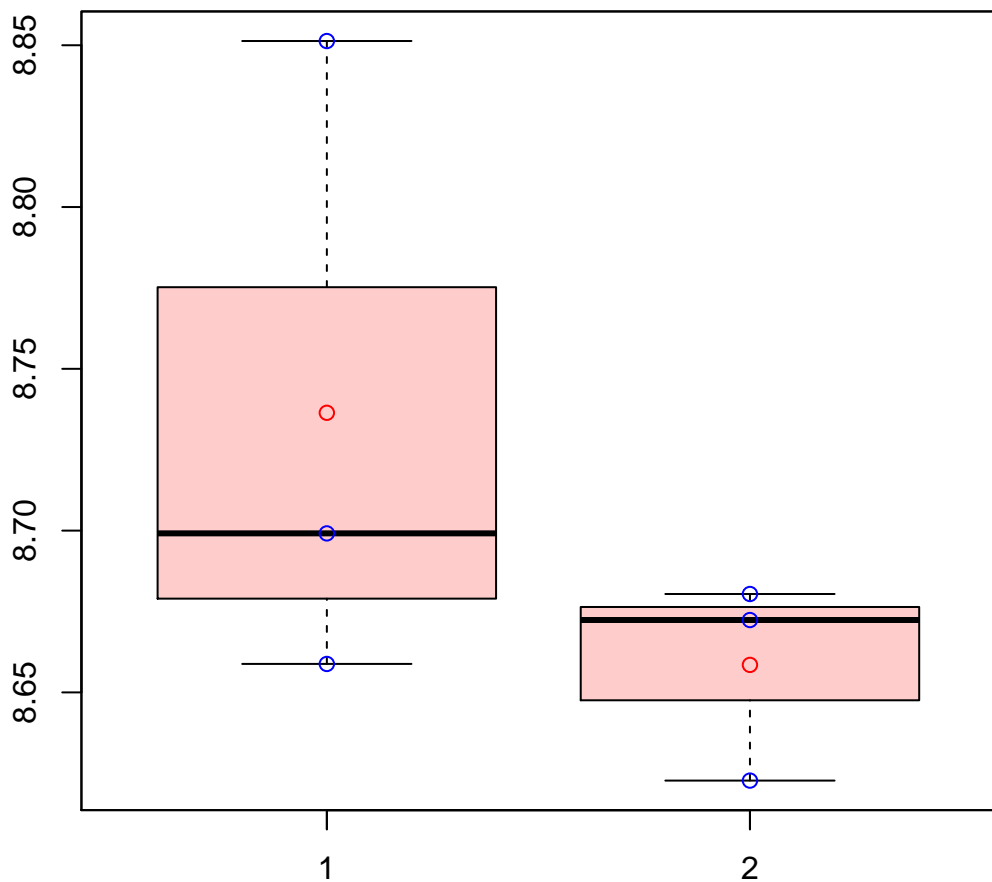

t-Test: p-value = 0.31

# CL1Contig5434|CL1Contig5434

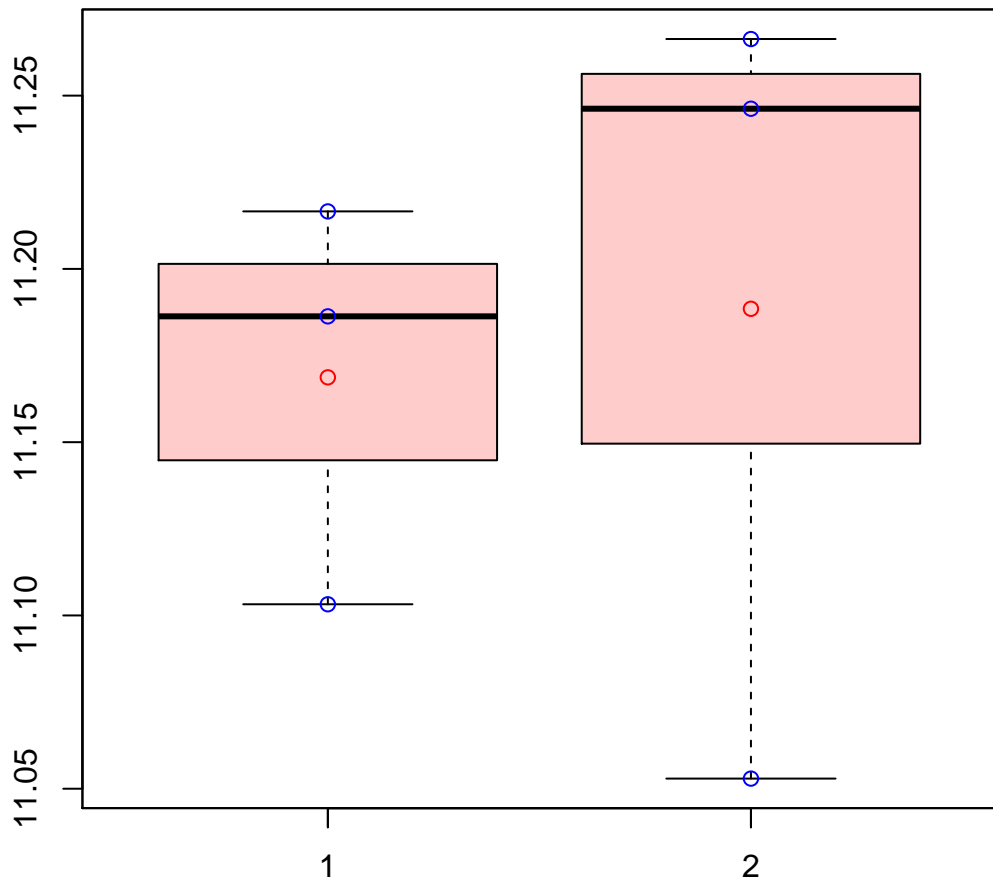

t-Test: p-value = 0.81

# CL1Contig5445|CL1Contig5445



t-Test: p-value = 0.85

# CL1Contig5461|CL1Contig5461

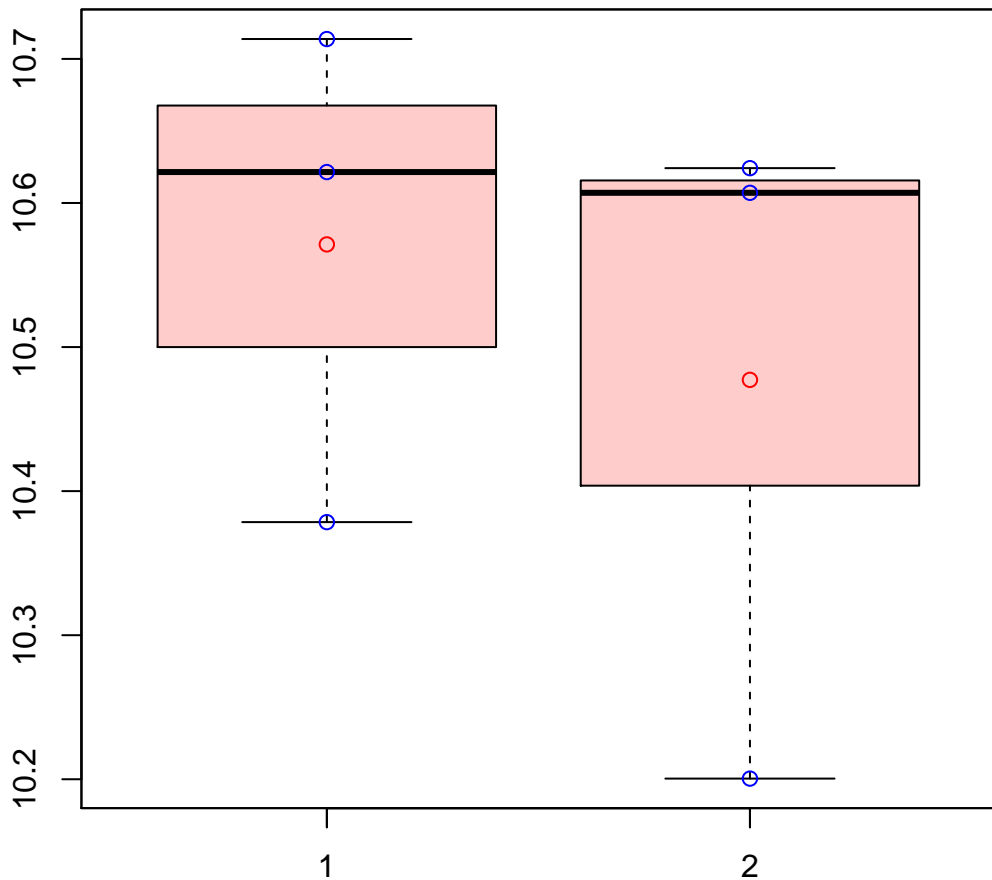

t-Test: p-value = 0.61



# CL1Contig5466|CL1Contig5466

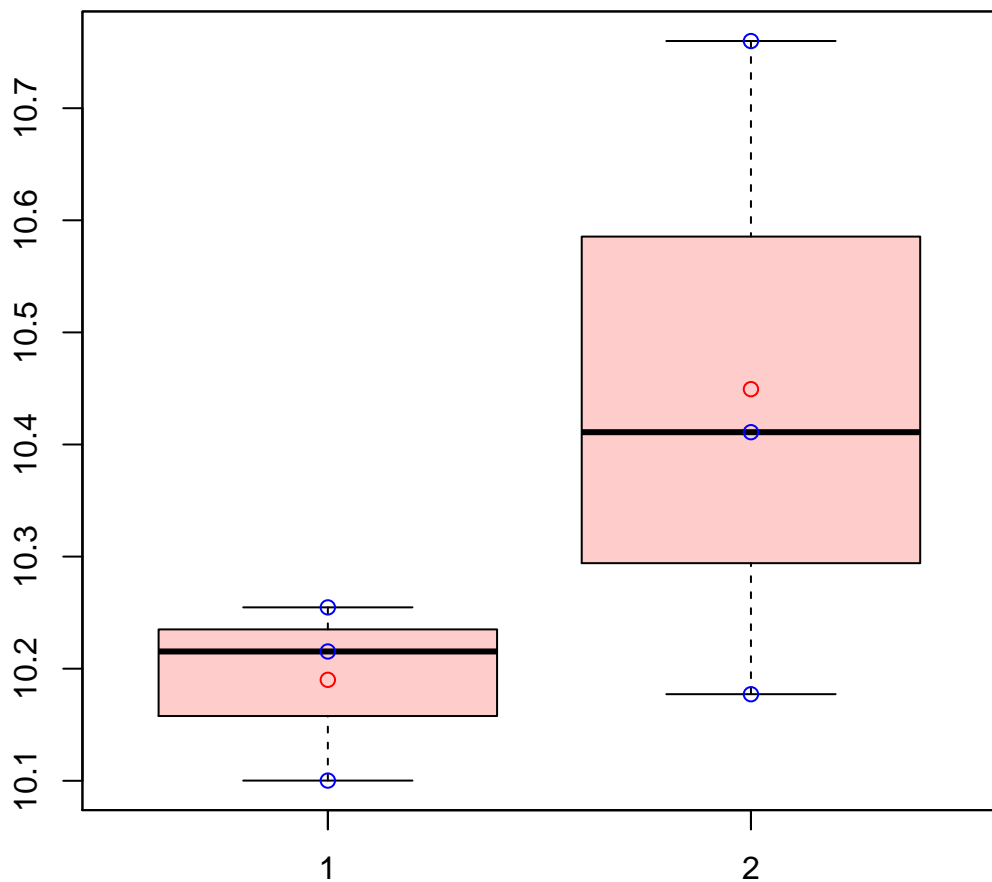

t-Test: p-value = 0.26

# CL1Contig5476|CL1Contig5476

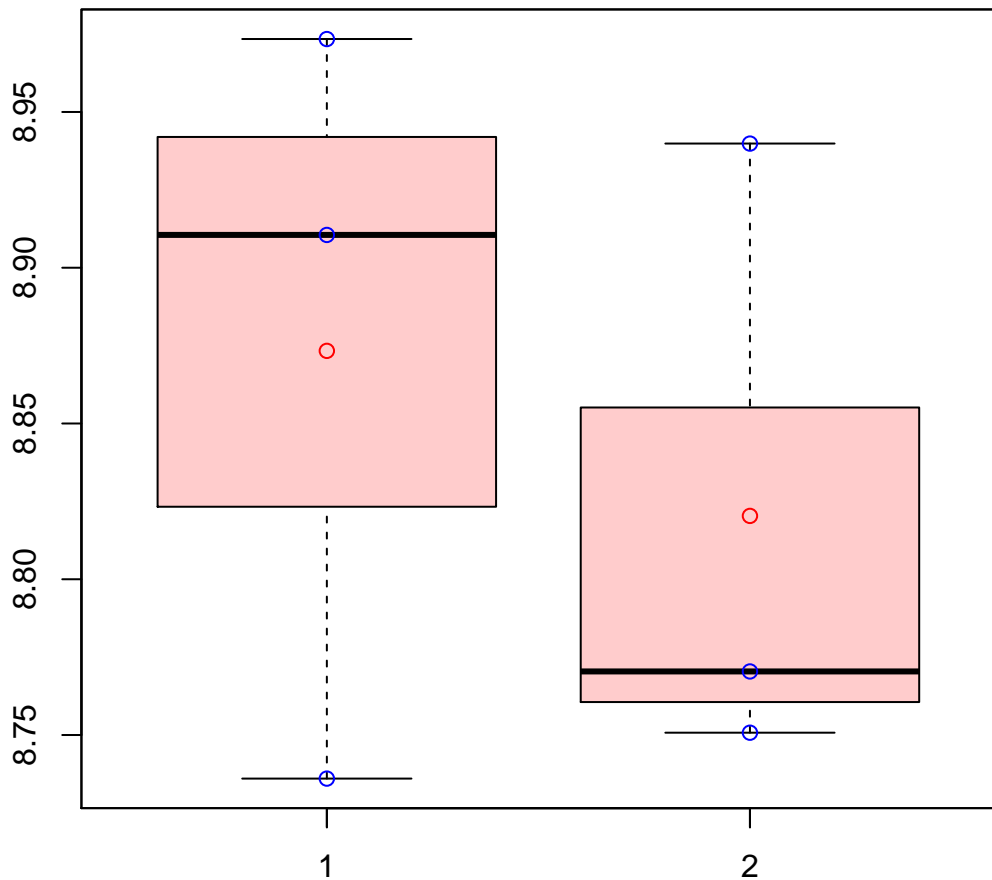

t-Test: p-value = 0.6

# CL1Contig5493|CL1Contig5493

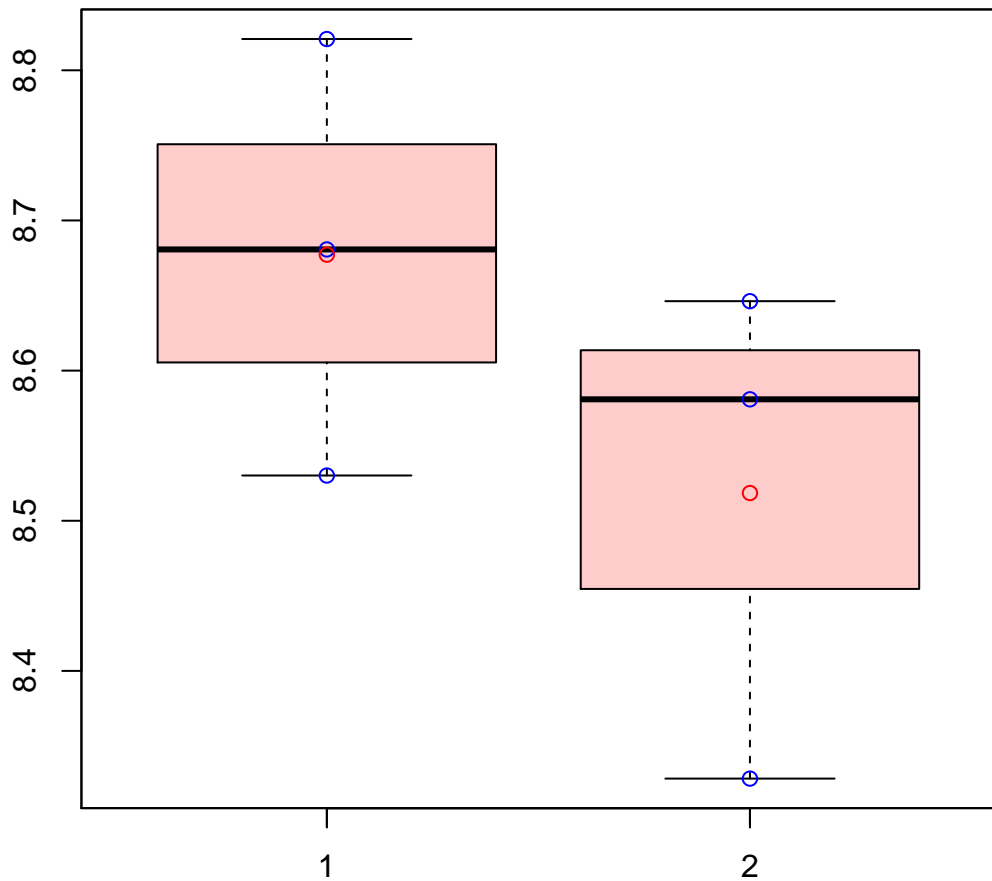

t-Test: p-value = 0.28

# CL1Contig5494|CL1Contig5494



t-Test: p-value = 0.28

# CL1Contig5500|CL1Contig5500

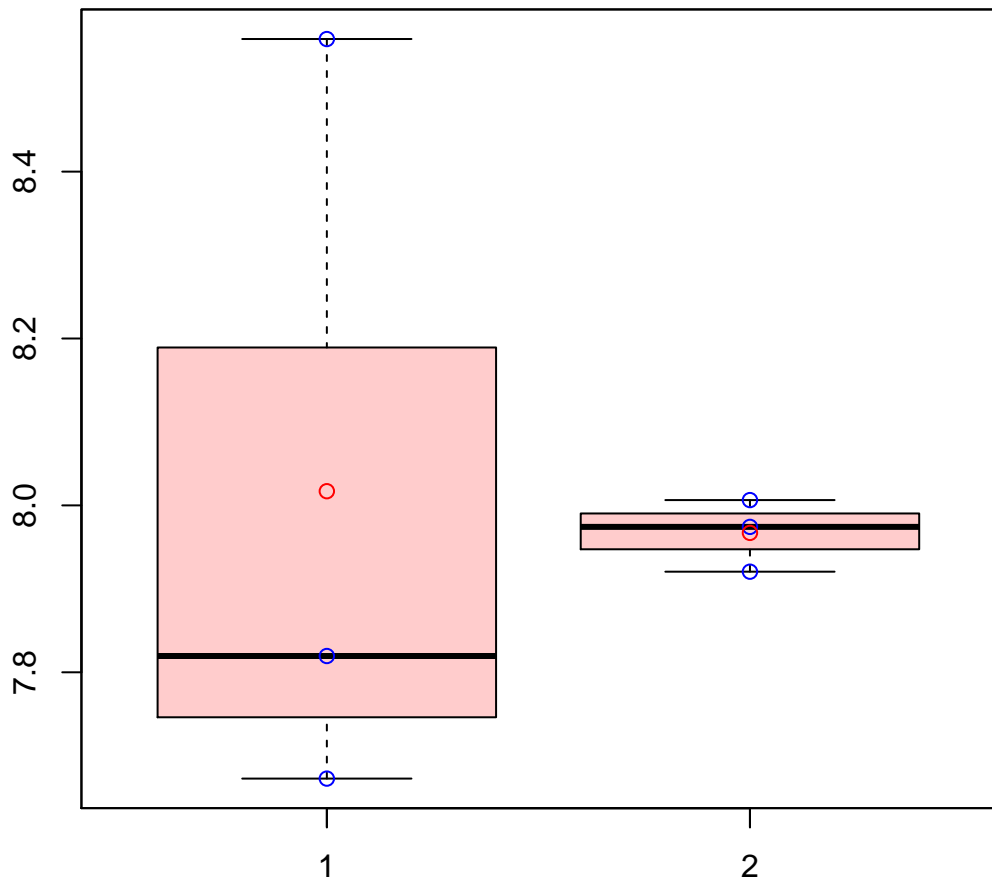

t-Test: p-value = 0.87

# CL1Contig5507|CL1Contig5507

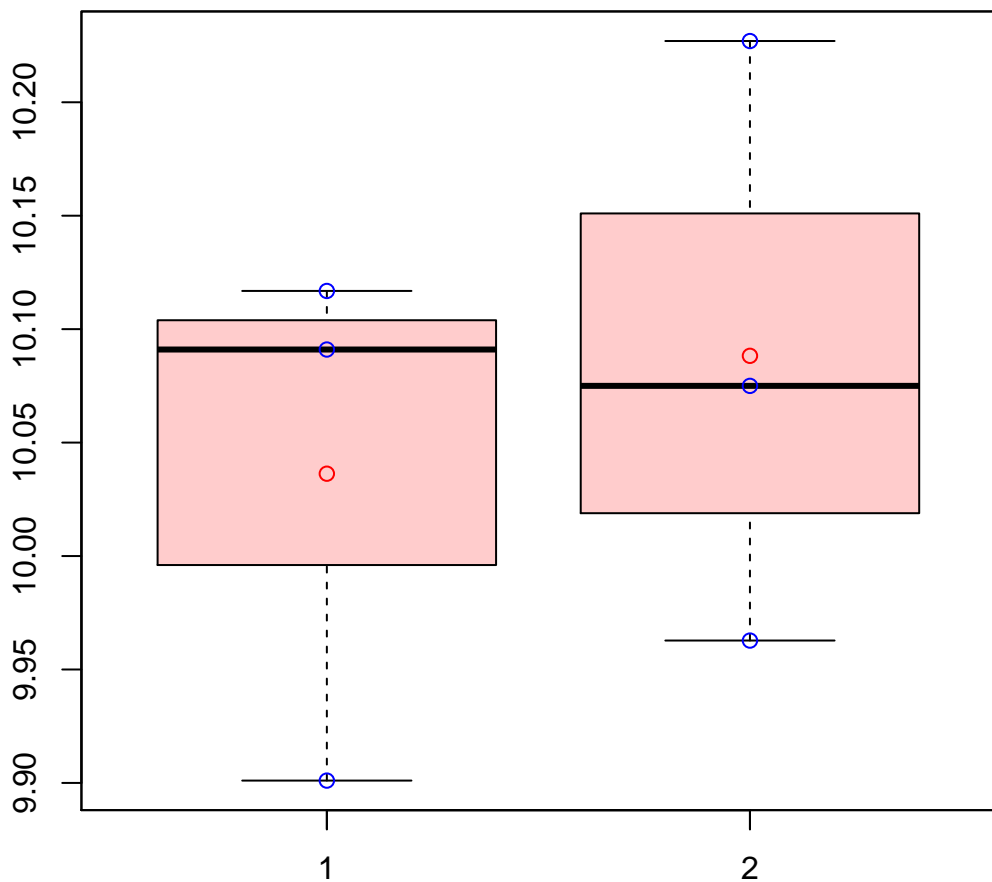

t-Test: p-value = 0.64

# CL1Contig5570|CL1Contig5570

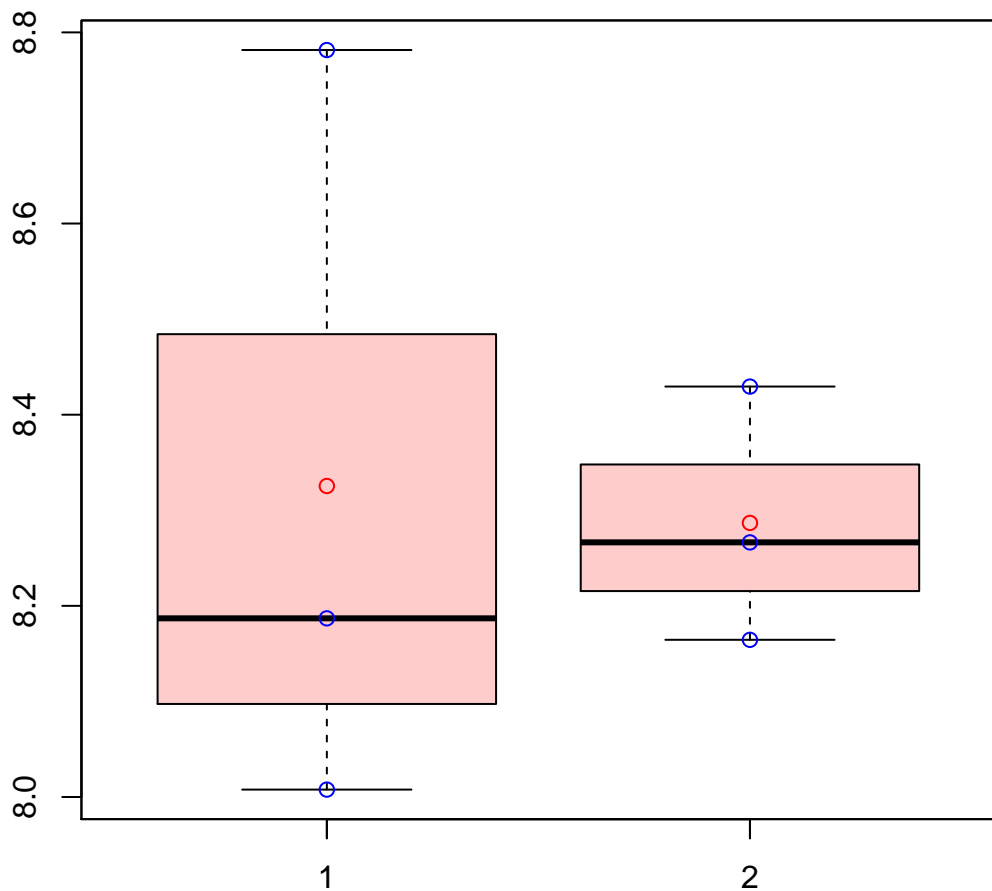

t-Test: p-value = 0.89

# CL1Contig5578|CL1Contig5578

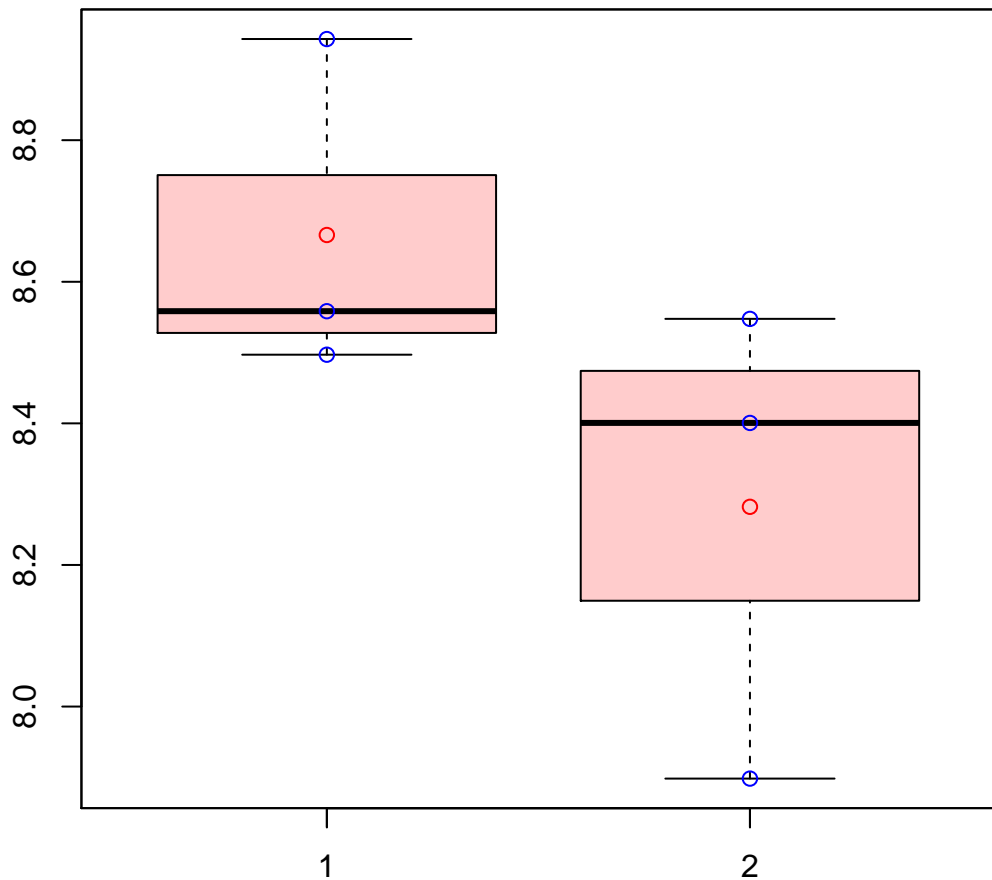

t-Test: p-value = 0.19



# CL1Contig5580|CL1Contig5580

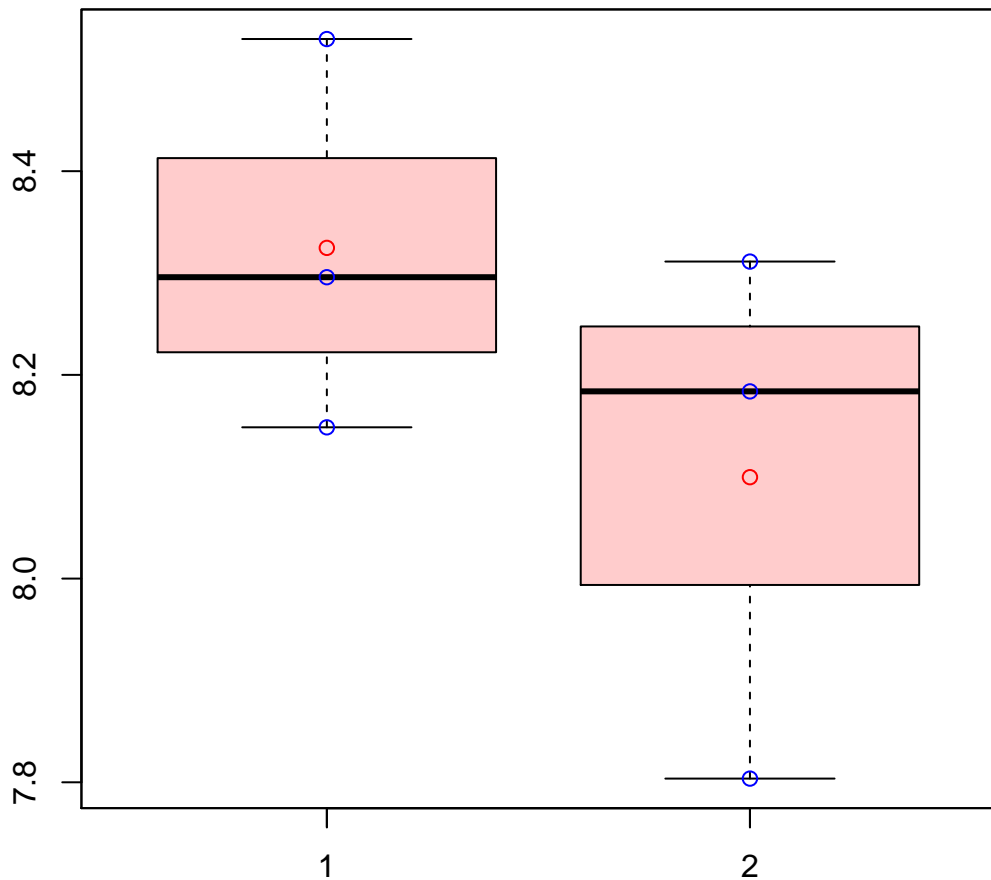

t-Test: p-value = 0.3

# CL1Contig5582|CL1Contig5582

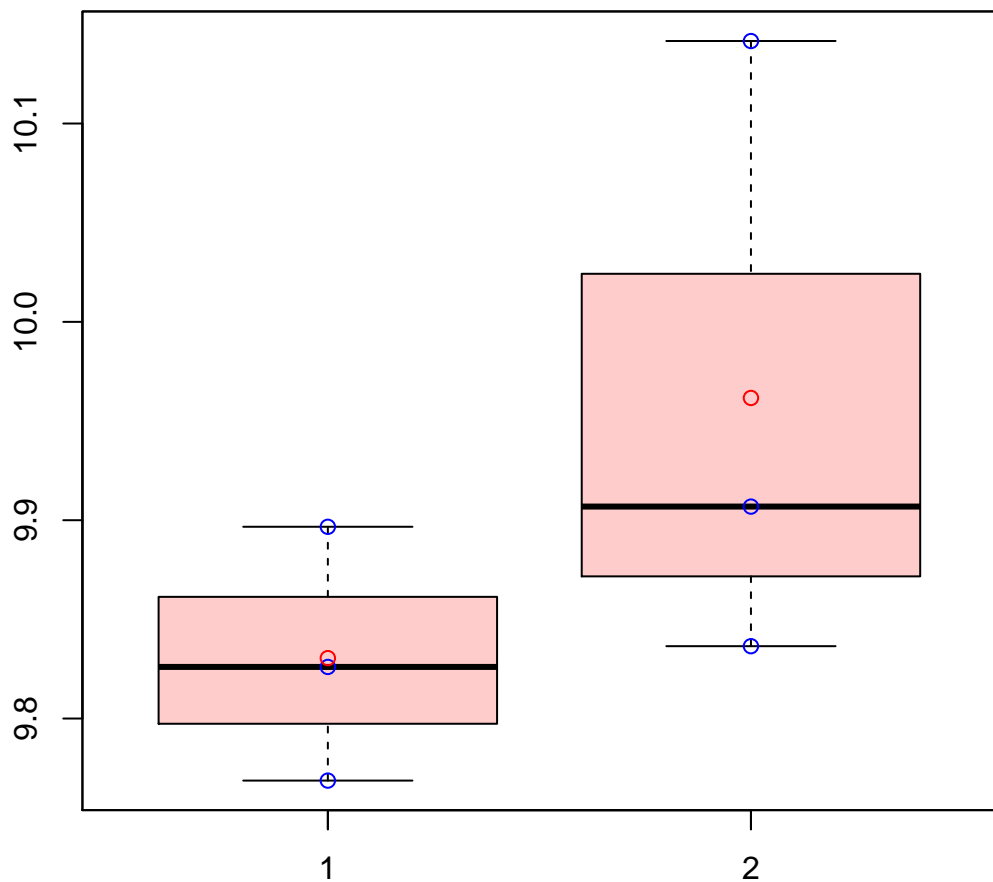

t-Test: p-value = 0.29

# CL1Contig5597|CL1Contig5597

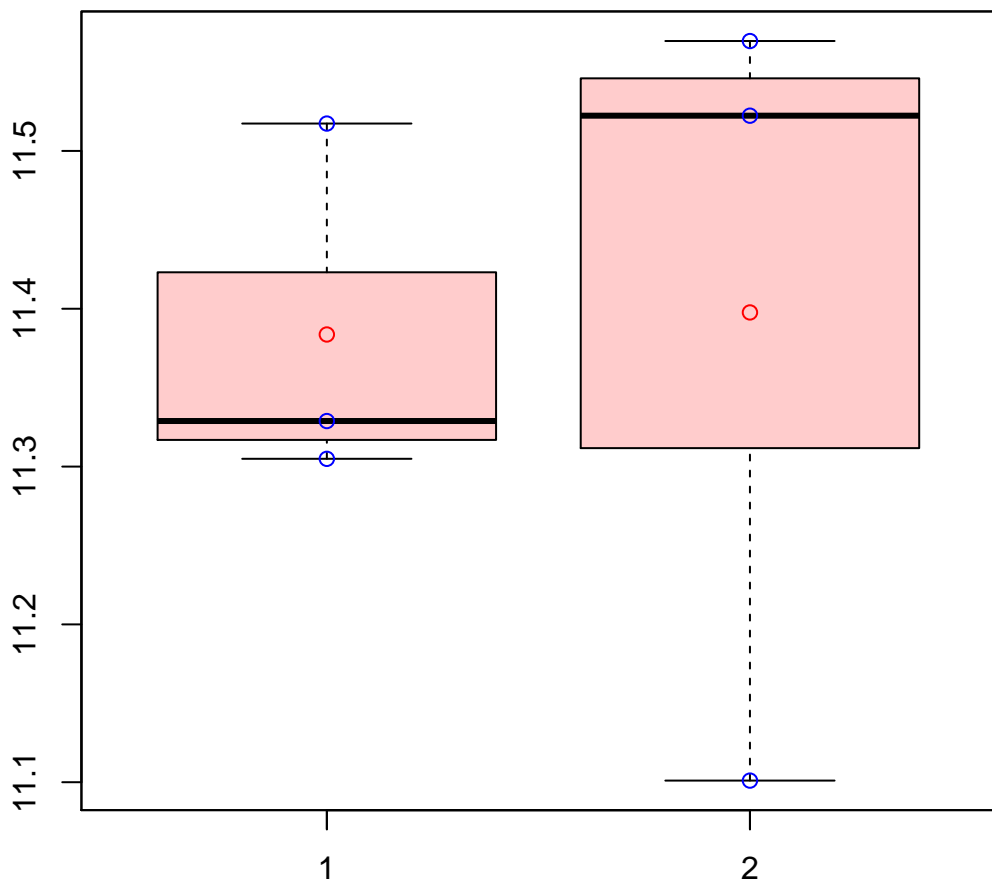

t-Test: p-value = 0.94

# CL1Contig5606|CL1Contig5606

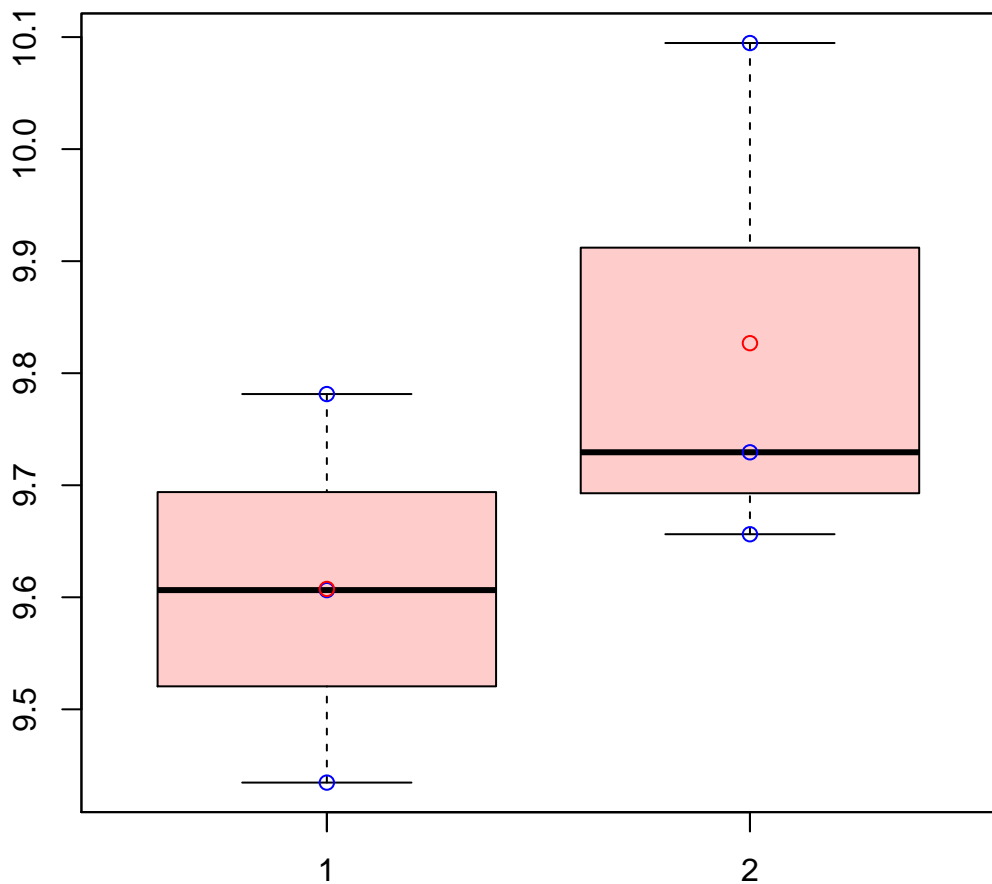

t-Test: p-value = 0.27

# CL1Contig5613|CL1Contig5613

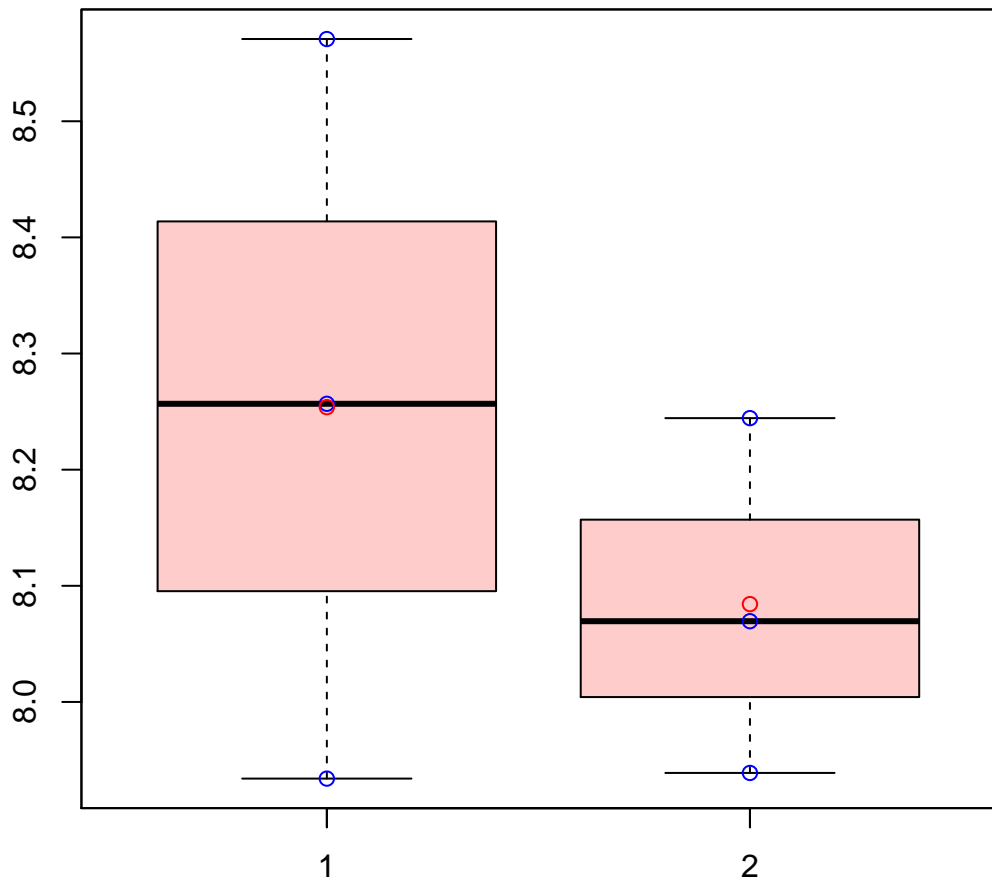

t-Test: p-value = 0.47

# CL1Contig5614|CL1Contig5614

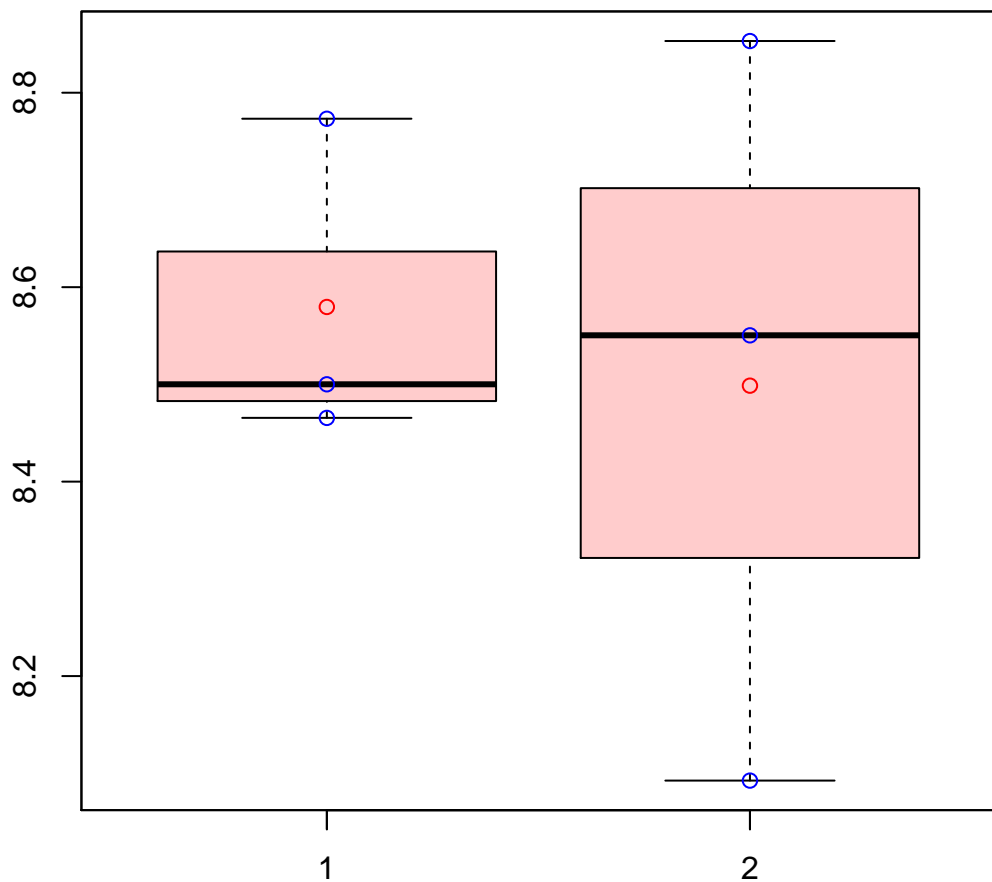

t-Test: p-value = 0.76

# CL1Contig5615|CL1Contig5615

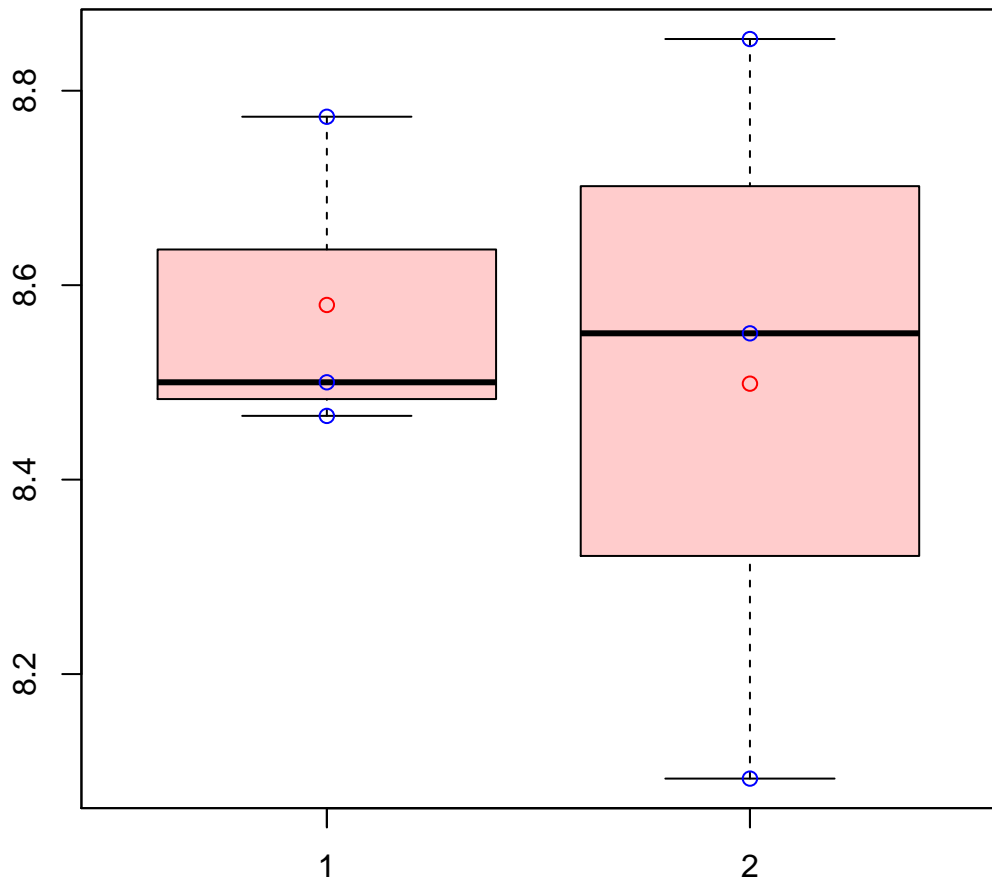

t-Test: p-value = 0.76

# CL1Contig5616|CL1Contig5616



t-Test: p-value = 0.47



# CL1Contig5617|CL1Contig5617

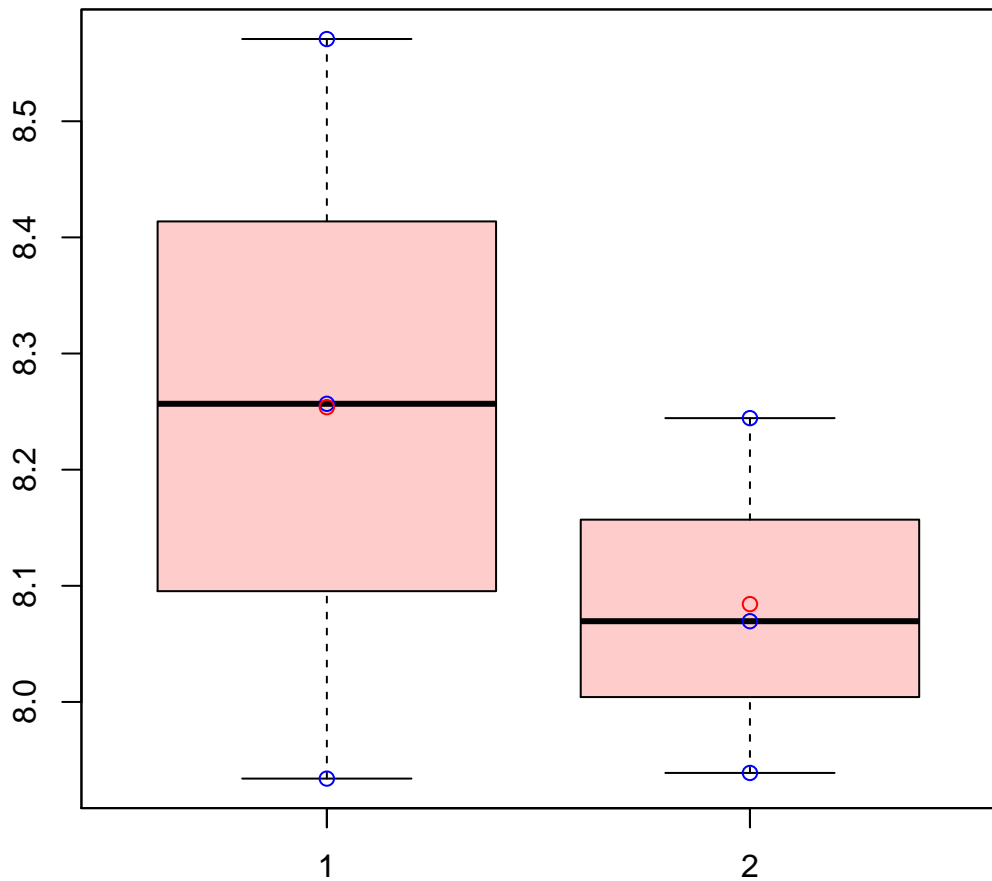

t-Test: p-value = 0.47

# CL1Contig5618|CL1Contig5618

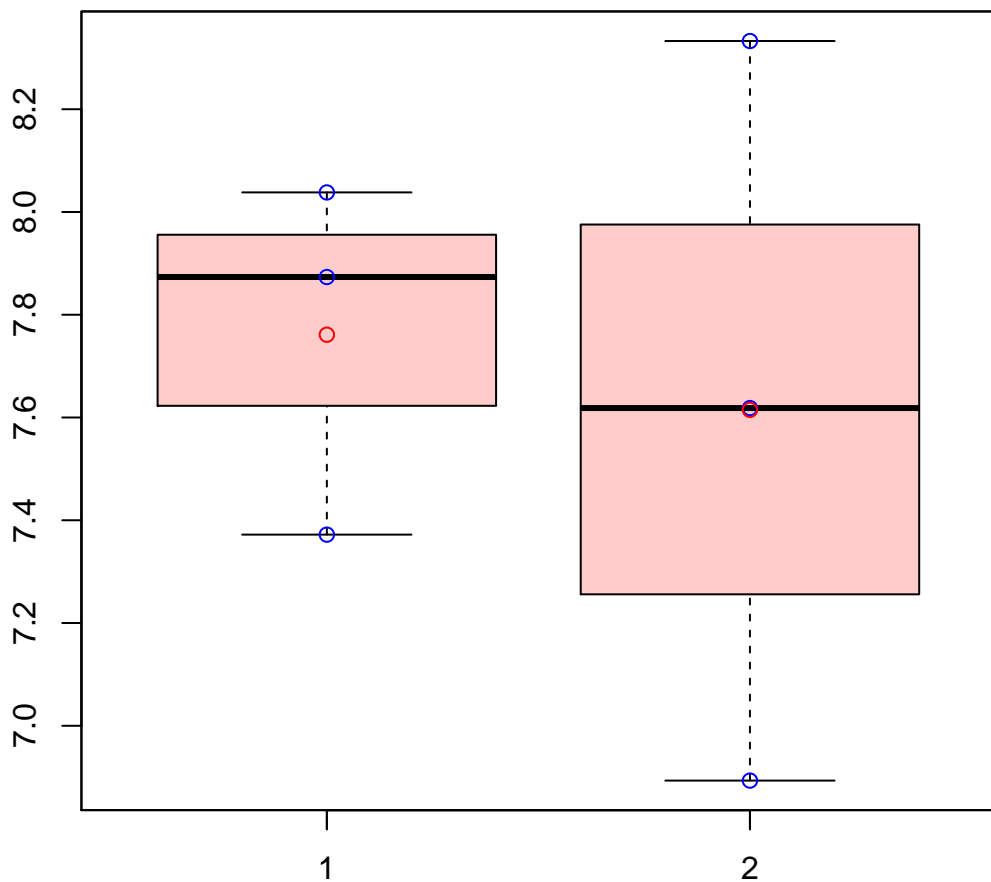

t-Test: p-value = 0.77

# CL1Contig5659|CL1Contig5659

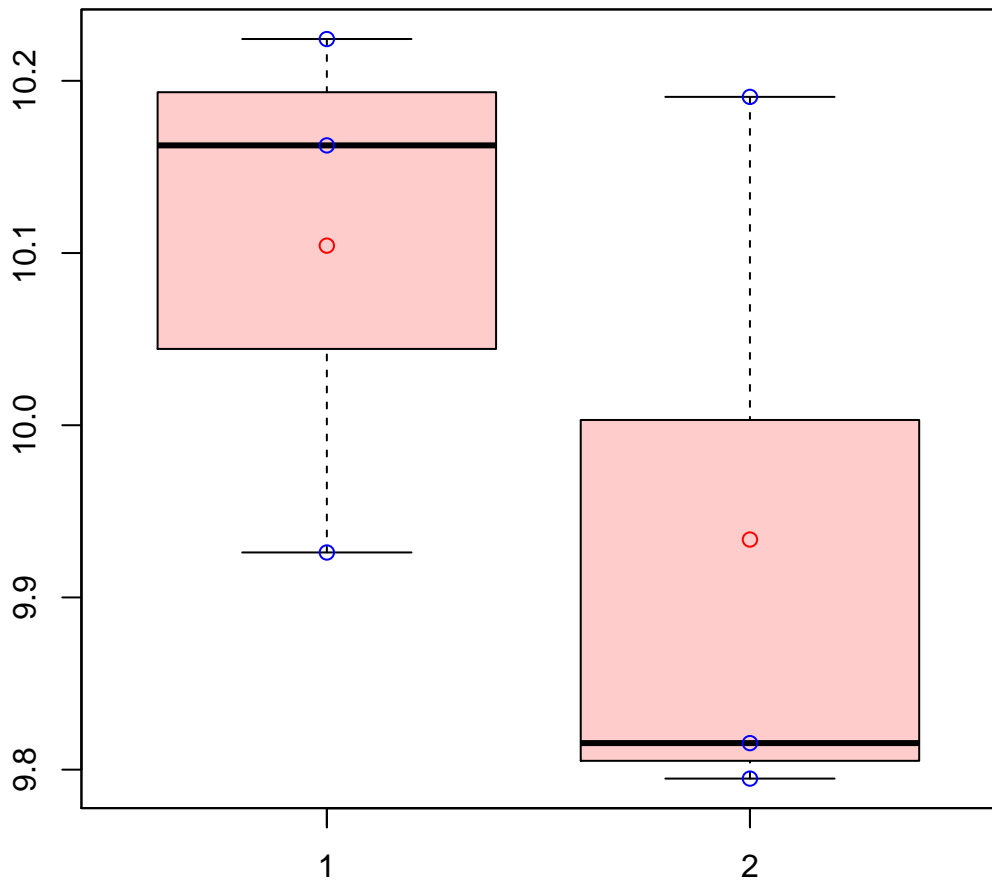

t-Test: p-value = 0.35

# CL1Contig5666|CL1Contig5666

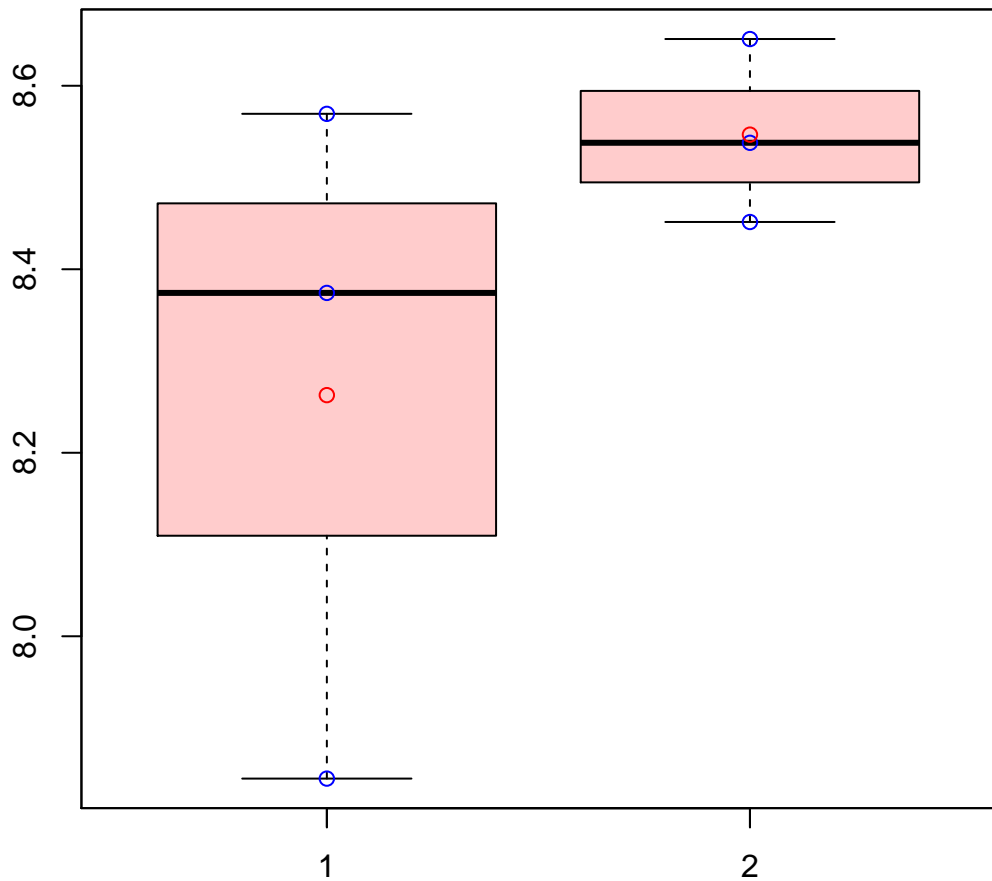

t-Test: p-value = 0.32

# CL1Contig5668|CL1Contig5668

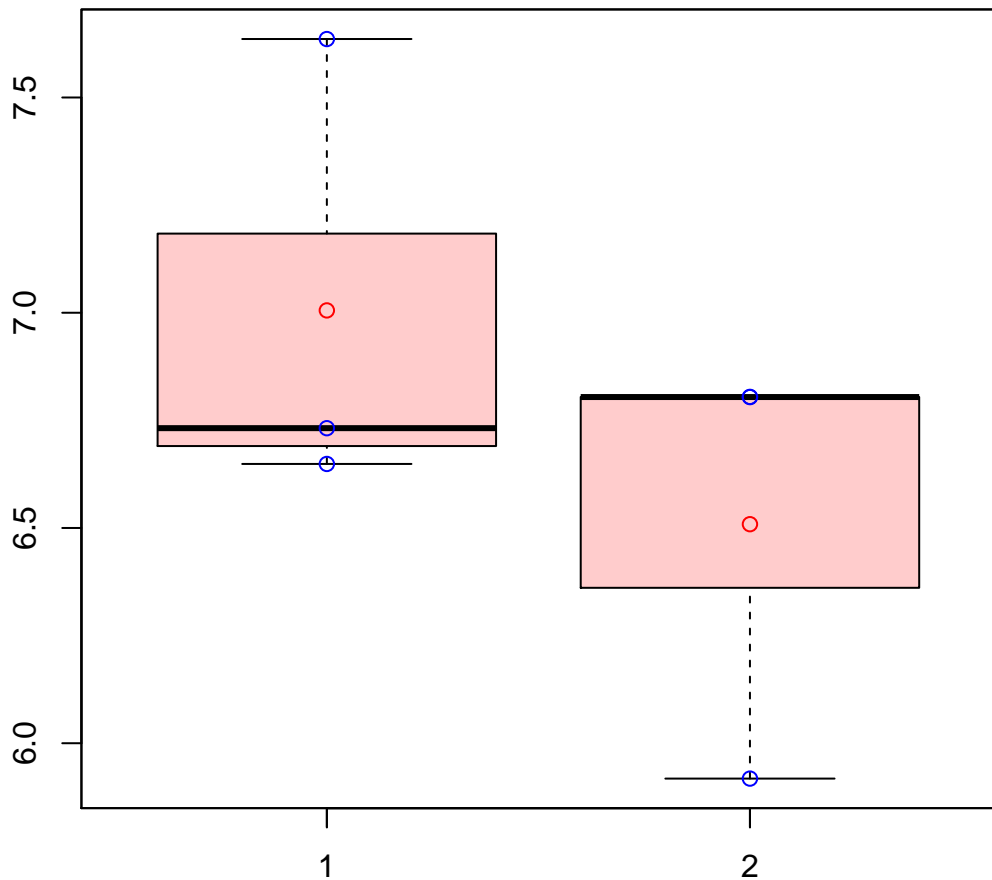

t-Test: p-value = 0.32

# CL1Contig5669|CL1Contig5669



t-Test: p-value = 0.32

# CL1Contig5674|CL1Contig5674

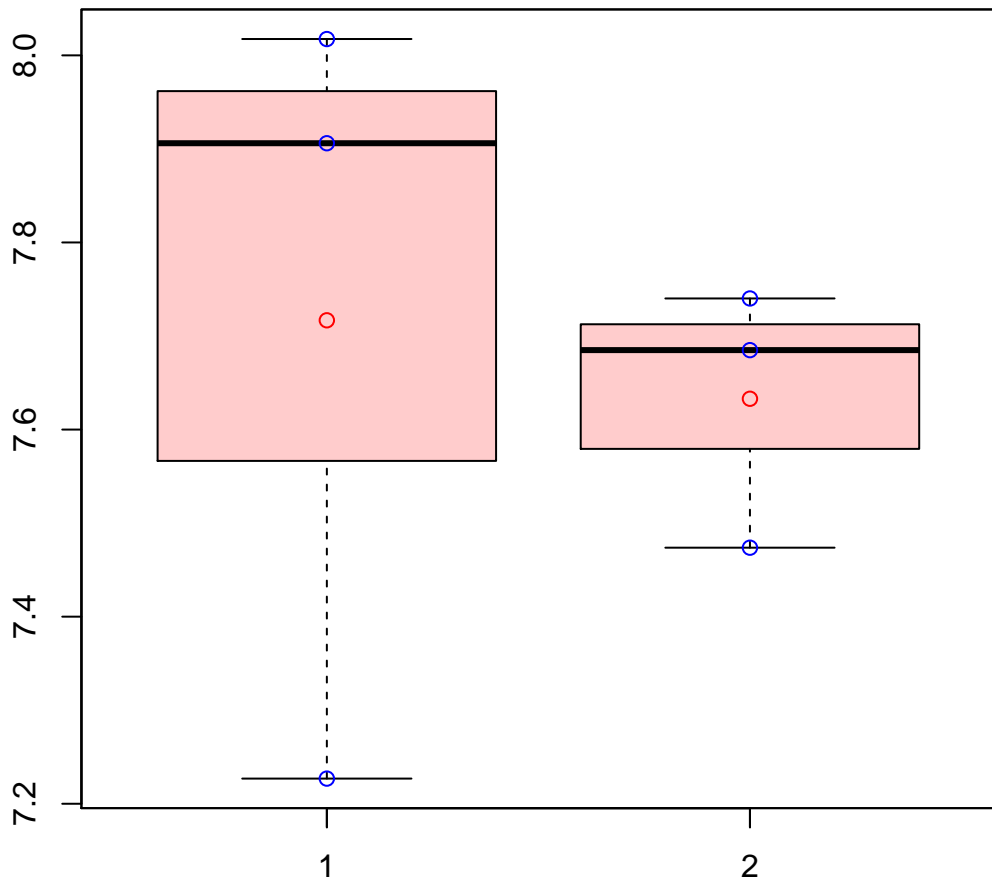

t-Test: p-value = 0.77

# CL1Contig5682|CL1Contig5682

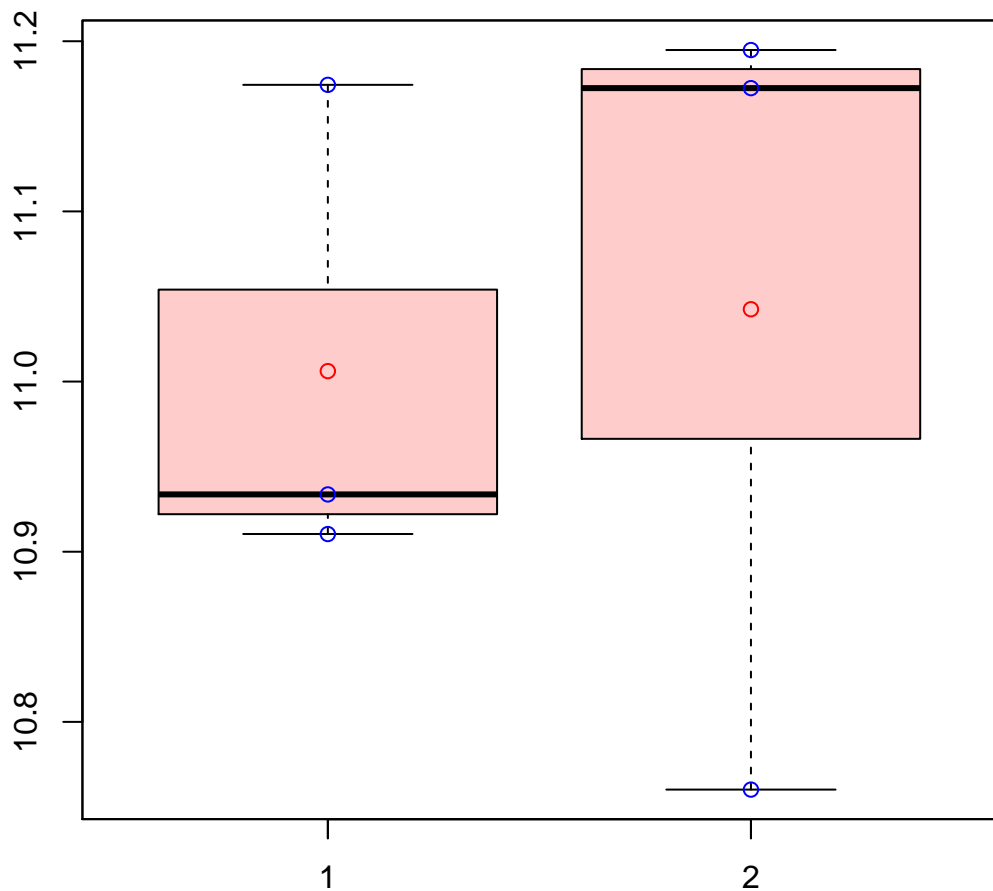

t-Test: p-value = 0.84



# CL1Contig5684|CL1Contig5684

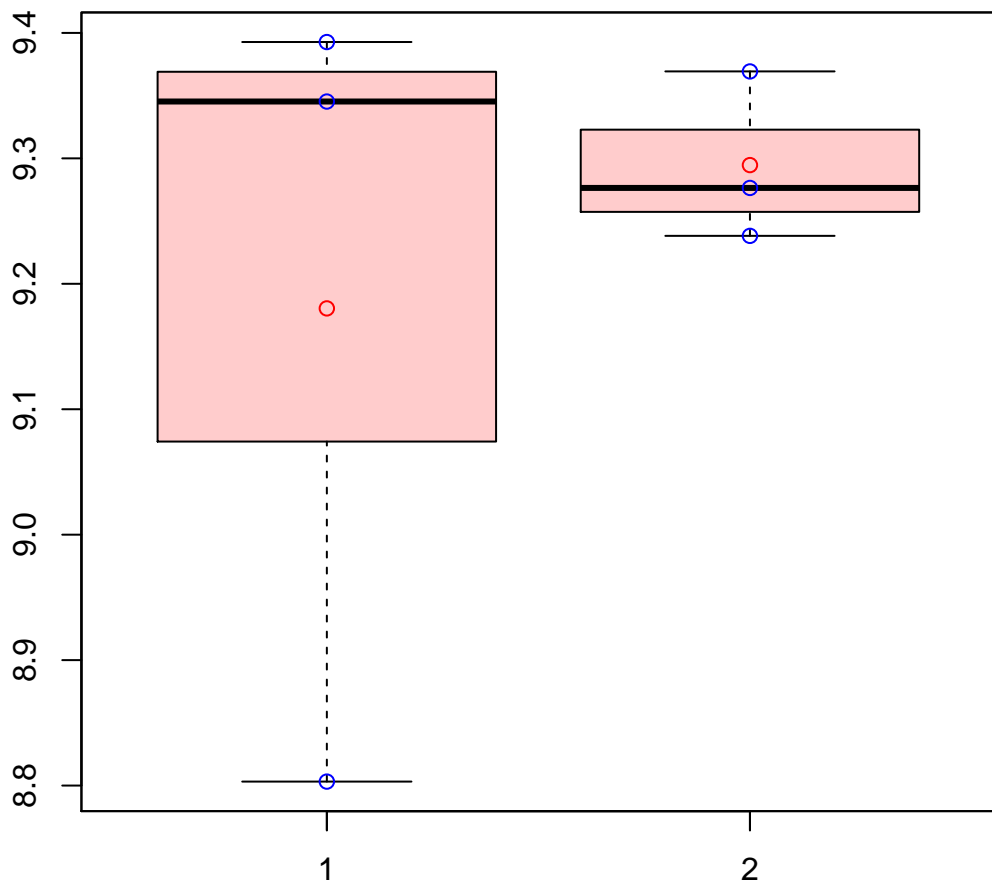

t-Test: p-value = 0.61

# CL1Contig5685|CL1Contig5685



t-Test: p-value = 0.61

# CL1Contig5686|CL1Contig5686



t-Test: p-value = 0.61

# CL1Contig5687|CL1Contig5687



t-Test: p-value = 0.61

# CL1Contig5698|CL1Contig5698

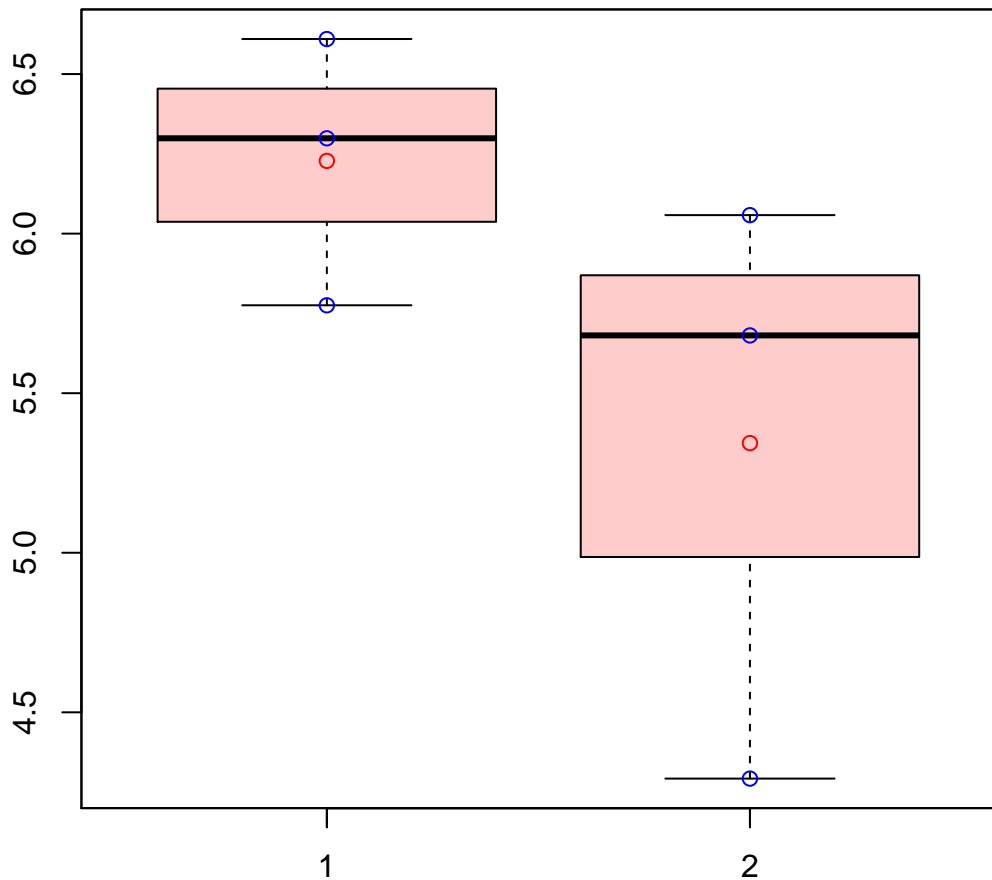

t-Test: p-value = 0.24

# CL1Contig5699|CL1Contig5699



t-Test: p-value = 0.03

# CL1Contig5722|CL1Contig5722

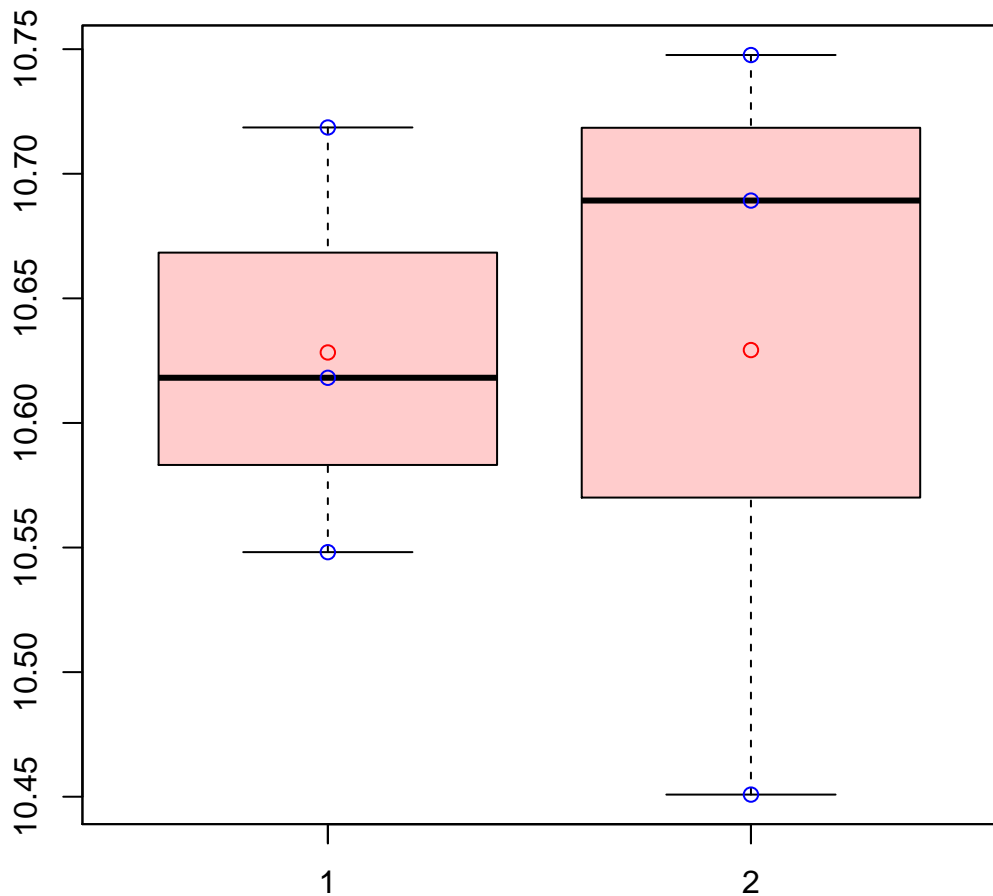

t-Test: p-value = 0.99

# CL1Contig5727|CL1Contig5727

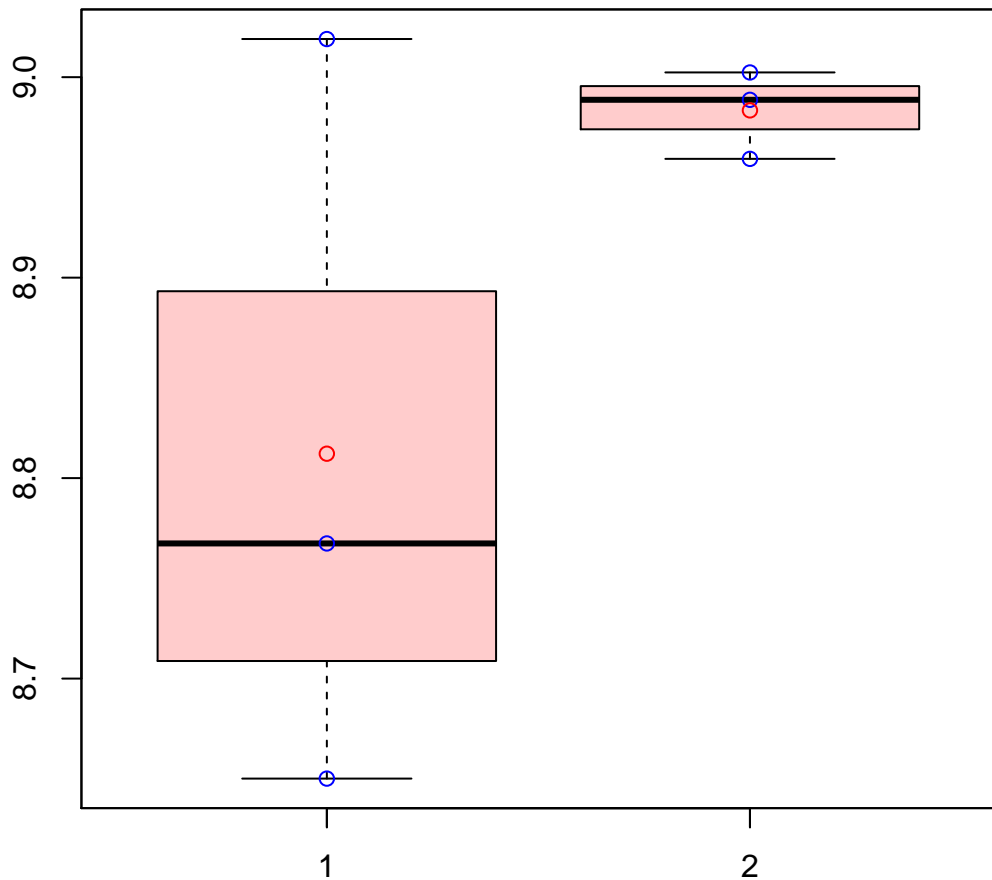

t-Test: p-value = 0.26



# CL1Contig5735|CL1Contig5735

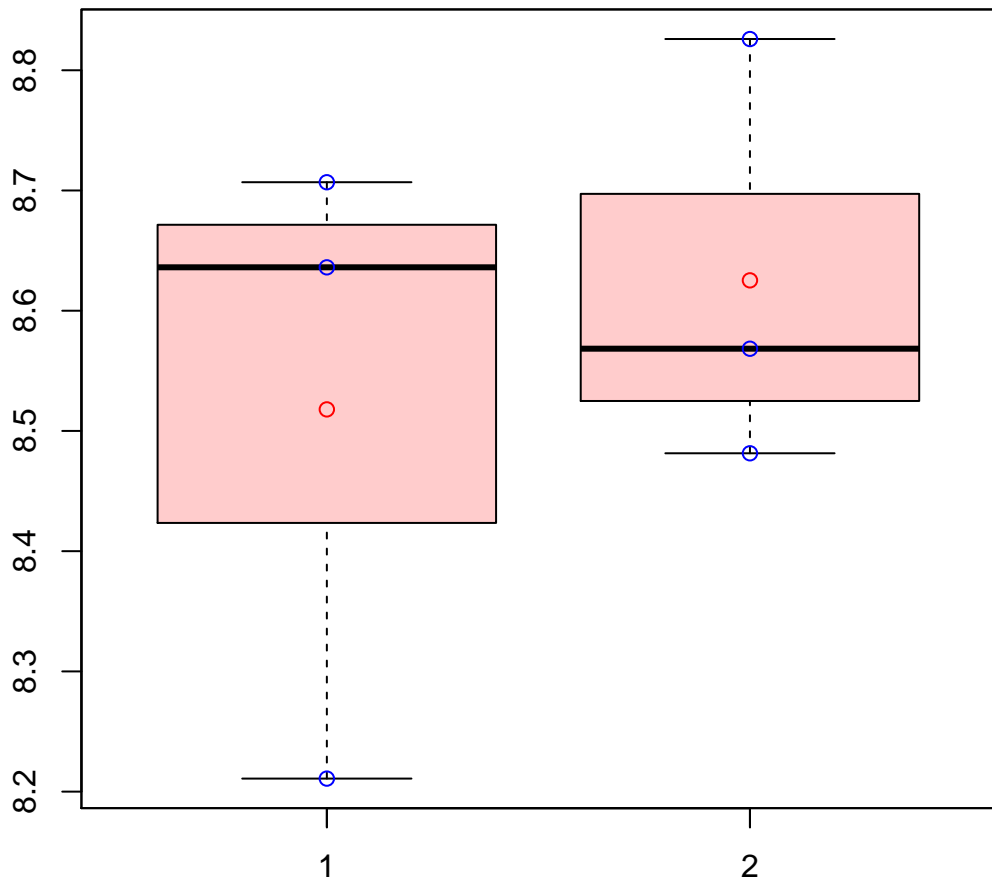

t-Test: p-value = 0.6

# CL1Contig5737|CL1Contig5737

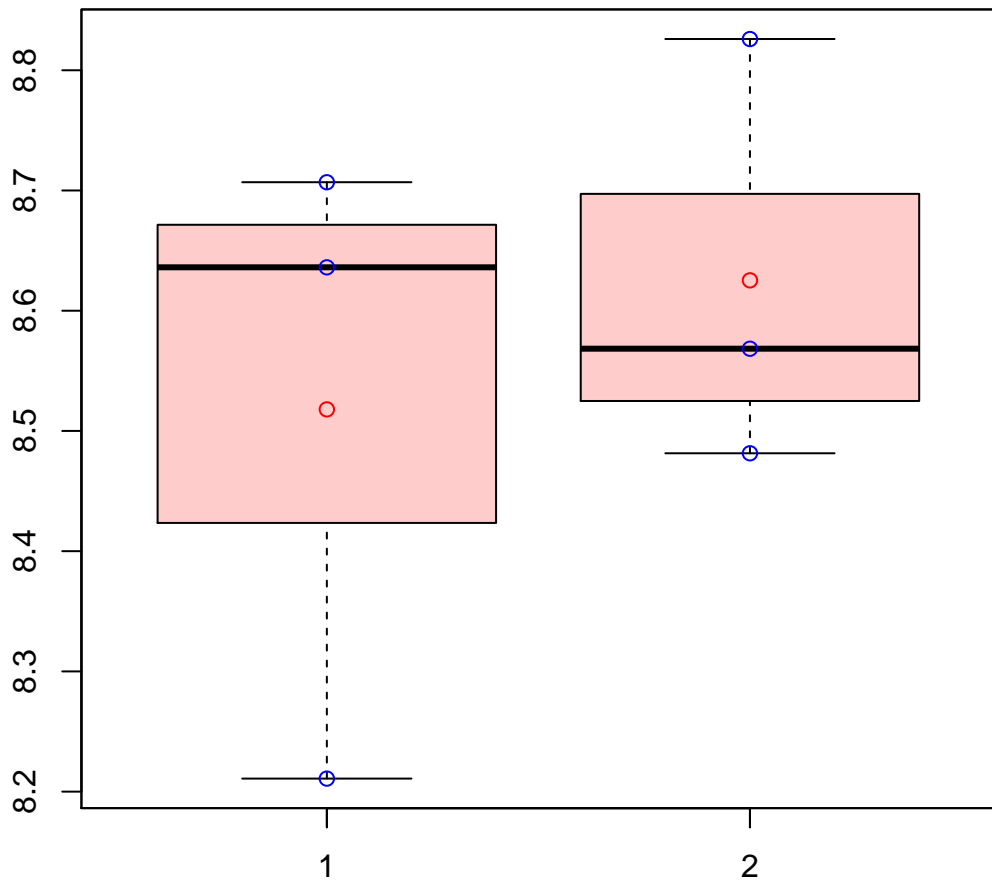

t-Test: p-value = 0.6

# CL1Contig5742|CL1Contig5742

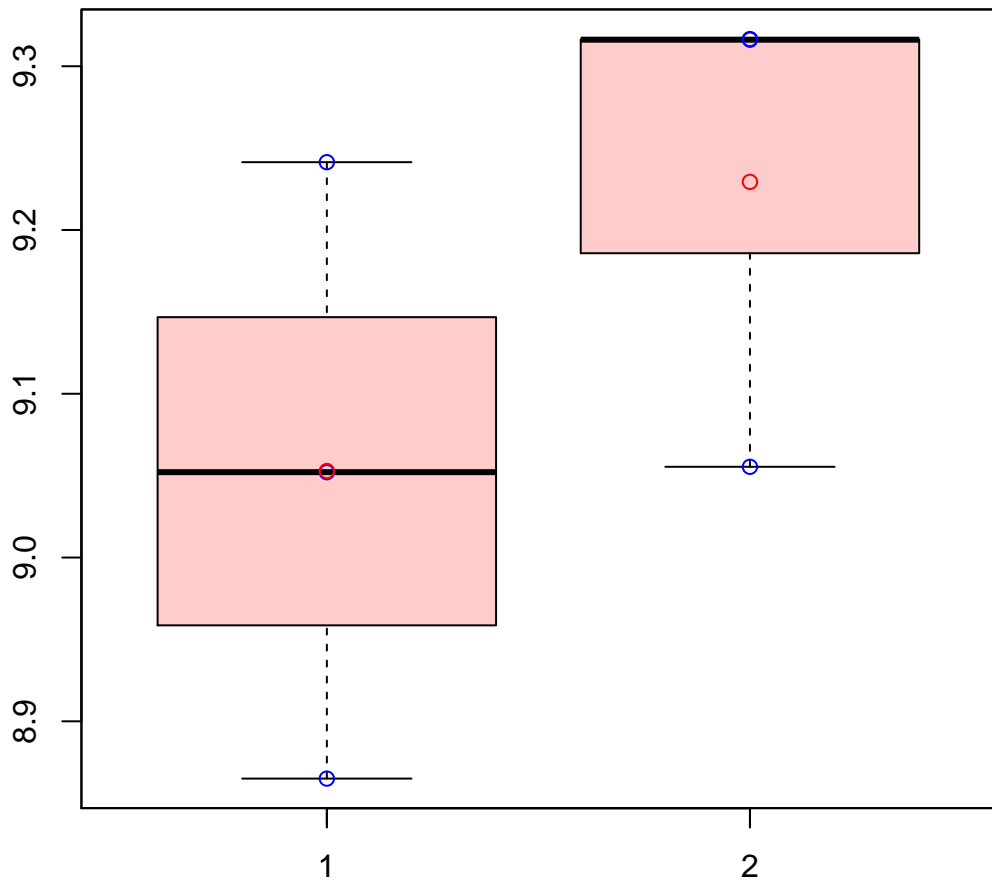

t-Test: p-value = 0.28

# CL1Contig5760|CL1Contig5760



t-Test: p-value = 0.61

# CL1Contig5775|CL1Contig5775

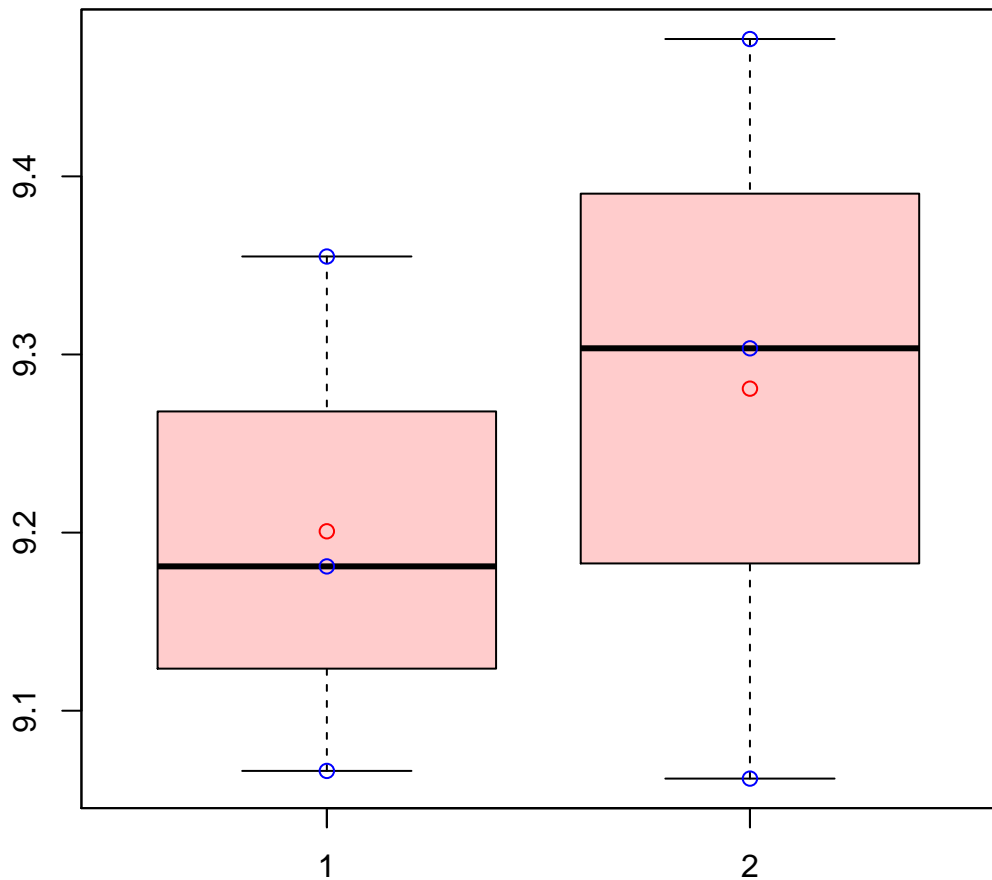

t-Test: p-value = 0.62

# CL1Contig5779|CL1Contig5779



t-Test: p-value = 0.27

# CL1Contig5786|CL1Contig5786

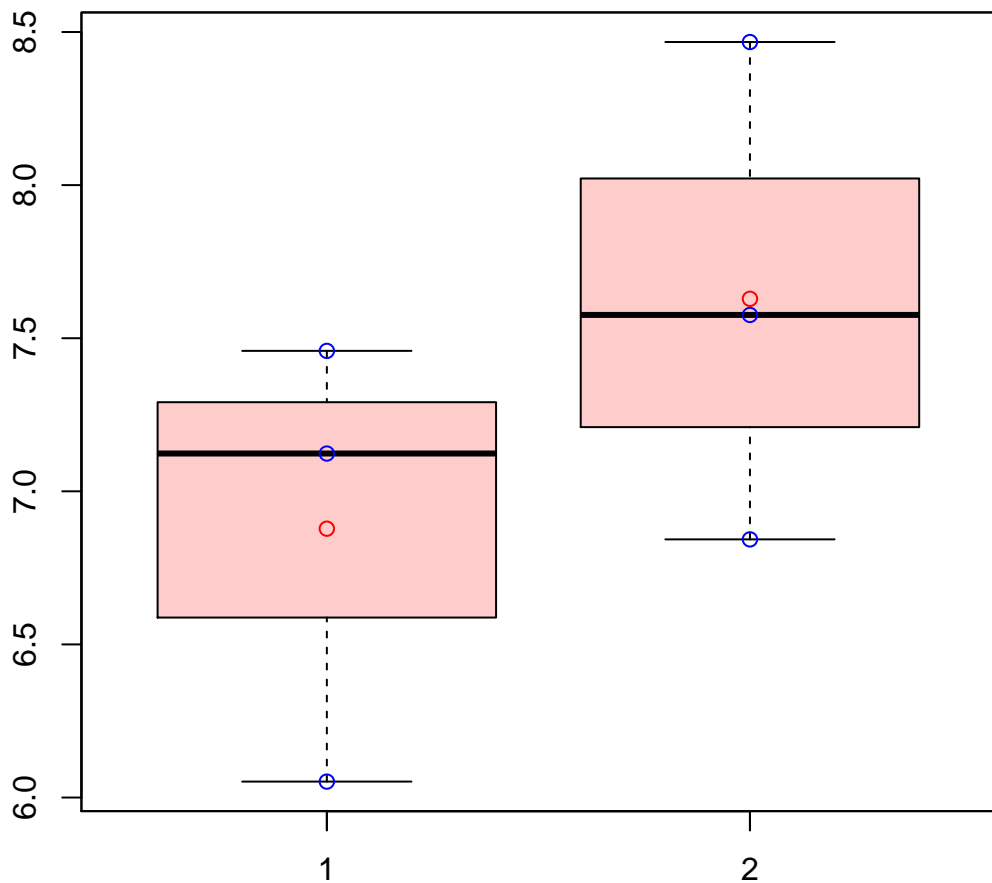

t-Test: p-value = 0.3

# CL1Contig5791|CL1Contig5791

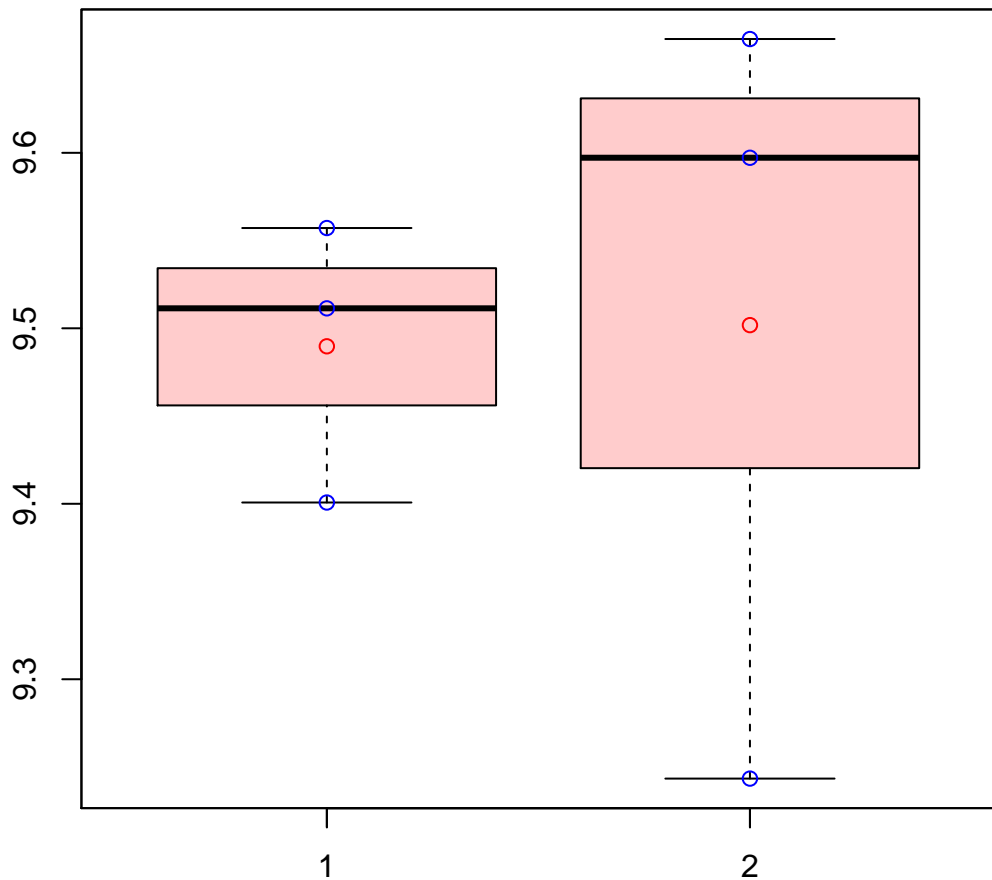

t-Test: p-value = 0.94



# CL1Contig5803|CL1Contig5803

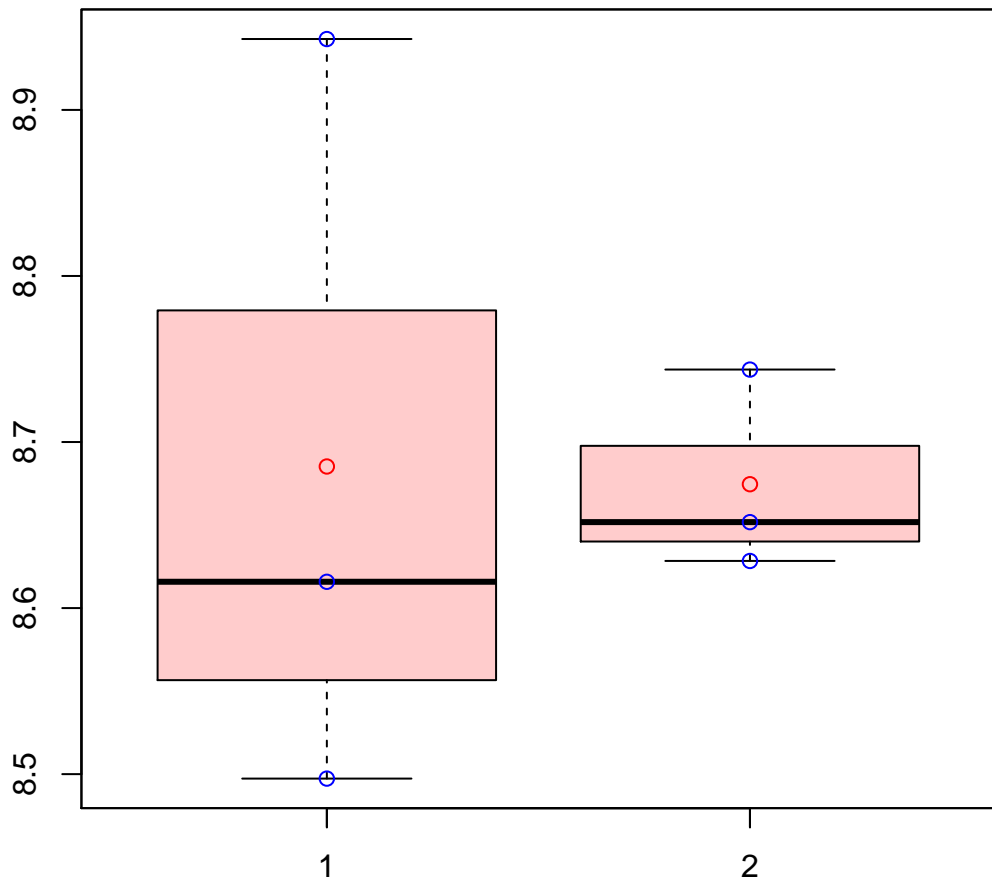

t-Test: p-value = 0.94

# CL1Contig5804|CL1Contig5804

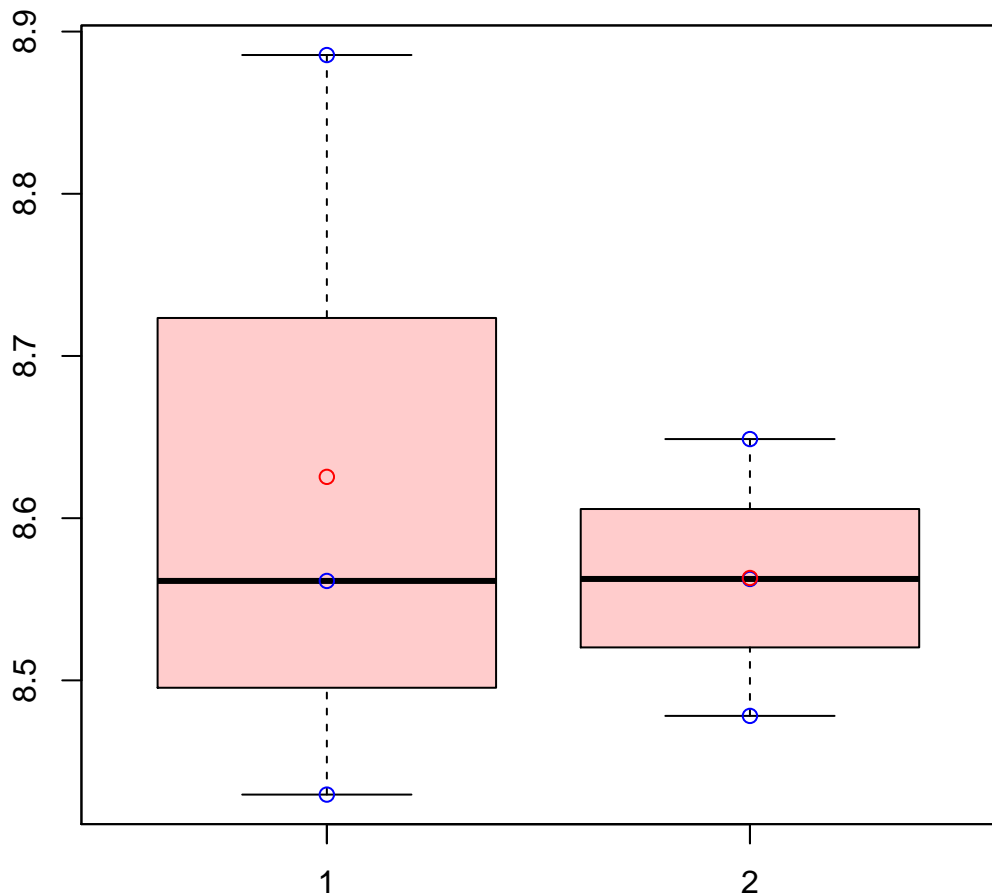

t-Test: p-value = 0.7

# CL1Contig5815|CL1Contig5815

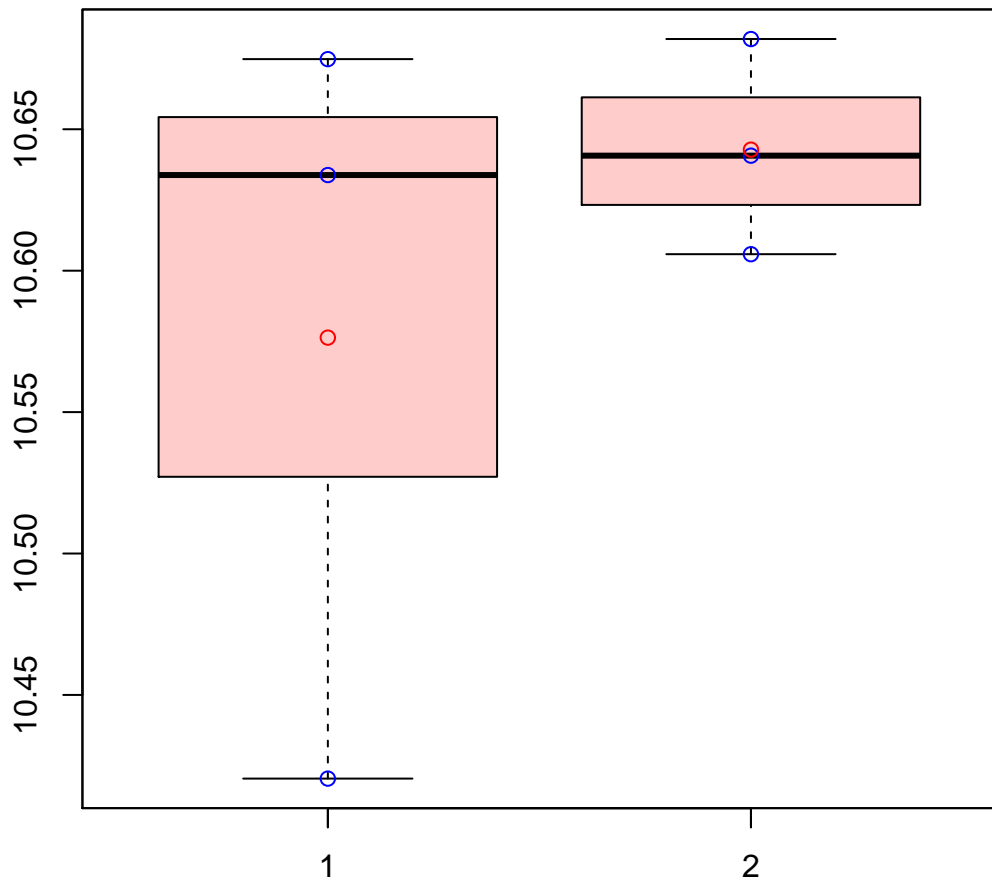

t-Test: p-value = 0.49

# CL1Contig5847|CL1Contig5847



t-Test: p-value = 0.85

# CL1Contig5860|CL1Contig5860

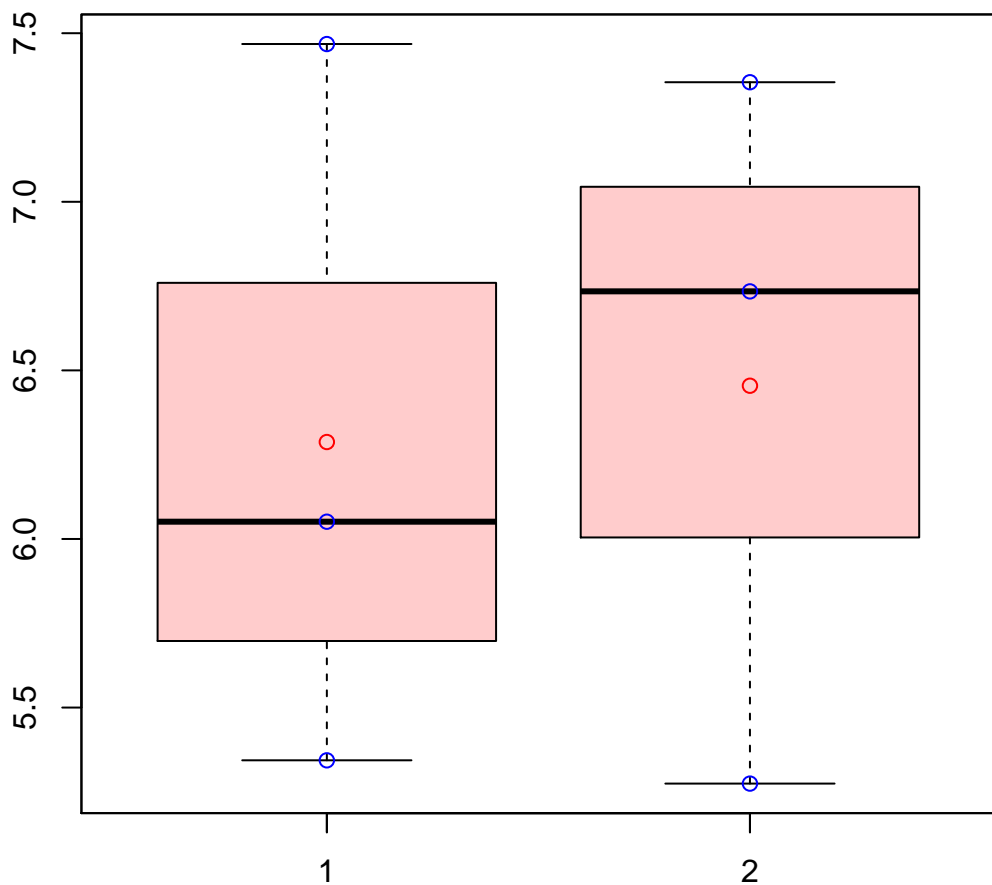

t-Test: p-value = 0.86

# CL1Contig5876|CL1Contig5876

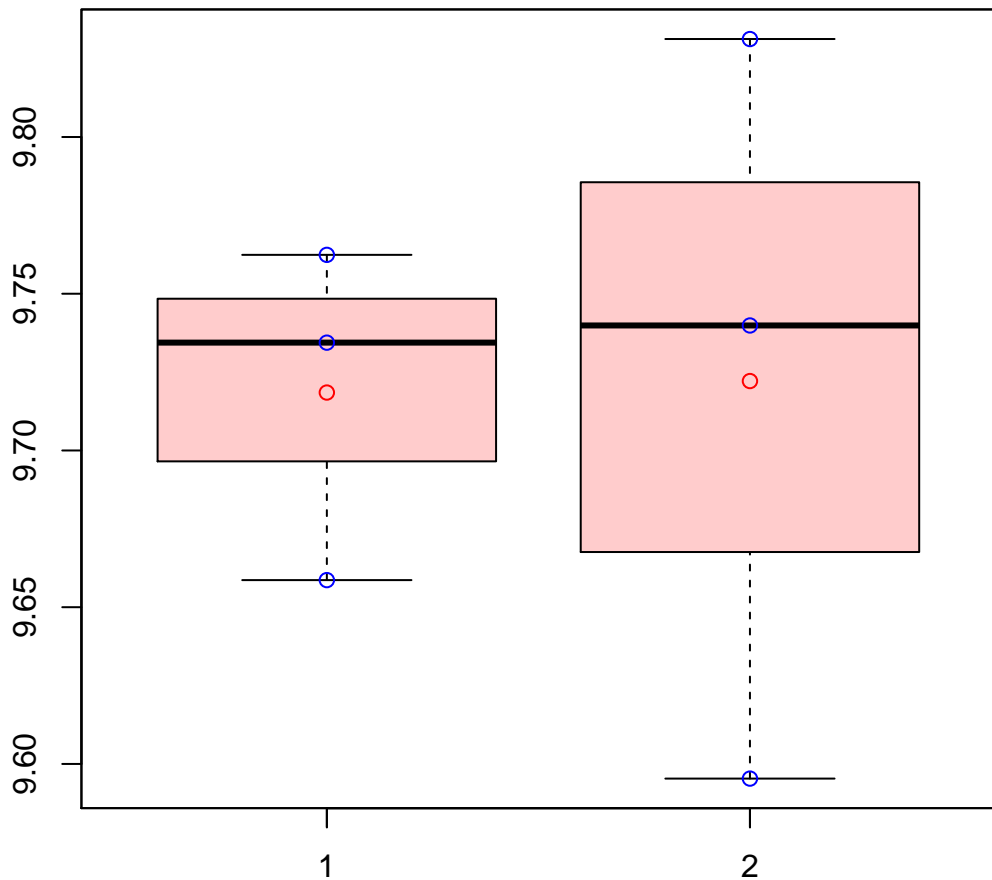

t-Test: p-value = 0.96

# CL1Contig590|CL1Contig590

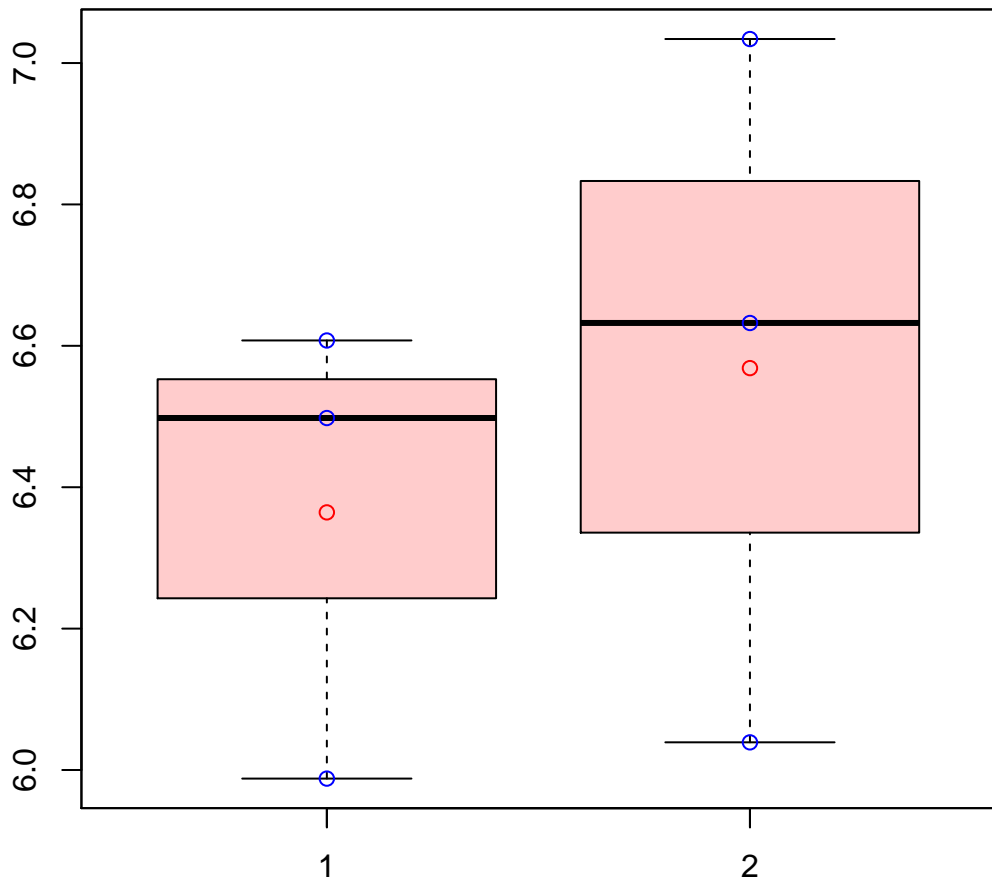

t-Test: p-value = 0.59

# CL1Contig5923|CL1Contig5923

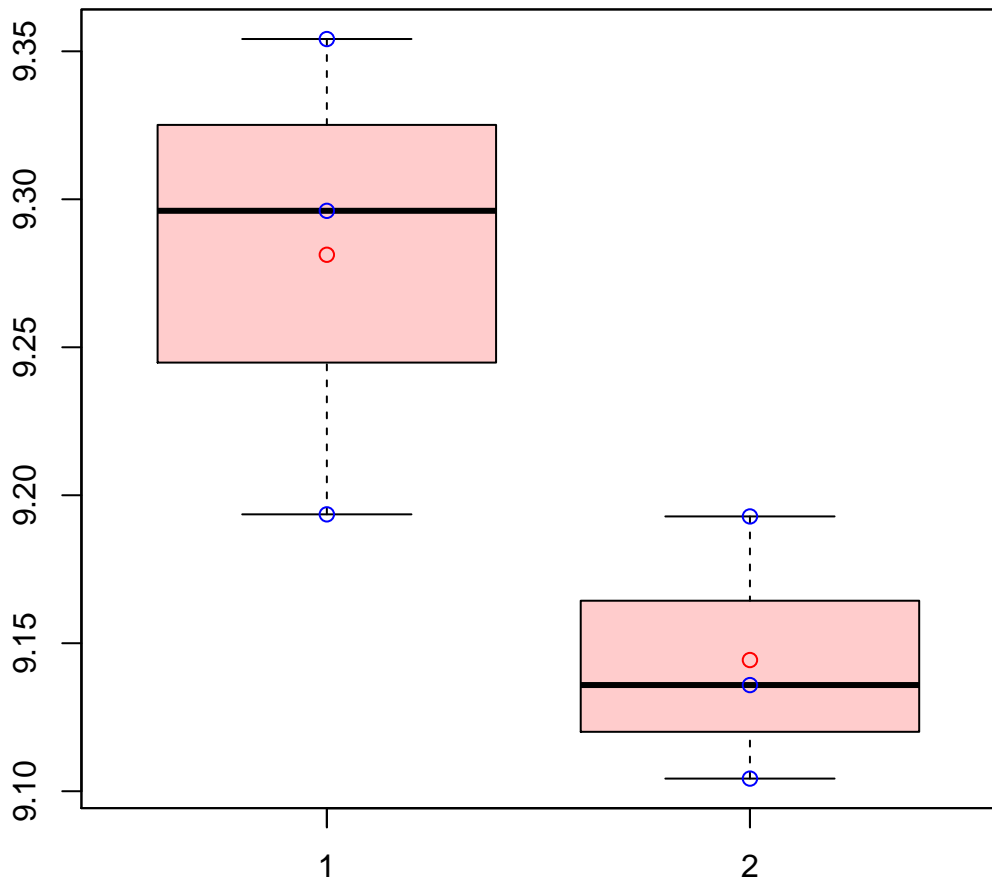

t-Test: p-value = 0.08



# CL1Contig5950|CL1Contig5950

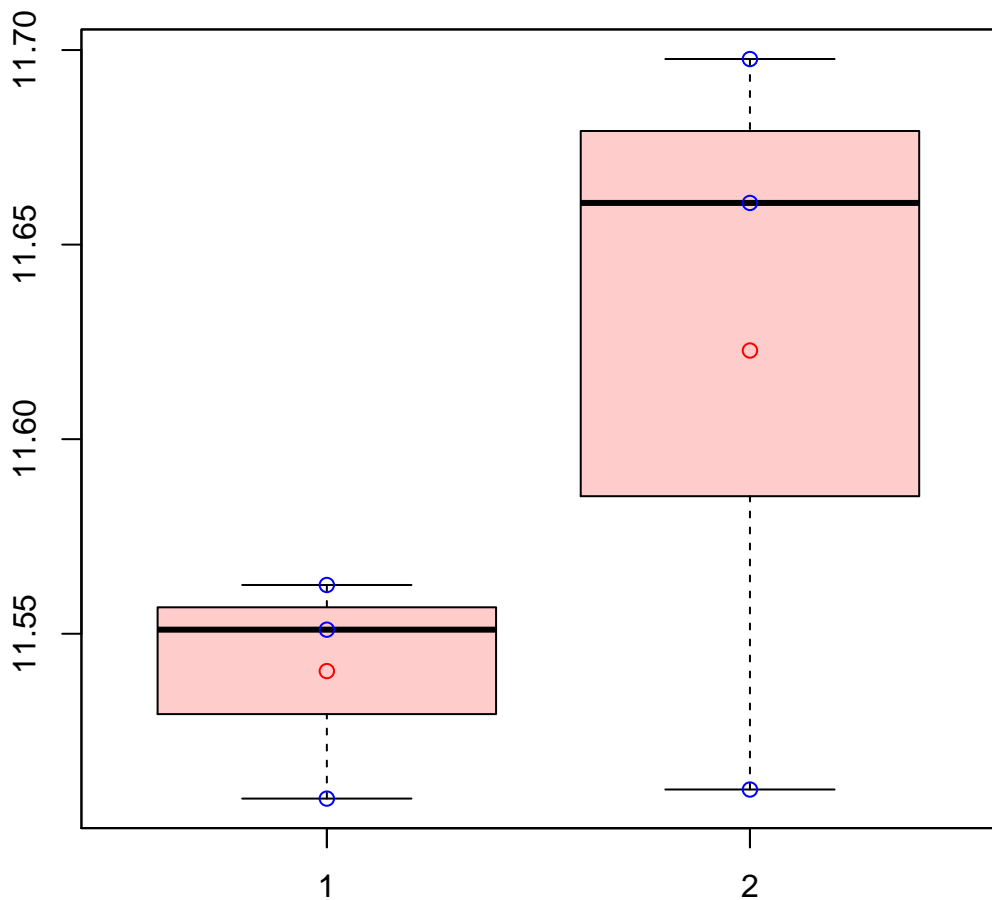

t-Test: p-value = 0.29

# CL1Contig5964|CL1Contig5964

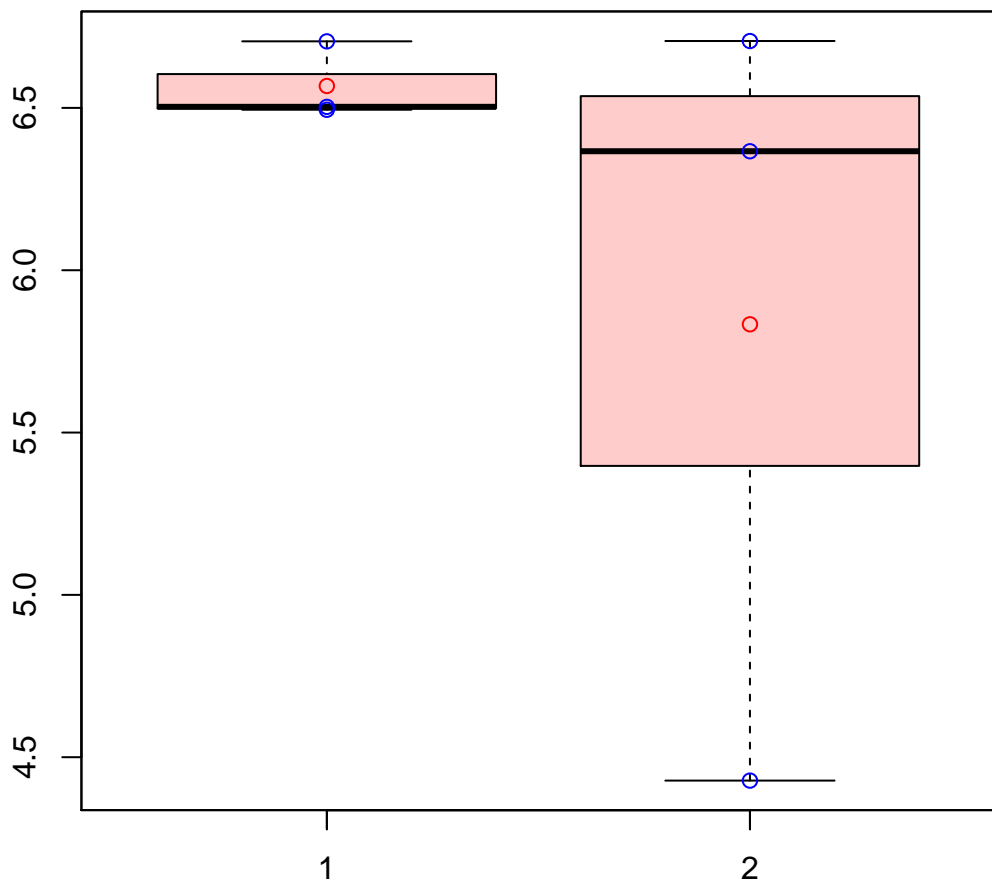

t-Test: p-value = 0.41

# CL1Contig5972|CL1Contig5972

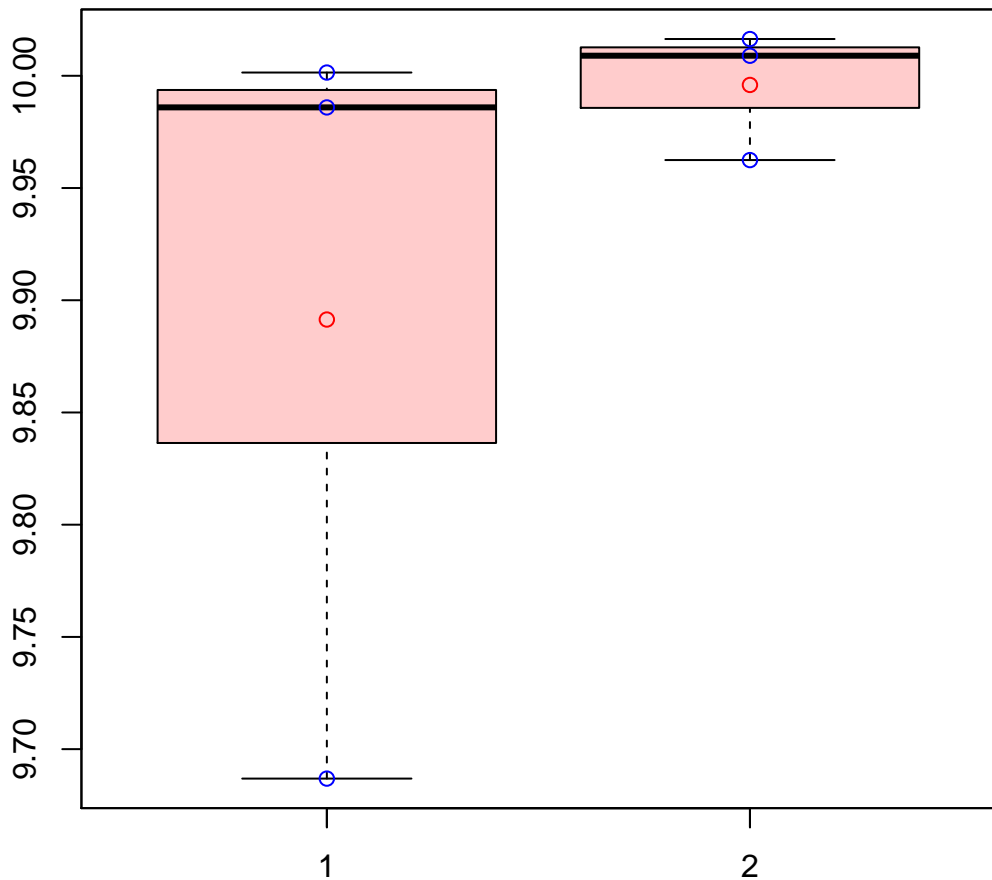

t-Test: p-value = 0.42

# CL1Contig5998|CL1Contig5998

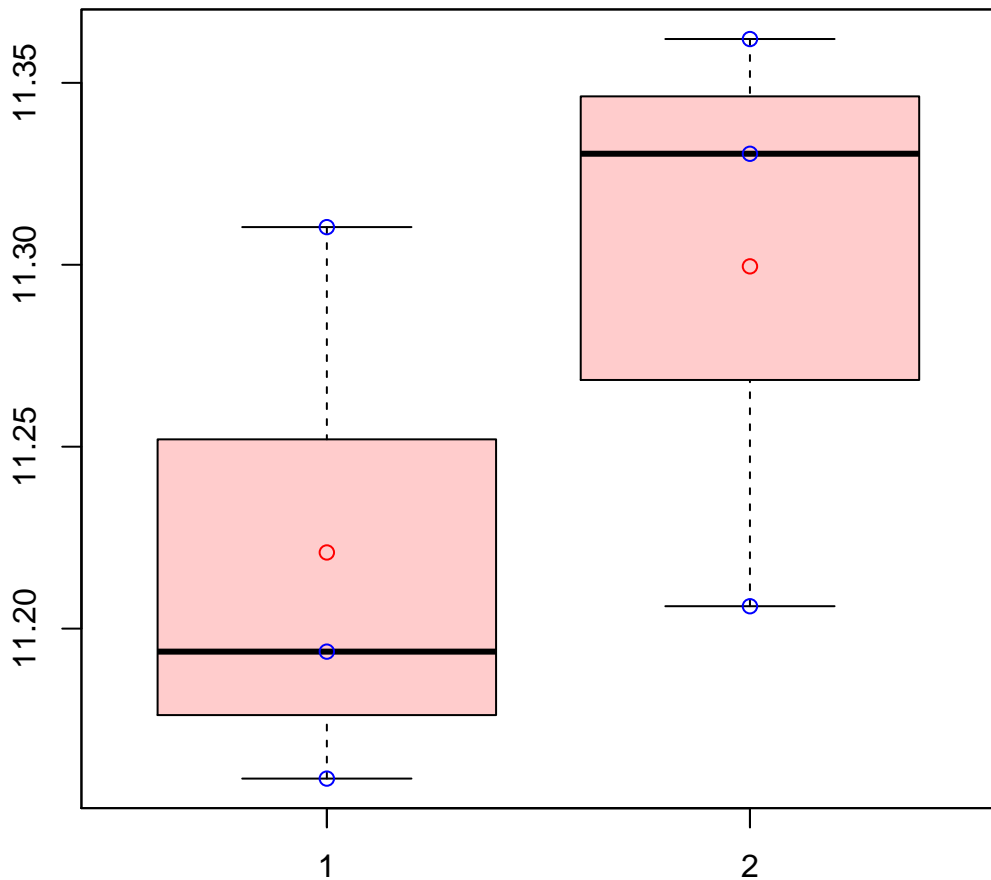

t-Test: p-value = 0.3

# CL1Contig5999|CL1Contig5999

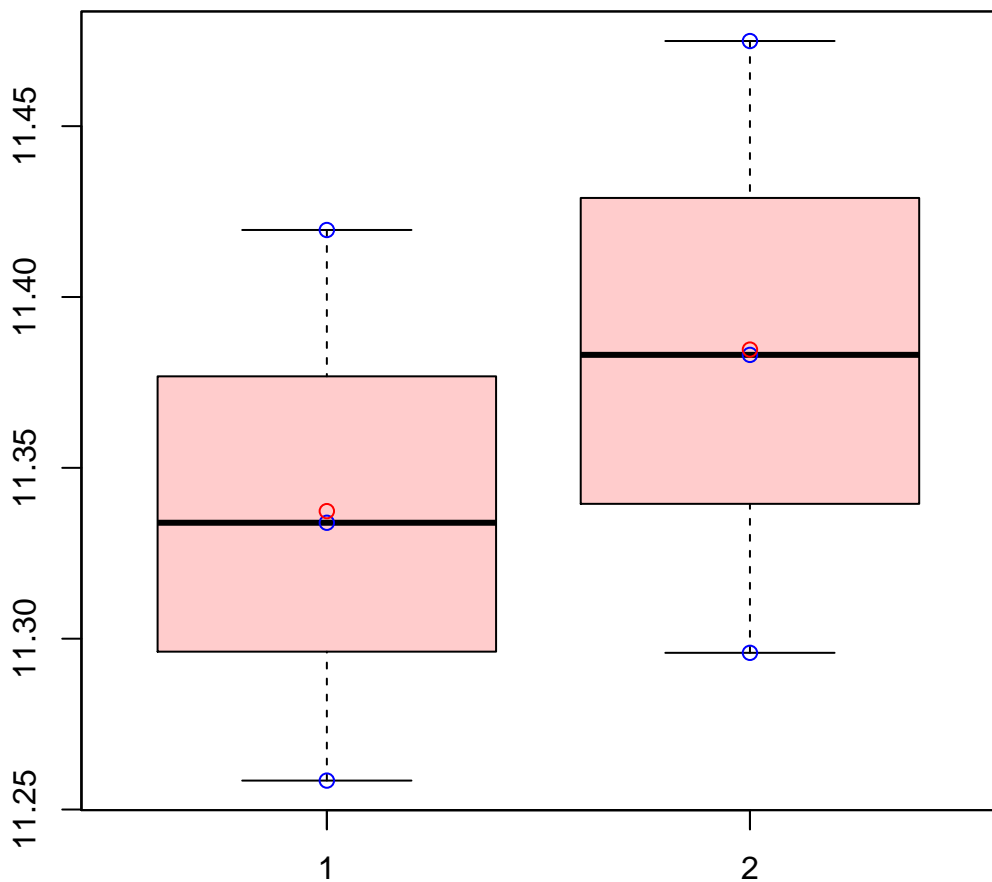

t-Test: p-value = 0.53

# CL1Contig6000|CL1Contig6000

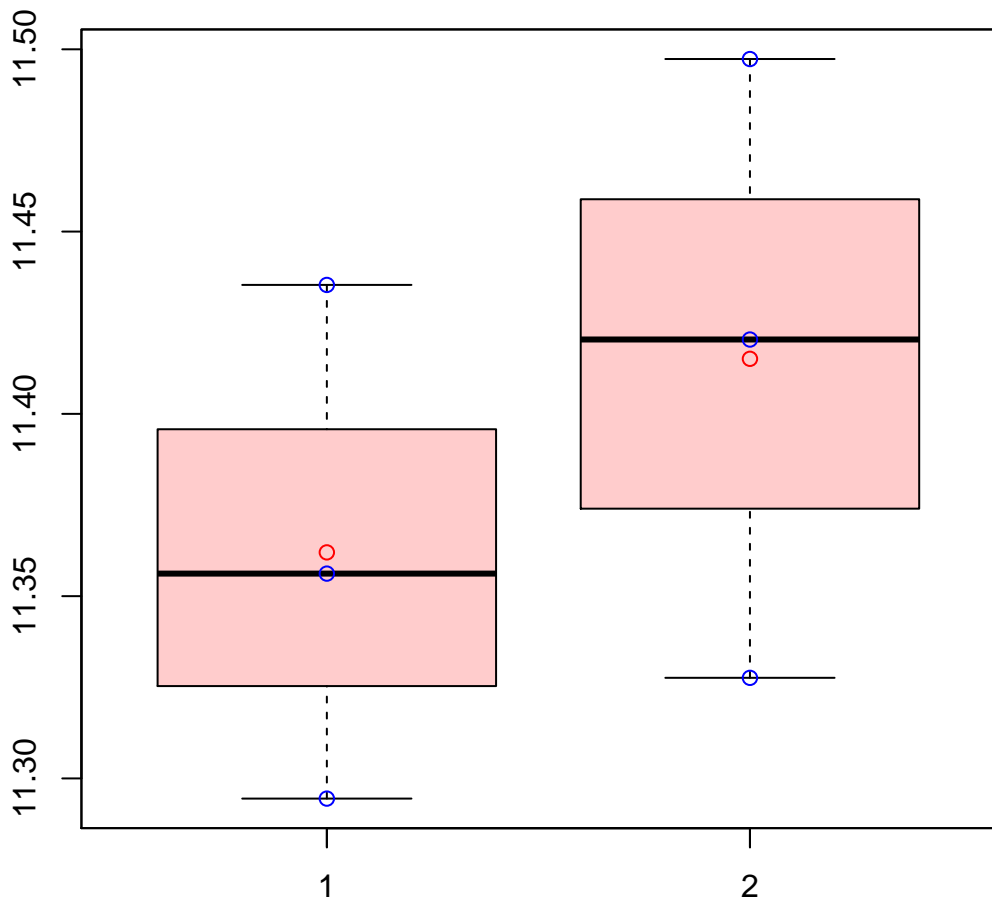

t-Test: p-value = 0.45

# CL1Contig6054|CL1Contig6054

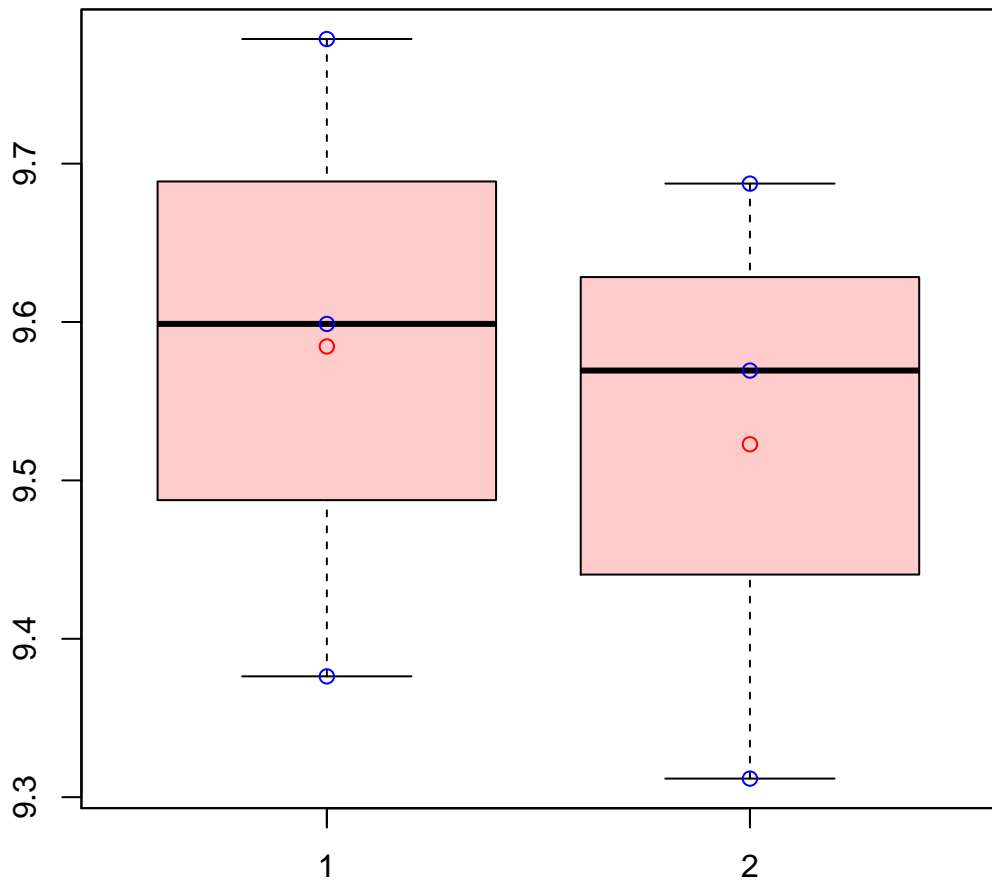

t-Test: p-value = 0.72

# CL1Contig6064|CL1Contig6064

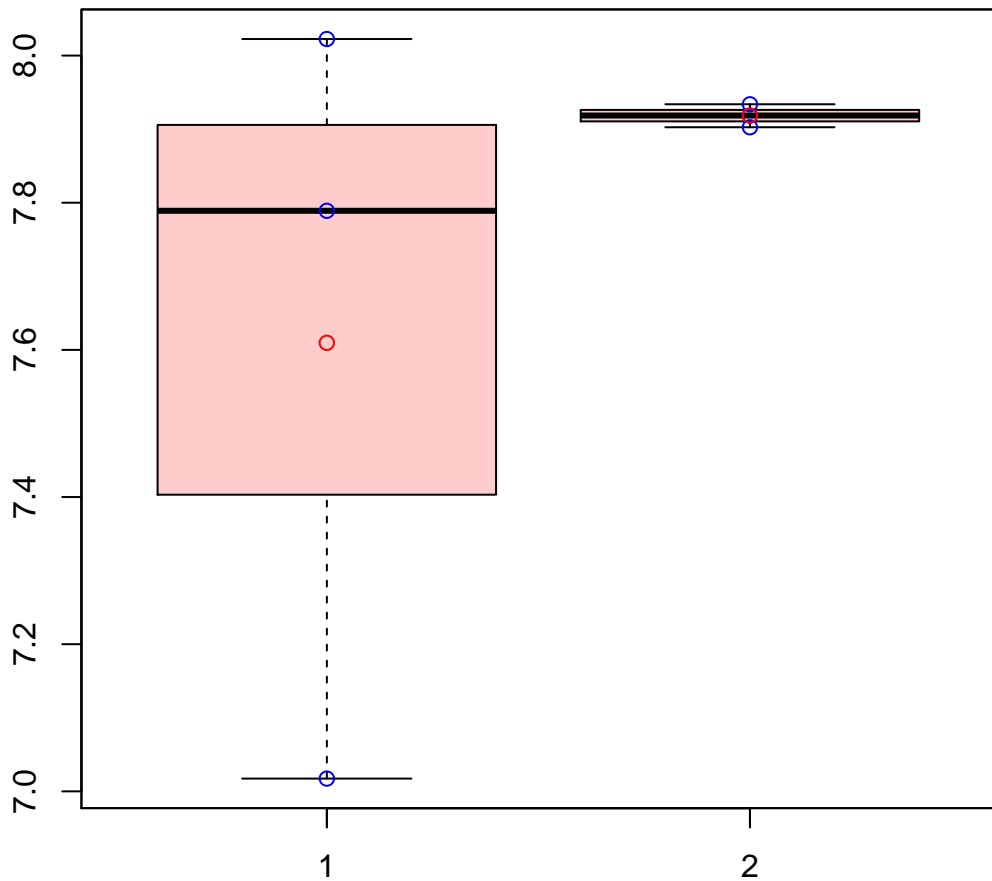

t-Test: p-value = 0.42



# CL1Contig6080|CL1Contig6080

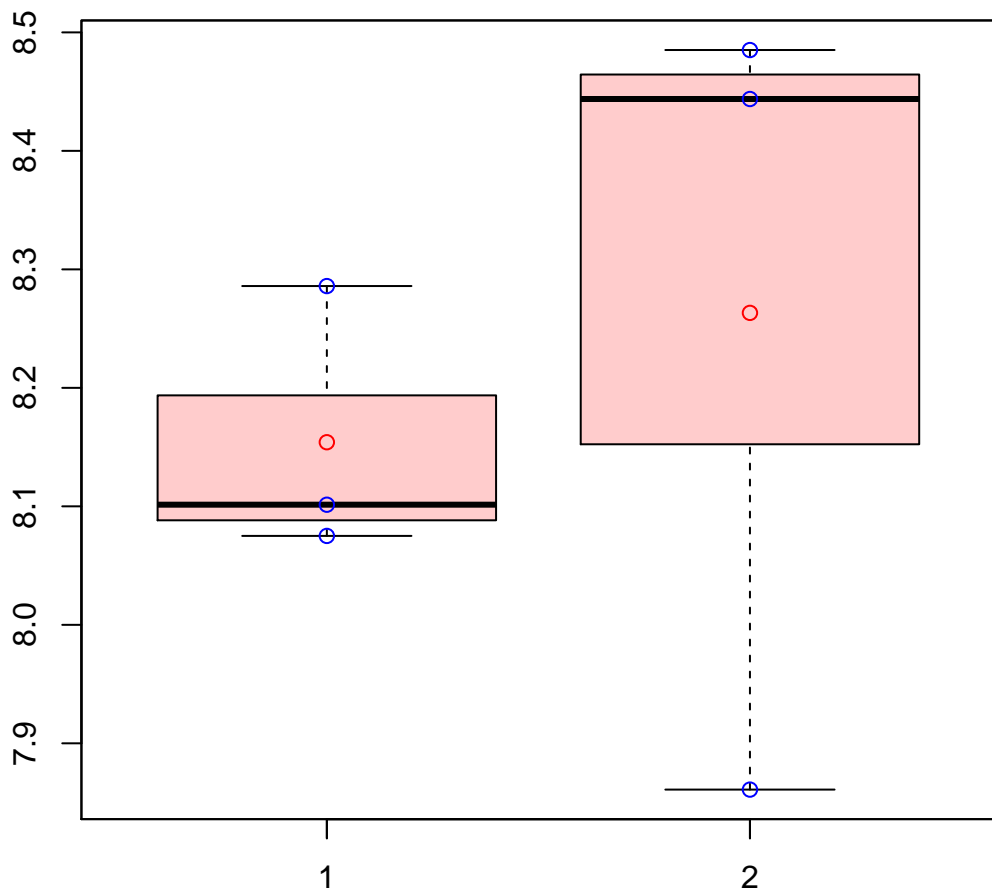

t-Test: p-value = 0.65

# CL1Contig6088|CL1Contig6088

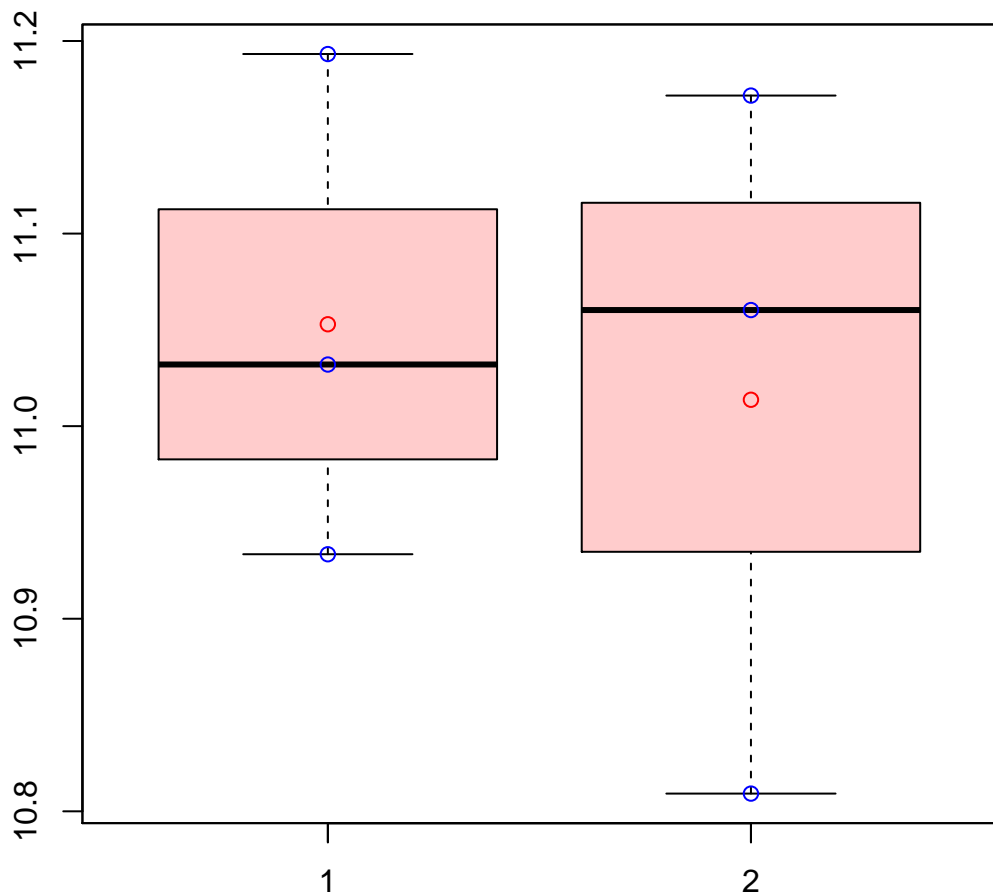

t-Test: p-value = 0.78

# CL1Contig6129|CL1Contig6129

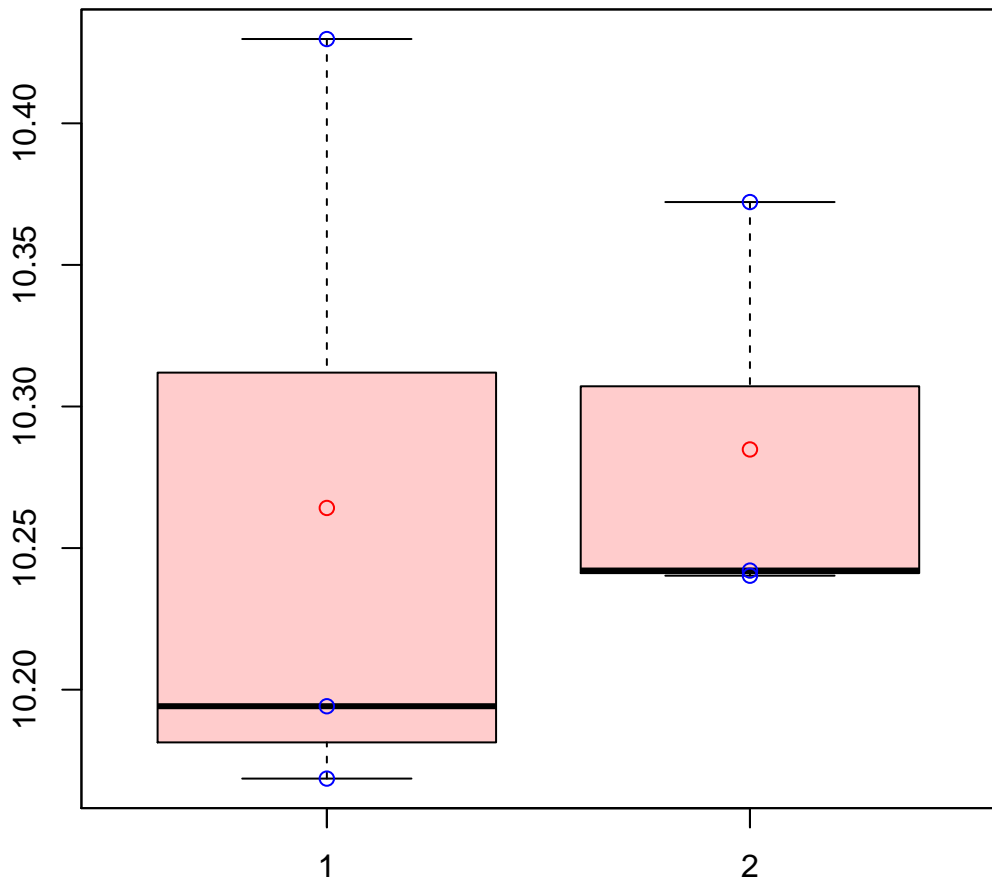

t-Test: p-value = 0.84

# CL1Contig6158|CL1Contig6158

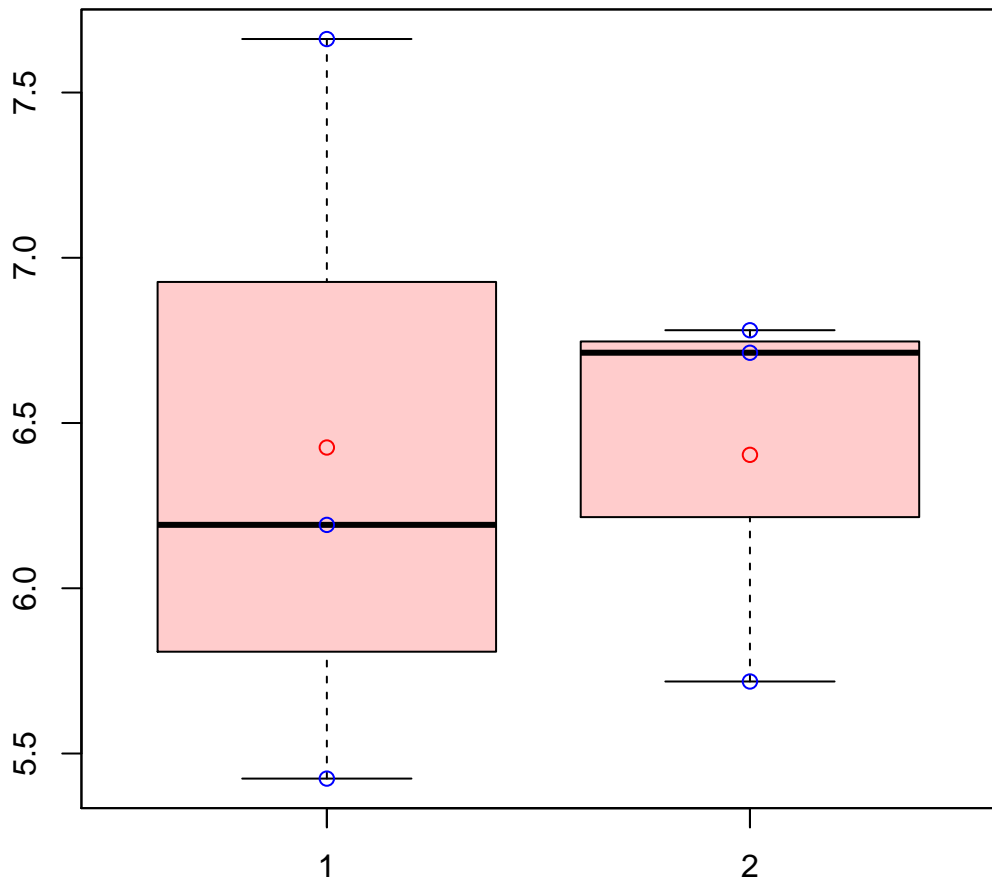

t-Test: p-value = 0.98

# CL1Contig6172|CL1Contig6172

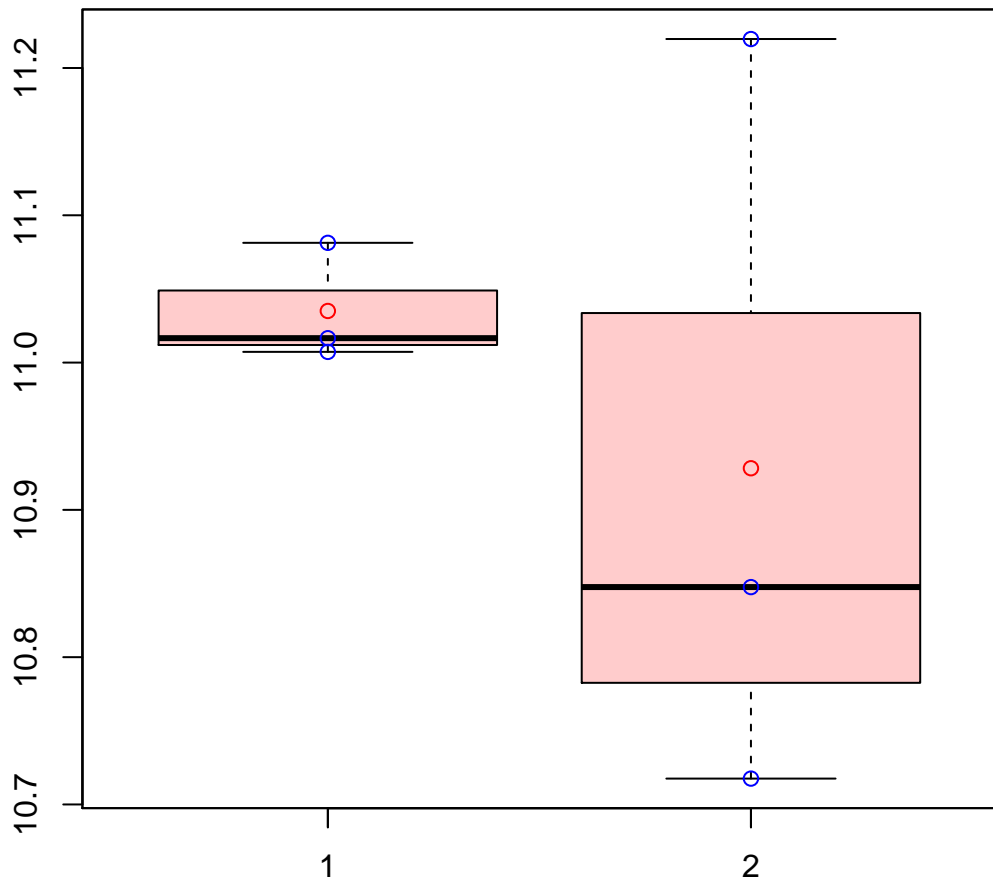

t-Test: p-value = 0.55

# CL1Contig6177|CL1Contig6177

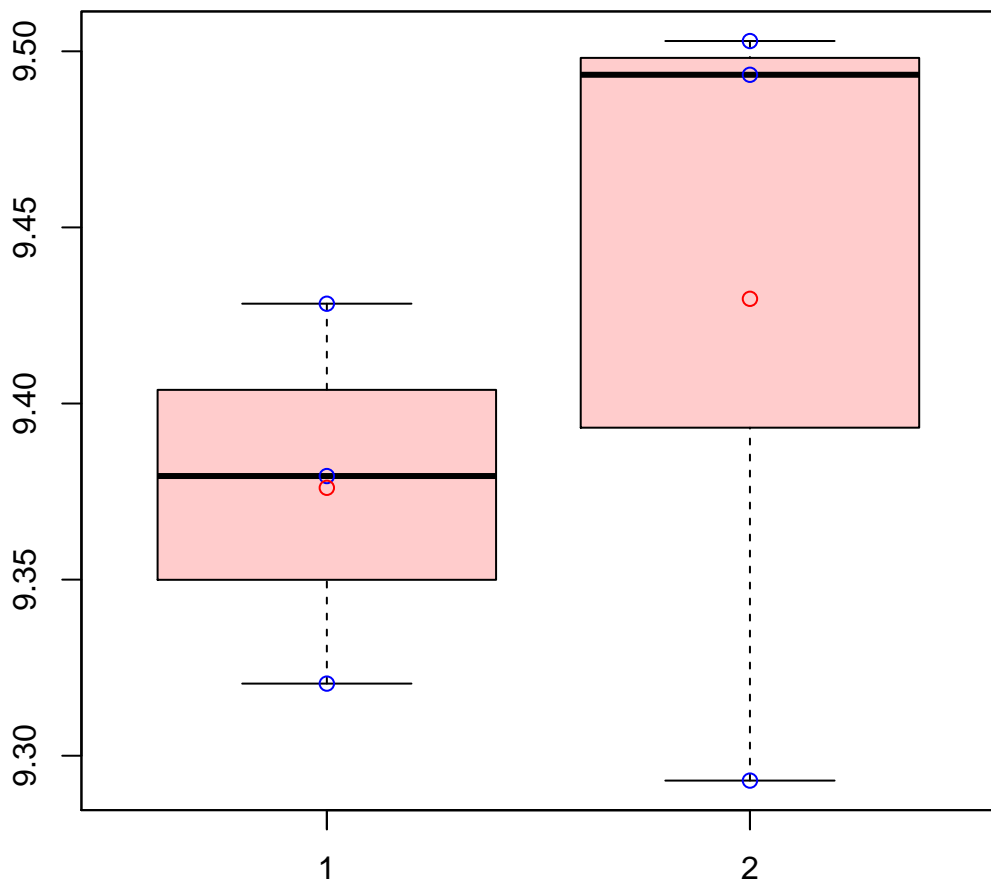

t-Test: p-value = 0.53

# CL1Contig6200|CL1Contig6200

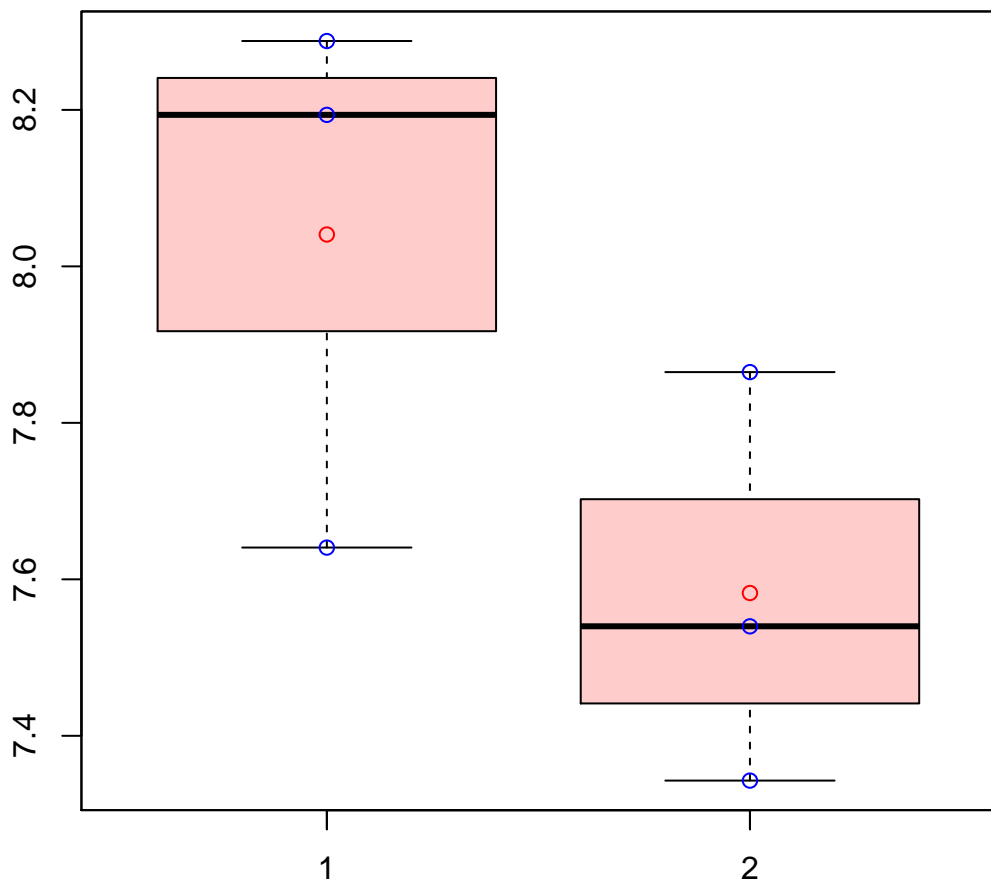

t-Test: p-value = 0.15

# CL1Contig6205|CL1Contig6205

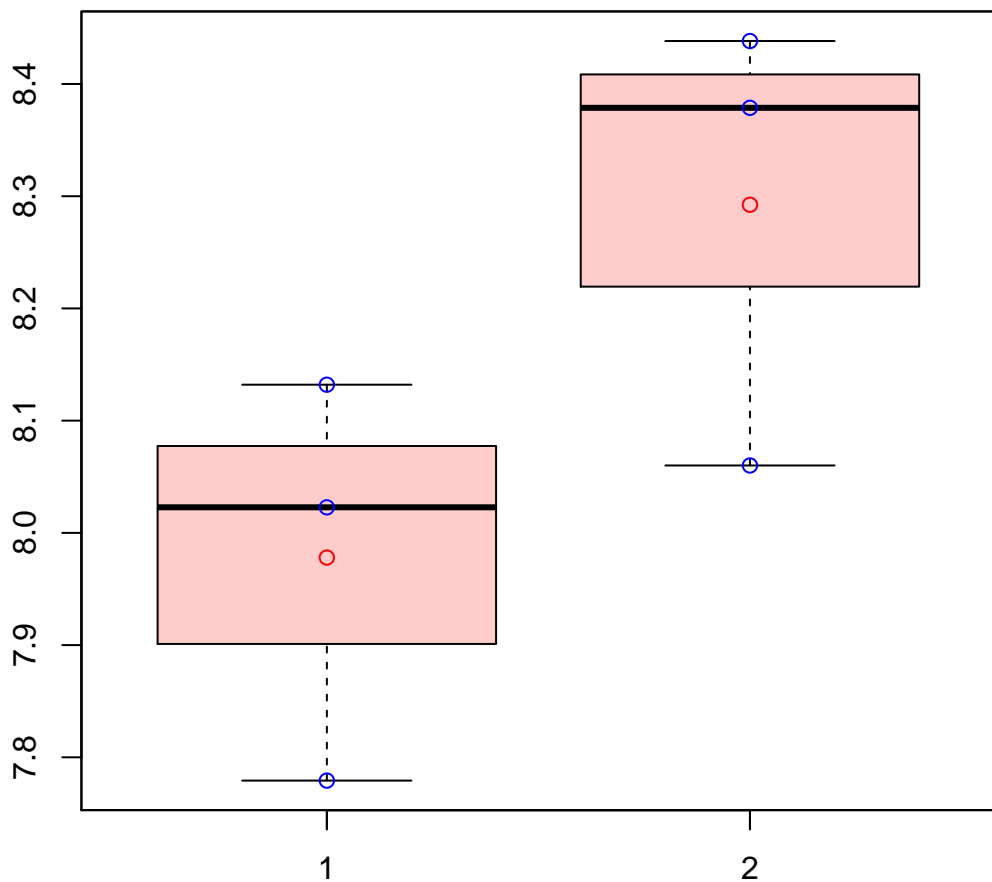

t-Test: p-value = 0.12



# CL1Contig6220|CL1Contig6220

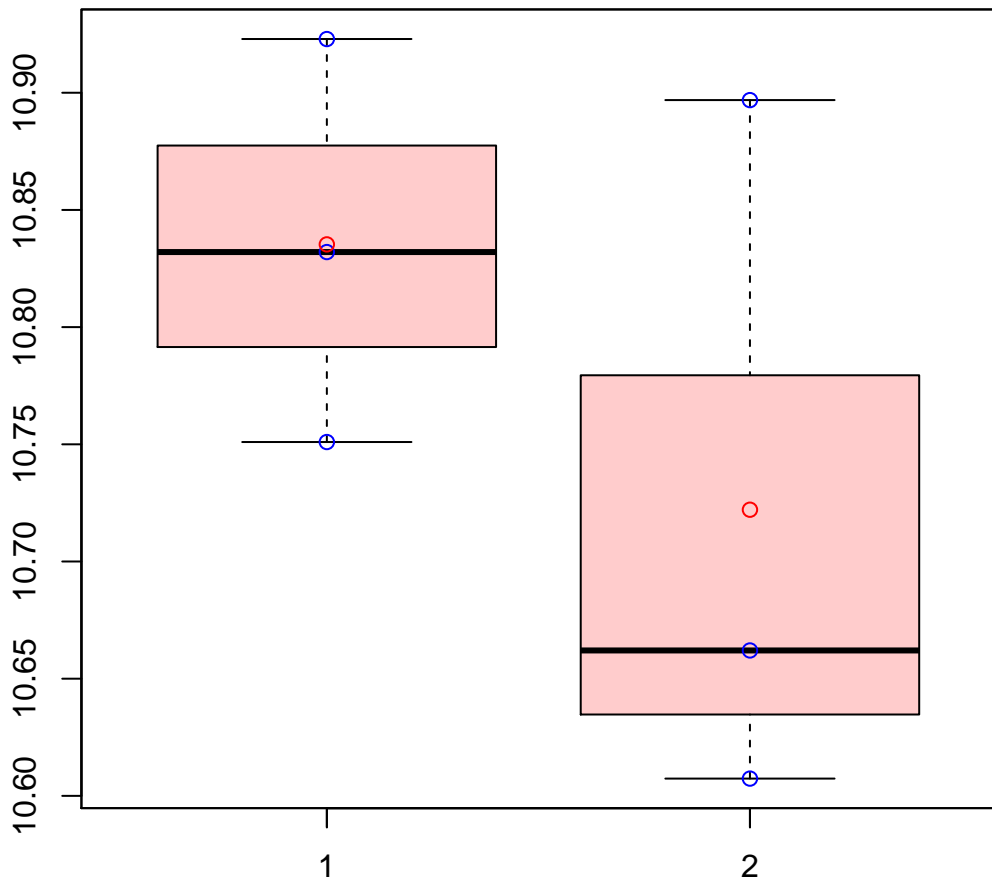

t-Test: p-value = 0.34

# CL1Contig6230|CL1Contig6230

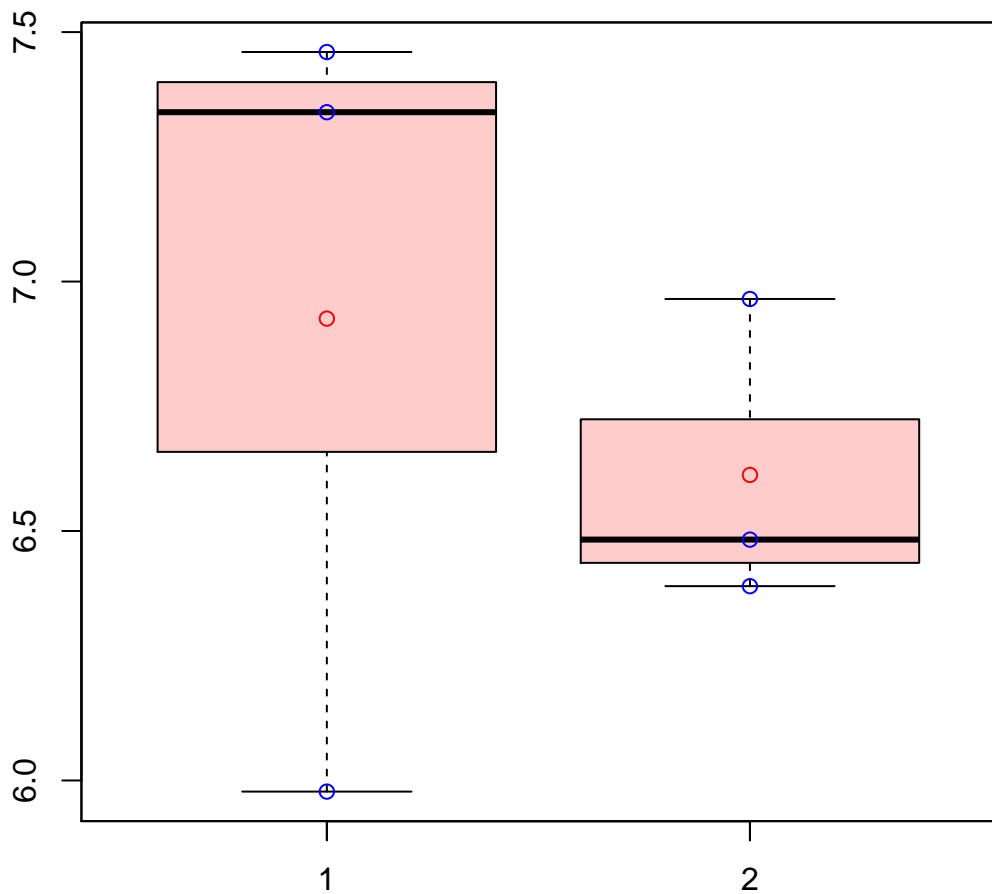

t-Test: p-value = 0.59

# CL1Contig6238|CL1Contig6238

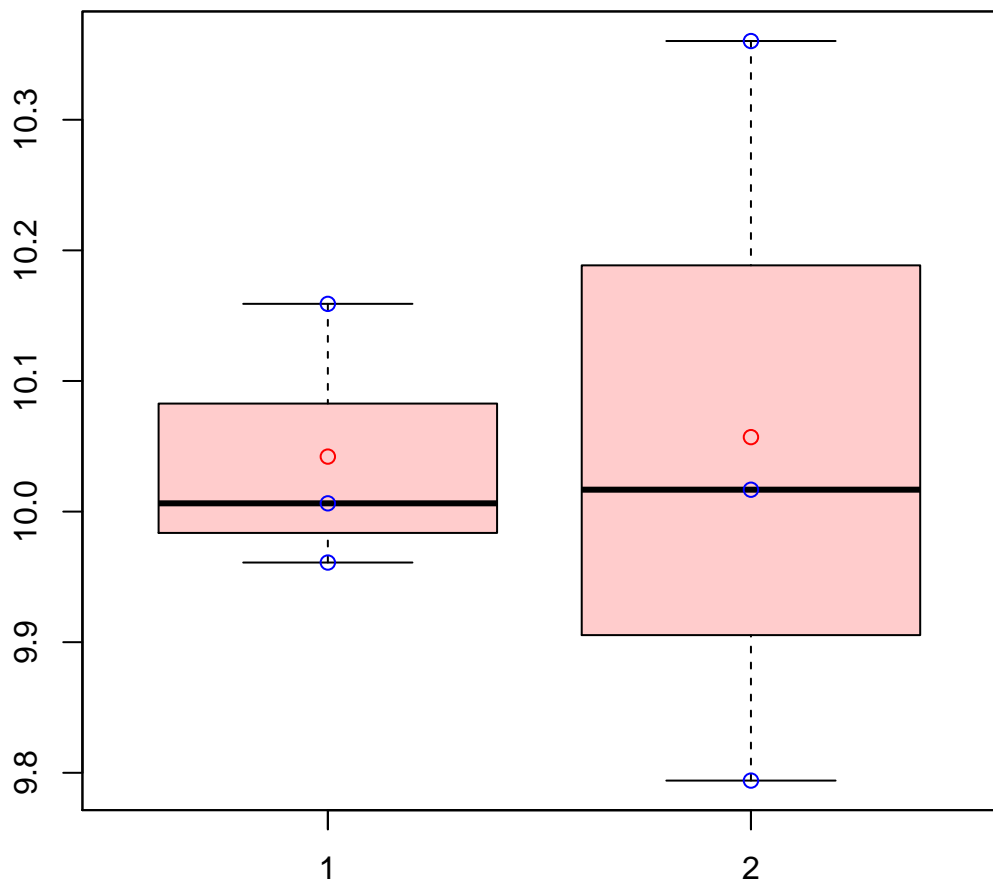

t-Test: p-value = 0.94

# CL1Contig623|CL1Contig623

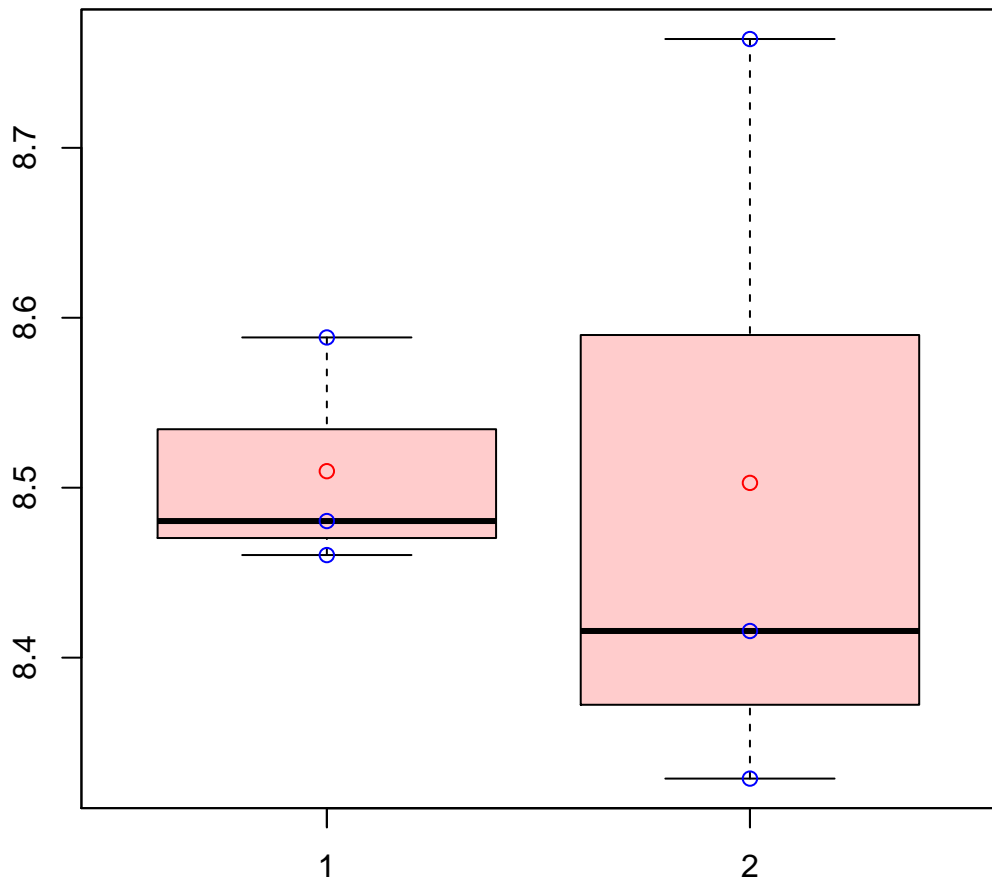

t-Test: p-value = 0.96

# CL1Contig6247|CL1Contig6247

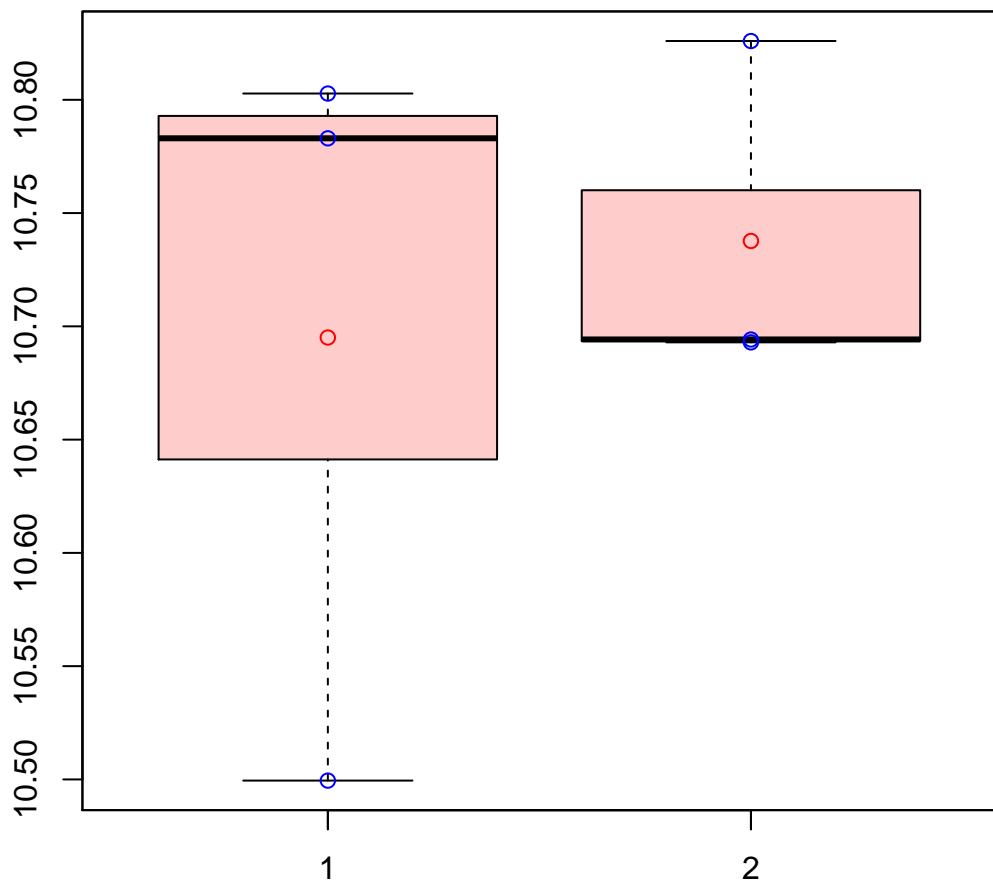

t-Test: p-value = 0.72

# CL1Contig6249|CL1Contig6249

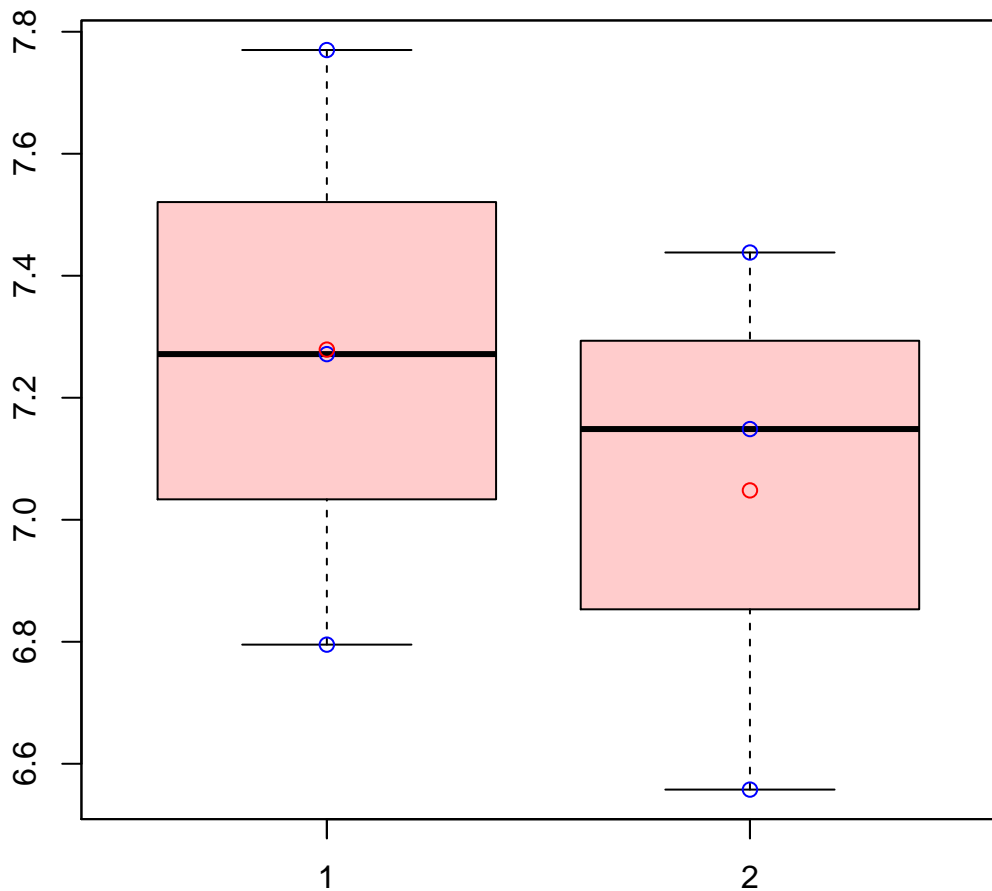

t-Test: p-value = 0.58

# CL1Contig6250|CL1Contig6250



t-Test: p-value = 0.58

# CL1Contig6304|CL1Contig6304

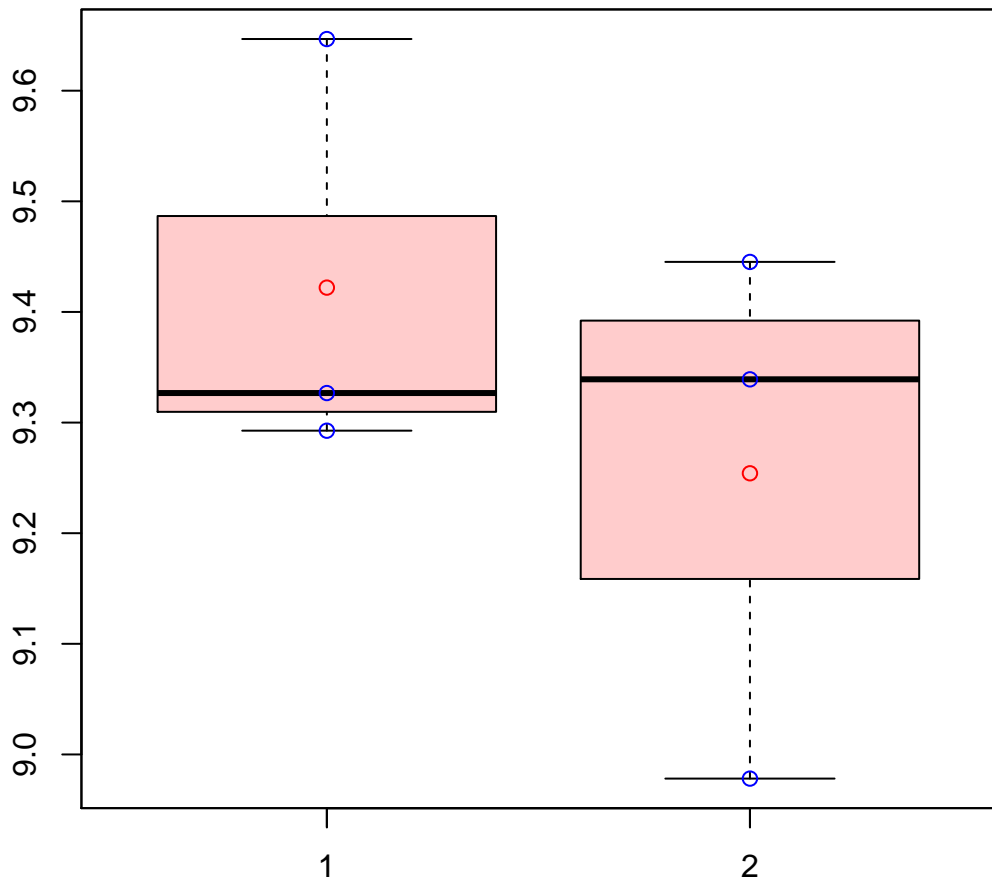

t-Test: p-value = 0.41



# CL1Contig6352|CL1Contig6352

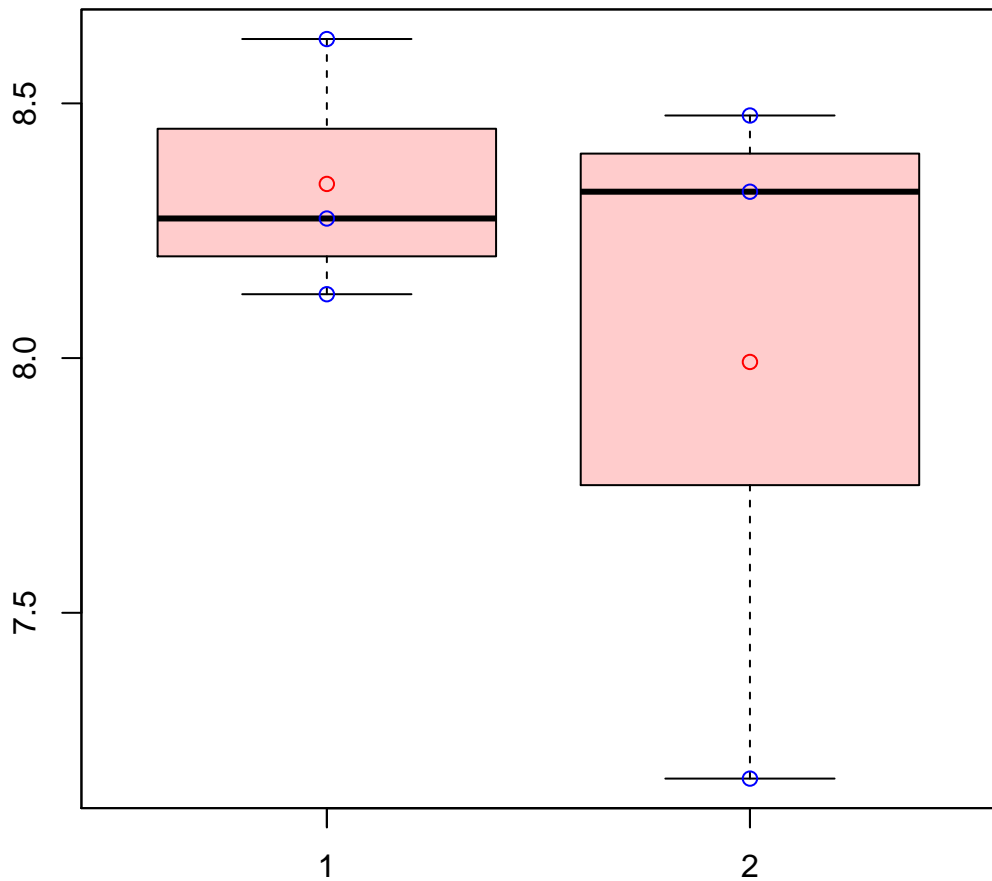

t-Test: p-value = 0.49

# CL1Contig6365|CL1Contig6365

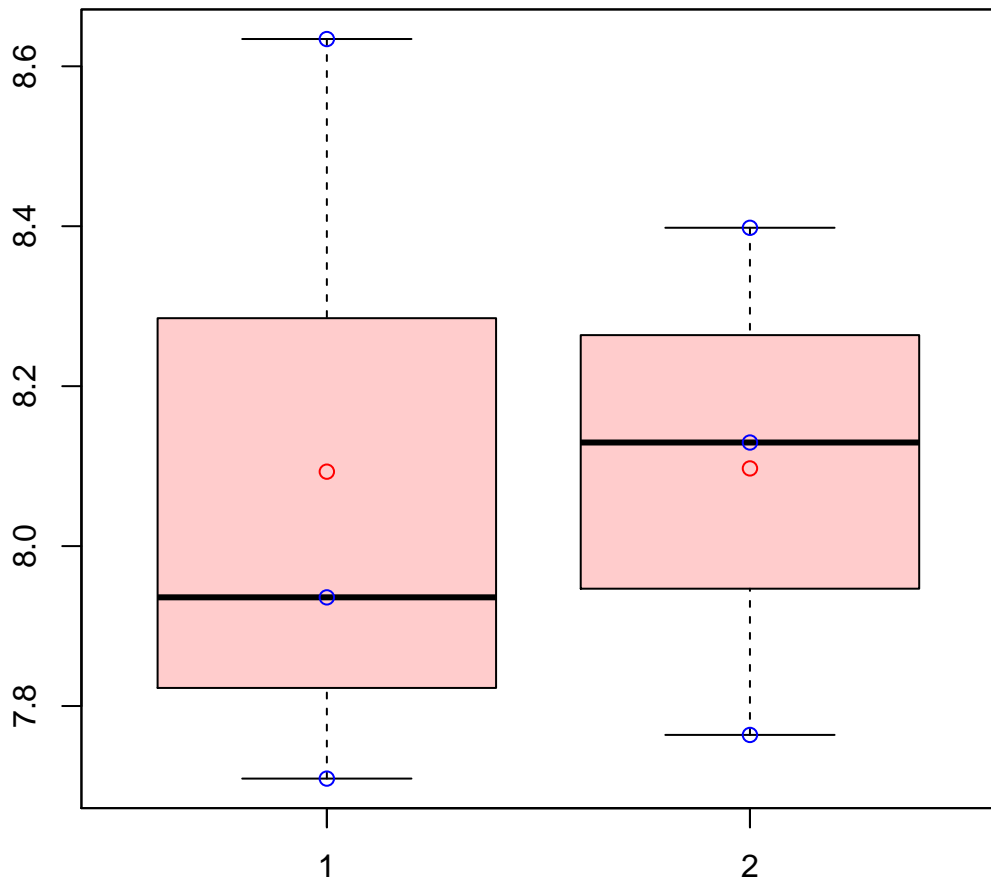

t-Test: p-value = 0.99

# CL1Contig6420|CL1Contig6420

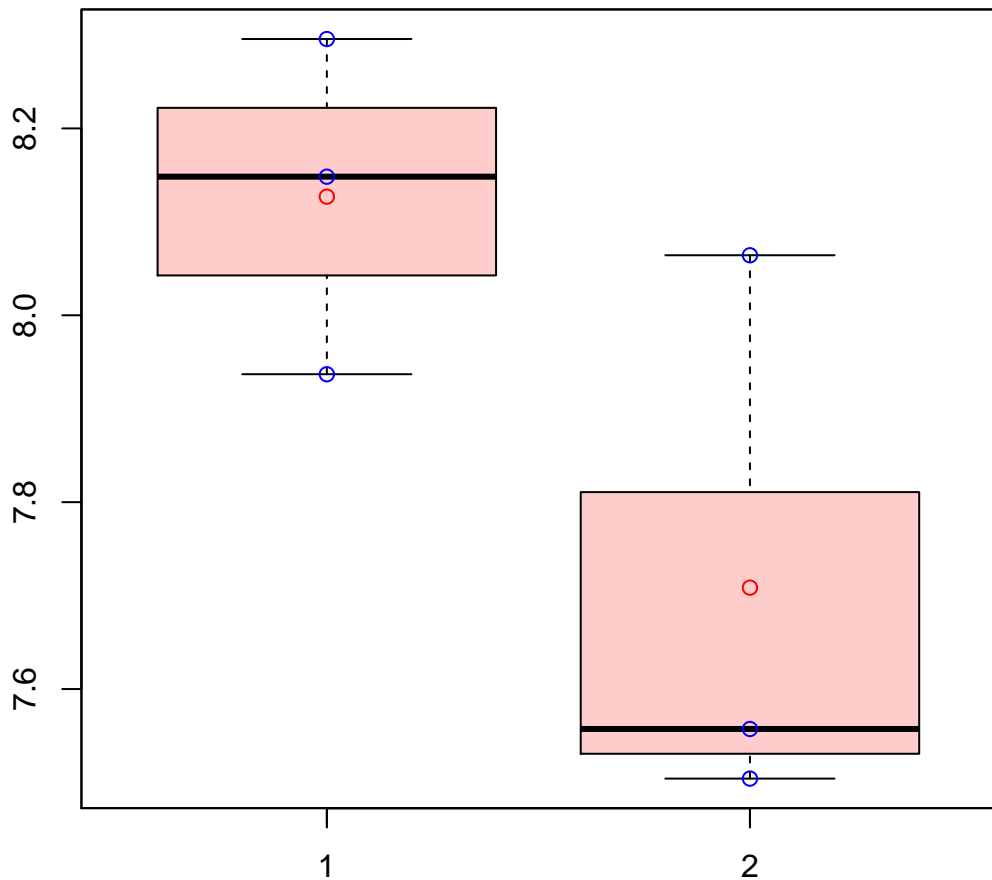

t-Test: p-value = 0.13

# CL1Contig6426|CL1Contig6426

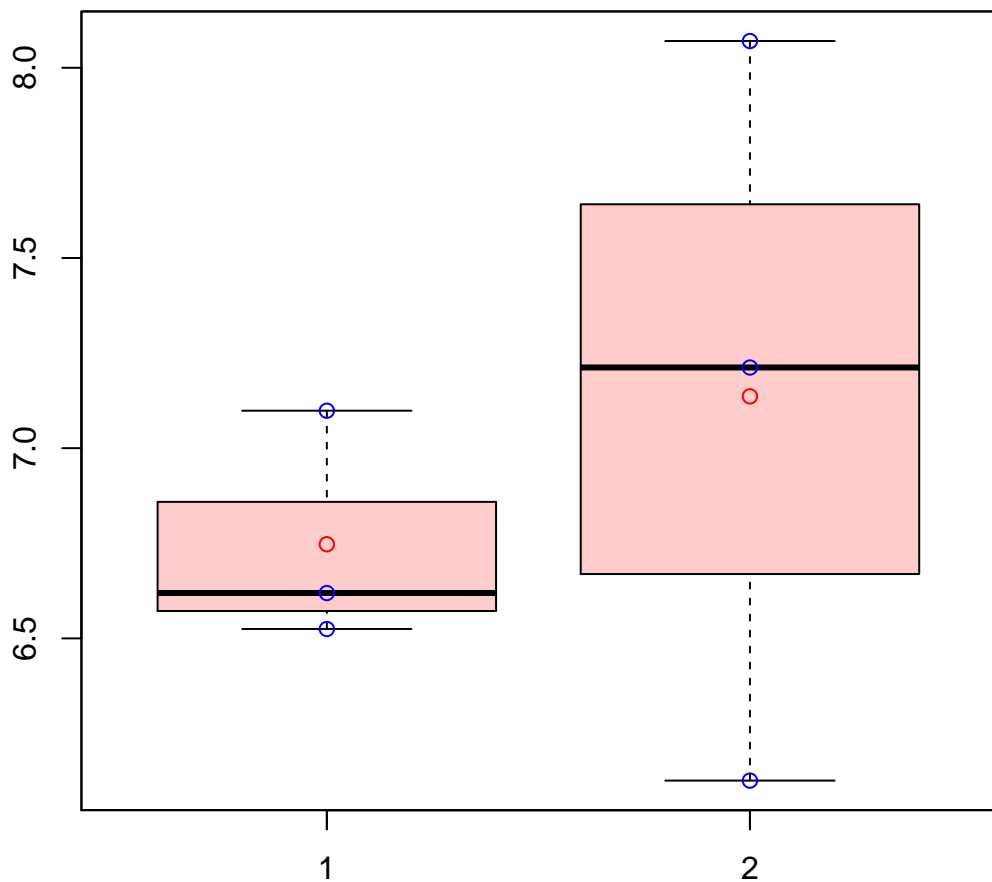

t-Test: p-value = 0.57

# CL1Contig643|CL1Contig643

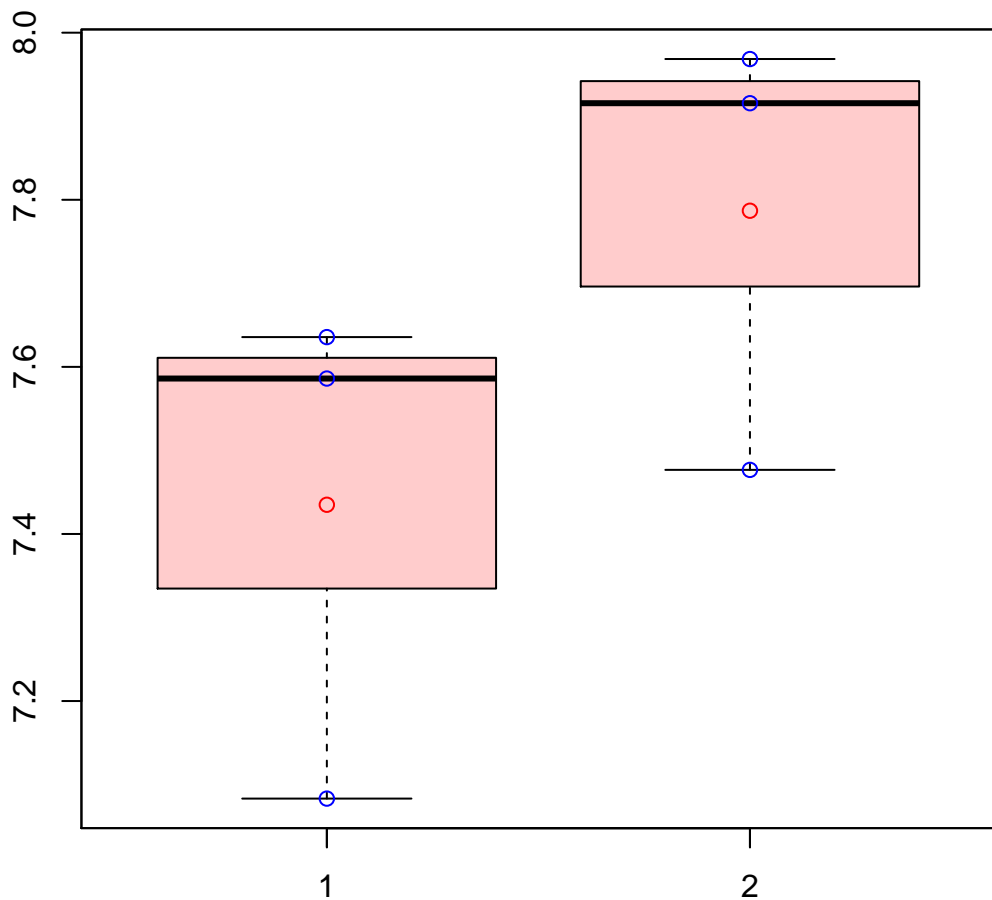

t-Test: p-value = 0.21

# CL1Contig6482|CL1Contig6482

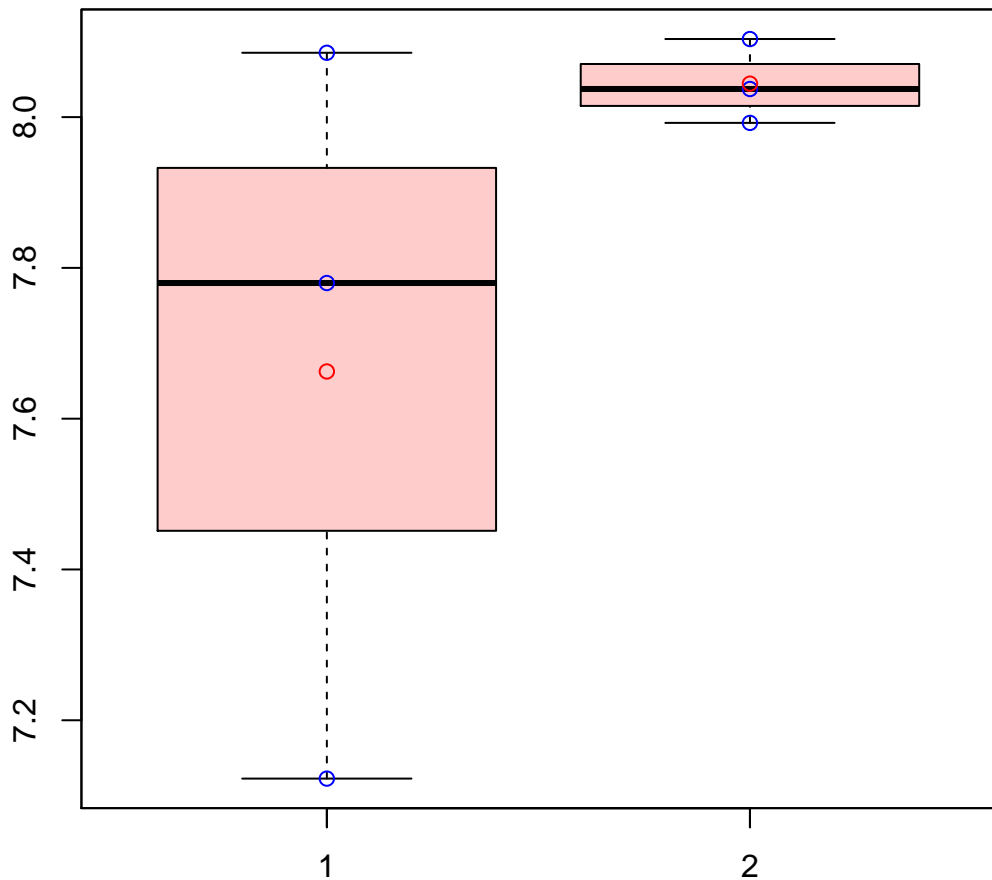

t-Test: p-value = 0.31

# CL1Contig6484|CL1Contig6484



t-Test: p-value = 0.31

# CL1Contig6495|CL1Contig6495

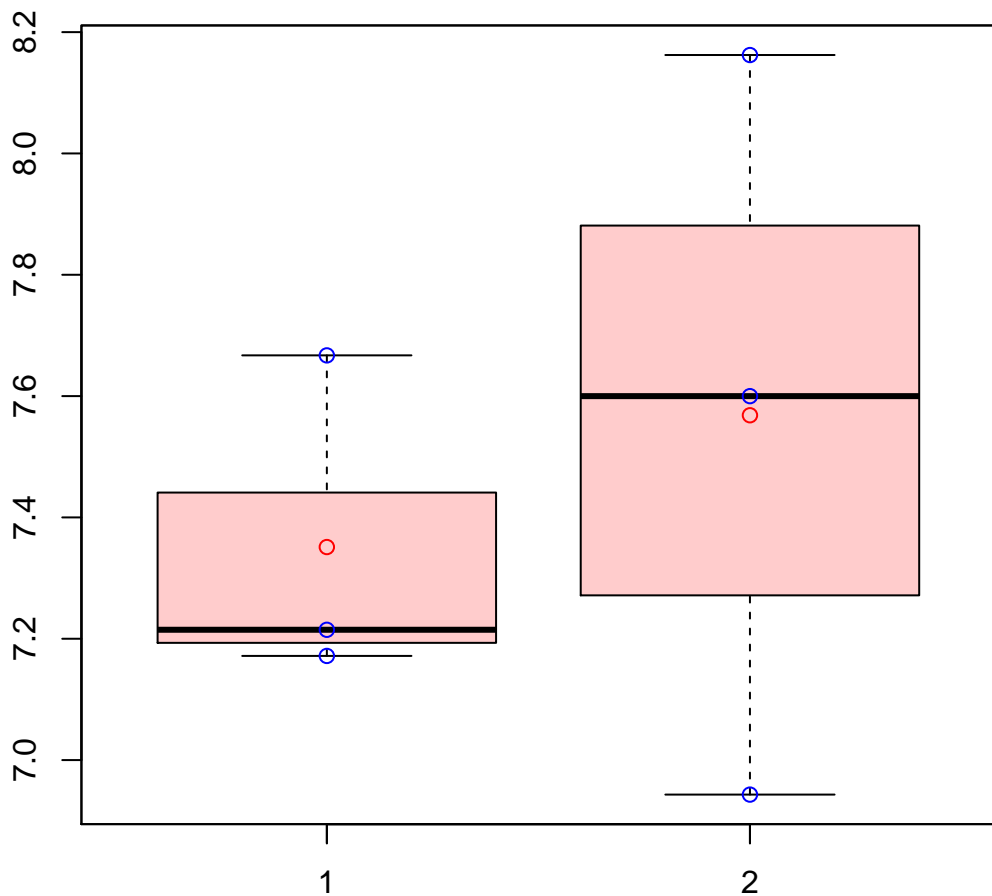

t-Test: p-value = 0.62



# CL1Contig653|CL1Contig653

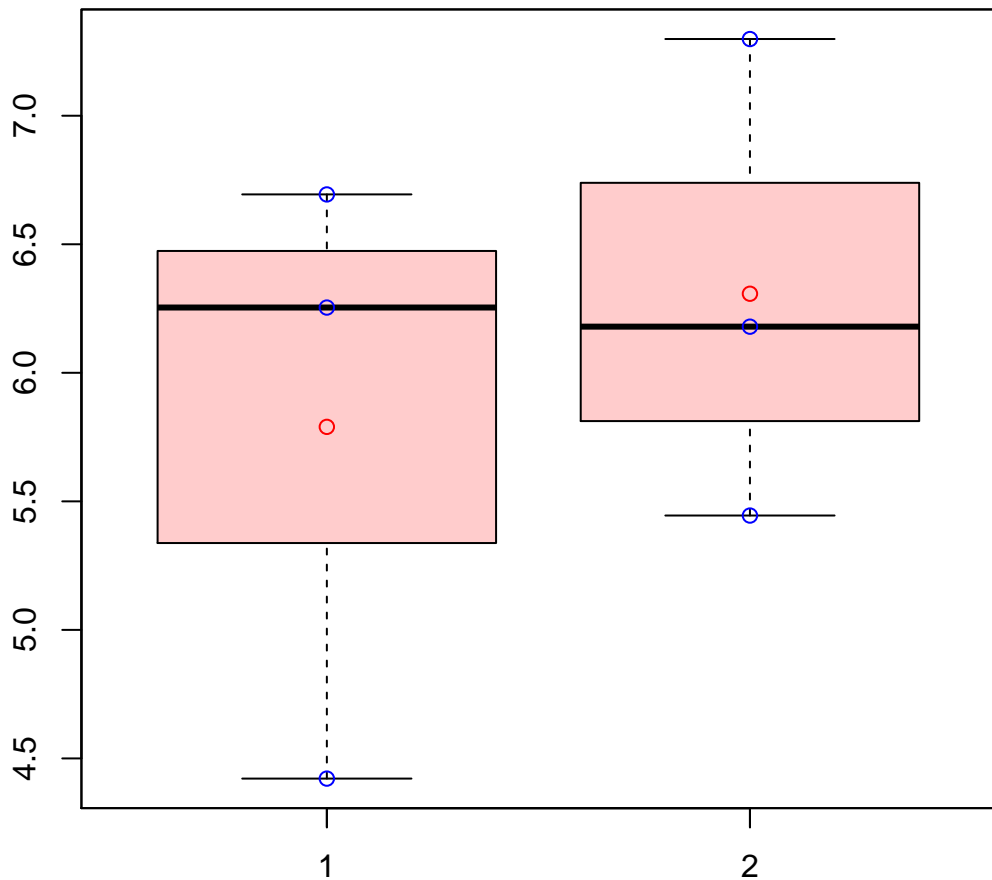

t-Test: p-value = 0.59

# CL1Contig6557|CL1Contig6557

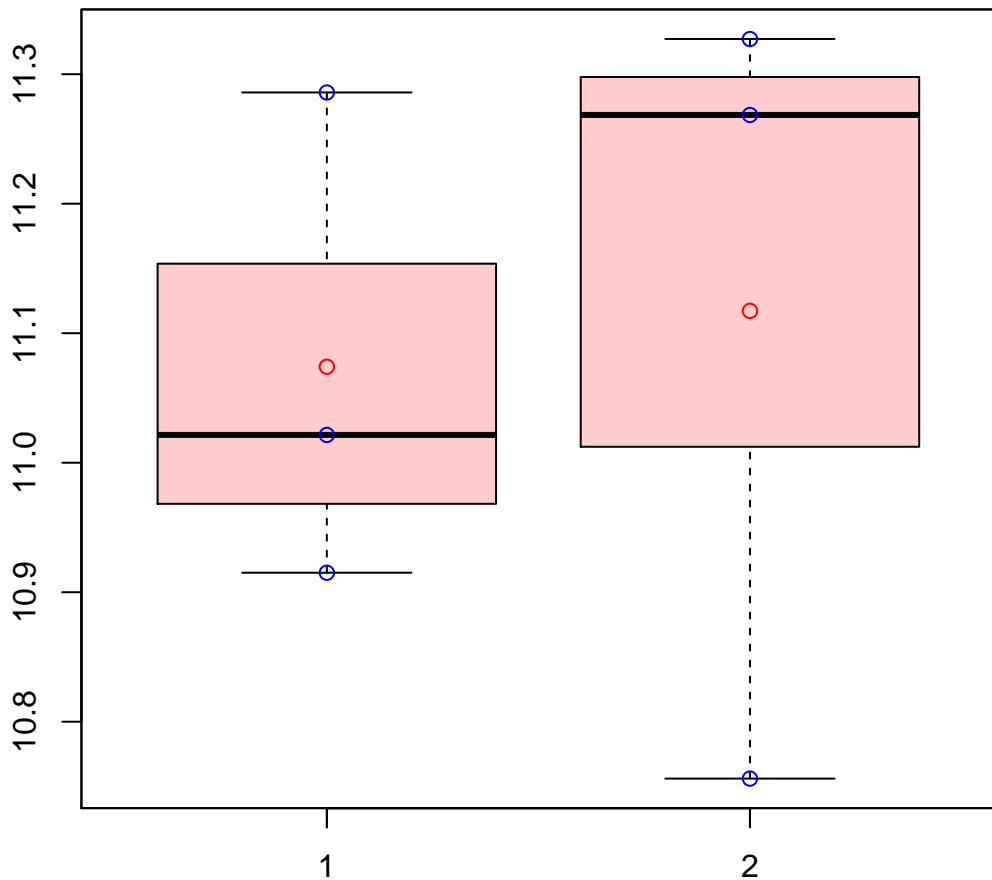

t-Test: p-value = 0.85

# CL1Contig6558|CL1Contig6558

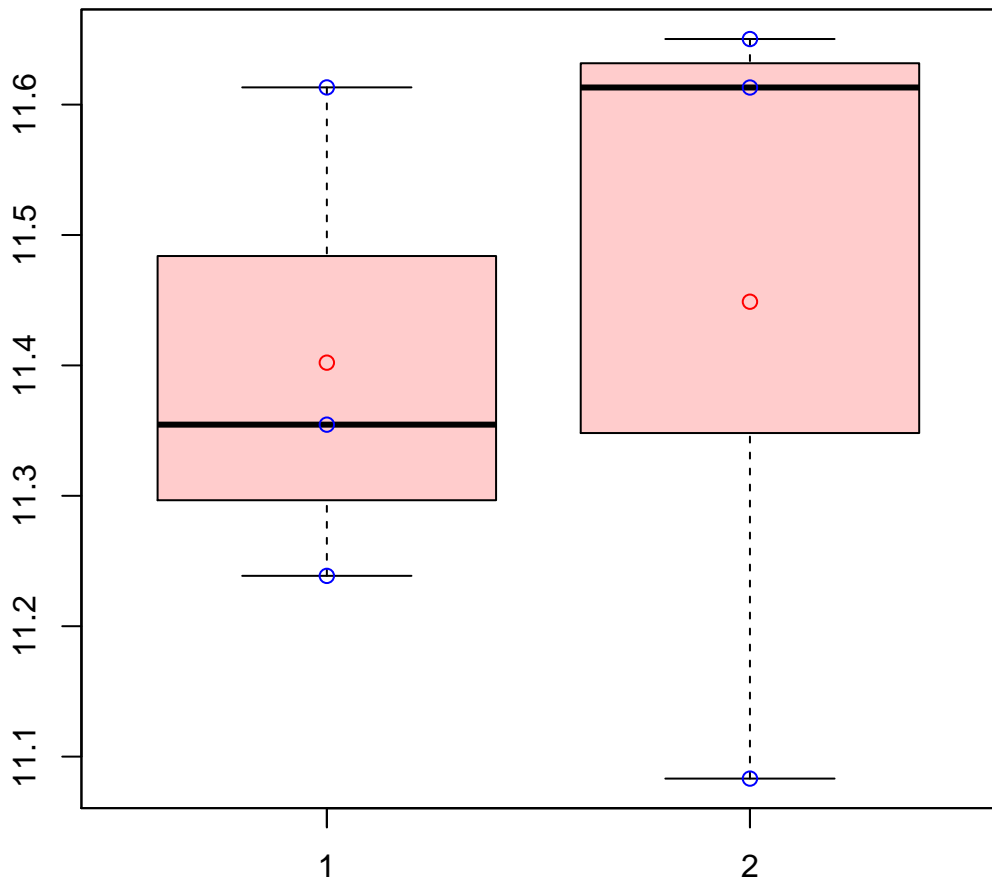

t-Test: p-value = 0.84

# CL1Contig6559|CL1Contig6559

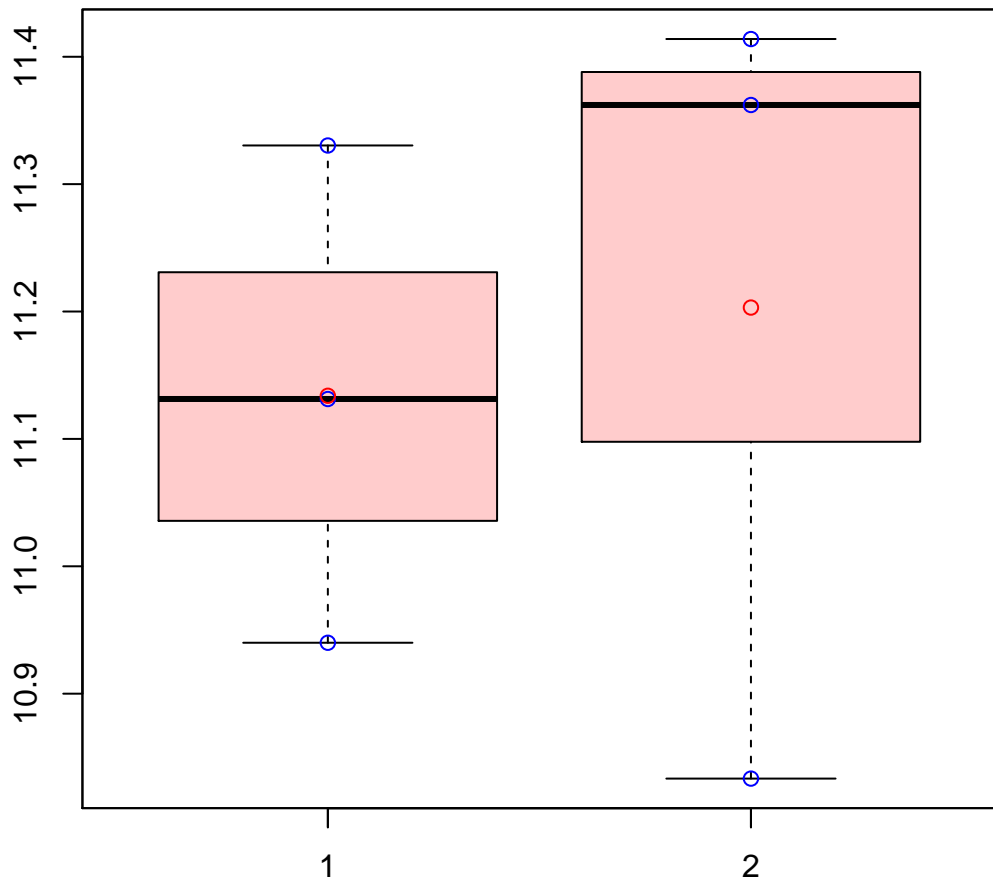

t-Test: p-value = 0.77

# CL1Contig6575|CL1Contig6575

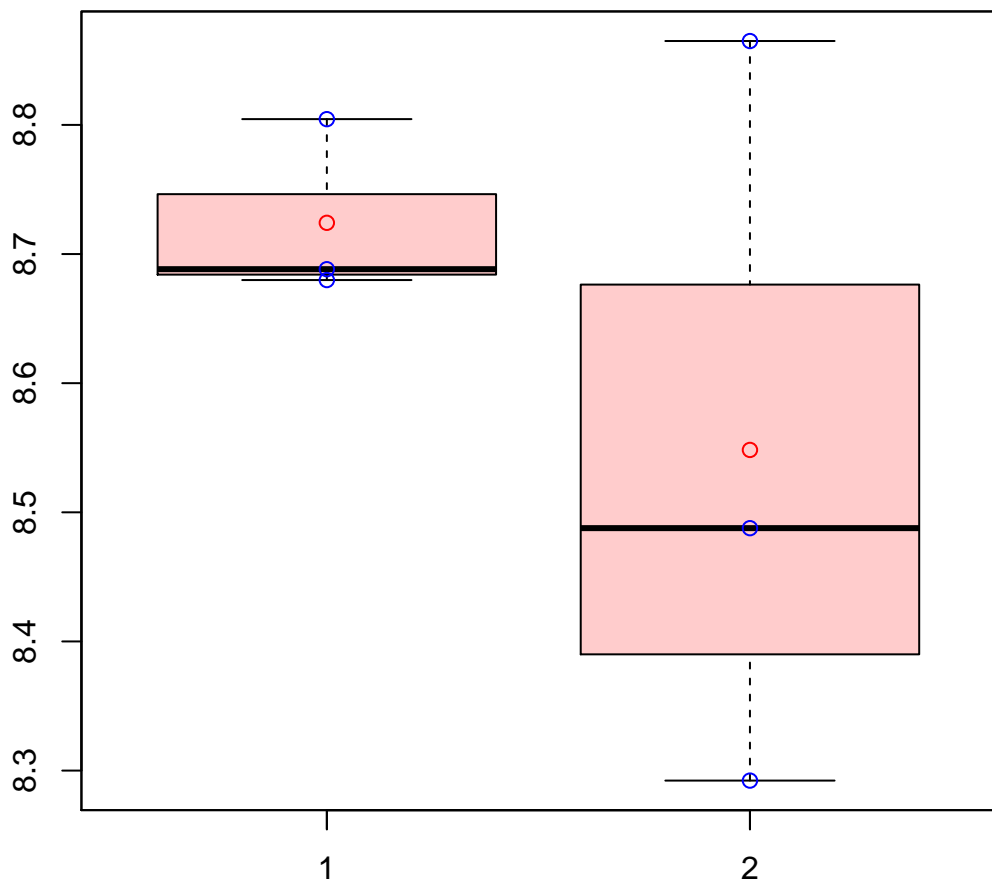

t-Test: p-value = 0.41

# CL1Contig6582|CL1Contig6582

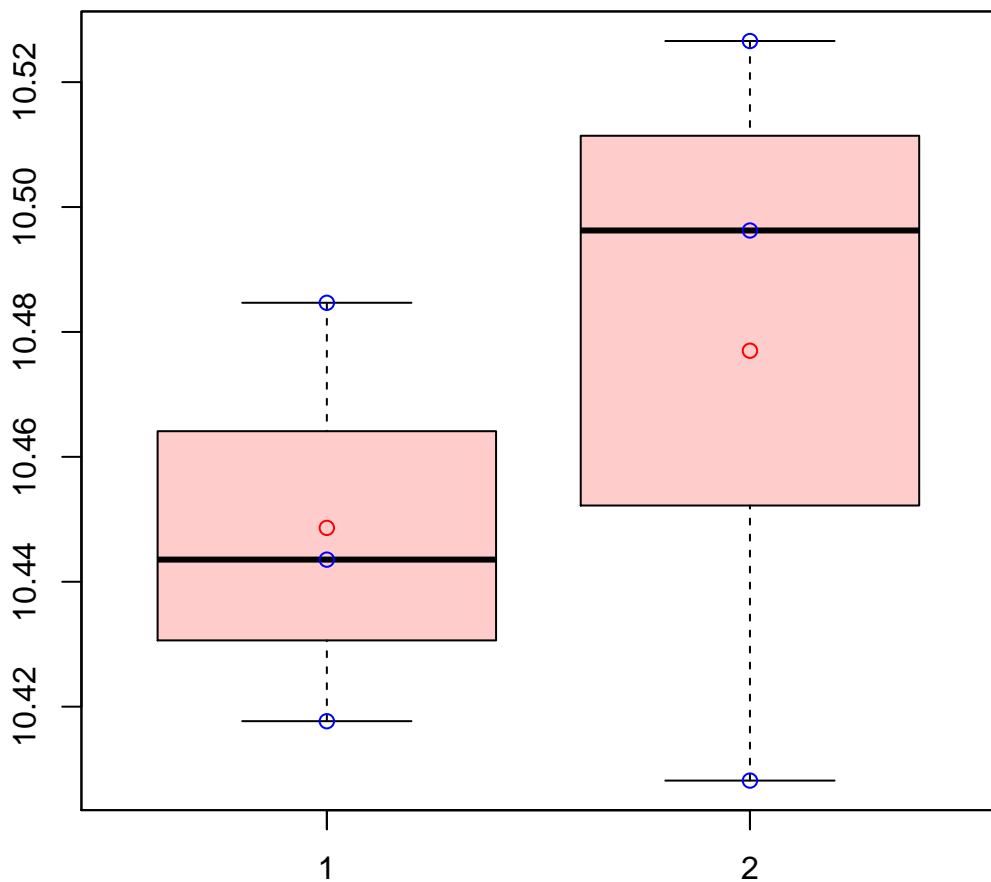

t-Test: p-value = 0.53

# CL1Contig6583|CL1Contig6583

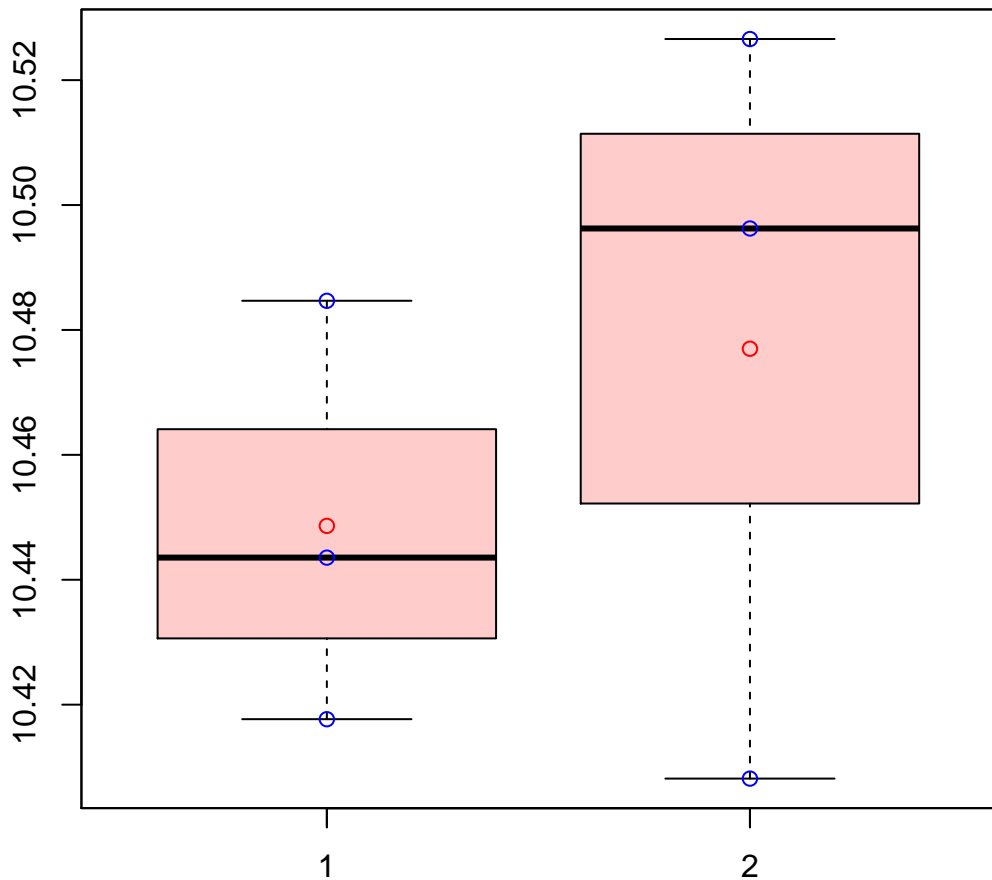

t-Test: p-value = 0.53

# CL1Contig6610|CL1Contig6610

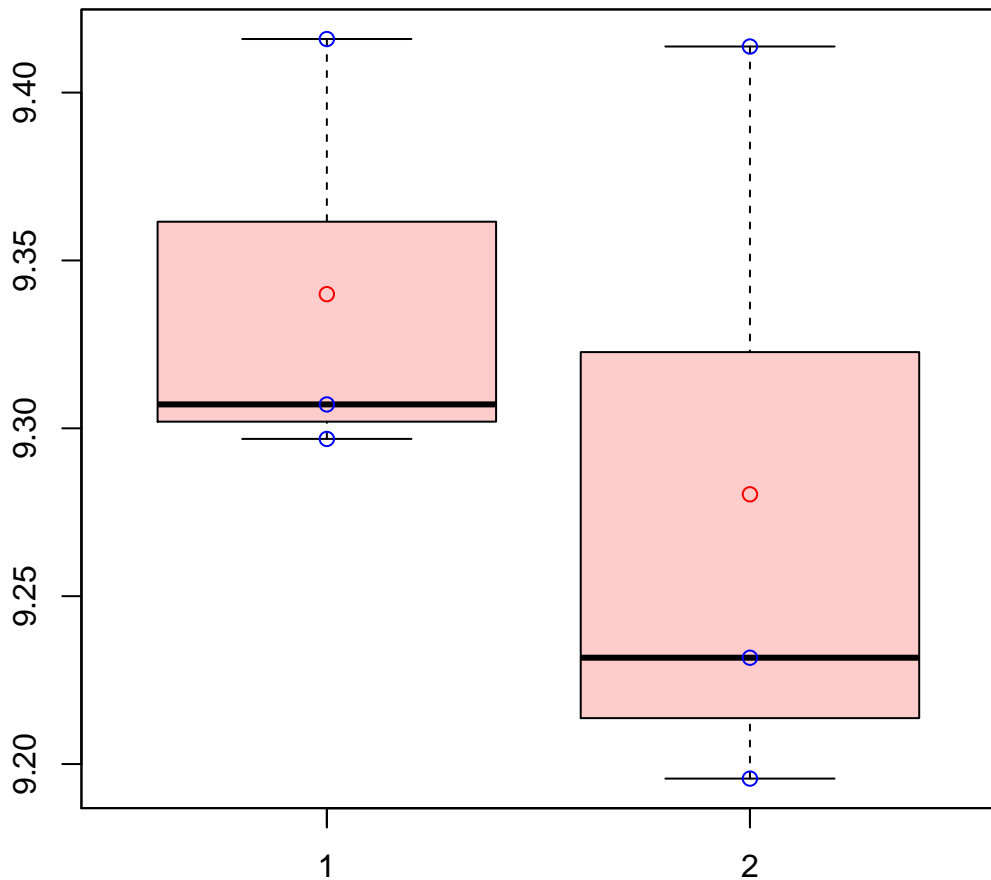

t-Test: p-value = 0.5



# CL1Contig6612|CL1Contig6612



t-Test: p-value = 0.5

# CL1Contig6690|CL1Contig6690

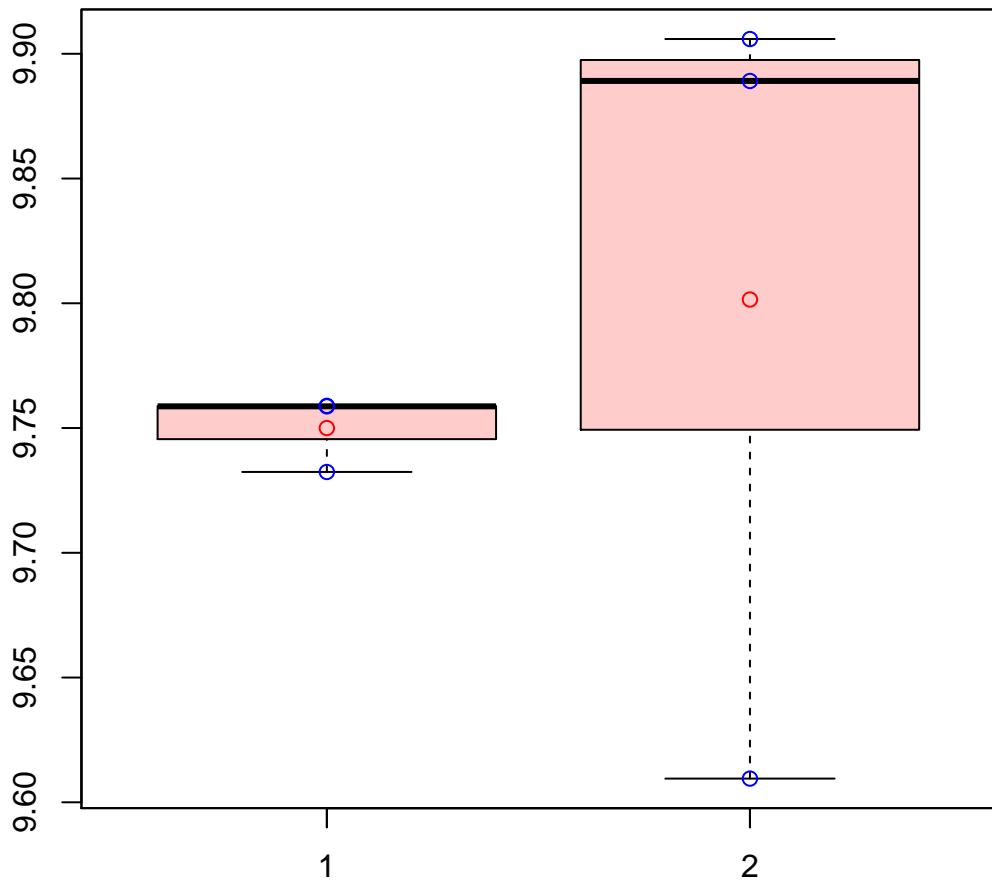

t-Test: p-value = 0.65

# CL1Contig6718|CL1Contig6718

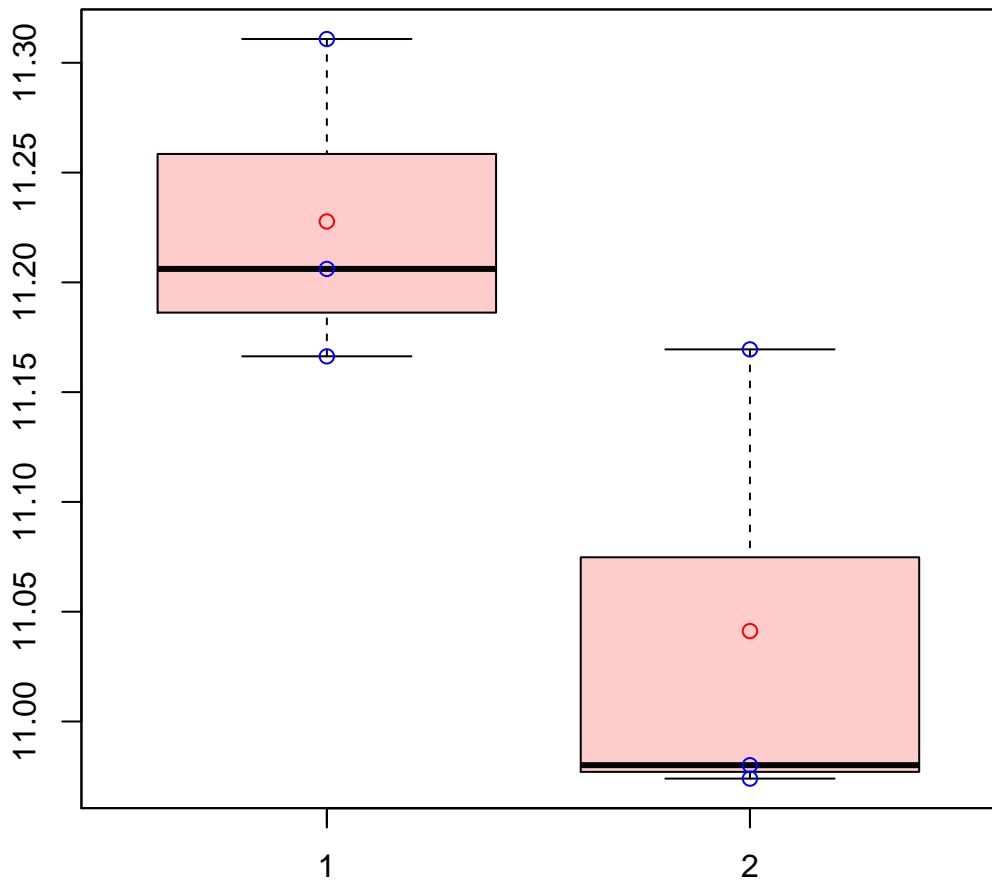

t-Test: p-value = 0.08

# CL1Contig6719|CL1Contig6719

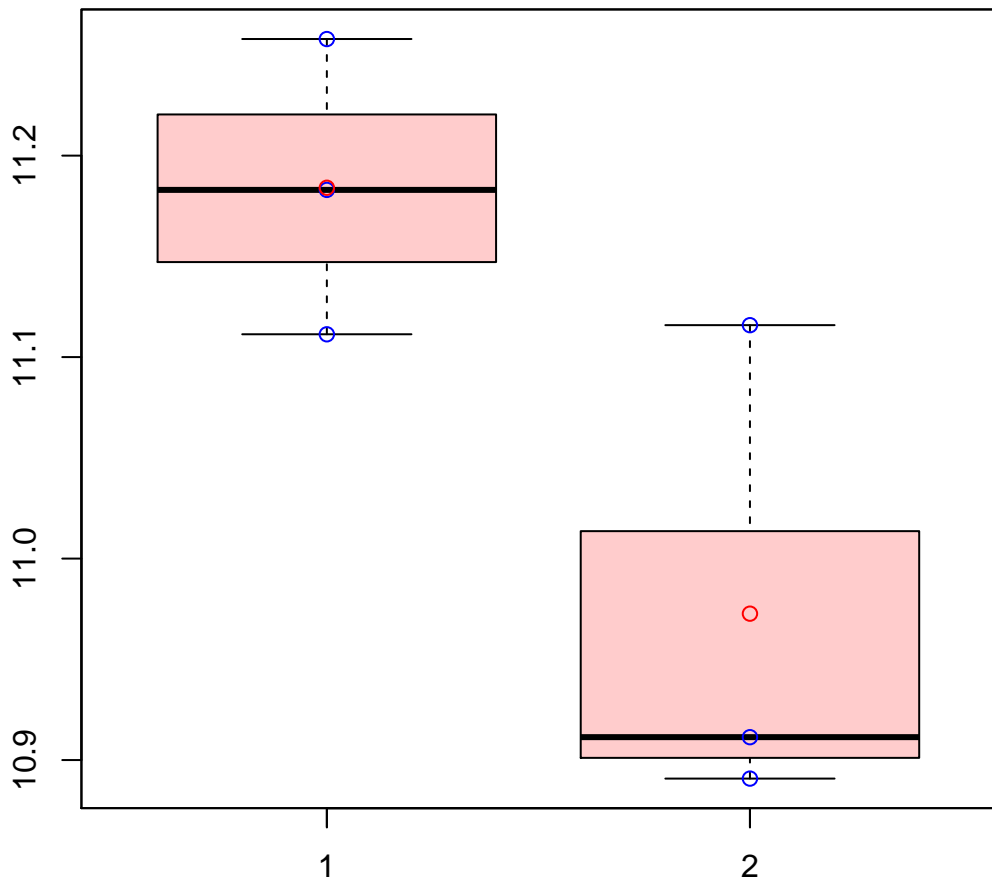

t-Test: p-value = 0.08

# CL1Contig6720|CL1Contig6720

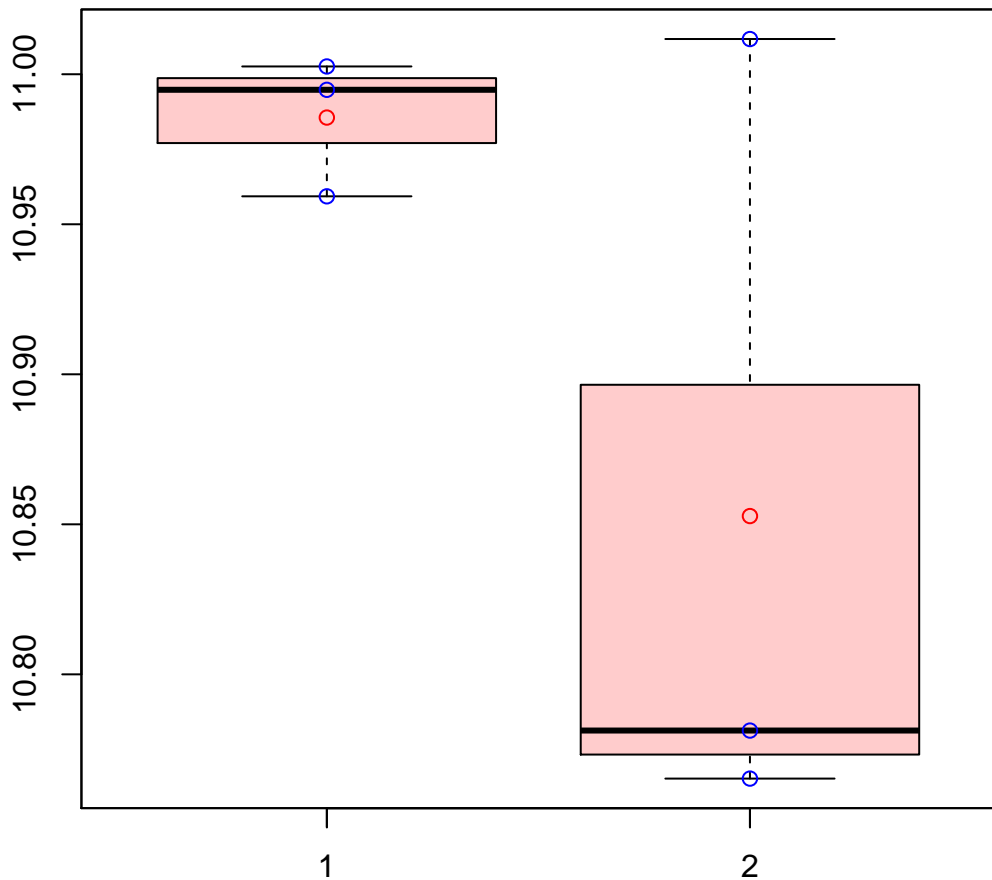

t-Test: p-value = 0.24

# CL1Contig6728|CL1Contig6728

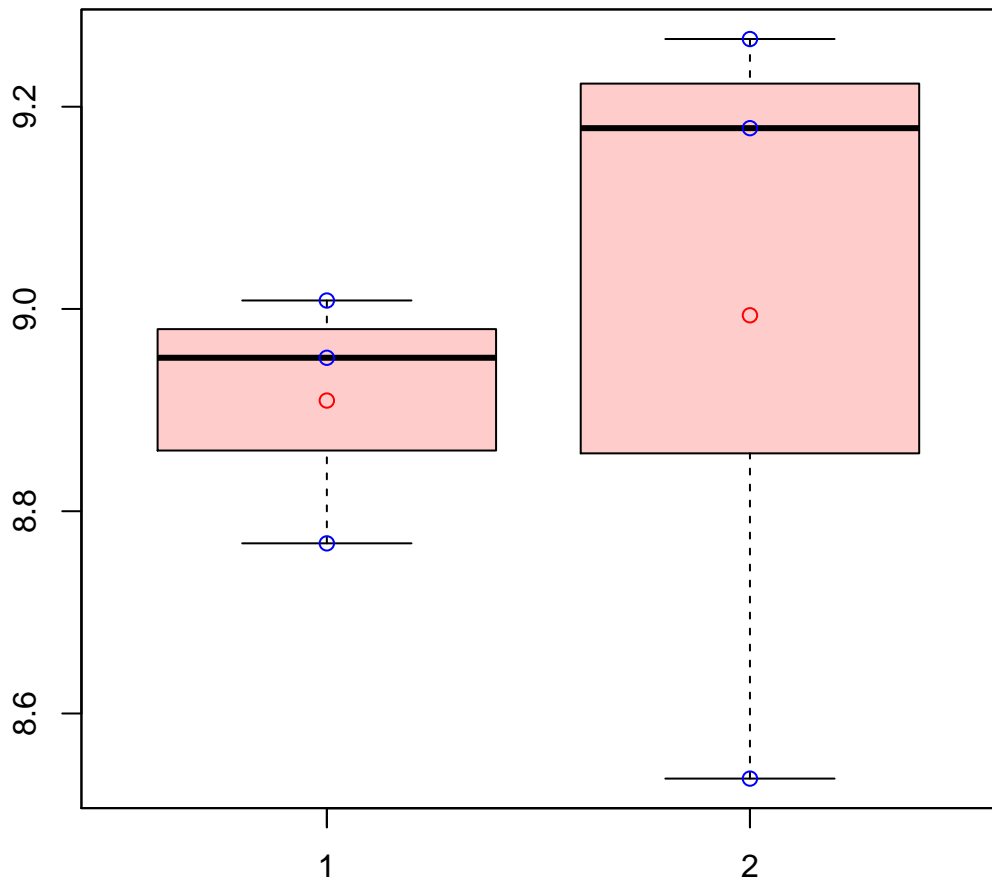

t-Test: p-value = 0.76

# CL1Contig6731|CL1Contig6731

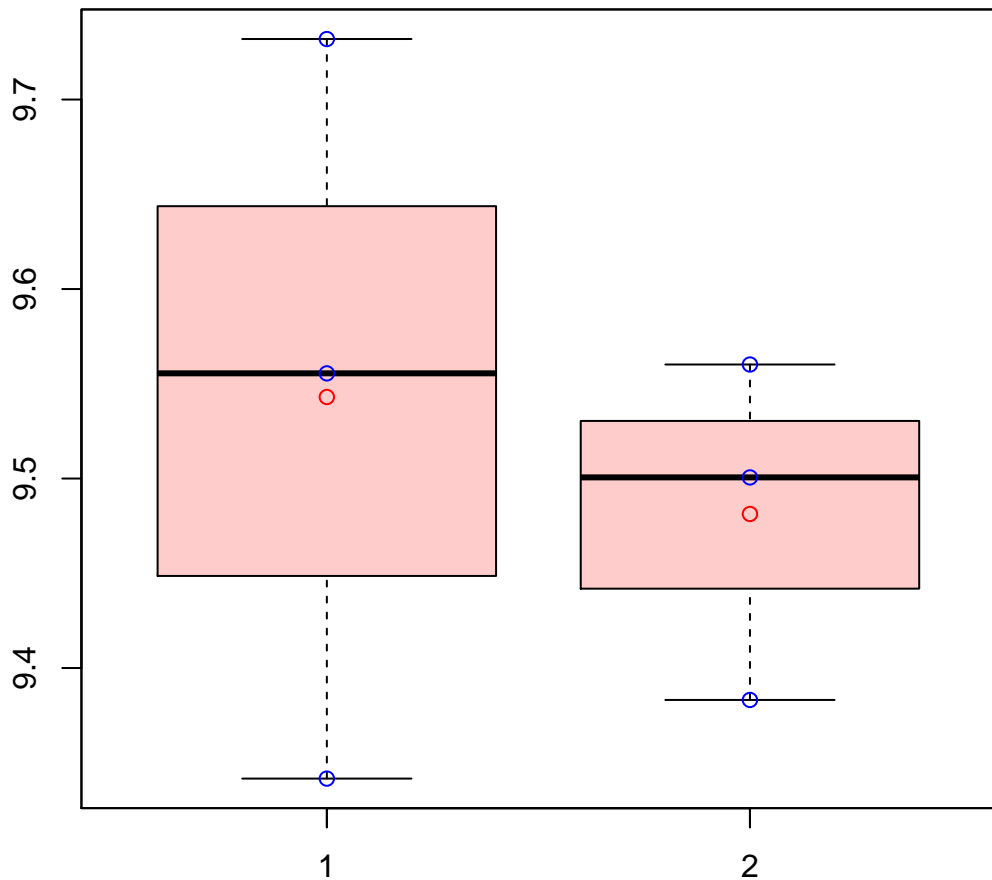

t-Test: p-value = 0.66

# CL1Contig6763|CL1Contig6763

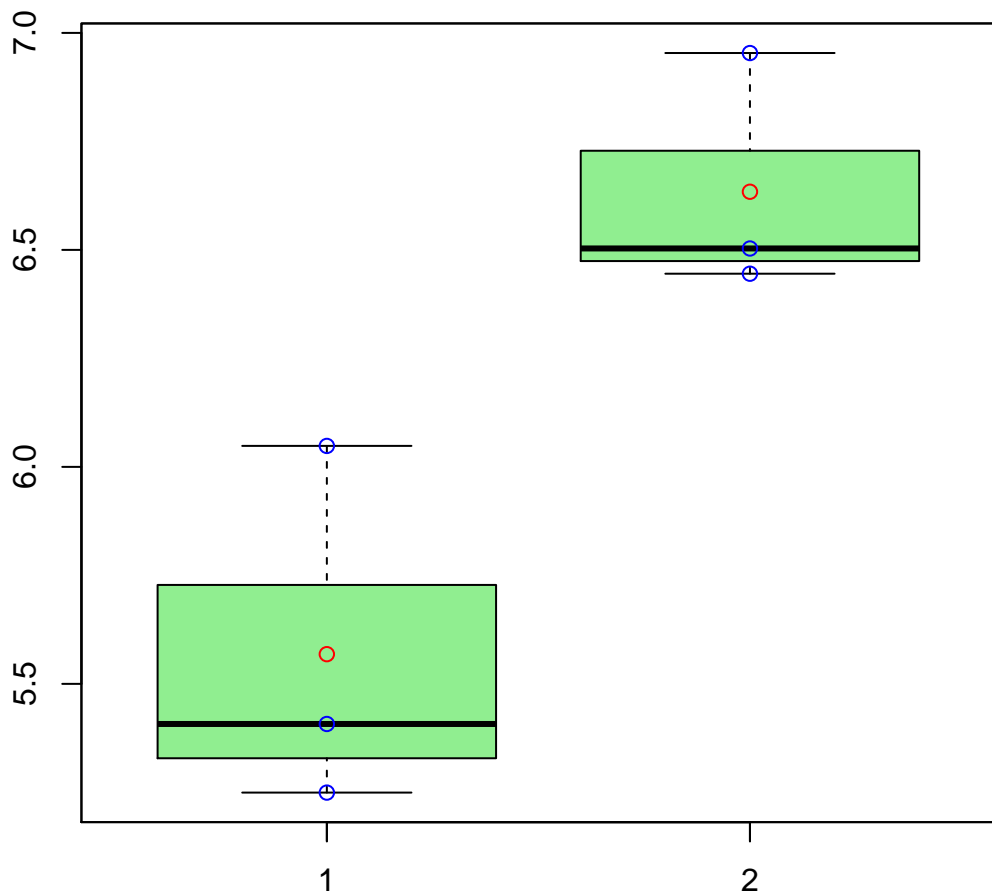

t-Test: p-value = 0.03



# CL1Contig6770|CL1Contig6770

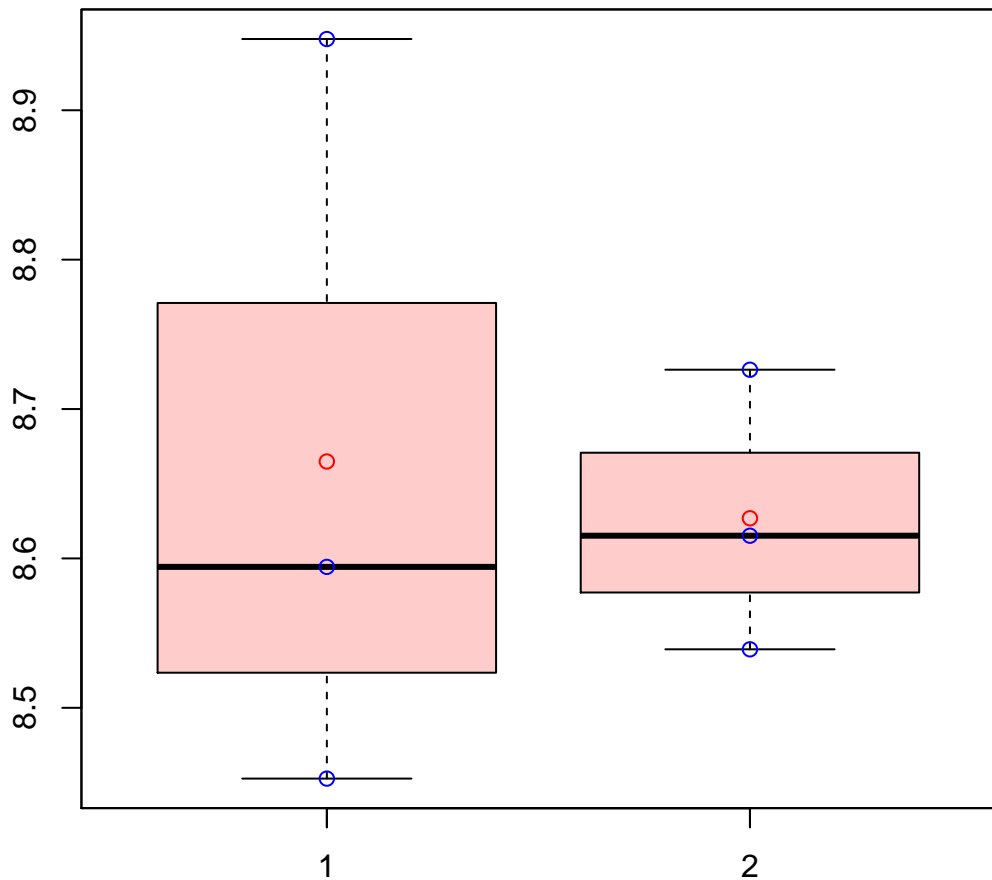

t-Test: p-value = 0.83

# CL1Contig6825|CL1Contig6825

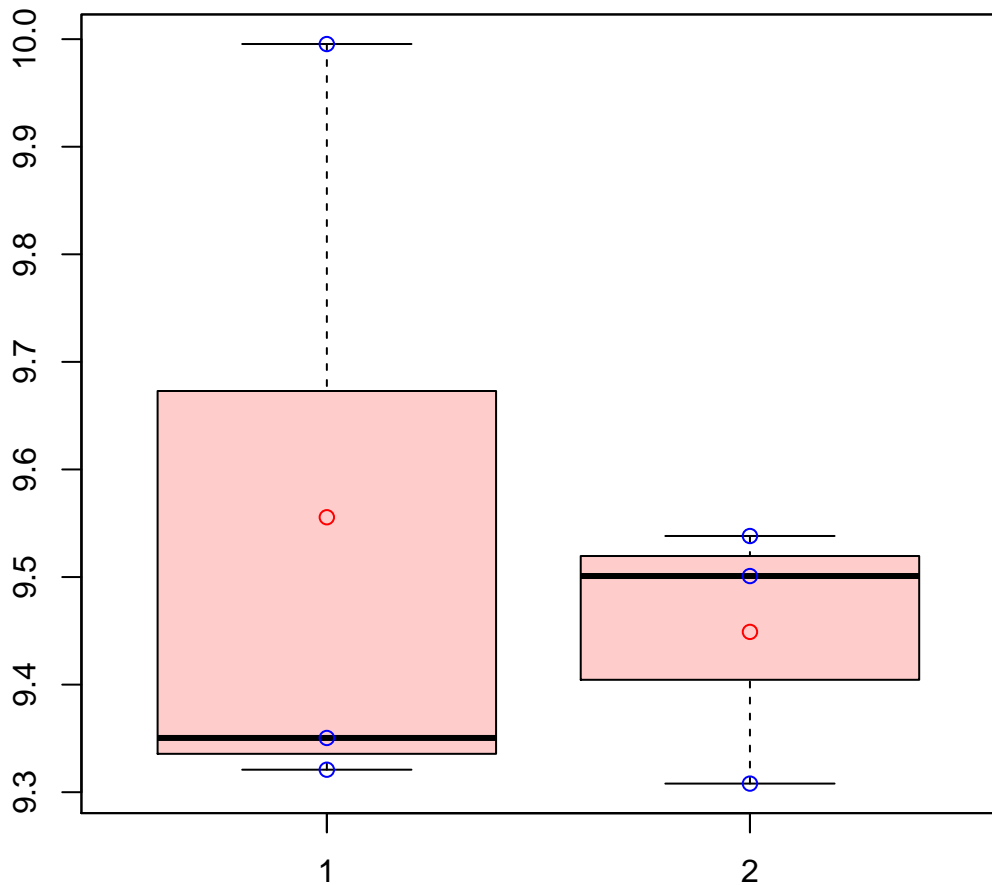

t-Test: p-value = 0.68

# CL1Contig6827|CL1Contig6827

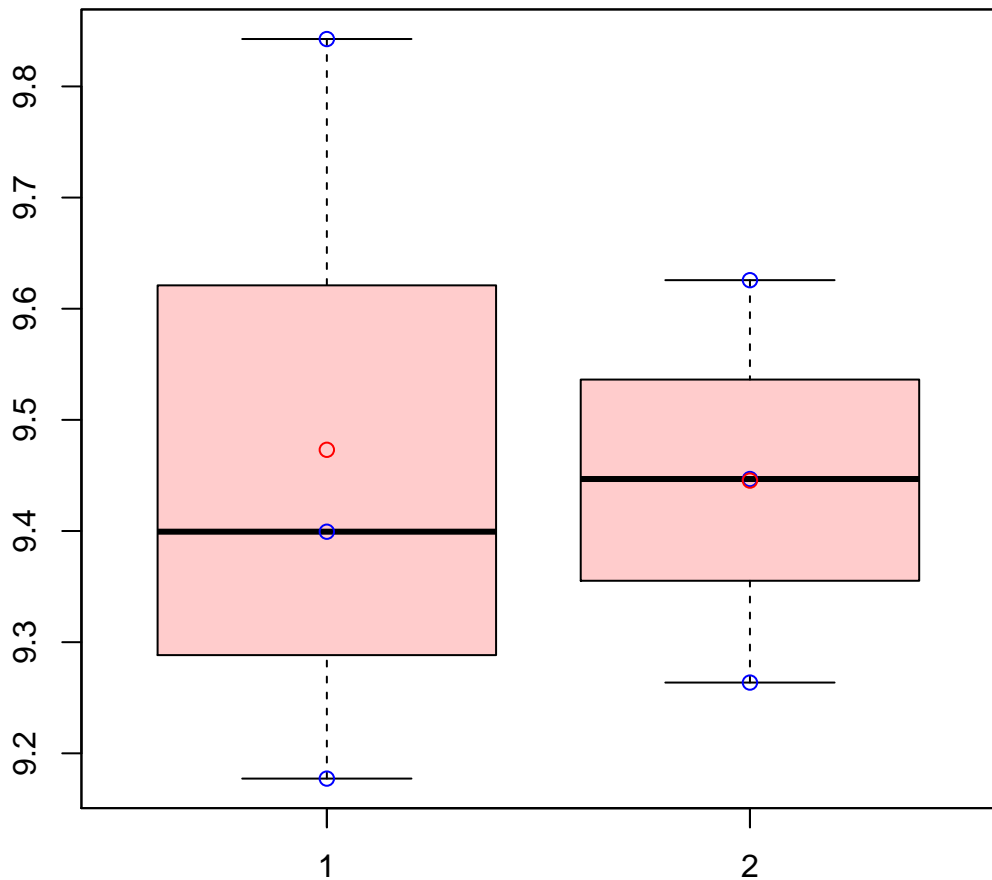

t-Test: p-value = 0.91

# CL1Contig6828|CL1Contig6828



t-Test: p-value = 0.91

# CL1Contig6829|CL1Contig6829

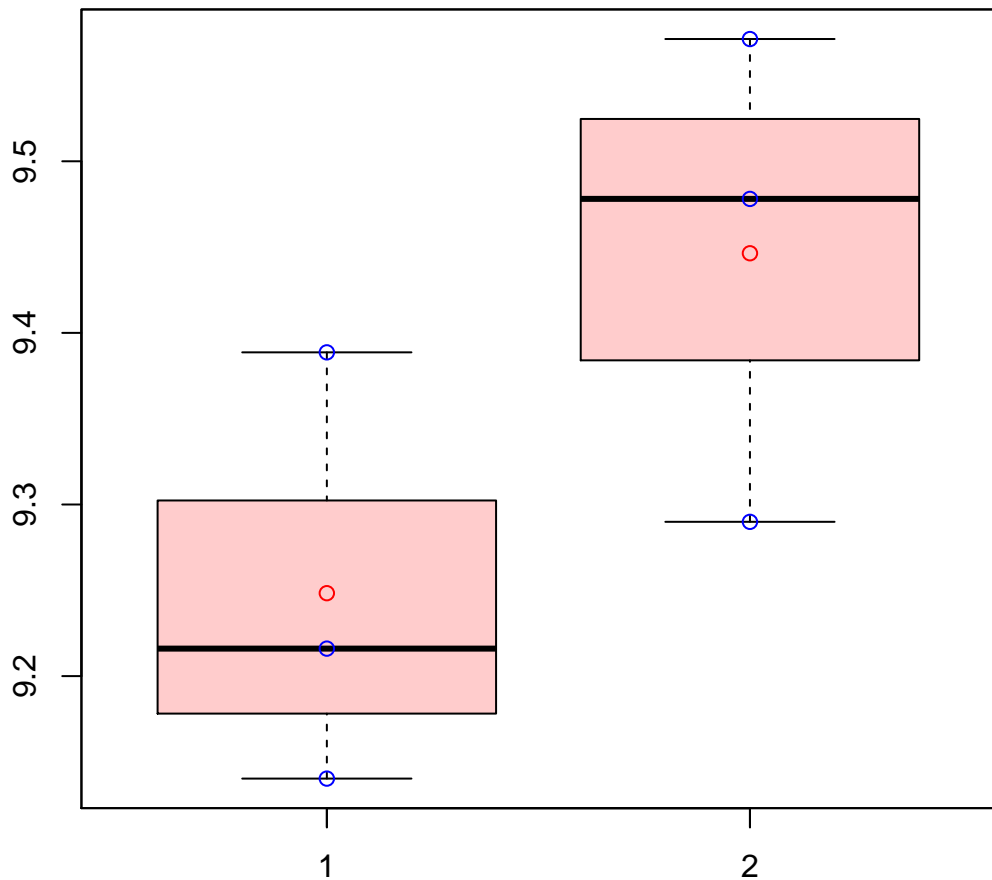

t-Test: p-value = 0.15

# CL1Contig6858|CL1Contig6858

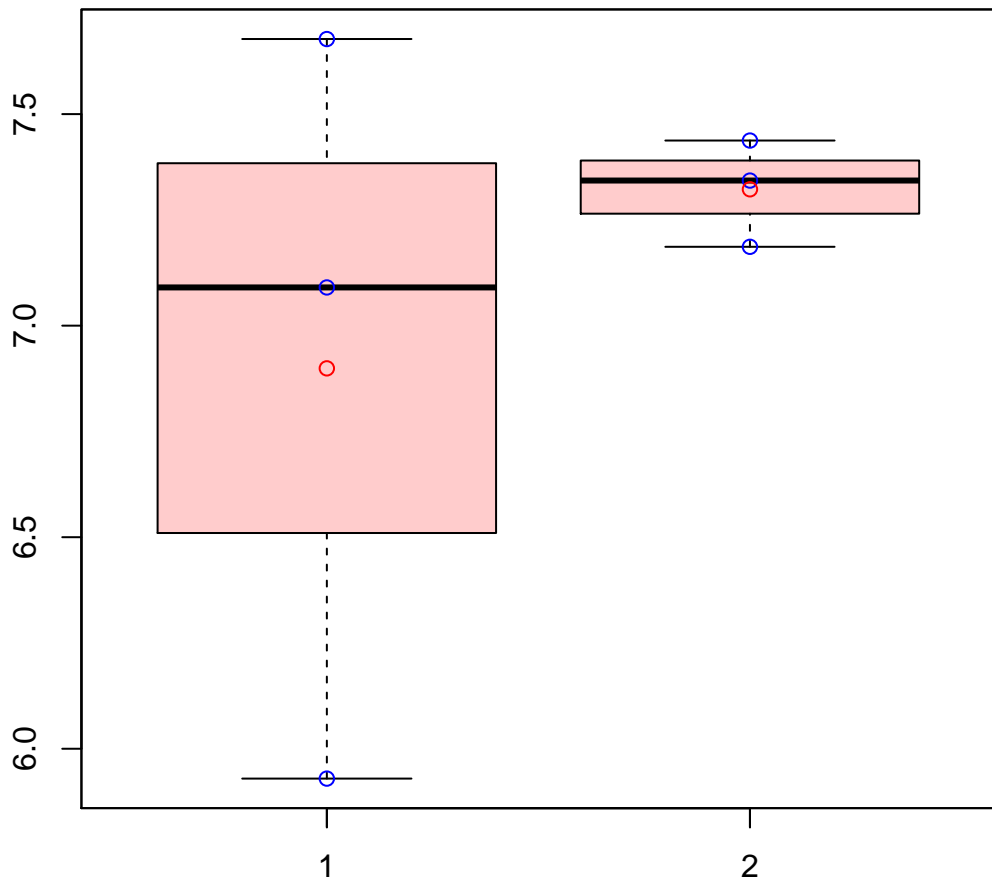

t-Test: p-value = 0.5

# CL1Contig6871|CL1Contig6871

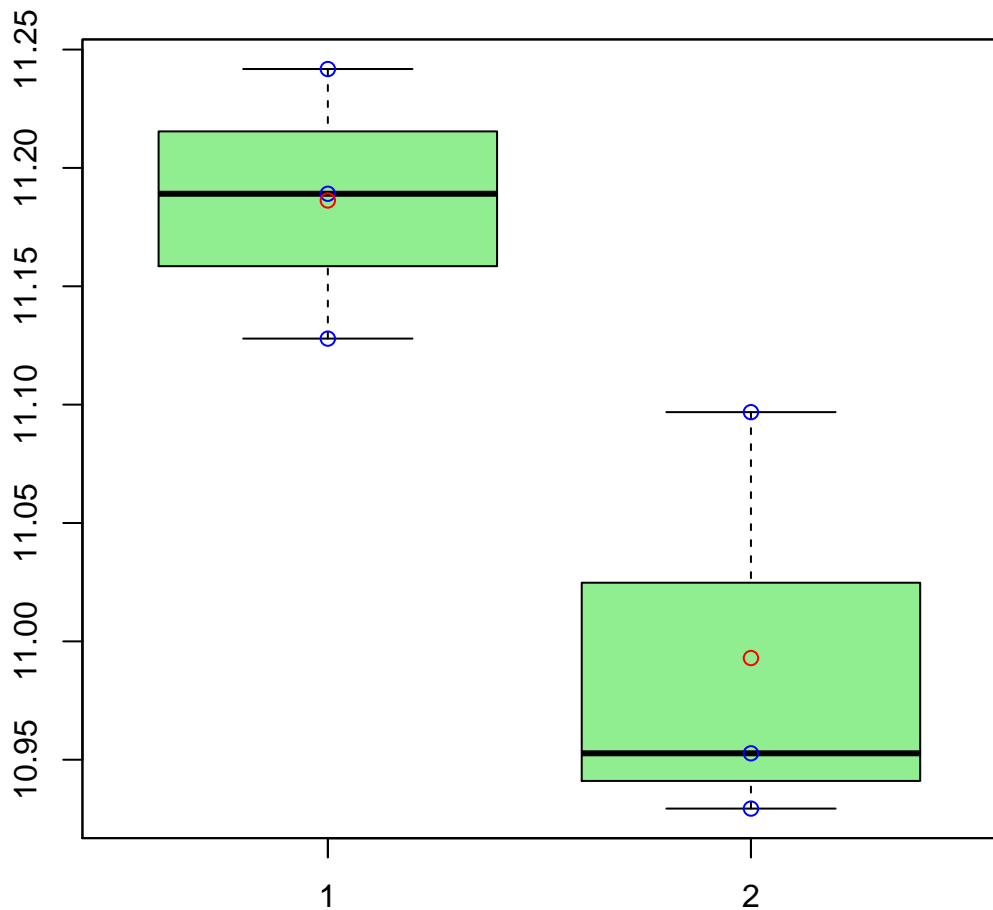

t-Test: p-value = 0.04

# CL1Contig6873|CL1Contig6873

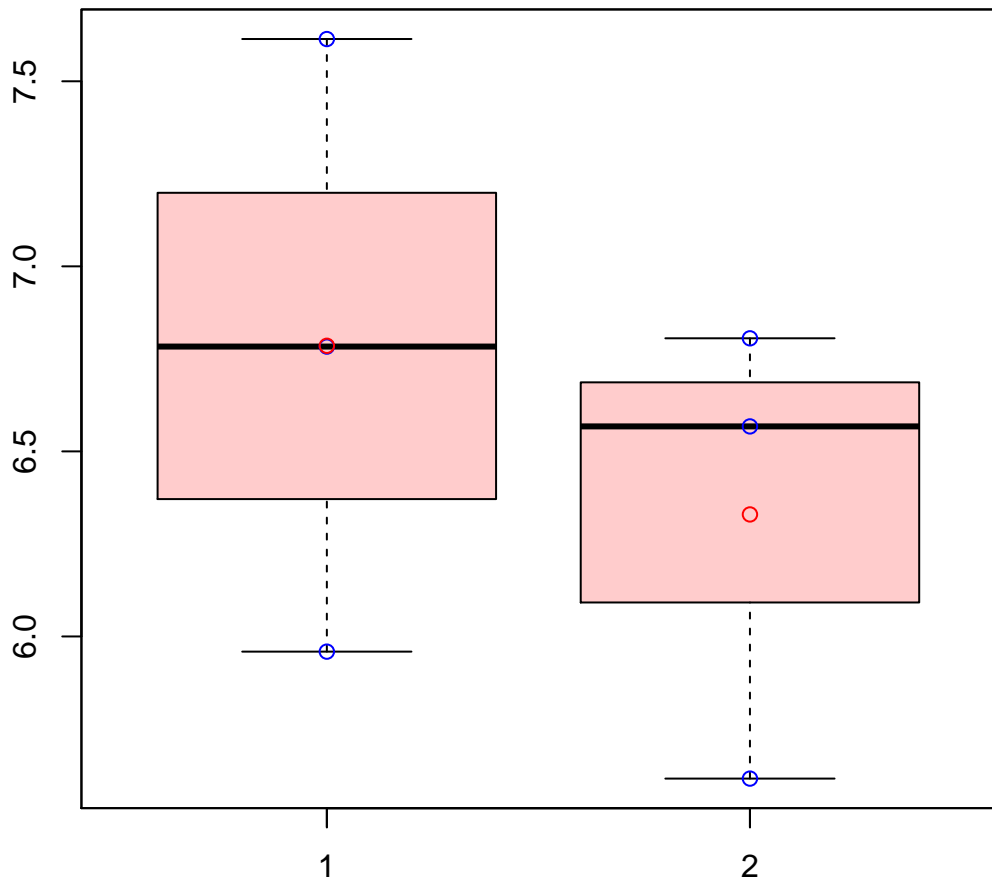

t-Test: p-value = 0.49



# CL1Contig6877|CL1Contig6877

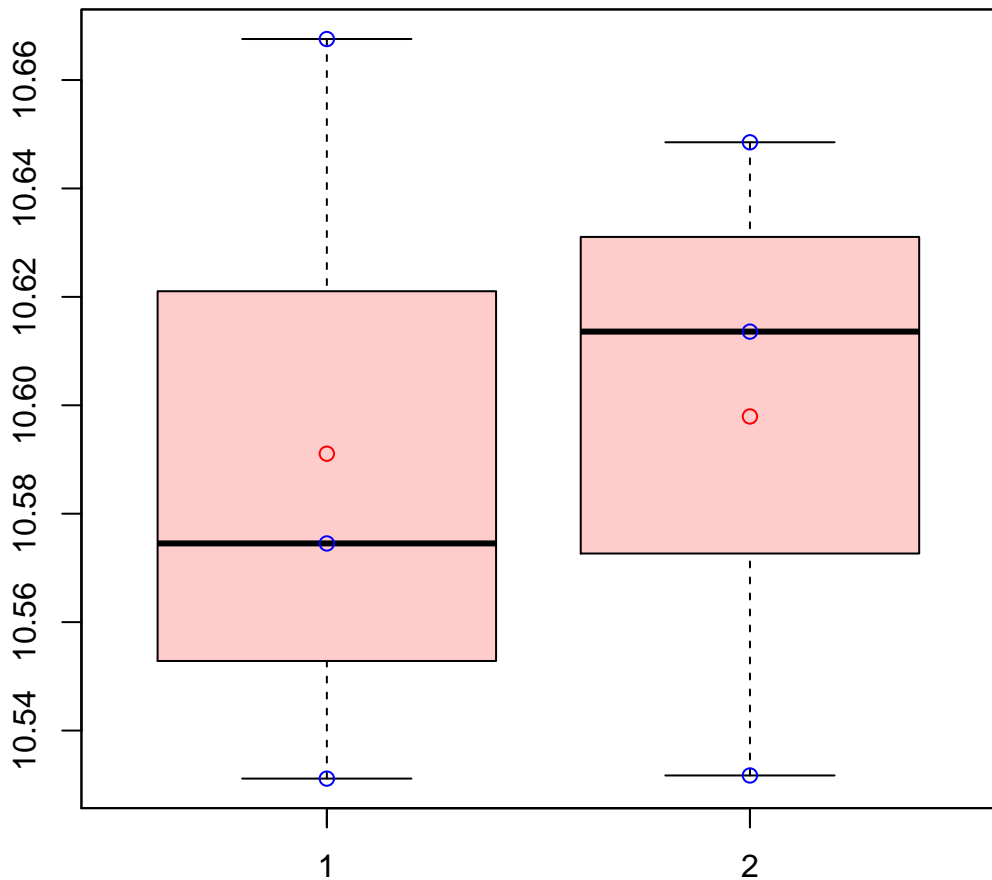

t-Test: p-value = 0.9

# CL1Contig6917|CL1Contig6917

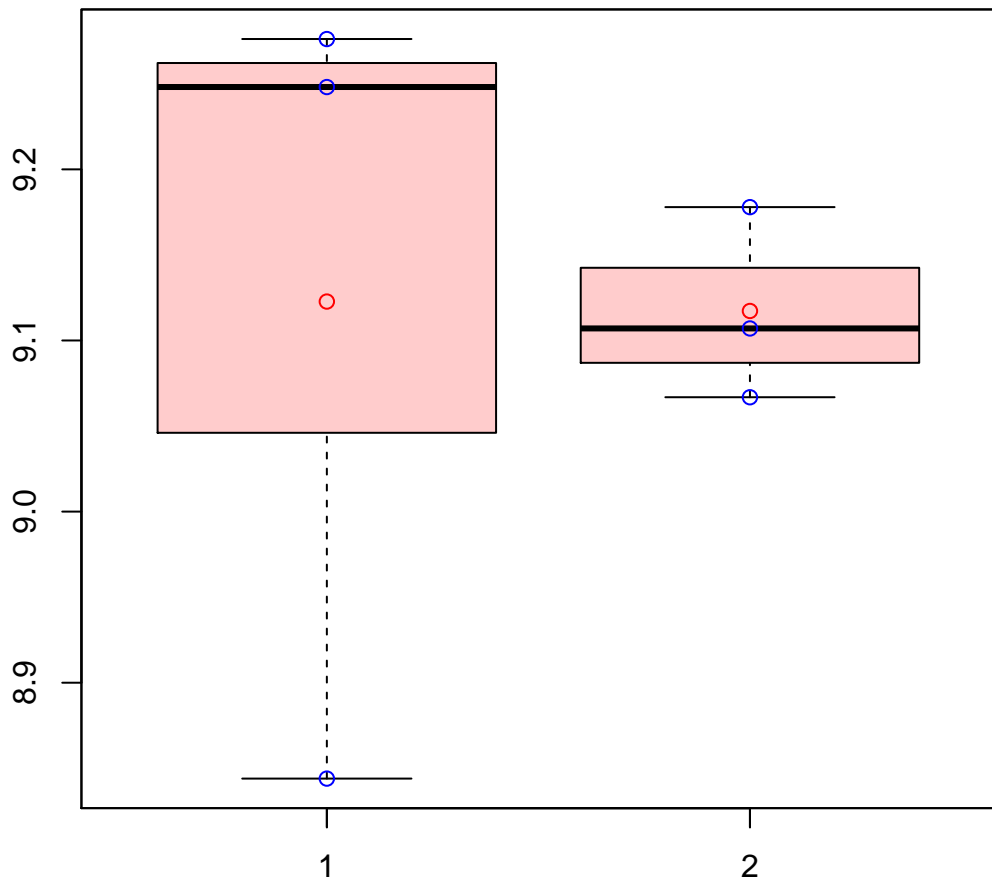

t-Test: p-value = 0.97

# CL1Contig6931|CL1Contig6931

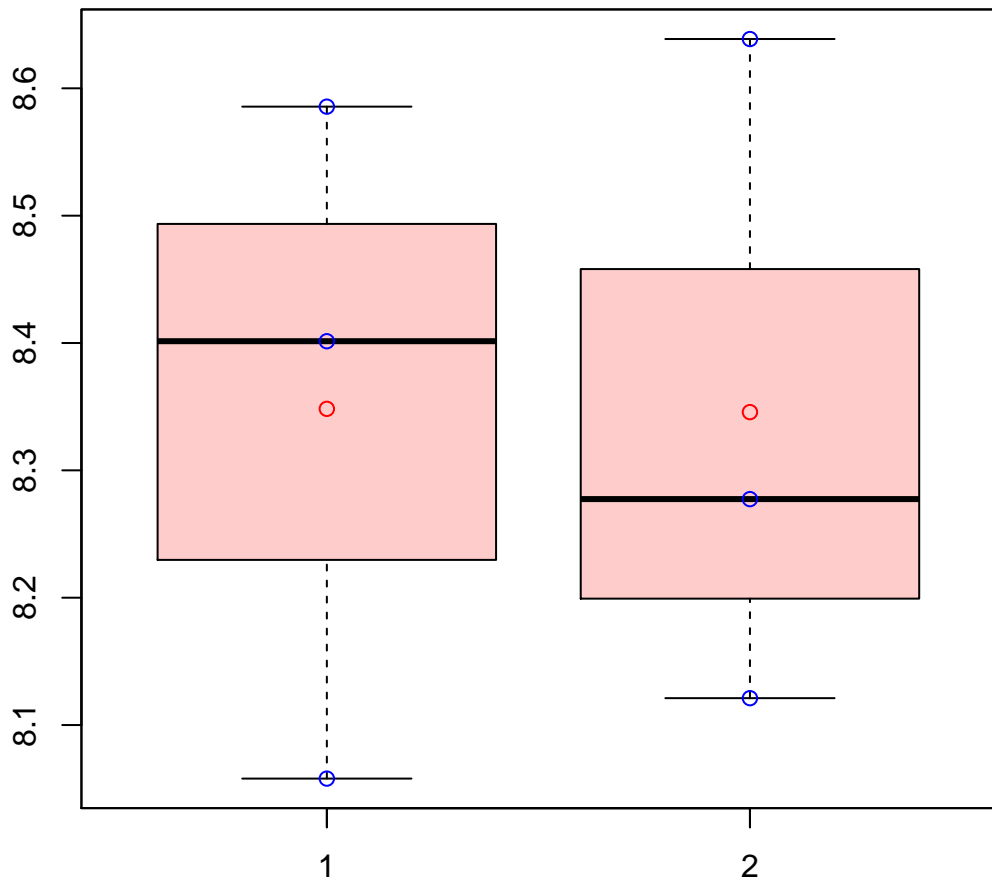

t-Test: p-value = 0.99

# CL1Contig6932|CL1Contig6932

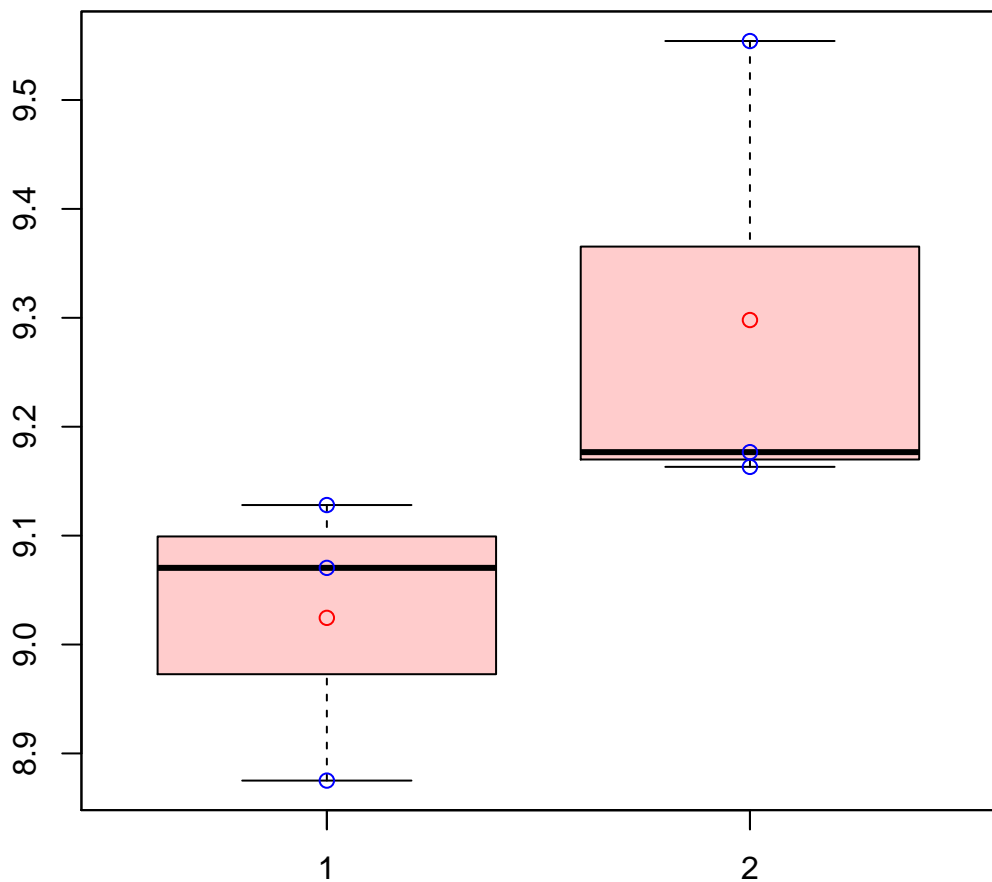

t-Test: p-value = 0.16

# CL1Contig693|CL1Contig693

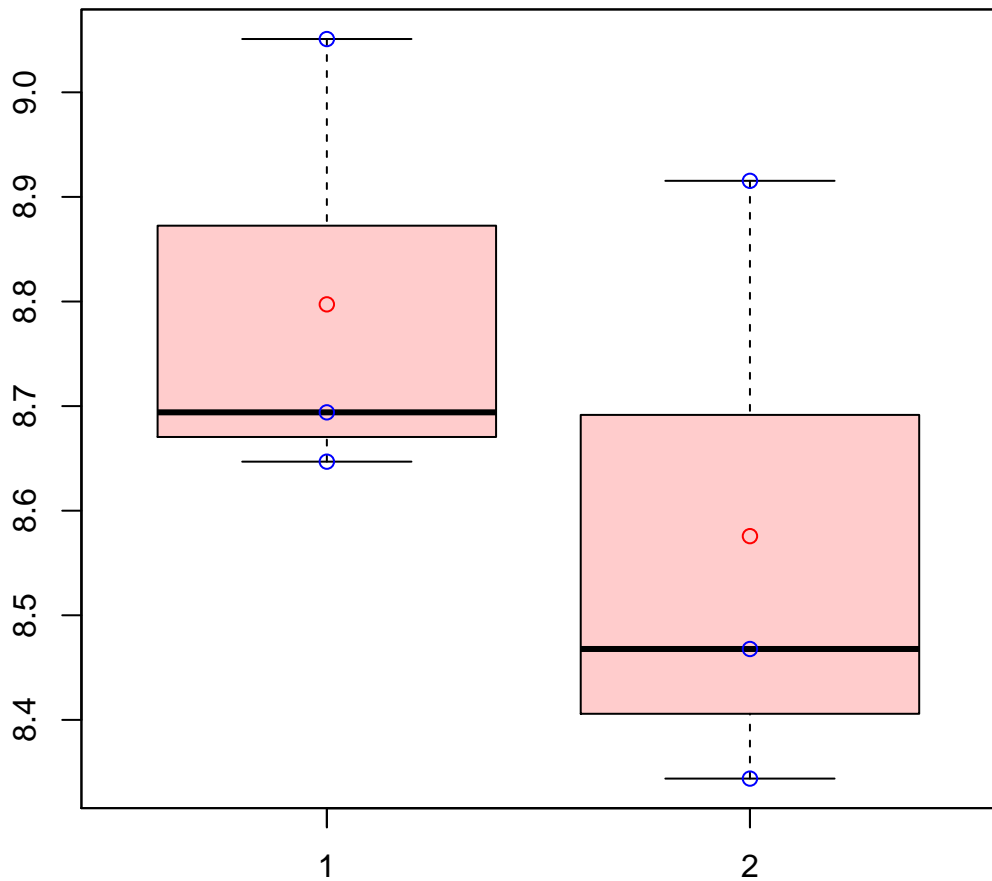

t-Test: p-value = 0.37

# CL1Contig6954|CL1Contig6954

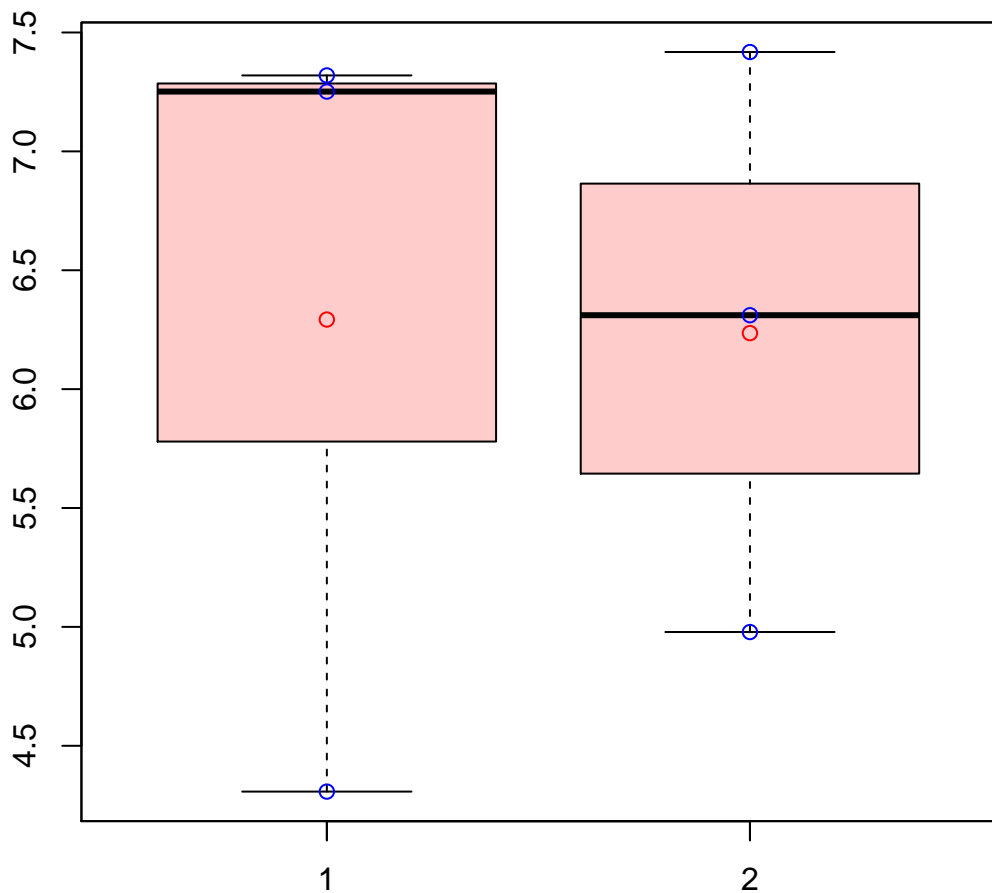

t-Test: p-value = 0.97

# CL1Contig6975|CL1Contig6975



t-Test: p-value = 0.45

# CL1Contig6984|CL1Contig6984

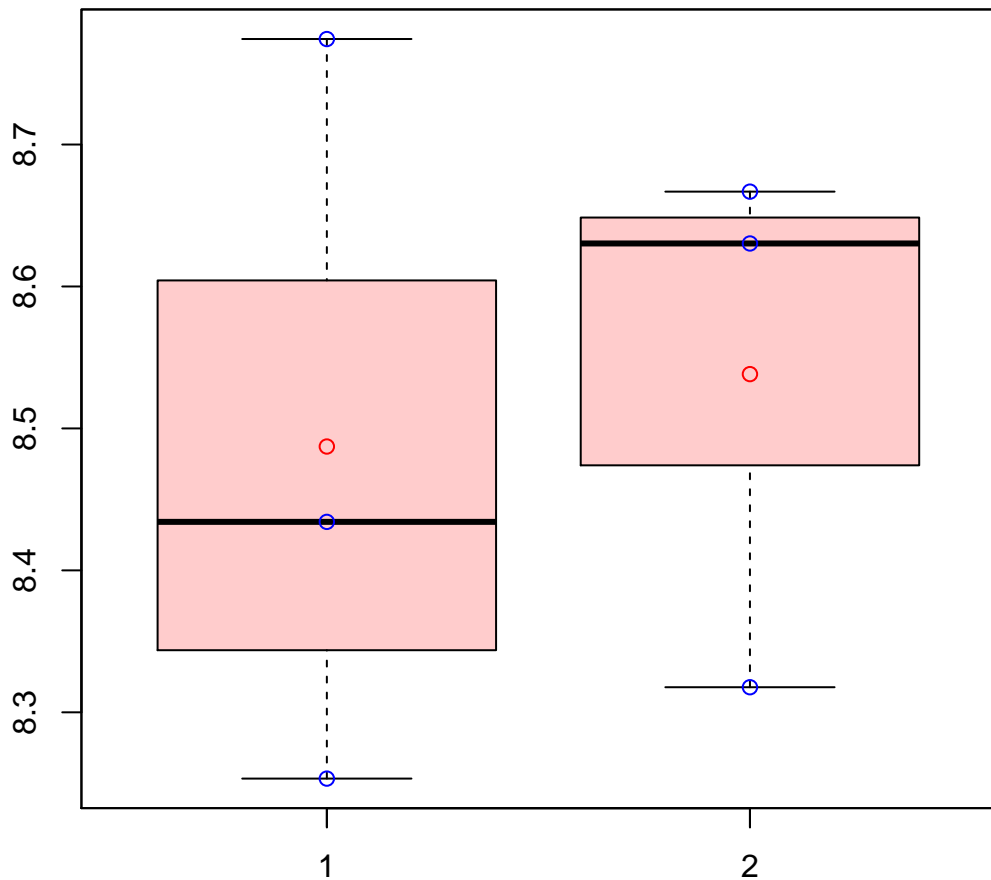

t-Test: p-value = 0.8



# CL1Contig69|CL1Contig69

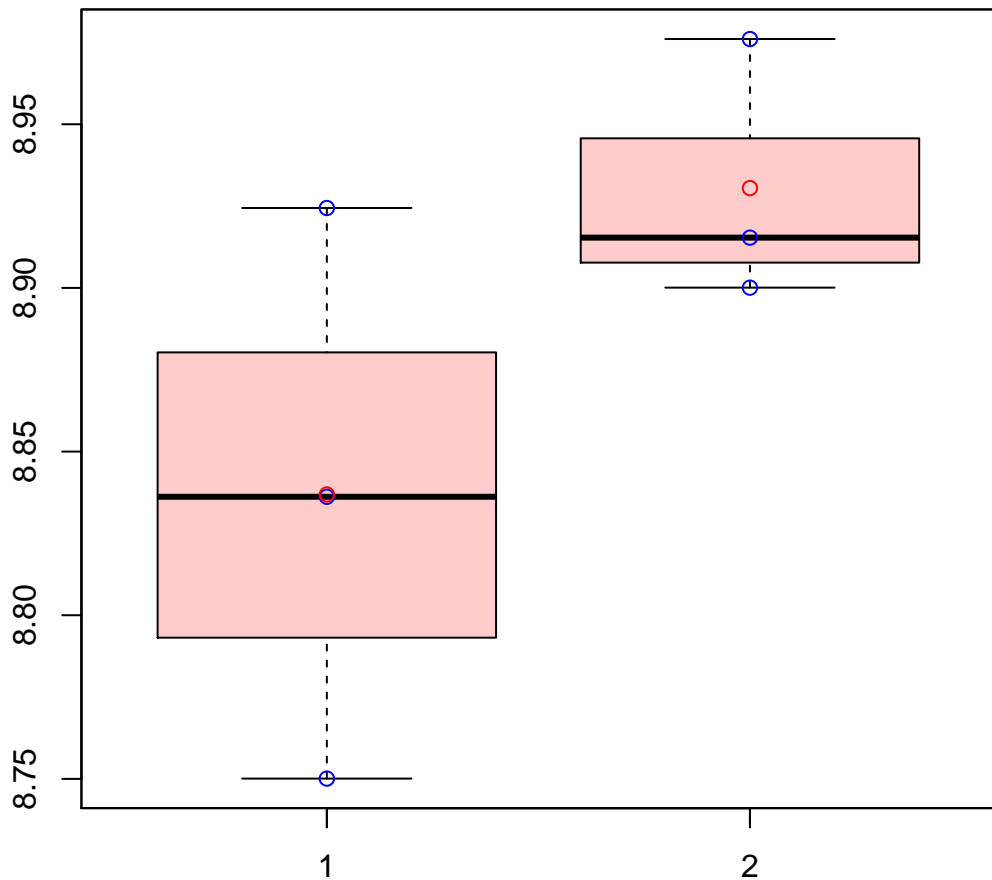

t-Test: p-value = 0.2

# CL1Contig7029|CL1Contig7029

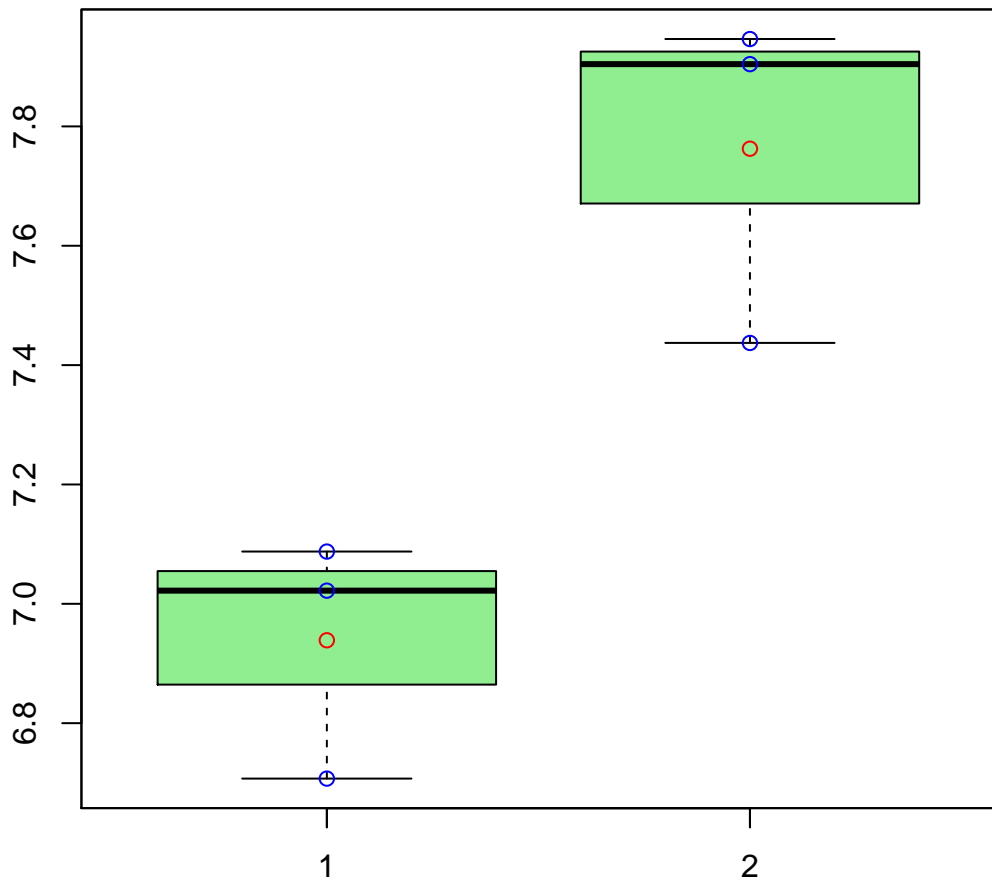

t-Test: p-value = 0.02

# CL1Contig7045|CL1Contig7045



t-Test: p-value = 0.88

# CL1Contig7053|CL1Contig7053



t-Test: p-value = 0.85

# CL1Contig7054|CL1Contig7054



t-Test: p-value = 0.85

# CL1Contig7057|CL1Contig7057

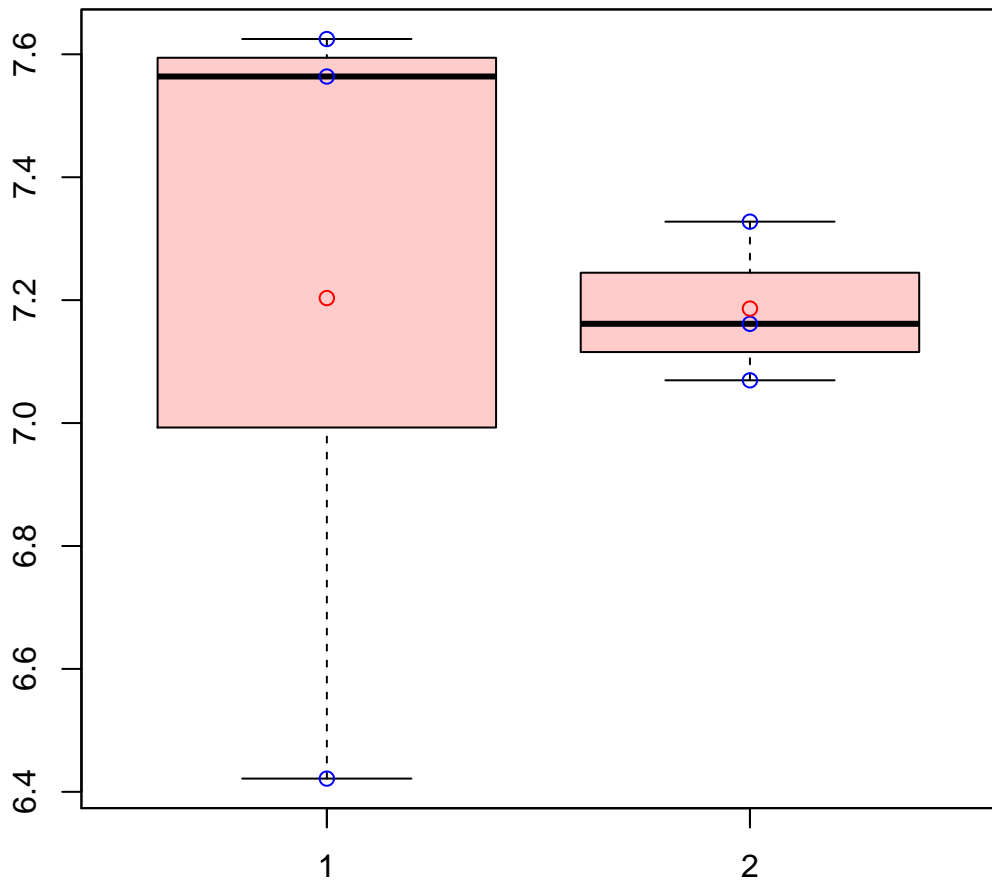

t-Test: p-value = 0.97

# CL1Contig7080|CL1Contig7080

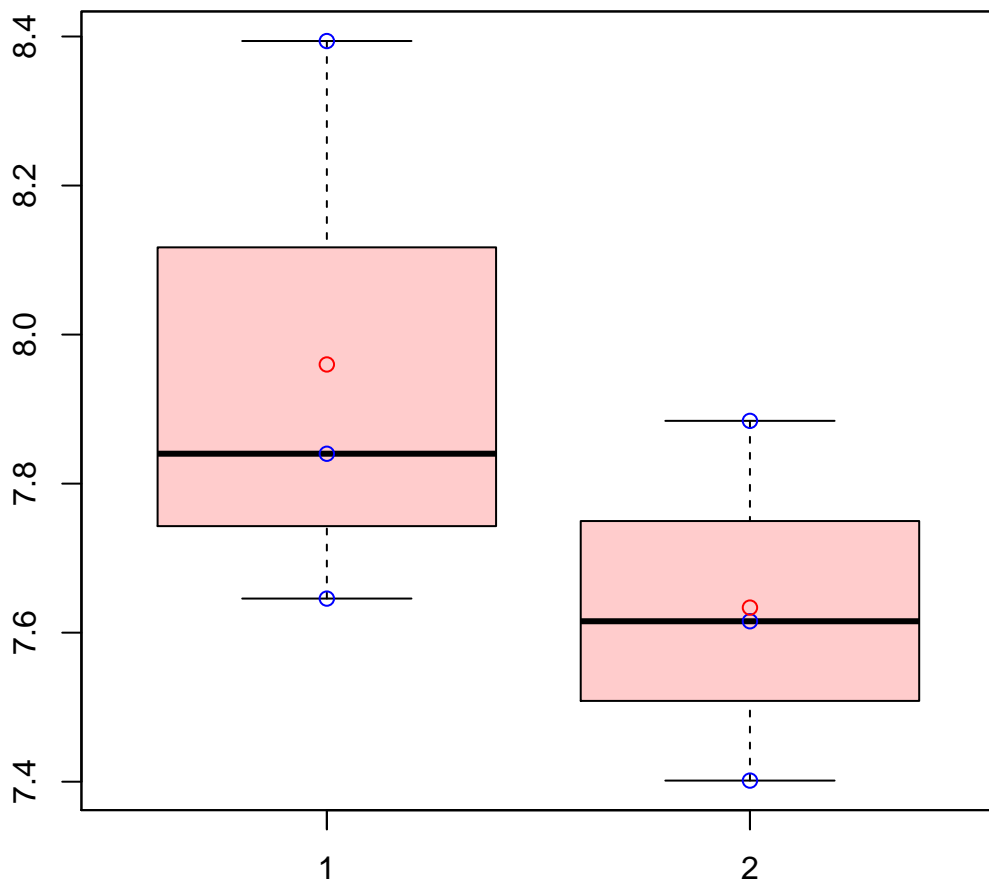

t-Test: p-value = 0.3

# CL1Contig7104|CL1Contig7104

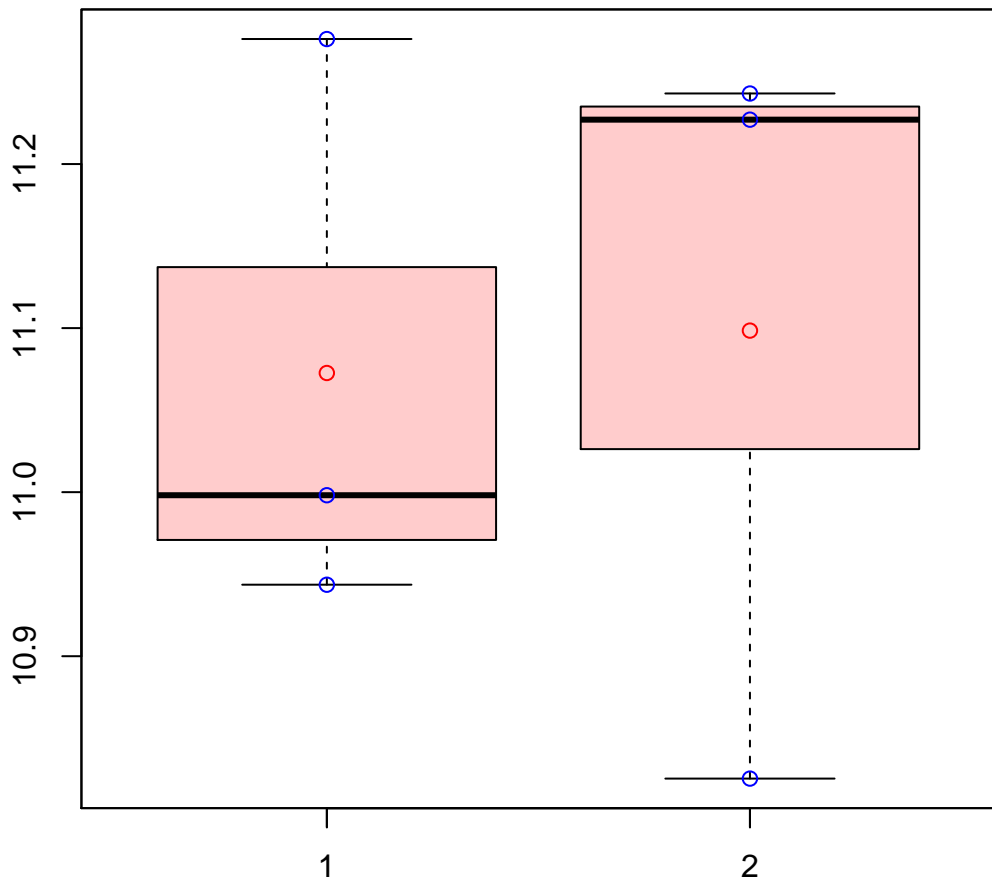

t-Test: p-value = 0.89



# CL1Contig7105|CL1Contig7105



t-Test: p-value = 0.89

# CL1Contig7106|CL1Contig7106

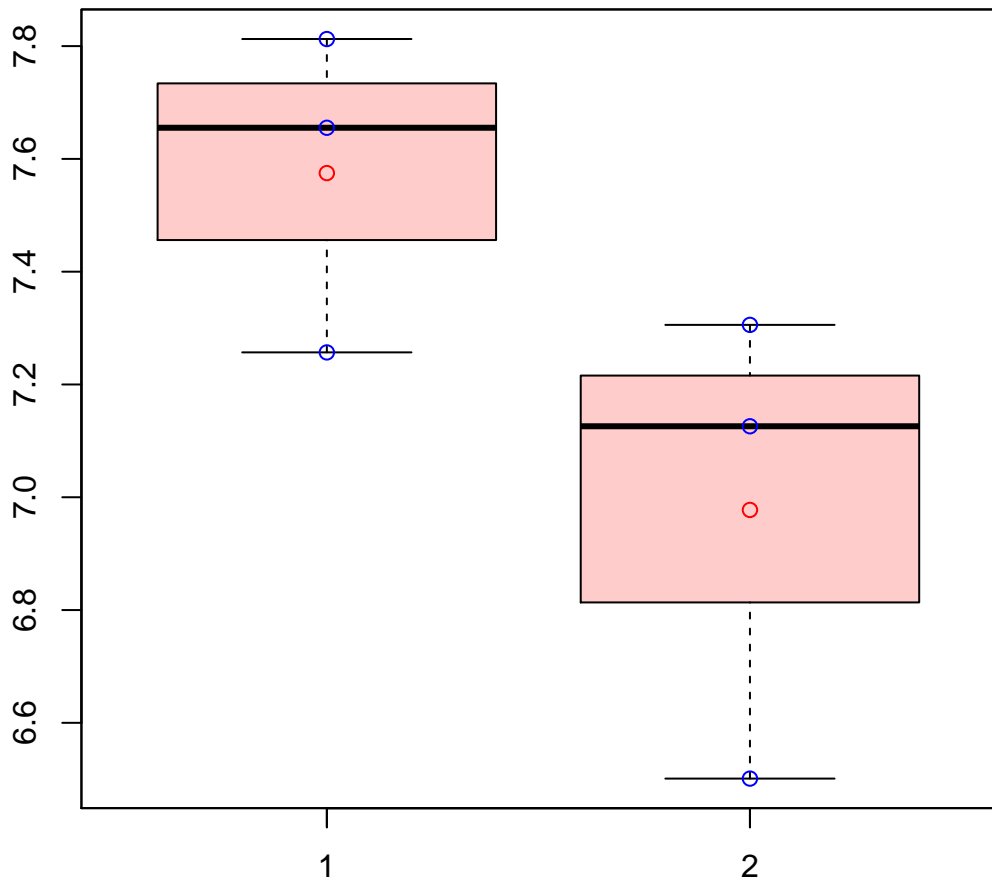

t-Test: p-value = 0.12

# CL1Contig7112|CL1Contig7112

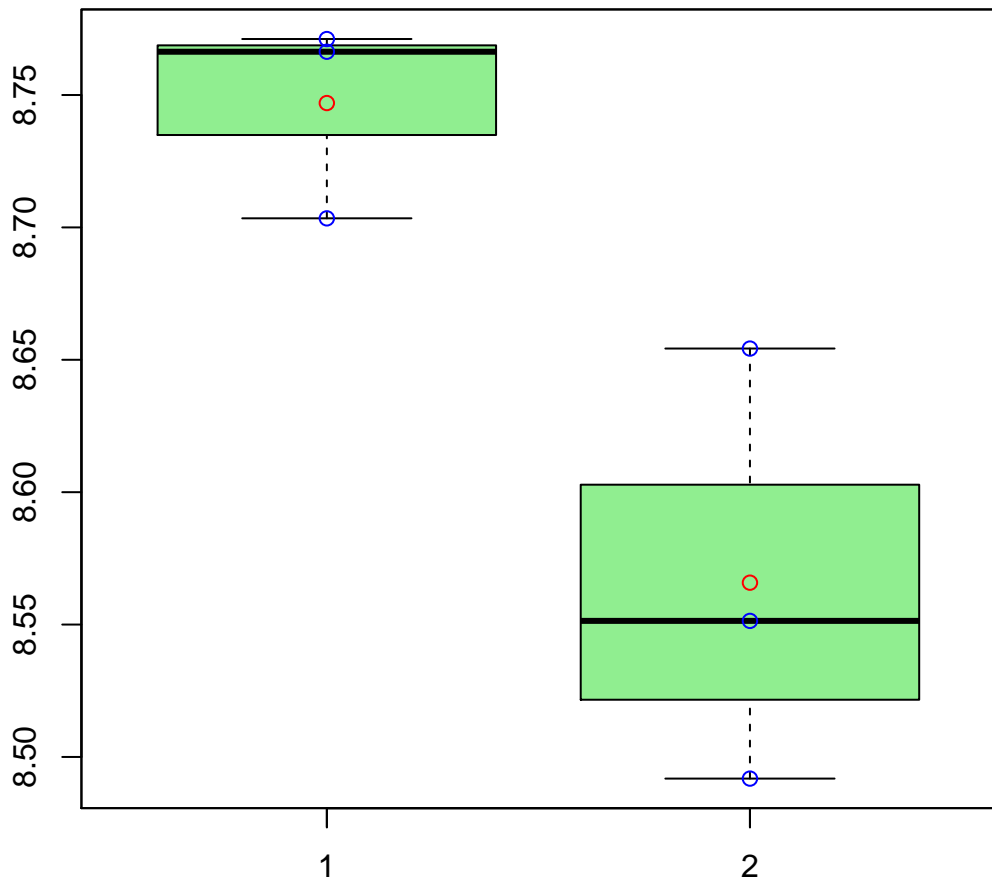

t-Test: p-value = 0.04

# CL1Contig7154|CL1Contig7154

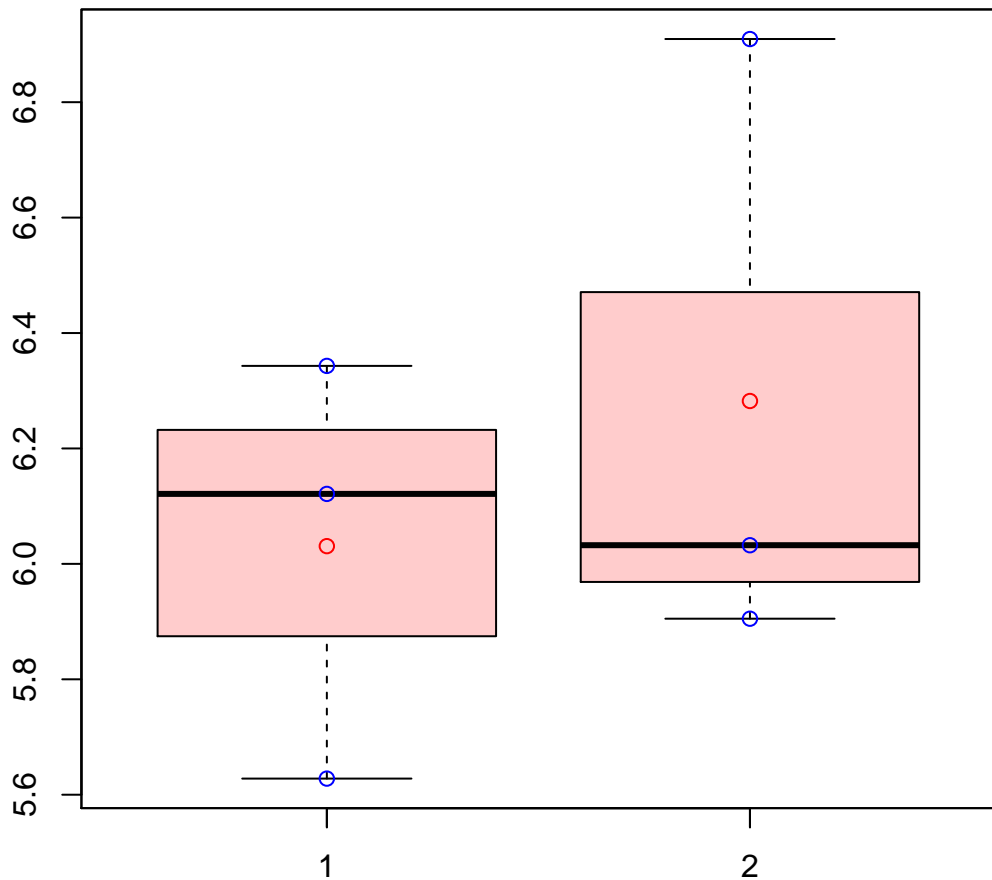

t-Test: p-value = 0.55

# CL1Contig7160|CL1Contig7160

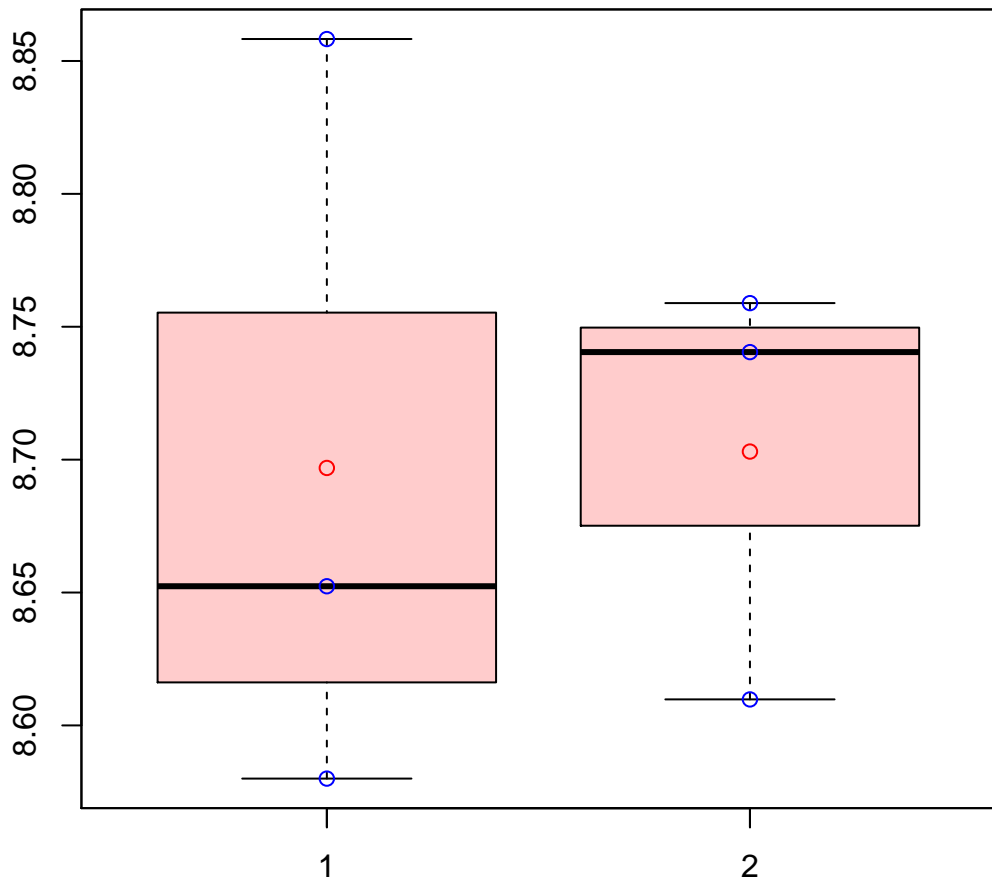

t-Test: p-value = 0.95

# CL1Contig7165|CL1Contig7165

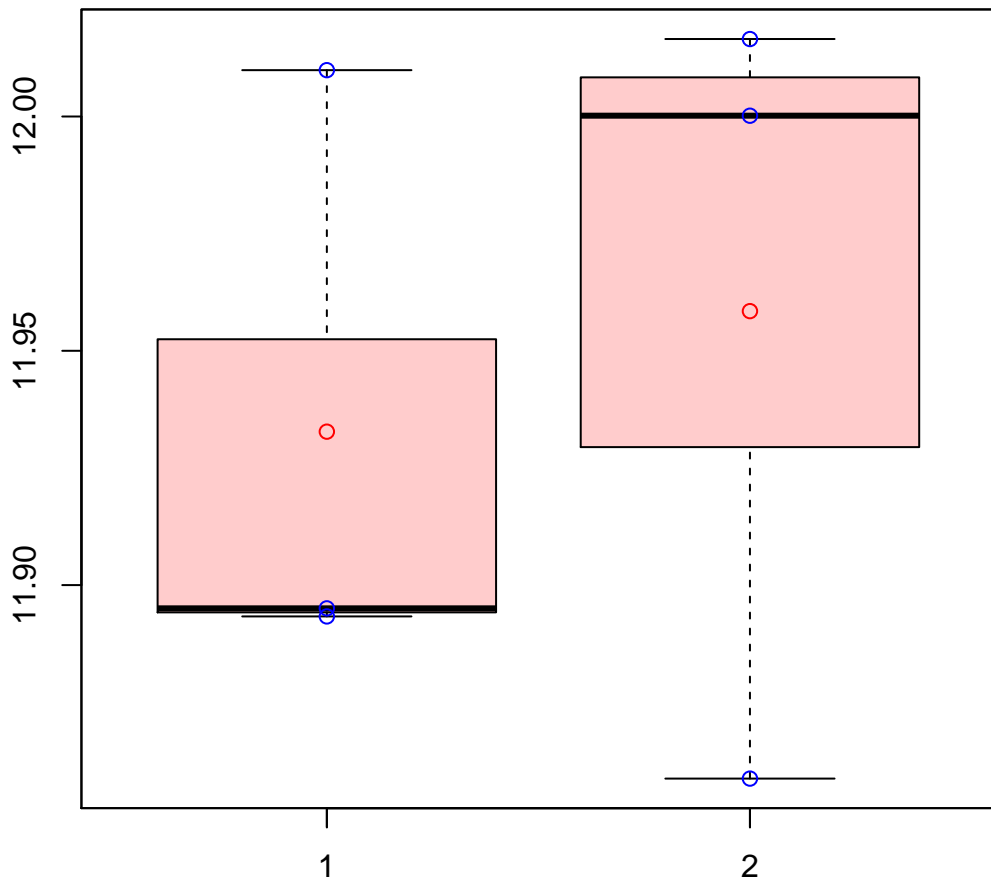

t-Test: p-value = 0.71

# CL1Contig7168|CL1Contig7168

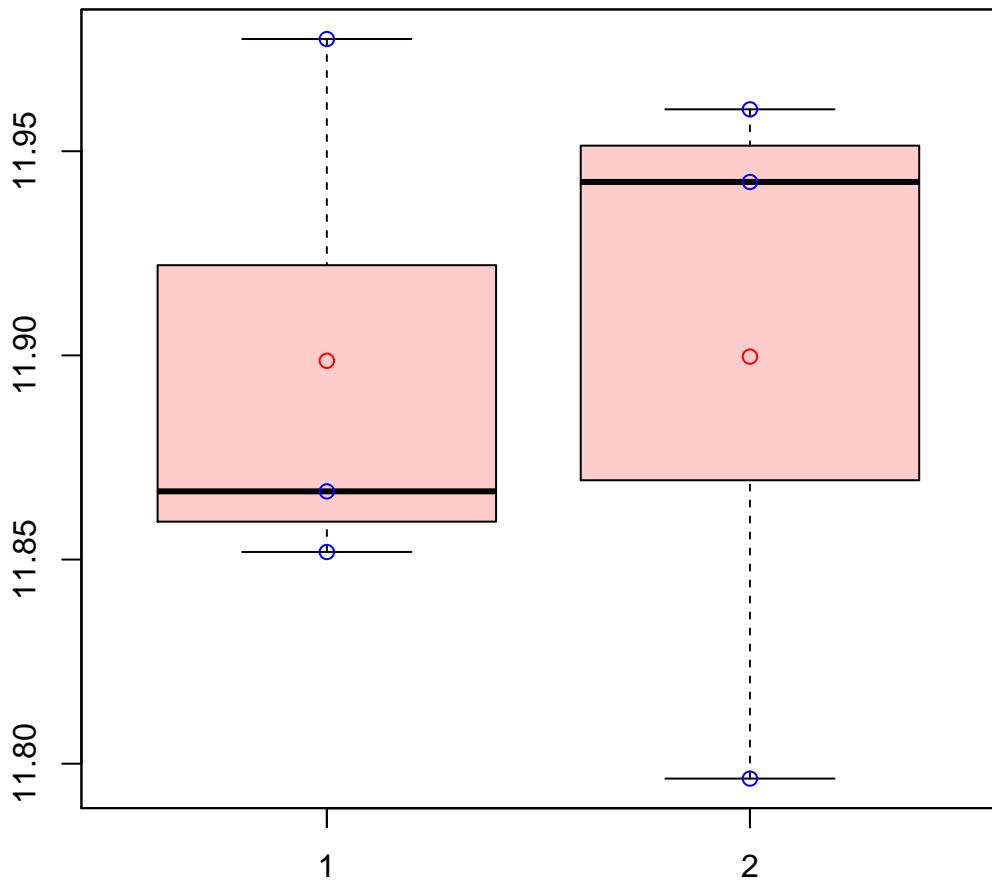

t-Test: p-value = 0.99

# CL1Contig7180|CL1Contig7180

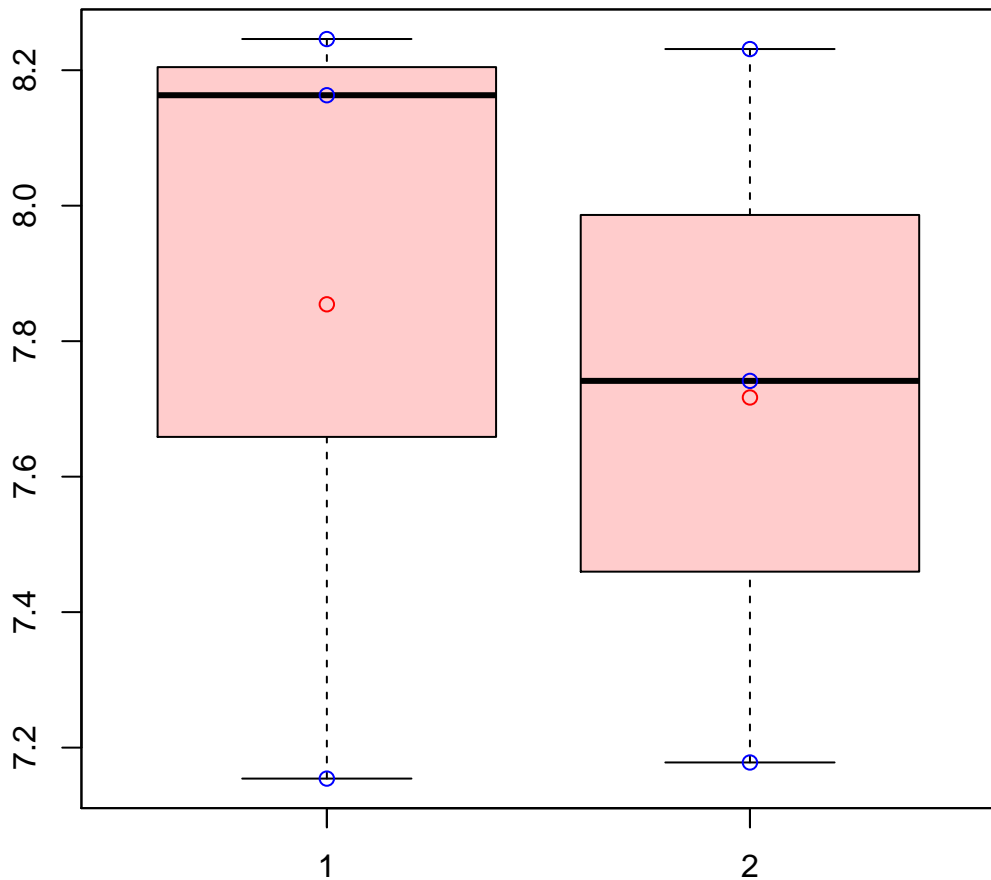

t-Test: p-value = 0.78



# CL1Contig719|CL1Contig719

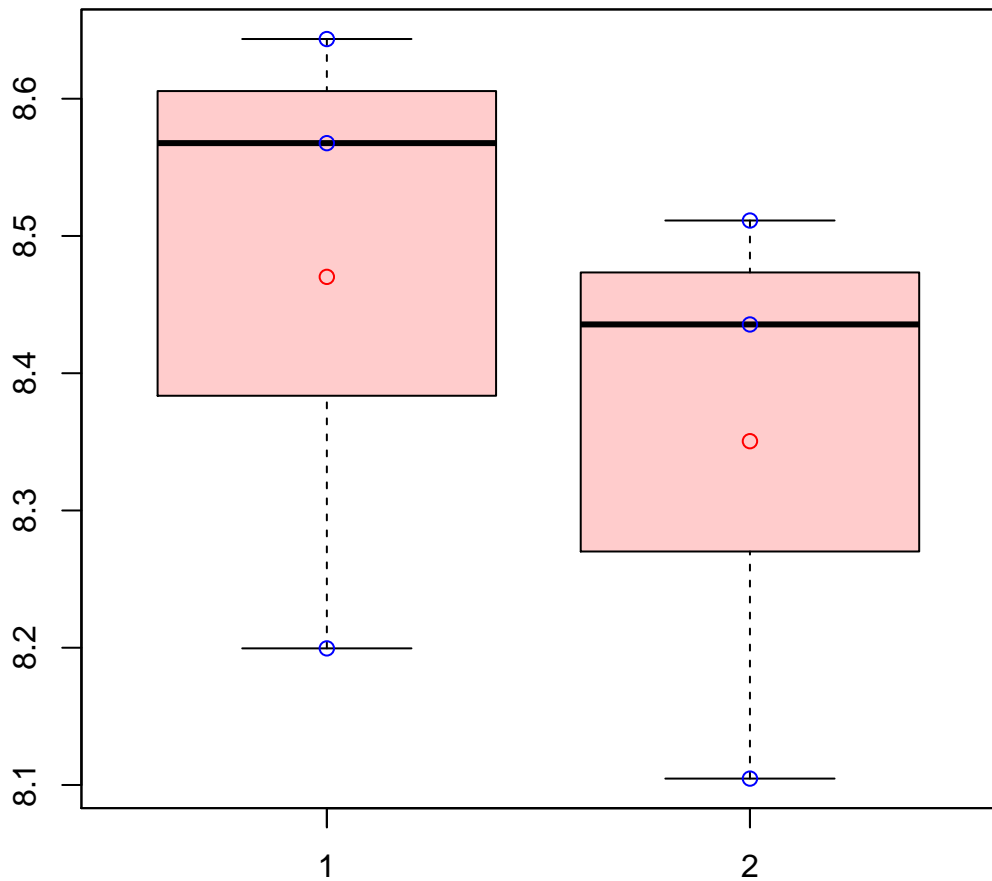

t-Test: p-value = 0.55

# CL1Contig7224|CL1Contig7224

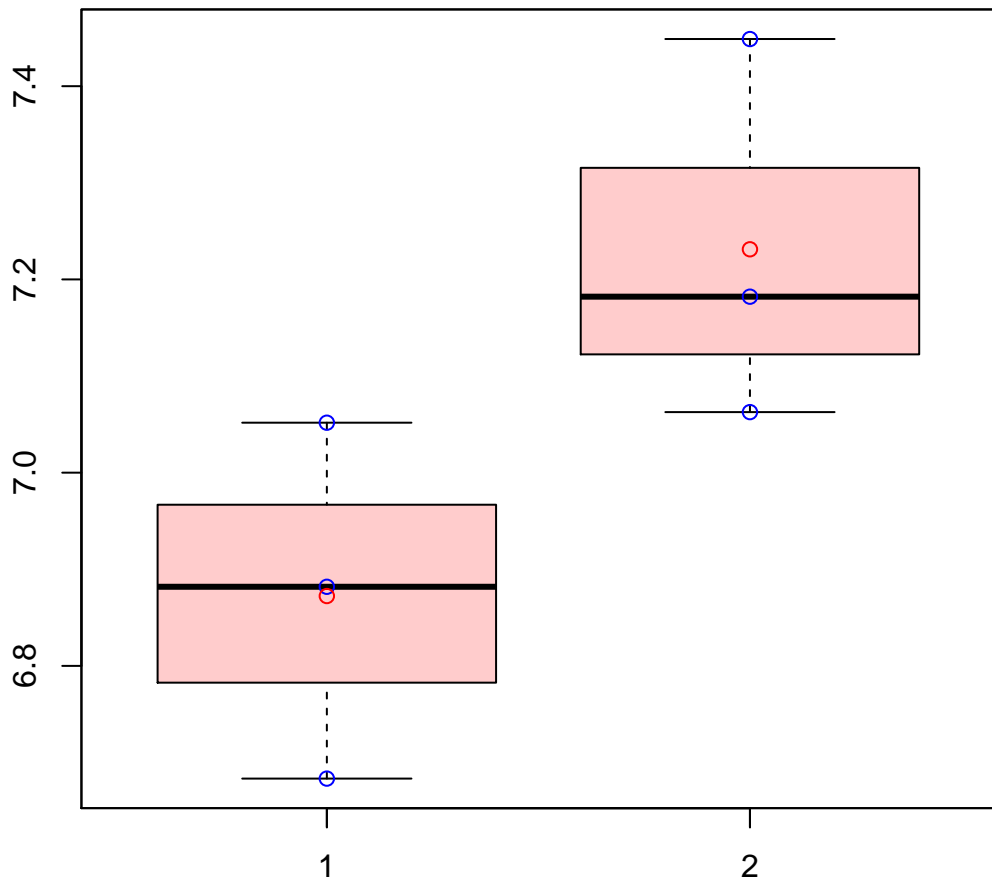

t-Test: p-value = 0.08

# CL1Contig7241|CL1Contig7241

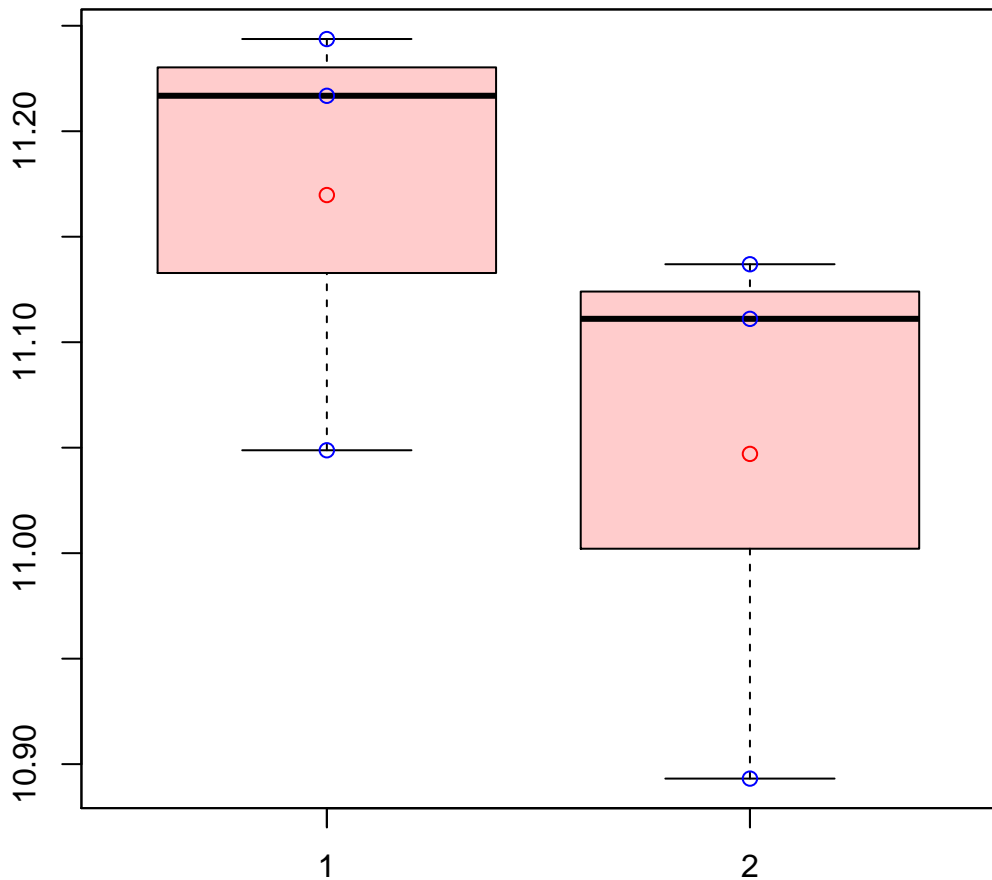

t-Test: p-value = 0.28

# CL1Contig7266|CL1Contig7266

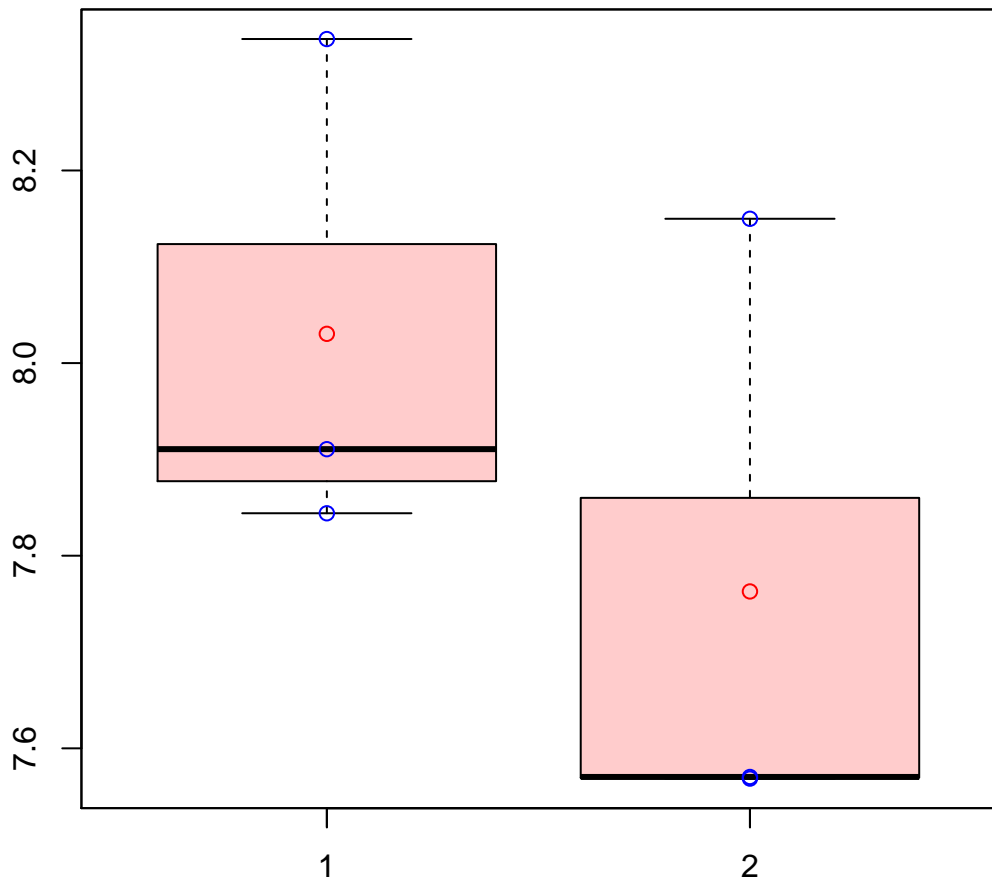

t-Test: p-value = 0.34

# CL1Contig7306|CL1Contig7306

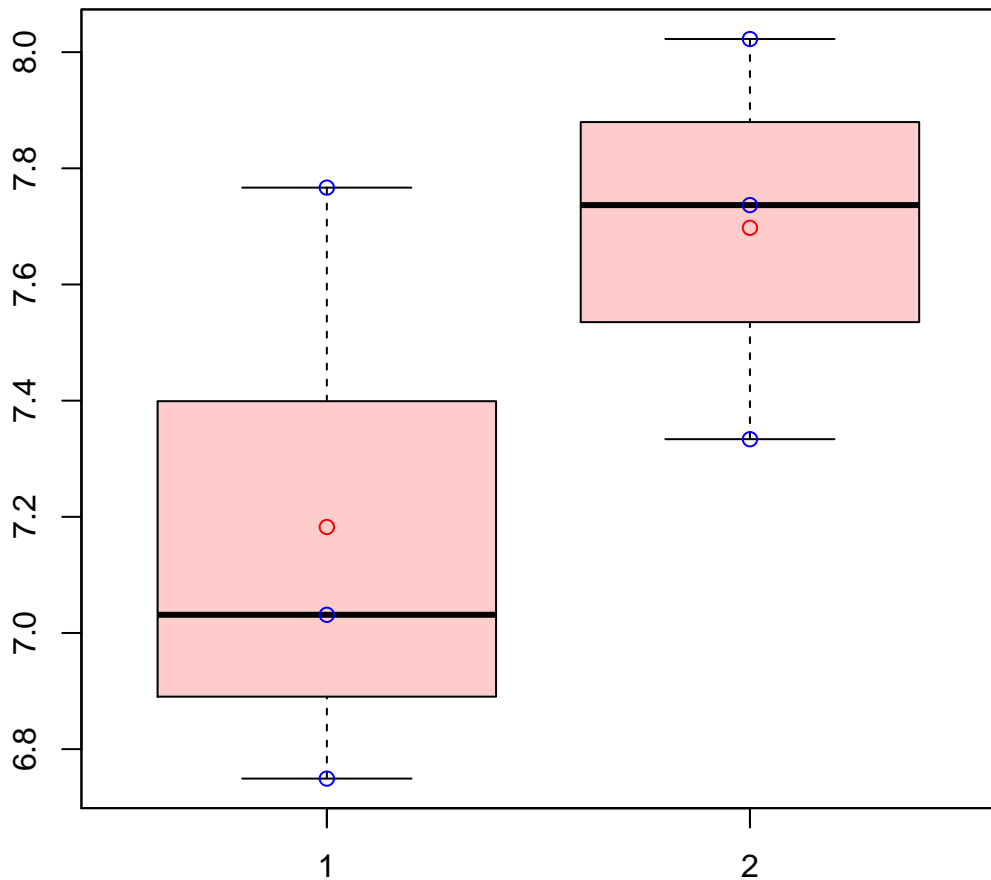

t-Test: p-value = 0.24

# CL1Contig7321|CL1Contig7321

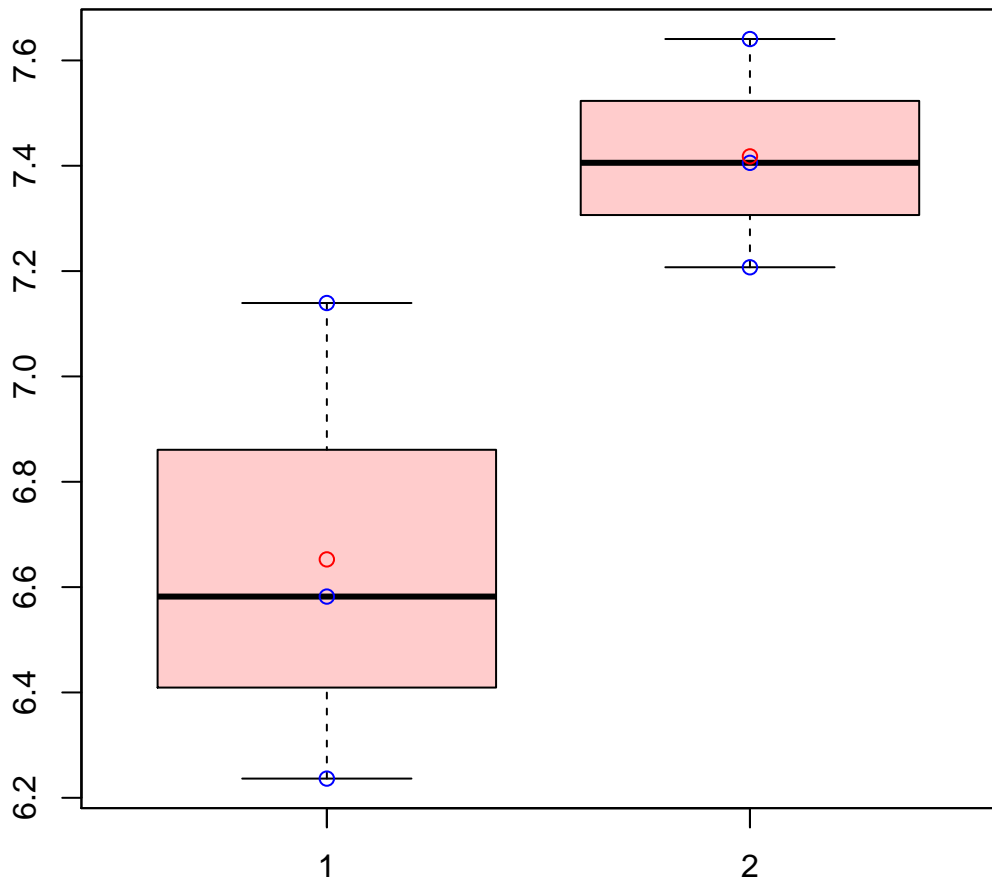

t-Test: p-value = 0.08

# CL1Contig733|CL1Contig733

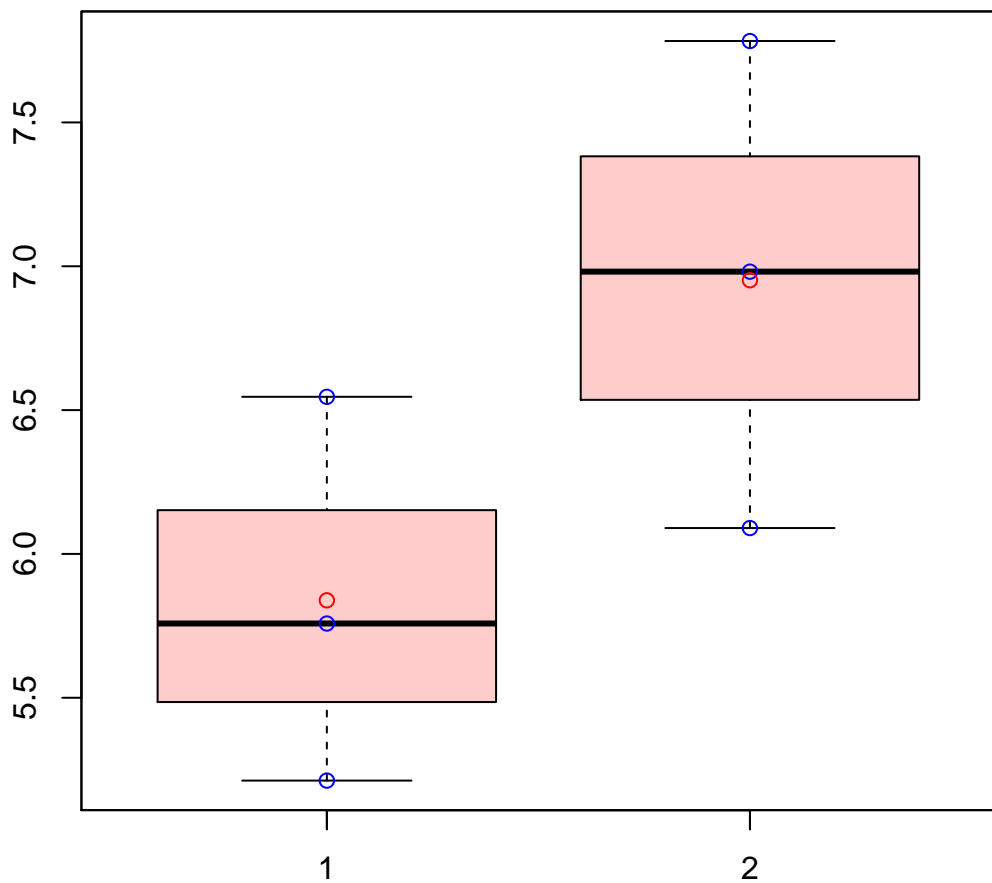

t-Test: p-value = 0.15

# CL1Contig7376|CL1Contig7376



t-Test: p-value = 0.52



# CL1Contig7383|CL1Contig7383

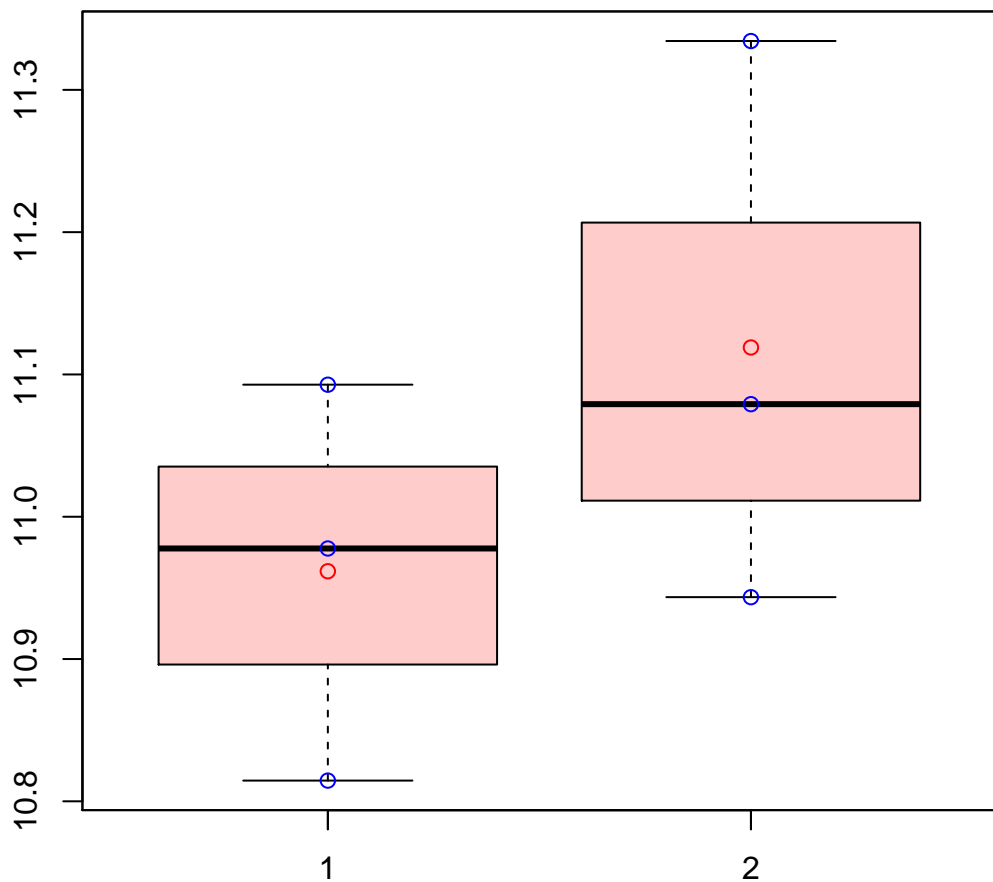

t-Test: p-value = 0.33

# CL1Contig7392|CL1Contig7392

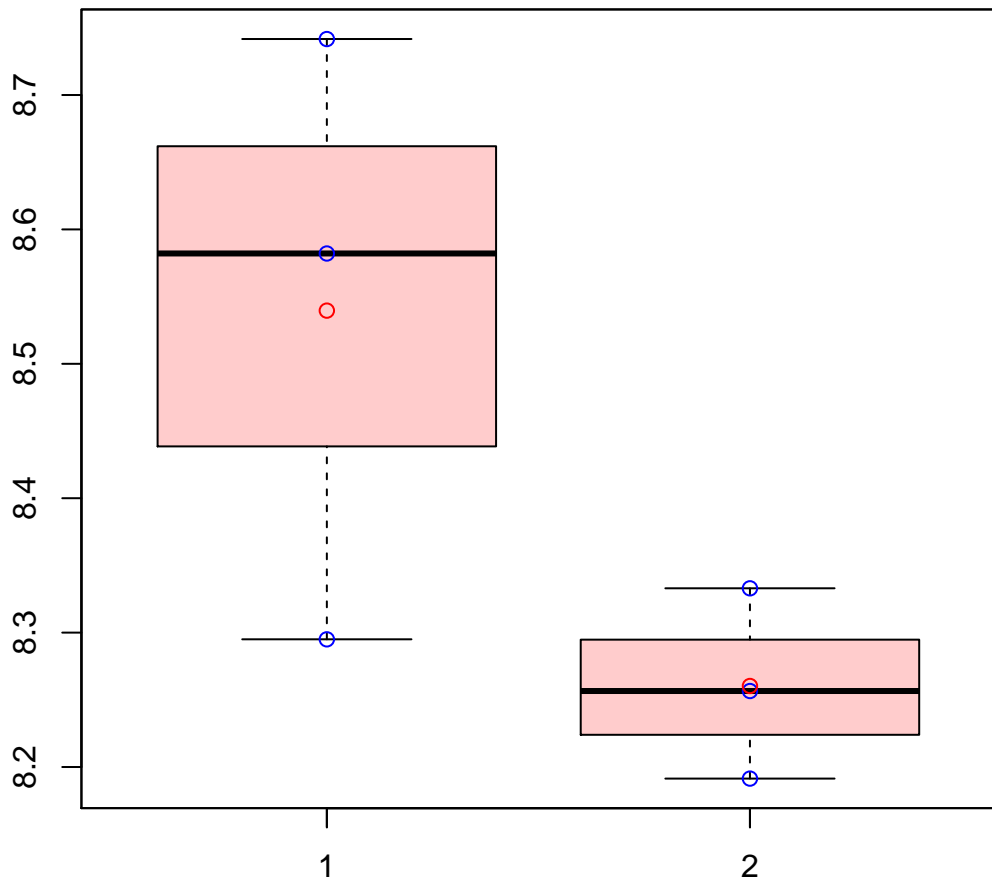

t-Test: p-value = 0.16

# CL1Contig7427|CL1Contig7427



t-Test: p-value = 0.9

# CL1Contig7438|CL1Contig7438

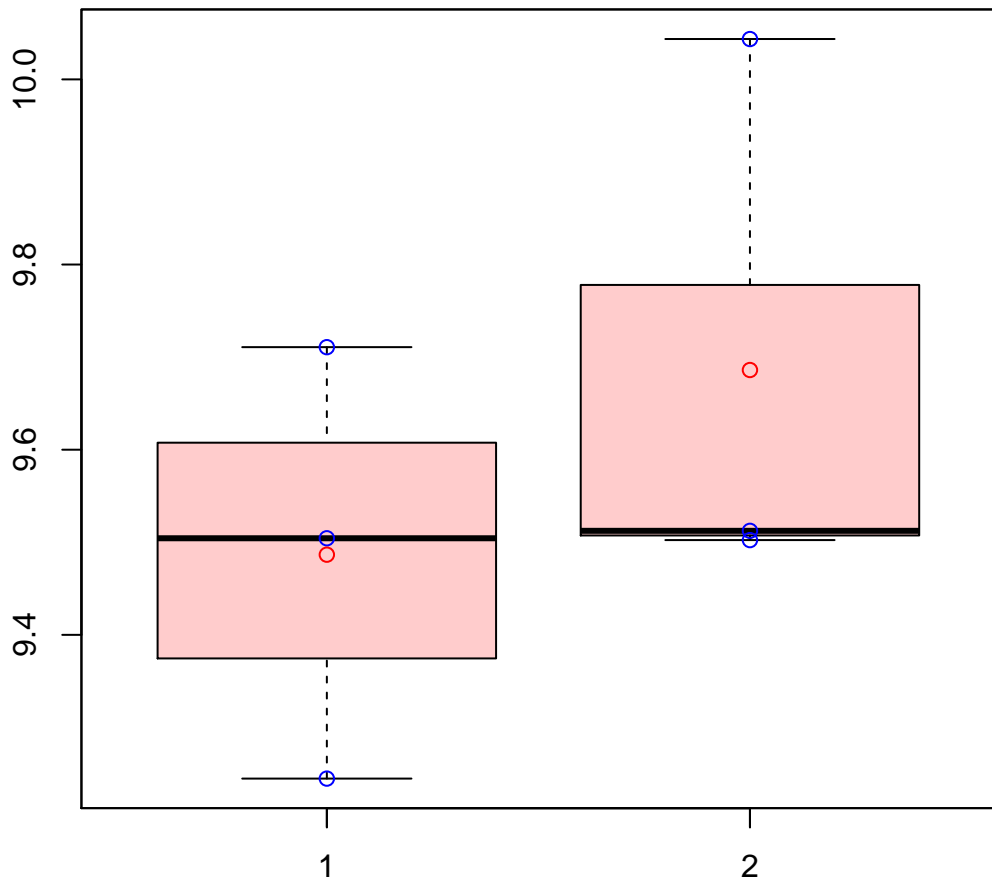

t-Test: p-value = 0.43

# CL1Contig7467|CL1Contig7467

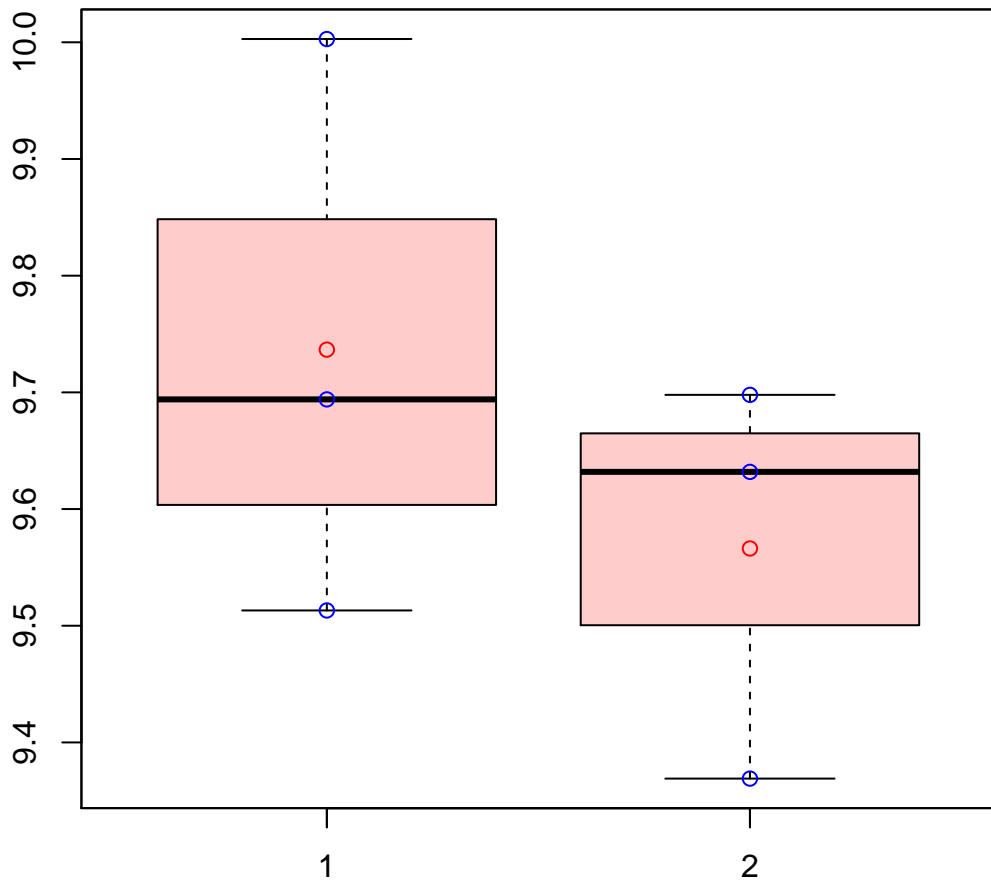

t-Test: p-value = 0.39

# CL1Contig7472|CL1Contig7472

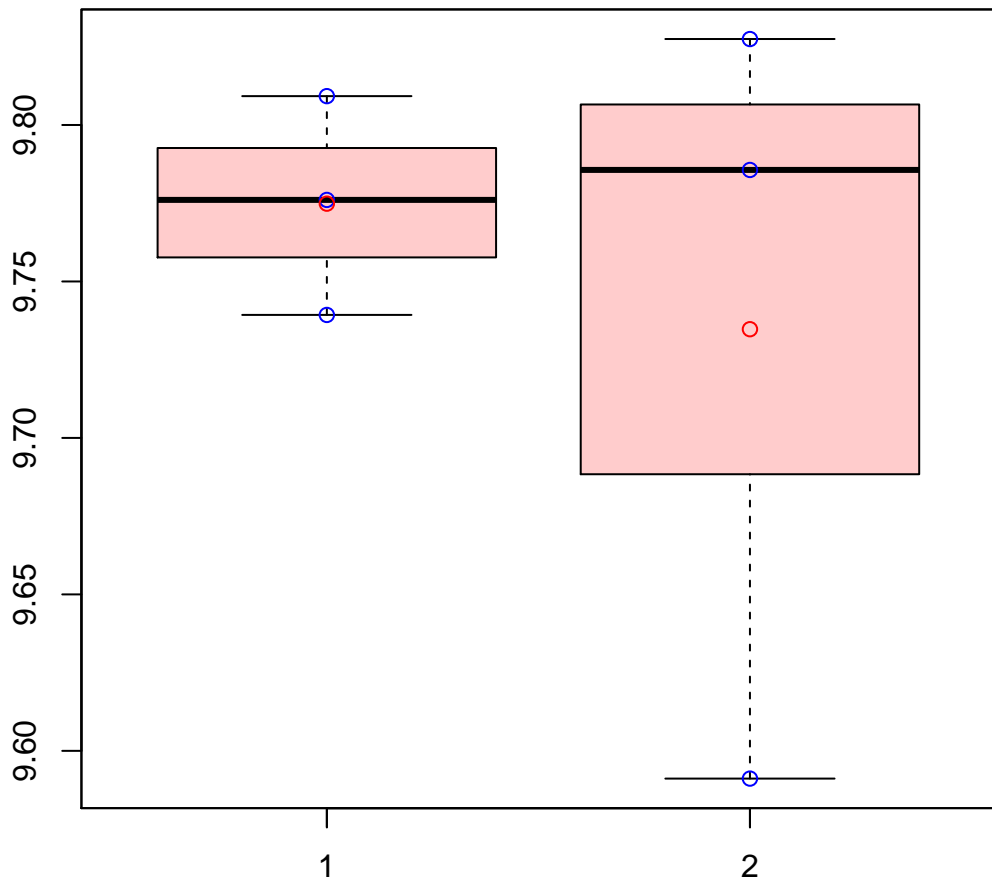

t-Test: p-value = 0.64

# CL1Contig7473|CL1Contig7473

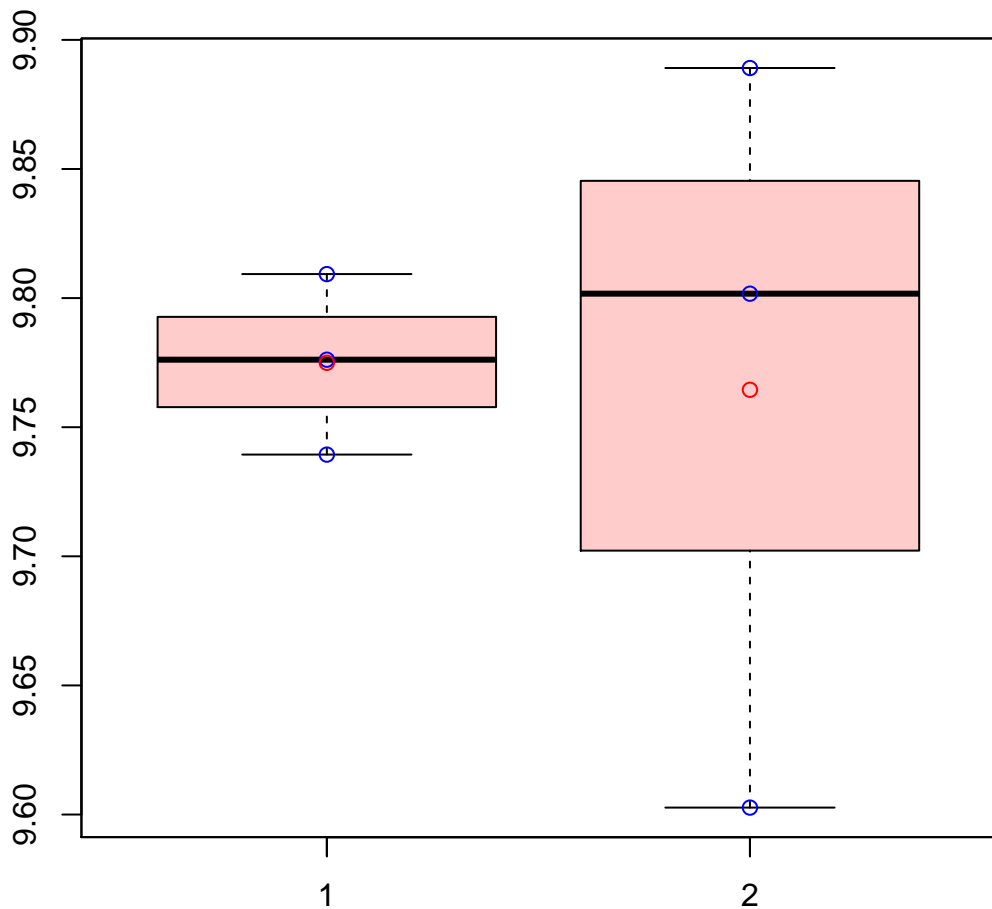

t-Test: p-value = 0.91

# CL1Contig7490|CL1Contig7490

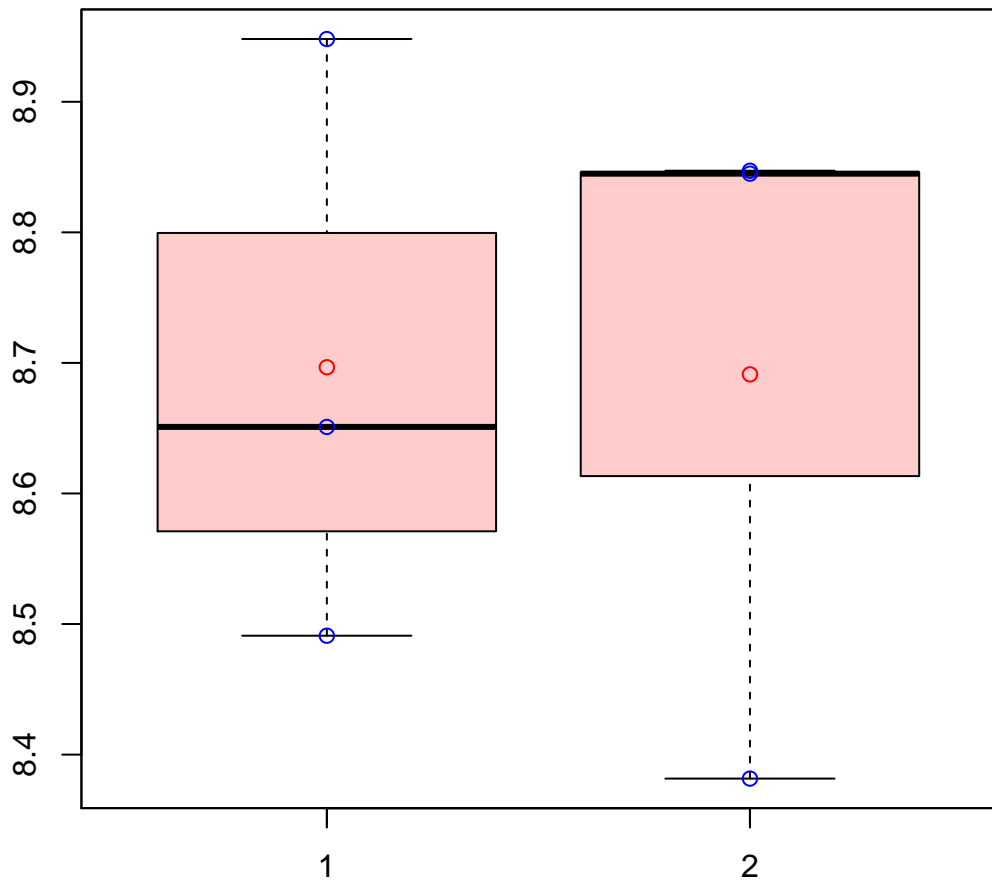

t-Test: p-value = 0.98



# CL1Contig7496|CL1Contig7496

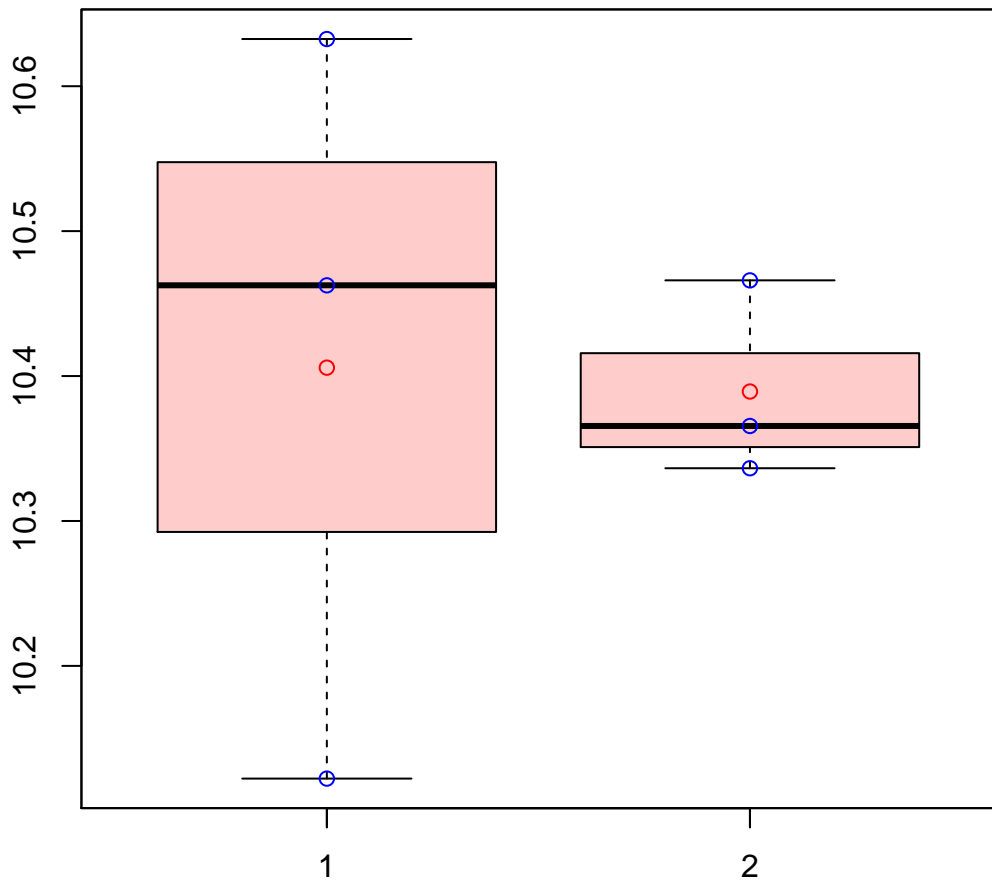

t-Test: p-value = 0.92

# CL1Contig749|CL1Contig749

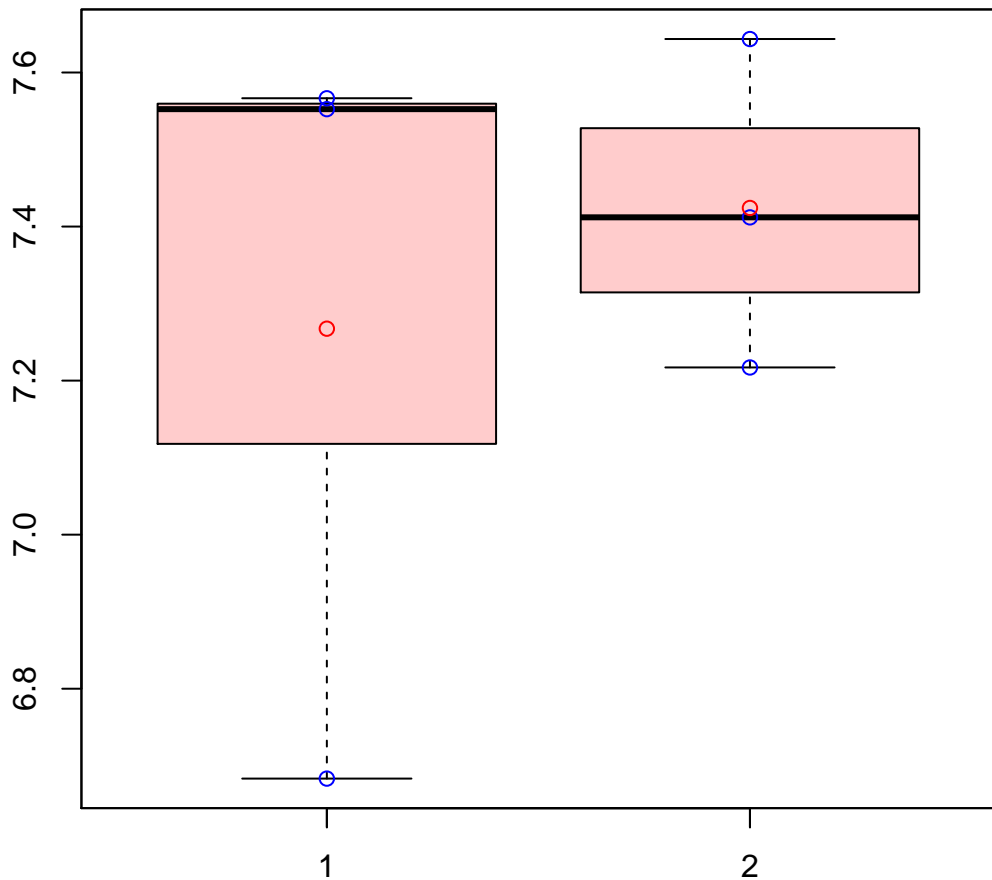

t-Test: p-value = 0.66

# CL1Contig7520|CL1Contig7520



t-Test: p-value = 0.57

# CL1Contig7567|CL1Contig7567

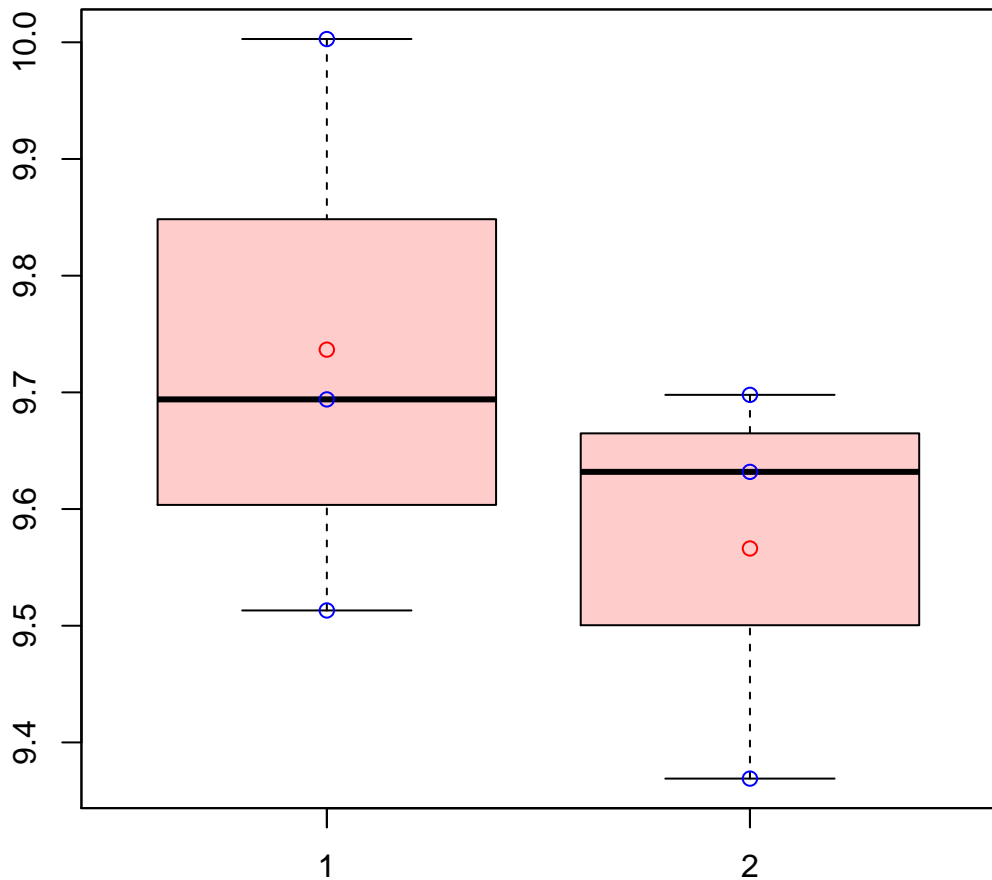

t-Test: p-value = 0.39

# CL1Contig7578|CL1Contig7578

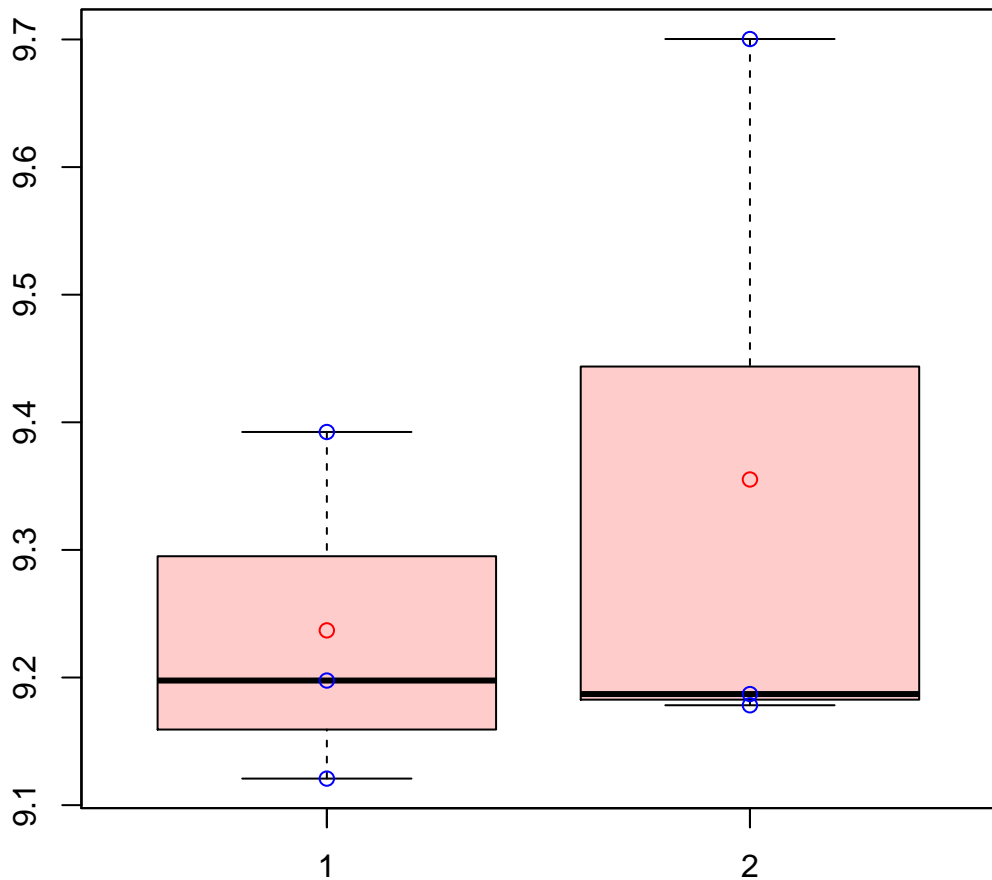

t-Test: p-value = 0.58

# CL1Contig7589|CL1Contig7589



t-Test: p-value = 0.72

# CL1Contig7611|CL1Contig7611

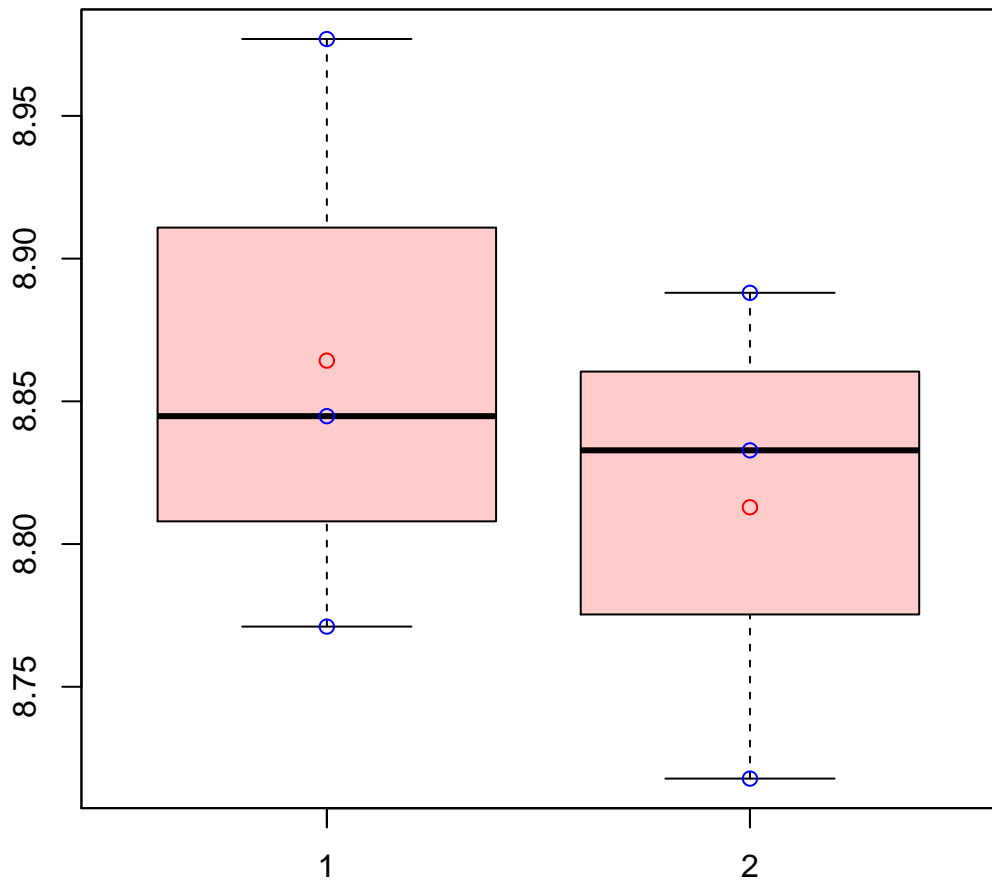

t-Test: p-value = 0.55

# CL1Contig7636|CL1Contig7636



t-Test: p-value = 0.58



# CL1Contig7657|CL1Contig7657

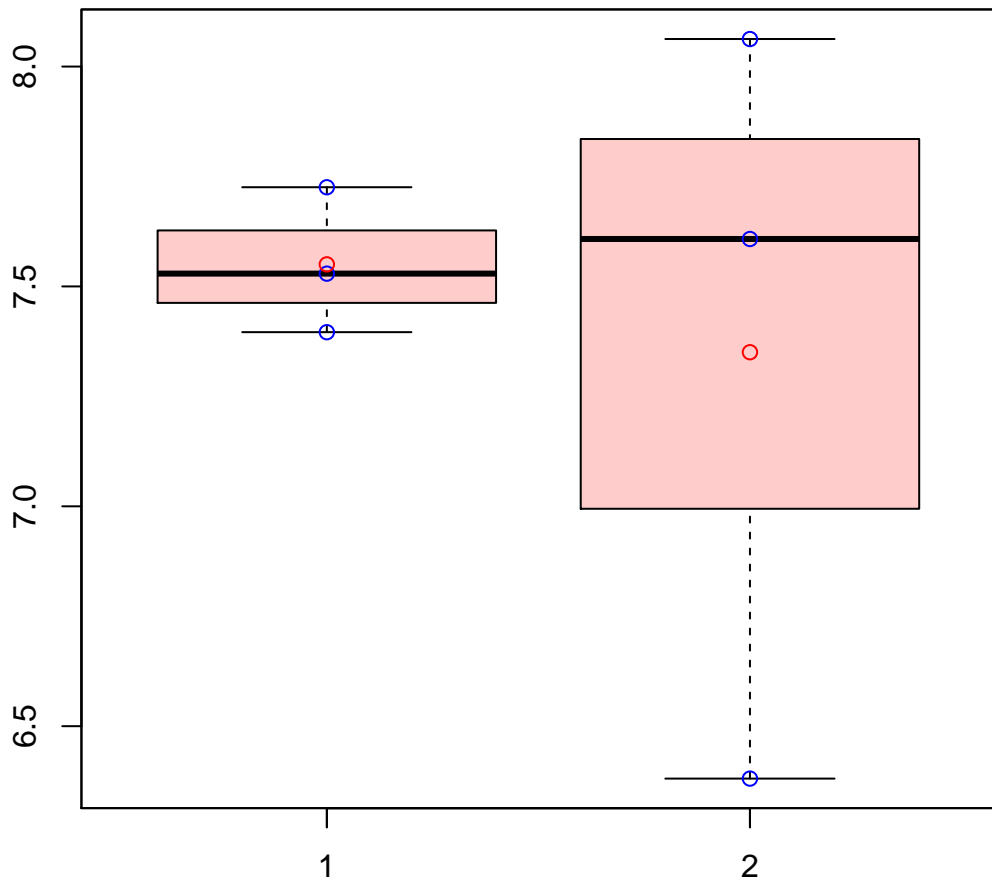

t-Test: p-value = 0.73

# CL1Contig7658|CL1Contig7658



t-Test: p-value = 0.73

# CL1Contig7659|CL1Contig7659

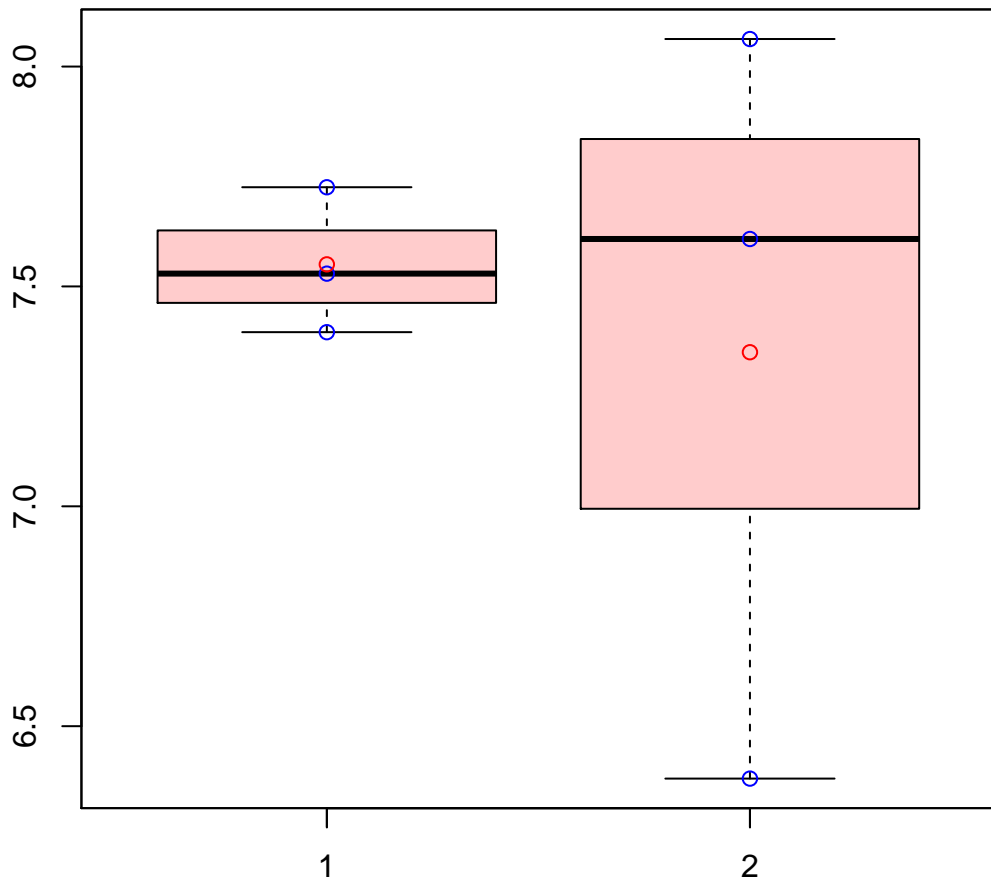

t-Test: p-value = 0.73

# CL1Contig7667|CL1Contig7667

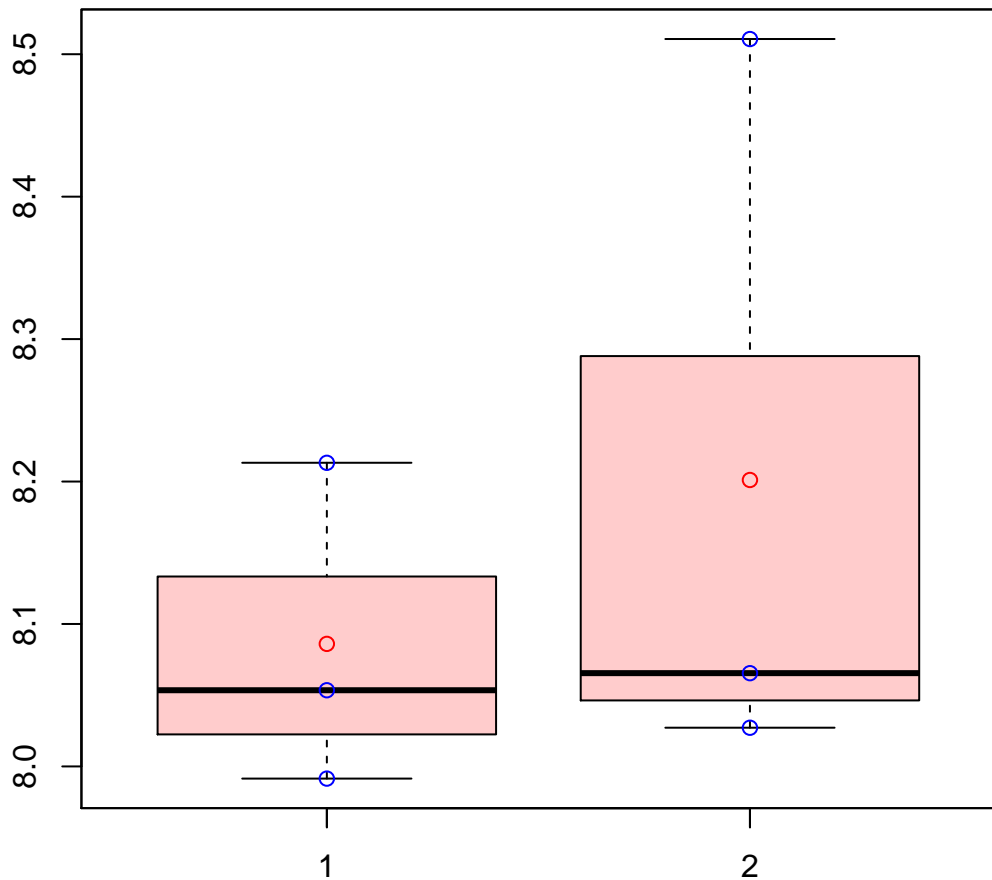

t-Test: p-value = 0.55

# CL1Contig7684|CL1Contig7684

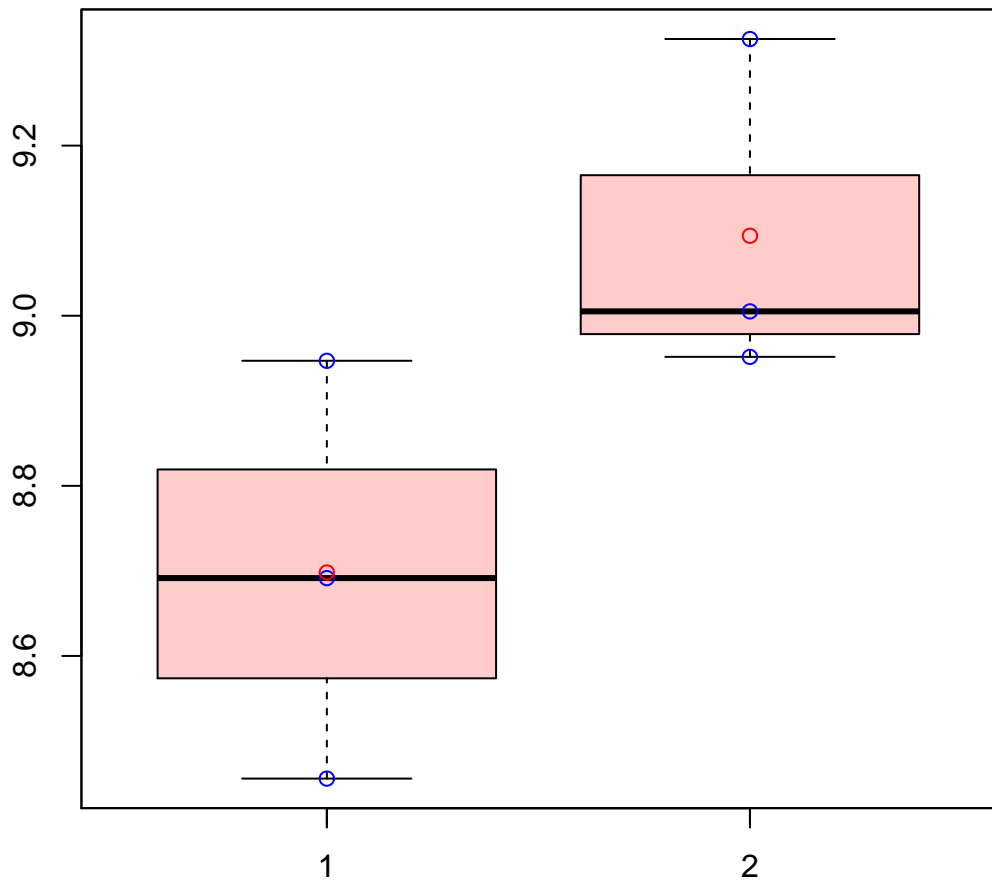

t-Test: p-value = 0.1

# CL1Contig769|CL1Contig769

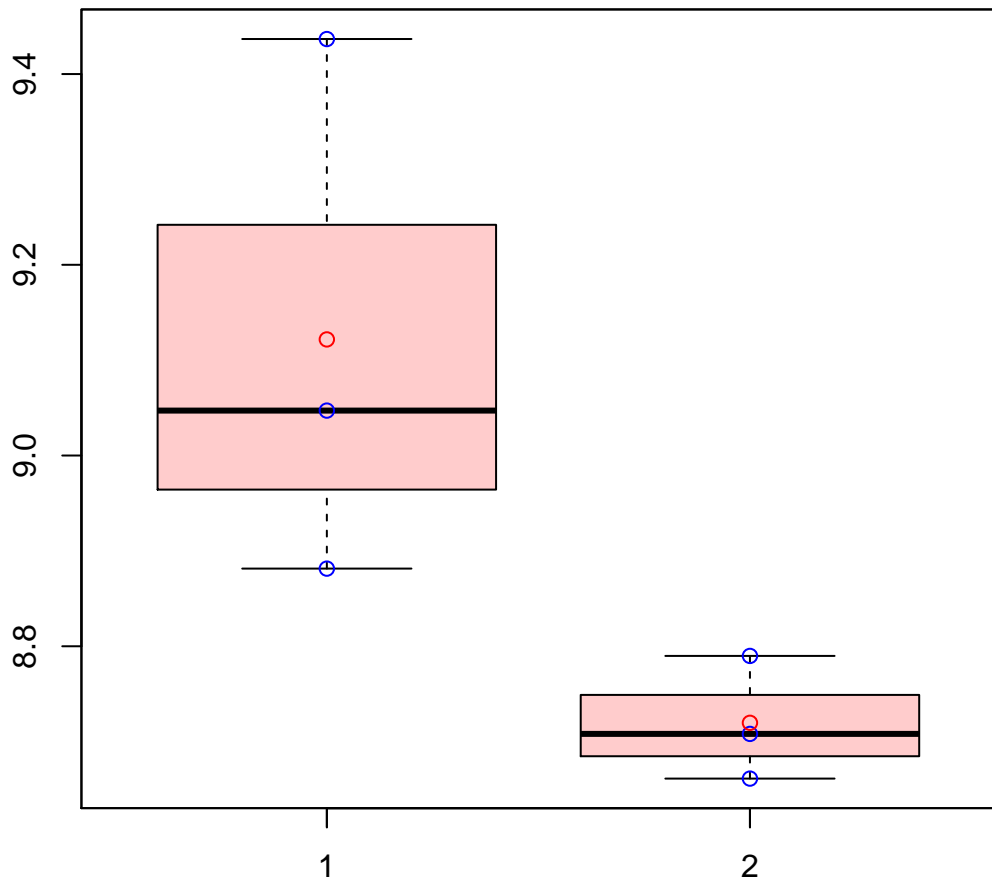

t-Test: p-value = 0.13

# CL1Contig7721|CL1Contig7721

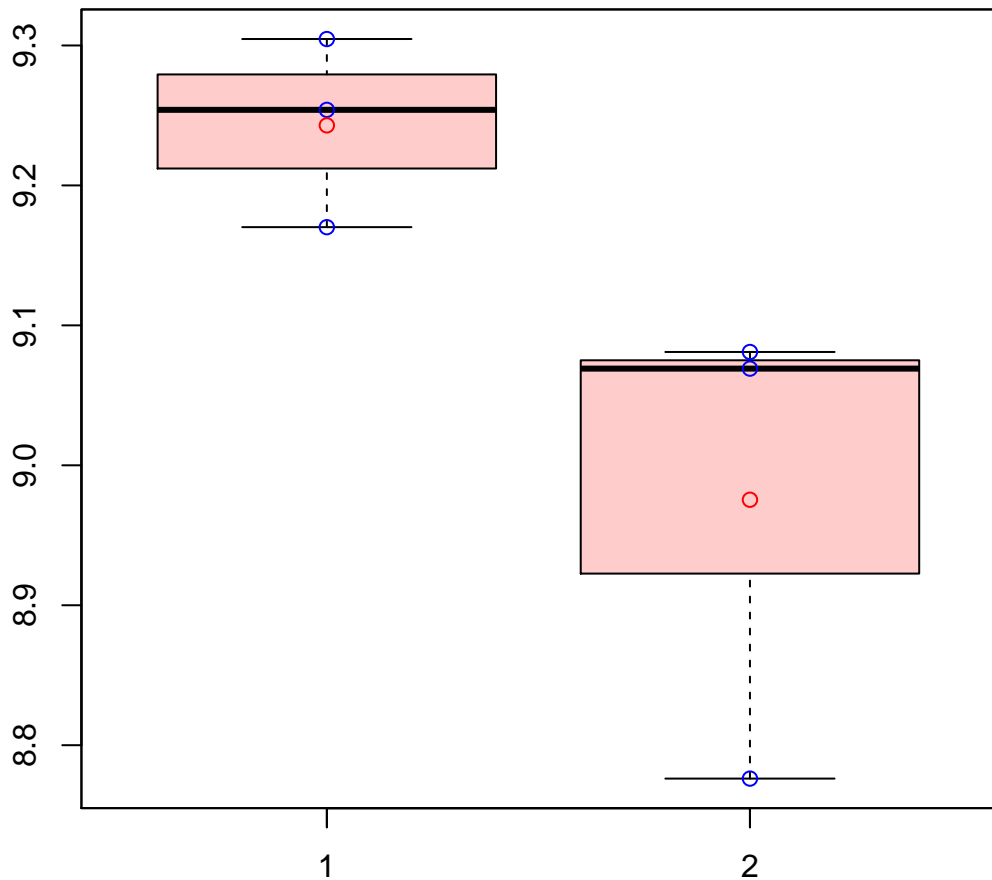

t-Test: p-value = 0.1

# CL1Contig7722|CL1Contig7722



t-Test: p-value = 0.1



# CL1Contig772|CL1Contig772

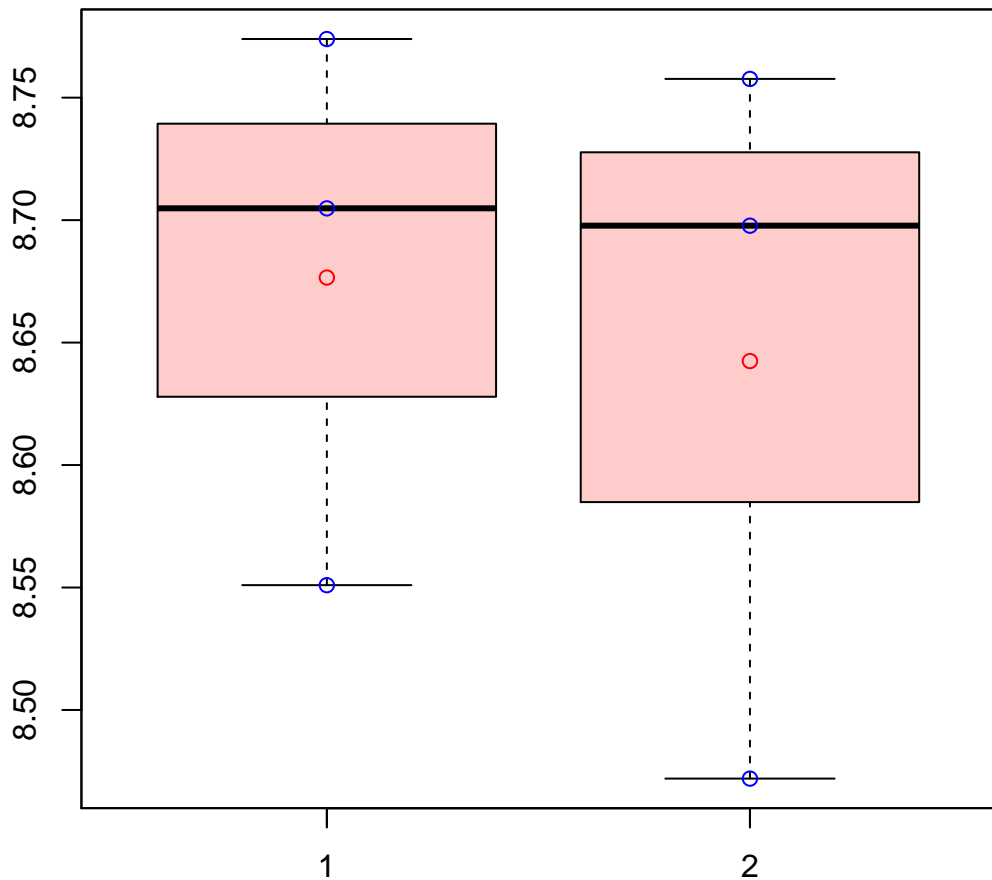

t-Test: p-value = 0.77

# CL1Contig7740|CL1Contig7740

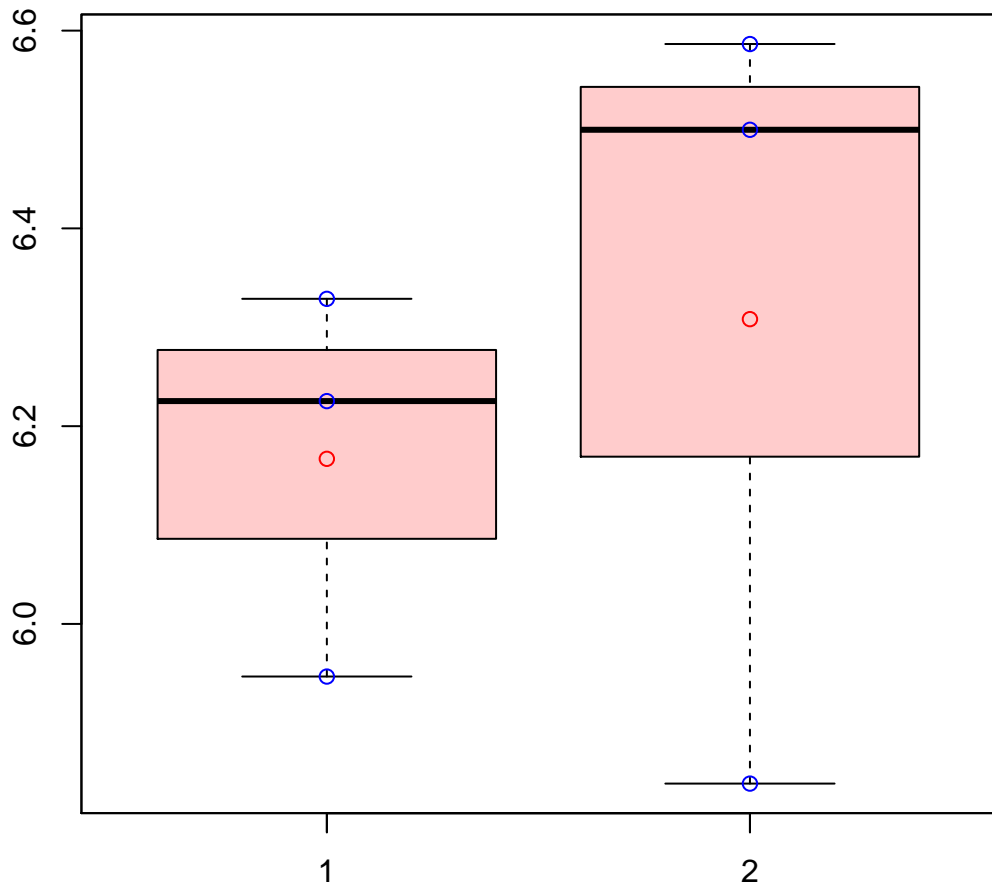

t-Test: p-value = 0.63

# CL1Contig7756|CL1Contig7756

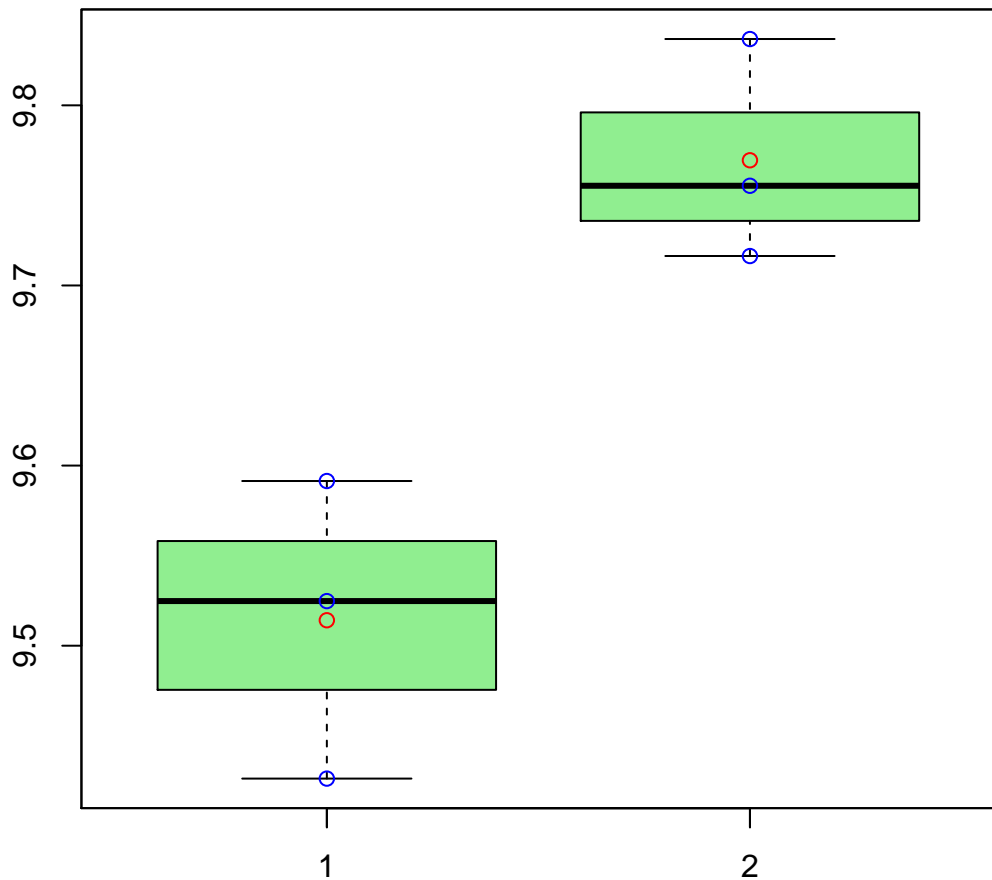

t-Test: p-value = 0.02

# CL1Contig7764|CL1Contig7764



t-Test: p-value = 0.22

# CL1Contig7776|CL1Contig7776

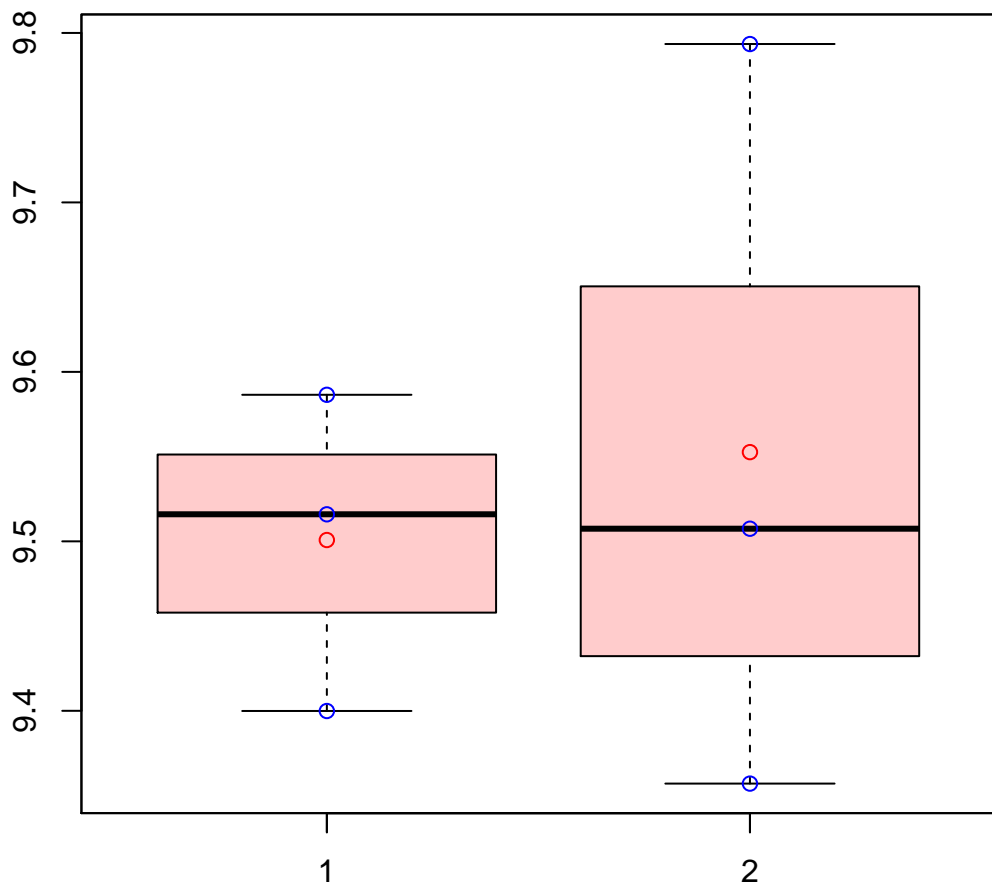

t-Test: p-value = 0.74

# CL1Contig7793|CL1Contig7793

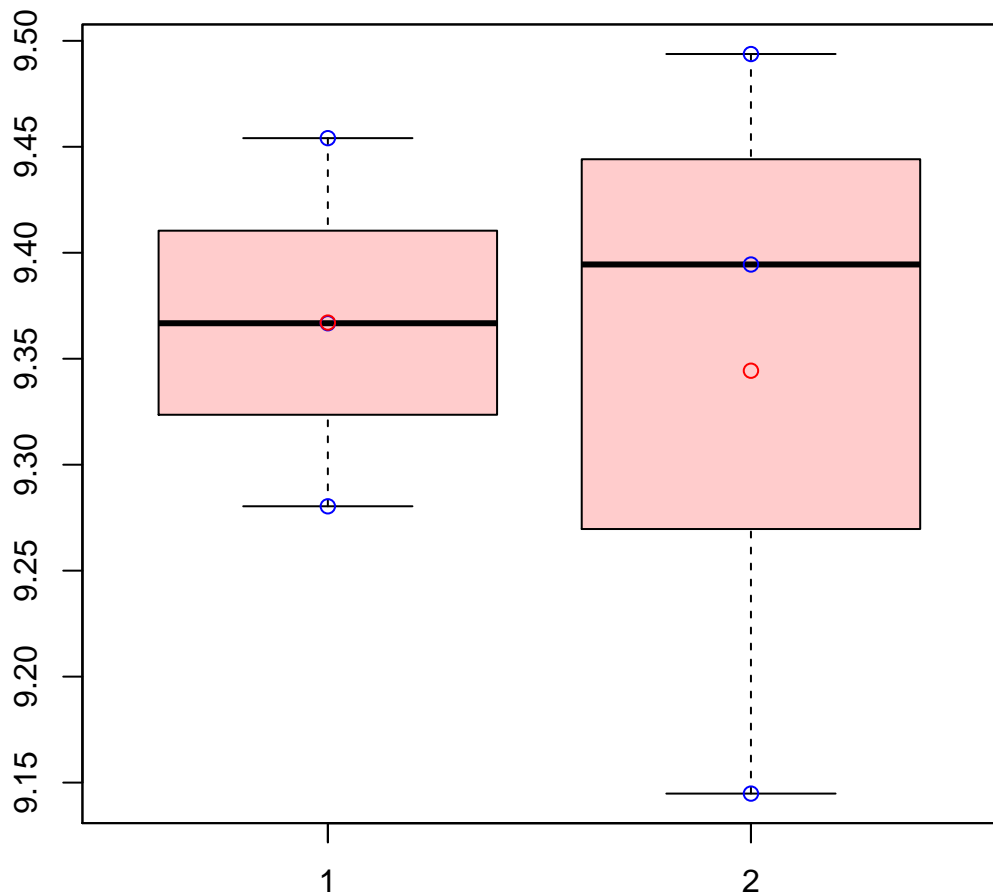

t-Test: p-value = 0.86

# CL1Contig7806|CL1Contig7806

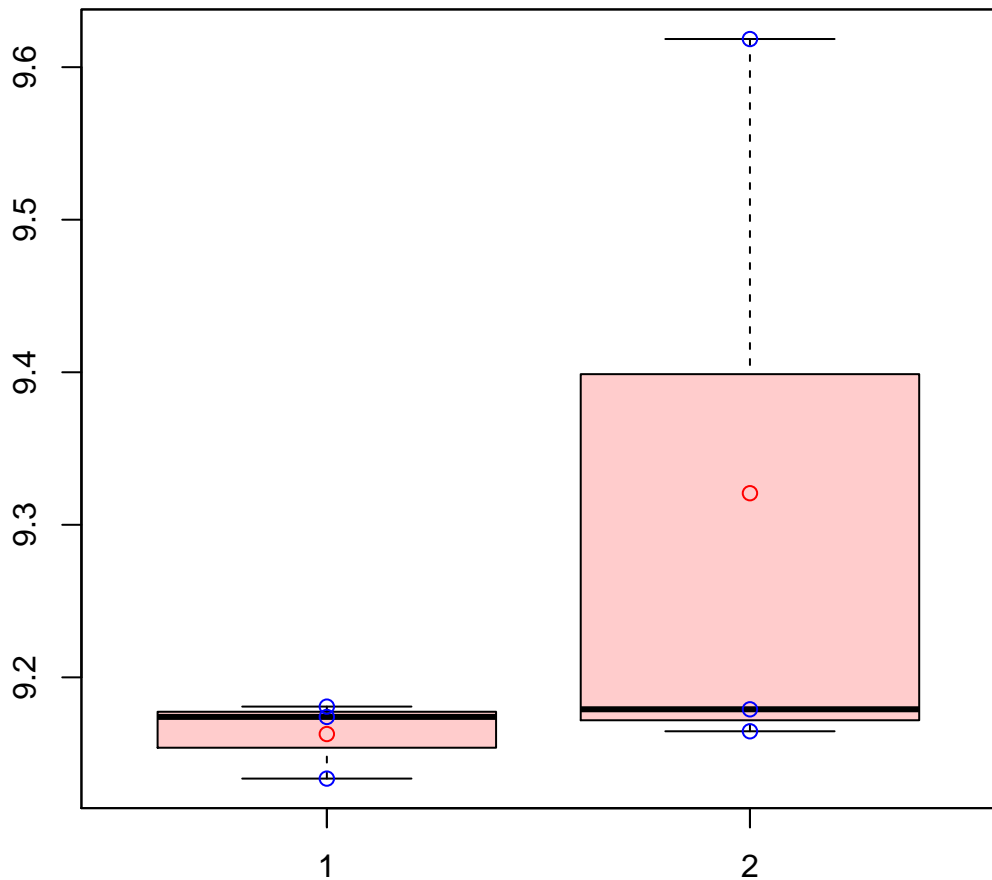

t-Test: p-value = 0.4

# CL1Contig7807|CL1Contig7807

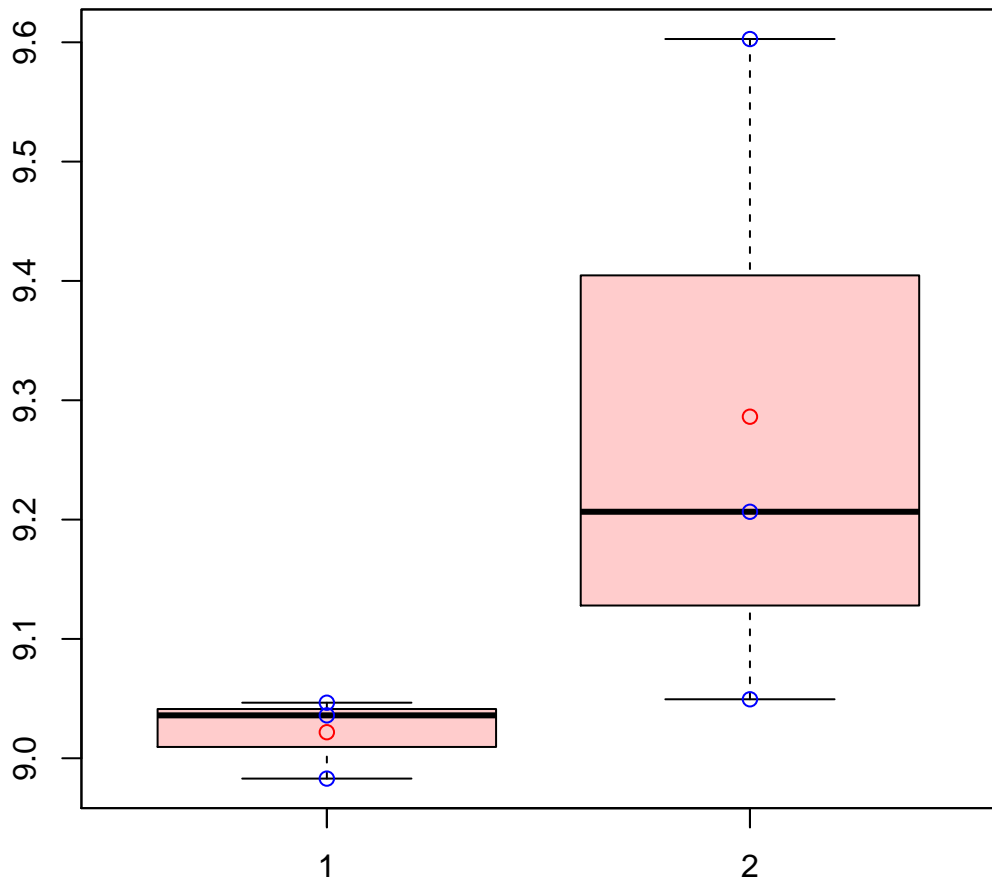

t-Test: p-value = 0.25



# CL1Contig7808|CL1Contig7808



t-Test: p-value = 0.4

# CL1Contig7829|CL1Contig7829

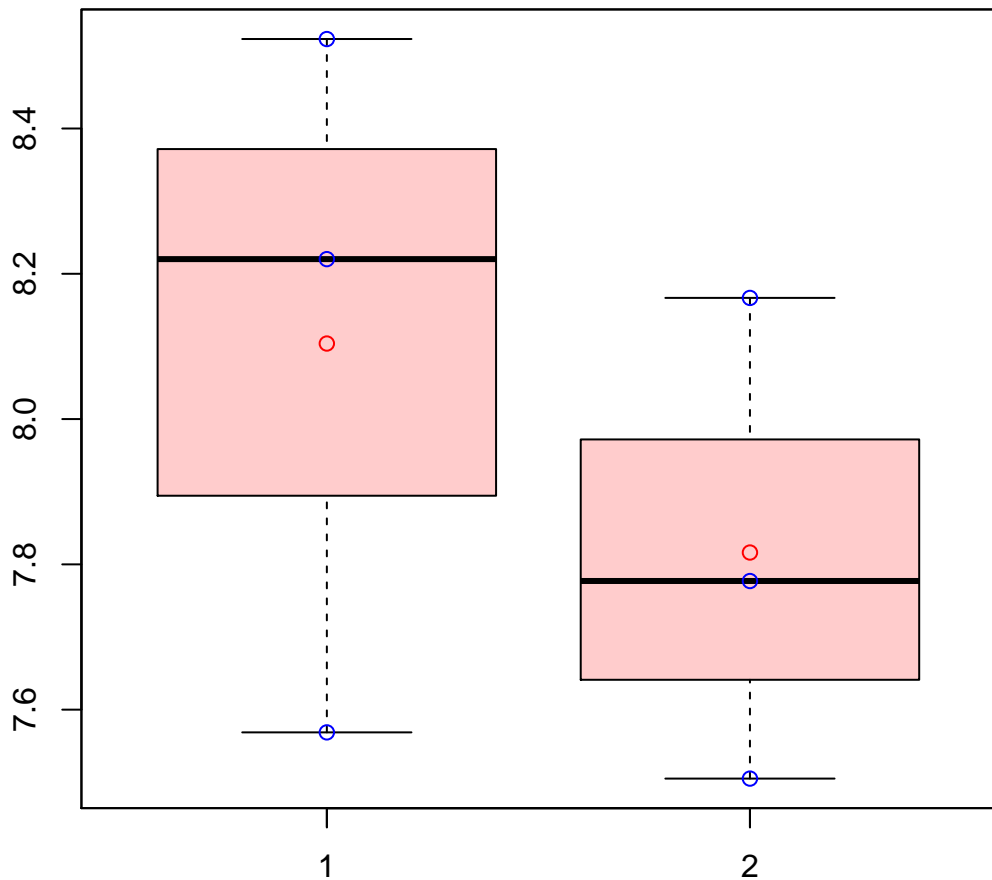

t-Test: p-value = 0.45

# CL1Contig7831|CL1Contig7831



t-Test: p-value = 0.45

# CL1Contig7864|CL1Contig7864

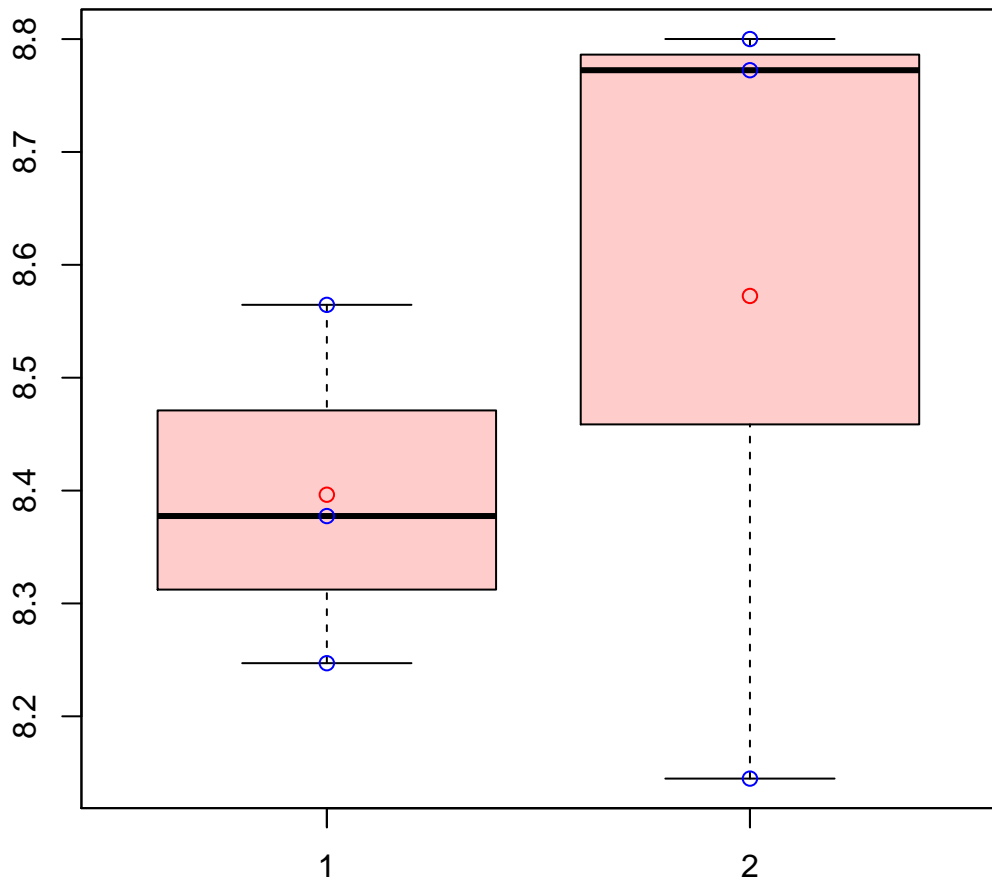

t-Test: p-value = 0.51

# CL1Contig7868|CL1Contig7868

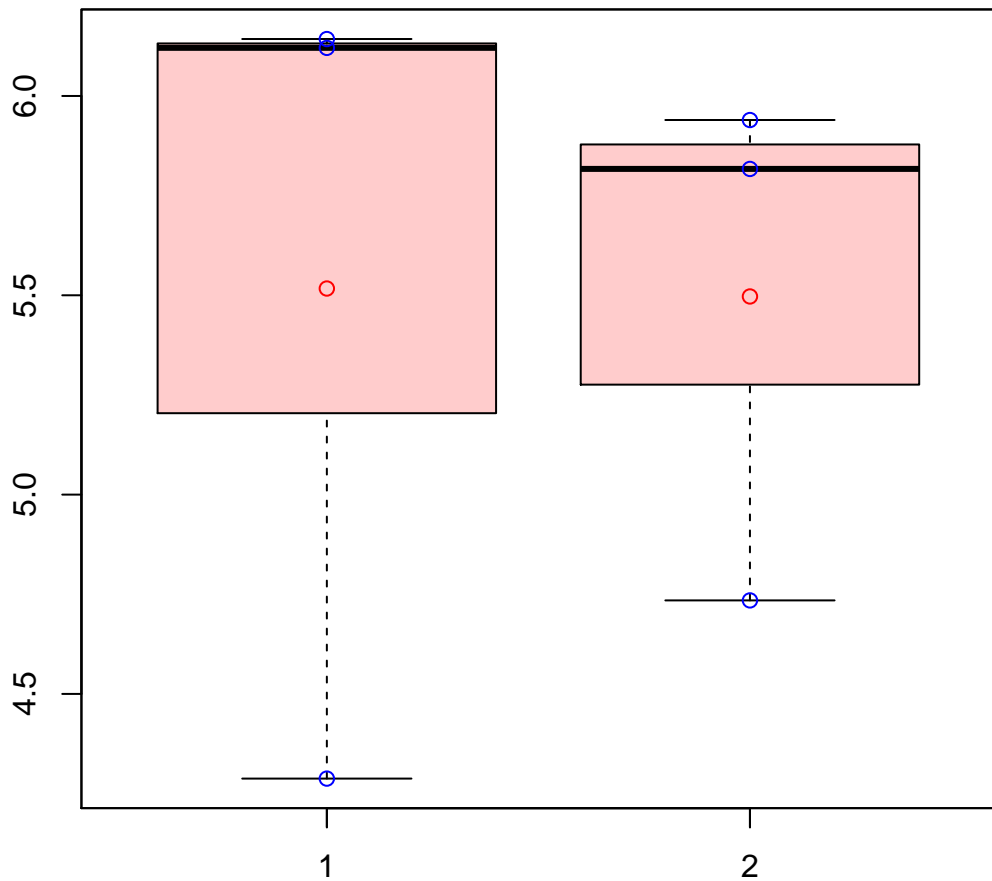

t-Test: p-value = 0.98

# CL1Contig7889|CL1Contig7889

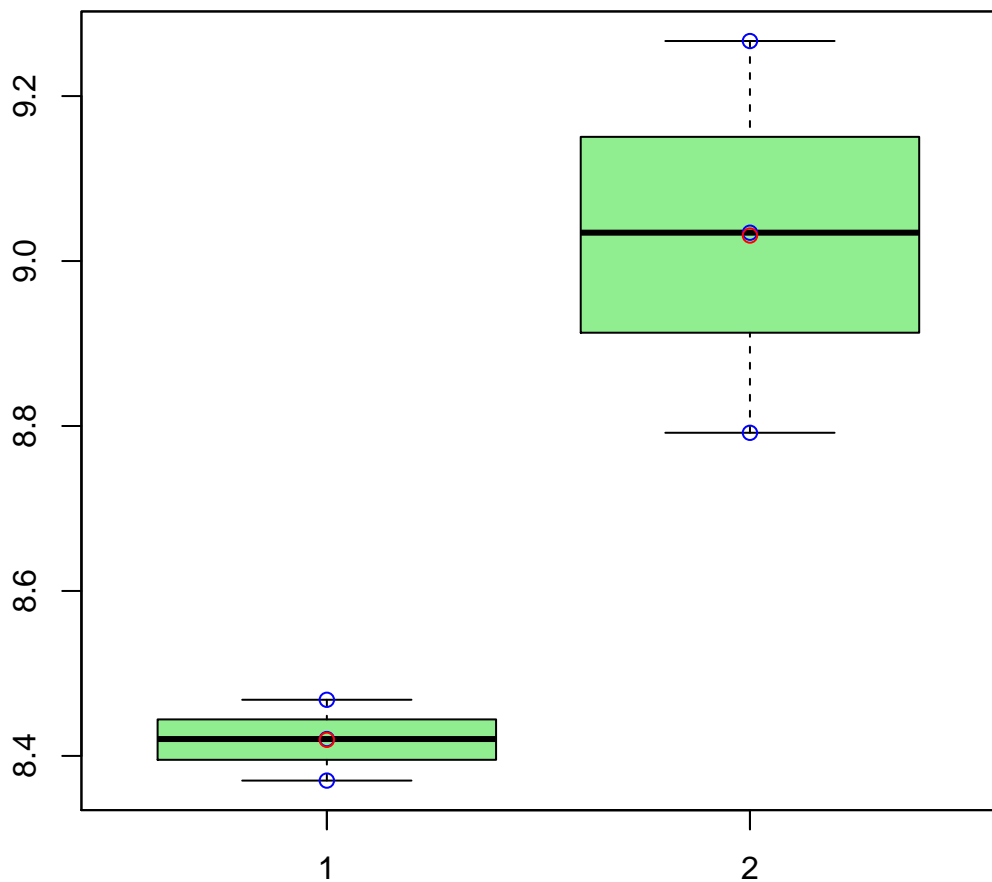

t-Test: p-value = 0.04

# CL1Contig788|CL1Contig788

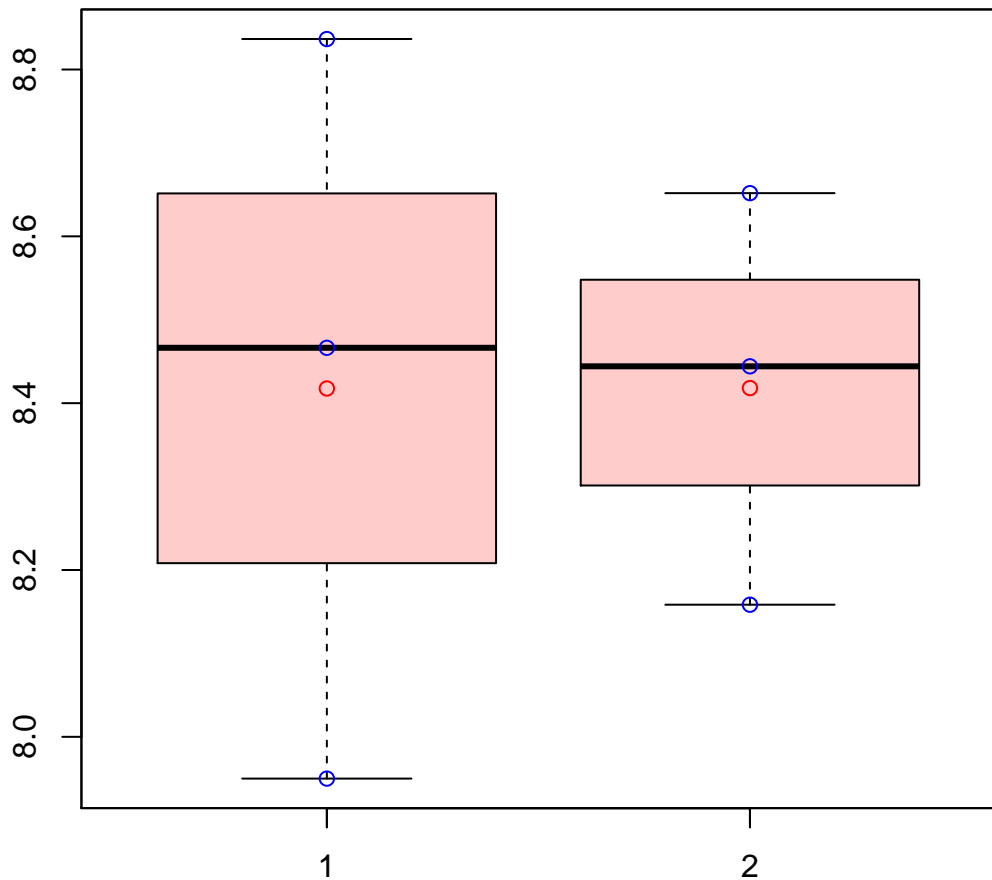

t-Test: p-value = 1

# CL1Contig7911|CL1Contig7911

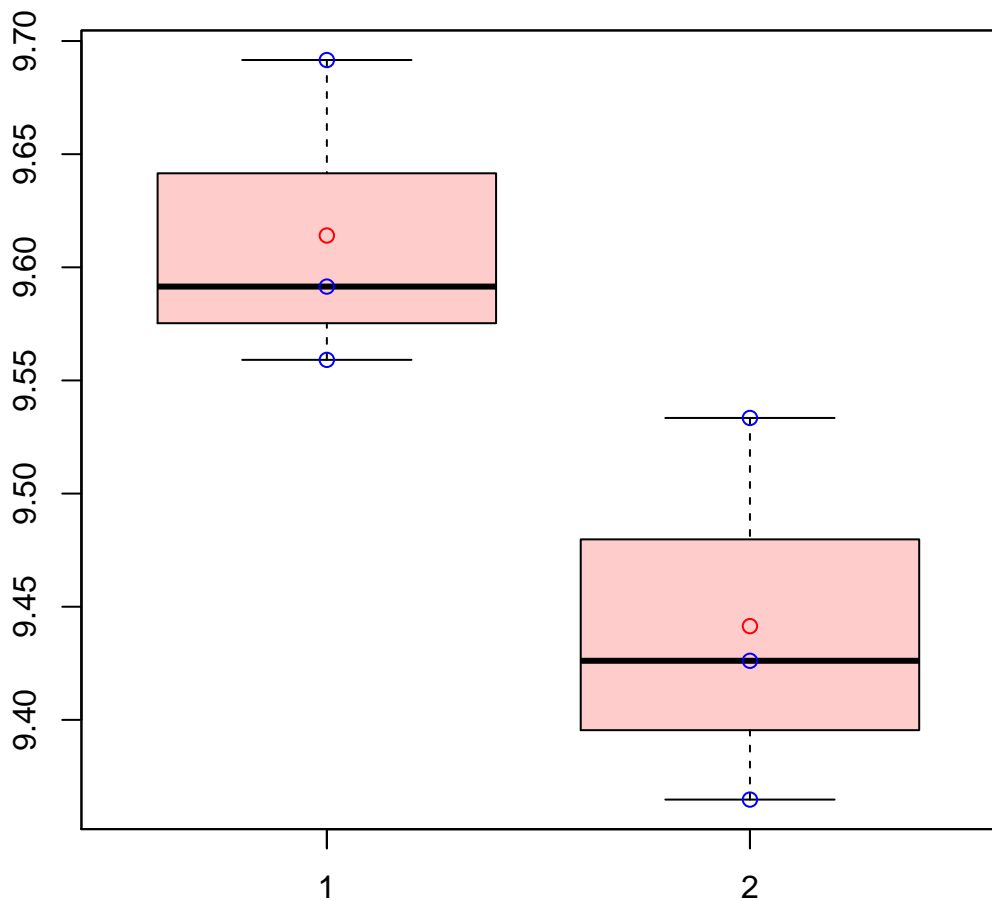

t-Test: p-value = 0.06



# CL1Contig7924|CL1Contig7924

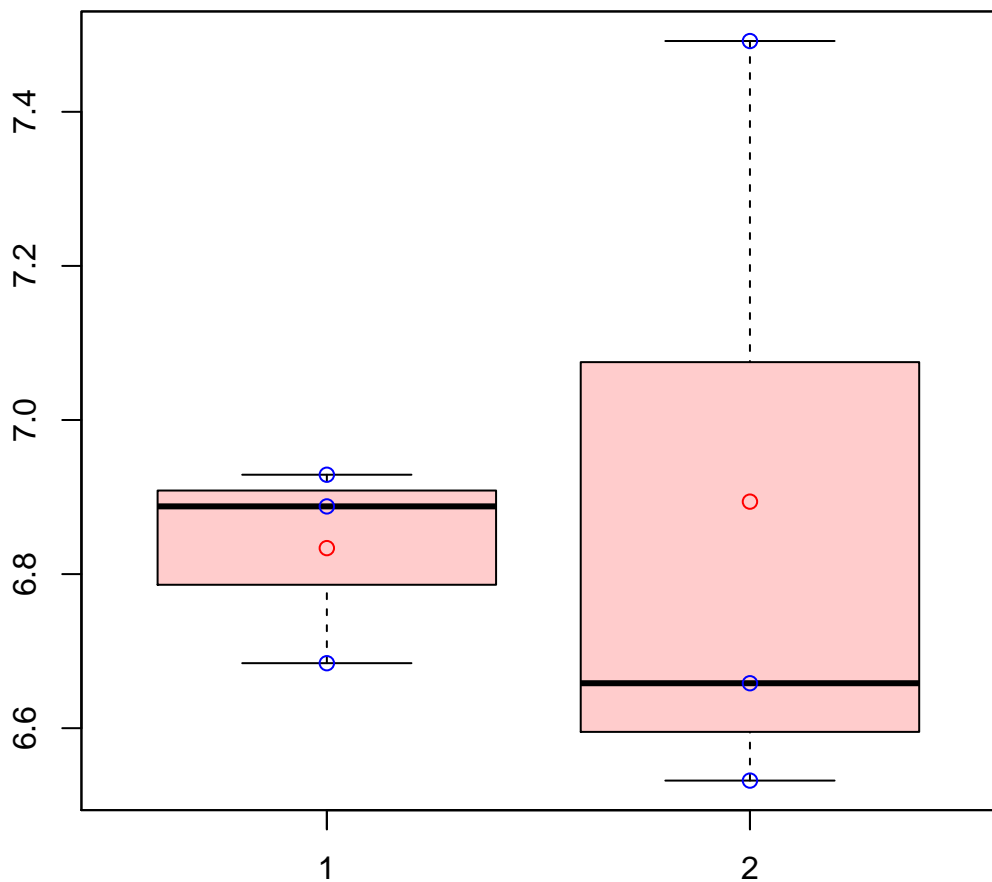

t-Test: p-value = 0.86

# CL1Contig7948|CL1Contig7948

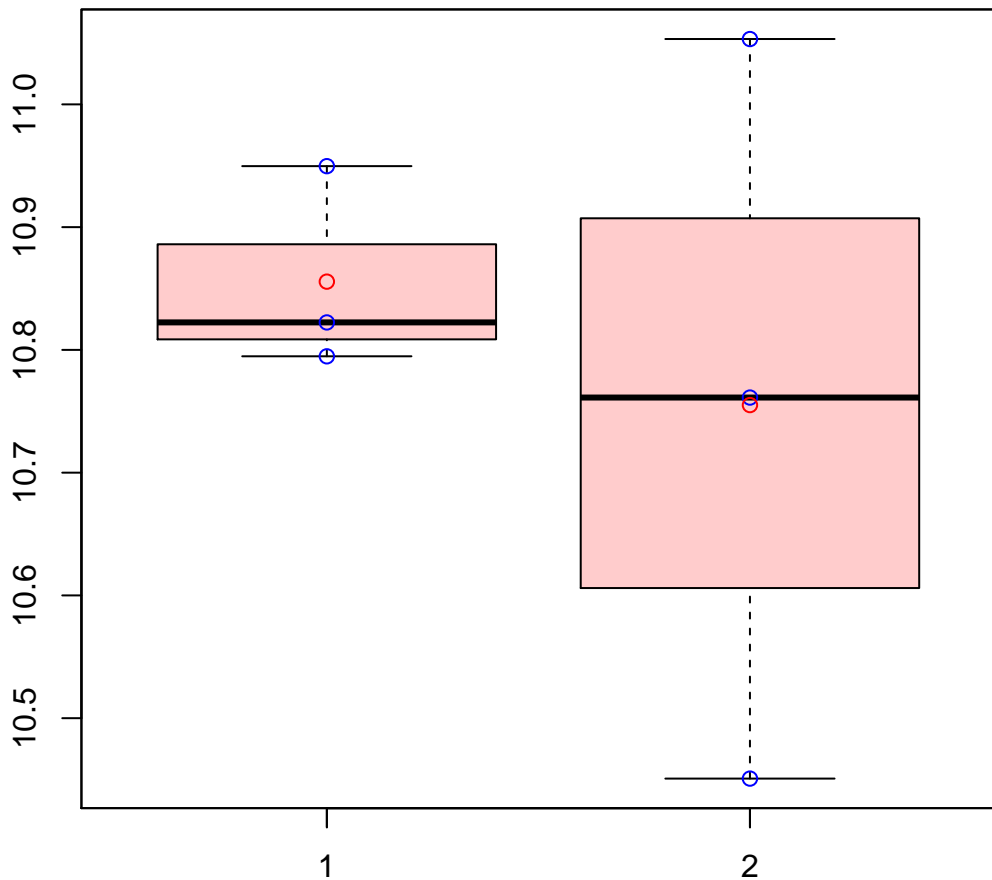

t-Test: p-value = 0.63

# CL1Contig7977|CL1Contig7977

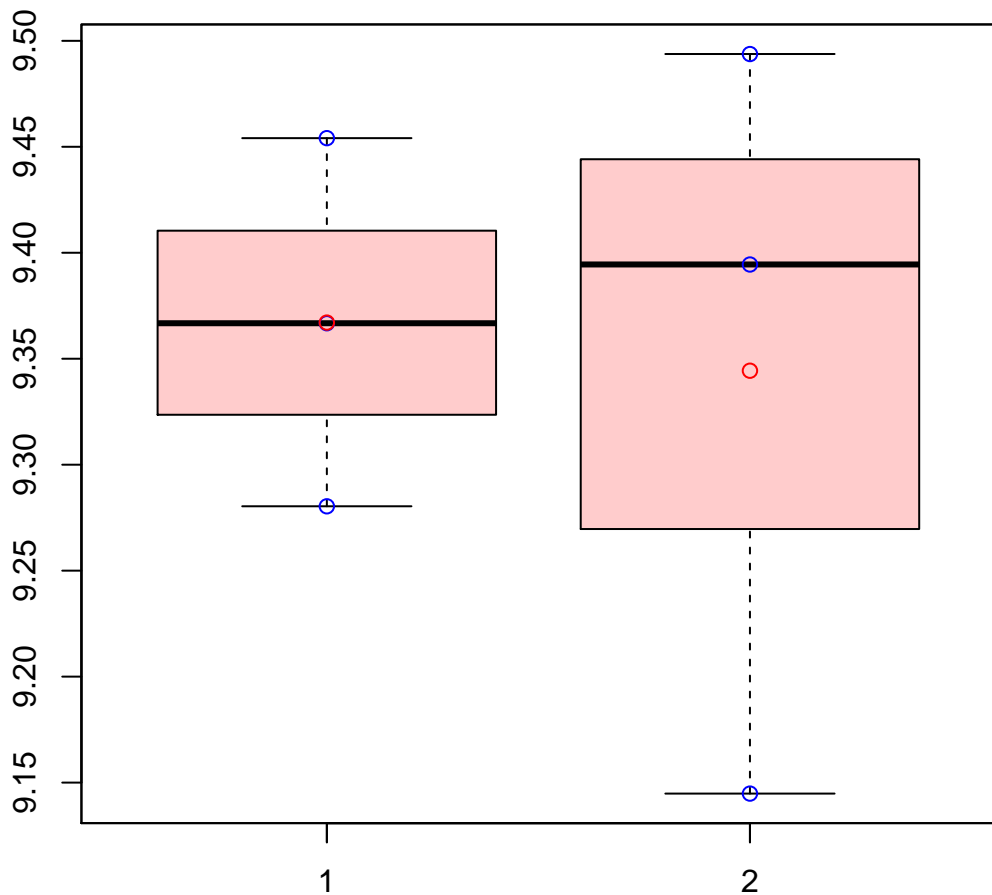

t-Test: p-value = 0.86

# CL1Contig8005|CL1Contig8005

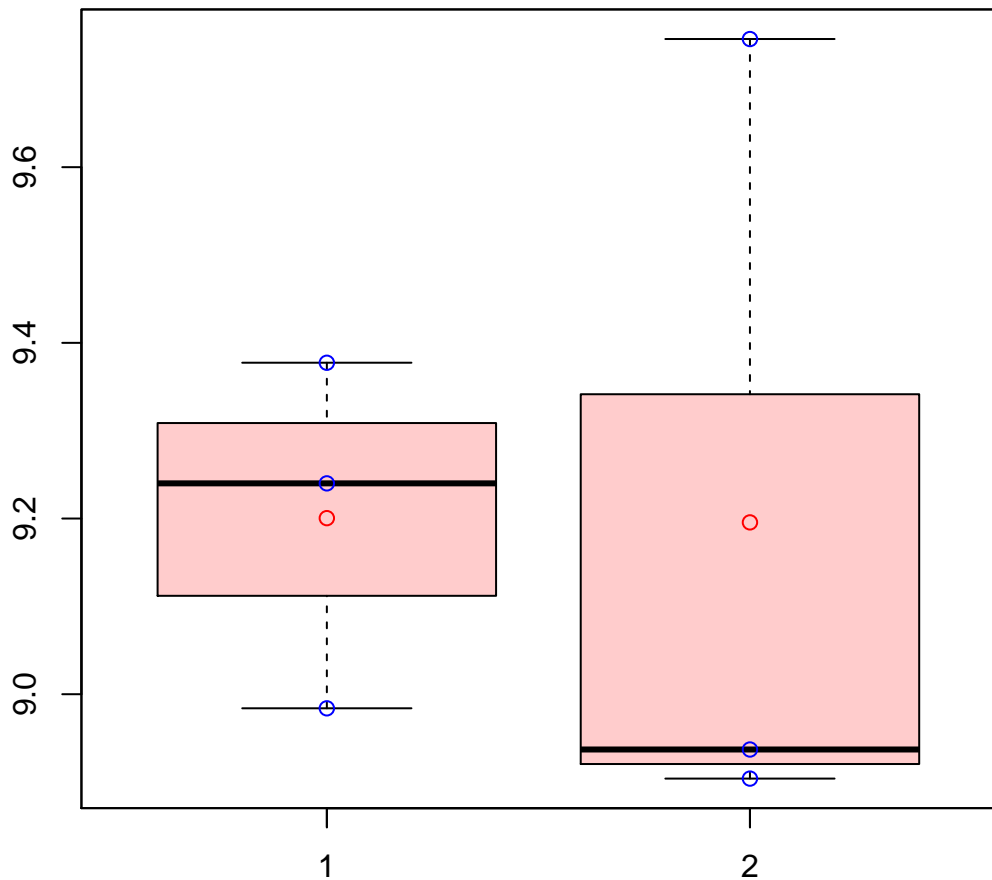

t-Test: p-value = 0.99

# CL1Contig8013|CL1Contig8013



t-Test: p-value = 0.25

# CL1Contig8014|CL1Contig8014

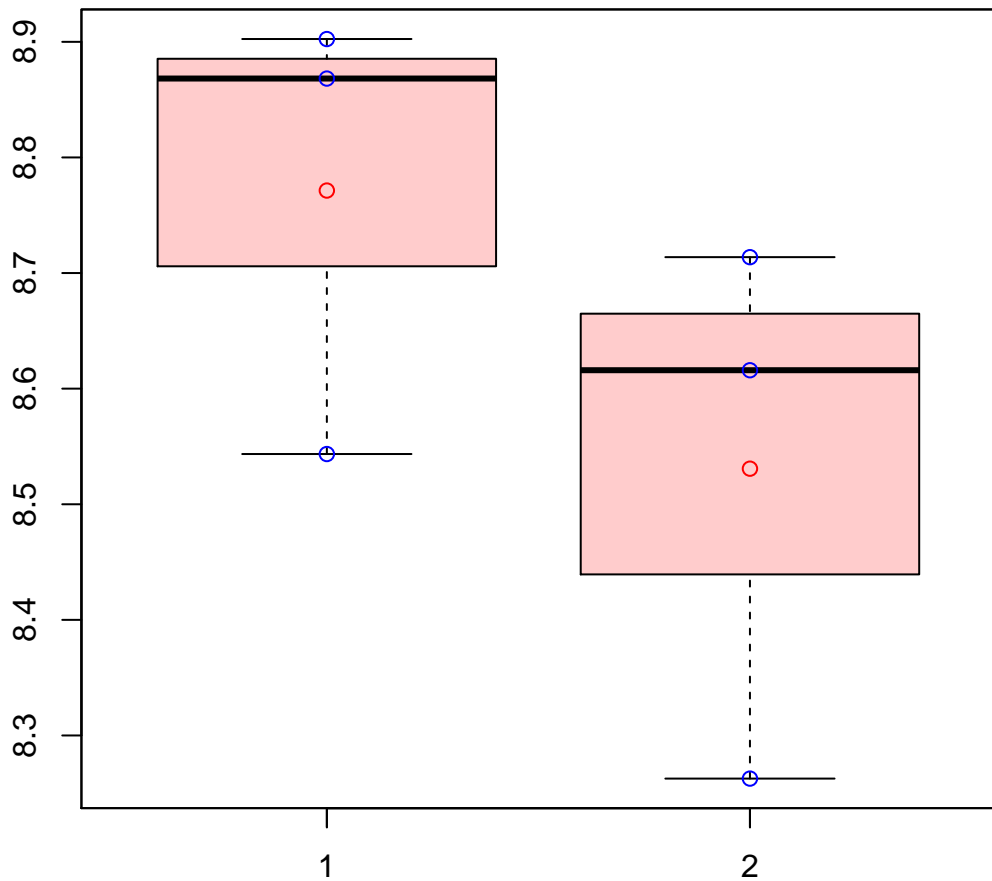

t-Test: p-value = 0.25

# CL1Contig8022|CL1Contig8022

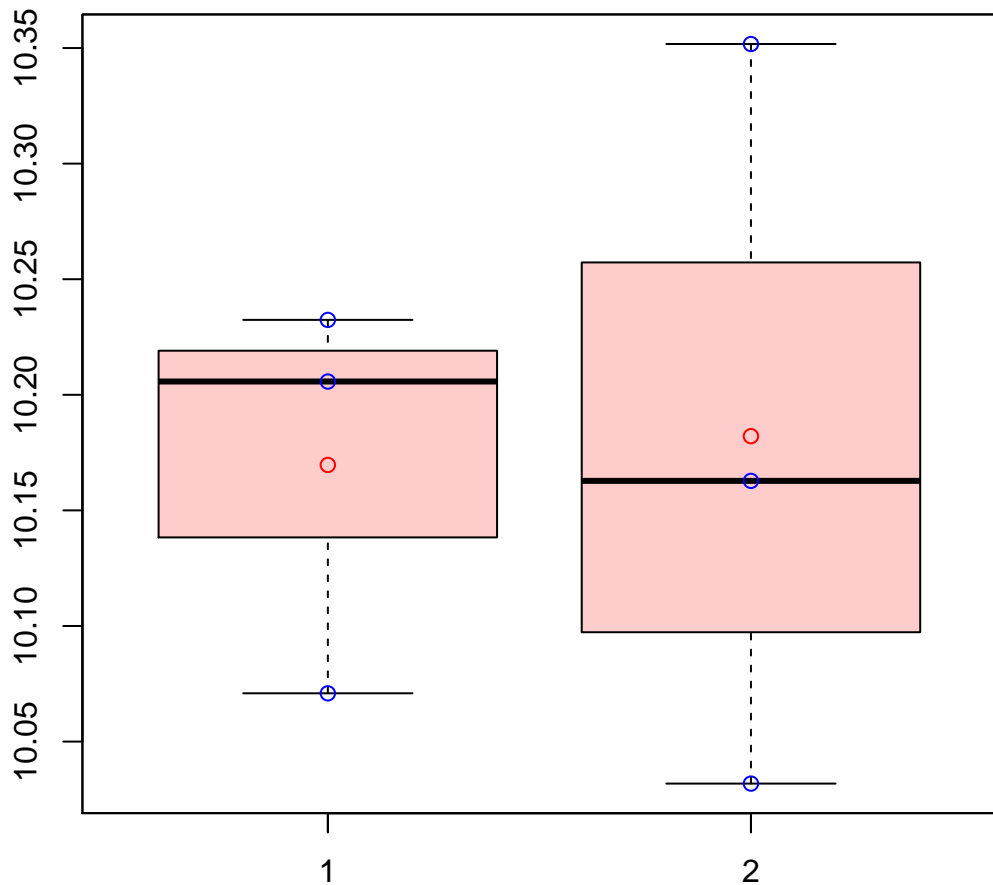

t-Test: p-value = 0.91

# CL1Contig8025|CL1Contig8025

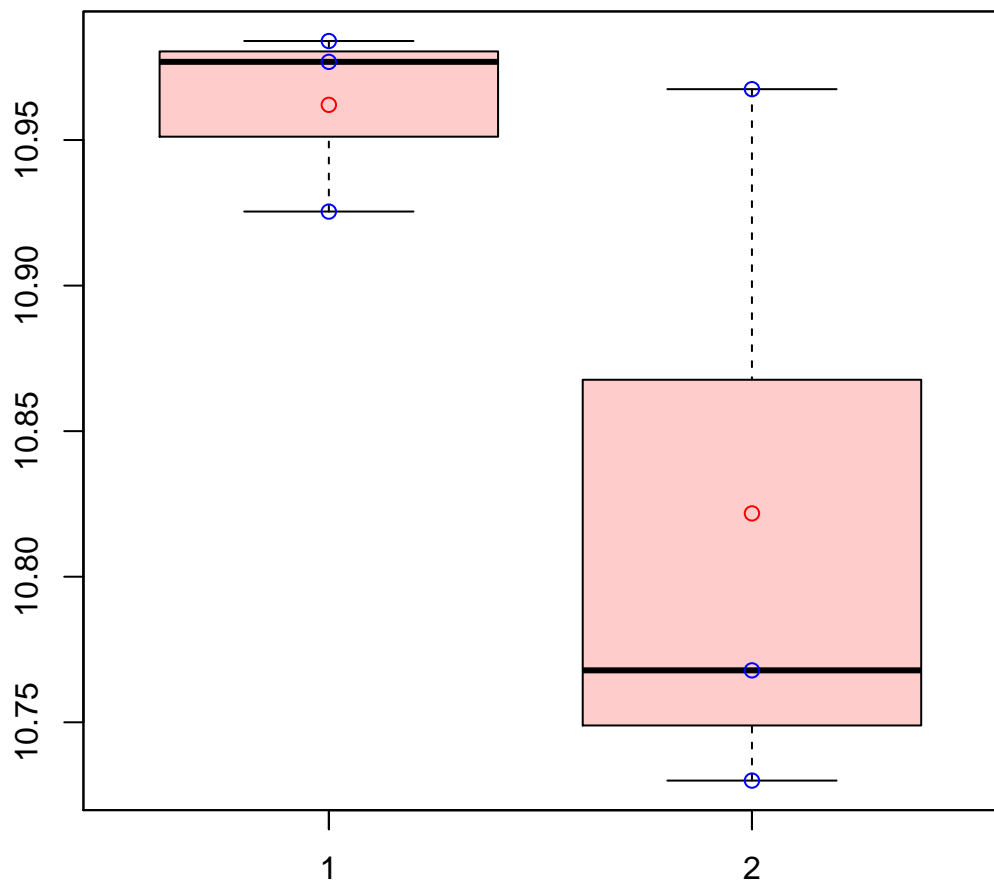

t-Test: p-value = 0.19



# CL1Contig804|CL1Contig804

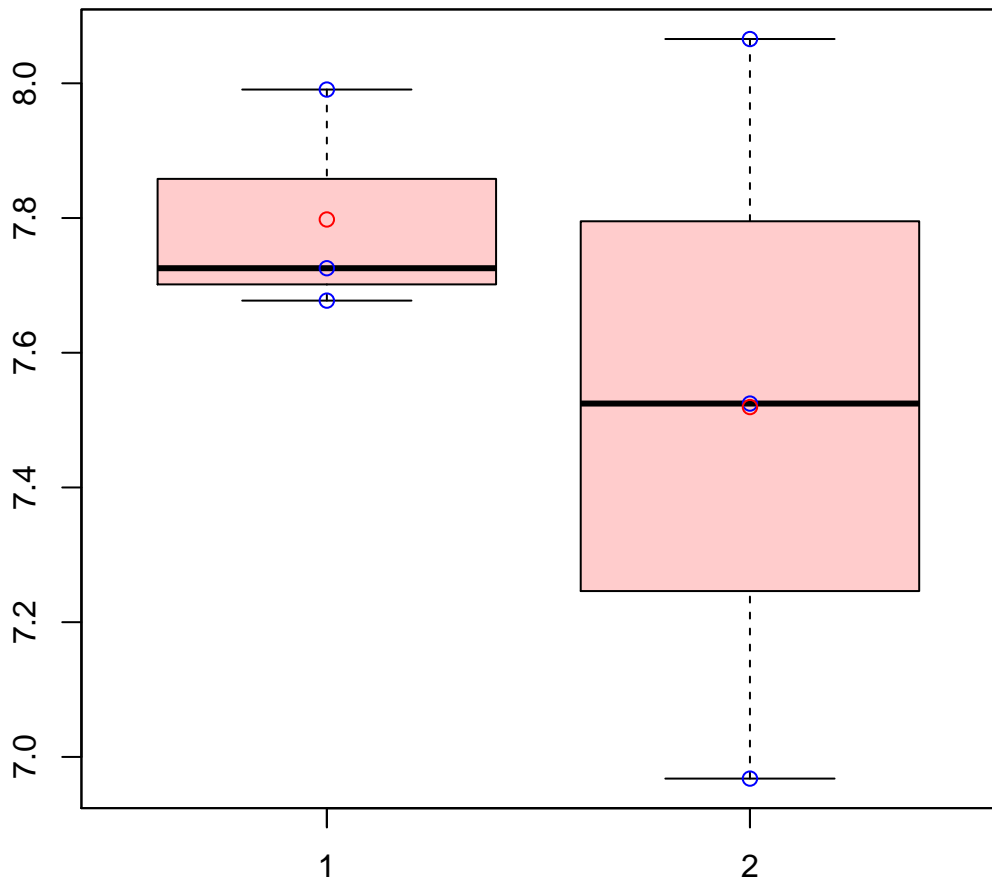

t-Test: p-value = 0.48

# CL1Contig805|CL1Contig805

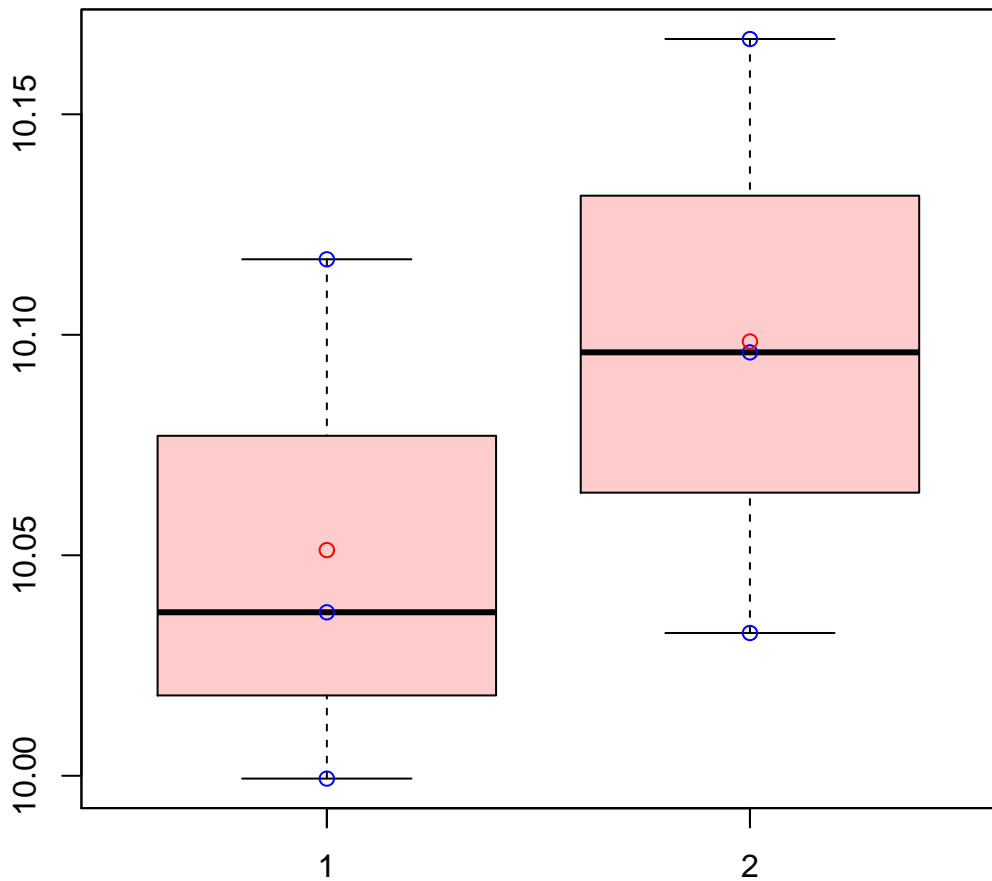

t-Test: p-value = 0.42

# CL1Contig8076|CL1Contig8076

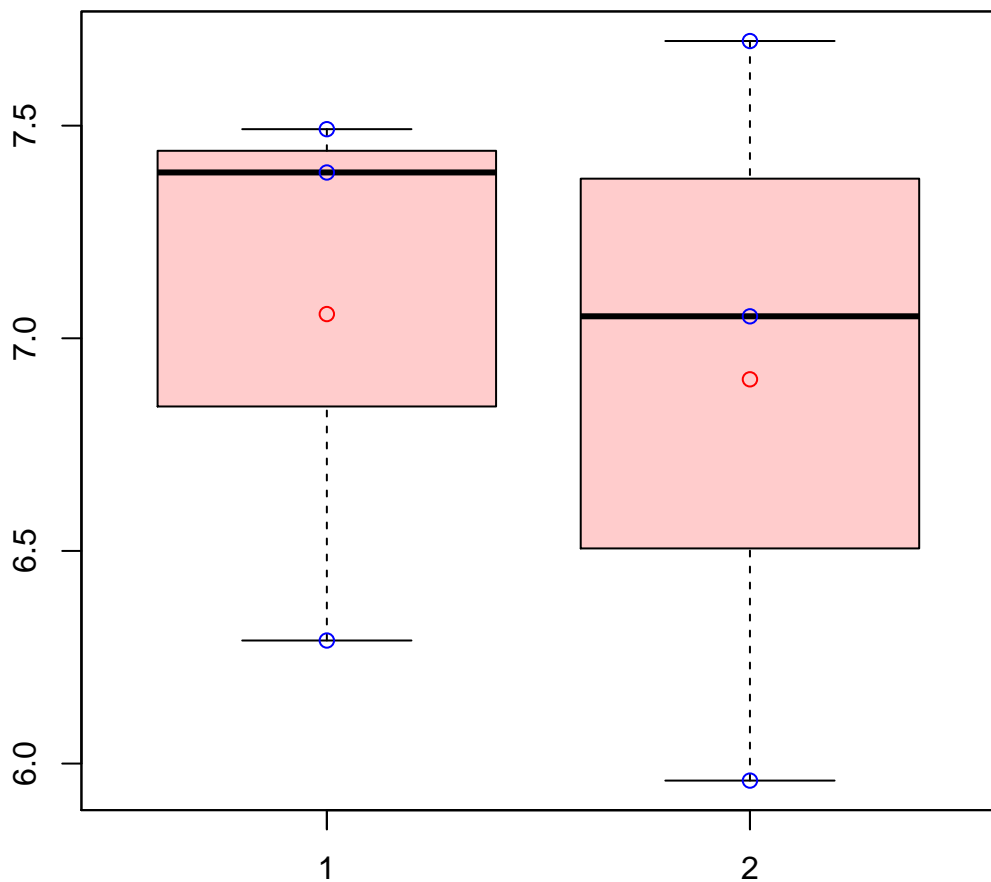

t-Test: p-value = 0.82

# CL1Contig807|CL1Contig807

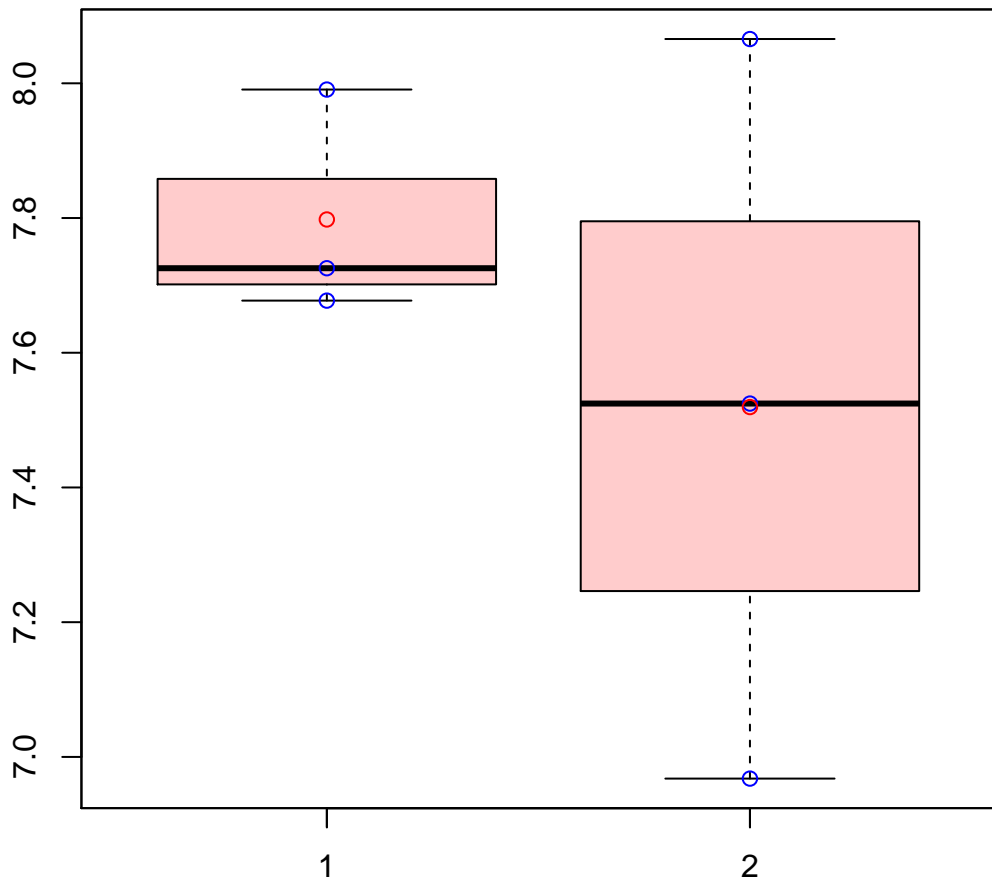

t-Test: p-value = 0.48

# CL1Contig8083|CL1Contig8083

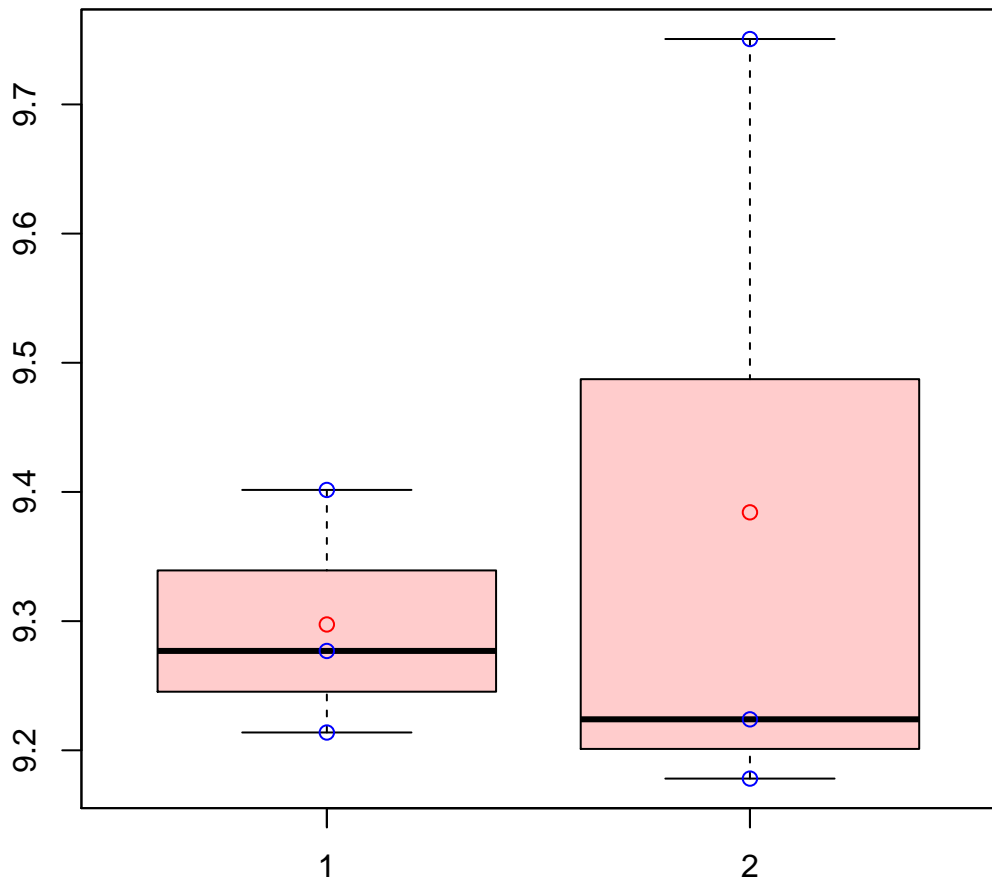

t-Test: p-value = 0.69

# CL1Contig8103|CL1Contig8103

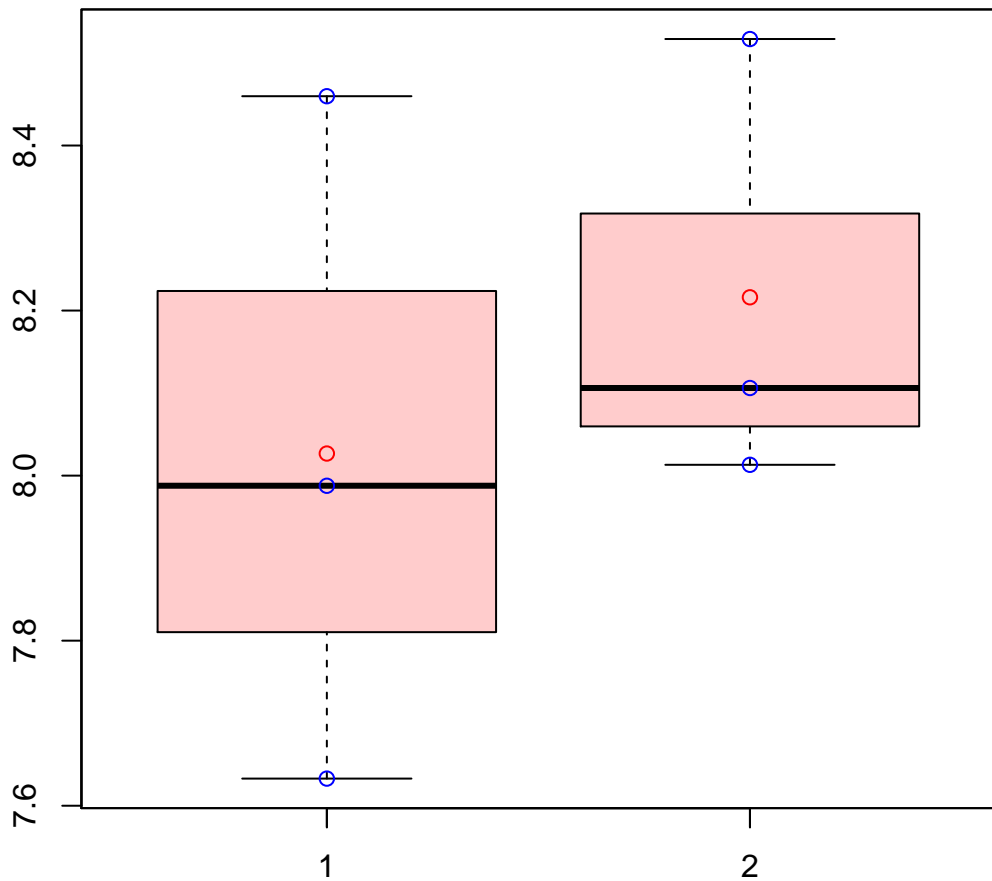

t-Test: p-value = 0.55

# CL1Contig8111|CL1Contig8111

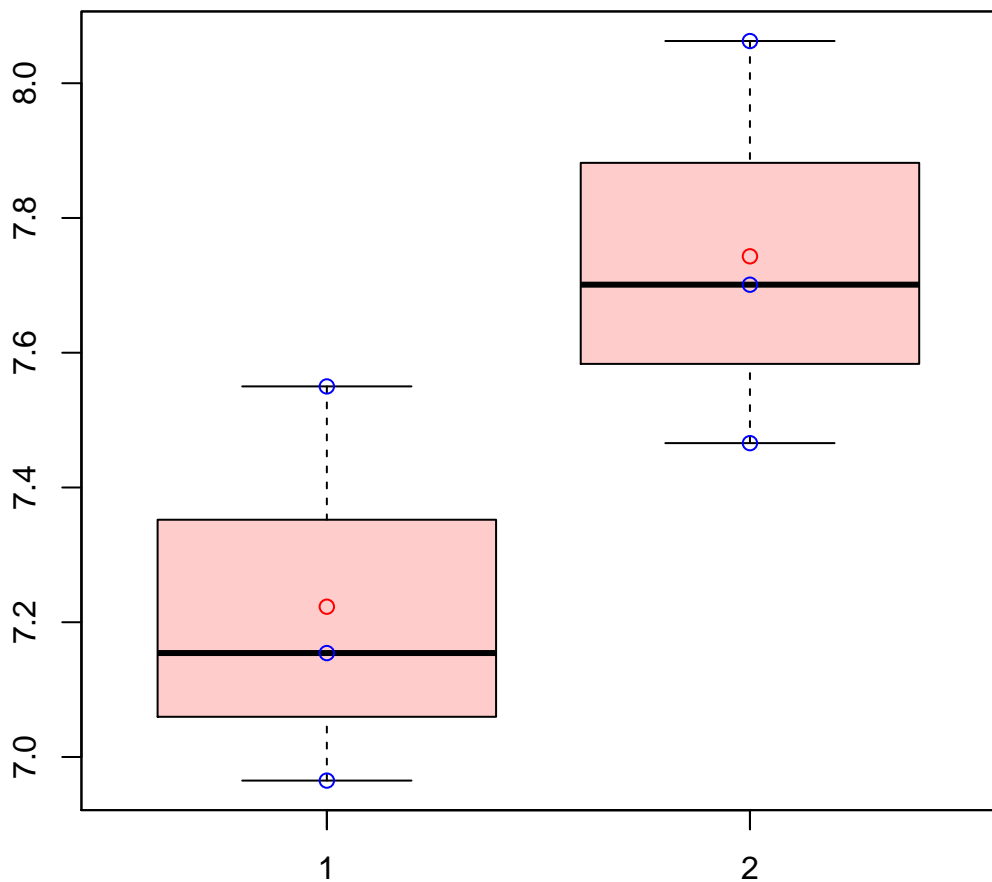

t-Test: p-value = 0.1

# CL1Contig8142|CL1Contig8142

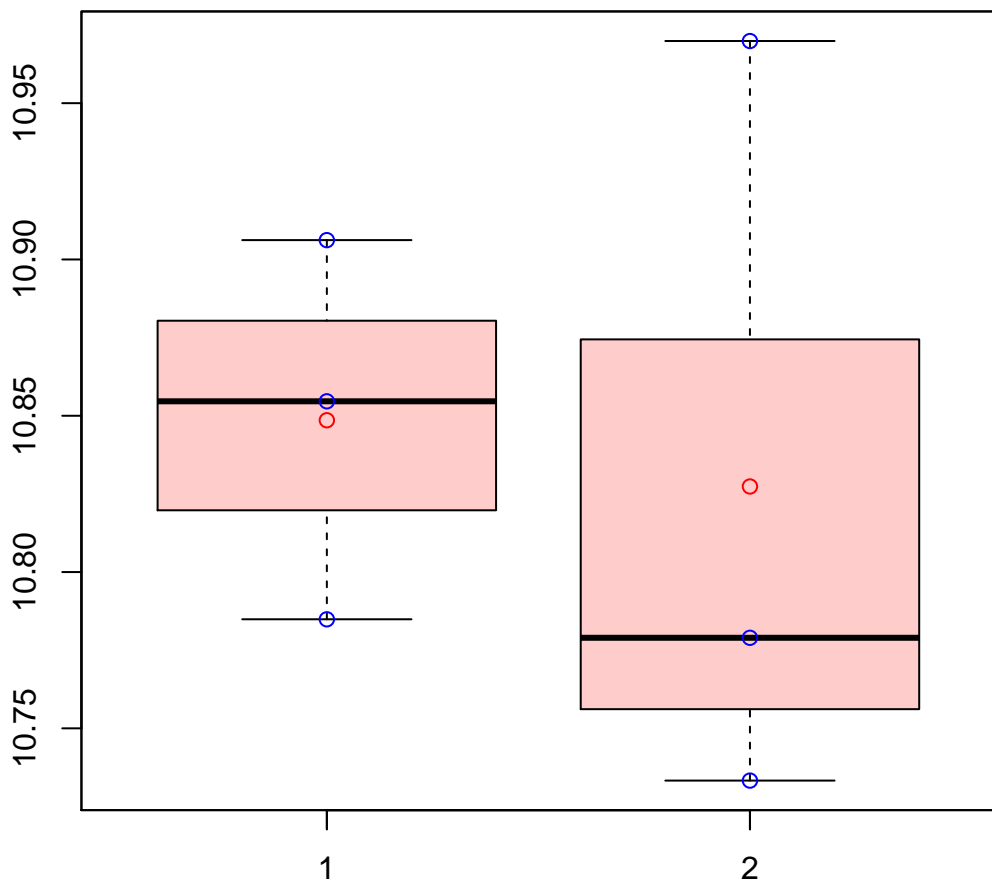

t-Test: p-value = 0.81



# CL1Contig8162|CL1Contig8162

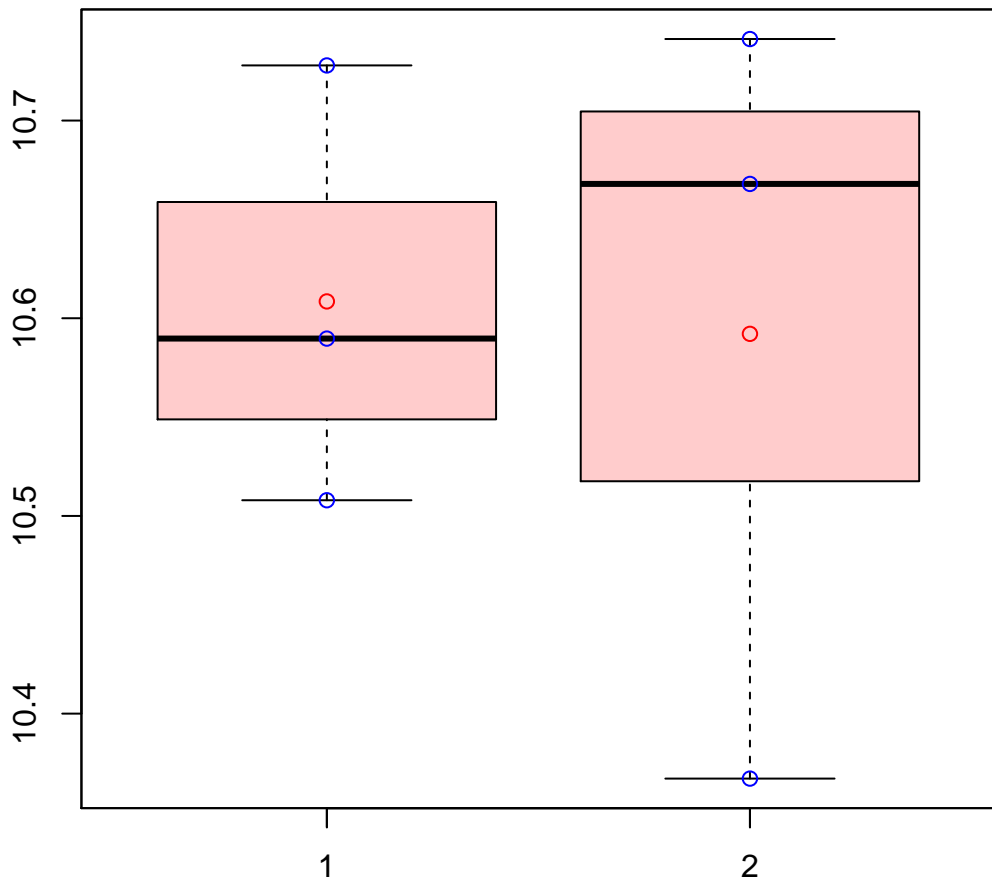

t-Test: p-value = 0.91

# CL1Contig8163|CL1Contig8163

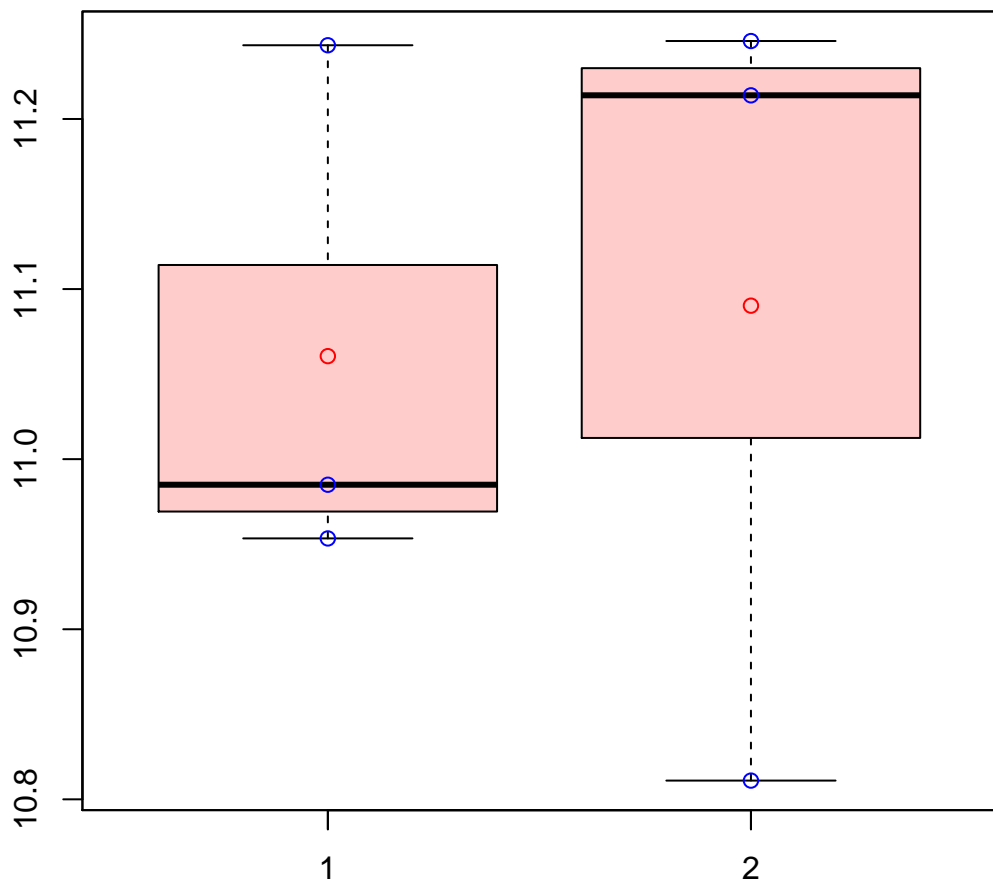

t-Test: p-value = 0.87

# CL1Contig8164|CL1Contig8164

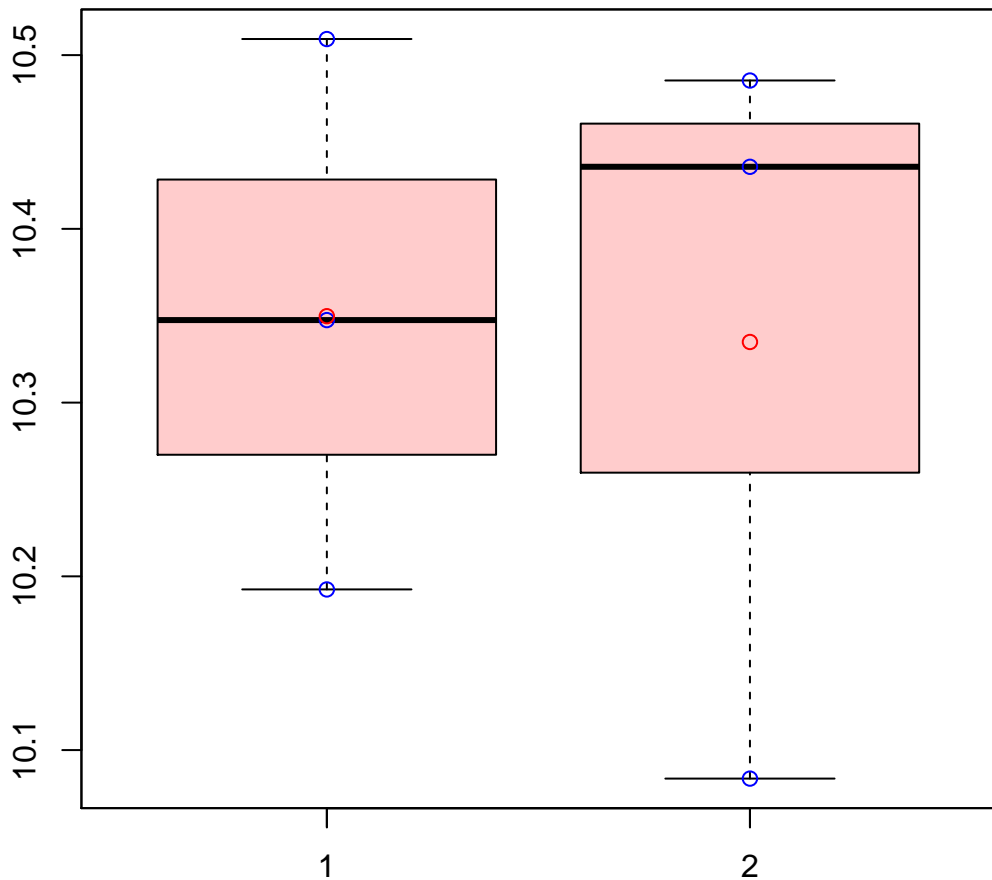

t-Test: p-value = 0.93

# CL1Contig8165|CL1Contig8165

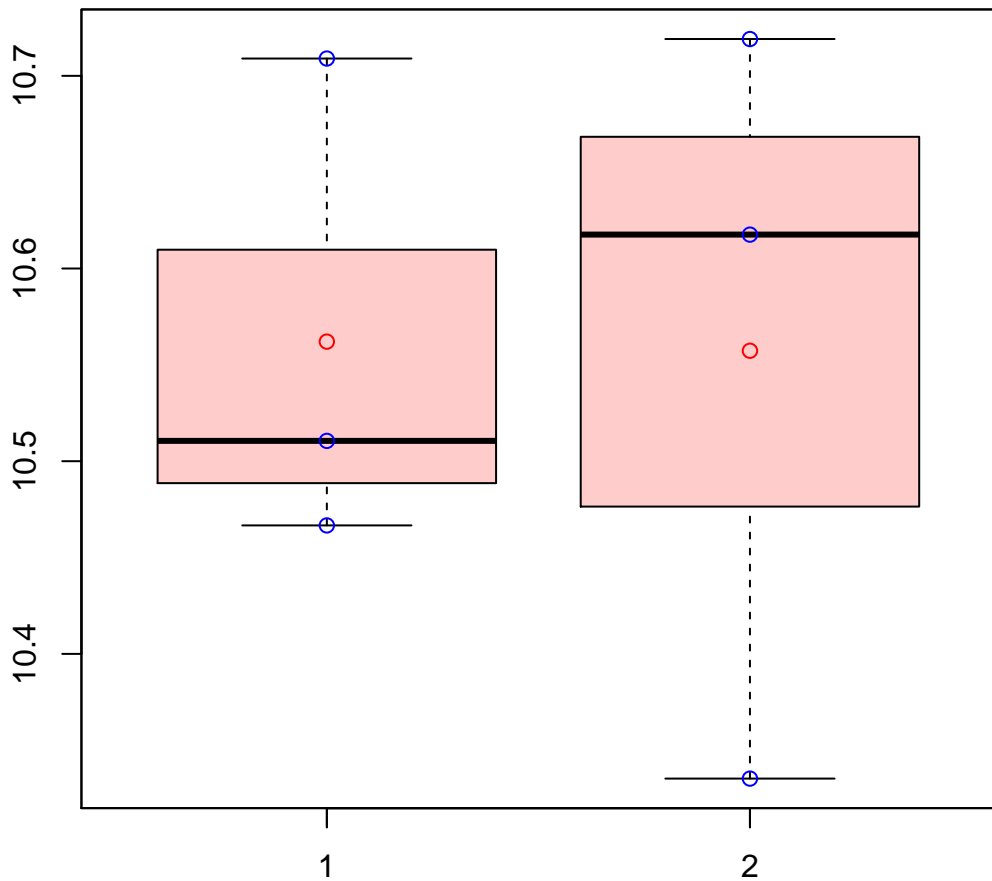

t-Test: p-value = 0.97

# CL1Contig8167|CL1Contig8167

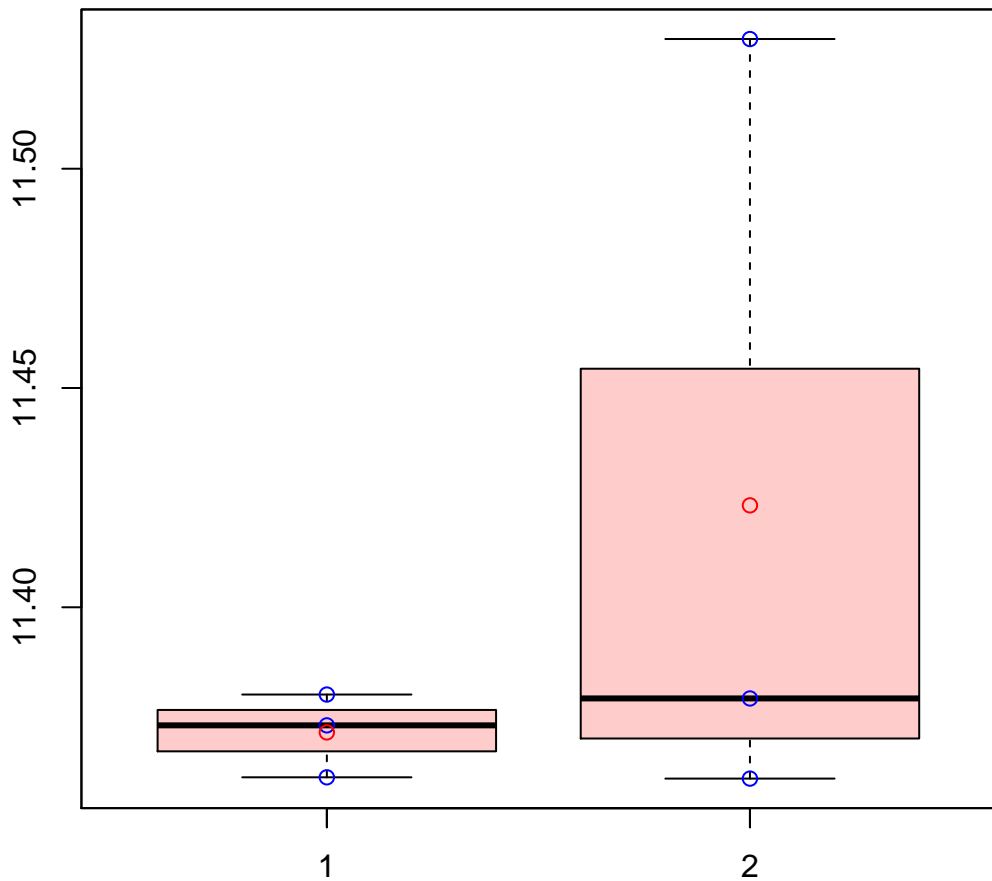

t-Test: p-value = 0.43

# CL1Contig8182|CL1Contig8182

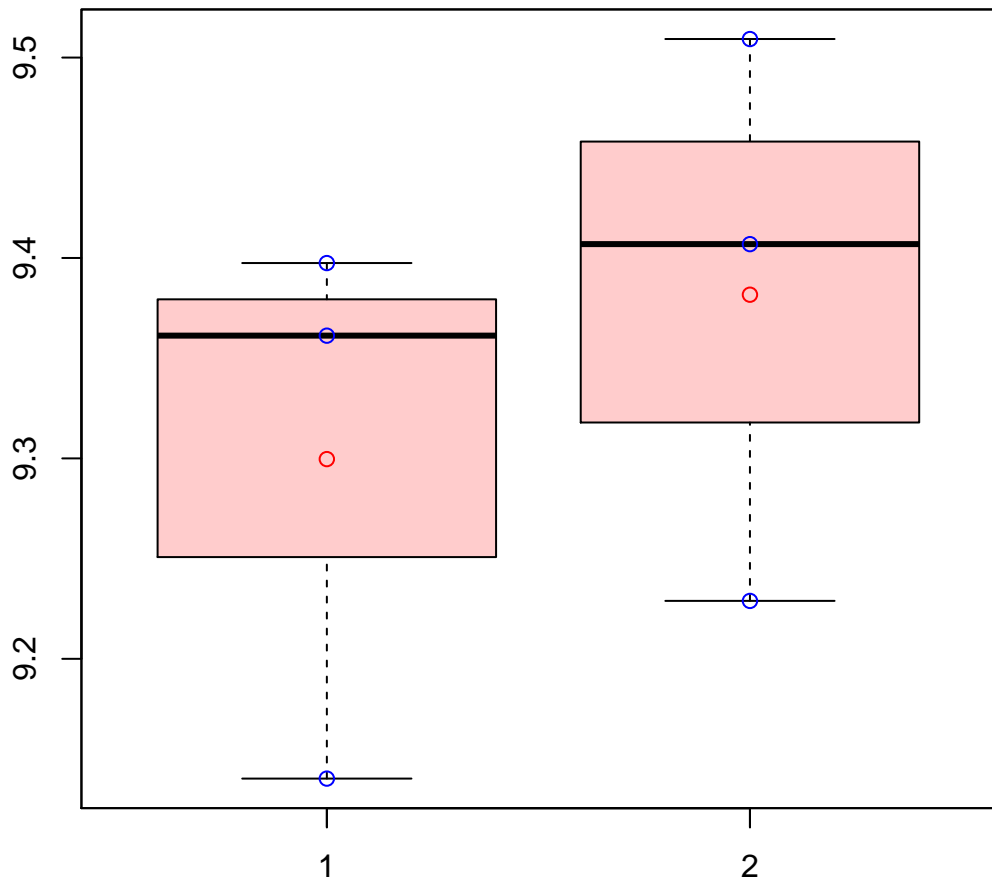

t-Test: p-value = 0.51

# CL1Contig8189|CL1Contig8189

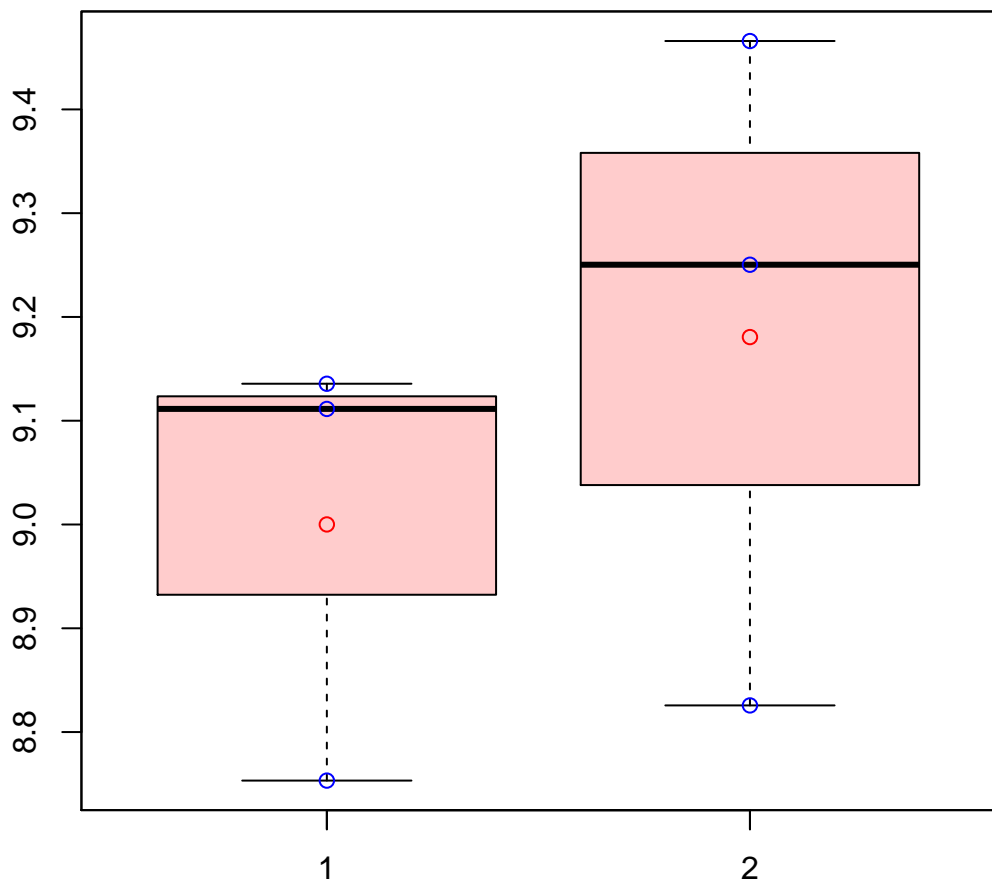

t-Test: p-value = 0.47

# CL1Contig8193|CL1Contig8193

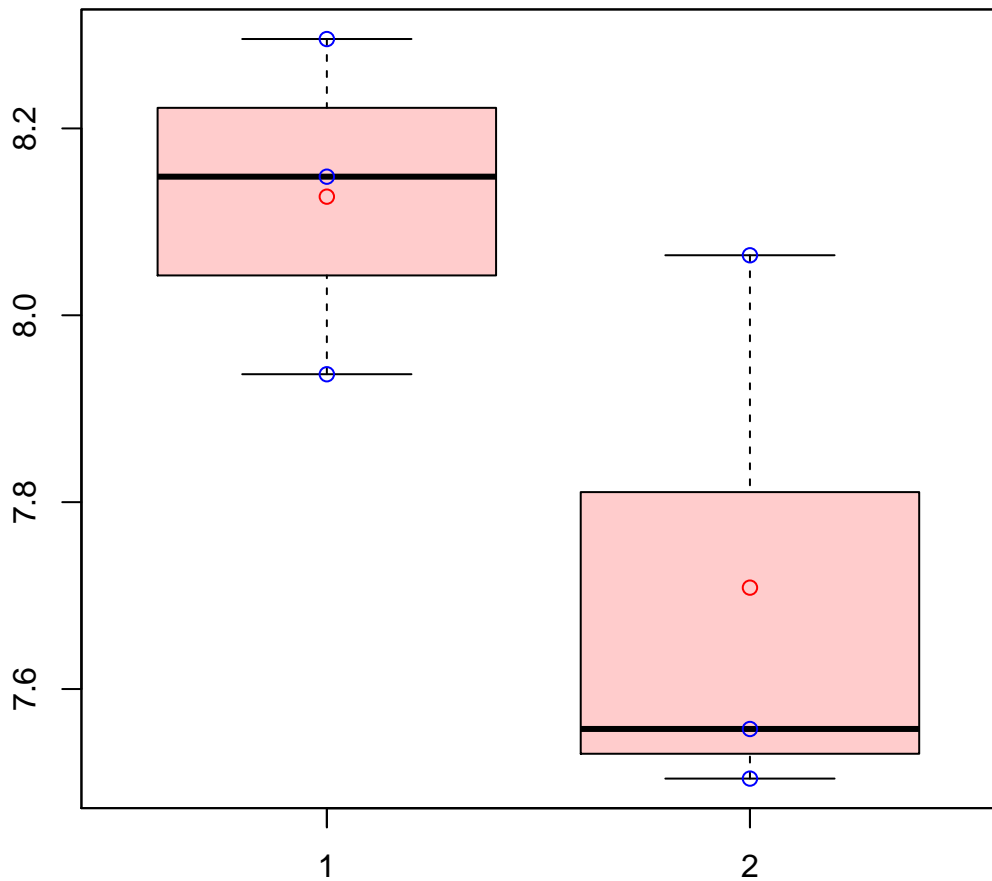

t-Test: p-value = 0.13



# CL1Contig8222|CL1Contig8222

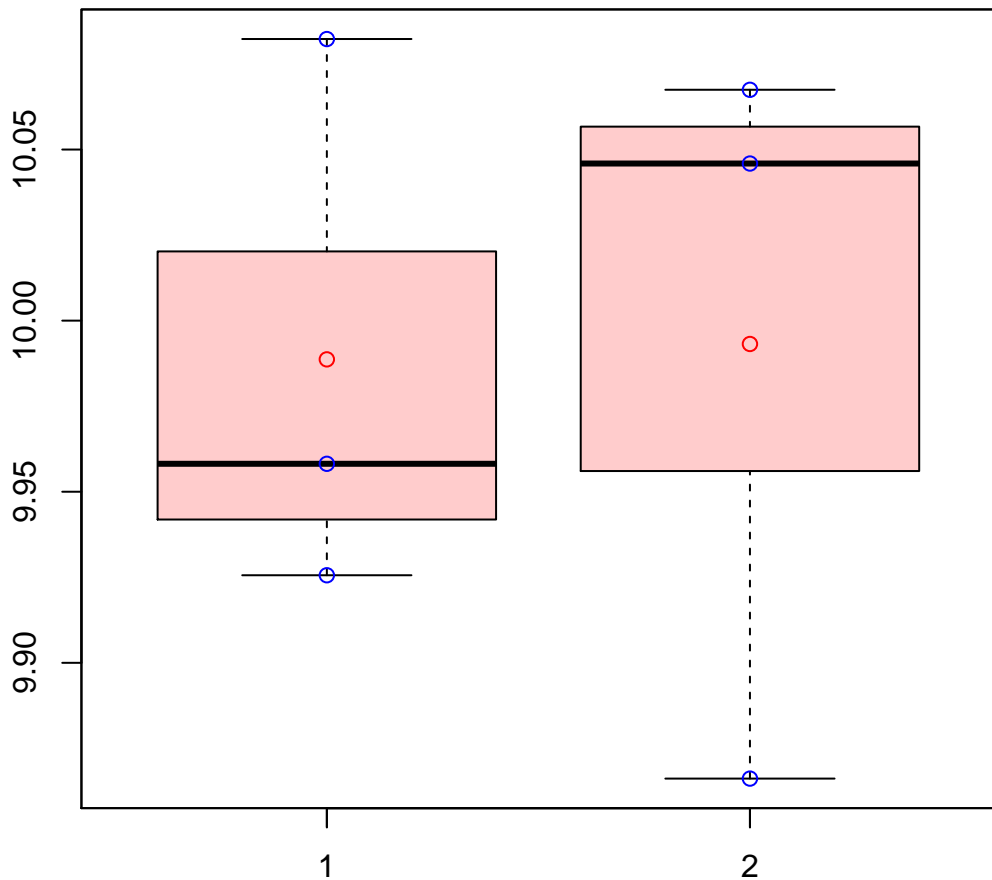

t-Test: p-value = 0.96

# CL1Contig8231|CL1Contig8231

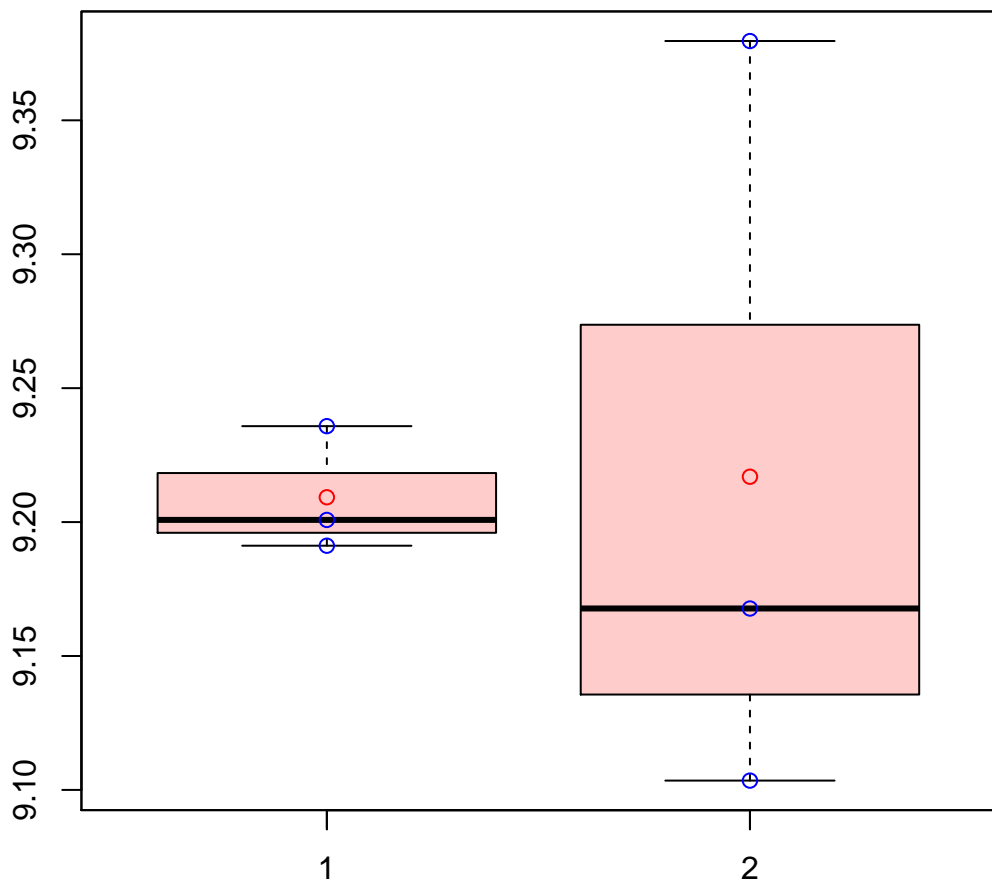

t-Test: p-value = 0.94

# CL1Contig8241|CL1Contig8241

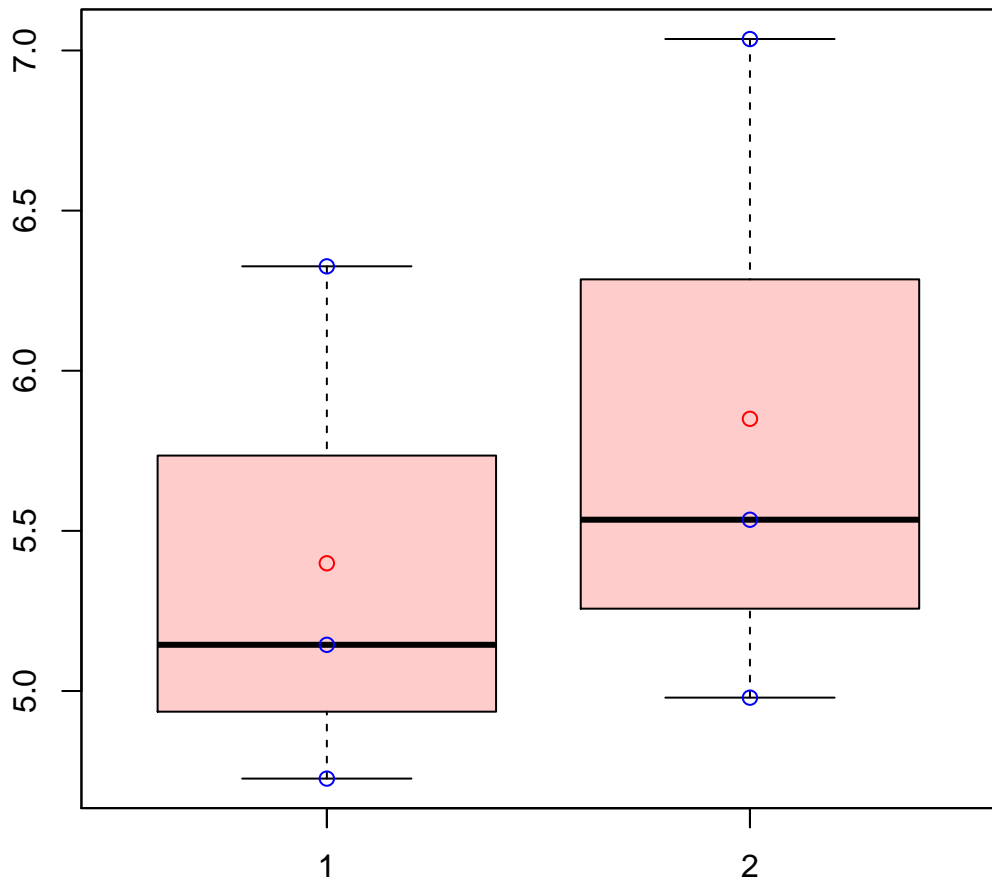

t-Test: p-value = 0.6

# CL1Contig8263|CL1Contig8263

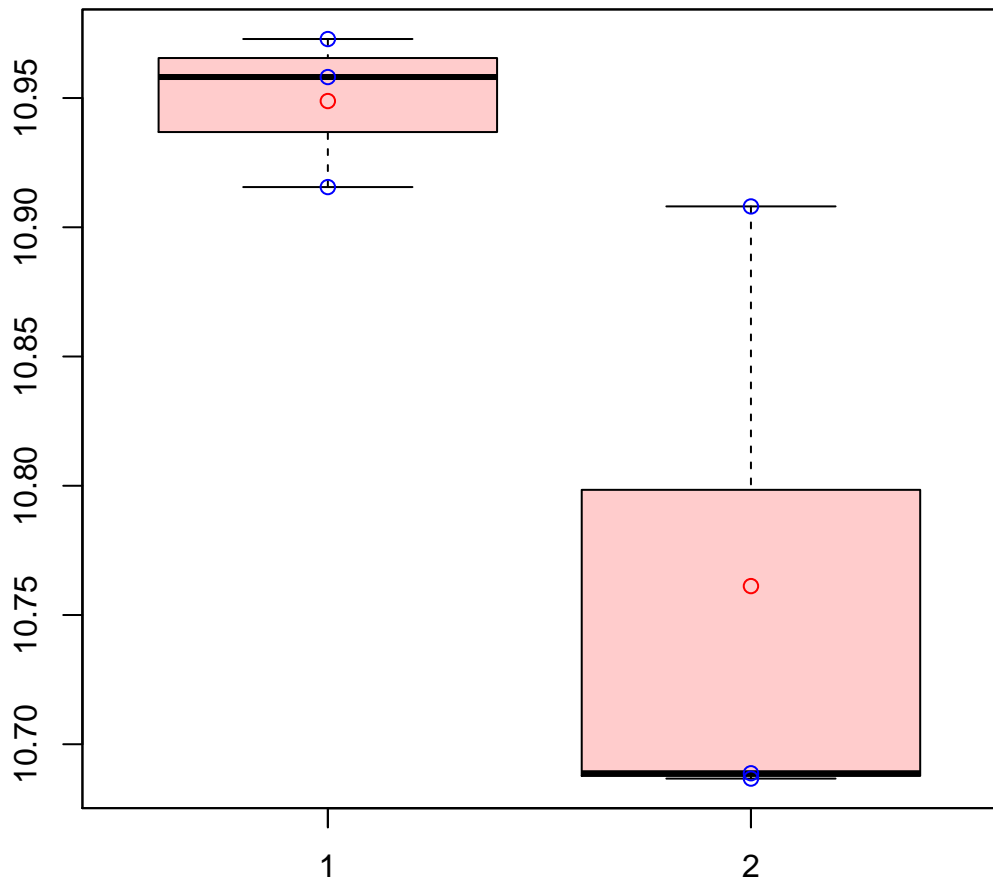

t-Test: p-value = 0.12

# CL1Contig8280|CL1Contig8280

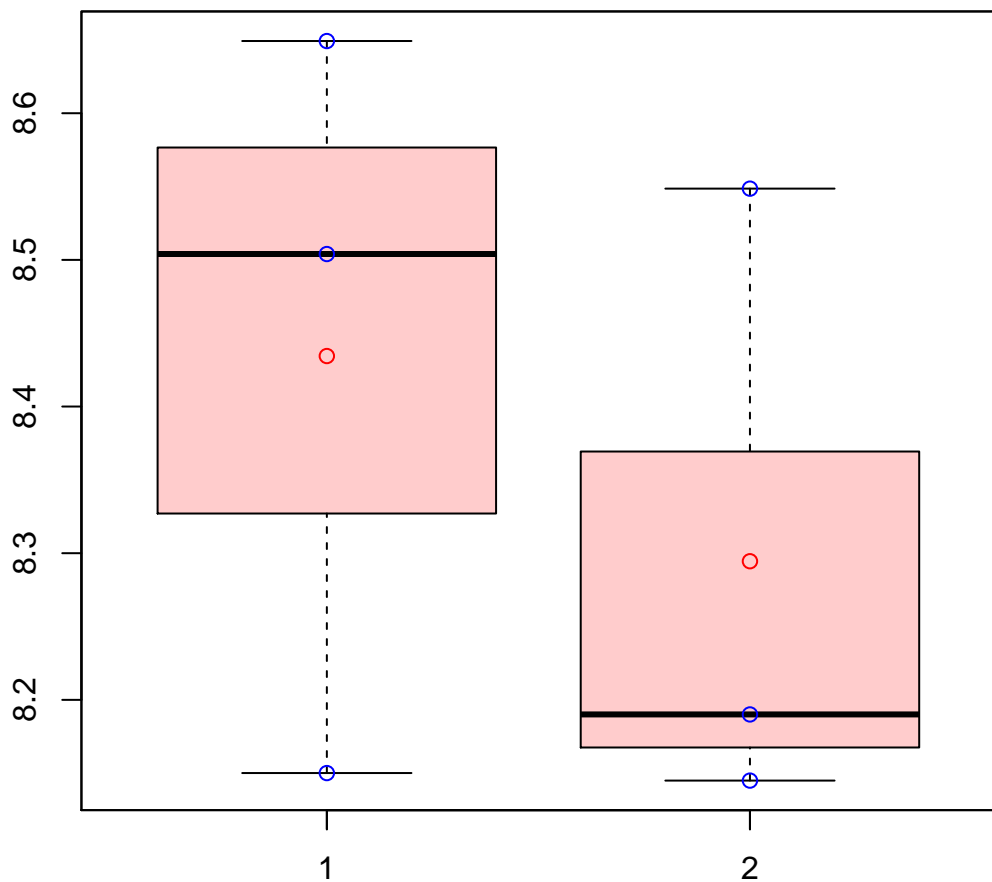

t-Test: p-value = 0.51

# CL1Contig82|CL1Contig82

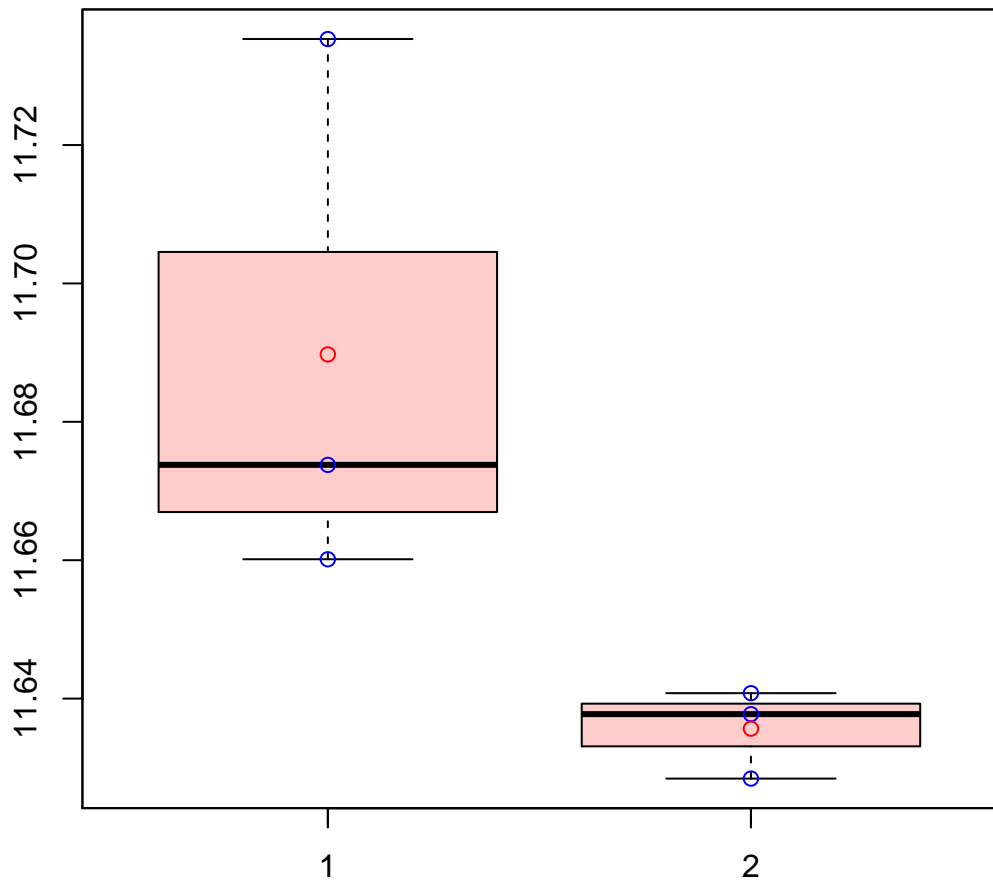

t-Test: p-value = 0.14

# CL1Contig8303|CL1Contig8303



t-Test: p-value = 0.03

# CL1Contig8308|CL1Contig8308

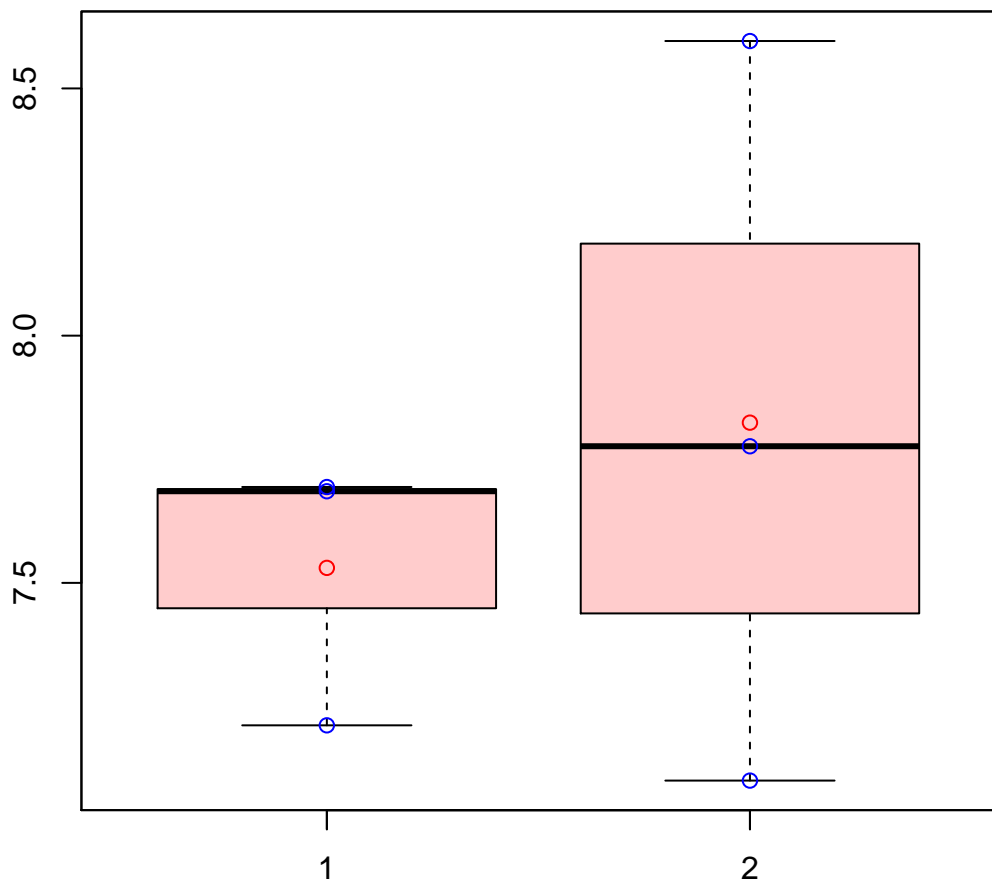

t-Test: p-value = 0.58



# CL1Contig8324|CL1Contig8324

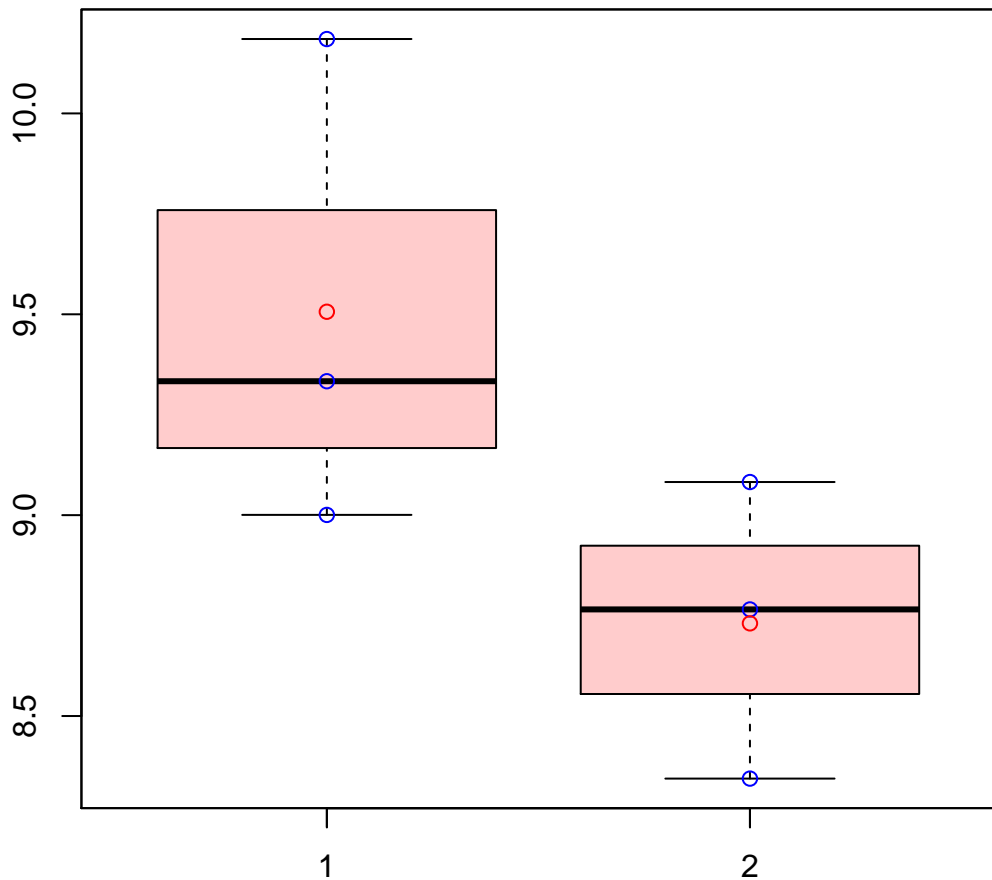

t-Test: p-value = 0.15

# CL1Contig8329|CL1Contig8329

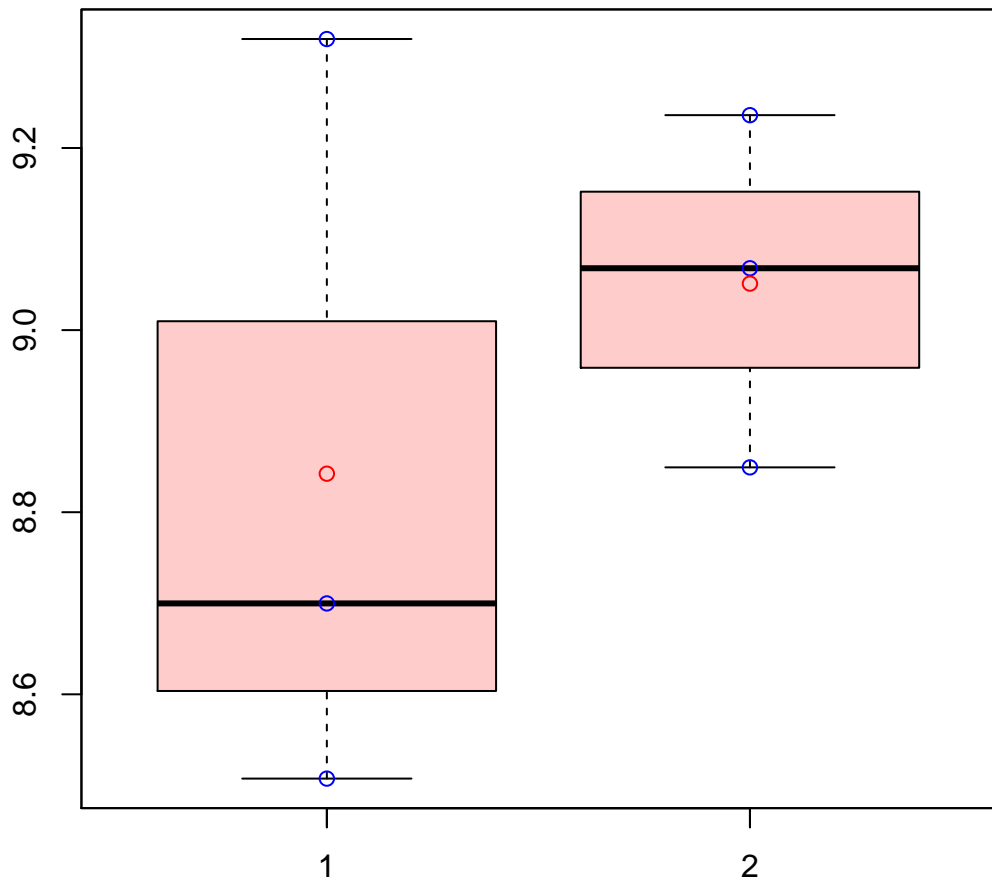

t-Test: p-value = 0.5

# CL1Contig8347|CL1Contig8347

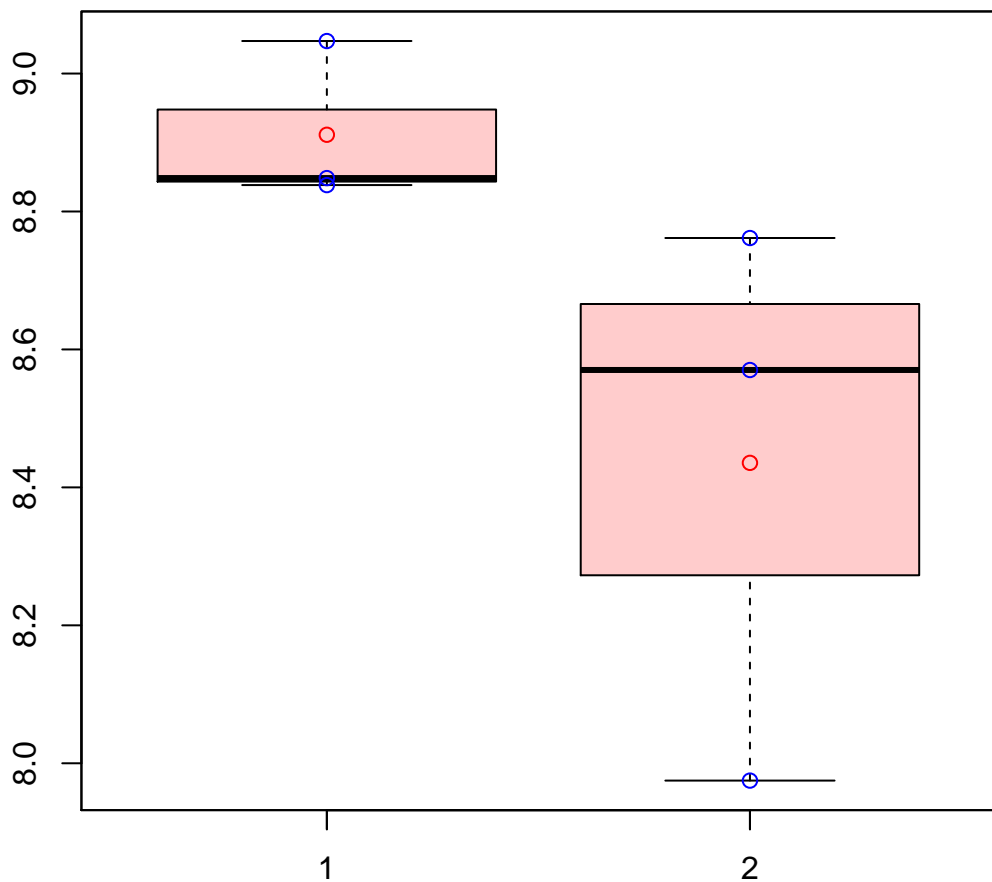

t-Test: p-value = 0.18

# CL1Contig8365|CL1Contig8365



t-Test: p-value = 0.74

# CL1Contig8366|CL1Contig8366

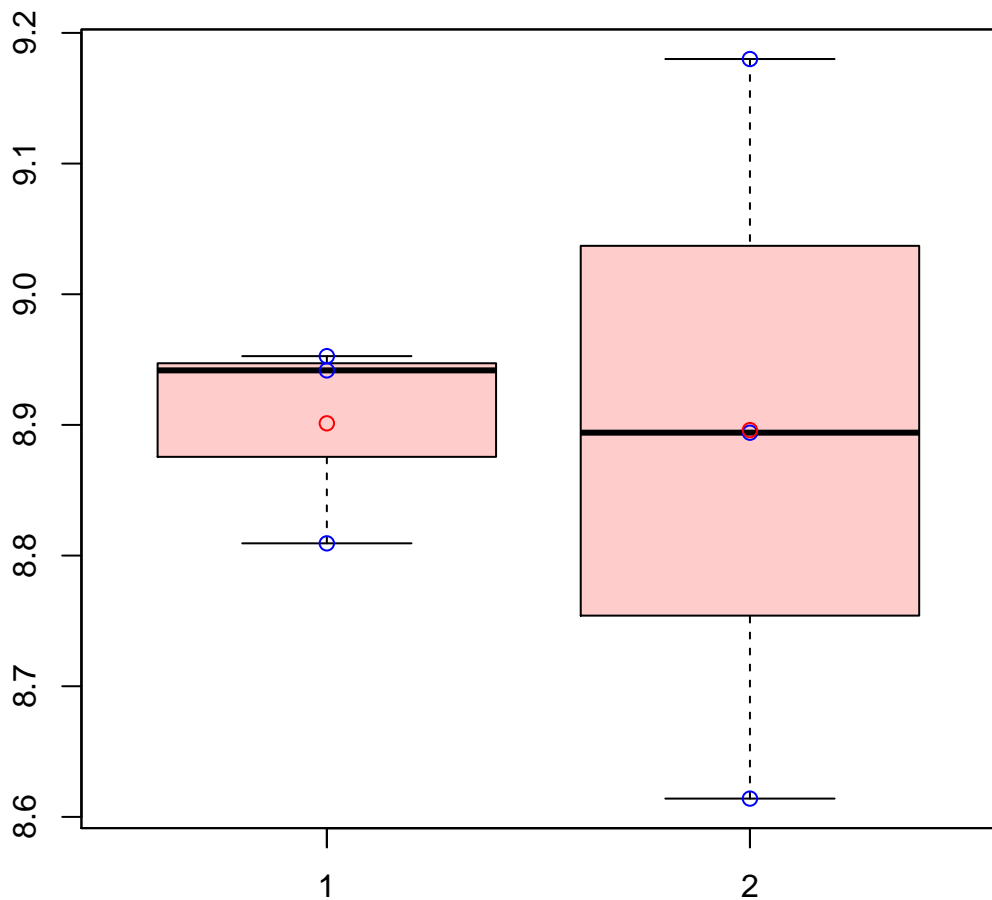

t-Test: p-value = 0.98

# CL1Contig8421|CL1Contig8421

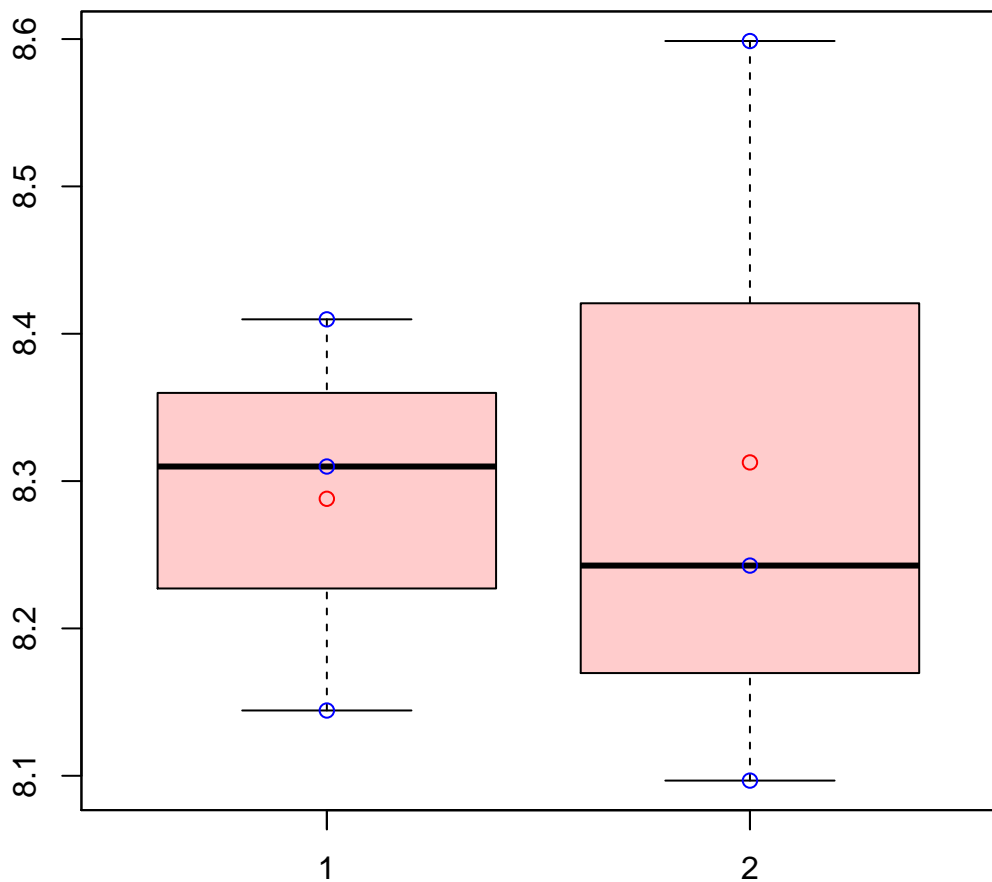

t-Test: p-value = 0.89

# CL1Contig8432|CL1Contig8432

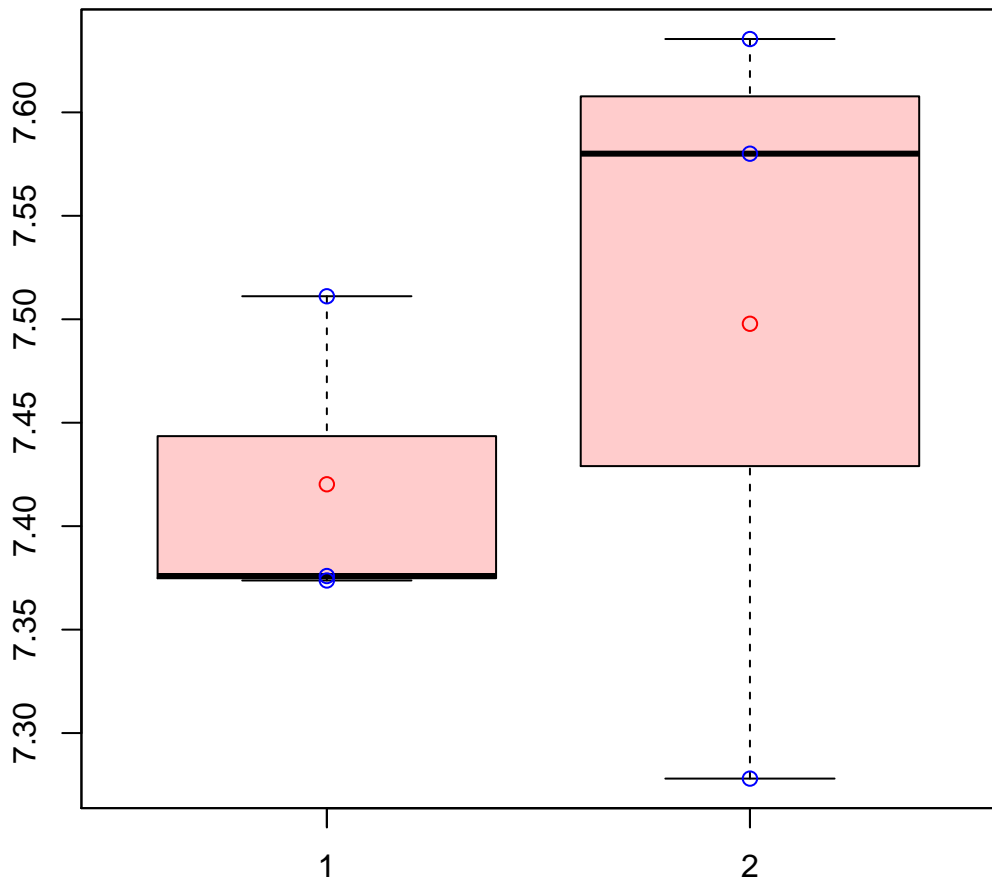

t-Test: p-value = 0.57

# CL1Contig8436|CL1Contig8436

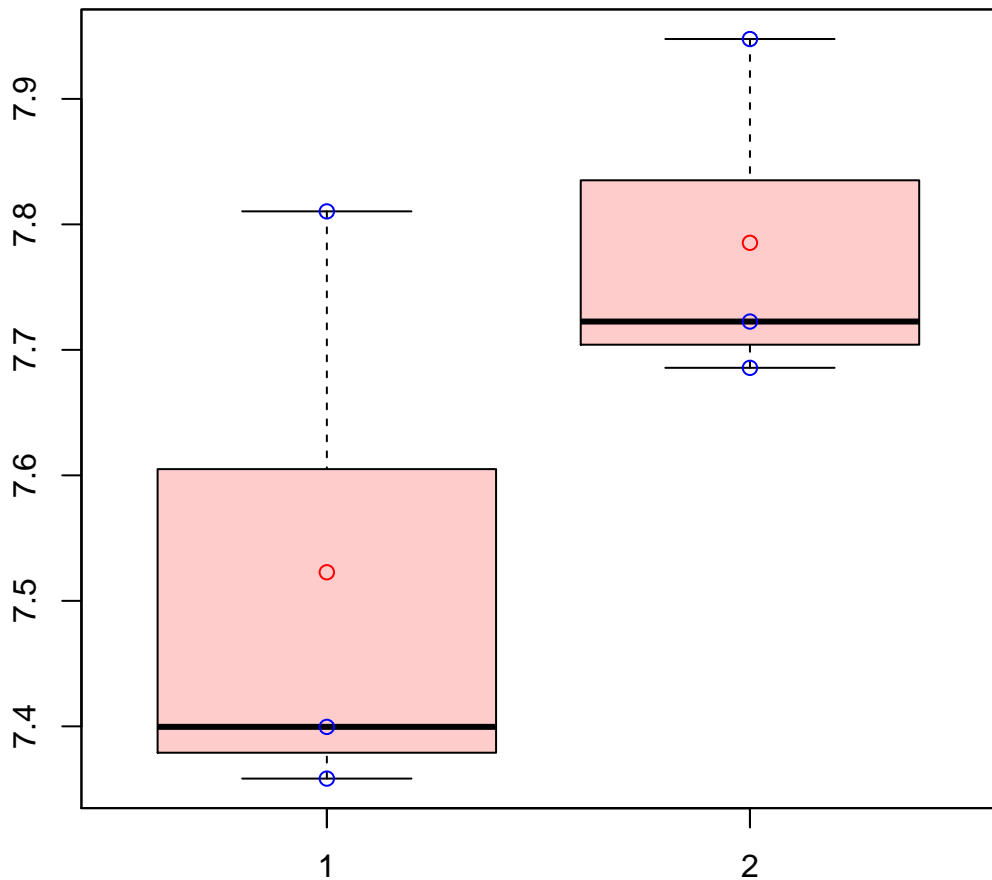

t-Test: p-value = 0.21



# CL1Contig8454|CL1Contig8454

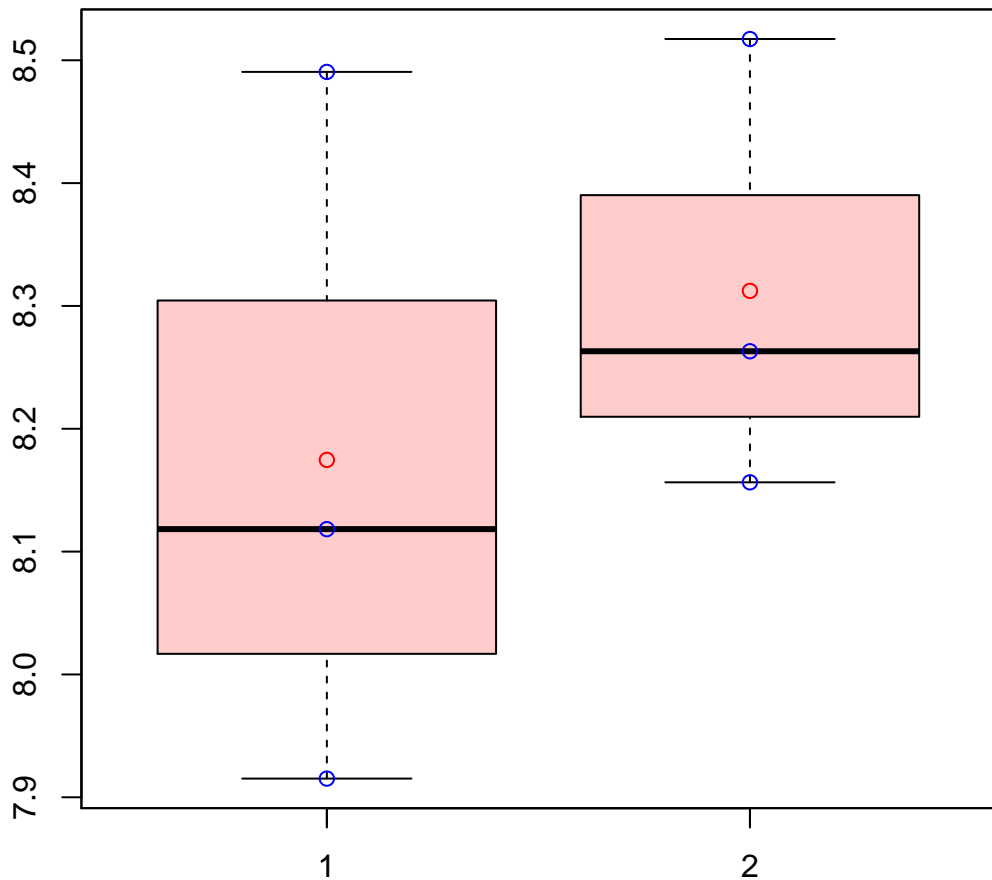

t-Test: p-value = 0.53

# CL1Contig8459|CL1Contig8459

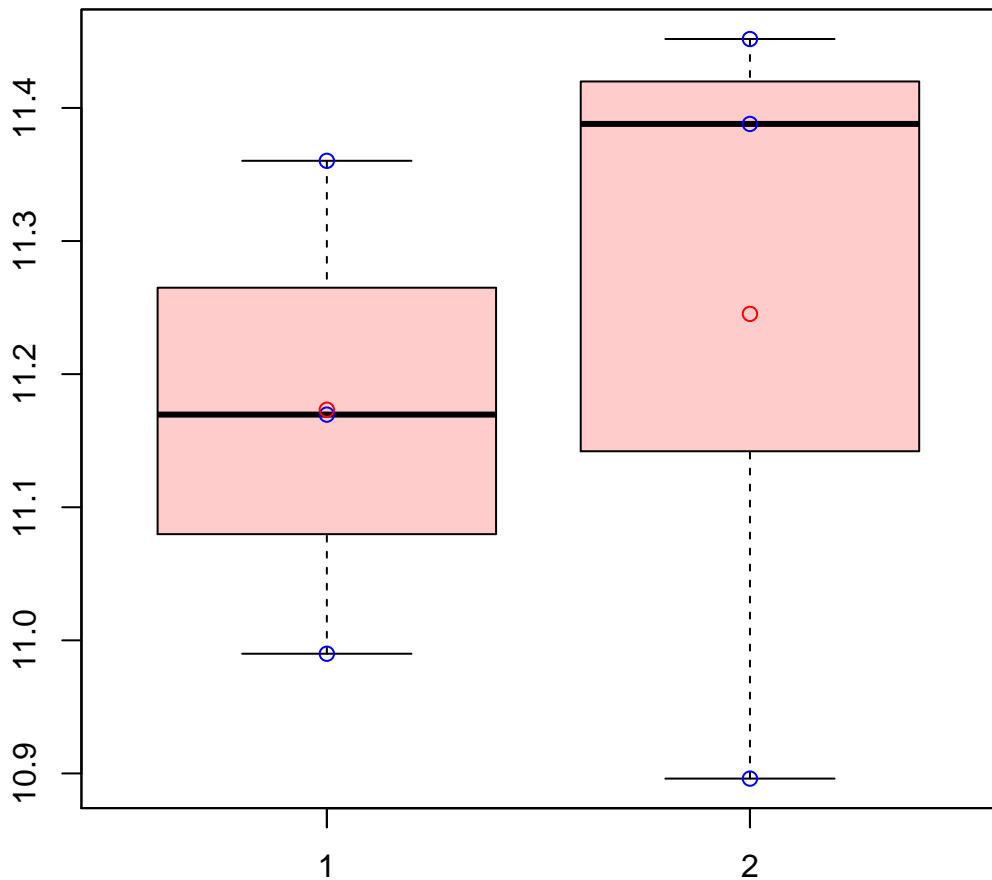

t-Test: p-value = 0.75

# CL1Contig8483|CL1Contig8483

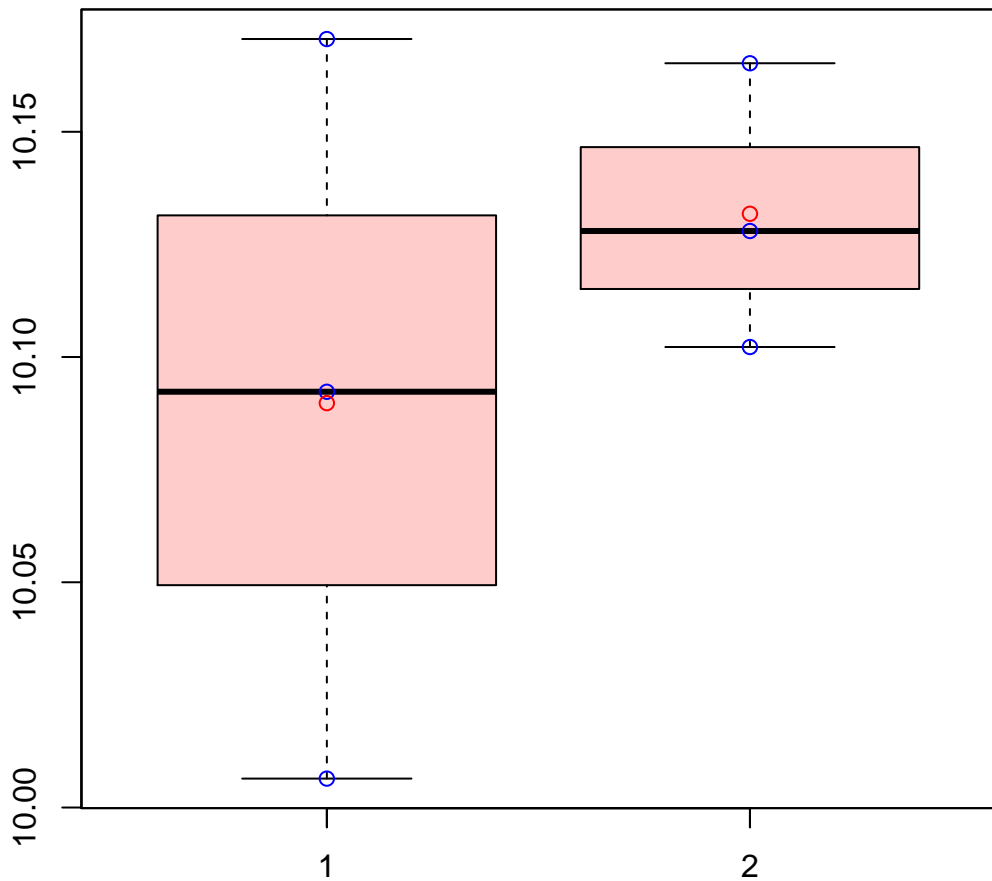

t-Test: p-value = 0.48

# CL1Contig849|CL1Contig849

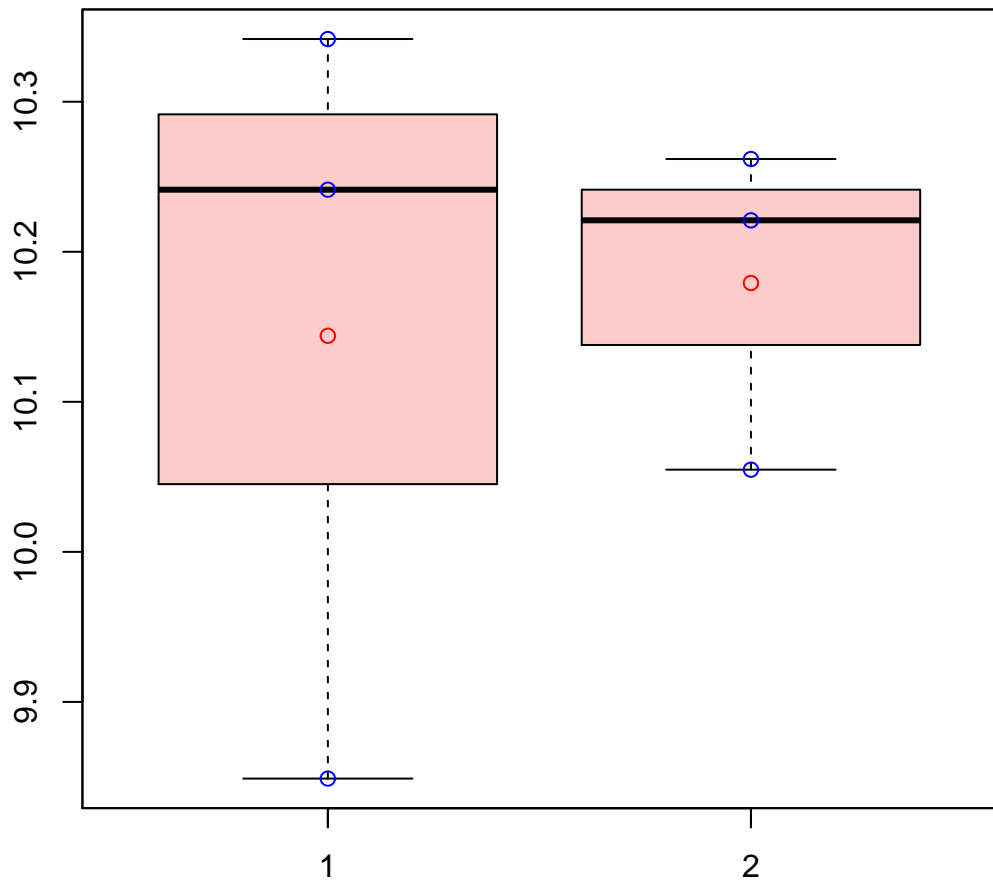

t-Test: p-value = 0.84

# CL1Contig8520|CL1Contig8520

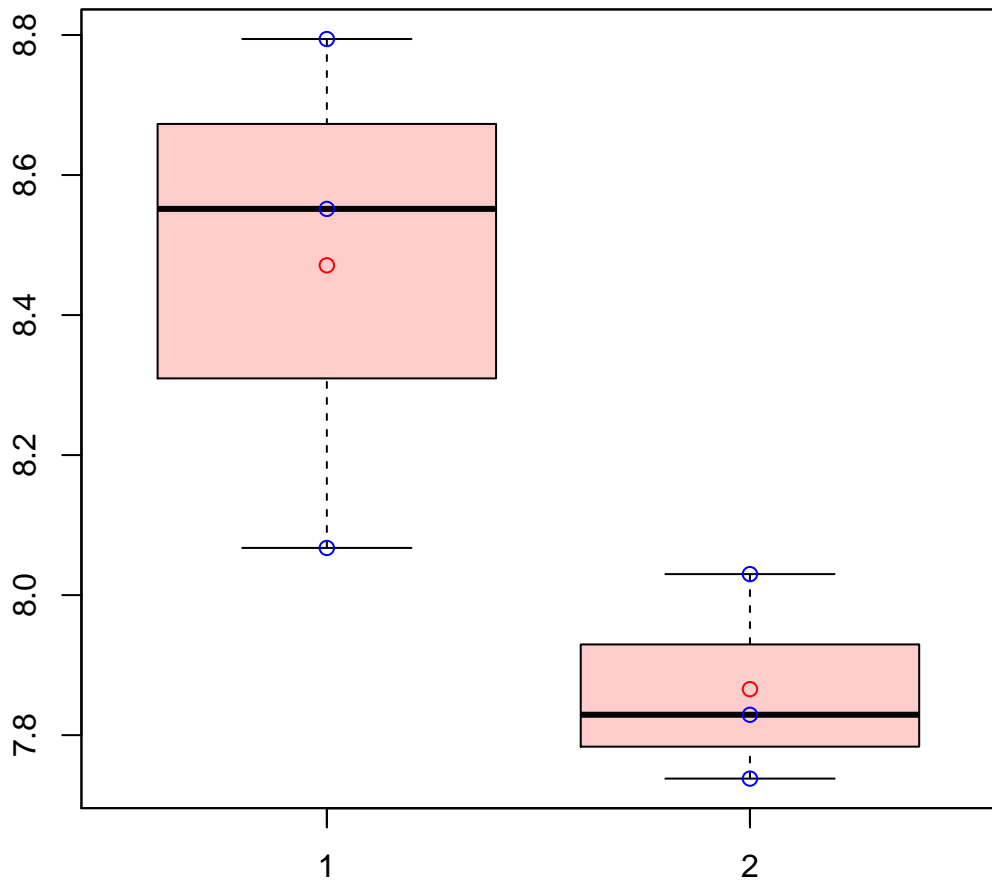

t-Test: p-value = 0.09

# CL1Contig8536|CL1Contig8536

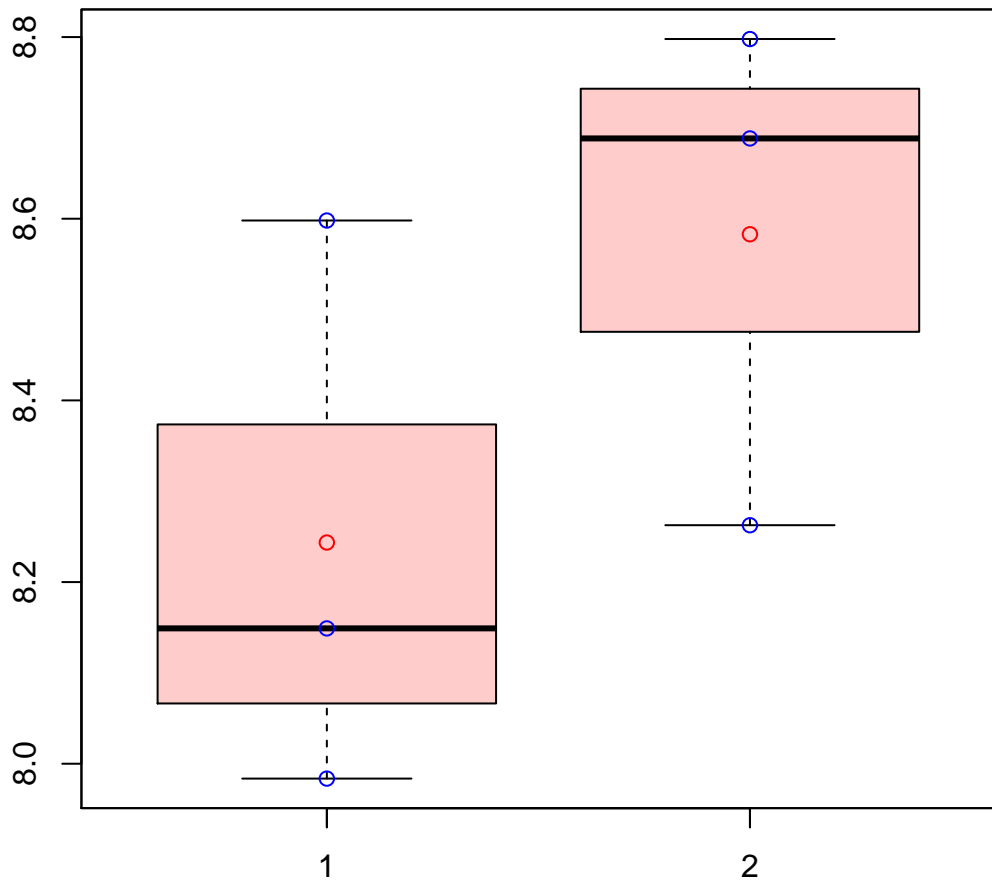

t-Test: p-value = 0.24

# CL1Contig8539|CL1Contig8539

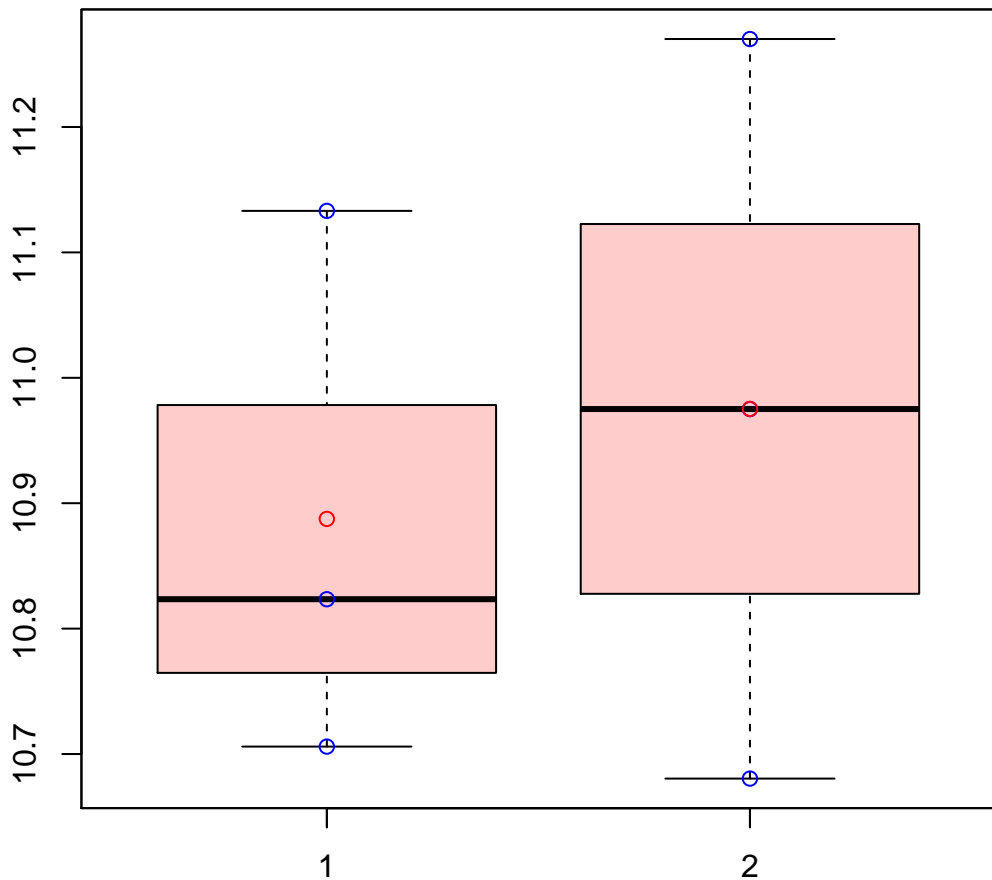

t-Test: p-value = 0.7

# CL1Contig8563|CL1Contig8563

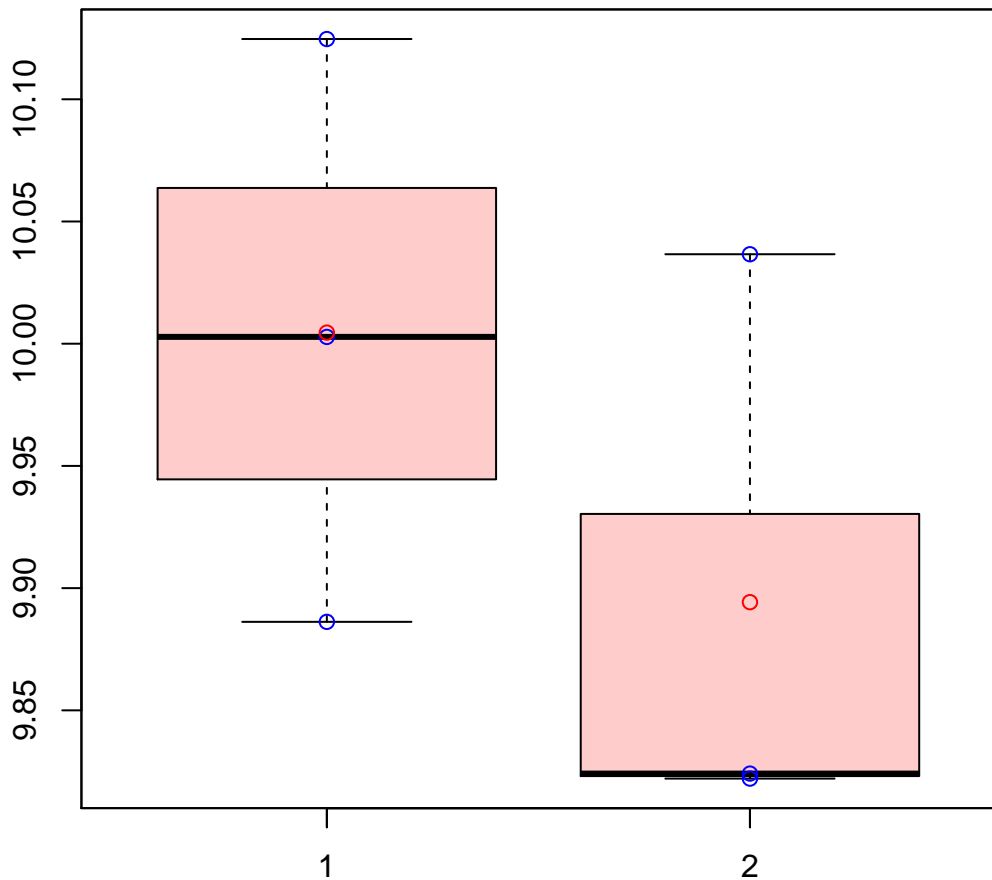

t-Test: p-value = 0.33



# CL1Contig8571|CL1Contig8571

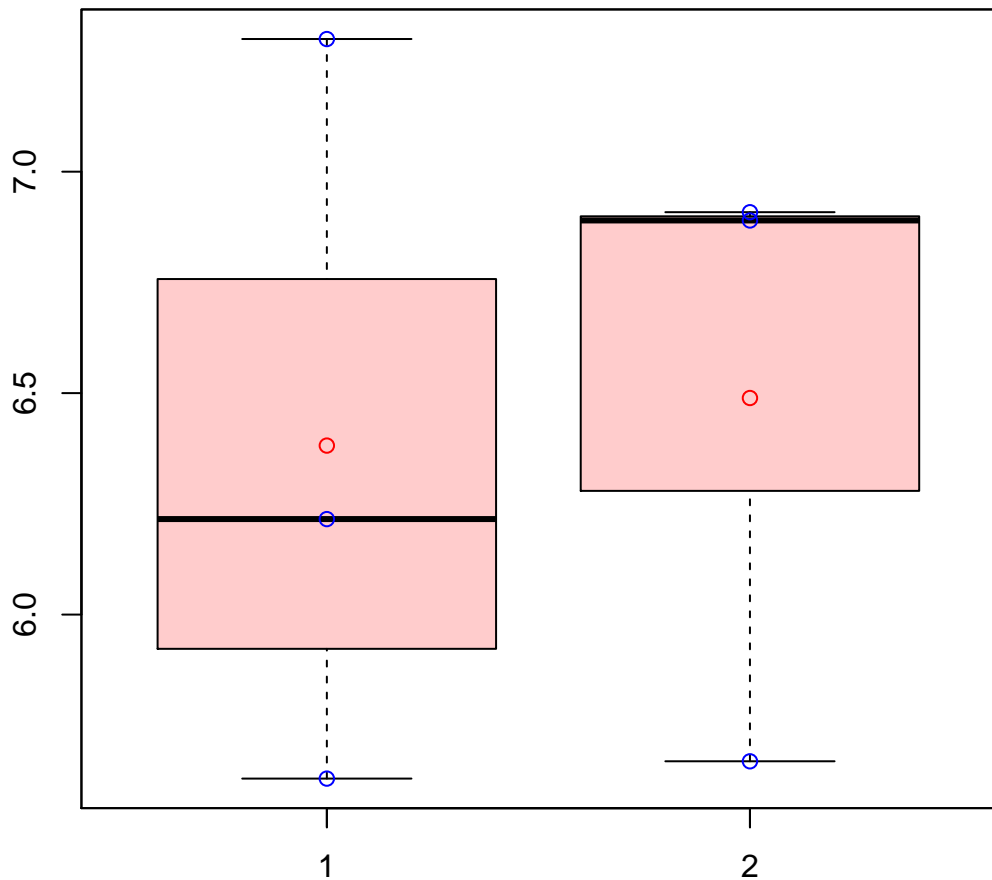

t-Test: p-value = 0.87

# CL1Contig8572|CL1Contig8572



t-Test: p-value = 0.87

# CL1Contig8575|CL1Contig8575

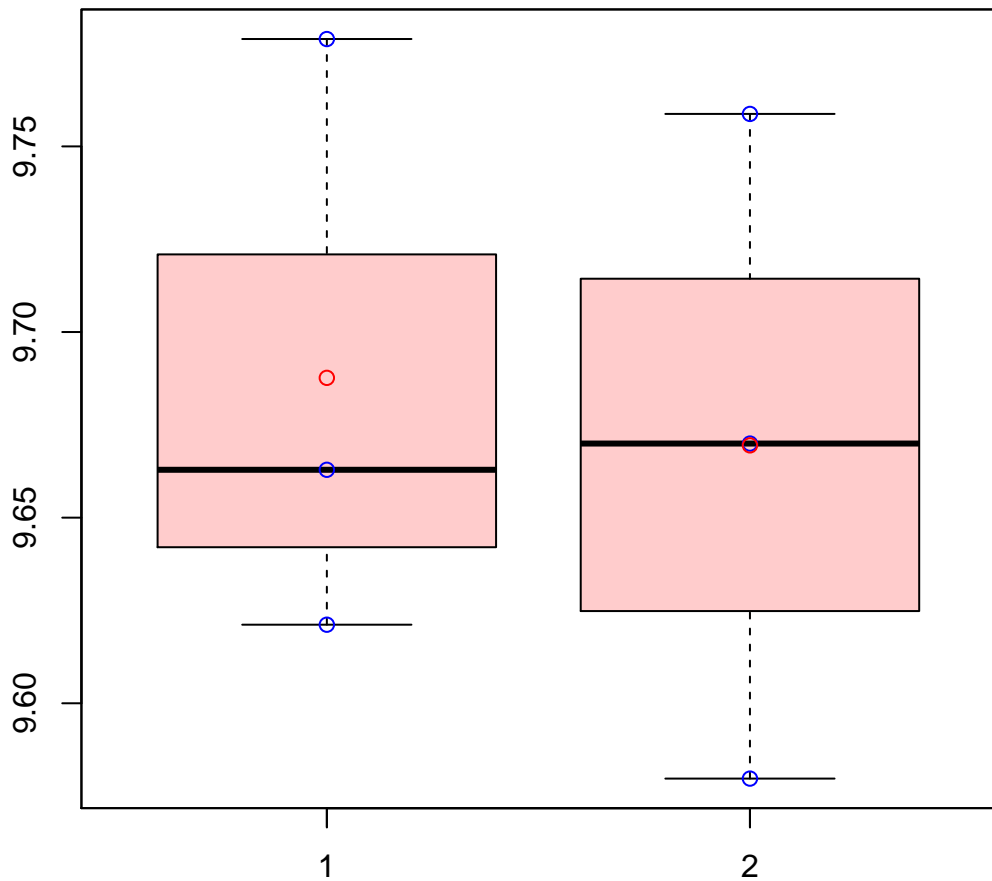

t-Test: p-value = 0.81

# CL1Contig8577|CL1Contig8577

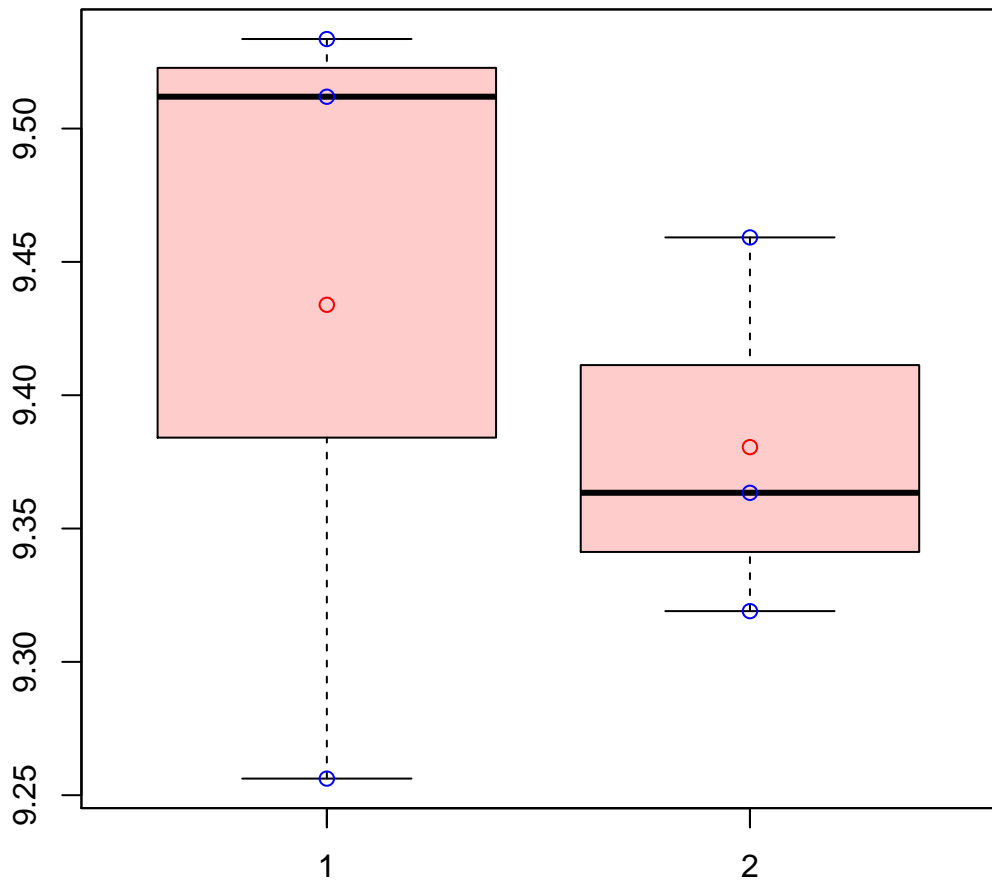

t-Test: p-value = 0.63

# CL1Contig8595|CL1Contig8595

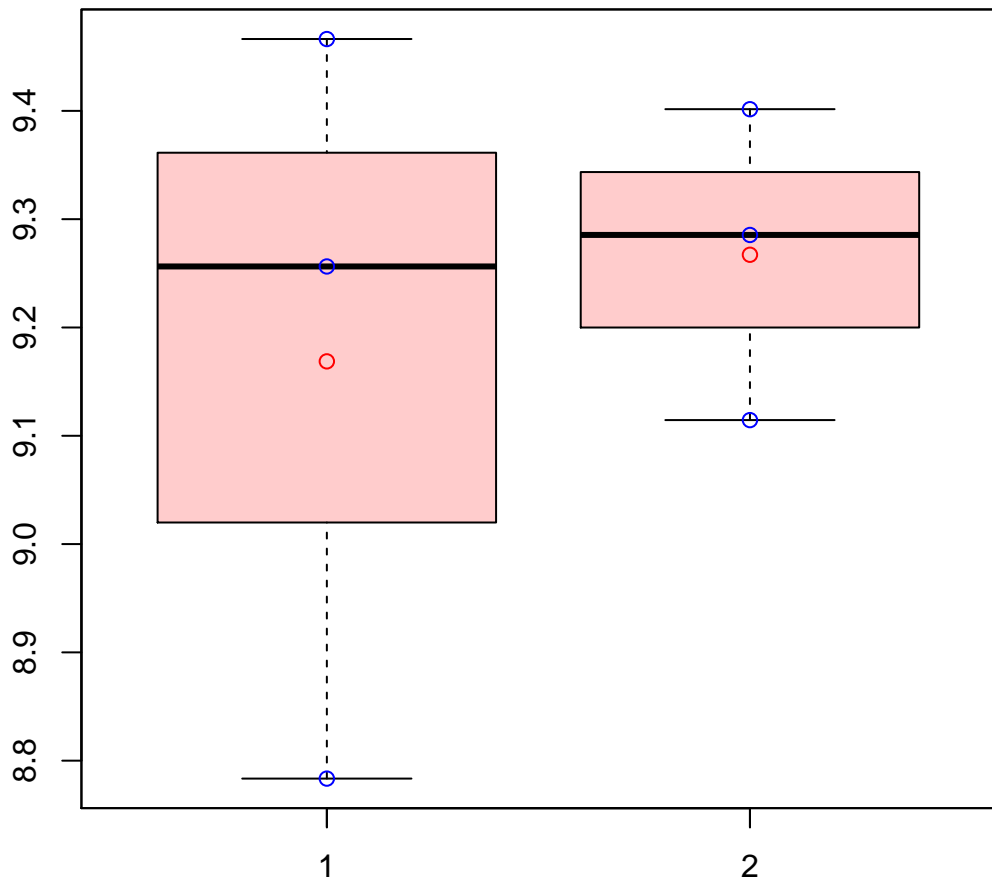

t-Test: p-value = 0.69

# CL1Contig8602|CL1Contig8602



t-Test: p-value = 0.5

# CL1Contig8603|CL1Contig8603



t-Test: p-value = 0.5

# CL1Contig8605|CL1Contig8605

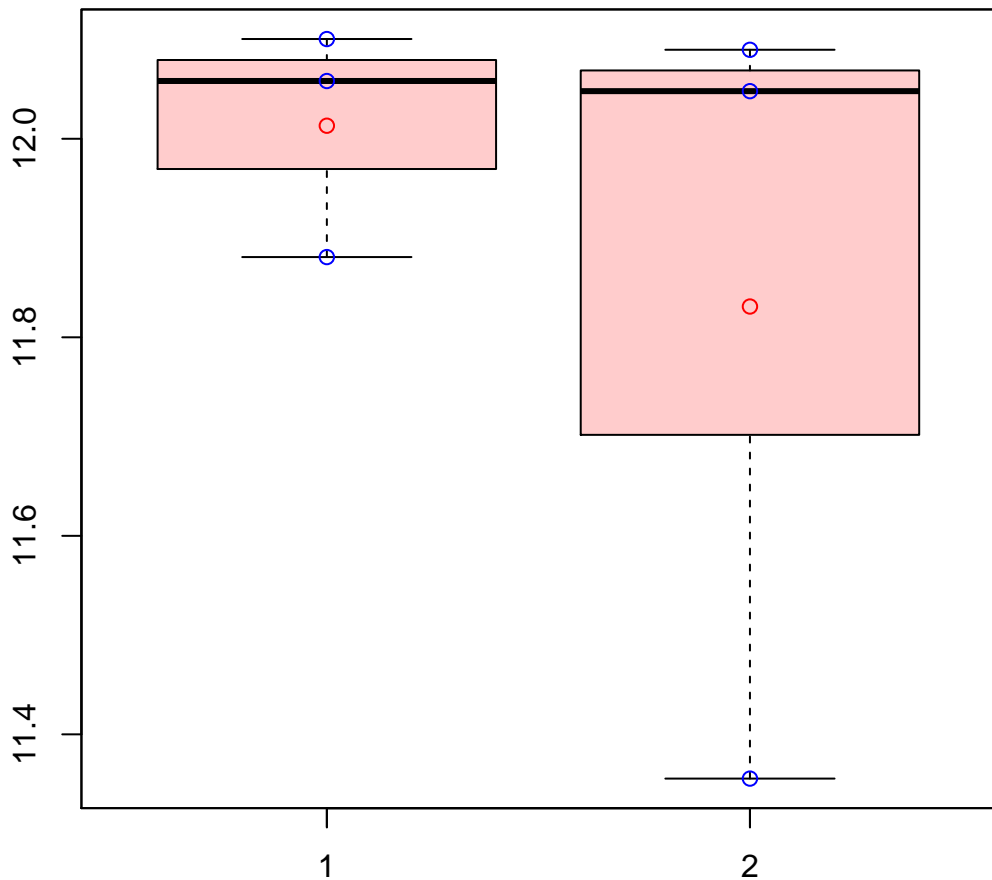

t-Test: p-value = 0.53



# CL1Contig8606|CL1Contig8606

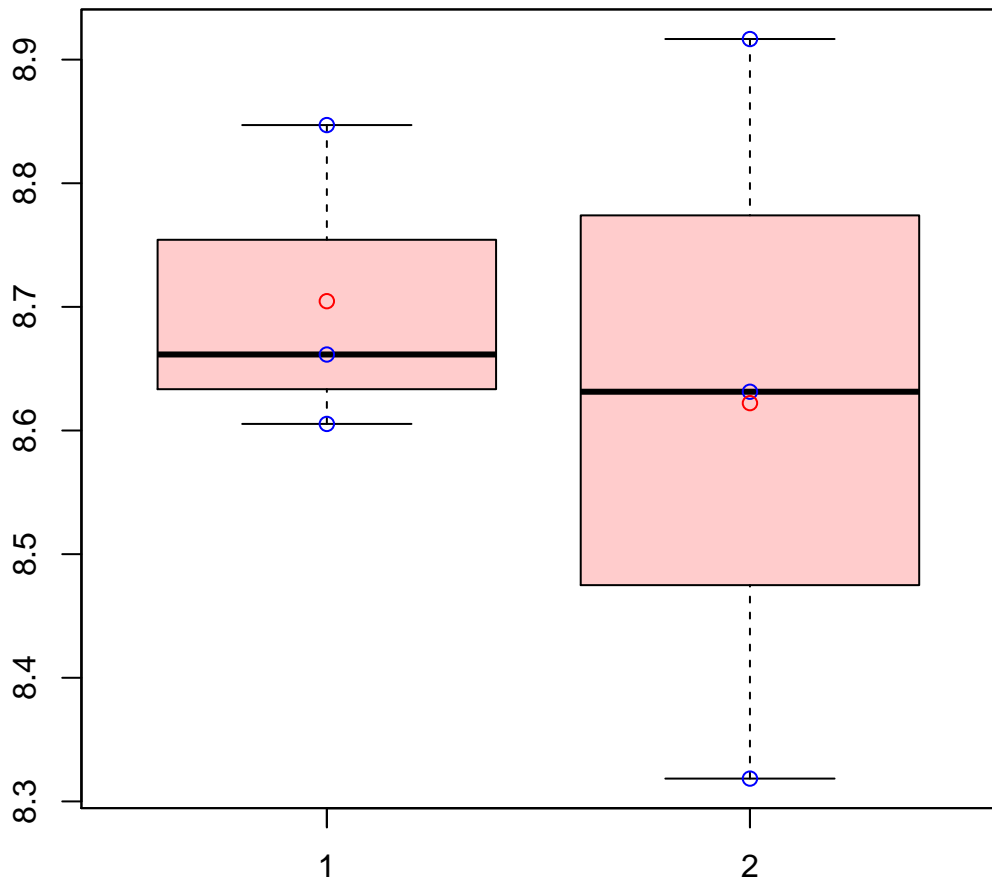

t-Test: p-value = 0.69

# CL1Contig8614|CL1Contig8614

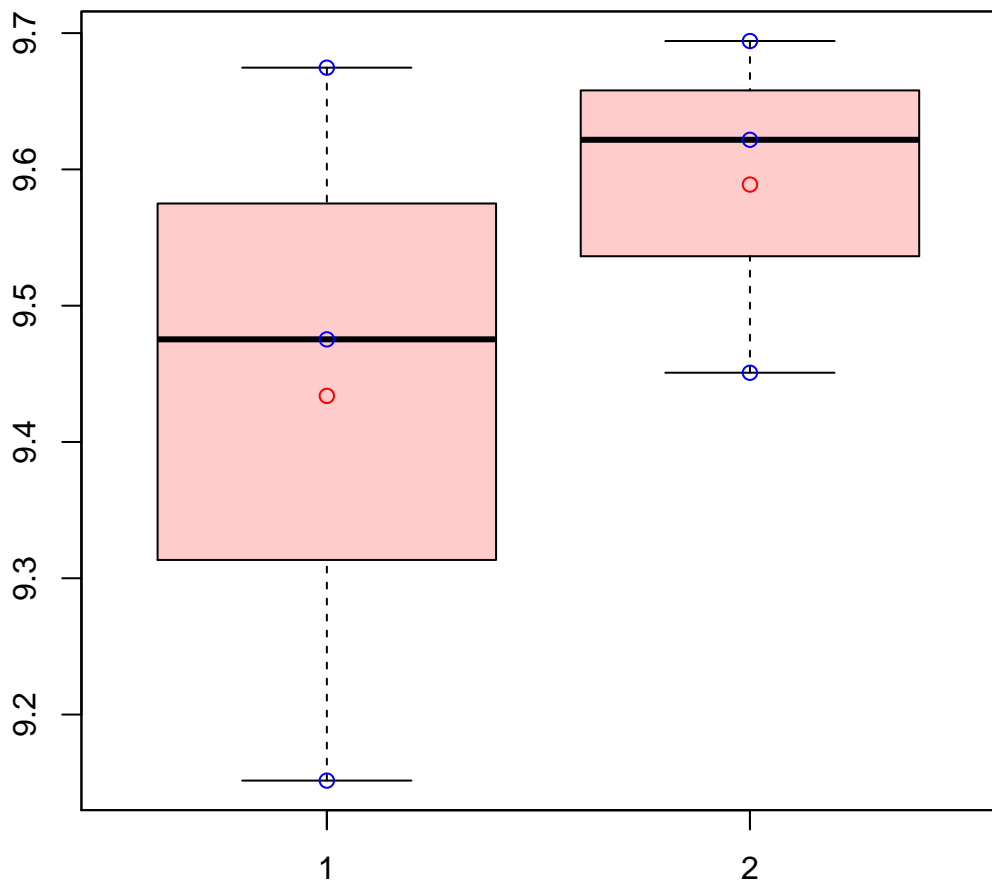

t-Test: p-value = 0.43

# CL1Contig8615|CL1Contig8615

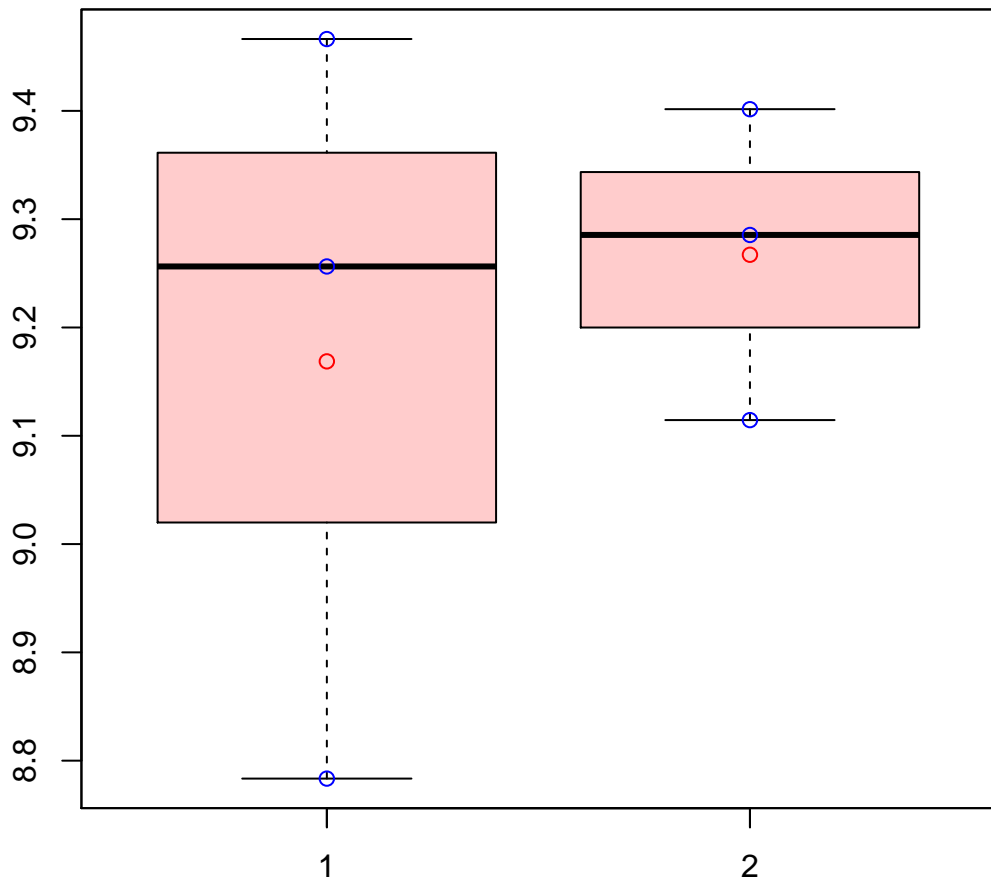

t-Test: p-value = 0.69

# CL1Contig8616|CL1Contig8616



t-Test: p-value = 0.69

# CL1Contig8620|CL1Contig8620

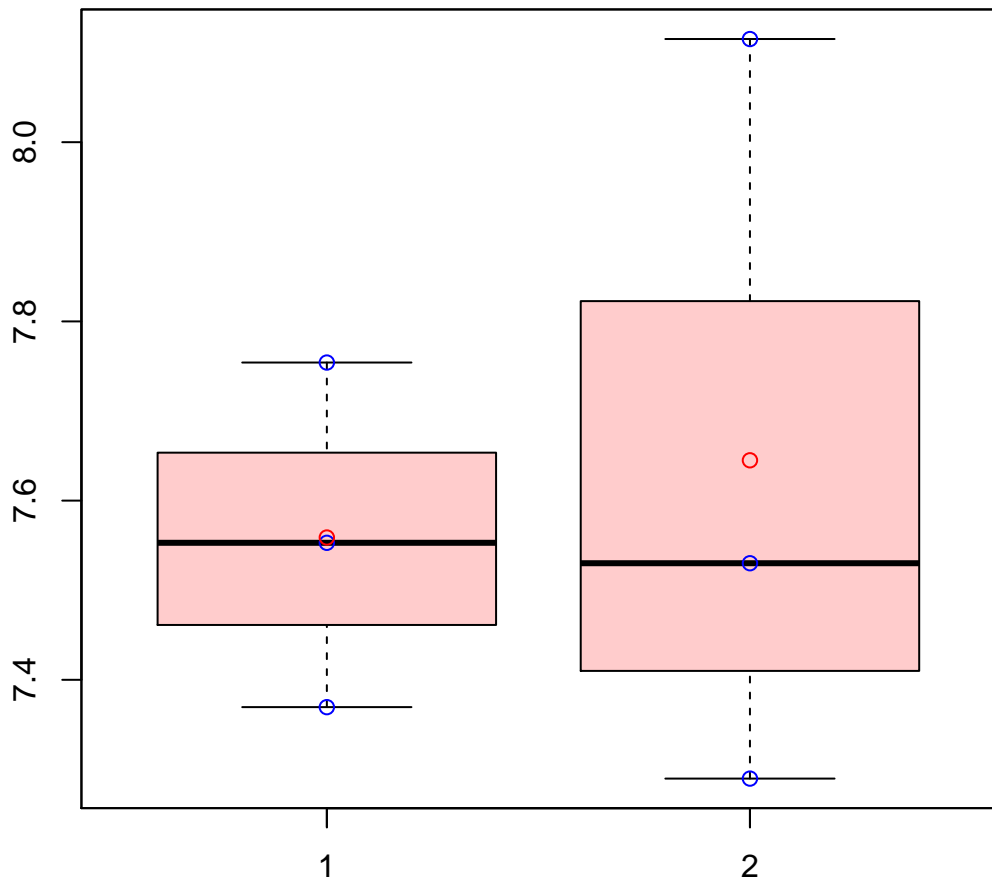

t-Test: p-value = 0.77

# CL1Contig8622|CL1Contig8622

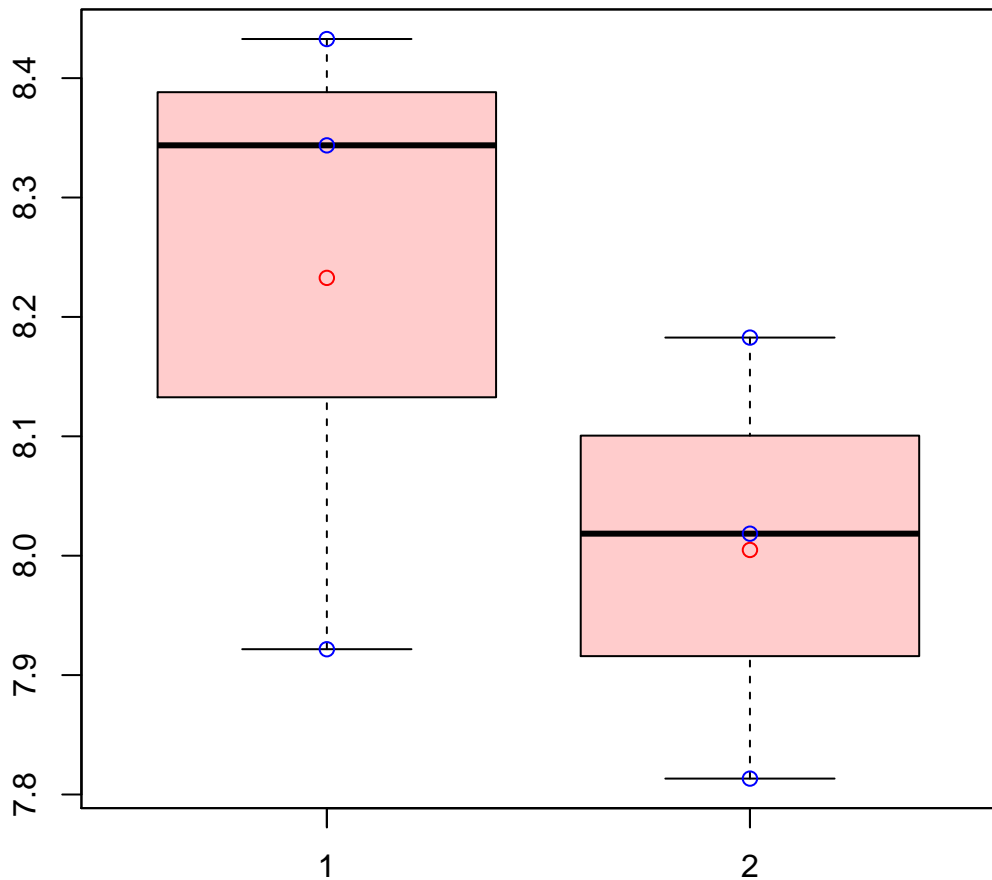

t-Test: p-value = 0.31

# CL1Contig8623|CL1Contig8623

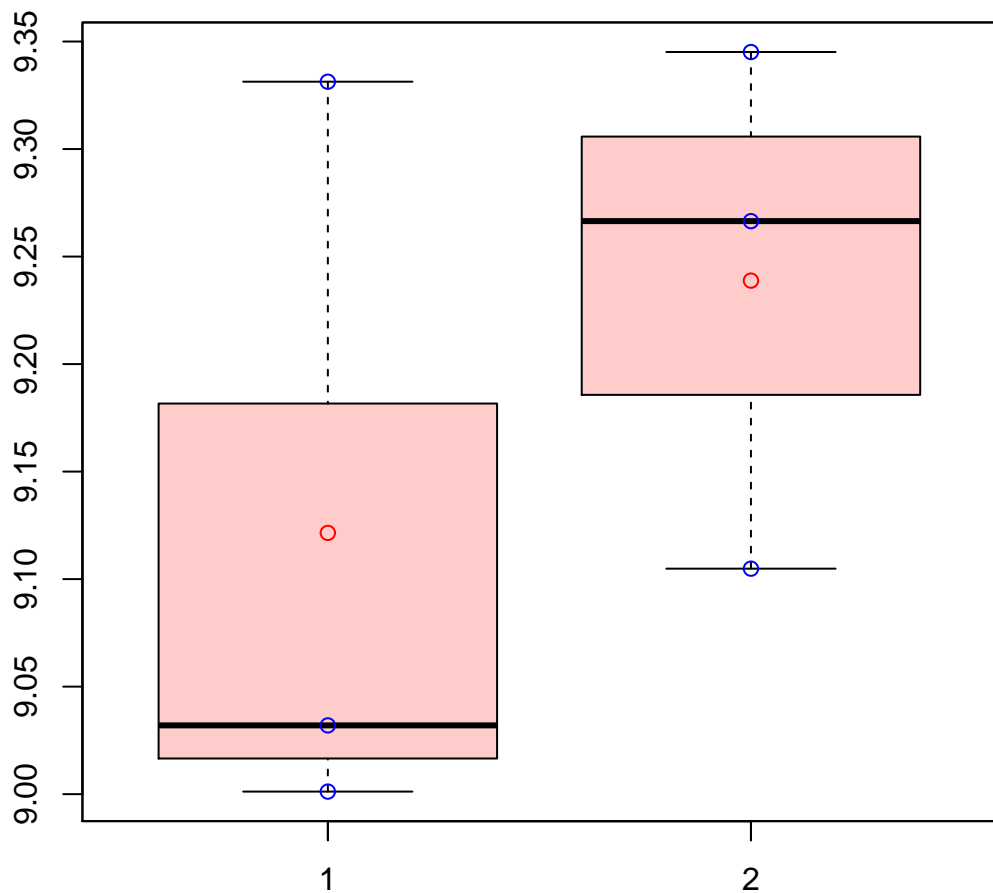

t-Test: p-value = 0.41

# CL1Contig8626|CL1Contig8626

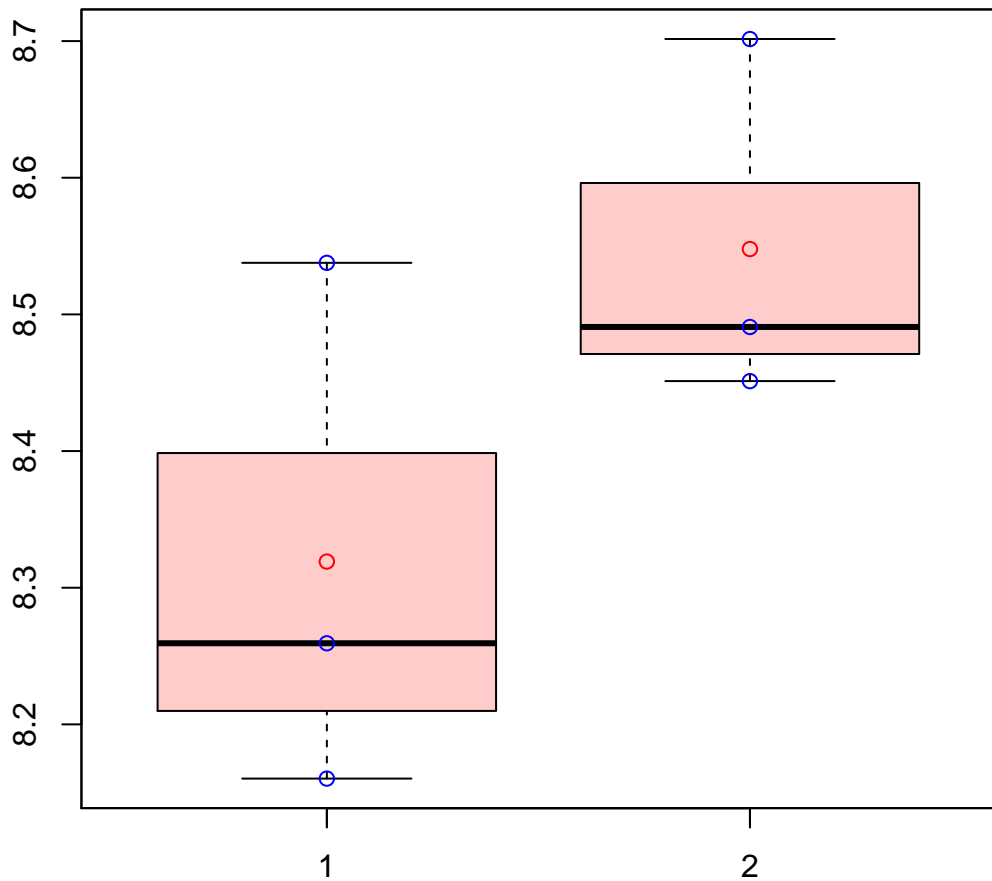

t-Test: p-value = 0.18



# CL1Contig8632|CL1Contig8632

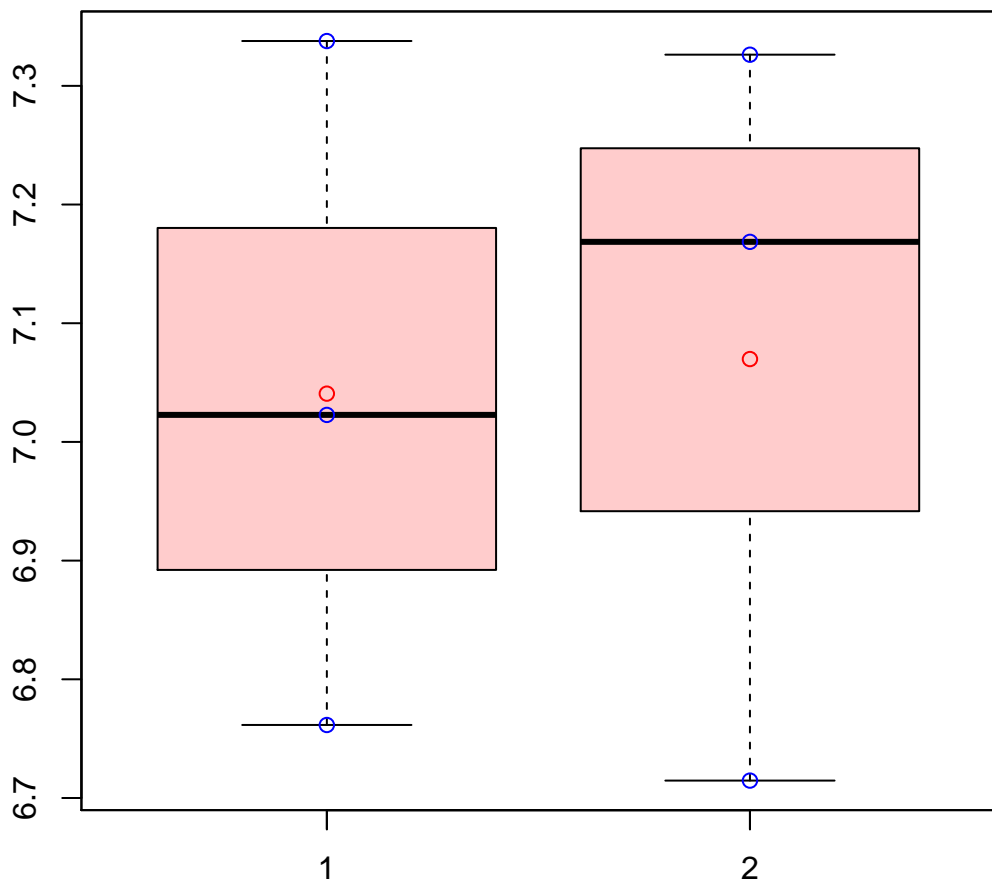

t-Test: p-value = 0.91

# CL1Contig8636|CL1Contig8636

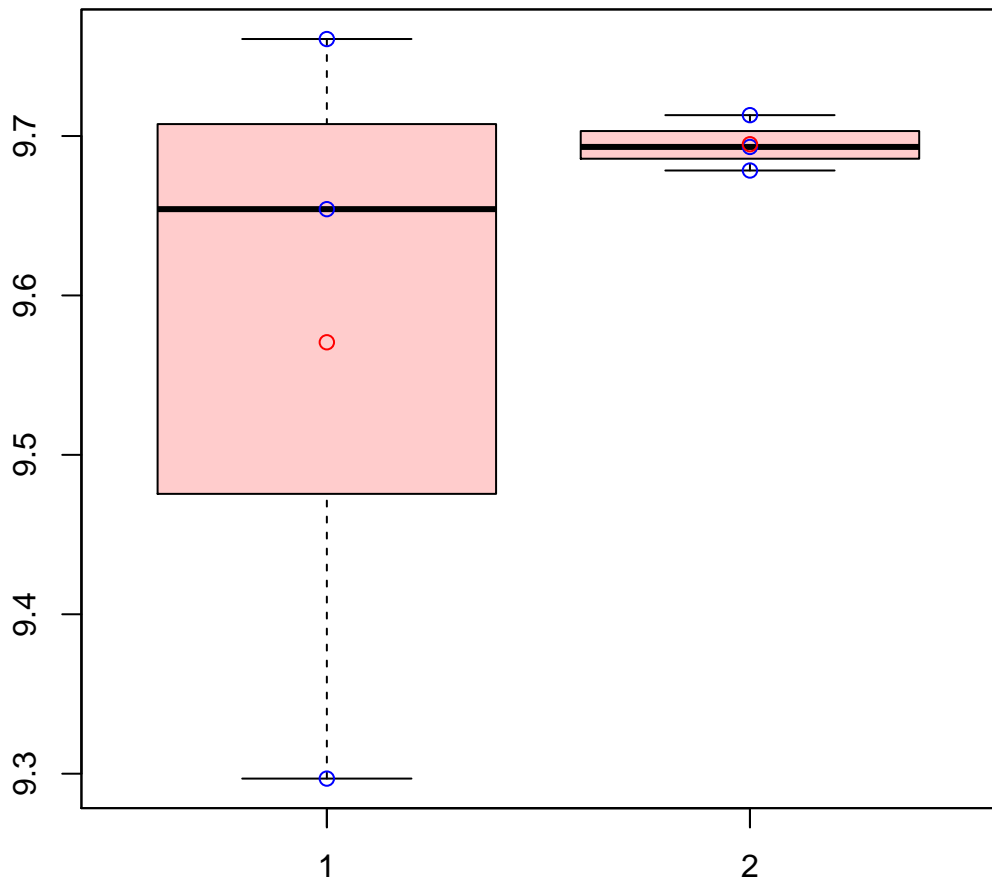

t-Test: p-value = 0.47

# CL1Contig8638|CL1Contig8638

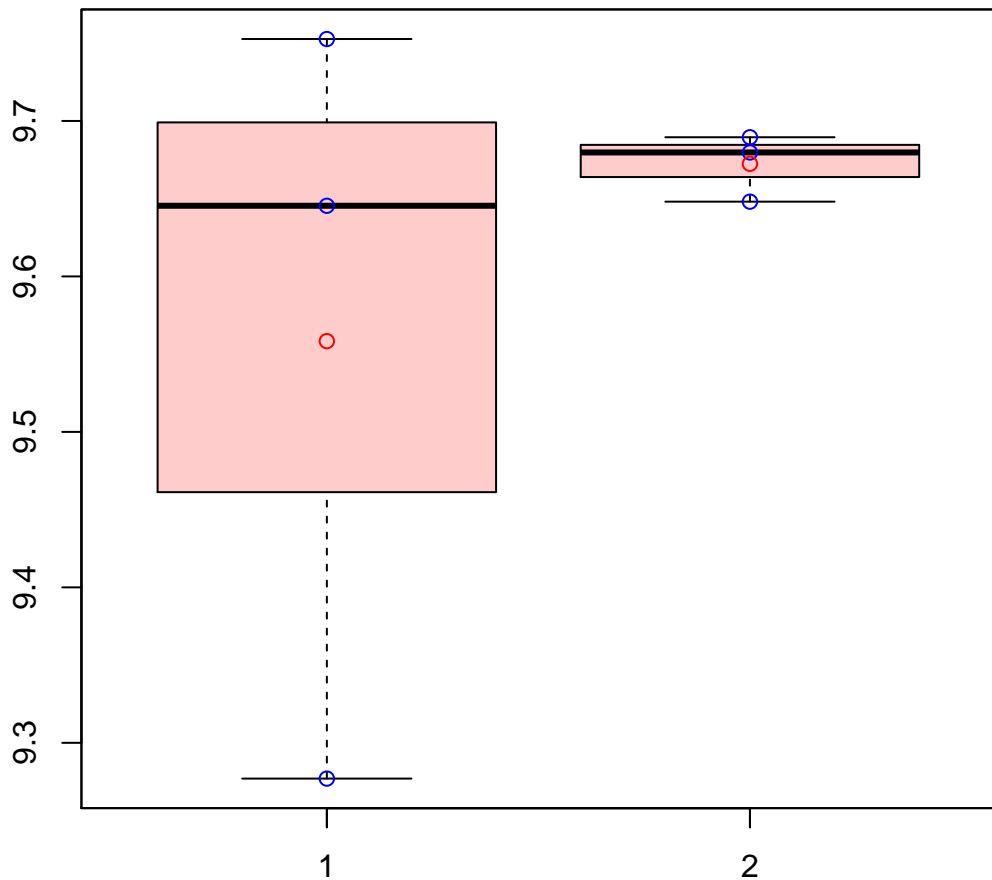

t-Test: p-value = 0.51

# CL1Contig8641|CL1Contig8641

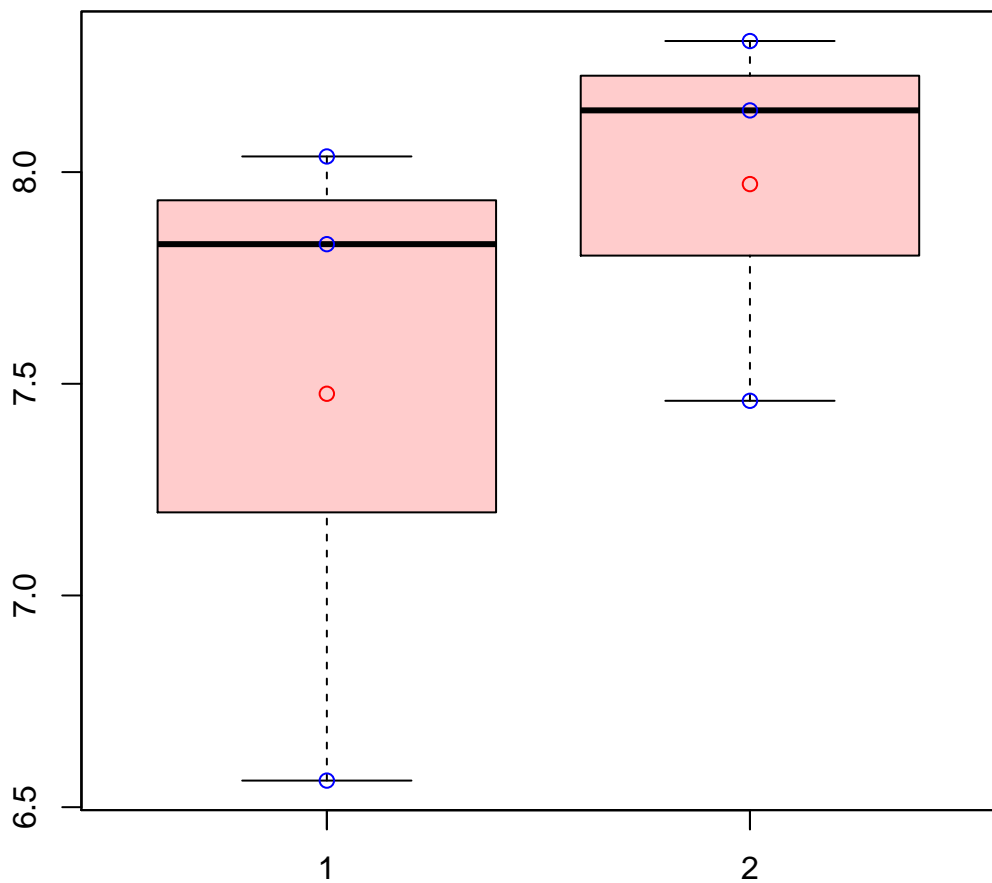

t-Test: p-value = 0.42

# CL1Contig8668|CL1Contig8668

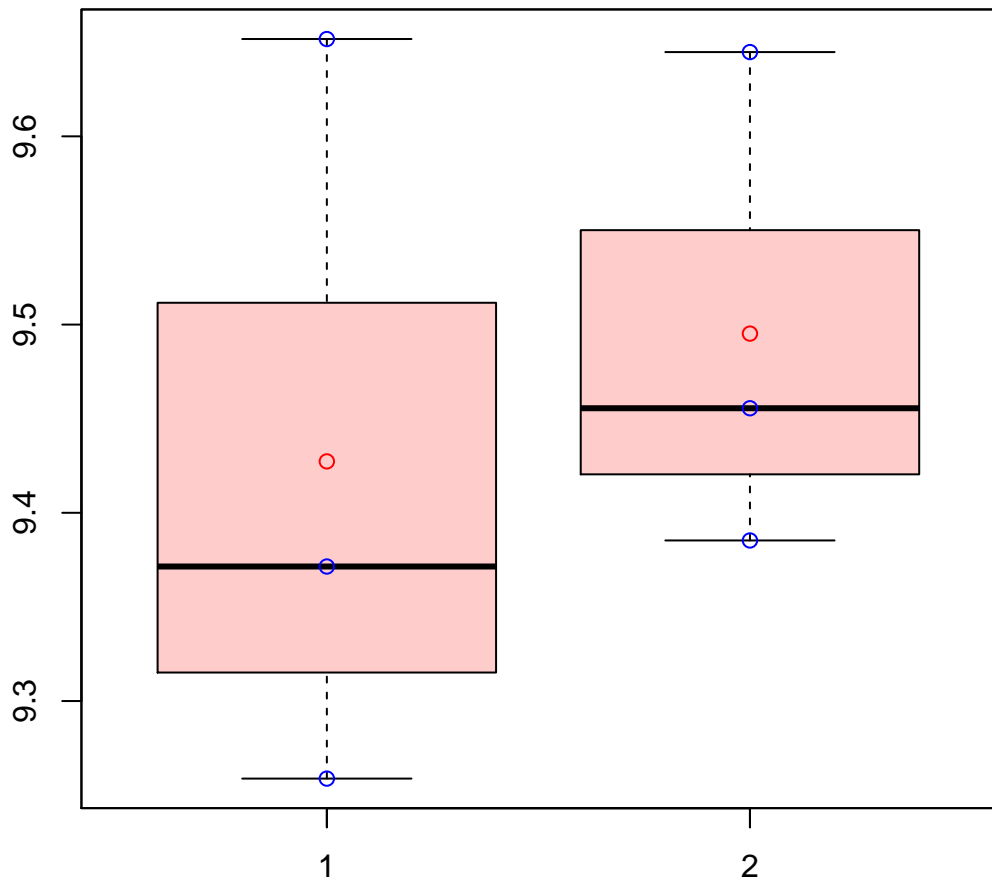

t-Test: p-value = 0.66

# CL1Contig8683|CL1Contig8683



t-Test: p-value = 0.36

# CL1Contig8691|CL1Contig8691

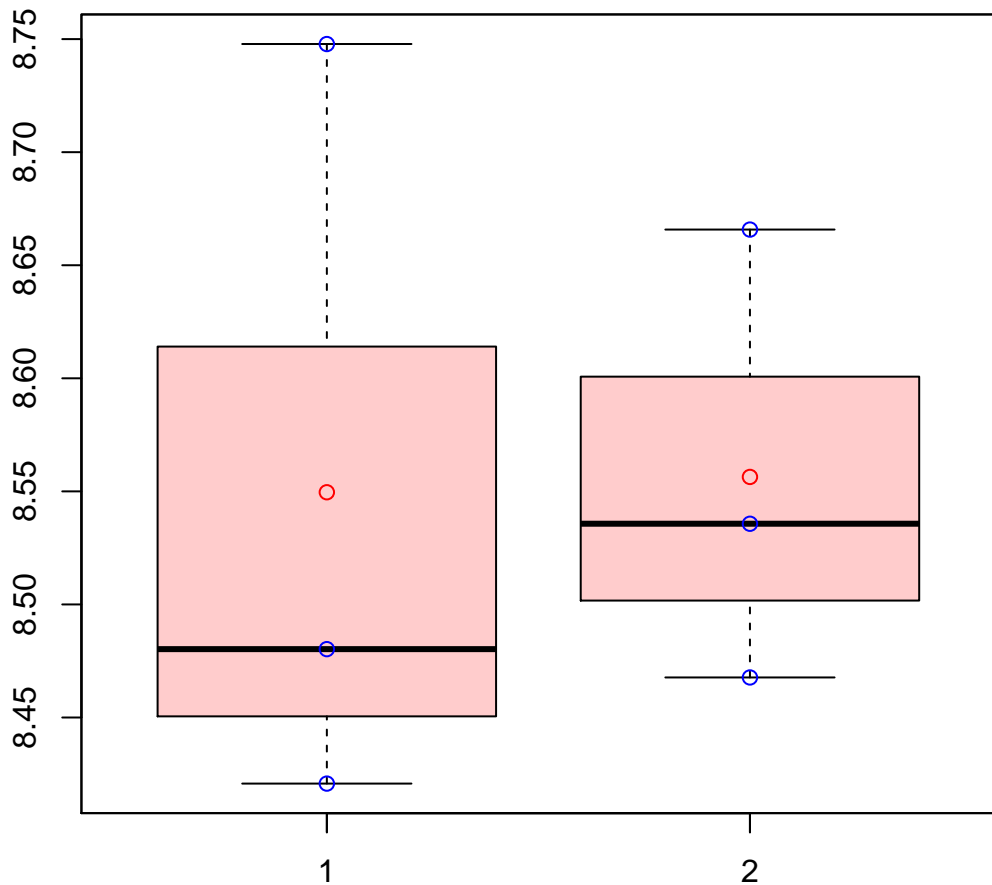

t-Test: p-value = 0.96

# CL1Contig8701|CL1Contig8701

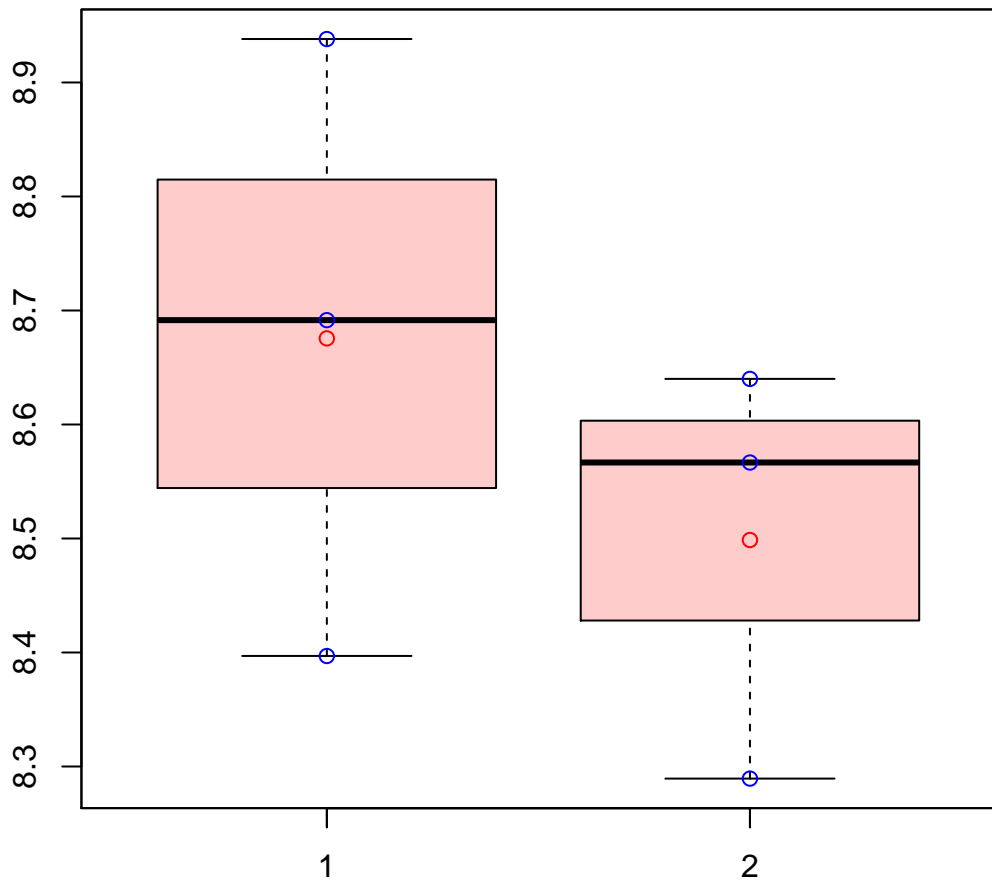

t-Test: p-value = 0.41



# CL1Contig8705|CL1Contig8705

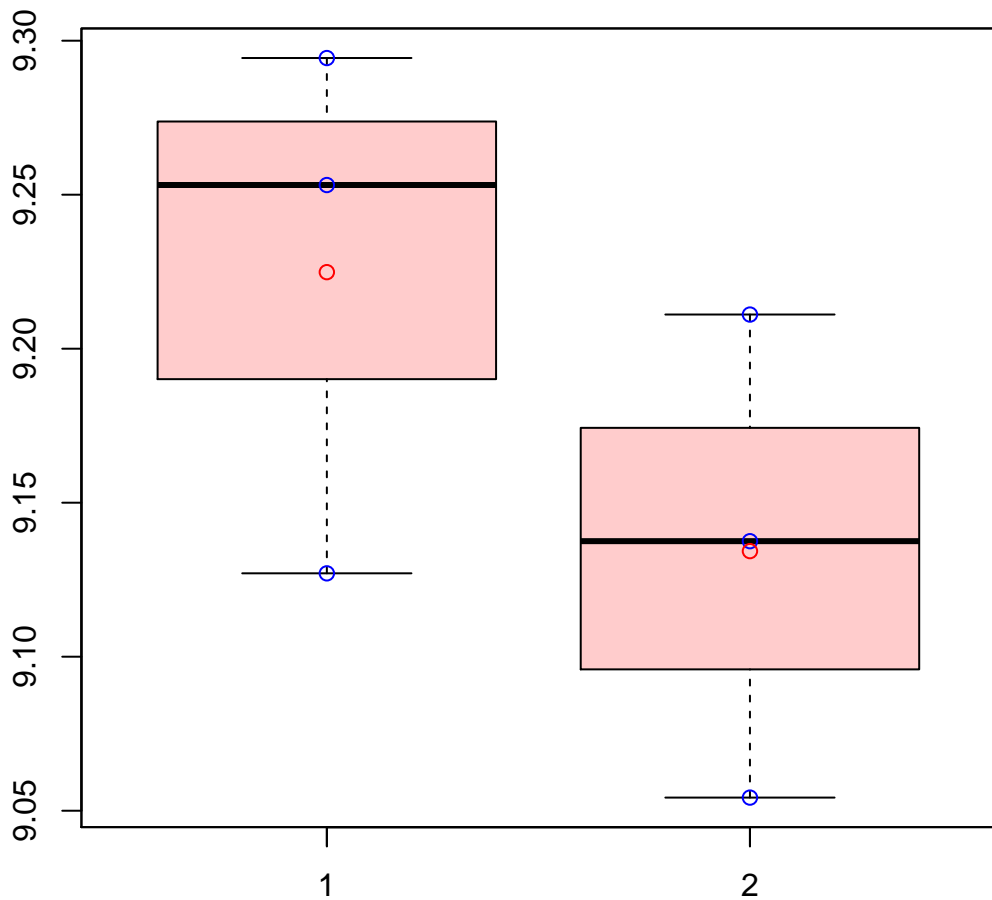

t-Test: p-value = 0.25

# CL1Contig8722|CL1Contig8722

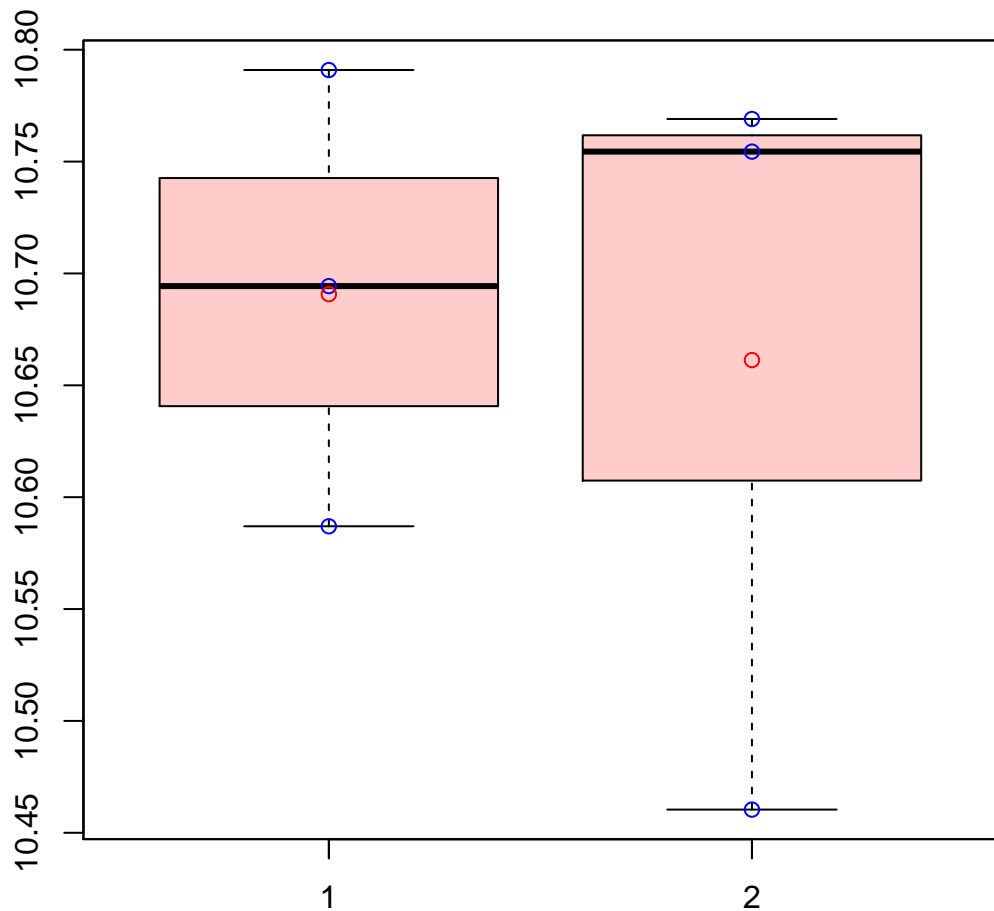

t-Test: p-value = 0.82

# CL1Contig8723|CL1Contig8723



t-Test: p-value = 0.61

# CL1Contig8732|CL1Contig8732

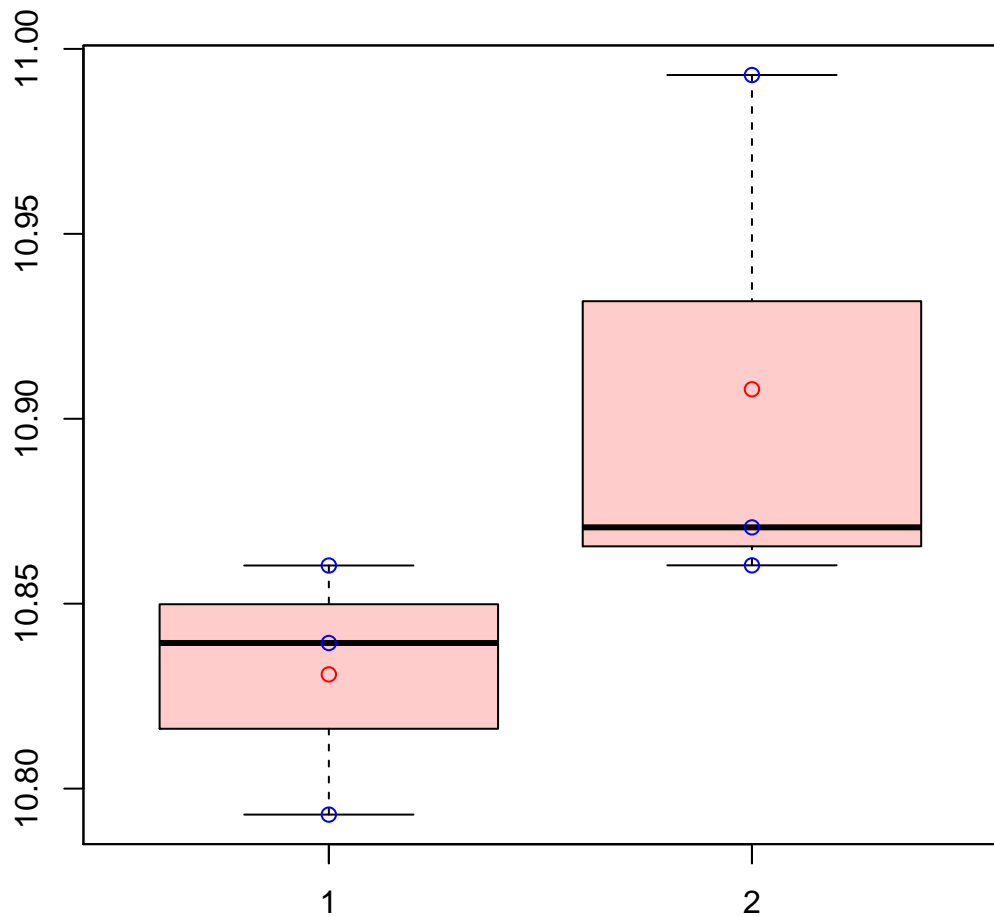

t-Test: p-value = 0.2

# CL1Contig873|CL1Contig873

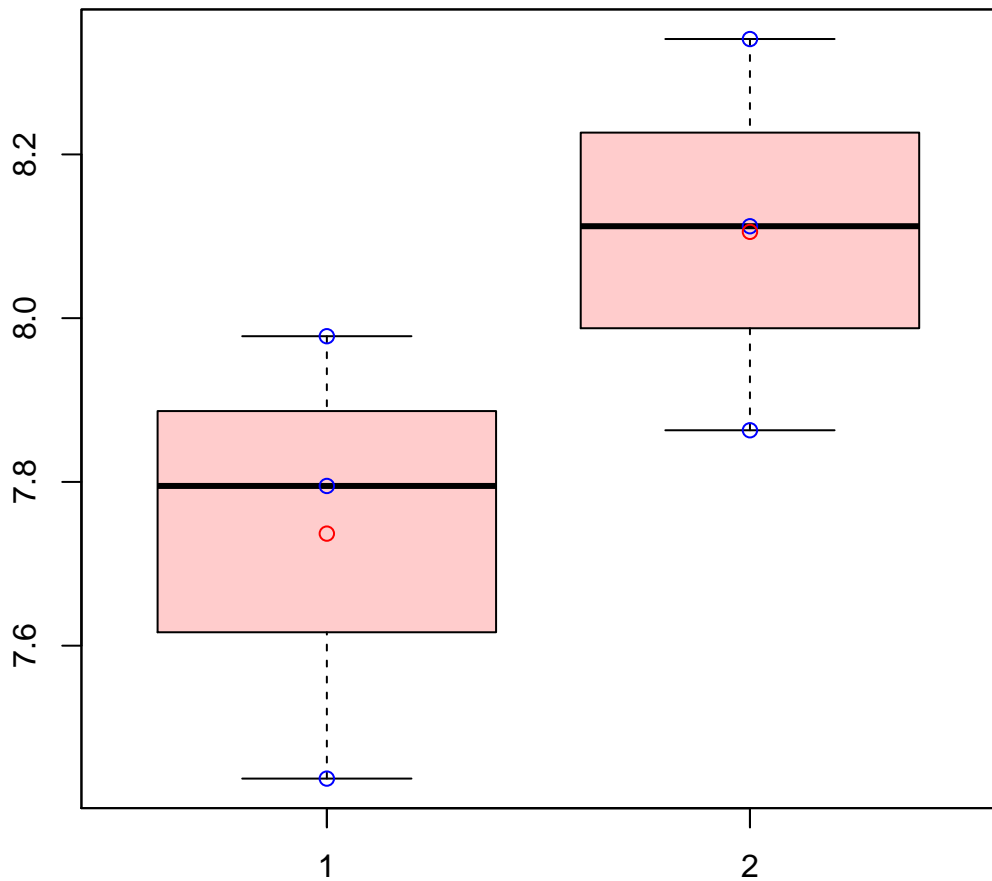

t-Test: p-value = 0.16

# CL1Contig874|CL1Contig874

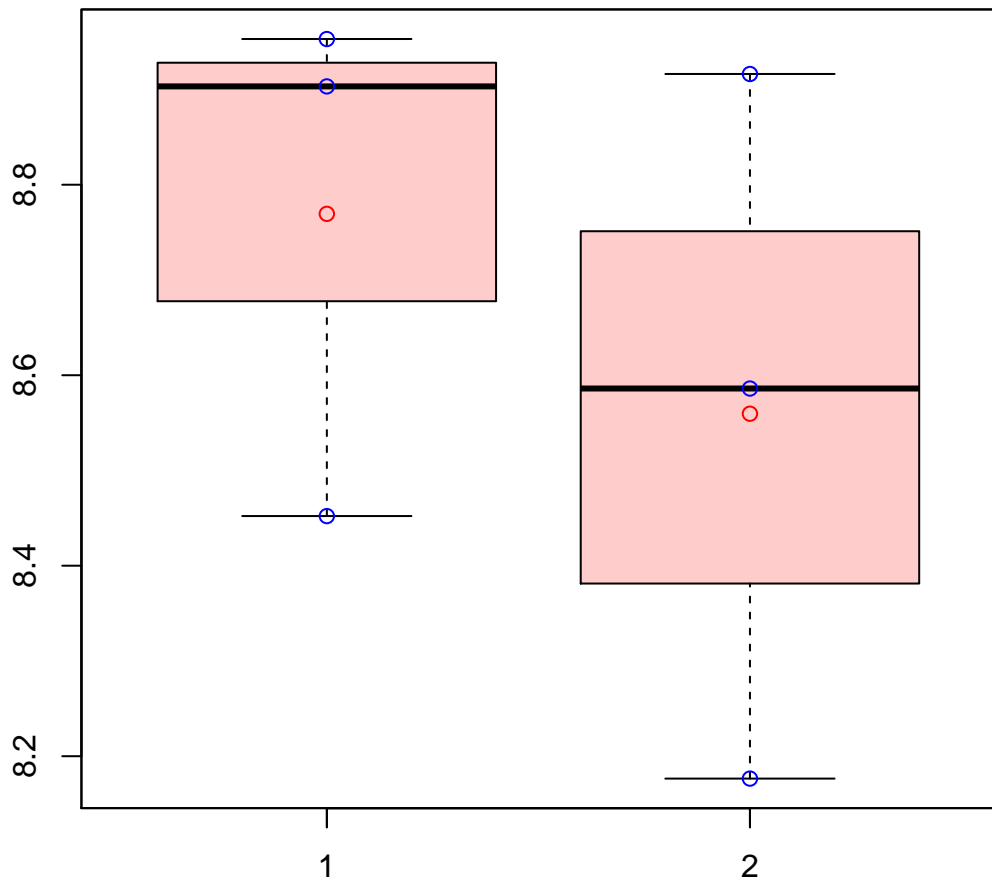

t-Test: p-value = 0.48

# CL1Contig8766|CL1Contig8766

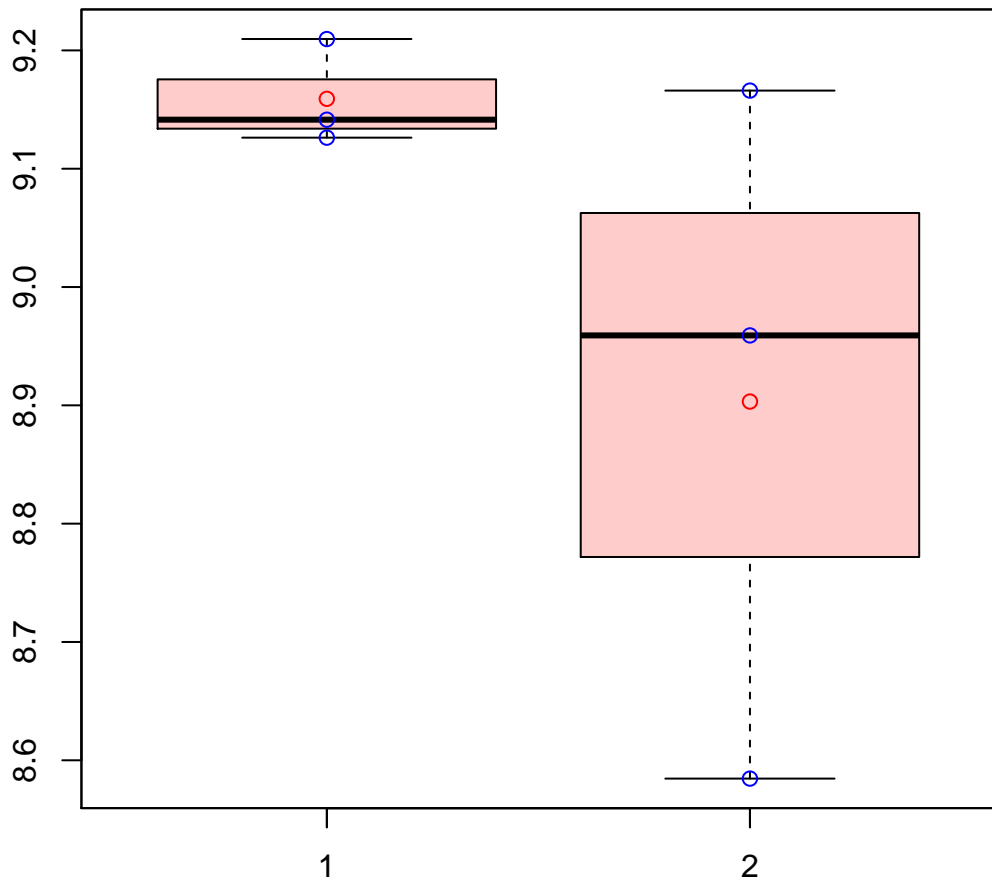

t-Test: p-value = 0.27

# CL1Contig8772|CL1Contig8772



t-Test: p-value = 0.14



# CL1Contig8780|CL1Contig8780

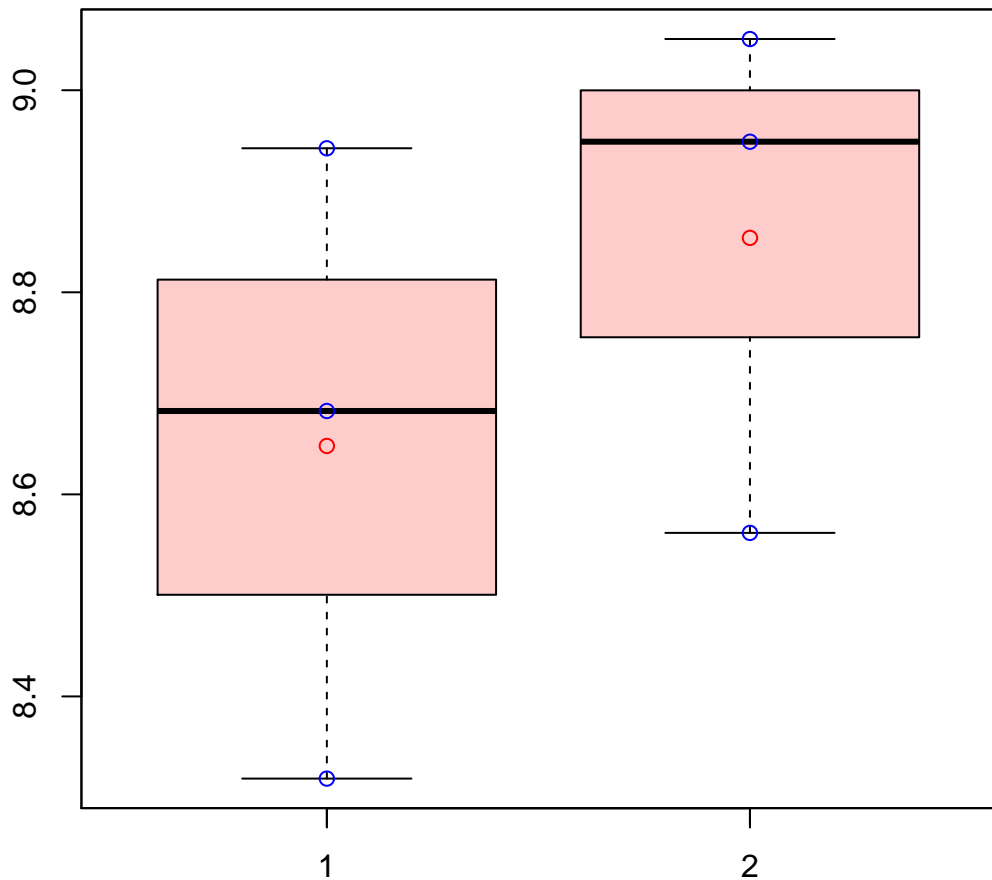

t-Test: p-value = 0.43

# CL1Contig8784|CL1Contig8784

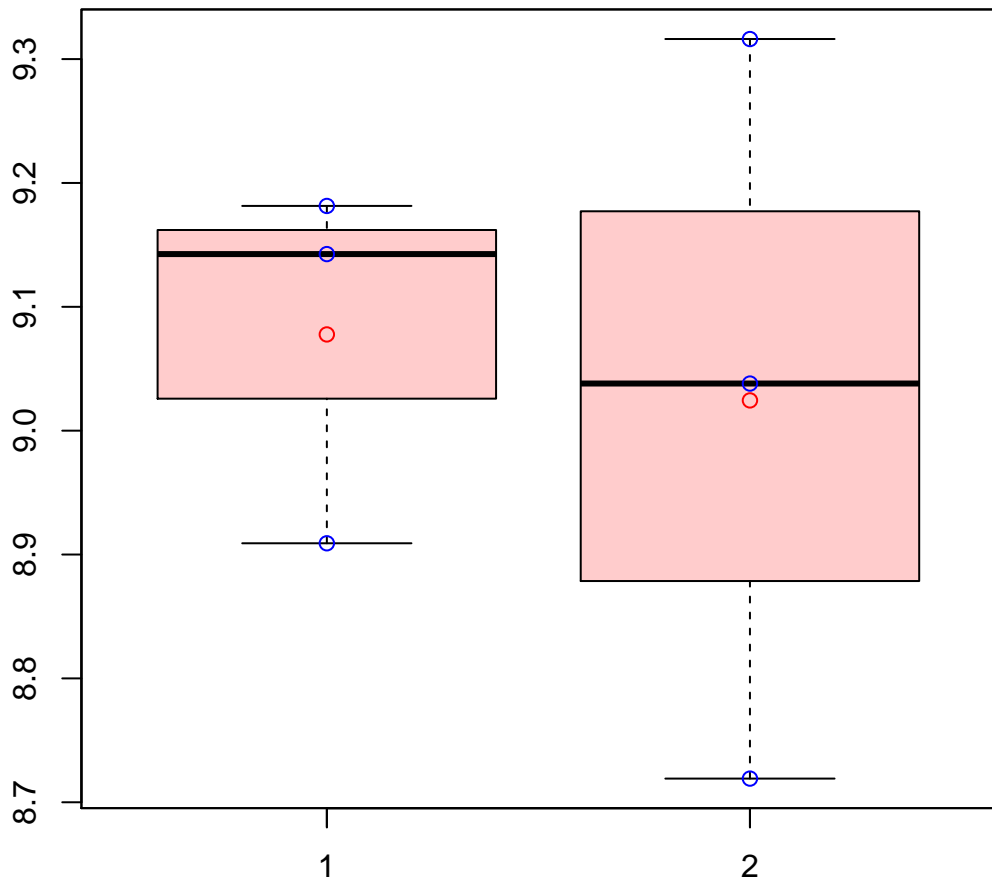

t-Test: p-value = 0.8

# CL1Contig8805|CL1Contig8805

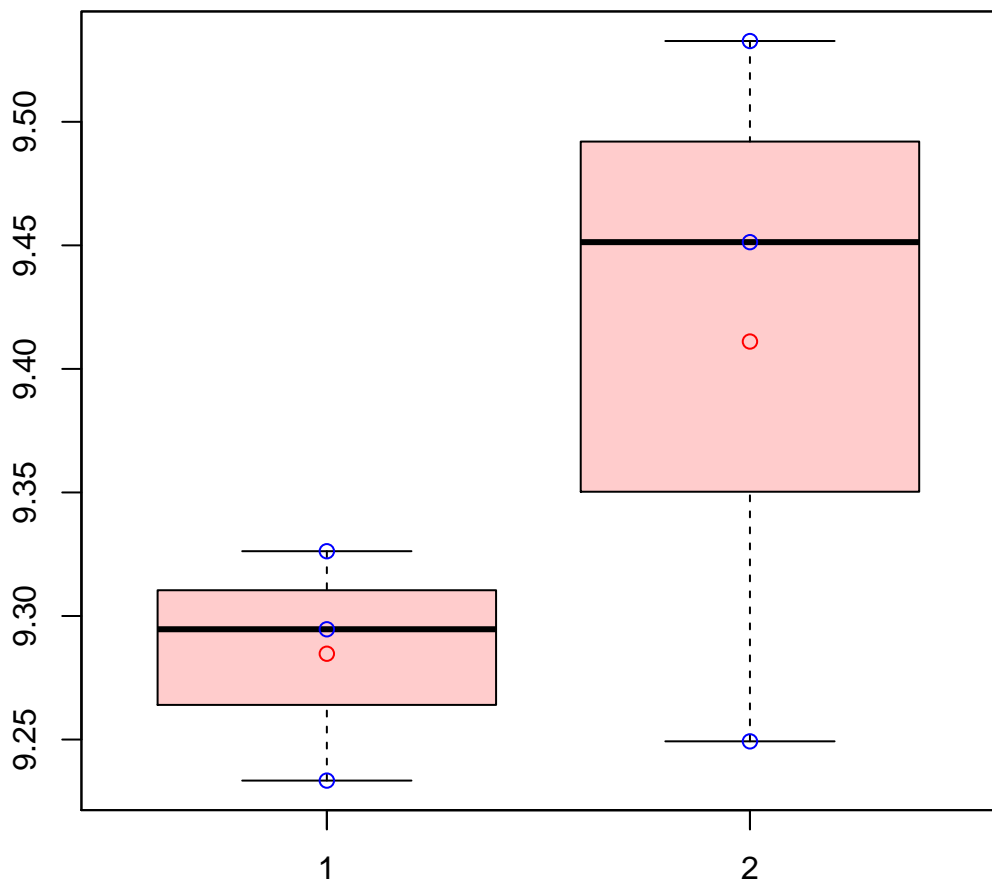

t-Test: p-value = 0.27

# CL1Contig8807|CL1Contig8807

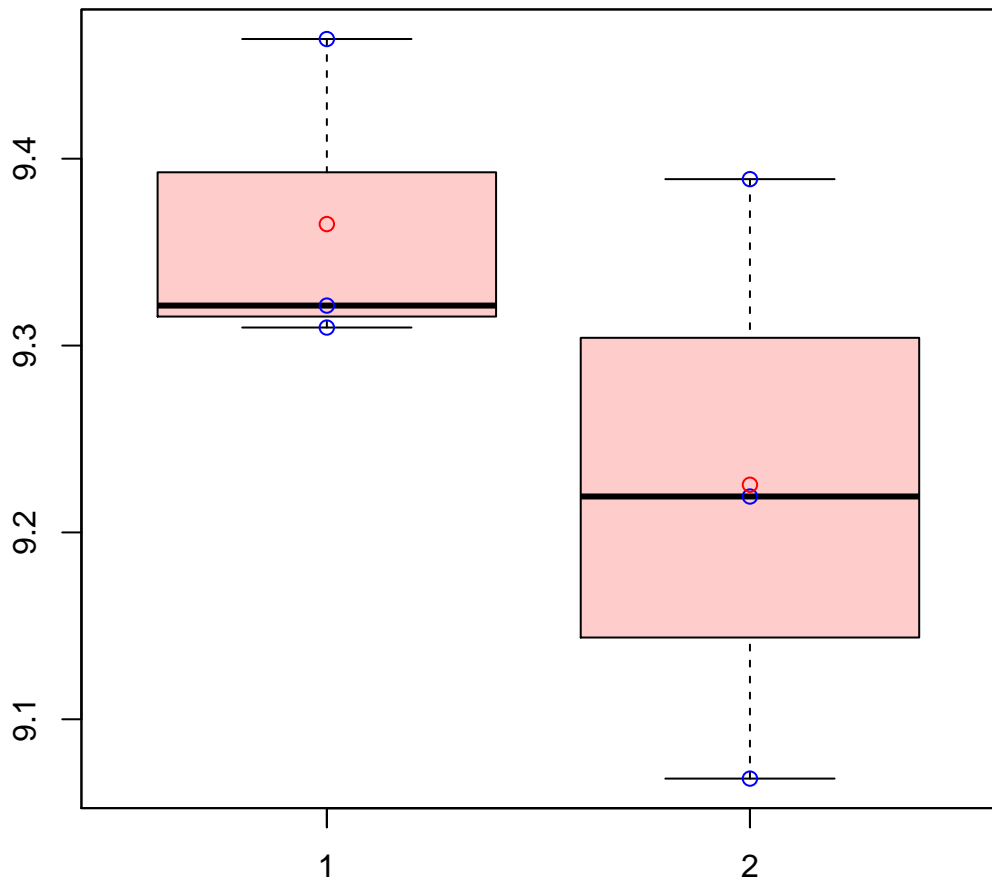

t-Test: p-value = 0.27

# CL1Contig8835|CL1Contig8835

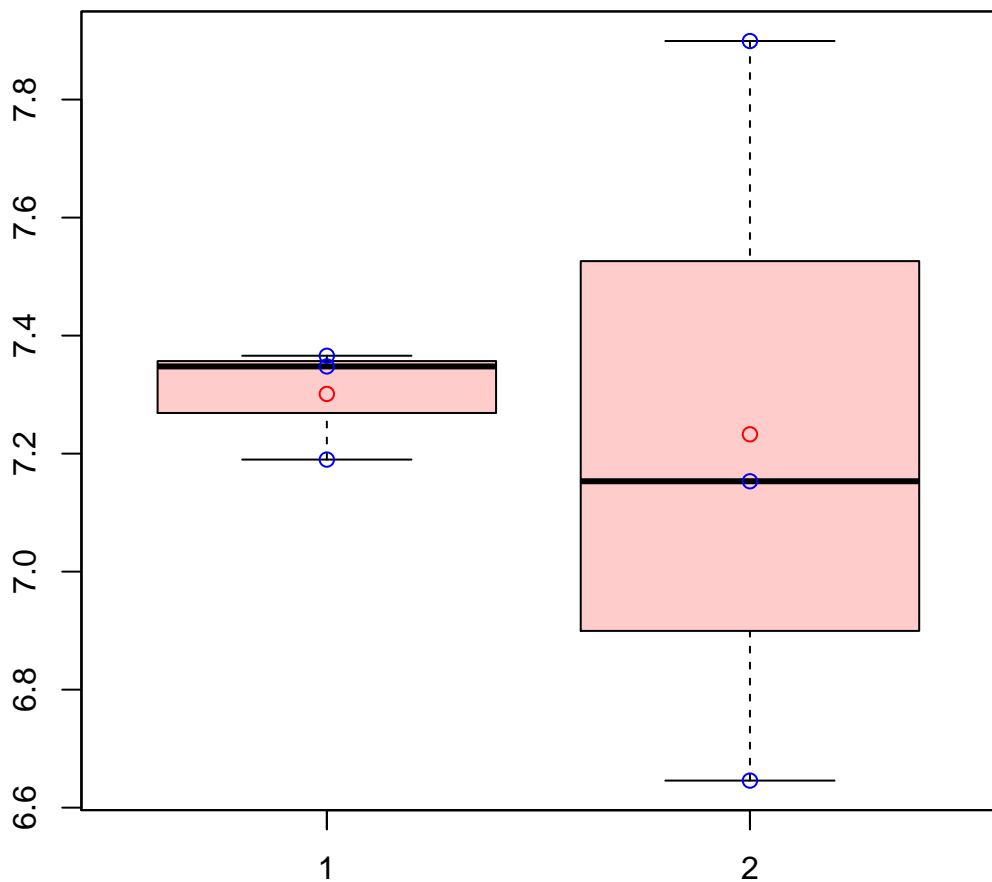

t-Test: p-value = 0.87

# CL1Contig8881|CL1Contig8881

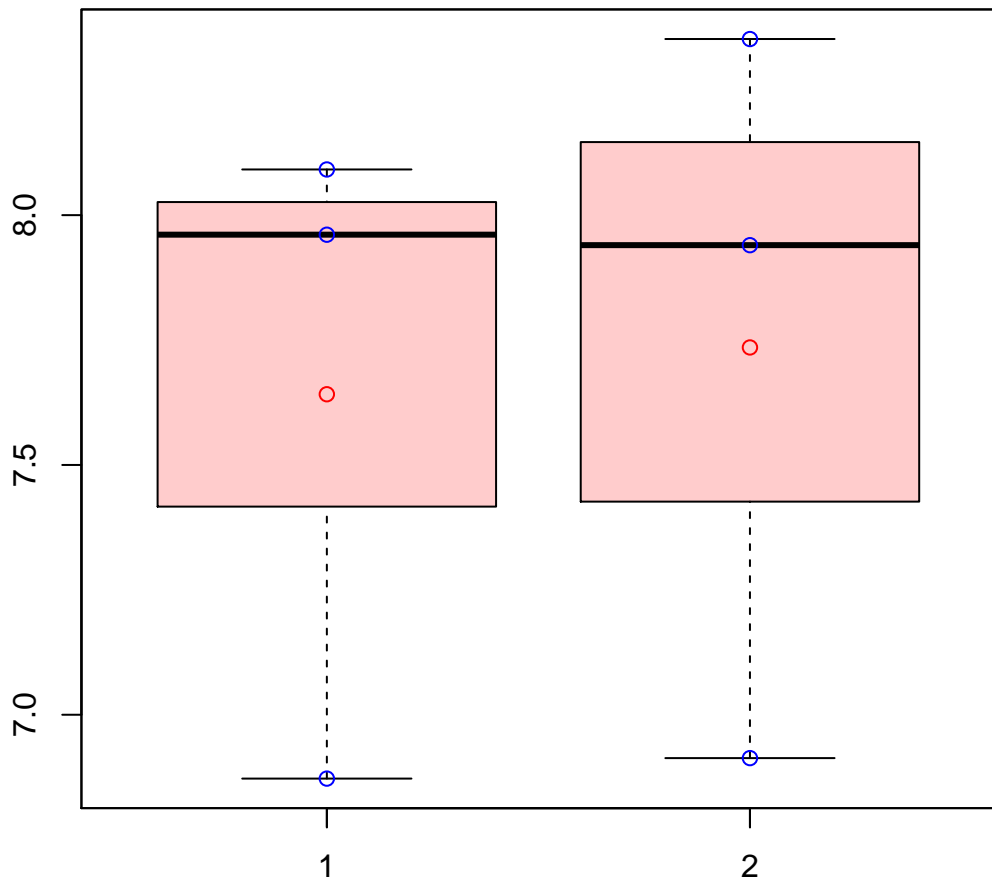

t-Test: p-value = 0.88

# CL1Contig8902|CL1Contig8902

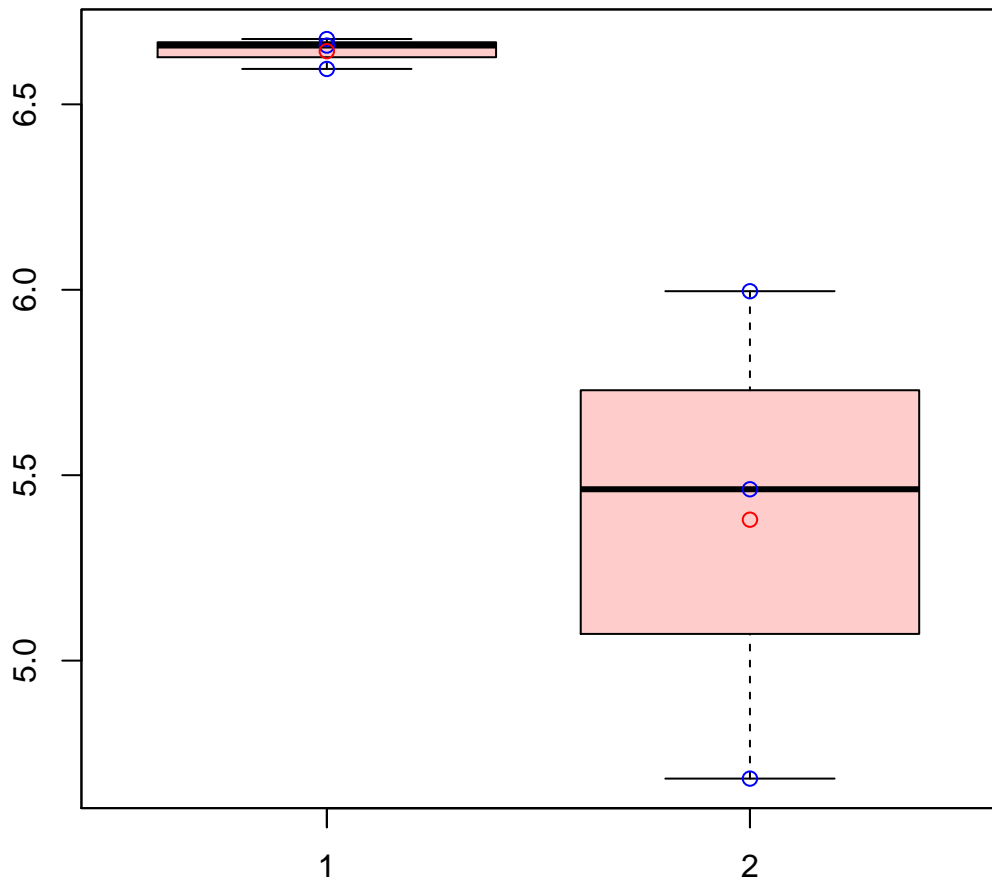

t-Test: p-value = 0.08

# CL1Contig8915|CL1Contig8915



t-Test: p-value = 0.24



# CL1Contig8928|CL1Contig8928

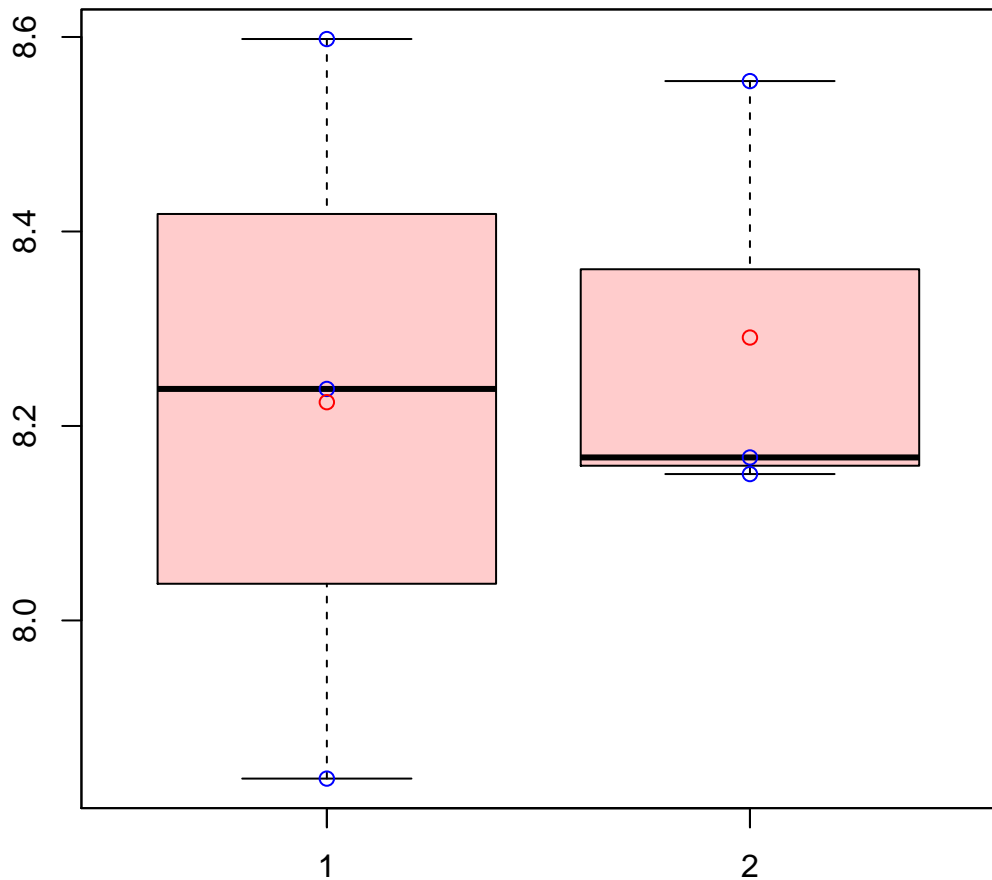

t-Test: p-value = 0.81

# CL1Contig8936|CL1Contig8936

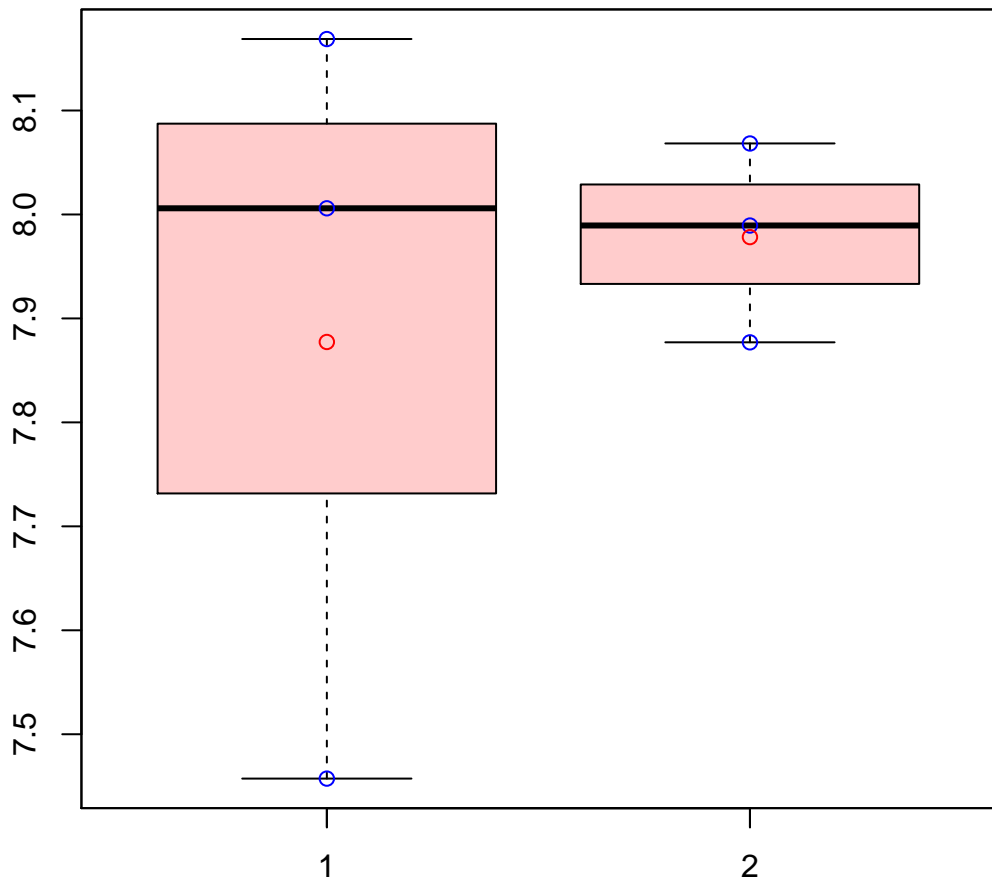

t-Test: p-value = 0.69

# CL1Contig8937|CL1Contig8937

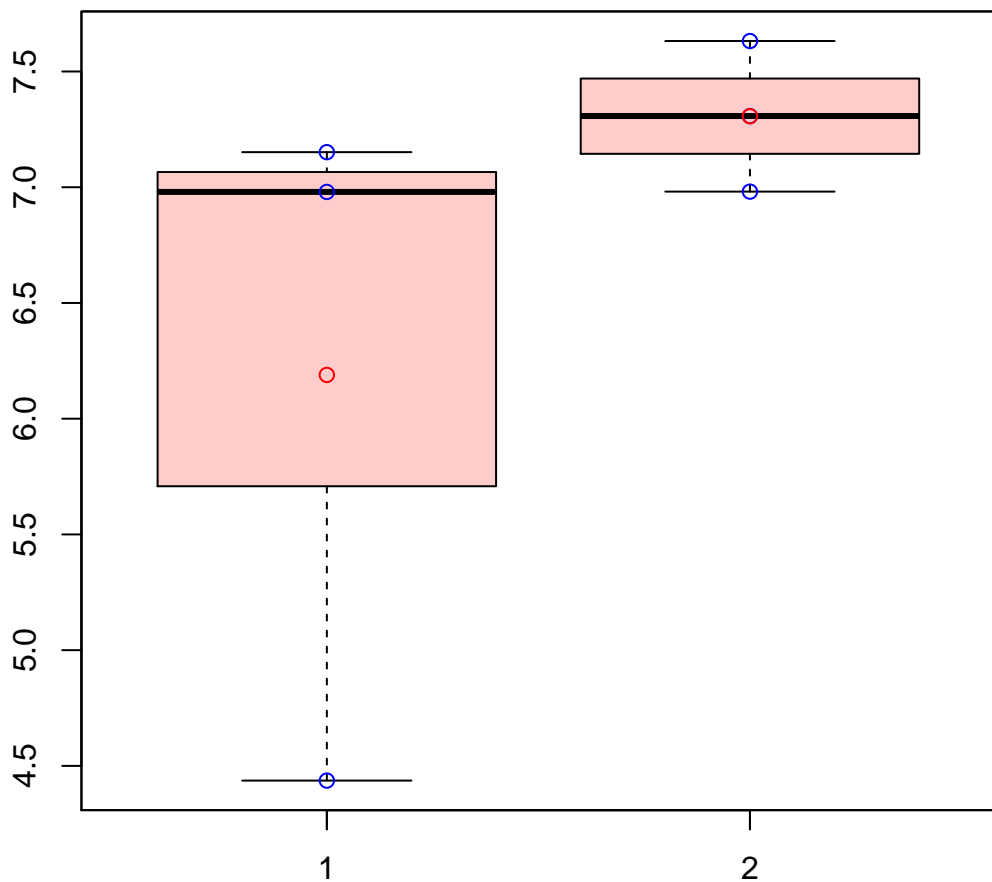

t-Test: p-value = 0.33

# CL1Contig8949|CL1Contig8949

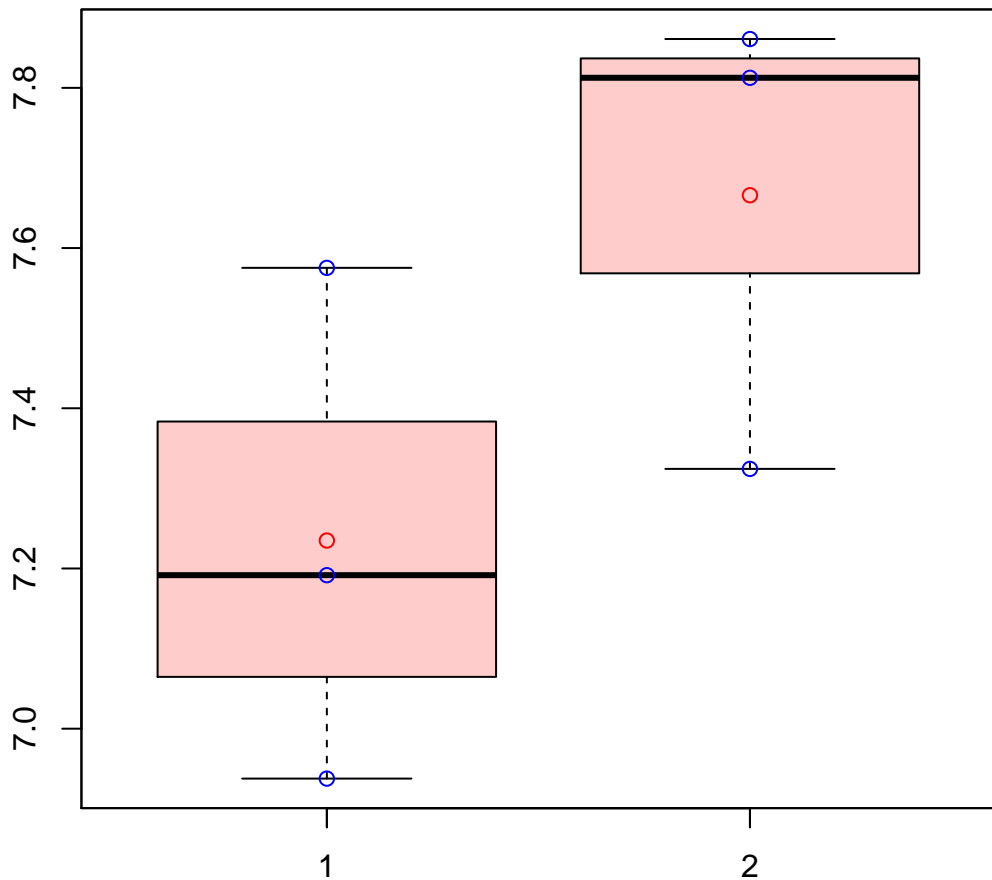

t-Test: p-value = 0.16

# CL1Contig8954|CL1Contig8954

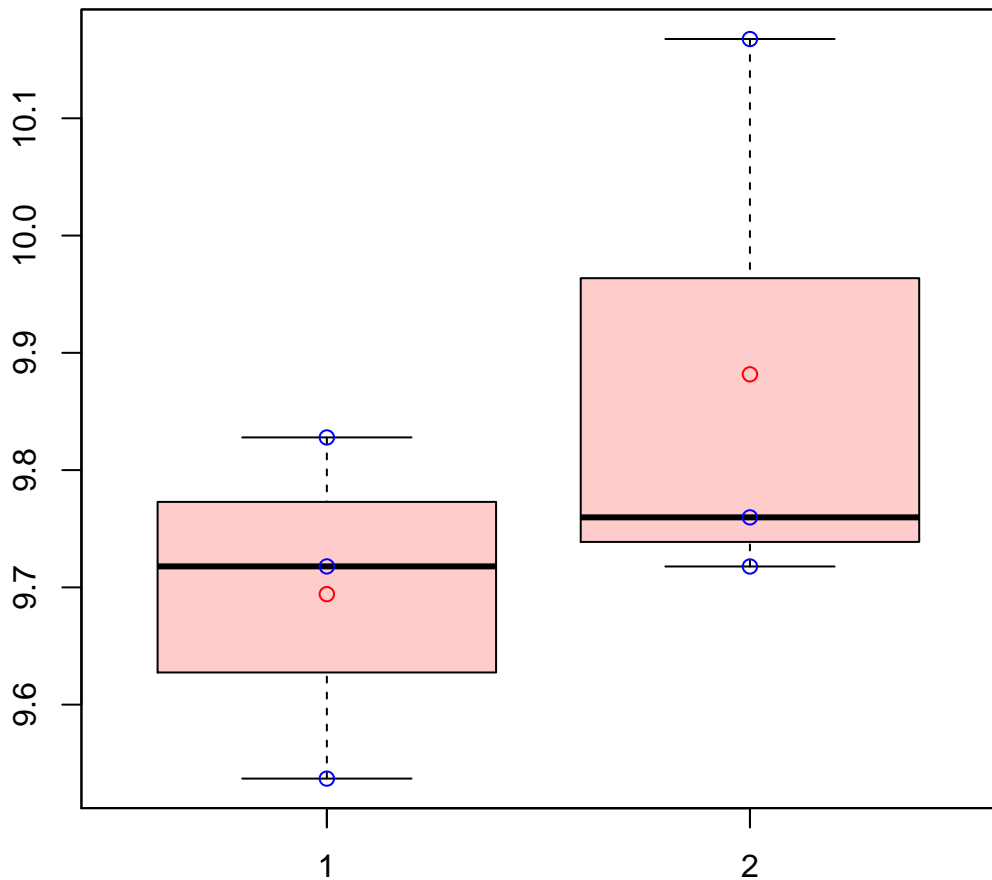

t-Test: p-value = 0.34

# CL1Contig8960|CL1Contig8960

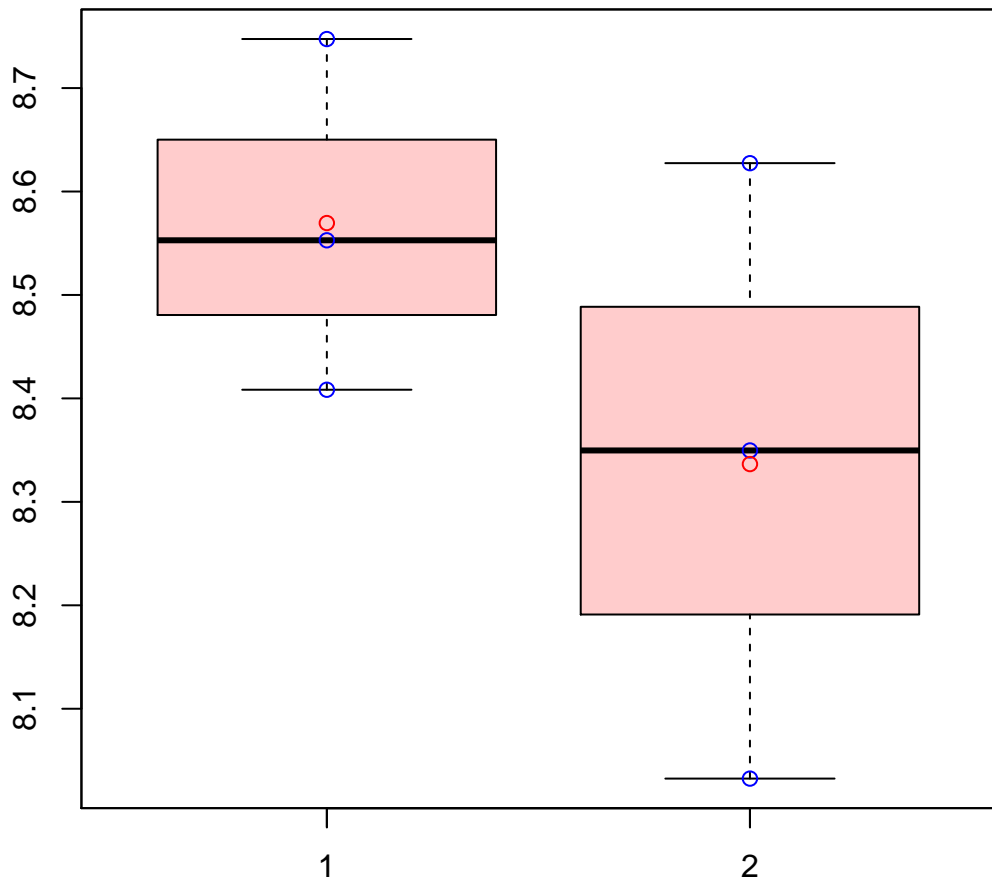

t-Test: p-value = 0.32

# CL1Contig8961|CL1Contig8961

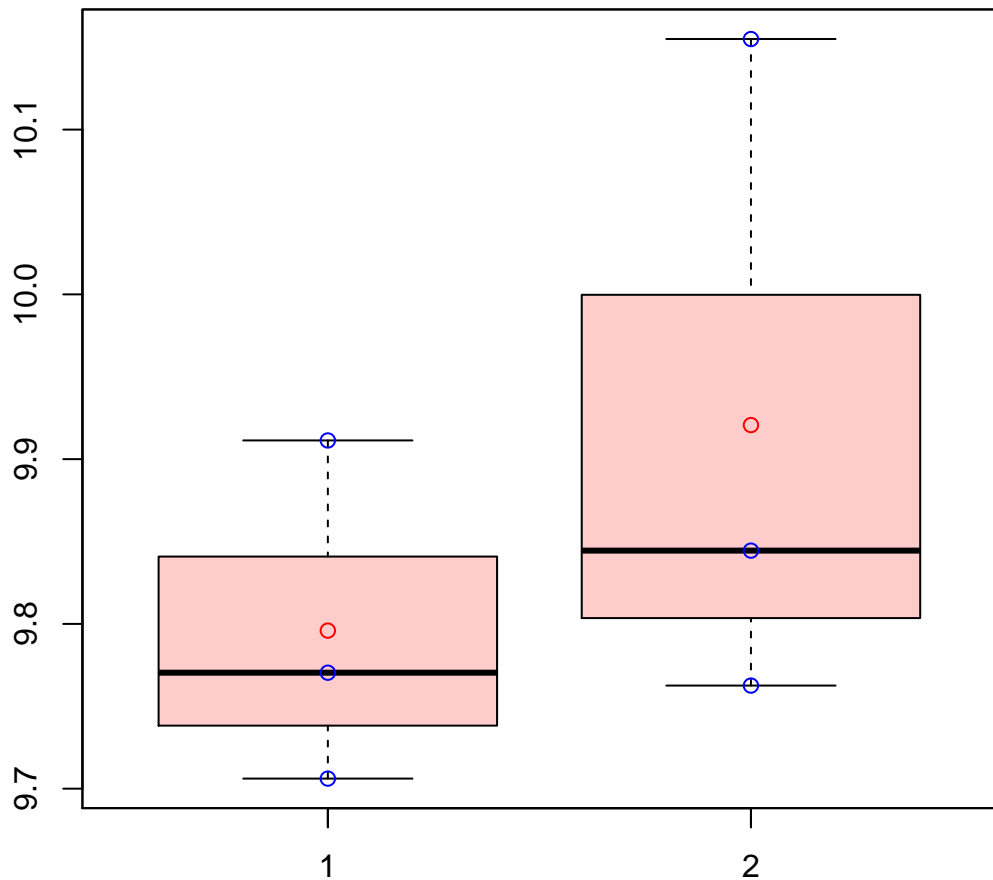

t-Test: p-value = 0.42

# CL1Contig8962|CL1Contig8962

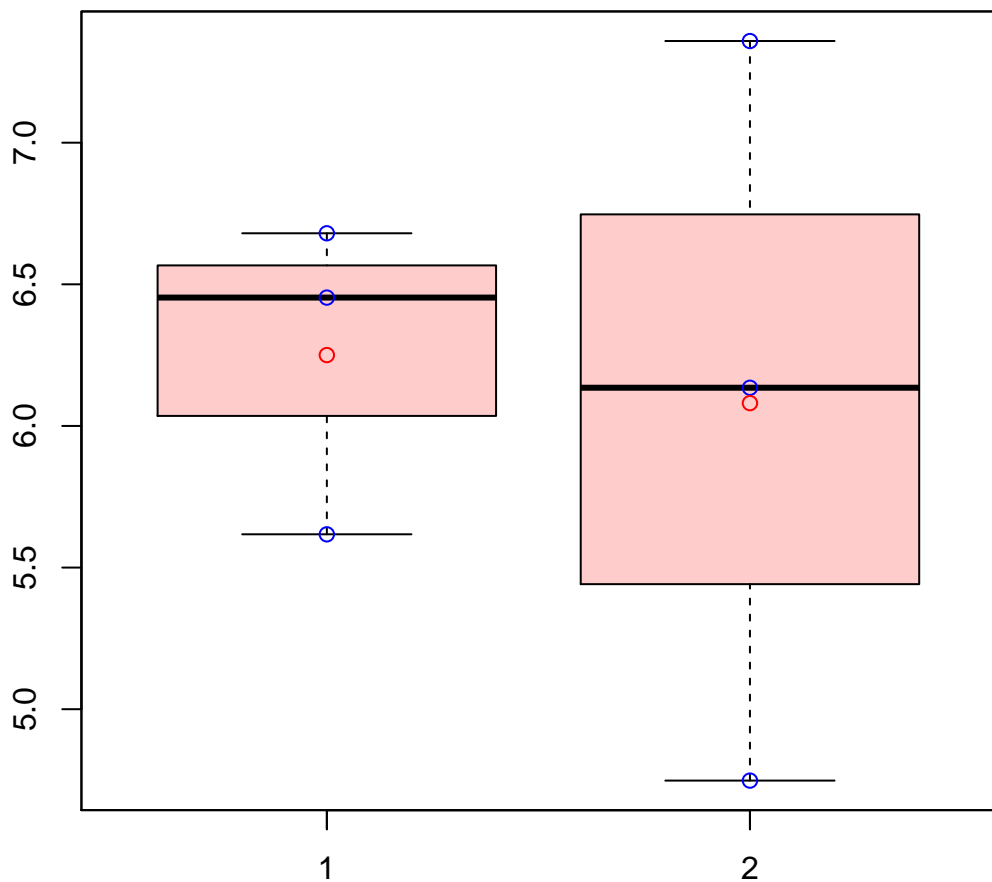

t-Test: p-value = 0.85



# CL1Contig8969|CL1Contig8969

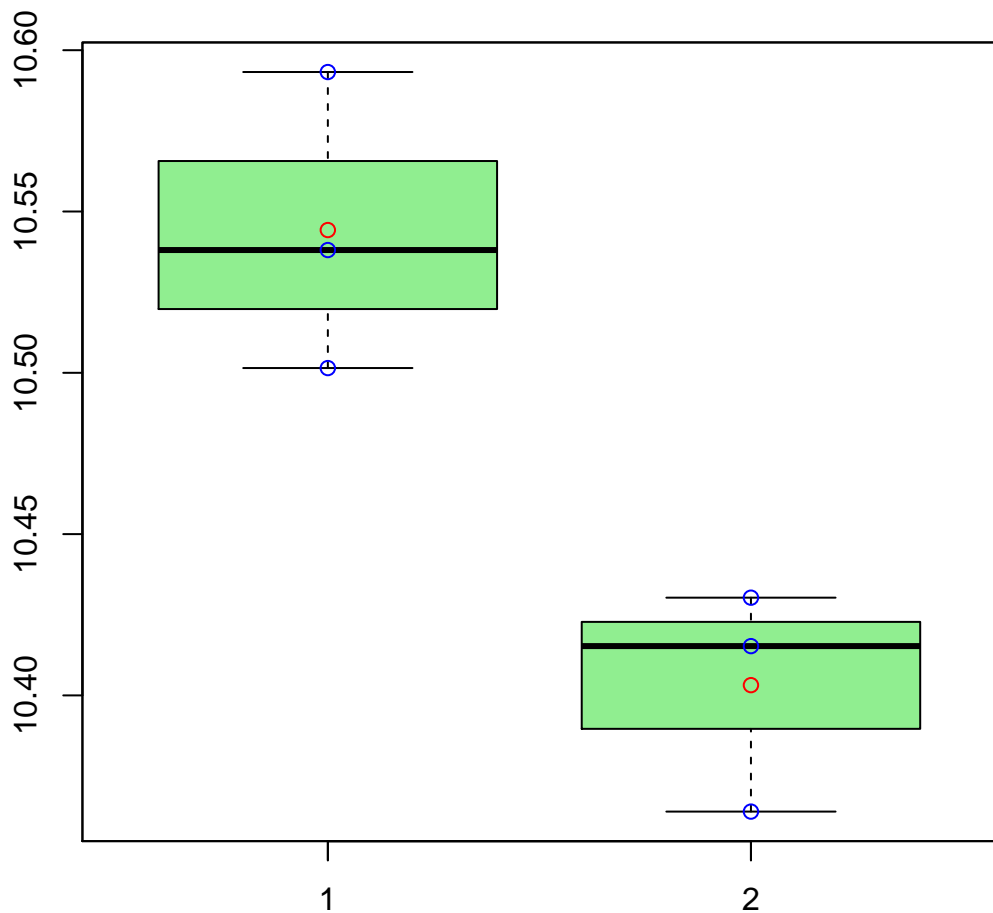

t-Test: p-value = 0.02

# CL1Contig8980|CL1Contig8980

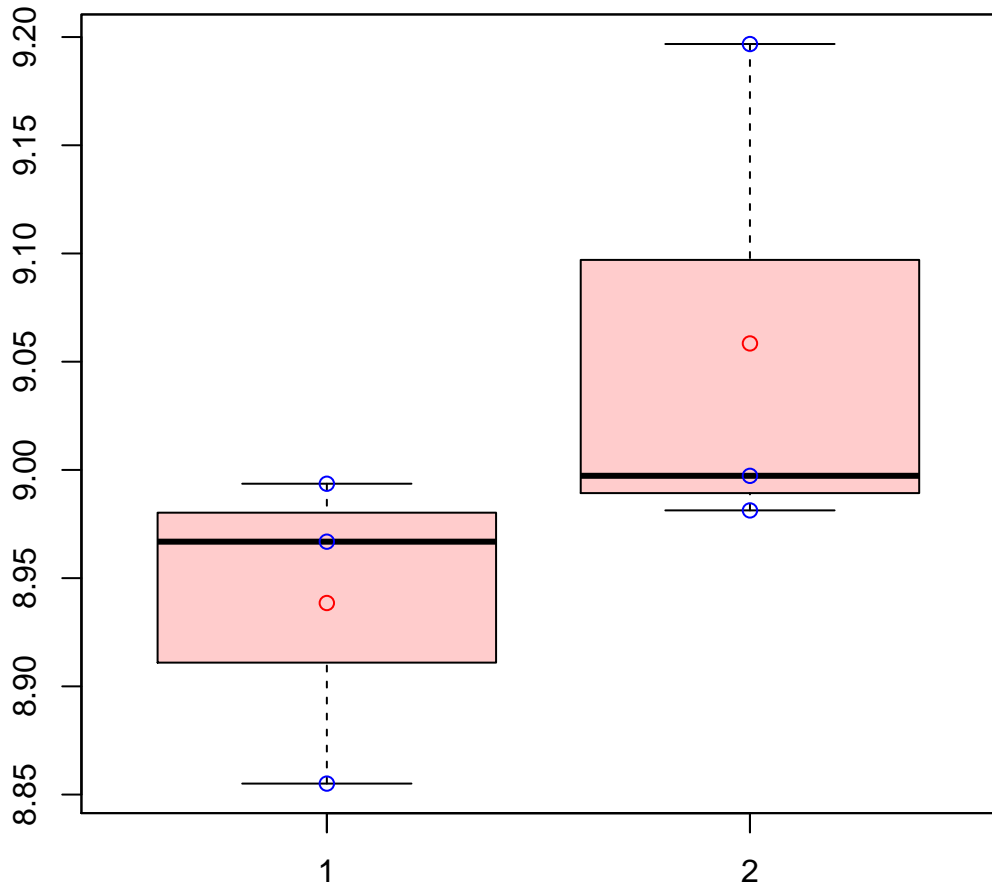

t-Test: p-value = 0.23

# CL1Contig899|CL1Contig899

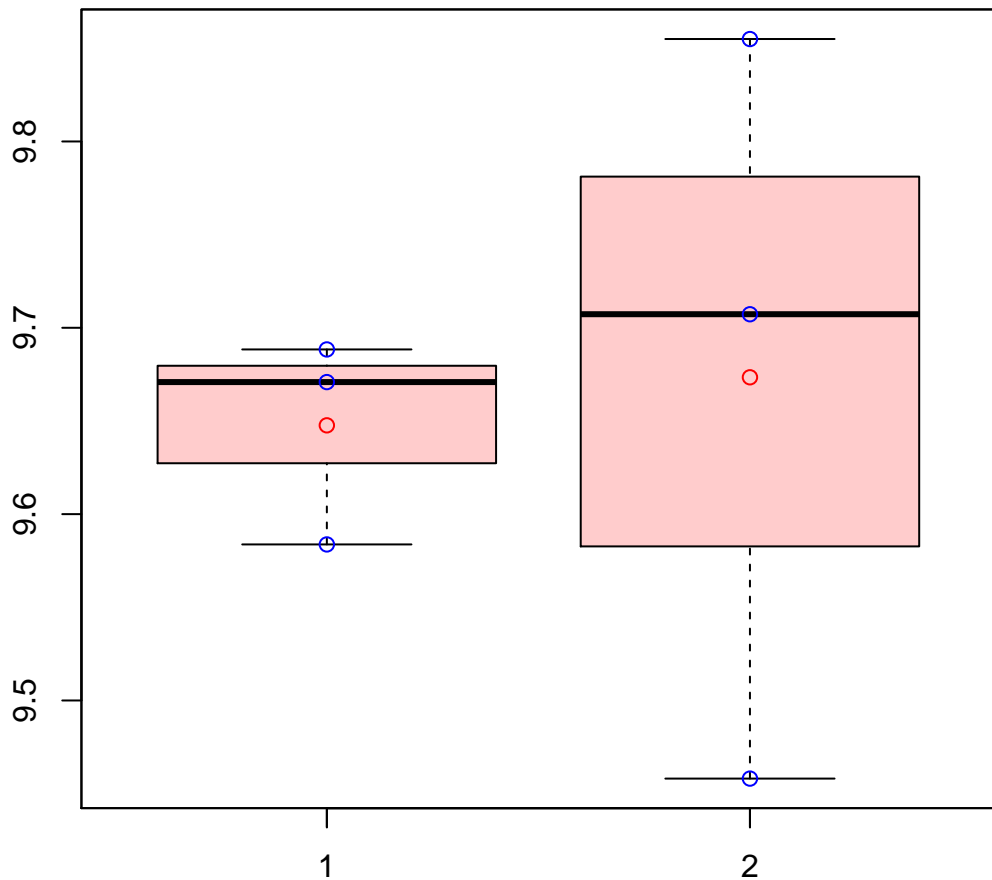

t-Test: p-value = 0.85

# CL1Contig8|CL1Contig8

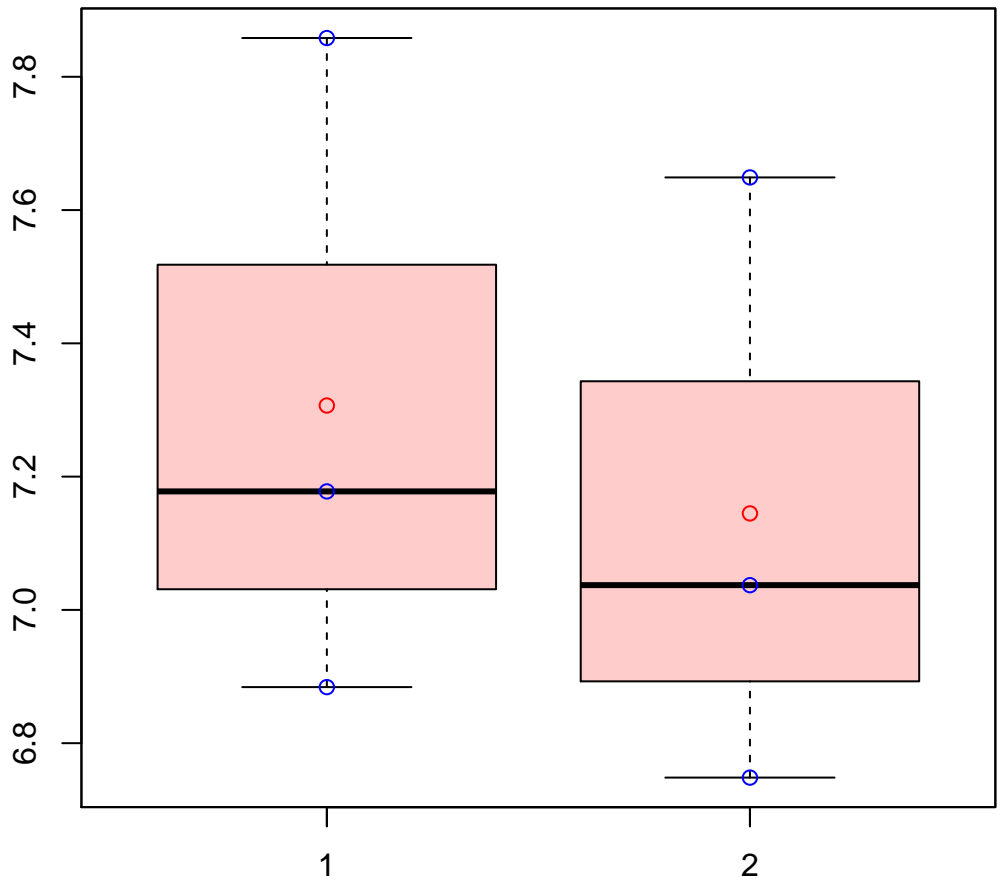

t-Test: p-value = 0.7

# CL1Contig9003|CL1Contig9003

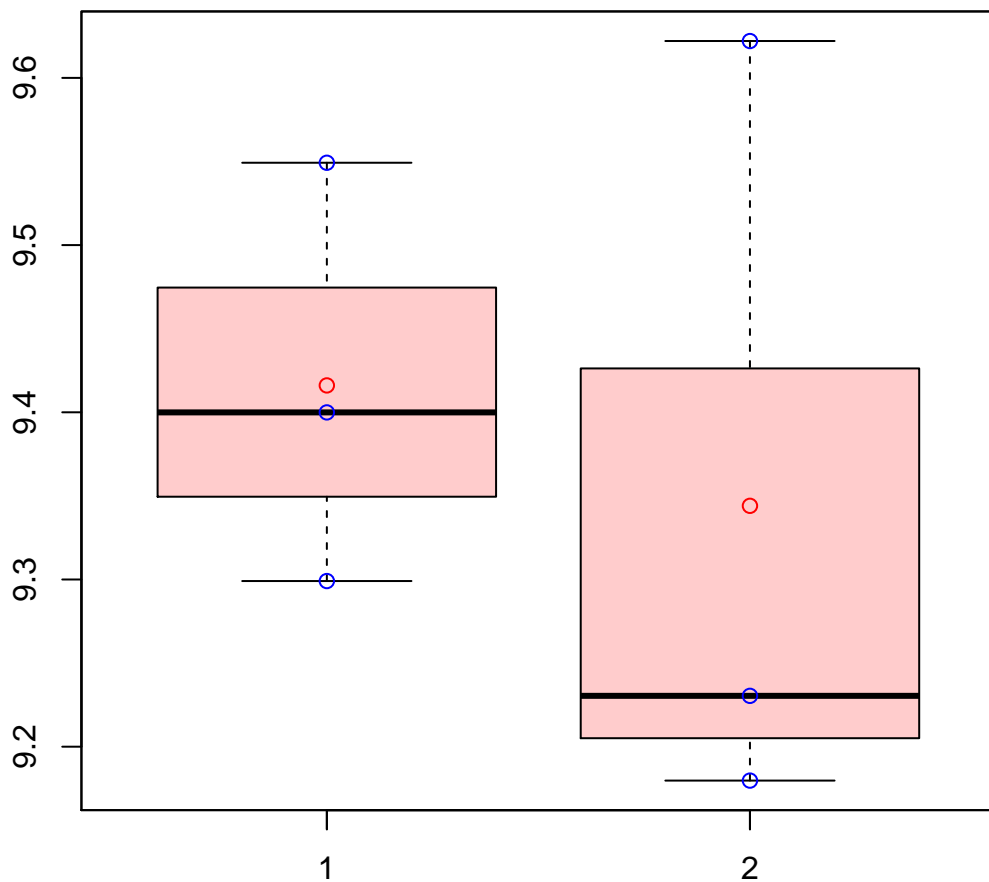

t-Test: p-value = 0.68

# CL1Contig9006|CL1Contig9006



t-Test: p-value = 0.39

# CL1Contig9007|CL1Contig9007



t-Test: p-value = 0.39

# CL1Contig9017|CL1Contig9017

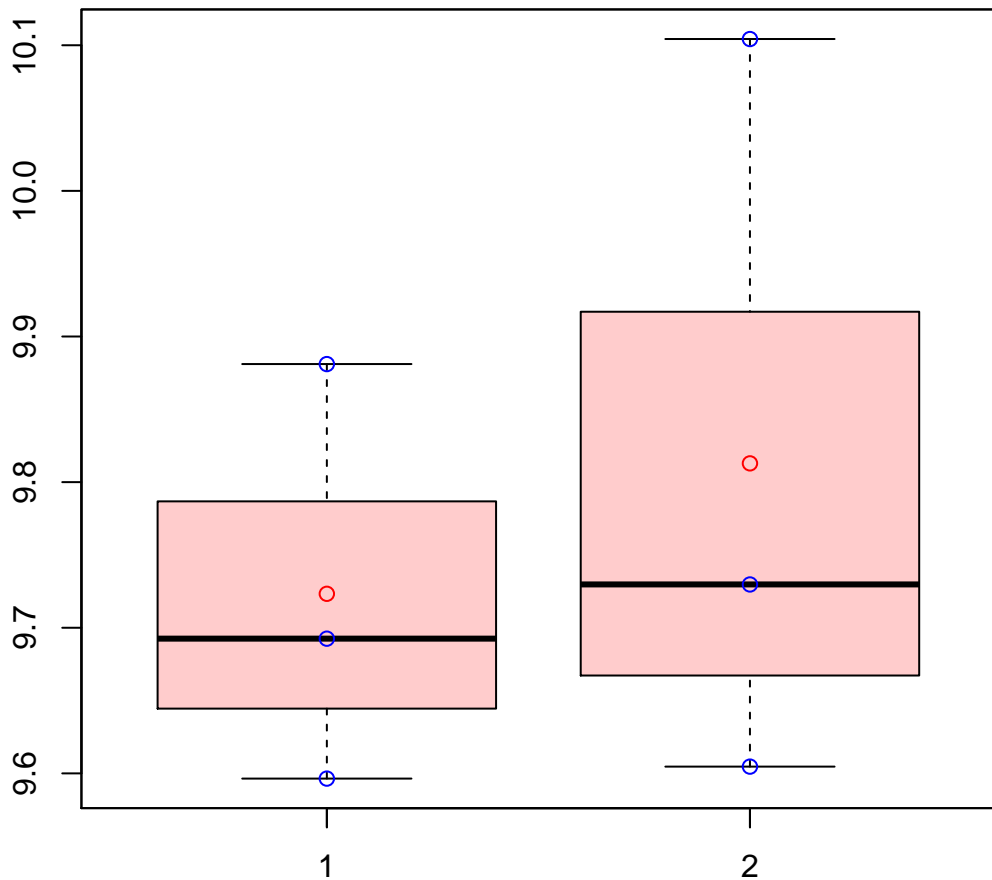

t-Test: p-value = 0.64



# CL1Contig902|CL1Contig902

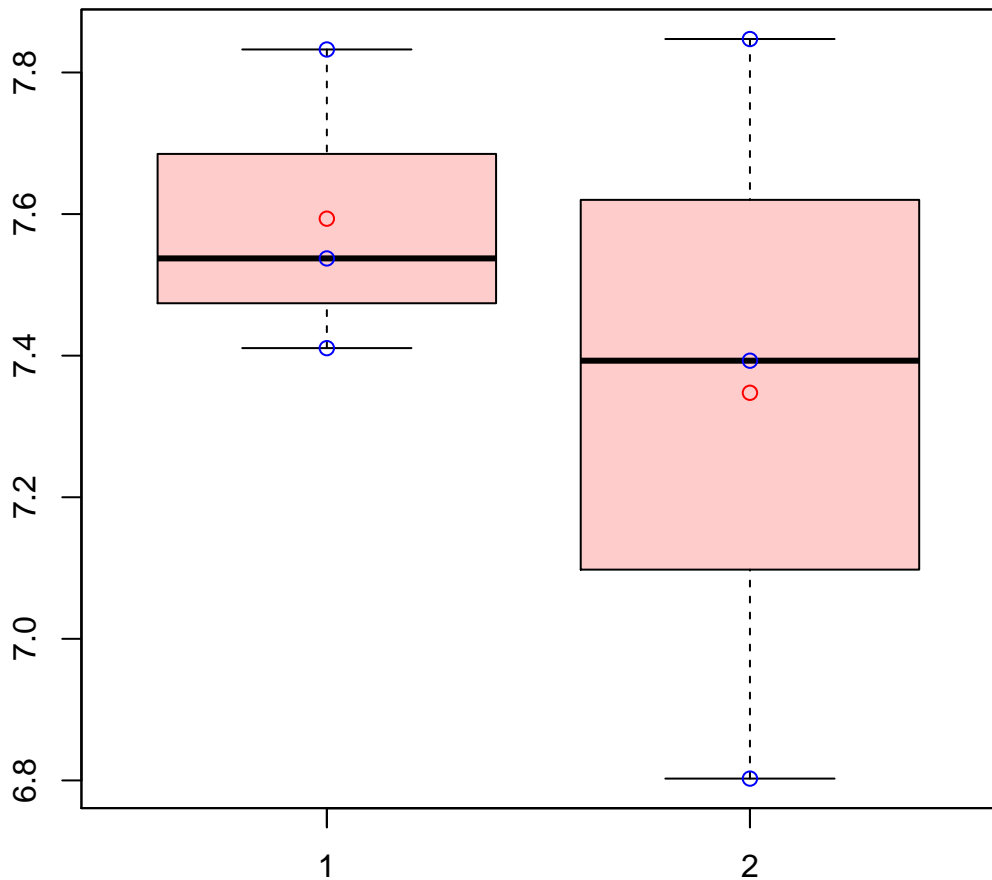

t-Test: p-value = 0.51

# CL1Contig9043|CL1Contig9043

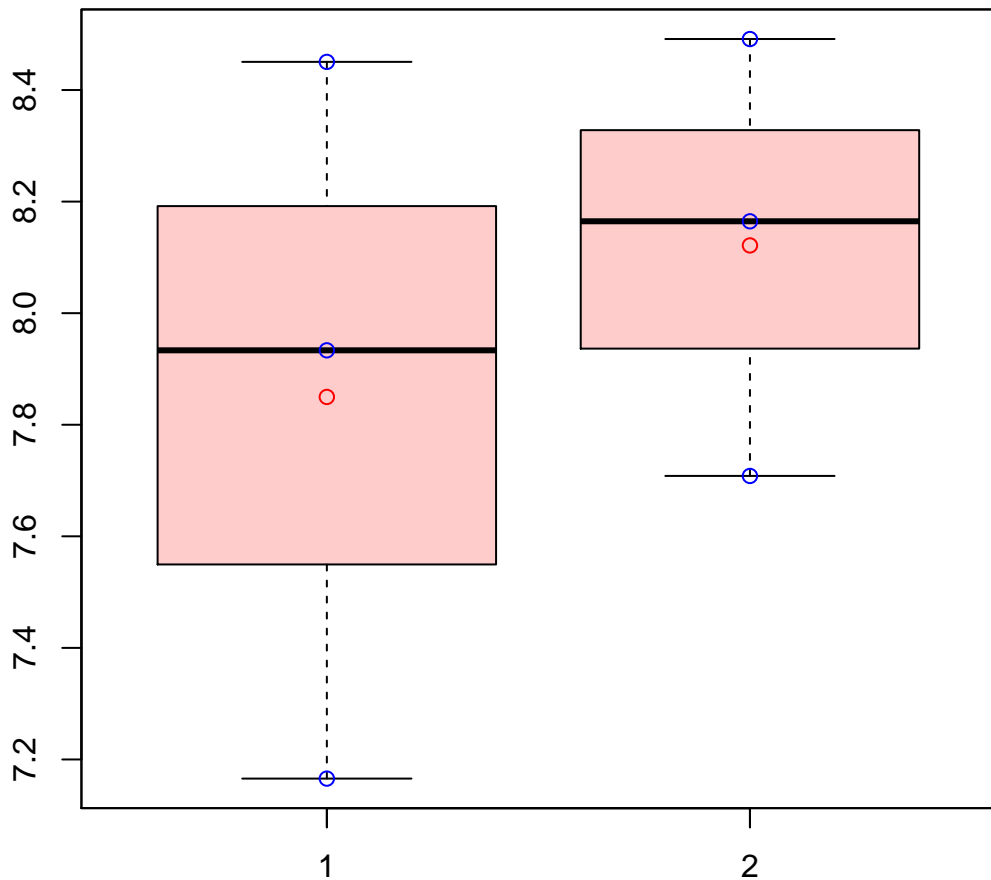

t-Test: p-value = 0.57

# CL1Contig9052|CL1Contig9052

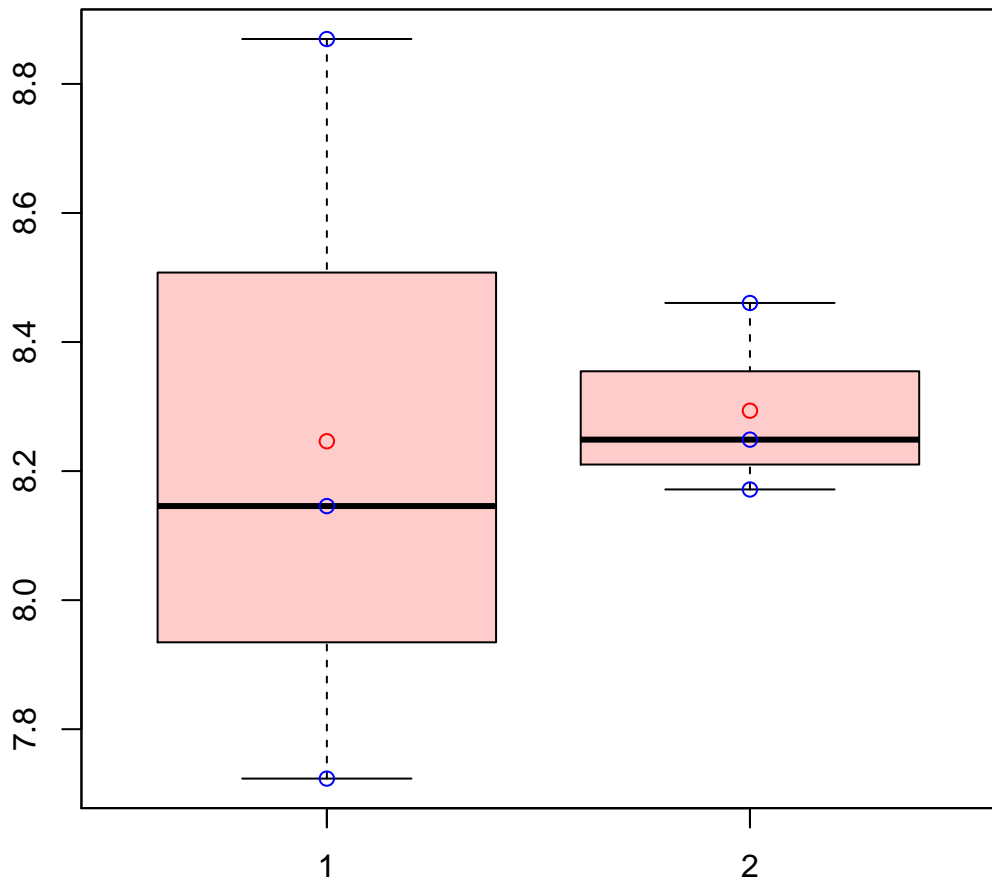

t-Test: p-value = 0.9

# CL1Contig906|CL1Contig906

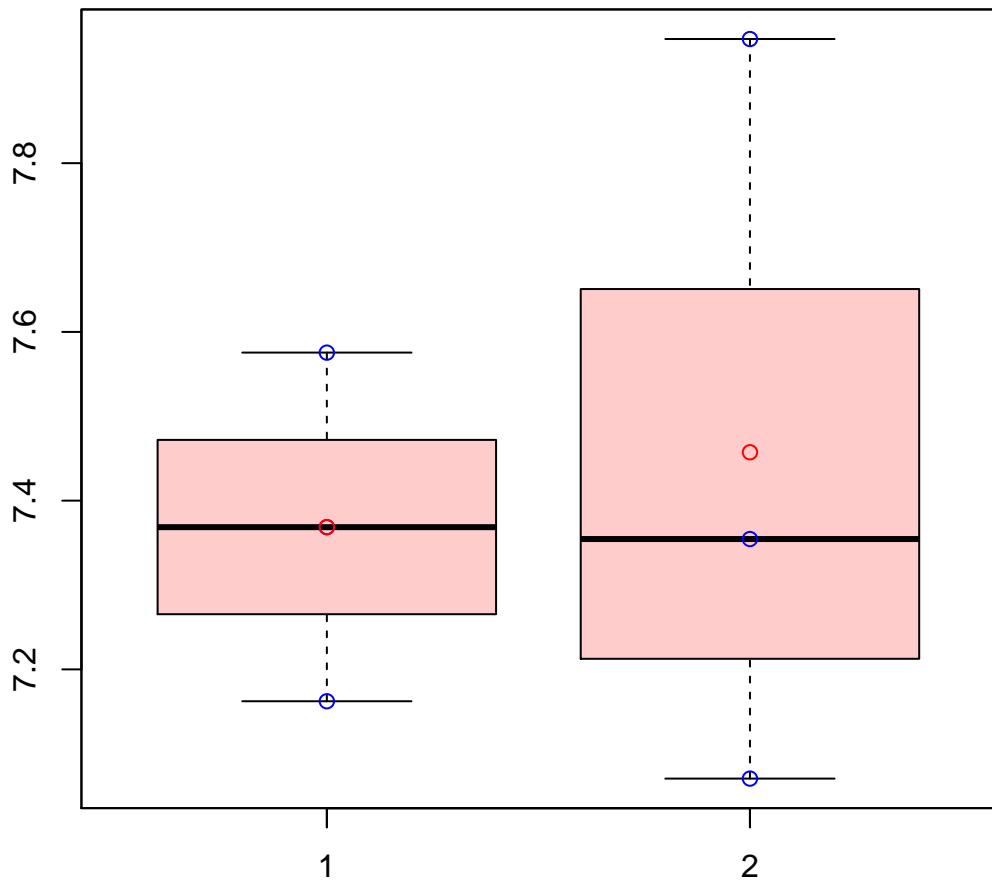

t-Test: p-value = 0.78

# CL1Contig9083|CL1Contig9083

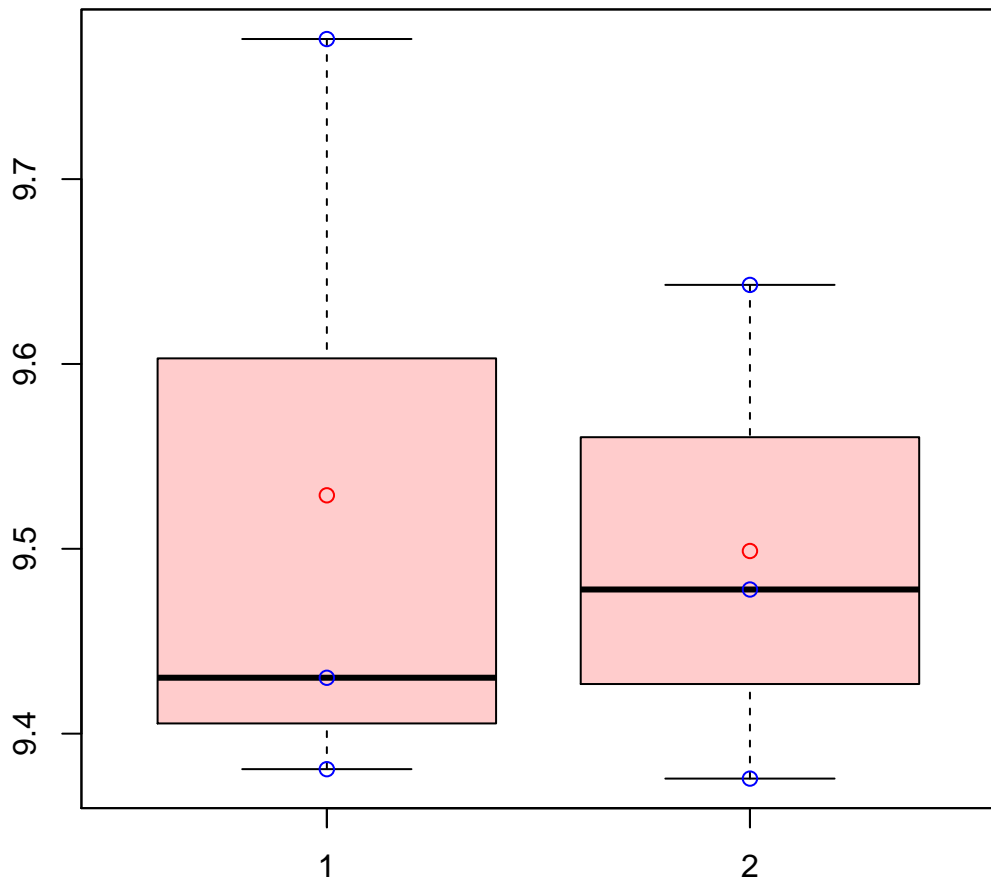

t-Test: p-value = 0.85

# CL1Contig9096|CL1Contig9096

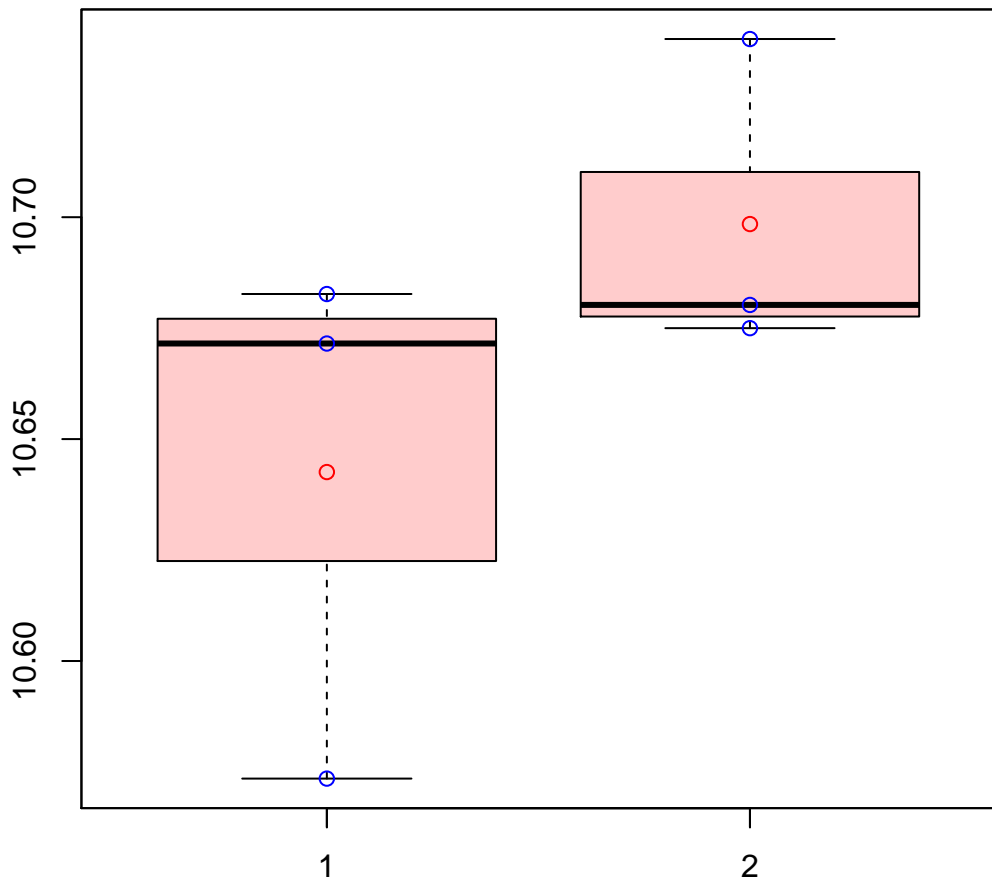

t-Test: p-value = 0.25

# CL1Contig9107|CL1Contig9107

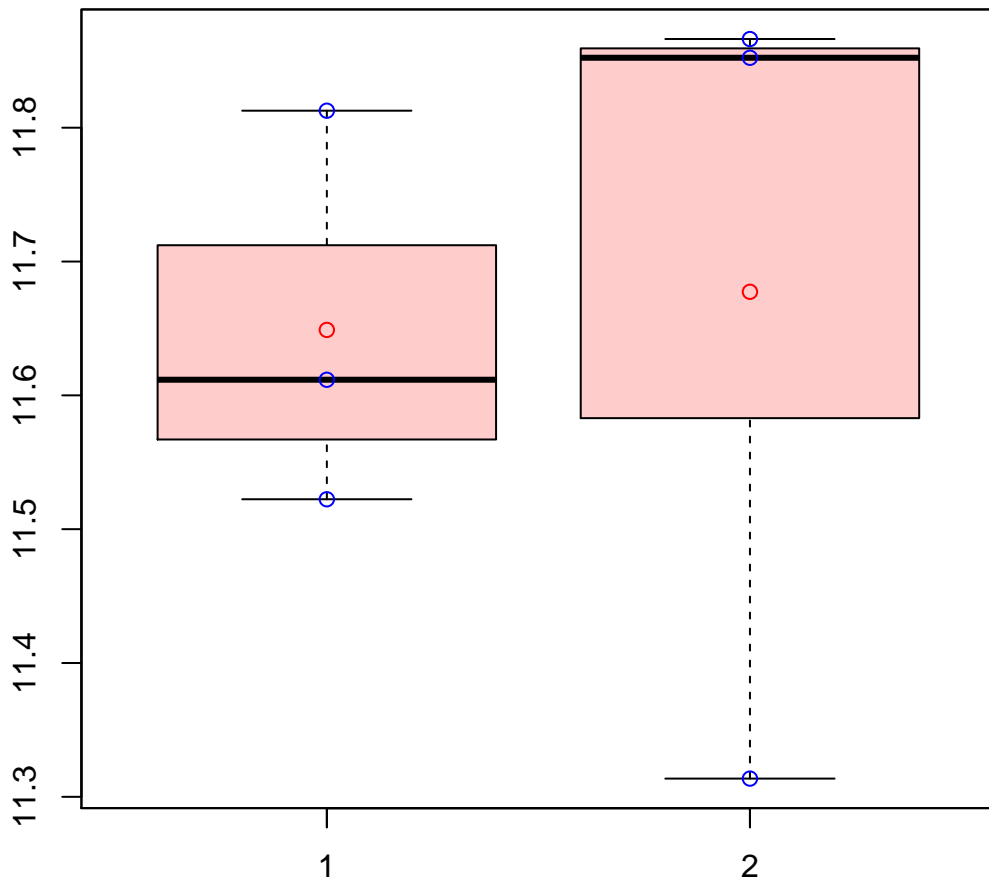

t-Test: p-value = 0.9

# CL1Contig9148|CL1Contig9148

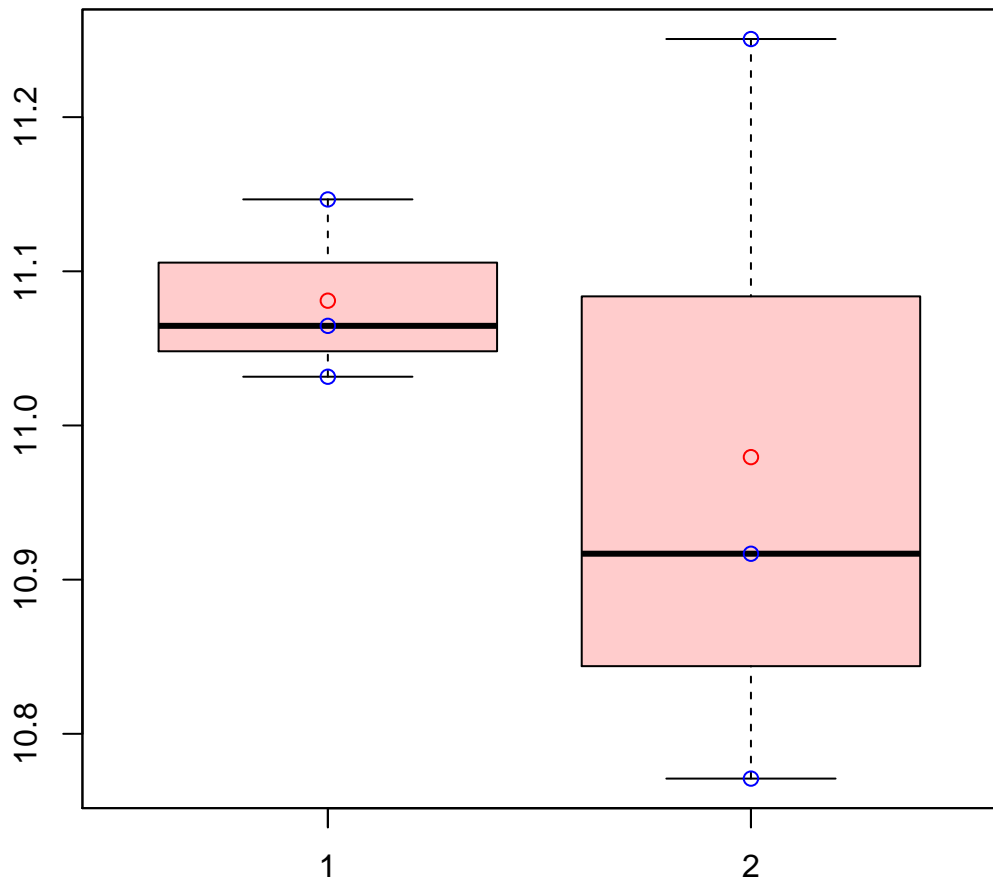

t-Test: p-value = 0.55



# CL1Contig9162|CL1Contig9162



t-Test: p-value = 0.51

# CL1Contig9170|CL1Contig9170

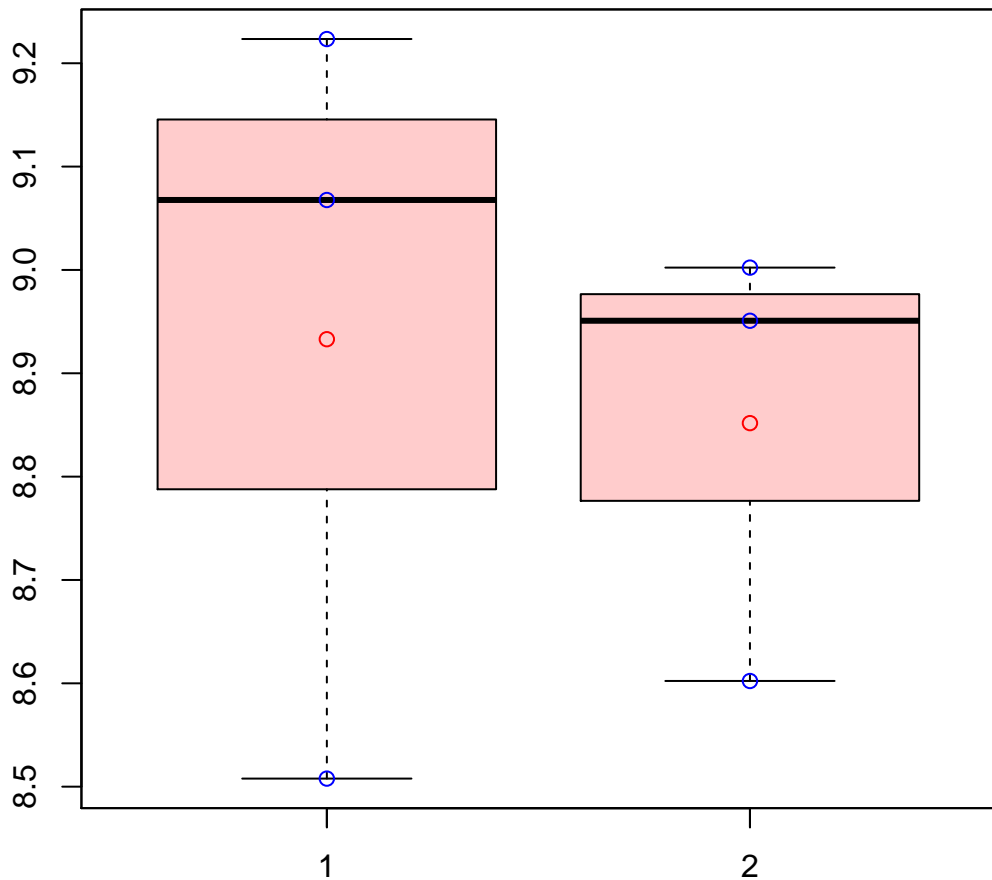

t-Test: p-value = 0.77

# CL1Contig9182|CL1Contig9182

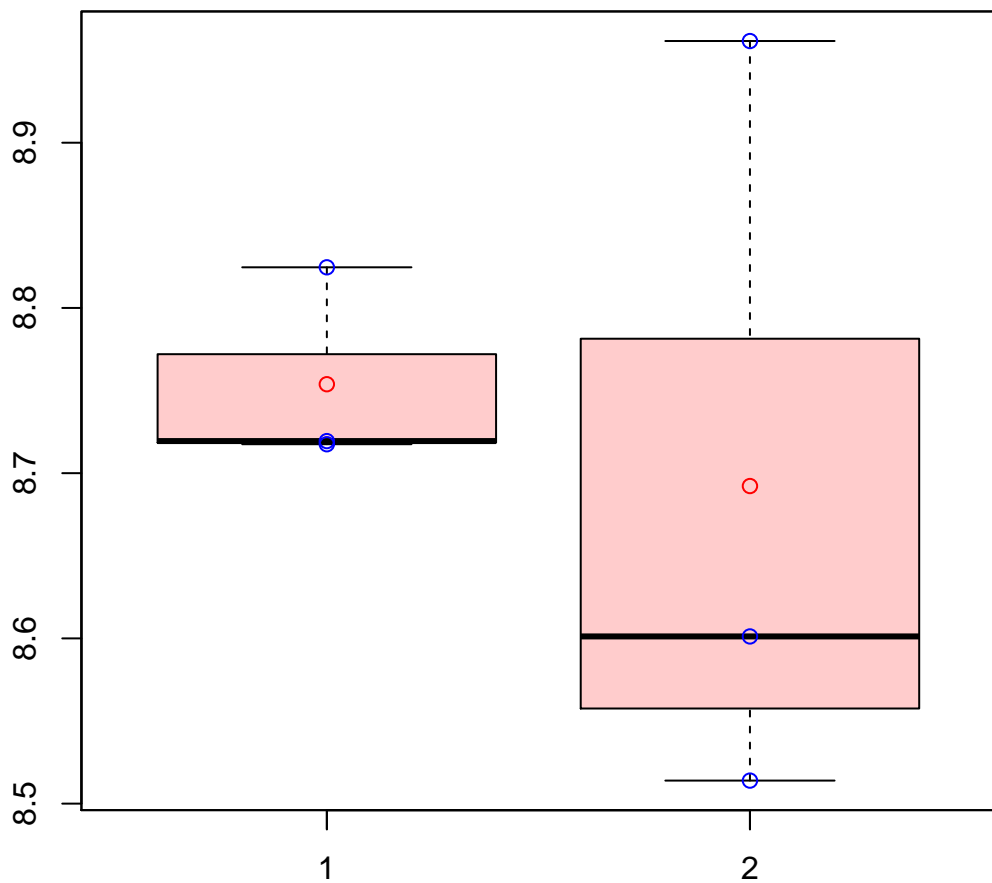

t-Test: p-value = 0.7

# CL1Contig9203|CL1Contig9203

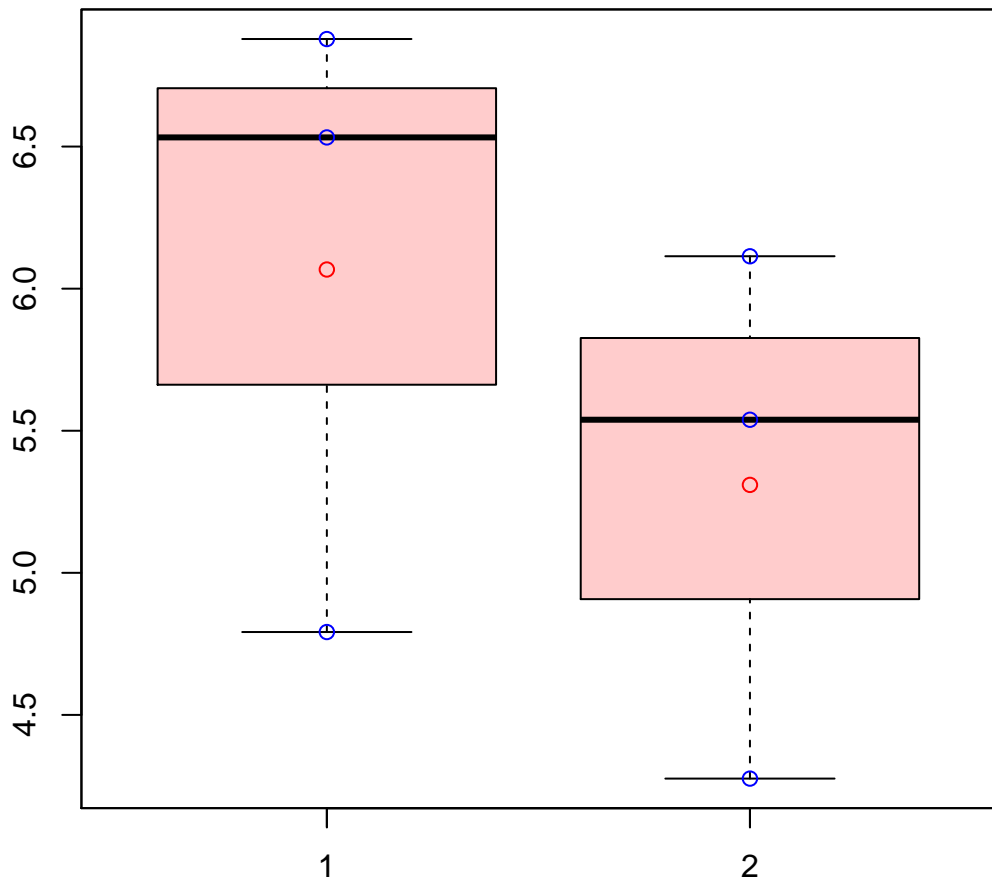

t-Test: p-value = 0.42

# CL1Contig9204|CL1Contig9204

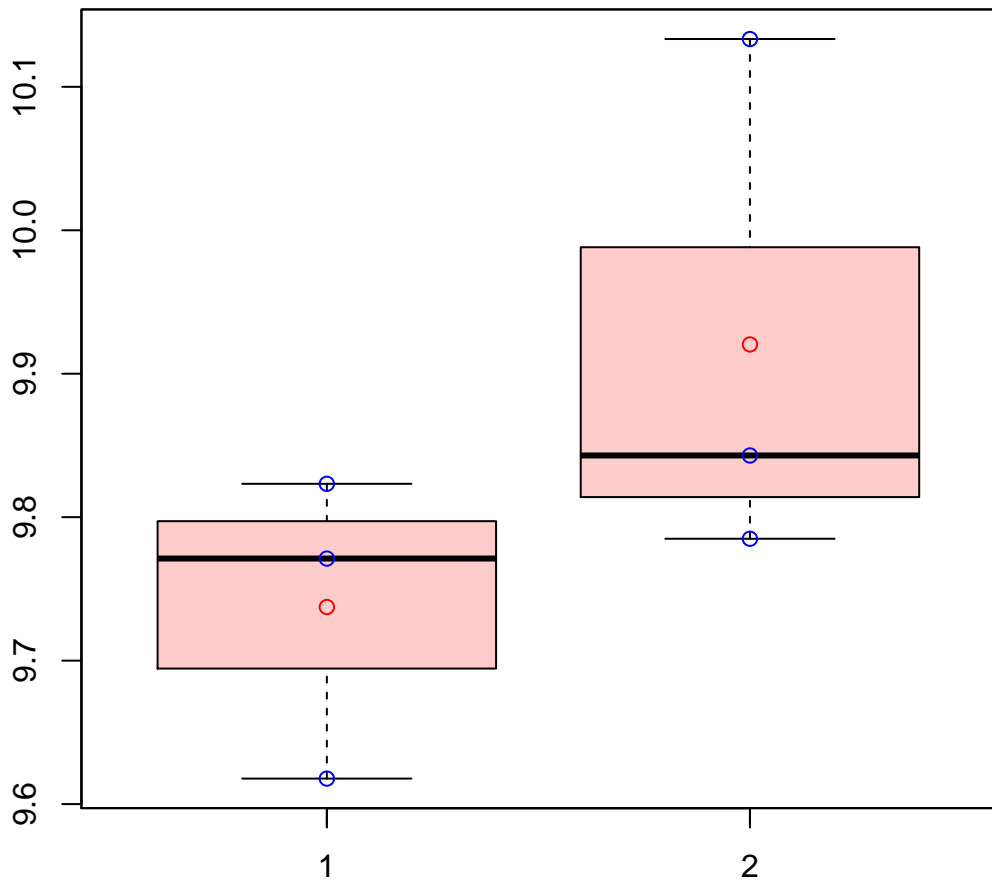

t-Test: p-value = 0.23

# CL1Contig9205|CL1Contig9205



t-Test: p-value = 0.07

# CL1Contig9208|CL1Contig9208

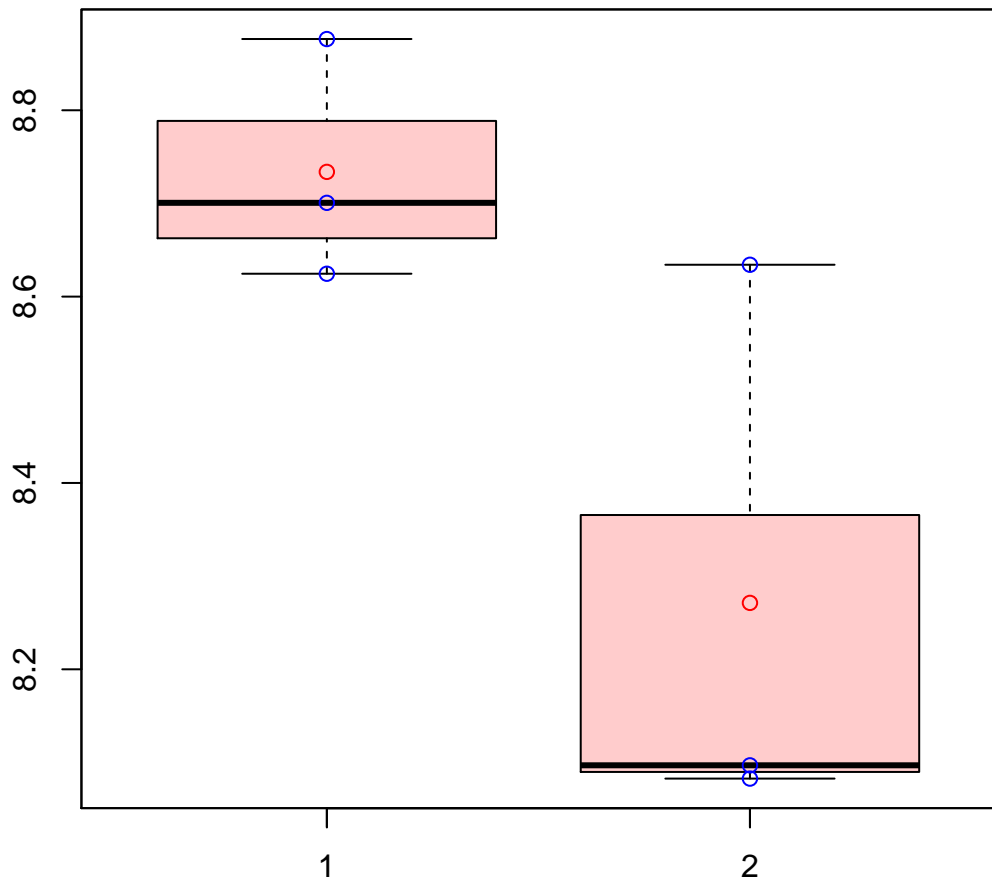

t-Test: p-value = 0.11

# CL1Contig9220|CL1Contig9220

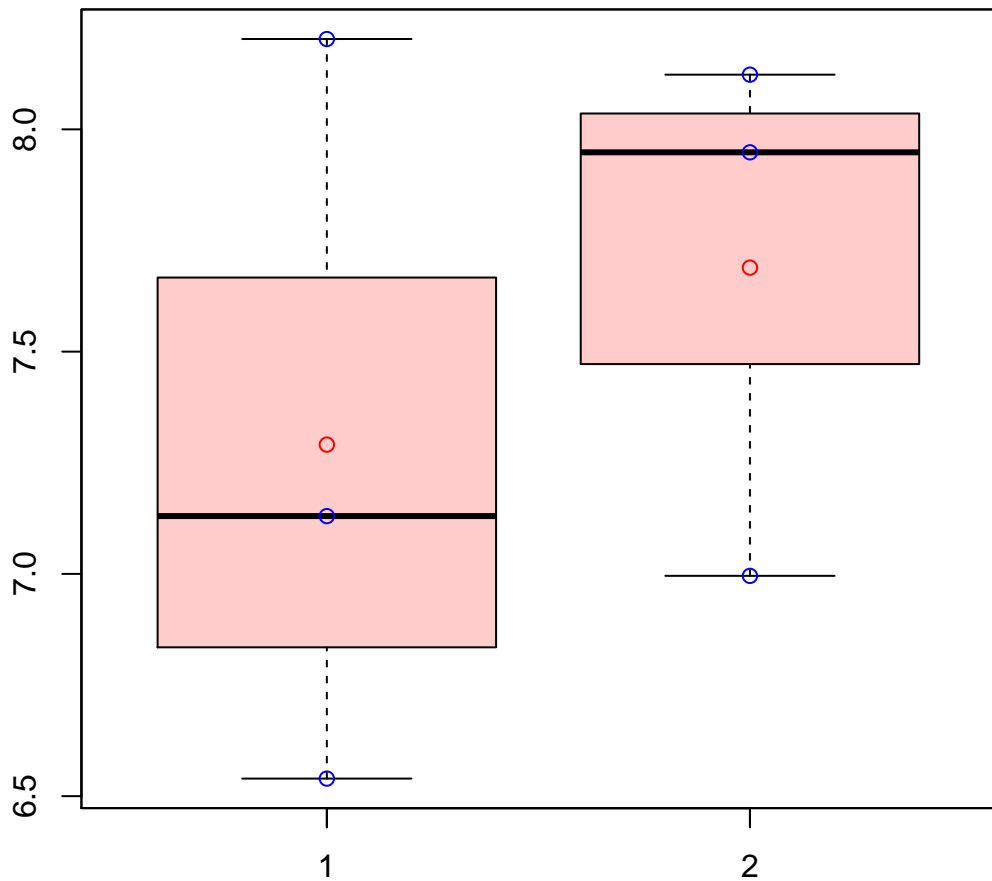

t-Test: p-value = 0.55



# CL1Contig9221|CL1Contig9221

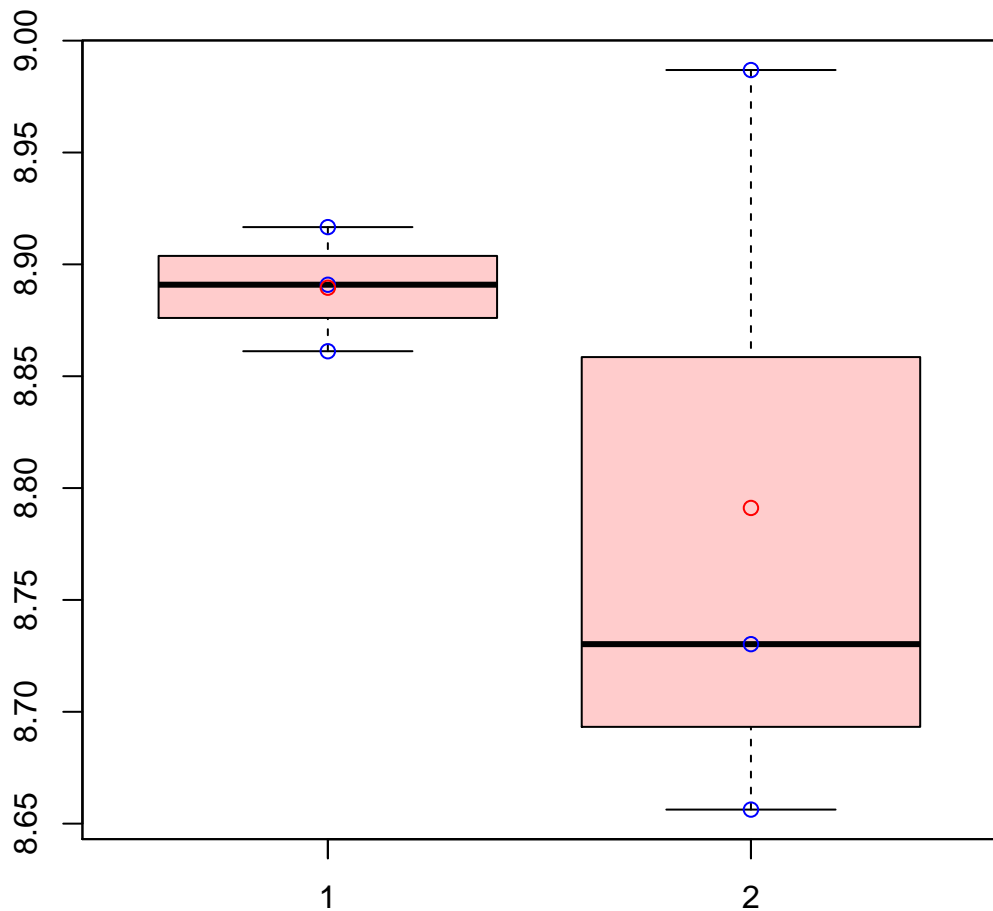

t-Test: p-value = 0.43

# CL1Contig9225|CL1Contig9225

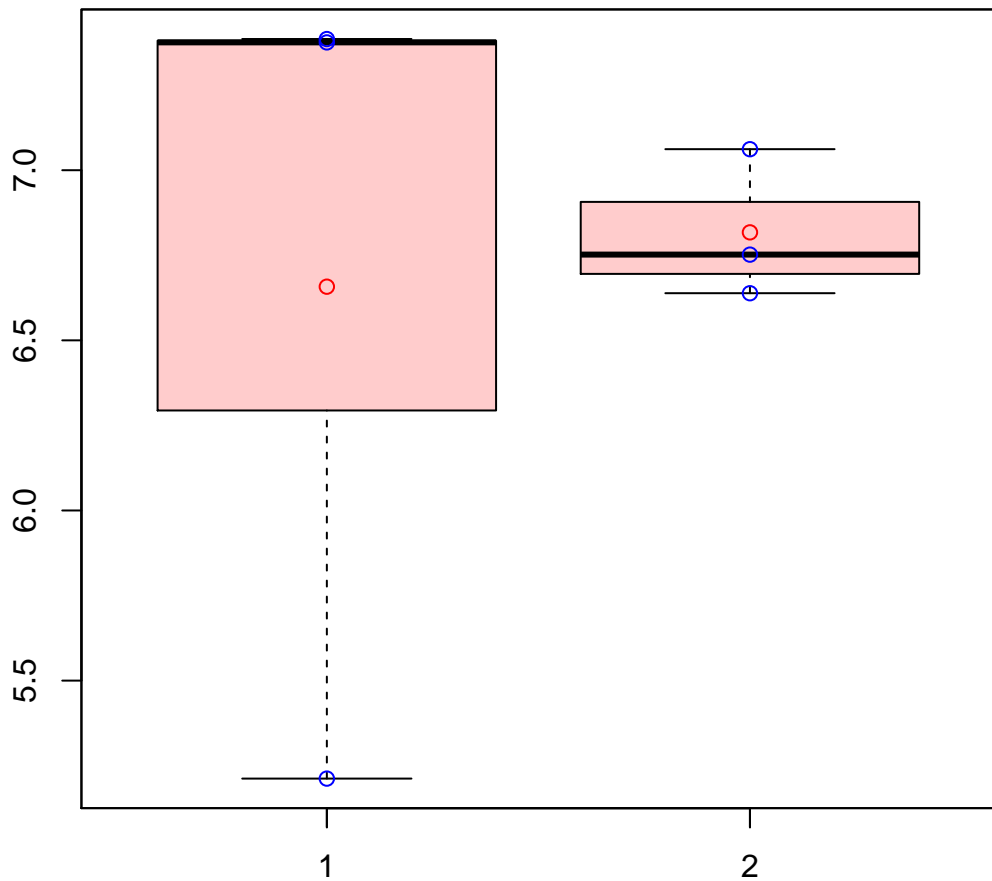

t-Test: p-value = 0.85

# CL1Contig9226|CL1Contig9226

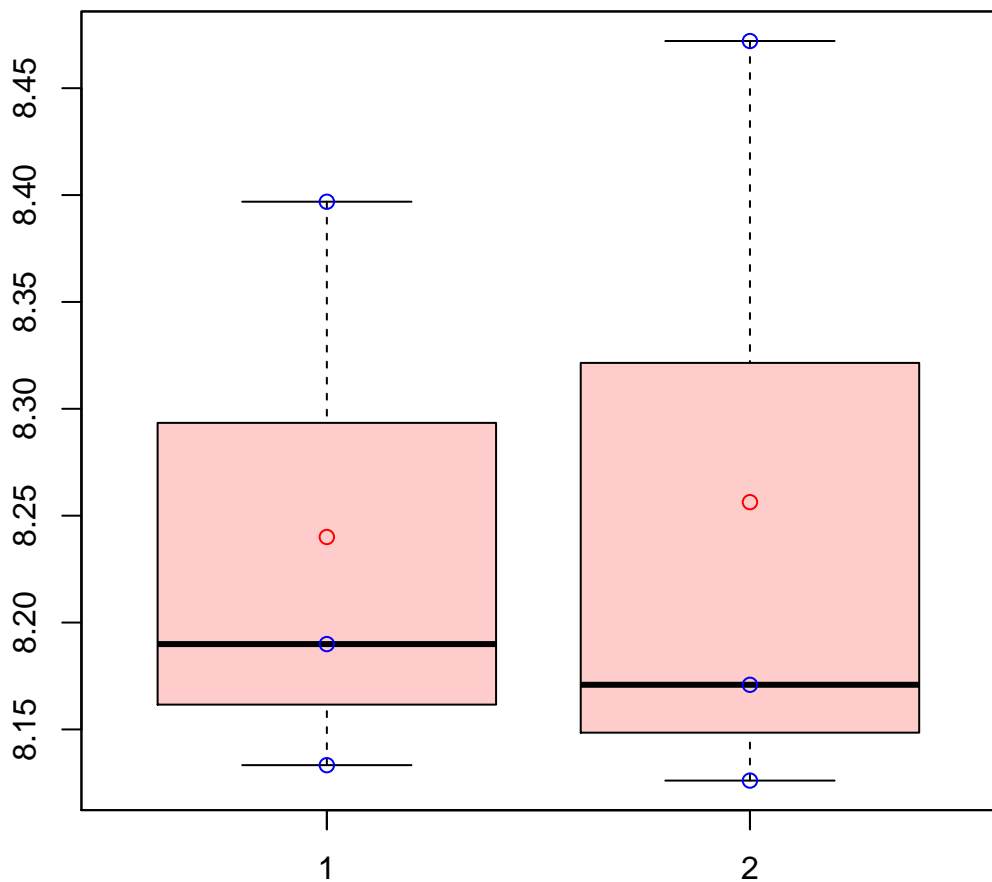

t-Test: p-value = 0.91

# CL1Contig9227|CL1Contig9227

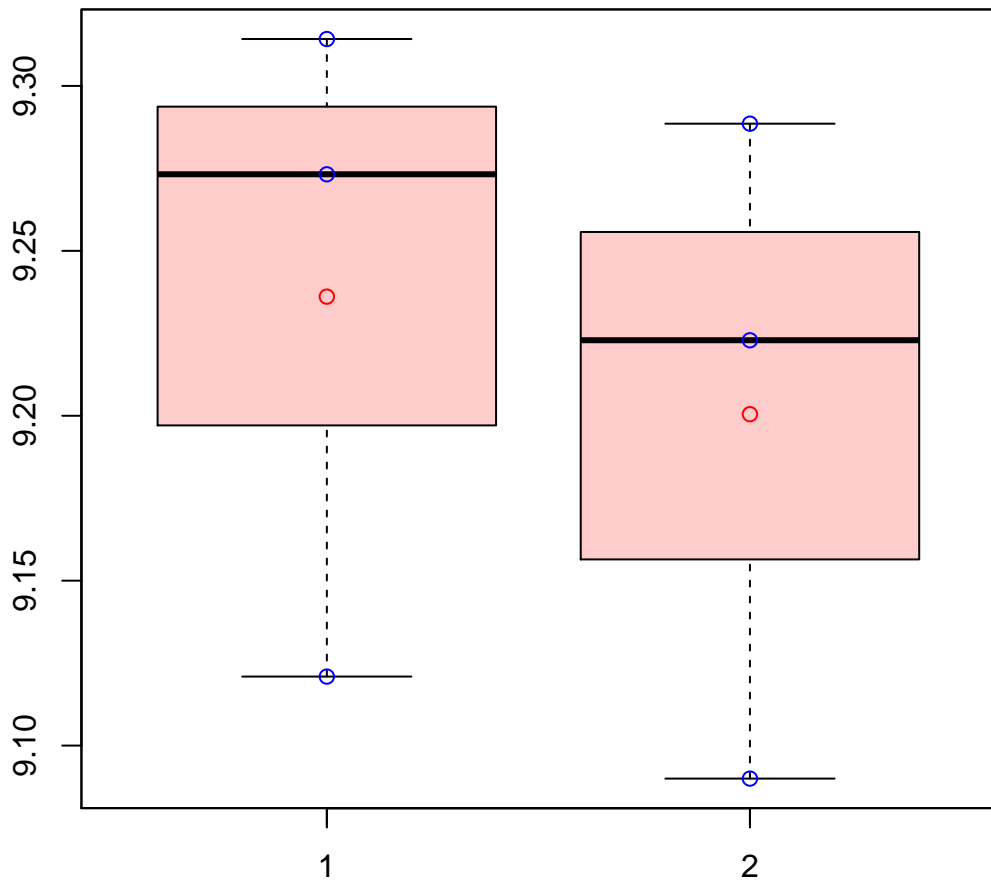

t-Test: p-value = 0.69

# CL1Contig9243|CL1Contig9243

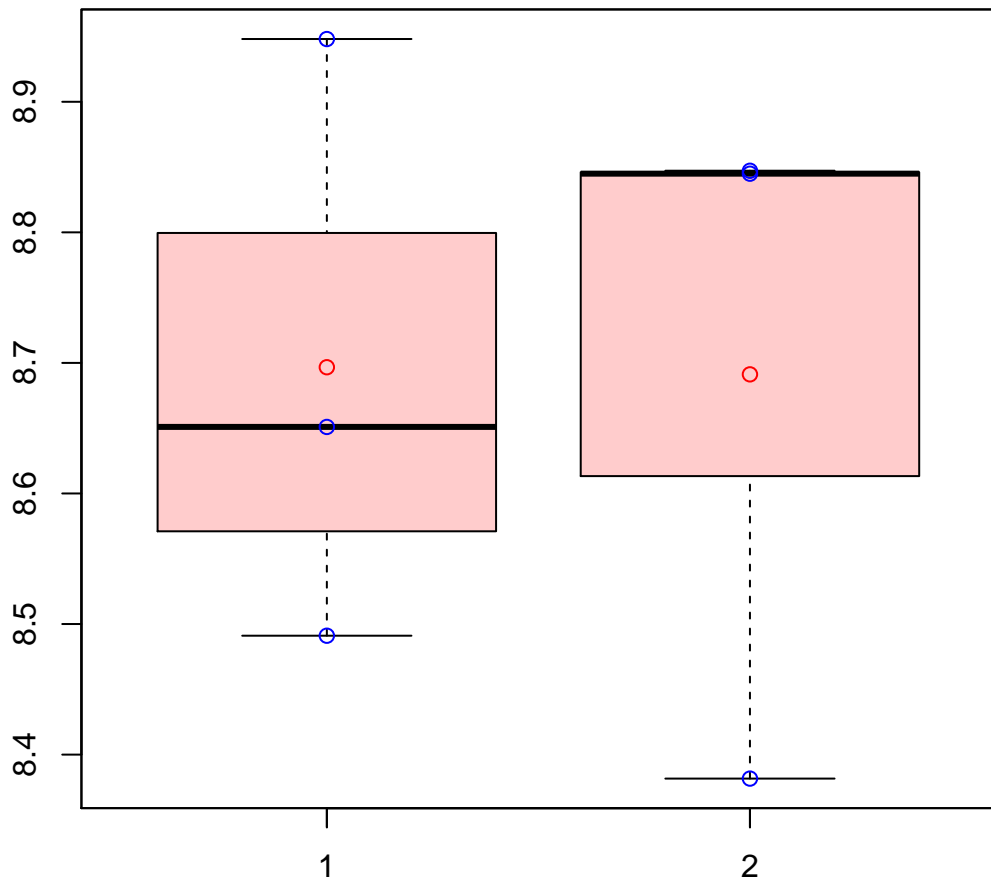

t-Test: p-value = 0.98

# CL1Contig9286|CL1Contig9286

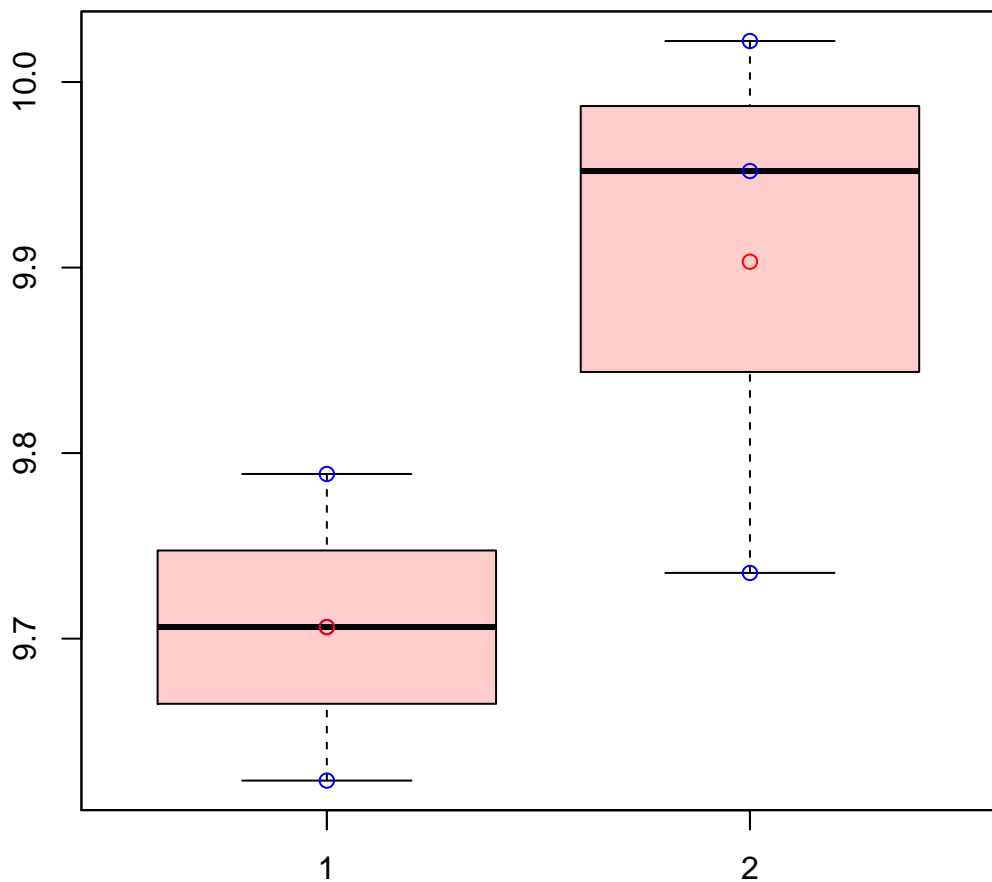

t-Test: p-value = 0.14

# CL1Contig9289|CL1Contig9289

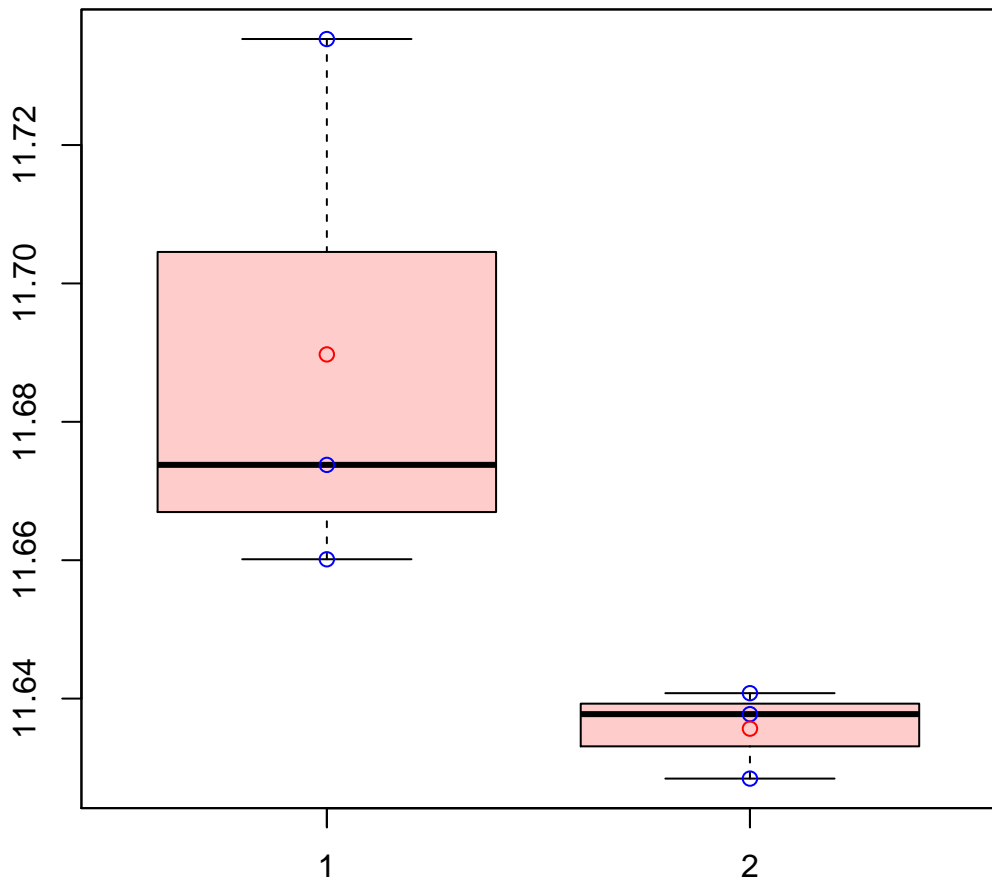

t-Test: p-value = 0.14

# CL1Contig929|CL1Contig929

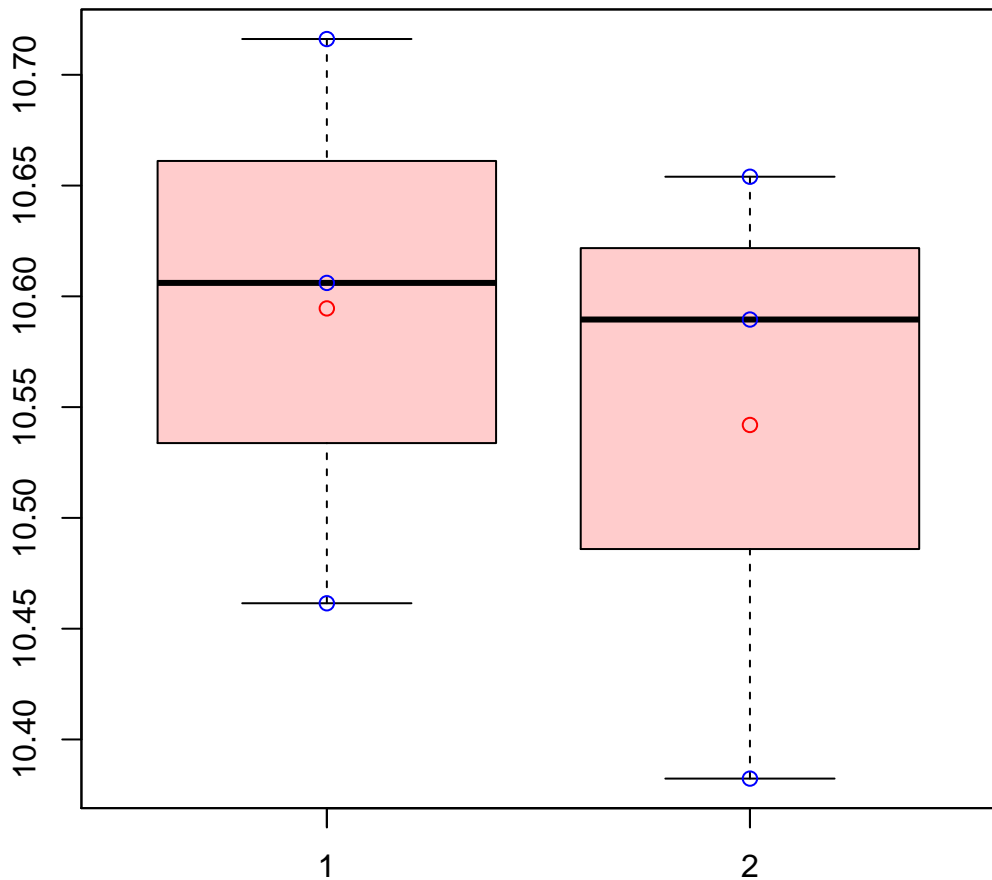

t-Test: p-value = 0.66



# CL1Contig9300|CL1Contig9300

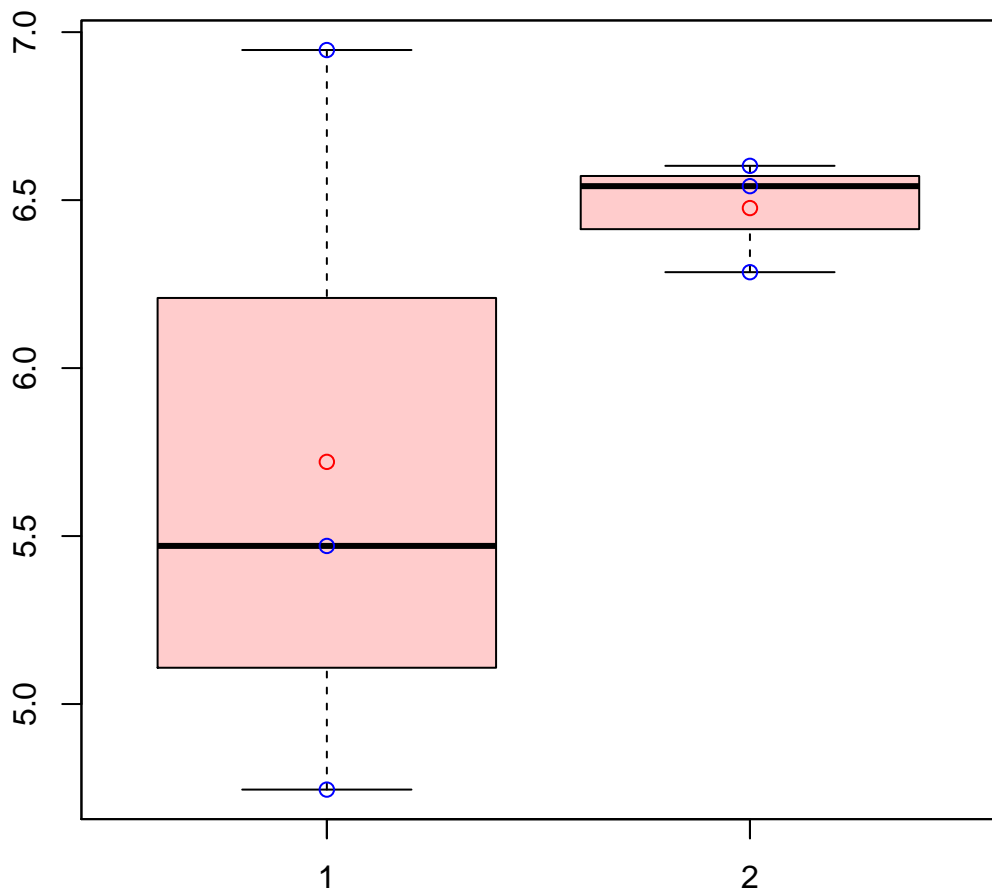

t-Test: p-value = 0.36

# CL1Contig930|CL1Contig930

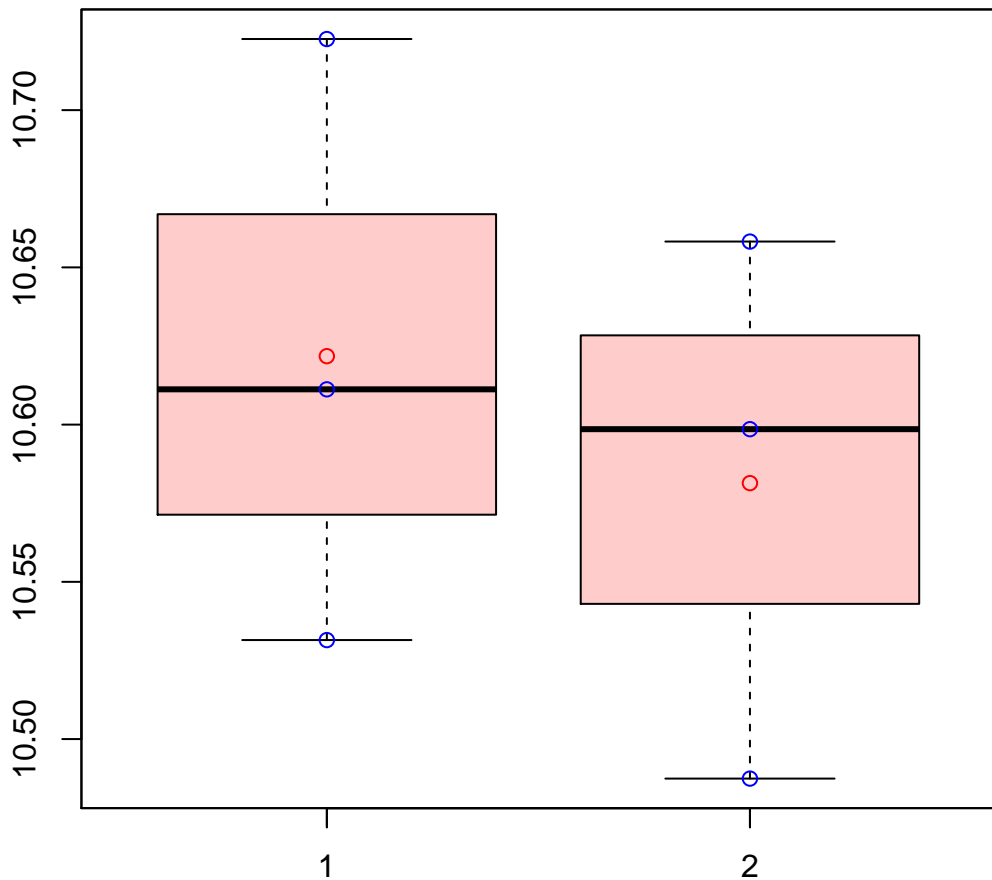

t-Test: p-value = 0.62

# CL1Contig9325|CL1Contig9325

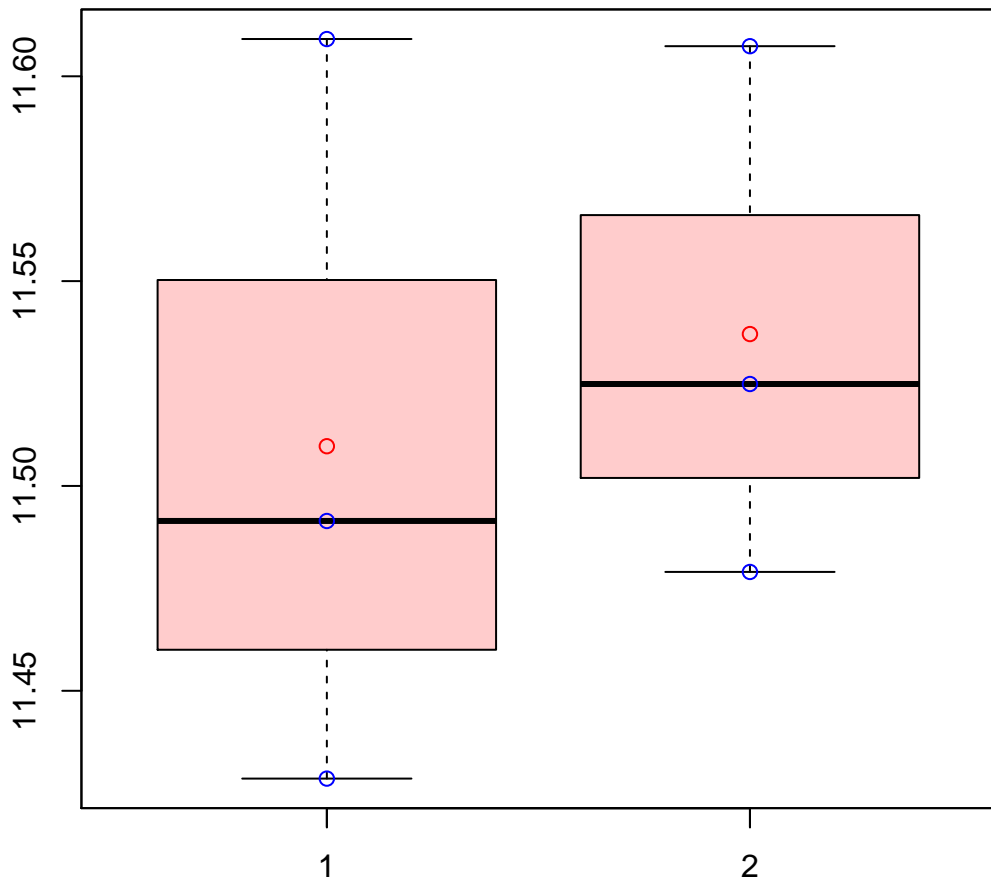

t-Test: p-value = 0.7

# CL1Contig932|CL1Contig932

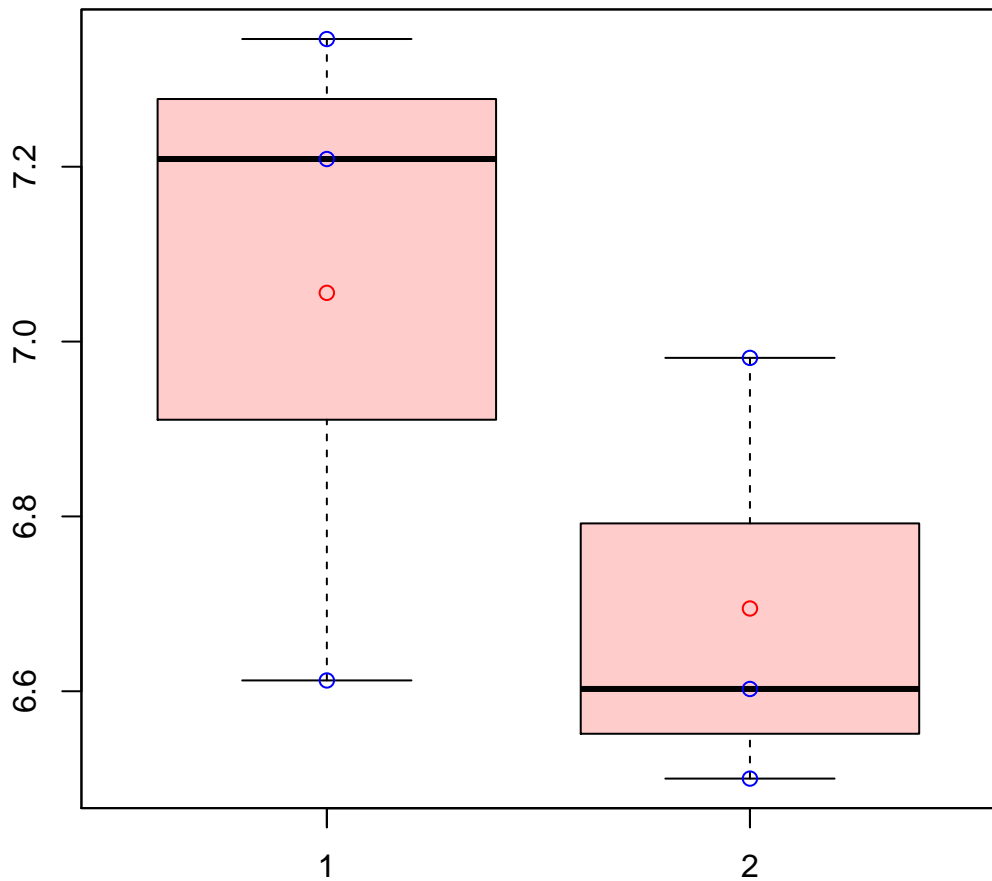

t-Test: p-value = 0.26

# CL1Contig9345|CL1Contig9345

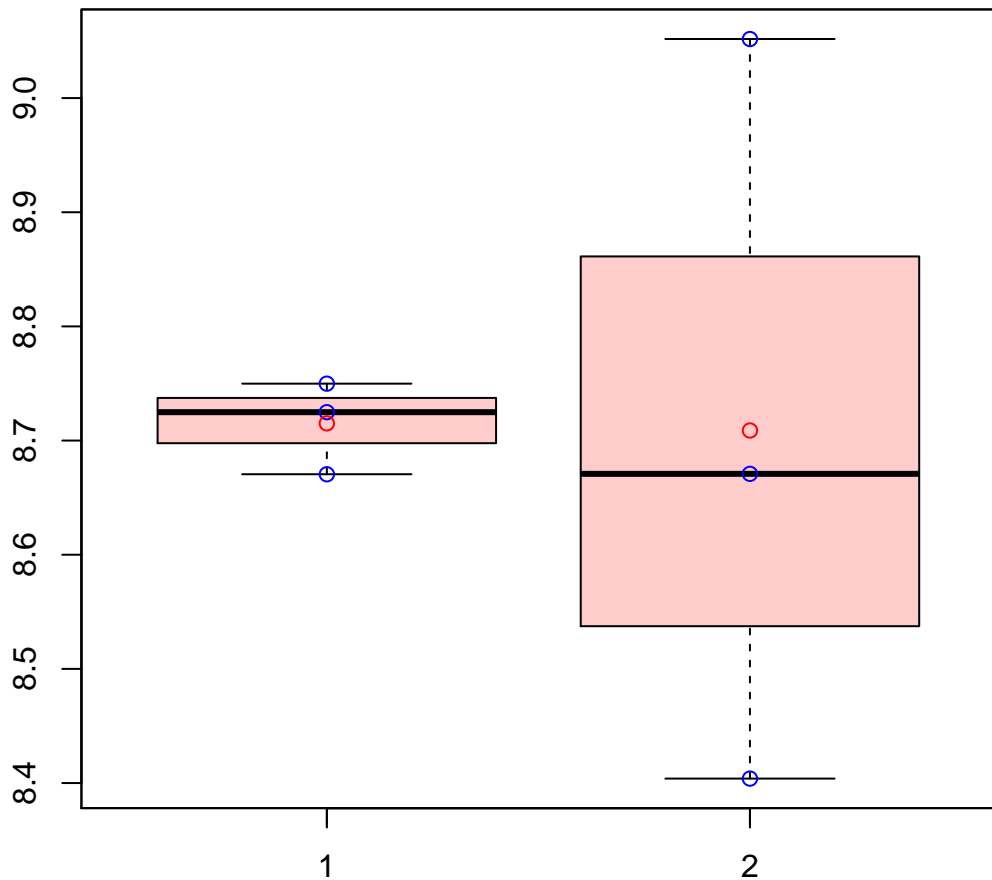

t-Test: p-value = 0.98

# CL1Contig9347|CL1Contig9347

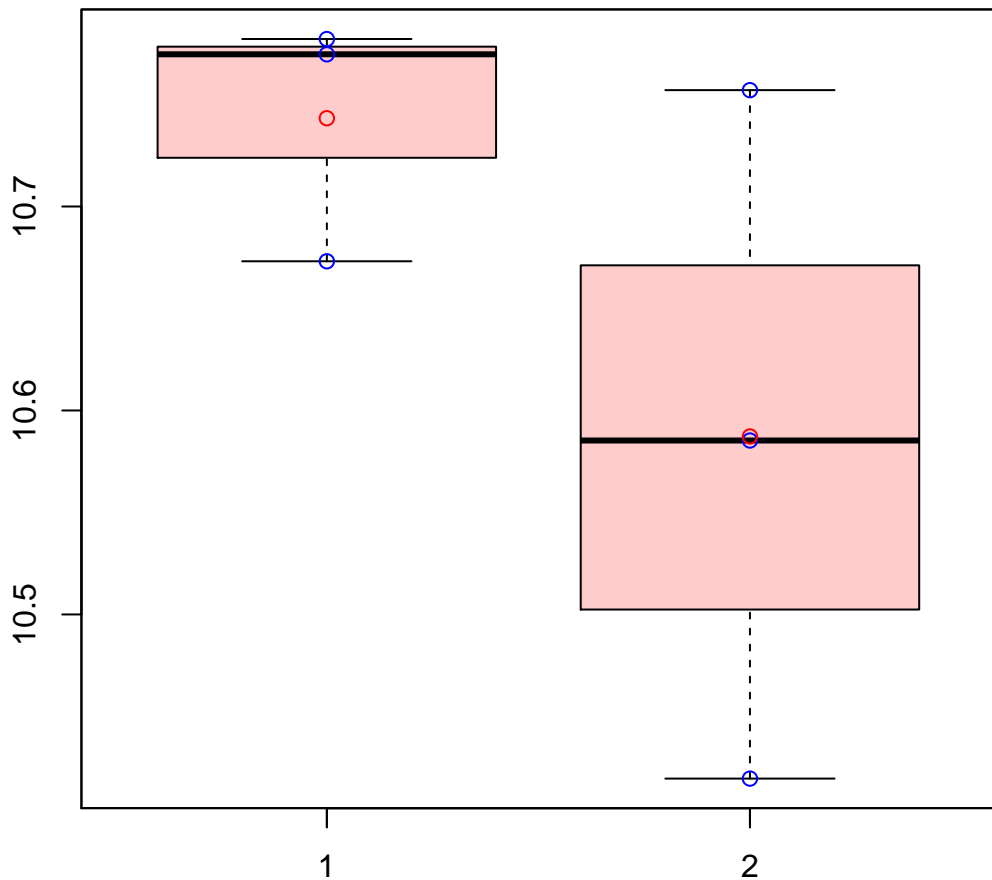

t-Test: p-value = 0.25

# CL1Contig936|CL1Contig936

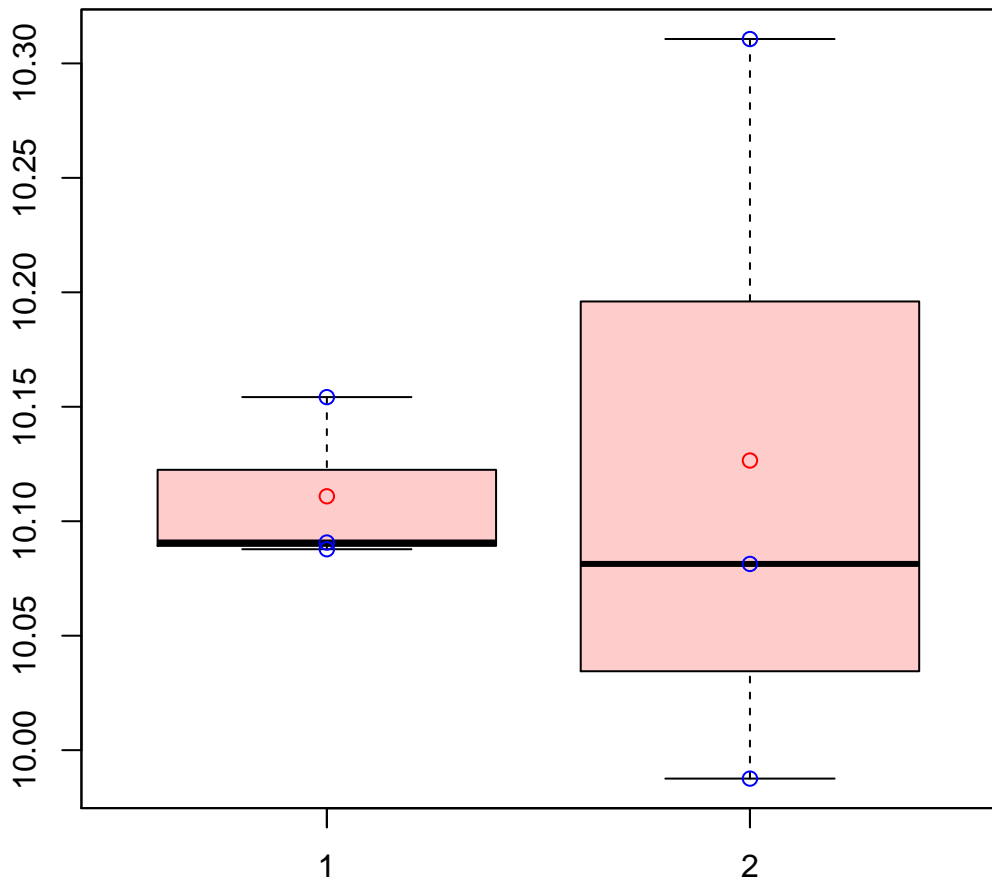

t-Test: p-value = 0.89

# CL1Contig9370|CL1Contig9370

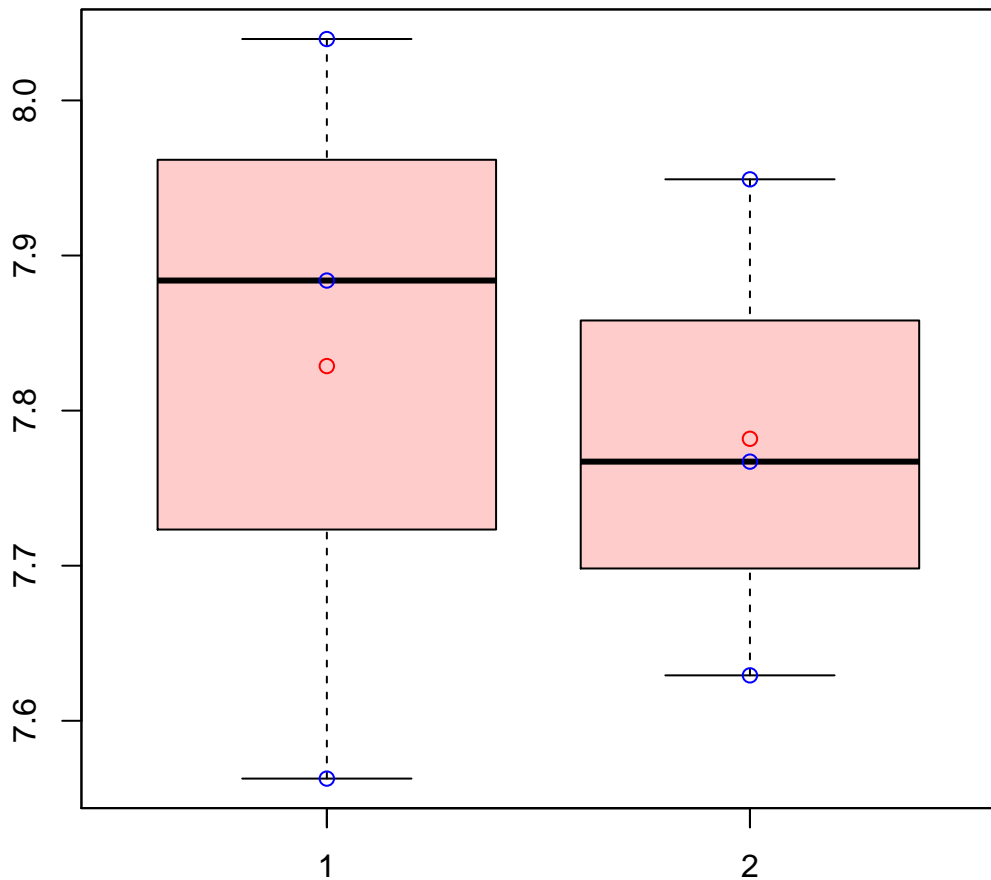

t-Test: p-value = 0.8



# CL1Contig937|CL1Contig937

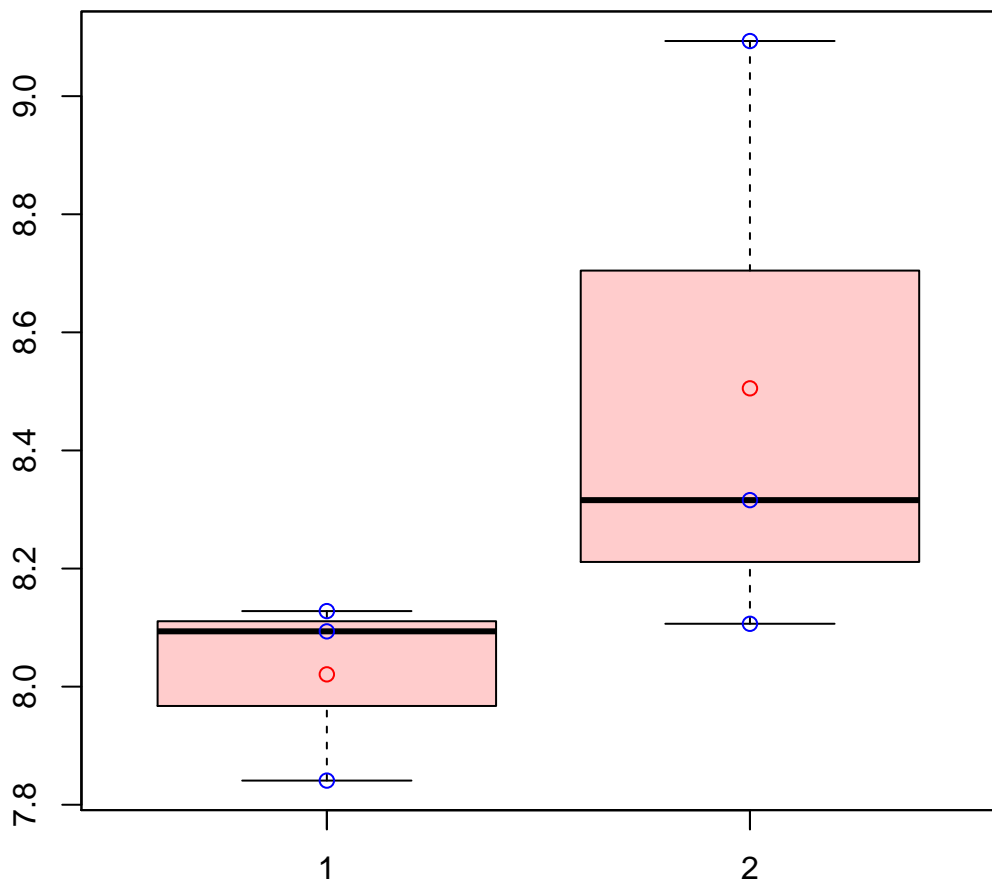

t-Test: p-value = 0.24

# CL1Contig93|CL1Contig93

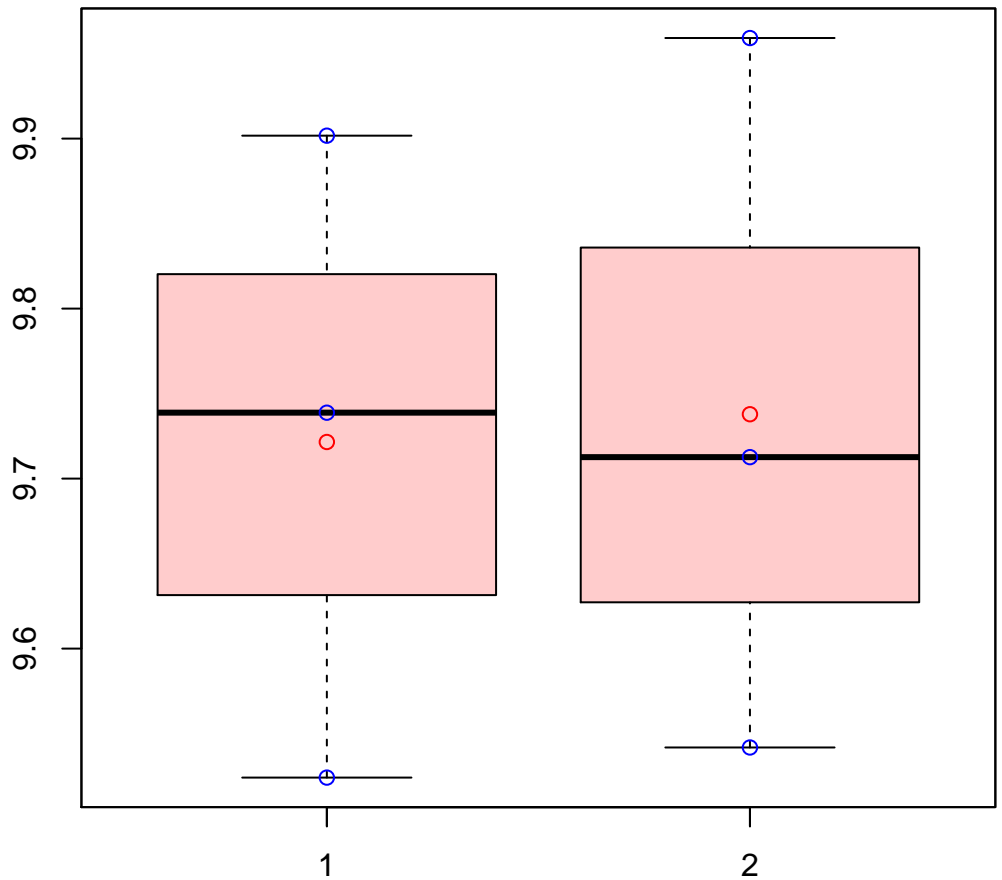

t-Test: p-value = 0.93

# CL1Contig9432|CL1Contig9432

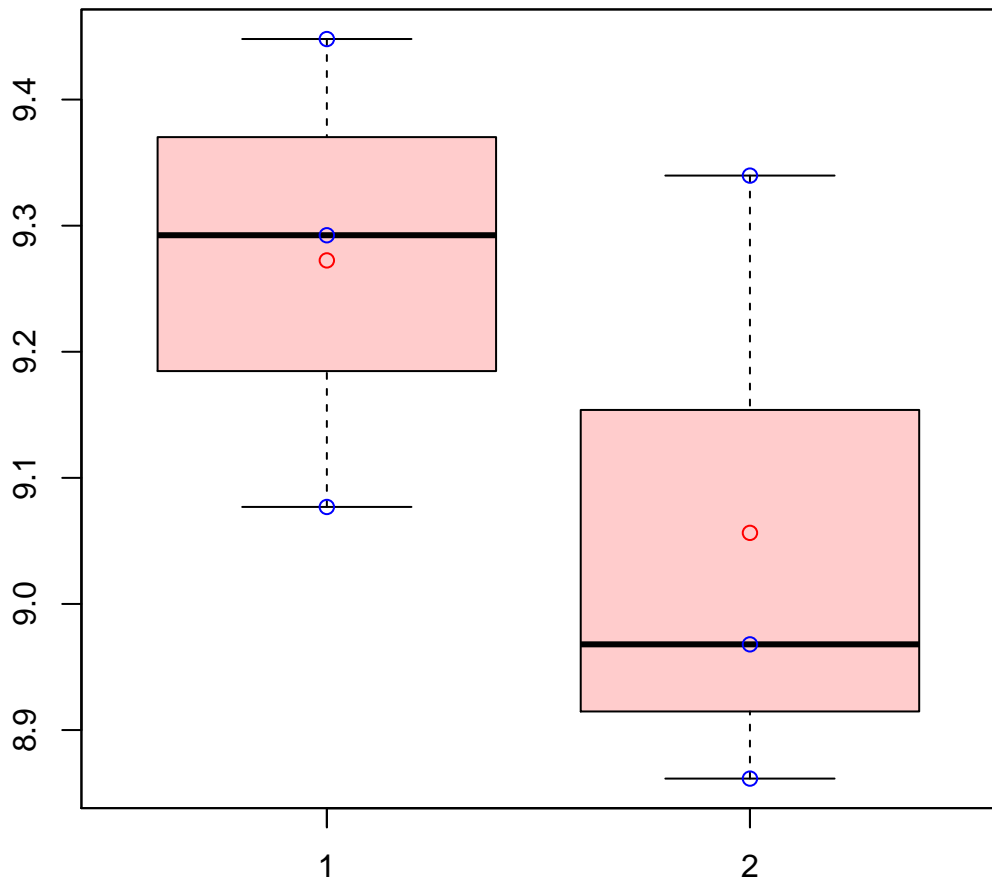

t-Test: p-value = 0.3

# CL1Contig9438|CL1Contig9438



t-Test: p-value = 0.15

# CL1Contig9442|CL1Contig9442

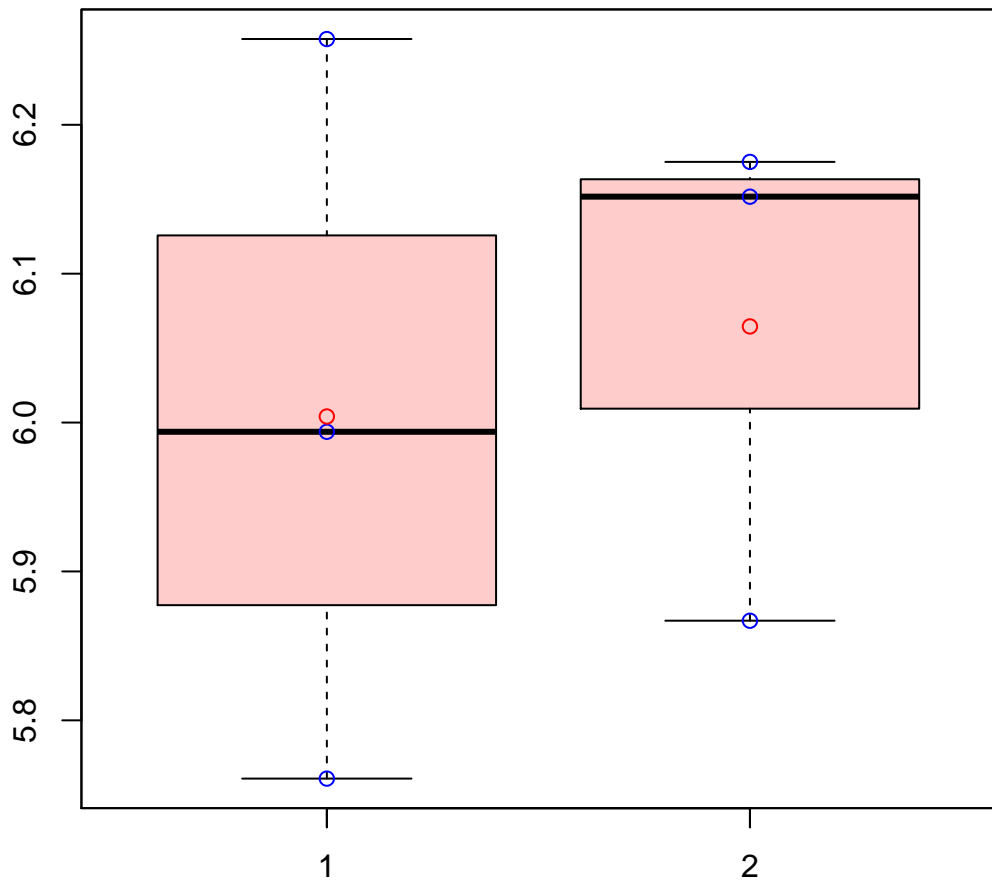

t-Test: p-value = 0.75

# CL1Contig9464|CL1Contig9464

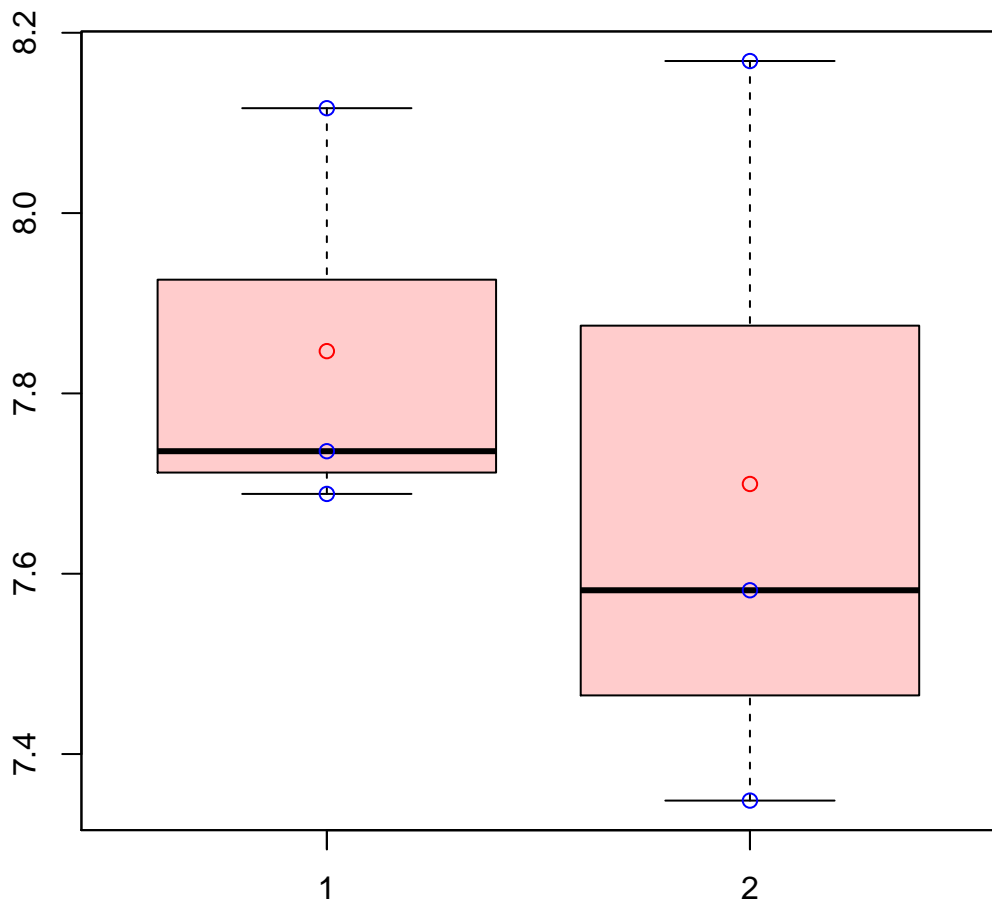

t-Test: p-value = 0.63

# CL1Contig9477|CL1Contig9477

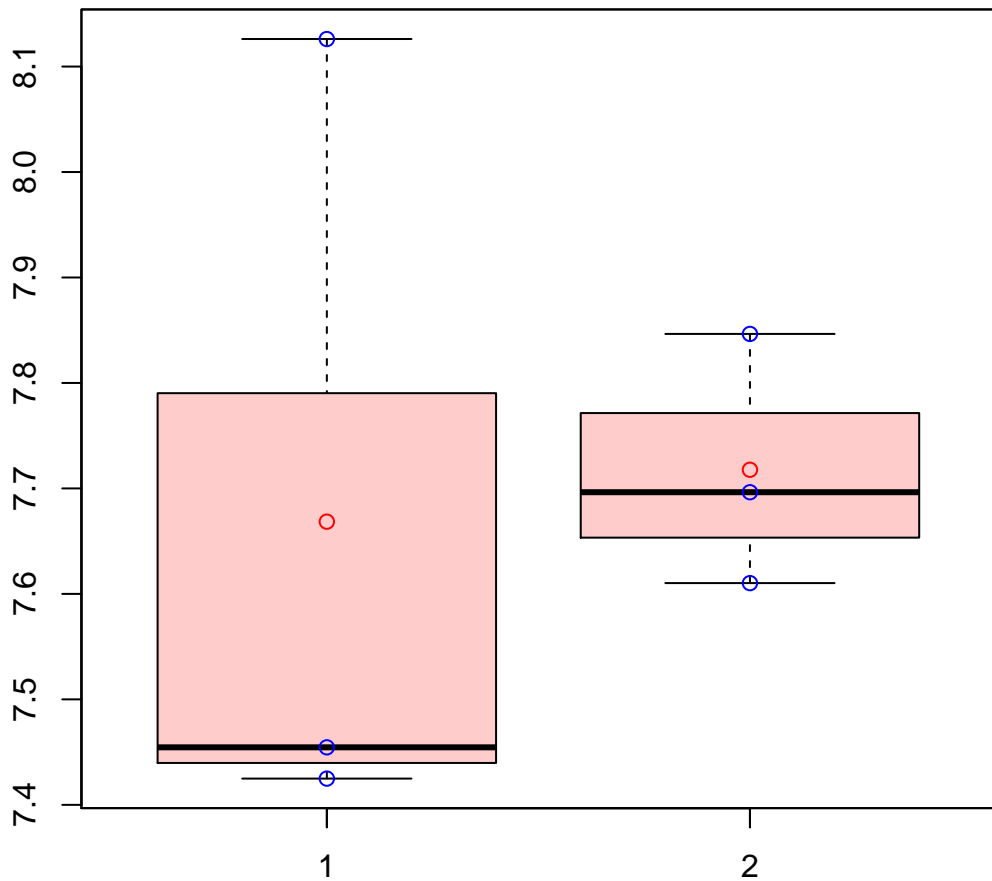

t-Test: p-value = 0.85

# CL1Contig950|CL1Contig950

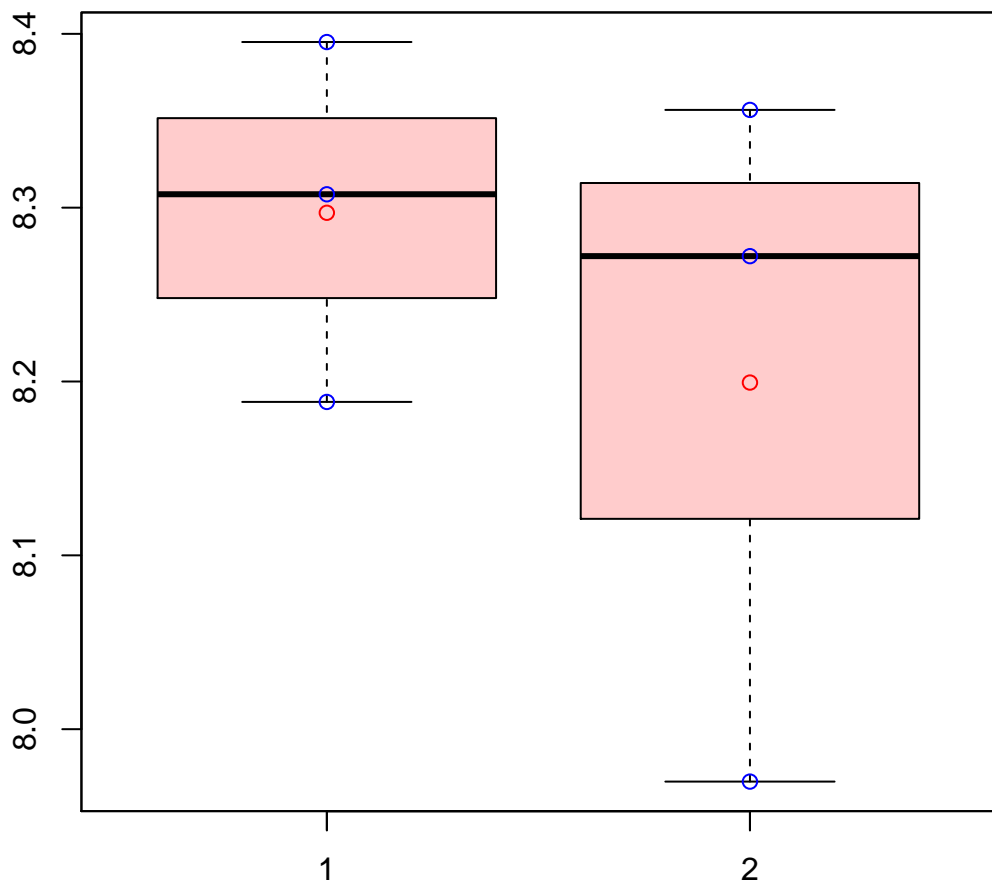

t-Test: p-value = 0.51



# CL1Contig9531|CL1Contig9531

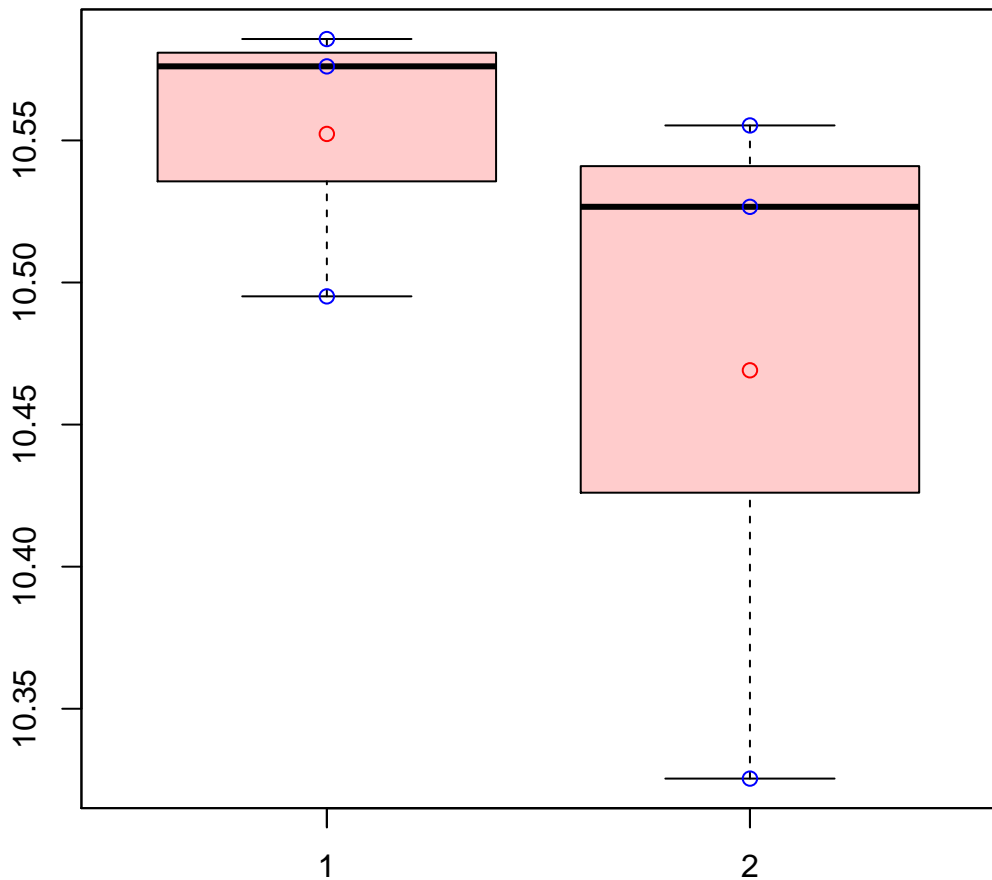

t-Test: p-value = 0.37

# CL1Contig9551|CL1Contig9551

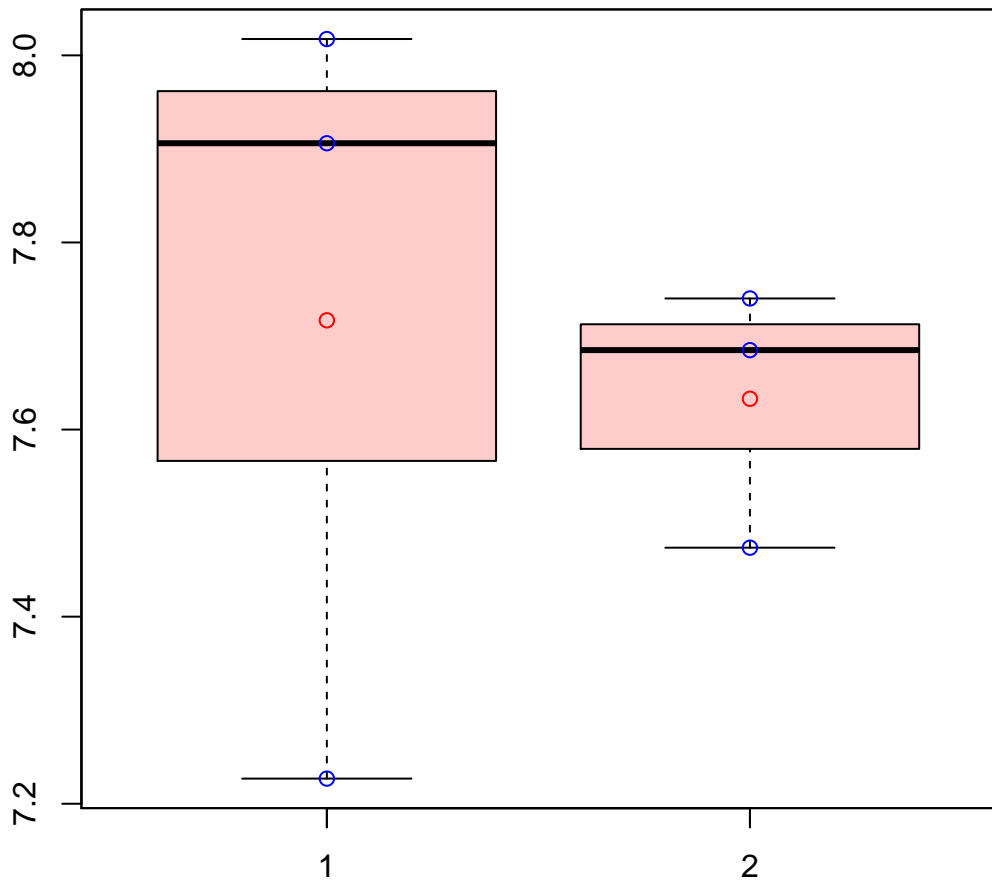

t-Test: p-value = 0.77

# CL1Contig955|CL1Contig955

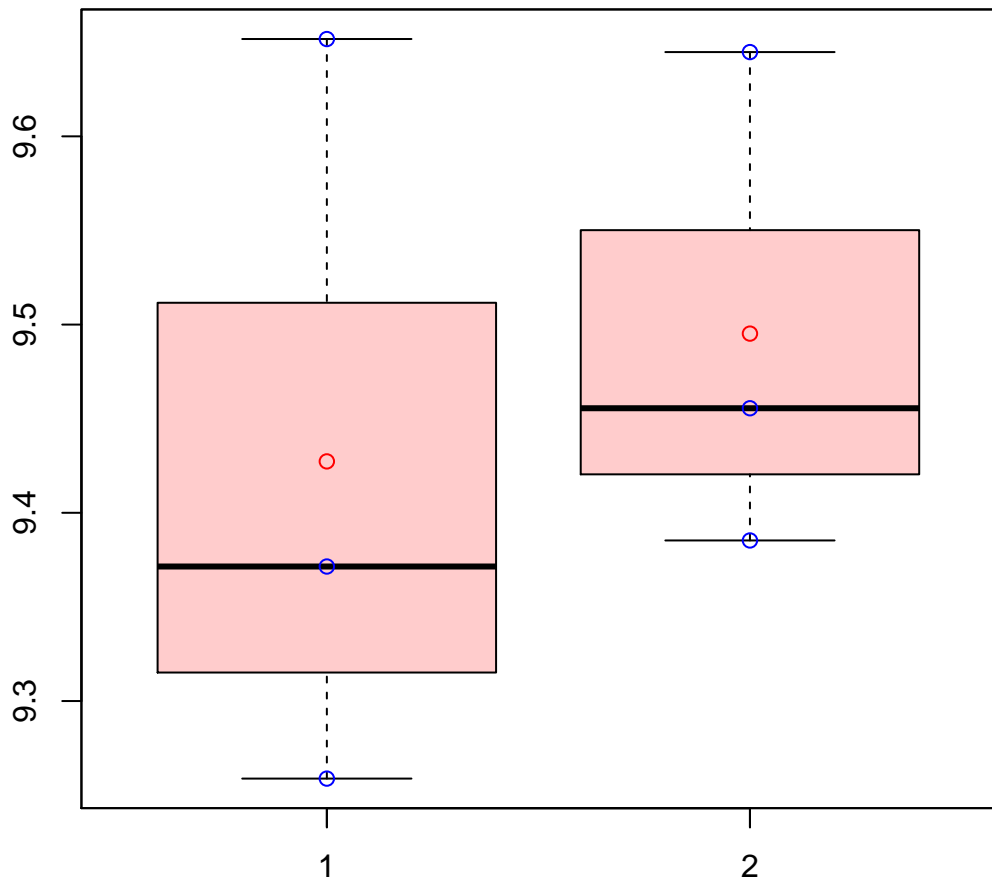

t-Test: p-value = 0.66

# CL1Contig956|CL1Contig956



t-Test: p-value = 0.66

# CL1Contig9576|CL1Contig9576

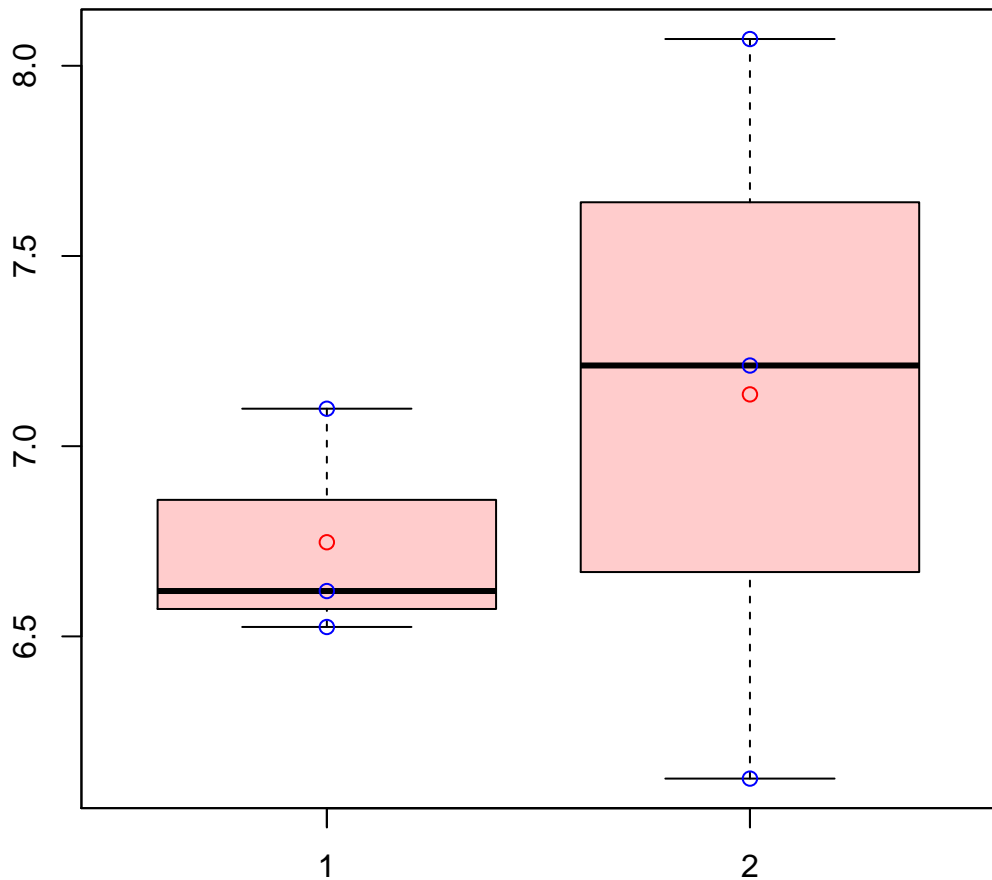

t-Test: p-value = 0.57

# CL1Contig9581|CL1Contig9581

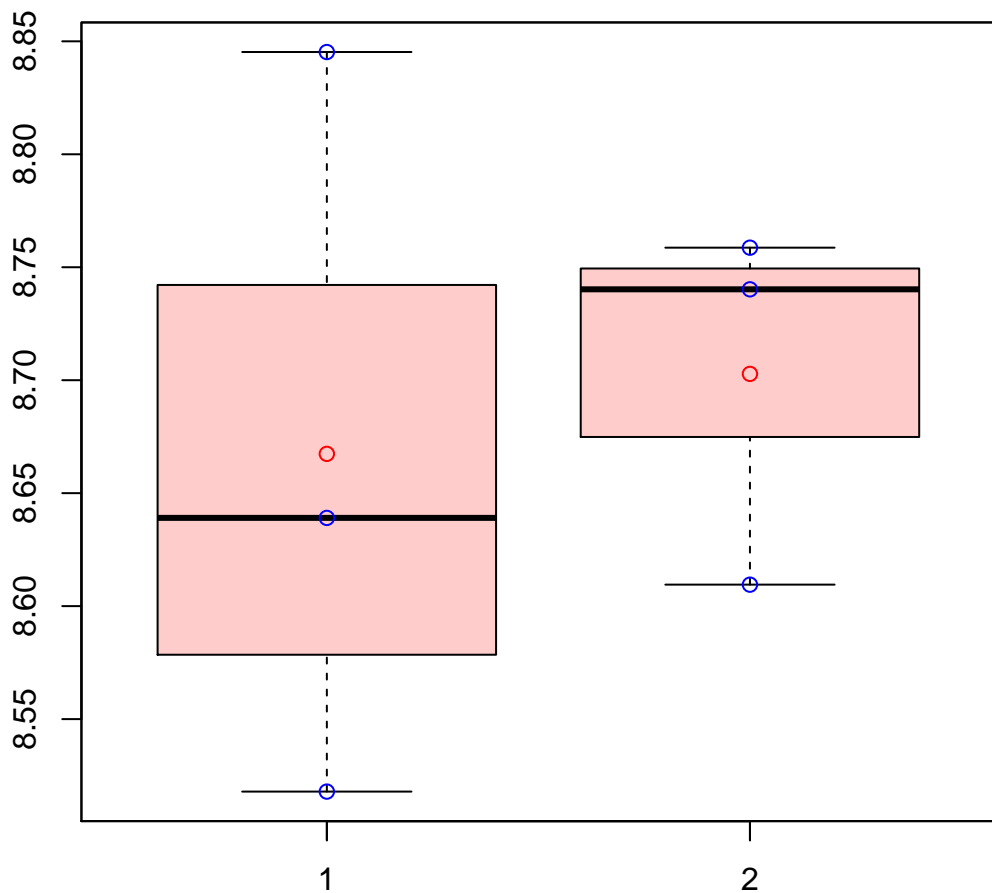

t-Test: p-value = 0.76

# CL1Contig9587|CL1Contig9587

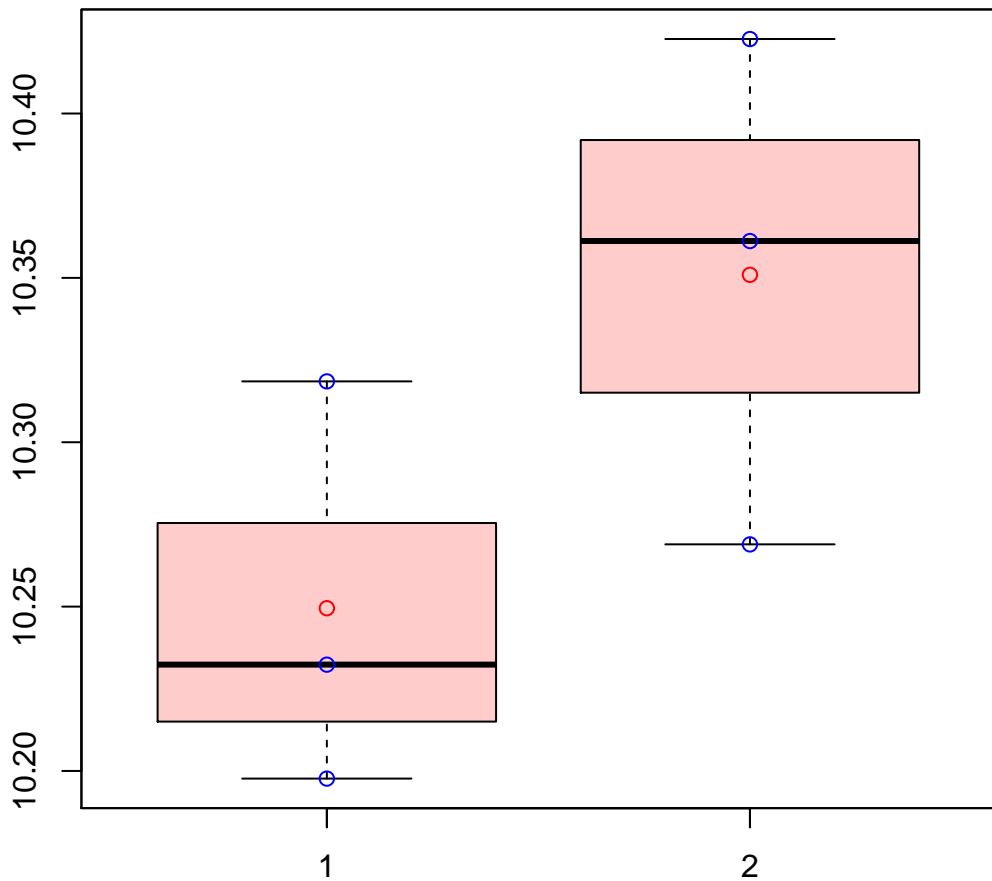

t-Test: p-value = 0.15

# CL1Contig9607|CL1Contig9607

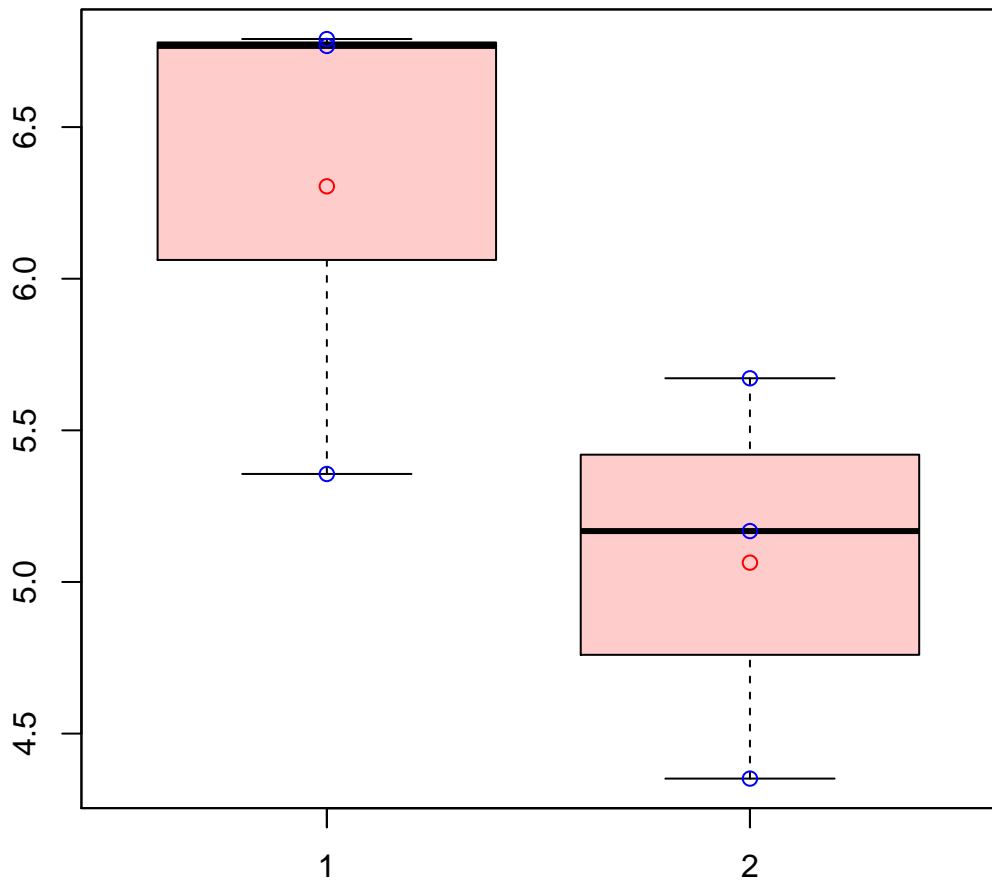

t-Test: p-value = 0.11



# CL1Contig962|CL1Contig962

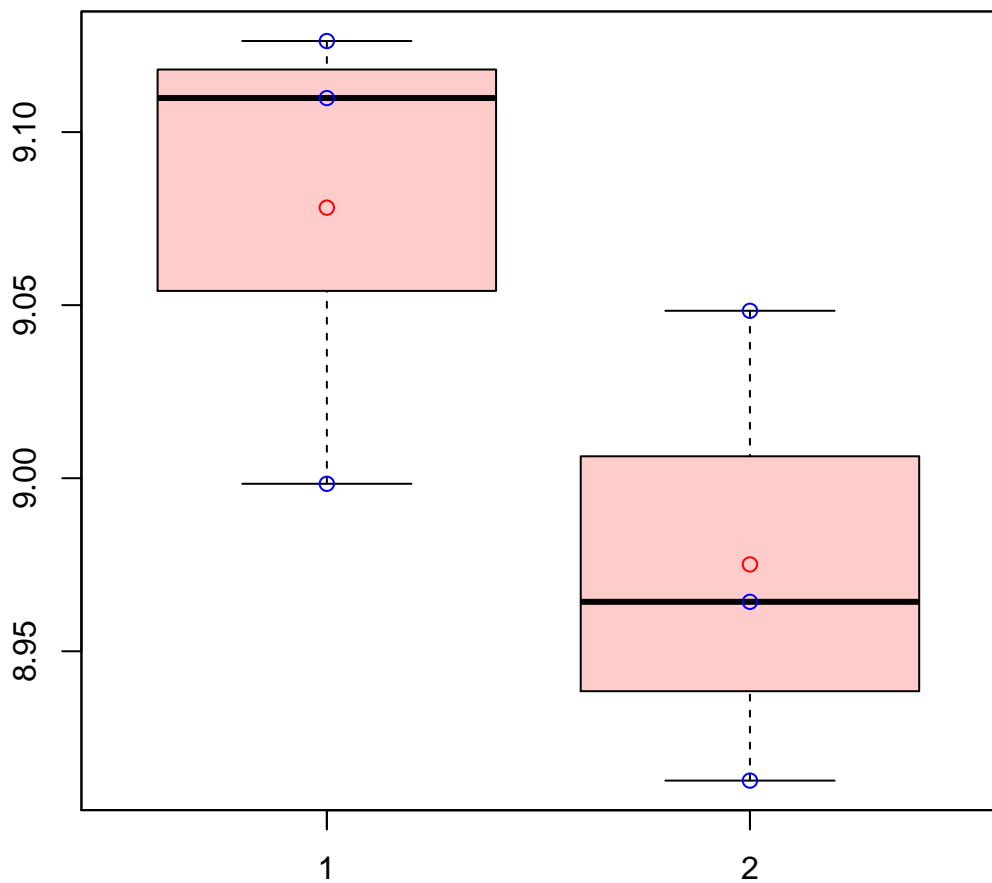

t-Test: p-value = 0.14

# CL1Contig9639|CL1Contig9639

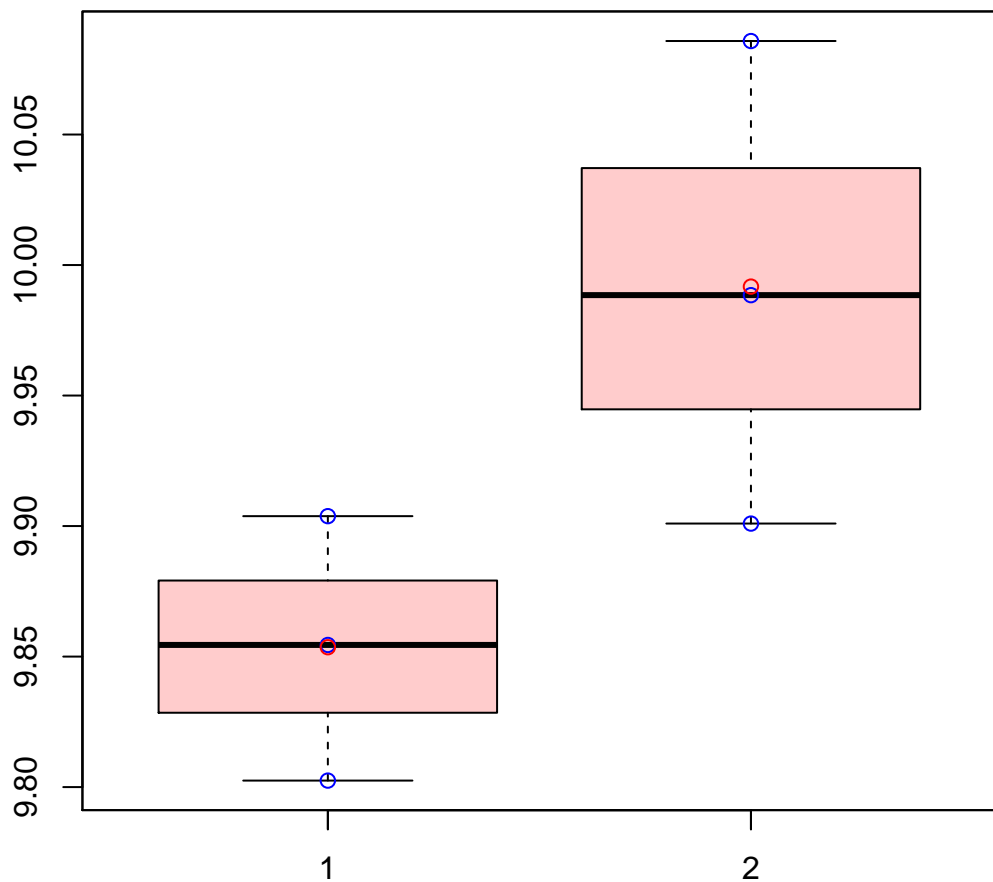

t-Test: p-value = 0.11

# CL1Contig9677|CL1Contig9677

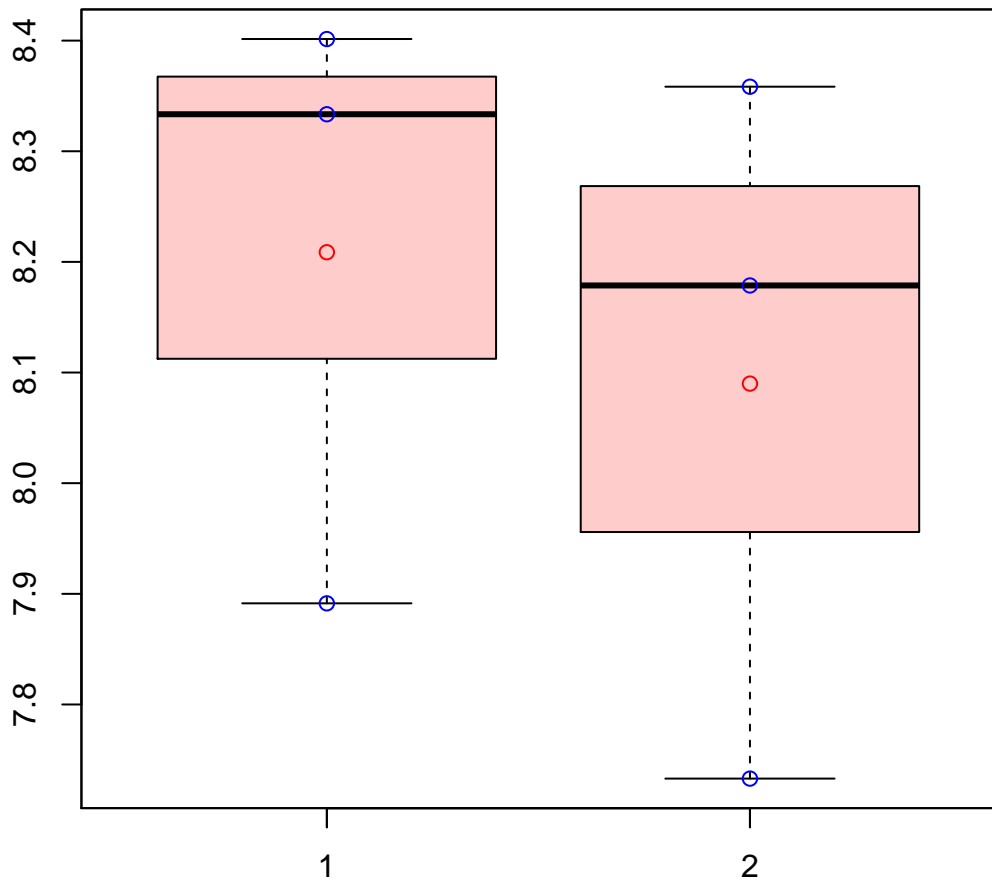

t-Test: p-value = 0.65

# CL1Contig9703|CL1Contig9703

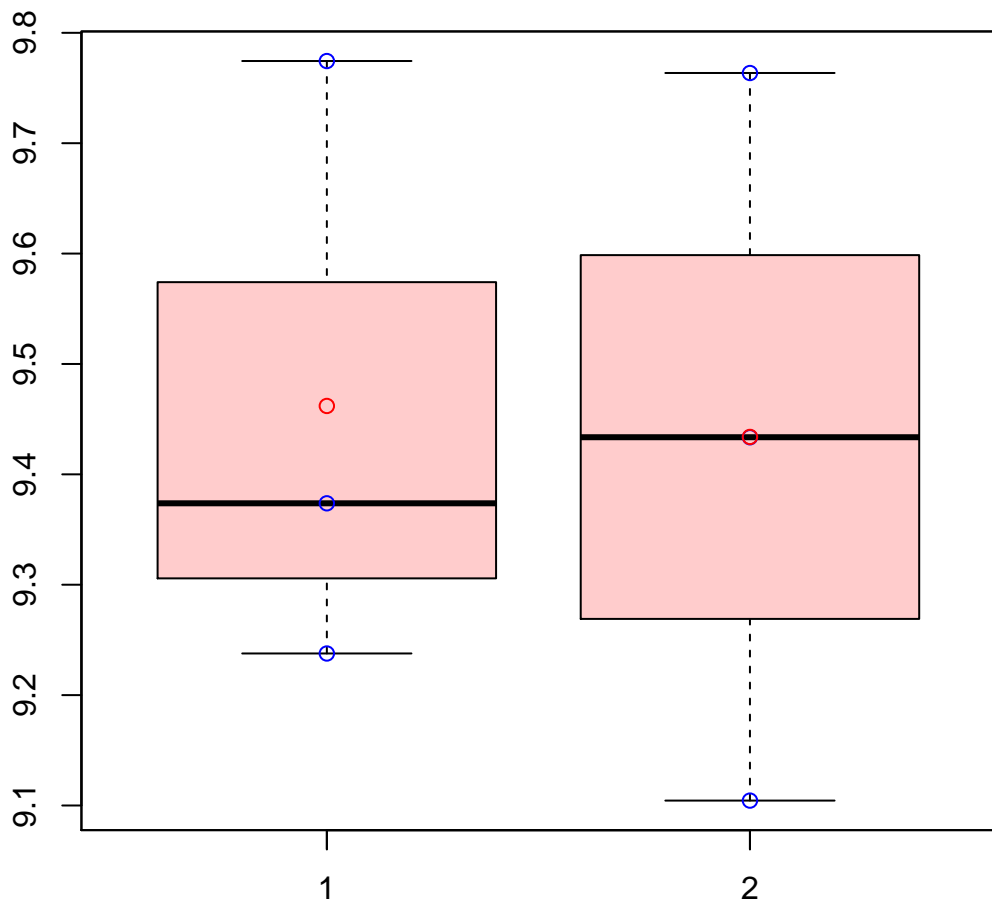

t-Test: p-value = 0.92

# CL1Contig9741|CL1Contig9741



t-Test: p-value = 0.32

# CL1Contig9799|CL1Contig9799

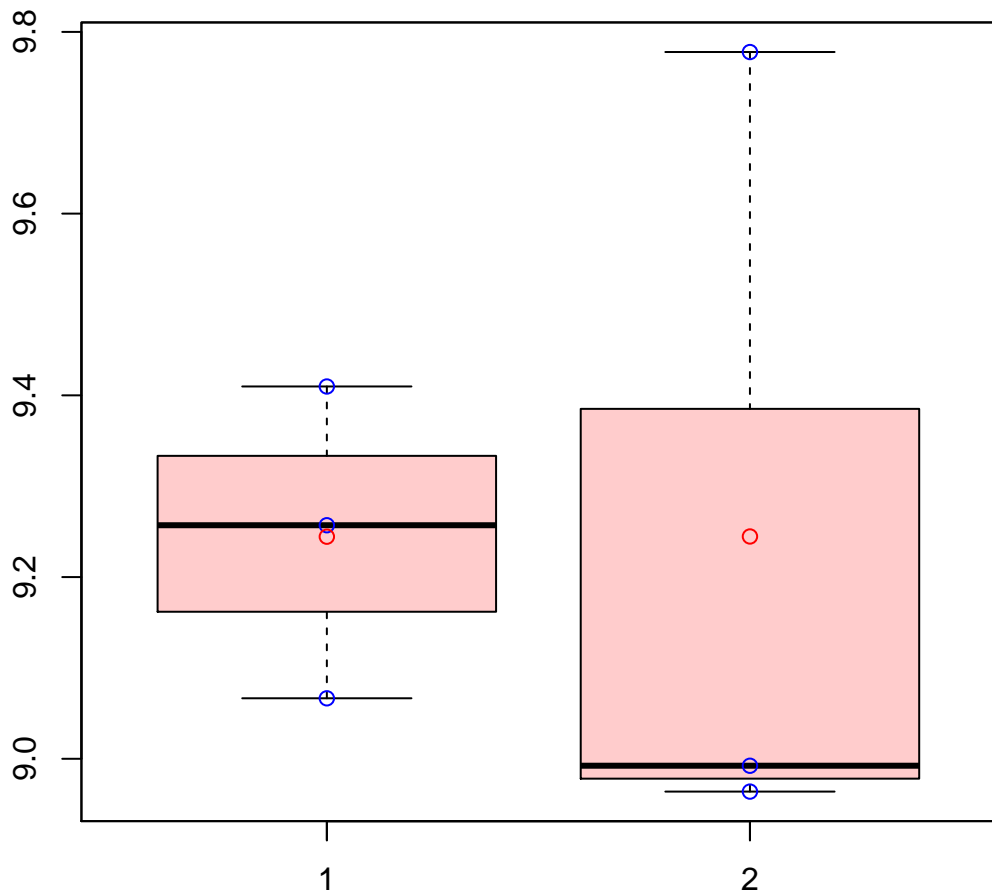

t-Test: p-value = 1

# CL1Contig9801|CL1Contig9801



t-Test: p-value = 0.75

# CL1Contig9810|CL1Contig9810

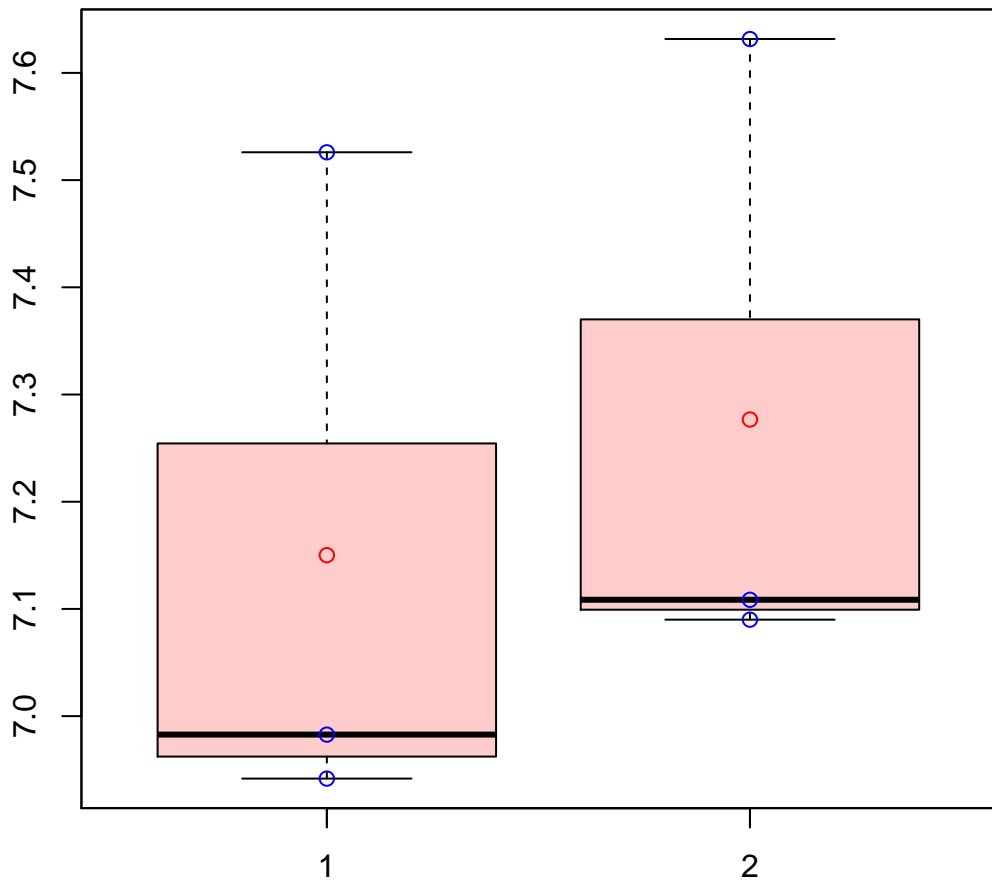

t-Test: p-value = 0.65



# CL1Contig987|CL1Contig987

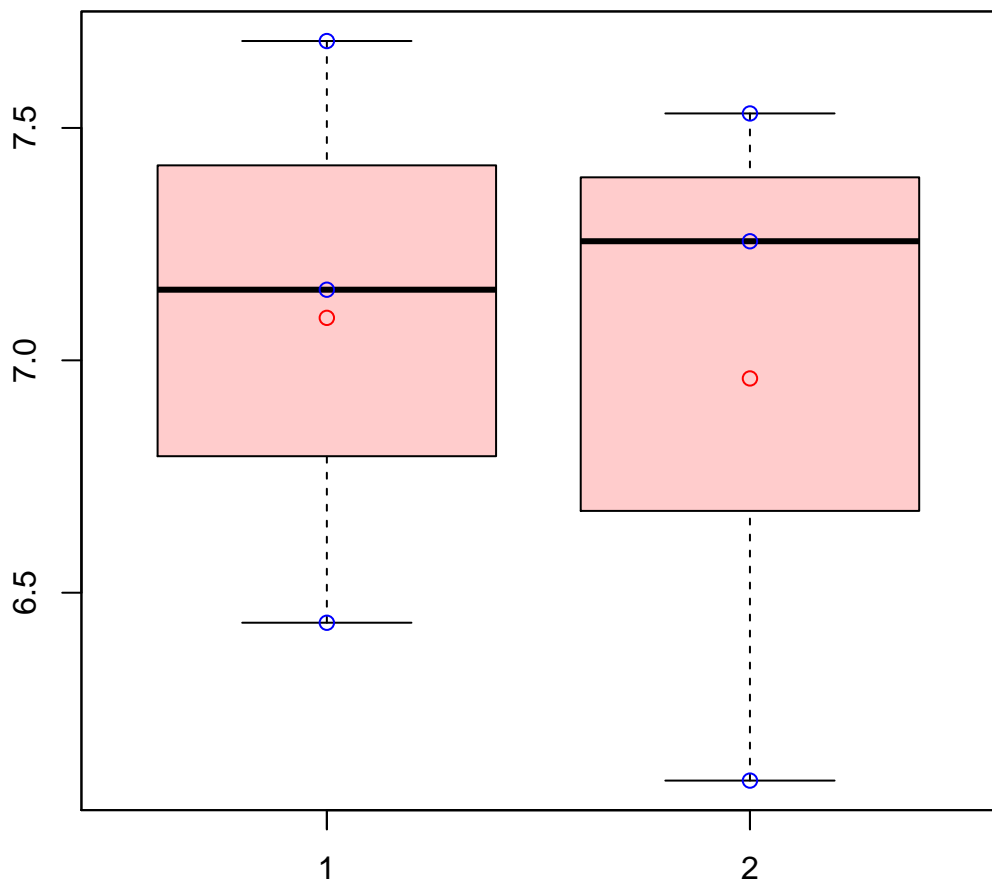

t-Test: p-value = 0.83

# CL1Contig9896|CL1Contig9896

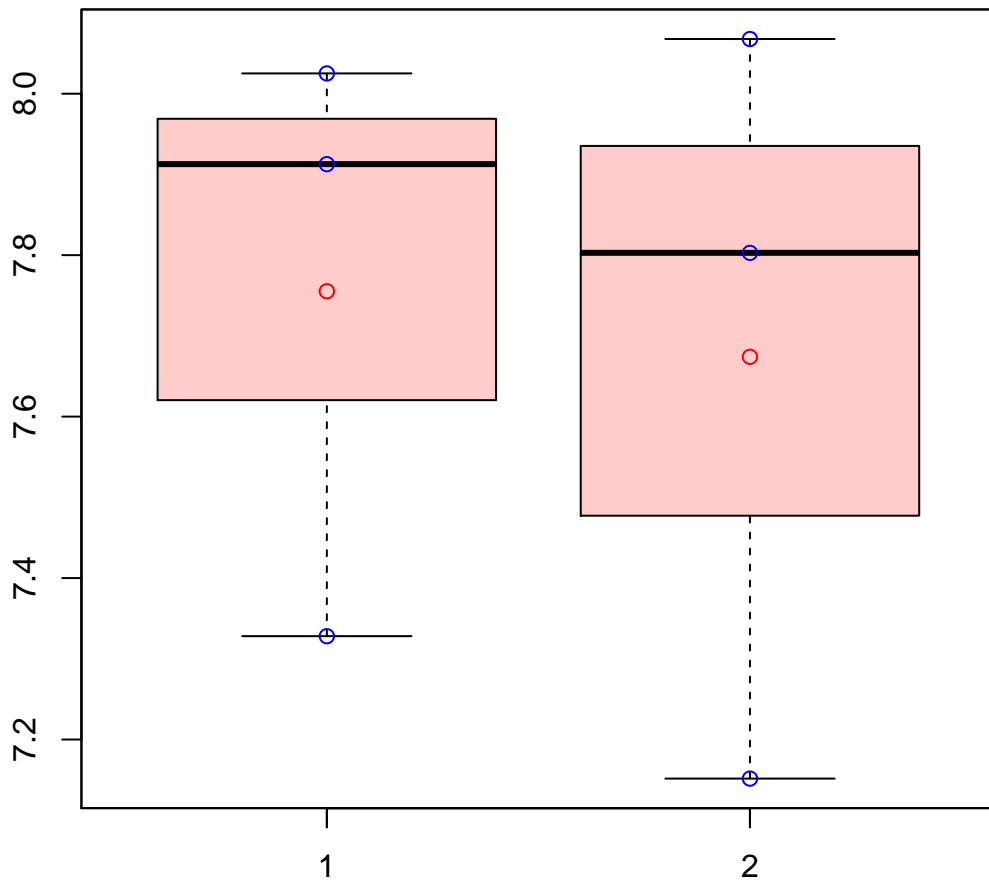

t-Test: p-value = 0.83

# CL1Contig990|CL1Contig990

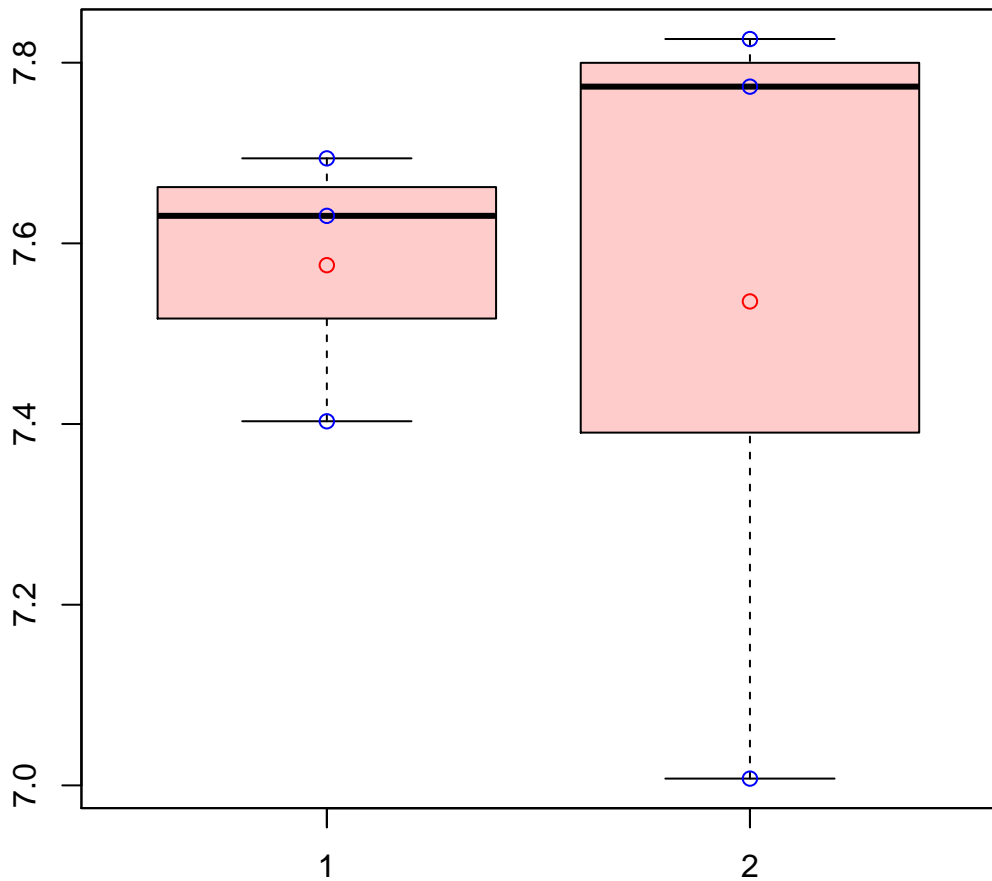

t-Test: p-value = 0.9

# CL1Contig991|CL1Contig991



t-Test: p-value = 0.56

# CL1Contig9949|CL1Contig9949

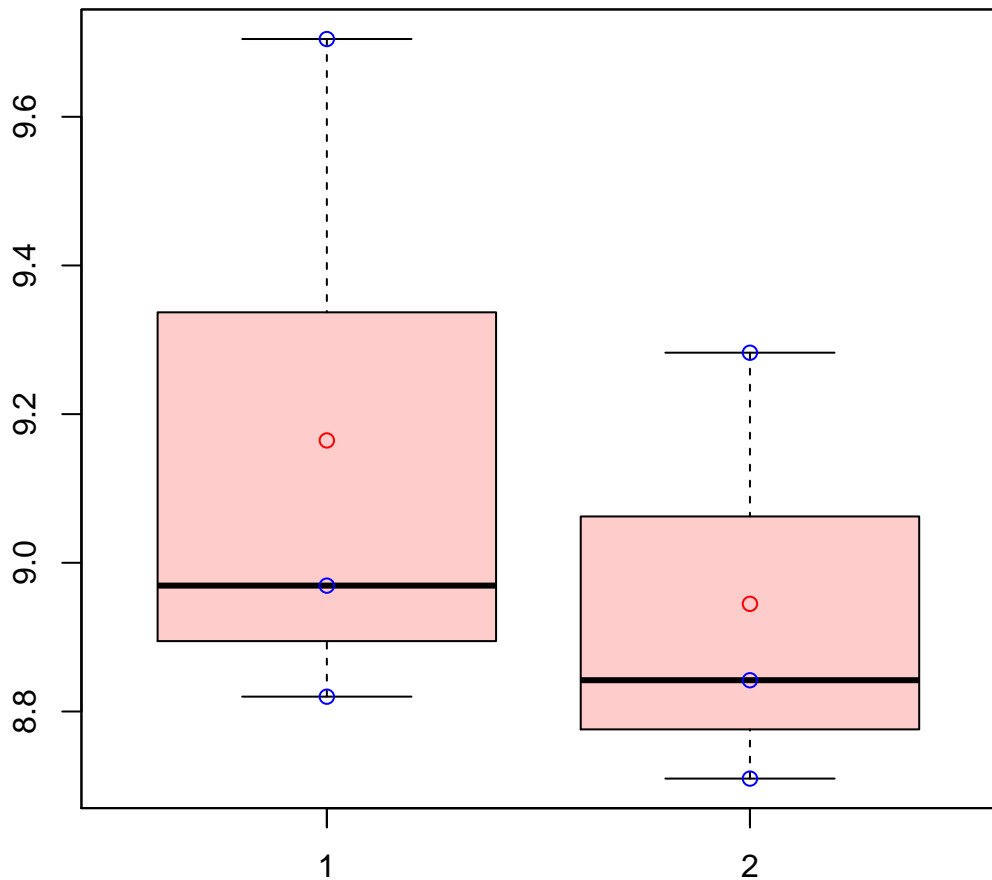

t-Test: p-value = 0.54

# CL1Contig9973|CL1Contig9973

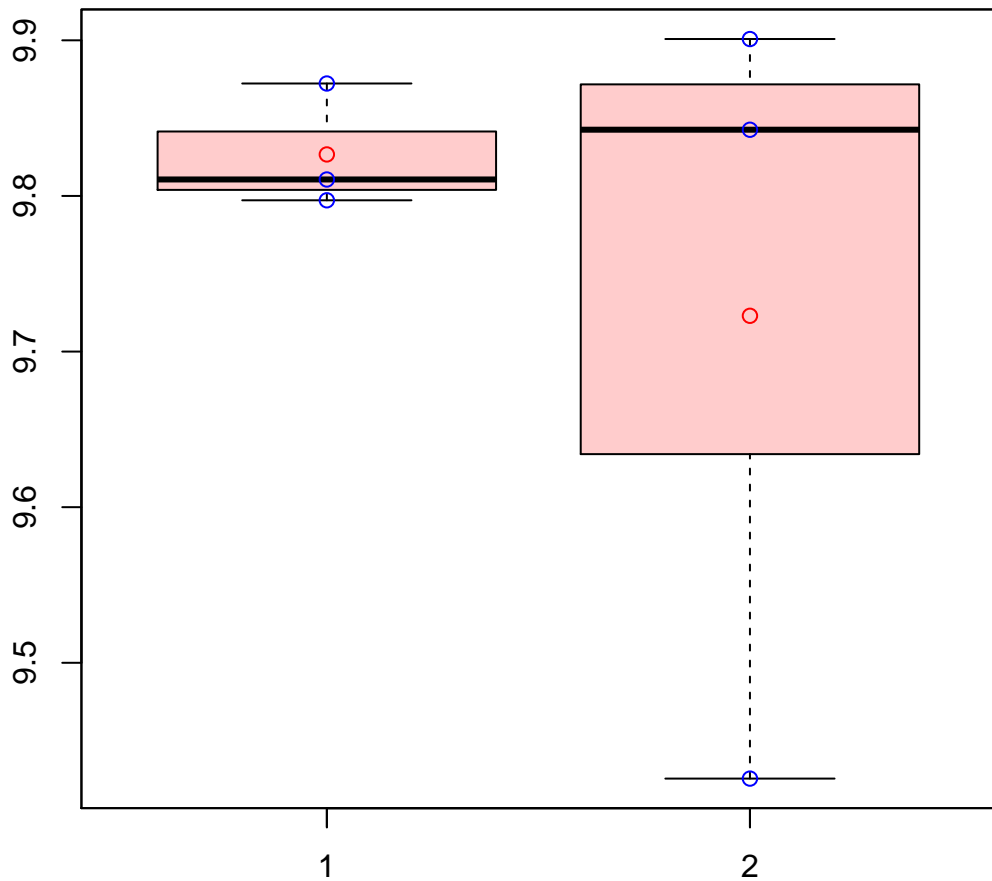

t-Test: p-value = 0.56

# CL1Contig9976|CL1Contig9976

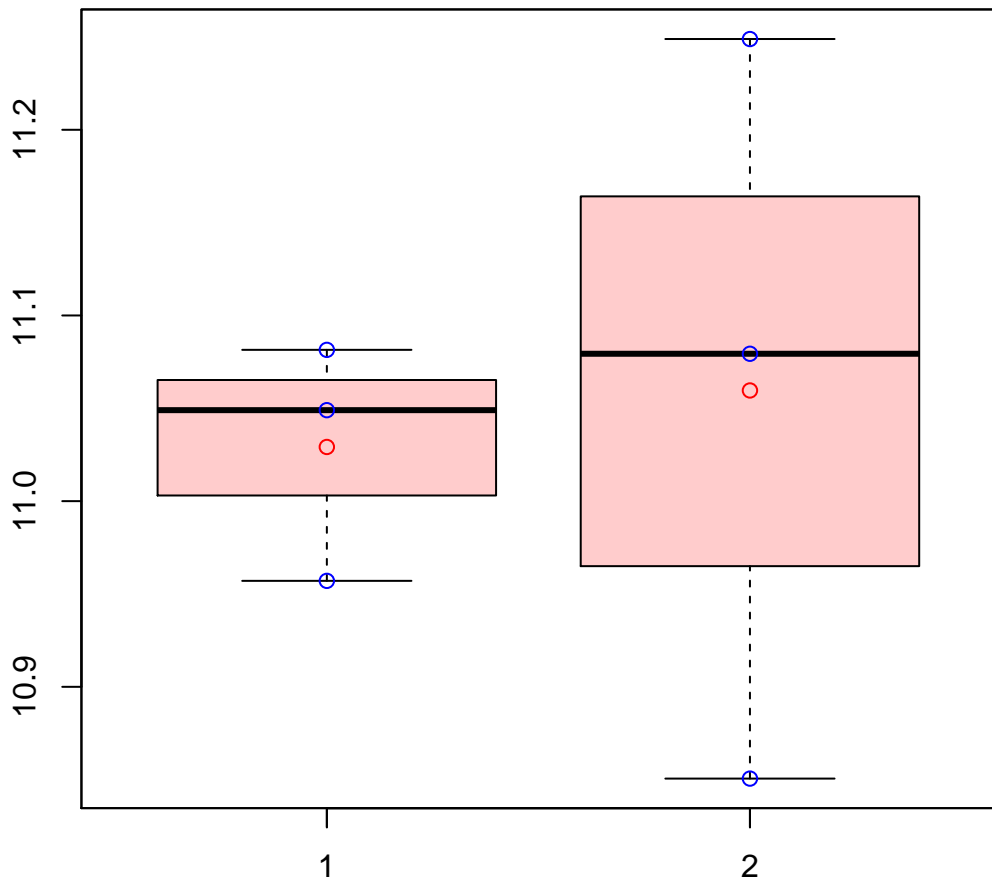

t-Test: p-value = 0.82

# CL2003Contig3|CL2003Contig3

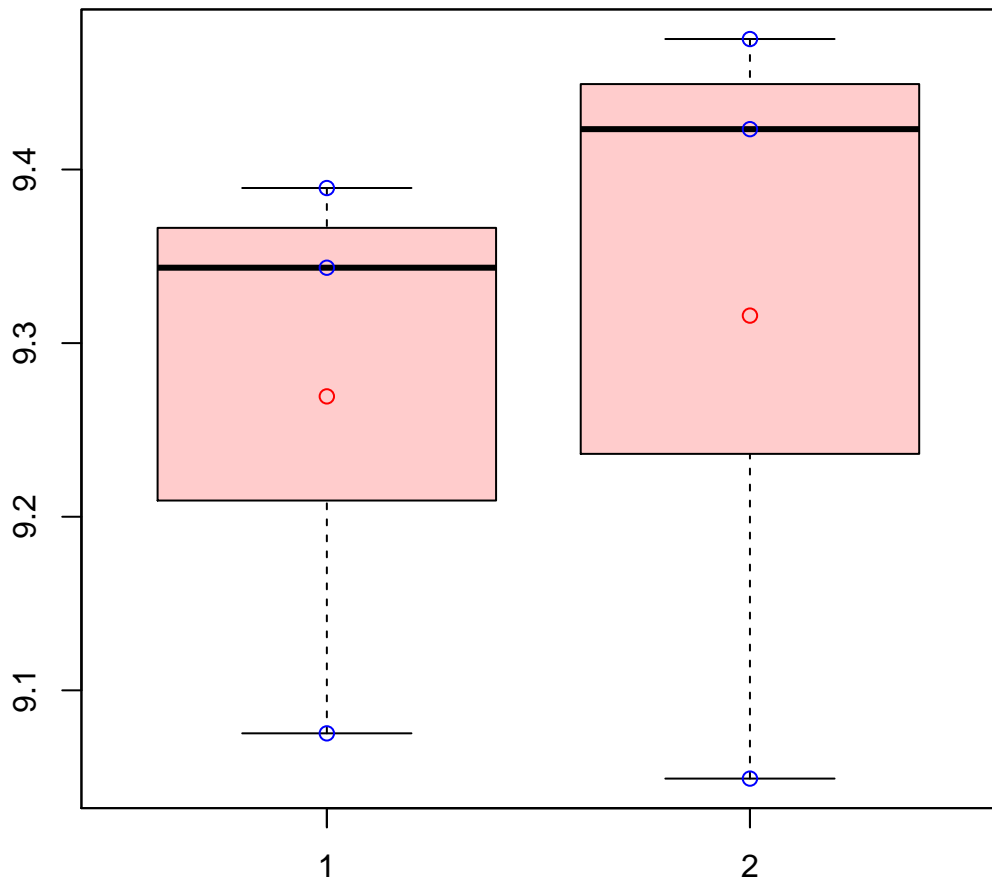

t-Test: p-value = 0.79



# CL2004Contig6|CL2004Contig6

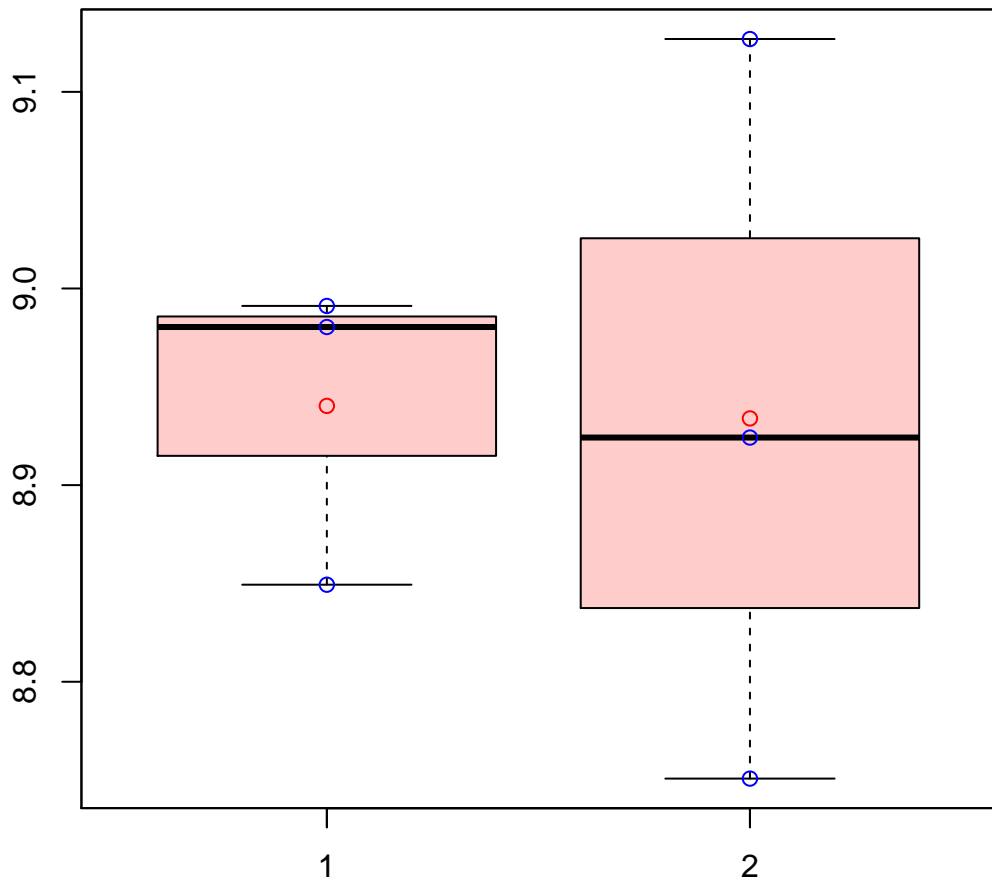

t-Test: p-value = 0.96

# CL2006Contig1|CL2006Contig1

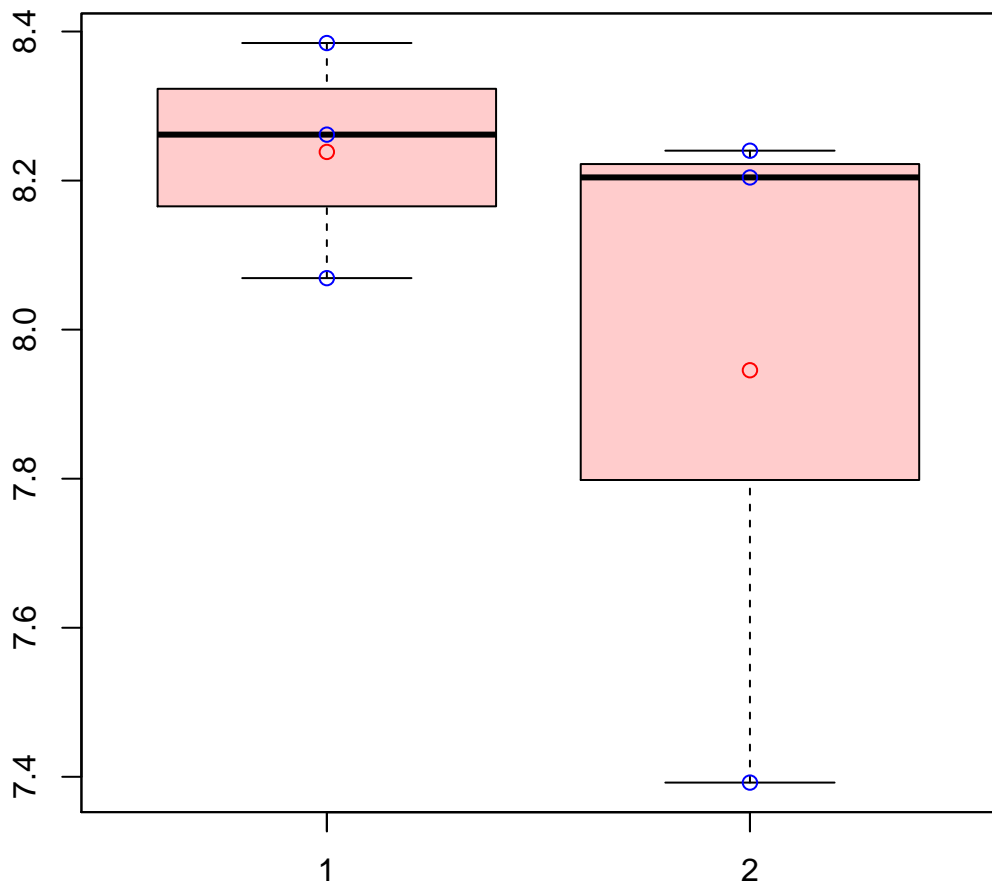

t-Test: p-value = 0.4

# CL2008Contig3|CL2008Contig3

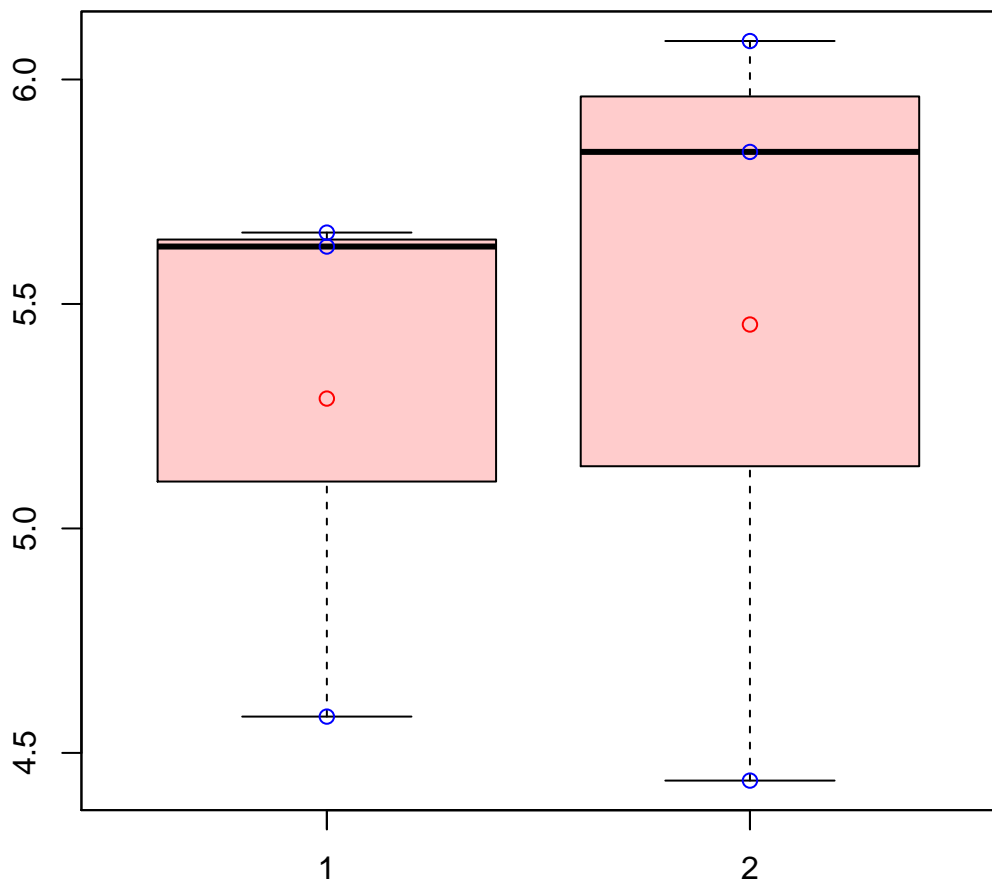

t-Test: p-value = 0.81

# CL200Contig4|CL200Contig4

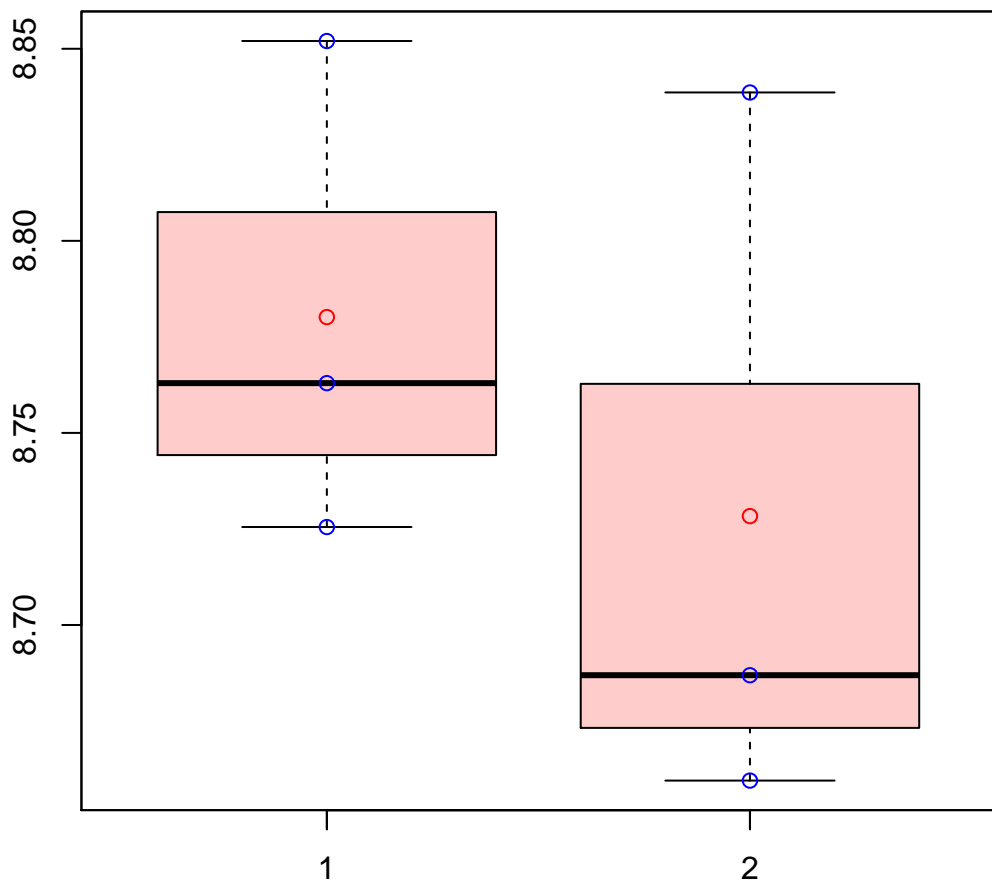

t-Test: p-value = 0.49

# CL200Contig6|CL200Contig6

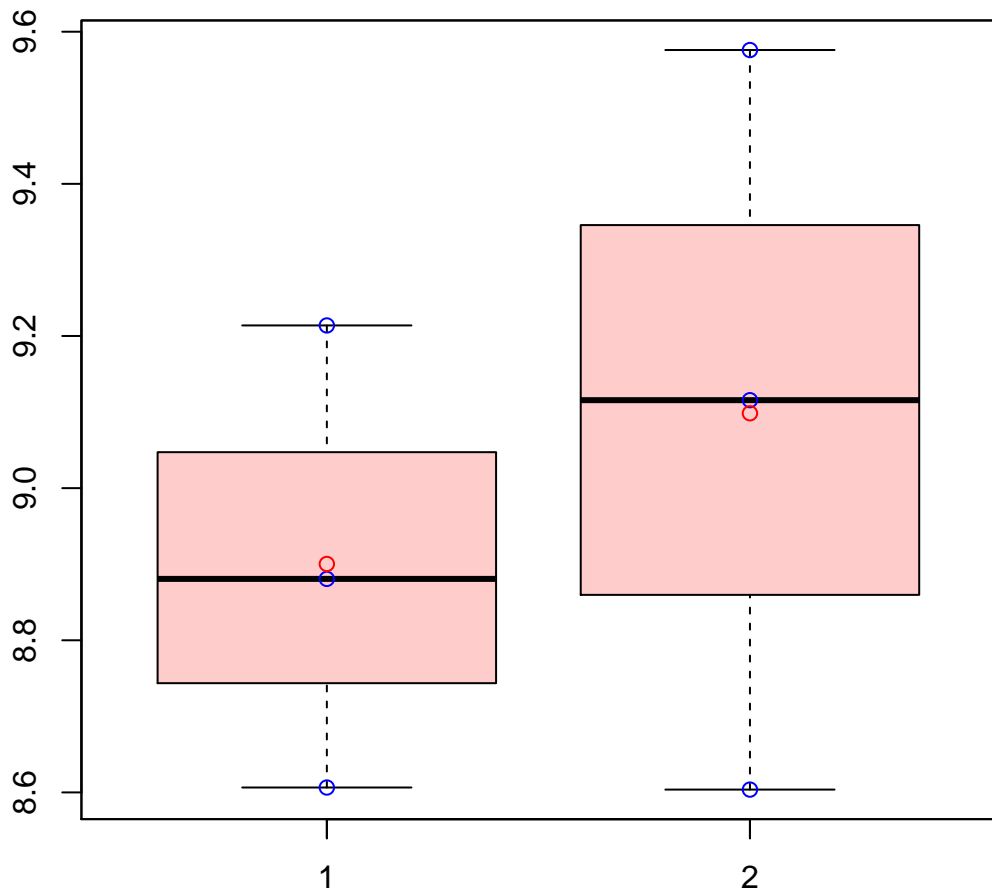

t-Test: p-value = 0.59

# CL200Contig7|CL200Contig7

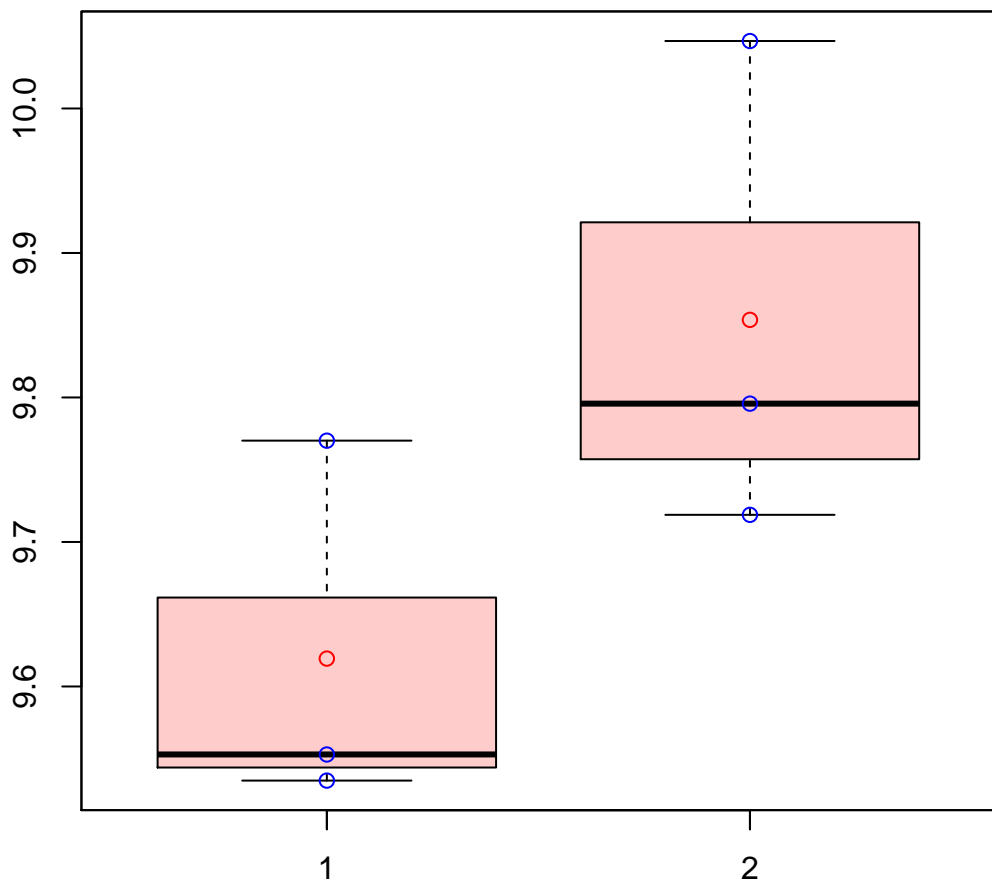

t-Test: p-value = 0.14

## CL2013Contig2|CL2013Contig2

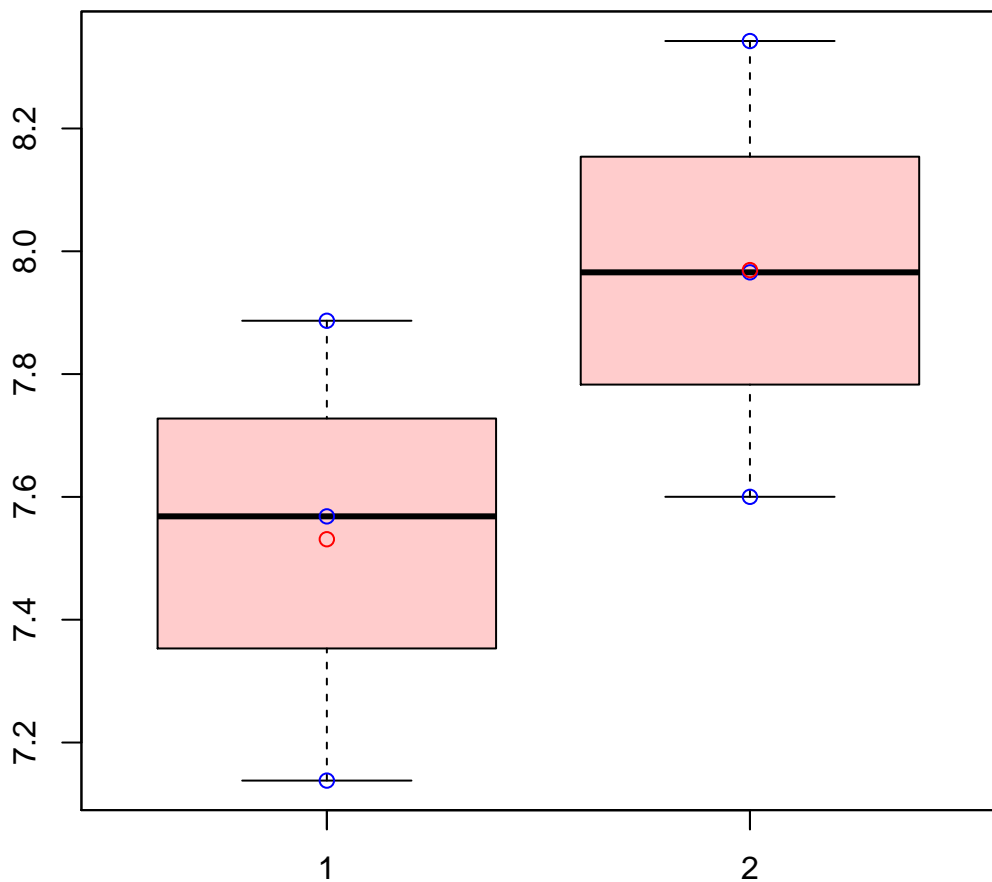

t-Test: p-value = 0.22

# CL2014Contig4|CL2014Contig4

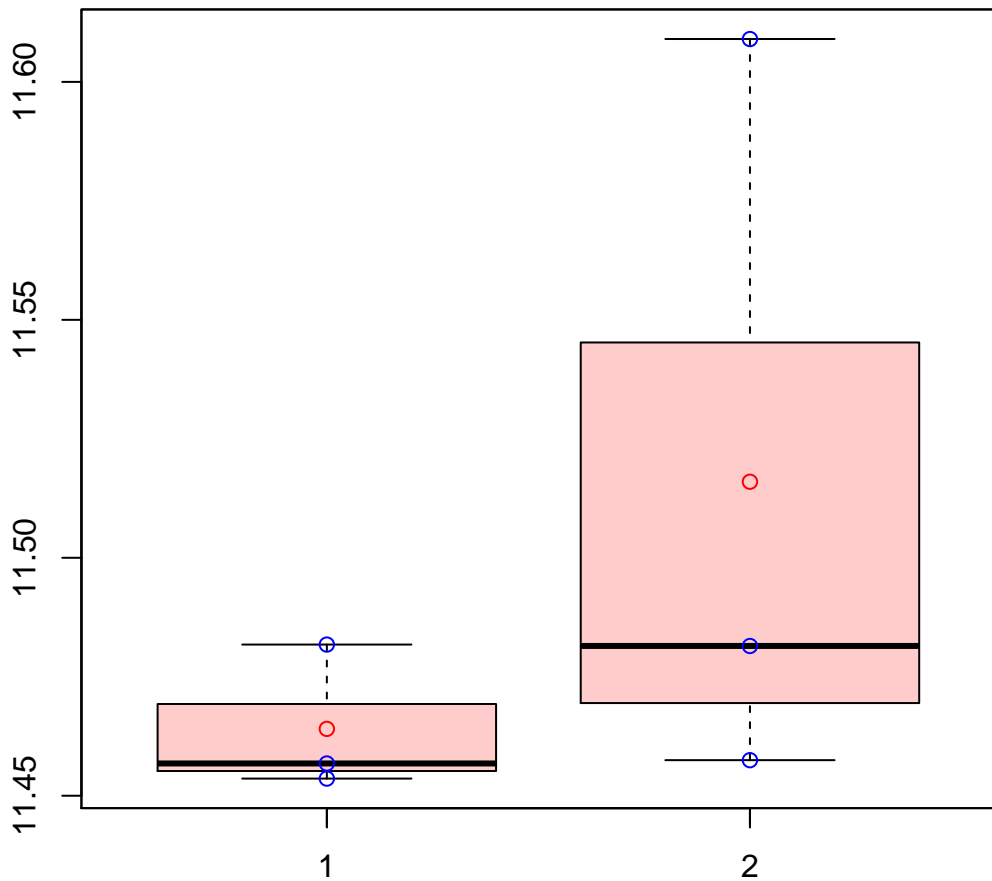

t-Test: p-value = 0.38



# CL2016Contig2|CL2016Contig2

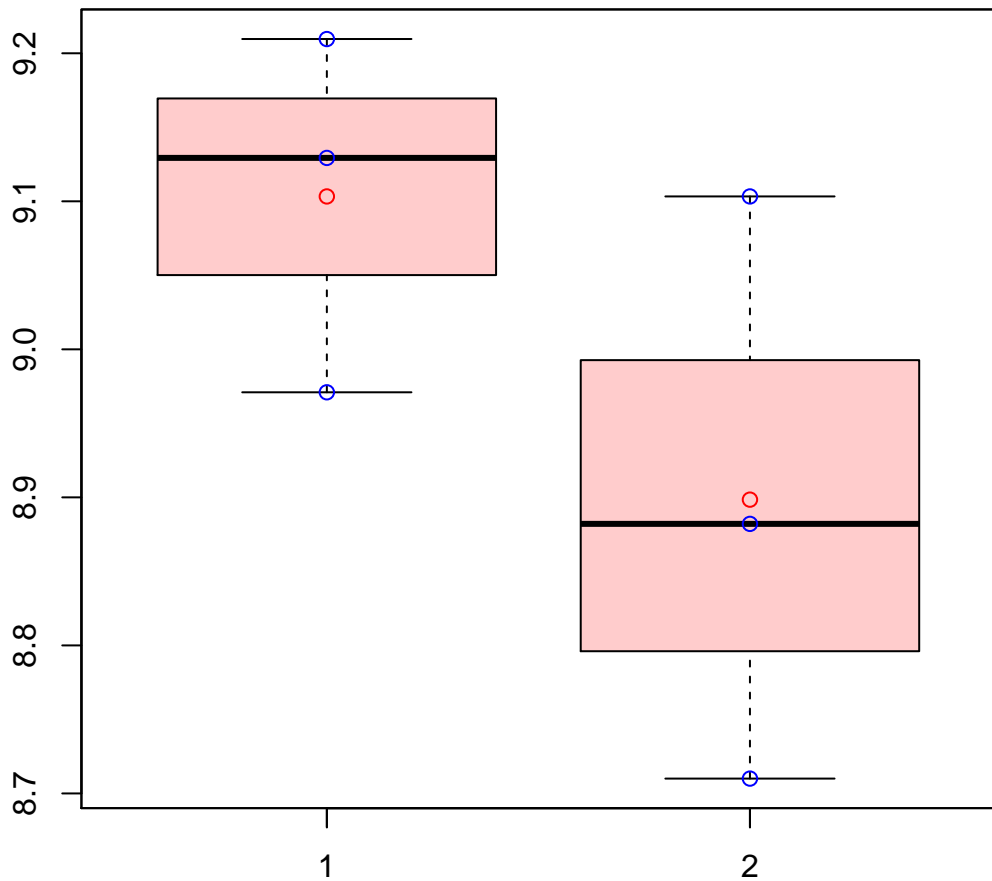

t-Test: p-value = 0.21

# CL20178Contig1|CL20178Contig1

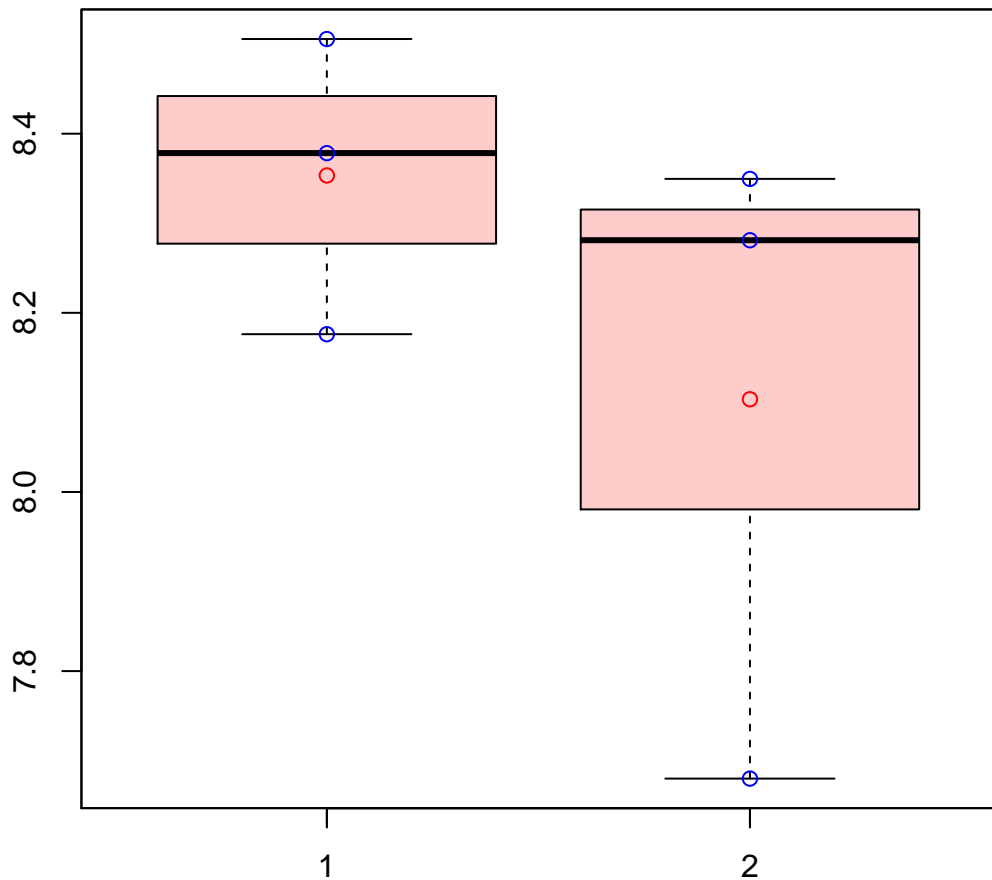

t-Test: p-value = 0.37

# CL2017Contig1|CL2017Contig1

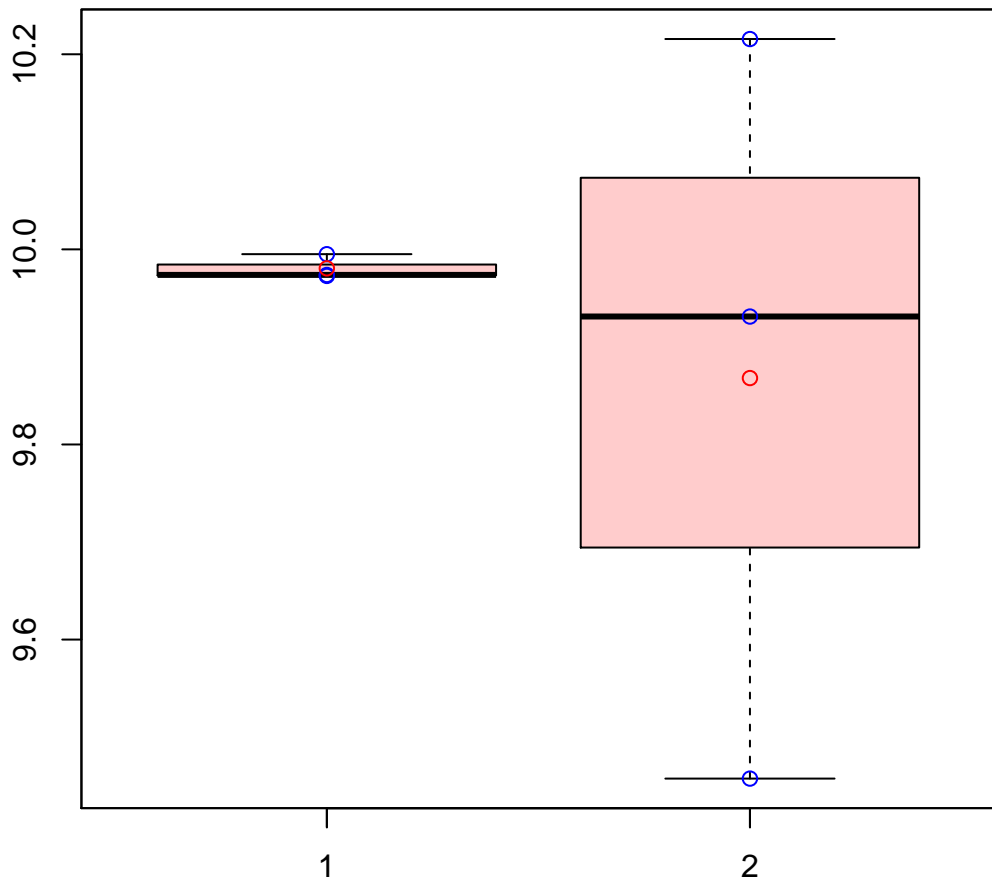

t-Test: p-value = 0.66

# CL2017Contig4|CL2017Contig4

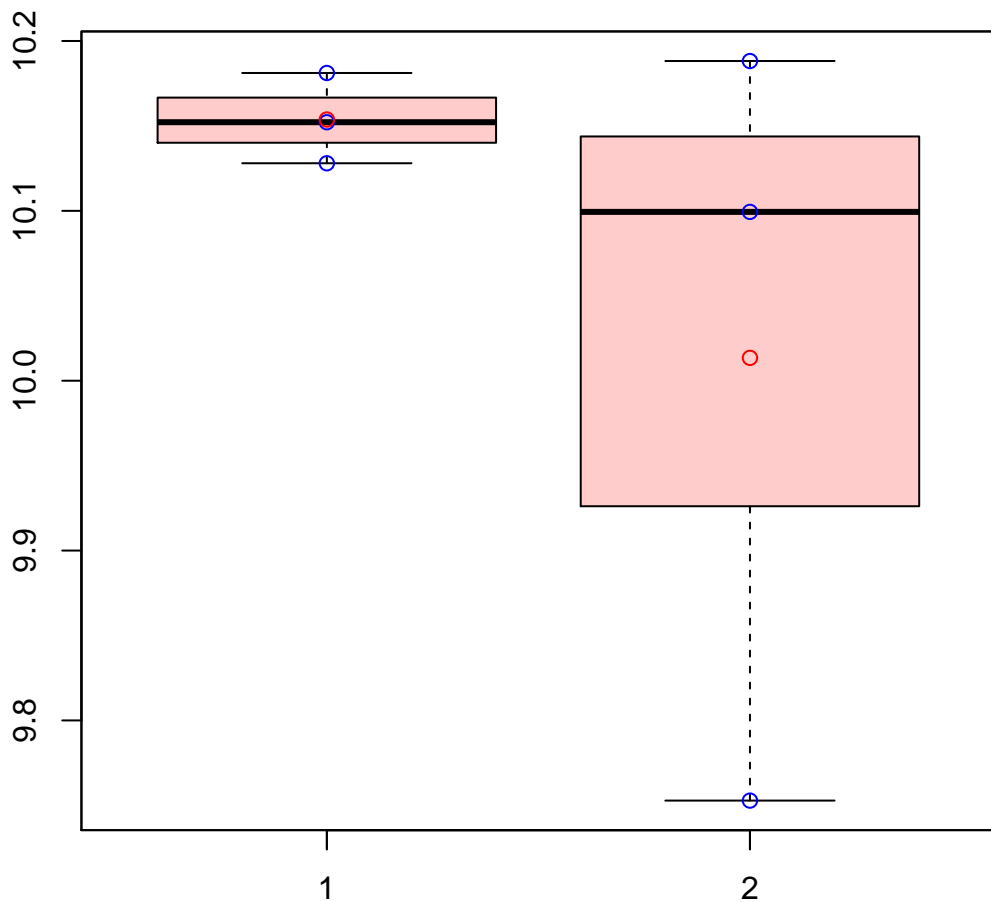

t-Test: p-value = 0.4

# CL201Contig7|CL201Contig7

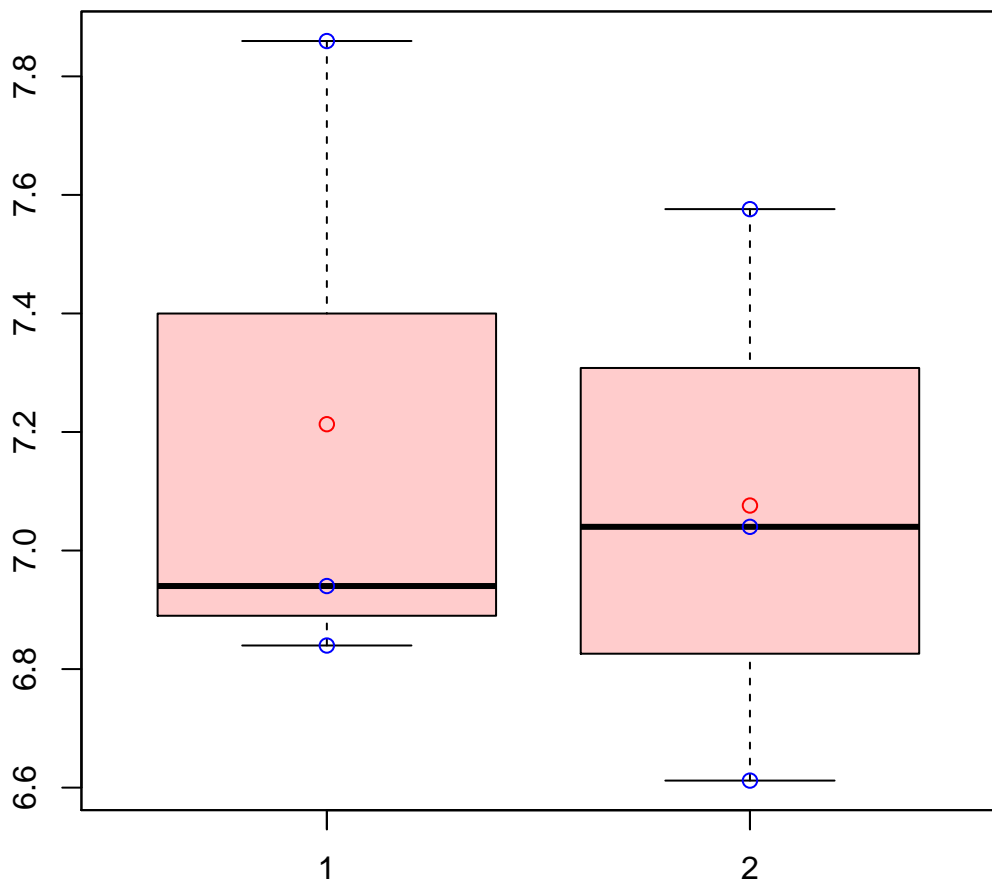

t-Test: p-value = 0.76

# CL2023Contig1|CL2023Contig1

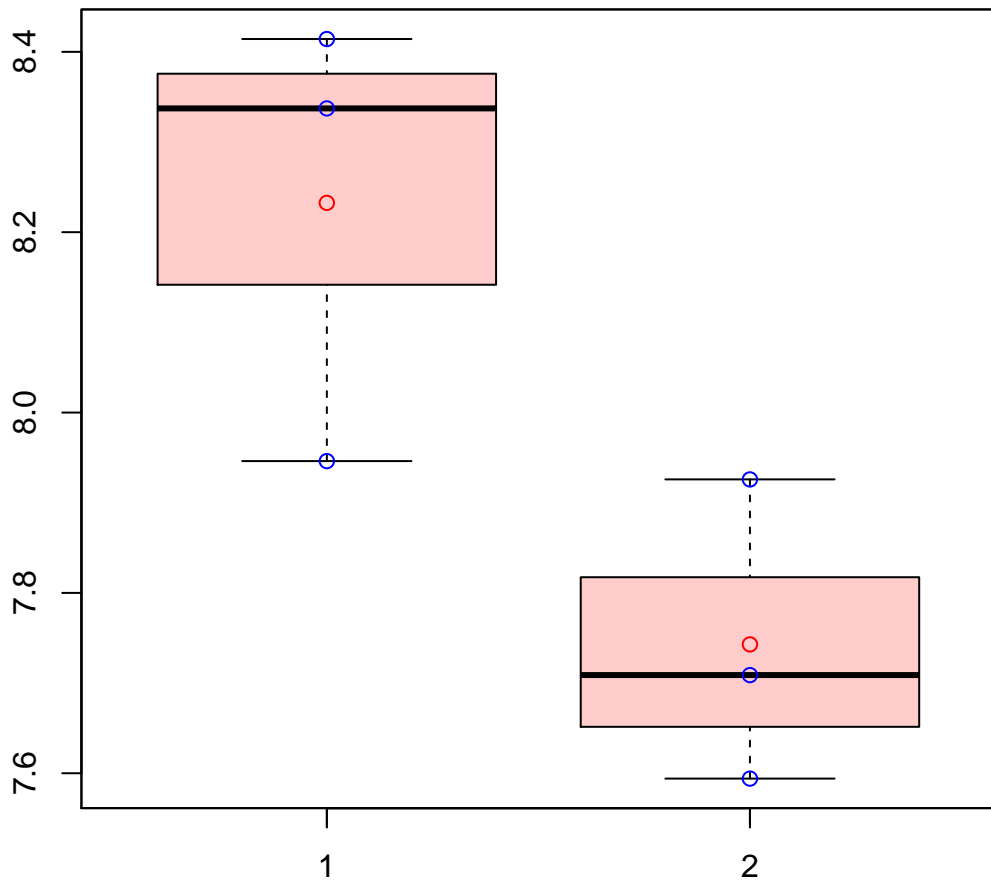

t-Test: p-value = 0.06

# CL2026Contig3|CL2026Contig3

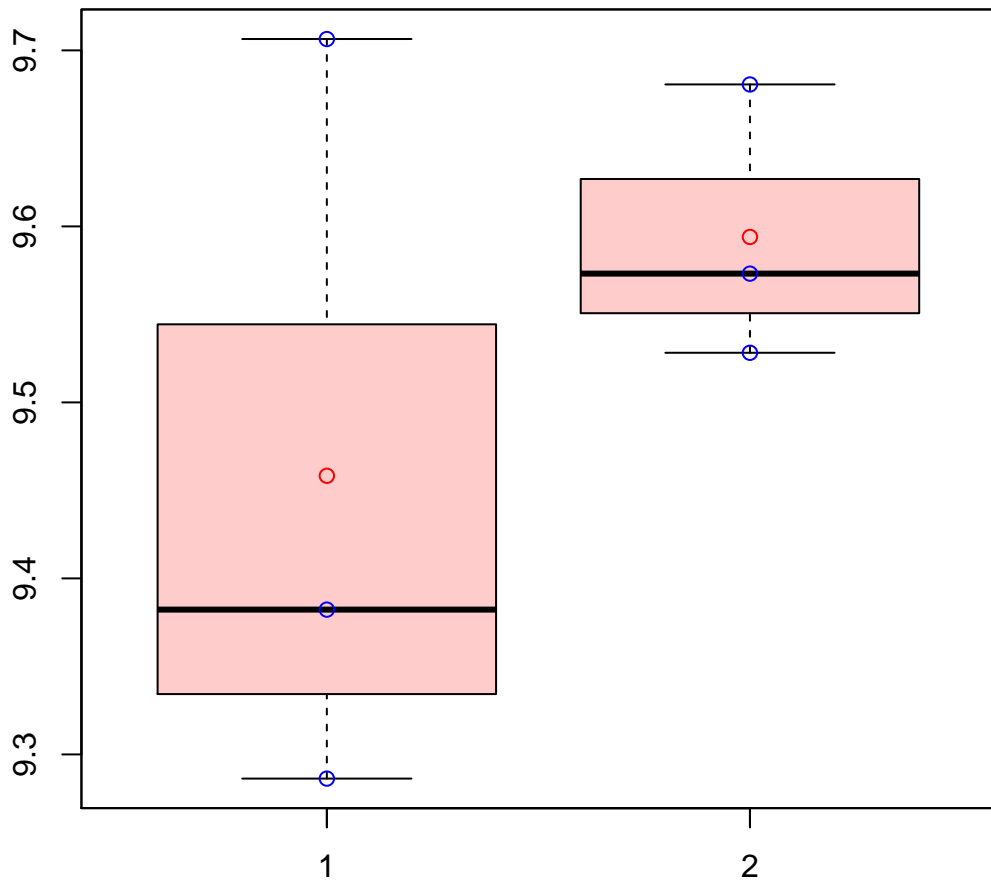

t-Test: p-value = 0.4

# CL2026Contig5|CL2026Contig5

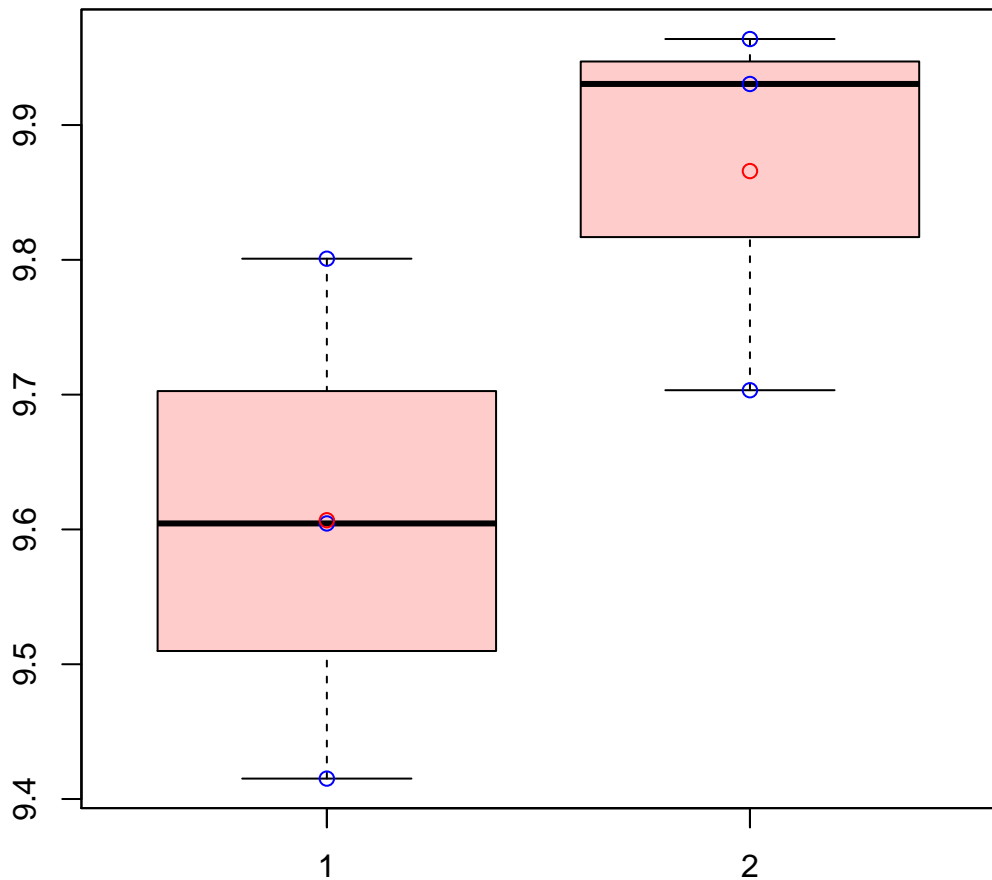

t-Test: p-value = 0.14



# CL2026Contig8|CL2026Contig8

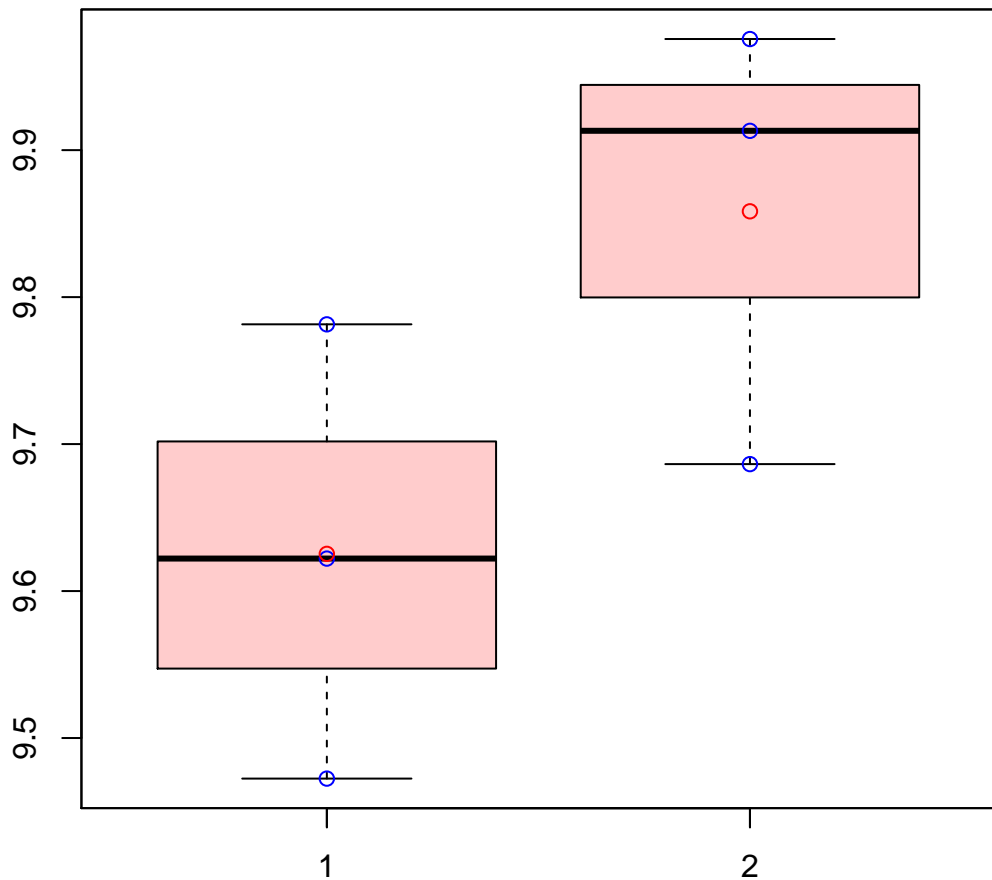

t-Test: p-value = 0.14

# CL2026Contig9|CL2026Contig9



t-Test: p-value = 0.14

# CL20307Contig1|CL20307Contig1

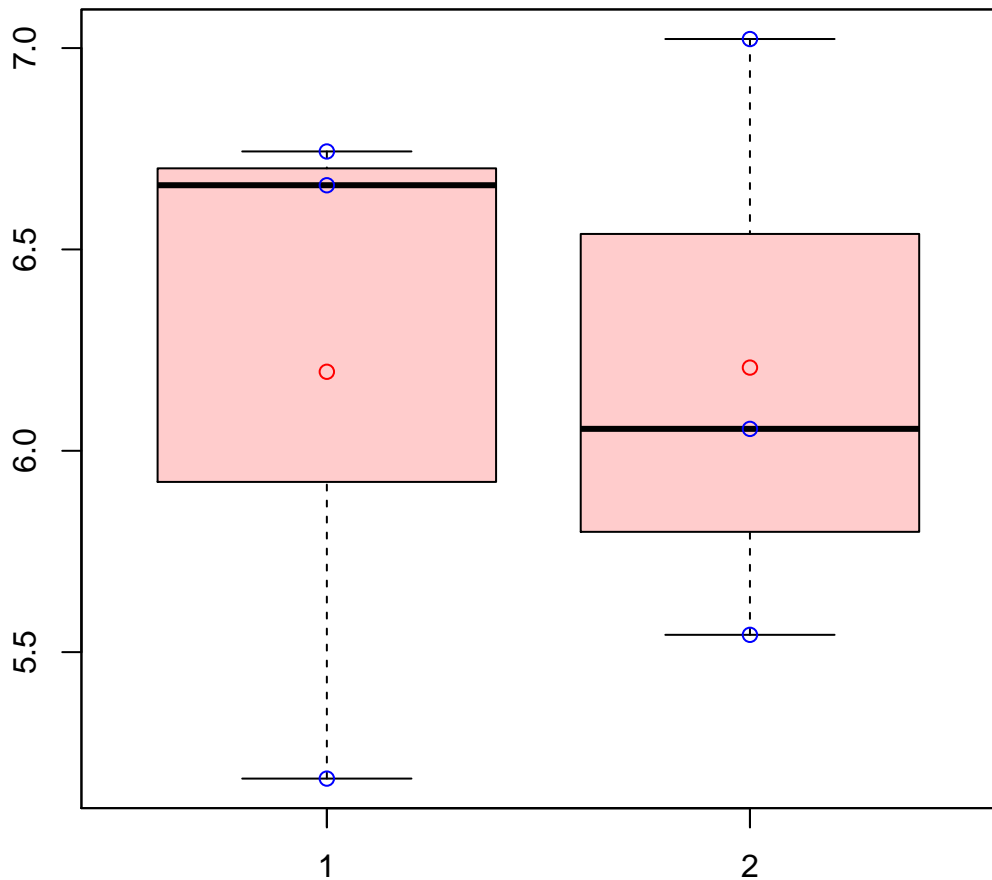

t-Test: p-value = 0.99

# CL20310Contig1|CL20310Contig1

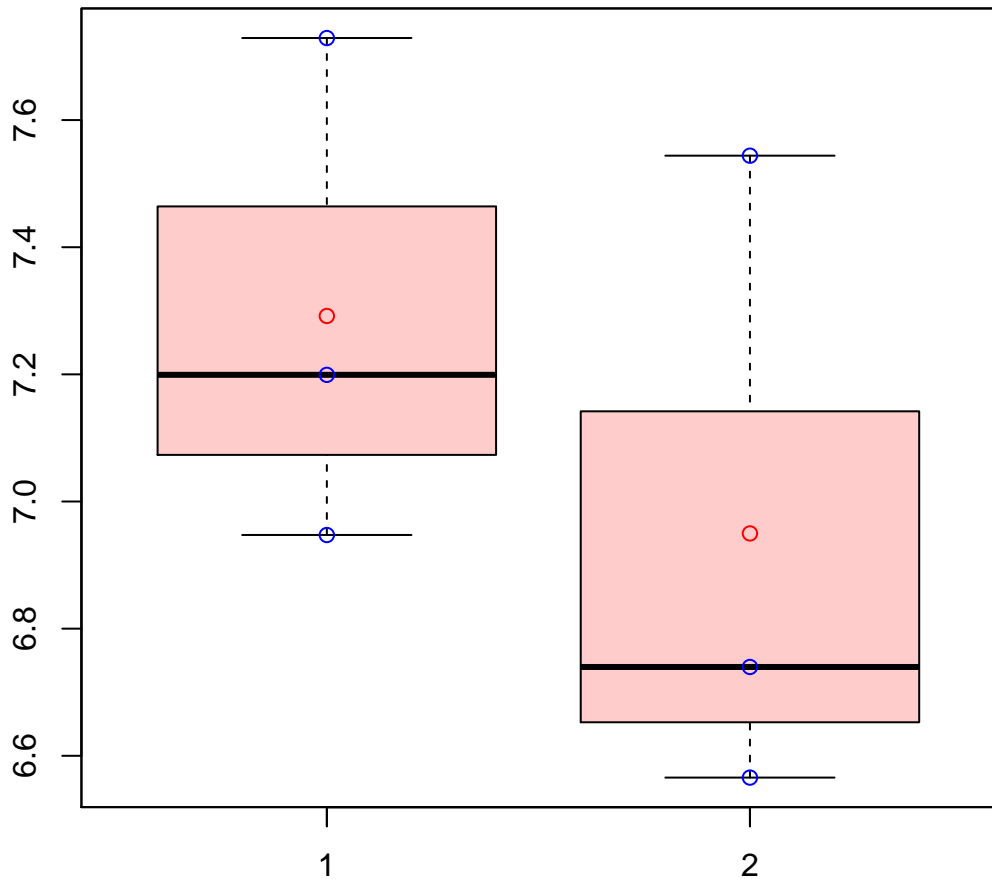

t-Test: p-value = 0.42

# CL2031Contig4|CL2031Contig4

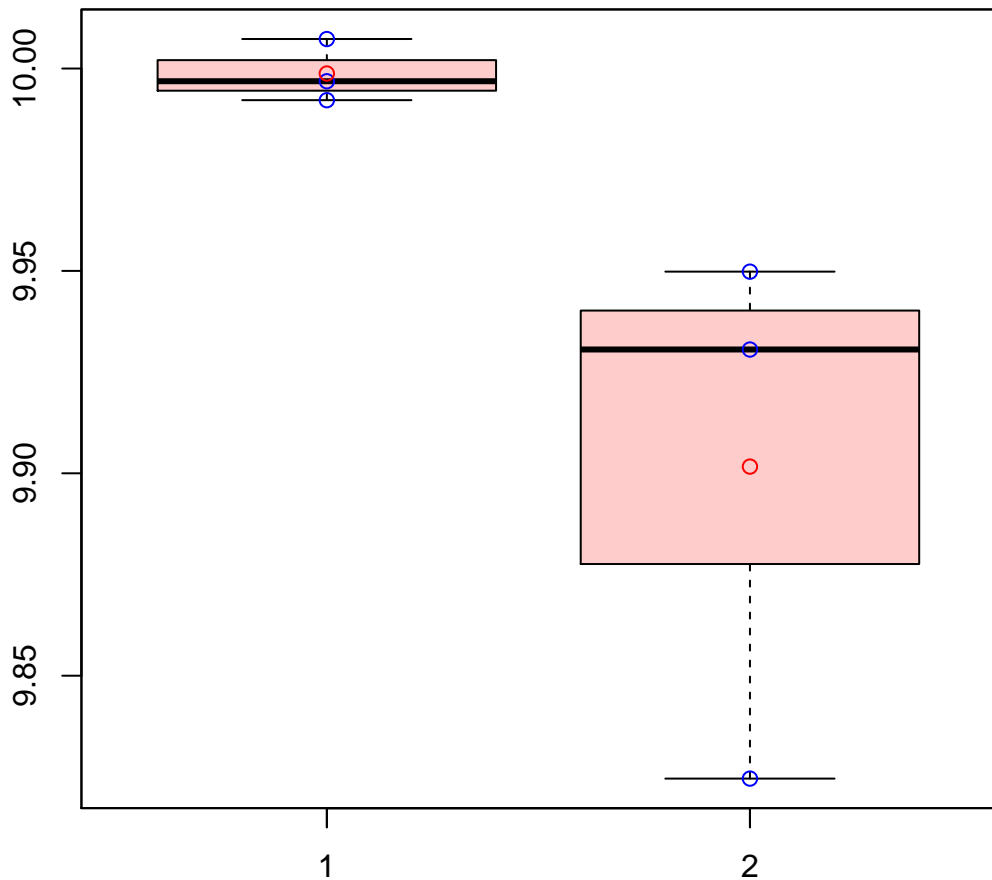

t-Test: p-value = 0.13

# CL2031Contig5|CL2031Contig5

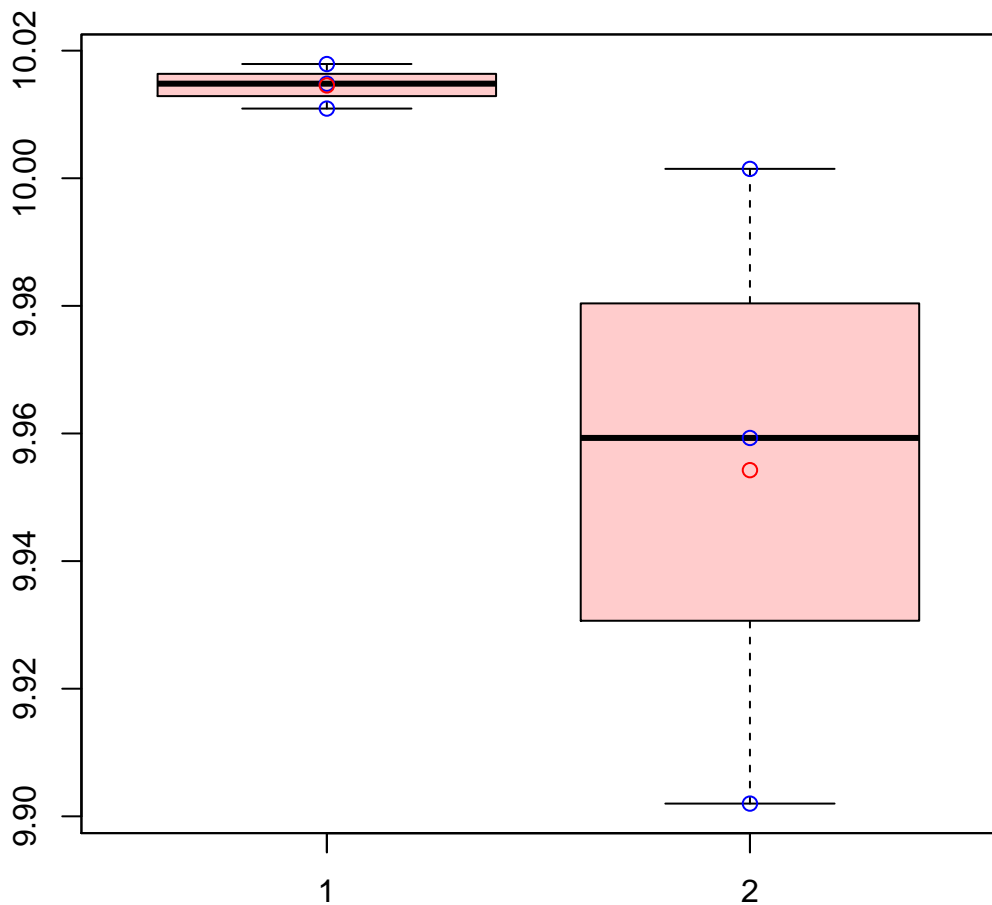

t-Test: p-value = 0.17

# CL2031Contig6|CL2031Contig6

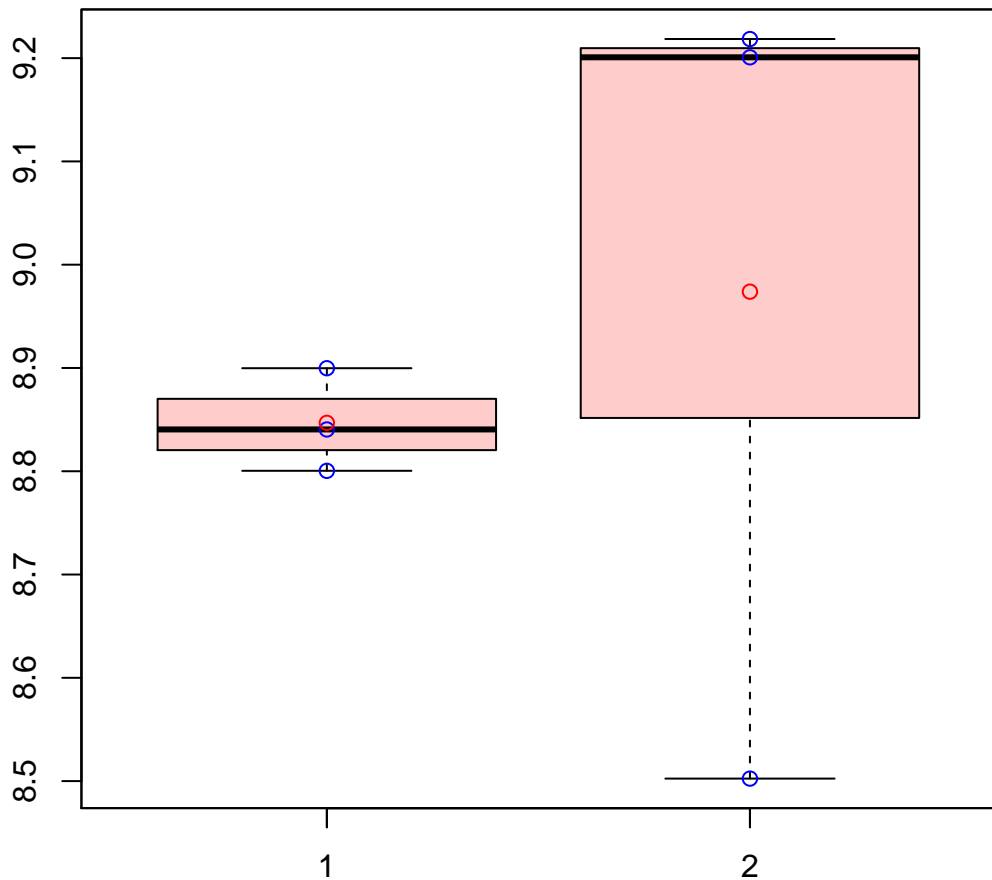

t-Test: p-value = 0.64

# CL2032Contig1|CL2032Contig1

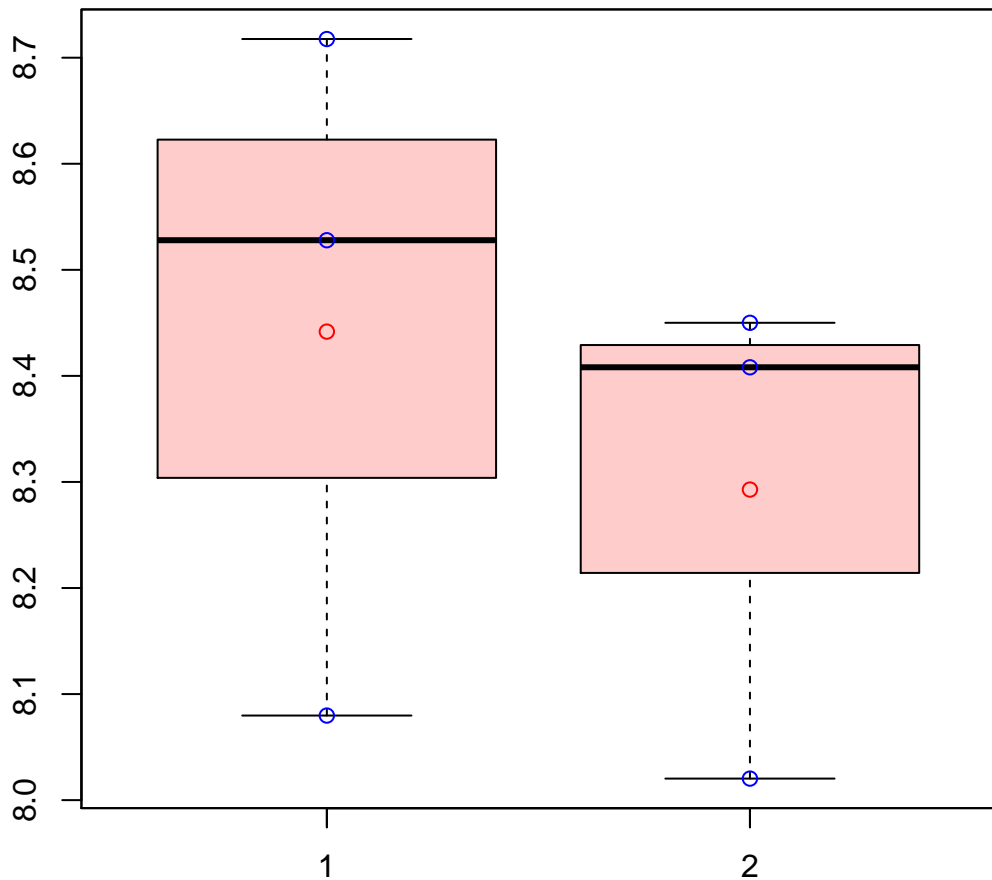

t-Test: p-value = 0.56



# CL2033Contig4|CL2033Contig4

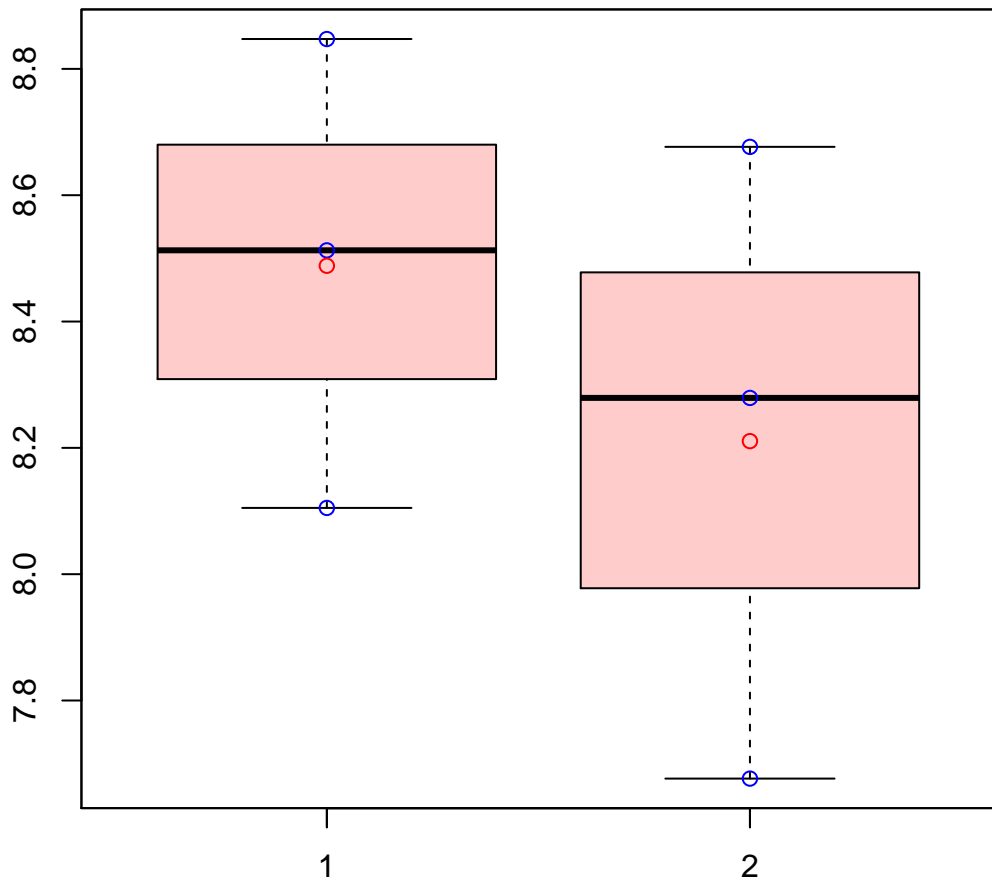

t-Test: p-value = 0.49

# CL2033Contig5|CL2033Contig5

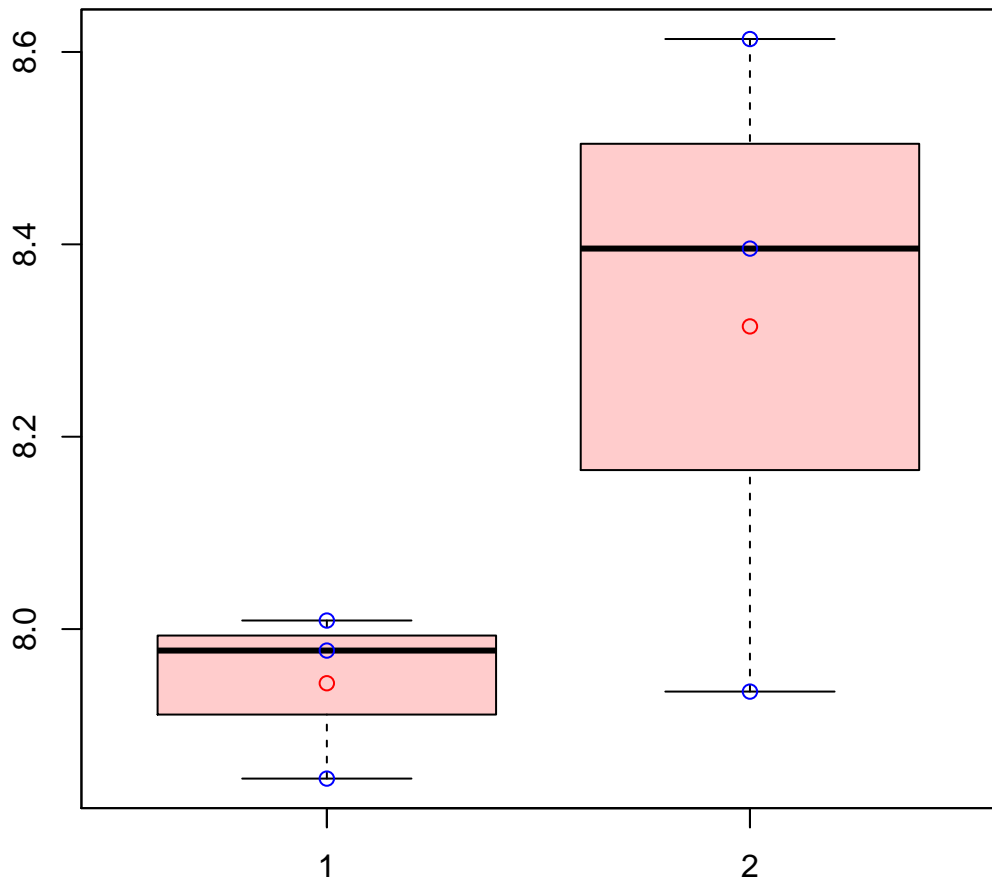

t-Test: p-value = 0.2

# CL2034Contig1|CL2034Contig1

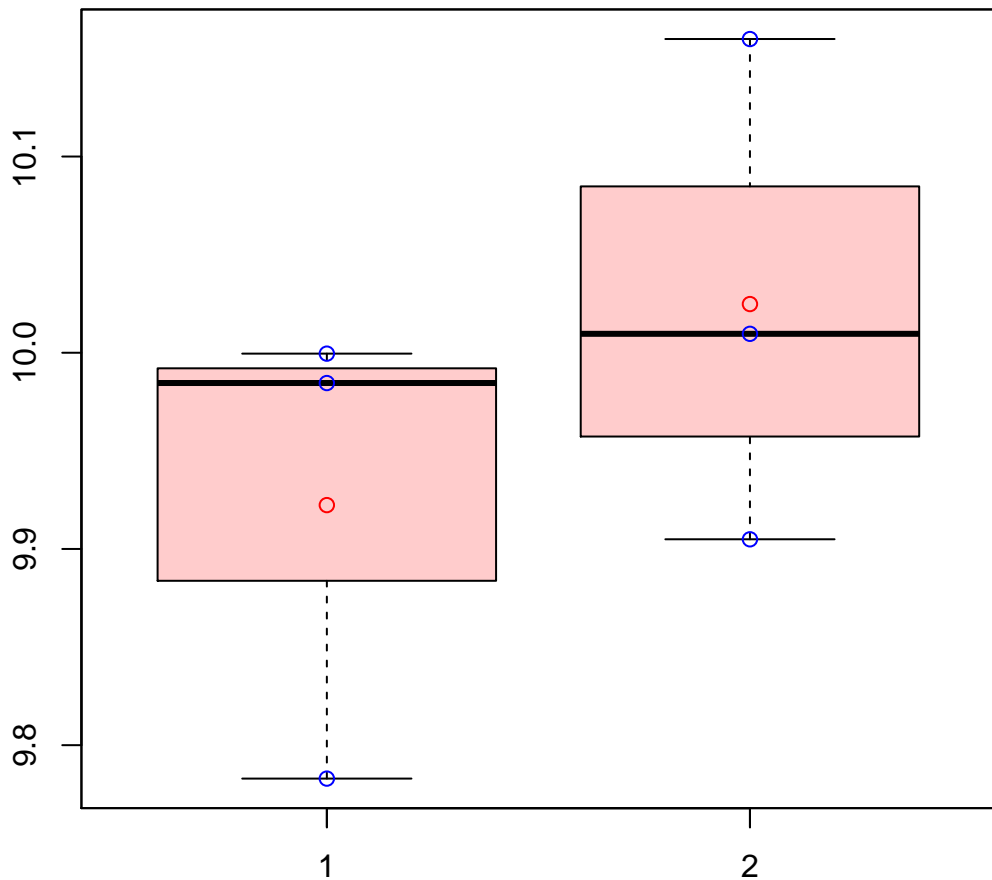

t-Test: p-value = 0.37

# CL2037Contig6|CL2037Contig6

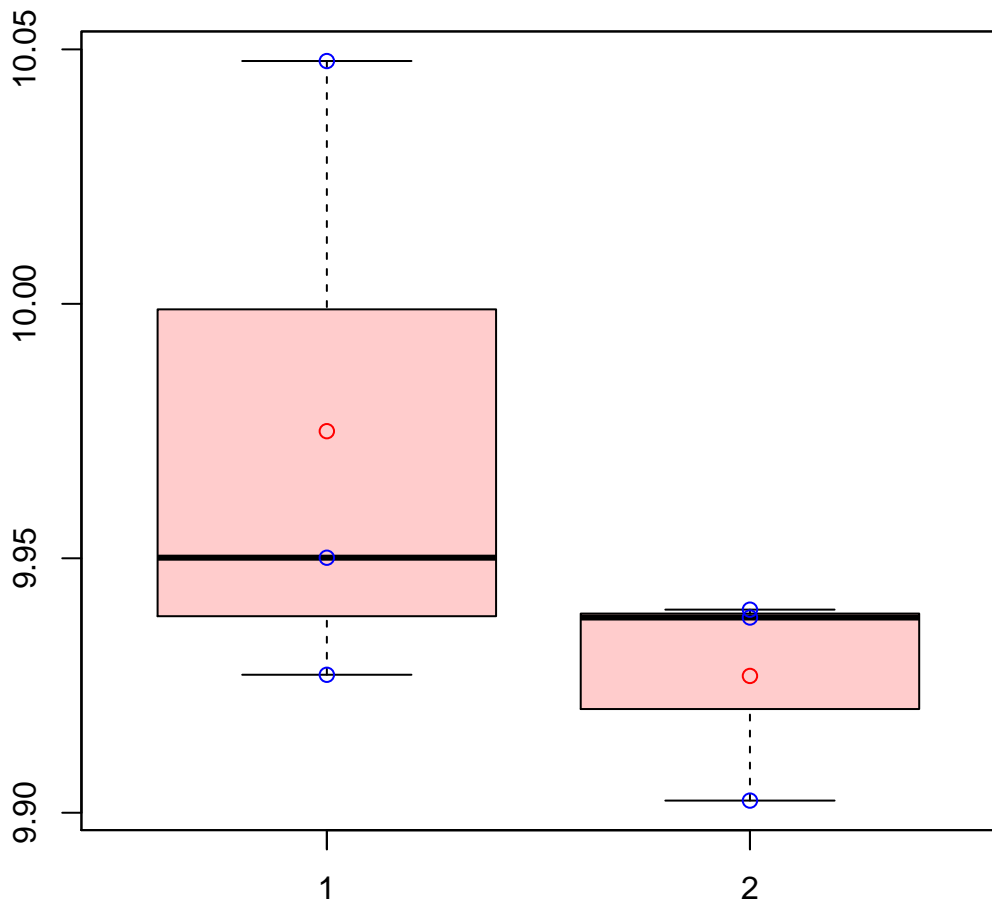

t-Test: p-value = 0.32

# CL20396Contig1|CL20396Contig1

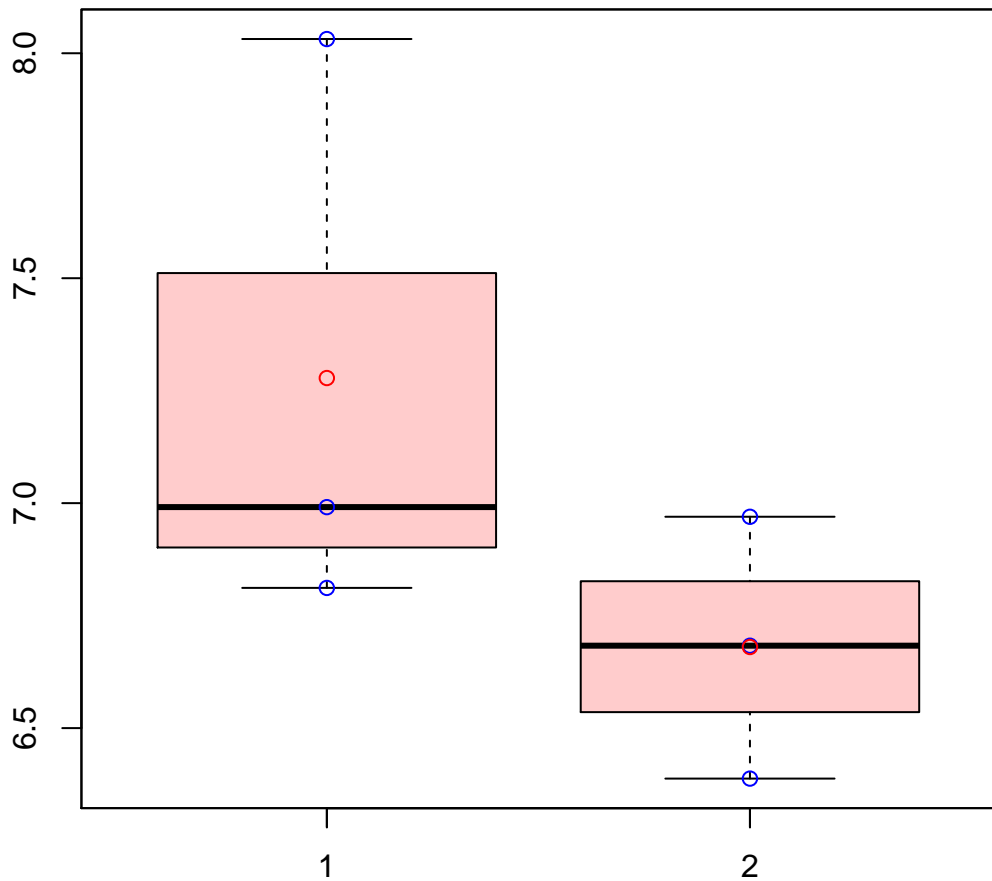

t-Test: p-value = 0.25

# CL203Contig10|CL203Contig10

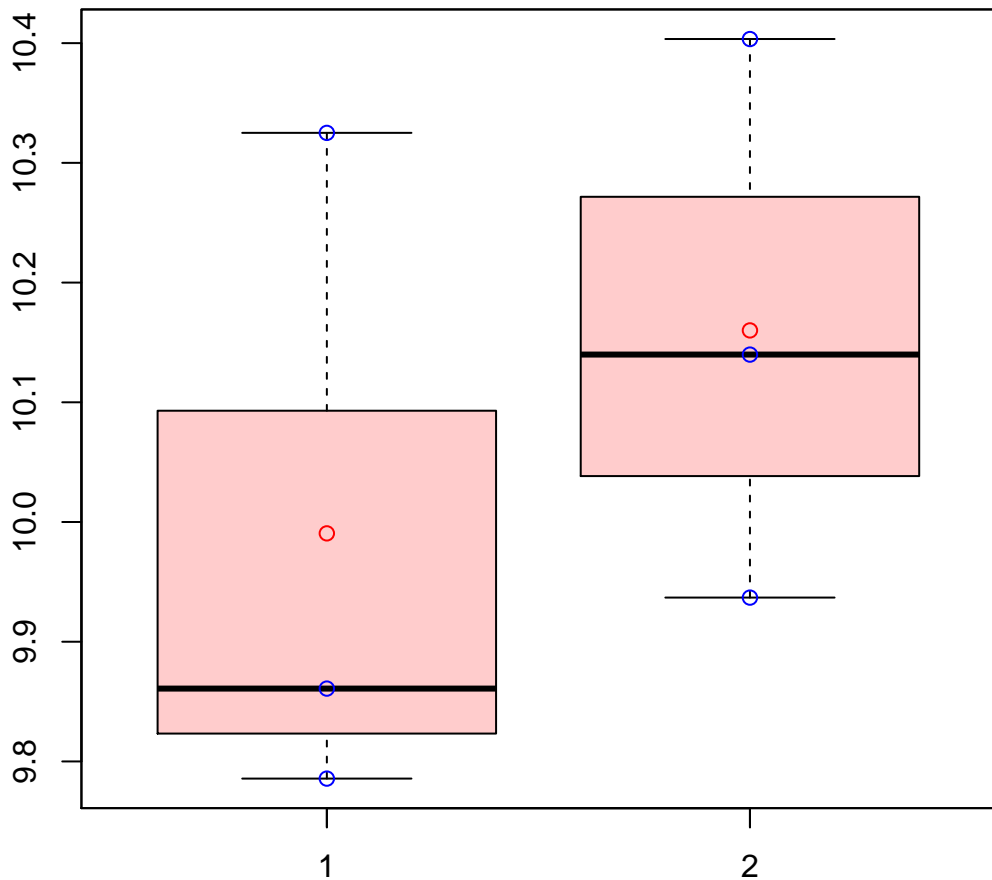

t-Test: p-value = 0.48

# CL20405Contig1|CL20405Contig1

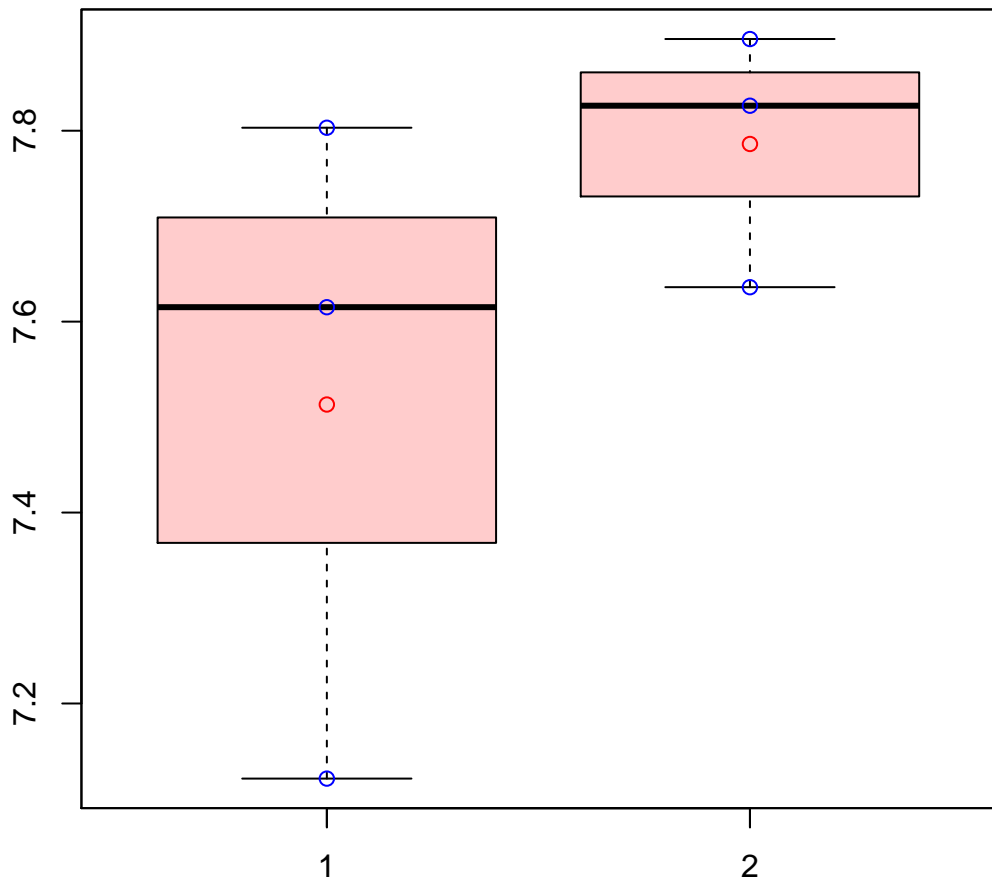

t-Test: p-value = 0.31

# CL20455Contig1|CL20455Contig1

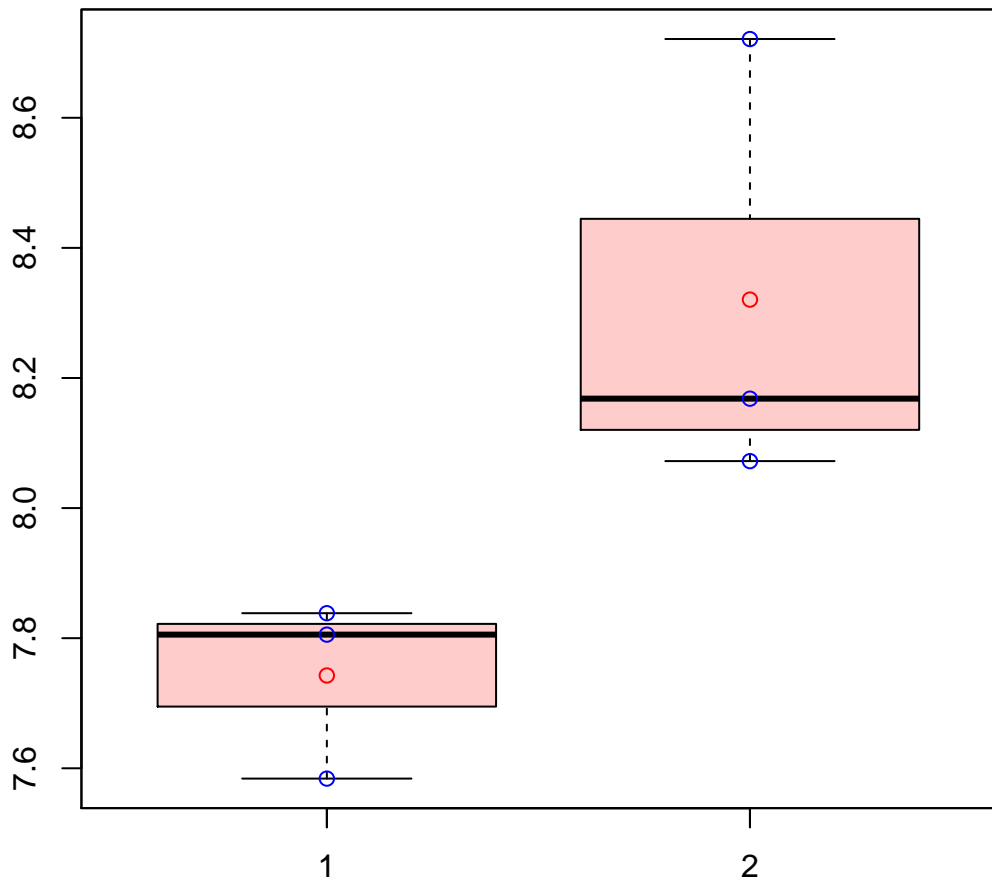

t-Test: p-value = 0.09



# CL20459Contig1|CL20459Contig1



t-Test: p-value = 0.79

# CL2045Contig4|CL2045Contig4

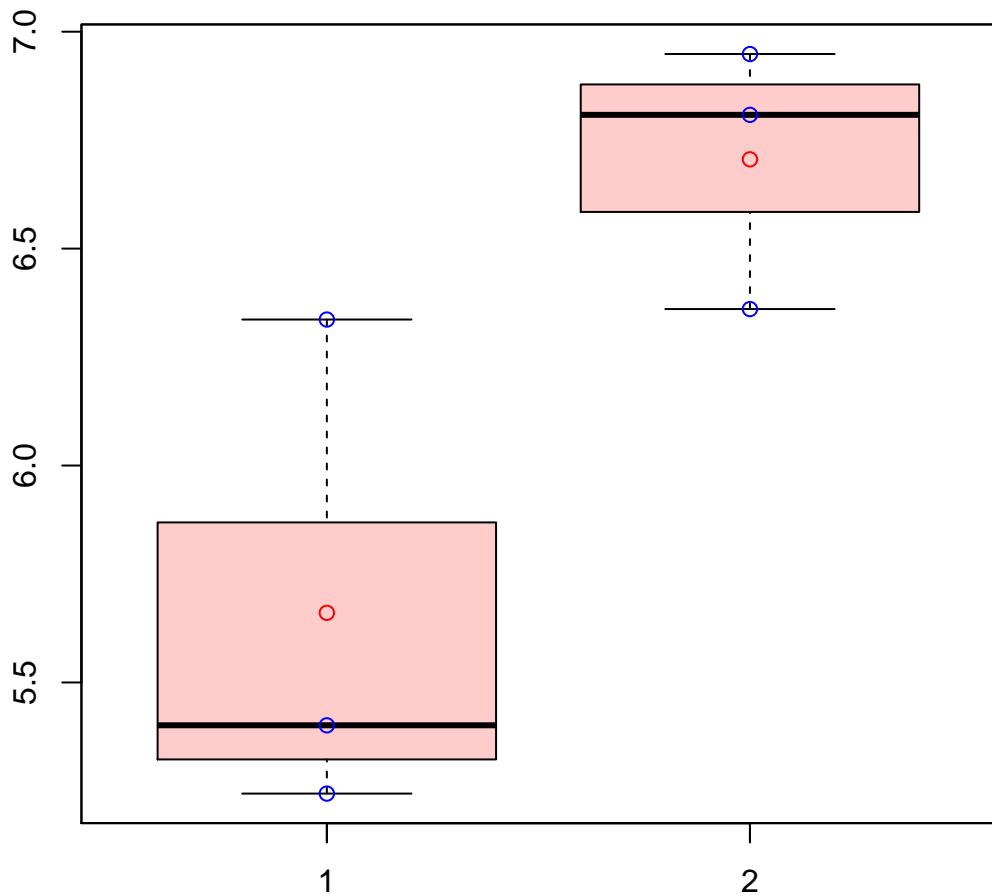

t-Test: p-value = 0.07

# CL2047Contig13|CL2047Contig13

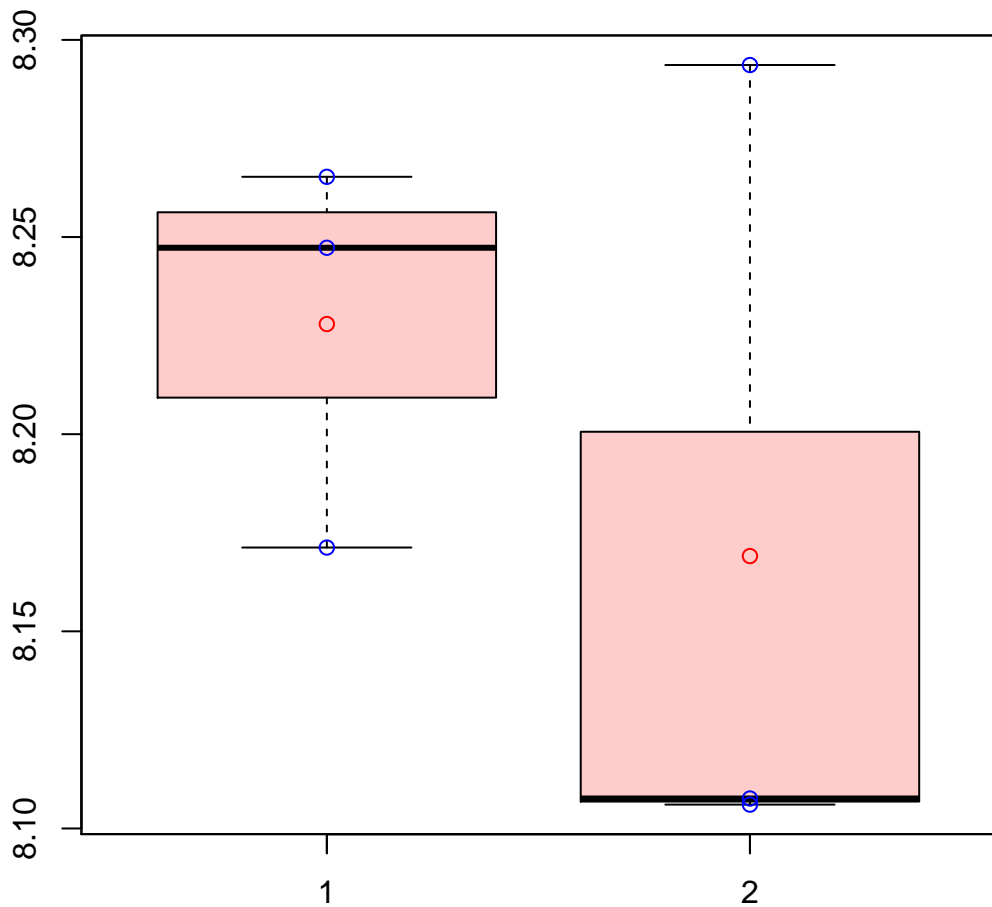

t-Test: p-value = 0.46

# CL2047Contig14|CL2047Contig14

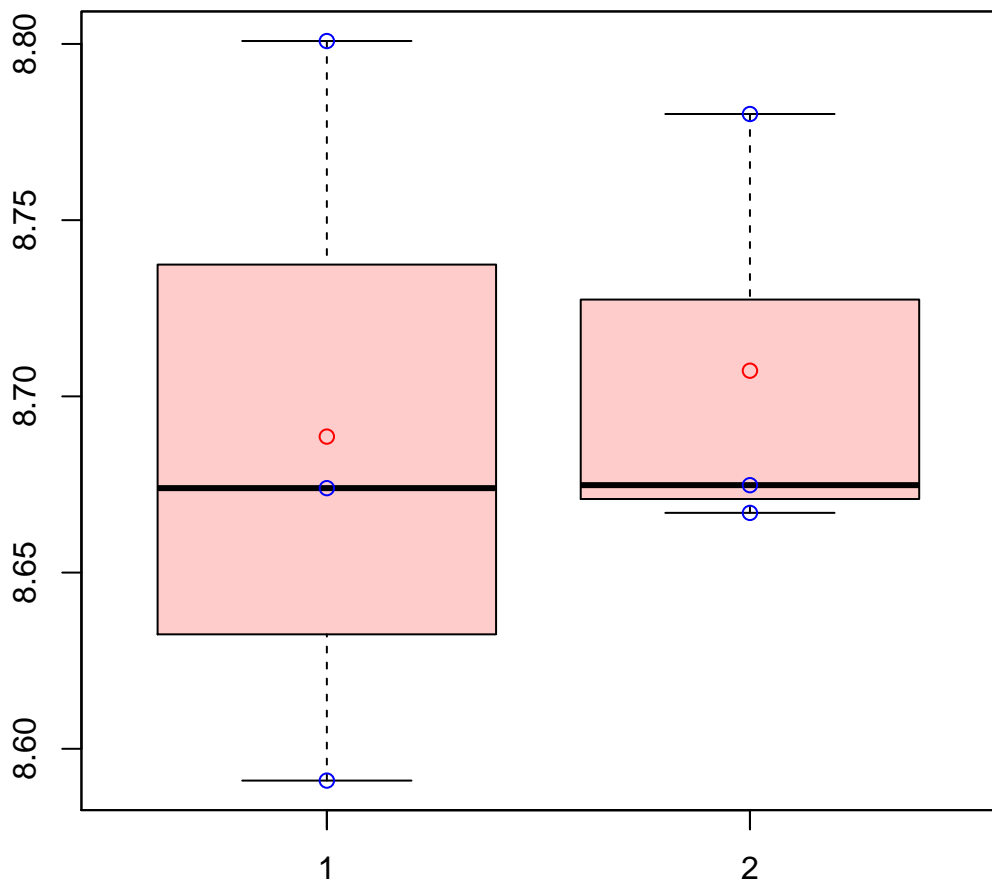

t-Test: p-value = 0.81

# CL2047Contig1|CL2047Contig1

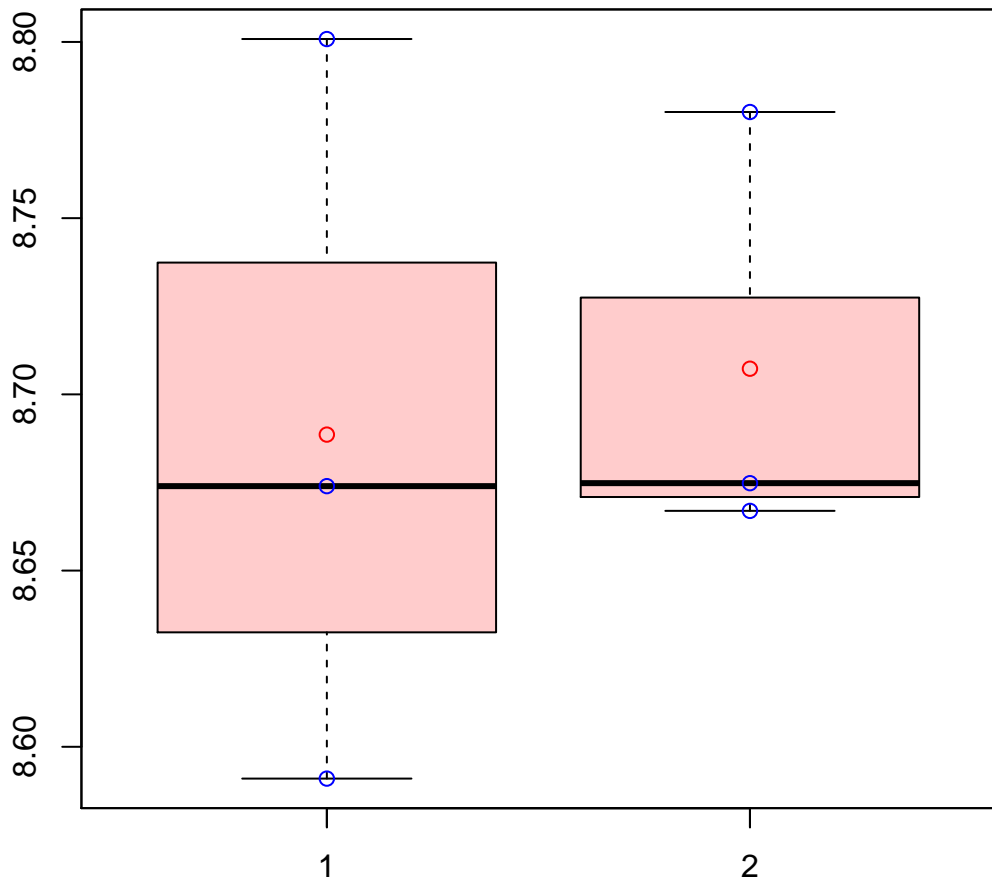

t-Test: p-value = 0.81

# CL2047Contig2|CL2047Contig2

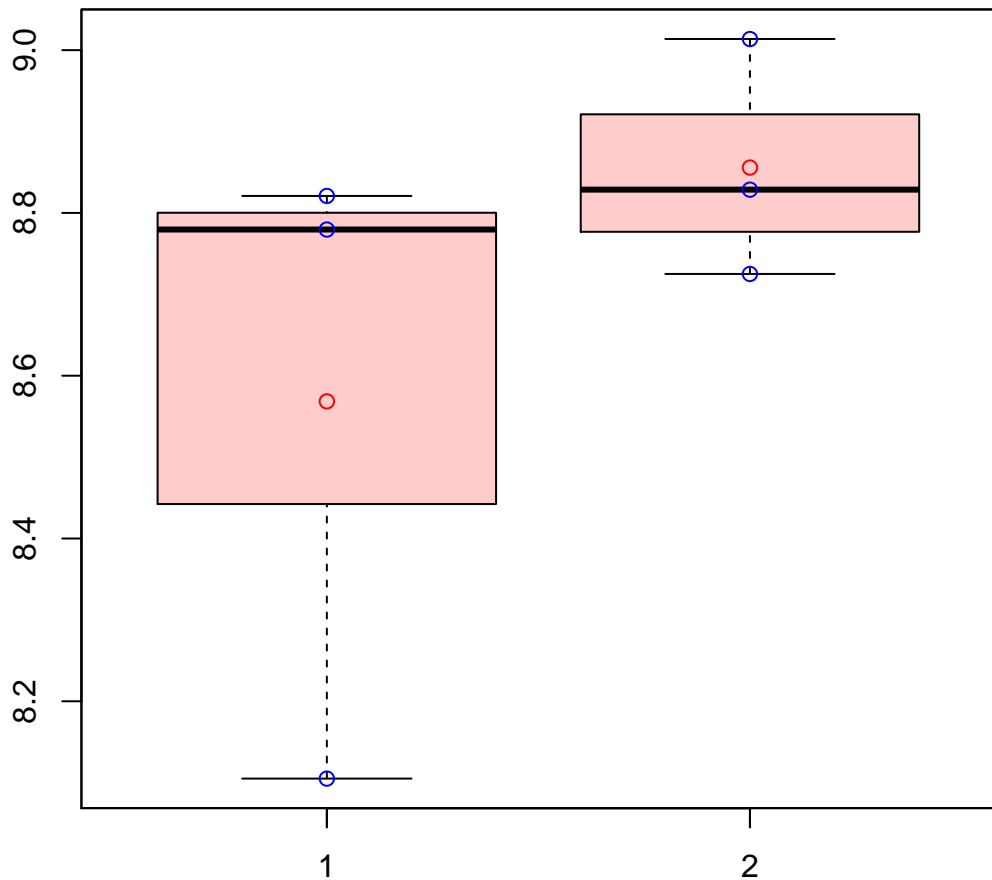

t-Test: p-value = 0.34

# CL2047Contig3|CL2047Contig3

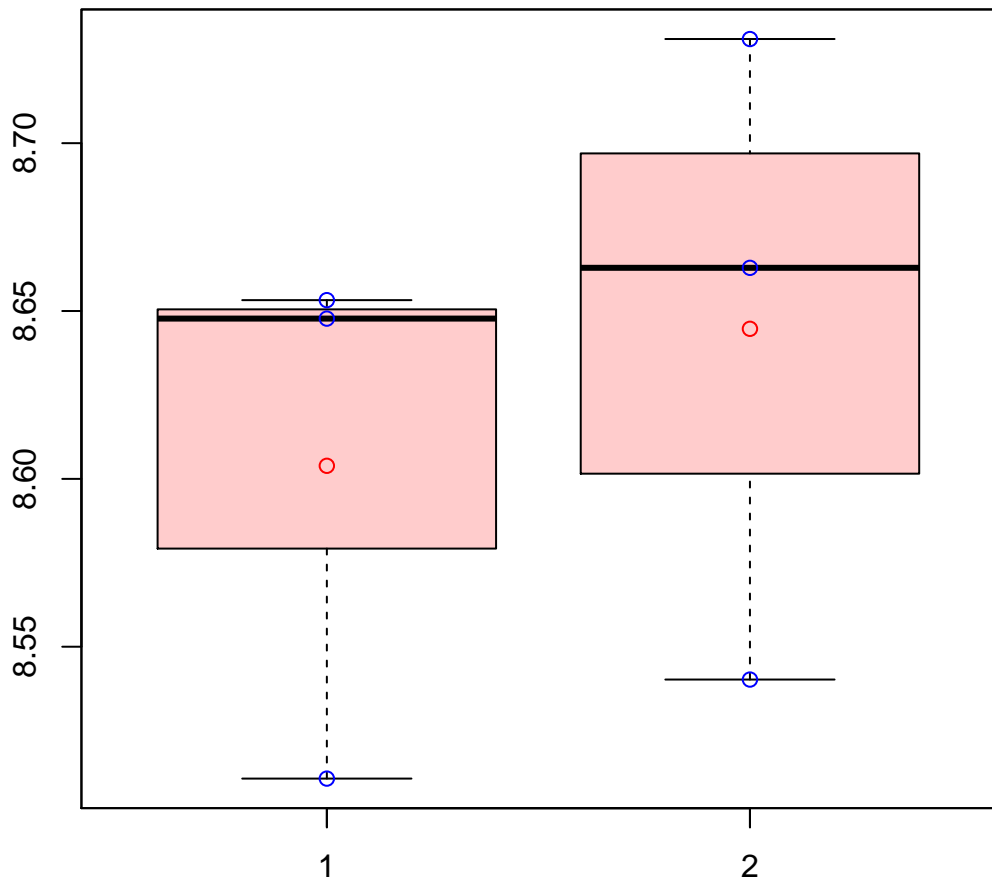

t-Test: p-value = 0.61

# CL2047Contig7|CL2047Contig7

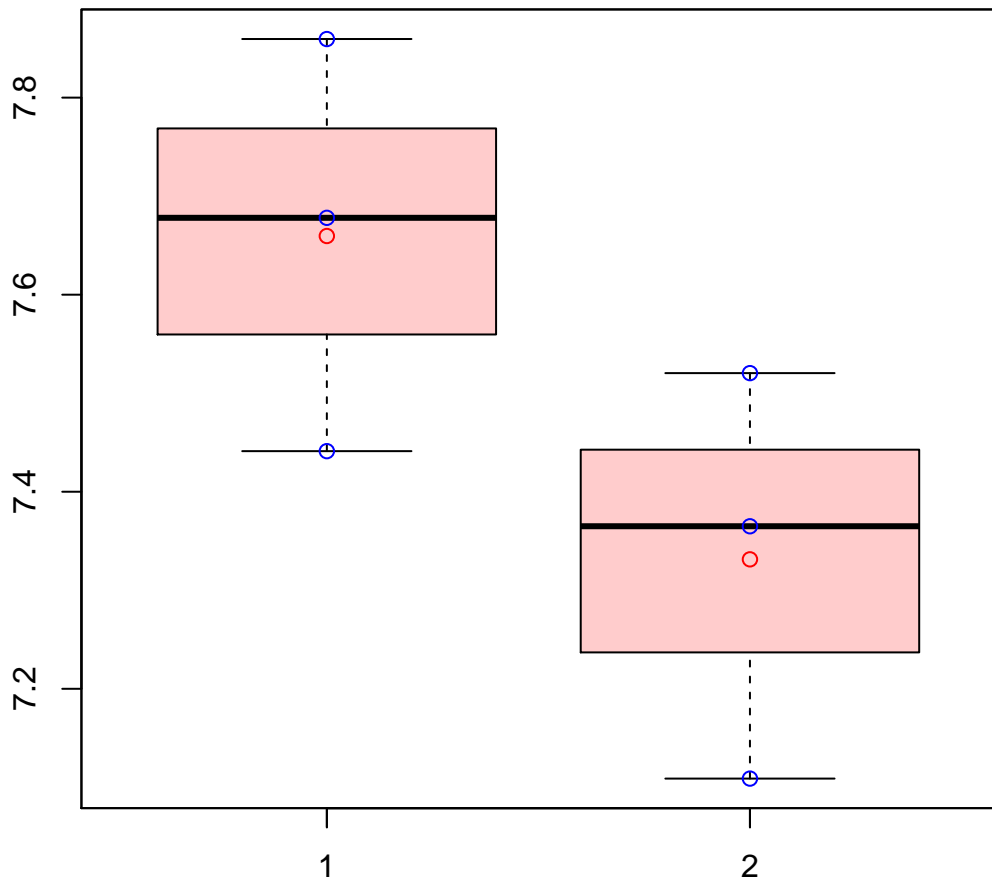

t-Test: p-value = 0.13



# CL20548Contig1|CL20548Contig1



t-Test: p-value = 0.19

# CL2055Contig1|CL2055Contig1

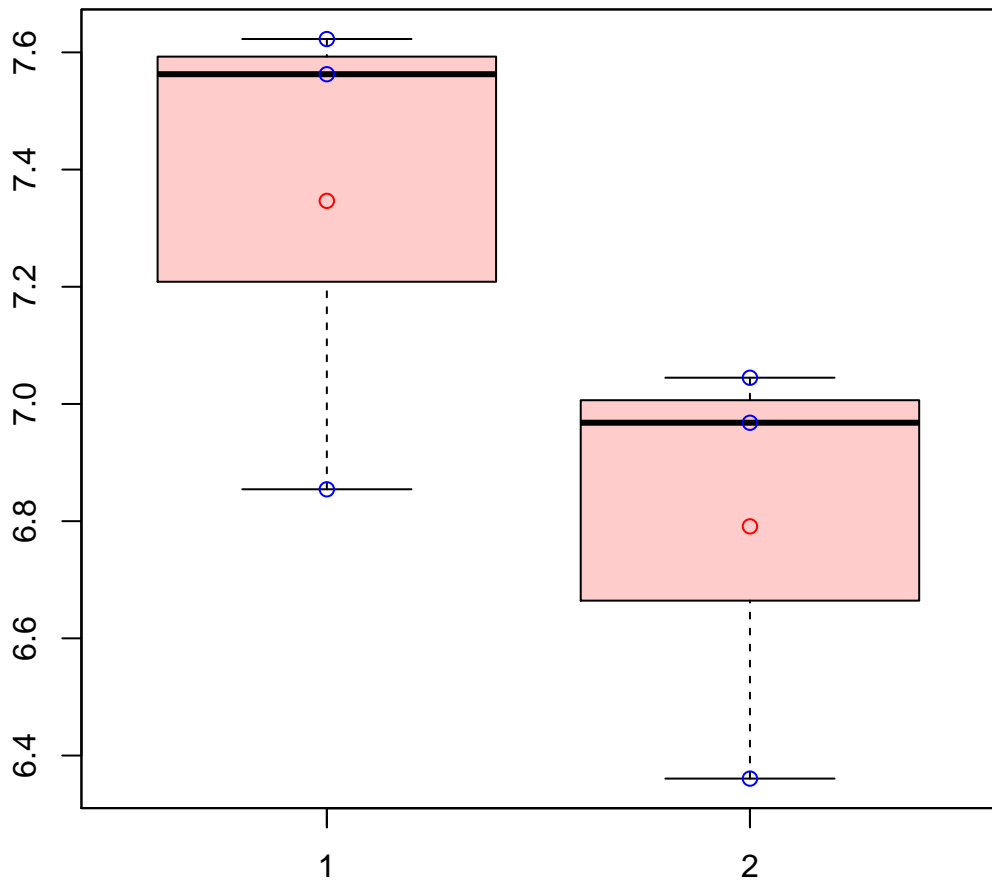

t-Test: p-value = 0.17

# CL2055Contig4|CL2055Contig4



t-Test: p-value = 0.17

# CL2056Contig1|CL2056Contig1

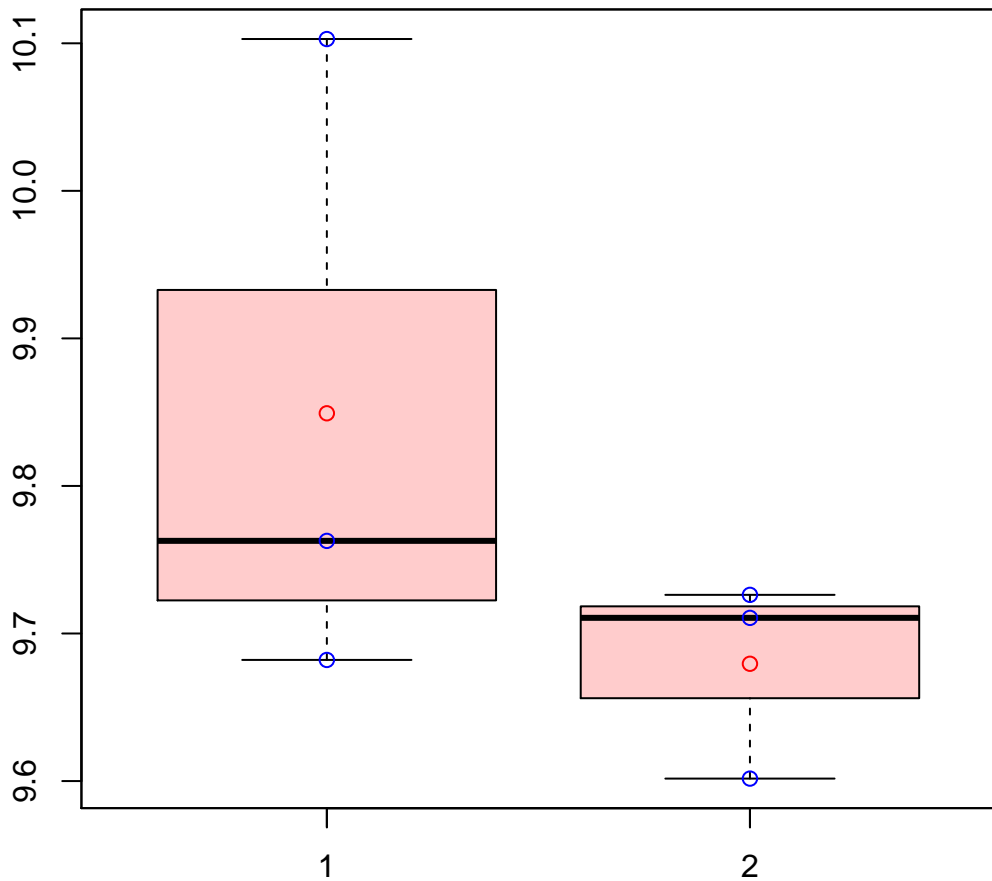

t-Test: p-value = 0.32

# CL2058Contig6|CL2058Contig6

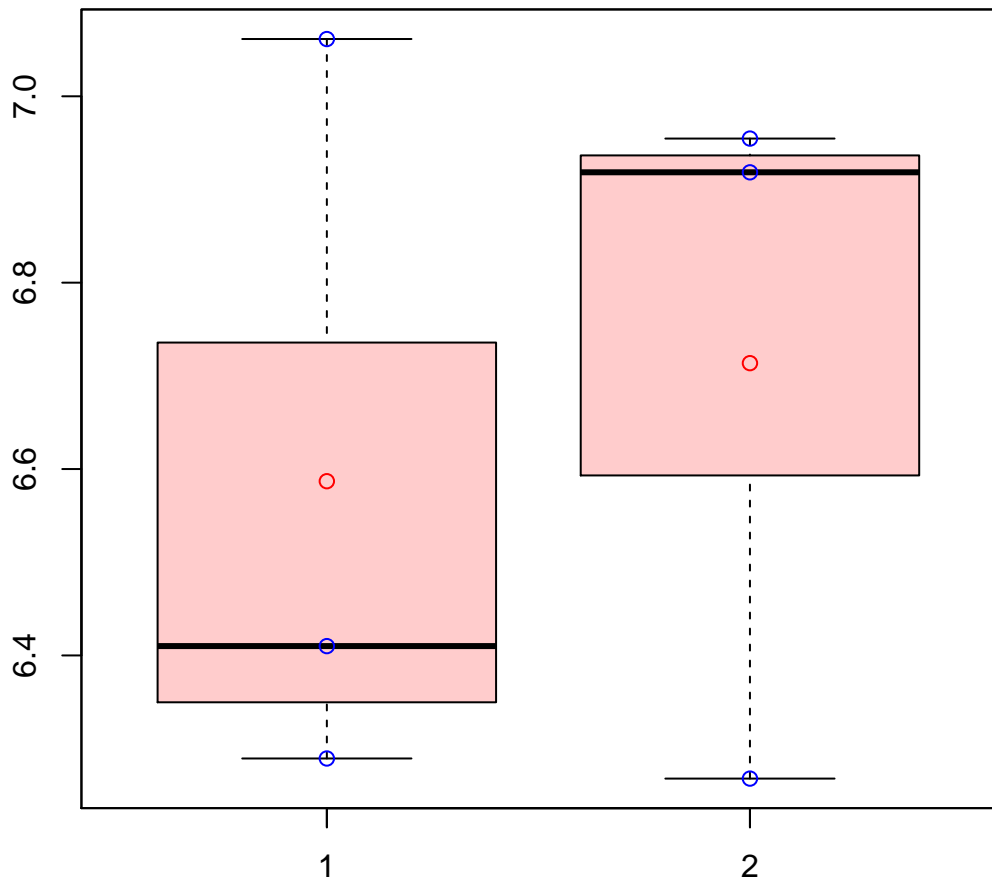

t-Test: p-value = 0.72

# CL2060Contig1|CL2060Contig1

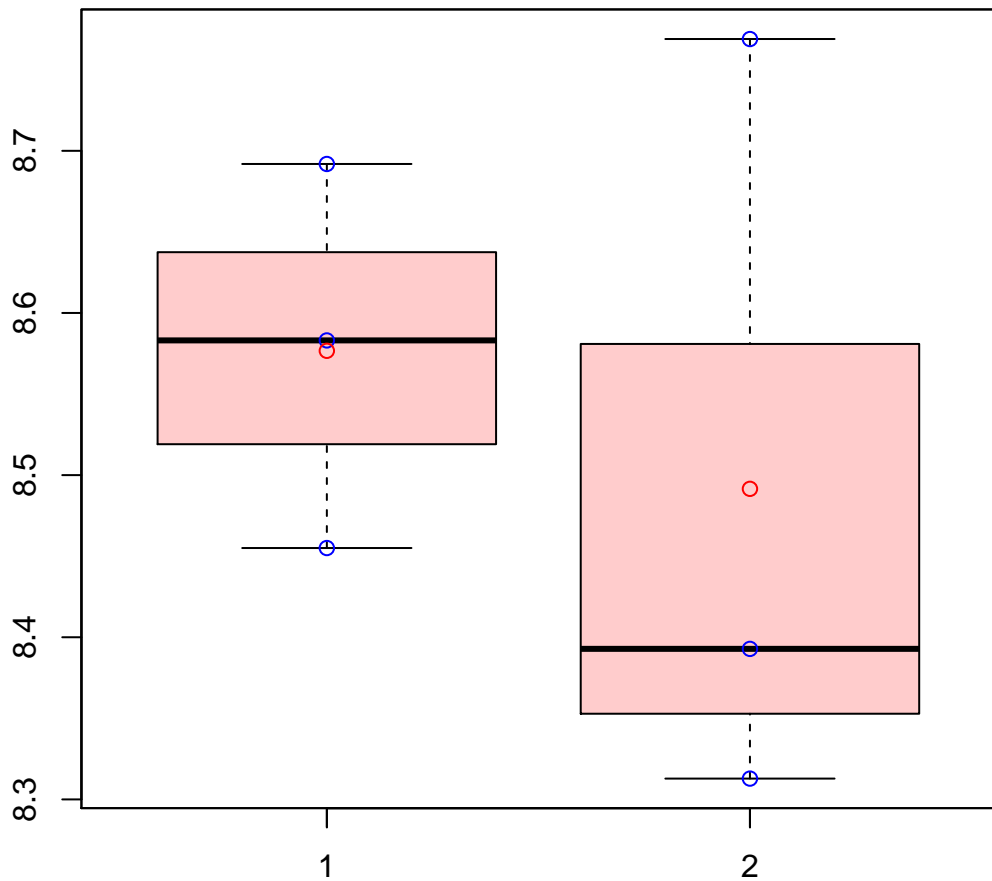

t-Test: p-value = 0.63

# CL2060Contig3|CL2060Contig3

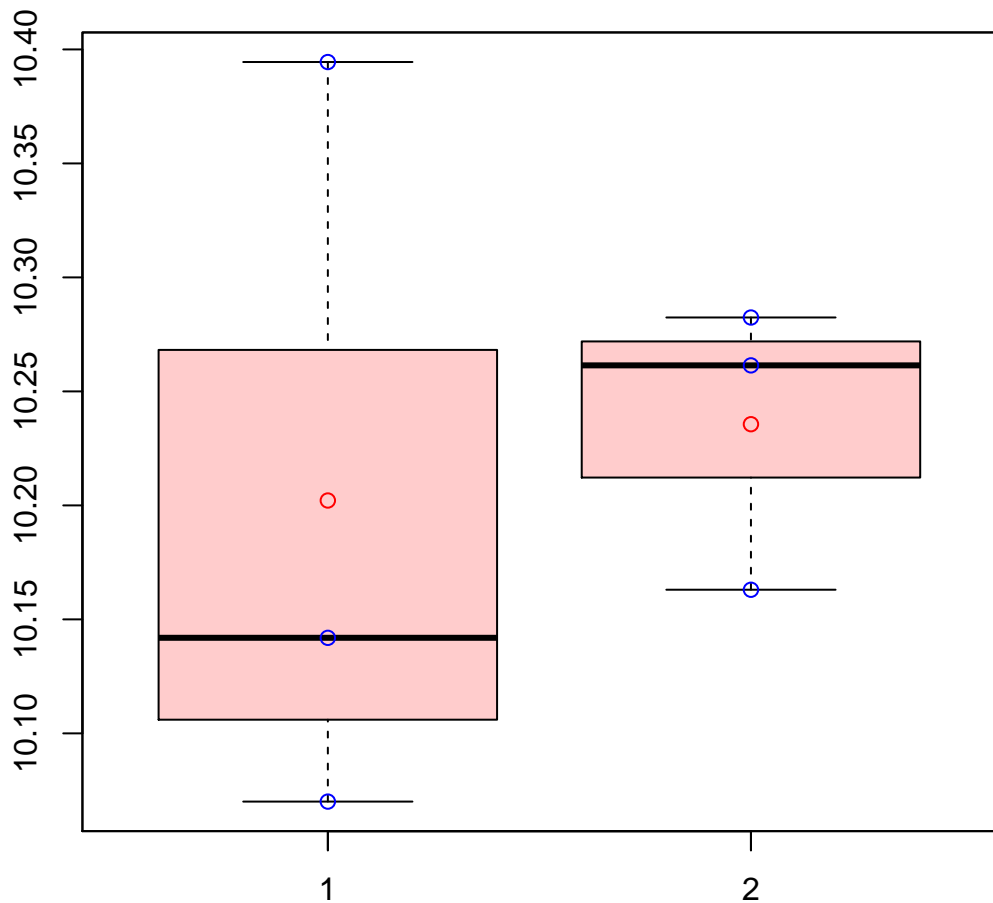

t-Test: p-value = 0.77

# CL20644Contig1|CL20644Contig1

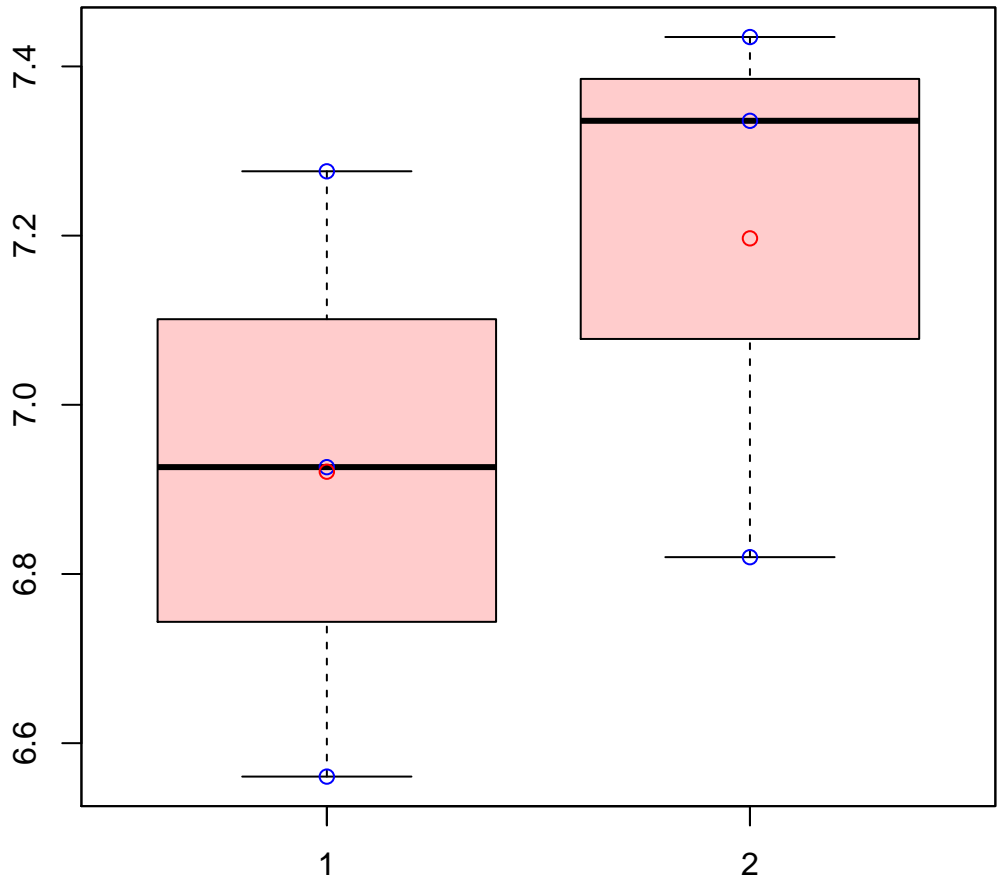

t-Test: p-value = 0.38



# CL2064Contig2|CL2064Contig2

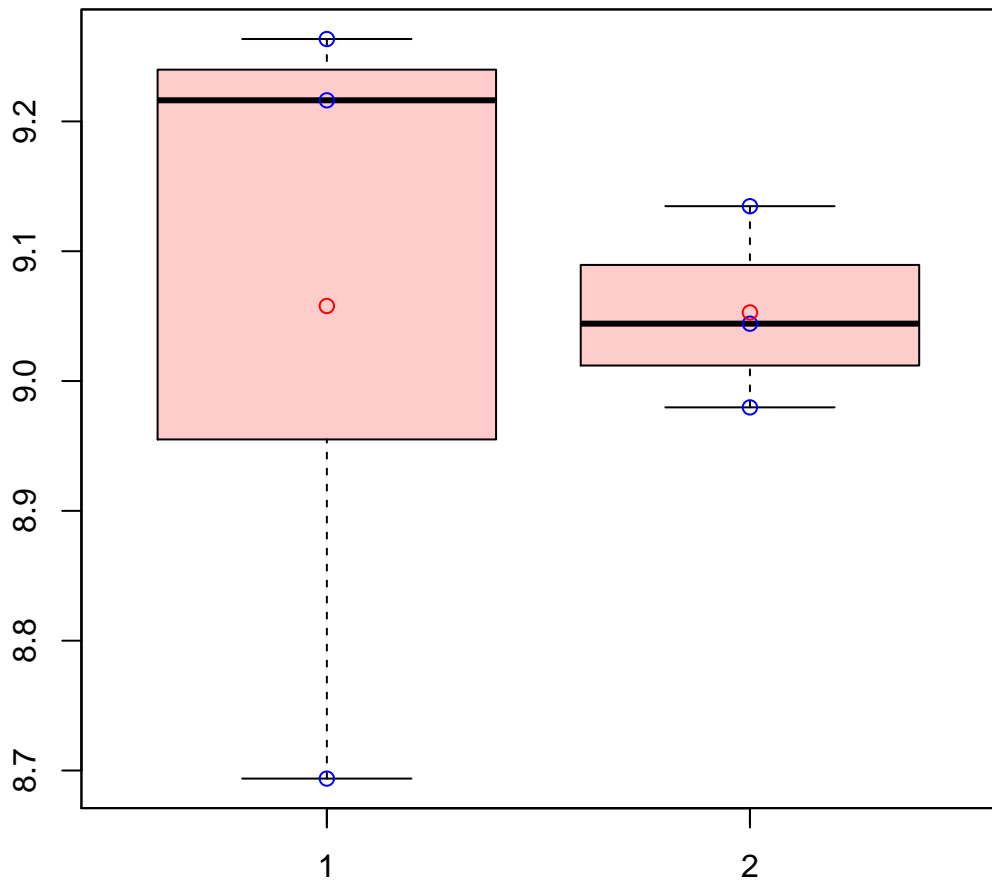

t-Test: p-value = 0.98

# CL2064Contig7|CL2064Contig7

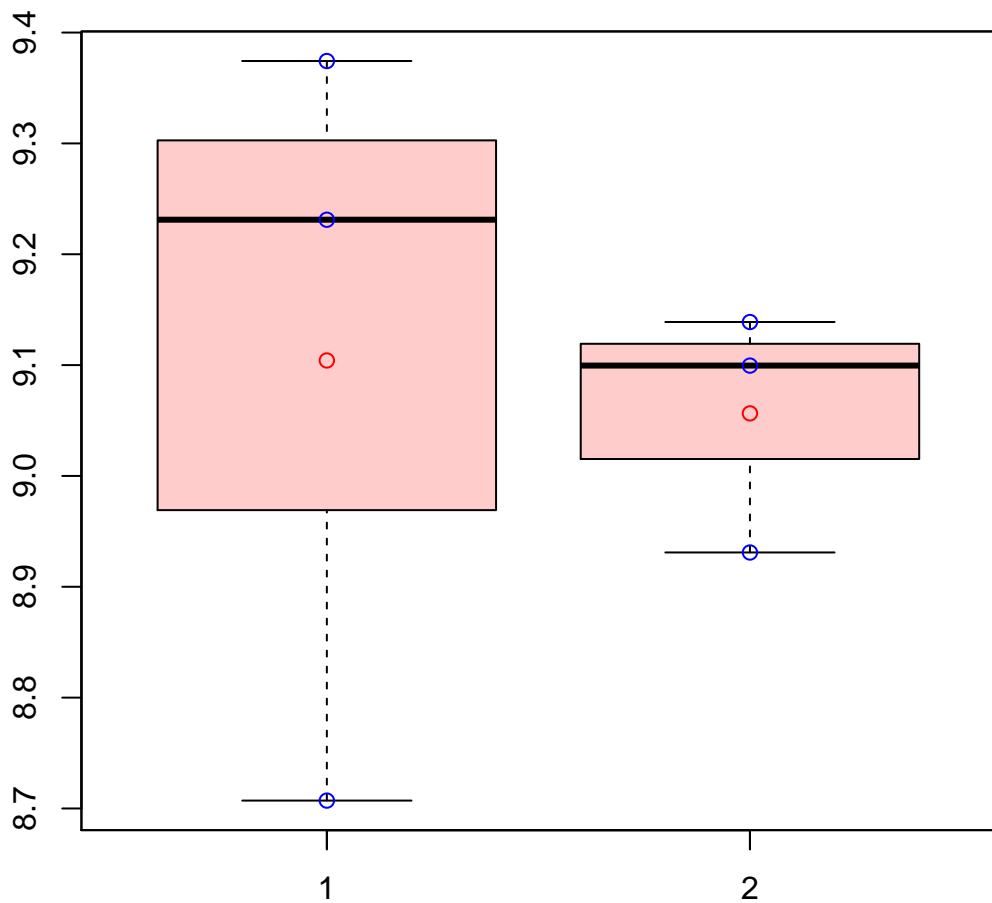

t-Test: p-value = 0.84

# CL2064Contig8|CL2064Contig8

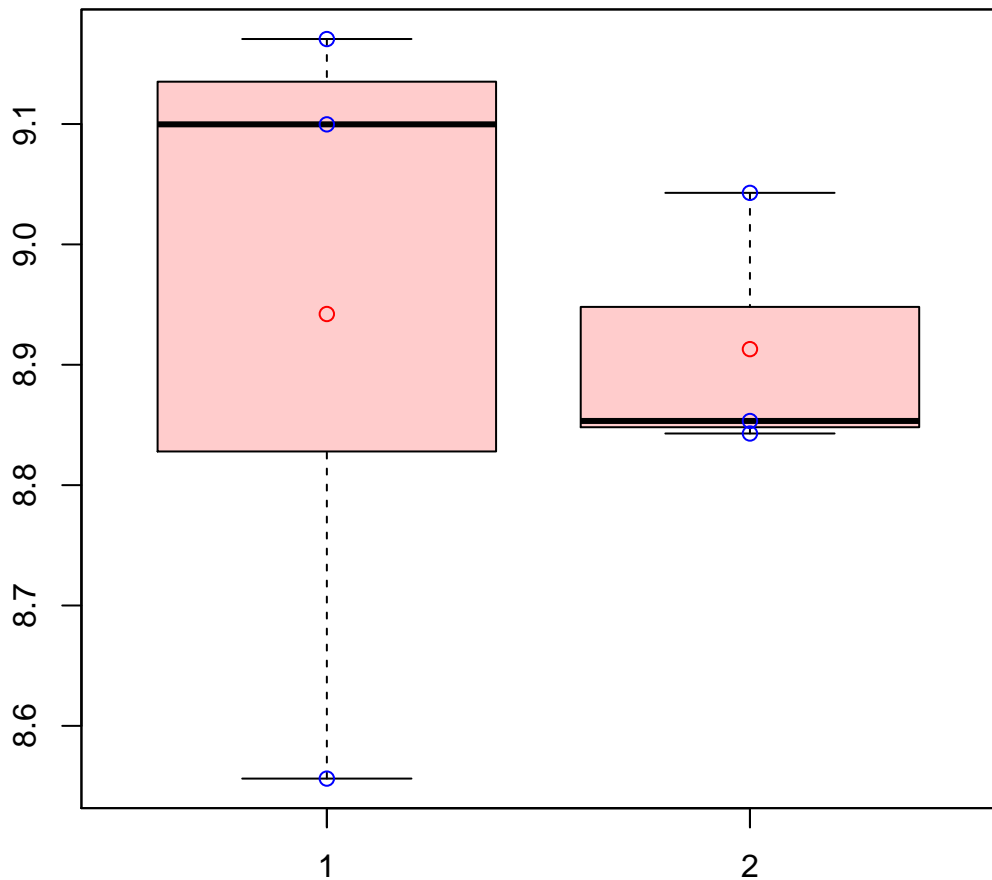

t-Test: p-value = 0.9

# CL2067Contig3|CL2067Contig3

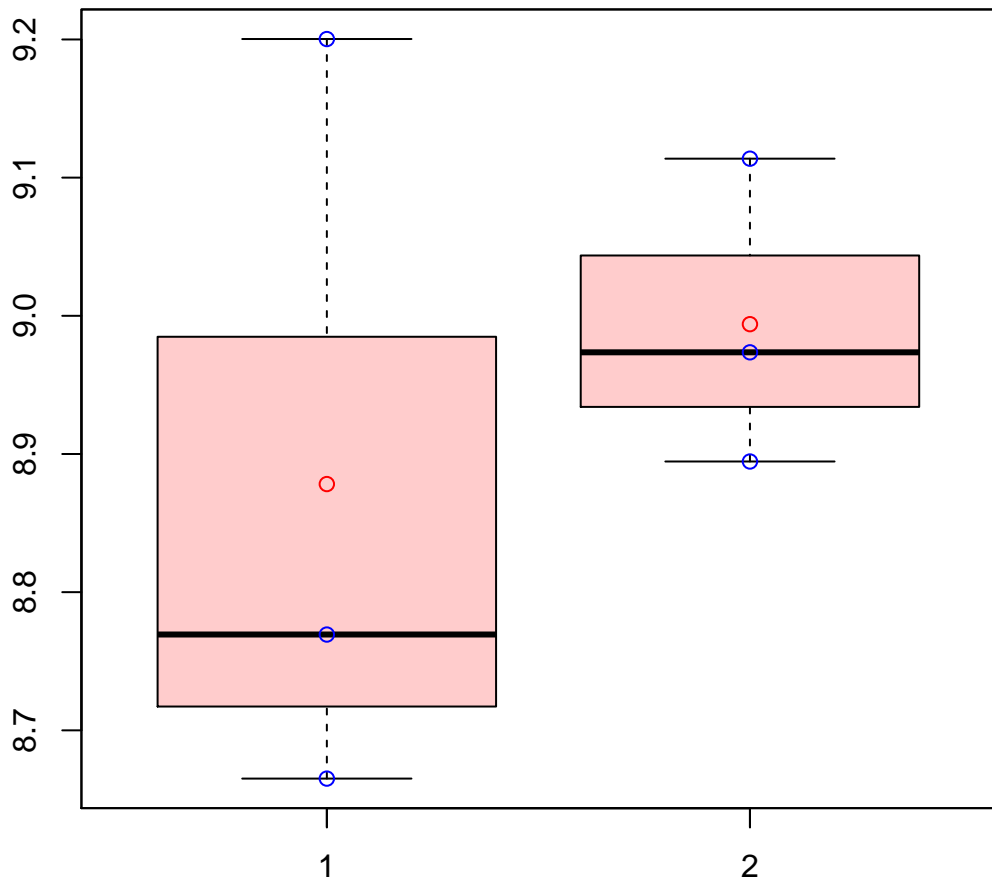

t-Test: p-value = 0.56

# CL206Contig26|CL206Contig26

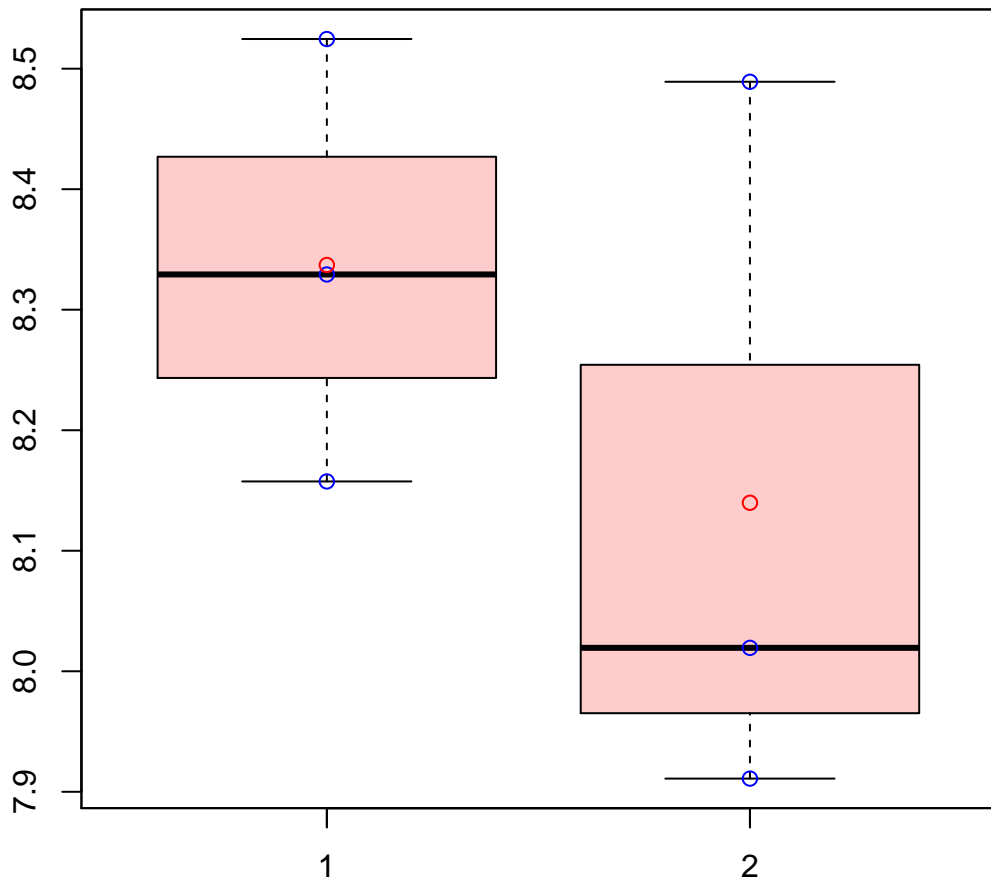

t-Test: p-value = 0.41

# CL206Contig28|CL206Contig28

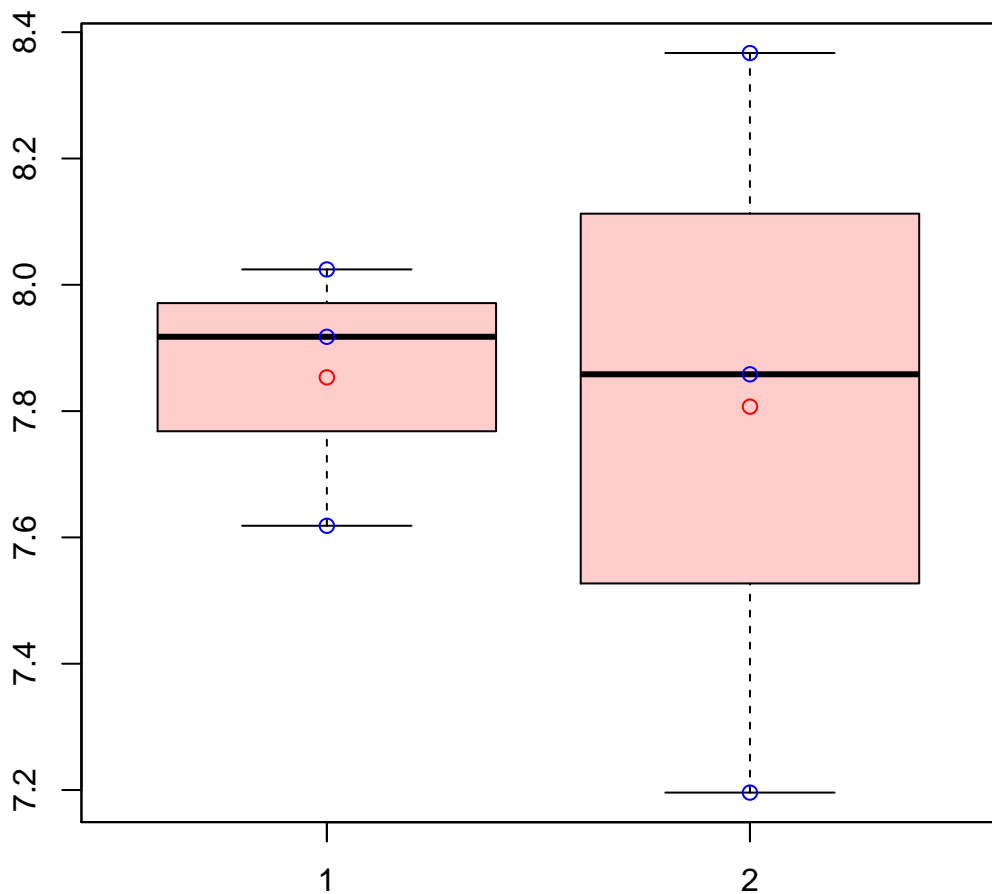

t-Test: p-value = 0.91

# CL206Contig8|CL206Contig8

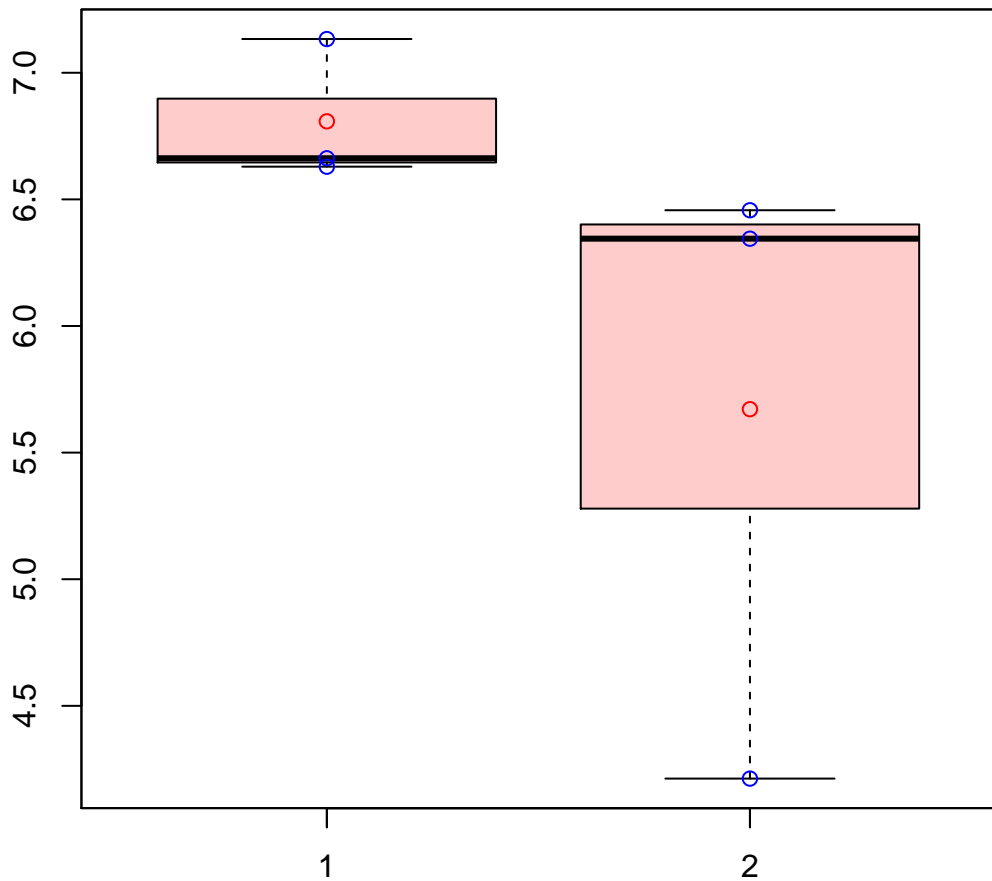

t-Test: p-value = 0.26

# CL2077Contig3|CL2077Contig3

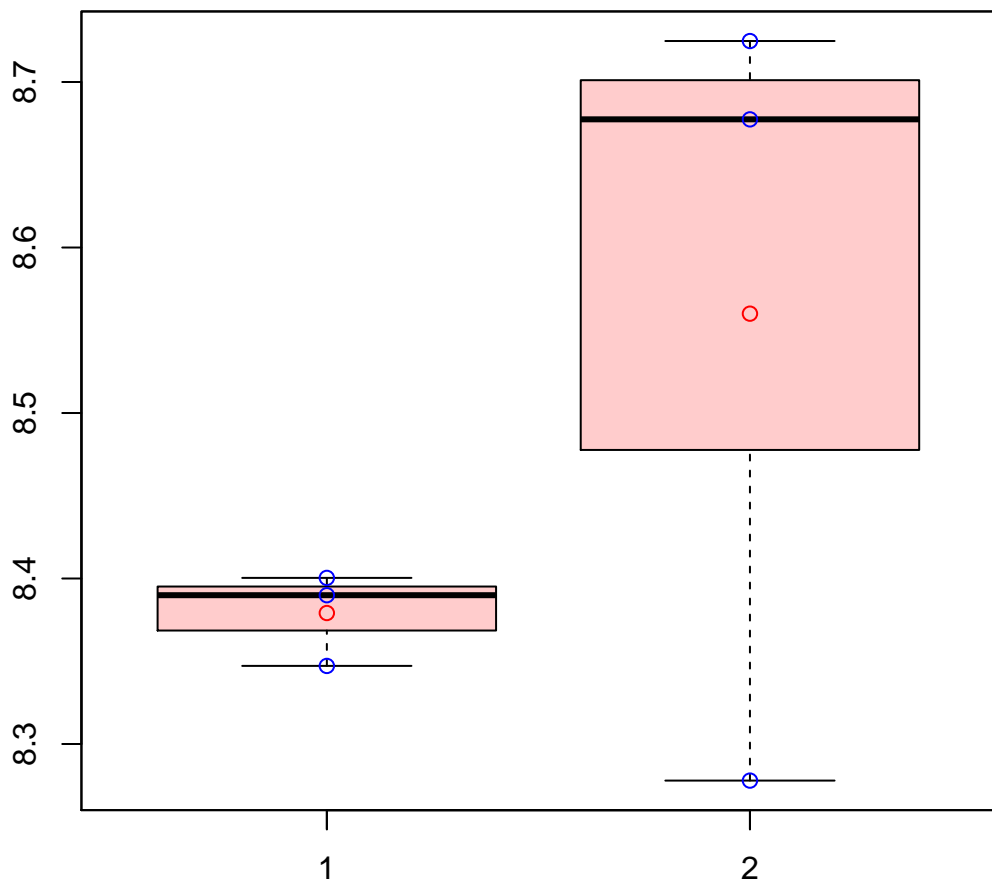

t-Test: p-value = 0.33



# CL2080Contig1|CL2080Contig1

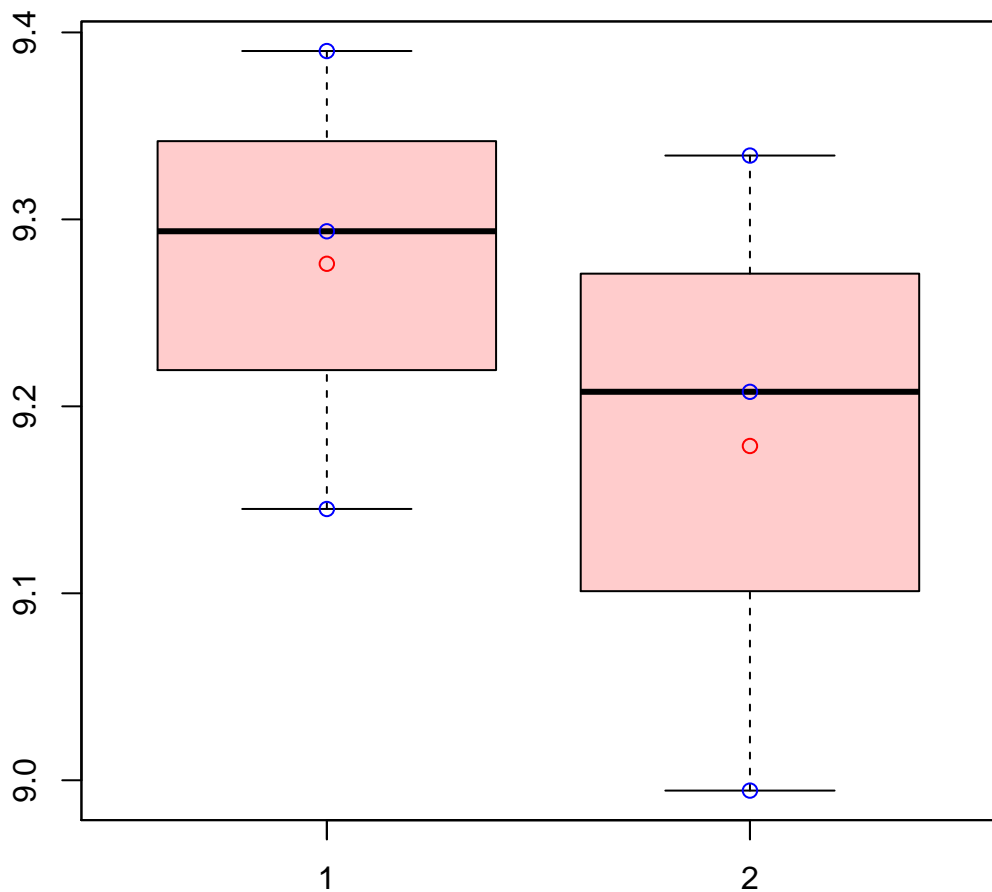

t-Test: p-value = 0.47

# CL2080Contig3|CL2080Contig3



t-Test: p-value = 0.47

# CL2086Contig1|CL2086Contig1

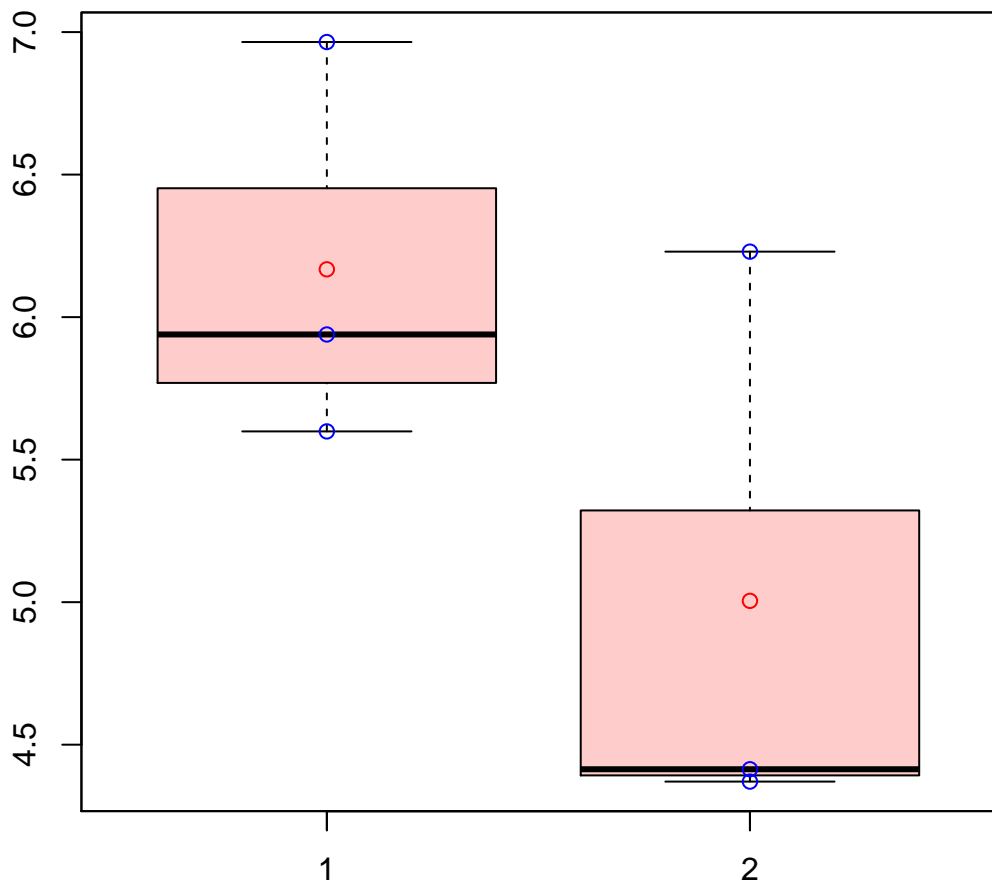

t-Test: p-value = 0.2

# CL2095Contig2|CL2095Contig2

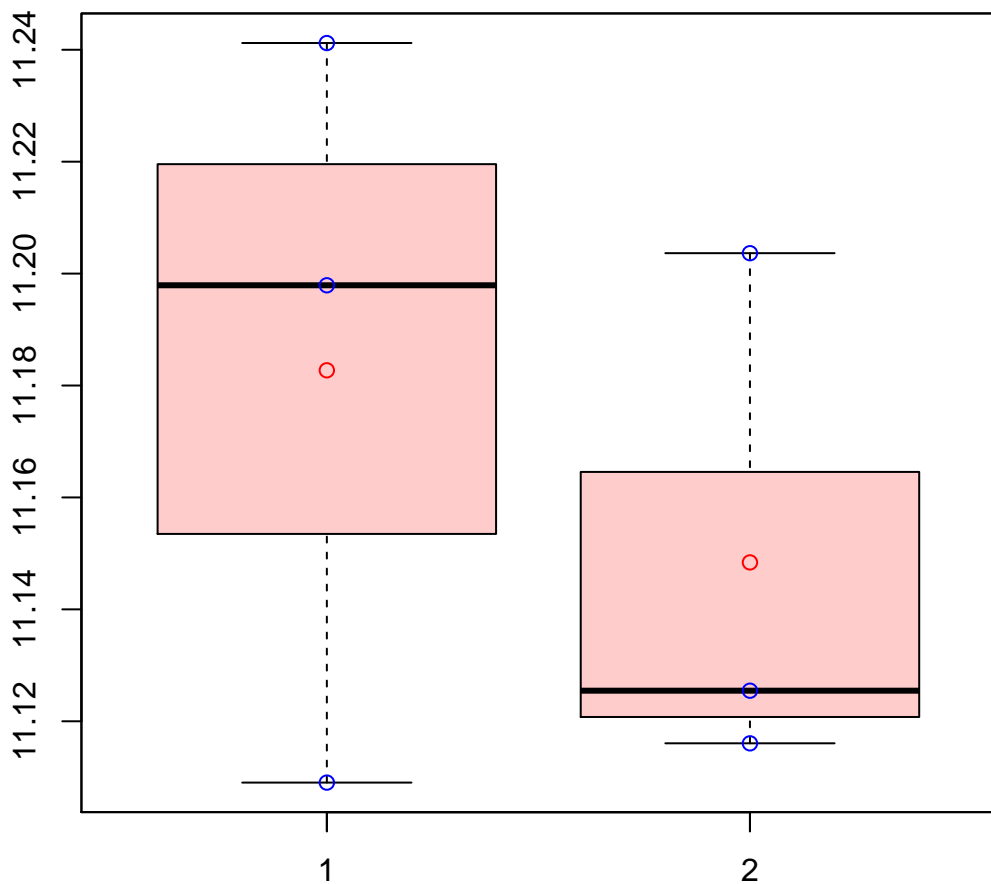

t-Test: p-value = 0.52

# CL2096Contig3|CL2096Contig3

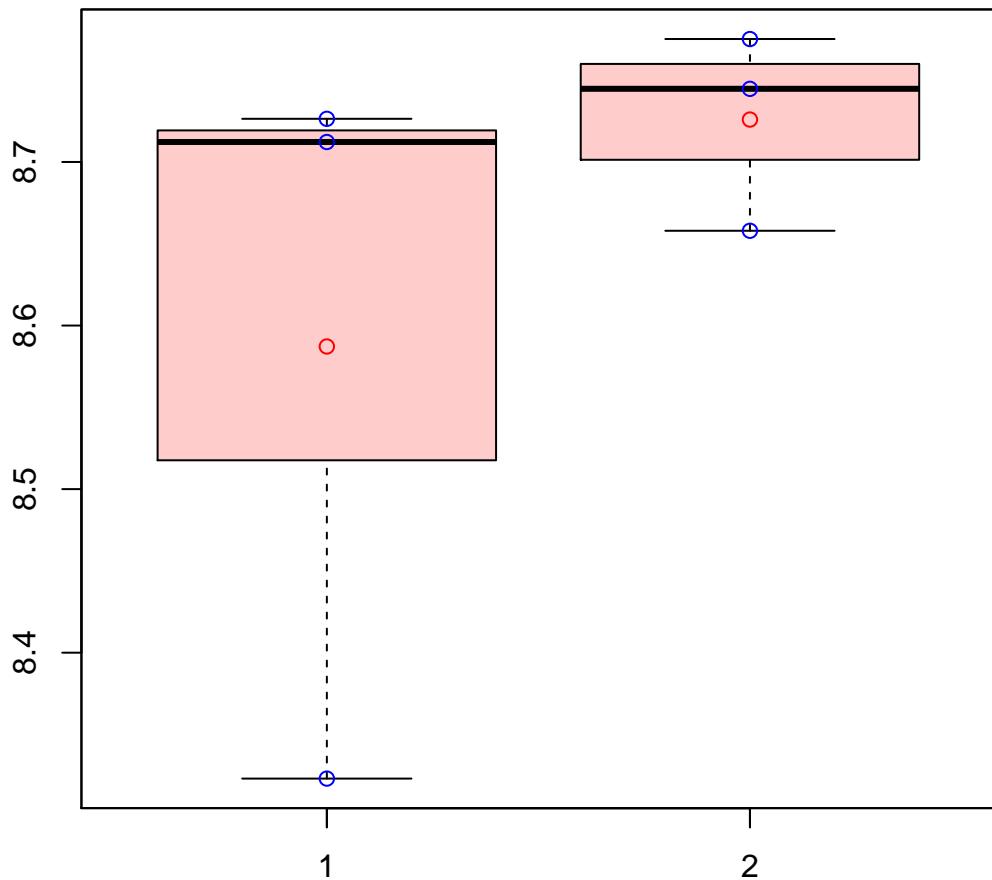

t-Test: p-value = 0.41

# CL20Contig1|CL20Contig1

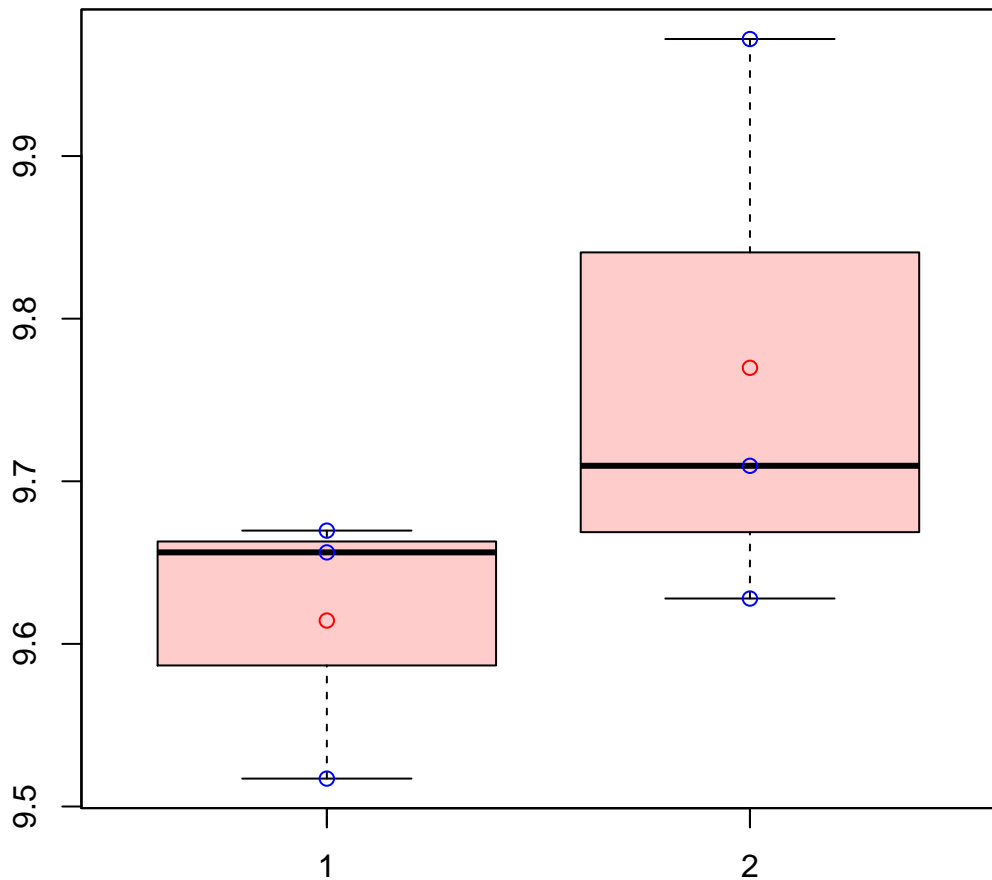

t-Test: p-value = 0.27

# CL20Contig4|CL20Contig4

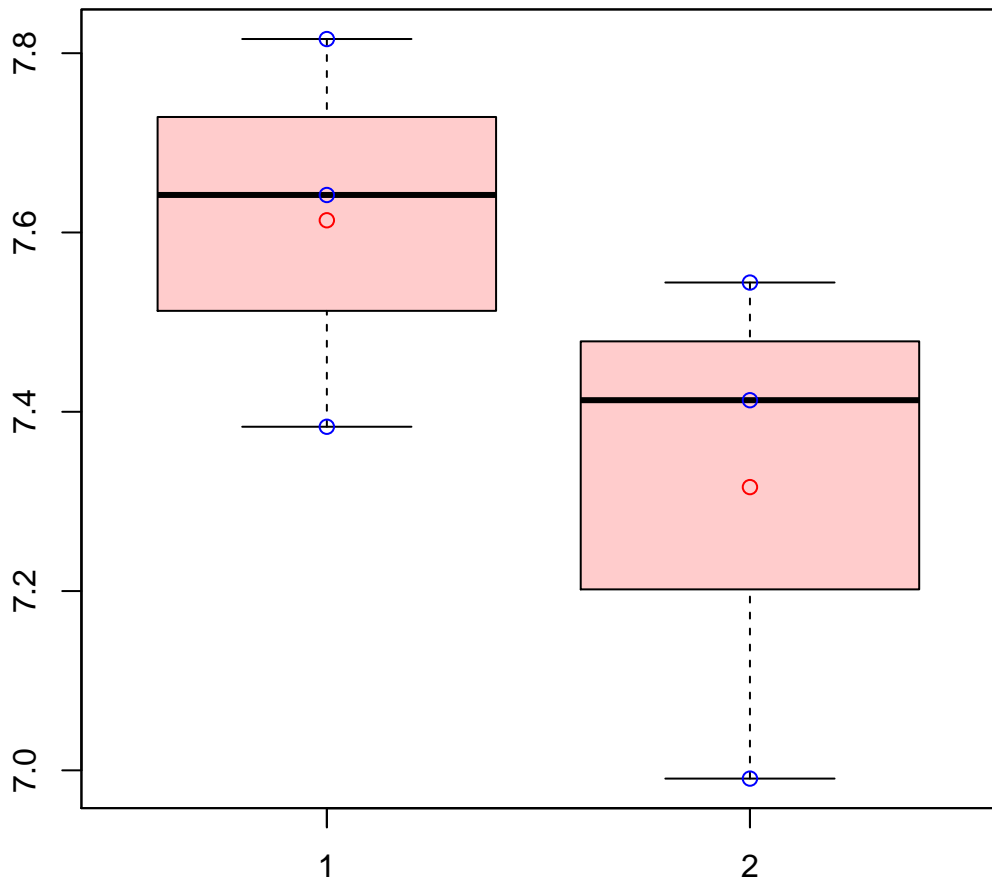

t-Test: p-value = 0.23

# CL20Contig5|CL20Contig5



t-Test: p-value = 0.23



# CL2102Contig2|CL2102Contig2

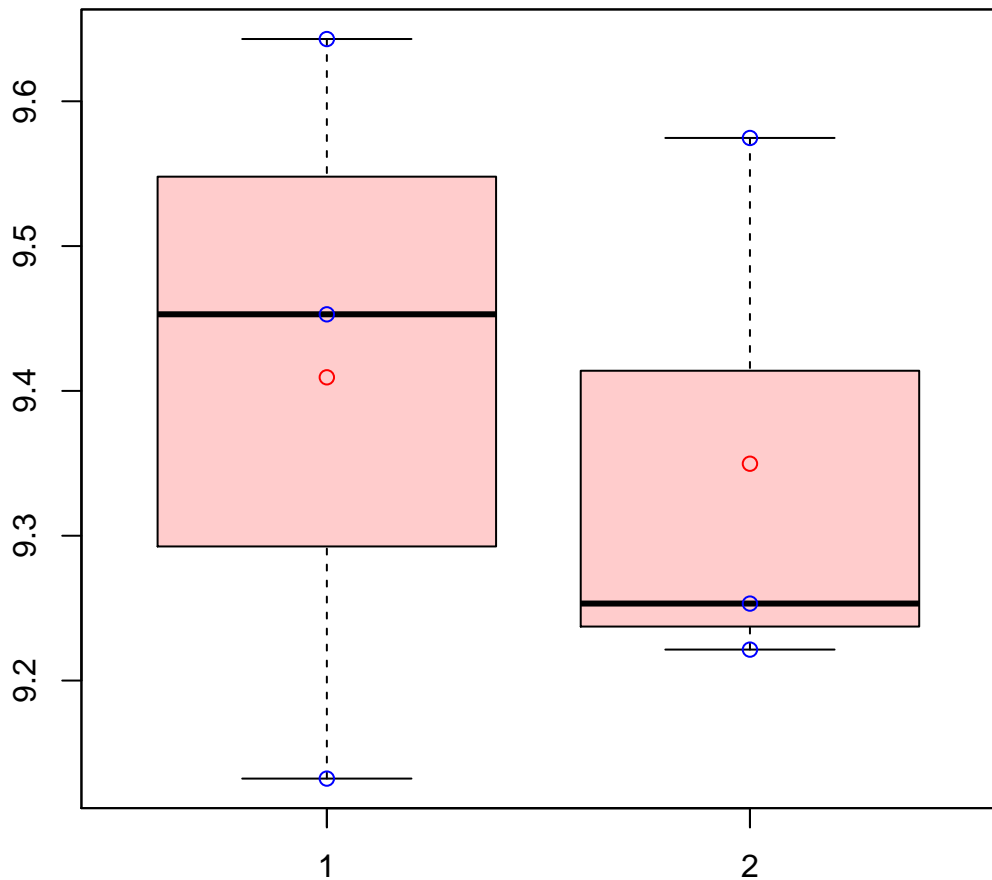

t-Test: p-value = 0.77

# CL2102Contig3|CL2102Contig3

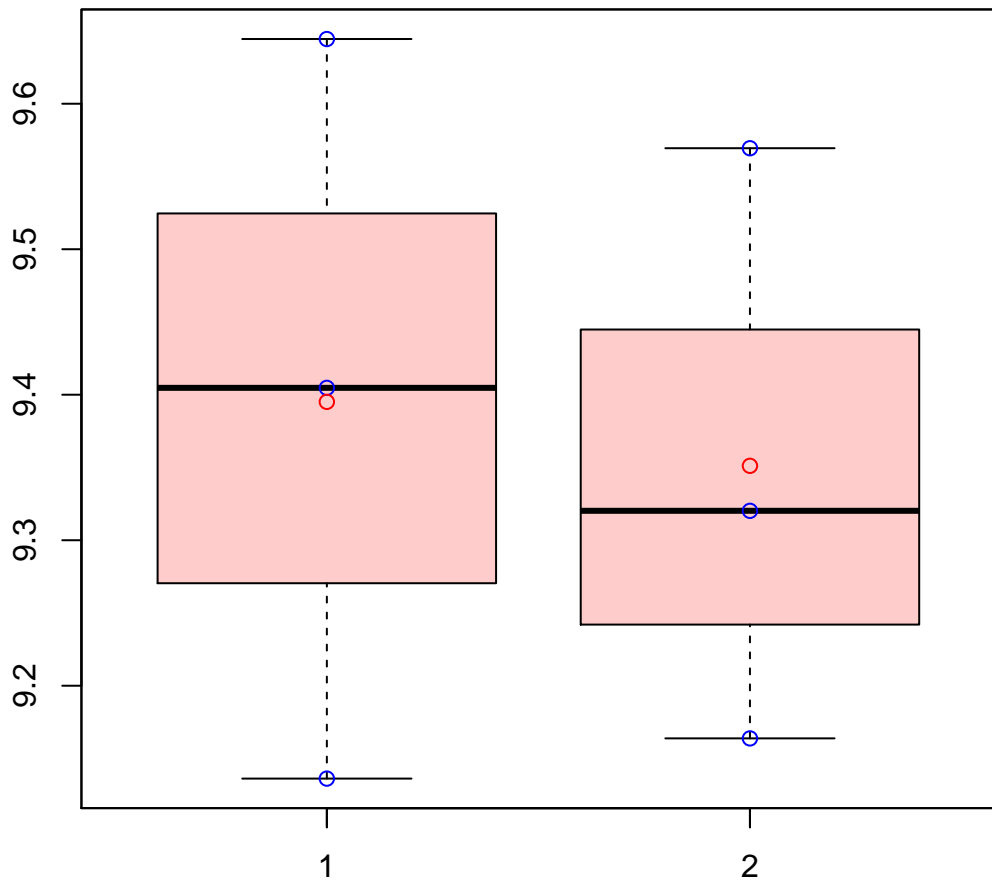

t-Test: p-value = 0.83

# CL2104Contig1|CL2104Contig1

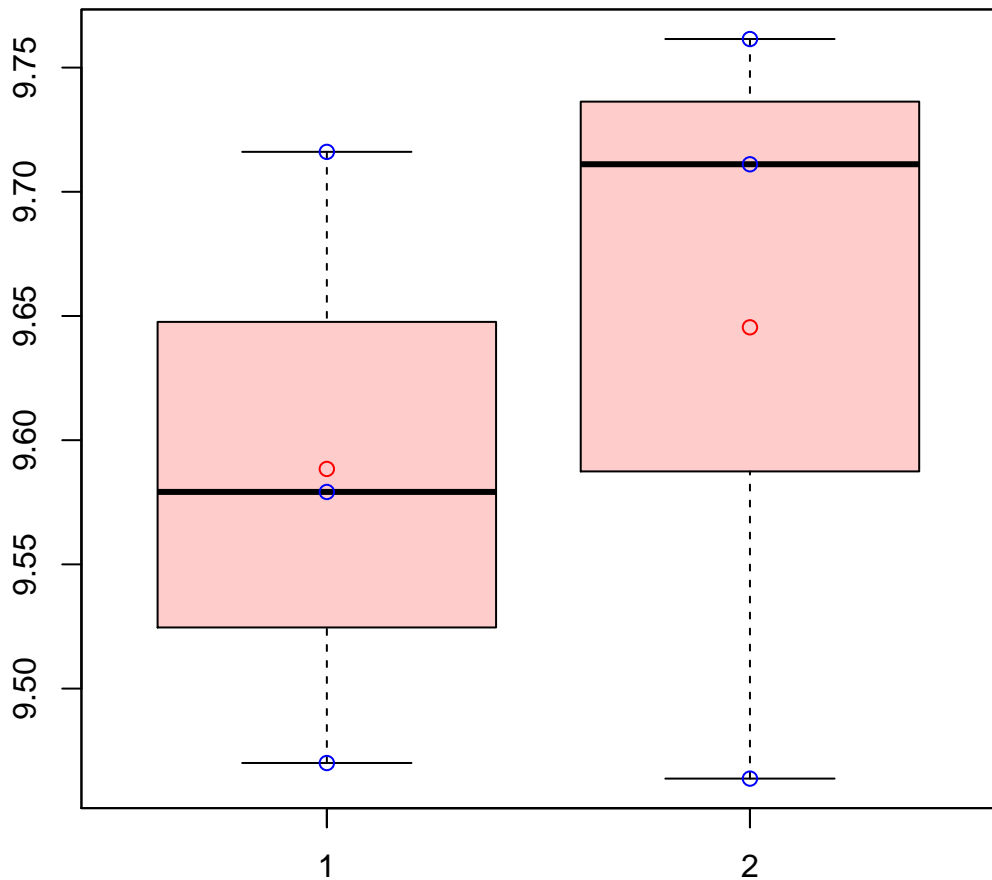

t-Test: p-value = 0.65

# CL21090Contig1|CL21090Contig1

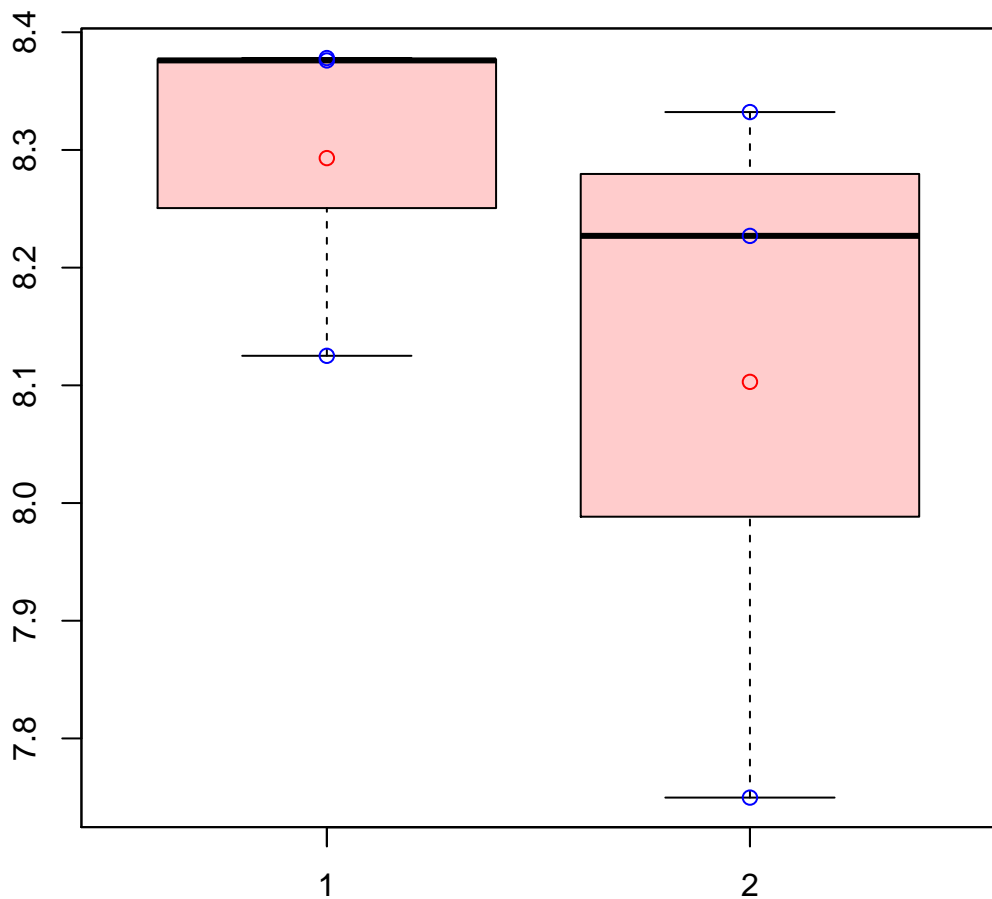

t-Test: p-value = 0.41

# CL210Contig11|CL210Contig11

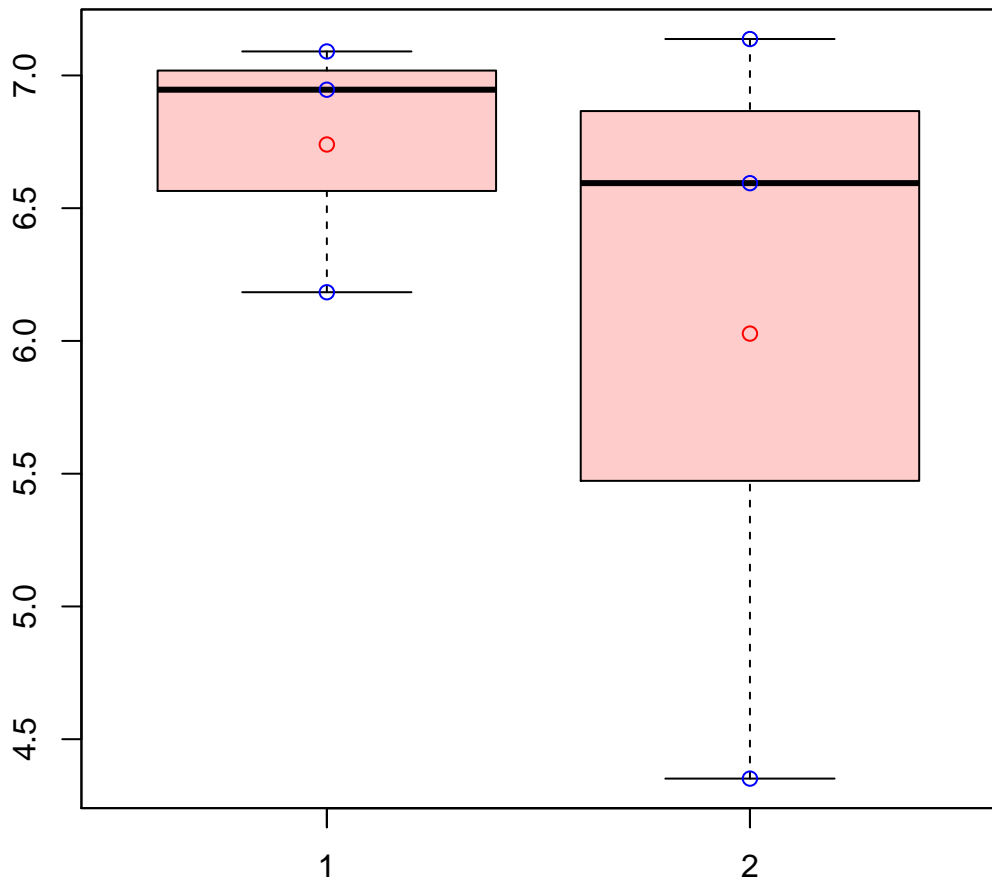

t-Test: p-value = 0.5

# CL210Contig12|CL210Contig12

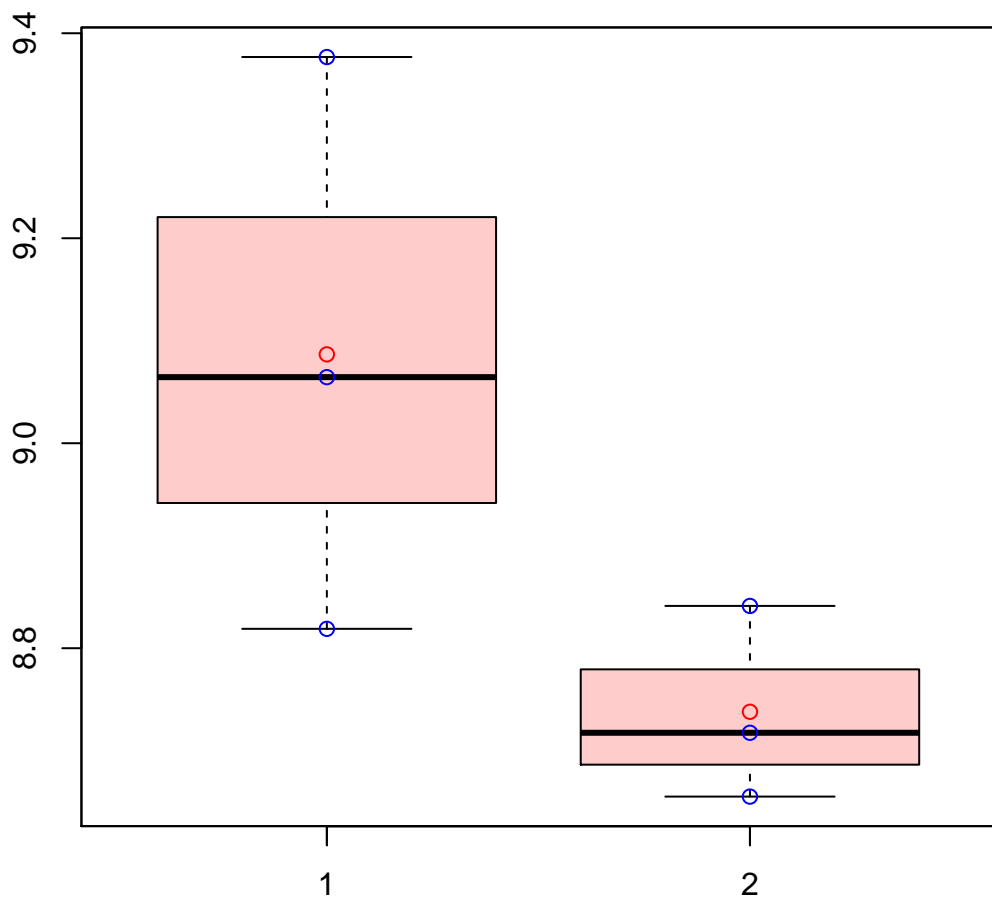

t-Test: p-value = 0.15

# CL210Contig7|CL210Contig7

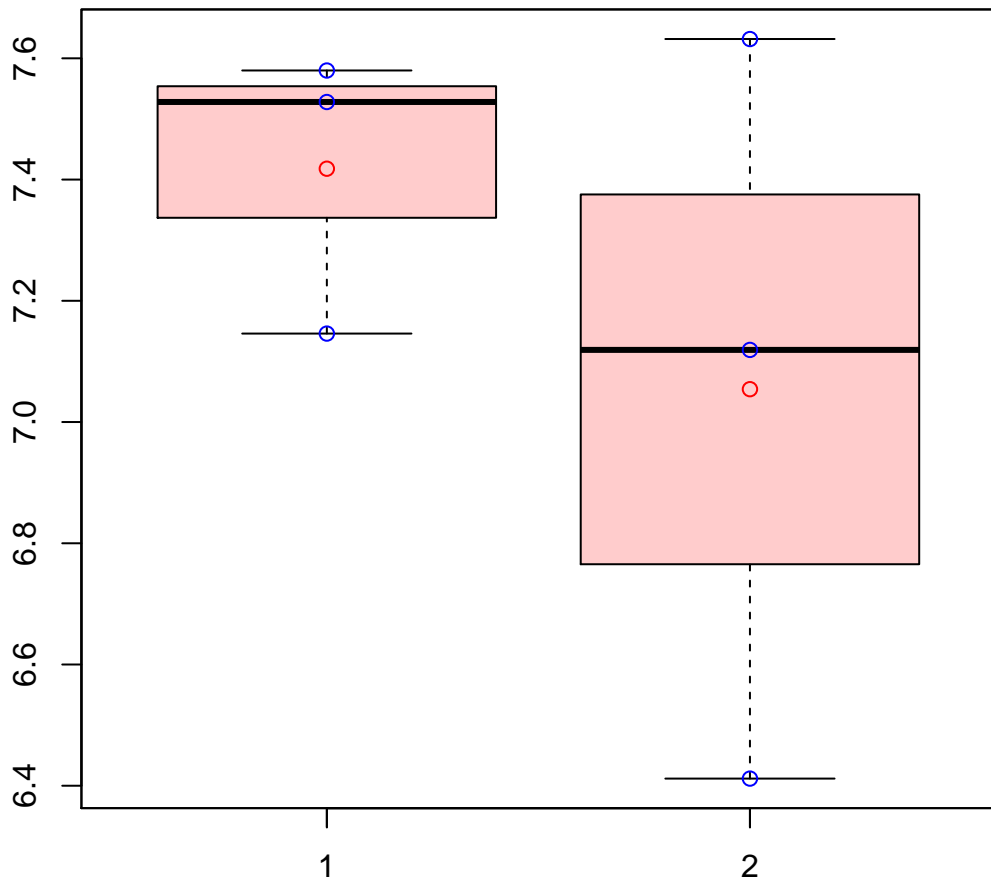

t-Test: p-value = 0.42

# CL210Contig9|CL210Contig9

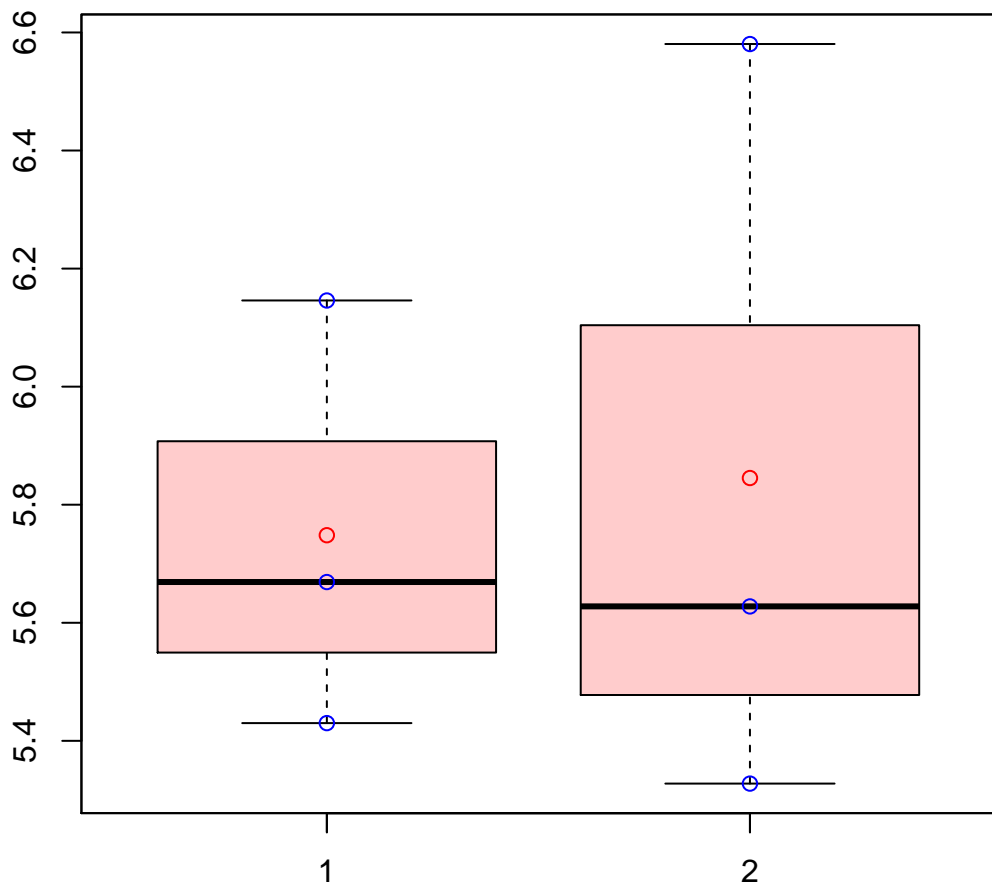

t-Test: p-value = 0.84



# CL2110Contig5|CL2110Contig5

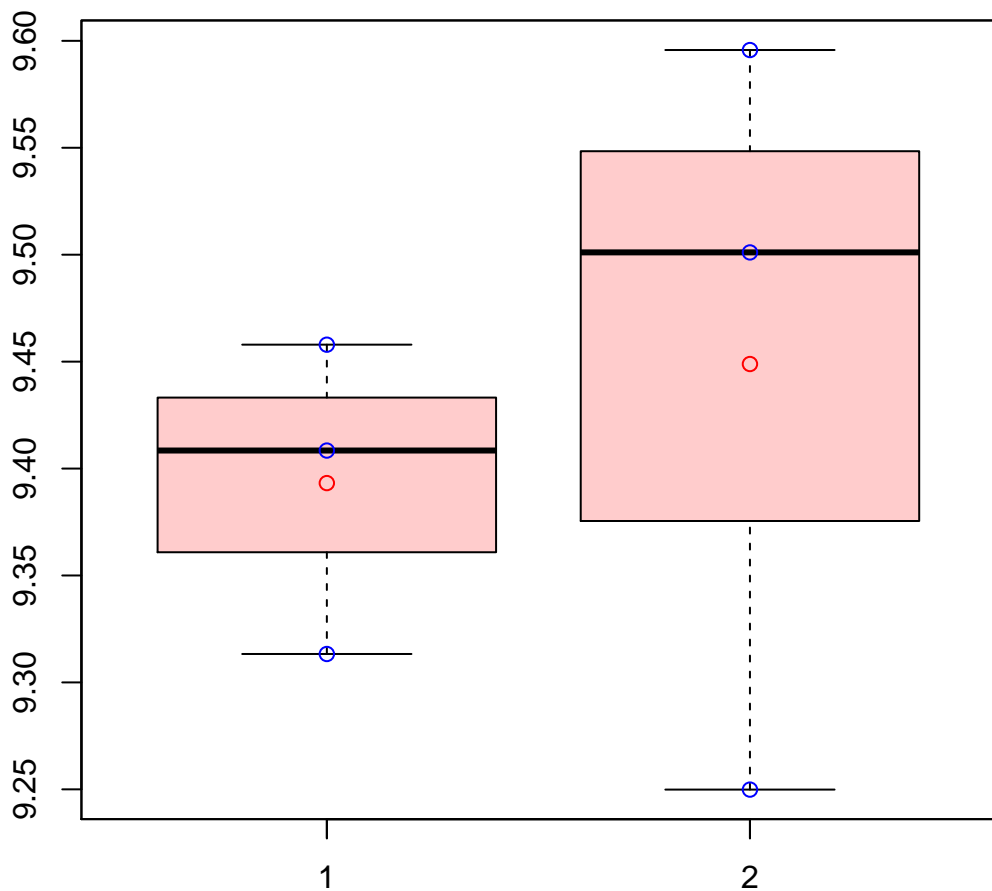

t-Test: p-value = 0.66

# CL2114Contig1|CL2114Contig1

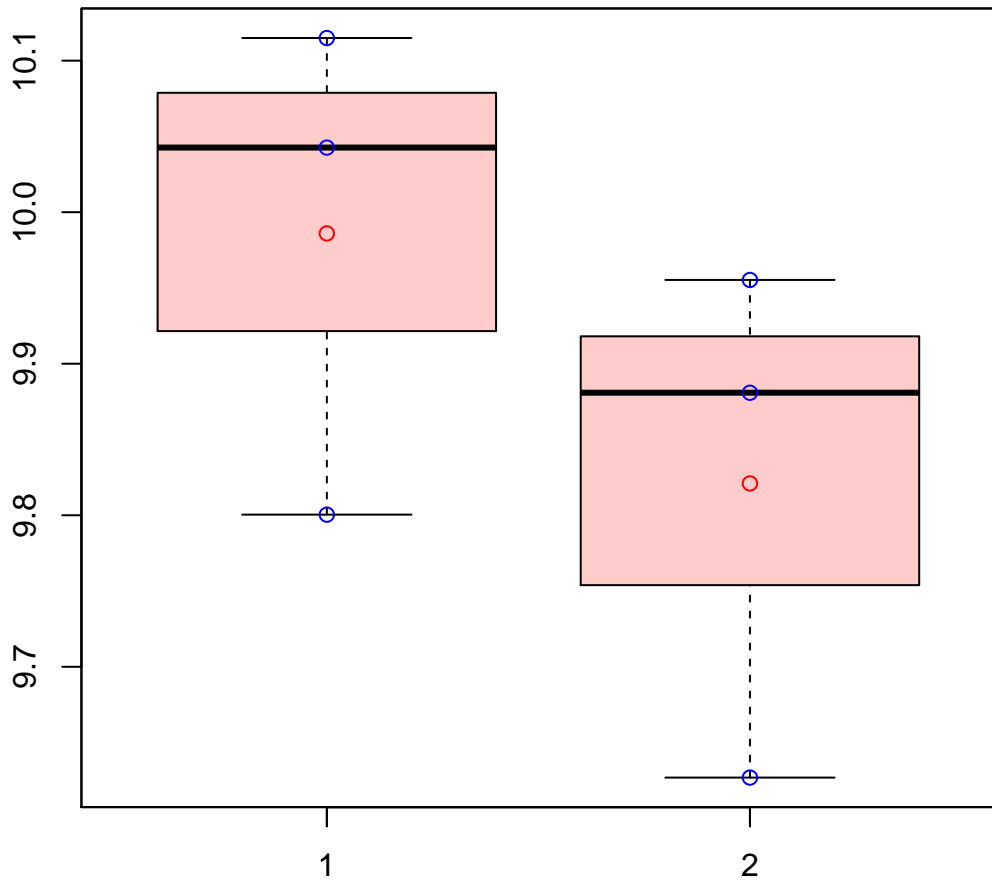

t-Test: p-value = 0.3

# CL2114Contig2|CL2114Contig2

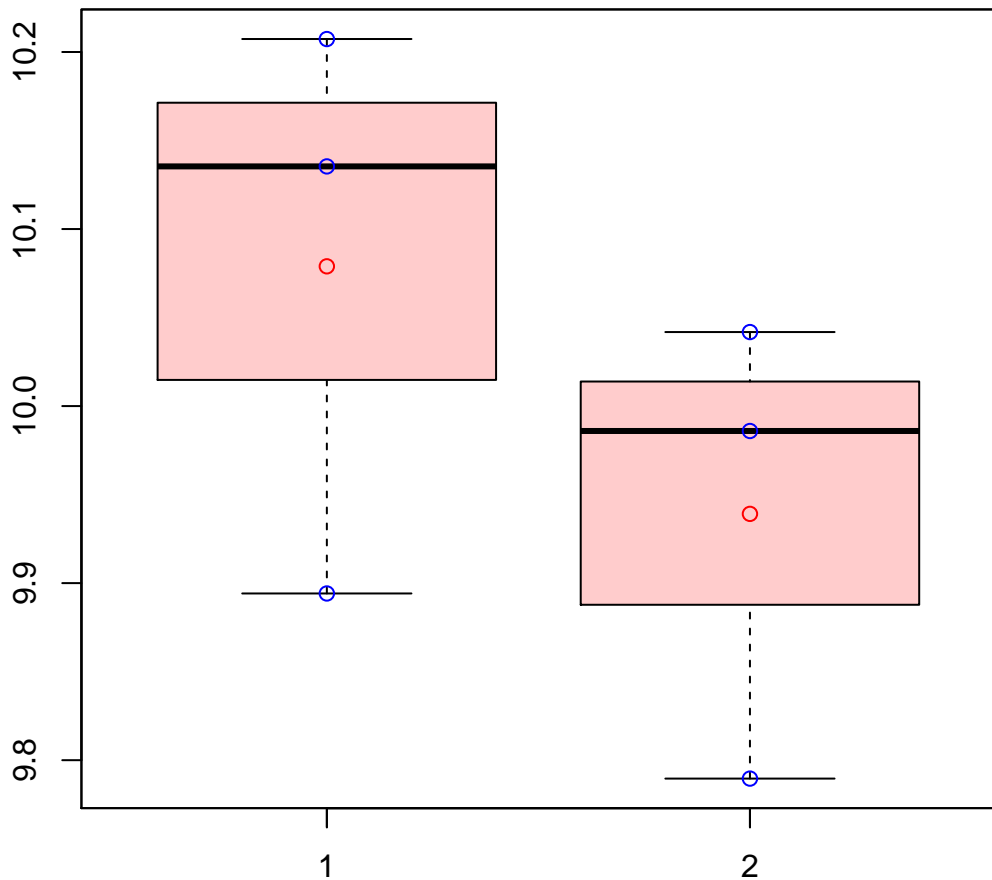

t-Test: p-value = 0.32

# CL2114Contig7|CL2114Contig7

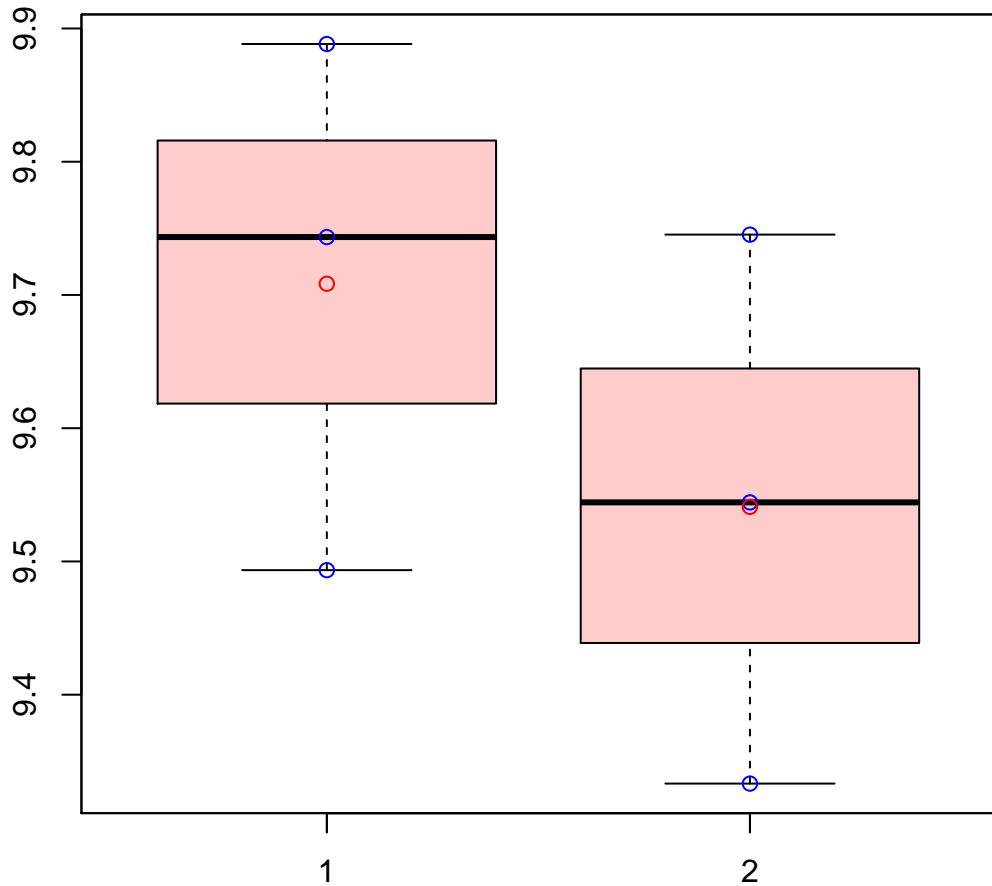

t-Test: p-value = 0.37

# CL2115Contig1|CL2115Contig1

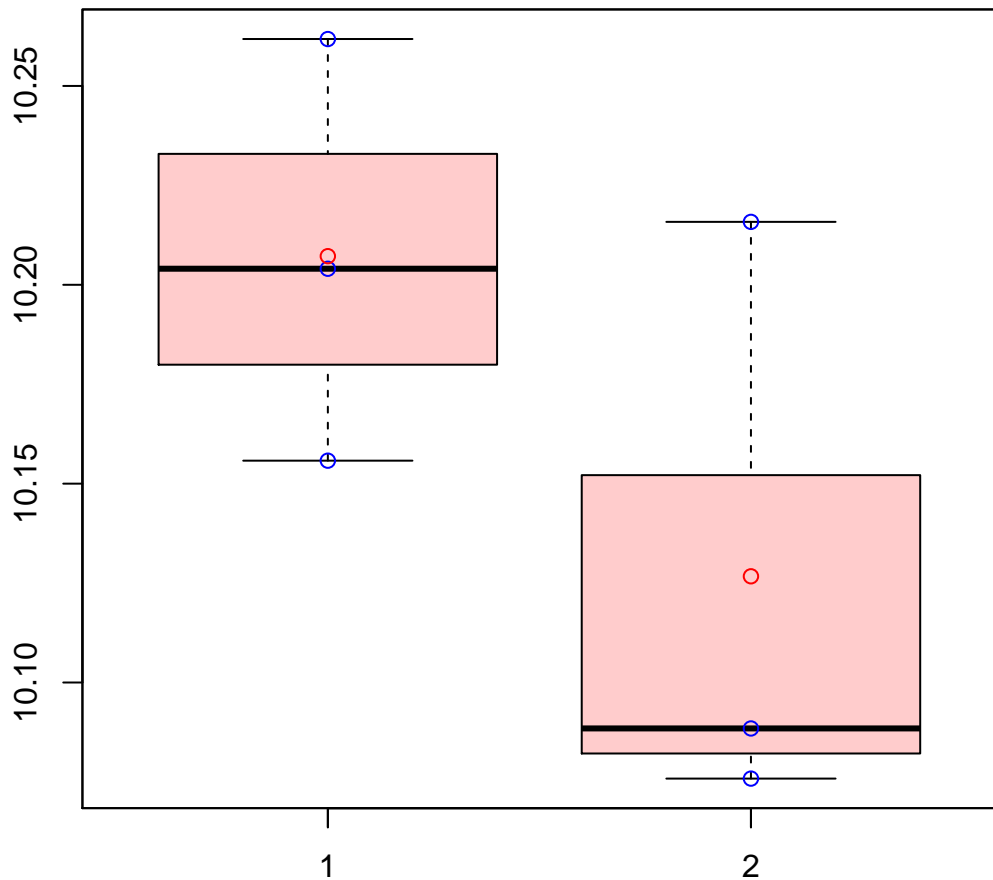

t-Test: p-value = 0.22

# CL2115Contig2|CL2115Contig2

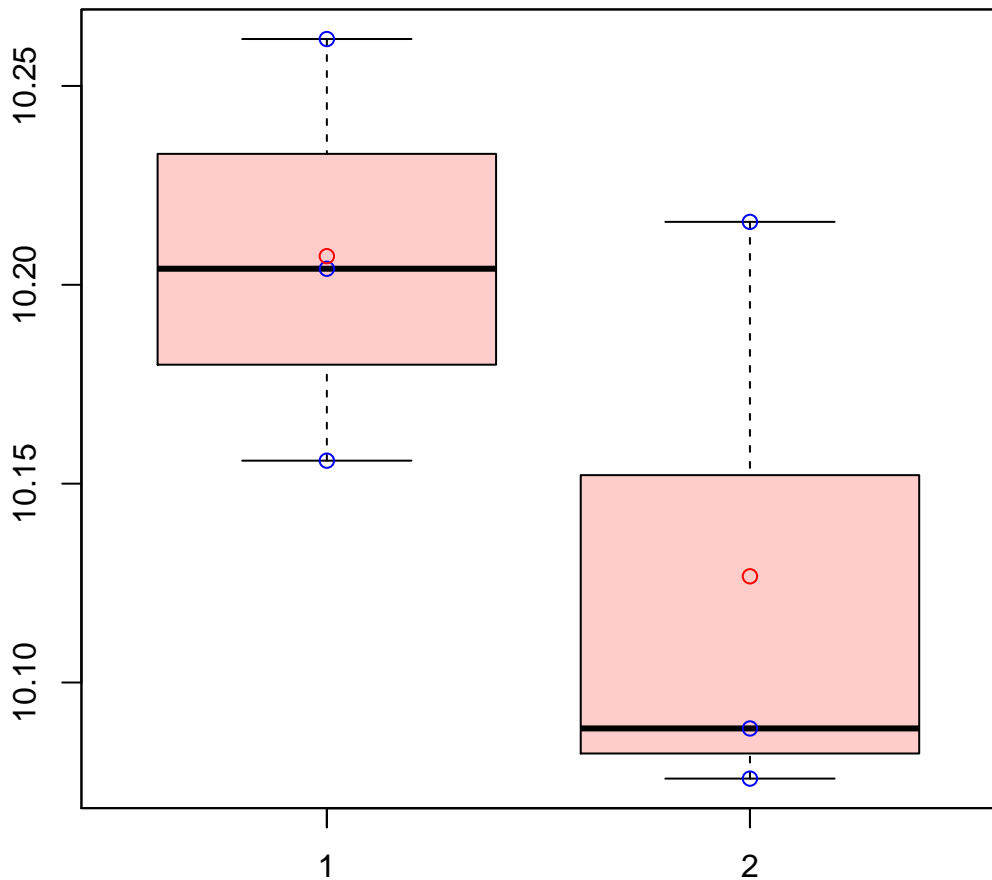

t-Test: p-value = 0.22

# CL2115Contig3|CL2115Contig3

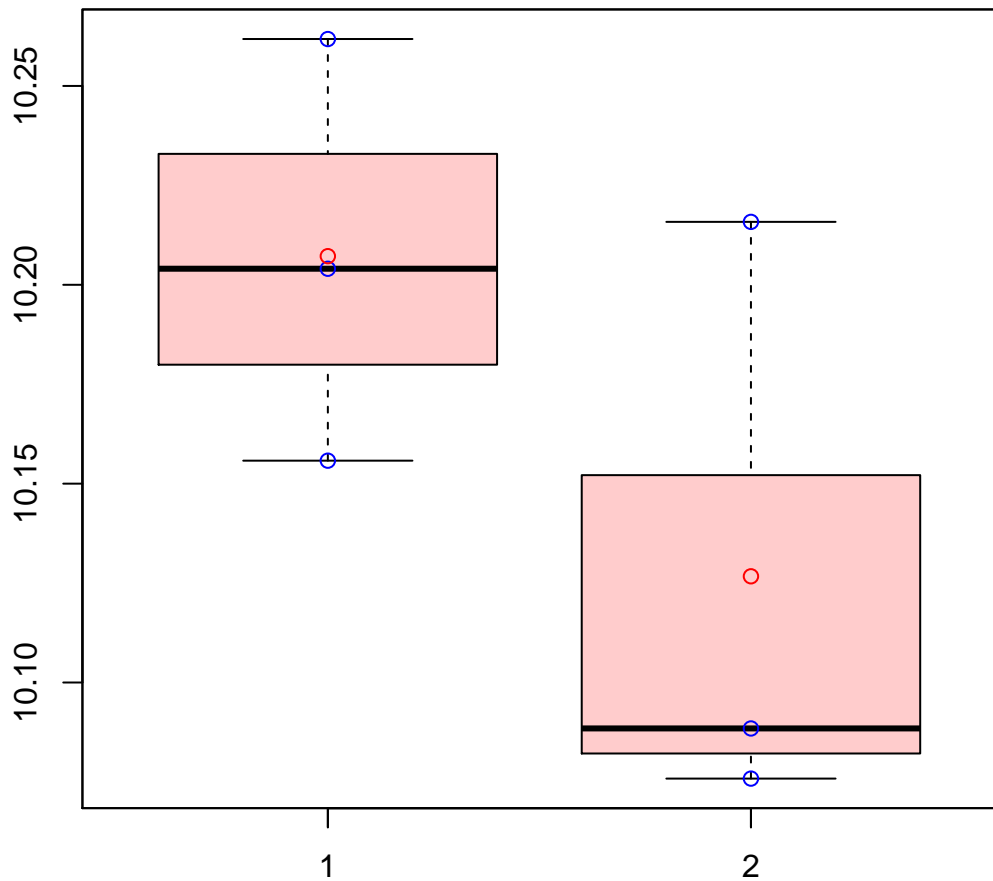

t-Test: p-value = 0.22

# CL2115Contig4|CL2115Contig4



t-Test: p-value = 0.22



# CL211Contig3|CL211Contig3

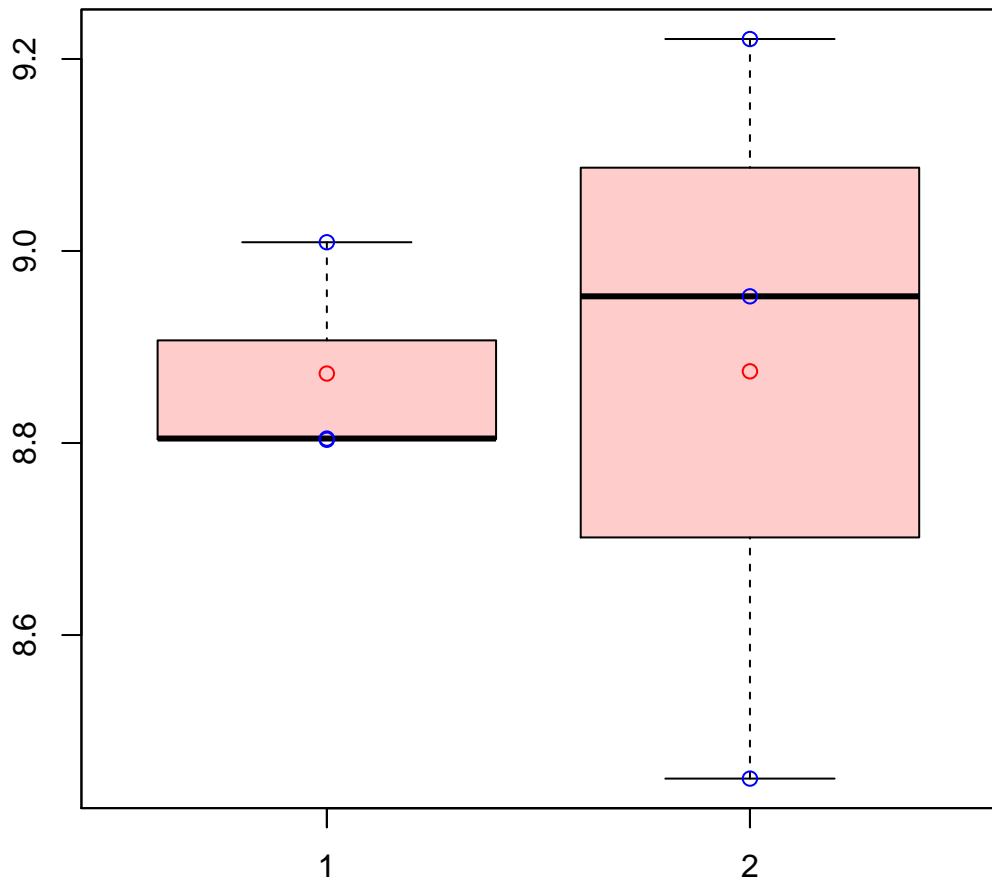

t-Test: p-value = 0.99

# CL211Contig5|CL211Contig5

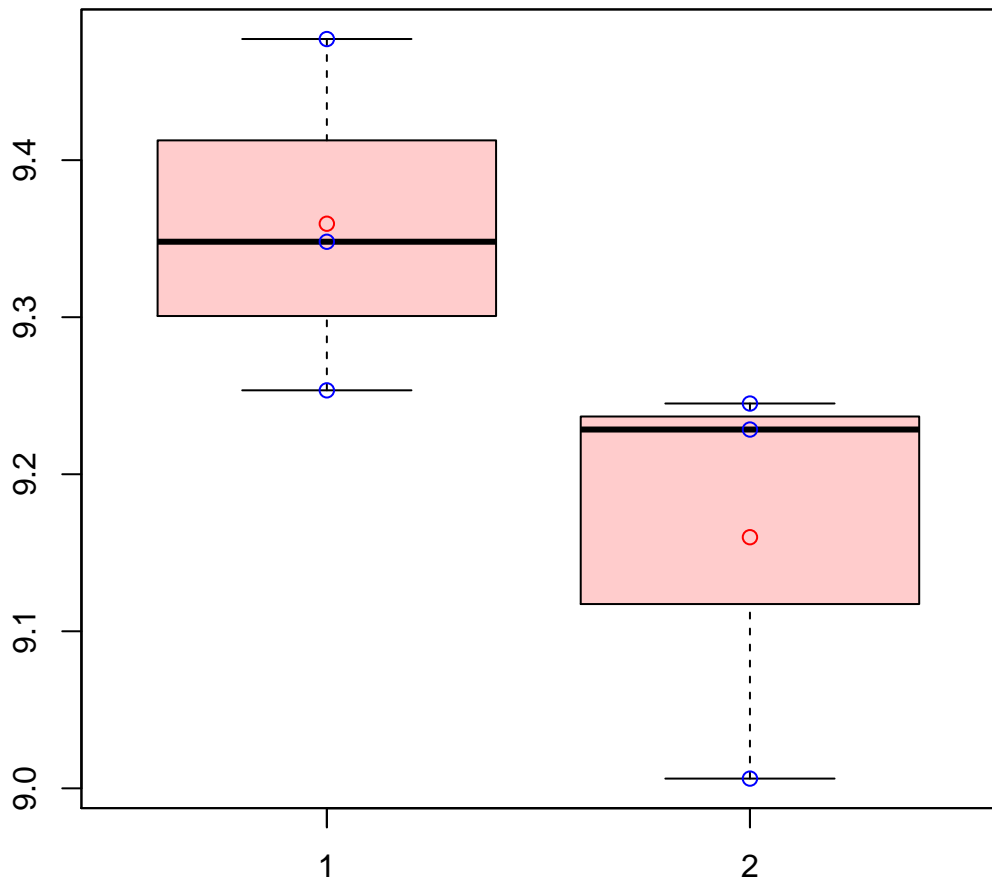

t-Test: p-value = 0.12

# CL2121Contig1|CL2121Contig1

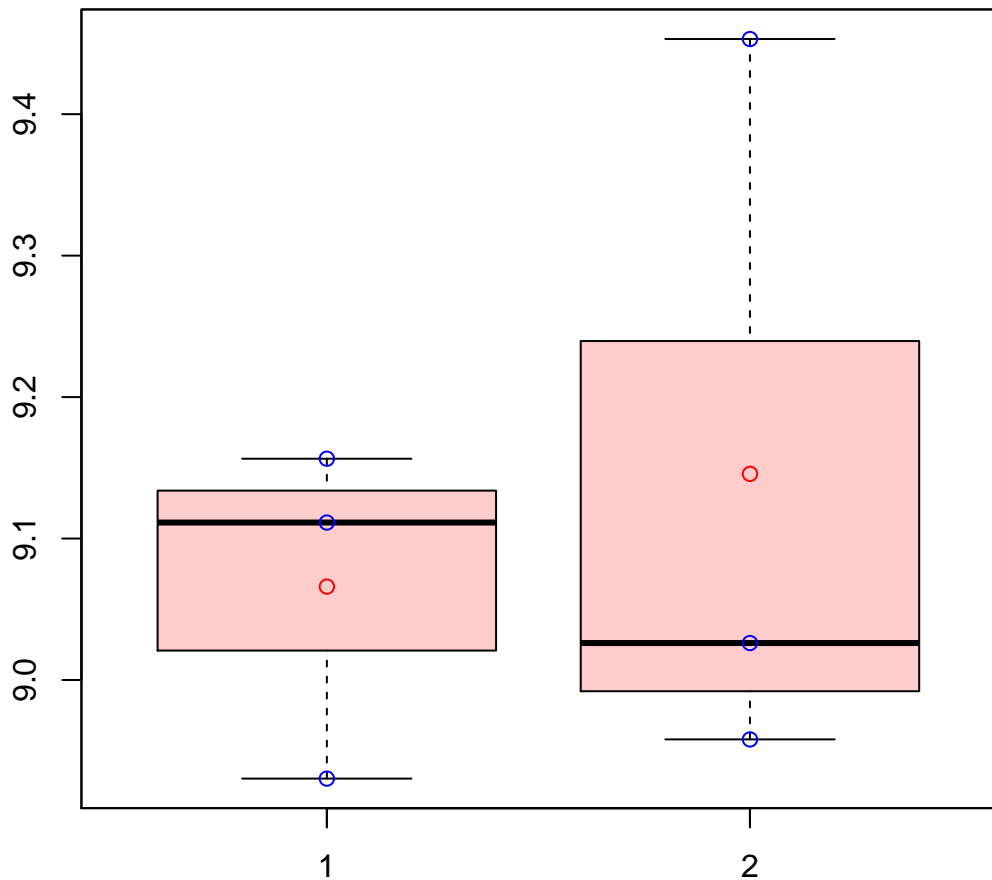

t-Test: p-value = 0.67

# CL2122Contig3|CL2122Contig3

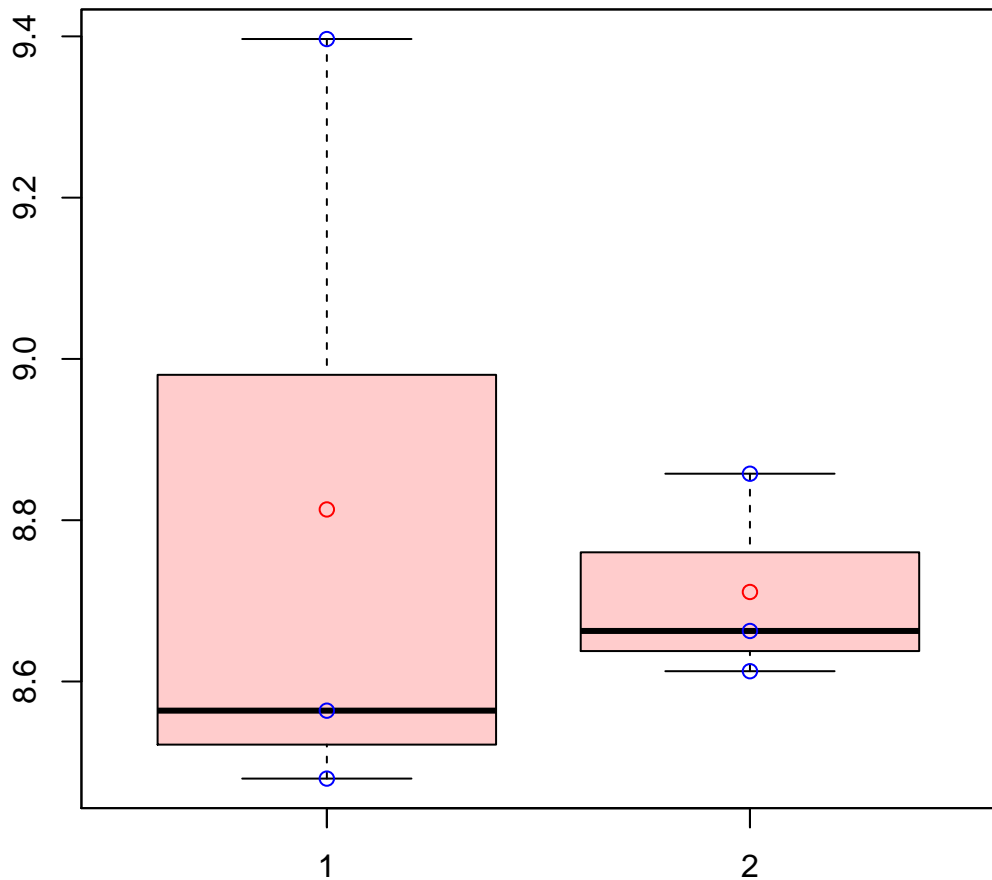

t-Test: p-value = 0.76

# CL2123Contig3|CL2123Contig3

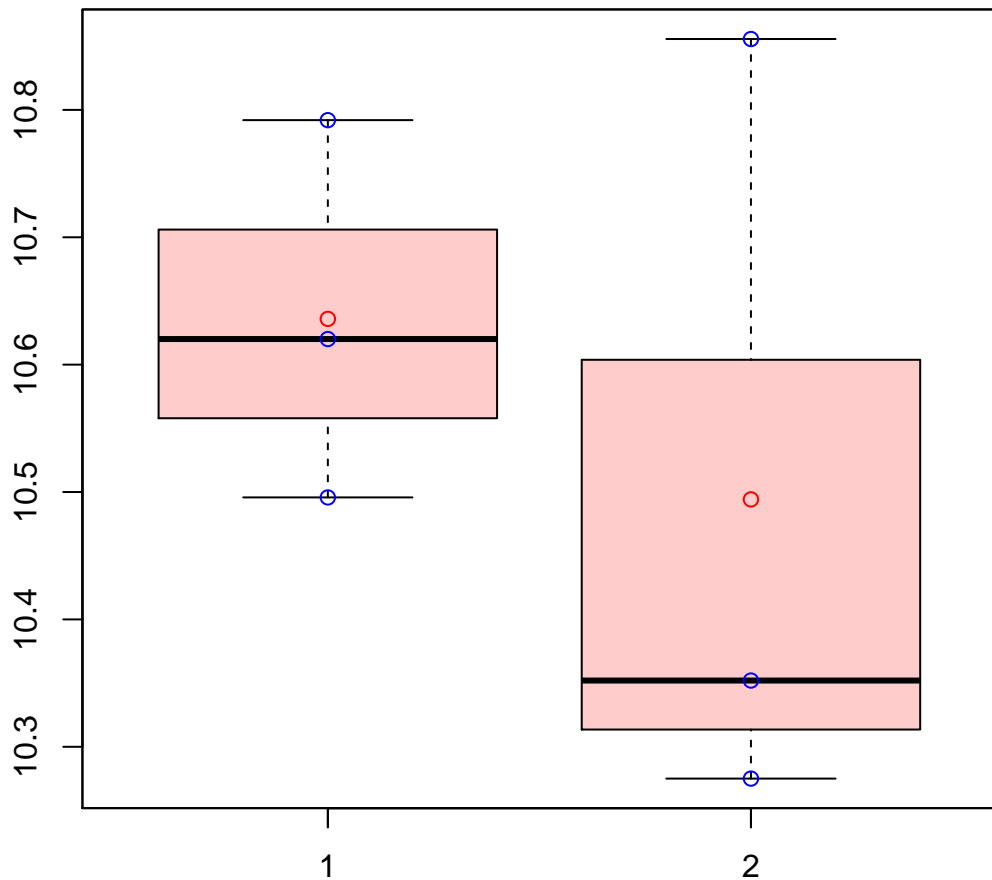

t-Test: p-value = 0.53

# CL2126Contig1|CL2126Contig1

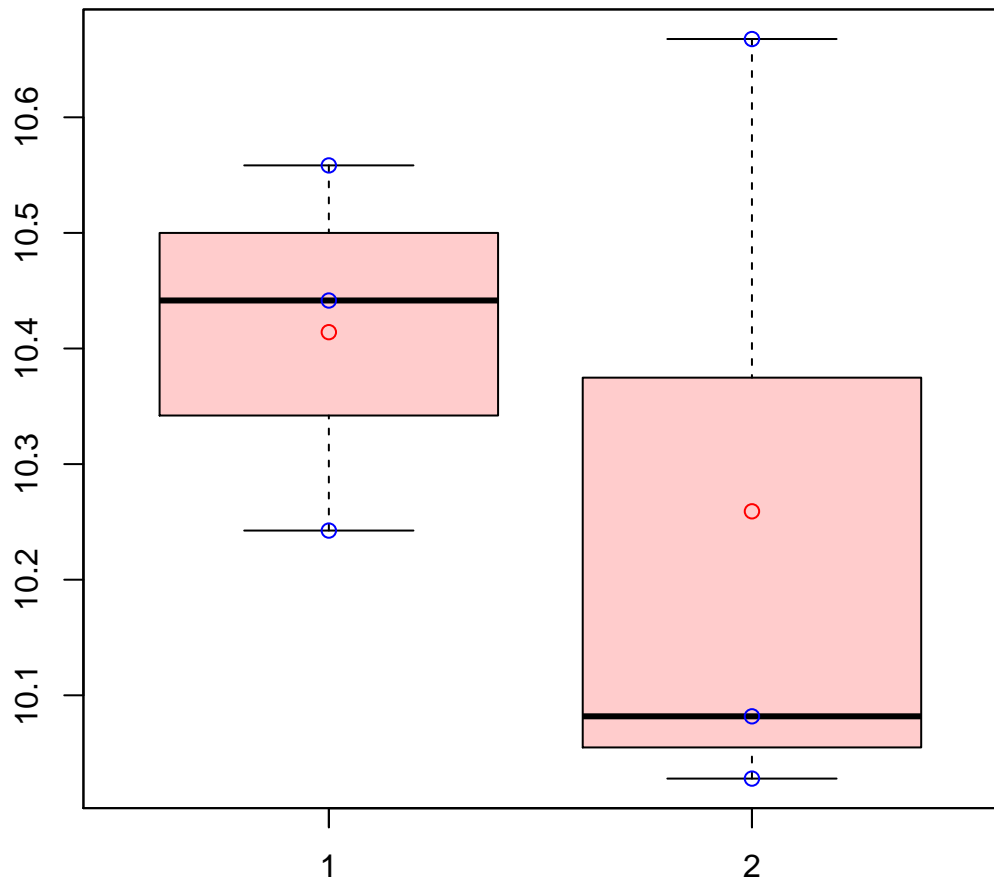

t-Test: p-value = 0.54

# CL2128Contig1|CL2128Contig1

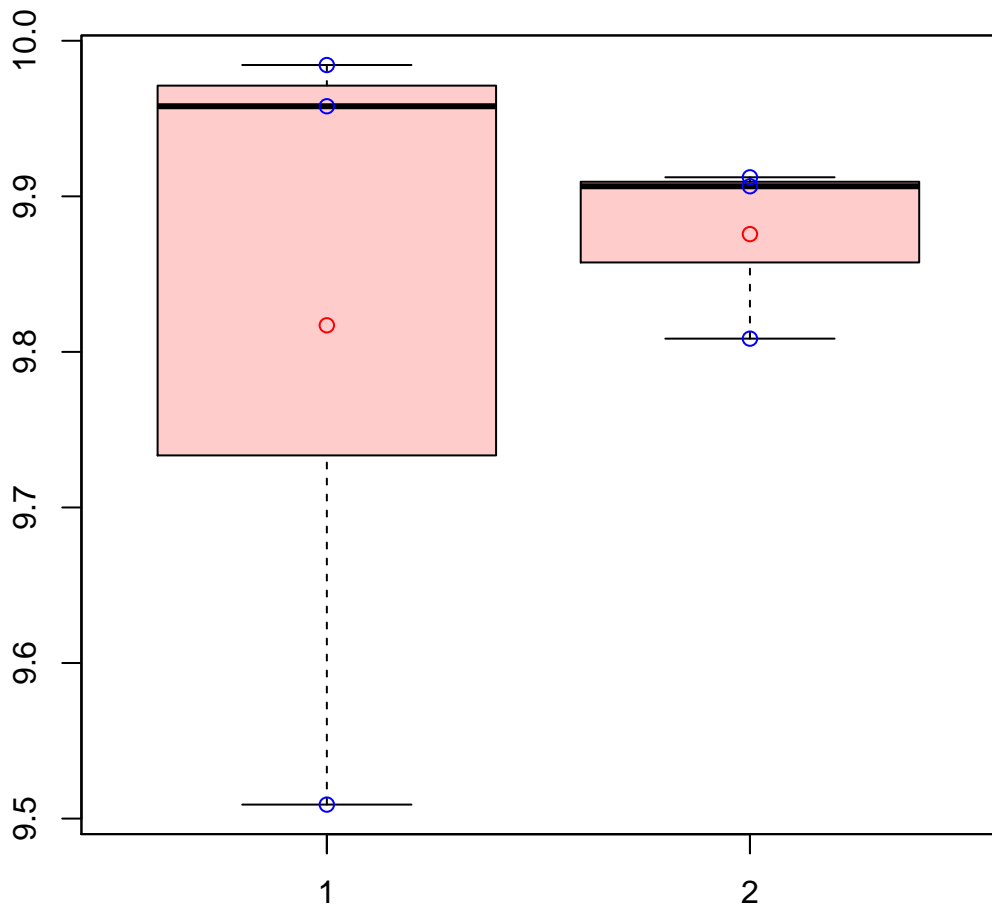

t-Test: p-value = 0.74

# CL2128Contig2|CL2128Contig2



t-Test: p-value = 0.74



# CL212Contig3|CL212Contig3

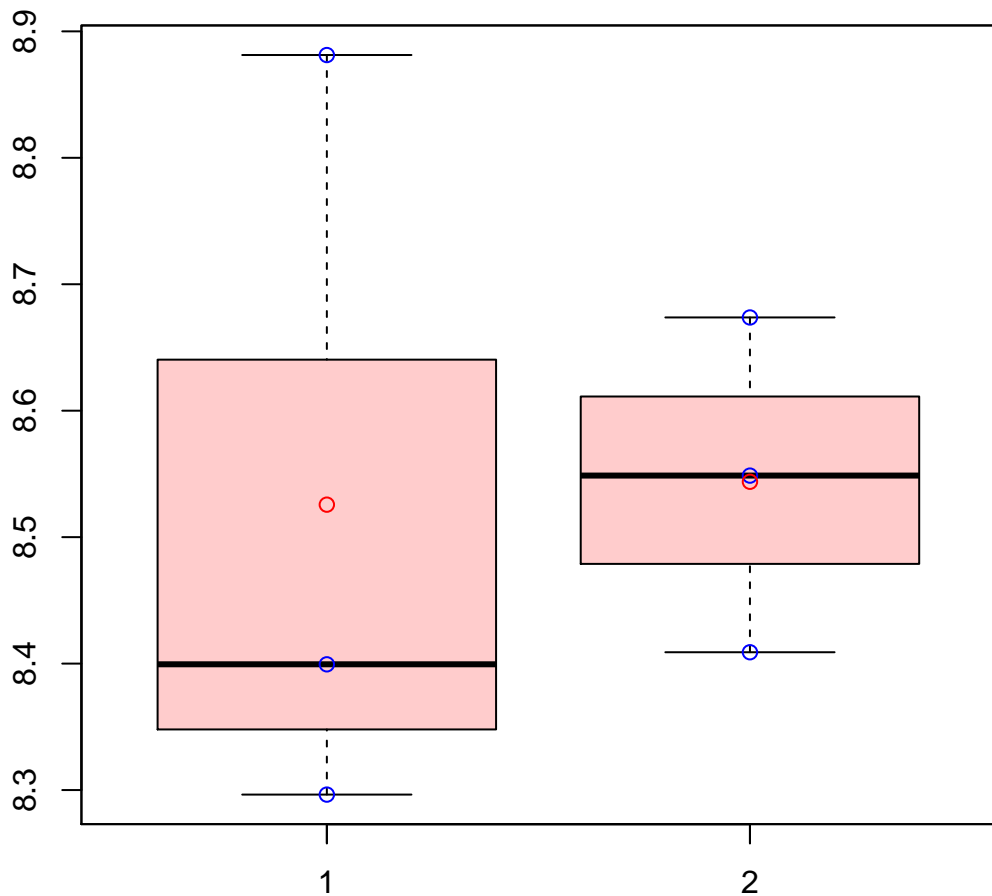

t-Test: p-value = 0.93

# CL21317Contig1|CL21317Contig1

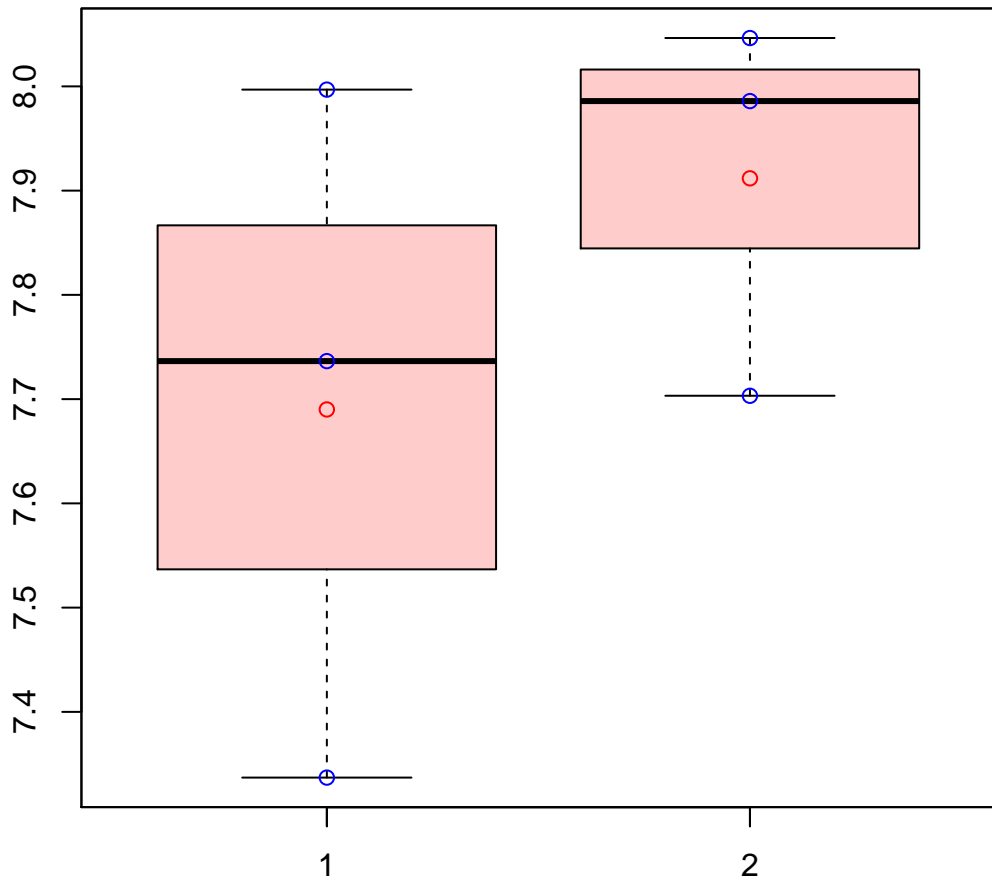

t-Test: p-value = 0.38

# CL21379Contig1|CL21379Contig1

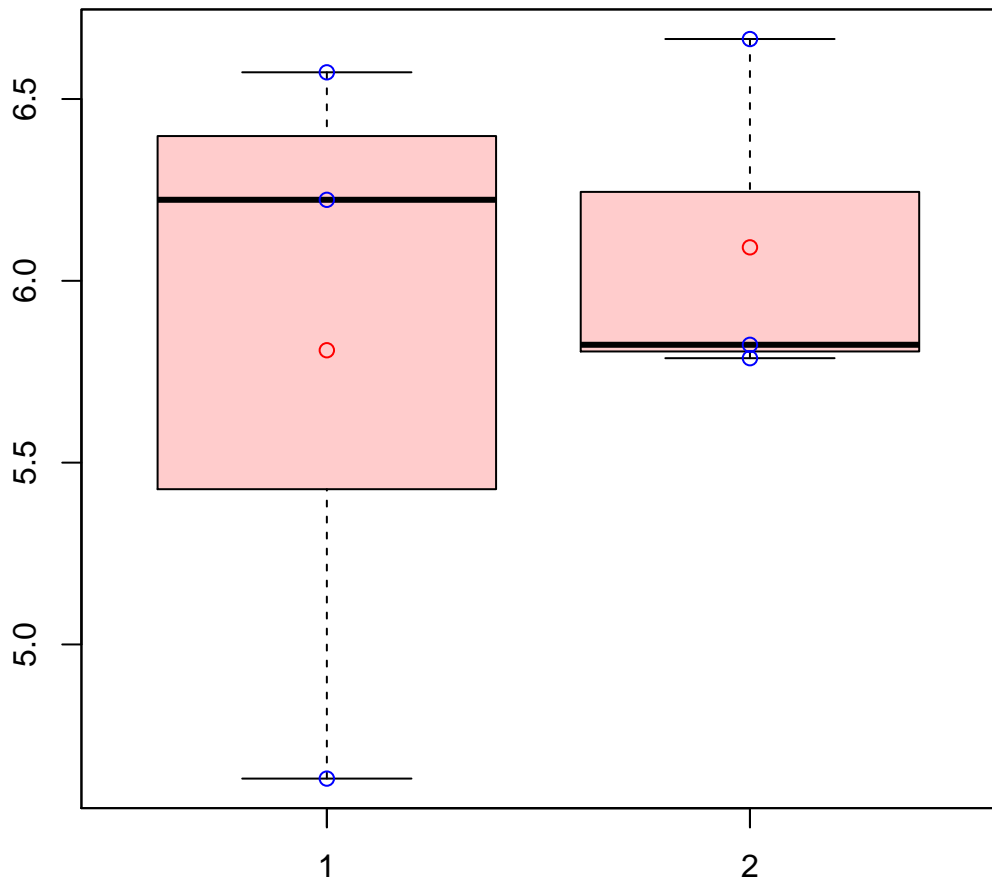

t-Test: p-value = 0.7

# CL2137Contig2|CL2137Contig2

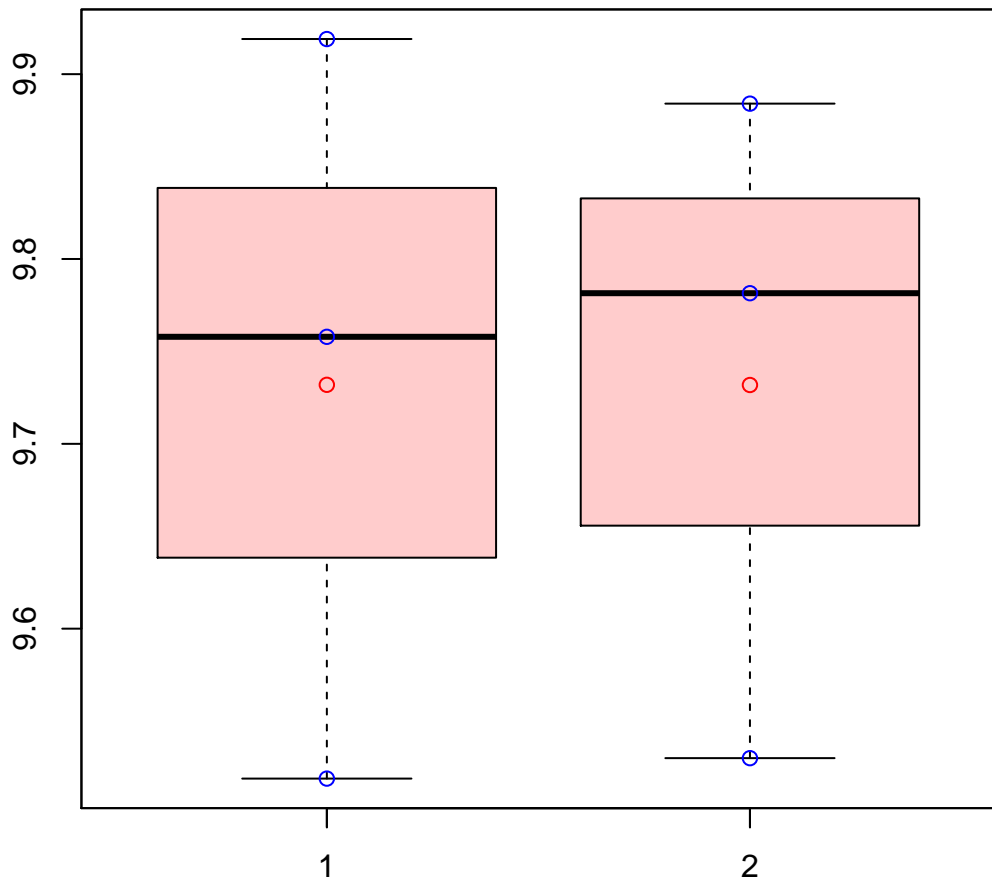

t-Test: p-value = 1

# CL213Contig1|CL213Contig1

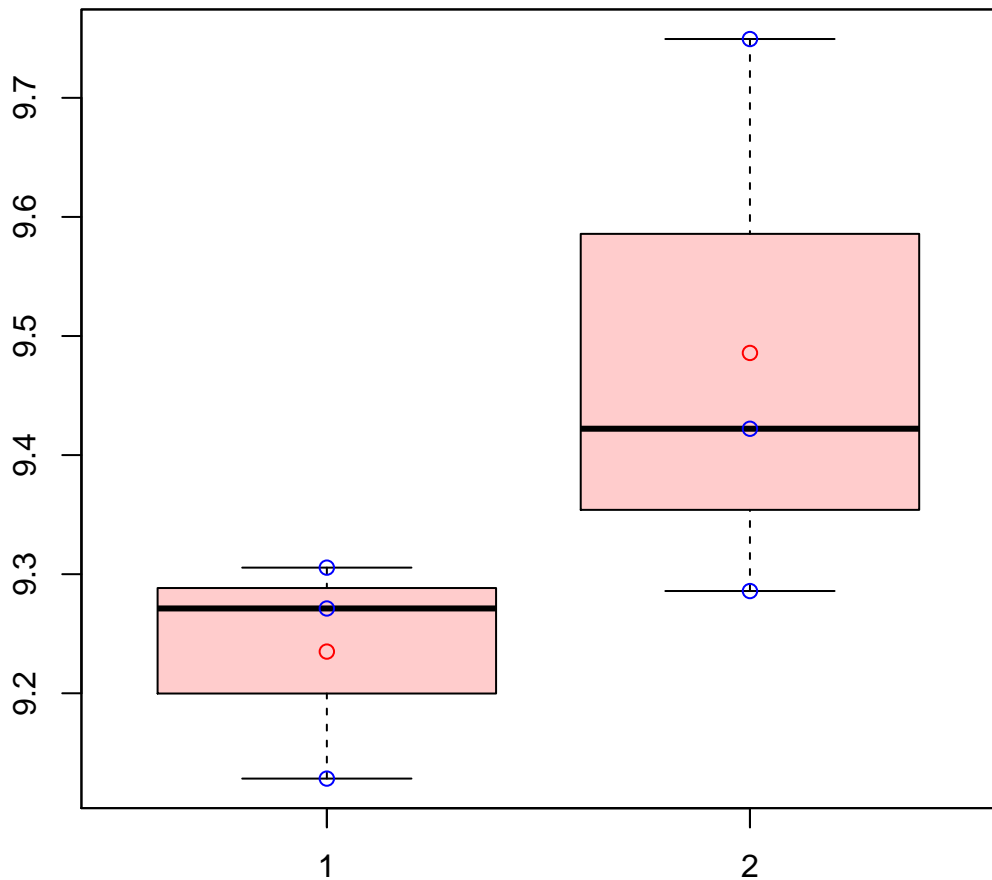

t-Test: p-value = 0.2

# CL213Contig9|CL213Contig9

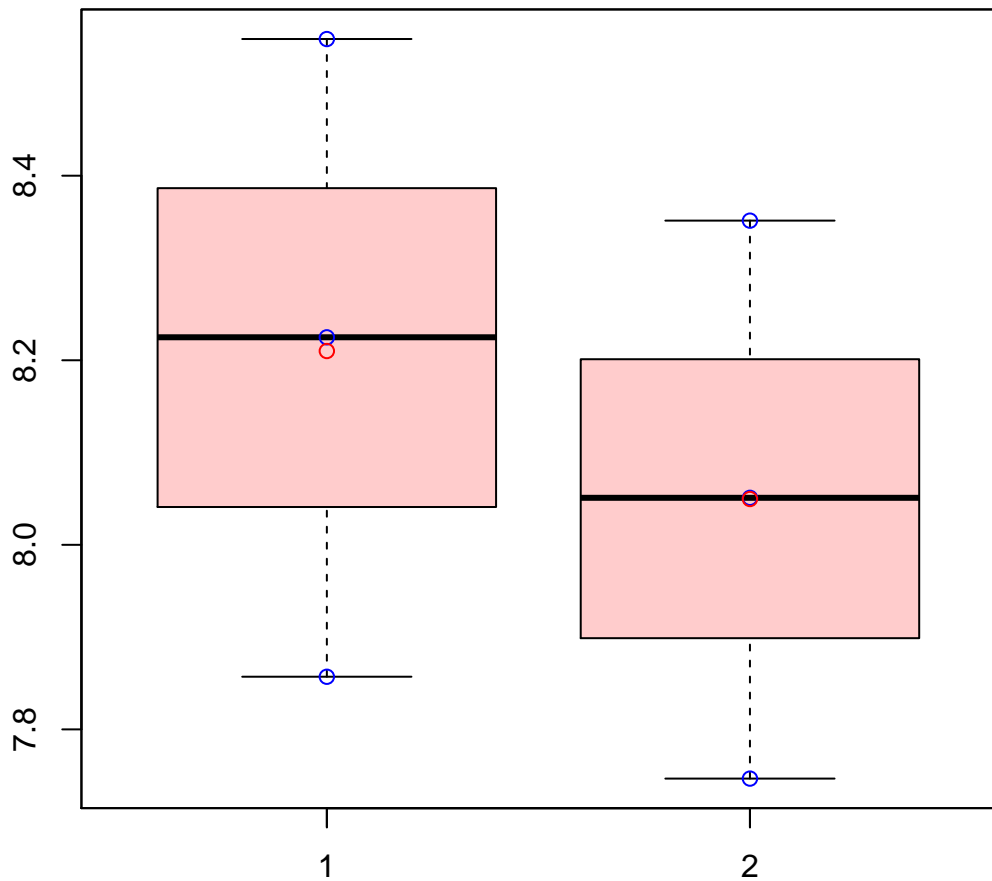

t-Test: p-value = 0.58

# CL2140Contig2|CL2140Contig2

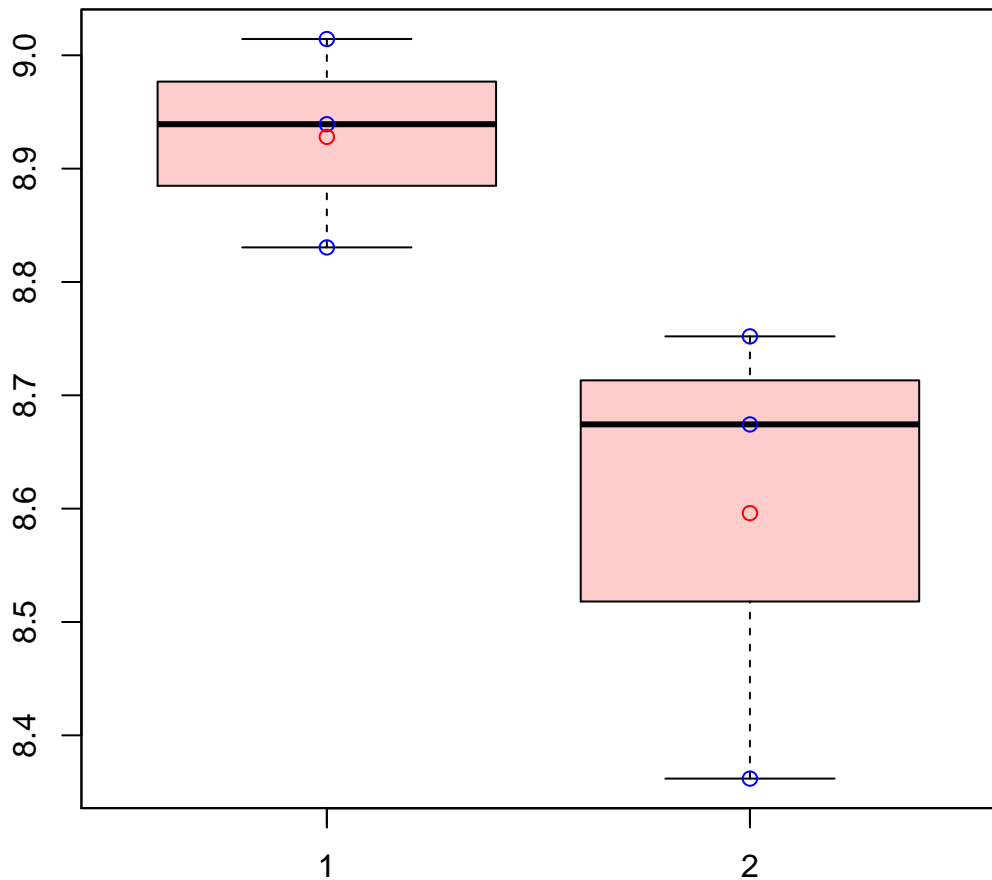

t-Test: p-value = 0.09

# CL2141Contig3|CL2141Contig3

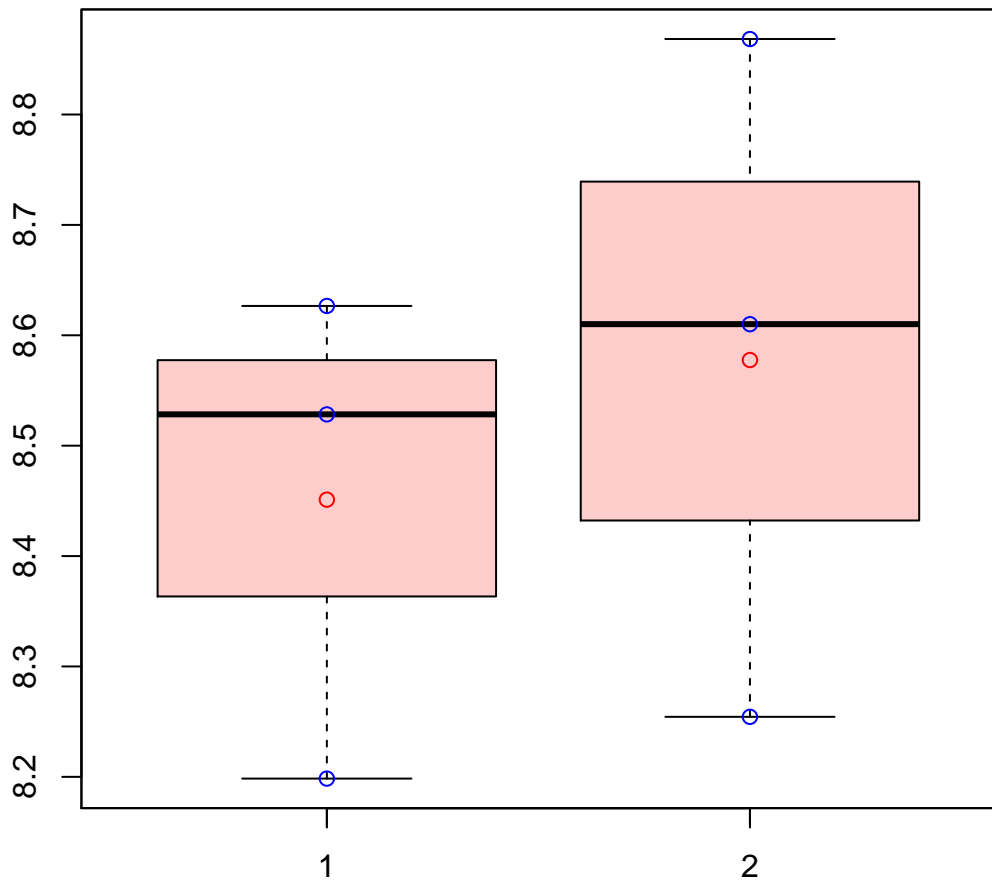

t-Test: p-value = 0.6



# CL2146Contig2|CL2146Contig2

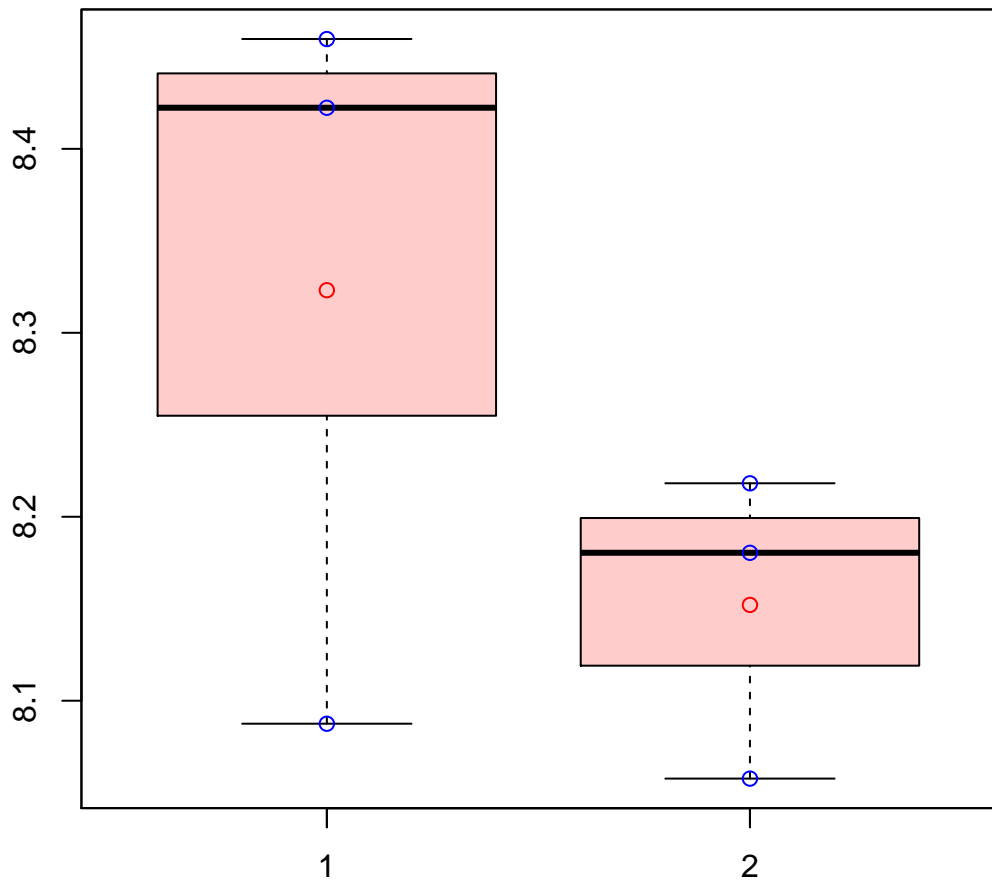

t-Test: p-value = 0.28

# CL2149Contig3|CL2149Contig3



t-Test: p-value = 0.73

# CL2152Contig3|CL2152Contig3

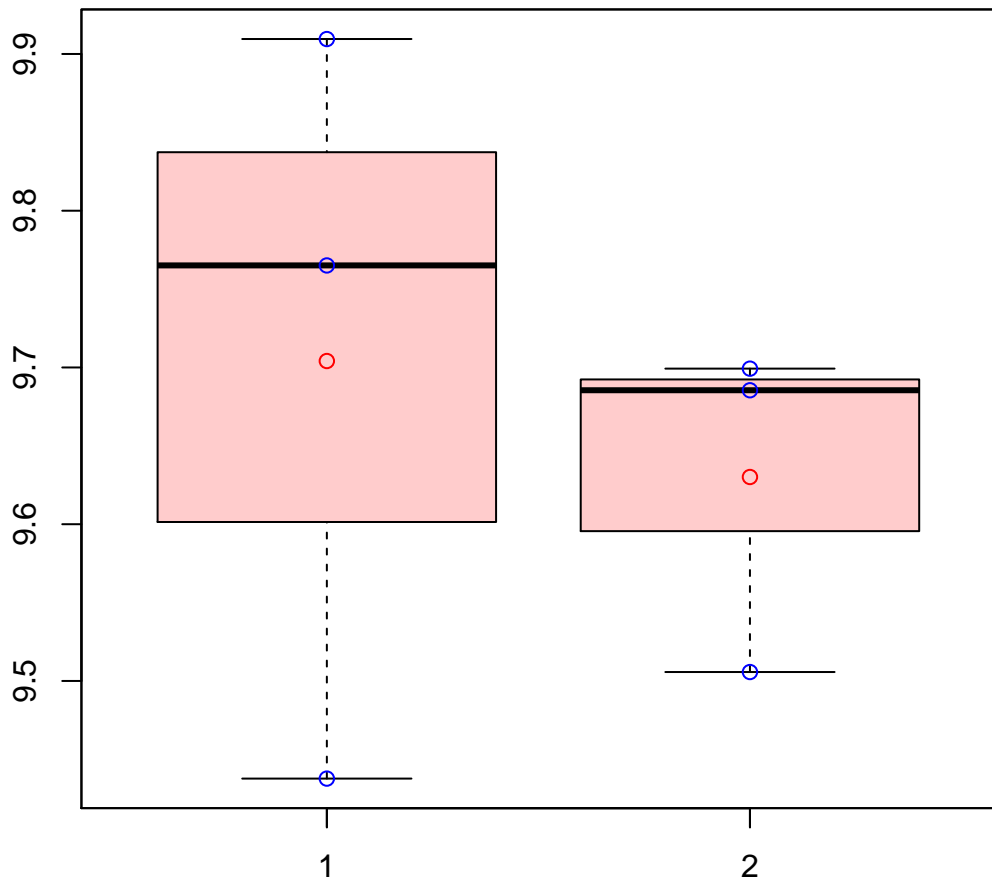

t-Test: p-value = 0.66

# CL2158Contig3|CL2158Contig3

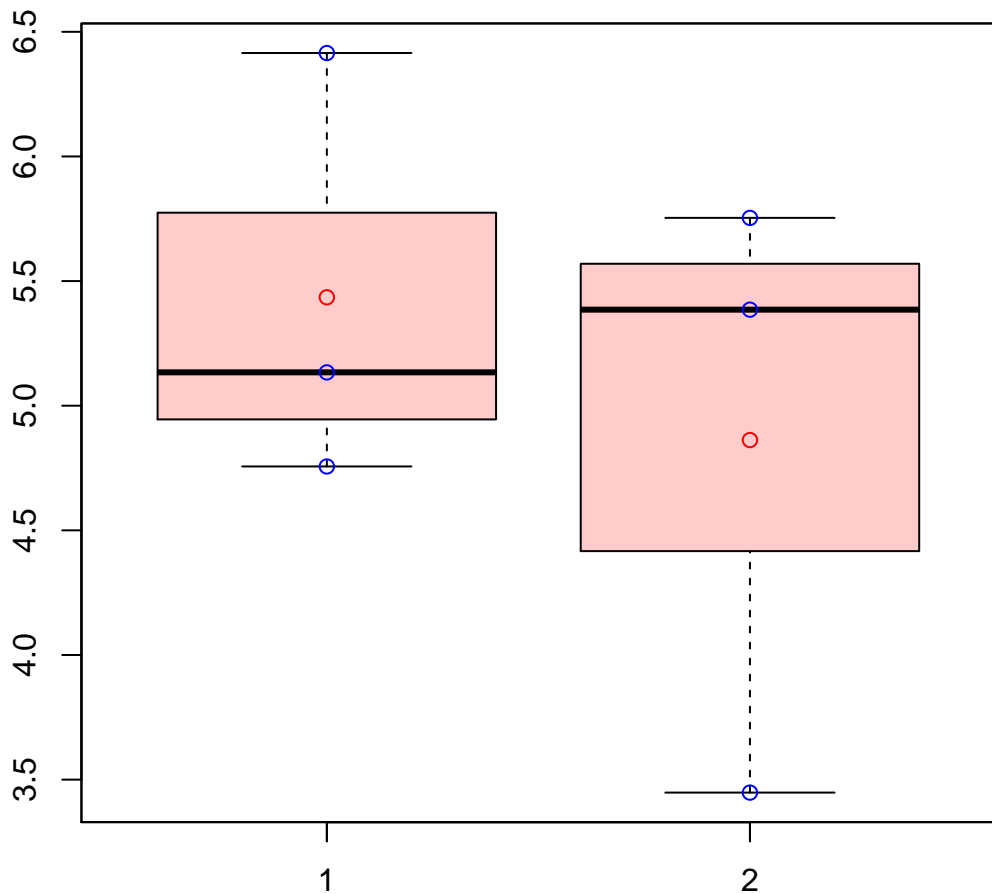

t-Test: p-value = 0.55

# CL2158Contig5|CL2158Contig5



t-Test: p-value = 0.55

# CL215Contig6|CL215Contig6

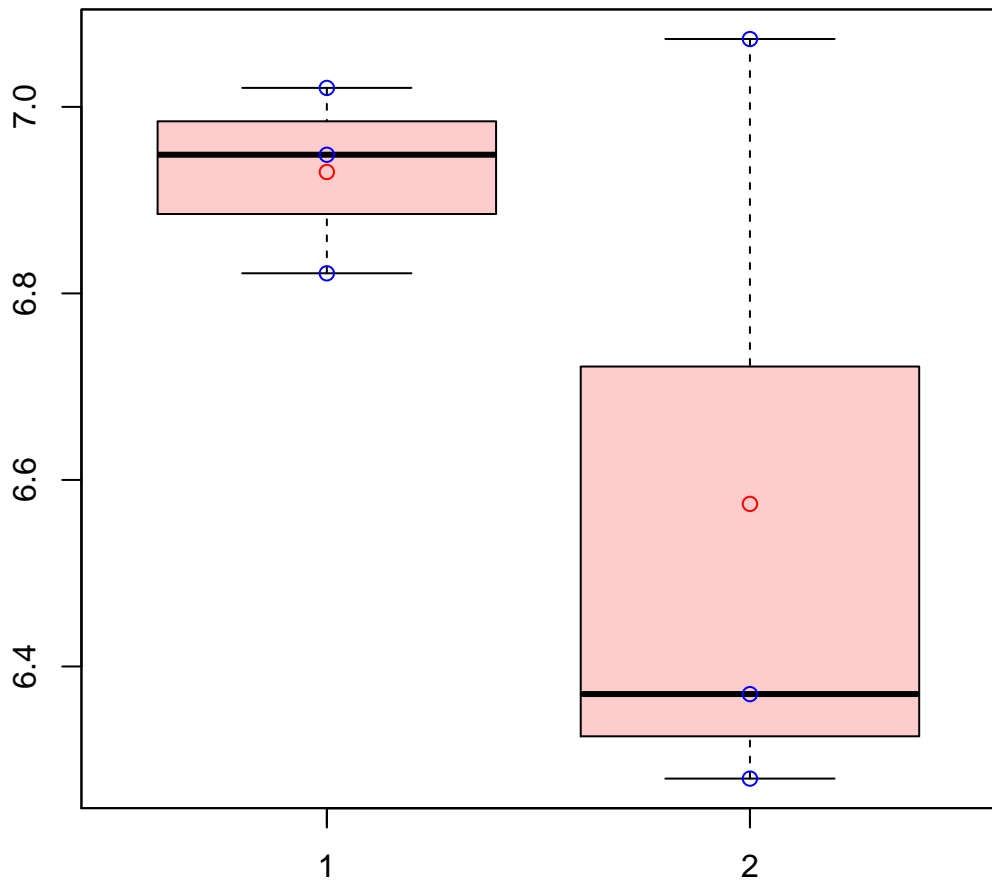

t-Test: p-value = 0.29

# CL2160Contig2|CL2160Contig2

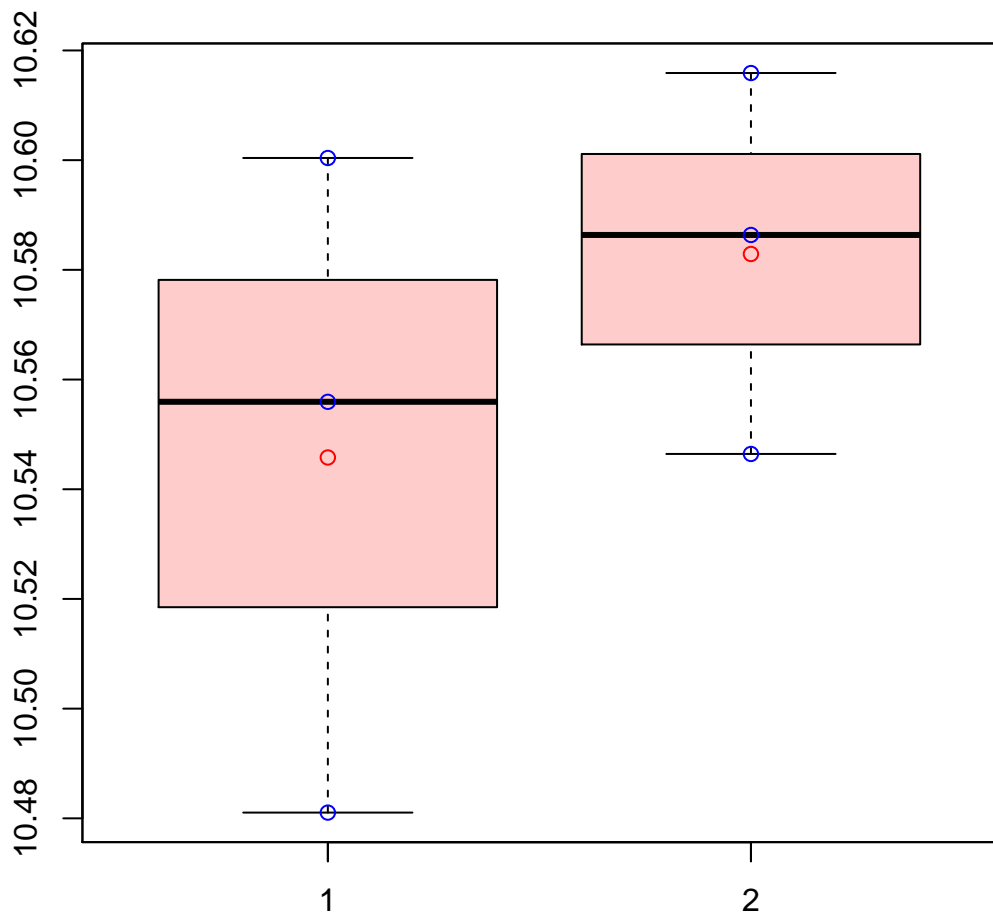

t-Test: p-value = 0.42

# CL2160Contig4|CL2160Contig4

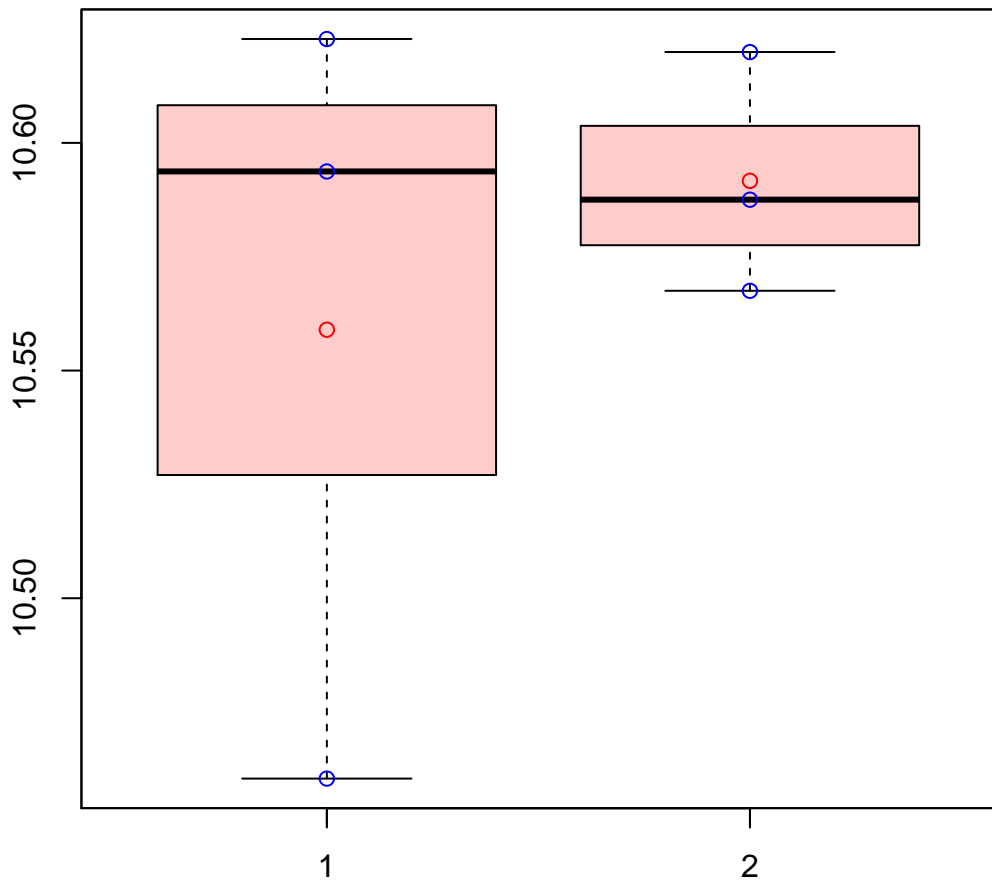

t-Test: p-value = 0.59



# CL2162Contig1|CL2162Contig1

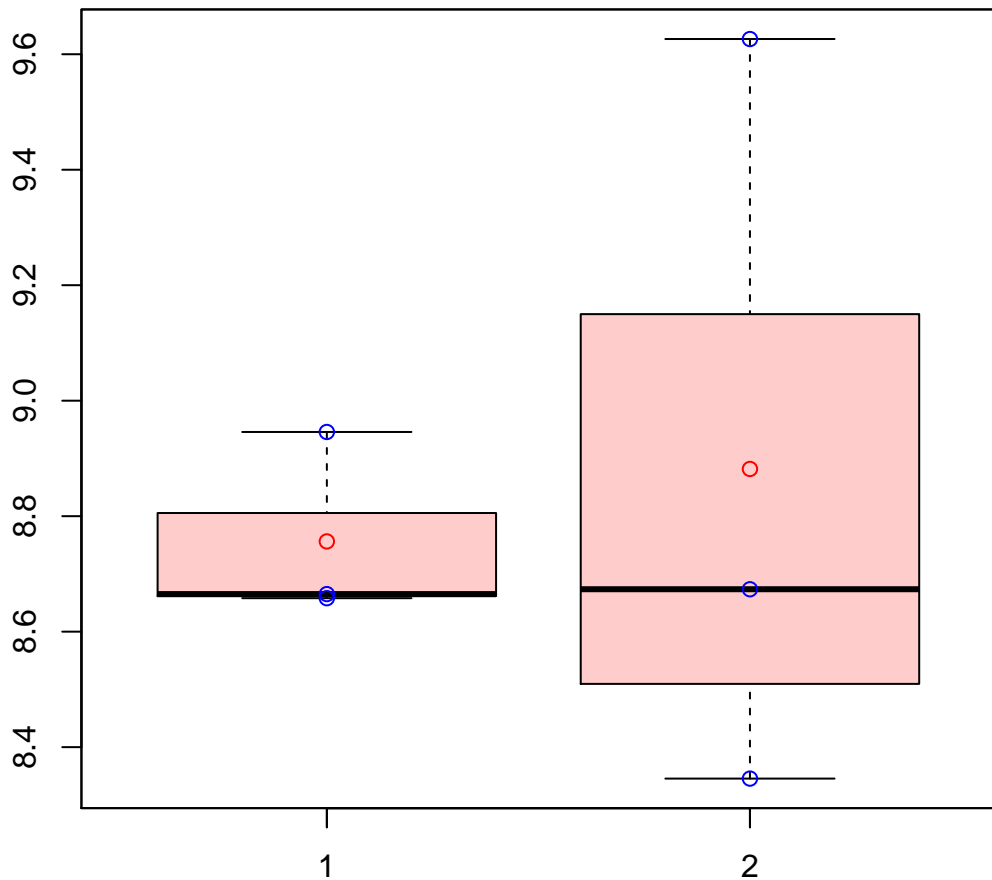

t-Test: p-value = 0.78

# CL2164Contig1|CL2164Contig1

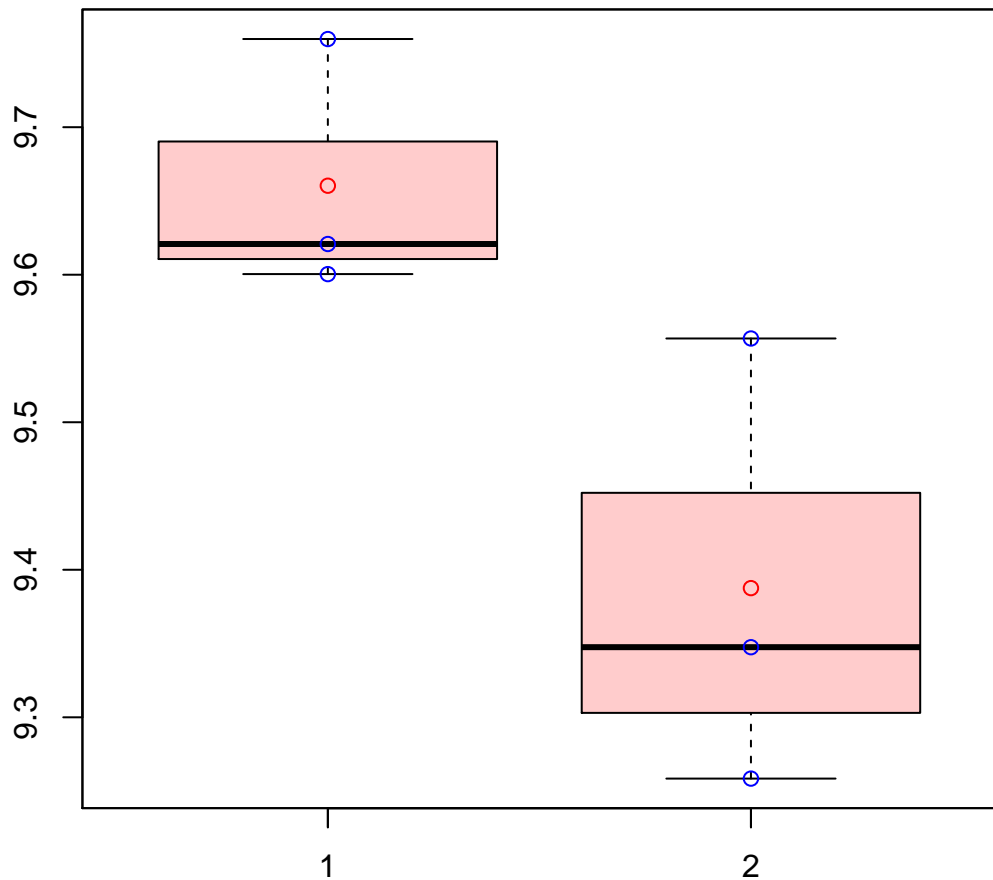

t-Test: p-value = 0.07

# CL2164Contig2|CL2164Contig2

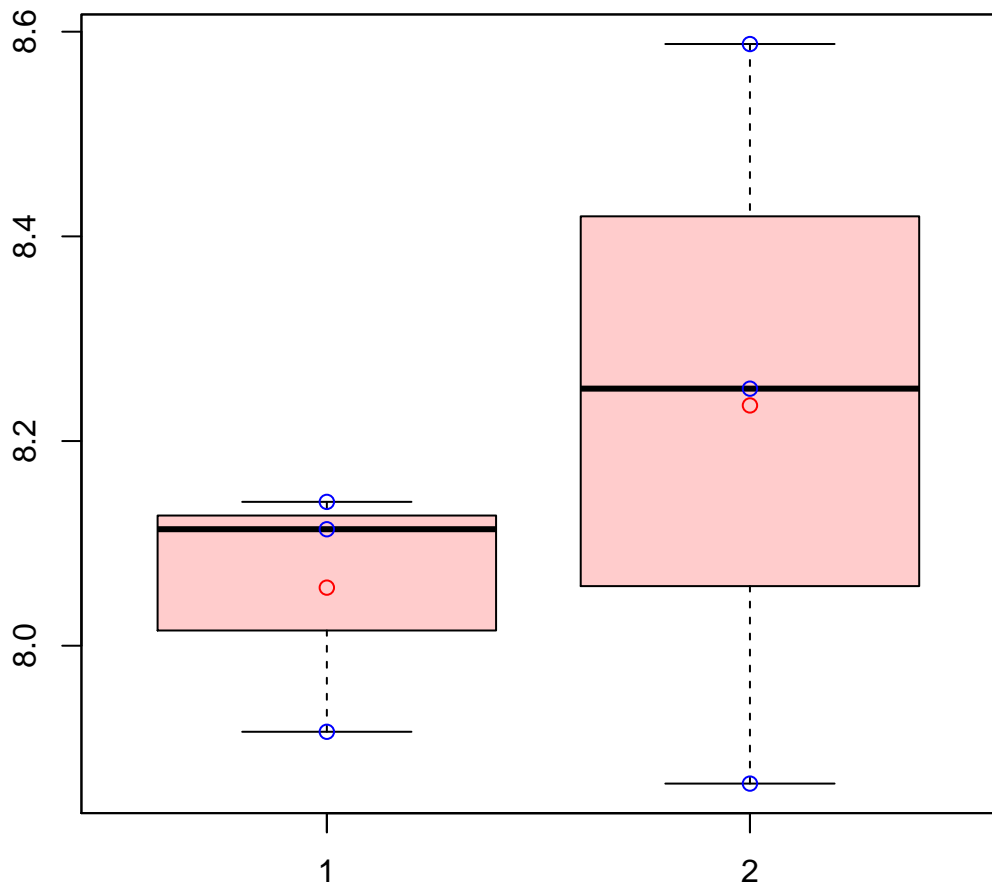

t-Test: p-value = 0.49

# CL21695Contig1|CL21695Contig1

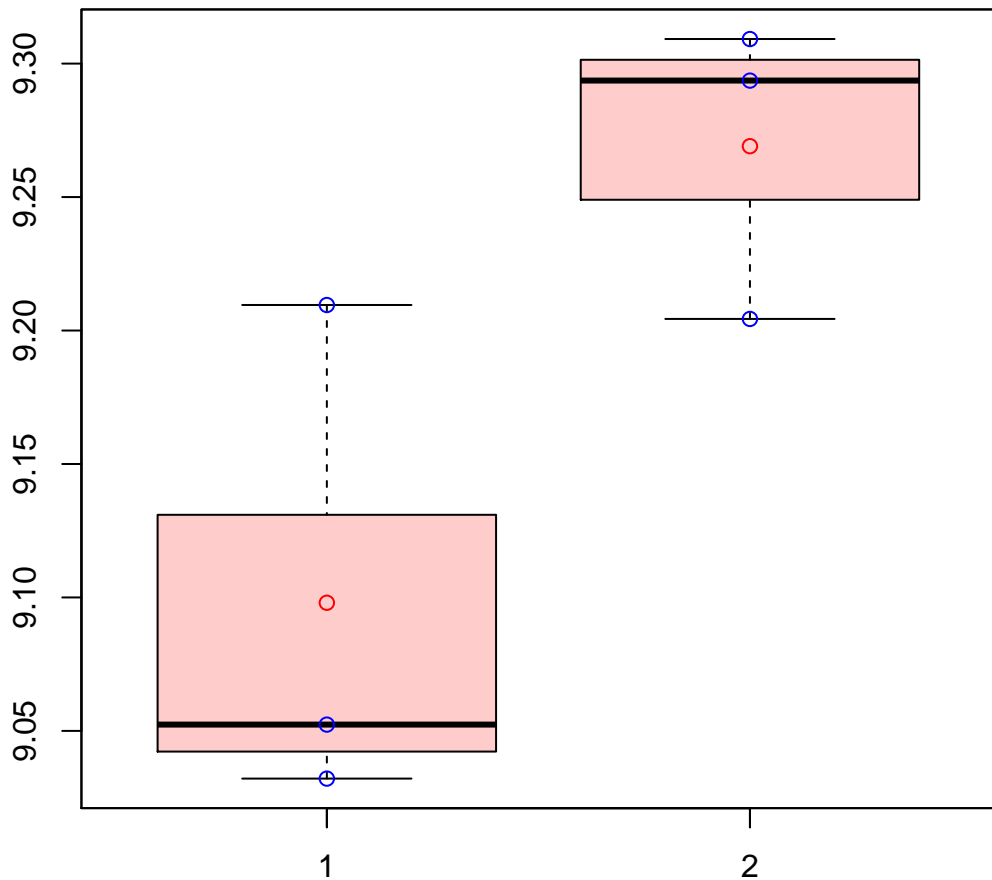

t-Test: p-value = 0.07

# CL21697Contig1|CL21697Contig1

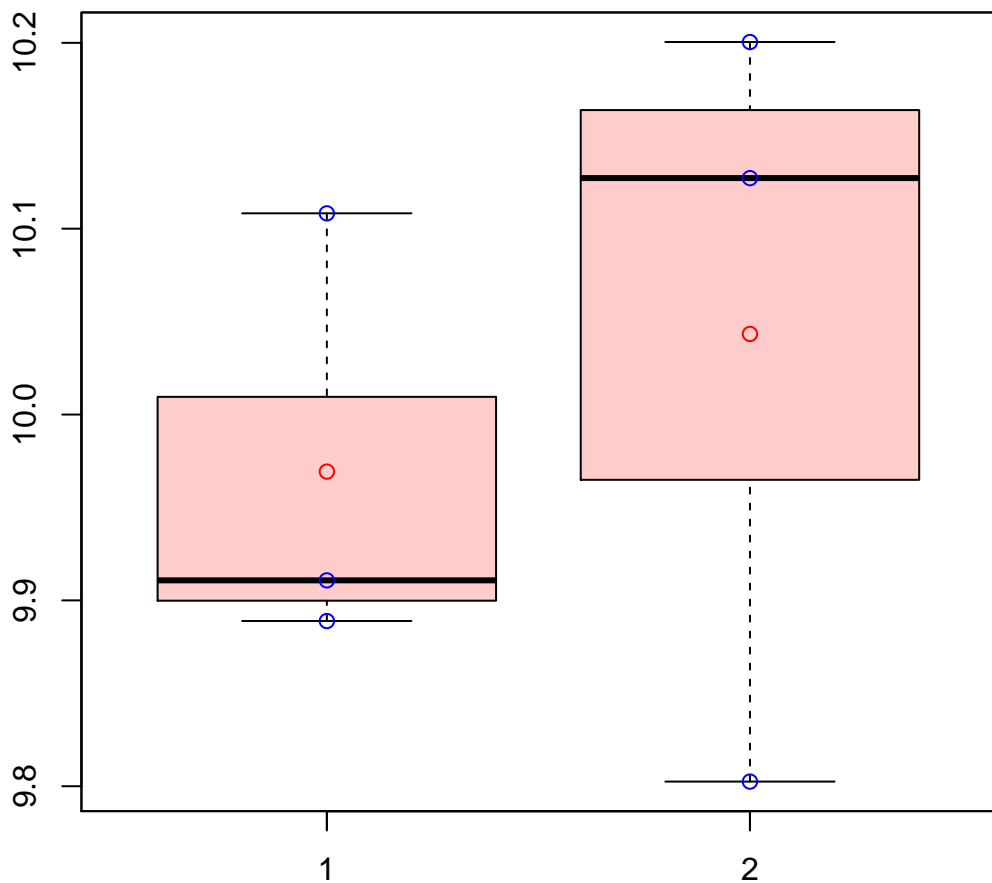

t-Test: p-value = 0.63

# CL2169Contig5|CL2169Contig5

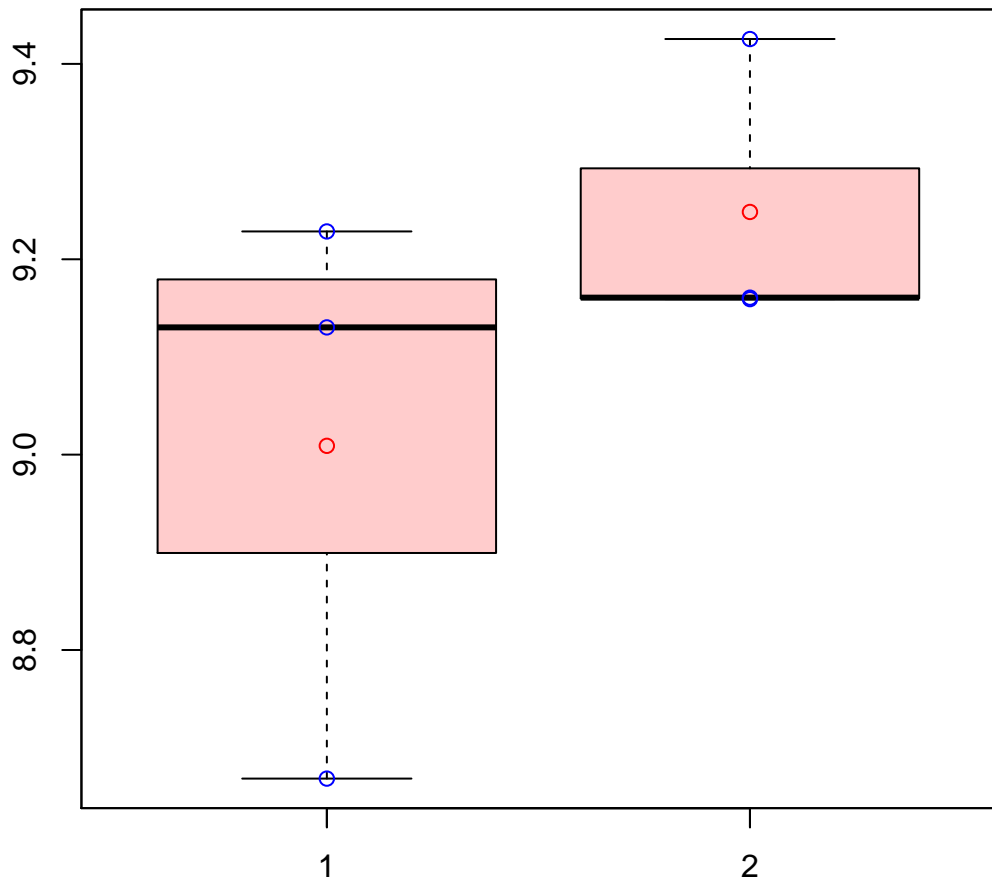

t-Test: p-value = 0.31

# CL2170Contig1|CL2170Contig1

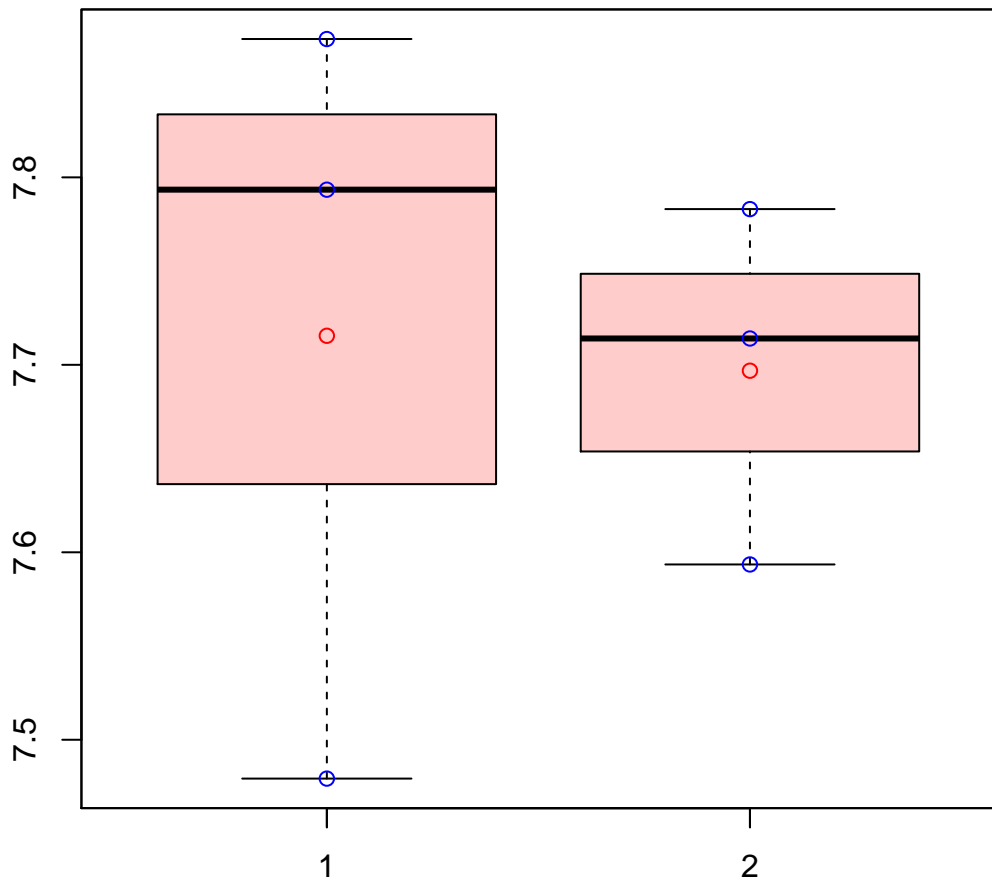

t-Test: p-value = 0.9

# CL21710Contig1|CL21710Contig1

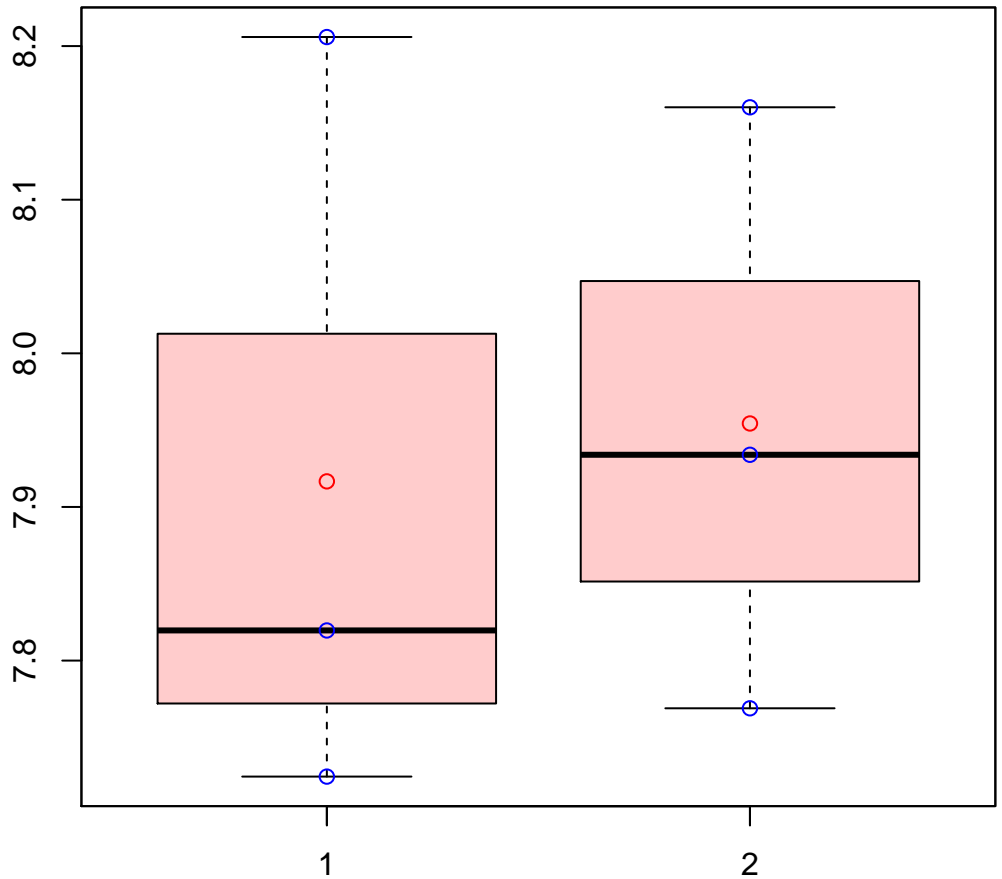

t-Test: p-value = 0.85



# CL2172Contig10|CL2172Contig10

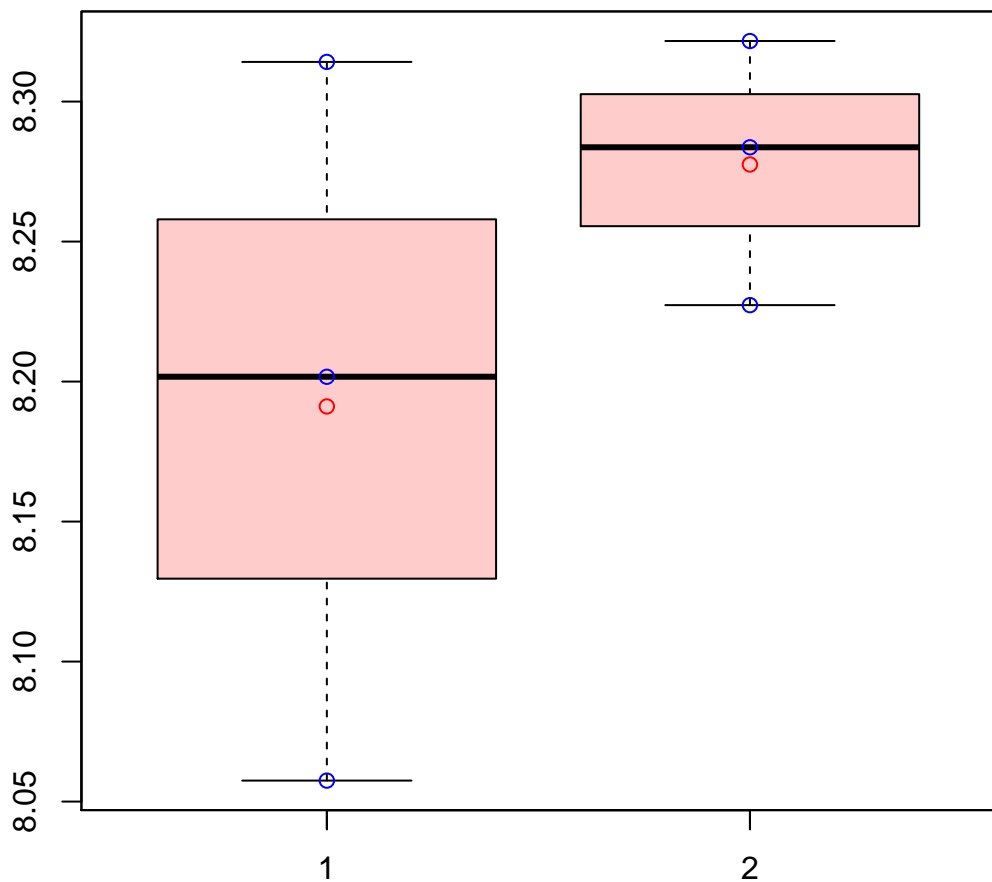

t-Test: p-value = 0.37

# CL2172Contig1|CL2172Contig1

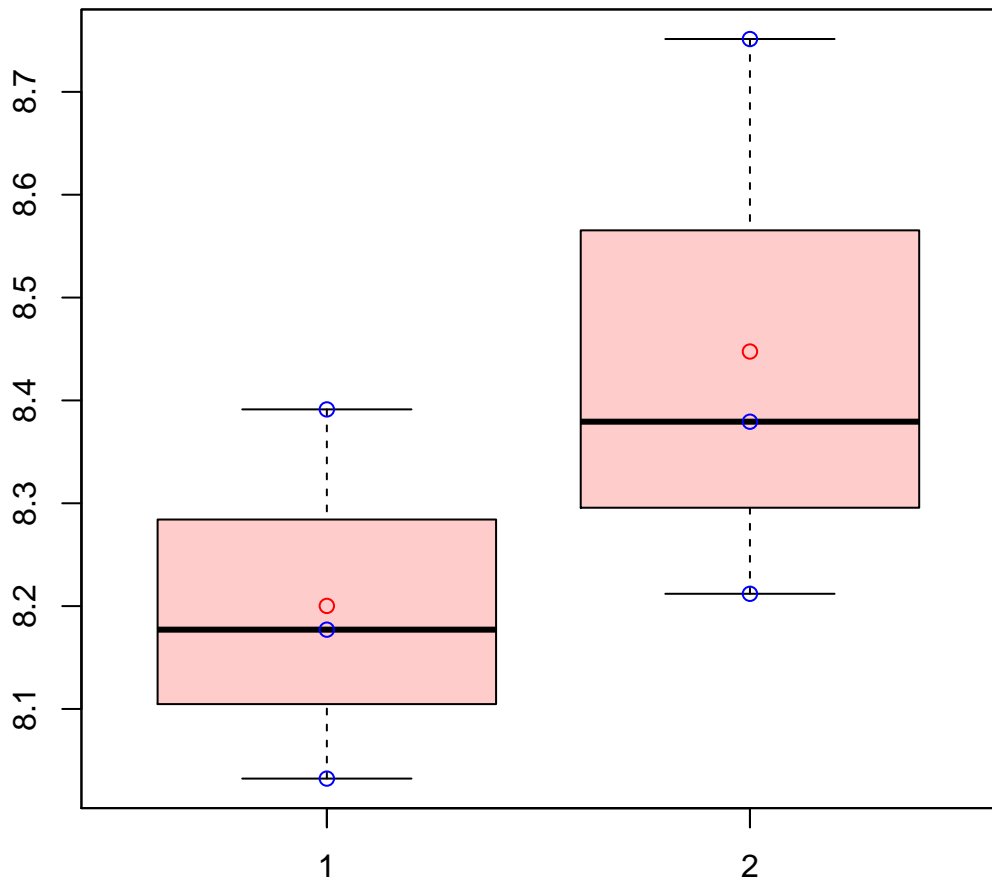

t-Test: p-value = 0.27

# CL2172Contig2|CL2172Contig2

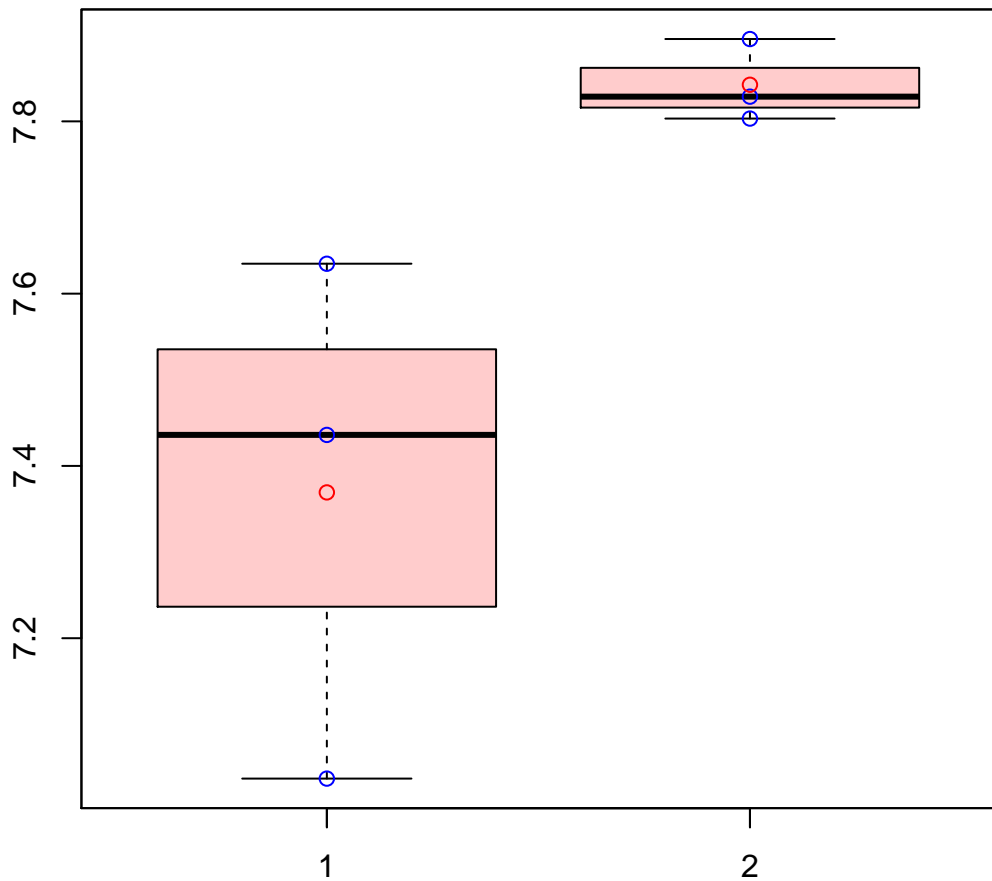

t-Test: p-value = 0.11

# CL2172Contig3|CL2172Contig3



t-Test: p-value = 0.27

# CL2172Contig5|CL2172Contig5

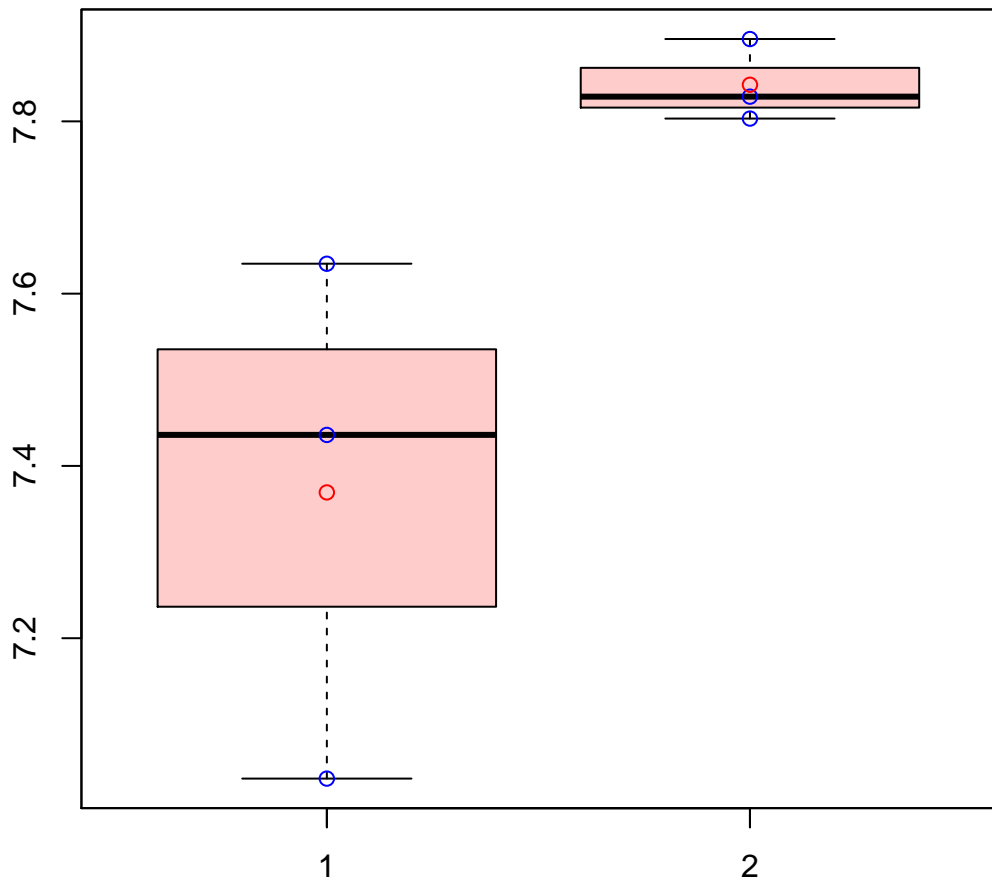

t-Test: p-value = 0.11

# CL217Contig3|CL217Contig3

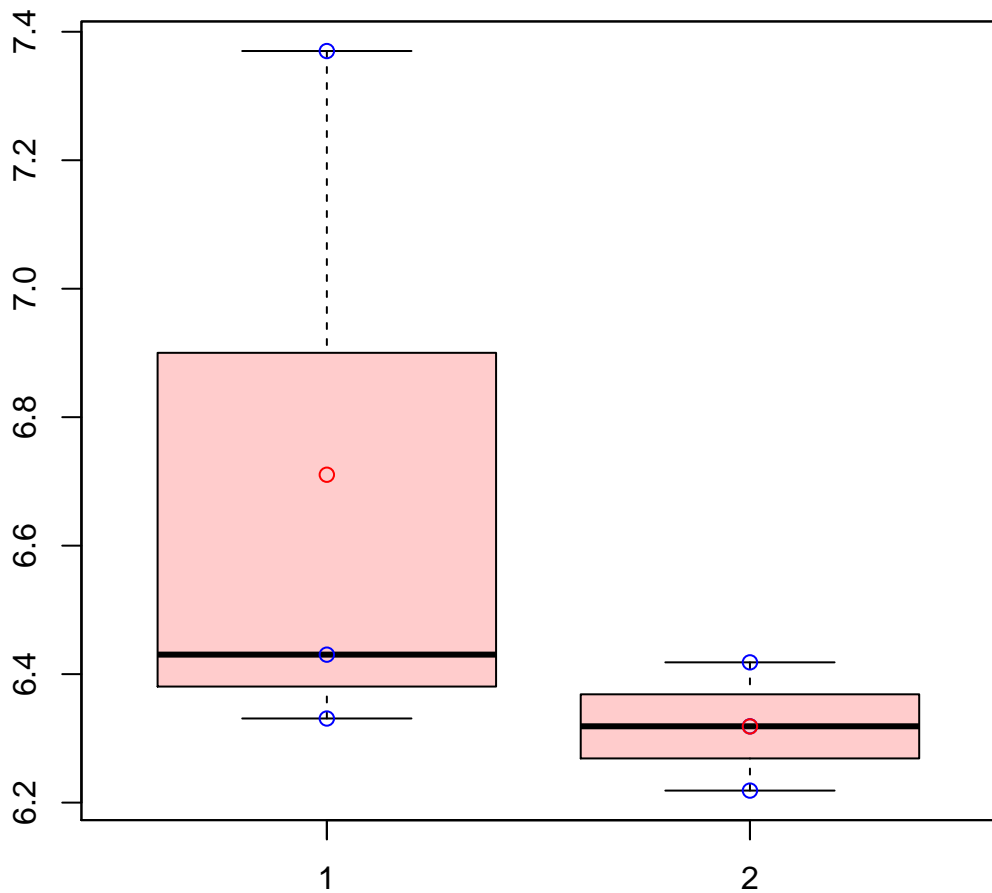

t-Test: p-value = 0.36

# CL21841Contig1|CL21841Contig1

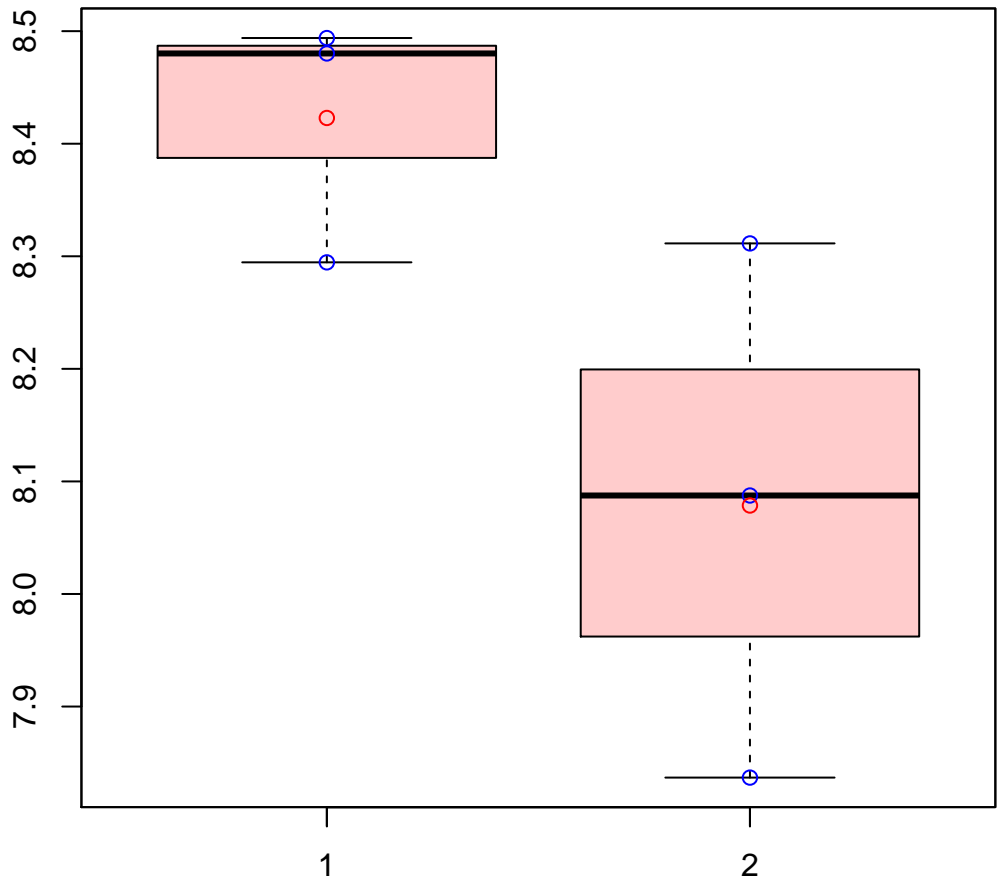

t-Test: p-value = 0.11

# CL2186Contig8|CL2186Contig8

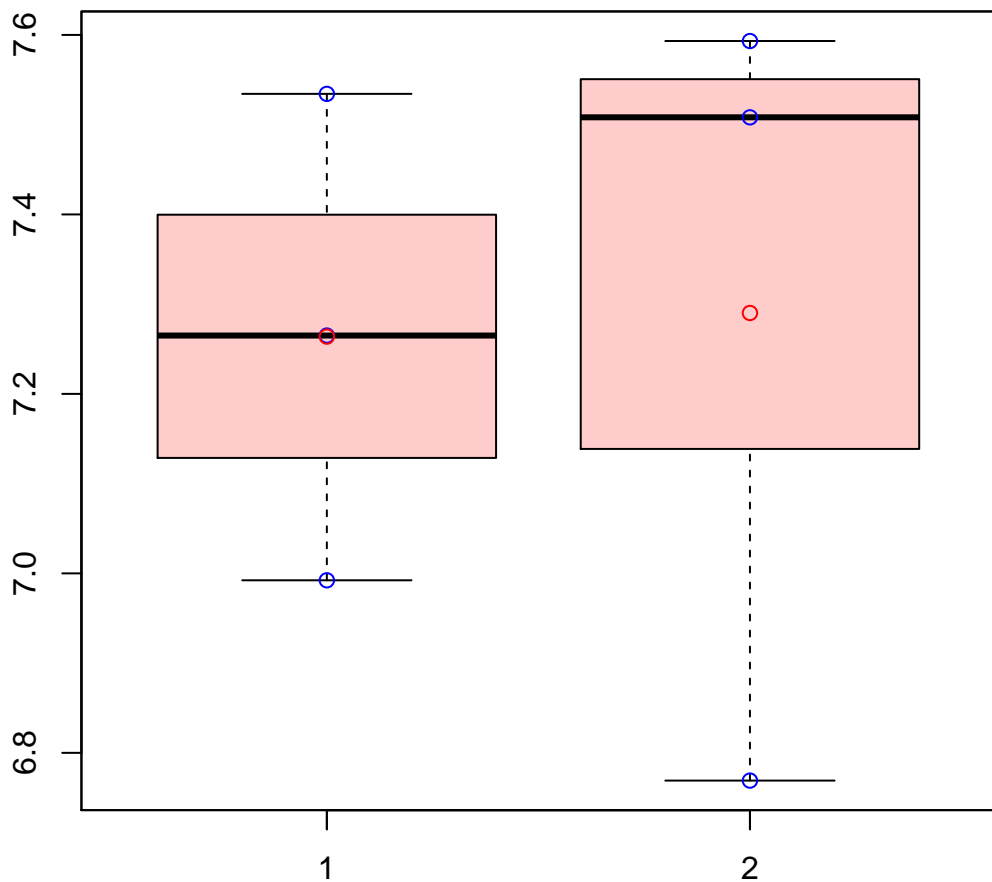

t-Test: p-value = 0.94



# CL218Contig5|CL218Contig5

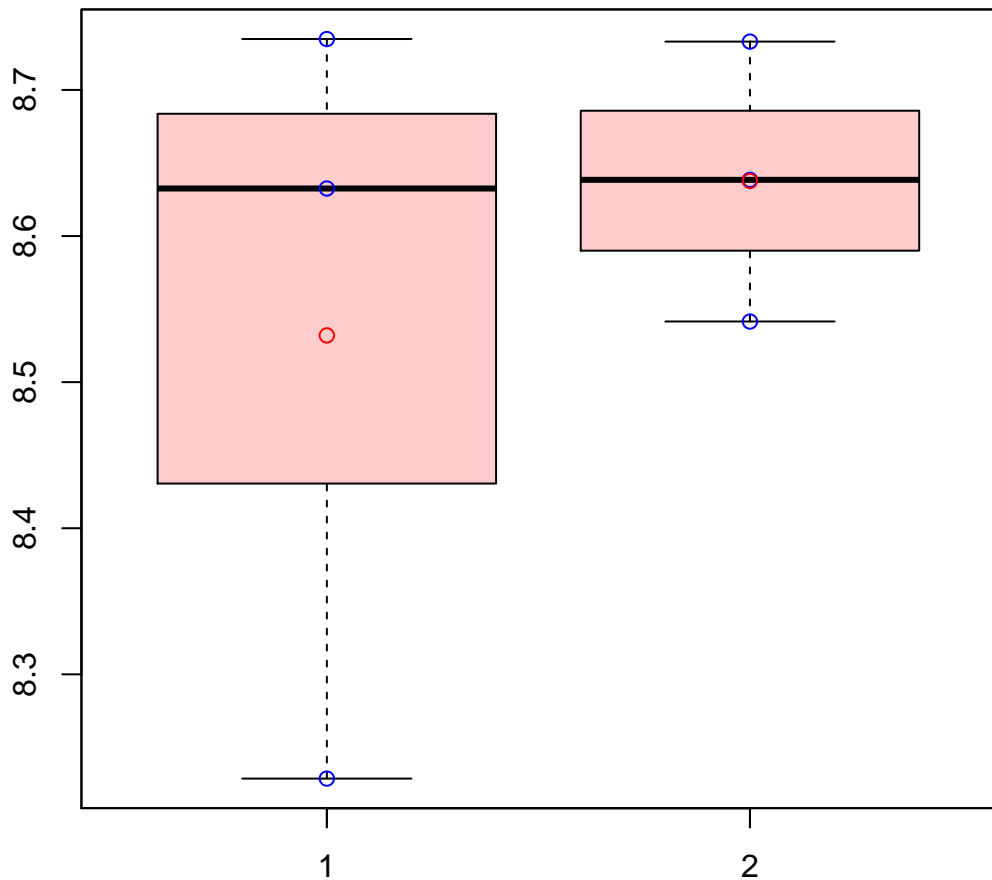

t-Test: p-value = 0.57

# CL2192Contig3|CL2192Contig3

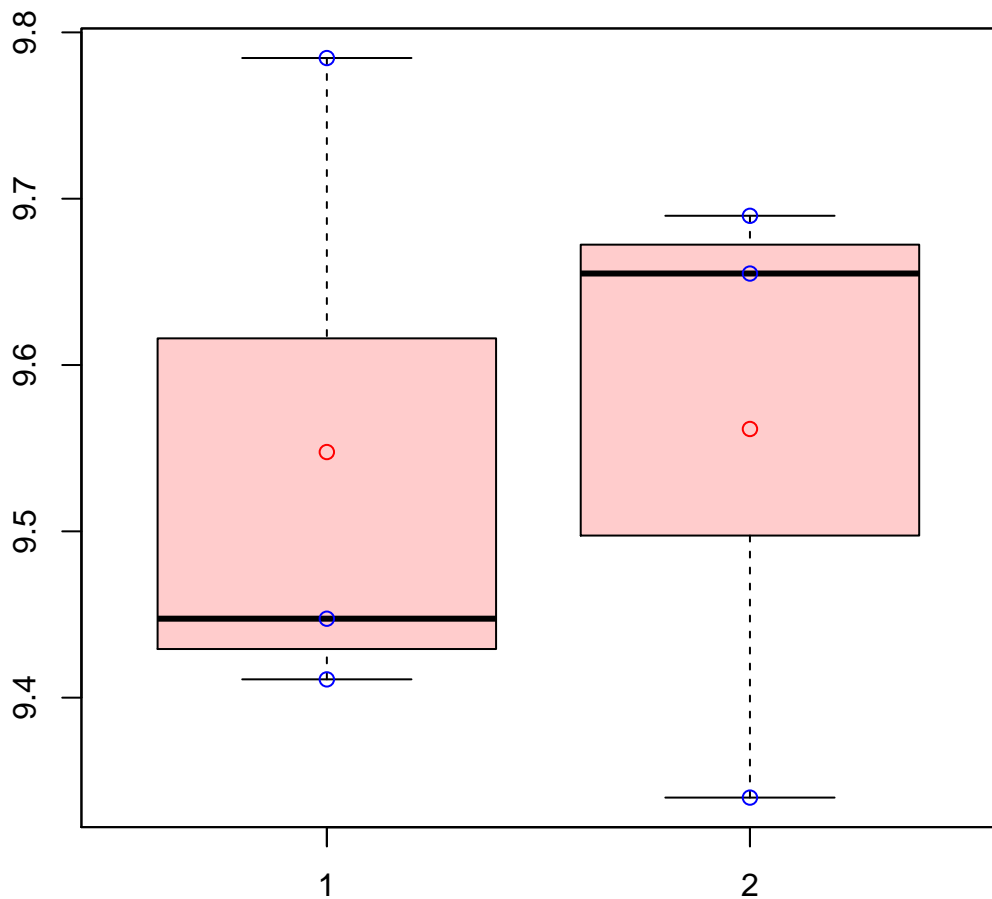

t-Test: p-value = 0.94

# CL2193Contig3|CL2193Contig3

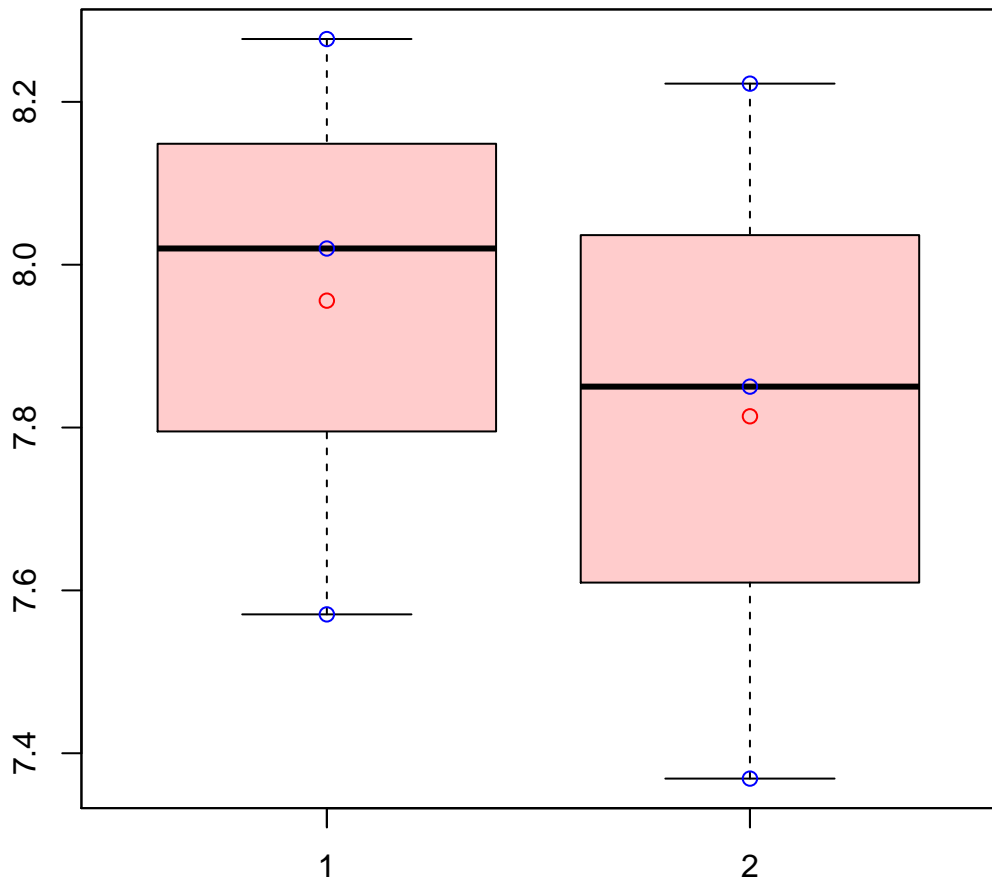

t-Test: p-value = 0.68

# CL2195Contig1|CL2195Contig1

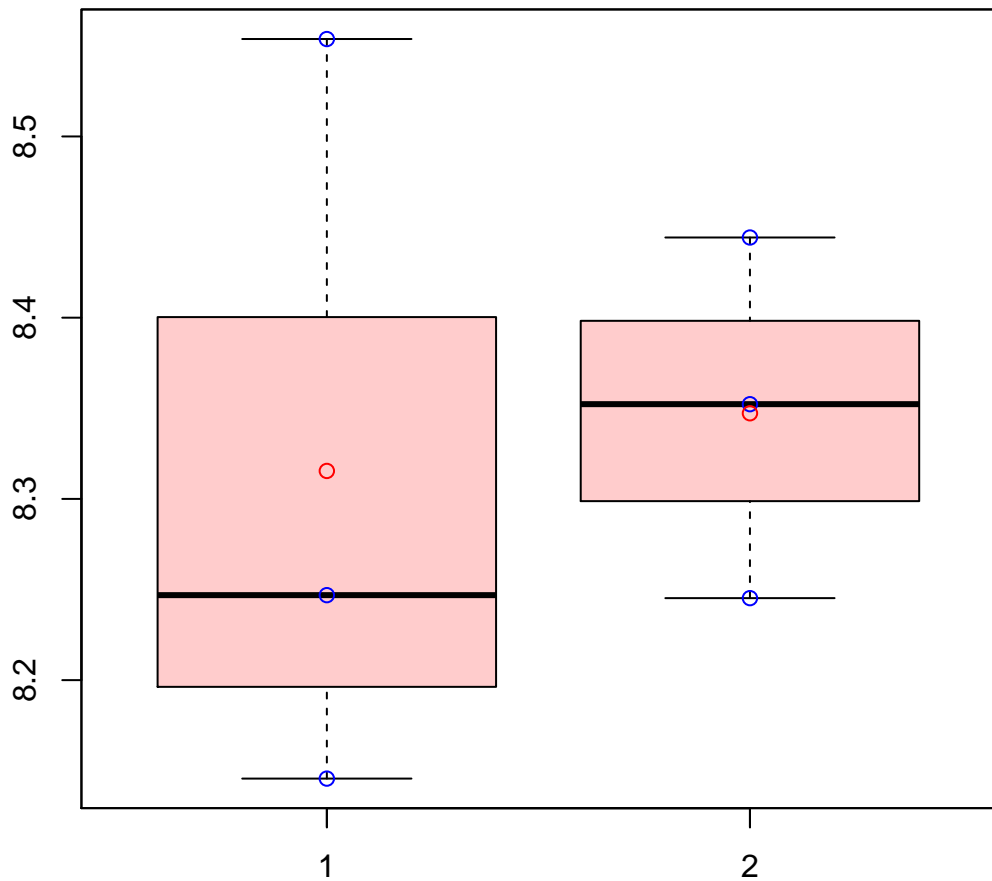

t-Test: p-value = 0.83

# CL21970Contig1|CL21970Contig1

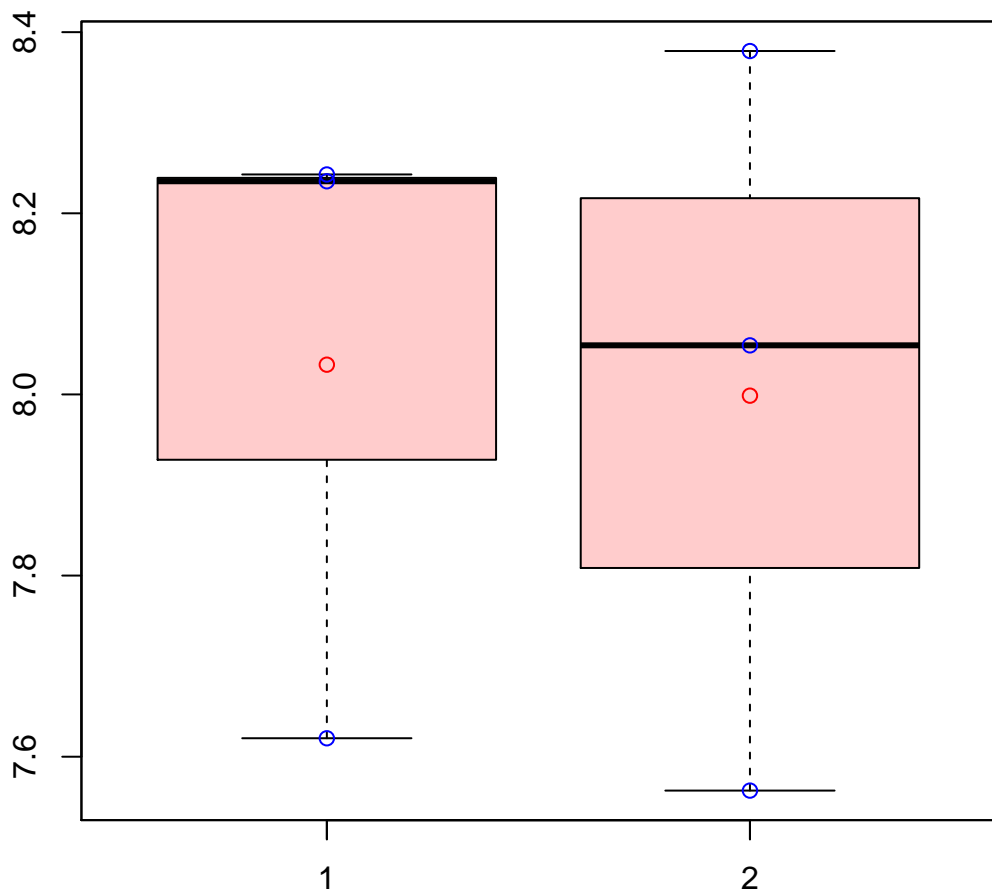

t-Test: p-value = 0.92

# CL21Contig15|CL21Contig15

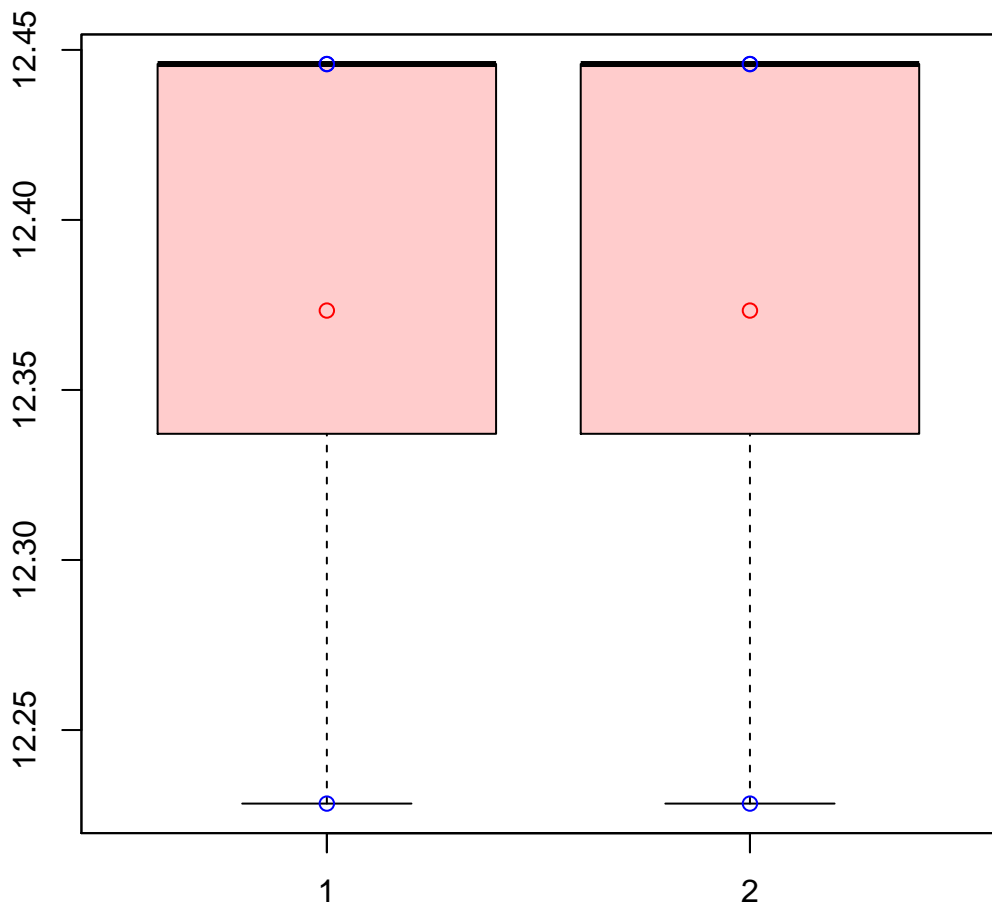

t-Test: p-value = 1

# CL21Contig27|CL21Contig27

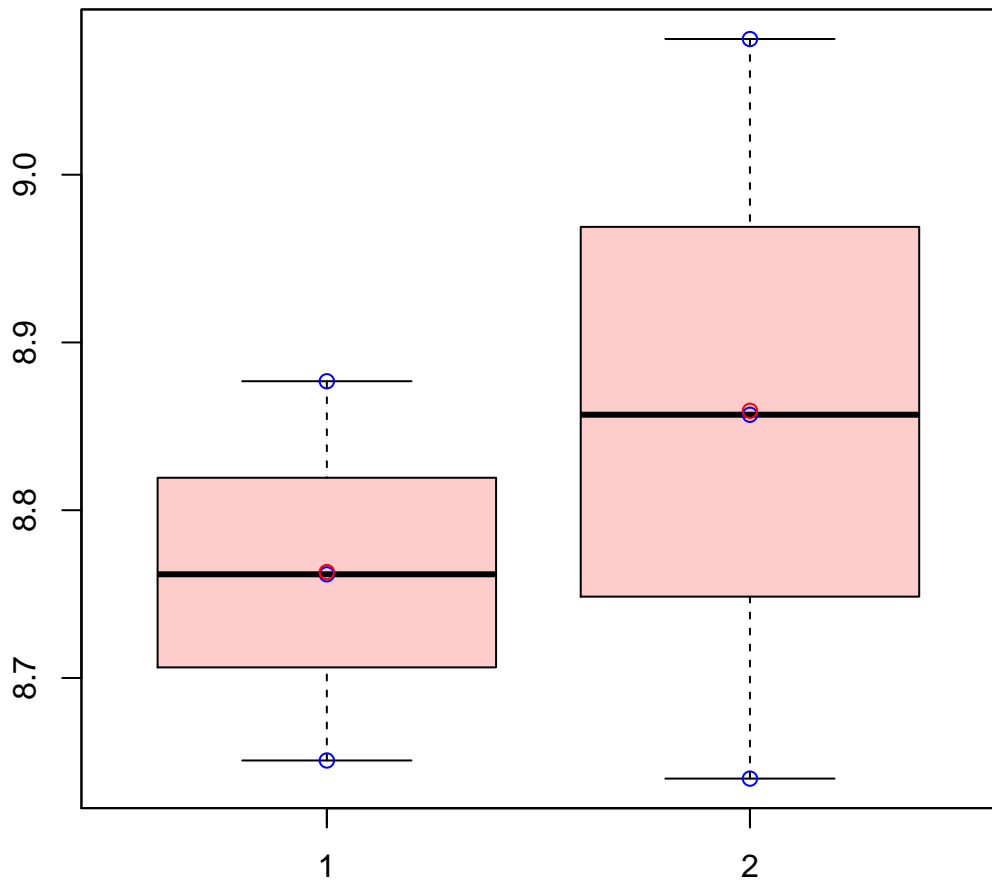

t-Test: p-value = 0.55

# CL21Contig42|CL21Contig42



t-Test: p-value = 1



# CL2200Contig4|CL2200Contig4

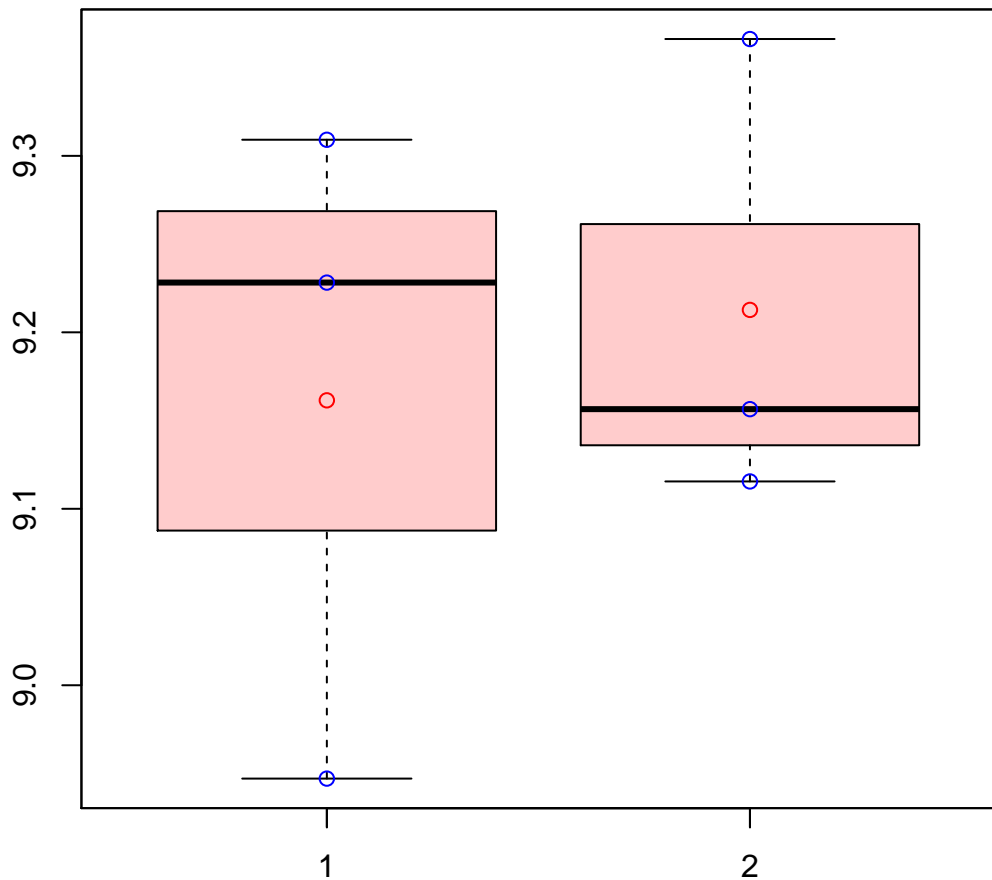

t-Test: p-value = 0.72

# CL2206Contig4|CL2206Contig4

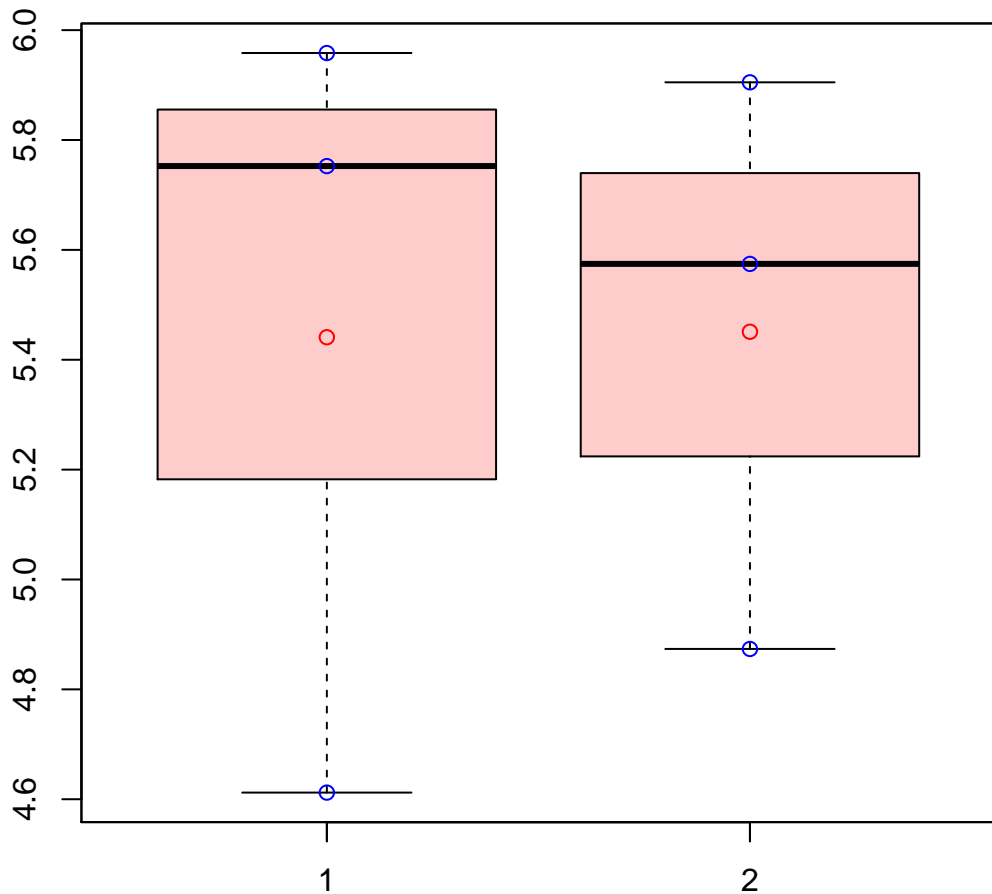

t-Test: p-value = 0.99

# CL2209Contig4|CL2209Contig4

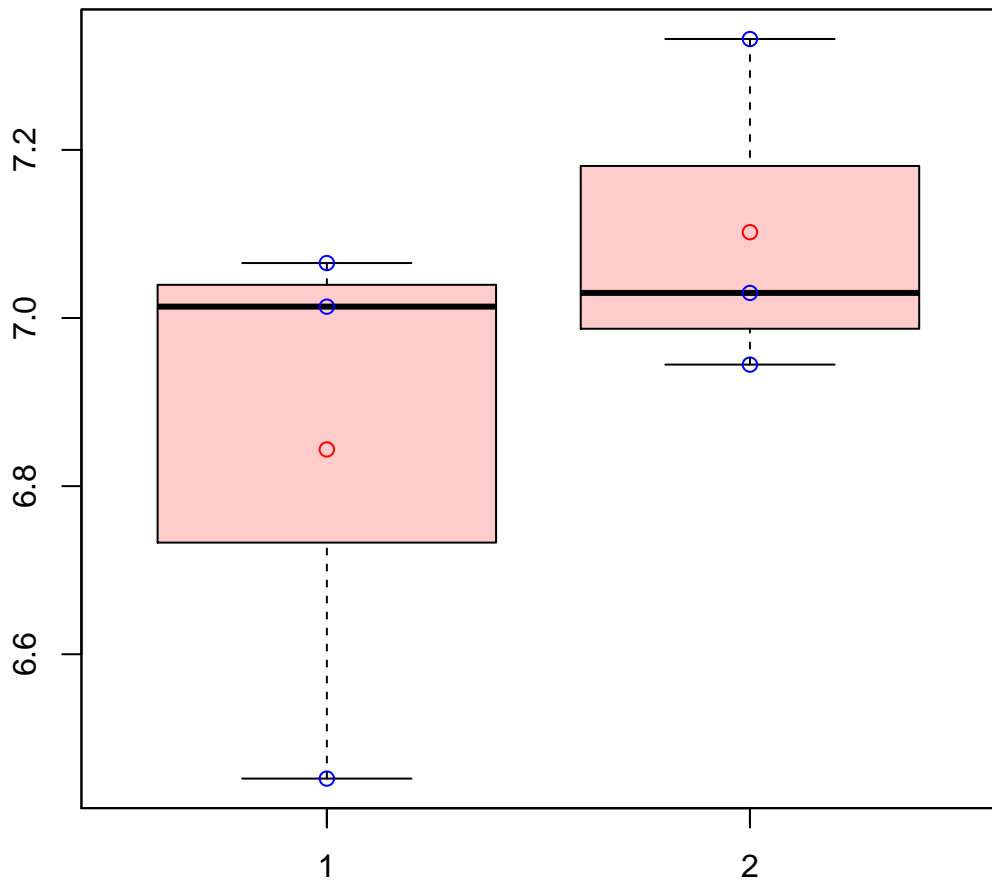

t-Test: p-value = 0.33

# CL220Contig7|CL220Contig7

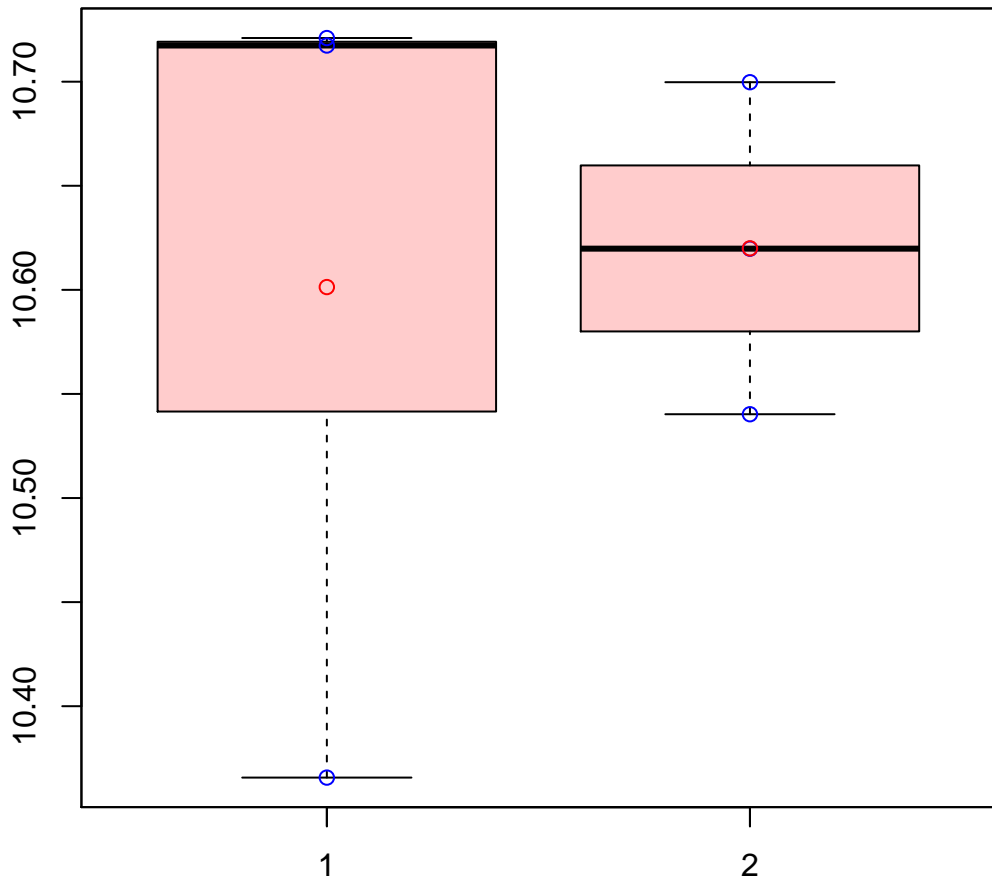

t-Test: p-value = 0.89

# CL220Contig8|CL220Contig8

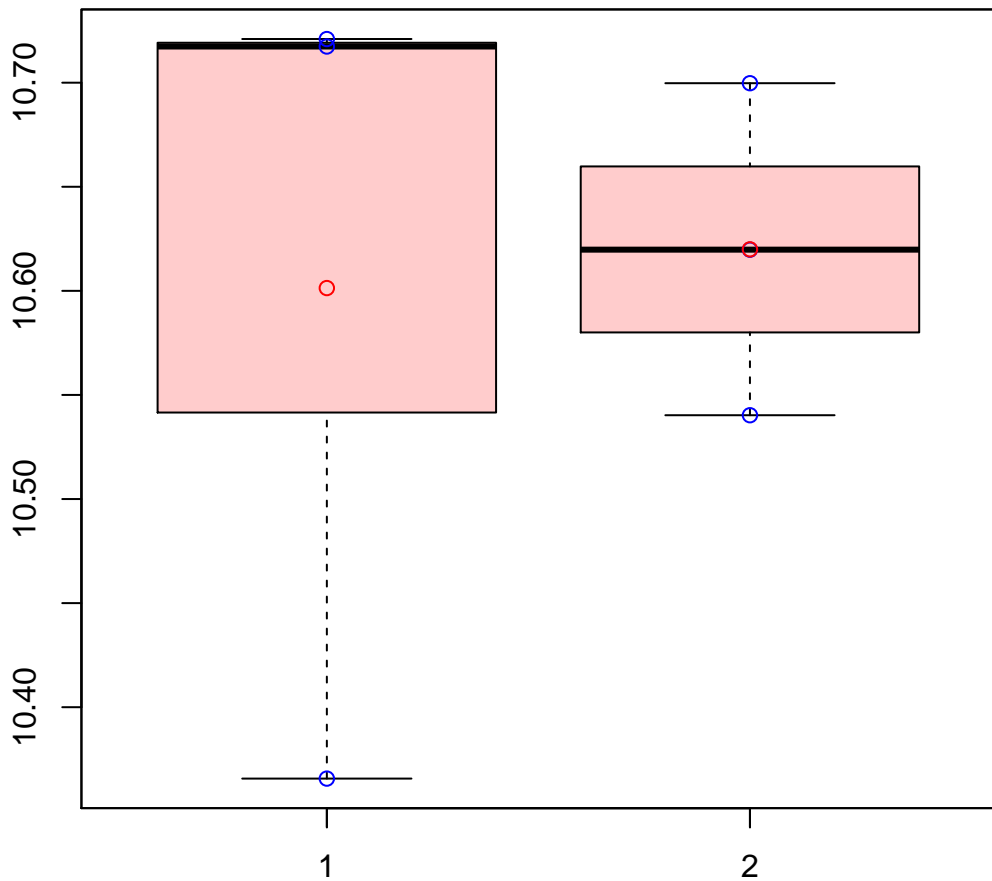

t-Test: p-value = 0.89

# CL220Contig9|CL220Contig9

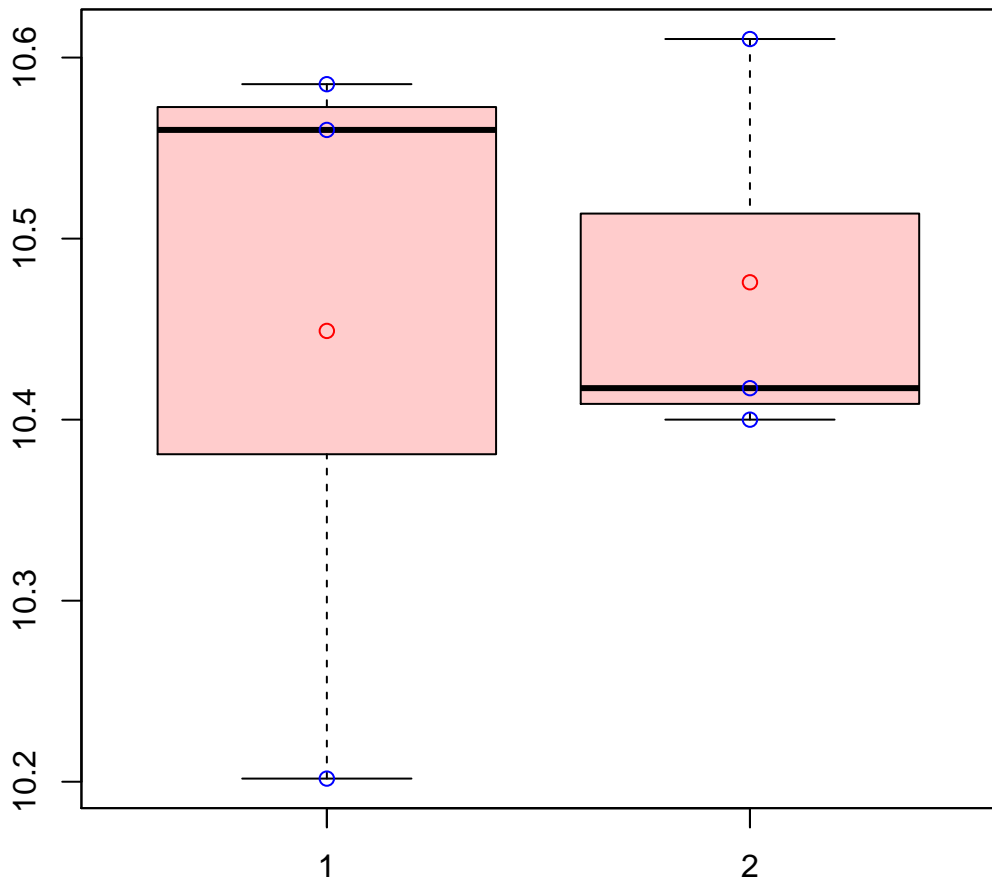

t-Test: p-value = 0.86

# CL2214Contig2|CL2214Contig2

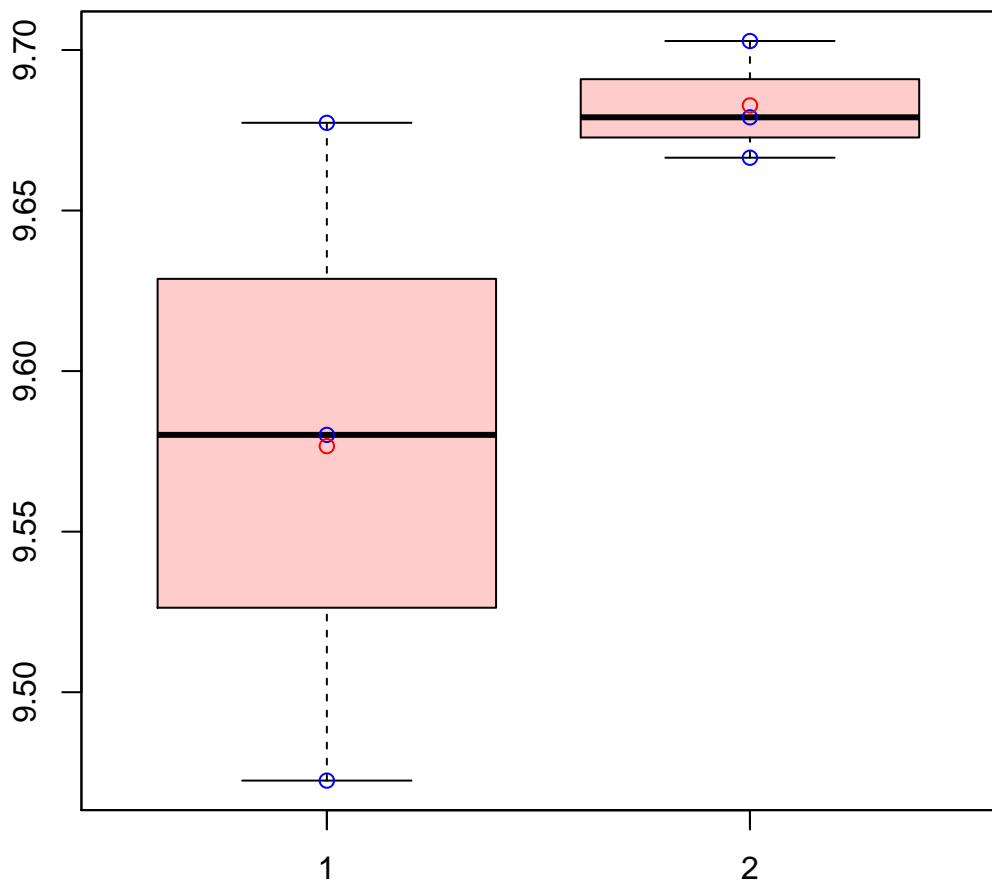

t-Test: p-value = 0.21

# CL2217Contig2|CL2217Contig2

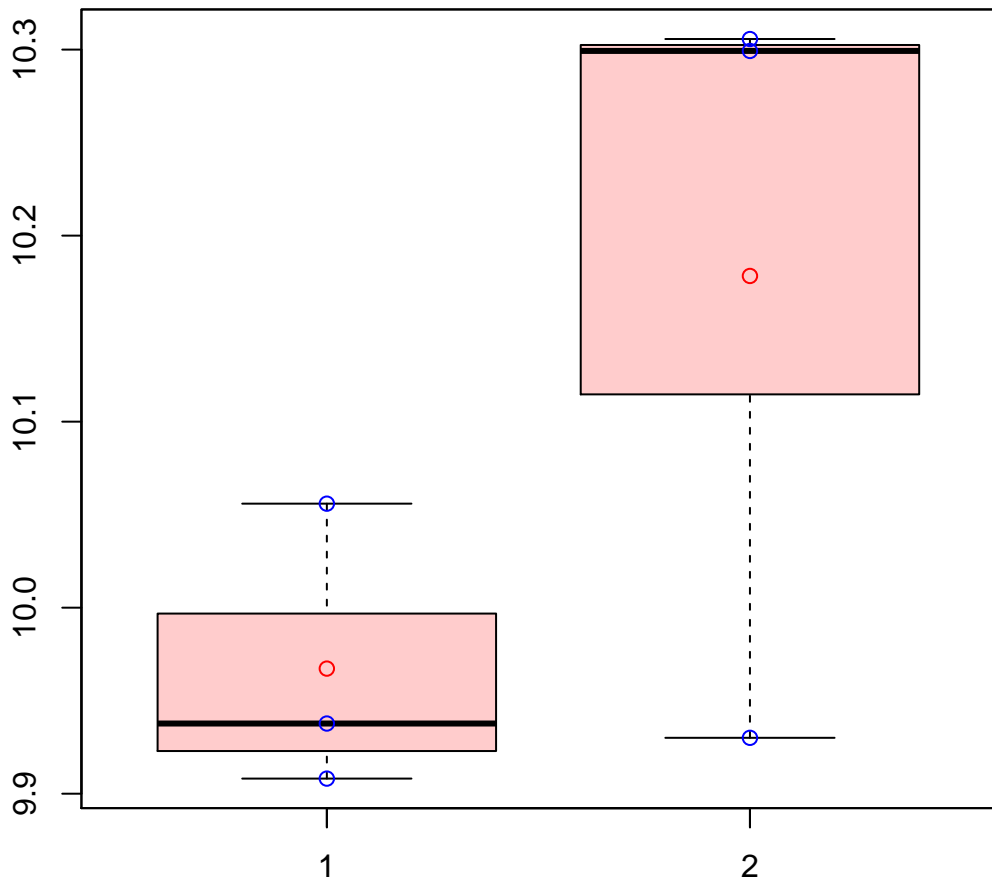

t-Test: p-value = 0.23



# CL2219Contig6|CL2219Contig6

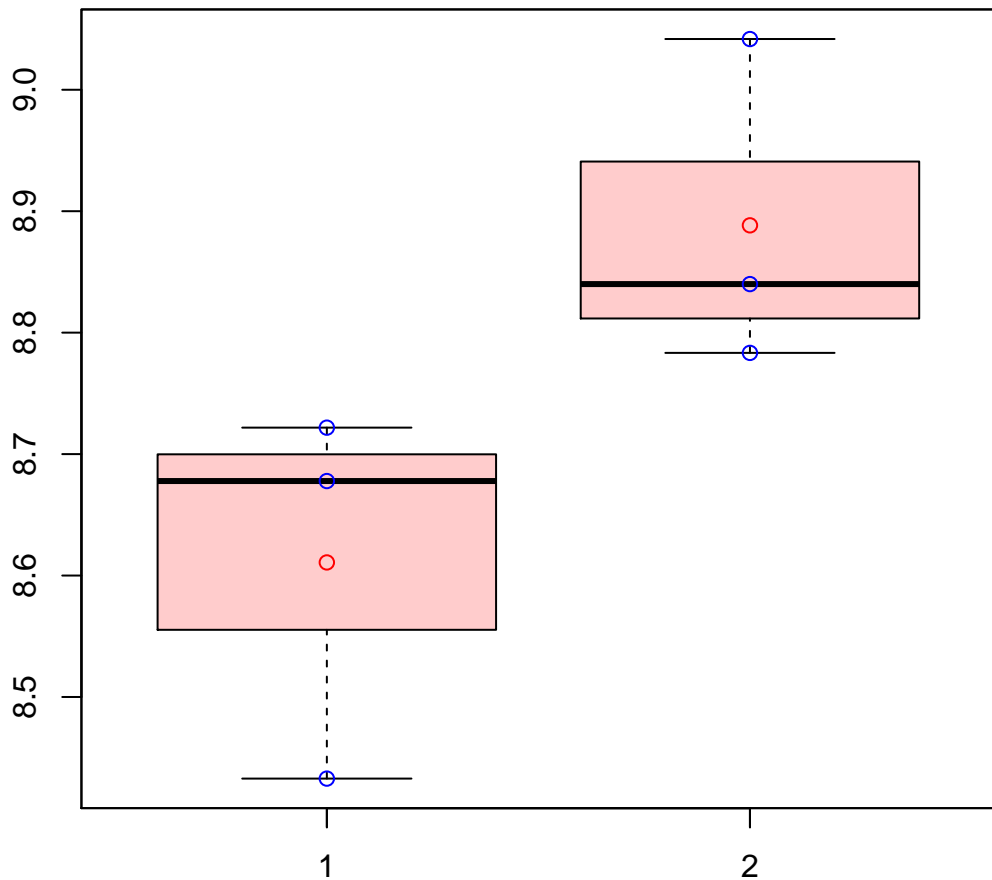

t-Test: p-value = 0.08

# CL2221Contig9|CL2221Contig9



t-Test: p-value = 0.85

# CL2222Contig1|CL2222Contig1

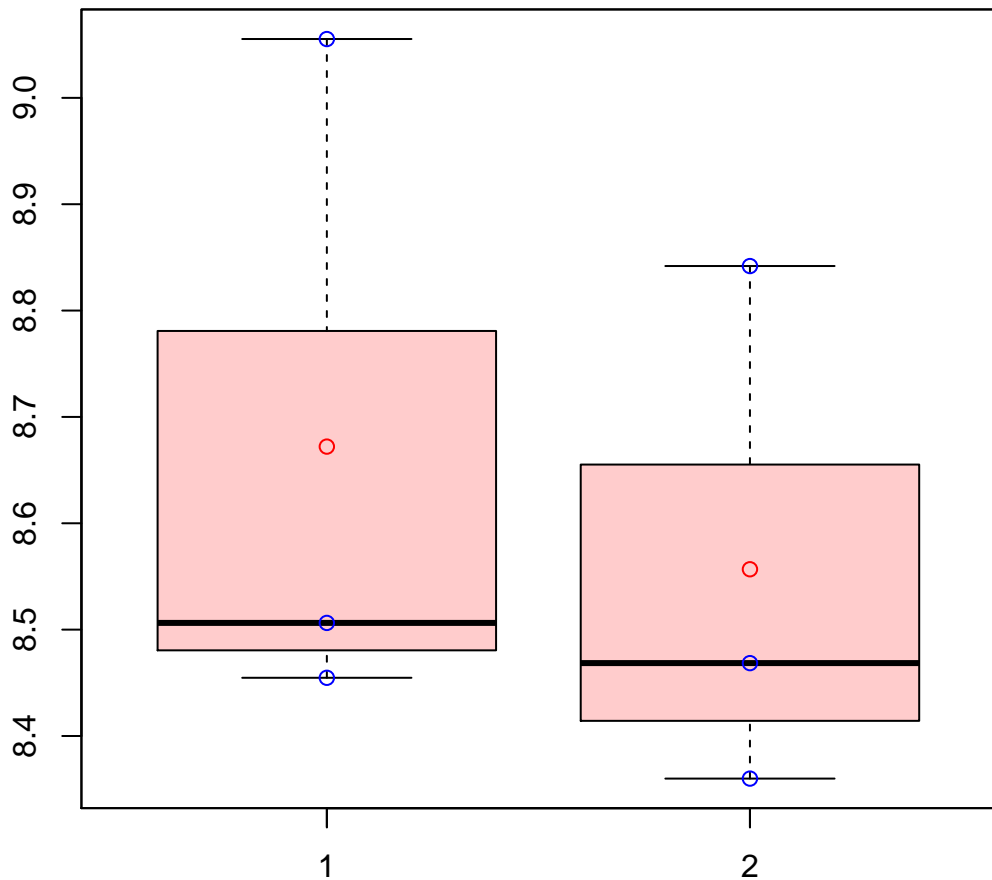

t-Test: p-value = 0.66

# CL22232Contig1|CL22232Contig1

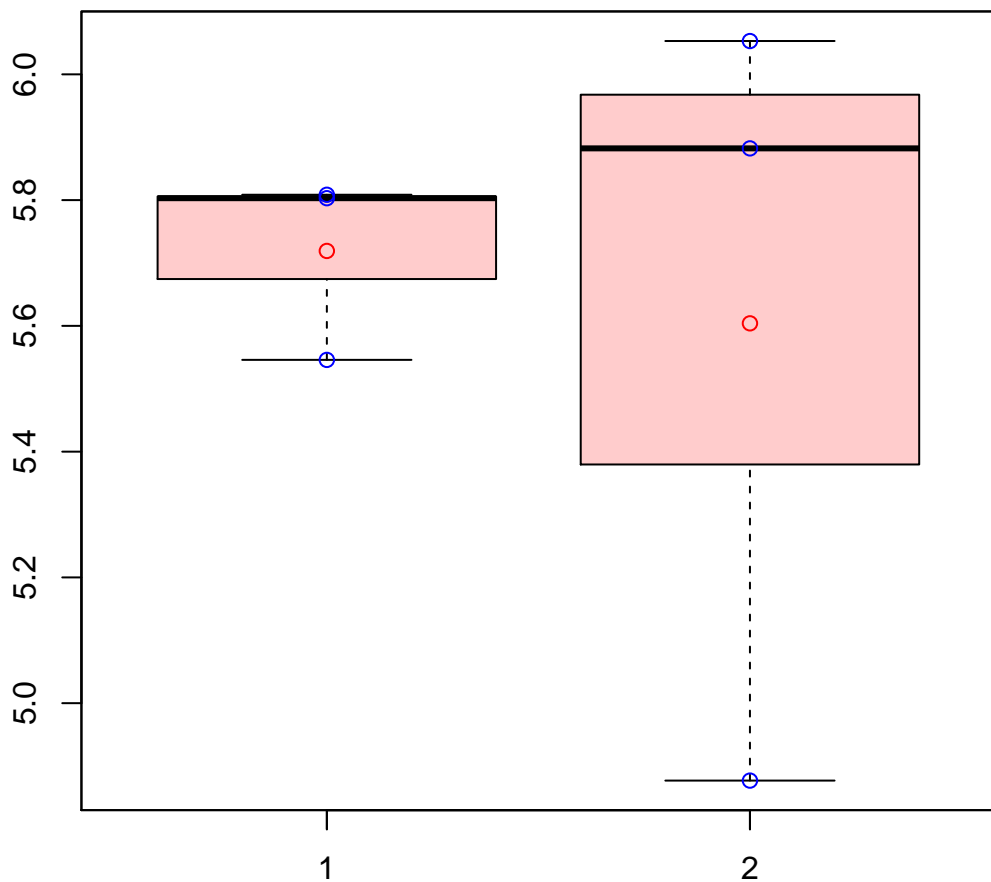

t-Test: p-value = 0.79

# CL2228Contig1|CL2228Contig1

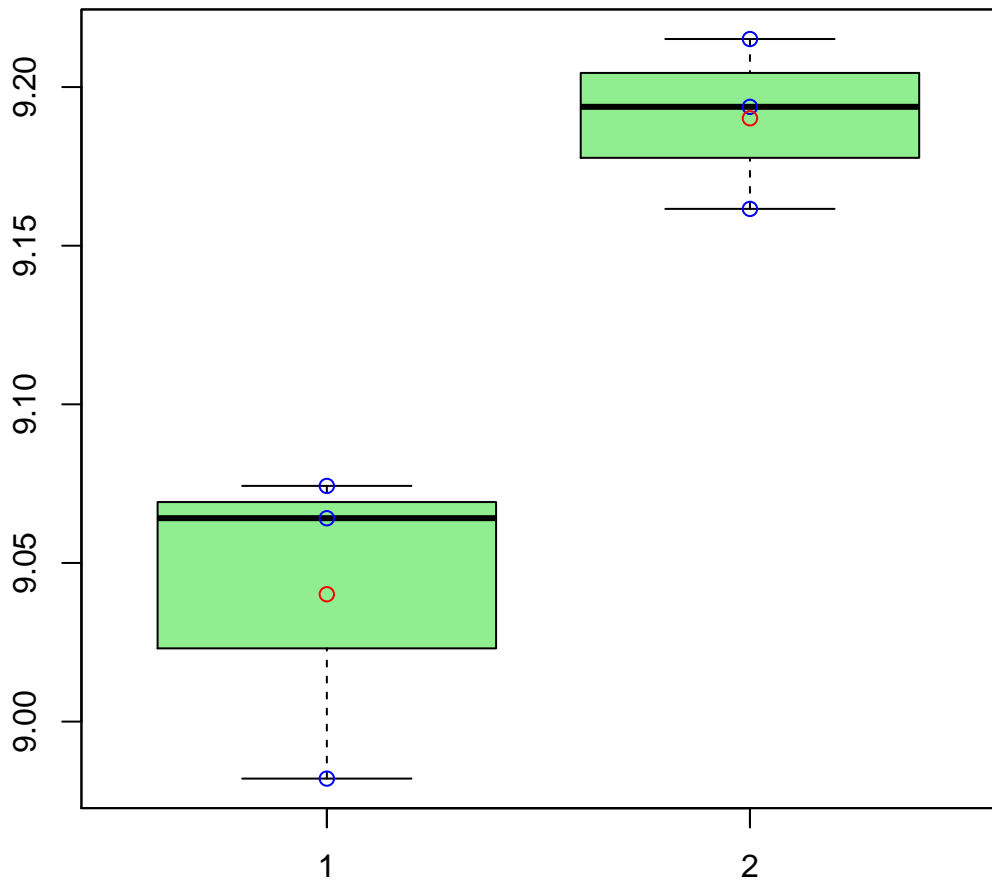

t-Test: p-value = 0.02

# CL222Contig13|CL222Contig13

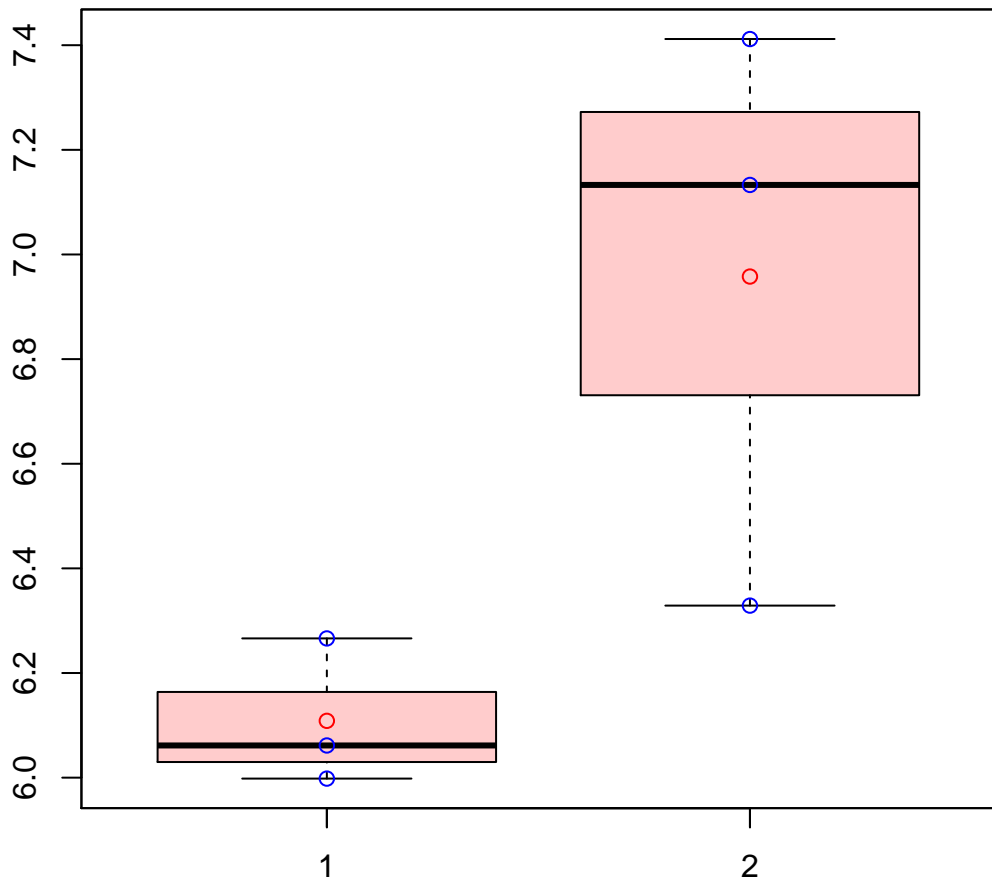

t-Test: p-value = 0.11

# CL2230Contig4|CL2230Contig4

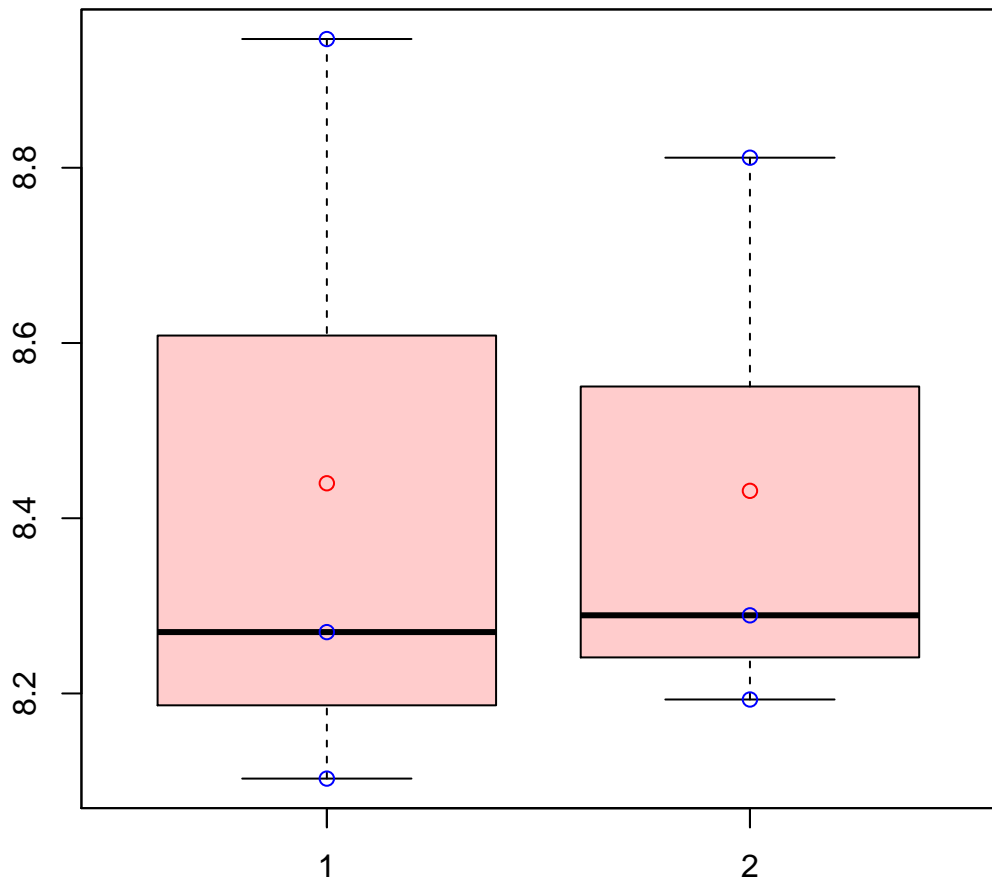

t-Test: p-value = 0.98

# CL22334Contig1|CL22334Contig1

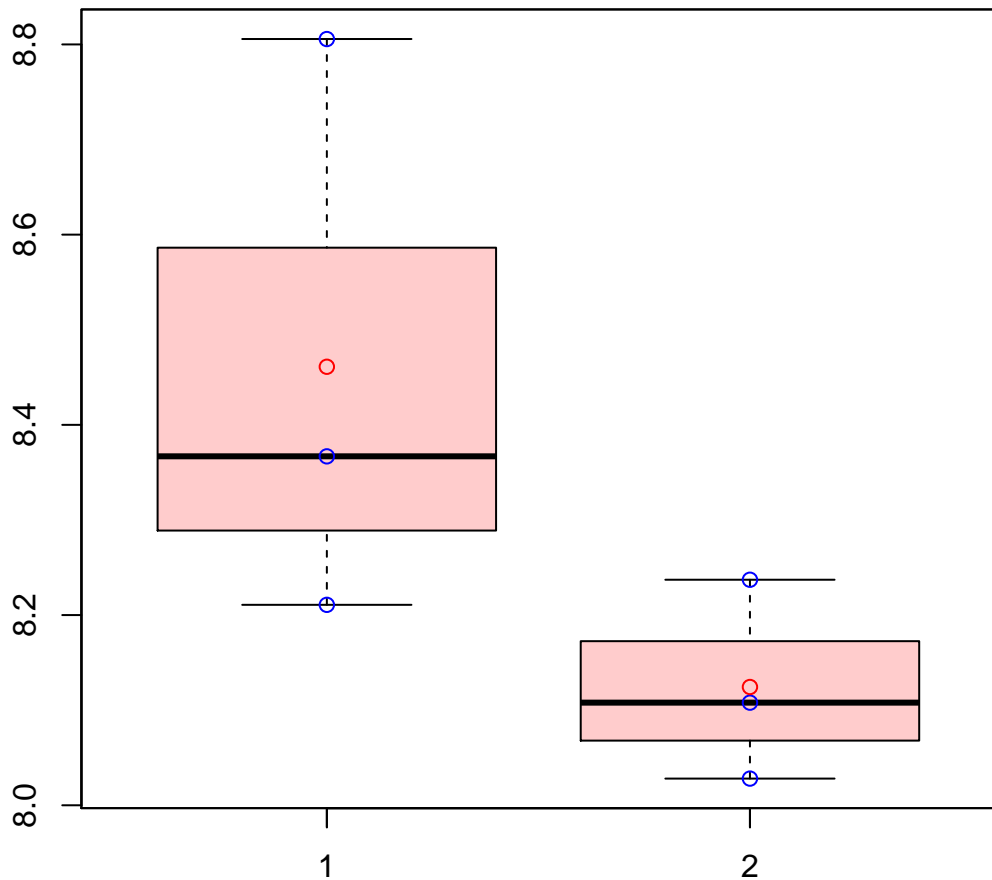

t-Test: p-value = 0.19



# CL2237Contig2|CL2237Contig2

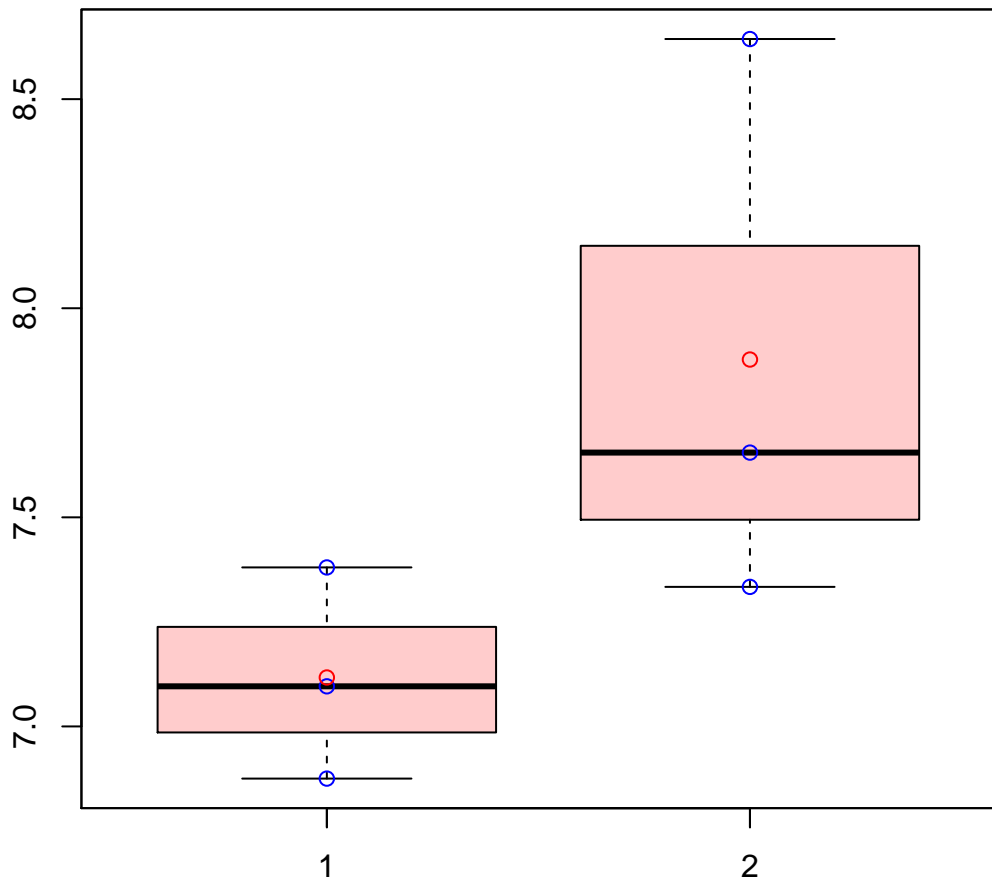

t-Test: p-value = 0.18

# CL2238Contig3|CL2238Contig3

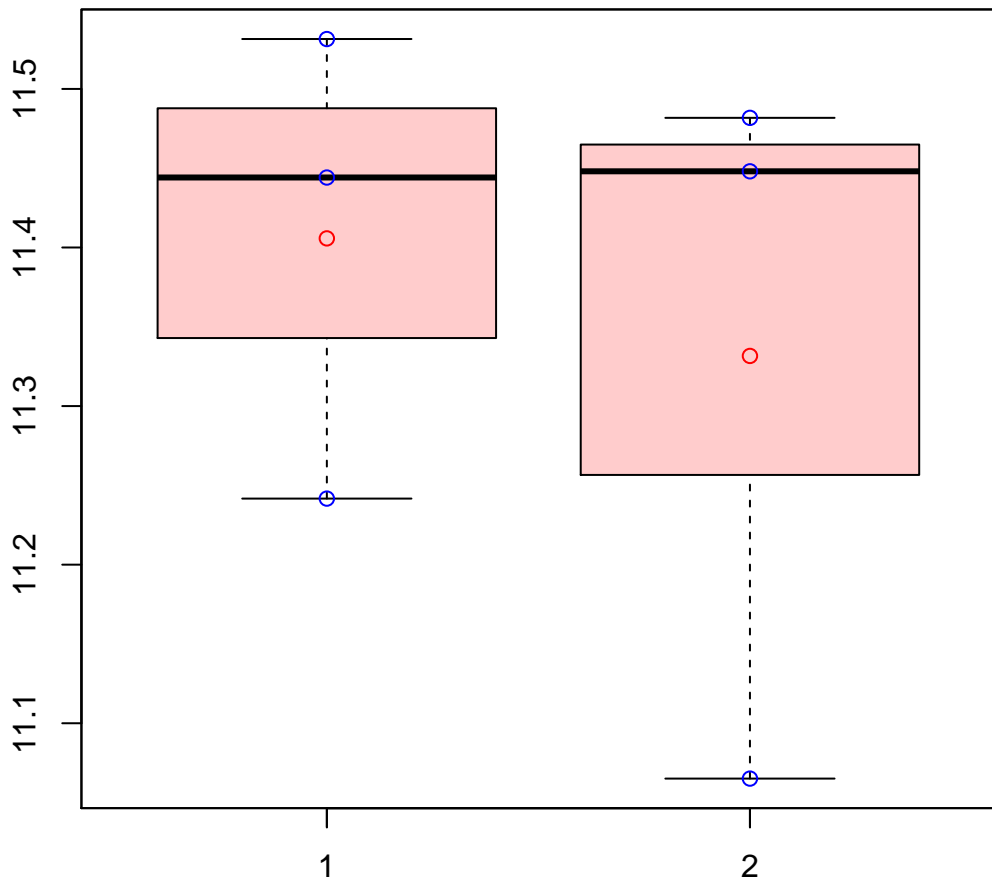

t-Test: p-value = 0.67

# CL2238Contig6|CL2238Contig6

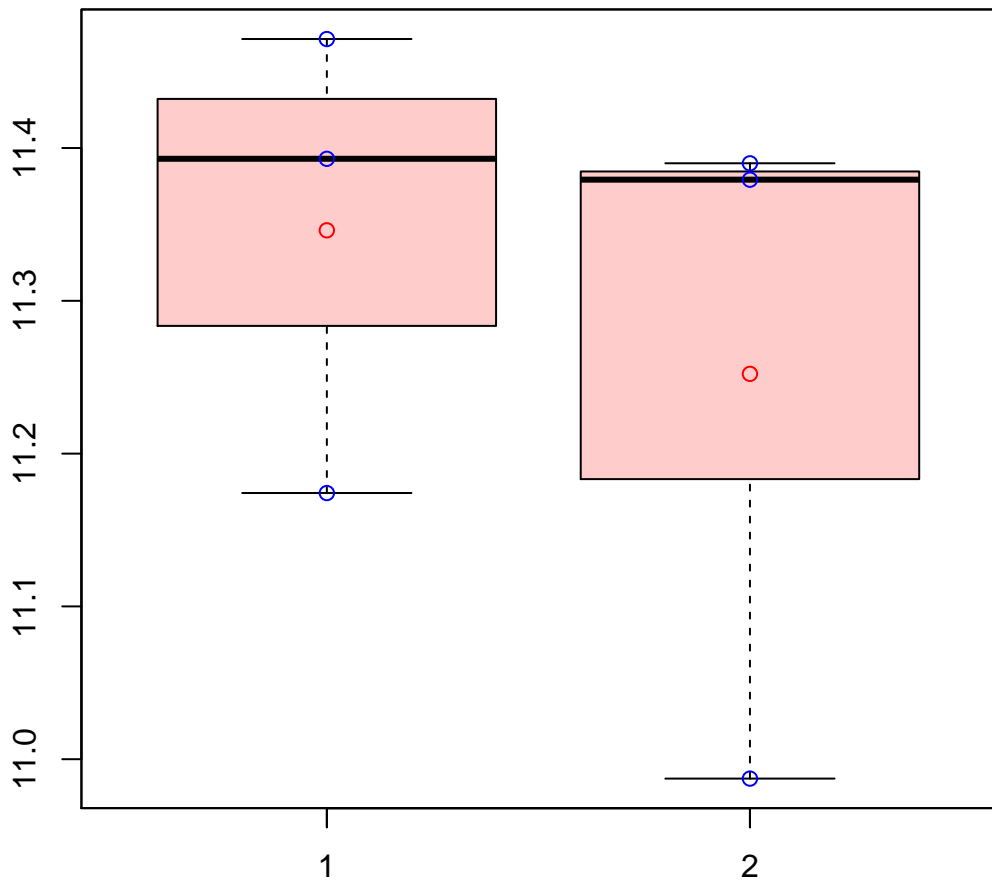

t-Test: p-value = 0.59

# CL2238Contig7|CL2238Contig7

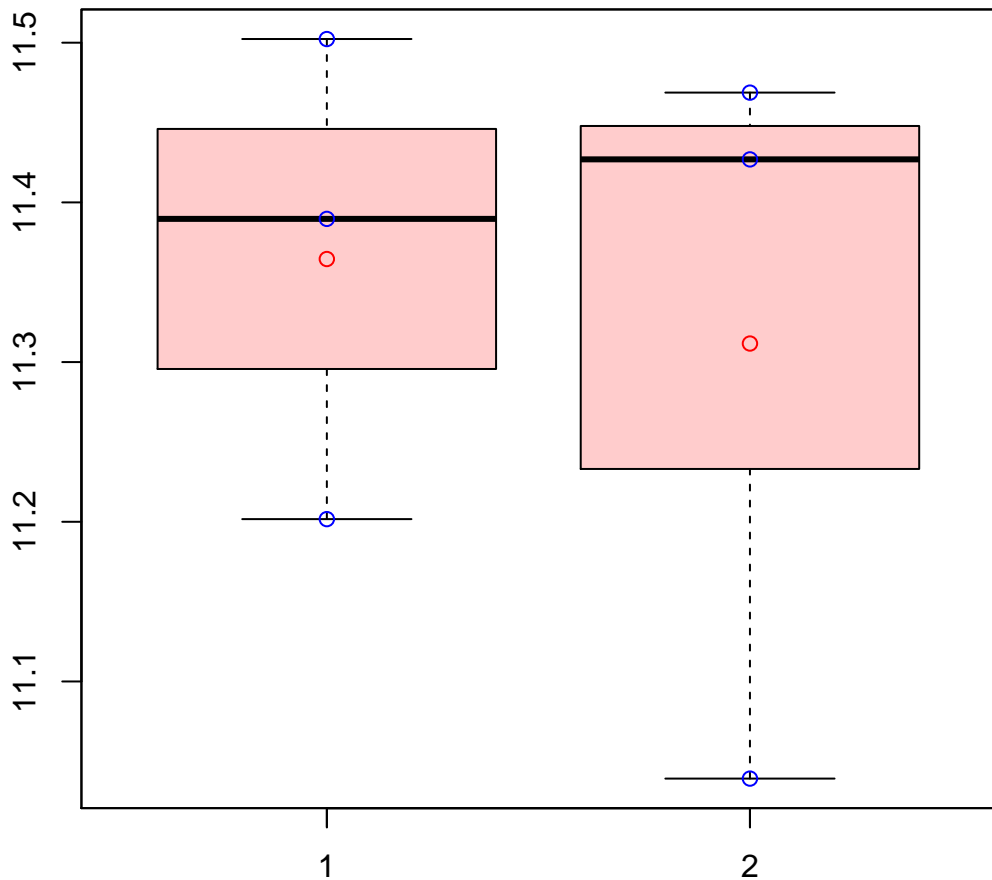

t-Test: p-value = 0.76

# CL2238Contig8|CL2238Contig8

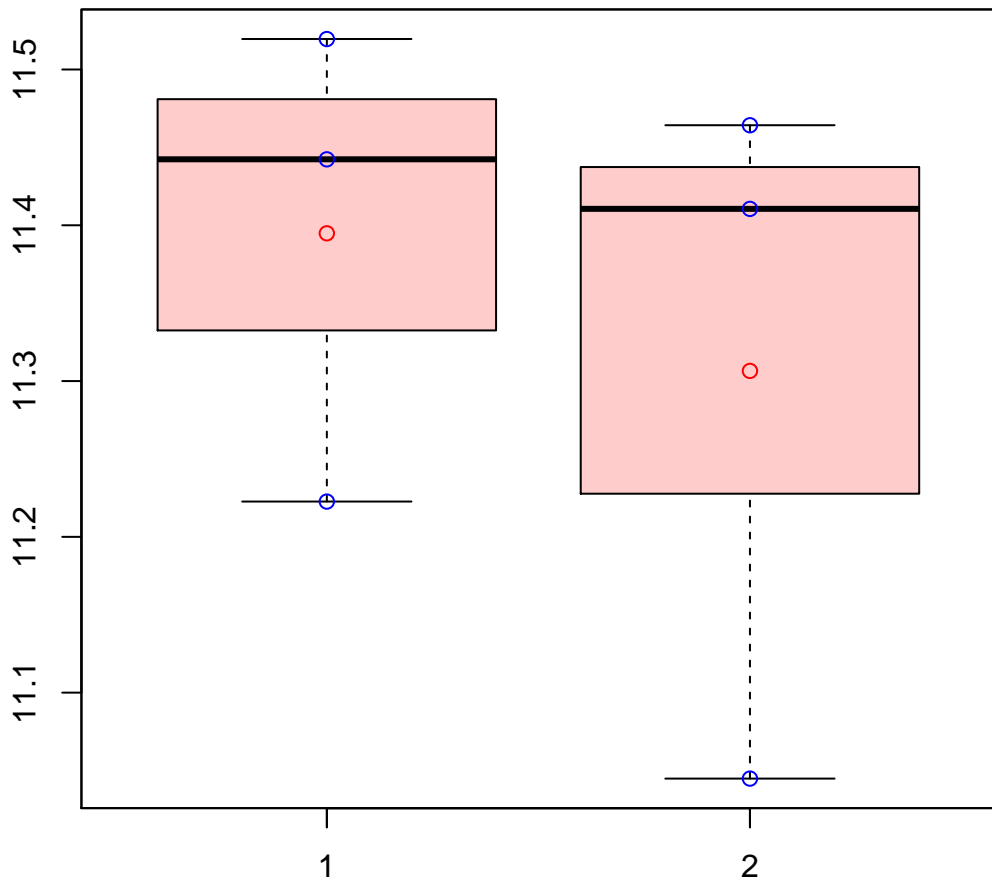

t-Test: p-value = 0.61

# CL2238Contig9|CL2238Contig9

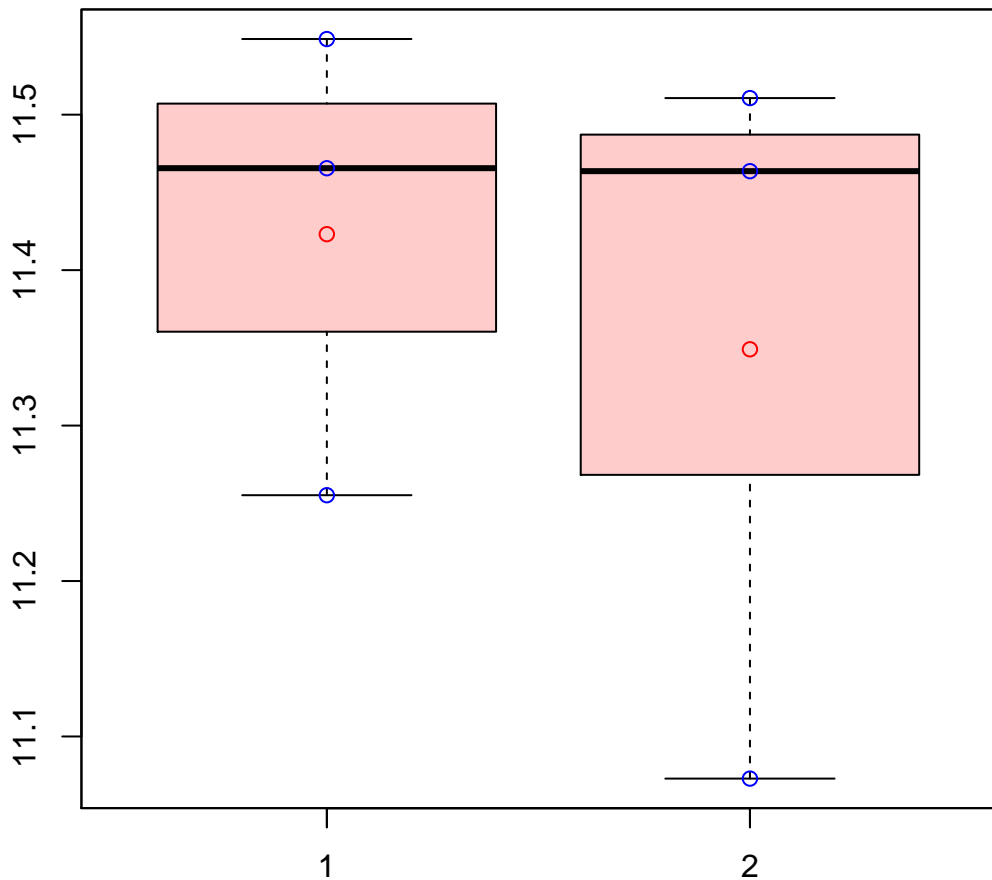

t-Test: p-value = 0.68

# CL2242Contig8|CL2242Contig8

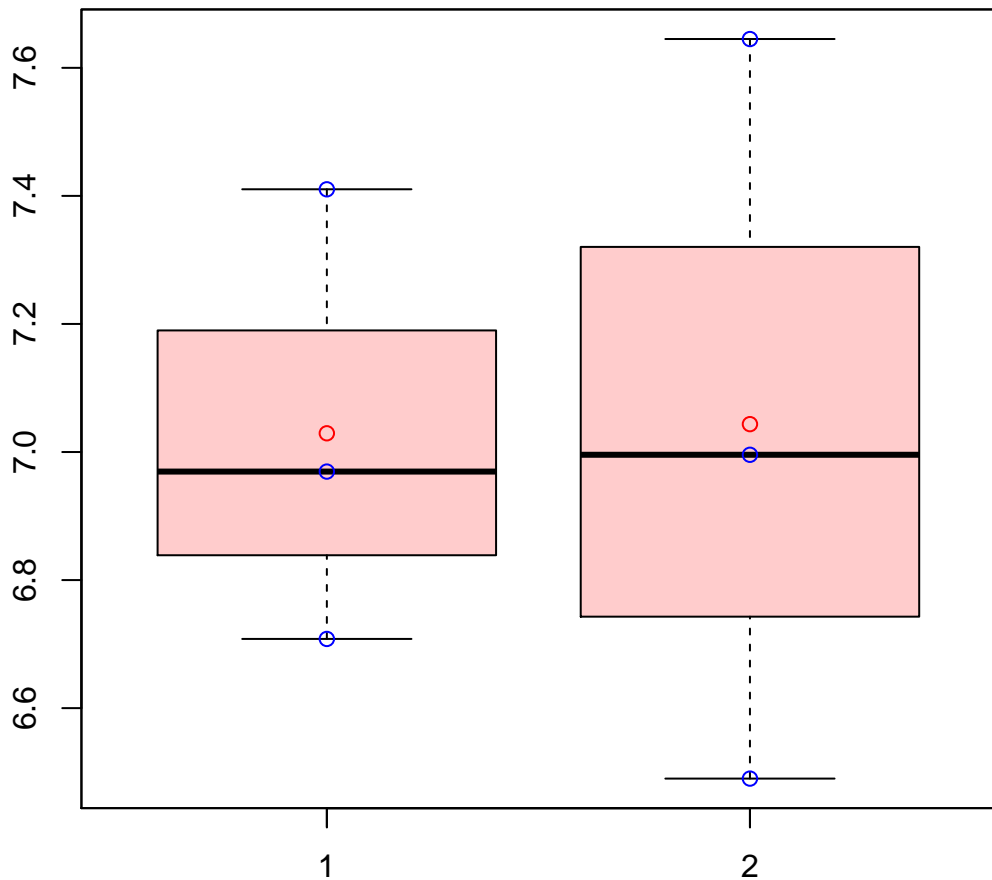

t-Test: p-value = 0.97

# CL2243Contig4|CL2243Contig4

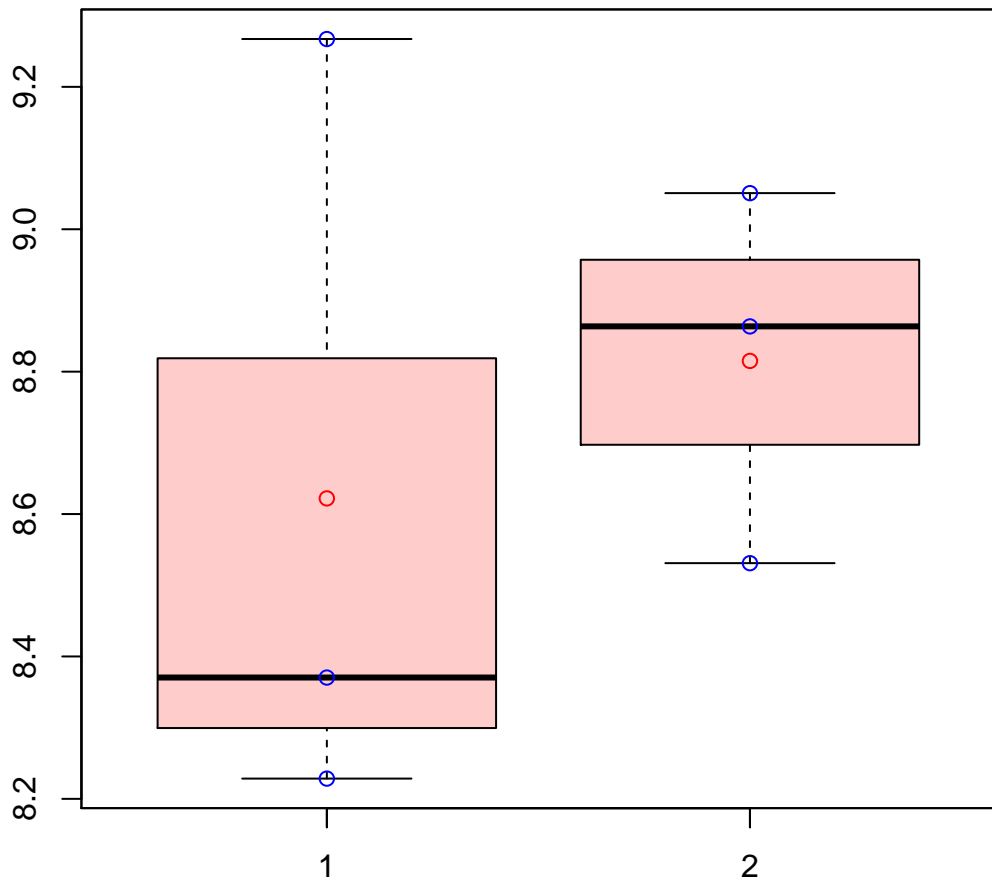

t-Test: p-value = 0.63



# CL2252Contig2|CL2252Contig2

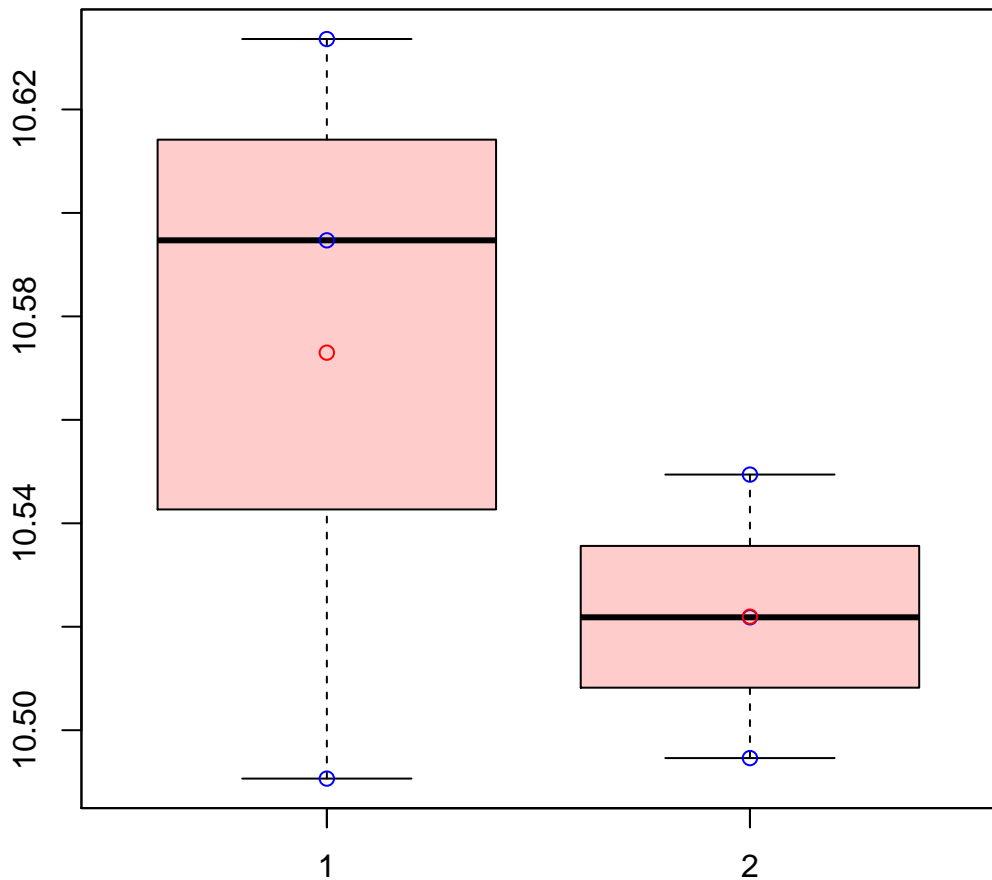

t-Test: p-value = 0.36

# CL2252Contig3|CL2252Contig3

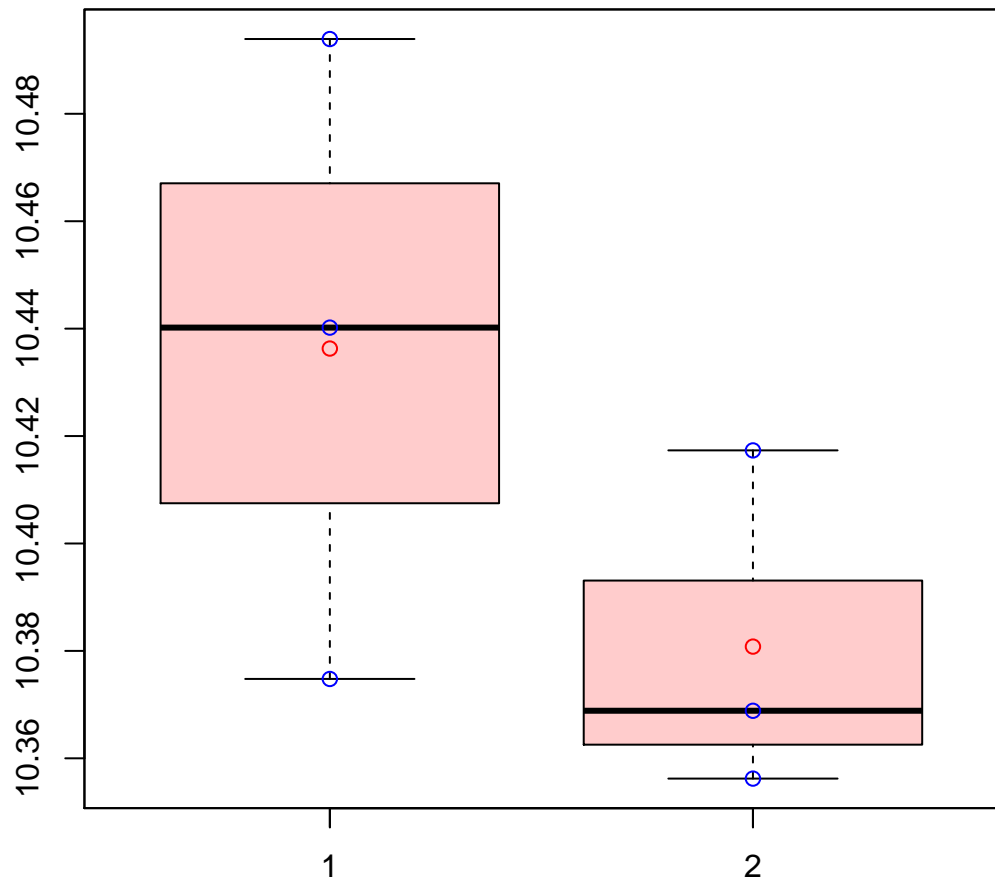

t-Test: p-value = 0.25

# CL2252Contig4|CL2252Contig4

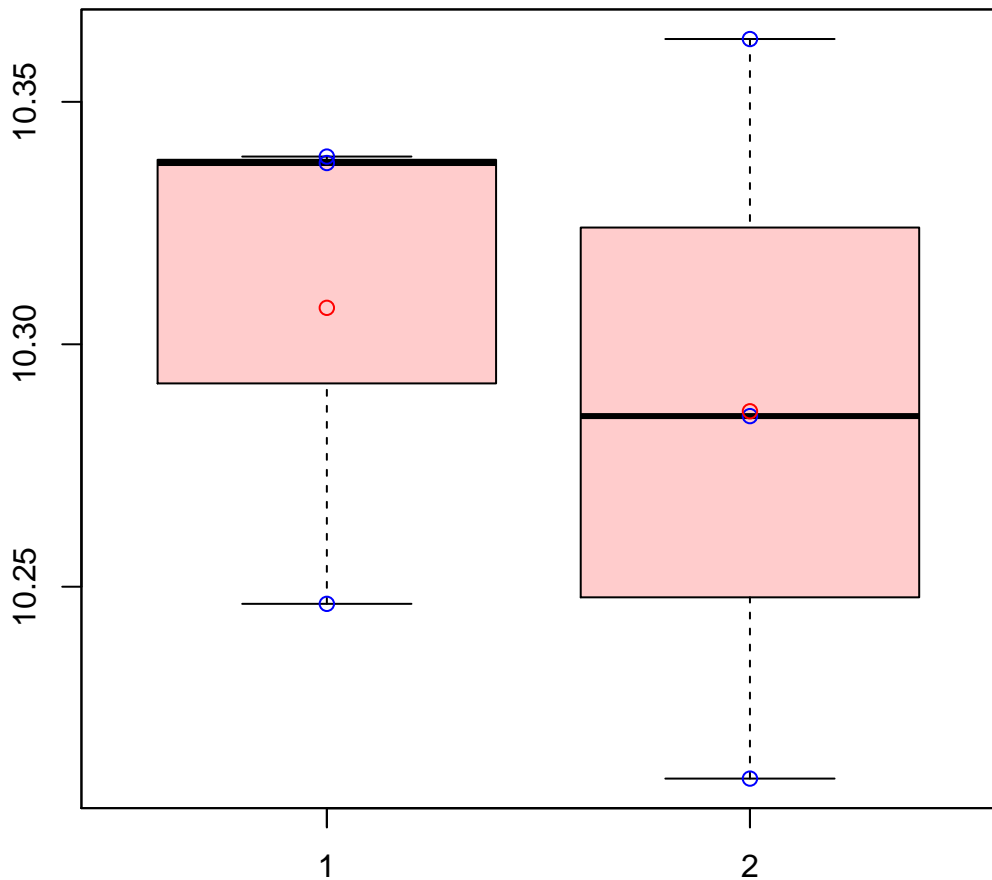

t-Test: p-value = 0.71

# CL22556Contig1|CL22556Contig1

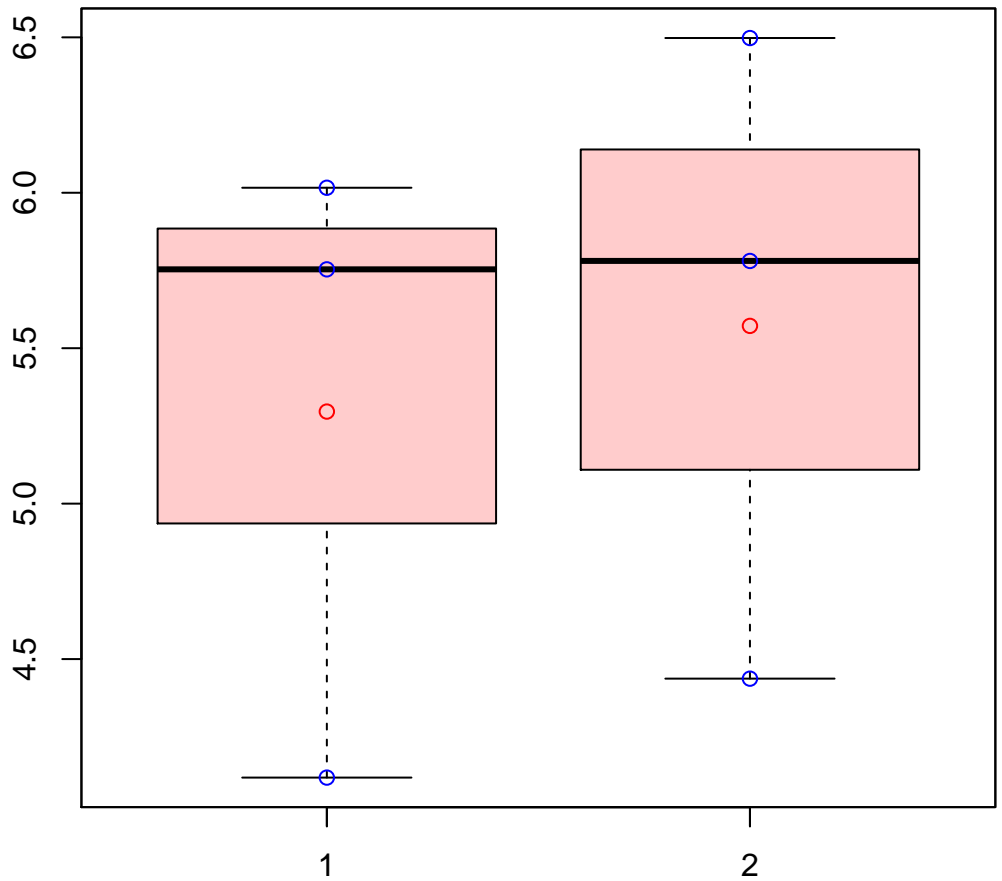

t-Test: p-value = 0.76

# CL2256Contig6|CL2256Contig6

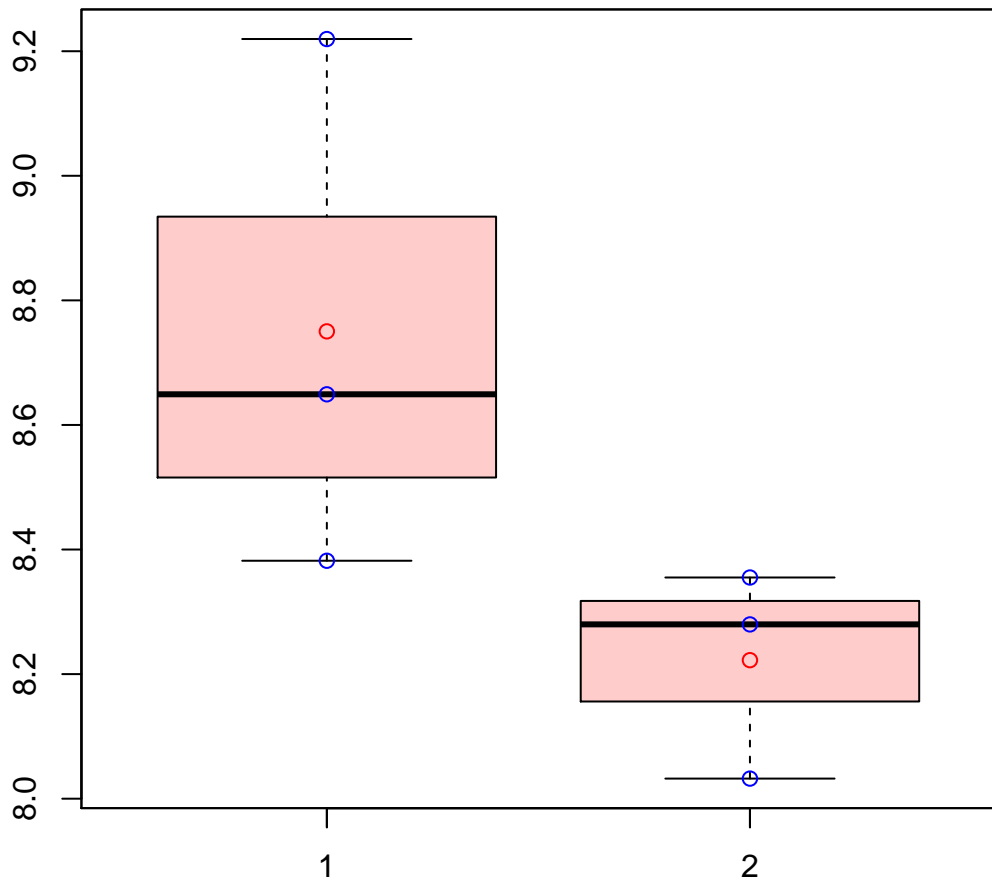

t-Test: p-value = 0.15

# CL2257Contig1|CL2257Contig1

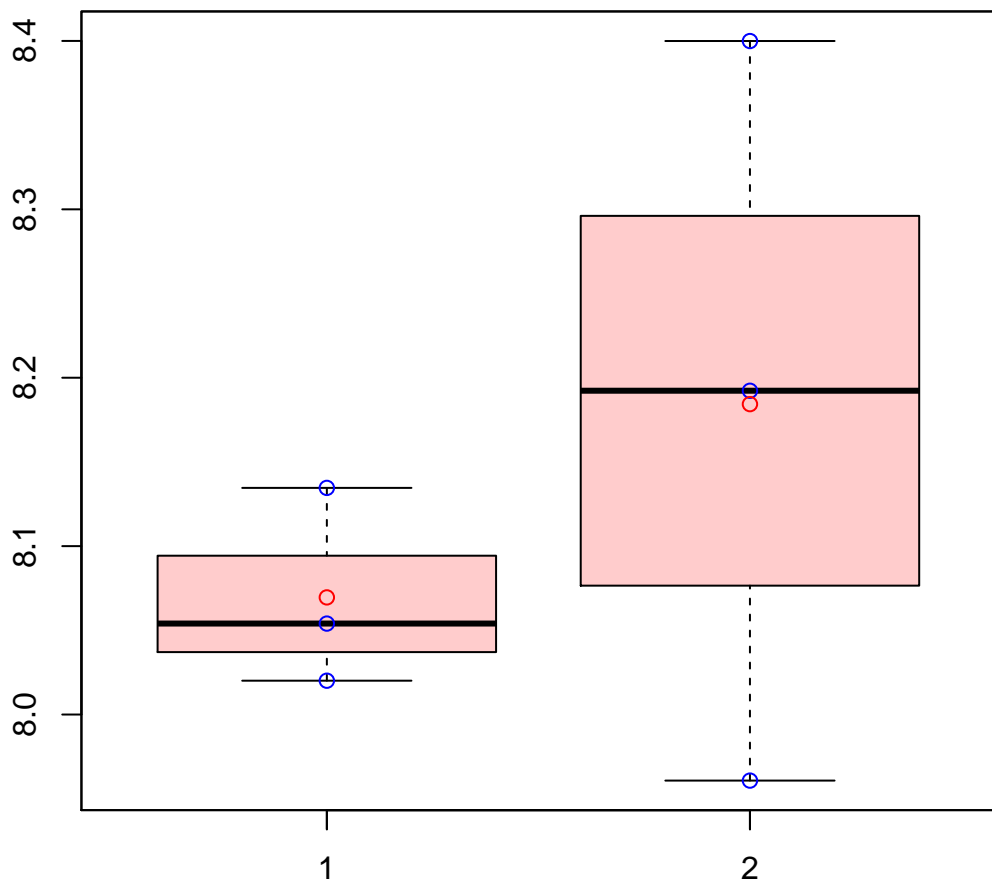

t-Test: p-value = 0.46

# CL2257Contig2|CL2257Contig2



t-Test: p-value = 0.46

# CL2257Contig9|CL2257Contig9

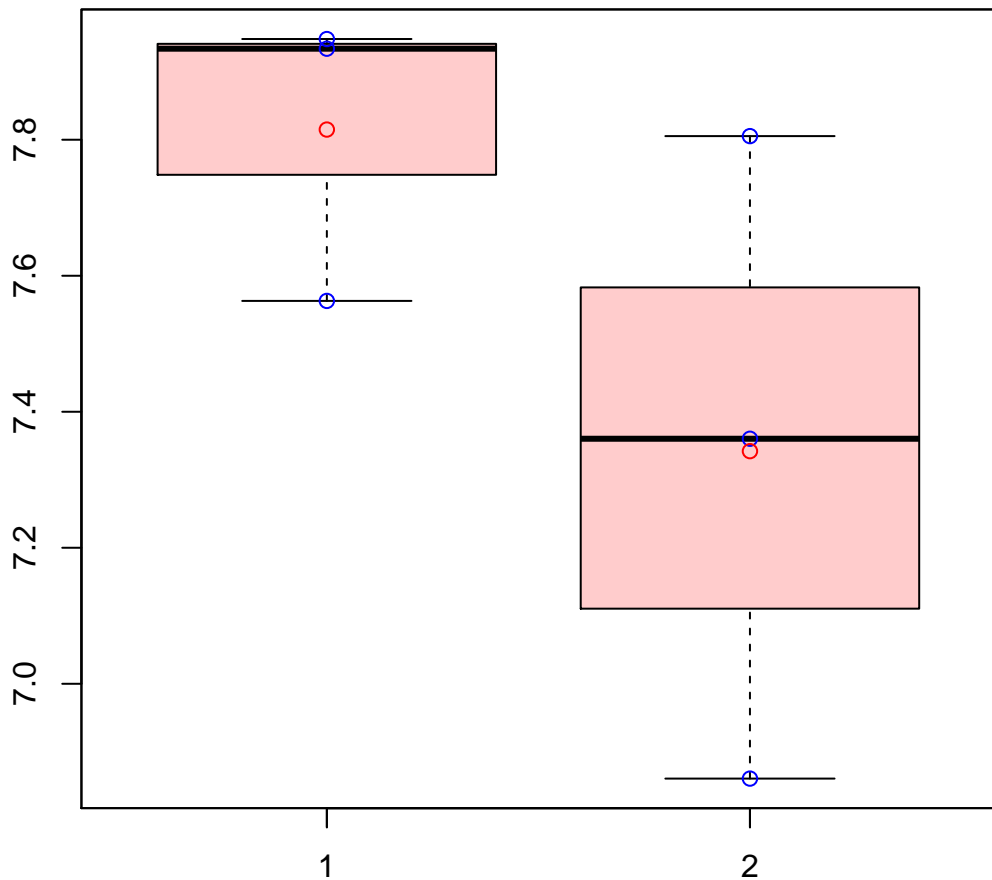

t-Test: p-value = 0.22



# CL22596Contig1|CL22596Contig1

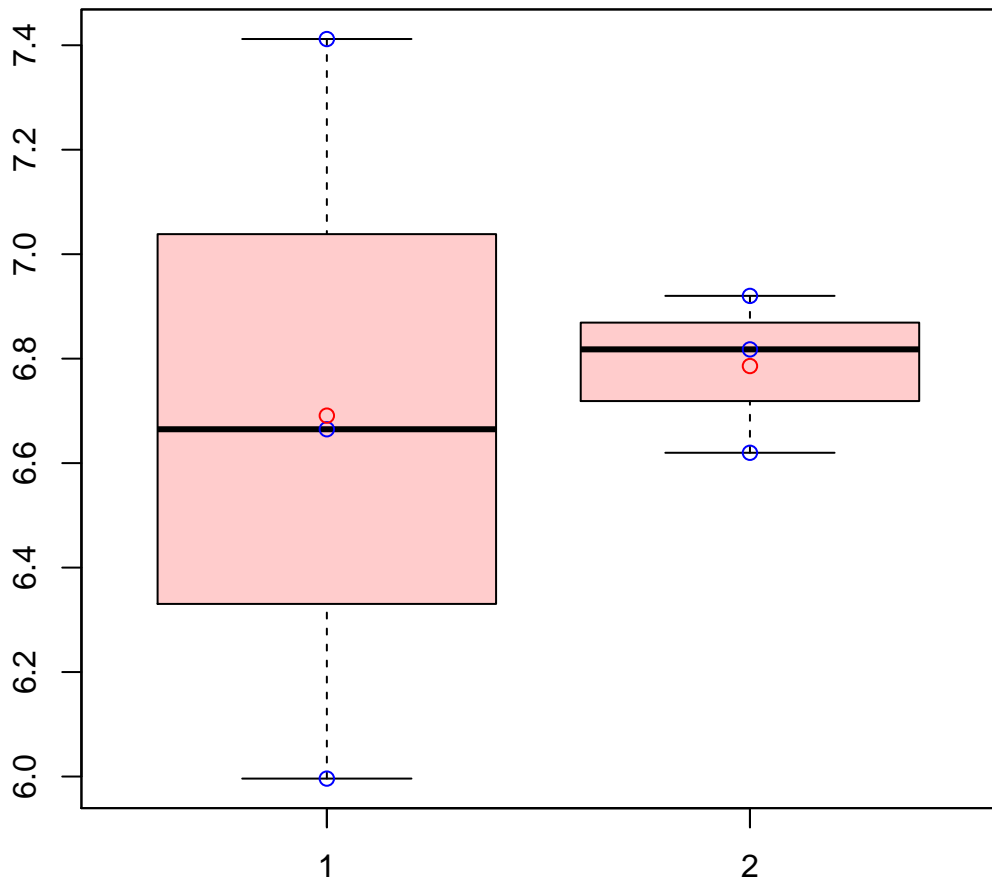

t-Test: p-value = 0.84

# CL2259Contig1|CL2259Contig1

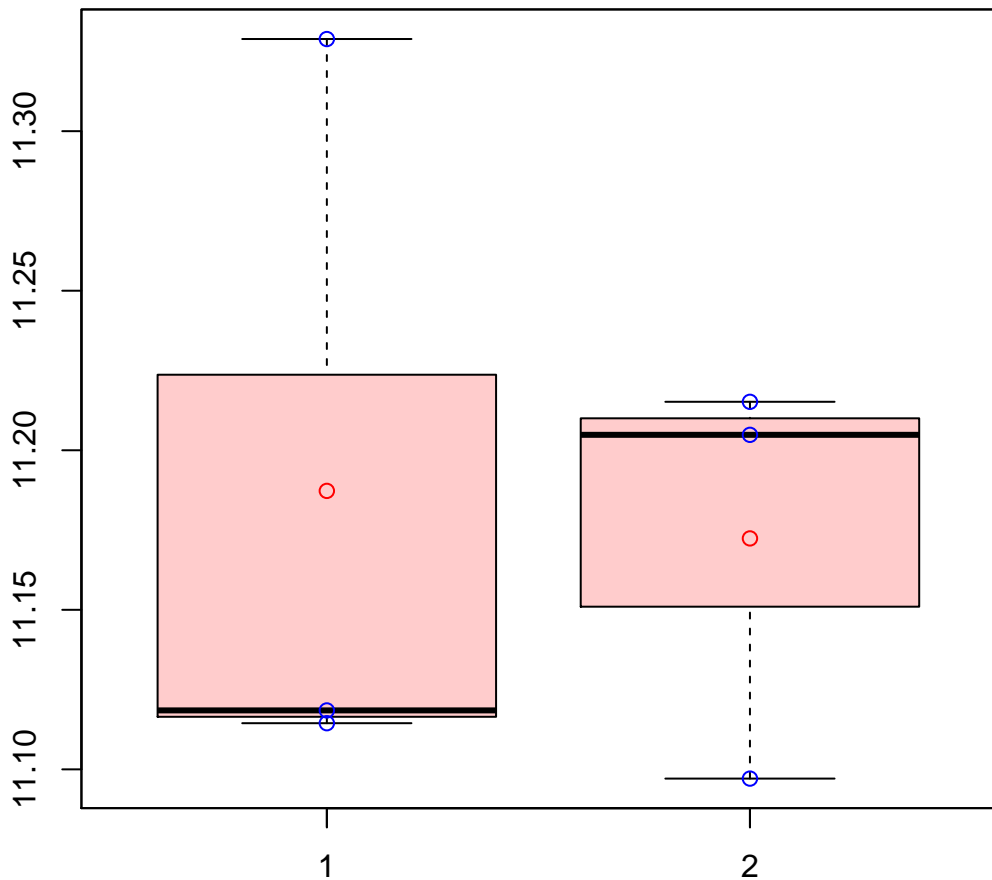

t-Test: p-value = 0.86

# CL2259Contig2|CL2259Contig2

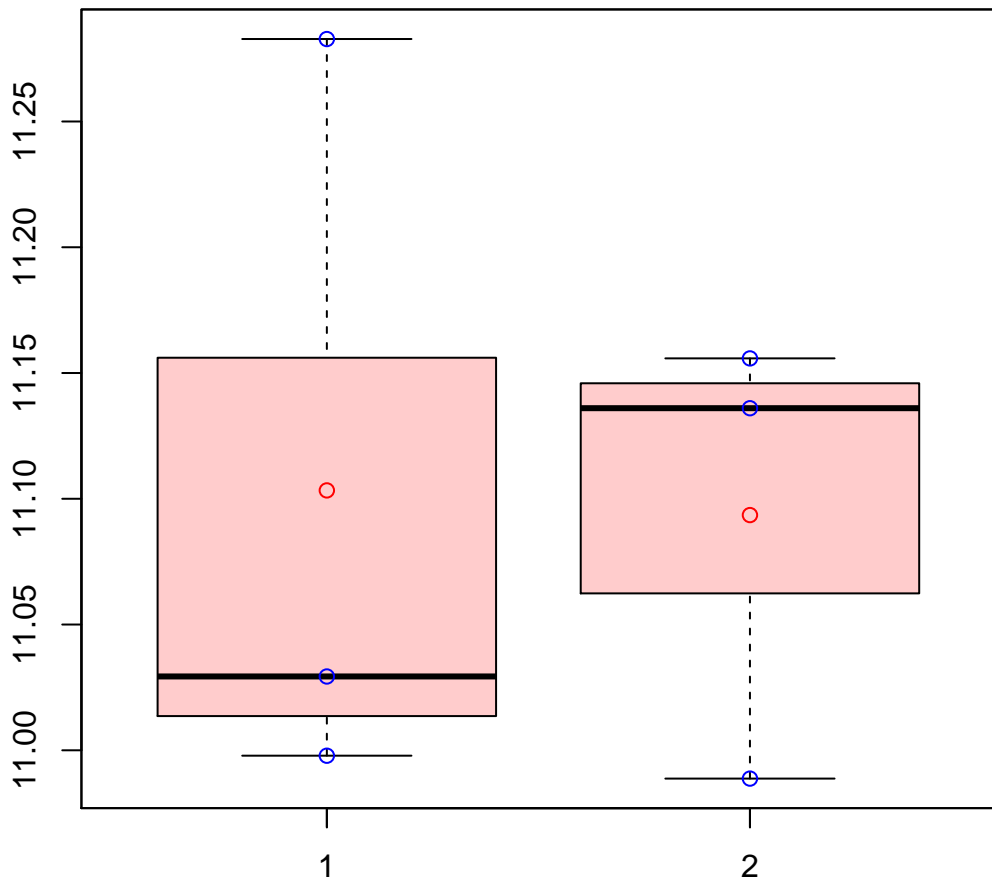

t-Test: p-value = 0.93

# CL2259Contig4|CL2259Contig4

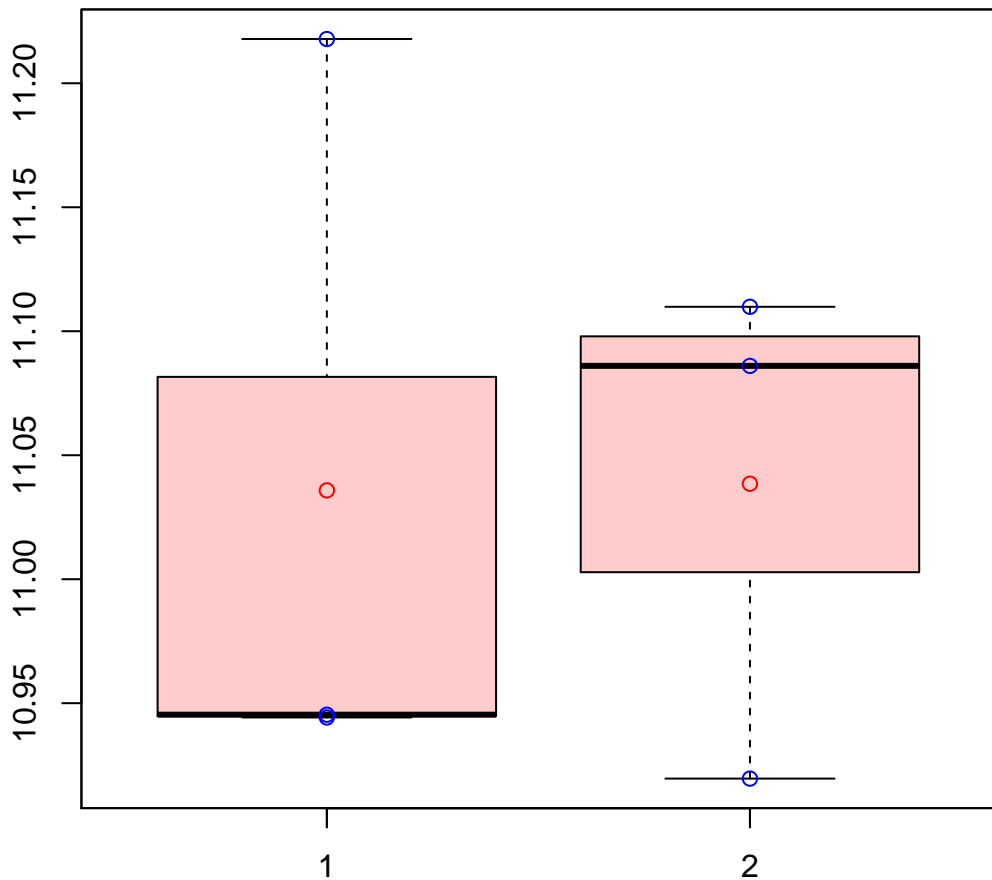

t-Test: p-value = 0.98

# CL2263Contig2|CL2263Contig2

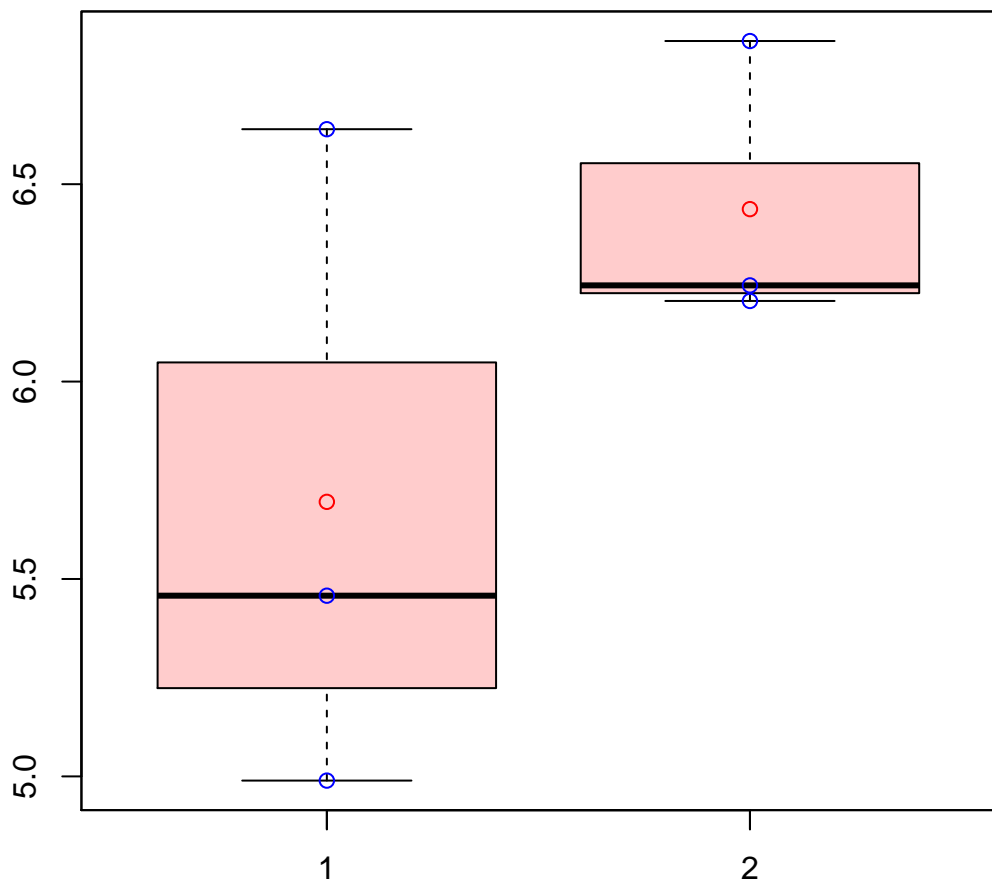

t-Test: p-value = 0.27

# CL2267Contig4|CL2267Contig4

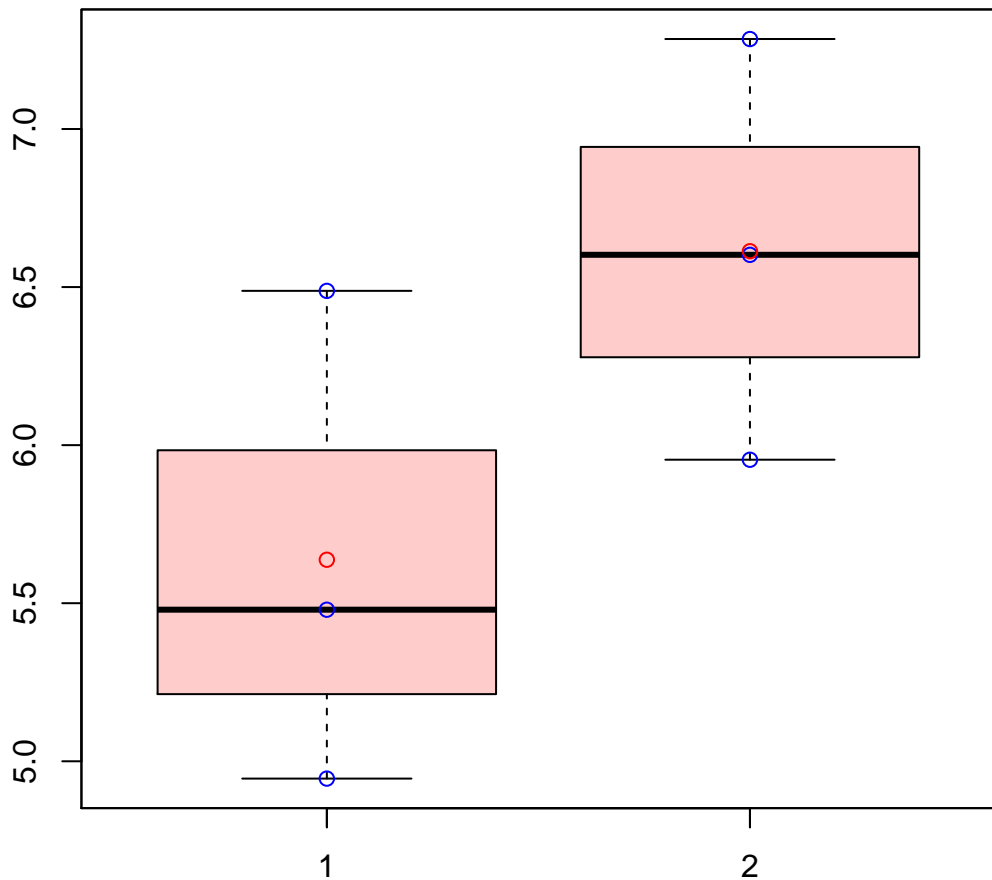

t-Test: p-value = 0.18

# CL2268Contig1|CL2268Contig1

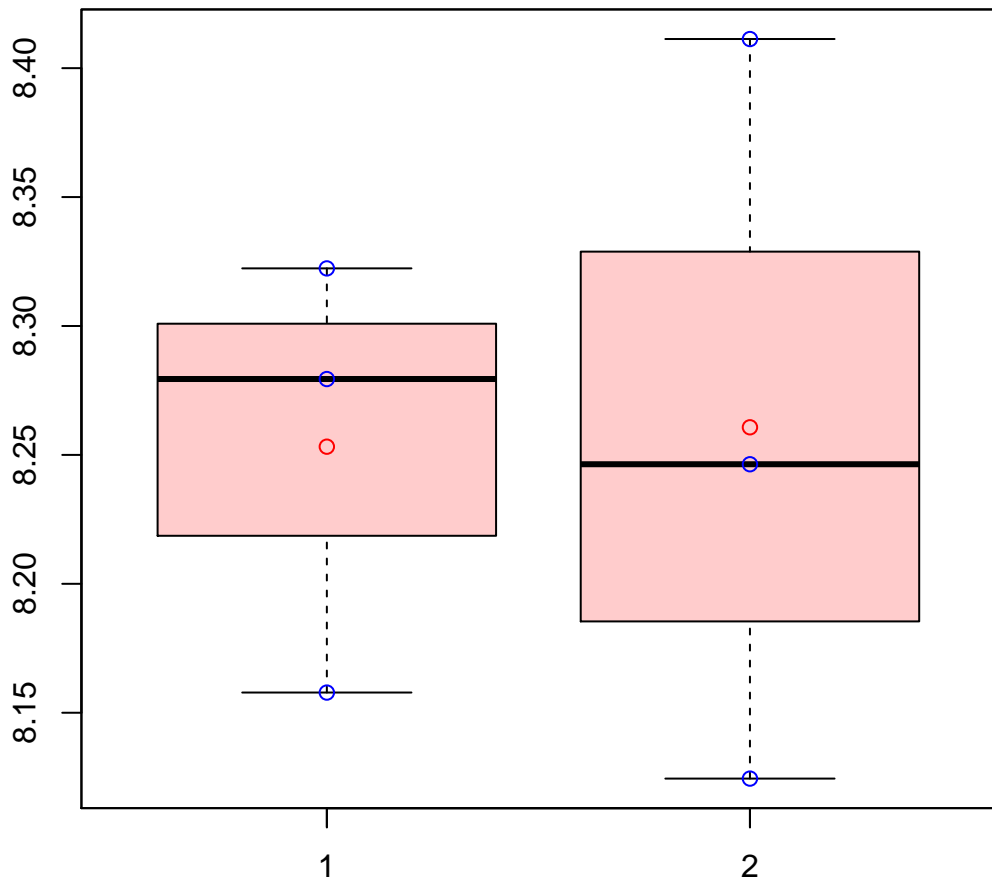

t-Test: p-value = 0.94

# CL2268Contig3|CL2268Contig3

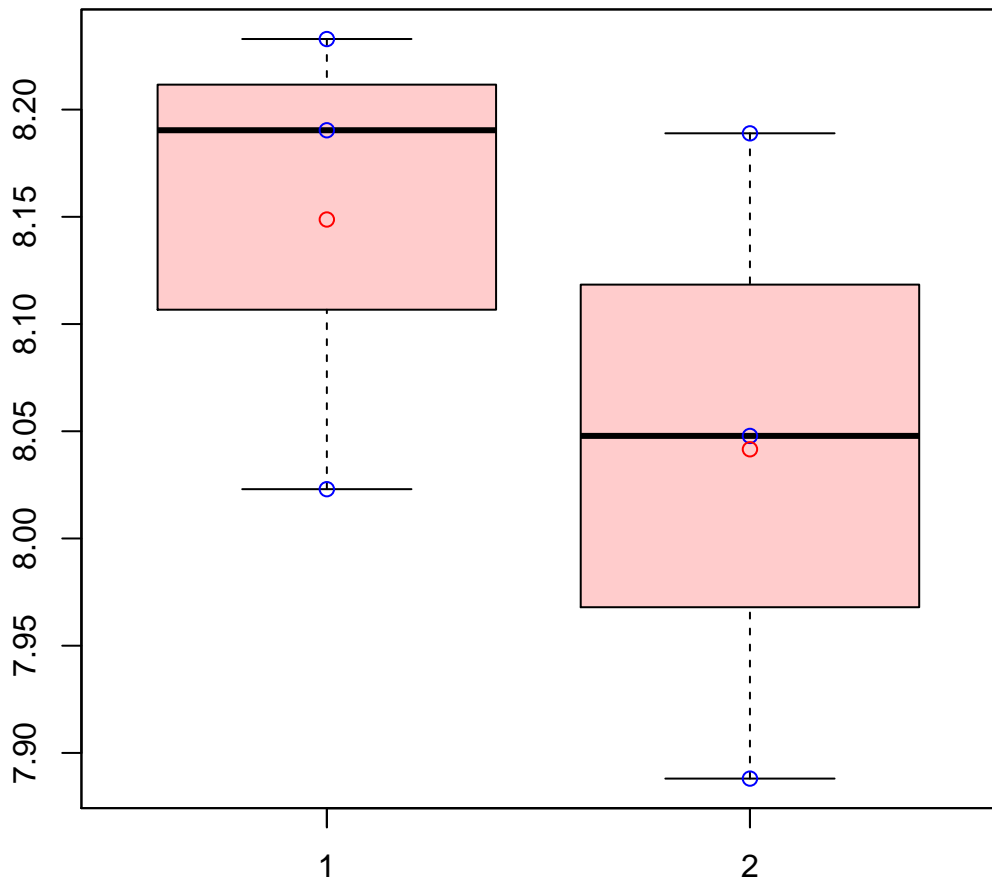

t-Test: p-value = 0.38



# CL226Contig1|CL226Contig1

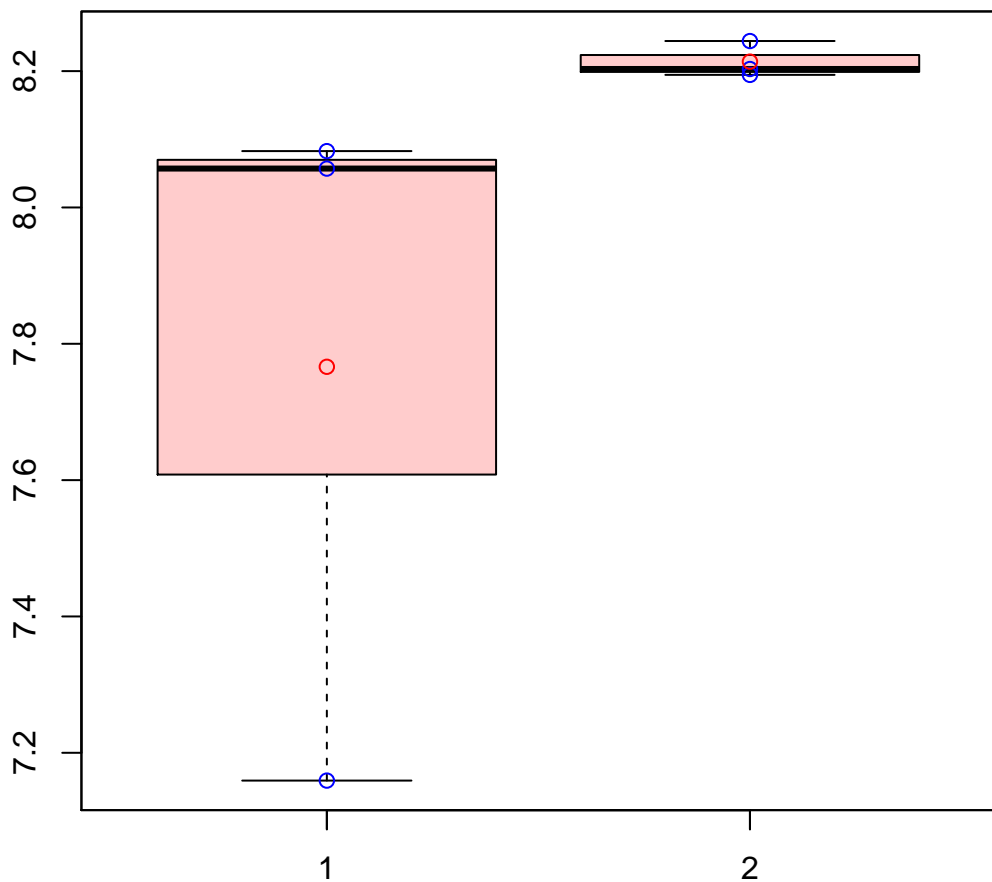

t-Test: p-value = 0.28

# CL226Contig2|CL226Contig2

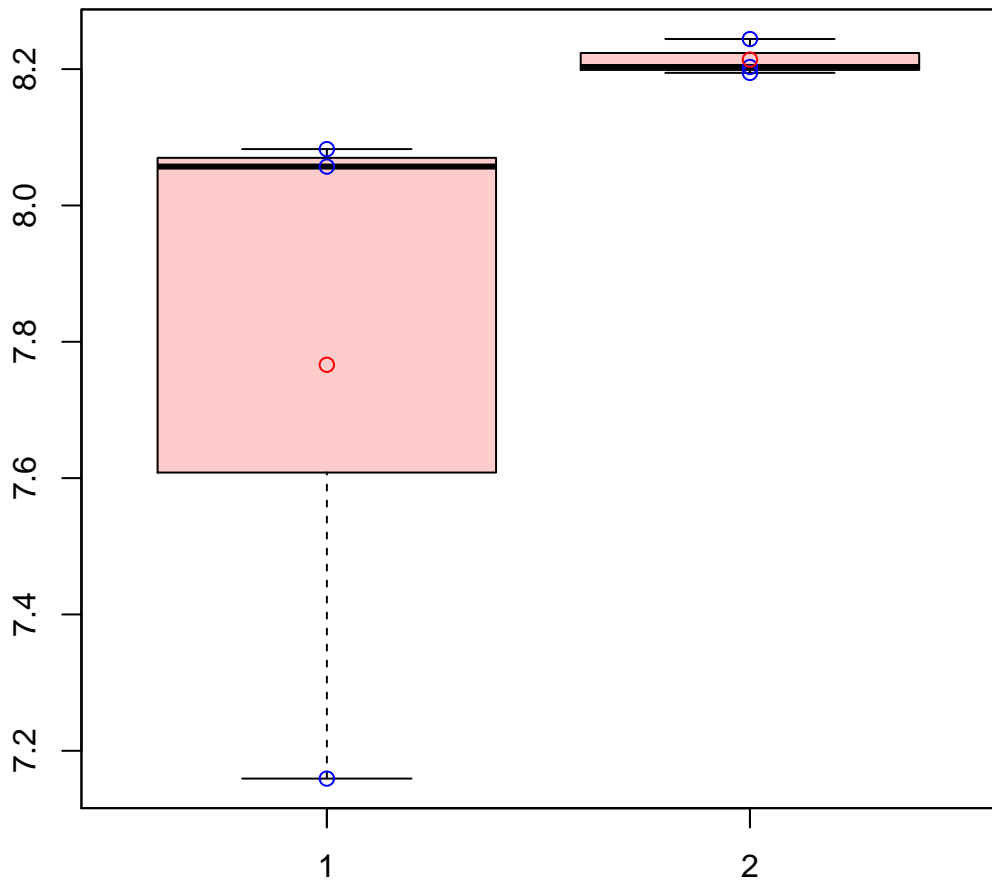

t-Test: p-value = 0.28

# CL226Contig3|CL226Contig3

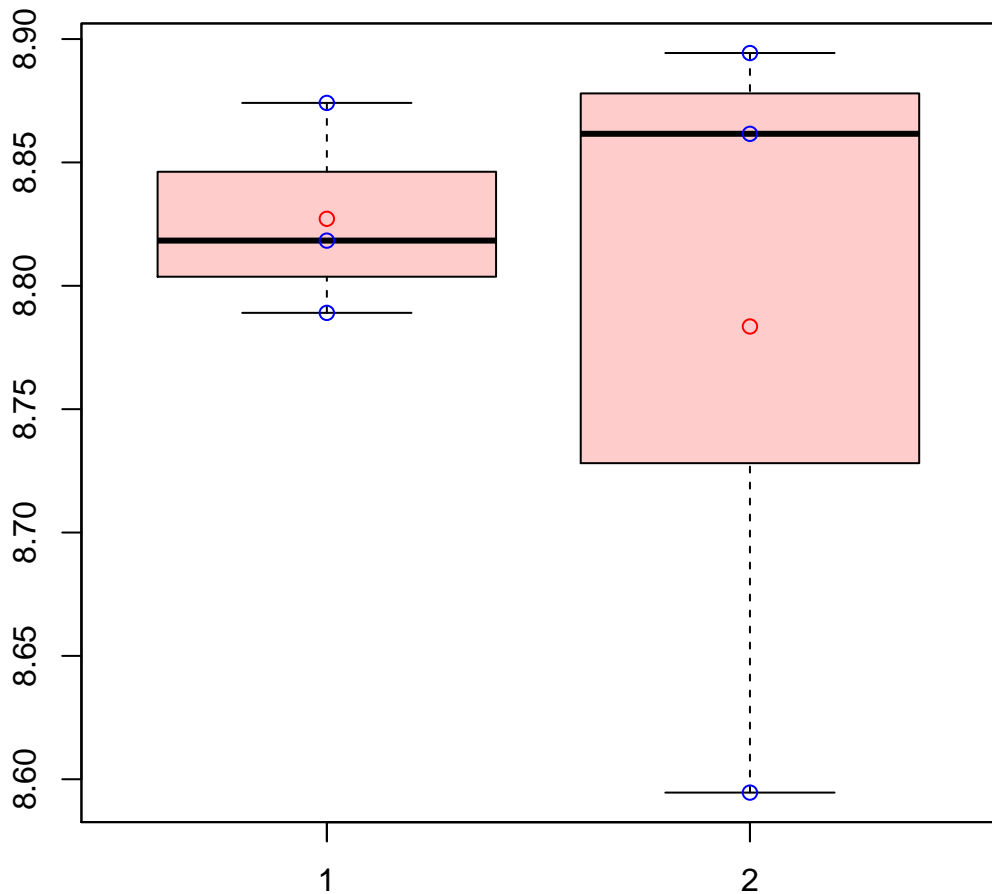

t-Test: p-value = 0.7

# CL2275Contig2|CL2275Contig2

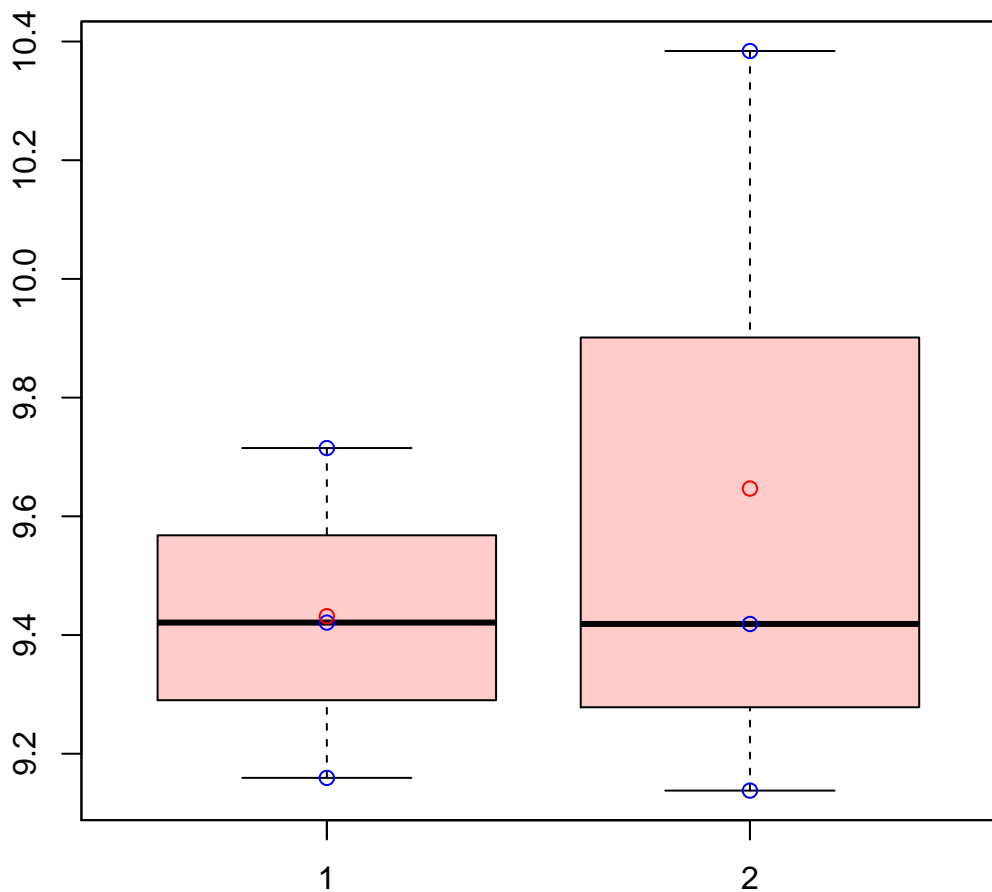

t-Test: p-value = 0.64

# CL22771Contig1|CL22771Contig1

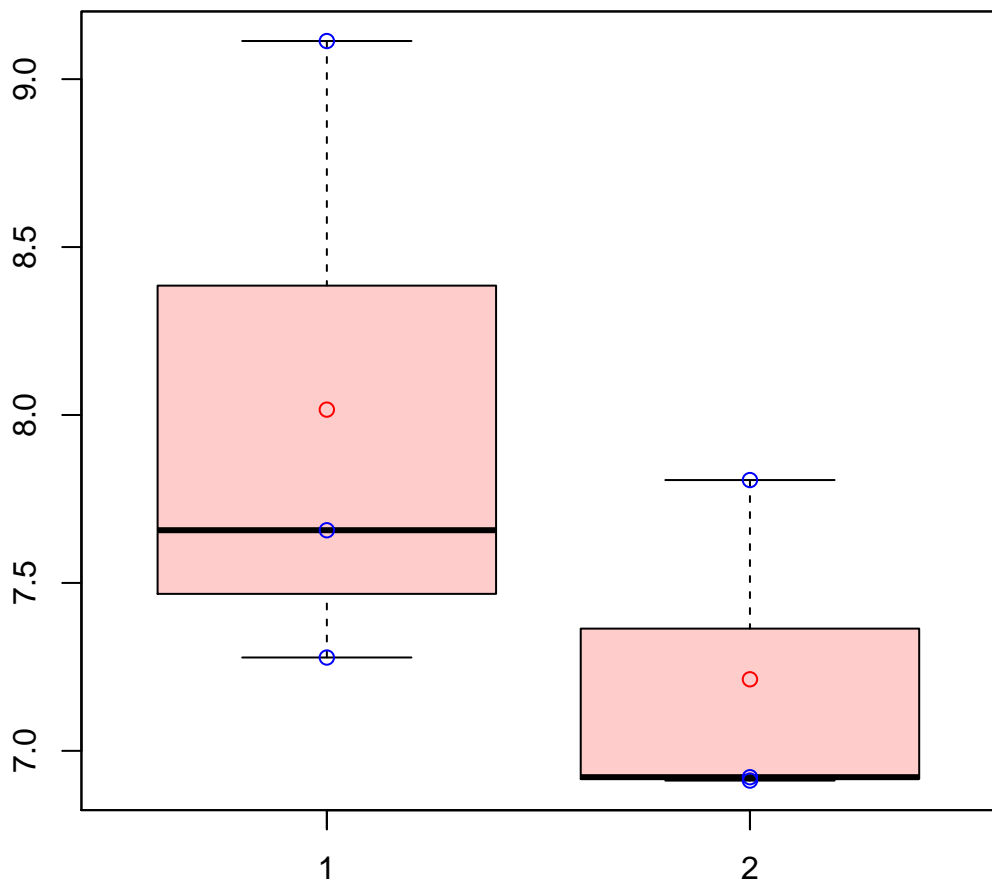

t-Test: p-value = 0.29

# CL2277Contig3|CL2277Contig3

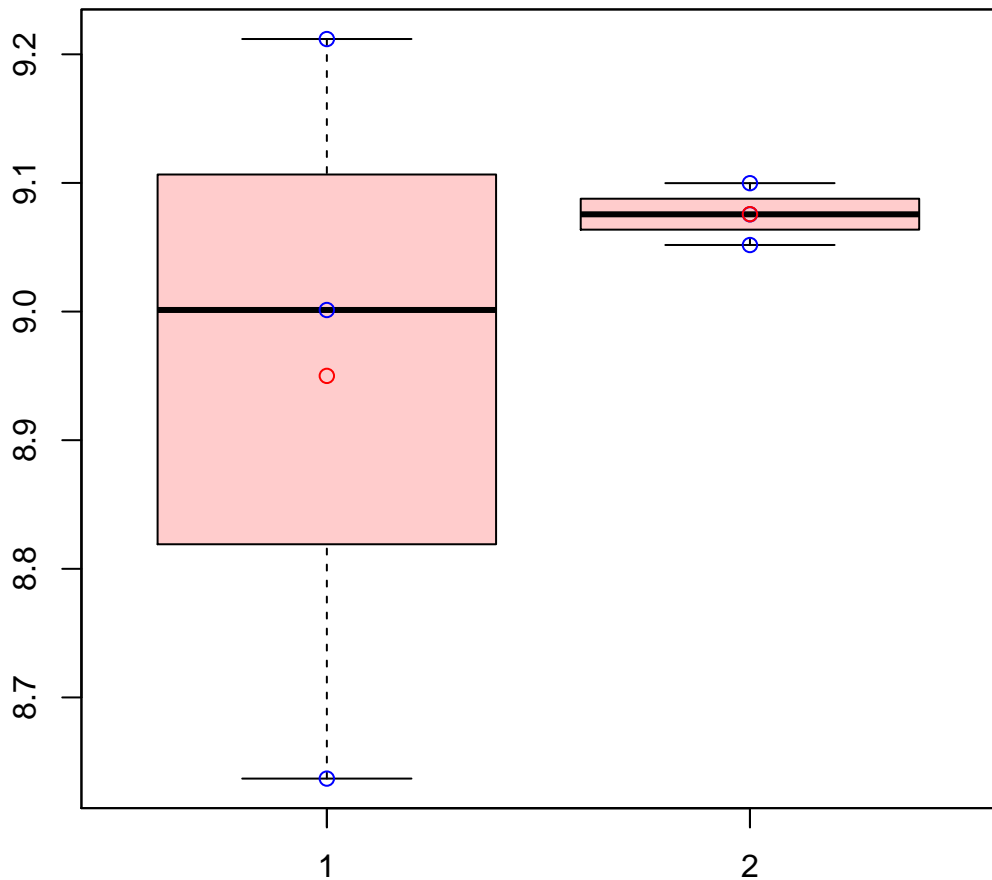

t-Test: p-value = 0.53

# CL22781Contig1|CL22781Contig1

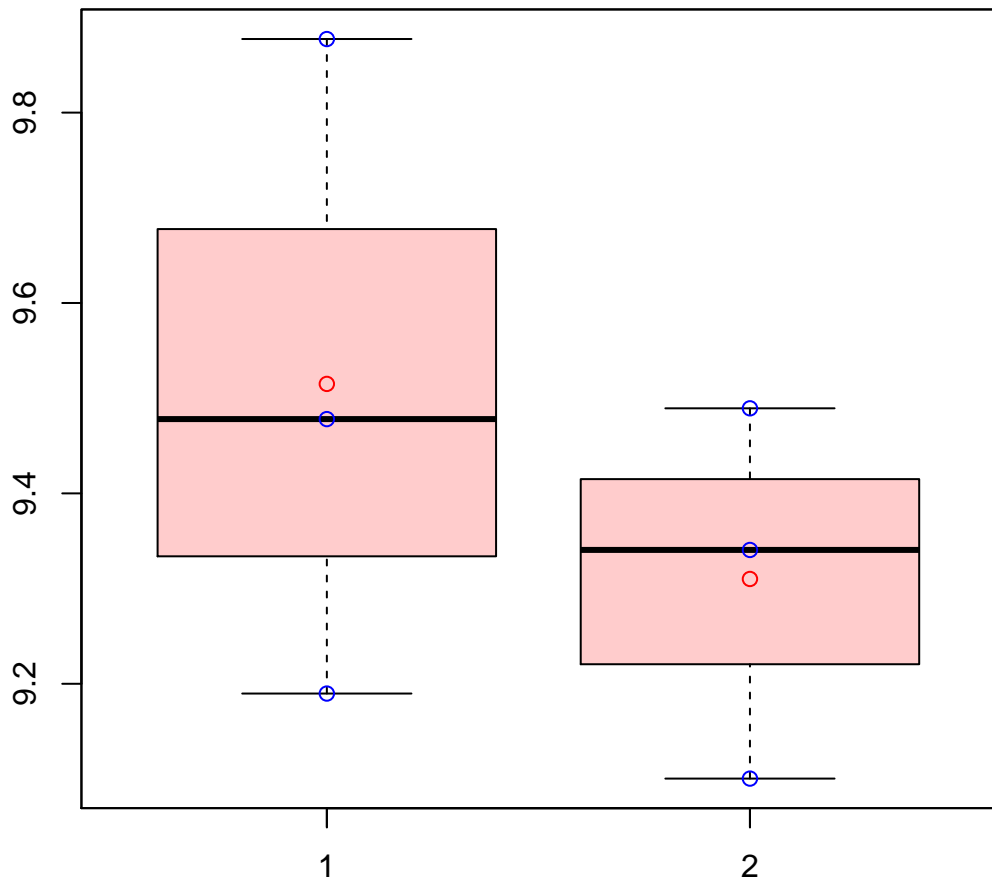

t-Test: p-value = 0.43

# CL227Contig12|CL227Contig12

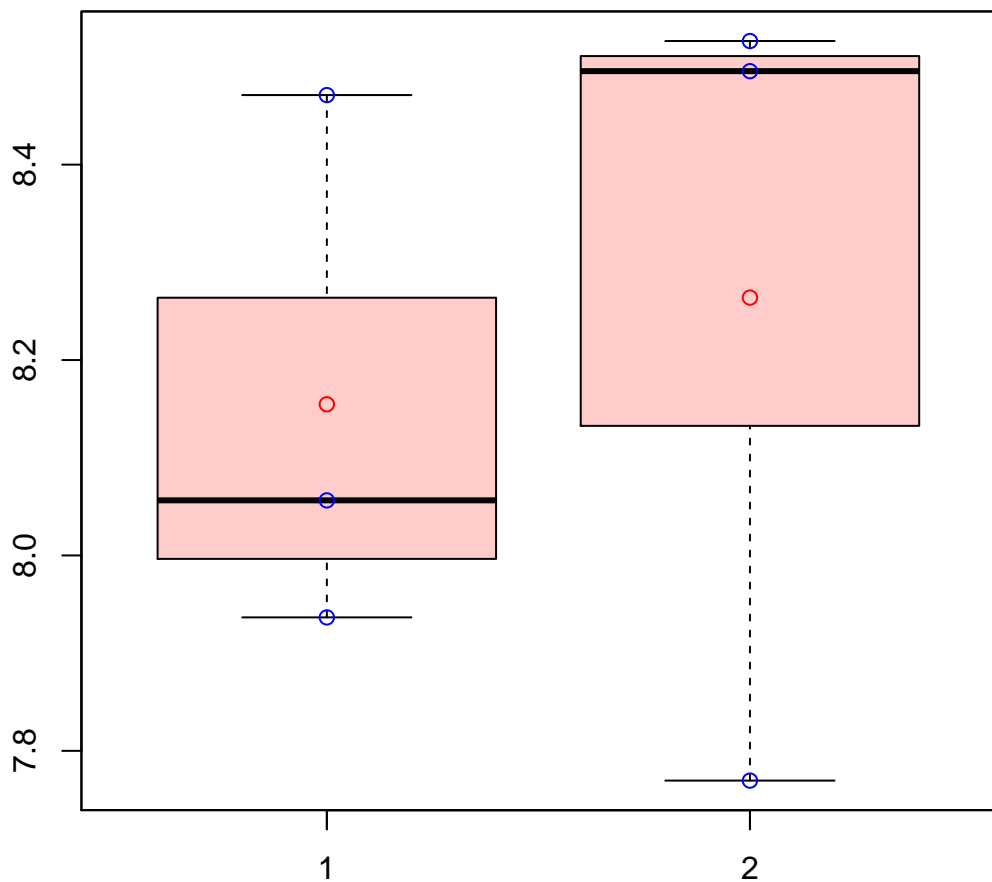

t-Test: p-value = 0.73



# CL227Contig17|CL227Contig17

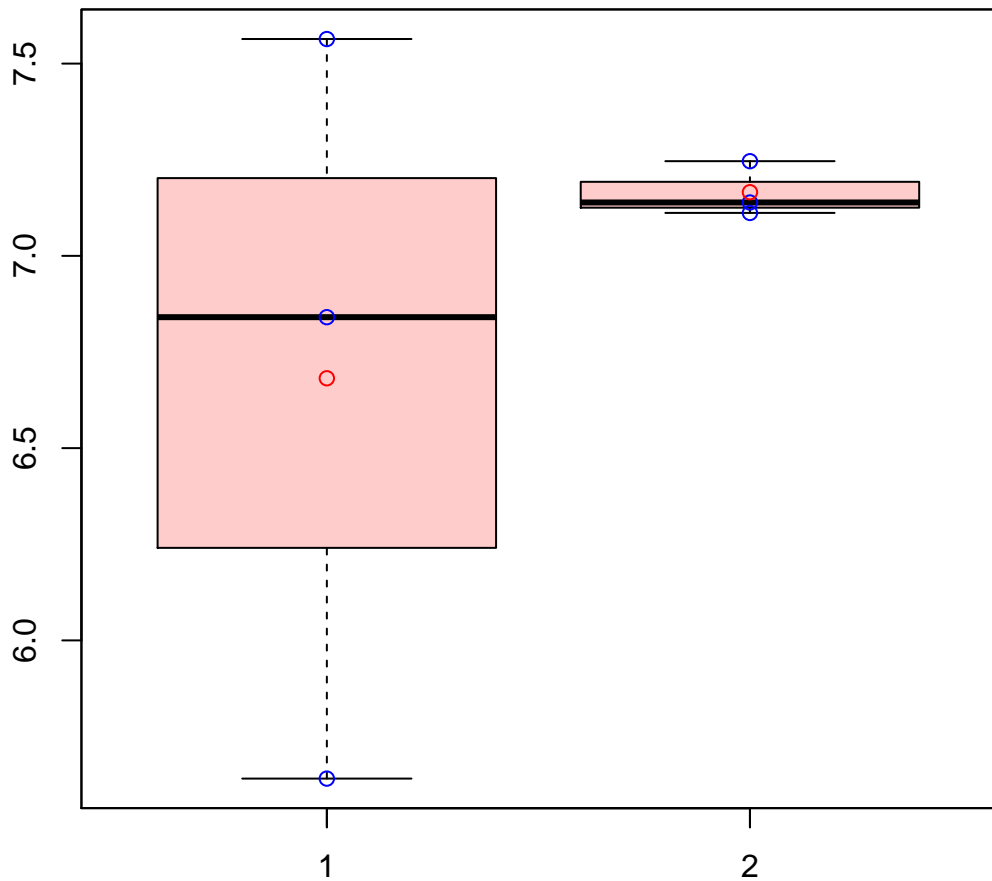

t-Test: p-value = 0.48

# CL227Contig7|CL227Contig7

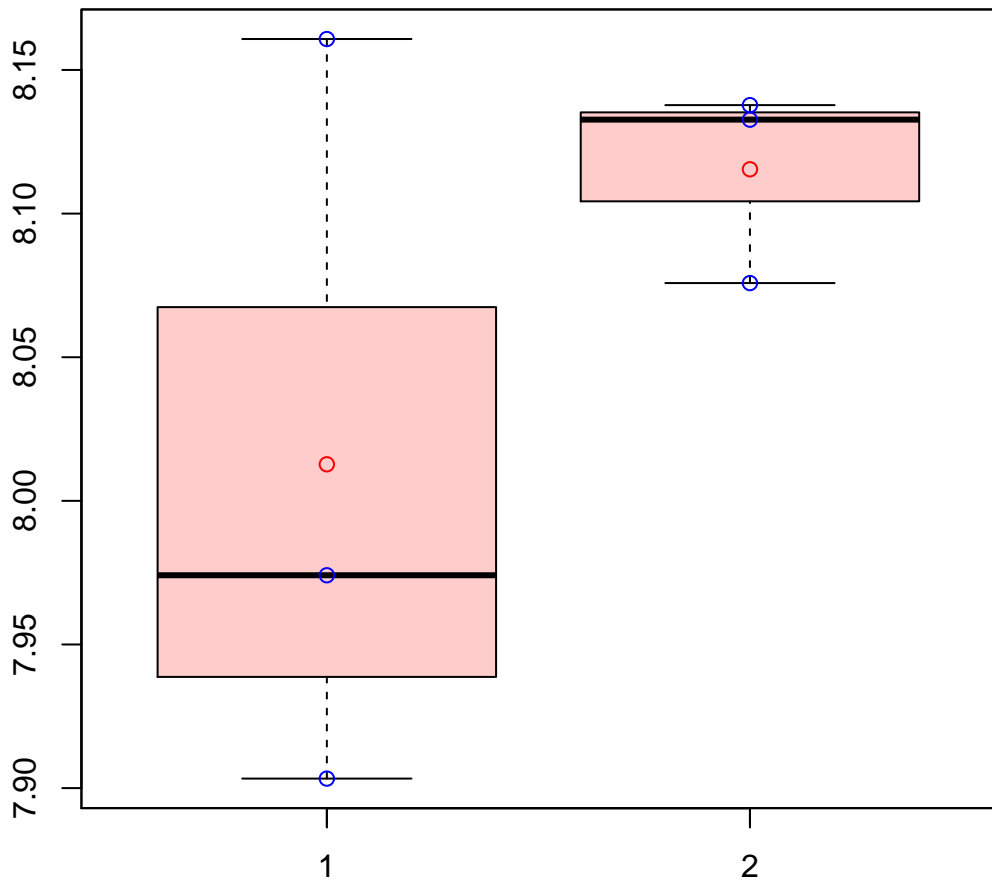

t-Test: p-value = 0.31

# CL2280Contig1|CL2280Contig1

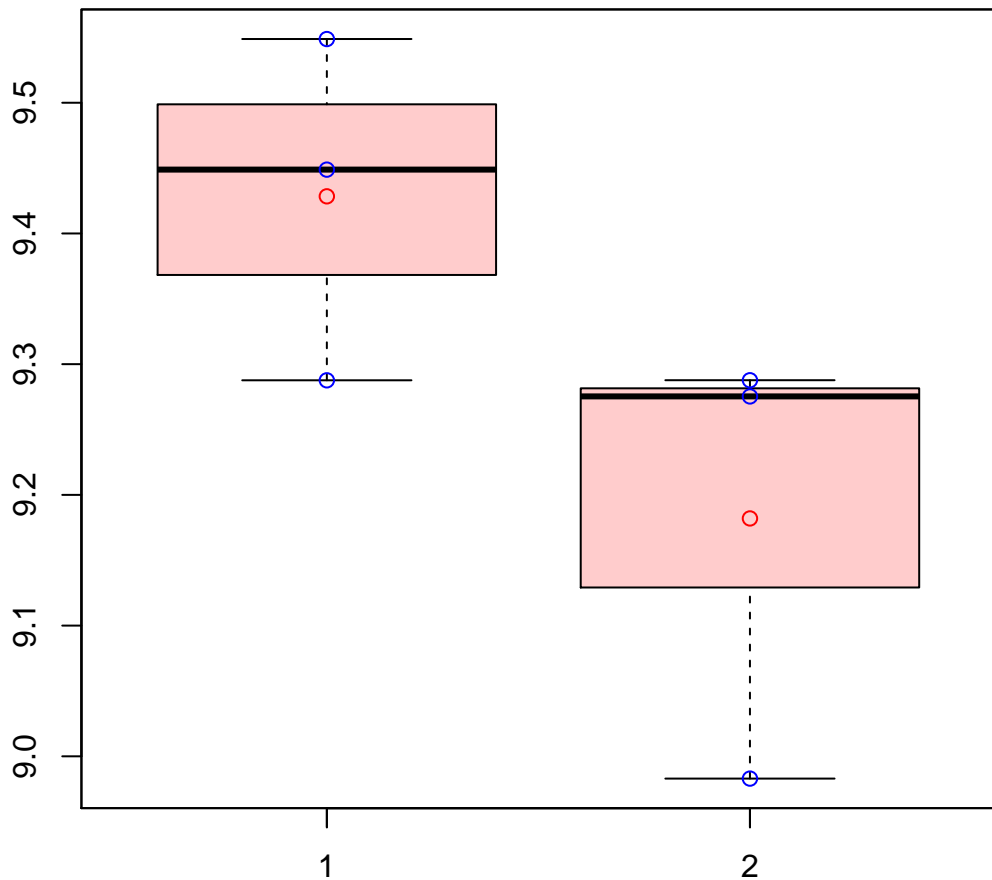

t-Test: p-value = 0.13

# CL2280Contig3|CL2280Contig3



t-Test: p-value = 0.13

# CL2284Contig2|CL2284Contig2

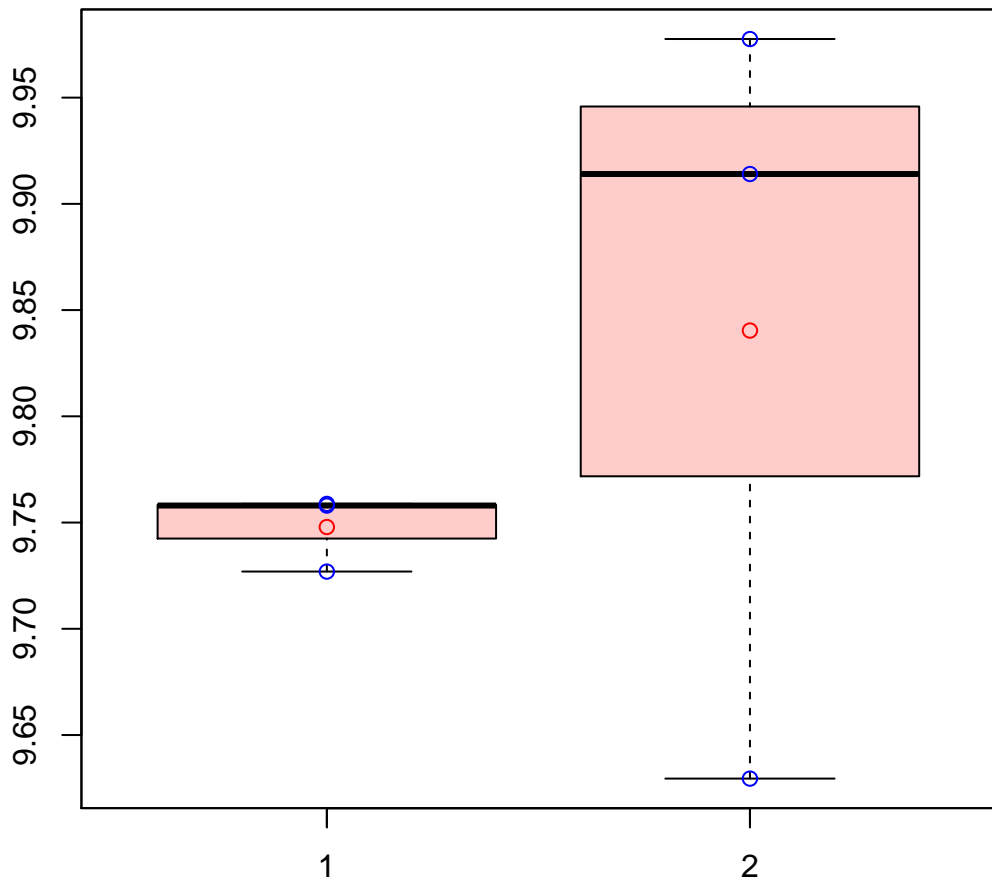

t-Test: p-value = 0.48

# CL2284Contig3|CL2284Contig3

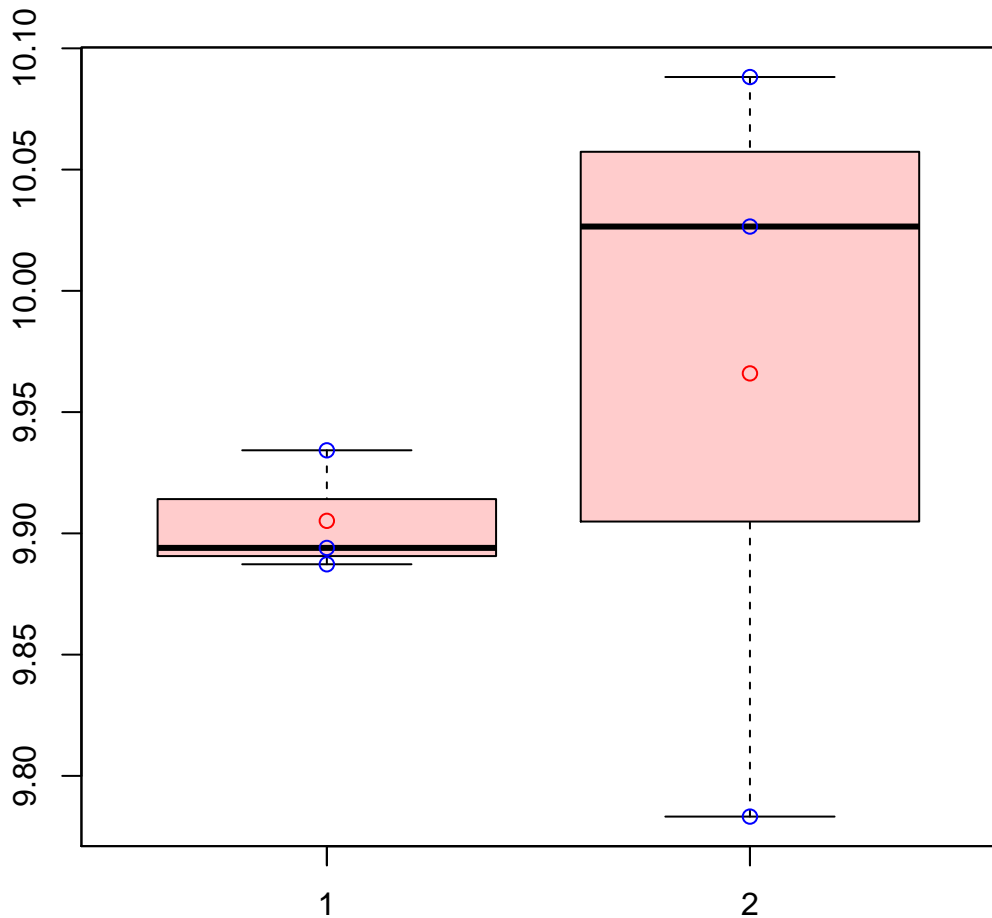

t-Test: p-value = 0.58

# CL2284Contig4|CL2284Contig4

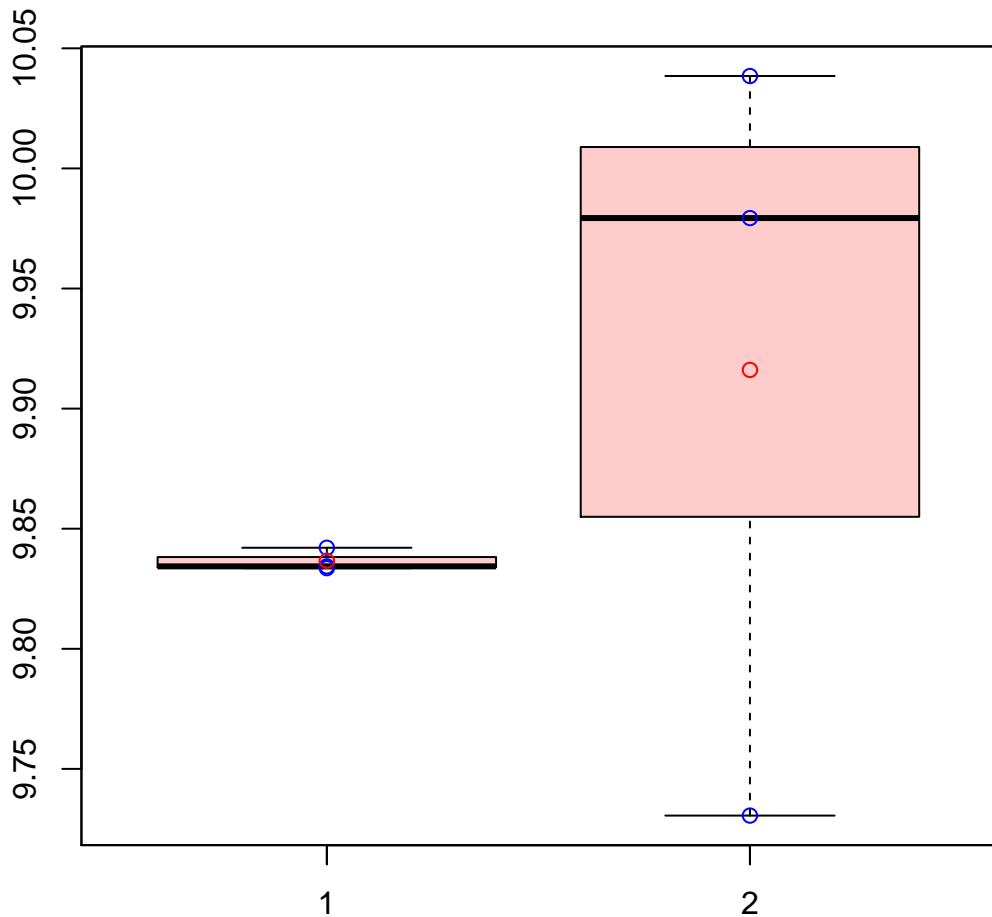

t-Test: p-value = 0.49

# CL2284Contig5|CL2284Contig5

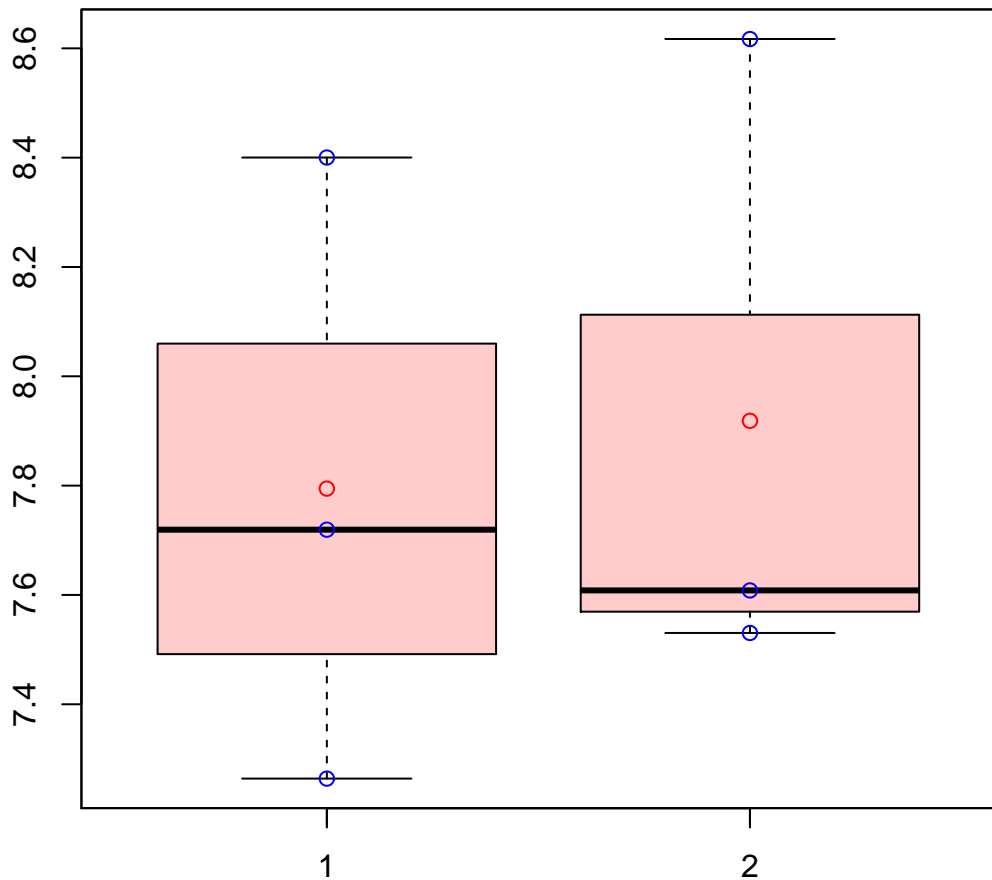

t-Test: p-value = 0.81



# CL22867Contig1|CL22867Contig1

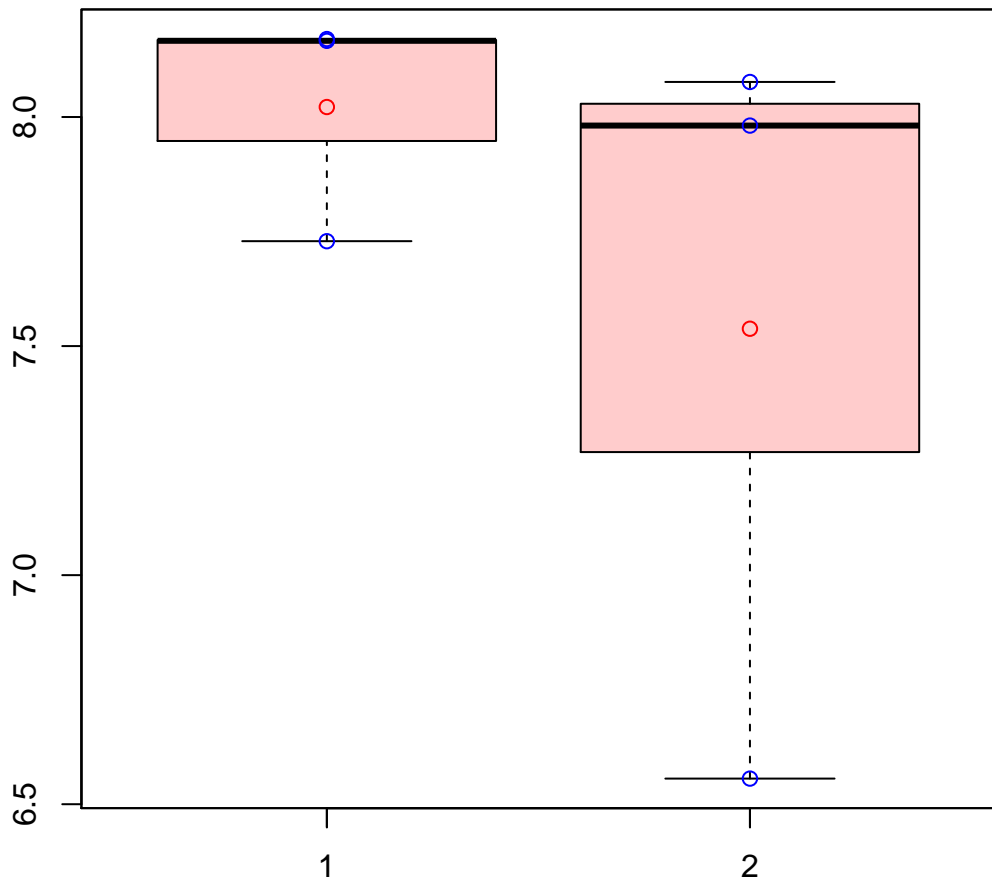

t-Test: p-value = 0.43

# CL2288Contig4|CL2288Contig4

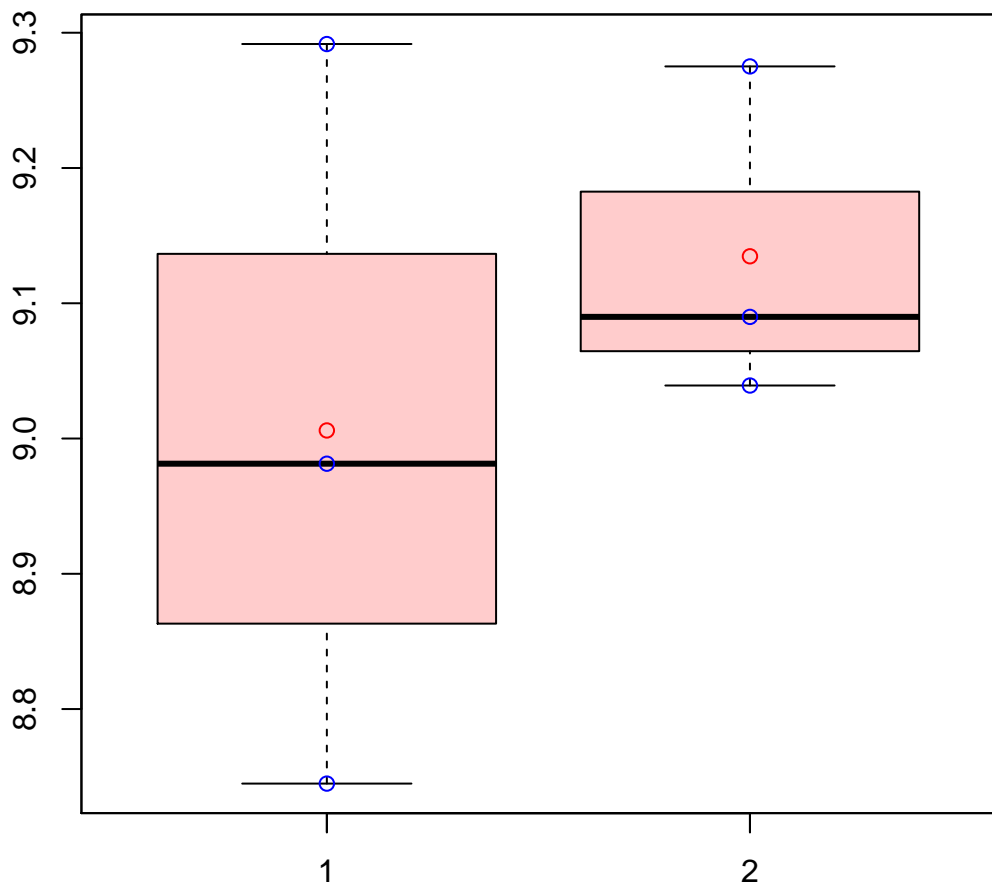

t-Test: p-value = 0.52

# CL2289Contig1|CL2289Contig1

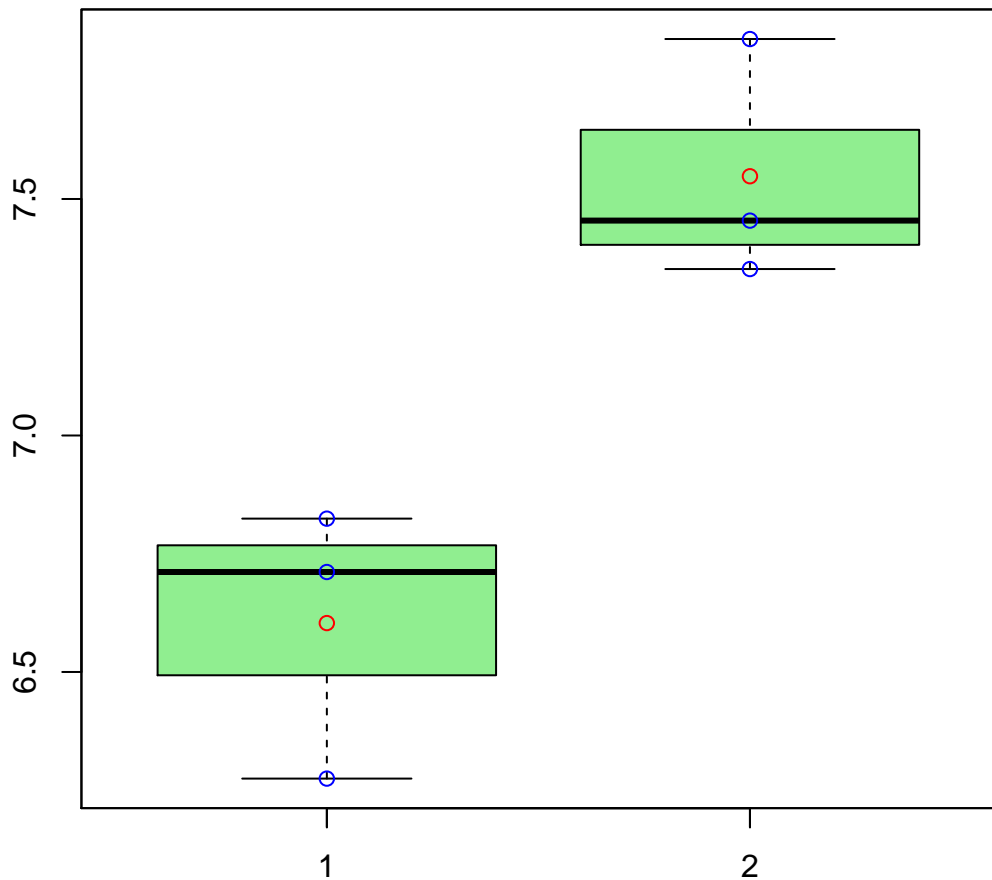

t-Test: p-value = 0.01

# CL2289Contig5|CL2289Contig5

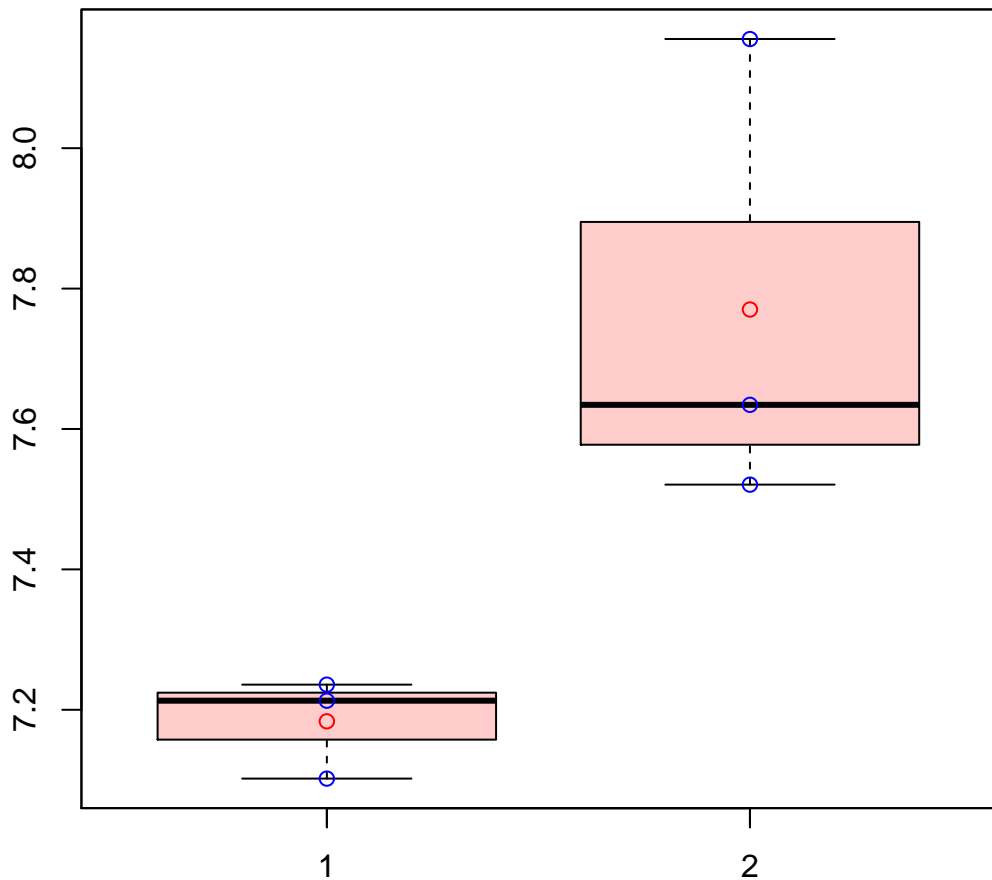

t-Test: p-value = 0.09

# CL228Contig20|CL228Contig20

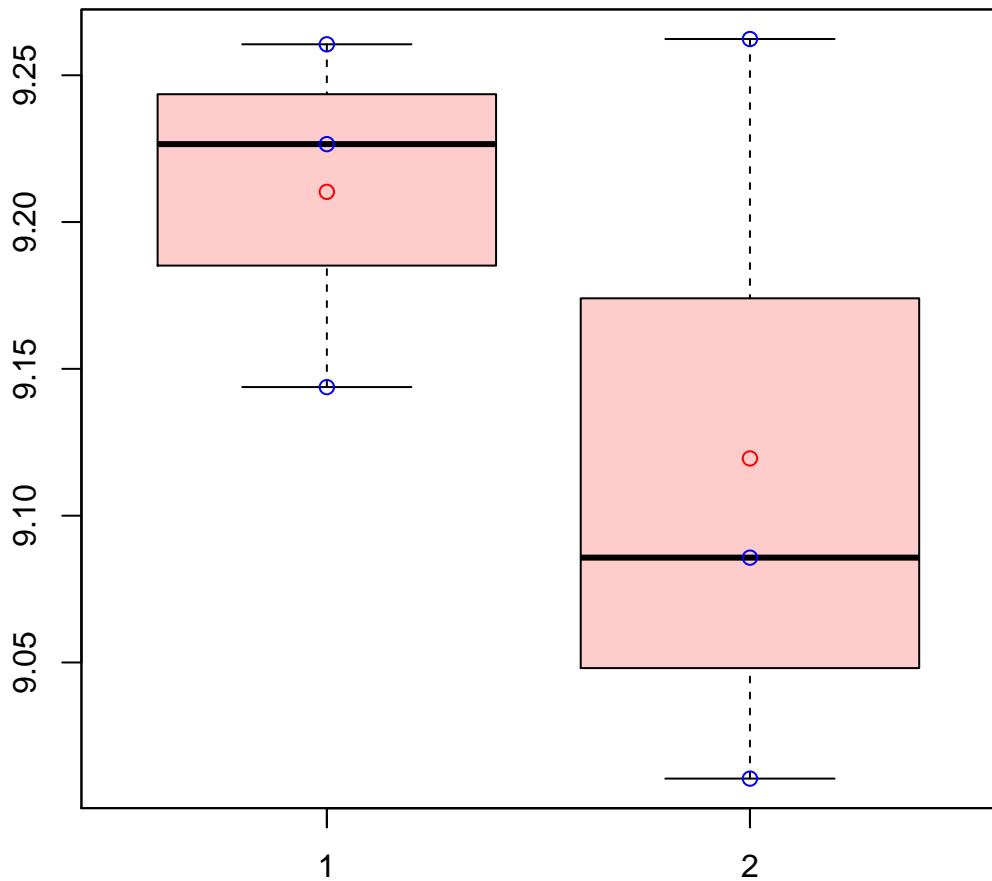

t-Test: p-value = 0.36

# CL2291Contig3|CL2291Contig3

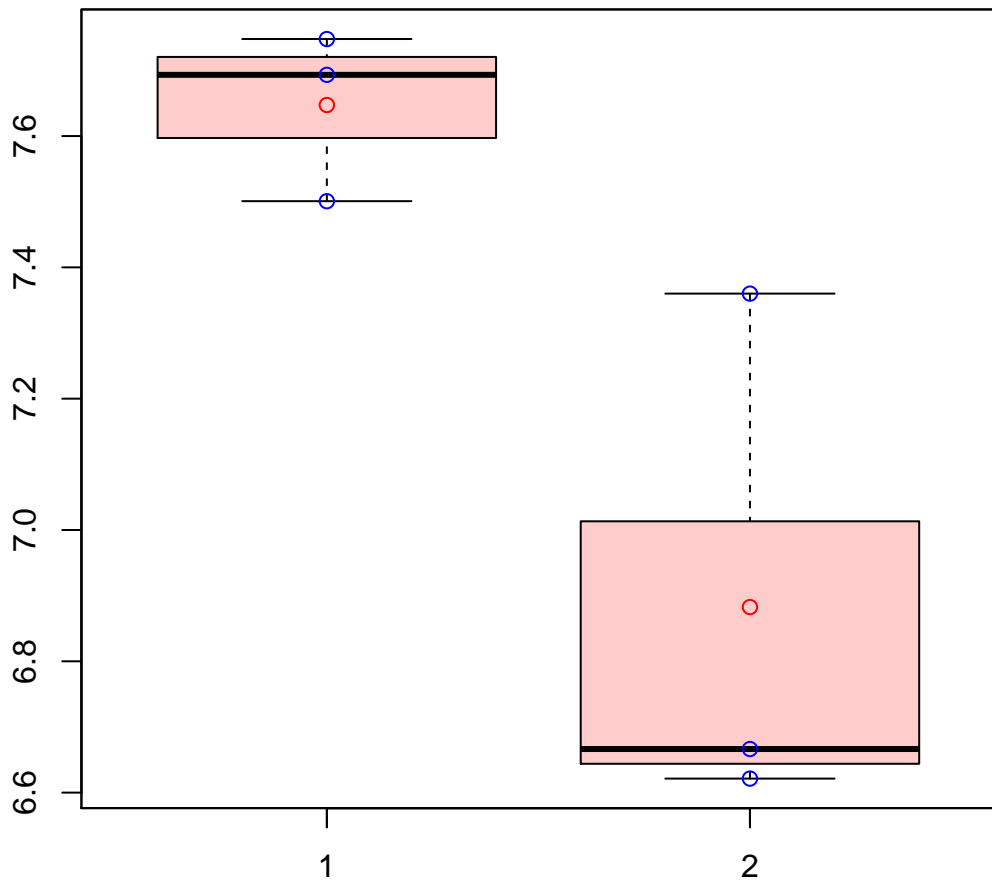

t-Test: p-value = 0.07

# CL22940Contig1|CL22940Contig1

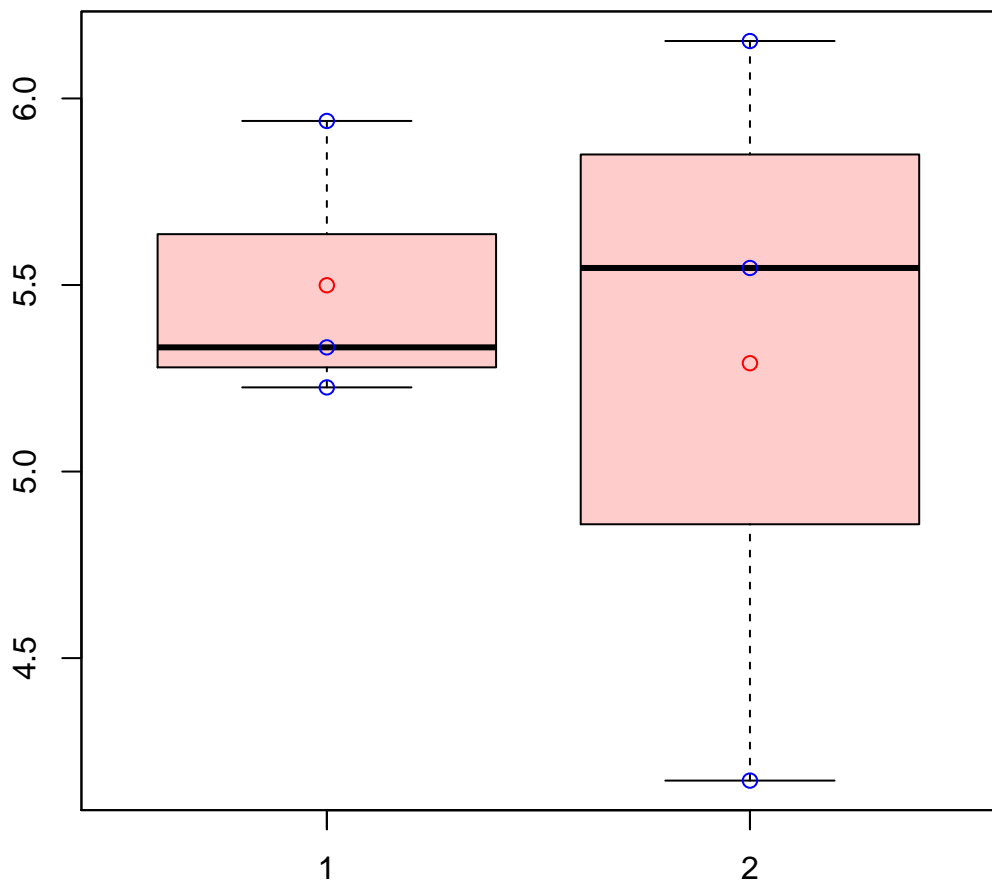

t-Test: p-value = 0.76

# CL2295Contig1|CL2295Contig1

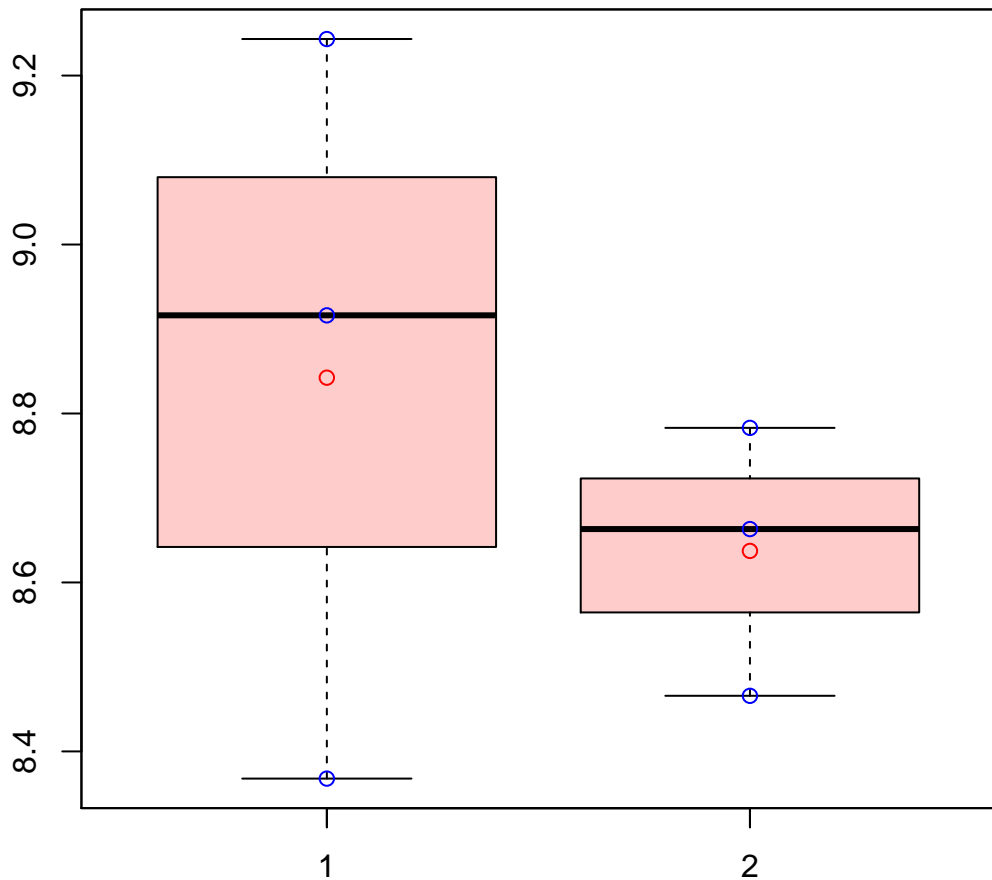

t-Test: p-value = 0.51



# CL229Contig15|CL229Contig15

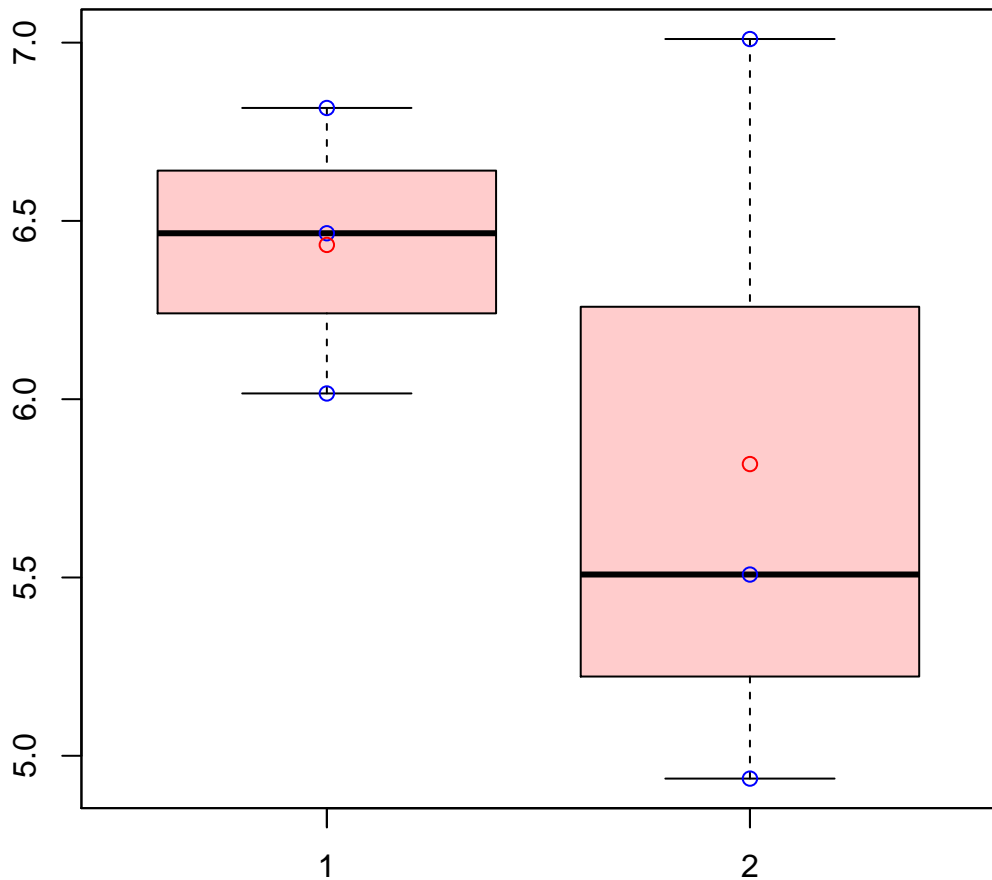

t-Test: p-value = 0.43

# CL229Contig1|CL229Contig1

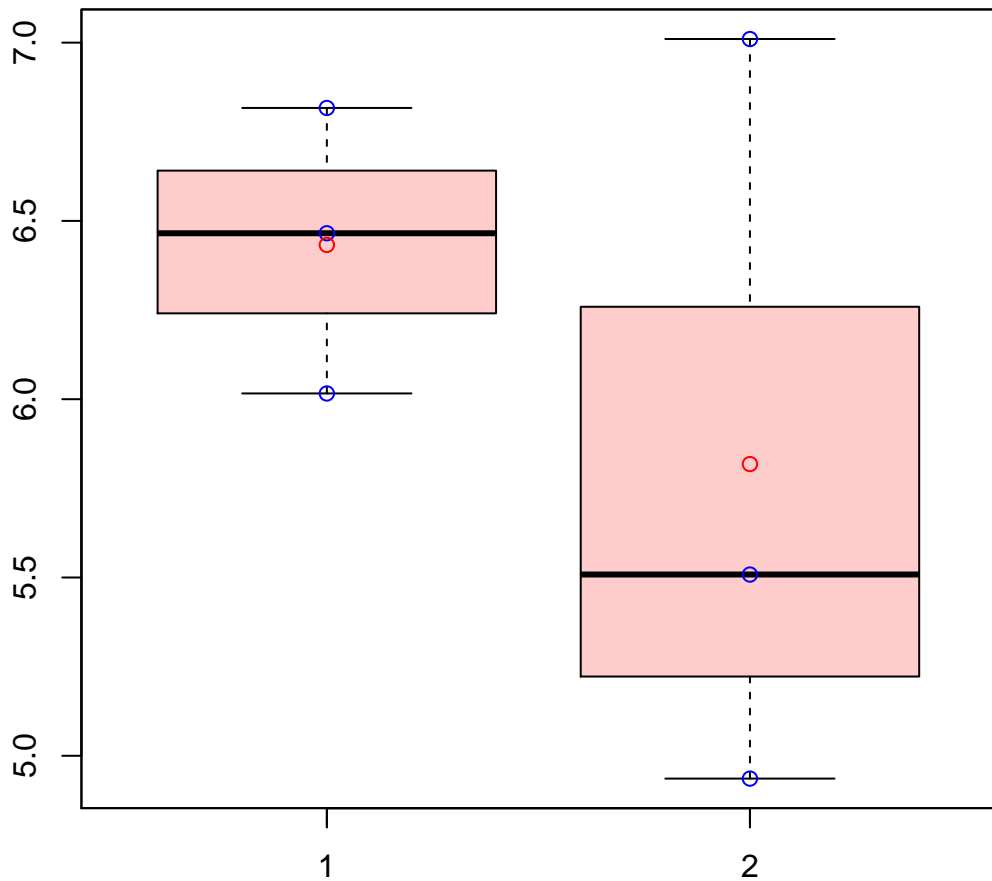

t-Test: p-value = 0.43

# CL229Contig2|CL229Contig2

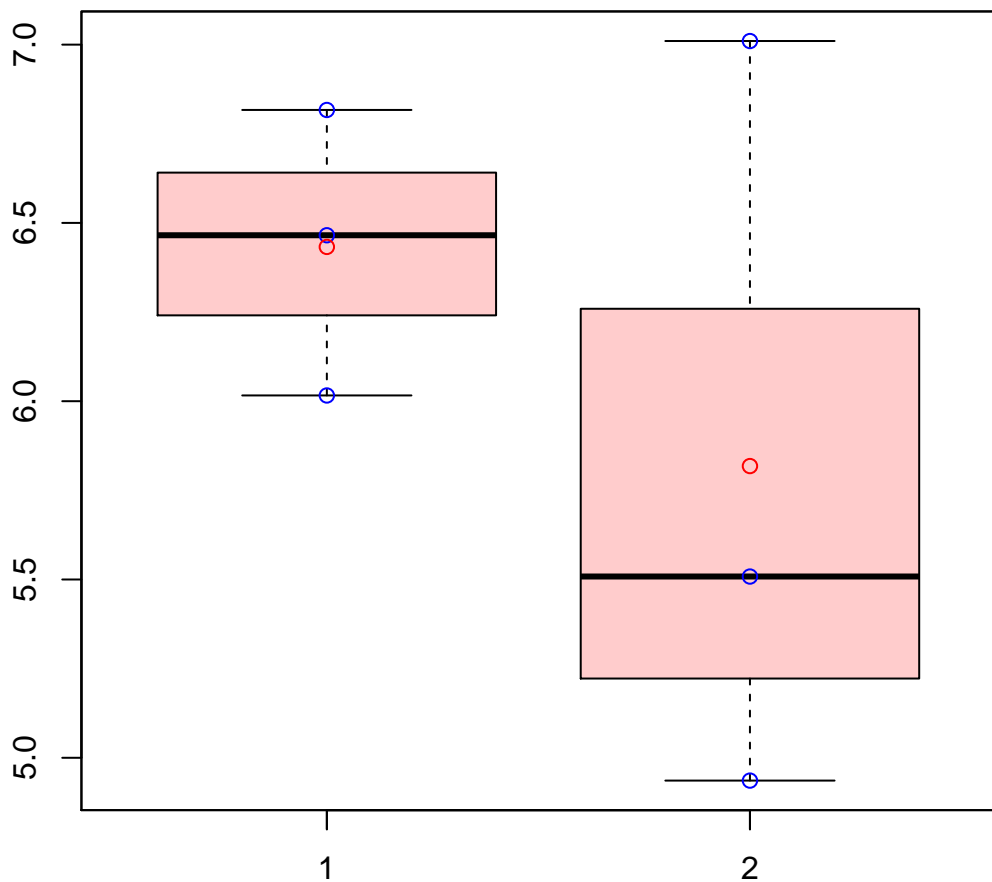

t-Test: p-value = 0.43

# CL22Contig37|CL22Contig37

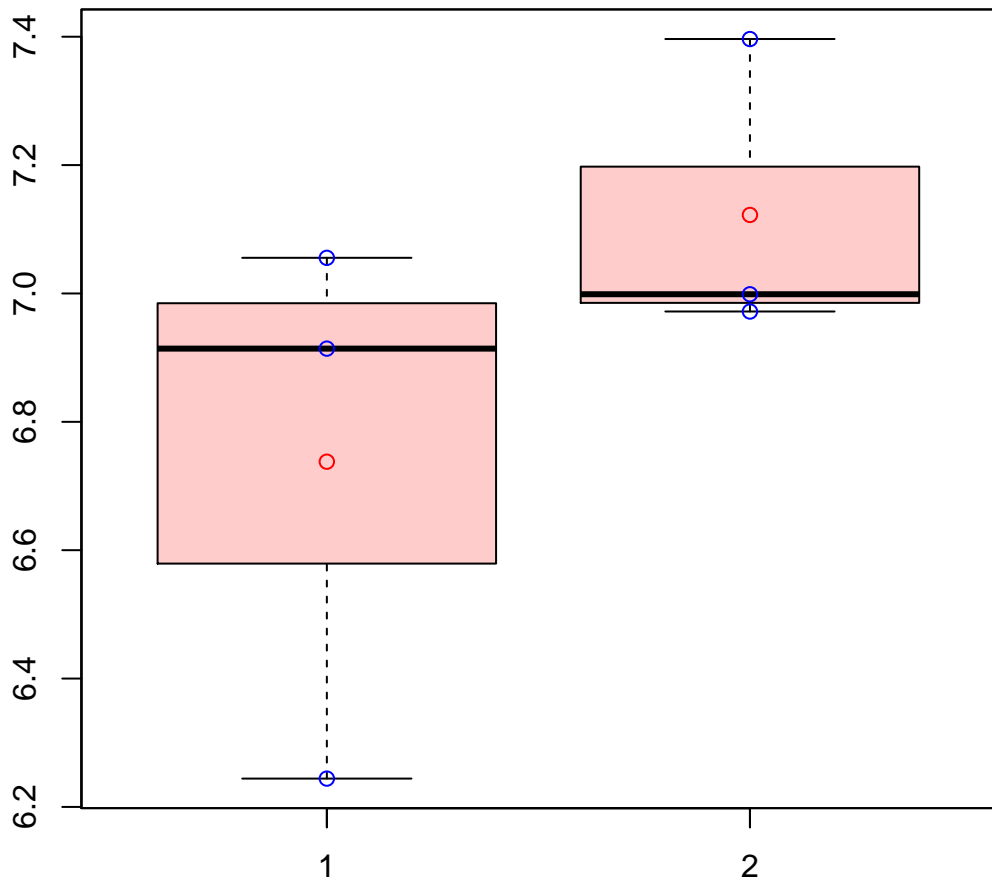

t-Test: p-value = 0.27

# CL23003Contig1|CL23003Contig1

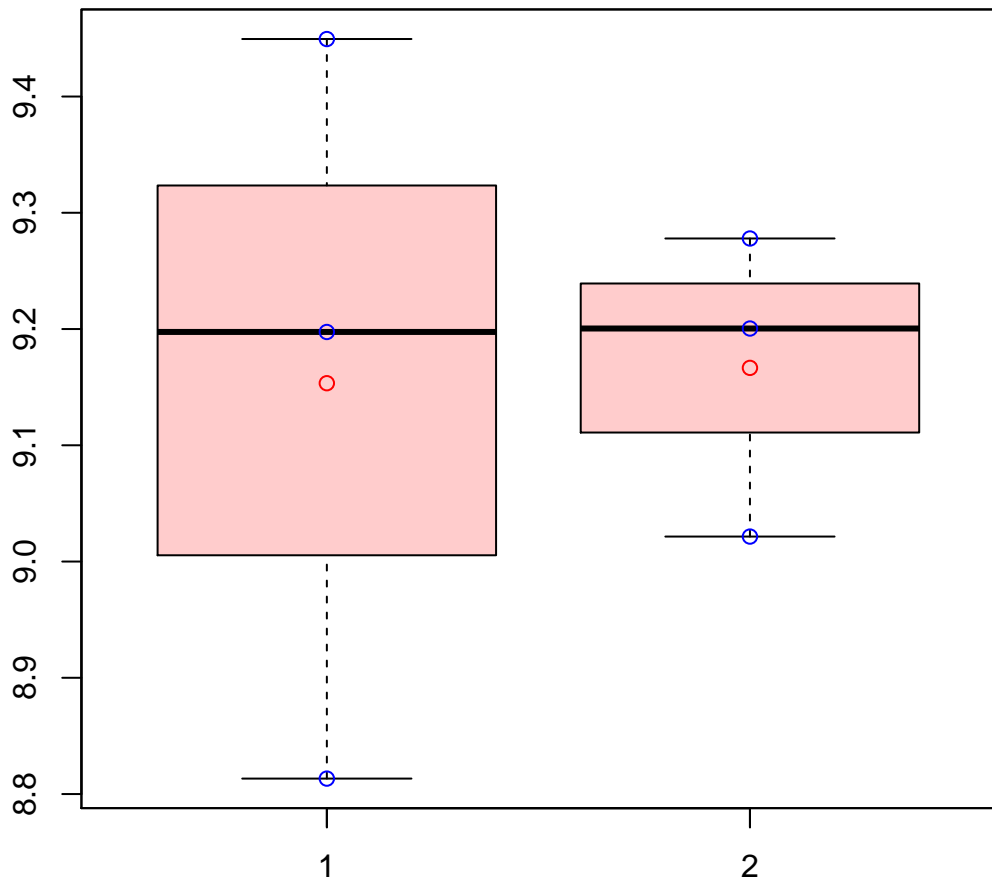

t-Test: p-value = 0.95

# CL23050Contig1|CL23050Contig1

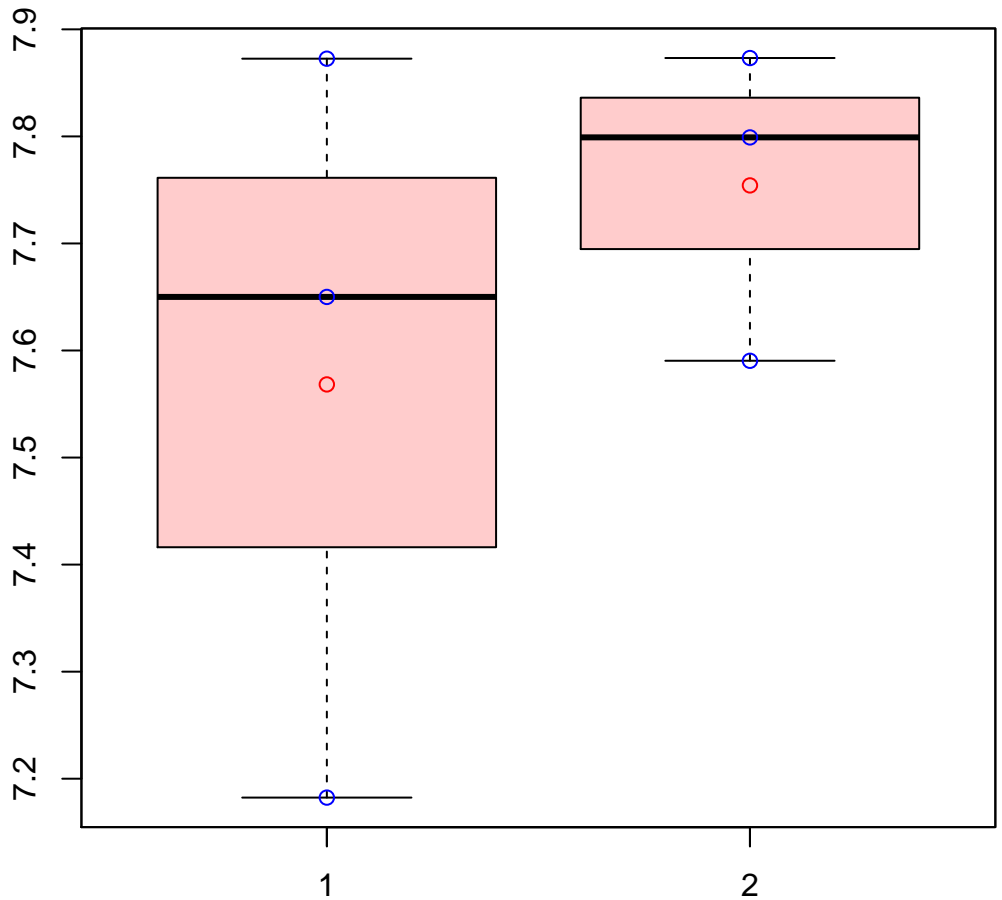

t-Test: p-value = 0.47

# CL2306Contig1|CL2306Contig1

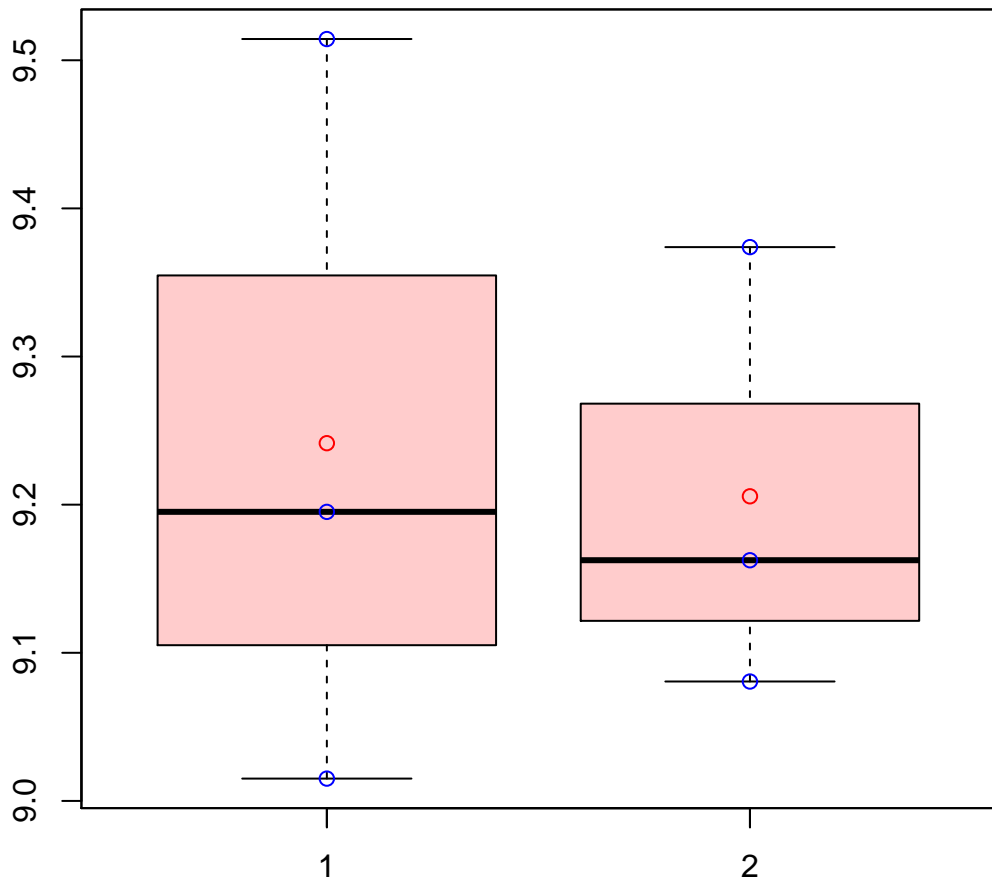

t-Test: p-value = 0.85

## CL230Contig2|CL230Contig2

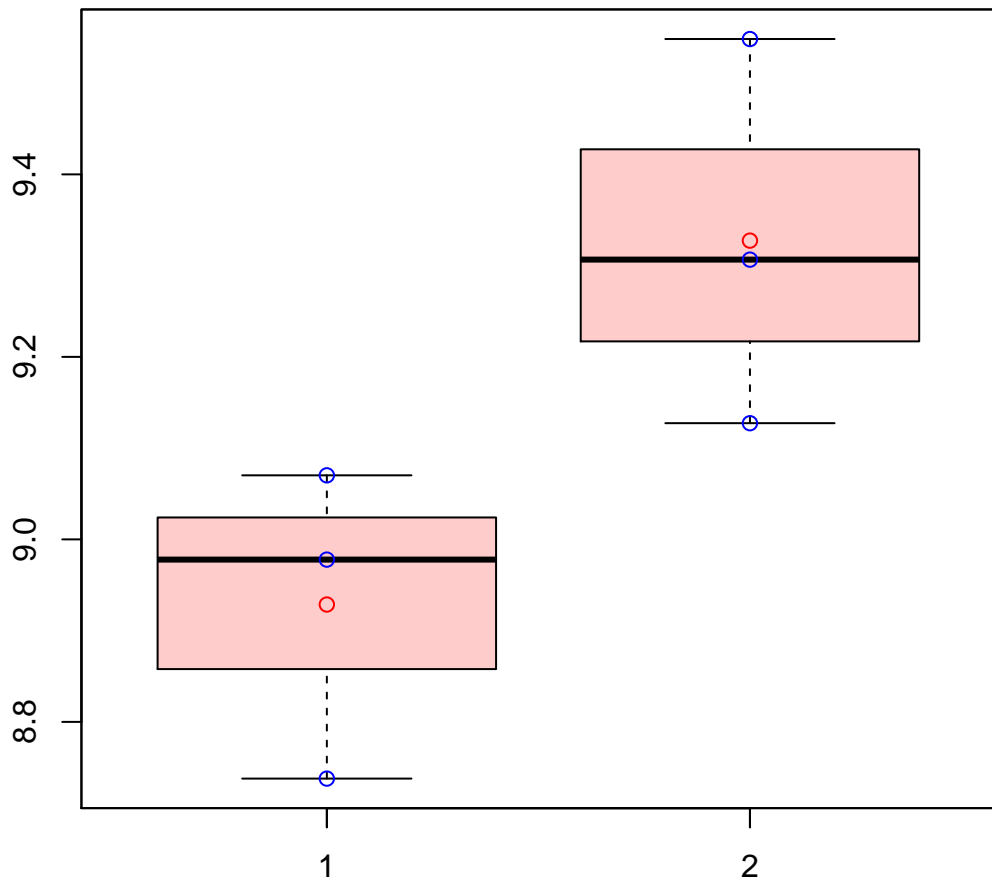

t-Test: p-value = 0.07



# CL230Contig3|CL230Contig3



t-Test: p-value = 0.07

# CL230Contig4|CL230Contig4

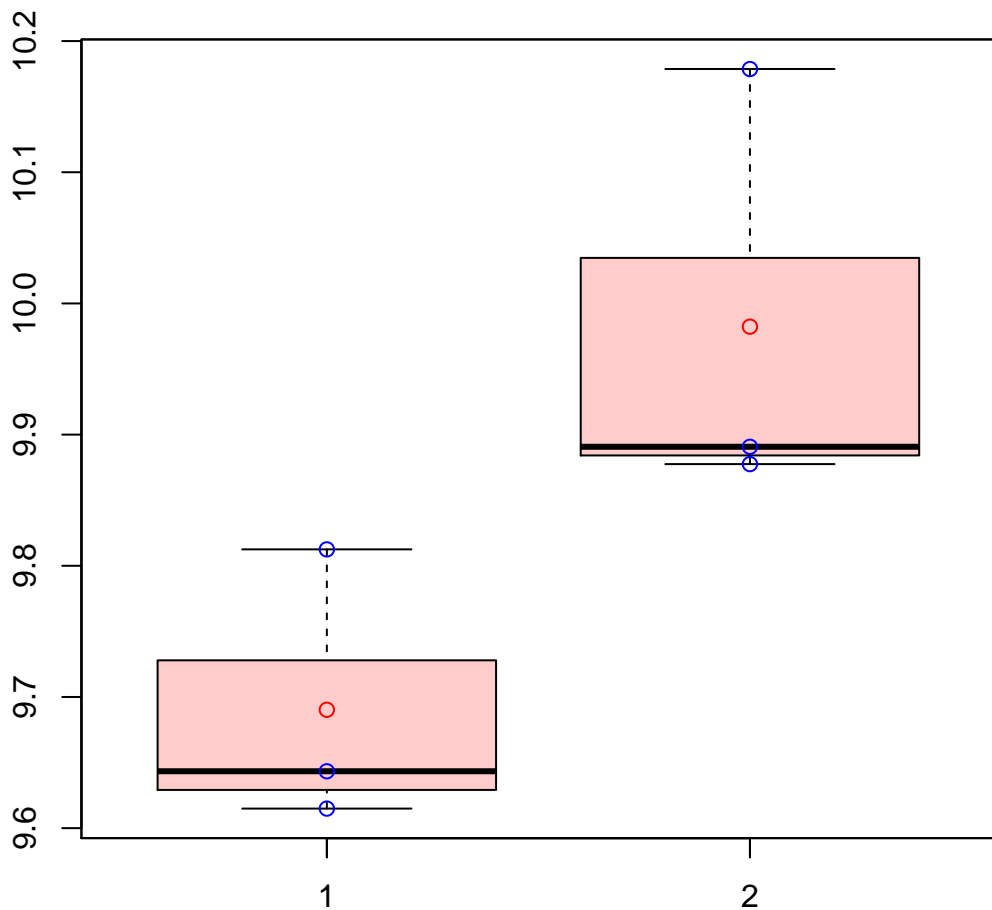

t-Test: p-value = 0.08

# CL2311Contig1|CL2311Contig1

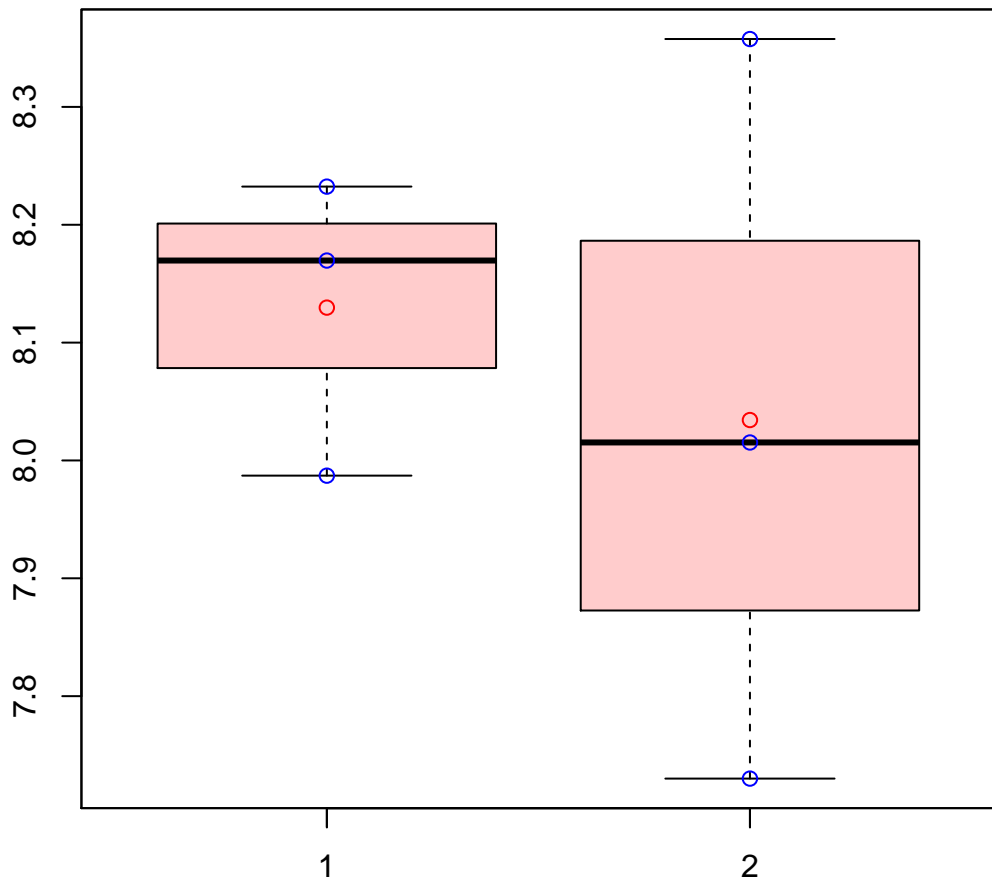

t-Test: p-value = 0.66

# CL23129Contig1|CL23129Contig1



t-Test: p-value = 0.85

# CL2312Contig2|CL2312Contig2

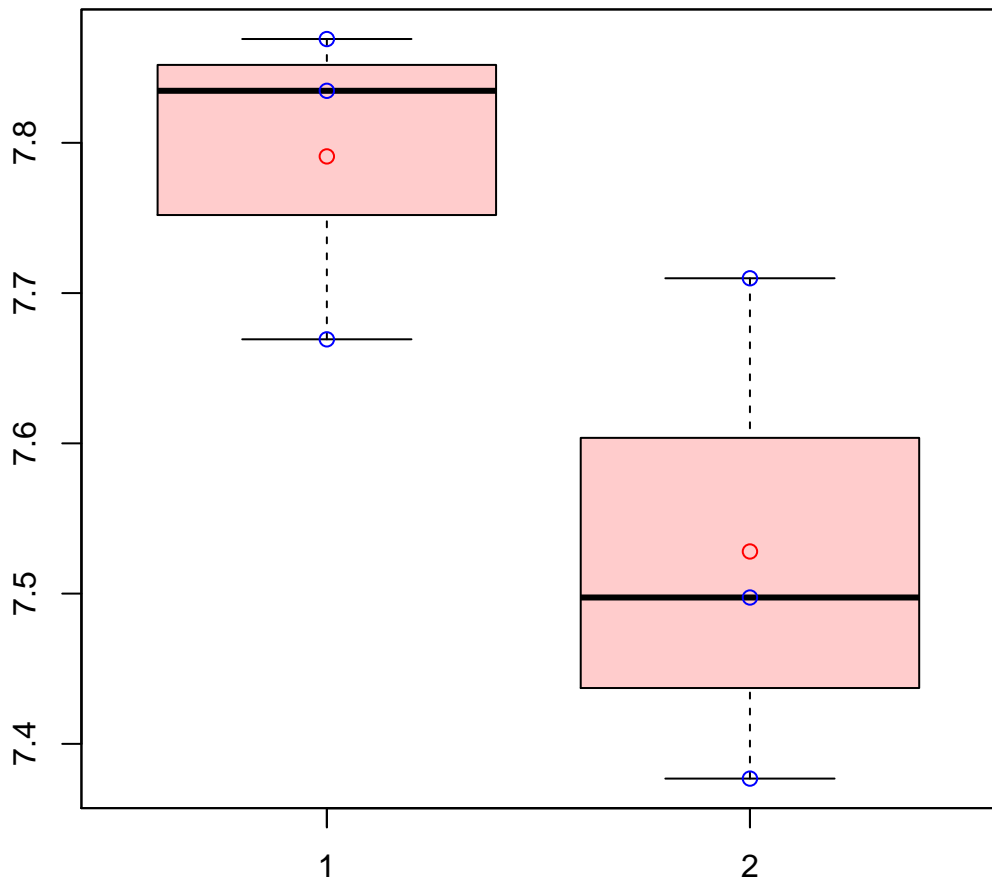

t-Test: p-value = 0.1

# CL2313Contig4|CL2313Contig4

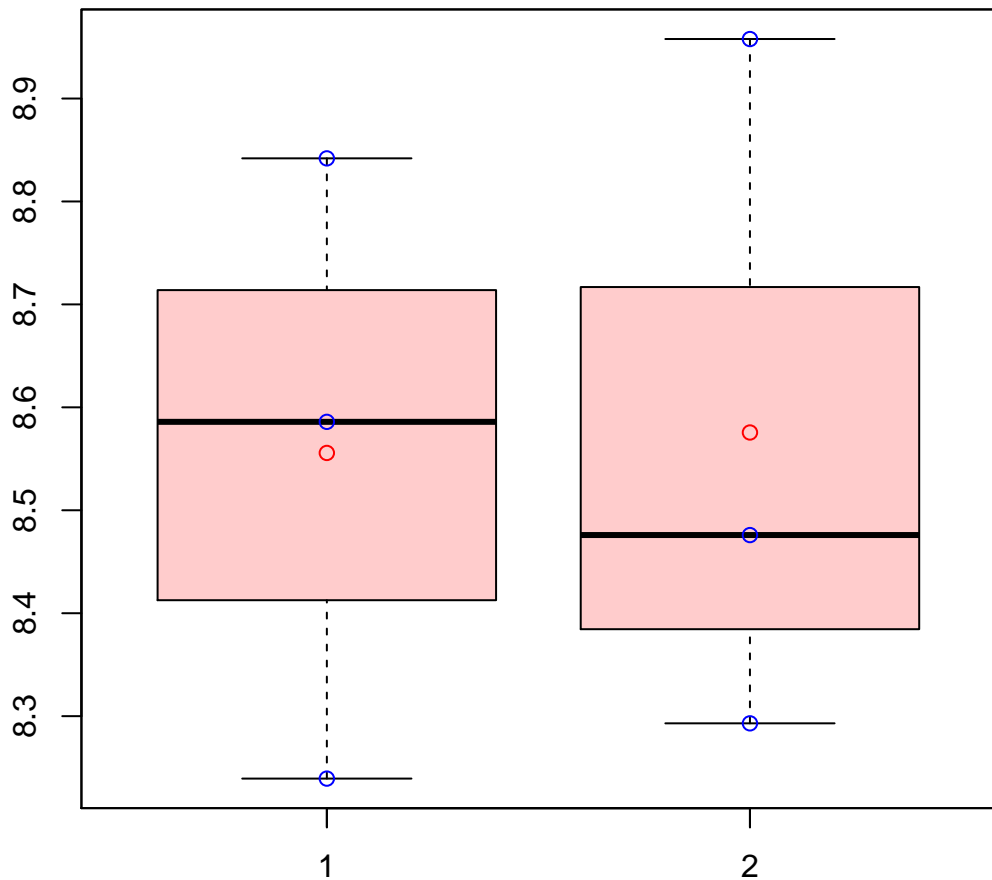

t-Test: p-value = 0.94

# CL2314Contig4|CL2314Contig4

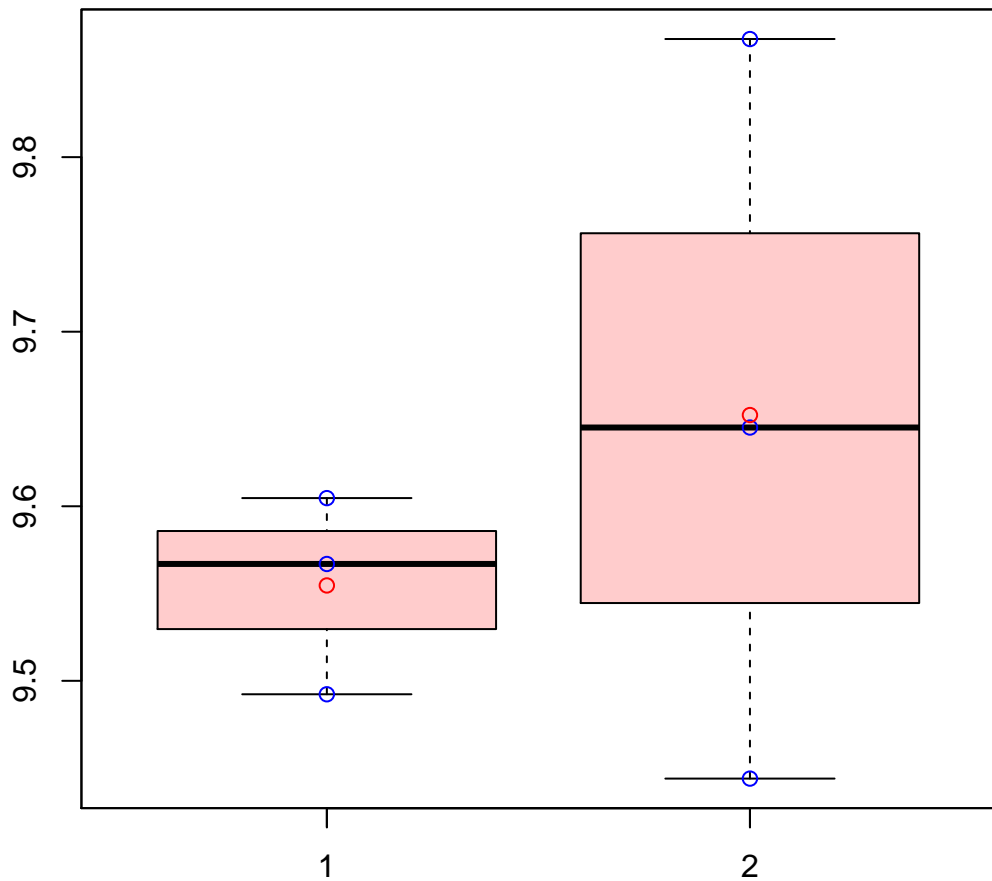

t-Test: p-value = 0.51

# CL2316Contig1|CL2316Contig1

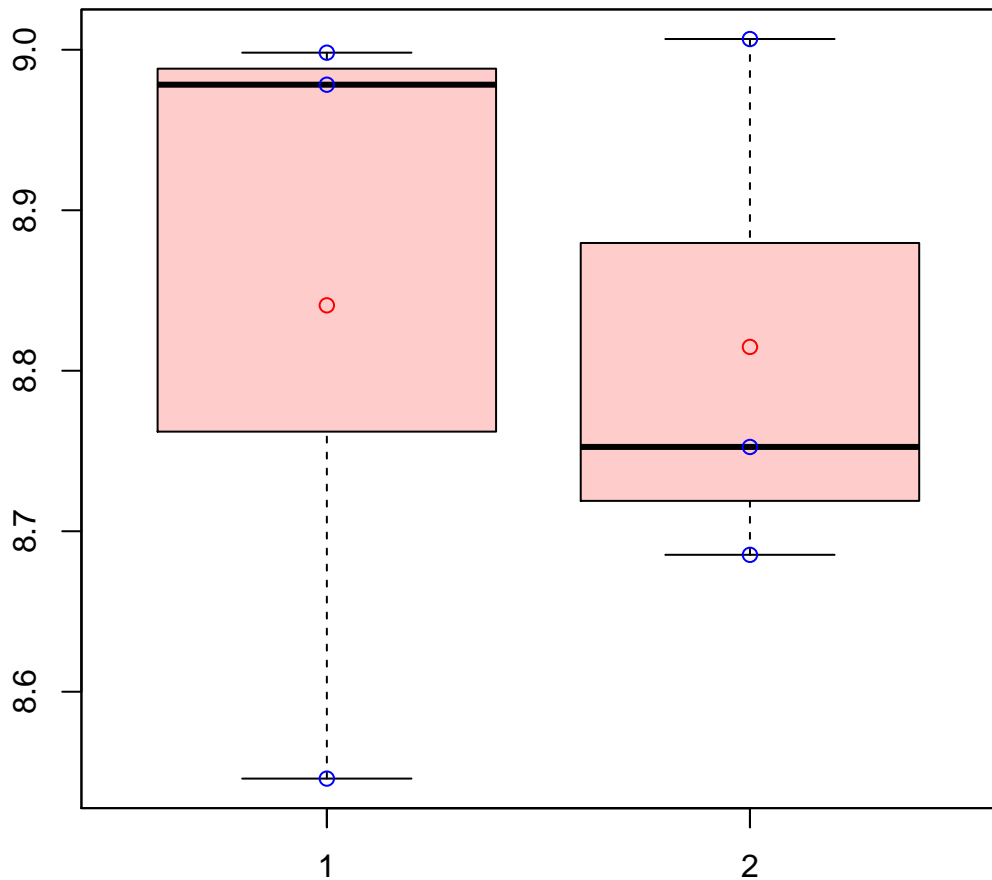

t-Test: p-value = 0.89



# CL2320Contig2|CL2320Contig2

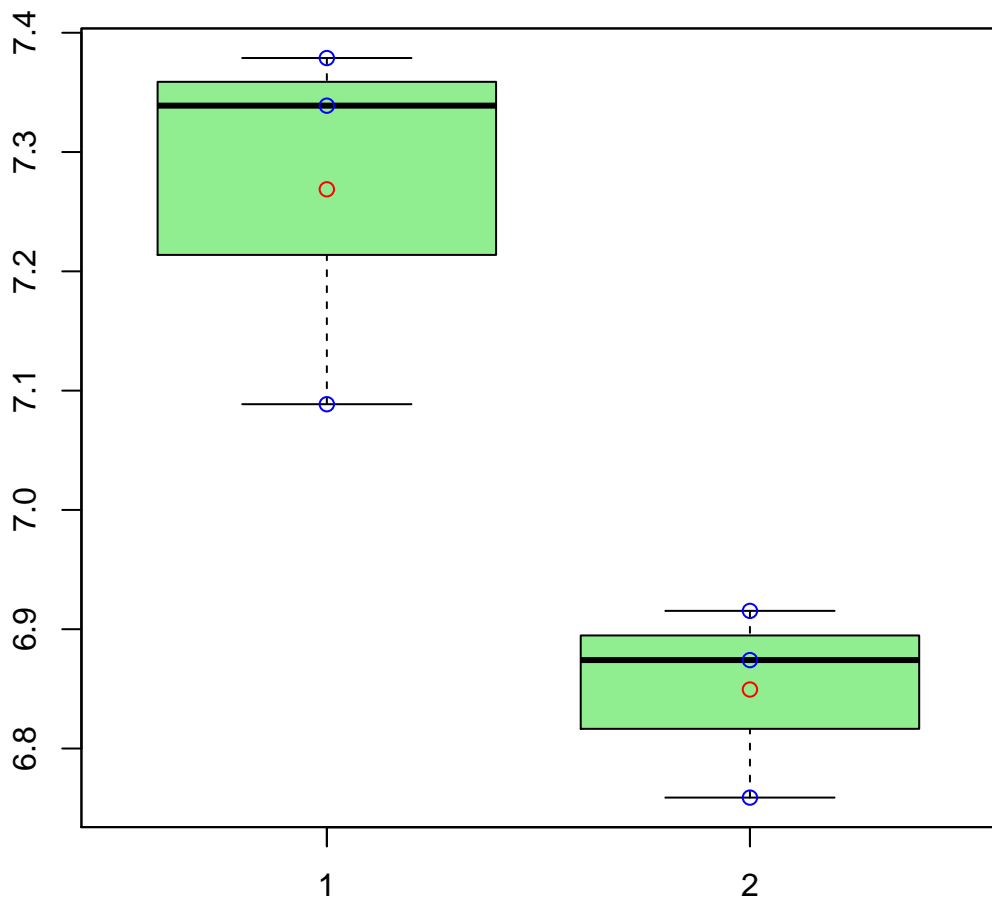

t-Test: p-value = 0.03

# CL2322Contig2|CL2322Contig2

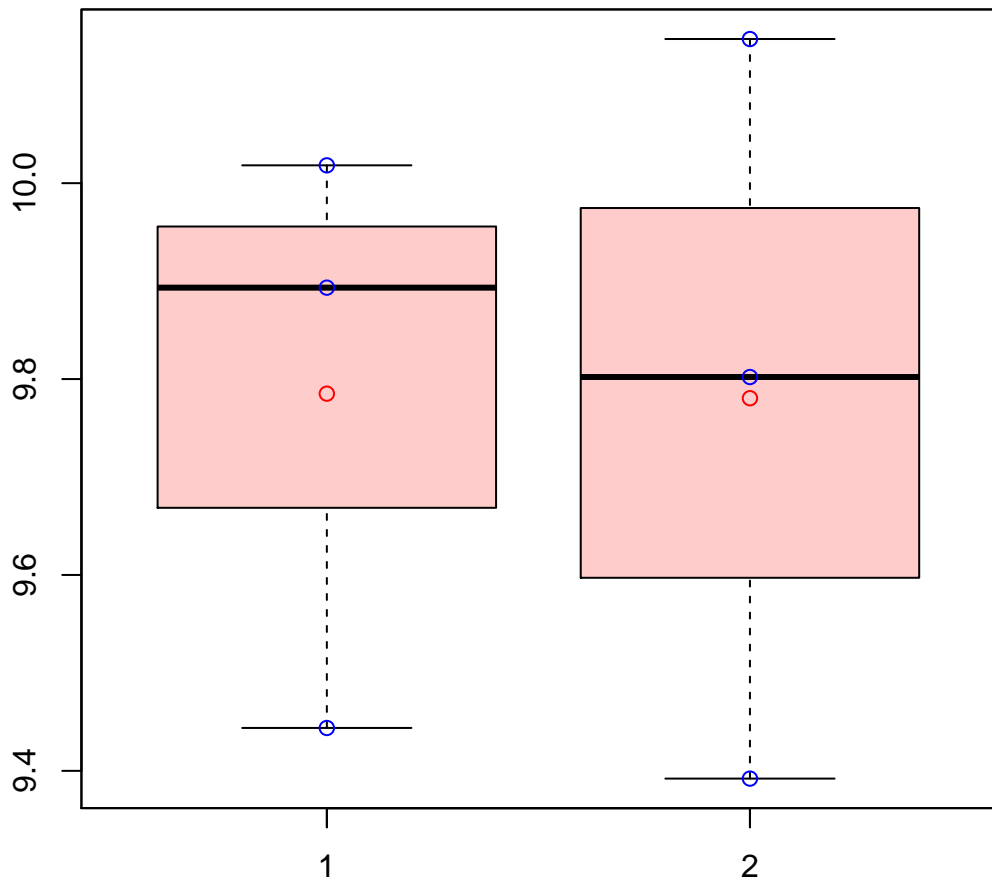

t-Test: p-value = 0.99

# CL23240Contig1|CL23240Contig1

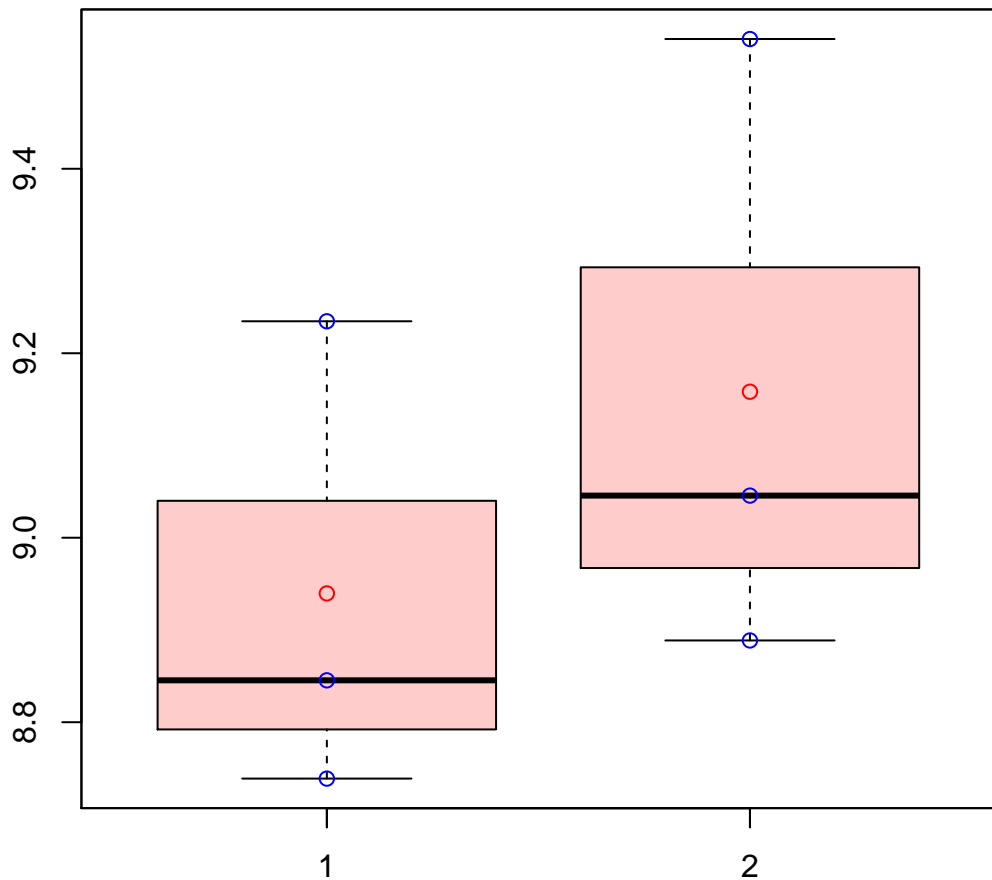

t-Test: p-value = 0.43

# CL23242Contig1|CL23242Contig1



t-Test: p-value = 0.33

# CL23265Contig1|CL23265Contig1

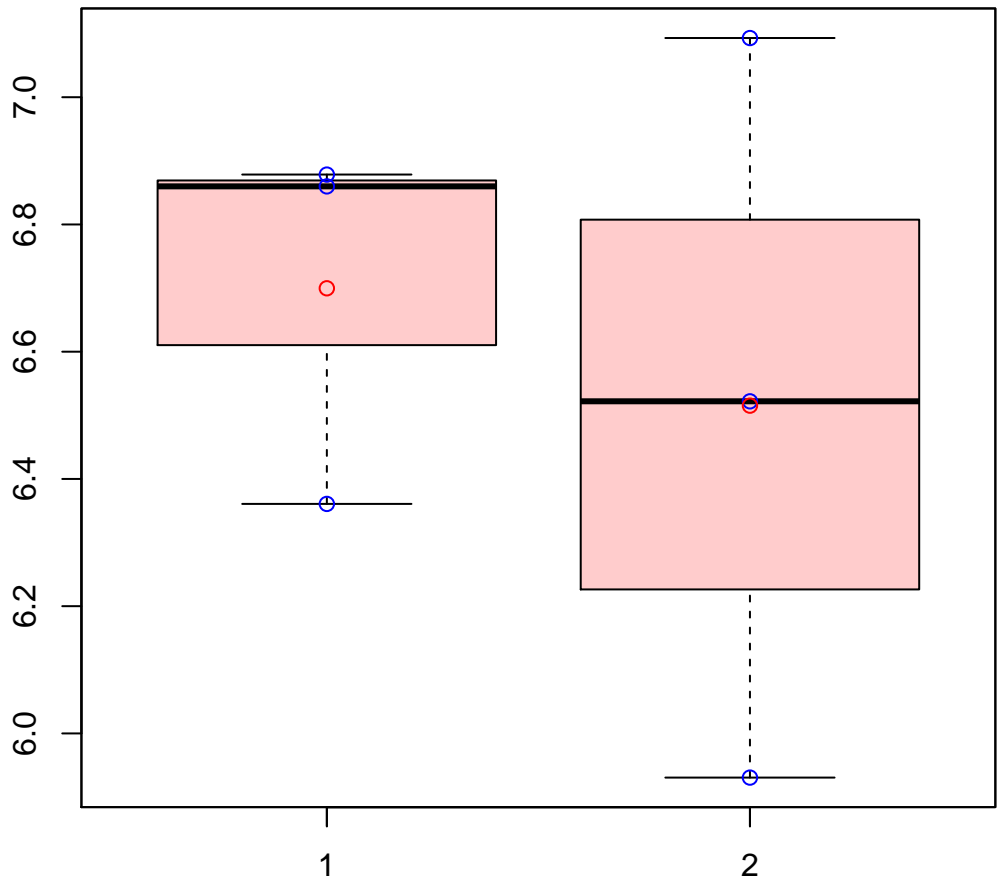

t-Test: p-value = 0.66

# CL232Contig14|CL232Contig14

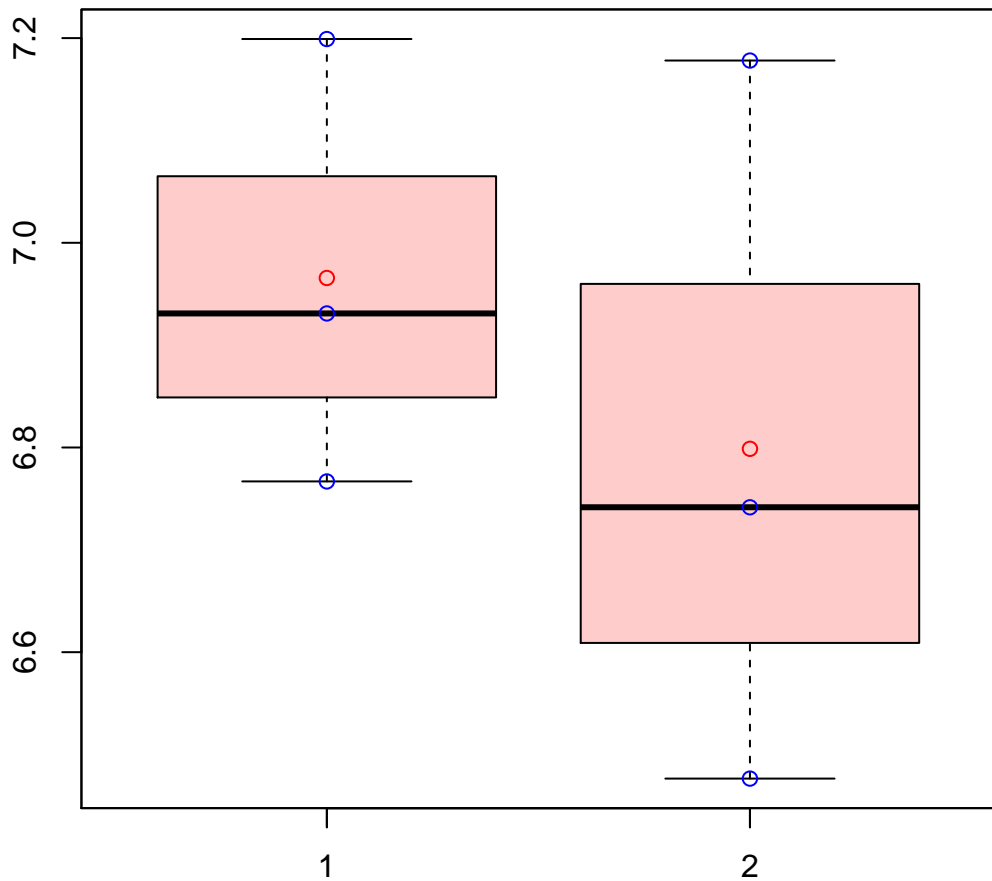

t-Test: p-value = 0.53

# CL2331Contig2|CL2331Contig2

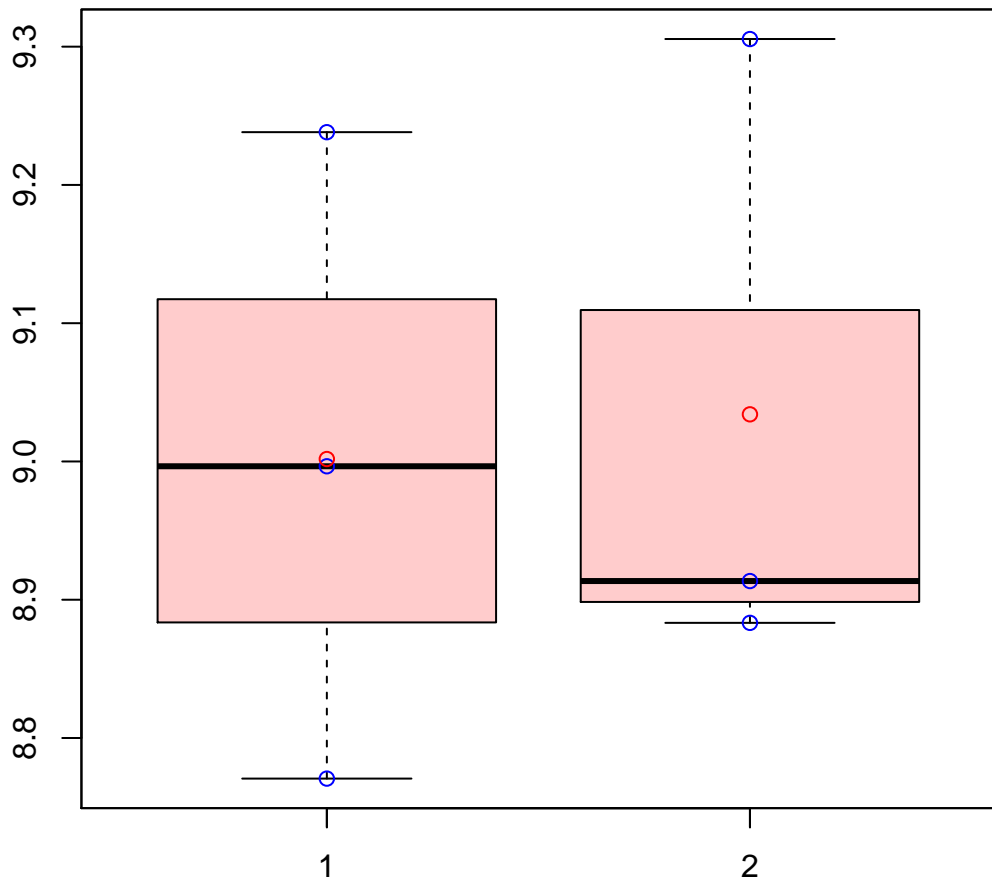

t-Test: p-value = 0.87

# CL2331Contig4|CL2331Contig4

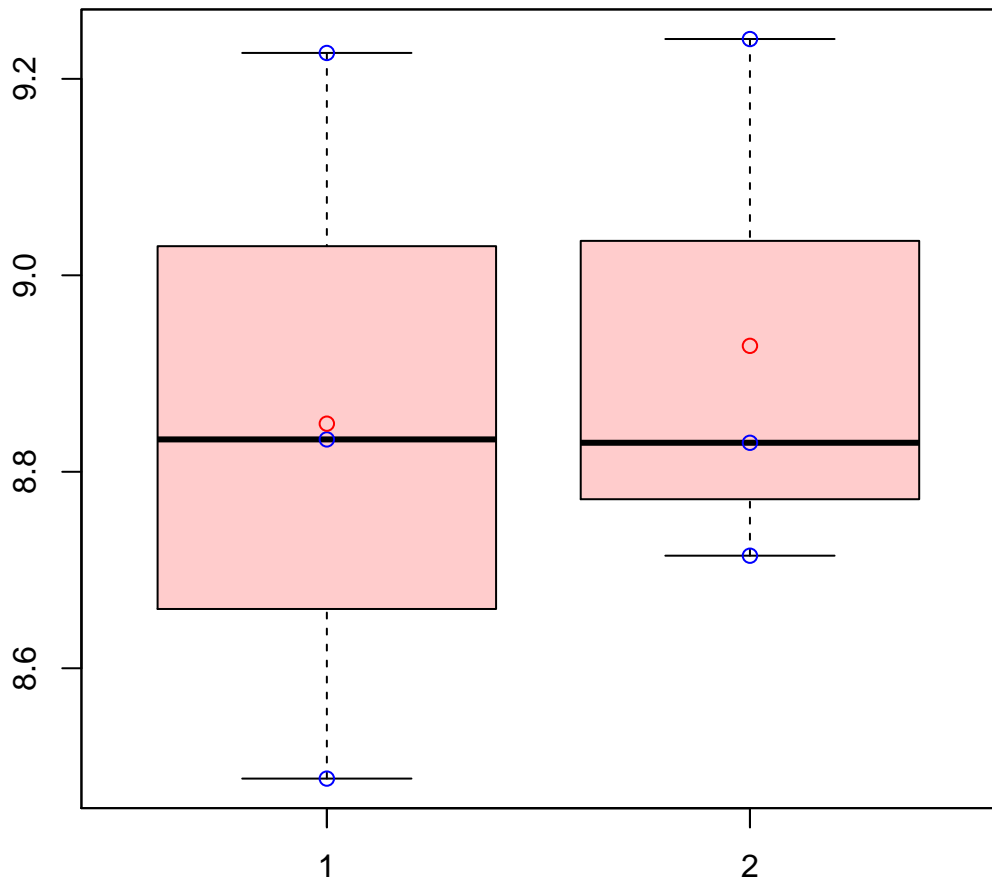

t-Test: p-value = 0.78



# CL2331Contig5|CL2331Contig5

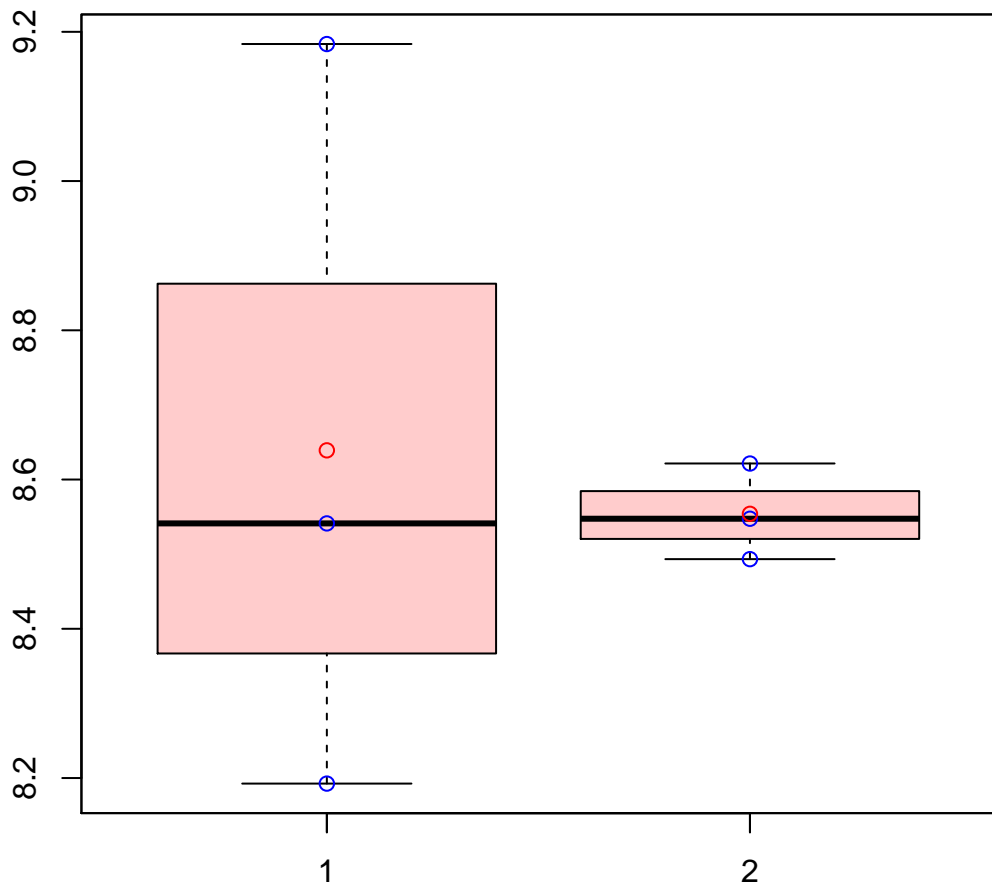

t-Test: p-value = 0.8

## CL2332Contig2|CL2332Contig2

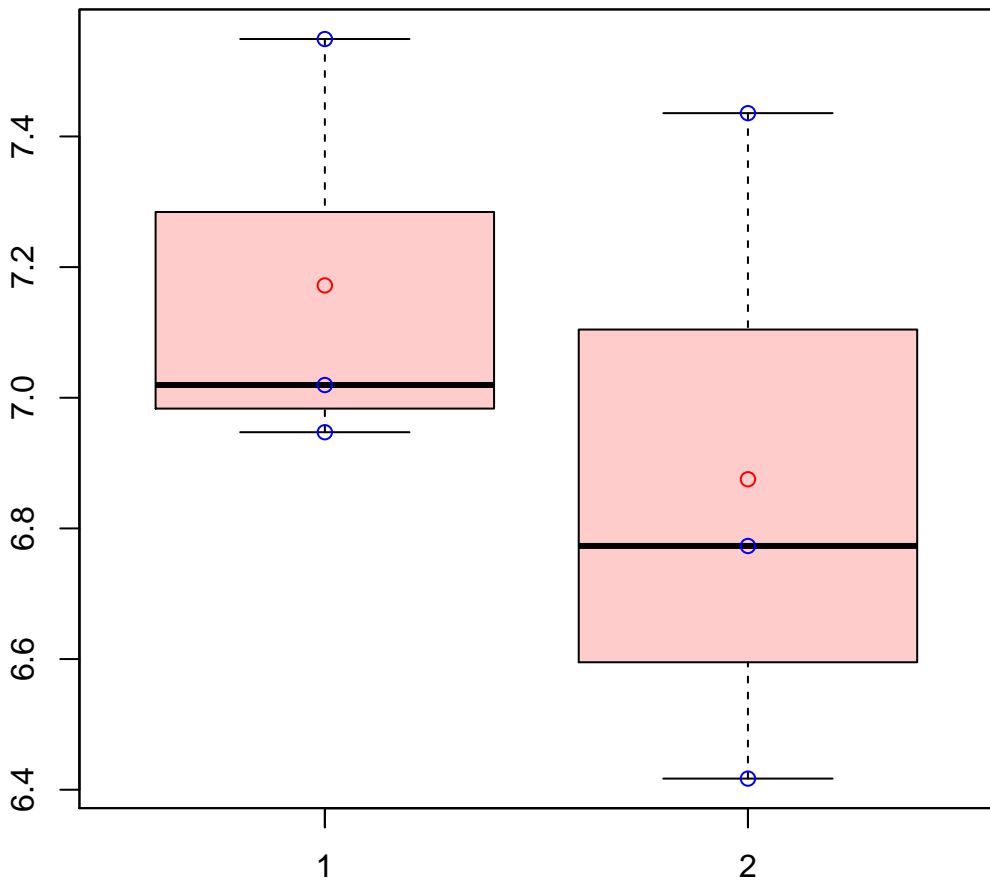

t-Test: p-value = 0.46

# CL2336Contig7|CL2336Contig7

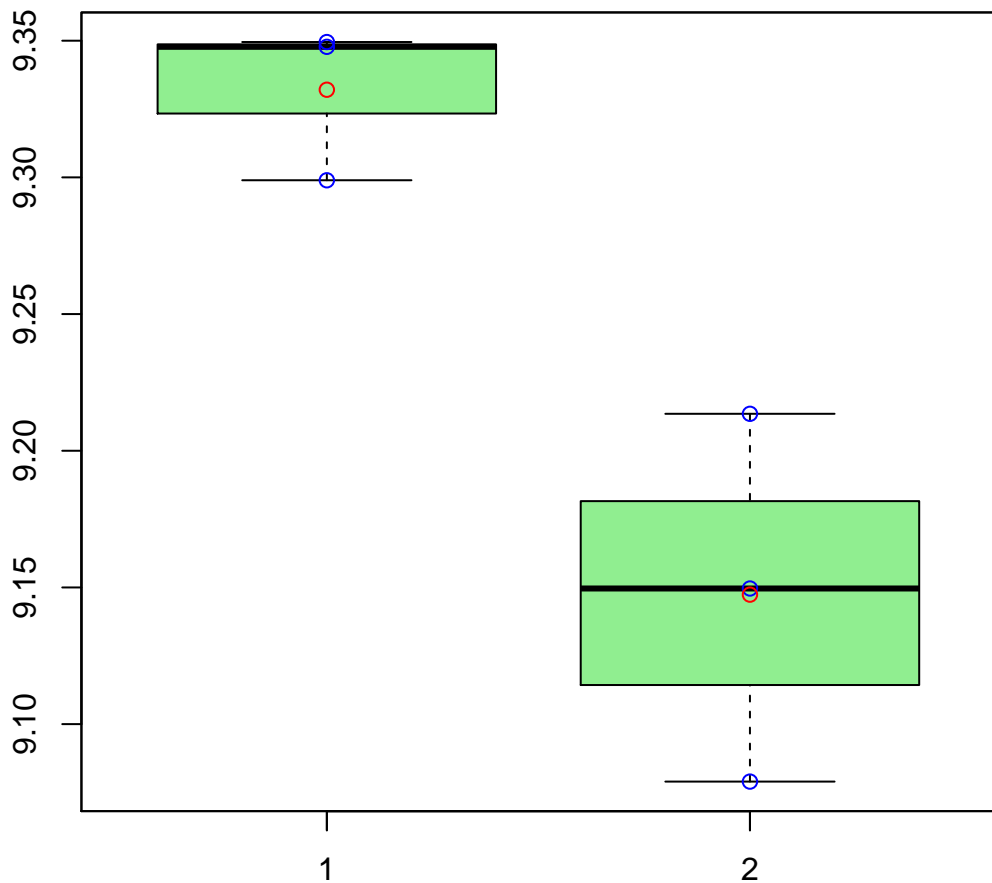

t-Test: p-value = 0.03

# CL233Contig18|CL233Contig18

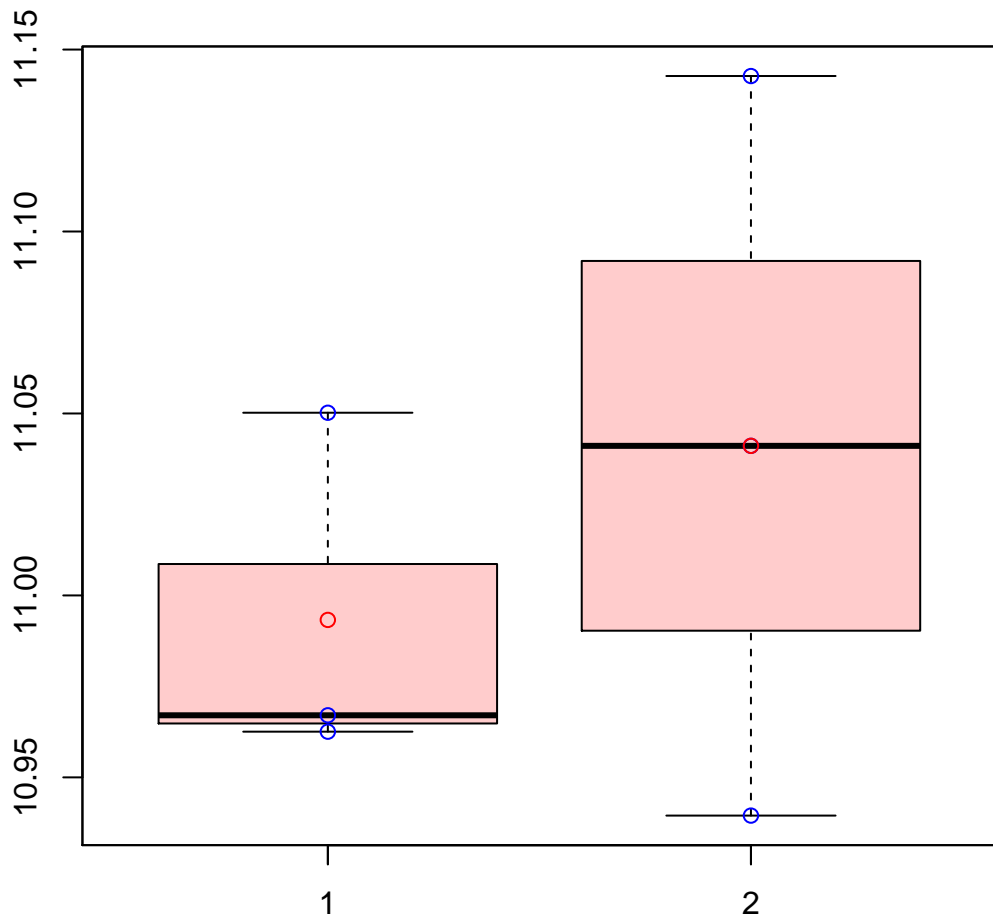

t-Test: p-value = 0.52

# CL233Contig3|CL233Contig3

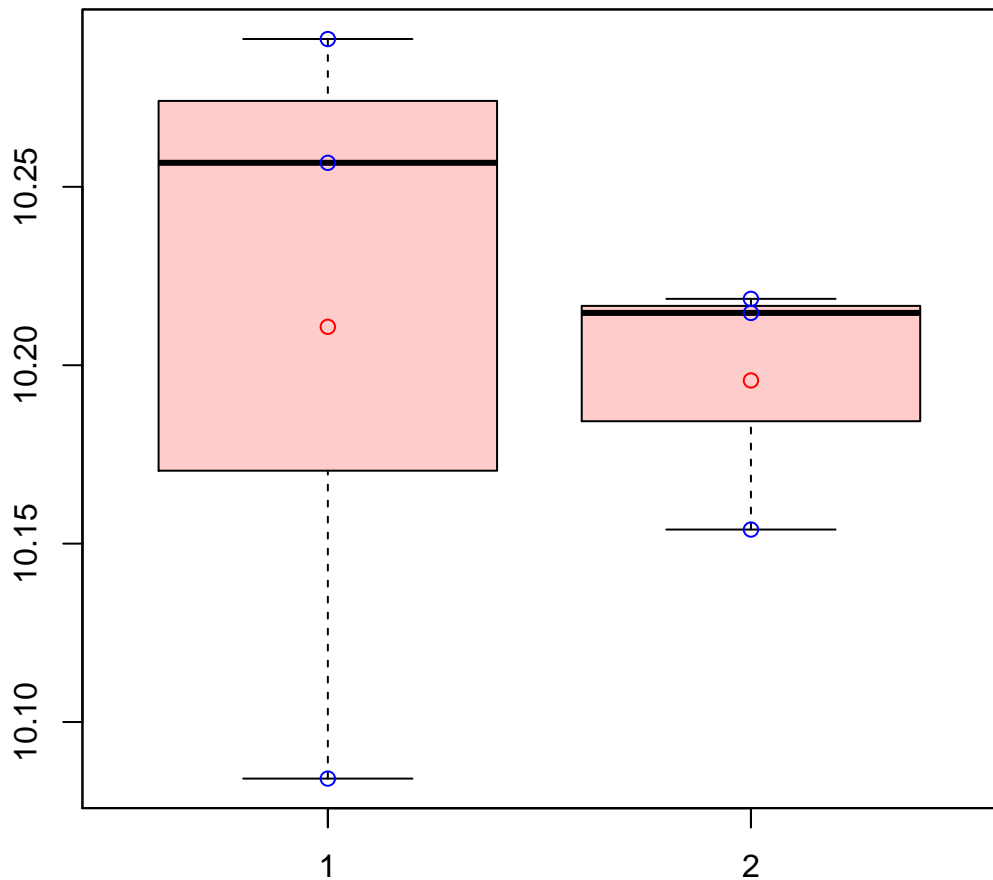

t-Test: p-value = 0.84

# CL233Contig4|CL233Contig4

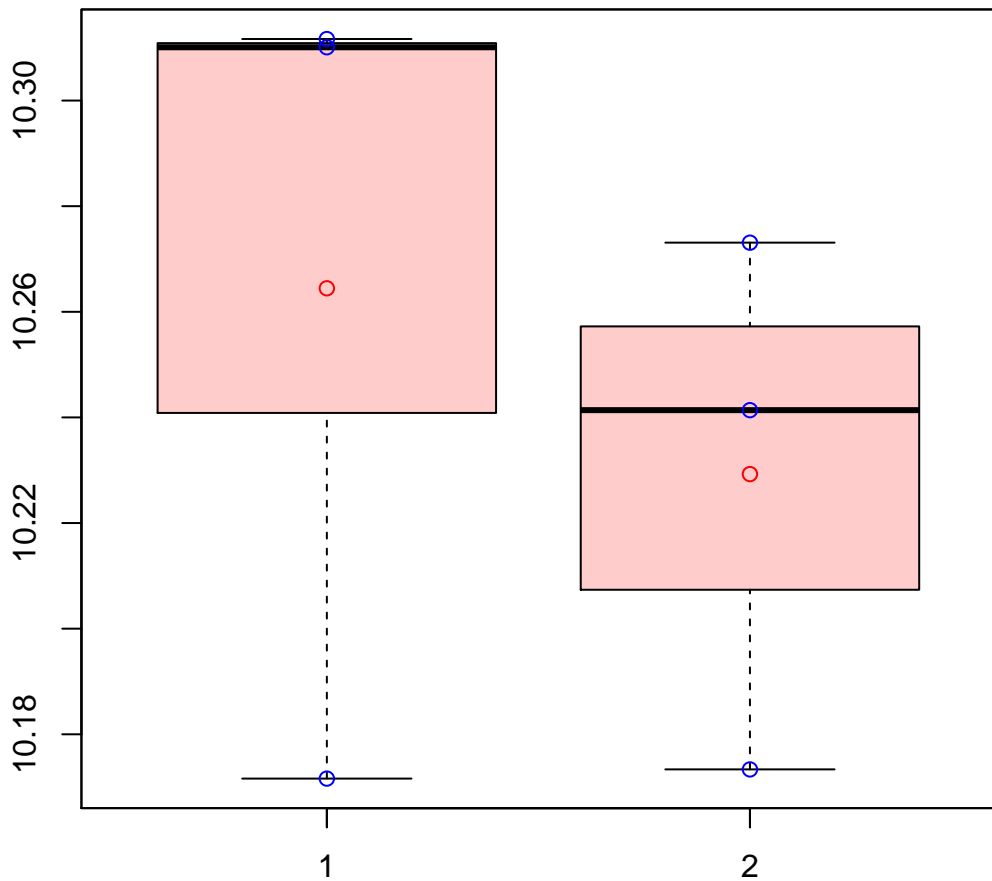

t-Test: p-value = 0.56

# CL233Contig7|CL233Contig7

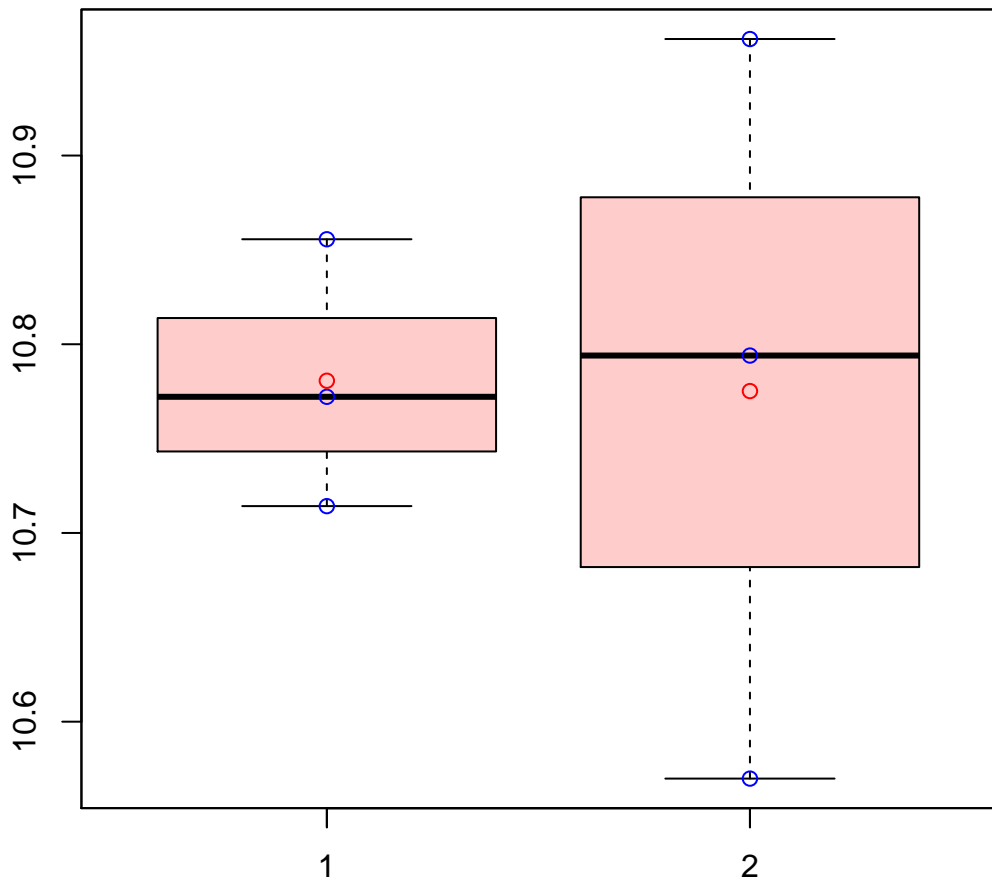

t-Test: p-value = 0.97

# CL233Contig8|CL233Contig8

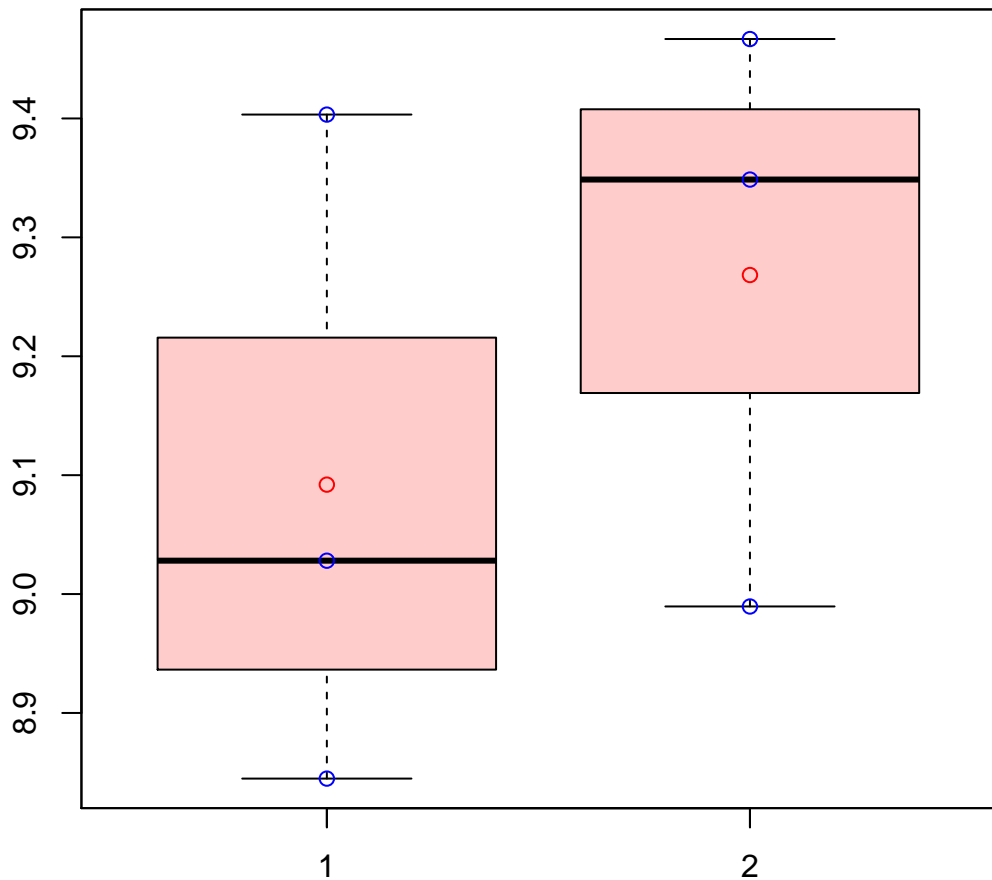

t-Test: p-value = 0.47



# CL233Contig9|CL233Contig9

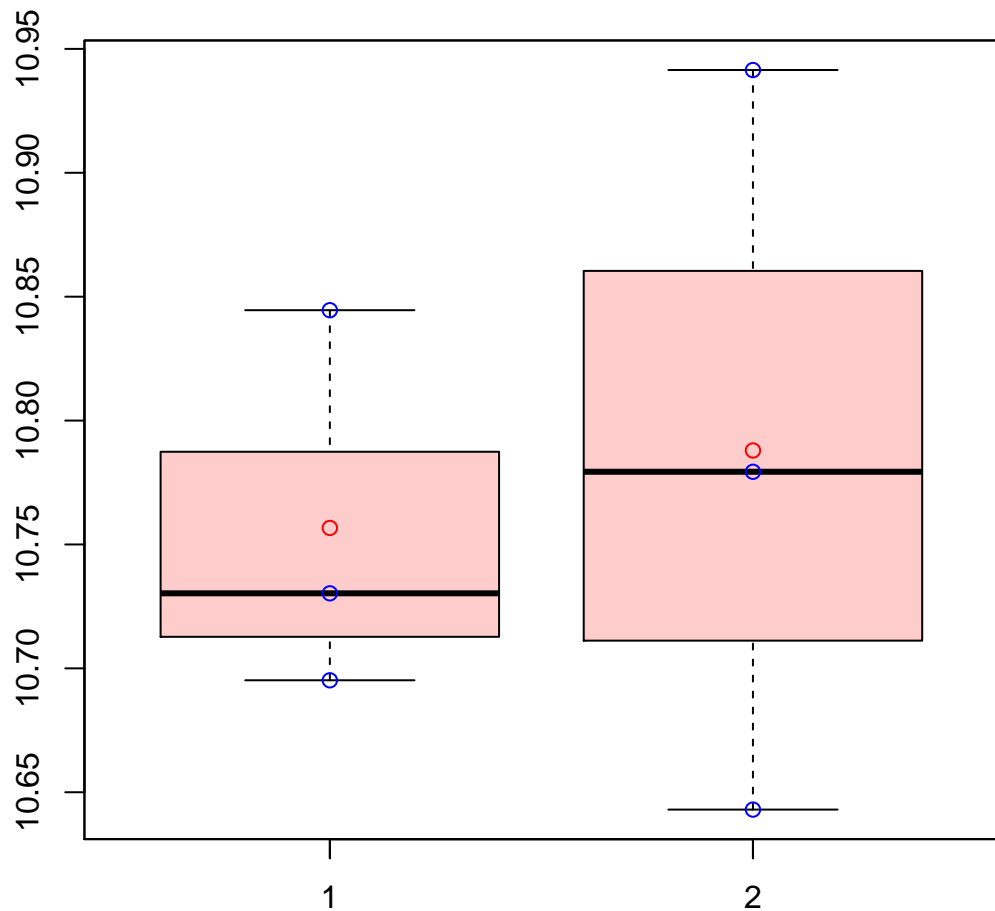

t-Test: p-value = 0.77

# CL2341Contig4|CL2341Contig4

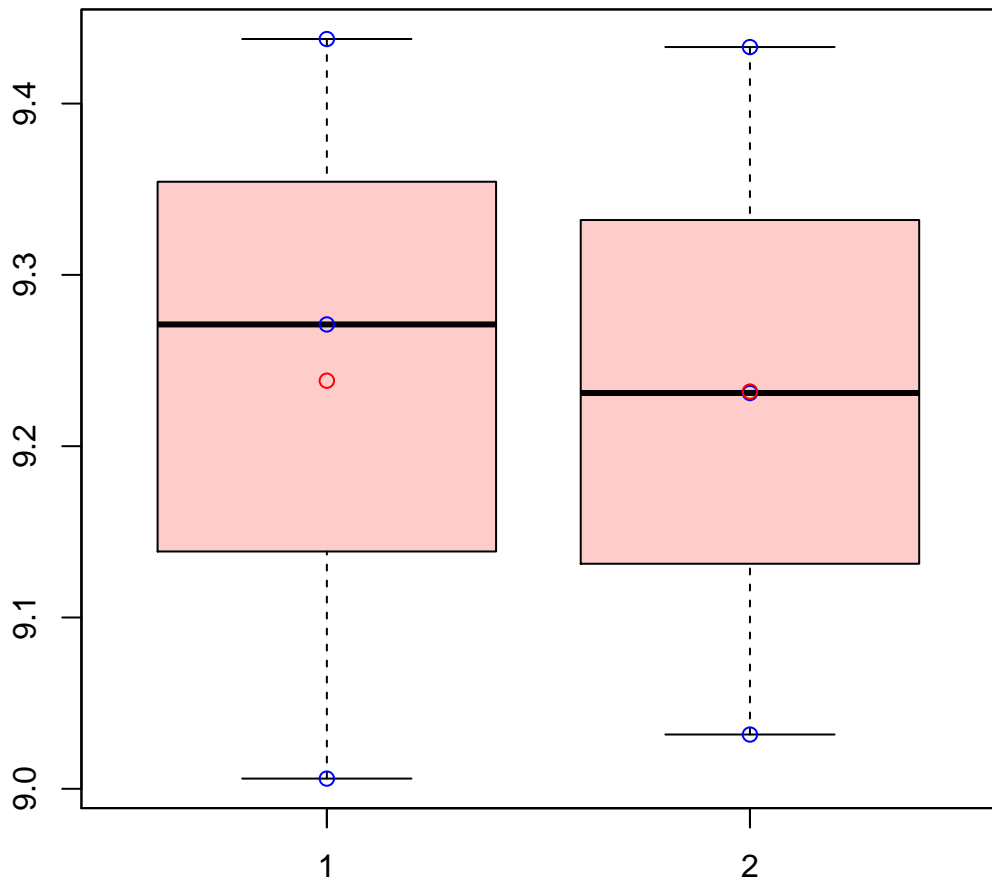

t-Test: p-value = 0.97

# CL2343Contig1|CL2343Contig1

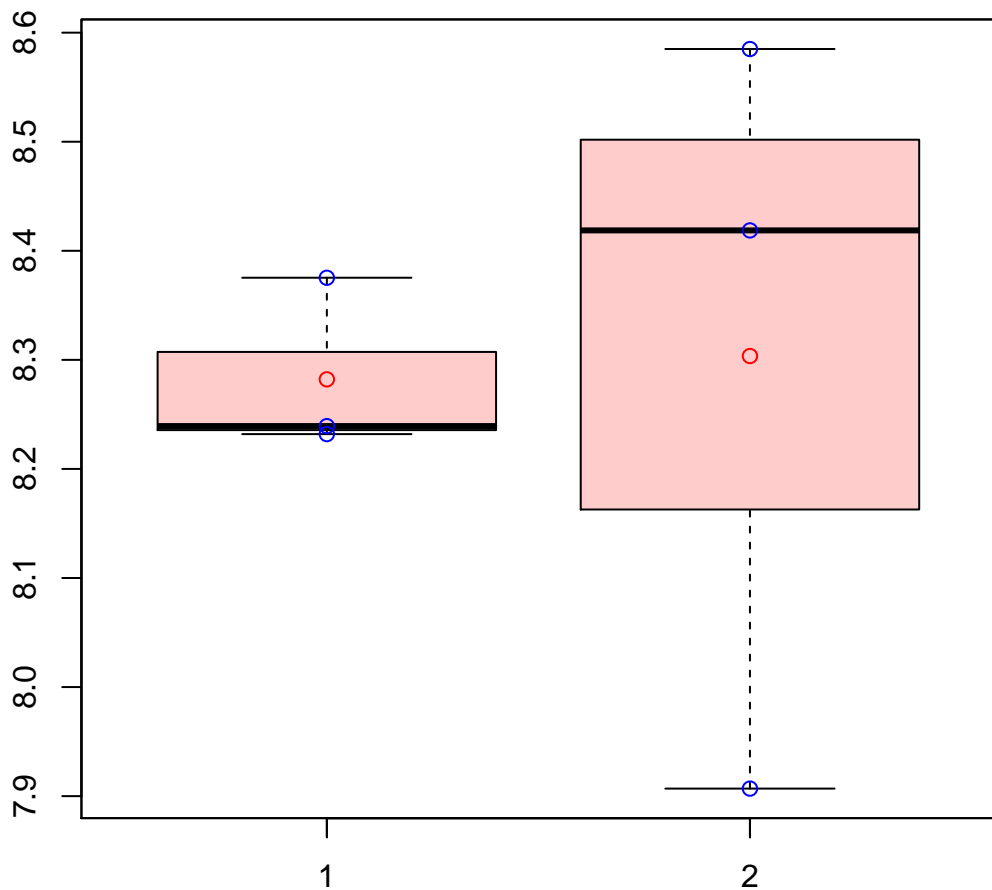

t-Test: p-value = 0.93

# CL2349Contig3|CL2349Contig3

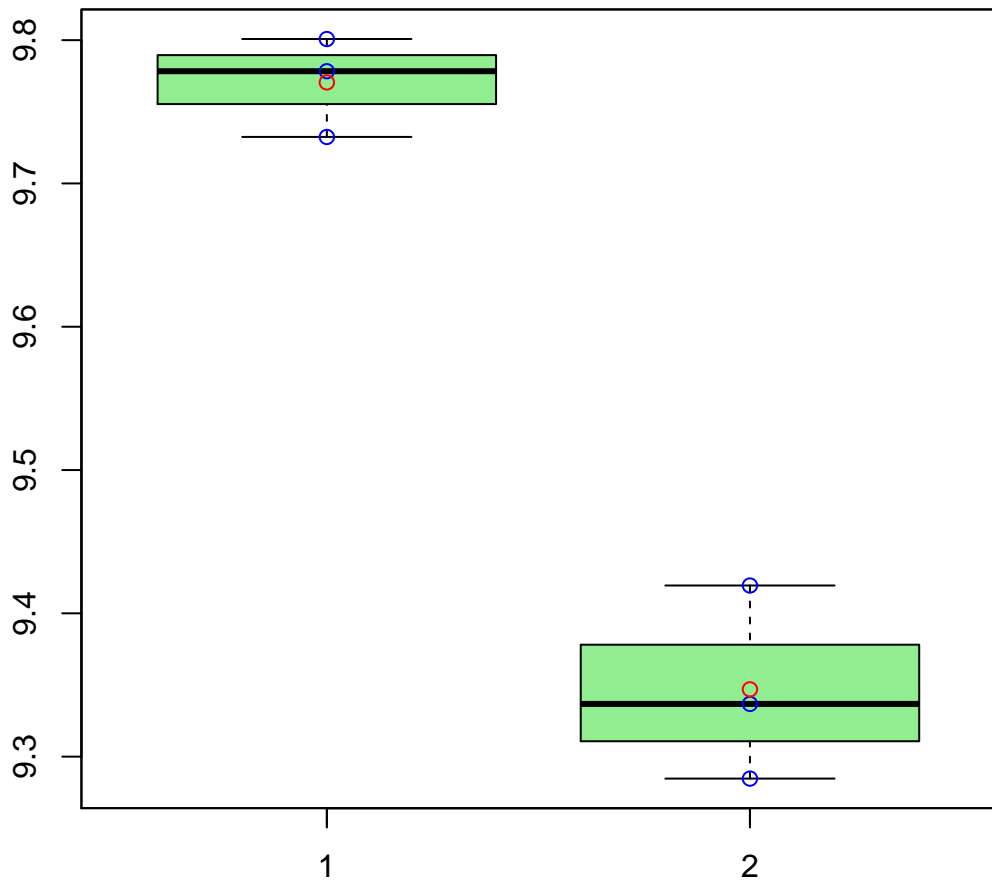

t-Test: p-value = 0

# CL234Contig1|CL234Contig1

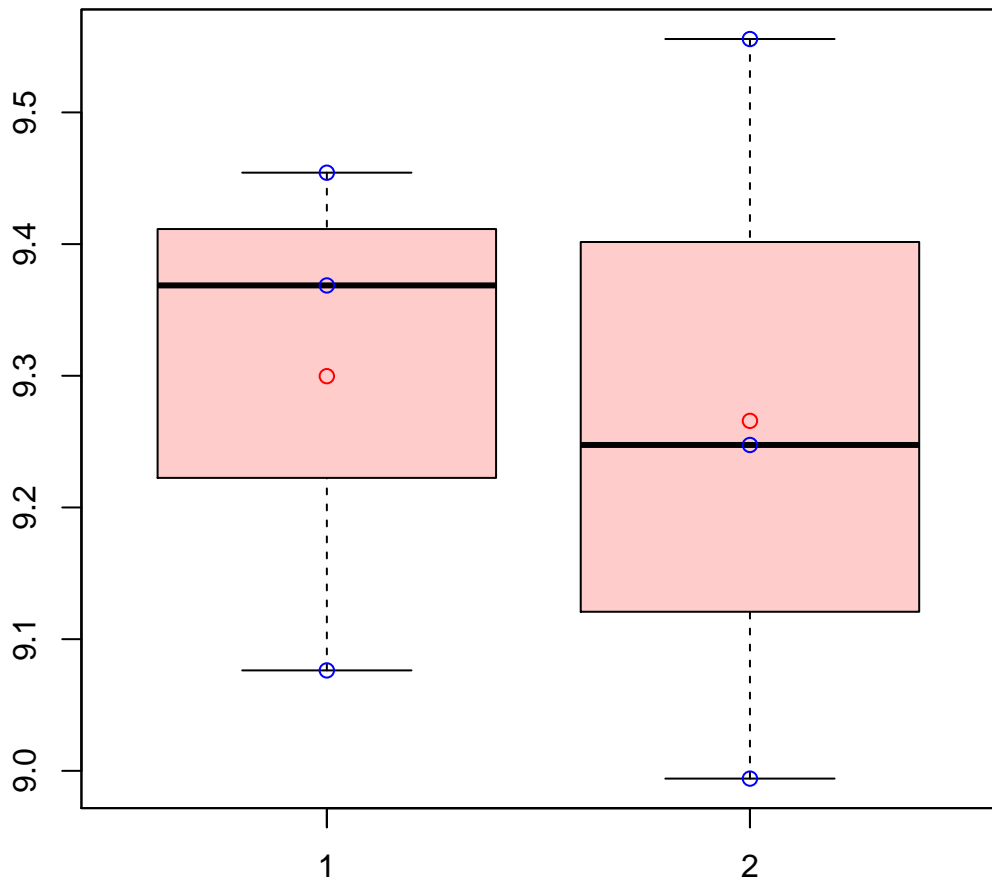

t-Test: p-value = 0.87

# CL2351Contig2|CL2351Contig2

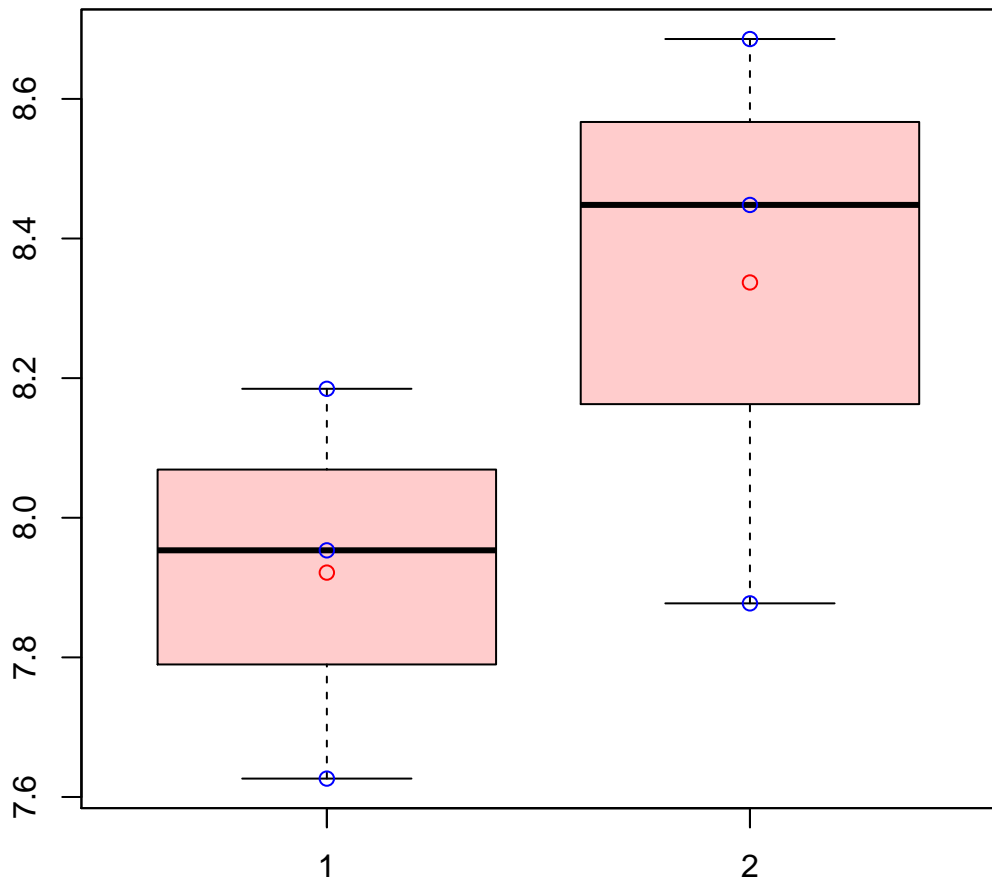

t-Test: p-value = 0.23

# CL2351Contig4|CL2351Contig4

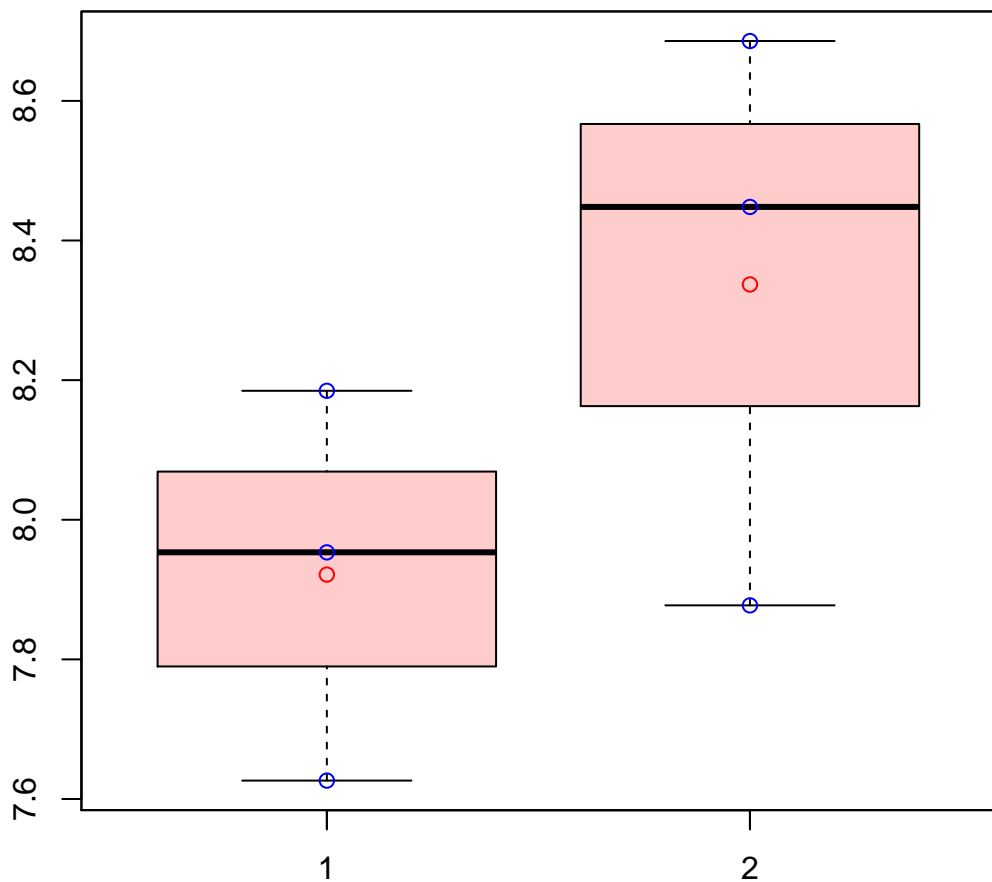

t-Test: p-value = 0.23

# CL2353Contig2|CL2353Contig2

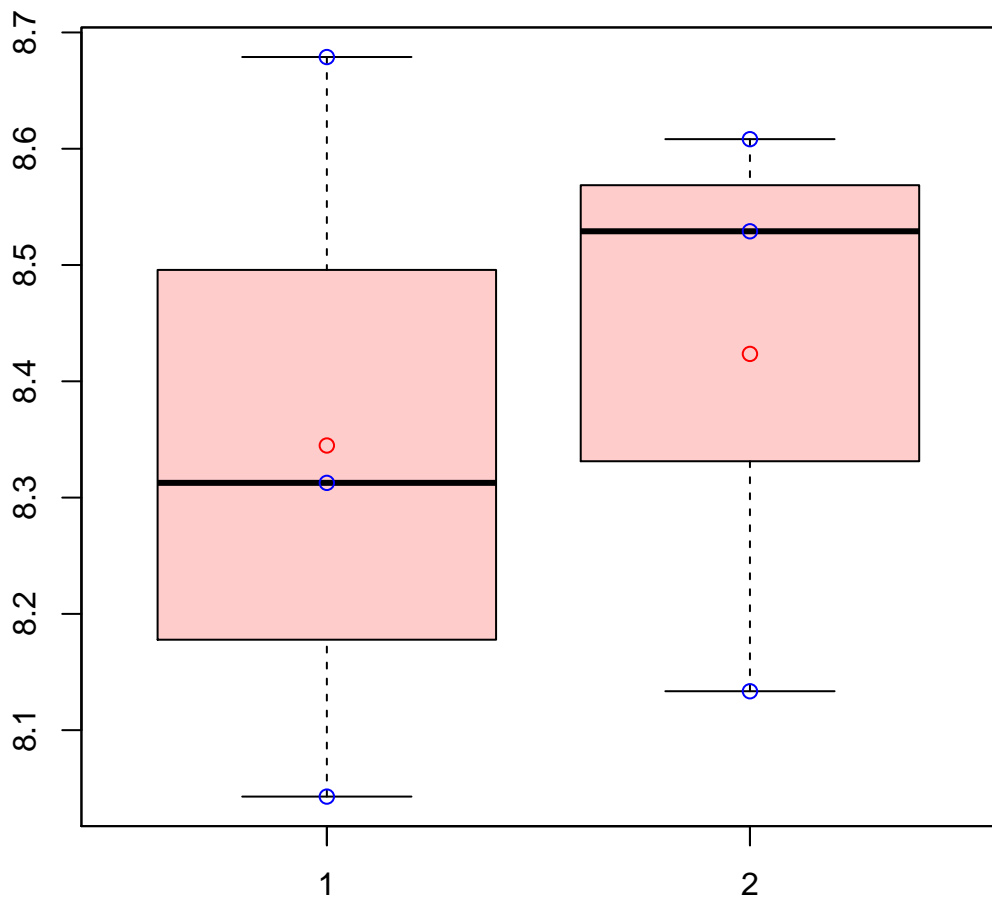

t-Test: p-value = 0.76



# CL23562Contig1|CL23562Contig1

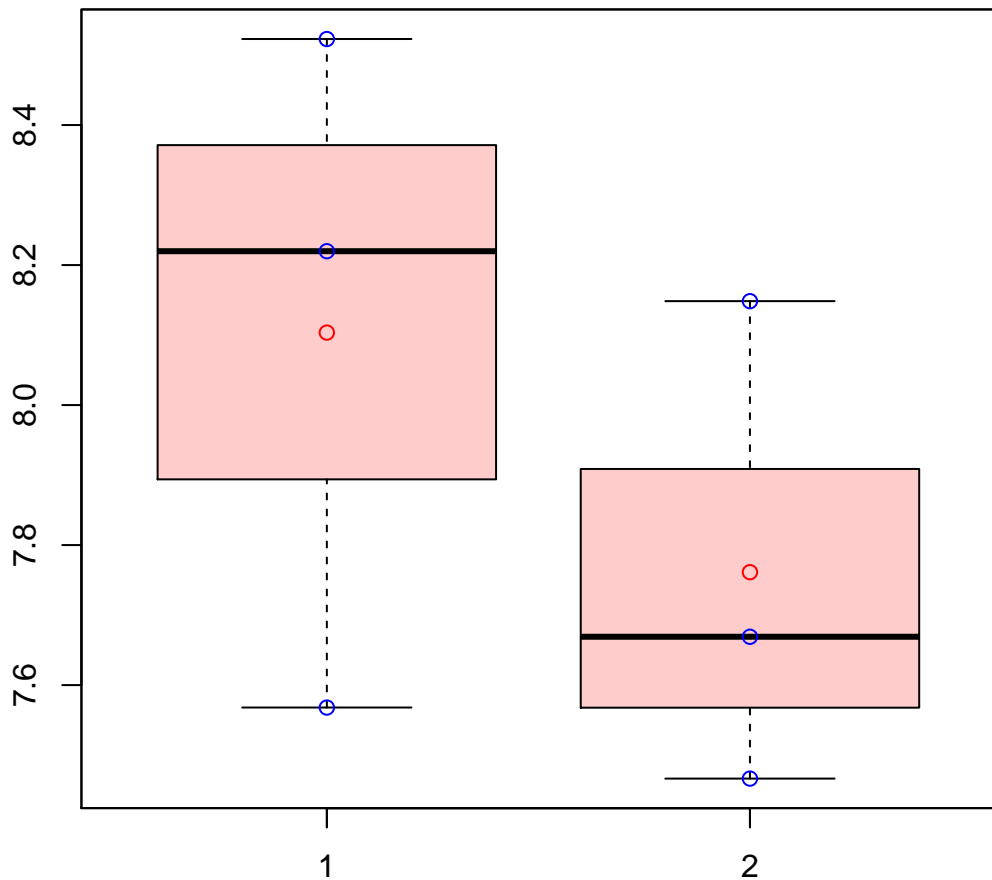

t-Test: p-value = 0.38

# CL2357Contig8|CL2357Contig8

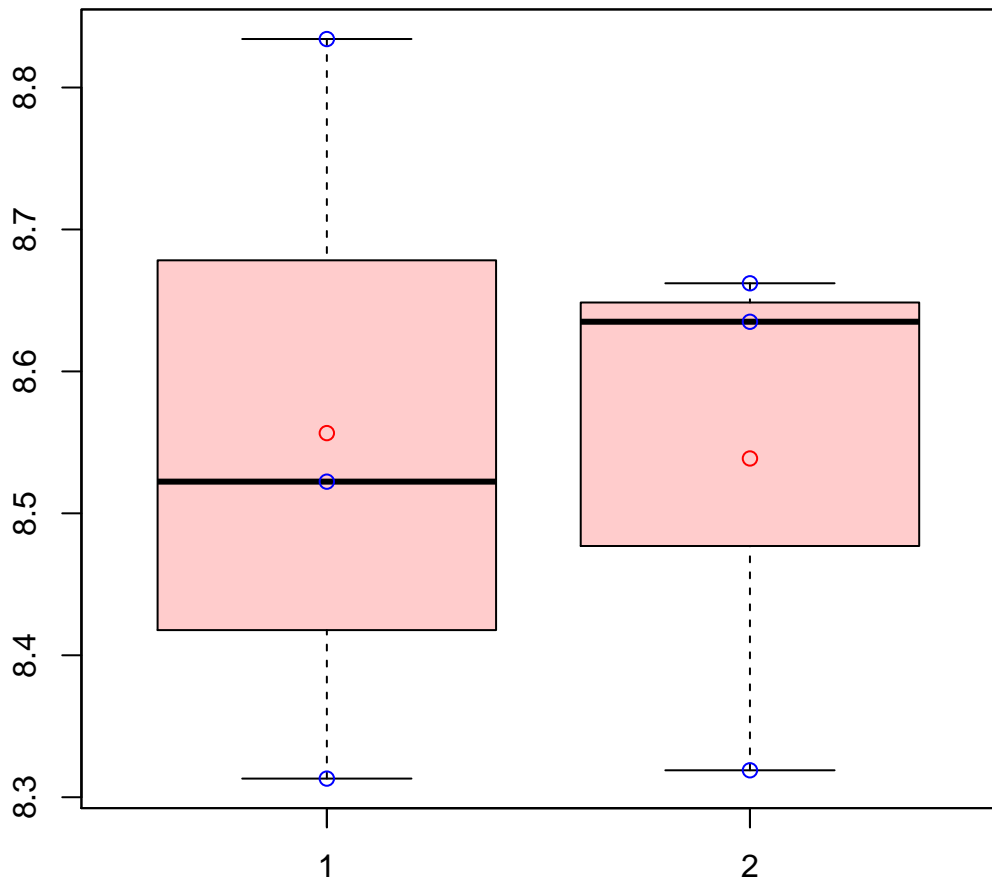

t-Test: p-value = 0.93

# CL23599Contig1|CL23599Contig1

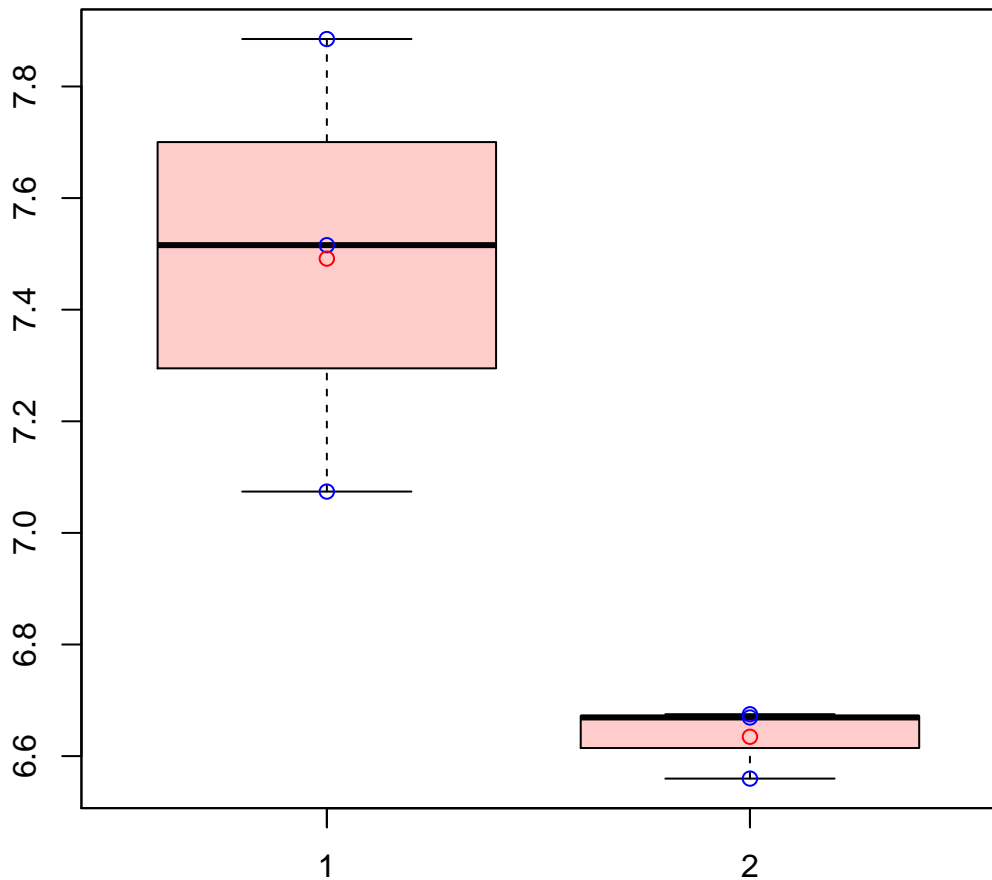

t-Test: p-value = 0.06

# CL2360Contig1|CL2360Contig1

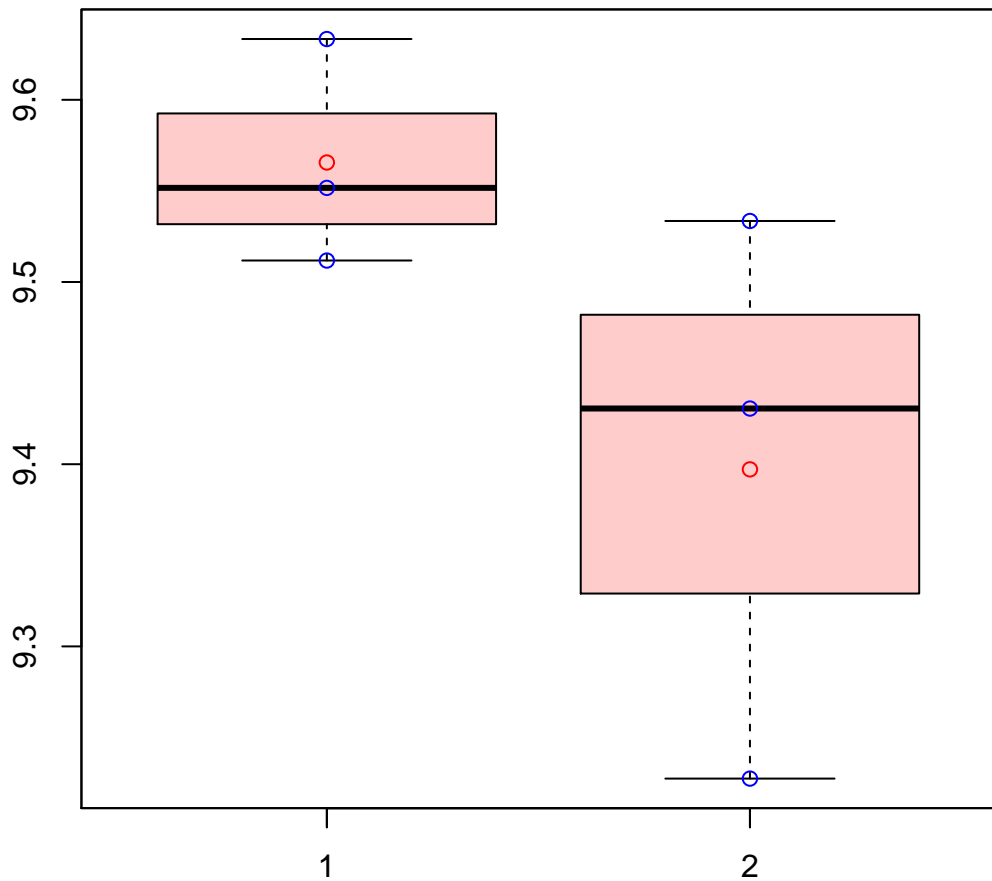

t-Test: p-value = 0.19

# CL2360Contig4|CL2360Contig4

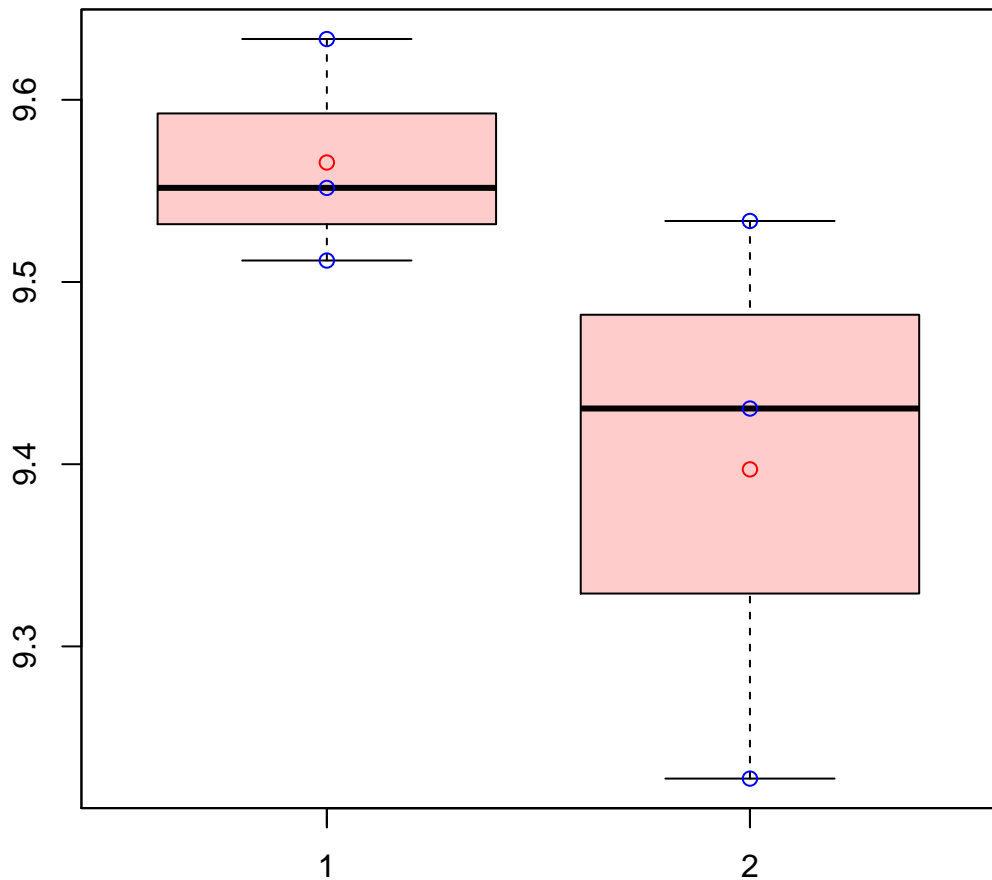

t-Test: p-value = 0.19

# CL2363Contig3|CL2363Contig3

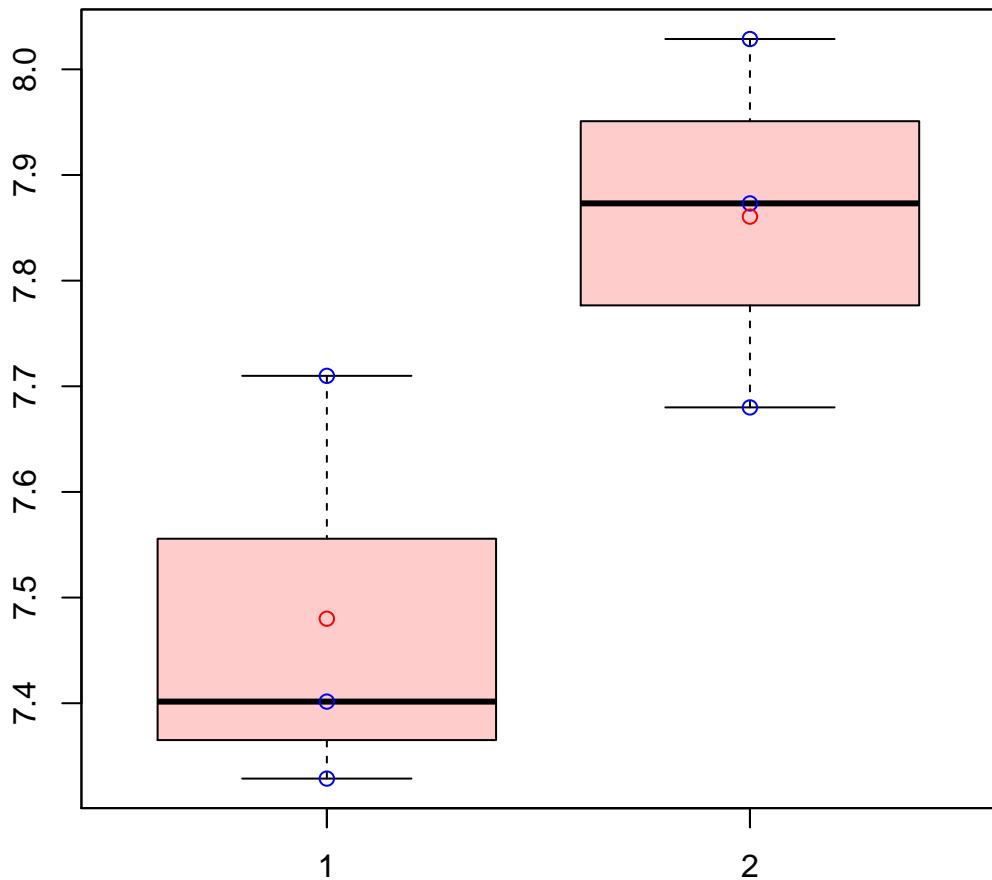

t-Test: p-value = 0.07

## CL236Contig2|CL236Contig2

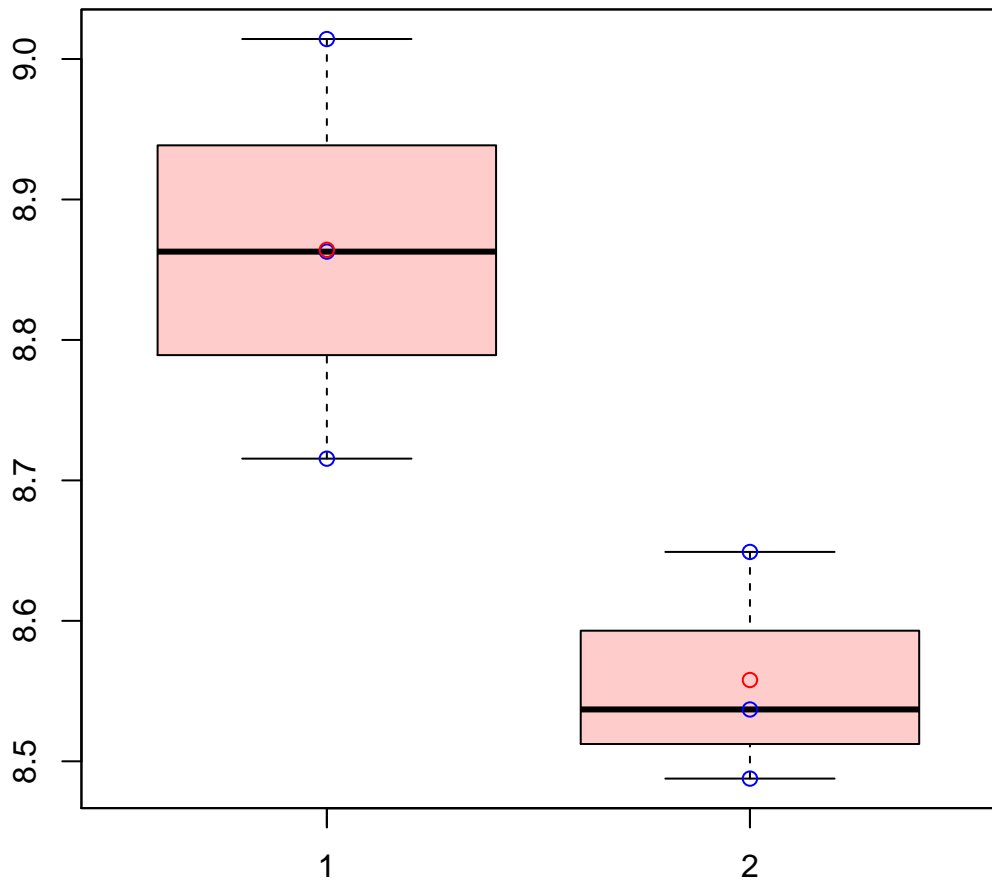

t-Test: p-value = 0.05

# CL236Contig5|CL236Contig5

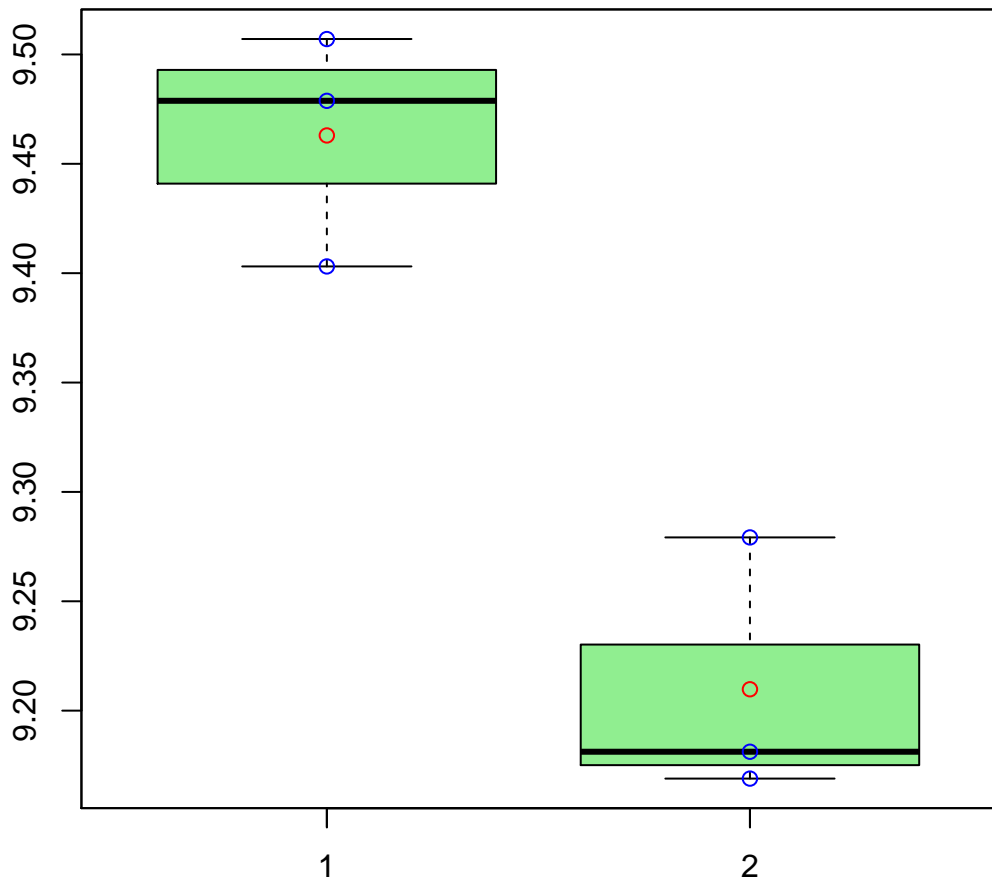

t-Test: p-value = 0.01



# CL236Contig6|CL236Contig6

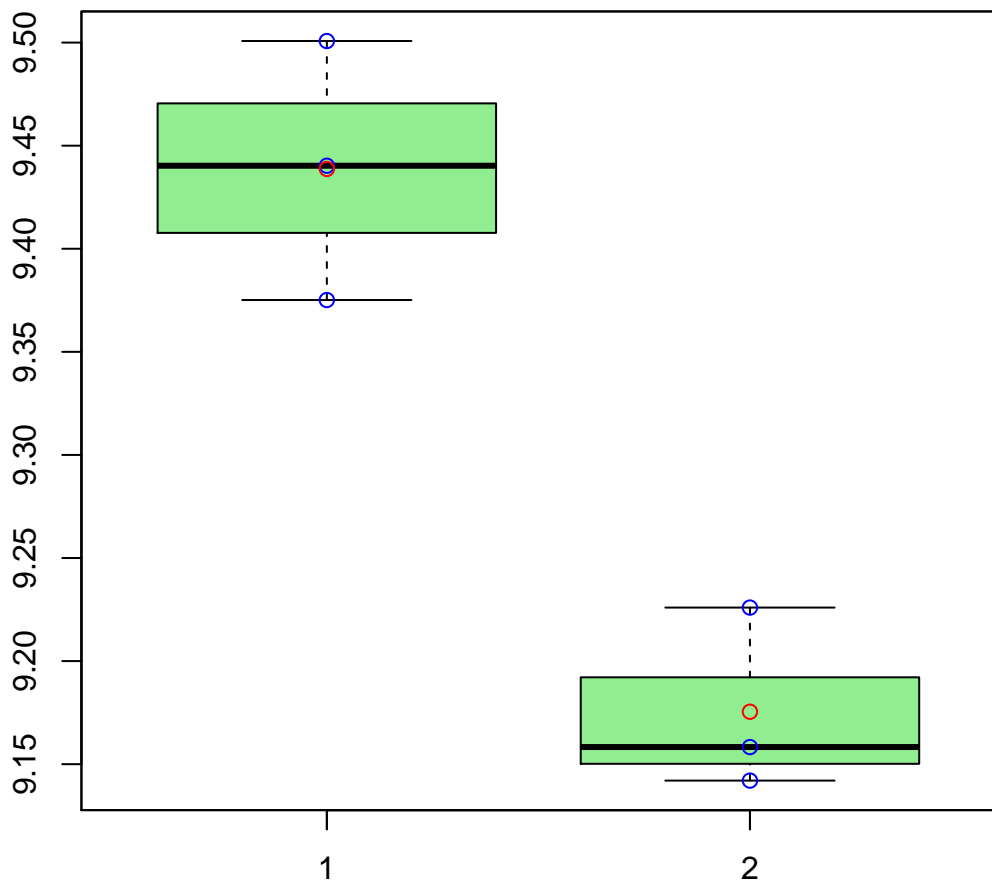

t-Test: p-value = 0.01

# CL236Contig9|CL236Contig9



t-Test: p-value = 0.05

# CL2379Contig3|CL2379Contig3

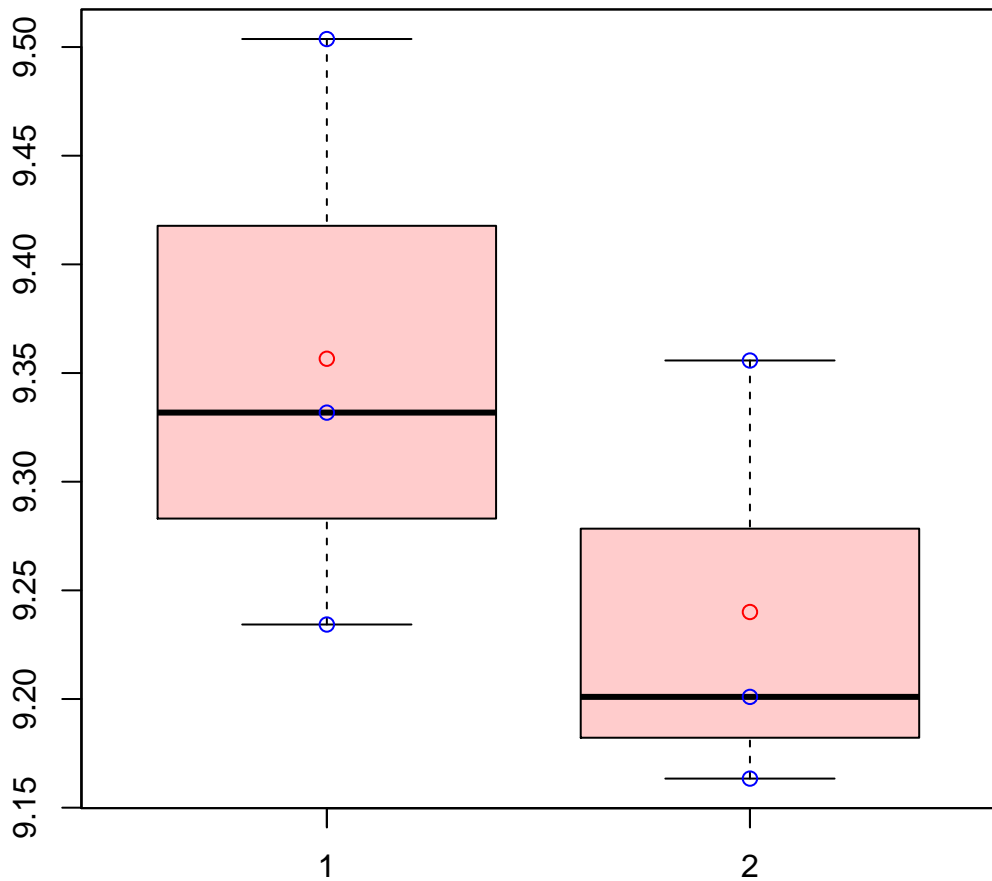

t-Test: p-value = 0.31

# CL237Contig2|CL237Contig2

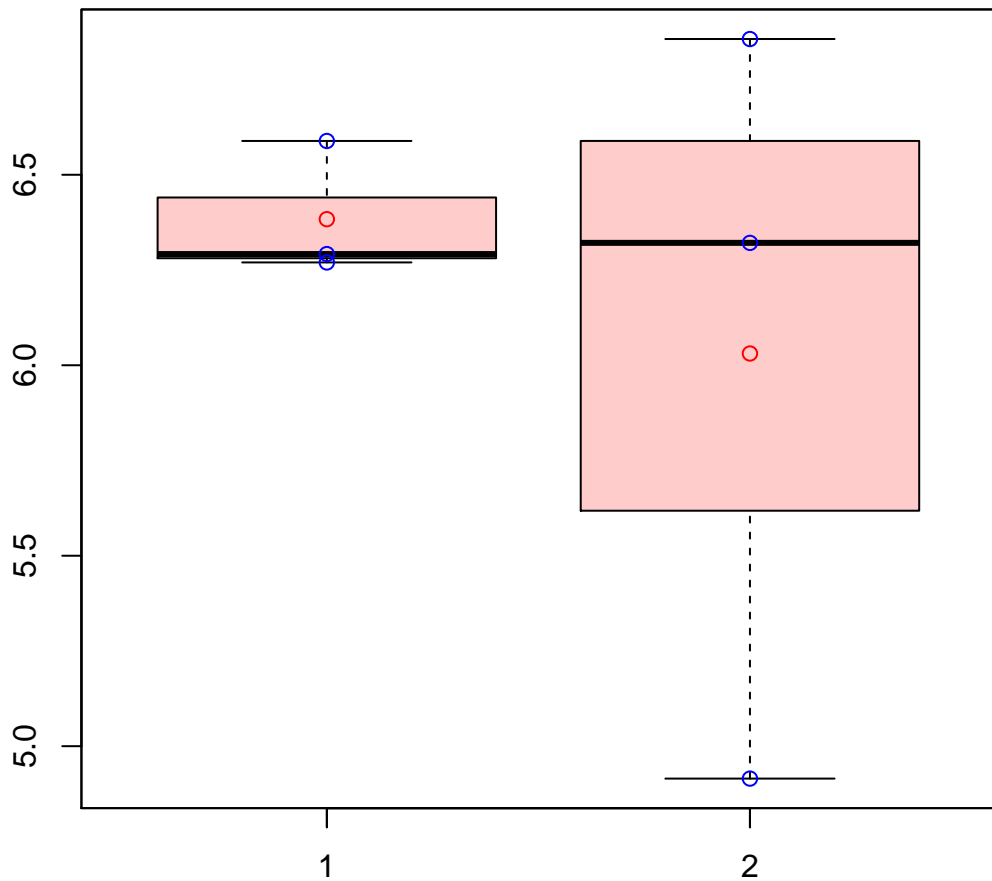

t-Test: p-value = 0.61

# CL2382Contig6|CL2382Contig6

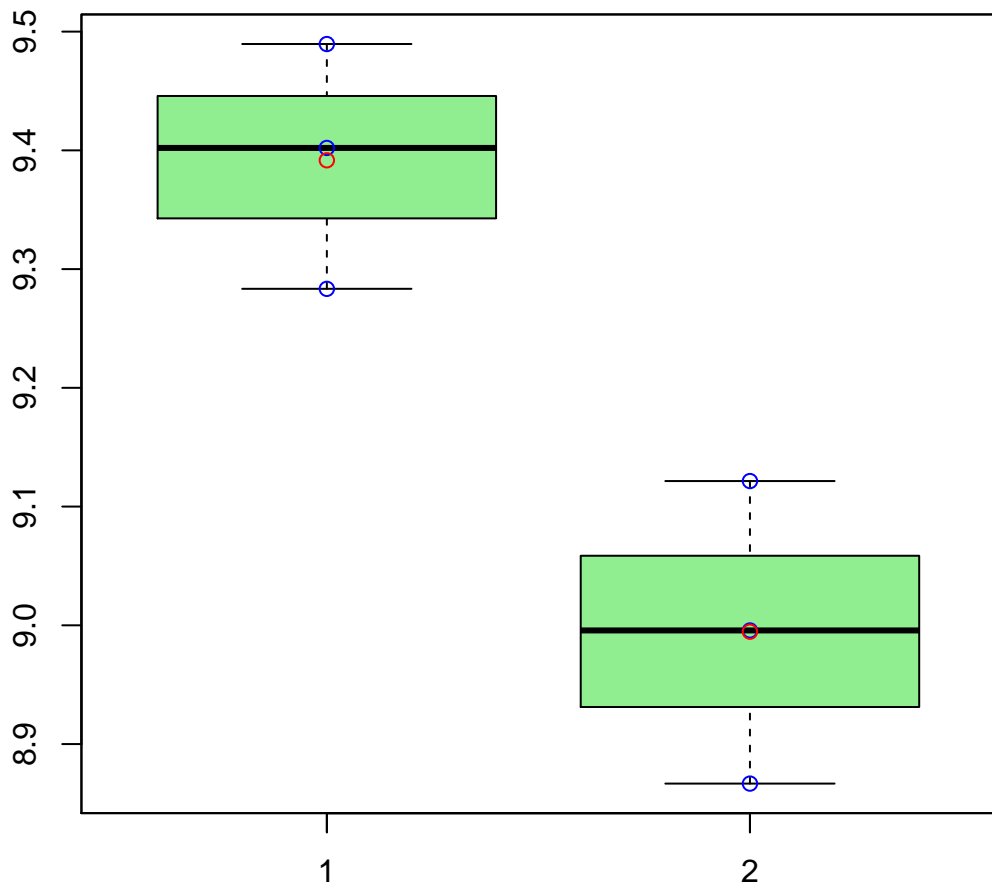

t-Test: p-value = 0.02

# CL2382Contig8|CL2382Contig8

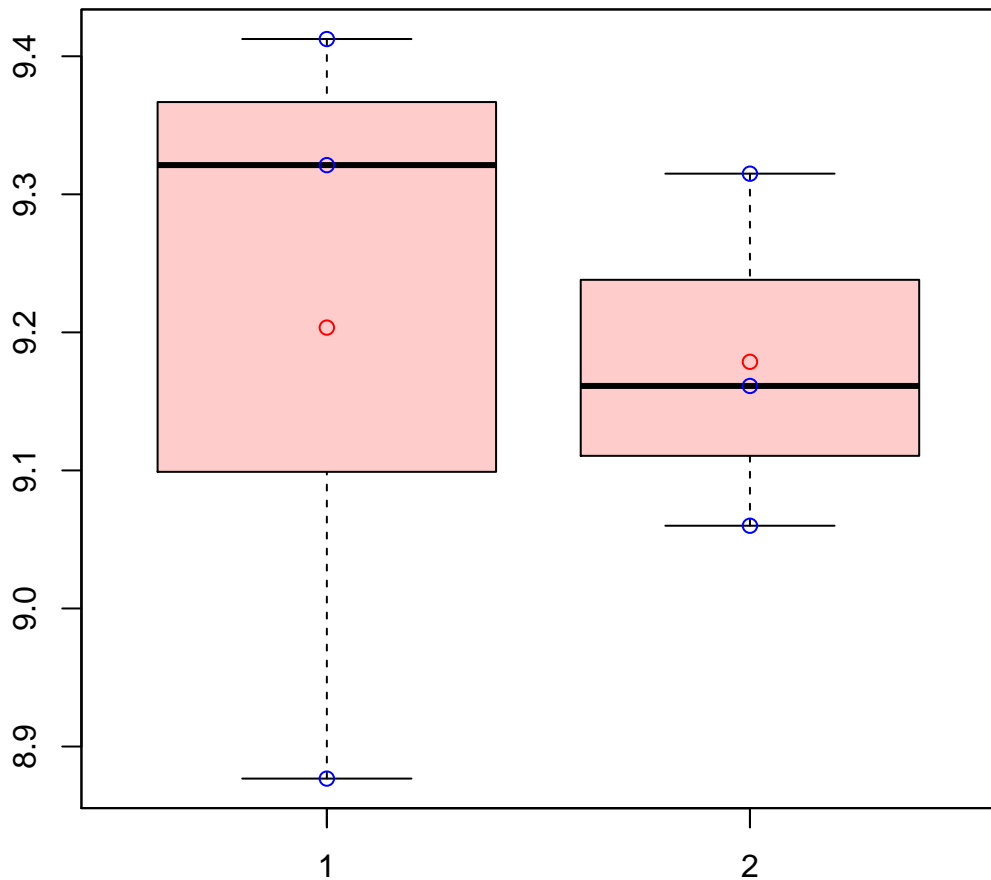

t-Test: p-value = 0.9

# CL2382Contig9|CL2382Contig9

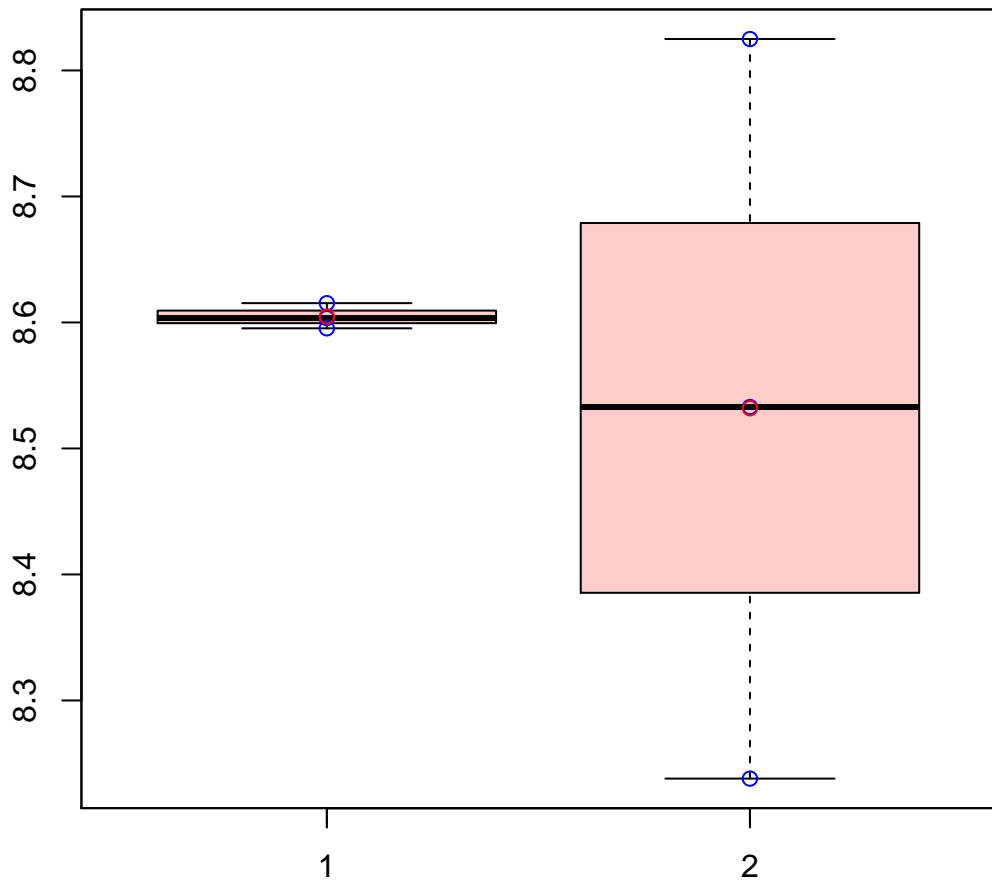

t-Test: p-value = 0.71

# CL2394Contig2|CL2394Contig2

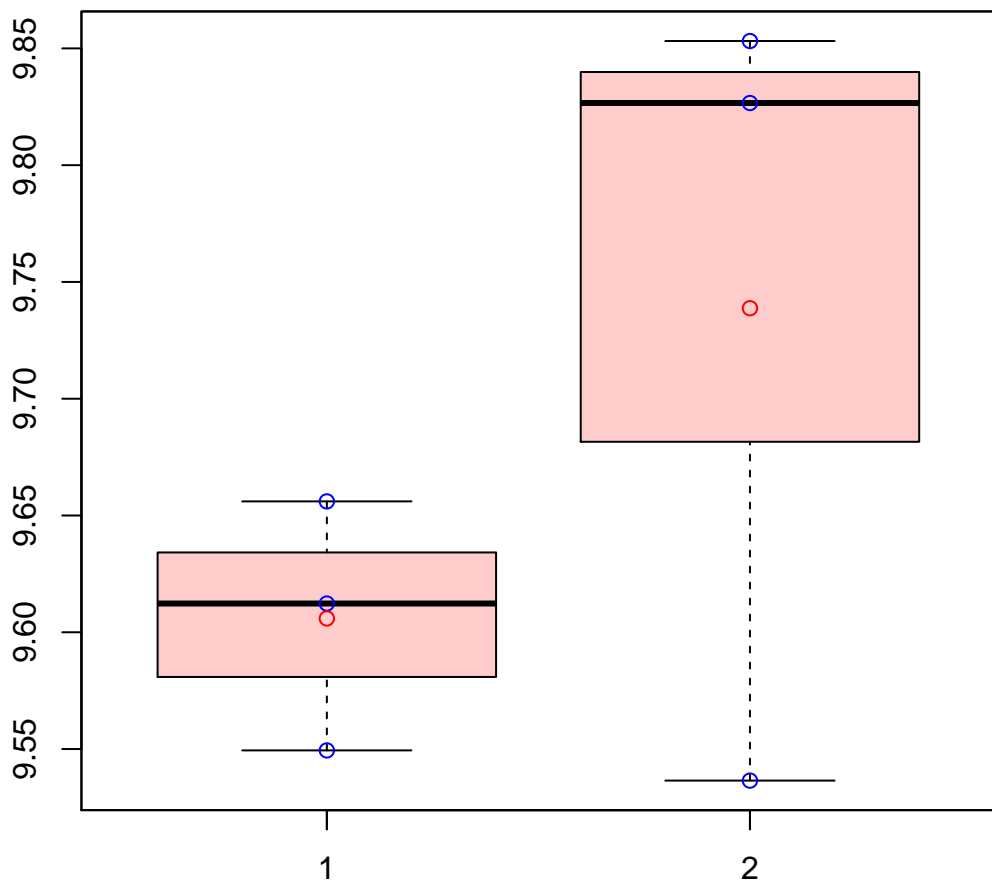

t-Test: p-value = 0.32



# CL2396Contig1|CL2396Contig1

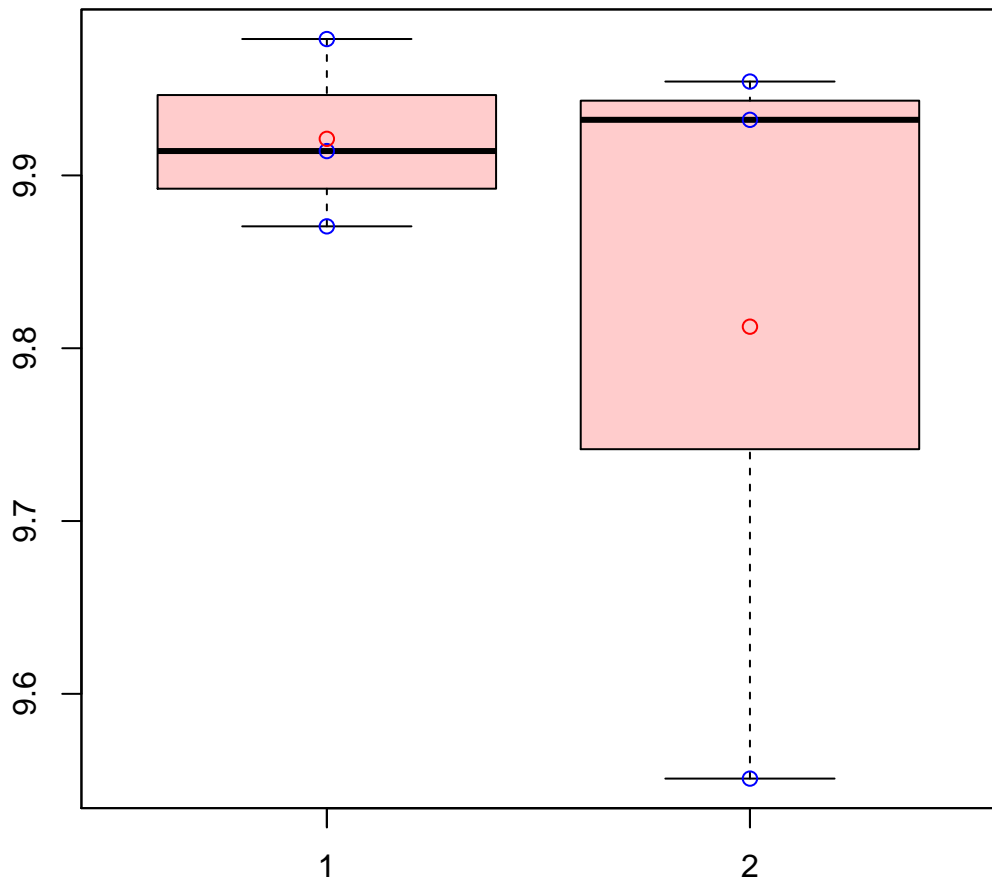

t-Test: p-value = 0.5

# CL2396Contig2|CL2396Contig2

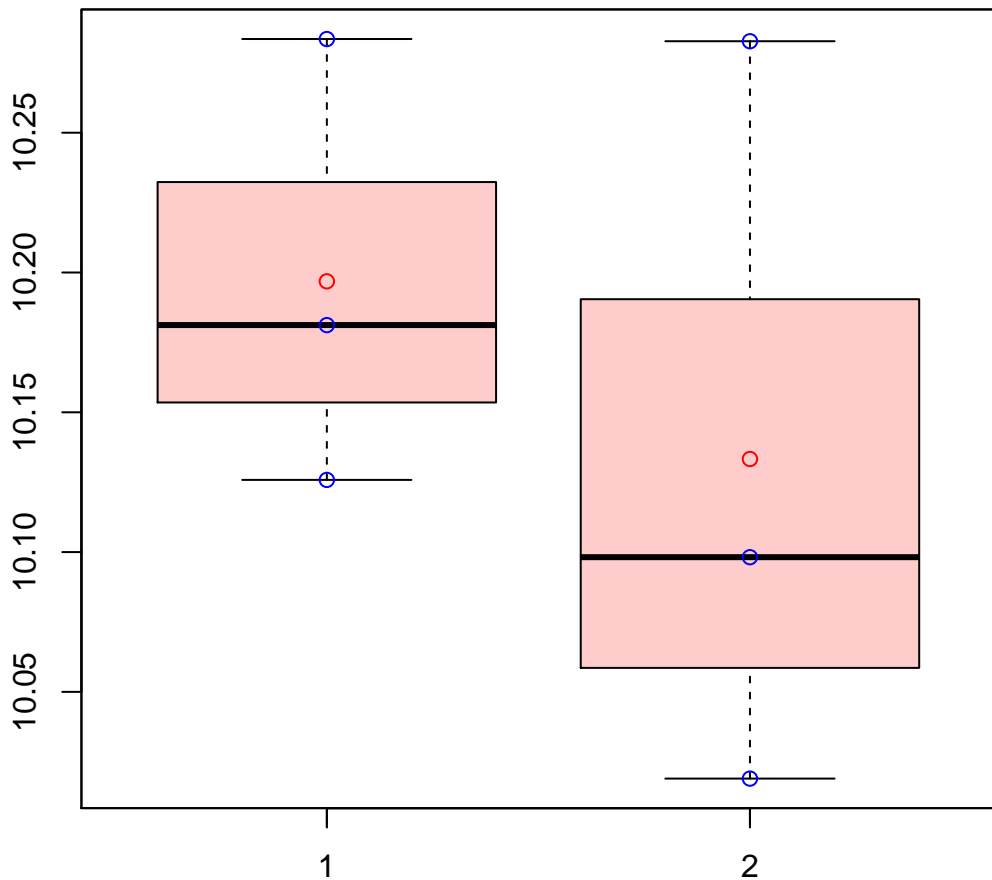

t-Test: p-value = 0.53

# CL2396Contig3|CL2396Contig3



t-Test: p-value = 0.53

# CL2396Contig4|CL2396Contig4

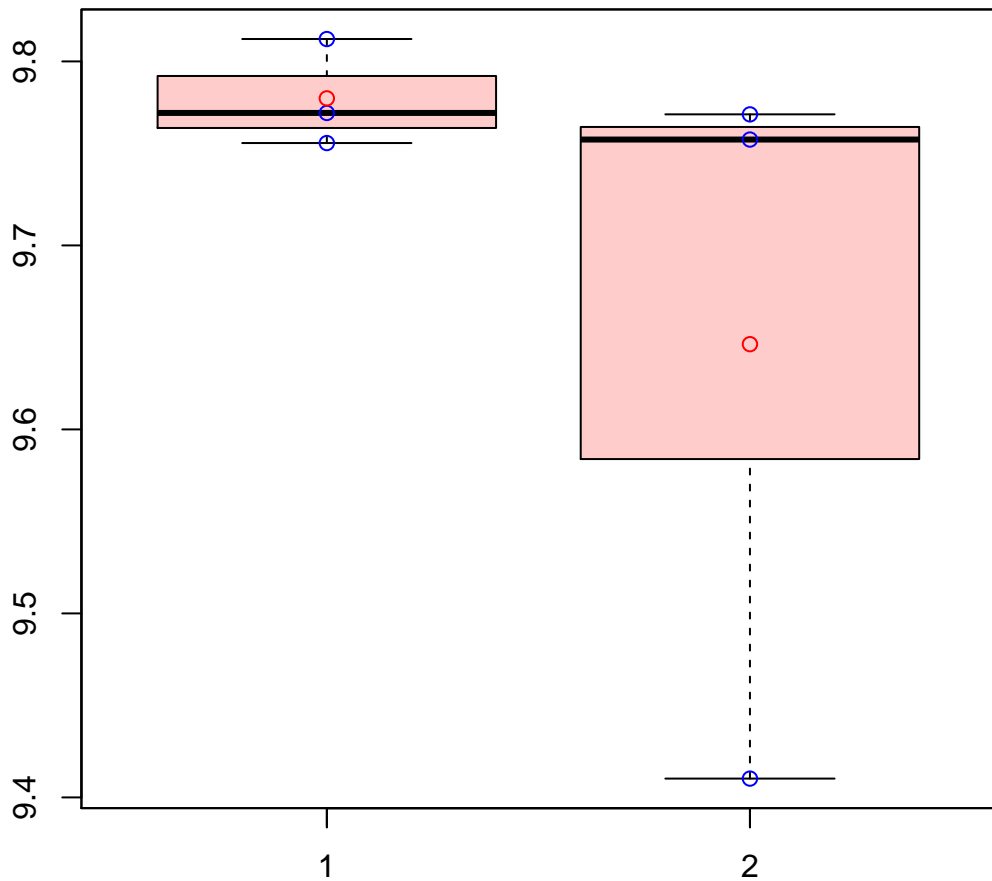

t-Test: p-value = 0.38

# CL2396Contig6|CL2396Contig6

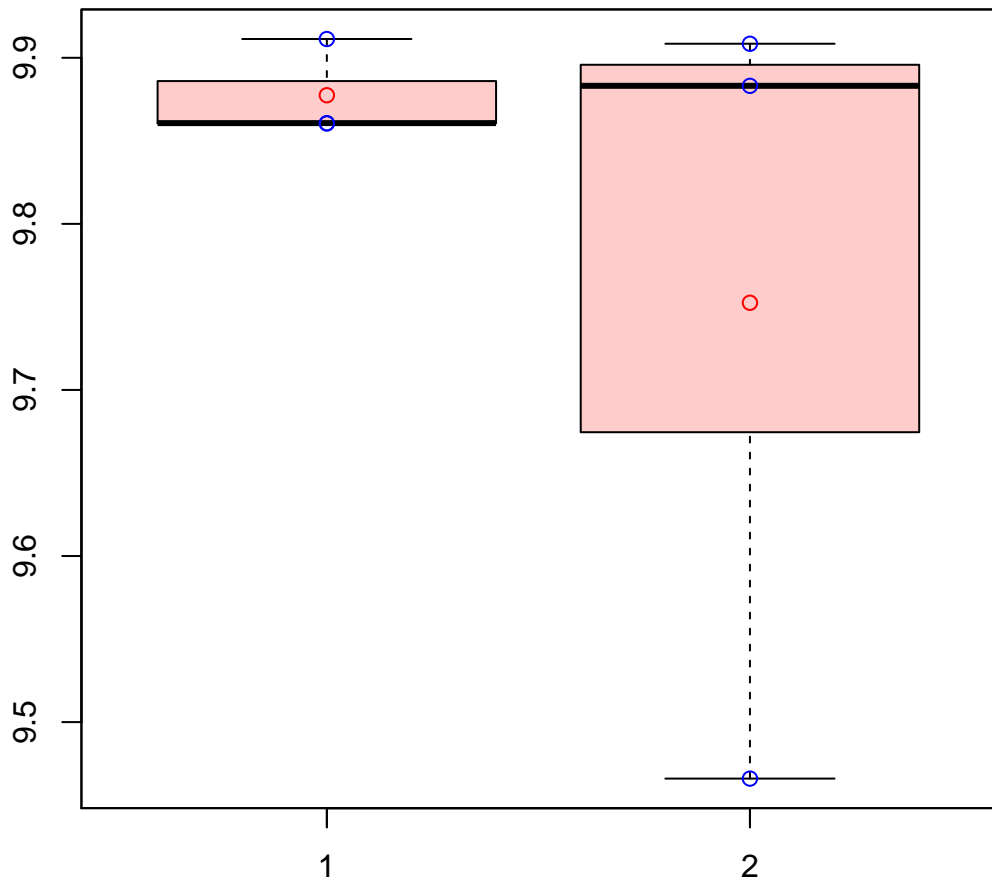

t-Test: p-value = 0.48

# CL2396Contig9|CL2396Contig9

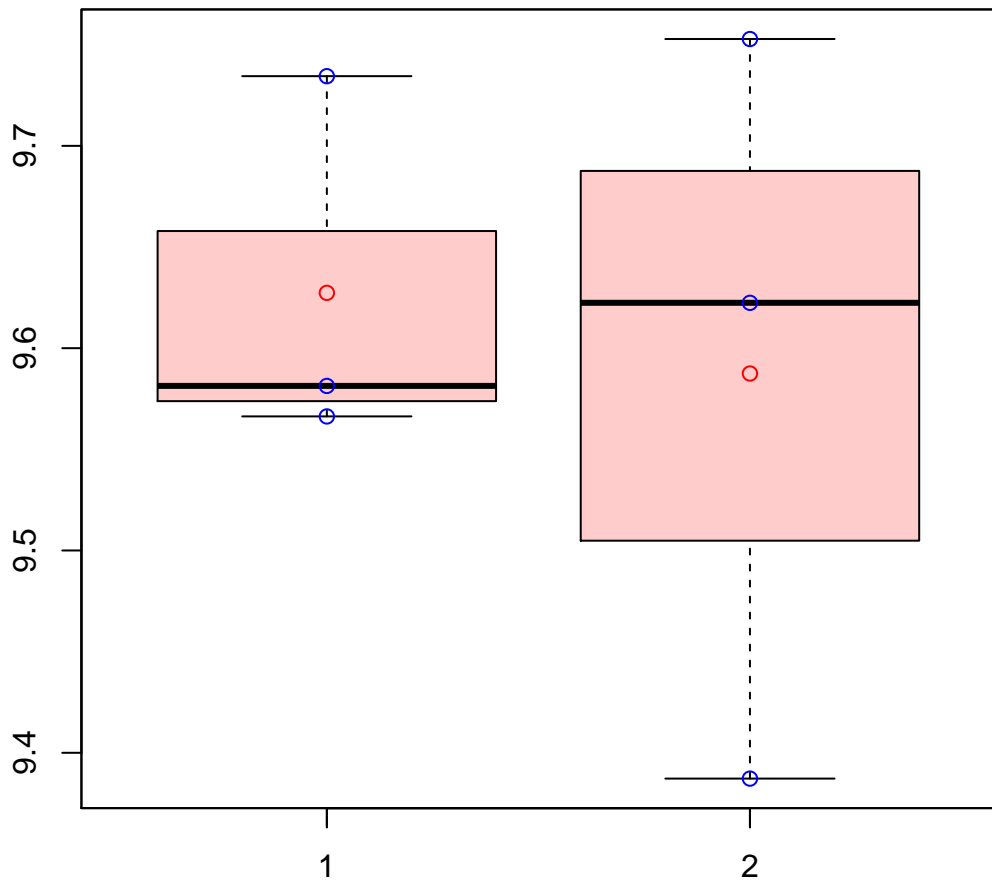

t-Test: p-value = 0.76

# CL239Contig13|CL239Contig13

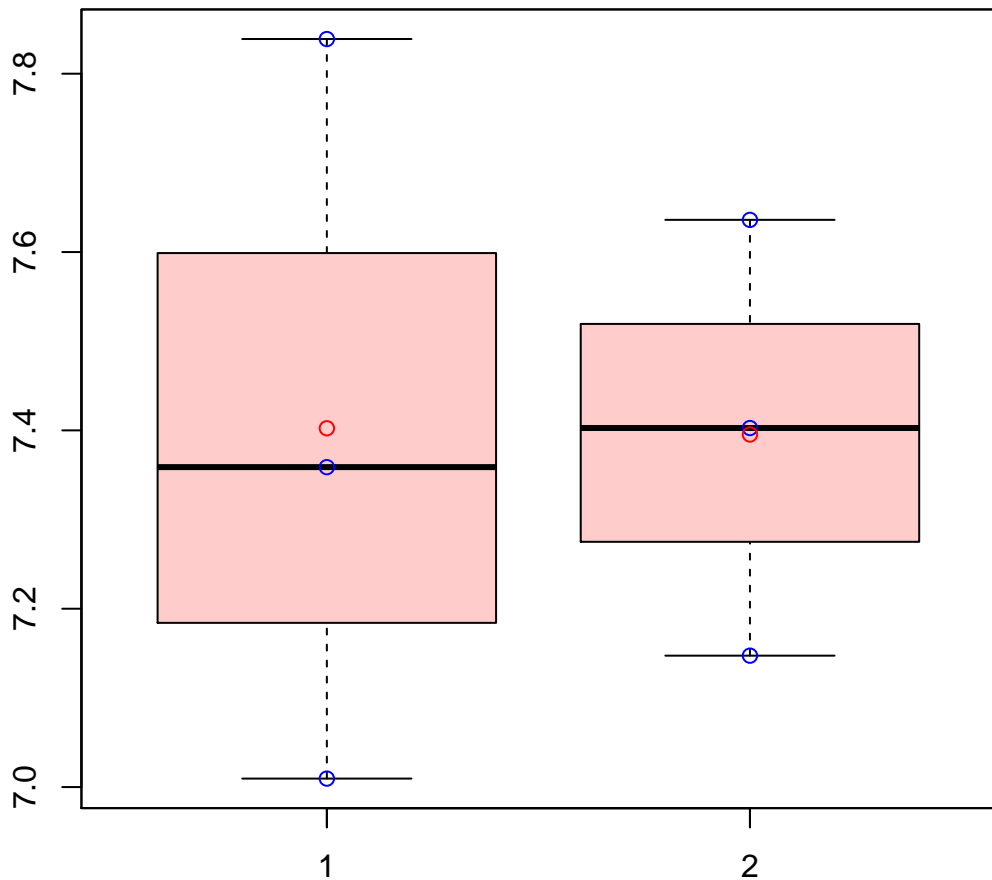

t-Test: p-value = 0.98

# CL239Contig21|CL239Contig21

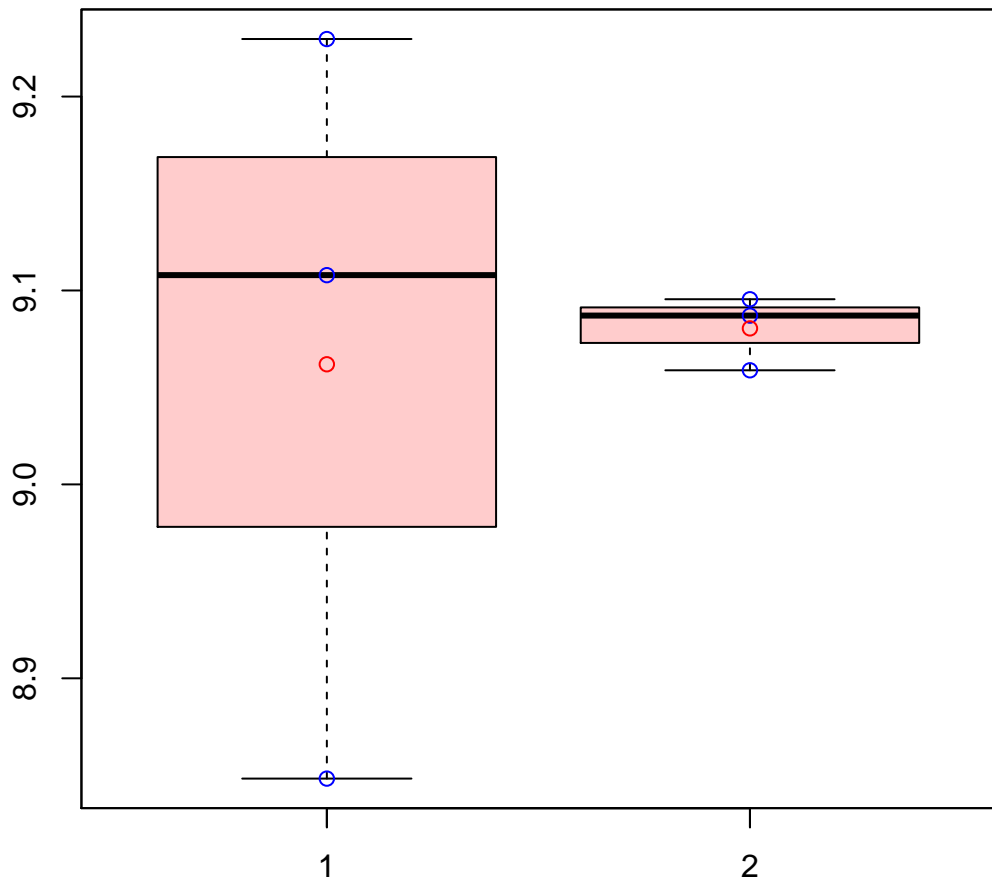

t-Test: p-value = 0.88



# CL23Contig27|CL23Contig27

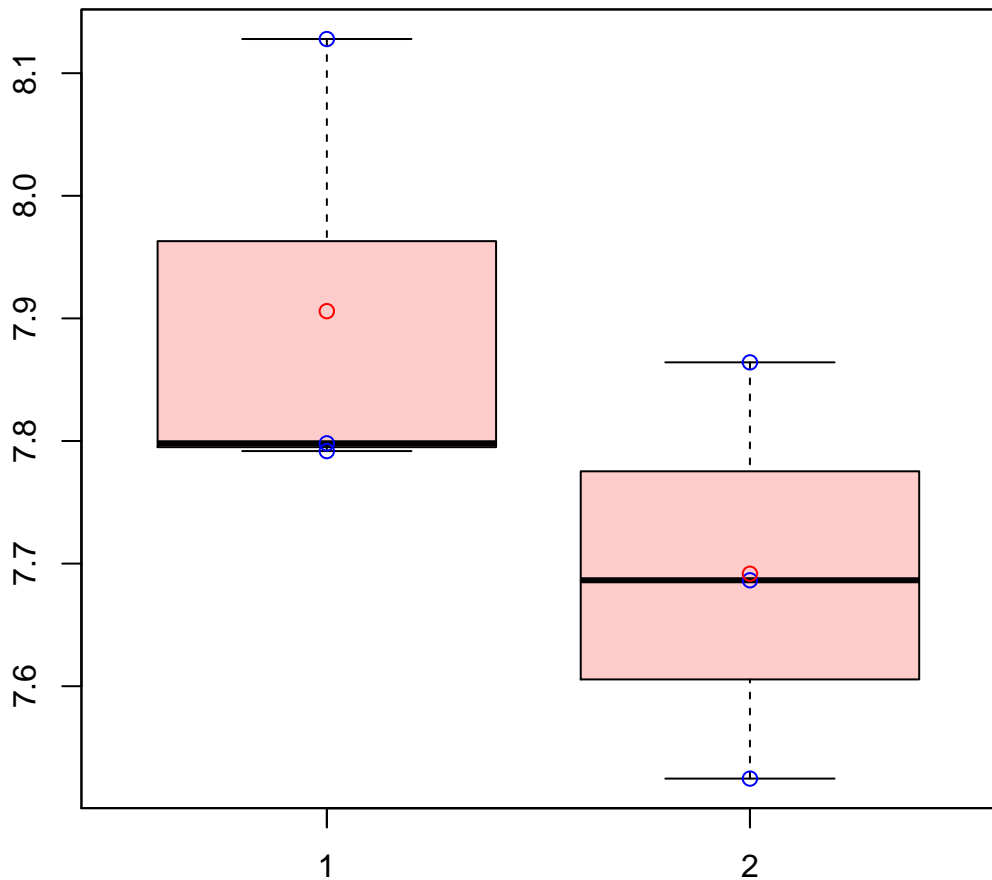

t-Test: p-value = 0.22

# CL23Contig30|CL23Contig30

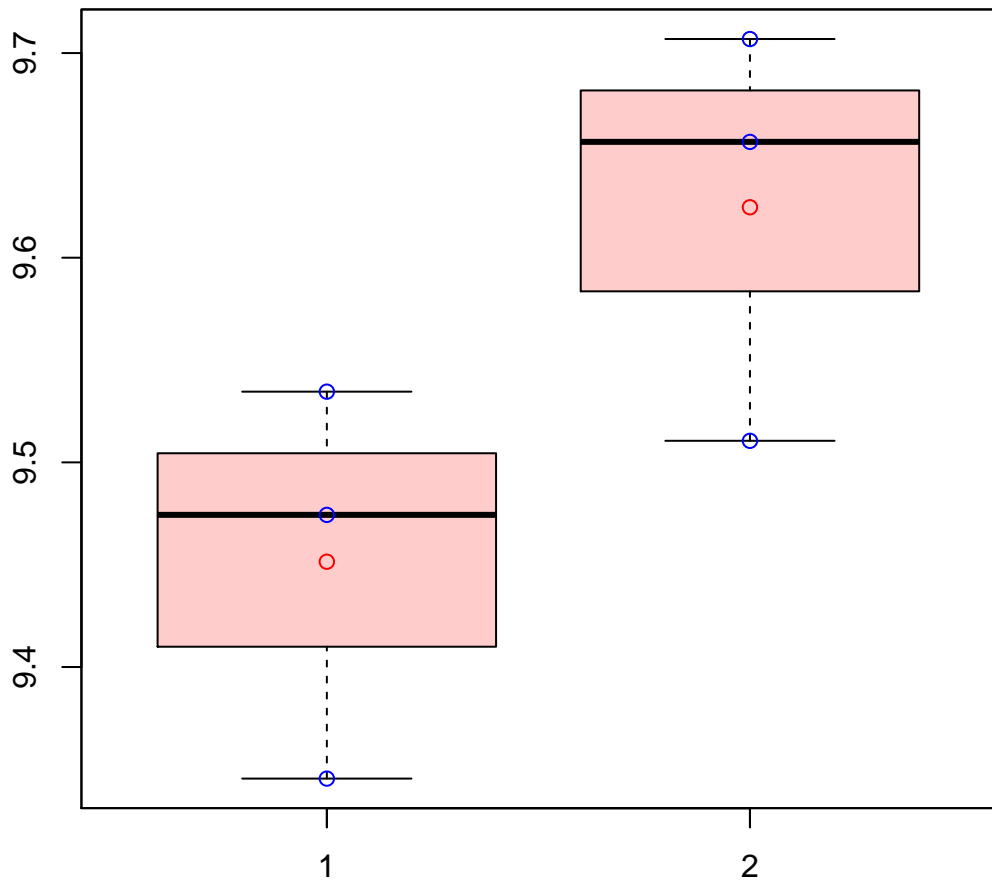

t-Test: p-value = 0.1

# CL23Contig6|CL23Contig6

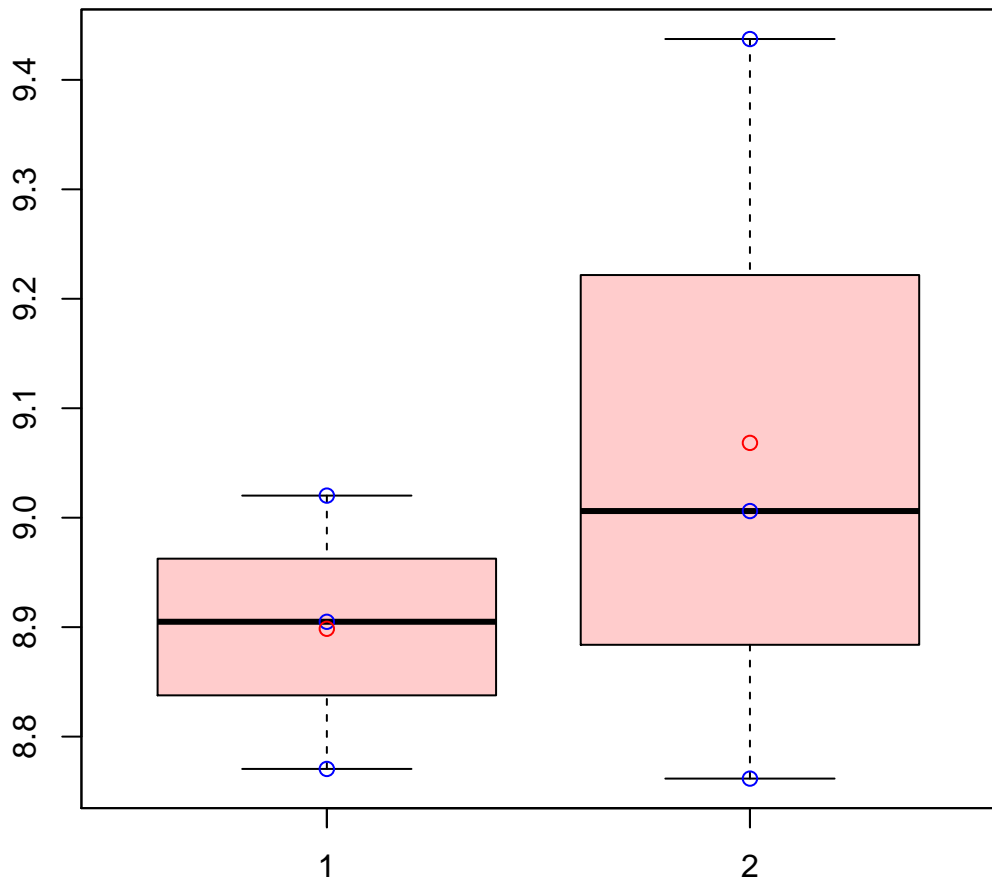

t-Test: p-value = 0.49

# CL2406Contig5|CL2406Contig5

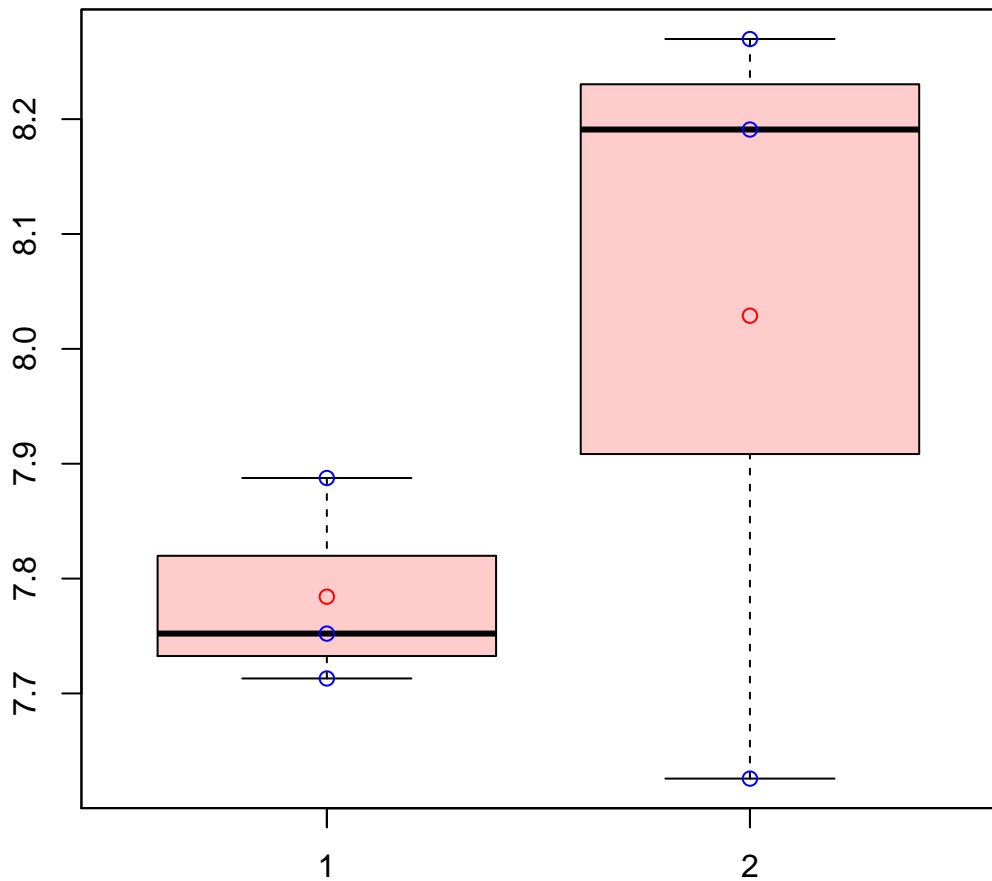

t-Test: p-value = 0.35

# CL2409Contig2|CL2409Contig2

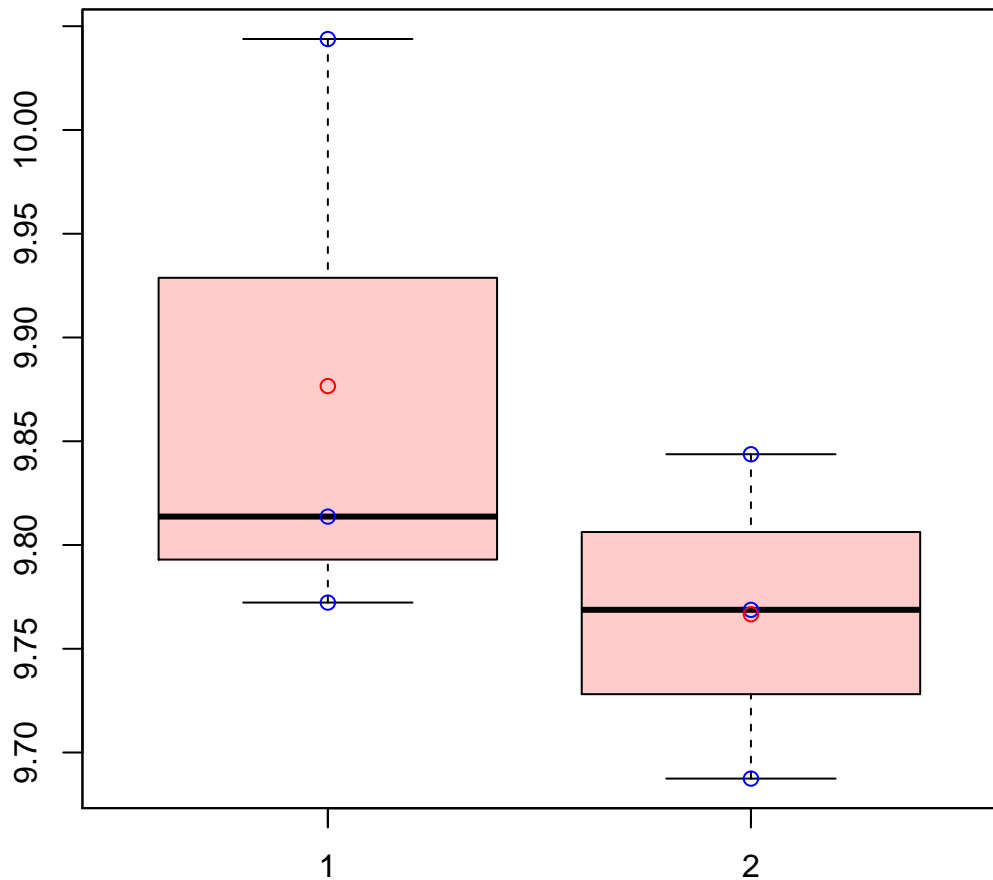

t-Test: p-value = 0.33

# CL240Contig16|CL240Contig16



t-Test: p-value = 0.9

# CL240Contig1|CL240Contig1

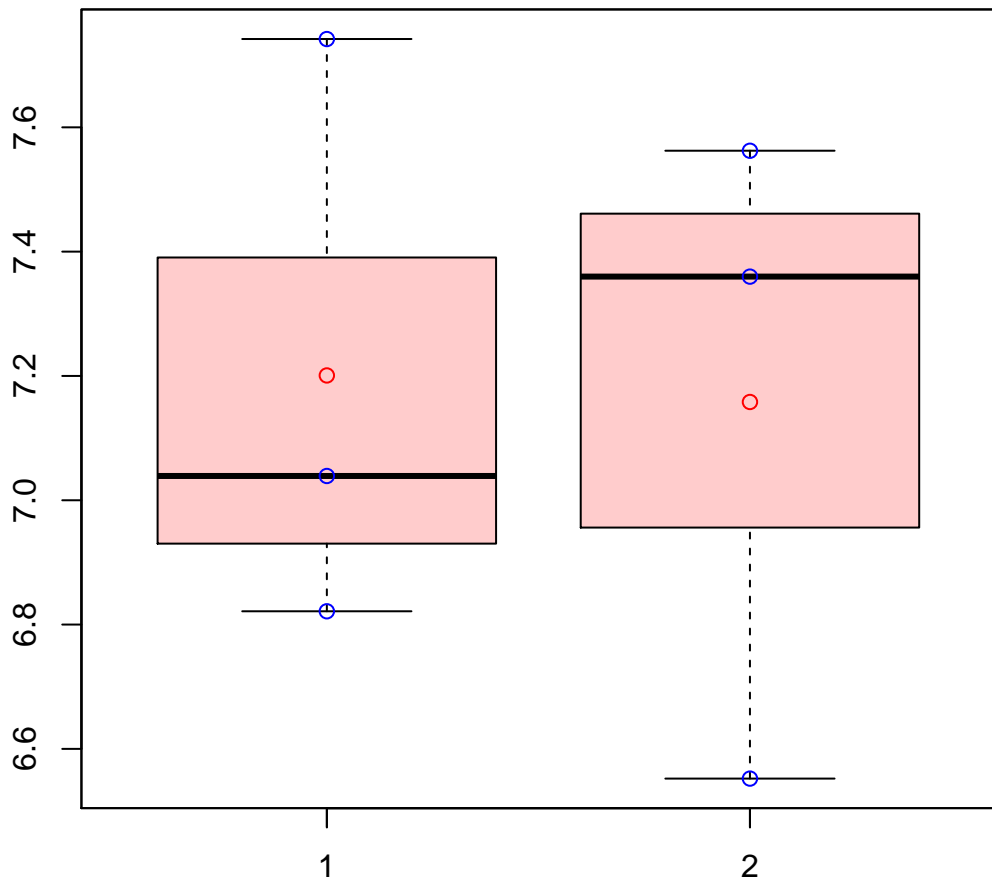

t-Test: p-value = 0.92

# CL2412Contig2|CL2412Contig2

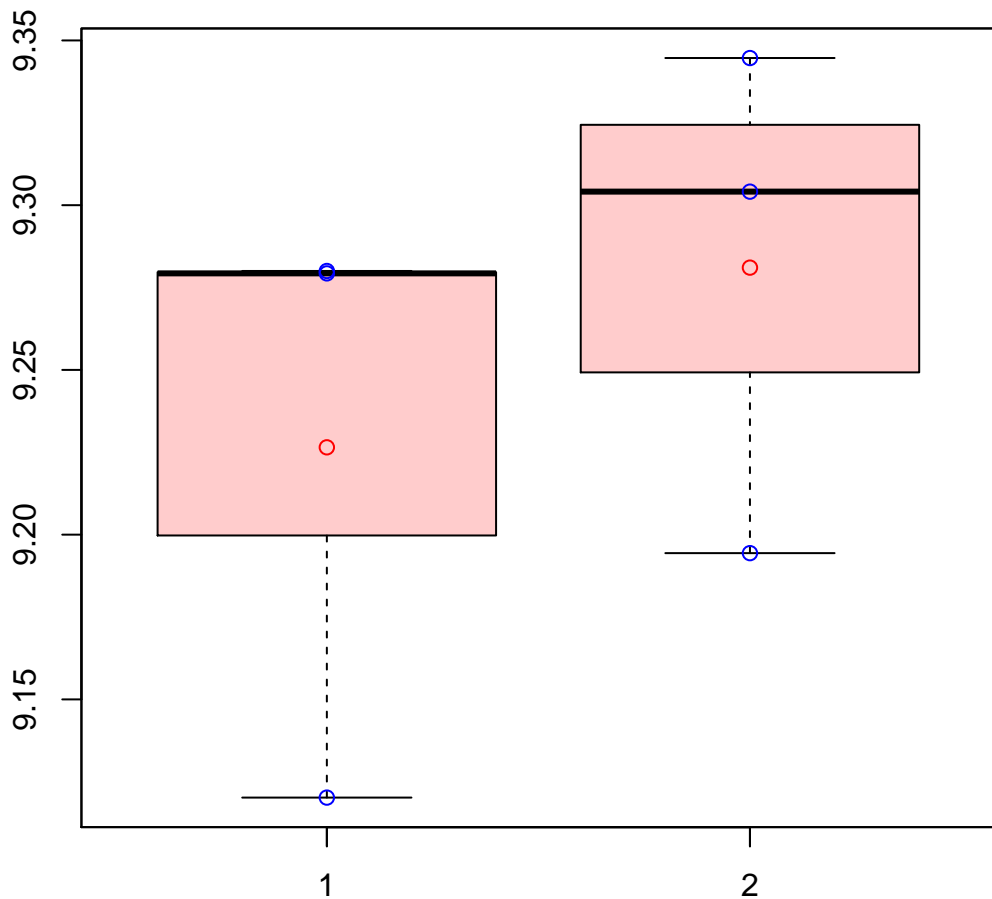

t-Test: p-value = 0.48



# CL2414Contig2|CL2414Contig2

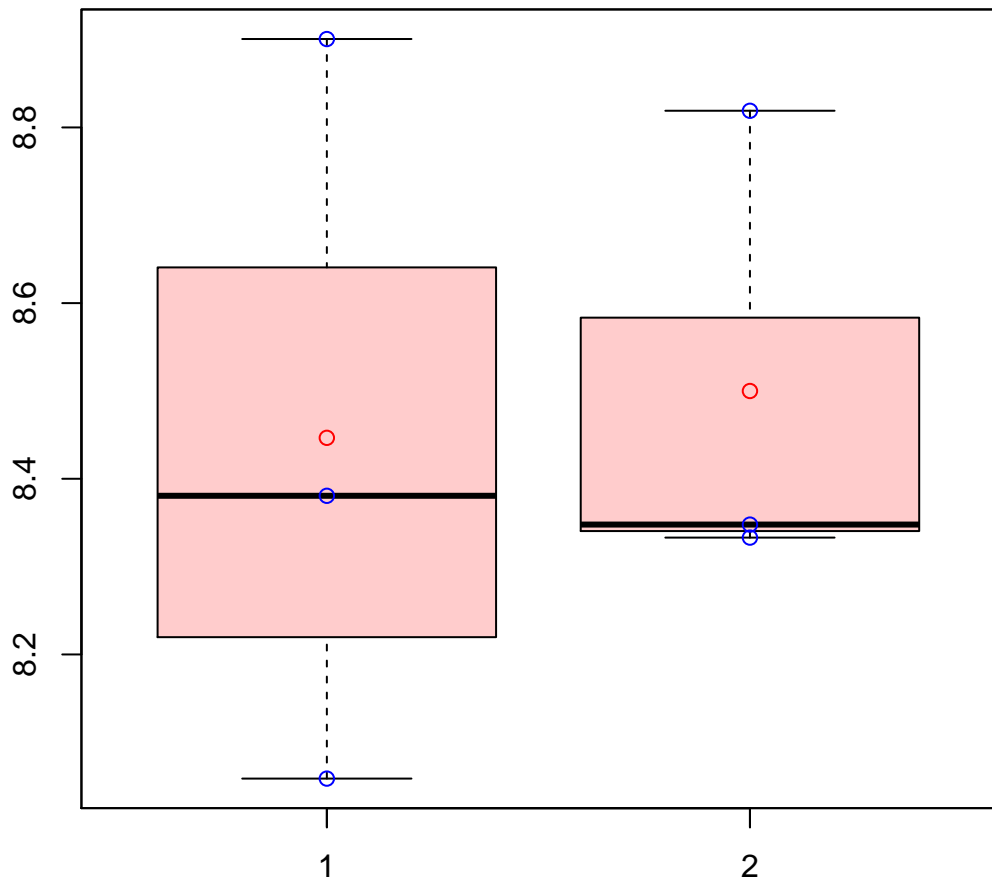

t-Test: p-value = 0.87

# CL2414Contig3|CL2414Contig3

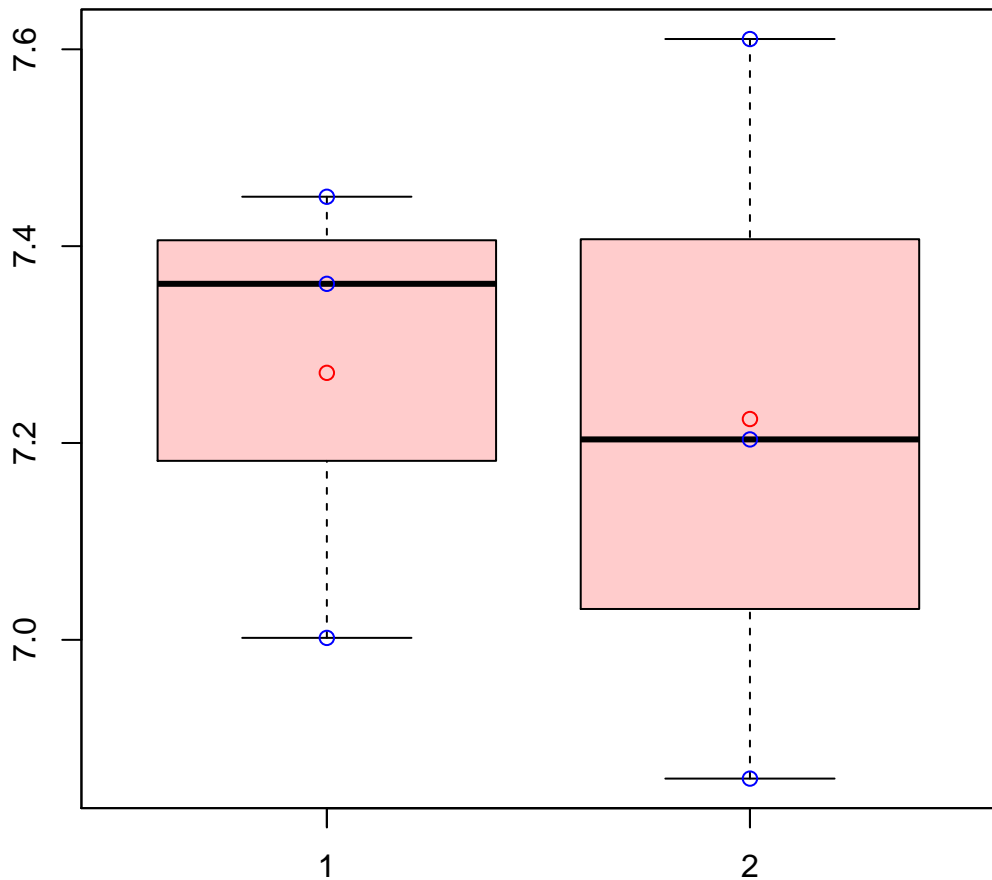

t-Test: p-value = 0.87

# CL2415Contig1|CL2415Contig1

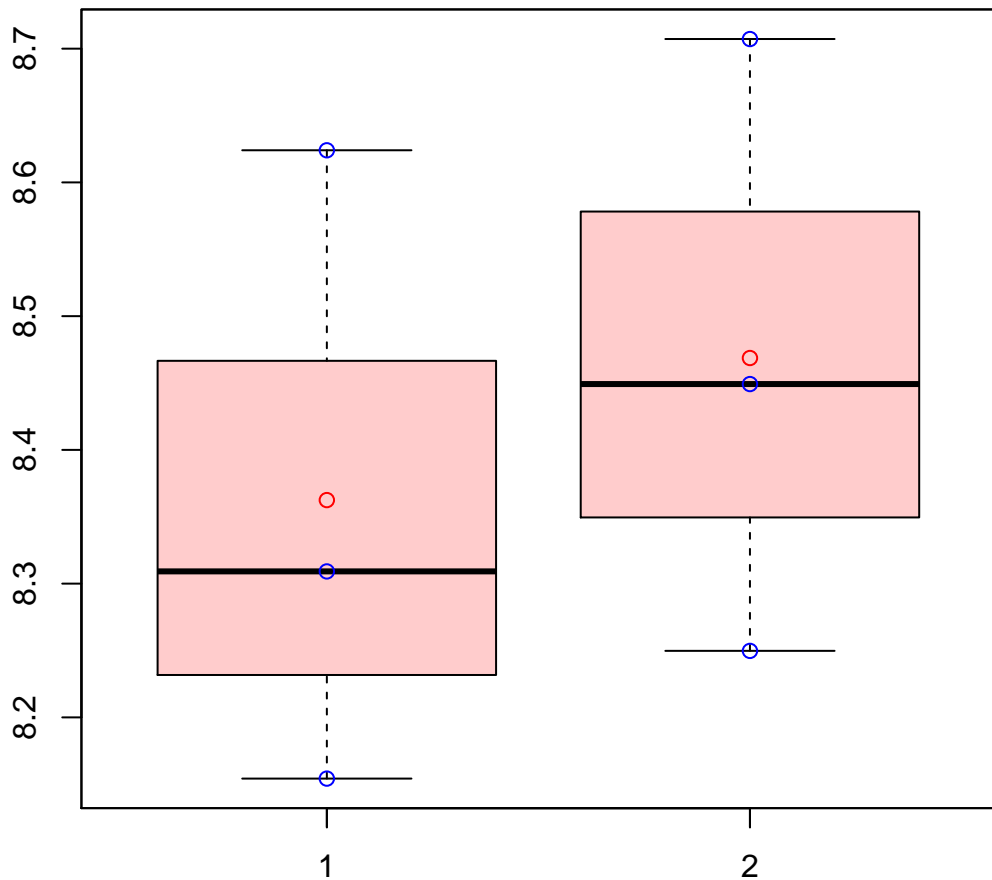

t-Test: p-value = 0.61

# CL2416Contig1|CL2416Contig1

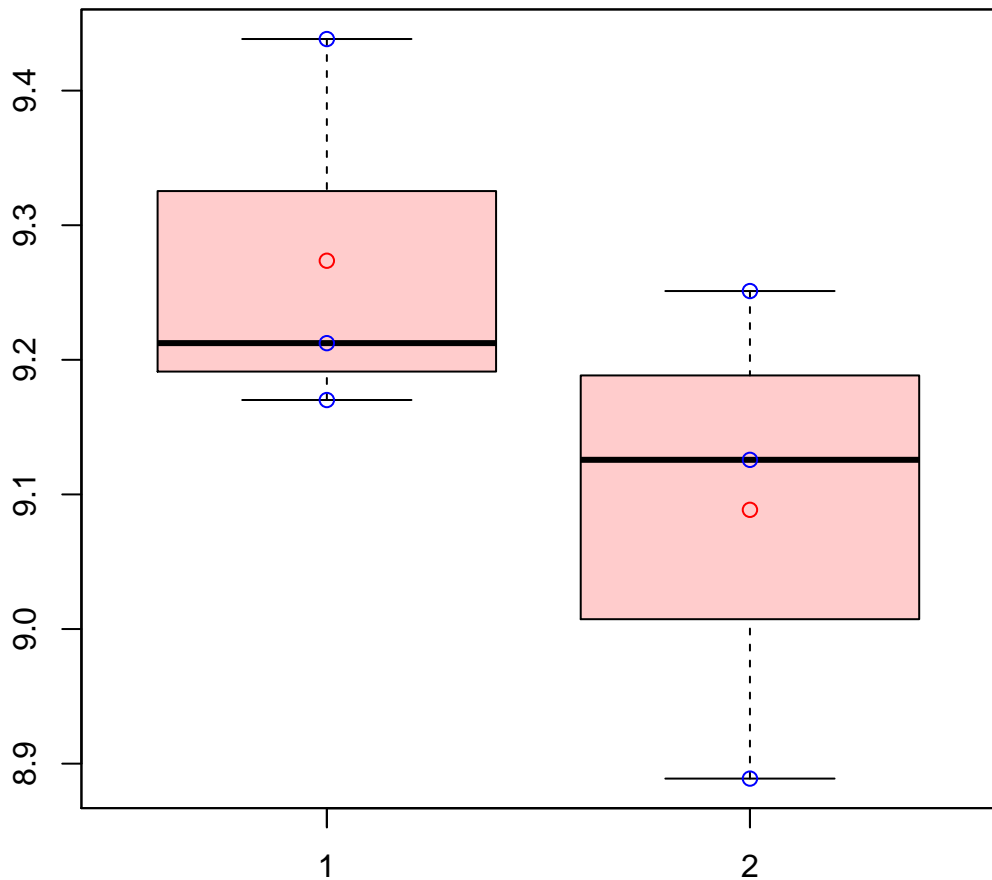

t-Test: p-value = 0.25

# CL2416Contig2|CL2416Contig2

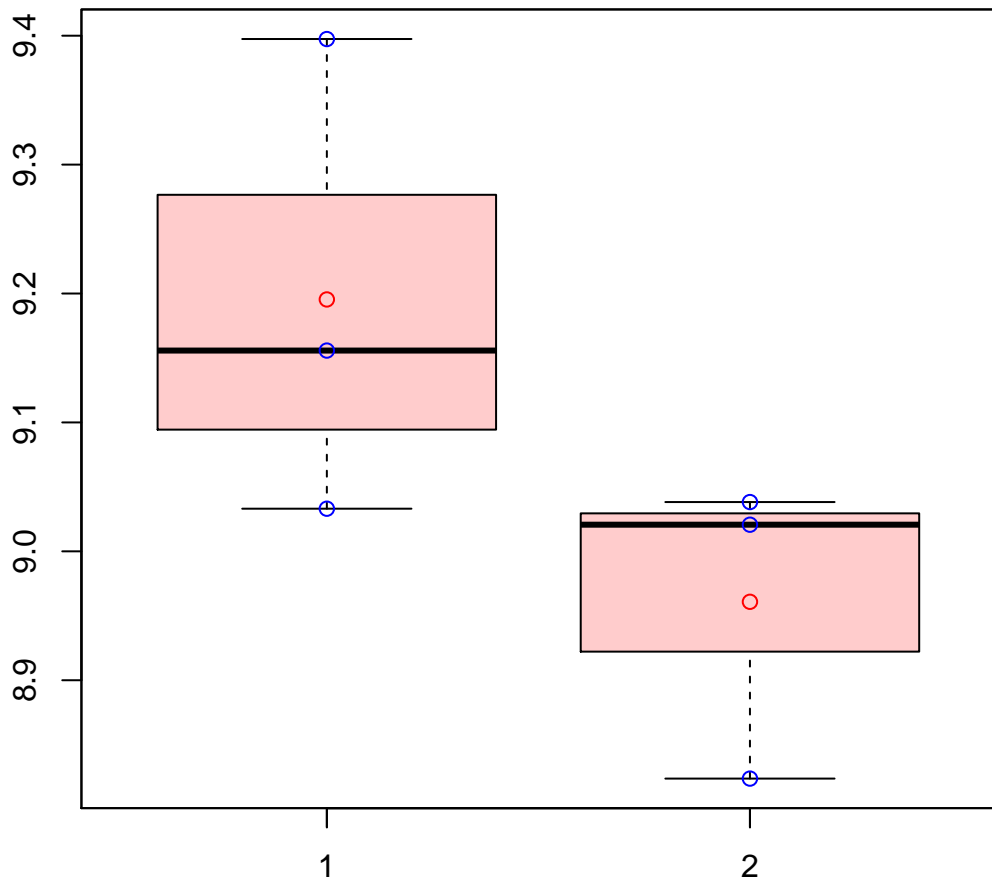

t-Test: p-value = 0.15

# CL2417Contig1|CL2417Contig1

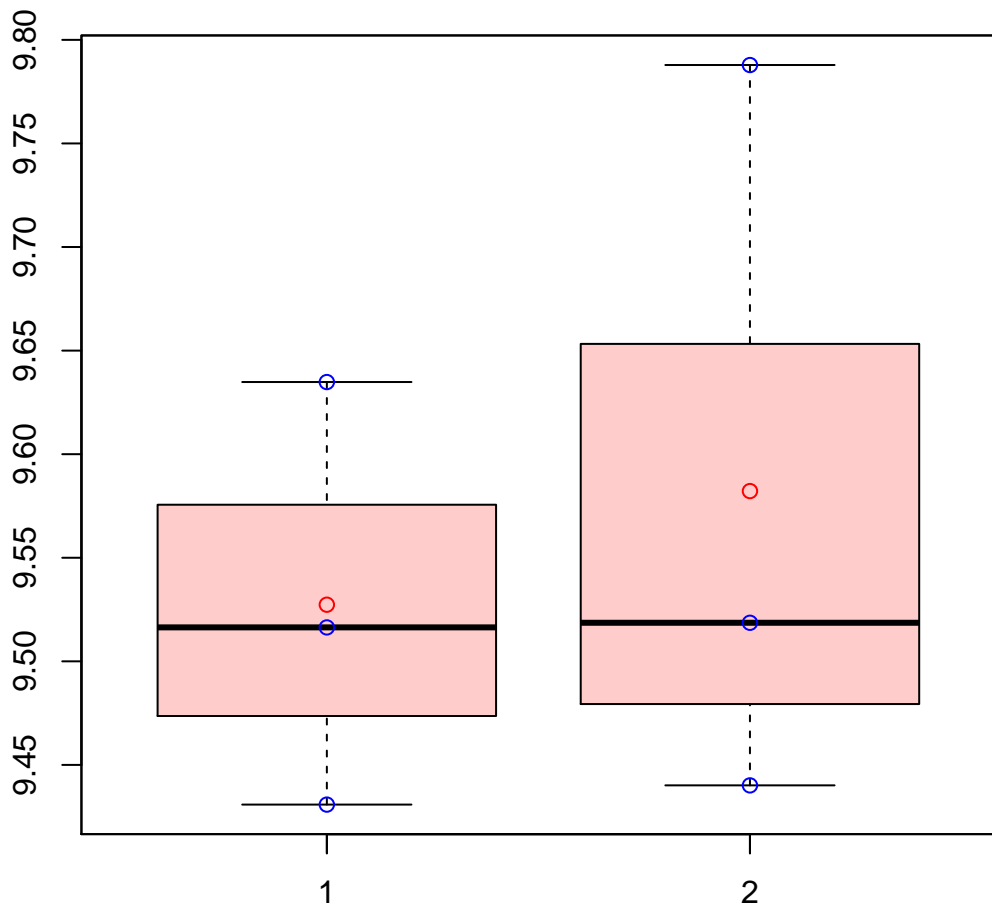

t-Test: p-value = 0.68

# CL2417Contig3|CL2417Contig3



t-Test: p-value = 0.68

# CL2419Contig3|CL2419Contig3

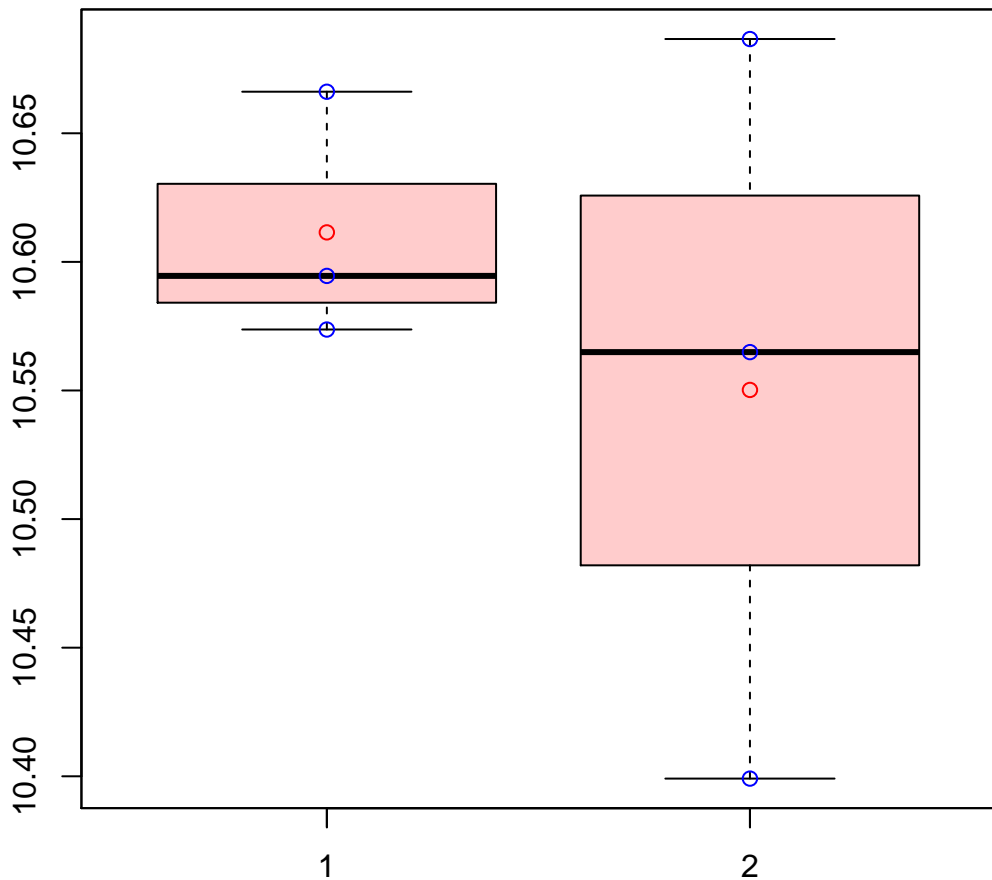

t-Test: p-value = 0.55



# CL2419Contig5|CL2419Contig5

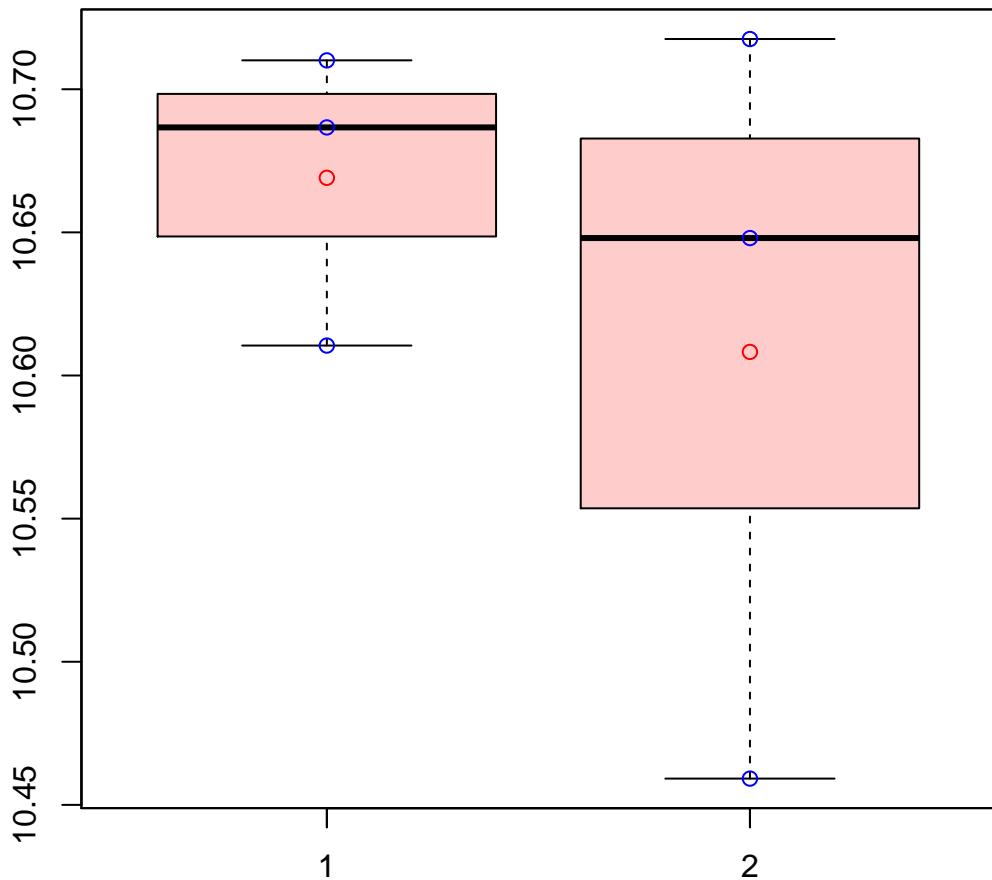

t-Test: p-value = 0.52

# CL2420Contig3|CL2420Contig3

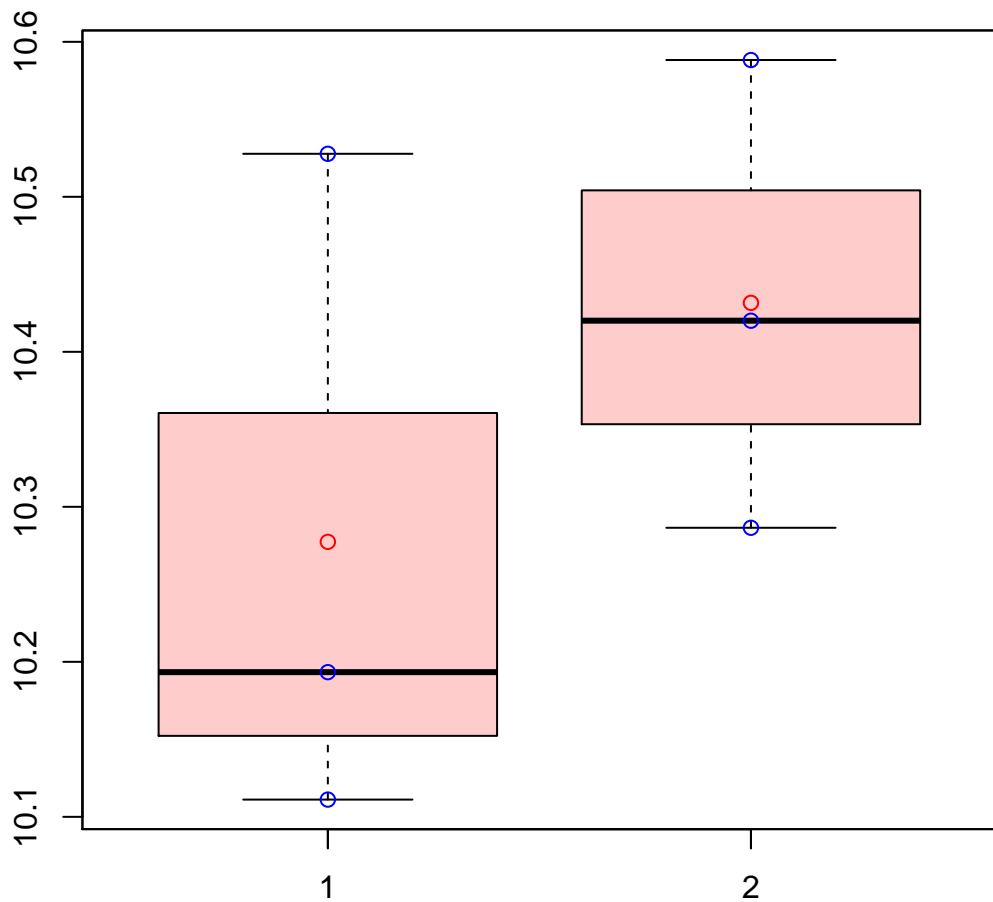

t-Test: p-value = 0.38

# CL2424Contig1|CL2424Contig1

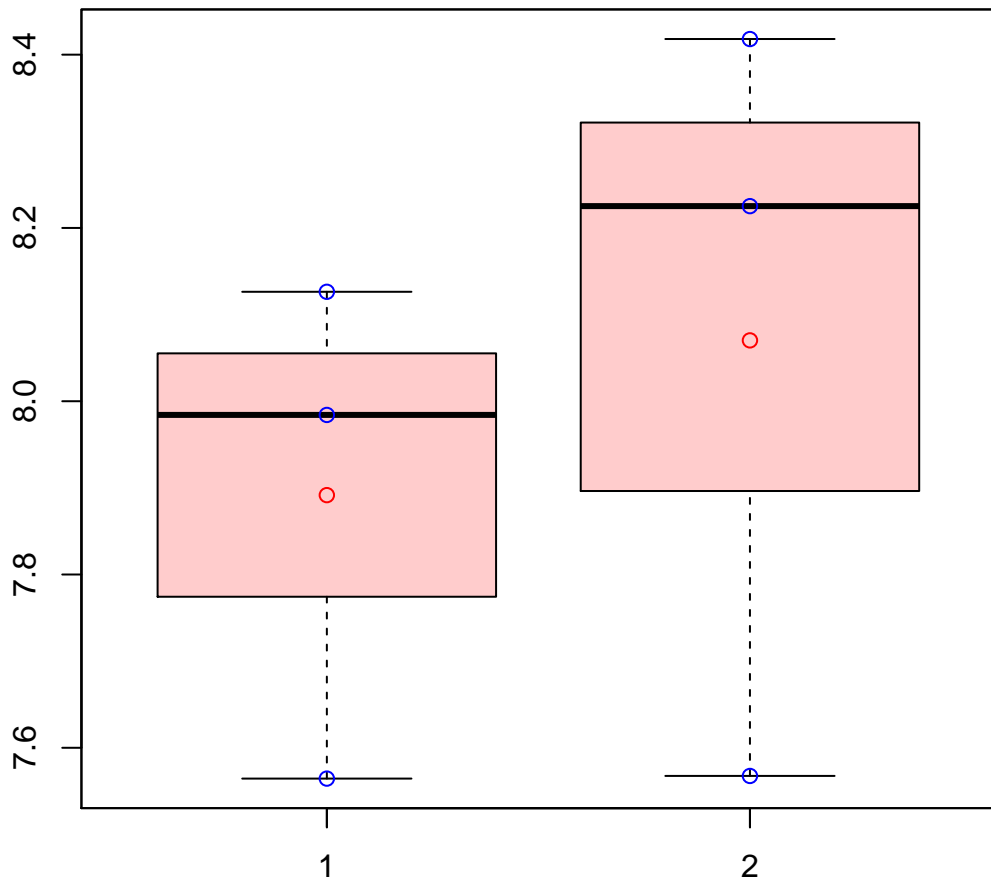

t-Test: p-value = 0.6

# CL2424Contig2|CL2424Contig2

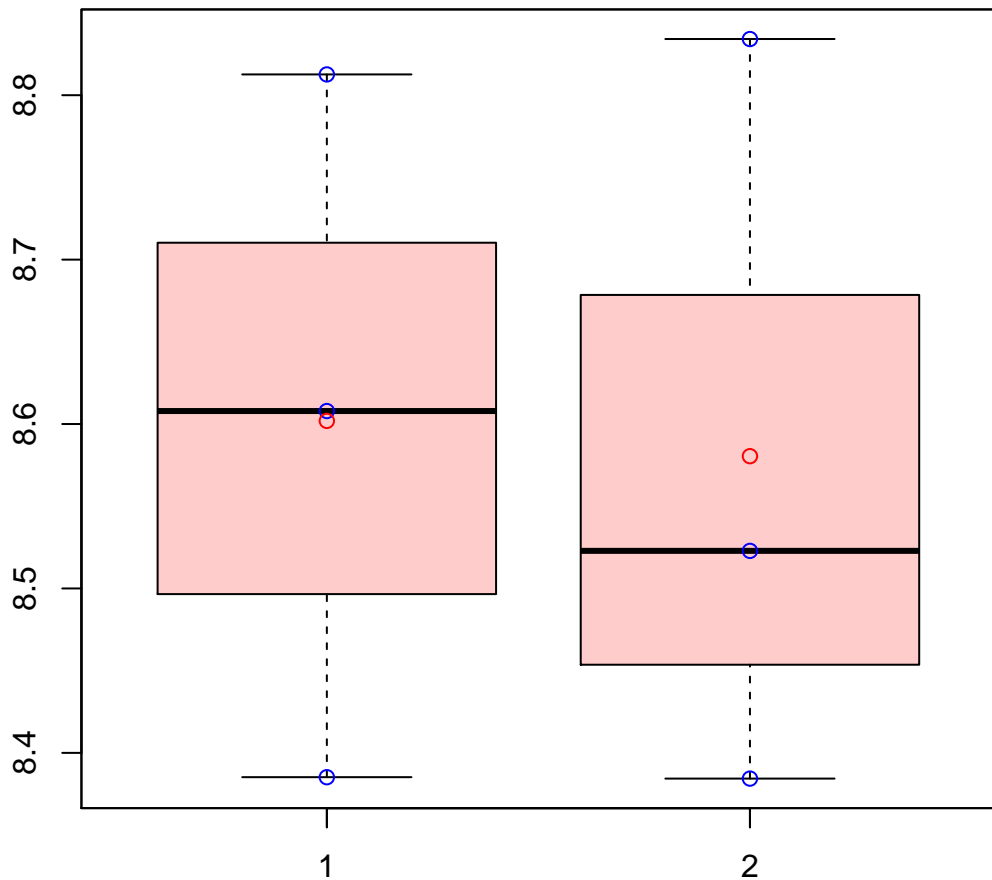

t-Test: p-value = 0.91

# CL2424Contig3|CL2424Contig3



t-Test: p-value = 0.6

# CL2425Contig4|CL2425Contig4

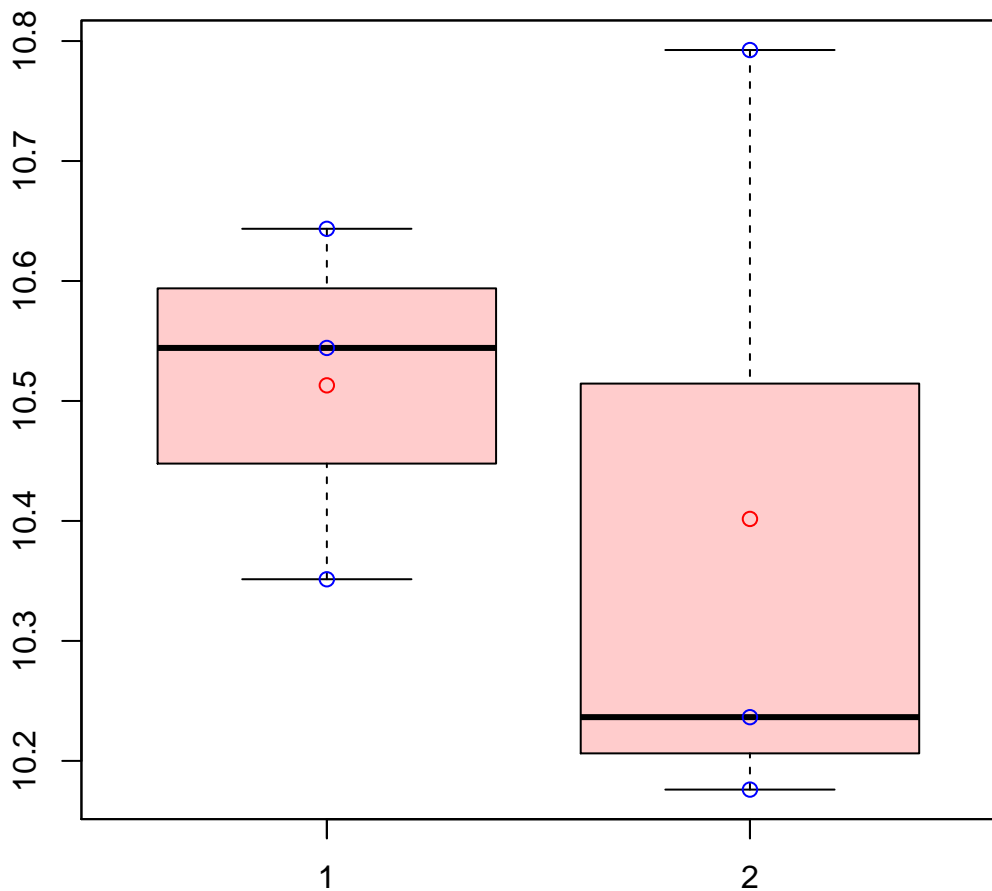

t-Test: p-value = 0.64

# CL2428Contig1|CL2428Contig1

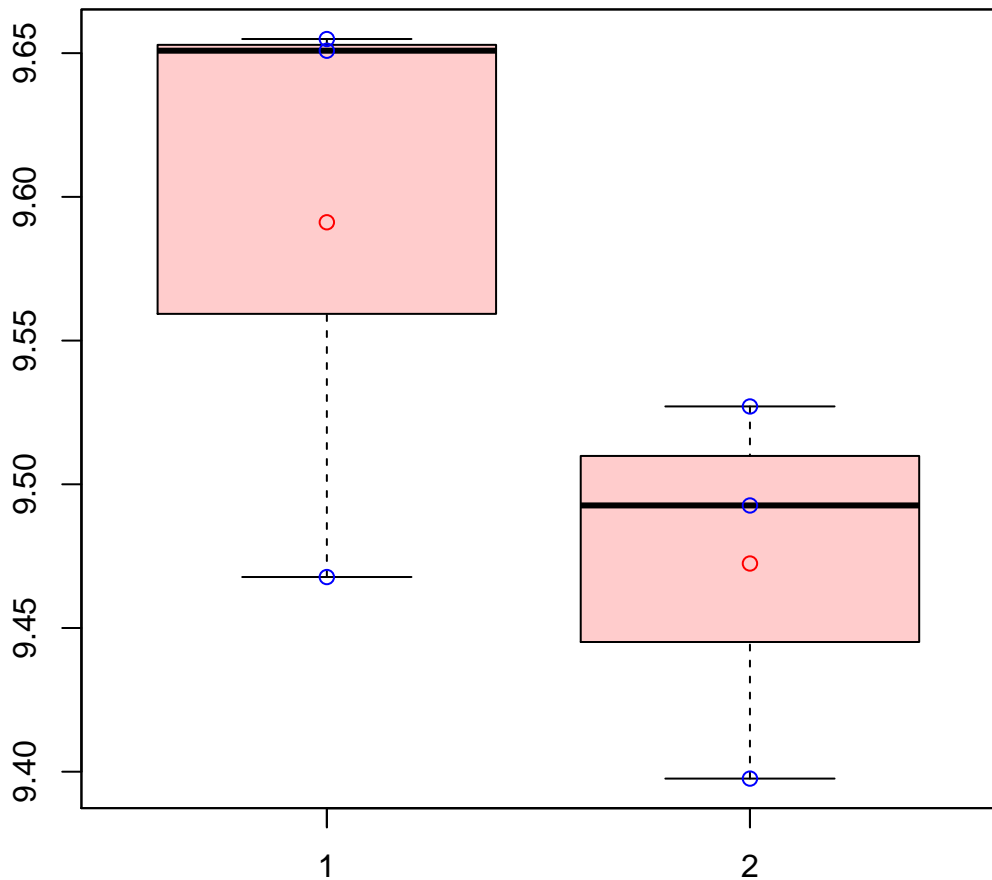

t-Test: p-value = 0.19

# CL2428Contig3|CL2428Contig3

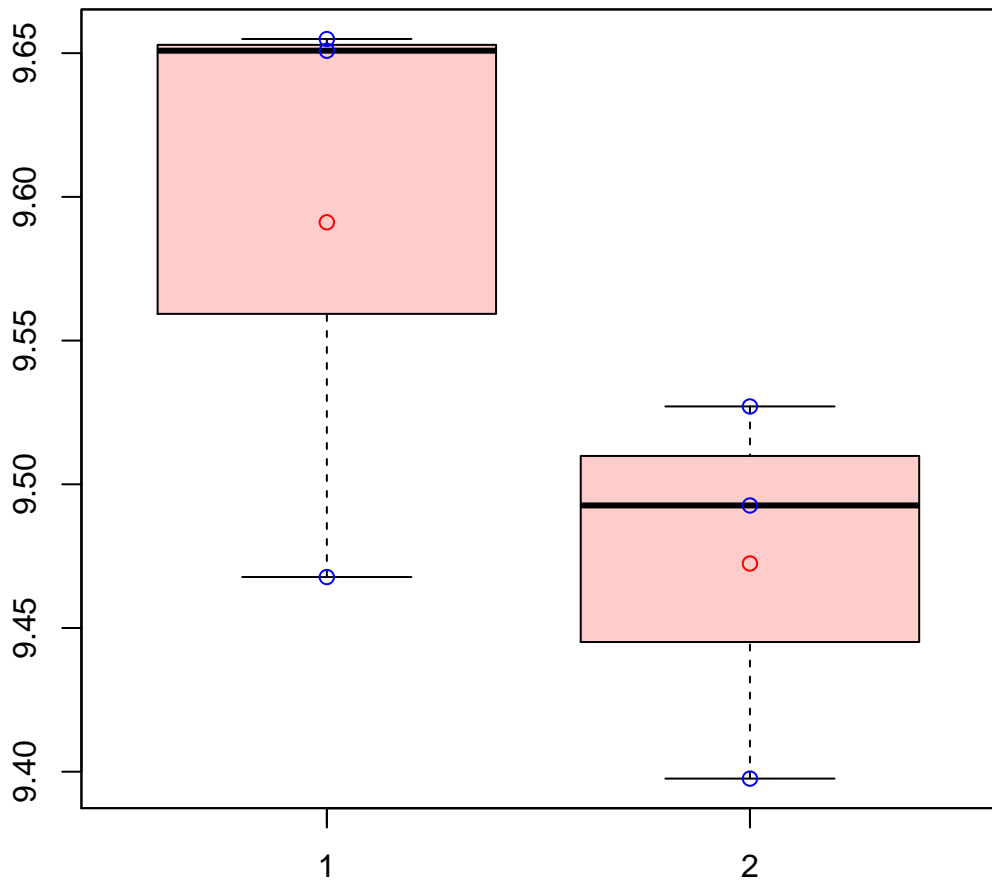

t-Test: p-value = 0.19



# CL242Contig13|CL242Contig13

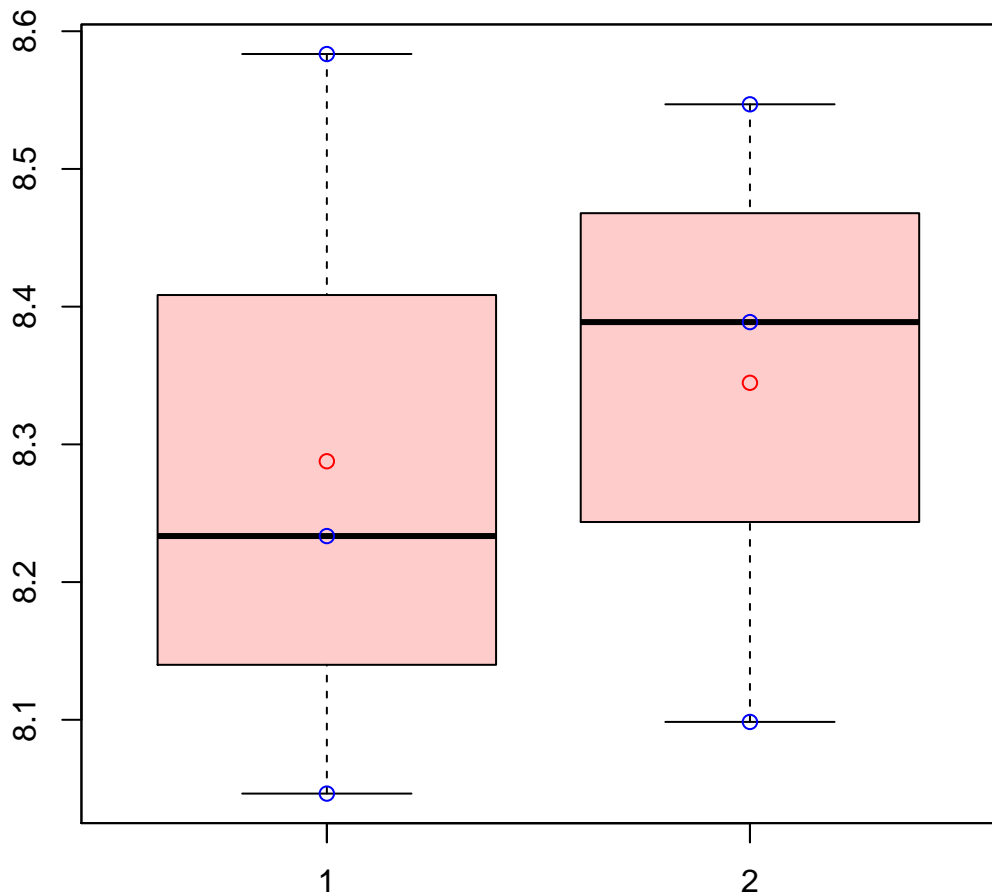

t-Test: p-value = 0.8

# CL243Contig5|CL243Contig5

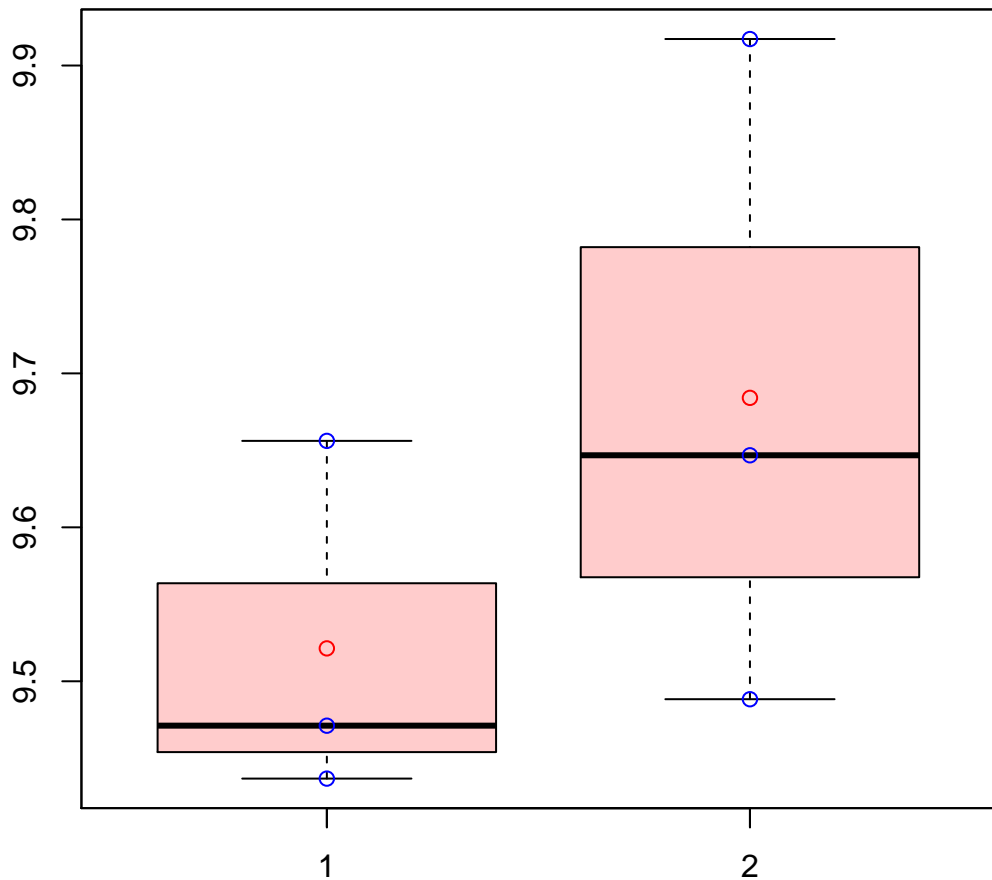

t-Test: p-value = 0.33

# CL2442Contig13|CL2442Contig13

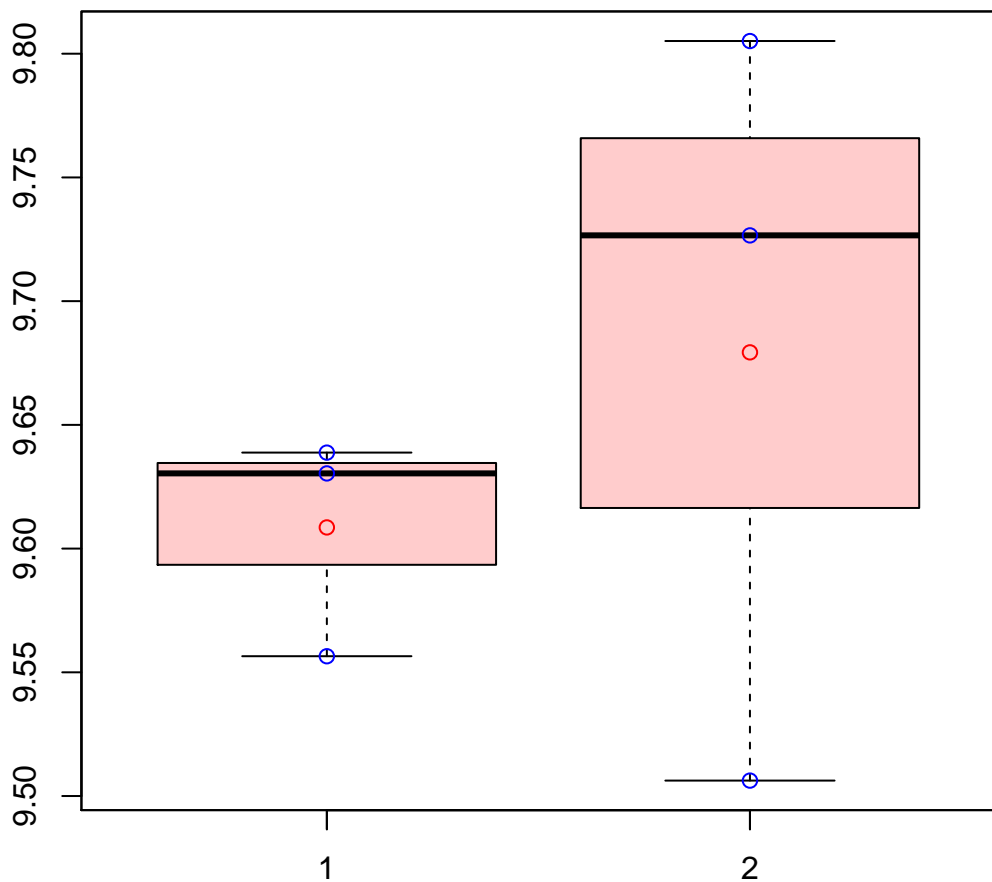

t-Test: p-value = 0.52

# CL2442Contig3|CL2442Contig3

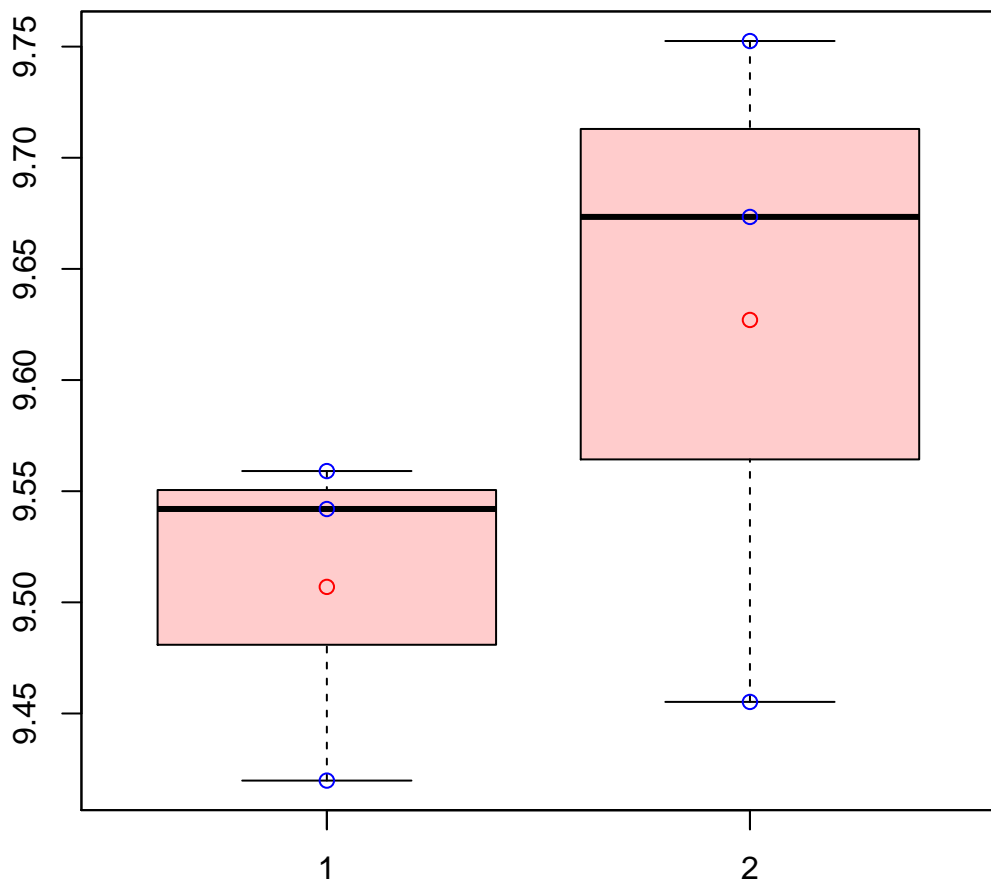

t-Test: p-value = 0.31

# CL2442Contig6|CL2442Contig6

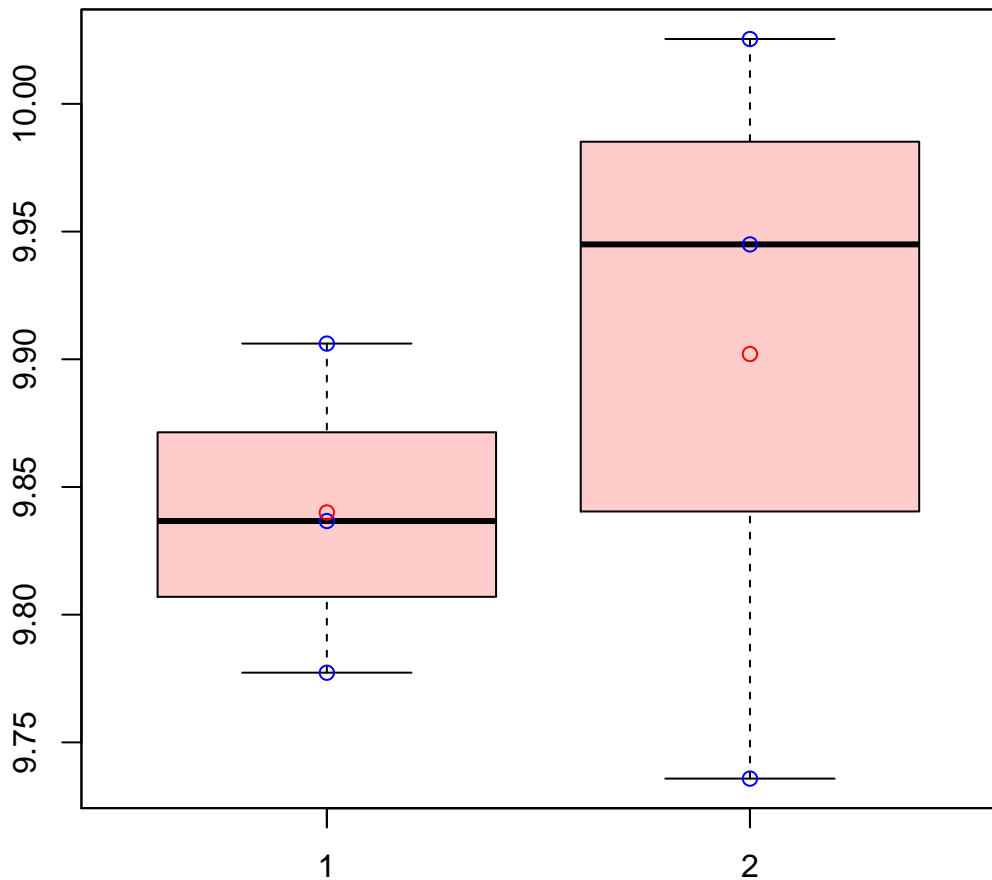

t-Test: p-value = 0.56

# CL2449Contig1|CL2449Contig1

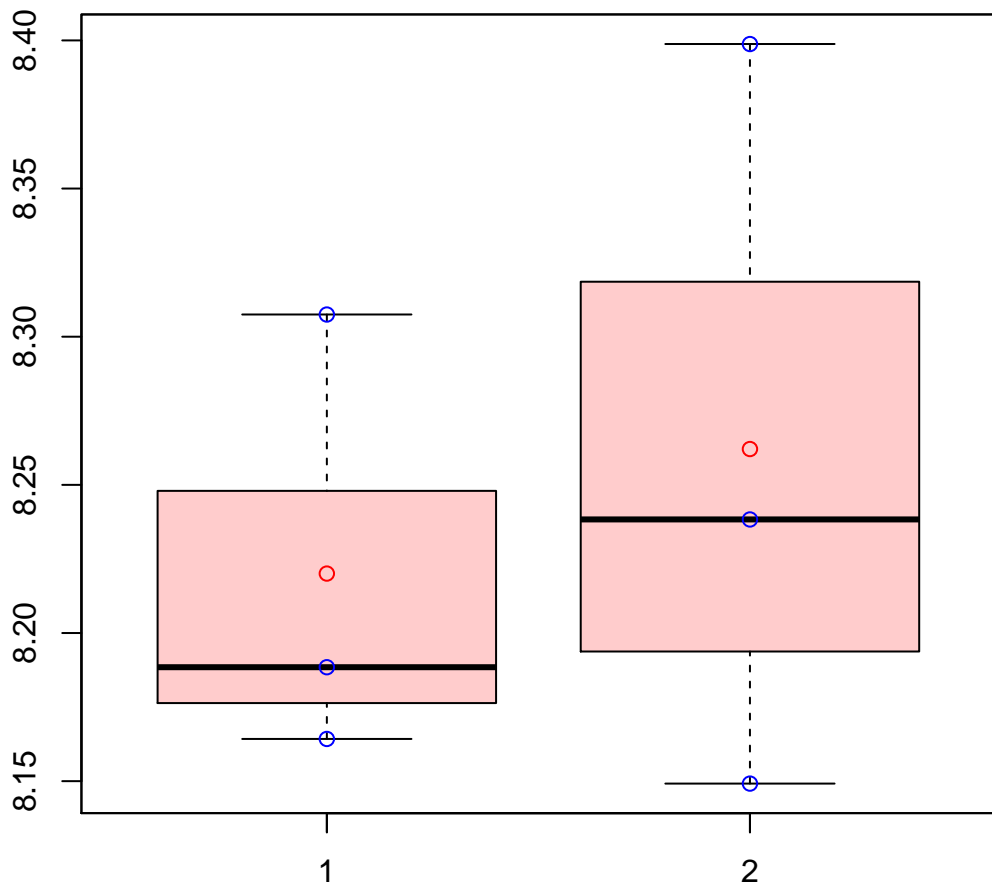

t-Test: p-value = 0.65

# CL2449Contig2|CL2449Contig2



t-Test: p-value = 0.65

# CL2449Contig6|CL2449Contig6



t-Test: p-value = 0.65



# CL2449Contig8|CL2449Contig8



t-Test: p-value = 0.65

# CL244Contig17|CL244Contig17

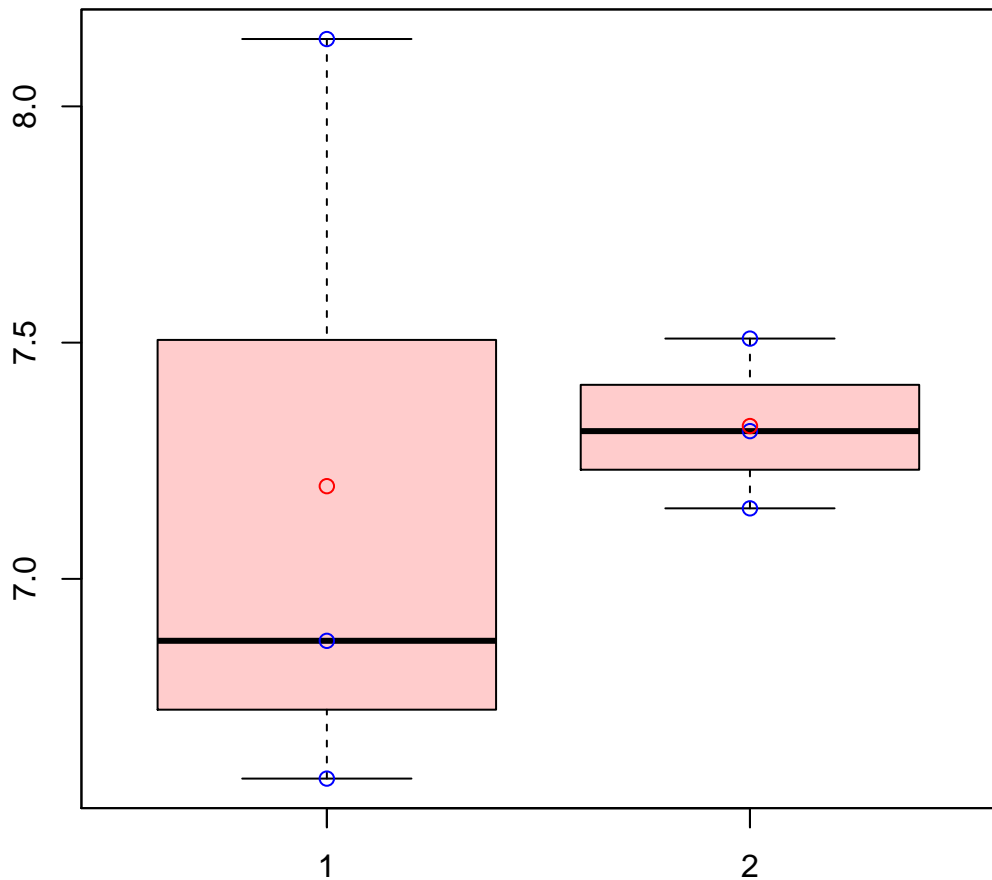

t-Test: p-value = 0.82

# CL244Contig9|CL244Contig9

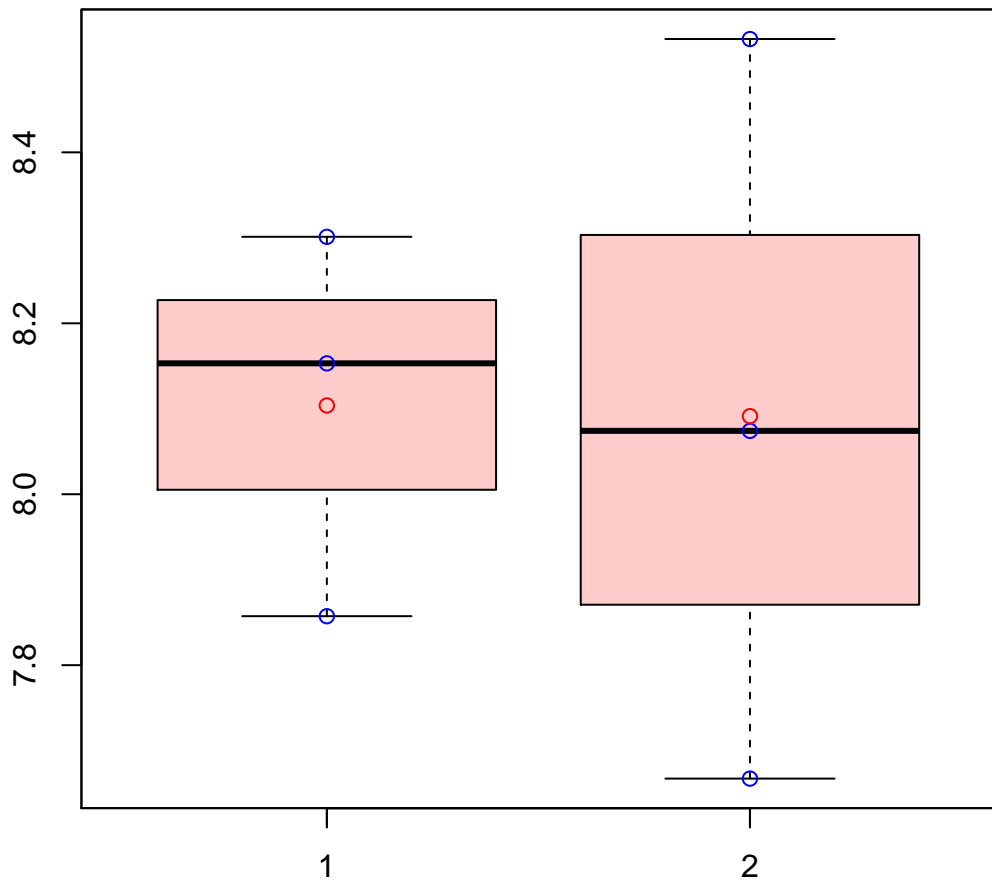

t-Test: p-value = 0.97

# CL2459Contig3|CL2459Contig3

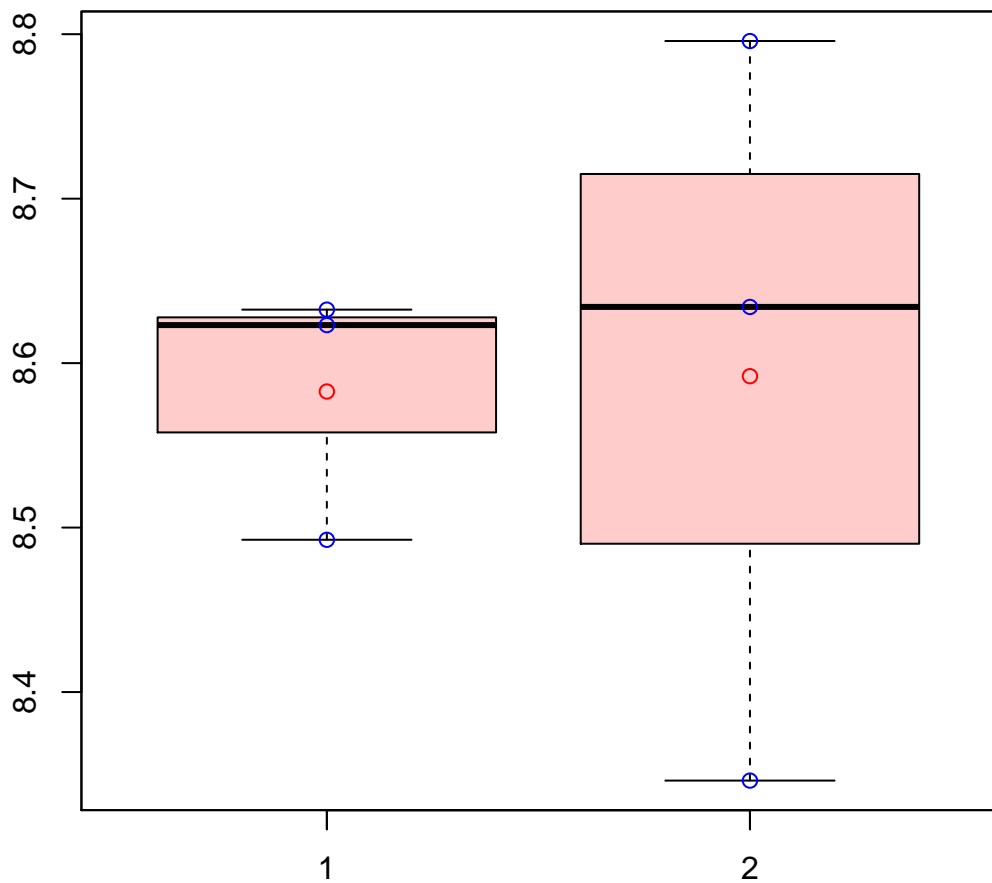

t-Test: p-value = 0.95

# CL245Contig13|CL245Contig13

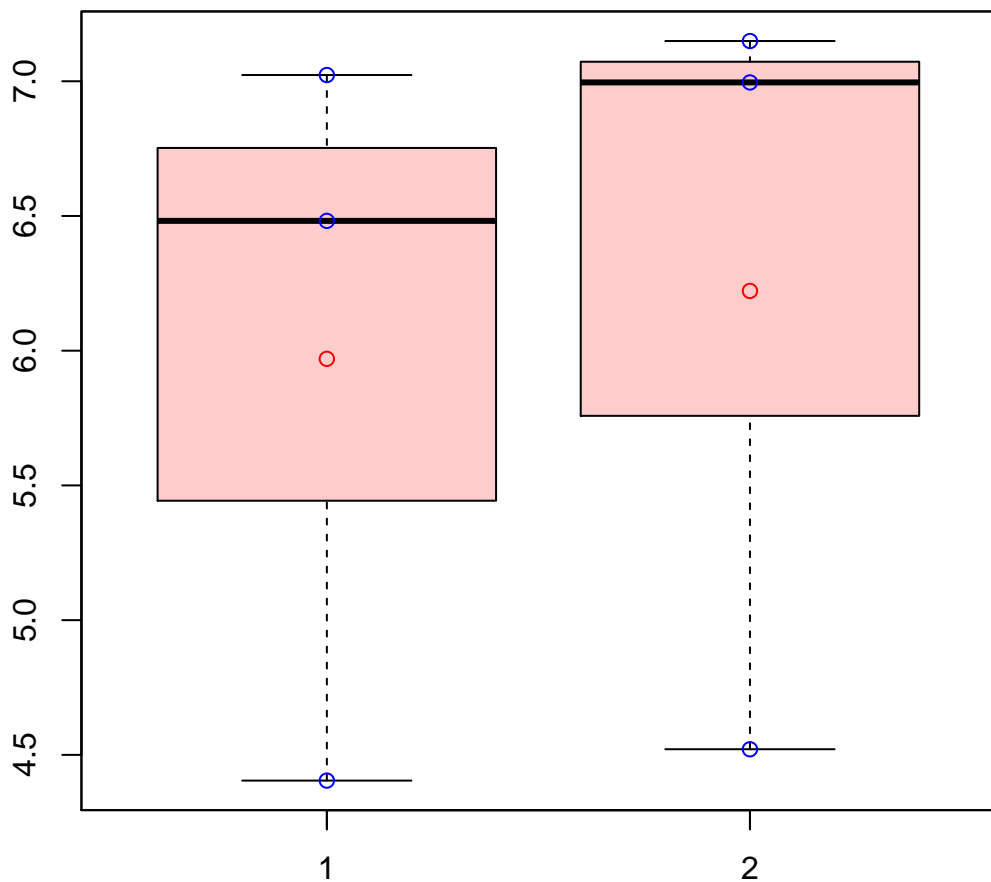

t-Test: p-value = 0.84

# CL2463Contig4|CL2463Contig4

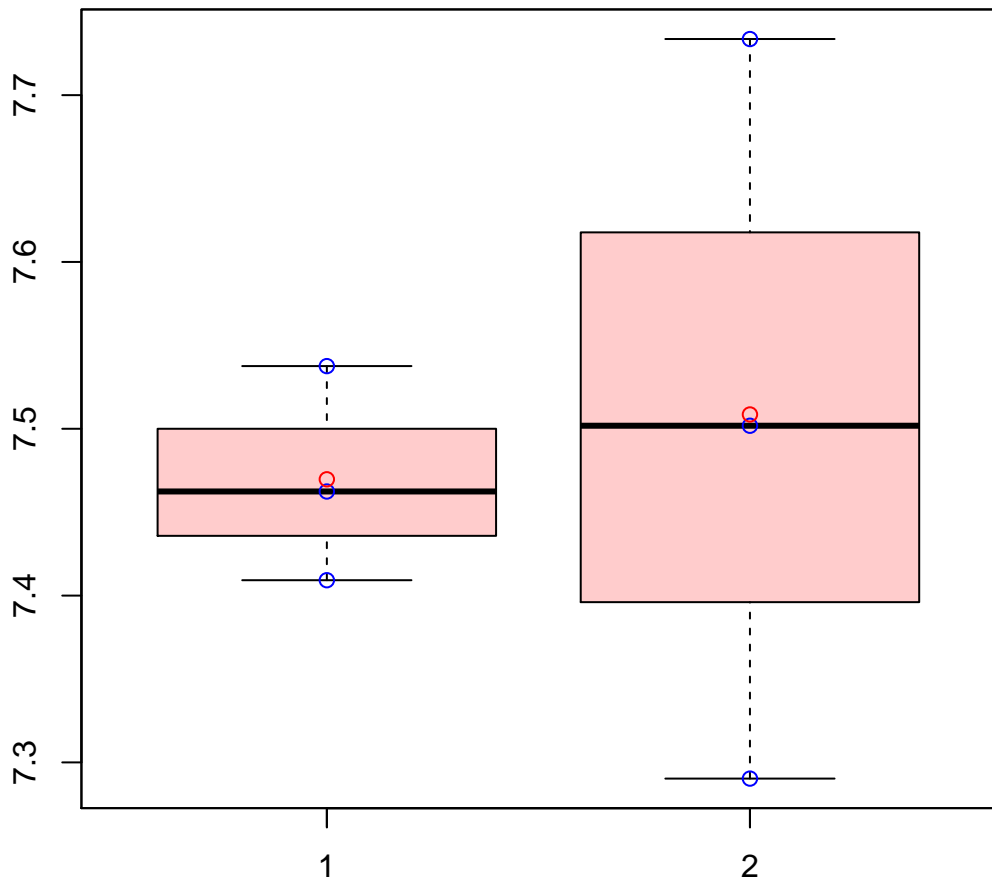

t-Test: p-value = 0.79

# CL2463Contig5|CL2463Contig5

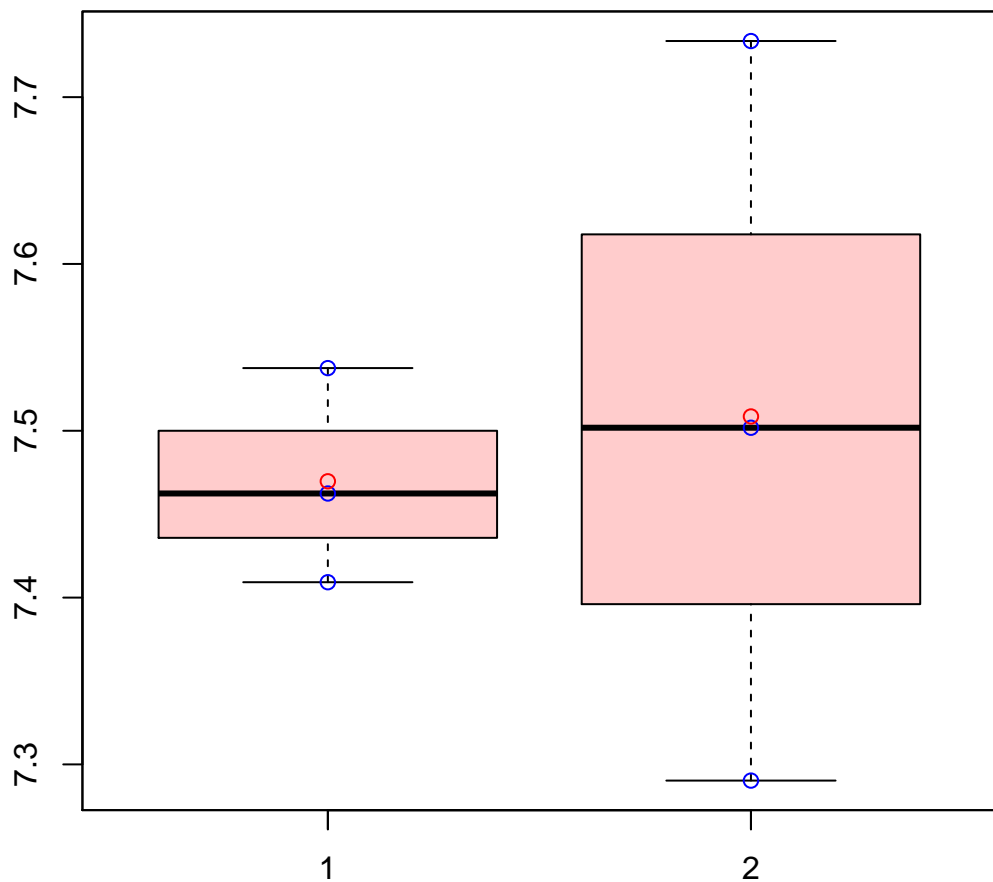

t-Test: p-value = 0.79

# CL2463Contig8|CL2463Contig8

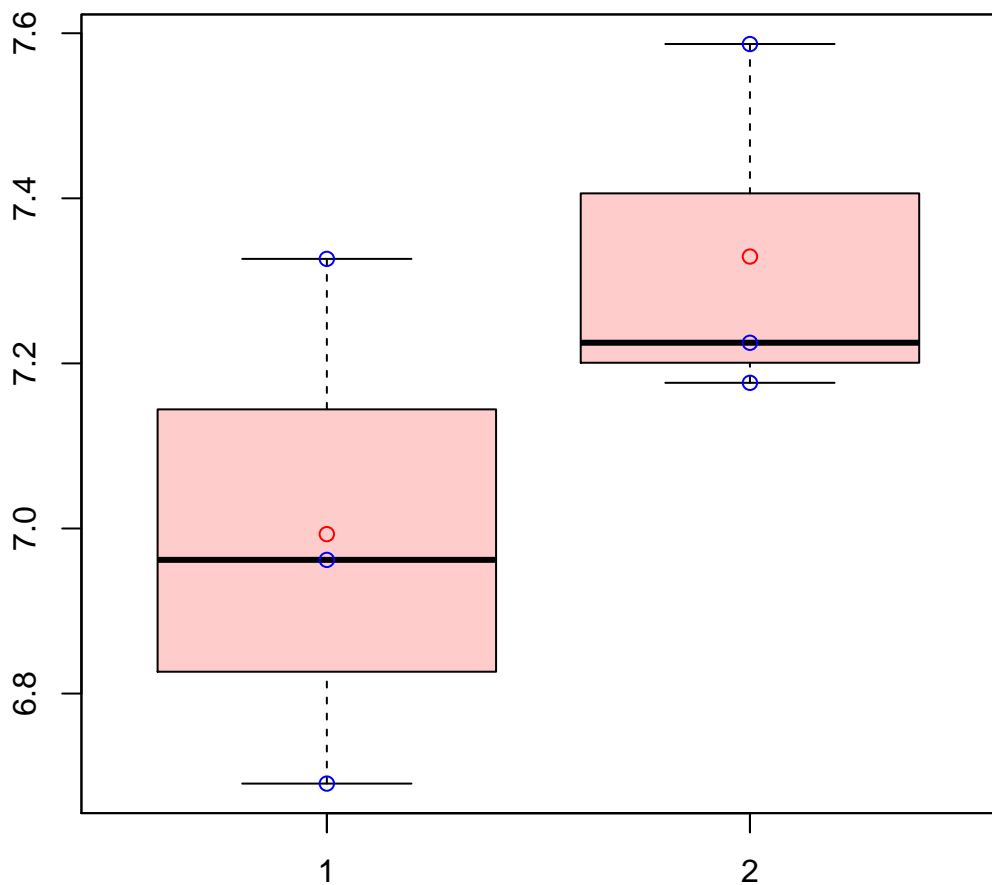

t-Test: p-value = 0.22



# CL24657Contig1|CL24657Contig1

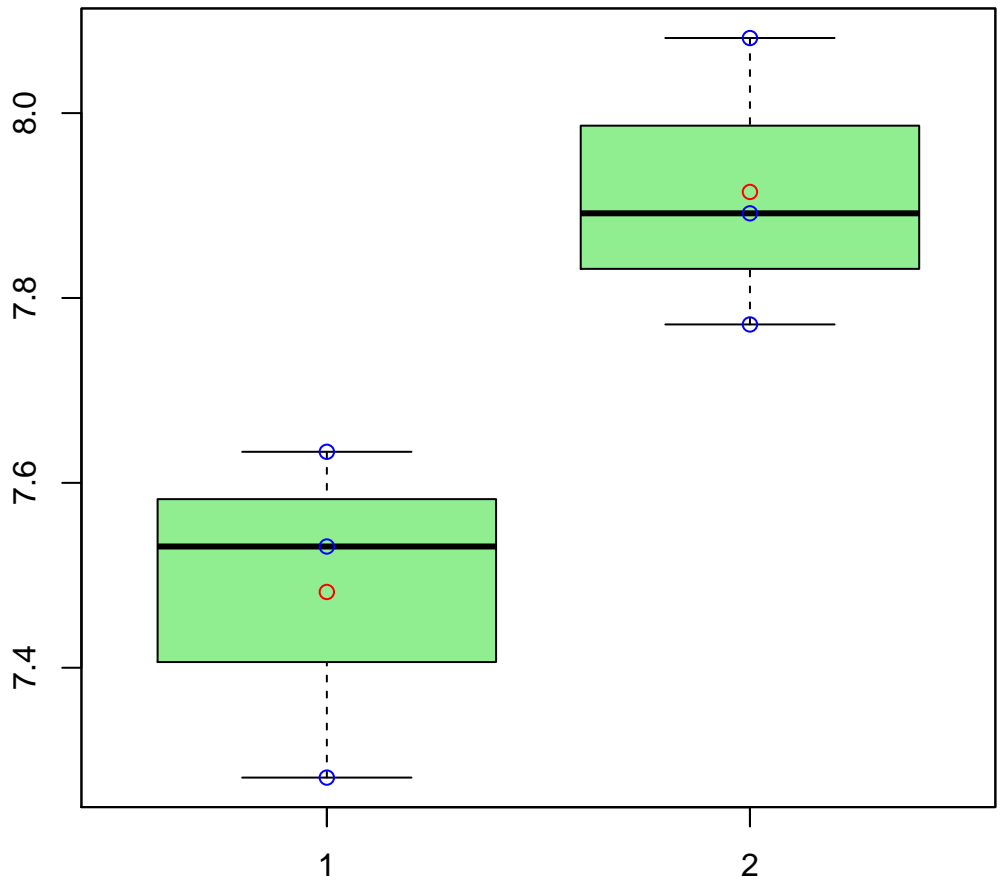

t-Test: p-value = 0.04

# CL2465Contig1|CL2465Contig1

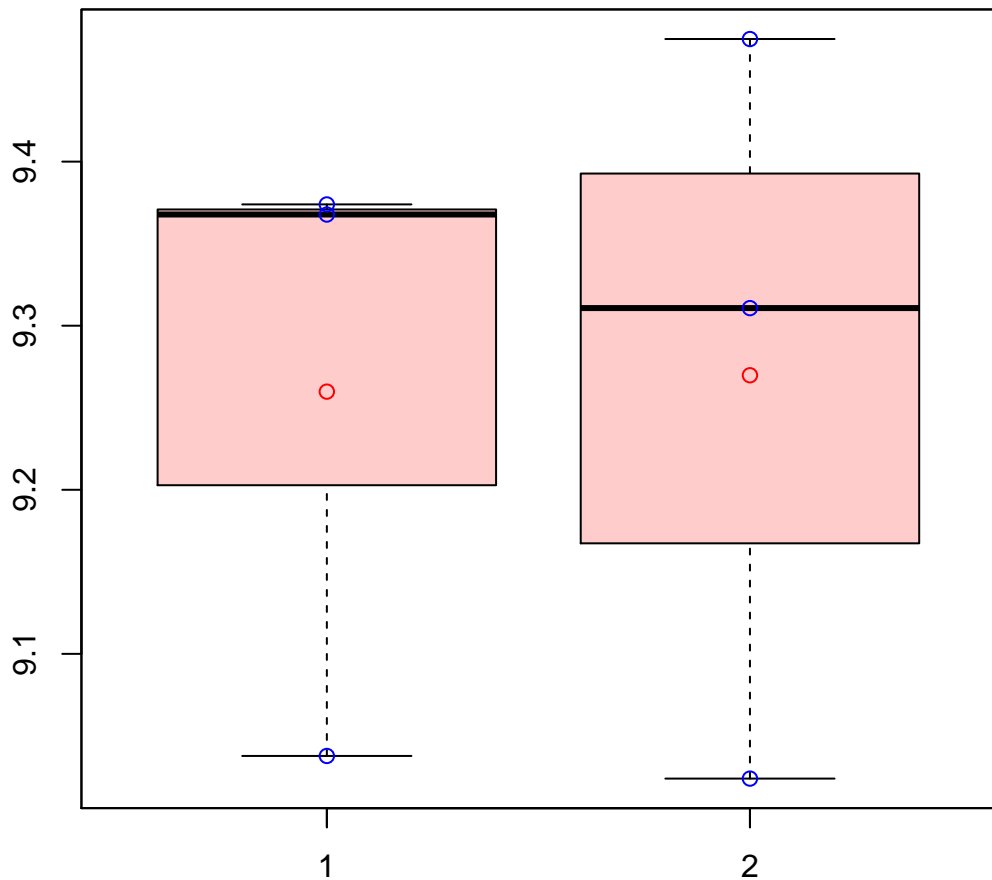

t-Test: p-value = 0.96

# CL2467Contig1|CL2467Contig1

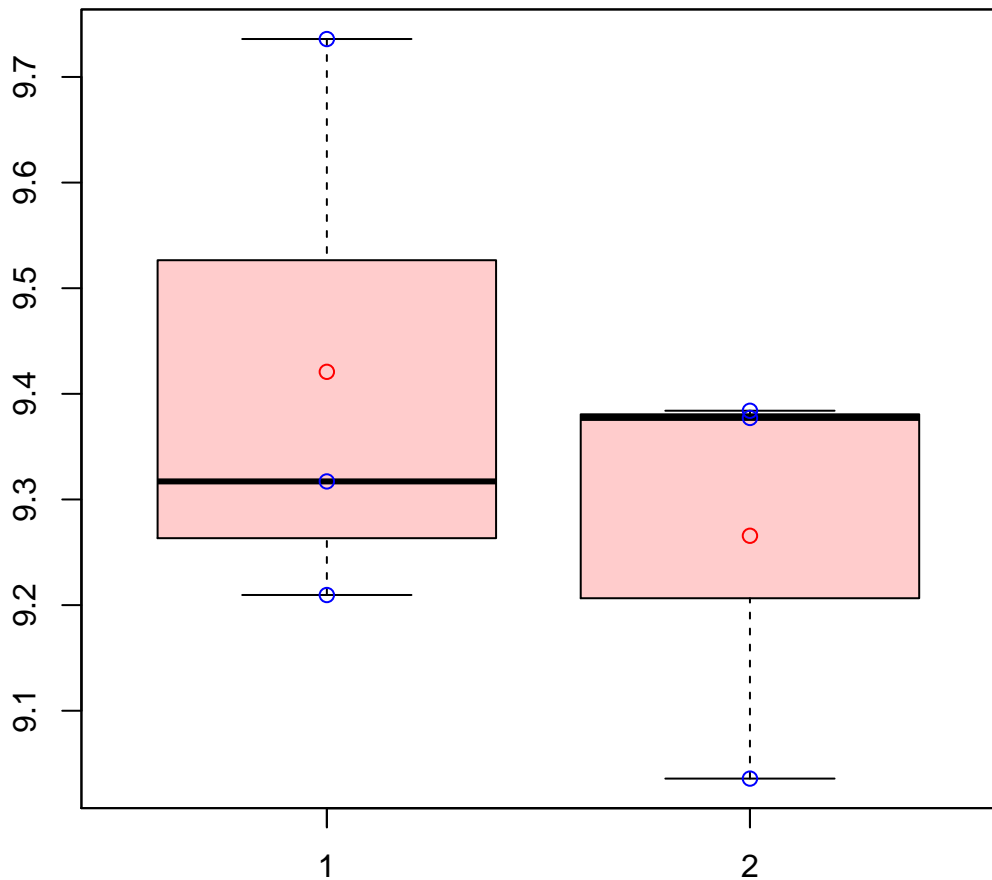

t-Test: p-value = 0.48

# CL2470Contig1|CL2470Contig1

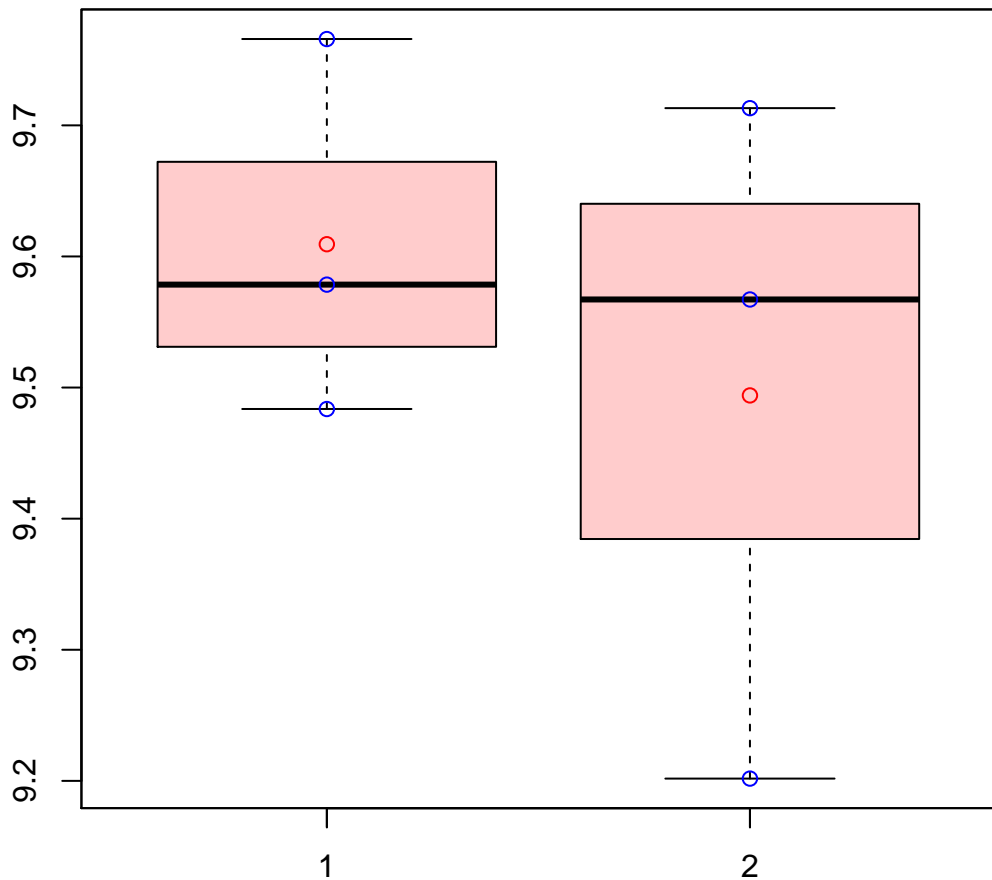

t-Test: p-value = 0.55

# CL2470Contig2|CL2470Contig2

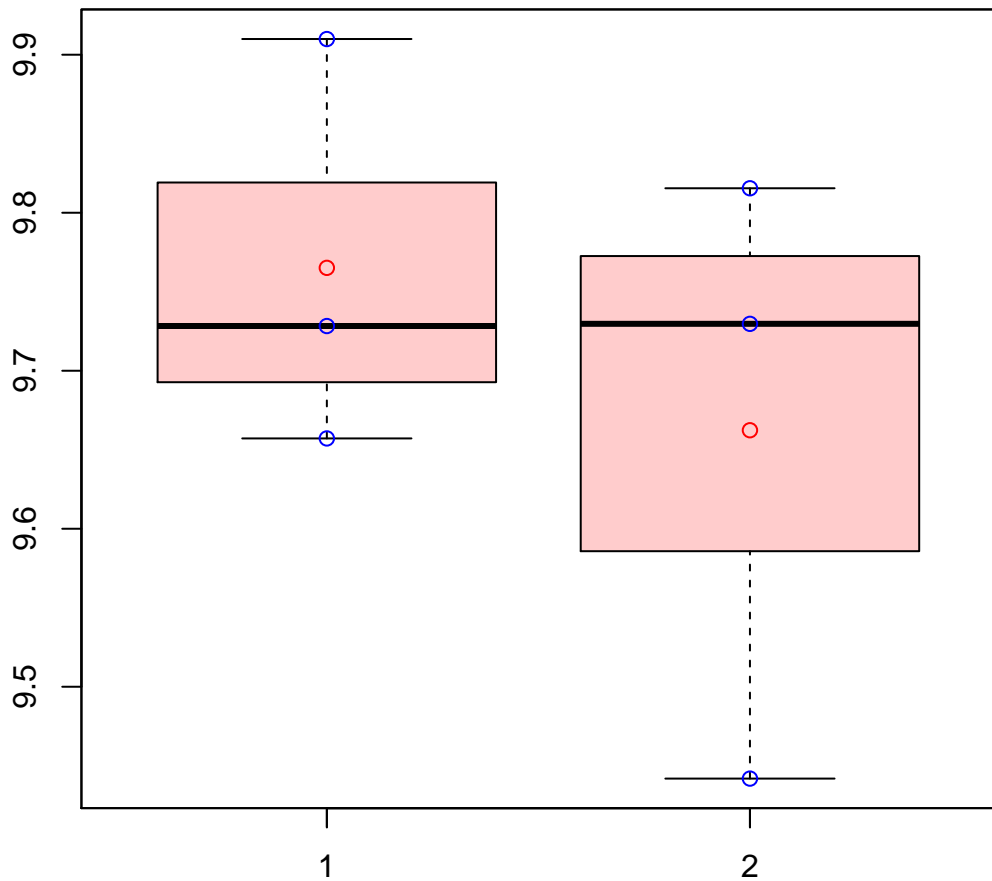

t-Test: p-value = 0.5

# CL2472Contig4|CL2472Contig4

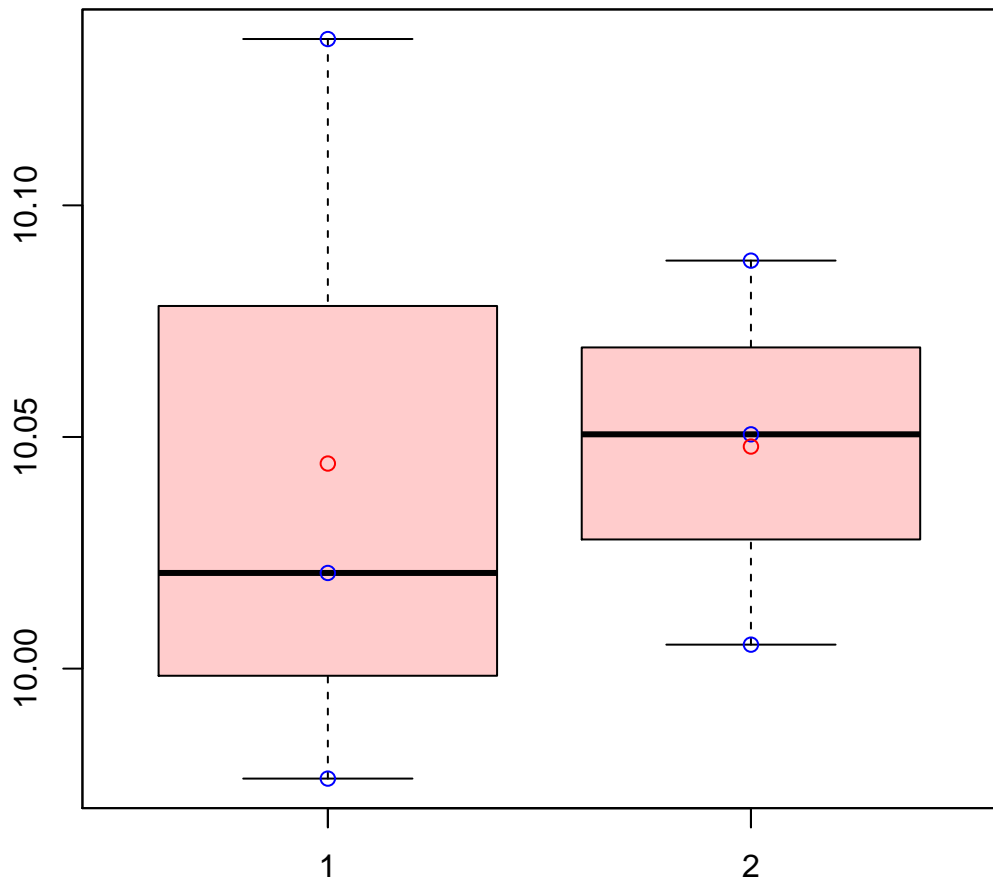

t-Test: p-value = 0.95

# CL2473Contig3|CL2473Contig3

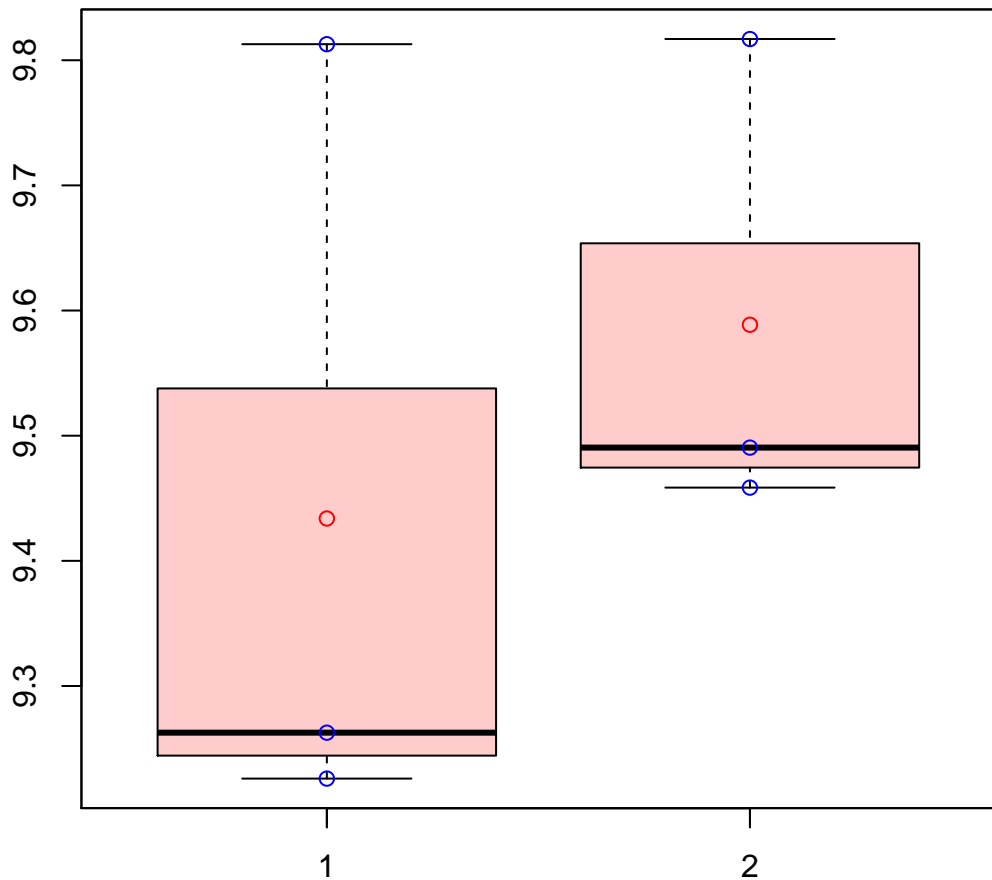

t-Test: p-value = 0.53

# CL2474Contig3|CL2474Contig3

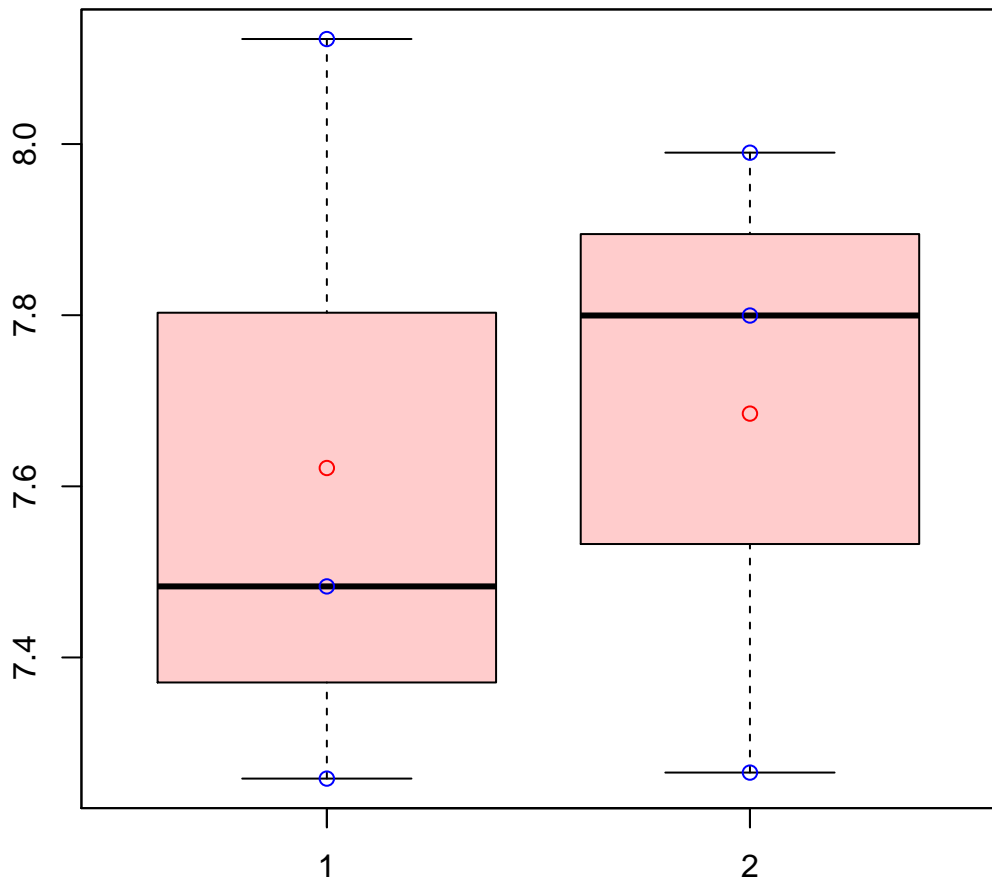

t-Test: p-value = 0.86



# CL24771Contig1|CL24771Contig1

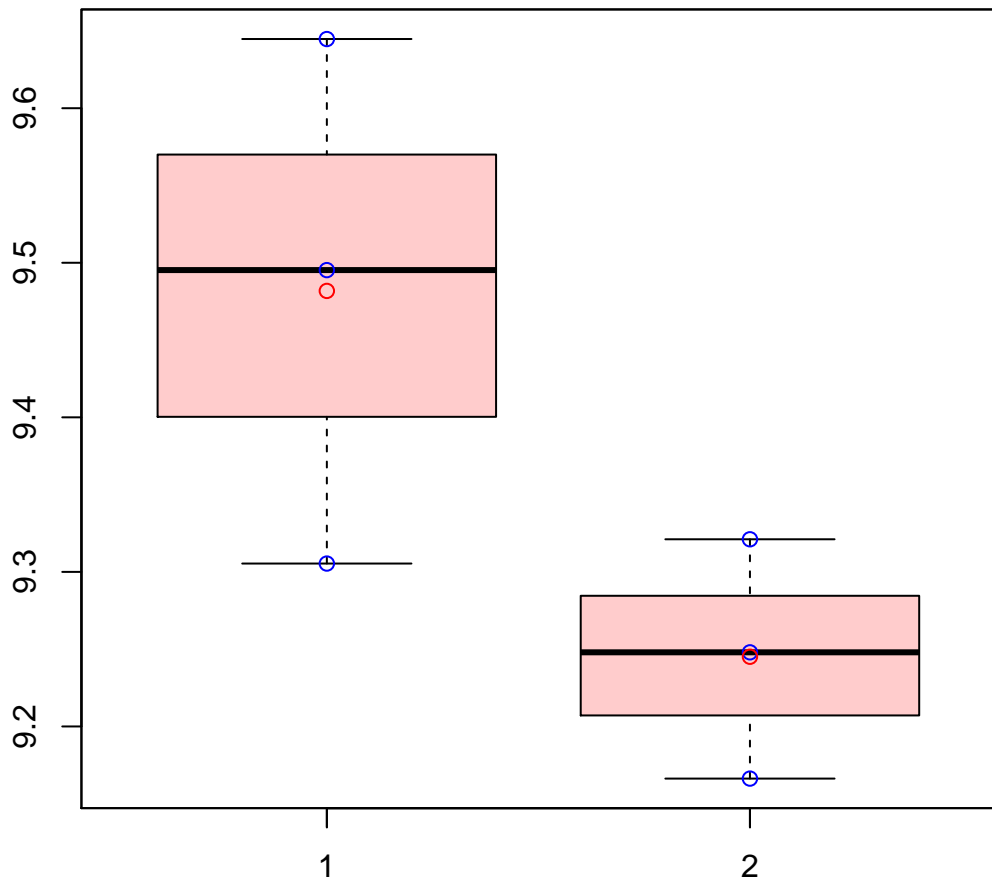

t-Test: p-value = 0.12

# CL2478Contig1|CL2478Contig1

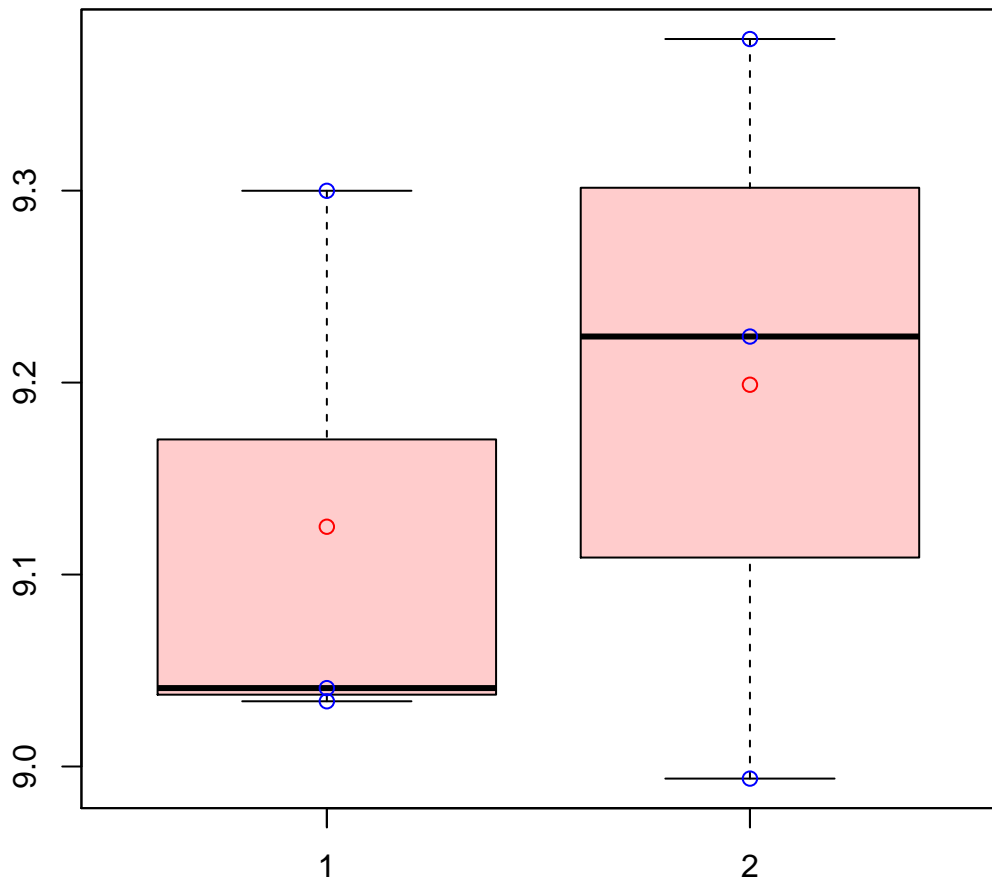

t-Test: p-value = 0.63

# CL2479Contig5|CL2479Contig5

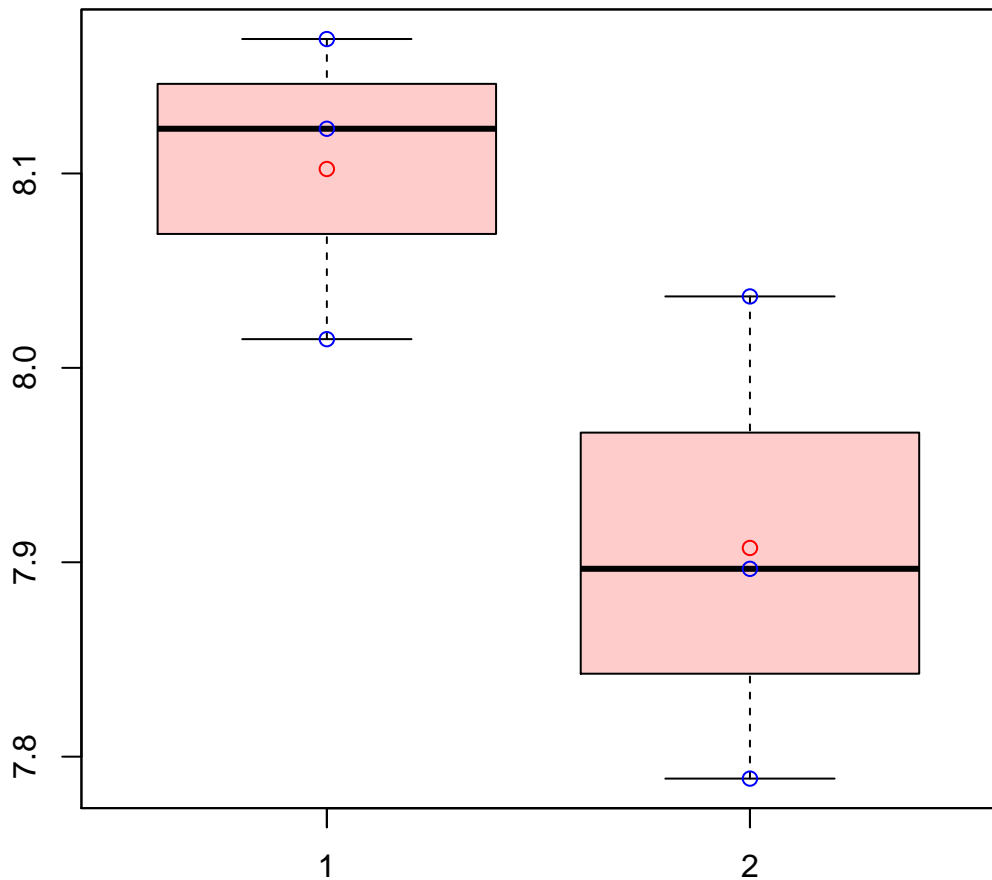

t-Test: p-value = 0.1

# CL2479Contig7|CL2479Contig7

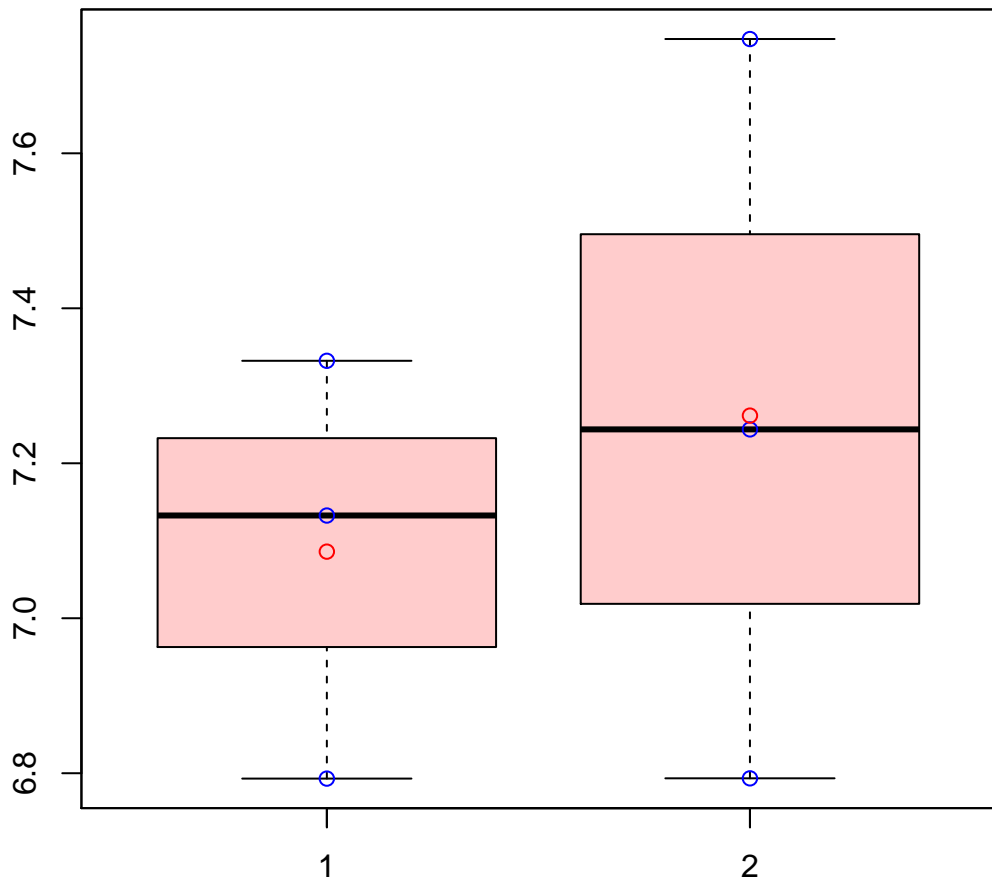

t-Test: p-value = 0.62

# CL247Contig1|CL247Contig1

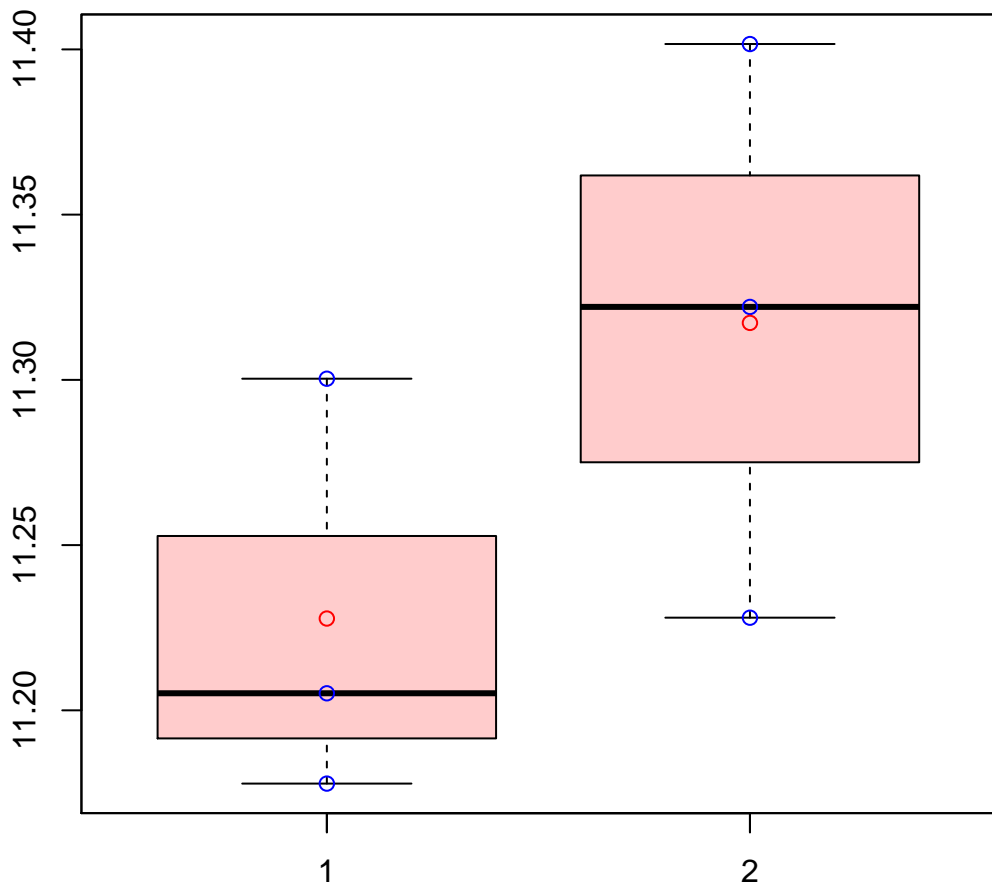

t-Test: p-value = 0.23

# CL247Contig3|CL247Contig3



t-Test: p-value = 0.23

# CL24843Contig1|CL24843Contig1

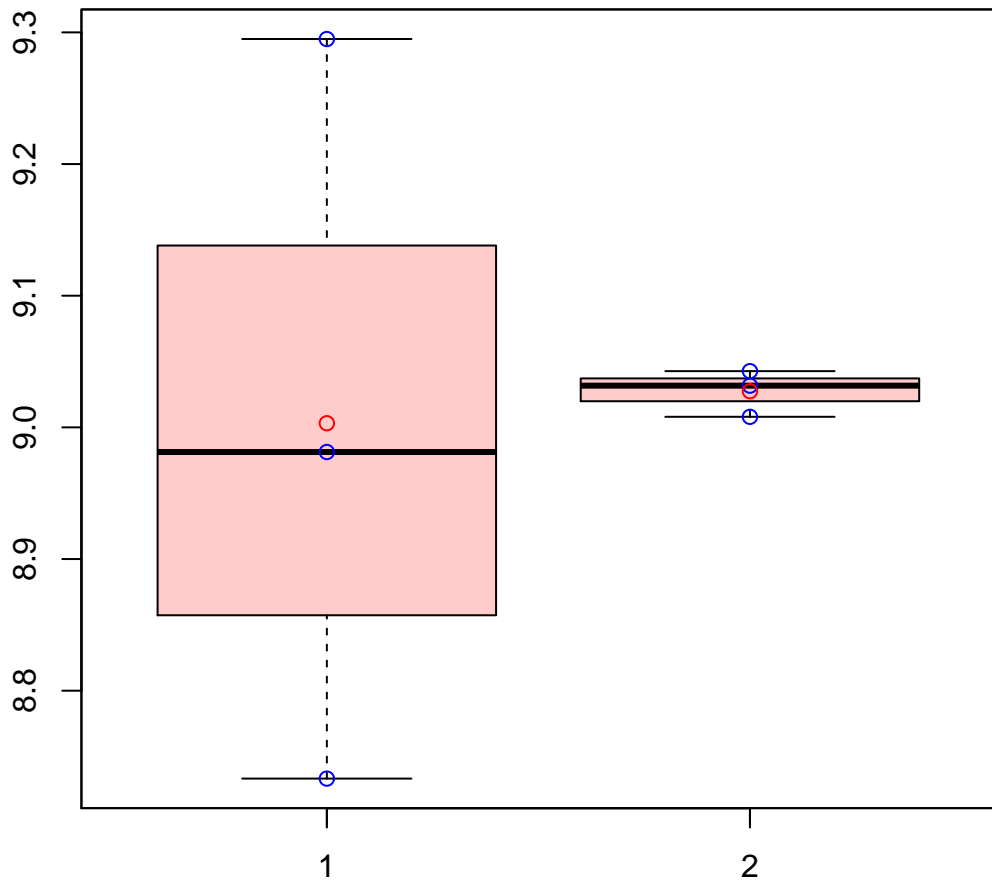

t-Test: p-value = 0.89

# CL2486Contig1|CL2486Contig1

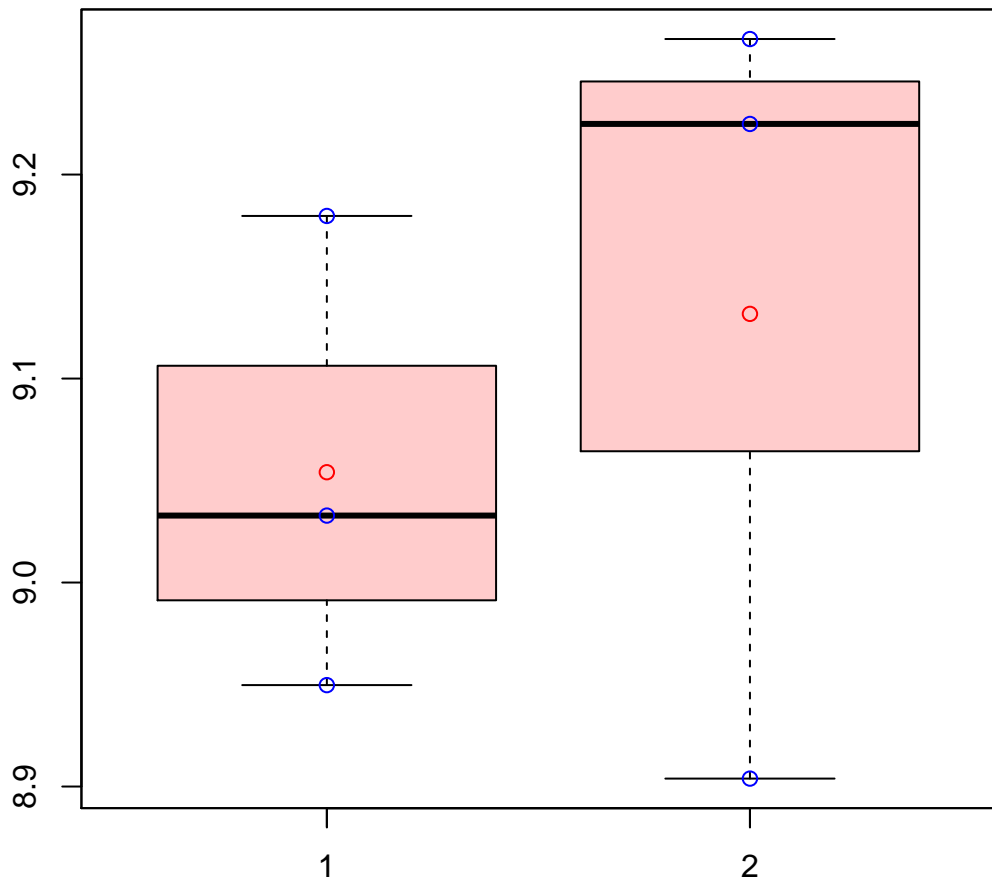

t-Test: p-value = 0.6



# CL2486Contig2|CL2486Contig2

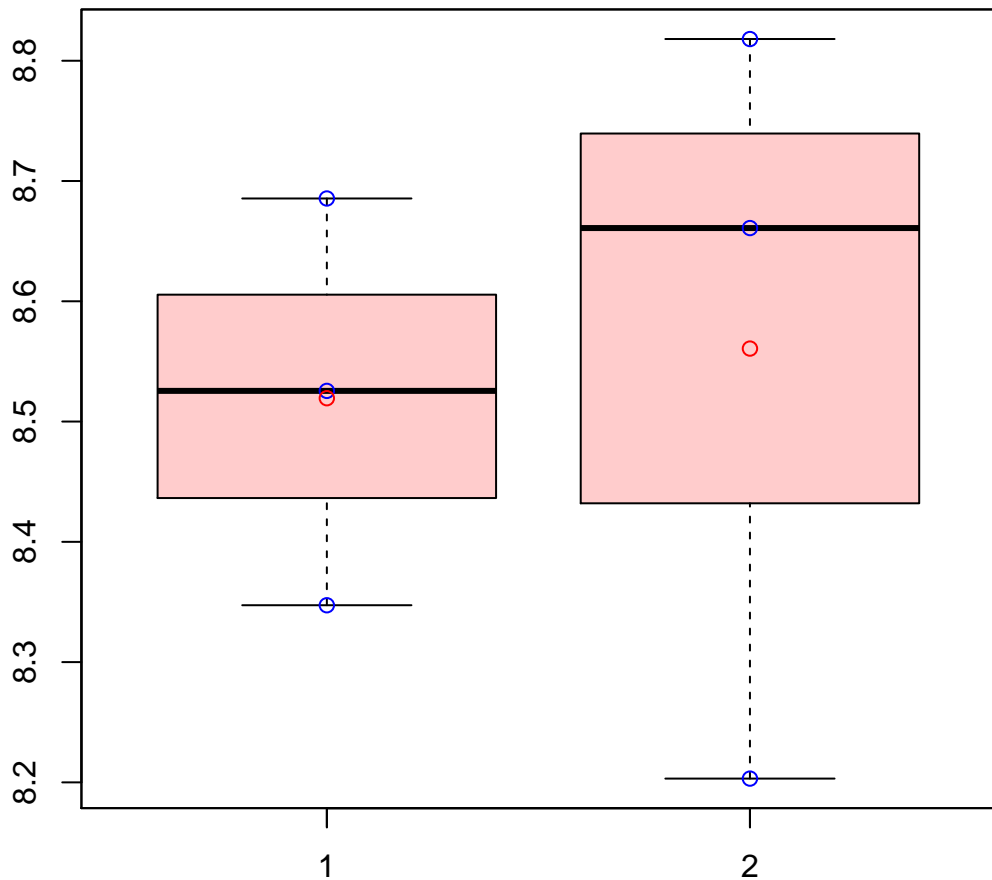

t-Test: p-value = 0.86

# CL2486Contig3|CL2486Contig3

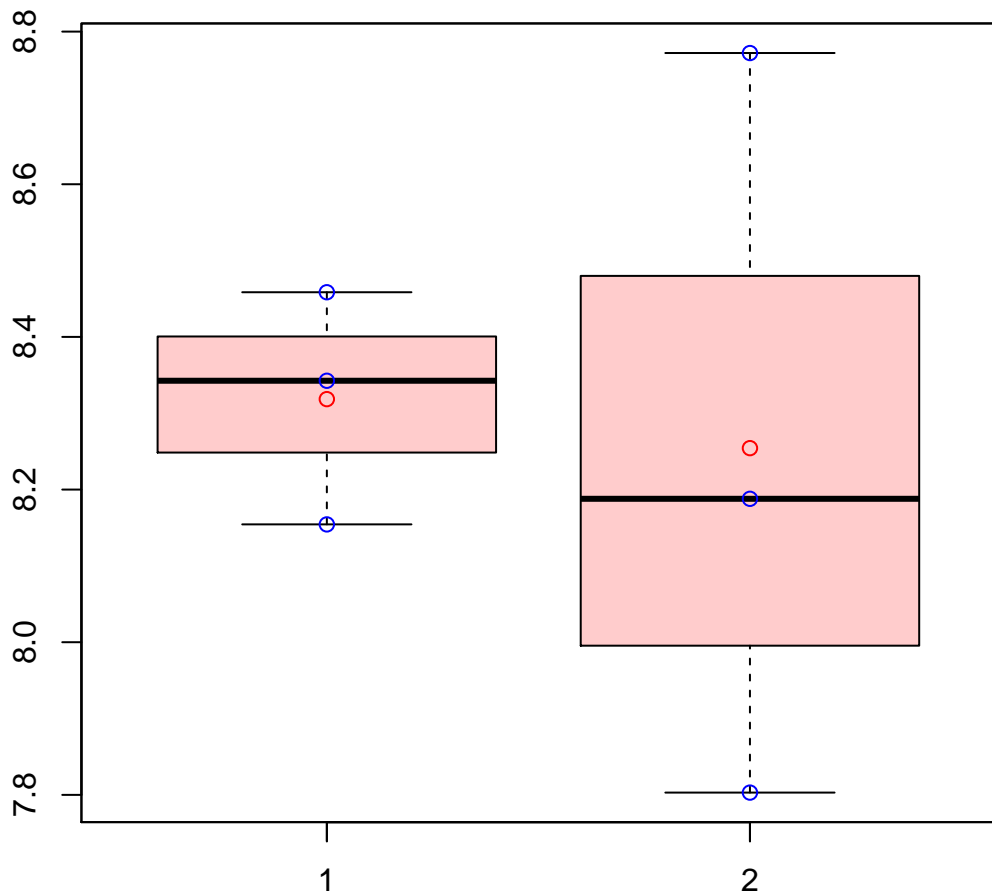

t-Test: p-value = 0.85

# CL24883Contig1|CL24883Contig1

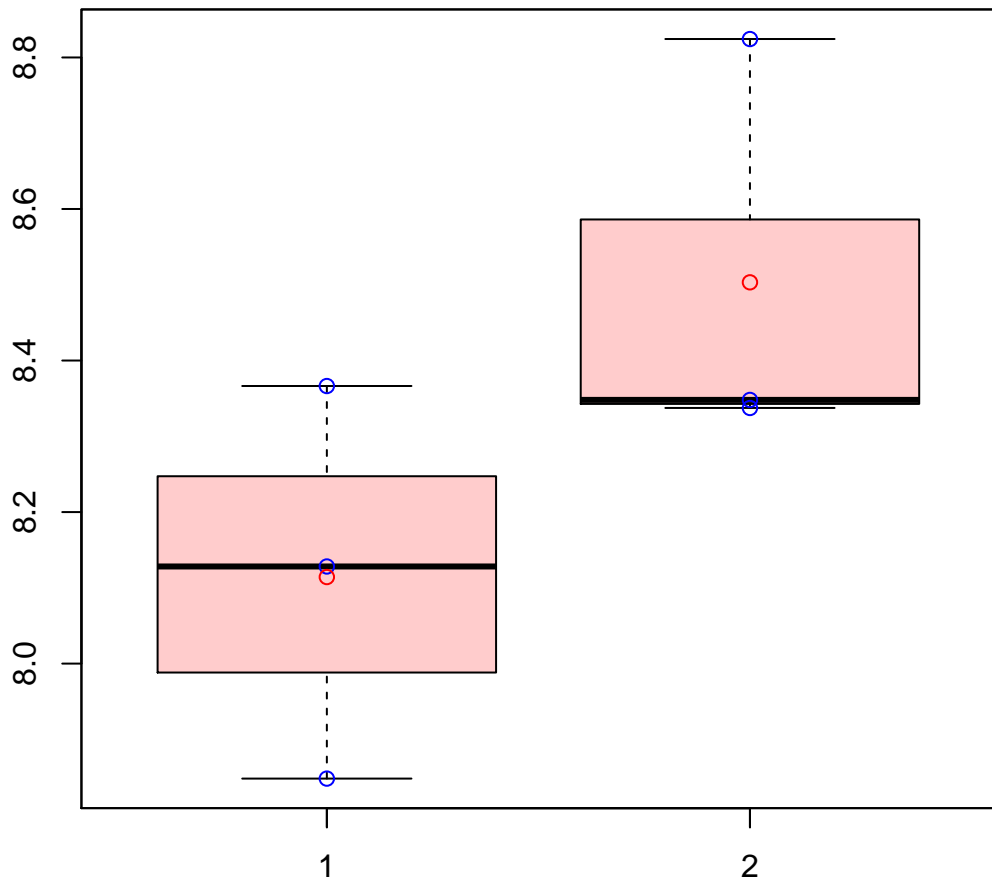

t-Test: p-value = 0.15

# CL2488Contig2|CL2488Contig2

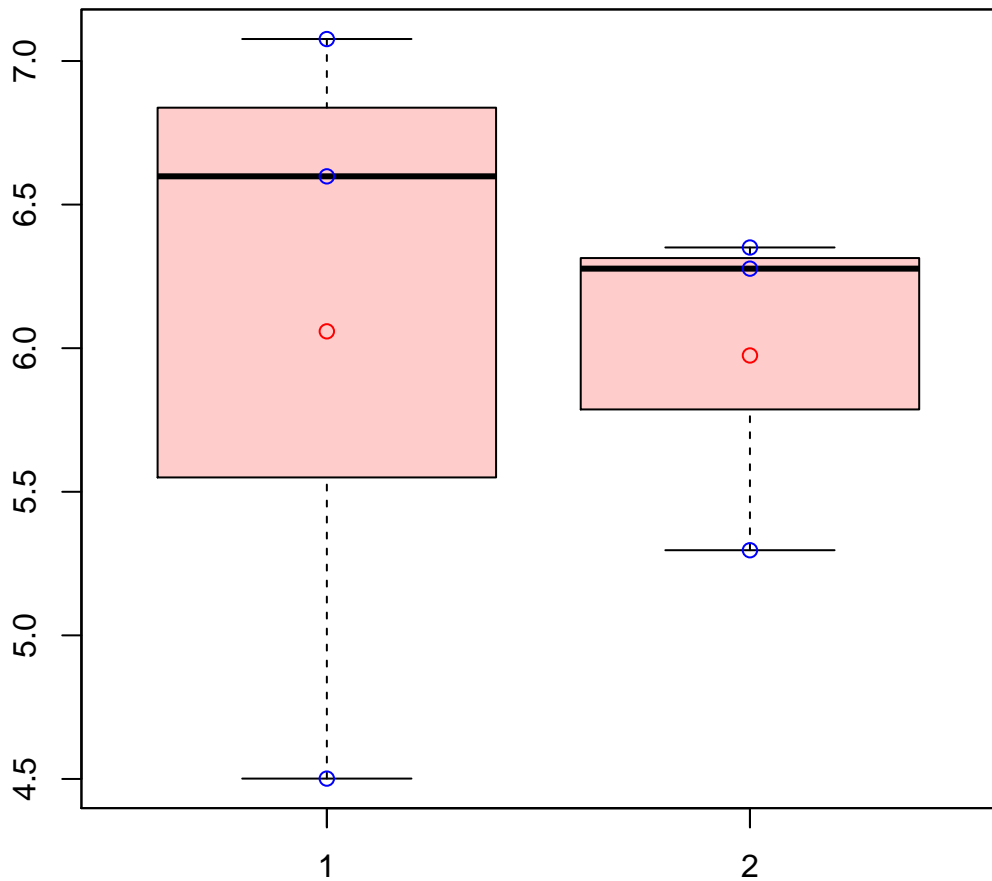

t-Test: p-value = 0.93

## CL248Contig2|CL248Contig2

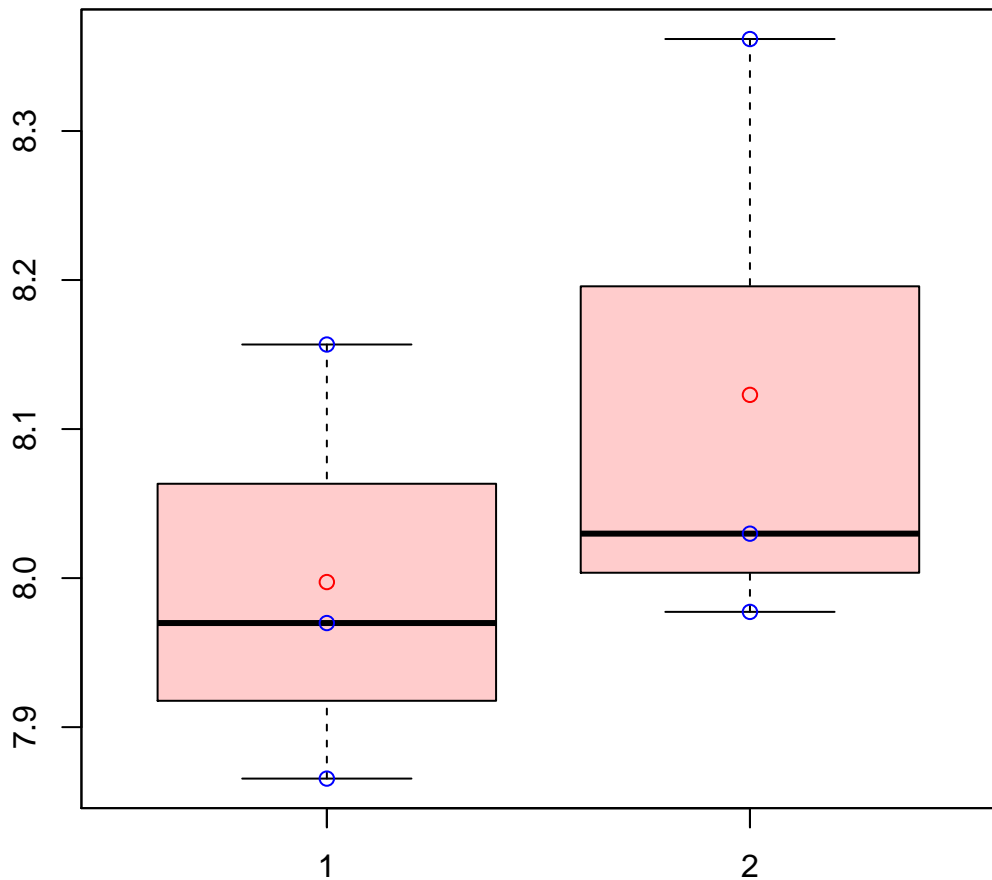

t-Test: p-value = 0.45

# CL248Contig7|CL248Contig7



t-Test: p-value = 0.45

# CL2491Contig2|CL2491Contig2

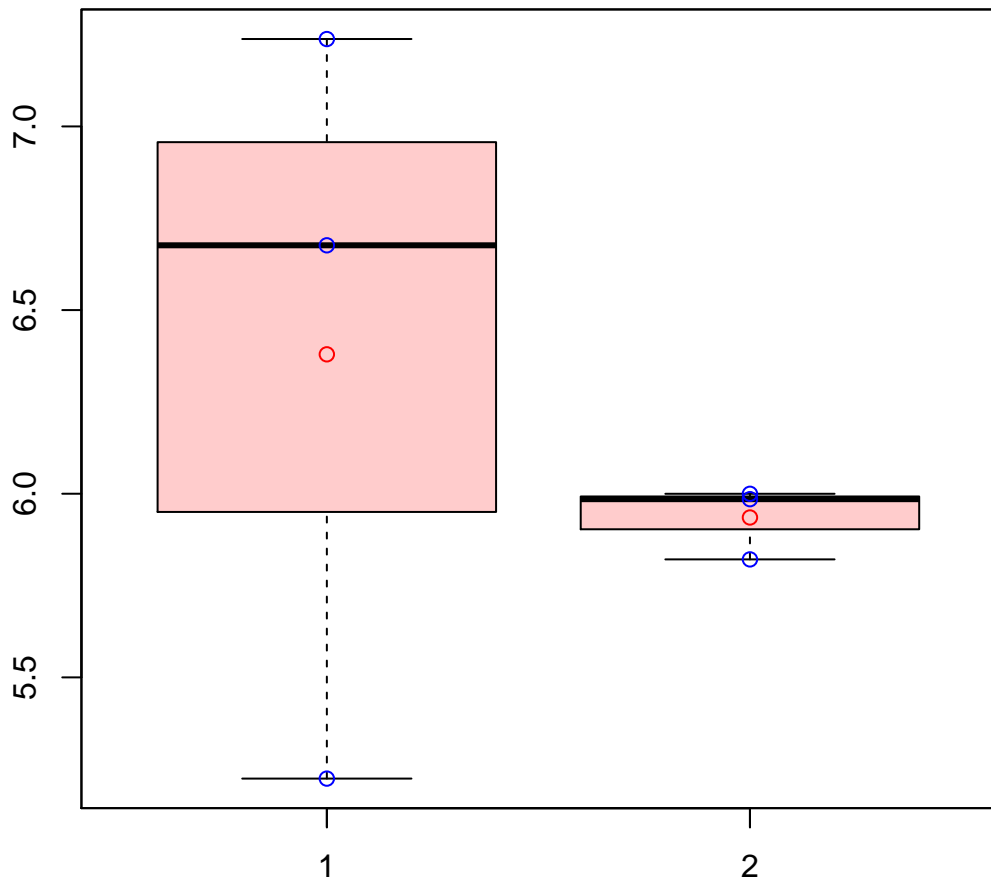

t-Test: p-value = 0.54

# CL2494Contig1|CL2494Contig1

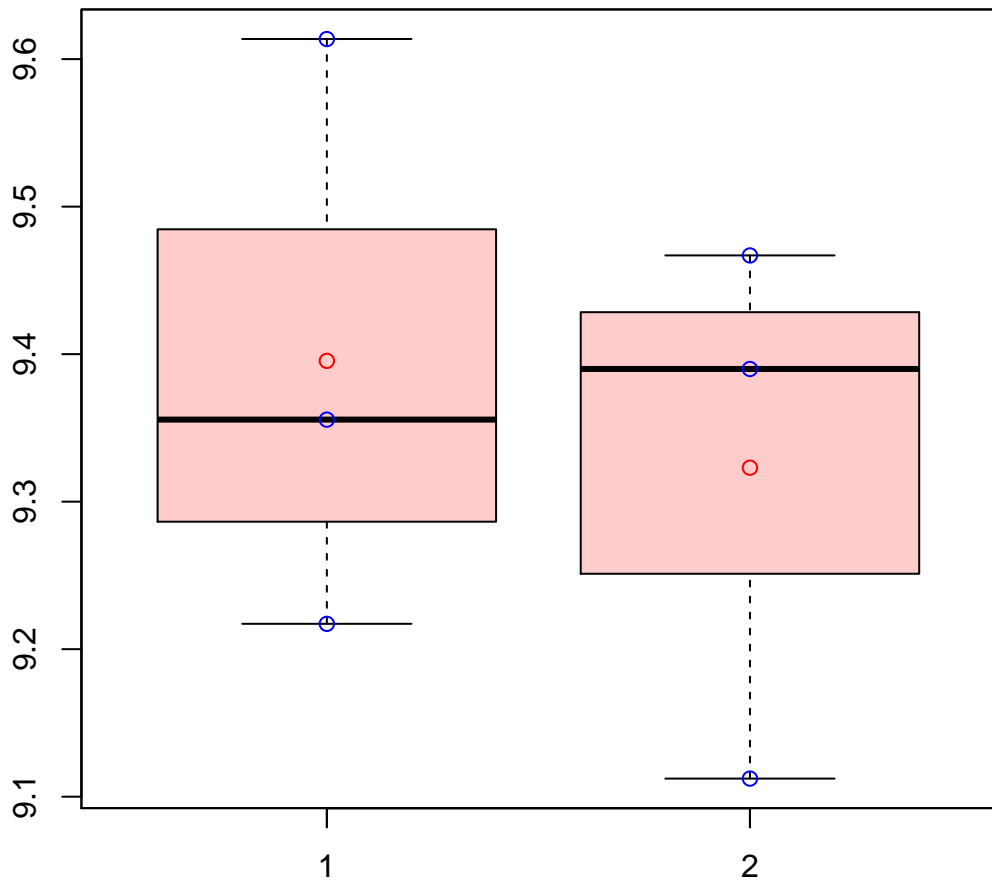

t-Test: p-value = 0.67



# CL24965Contig1|CL24965Contig1

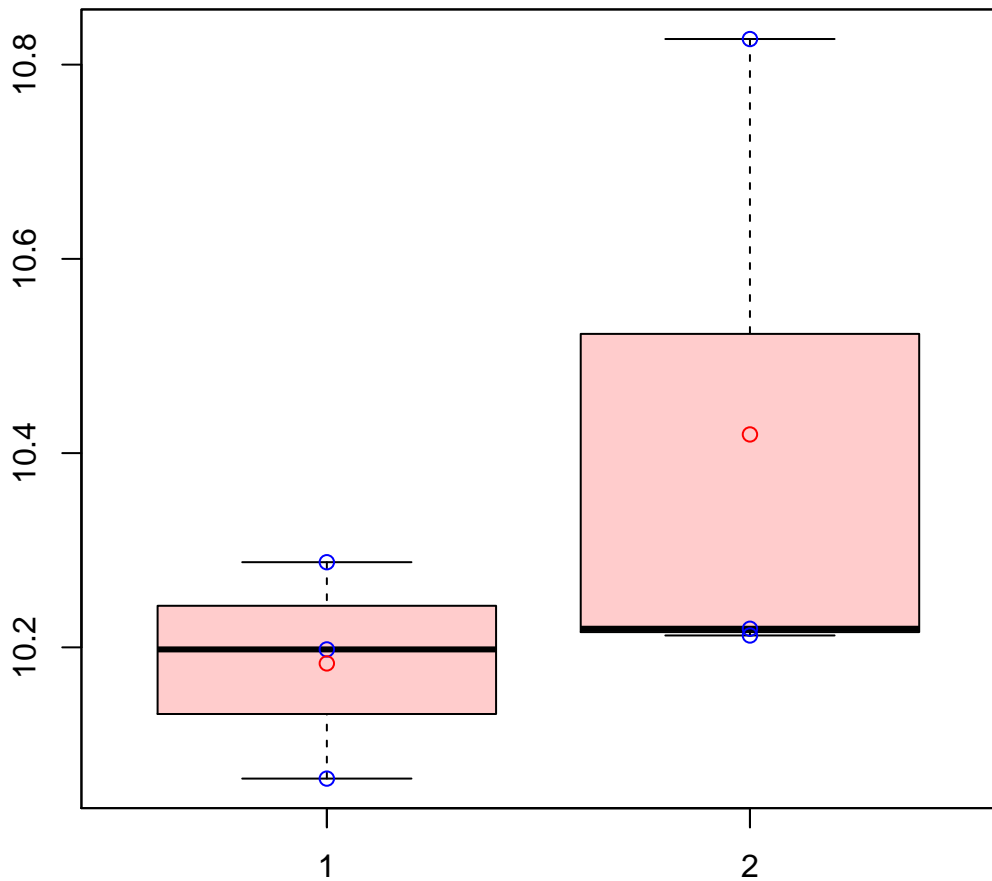

t-Test: p-value = 0.37

# CL24975Contig1|CL24975Contig1

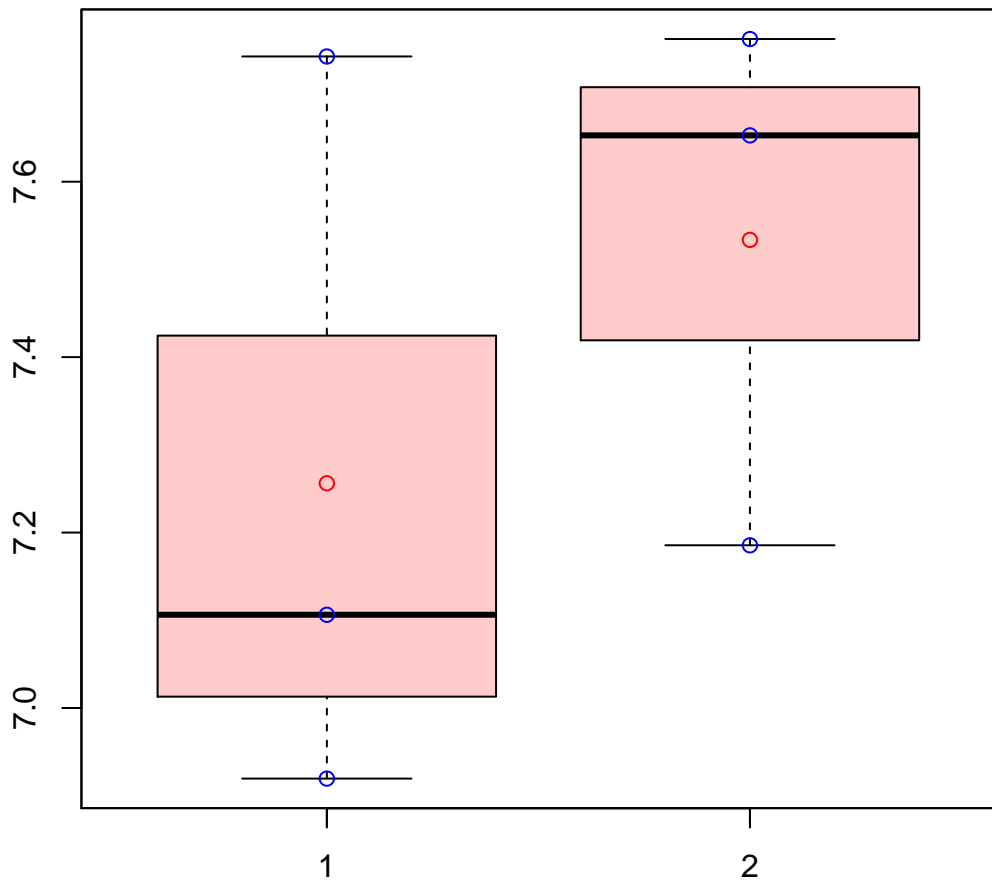

t-Test: p-value = 0.42

# CL2498Contig1|CL2498Contig1

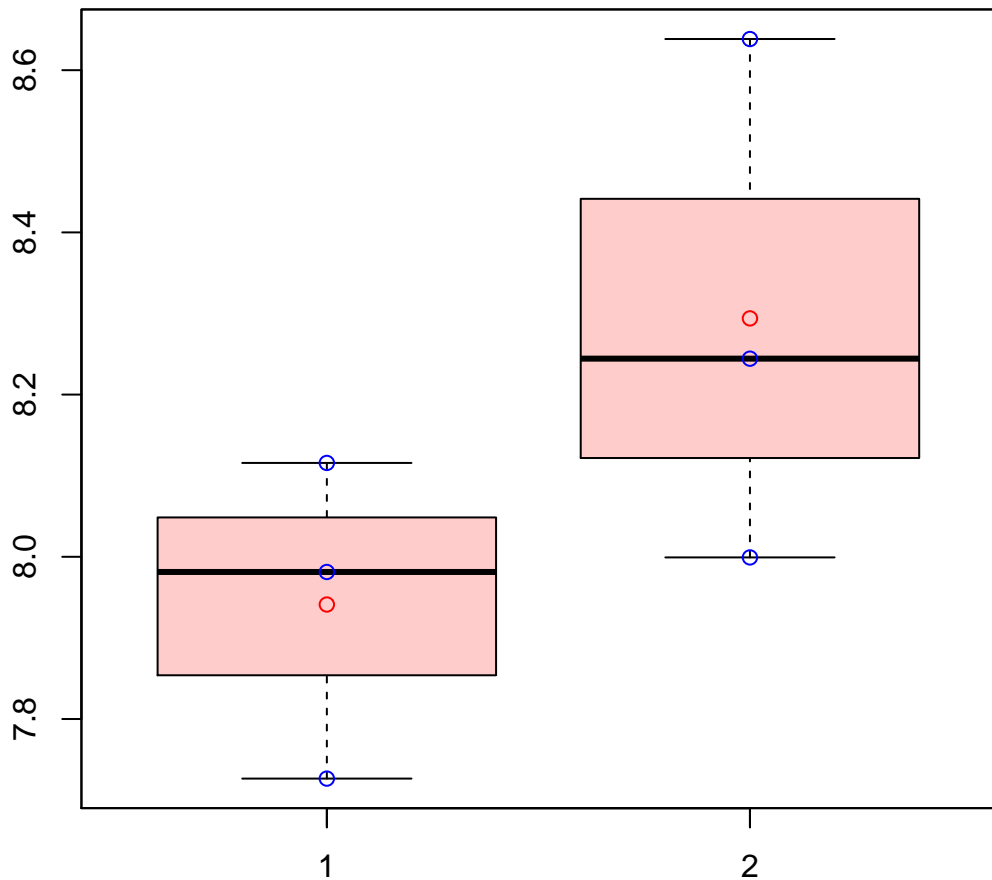

t-Test: p-value = 0.2

# CL2498Contig2|CL2498Contig2



t-Test: p-value = 0.2

# CL24991Contig1|CL24991Contig1

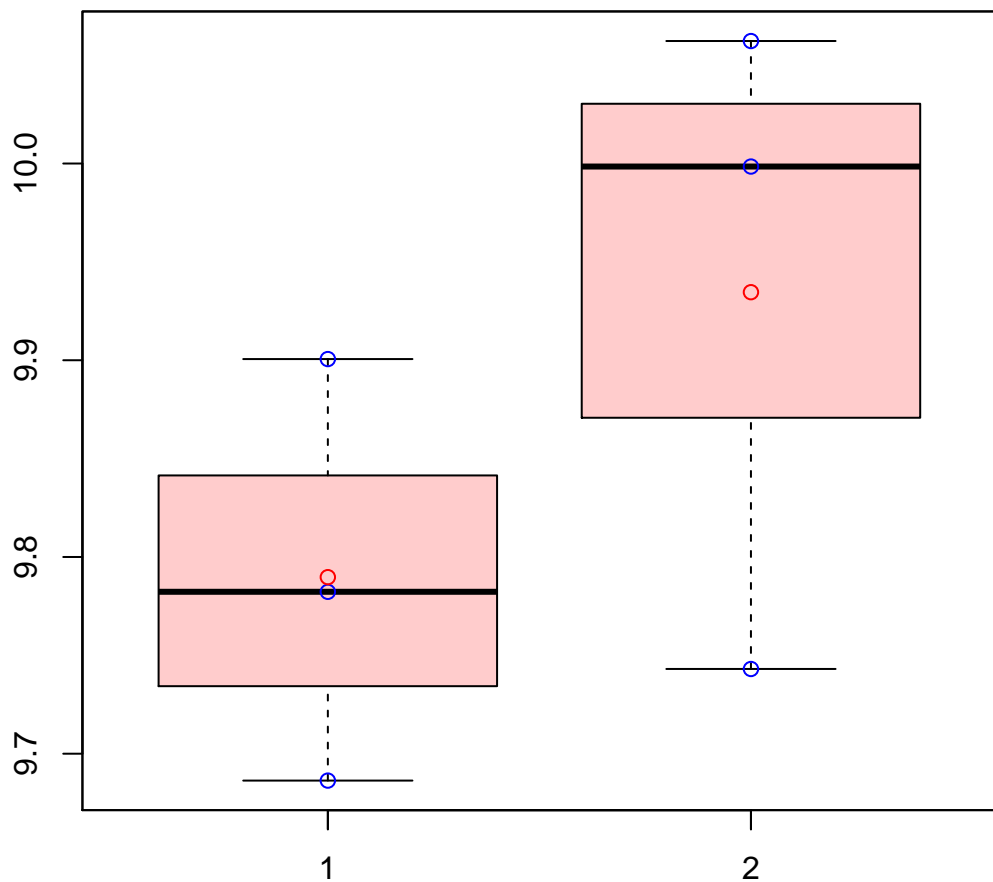

t-Test: p-value = 0.29

# CL24998Contig1|CL24998Contig1

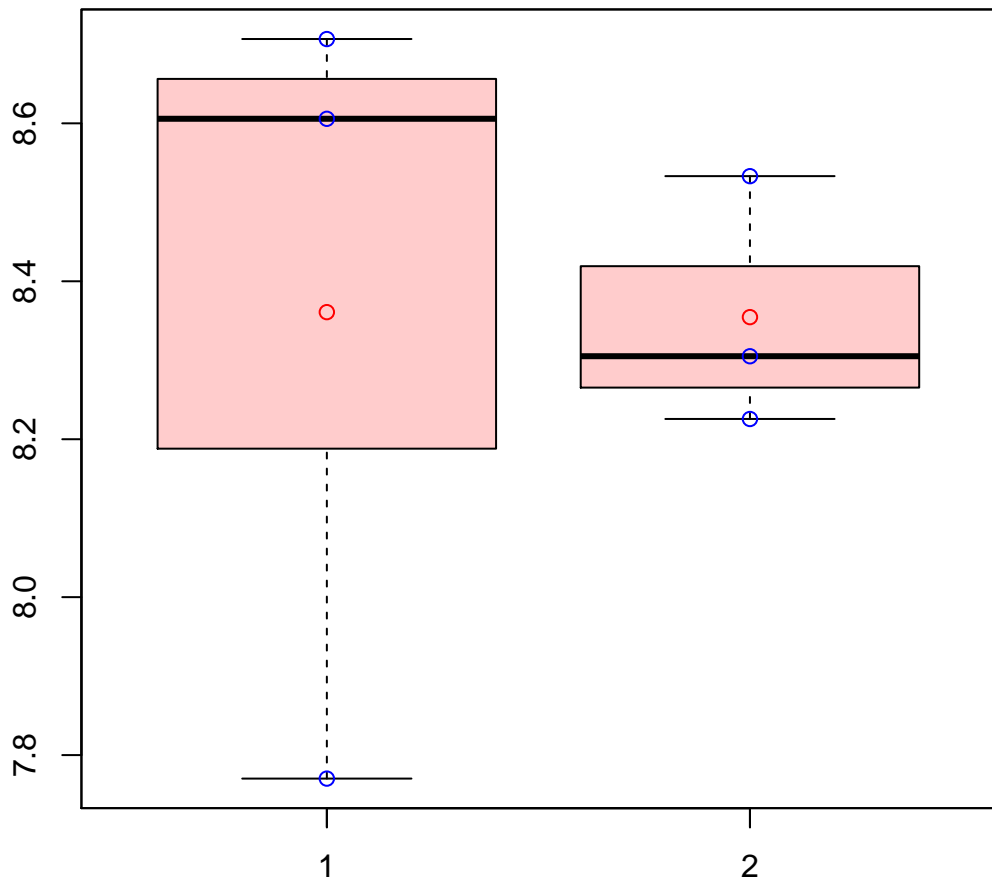

t-Test: p-value = 0.99

# CL249Contig10|CL249Contig10

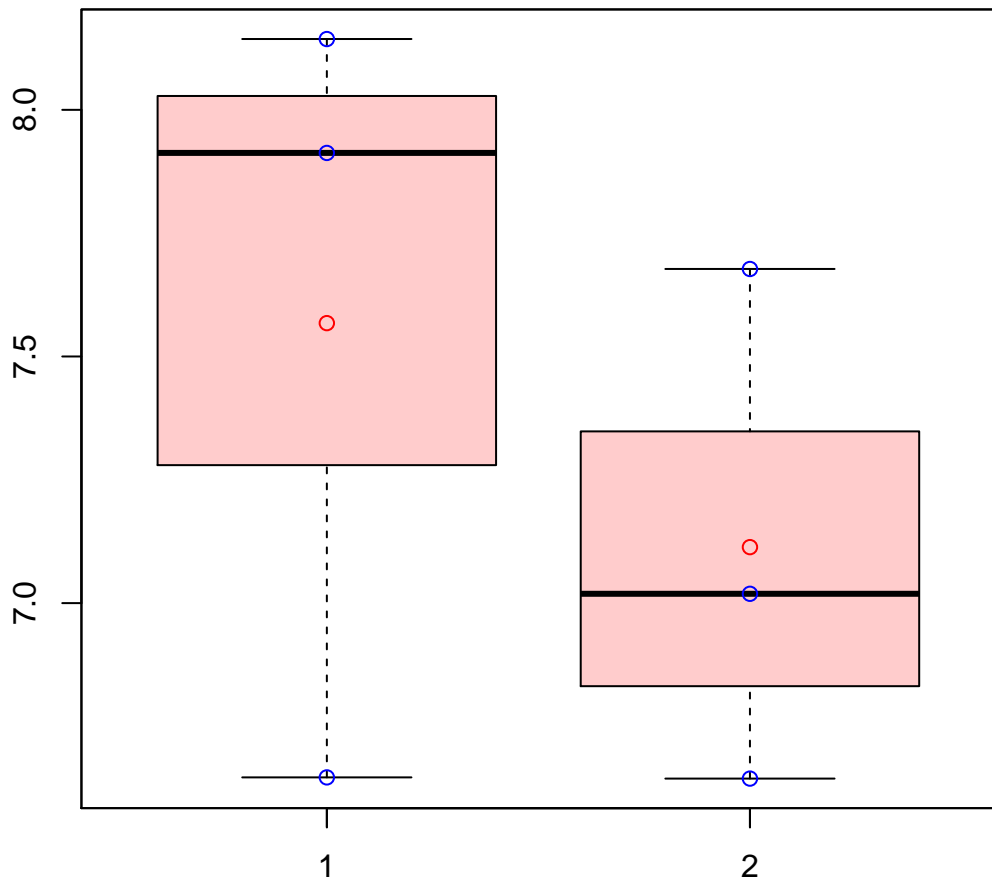

t-Test: p-value = 0.47

# CL249Contig14|CL249Contig14



t-Test: p-value = 0.47



# CL249Contig16|CL249Contig16



t-Test: p-value = 0.47

# CL24Contig15|CL24Contig15

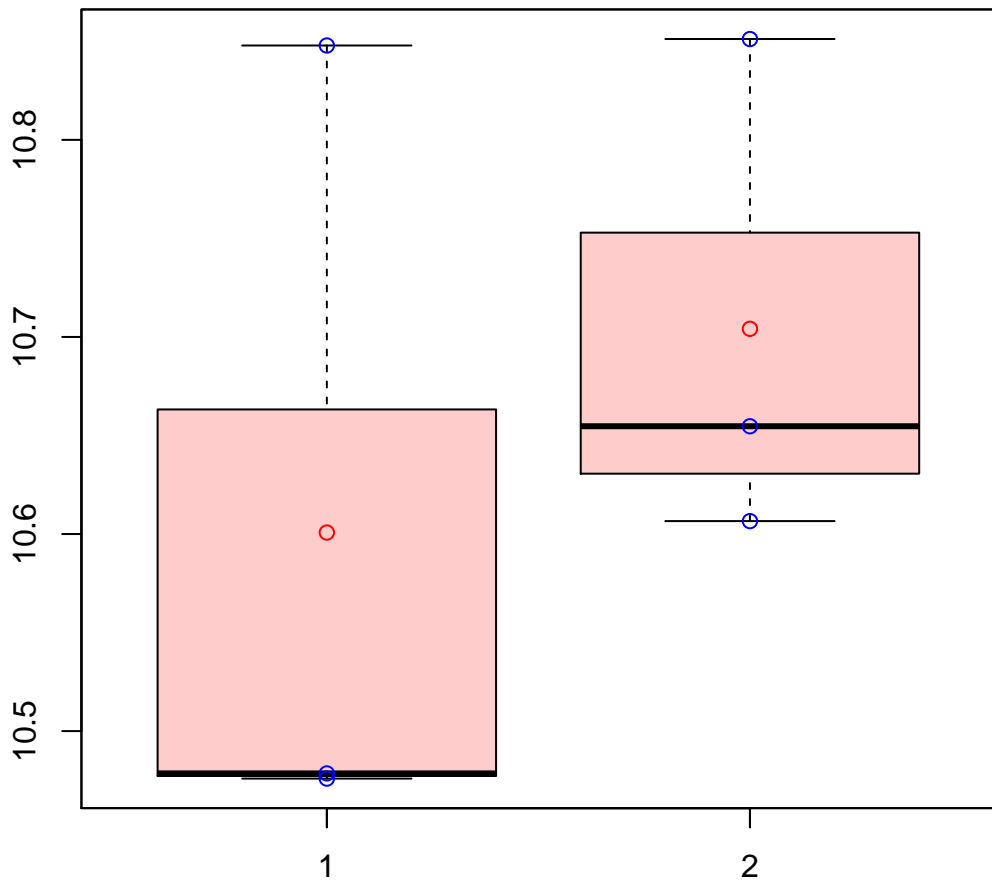

t-Test: p-value = 0.52

# CL25025Contig1|CL25025Contig1

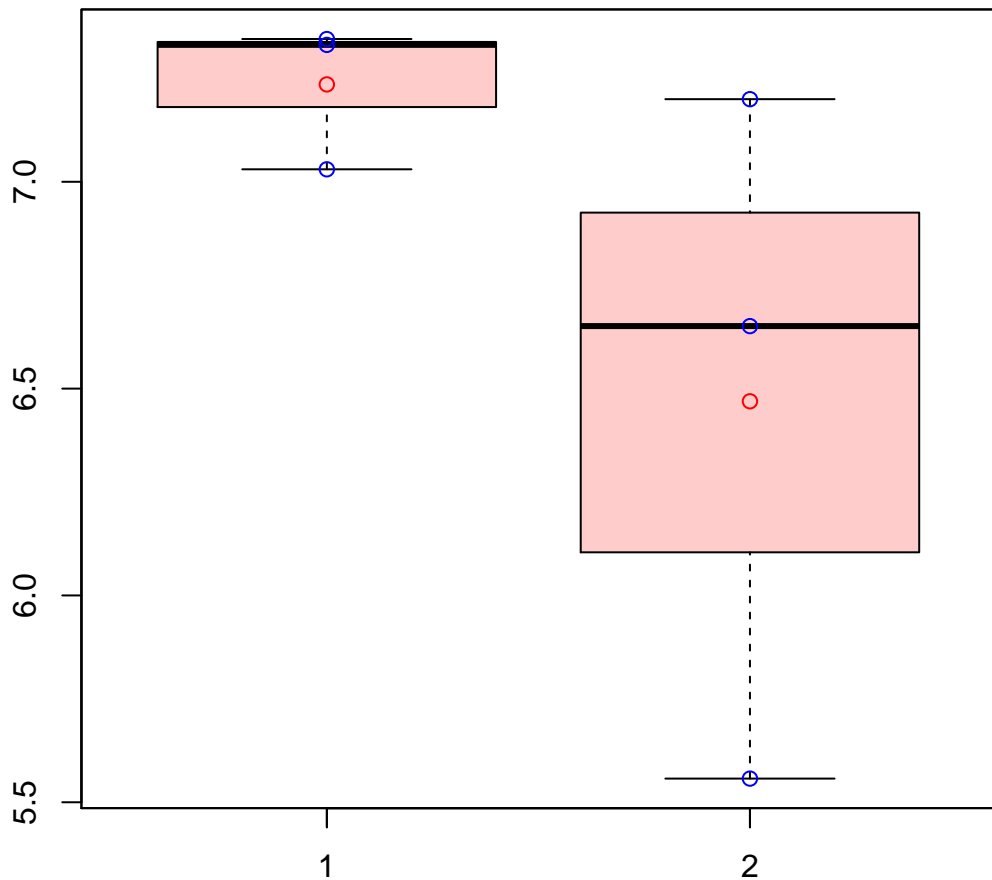

t-Test: p-value = 0.25

# CL250Contig12|CL250Contig12

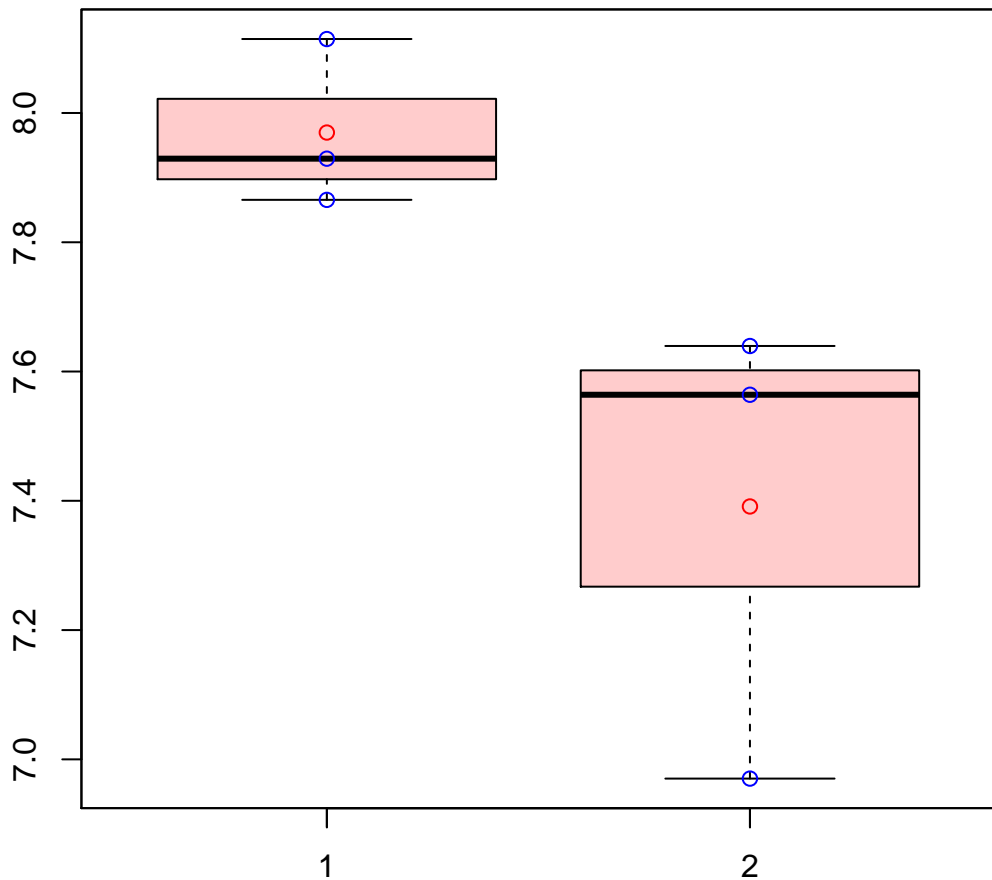

t-Test: p-value = 0.1

# CL2510Contig1|CL2510Contig1

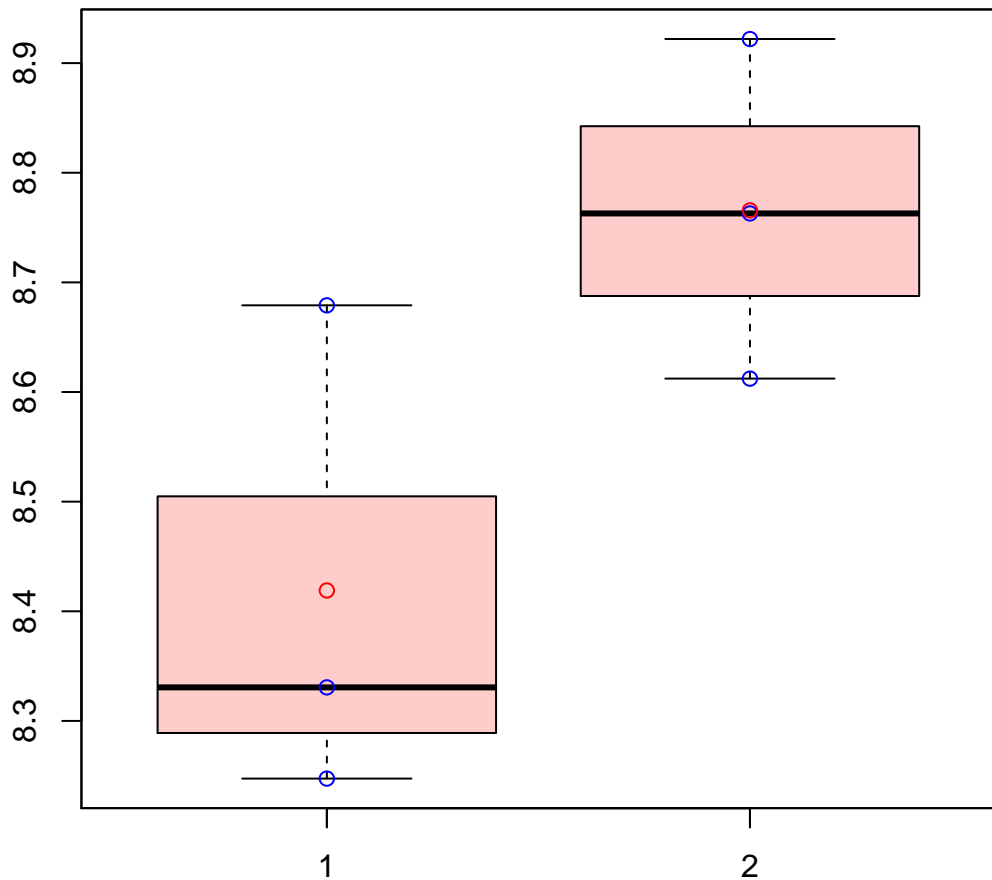

t-Test: p-value = 0.11

# CL2511Contig2|CL2511Contig2

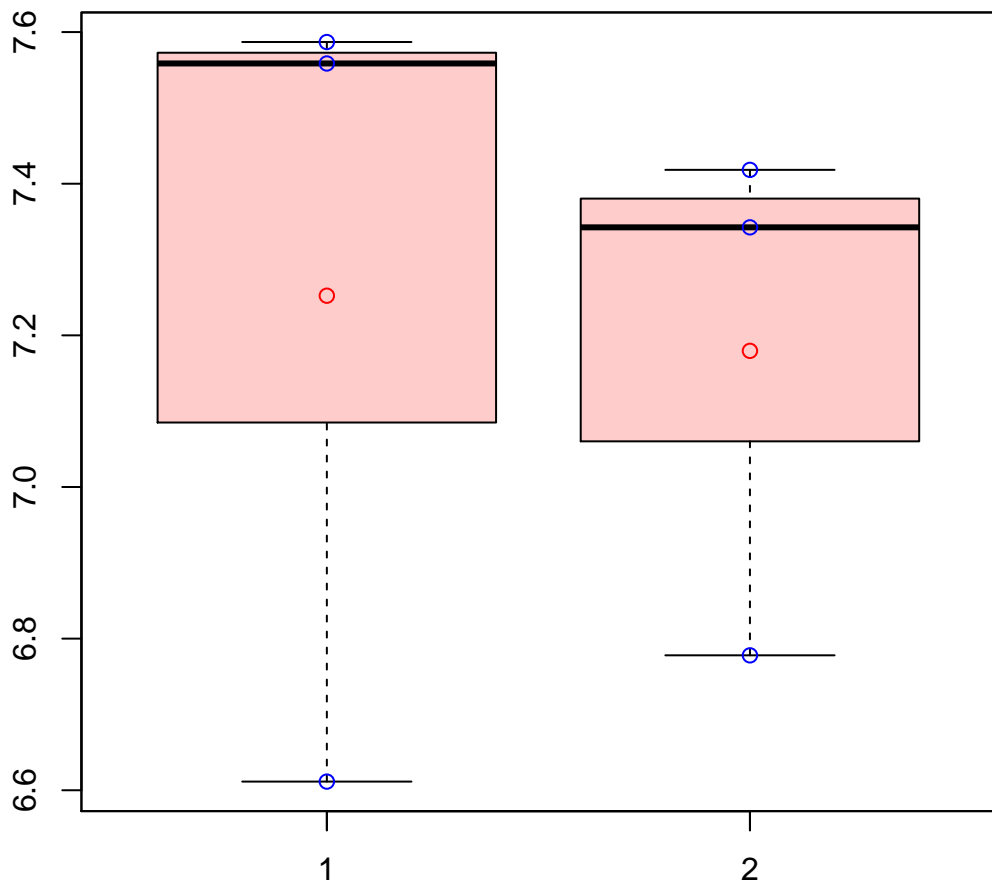

t-Test: p-value = 0.86

# CL2515Contig1|CL2515Contig1

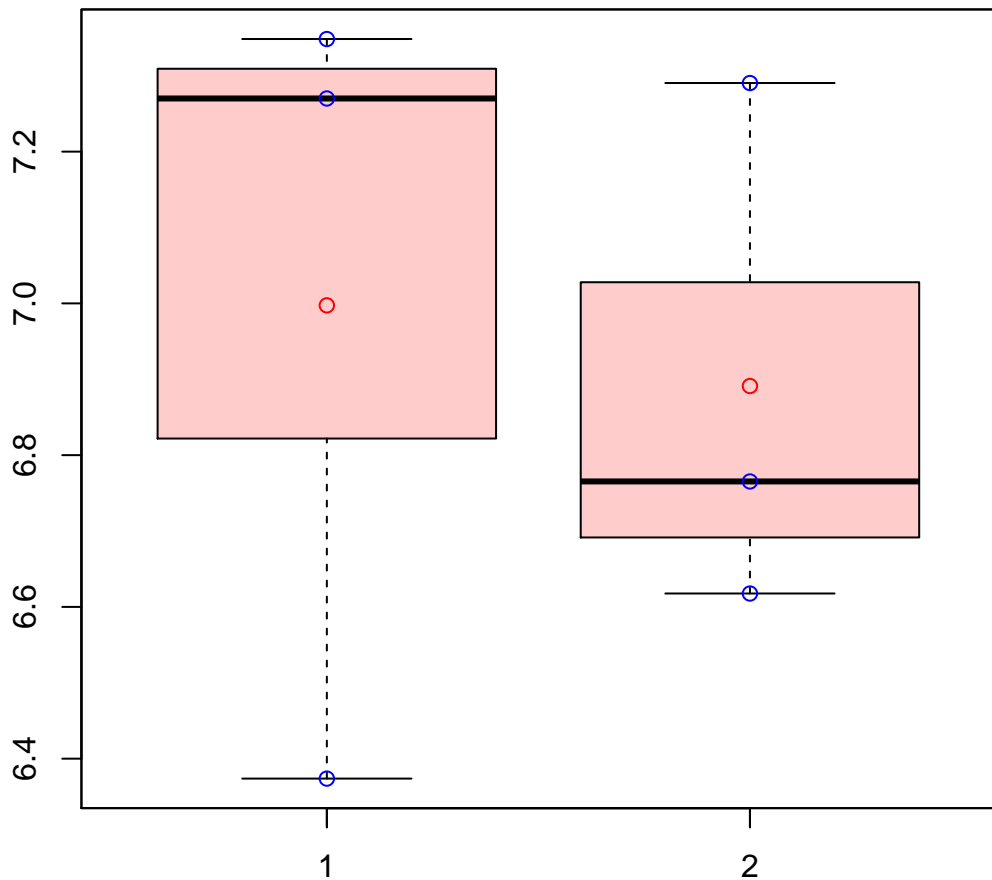

t-Test: p-value = 0.79

# CL2515Contig2|CL2515Contig2

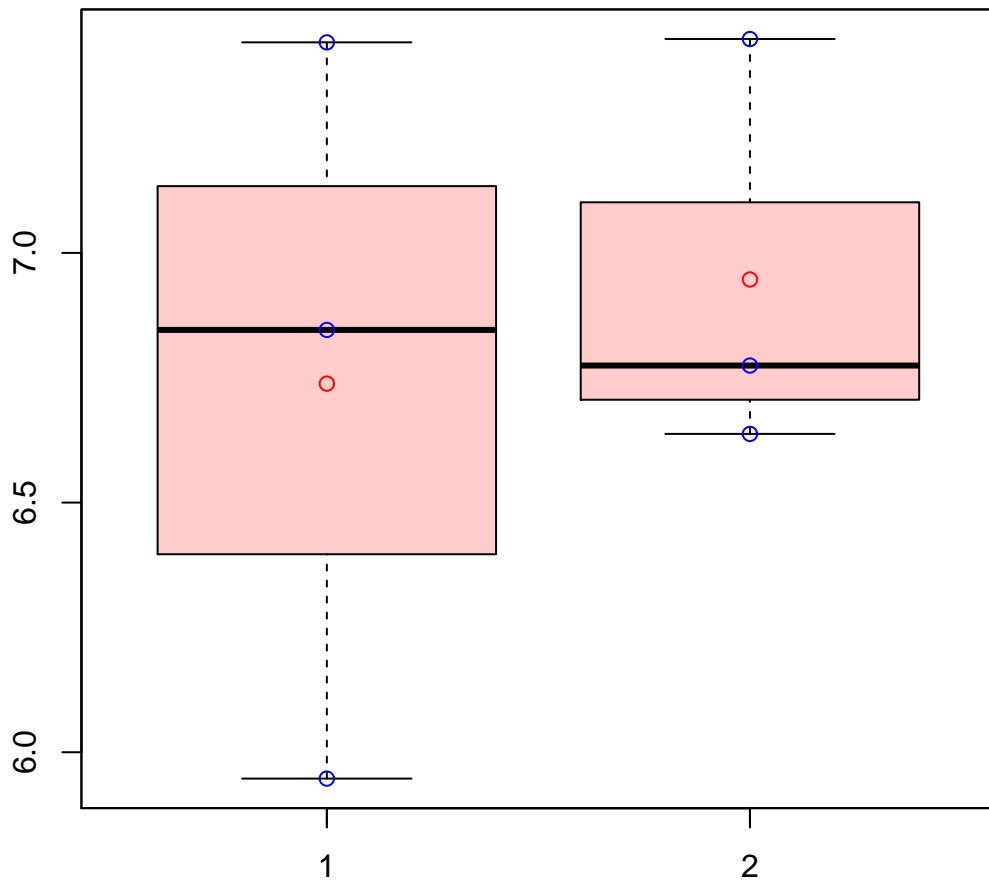

t-Test: p-value = 0.7



# CL2515Contig3|CL2515Contig3

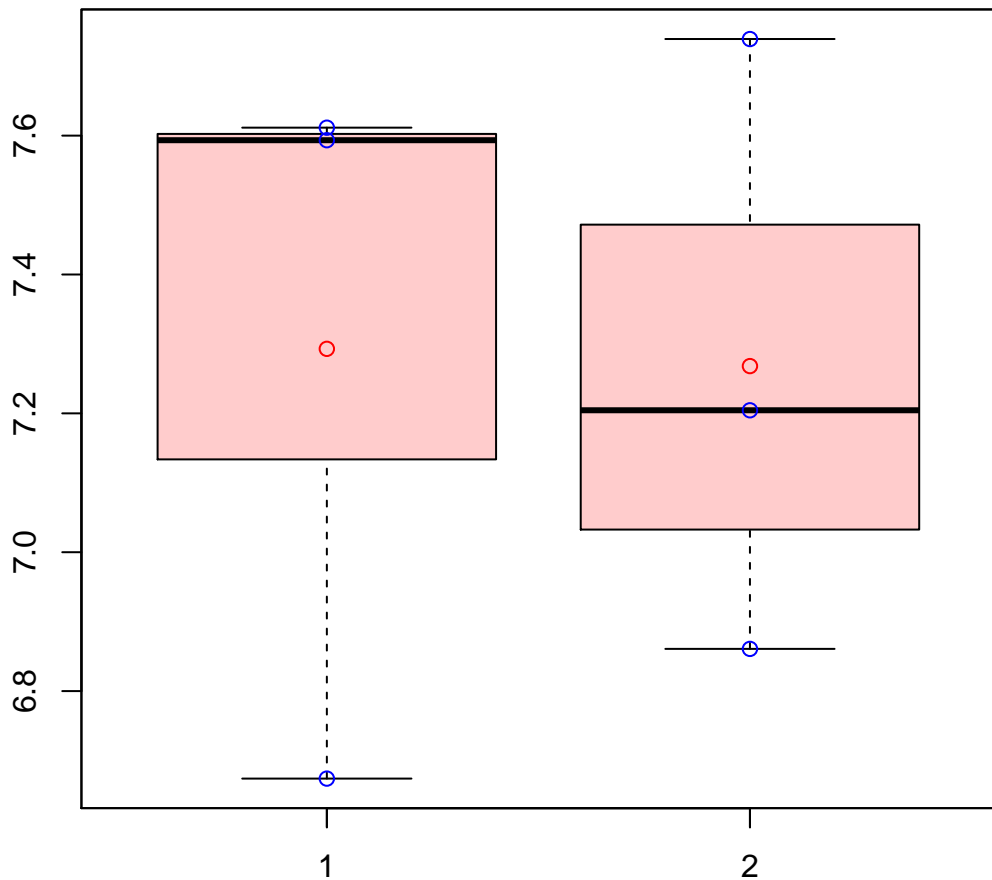

t-Test: p-value = 0.95

# CL2515Contig5|CL2515Contig5

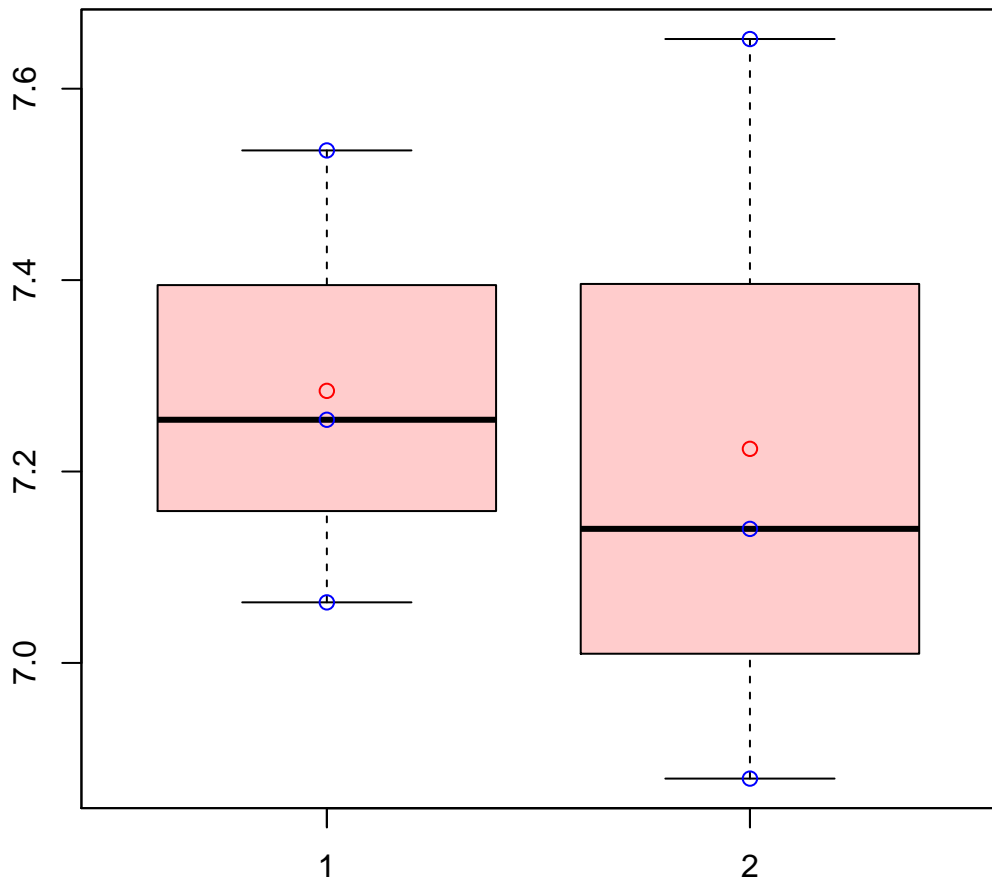

t-Test: p-value = 0.83

# CL2515Contig8|CL2515Contig8



t-Test: p-value = 0.97

# CL2519Contig1|CL2519Contig1

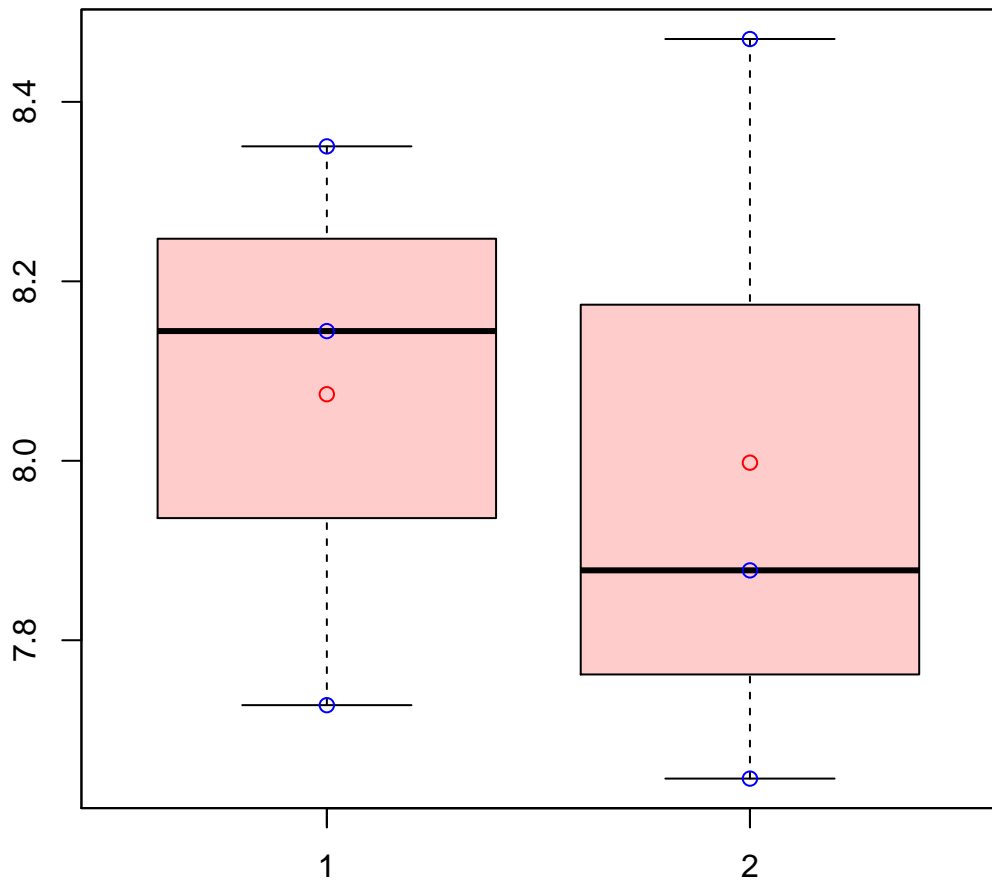

t-Test: p-value = 0.82

# CL2519Contig2|CL2519Contig2

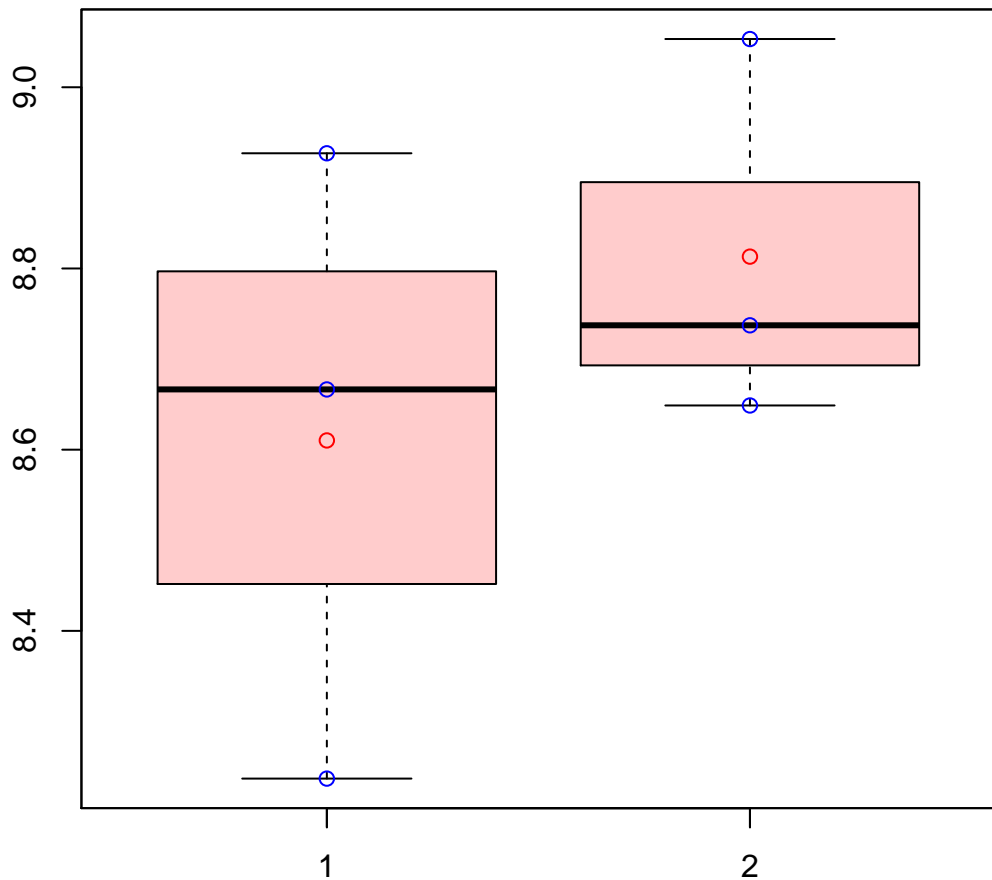

t-Test: p-value = 0.45

# CL2519Contig3|CL2519Contig3



t-Test: p-value = 0.82

# CL251Contig8|CL251Contig8

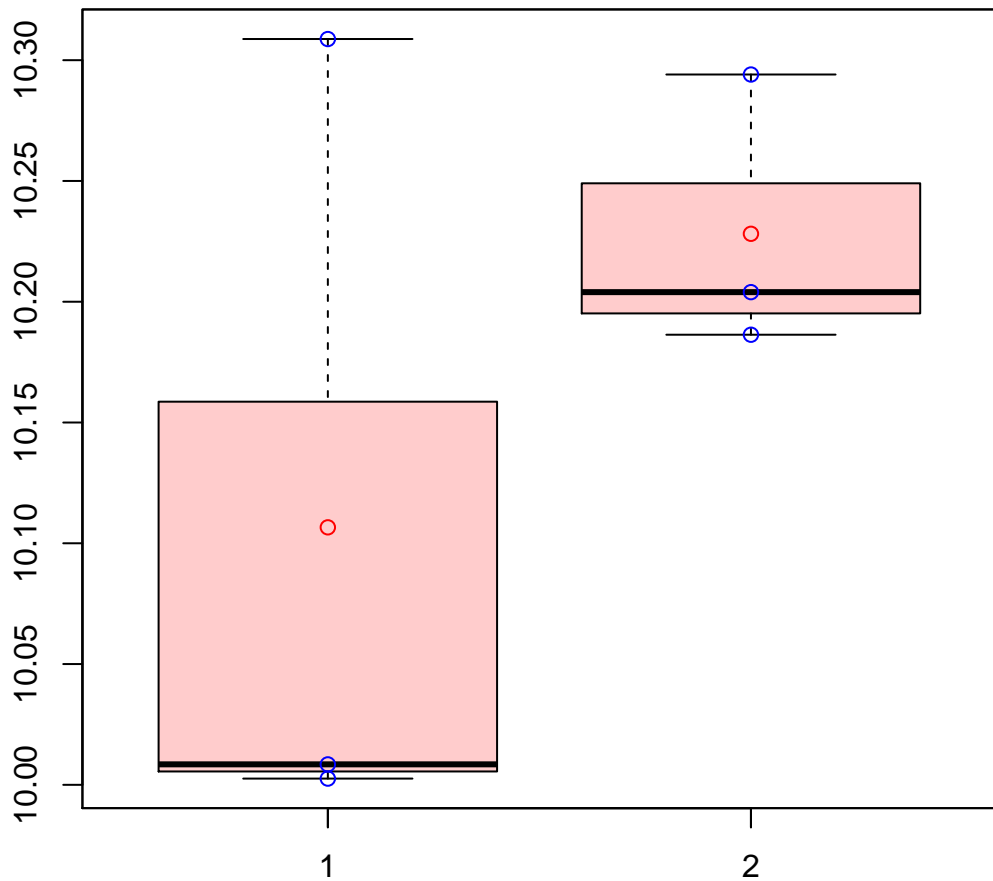

t-Test: p-value = 0.35

# CL2520Contig3|CL2520Contig3

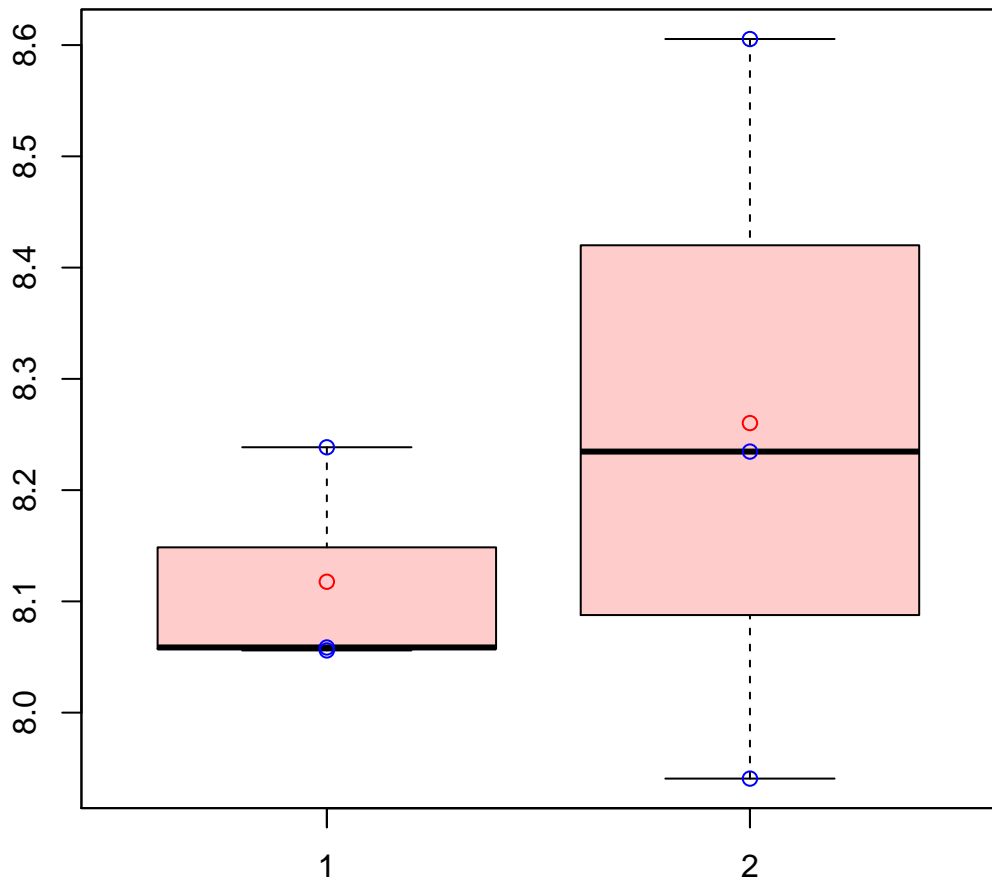

t-Test: p-value = 0.54



# CL2521Contig1|CL2521Contig1

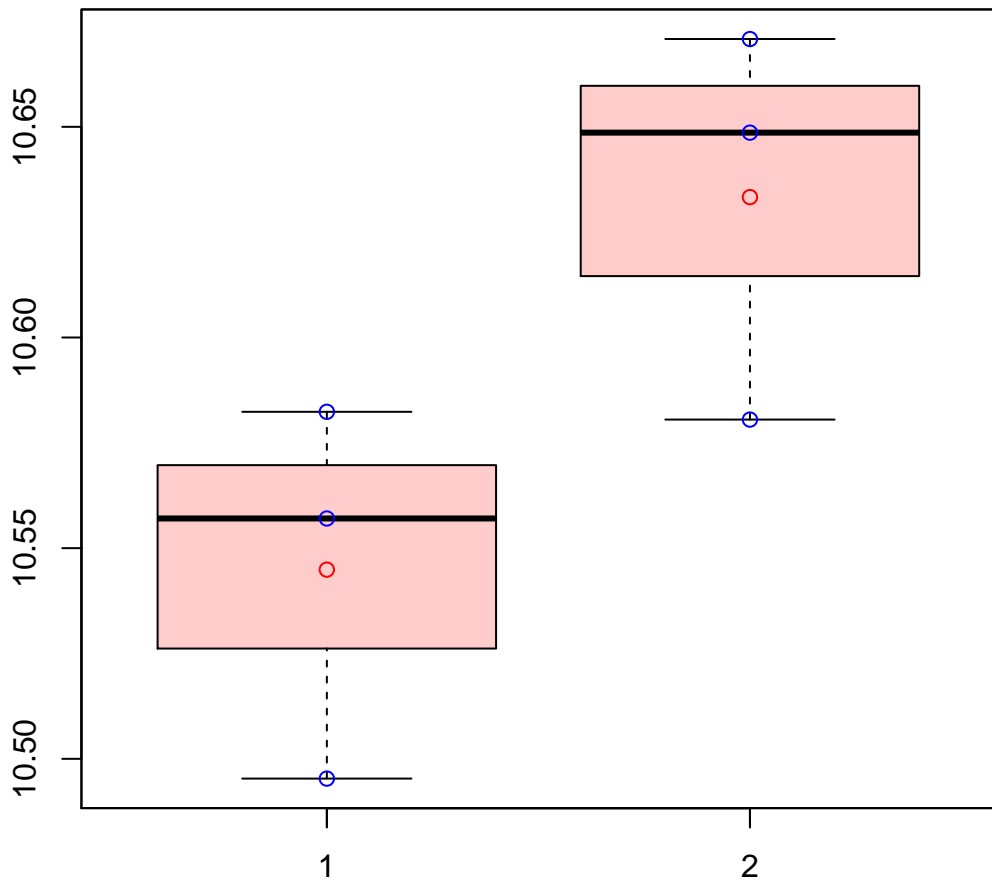

t-Test: p-value = 0.08

## CL2521Contig2|CL2521Contig2



t-Test: p-value = 0.08

# CL2523Contig2|CL2523Contig2

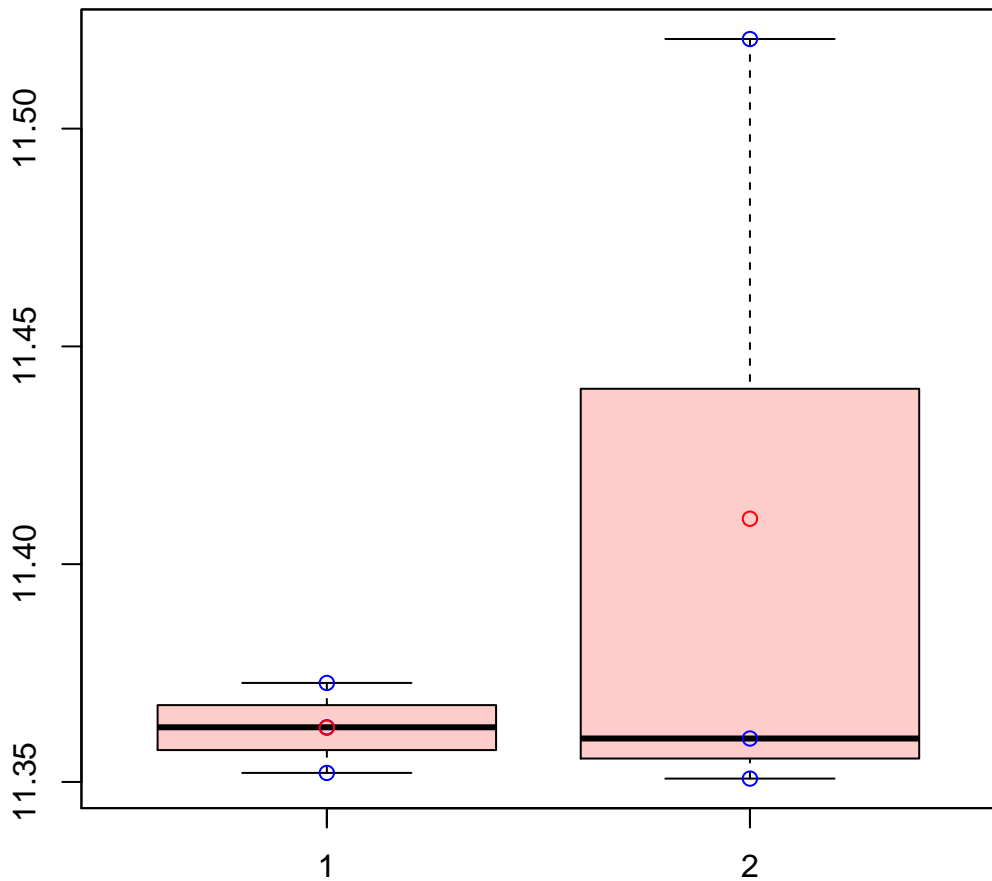

t-Test: p-value = 0.48

# CL25246Contig1|CL25246Contig1

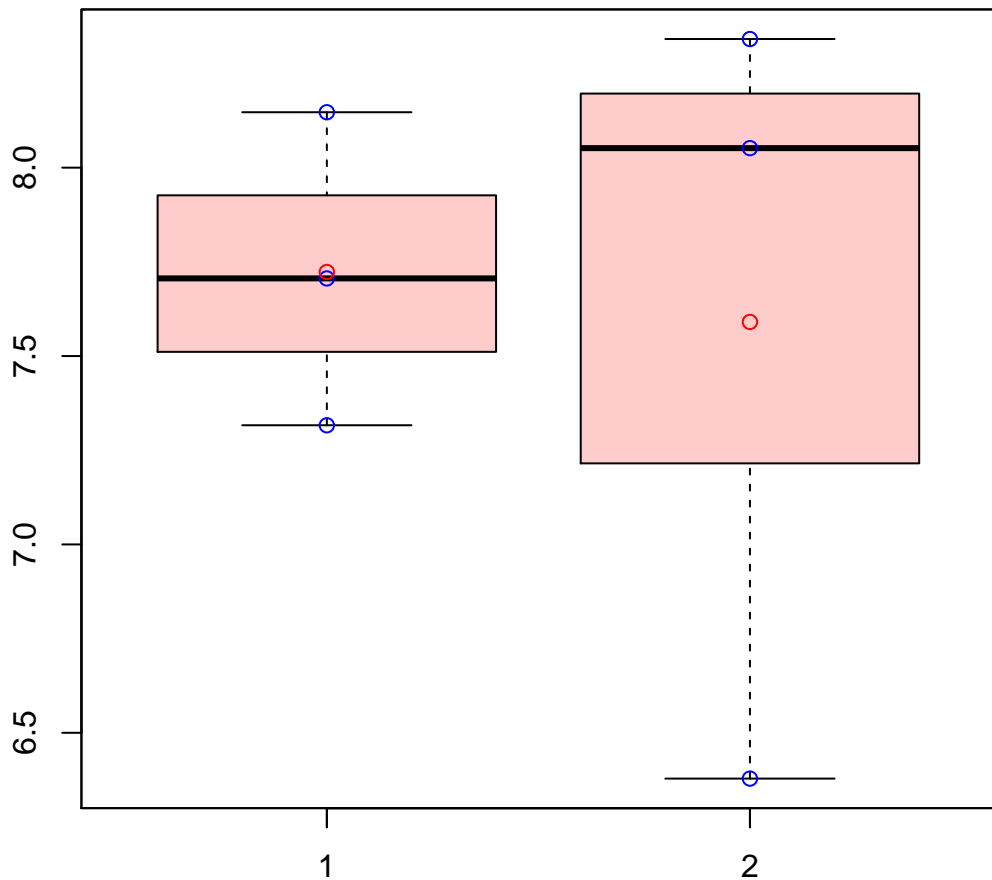

t-Test: p-value = 0.85

# CL2525Contig1|CL2525Contig1

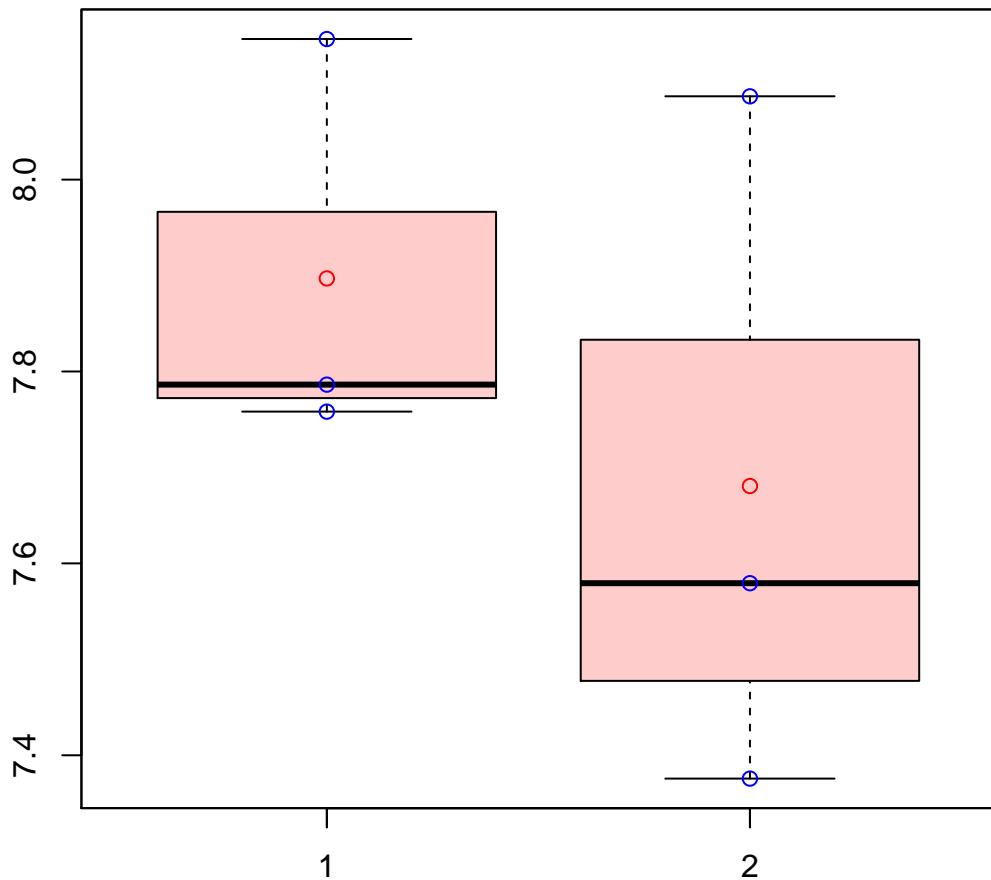

t-Test: p-value = 0.44

# CL2525Contig2|CL2525Contig2

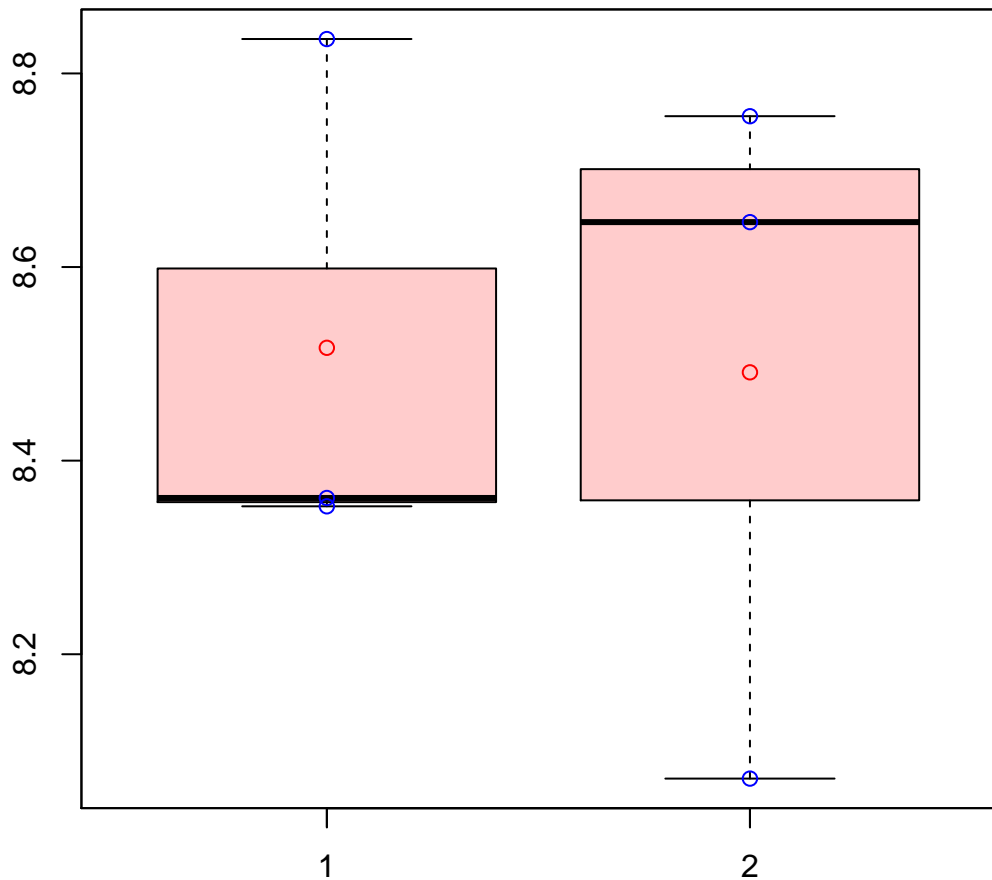

t-Test: p-value = 0.93

## CL252Contig2|CL252Contig2

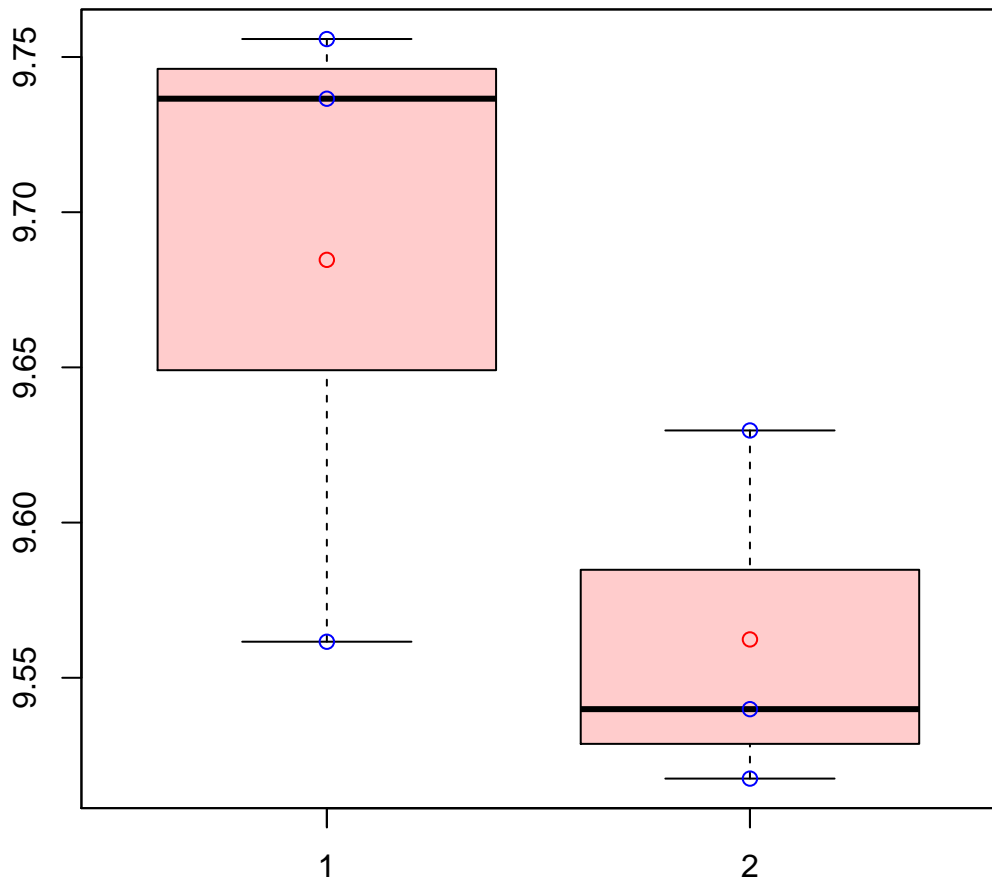

t-Test: p-value = 0.18

# CL2533Contig1|CL2533Contig1

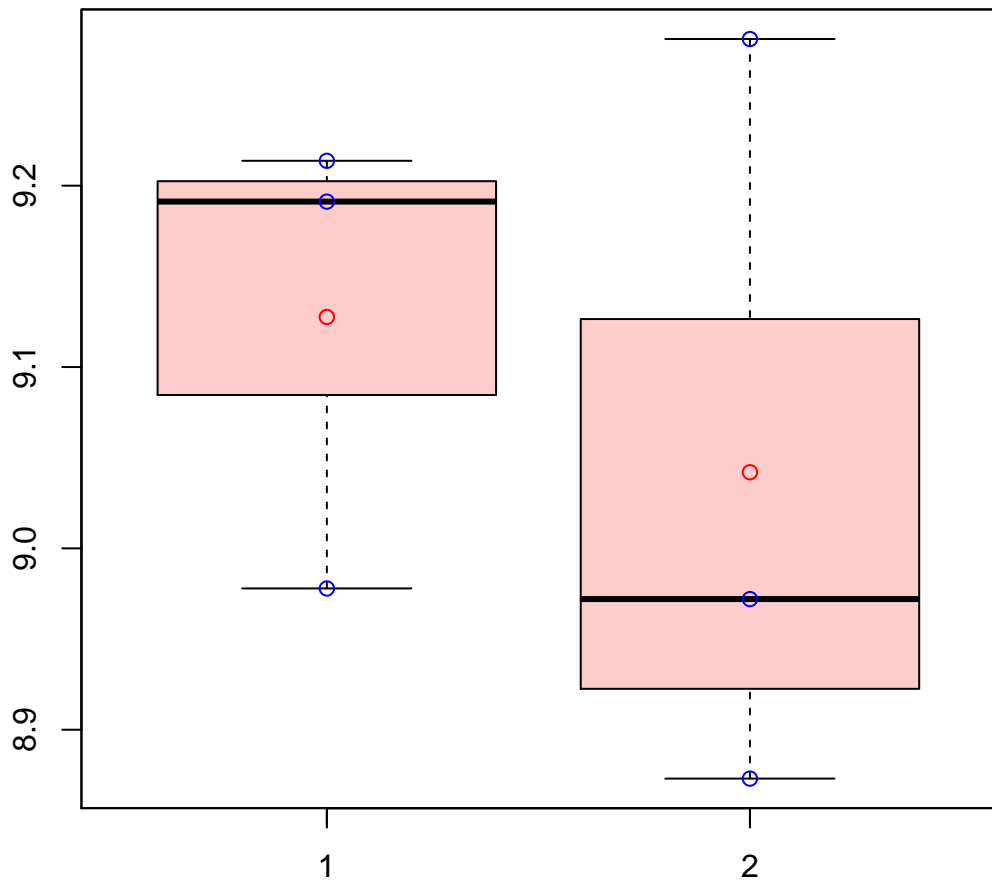

t-Test: p-value = 0.59



# CL2535Contig1|CL2535Contig1

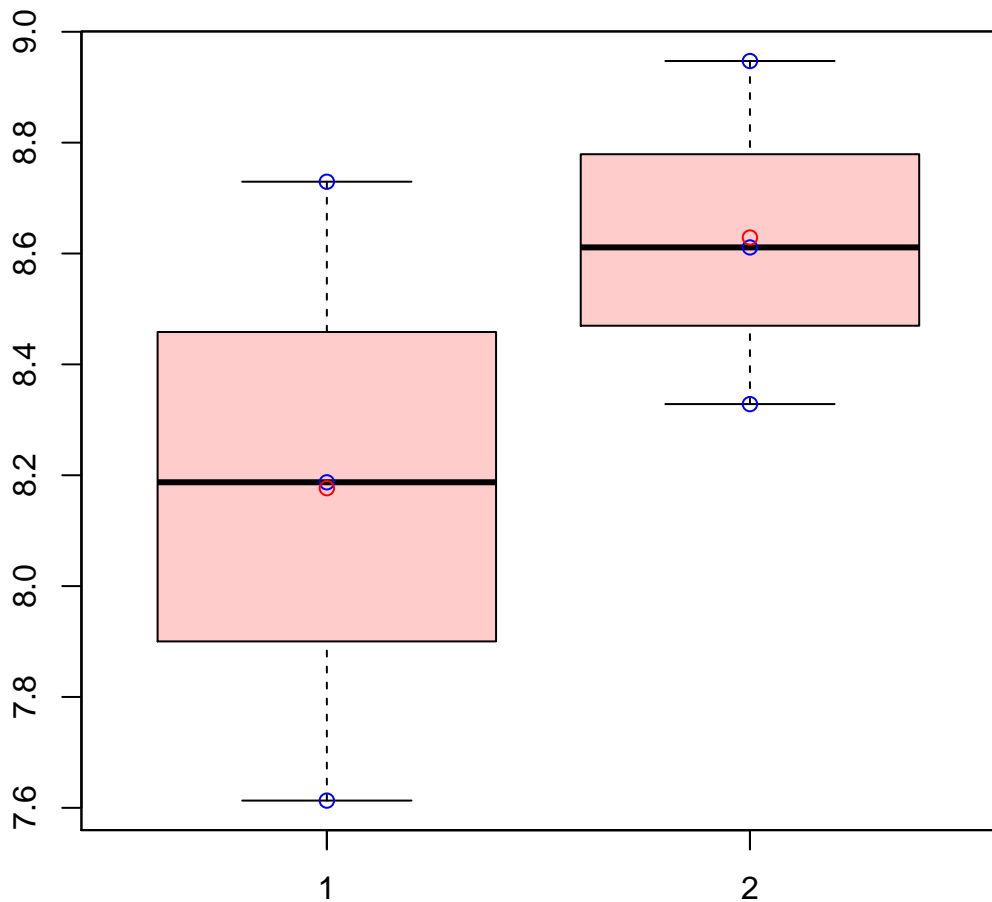

t-Test: p-value = 0.3

# CL2537Contig3|CL2537Contig3

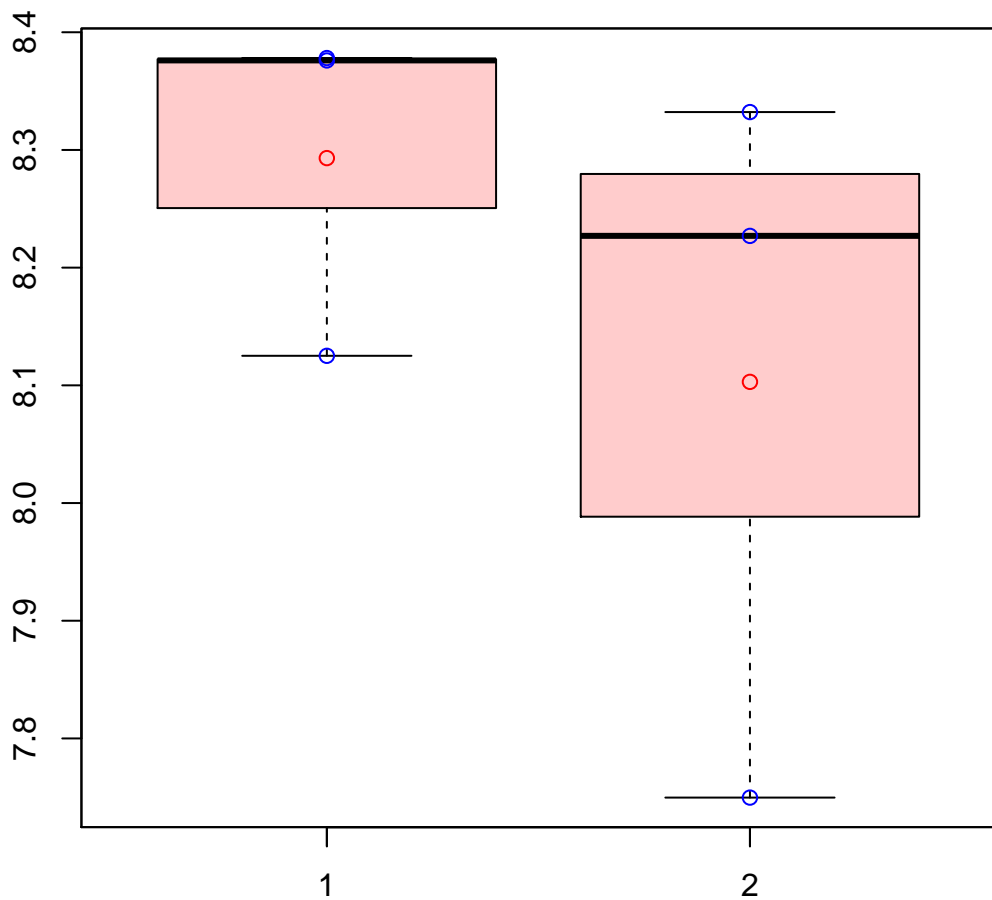

t-Test: p-value = 0.41

# CL253Contig1|CL253Contig1

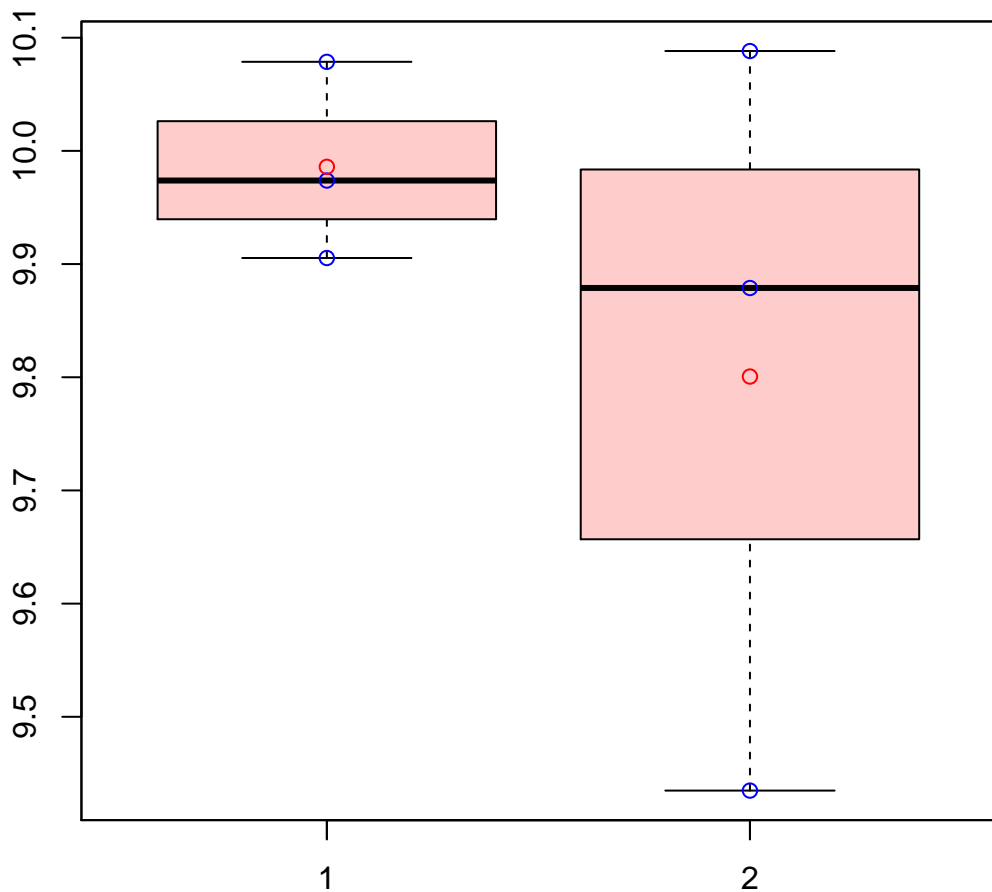

t-Test: p-value = 0.44

# CL253Contig5|CL253Contig5

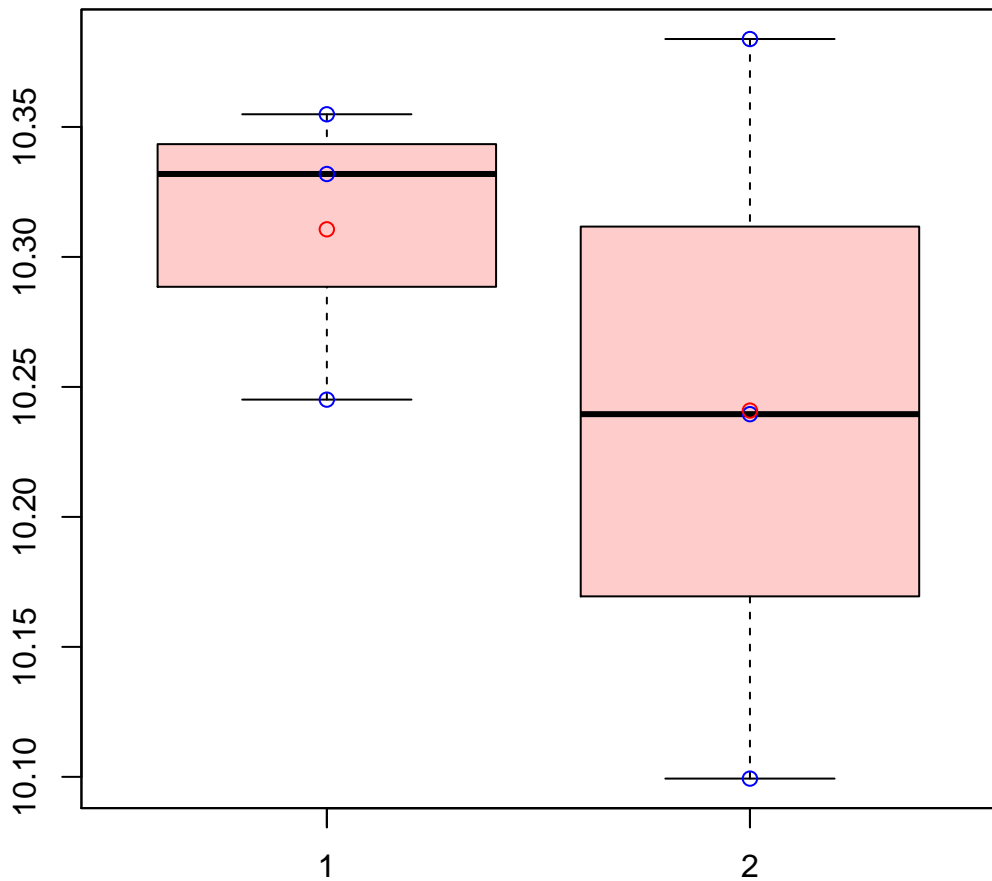

t-Test: p-value = 0.5

# CL25466Contig1|CL25466Contig1

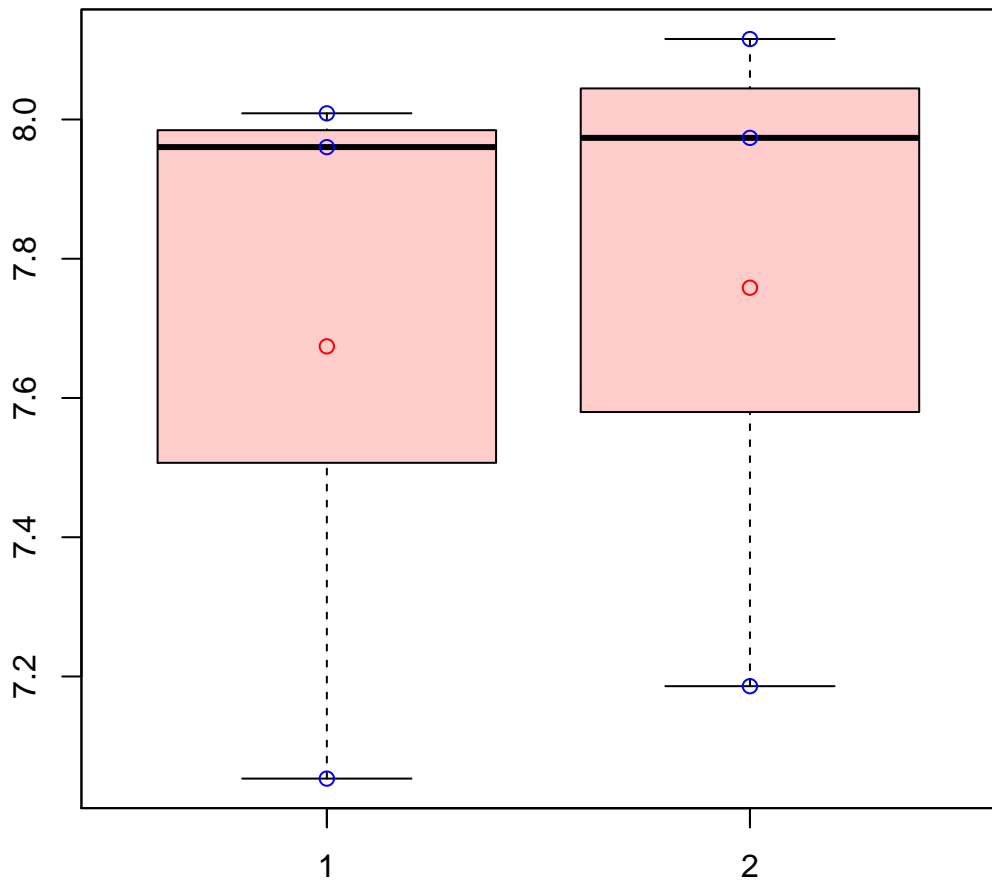

t-Test: p-value = 0.85

# CL2546Contig1|CL2546Contig1

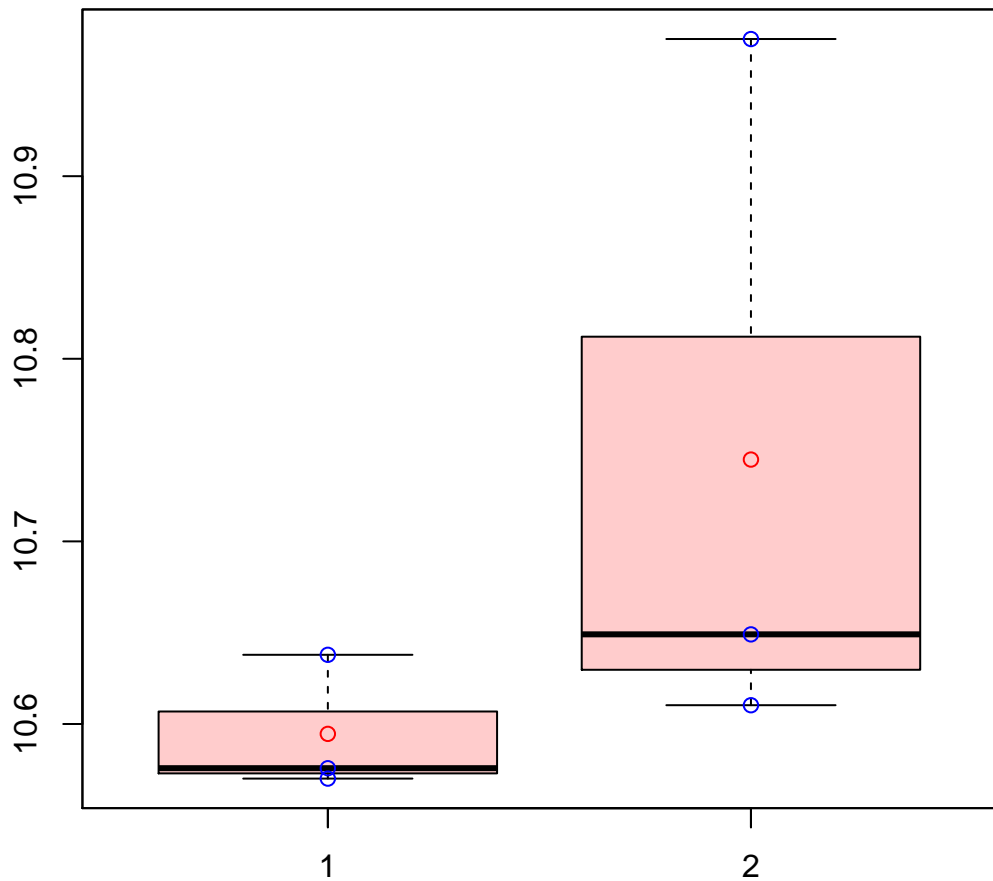

t-Test: p-value = 0.32

# CL2546Contig3|CL2546Contig3

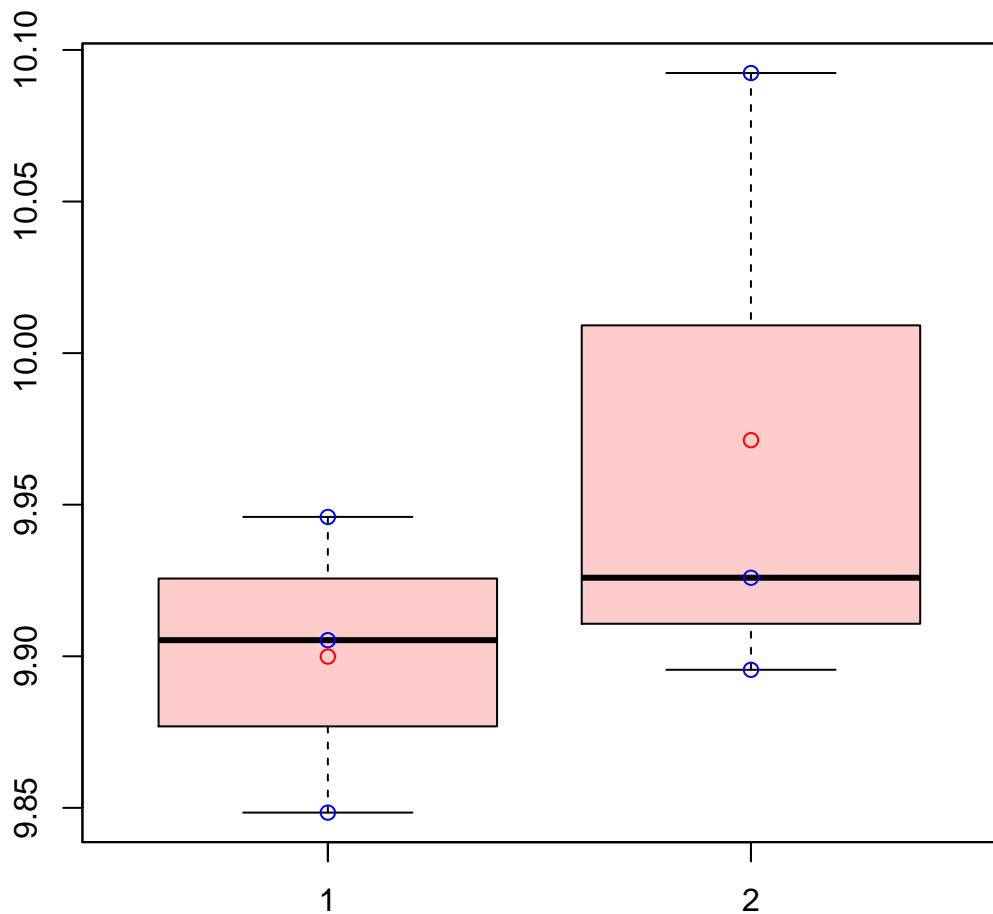

t-Test: p-value = 0.37

# CL2546Contig4|CL2546Contig4

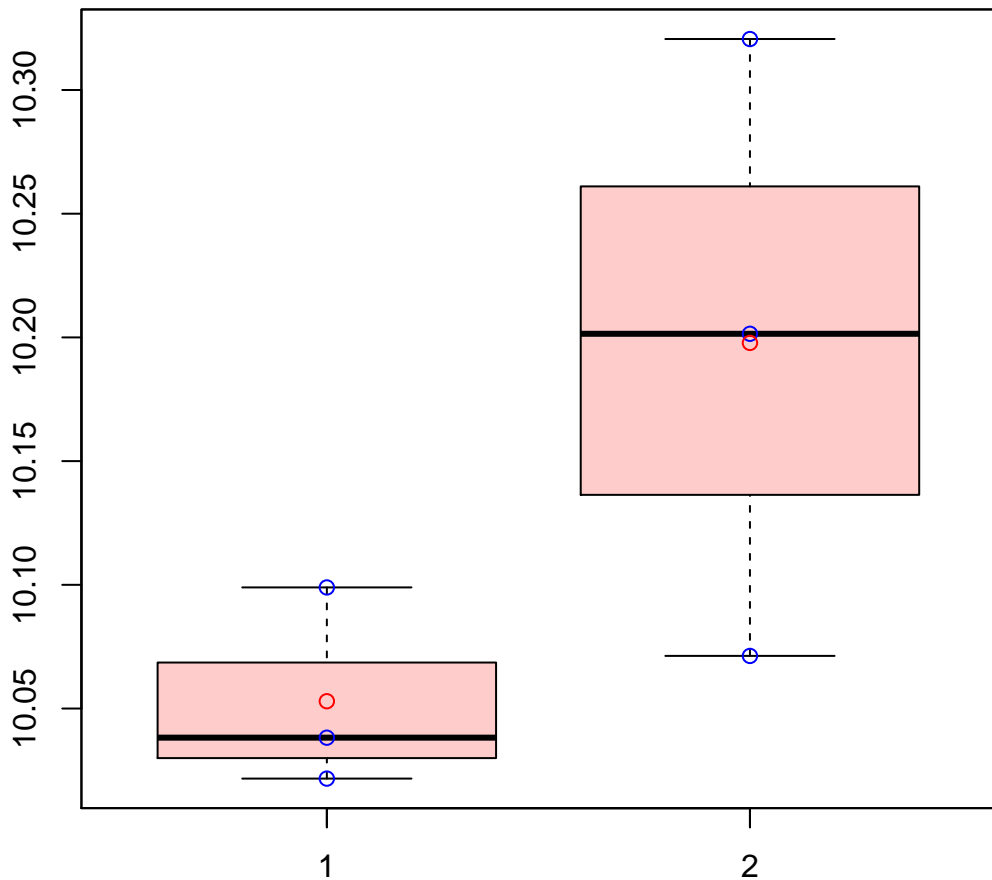

t-Test: p-value = 0.17



# CL2546Contig5|CL2546Contig5

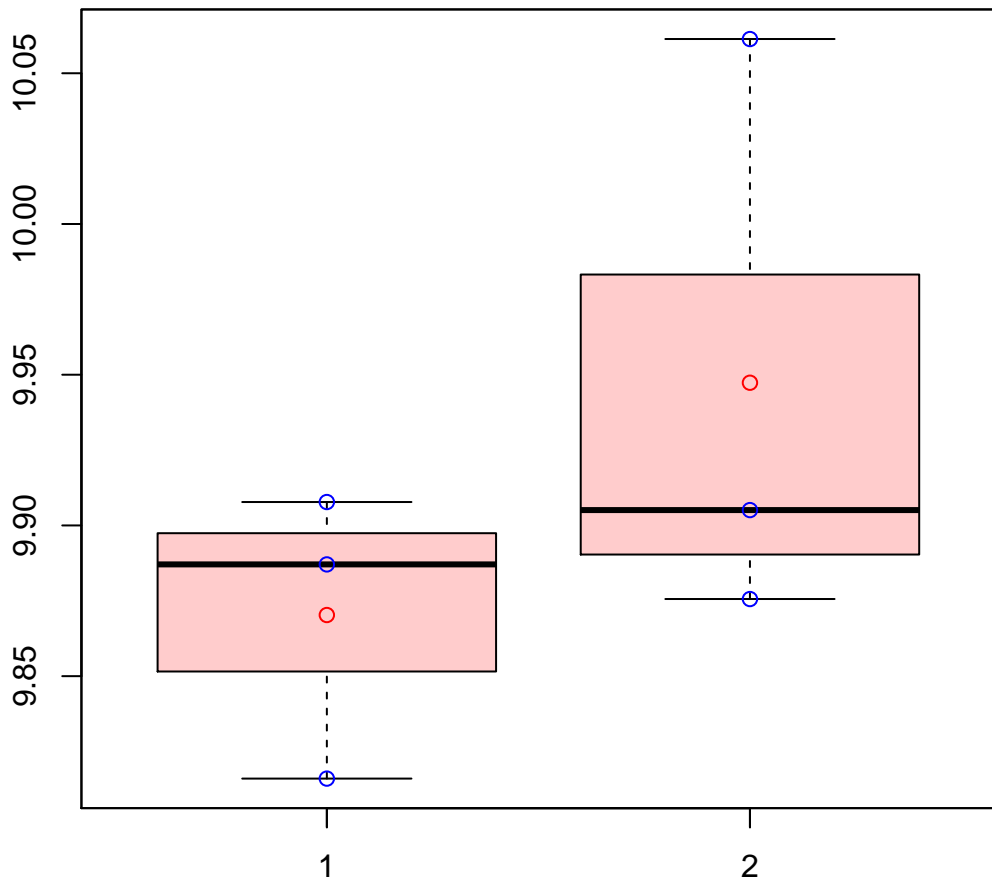

t-Test: p-value = 0.32

# CL2547Contig2|CL2547Contig2

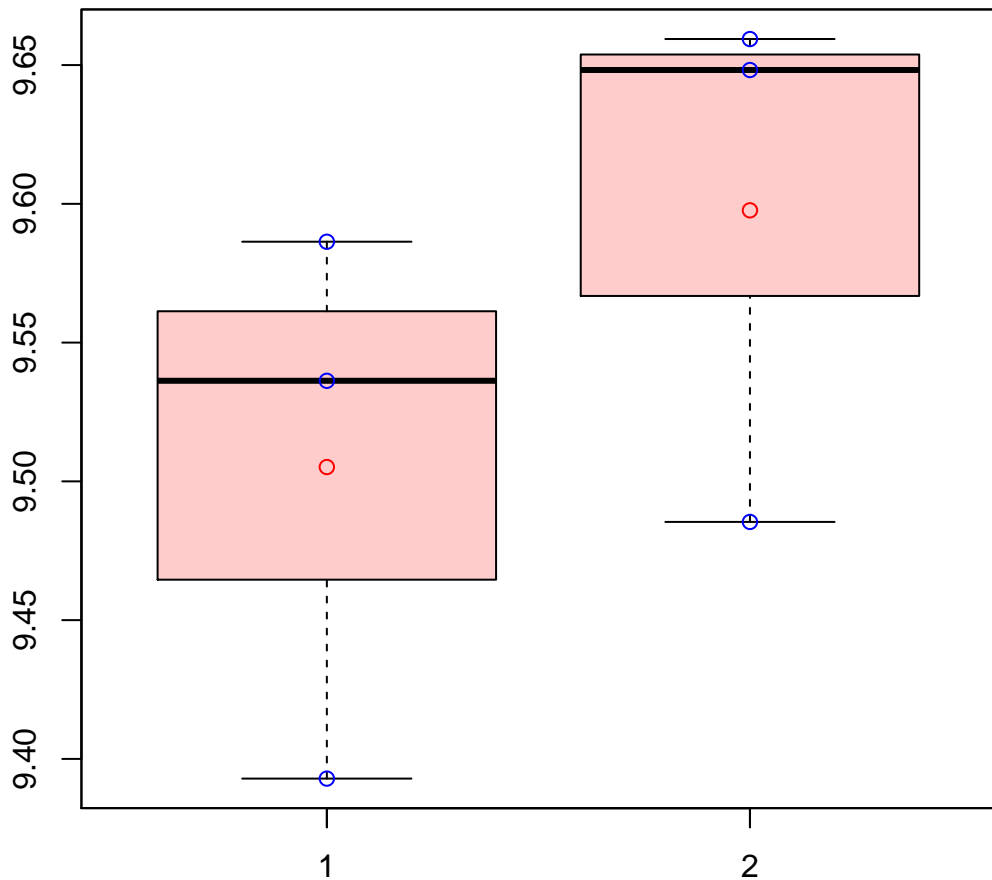

t-Test: p-value = 0.32

# CL25516Contig1|CL25516Contig1

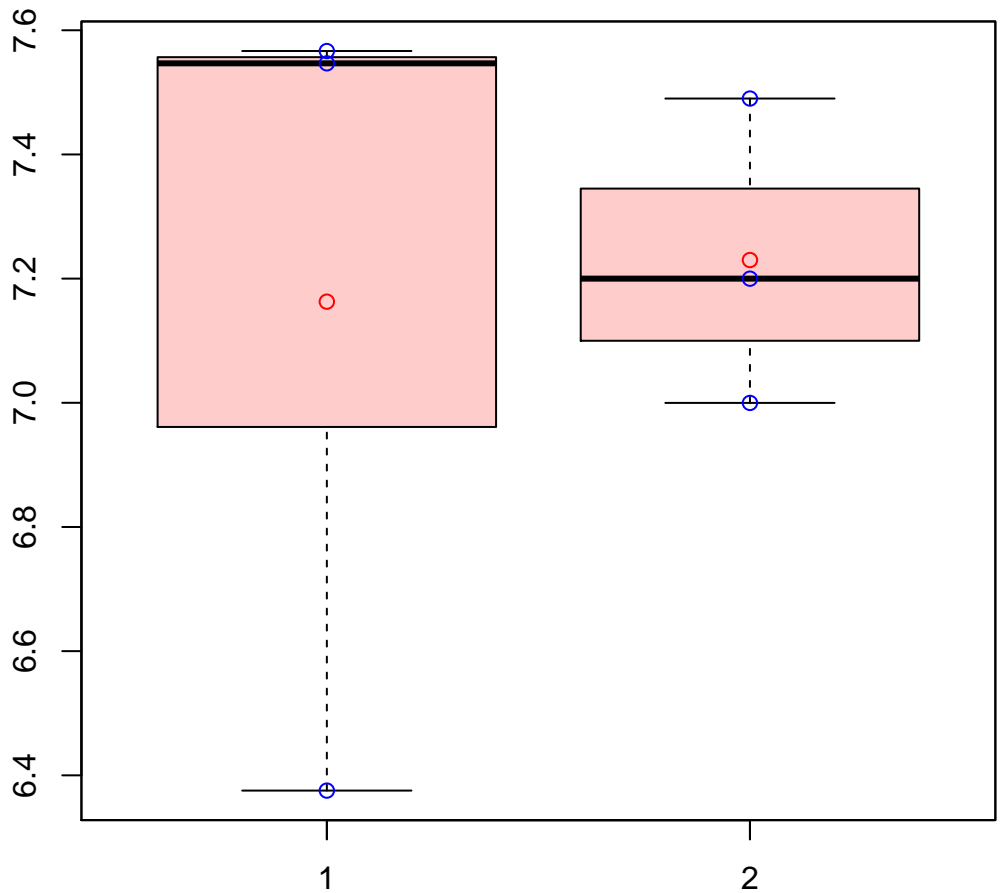

t-Test: p-value = 0.88

# CL2551Contig1|CL2551Contig1

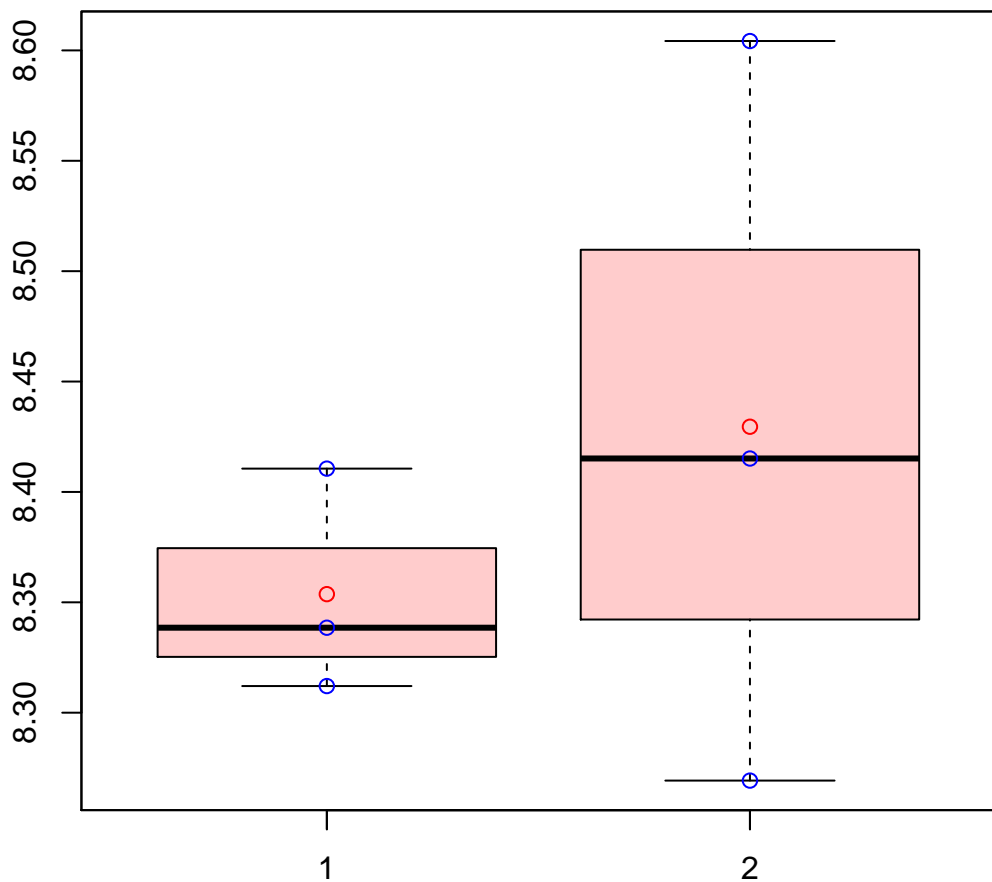

t-Test: p-value = 0.52

# CL2555Contig2|CL2555Contig2

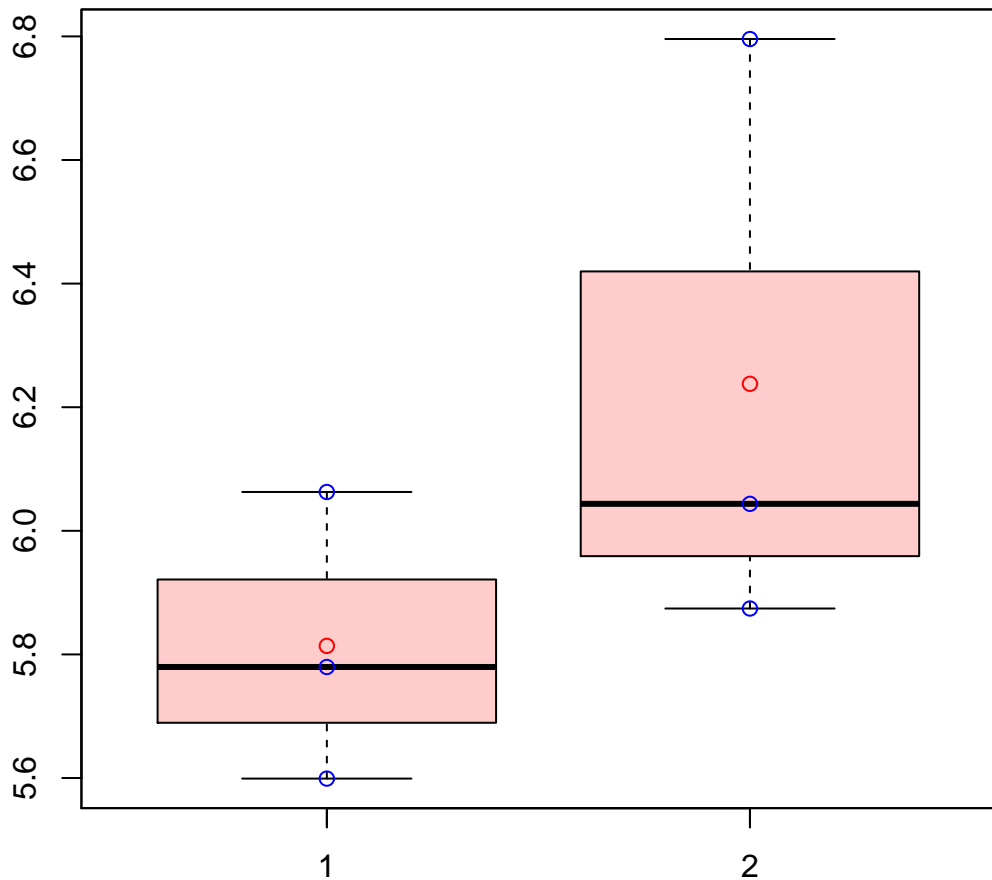

t-Test: p-value = 0.27

# CL255Contig3|CL255Contig3

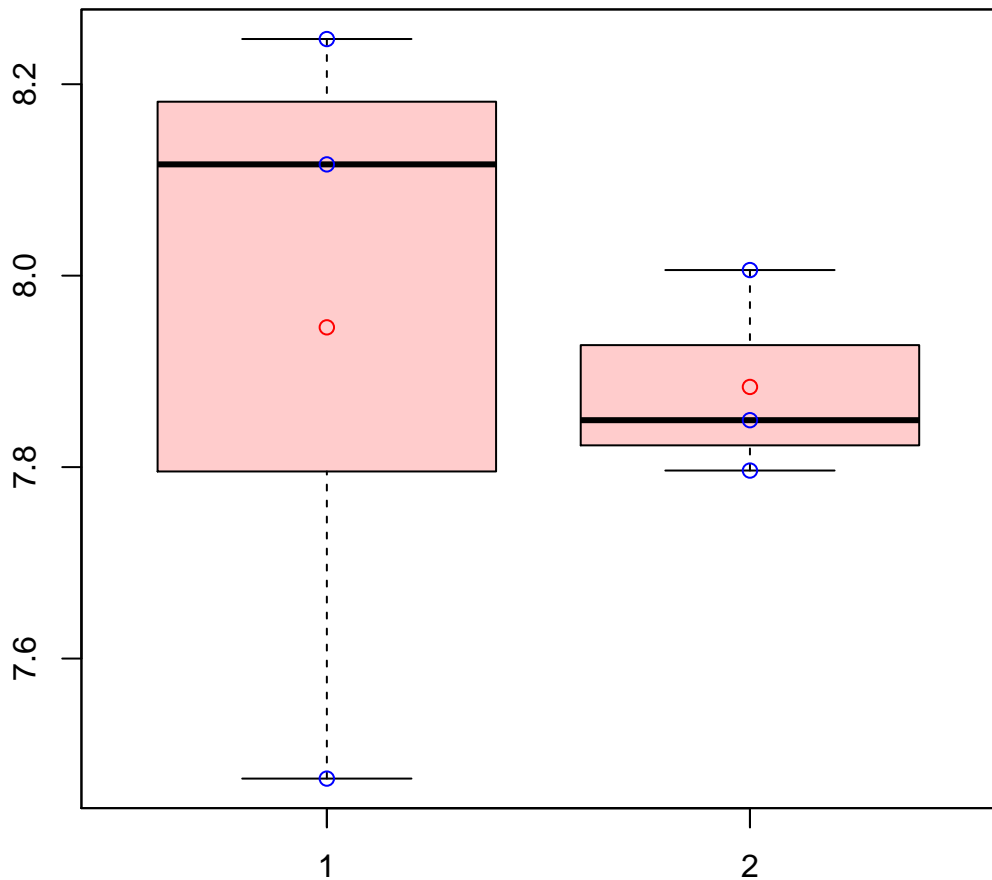

t-Test: p-value = 0.82

# CL255Contig7|CL255Contig7

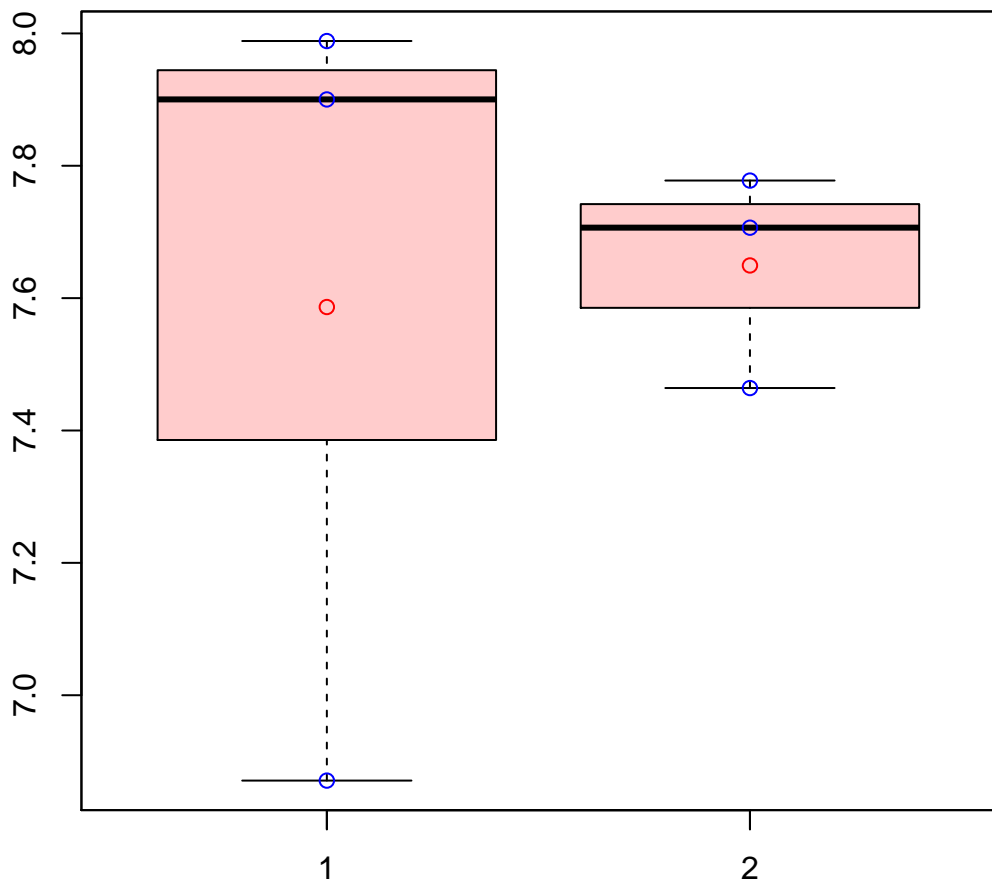

t-Test: p-value = 0.88

# CL25678Contig1|CL25678Contig1

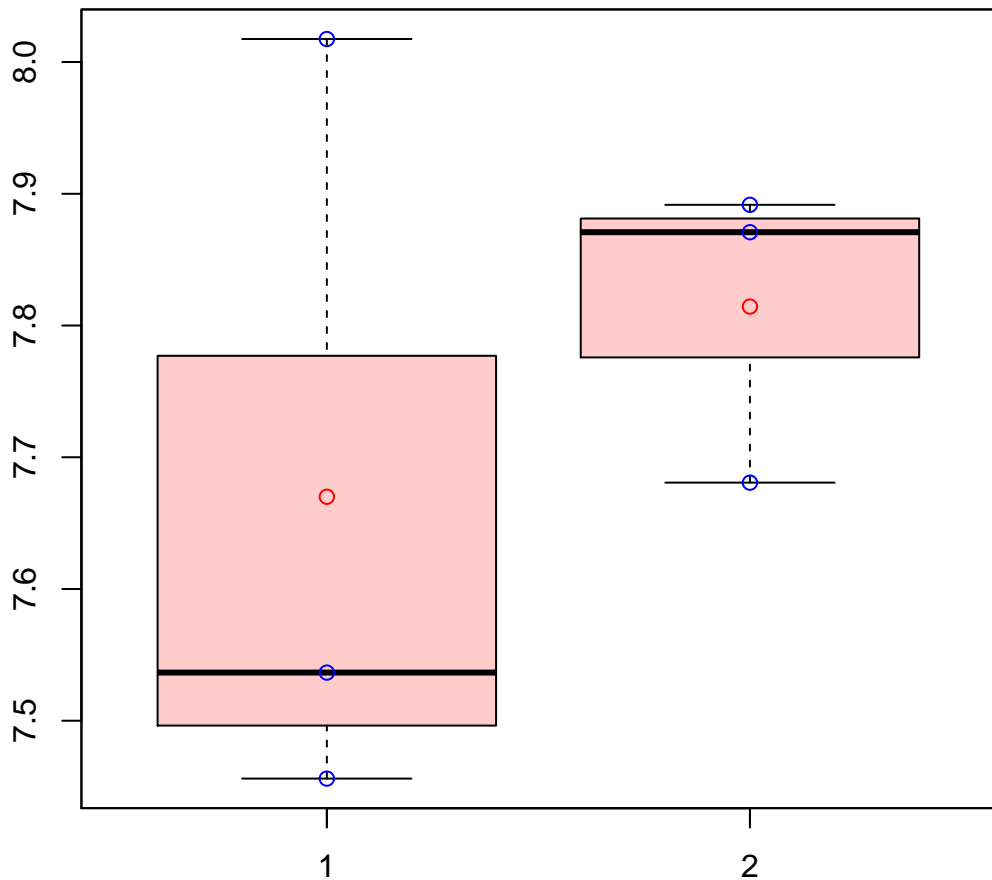

t-Test: p-value = 0.51



# CL256Contig12|CL256Contig12

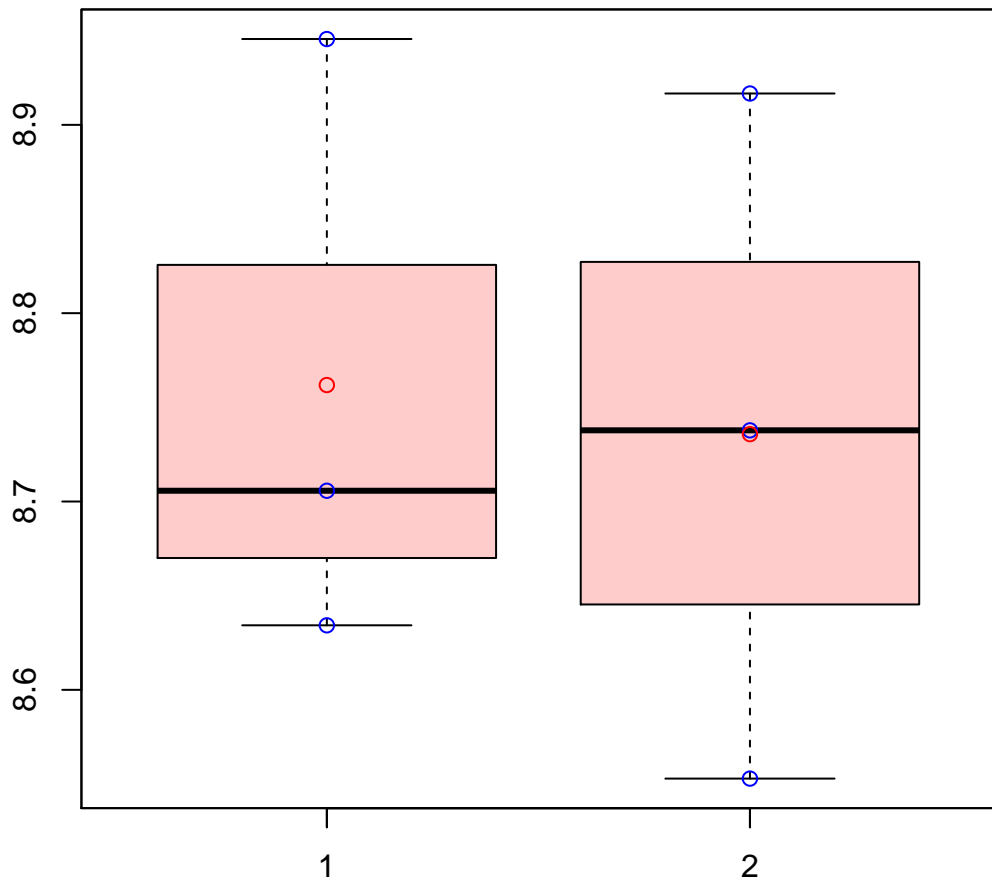

t-Test: p-value = 0.86

# CL25721Contig1|CL25721Contig1

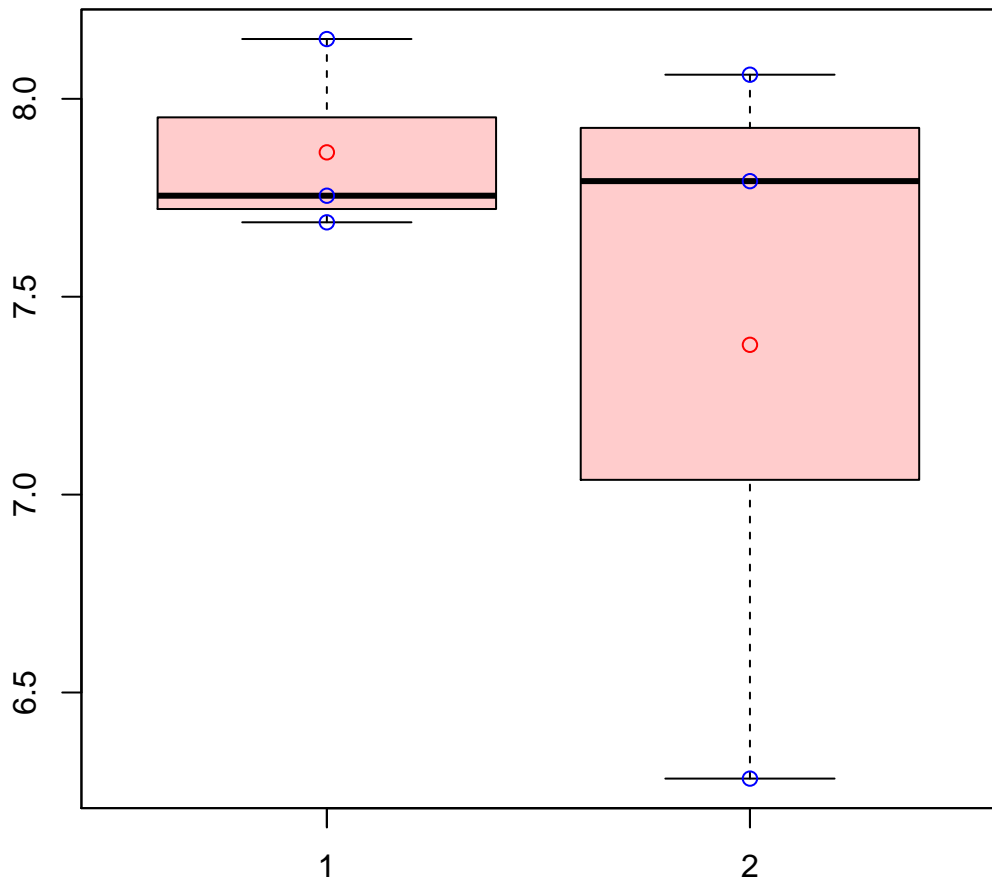

t-Test: p-value = 0.48

# CL2573Contig2|CL2573Contig2

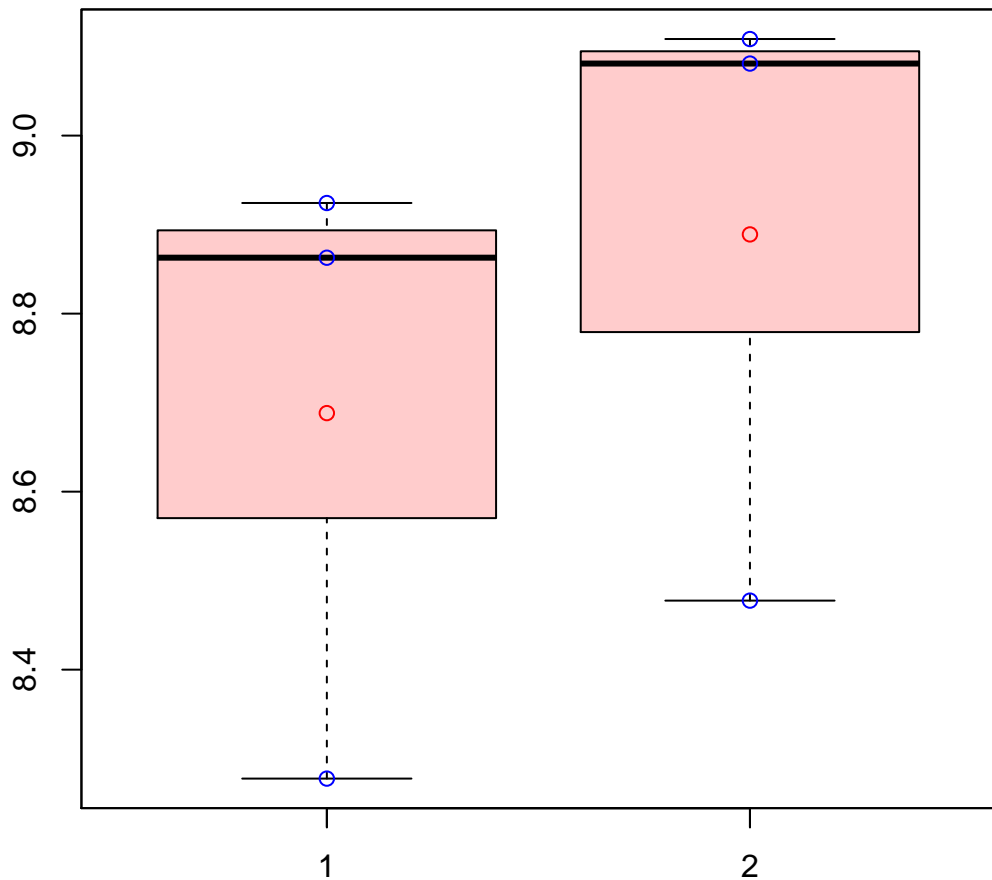

t-Test: p-value = 0.53

# CL2573Contig6|CL2573Contig6



t-Test: p-value = 0.53

# CL2573Contig7|CL2573Contig7

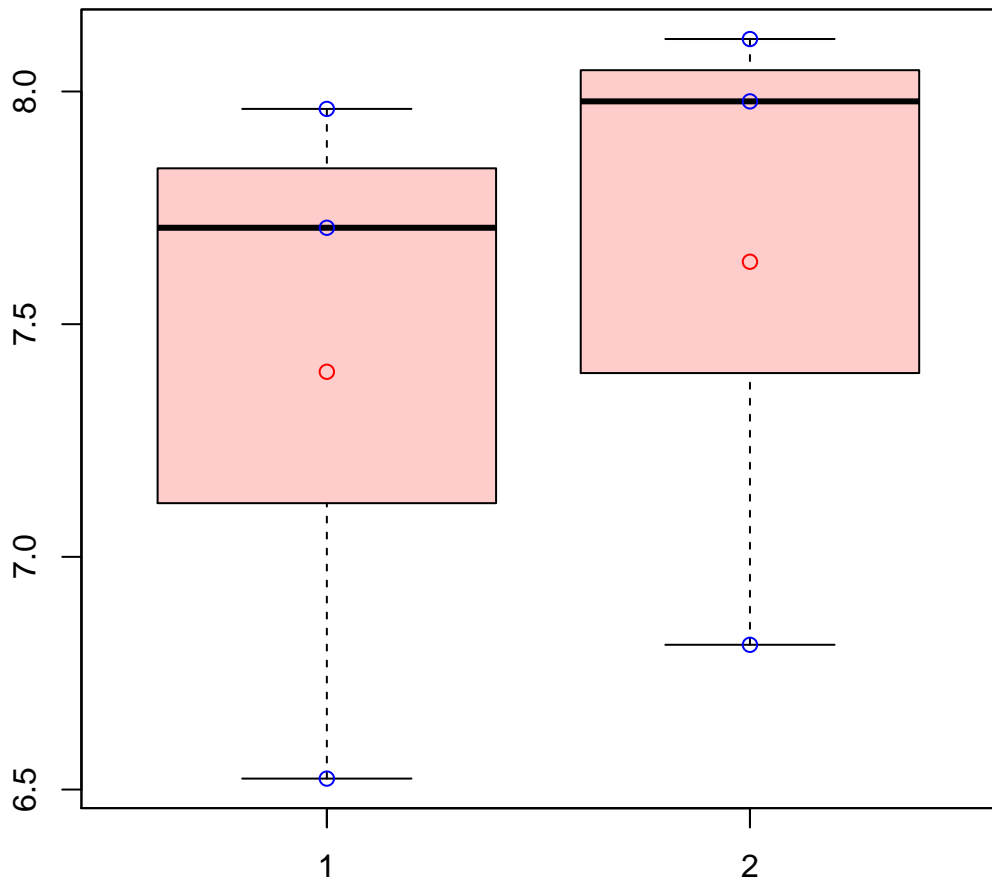

t-Test: p-value = 0.72

# CL2575Contig2|CL2575Contig2

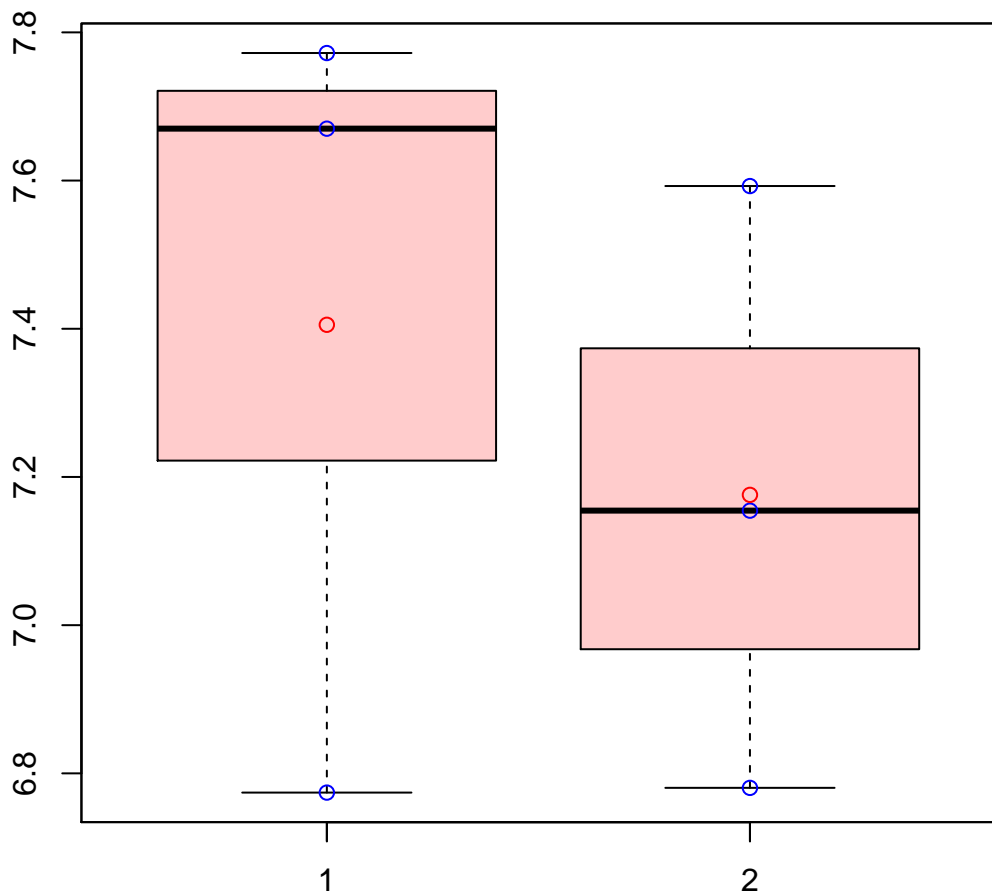

t-Test: p-value = 0.59

# CL25770Contig1|CL25770Contig1

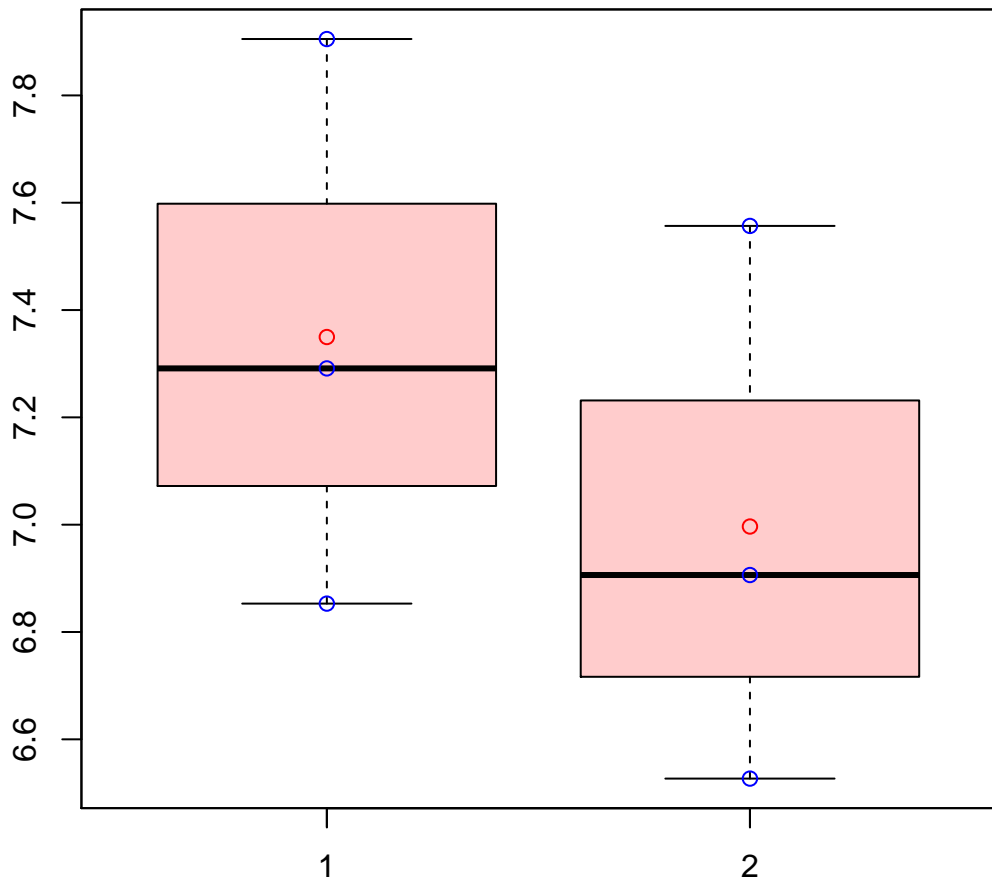

t-Test: p-value = 0.46

# CL257Contig6|CL257Contig6

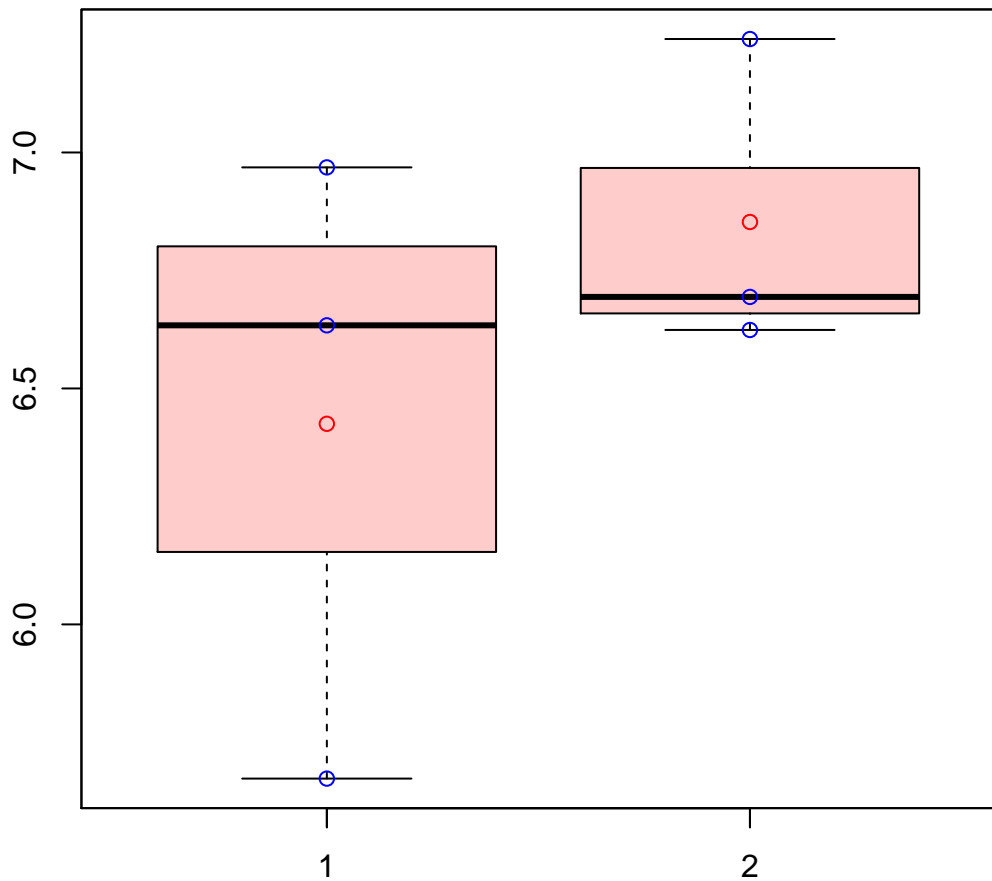

t-Test: p-value = 0.4



# CL257Contig7|CL257Contig7

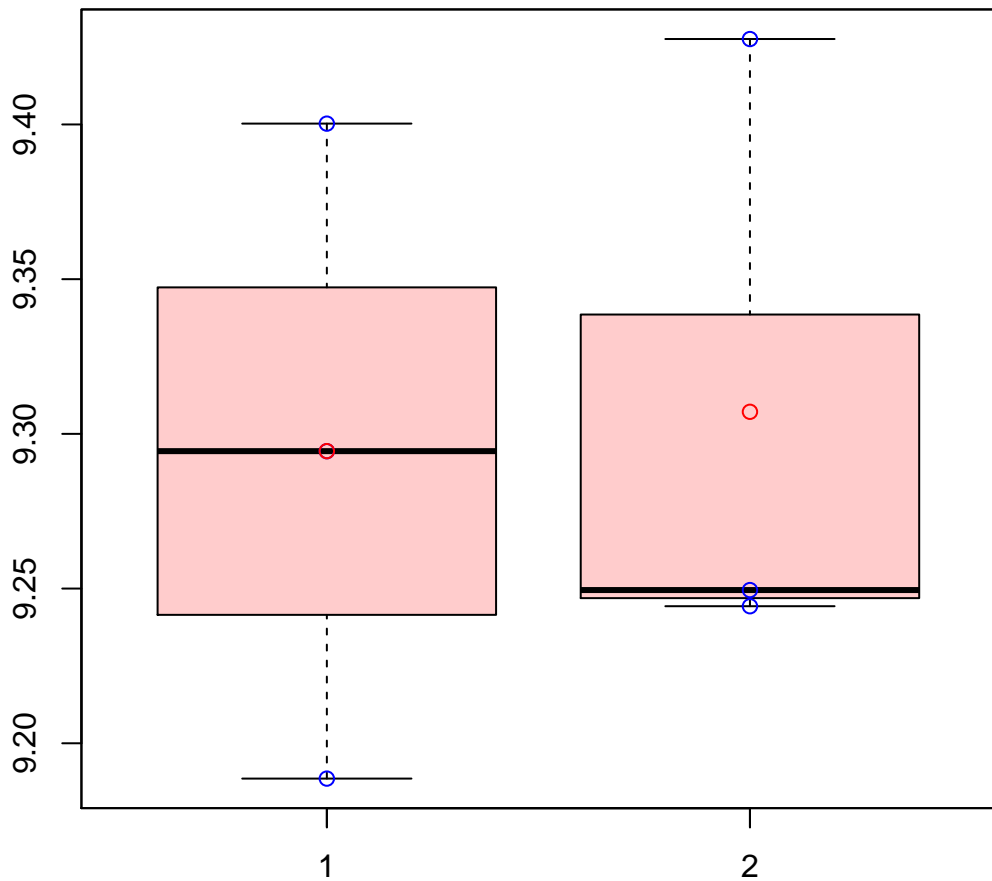

t-Test: p-value = 0.89

# CL2581Contig3|CL2581Contig3

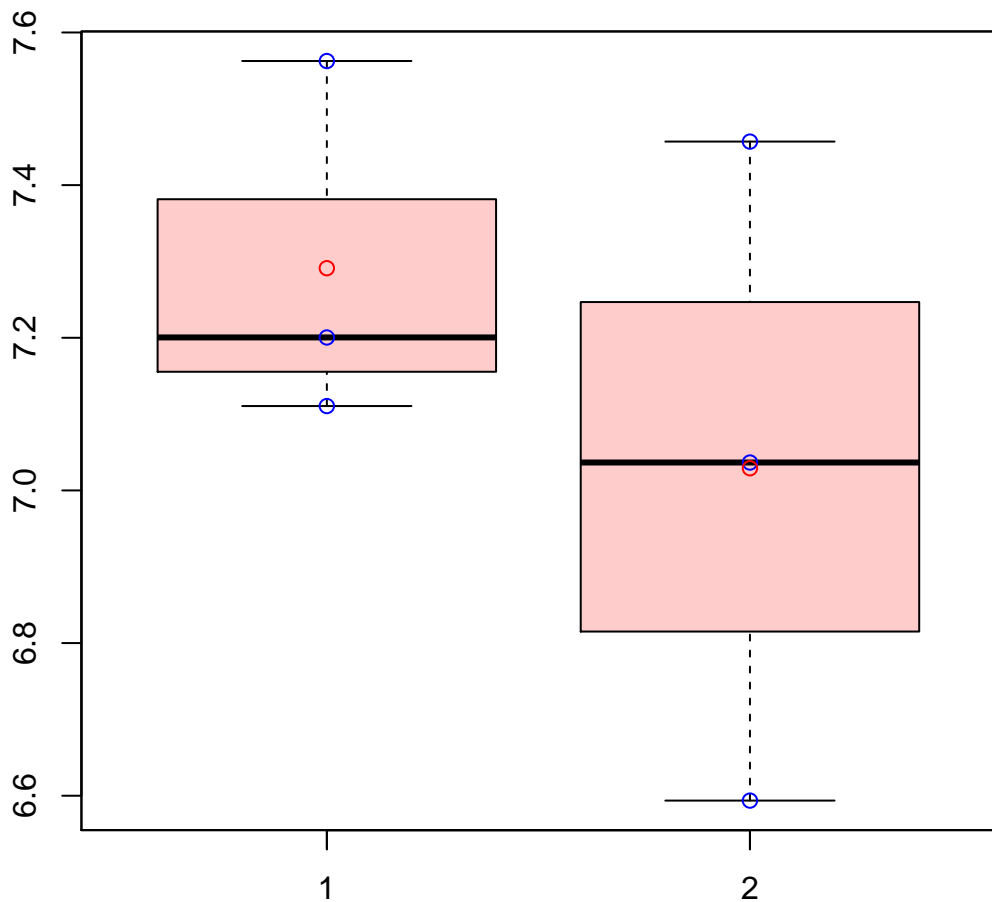

t-Test: p-value = 0.42

# CL25869Contig1|CL25869Contig1

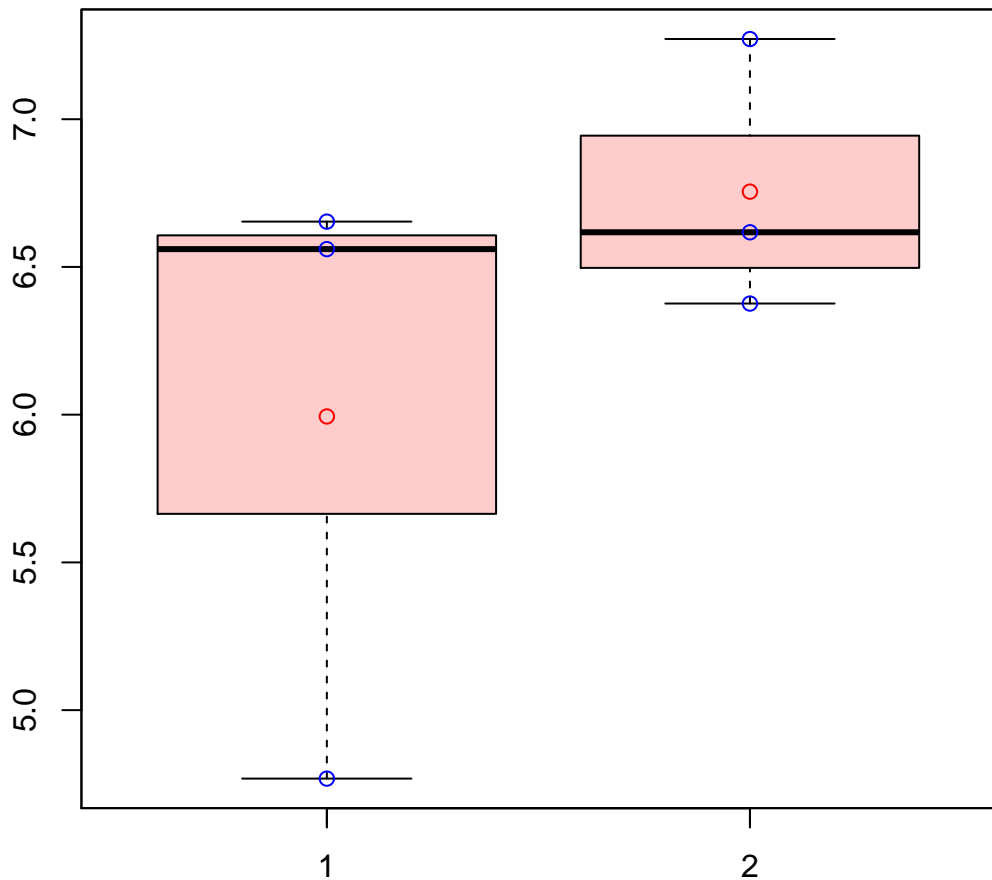

t-Test: p-value = 0.35

# CL2598Contig2|CL2598Contig2

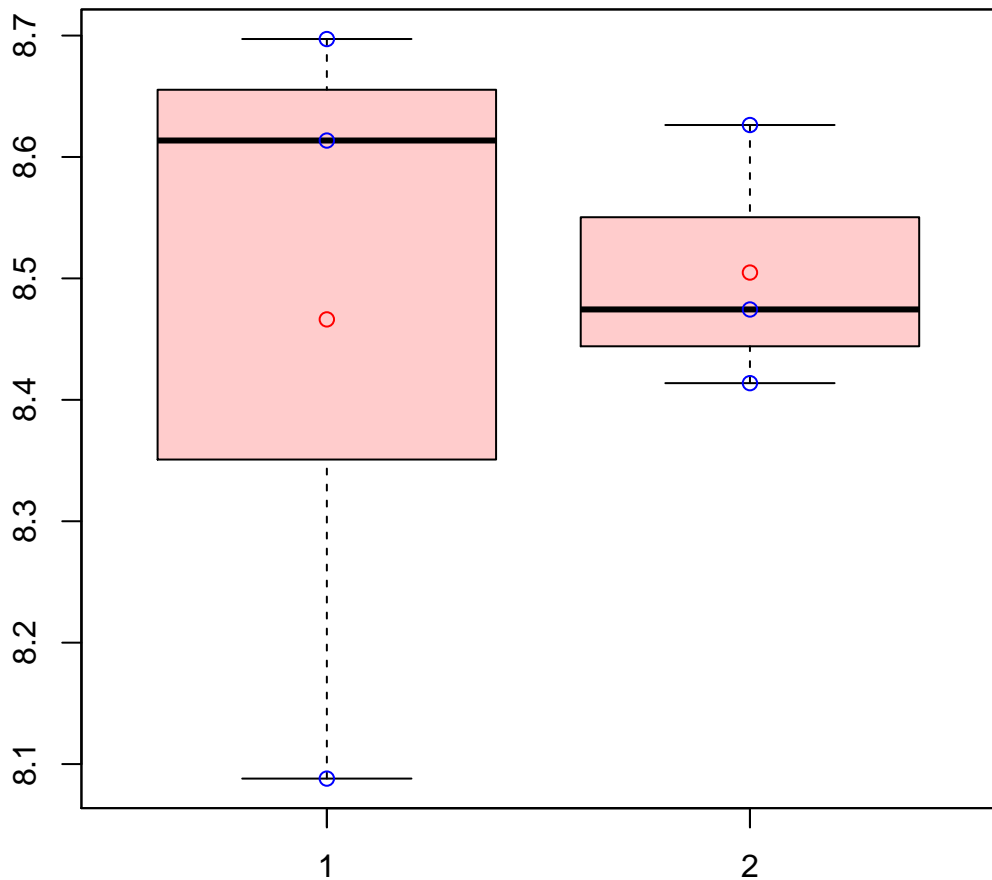

t-Test: p-value = 0.86

# CL259Contig3|CL259Contig3

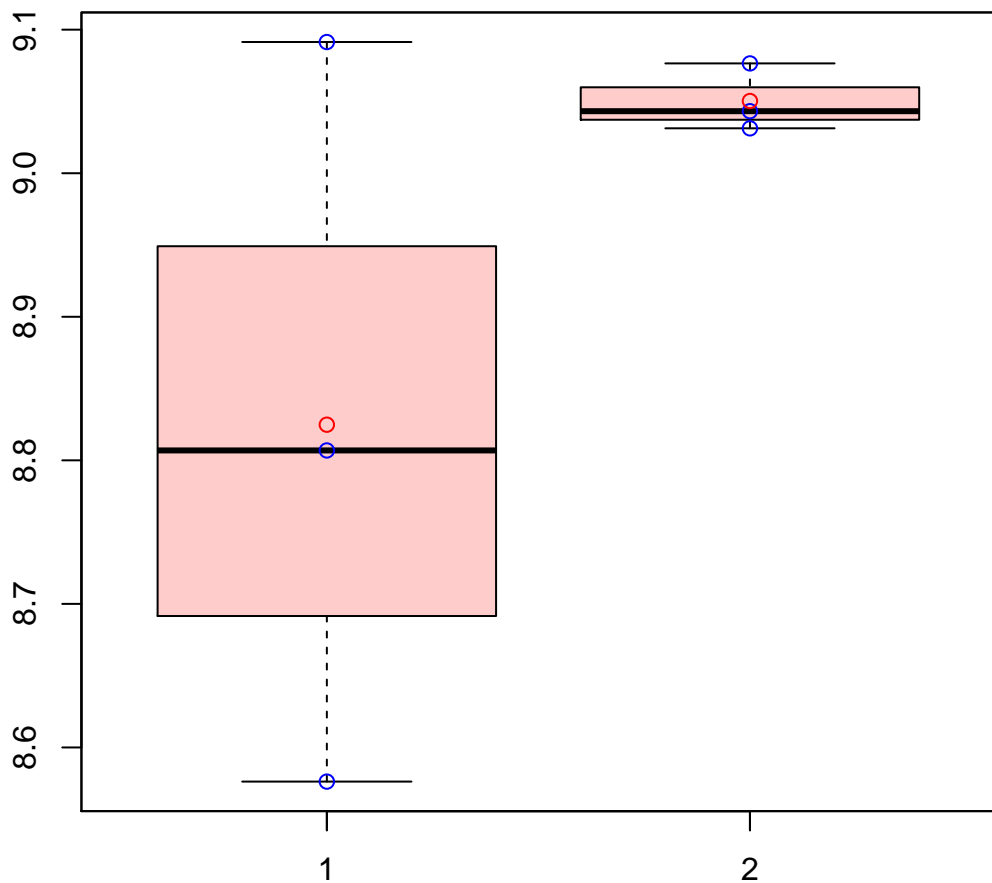

t-Test: p-value = 0.27

# CL26021Contig1|CL26021Contig1

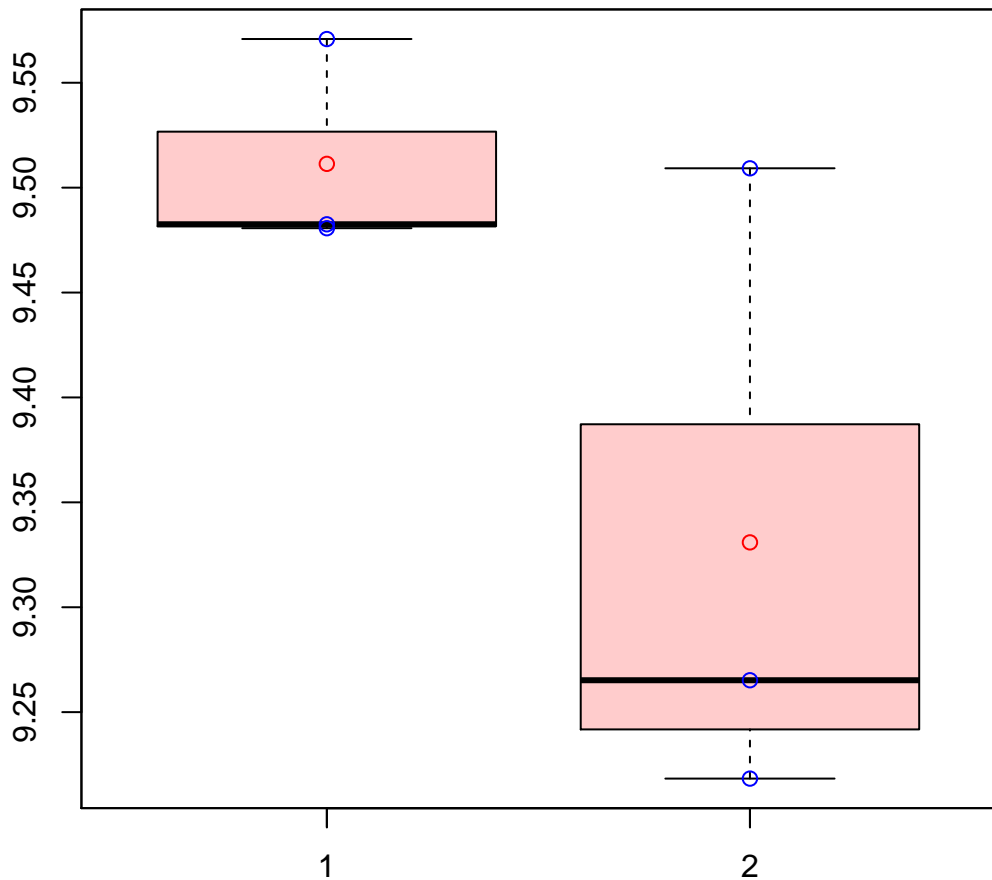

t-Test: p-value = 0.17

# CL2608Contig3|CL2608Contig3

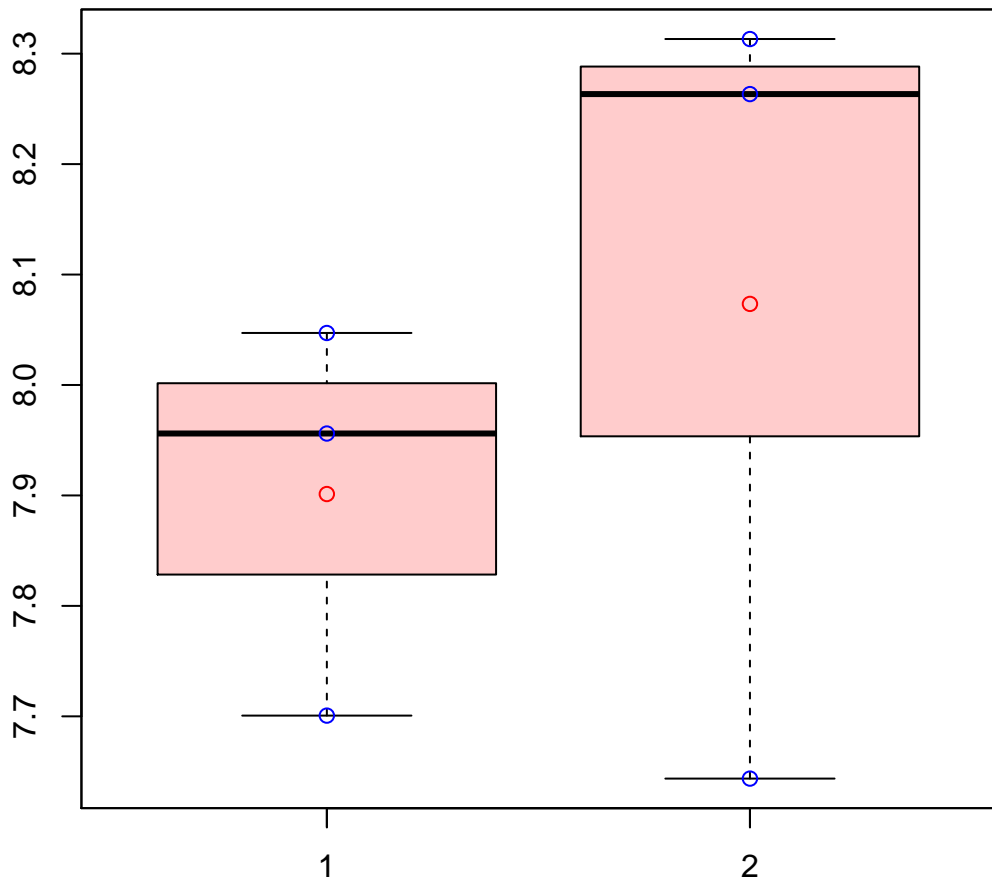

t-Test: p-value = 0.53

# CL2610Contig5|CL2610Contig5

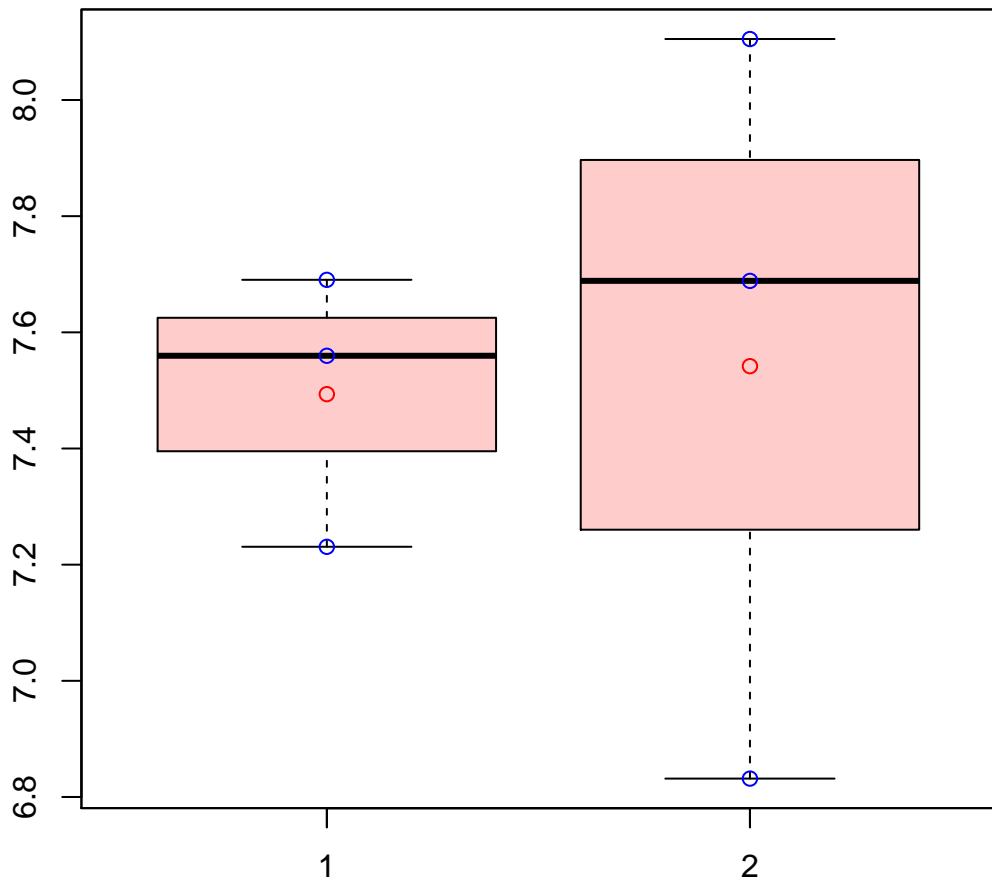

t-Test: p-value = 0.91



# CL2612Contig1|CL2612Contig1

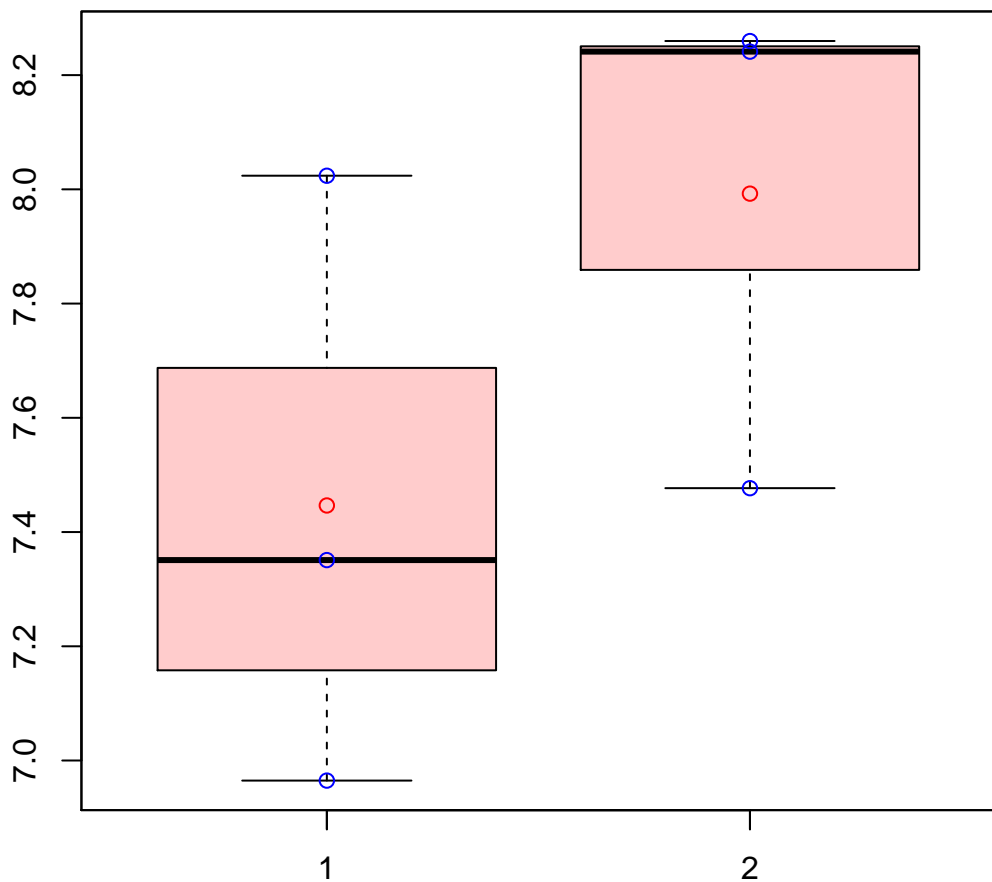

t-Test: p-value = 0.25

## CL2612Contig2|CL2612Contig2

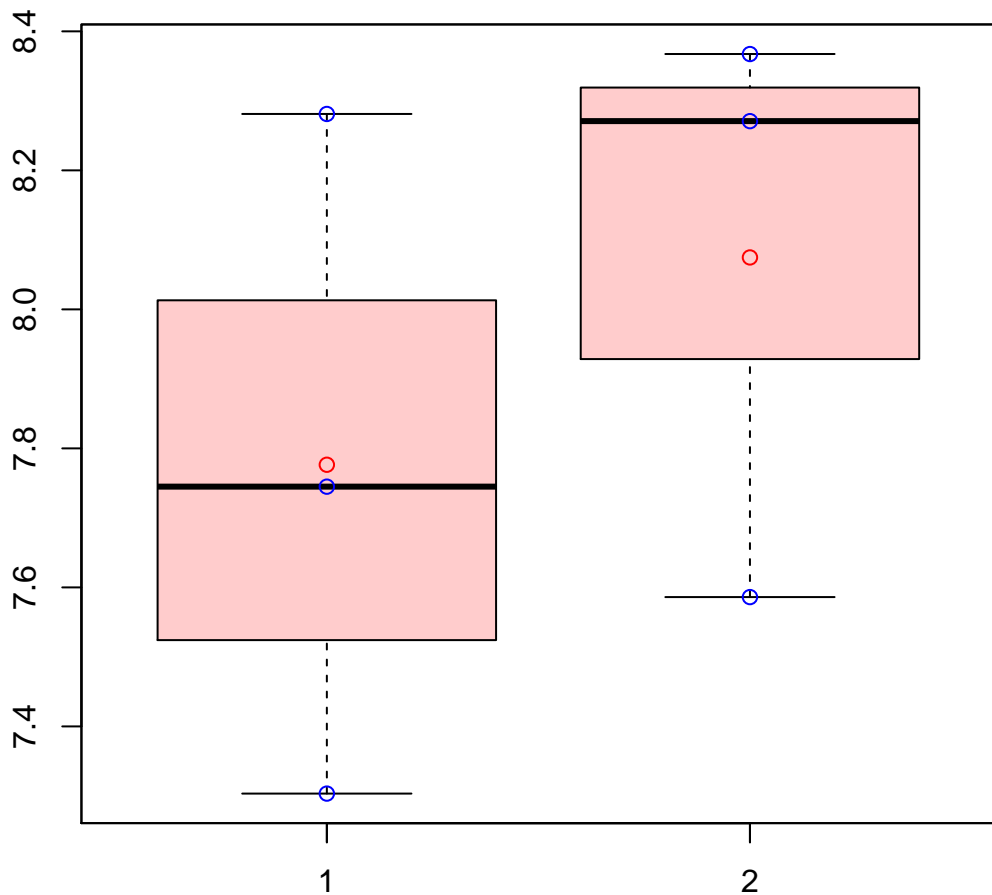

t-Test: p-value = 0.47

# CL2613Contig1|CL2613Contig1

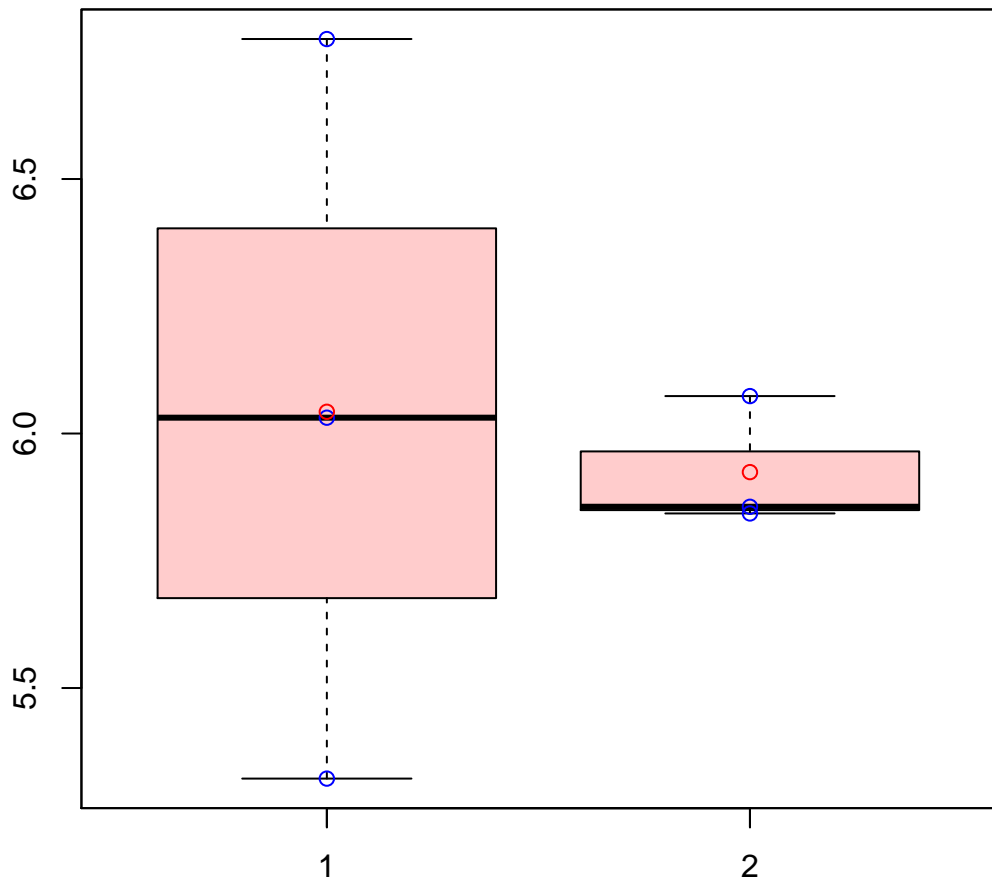

t-Test: p-value = 0.81

# CL2617Contig3|CL2617Contig3

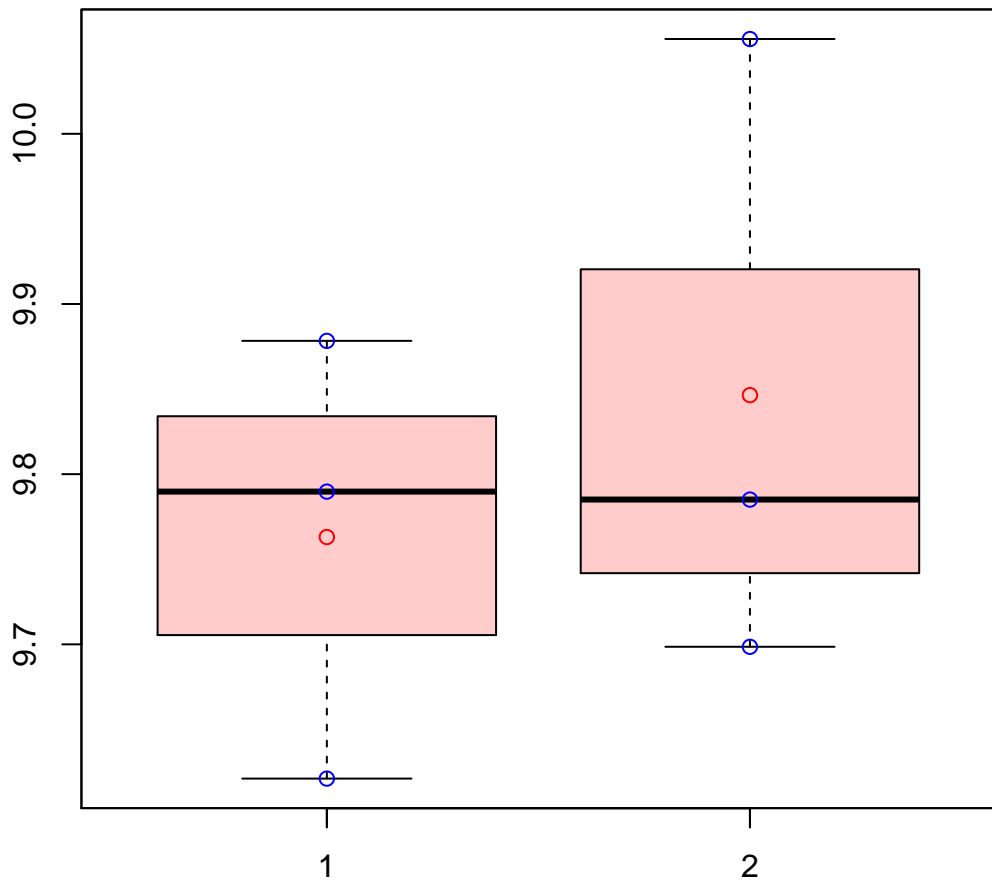

t-Test: p-value = 0.56

# CL2618Contig3|CL2618Contig3

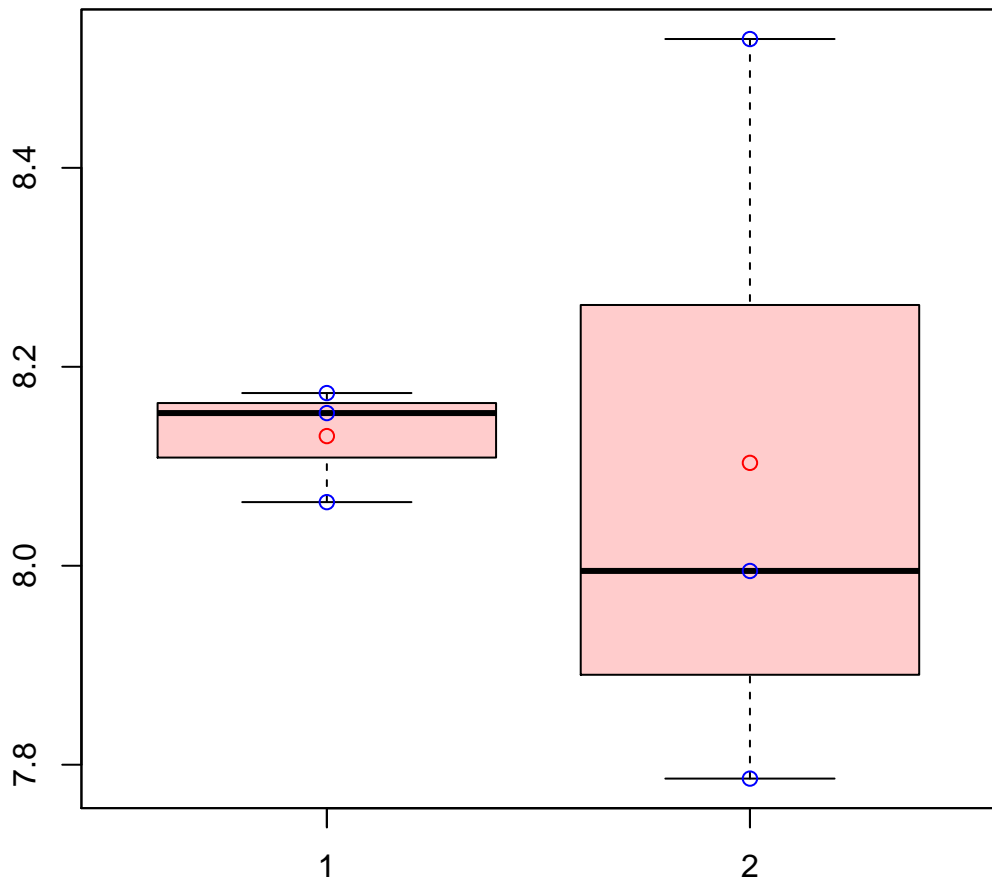

t-Test: p-value = 0.91

# CL261Contig1|CL261Contig1

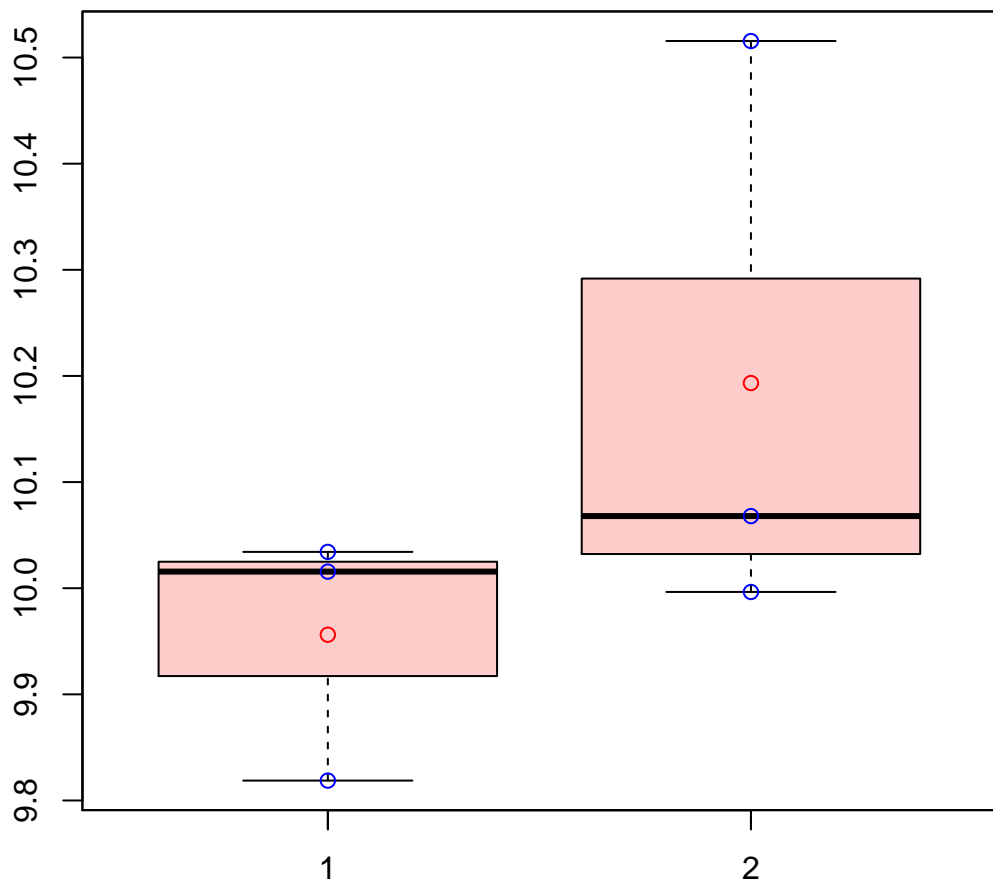

t-Test: p-value = 0.28

# CL2620Contig1|CL2620Contig1

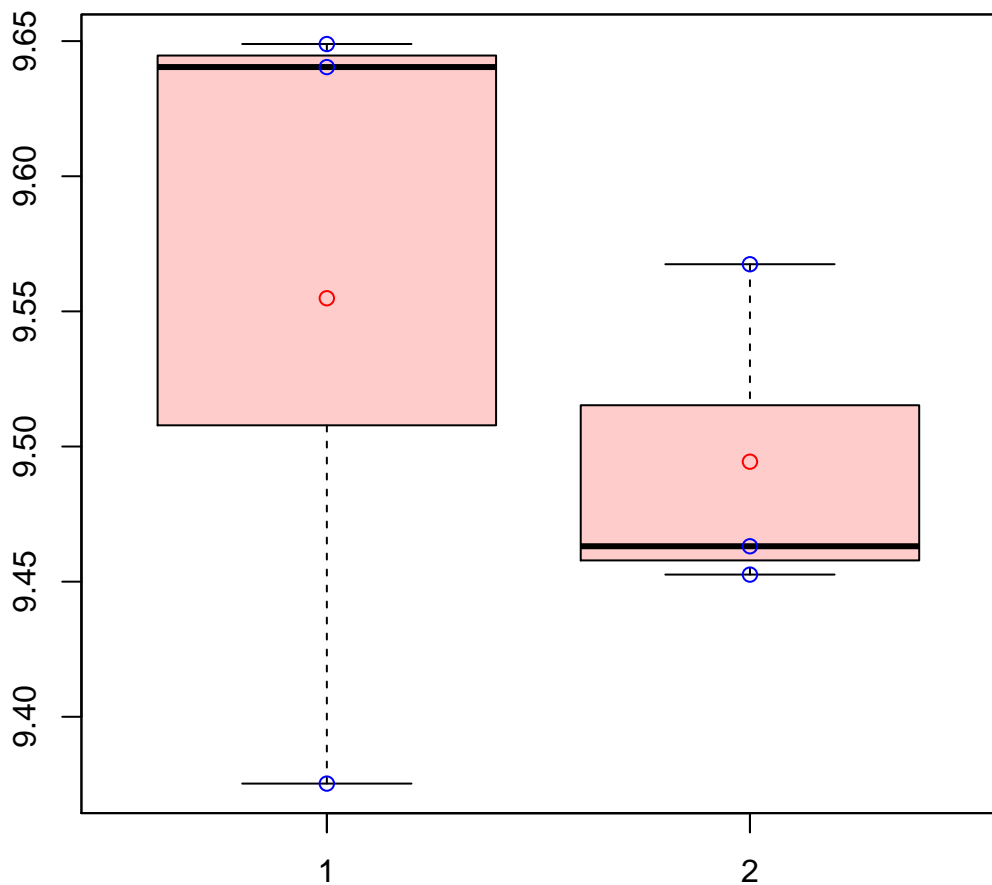

t-Test: p-value = 0.58

## CL2620Contig2|CL2620Contig2

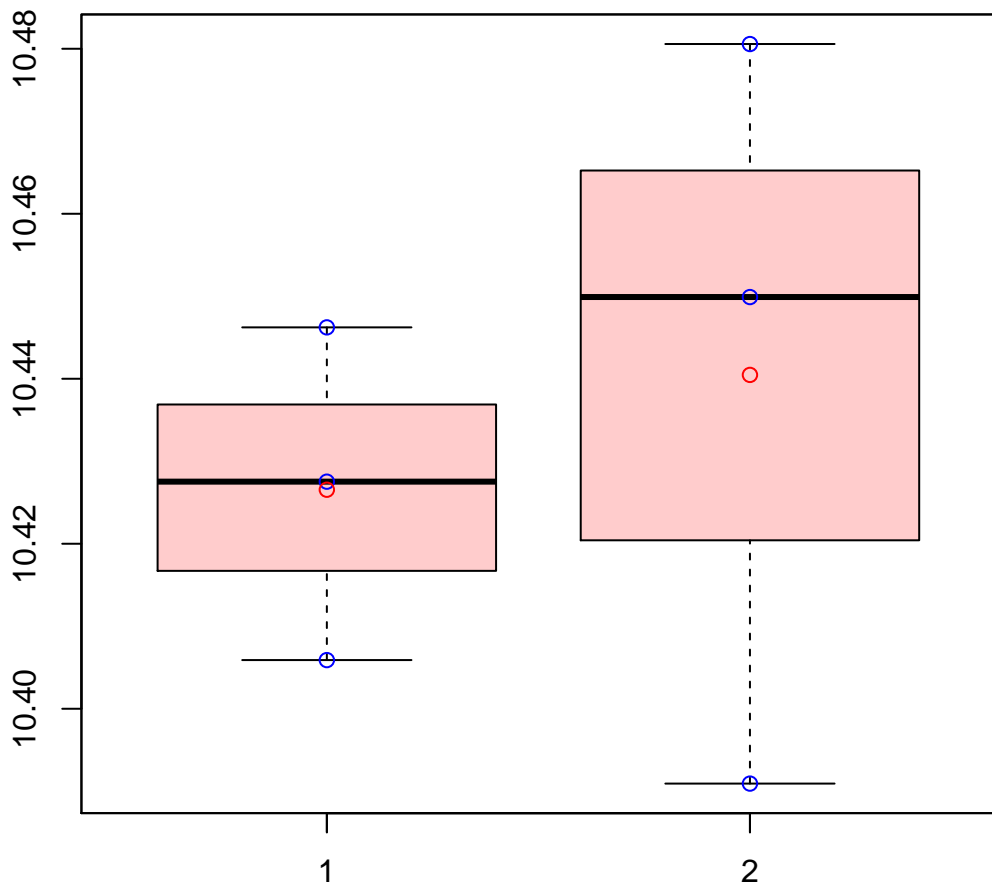

t-Test: p-value = 0.66



# CL2620Contig3|CL2620Contig3



t-Test: p-value = 0.66

# CL2620Contig5|CL2620Contig5

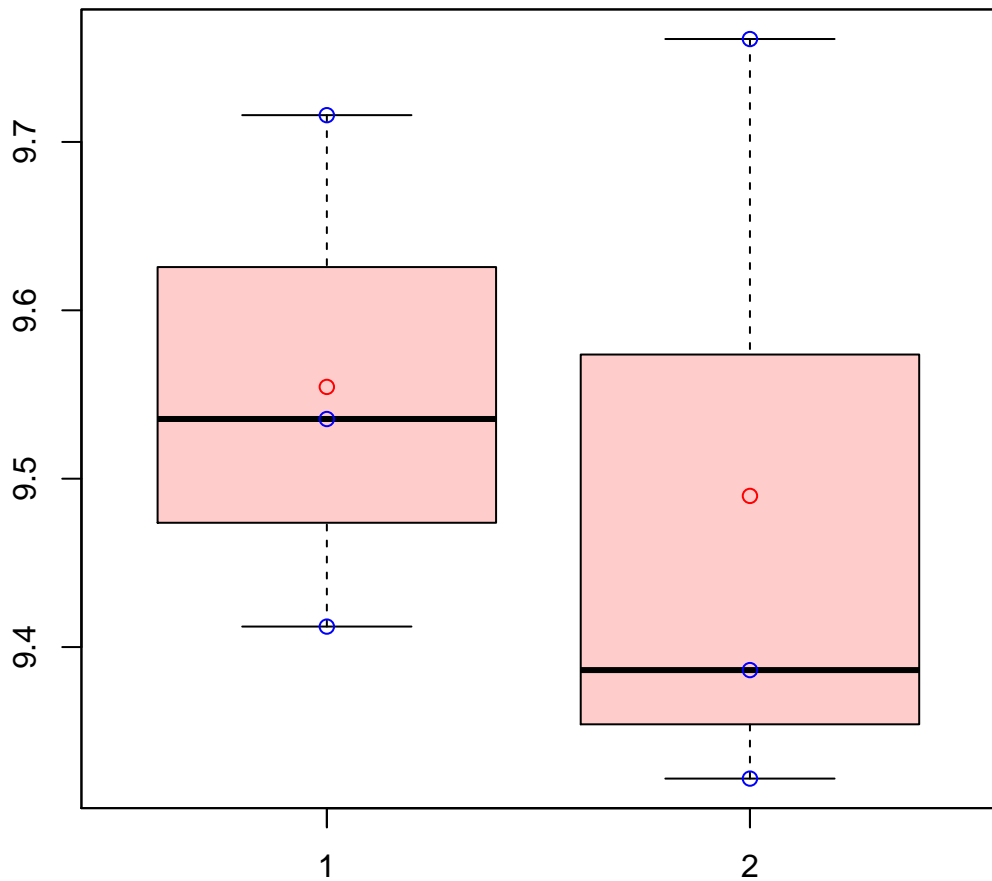

t-Test: p-value = 0.71

# CL2623Contig2|CL2623Contig2

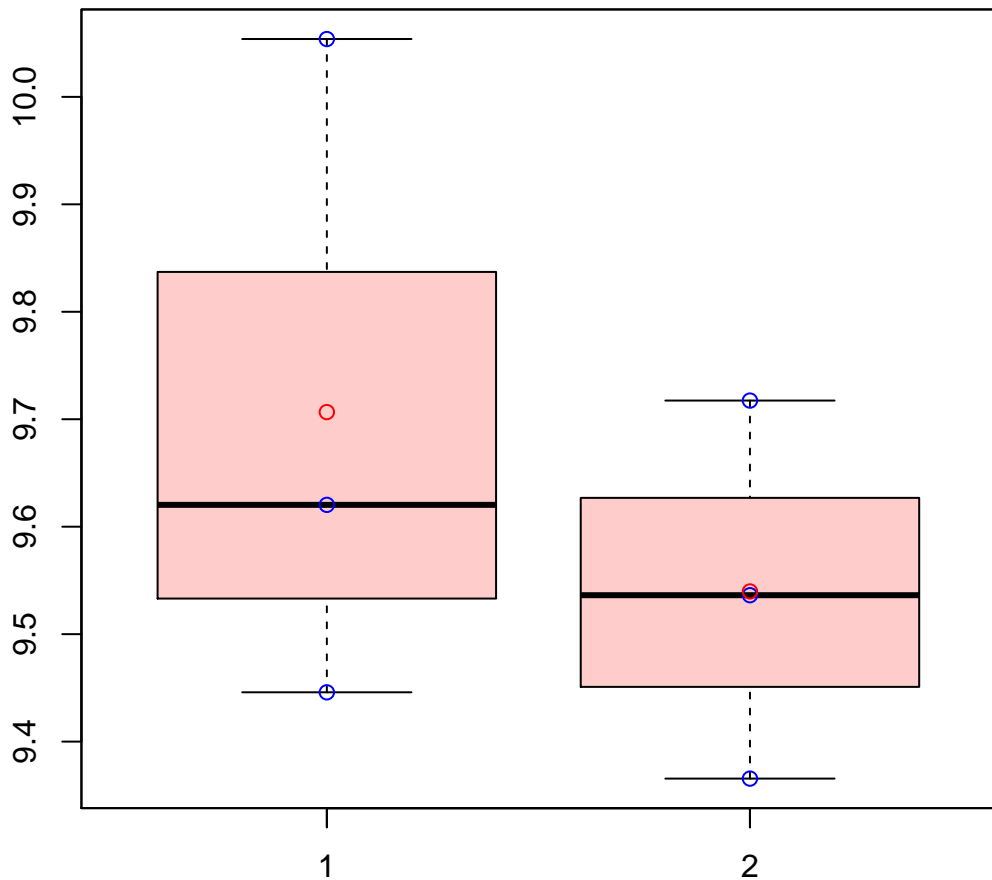

t-Test: p-value = 0.48

# CL2623Contig3|CL2623Contig3

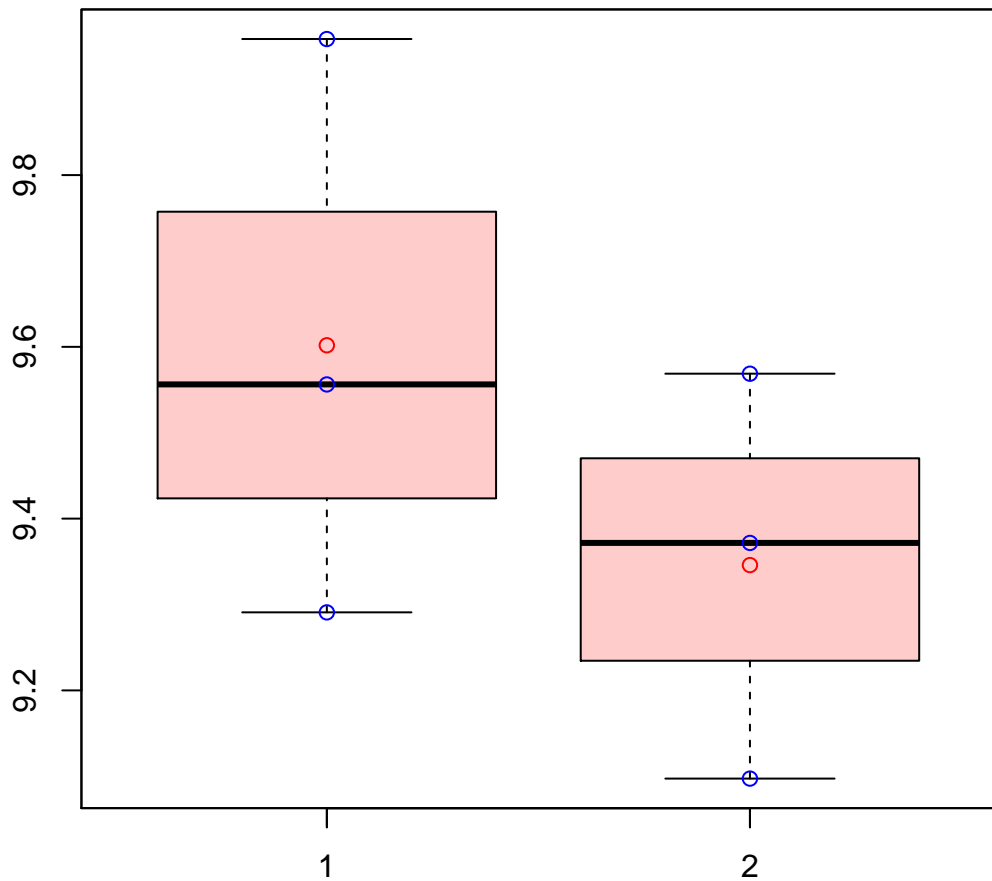

t-Test: p-value = 0.35

# CL2624Contig1|CL2624Contig1

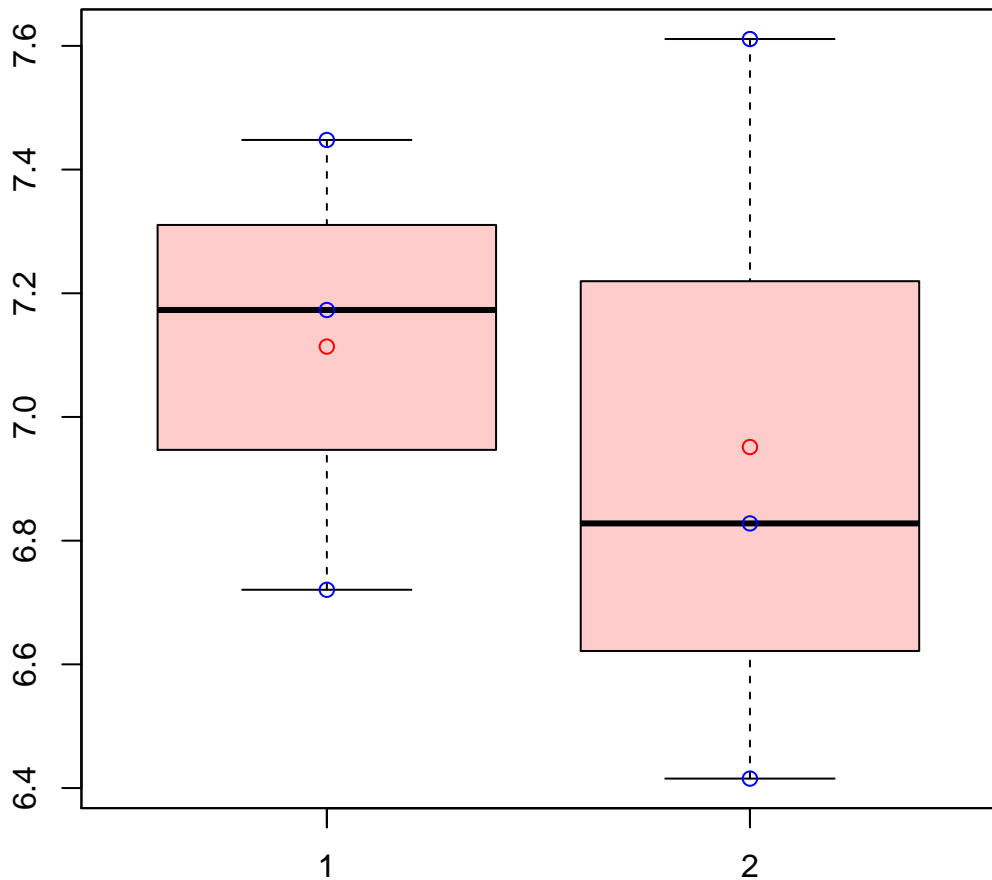

t-Test: p-value = 0.72

# CL262Contig10|CL262Contig10

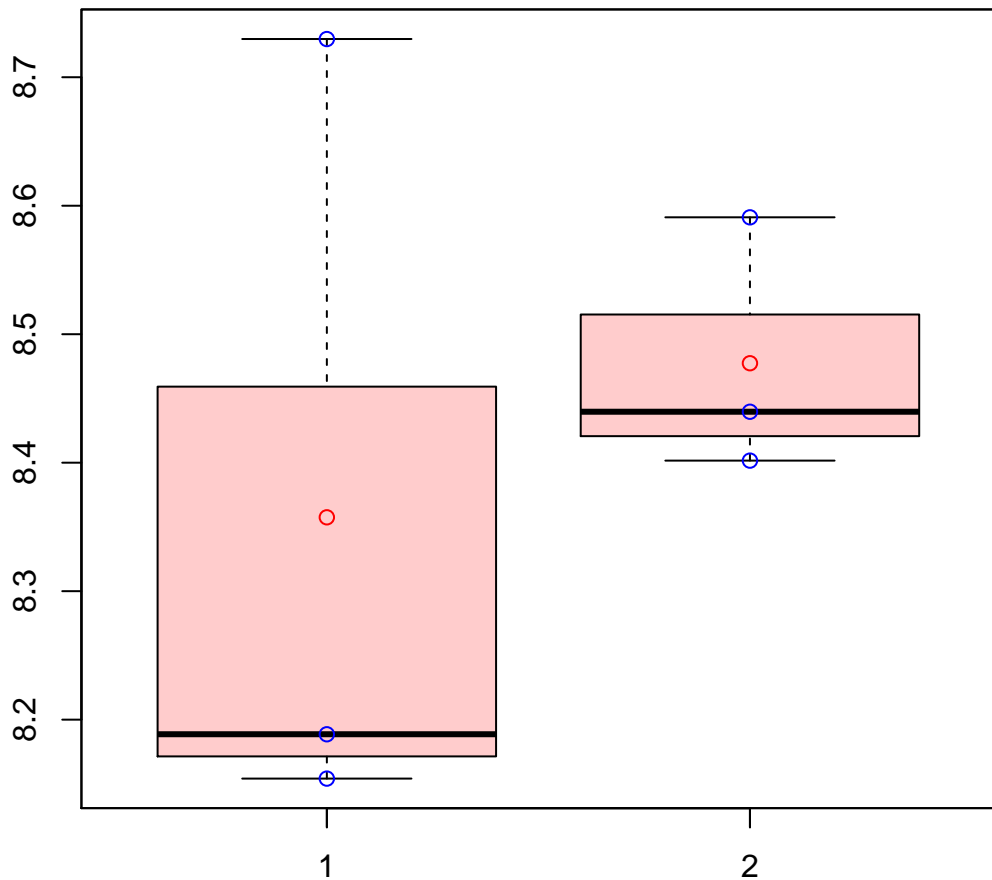

t-Test: p-value = 0.59

# CL26305Contig1|CL26305Contig1

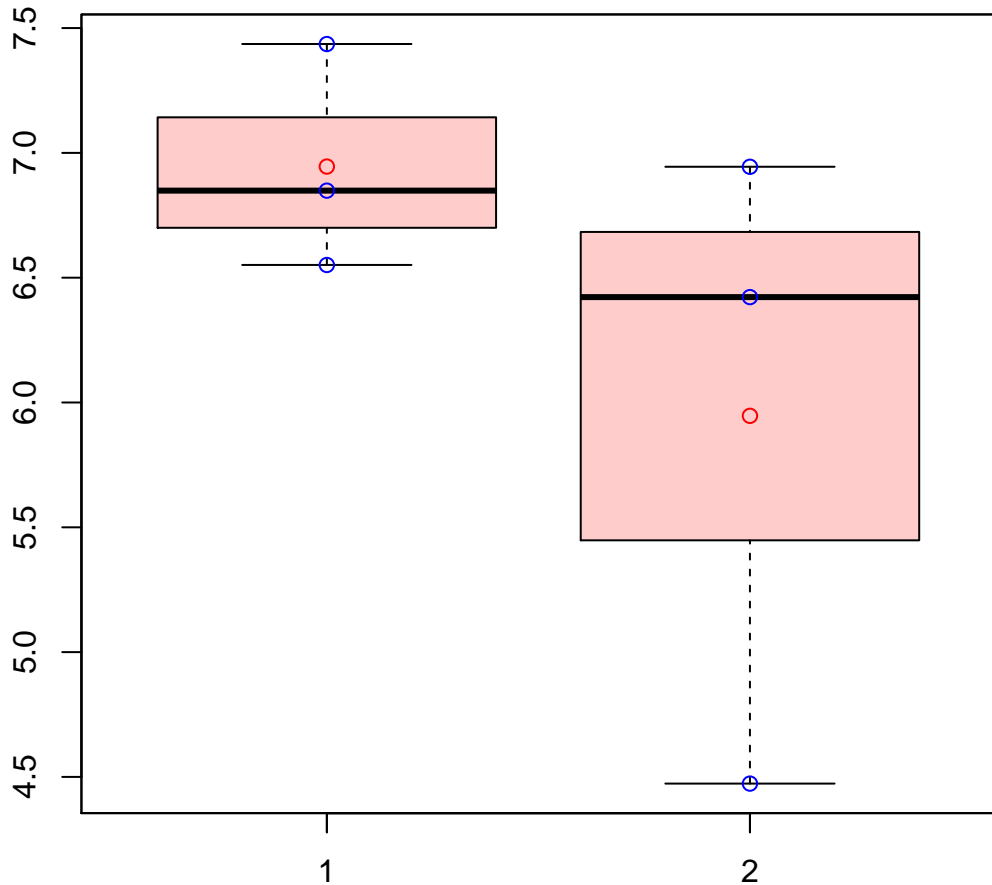

t-Test: p-value = 0.31

# CL26313Contig1|CL26313Contig1

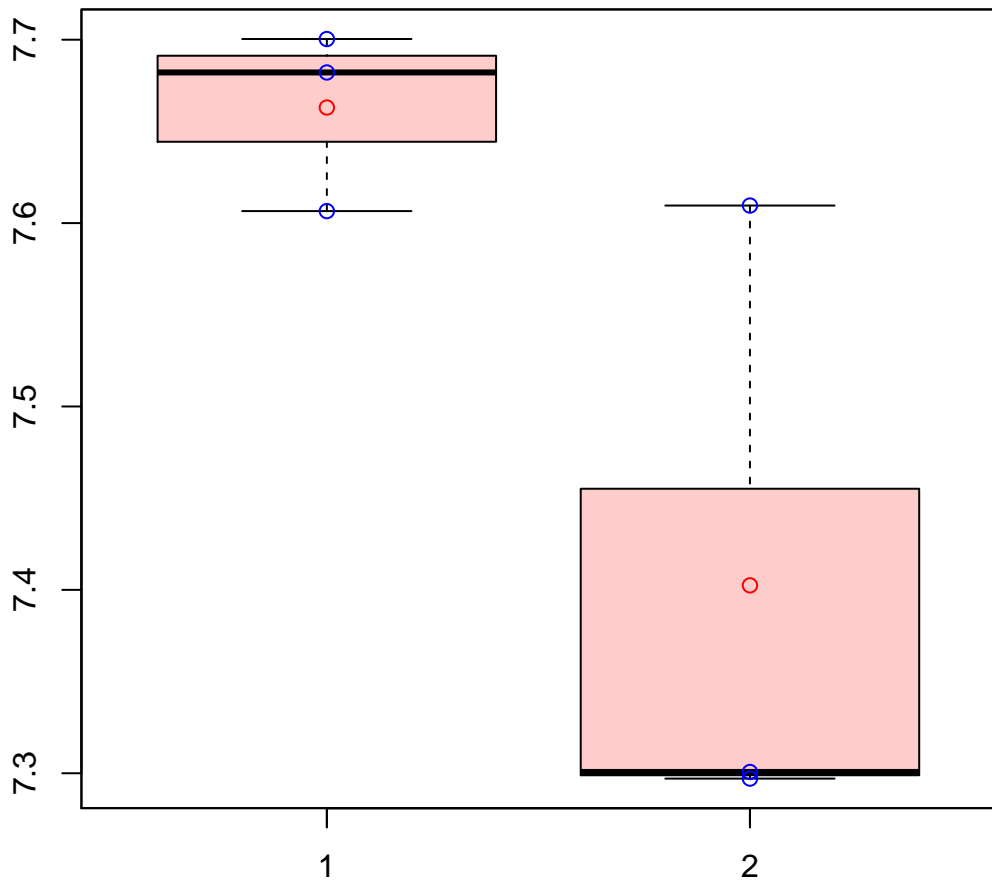

t-Test: p-value = 0.12



# CL2631Contig5|CL2631Contig5

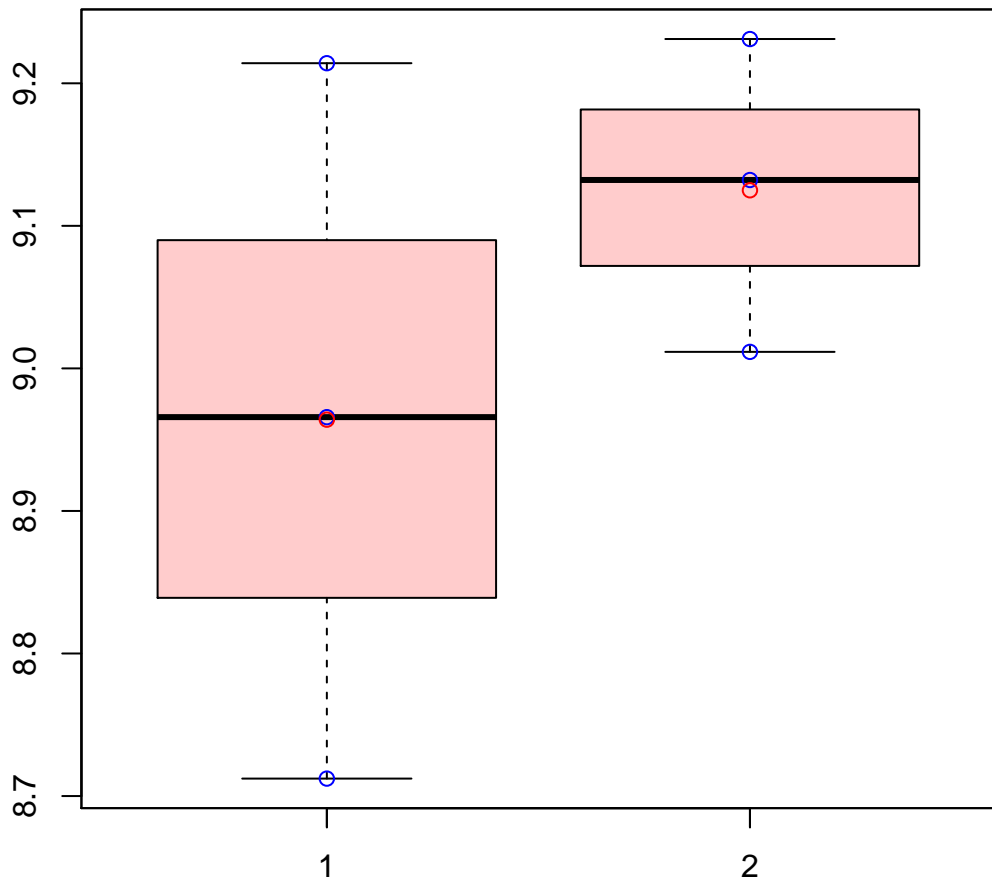

t-Test: p-value = 0.39

# CL2634Contig2|CL2634Contig2

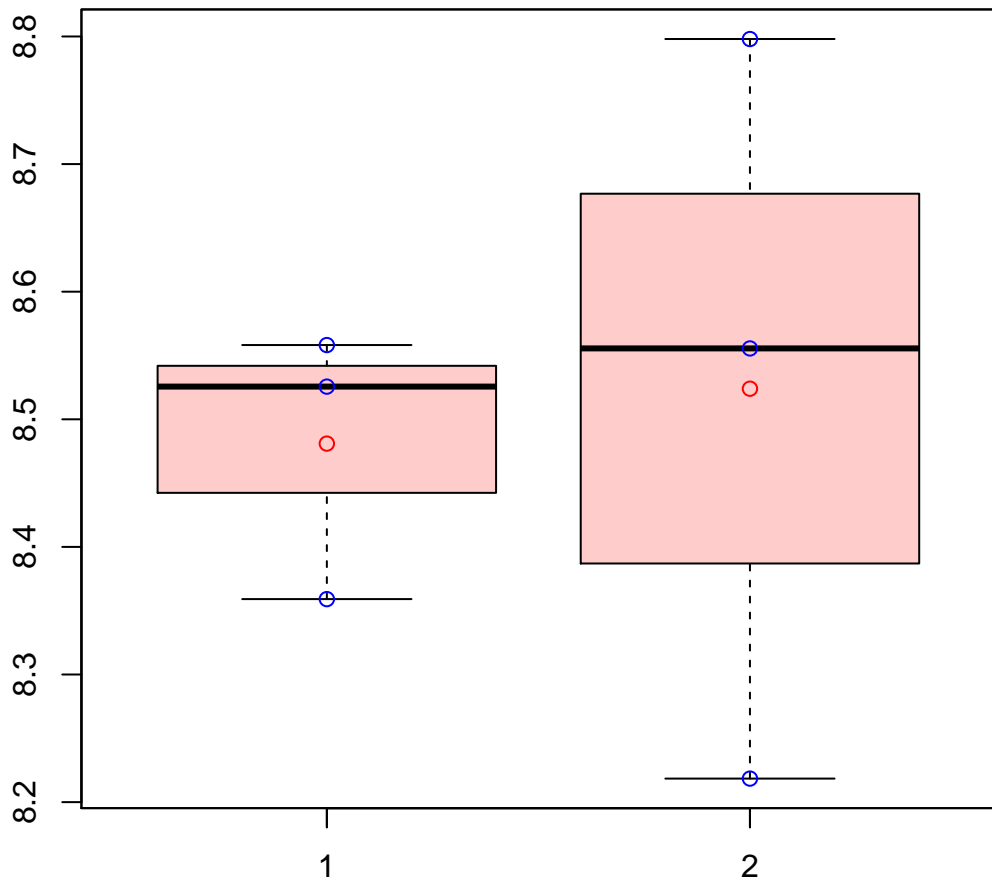

t-Test: p-value = 0.83

# CL2635Contig2|CL2635Contig2

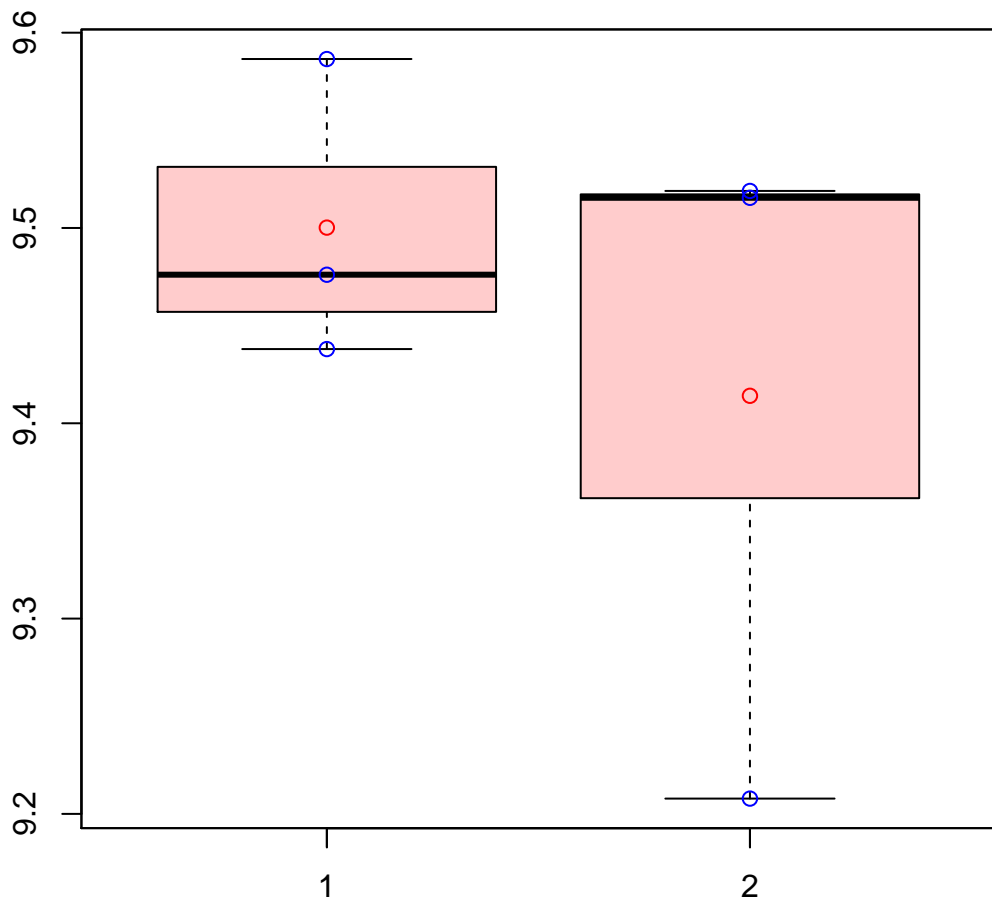

t-Test: p-value = 0.5

# CL2637Contig1|CL2637Contig1

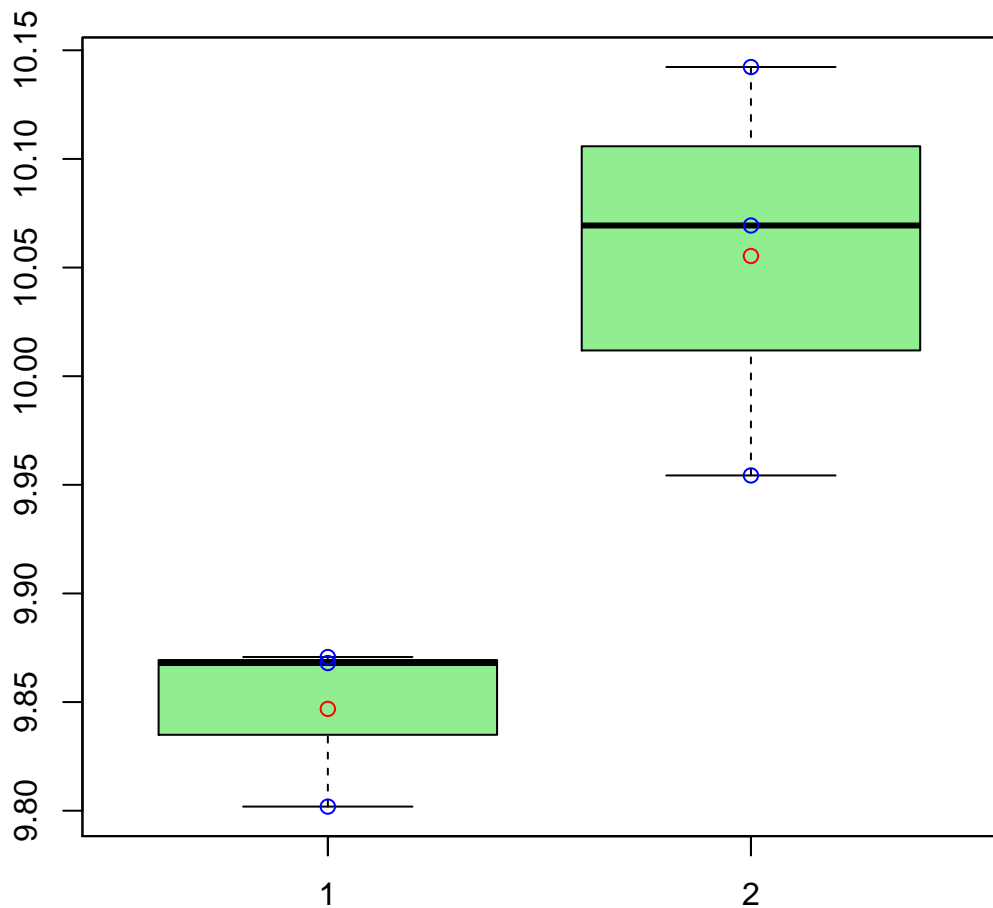

t-Test: p-value = 0.05

# CL2637Contig2|CL2637Contig2

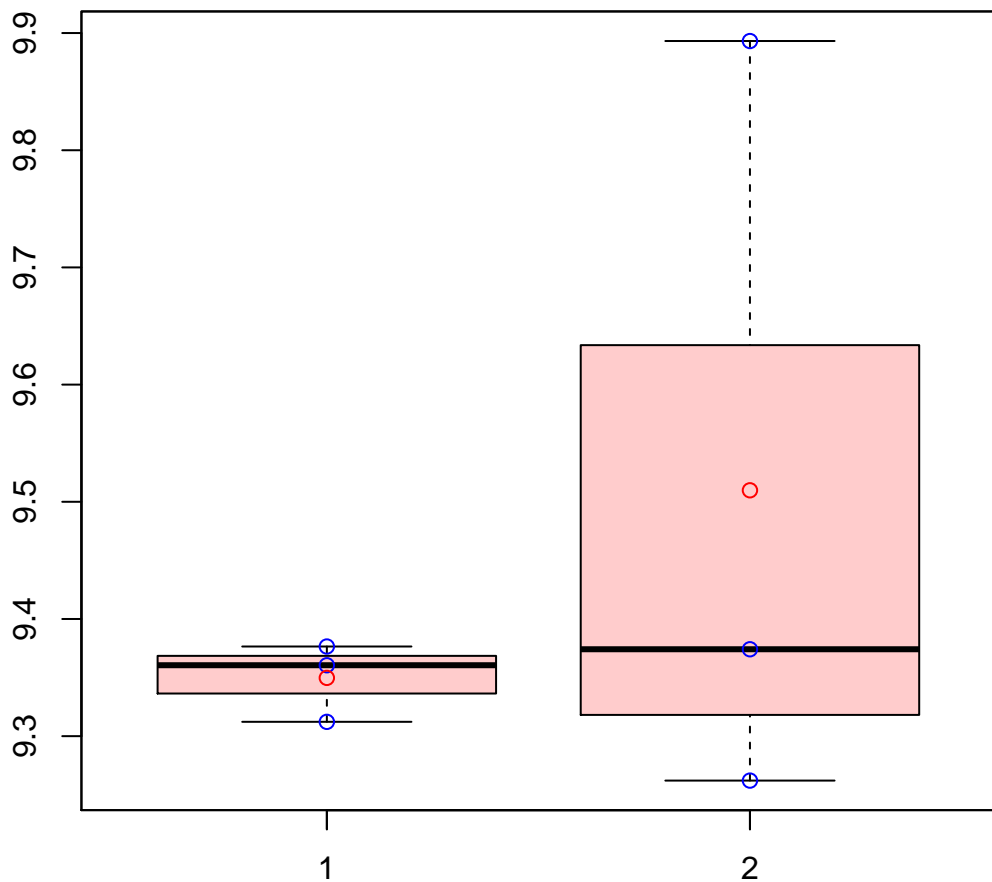

t-Test: p-value = 0.5

# CL2637Contig6|CL2637Contig6



t-Test: p-value = 0.5

# CL2637Contig7|CL2637Contig7

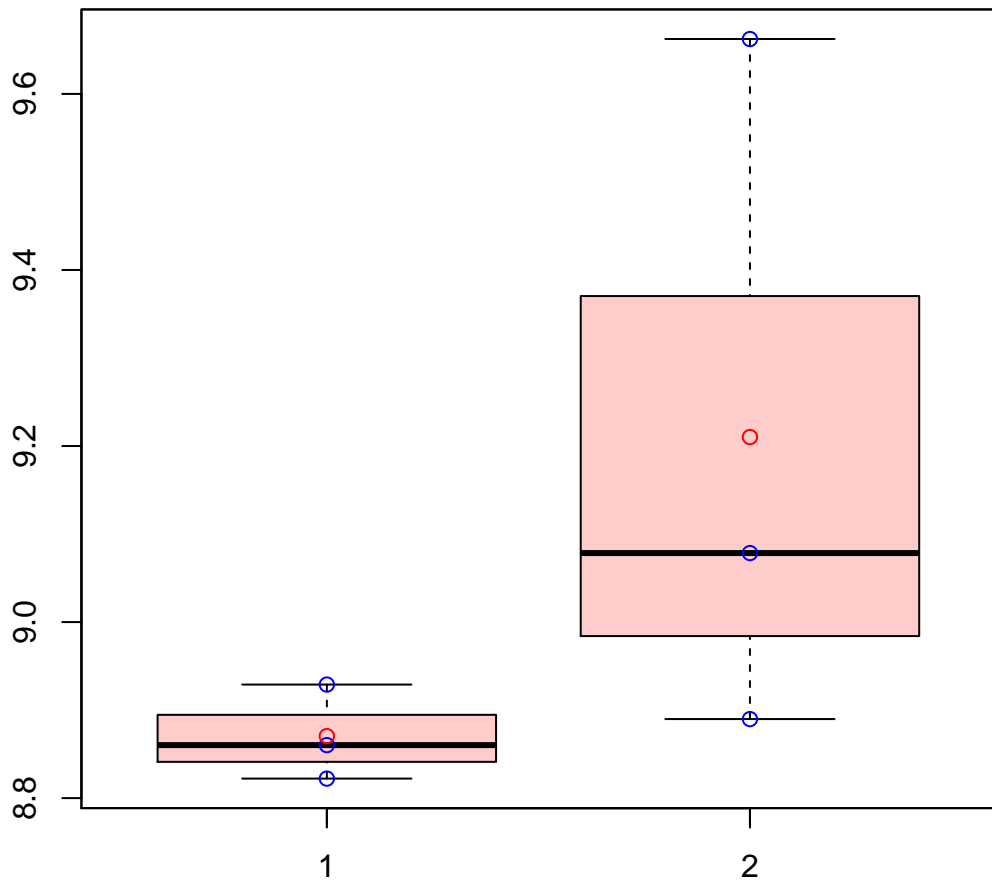

t-Test: p-value = 0.28

# CL2638Contig2|CL2638Contig2

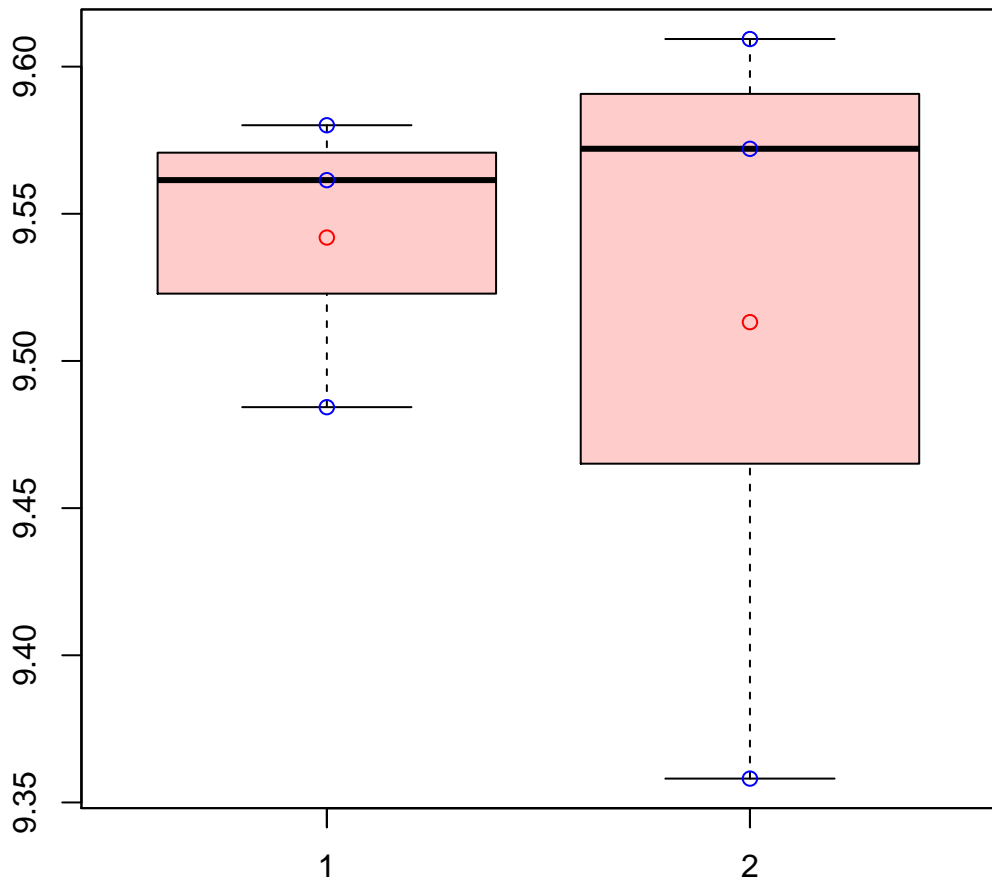

t-Test: p-value = 0.76



# CL2638Contig4|CL2638Contig4

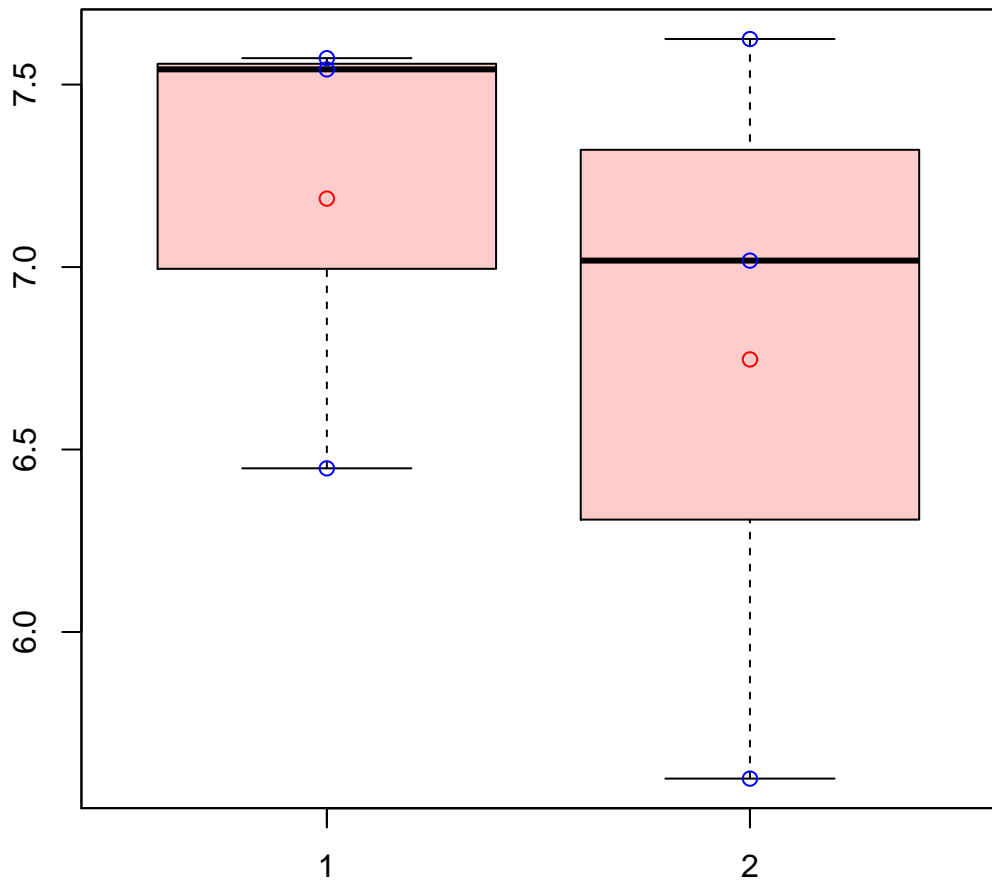

t-Test: p-value = 0.57

# CL26395Contig1|CL26395Contig1

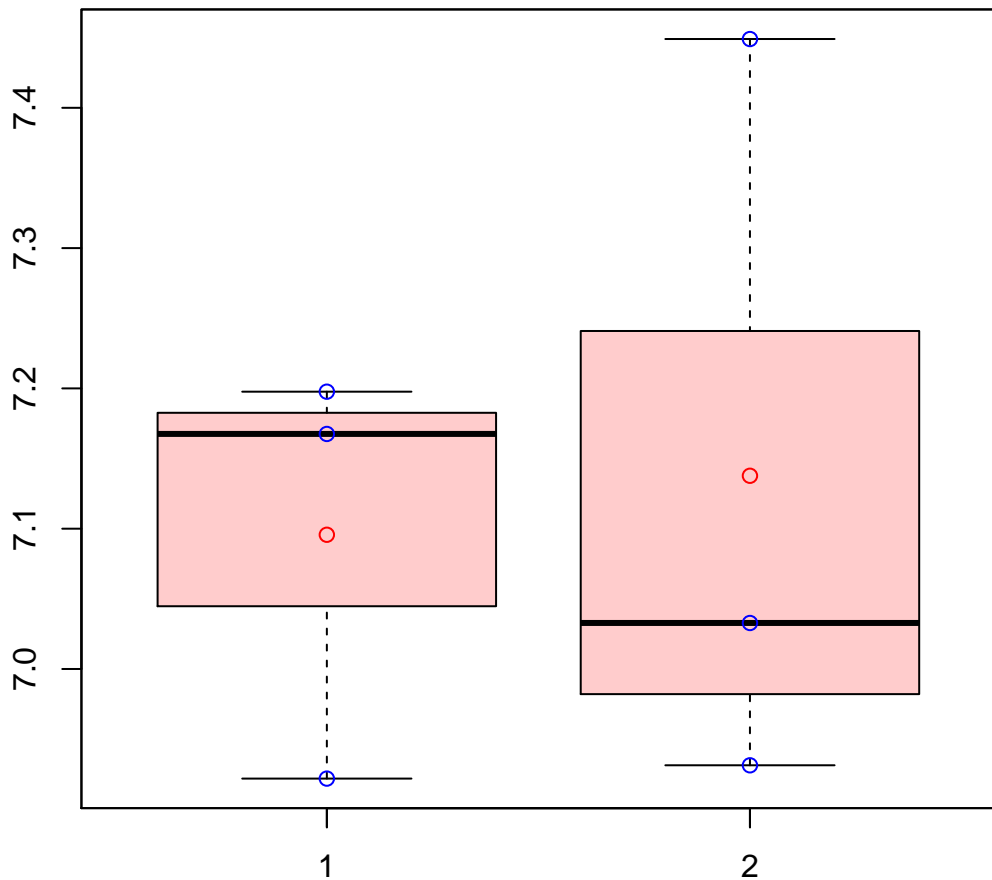

t-Test: p-value = 0.83

# CL2640Contig8|CL2640Contig8

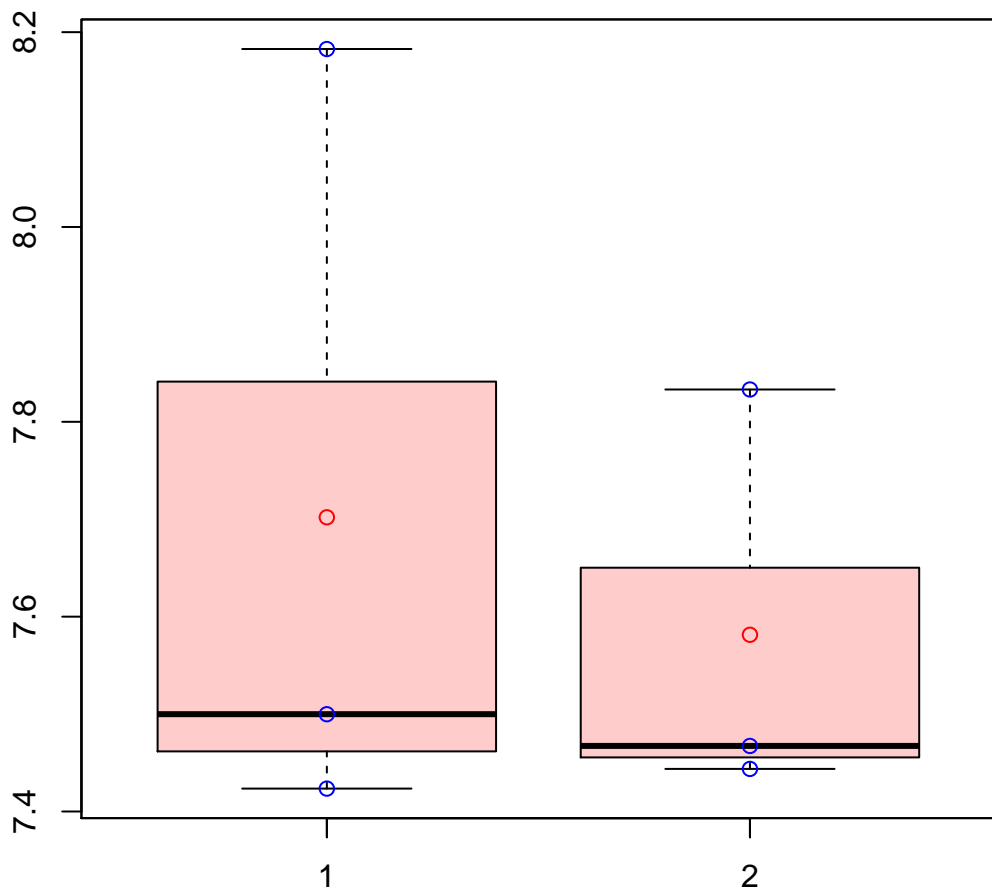

t-Test: p-value = 0.69

# CL2641Contig2|CL2641Contig2

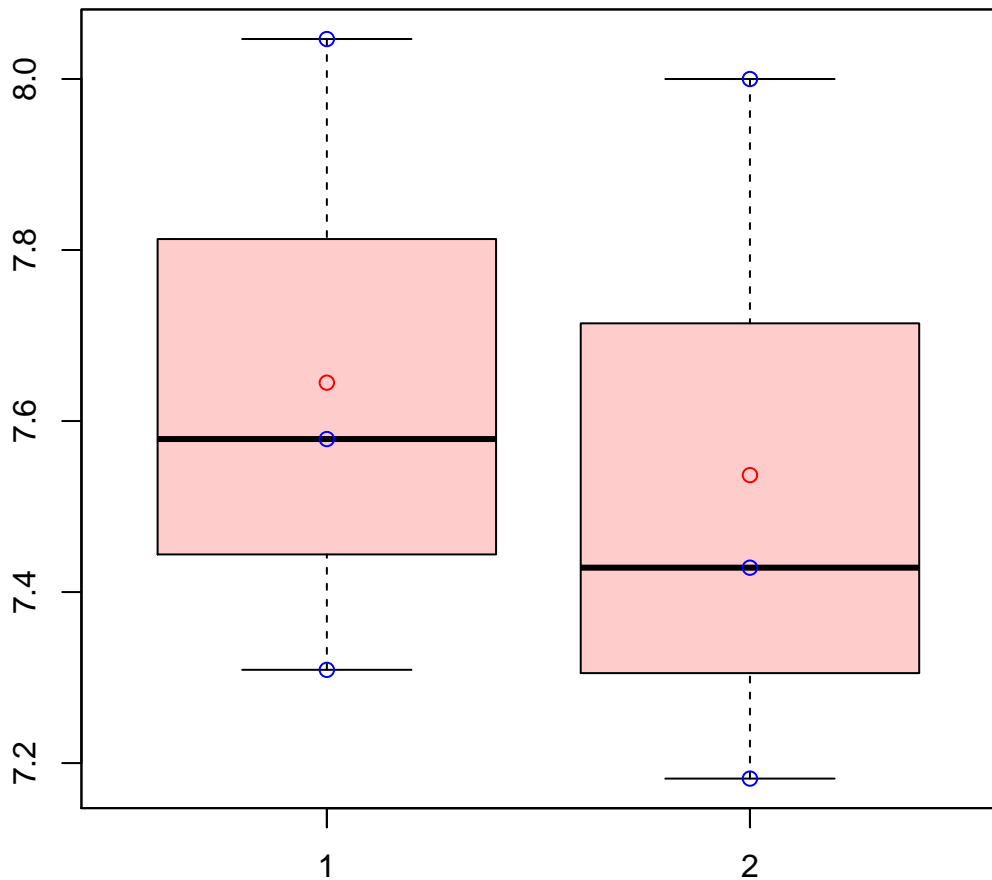

t-Test: p-value = 0.76

# CL2644Contig2|CL2644Contig2

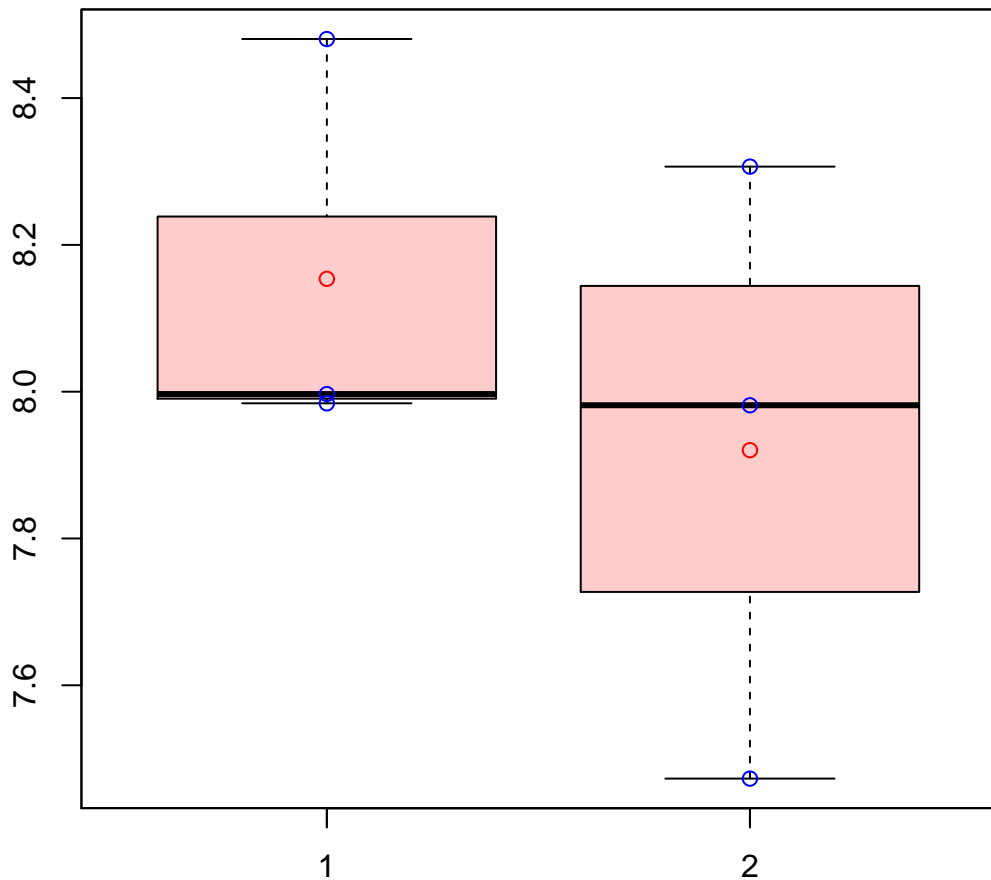

t-Test: p-value = 0.48

# CL26474Contig1|CL26474Contig1



t-Test: p-value = 0.43

# CL2648Contig2|CL2648Contig2

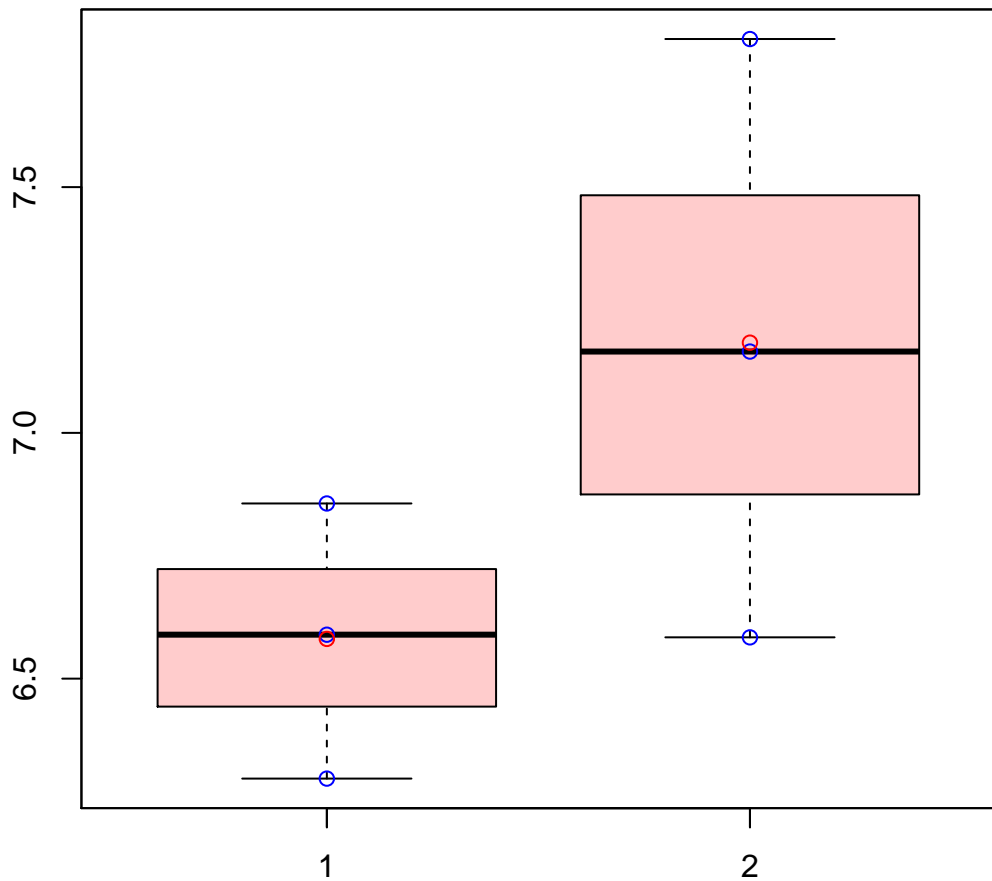

t-Test: p-value = 0.22

# CL264Contig10|CL264Contig10

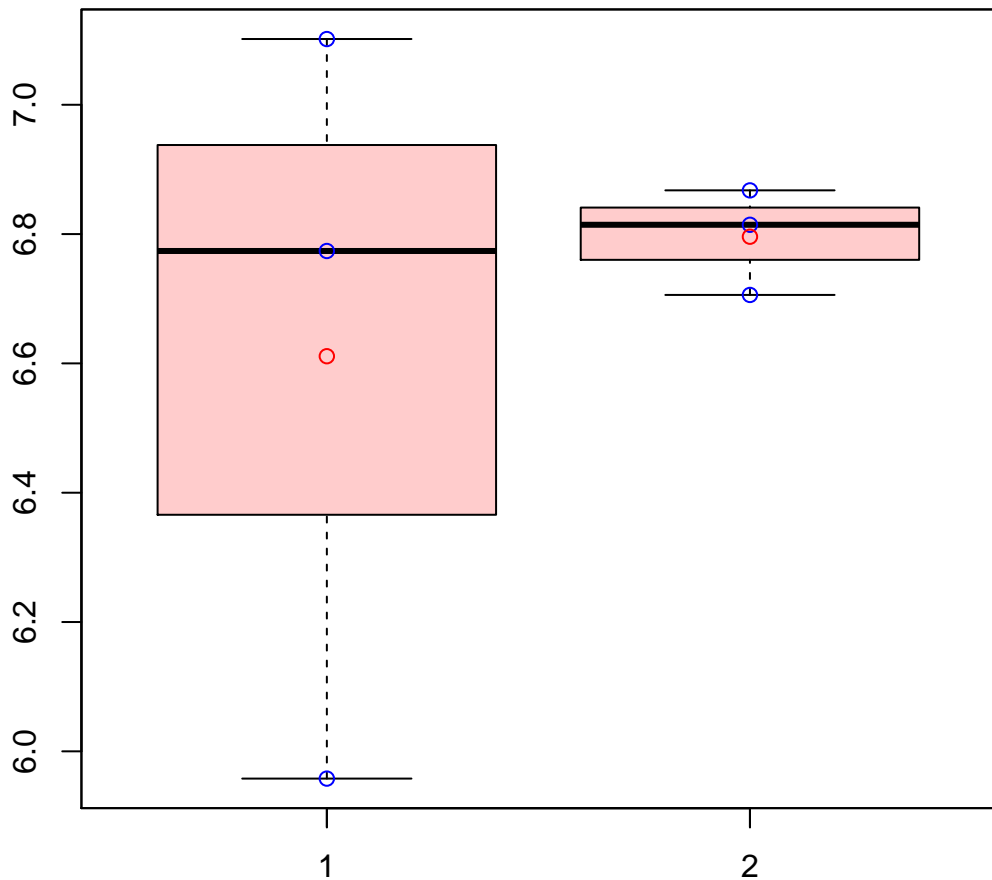

t-Test: p-value = 0.64



# CL264Contig4|CL264Contig4

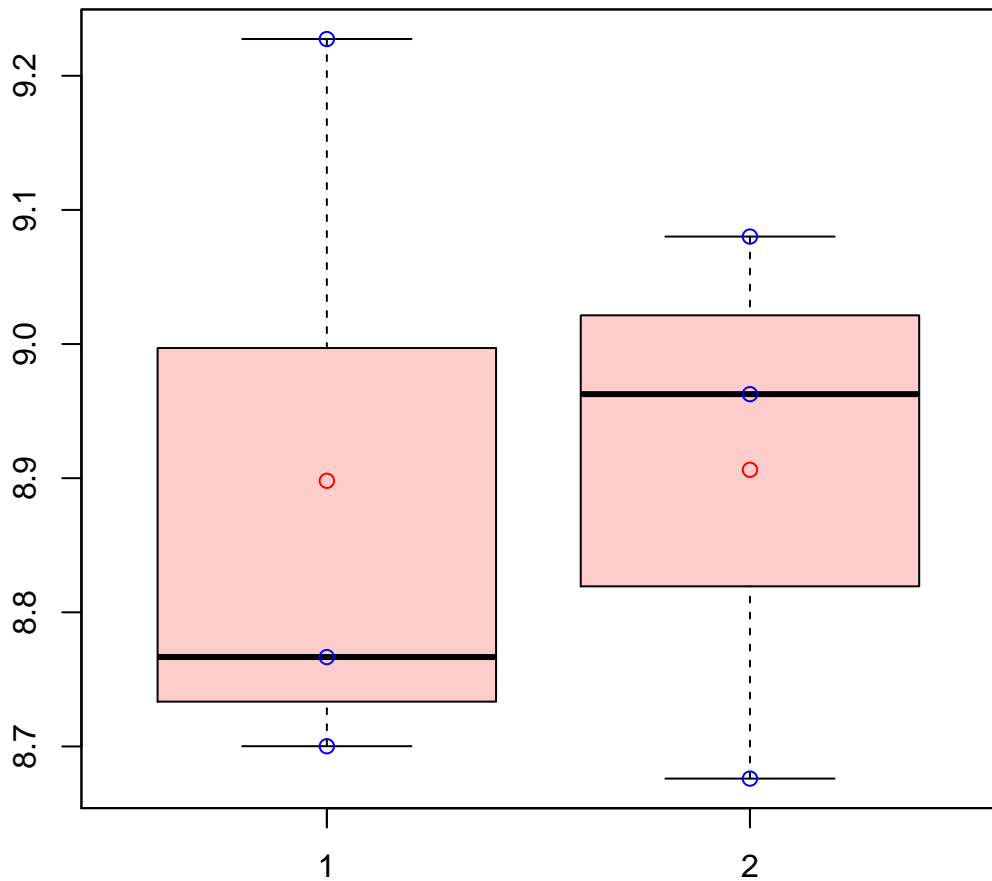

t-Test: p-value = 0.97

# CL265Contig1|CL265Contig1

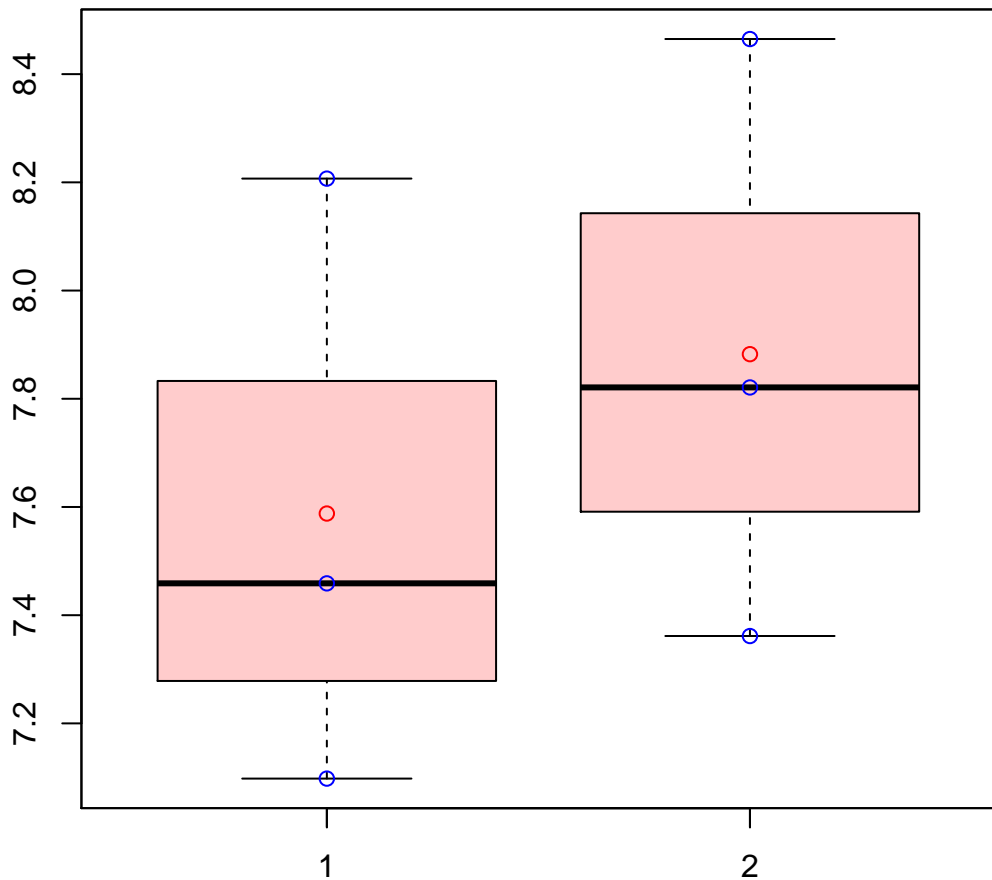

t-Test: p-value = 0.55

# CL266Contig11|CL266Contig11

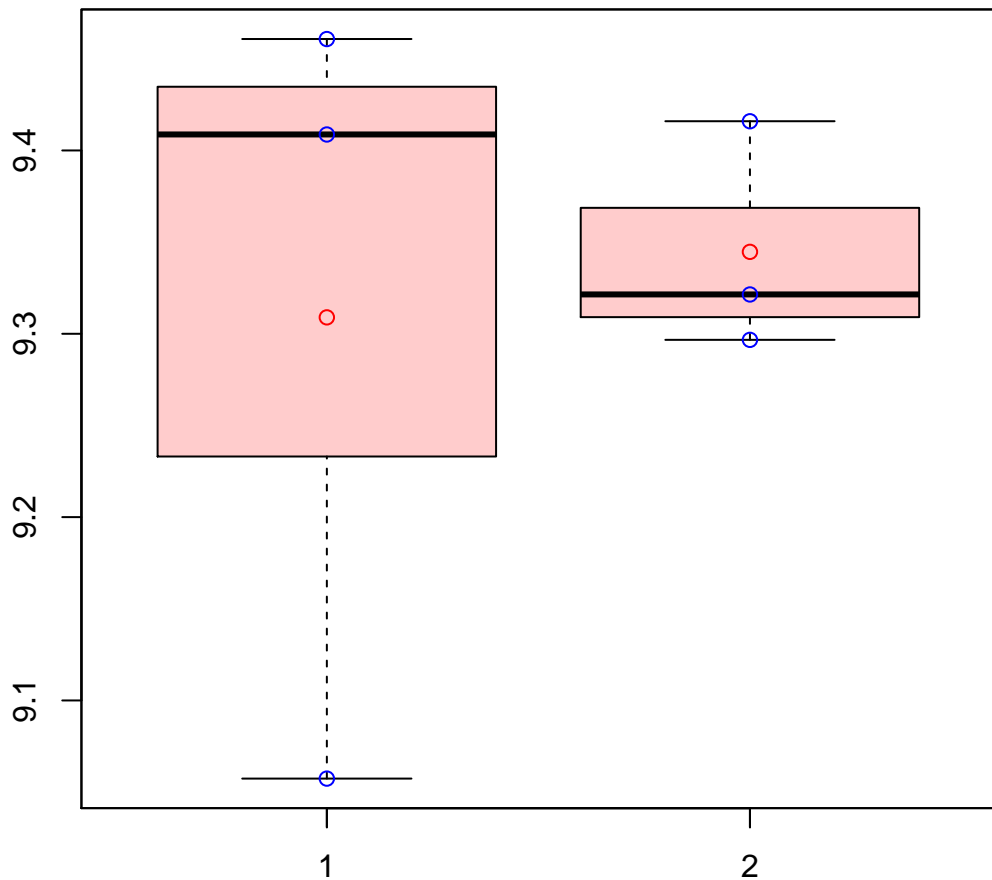

t-Test: p-value = 0.81

# CL2673Contig1|CL2673Contig1

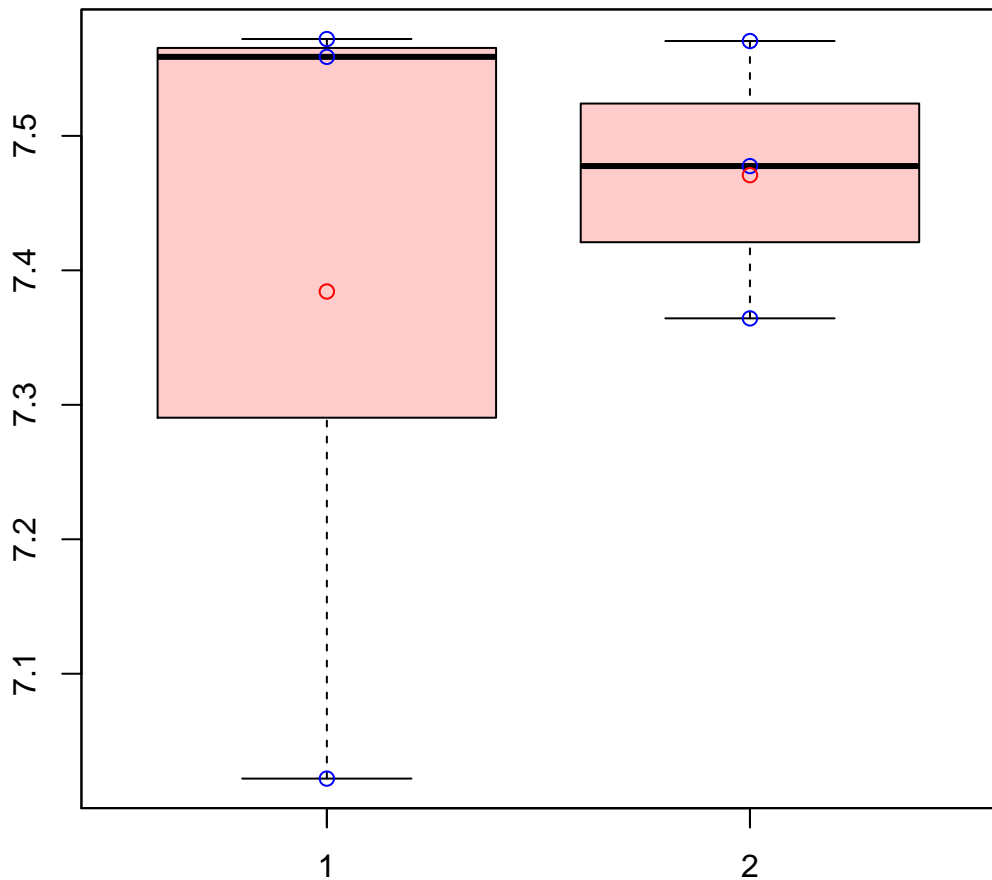

t-Test: p-value = 0.69

# CL2673Contig4|CL2673Contig4

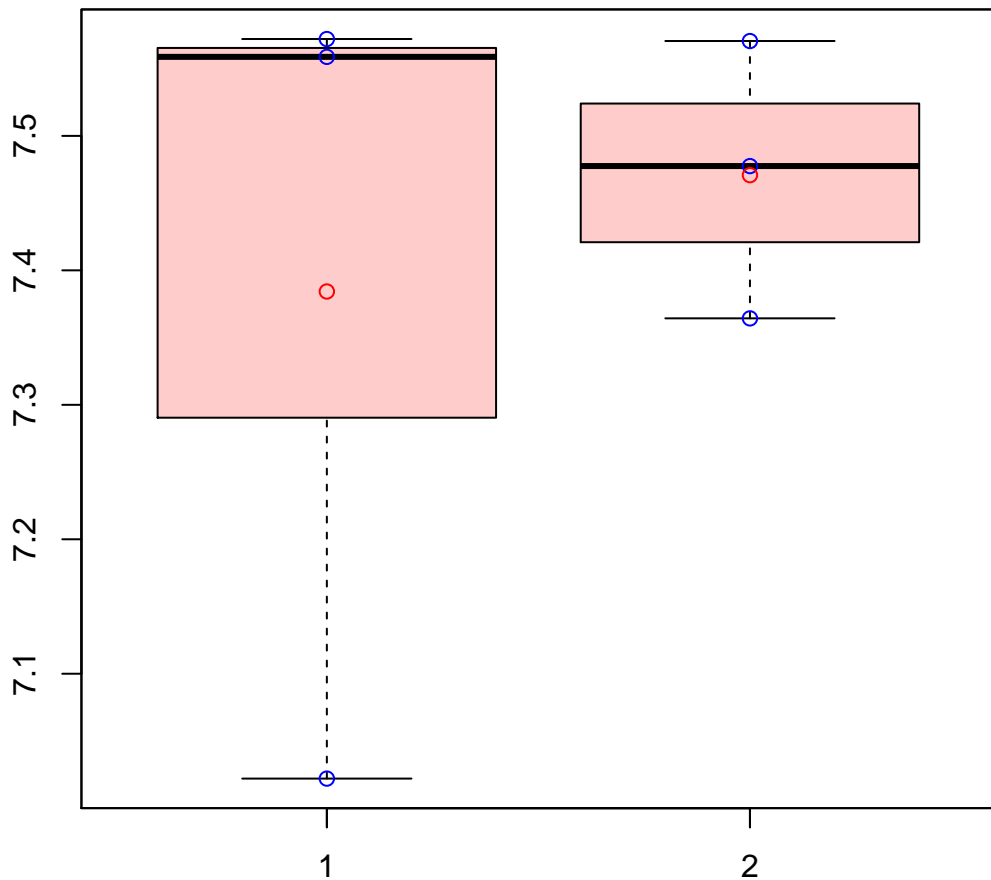

t-Test: p-value = 0.69

# CL2673Contig7|CL2673Contig7

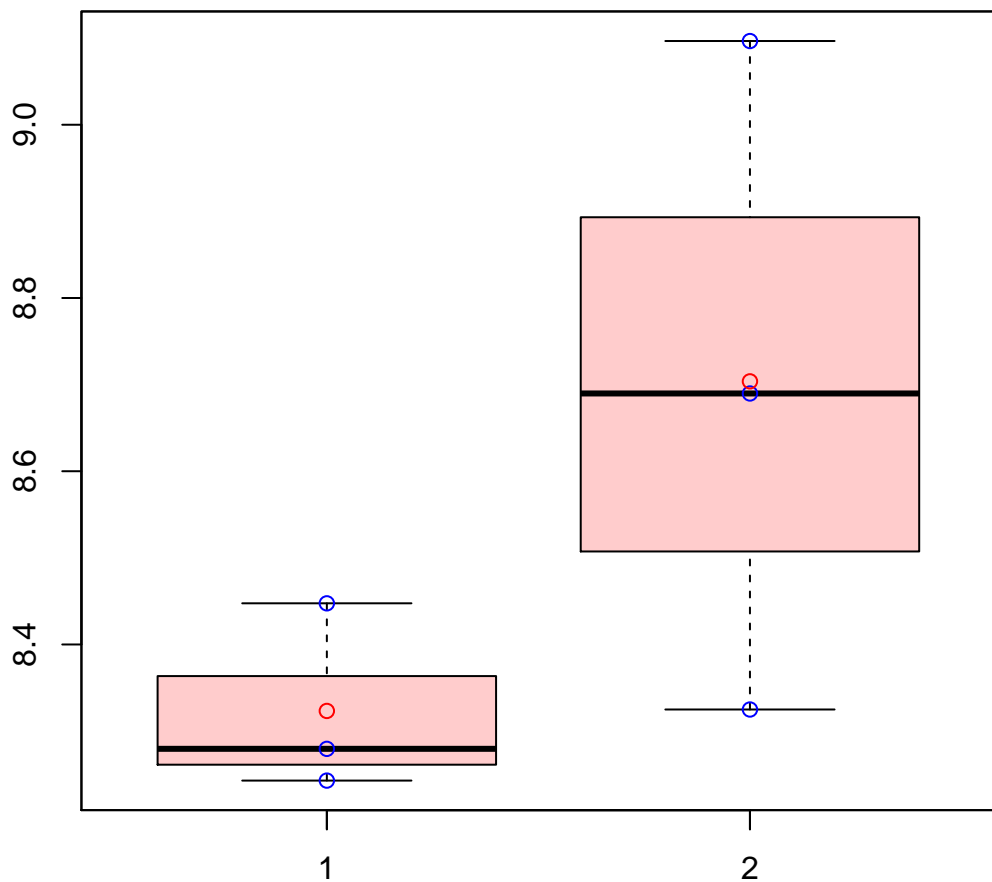

t-Test: p-value = 0.22

# CL26770Contig1|CL26770Contig1

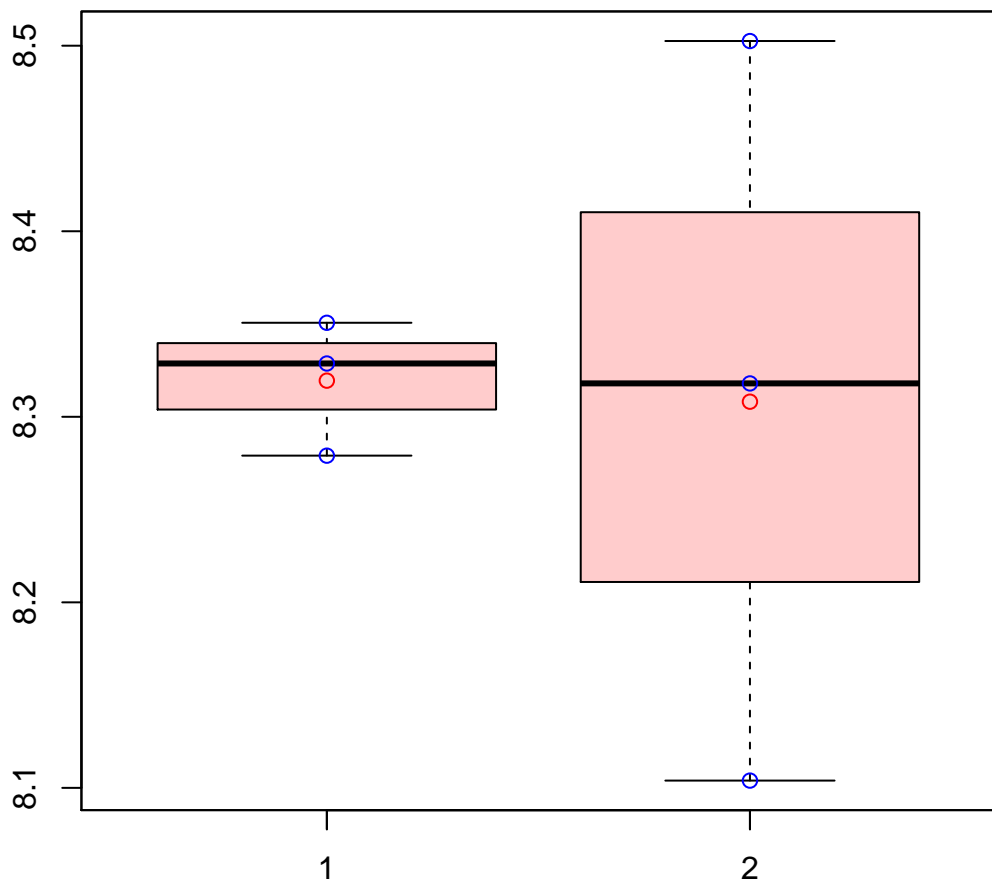

t-Test: p-value = 0.93

# CL26802Contig1|CL26802Contig1



t-Test: p-value = 0.55



# CL2681Contig6|CL2681Contig6

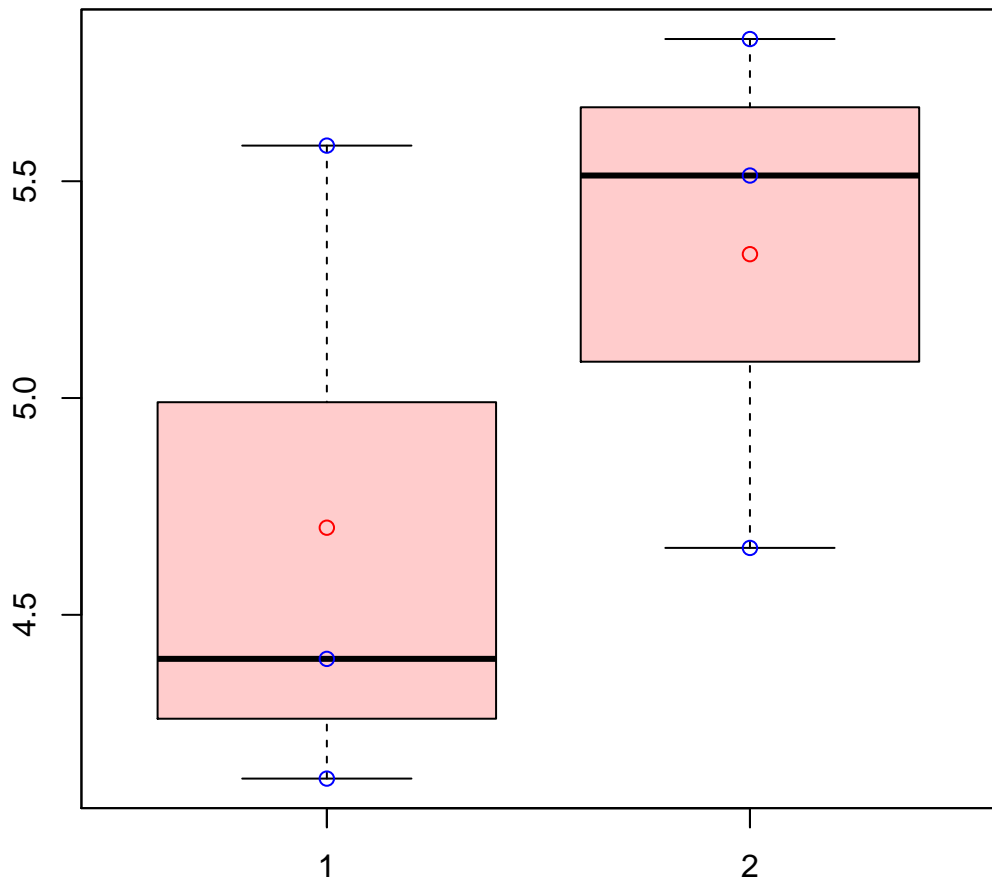

t-Test: p-value = 0.33

# CL2682Contig1|CL2682Contig1

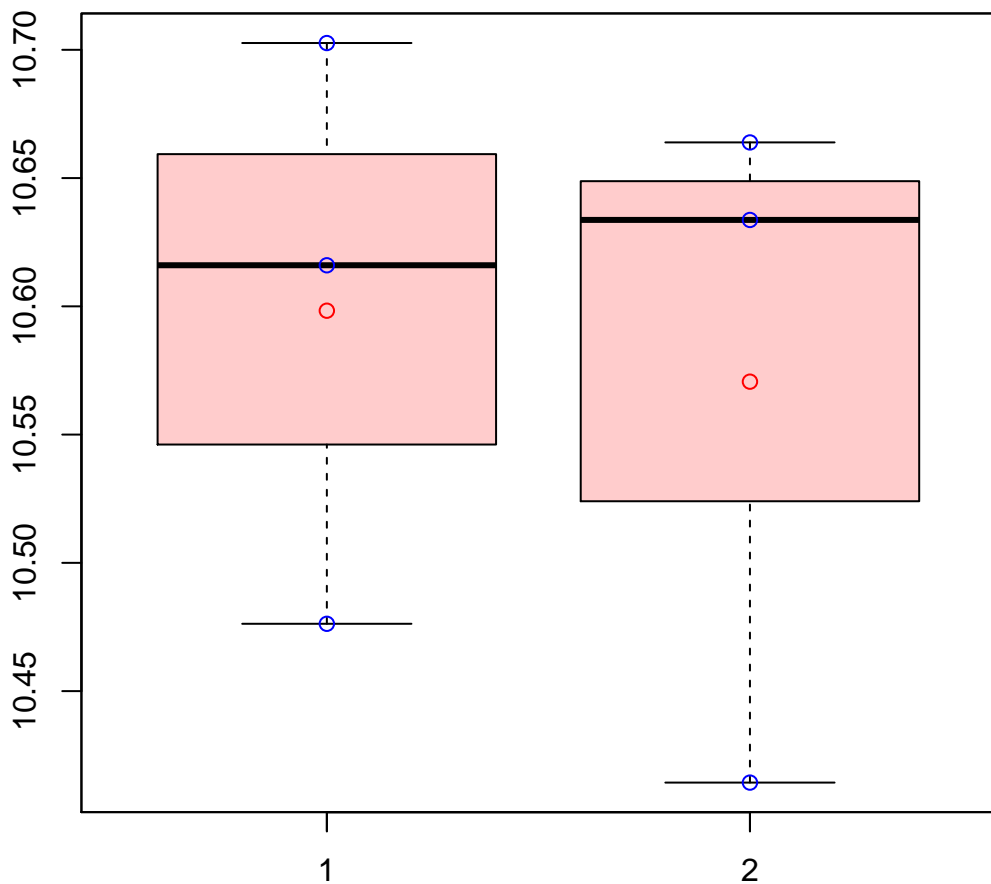

t-Test: p-value = 0.8

# CL2685Contig1|CL2685Contig1

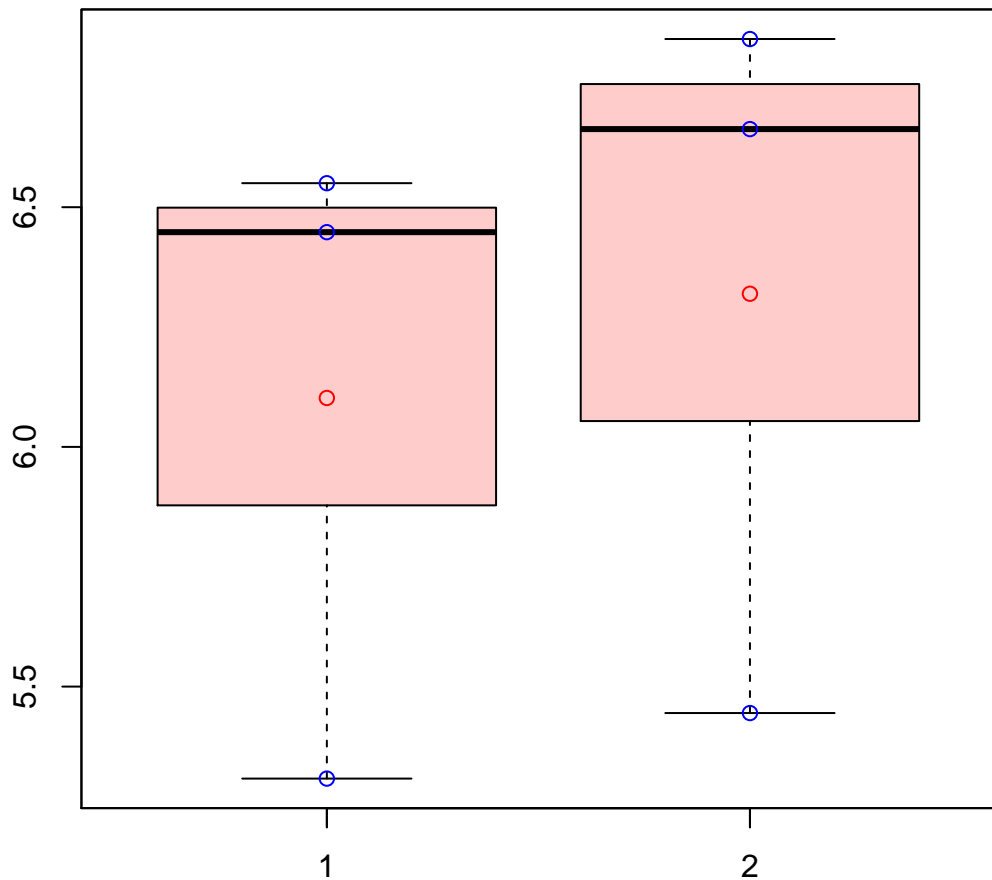

t-Test: p-value = 0.73

# CL2689Contig2|CL2689Contig2

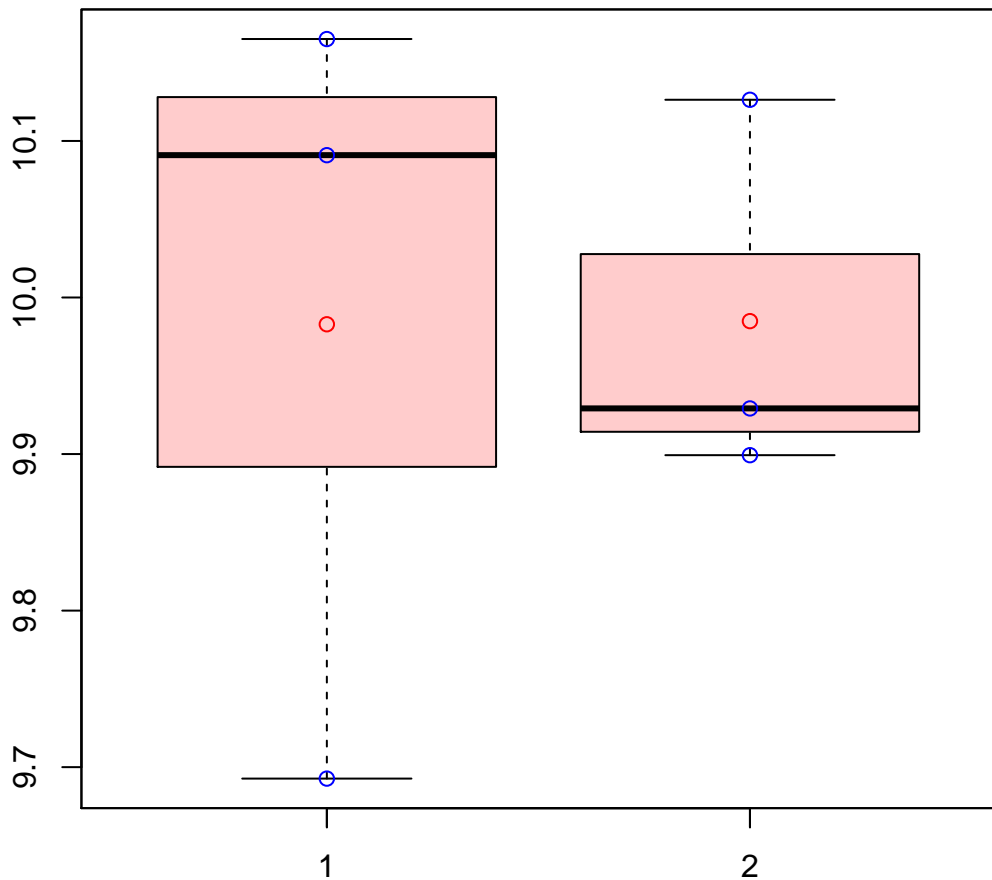

t-Test: p-value = 0.99

## CL2690Contig2|CL2690Contig2

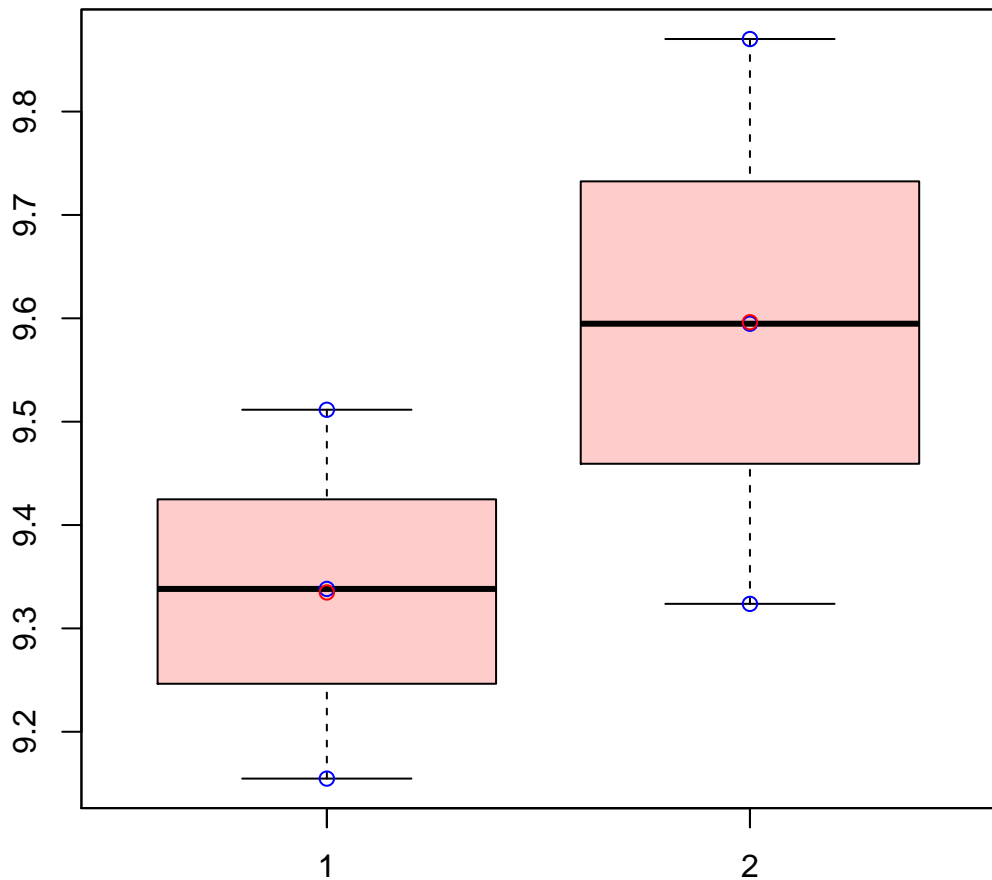

t-Test: p-value = 0.25

# CL2690Contig3|CL2690Contig3



t-Test: p-value = 0.25

# CL2694Contig2|CL2694Contig2

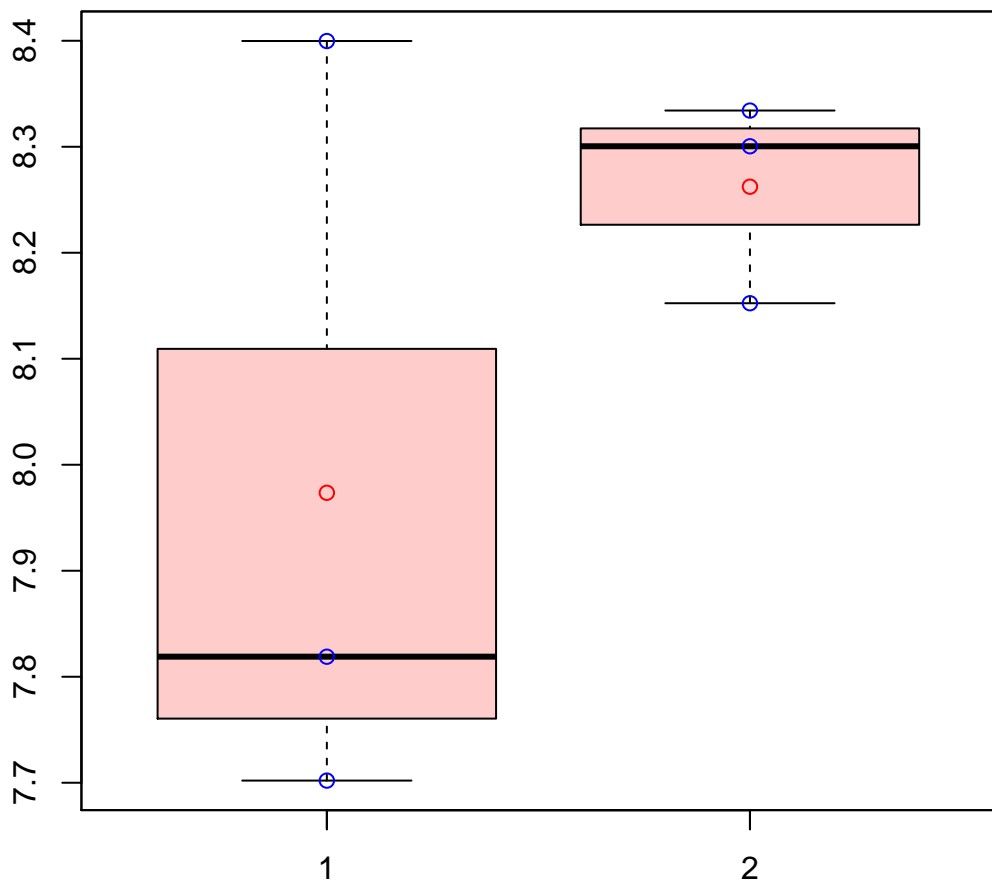

t-Test: p-value = 0.31

# CL2694Contig4|CL2694Contig4

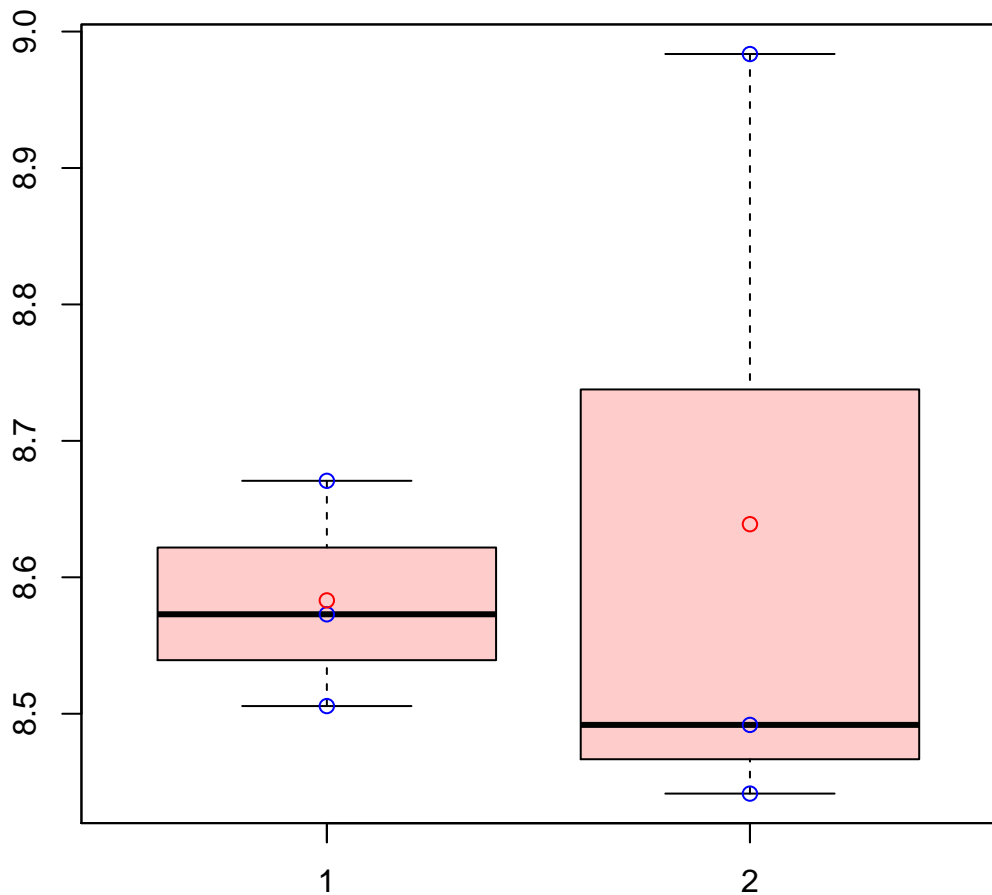

t-Test: p-value = 0.78



# CL2695Contig1|CL2695Contig1

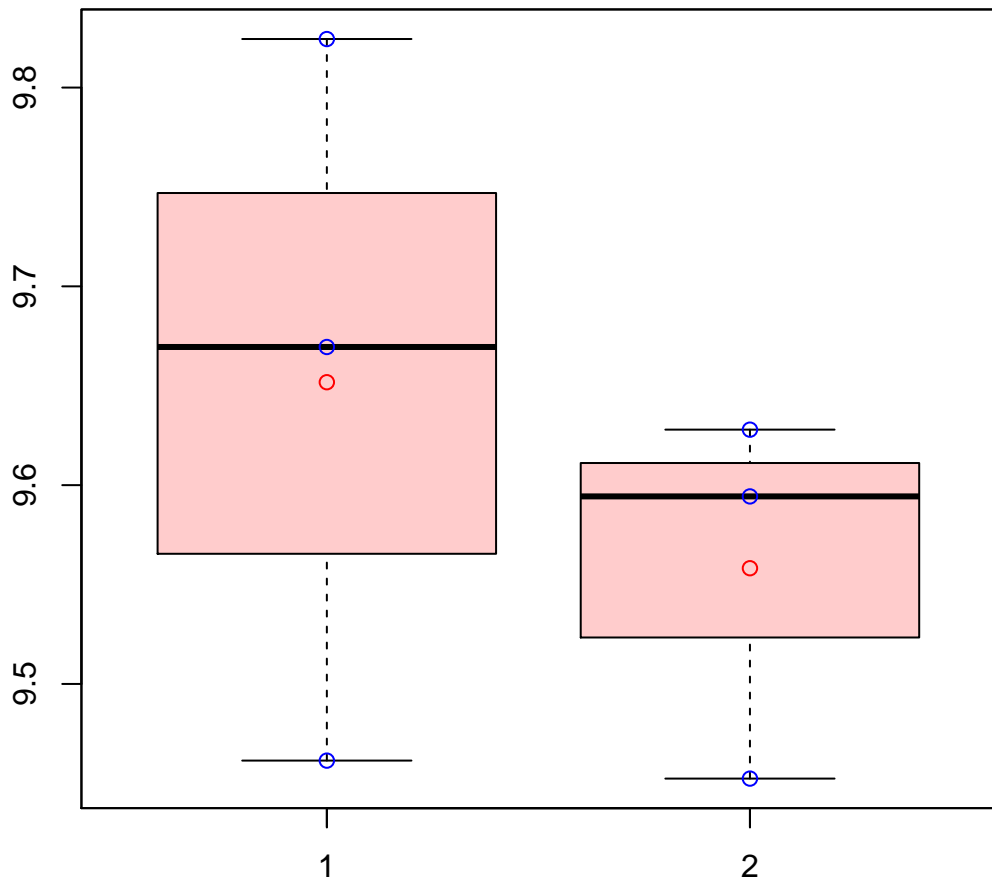

t-Test: p-value = 0.49

# CL2699Contig5|CL2699Contig5

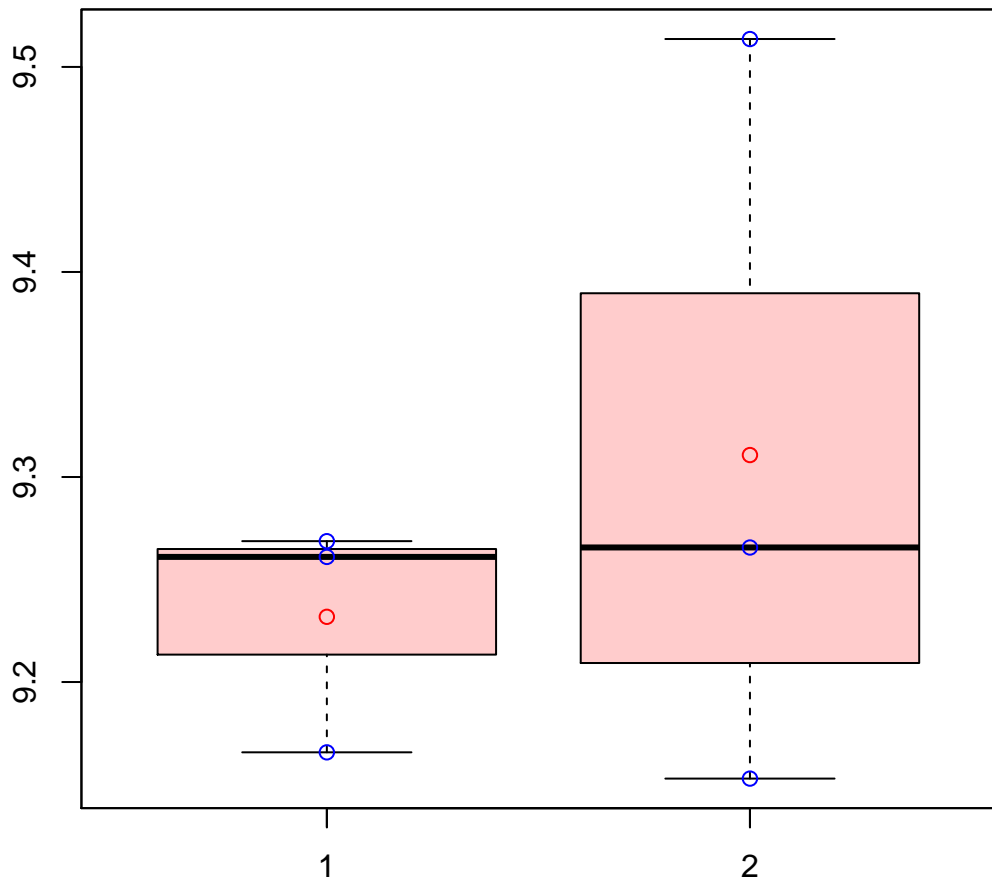

t-Test: p-value = 0.54

# CL2699Contig6|CL2699Contig6



t-Test: p-value = 0.01

# CL2699Contig7|CL2699Contig7

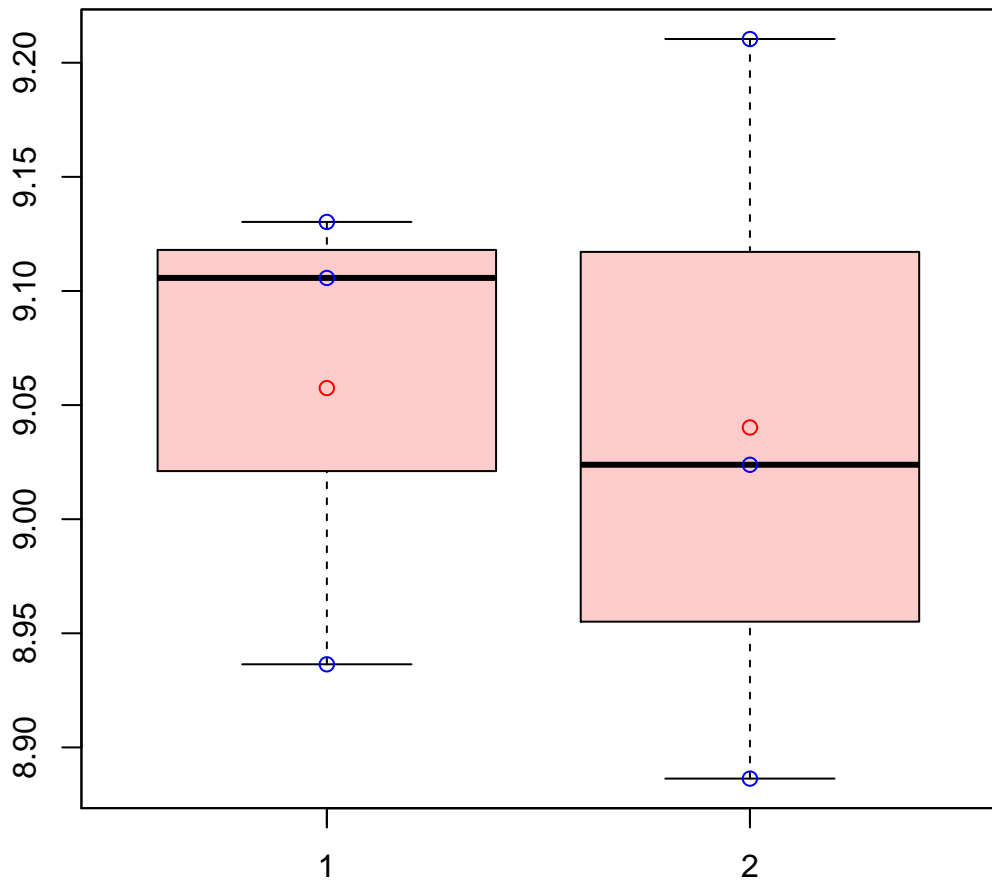

t-Test: p-value = 0.89

# CL269Contig4|CL269Contig4

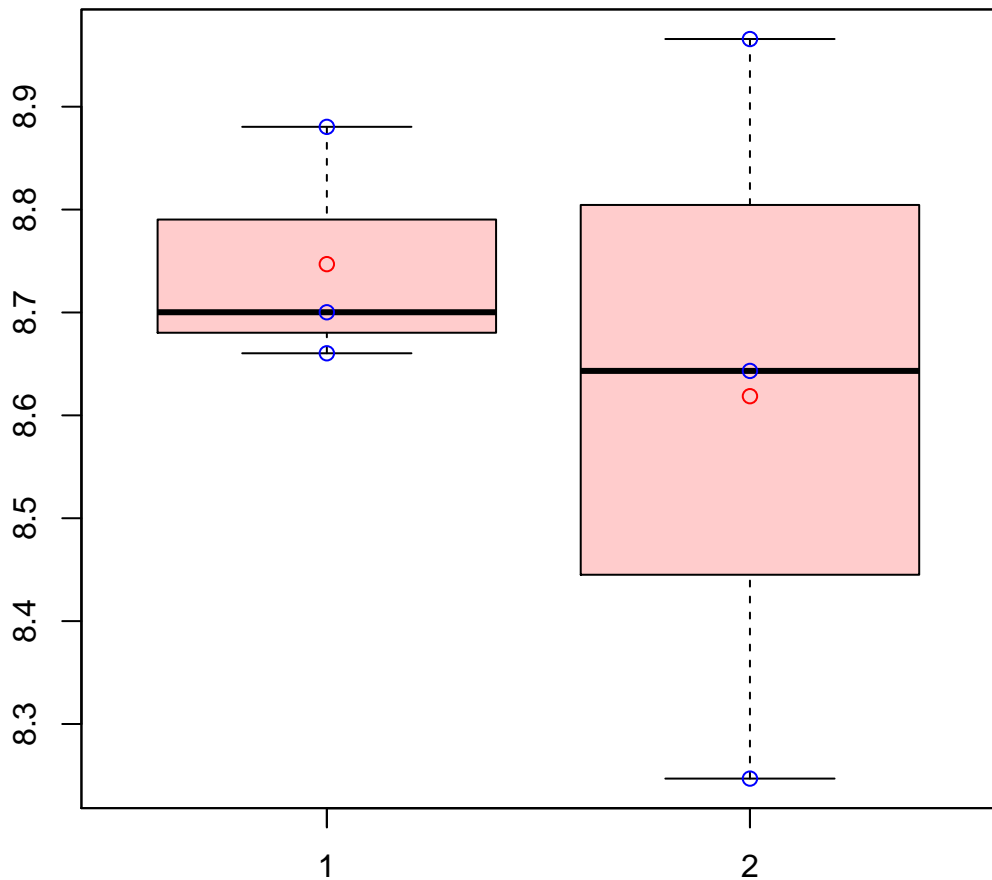

t-Test: p-value = 0.61

# CL2701Contig2|CL2701Contig2

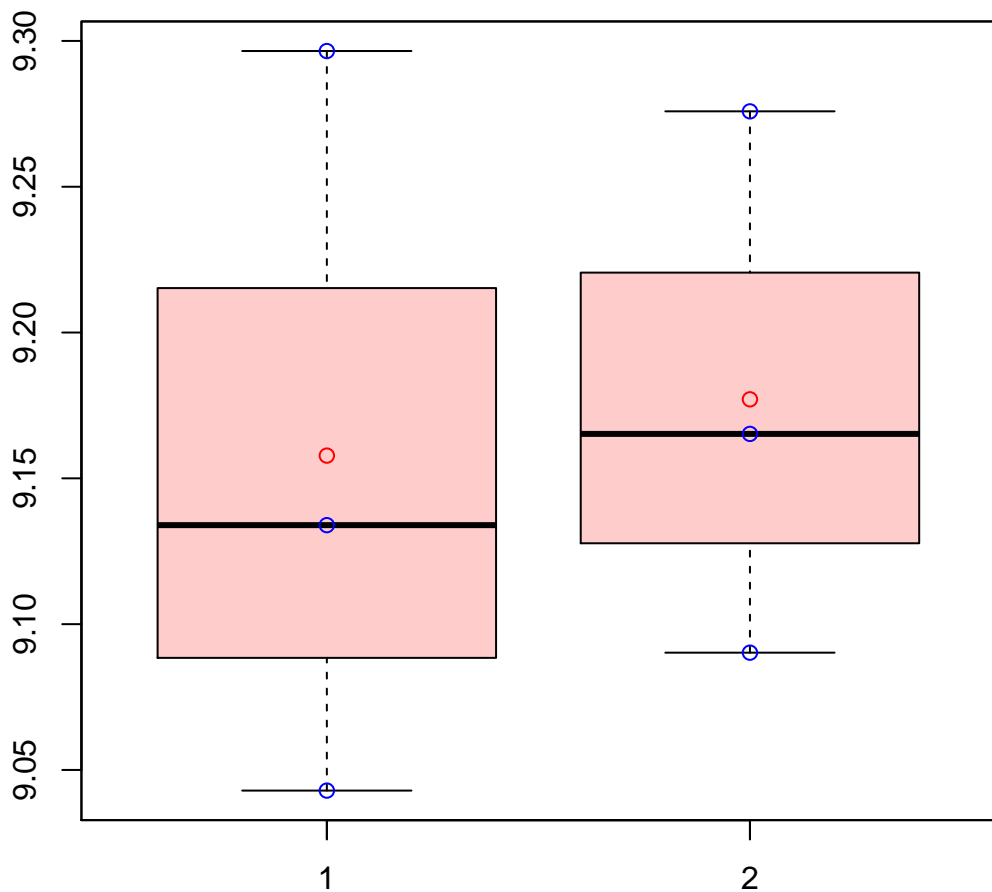

t-Test: p-value = 0.84

# CL2701Contig3|CL2701Contig3



t-Test: p-value = 0.84

# CL2701Contig6|CL2701Contig6

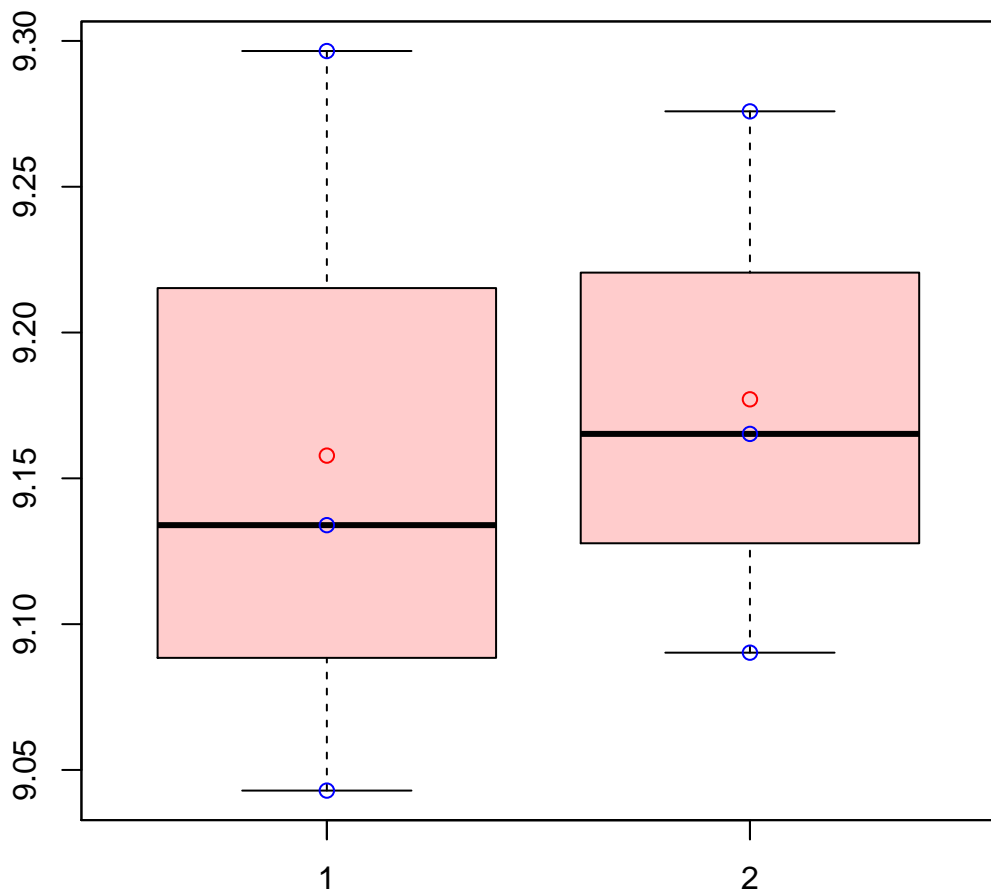

t-Test: p-value = 0.84



# CL27065Contig1|CL27065Contig1

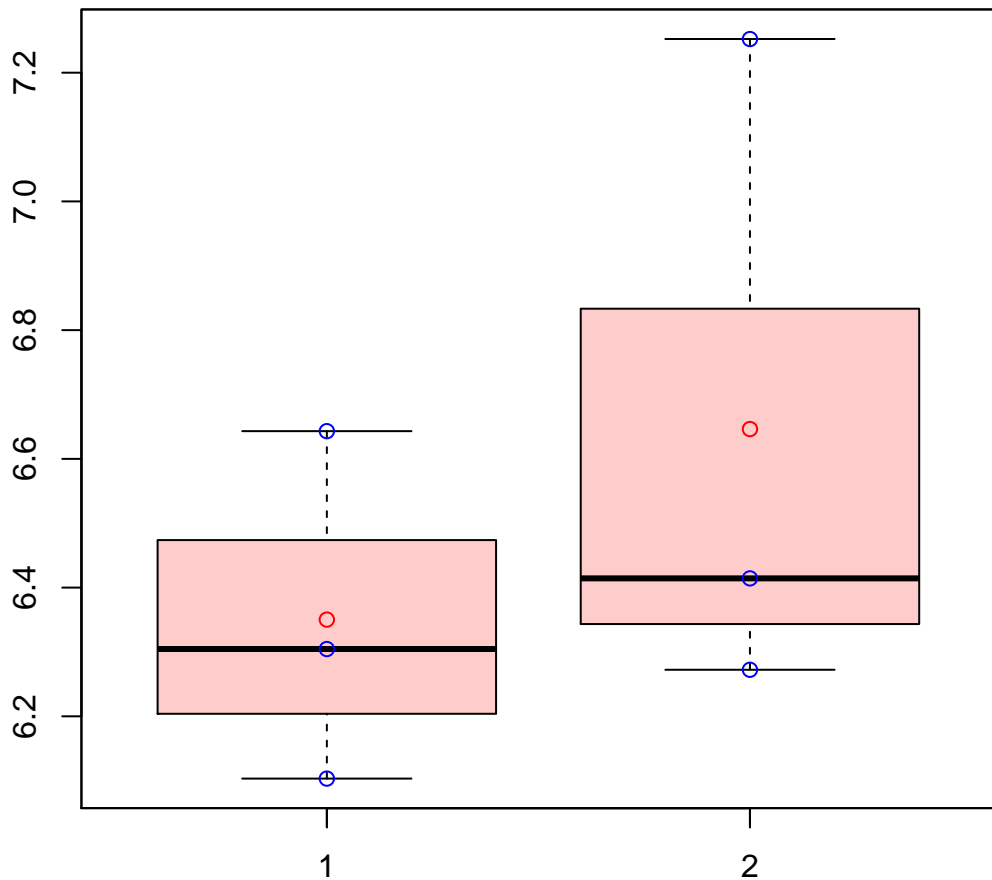

t-Test: p-value = 0.45

# CL2706Contig1|CL2706Contig1

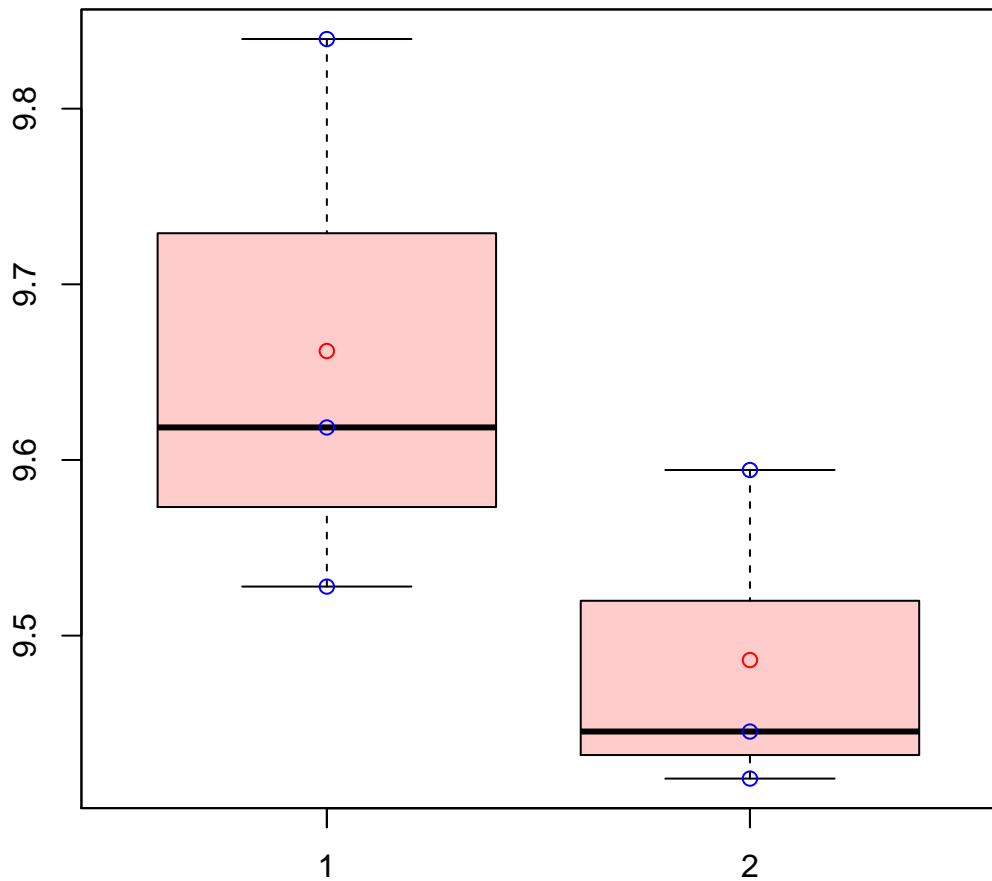

t-Test: p-value = 0.19

# CL2706Contig2|CL2706Contig2

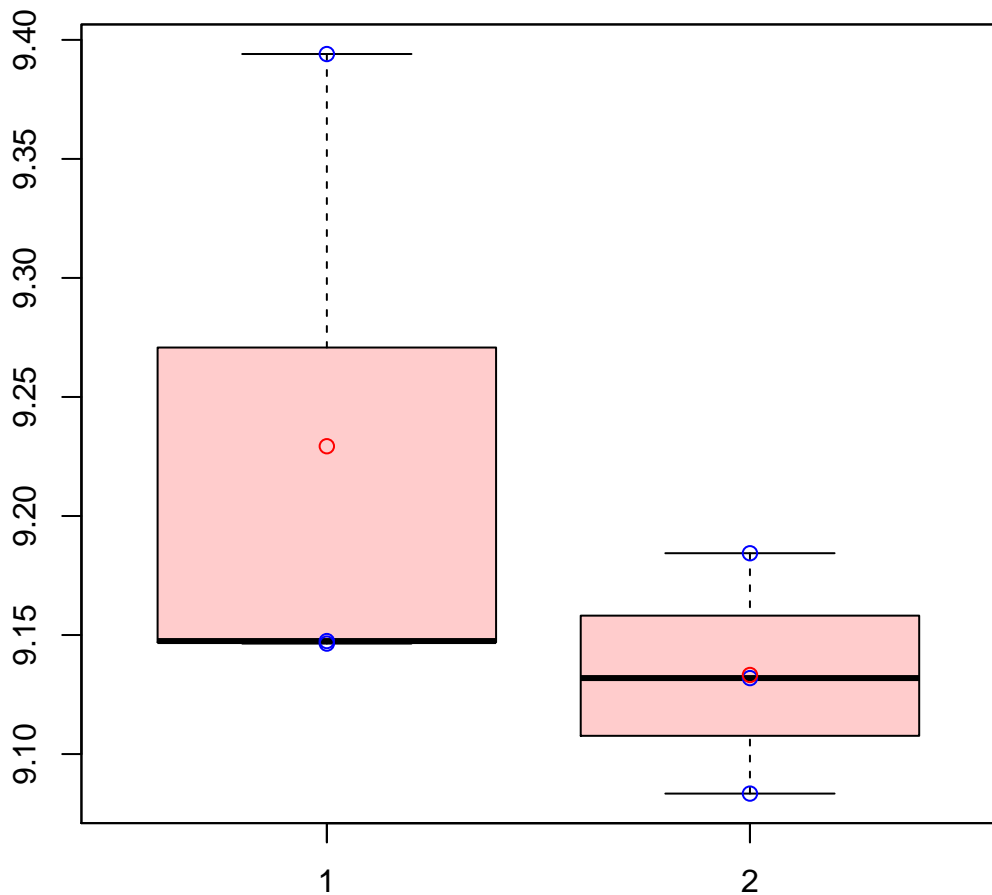

t-Test: p-value = 0.37

# CL2706Contig3|CL2706Contig3

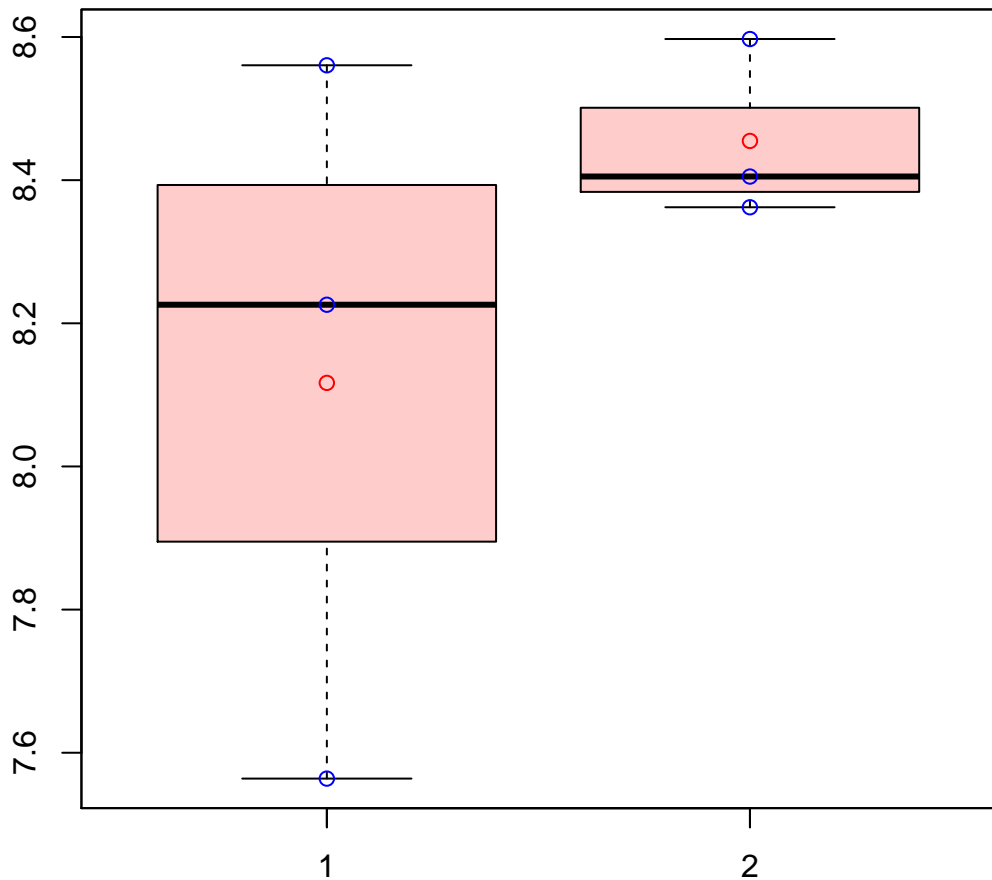

t-Test: p-value = 0.37

# CL2707Contig1|CL2707Contig1

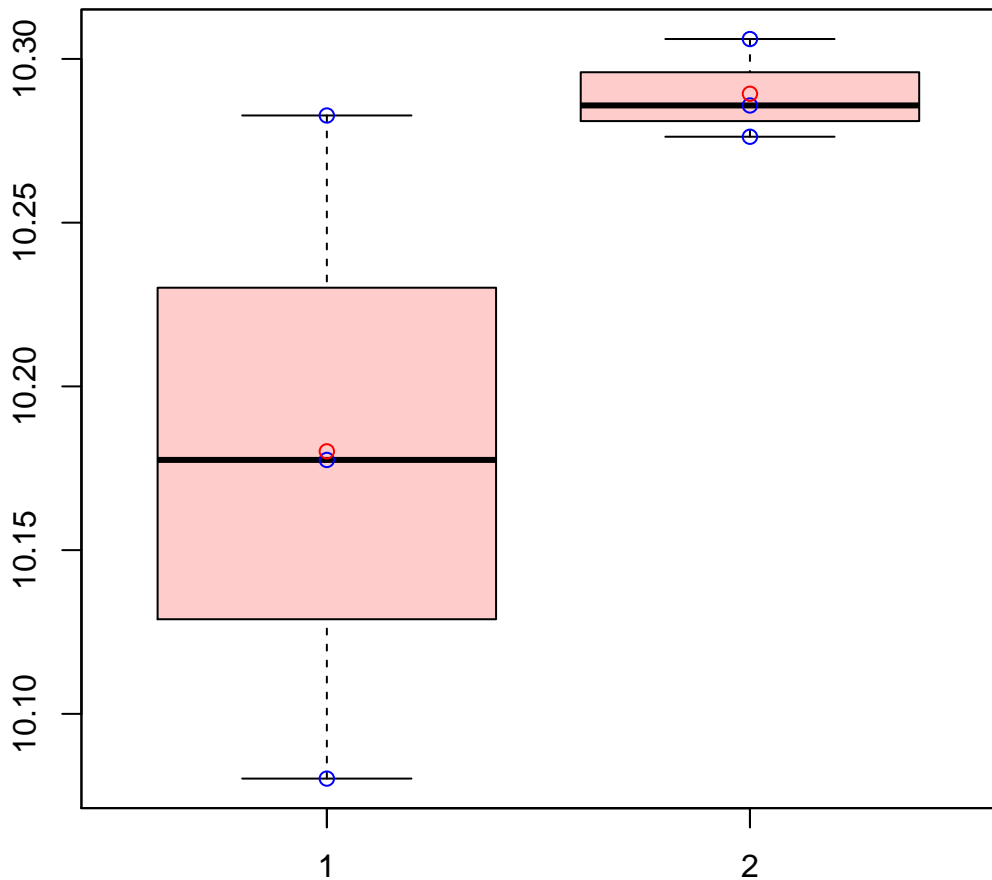

t-Test: p-value = 0.2

# CL2707Contig2|CL2707Contig2

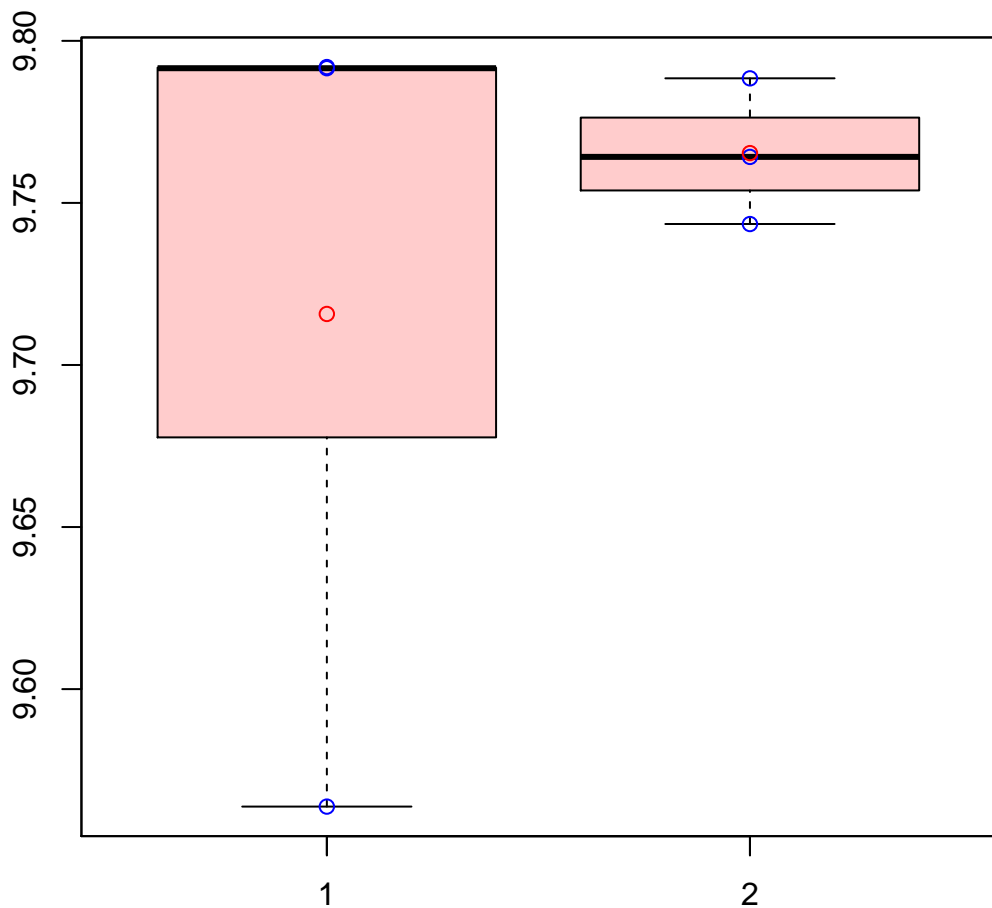

t-Test: p-value = 0.58

# CL270Contig1|CL270Contig1

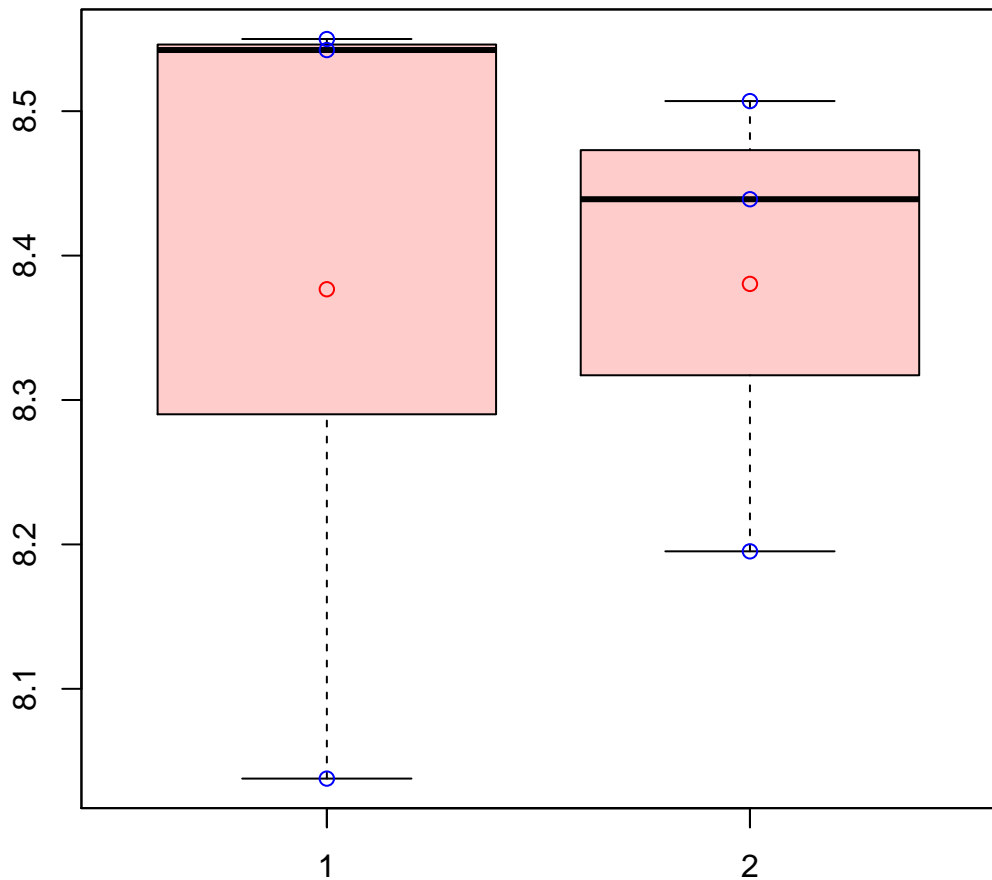

t-Test: p-value = 0.99

# CL27102Contig1|CL27102Contig1

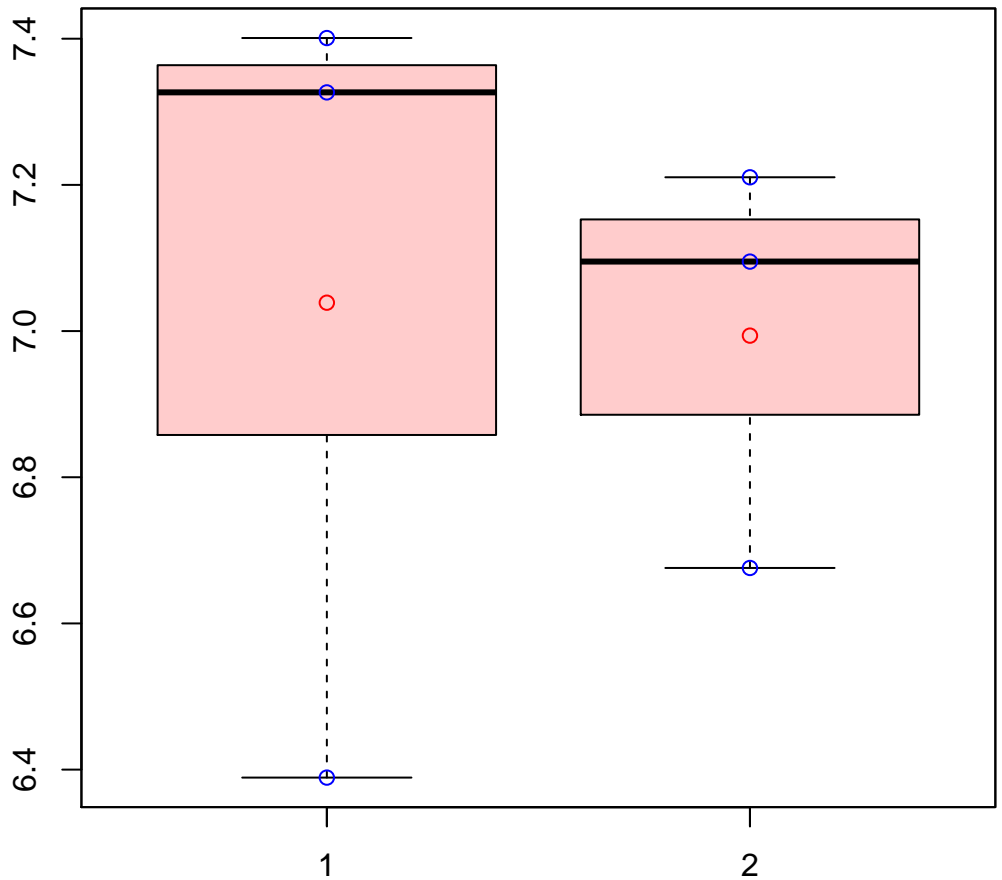

t-Test: p-value = 0.91



# CL2711Contig2|CL2711Contig2

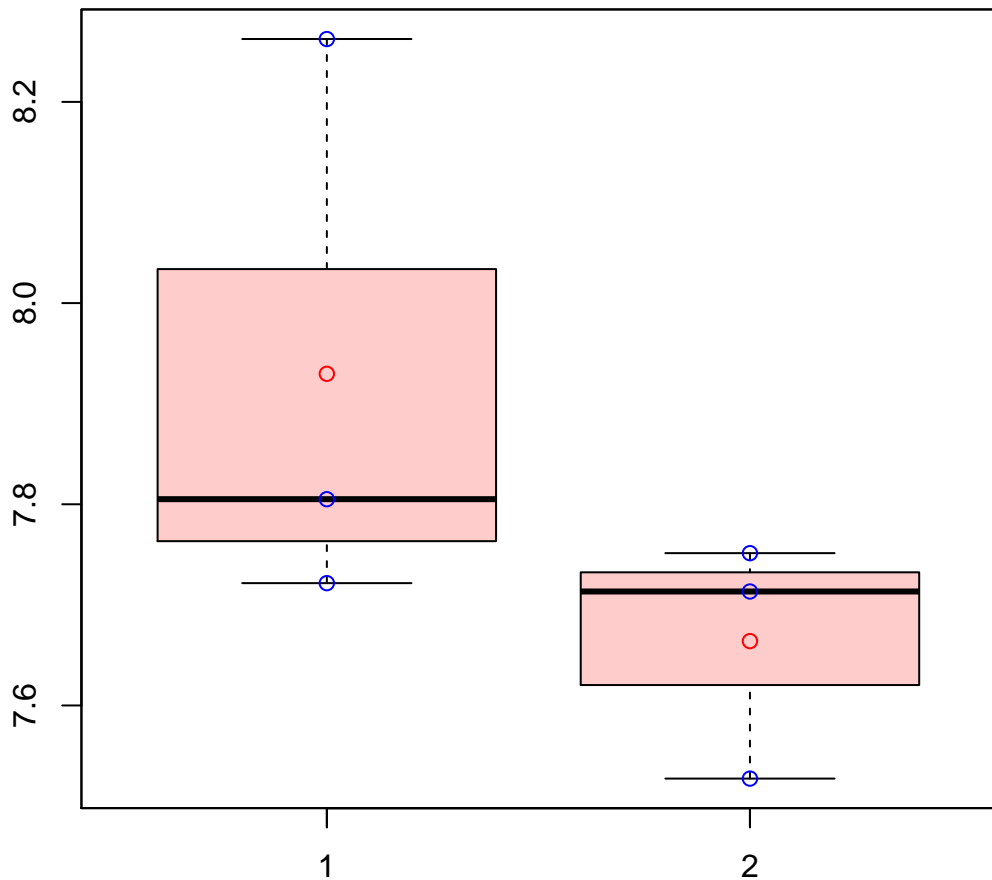

t-Test: p-value = 0.25

# CL2714Contig5|CL2714Contig5

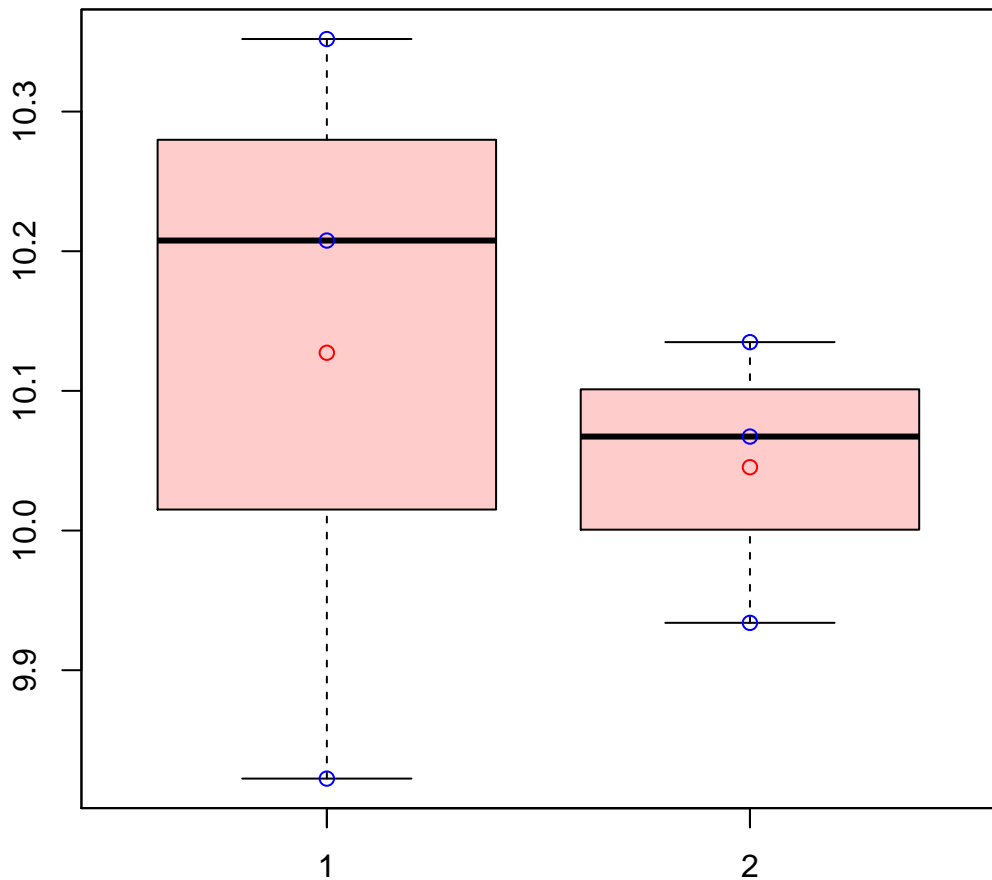

t-Test: p-value = 0.67

# CL2716Contig2|CL2716Contig2

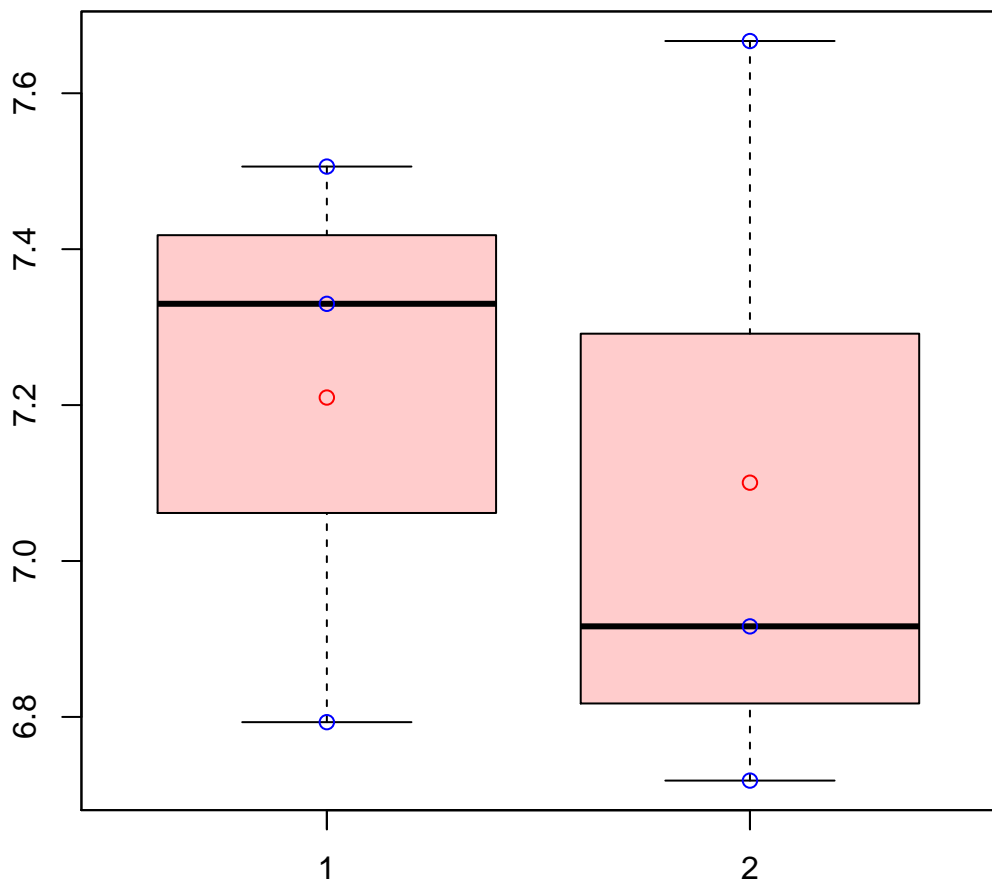

t-Test: p-value = 0.78

# CL271Contig23|CL271Contig23

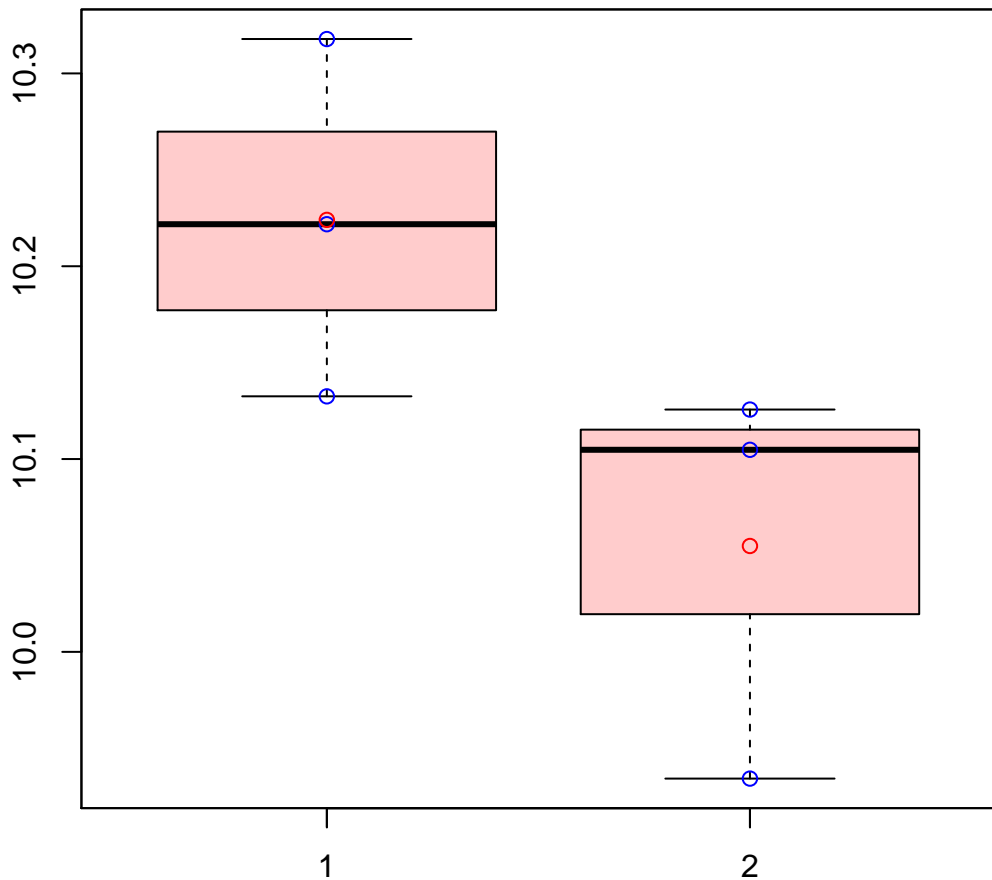

t-Test: p-value = 0.11

# CL271Contig24|CL271Contig24

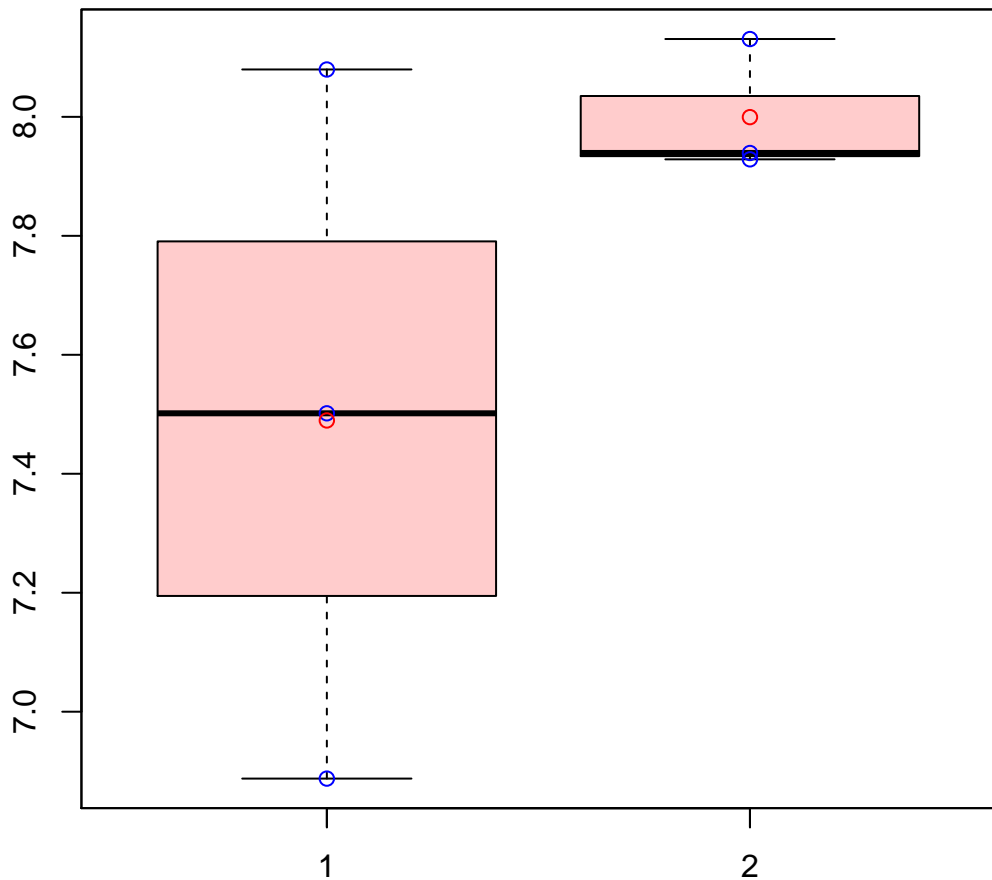

t-Test: p-value = 0.27

# CL271Contig26|CL271Contig26

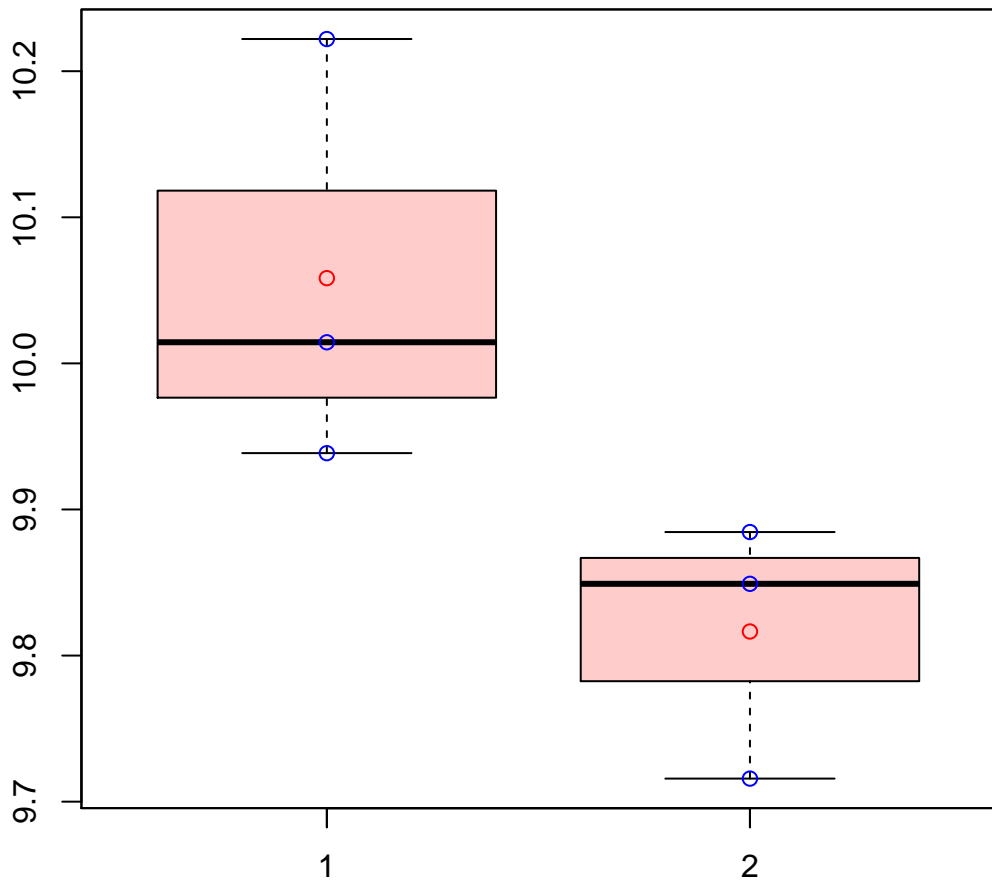

t-Test: p-value = 0.08

# CL27217Contig1|CL27217Contig1



t-Test: p-value = 0.3

# CL2723Contig3|CL2723Contig3

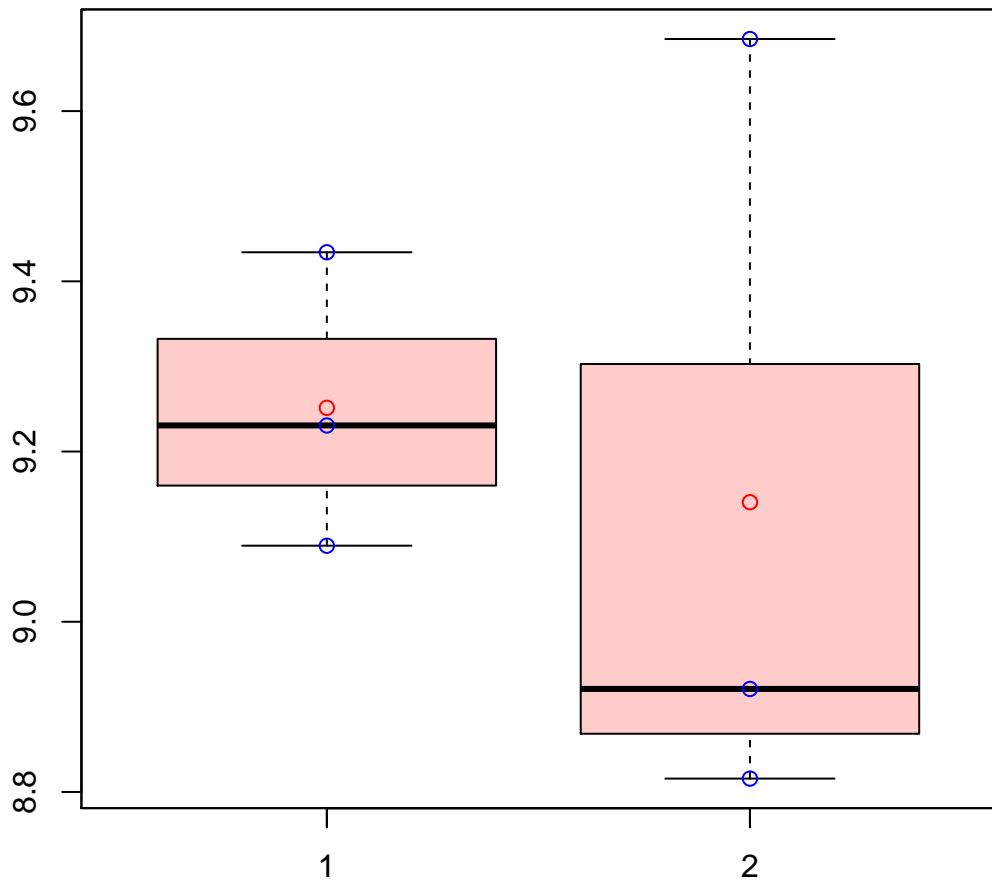

t-Test: p-value = 0.73



# CL2725Contig3|CL2725Contig3

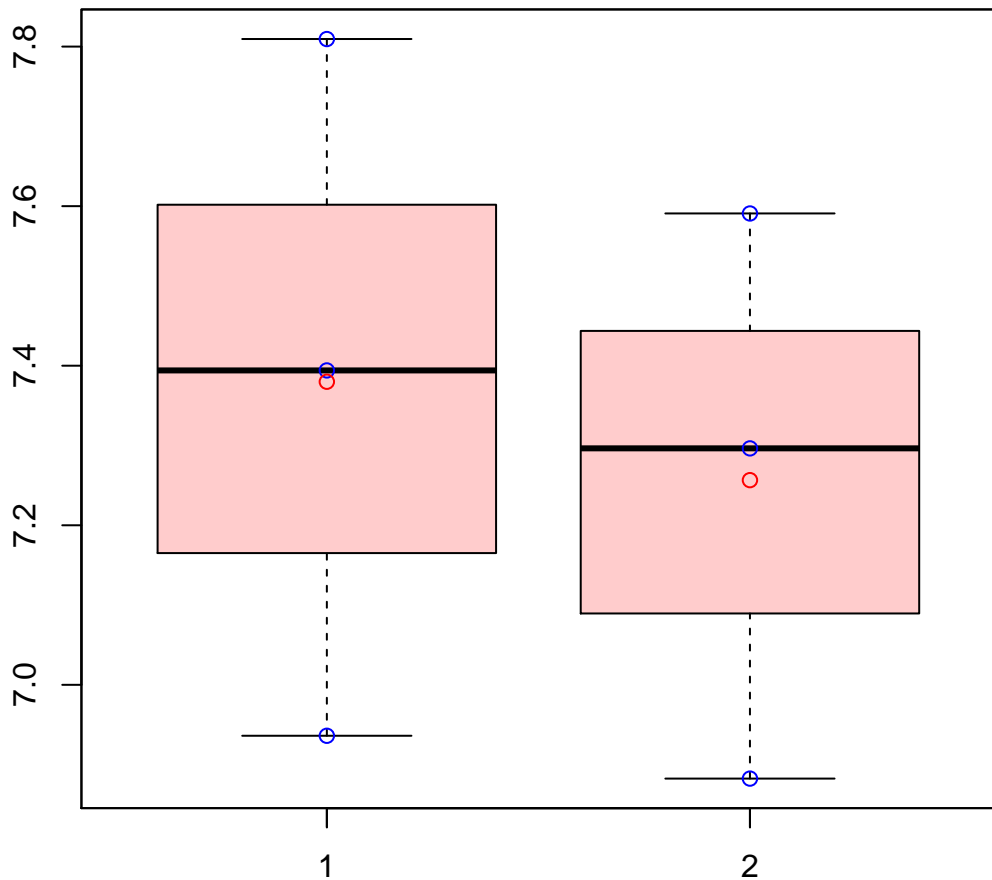

t-Test: p-value = 0.72

# CL27260Contig1|CL27260Contig1

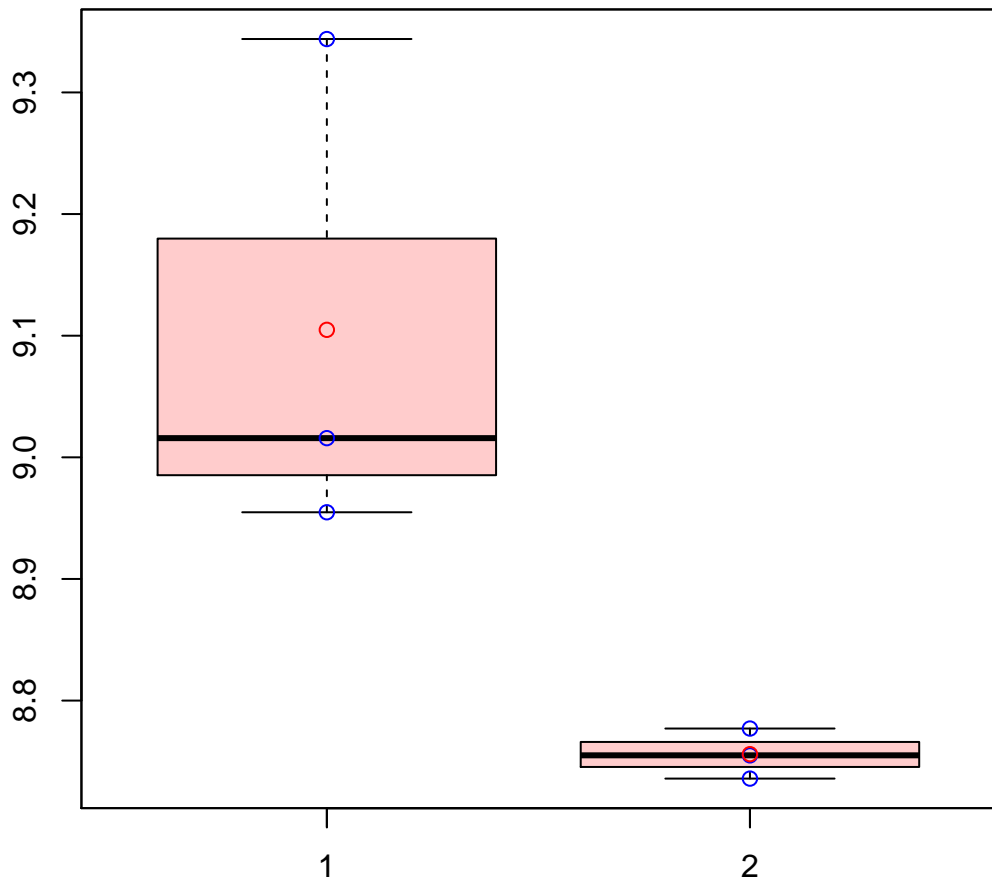

t-Test: p-value = 0.1

# CL2728Contig3|CL2728Contig3

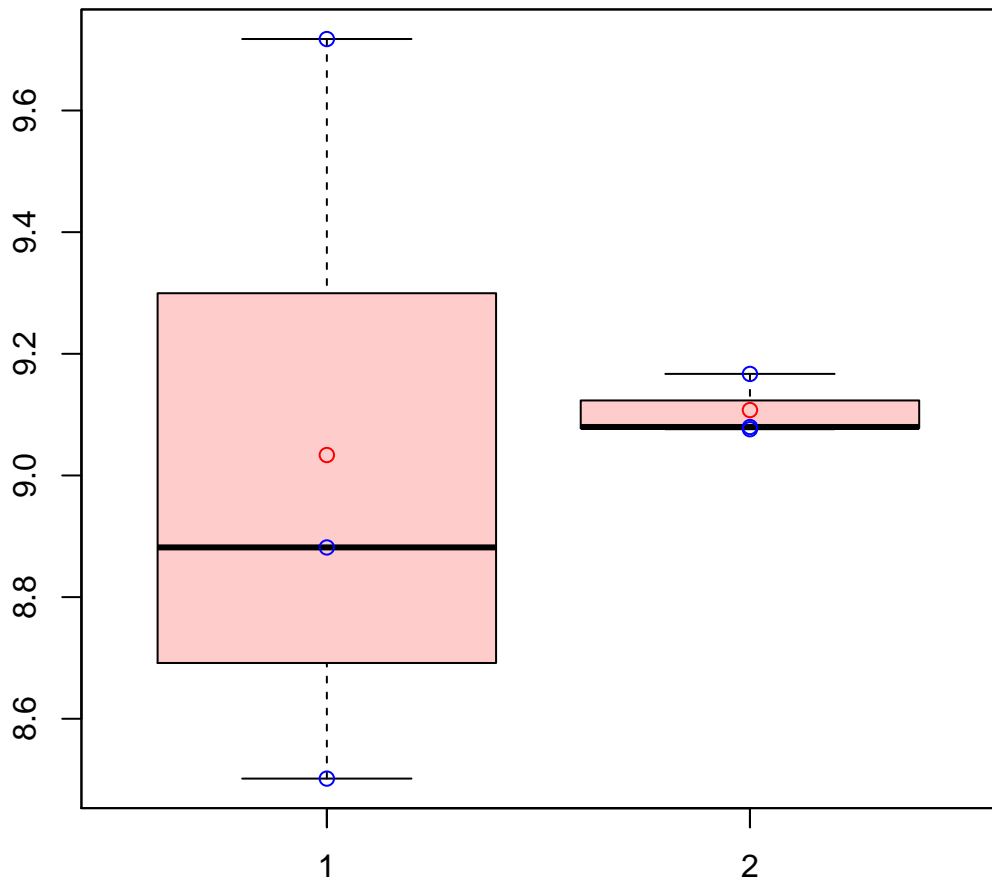

t-Test: p-value = 0.86

# CL2729Contig1|CL2729Contig1

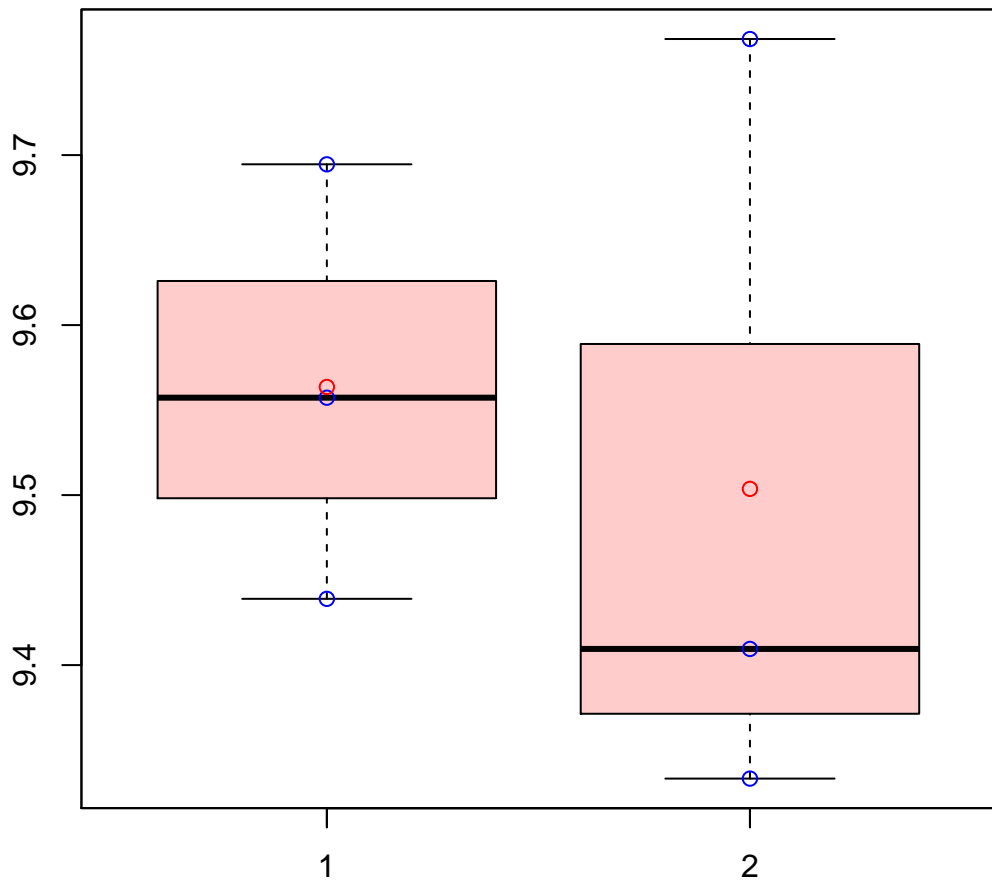

t-Test: p-value = 0.72

# CL272Contig20|CL272Contig20

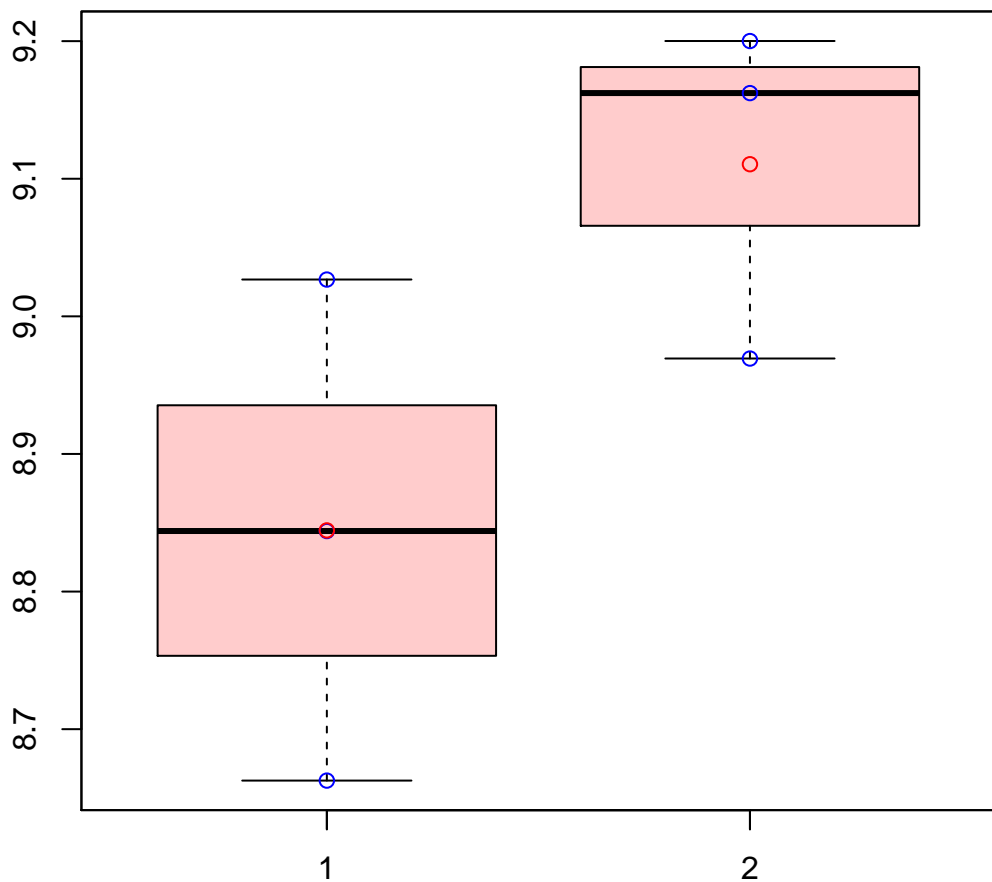

t-Test: p-value = 0.11

# CL2733Contig3|CL2733Contig3

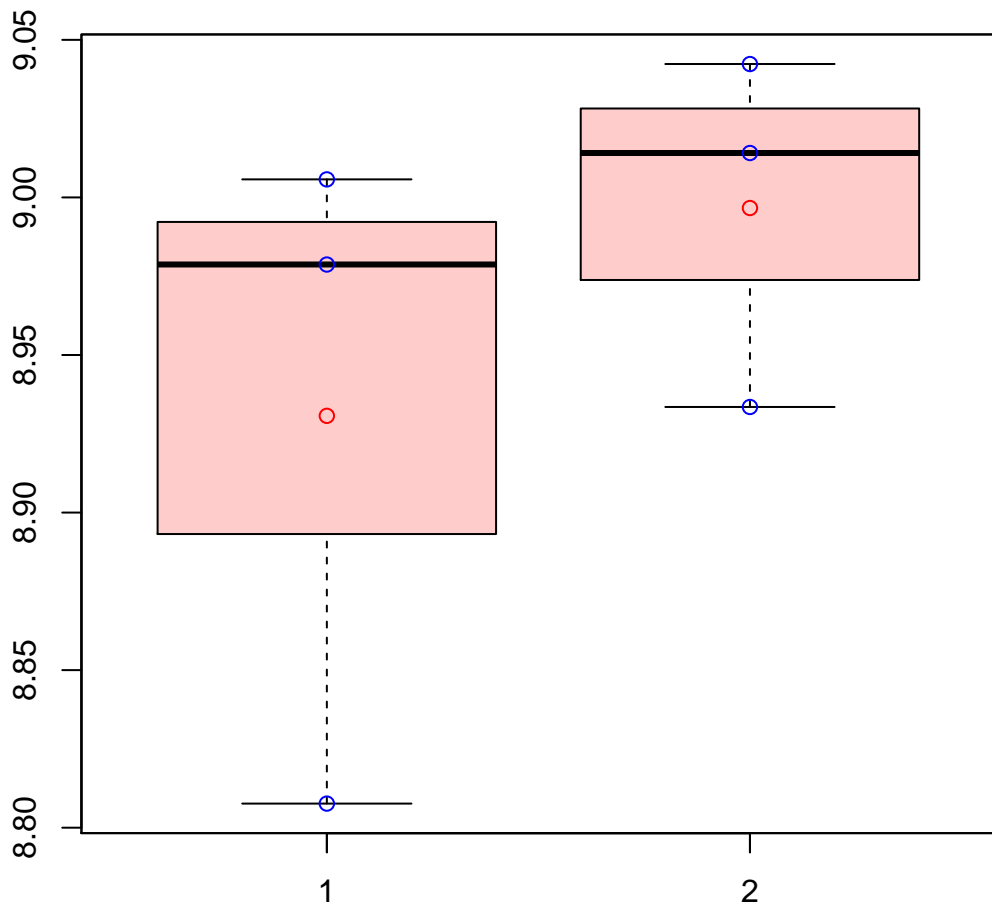

t-Test: p-value = 0.42

# CL2733Contig6|CL2733Contig6

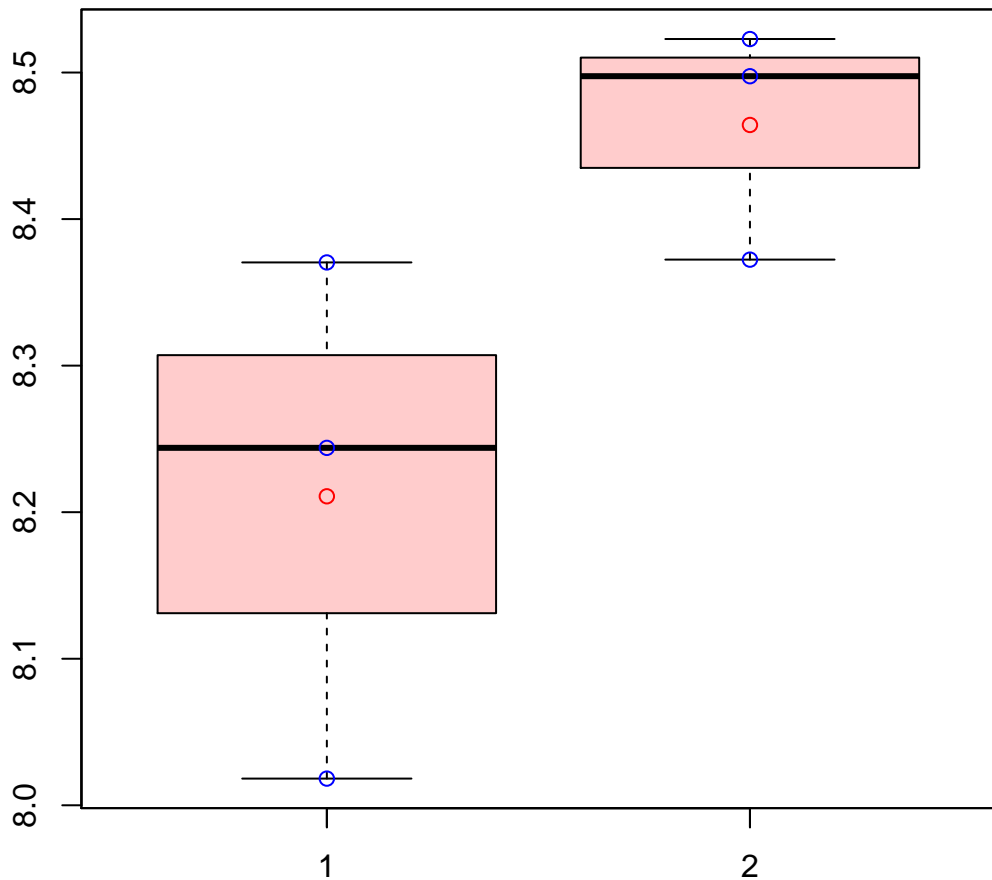

t-Test: p-value = 0.12

# CL27352Contig1|CL27352Contig1

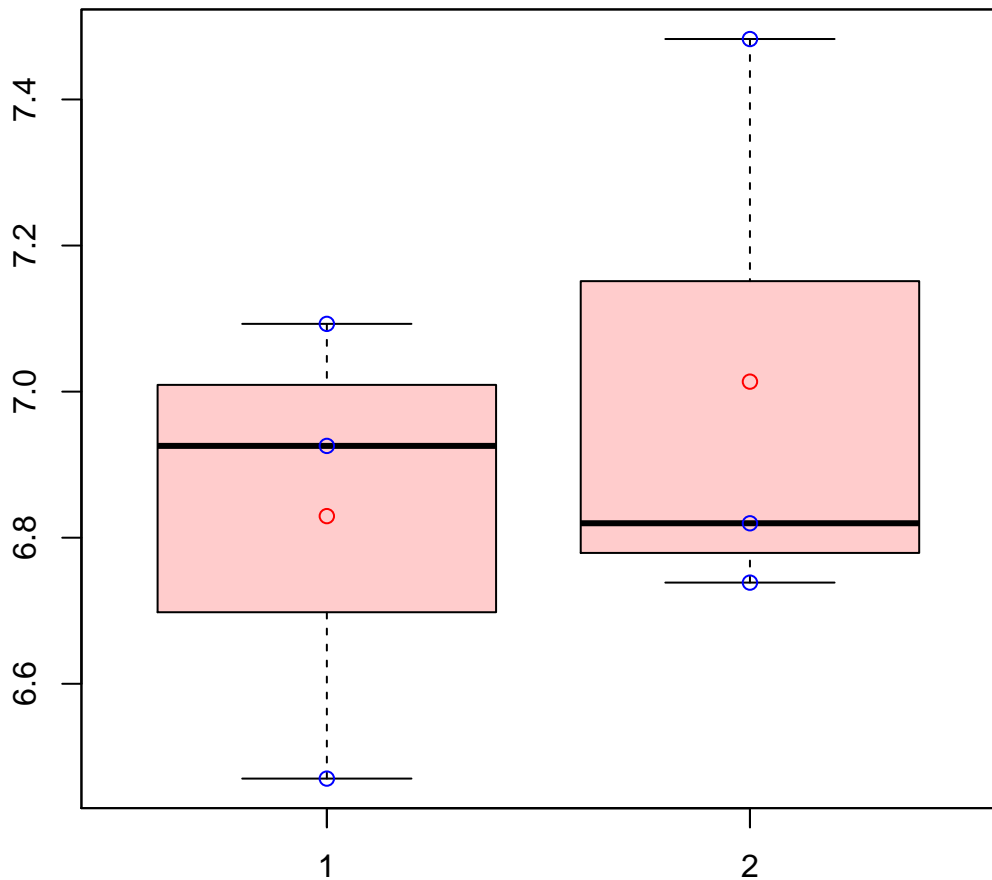

t-Test: p-value = 0.57



# CL2736Contig1|CL2736Contig1

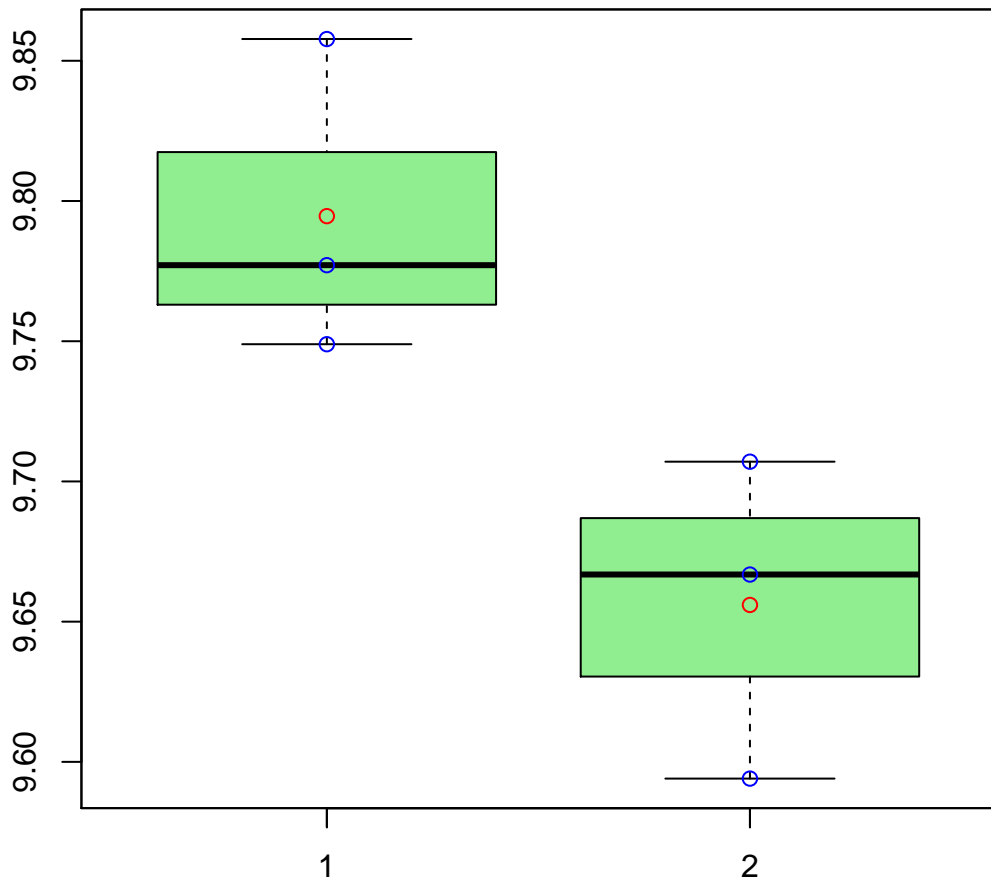

t-Test: p-value = 0.04

# CL2736Contig3|CL2736Contig3

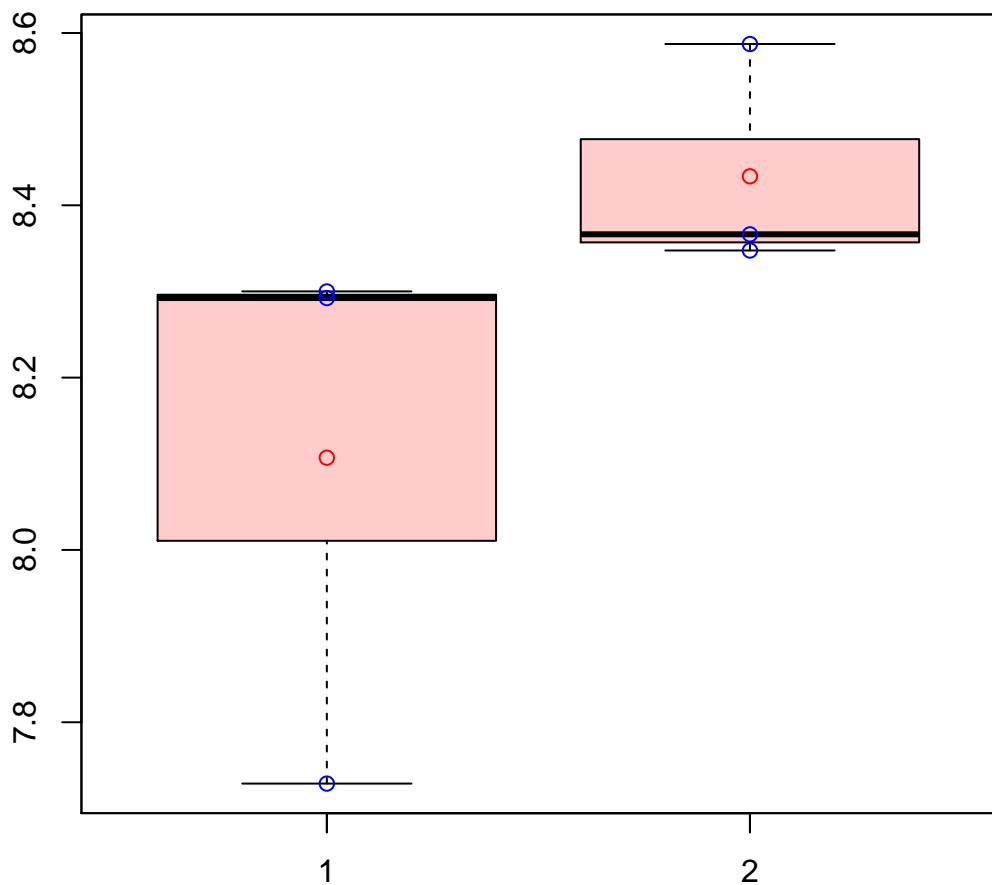

t-Test: p-value = 0.22

# CL2740Contig2|CL2740Contig2

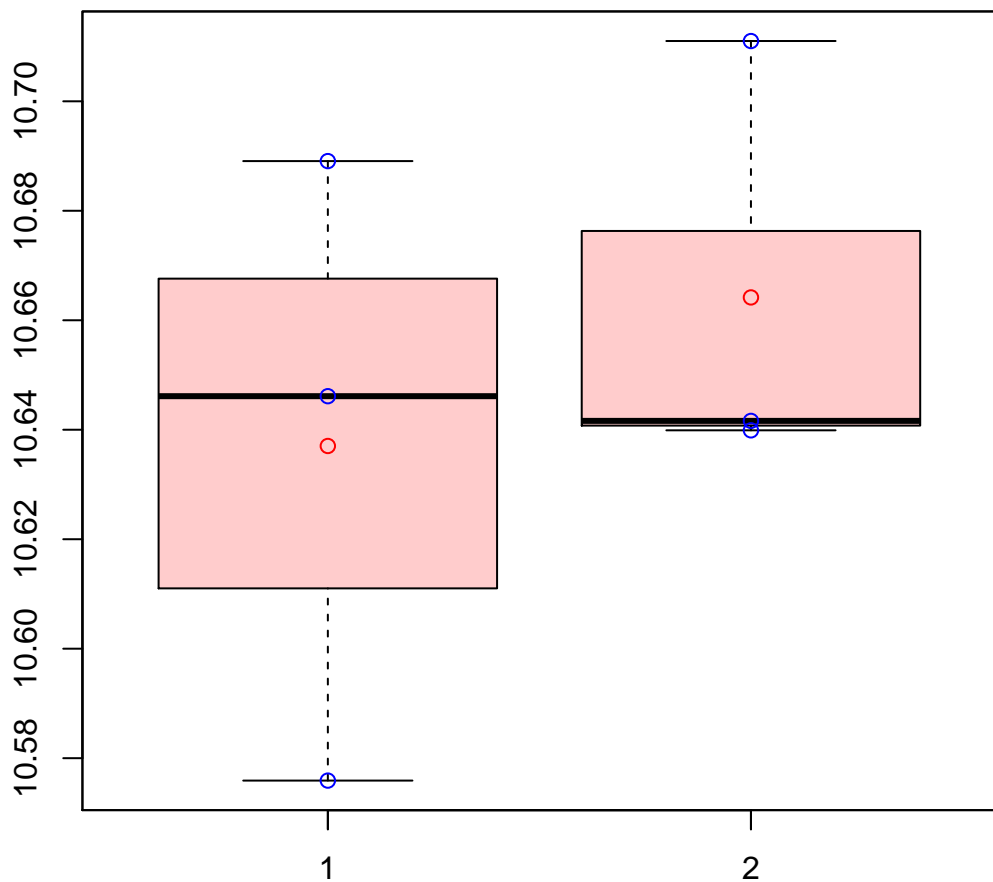

t-Test: p-value = 0.54

# CL2747Contig2|CL2747Contig2

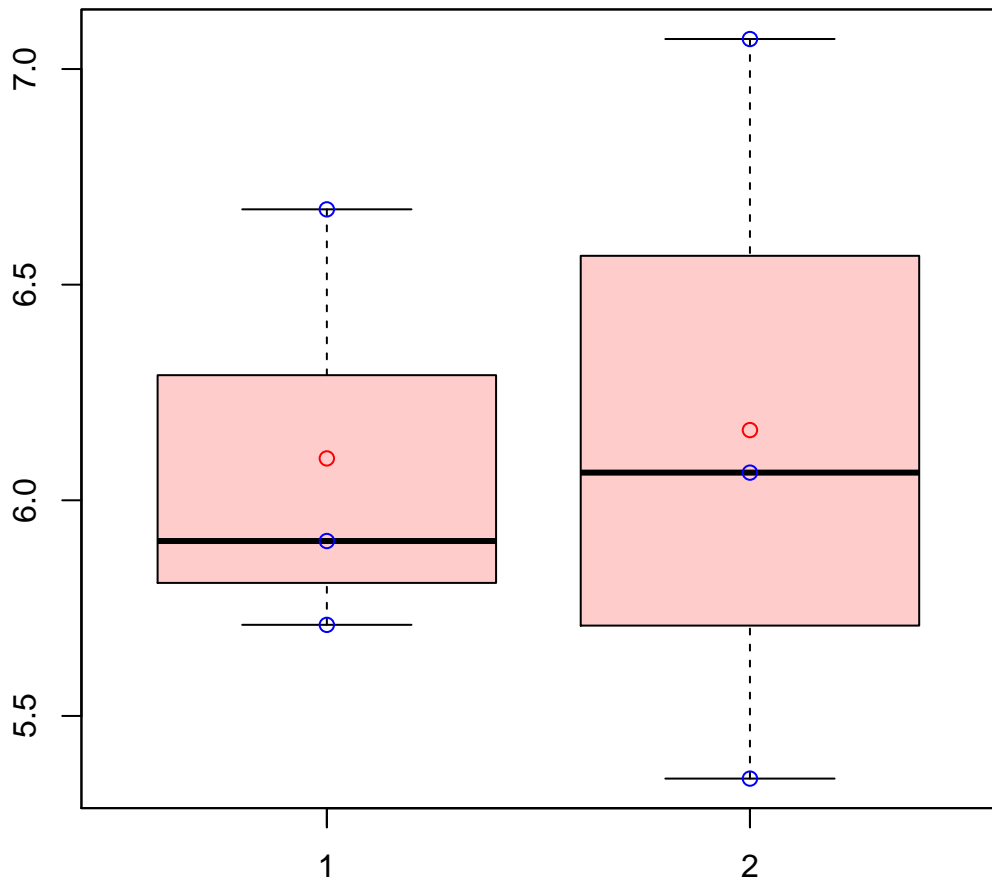

t-Test: p-value = 0.92

# CL2747Contig4|CL2747Contig4



t-Test: p-value = 0.92

# CL2747Contig6|CL2747Contig6



t-Test: p-value = 0.92

# CL274Contig7|CL274Contig7

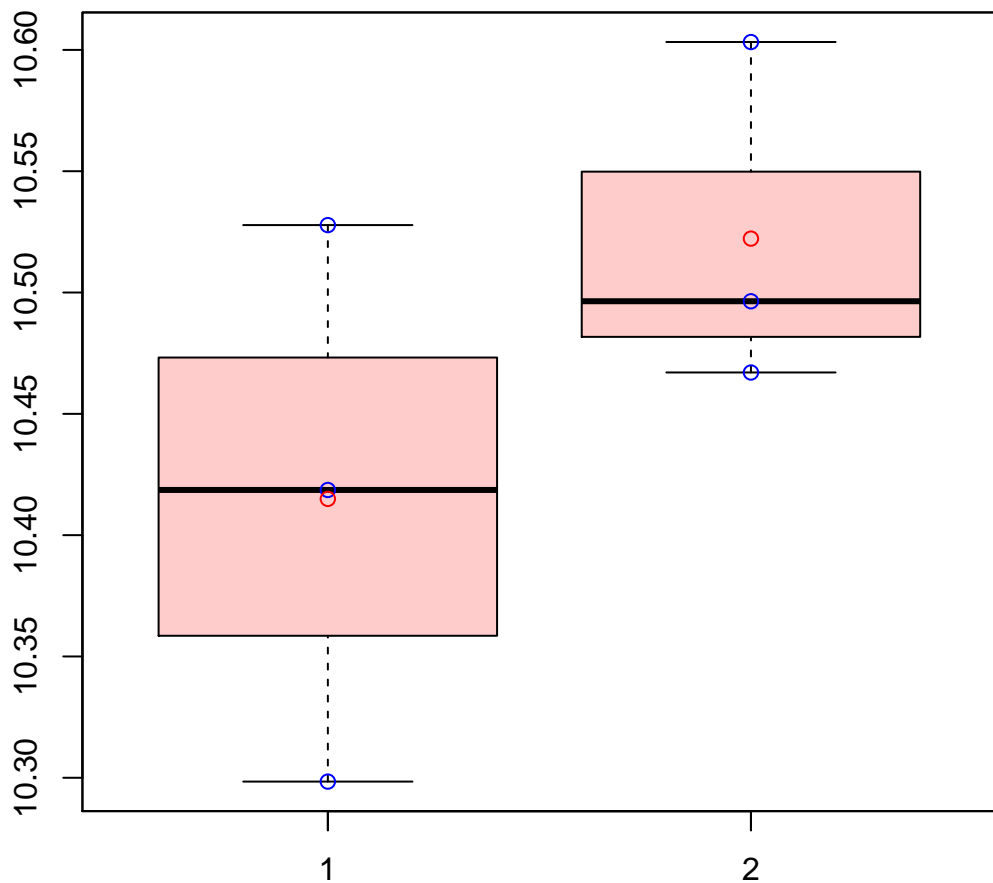

t-Test: p-value = 0.25

# CL2750Contig1|CL2750Contig1

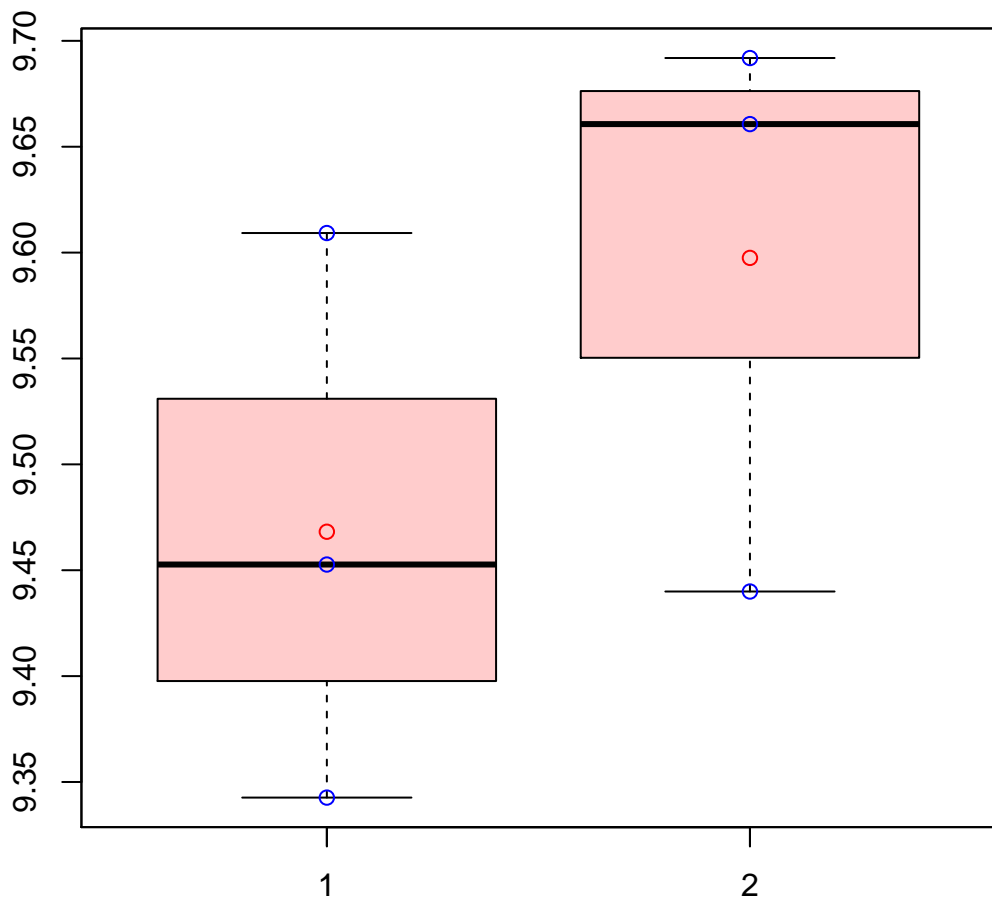

t-Test: p-value = 0.31



# CL2752Contig3|CL2752Contig3

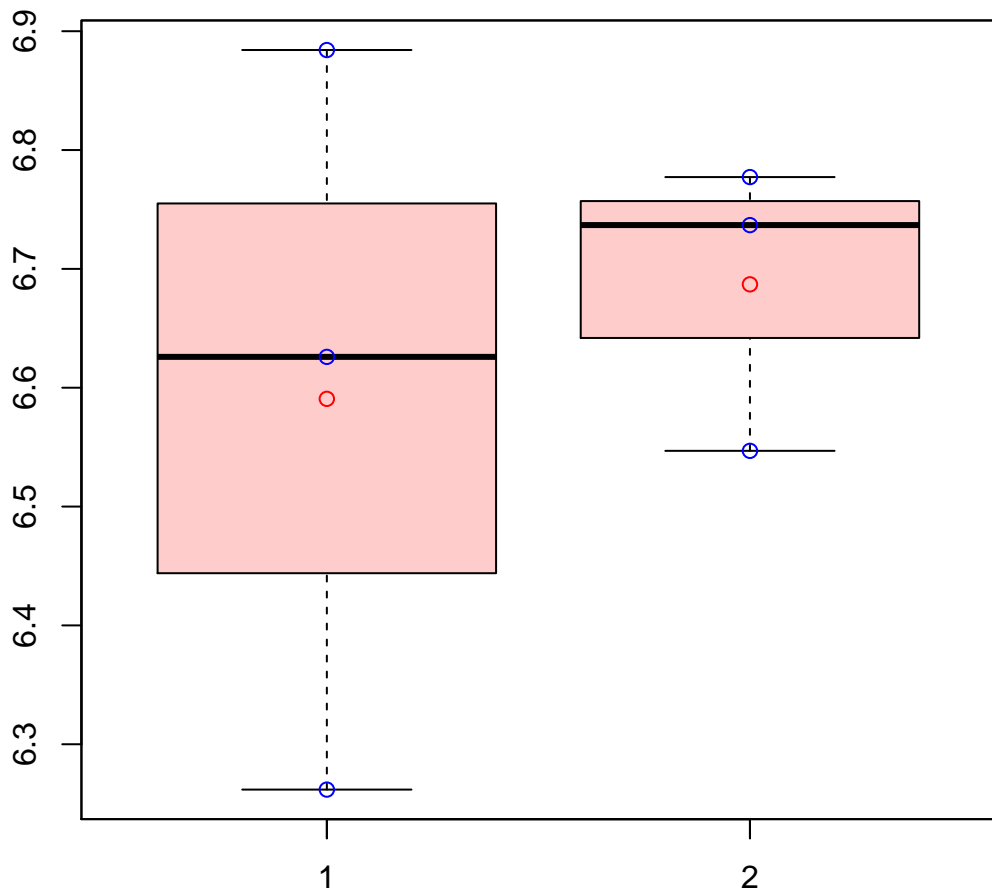

t-Test: p-value = 0.66

# CL2752Contig4|CL2752Contig4



t-Test: p-value = 0.42

# CL27536Contig1|CL27536Contig1

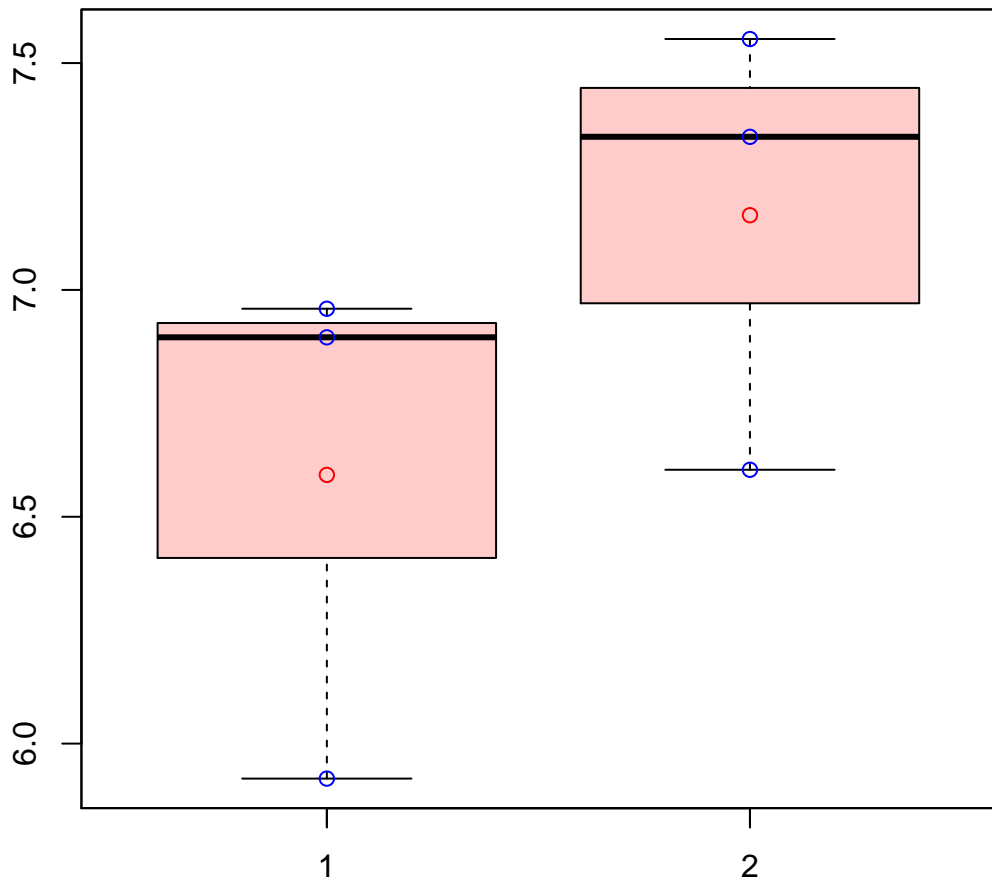

t-Test: p-value = 0.27

# CL2755Contig1|CL2755Contig1



t-Test: p-value = 0.77

# CL2756Contig5|CL2756Contig5

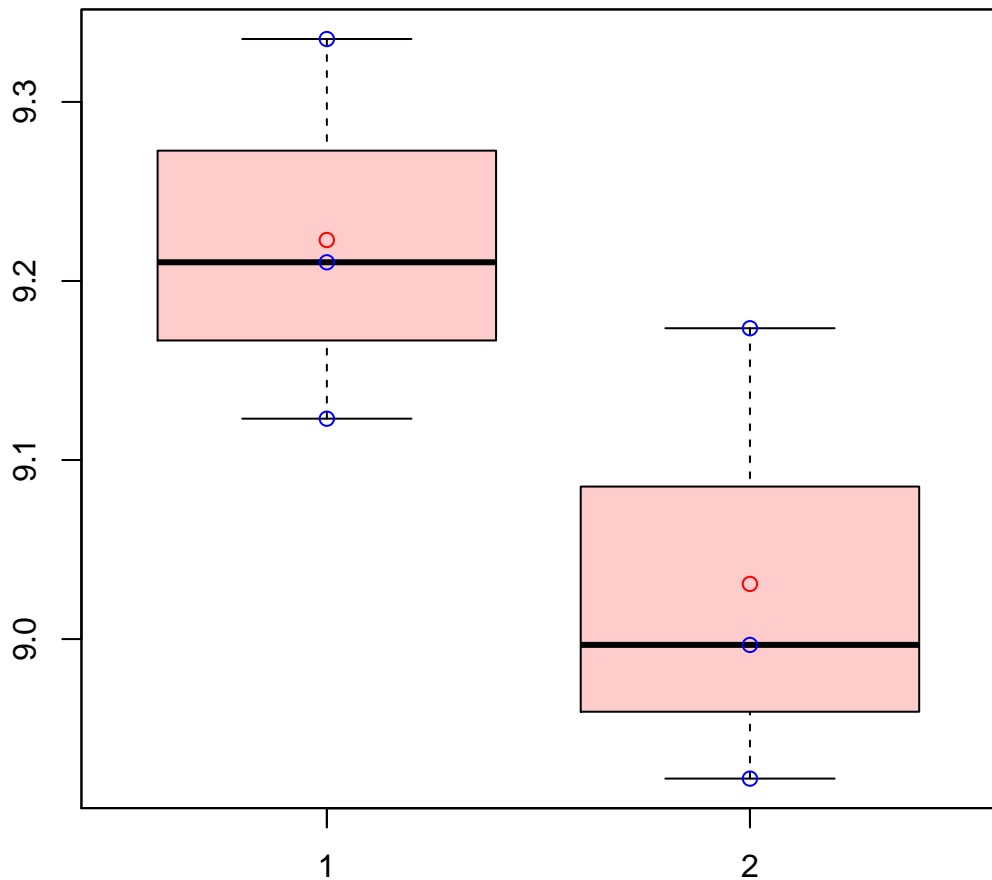

t-Test: p-value = 0.12

# CL2758Contig6|CL2758Contig6

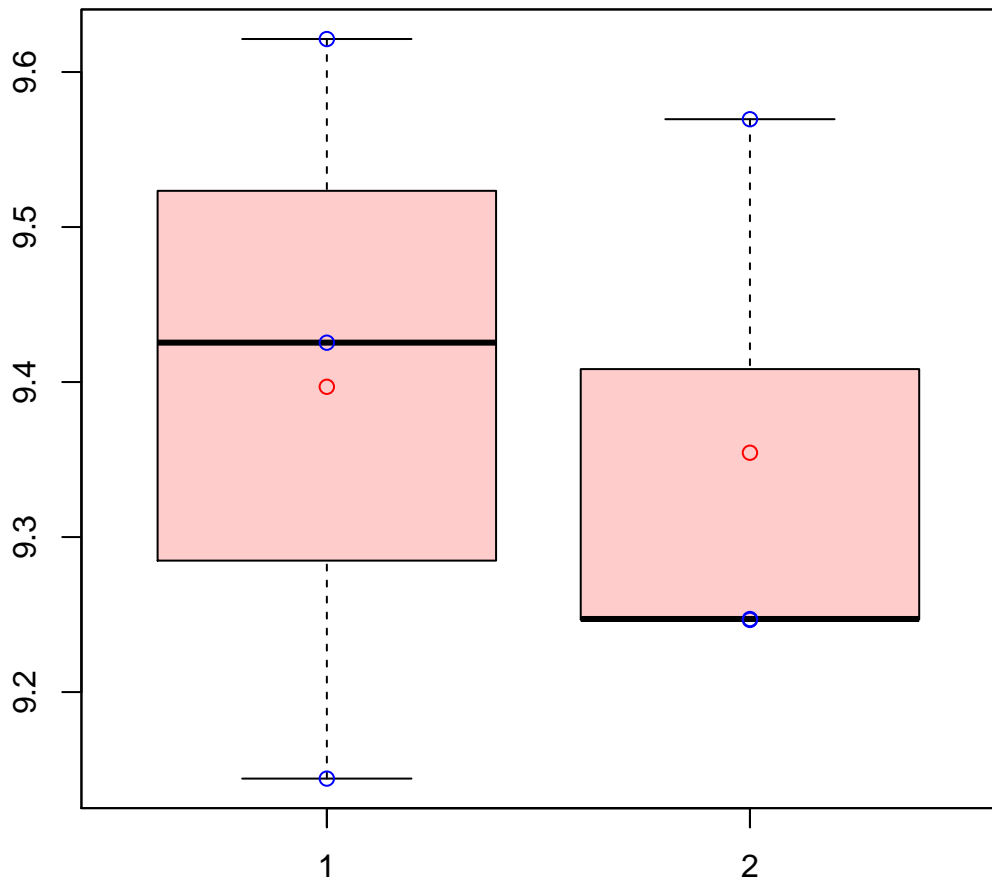

t-Test: p-value = 0.82

# CL2760Contig2|CL2760Contig2

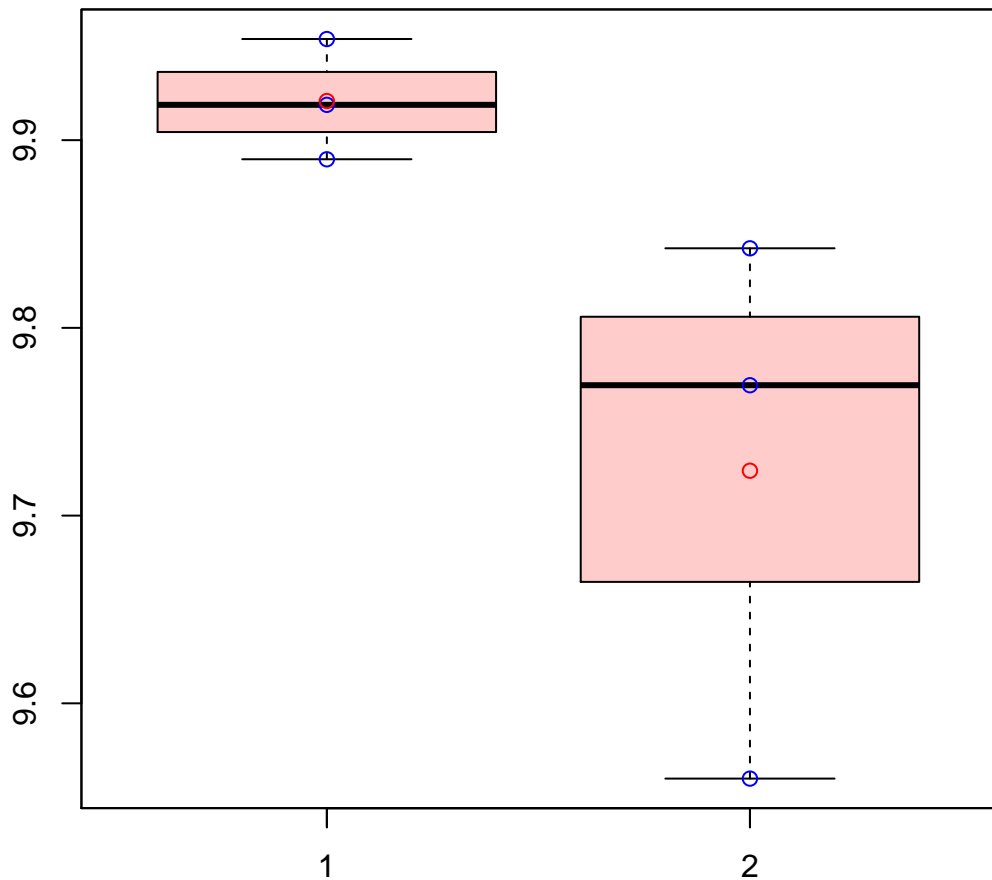

t-Test: p-value = 0.14

# CL2761Contig3|CL2761Contig3

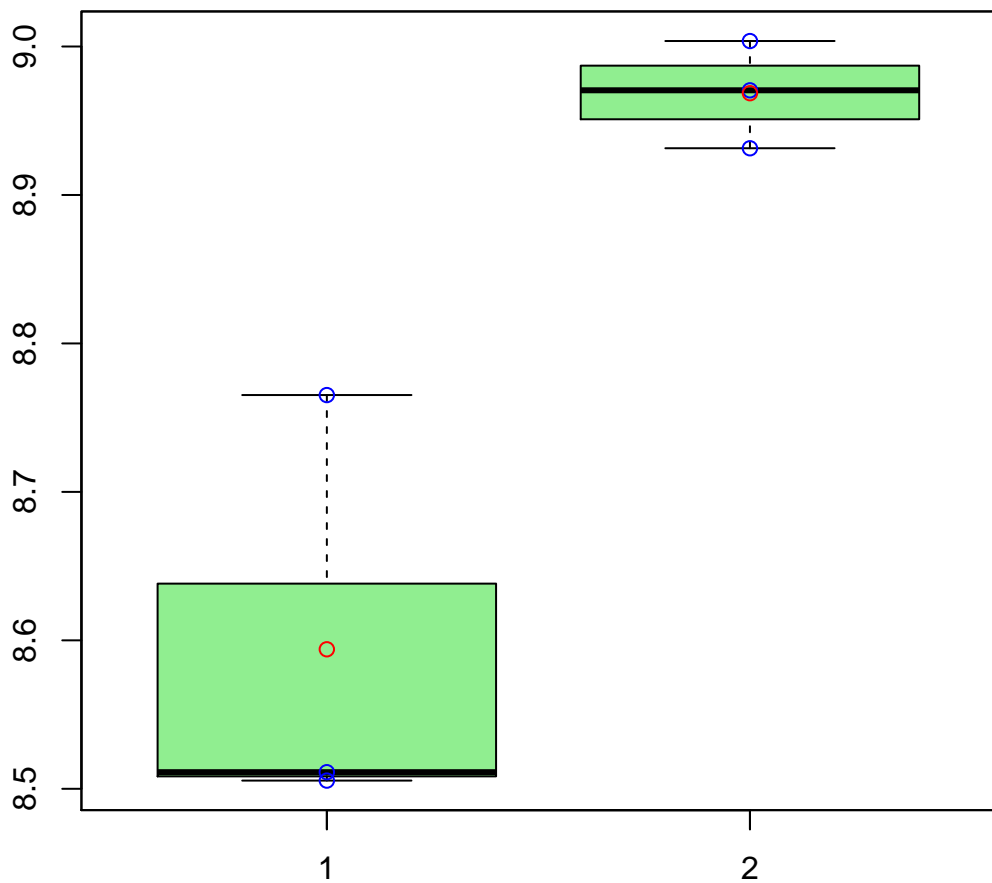

t-Test: p-value = 0.04



# CL2761Contig4|CL2761Contig4

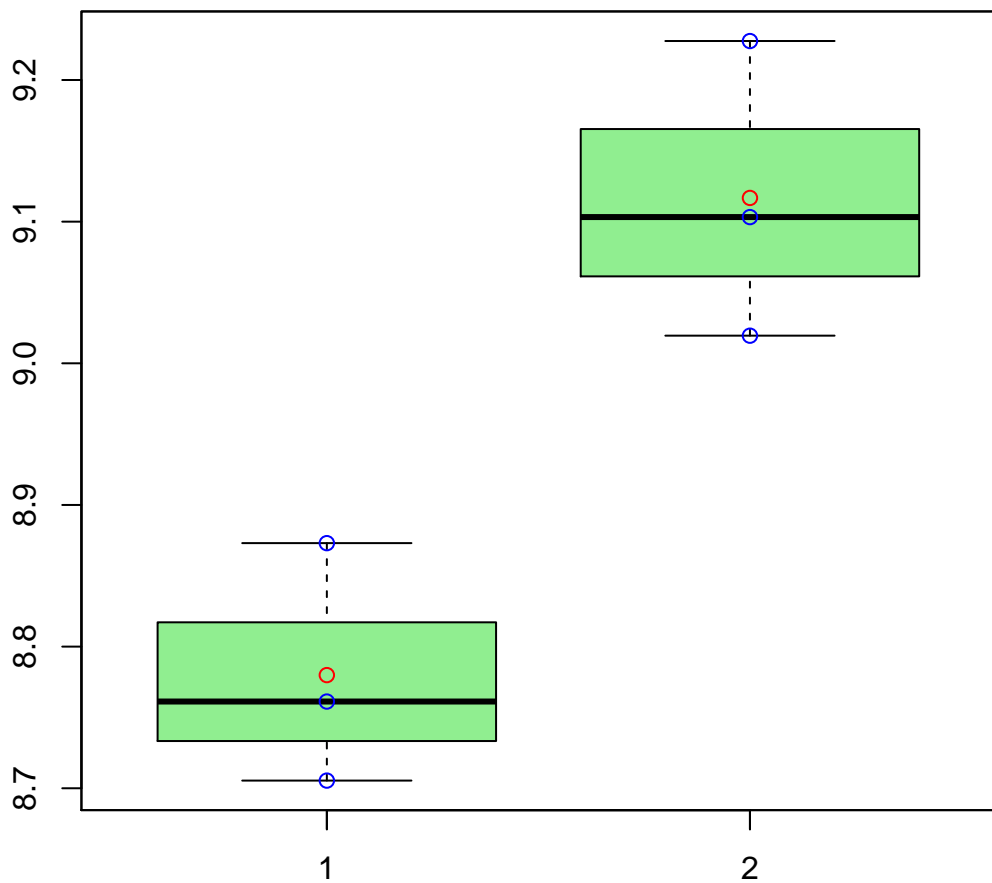

t-Test: p-value = 0.01

# CL2764Contig1|CL2764Contig1

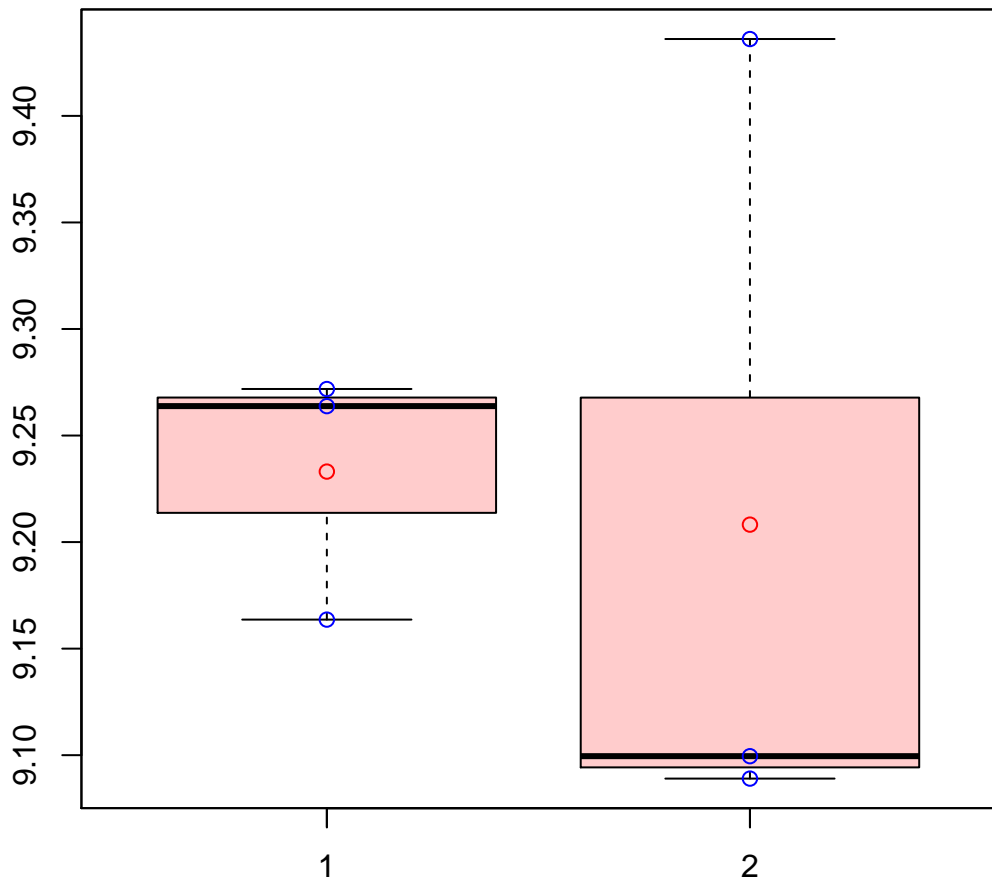

t-Test: p-value = 0.85

# CL2764Contig4|CL2764Contig4

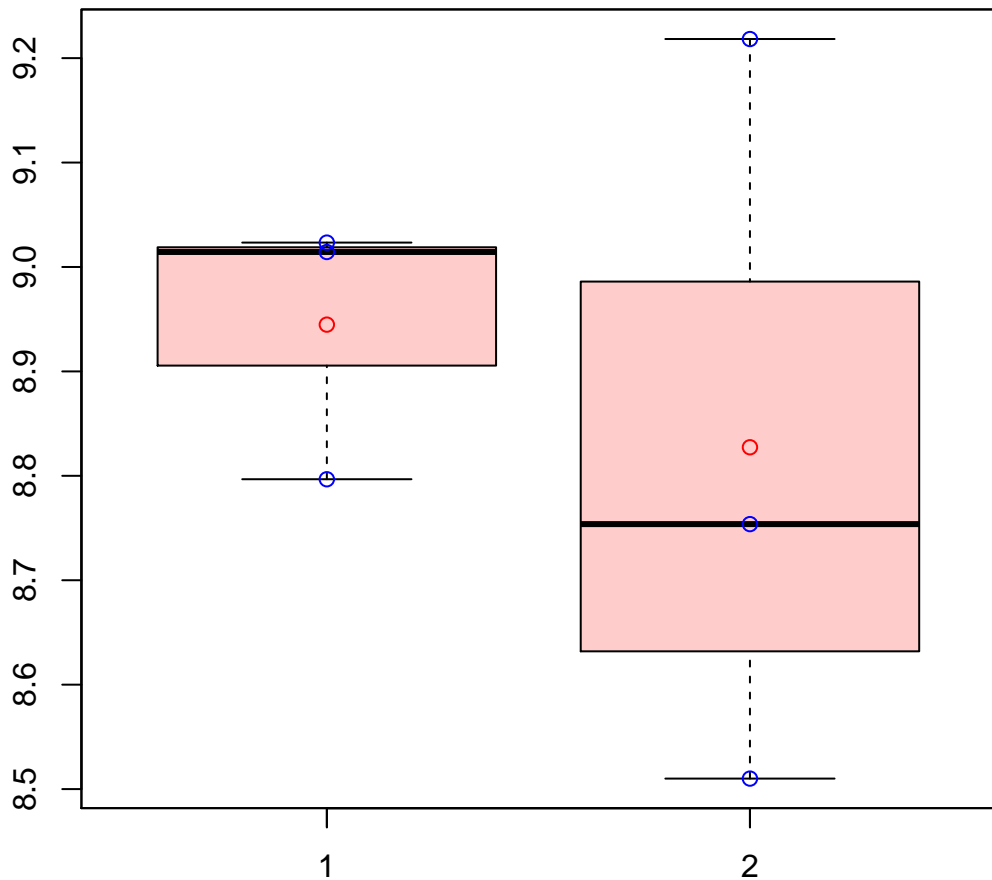

t-Test: p-value = 0.64

# CL2766Contig3|CL2766Contig3

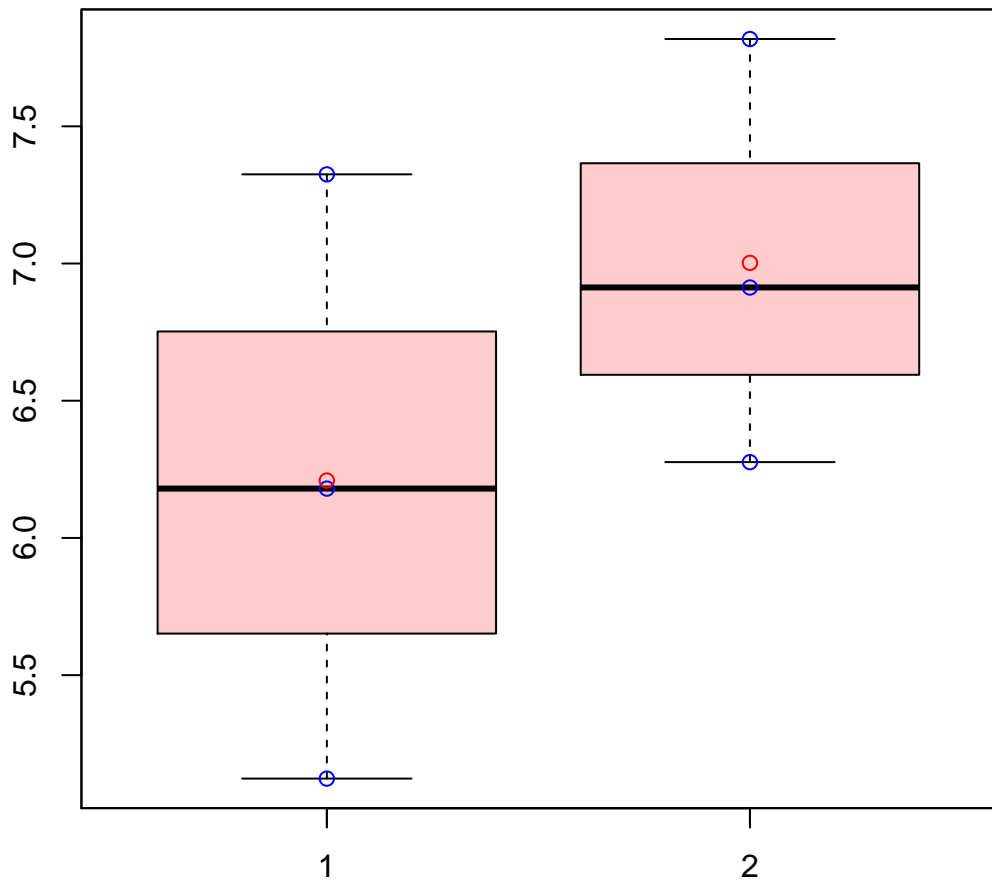

t-Test: p-value = 0.37

# CL2767Contig1|CL2767Contig1

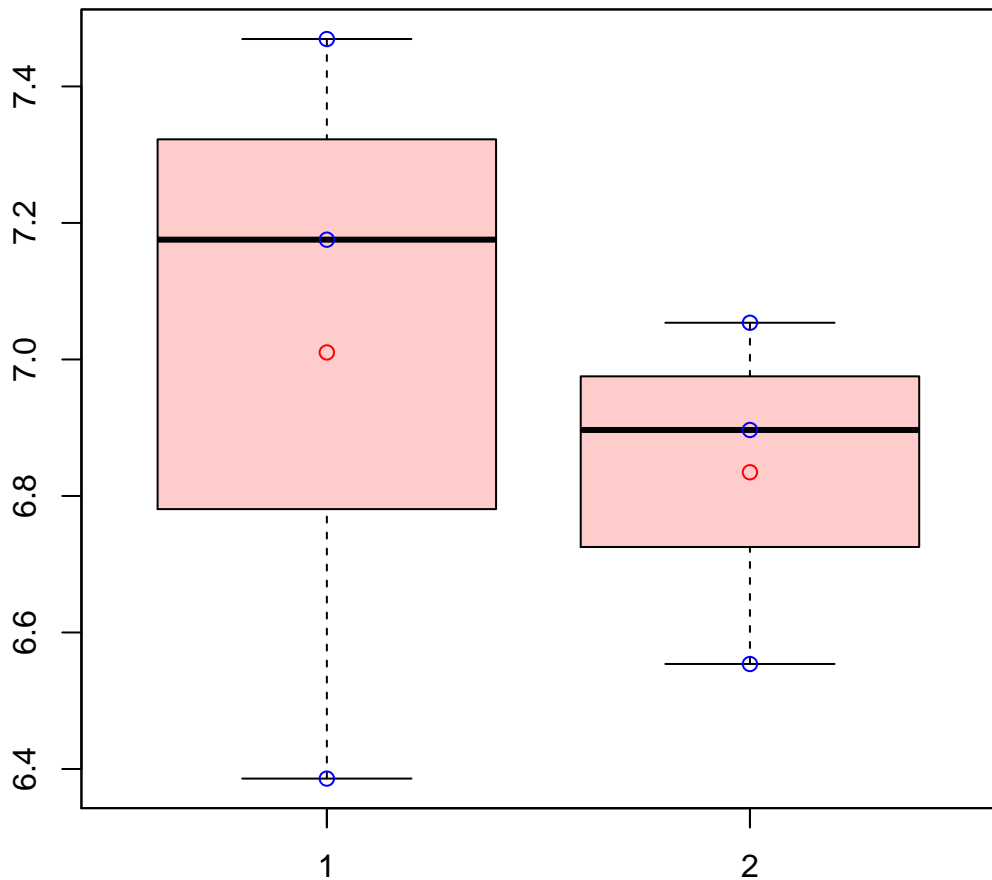

t-Test: p-value = 0.66

# CL27690Contig1|CL27690Contig1

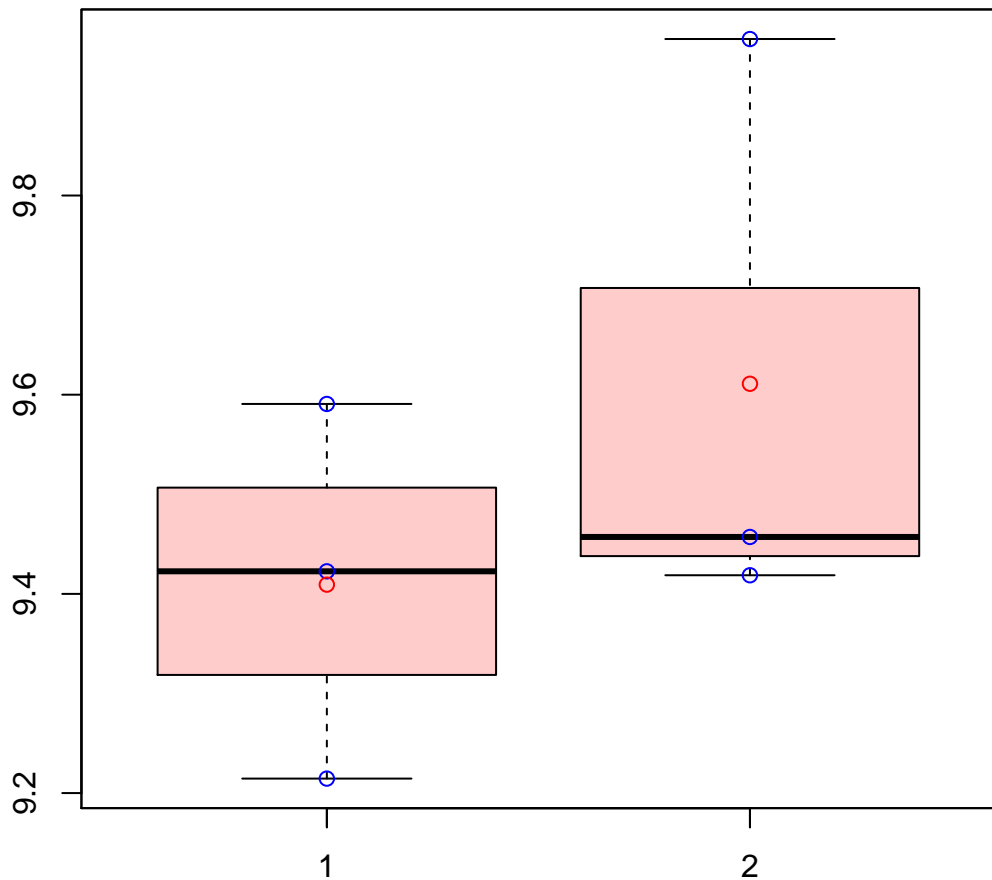

t-Test: p-value = 0.39

# CL2771Contig1|CL2771Contig1

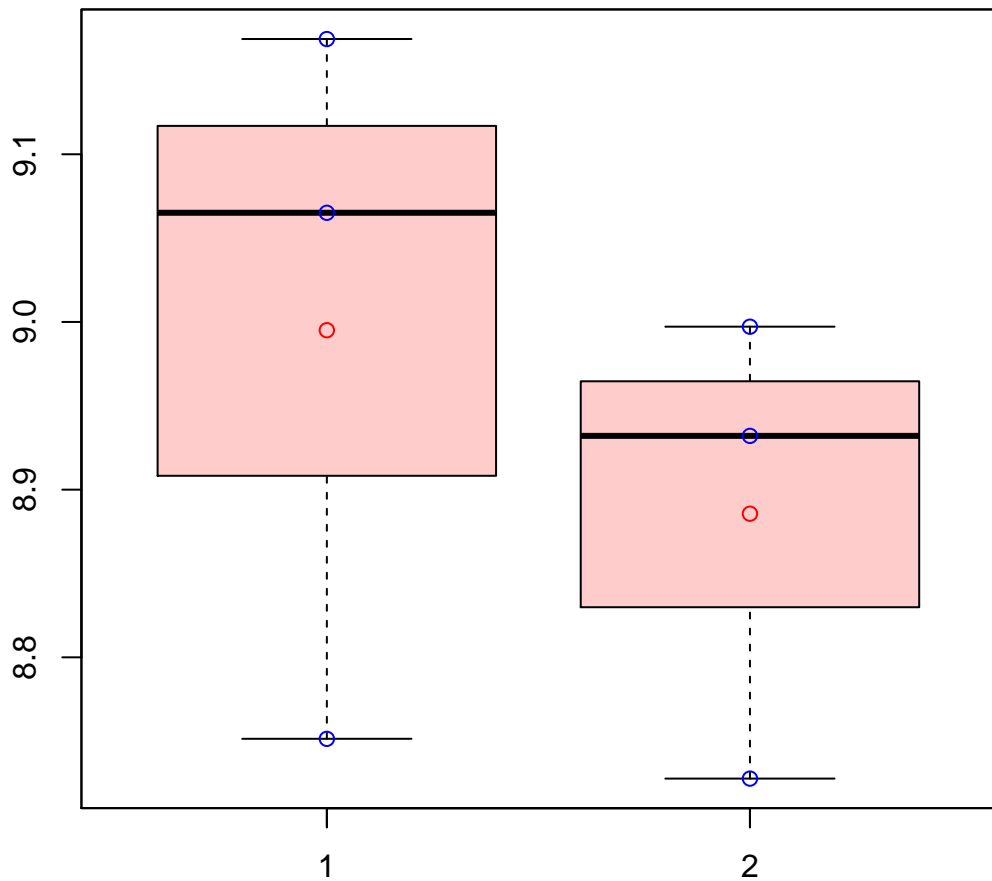

t-Test: p-value = 0.51

# CL2773Contig9|CL2773Contig9

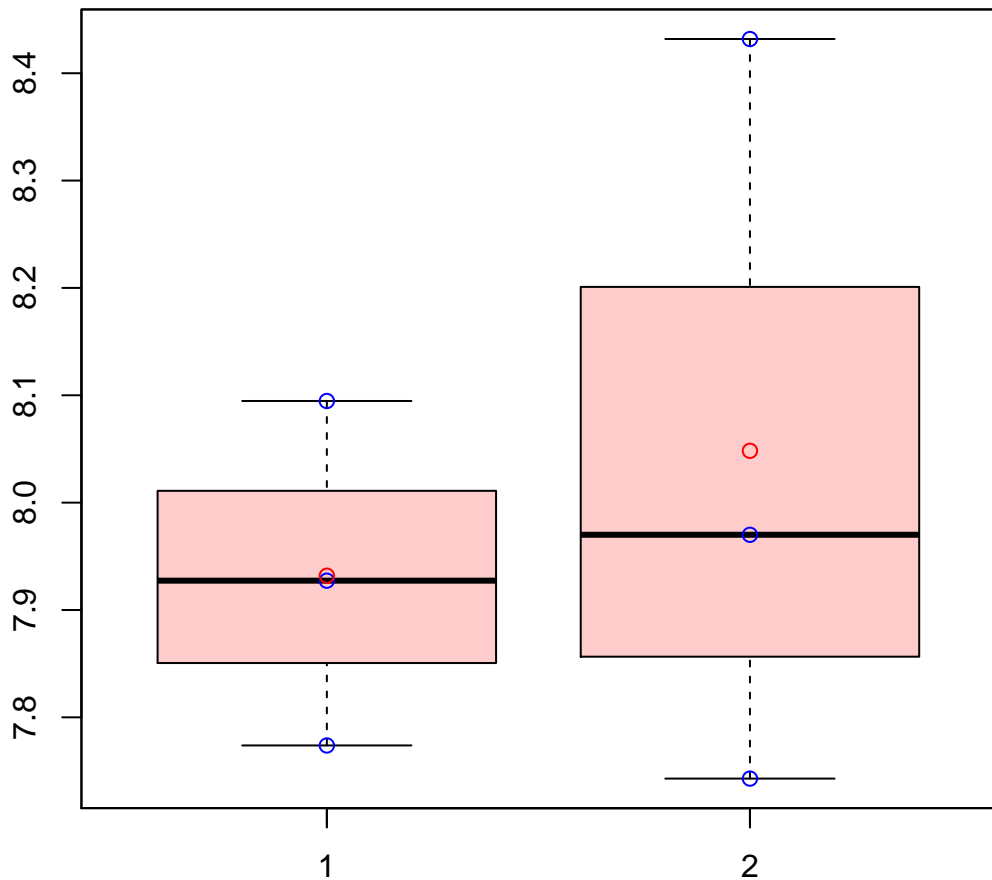

t-Test: p-value = 0.64



# CL27766Contig1|CL27766Contig1

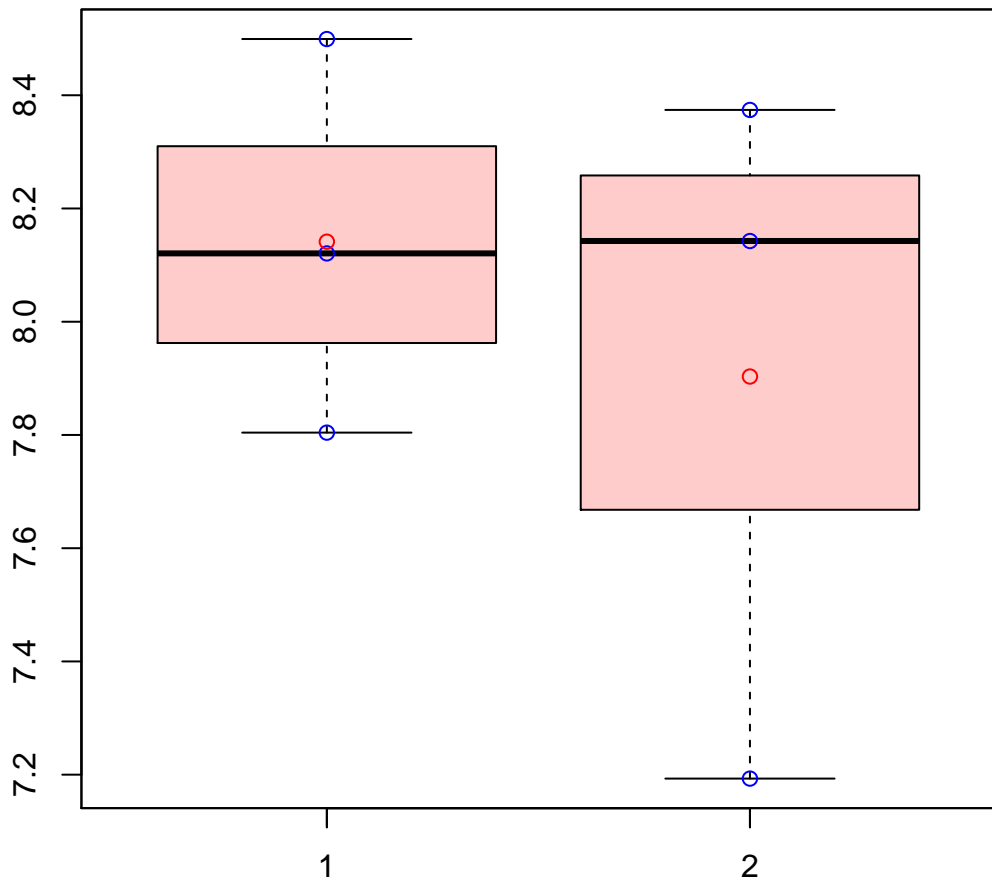

t-Test: p-value = 0.6

# CL2776Contig1|CL2776Contig1

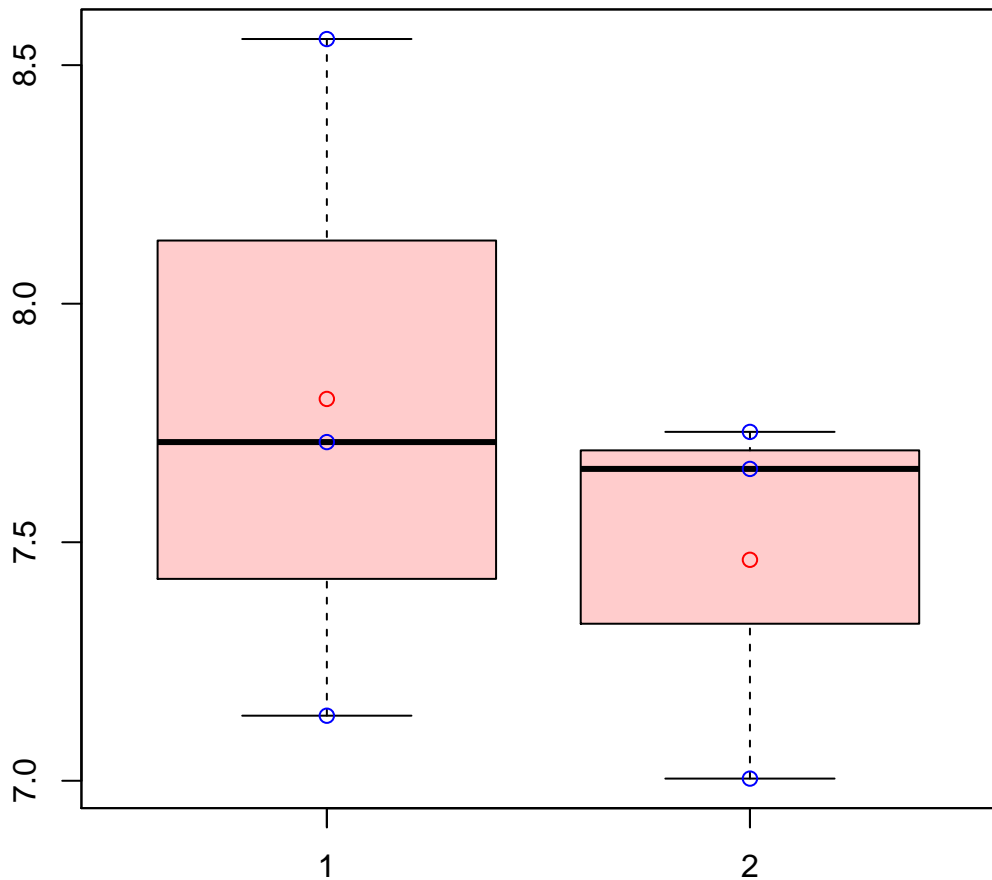

t-Test: p-value = 0.52

# CL2778Contig1|CL2778Contig1

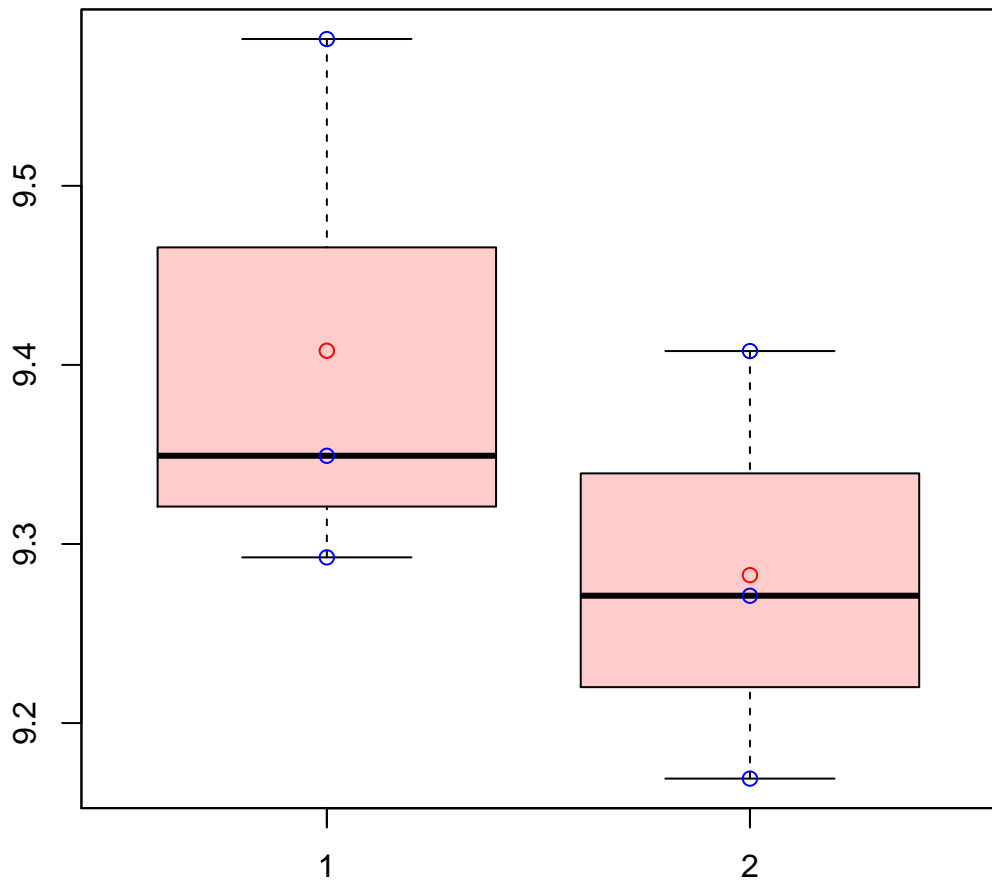

t-Test: p-value = 0.33

# CL2778Contig5|CL2778Contig5



t-Test: p-value = 0.33

# CL27803Contig1|CL27803Contig1

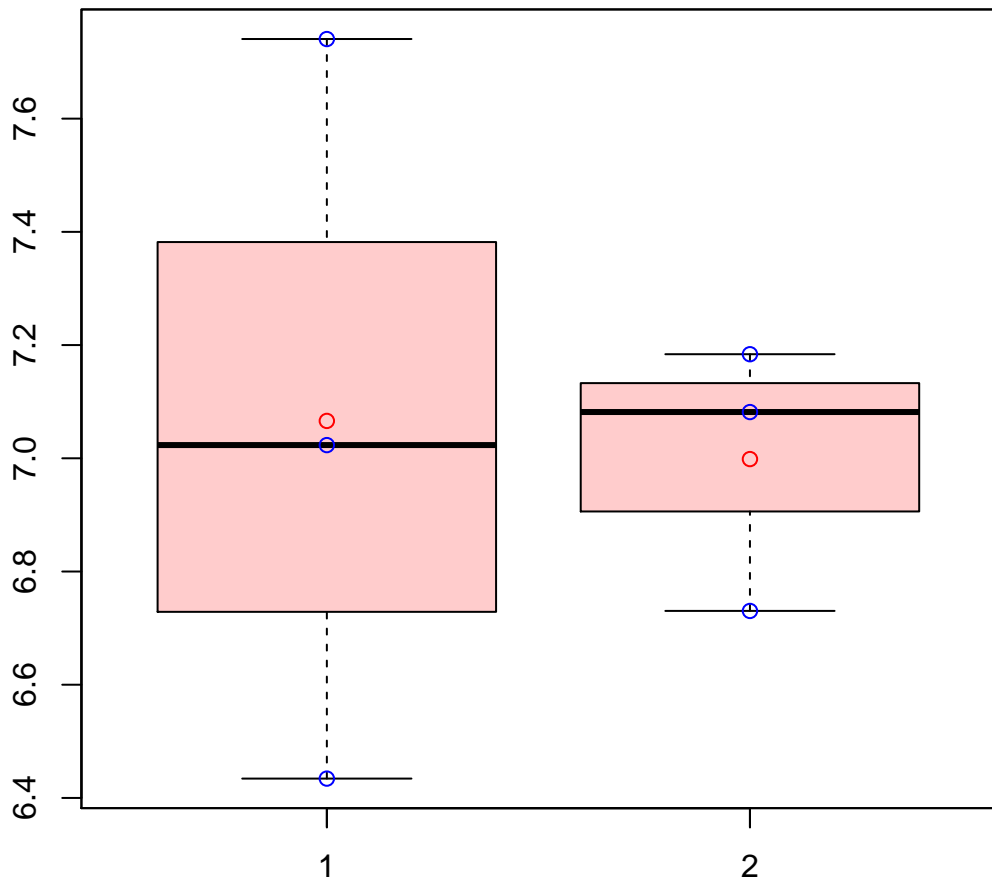

t-Test: p-value = 0.88

# CL2781Contig1|CL2781Contig1

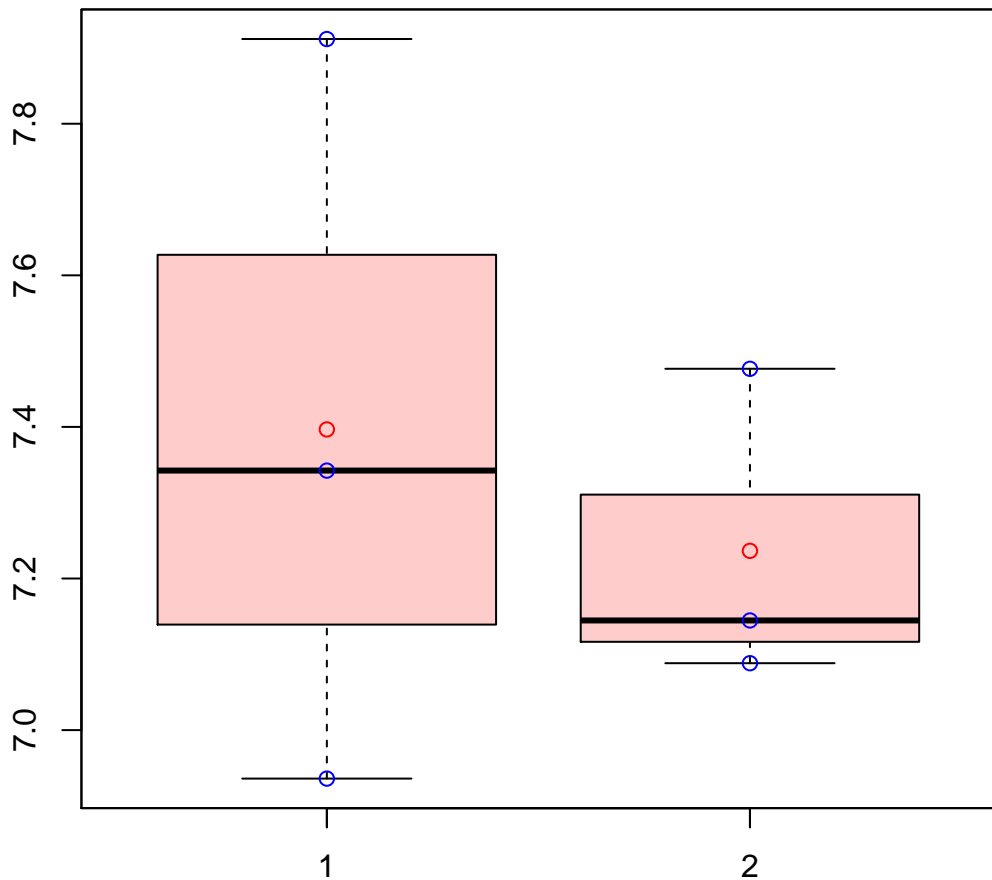

t-Test: p-value = 0.64

# CL2783Contig1|CL2783Contig1

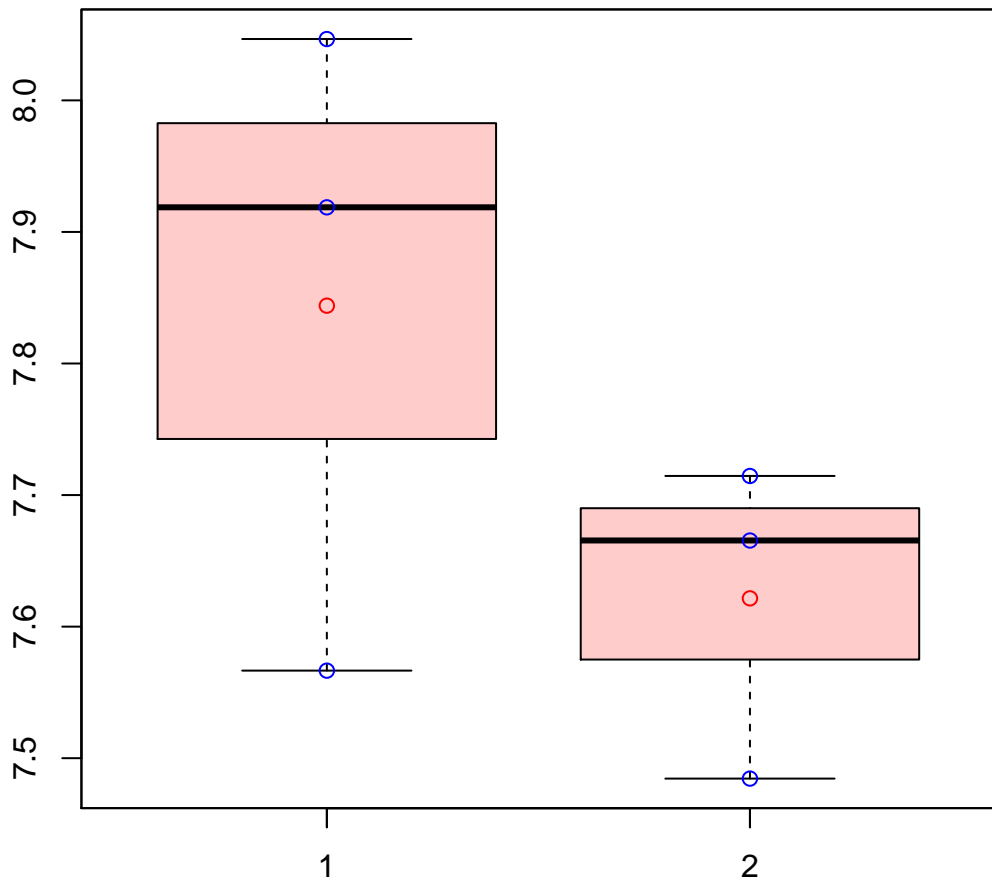

t-Test: p-value = 0.26

# CL2783Contig7|CL2783Contig7



t-Test: p-value = 0.19



# CL2784Contig2|CL2784Contig2

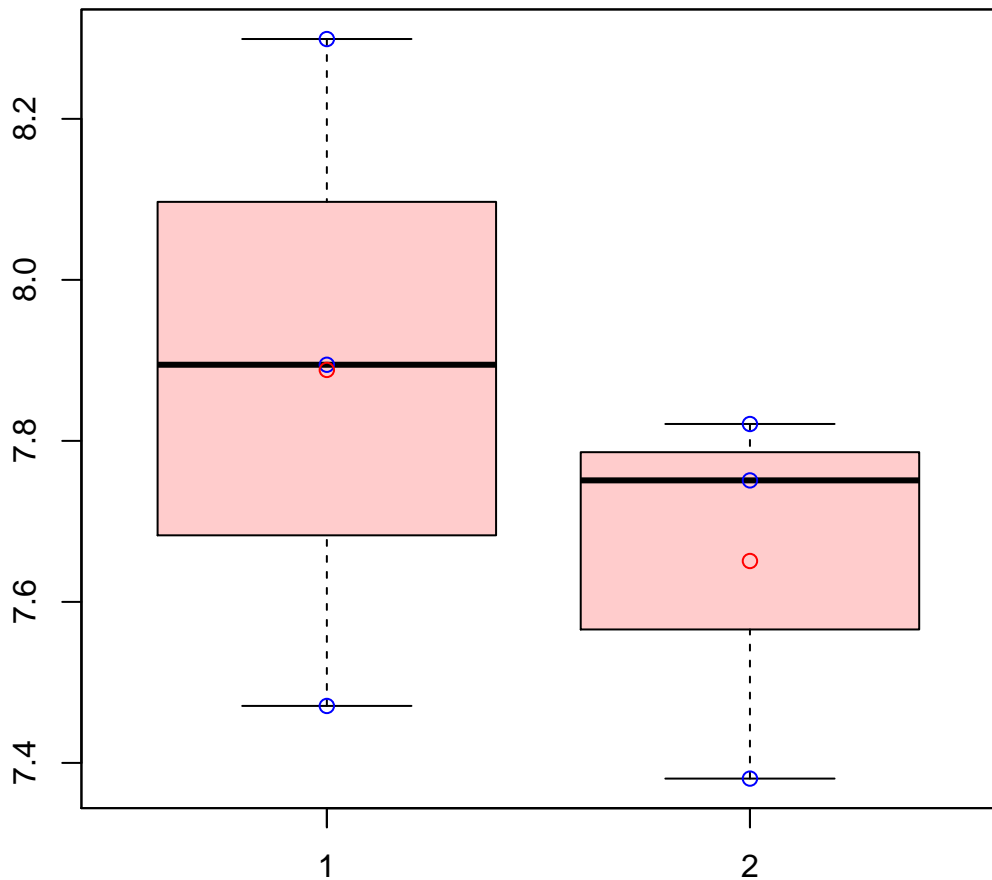

t-Test: p-value = 0.45

# CL2786Contig7|CL2786Contig7

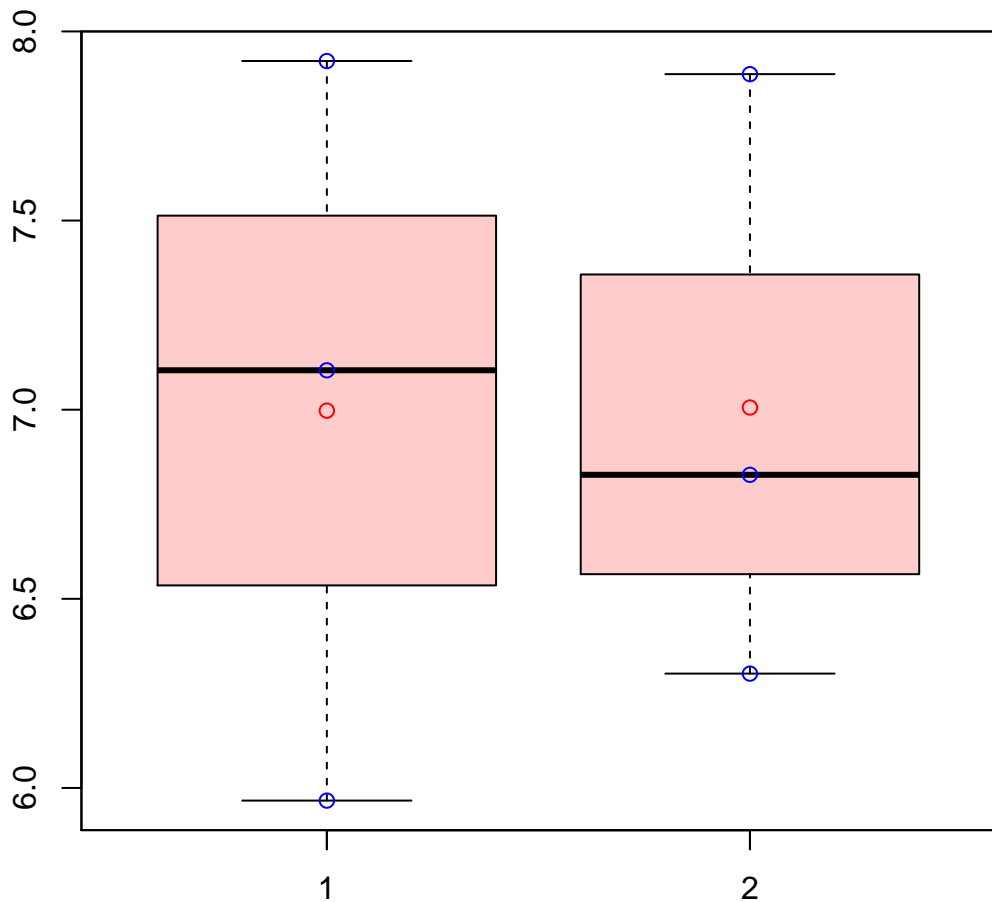

t-Test: p-value = 0.99

# CL27895Contig1|CL27895Contig1

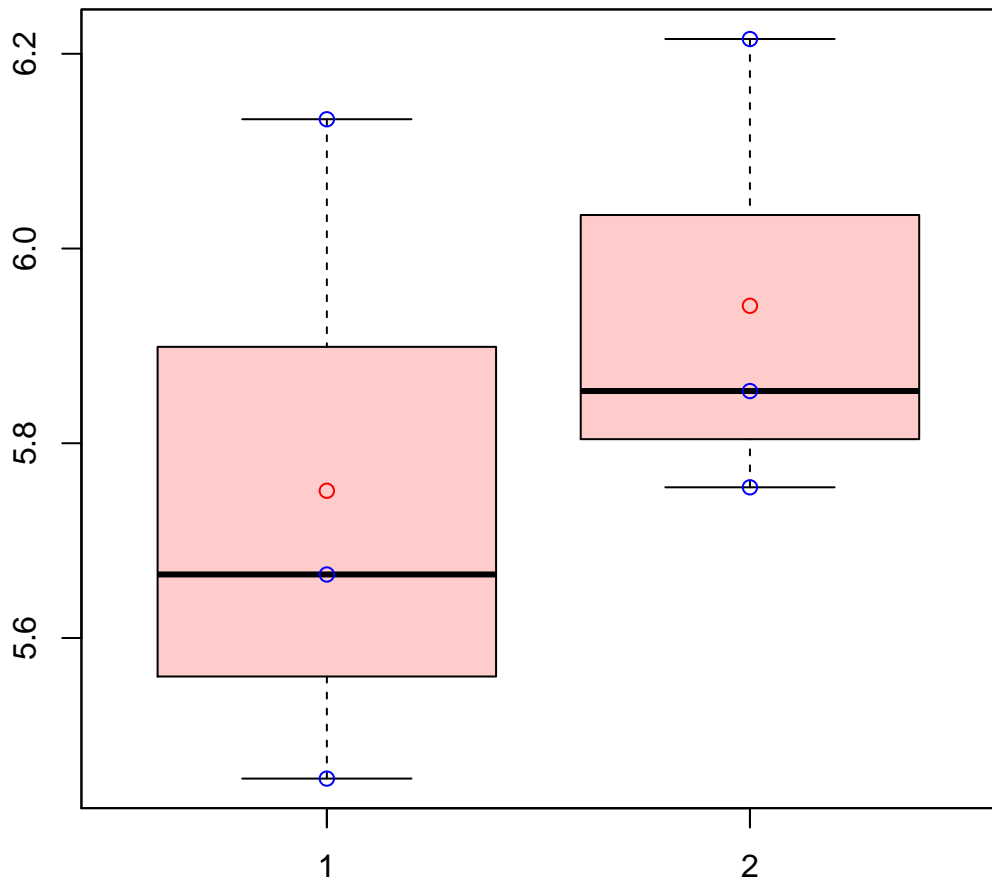

t-Test: p-value = 0.48

# CL2789Contig2|CL2789Contig2

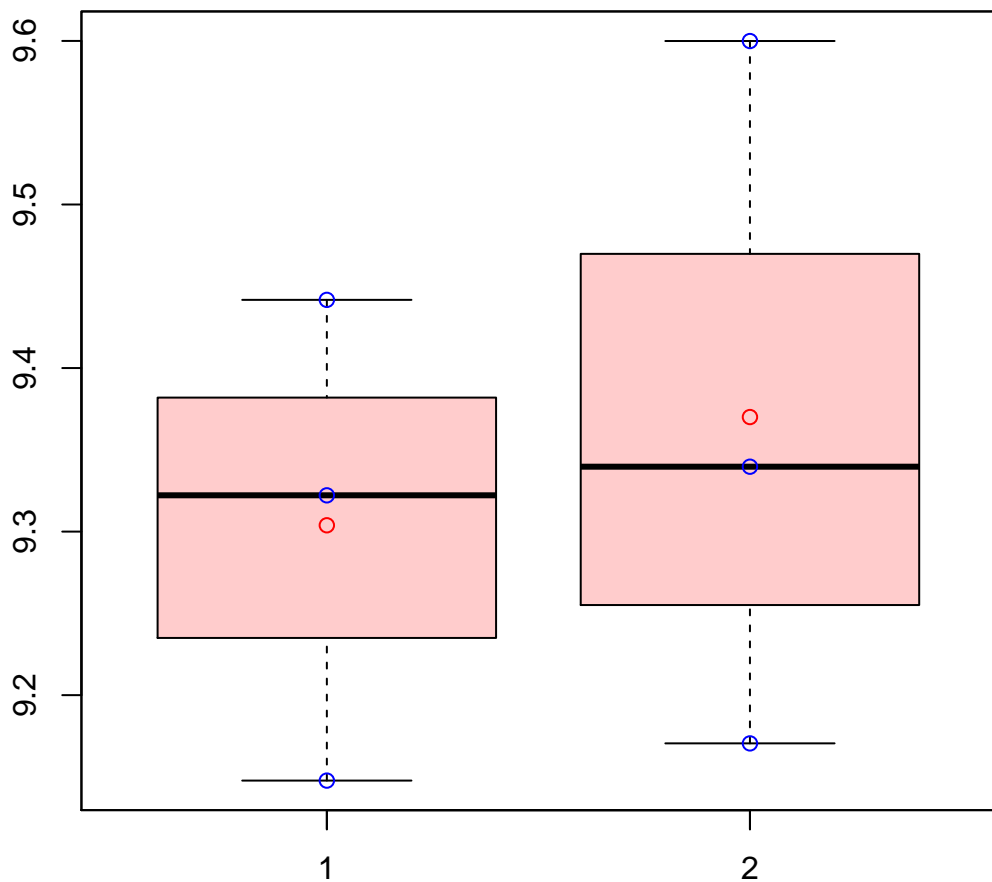

t-Test: p-value = 0.69

# CL2789Contig3|CL2789Contig3

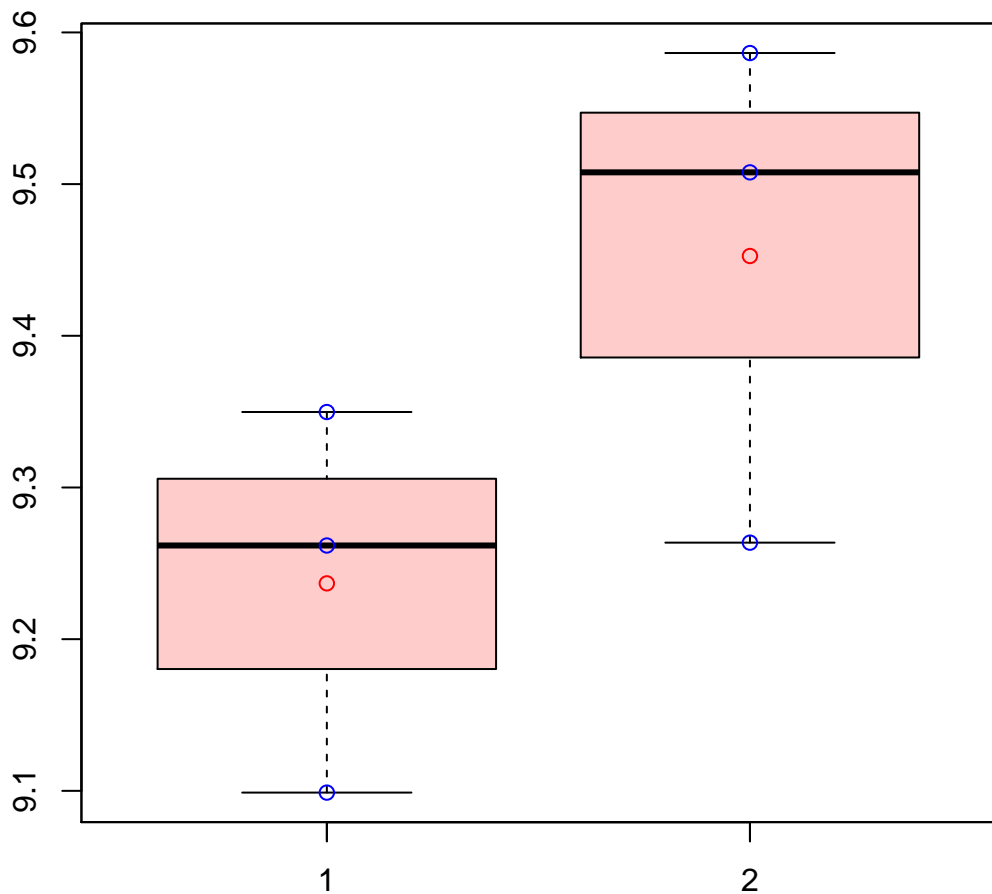

t-Test: p-value = 0.16

# CL278Contig2|CL278Contig2

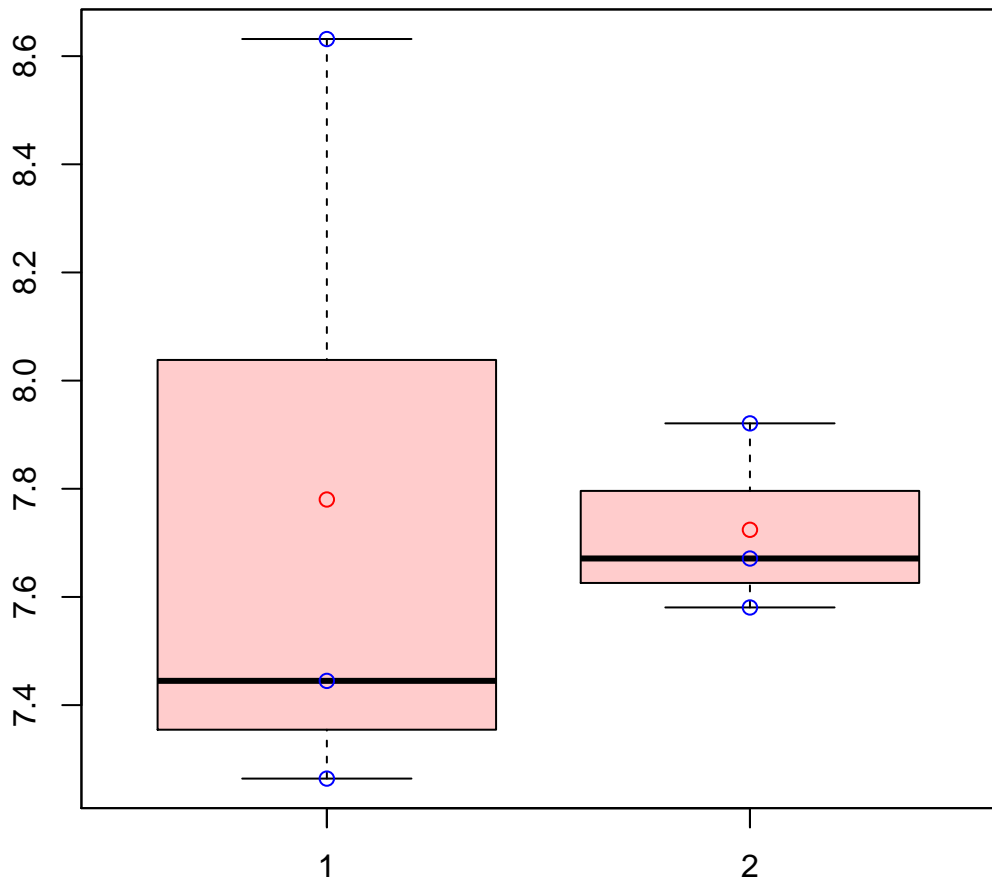

t-Test: p-value = 0.91

# CL2790Contig5|CL2790Contig5

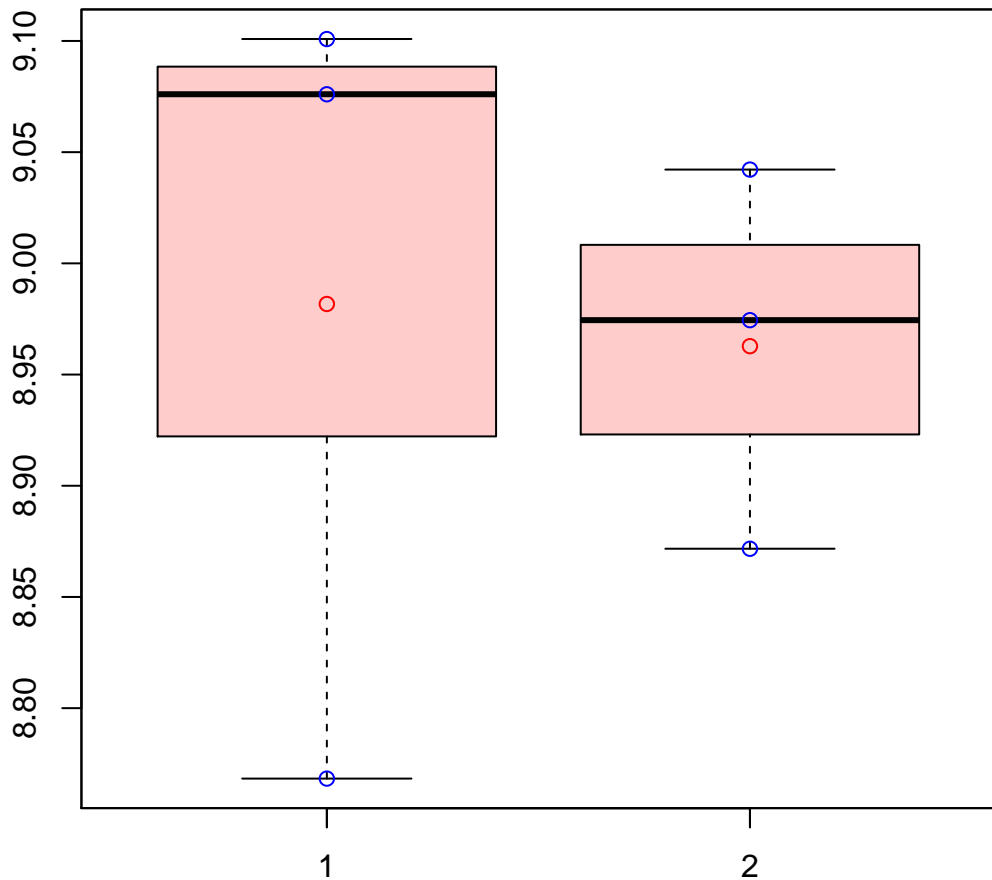

t-Test: p-value = 0.88

# CL27991Contig1|CL27991Contig1



t-Test: p-value = 0.45



# CL279Contig4|CL279Contig4

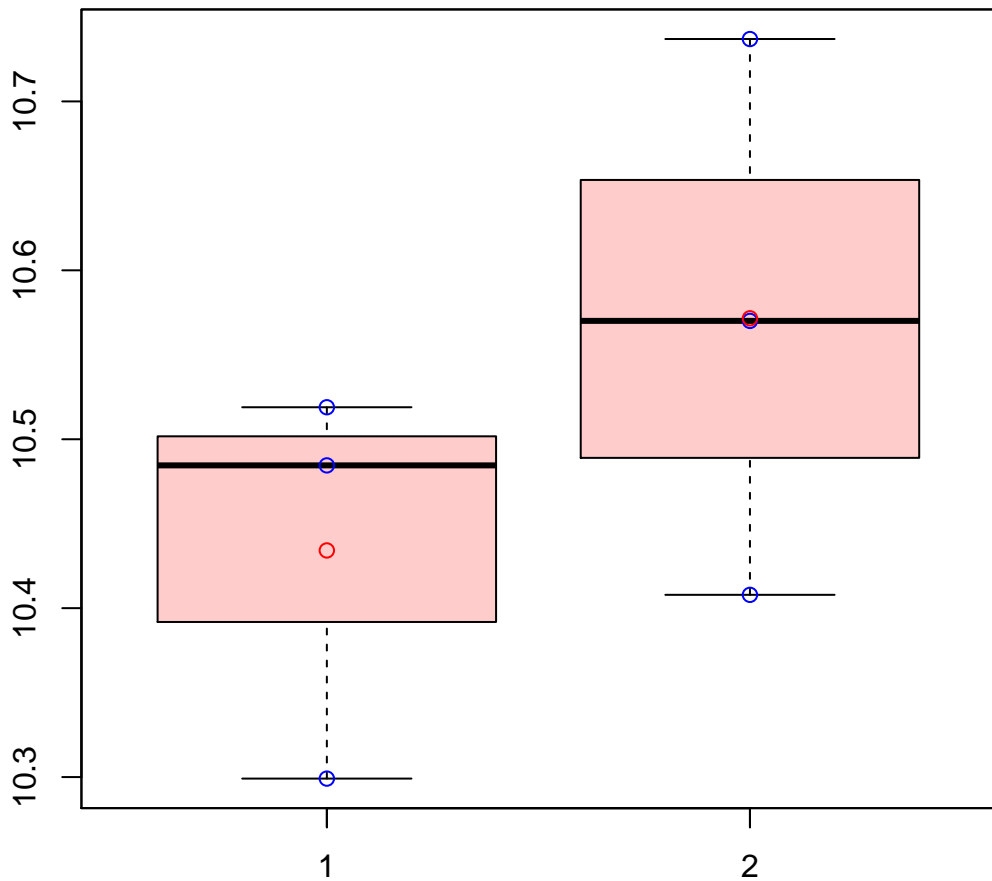

t-Test: p-value = 0.31

# CL279Contig7|CL279Contig7

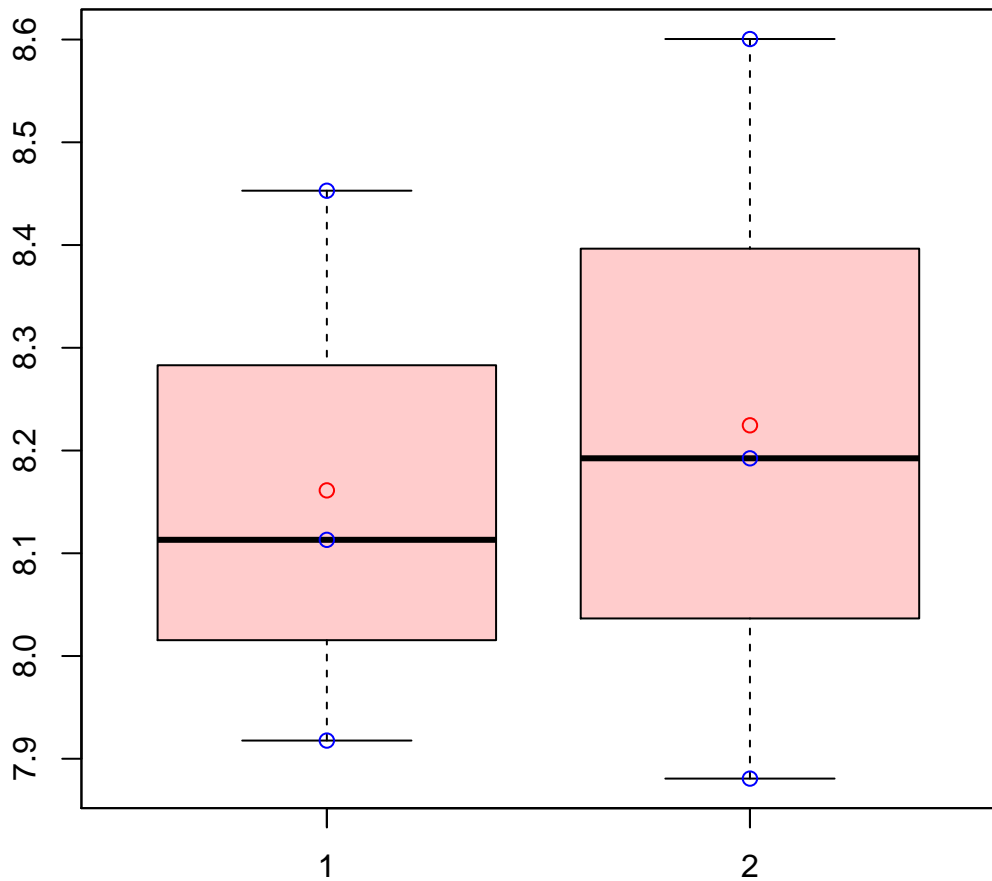

t-Test: p-value = 0.82

# CL27Contig17|CL27Contig17

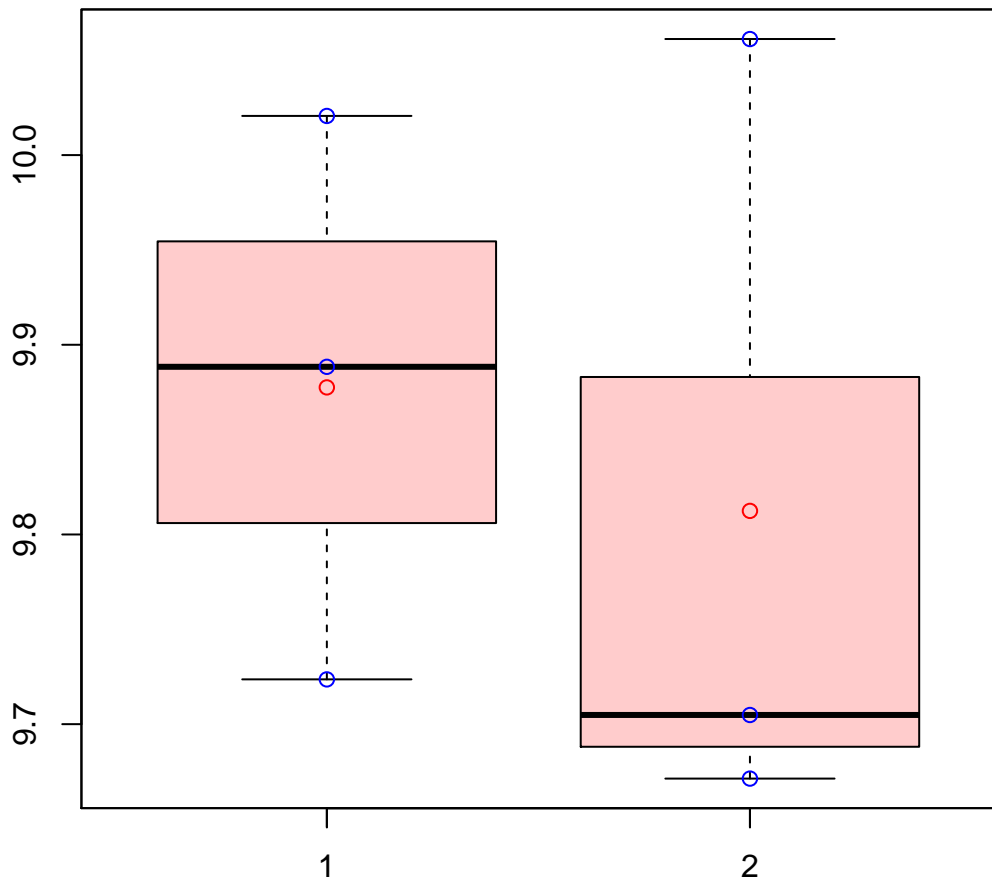

t-Test: p-value = 0.69

# CL27Contig20|CL27Contig20

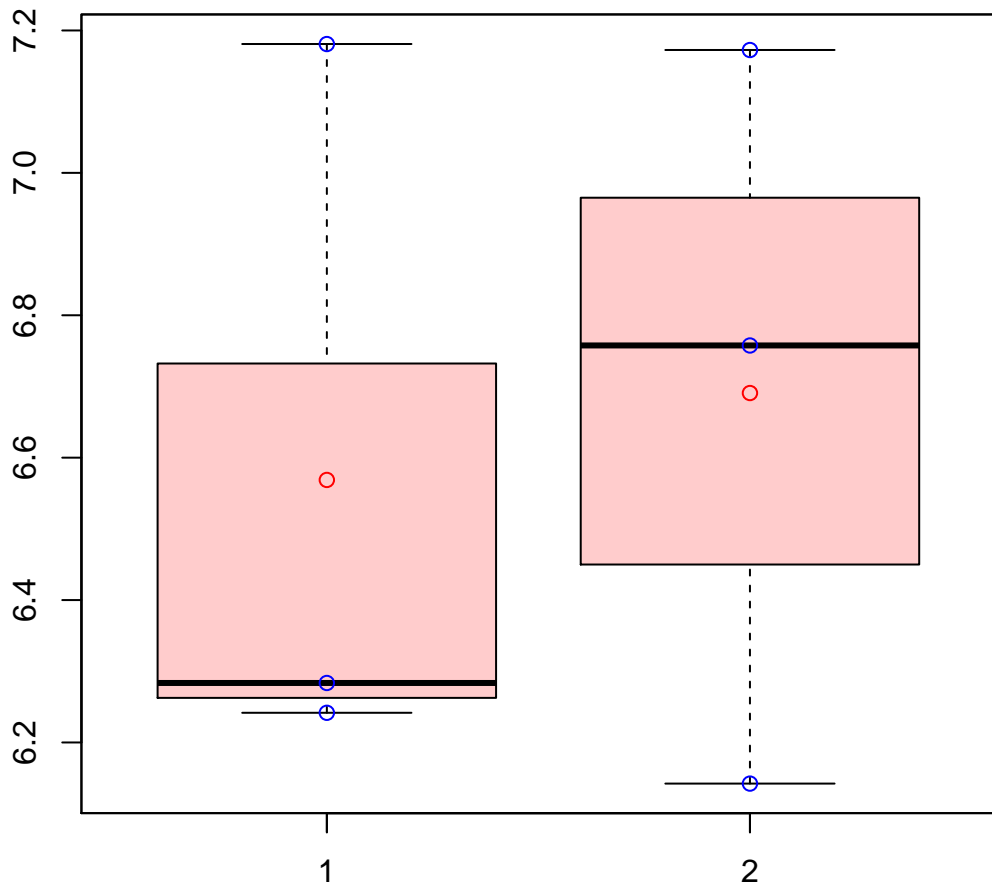

t-Test: p-value = 0.79

# CL2805Contig1|CL2805Contig1

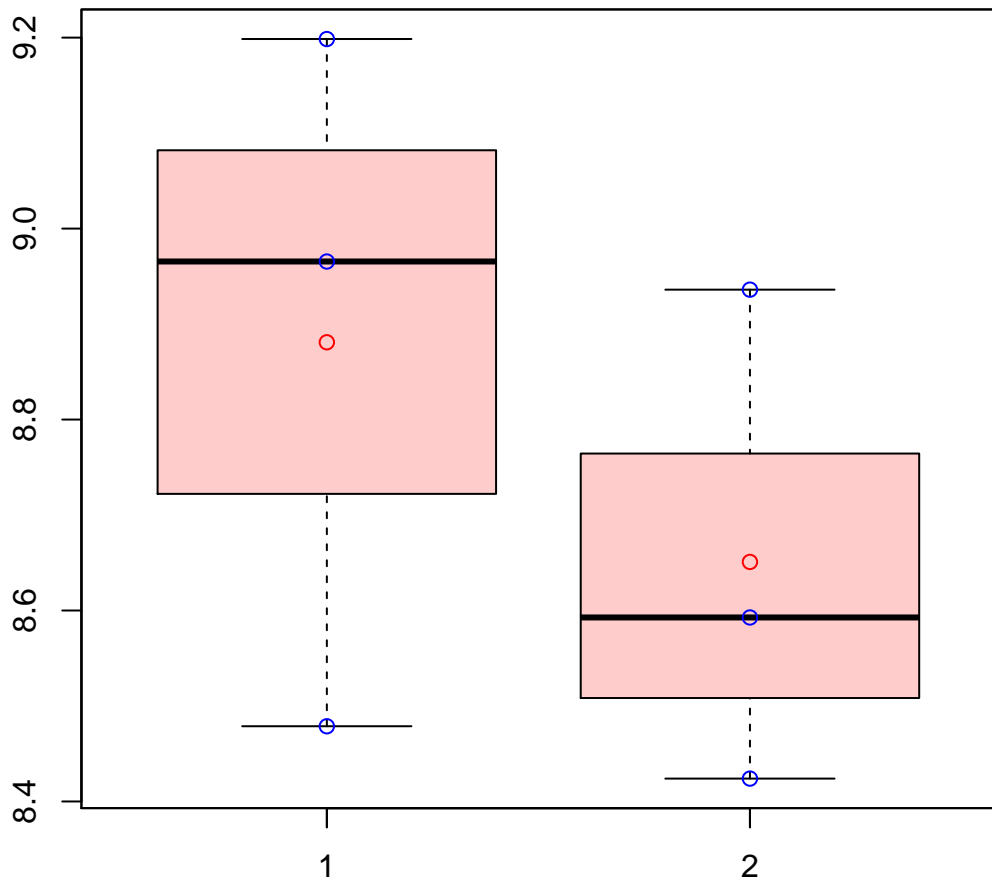

t-Test: p-value = 0.43

# CL2805Contig2|CL2805Contig2

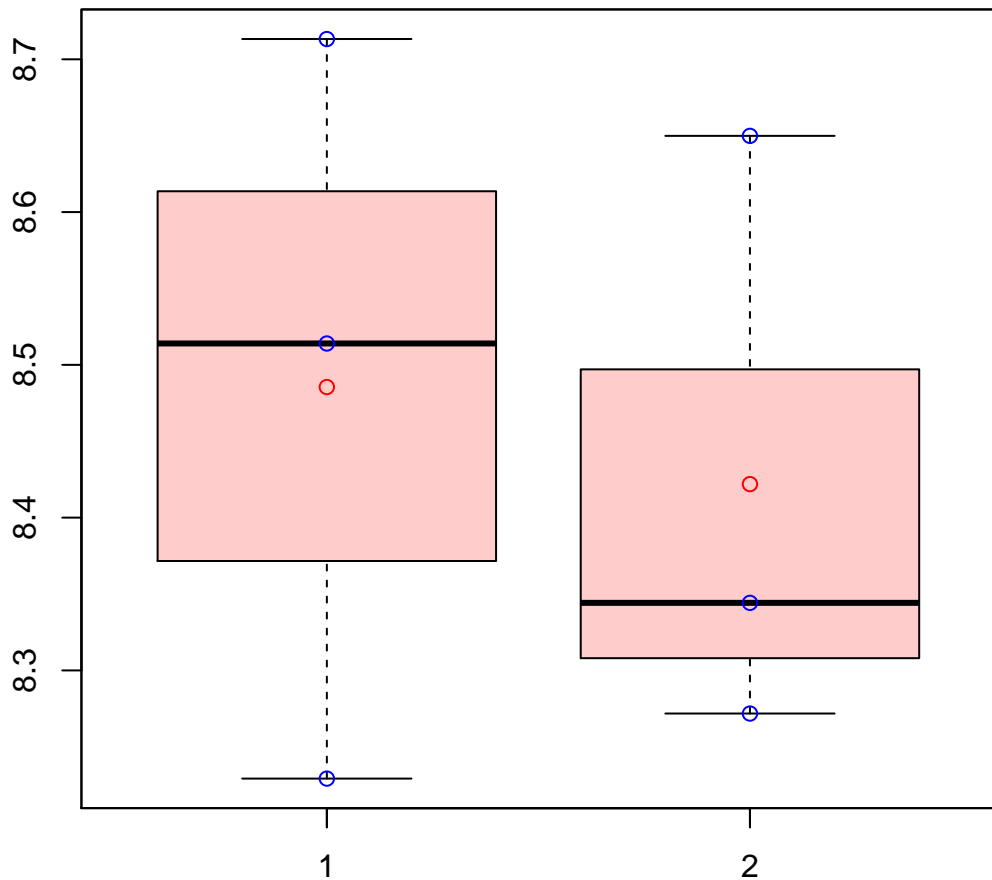

t-Test: p-value = 0.75

# CL2806Contig1|CL2806Contig1

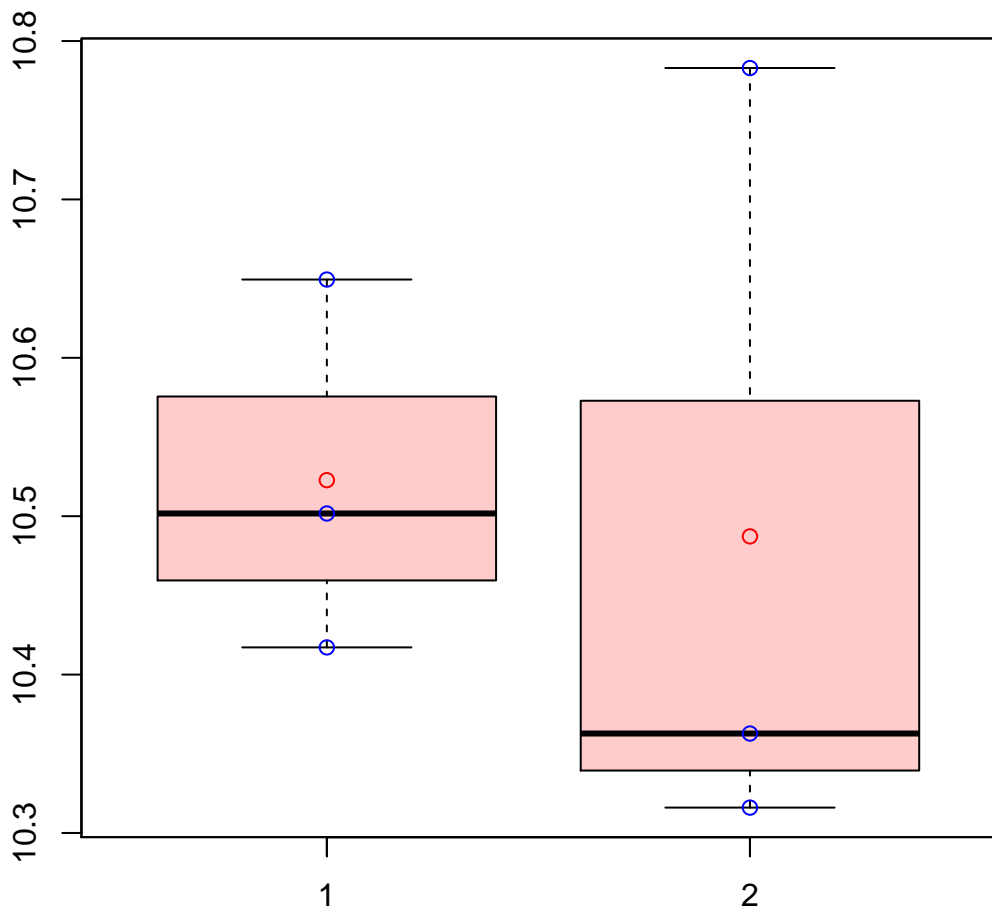

t-Test: p-value = 0.84

# CL2806Contig4|CL2806Contig4

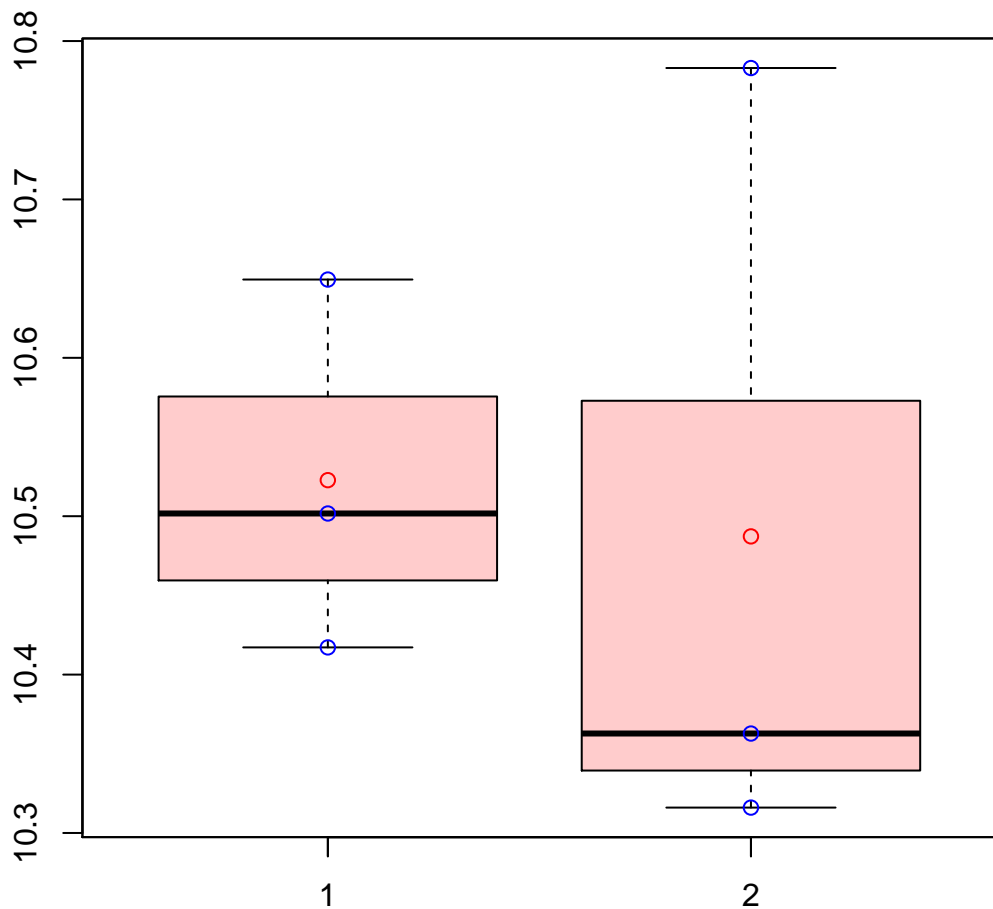

t-Test: p-value = 0.84



# CL2806Contig6|CL2806Contig6



t-Test: p-value = 0.84

# CL28076Contig1|CL28076Contig1

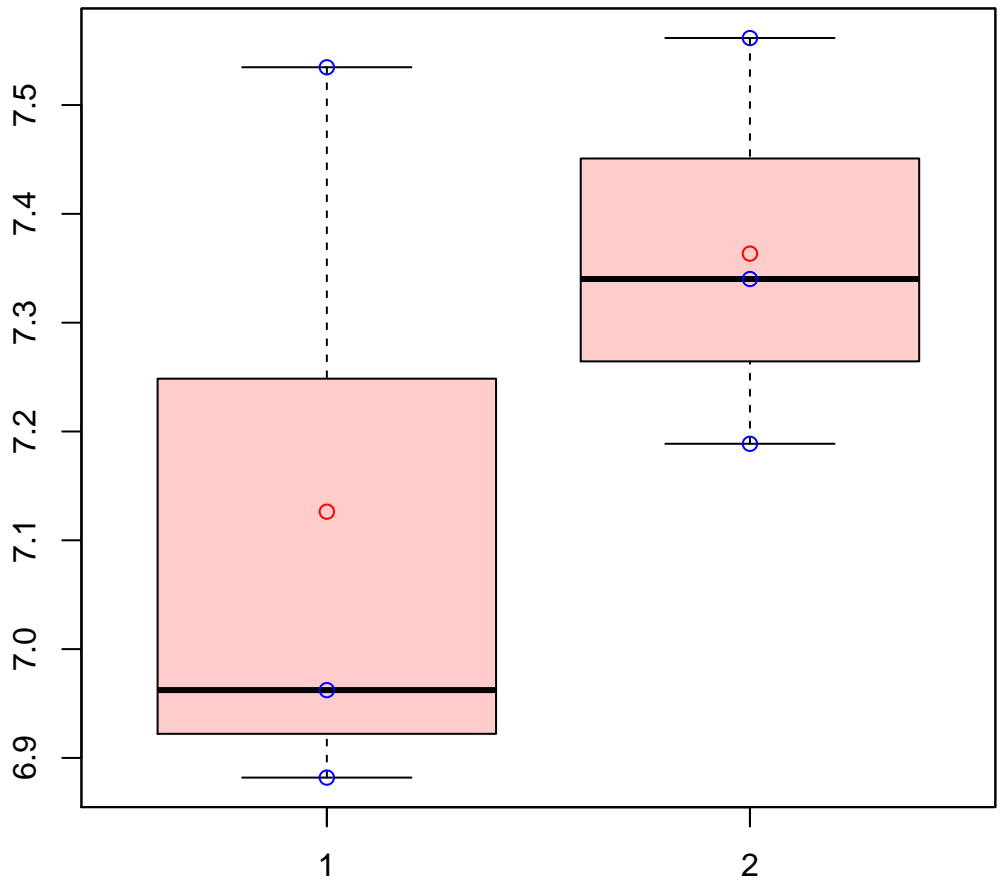

t-Test: p-value = 0.38

# CL2808Contig2|CL2808Contig2



t-Test: p-value = 0.43

# CL280Contig12|CL280Contig12

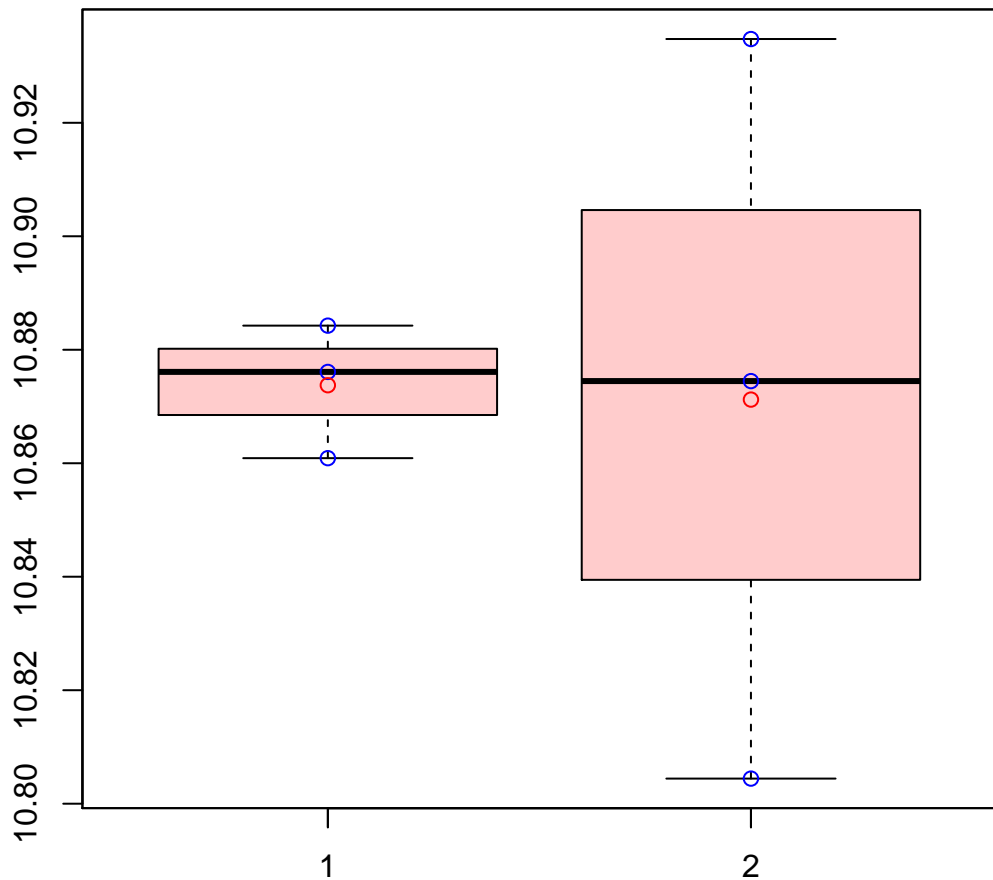

t-Test: p-value = 0.95

# CL280Contig13|CL280Contig13

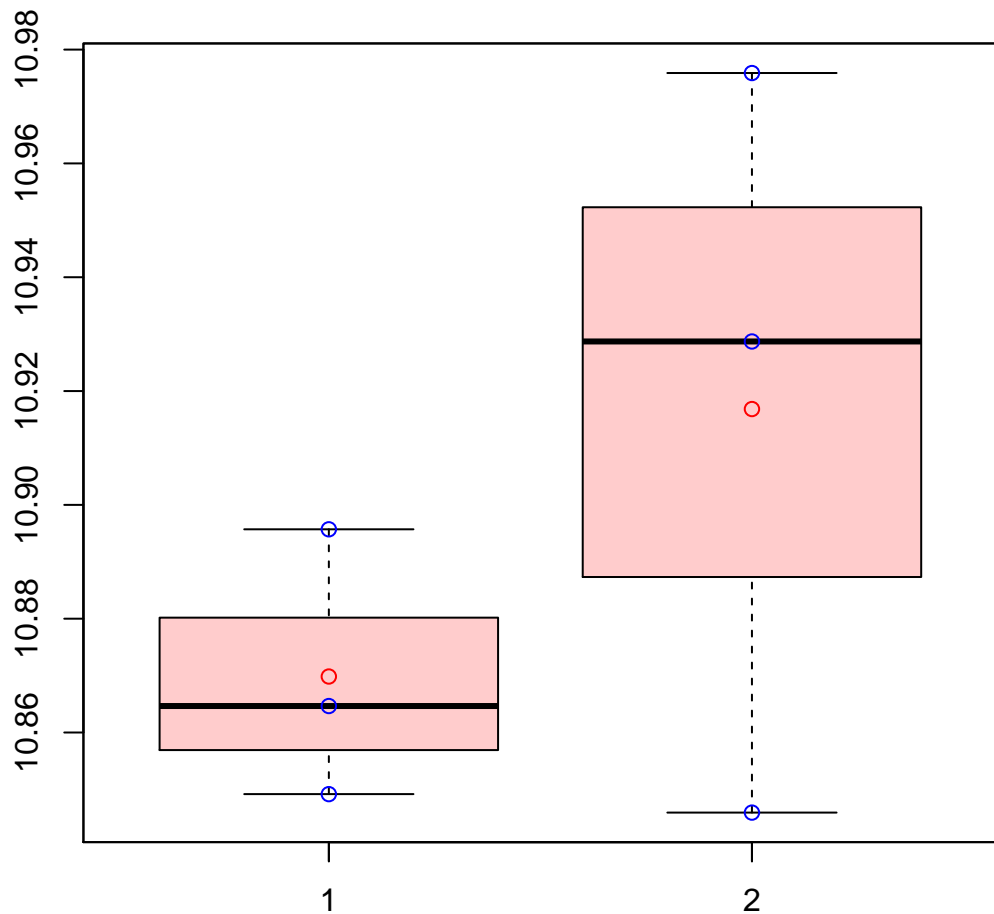

t-Test: p-value = 0.34

# CL280Contig14|CL280Contig14

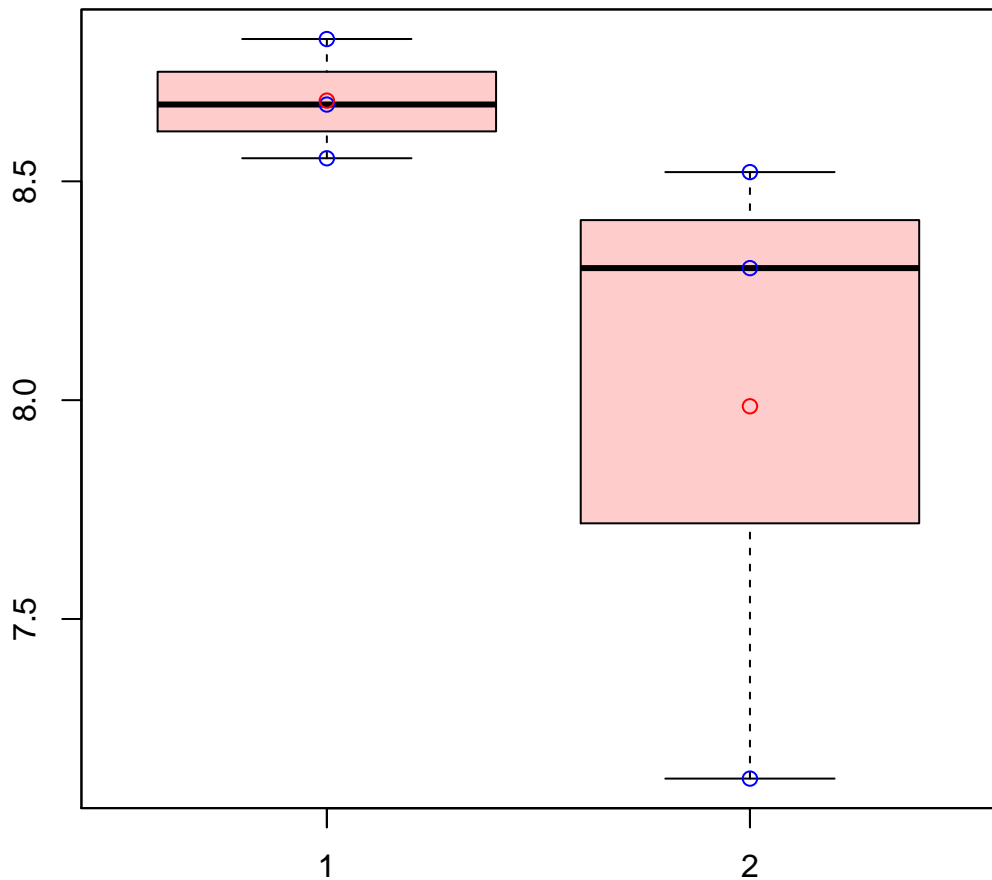

t-Test: p-value = 0.24

# CL280Contig16|CL280Contig16

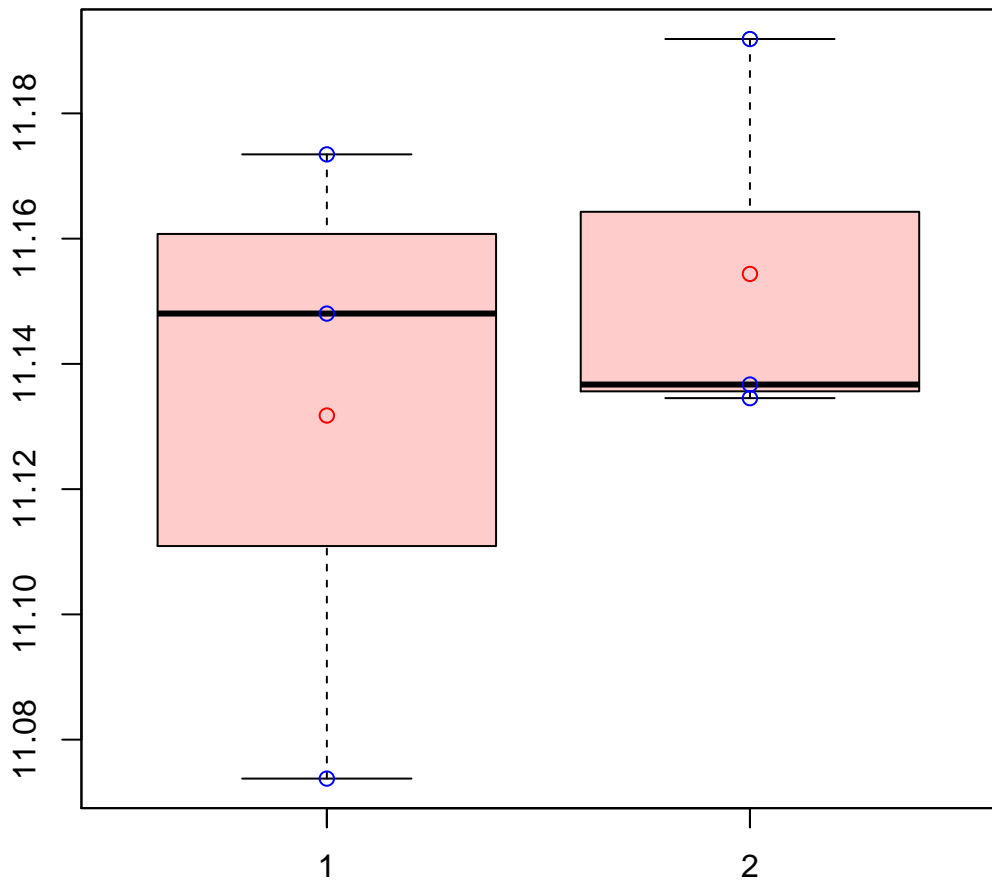

t-Test: p-value = 0.56

# CL280Contig19|CL280Contig19

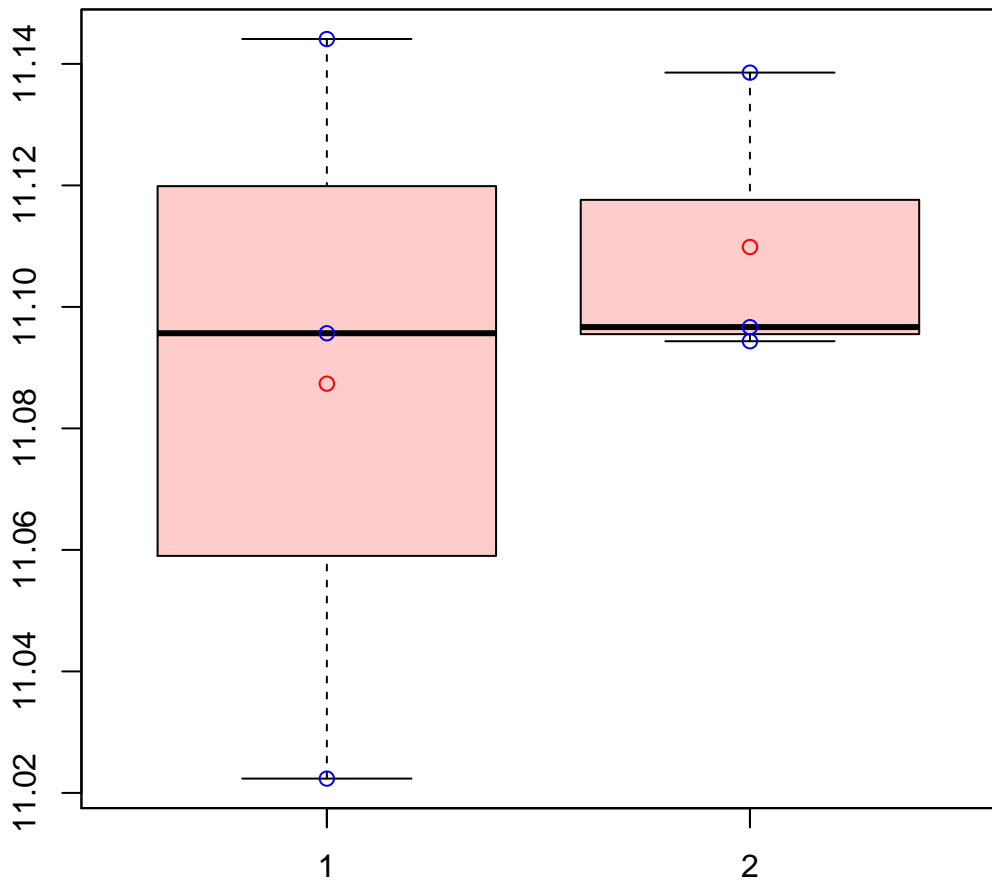

t-Test: p-value = 0.6



# CL280Contig1|CL280Contig1

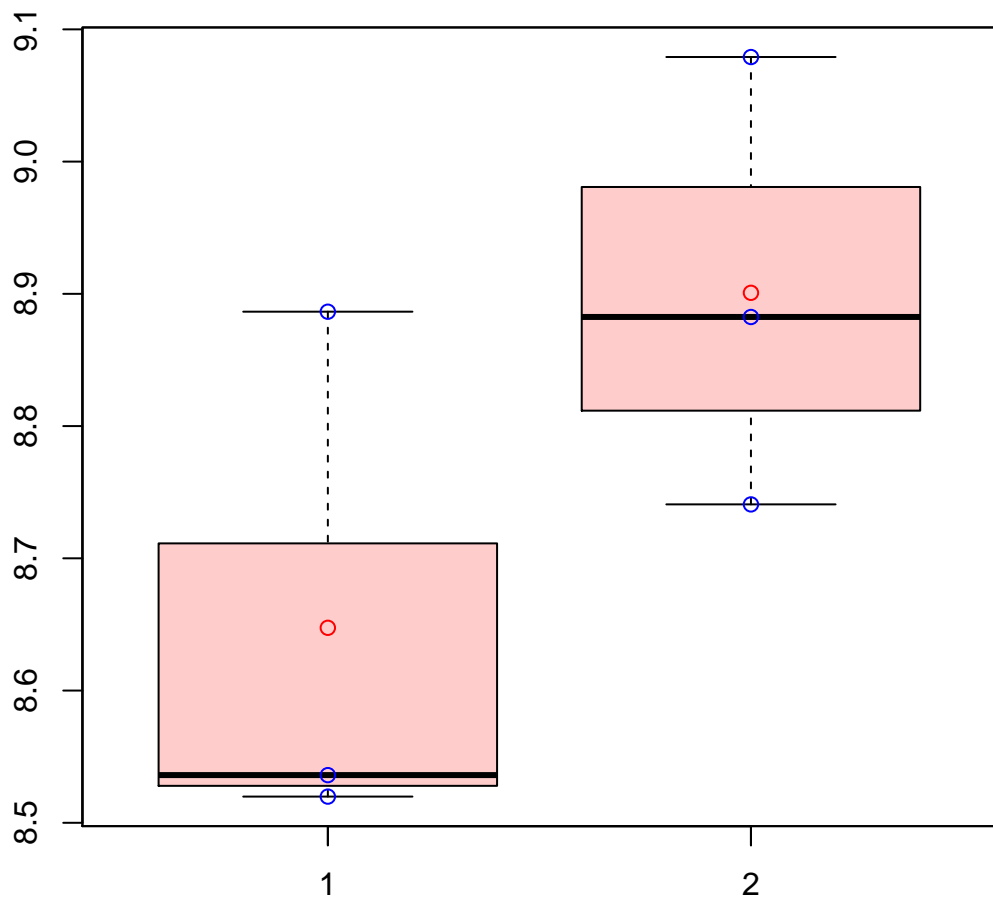

t-Test: p-value = 0.18

# CL280Contig20|CL280Contig20

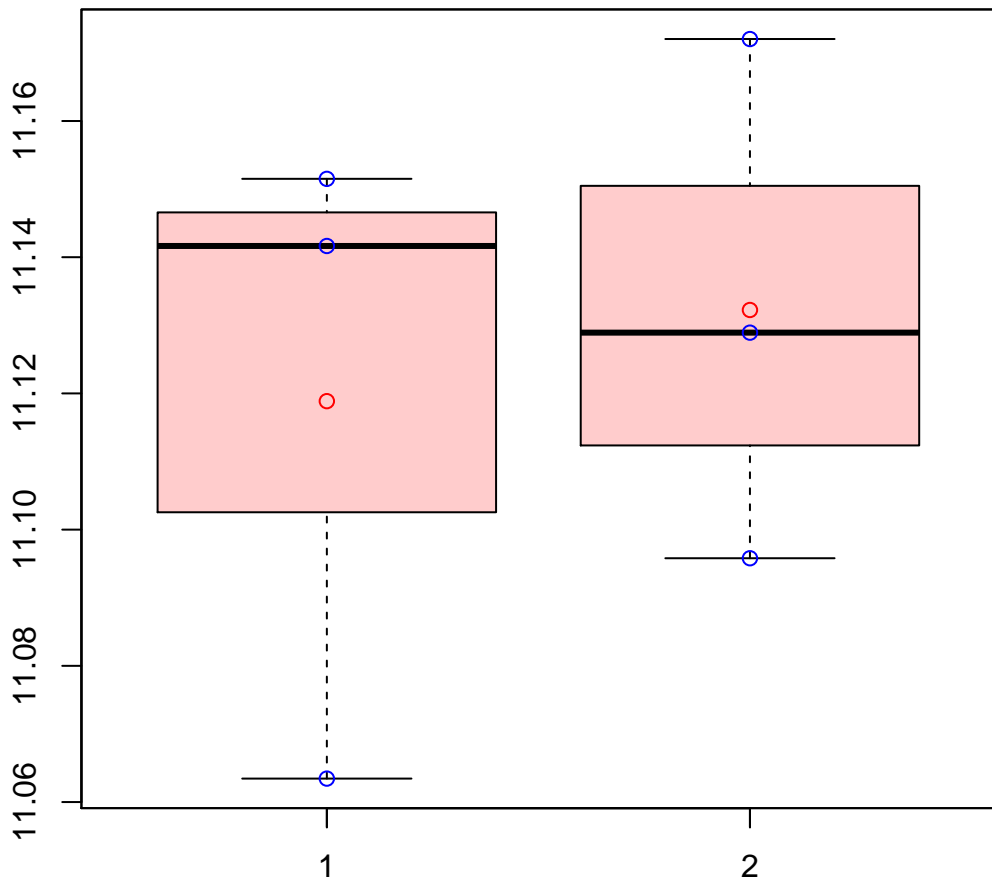

t-Test: p-value = 0.73

# CL280Contig21|CL280Contig21

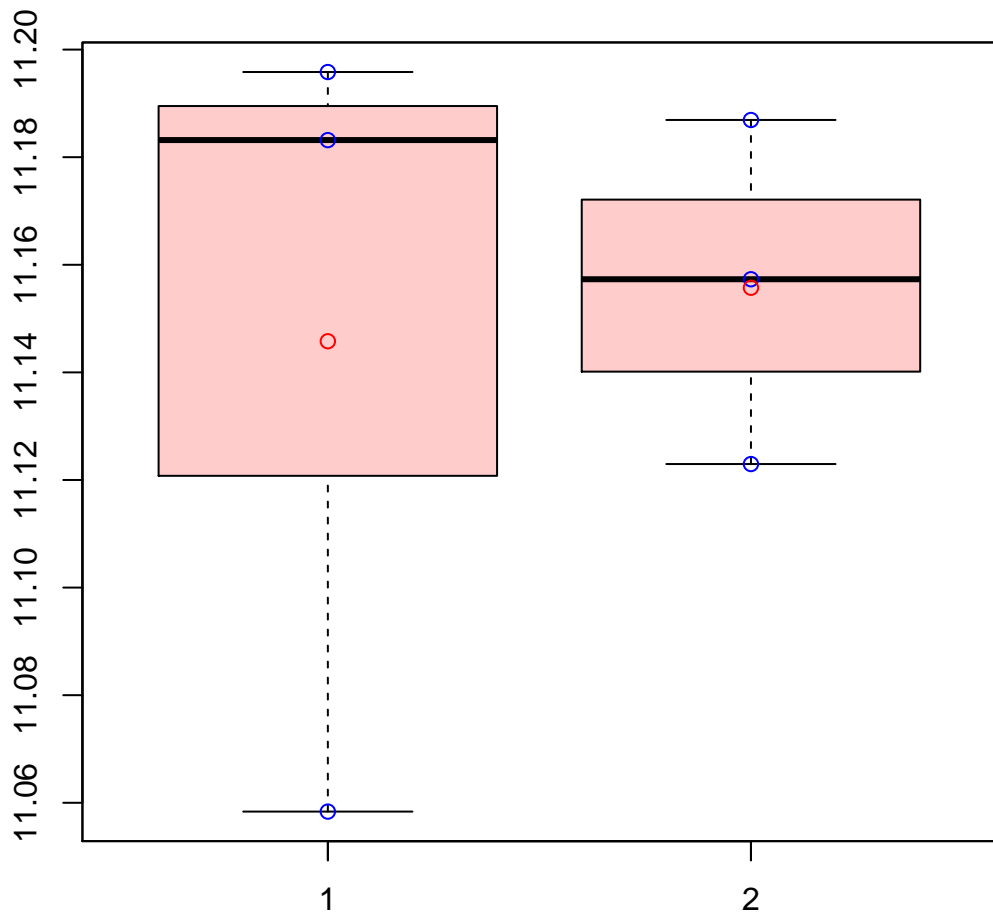

t-Test: p-value = 0.85

# CL280Contig22|CL280Contig22

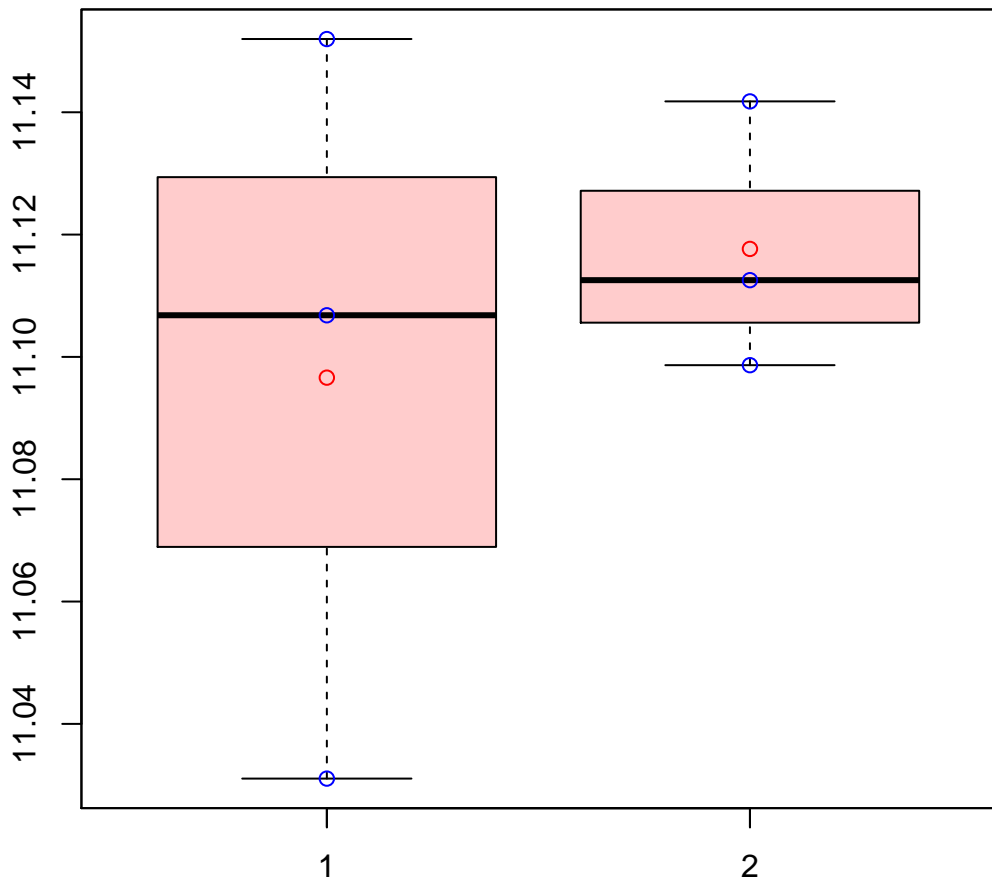

t-Test: p-value = 0.62

## CL280Contig2|CL280Contig2

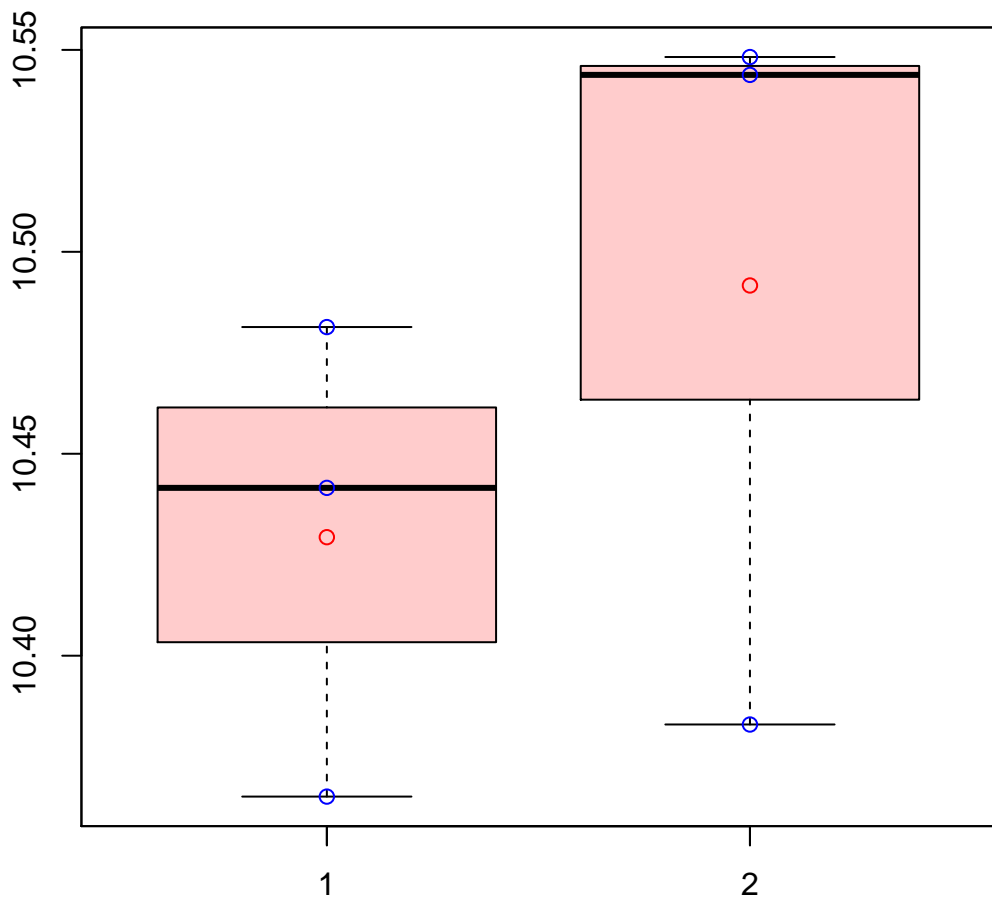

t-Test: p-value = 0.4

# CL280Contig3|CL280Contig3

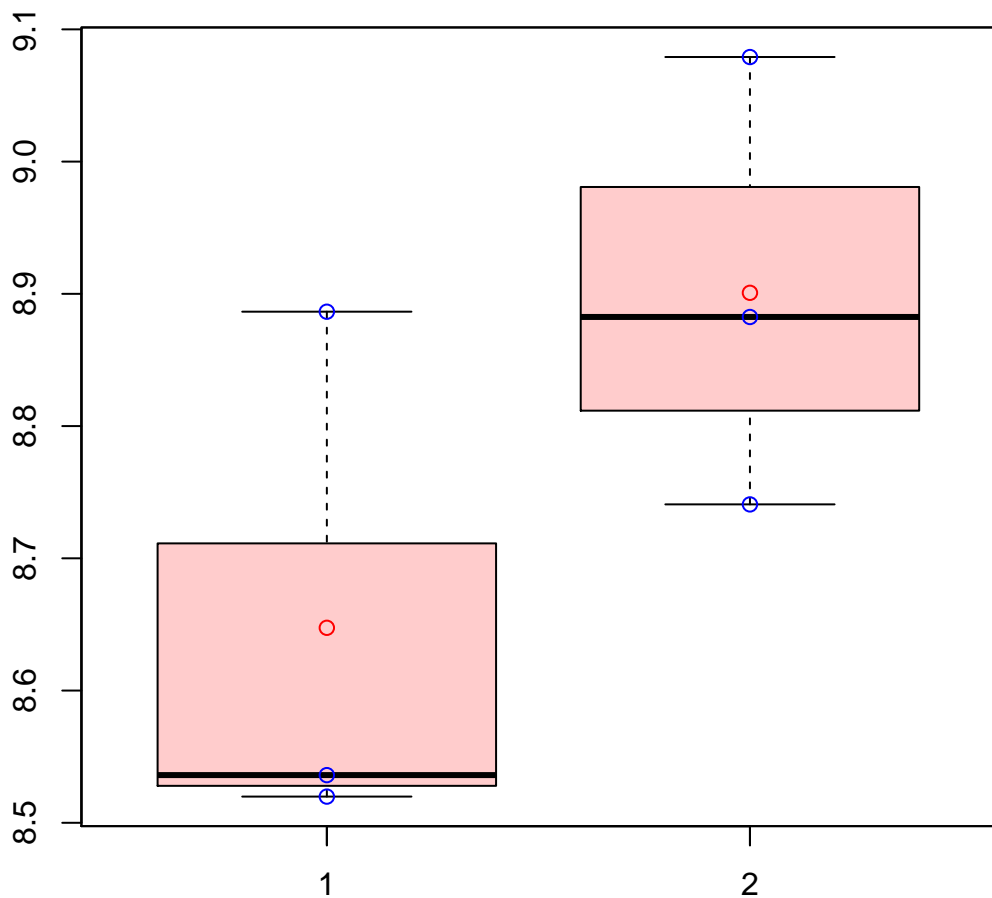

t-Test: p-value = 0.18

# CL280Contig5|CL280Contig5

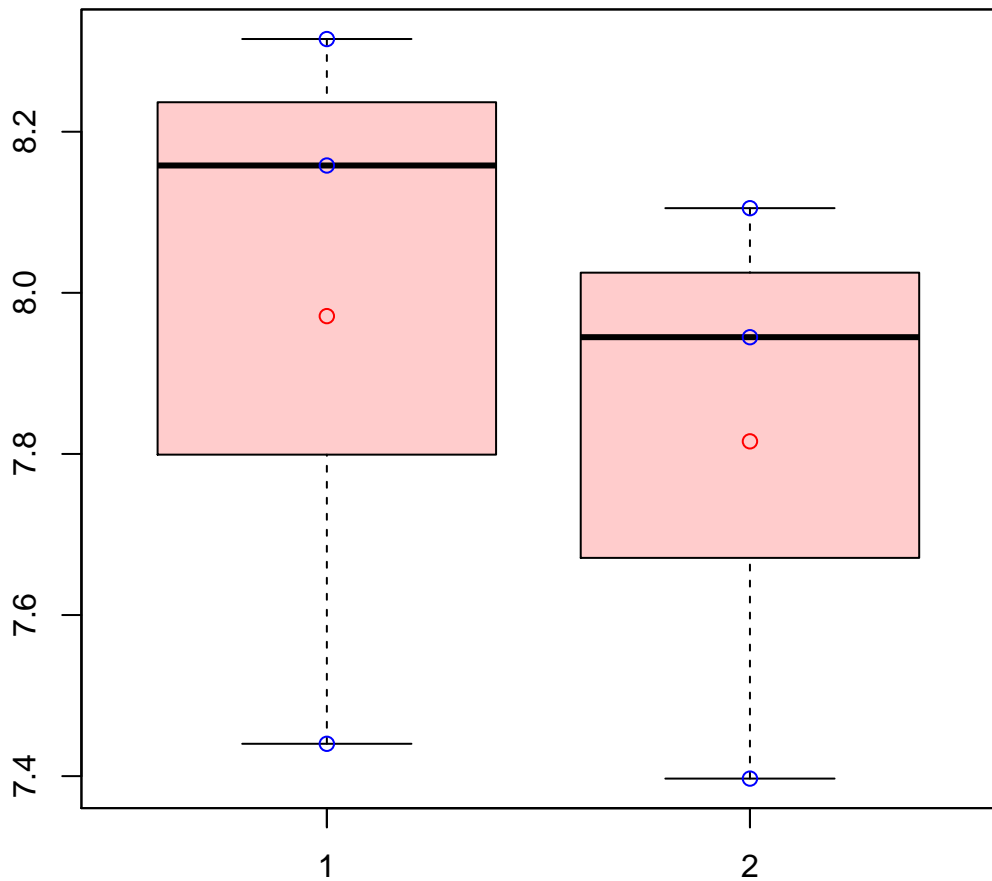

t-Test: p-value = 0.68

# CL280Contig6|CL280Contig6

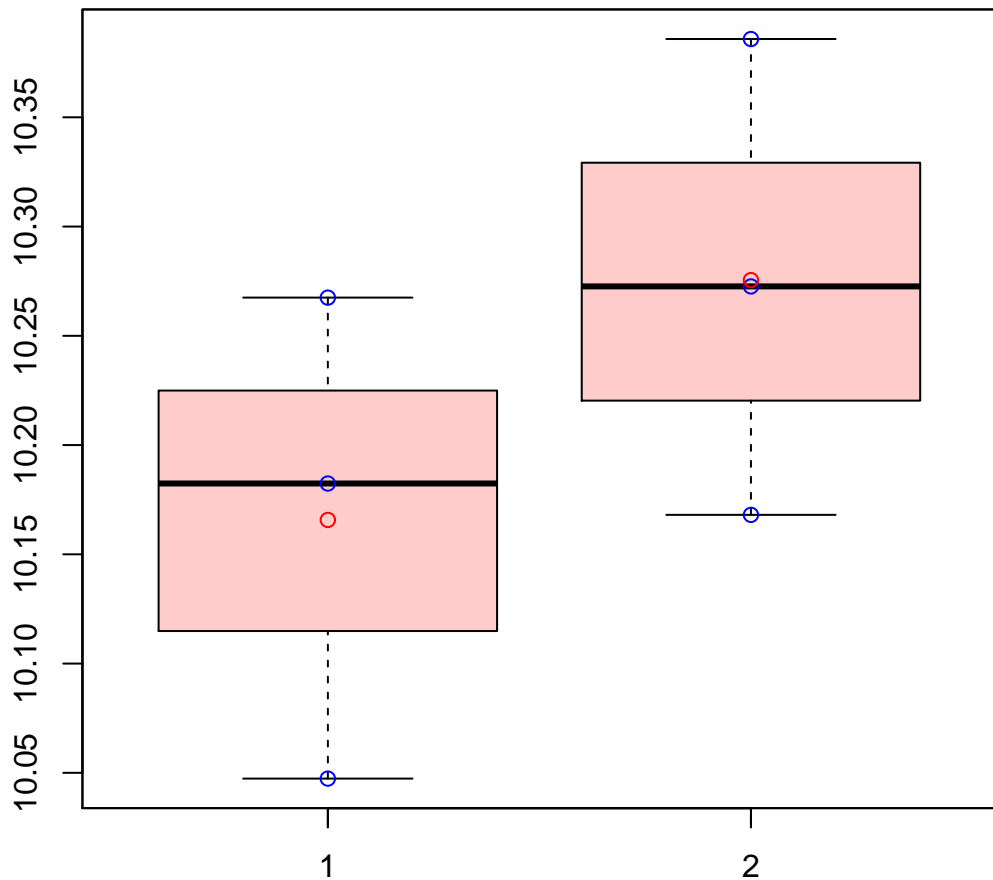

t-Test: p-value = 0.29



# CL280Contig8|CL280Contig8

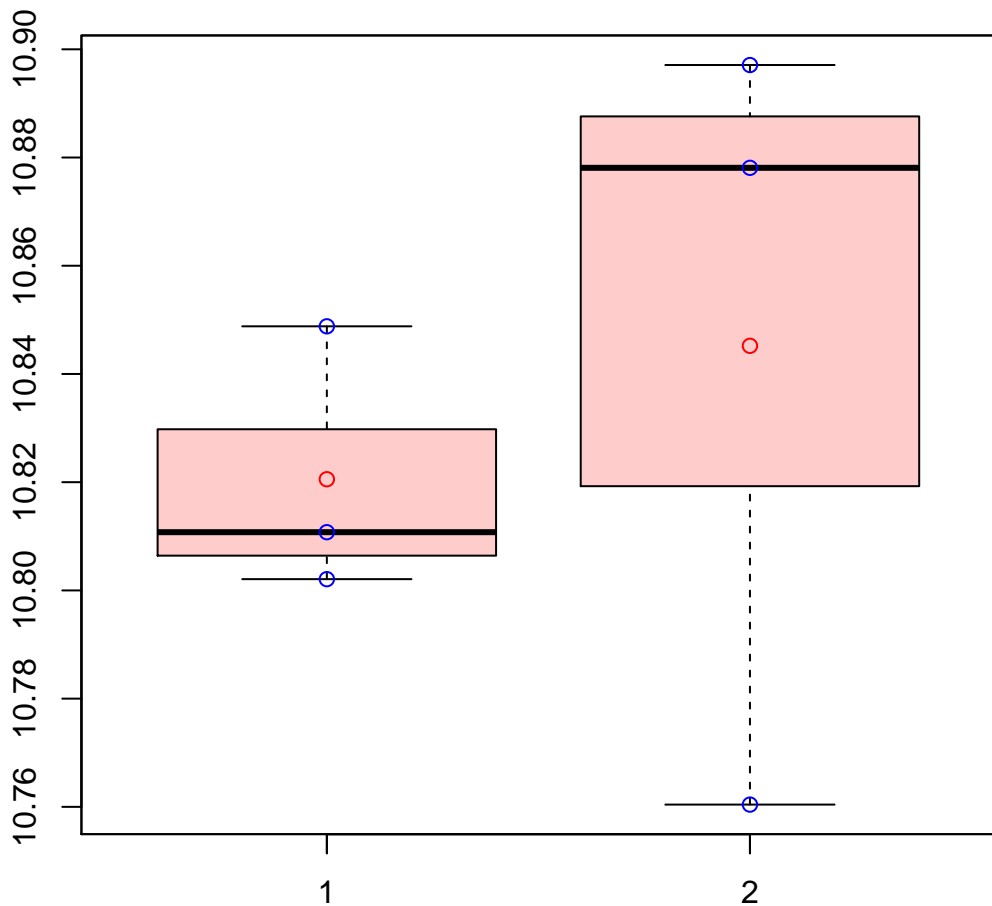

t-Test: p-value = 0.63

# CL2810Contig1|CL2810Contig1

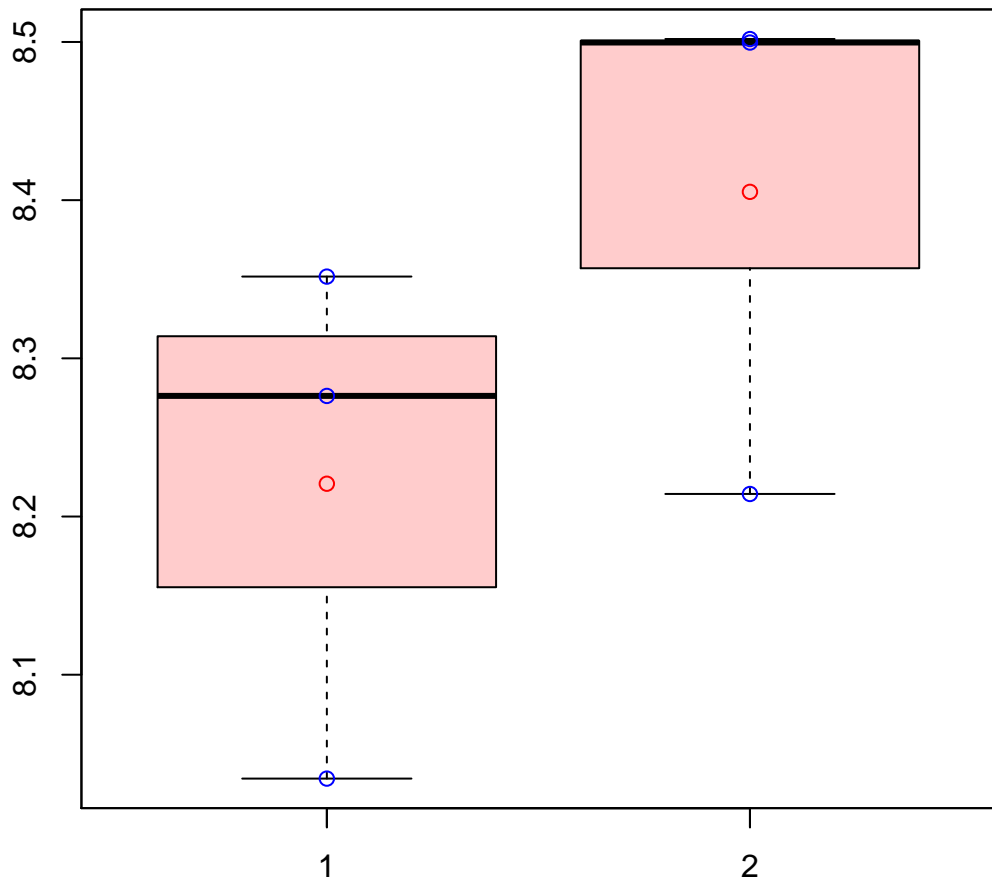

t-Test: p-value = 0.24

# CL2810Contig3|CL2810Contig3

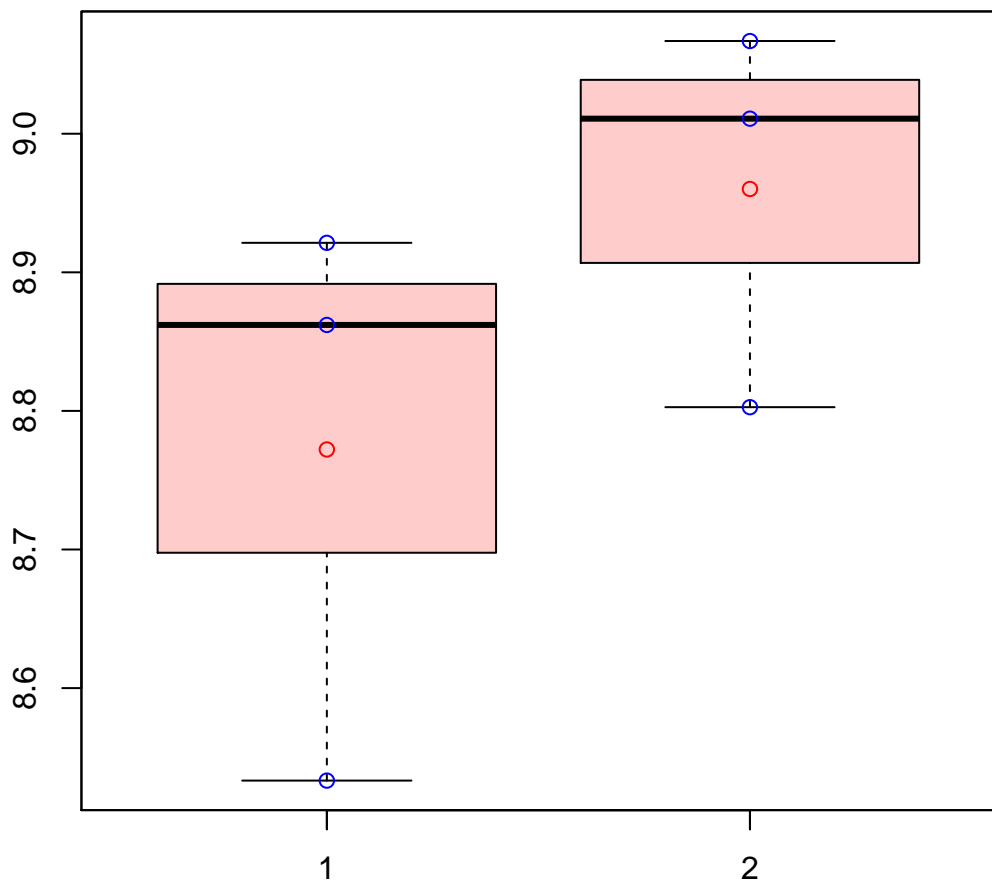

t-Test: p-value = 0.27

# CL2811Contig4|CL2811Contig4

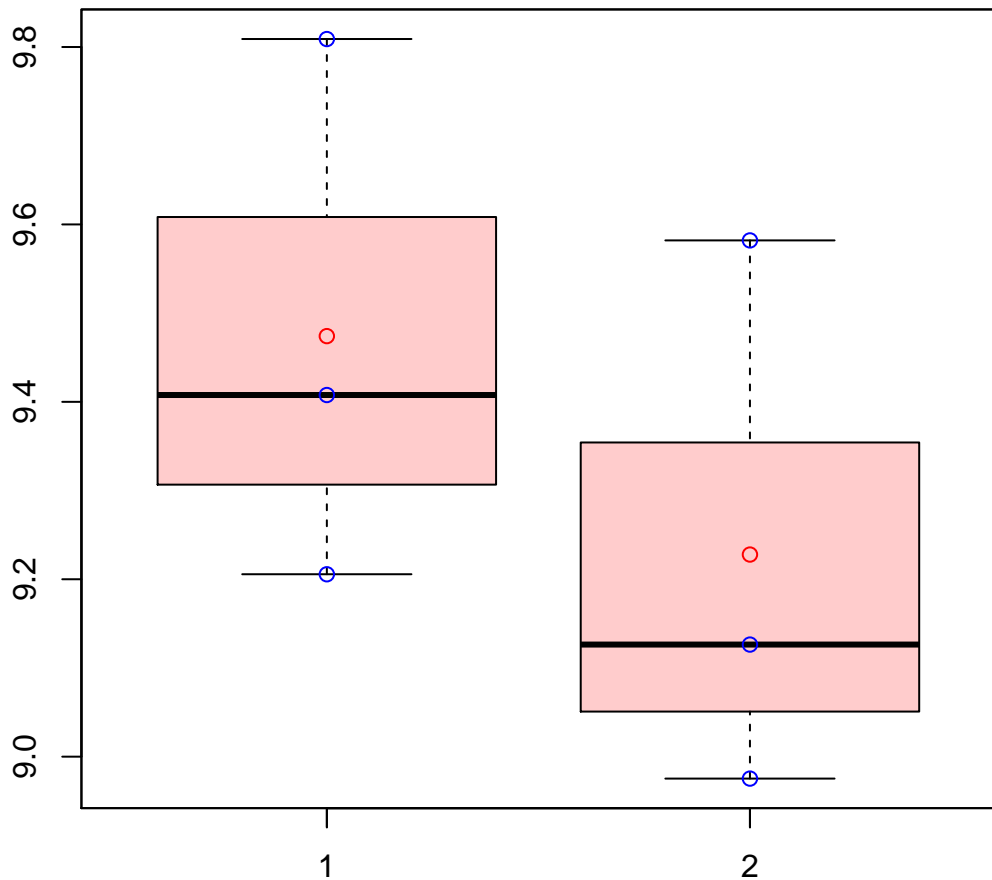

t-Test: p-value = 0.39

# CL2813Contig3|CL2813Contig3

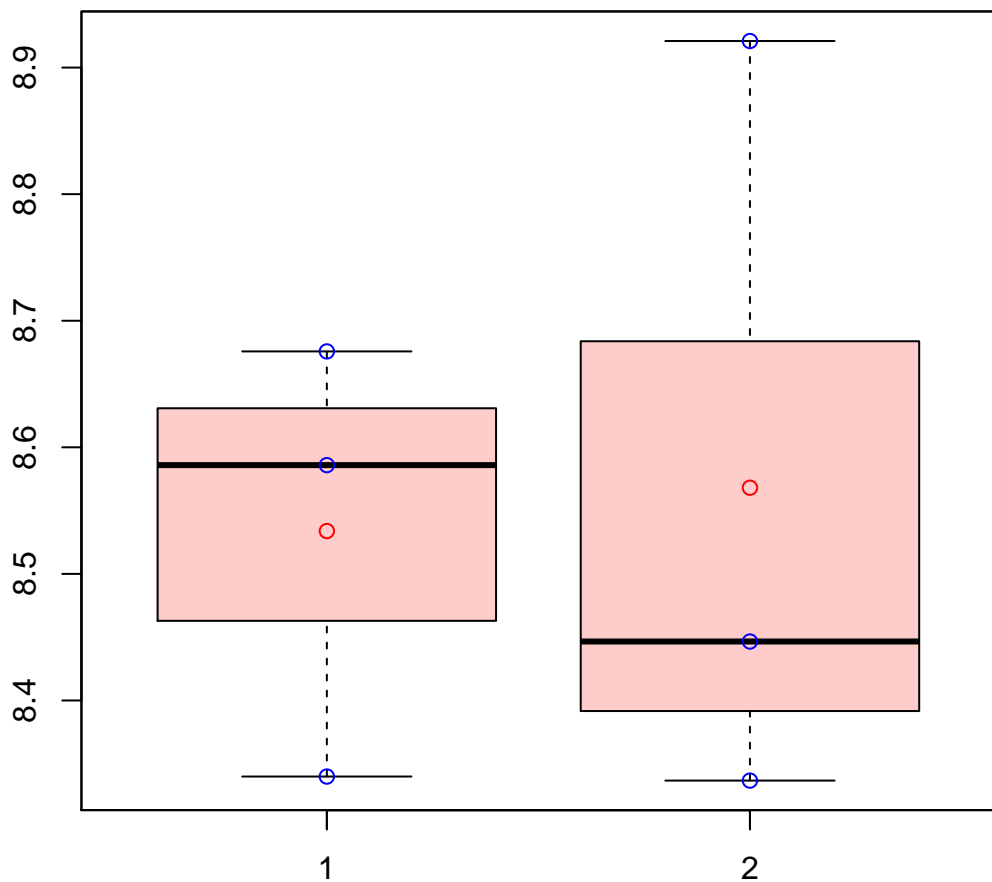

t-Test: p-value = 0.88

# CL2818Contig11|CL2818Contig11

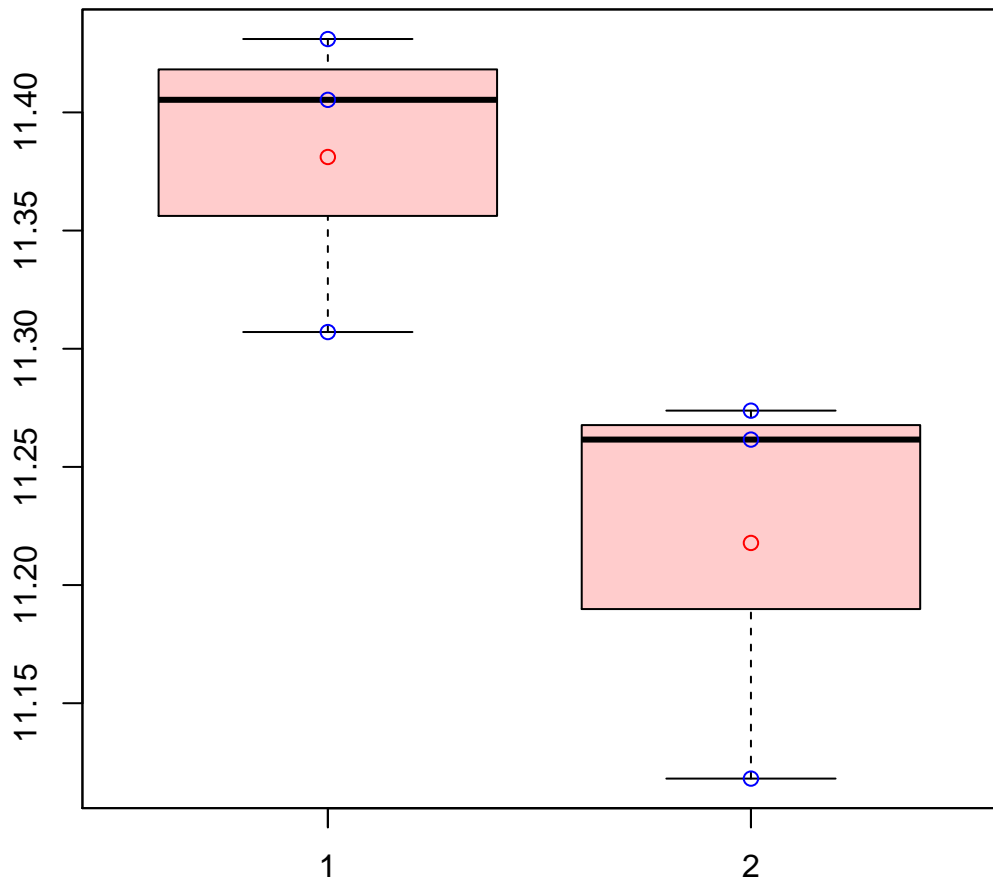

t-Test: p-value = 0.06

# CL2818Contig7|CL2818Contig7

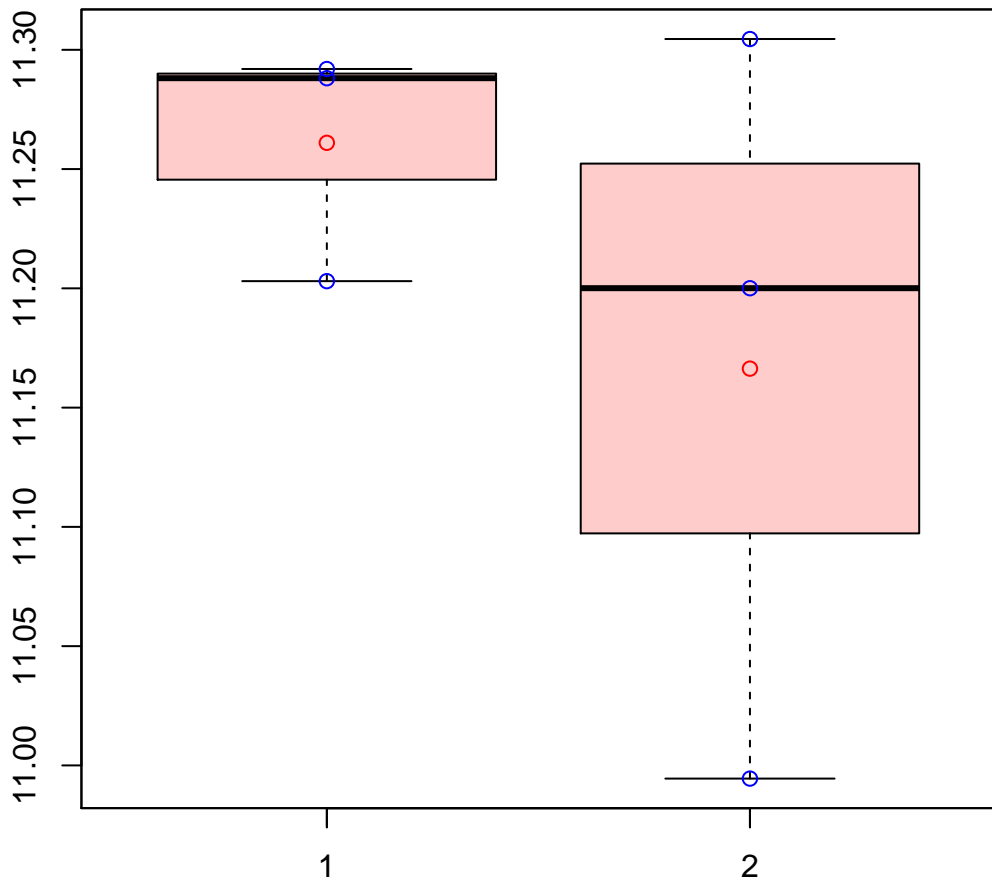

t-Test: p-value = 0.41

# CL2818Contig8|CL2818Contig8

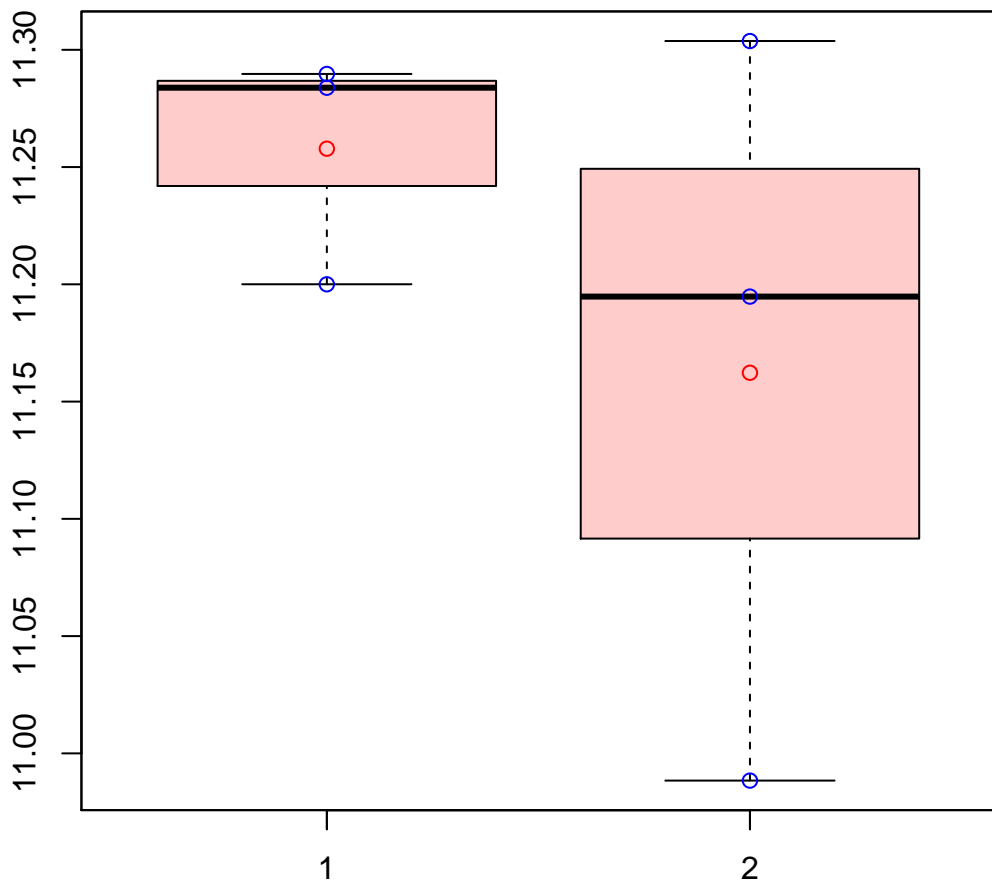

t-Test: p-value = 0.41



# CL2818Contig9|CL2818Contig9

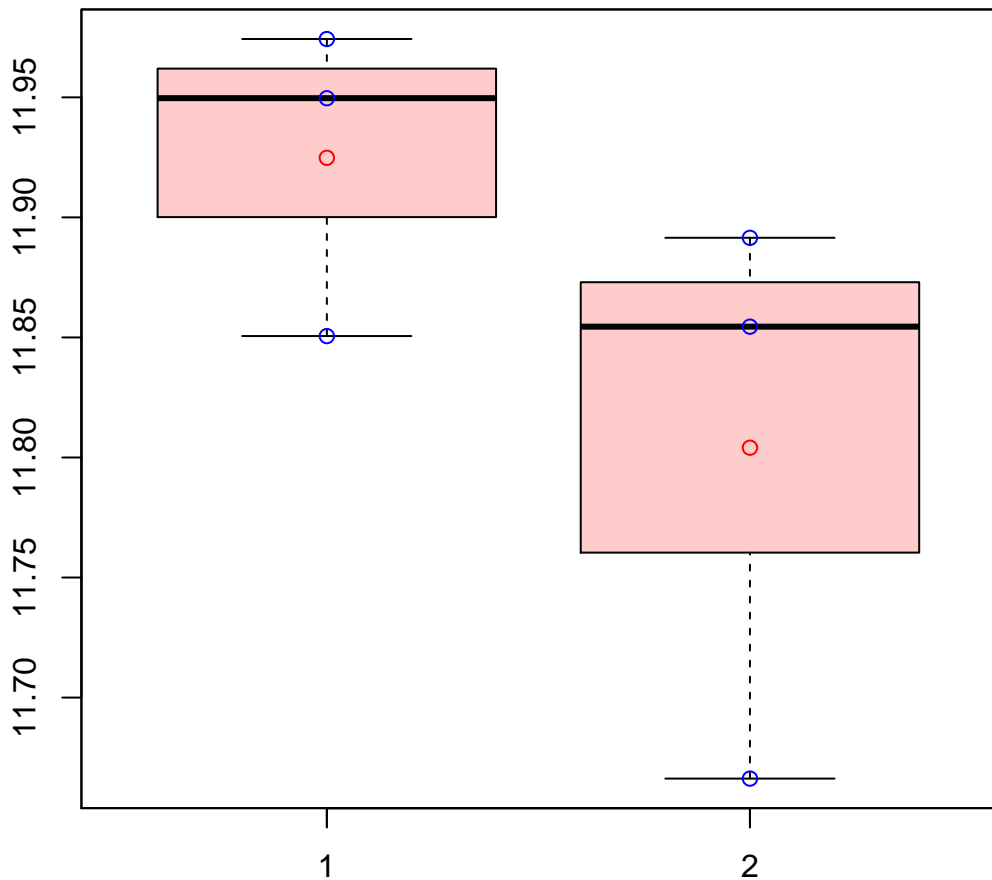

t-Test: p-value = 0.22

# CL281Contig14|CL281Contig14

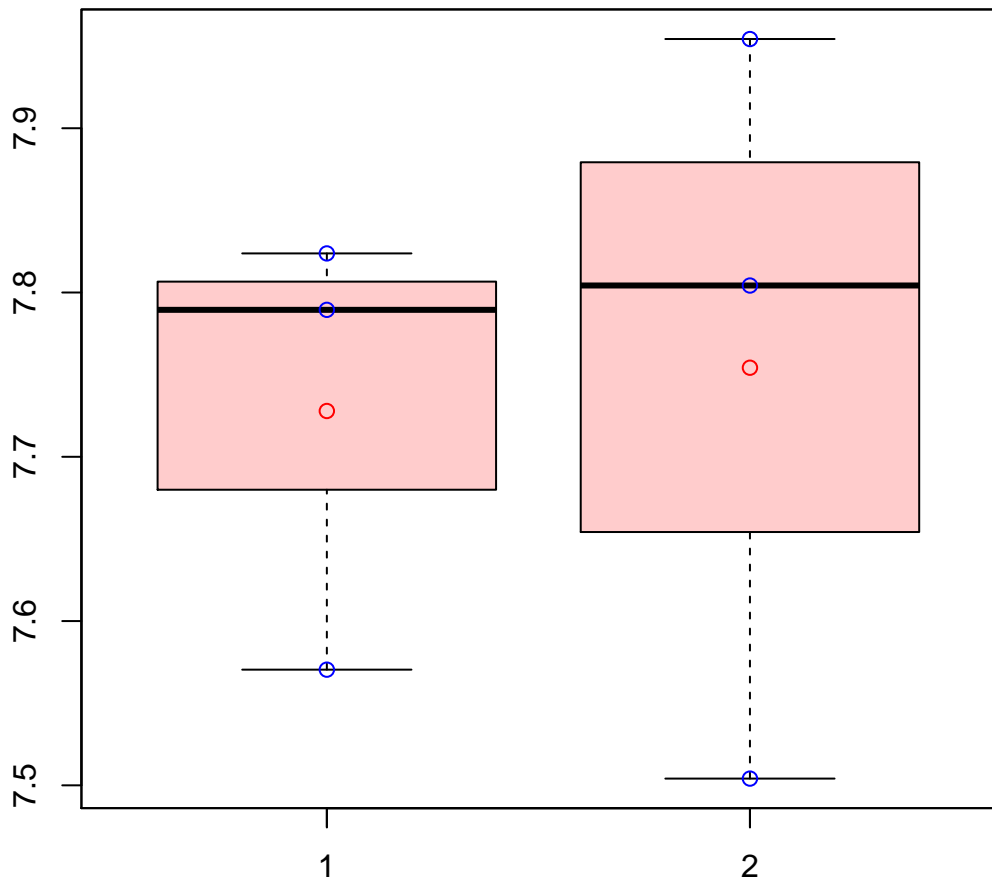

t-Test: p-value = 0.87

# CL2827Contig2|CL2827Contig2

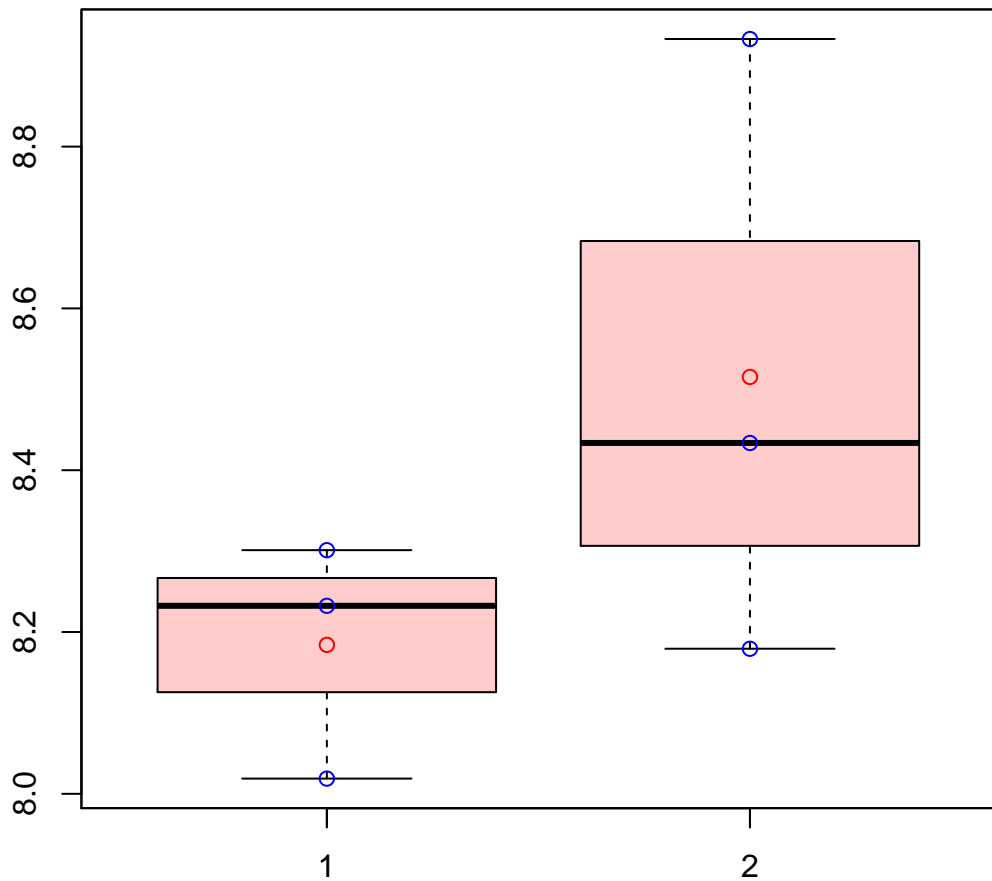

t-Test: p-value = 0.27

# CL2829Contig5|CL2829Contig5

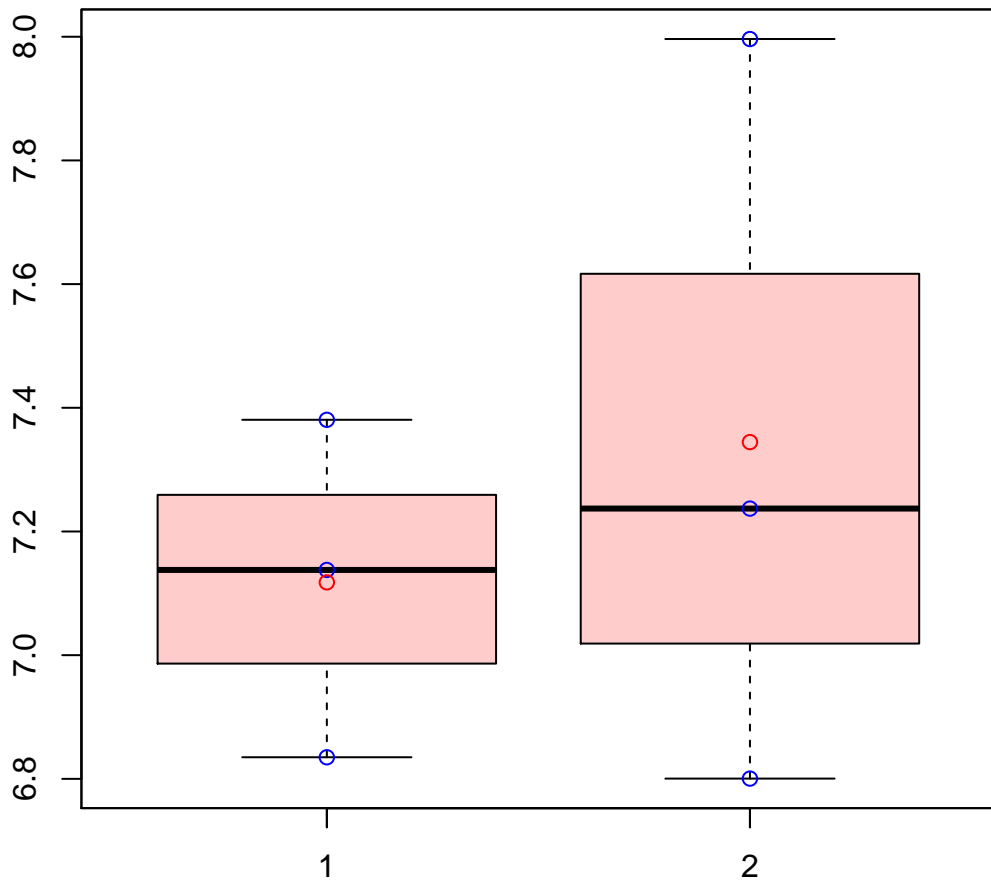

t-Test: p-value = 0.6

# CL2829Contig6|CL2829Contig6

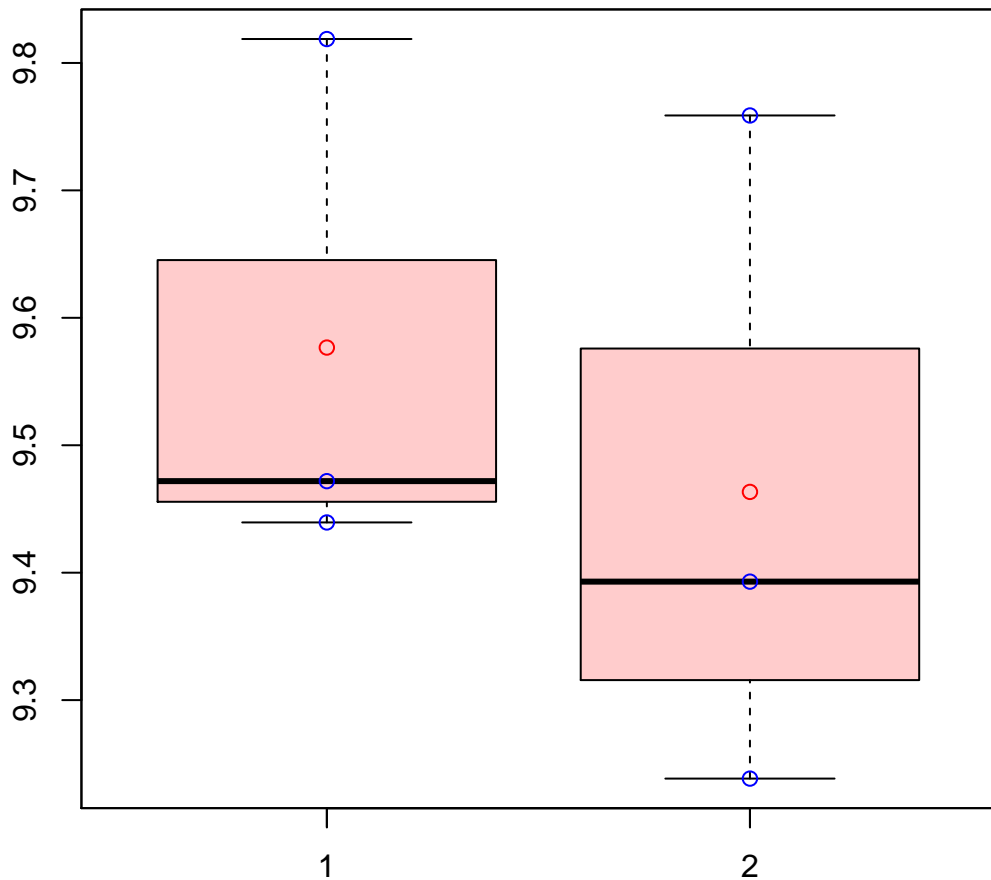

t-Test: p-value = 0.6

# CL2829Contig7|CL2829Contig7

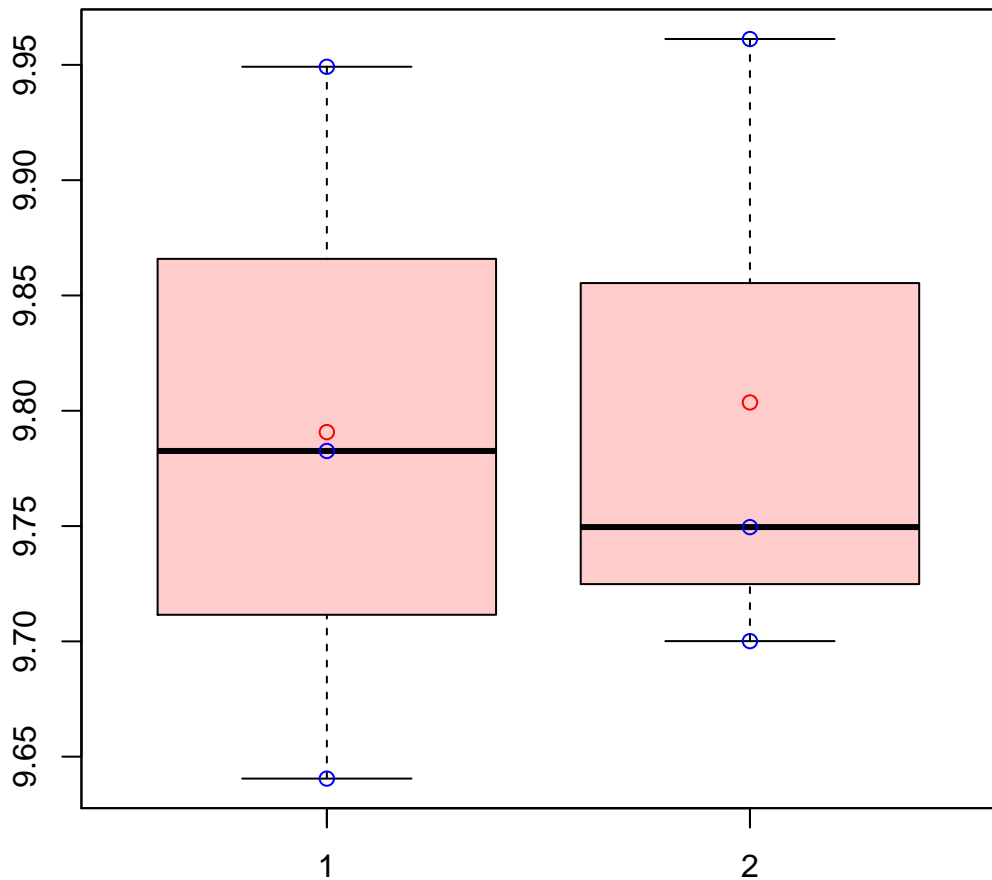

t-Test: p-value = 0.92

# CL283Contig16|CL283Contig16

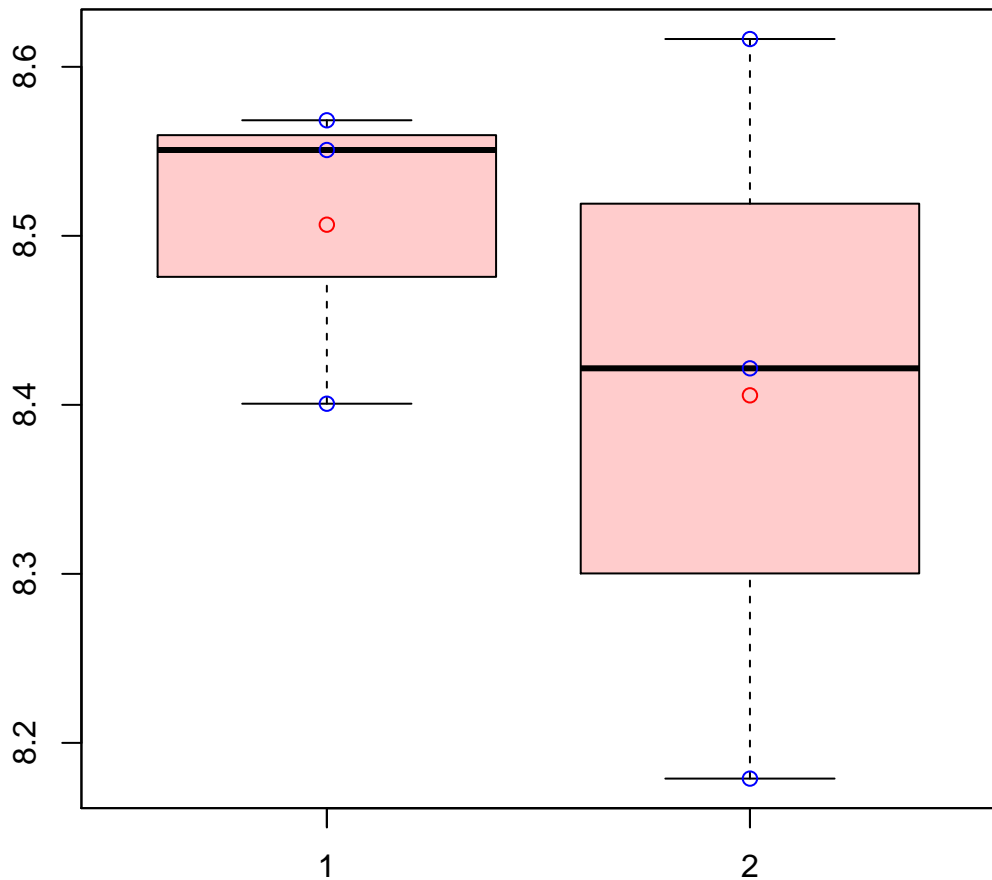

t-Test: p-value = 0.52

# CL283Contig5|CL283Contig5

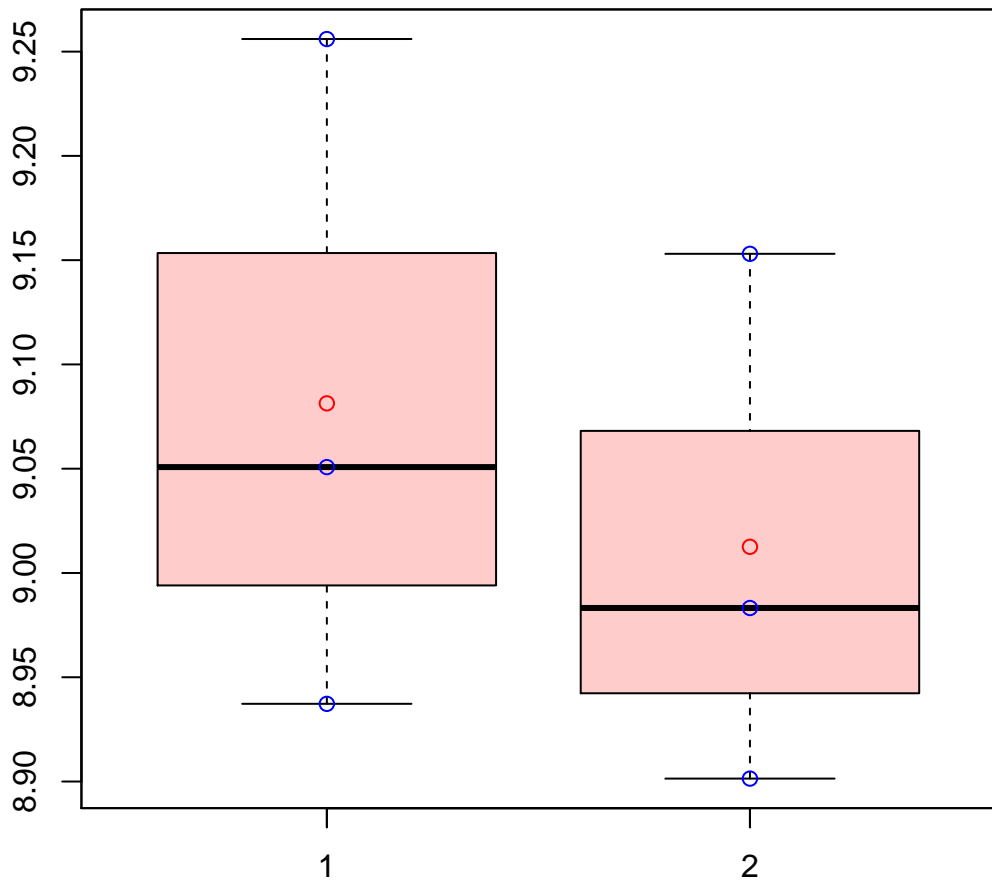

t-Test: p-value = 0.6



# CL2845Contig1|CL2845Contig1

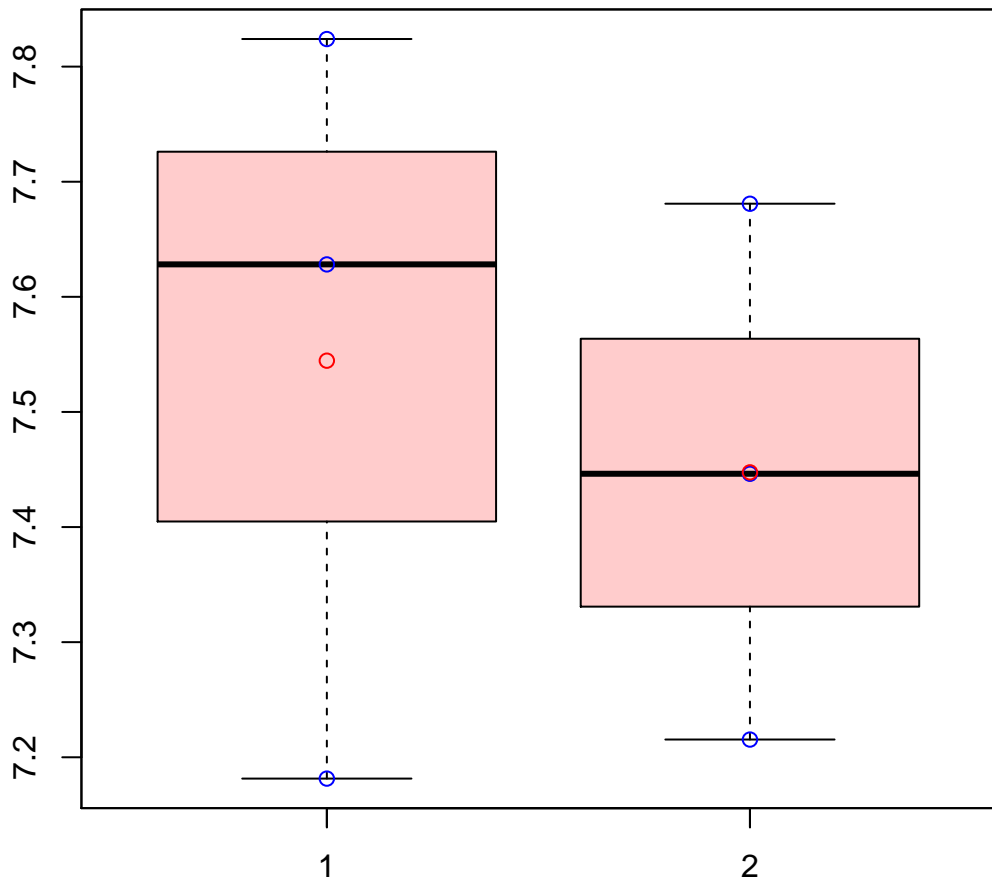

t-Test: p-value = 0.7

# CL2845Contig2|CL2845Contig2

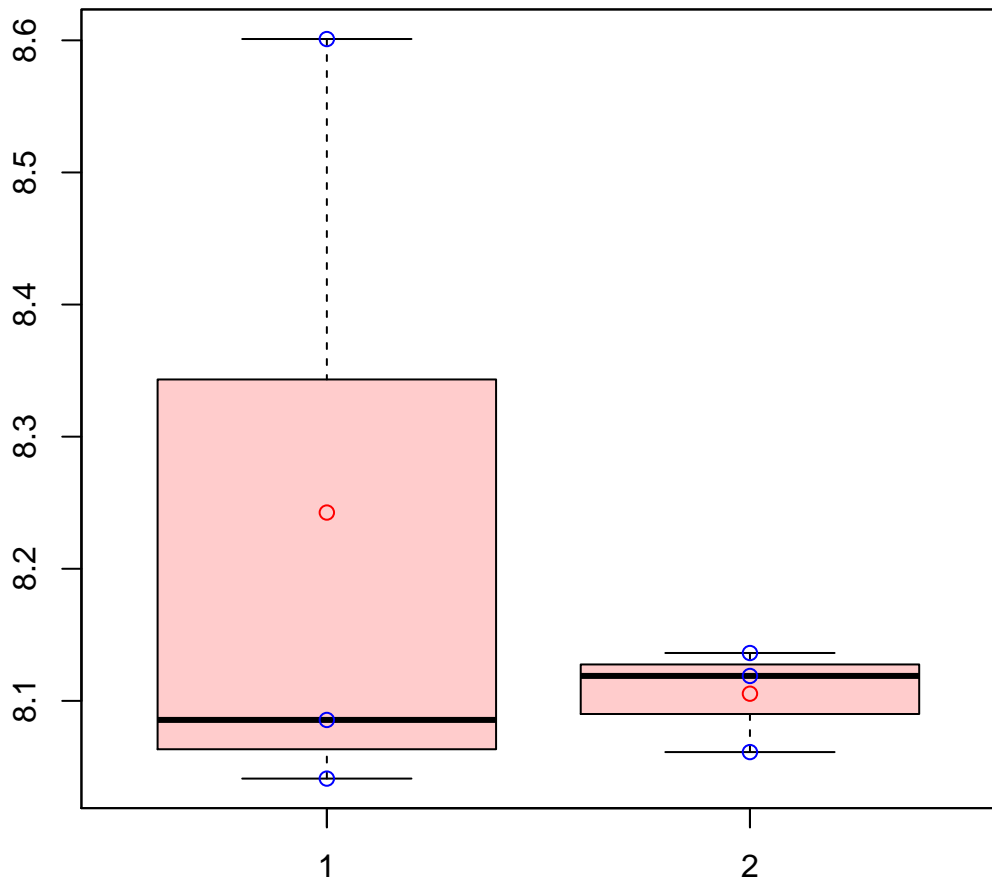

t-Test: p-value = 0.53

# CL2845Contig4|CL2845Contig4



t-Test: p-value = 0.53

# CL2845Contig6|CL2845Contig6

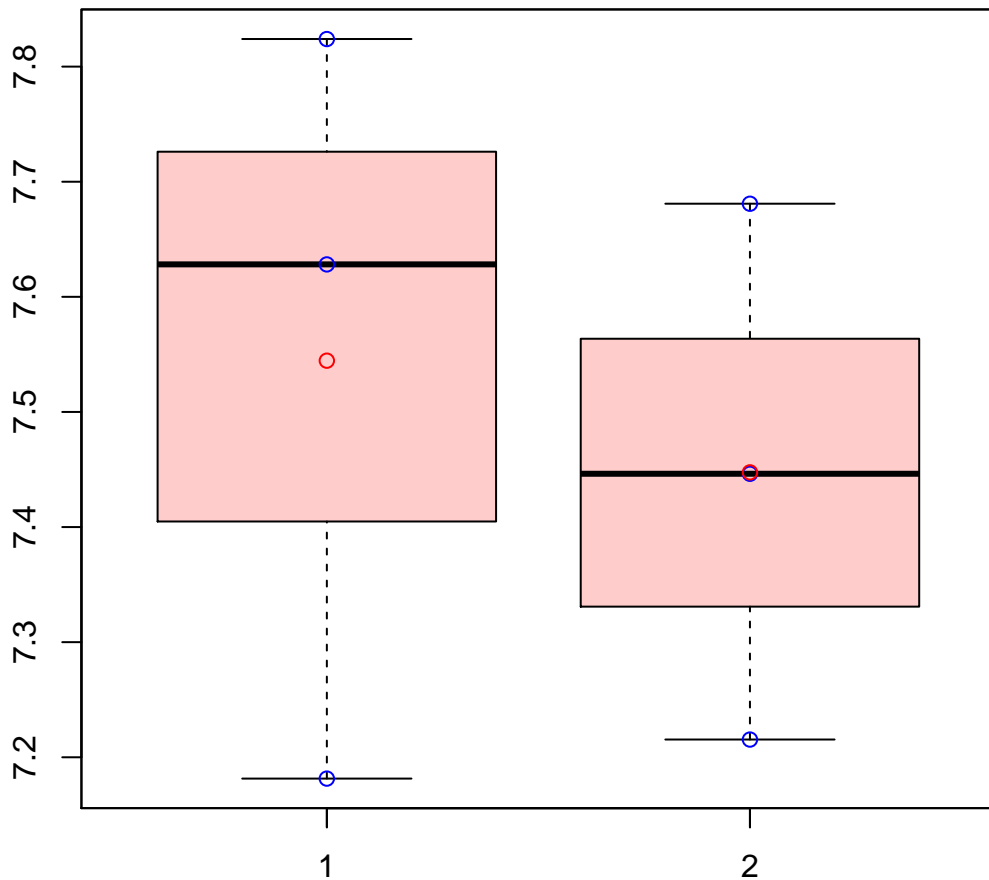

t-Test: p-value = 0.7

# CL2847Contig4|CL2847Contig4

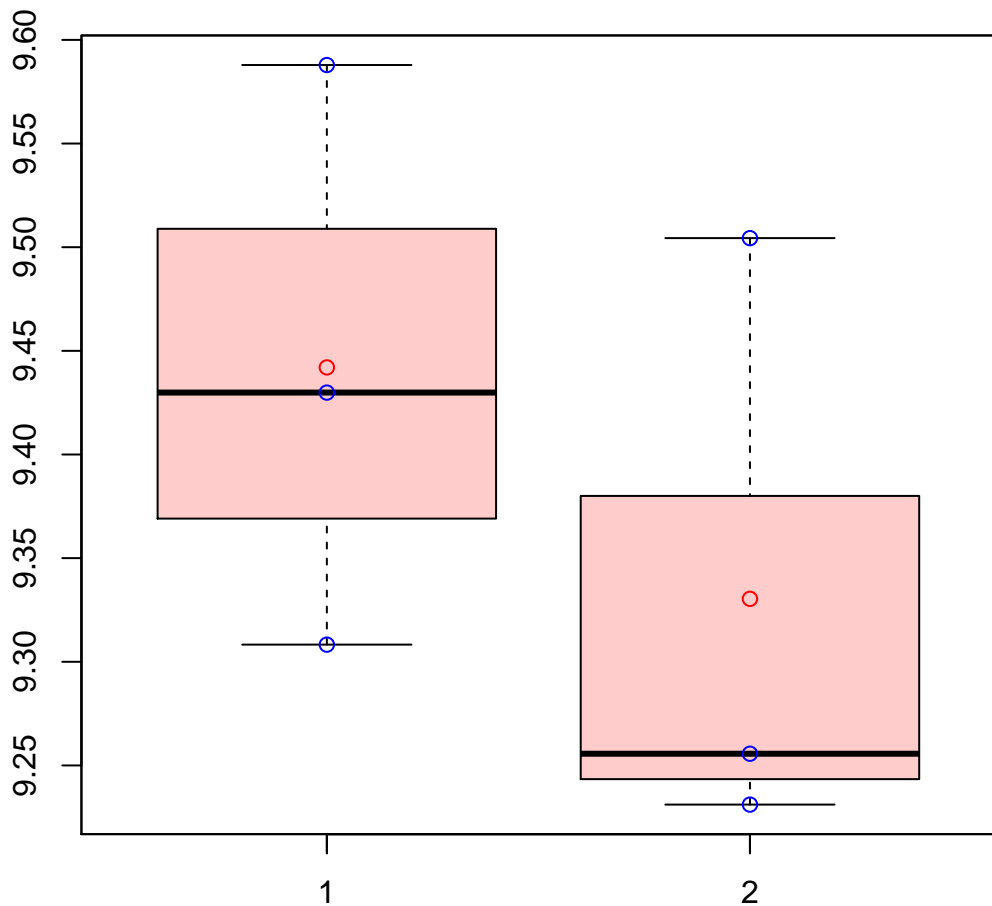

t-Test: p-value = 0.4

# CL2847Contig5|CL2847Contig5

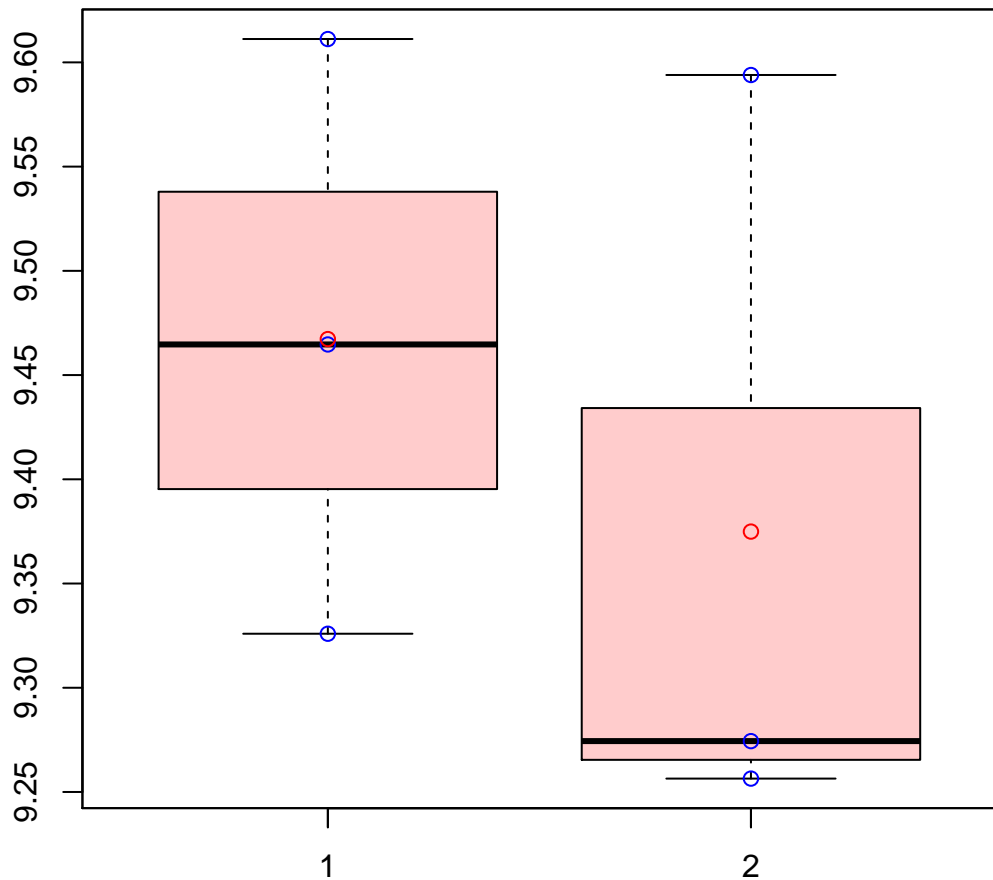

t-Test: p-value = 0.54

# CL2847Contig6|CL2847Contig6

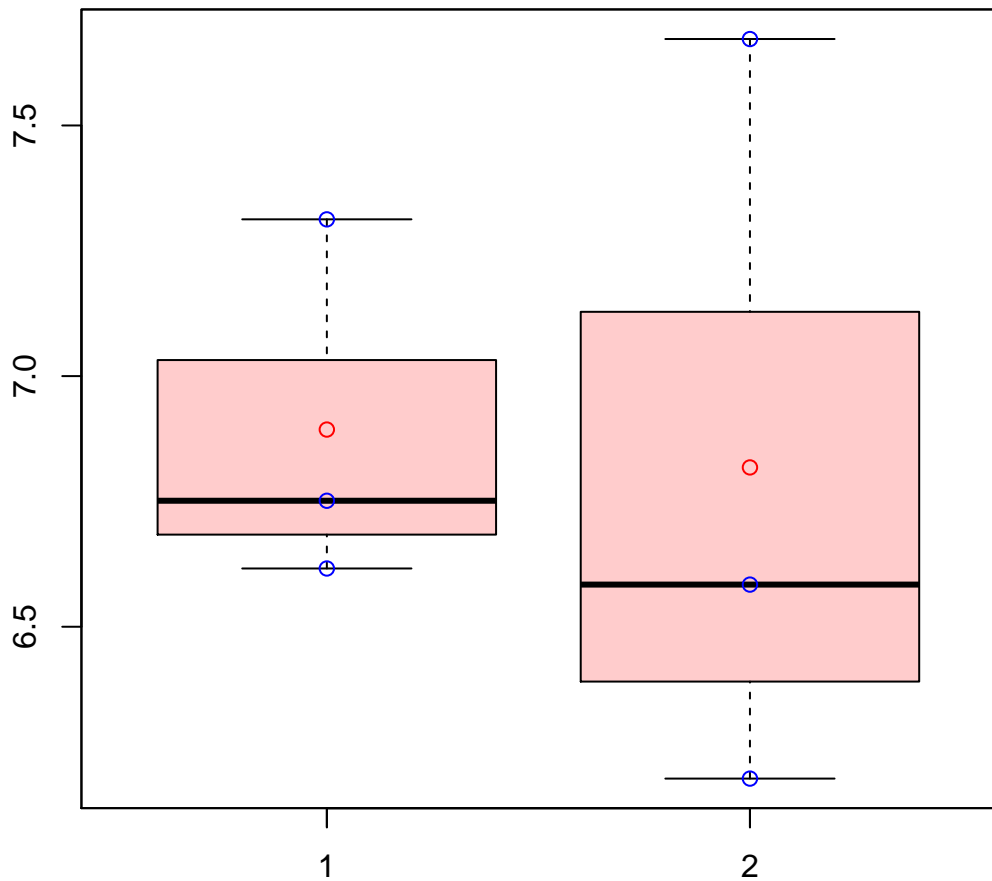

t-Test: p-value = 0.89

# CL2853Contig3|CL2853Contig3

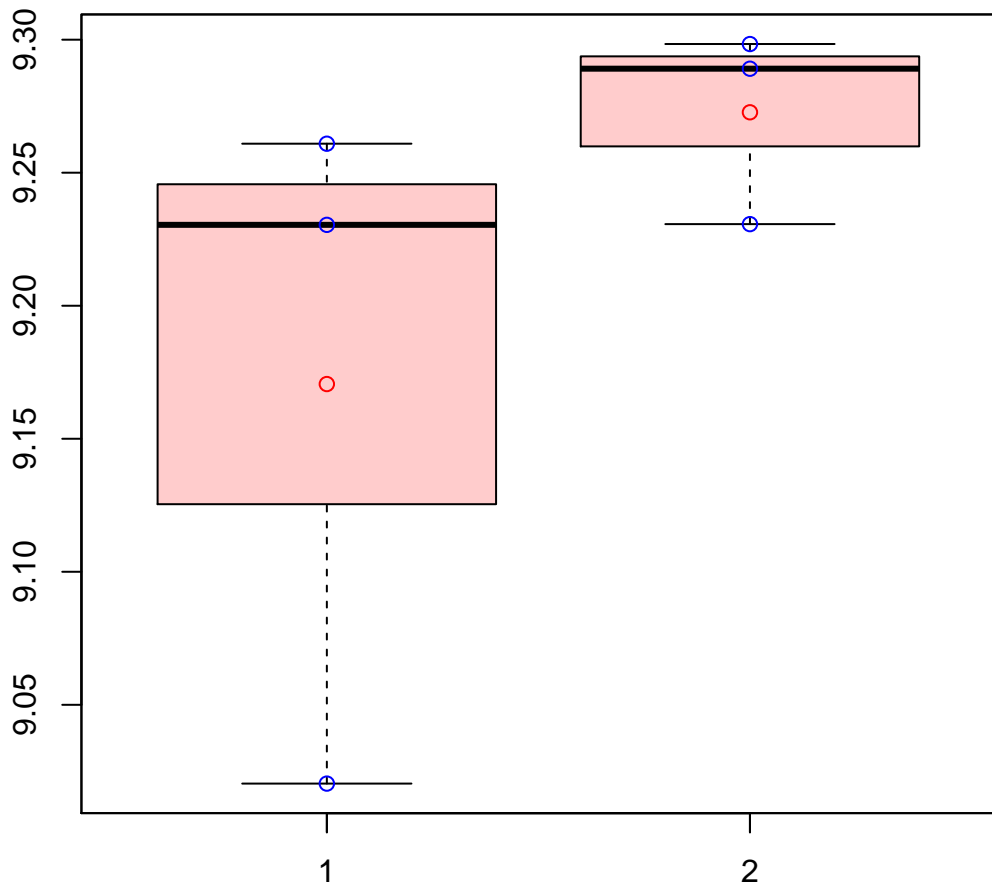

t-Test: p-value = 0.31



# CL2860Contig2|CL2860Contig2

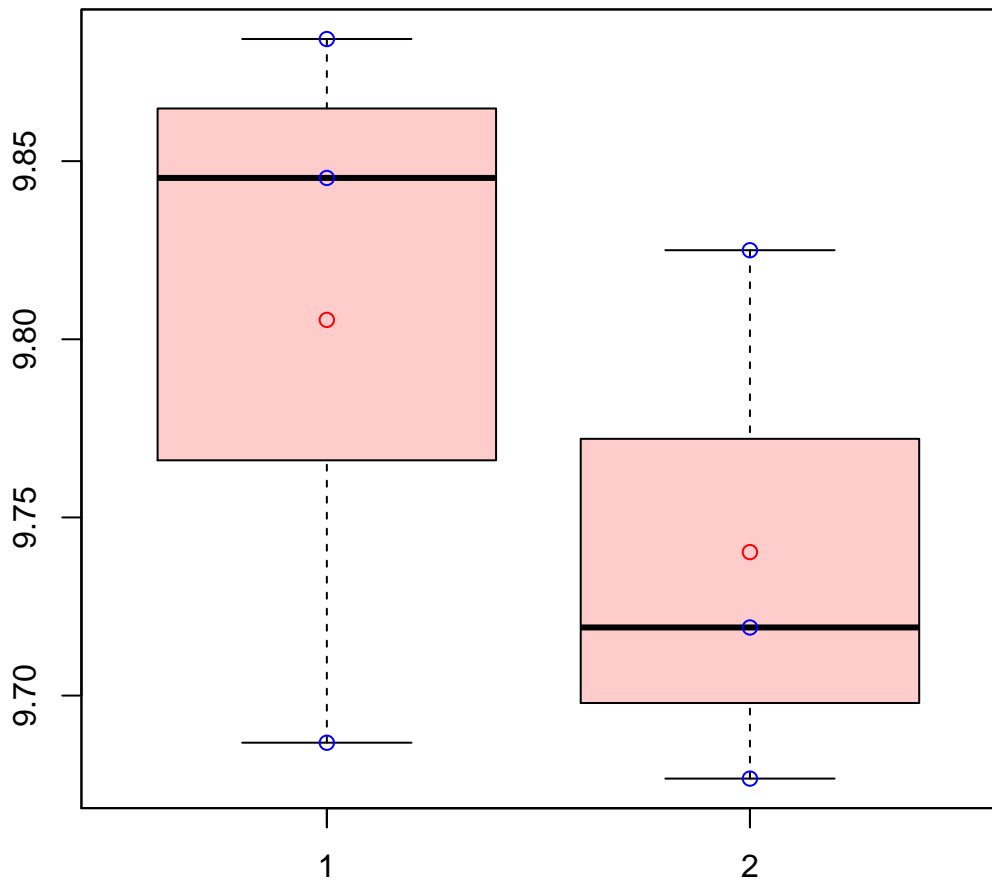

t-Test: p-value = 0.44

# CL2860Contig3|CL2860Contig3

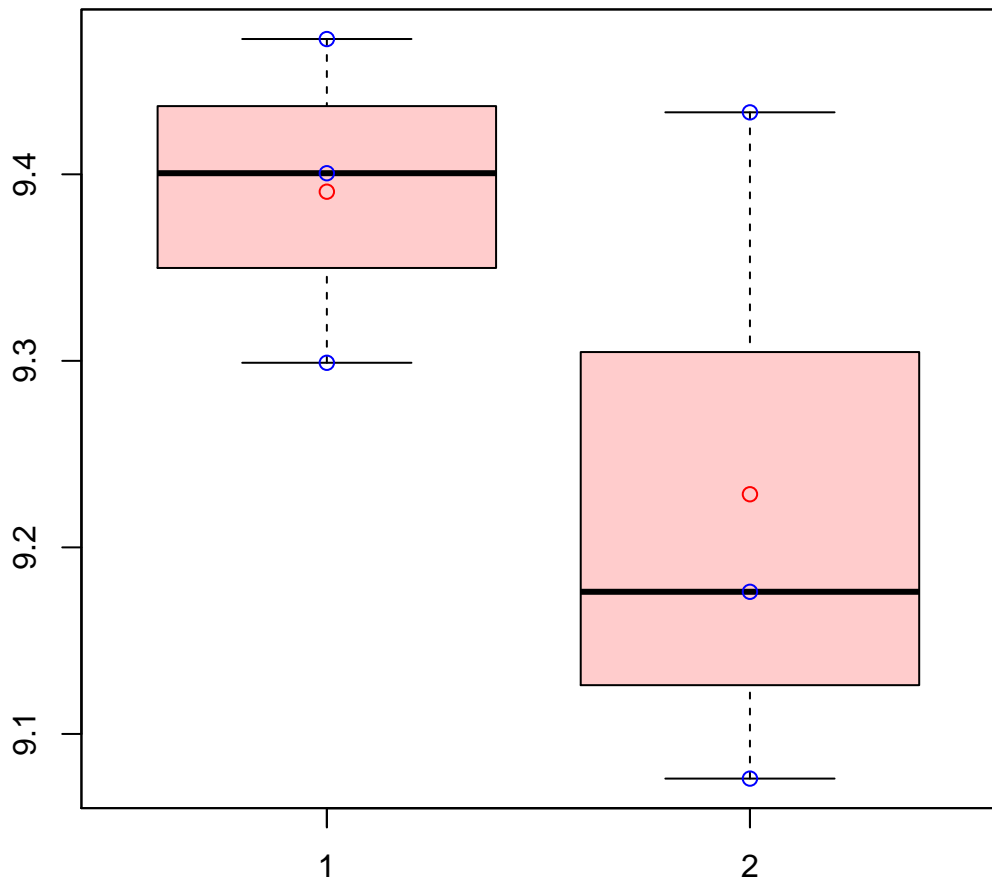

t-Test: p-value = 0.27

# CL2860Contig4|CL2860Contig4



t-Test: p-value = 0.44

# CL2868Contig3|CL2868Contig3

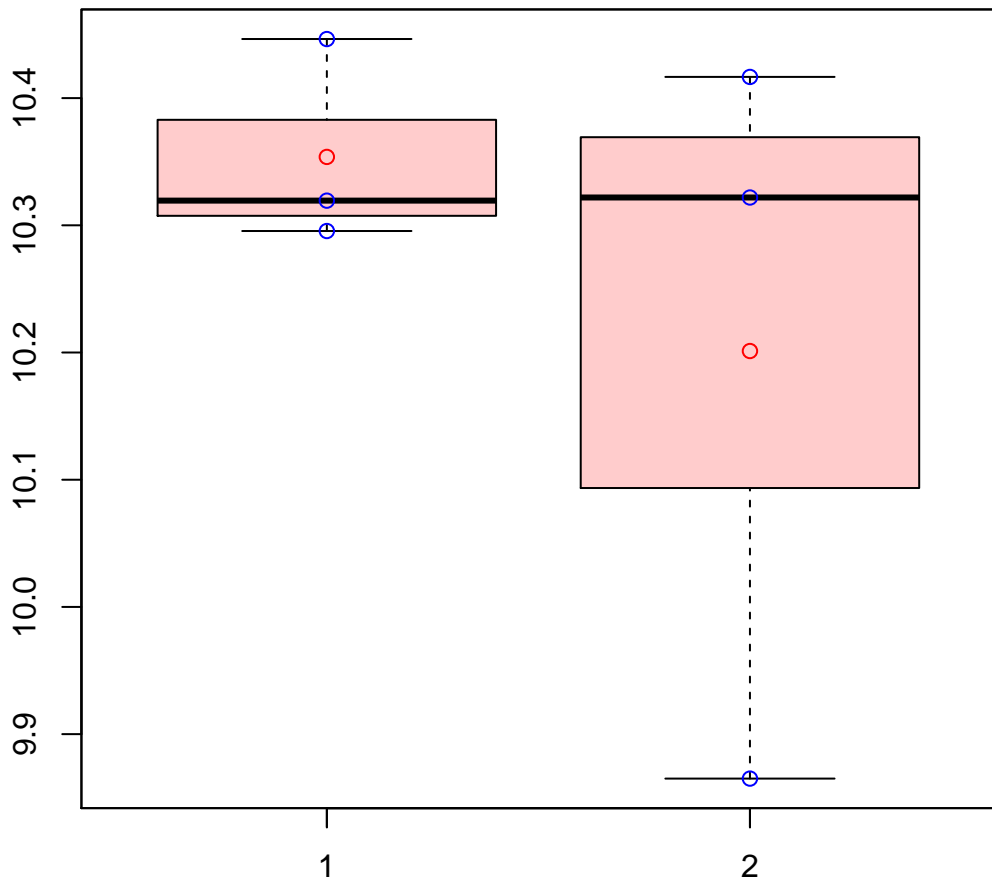

t-Test: p-value = 0.47

# CL286Contig10|CL286Contig10

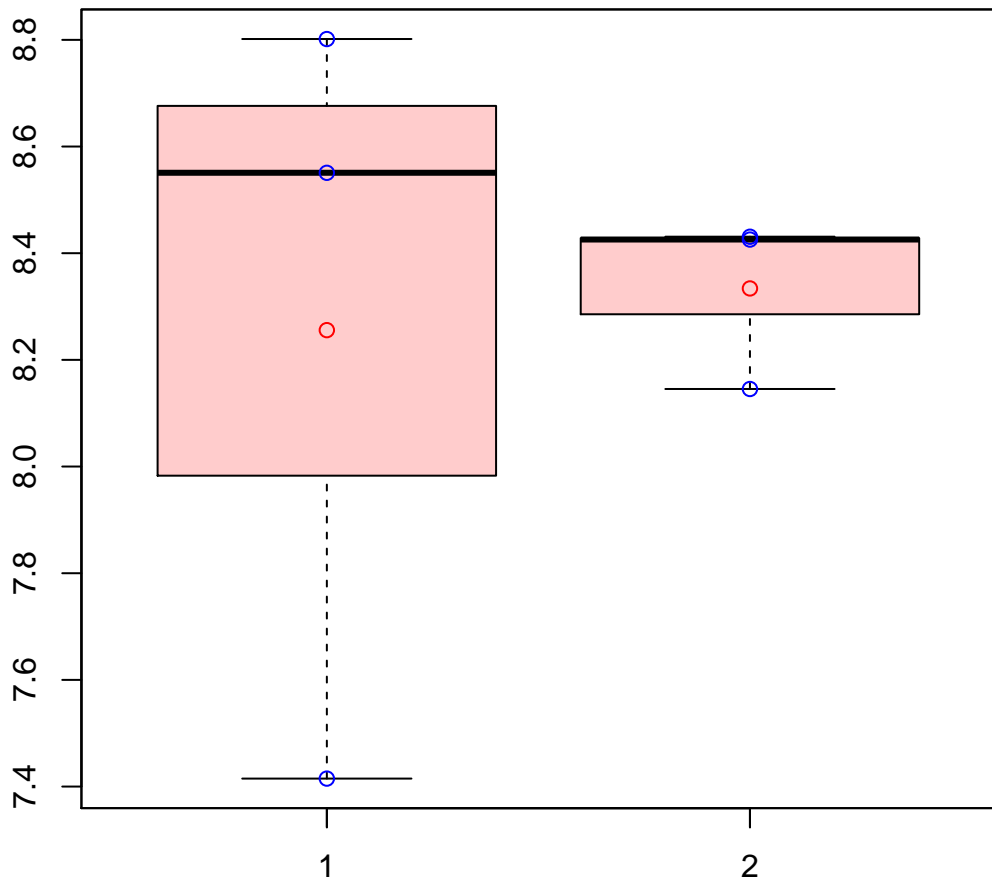

t-Test: p-value = 0.87

# CL2874Contig3|CL2874Contig3

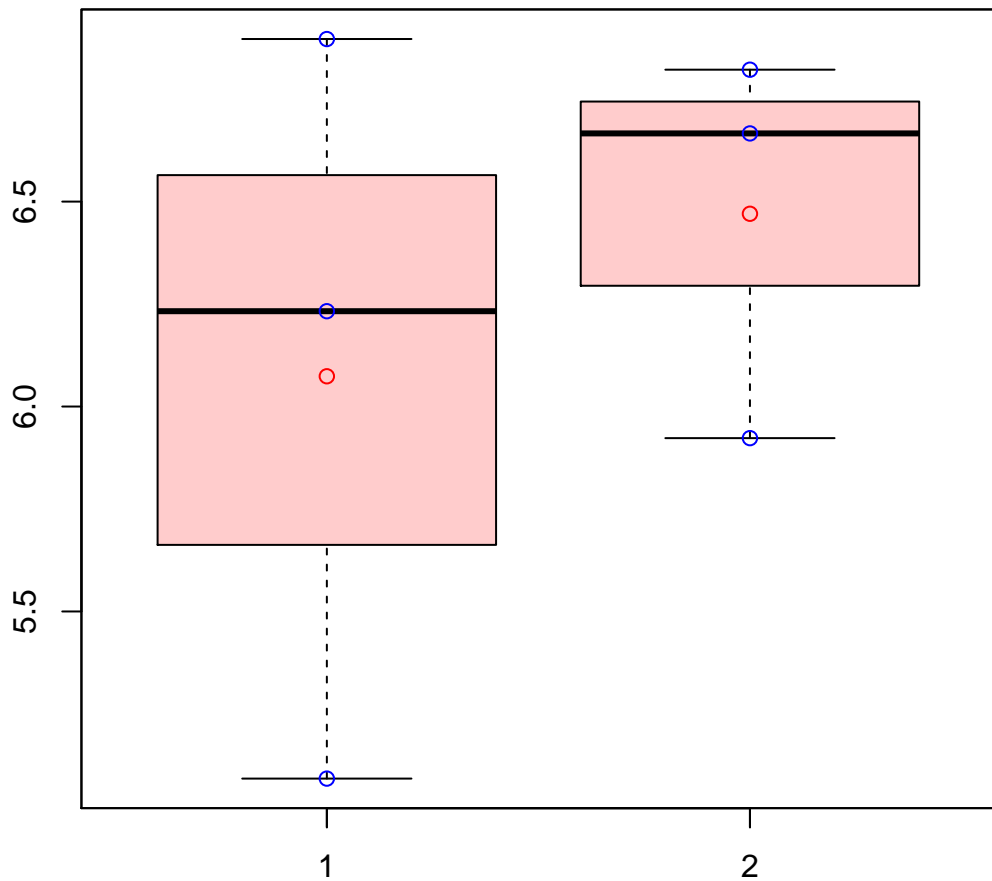

t-Test: p-value = 0.55

# CL2876Contig3|CL2876Contig3

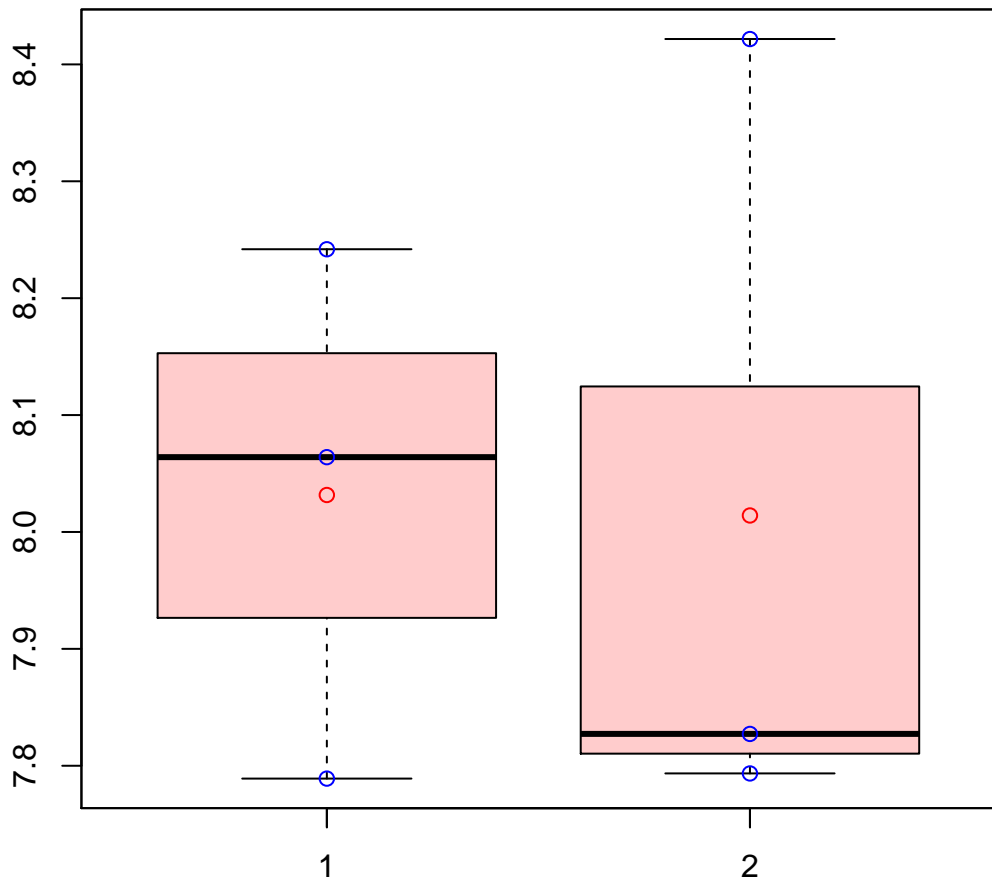

t-Test: p-value = 0.95

# CL2878Contig1|CL2878Contig1

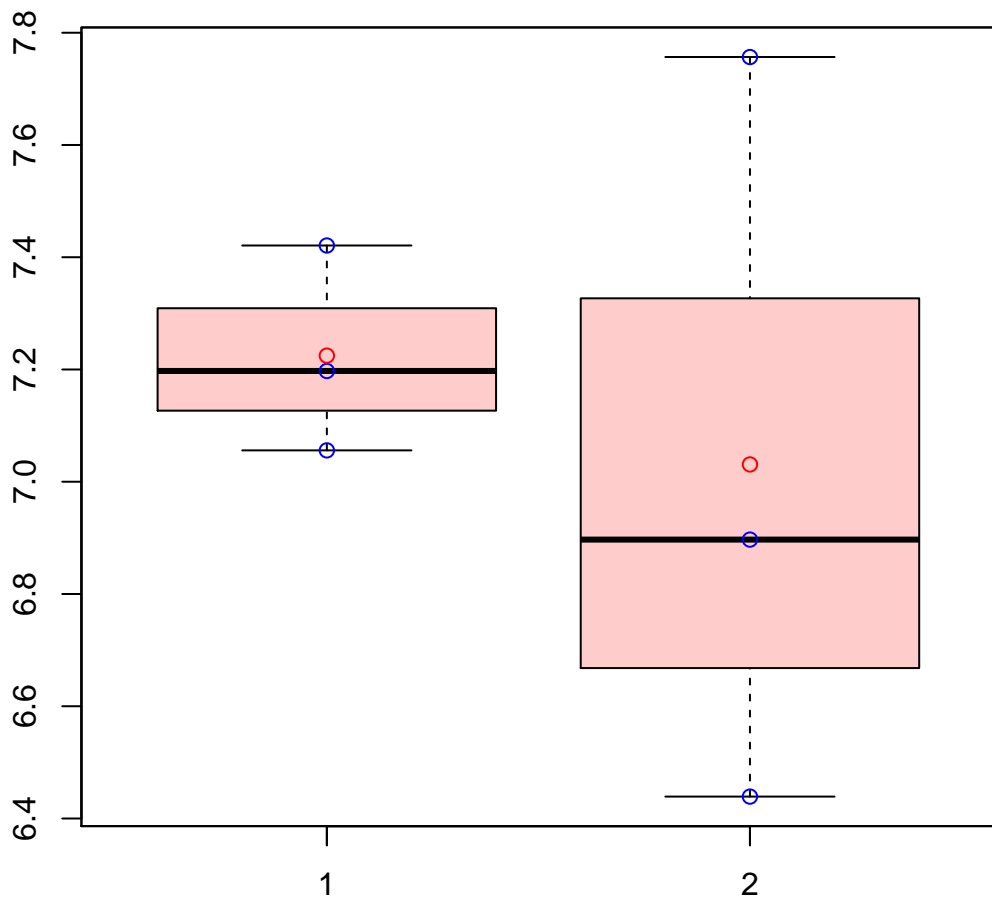

t-Test: p-value = 0.67



# CL287Contig5|CL287Contig5

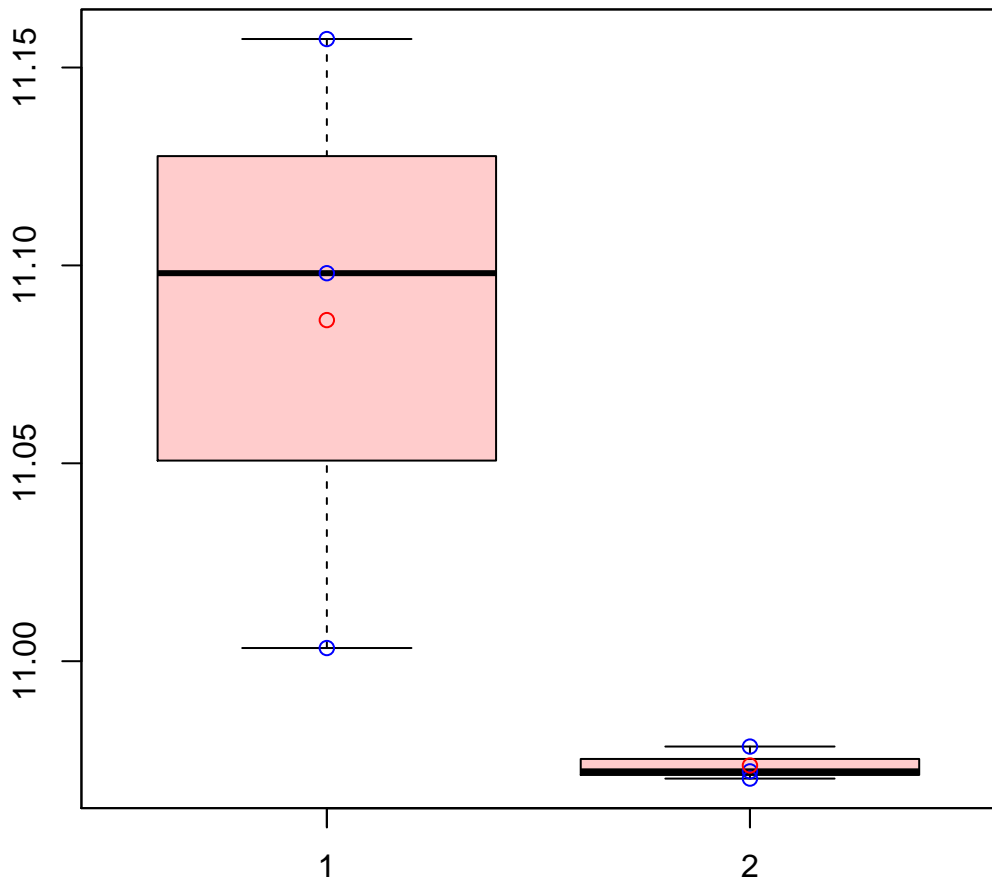

t-Test: p-value = 0.13

# CL2885Contig3|CL2885Contig3

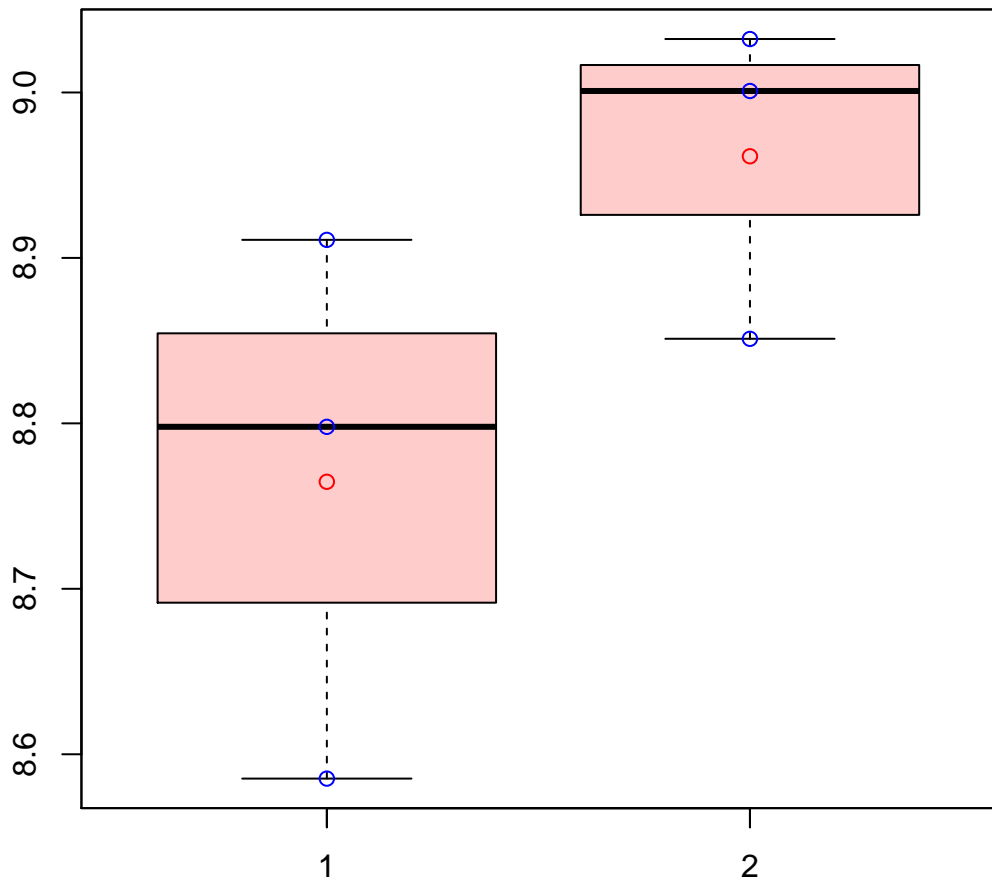

t-Test: p-value = 0.17

# CL2885Contig5|CL2885Contig5

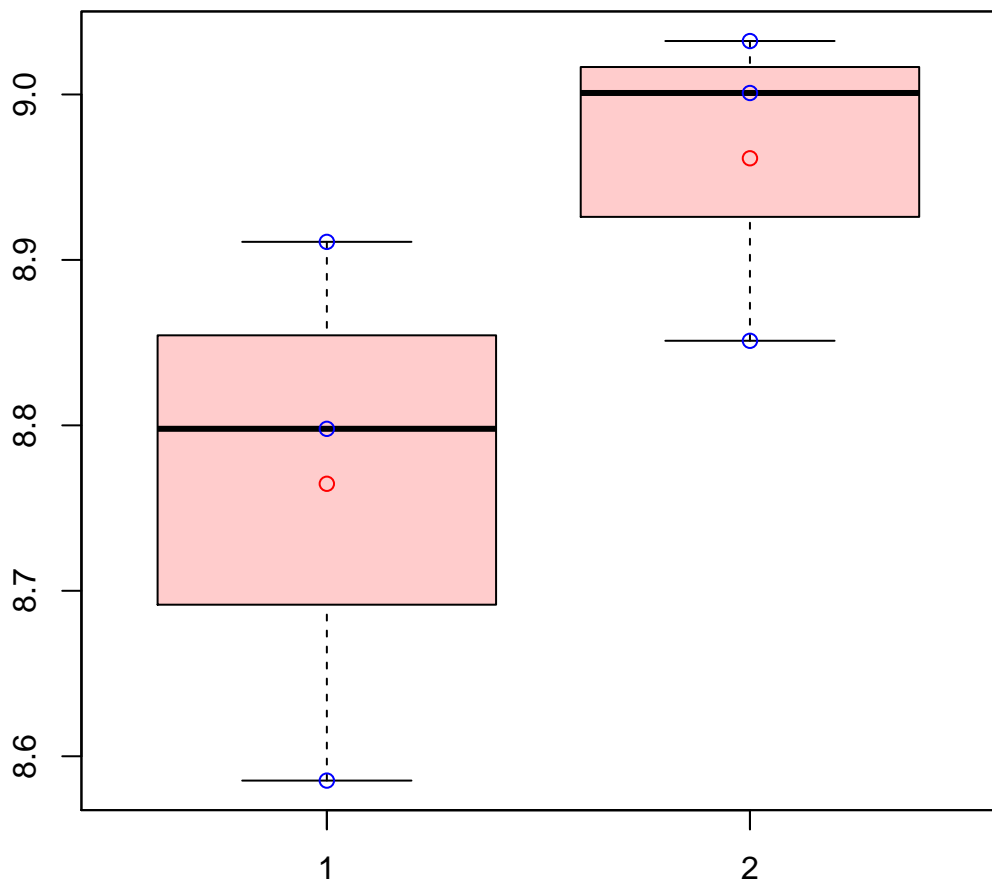

t-Test: p-value = 0.17

# CL2891Contig4|CL2891Contig4

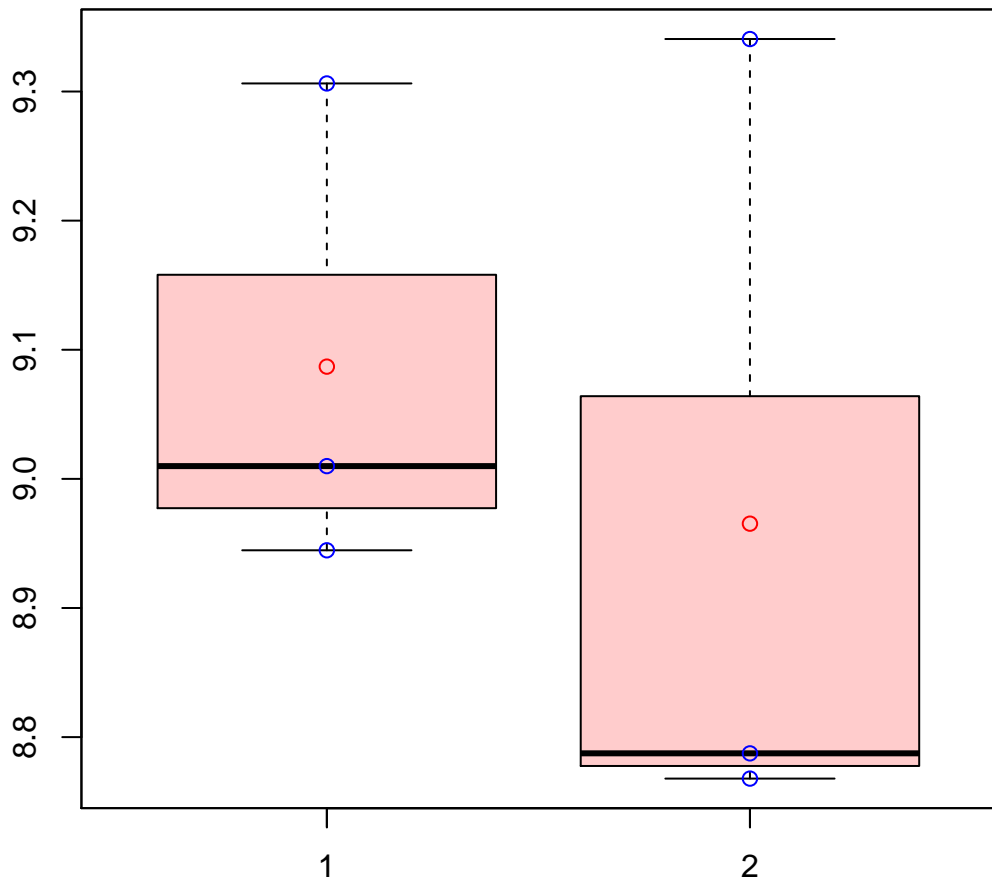

t-Test: p-value = 0.61

# CL2892Contig3|CL2892Contig3

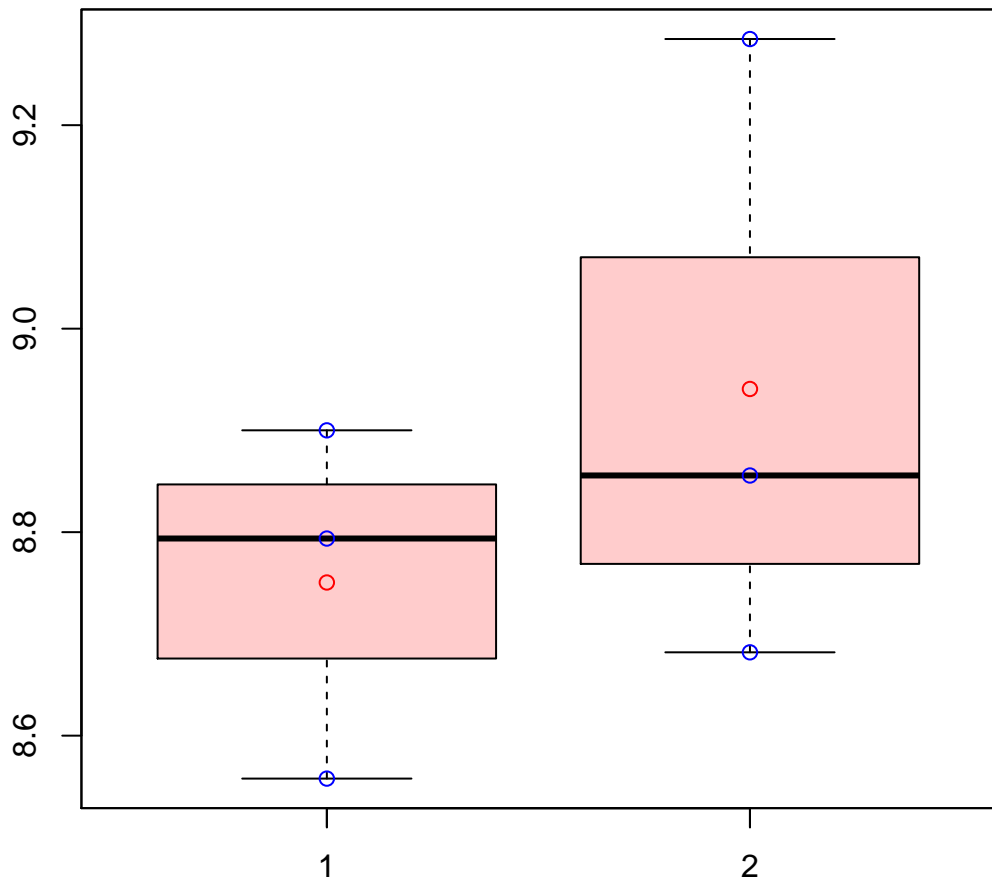

t-Test: p-value = 0.42

# CL2892Contig5|CL2892Contig5



t-Test: p-value = 0.42

# CL2892Contig6|CL2892Contig6

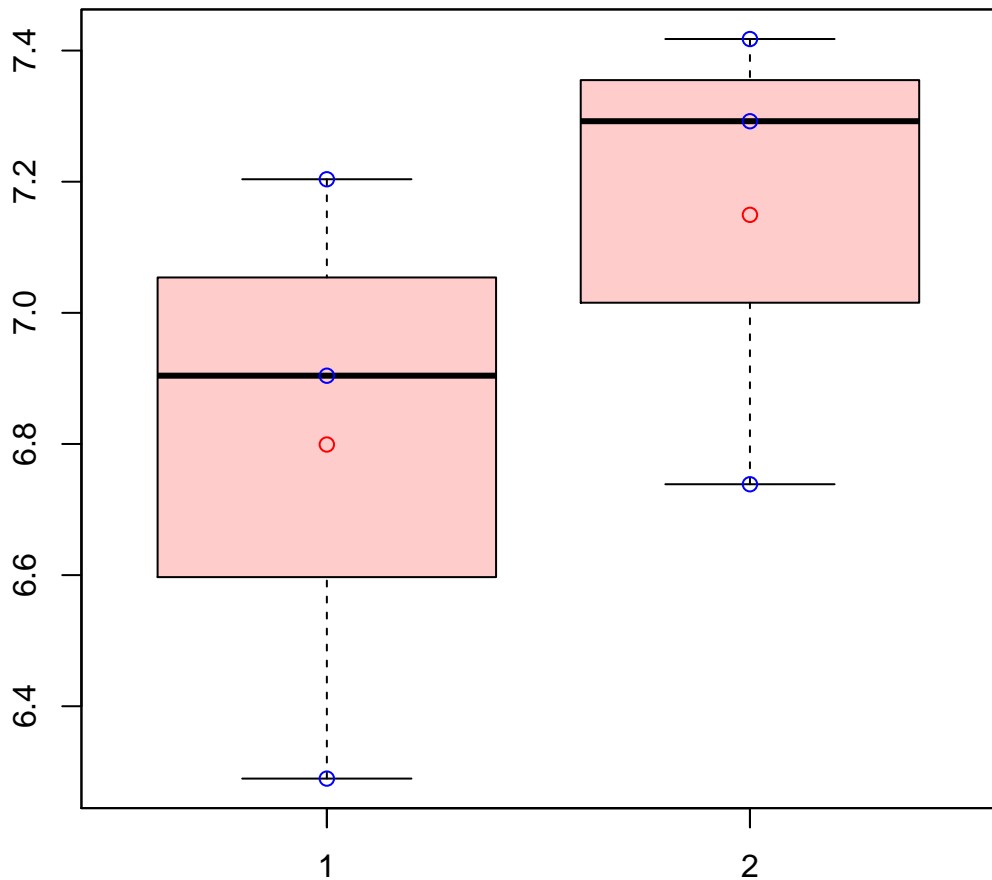

t-Test: p-value = 0.36

# CL2899Contig2|CL2899Contig2

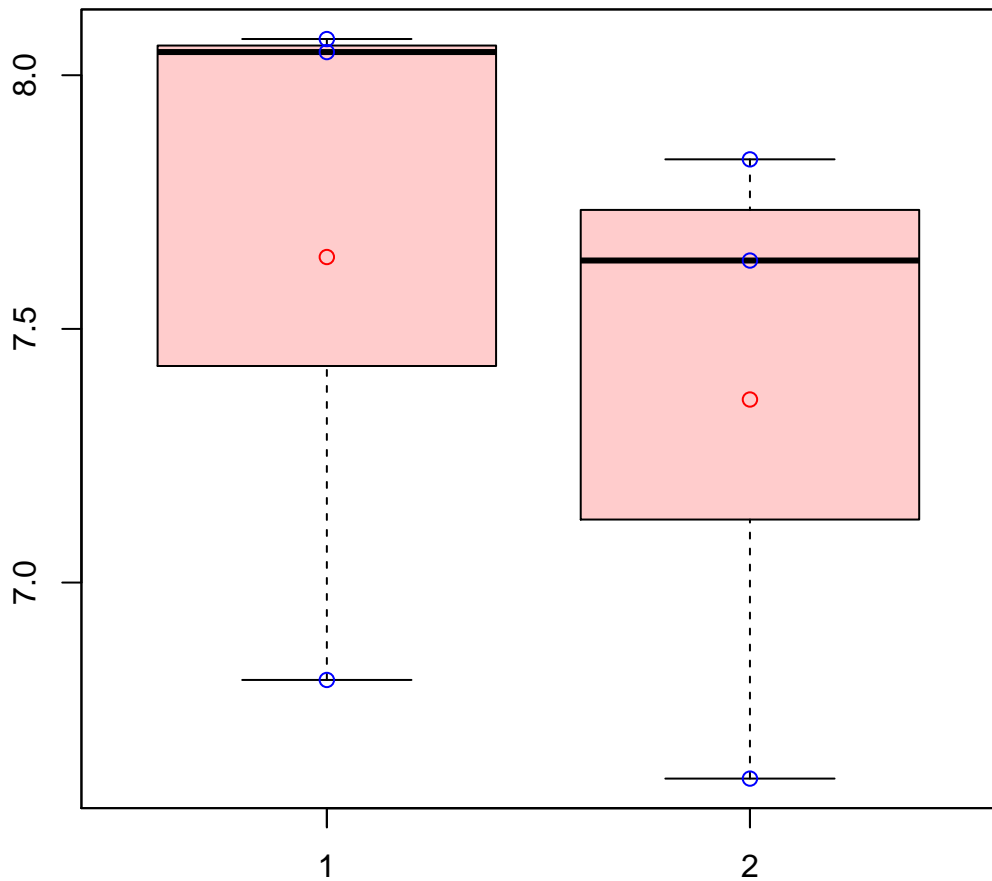

t-Test: p-value = 0.64



# CL289Contig17|CL289Contig17

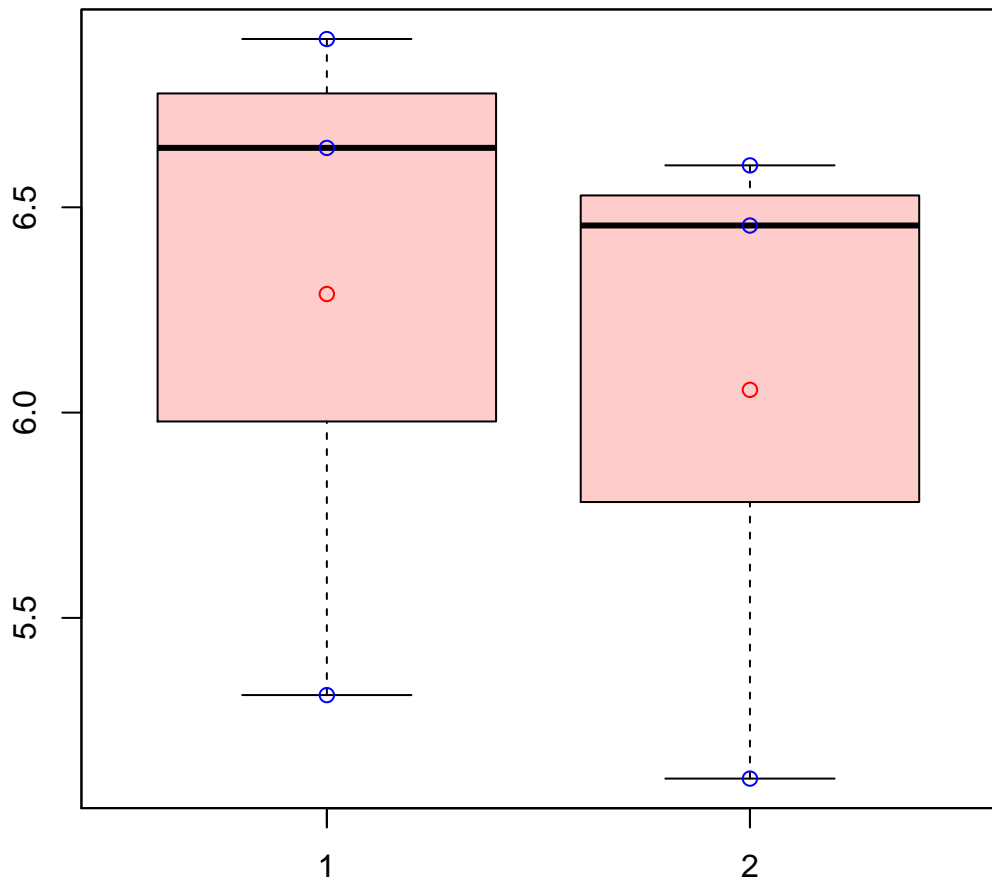

t-Test: p-value = 0.75

# CL289Contig4|CL289Contig4



t-Test: p-value = 0.75

# CL28Contig15|CL28Contig15

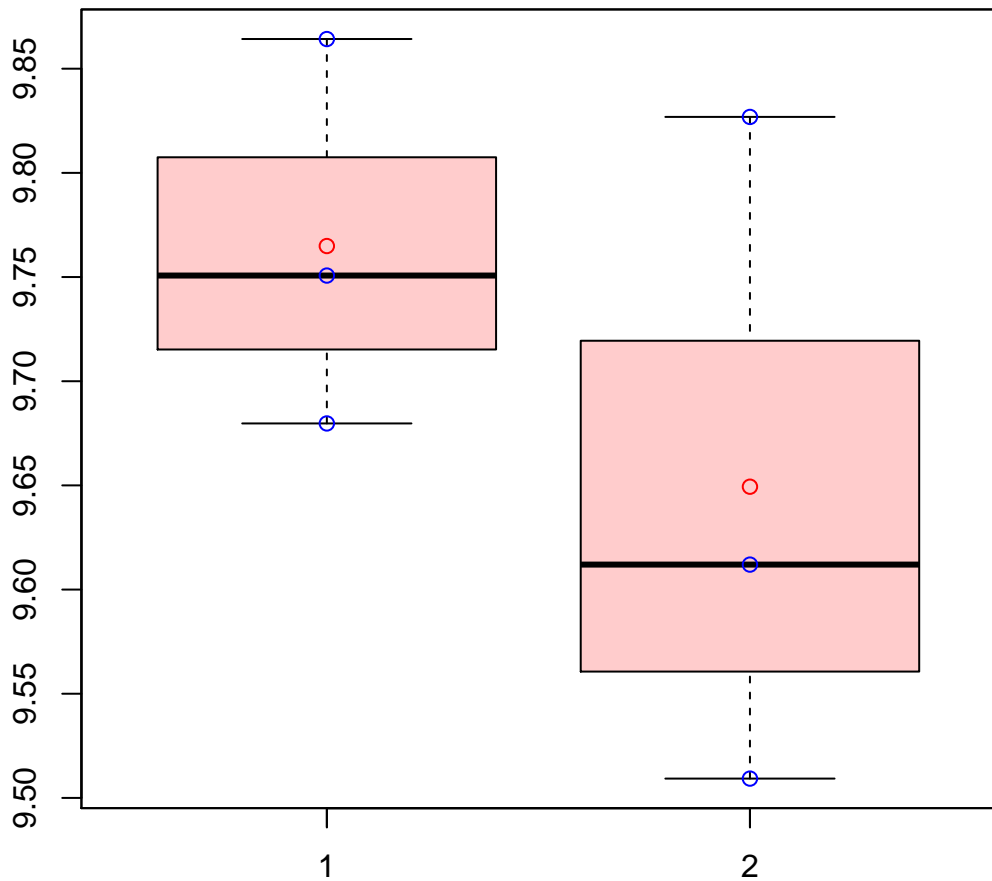

t-Test: p-value = 0.36

# CL28Contig16|CL28Contig16

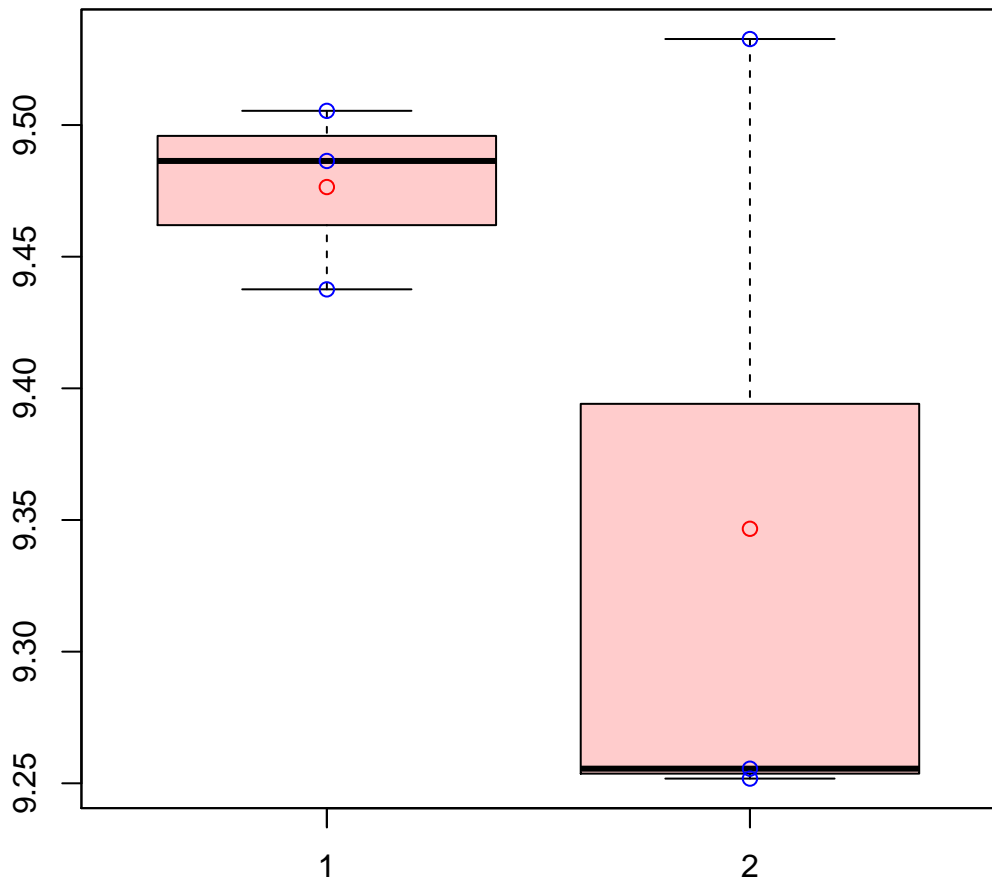

t-Test: p-value = 0.3

# CL28Contig17|CL28Contig17

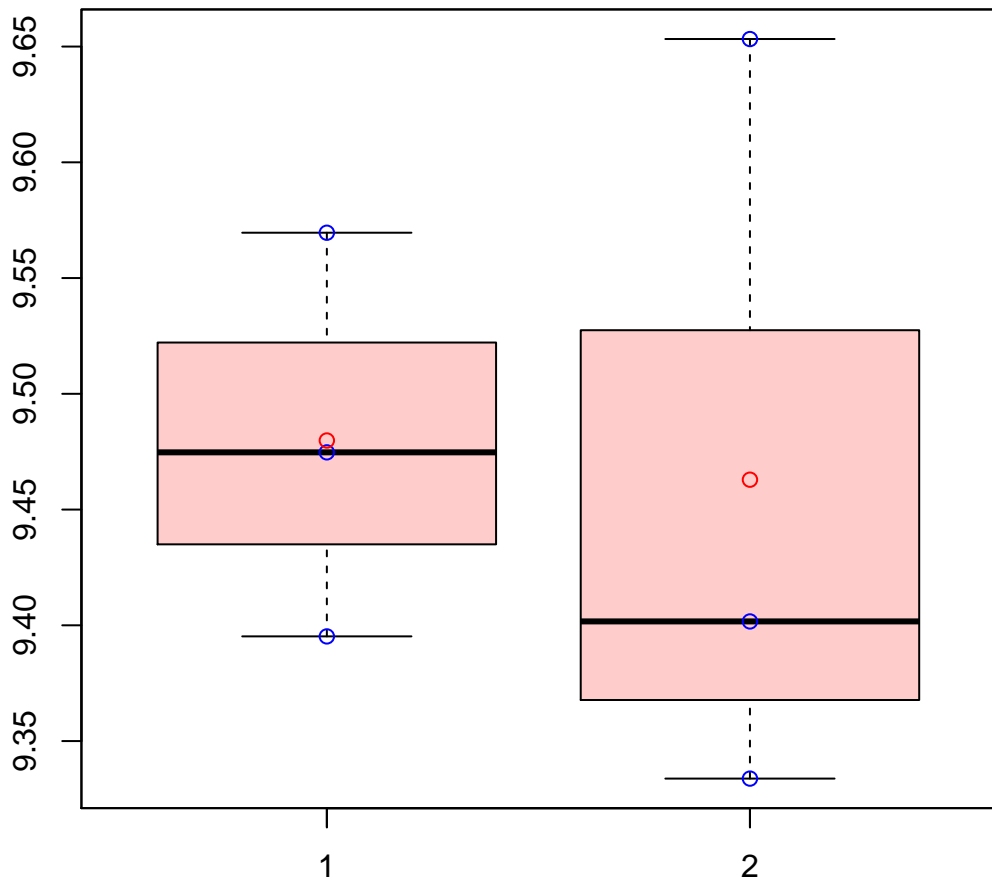

t-Test: p-value = 0.89

# CL28Contig29|CL28Contig29

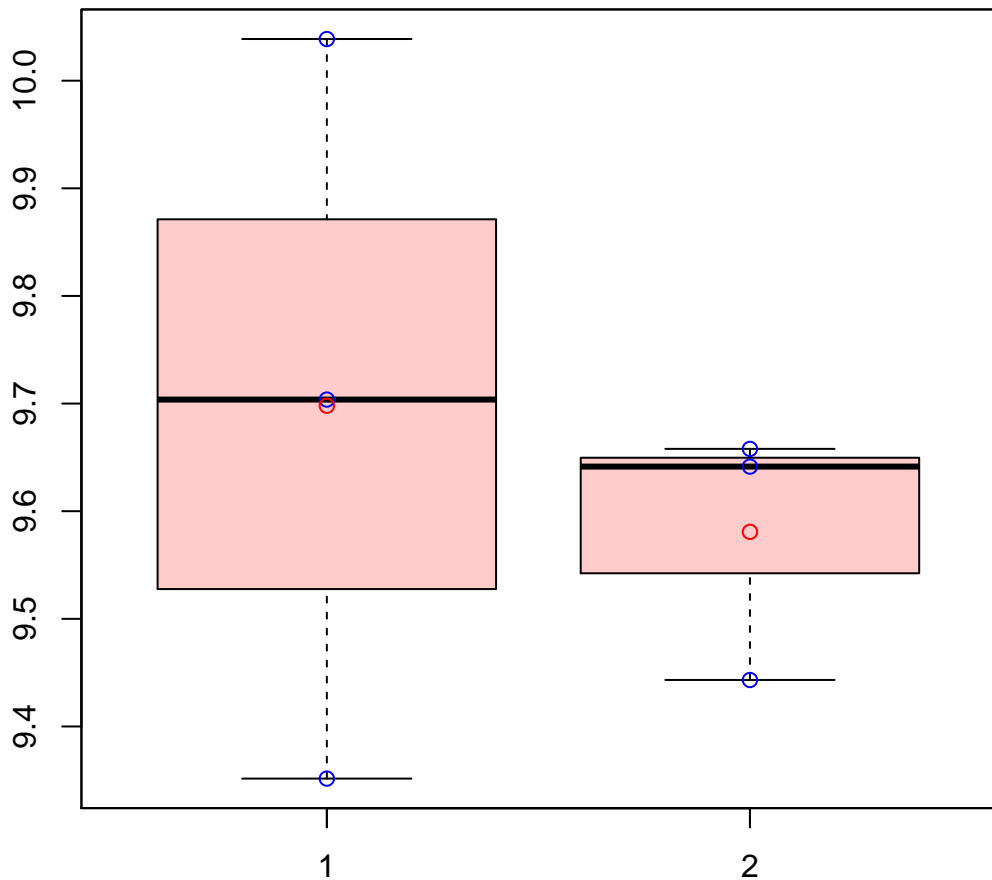

t-Test: p-value = 0.62

## CL28Contig2|CL28Contig2

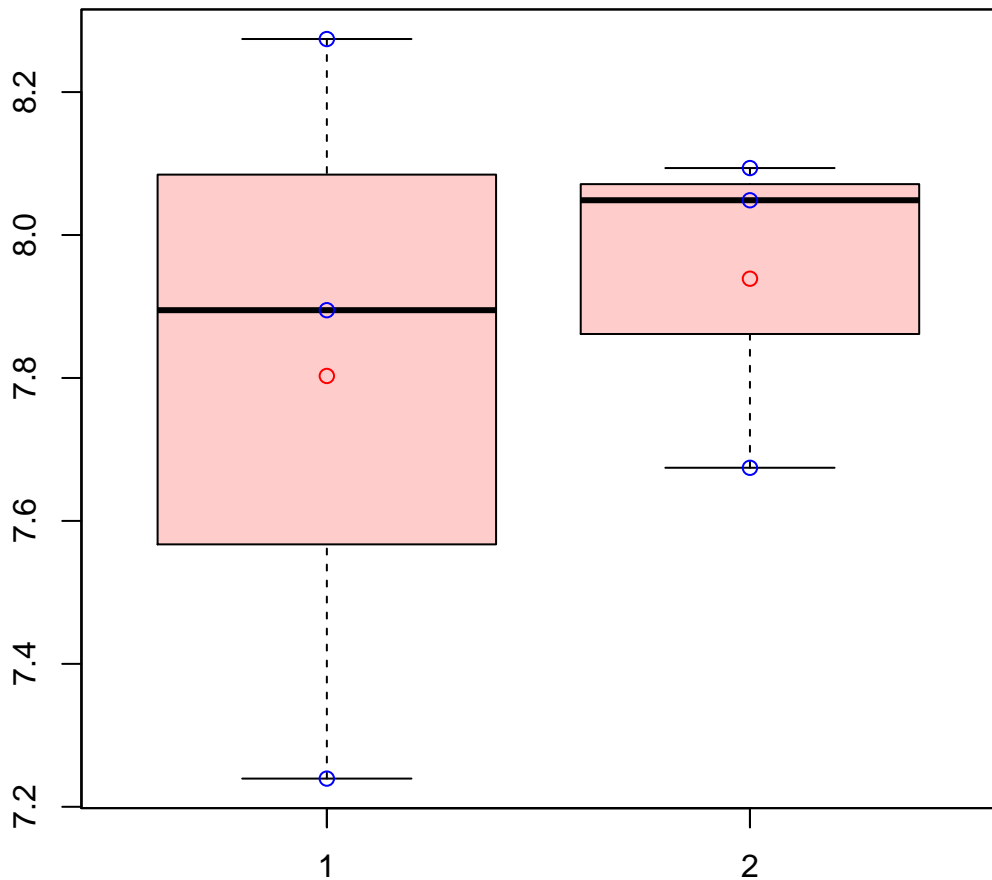

t-Test: p-value = 0.71

# CL28Contig37|CL28Contig37

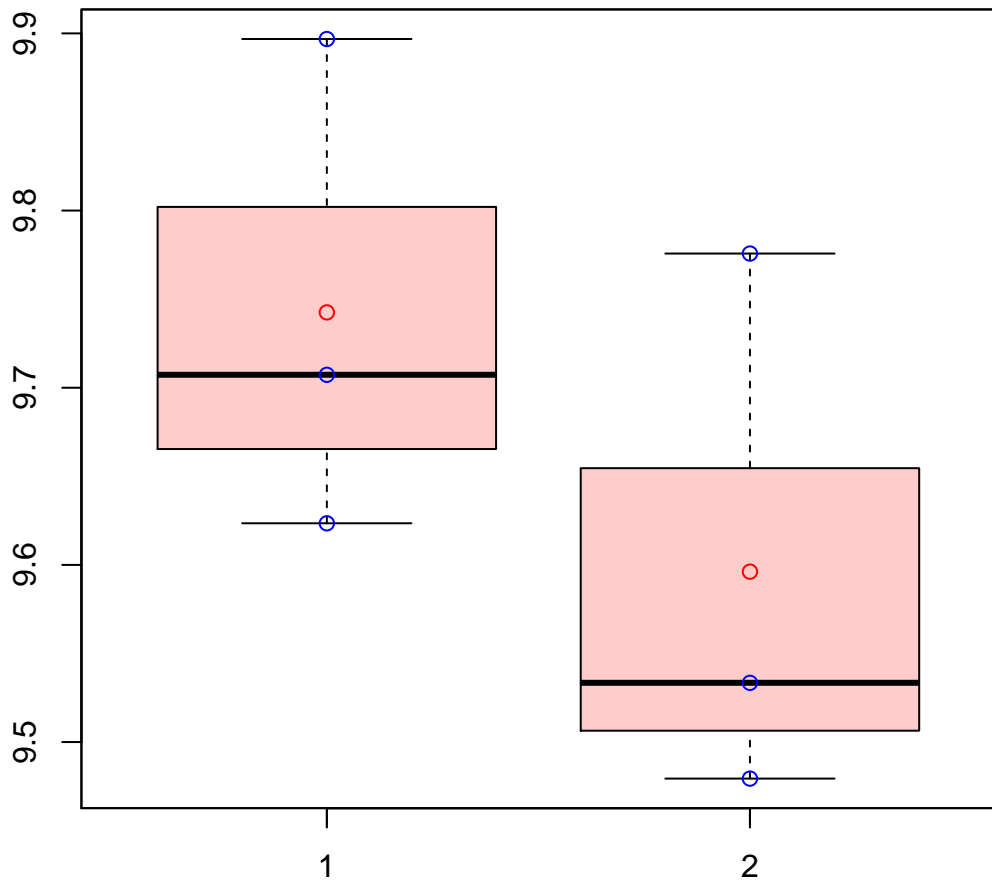

t-Test: p-value = 0.3



# CL28Contig4|CL28Contig4

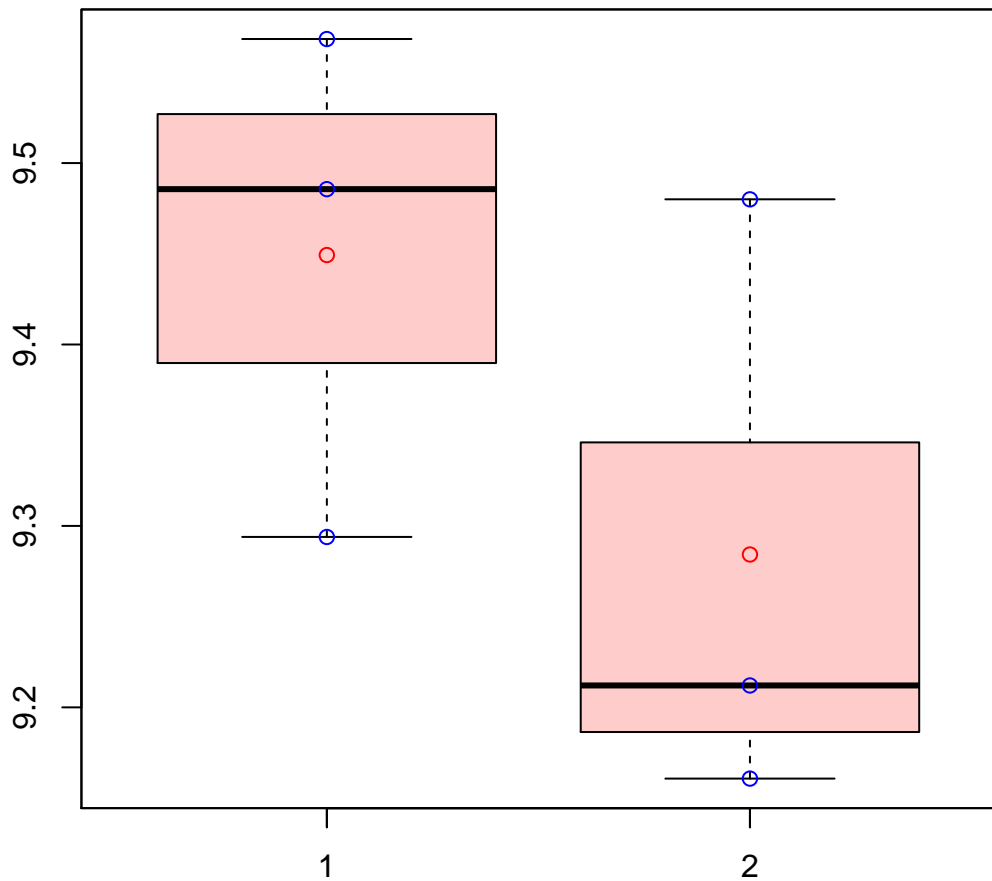

t-Test: p-value = 0.27

# CL2900Contig3|CL2900Contig3

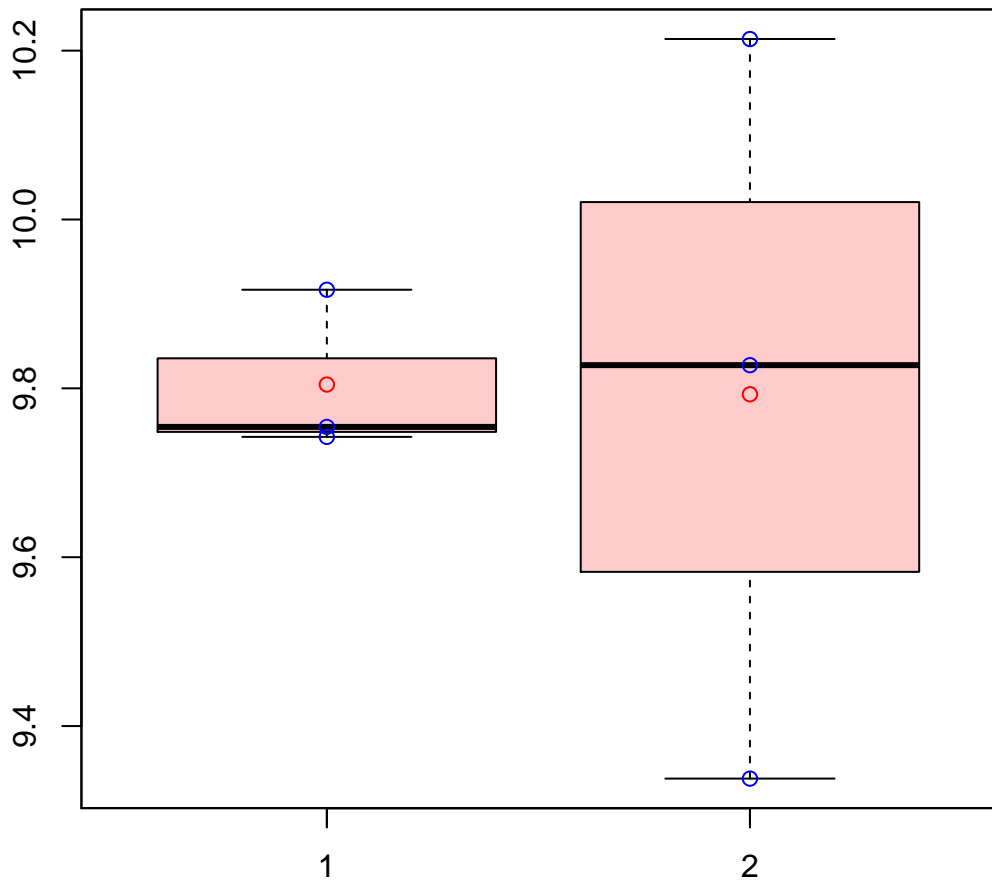

t-Test: p-value = 0.97

# CL2900Contig4|CL2900Contig4



t-Test: p-value = 0.97

# CL2901Contig11|CL2901Contig11

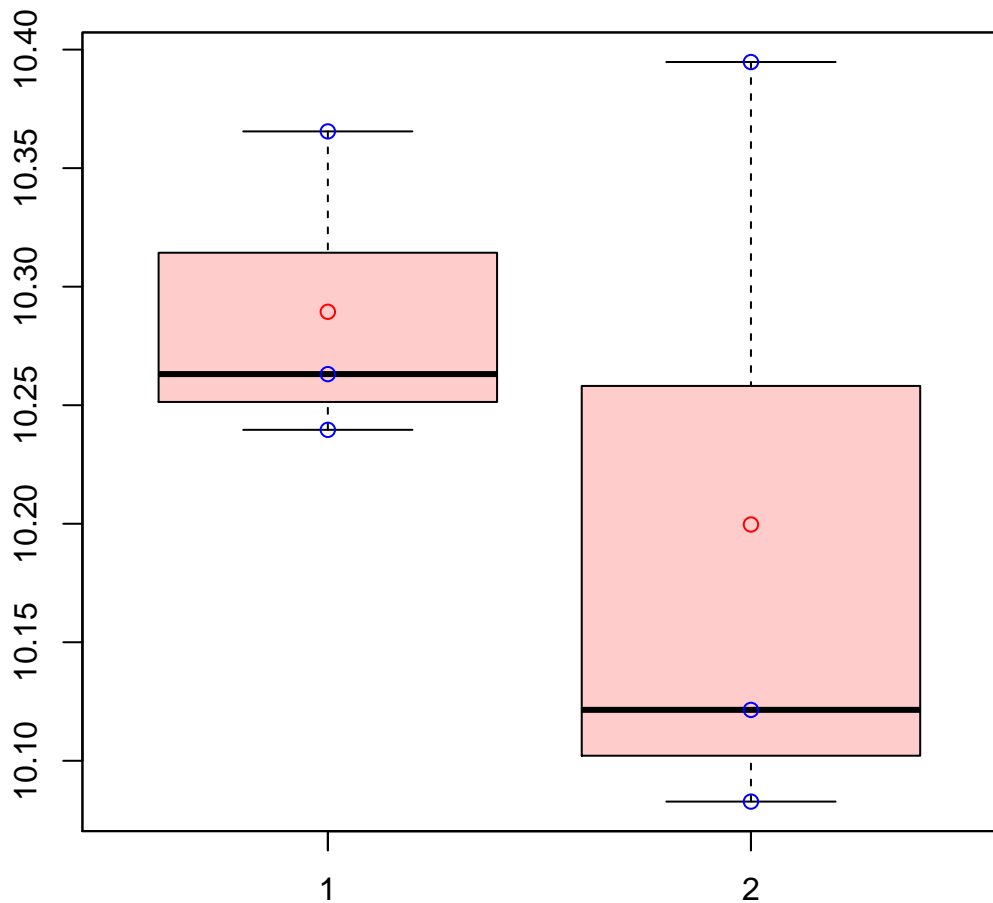

t-Test: p-value = 0.47

# CL2901Contig12|CL2901Contig12



t-Test: p-value = 0.47

# CL2901Contig5|CL2901Contig5

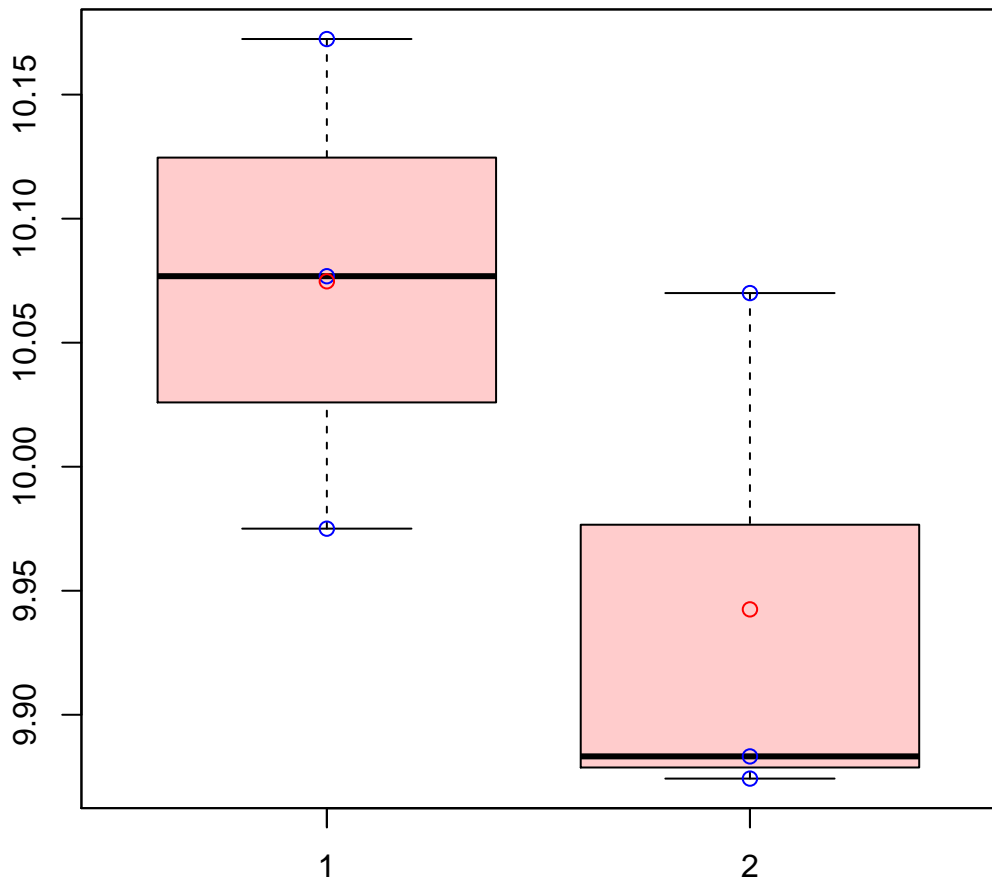

t-Test: p-value = 0.2

# CL2901Contig6|CL2901Contig6

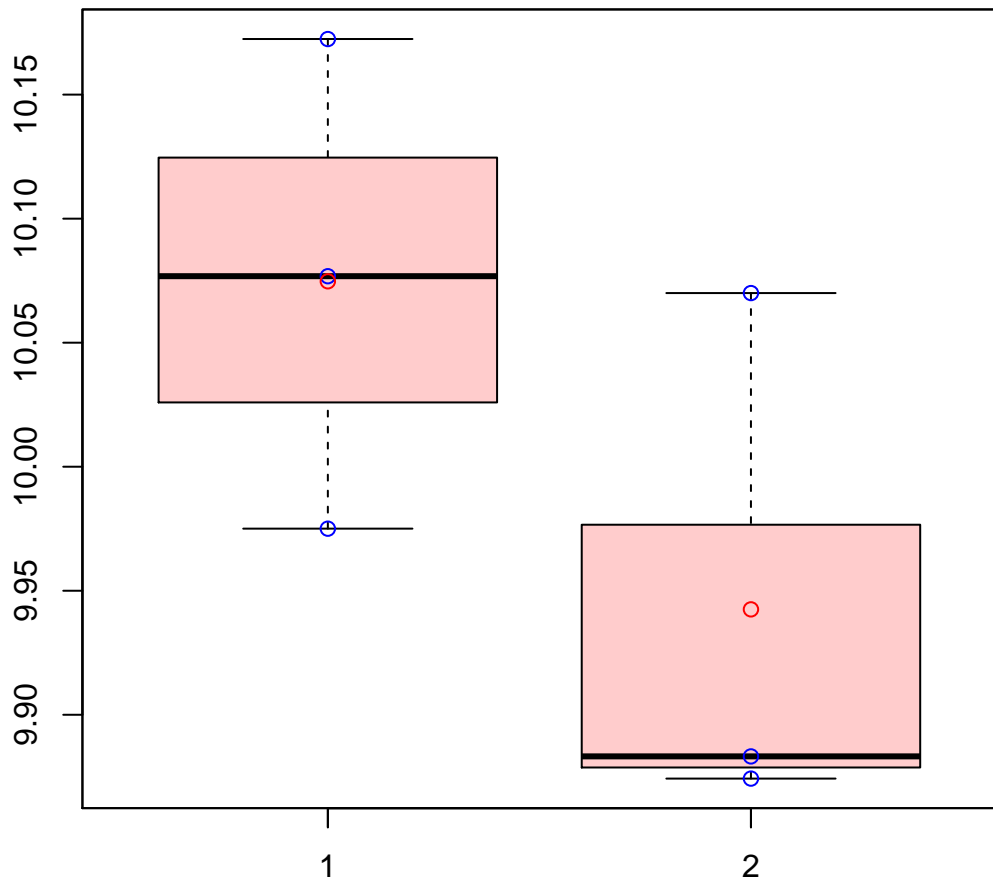

t-Test: p-value = 0.2

# CL2901Contig8|CL2901Contig8



t-Test: p-value = 0.2



# CL2907Contig3|CL2907Contig3

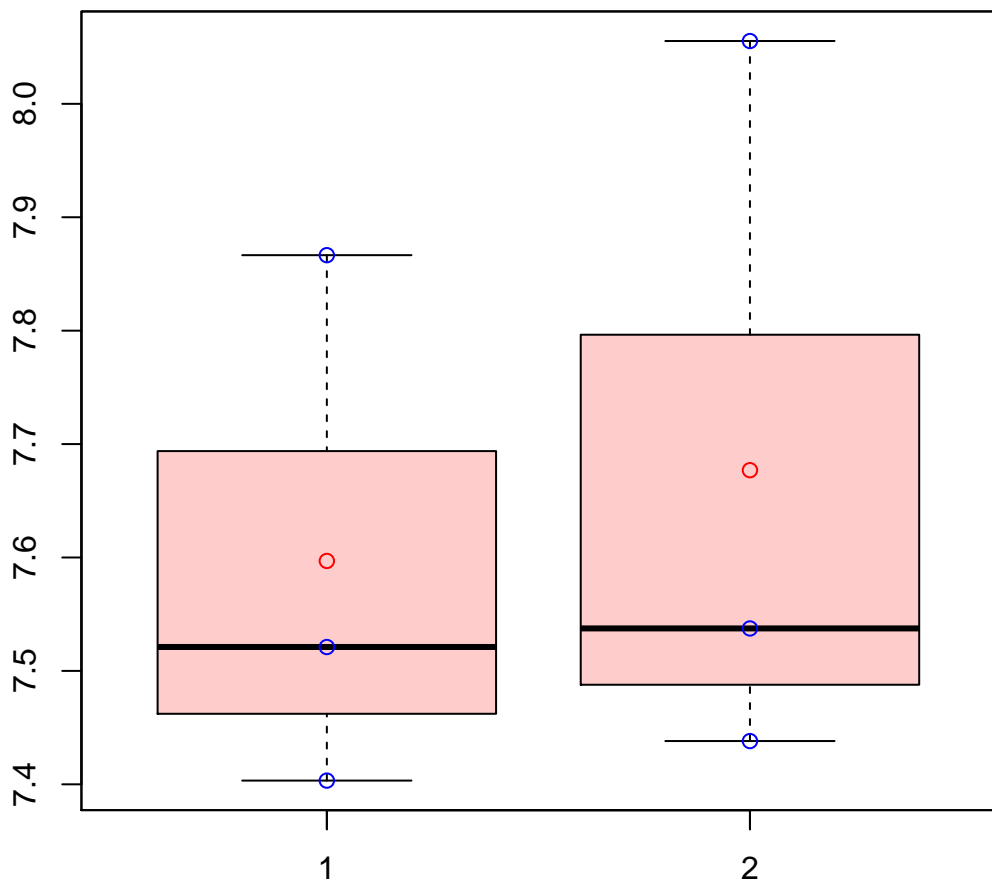

t-Test: p-value = 0.75

# CL2909Contig5|CL2909Contig5

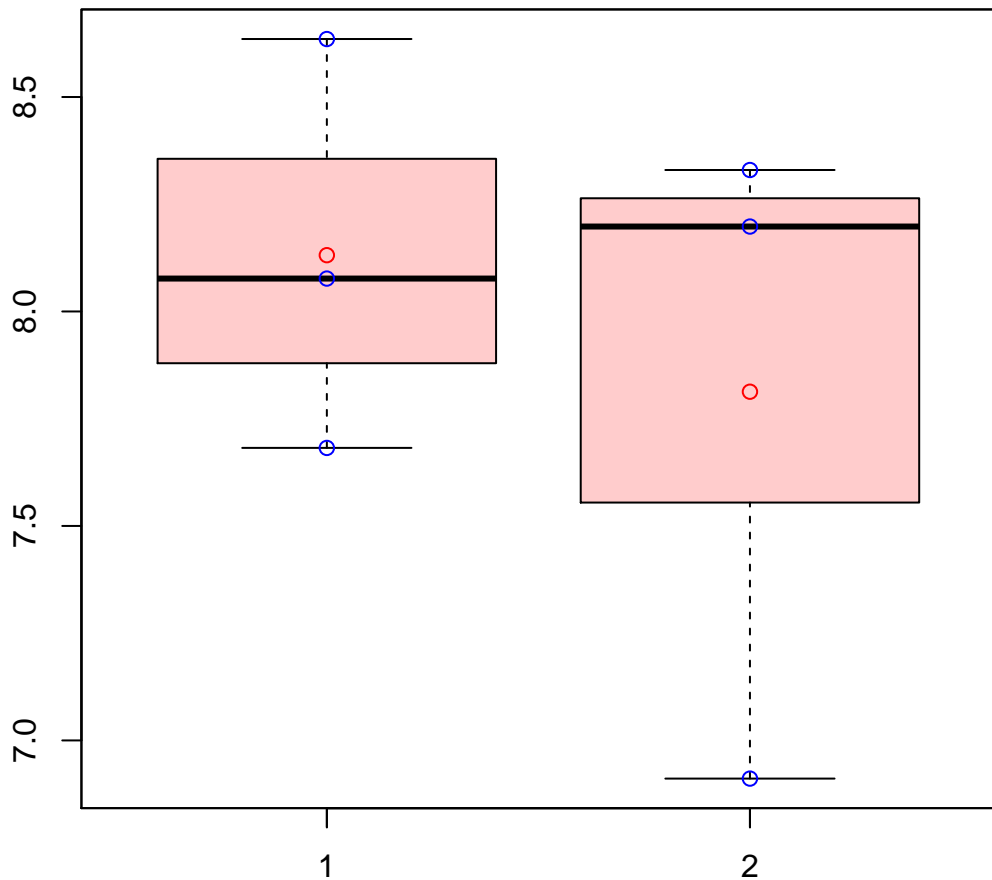

t-Test: p-value = 0.59

# CL2913Contig2|CL2913Contig2



t-Test: p-value = 0.57

# CL2916Contig2|CL2916Contig2



t-Test: p-value = 0.65

# CL2916Contig3|CL2916Contig3

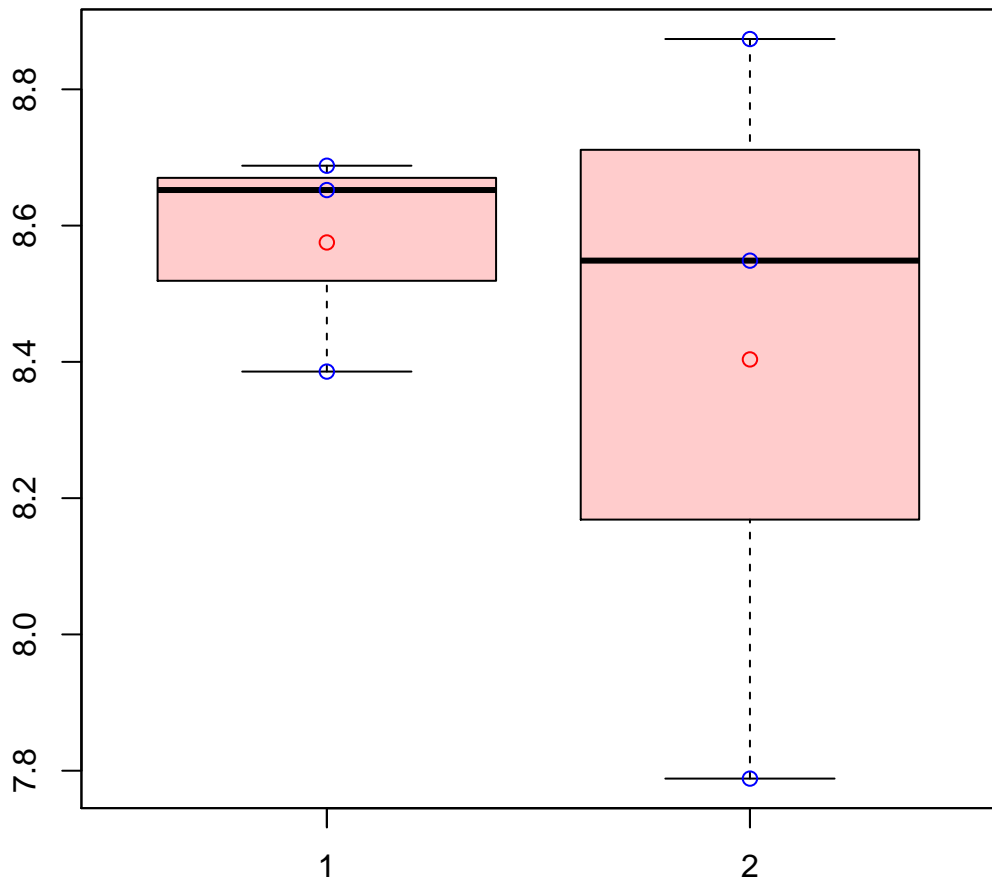

t-Test: p-value = 0.65

# CL291Contig6|CL291Contig6

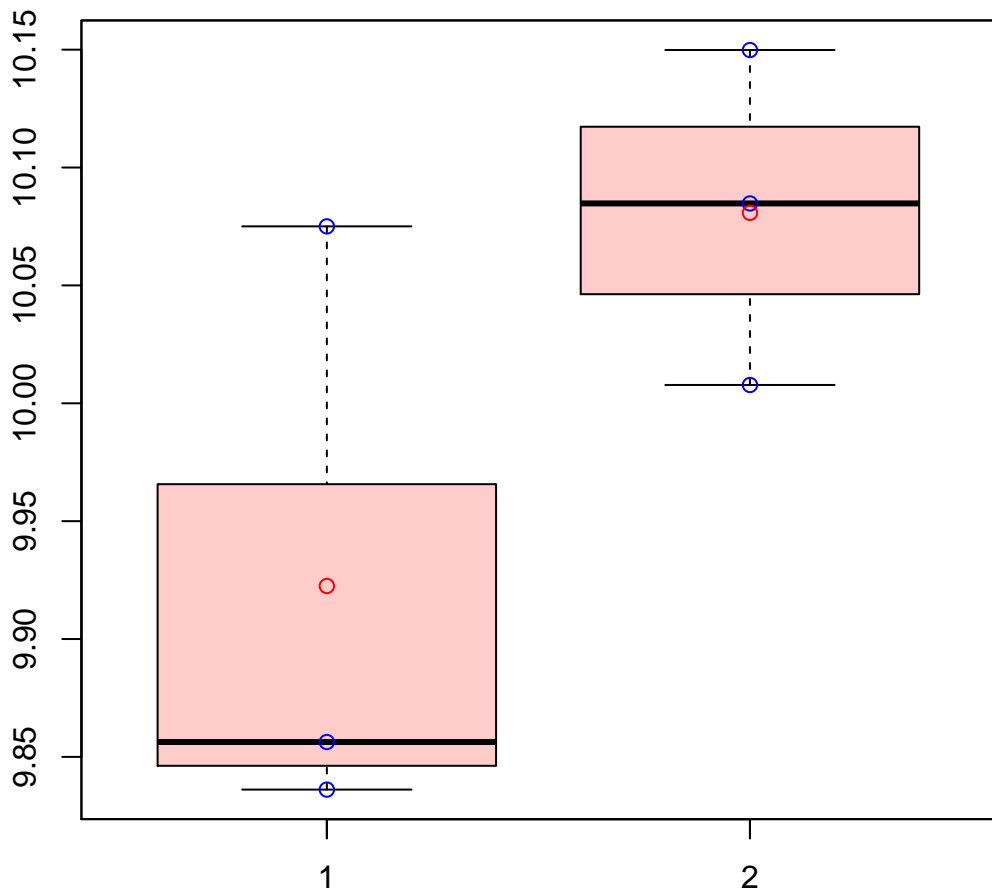

t-Test: p-value = 0.16

# CL2924Contig2|CL2924Contig2

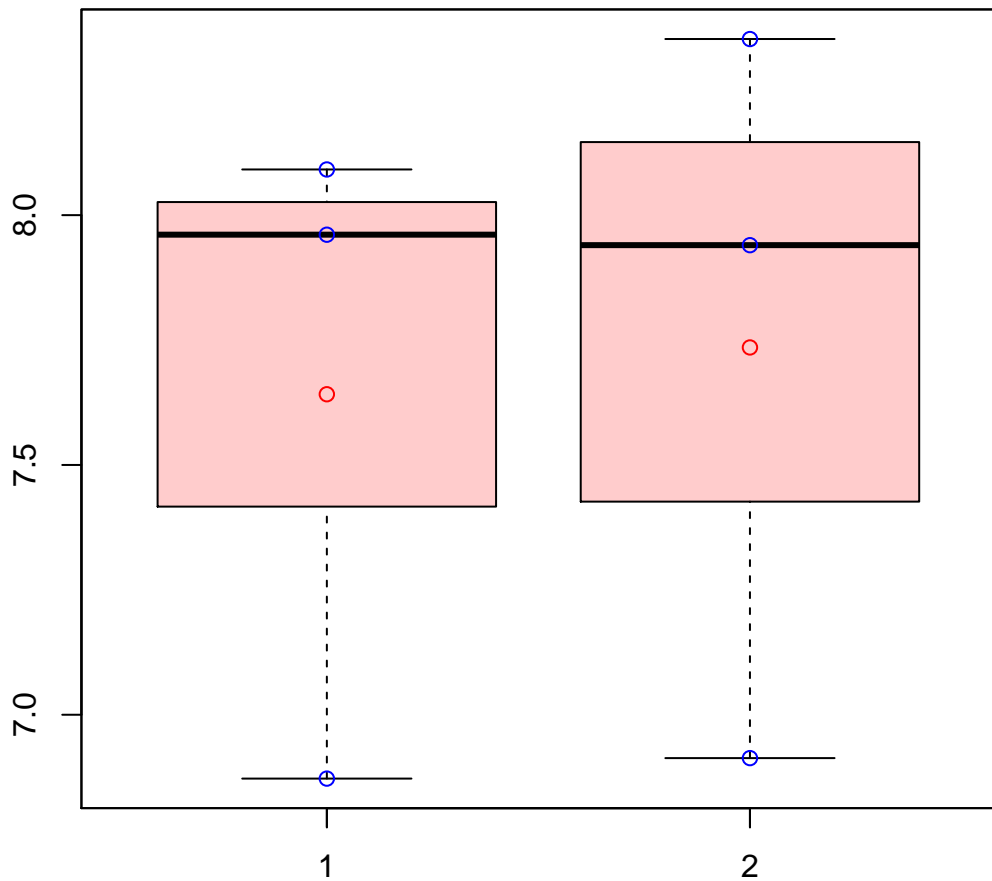

t-Test: p-value = 0.88

## CL292Contig2|CL292Contig2



t-Test: p-value = 0.84



# CL292Contig4|CL292Contig4

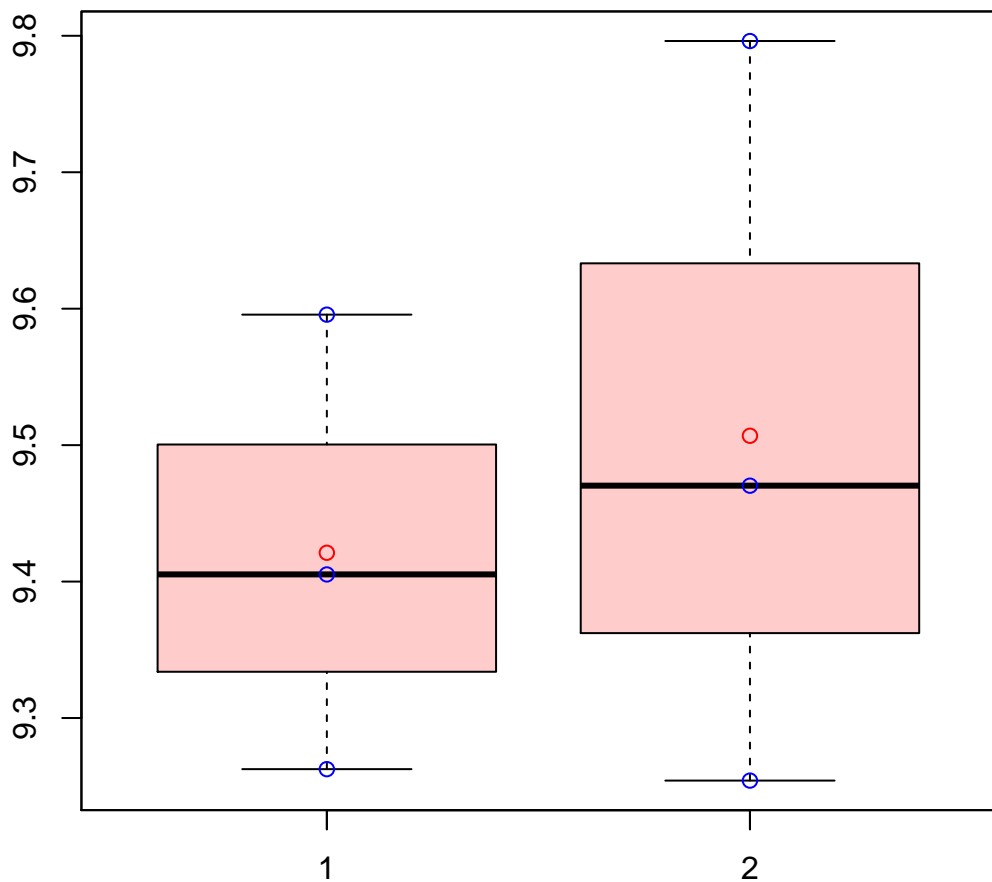

t-Test: p-value = 0.67

# CL2932Contig1|CL2932Contig1

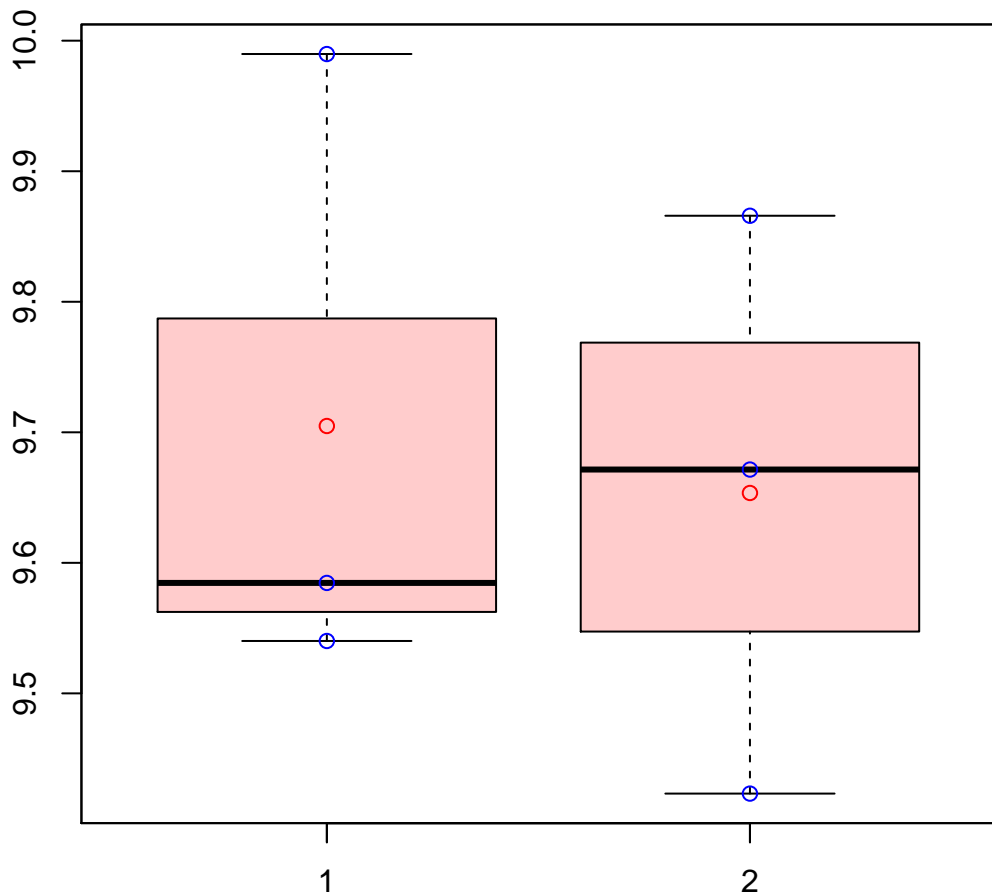

t-Test: p-value = 0.8

# CL2932Contig2|CL2932Contig2

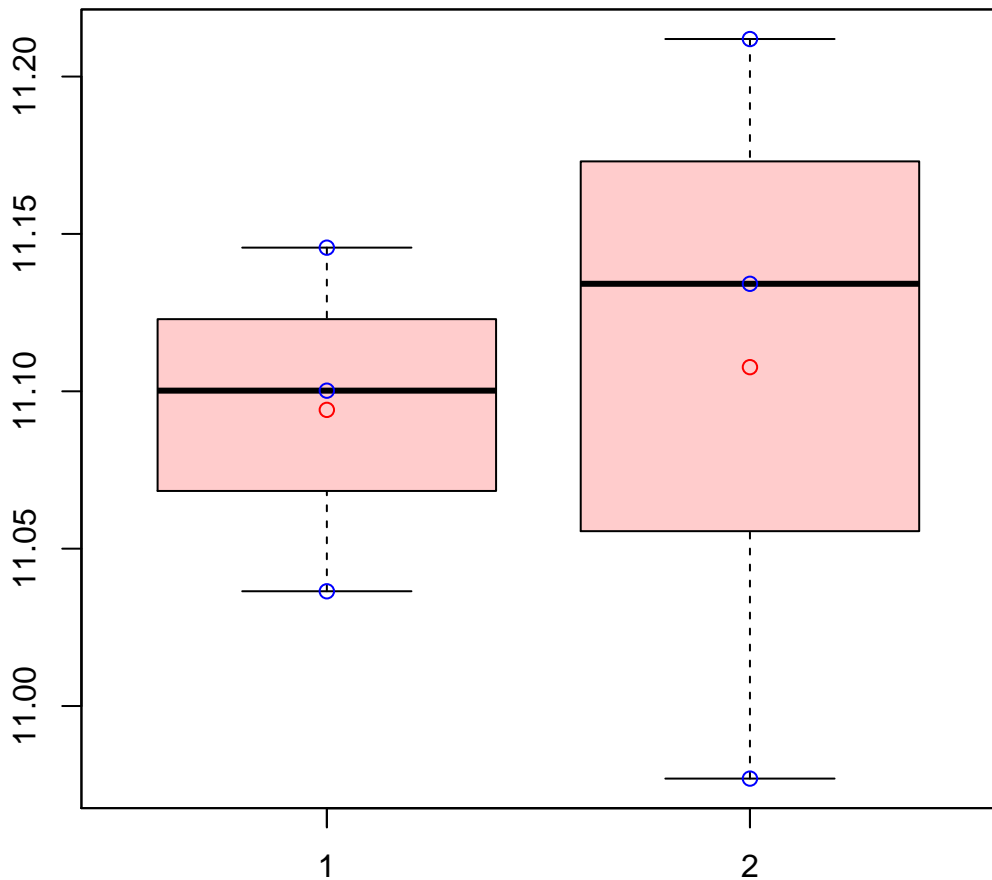

t-Test: p-value = 0.87

# CL2935Contig3|CL2935Contig3

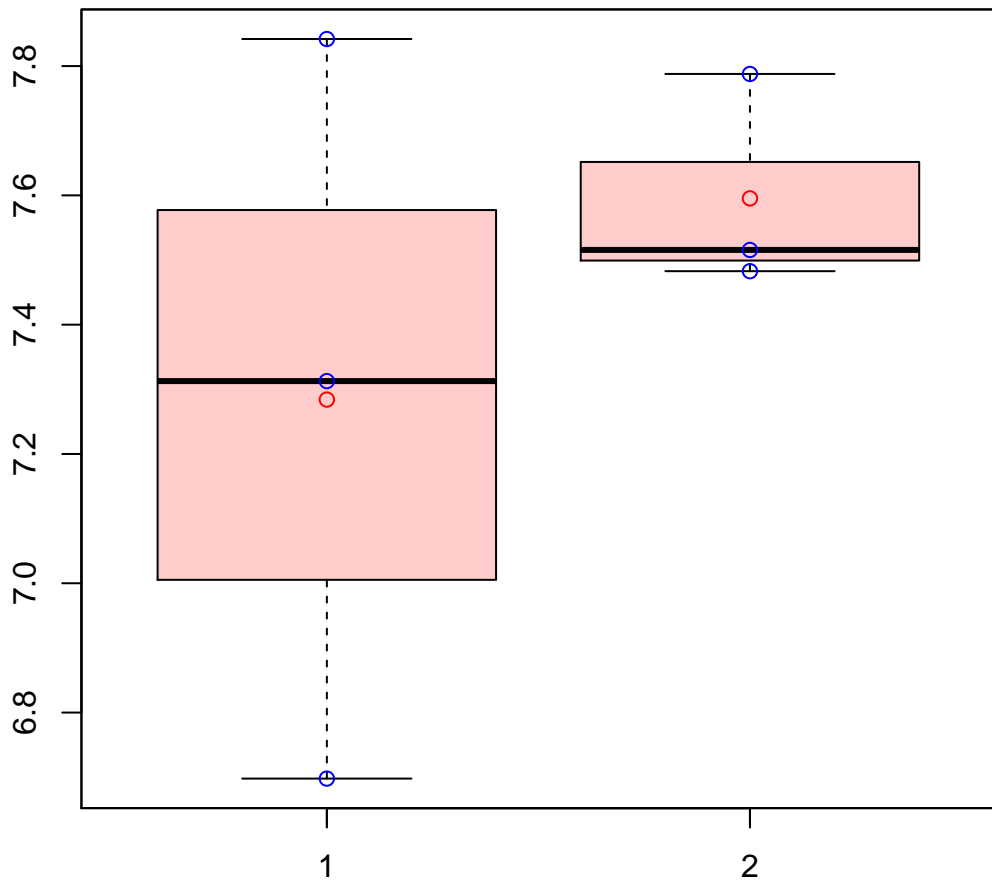

t-Test: p-value = 0.45

# CL2940Contig5|CL2940Contig5

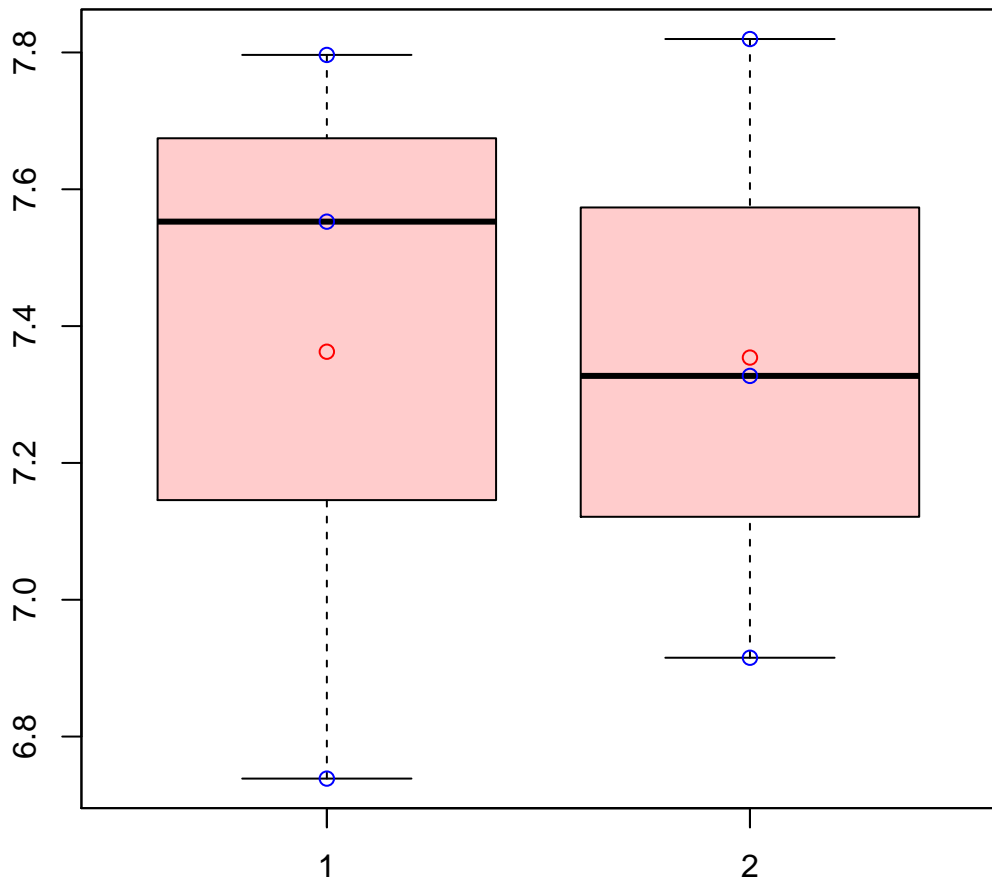

t-Test: p-value = 0.98

# CL2948Contig2|CL2948Contig2

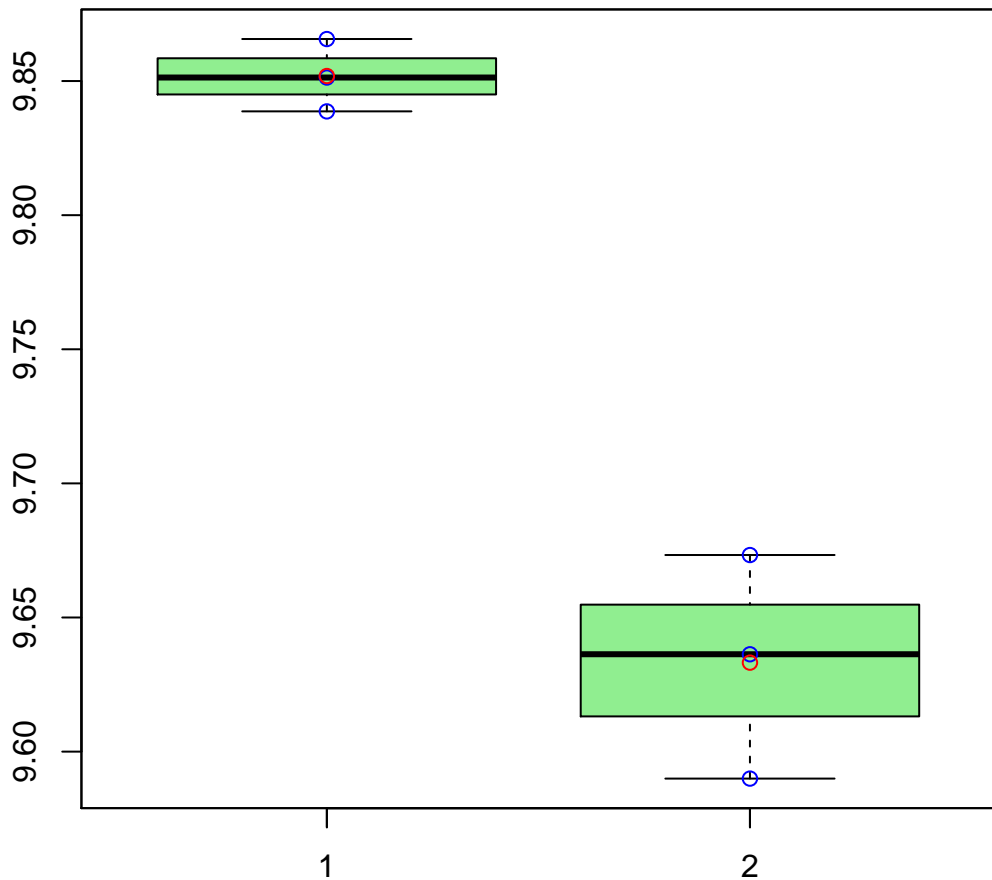

t-Test: p-value = 0.01

# CL2948Contig4|CL2948Contig4

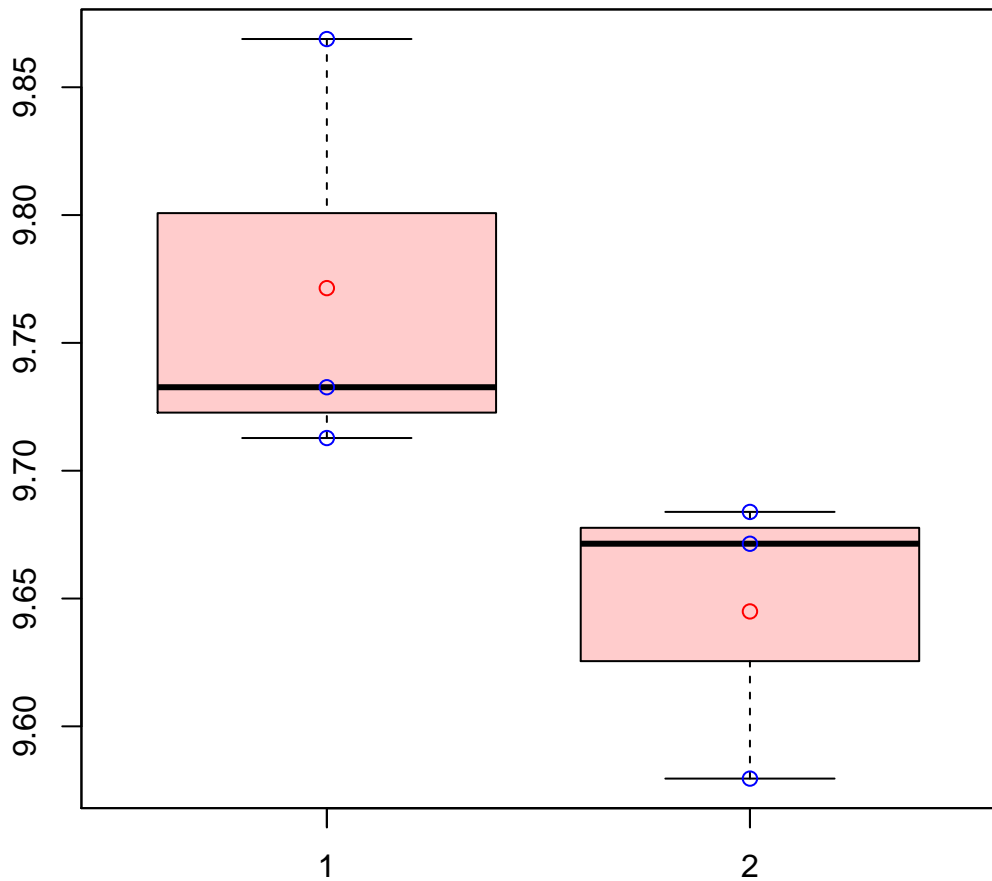

t-Test: p-value = 0.11

# CL2948Contig6|CL2948Contig6

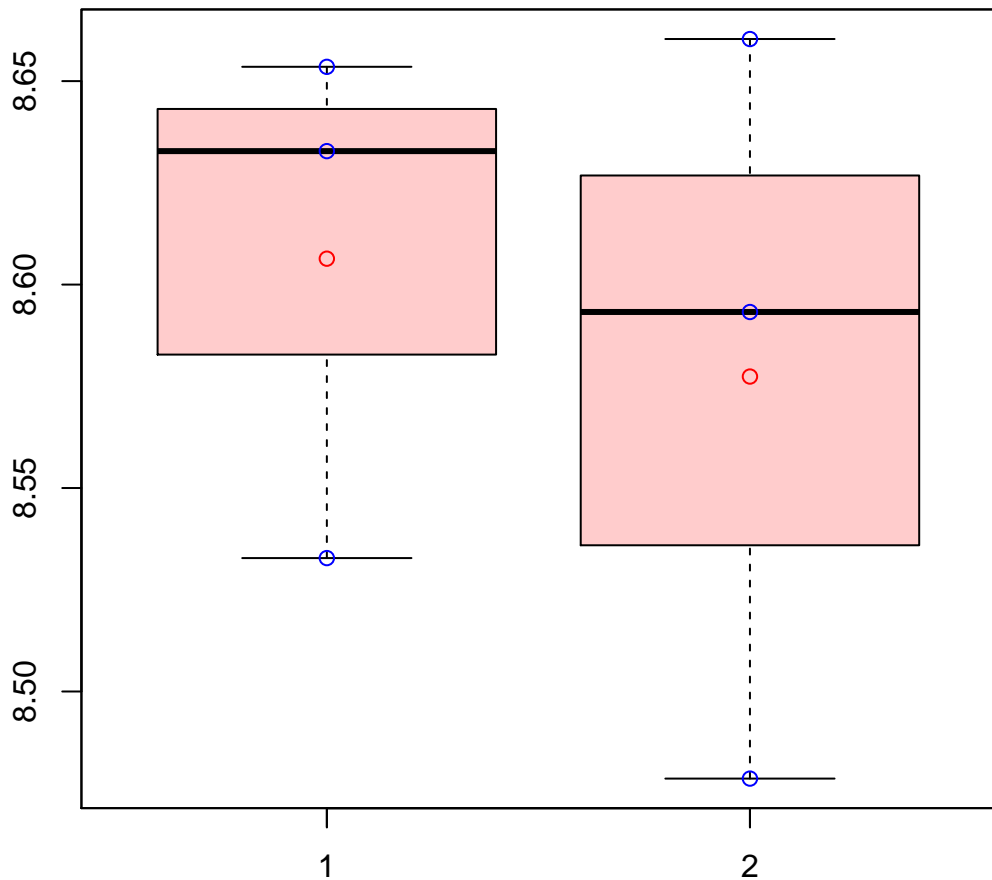

t-Test: p-value = 0.68



# CL2957Contig2|CL2957Contig2

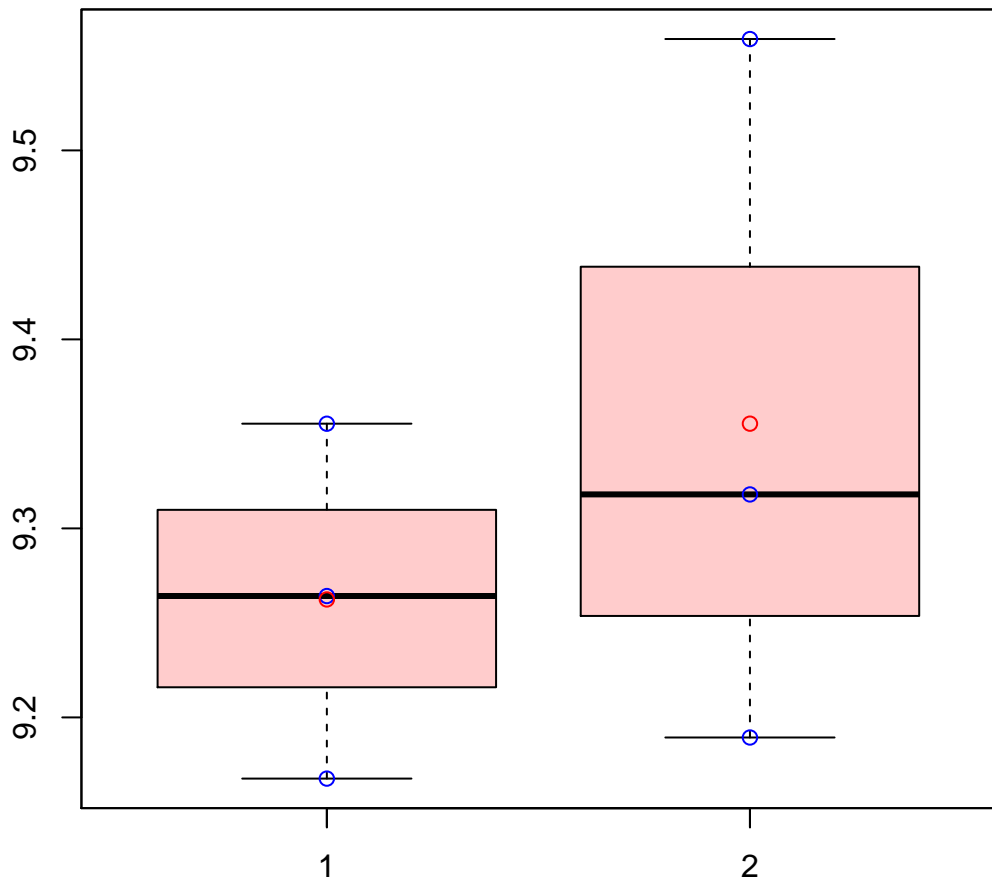

t-Test: p-value = 0.5

# CL2958Contig2|CL2958Contig2

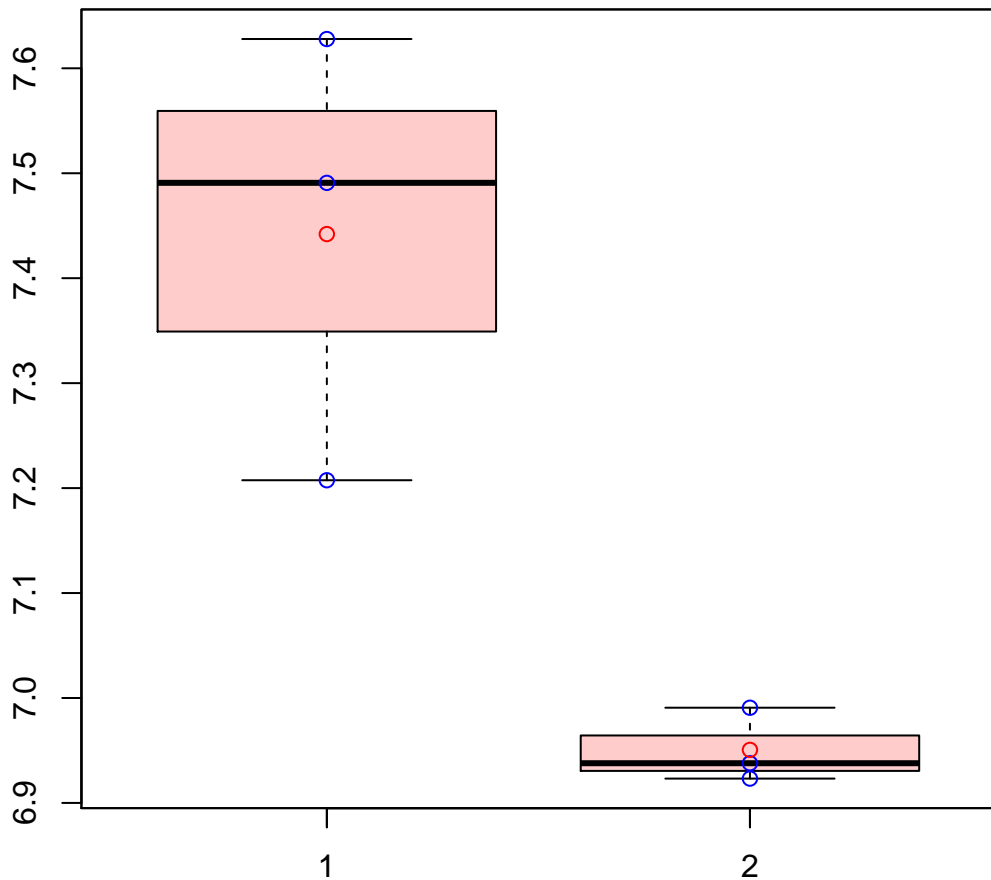

t-Test: p-value = 0.05

# CL2962Contig1|CL2962Contig1

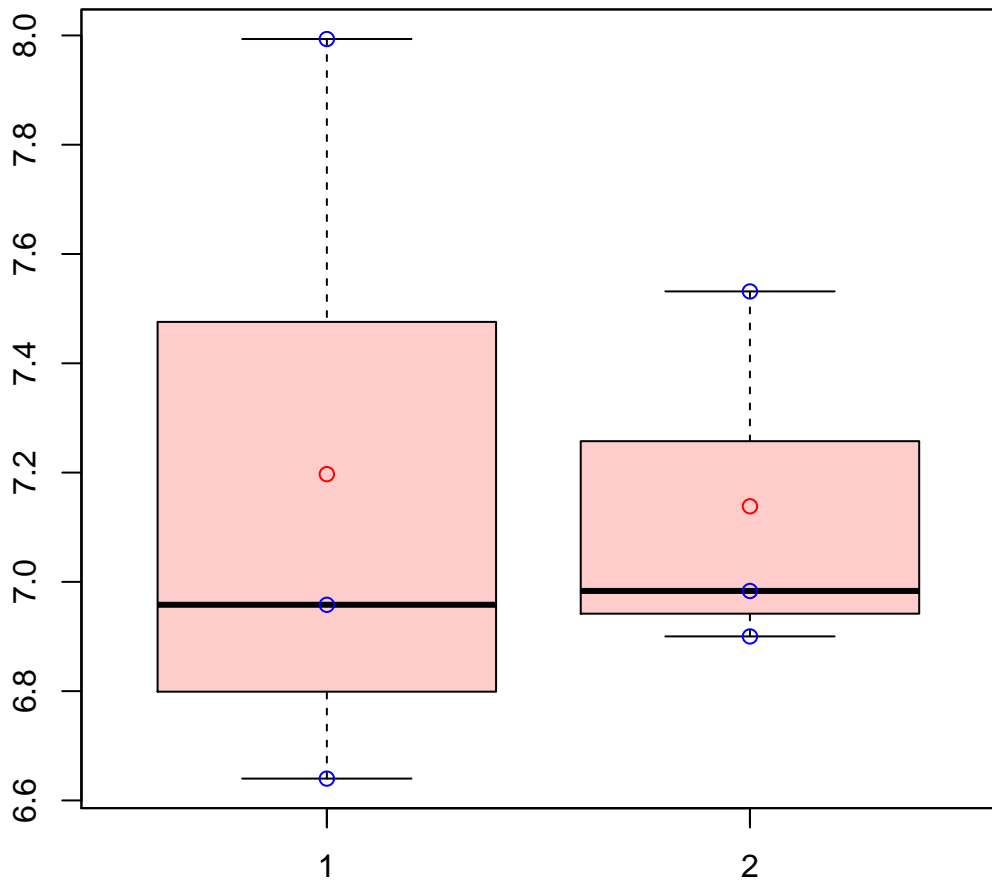

t-Test: p-value = 0.91

# CL2965Contig4|CL2965Contig4

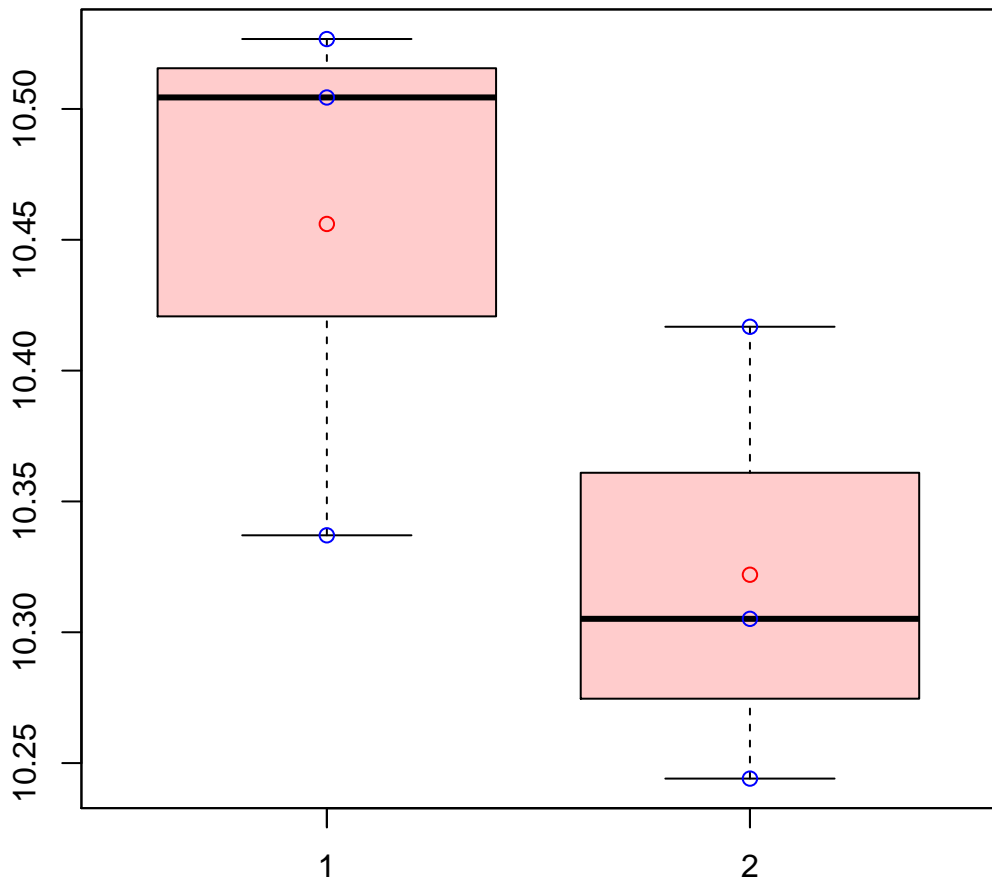

t-Test: p-value = 0.16

## CL296Contig2|CL296Contig2

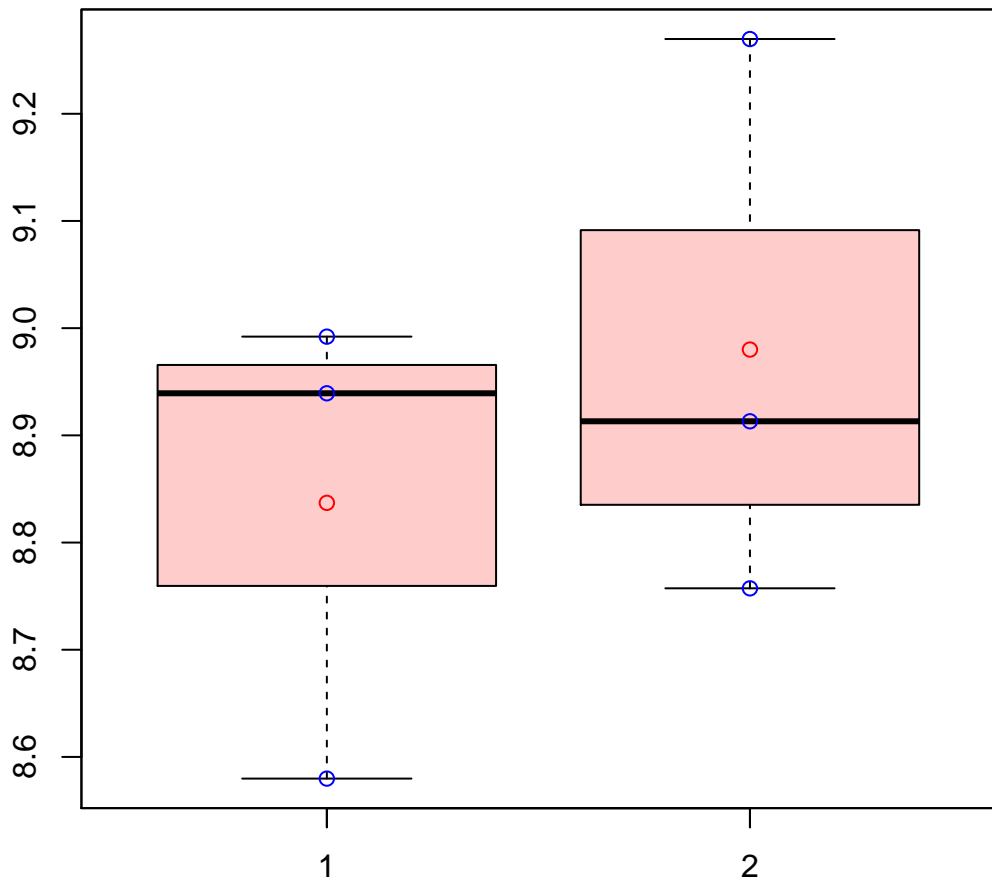

t-Test: p-value = 0.51

# CL2970Contig1|CL2970Contig1

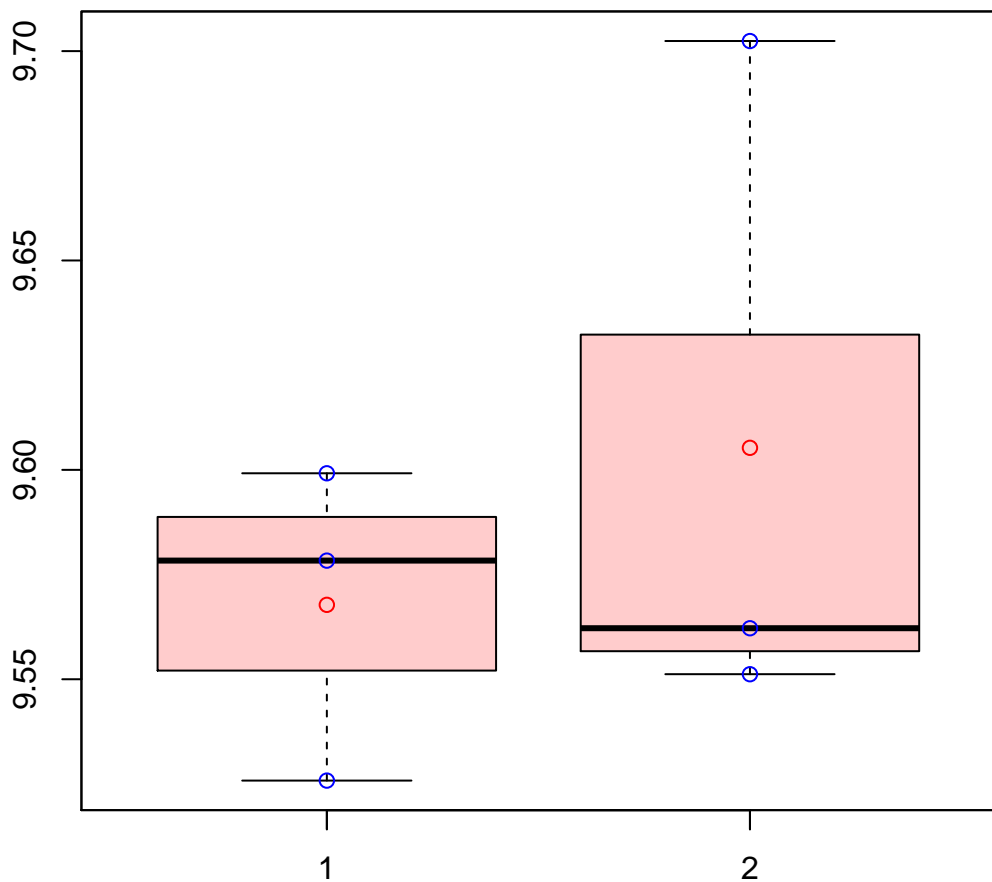

t-Test: p-value = 0.54

# CL2970Contig2|CL2970Contig2



t-Test: p-value = 0.54

# CL2970Contig3|CL2970Contig3

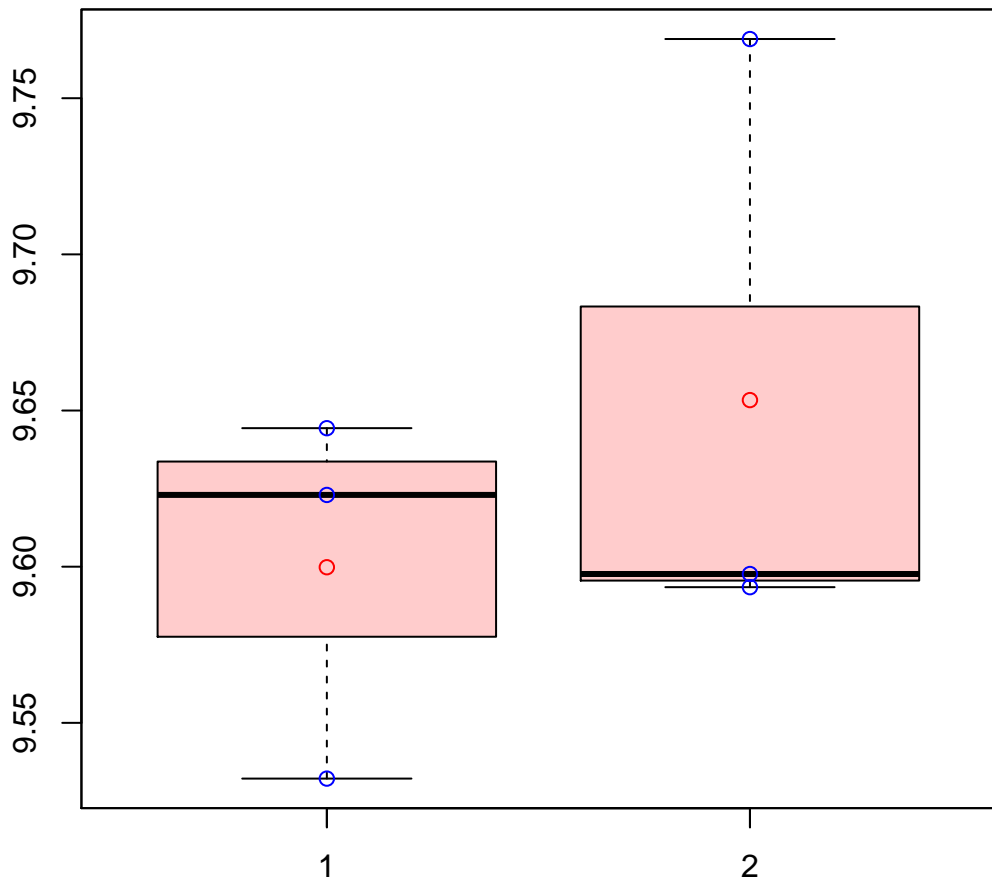

t-Test: p-value = 0.48



# CL2970Contig4|CL2970Contig4



t-Test: p-value = 0.54

# CL2976Contig3|CL2976Contig3

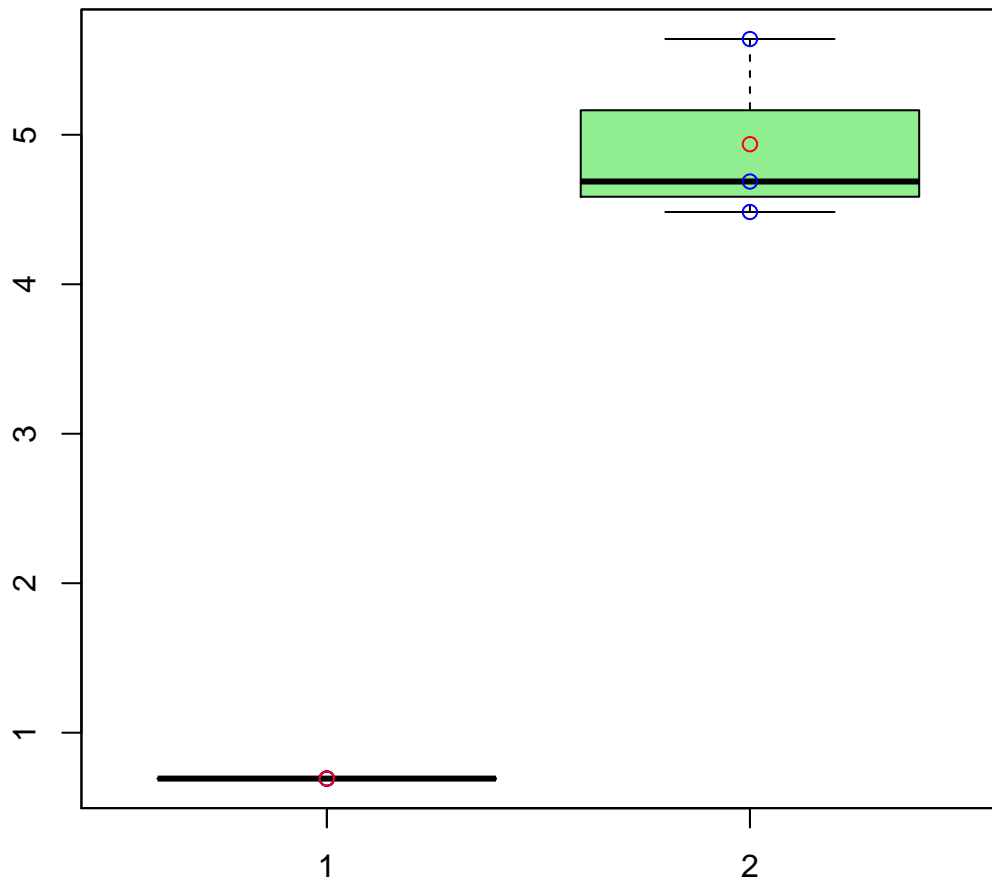

t-Test: p-value = 0.01

# CL2978Contig1|CL2978Contig1

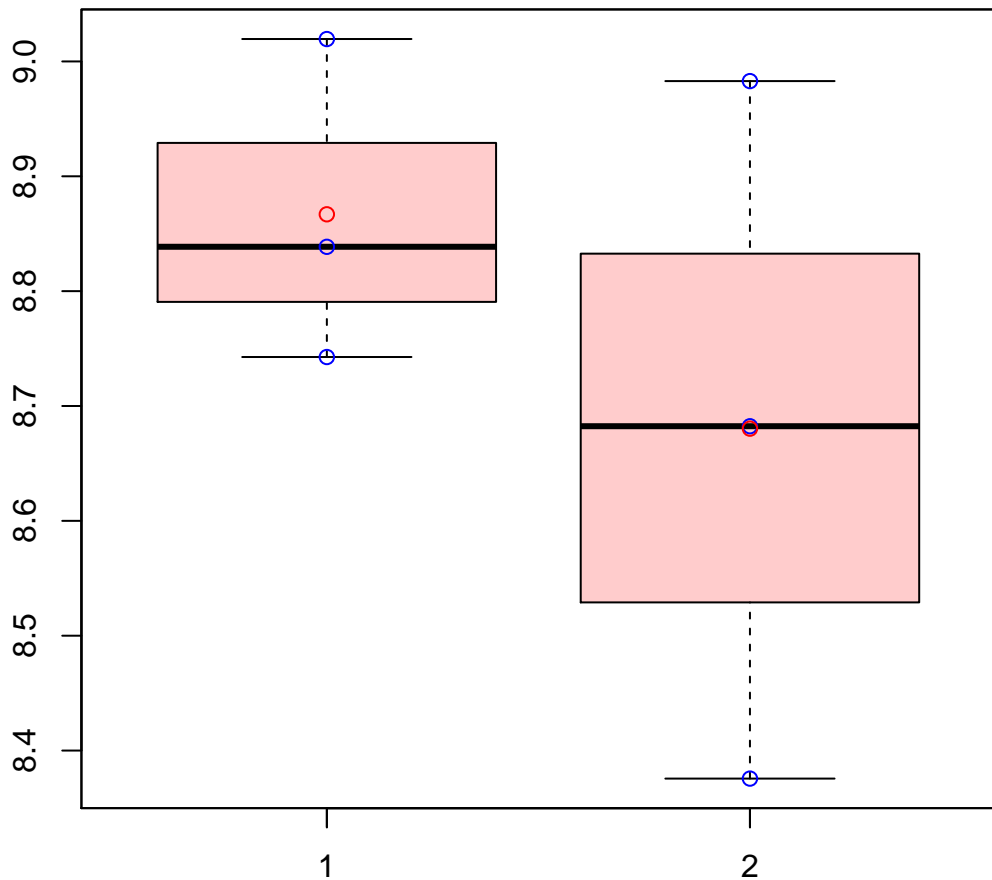

t-Test: p-value = 0.41

# CL297Contig14|CL297Contig14

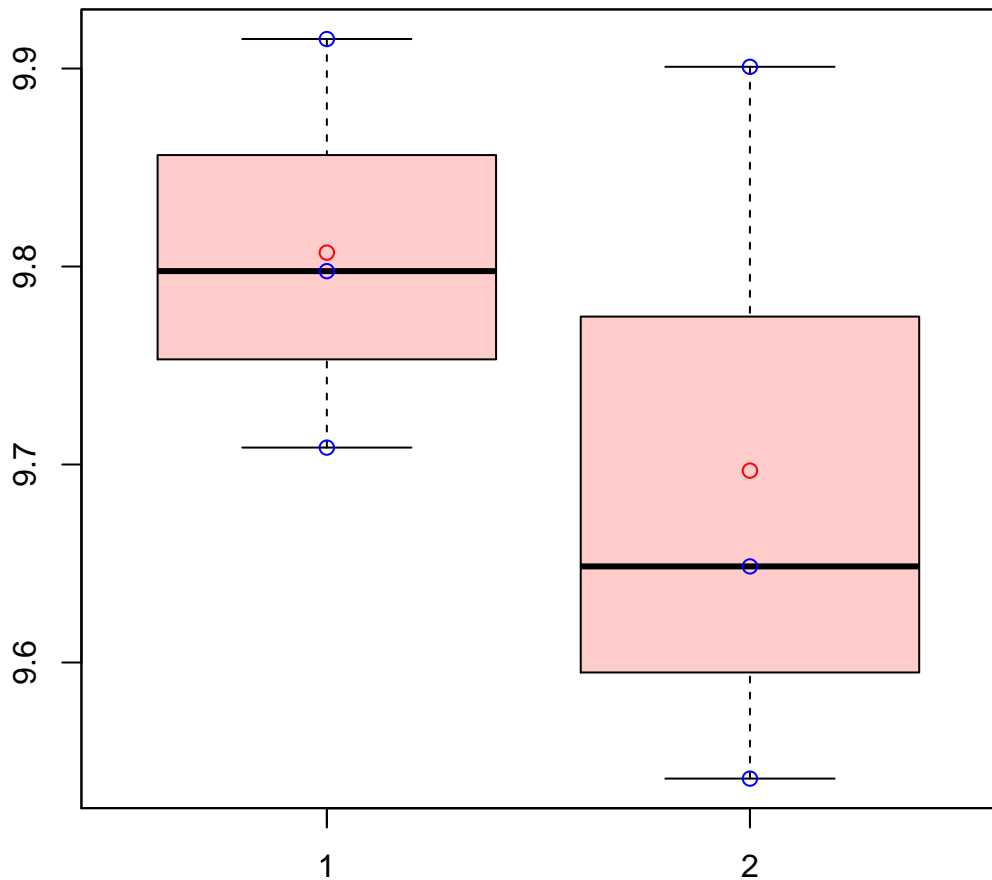

t-Test: p-value = 0.43

# CL2986Contig7|CL2986Contig7

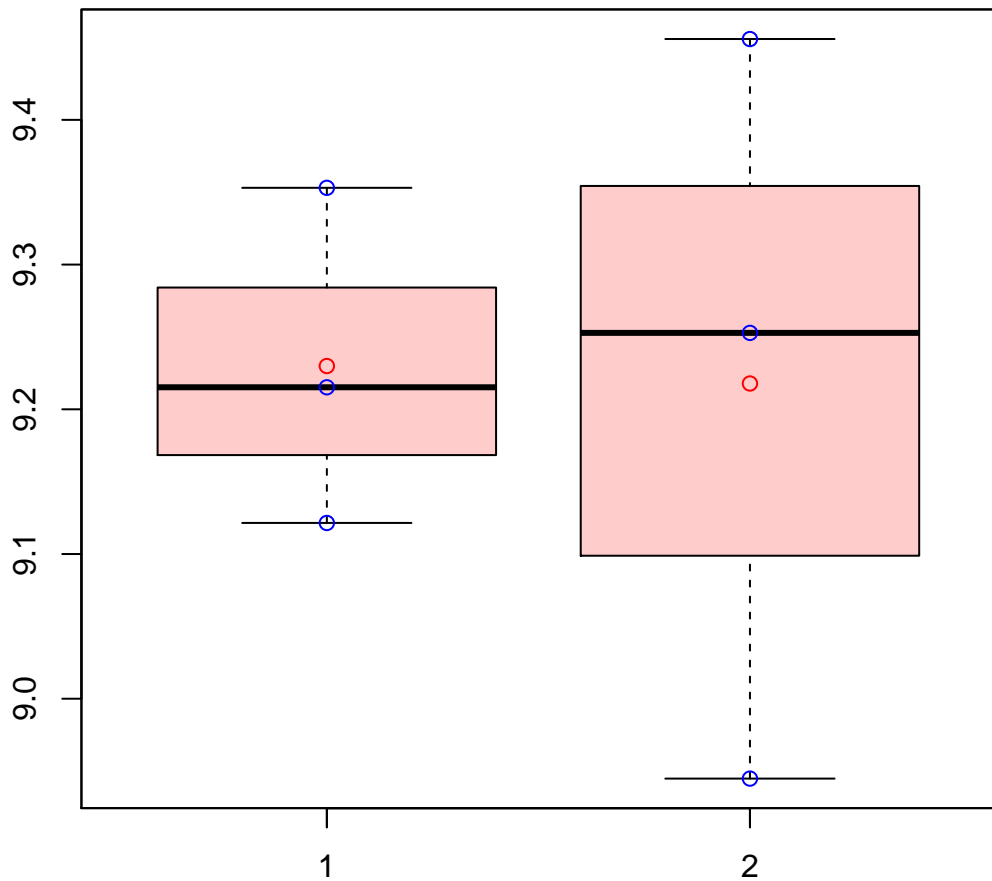

t-Test: p-value = 0.95

# CL298Contig4|CL298Contig4

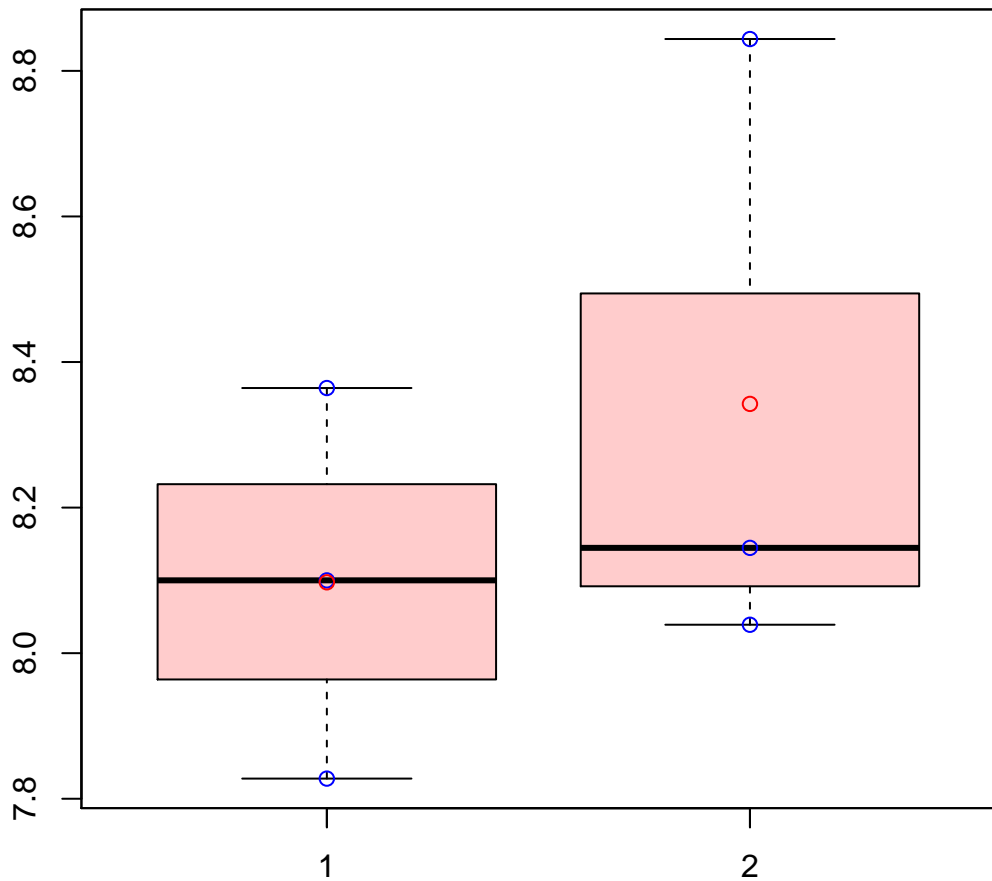

t-Test: p-value = 0.46

# CL2990Contig3|CL2990Contig3

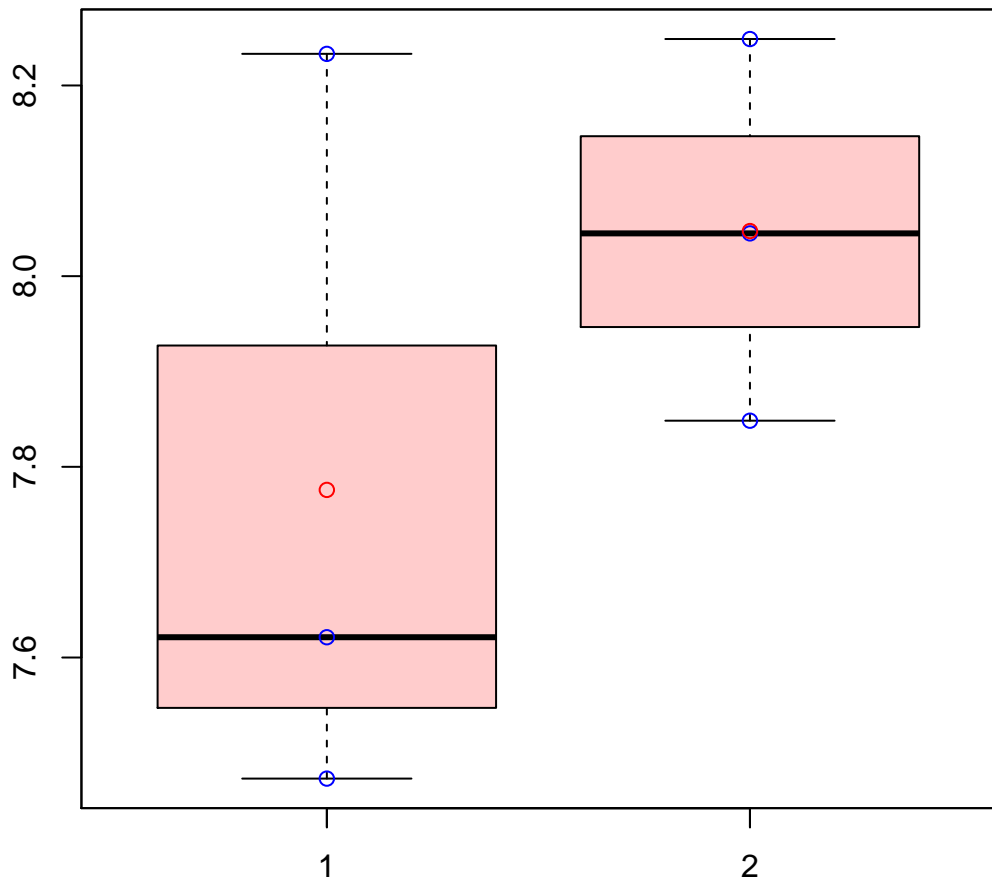

t-Test: p-value = 0.37

# CL2991Contig2|CL2991Contig2

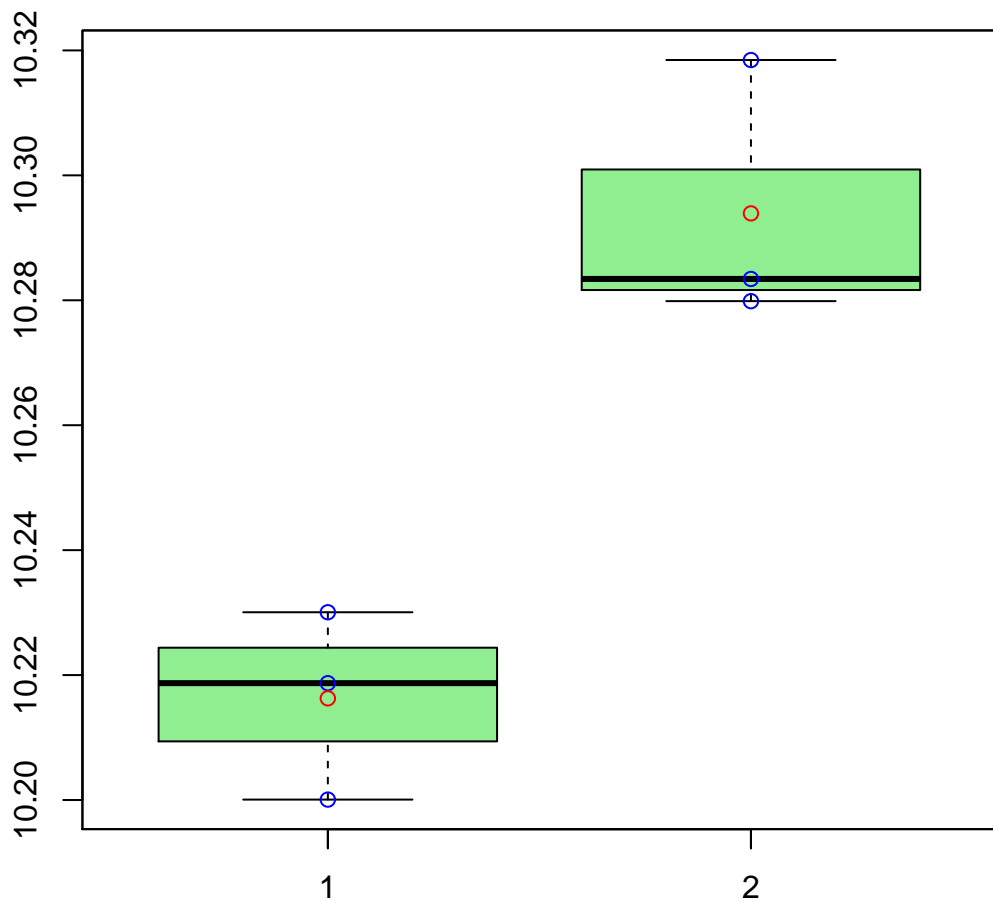

t-Test: p-value = 0.01



# CL2991Contig3|CL2991Contig3

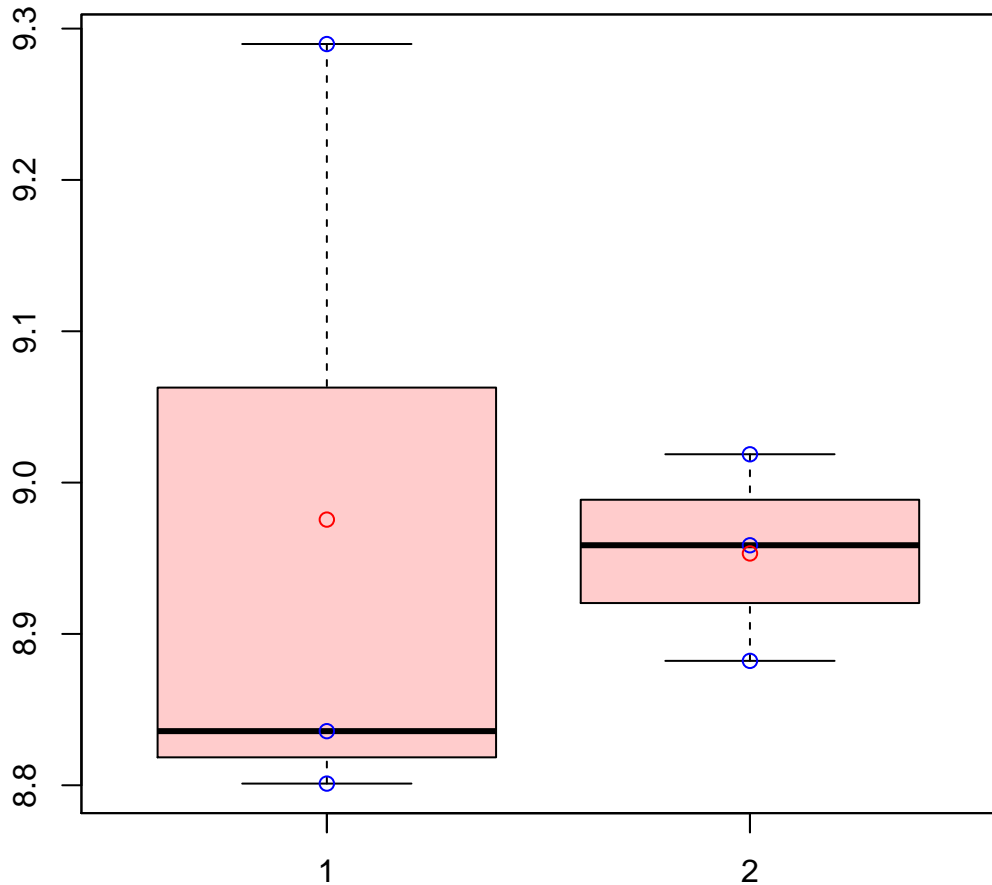

t-Test: p-value = 0.9

# CL2991Contig4|CL2991Contig4

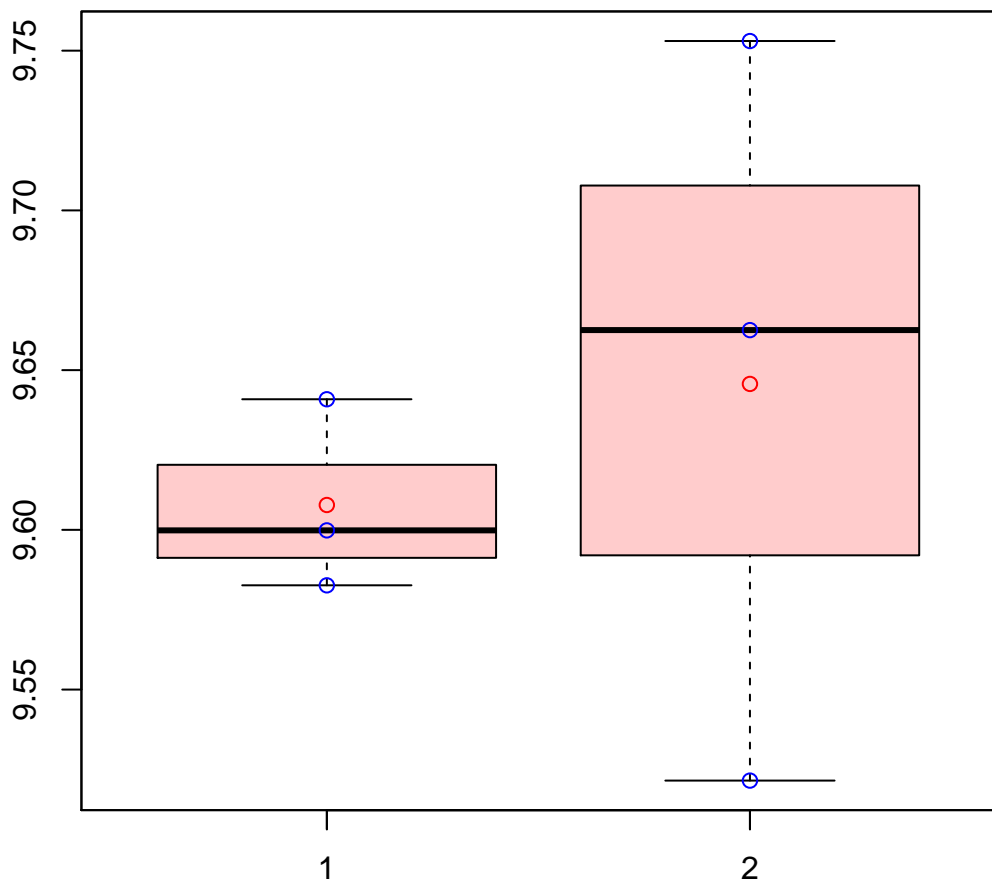

t-Test: p-value = 0.63

# CL2996Contig2|CL2996Contig2

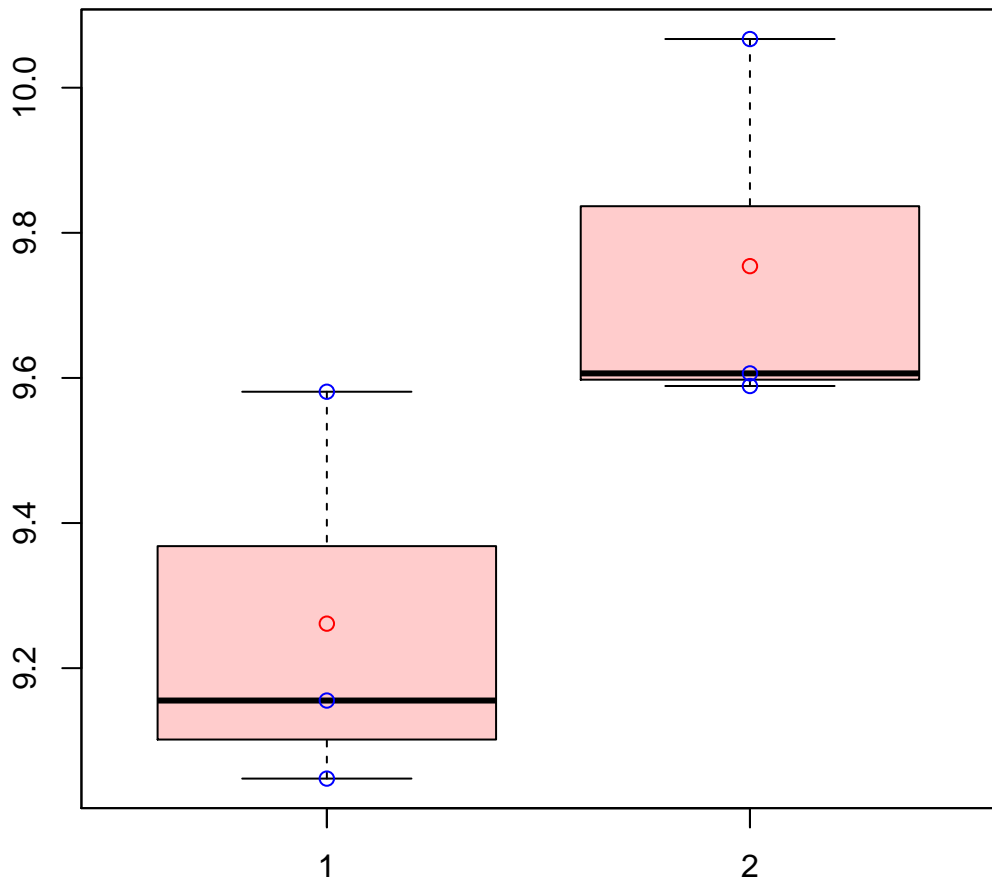

t-Test: p-value = 0.09

# CL2996Contig4|CL2996Contig4

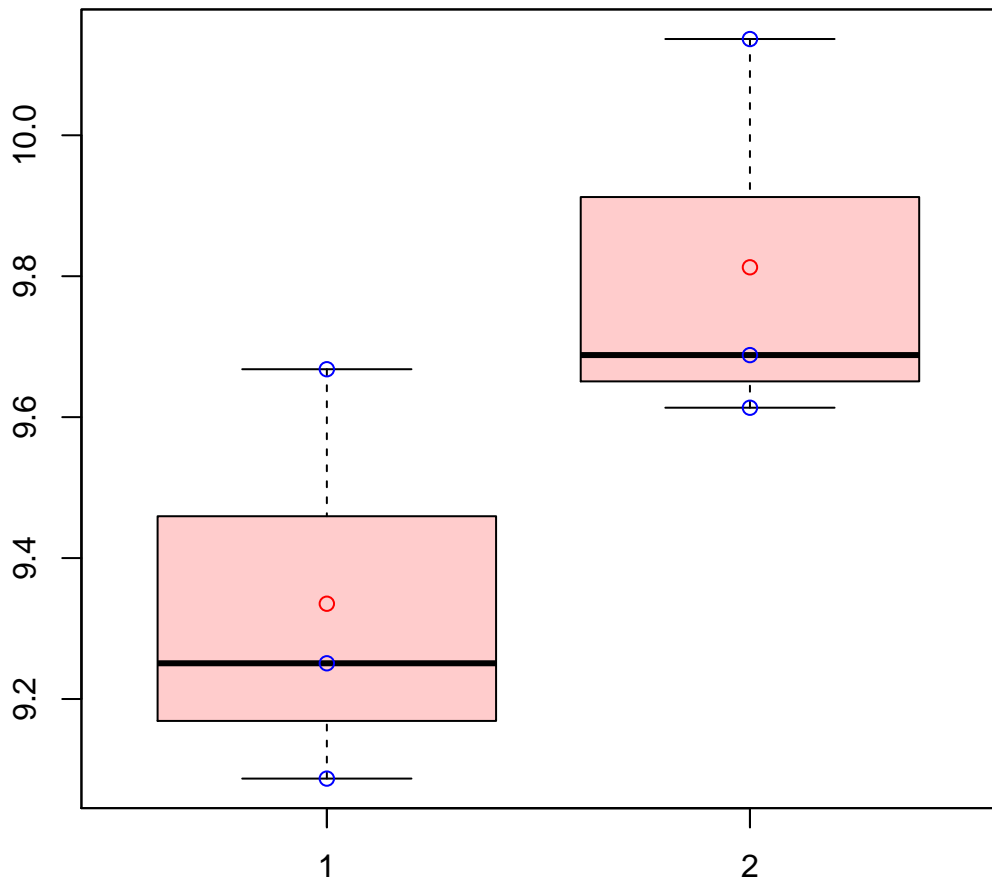

t-Test: p-value = 0.12

# CL2996Contig5|CL2996Contig5

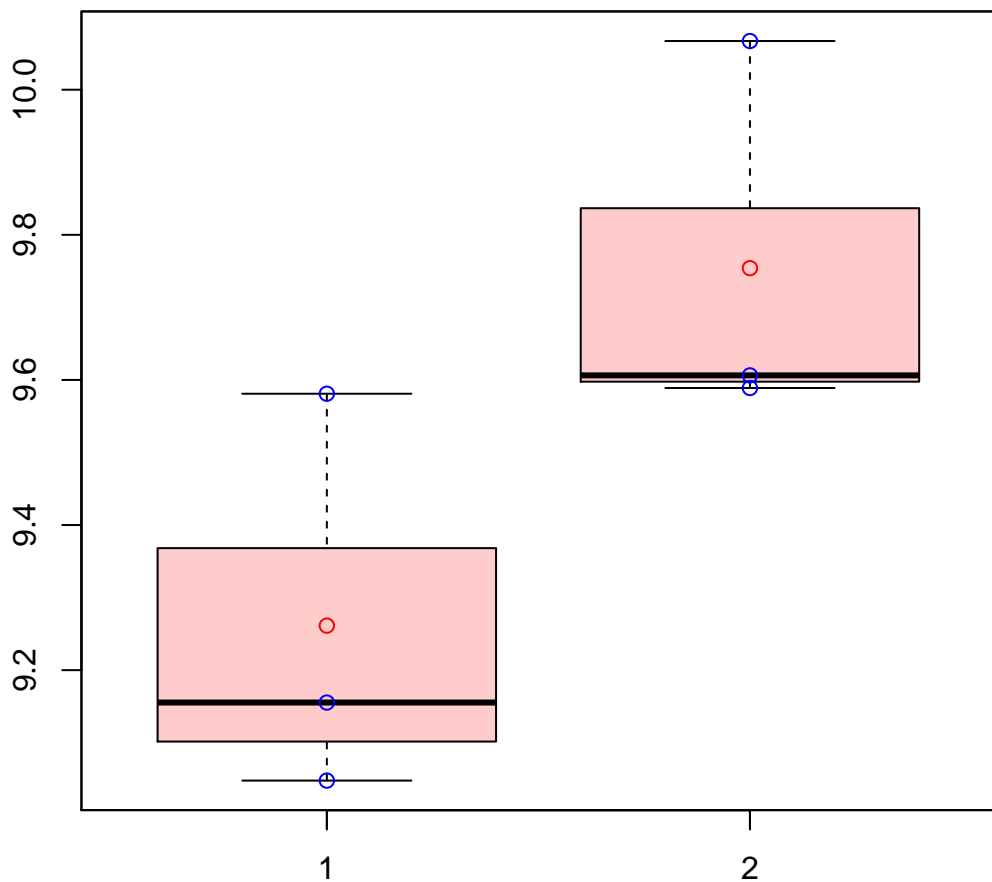

t-Test: p-value = 0.09

# CL2996Contig7|CL2996Contig7



t-Test: p-value = 0.1

# CL2998Contig2|CL2998Contig2

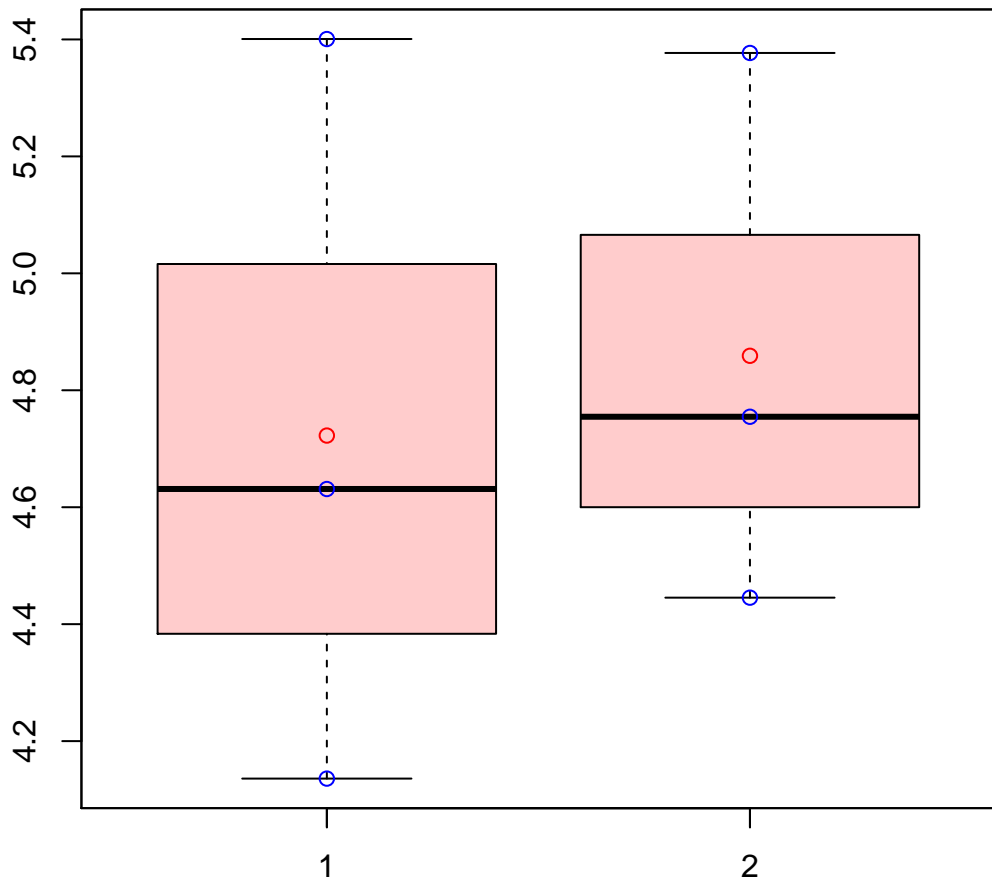

t-Test: p-value = 0.78

# CL29Contig29|CL29Contig29

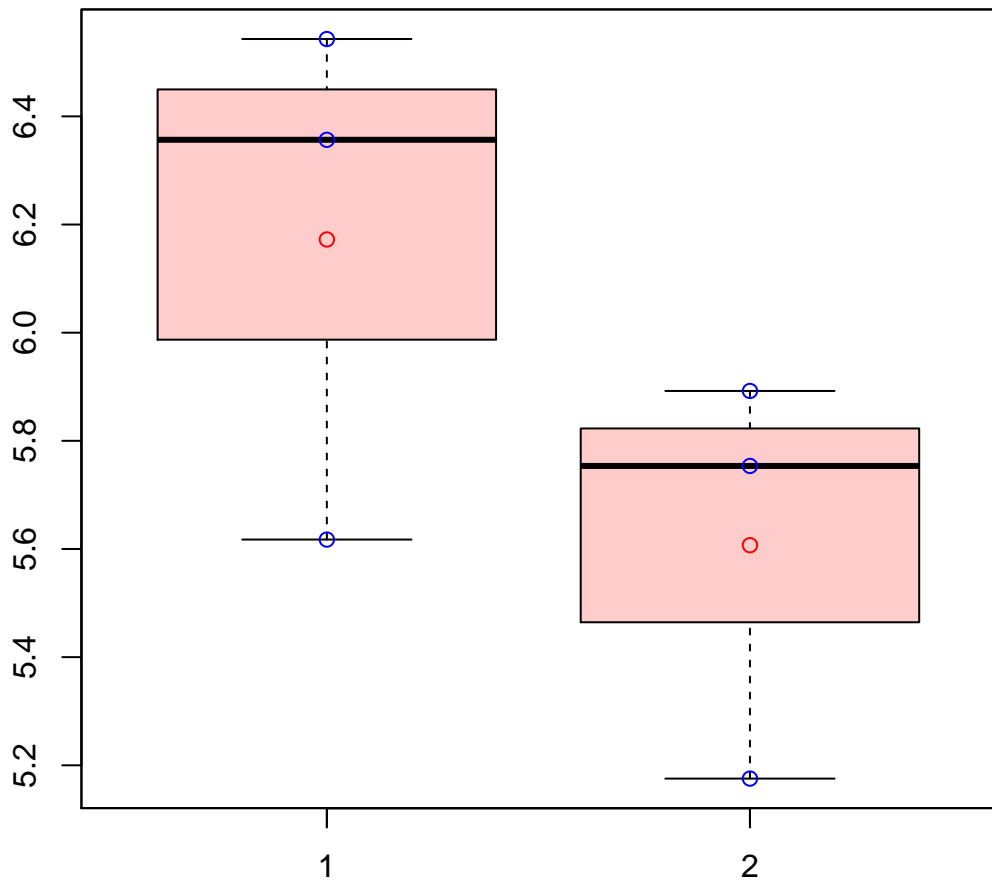

t-Test: p-value = 0.19



# CL2Contig104|CL2Contig104

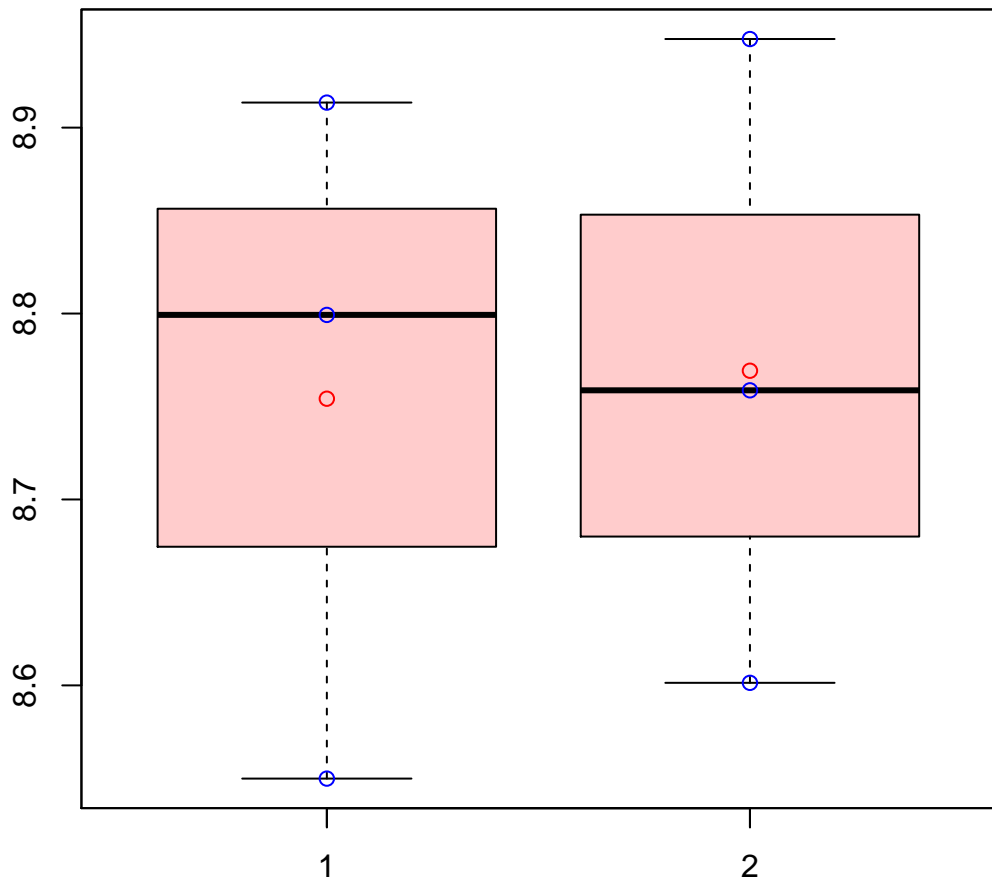

t-Test: p-value = 0.92

# CL2Contig108|CL2Contig108

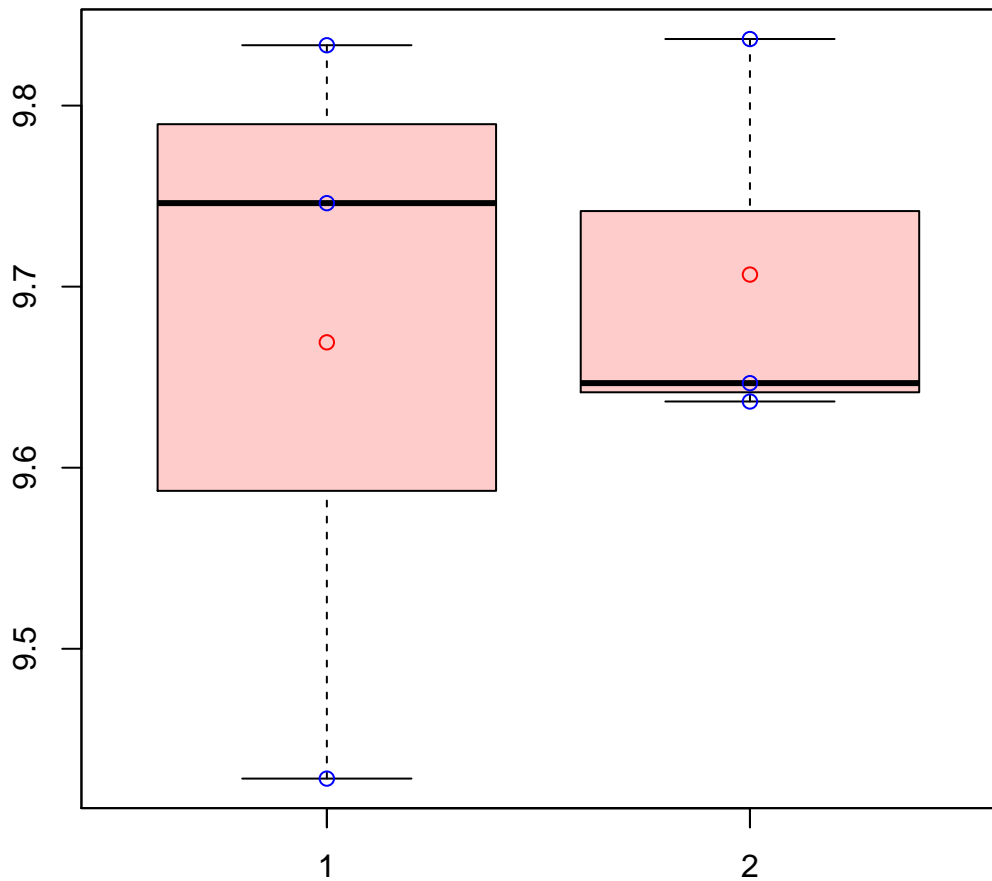

t-Test: p-value = 0.81

# CL2Contig152|CL2Contig152

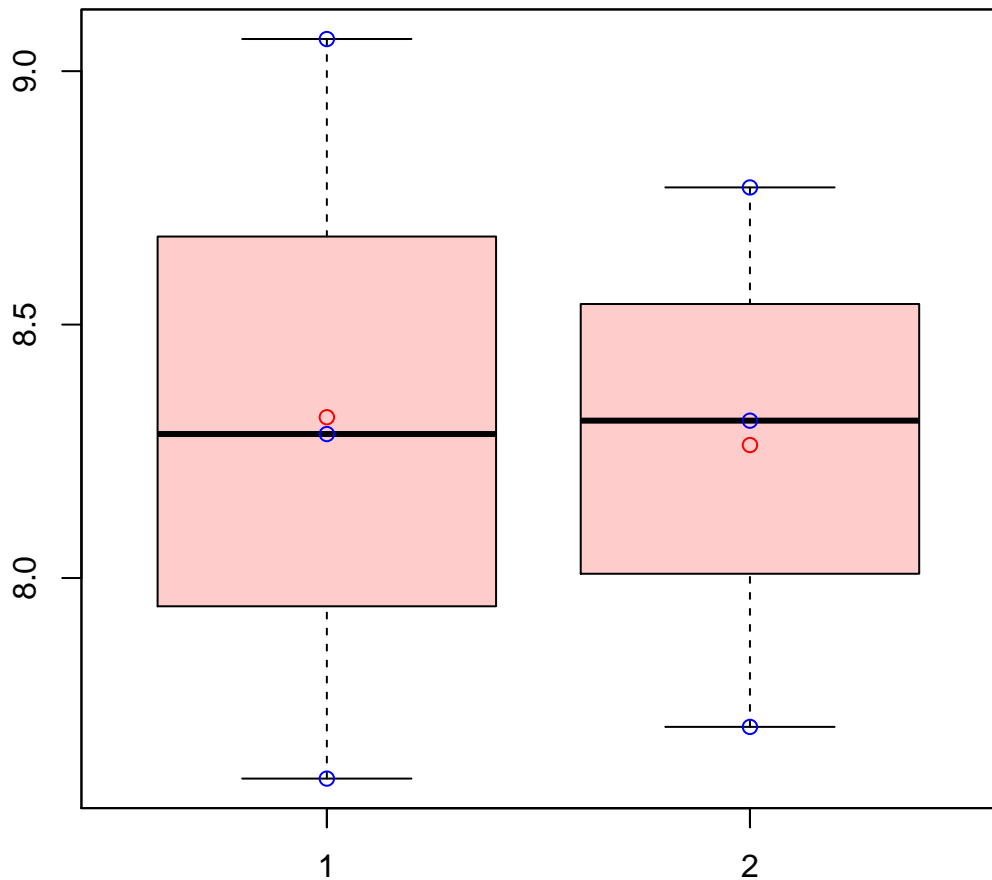

t-Test: p-value = 0.92

# CL2Contig153|CL2Contig153

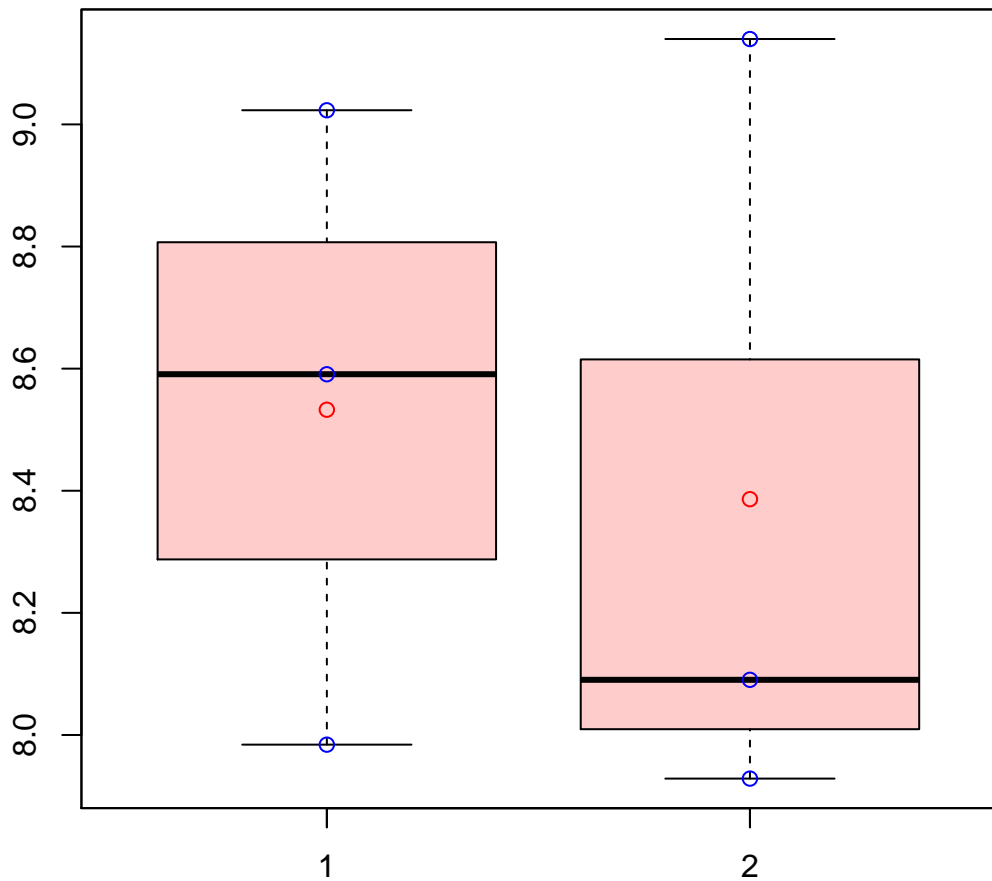

t-Test: p-value = 0.78

# CL2Contig162|CL2Contig162

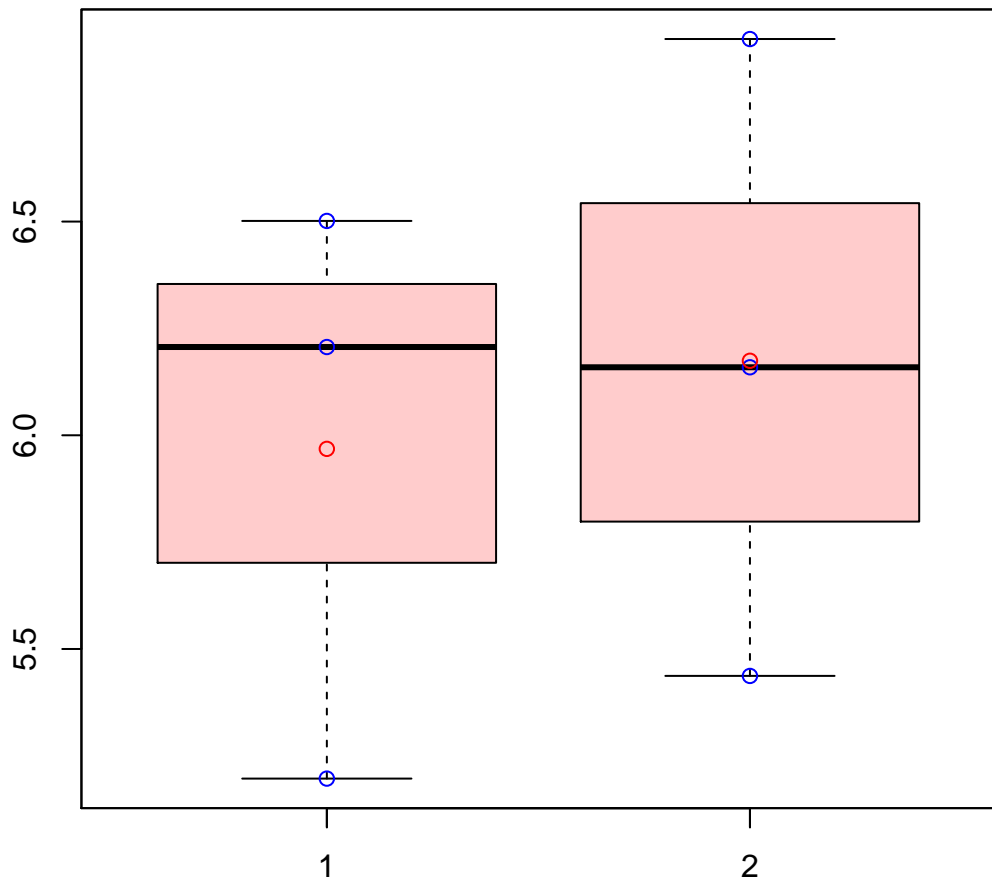

t-Test: p-value = 0.74

# CL2Contig165|CL2Contig165

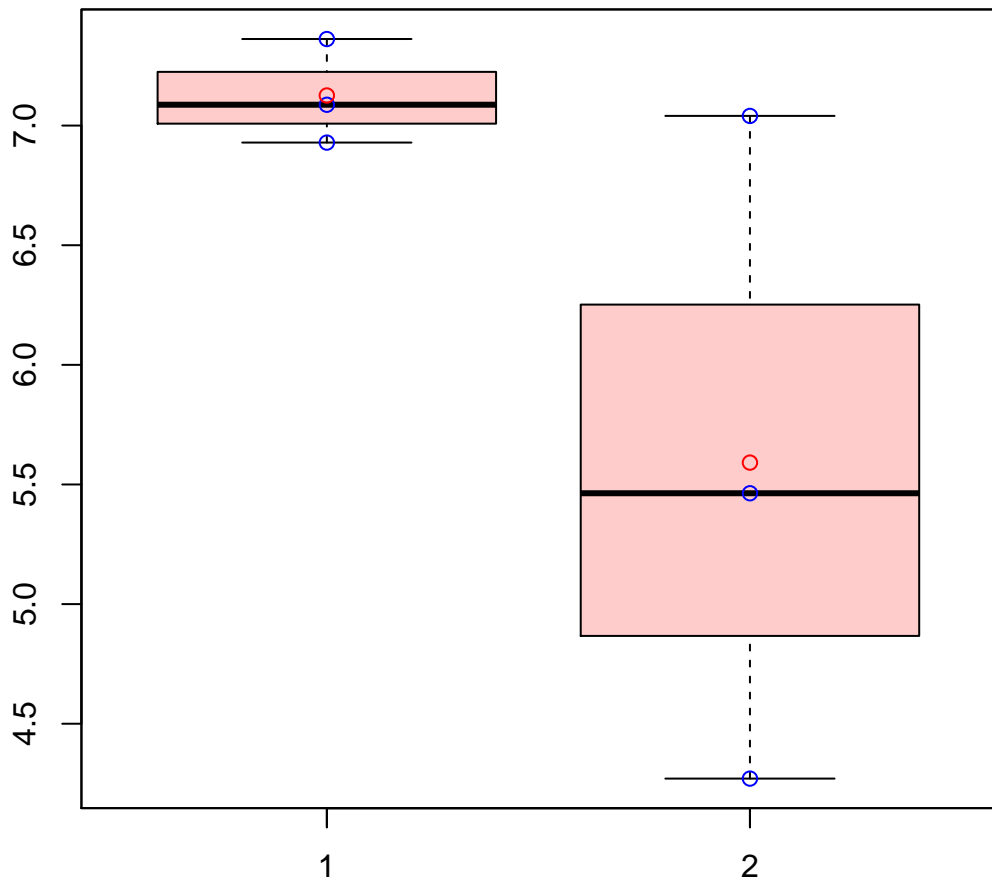

t-Test: p-value = 0.19

# CL2Contig166|CL2Contig166

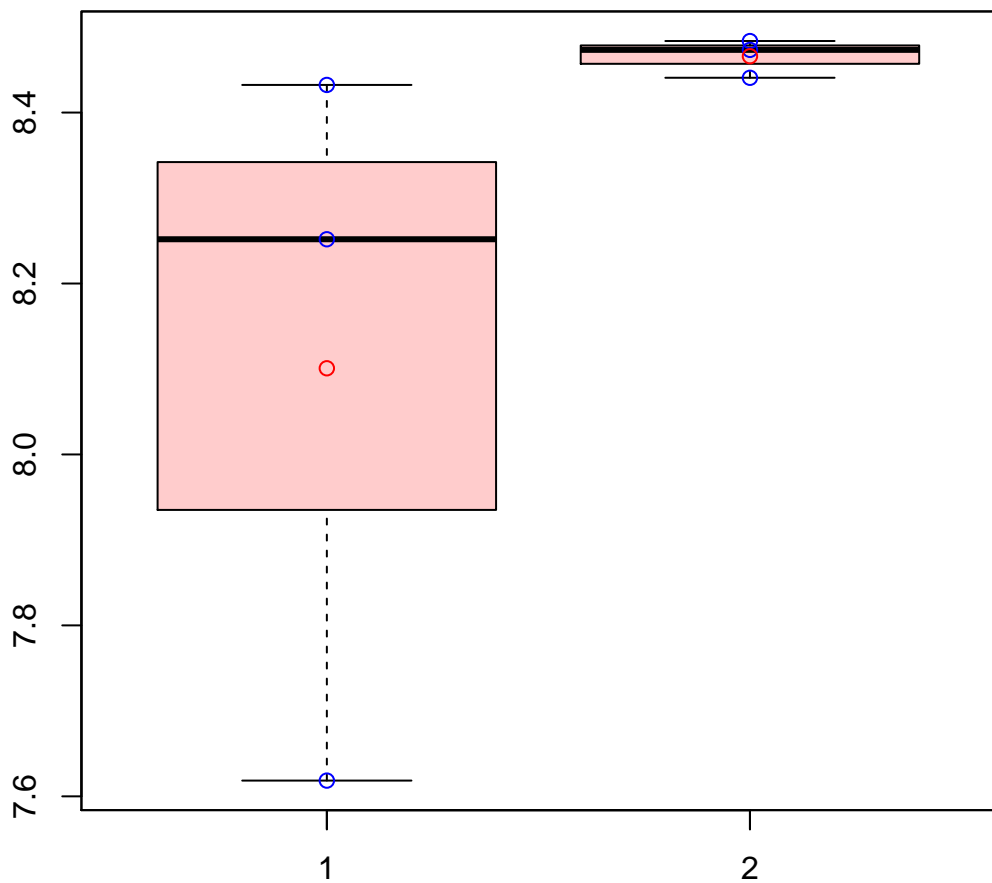

t-Test: p-value = 0.28

# CL2Contig170|CL2Contig170

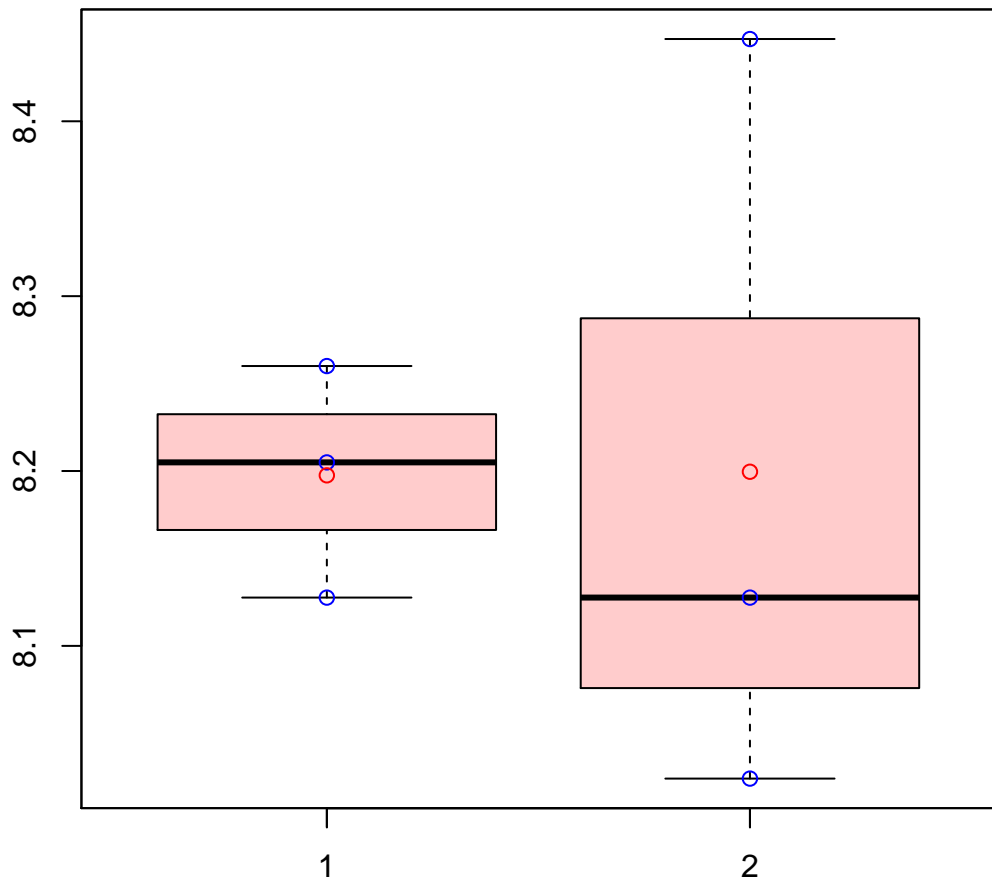

t-Test: p-value = 0.99



# CL2Contig174|CL2Contig174

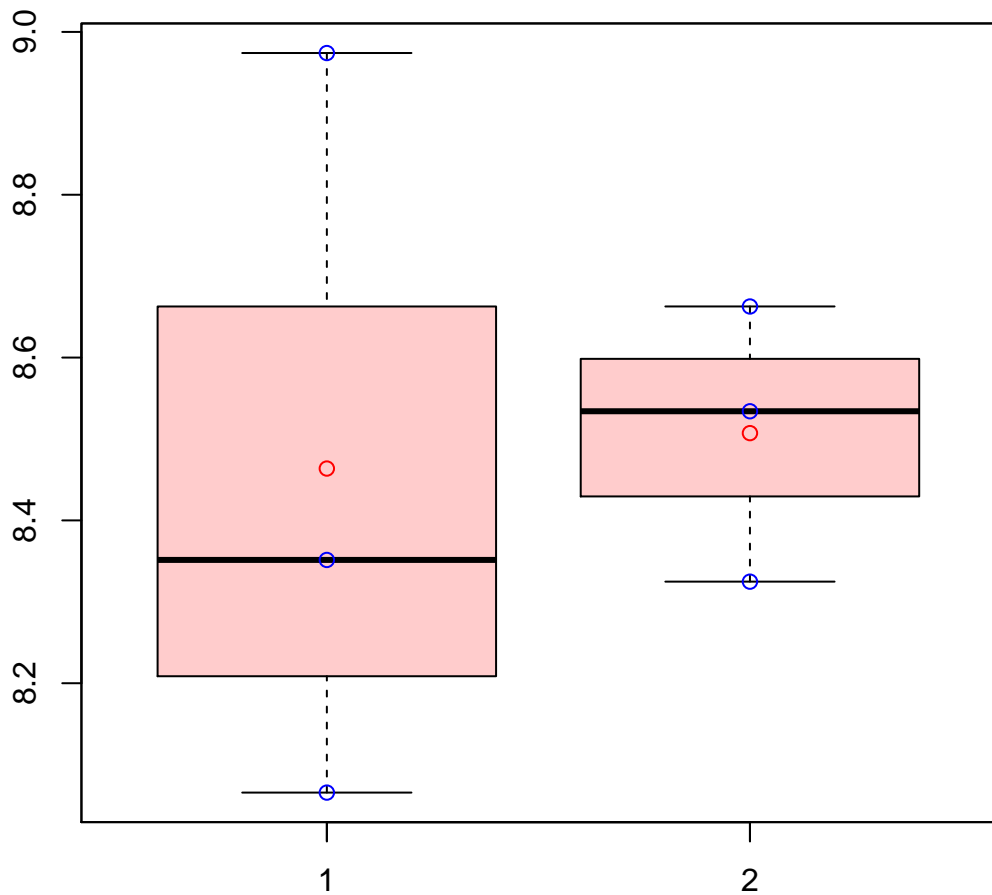

t-Test: p-value = 0.89

# CL2Contig29|CL2Contig29

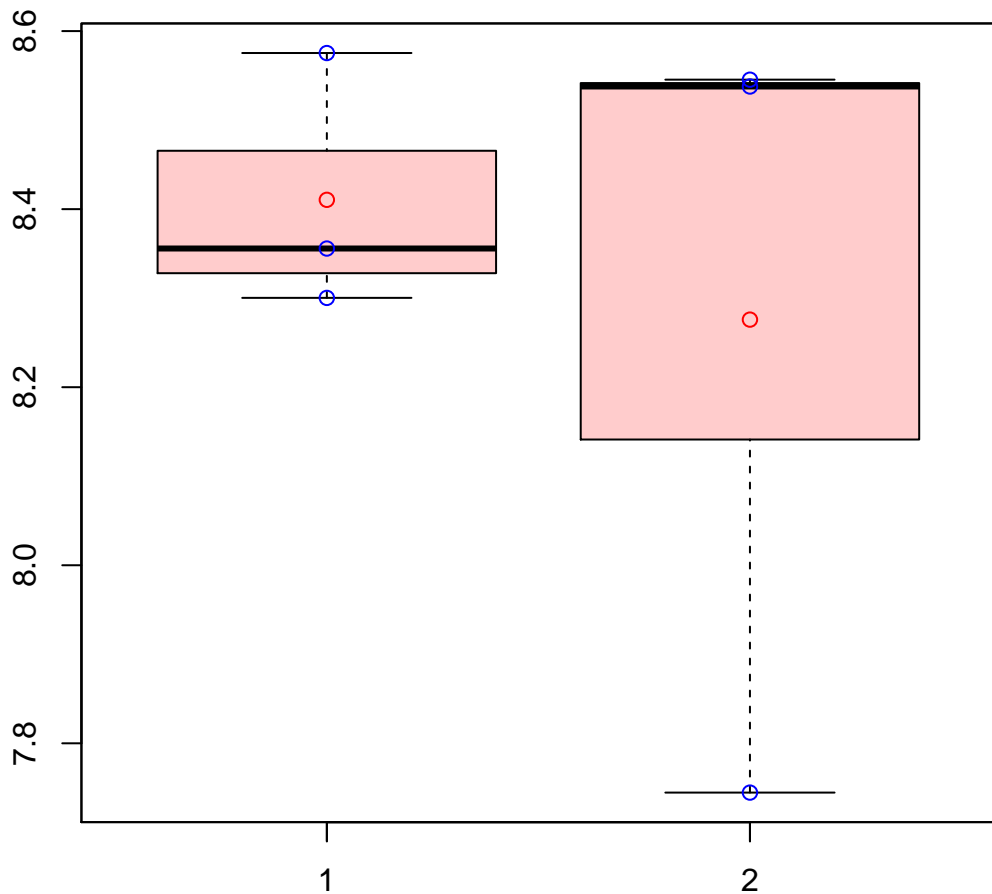

t-Test: p-value = 0.67

# CL2Contig35|CL2Contig35



t-Test: p-value = 0.89

# CL2Contig37|CL2Contig37

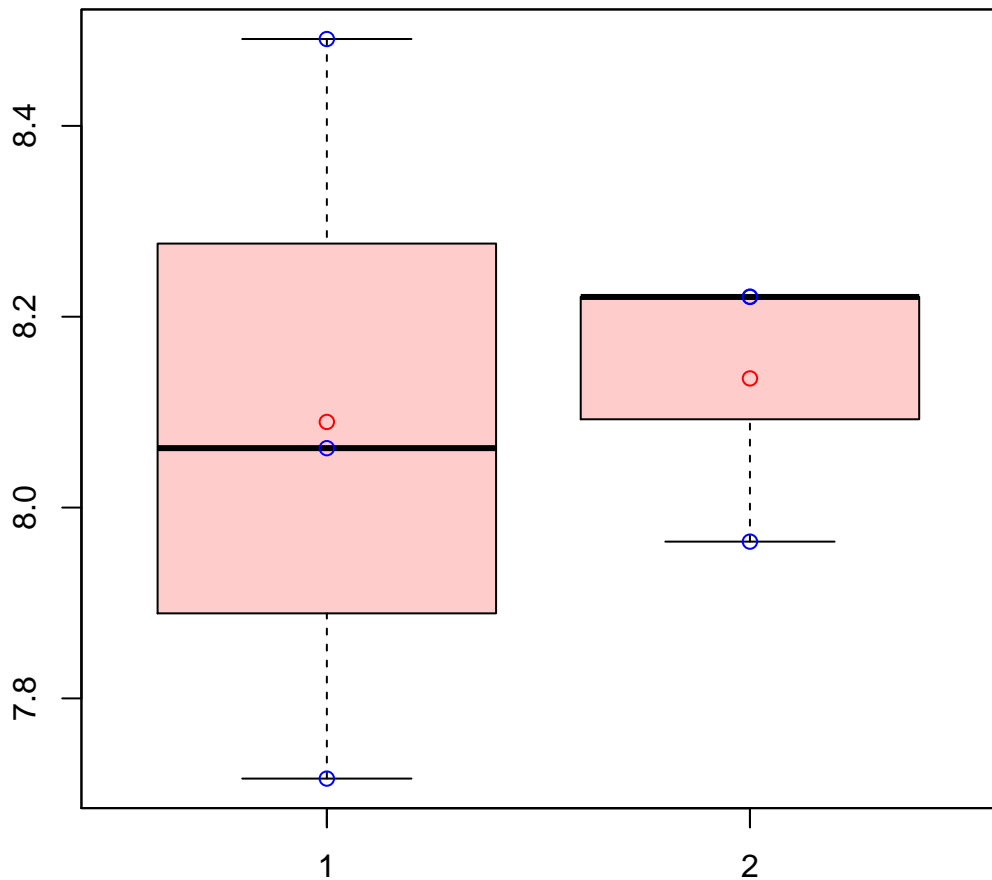

t-Test: p-value = 0.86

# CL2Contig39|CL2Contig39

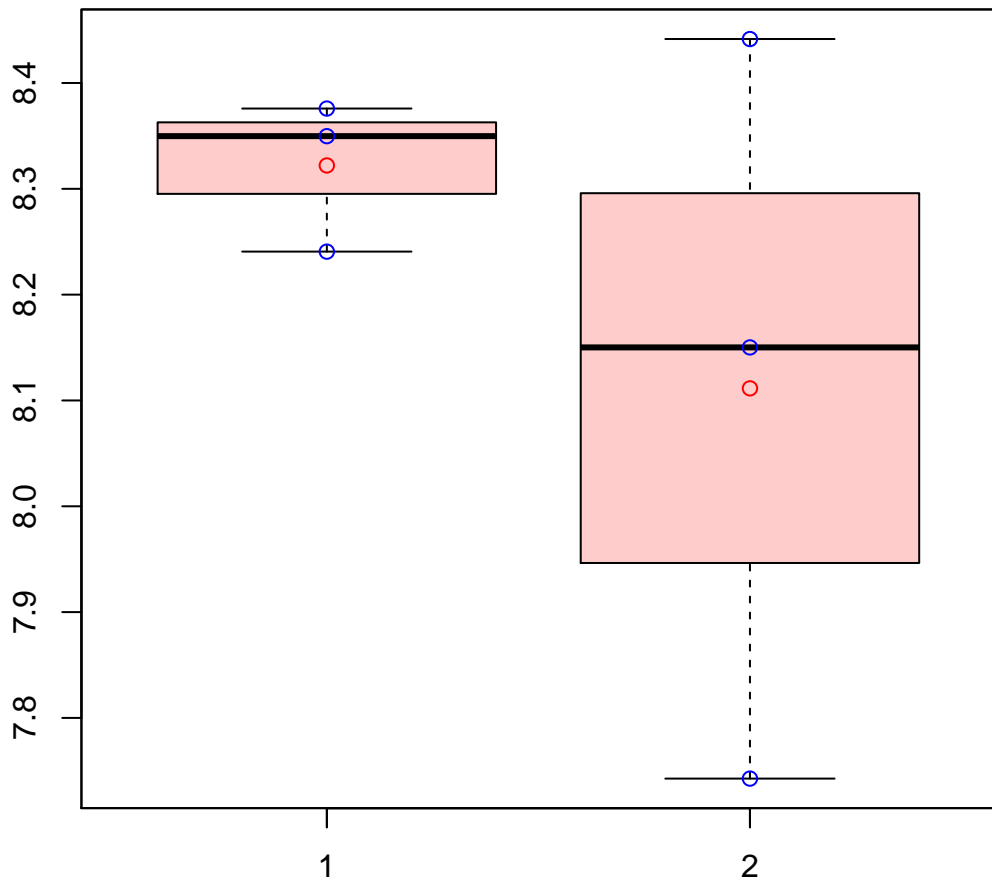

t-Test: p-value = 0.41

# CL2Contig5|CL2Contig5

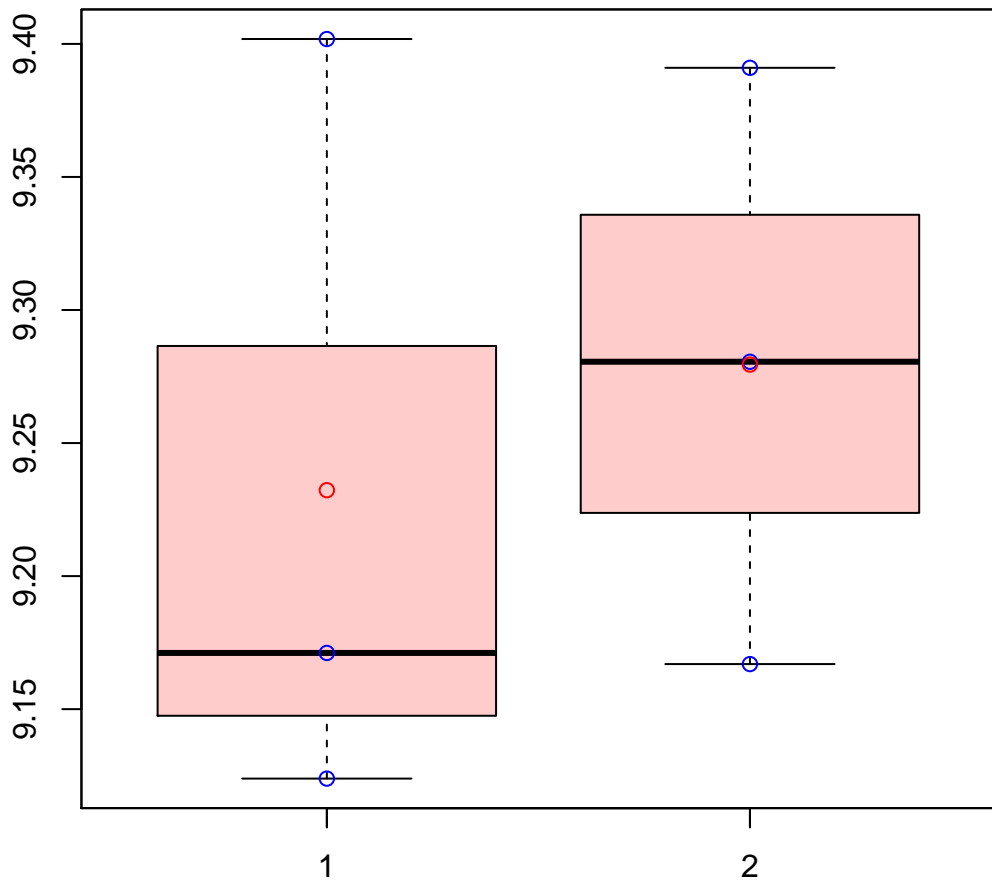

t-Test: p-value = 0.68

# CL2Contig71|CL2Contig71



t-Test: p-value = 0.41

# CL2Contig8|CL2Contig8

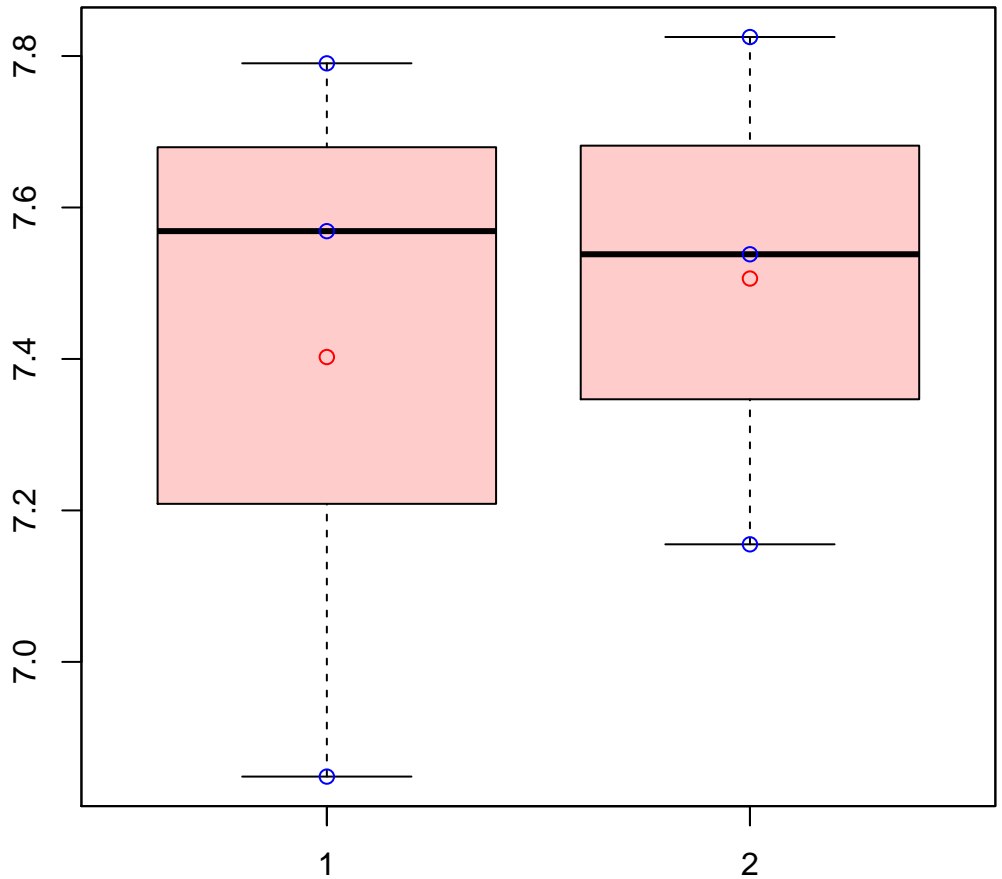

t-Test: p-value = 0.78



# CL2Contig9|CL2Contig9

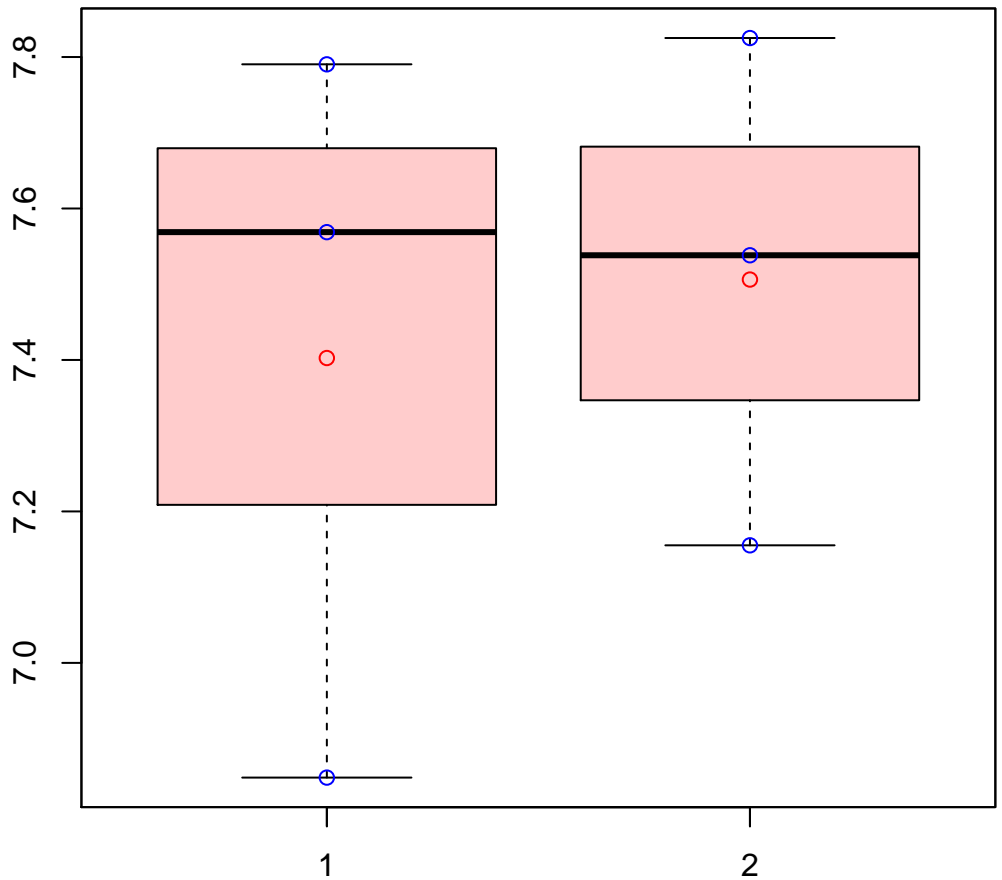

t-Test: p-value = 0.78

# CL3000Contig1|CL3000Contig1

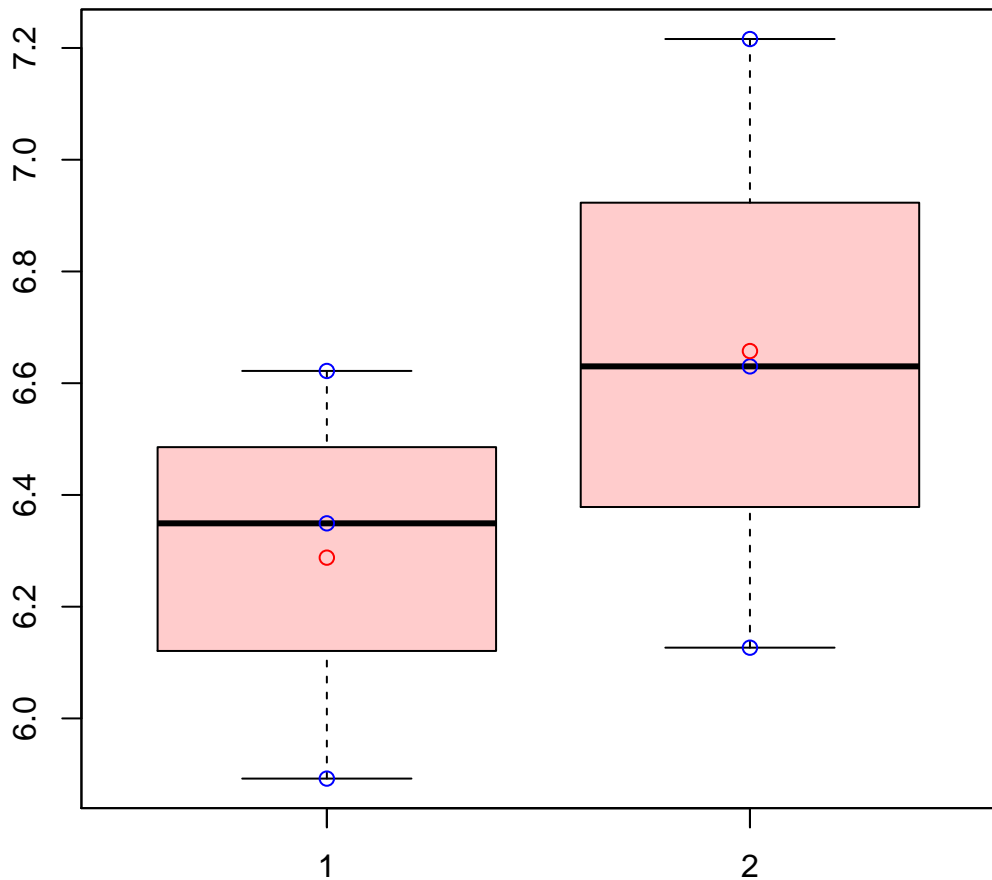

t-Test: p-value = 0.39

# CL3000Contig3|CL3000Contig3



t-Test: p-value = 0.39

# CL3000Contig4|CL3000Contig4

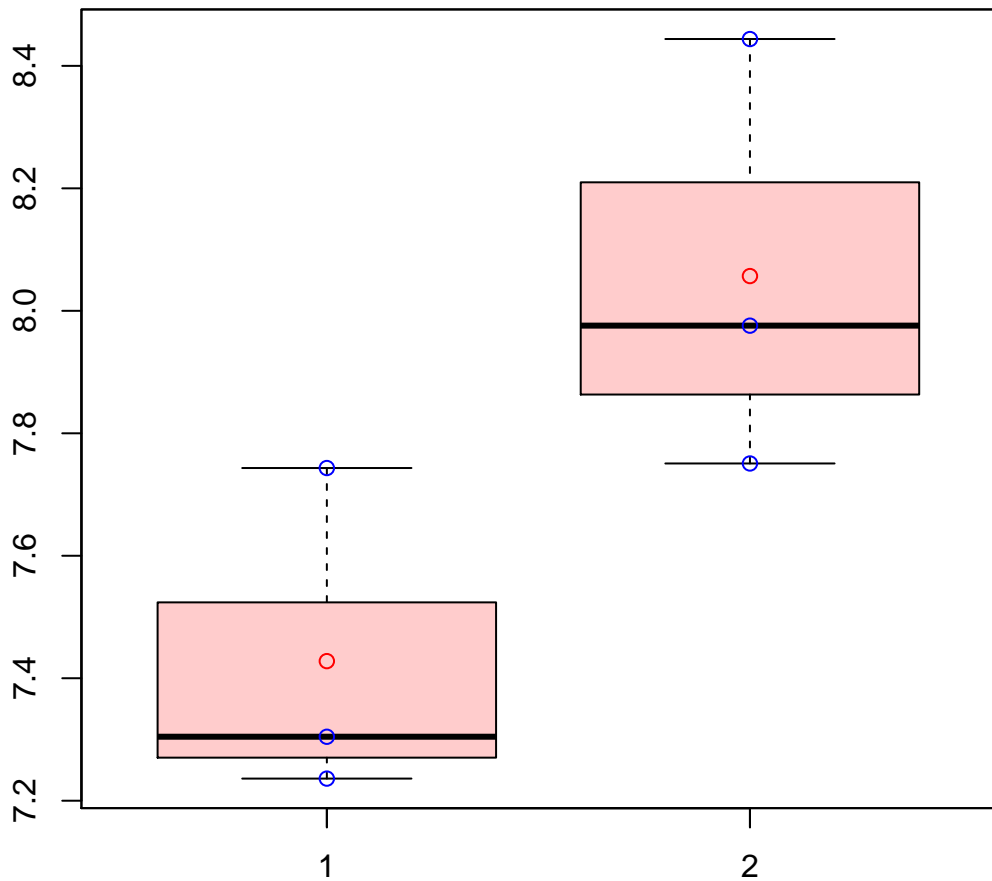

t-Test: p-value = 0.08

# CL3004Contig1|CL3004Contig1

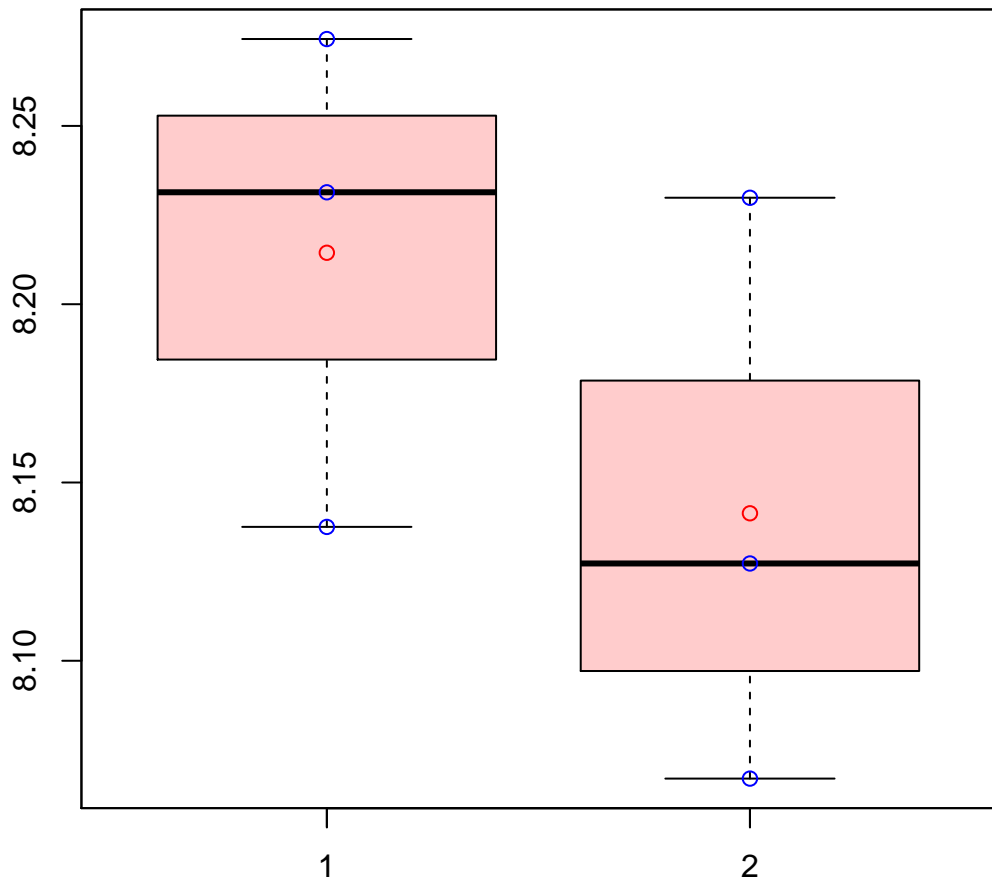

t-Test: p-value = 0.31

# CL3010Contig4|CL3010Contig4

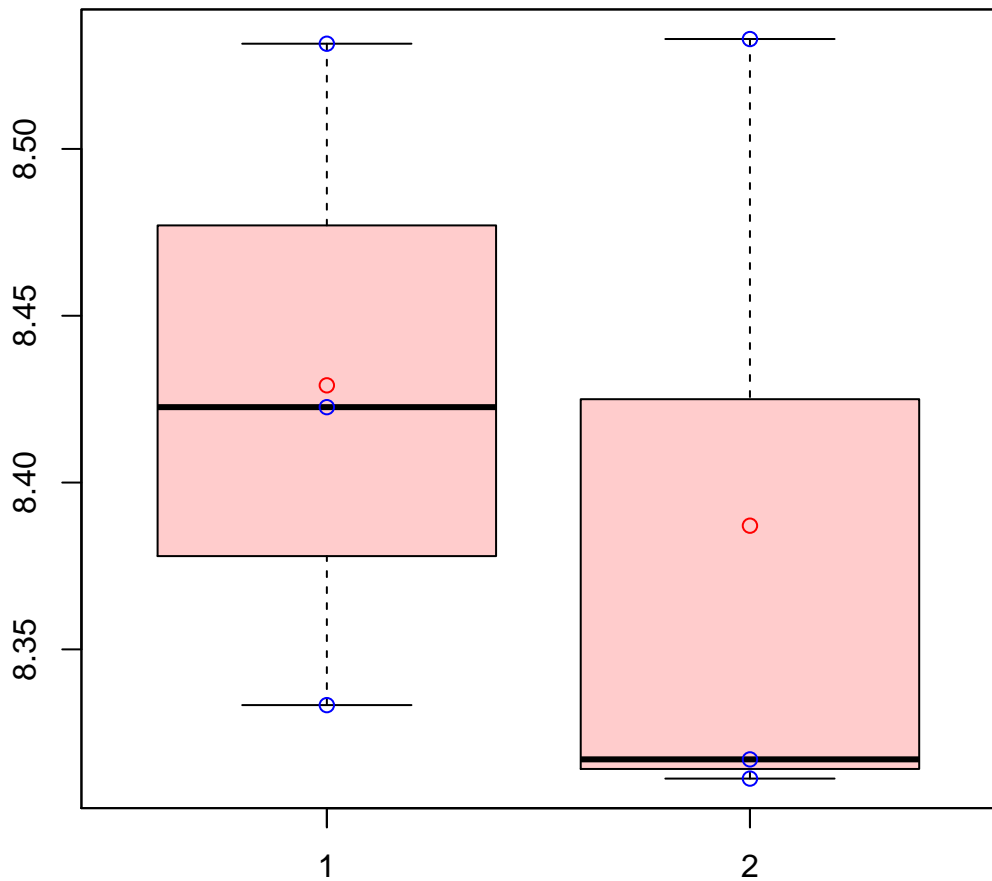

t-Test: p-value = 0.68

# CL3010Contig5|CL3010Contig5



t-Test: p-value = 0.68

# CL3013Contig1|CL3013Contig1

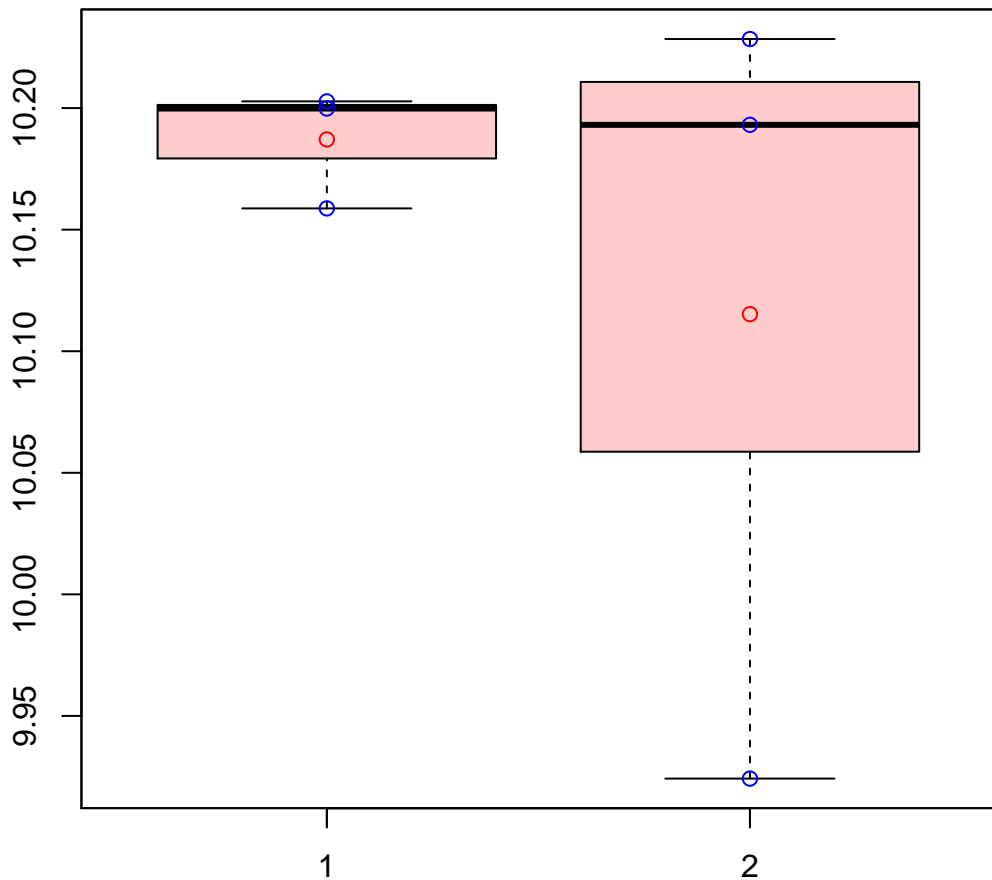

t-Test: p-value = 0.53



# CL3013Contig3|CL3013Contig3

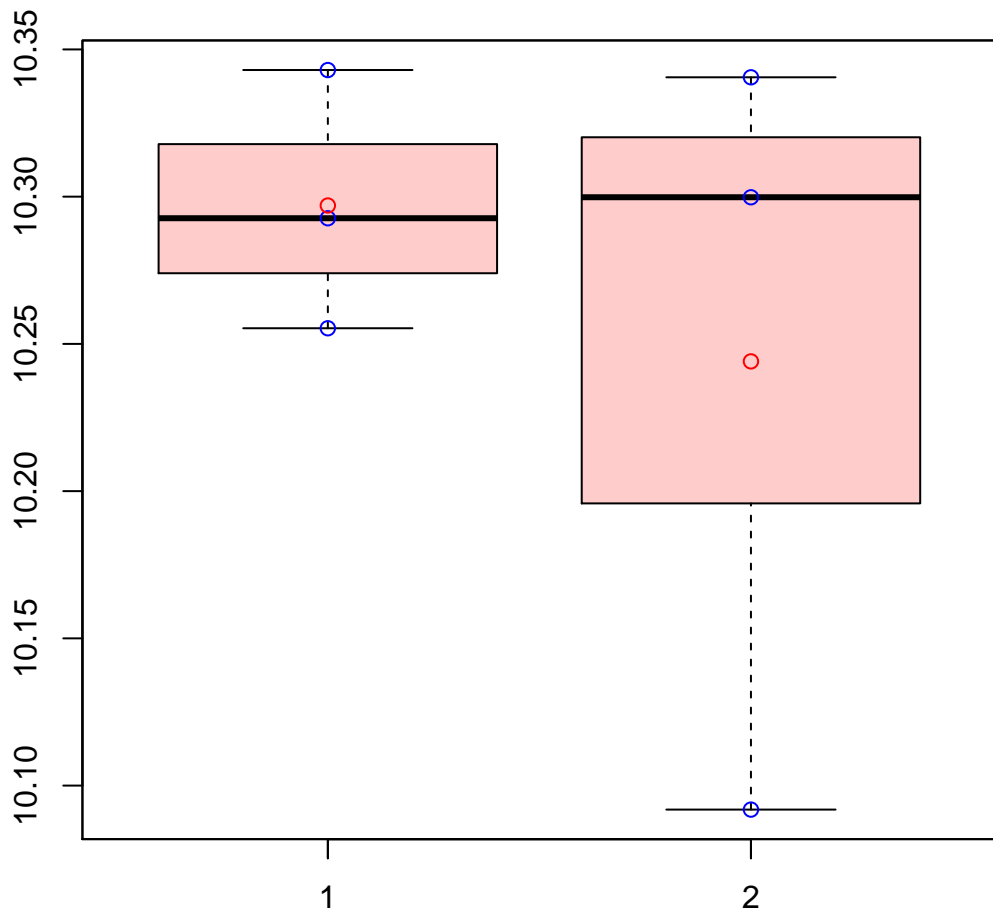

t-Test: p-value = 0.57

# CL3013Contig5|CL3013Contig5

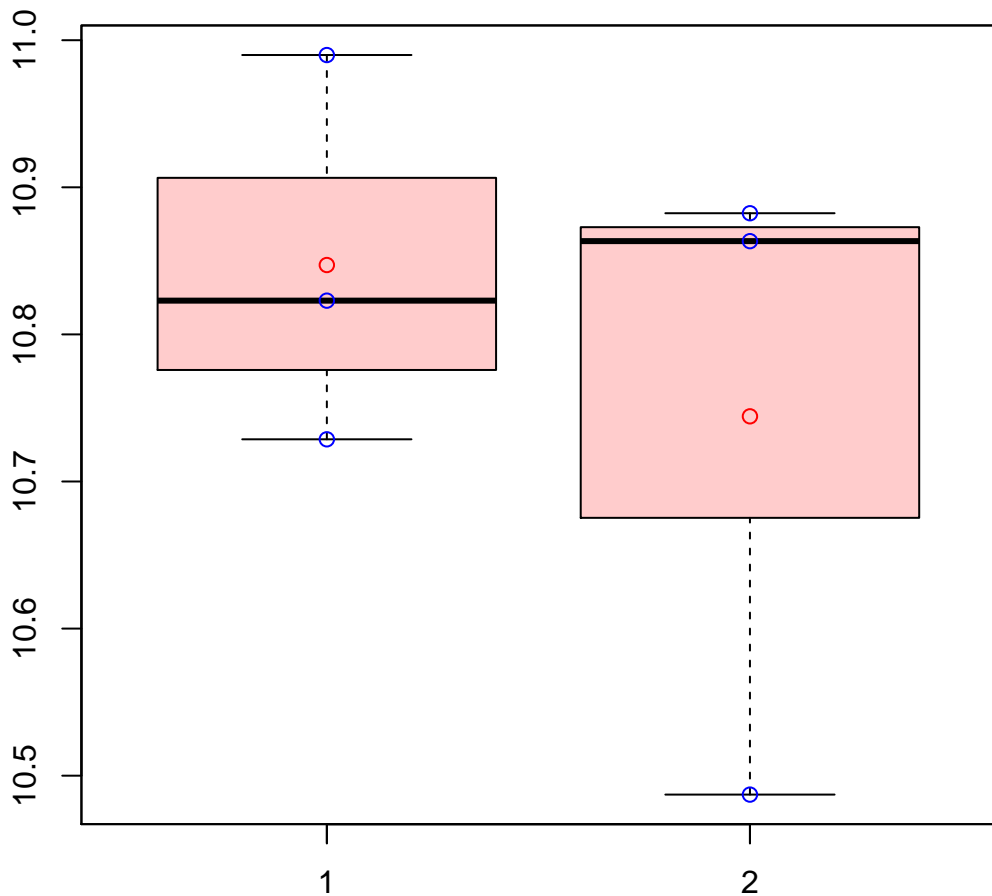

t-Test: p-value = 0.54

# CL3013Contig6|CL3013Contig6



t-Test: p-value = 0.54

# CL3017Contig4|CL3017Contig4

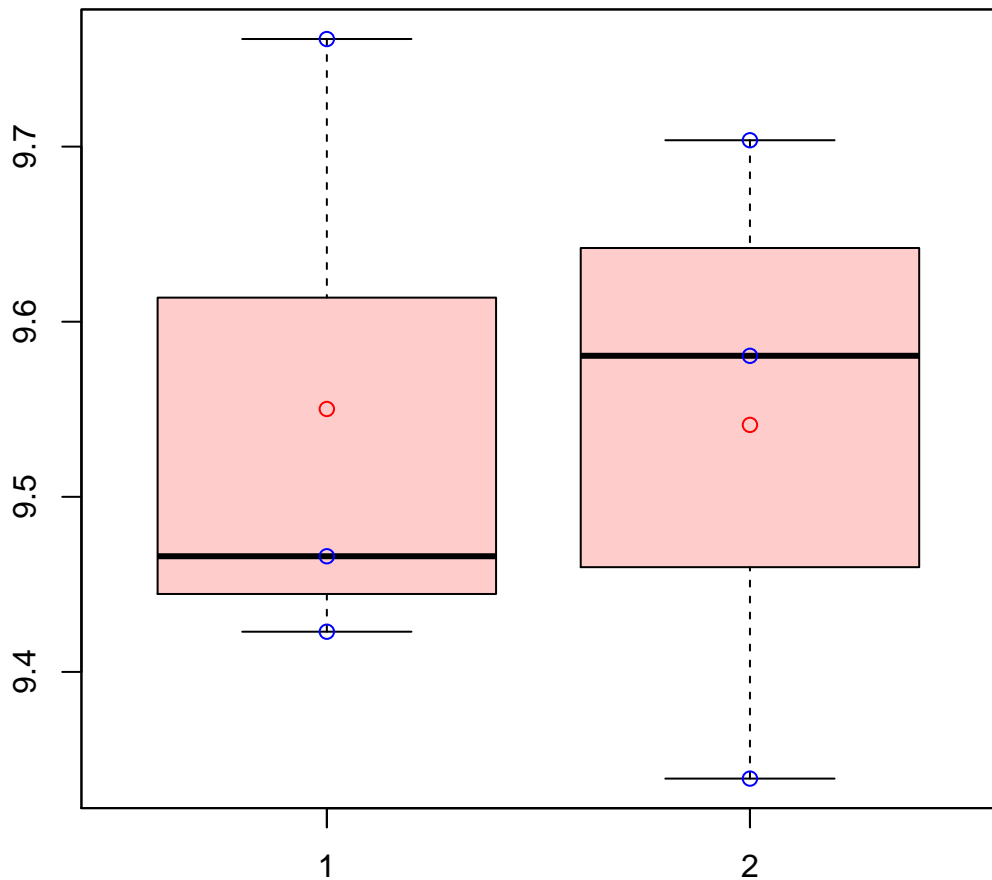

t-Test: p-value = 0.95

# CL3019Contig14|CL3019Contig14

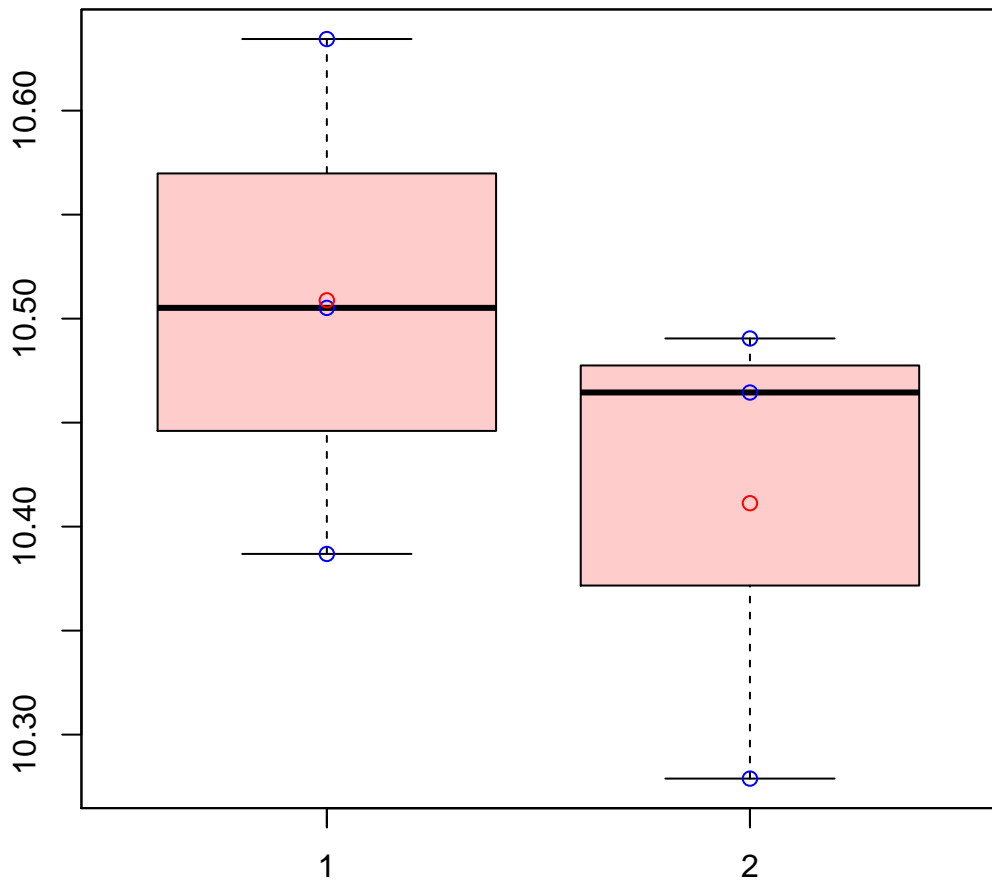

t-Test: p-value = 0.37

# CL3019Contig6|CL3019Contig6

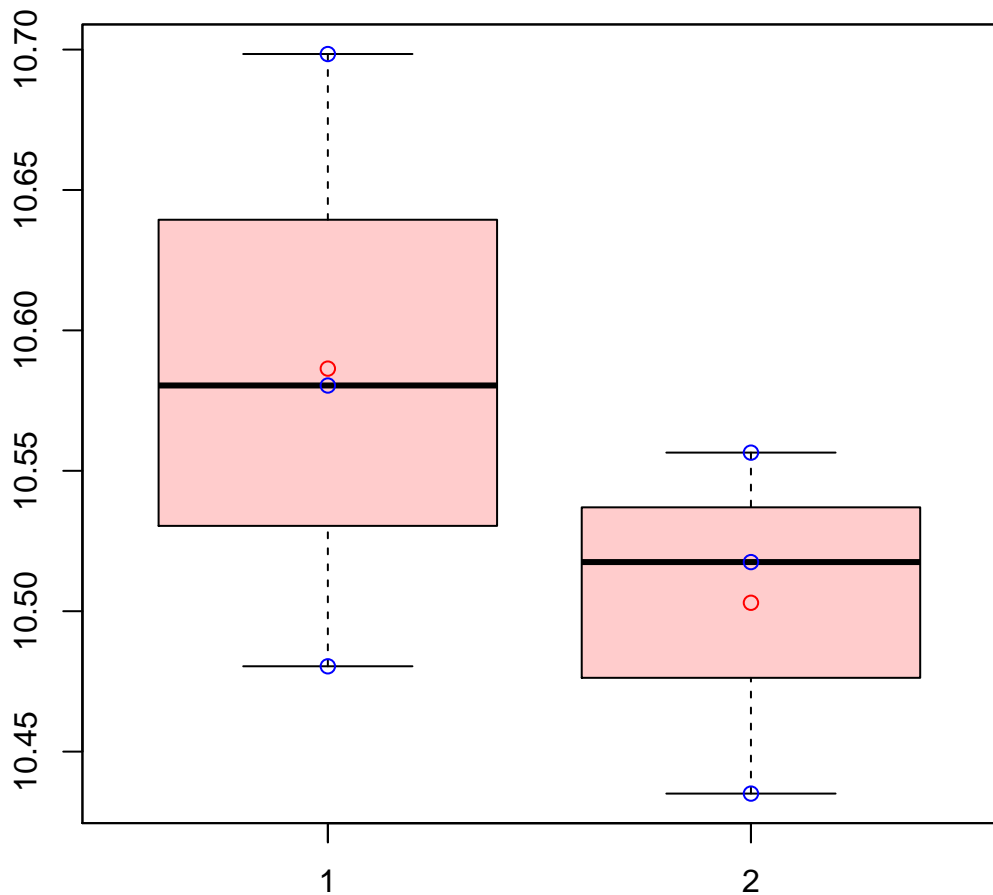

t-Test: p-value = 0.33

# CL3019Contig7|CL3019Contig7

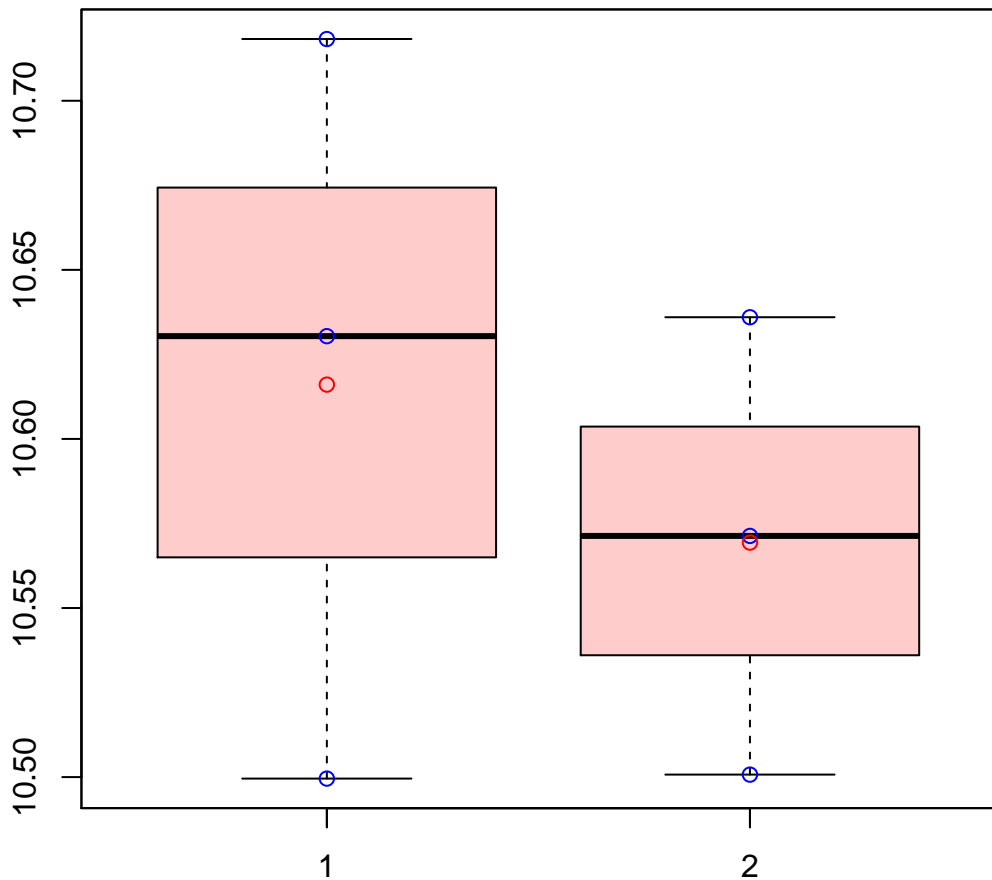

t-Test: p-value = 0.57

# CL3019Contig8|CL3019Contig8



t-Test: p-value = 0.57



# CL301Contig8|CL301Contig8



t-Test: p-value = 0.75

# CL3021Contig2|CL3021Contig2

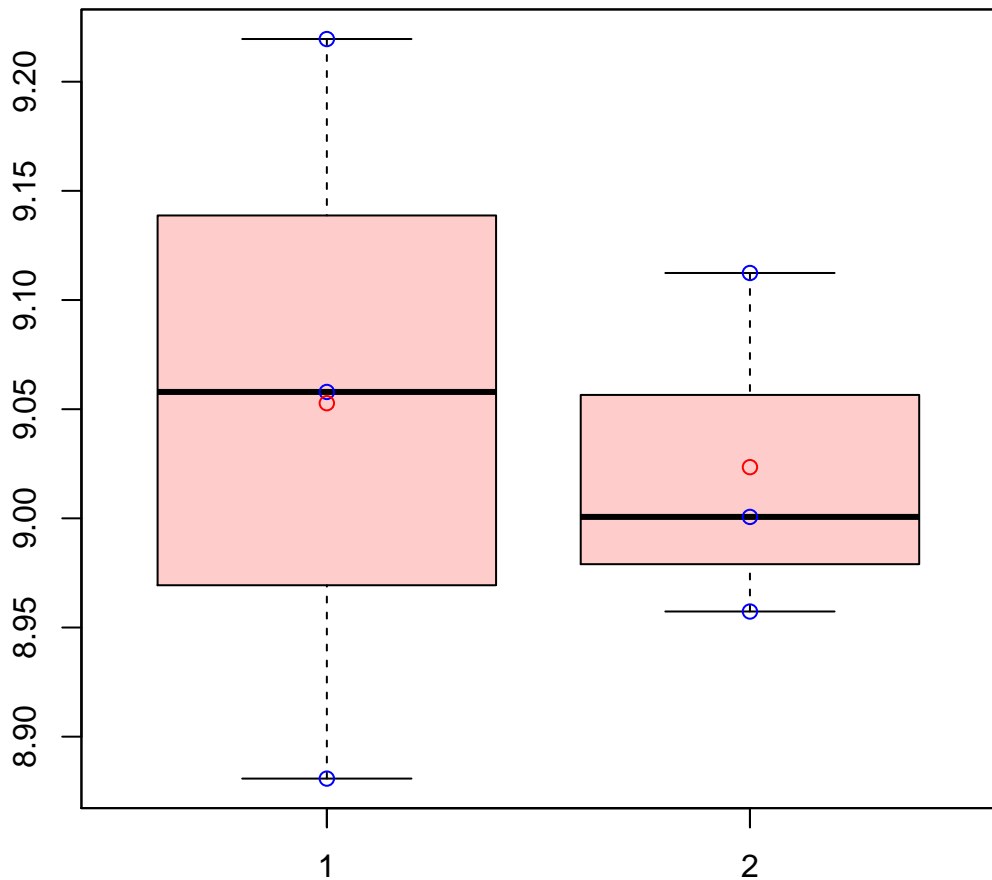

t-Test: p-value = 0.8

# CL3023Contig1|CL3023Contig1

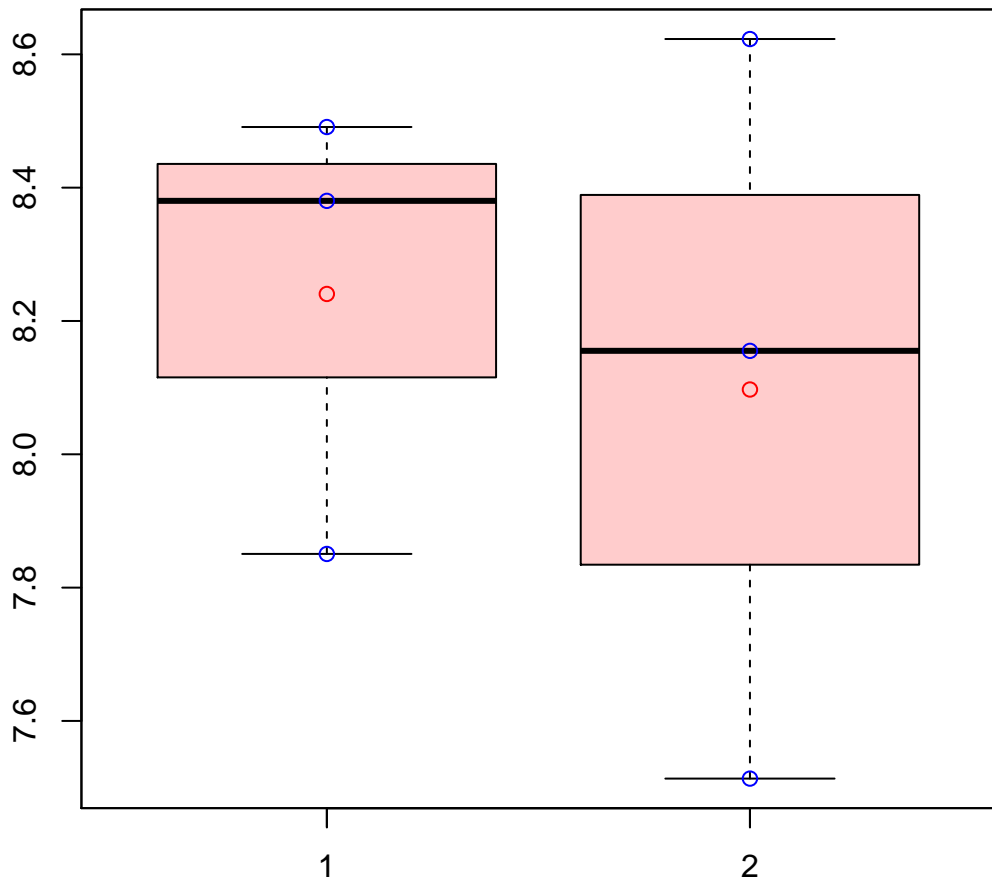

t-Test: p-value = 0.73

# CL3024Contig1|CL3024Contig1

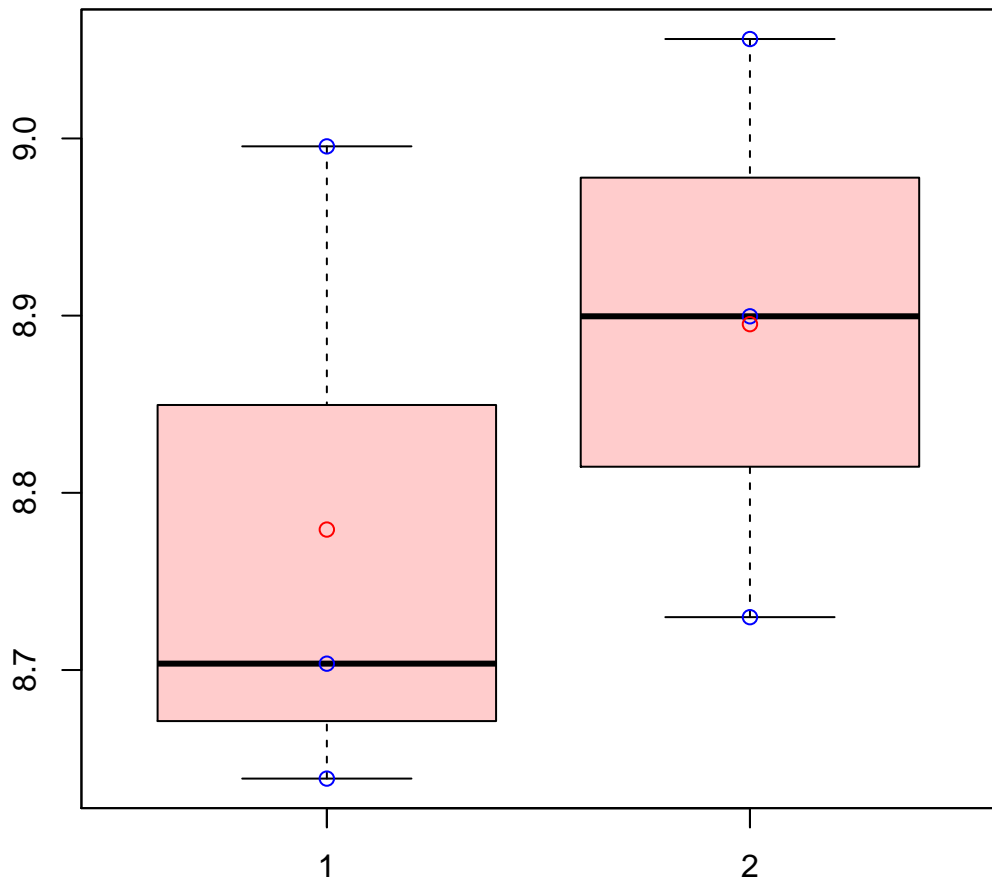

t-Test: p-value = 0.47

# CL3025Contig10|CL3025Contig10

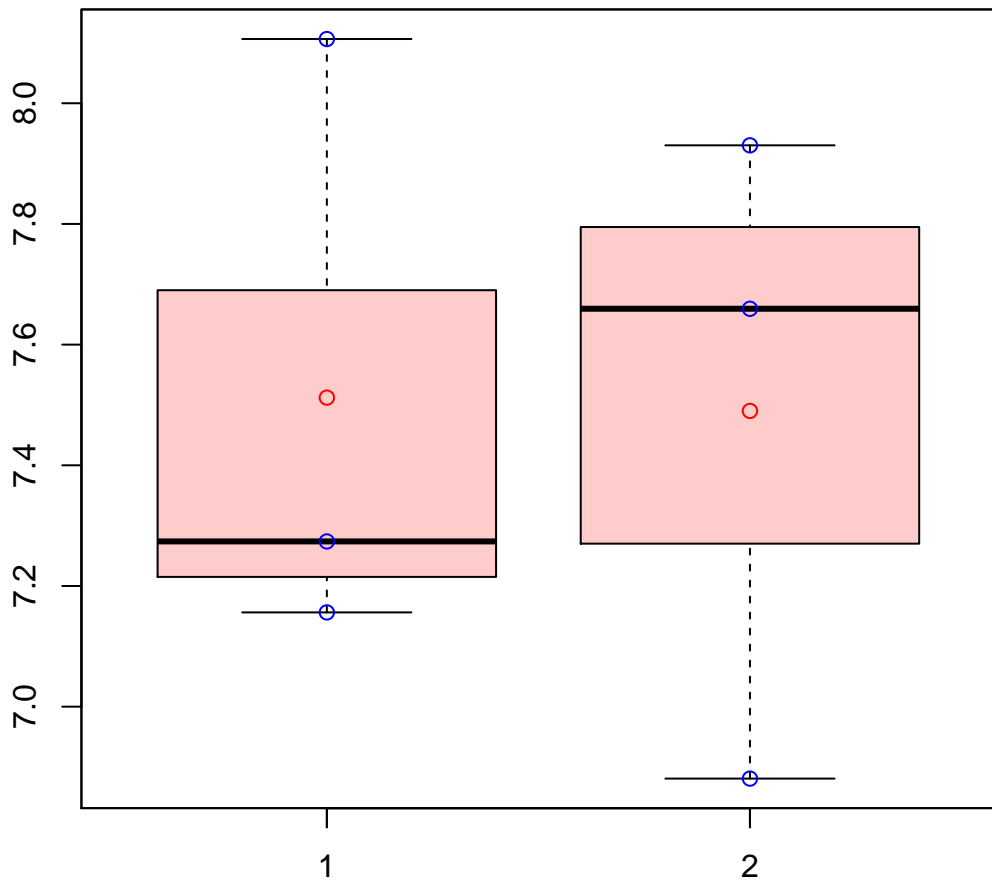

t-Test: p-value = 0.96

# CL3025Contig4|CL3025Contig4



t-Test: p-value = 0.99

# CL3025Contig8|CL3025Contig8

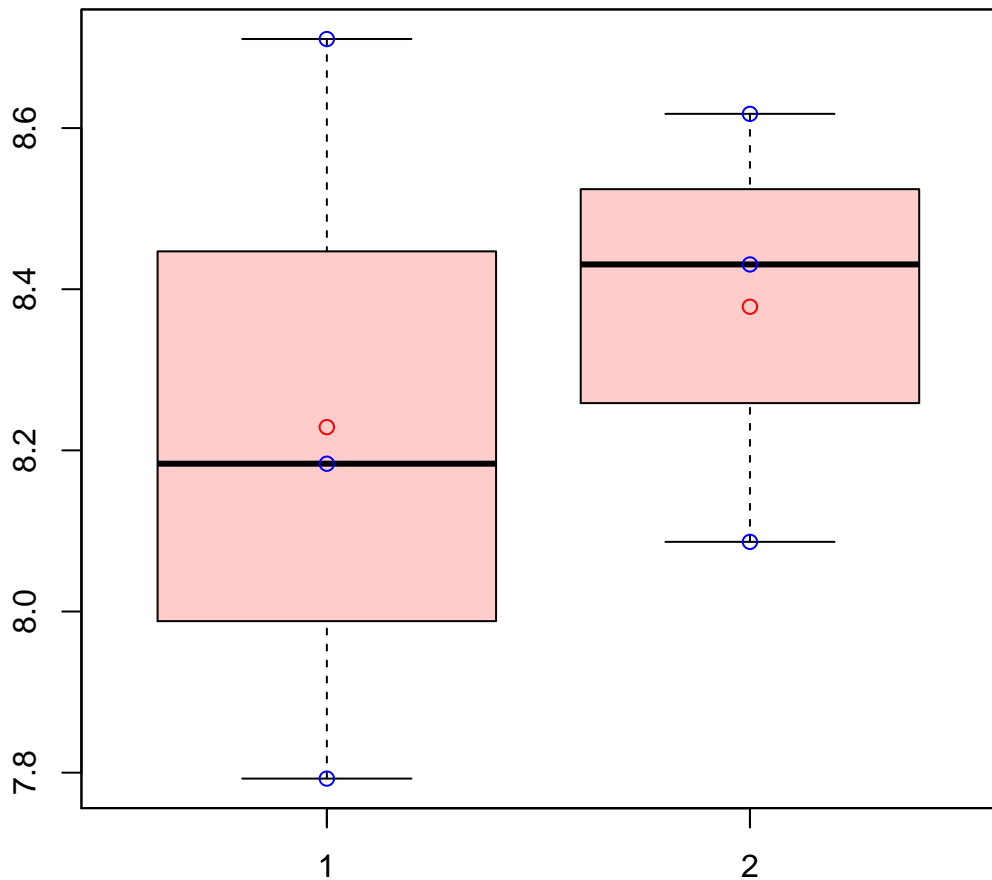

t-Test: p-value = 0.66

# CL3025Contig9|CL3025Contig9

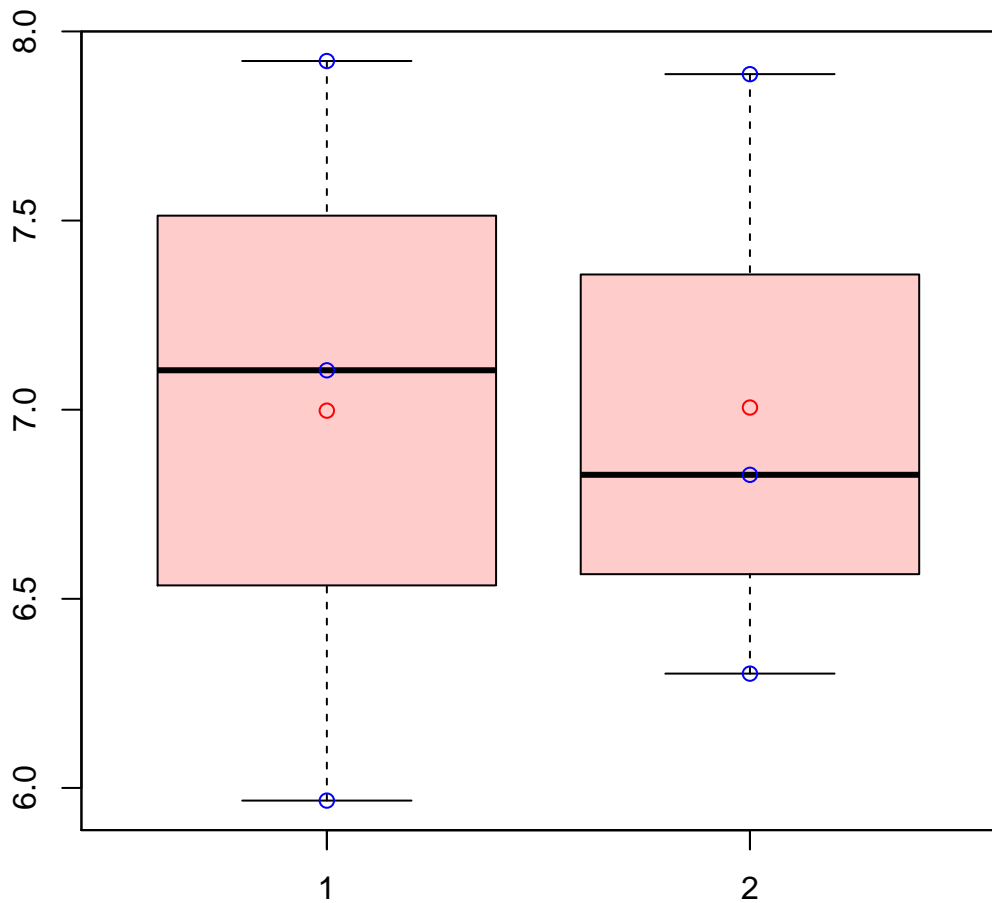

t-Test: p-value = 0.99



# CL3032Contig3|CL3032Contig3

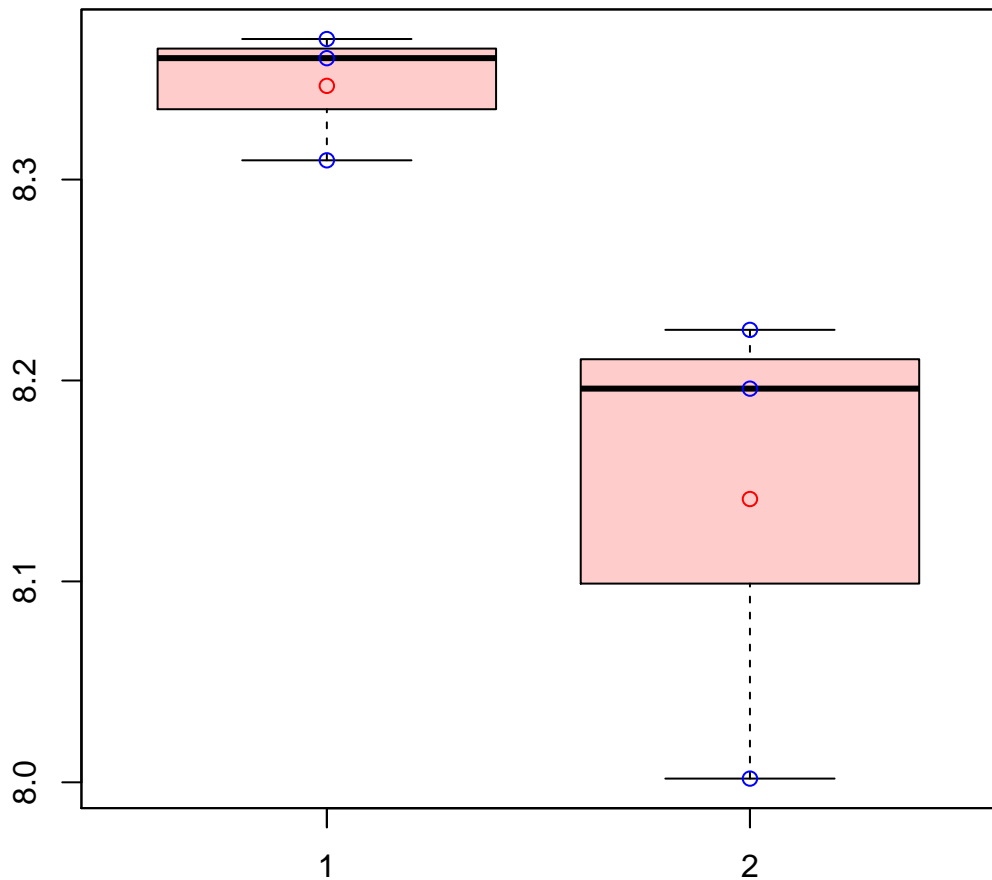

t-Test: p-value = 0.09

# CL3039Contig1|CL3039Contig1

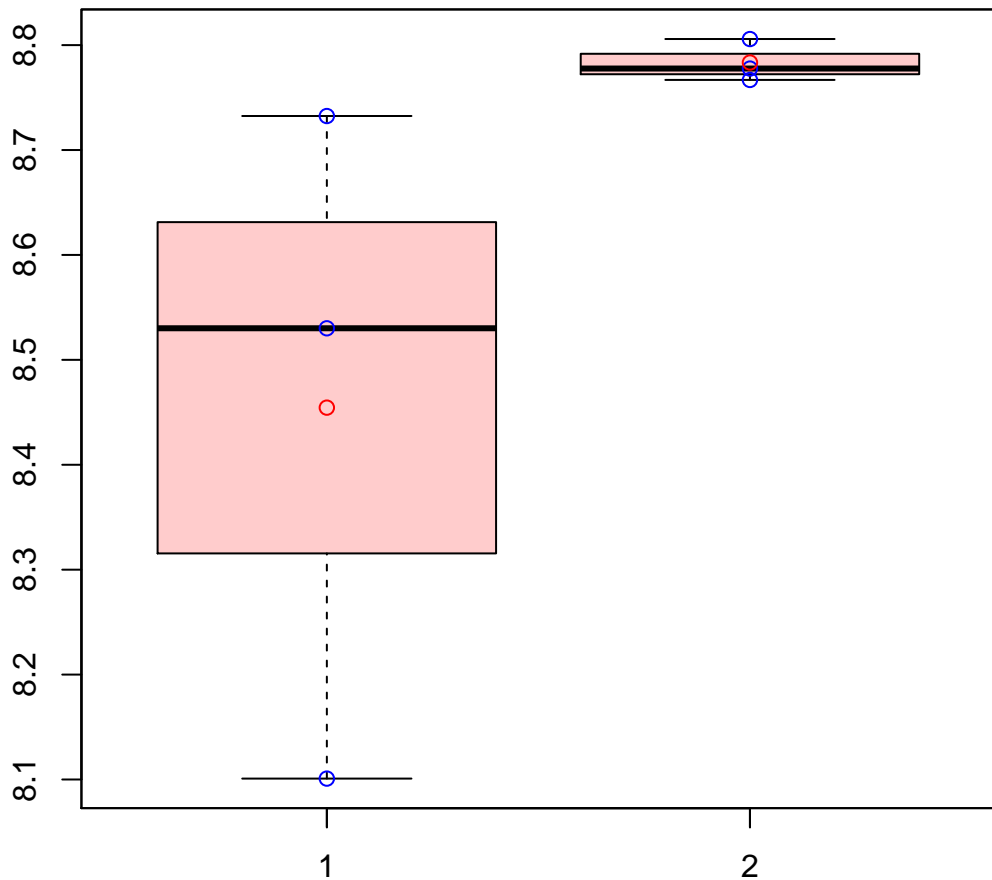

t-Test: p-value = 0.22

# CL3044Contig10|CL3044Contig10

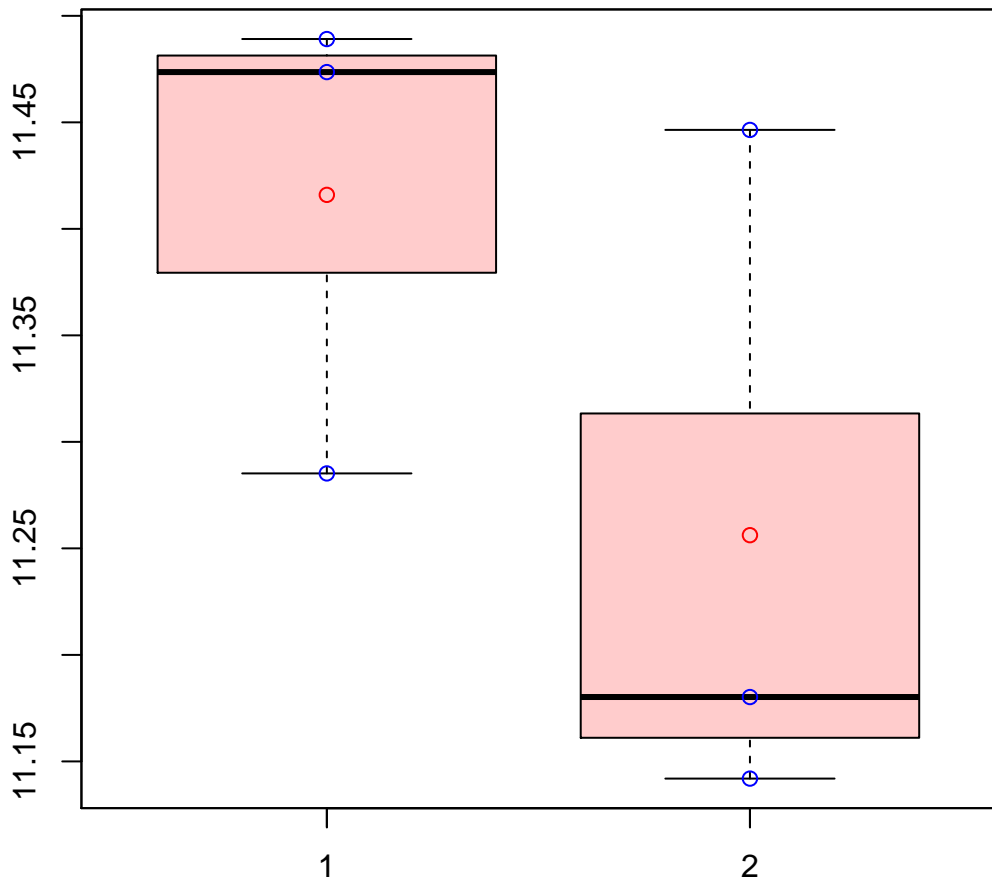

t-Test: p-value = 0.25

# CL3044Contig11|CL3044Contig11

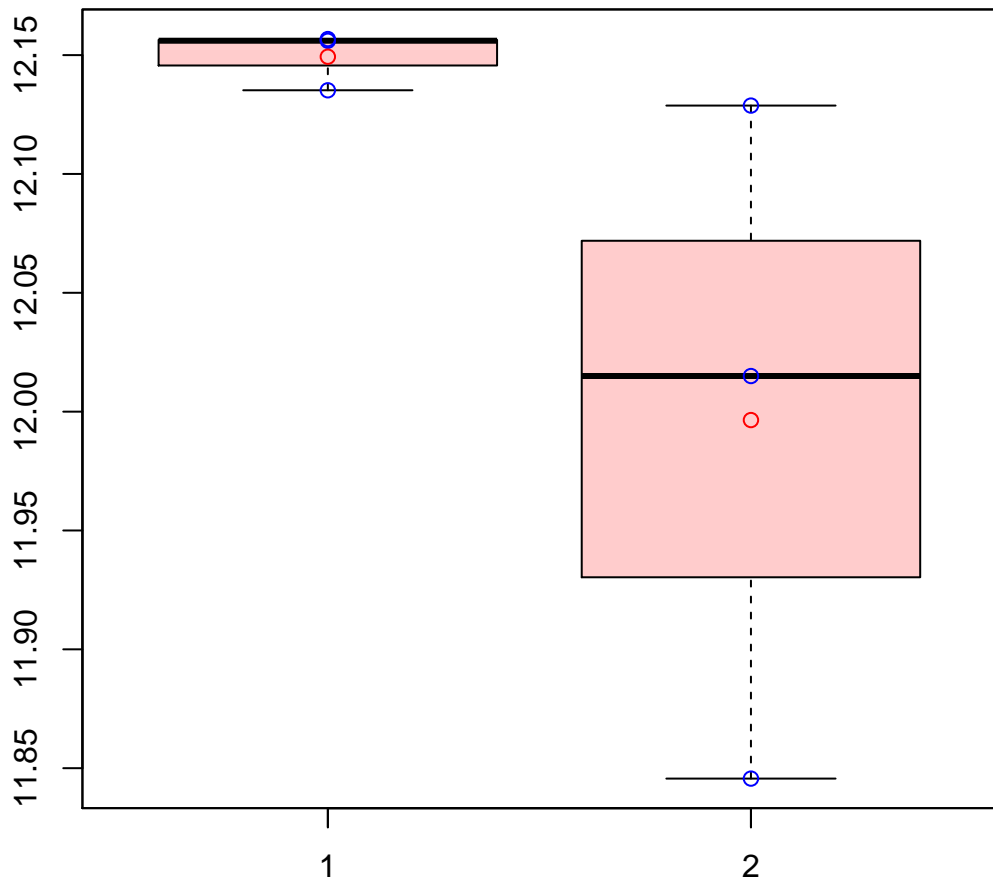

t-Test: p-value = 0.2

# CL3044Contig1|CL3044Contig1

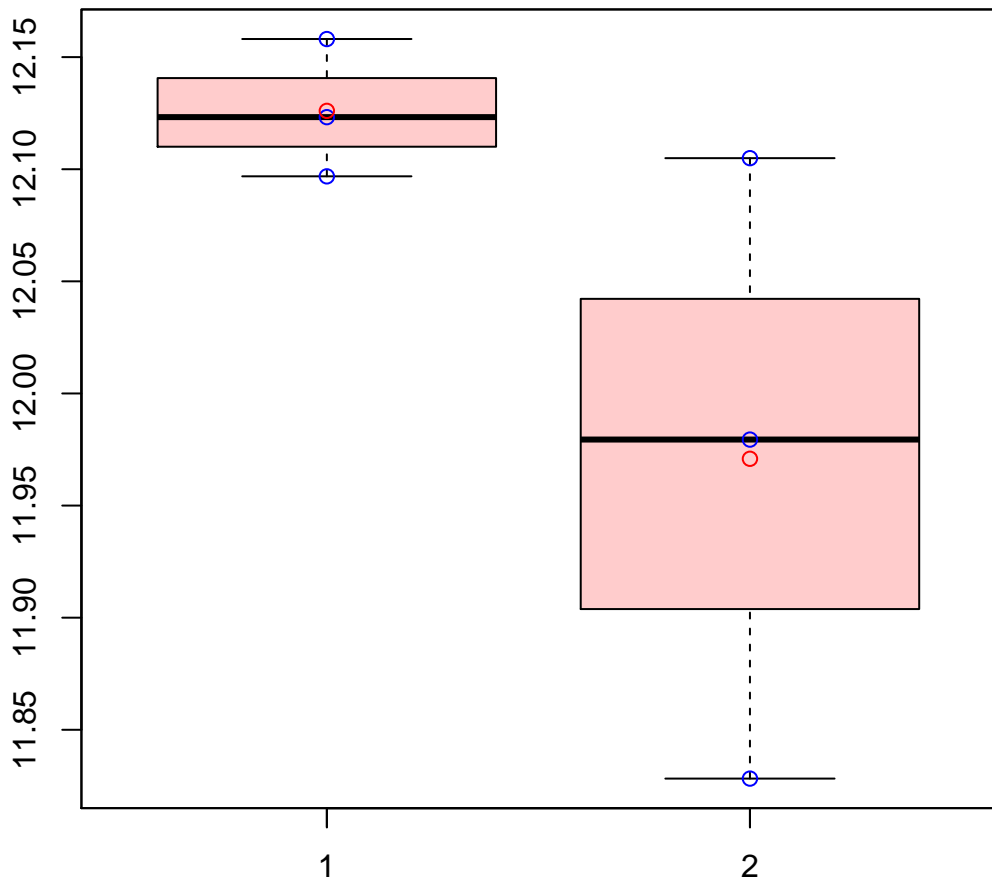

t-Test: p-value = 0.19

# CL3044Contig3|CL3044Contig3

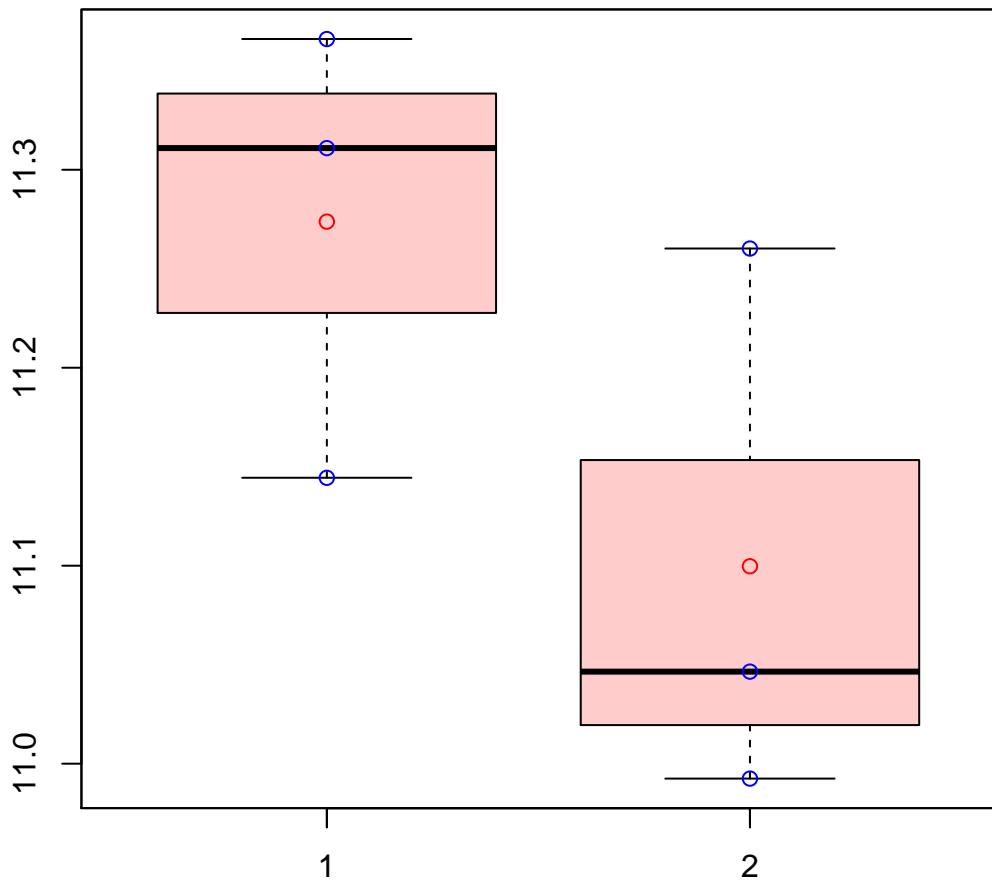

t-Test: p-value = 0.18

# CL3044Contig4|CL3044Contig4

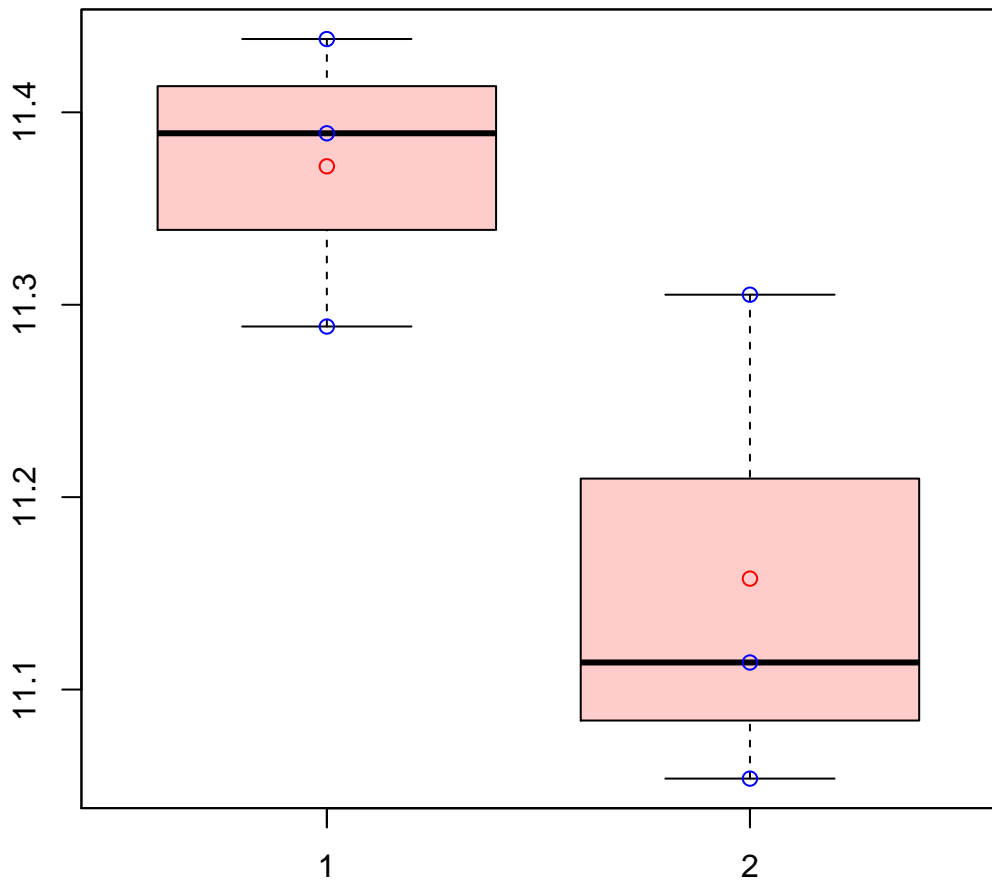

t-Test: p-value = 0.09

# CL3044Contig5|CL3044Contig5

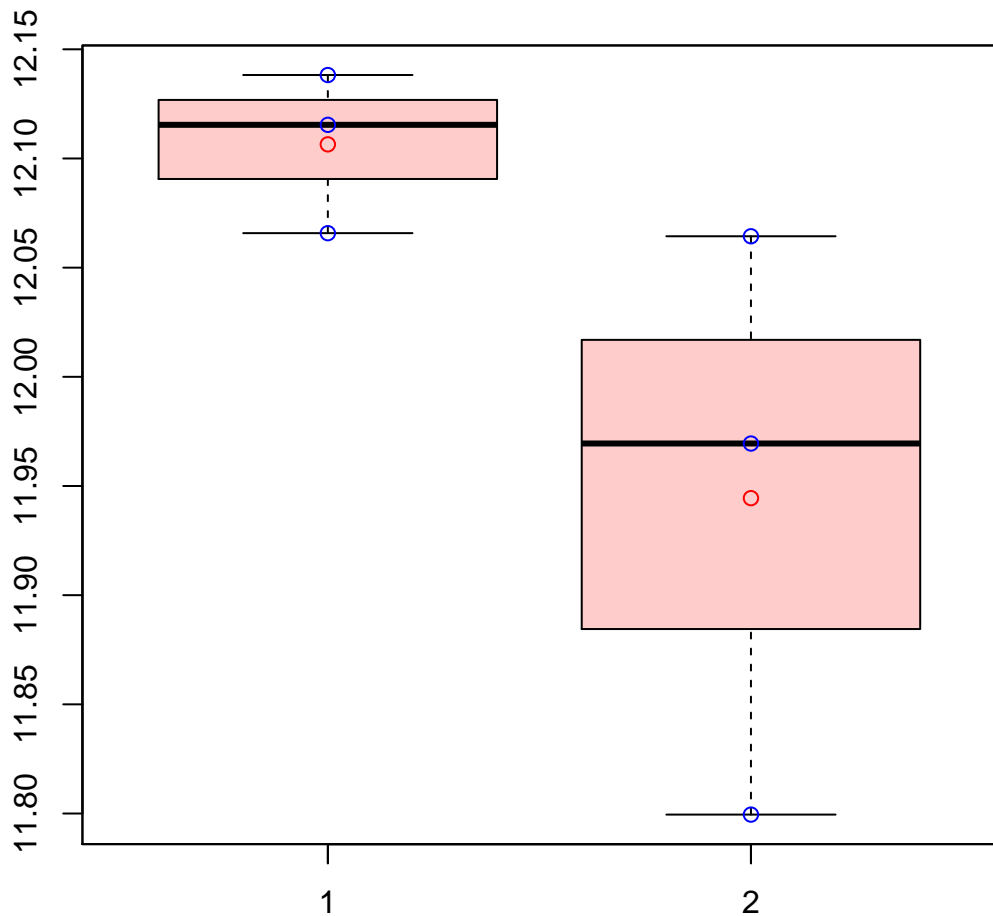

t-Test: p-value = 0.16



# CL3044Contig8|CL3044Contig8

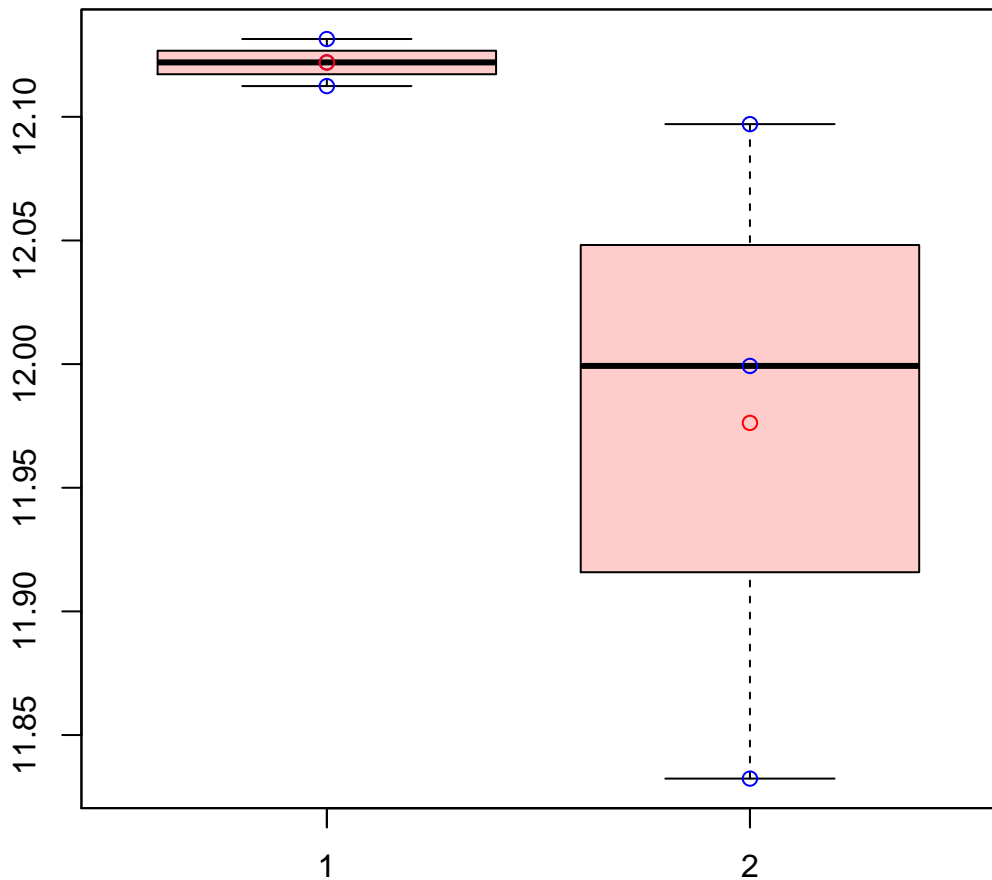

t-Test: p-value = 0.2

# CL3048Contig2|CL3048Contig2

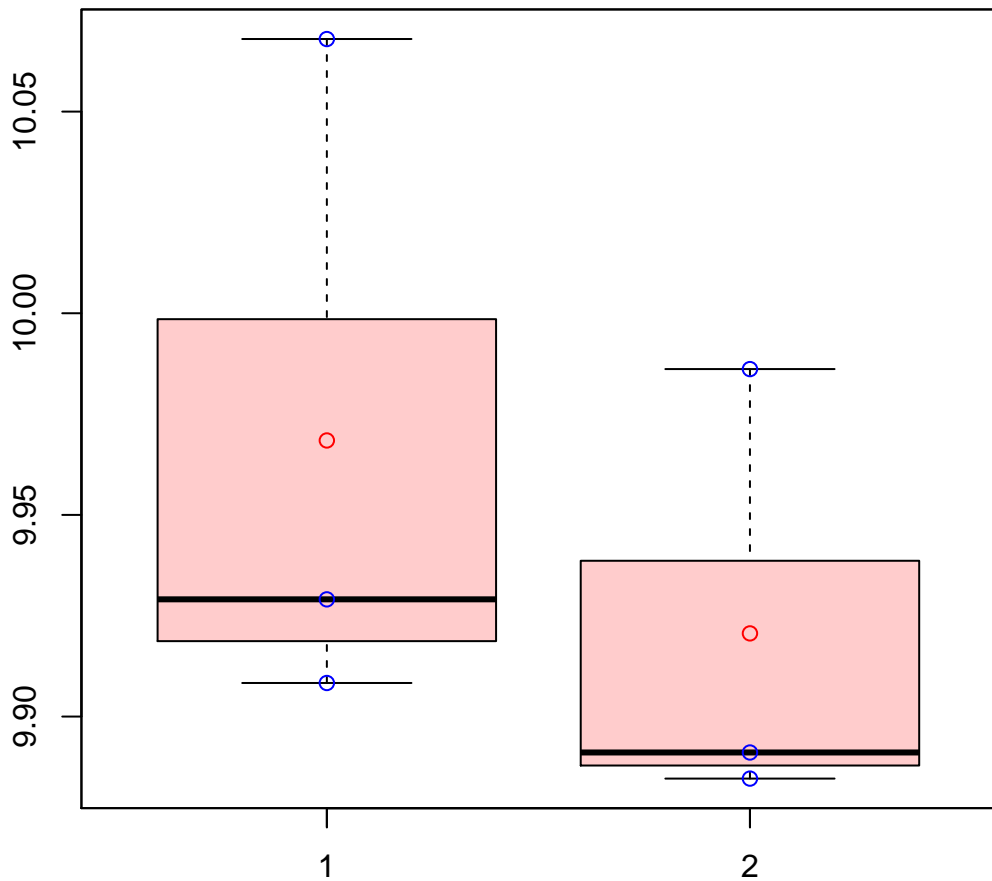

t-Test: p-value = 0.48

# CL304Contig9|CL304Contig9

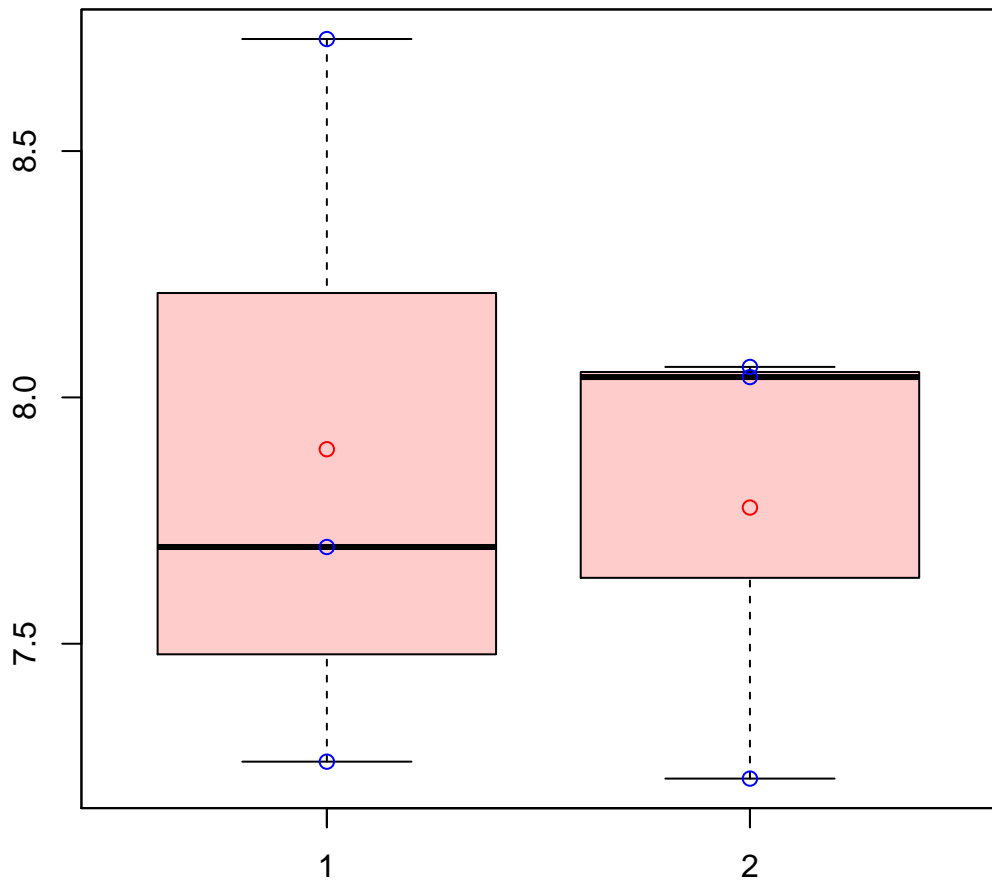

t-Test: p-value = 0.83

# CL3051Contig2|CL3051Contig2

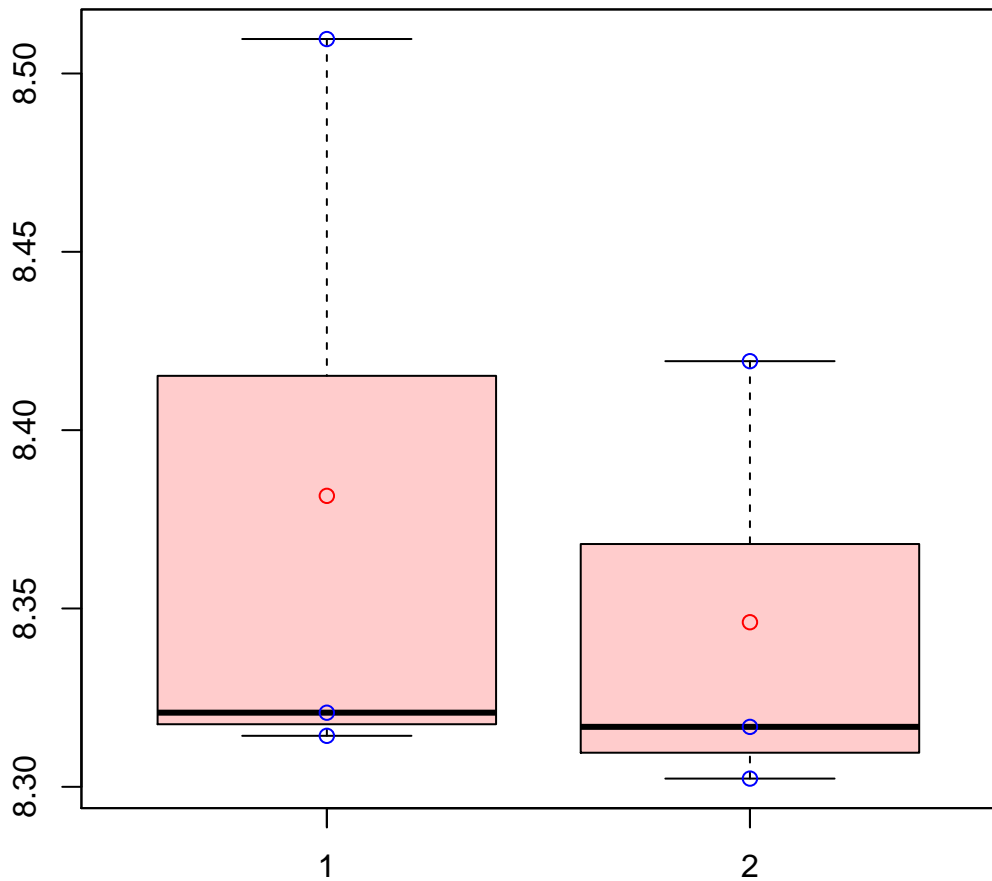

t-Test: p-value = 0.66

# CL3053Contig2|CL3053Contig2

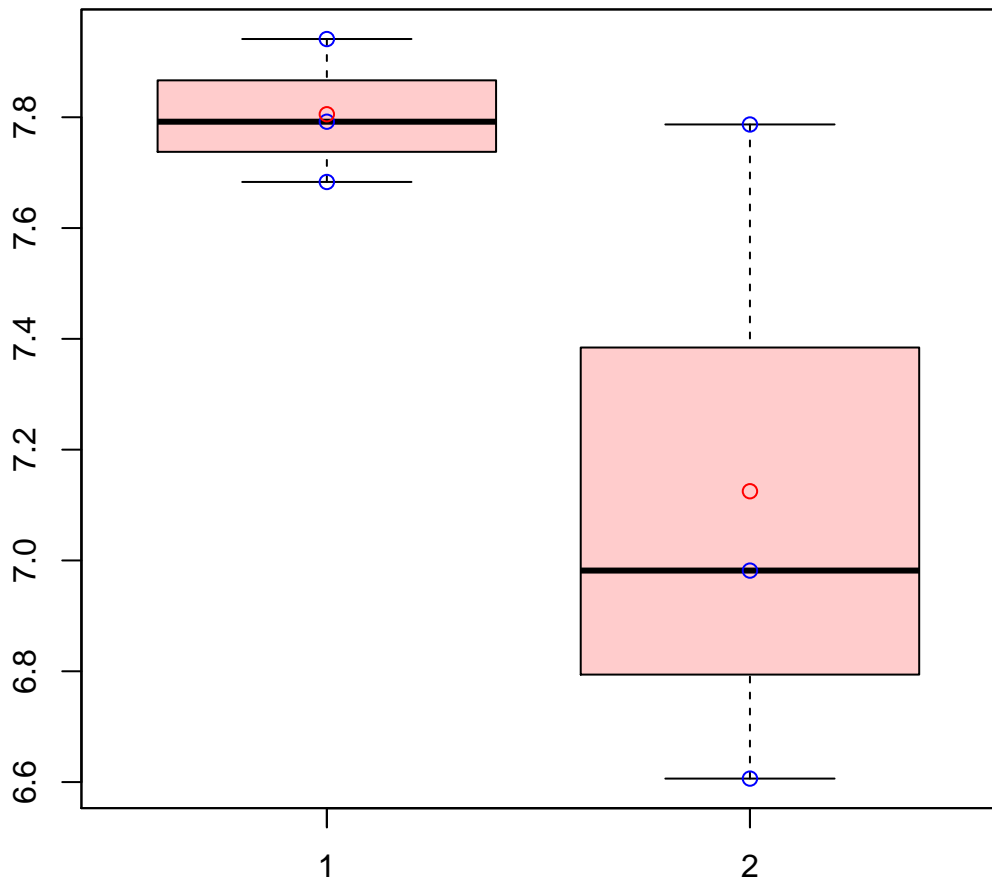

t-Test: p-value = 0.19

# CL3053Contig4|CL3053Contig4



t-Test: p-value = 0.19

# CL305Contig27|CL305Contig27



t-Test: p-value = 0.05

# CL305Contig3|CL305Contig3

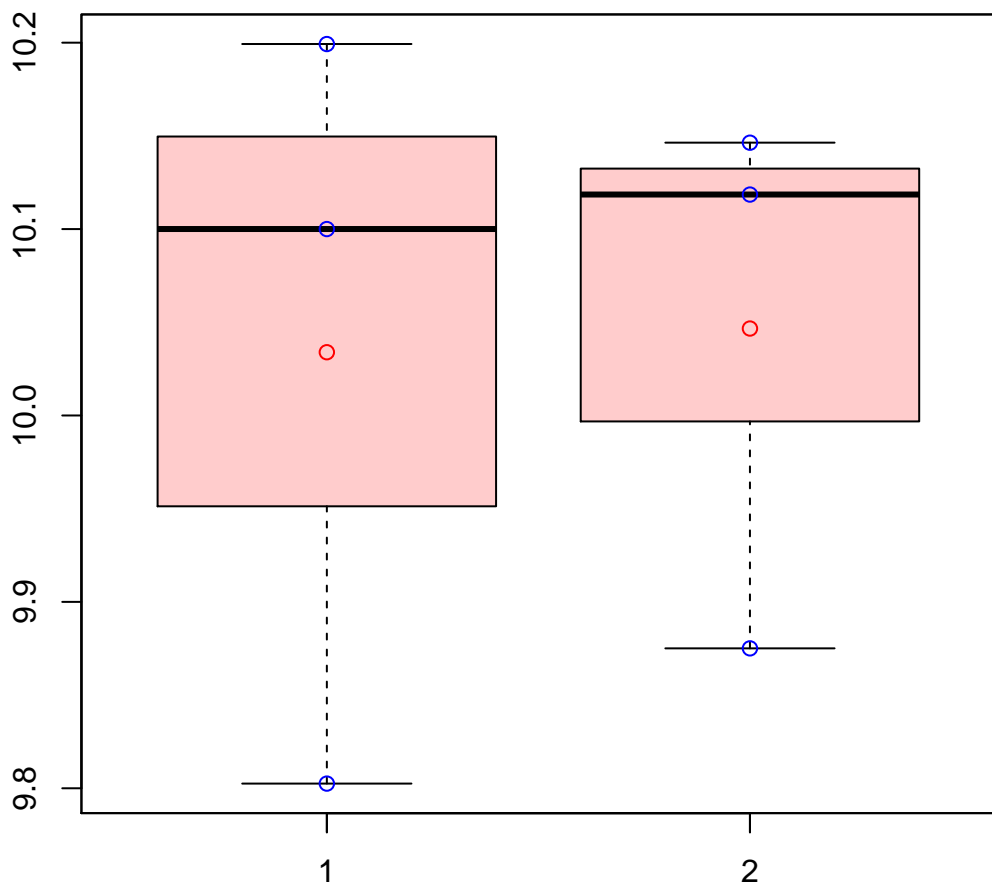

t-Test: p-value = 0.94



# CL305Contig4|CL305Contig4

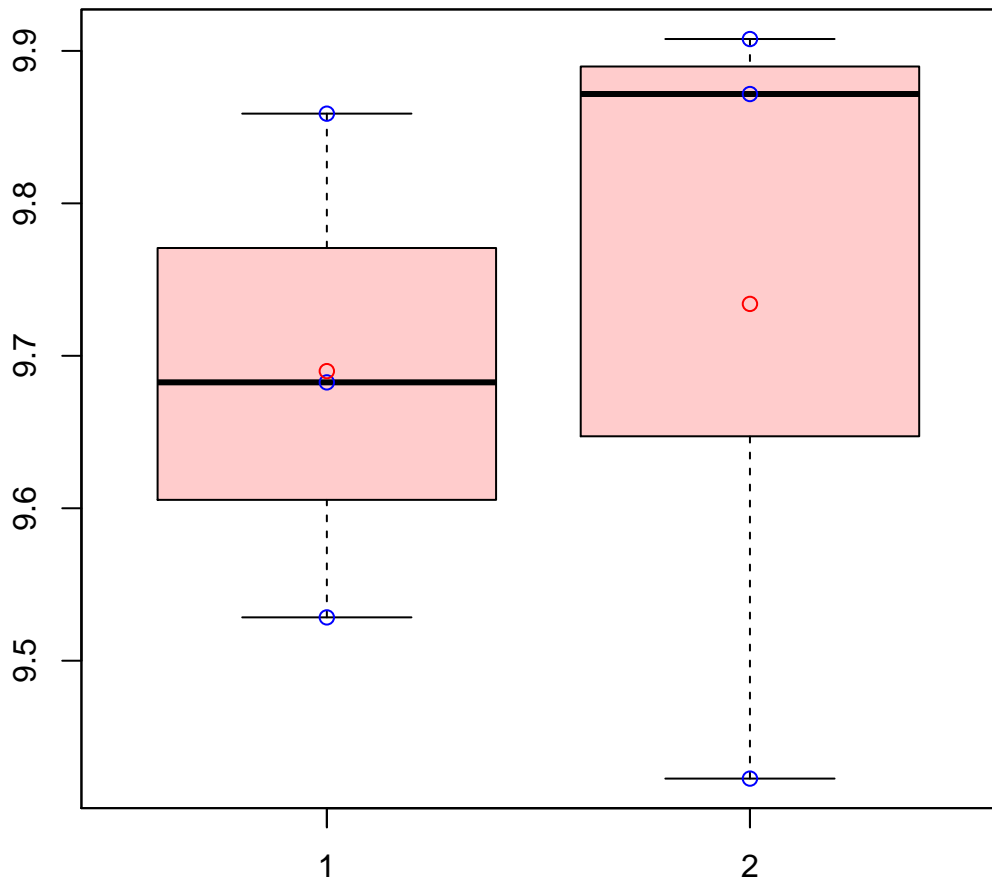

t-Test: p-value = 0.82

# CL3064Contig1|CL3064Contig1



t-Test: p-value = 0.67

# CL3064Contig3|CL3064Contig3

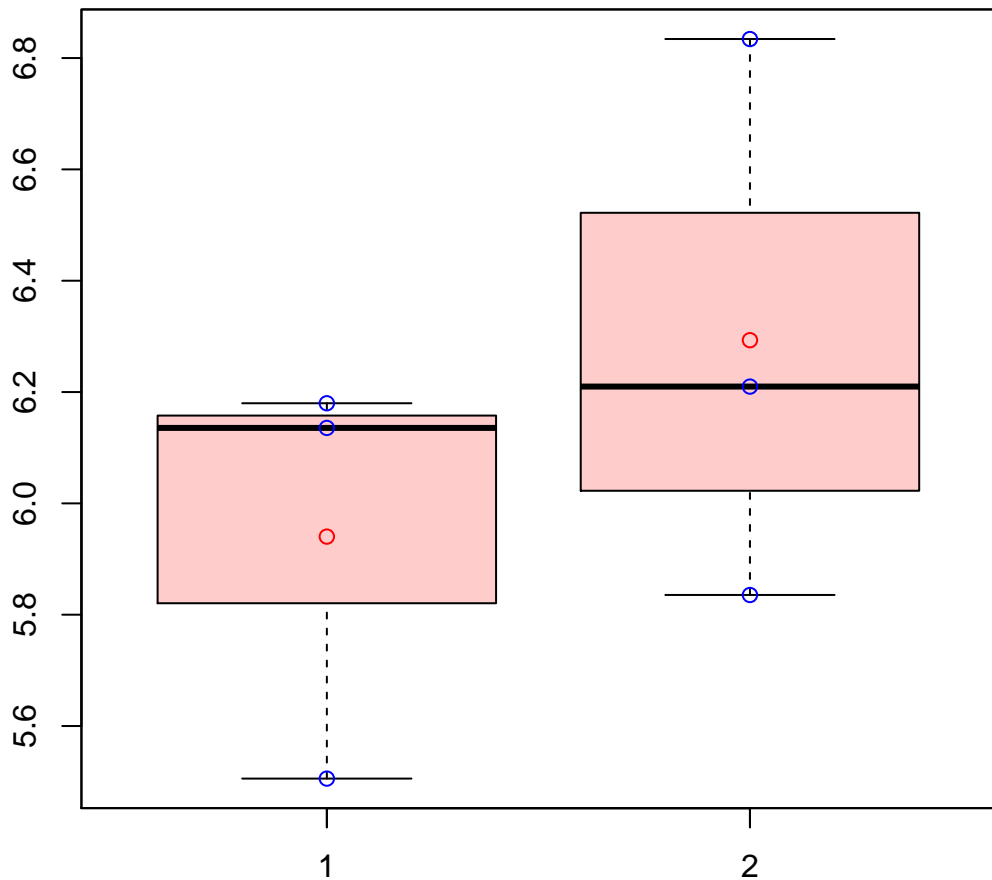

t-Test: p-value = 0.39

# CL3067Contig5|CL3067Contig5

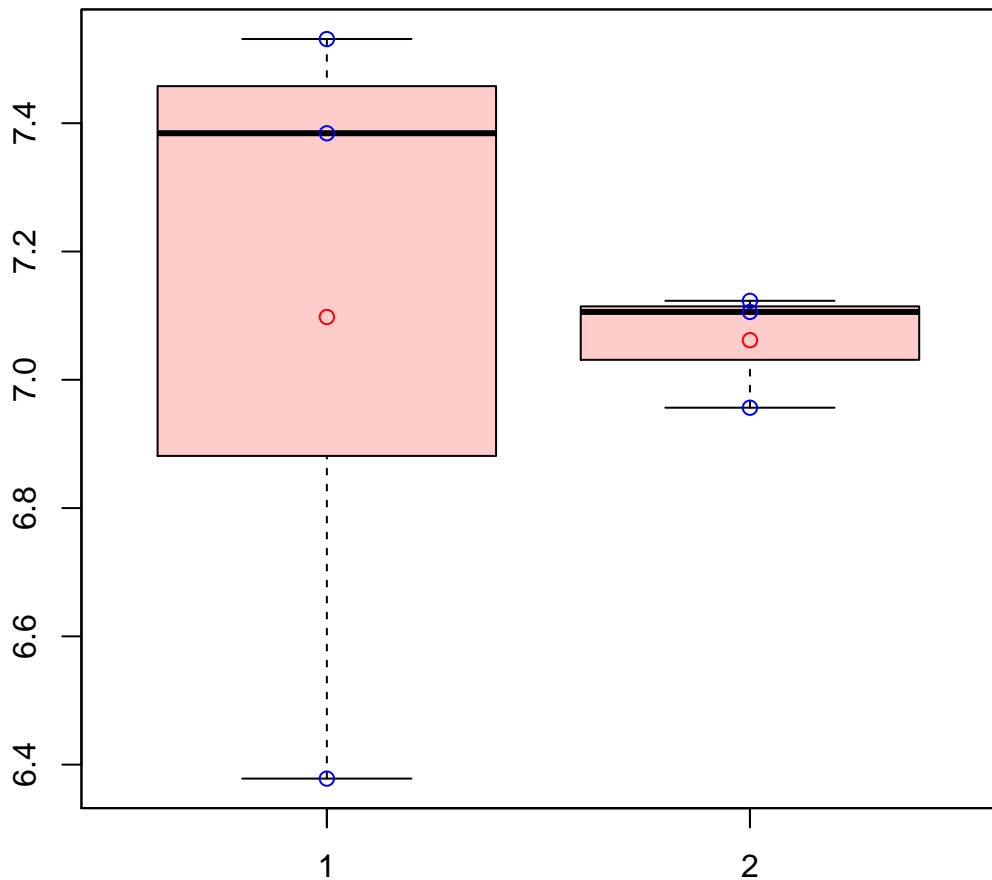

t-Test: p-value = 0.93

# CL3068Contig1|CL3068Contig1

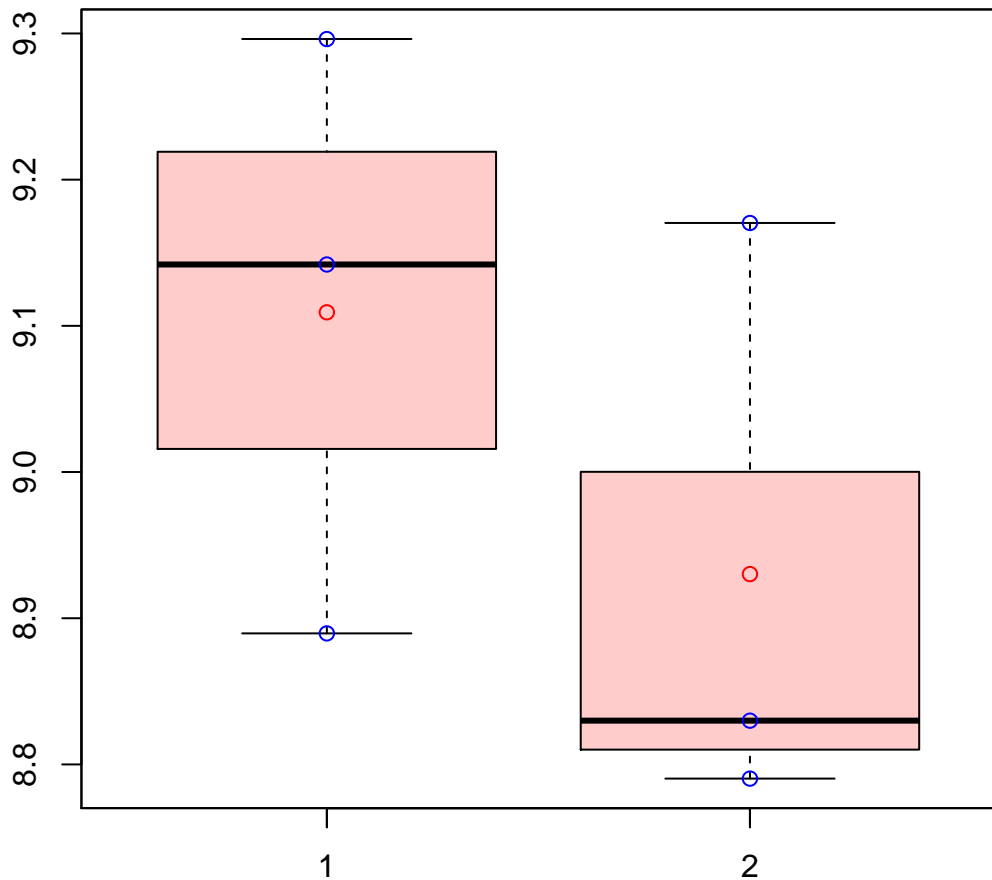

t-Test: p-value = 0.35

# CL3068Contig2|CL3068Contig2

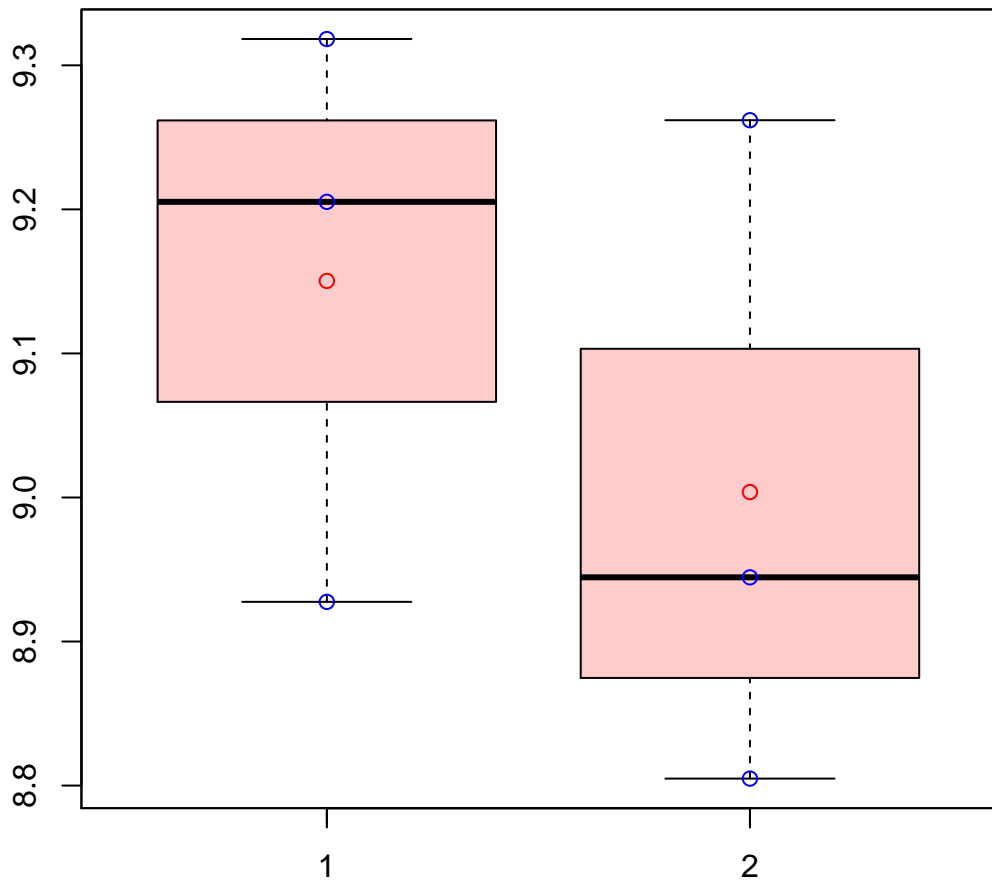

t-Test: p-value = 0.46

# CL3068Contig3|CL3068Contig3

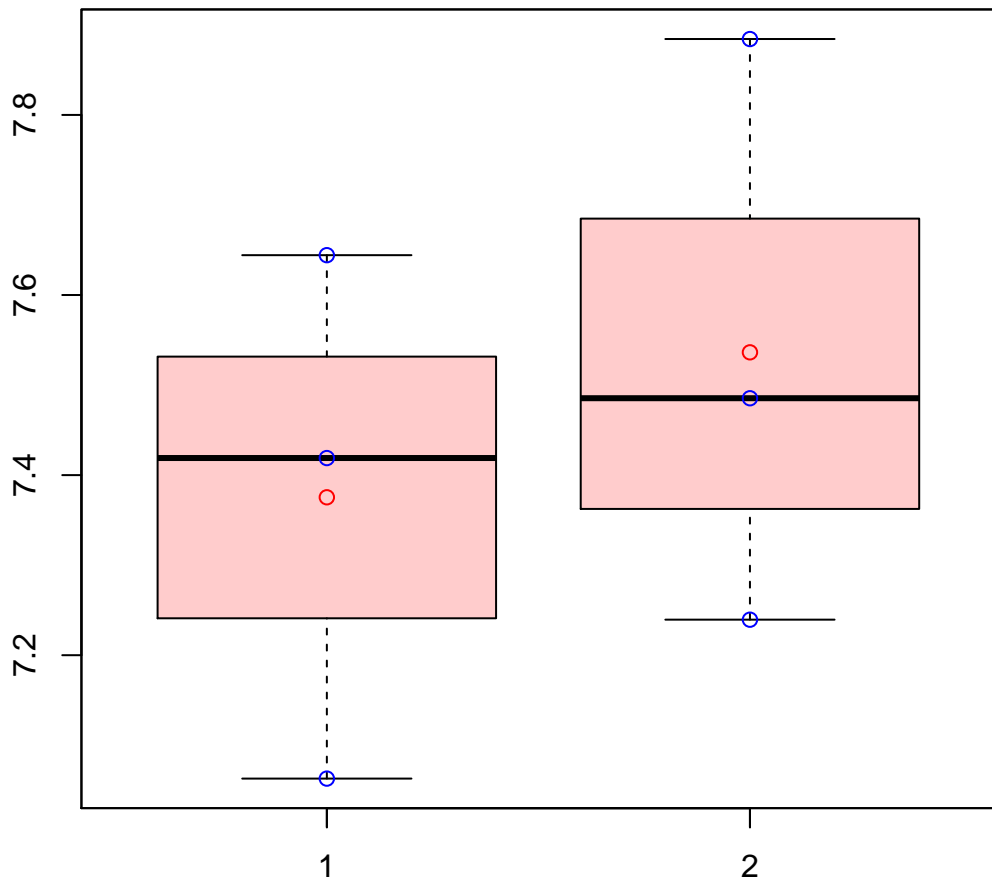

t-Test: p-value = 0.56

# CL306Contig6|CL306Contig6

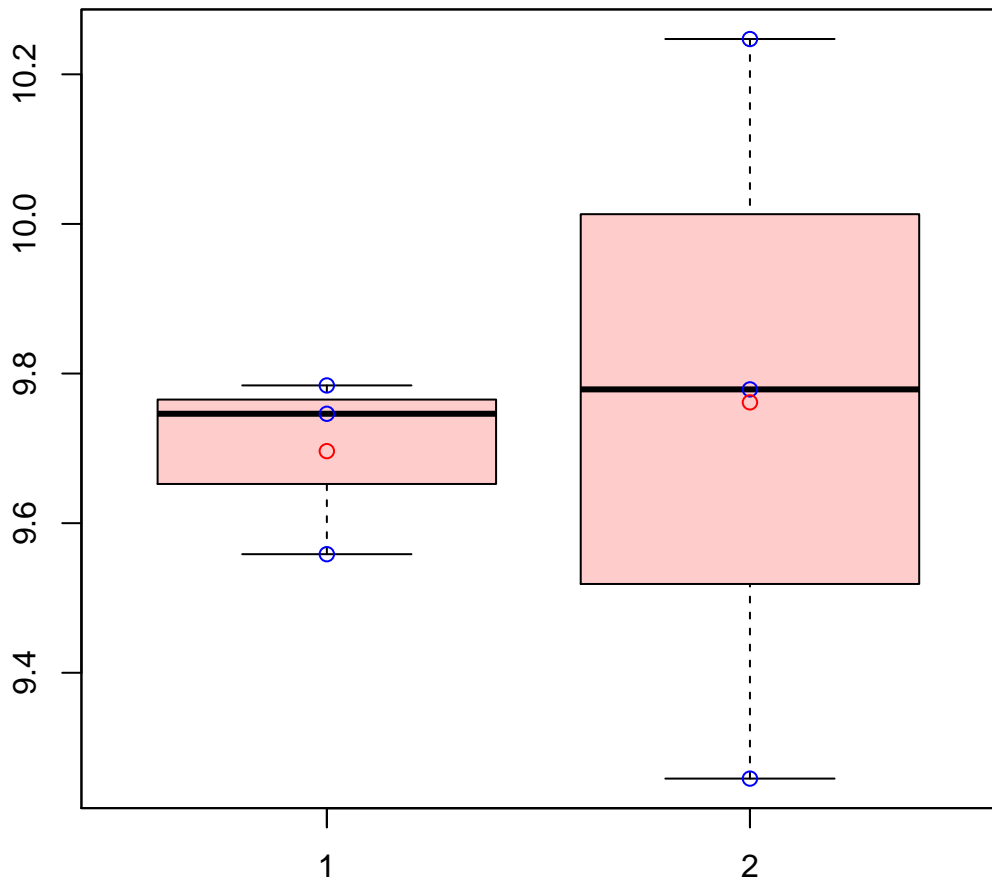

t-Test: p-value = 0.84



# CL3074Contig4|CL3074Contig4

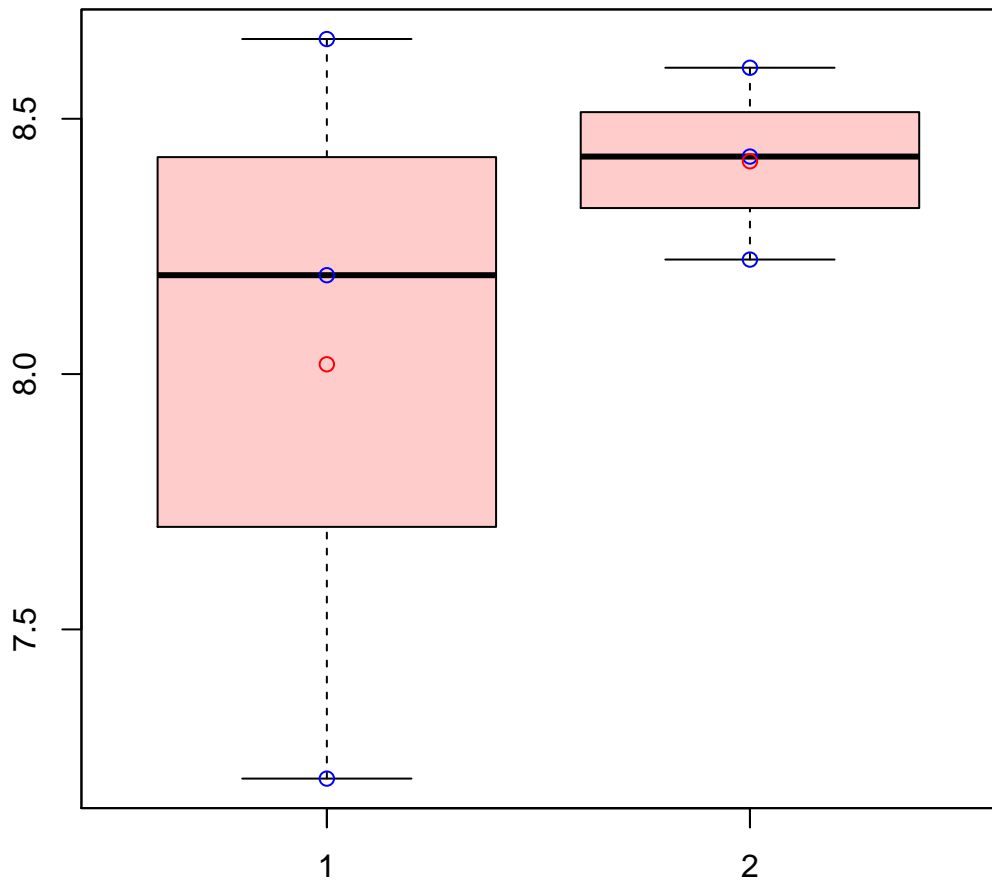

t-Test: p-value = 0.45

# CL3075Contig1|CL3075Contig1

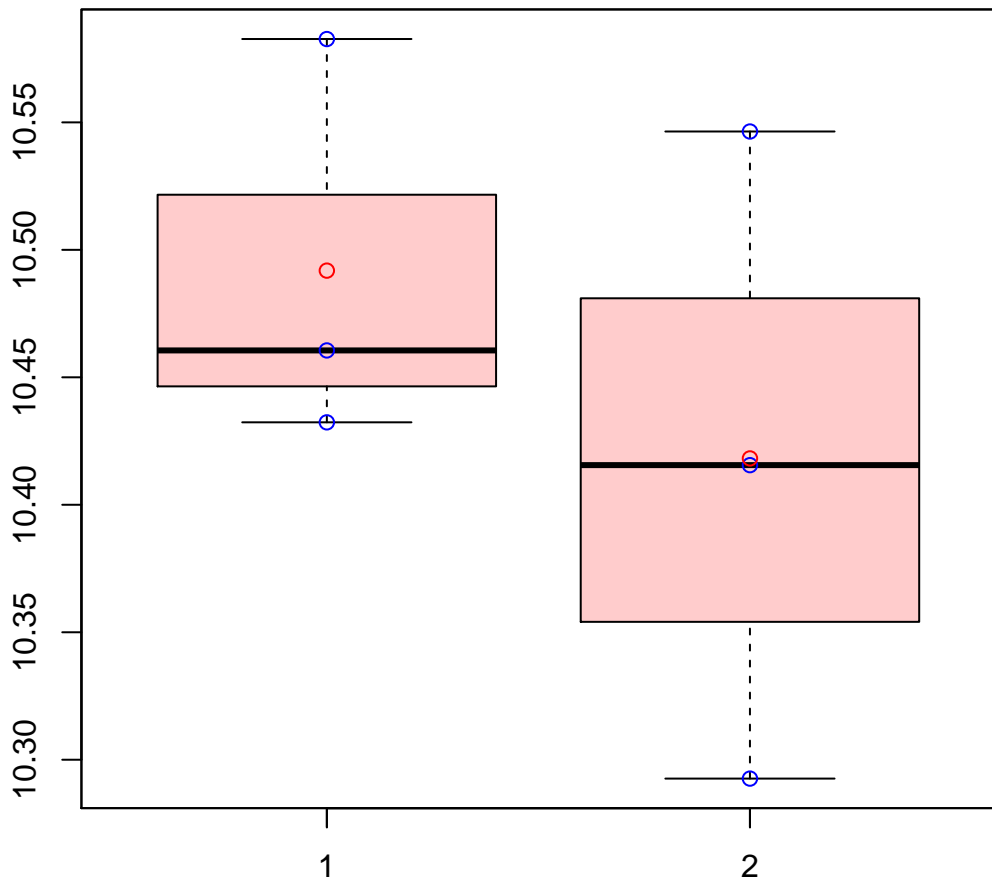

t-Test: p-value = 0.45

# CL307Contig17|CL307Contig17

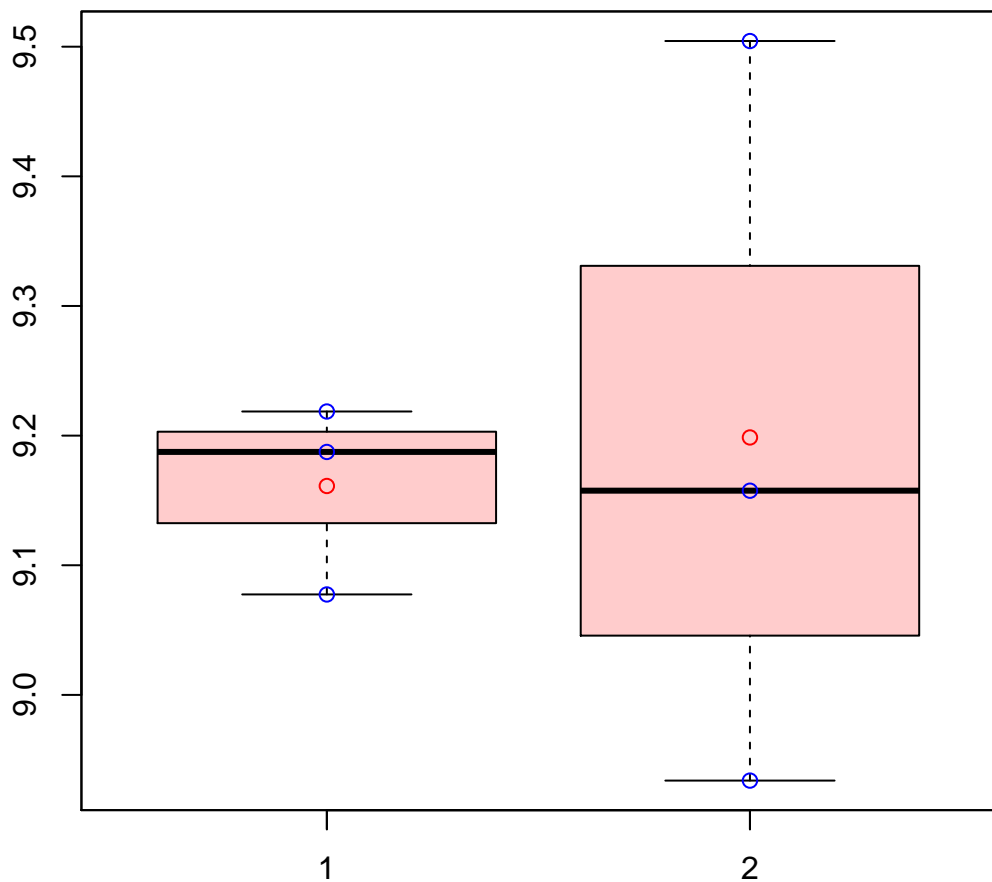

t-Test: p-value = 0.85

# CL307Contig6|CL307Contig6

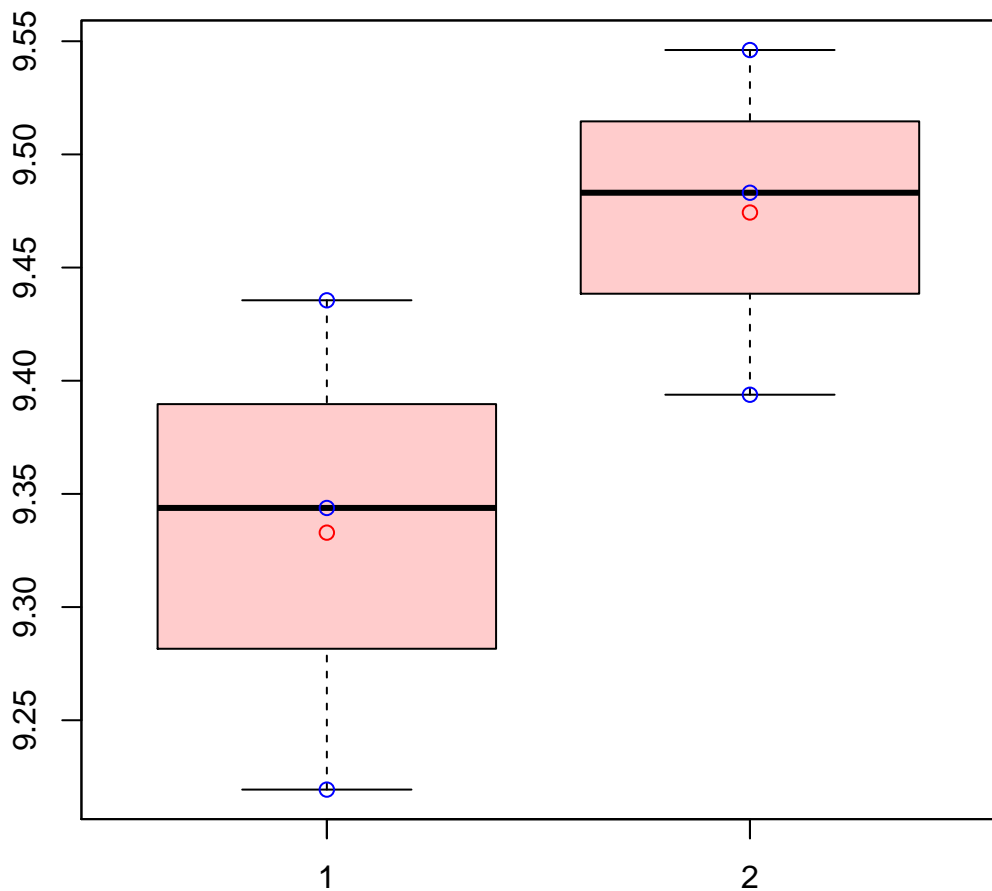

t-Test: p-value = 0.15

# CL3081Contig1|CL3081Contig1

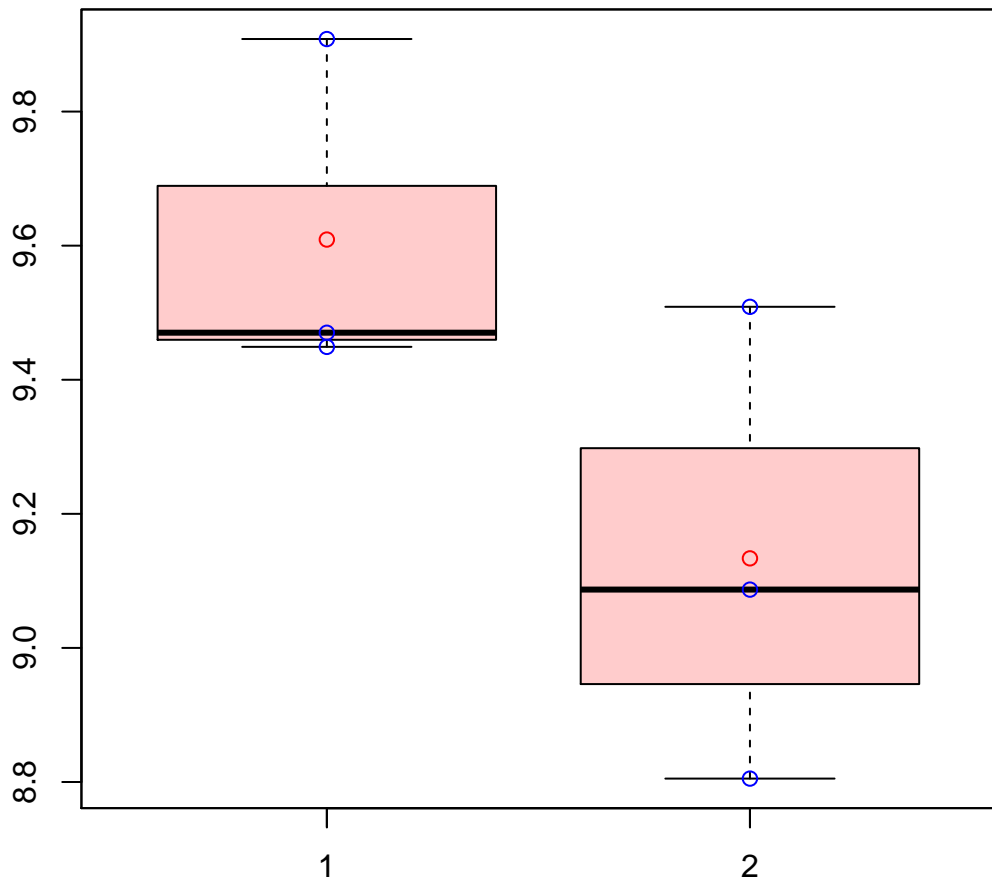

t-Test: p-value = 0.14

# CL3083Contig1|CL3083Contig1

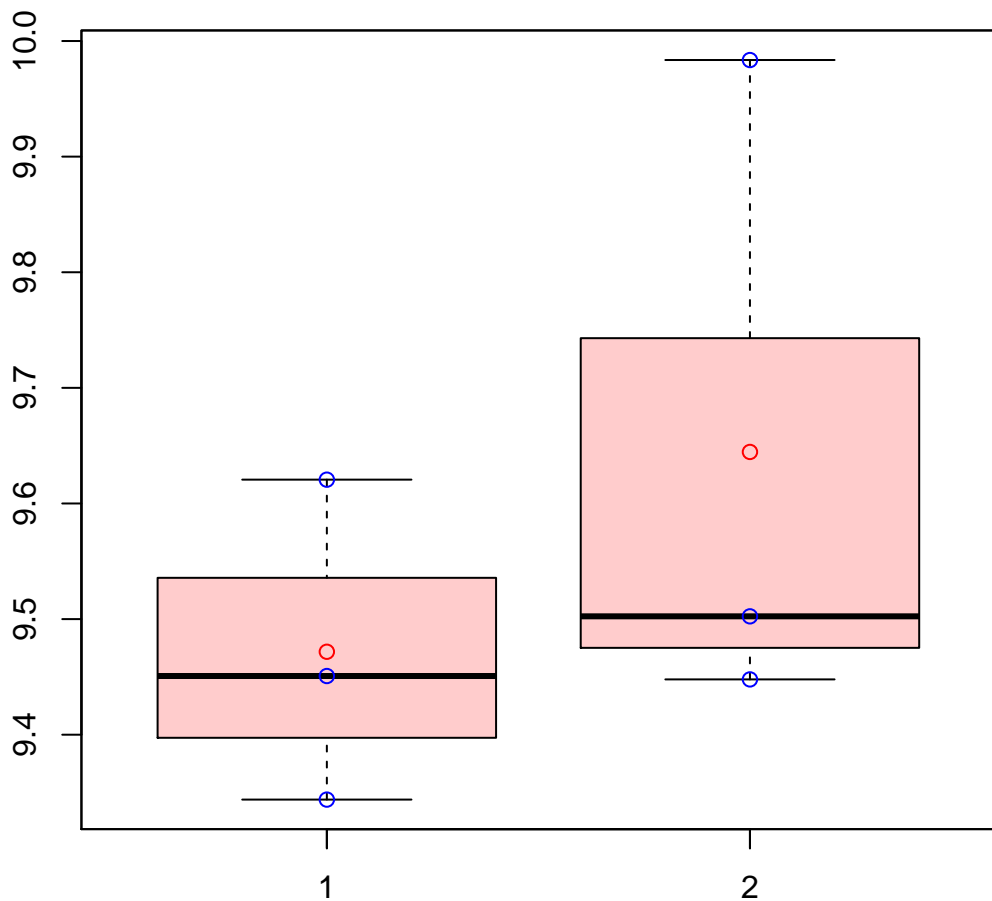

t-Test: p-value = 0.43

# CL3084Contig2|CL3084Contig2

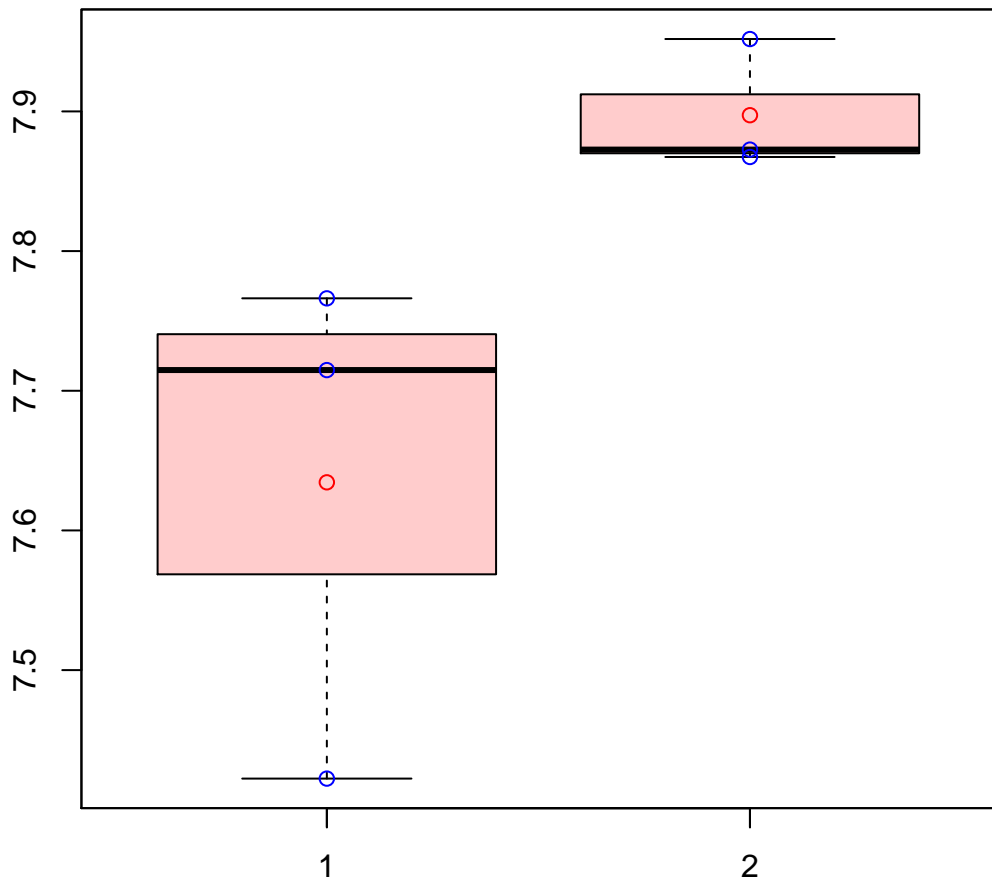

t-Test: p-value = 0.13

# CL3088Contig1|CL3088Contig1

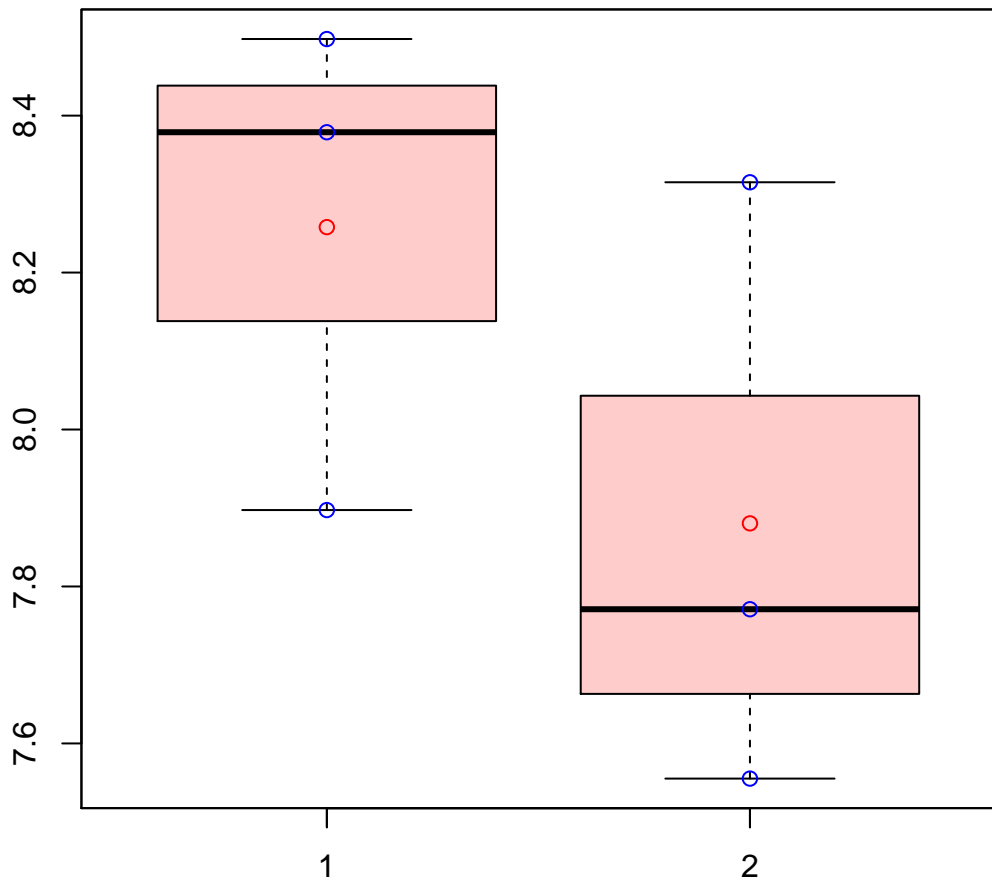

t-Test: p-value = 0.27



# CL3092Contig3|CL3092Contig3

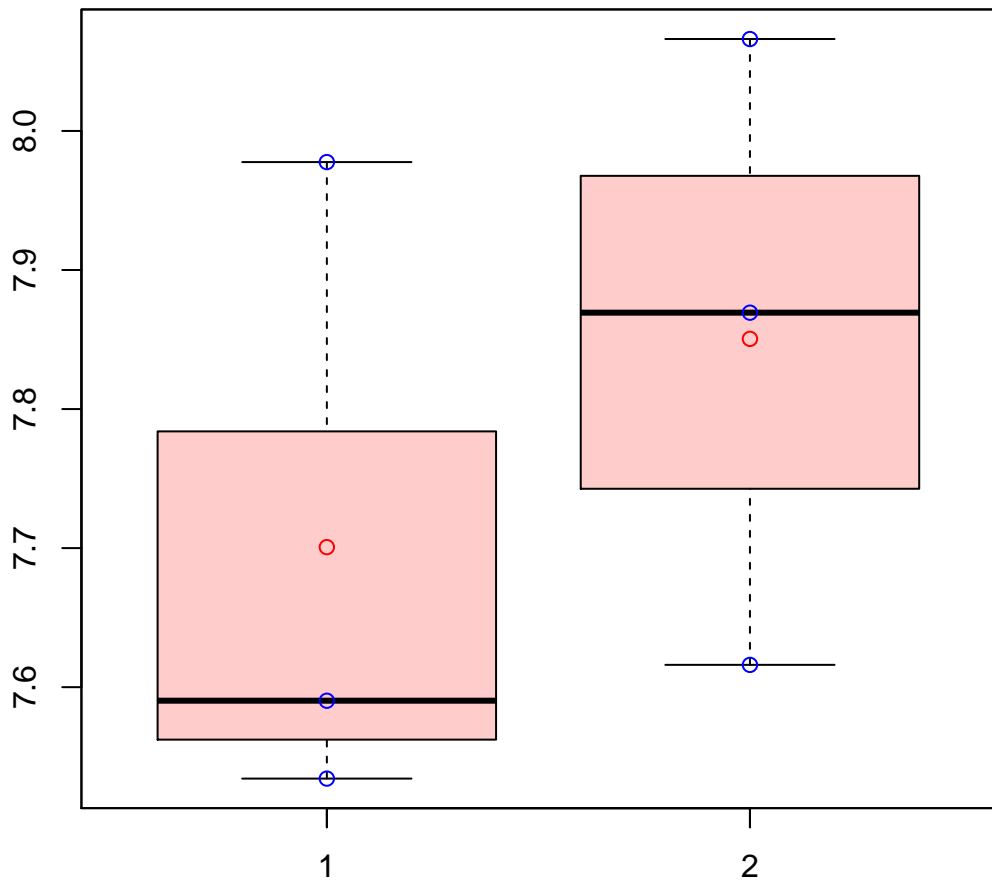

t-Test: p-value = 0.48

# CL3095Contig1|CL3095Contig1

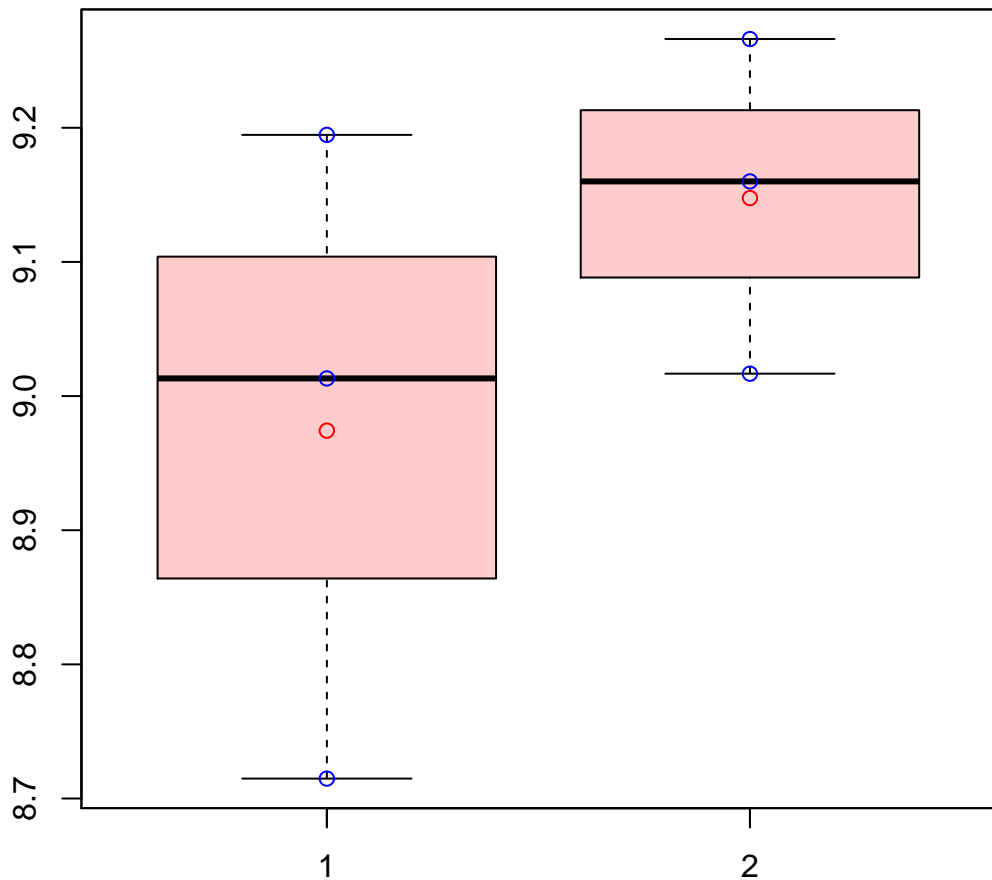

t-Test: p-value = 0.35

# CL3095Contig2|CL3095Contig2

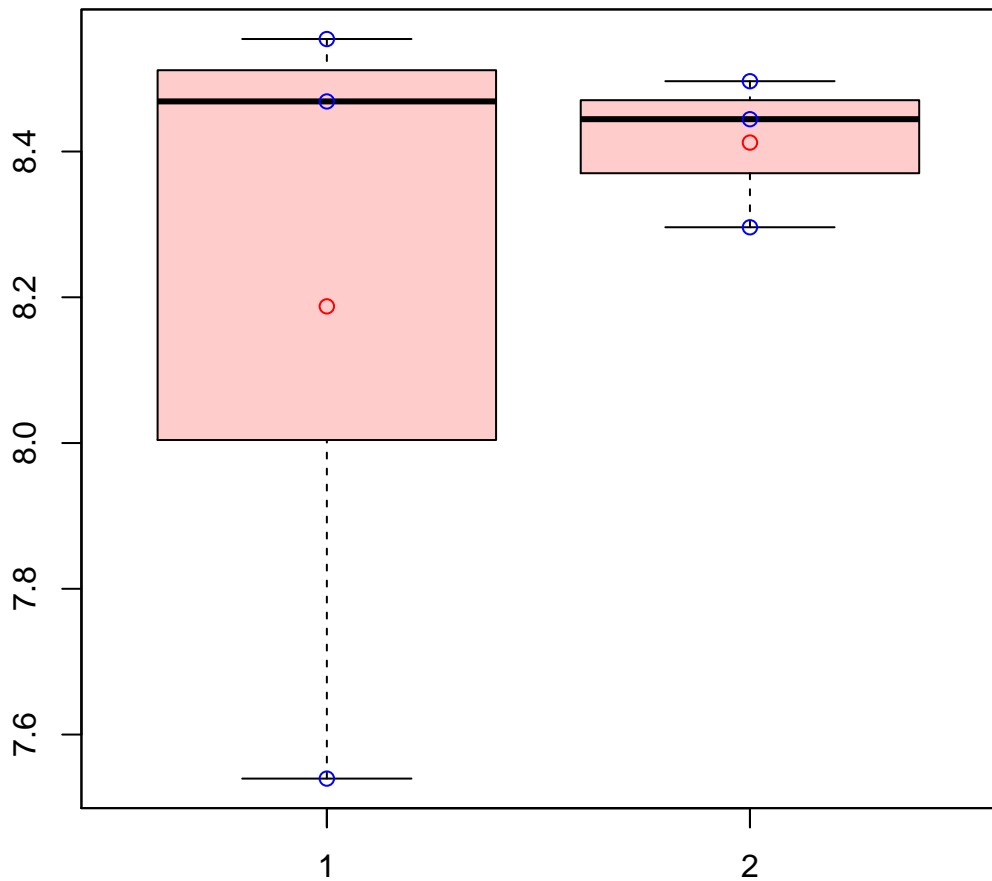

t-Test: p-value = 0.56

# CL309Contig4|CL309Contig4



t-Test: p-value = 0.38

# CL309Contig8|CL309Contig8

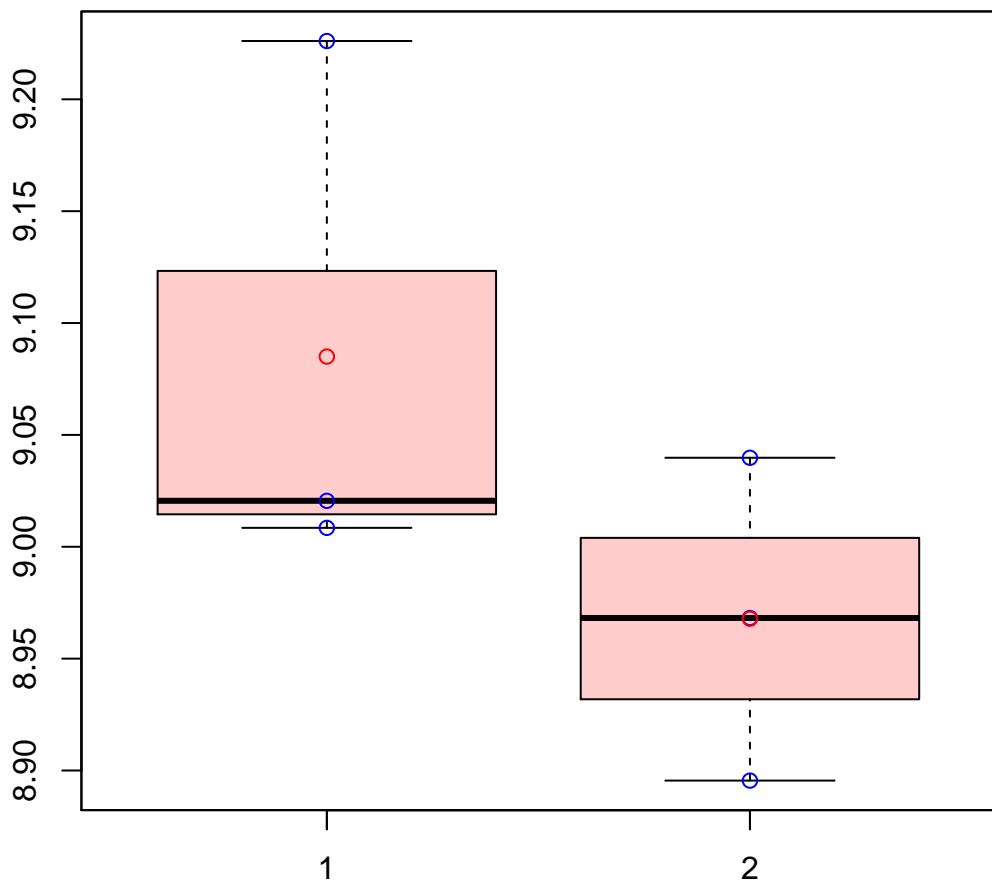

t-Test: p-value = 0.24

# CL30Contig19|CL30Contig19

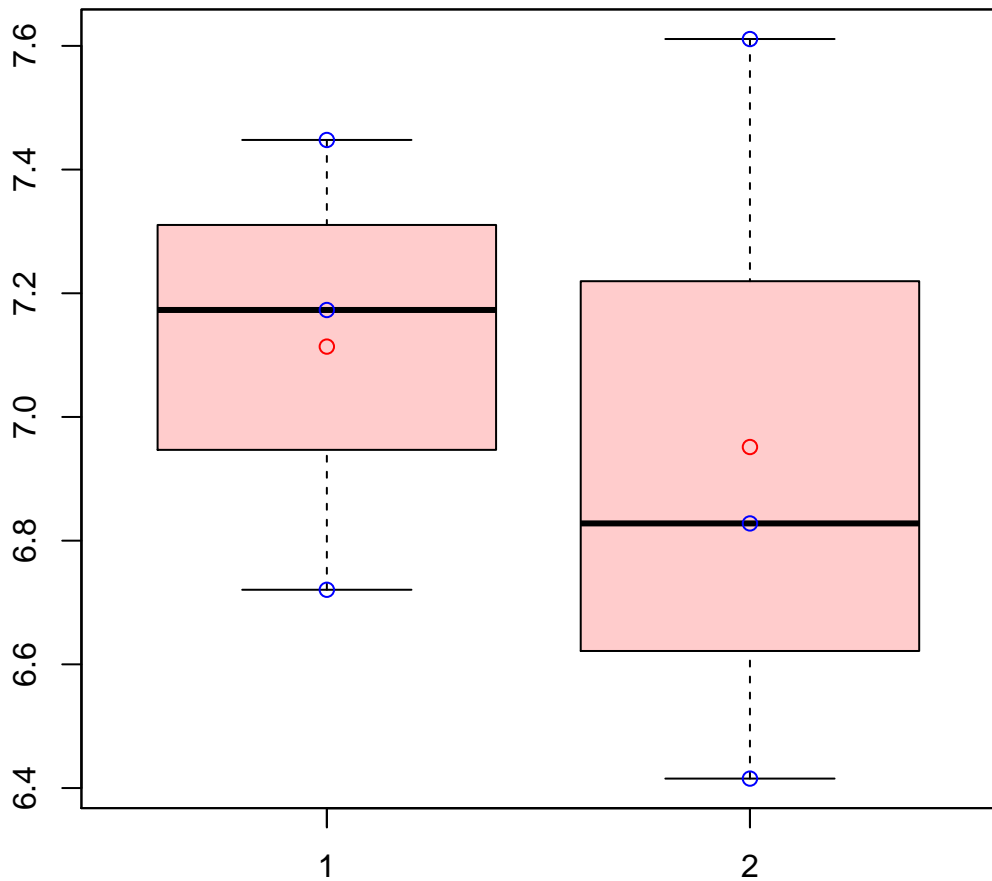

t-Test: p-value = 0.72

# CL30Contig20|CL30Contig20

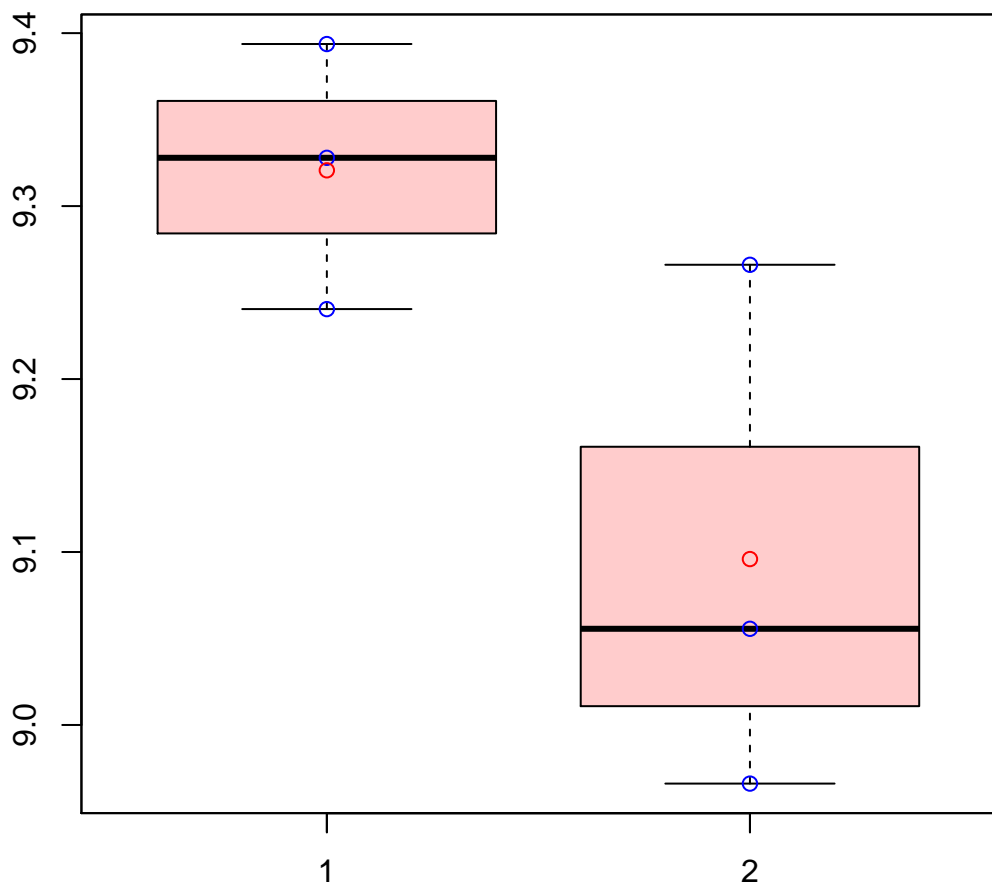

t-Test: p-value = 0.11

# CL3104Contig1|CL3104Contig1

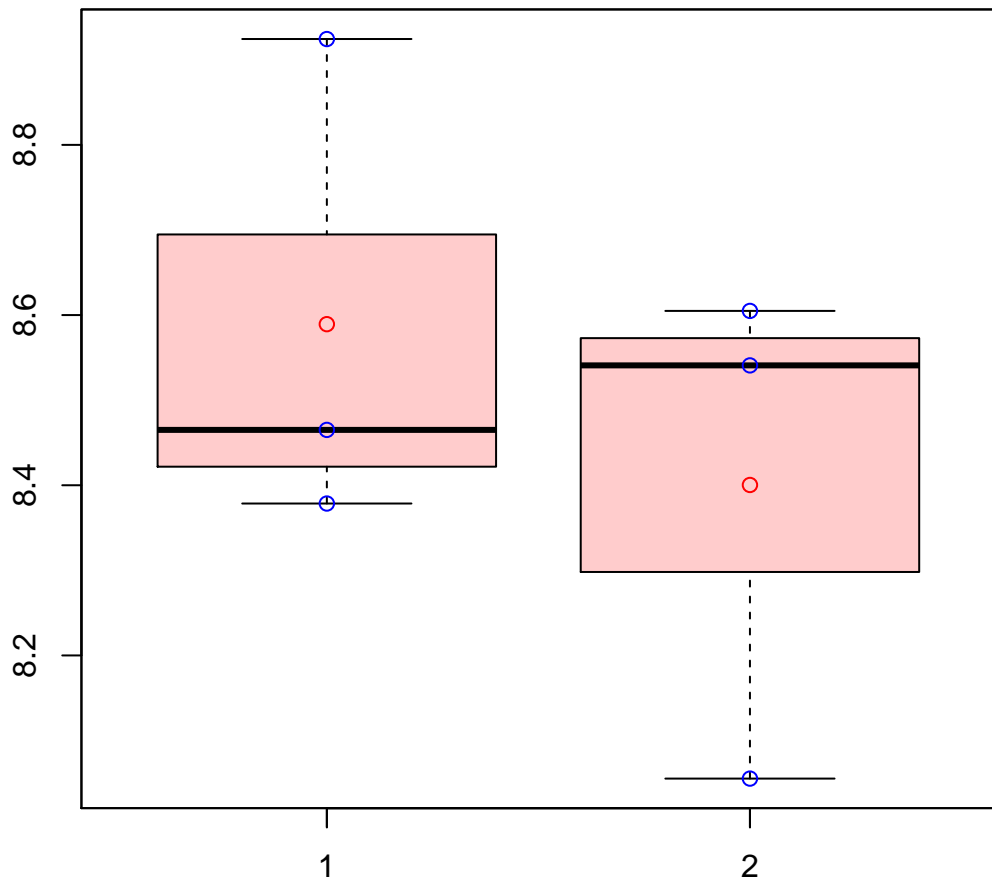

t-Test: p-value = 0.48



# CL3104Contig2|CL3104Contig2

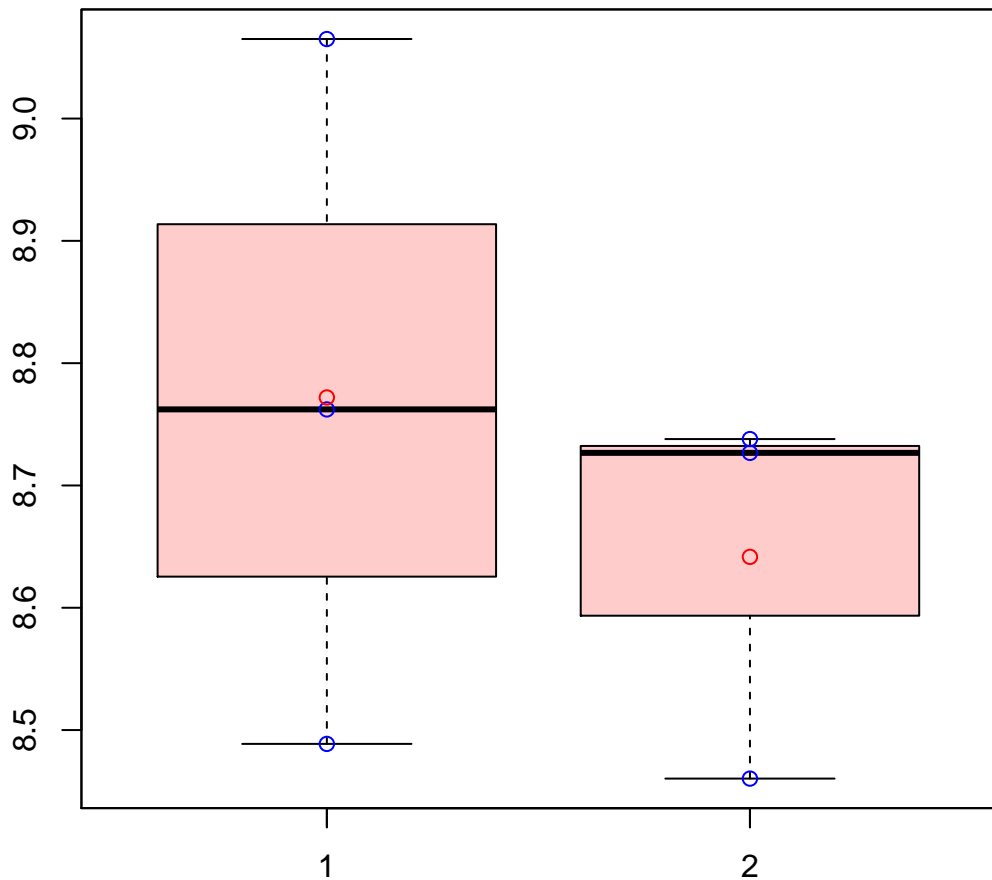

t-Test: p-value = 0.54

# CL3104Contig8|CL3104Contig8

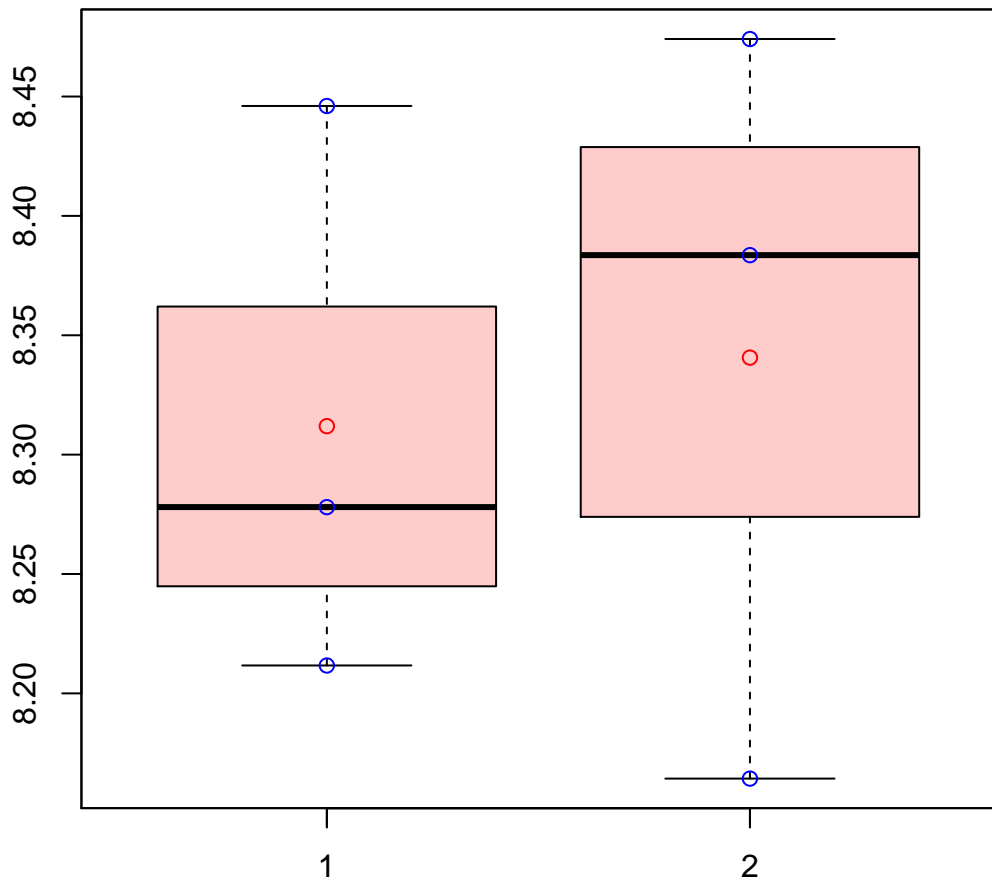

t-Test: p-value = 0.82

# CL3106Contig1|CL3106Contig1

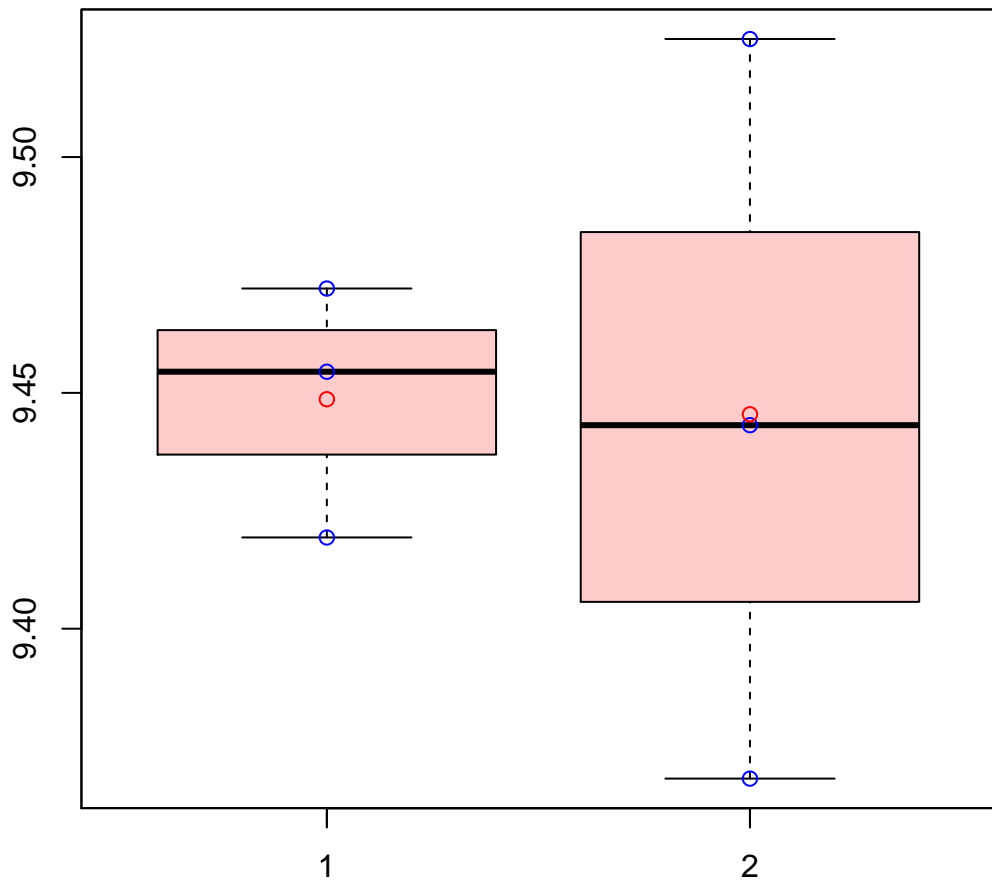

t-Test: p-value = 0.95

# CL310Contig6|CL310Contig6

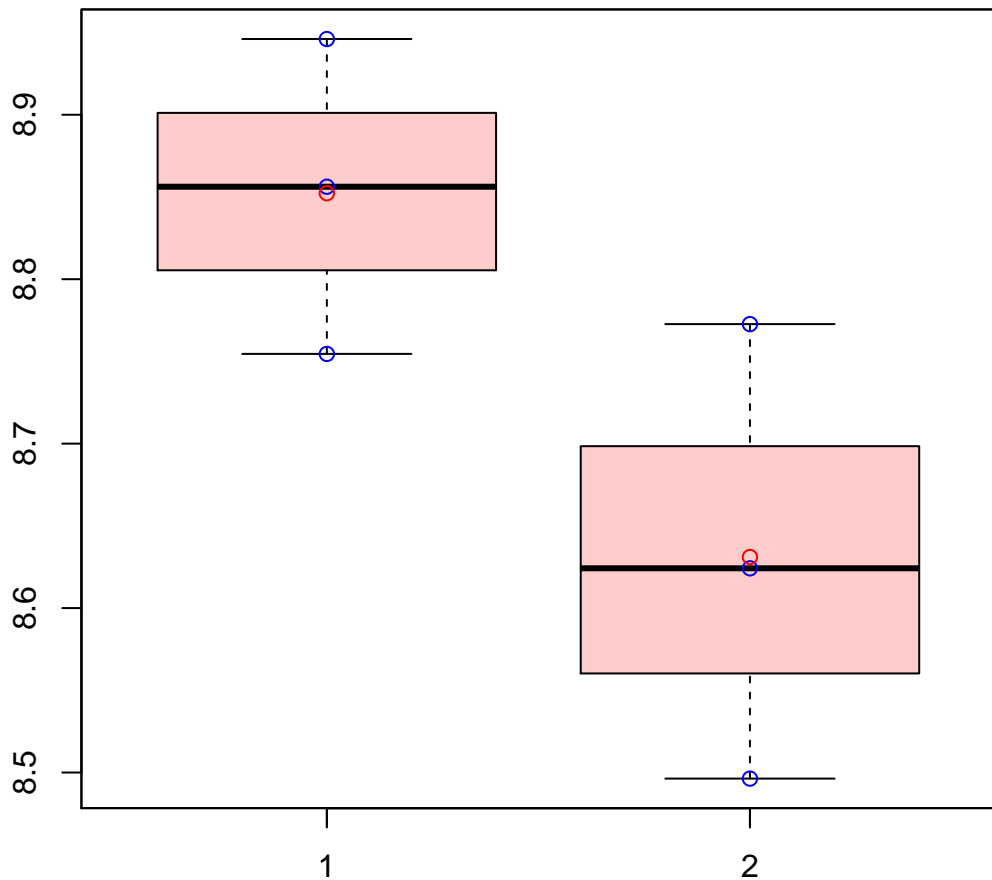

t-Test: p-value = 0.09

# CL3119Contig3|CL3119Contig3

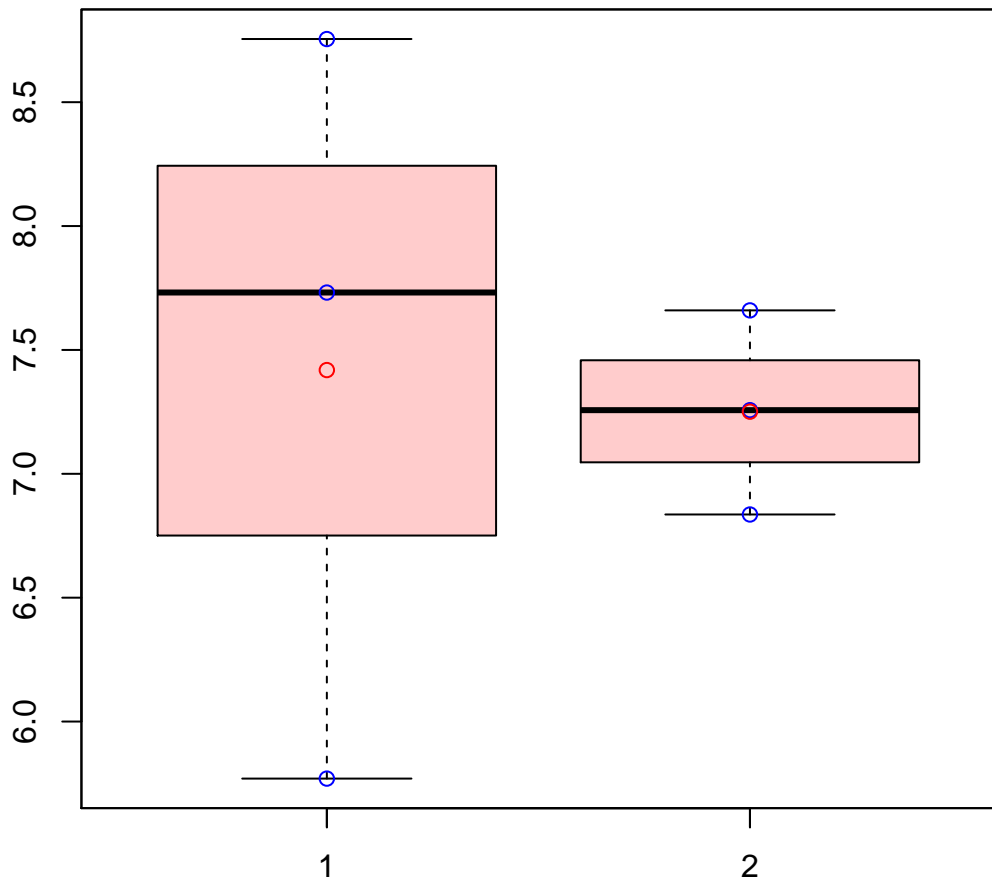

t-Test: p-value = 0.87

# CL3123Contig2|CL3123Contig2

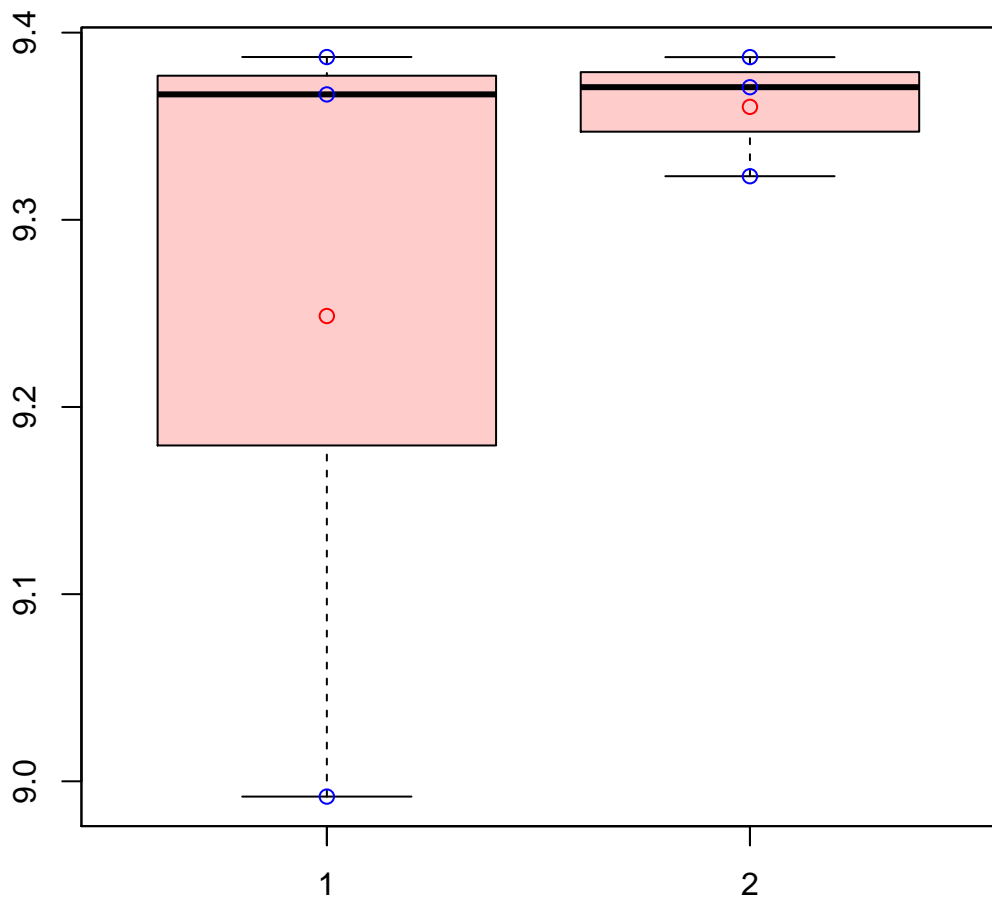

t-Test: p-value = 0.48

# CL3123Contig4|CL3123Contig4



t-Test: p-value = 0.48

# CL3124Contig3|CL3124Contig3

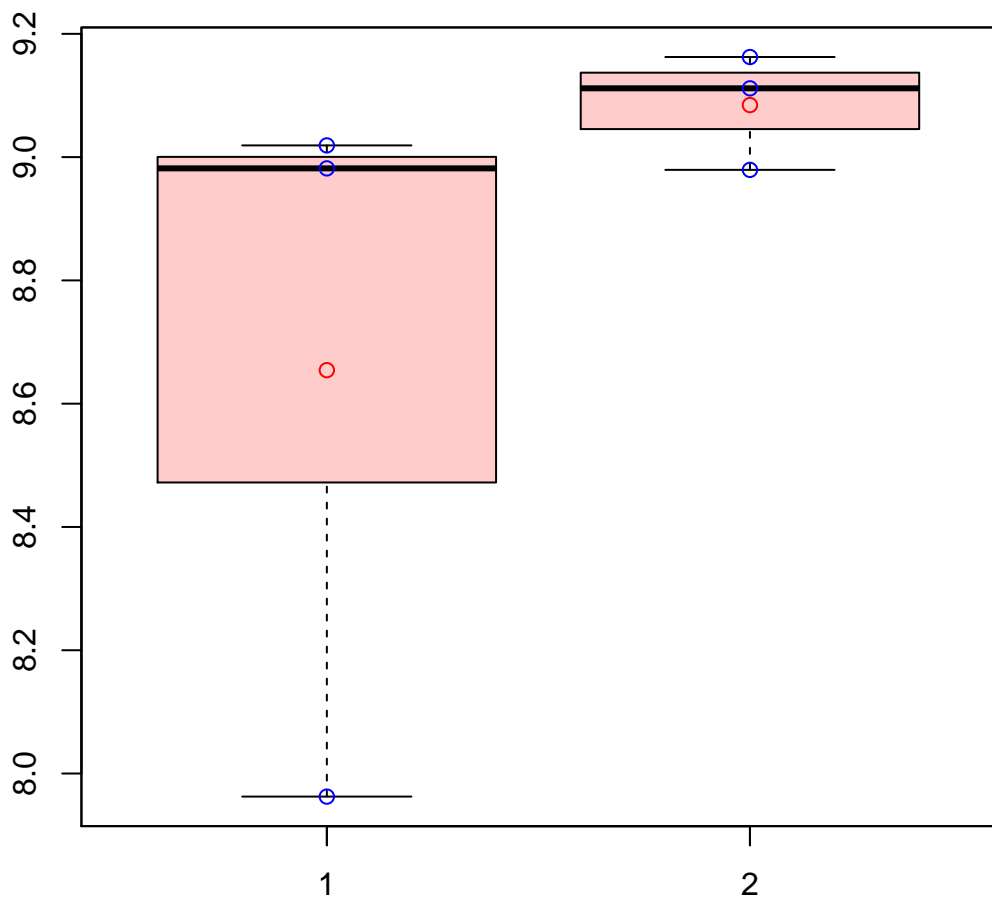

t-Test: p-value = 0.34



# CL312Contig6|CL312Contig6

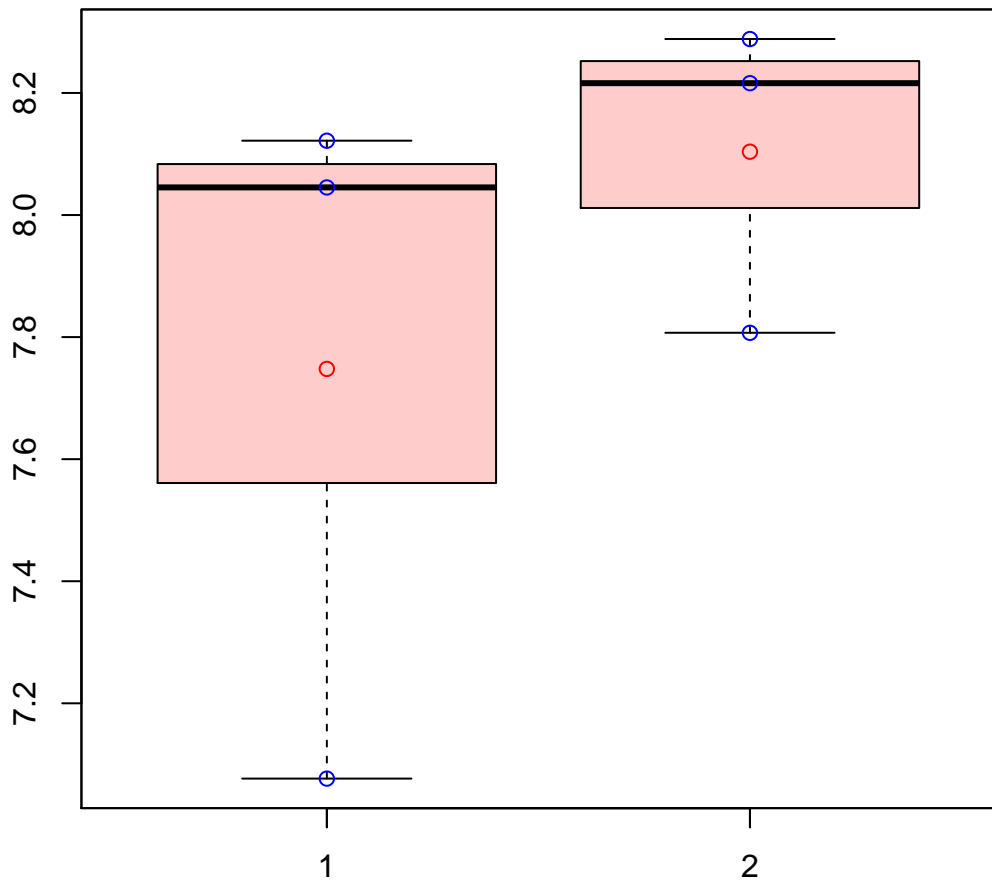

t-Test: p-value = 0.41

# CL3130Contig3|CL3130Contig3

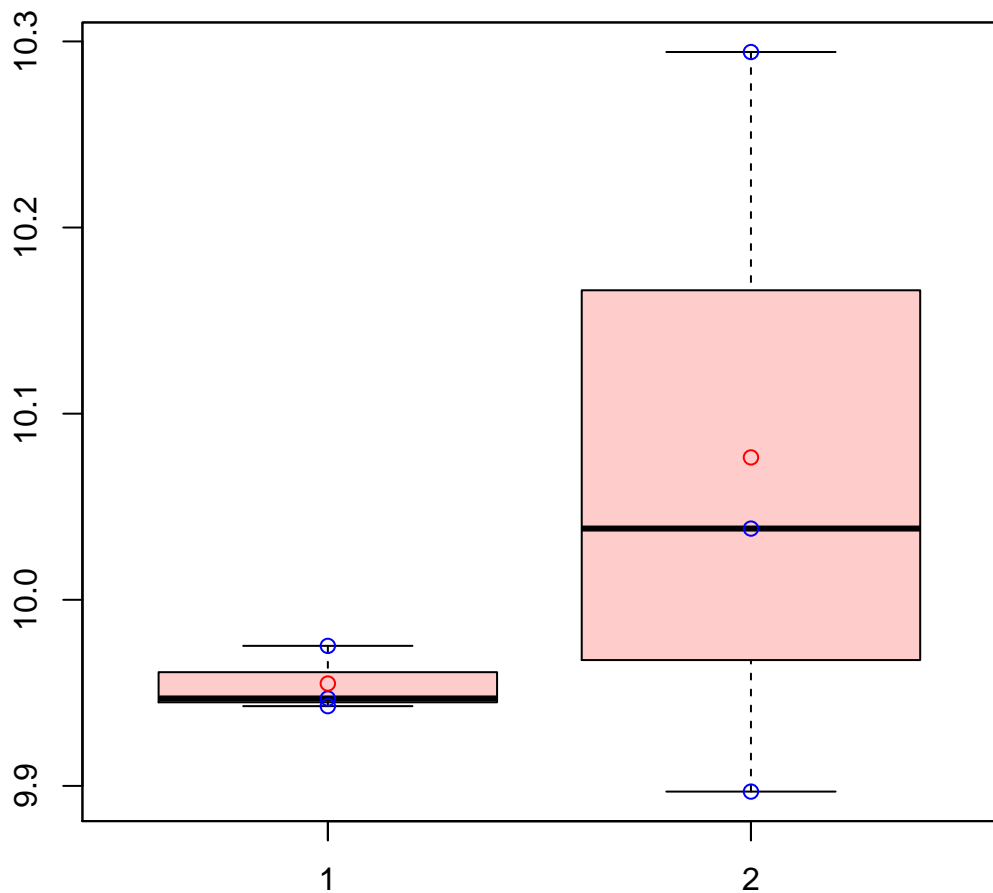

t-Test: p-value = 0.41

# CL3130Contig4|CL3130Contig4

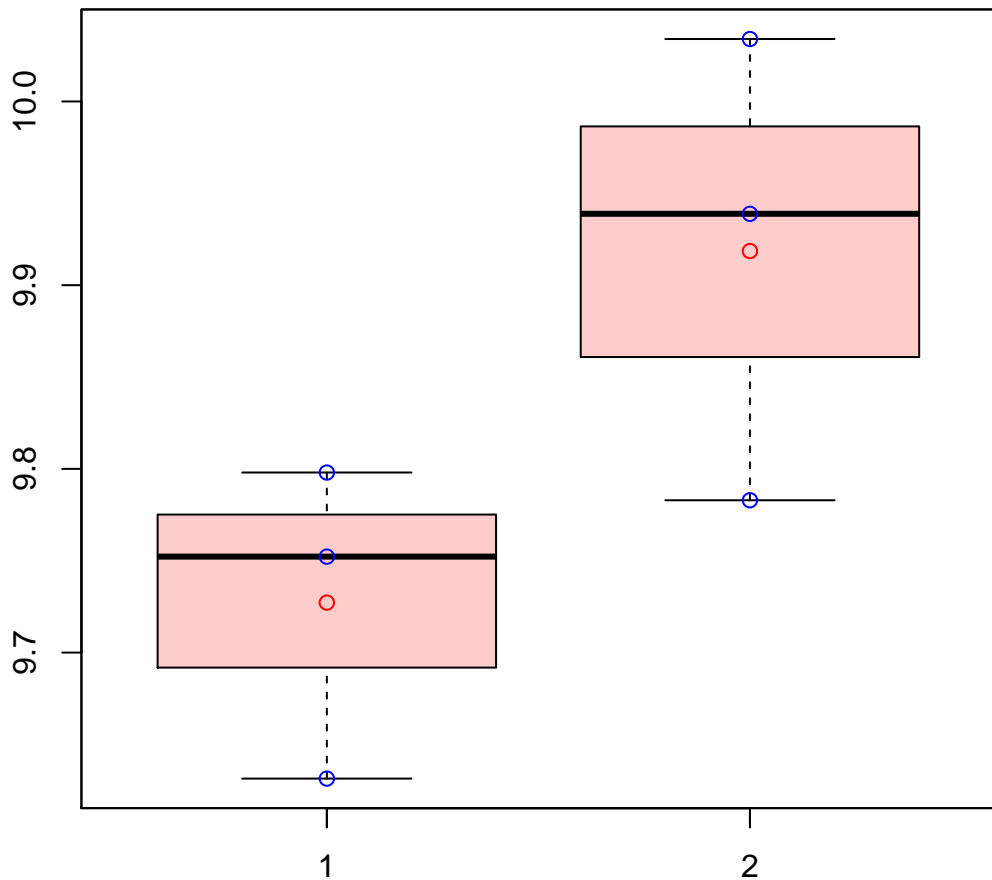

t-Test: p-value = 0.11

# CL3130Contig5|CL3130Contig5



t-Test: p-value = 0.11

# CL3133Contig1|CL3133Contig1

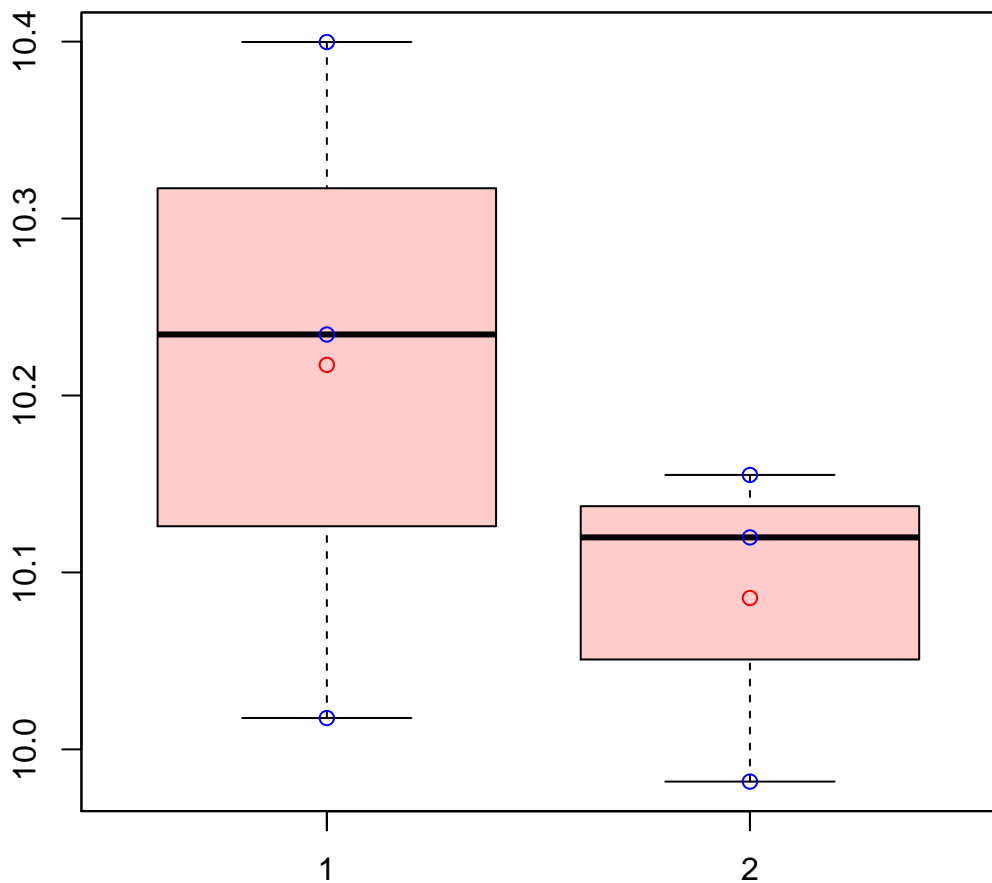

t-Test: p-value = 0.36

# CL3133Contig2|CL3133Contig2

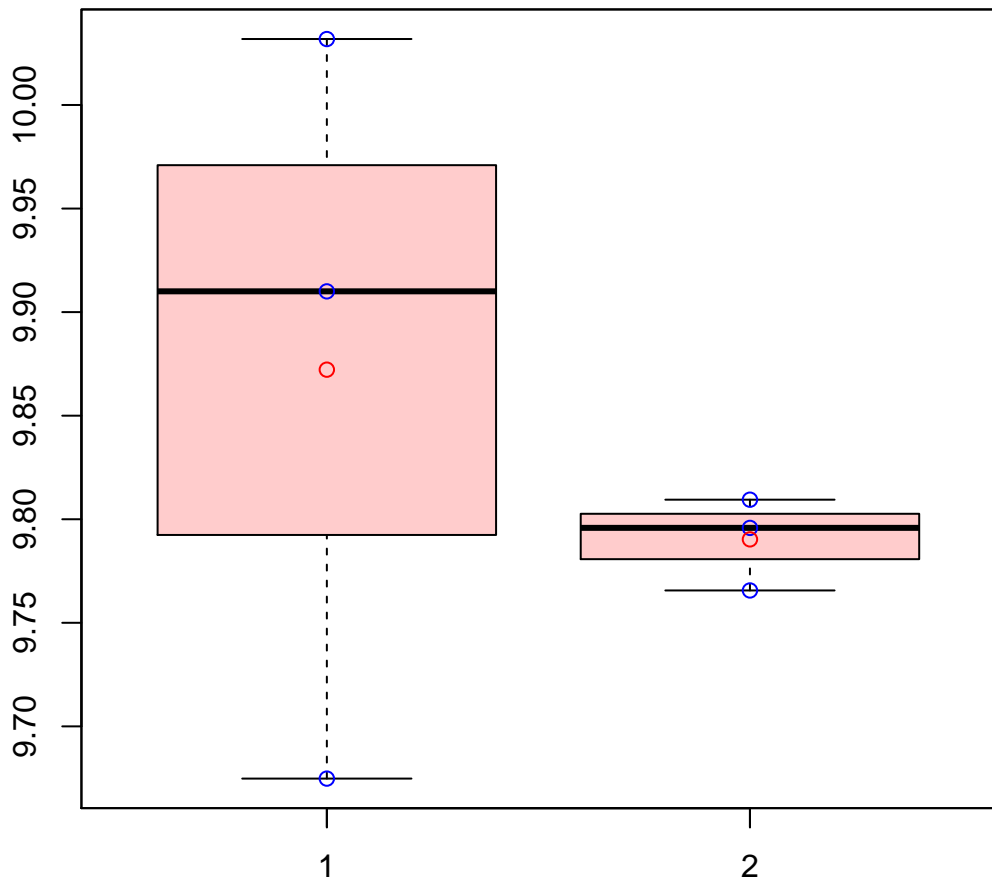

t-Test: p-value = 0.52

# CL3136Contig6|CL3136Contig6

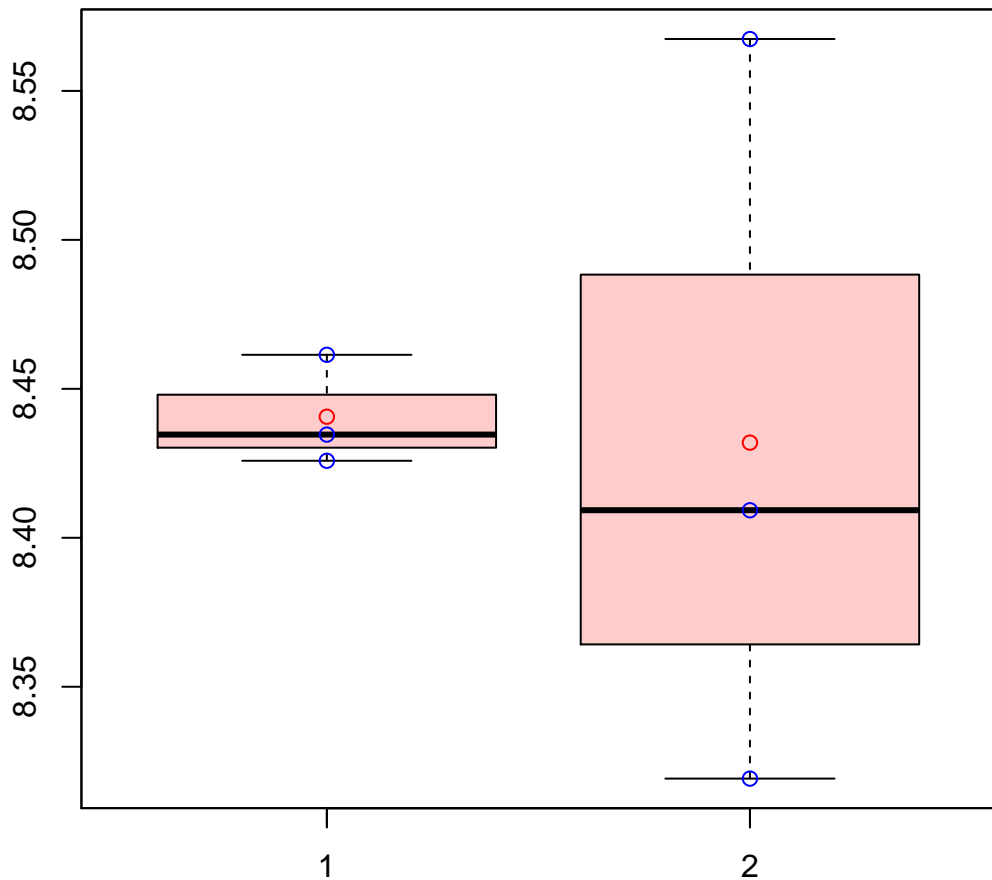

t-Test: p-value = 0.92

# CL3139Contig2|CL3139Contig2

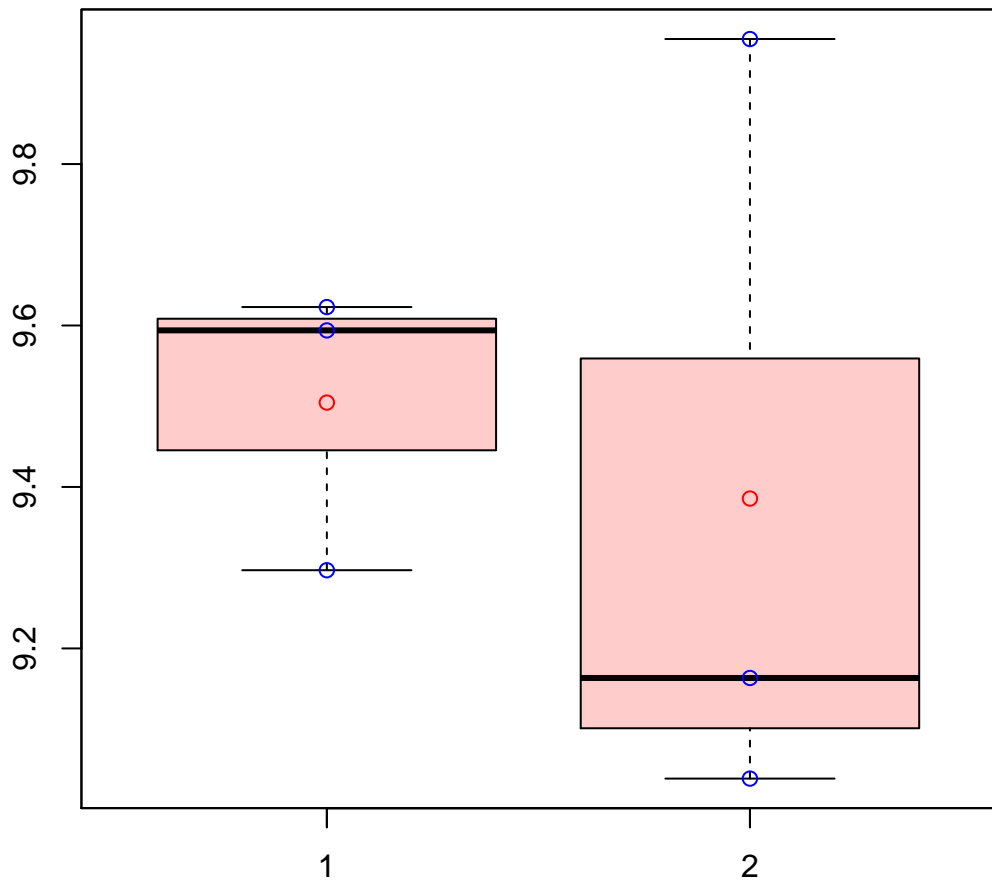

t-Test: p-value = 0.73



# CL3147Contig6|CL3147Contig6

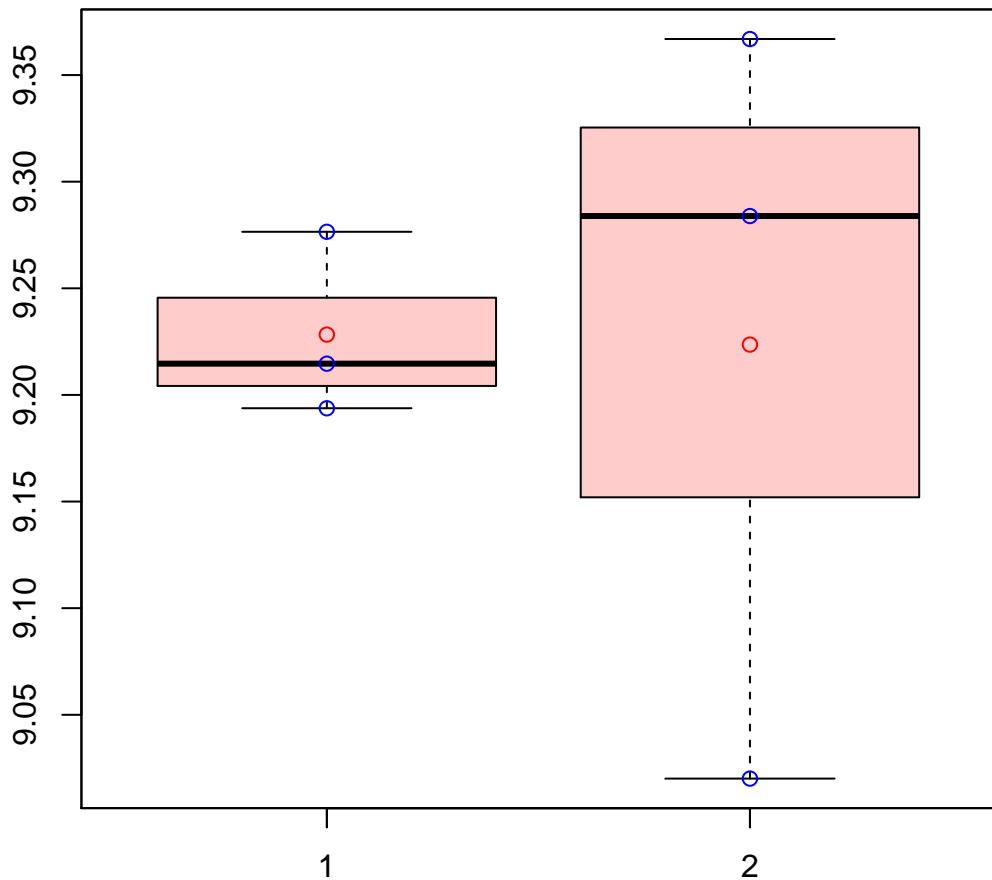

t-Test: p-value = 0.97

# CL3151Contig1|CL3151Contig1

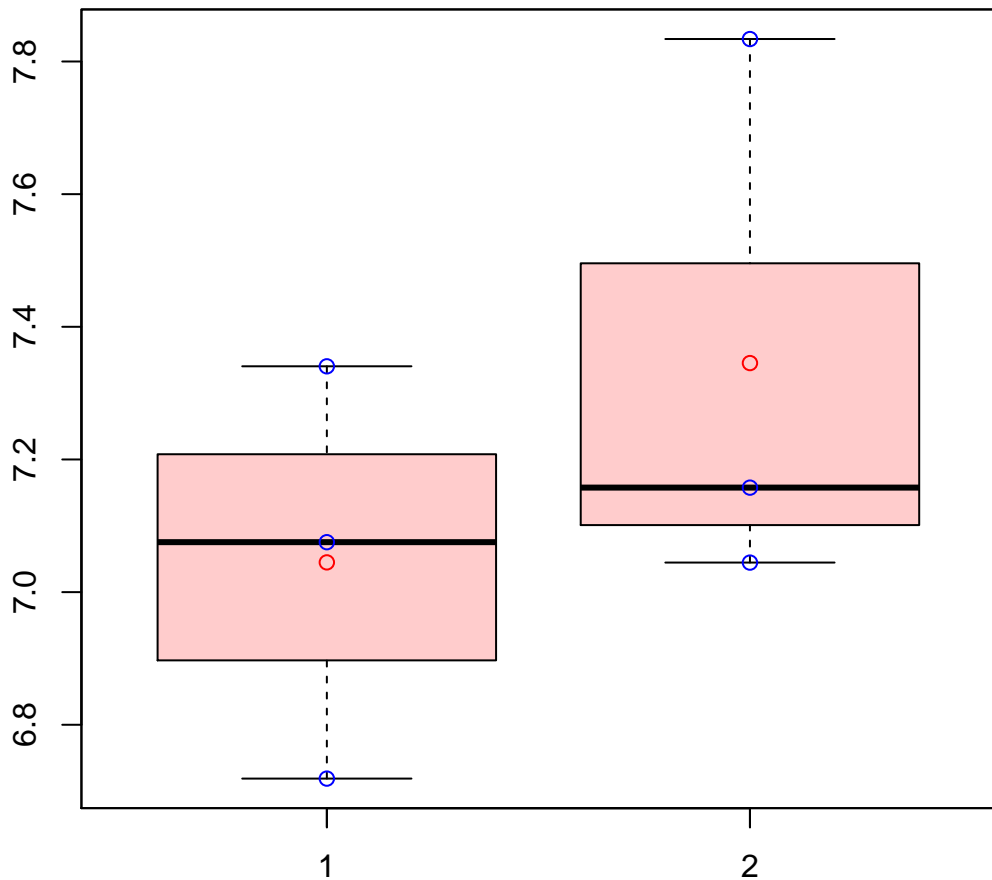

t-Test: p-value = 0.39

# CL3151Contig2|CL3151Contig2



t-Test: p-value = 0.39

# CL3155Contig3|CL3155Contig3

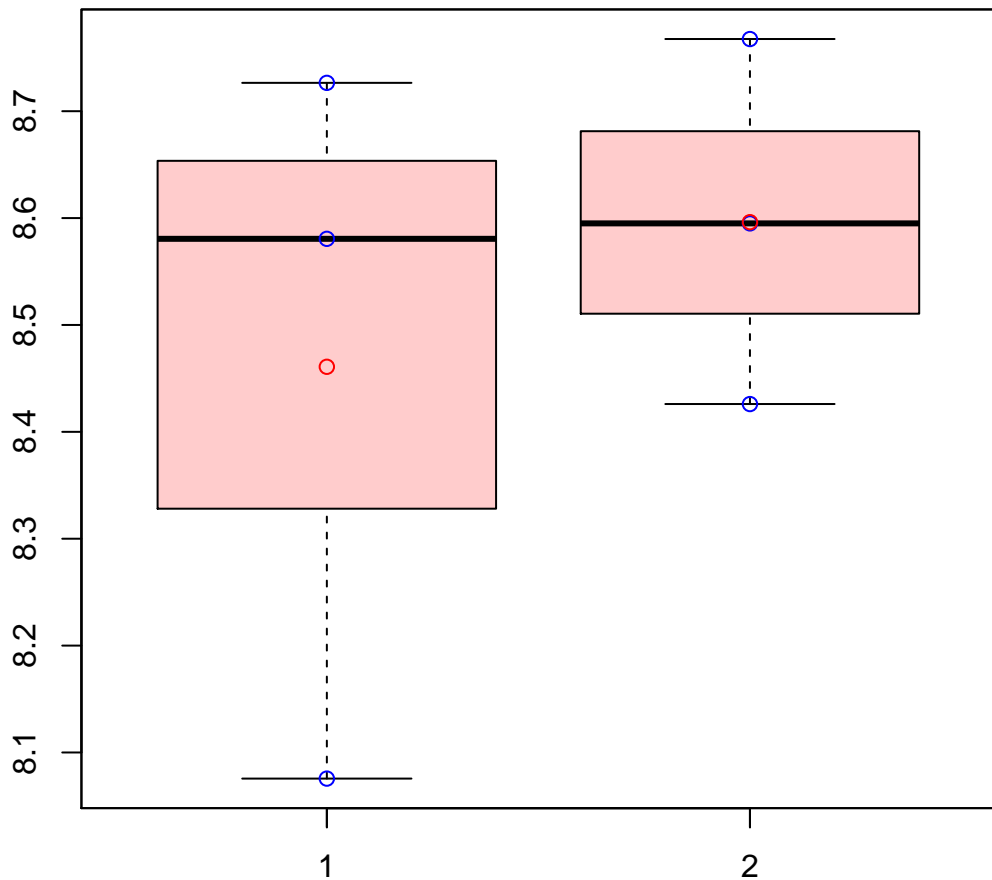

t-Test: p-value = 0.58

# CL3156Contig1|CL3156Contig1

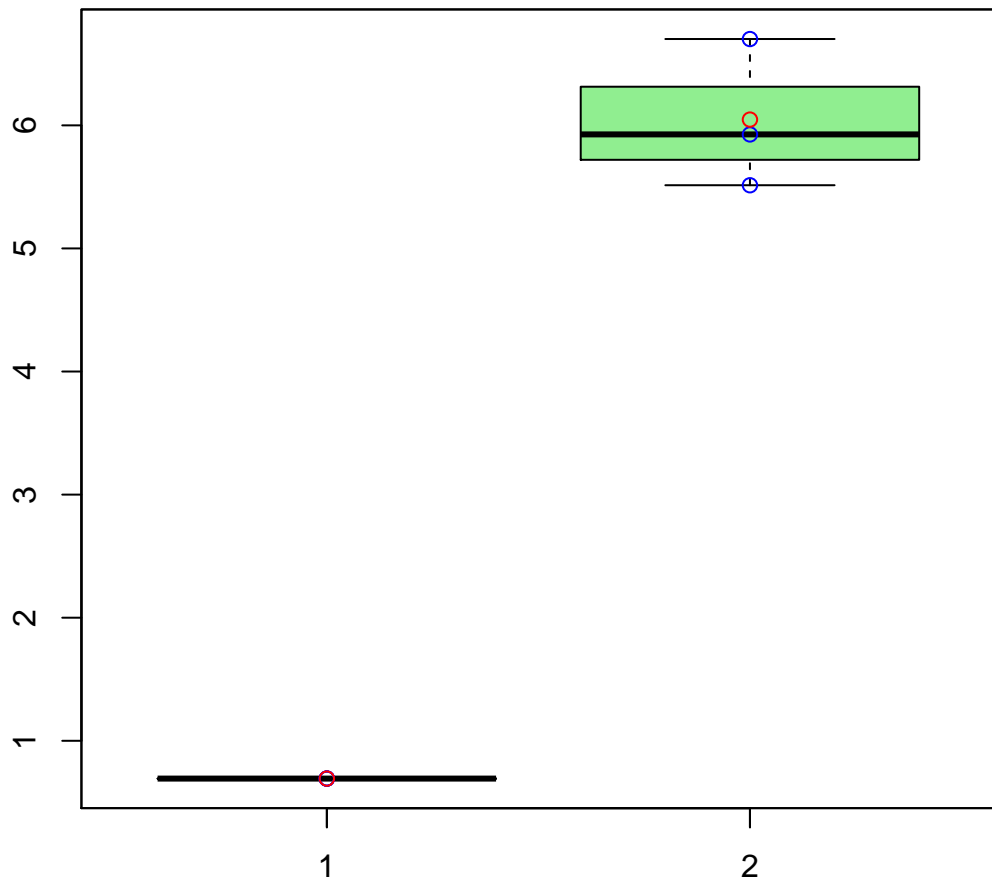

t-Test: p-value = 0

# CL3156Contig3|CL3156Contig3



t-Test: p-value = 0.7

# CL3161Contig1|CL3161Contig1

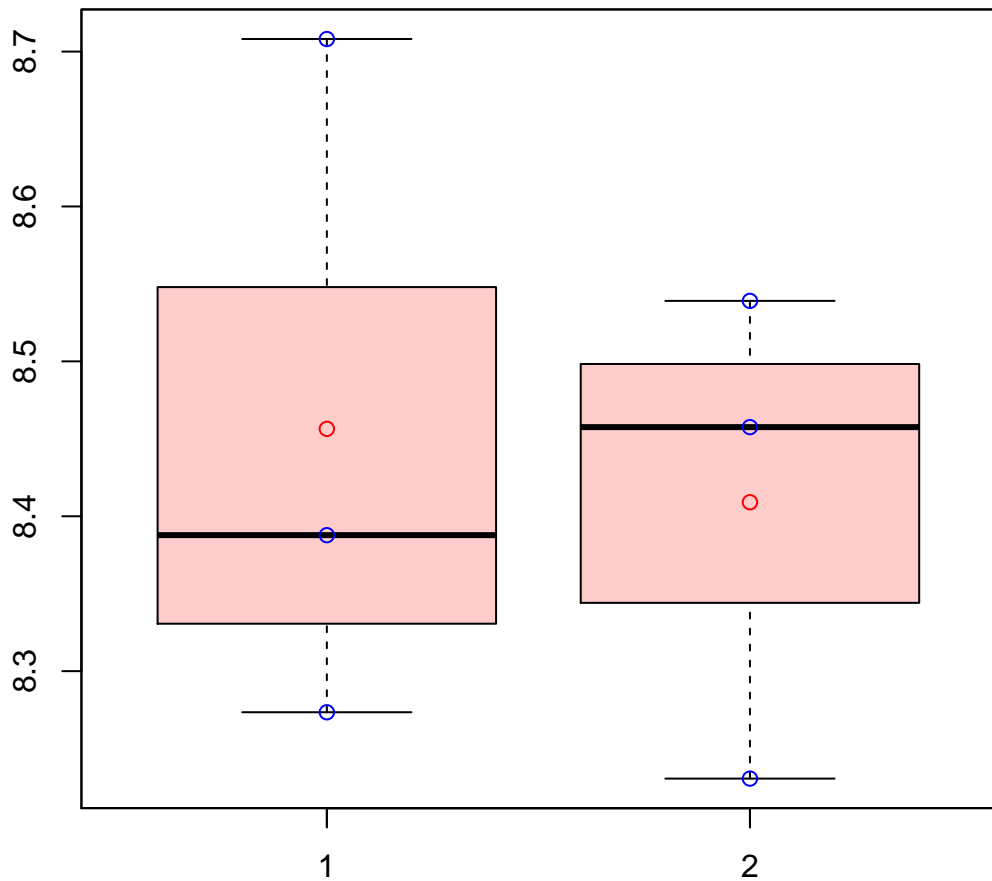

t-Test: p-value = 0.78

# CL3162Contig1|CL3162Contig1

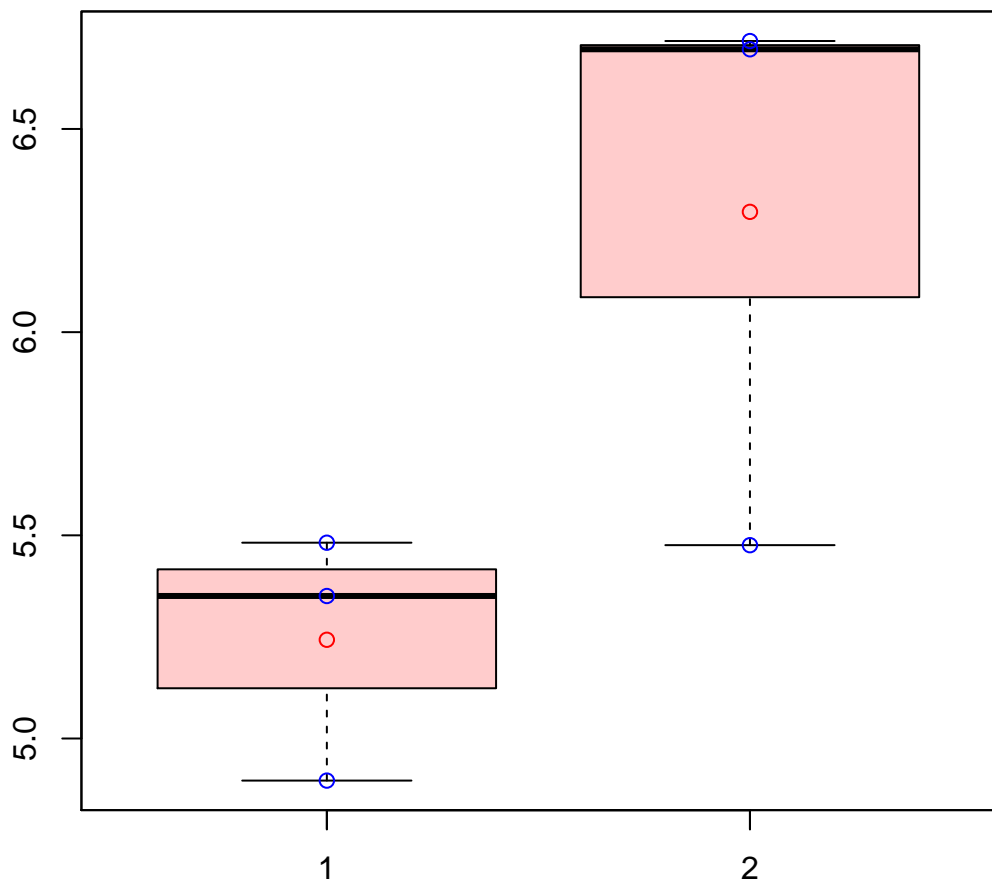

t-Test: p-value = 0.11



# CL3162Contig3|CL3162Contig3

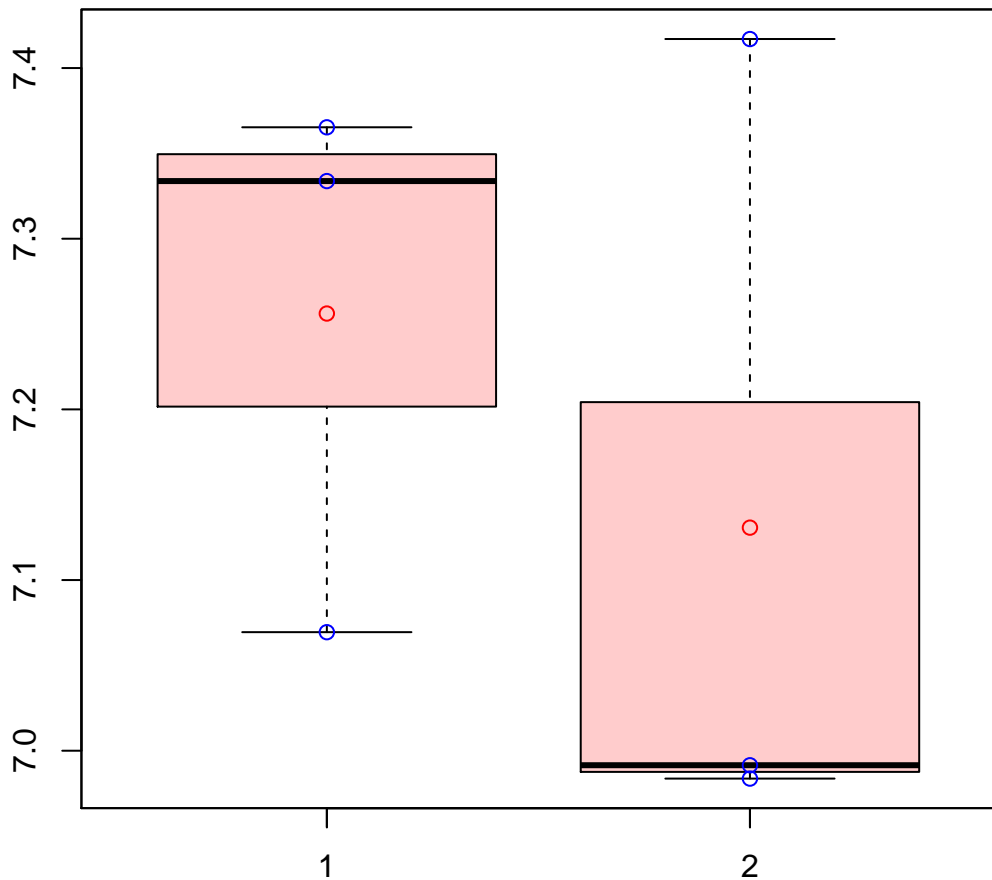

t-Test: p-value = 0.51

# CL3168Contig1|CL3168Contig1

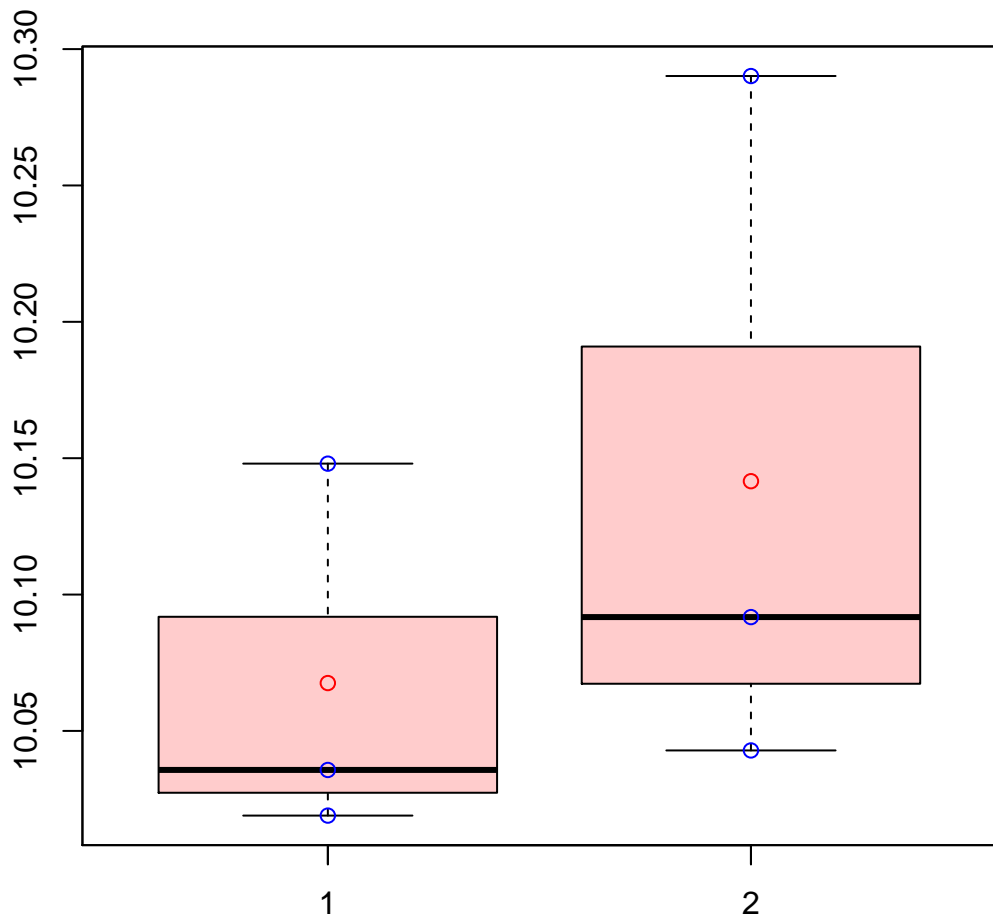

t-Test: p-value = 0.45

# CL3168Contig2|CL3168Contig2

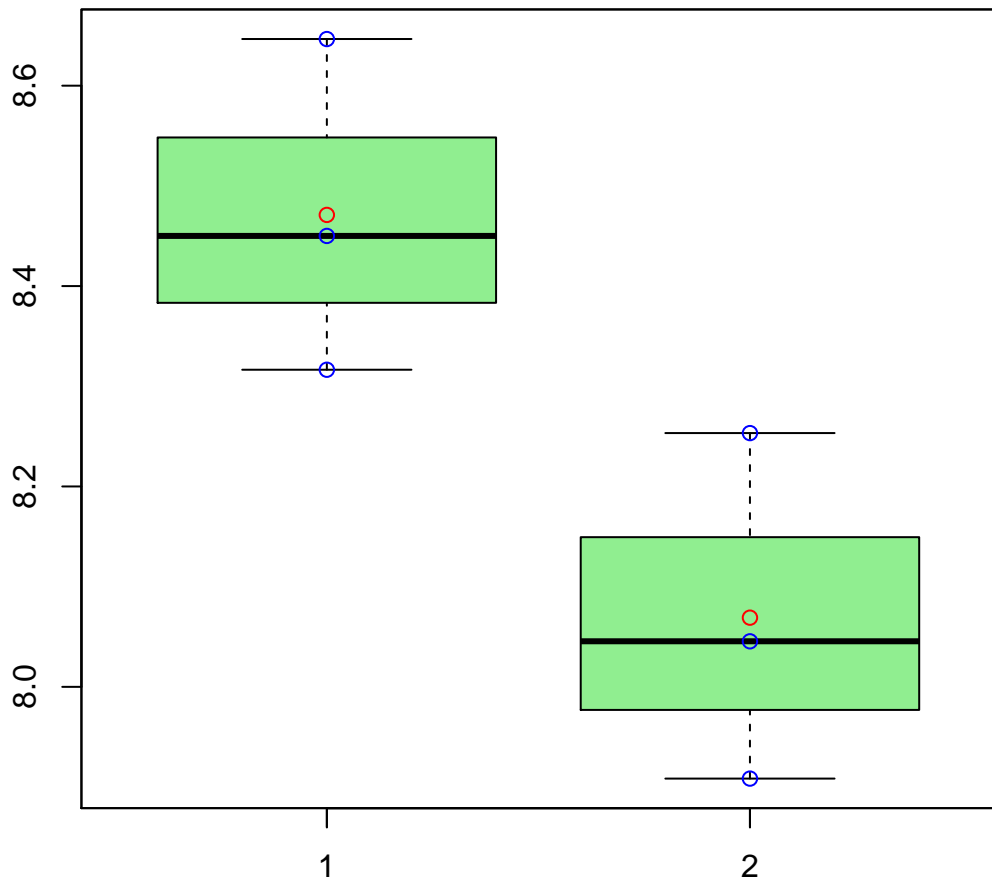

t-Test: p-value = 0.04

# CL316Contig2|CL316Contig2

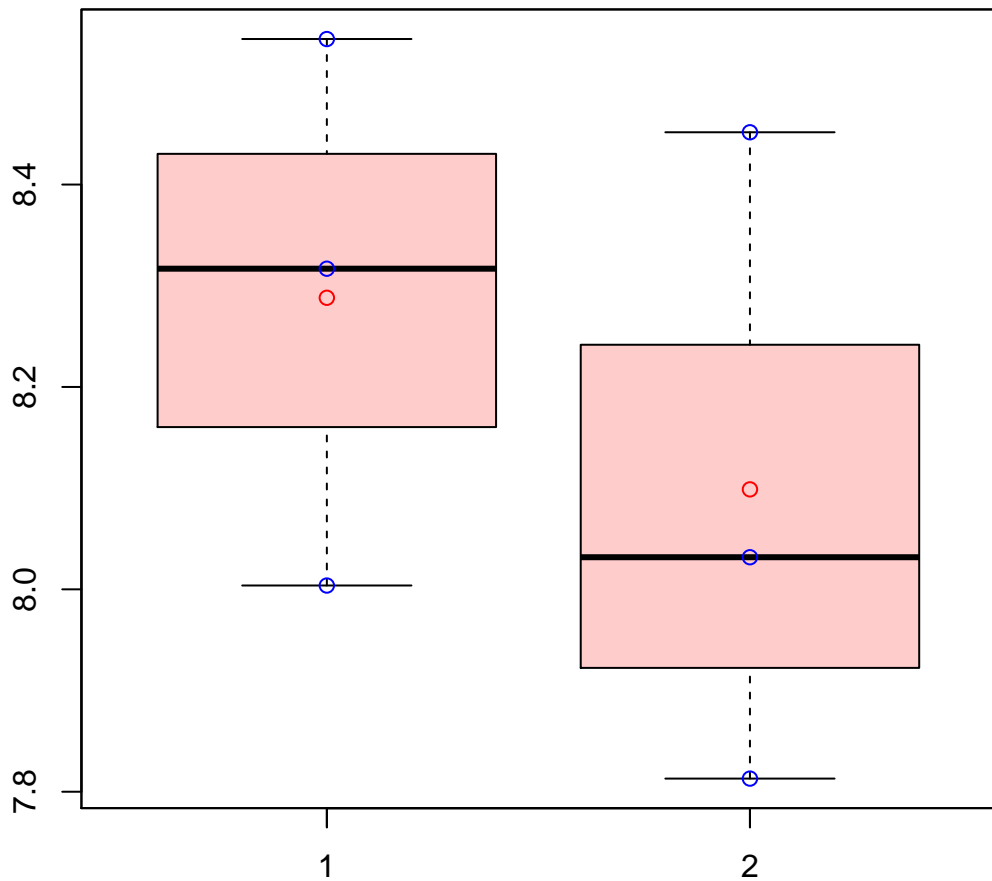

t-Test: p-value = 0.48

# CL316Contig3|CL316Contig3

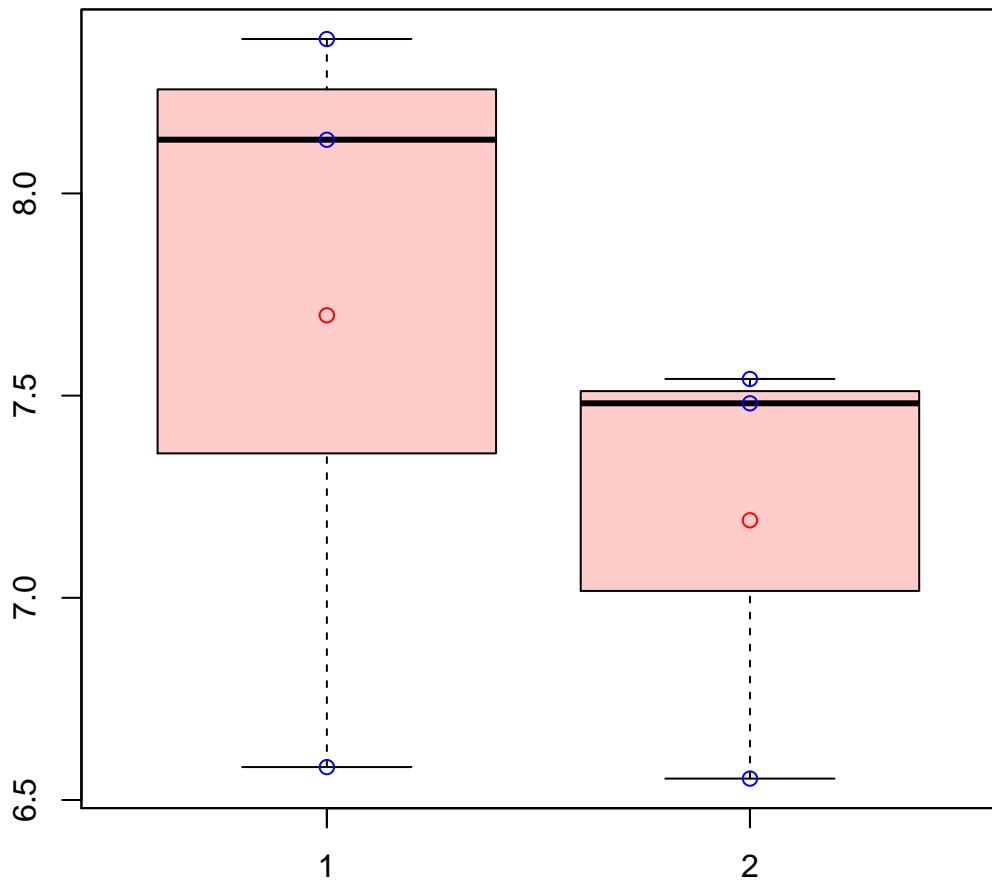

t-Test: p-value = 0.49

# CL317Contig14|CL317Contig14

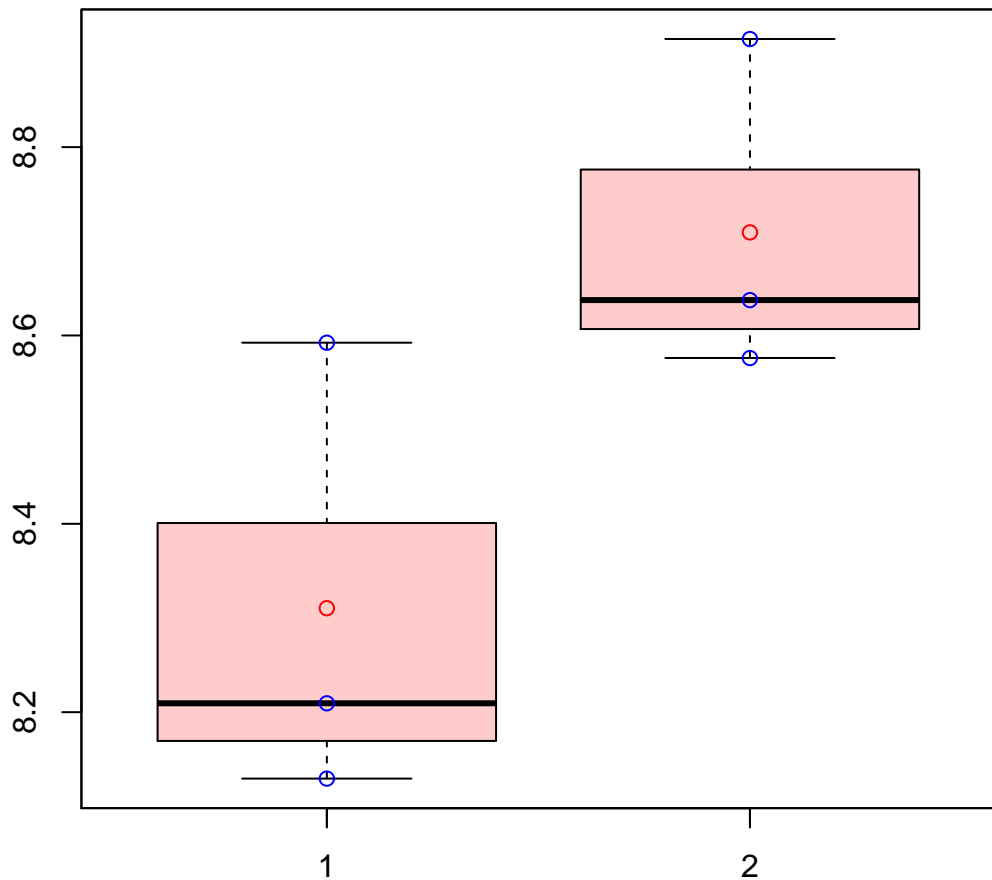

t-Test: p-value = 0.09

# CL317Contig5|CL317Contig5

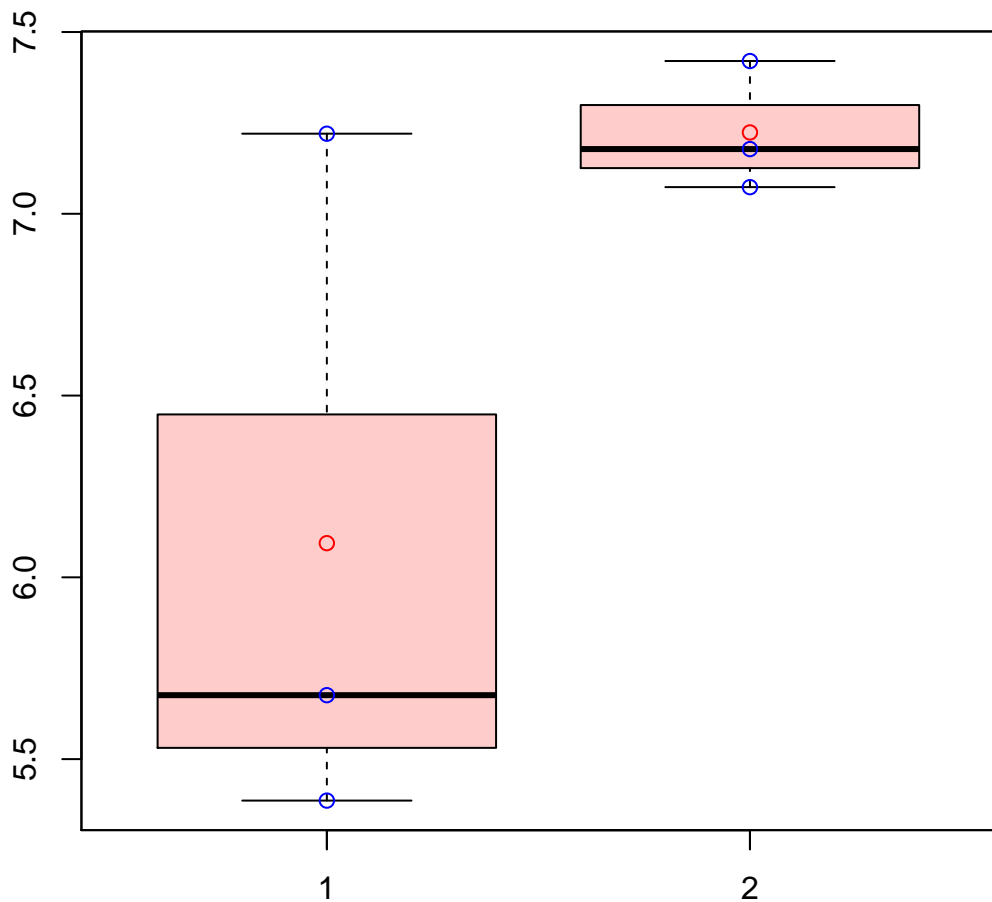

t-Test: p-value = 0.18

# CL3186Contig1|CL3186Contig1

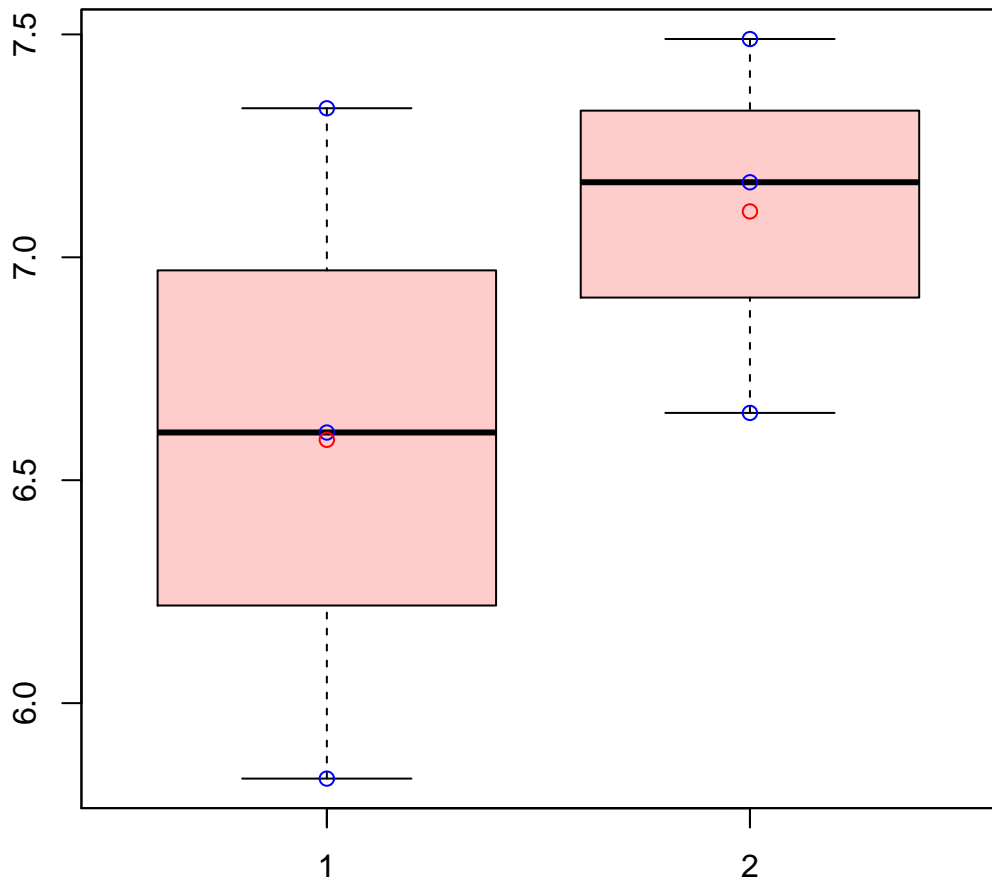

t-Test: p-value = 0.38



# CL318Contig2|CL318Contig2

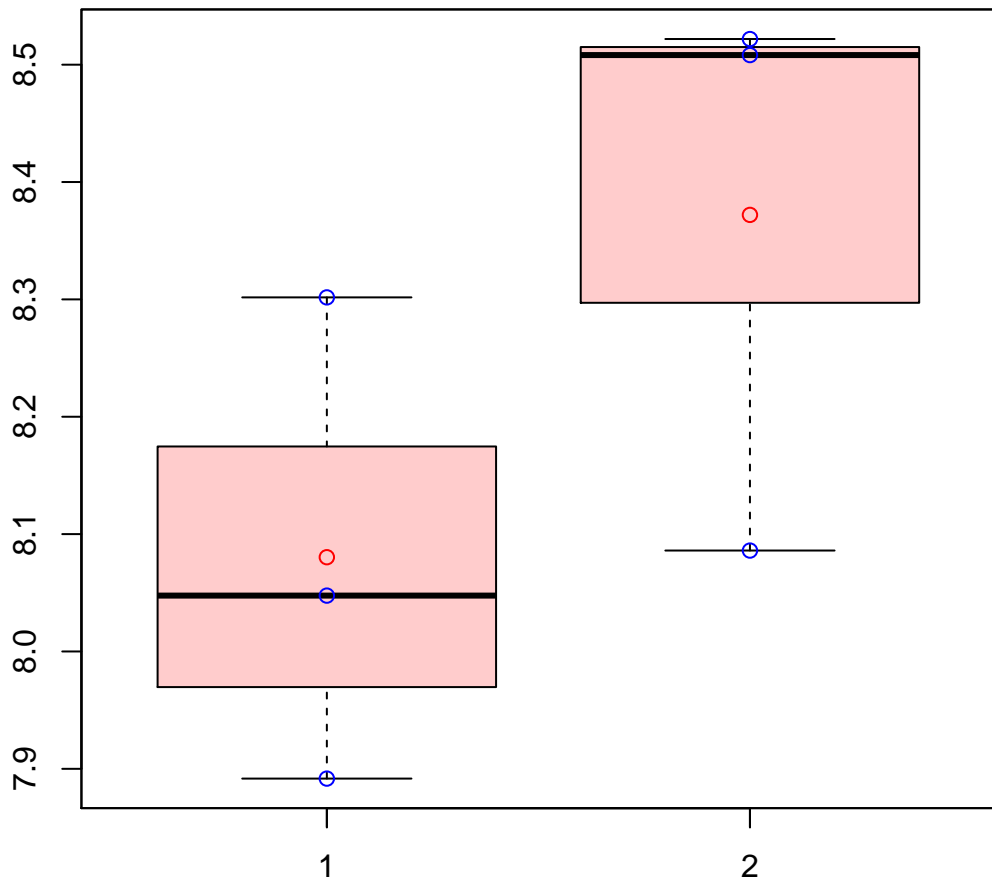

t-Test: p-value = 0.19

# CL3191Contig3|CL3191Contig3

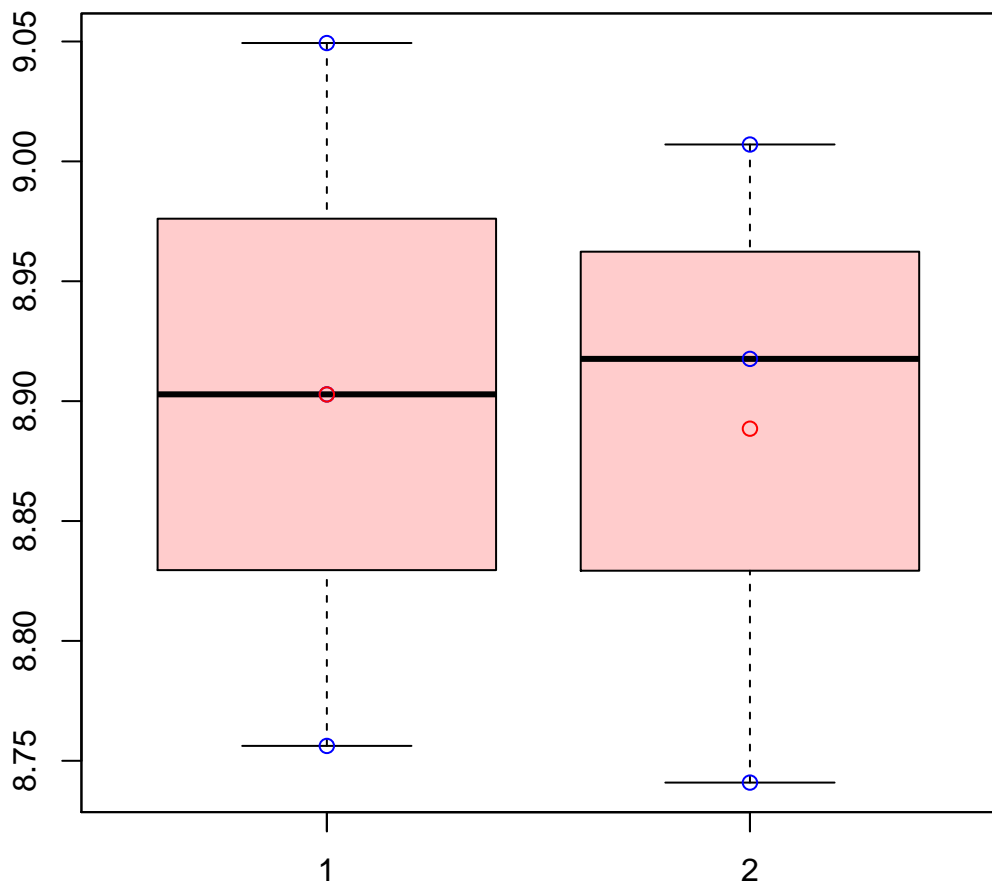

t-Test: p-value = 0.91

# CL3191Contig5|CL3191Contig5



t-Test: p-value = 0.91

# CL3195Contig5|CL3195Contig5

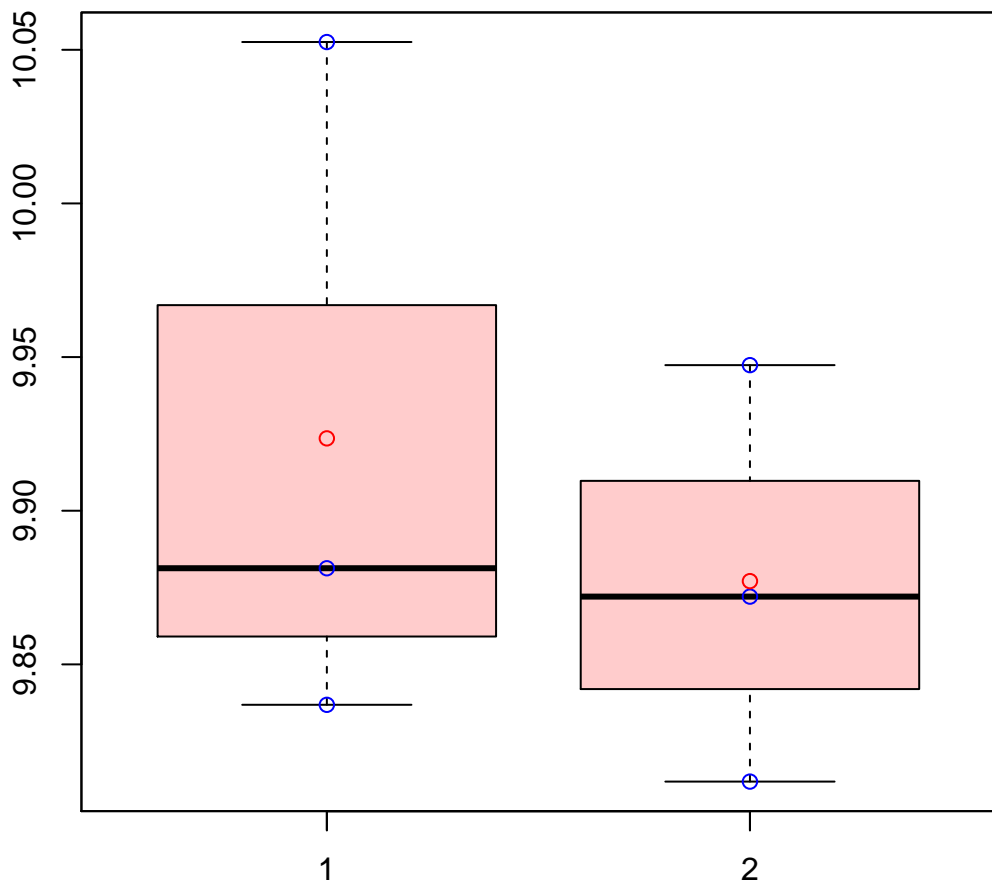

t-Test: p-value = 0.58

# CL319Contig2|CL319Contig2

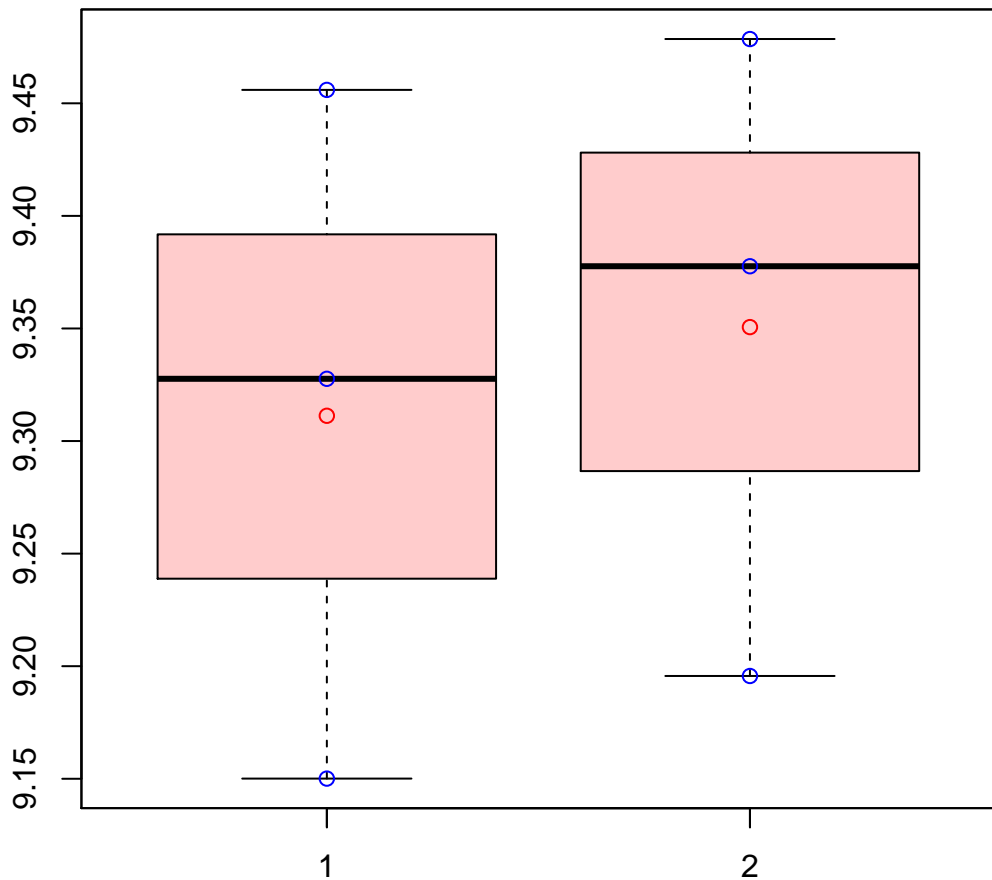

t-Test: p-value = 0.76

# CL3204Contig2|CL3204Contig2

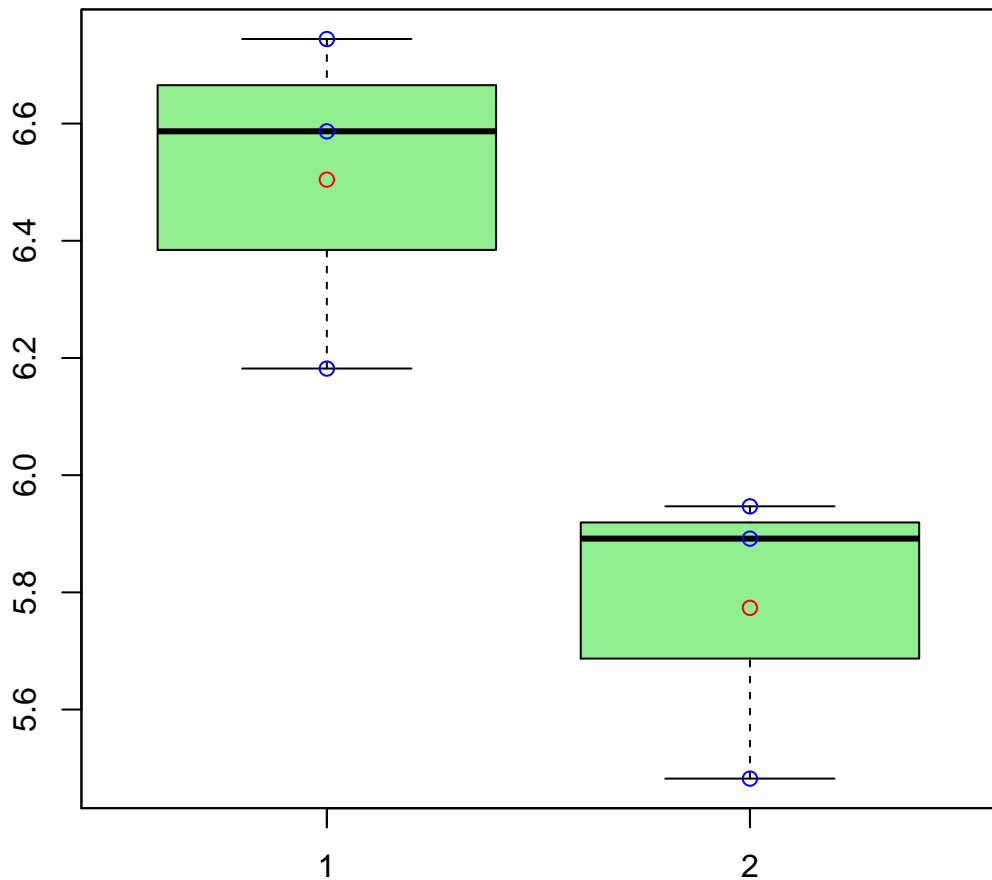

t-Test: p-value = 0.03

# CL3208Contig3|CL3208Contig3

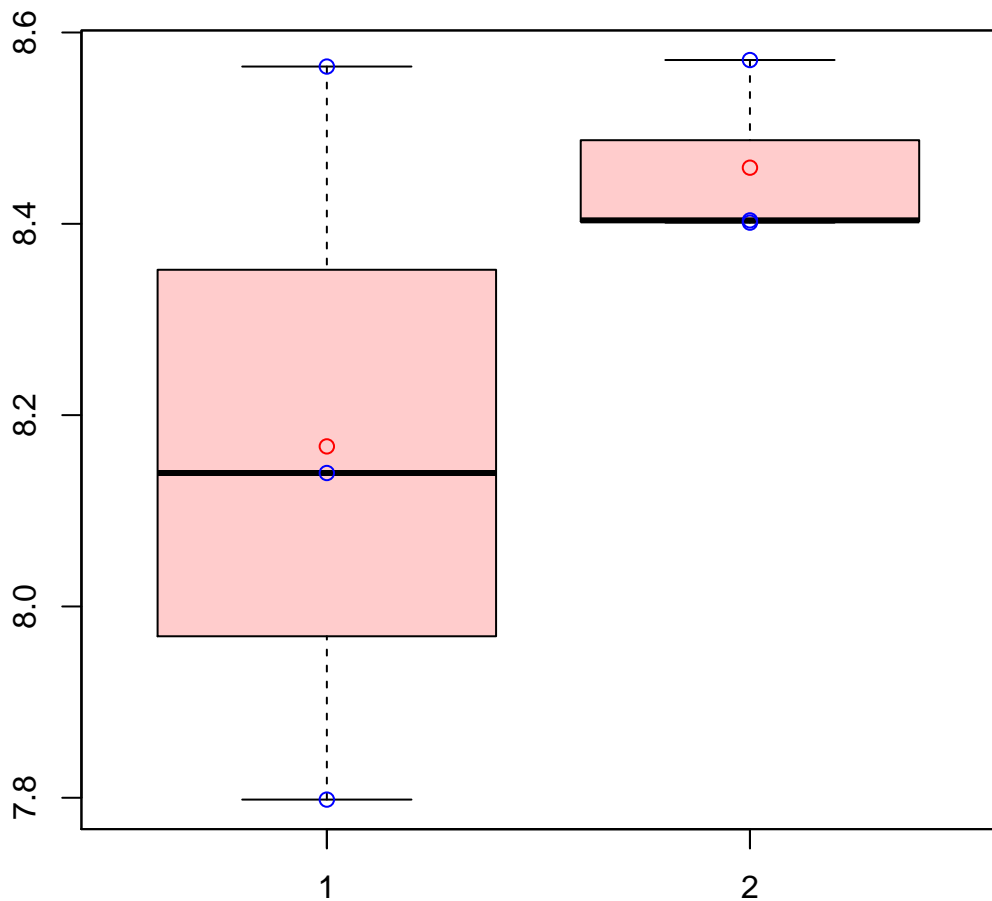

t-Test: p-value = 0.32

# CL320Contig1|CL320Contig1

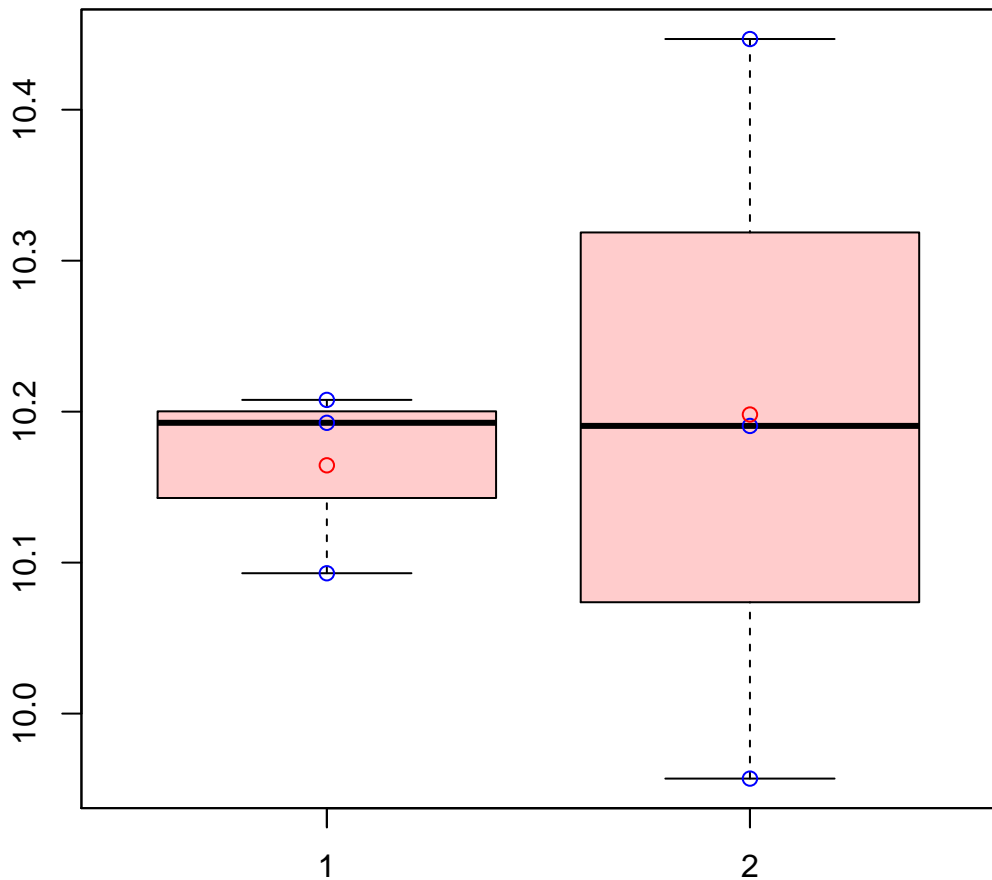

t-Test: p-value = 0.84



# CL320Contig2|CL320Contig2

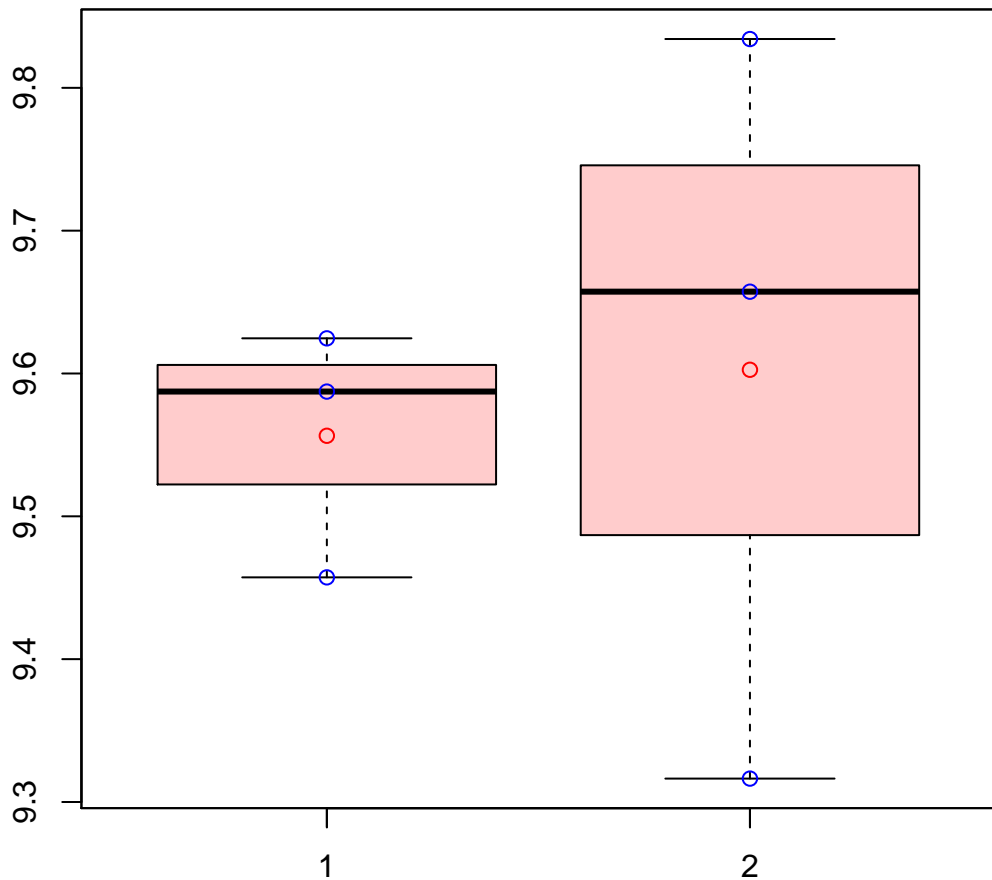

t-Test: p-value = 0.8

# CL320Contig3|CL320Contig3

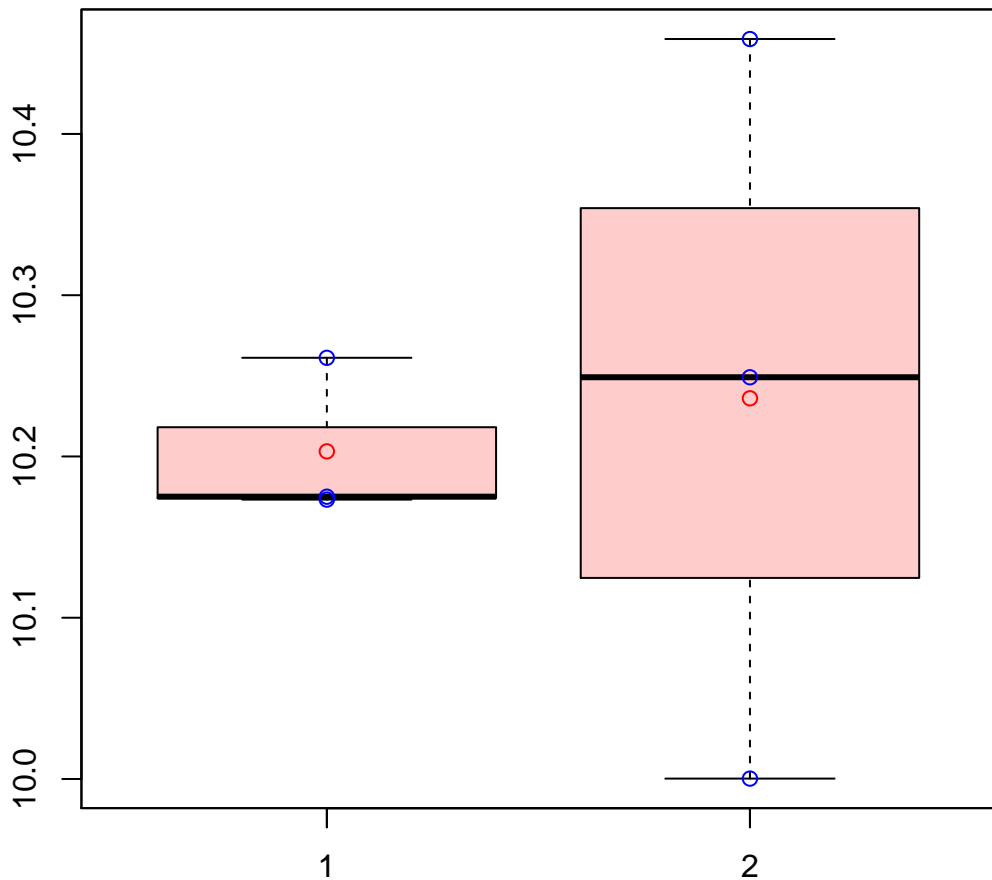

t-Test: p-value = 0.83

# CL3211Contig1|CL3211Contig1



t-Test: p-value = 0.85

# CL3214Contig8|CL3214Contig8



t-Test: p-value = 0.7

# CL3217Contig1|CL3217Contig1

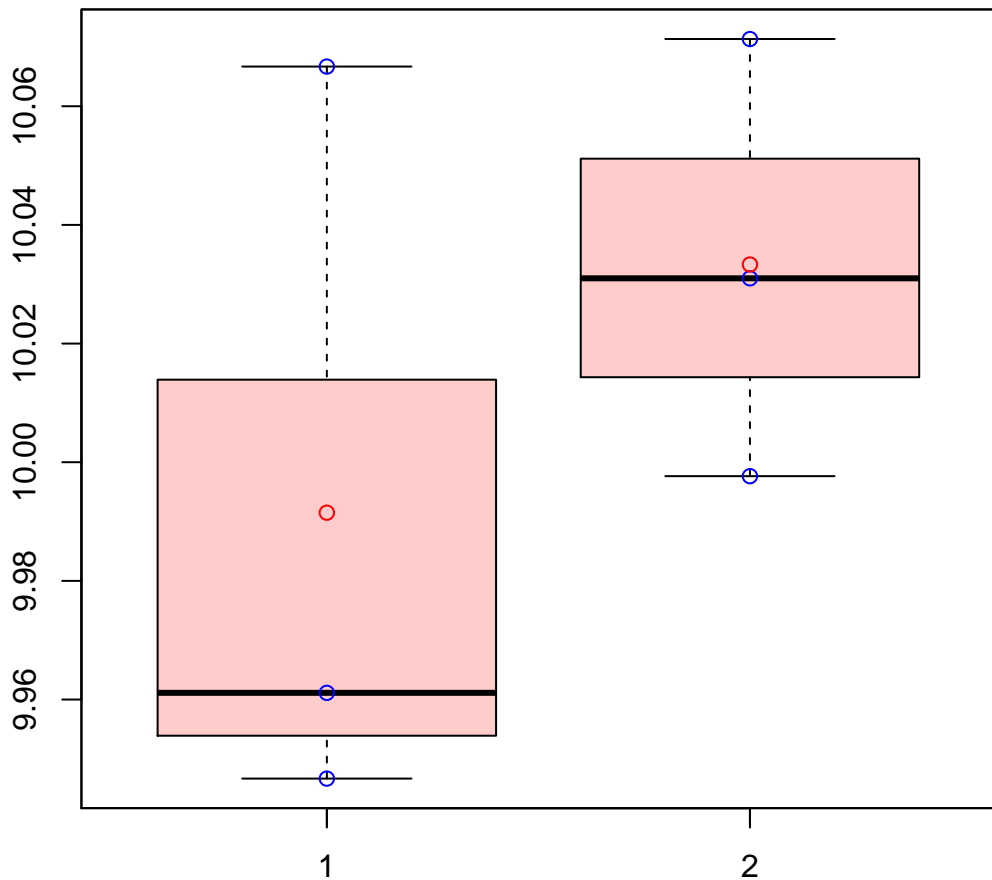

t-Test: p-value = 0.4

# CL3217Contig2|CL3217Contig2

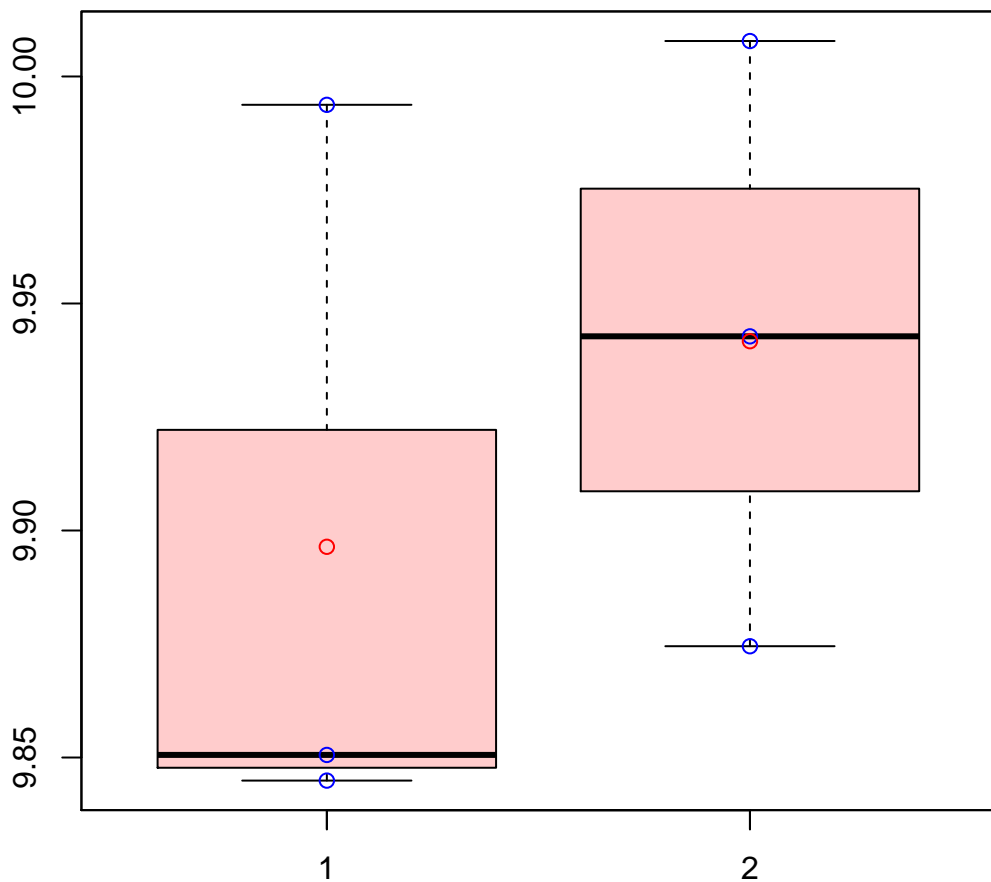

t-Test: p-value = 0.51

# CL321Contig10|CL321Contig10

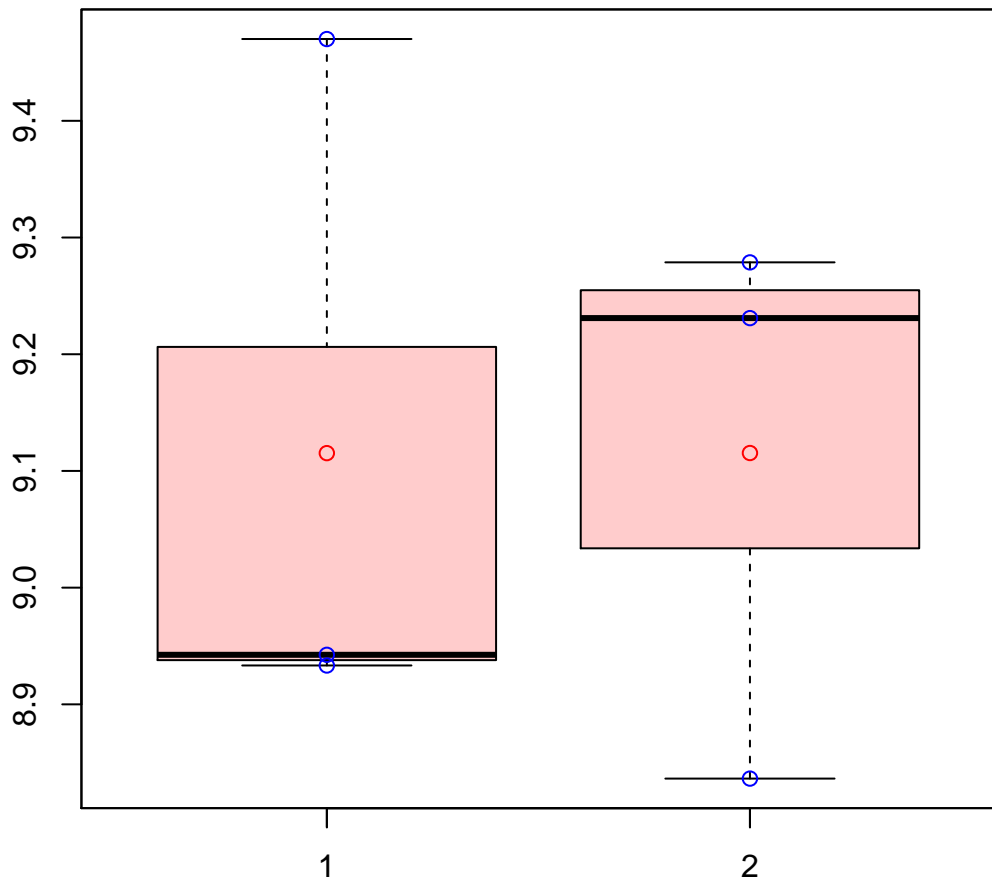

t-Test: p-value = 1

# CL321Contig12|CL321Contig12

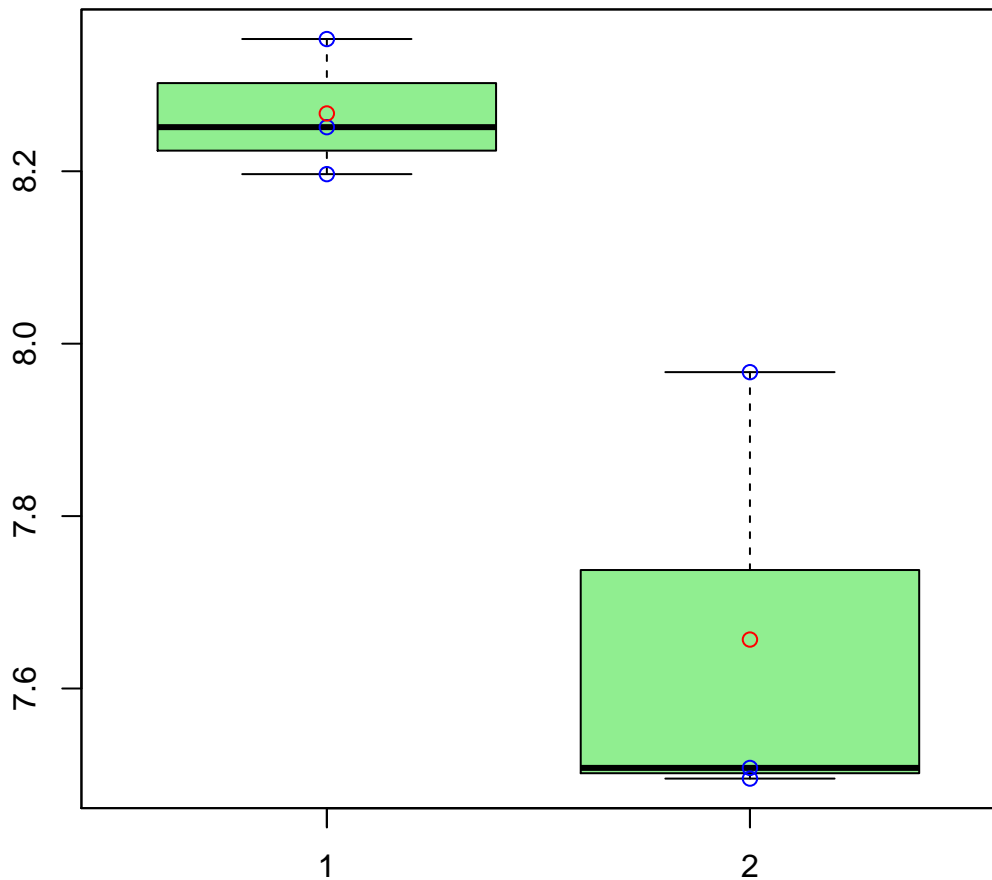

t-Test: p-value = 0.05



# CL321Contig14|CL321Contig14

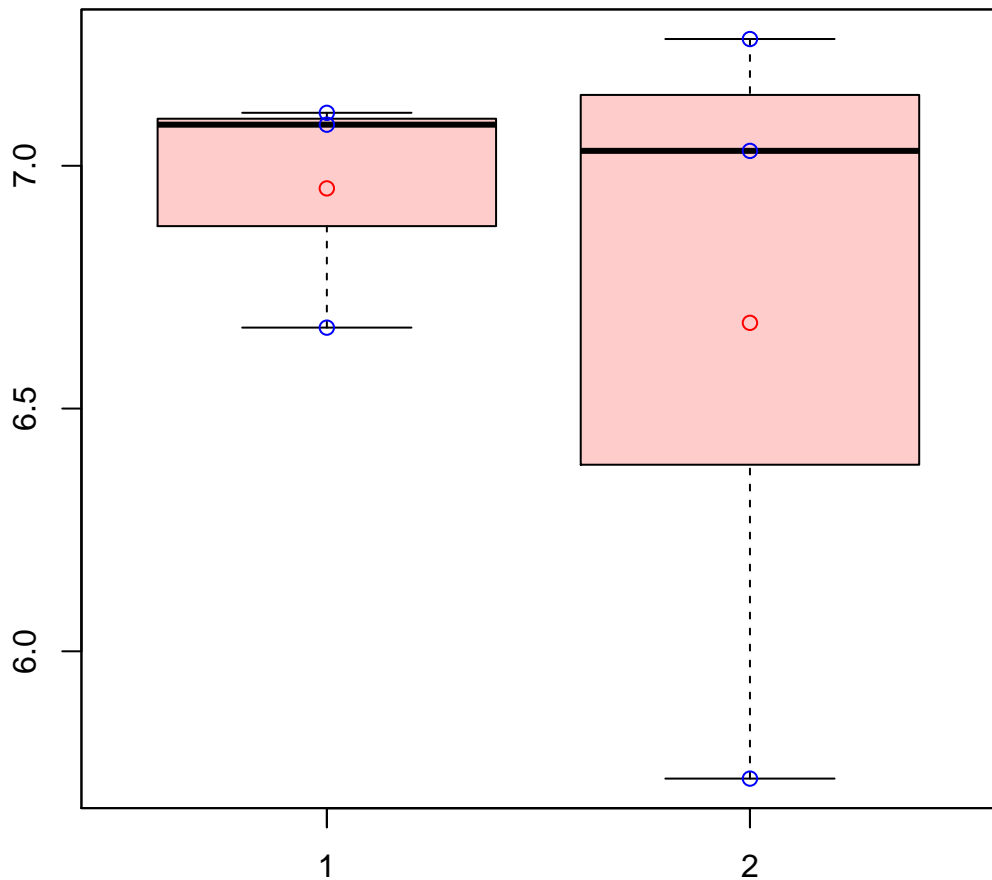

t-Test: p-value = 0.62

# CL321Contig16|CL321Contig16

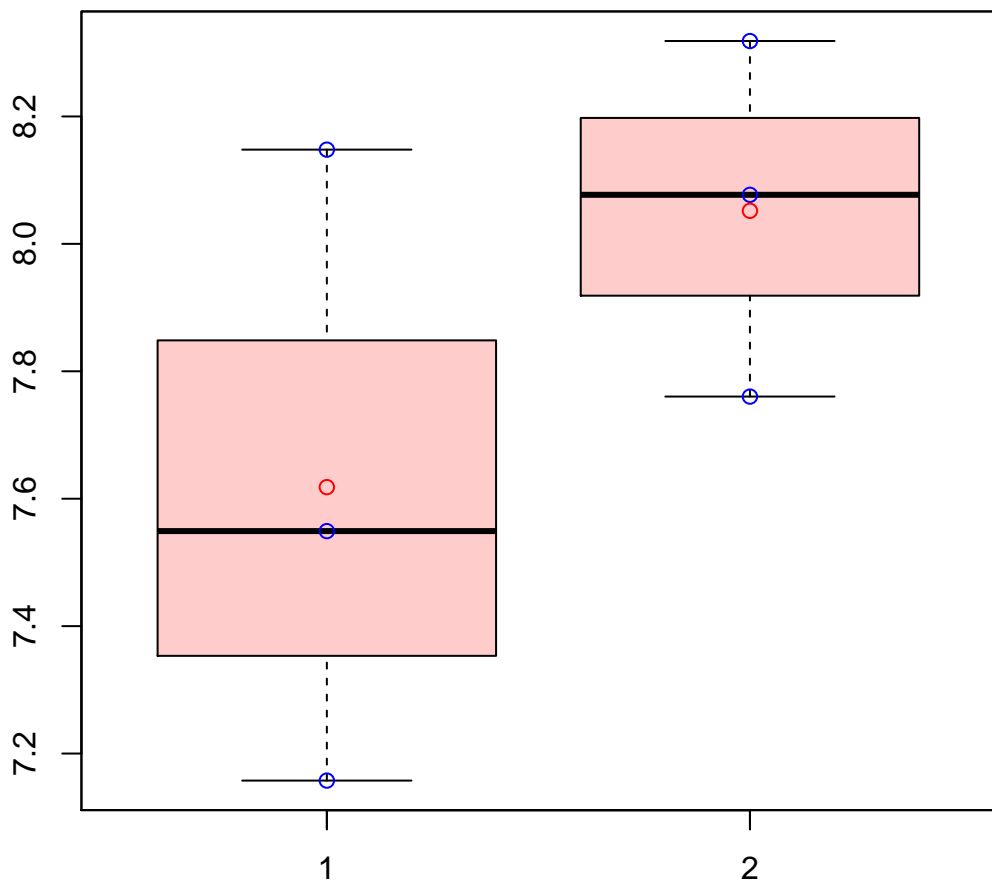

t-Test: p-value = 0.28

# CL3221Contig1|CL3221Contig1

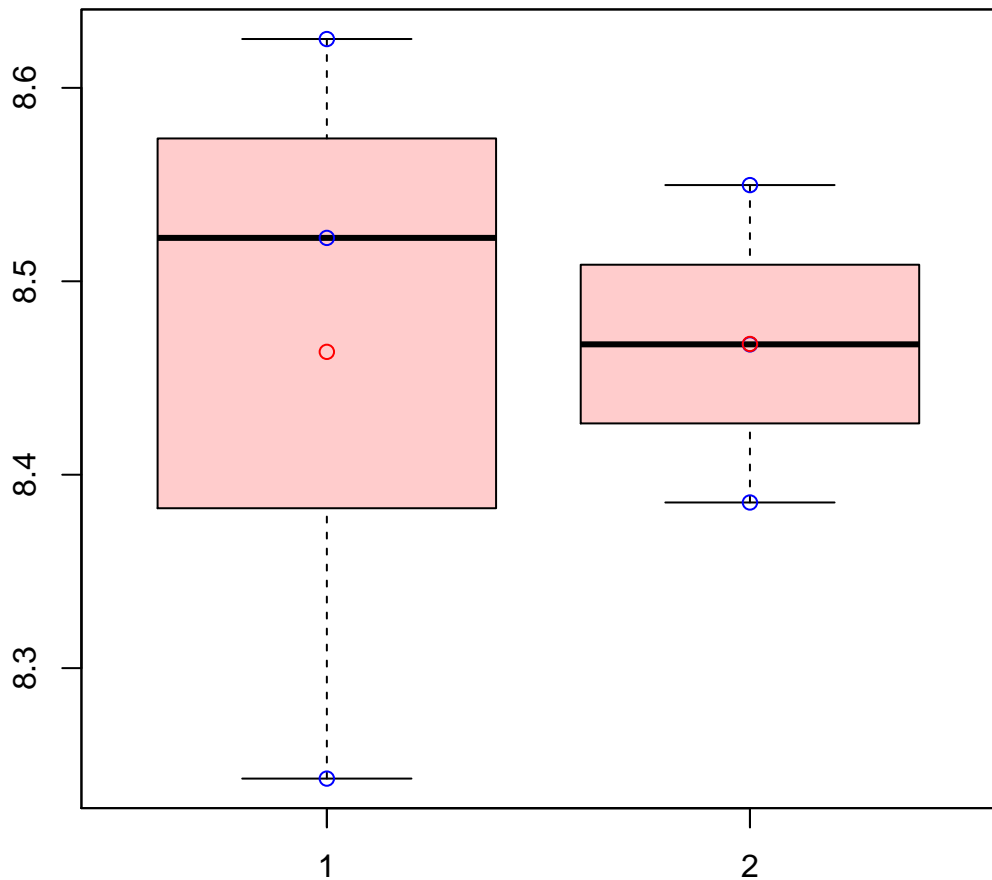

t-Test: p-value = 0.98

# CL3225Contig1|CL3225Contig1

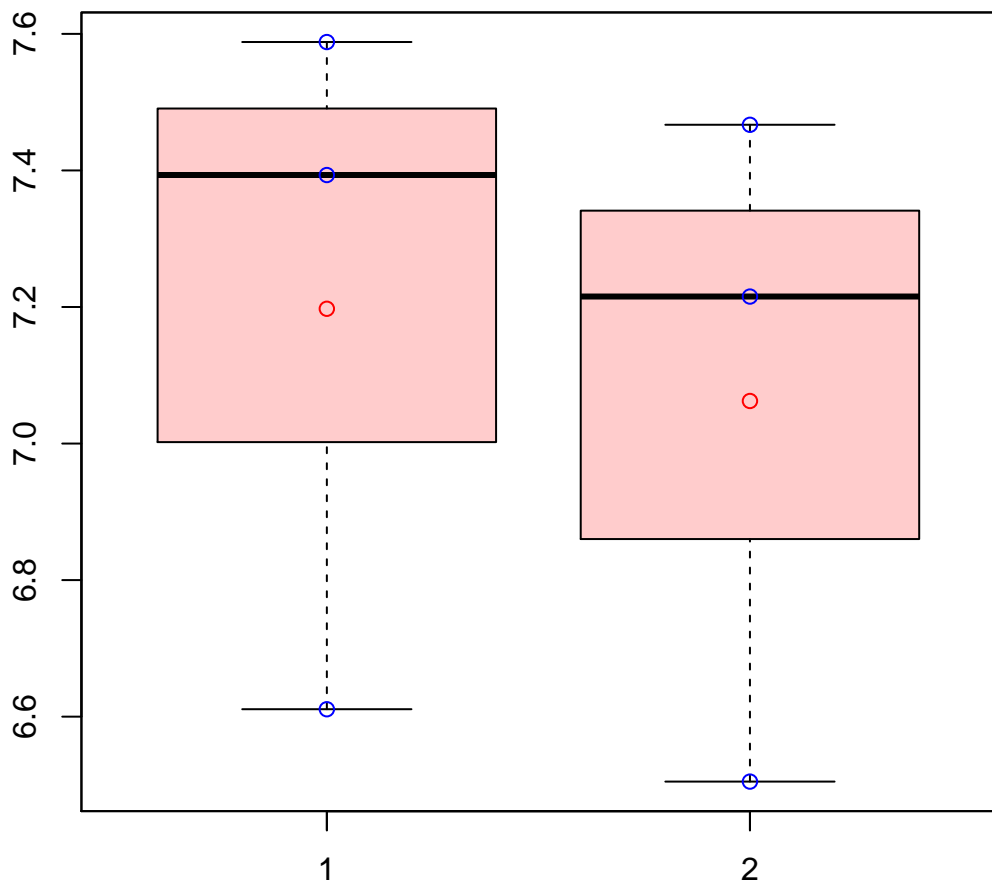

t-Test: p-value = 0.76

# CL3225Contig2|CL3225Contig2

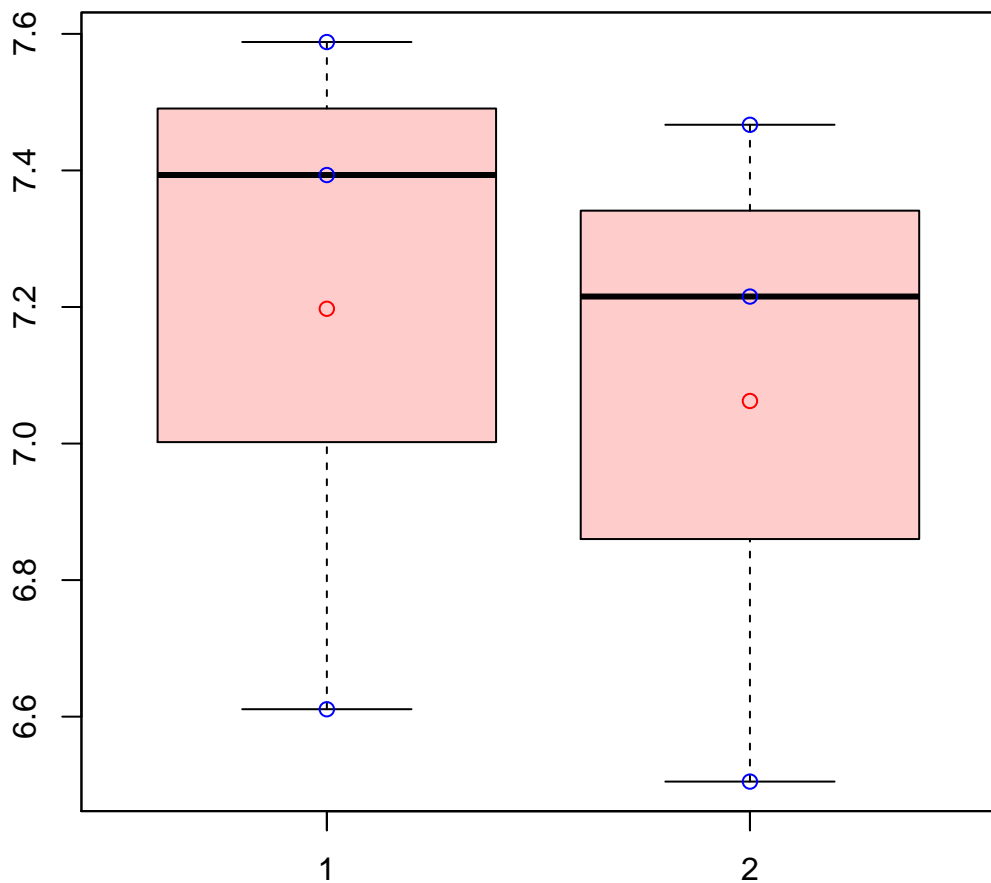

t-Test: p-value = 0.76

# CL3227Contig1|CL3227Contig1

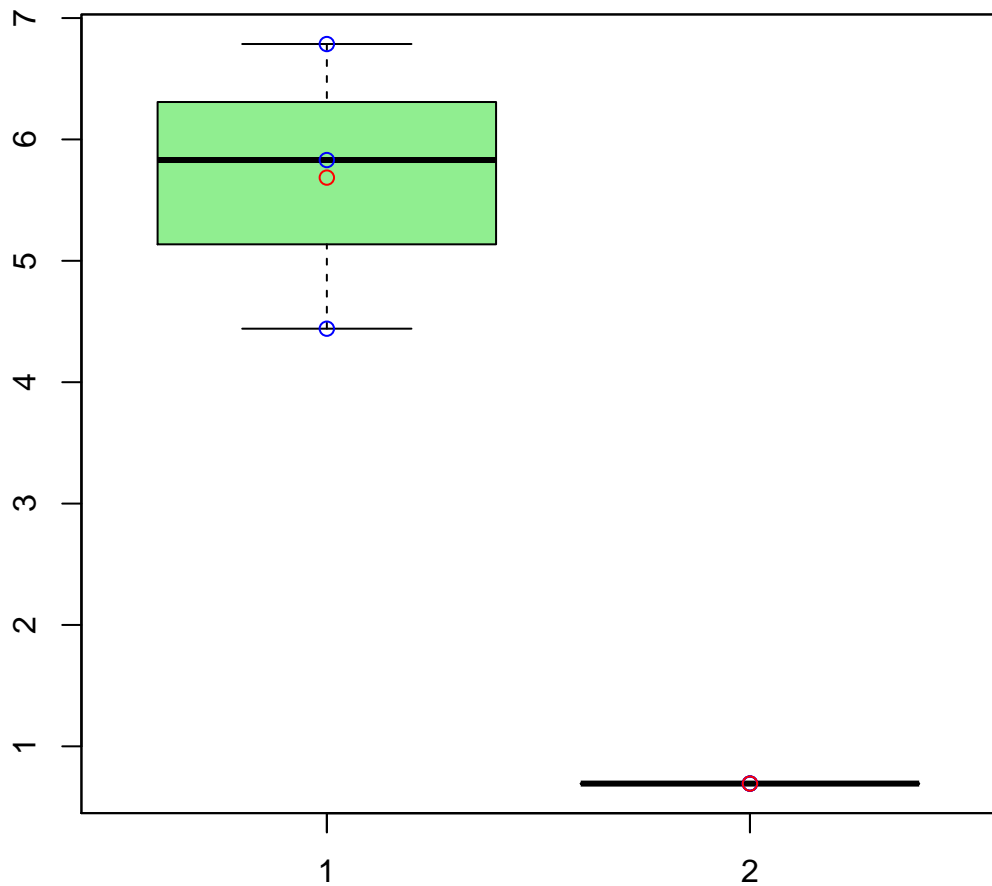

t-Test: p-value = 0.02

# CL3227Contig2|CL3227Contig2



t-Test: p-value = 0.02

# CL322Contig12|CL322Contig12

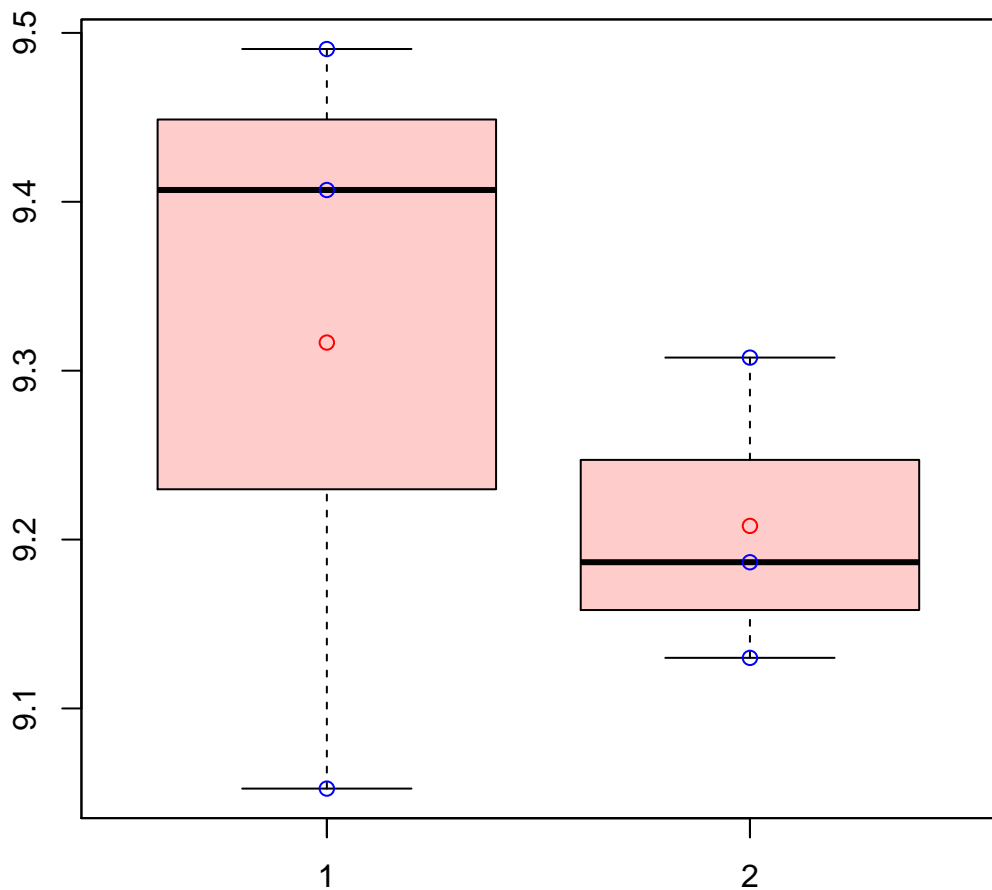

t-Test: p-value = 0.51



# CL322Contig21|CL322Contig21

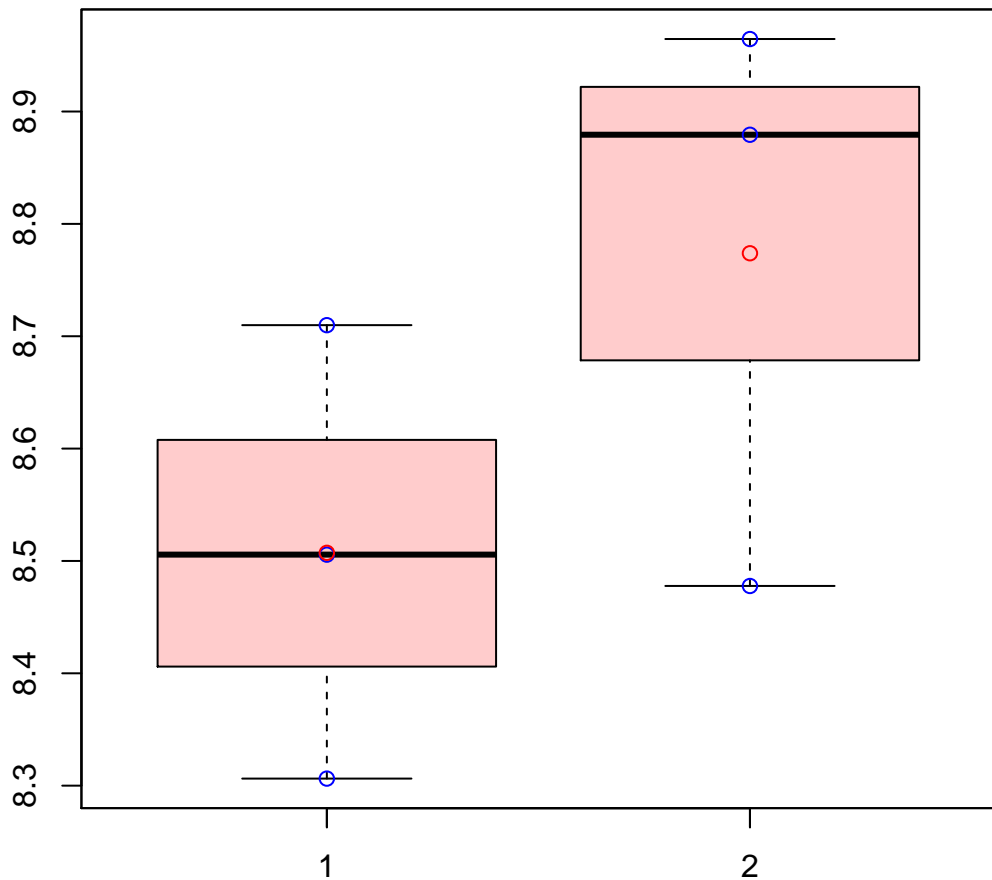

t-Test: p-value = 0.24

# CL322Contig2|CL322Contig2

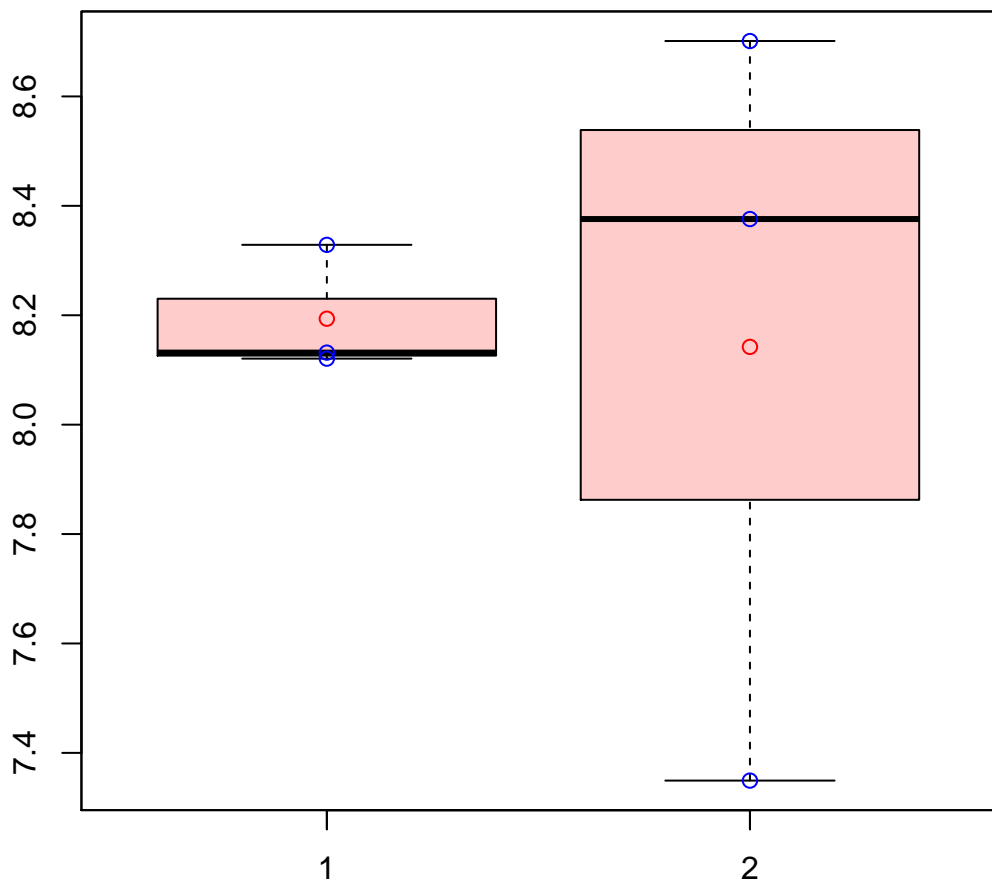

t-Test: p-value = 0.91

# CL322Contig9|CL322Contig9

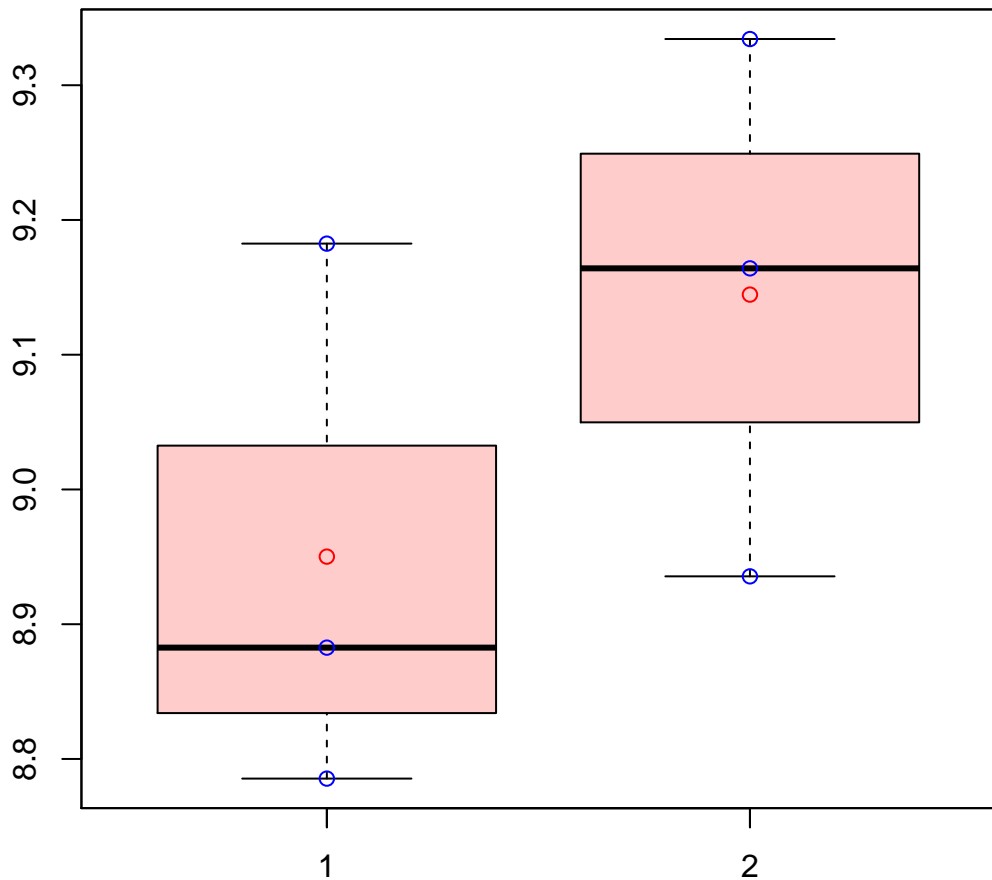

t-Test: p-value = 0.31

# CL3231Contig2|CL3231Contig2

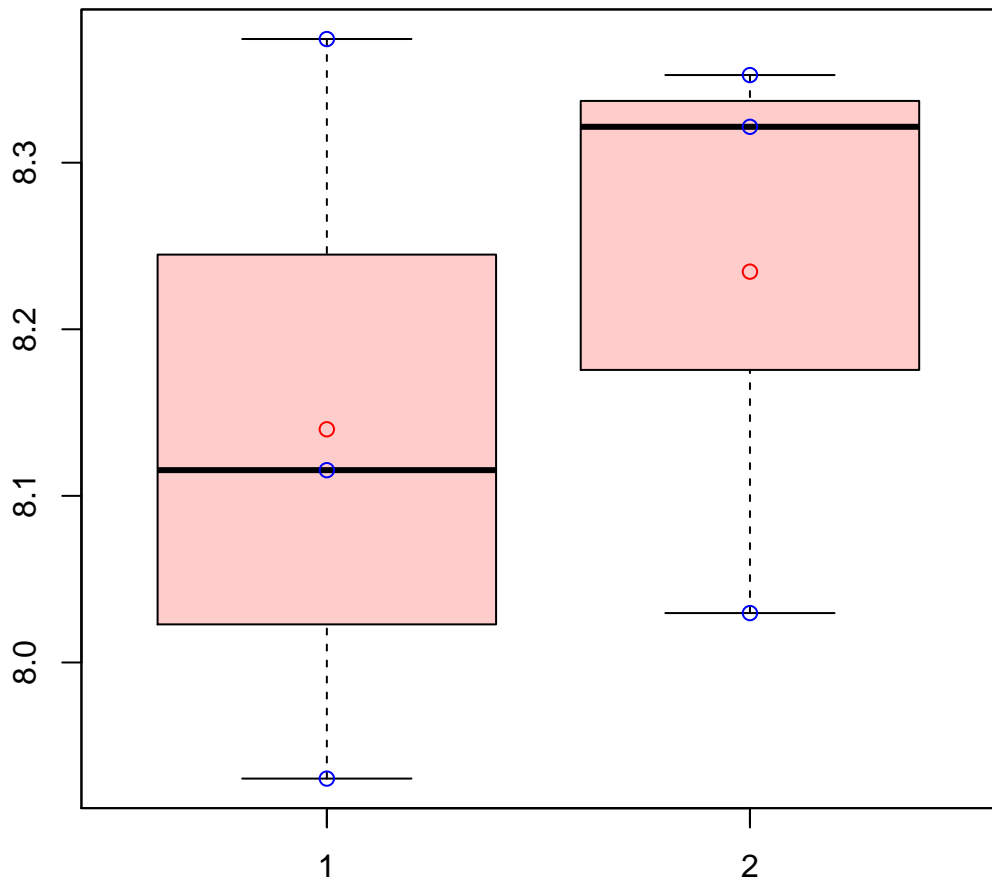

t-Test: p-value = 0.6

# CL3231Contig4|CL3231Contig4

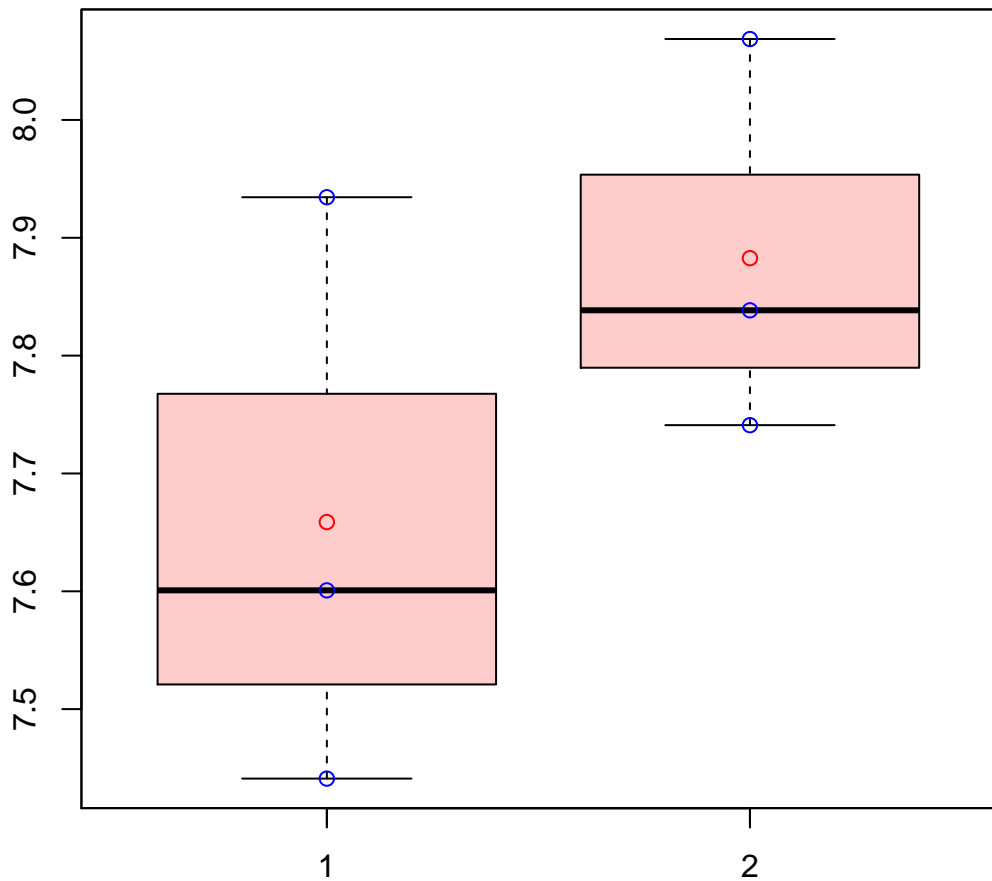

t-Test: p-value = 0.28

# CL3231Contig5|CL3231Contig5



t-Test: p-value = 0.28

# CL3231Contig7|CL3231Contig7



t-Test: p-value = 0.28

# CL3239Contig1|CL3239Contig1

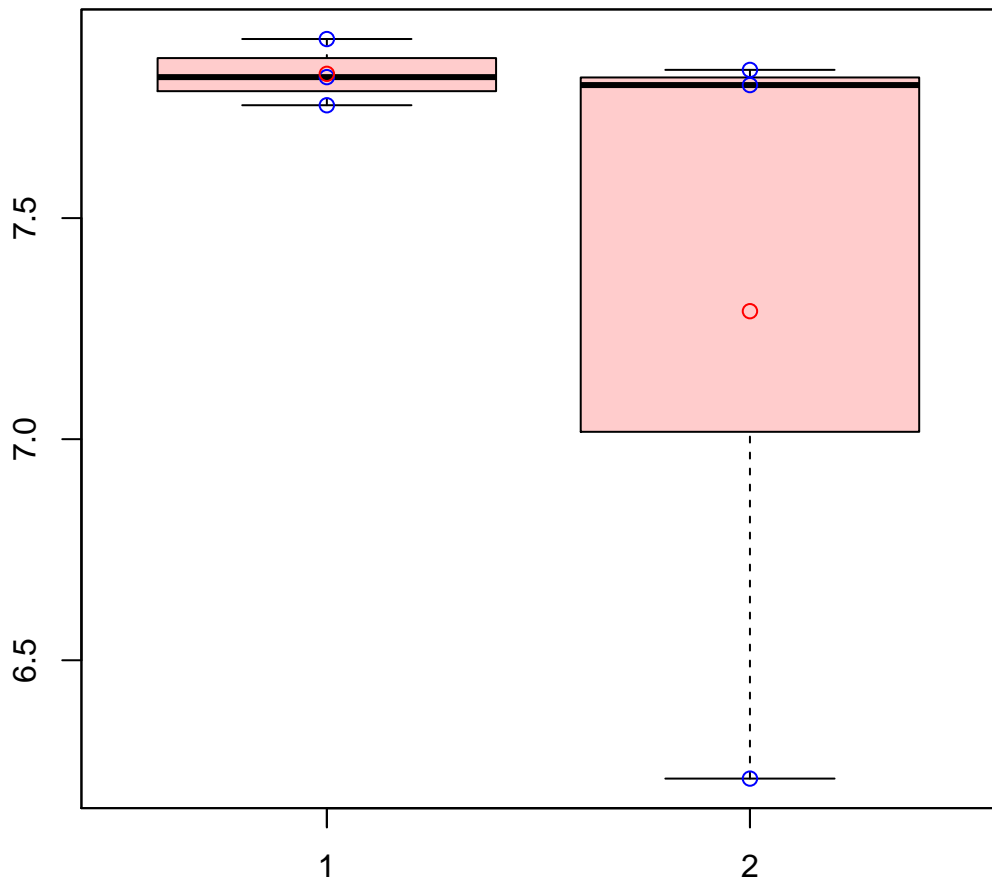

t-Test: p-value = 0.42



# CL3239Contig2|CL3239Contig2

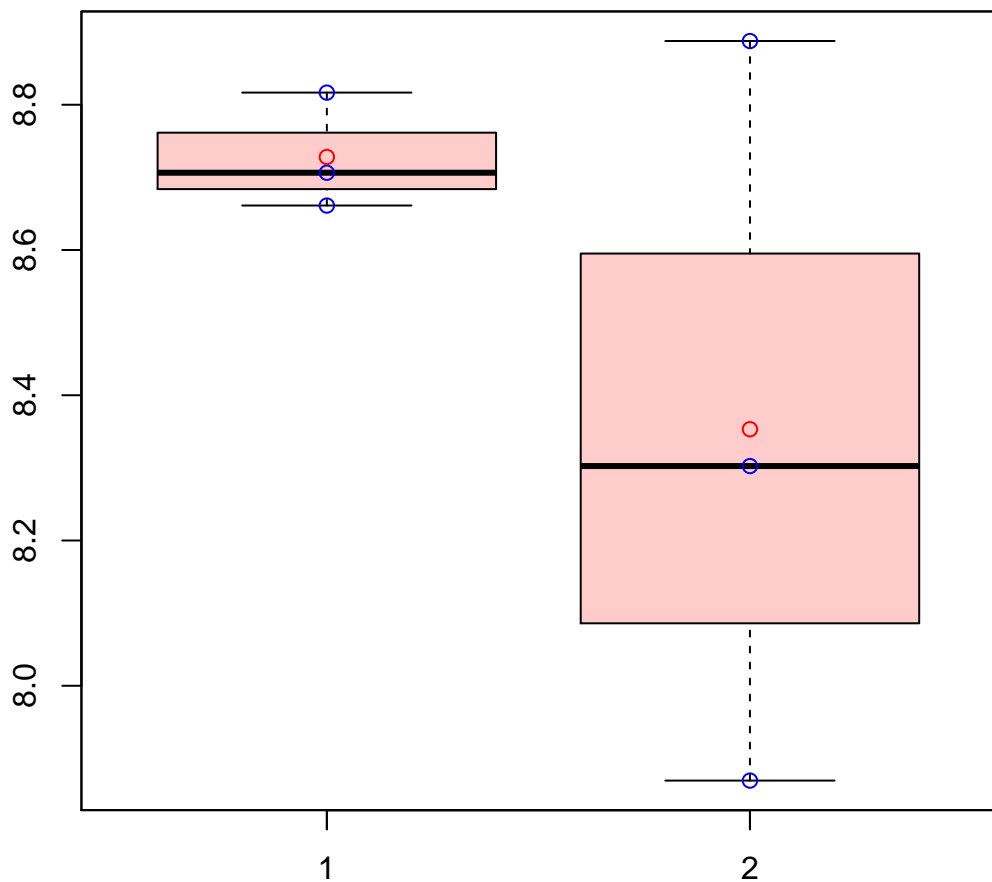

t-Test: p-value = 0.33

# CL323Contig2|CL323Contig2

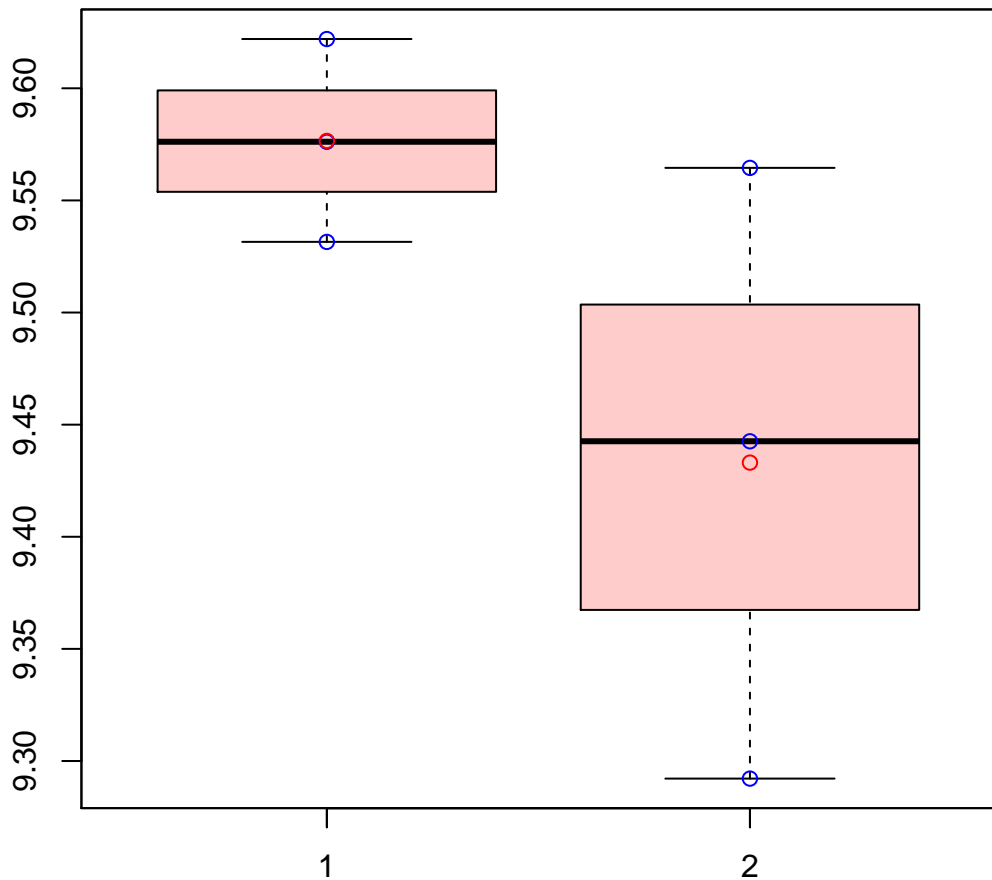

t-Test: p-value = 0.2

# CL3243Contig3|CL3243Contig3

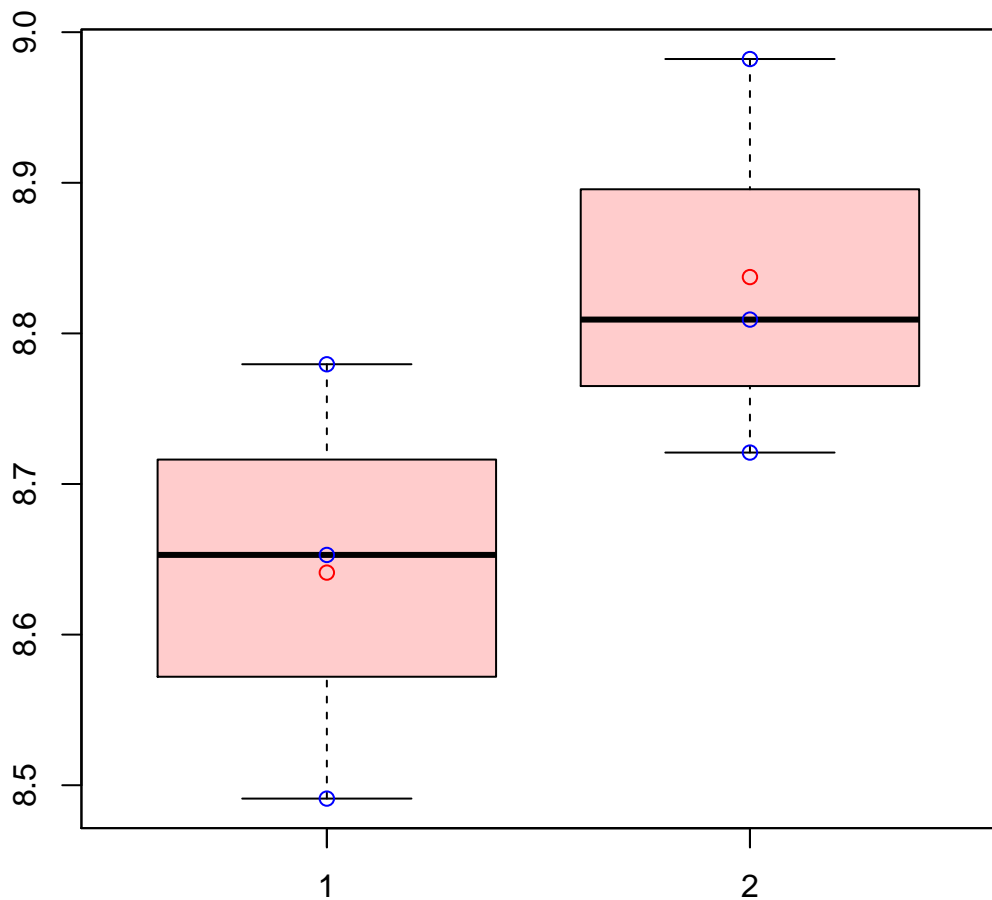

t-Test: p-value = 0.16

# CL3249Contig1|CL3249Contig1

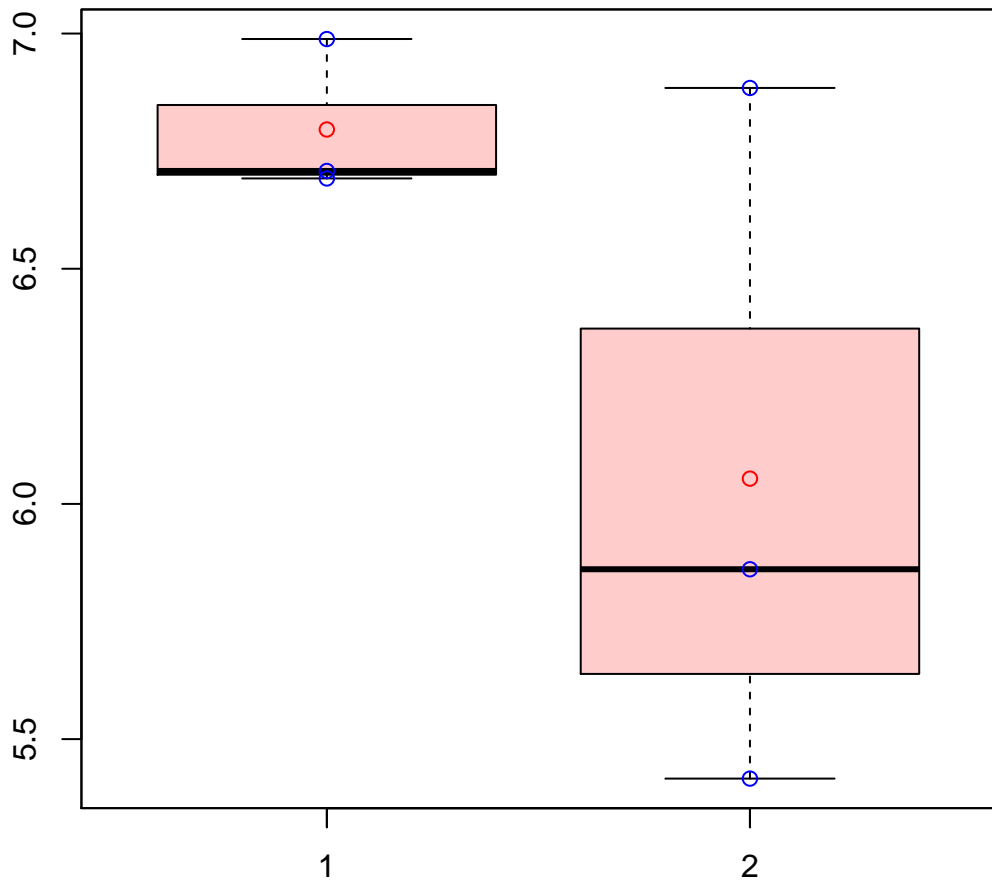

t-Test: p-value = 0.23

# CL3251Contig1|CL3251Contig1

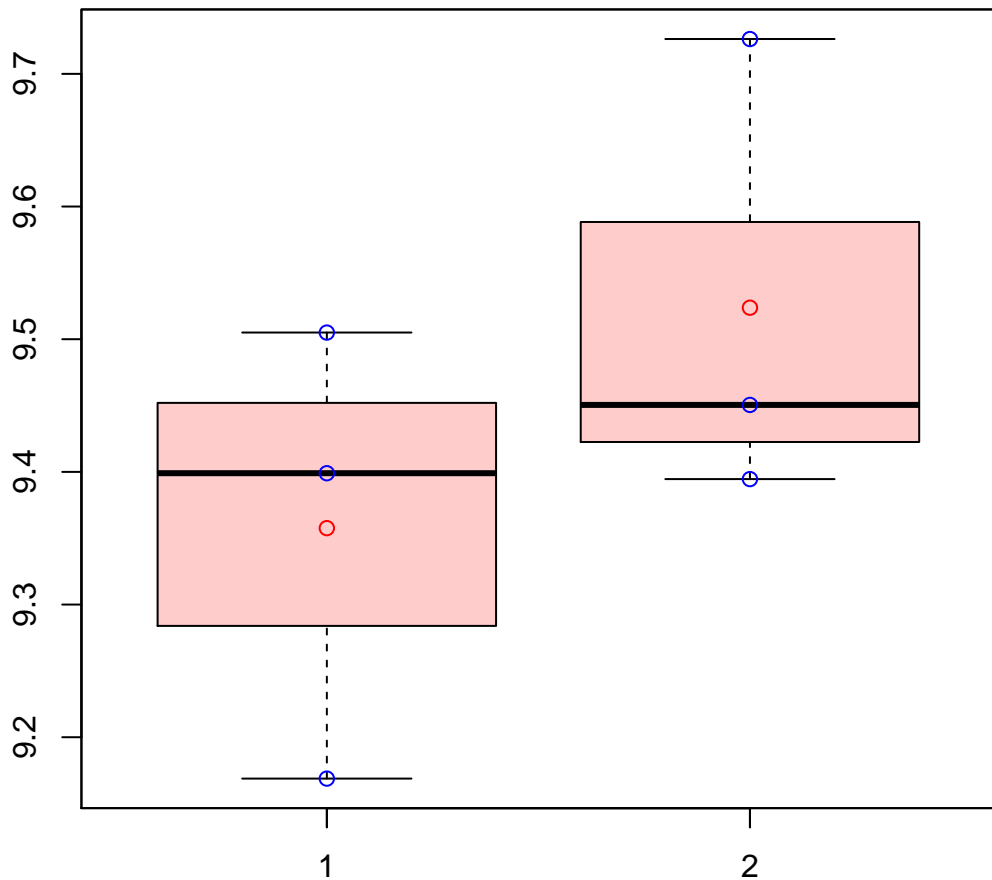

t-Test: p-value = 0.31

# CL3251Contig2|CL3251Contig2

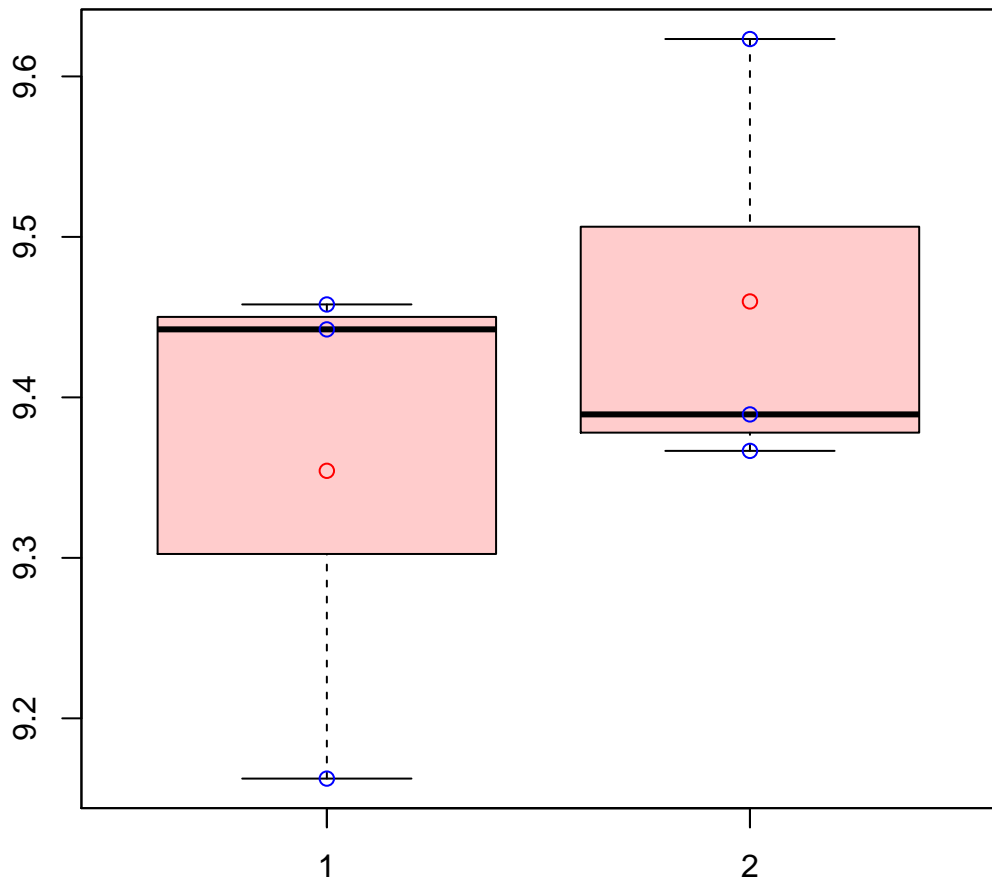

t-Test: p-value = 0.45

# CL325Contig1|CL325Contig1

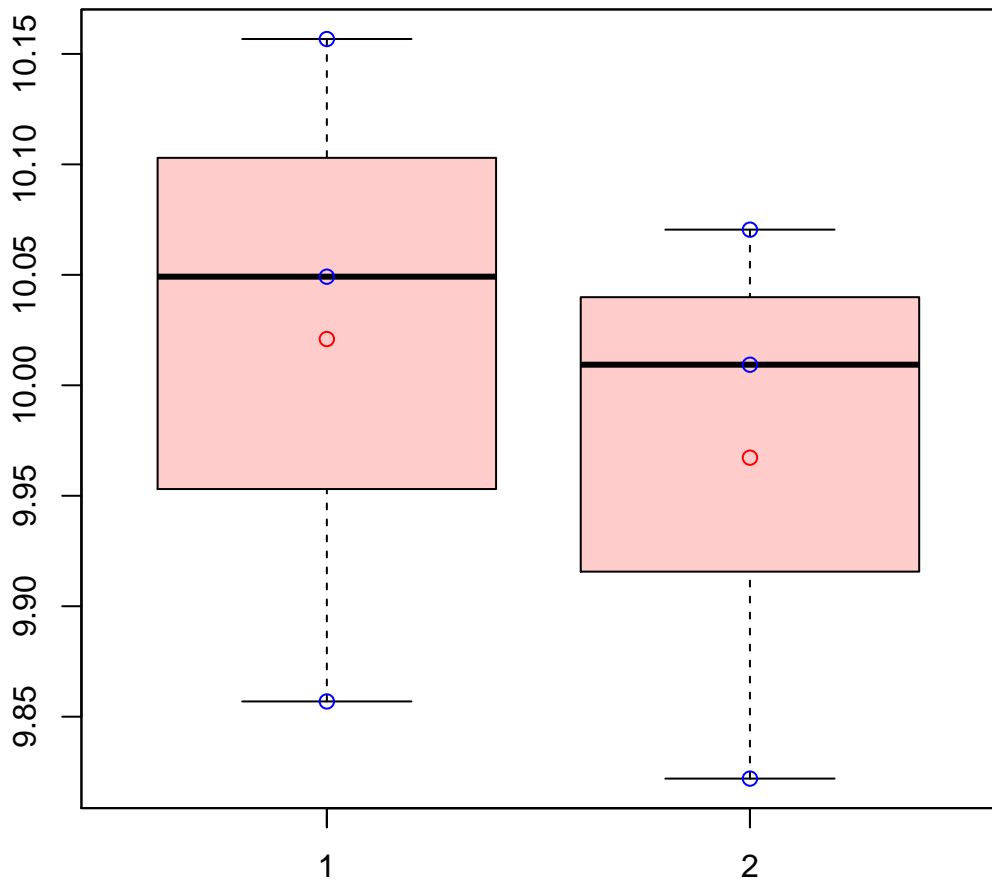

t-Test: p-value = 0.67

# CL325Contig9|CL325Contig9

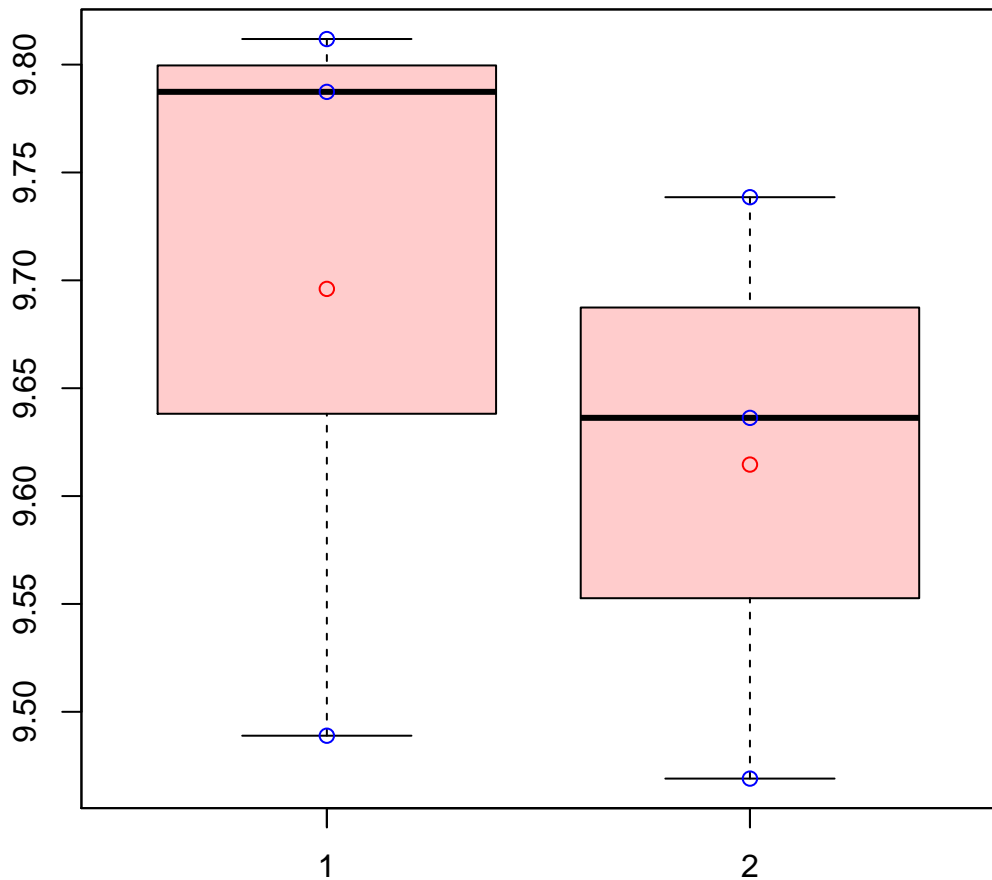

t-Test: p-value = 0.57



# CL3264Contig3|CL3264Contig3

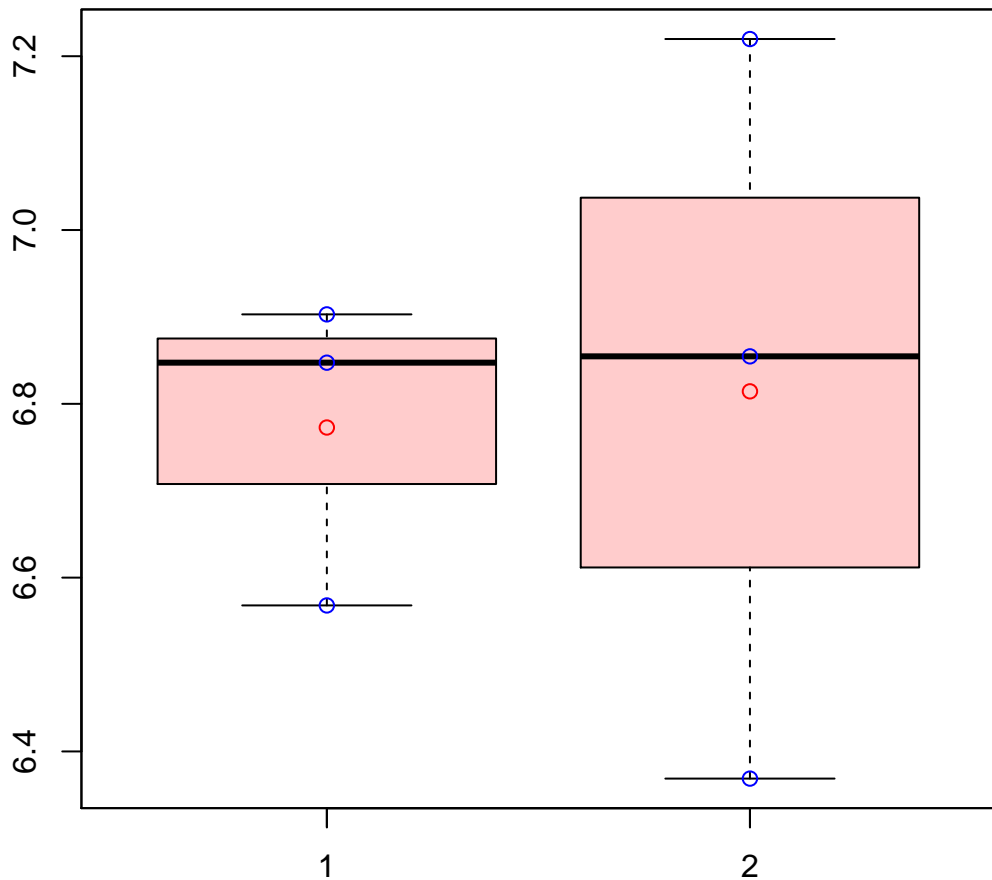

t-Test: p-value = 0.89

# CL3269Contig3|CL3269Contig3

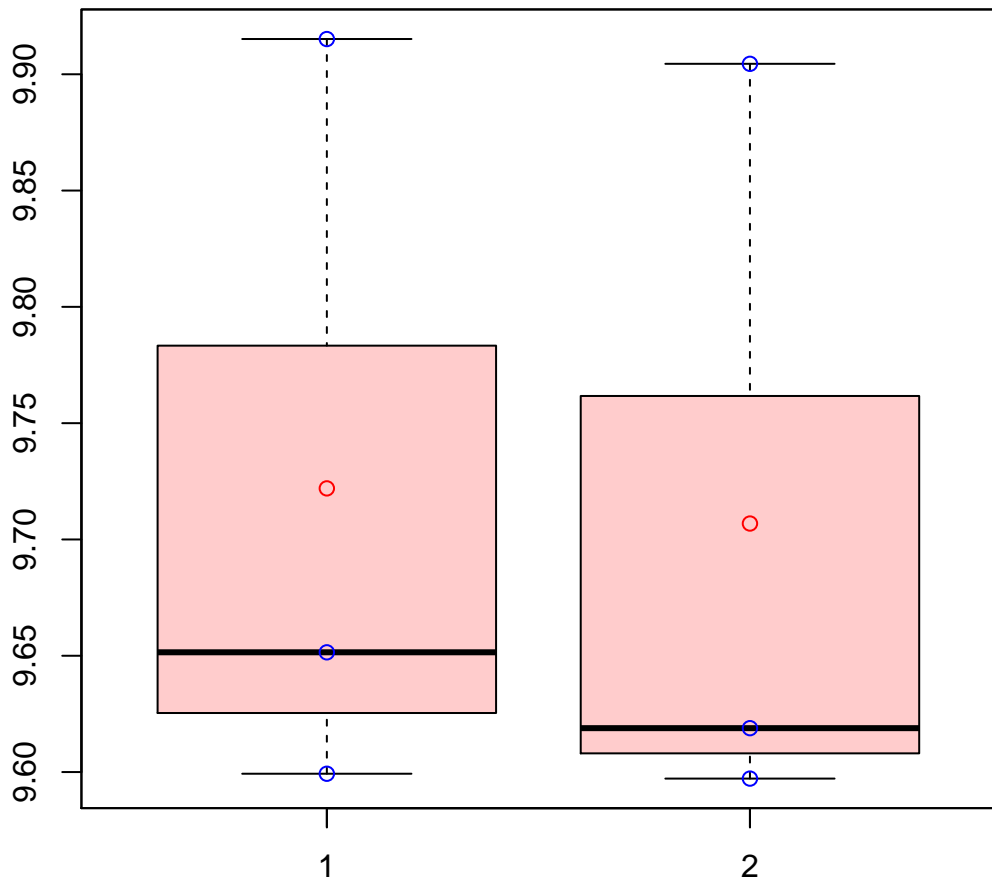

t-Test: p-value = 0.92

# CL326Contig2|CL326Contig2

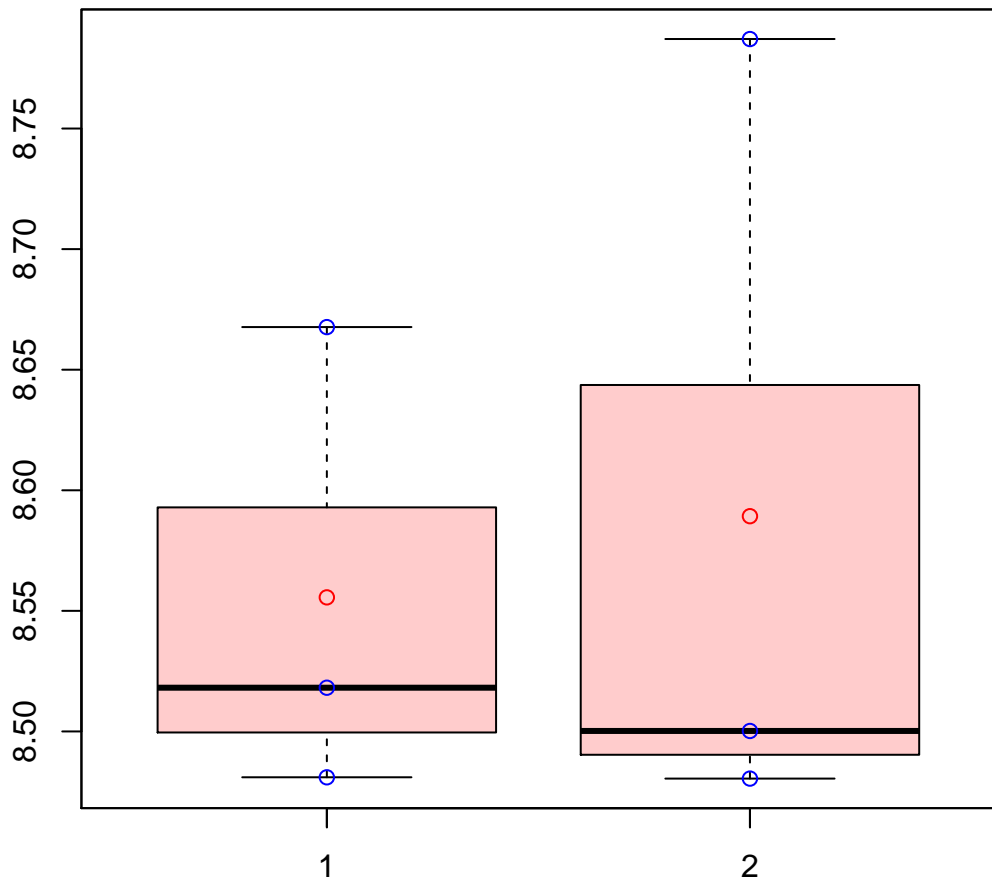

t-Test: p-value = 0.79

# CL326Contig5|CL326Contig5

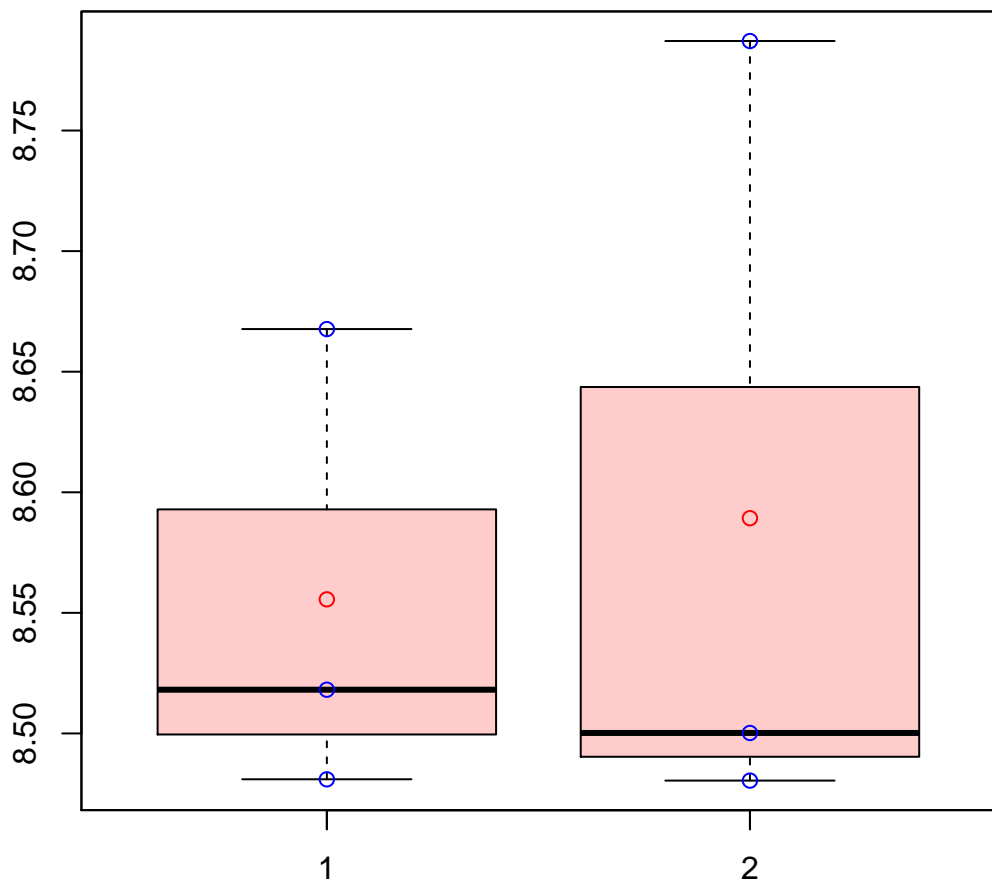

t-Test: p-value = 0.79

# CL326Contig6|CL326Contig6

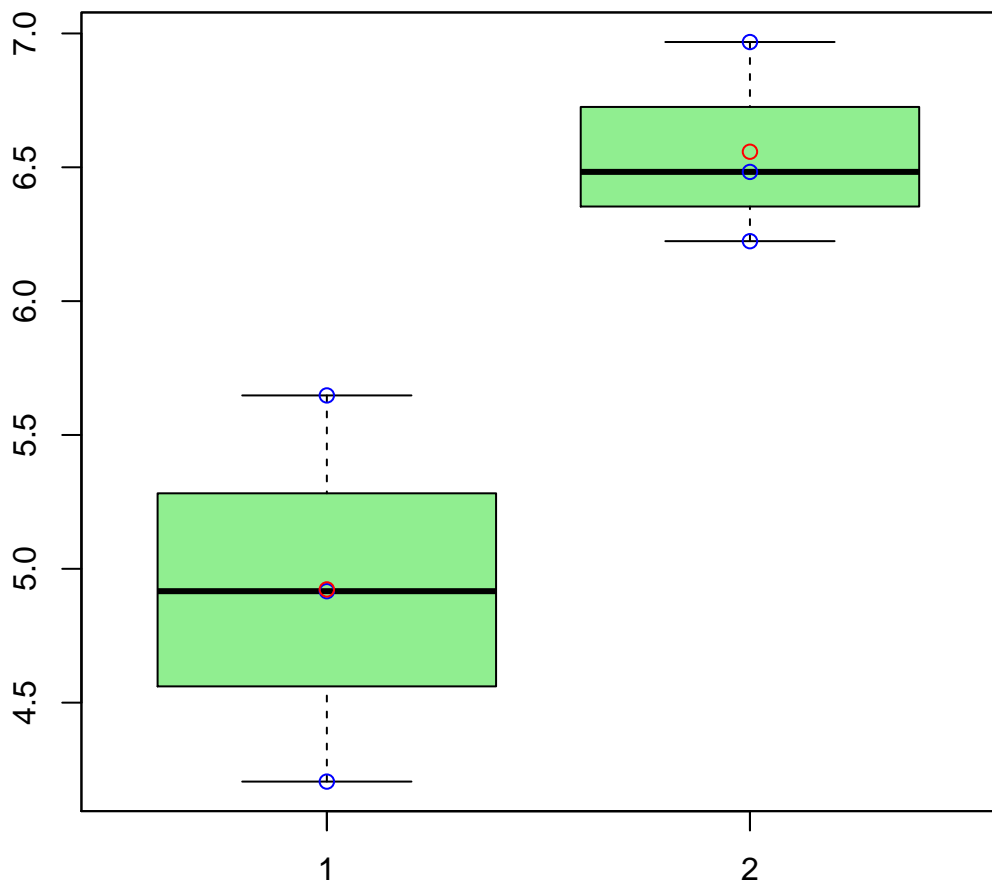

t-Test: p-value = 0.04

# CL3278Contig1|CL3278Contig1

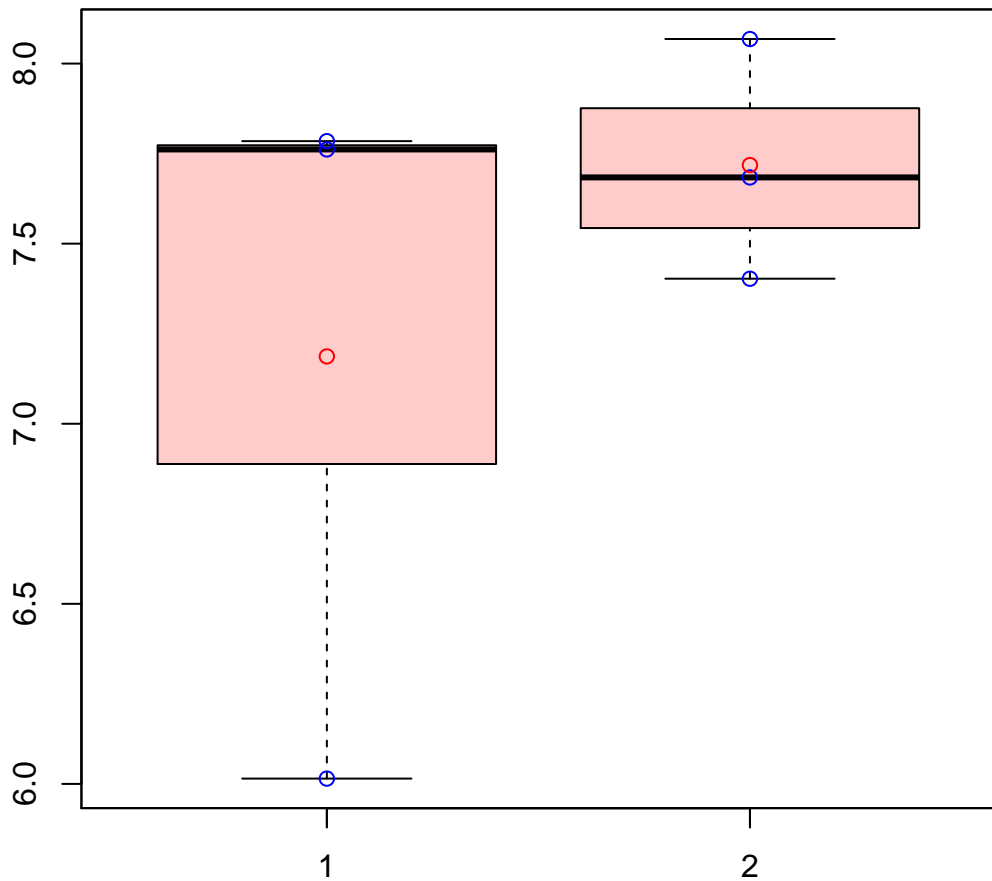

t-Test: p-value = 0.47

# CL3278Contig2|CL3278Contig2

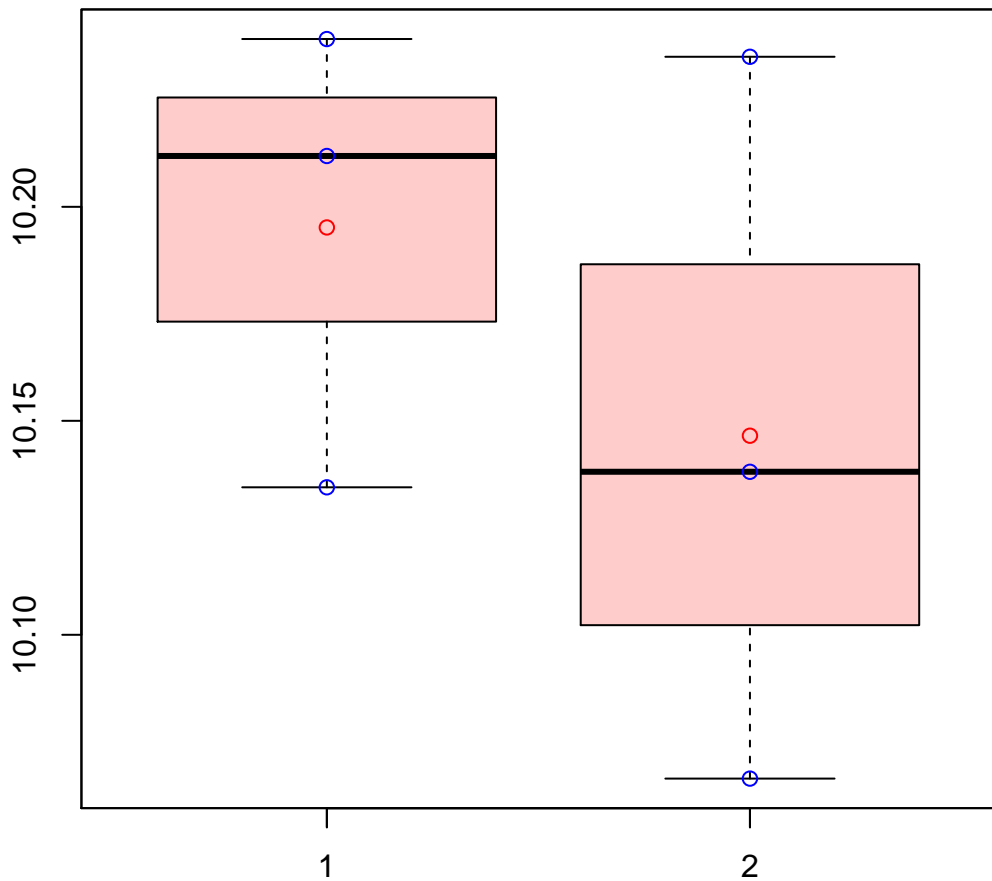

t-Test: p-value = 0.46

# CL327Contig3|CL327Contig3

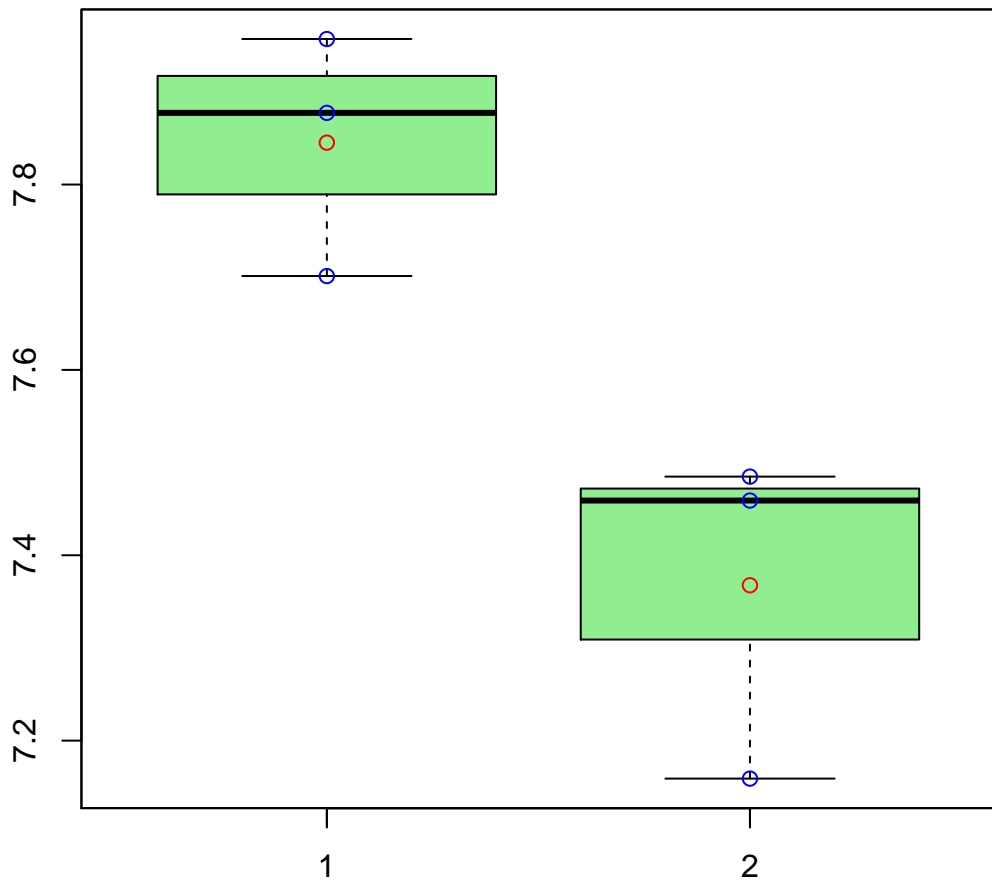

t-Test: p-value = 0.02



# CL3285Contig5|CL3285Contig5

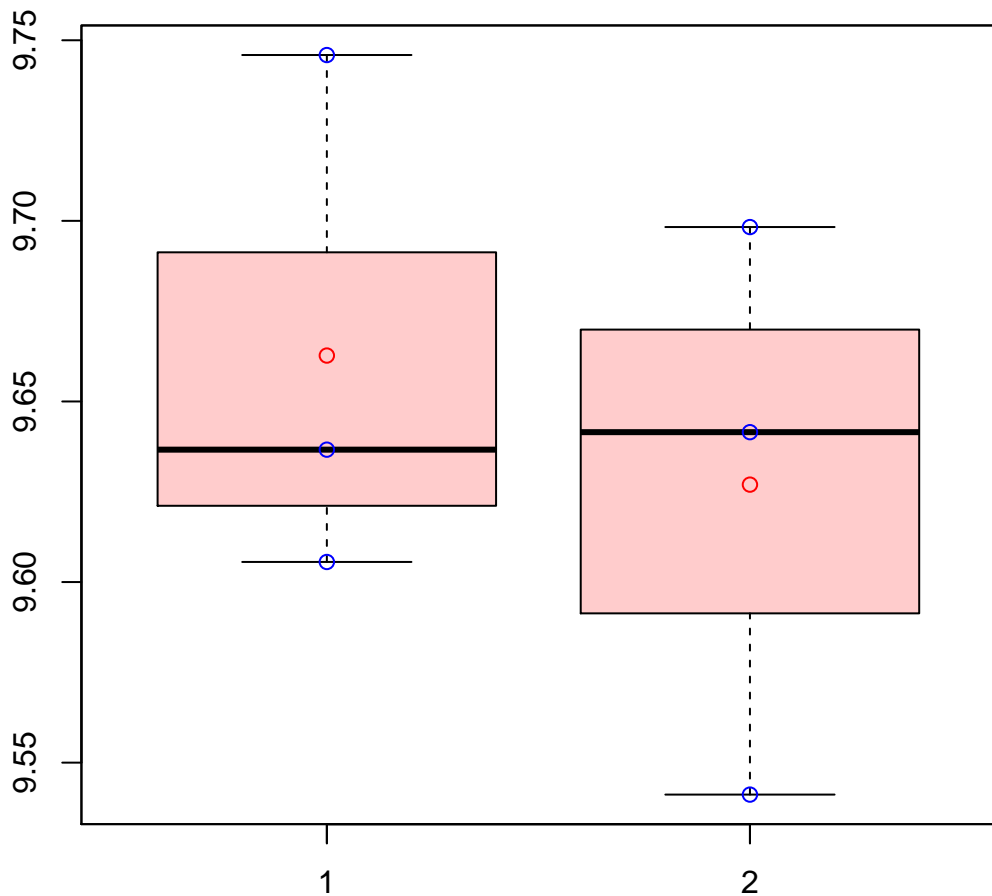

t-Test: p-value = 0.6

# CL3287Contig1|CL3287Contig1

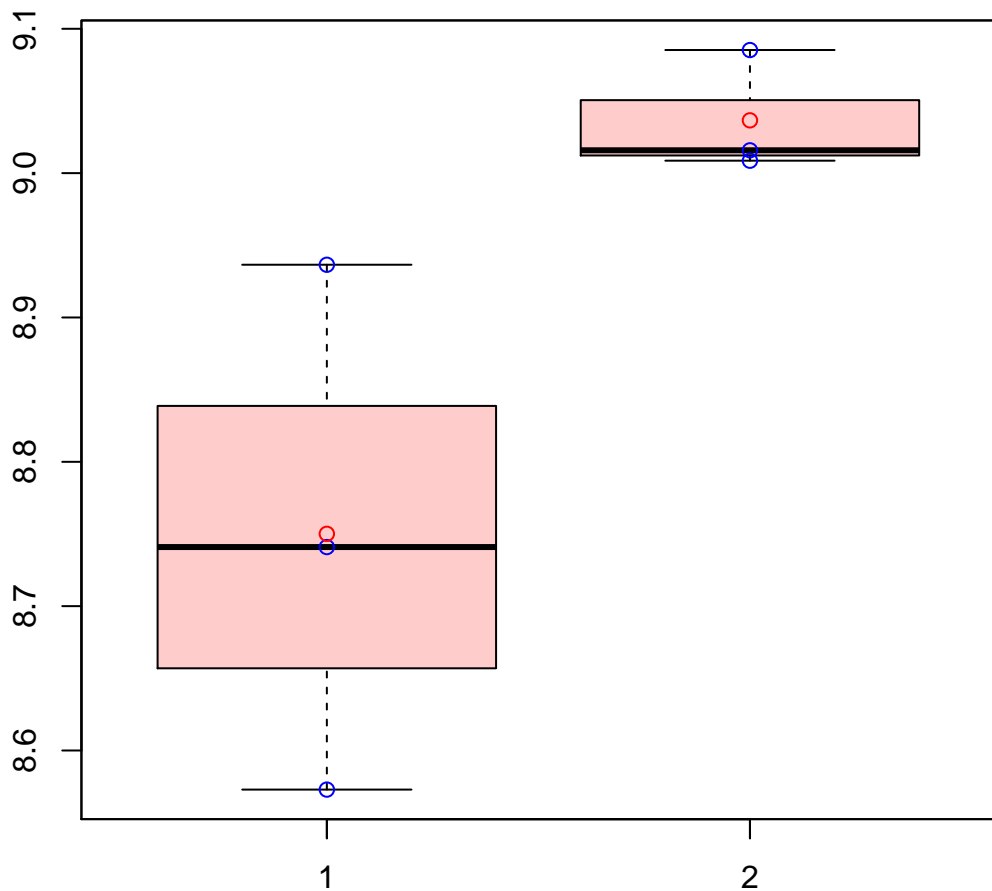

t-Test: p-value = 0.11

# CL328Contig4|CL328Contig4

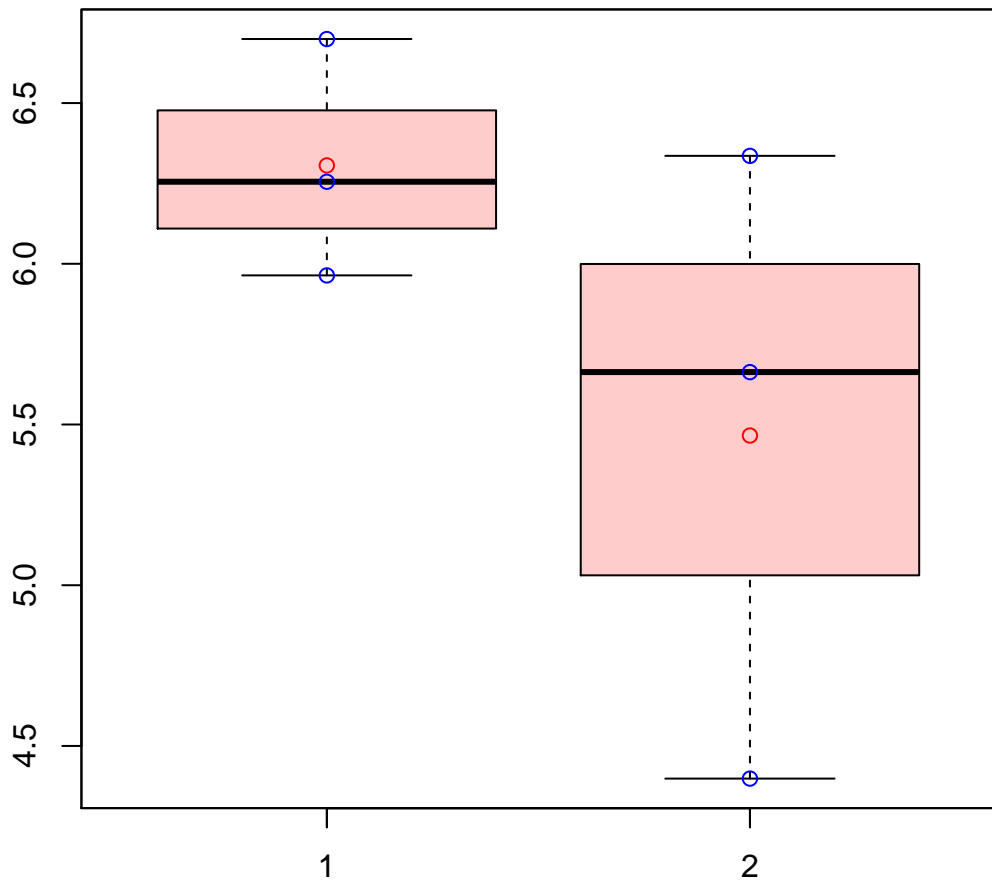

t-Test: p-value = 0.27

# CL328Contig6|CL328Contig6

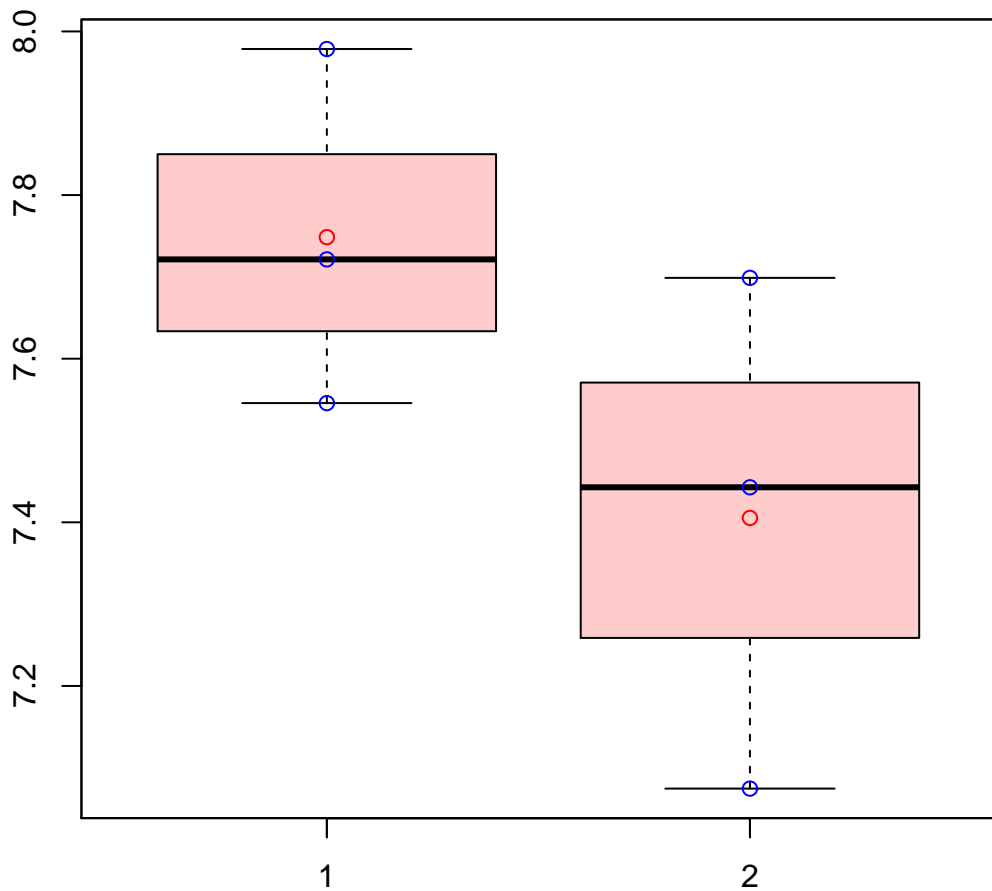

t-Test: p-value = 0.2

**CL3290Contig2|CL3290Contig2**

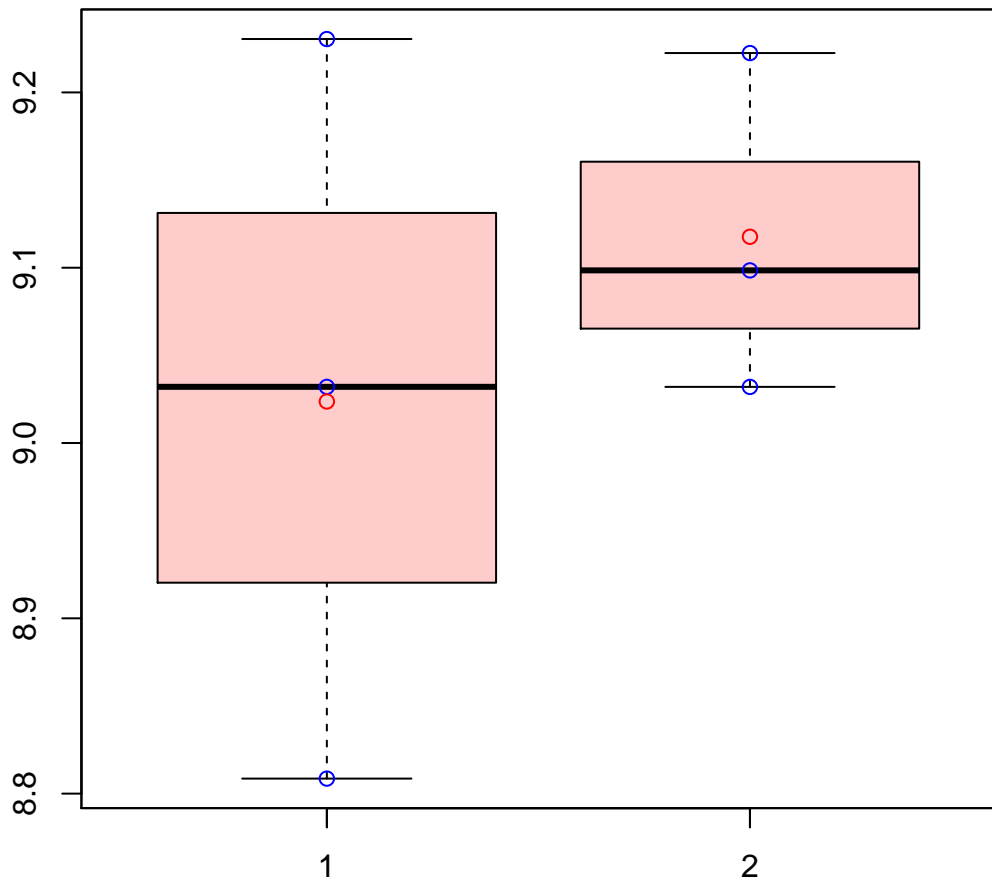

t-Test: p-value = 0.54

# CL3290Contig3|CL3290Contig3

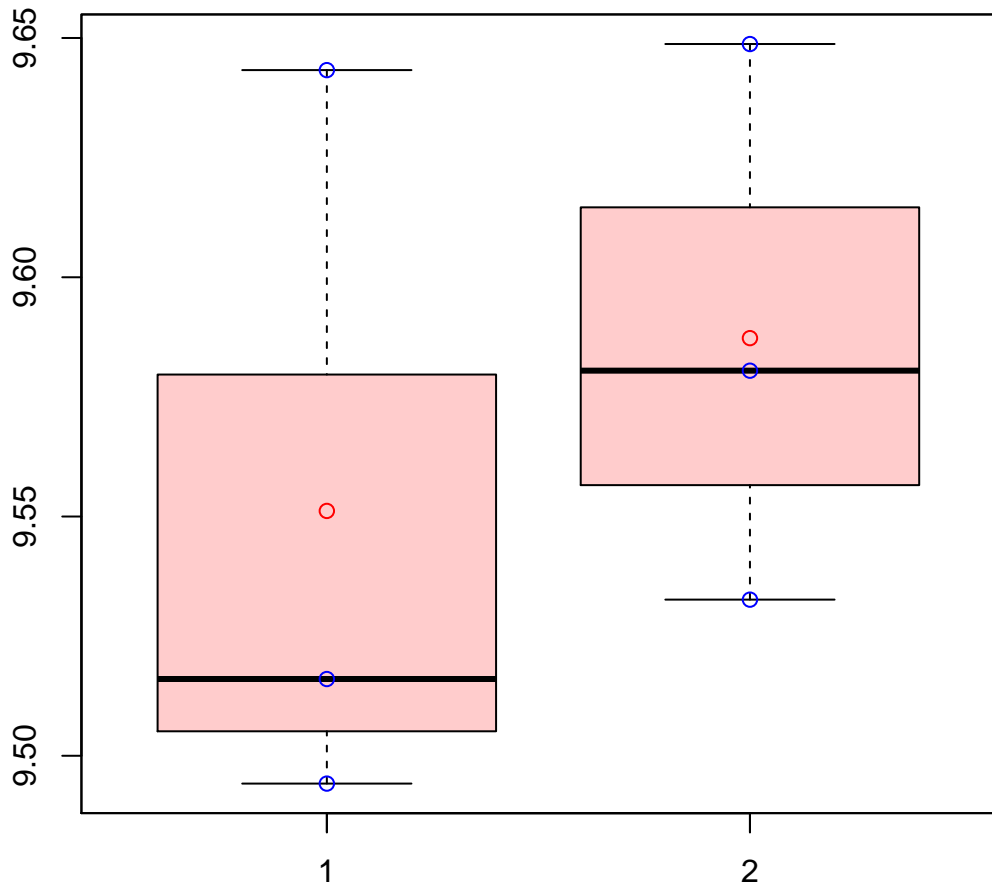

t-Test: p-value = 0.57

# CL3294Contig3|CL3294Contig3

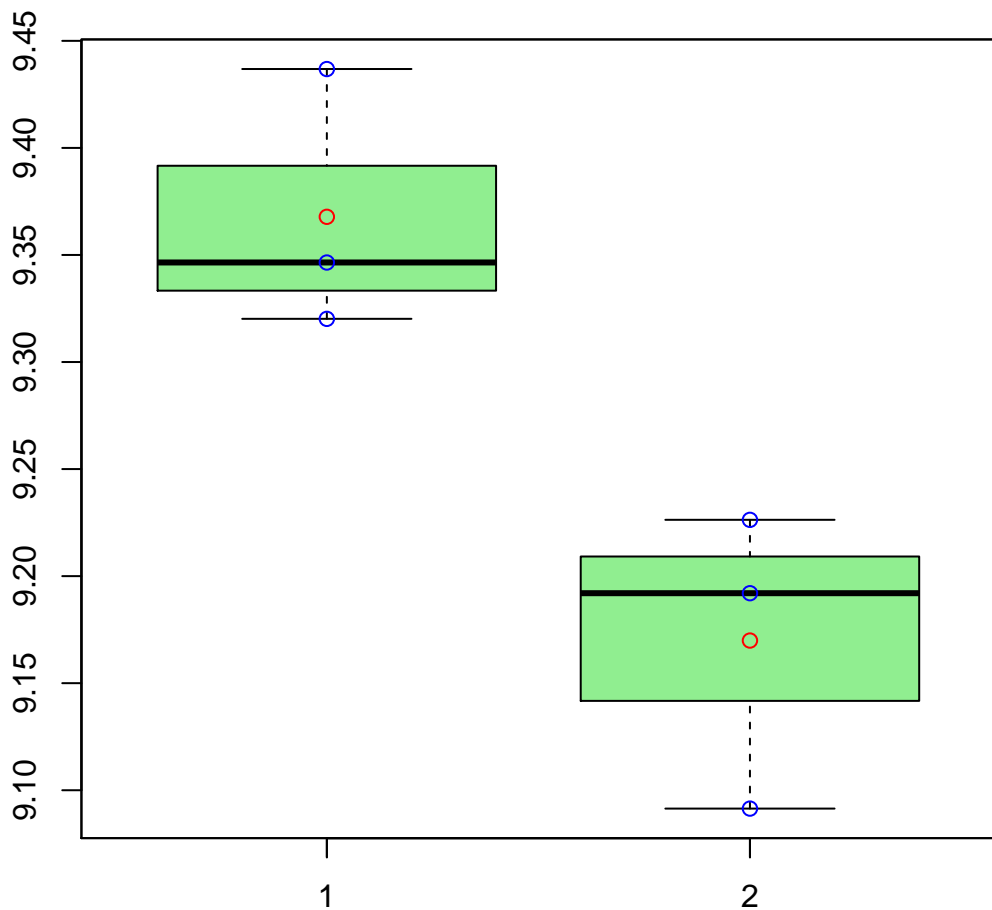

t-Test: p-value = 0.02

# CL3294Contig4|CL3294Contig4



t-Test: p-value = 0.02



# CL3294Contig5|CL3294Contig5



t-Test: p-value = 0.02

# CL3294Contig6|CL3294Contig6

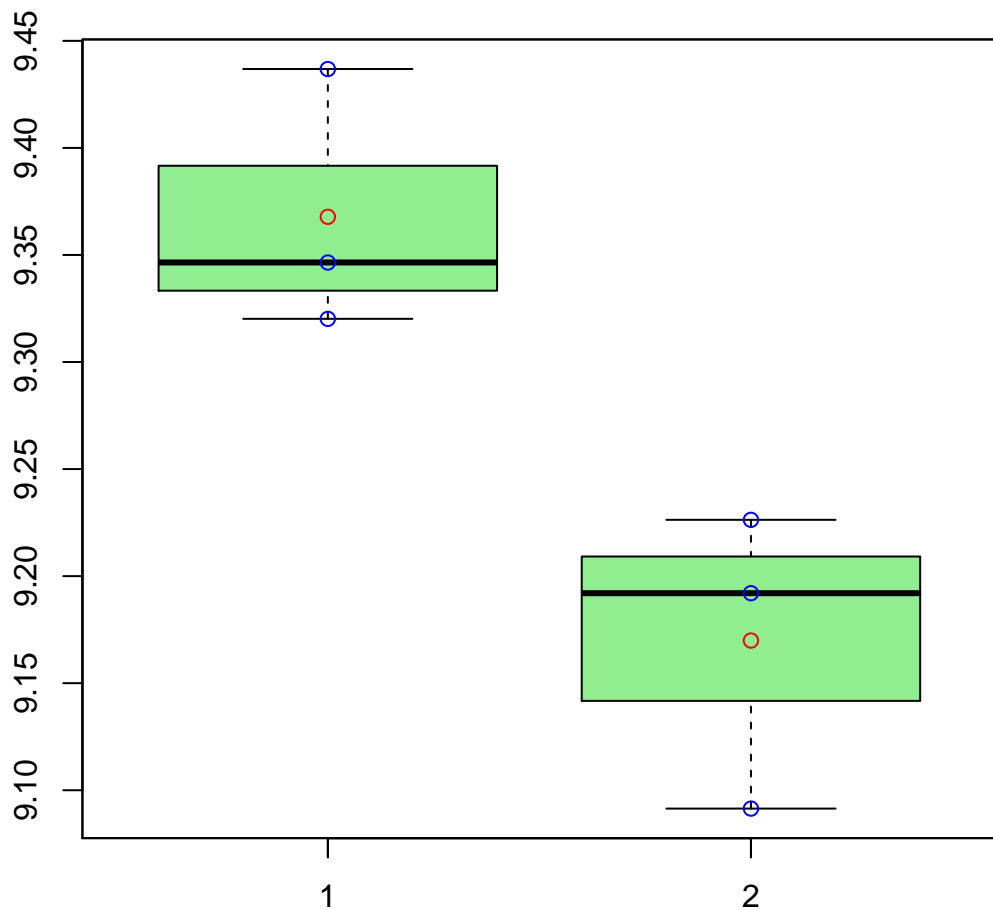

t-Test: p-value = 0.02

# CL3294Contig7|CL3294Contig7

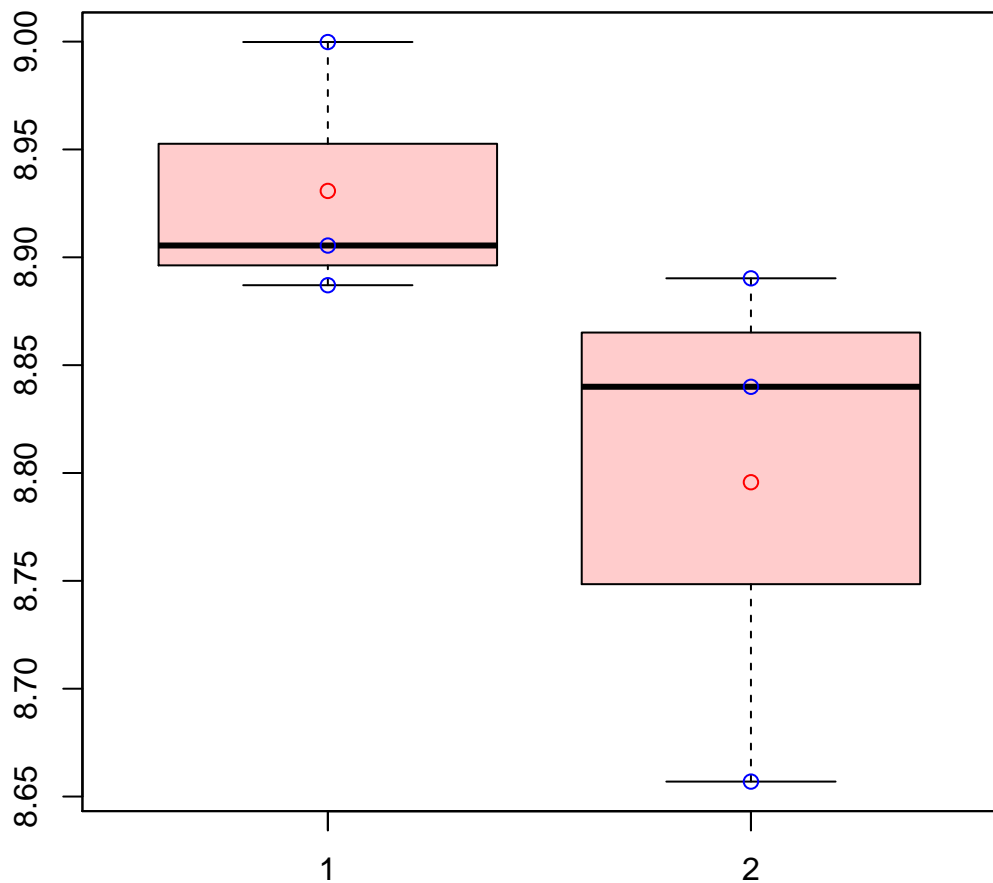

t-Test: p-value = 0.19

# CL3296Contig1|CL3296Contig1

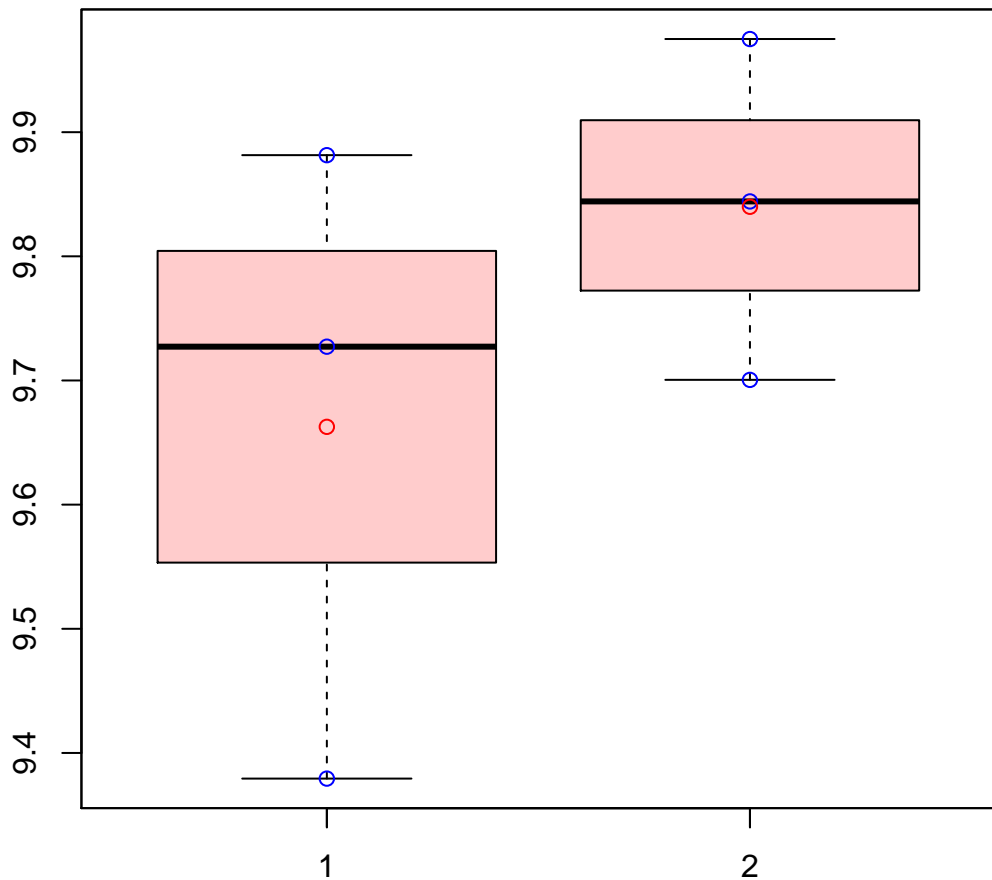

# CL3296Contig4|CL3296Contig4



t-Test: p-value = 0.34

# CL3297Contig4|CL3297Contig4

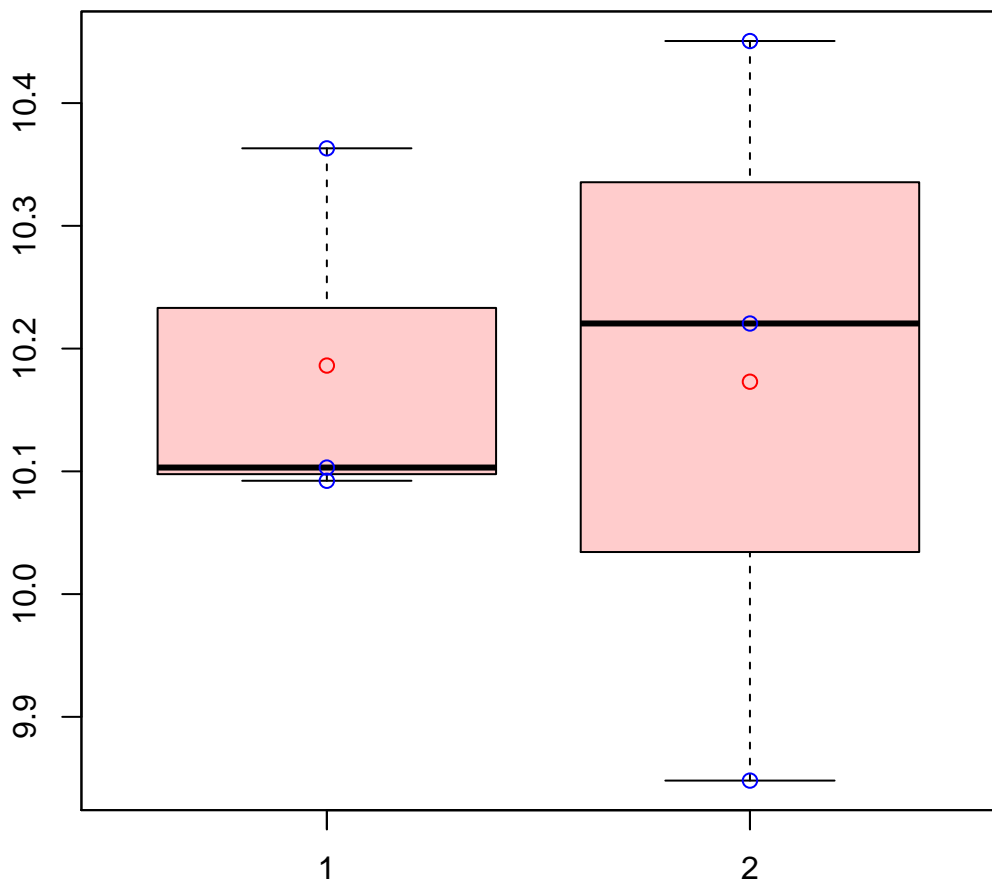

t-Test: p-value = 0.95

# CL32Contig10|CL32Contig10

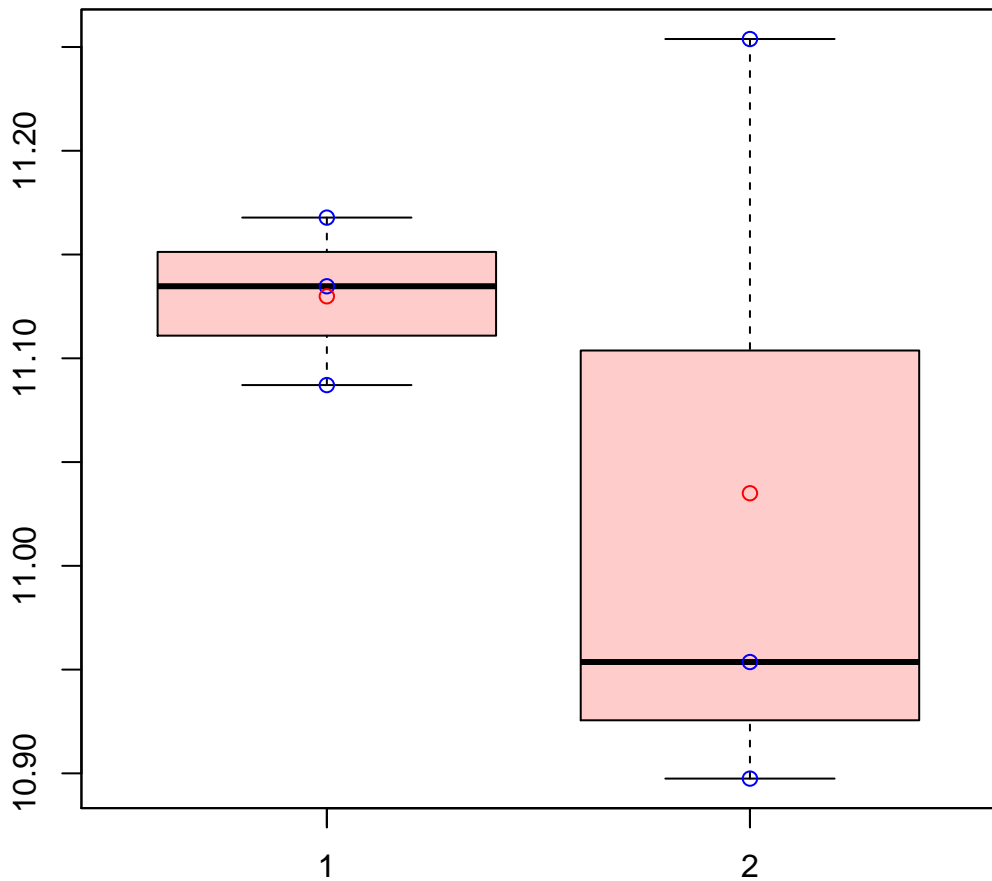

t-Test: p-value = 0.48

# CL32Contig12|CL32Contig12

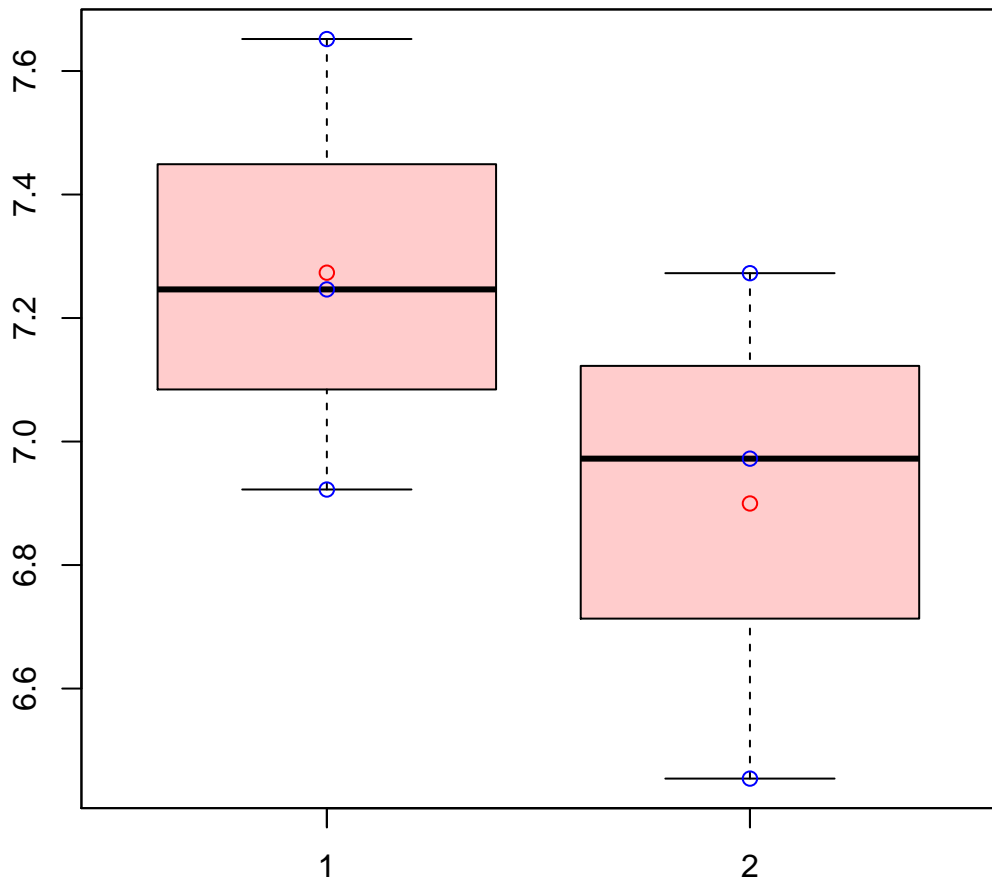

t-Test: p-value = 0.31



# CL32Contig13|CL32Contig13

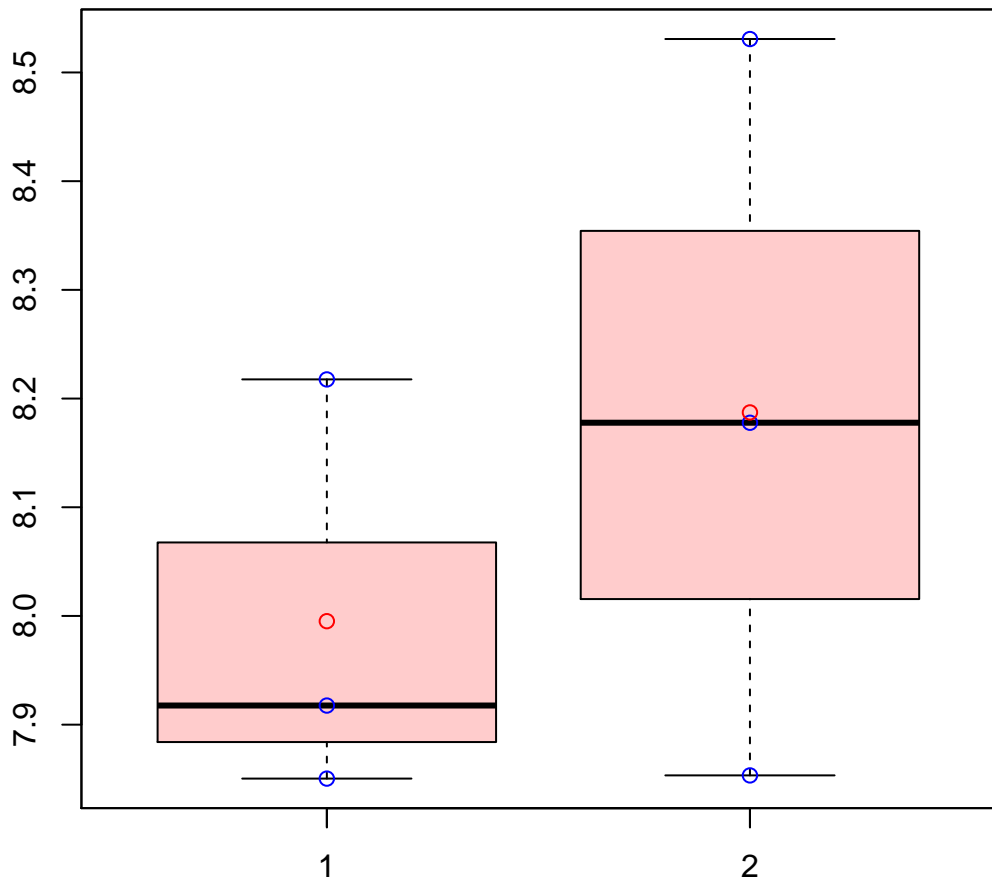

t-Test: p-value = 0.45

# CL32Contig17|CL32Contig17

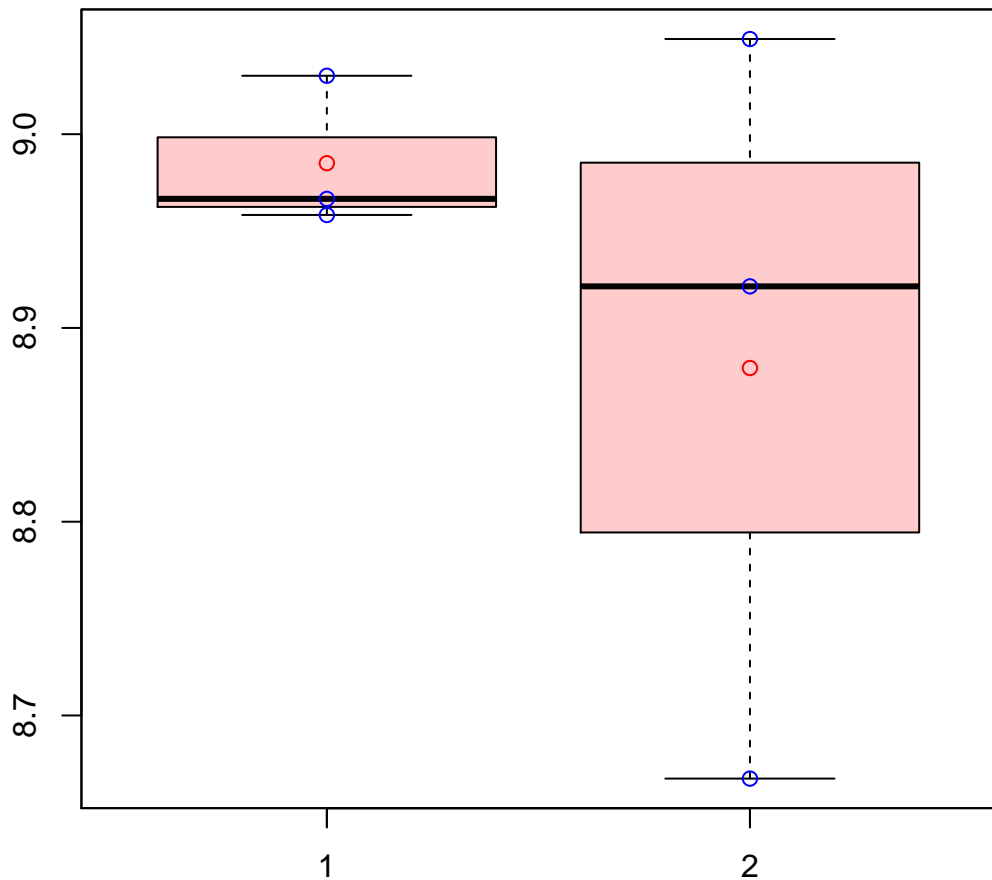

t-Test: p-value = 0.45

# CL32Contig1|CL32Contig1



t-Test: p-value = 0.45

# CL32Contig4|CL32Contig4

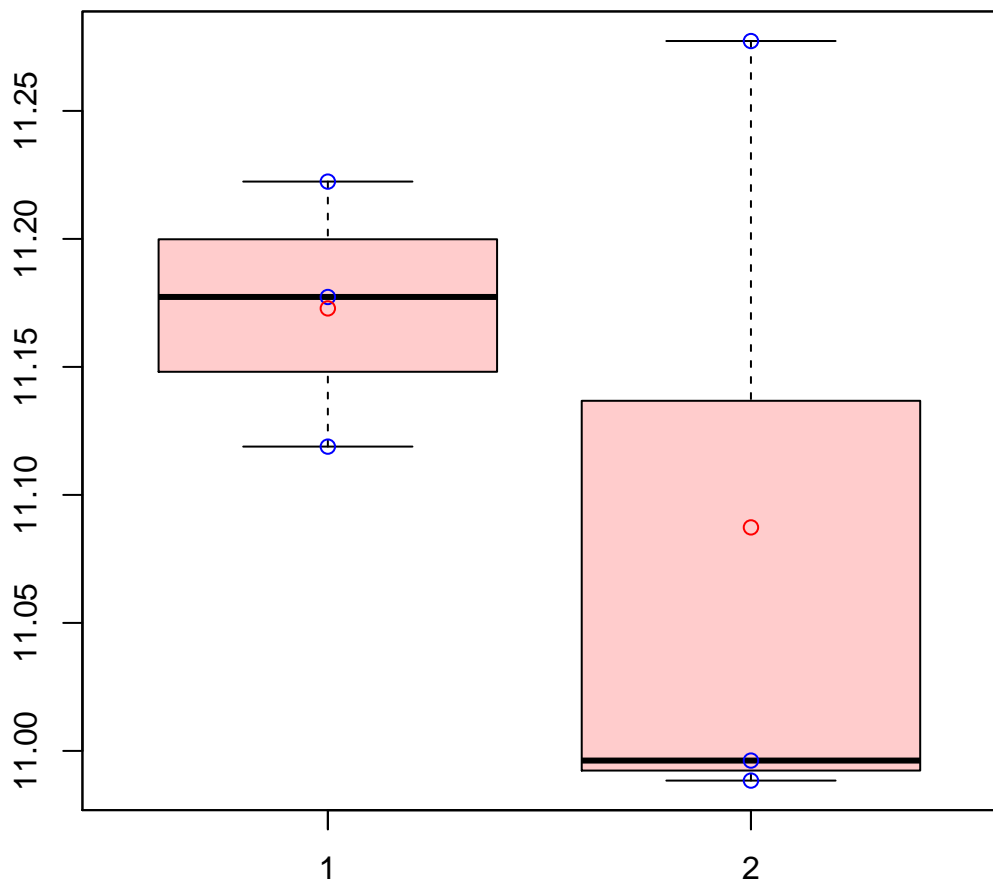

t-Test: p-value = 0.47

# CL32Contig5|CL32Contig5

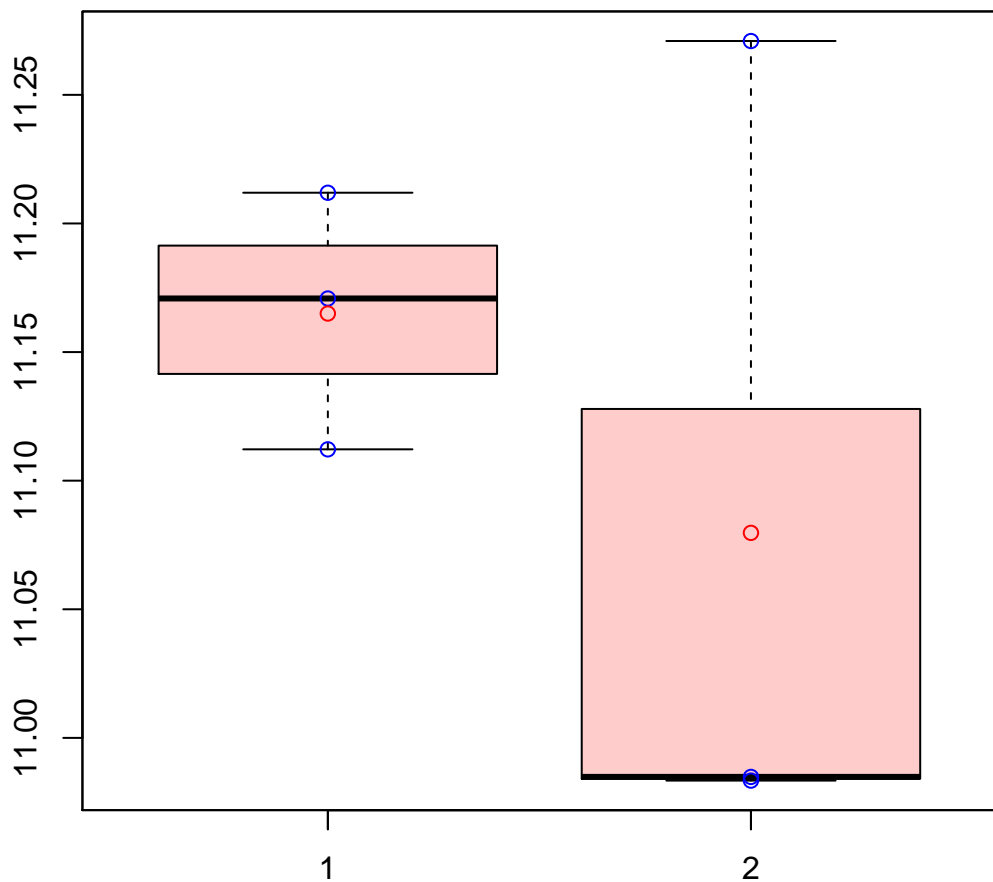

t-Test: p-value = 0.47

# CL32Contig6|CL32Contig6

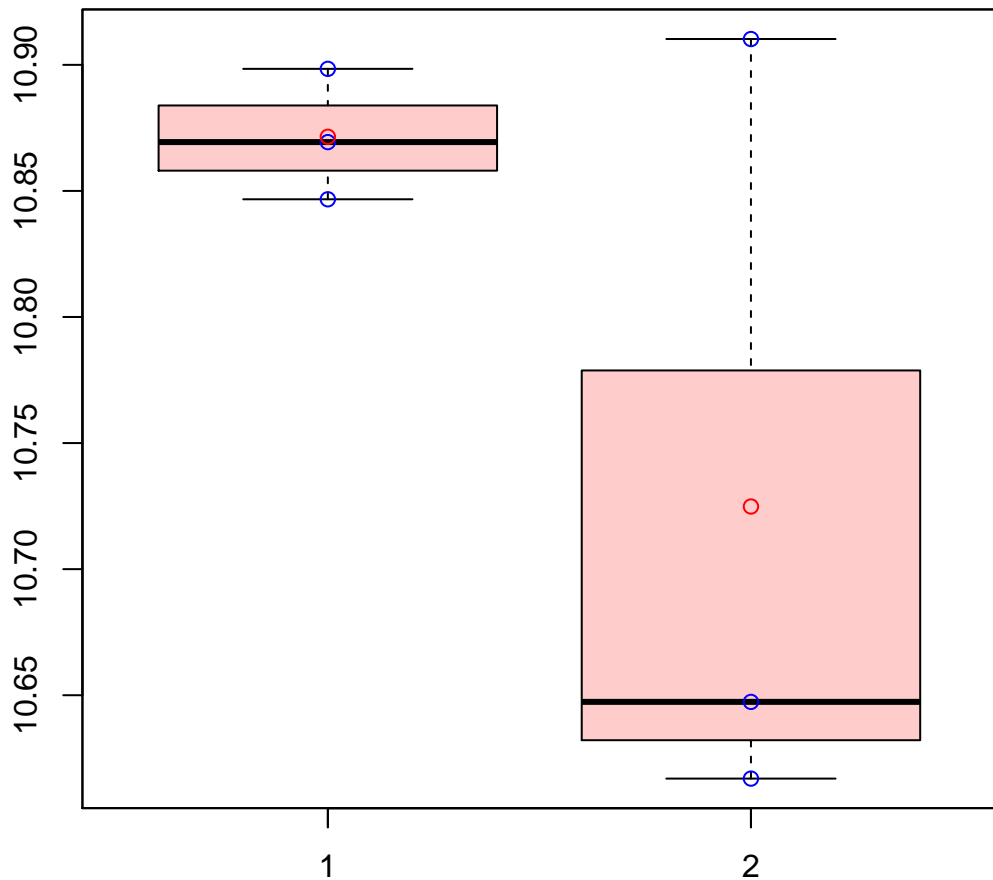

t-Test: p-value = 0.25

# CL32Contig7|CL32Contig7

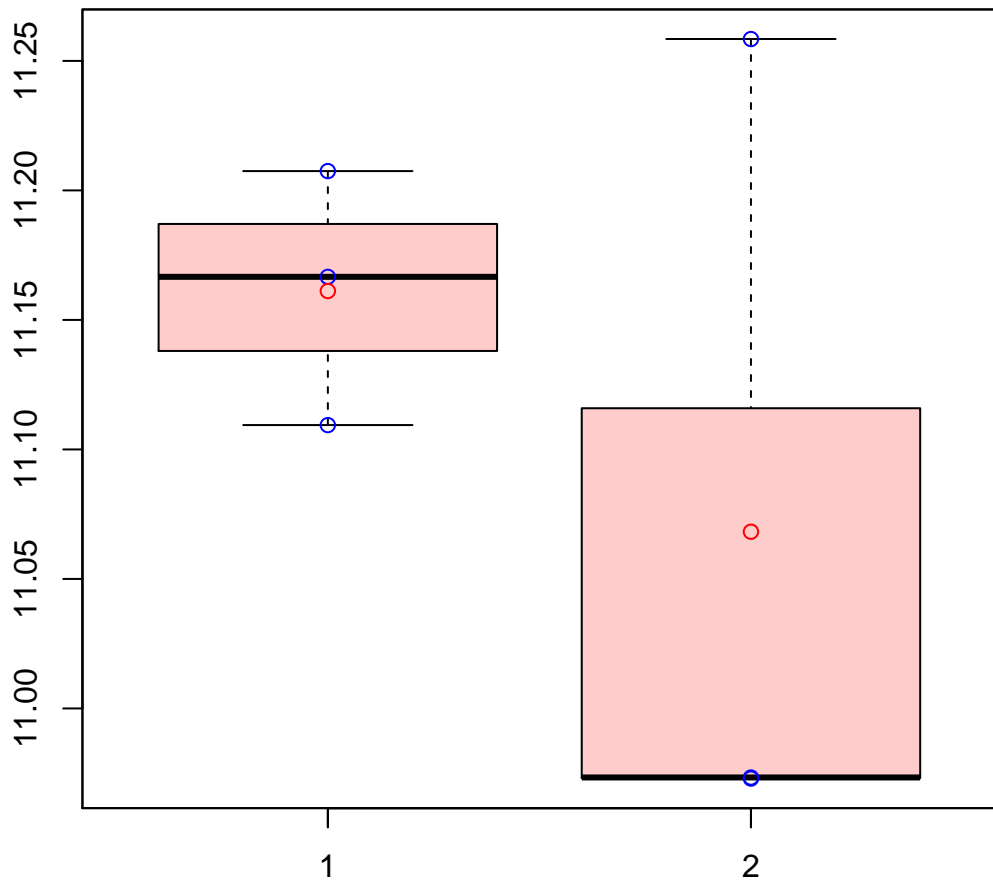

t-Test: p-value = 0.43

# CL32Contig8|CL32Contig8

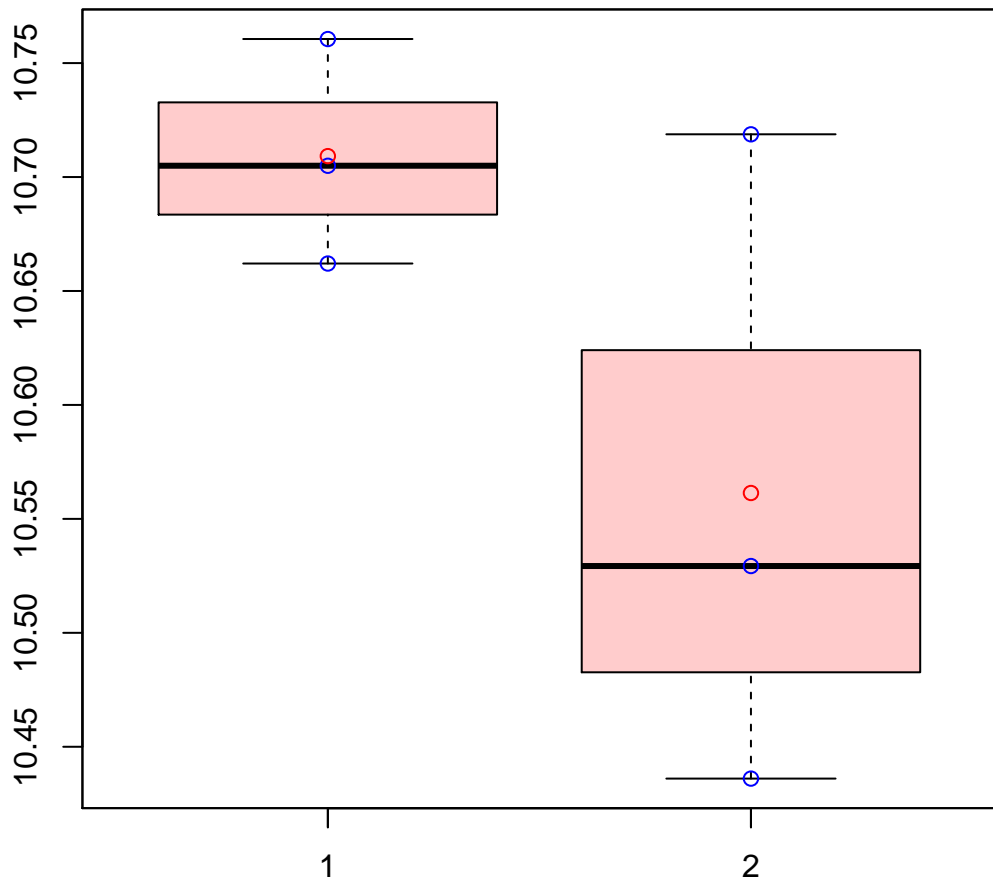

t-Test: p-value = 0.21



# CL32Contig9|CL32Contig9

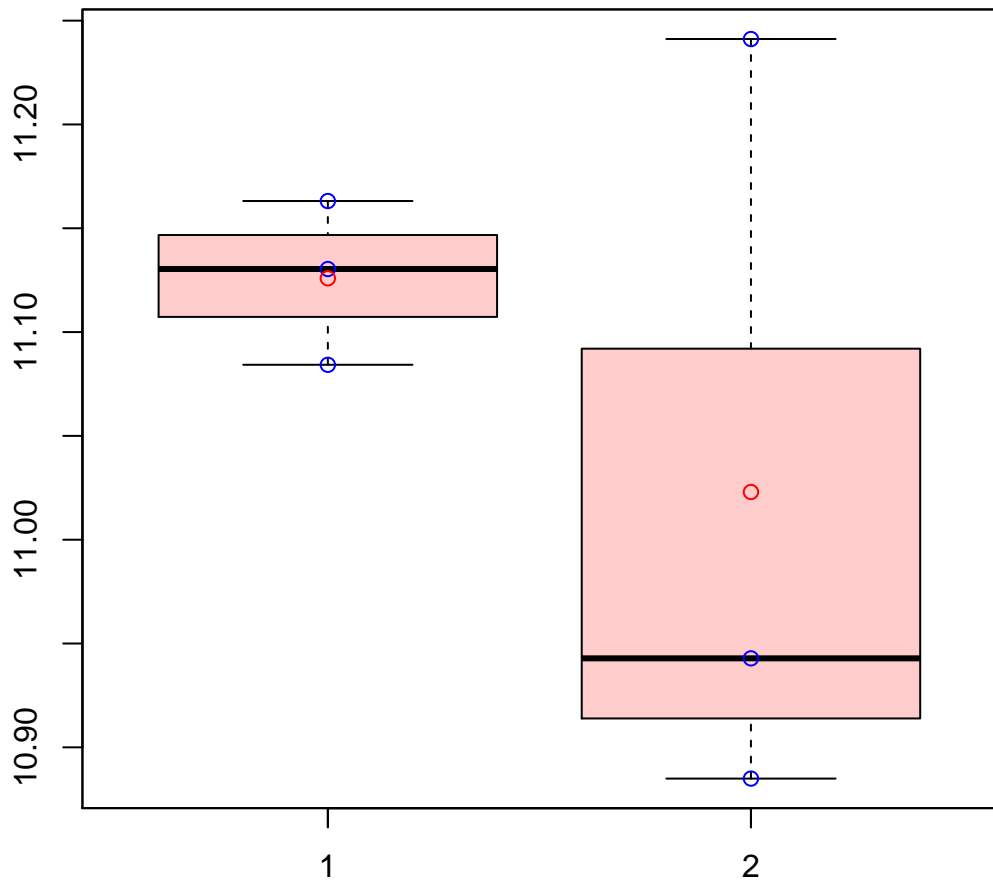

t-Test: p-value = 0.45

# CL3302Contig2|CL3302Contig2

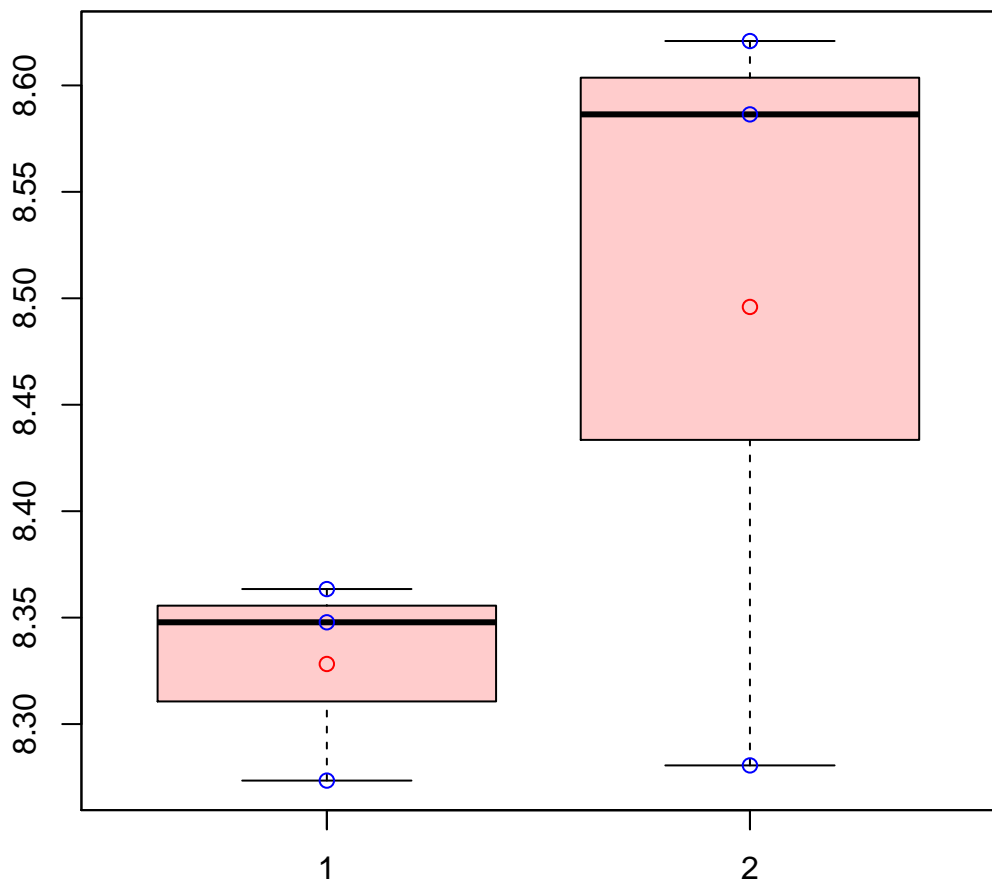

t-Test: p-value = 0.26

# CL3306Contig1|CL3306Contig1

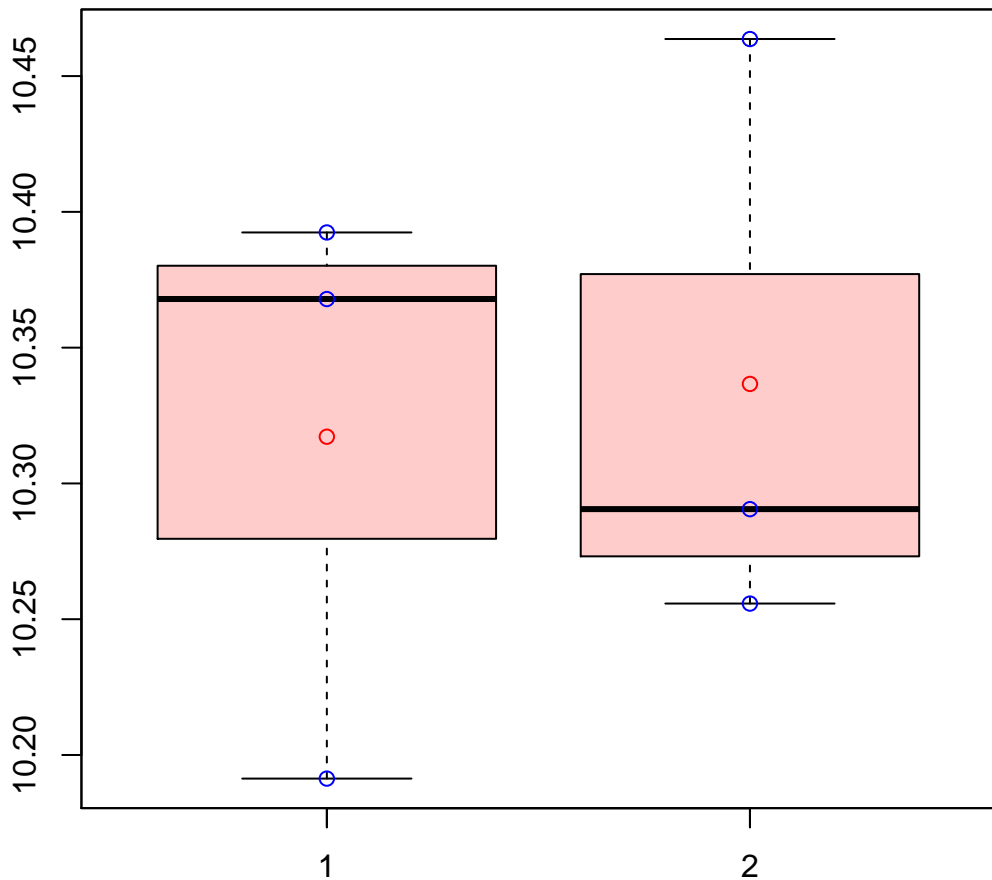

t-Test: p-value = 0.84

# CL3306Contig2|CL3306Contig2

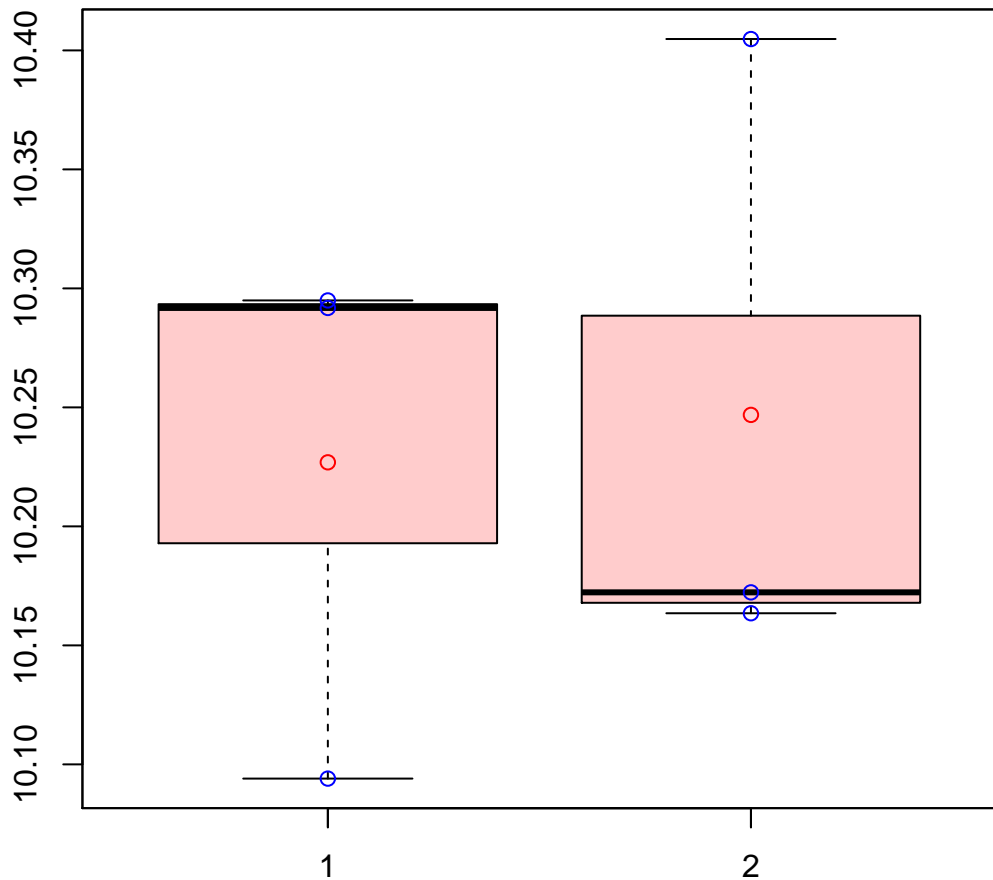

t-Test: p-value = 0.86

# CL3307Contig2|CL3307Contig2

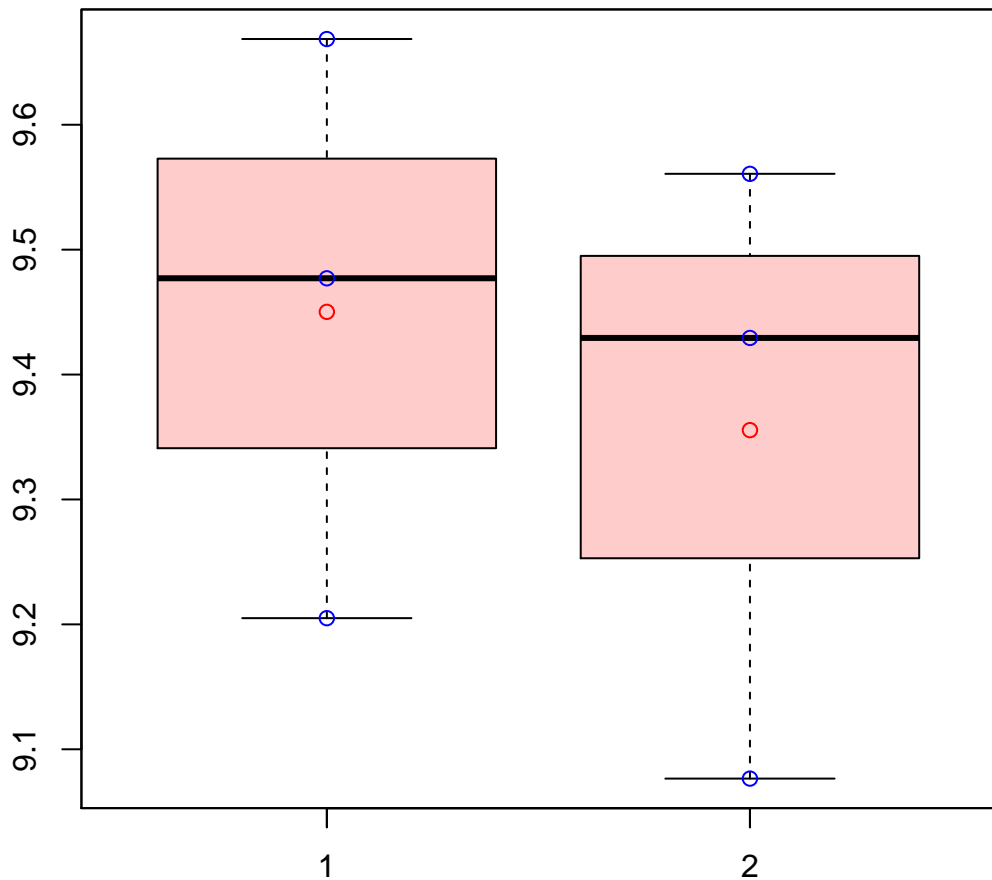

t-Test: p-value = 0.66

# CL330Contig13|CL330Contig13



t-Test: p-value = 0.77

# CL330Contig5|CL330Contig5

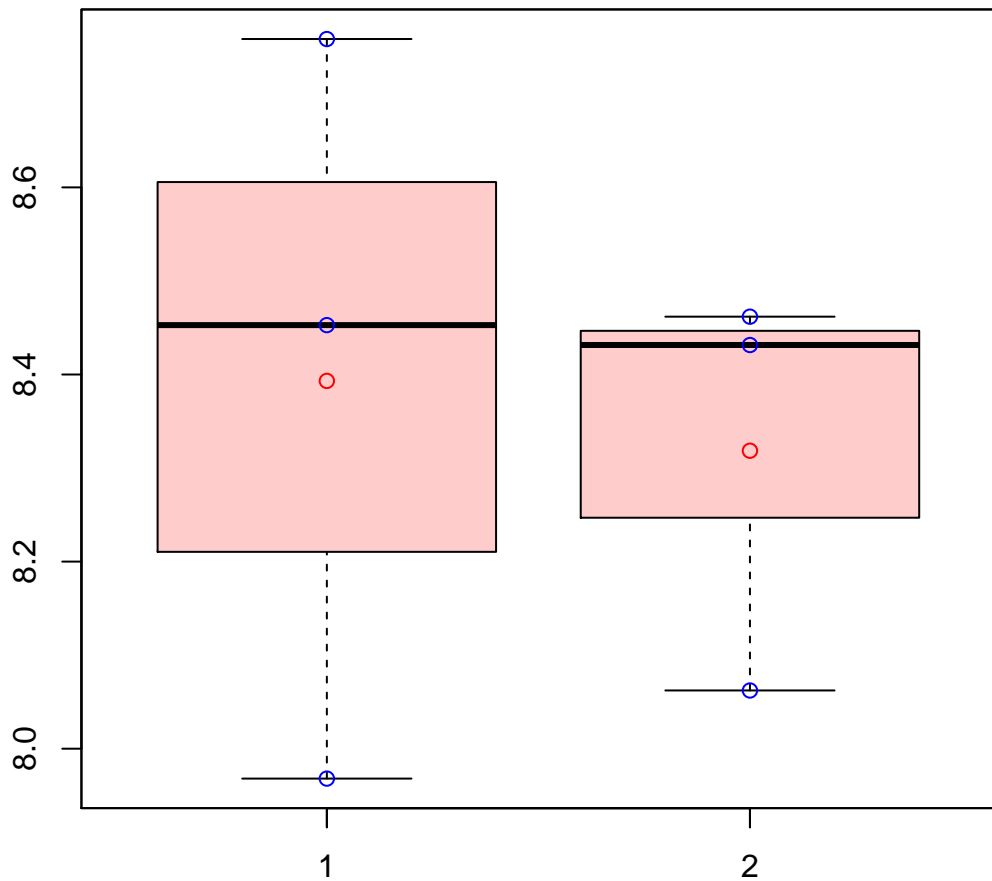

t-Test: p-value = 0.79

# CL330Contig9|CL330Contig9



t-Test: p-value = 0.77



# CL3314Contig1|CL3314Contig1

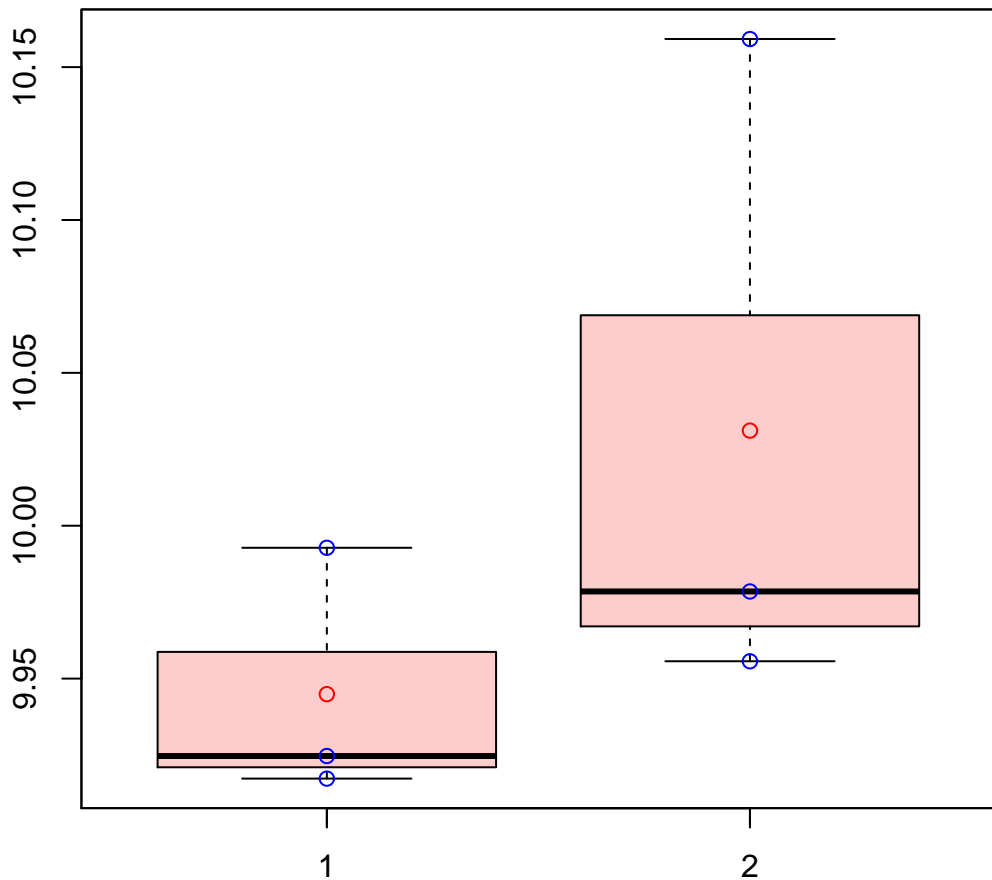

t-Test: p-value = 0.31

# CL3315Contig1|CL3315Contig1

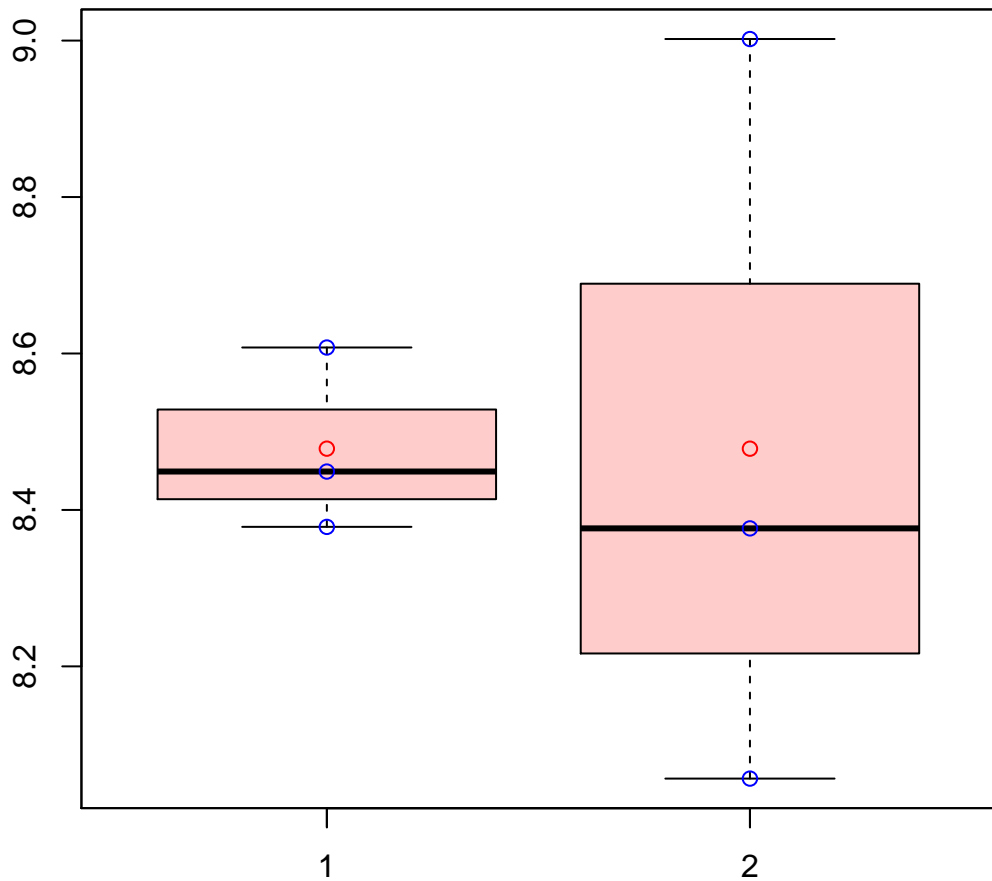

t-Test: p-value = 1

# CL3315Contig2|CL3315Contig2

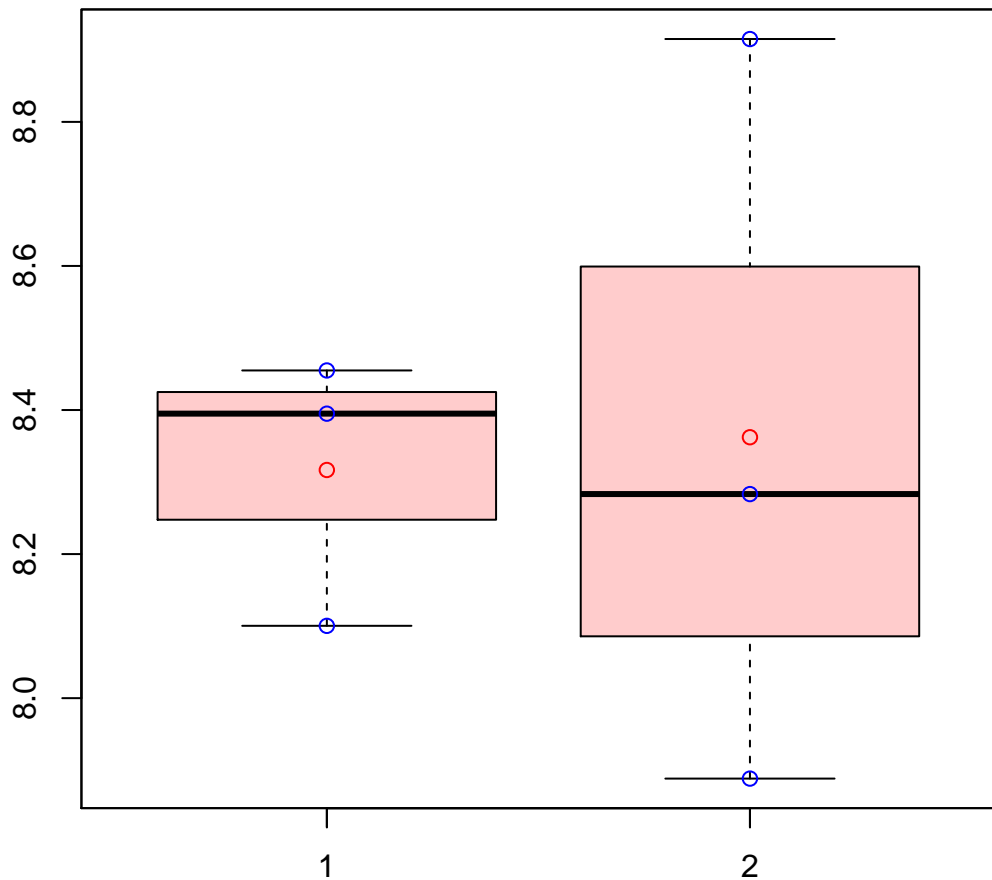

t-Test: p-value = 0.9

# CL3315Contig3|CL3315Contig3

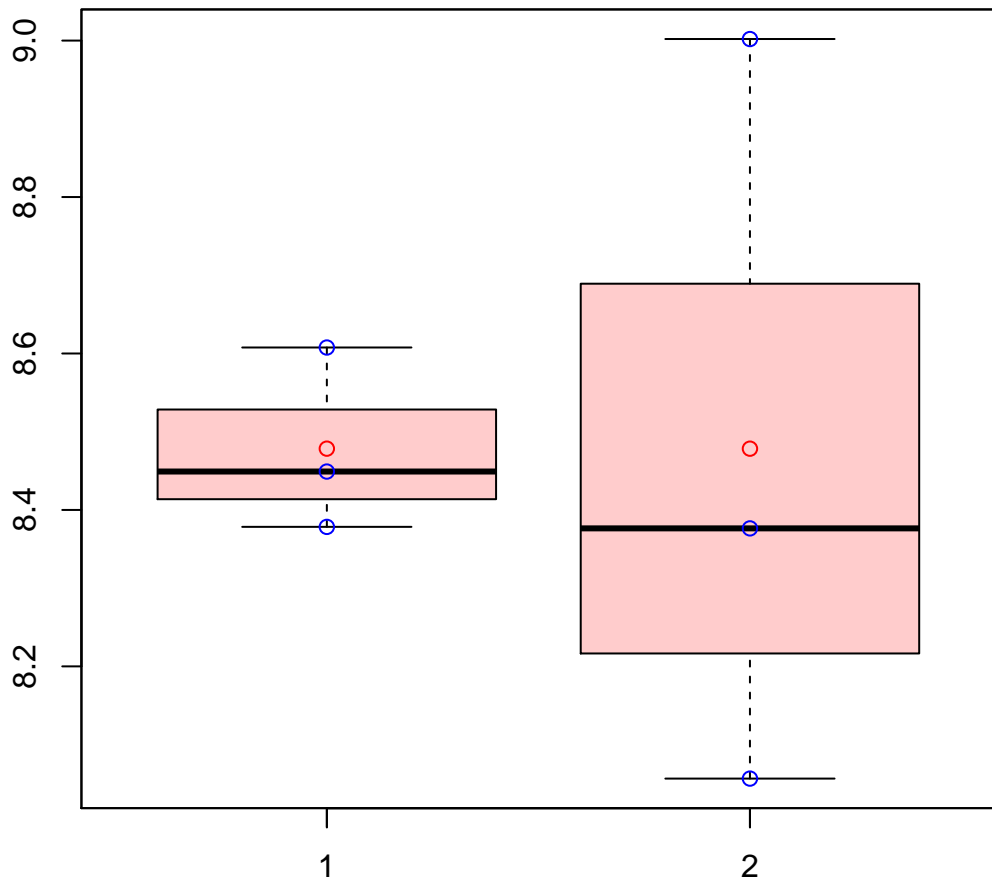

t-Test: p-value = 1

# CL3318Contig4|CL3318Contig4

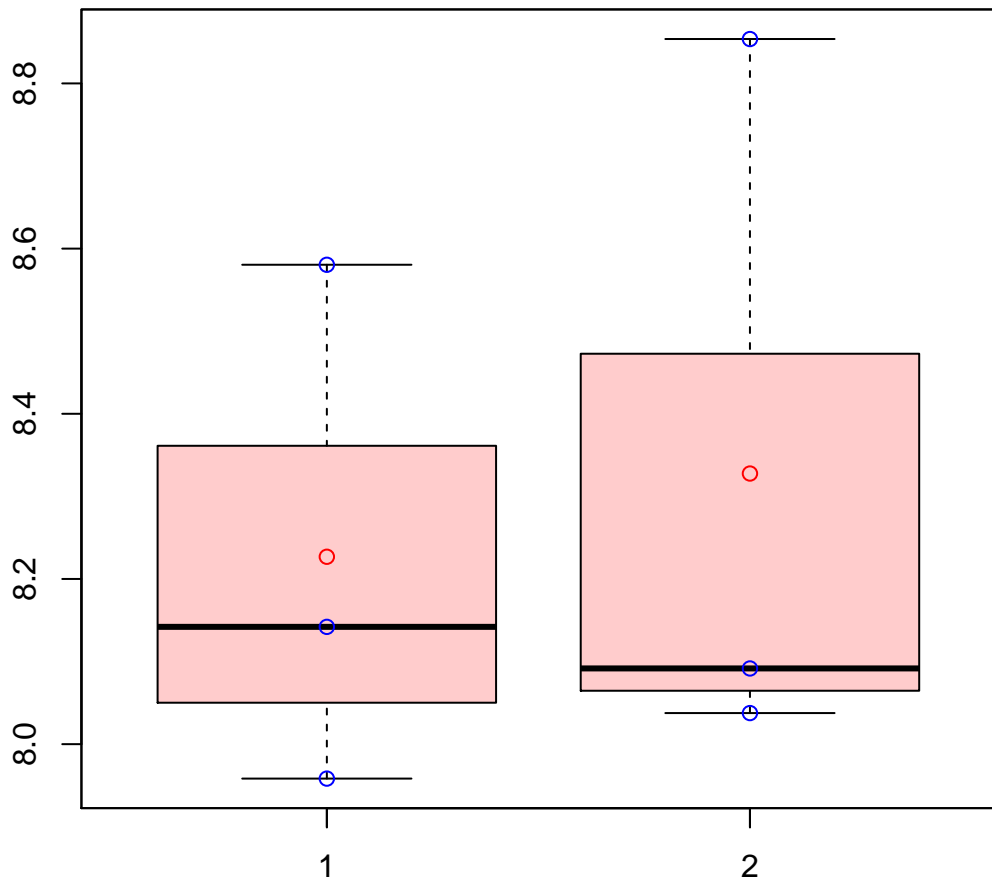

t-Test: p-value = 0.77

# CL3321Contig1|CL3321Contig1

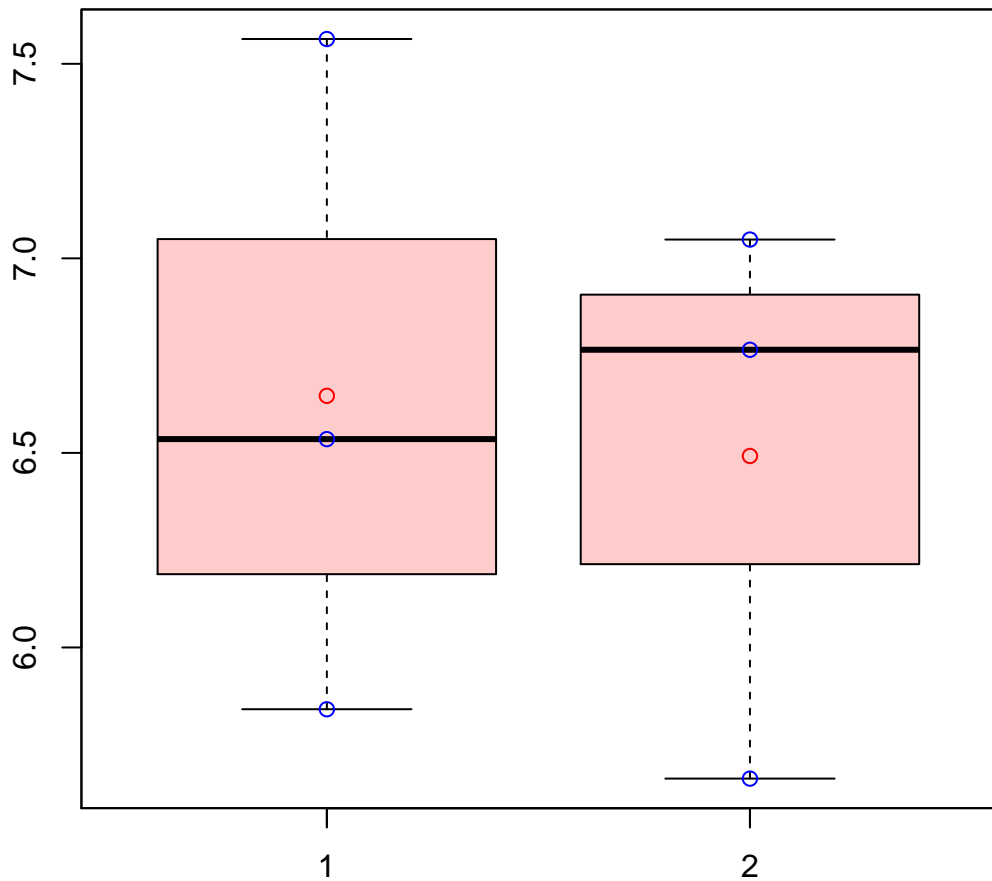

t-Test: p-value = 0.83

# CL3323Contig3|CL3323Contig3

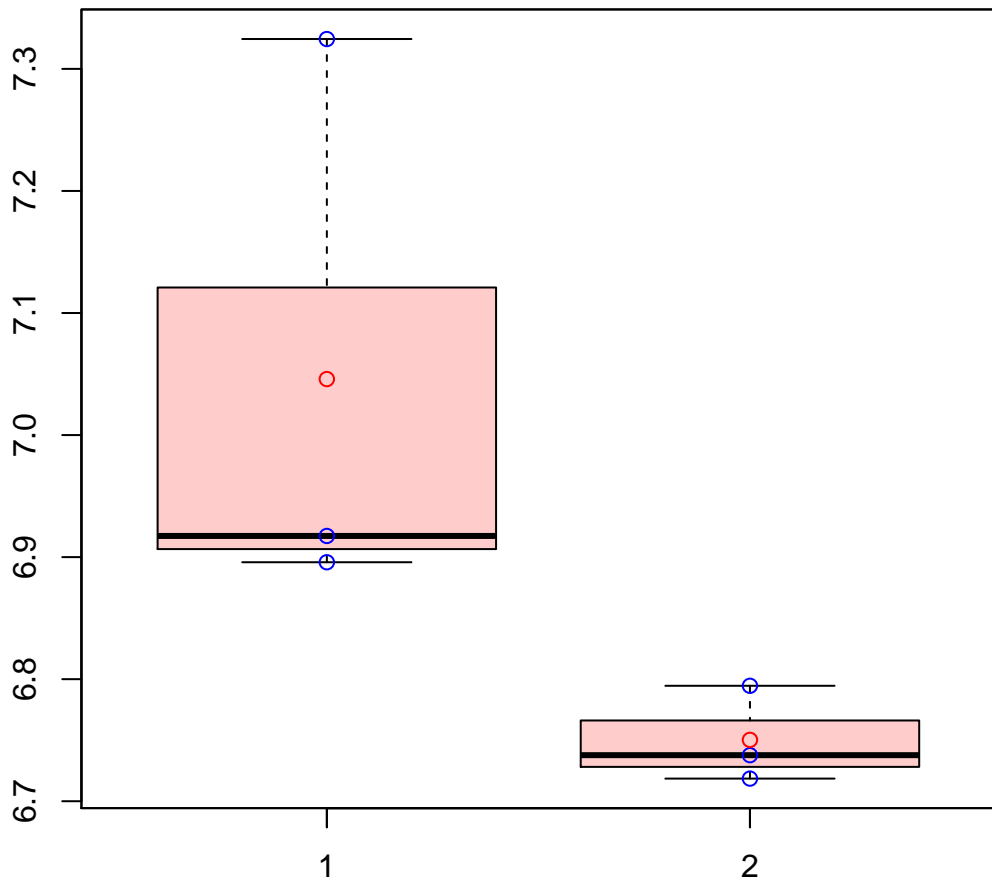

t-Test: p-value = 0.17

# CL3323Contig4|CL3323Contig4



t-Test: p-value = 0.17



# CL3325Contig2|CL3325Contig2

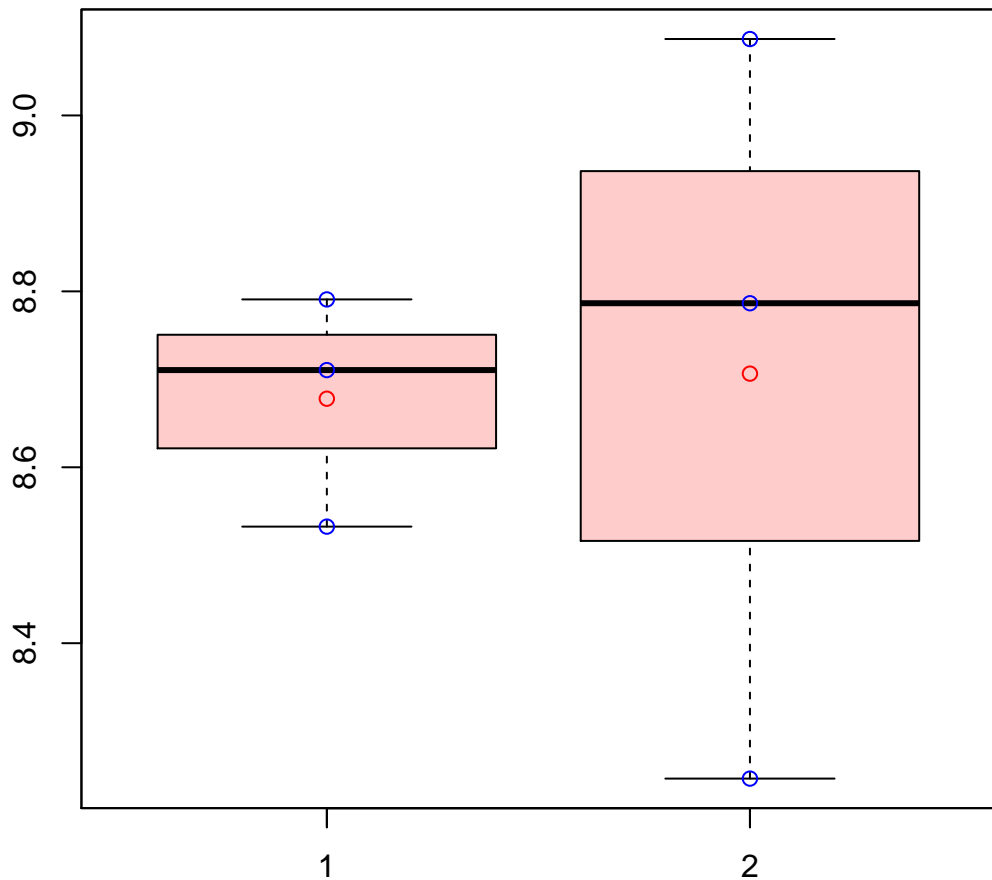

t-Test: p-value = 0.92

# CL332Contig2|CL332Contig2

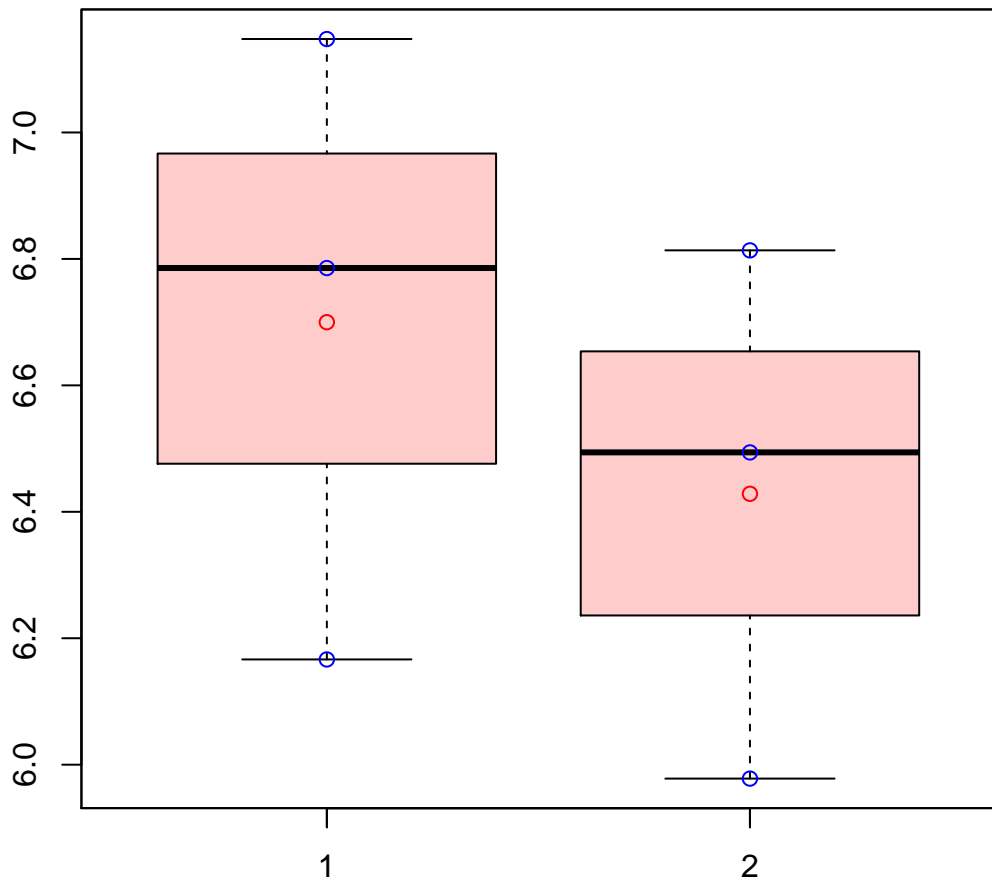

t-Test: p-value = 0.51

# CL3331Contig1|CL3331Contig1

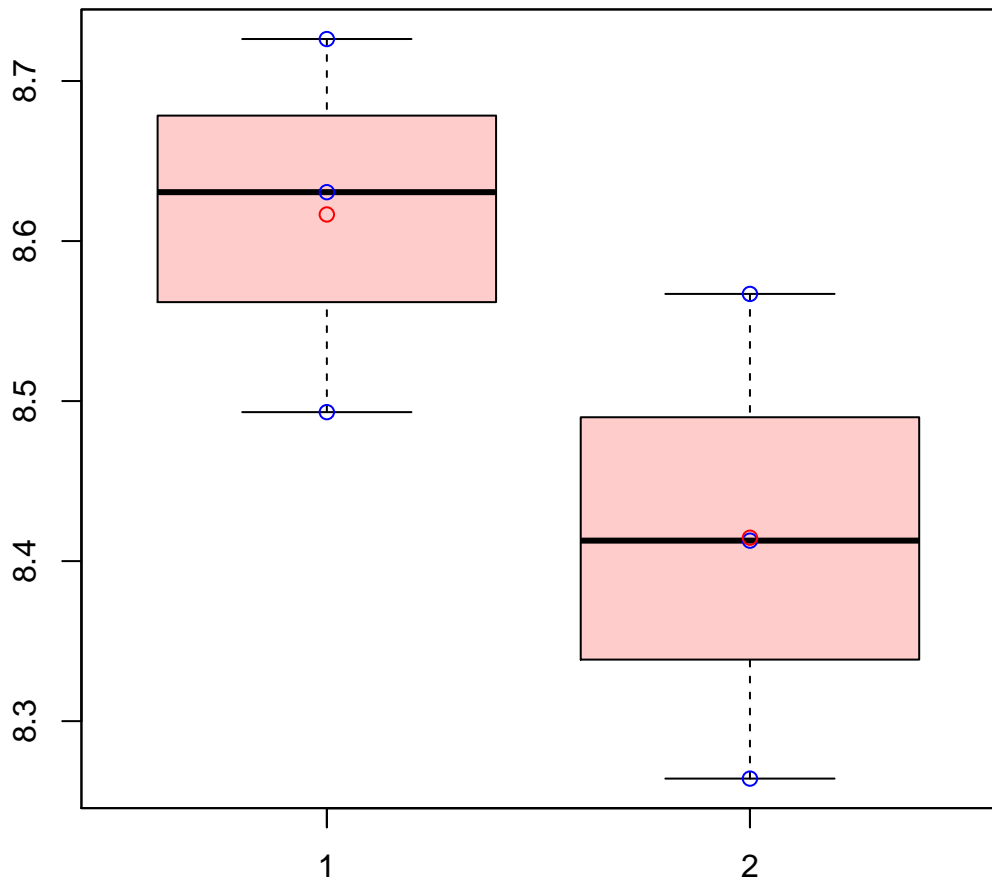

t-Test: p-value = 0.15

# CL3336Contig4|CL3336Contig4

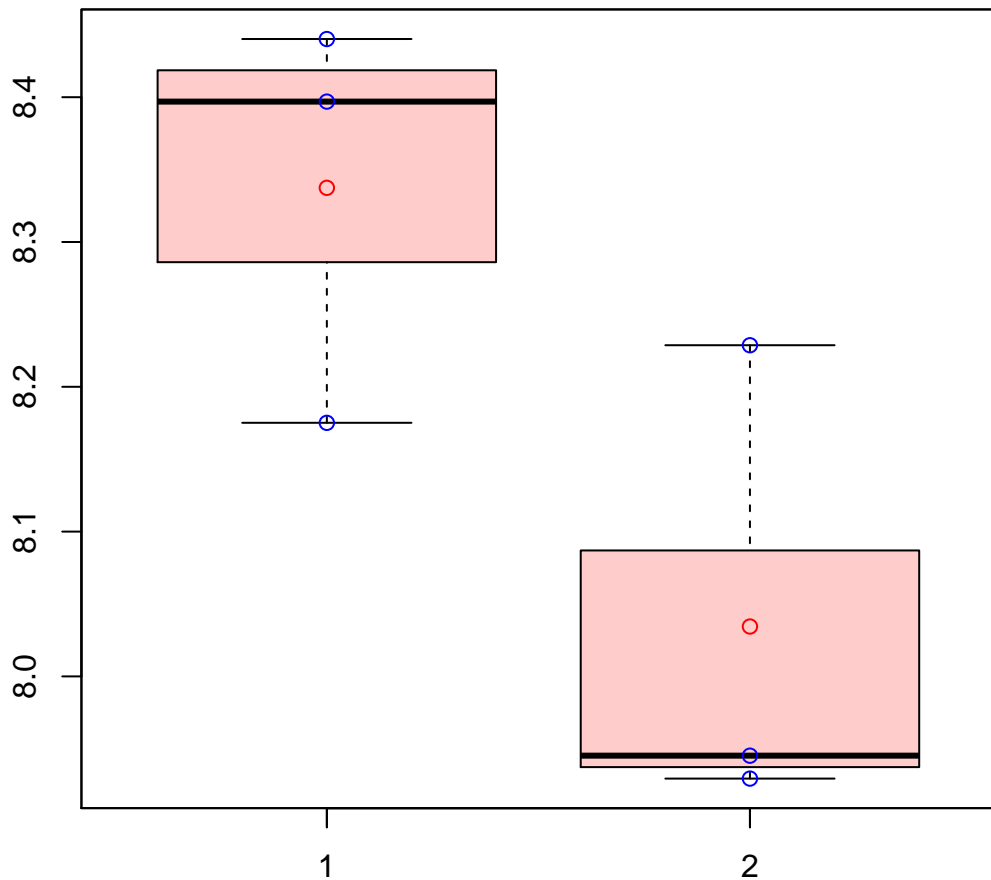

t-Test: p-value = 0.08

# CL3336Contig5|CL3336Contig5

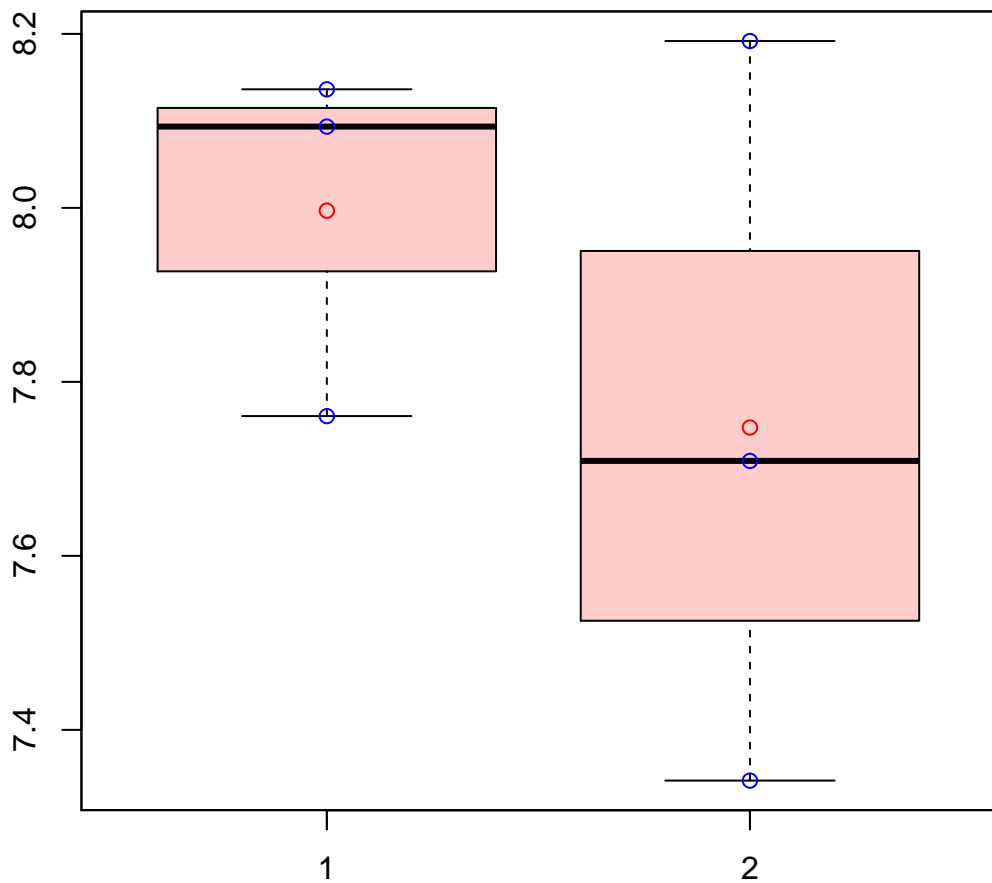

t-Test: p-value = 0.43

# CL333Contig12|CL333Contig12

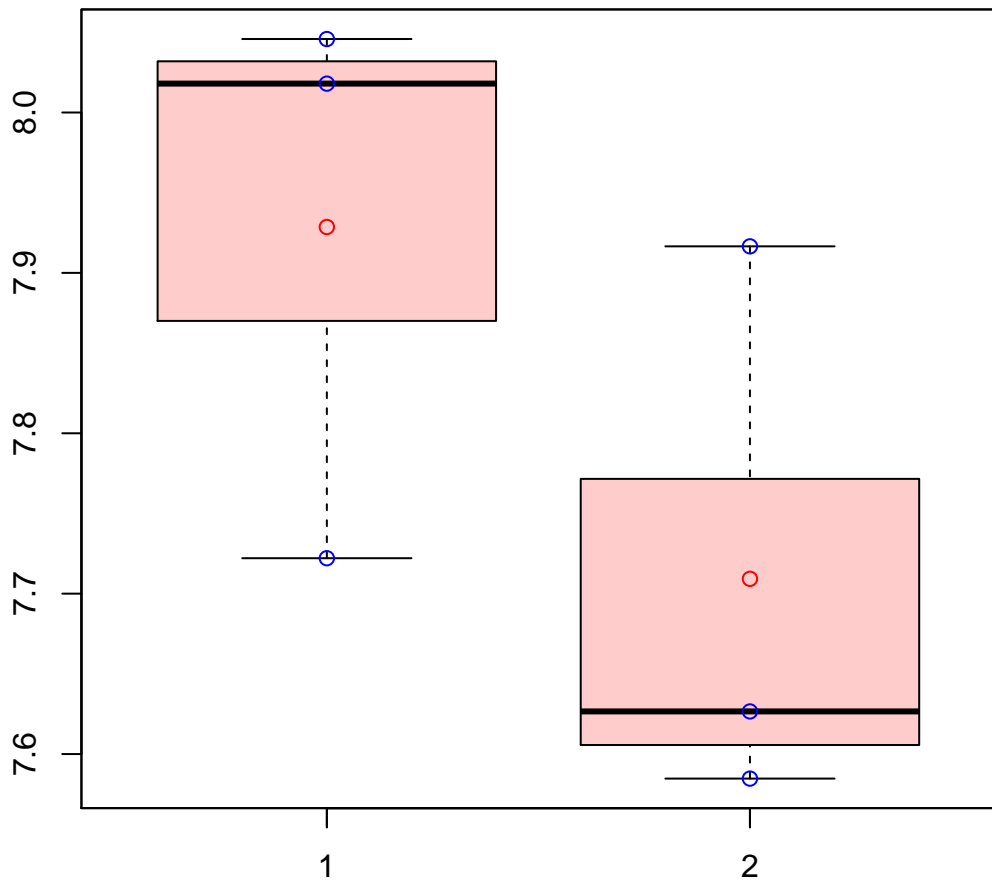

t-Test: p-value = 0.21

# CL333Contig13|CL333Contig13

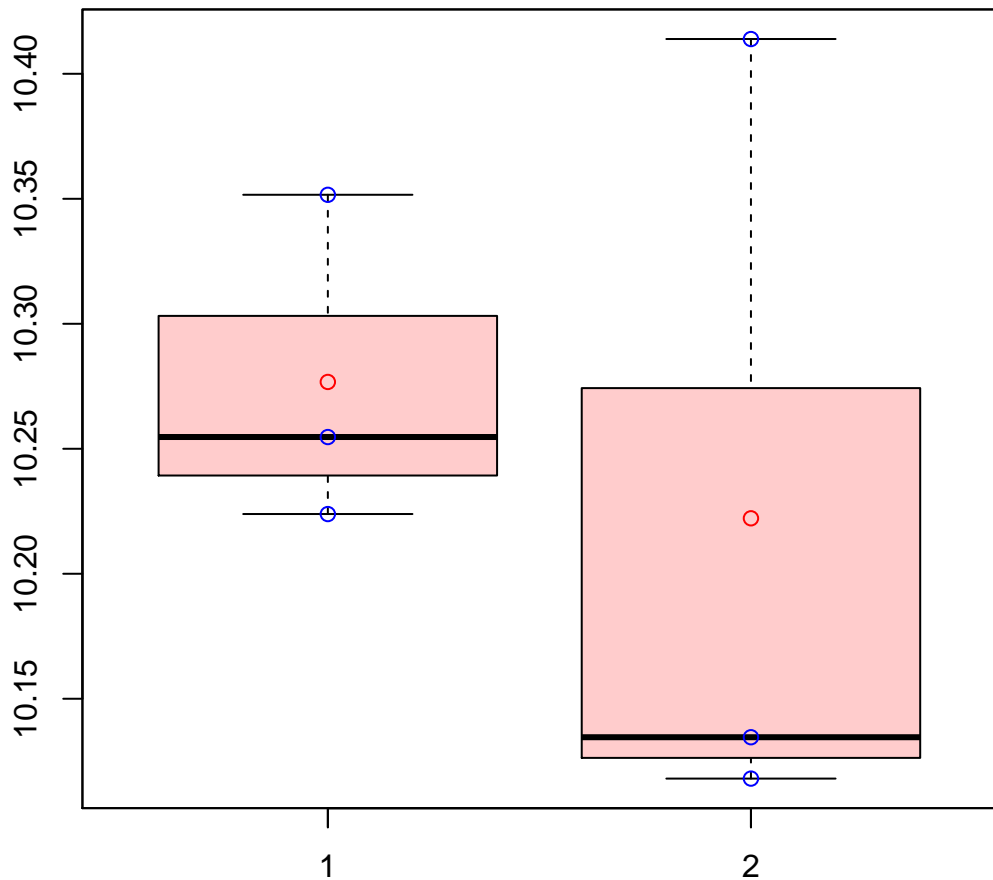

t-Test: p-value = 0.64

# CL3343Contig4|CL3343Contig4

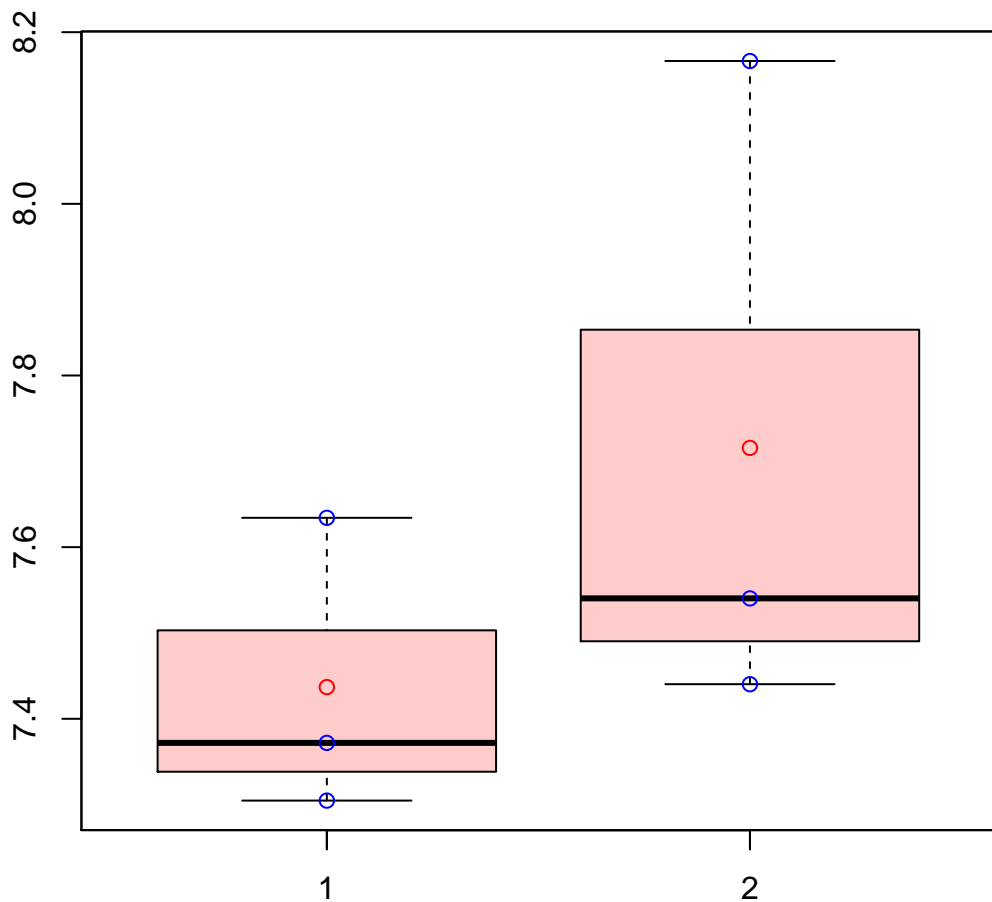

t-Test: p-value = 0.35



# CL3347Contig3|CL3347Contig3

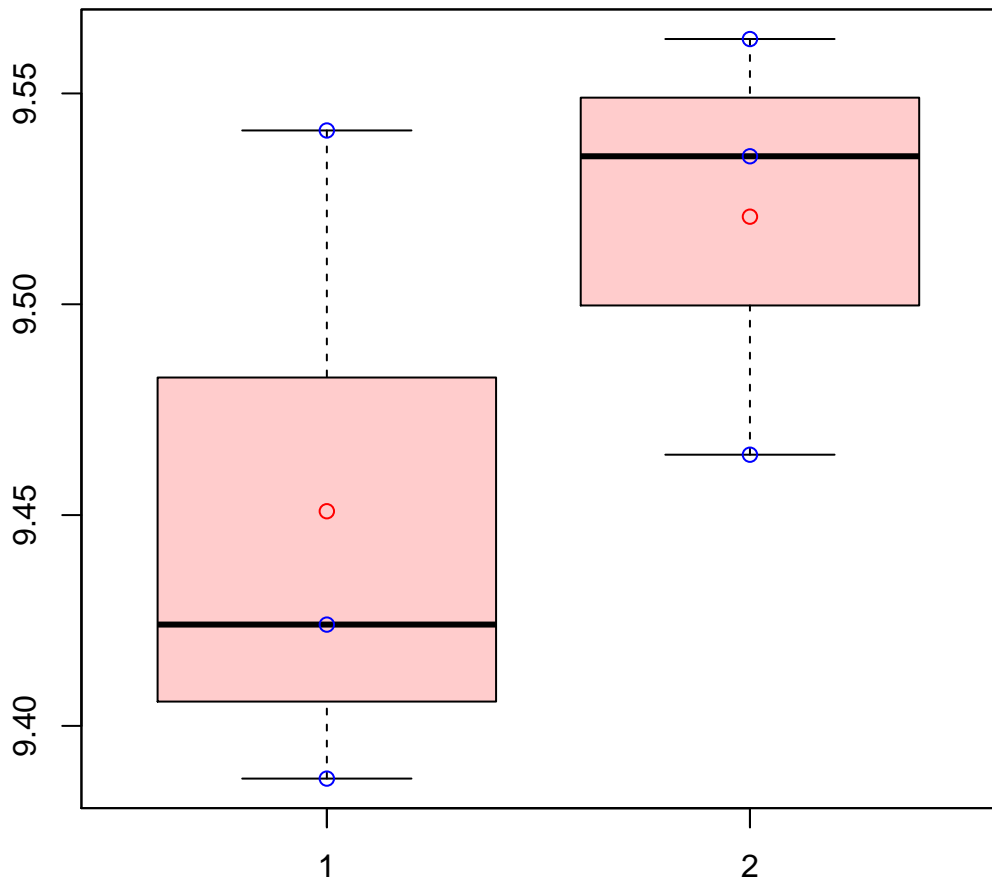

t-Test: p-value = 0.28

# CL3347Contig4|CL3347Contig4

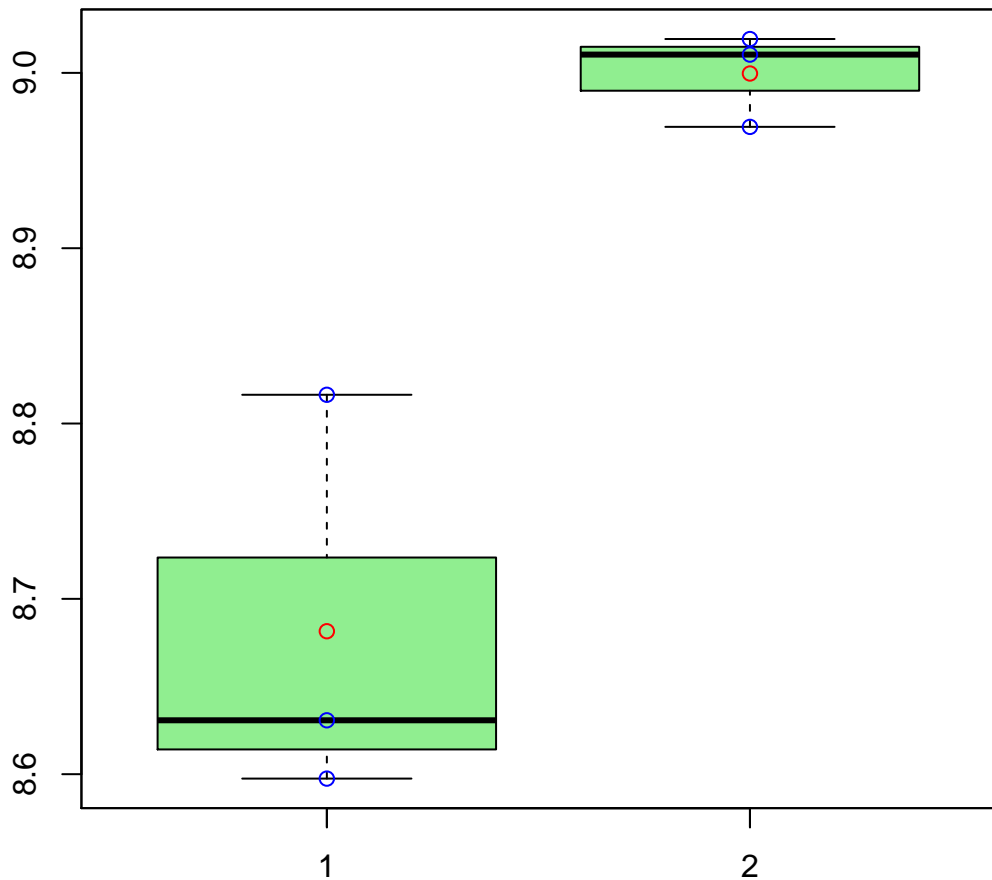

t-Test: p-value = 0.04

# CL3347Contig7|CL3347Contig7

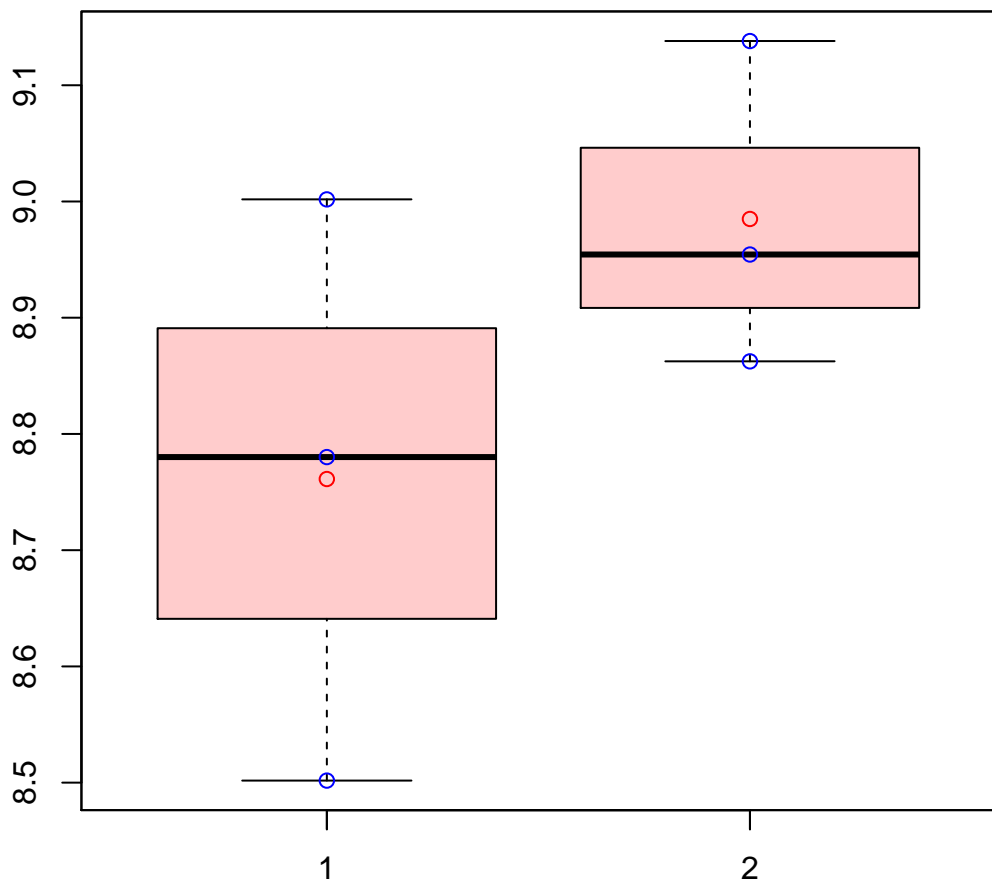

t-Test: p-value = 0.27

# CL3348Contig1|CL3348Contig1

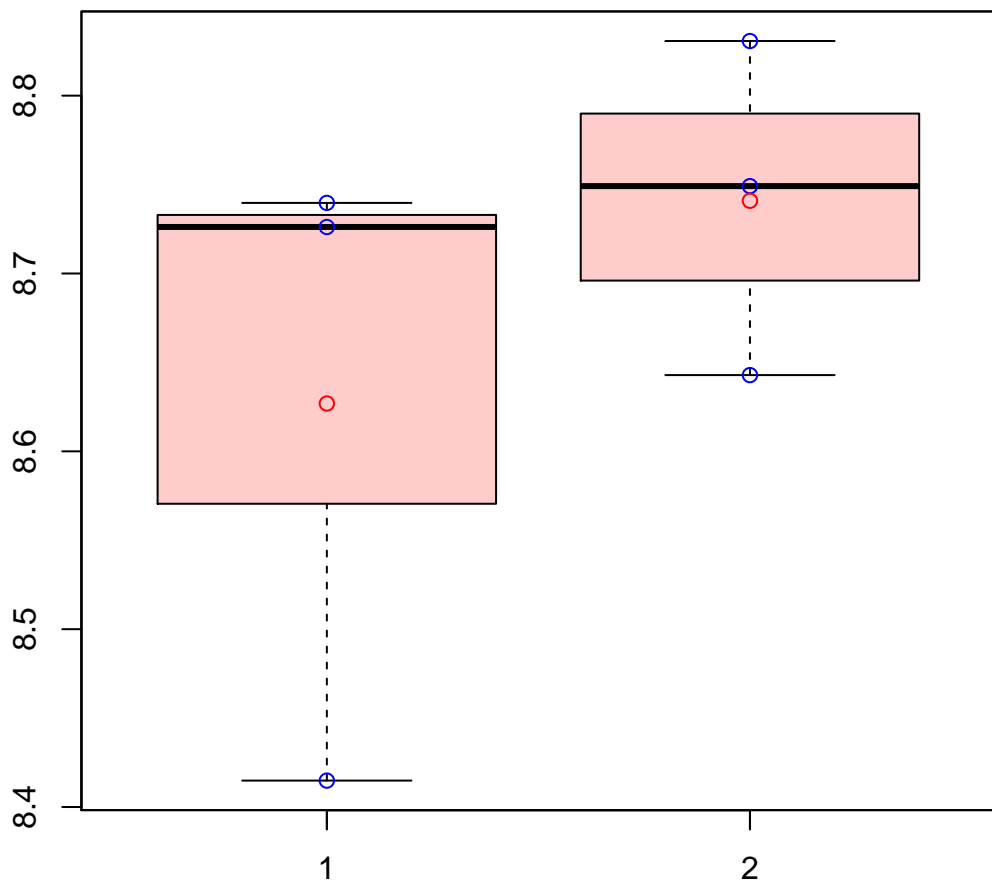

t-Test: p-value = 0.41

# CL3348Contig3|CL3348Contig3

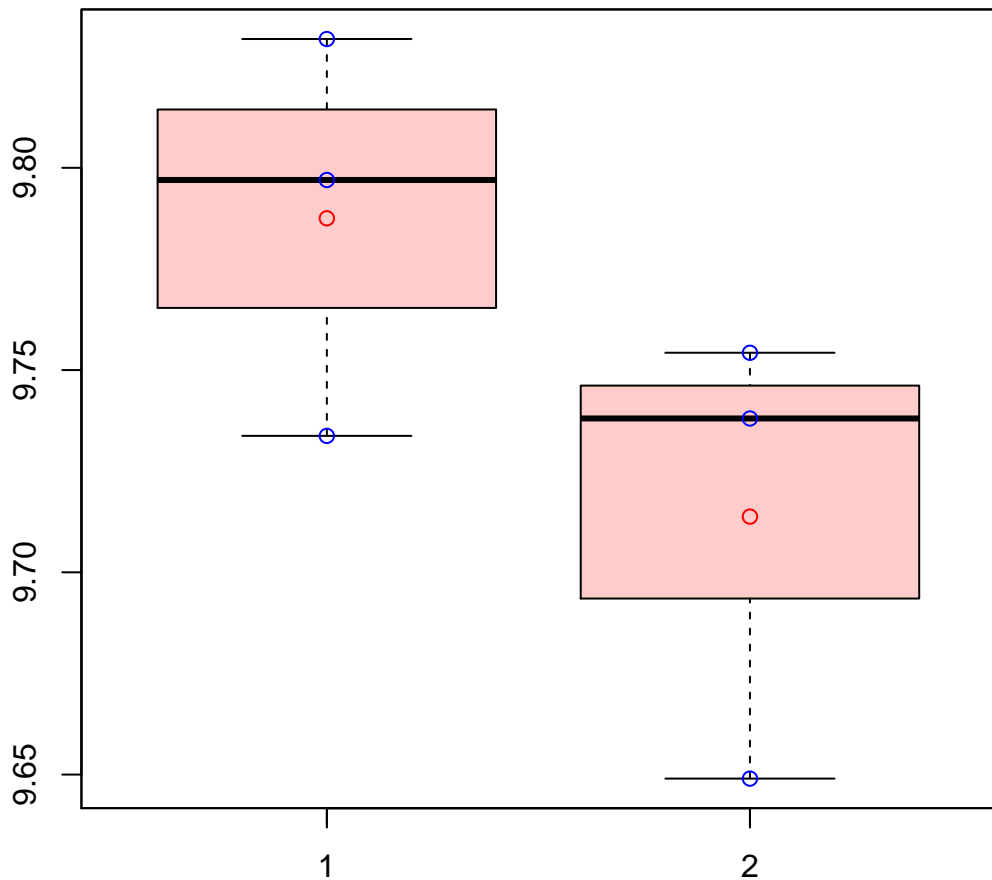

t-Test: p-value = 0.17

# CL3352Contig1|CL3352Contig1

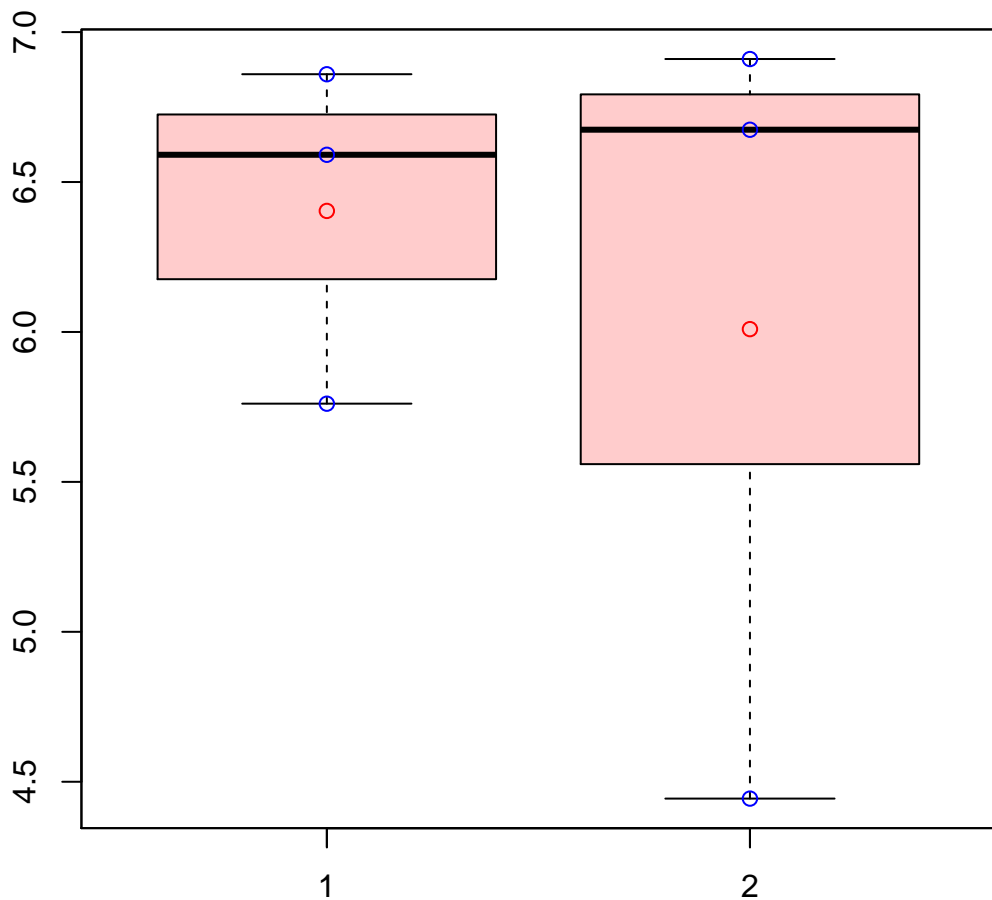

t-Test: p-value = 0.68

# CL3353Contig8|CL3353Contig8



t-Test: p-value = 0.16

# CL335Contig4|CL335Contig4

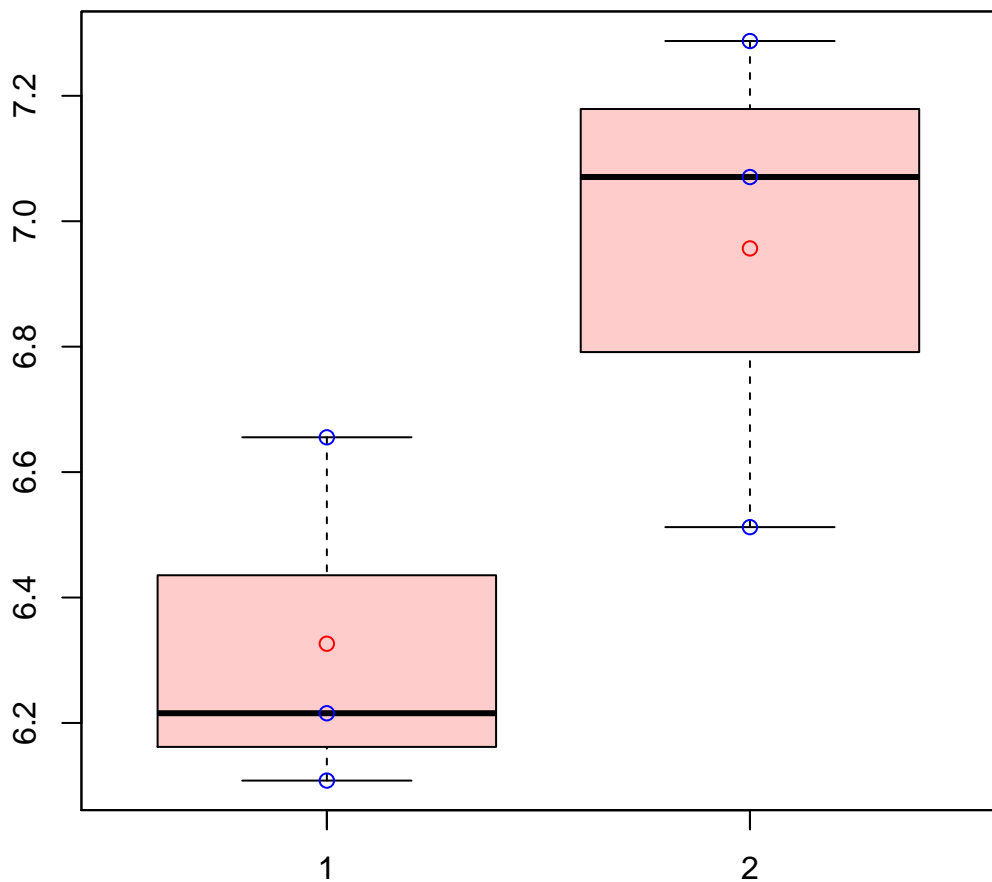

t-Test: p-value = 0.1



# CL335Contig5|CL335Contig5

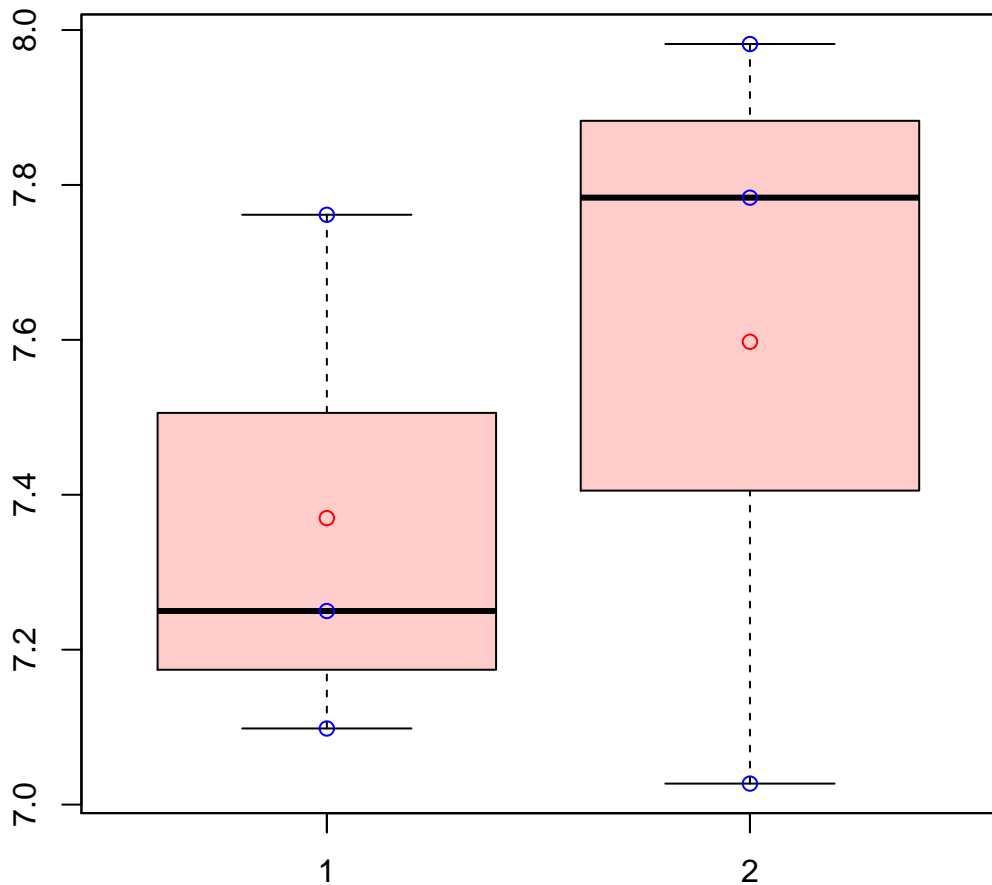

t-Test: p-value = 0.56

# CL3362Contig3|CL3362Contig3



t-Test: p-value = 0.35

# CL3374Contig5|CL3374Contig5

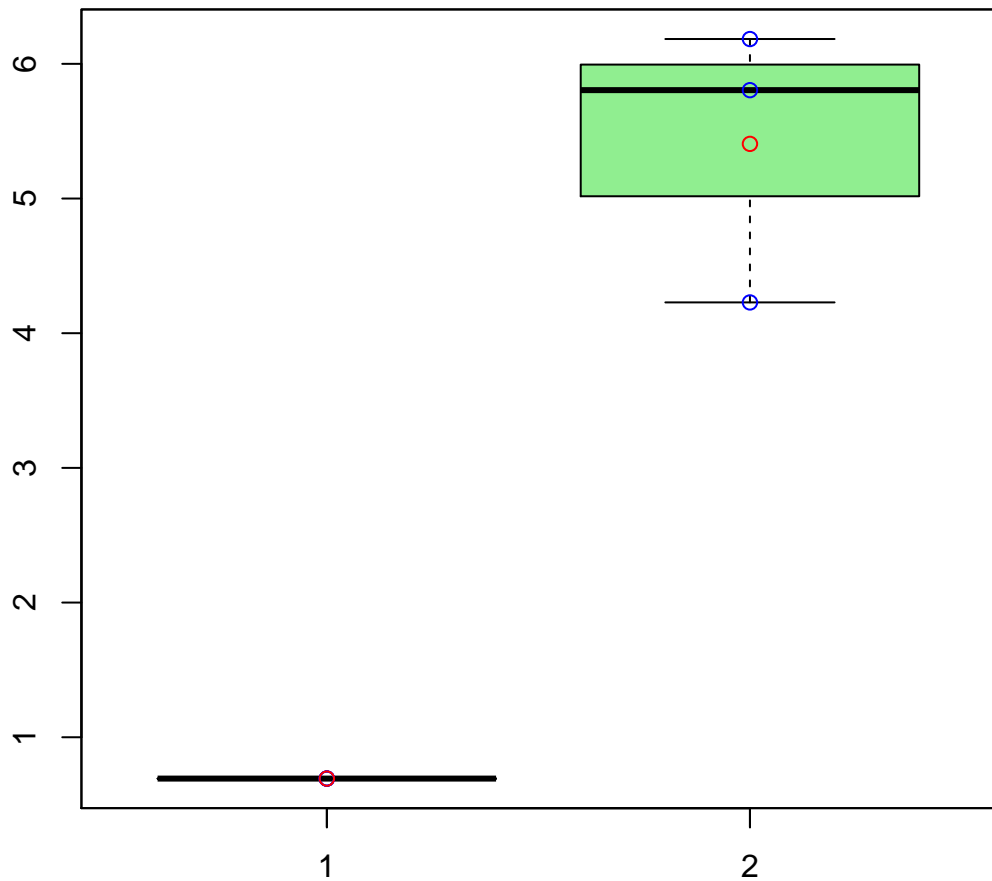

t-Test: p-value = 0.02

# CL3376Contig1|CL3376Contig1

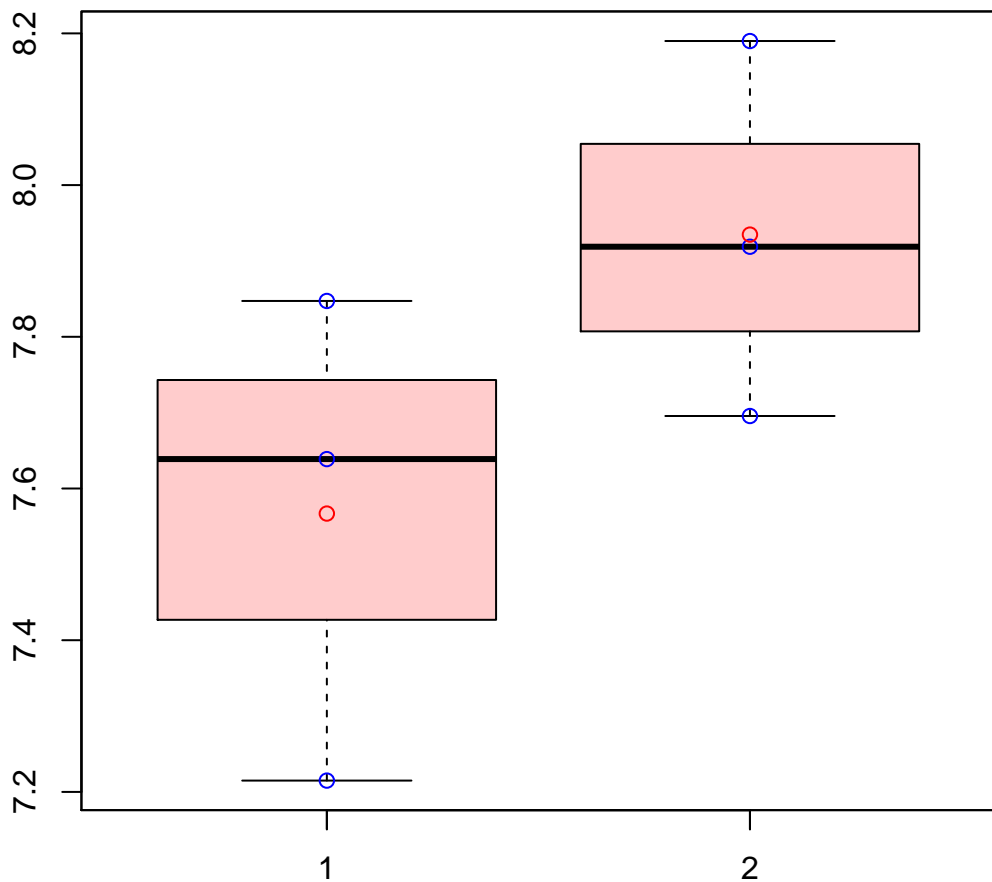

t-Test: p-value = 0.2

# CL337Contig7|CL337Contig7

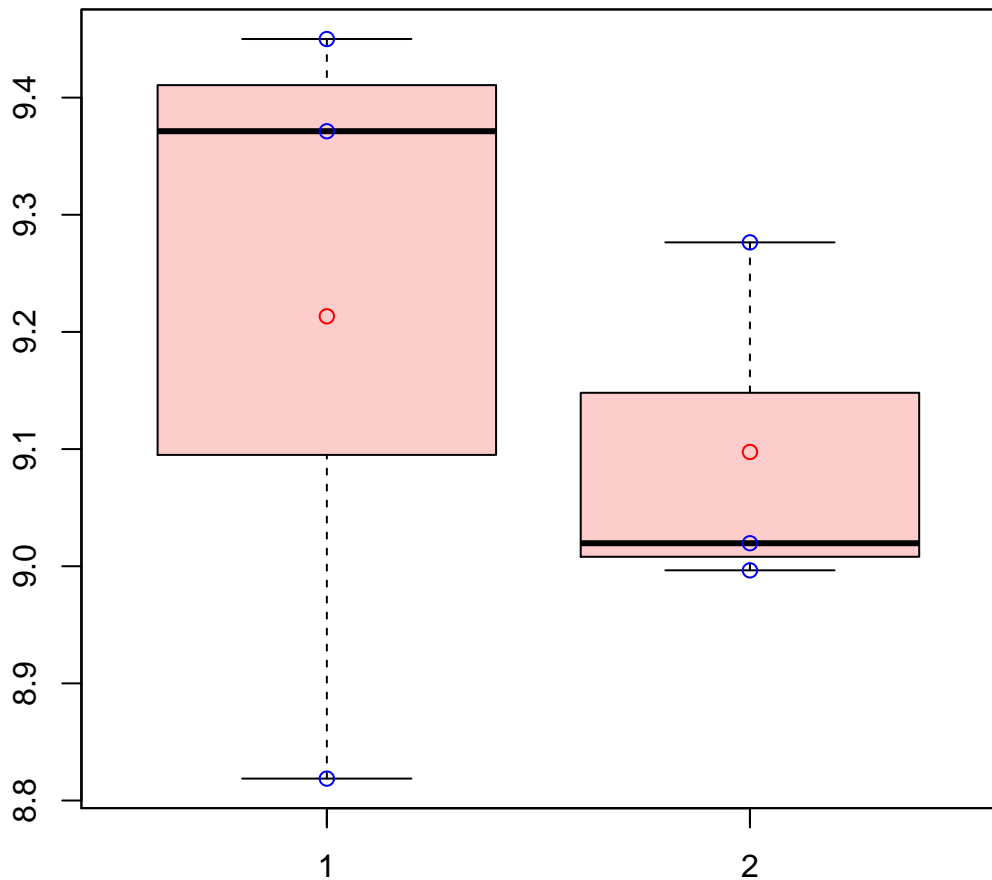

t-Test: p-value = 0.63

# CL3383Contig4|CL3383Contig4

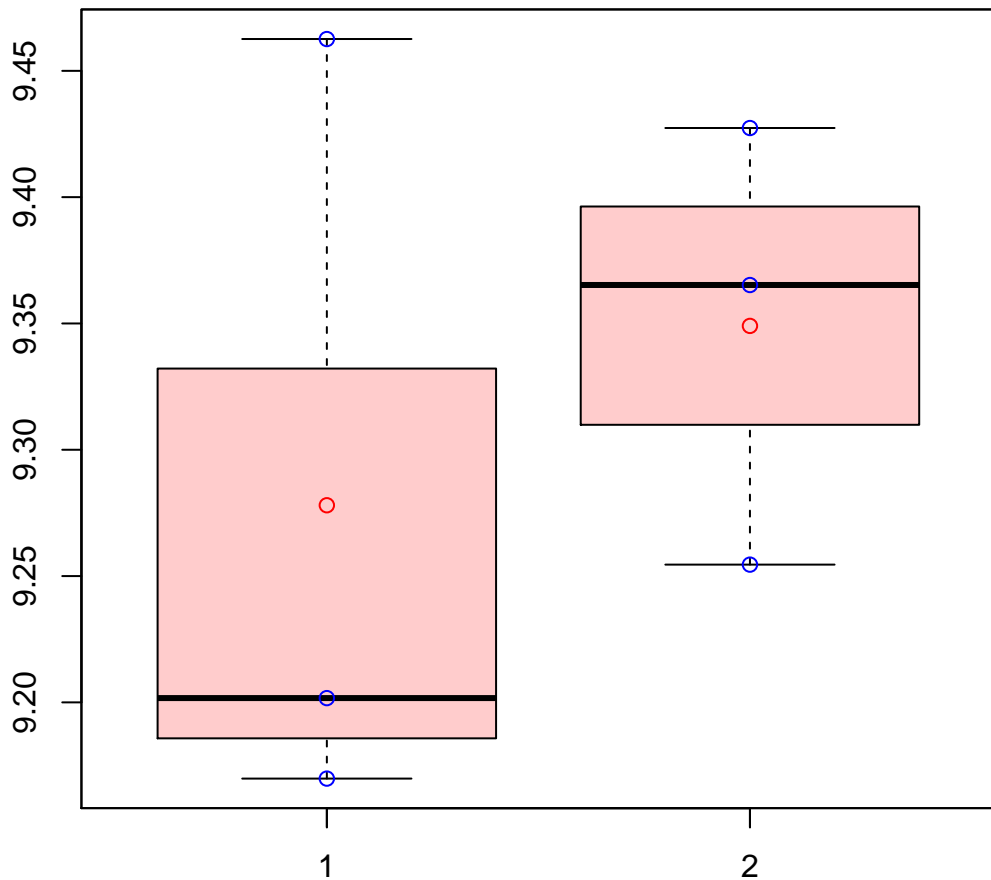

t-Test: p-value = 0.55

# CL3384Contig1|CL3384Contig1

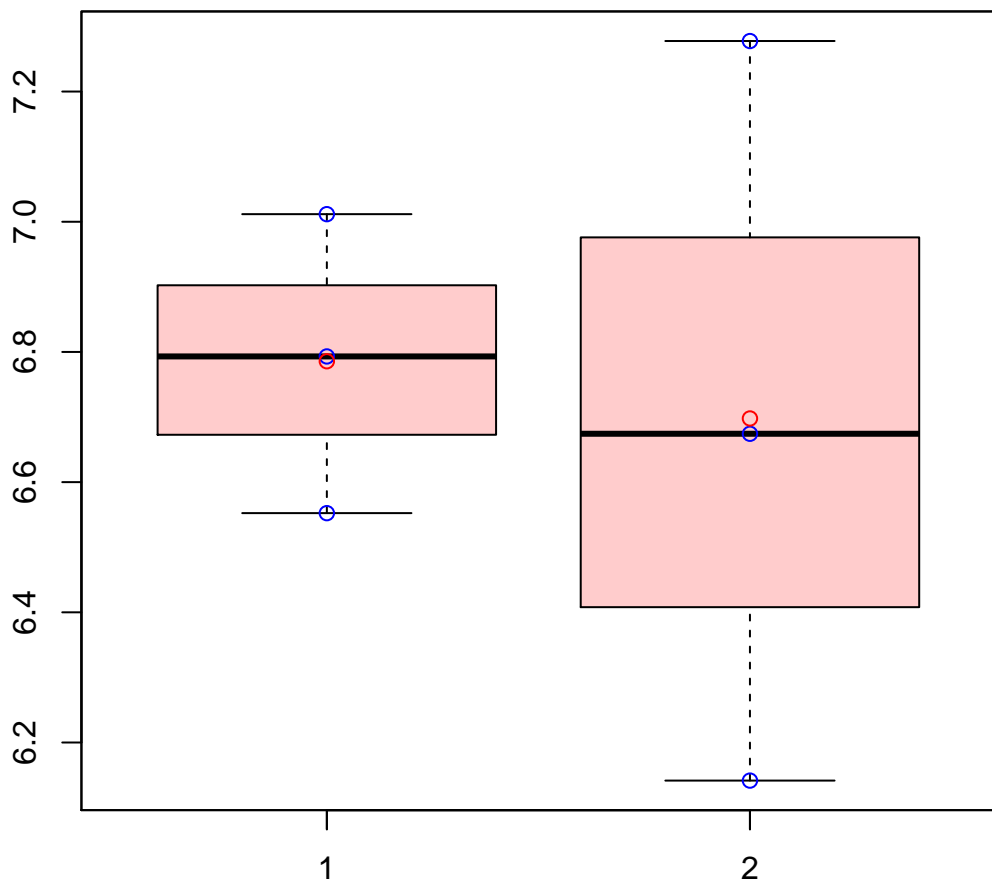

t-Test: p-value = 0.82

# CL3384Contig5|CL3384Contig5

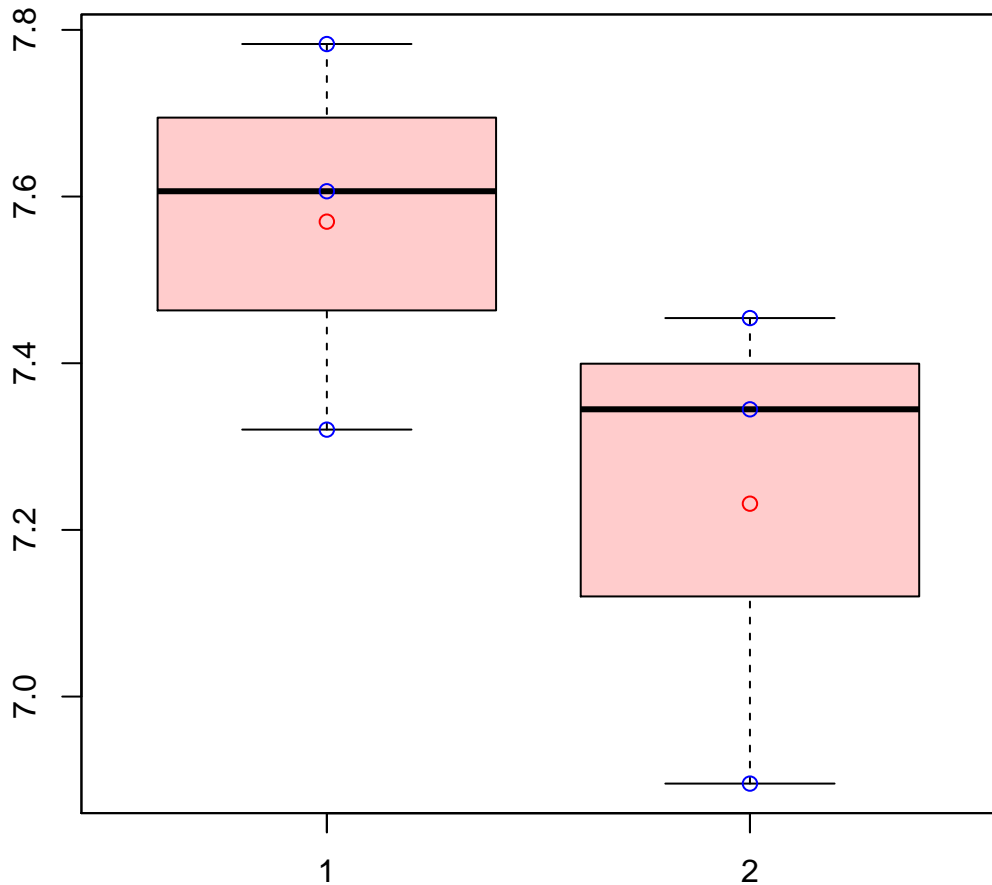

t-Test: p-value = 0.2



# CL3384Contig6|CL3384Contig6

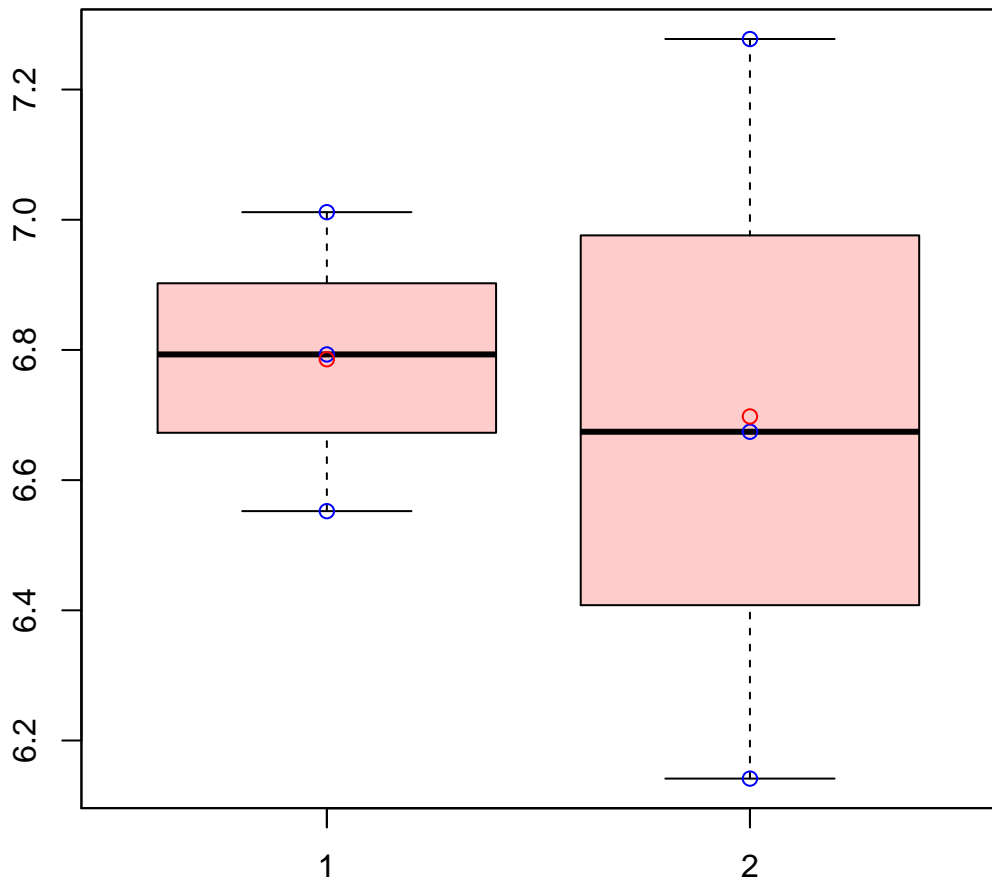

t-Test: p-value = 0.82

# CL3389Contig1|CL3389Contig1

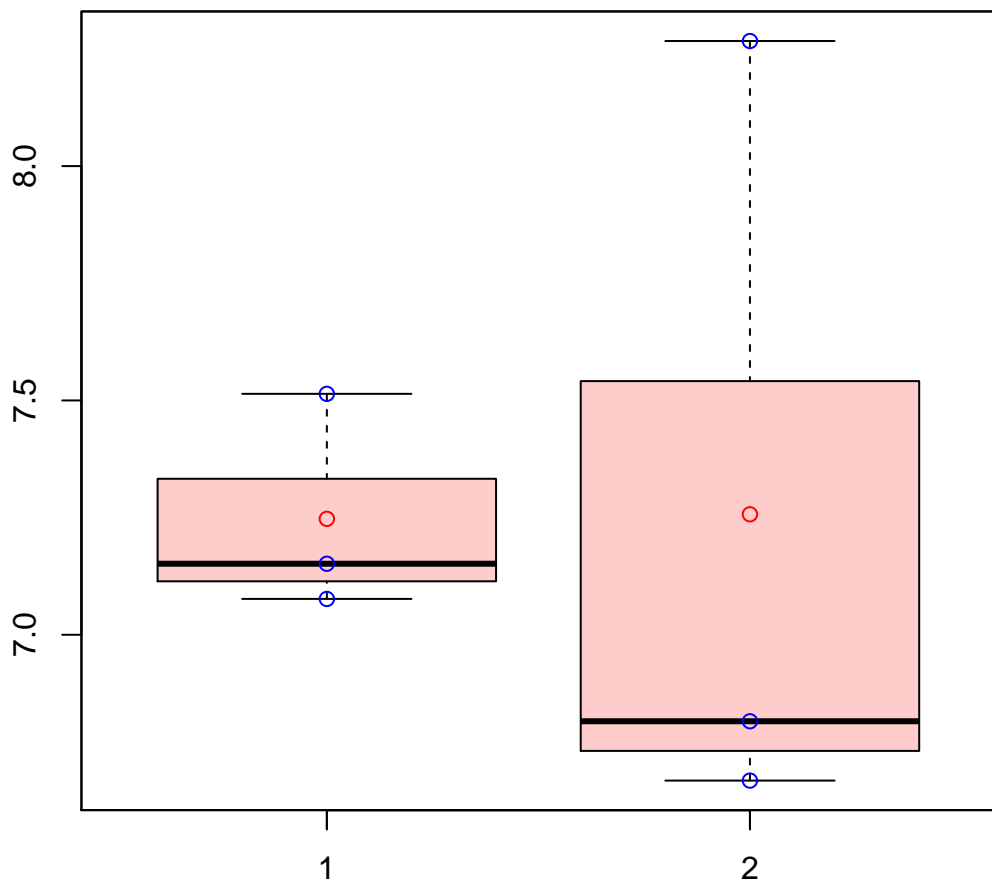

t-Test: p-value = 0.99

# CL338Contig6|CL338Contig6

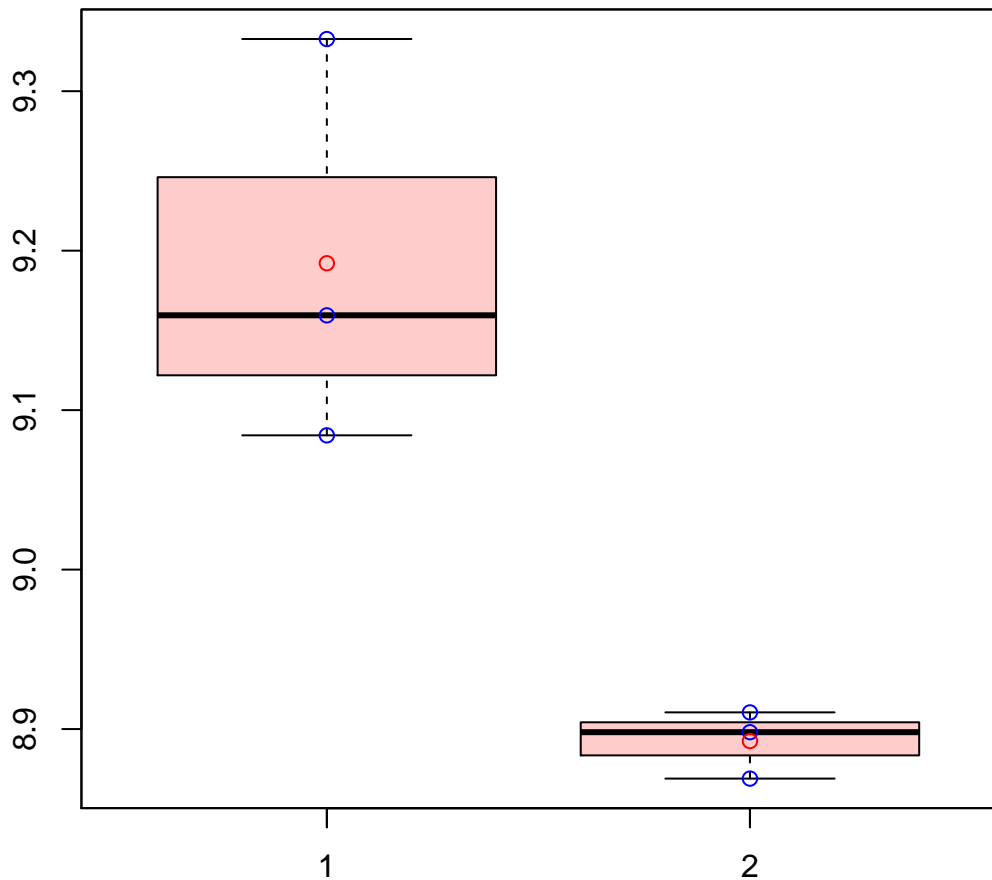

t-Test: p-value = 0.05

# CL338Contig8|CL338Contig8

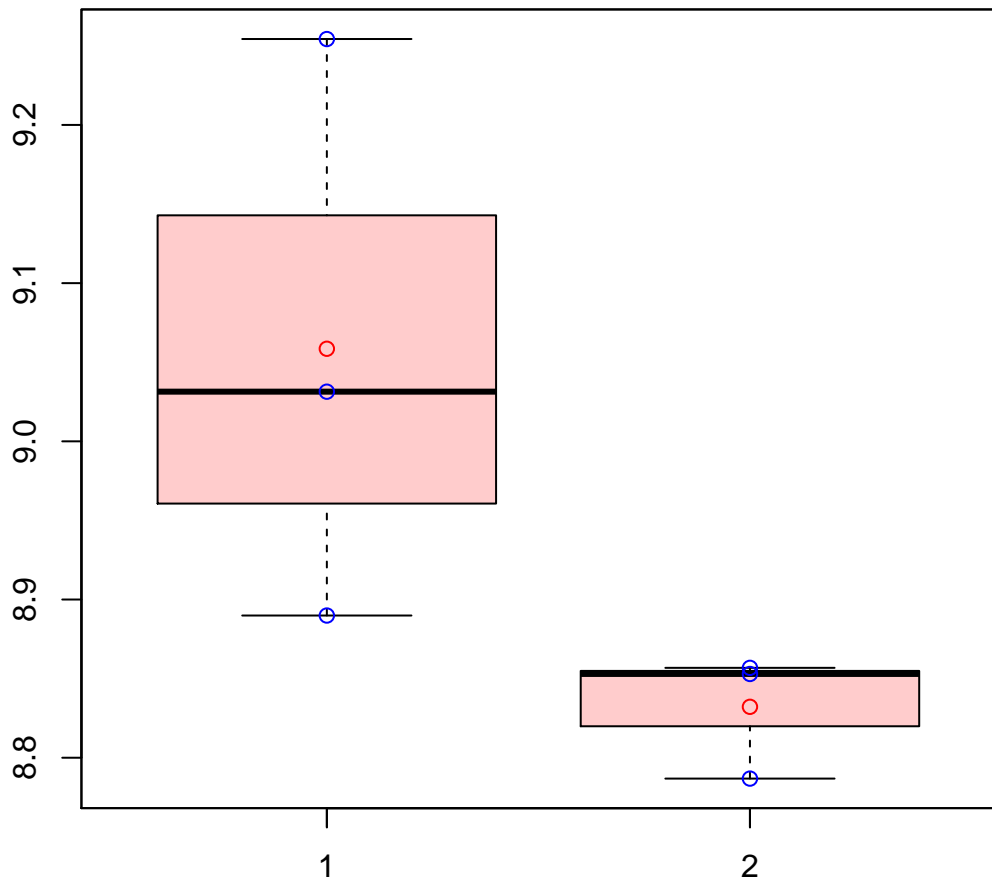

t-Test: p-value = 0.16

# CL3390Contig1|CL3390Contig1

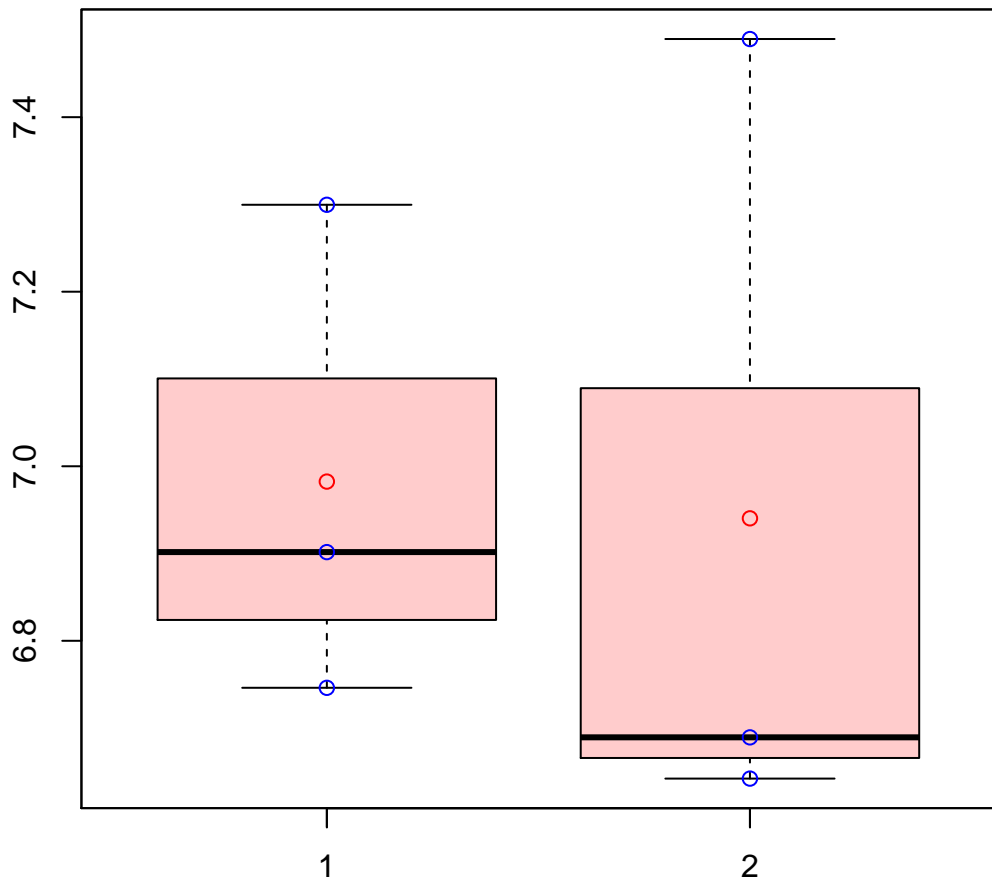

t-Test: p-value = 0.9

# CL3394Contig11|CL3394Contig11

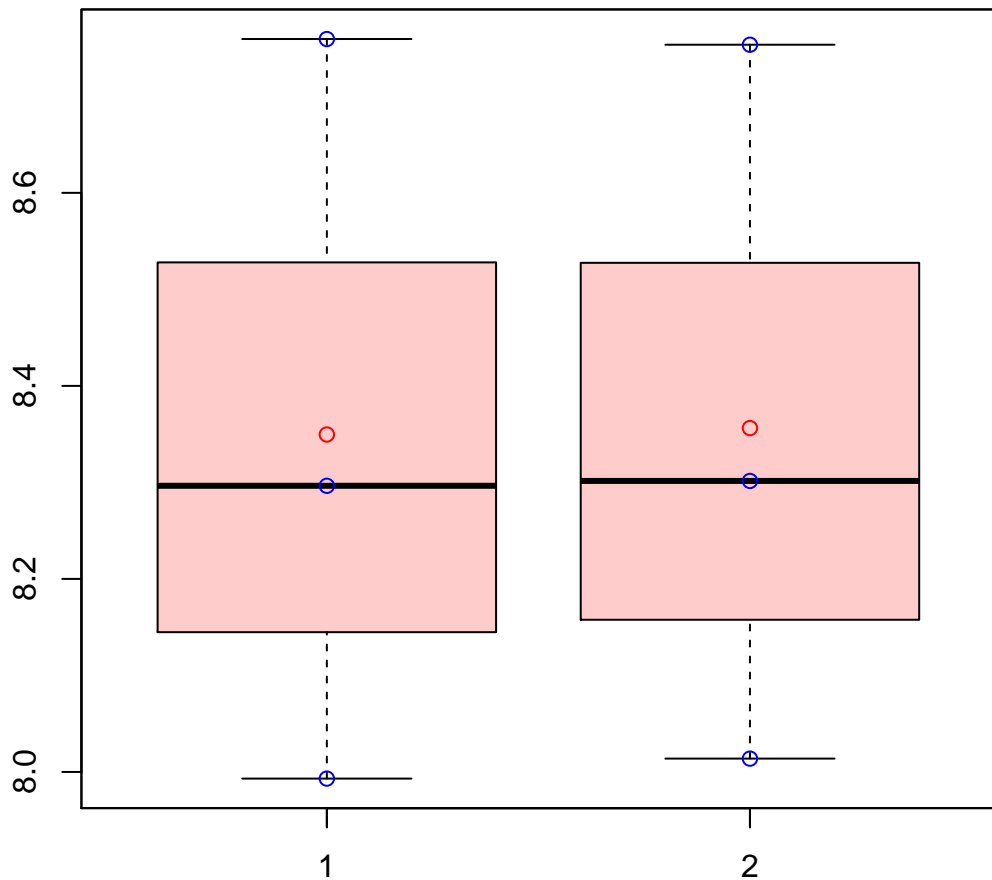

t-Test: p-value = 0.98

# CL3394Contig12|CL3394Contig12



t-Test: p-value = 0.98

# CL3394Contig13|CL3394Contig13



t-Test: p-value = 0.98



# CL3394Contig14|CL3394Contig14



t-Test: p-value = 0.98

# CL3394Contig2|CL3394Contig2

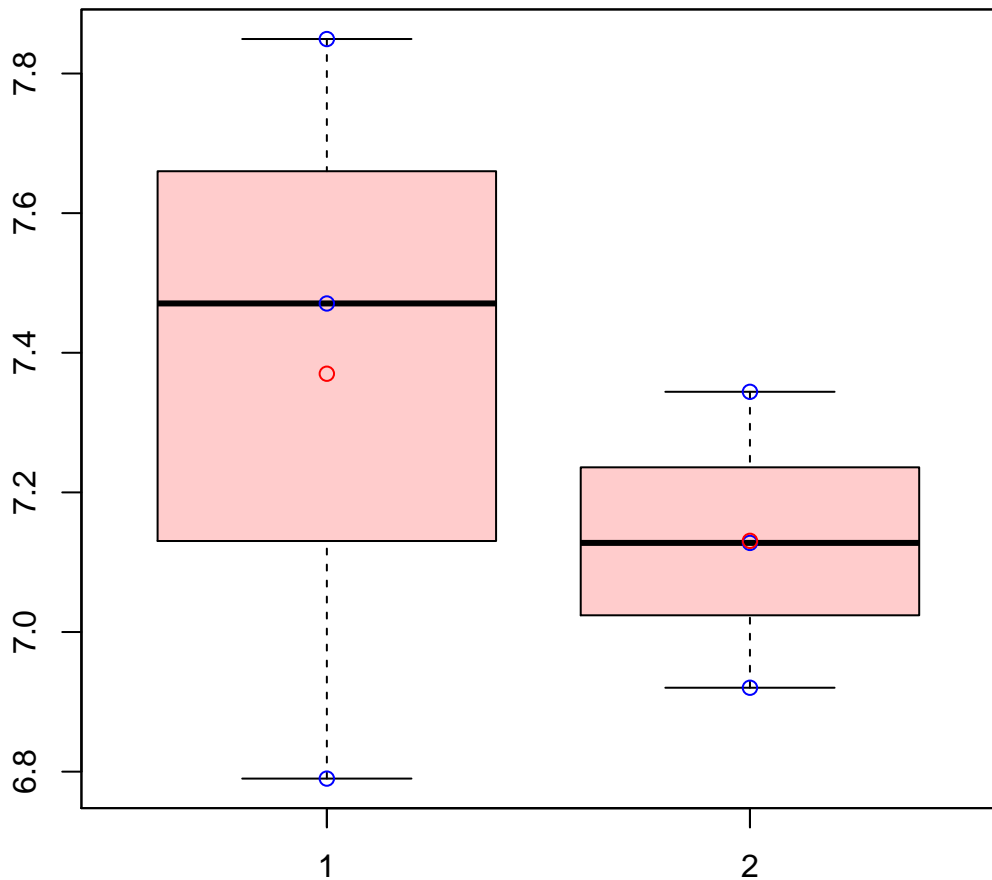

t-Test: p-value = 0.53

# CL3394Contig5|CL3394Contig5

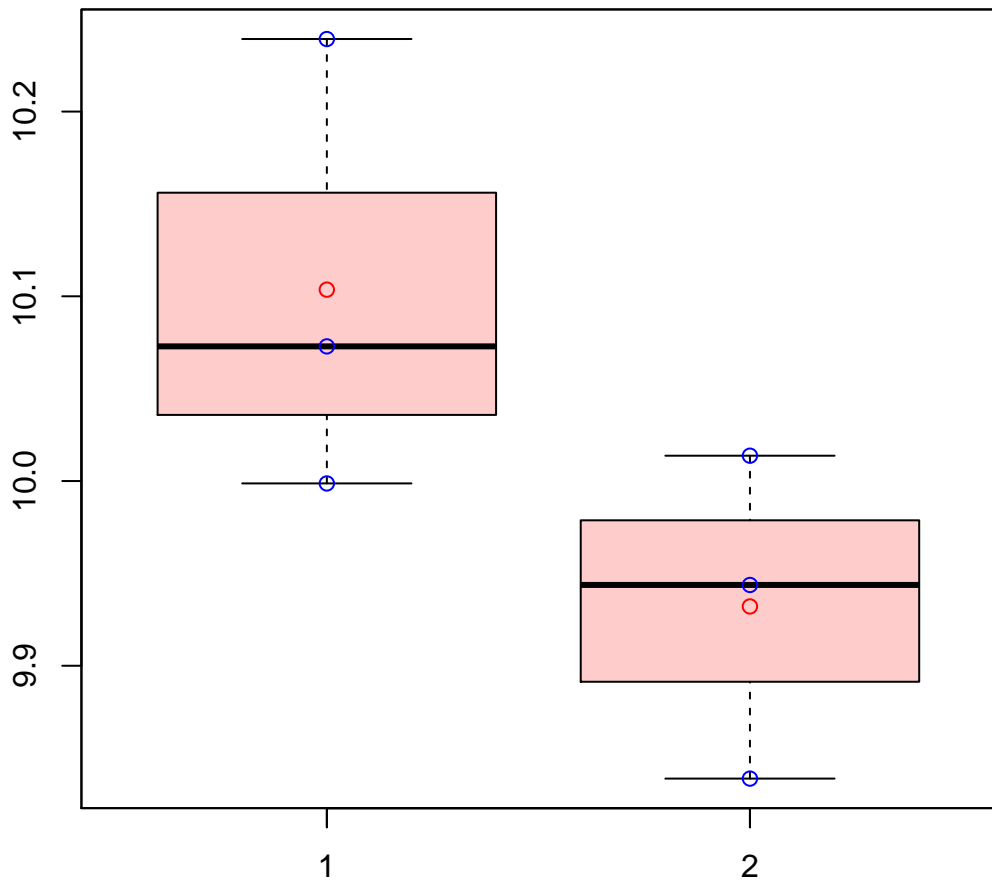

t-Test: p-value = 0.13

# CL3394Contig6|CL3394Contig6



t-Test: p-value = 0.98

# CL3394Contig9|CL3394Contig9

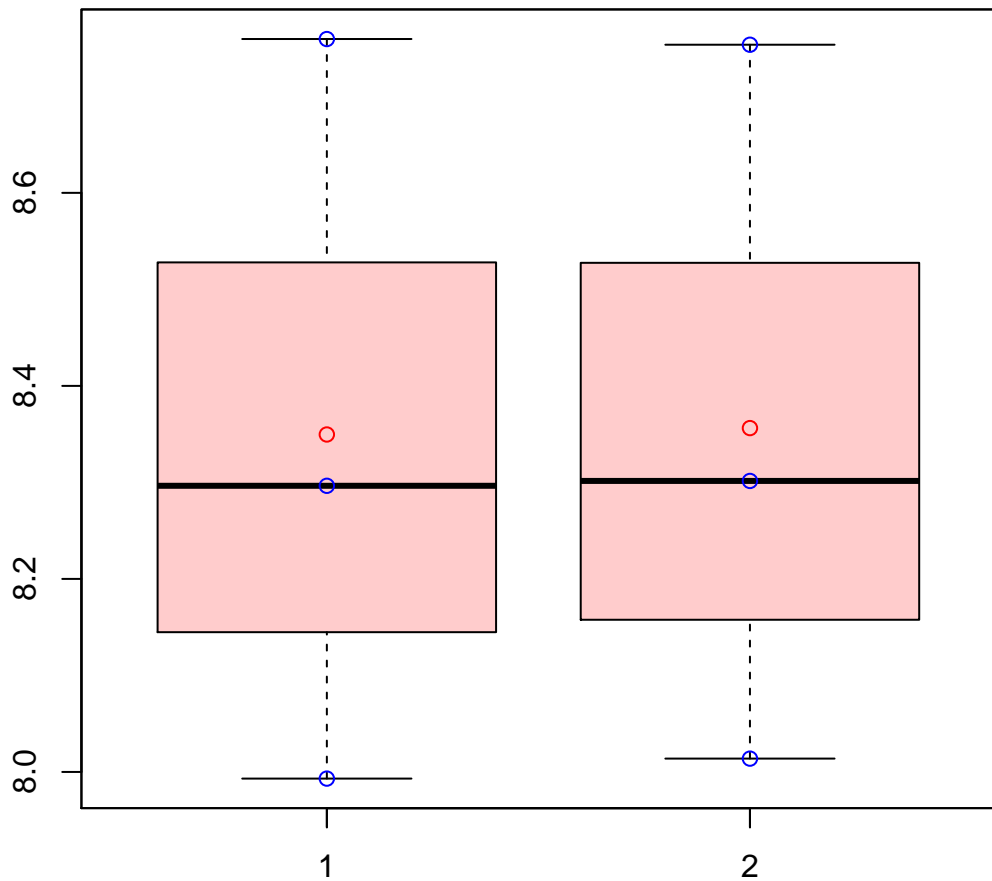

t-Test: p-value = 0.98

# CL3395Contig1|CL3395Contig1

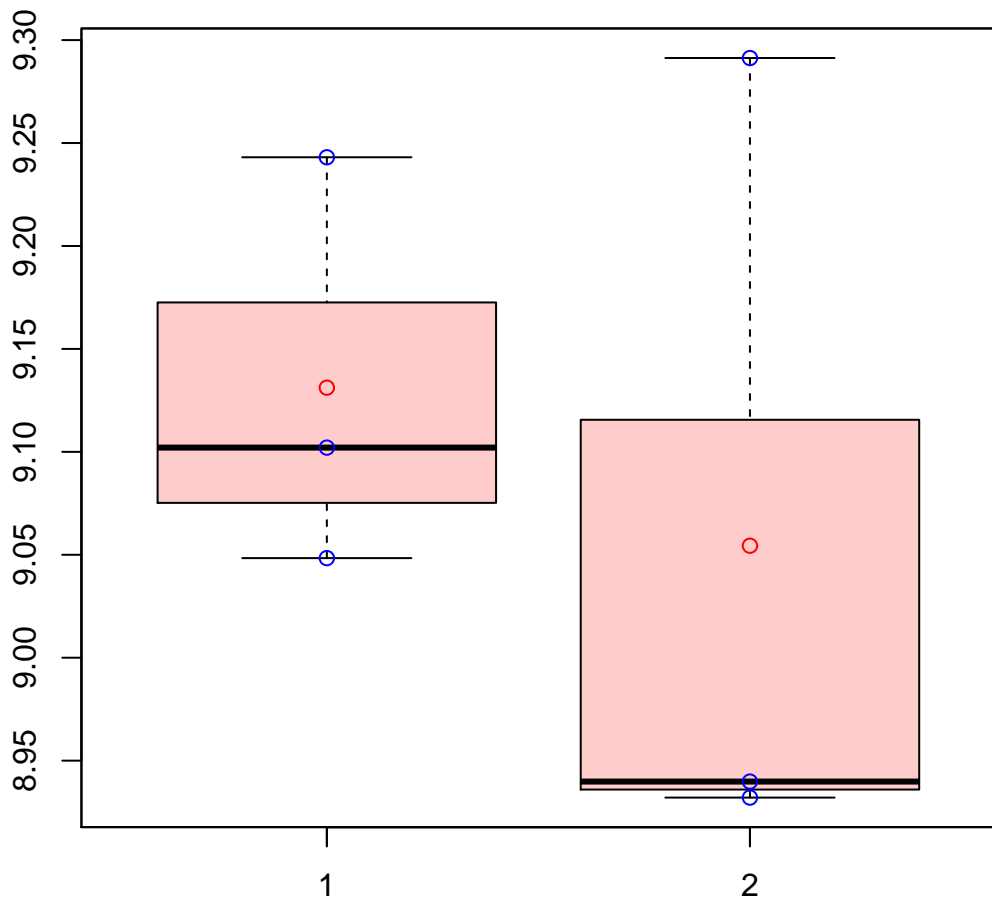

t-Test: p-value = 0.6

# CL339Contig2|CL339Contig2

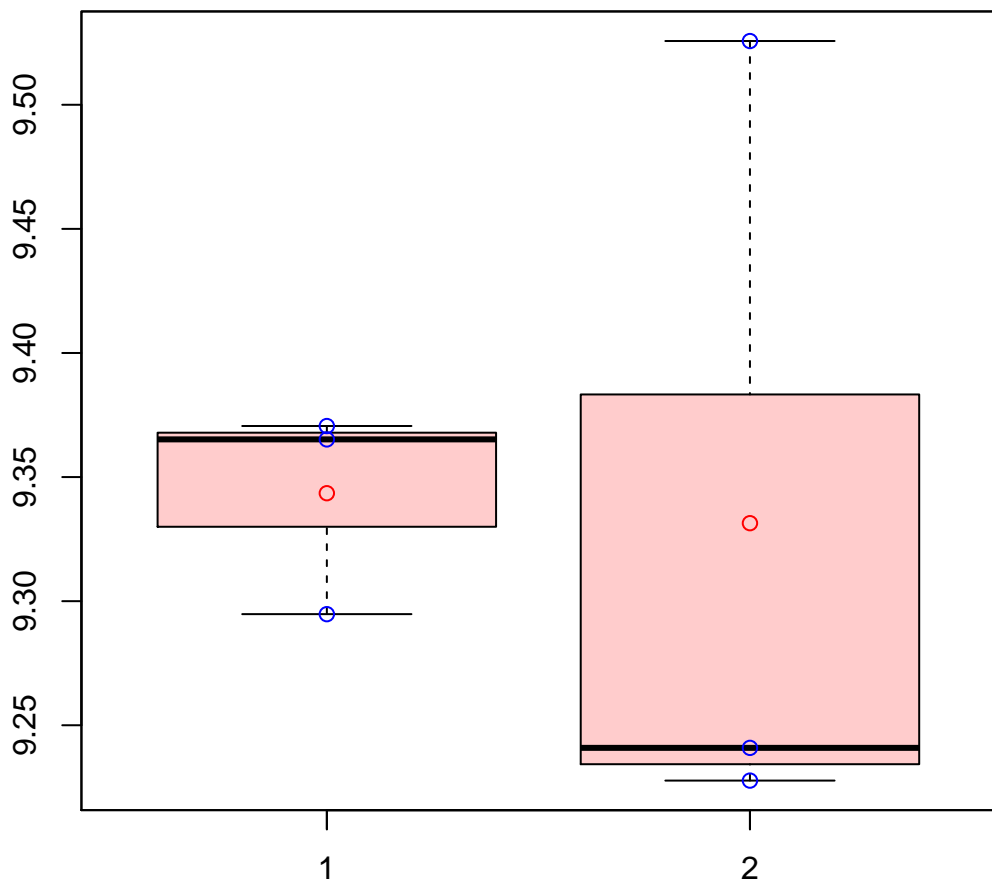

t-Test: p-value = 0.91

# CL339Contig4|CL339Contig4

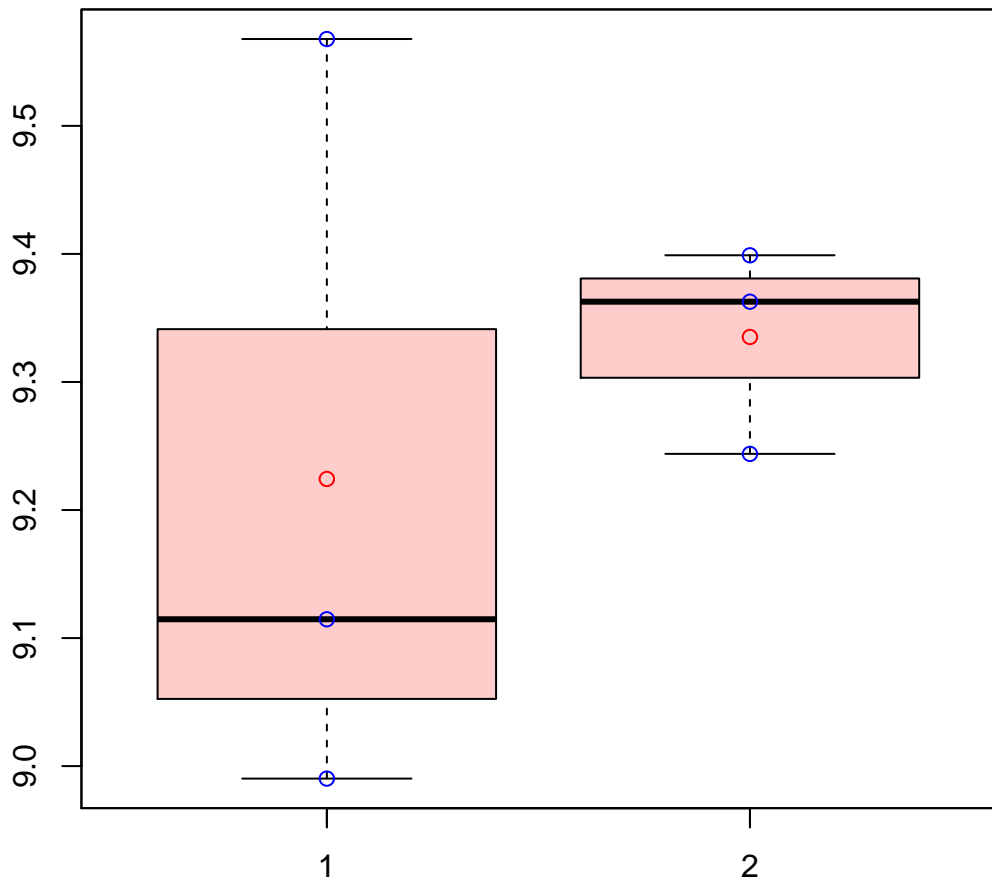

t-Test: p-value = 0.6



# CL339Contig7|CL339Contig7

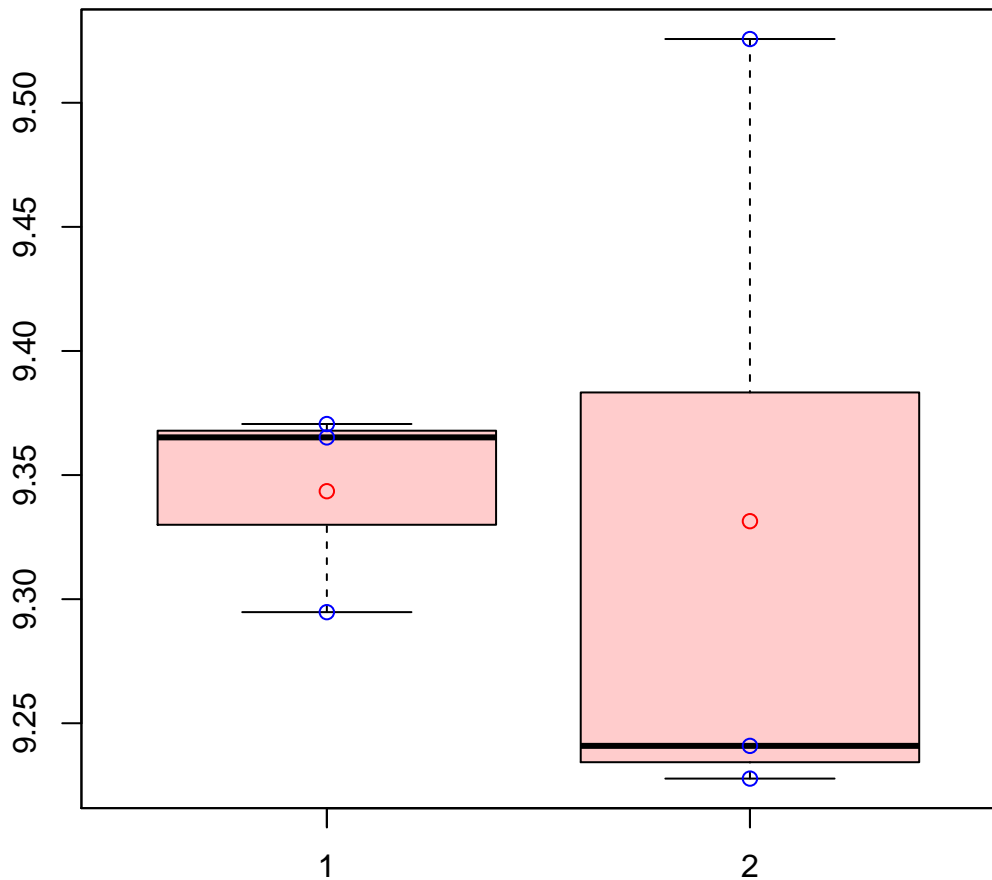

t-Test: p-value = 0.91

# CL33Contig26|CL33Contig26

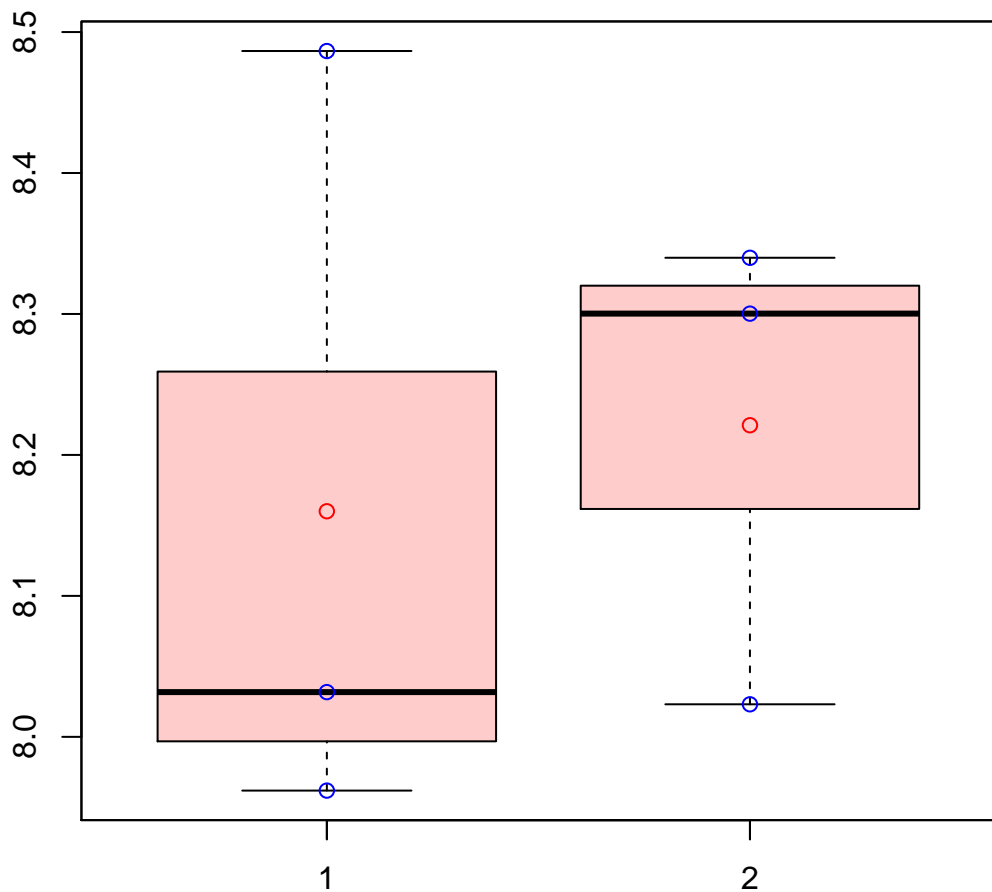

t-Test: p-value = 0.77

# CL33Contig28|CL33Contig28

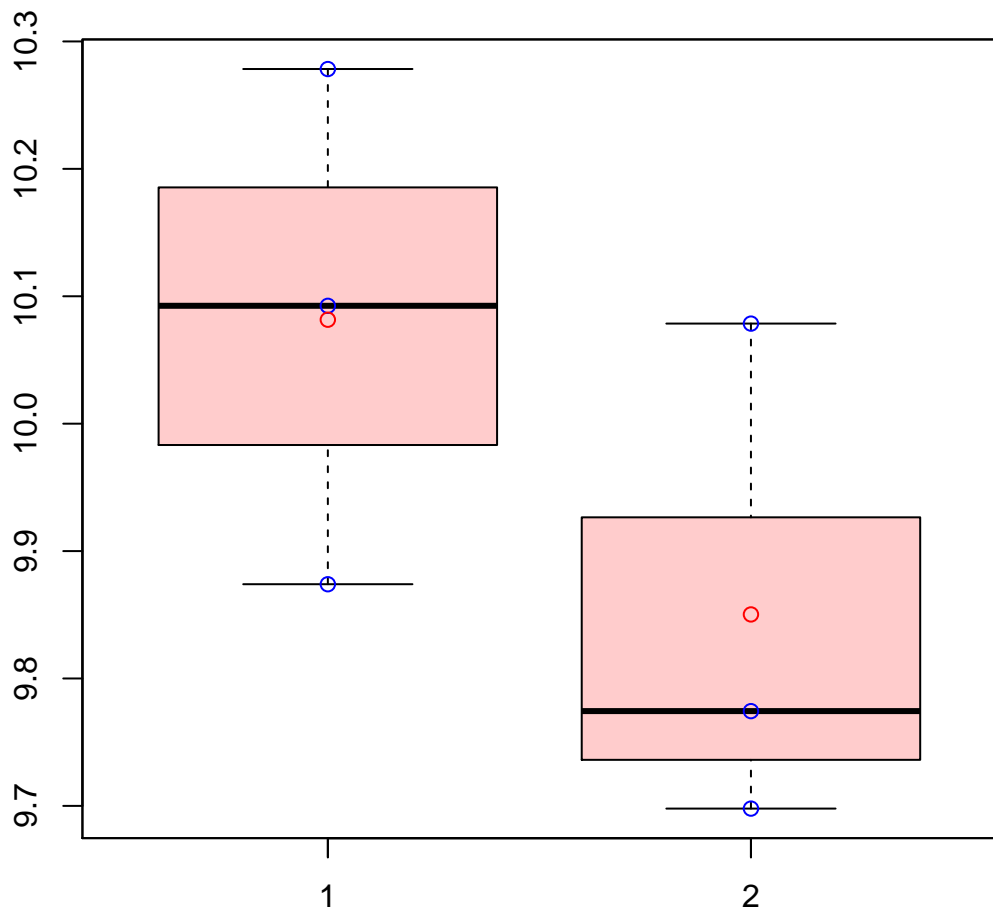

t-Test: p-value = 0.23

# CL33Contig2|CL33Contig2

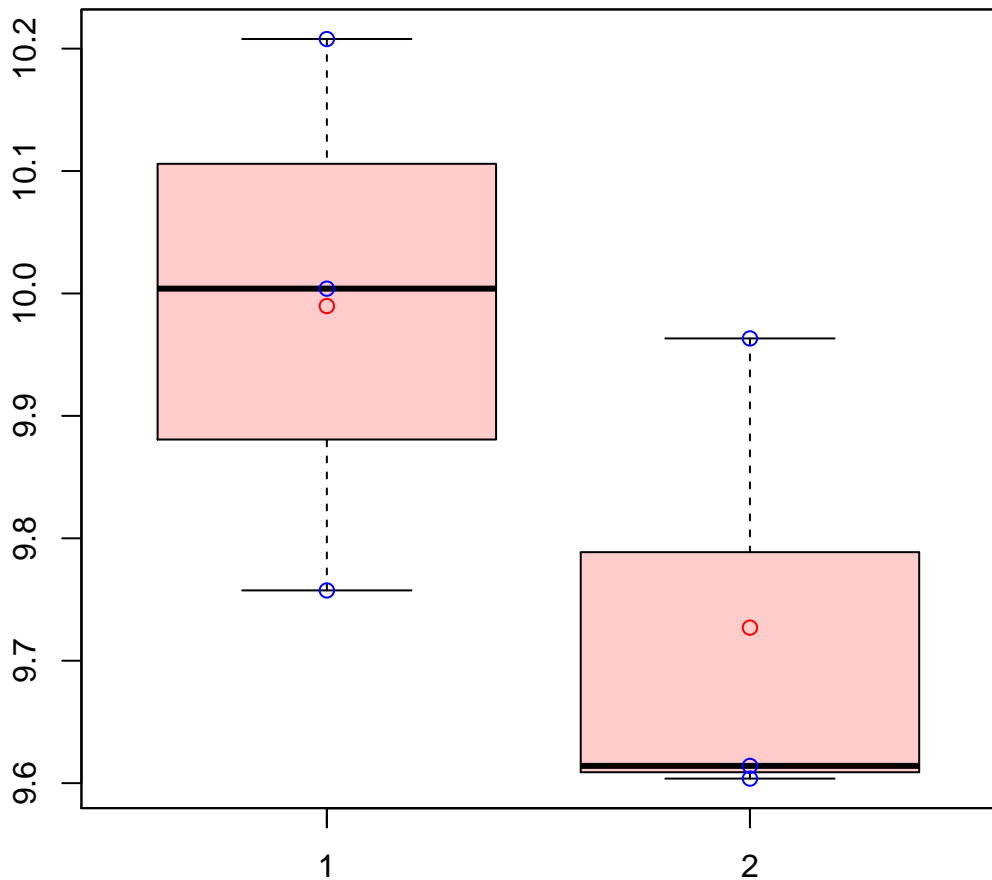

t-Test: p-value = 0.21

# CL3403Contig1|CL3403Contig1

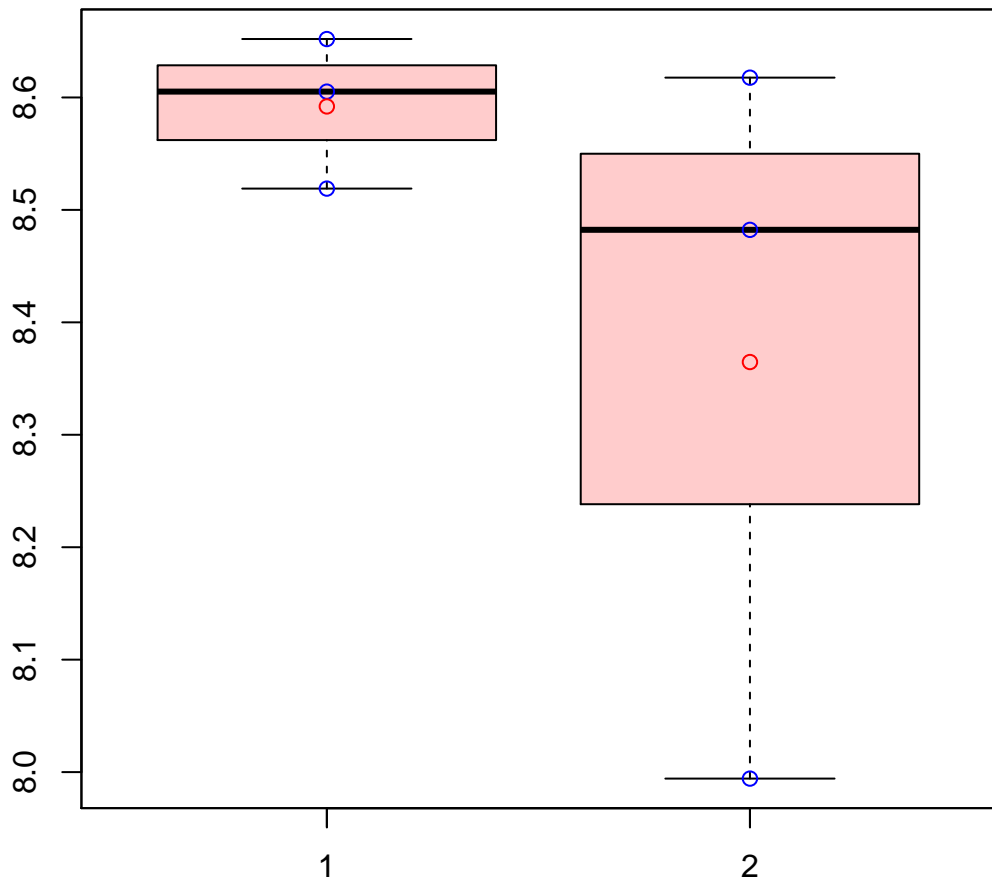

t-Test: p-value = 0.35

# CL3406Contig3|CL3406Contig3

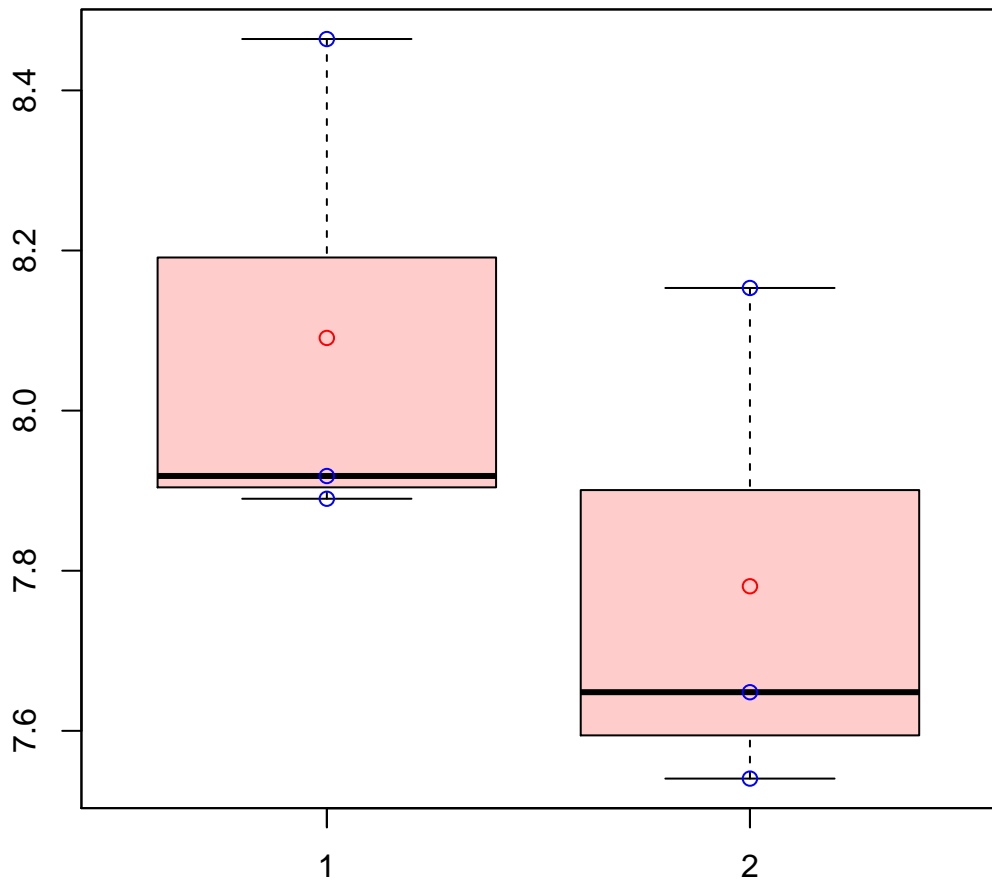

t-Test: p-value = 0.31

# CL3407Contig3|CL3407Contig3

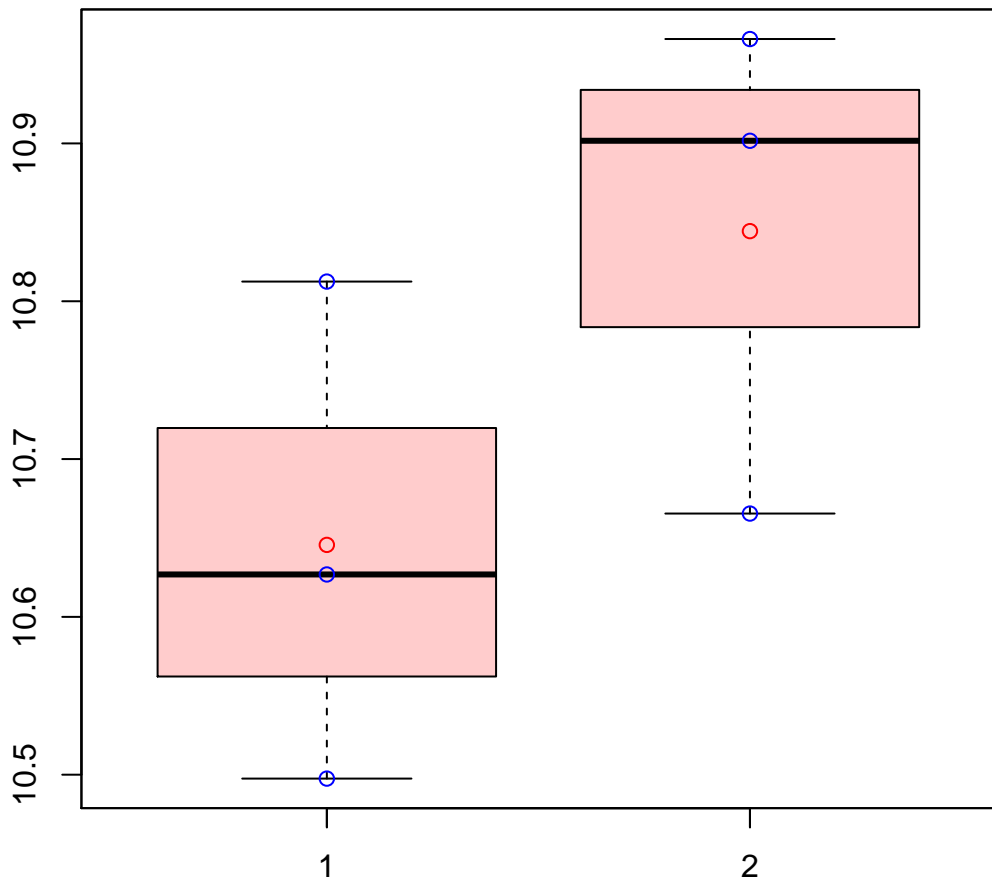

t-Test: p-value = 0.2

# CL3412Contig1|CL3412Contig1

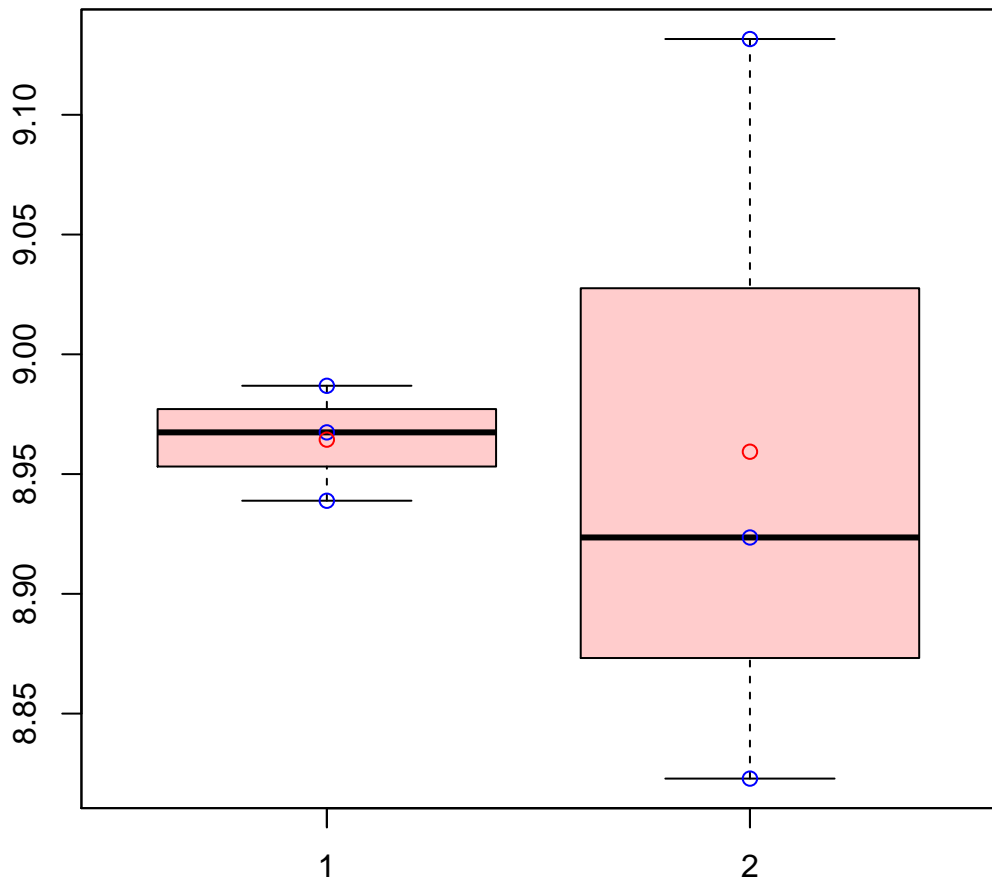

t-Test: p-value = 0.96



# CL3421Contig3|CL3421Contig3

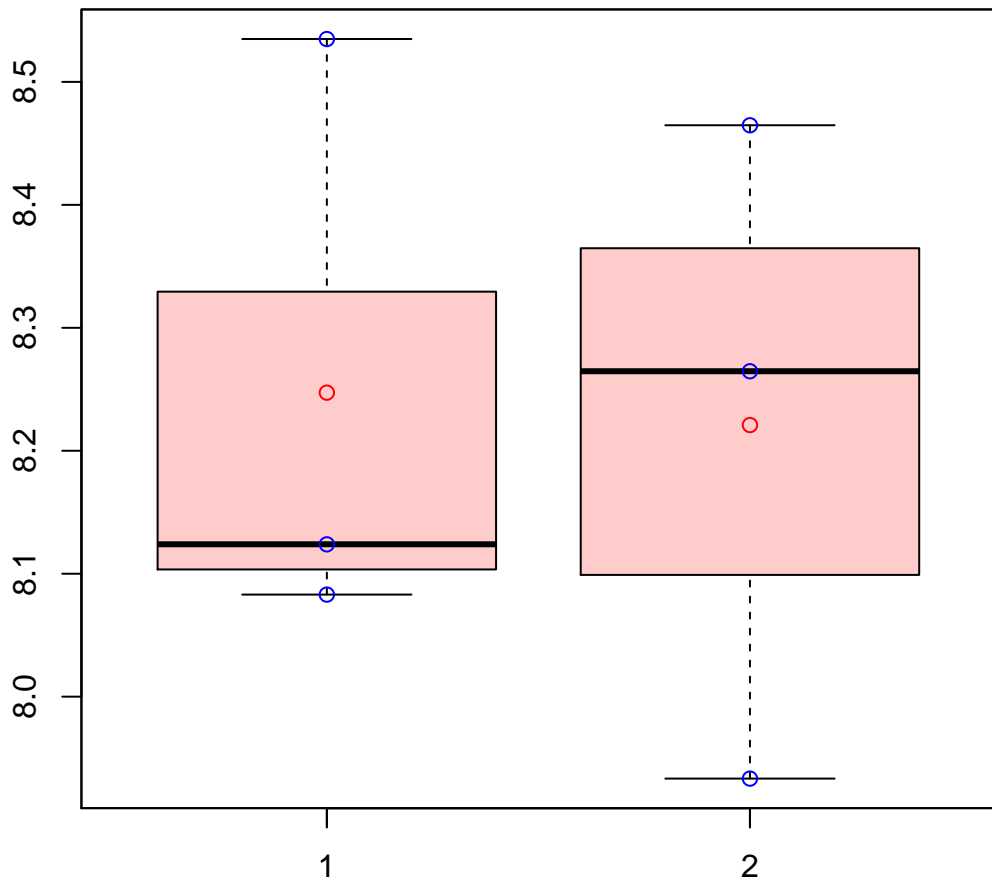

t-Test: p-value = 0.91

# CL3442Contig1|CL3442Contig1

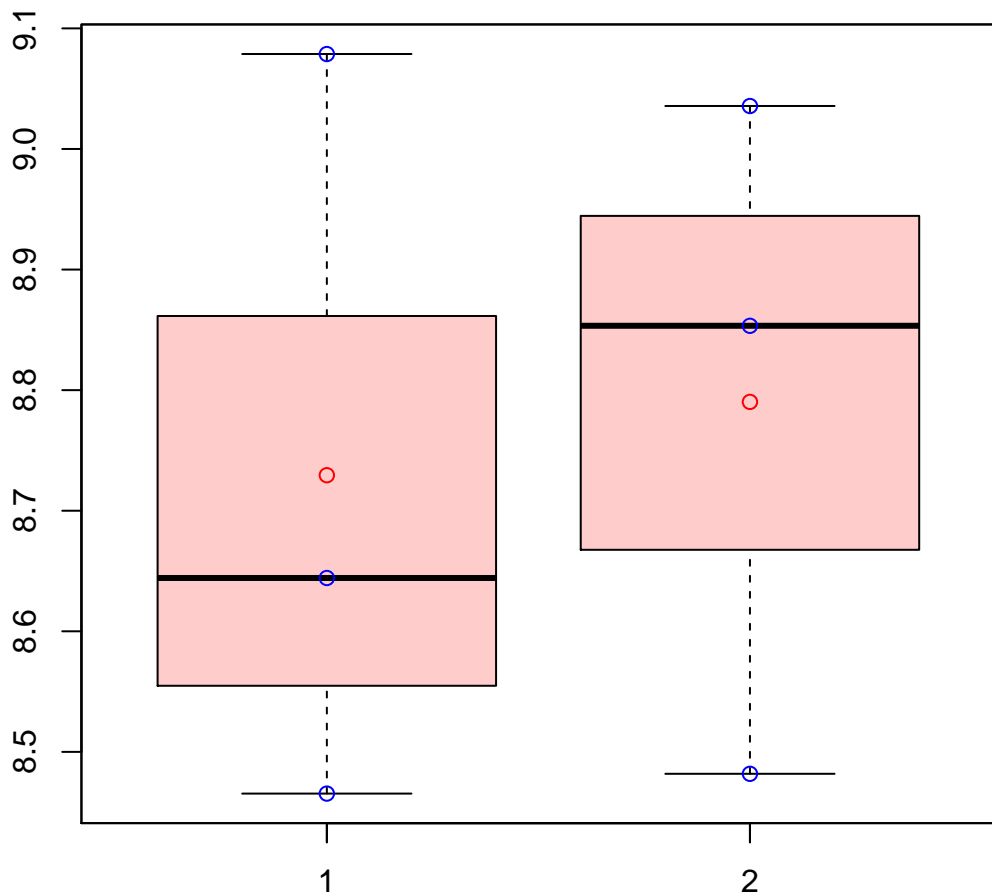

t-Test: p-value = 0.82

# CL3442Contig2|CL3442Contig2

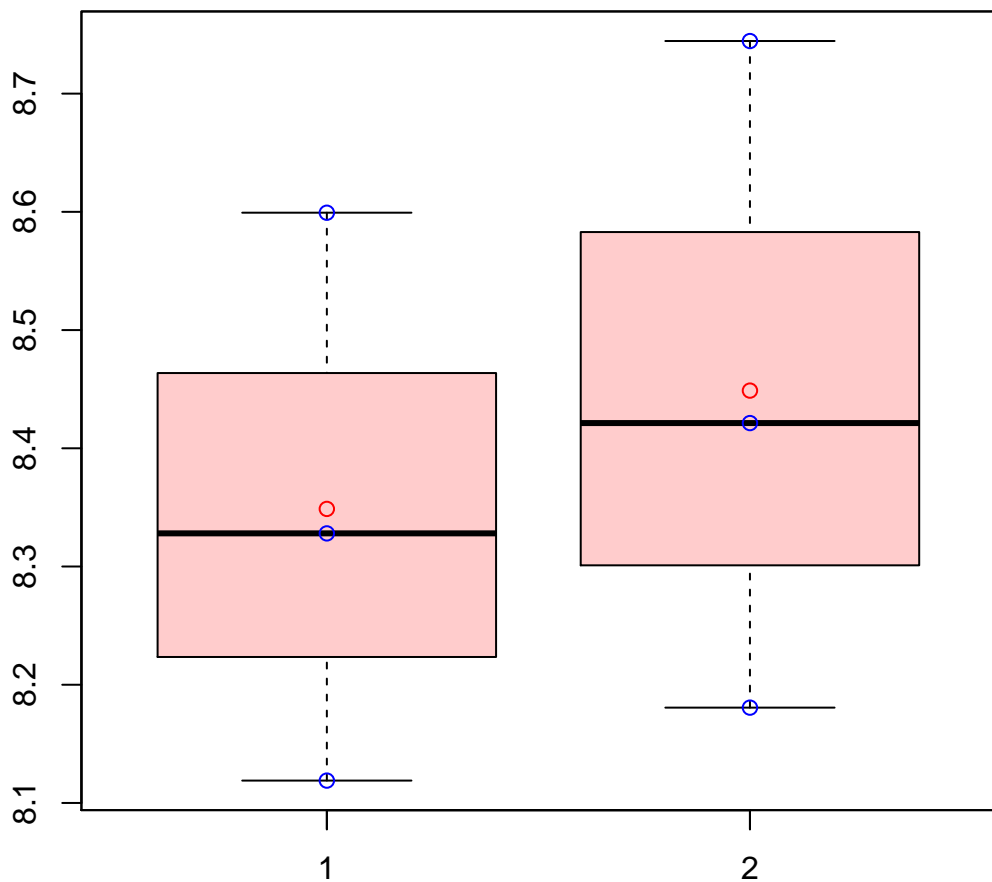

t-Test: p-value = 0.67

# CL3442Contig4|CL3442Contig4

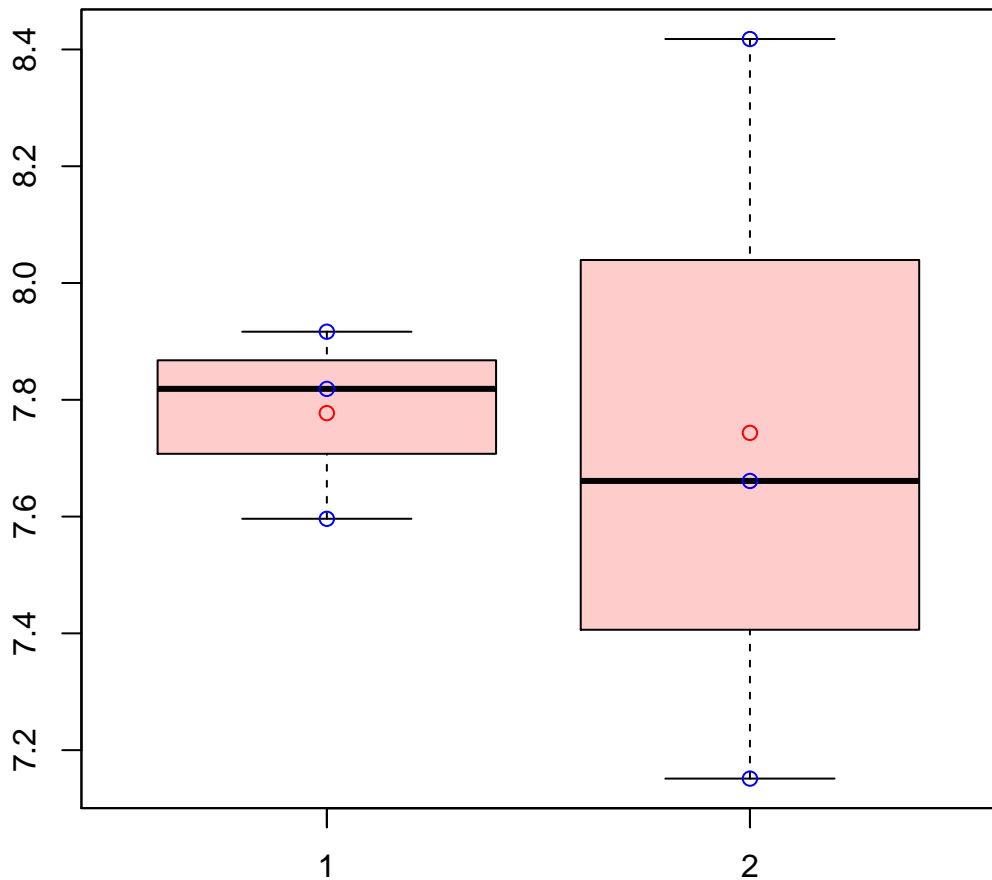

t-Test: p-value = 0.94

# CL3445Contig1|CL3445Contig1



t-Test: p-value = 0.84

# CL3446Contig2|CL3446Contig2

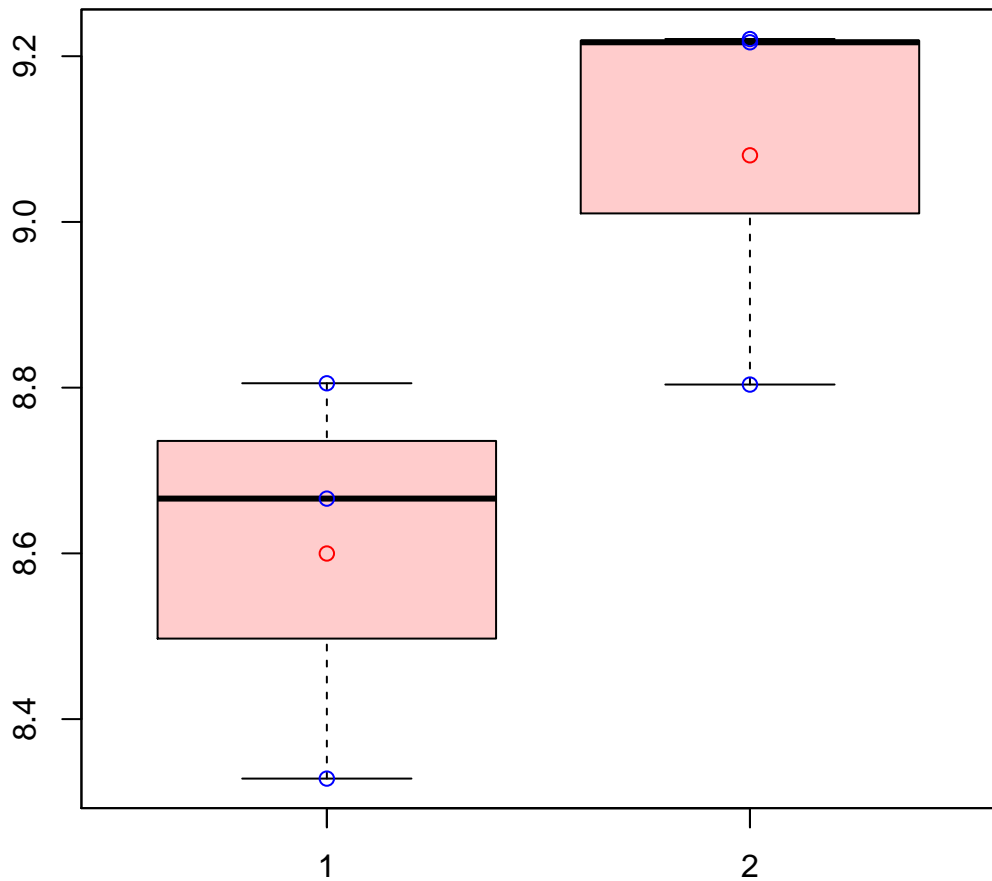

t-Test: p-value = 0.07

# CL3449Contig3|CL3449Contig3

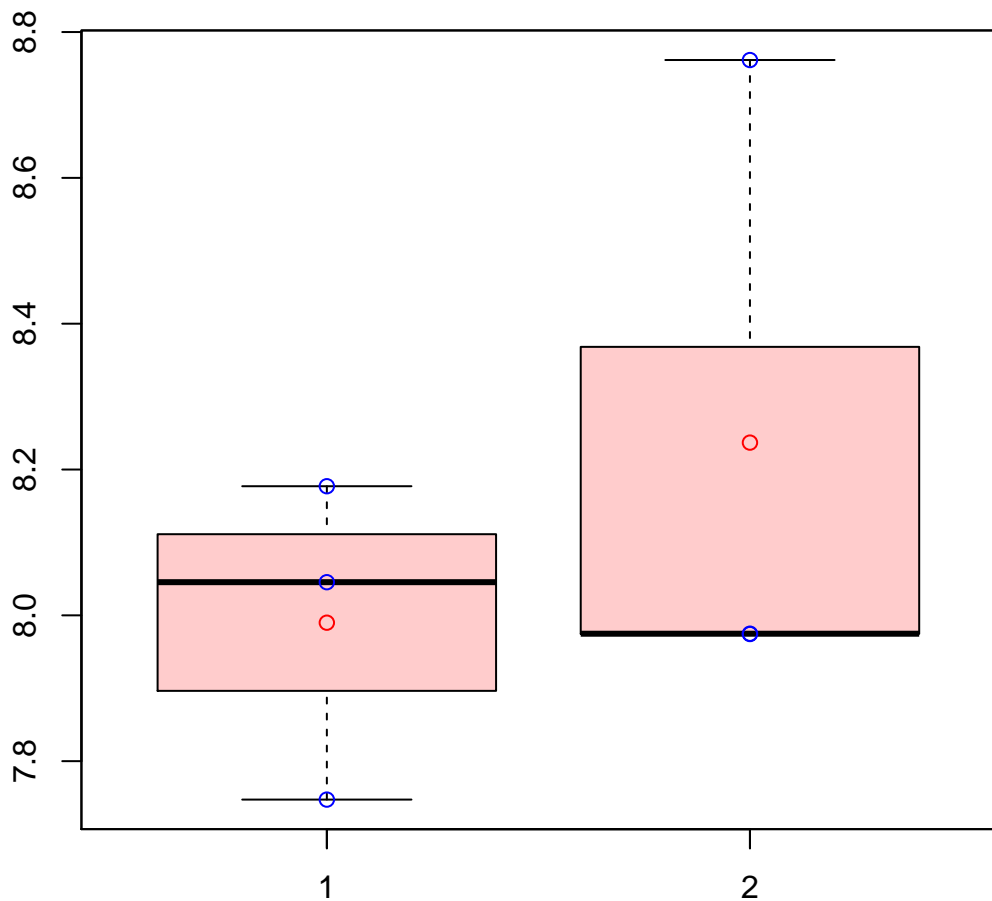

t-Test: p-value = 0.46

# CL3452Contig1|CL3452Contig1

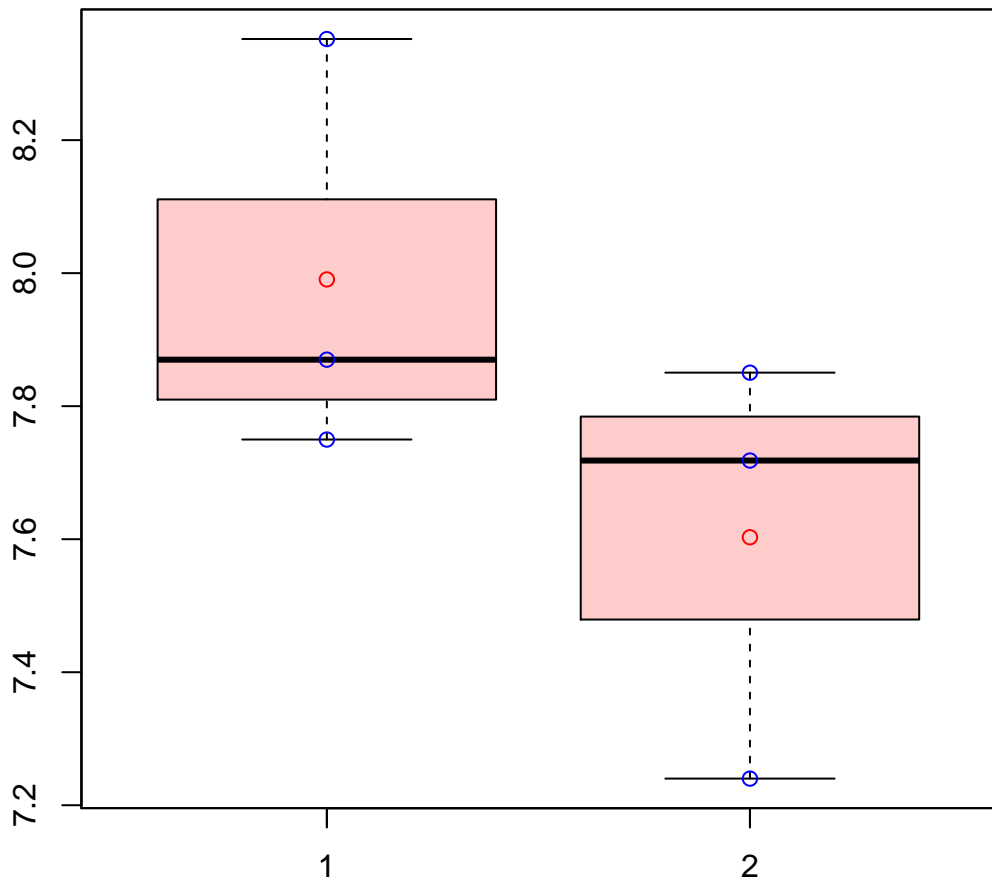

t-Test: p-value = 0.21



# CL3452Contig4|CL3452Contig4

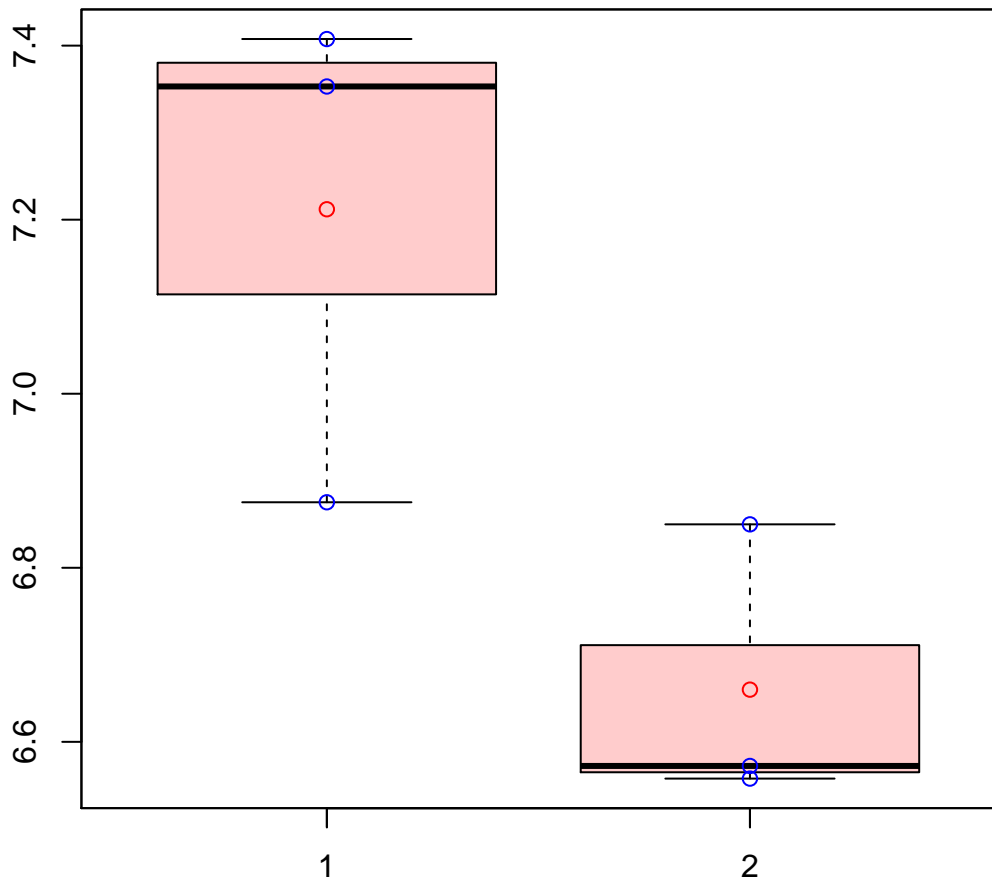

t-Test: p-value = 0.06

# CL3452Contig5|CL3452Contig5

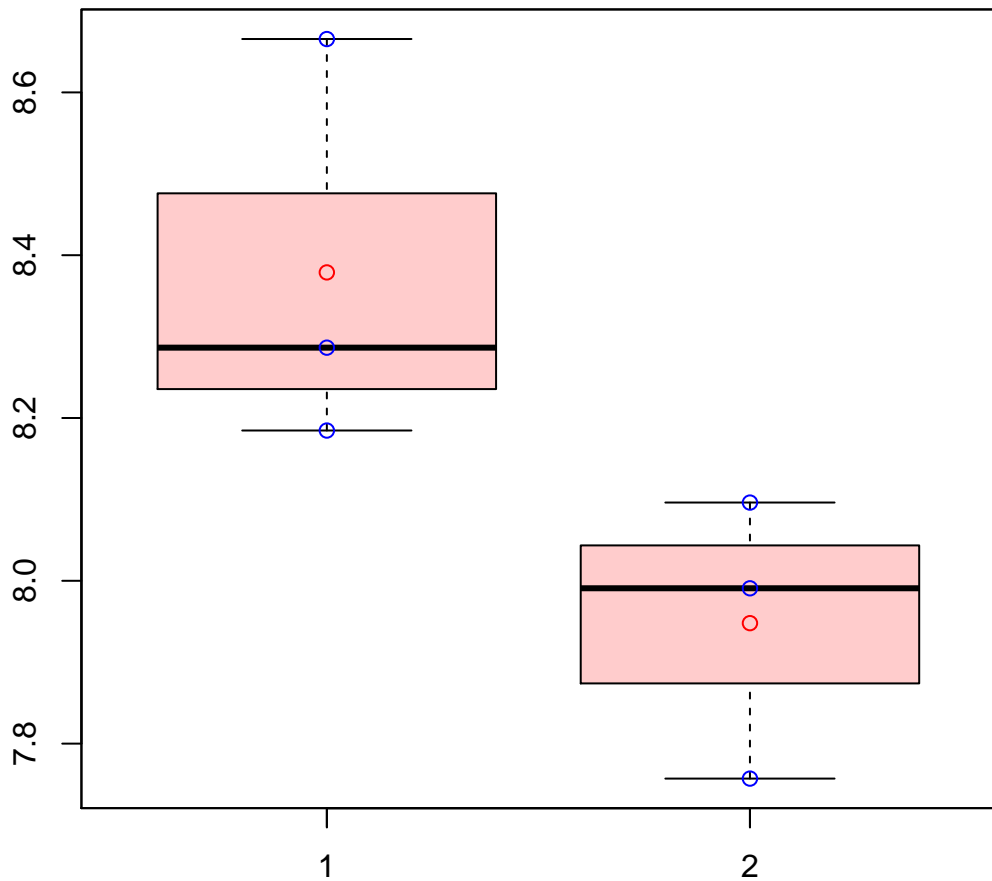

t-Test: p-value = 0.08

# CL3455Contig2|CL3455Contig2

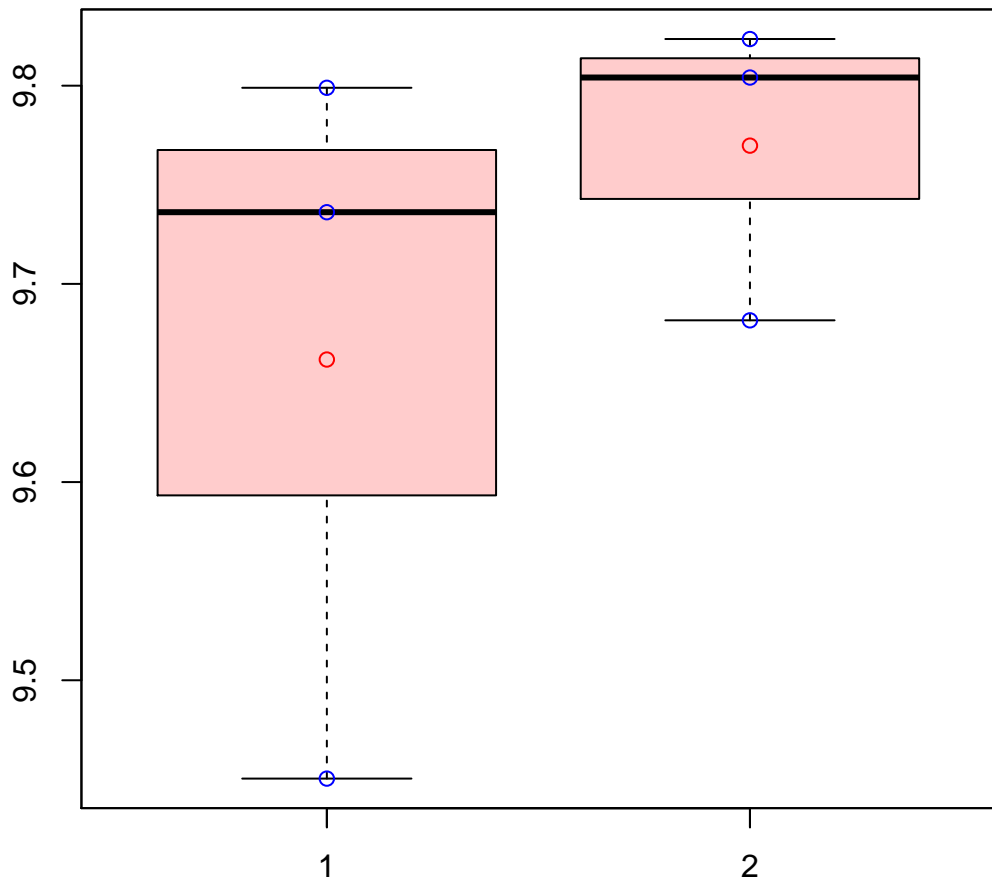

t-Test: p-value = 0.43

# CL3456Contig2|CL3456Contig2

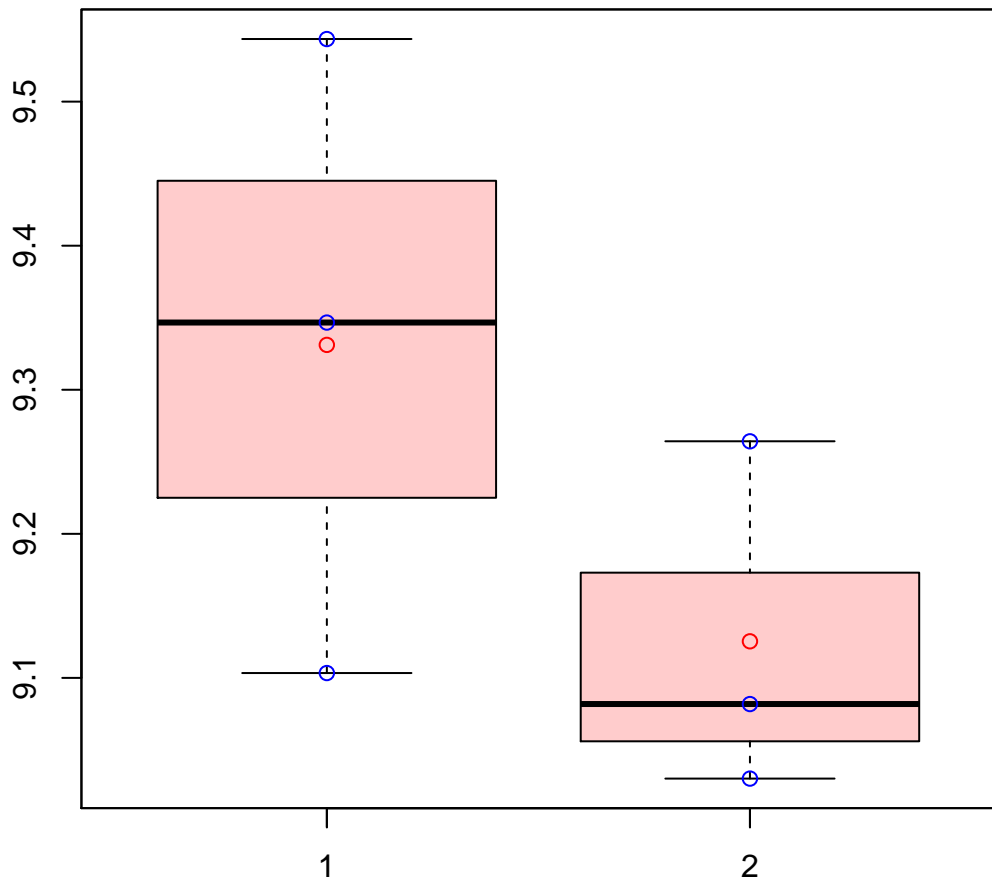

t-Test: p-value = 0.25

# CL3457Contig4|CL3457Contig4



t-Test: p-value = 0.26

# CL3458Contig1|CL3458Contig1

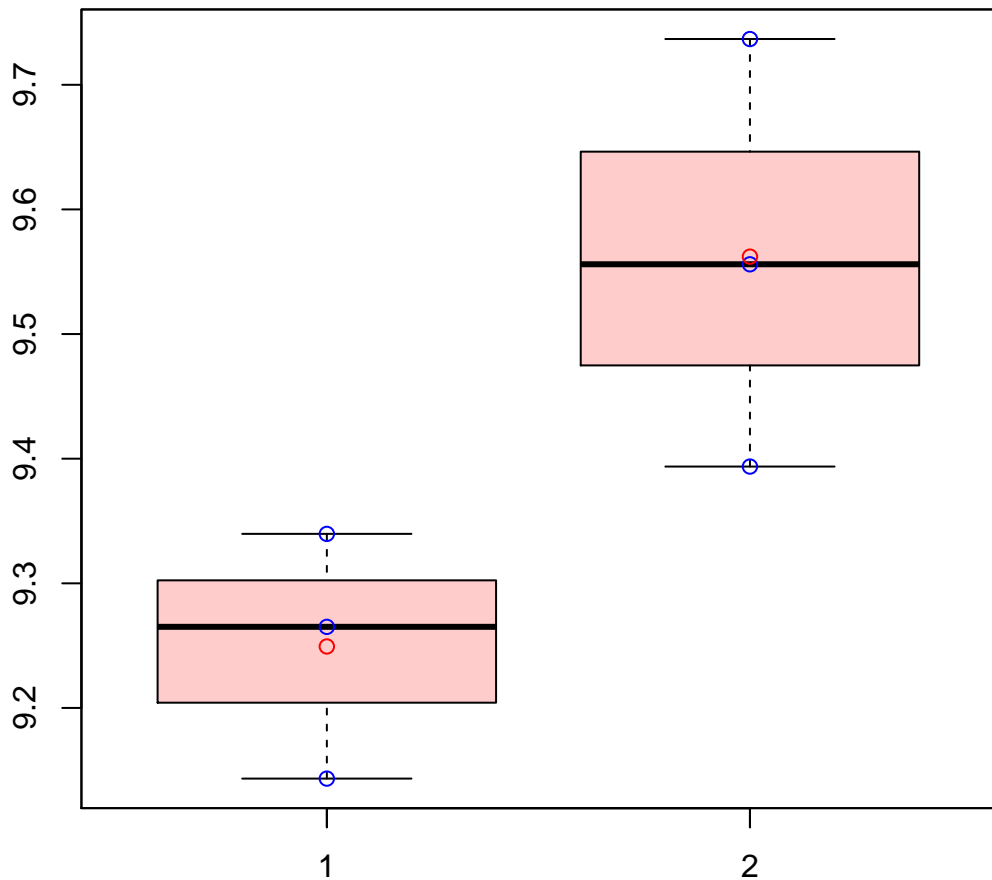

t-Test: p-value = 0.07

# CL3458Contig2|CL3458Contig2

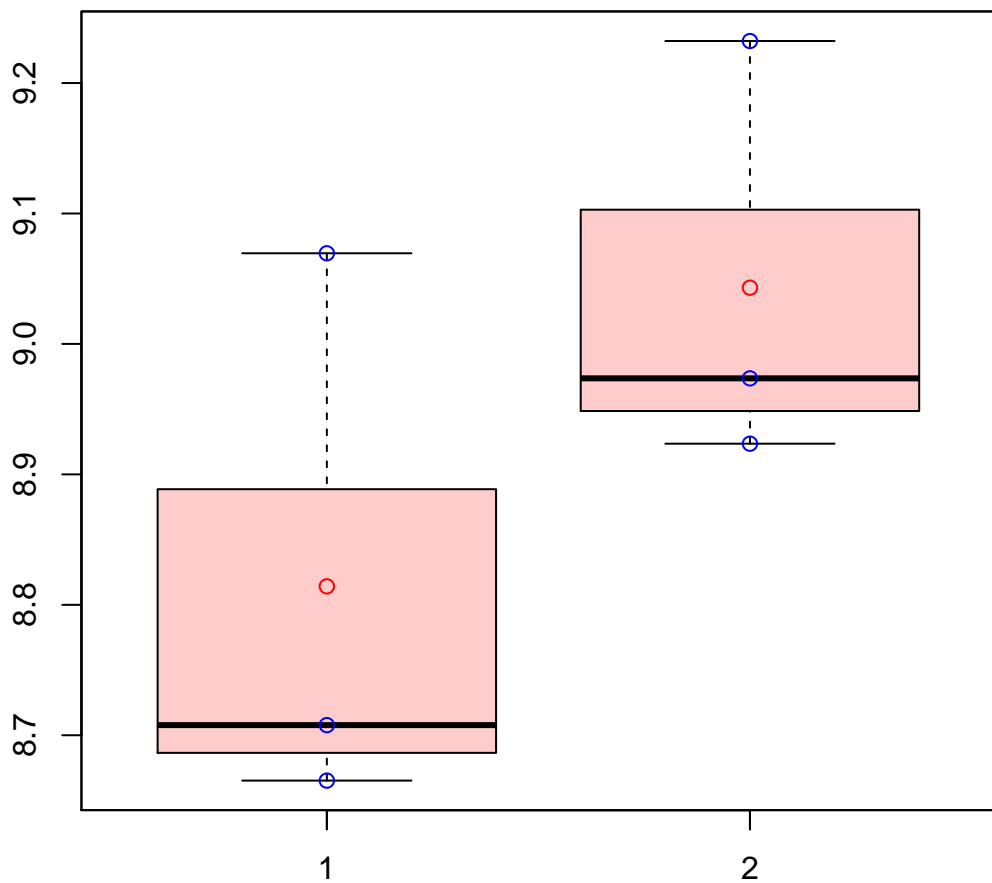

t-Test: p-value = 0.23

# CL3458Contig3|CL3458Contig3

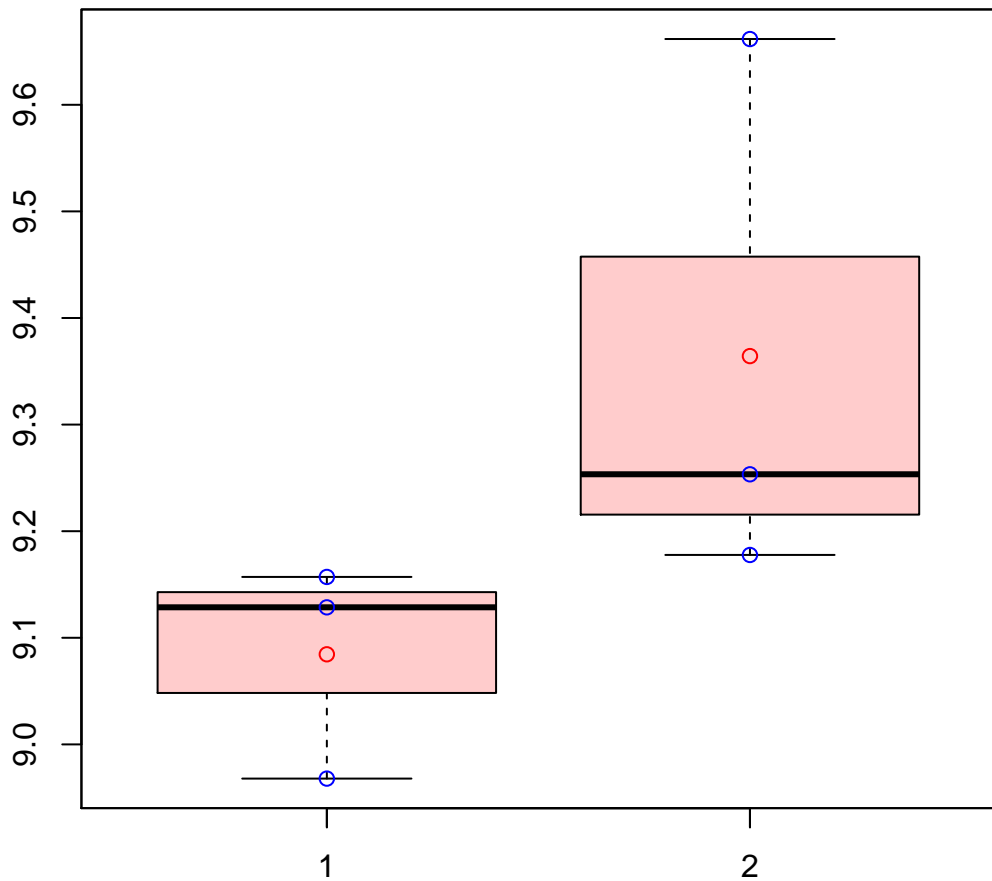

t-Test: p-value = 0.2



# CL345Contig3|CL345Contig3

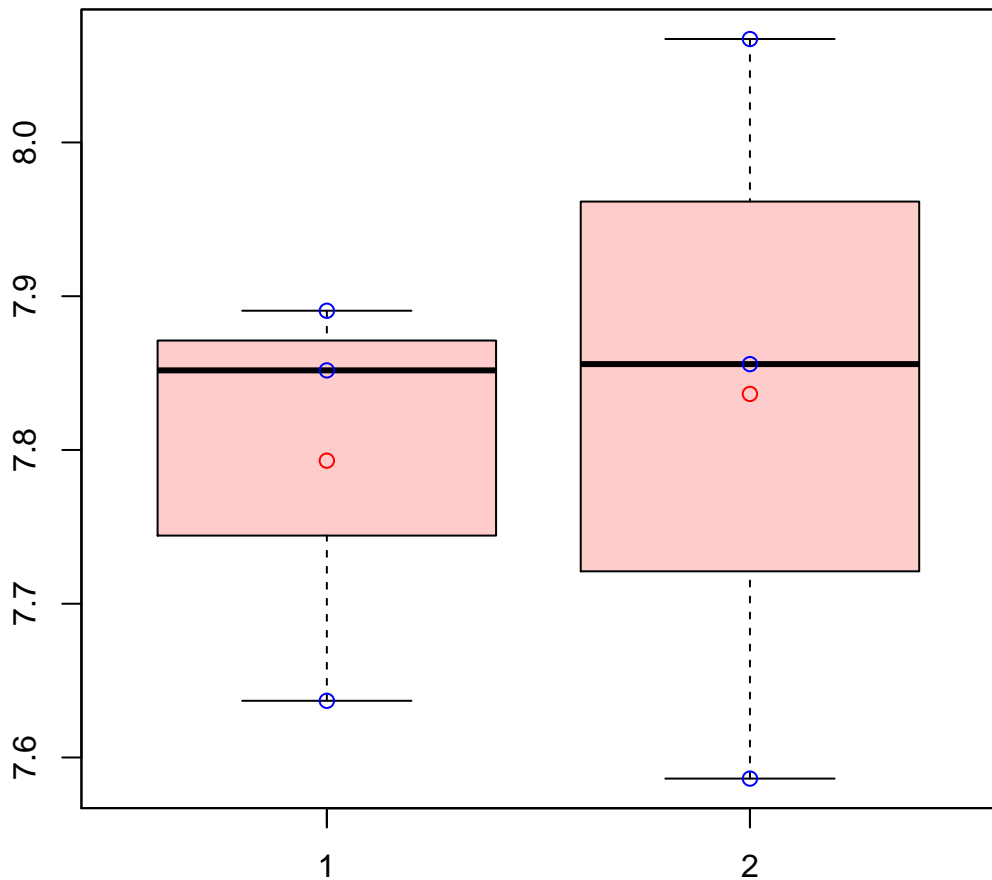

t-Test: p-value = 0.8

# CL3461Contig5|CL3461Contig5

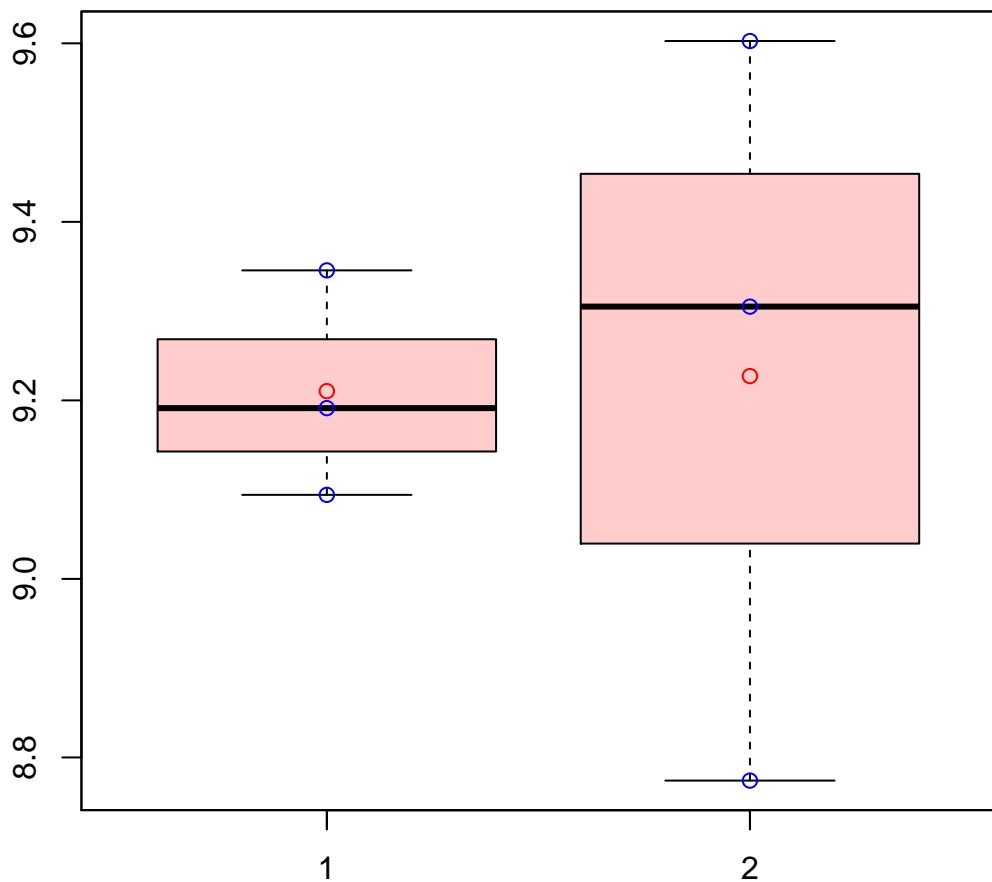

t-Test: p-value = 0.95

# CL3463Contig4|CL3463Contig4

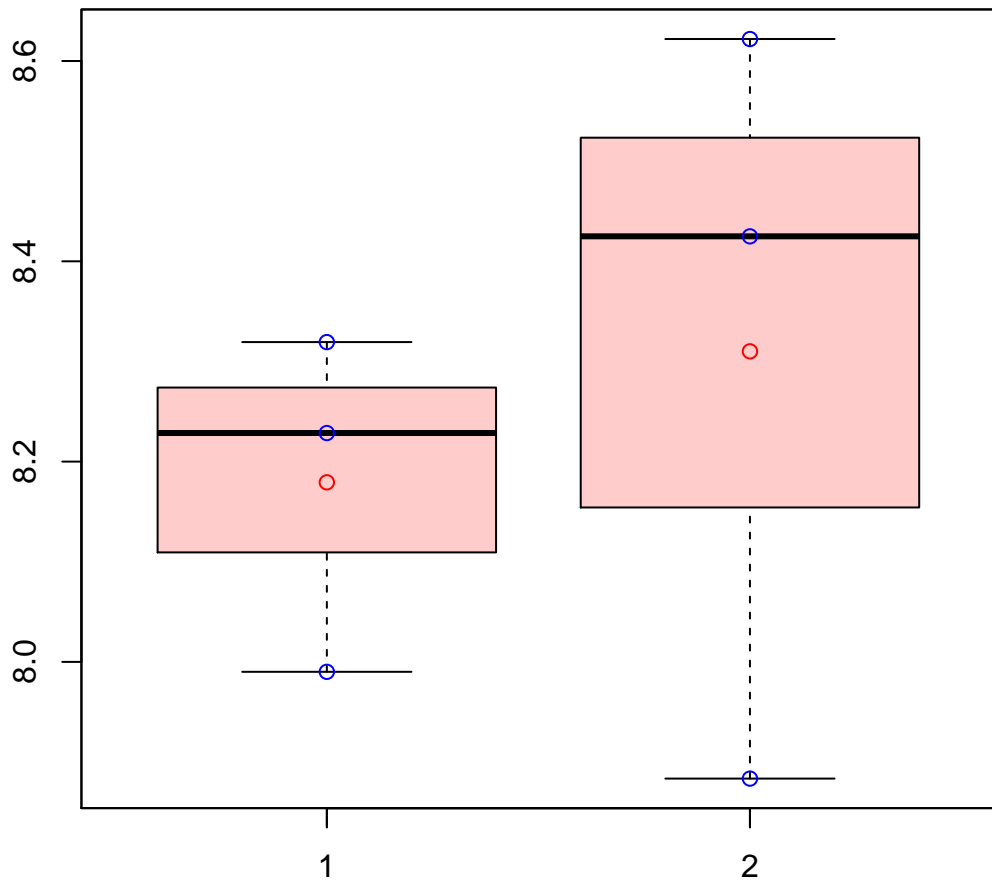

t-Test: p-value = 0.63

# CL3463Contig7|CL3463Contig7

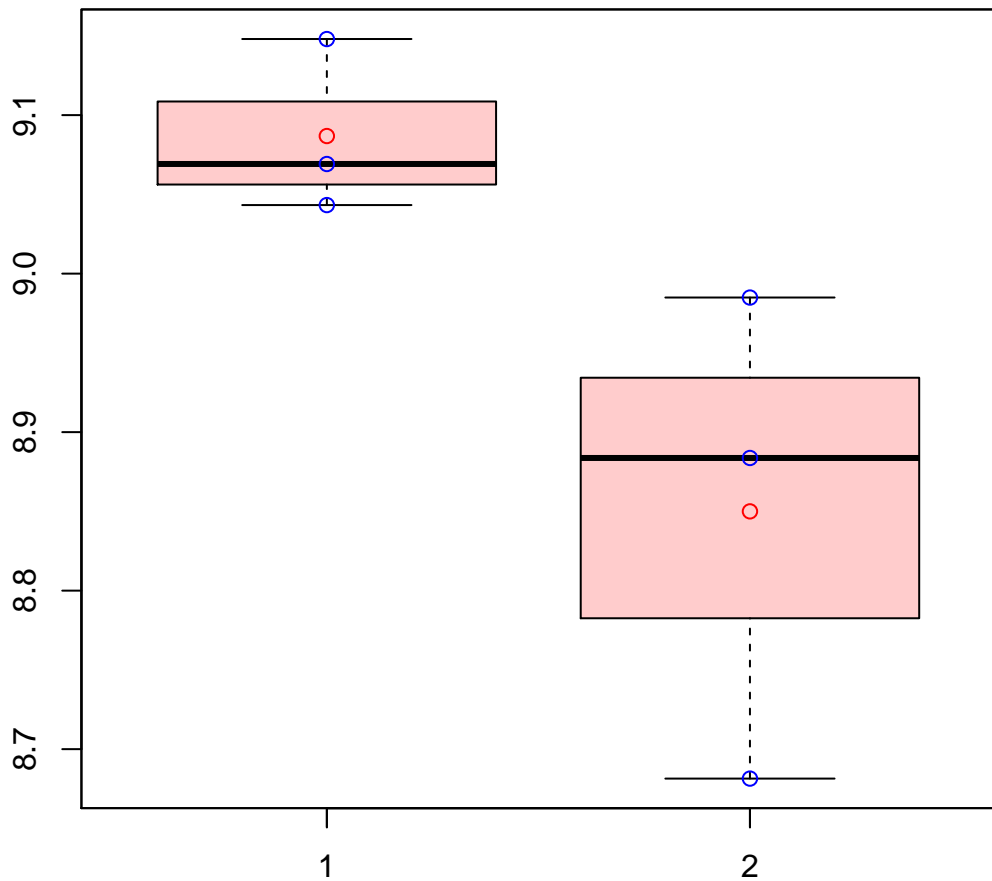

t-Test: p-value = 0.1

# CL3476Contig1|CL3476Contig1

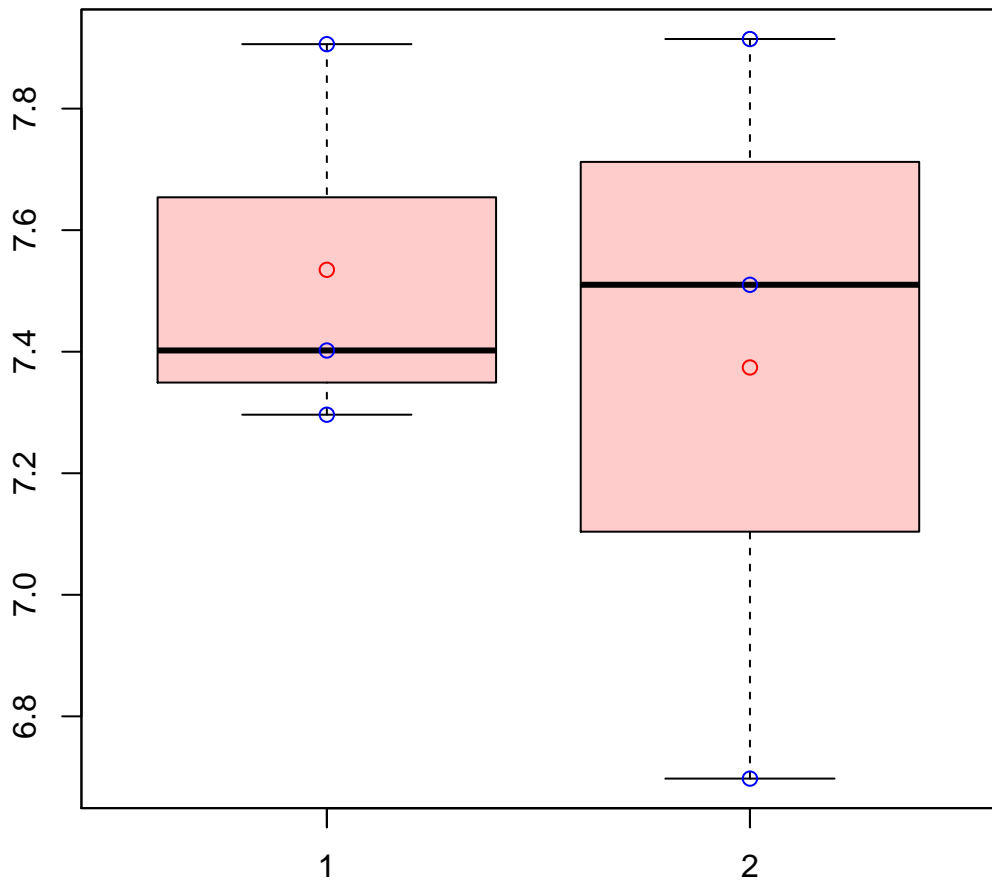

t-Test: p-value = 0.72

# CL3480Contig3|CL3480Contig3

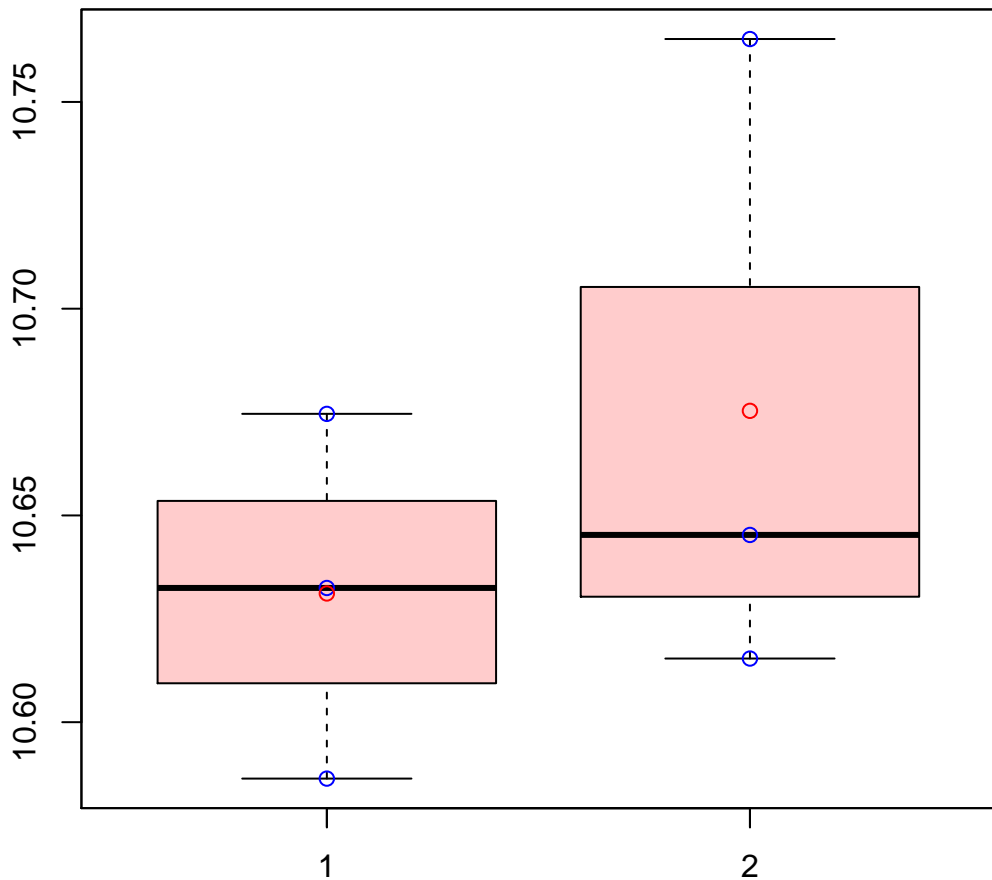

t-Test: p-value = 0.46

# CL3481Contig3|CL3481Contig3

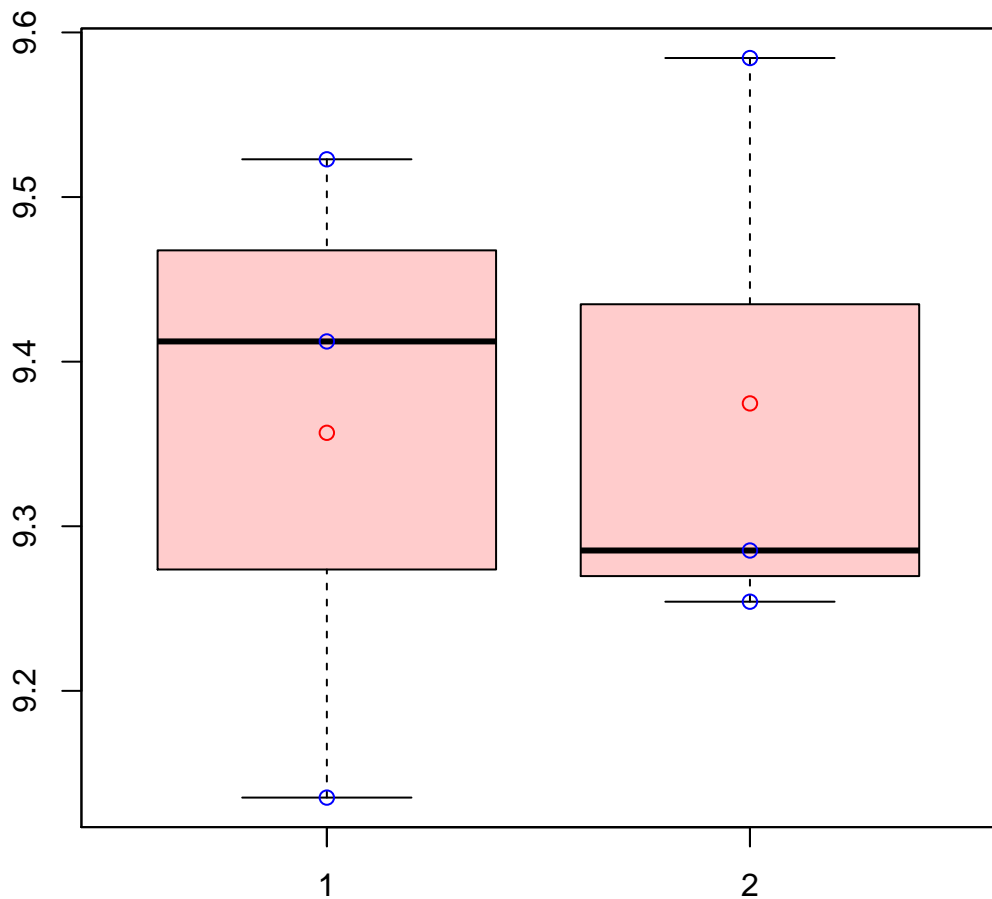

t-Test: p-value = 0.91

# CL3487Contig4|CL3487Contig4

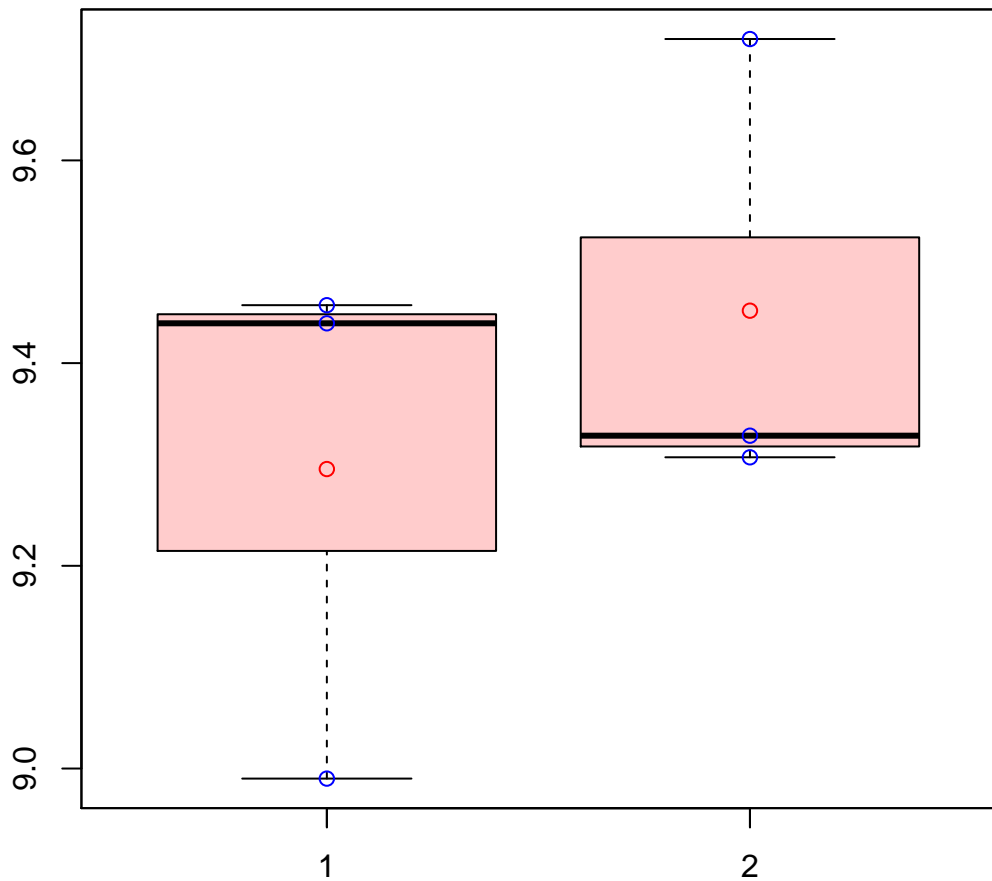

t-Test: p-value = 0.49



# CL3489Contig3|CL3489Contig3

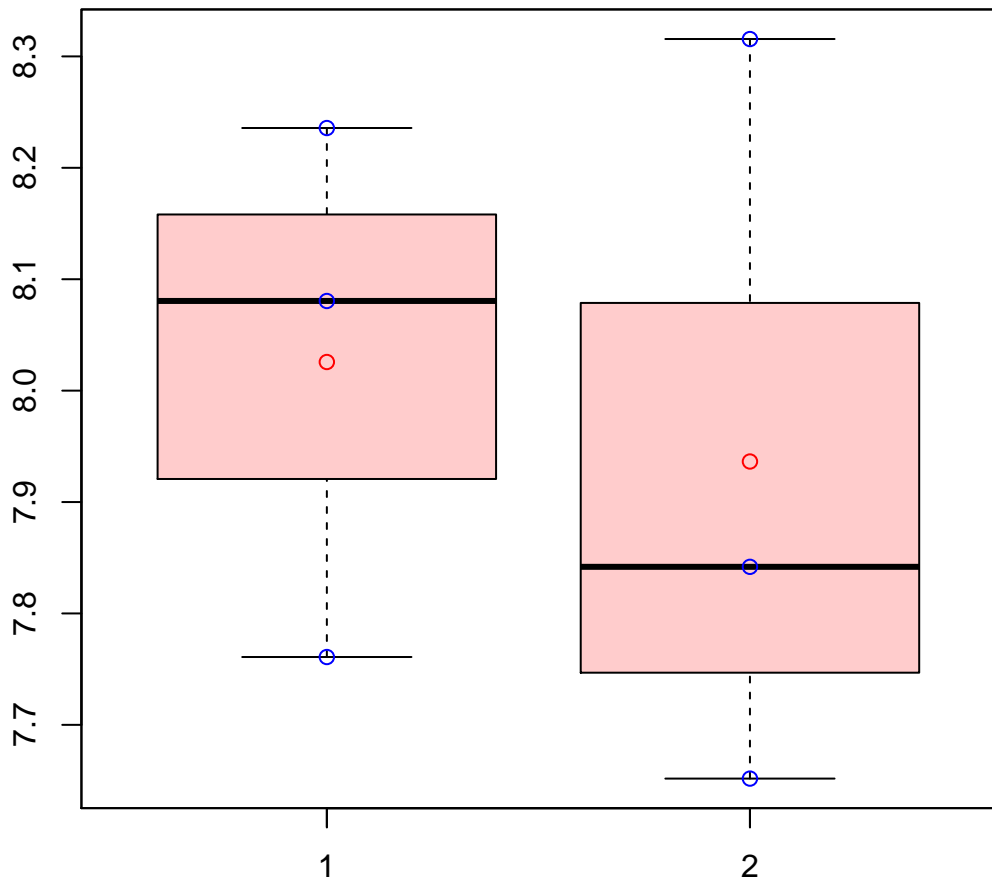

t-Test: p-value = 0.73

# CL3489Contig4|CL3489Contig4

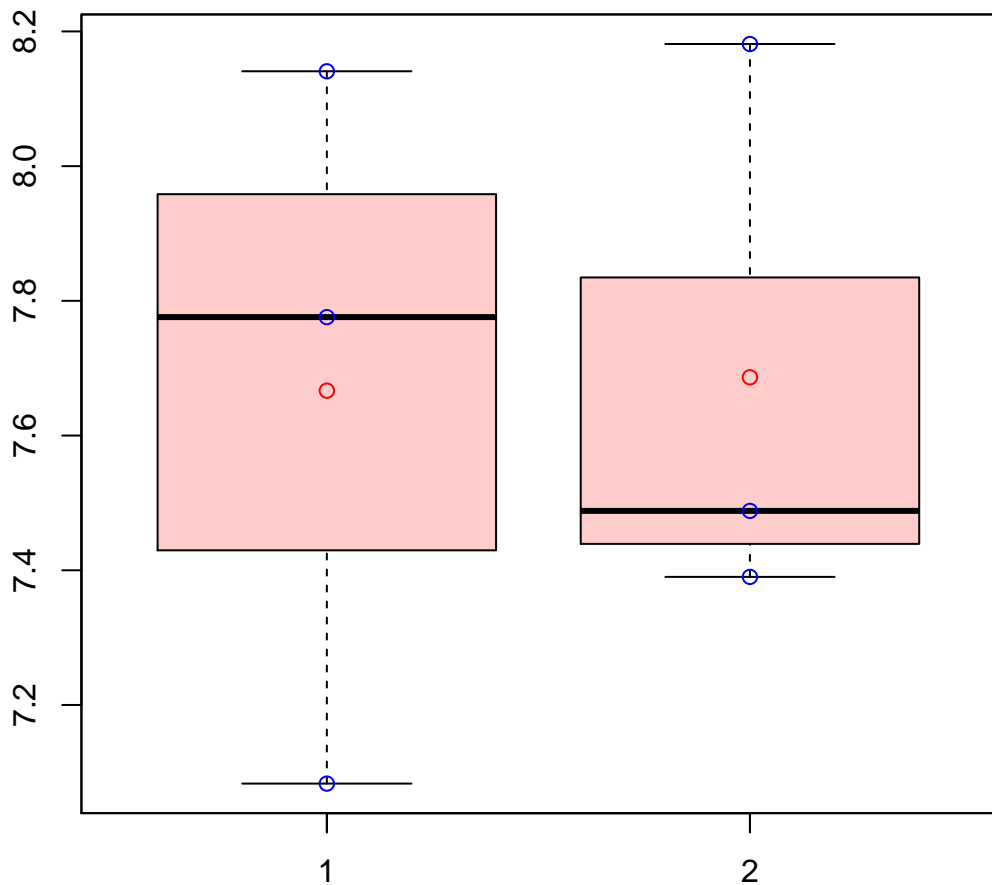

t-Test: p-value = 0.96

# CL348Contig6|CL348Contig6

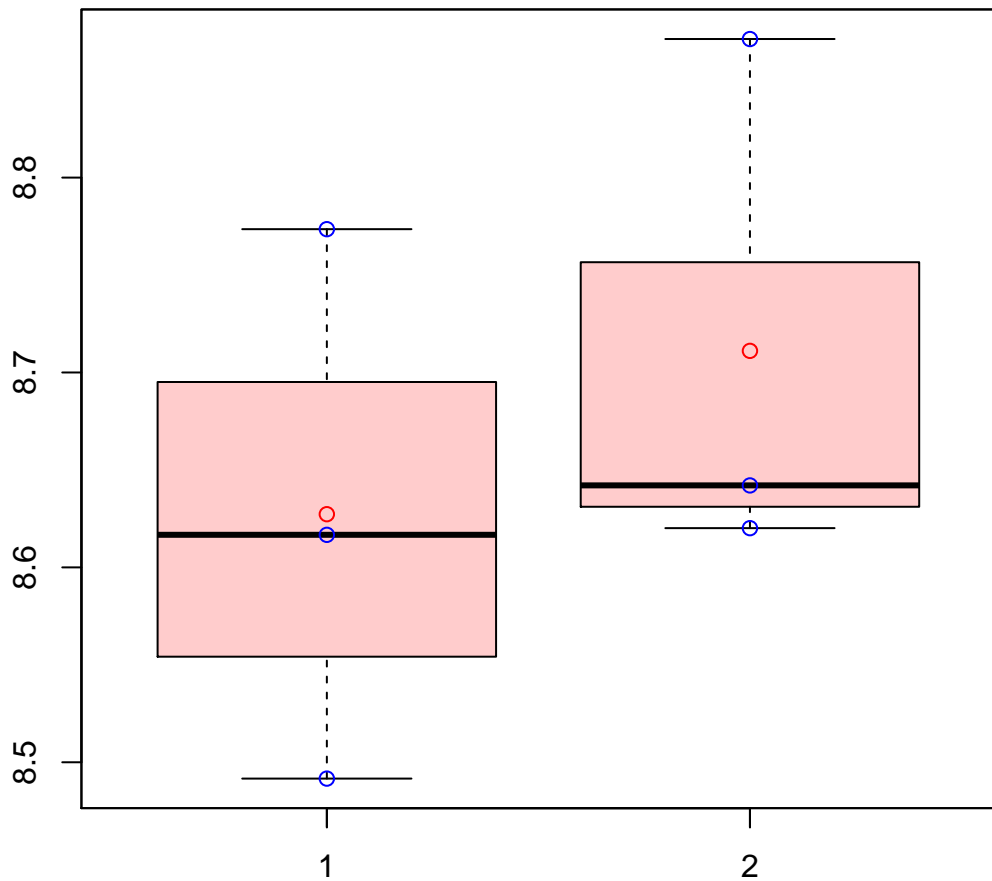

t-Test: p-value = 0.5

# CL3494Contig2|CL3494Contig2

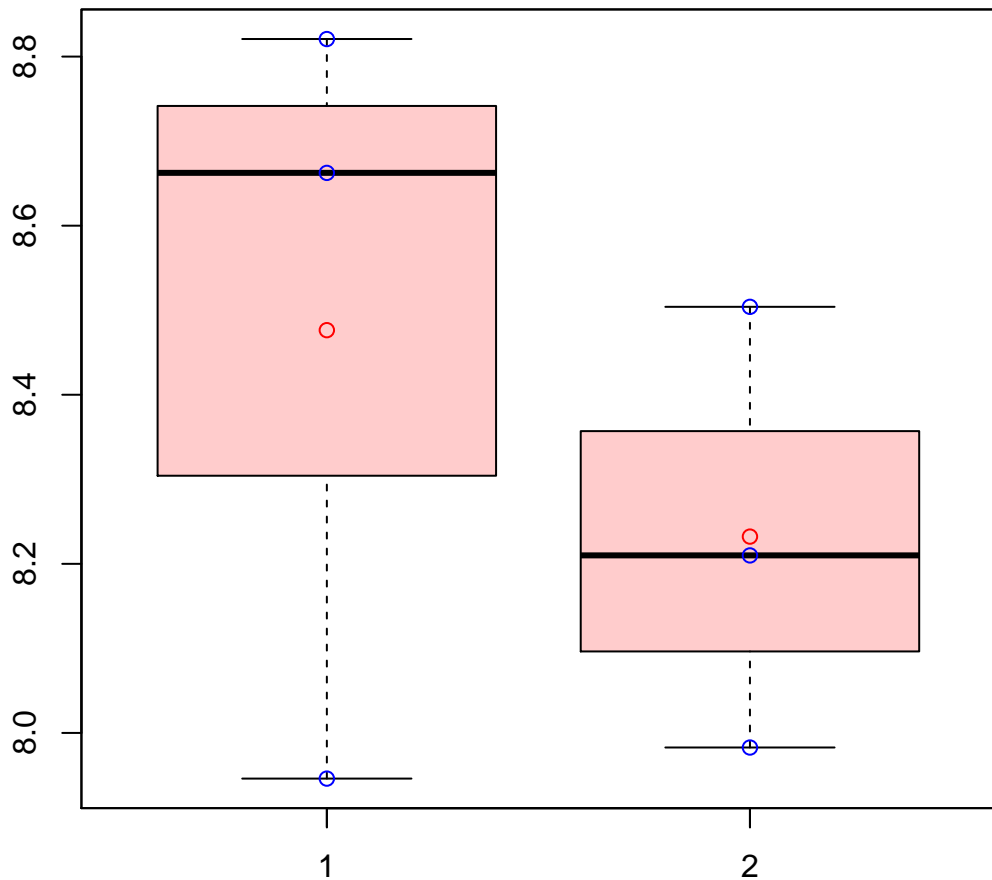

t-Test: p-value = 0.48

# CL3494Contig3|CL3494Contig3



t-Test: p-value = 0.48

# CL3494Contig6|CL3494Contig6



t-Test: p-value = 0.48

# CL3496Contig10|CL3496Contig10

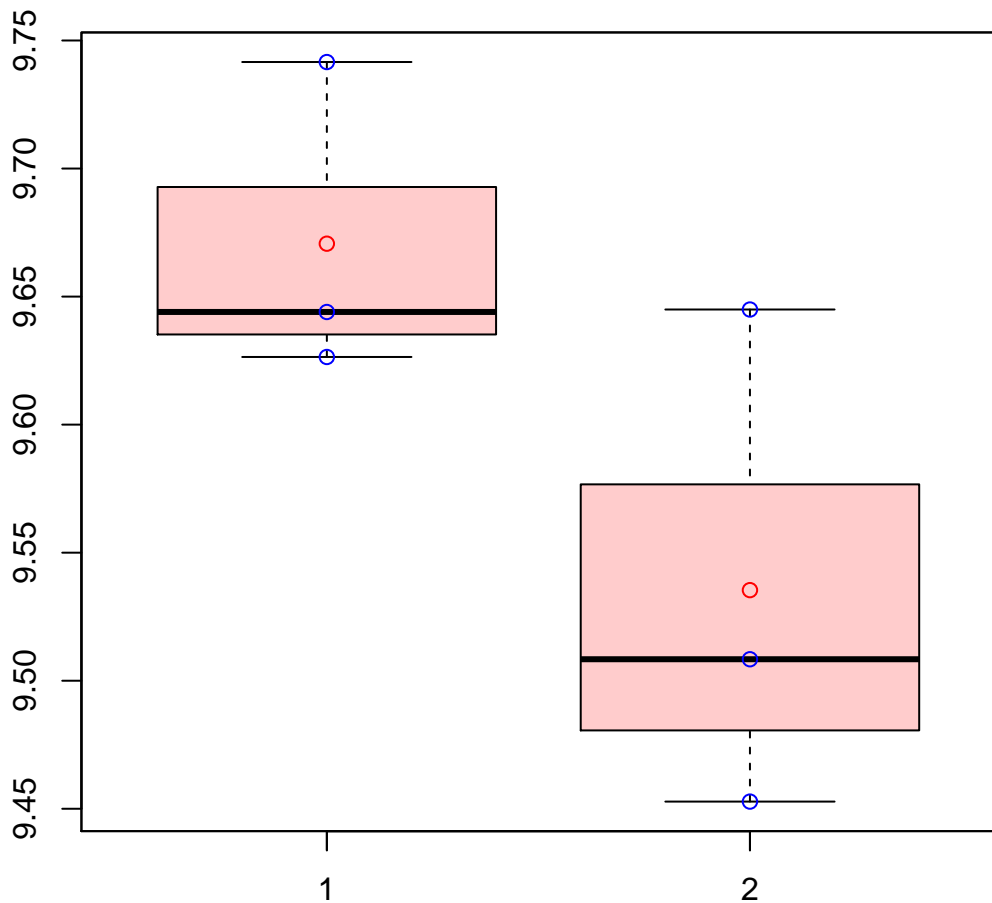

t-Test: p-value = 0.13

# CL3496Contig11|CL3496Contig11

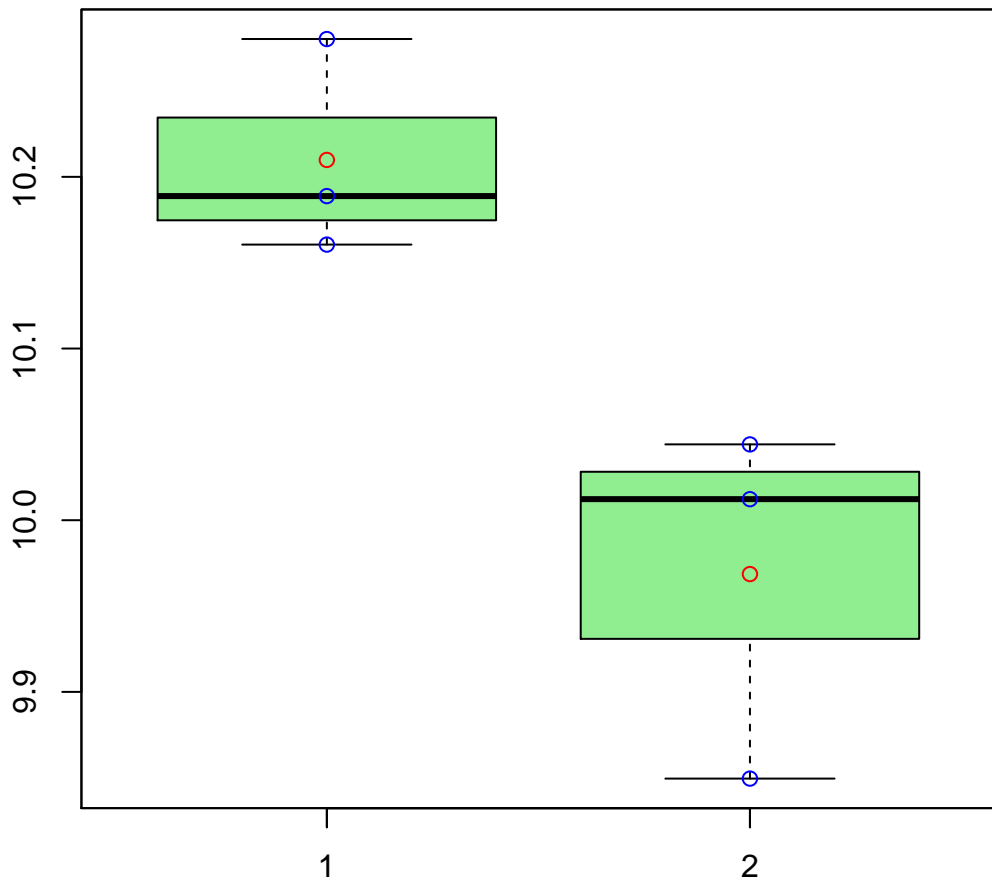

t-Test: p-value = 0.04



# CL3496Contig12|CL3496Contig12

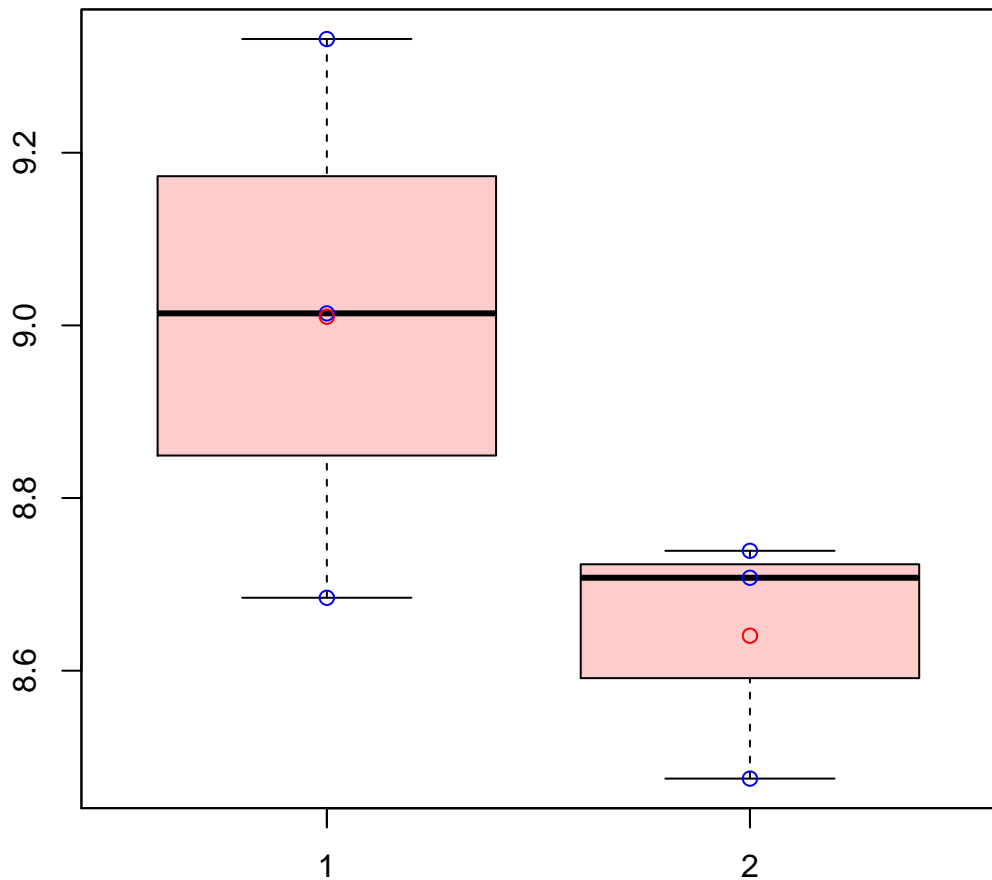

t-Test: p-value = 0.18

# CL3496Contig13|CL3496Contig13

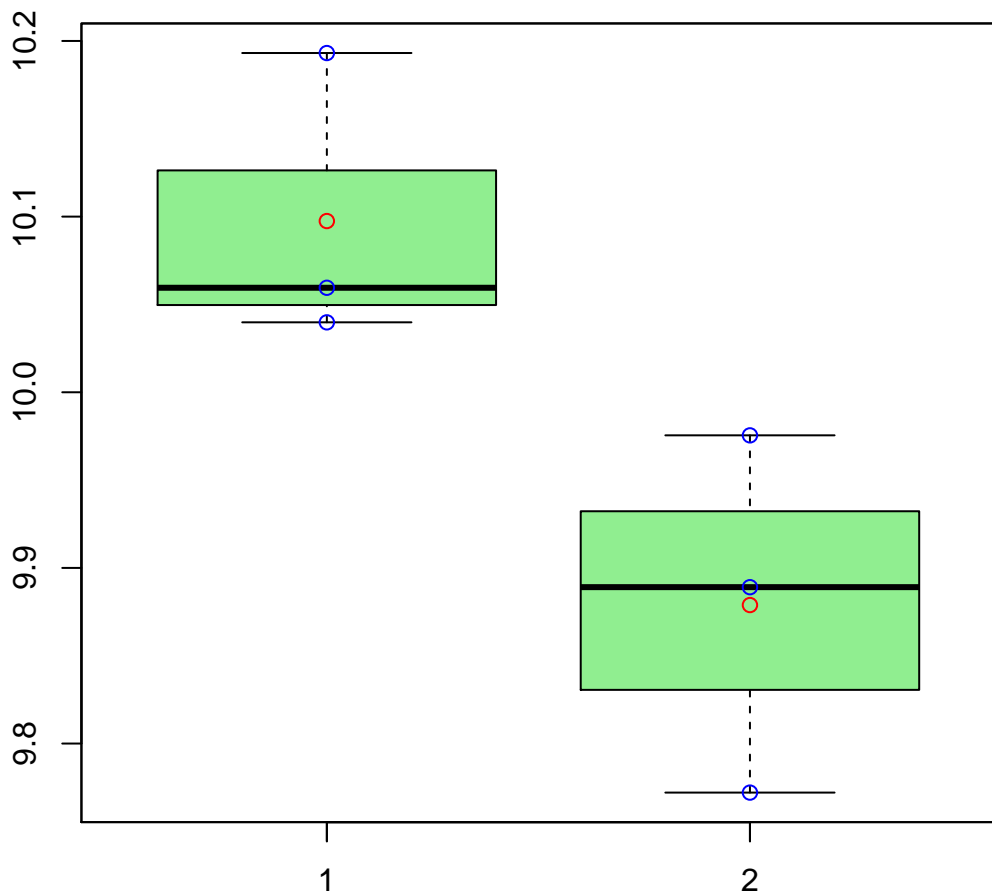

t-Test: p-value = 0.05

# CL3496Contig14|CL3496Contig14

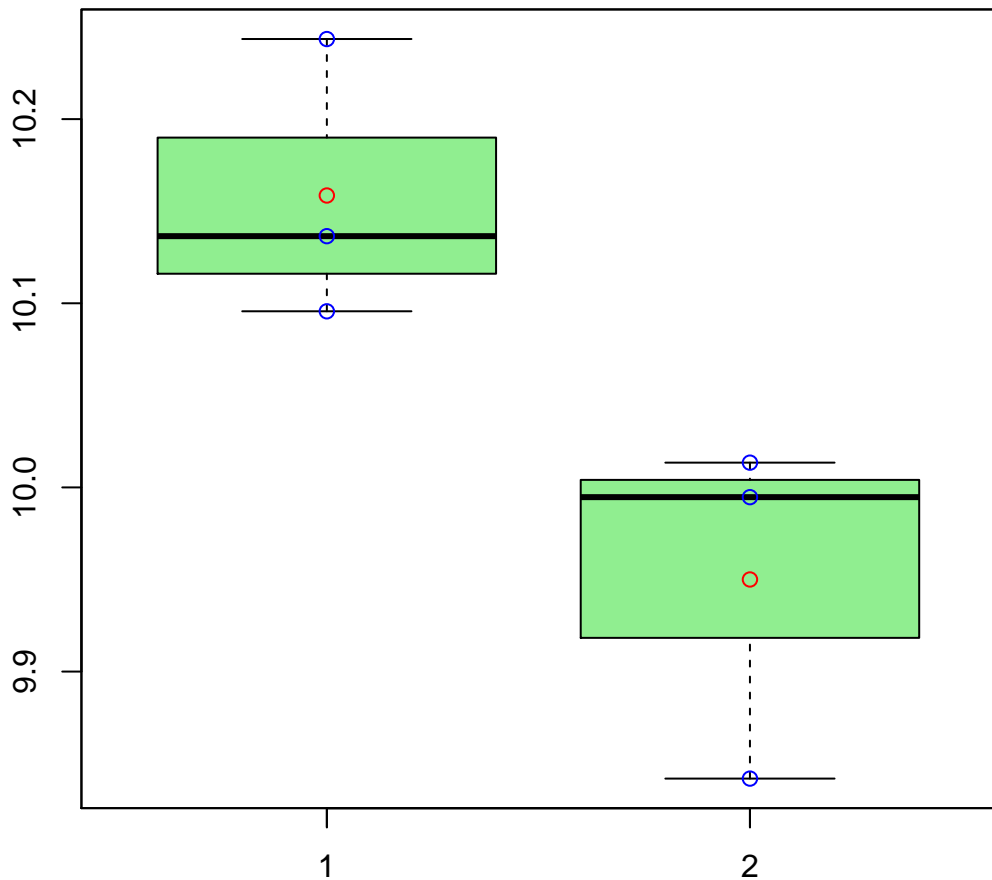

t-Test: p-value = 0.04

# CL3496Contig15|CL3496Contig15



t-Test: p-value = 0.04

# CL3496Contig17|CL3496Contig17

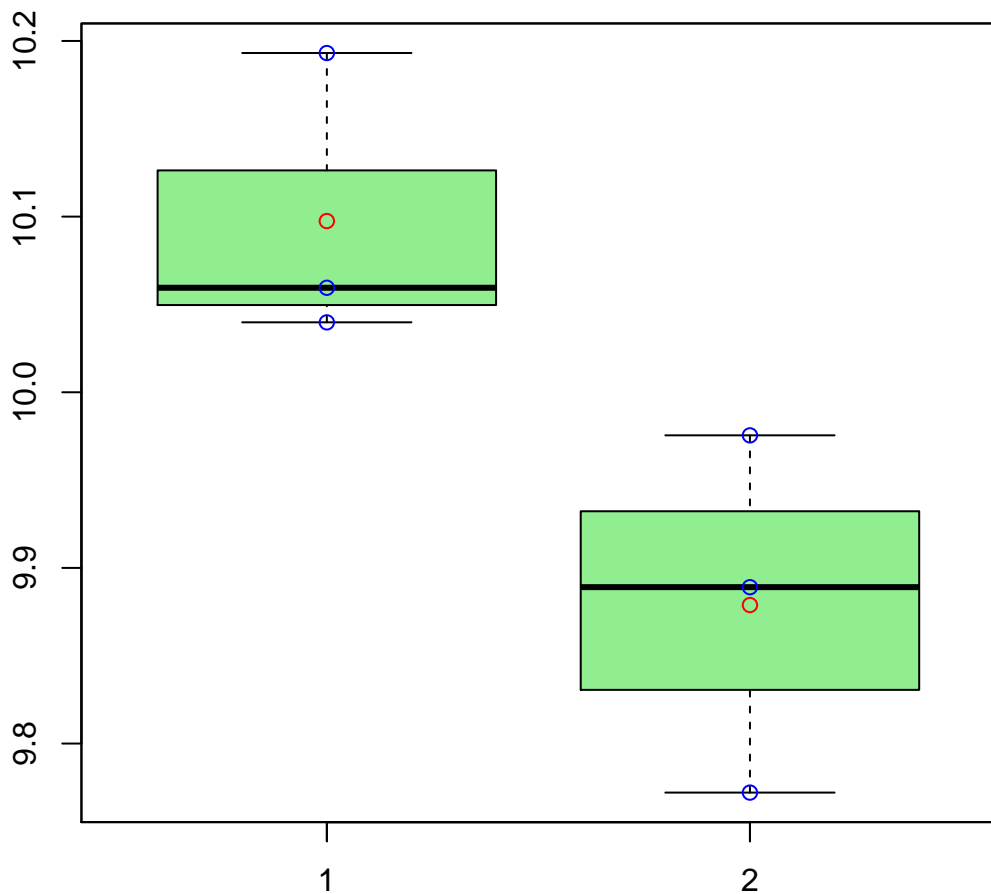

t-Test: p-value = 0.05

# CL3496Contig3|CL3496Contig3

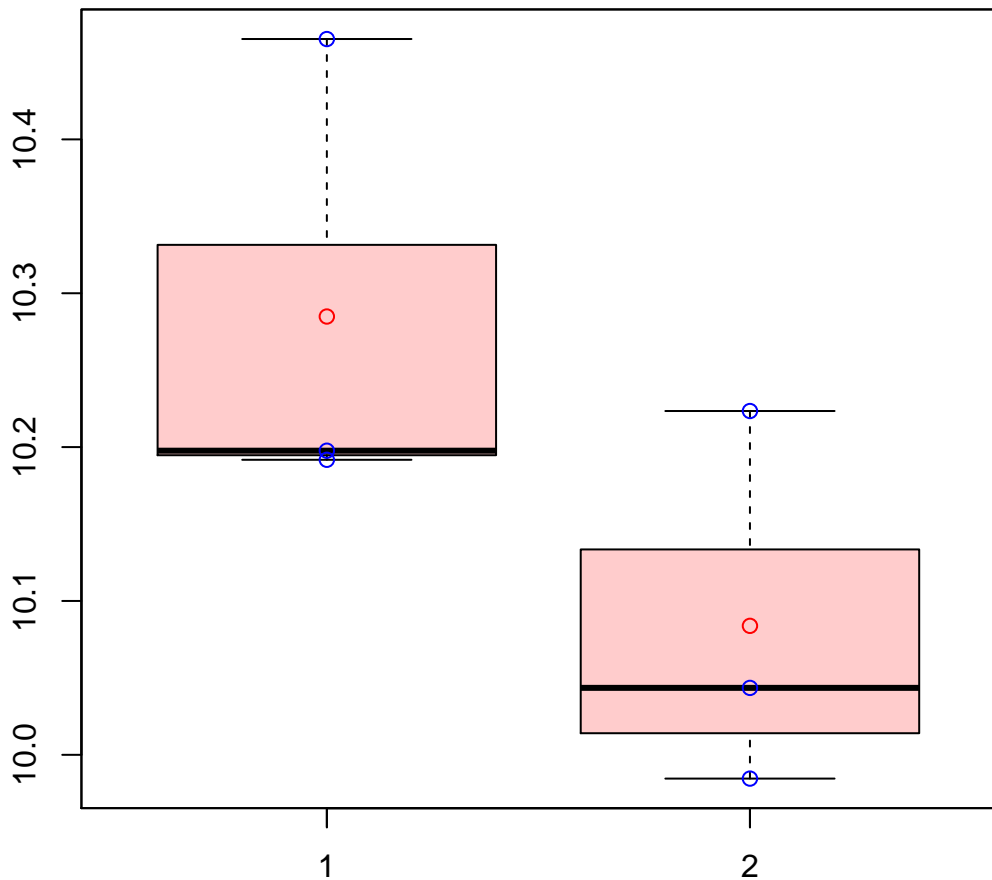

t-Test: p-value = 0.16

# CL3496Contig4|CL3496Contig4



t-Test: p-value = 0.16

# CL3496Contig5|CL3496Contig5



t-Test: p-value = 0.16



# CL3496Contig6|CL3496Contig6

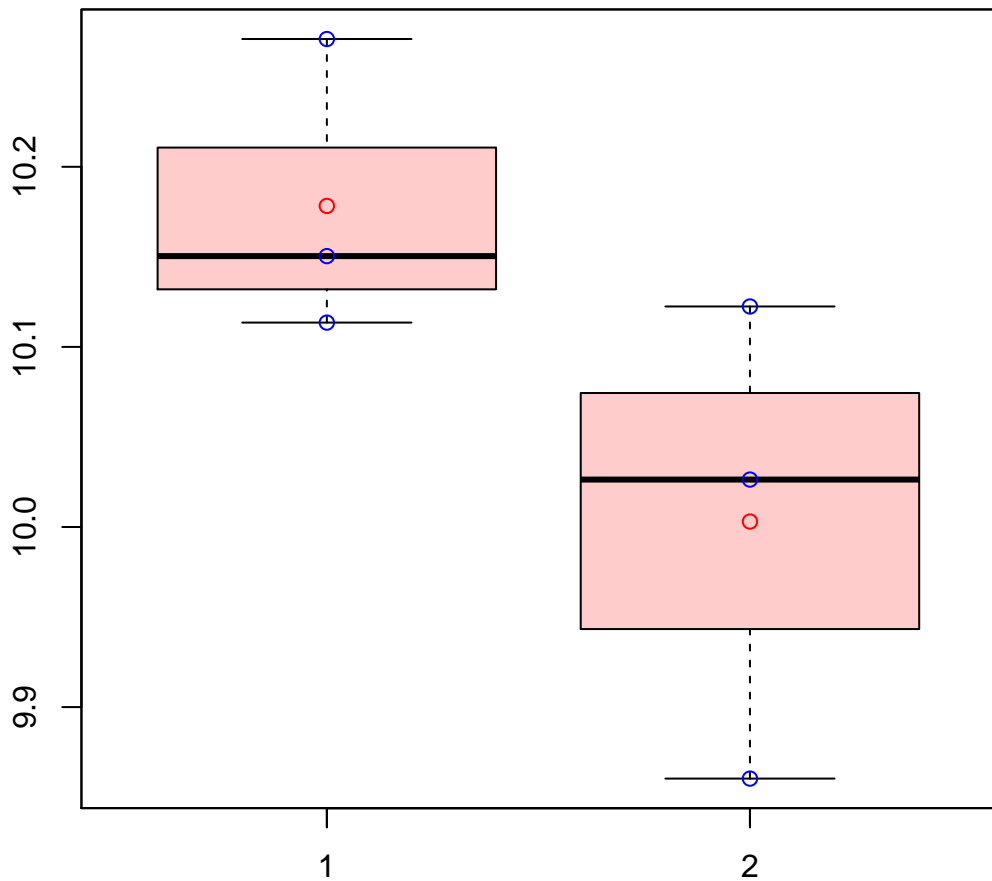

t-Test: p-value = 0.14

# CL3496Contig7|CL3496Contig7



t-Test: p-value = 0.13

# CL3496Contig8|CL3496Contig8



t-Test: p-value = 0.13

# CL3496Contig9|CL3496Contig9

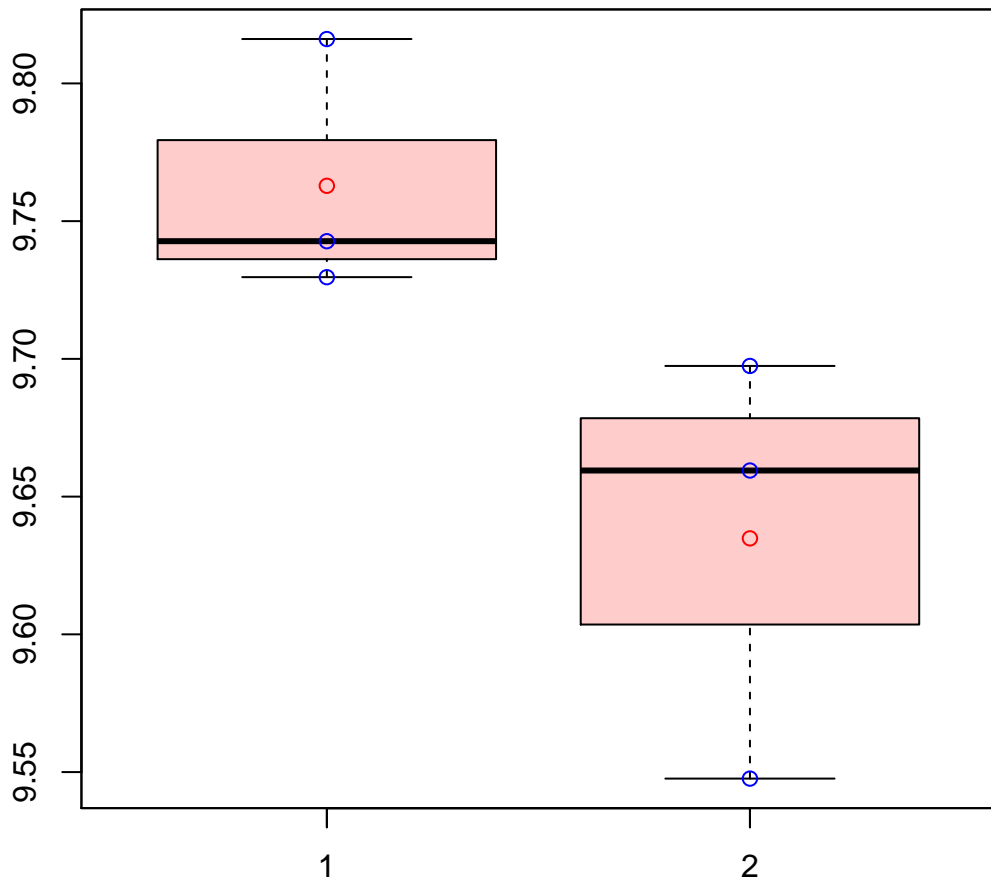

t-Test: p-value = 0.09

# CL3497Contig2|CL3497Contig2

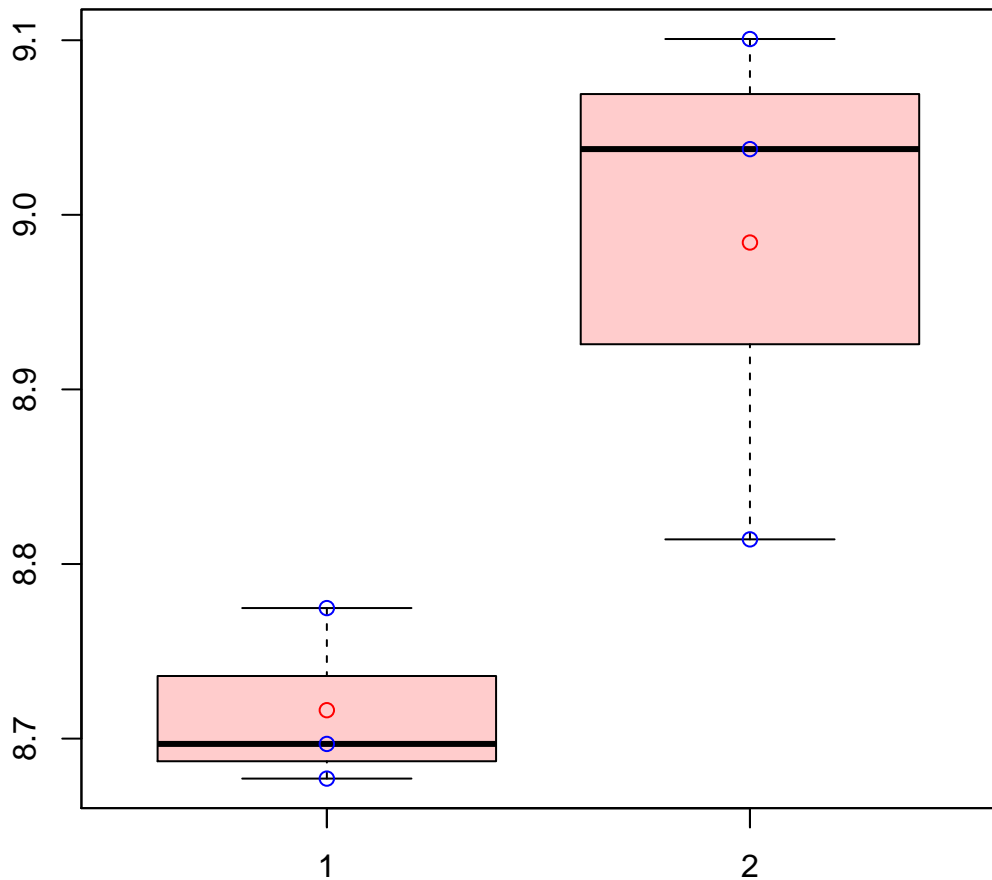

t-Test: p-value = 0.08

# CL3498Contig2|CL3498Contig2

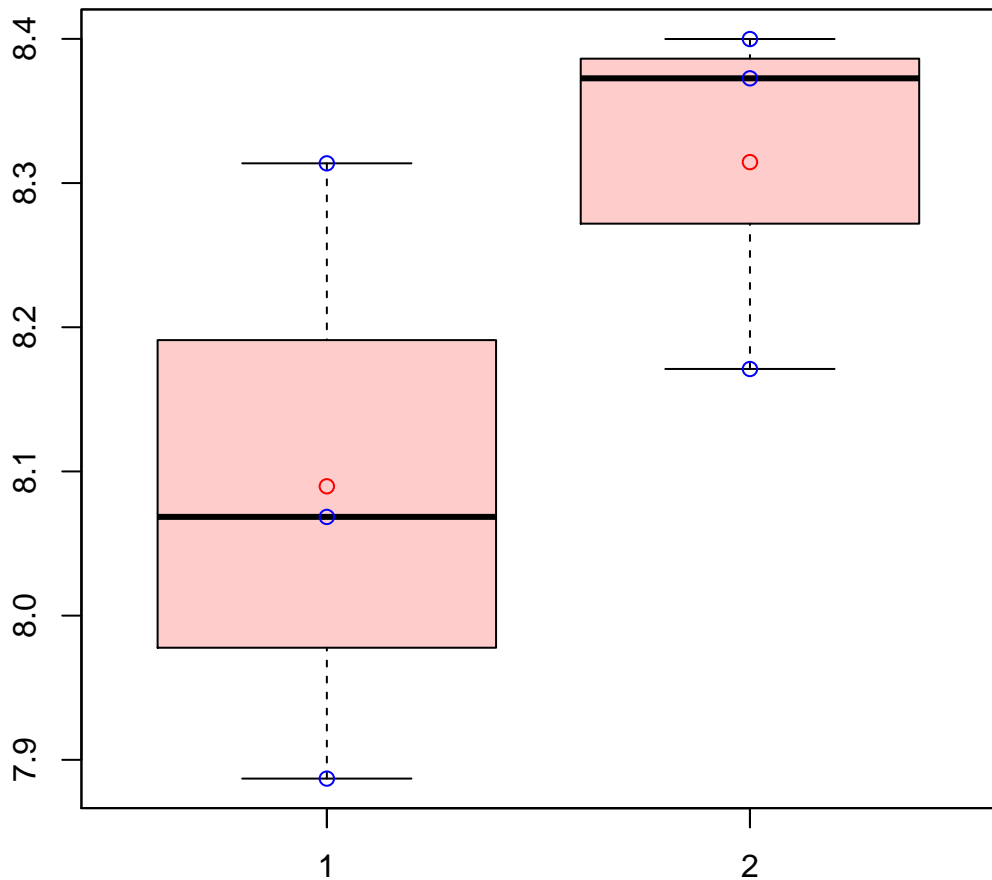

t-Test: p-value = 0.21

# CL349Contig4|CL349Contig4

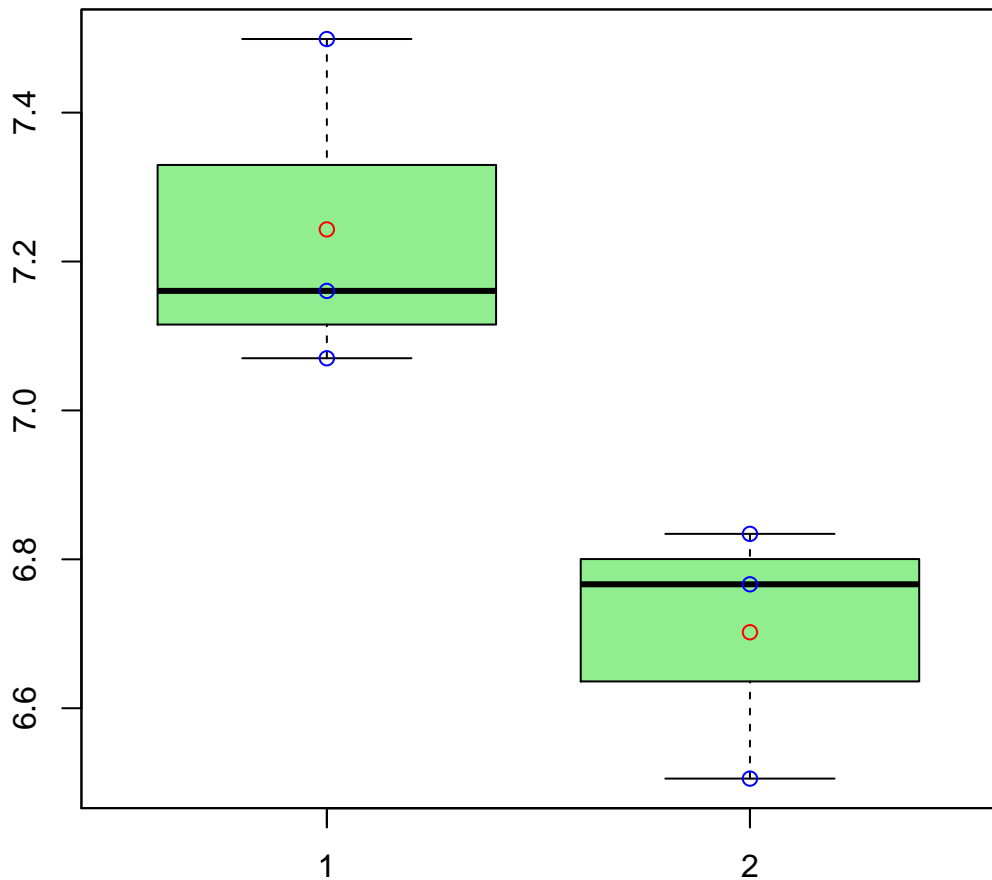

t-Test: p-value = 0.03

# CL349Contig7|CL349Contig7



t-Test: p-value = 0.03



# CL34Contig12|CL34Contig12

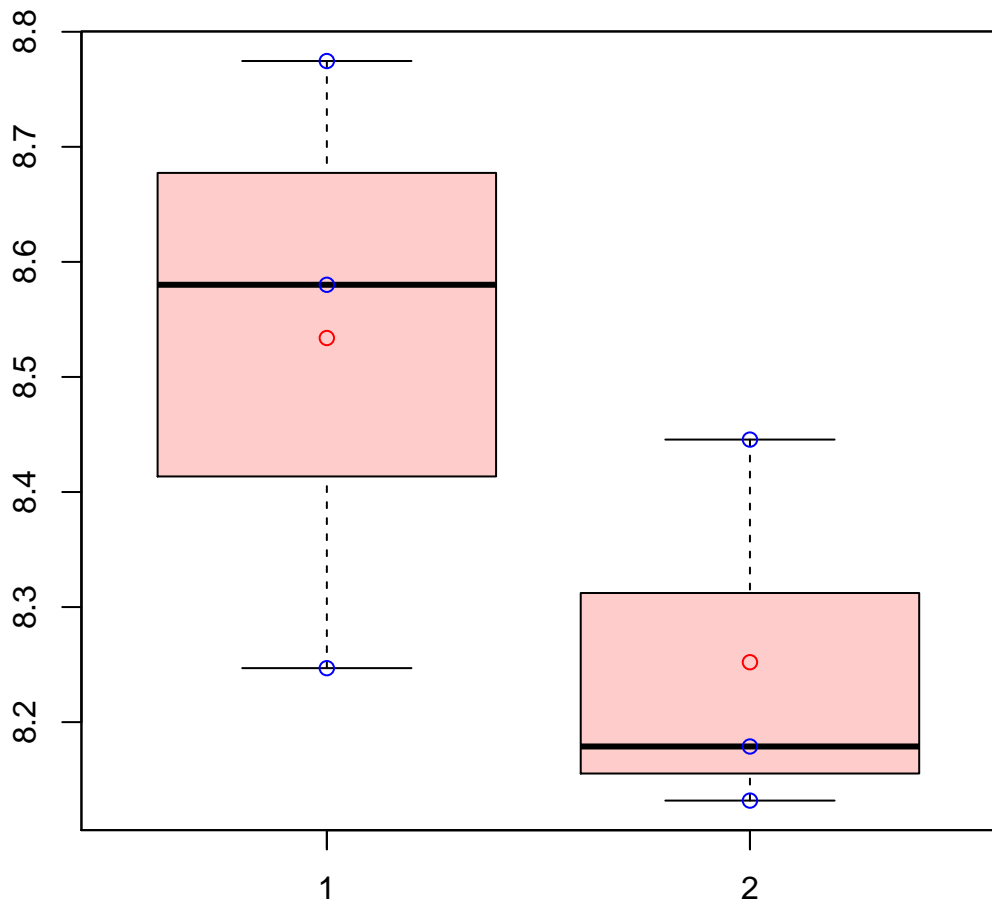

t-Test: p-value = 0.21

# CL34Contig20|CL34Contig20

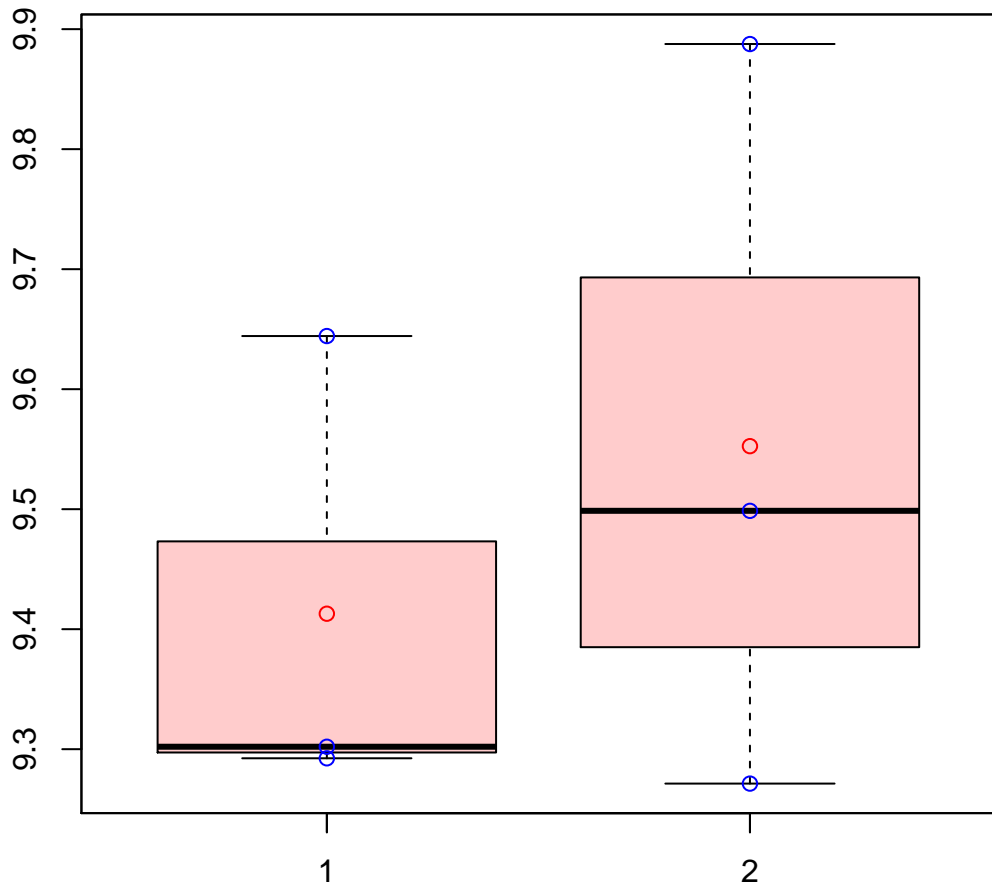

t-Test: p-value = 0.56

# CL34Contig30|CL34Contig30

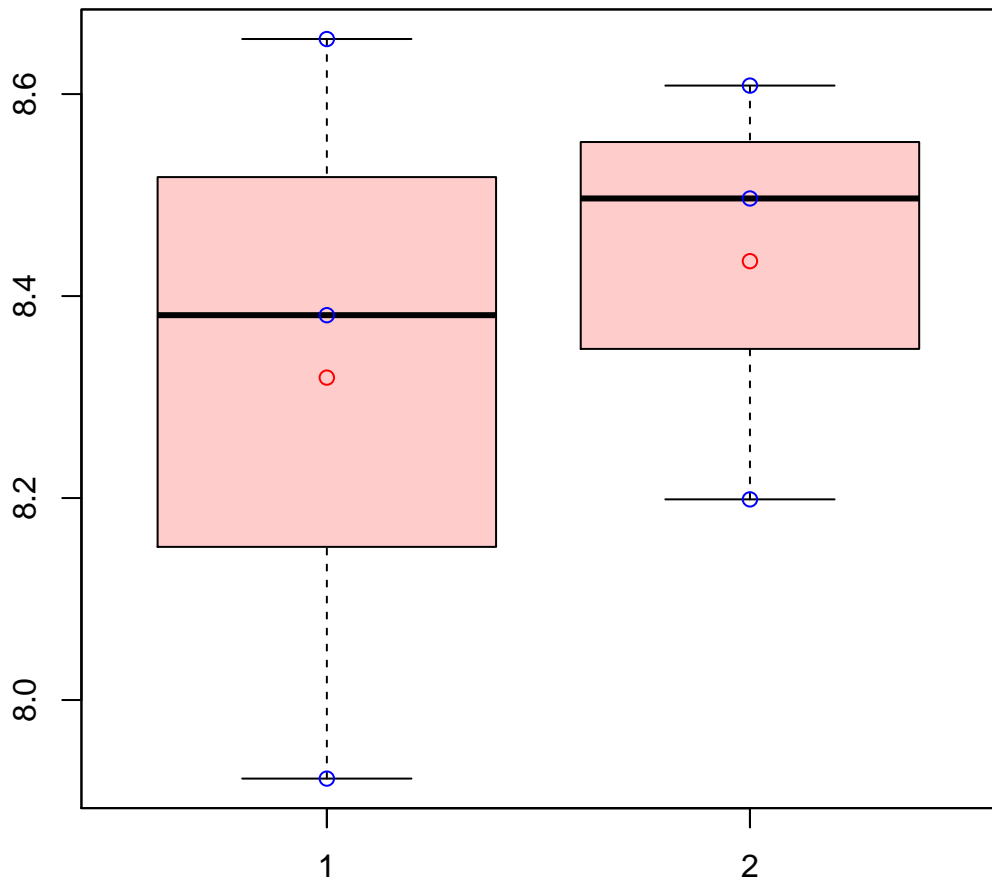

t-Test: p-value = 0.67

# CL3500Contig2|CL3500Contig2

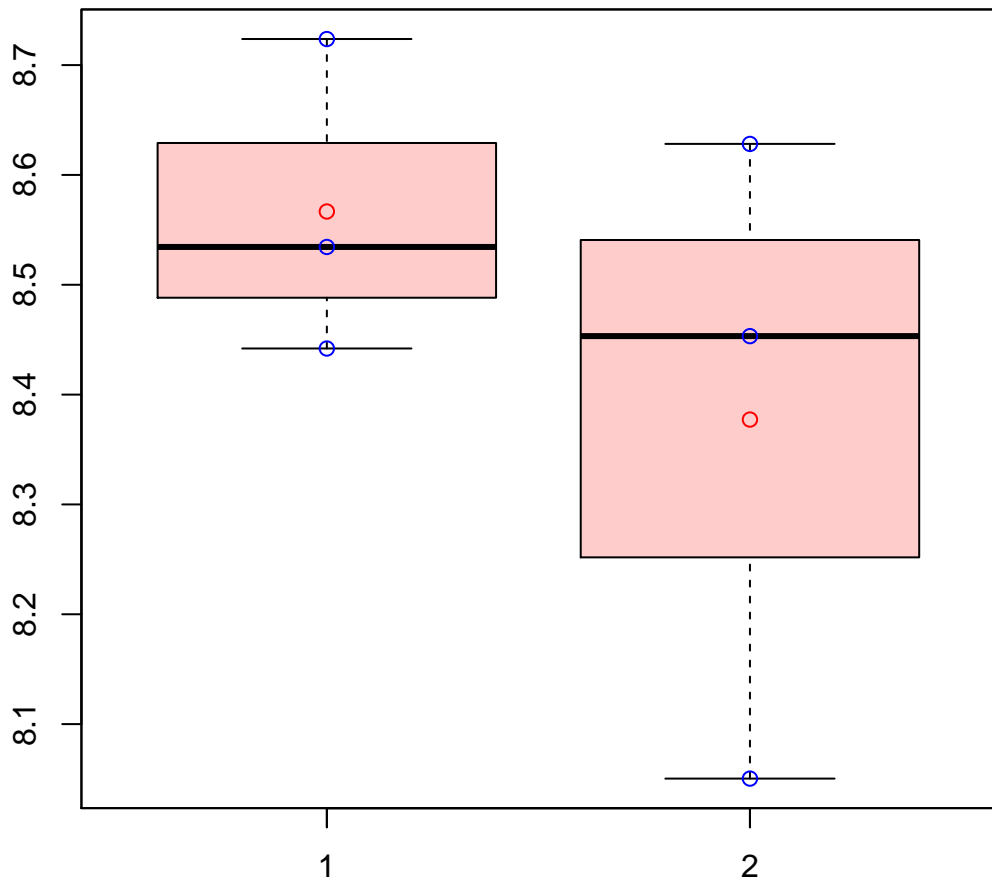

t-Test: p-value = 0.4

# CL3503Contig2|CL3503Contig2

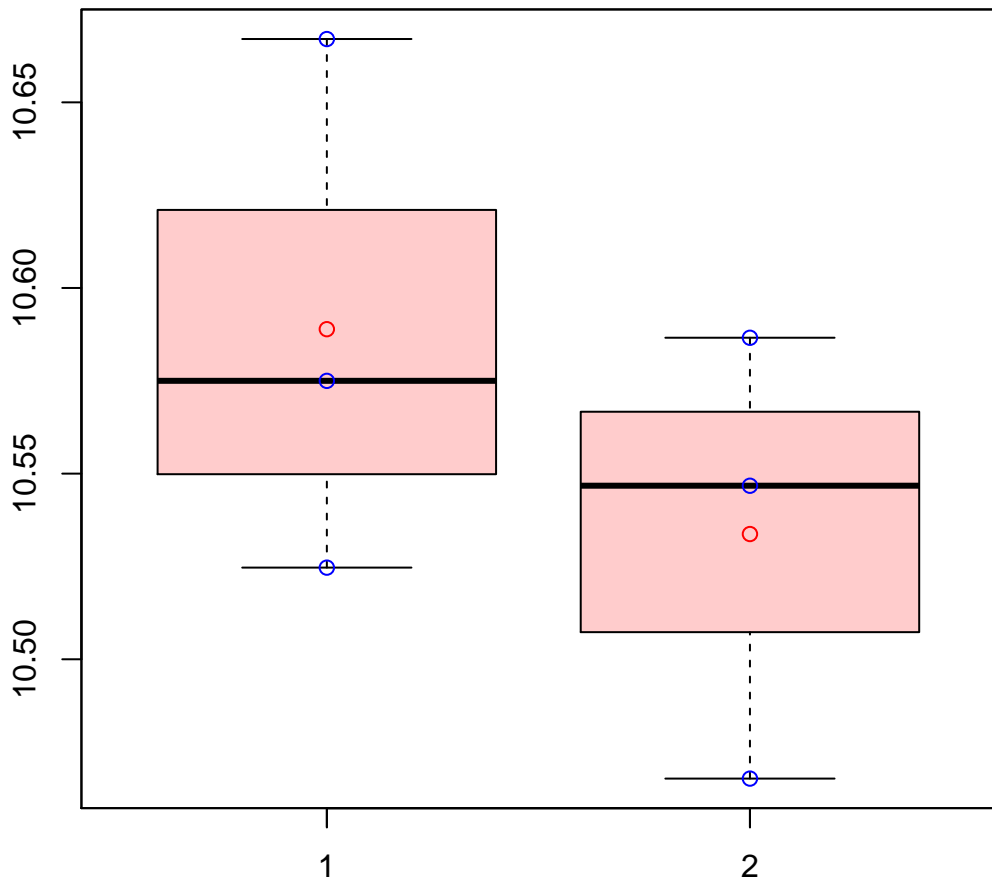

t-Test: p-value = 0.37

# CL3504Contig1|CL3504Contig1

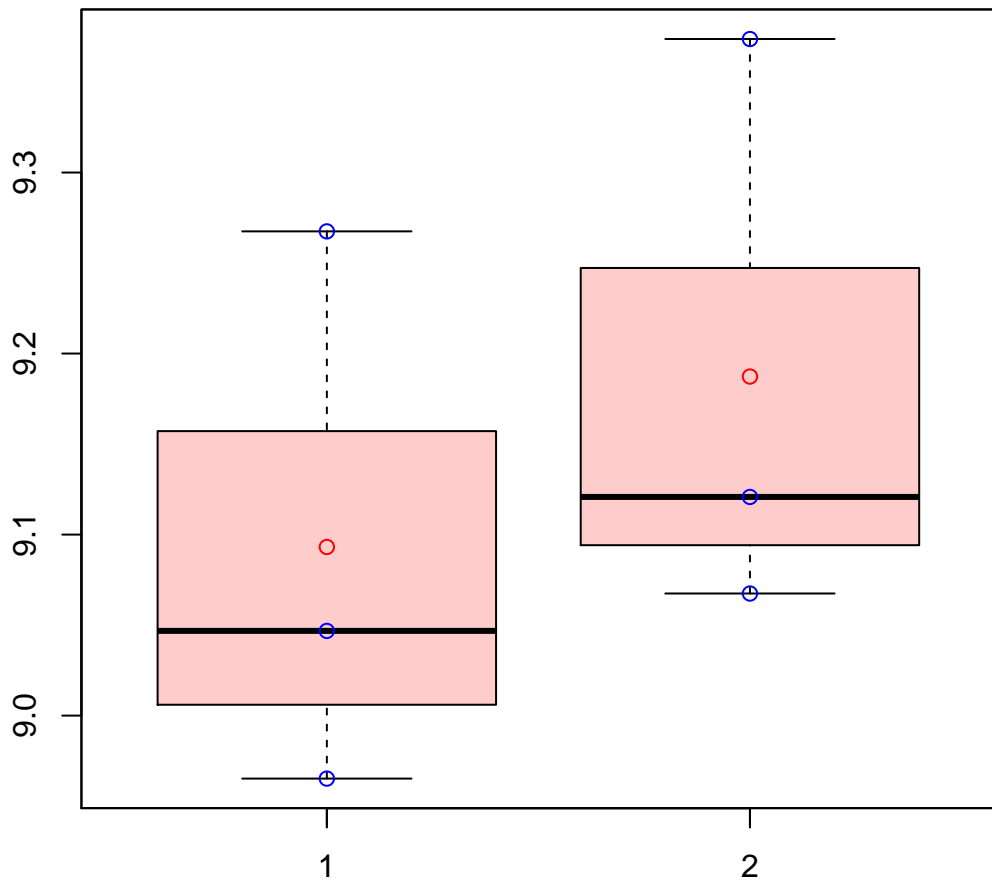

t-Test: p-value = 0.51

# CL3508Contig1|CL3508Contig1

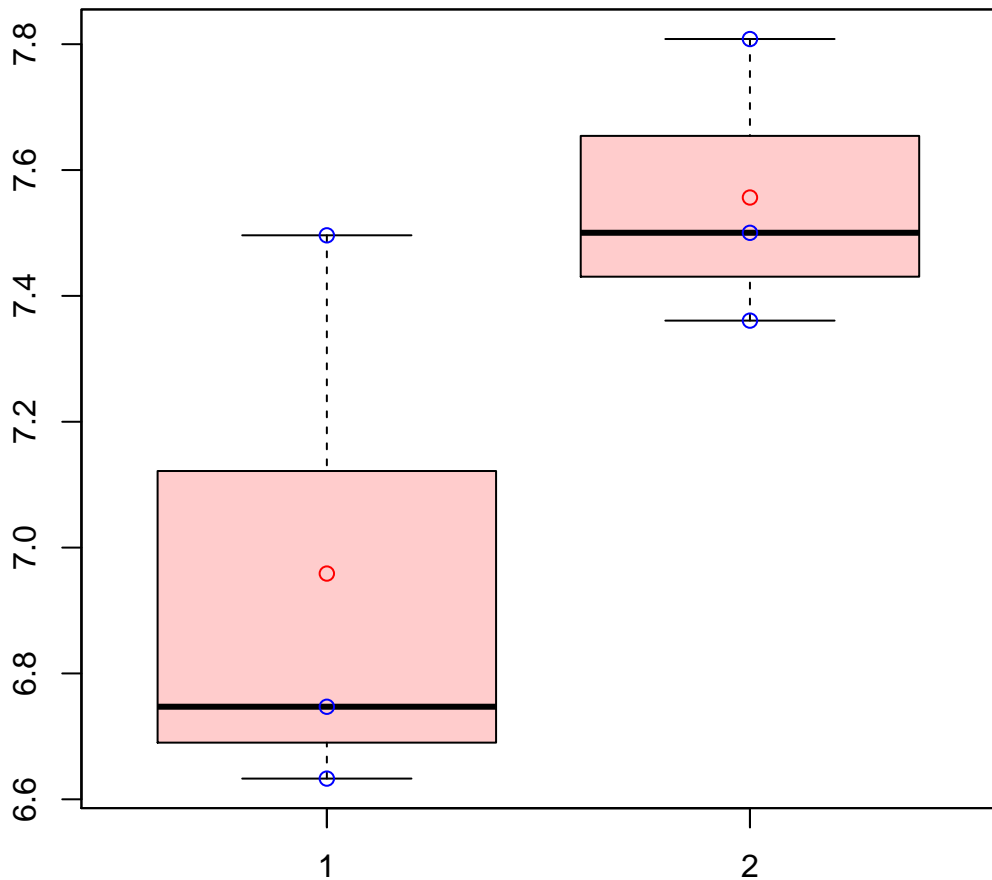

t-Test: p-value = 0.14

# CL3513Contig2|CL3513Contig2

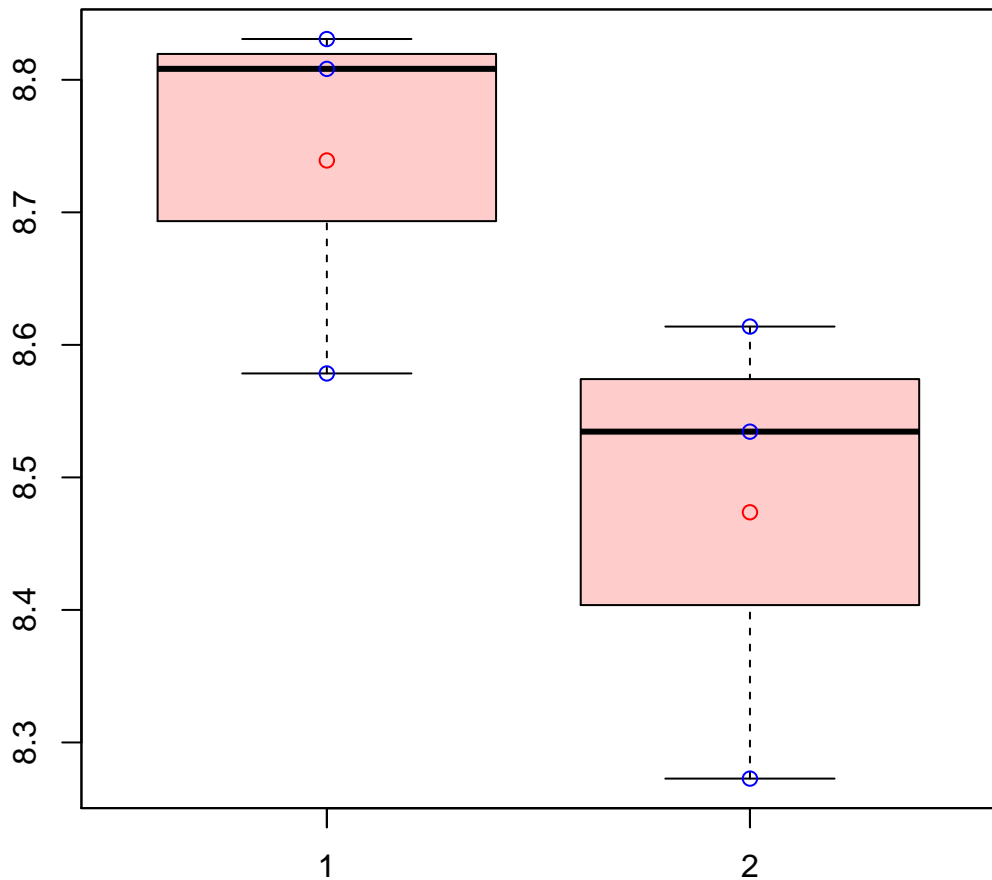

t-Test: p-value = 0.12



# CL351Contig1|CL351Contig1

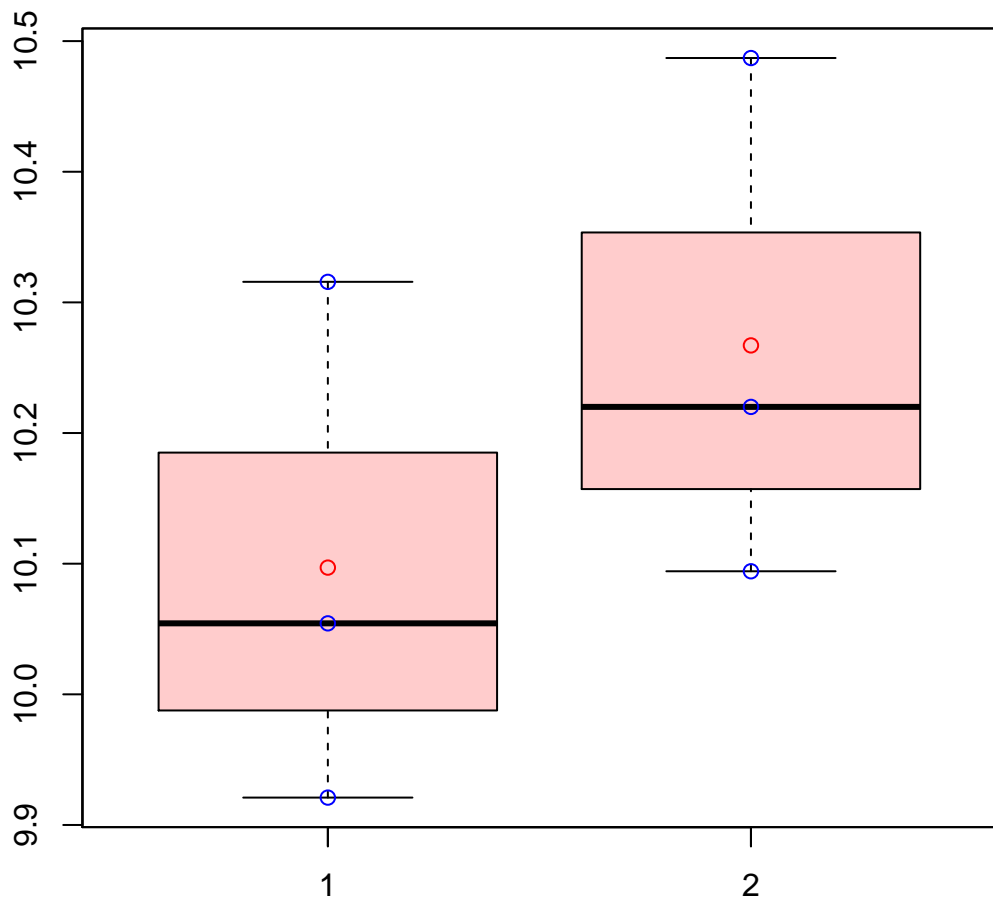

t-Test: p-value = 0.36

# CL3523Contig1|CL3523Contig1

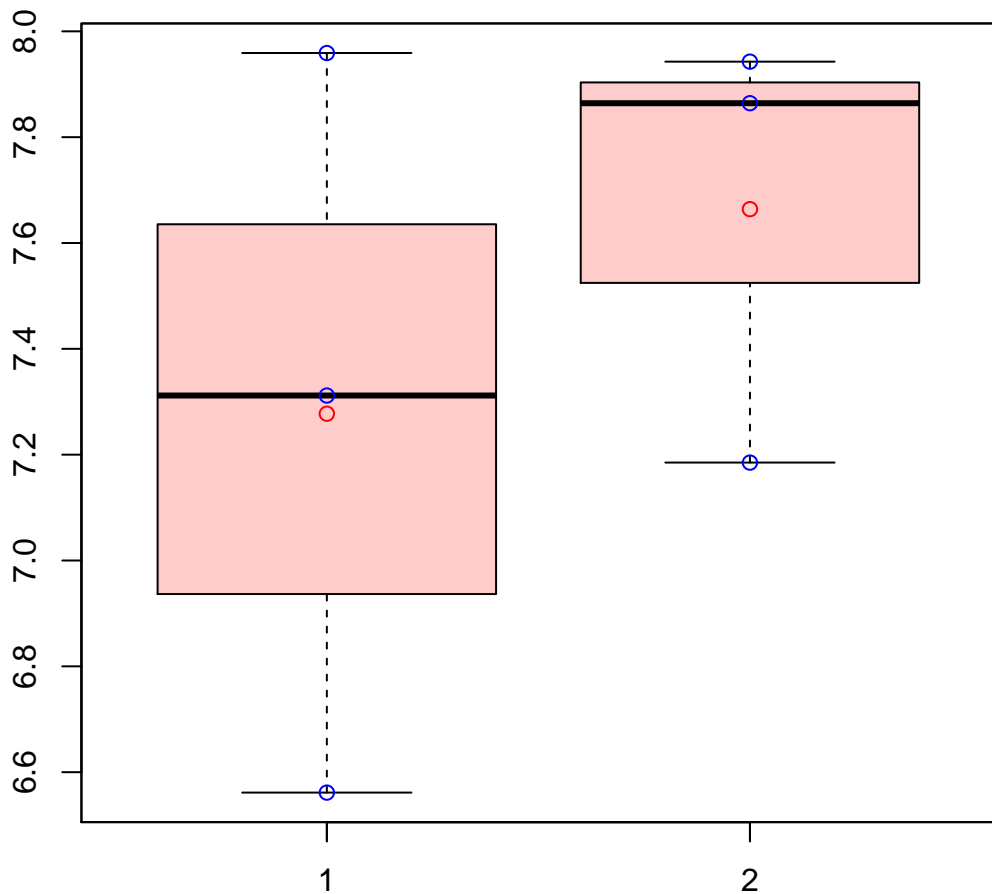

t-Test: p-value = 0.47

# CL3523Contig3|CL3523Contig3

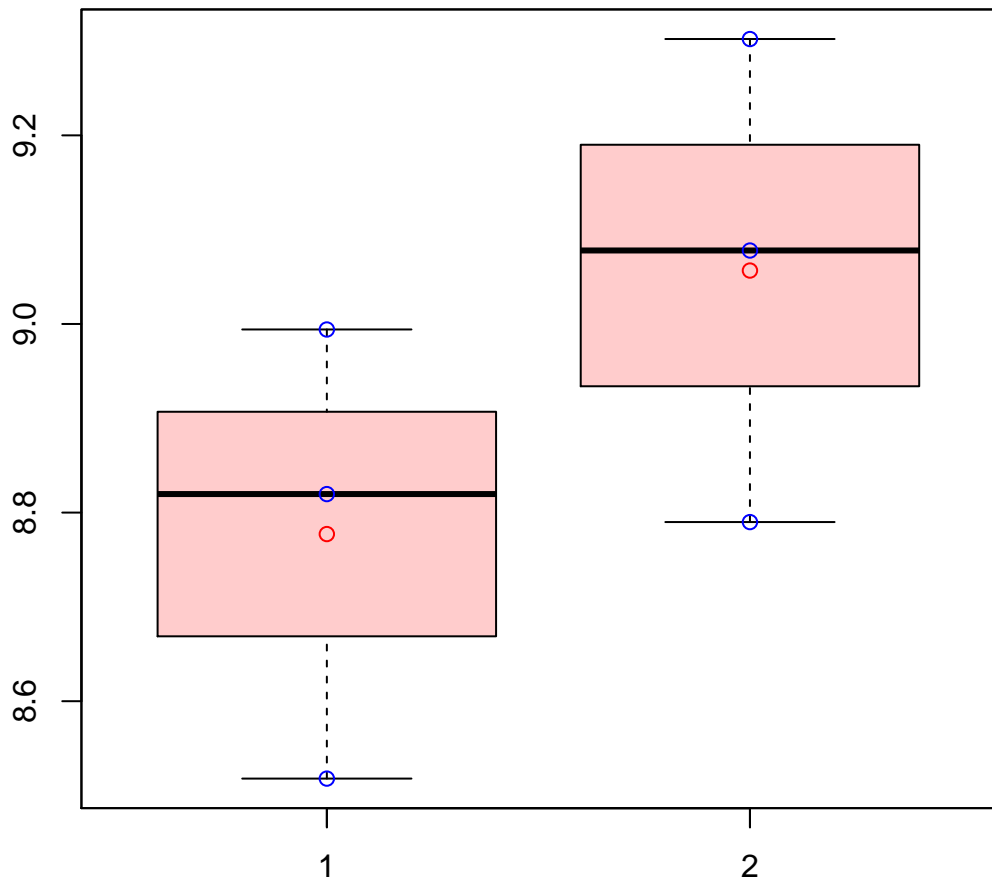

t-Test: p-value = 0.24

# CL3523Contig4|CL3523Contig4

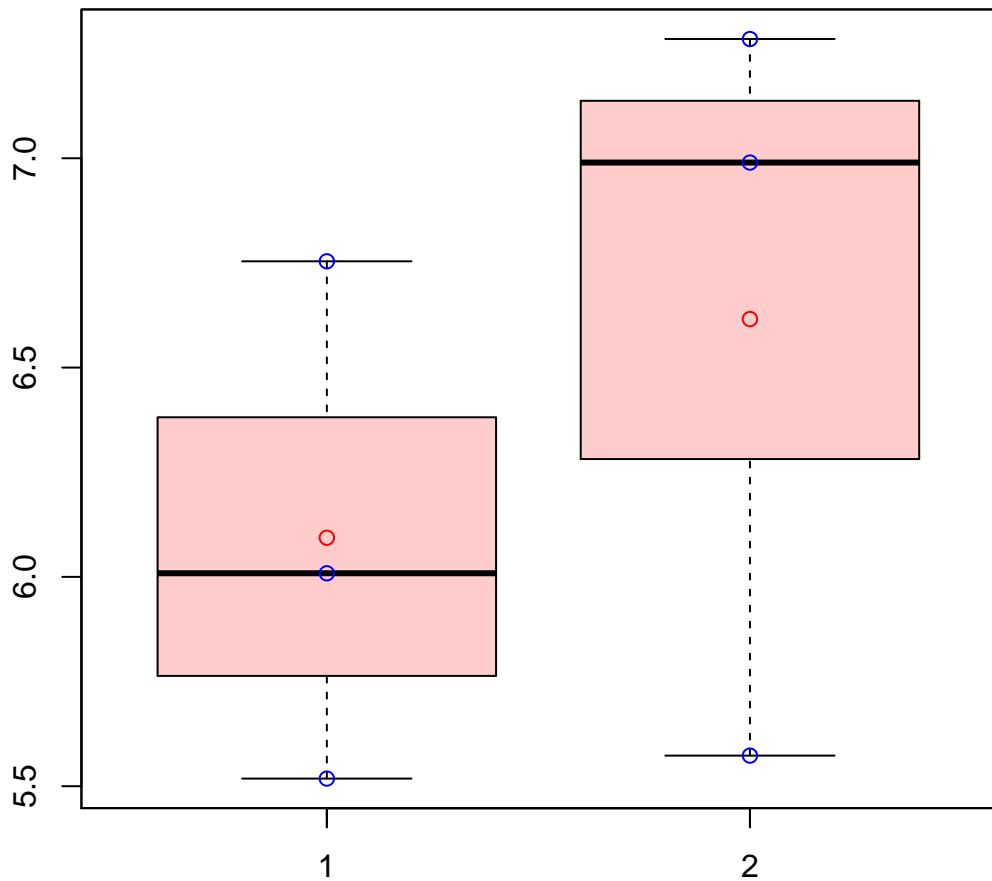

t-Test: p-value = 0.47

# CL3523Contig5|CL3523Contig5



t-Test: p-value = 0.47

# CL3523Contig7|CL3523Contig7

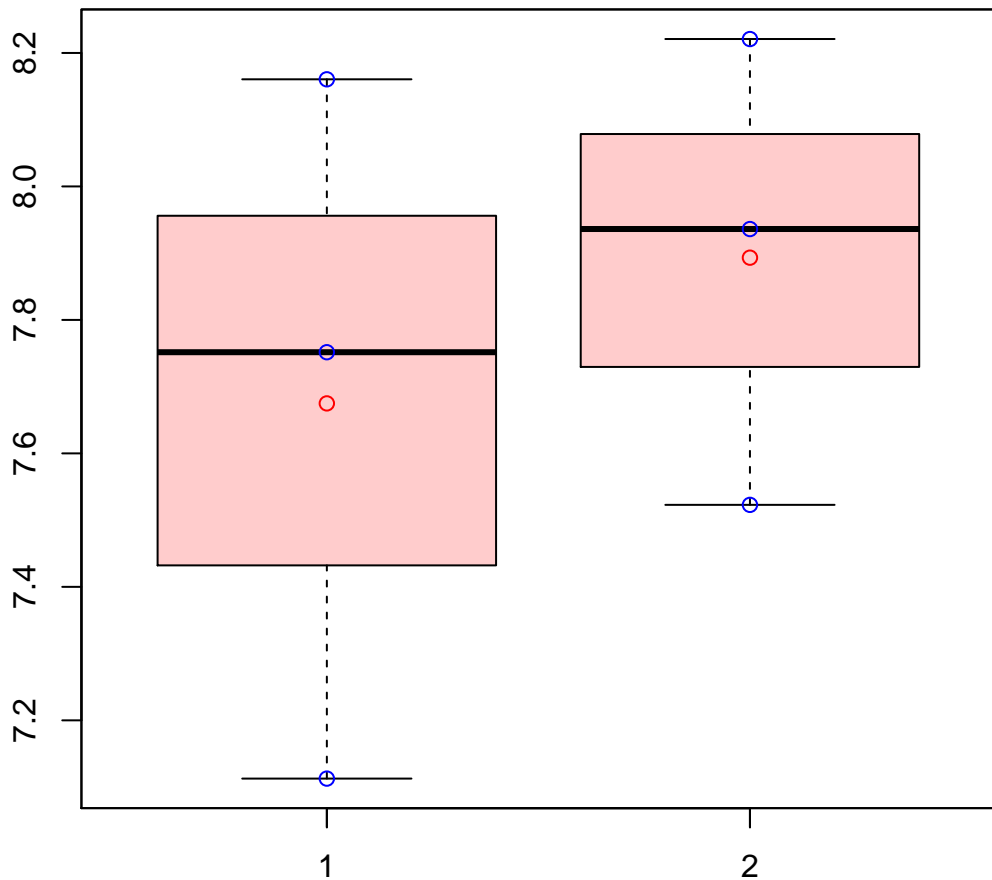

t-Test: p-value = 0.59

# CL3525Contig1|CL3525Contig1

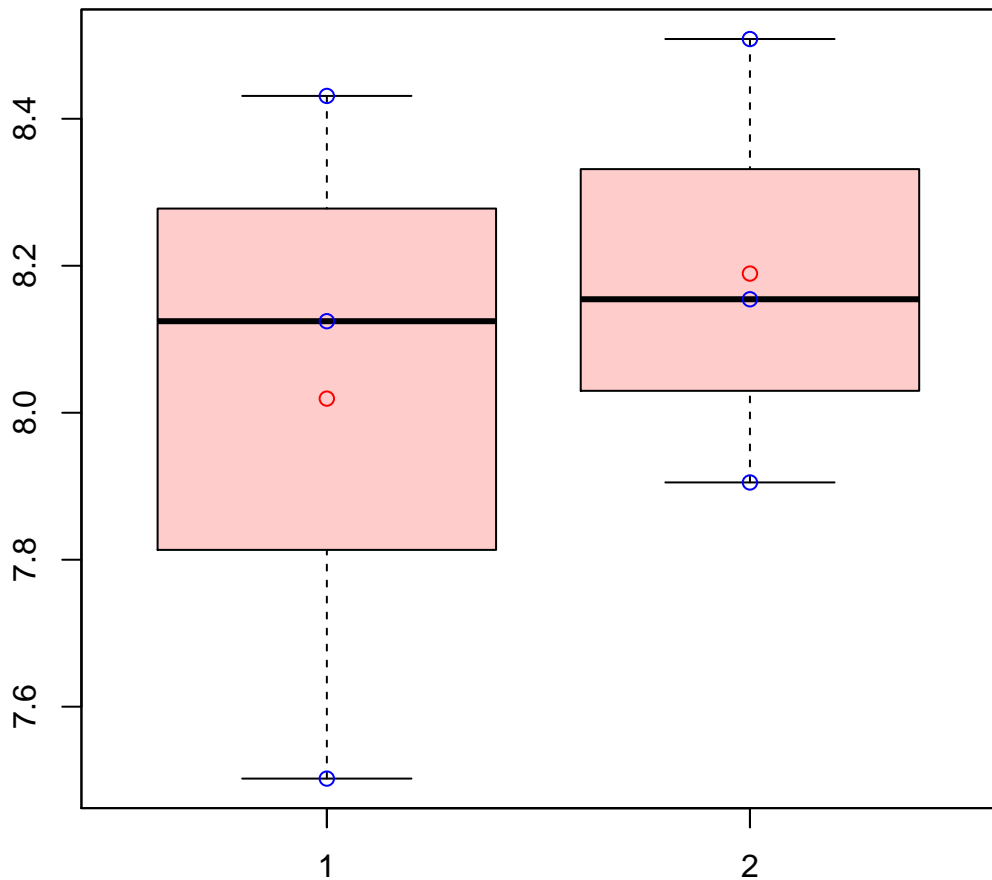

t-Test: p-value = 0.63

# CL3525Contig3|CL3525Contig3

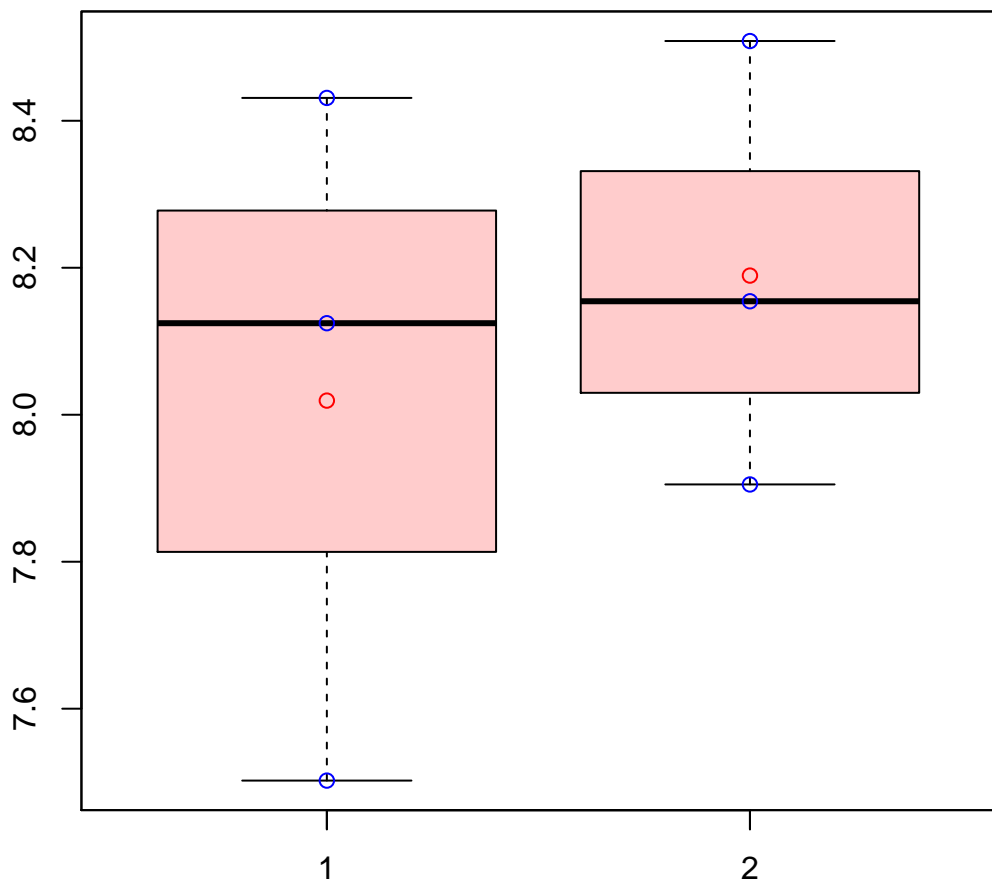

t-Test: p-value = 0.63



# CL3525Contig4|CL3525Contig4

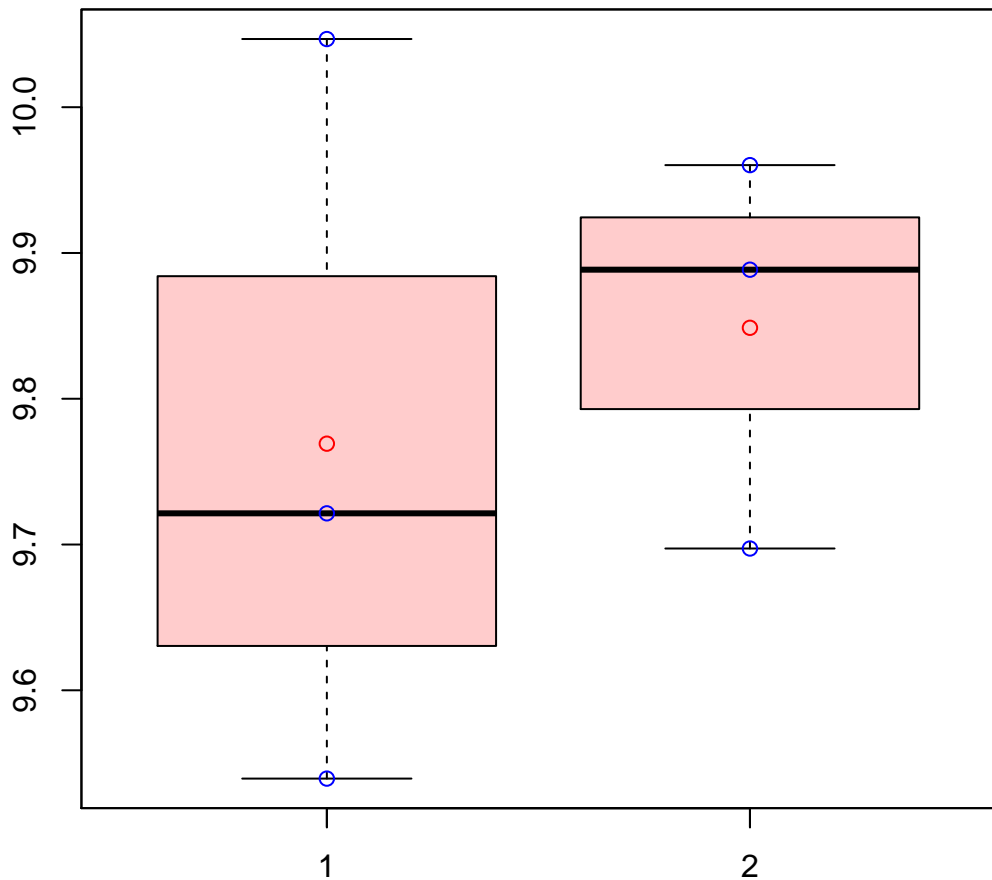

t-Test: p-value = 0.67

# CL3527Contig4|CL3527Contig4

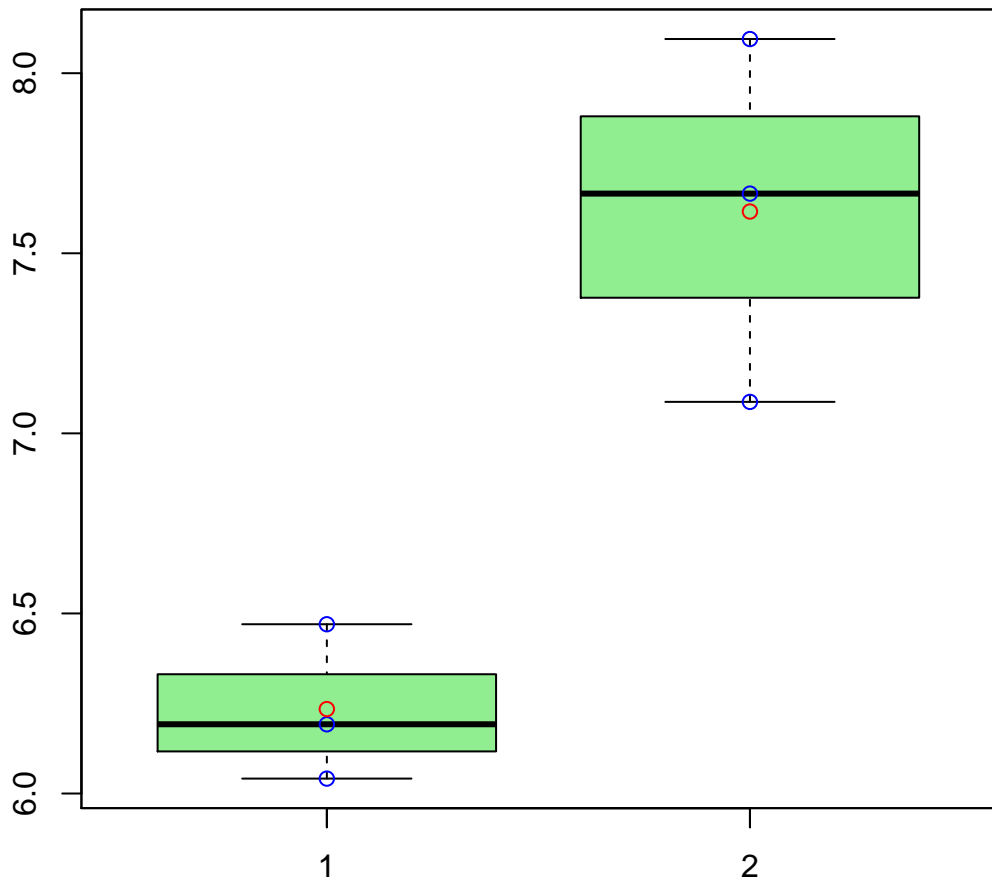

t-Test: p-value = 0.03

# CL3528Contig3|CL3528Contig3

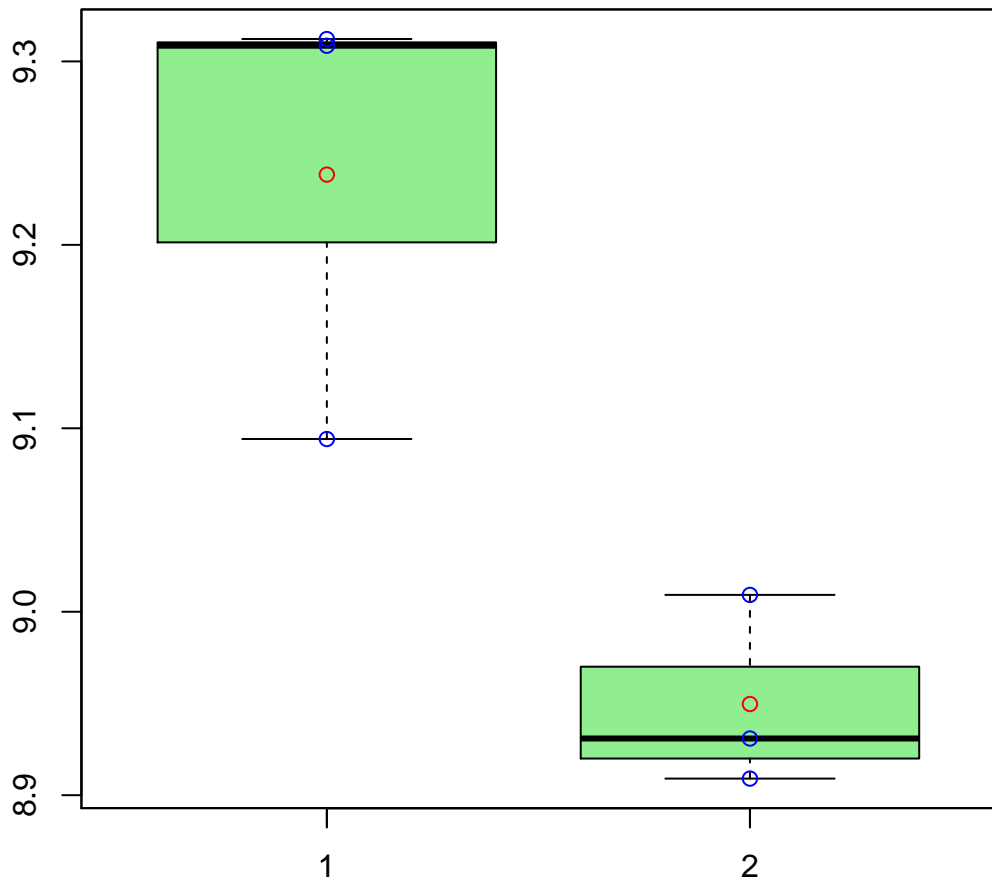

t-Test: p-value = 0.04

# CL3534Contig2|CL3534Contig2

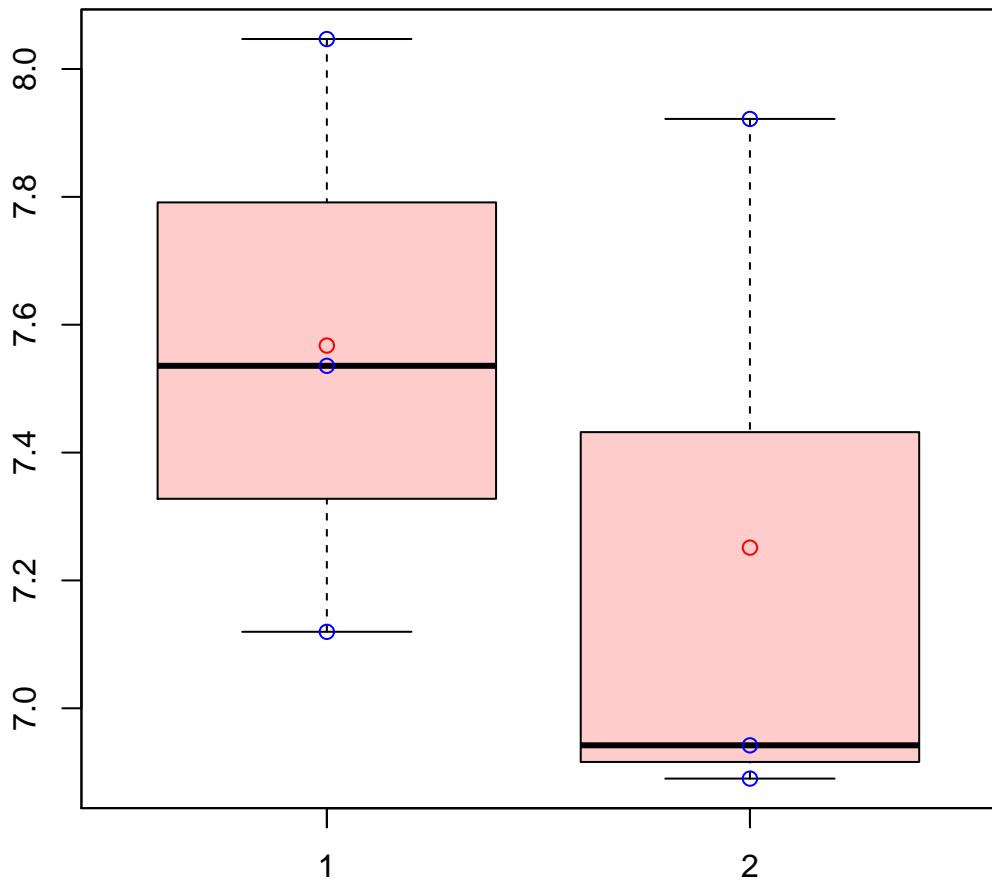

t-Test: p-value = 0.5

# CL3535Contig3|CL3535Contig3

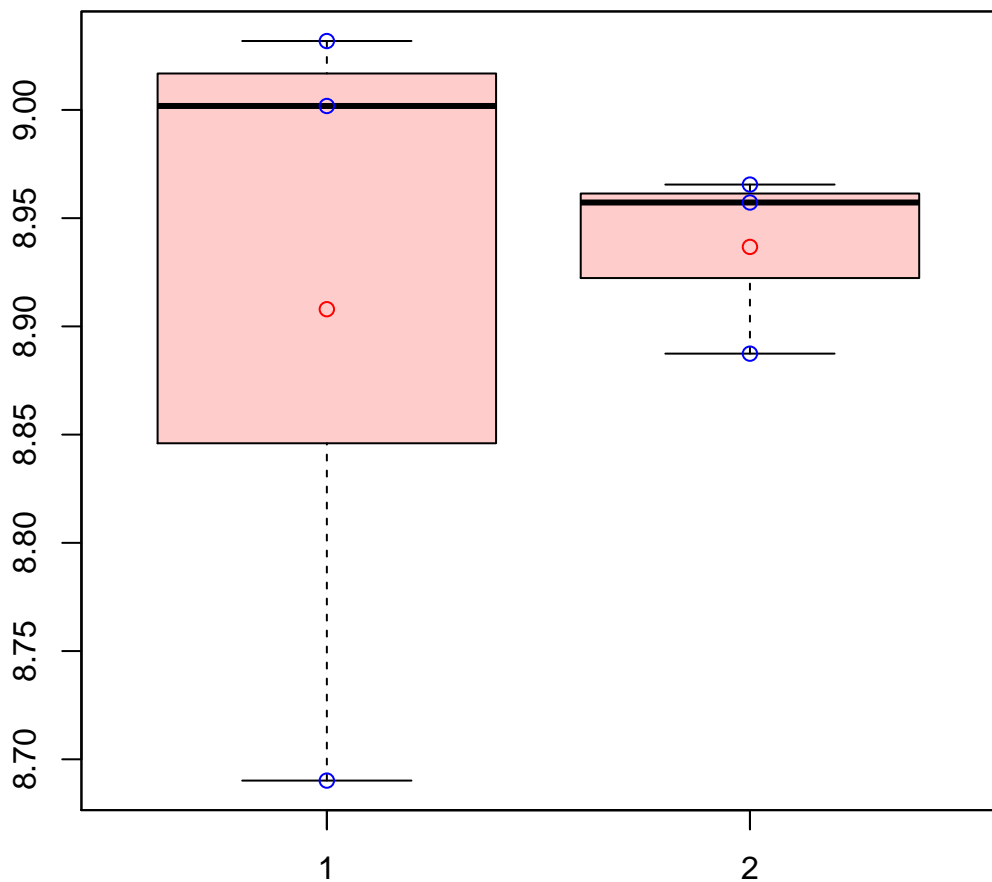

t-Test: p-value = 0.82

# CL3535Contig7|CL3535Contig7

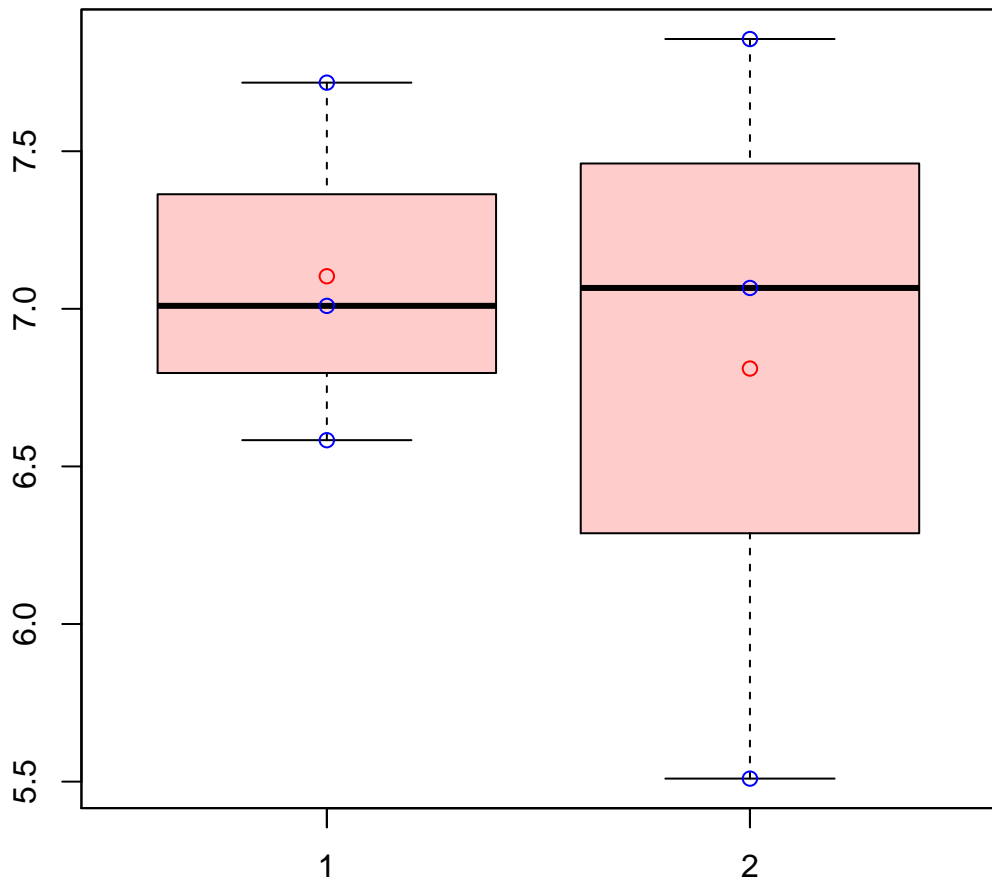

t-Test: p-value = 0.73

# CL3545Contig2|CL3545Contig2

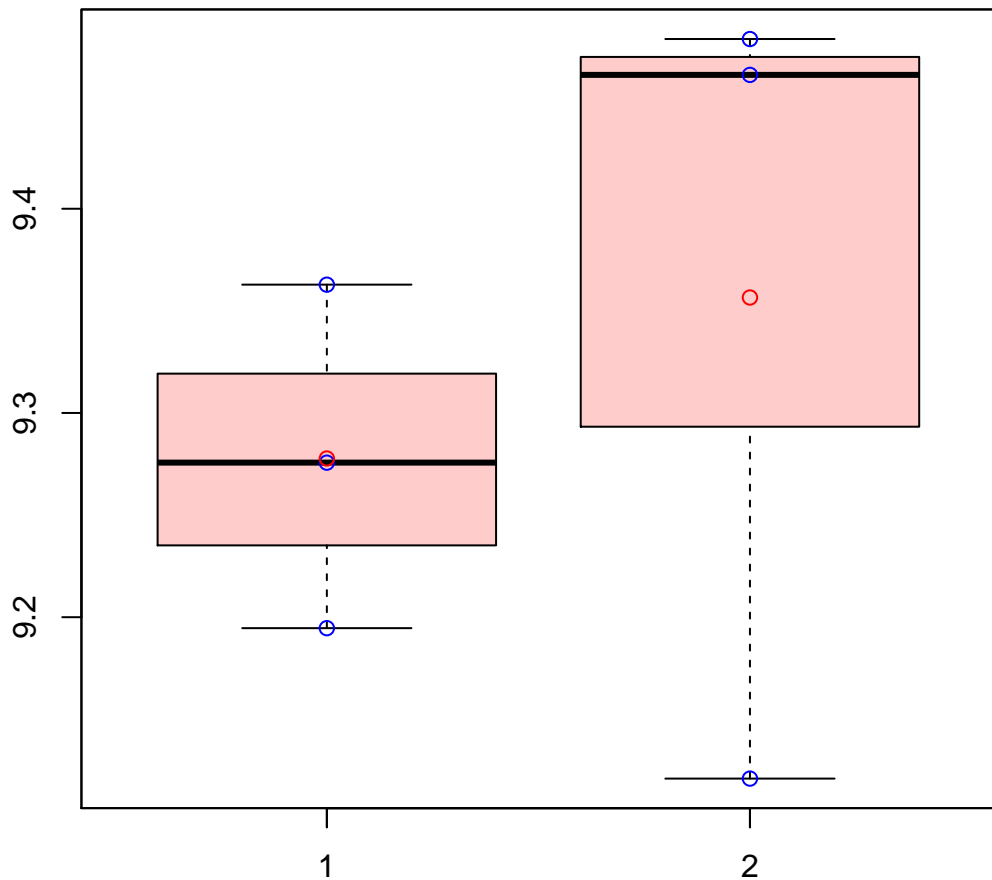

t-Test: p-value = 0.59

# CL3546Contig1|CL3546Contig1

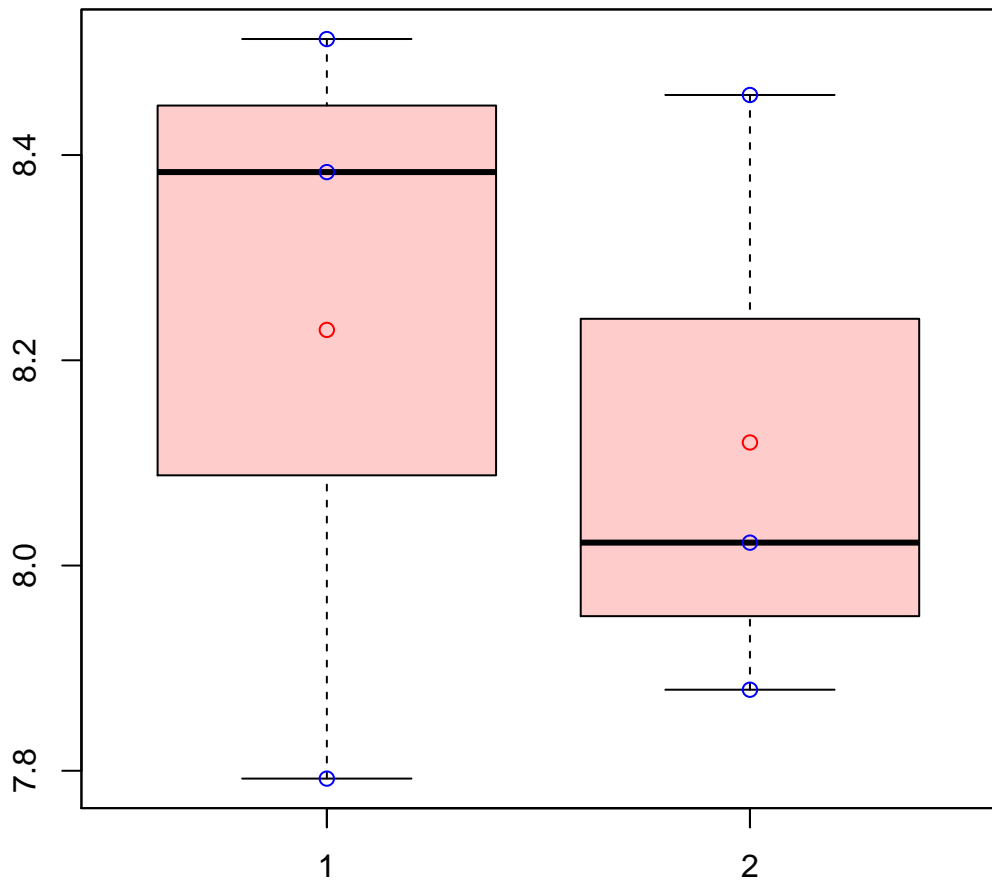

t-Test: p-value = 0.72



# CL354Contig2|CL354Contig2

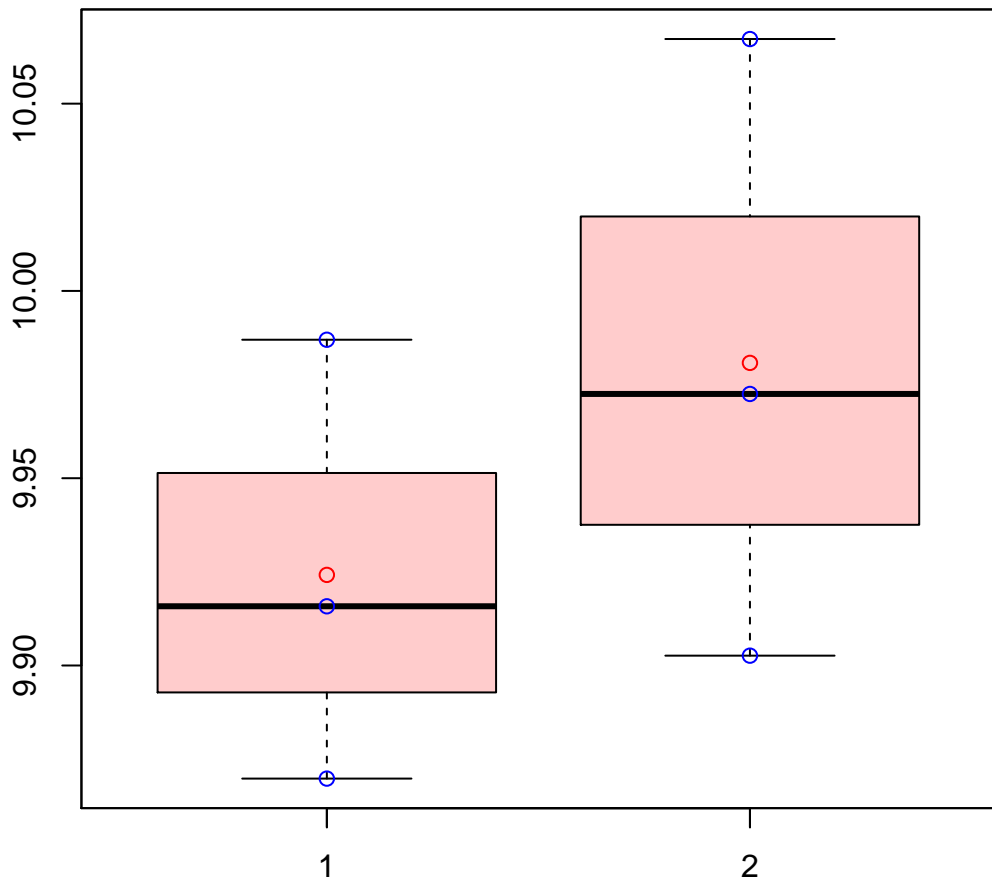

t-Test: p-value = 0.39

# CL3551Contig1|CL3551Contig1

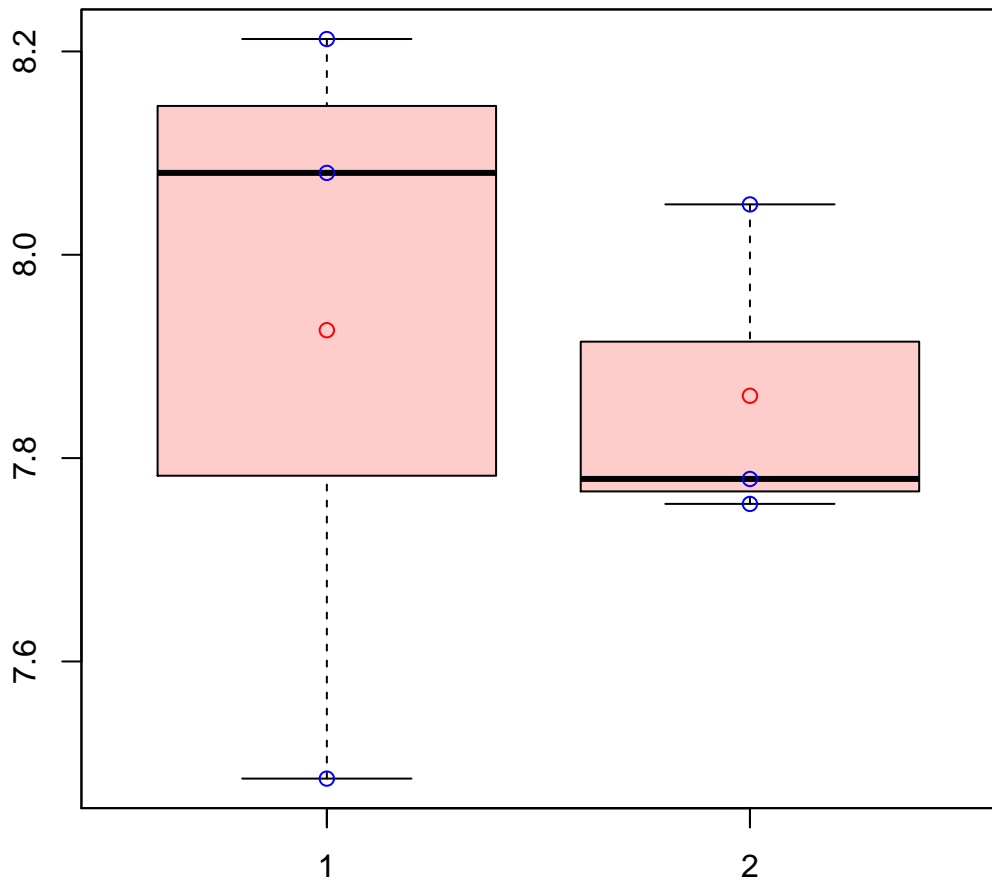

t-Test: p-value = 0.81

# CL3552Contig1|CL3552Contig1



t-Test: p-value = 0.87

# CL3553Contig1|CL3553Contig1

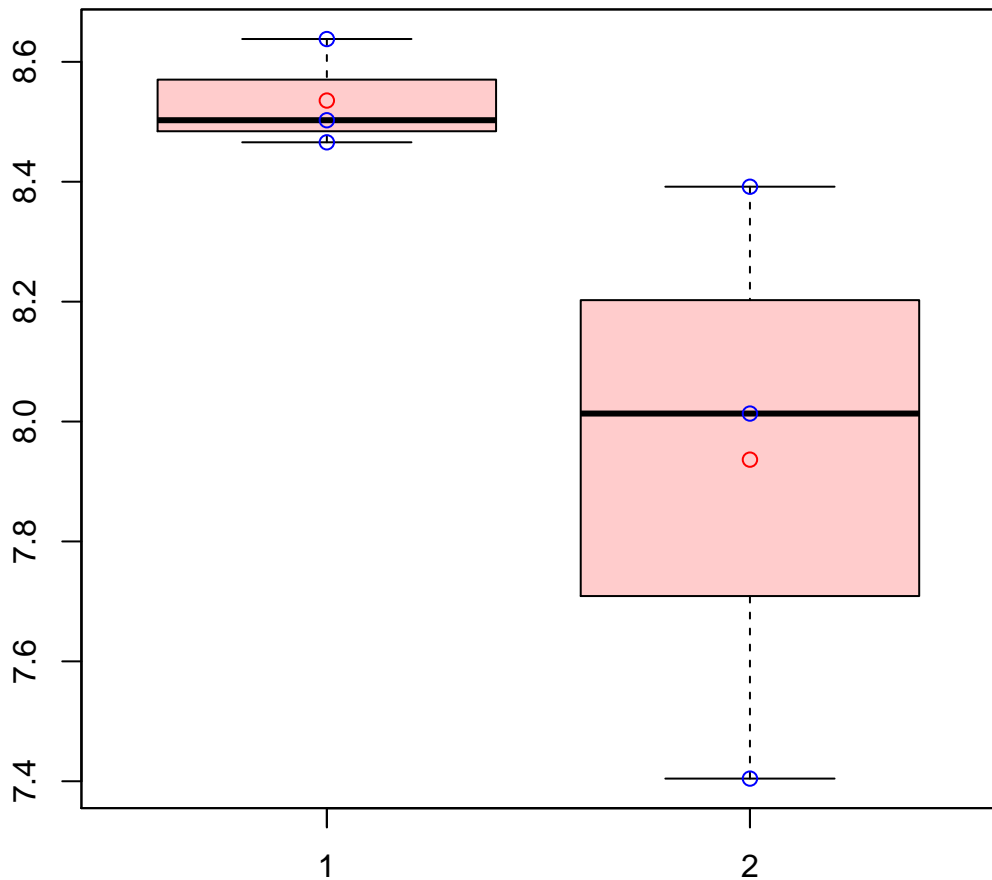

t-Test: p-value = 0.17

# CL3553Contig2|CL3553Contig2

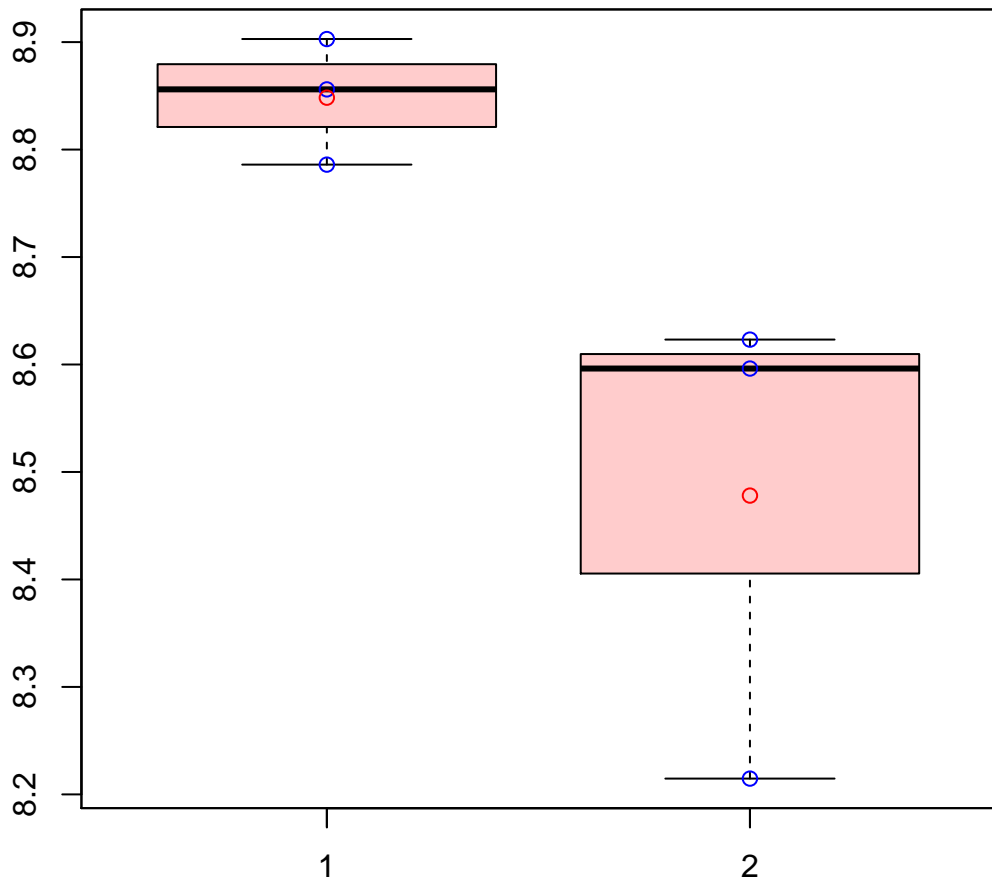

t-Test: p-value = 0.1

# CL3553Contig3|CL3553Contig3

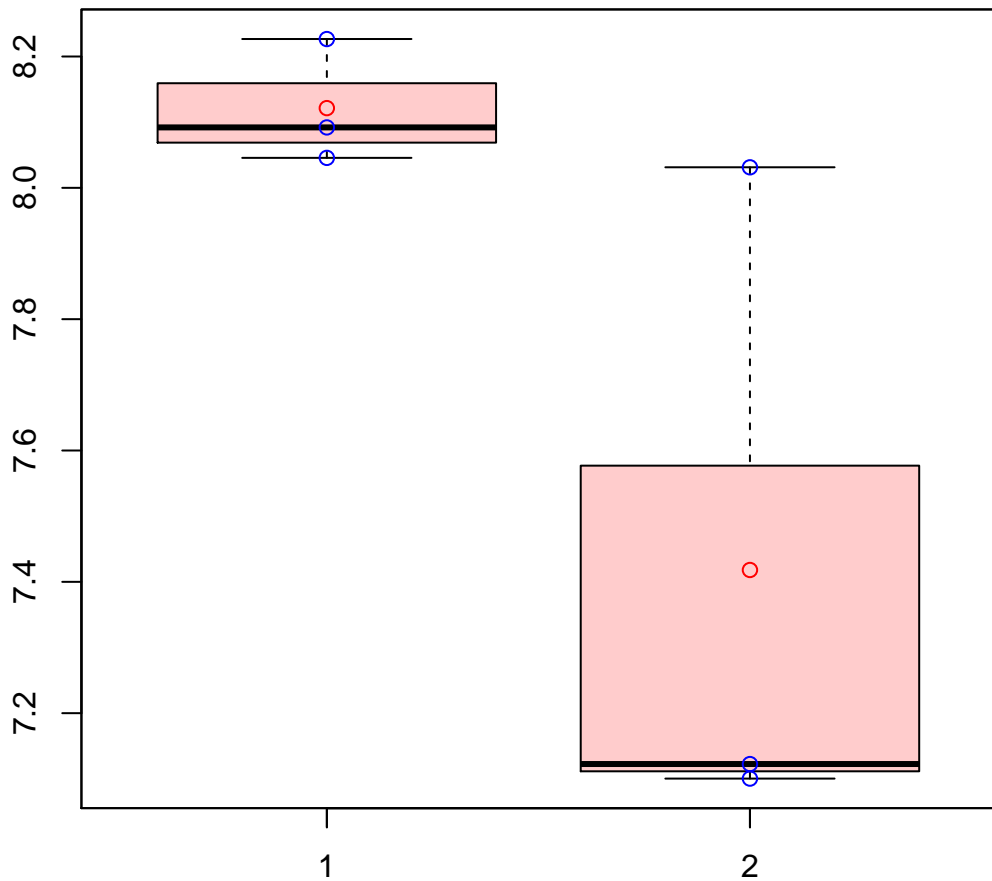

t-Test: p-value = 0.14

# CL3553Contig6|CL3553Contig6

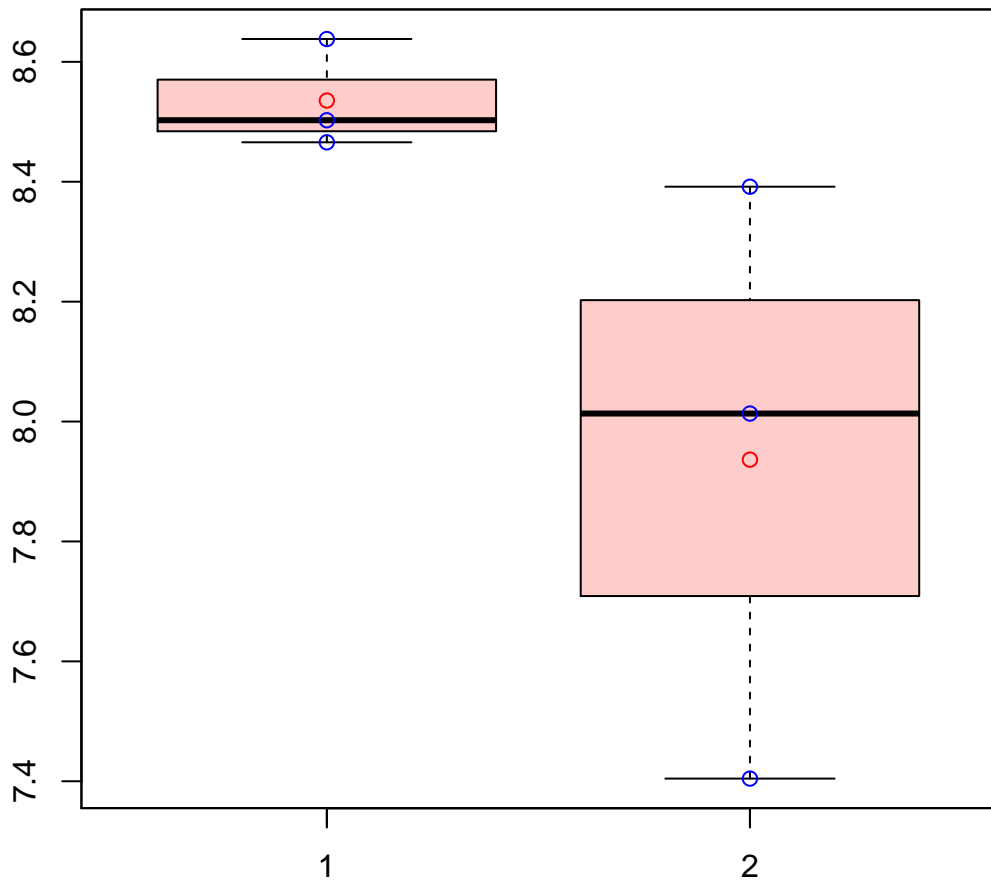

t-Test: p-value = 0.17

# CL3555Contig1|CL3555Contig1

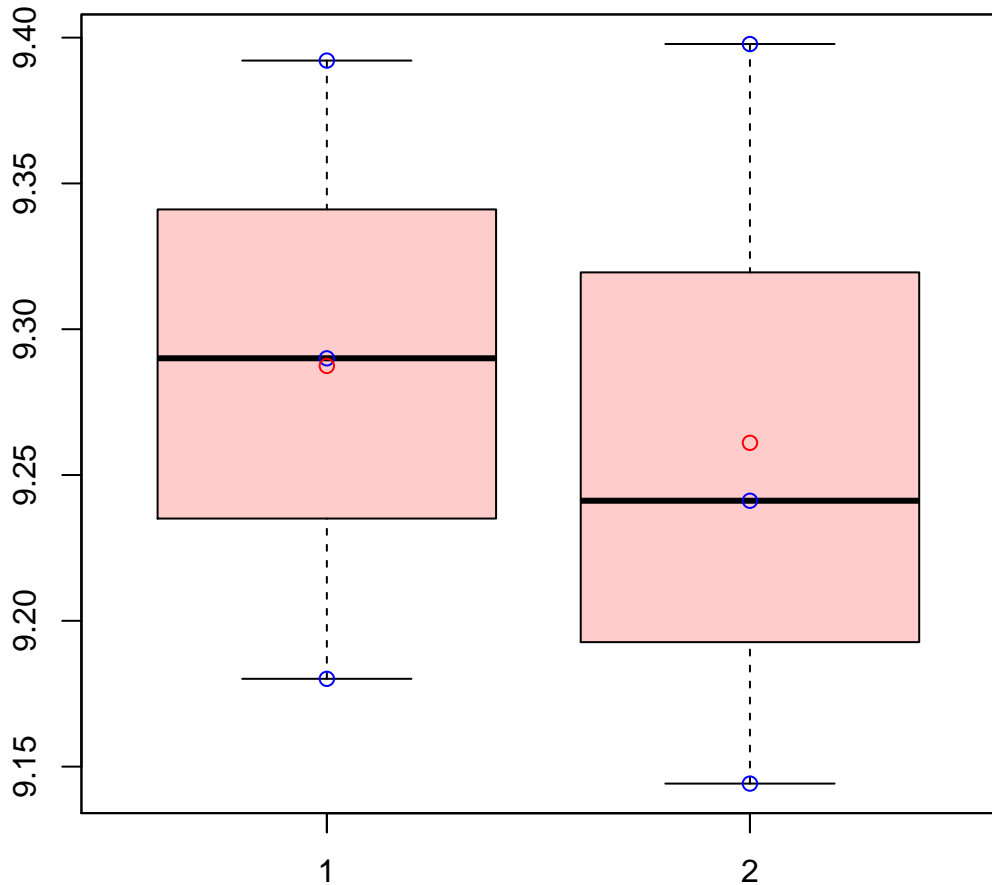

t-Test: p-value = 0.8



# CL3555Contig2|CL3555Contig2

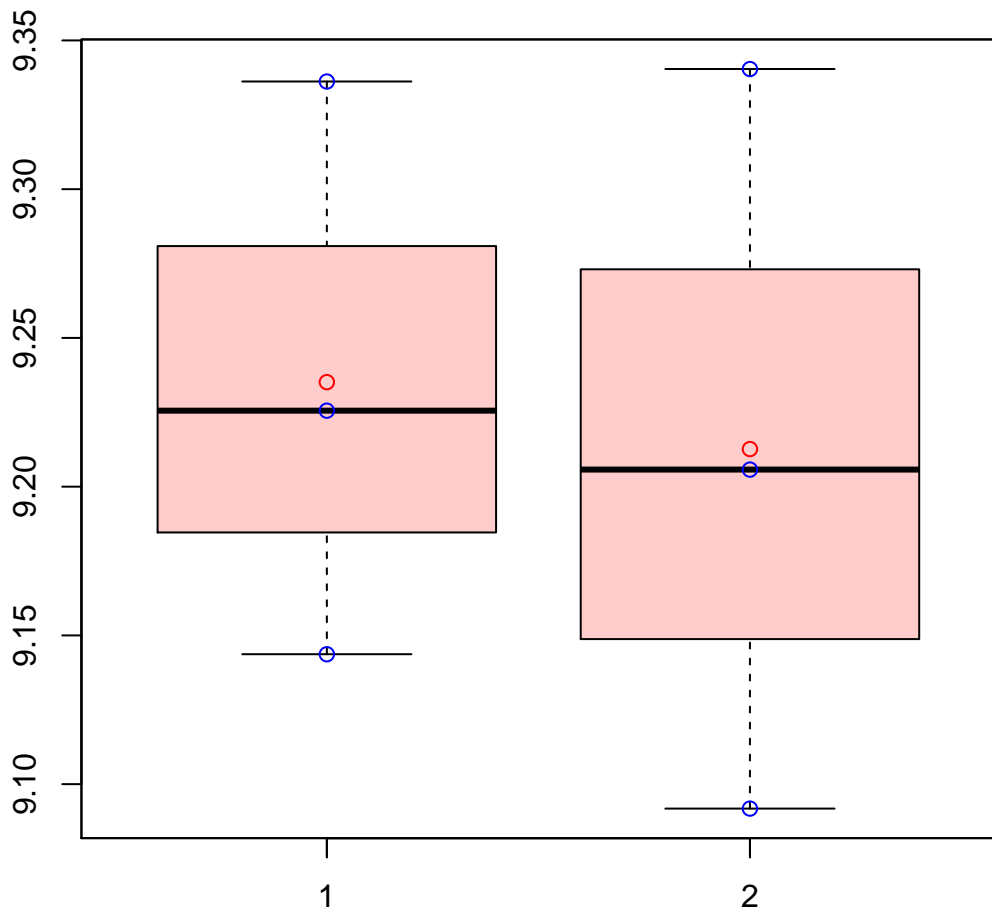

t-Test: p-value = 0.82

# CL3561Contig4|CL3561Contig4

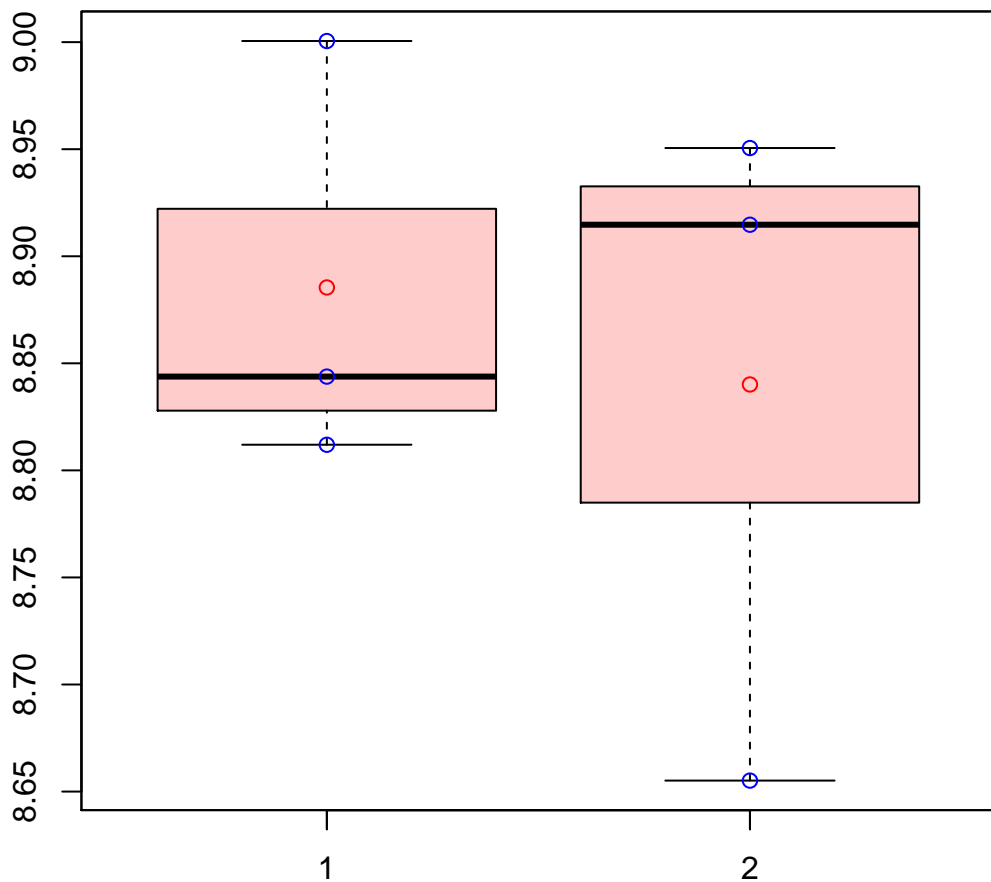

t-Test: p-value = 0.7

# CL3561Contig6|CL3561Contig6

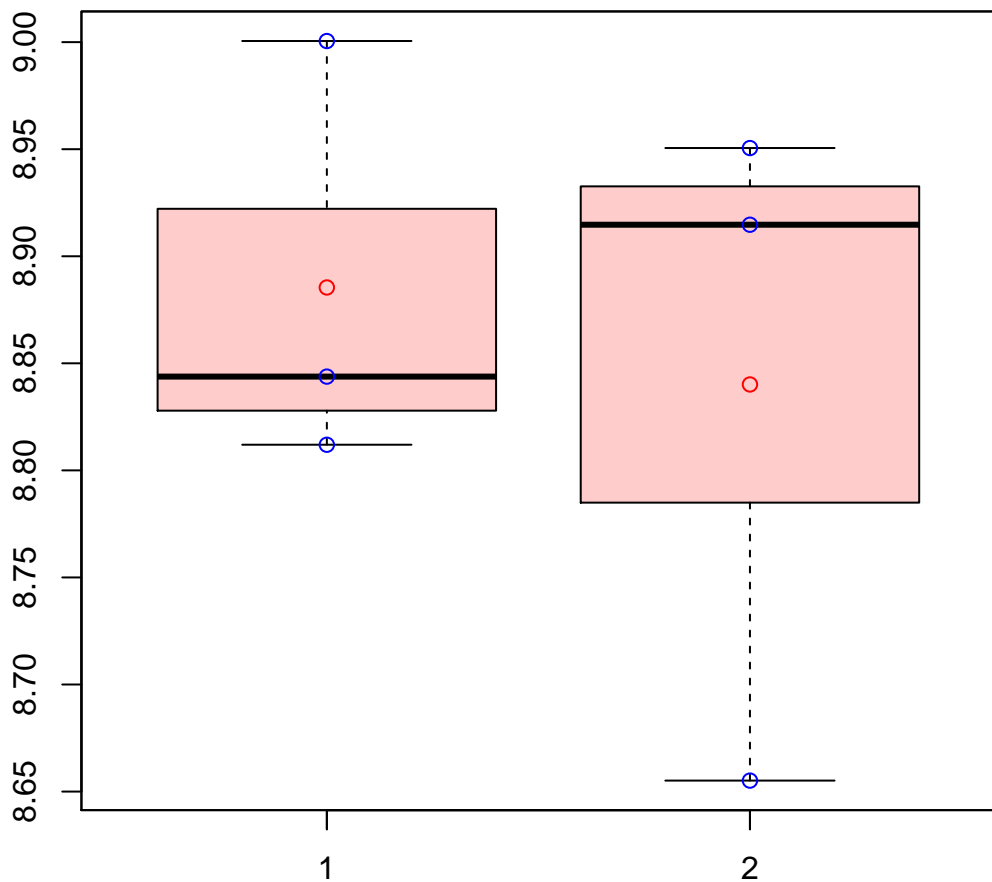

t-Test: p-value = 0.7

# CL3570Contig2|CL3570Contig2

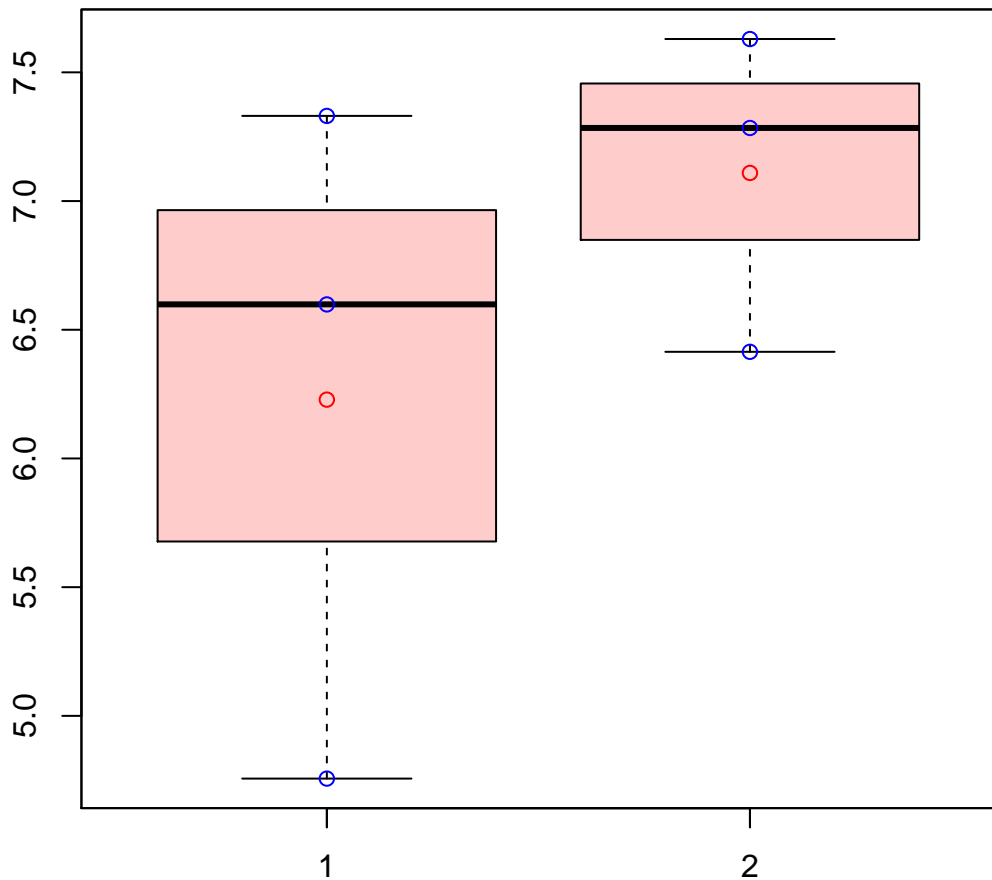

t-Test: p-value = 0.38

# CL3570Contig6|CL3570Contig6

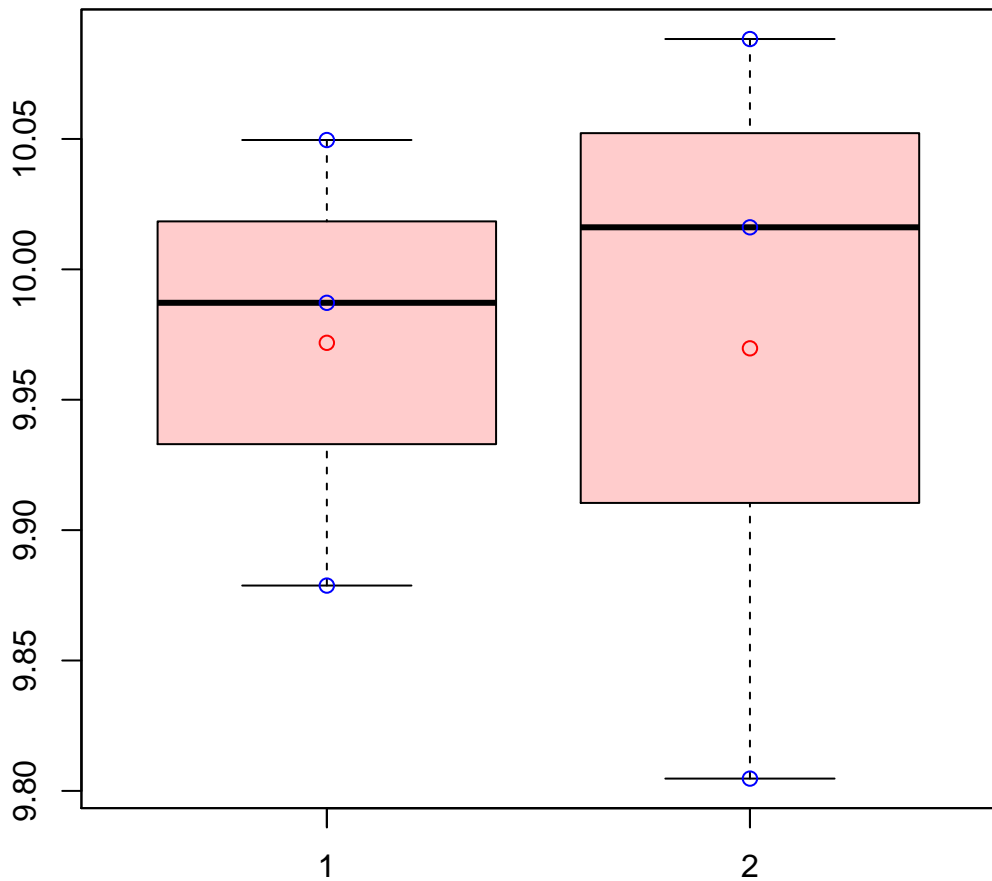

t-Test: p-value = 0.98

# CL3573Contig2|CL3573Contig2

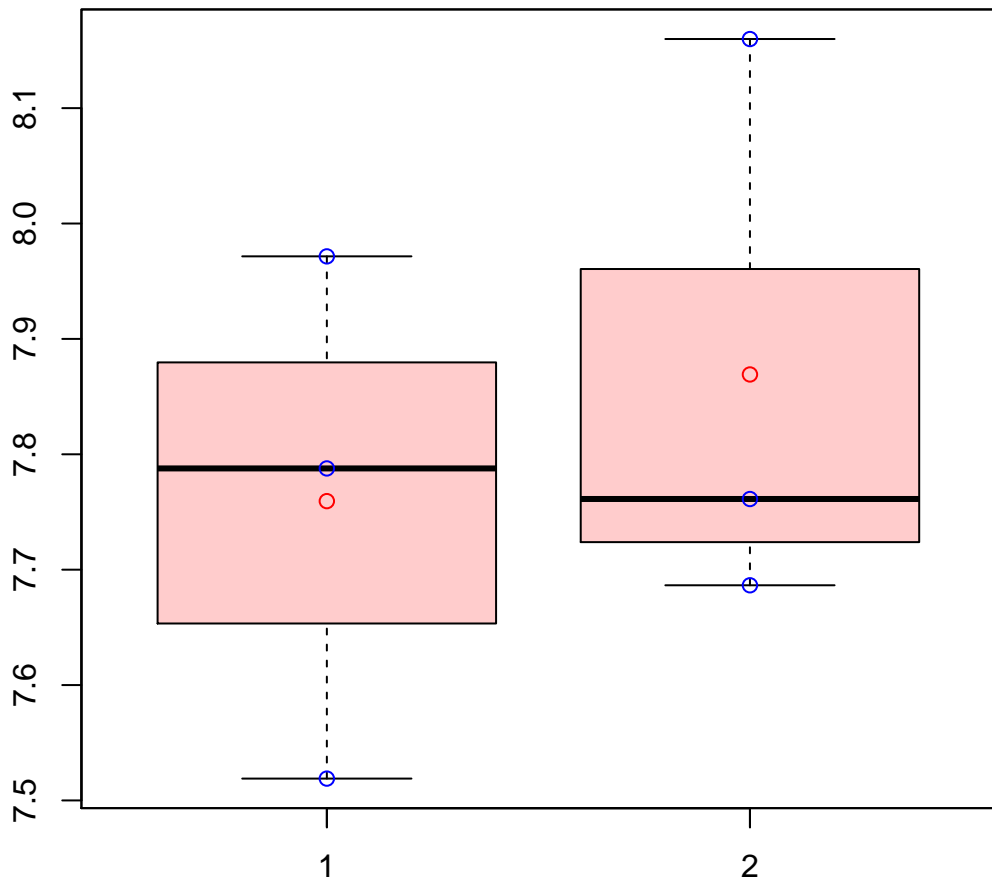

t-Test: p-value = 0.61

# CL3580Contig2|CL3580Contig2

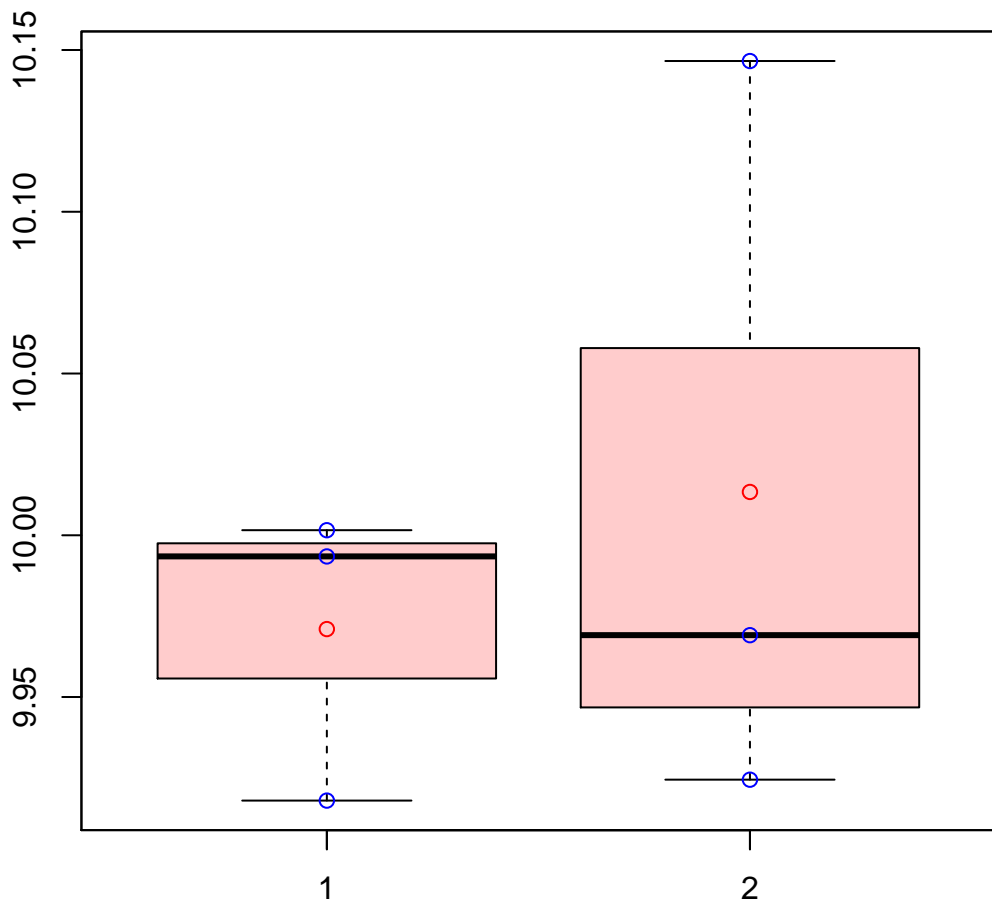

t-Test: p-value = 0.61

# CL3585Contig2|CL3585Contig2

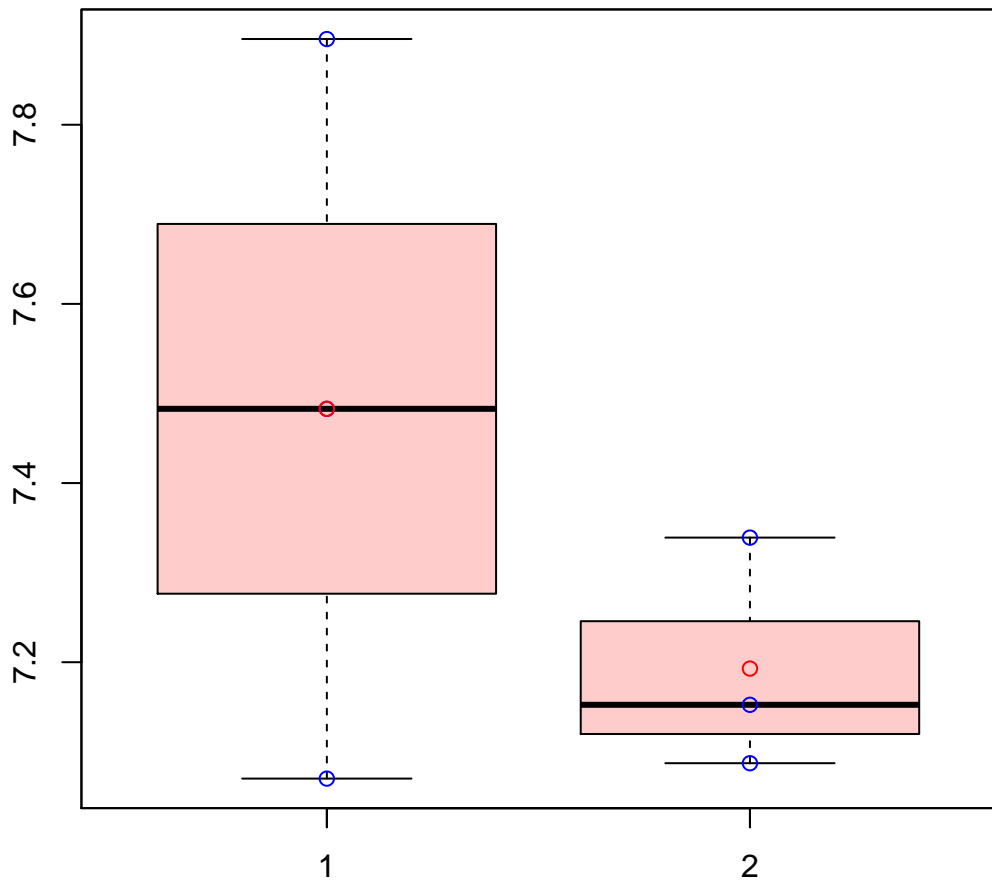

t-Test: p-value = 0.35



# CL3598Contig1|CL3598Contig1

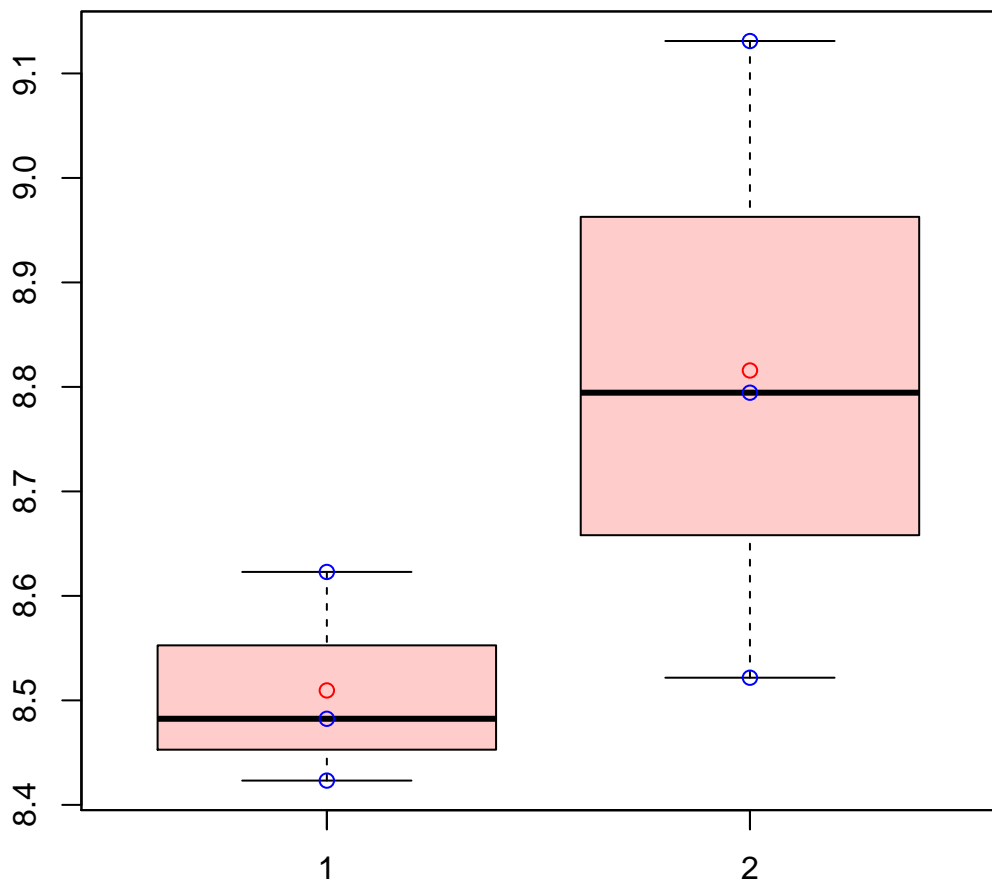

t-Test: p-value = 0.22

# CL35Contig17|CL35Contig17

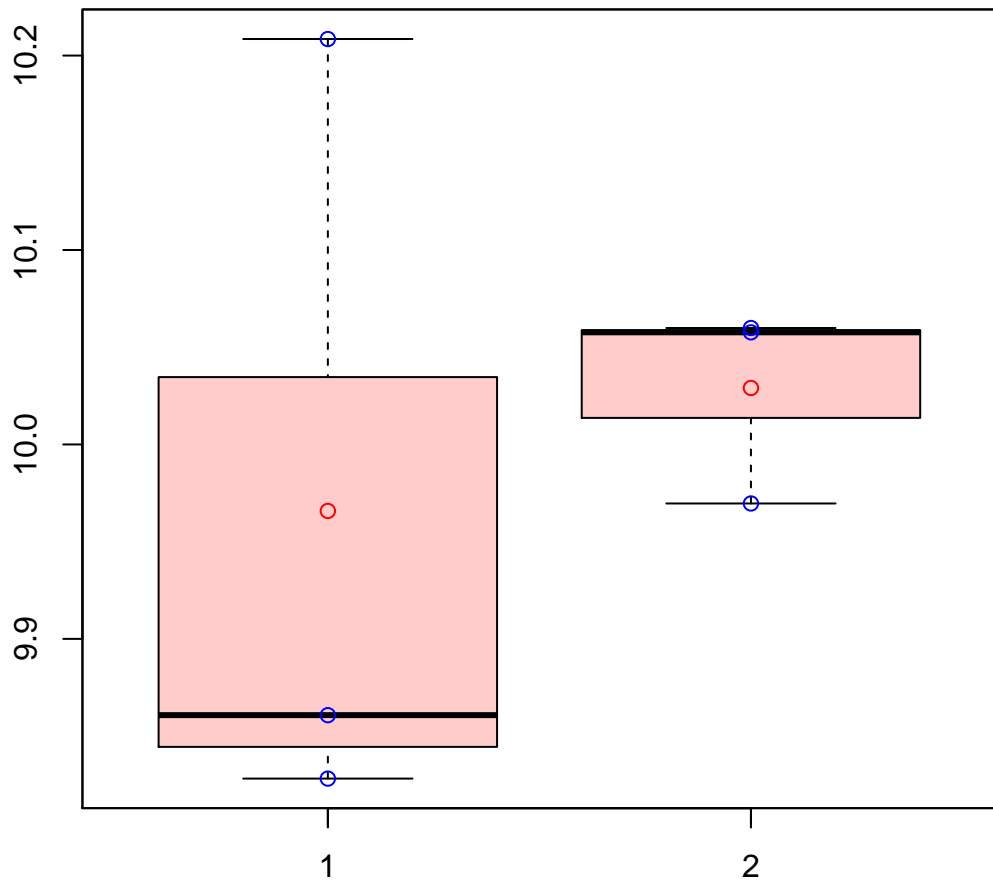

t-Test: p-value = 0.66

# CL35Contig7|CL35Contig7

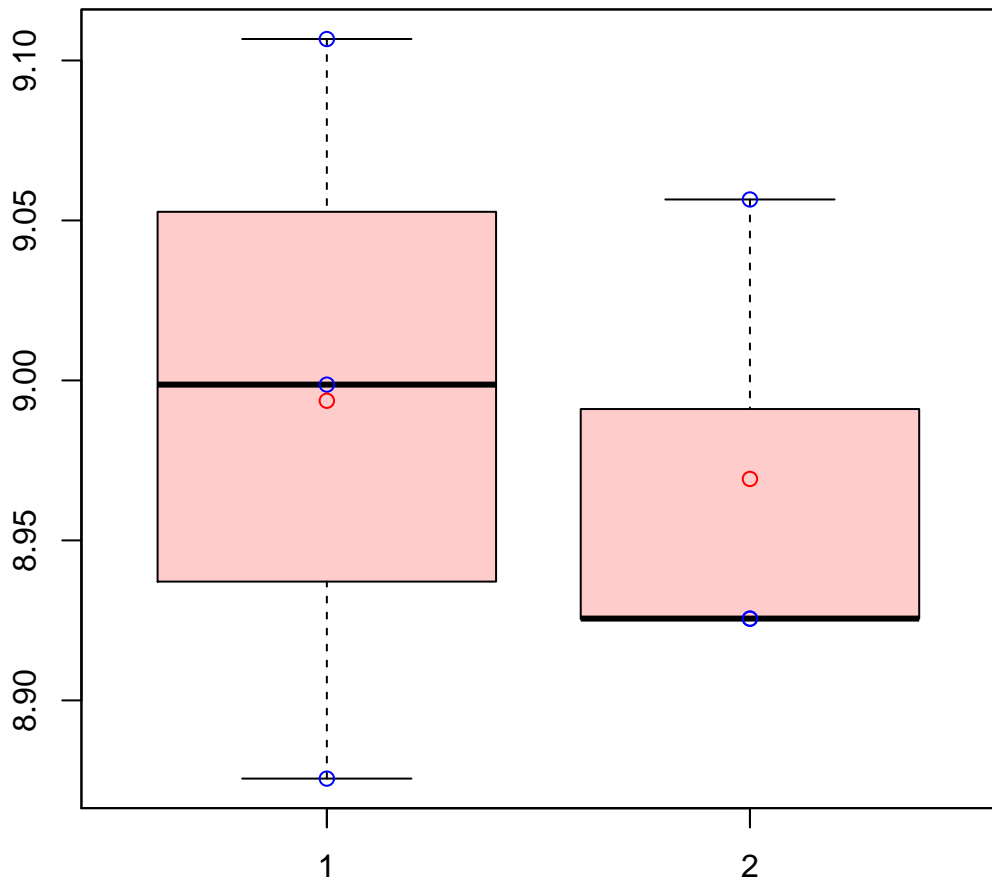

t-Test: p-value = 0.78

# CL3600Contig2|CL3600Contig2

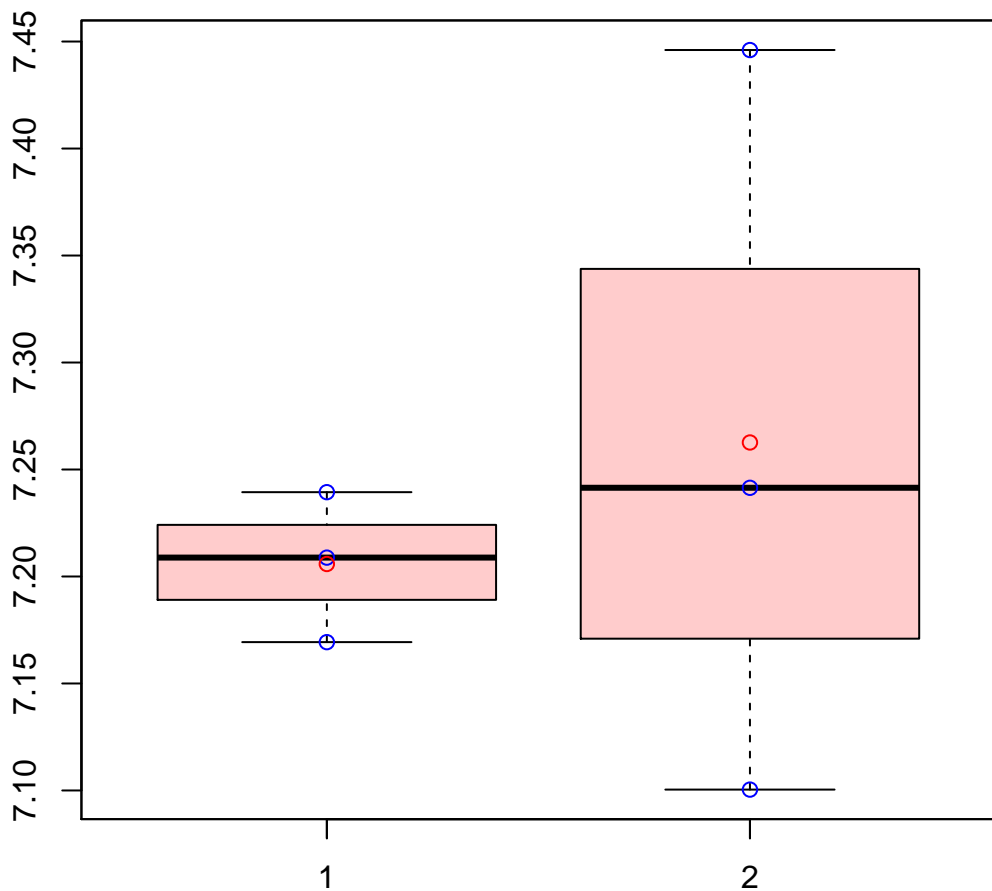

t-Test: p-value = 0.63

# CL360Contig2|CL360Contig2

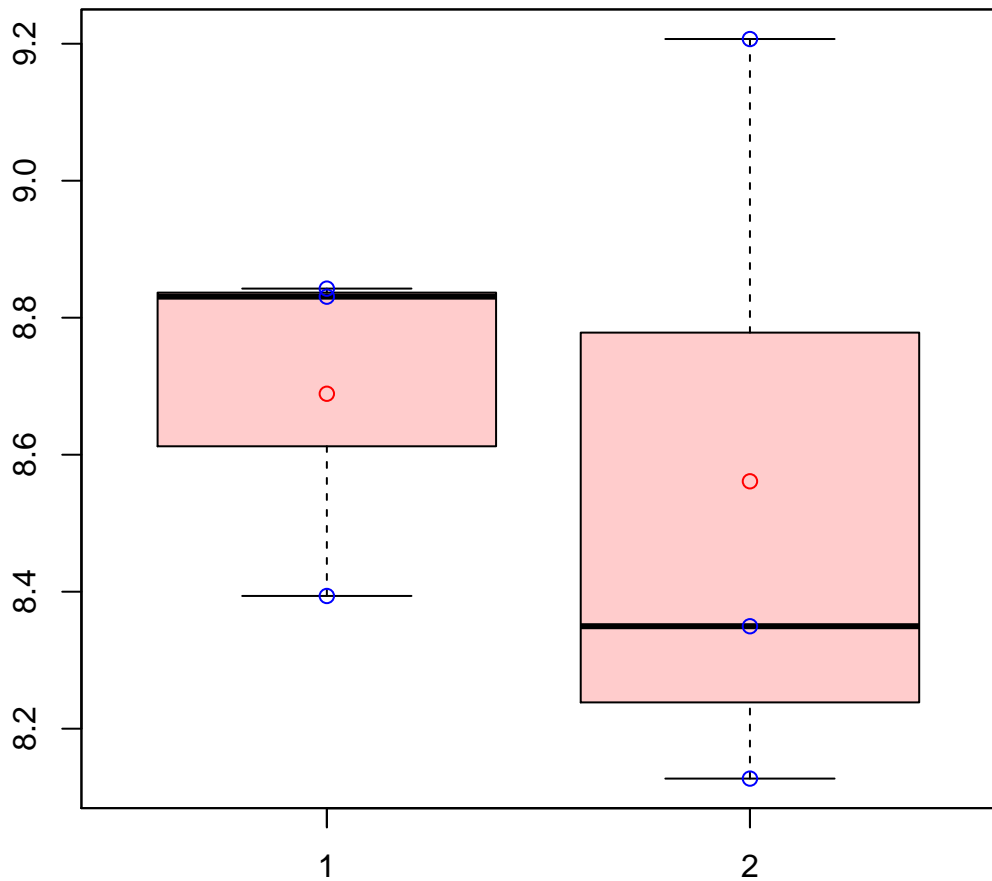

t-Test: p-value = 0.75

# CL360Contig5|CL360Contig5

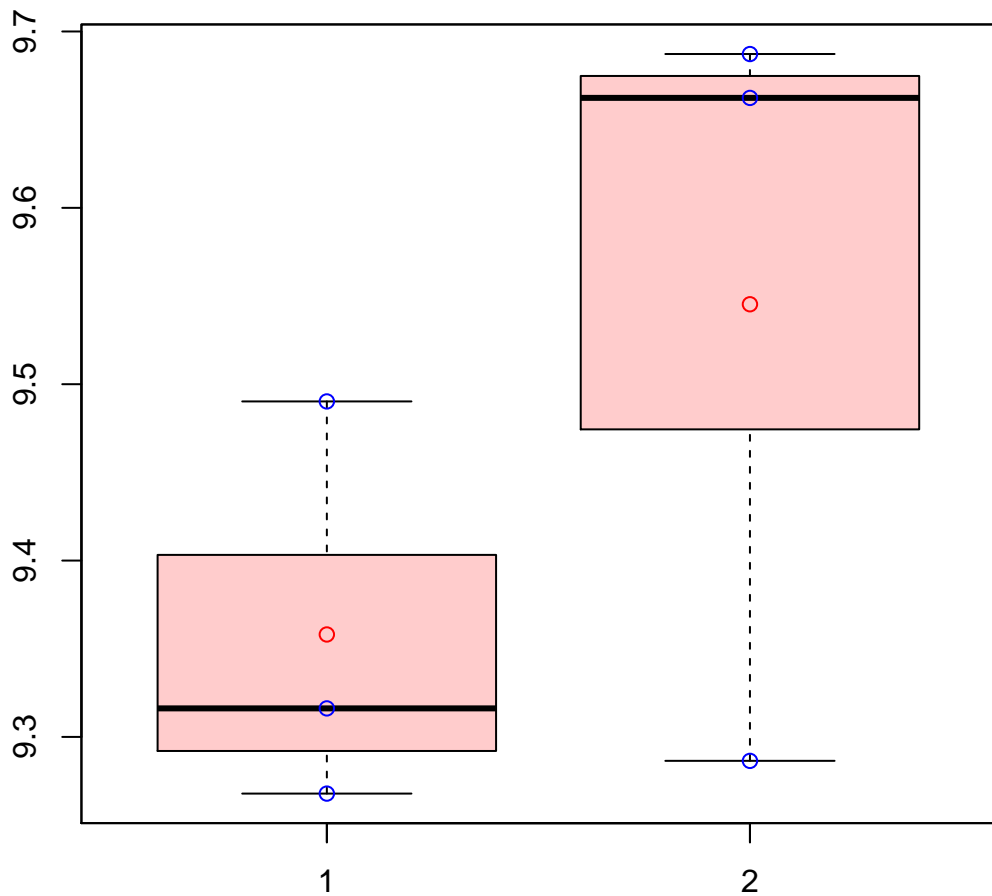

t-Test: p-value = 0.29

# CL360Contig6|CL360Contig6

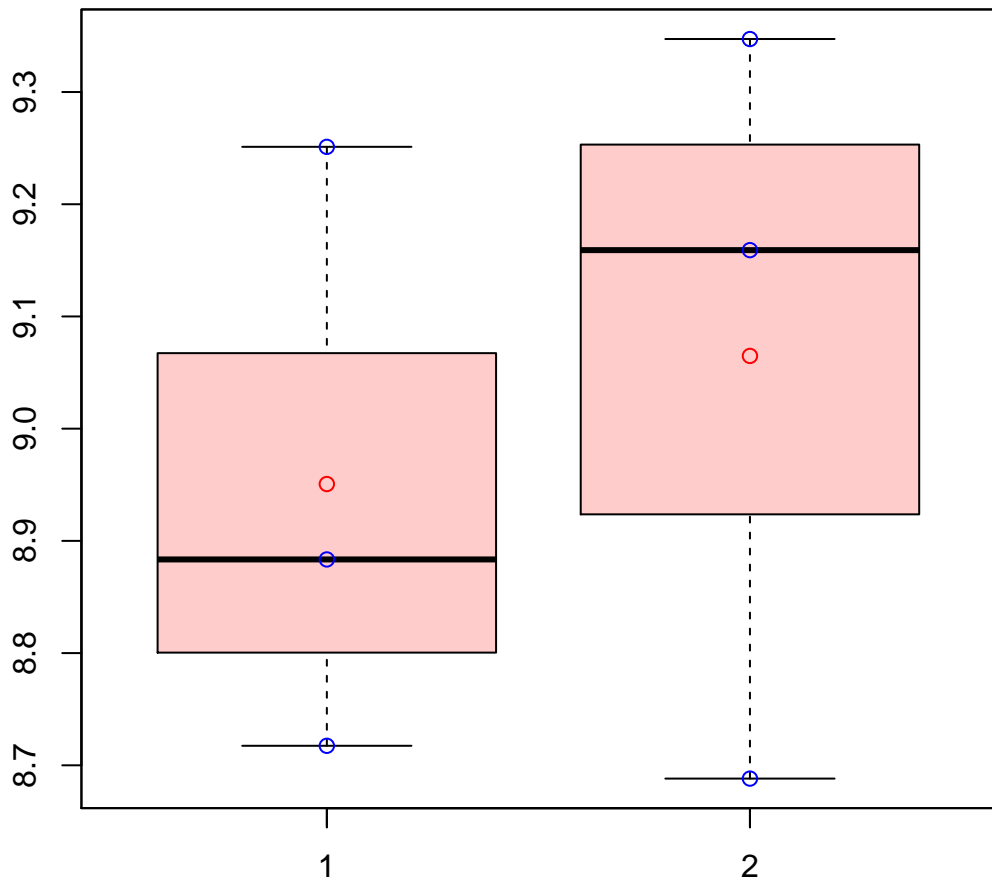

t-Test: p-value = 0.67

# CL360Contig9|CL360Contig9

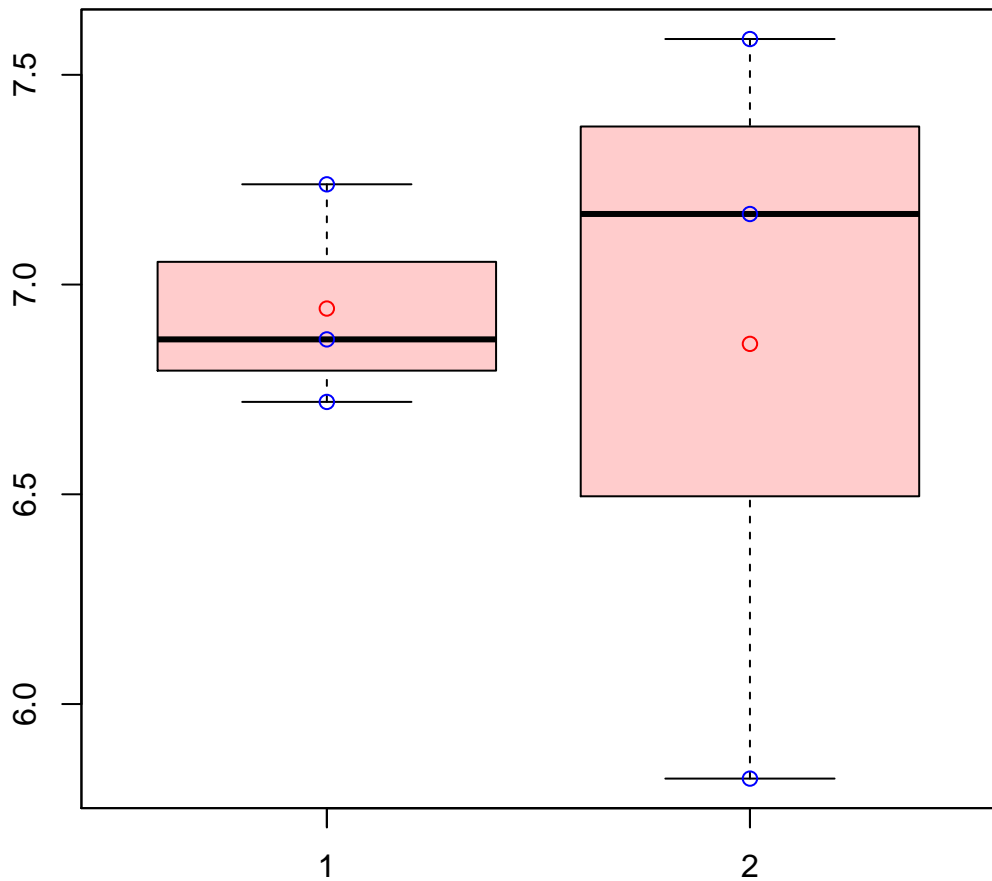

t-Test: p-value = 0.89



# CL3614Contig5|CL3614Contig5

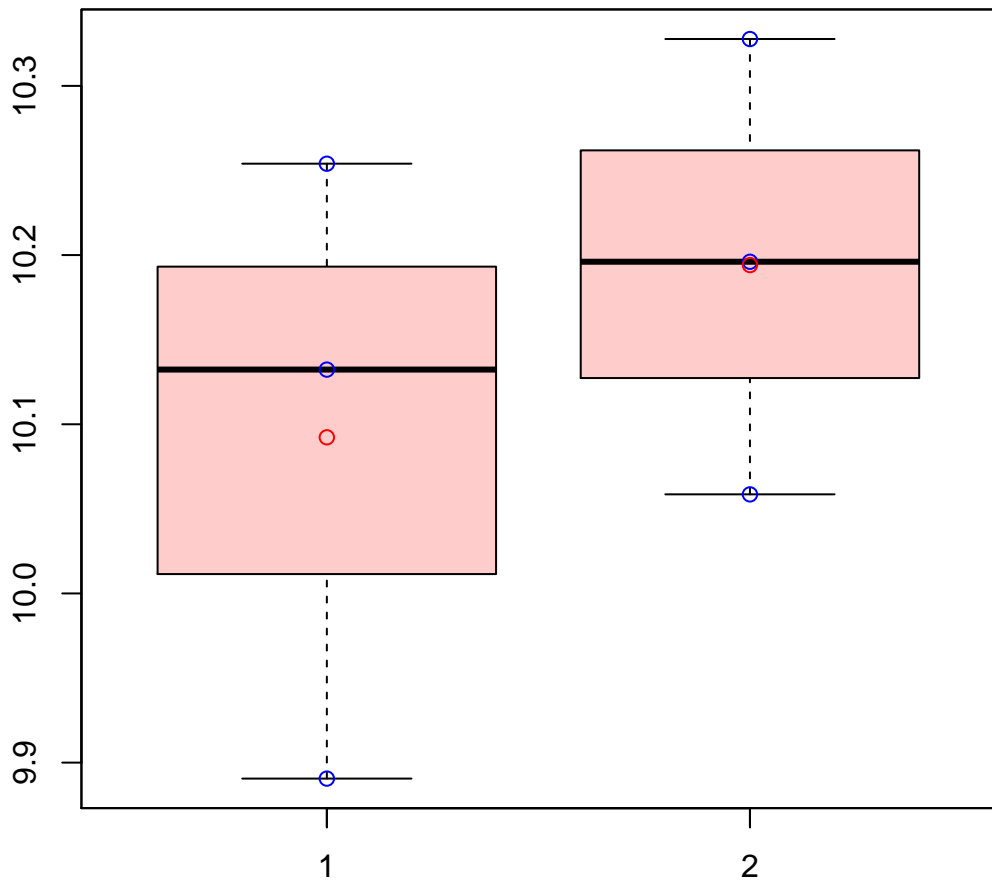

t-Test: p-value = 0.49

# CL3625Contig2|CL3625Contig2

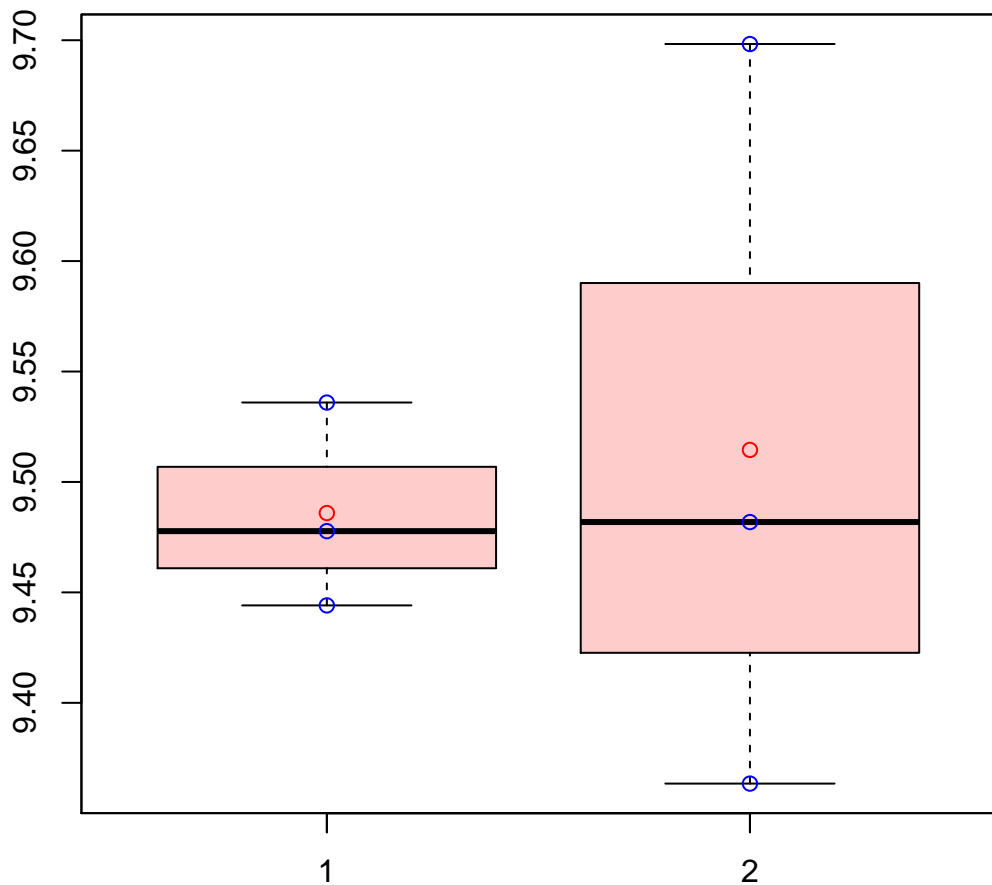

t-Test: p-value = 0.8

# CL3629Contig1|CL3629Contig1

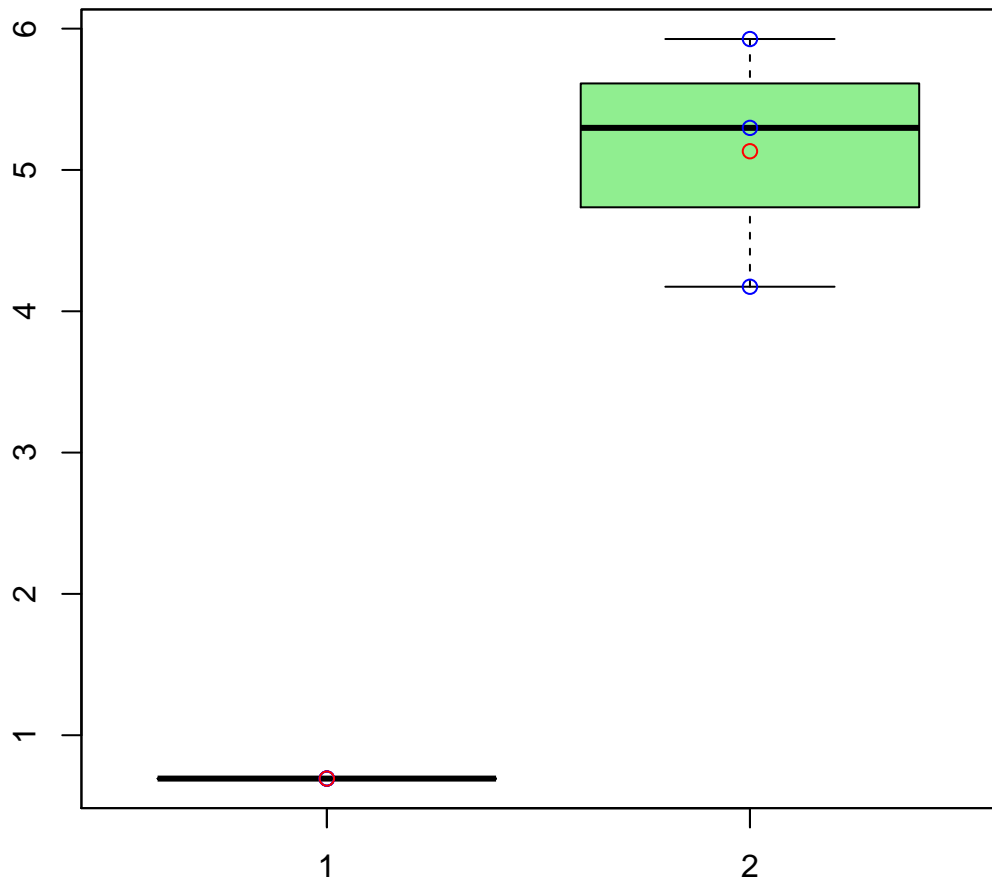

t-Test: p-value = 0.01

# CL3629Contig2|CL3629Contig2

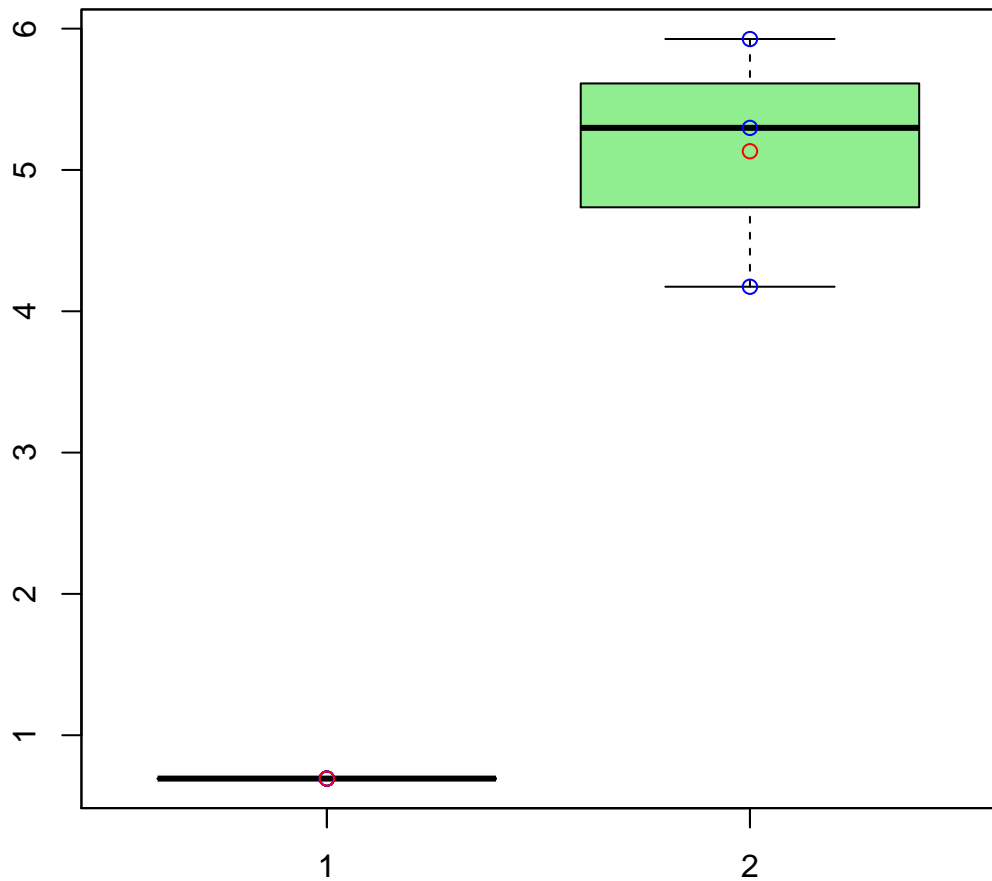

t-Test: p-value = 0.01

# CL362Contig10|CL362Contig10

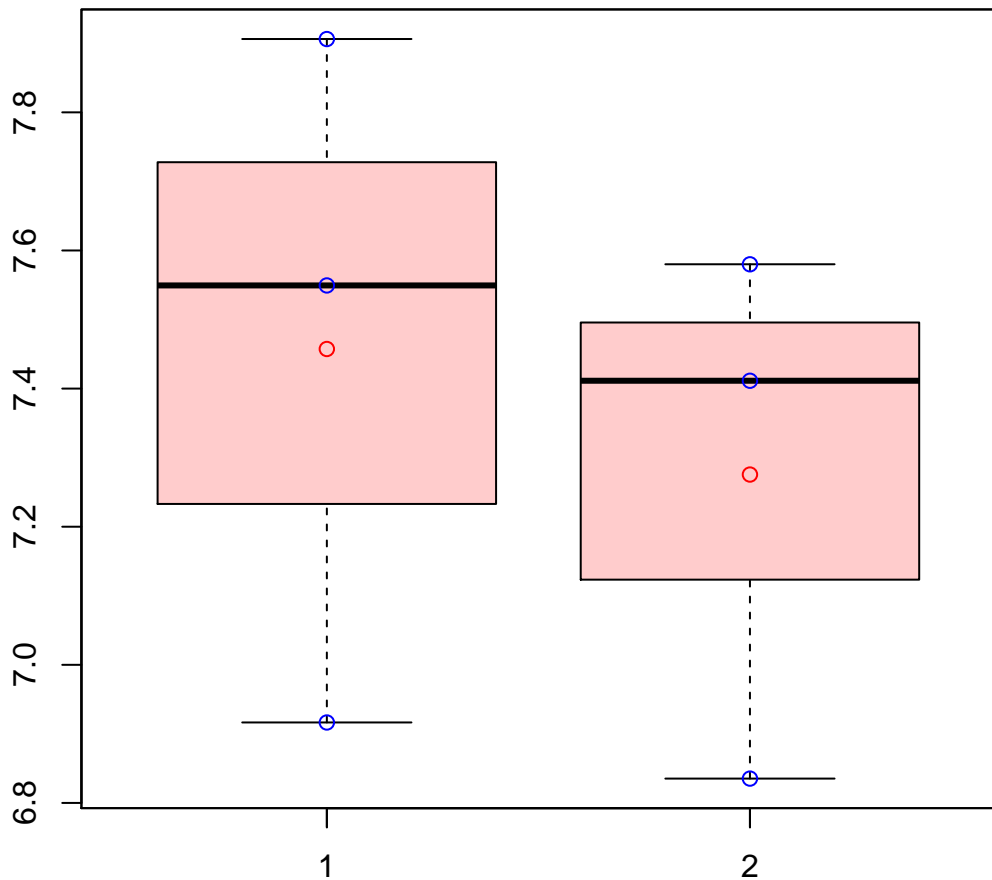

t-Test: p-value = 0.65

# CL362Contig3|CL362Contig3



t-Test: p-value = 0.65

# CL3631Contig3|CL3631Contig3

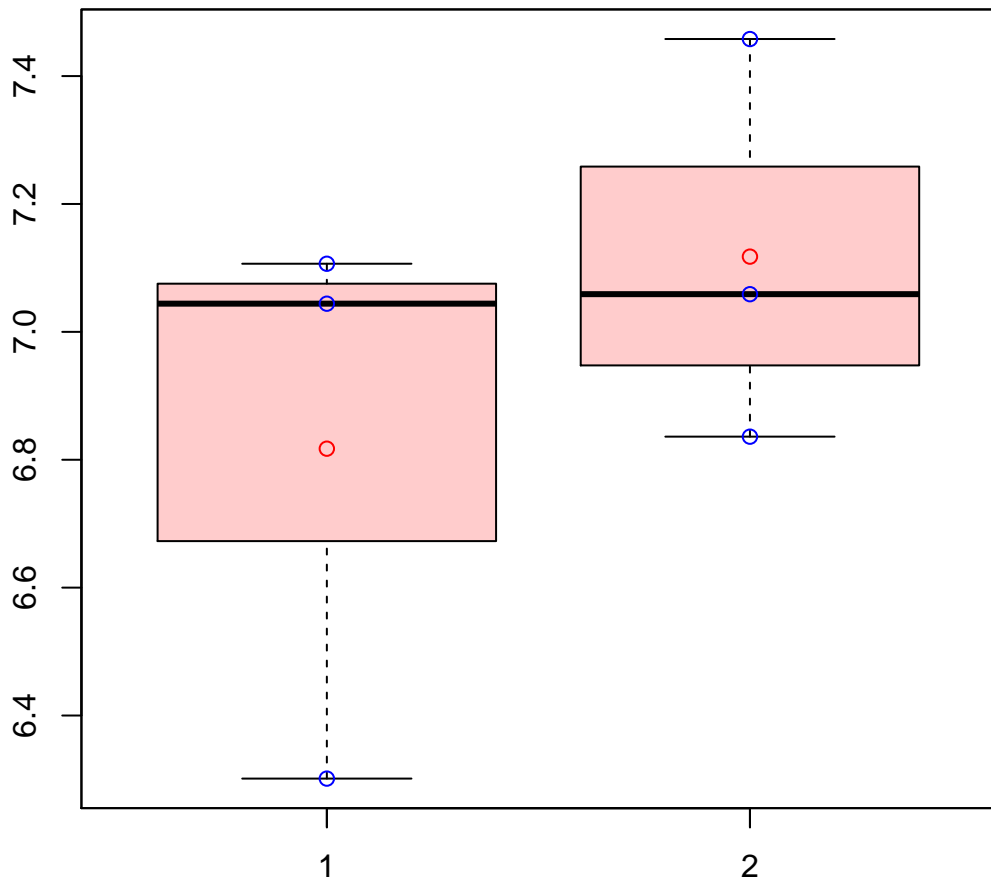

t-Test: p-value = 0.4

# CL3635Contig1|CL3635Contig1

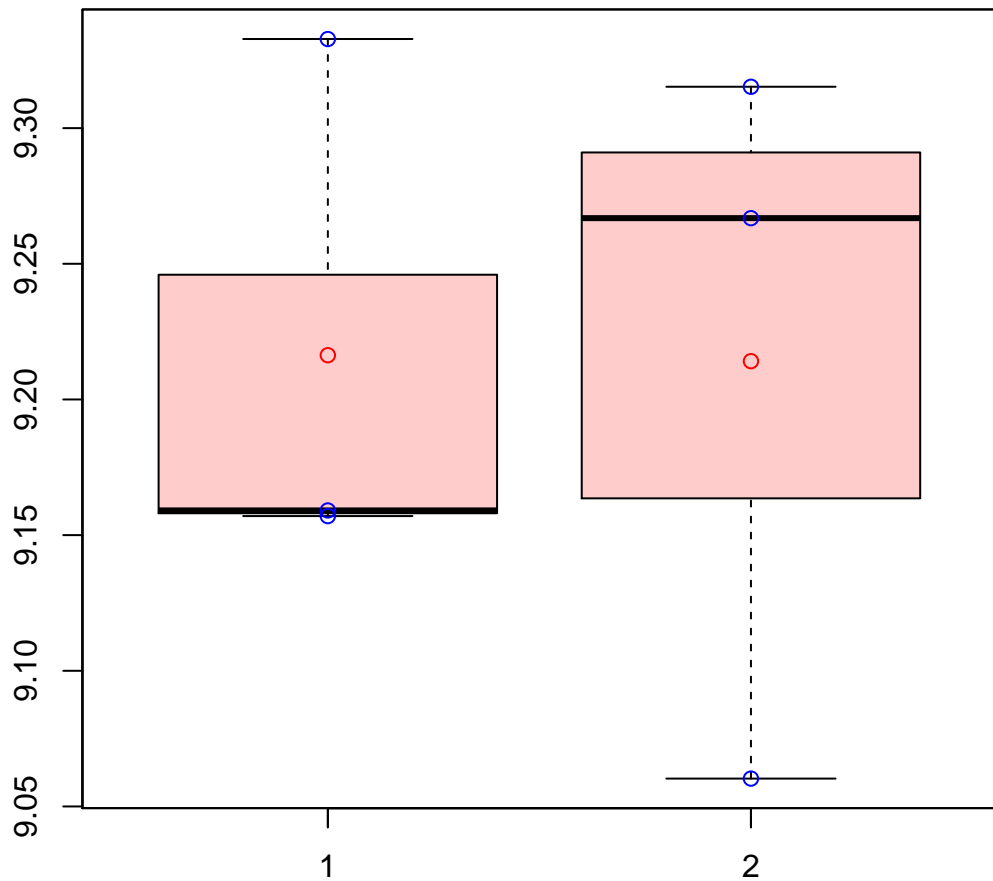

t-Test: p-value = 0.98



# CL363Contig4|CL363Contig4

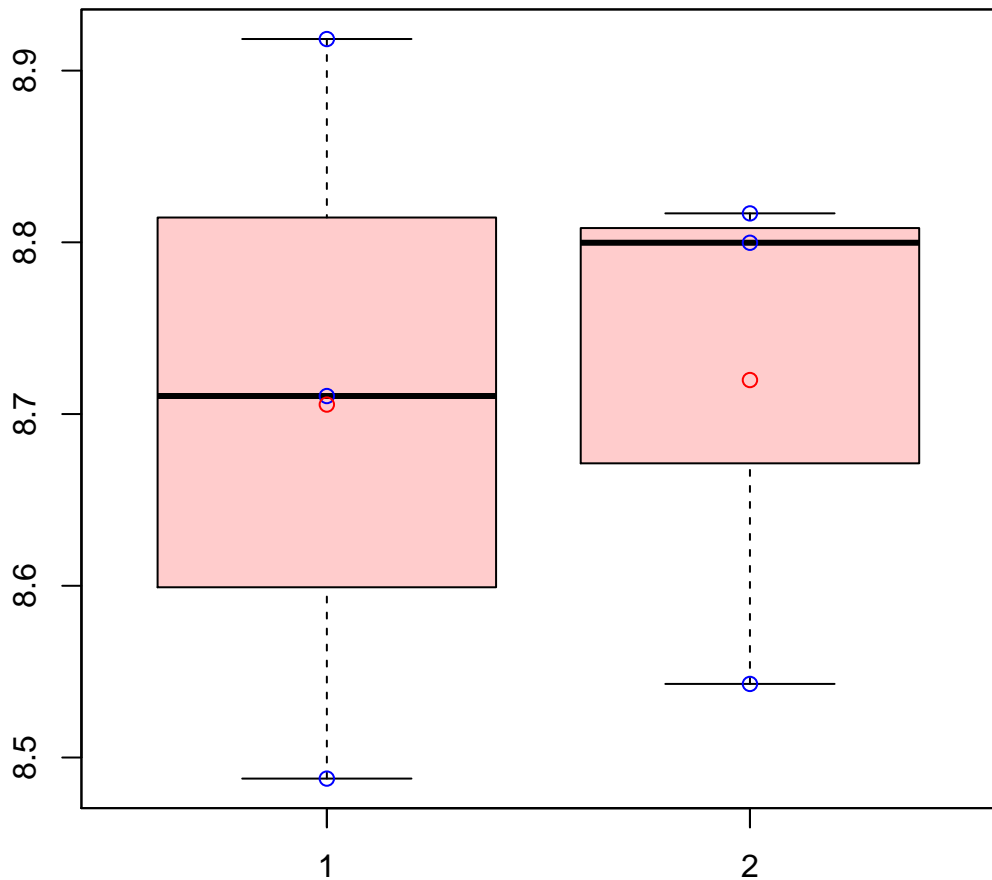

t-Test: p-value = 0.93

# CL3640Contig1|CL3640Contig1

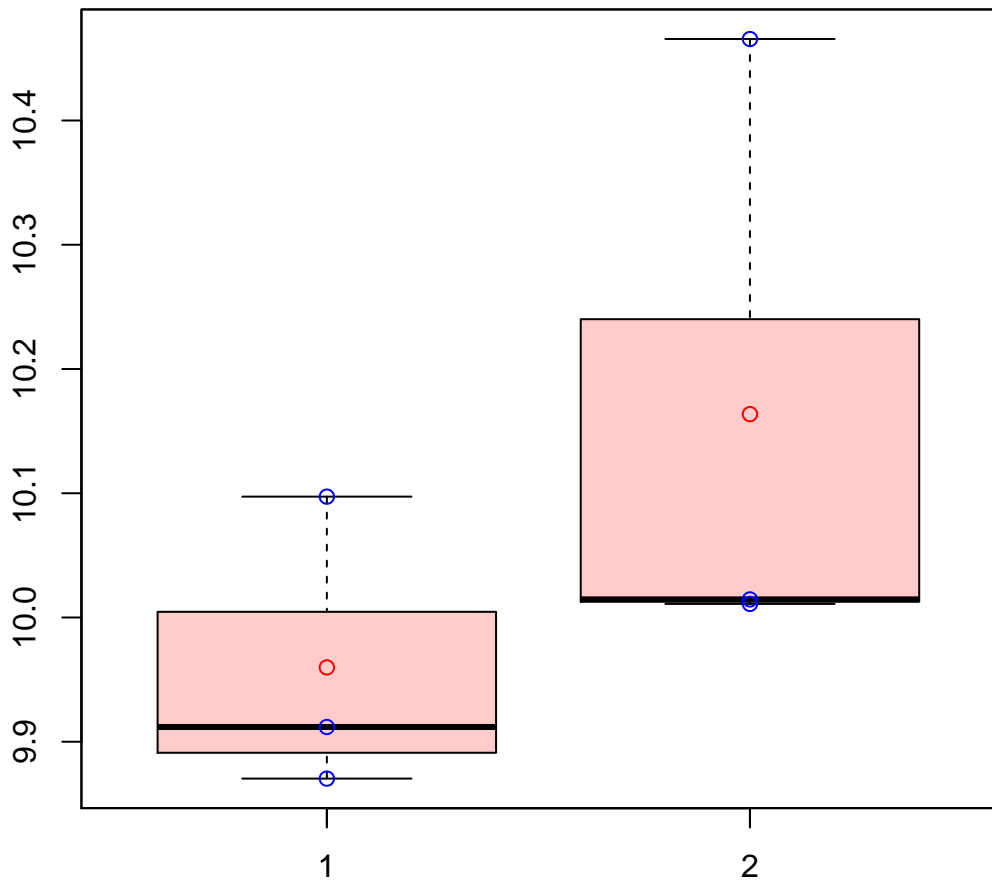

t-Test: p-value = 0.31

# CL3640Contig2|CL3640Contig2

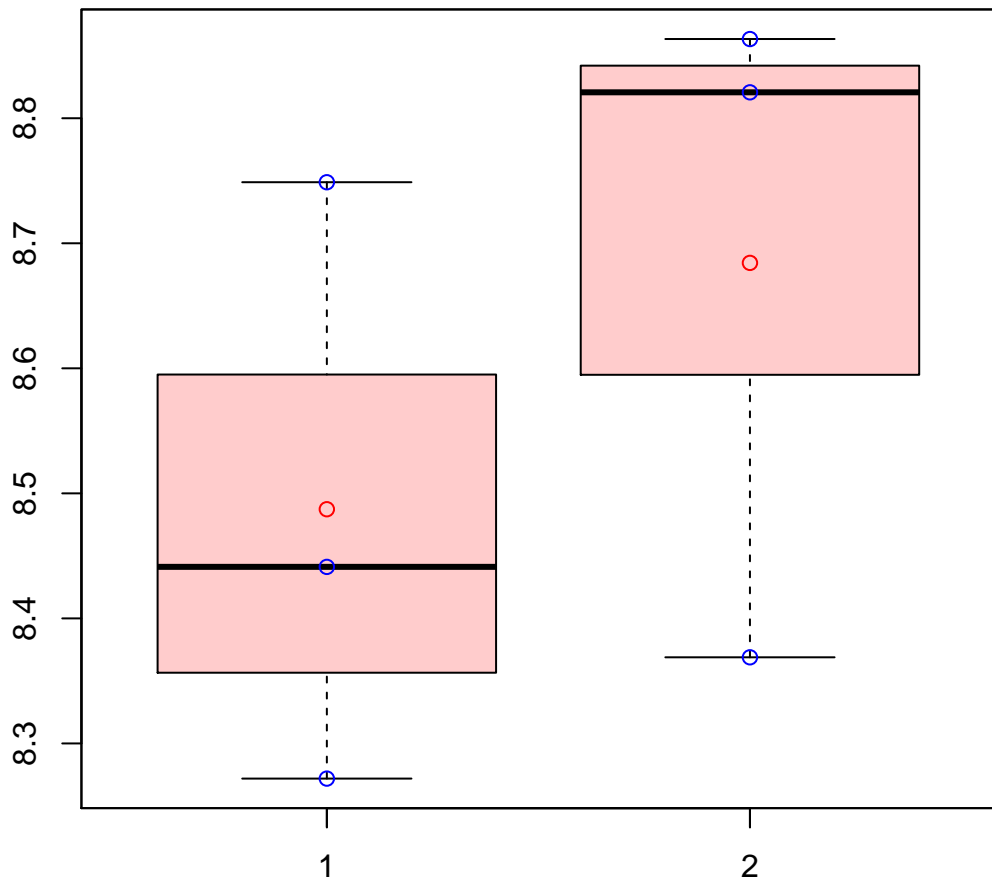

t-Test: p-value = 0.4

# CL3640Contig3|CL3640Contig3

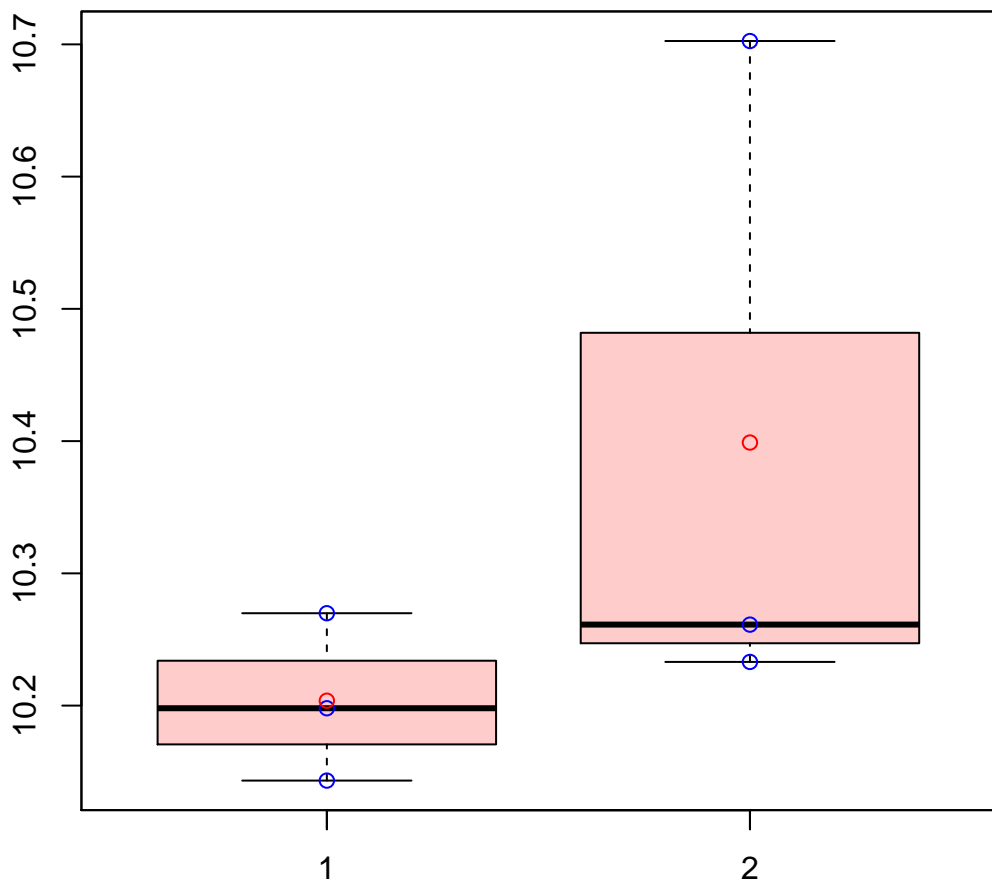

t-Test: p-value = 0.33

# CL3641Contig4|CL3641Contig4

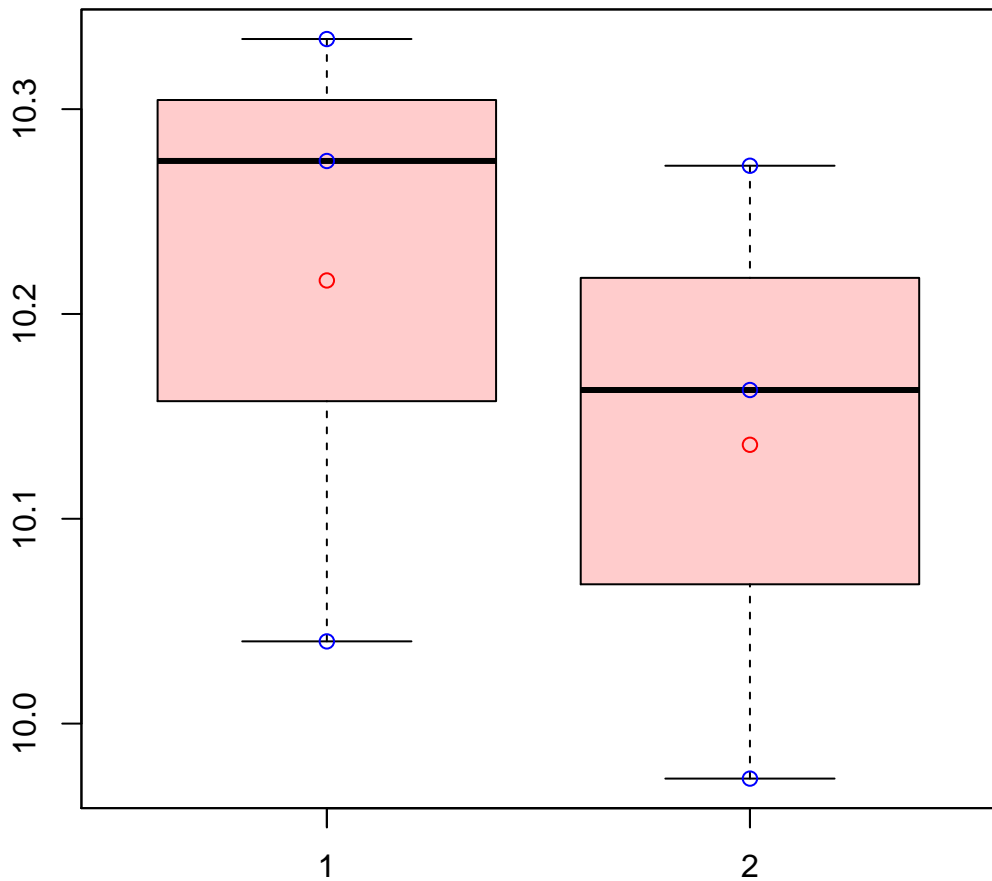

t-Test: p-value = 0.56

# CL3641Contig5|CL3641Contig5

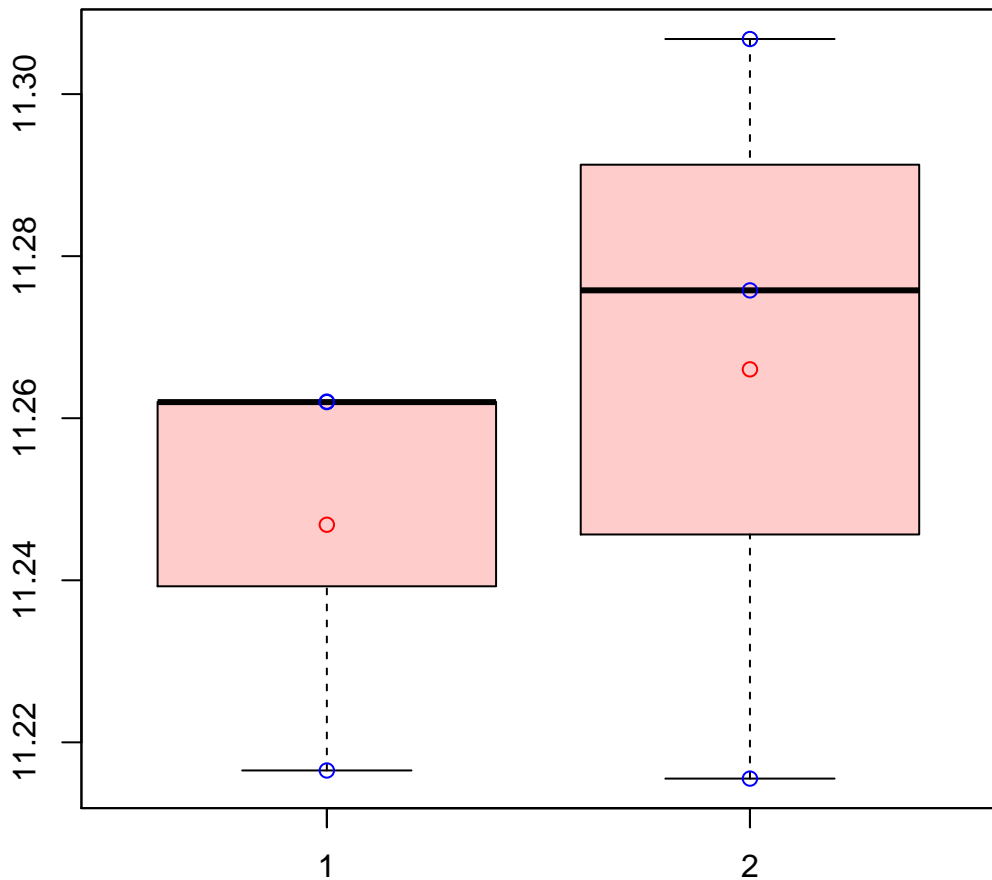

t-Test: p-value = 0.58

# CL3643Contig4|CL3643Contig4

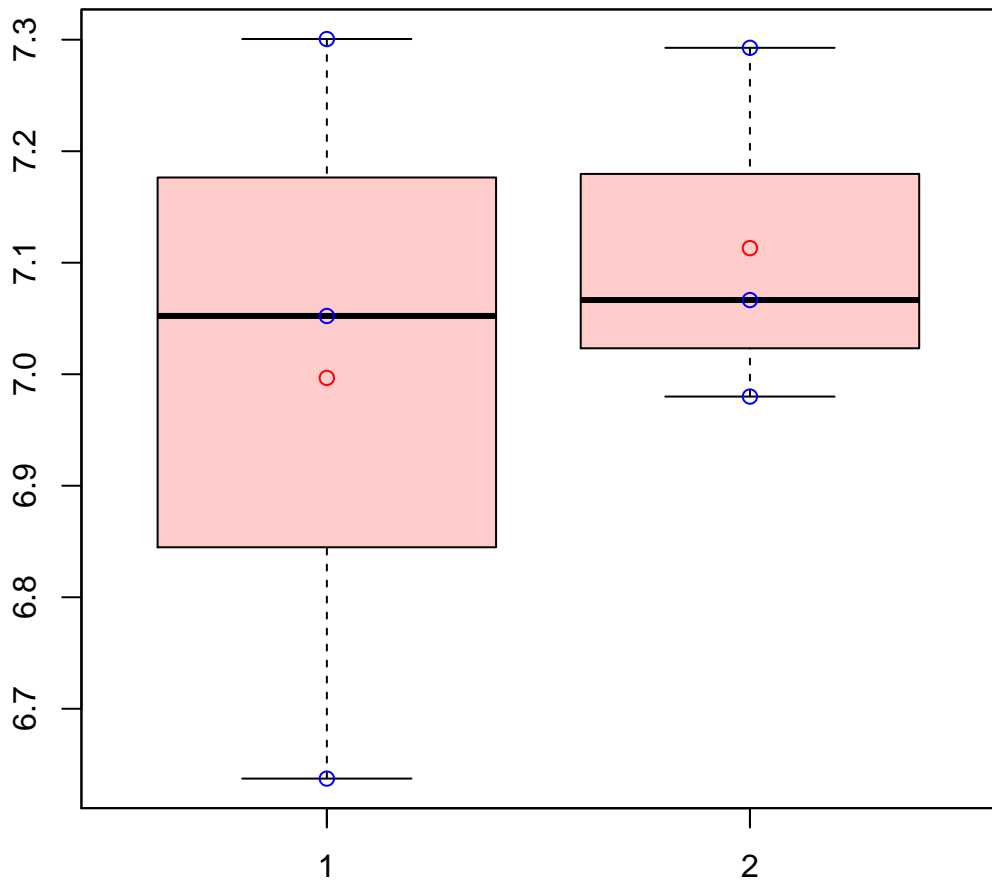

t-Test: p-value = 0.63

# CL3646Contig2|CL3646Contig2

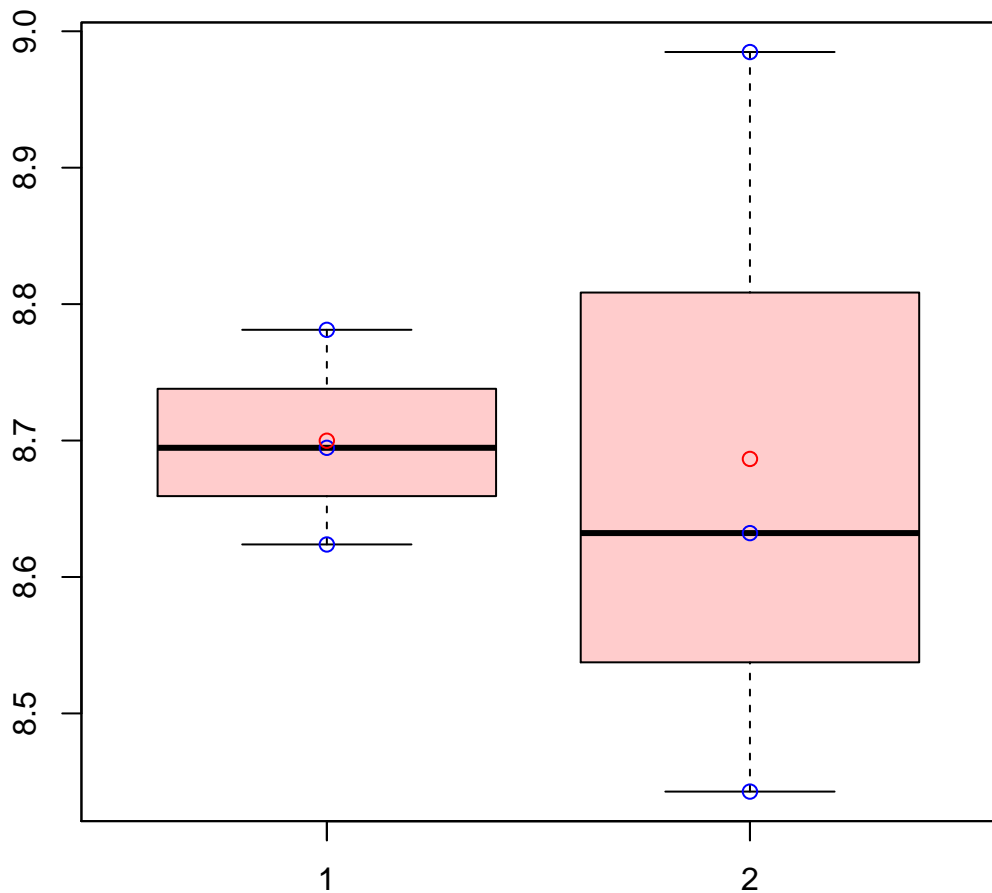

t-Test: p-value = 0.94



# CL3647Contig2|CL3647Contig2

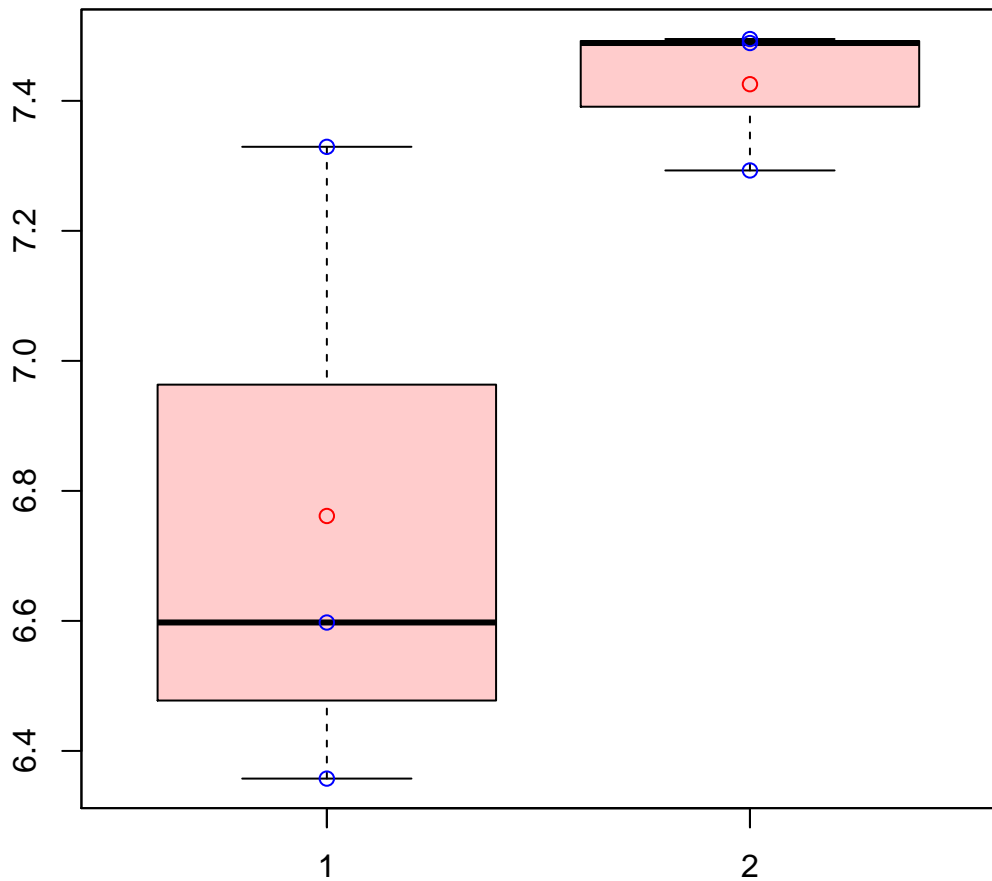

t-Test: p-value = 0.15

# CL3657Contig7|CL3657Contig7

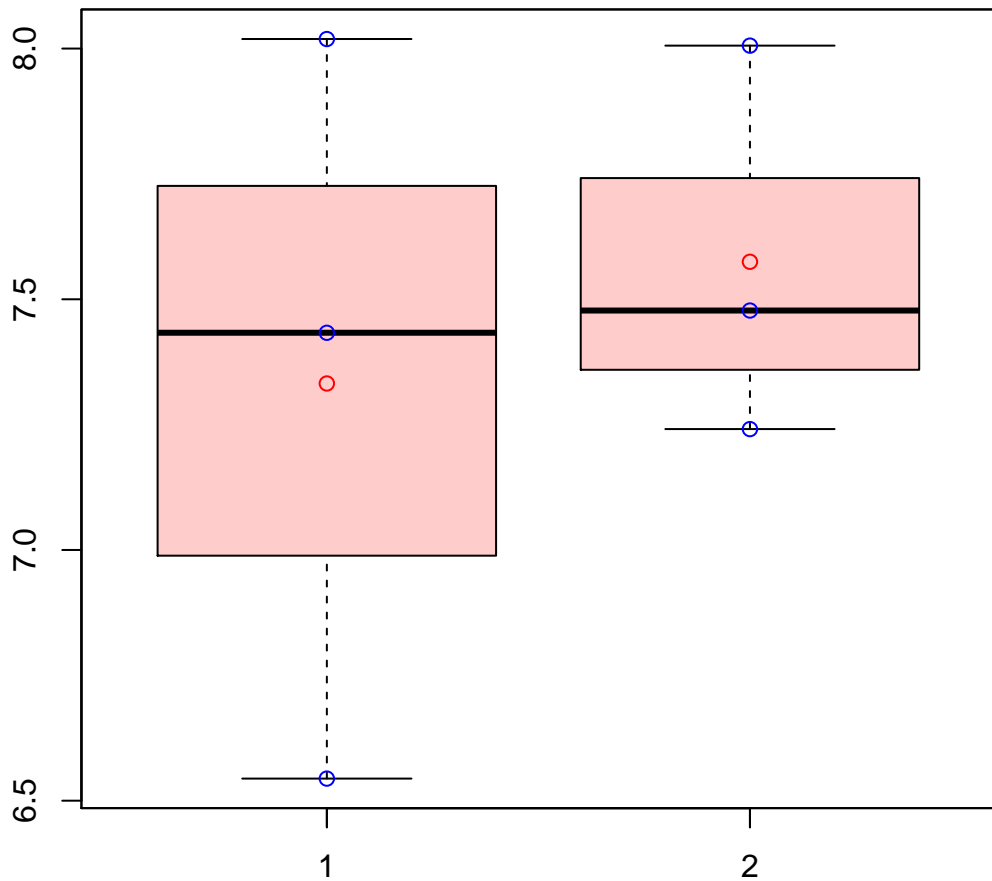

t-Test: p-value = 0.65

# CL365Contig6|CL365Contig6

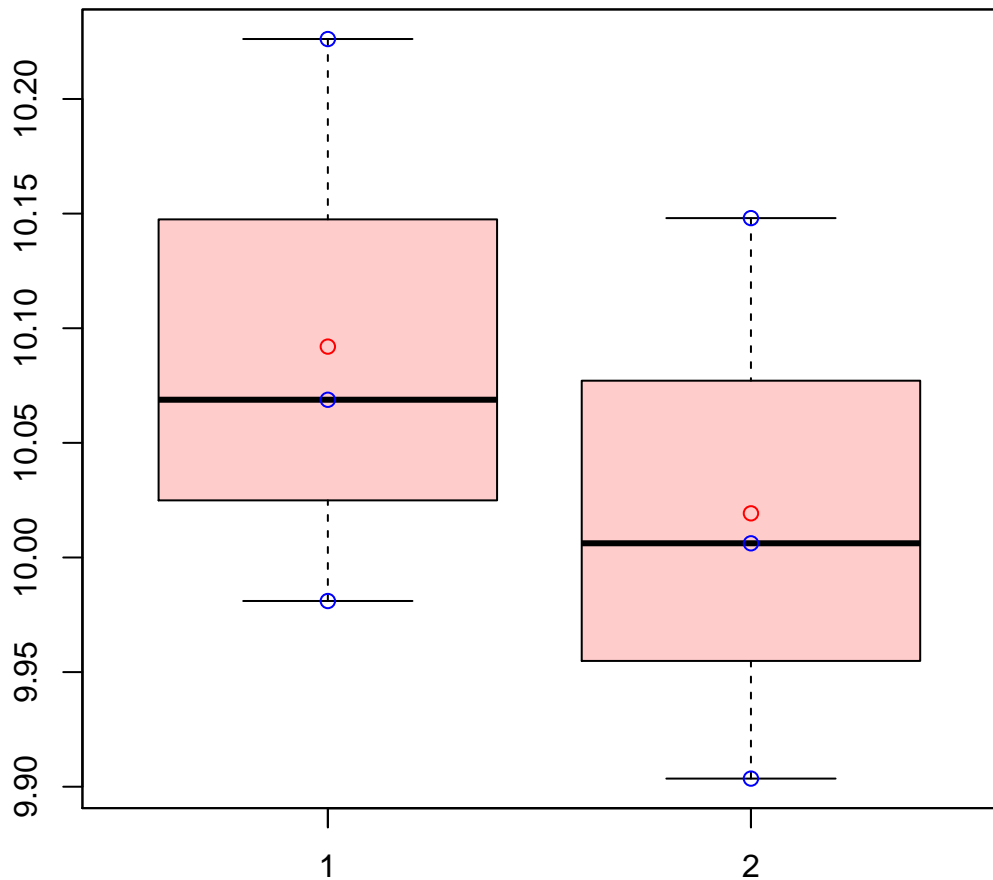

t-Test: p-value = 0.51

# CL3660Contig2|CL3660Contig2

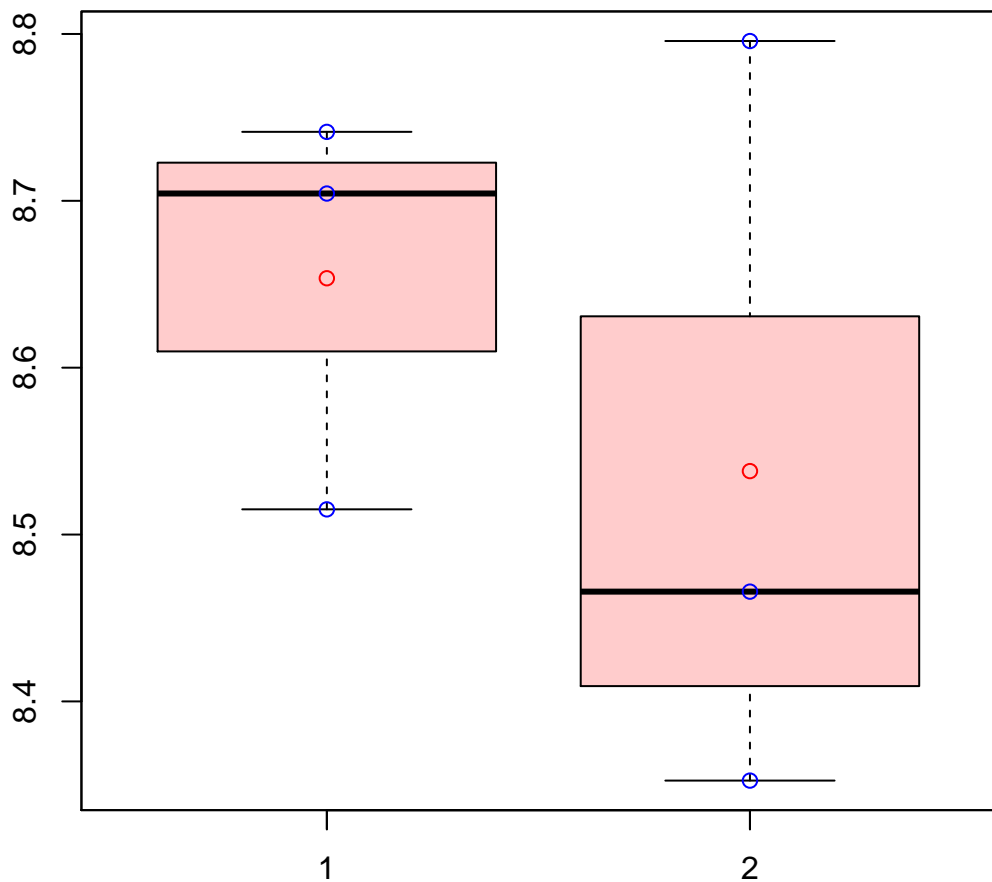

t-Test: p-value = 0.5

# CL3661Contig3|CL3661Contig3

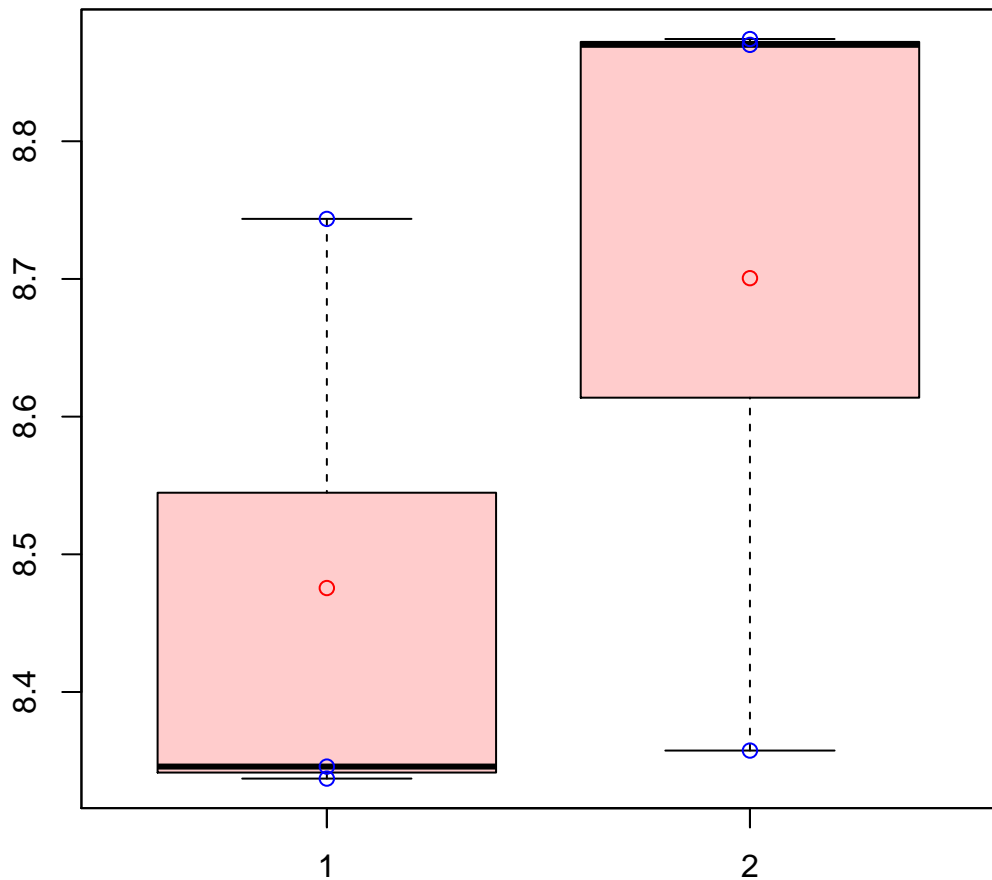

t-Test: p-value = 0.36

# CL366Contig6|CL366Contig6

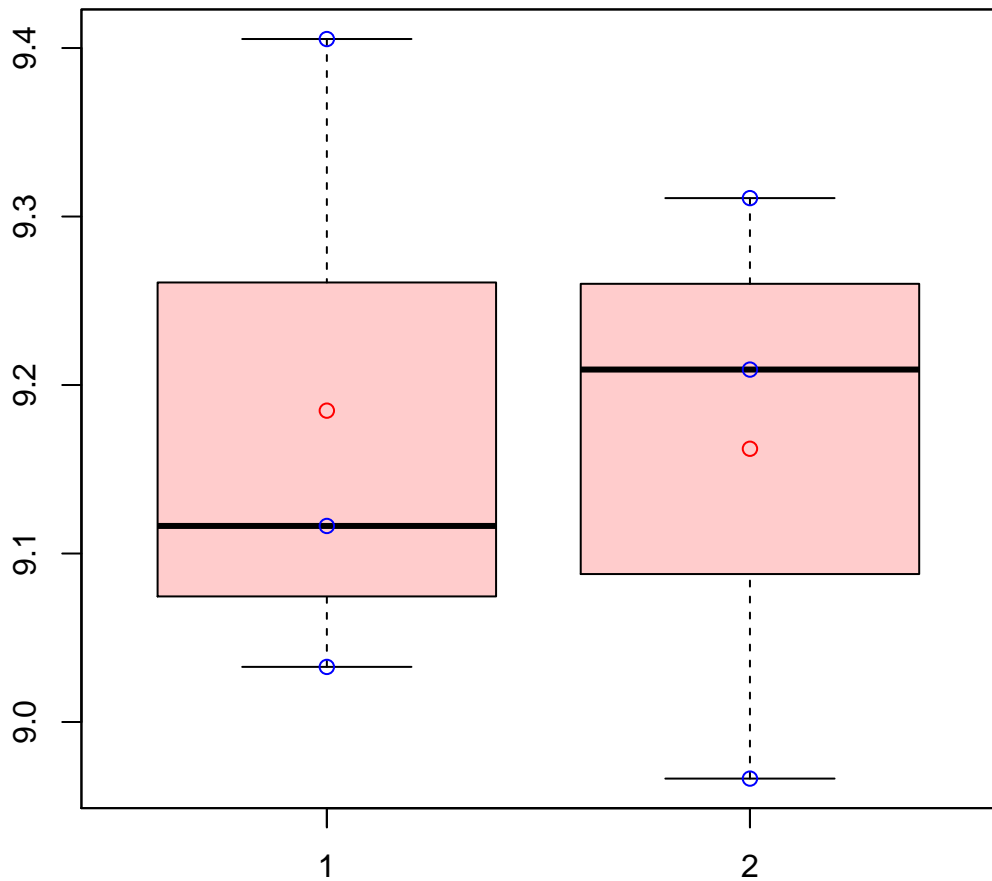

t-Test: p-value = 0.89

# CL3672Contig2|CL3672Contig2

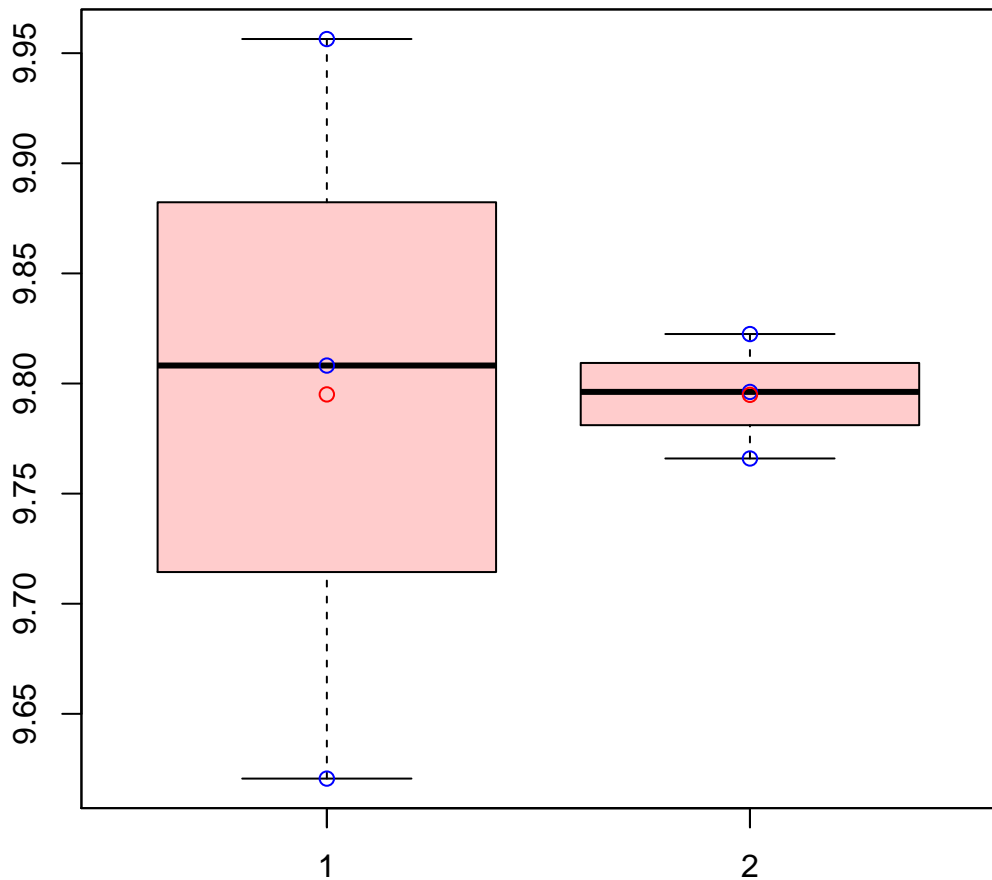

t-Test: p-value = 1

# CL367Contig10|CL367Contig10

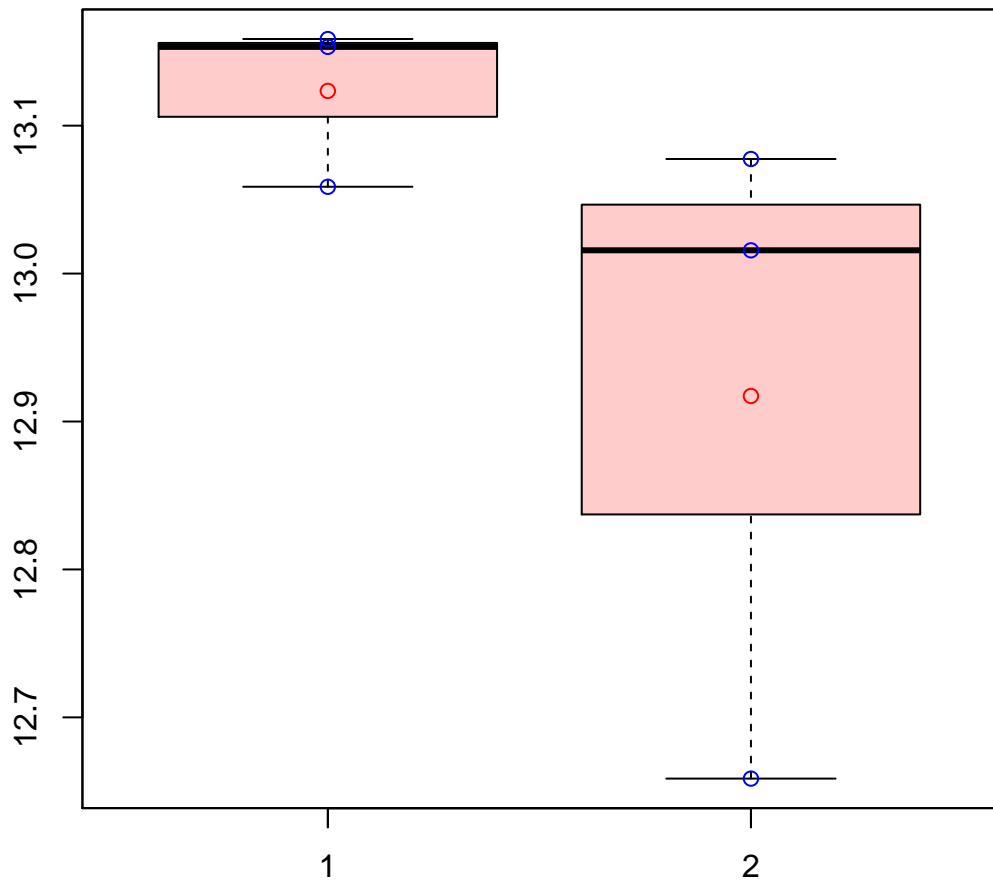

t-Test: p-value = 0.25



# CL367Contig12|CL367Contig12

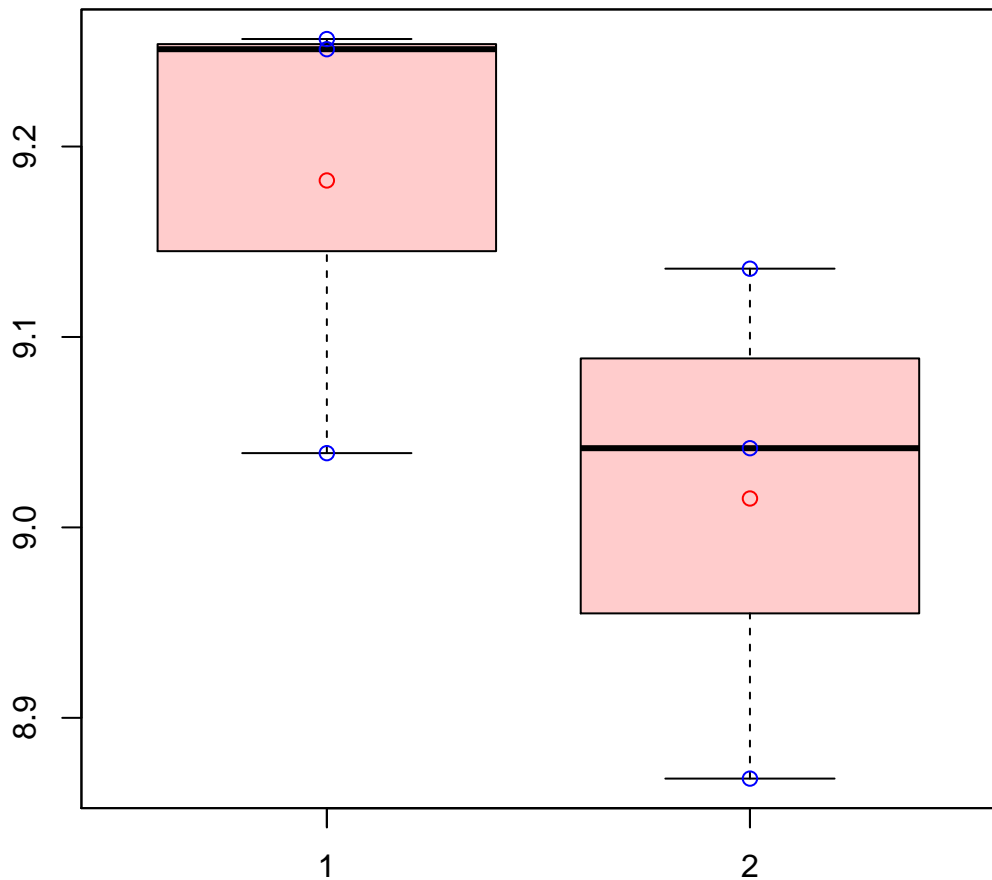

t-Test: p-value = 0.19

# CL367Contig1|CL367Contig1

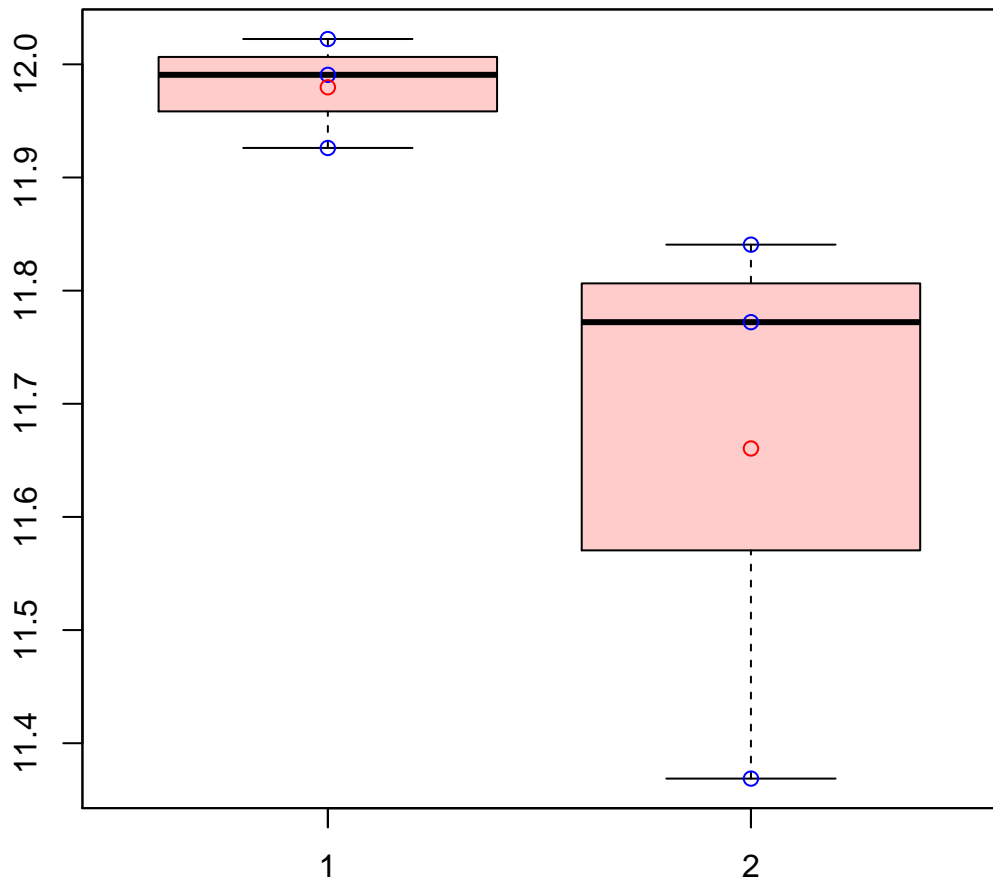

t-Test: p-value = 0.16

# CL367Contig22|CL367Contig22

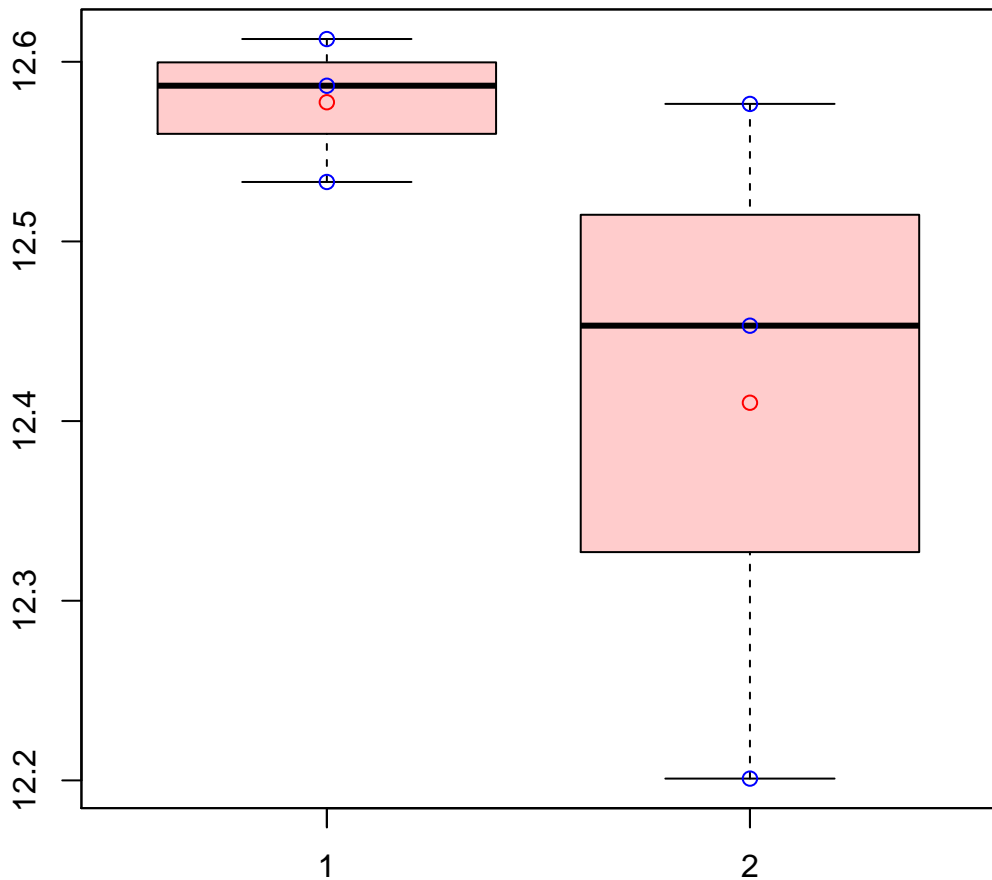

t-Test: p-value = 0.27

# CL367Contig23|CL367Contig23

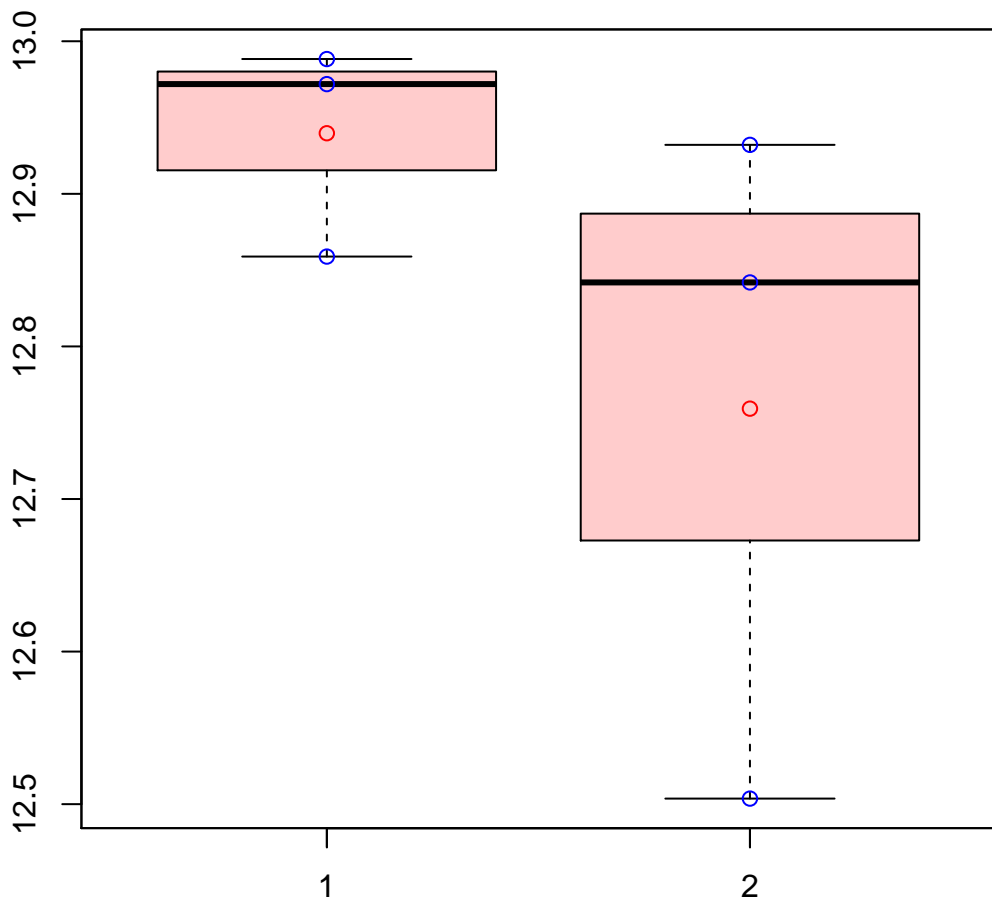

t-Test: p-value = 0.3

# CL367Contig2|CL367Contig2

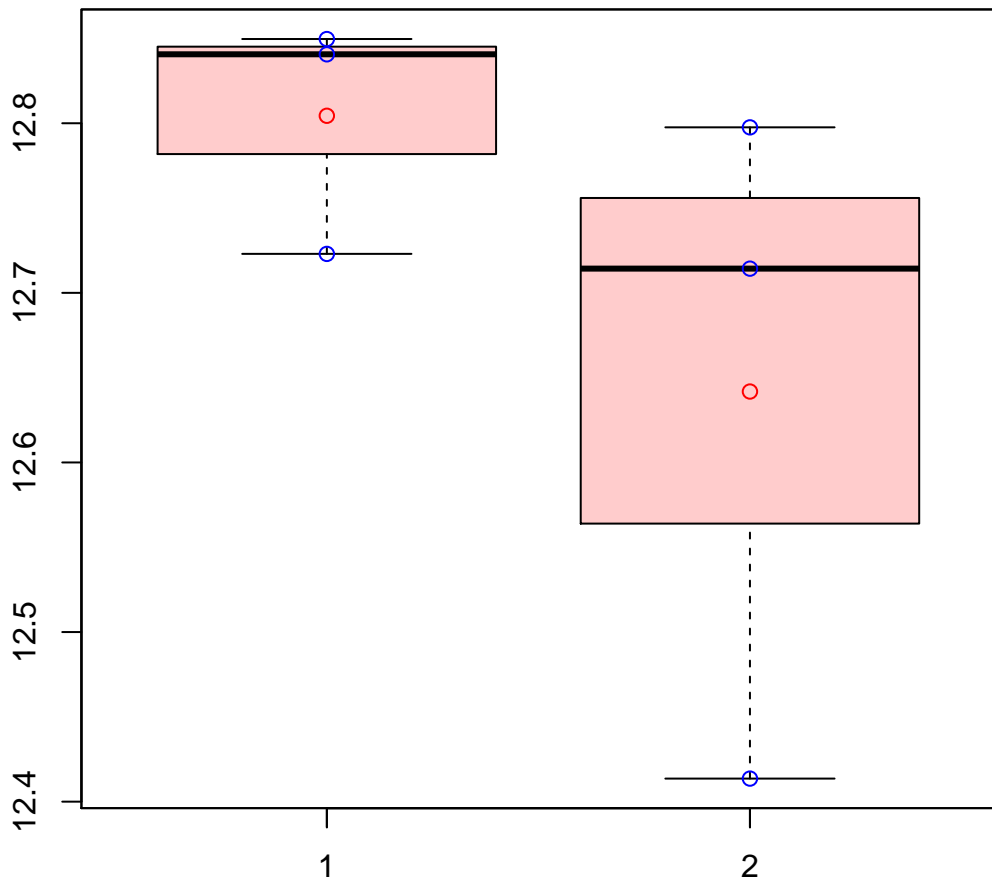

t-Test: p-value = 0.3

# CL367Contig32|CL367Contig32

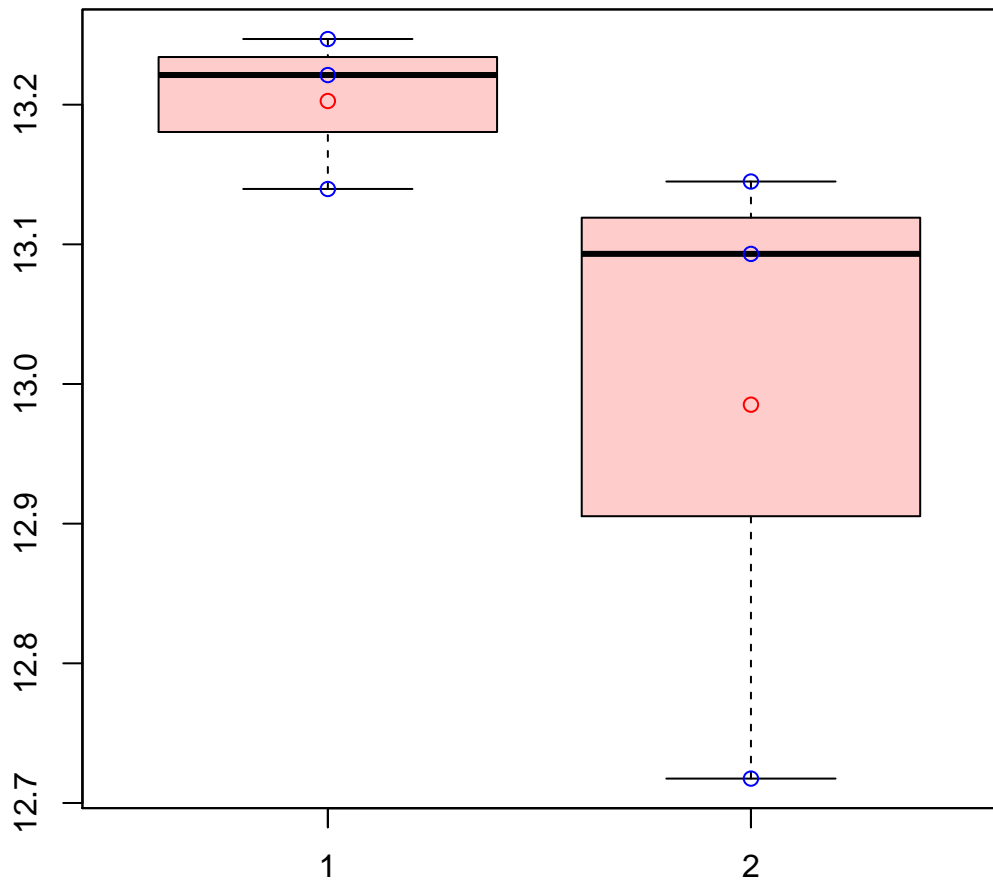

t-Test: p-value = 0.24

# CL367Contig7|CL367Contig7

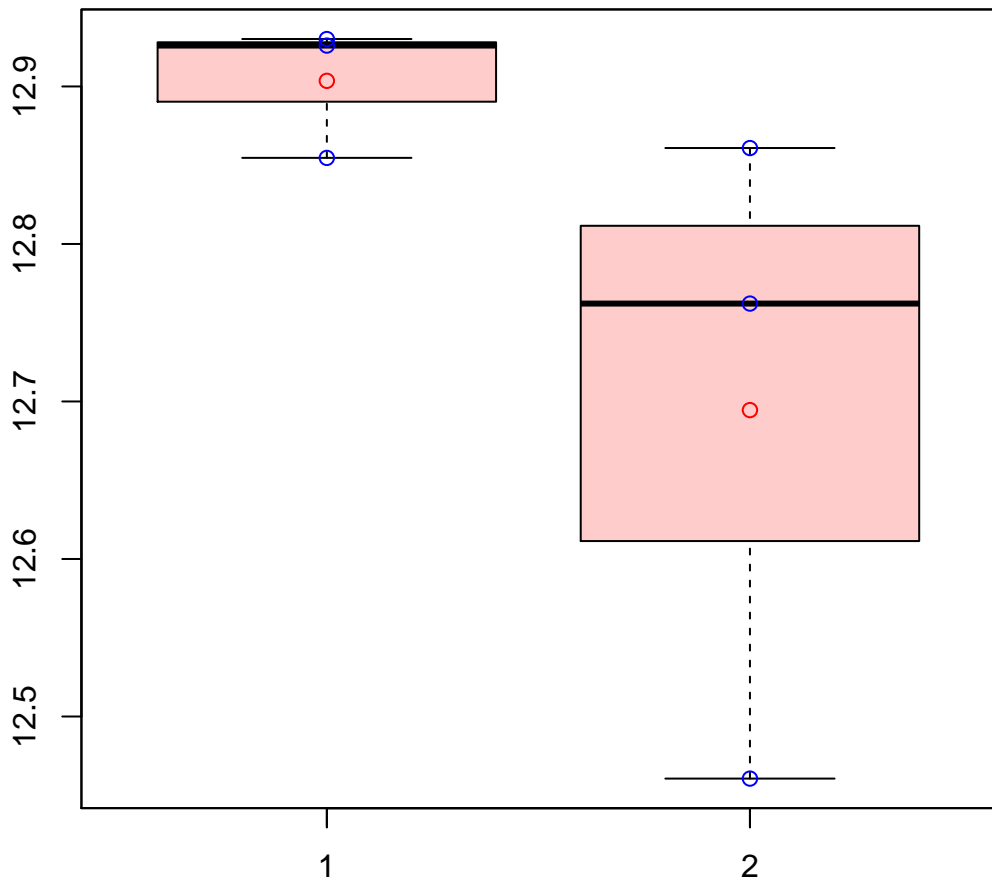

t-Test: p-value = 0.22

# CL3687Contig5|CL3687Contig5



t-Test: p-value = 0.04



# CL3687Contig7|CL3687Contig7

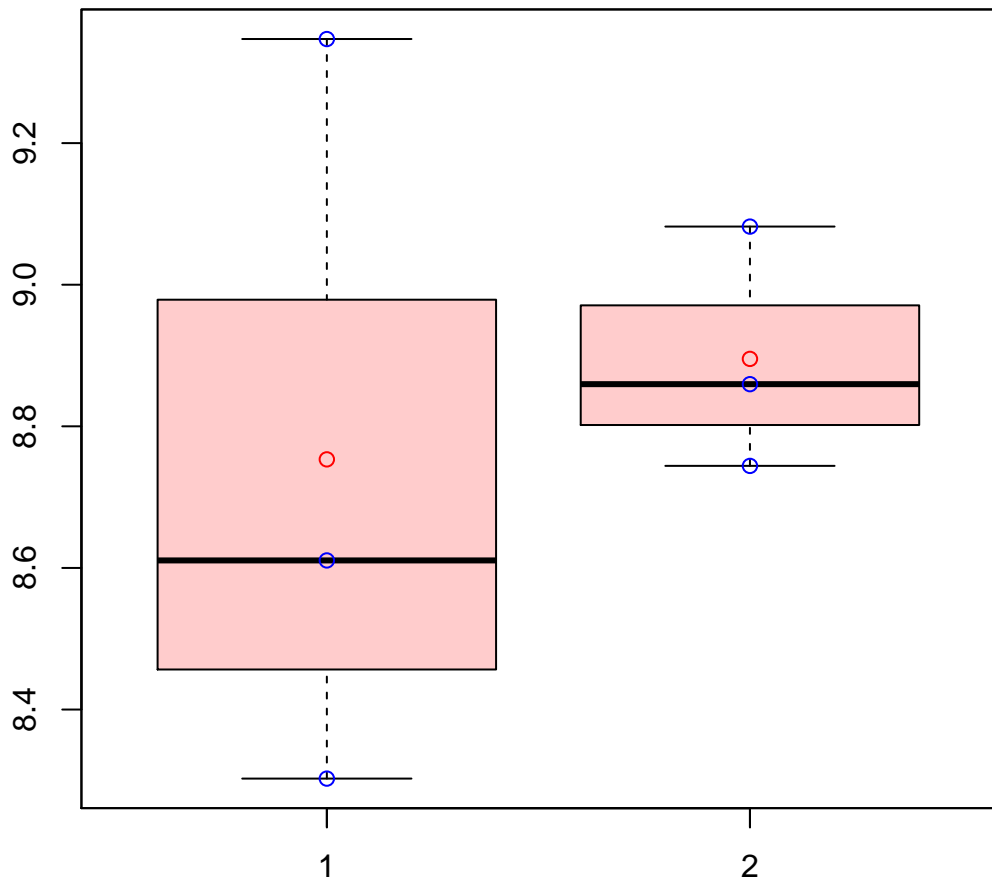

t-Test: p-value = 0.7

# CL368Contig5|CL368Contig5

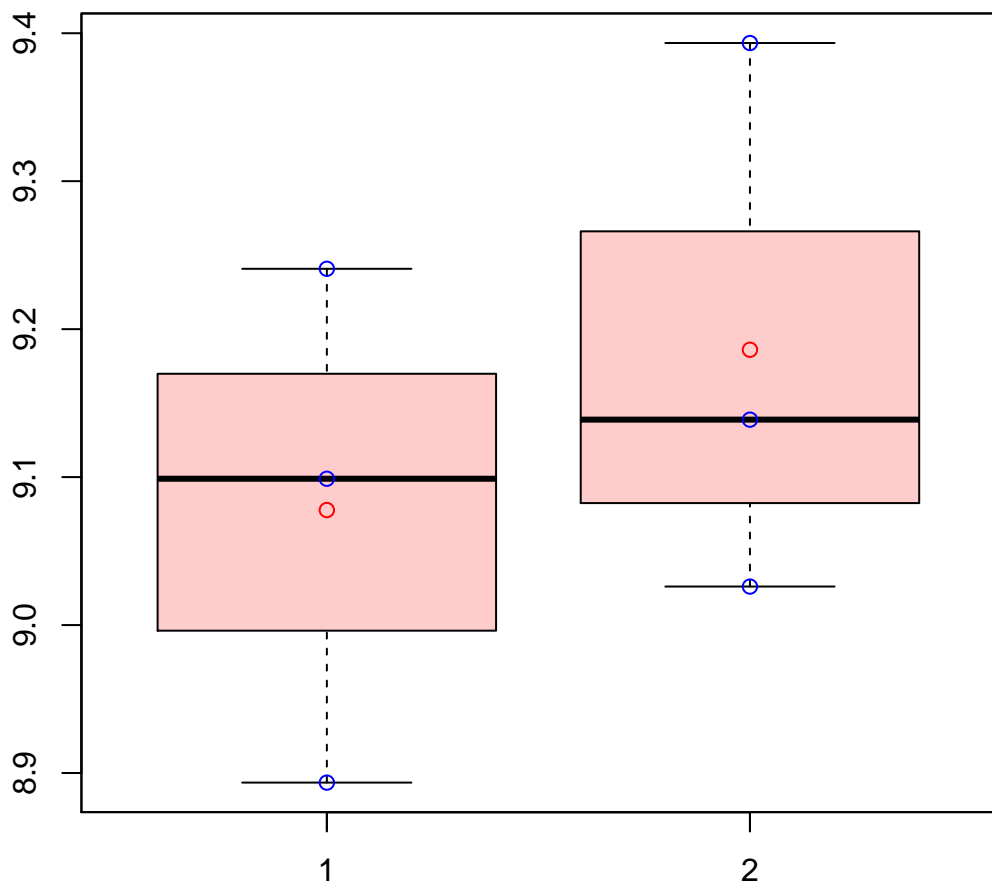

t-Test: p-value = 0.51

# CL368Contig6|CL368Contig6



t-Test: p-value = 0.51

# CL3695Contig2|CL3695Contig2

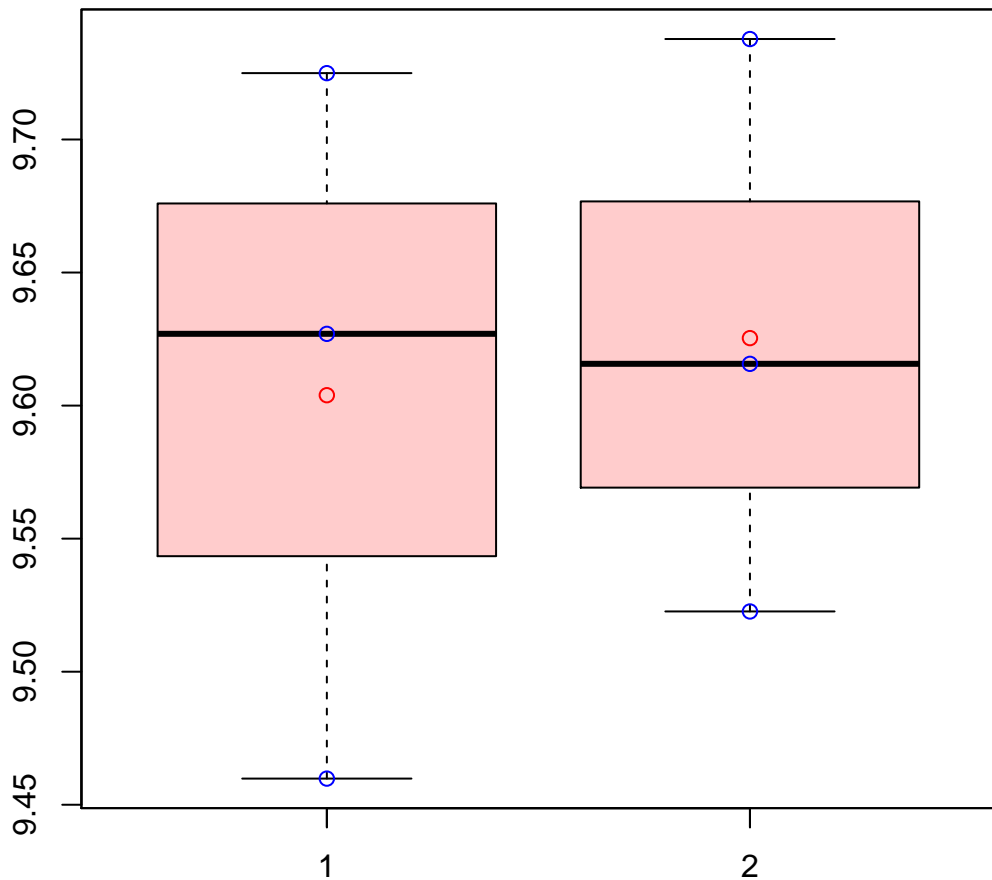

t-Test: p-value = 0.84

# CL3697Contig4|CL3697Contig4

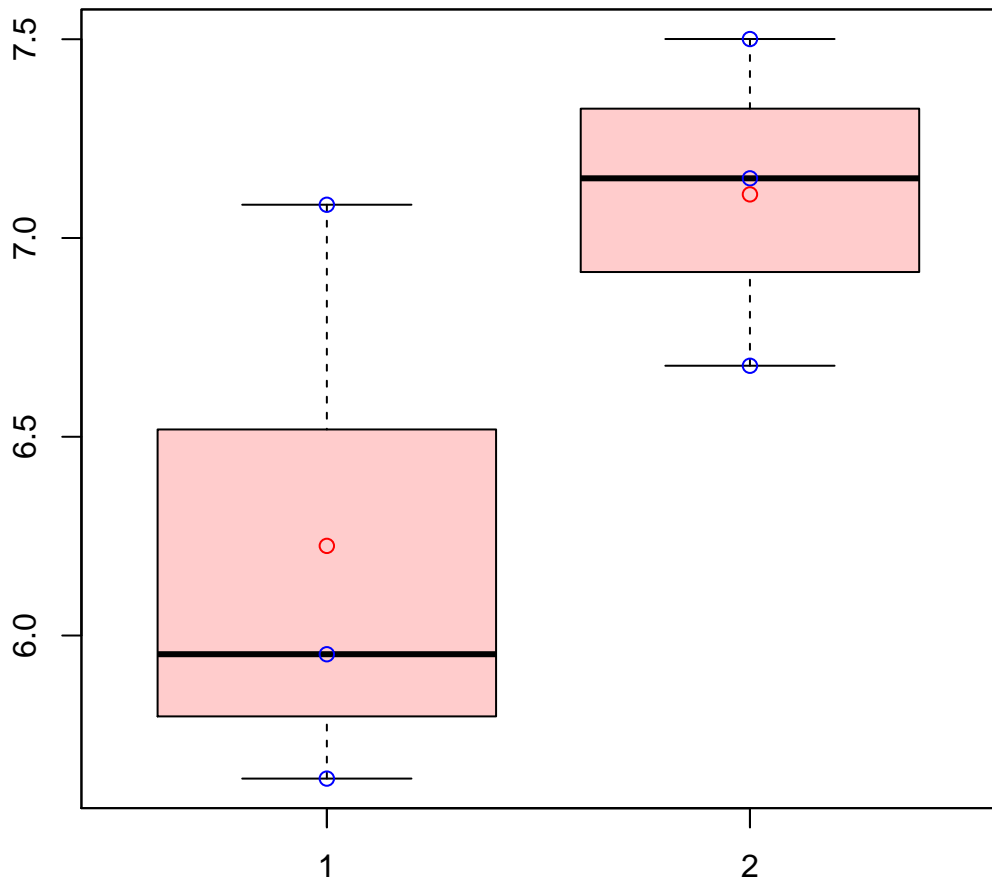

t-Test: p-value = 0.17

# CL3699Contig7|CL3699Contig7

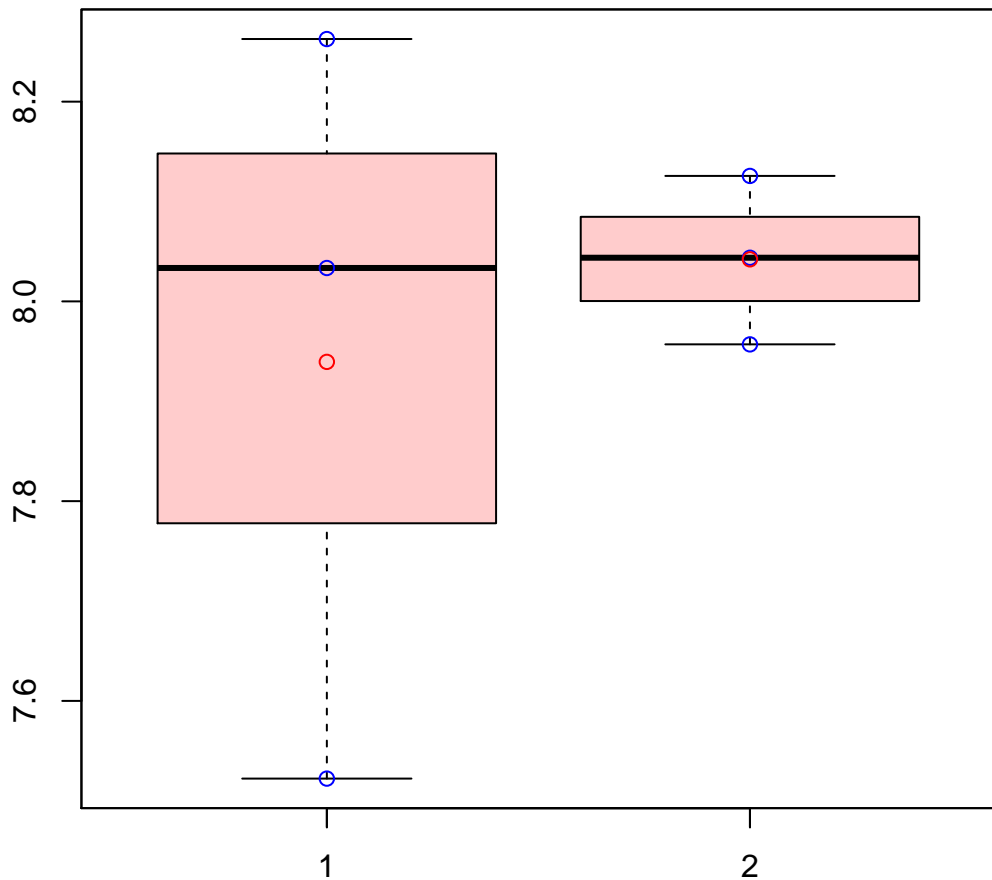

t-Test: p-value = 0.69

# CL369Contig3|CL369Contig3

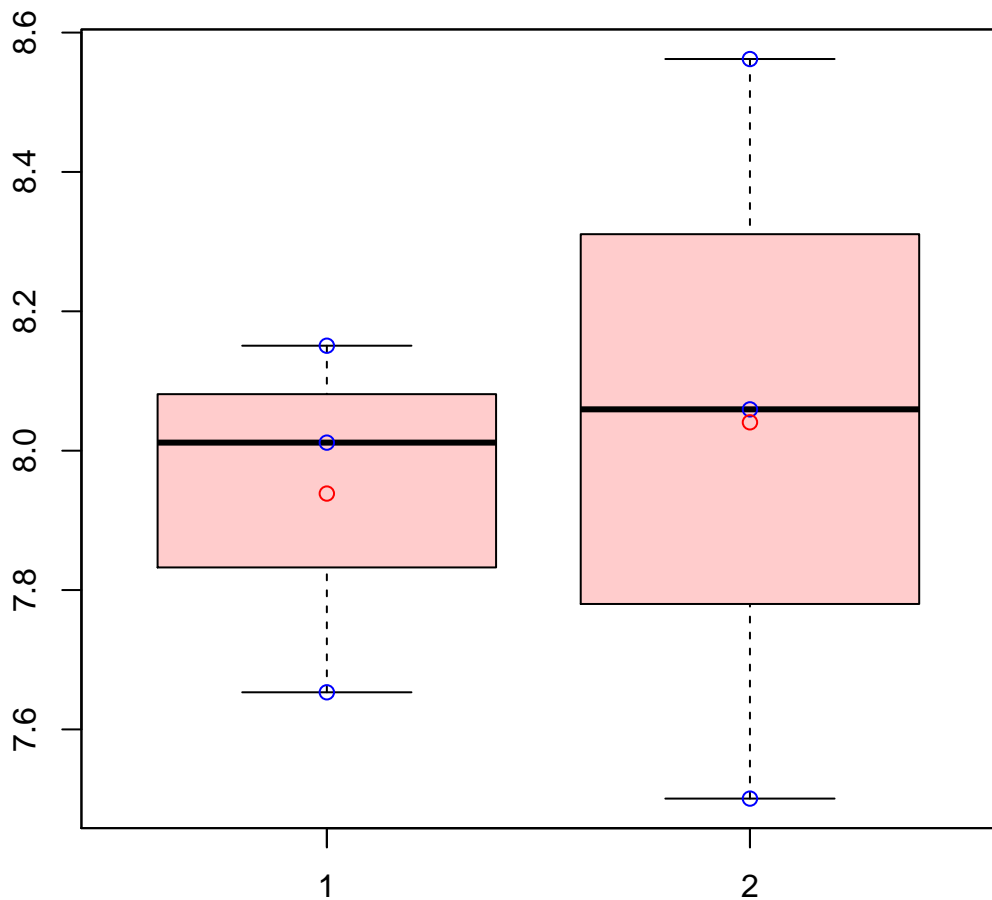

t-Test: p-value = 0.78

# CL36Contig11|CL36Contig11

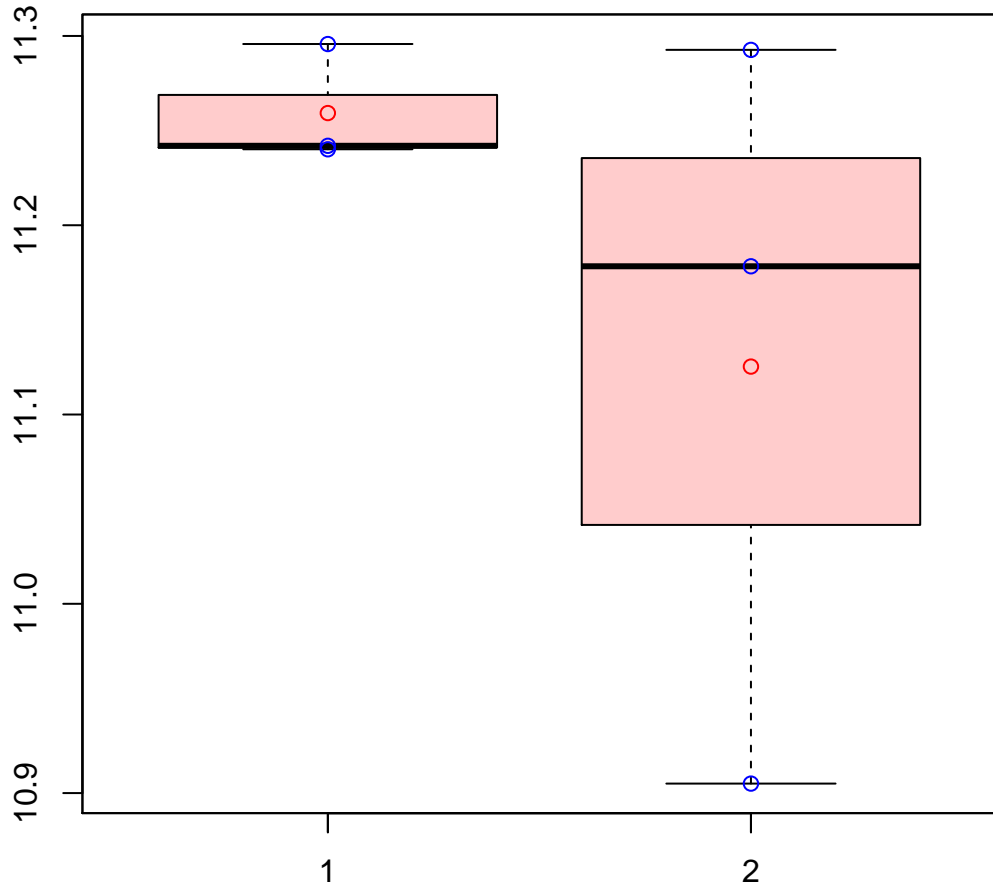

t-Test: p-value = 0.36



# CL36Contig12|CL36Contig12

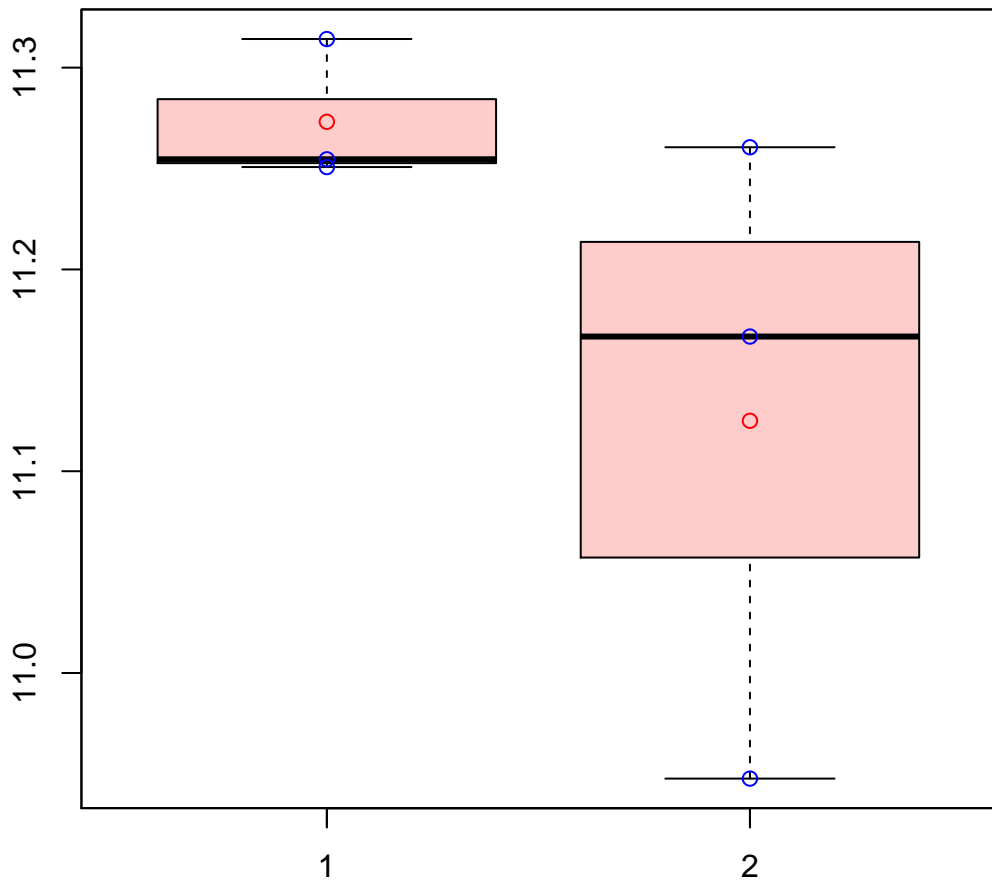

t-Test: p-value = 0.25

# CL36Contig13|CL36Contig13

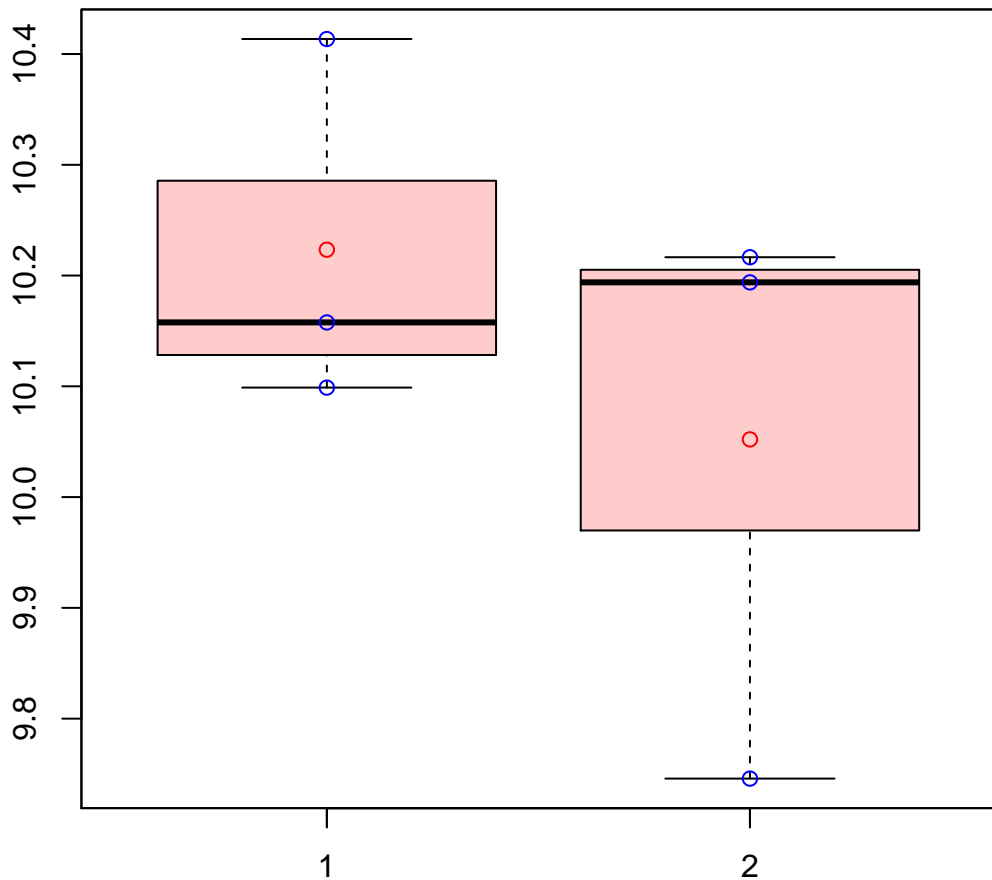

t-Test: p-value = 0.41

# CL36Contig14|CL36Contig14

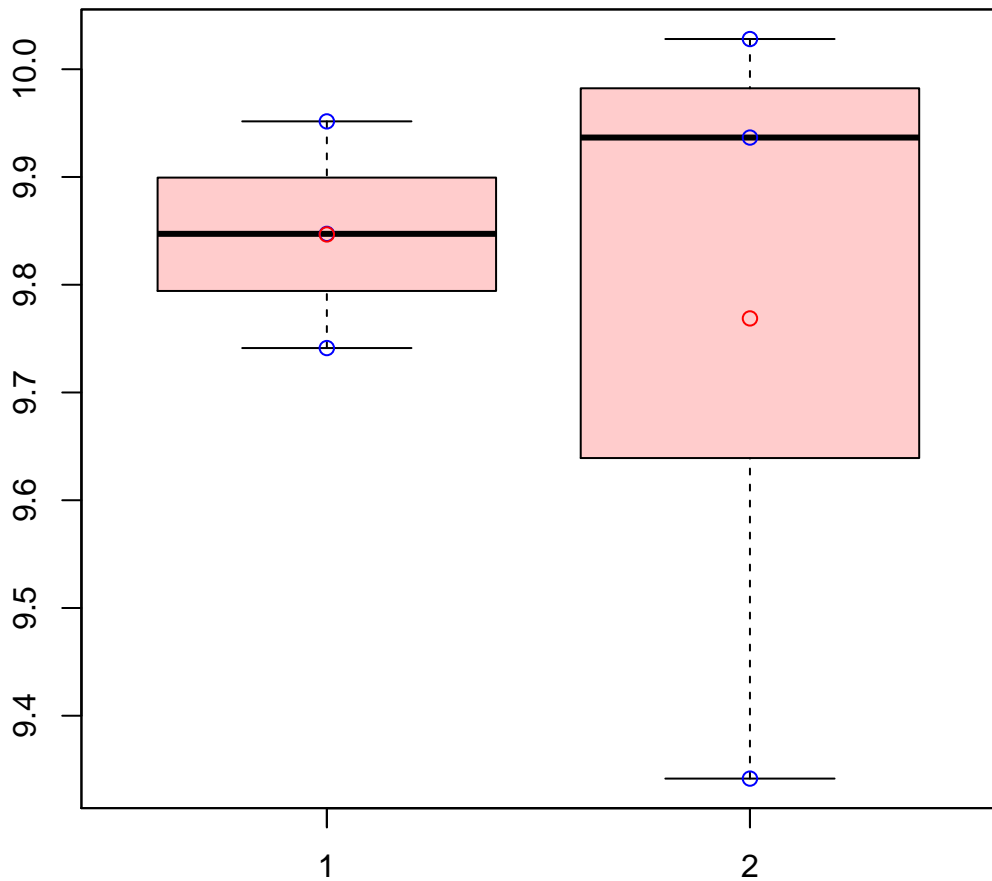

t-Test: p-value = 0.76

# CL36Contig22|CL36Contig22

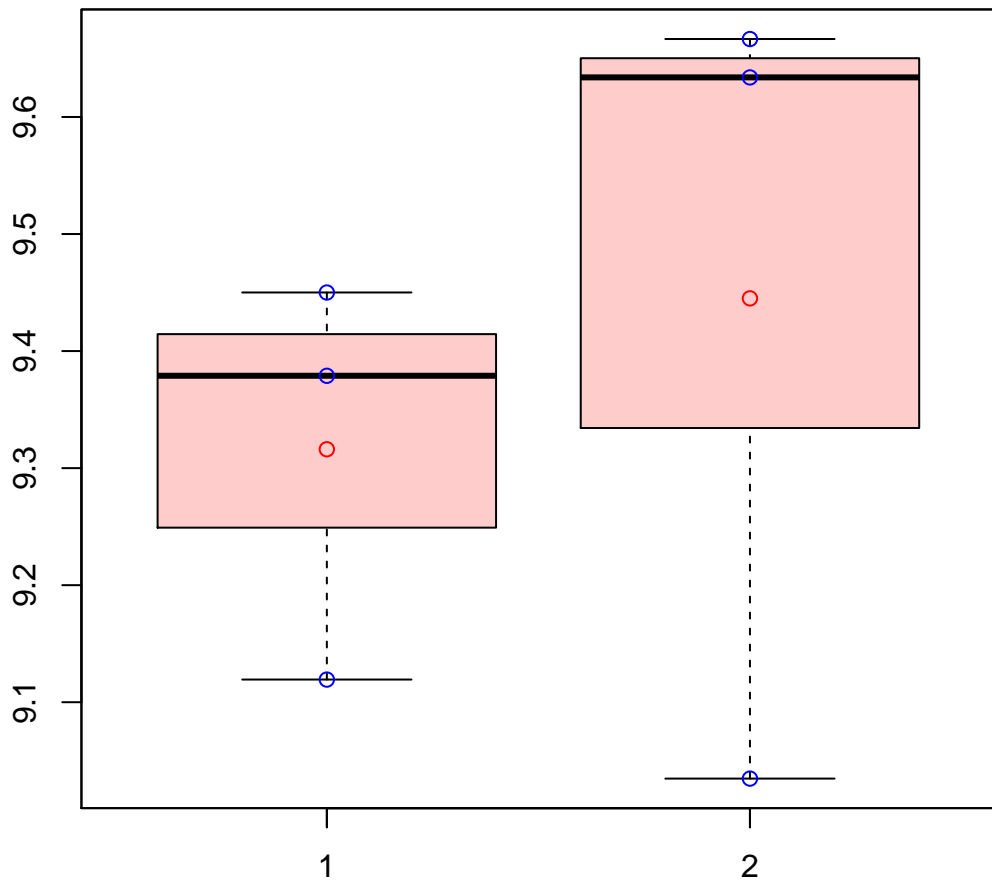

t-Test: p-value = 0.61

# CL36Contig35|CL36Contig35

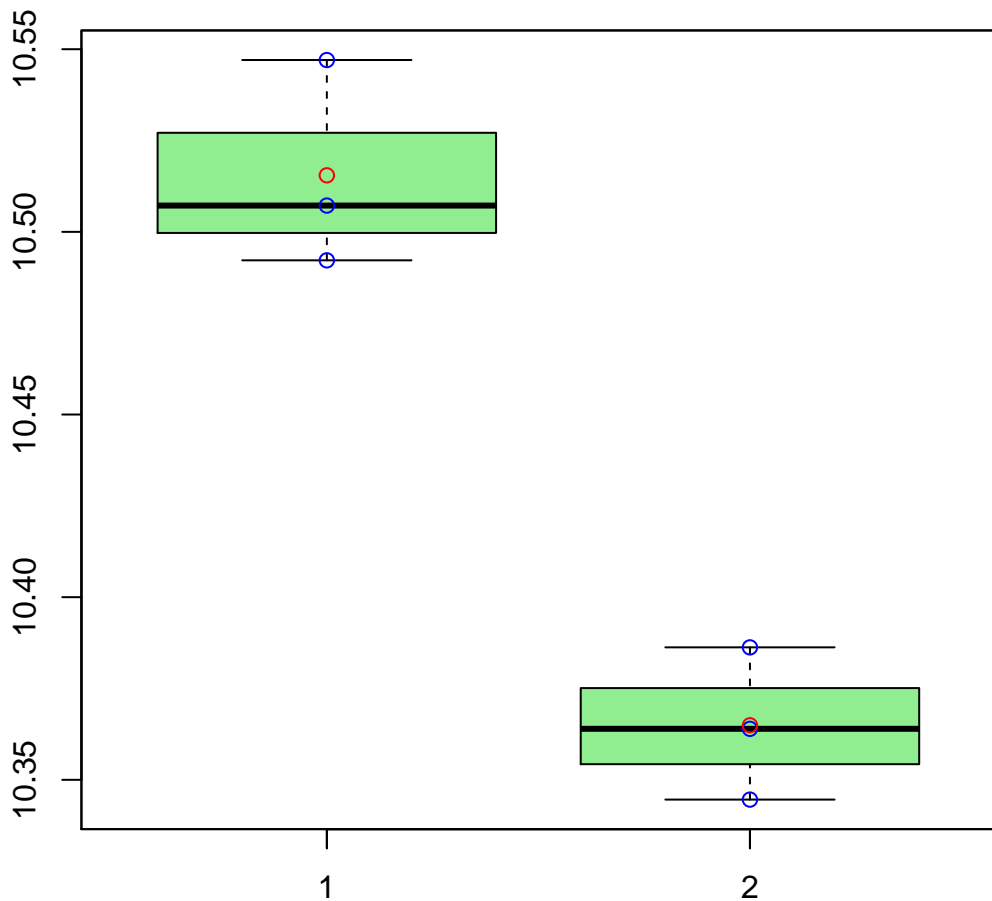

t-Test: p-value = 0

# CL36Contig36|CL36Contig36

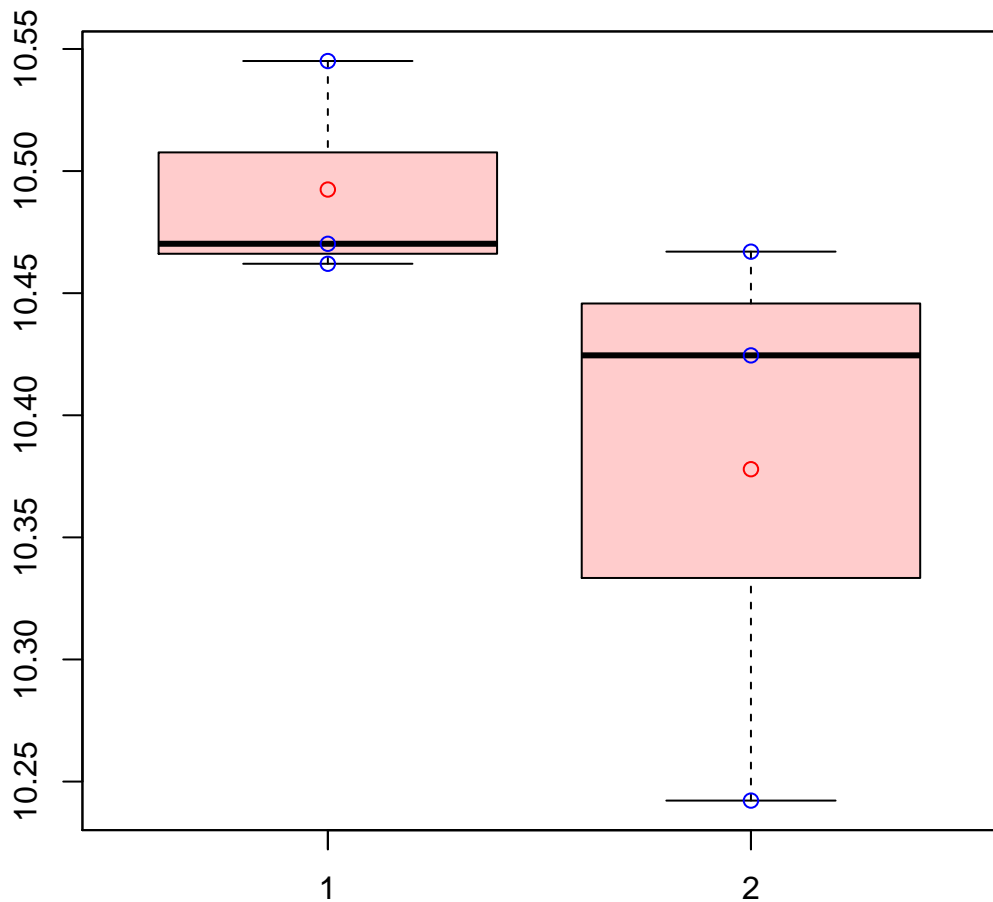

t-Test: p-value = 0.23

# CL36Contig37|CL36Contig37

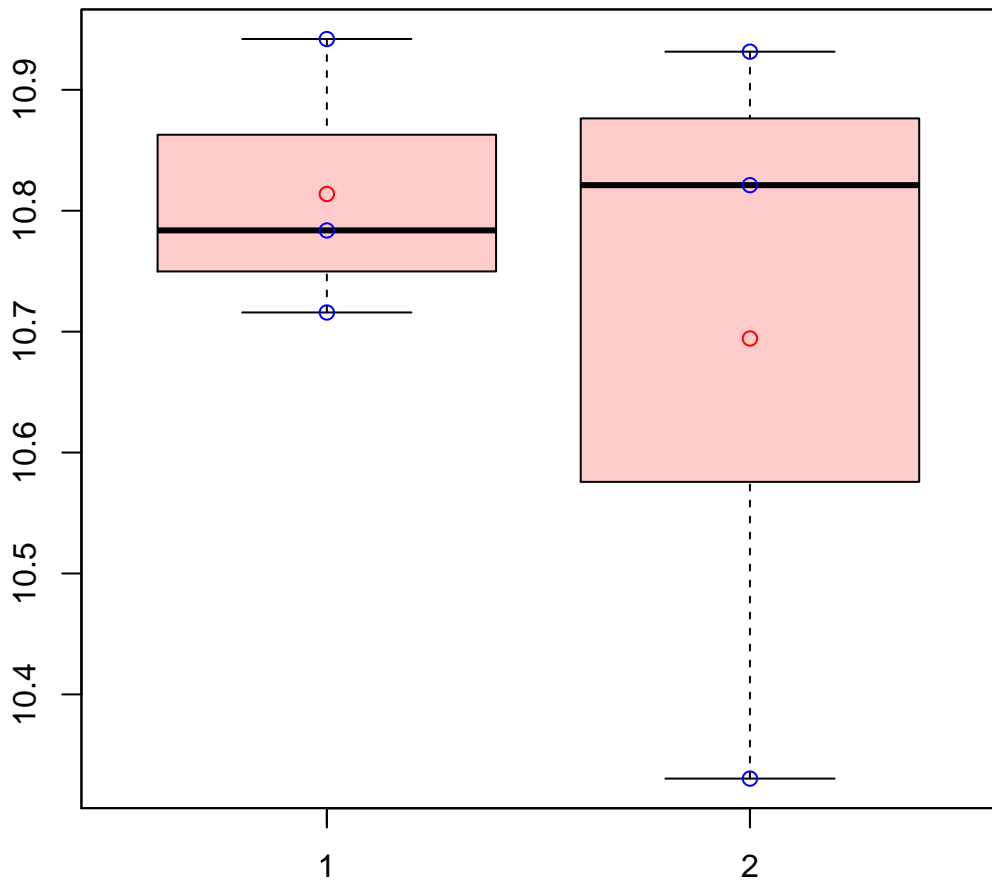

t-Test: p-value = 0.59

# CL36Contig38|CL36Contig38

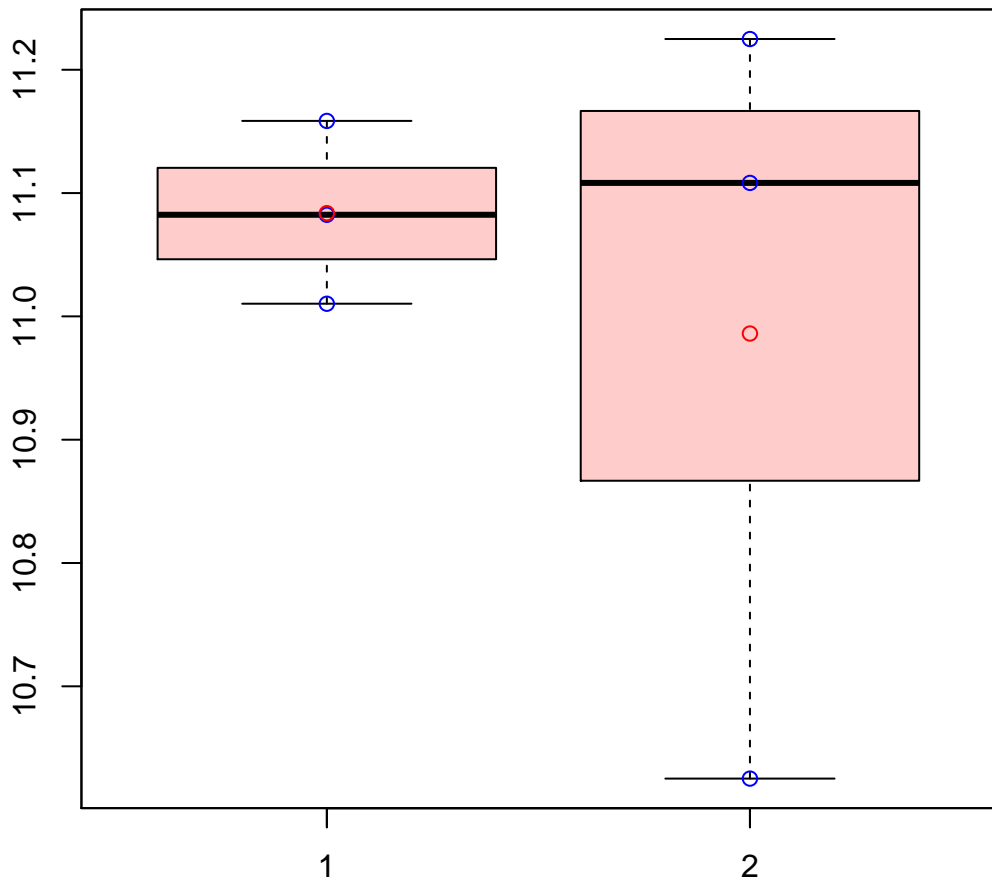

t-Test: p-value = 0.65



# CL36Contig39|CL36Contig39

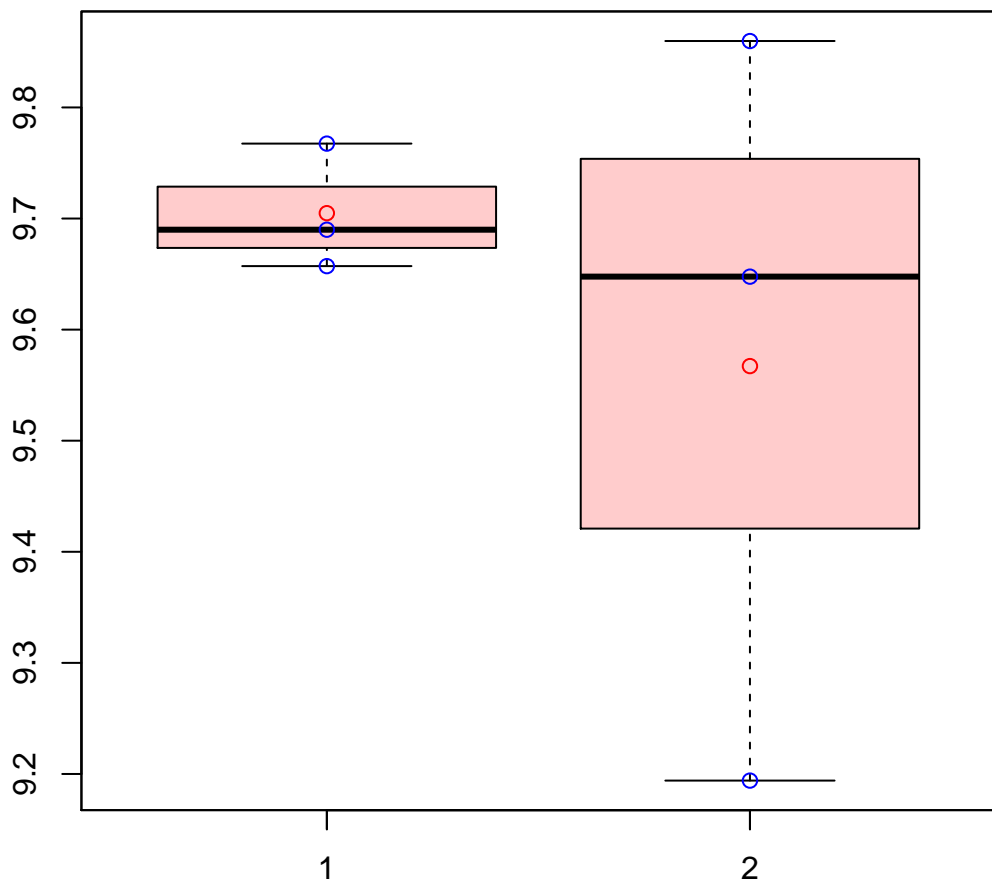

t-Test: p-value = 0.56

# CL36Contig40|CL36Contig40

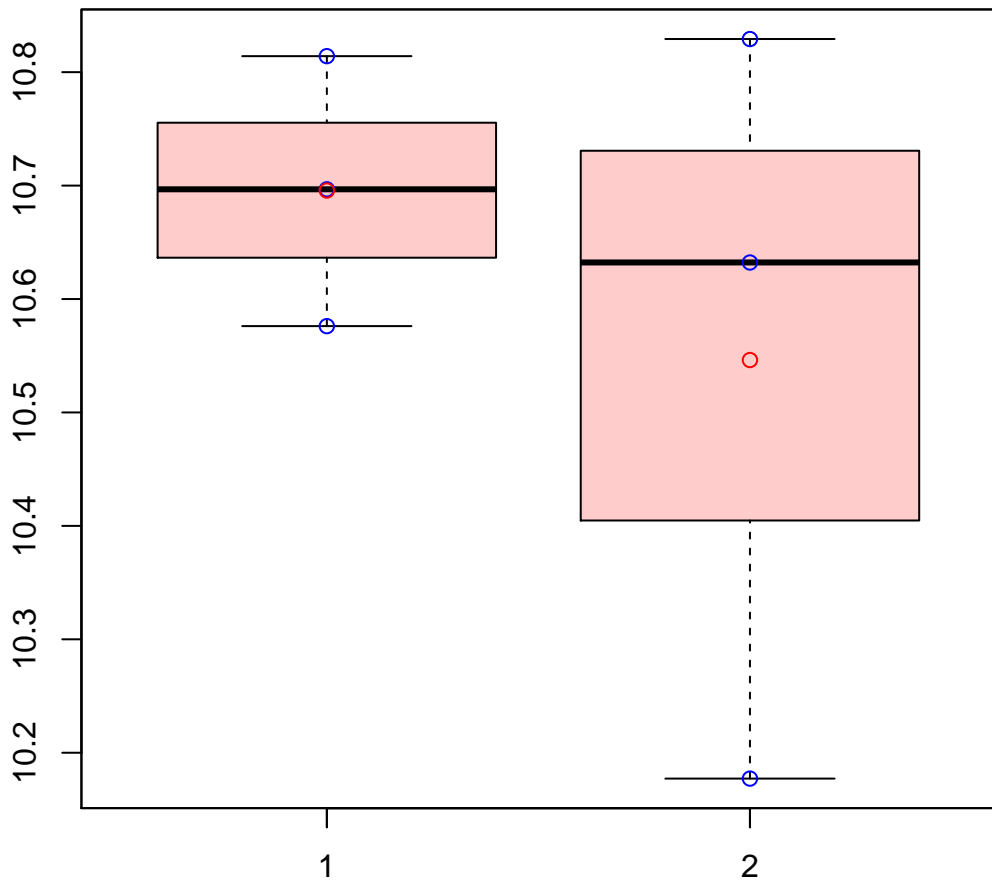

t-Test: p-value = 0.53

# CL36Contig7|CL36Contig7

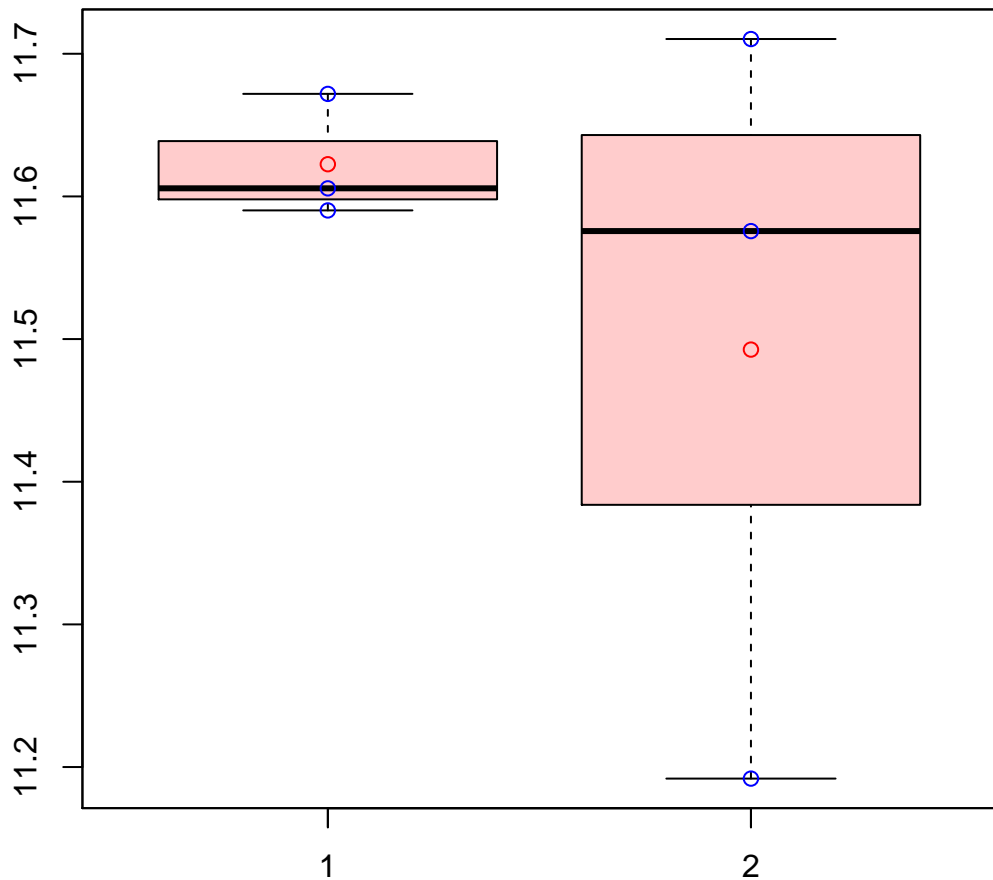

t-Test: p-value = 0.49

# CL3700Contig1|CL3700Contig1

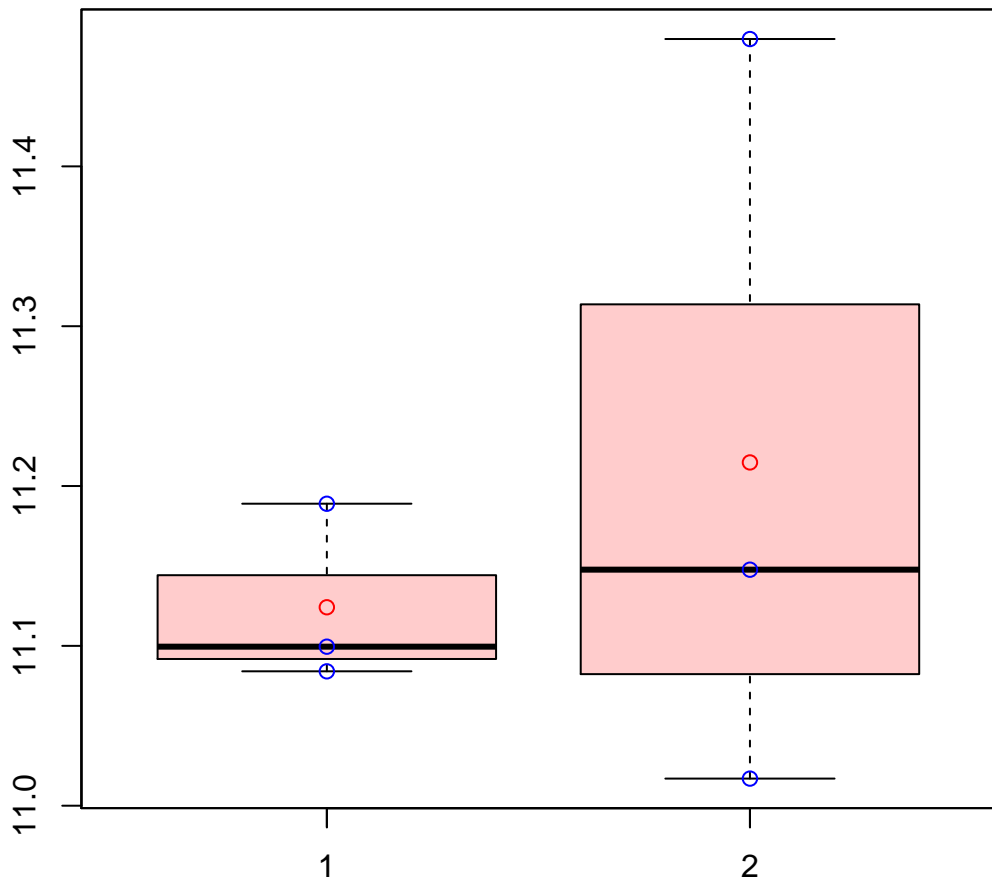

t-Test: p-value = 0.58

# CL3704Contig7|CL3704Contig7

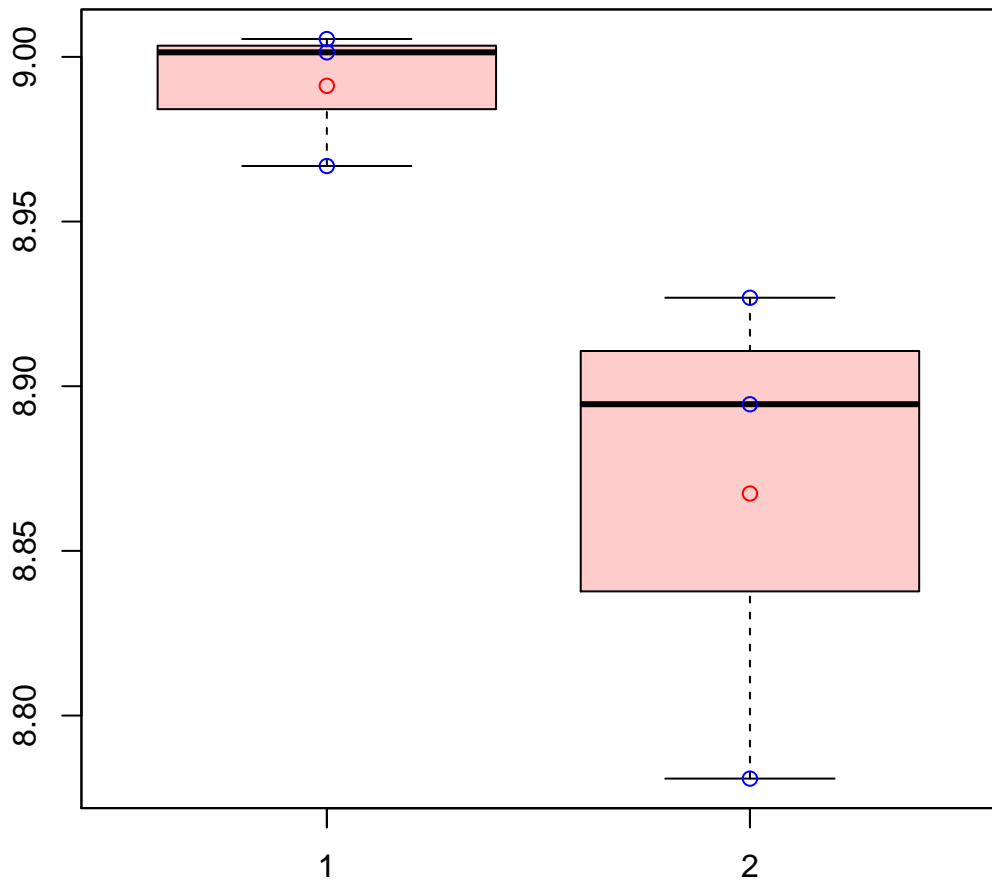

t-Test: p-value = 0.1

# CL3707Contig2|CL3707Contig2

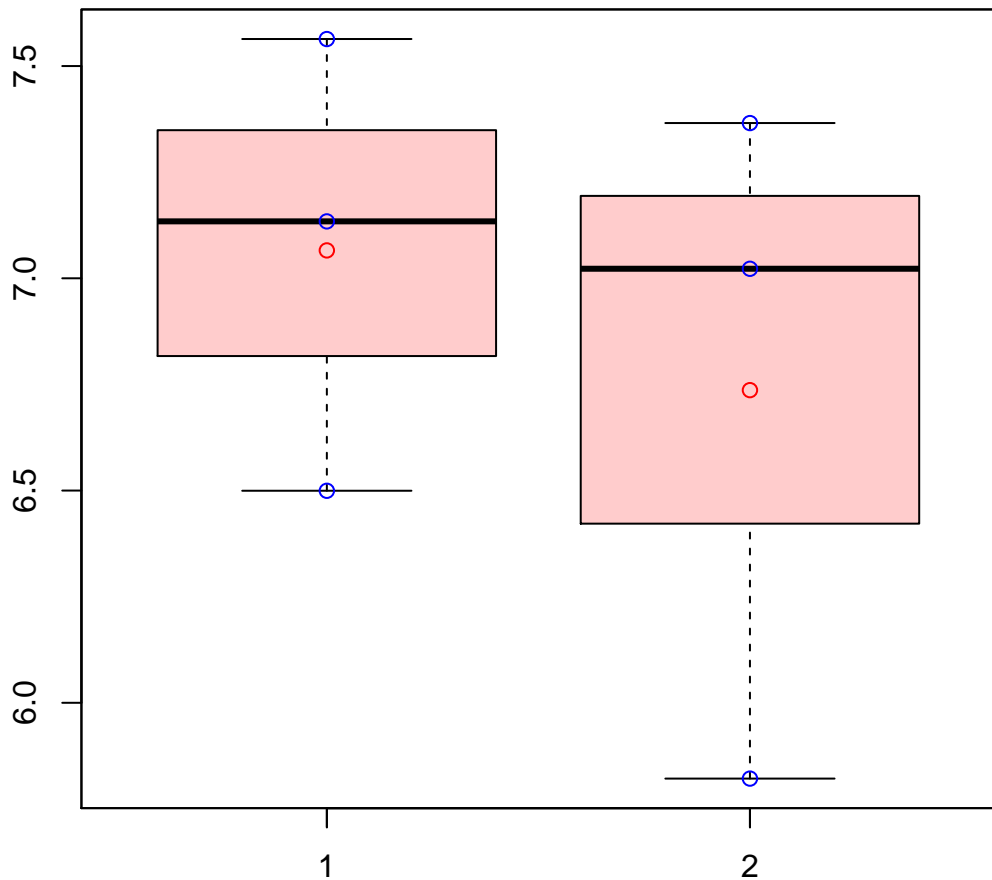

t-Test: p-value = 0.59

# CL370Contig5|CL370Contig5

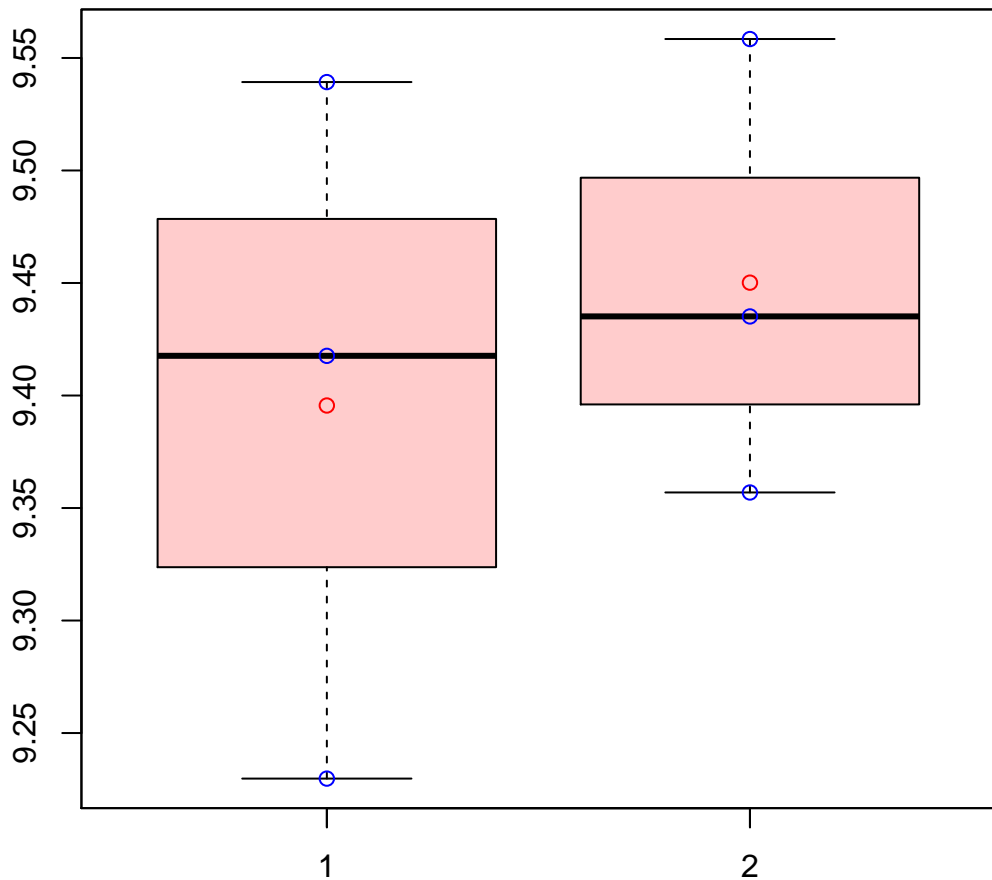

t-Test: p-value = 0.64

# CL3720Contig1|CL3720Contig1

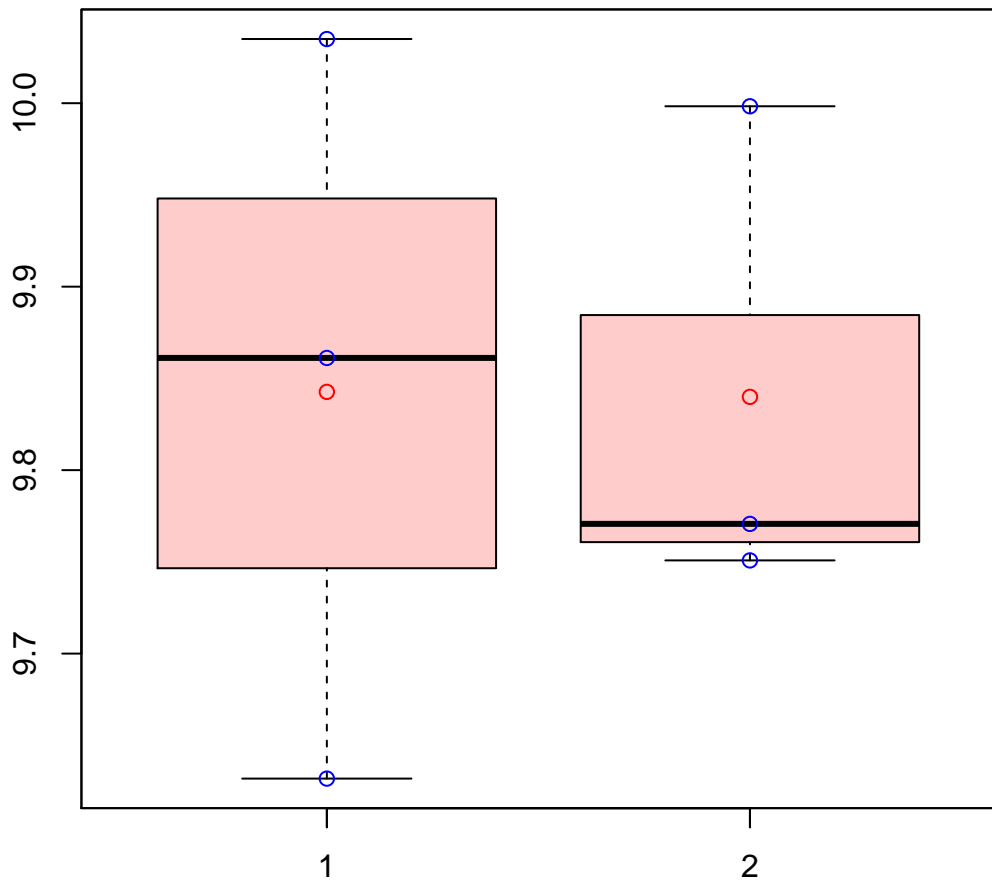

t-Test: p-value = 0.99



# CL3721Contig1|CL3721Contig1

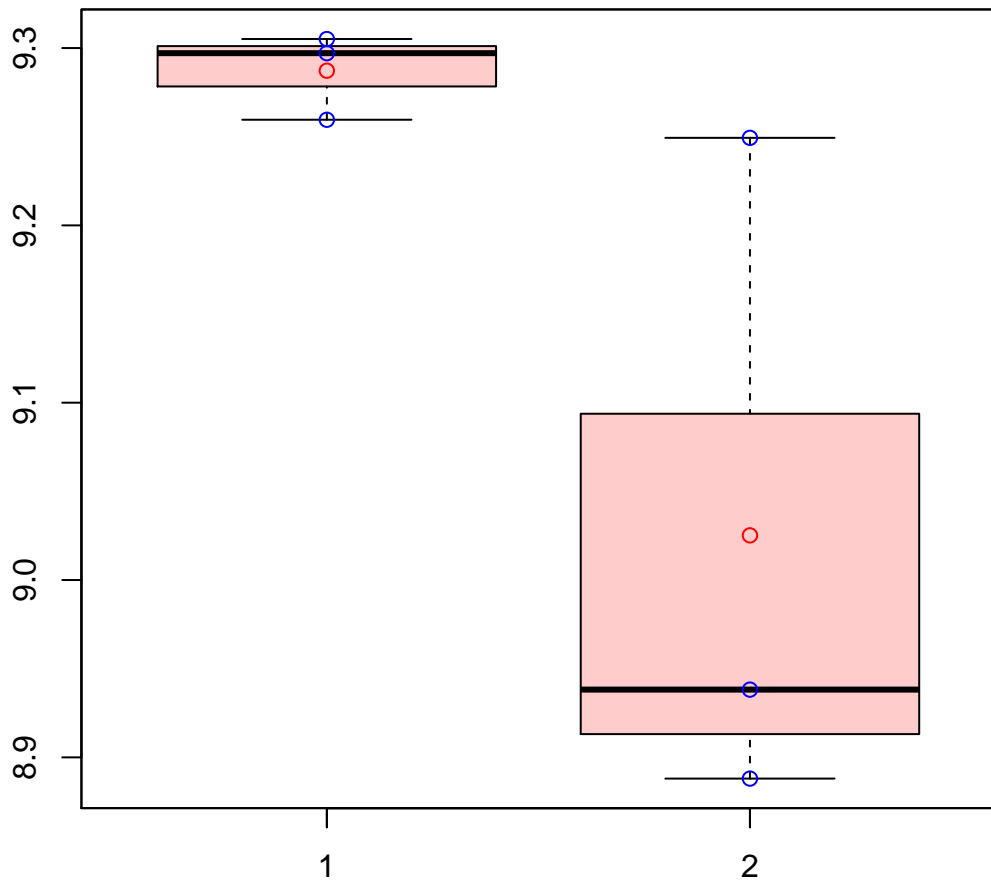

t-Test: p-value = 0.14

# CL3721Contig2|CL3721Contig2

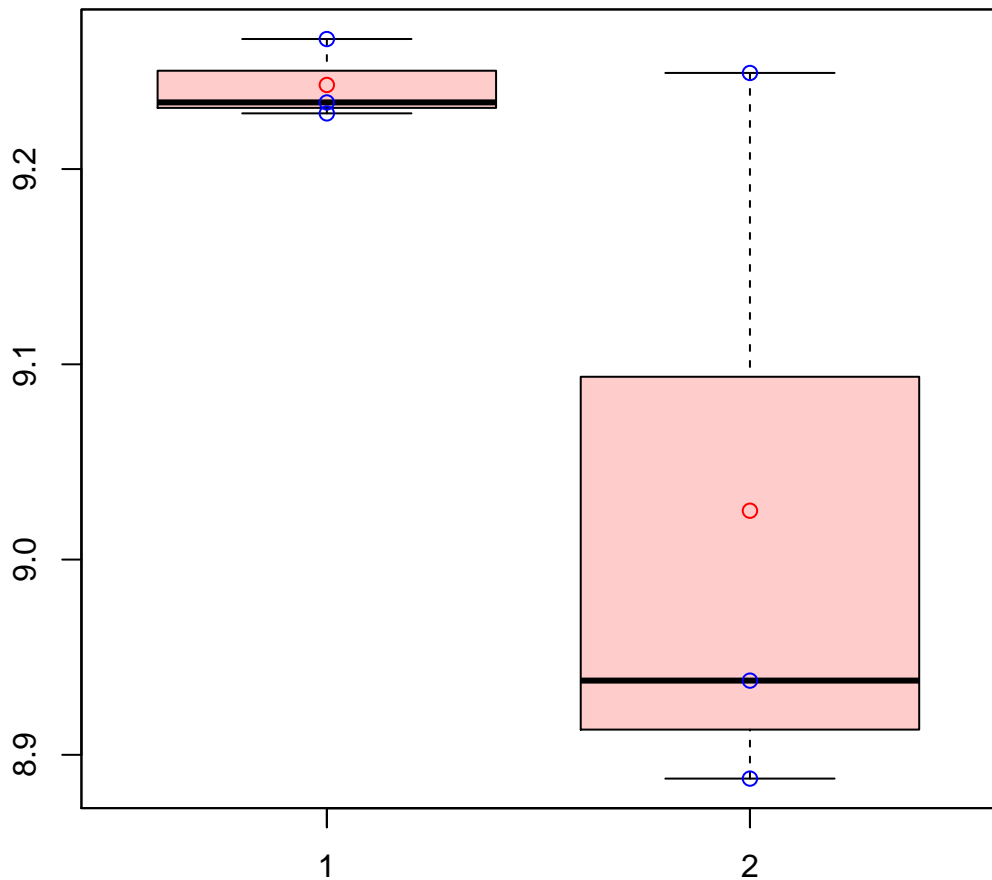

t-Test: p-value = 0.19

# CL3721Contig4|CL3721Contig4

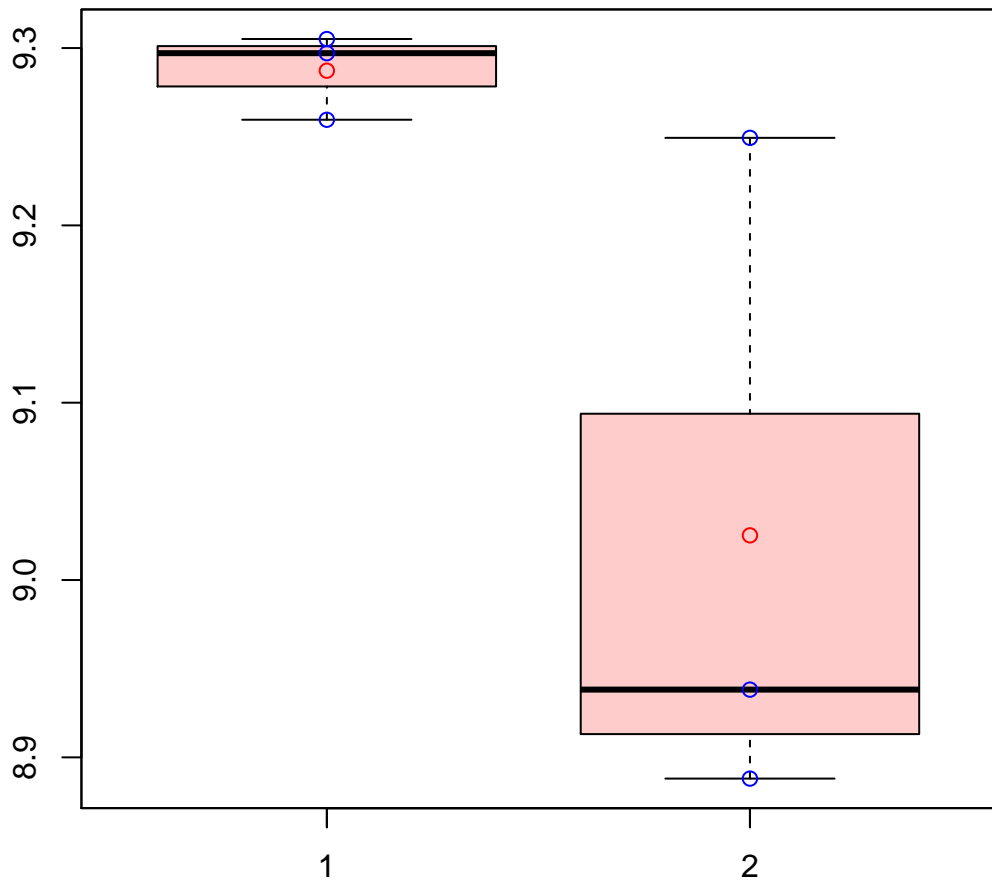

t-Test: p-value = 0.14

# CL3721Contig6|CL3721Contig6



t-Test: p-value = 0.14

# CL3723Contig1|CL3723Contig1

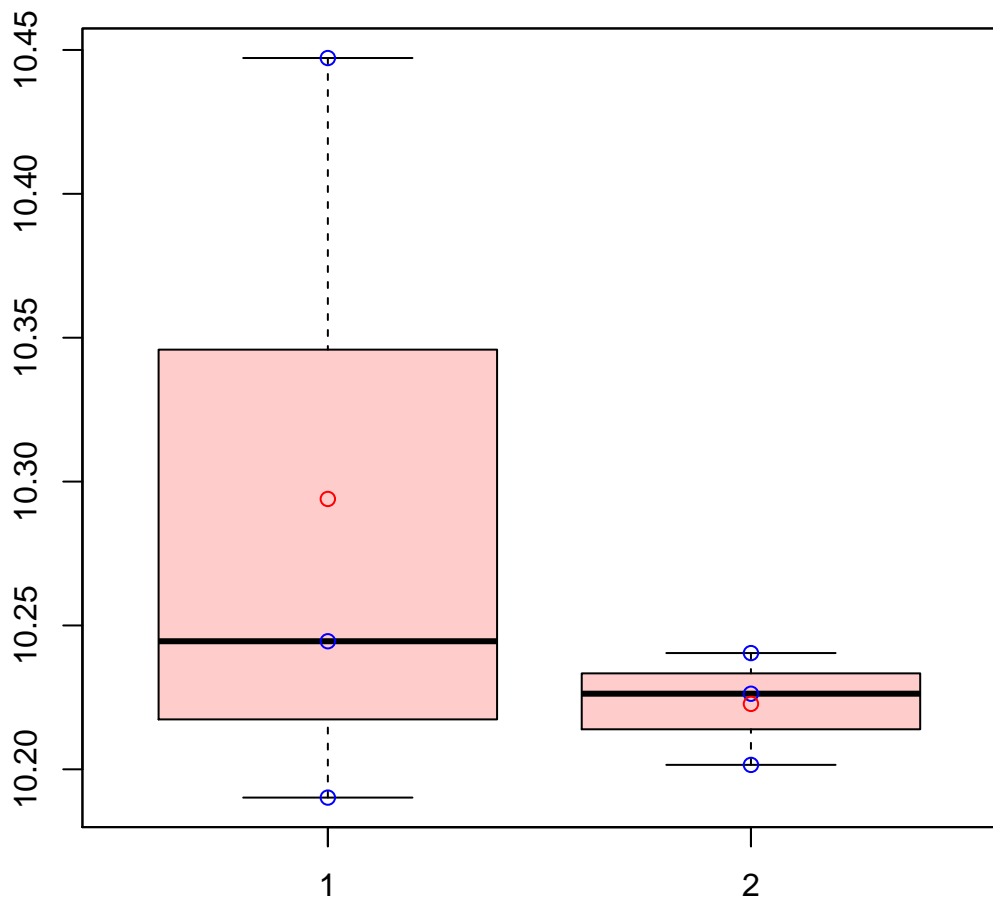

t-Test: p-value = 0.46

# CL372Contig1|CL372Contig1

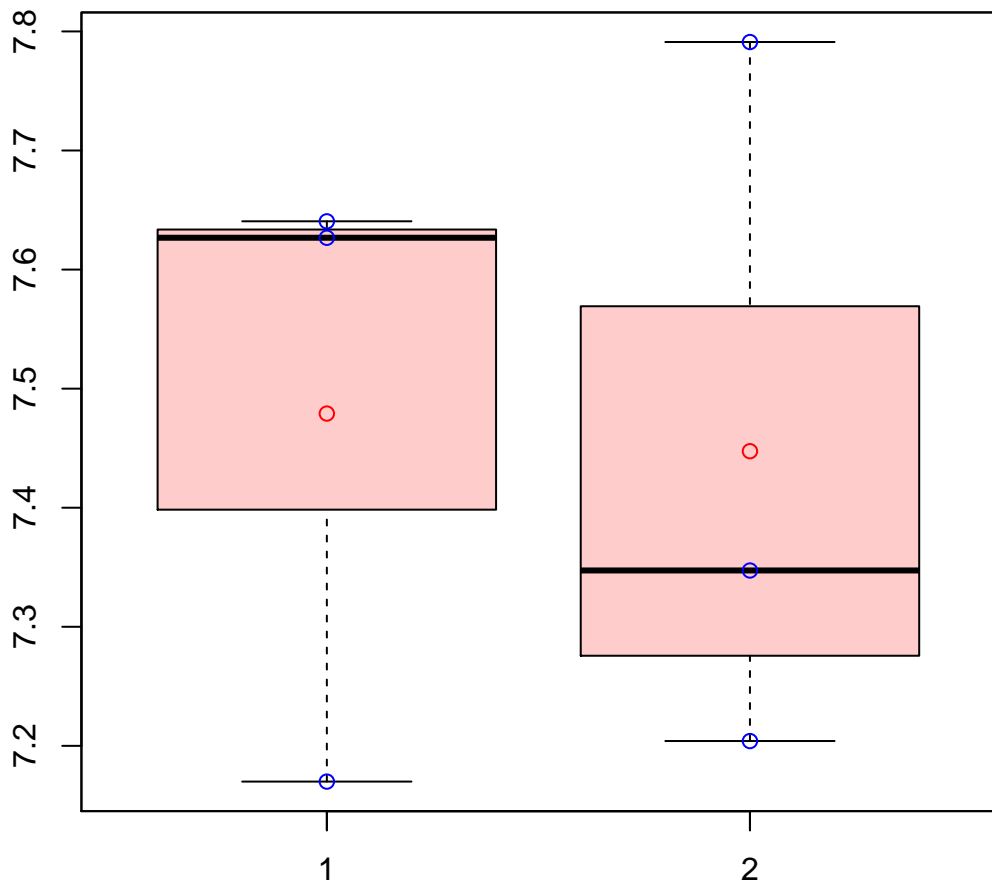

t-Test: p-value = 0.9

# CL3739Contig2|CL3739Contig2

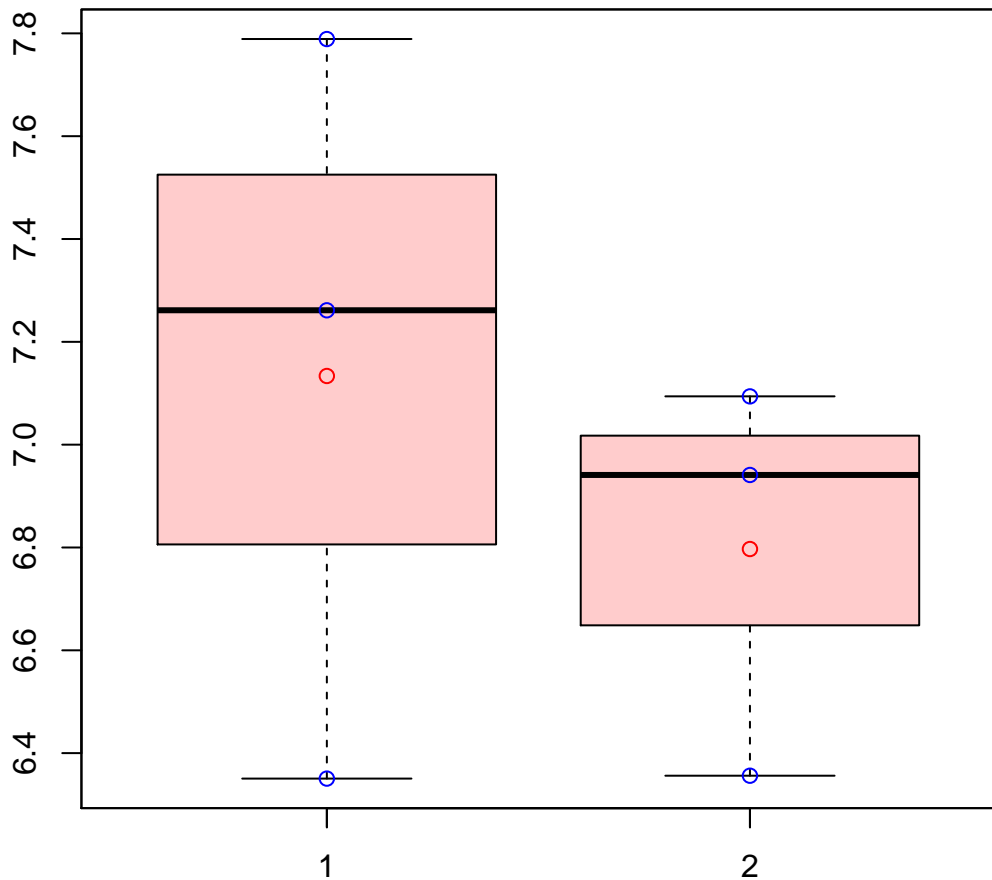

t-Test: p-value = 0.53

# CL3743Contig4|CL3743Contig4

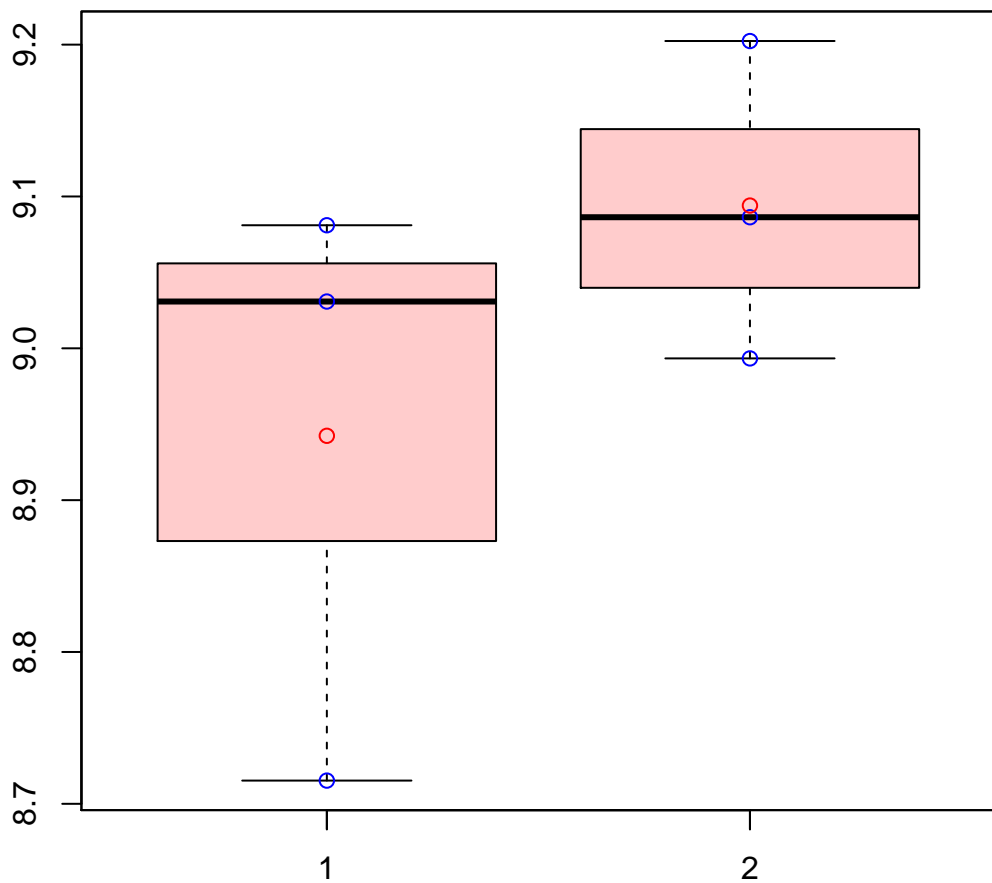

t-Test: p-value = 0.33



# CL374Contig2|CL374Contig2

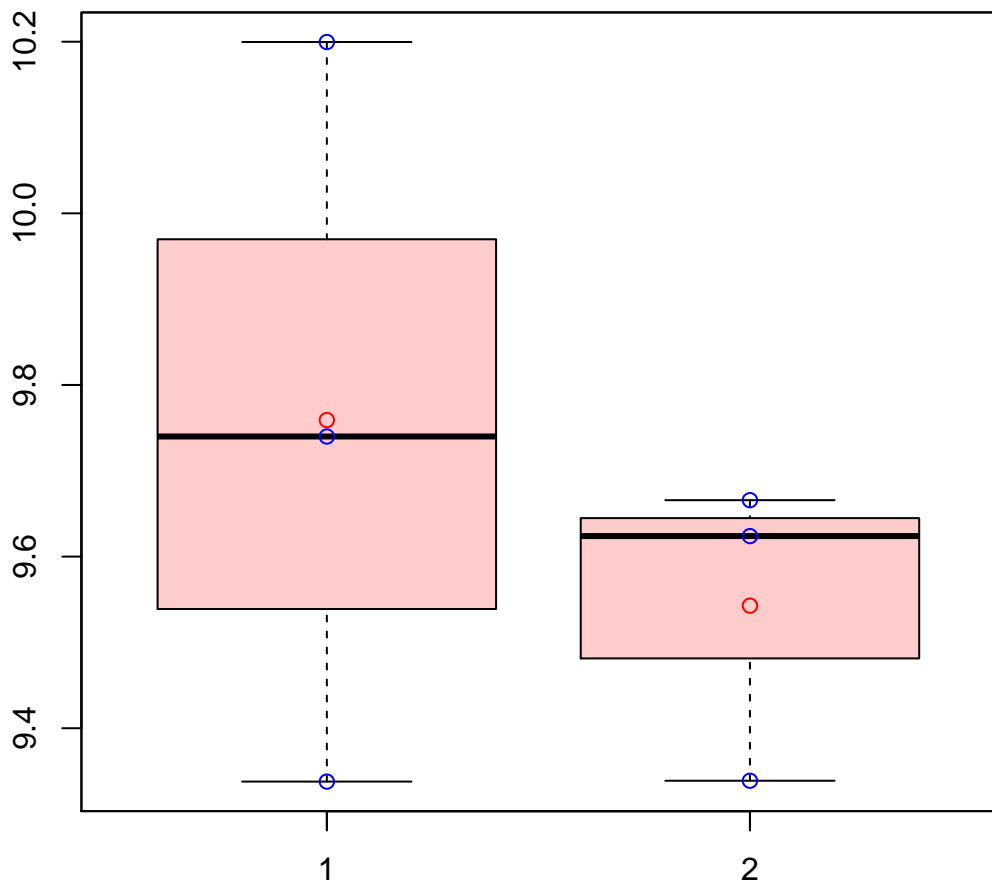

t-Test: p-value = 0.49

# CL374Contig4|CL374Contig4

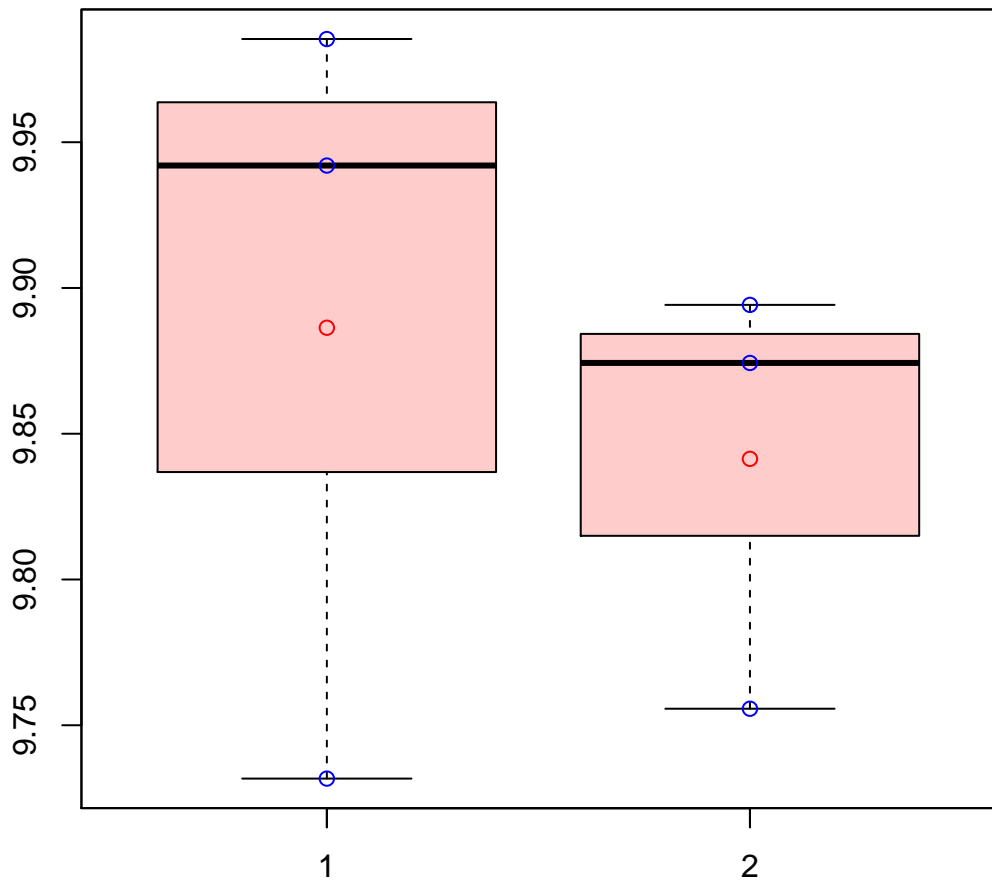

t-Test: p-value = 0.65

# CL3752Contig1|CL3752Contig1

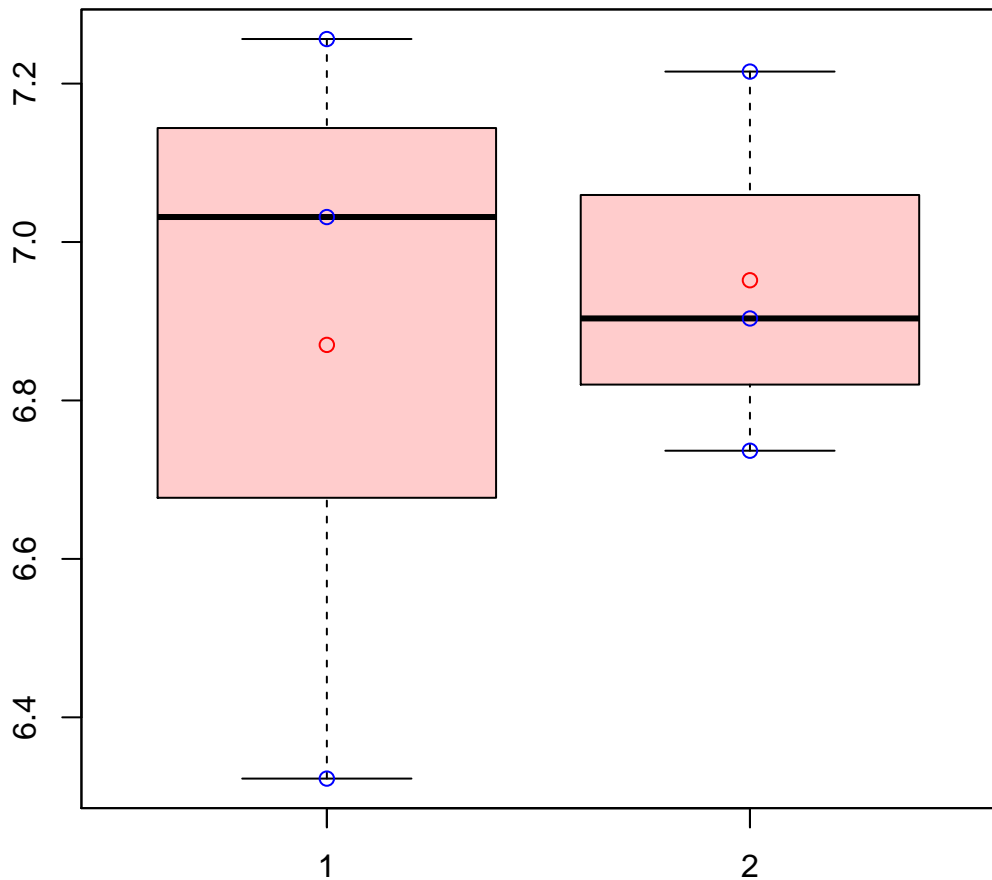

t-Test: p-value = 0.81

# CL3755Contig1|CL3755Contig1

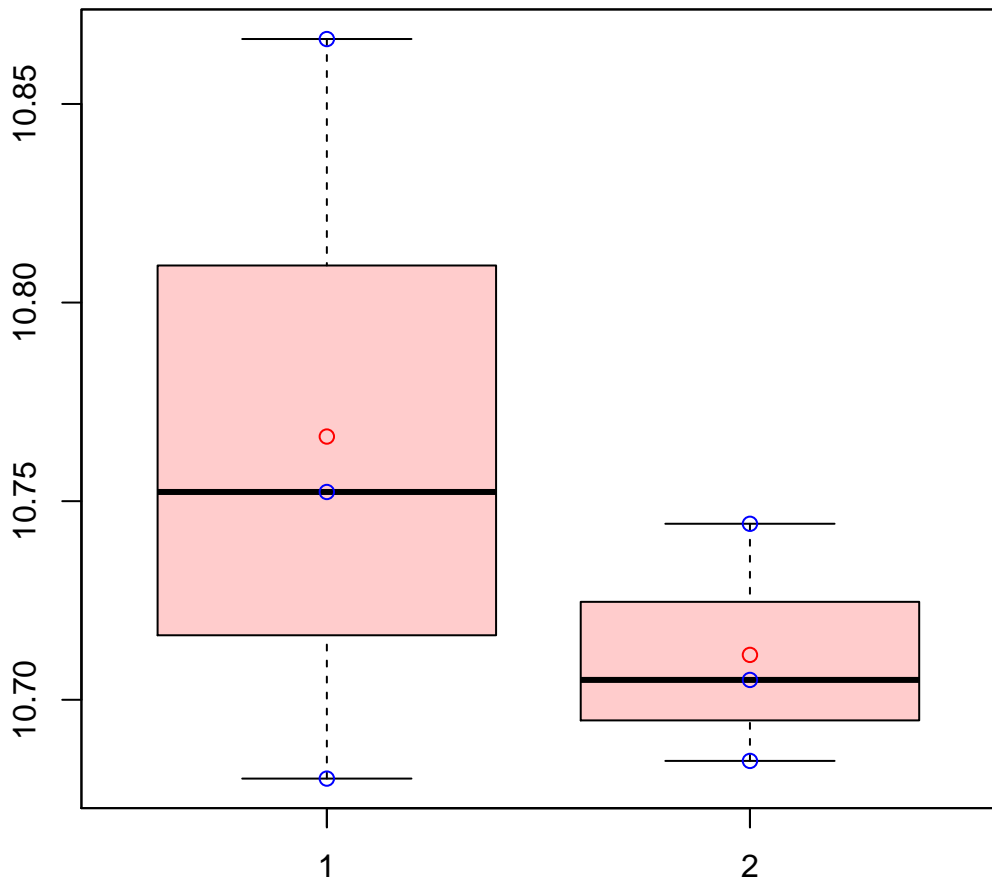

t-Test: p-value = 0.42

# CL3757Contig1|CL3757Contig1

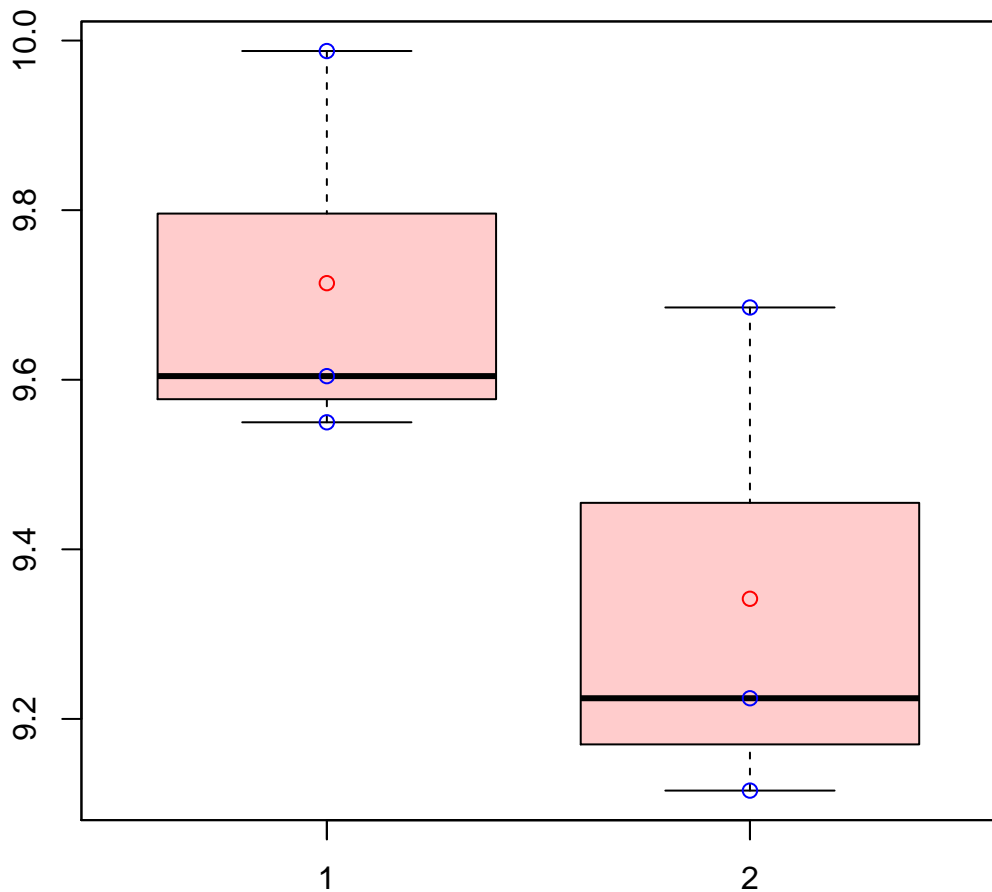

t-Test: p-value = 0.17

# CL3758Contig11|CL3758Contig11

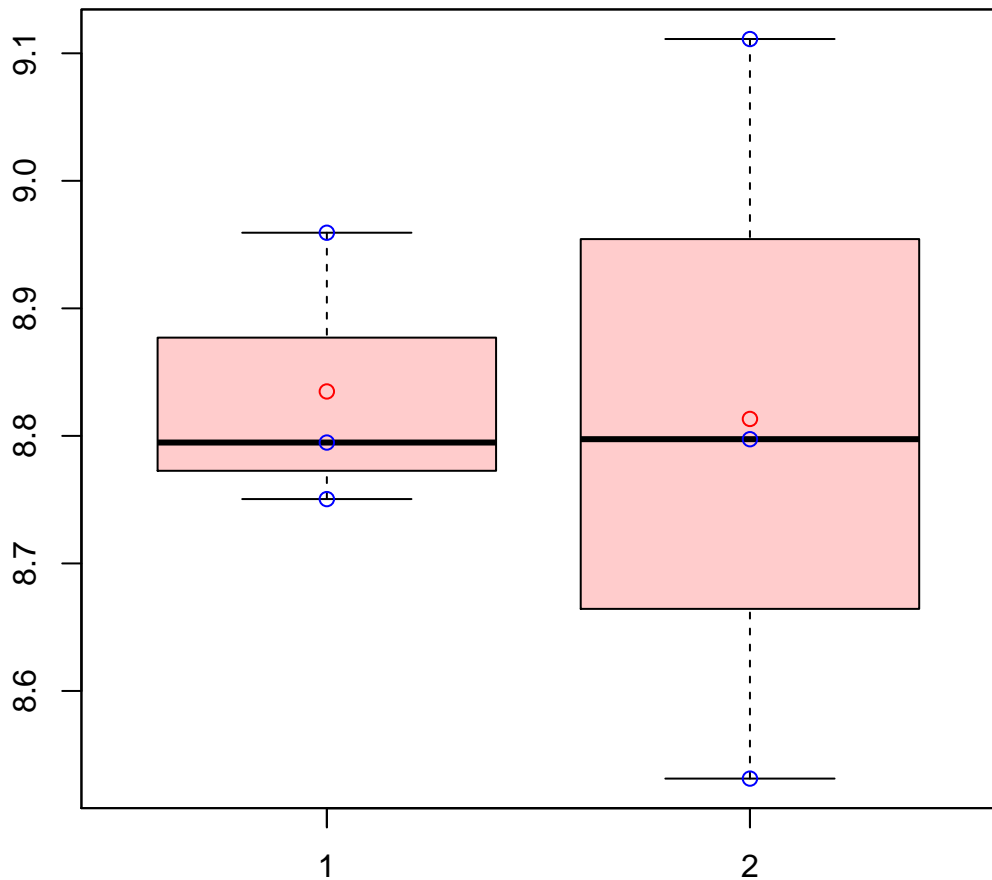

t-Test: p-value = 0.91

# CL3758Contig2|CL3758Contig2

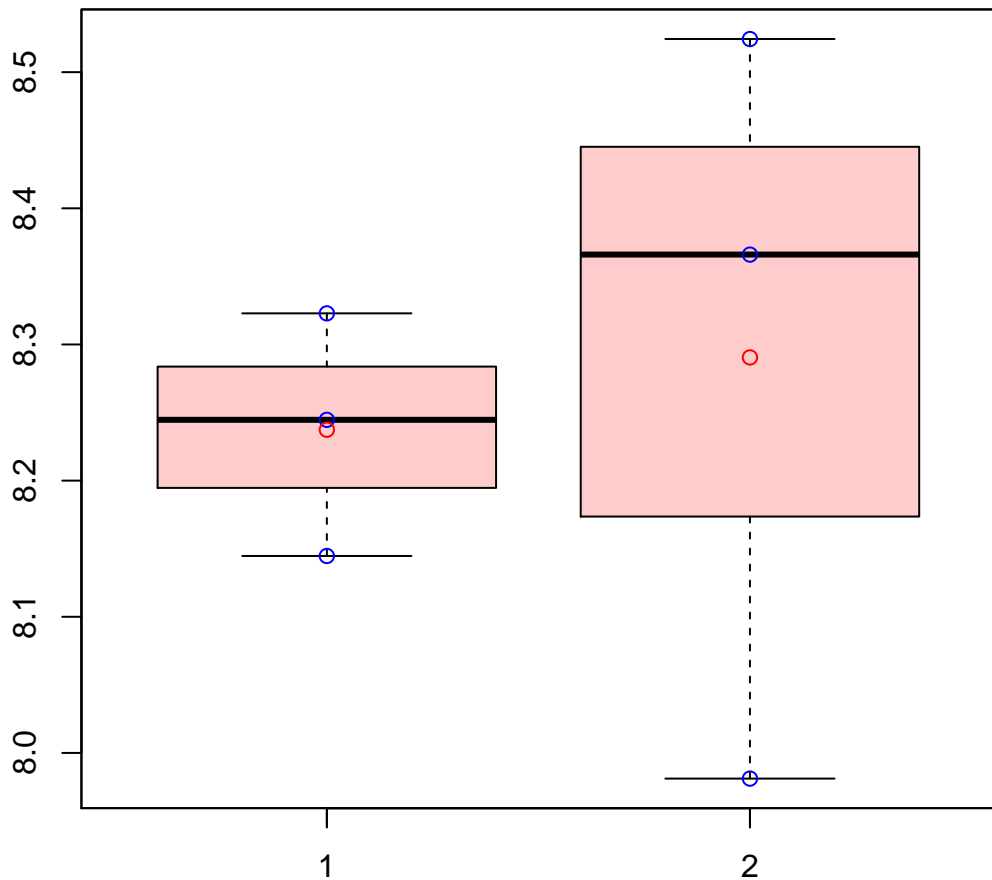

t-Test: p-value = 0.78

# CL3758Contig5|CL3758Contig5

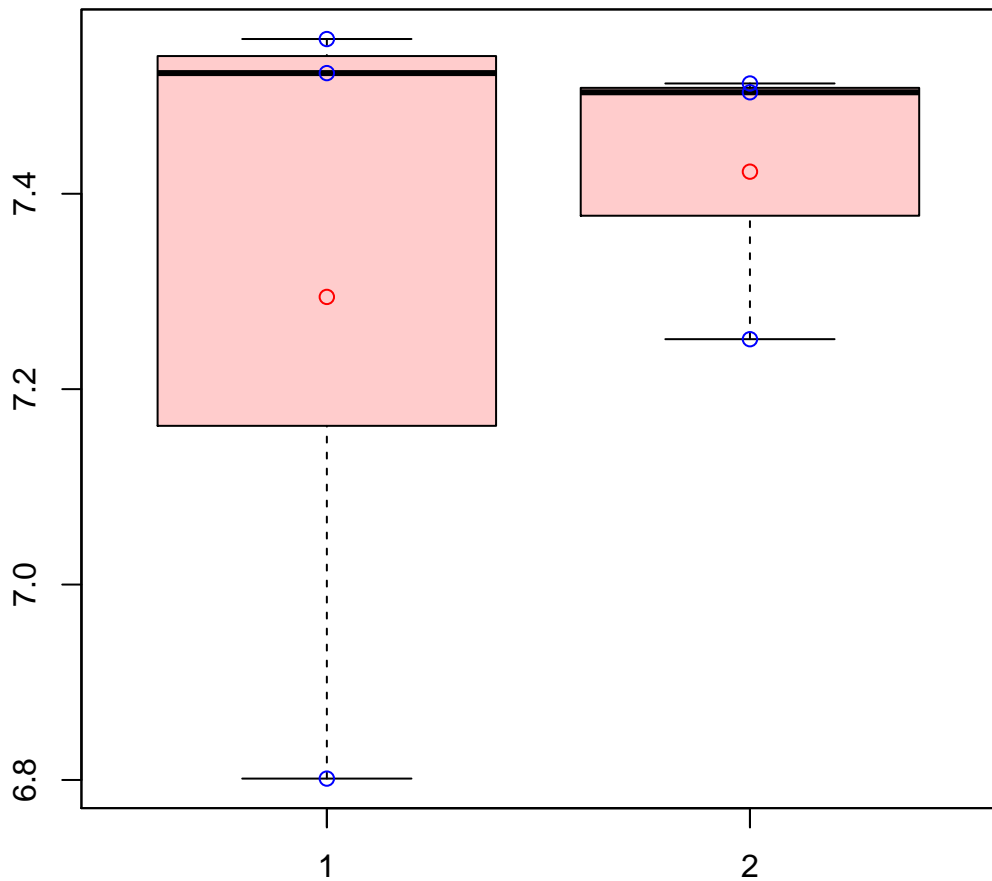

t-Test: p-value = 0.66



# CL3758Contig6|CL3758Contig6

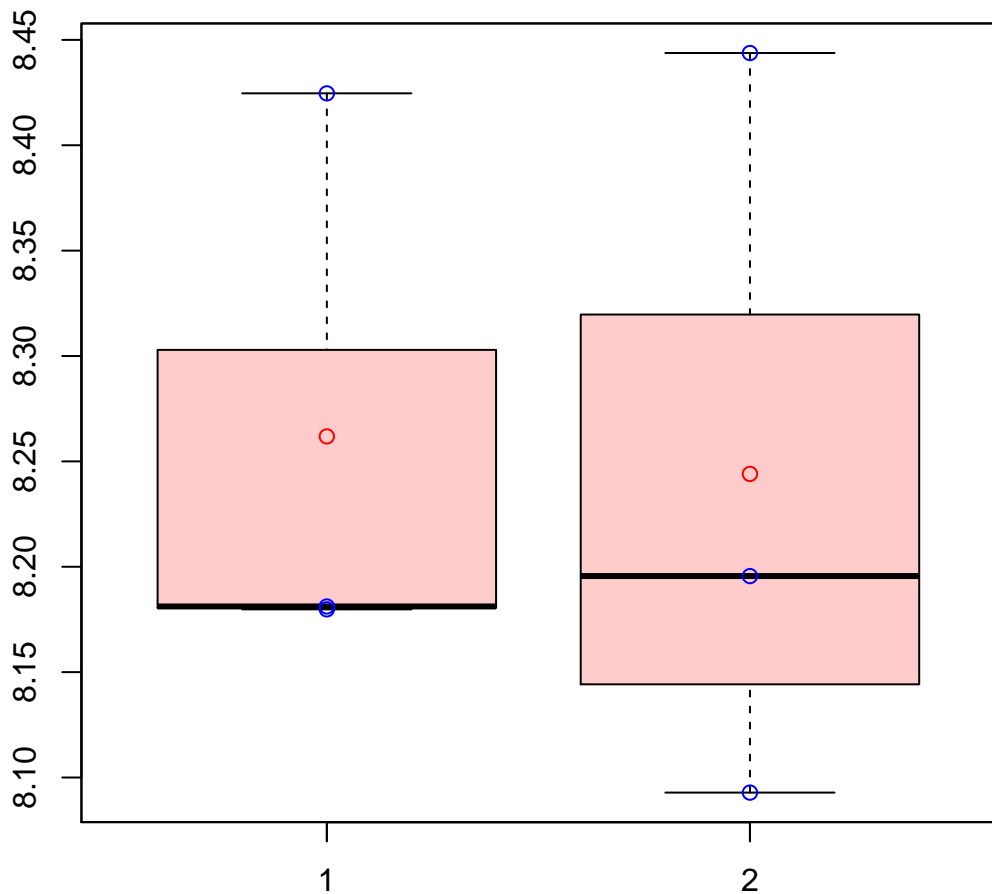

t-Test: p-value = 0.9

# CL3759Contig5|CL3759Contig5

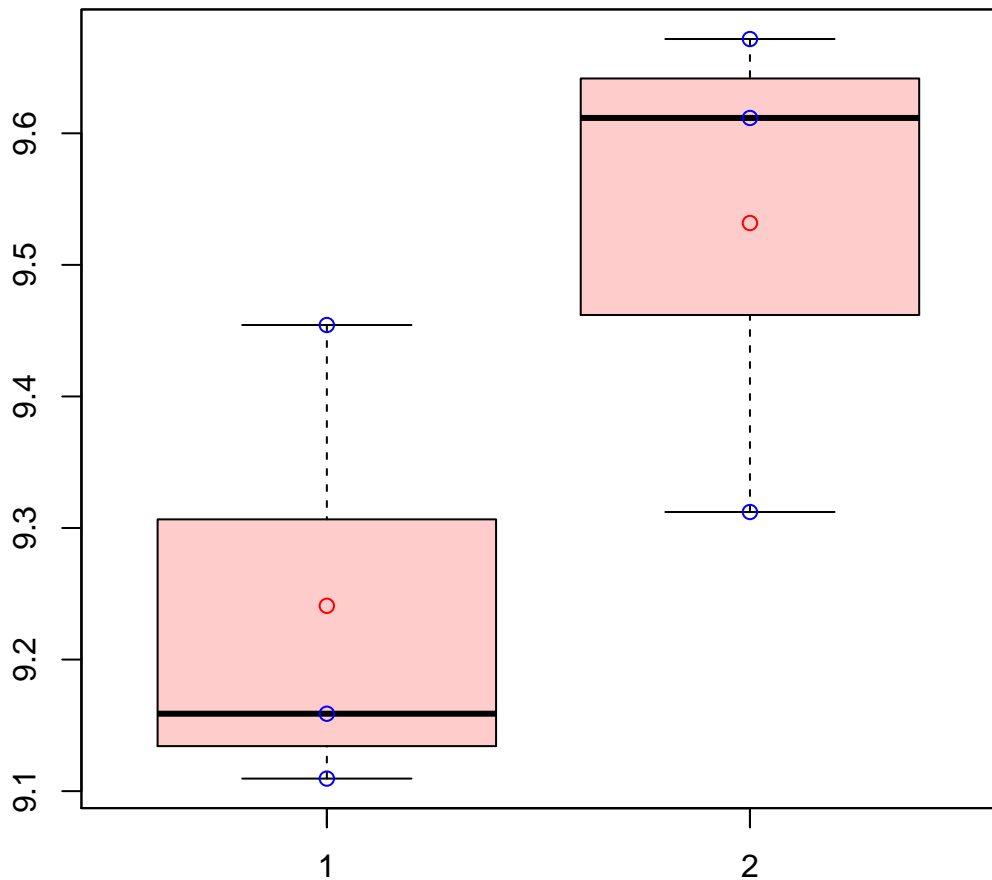

t-Test: p-value = 0.13

# CL376Contig15|CL376Contig15

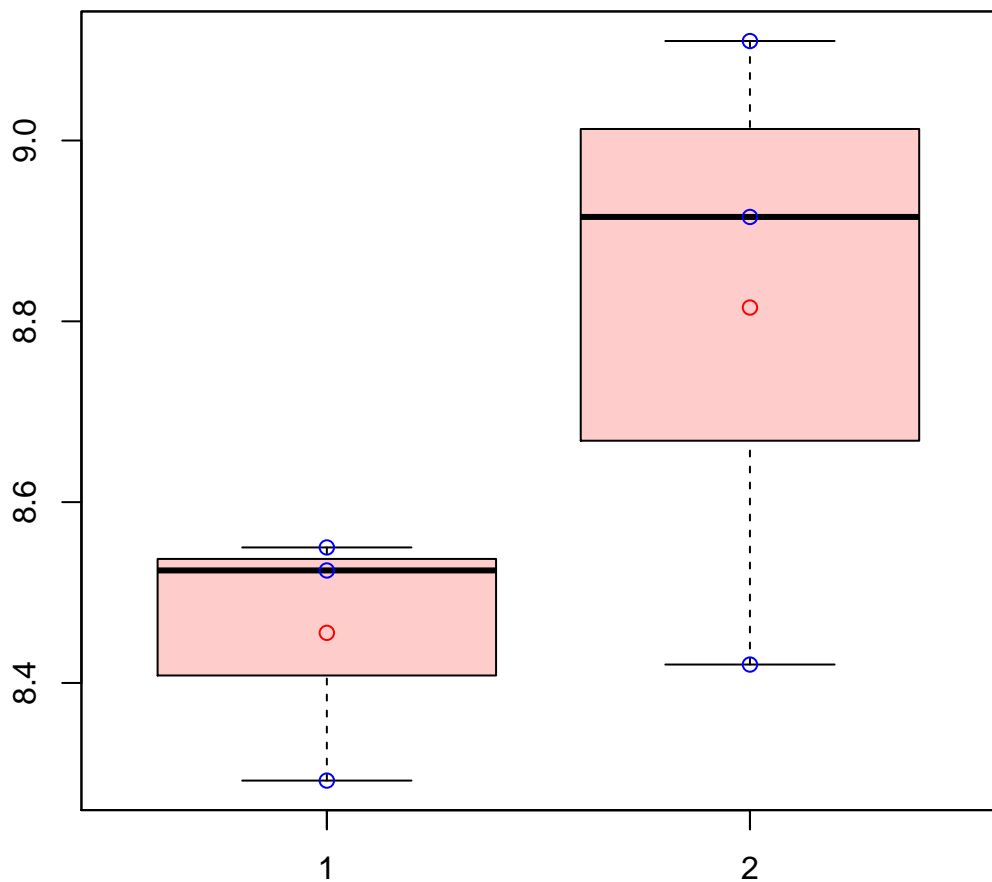

t-Test: p-value = 0.21

# CL376Contig1|CL376Contig1

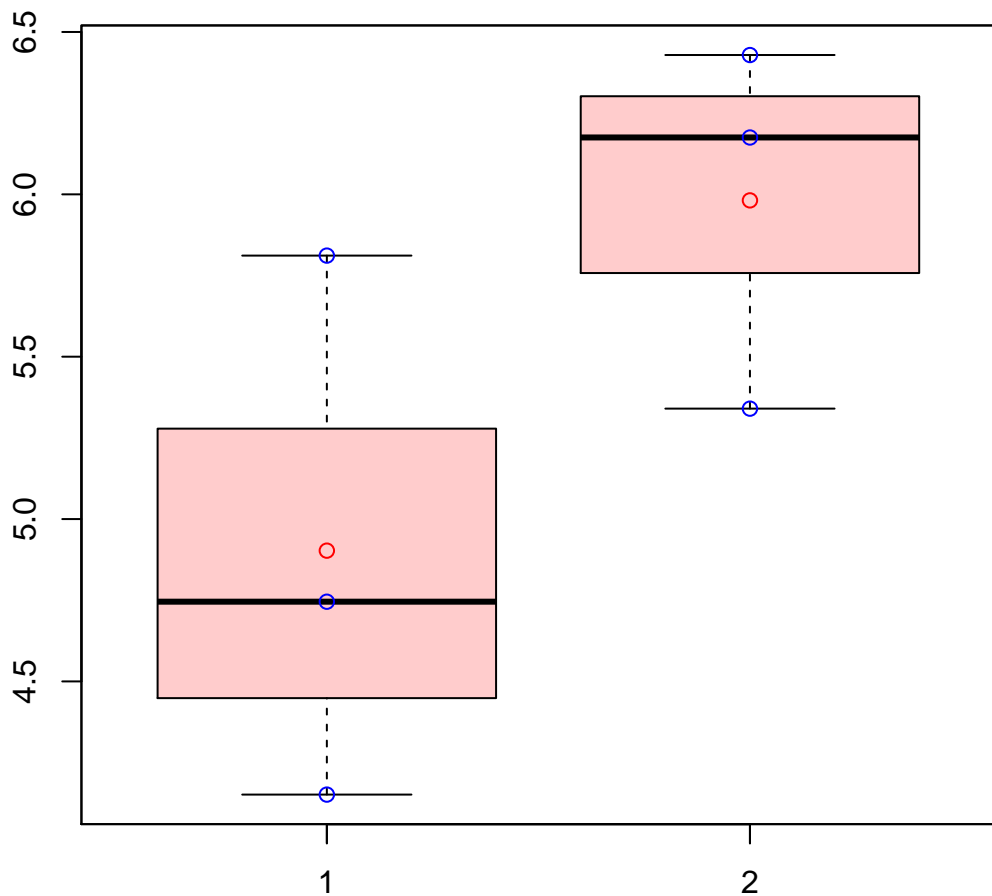

t-Test: p-value = 0.15

# CL376Contig3|CL376Contig3

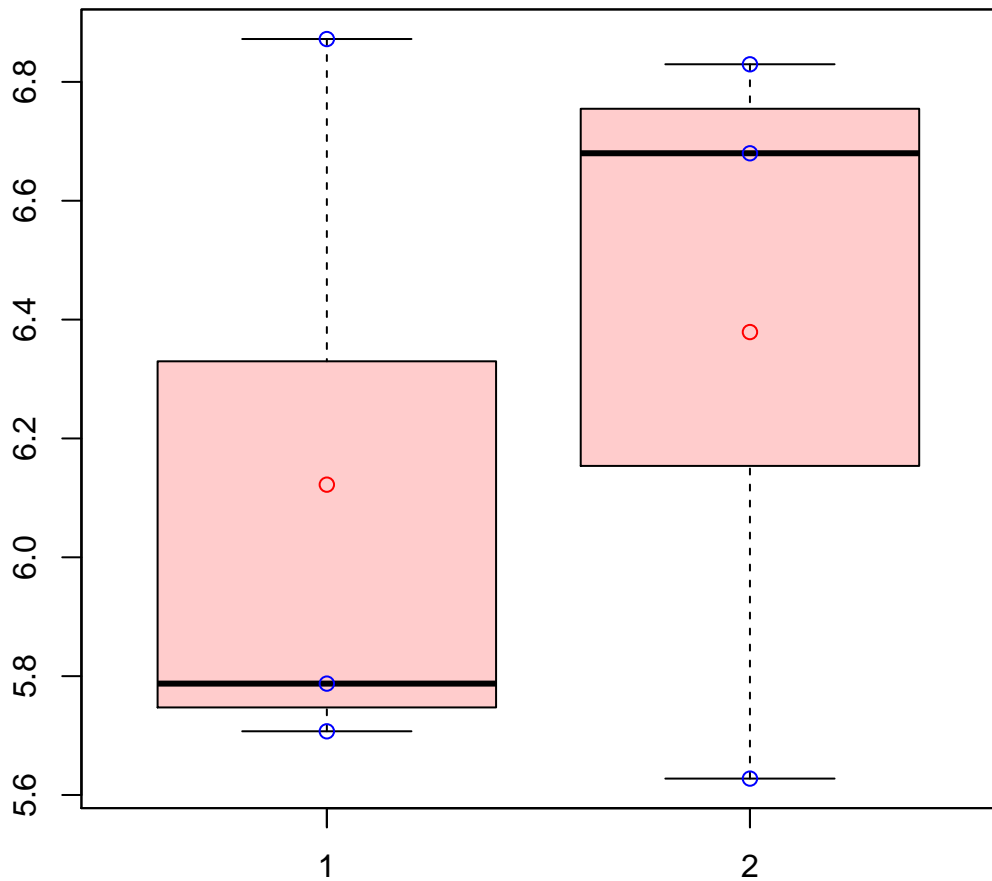

t-Test: p-value = 0.66

# CL376Contig4|CL376Contig4

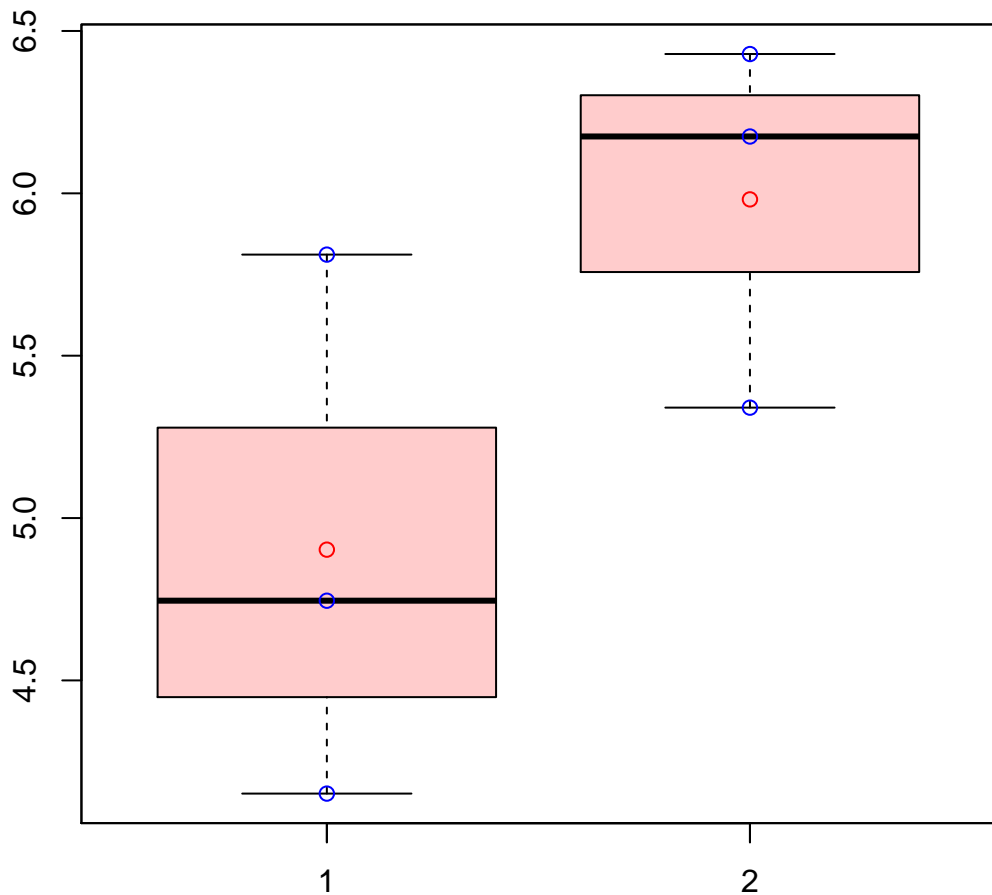

t-Test: p-value = 0.15

# CL376Contig5|CL376Contig5



t-Test: p-value = 0.15

# CL376Contig8|CL376Contig8

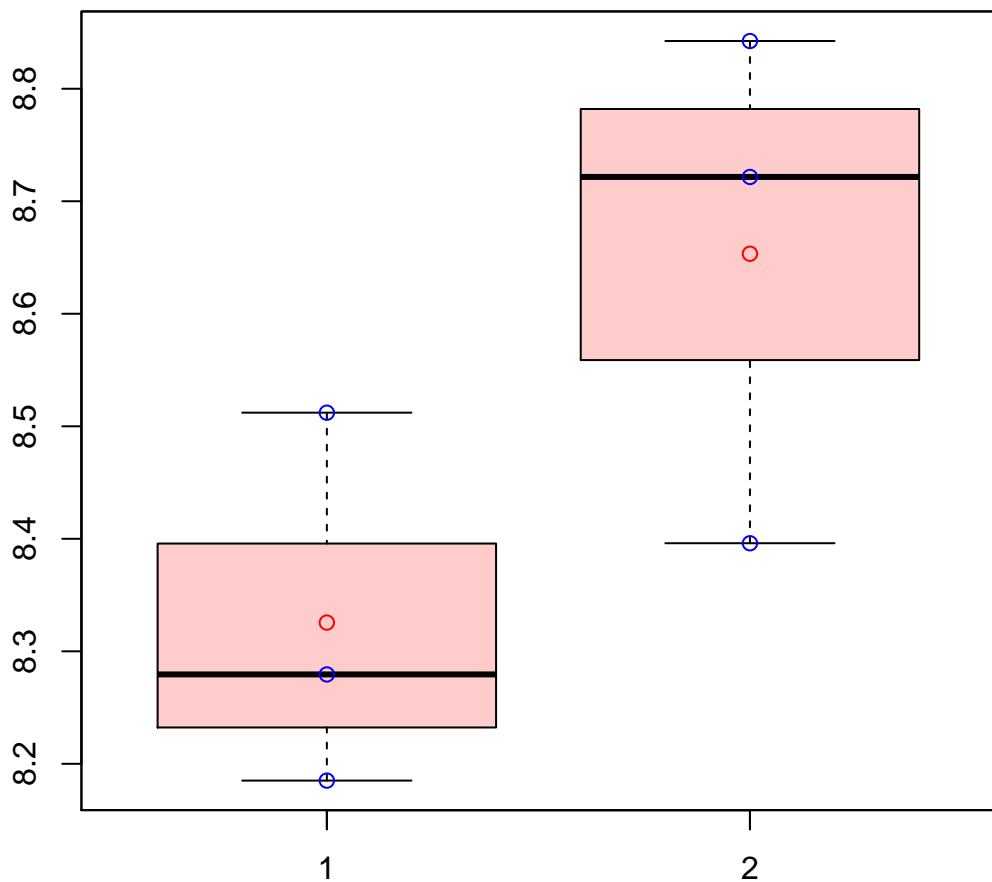

t-Test: p-value = 0.12



# CL376Contig9|CL376Contig9



t-Test: p-value = 0.12

# CL3774Contig1|CL3774Contig1



t-Test: p-value = 0.38

# CL3779Contig2|CL3779Contig2

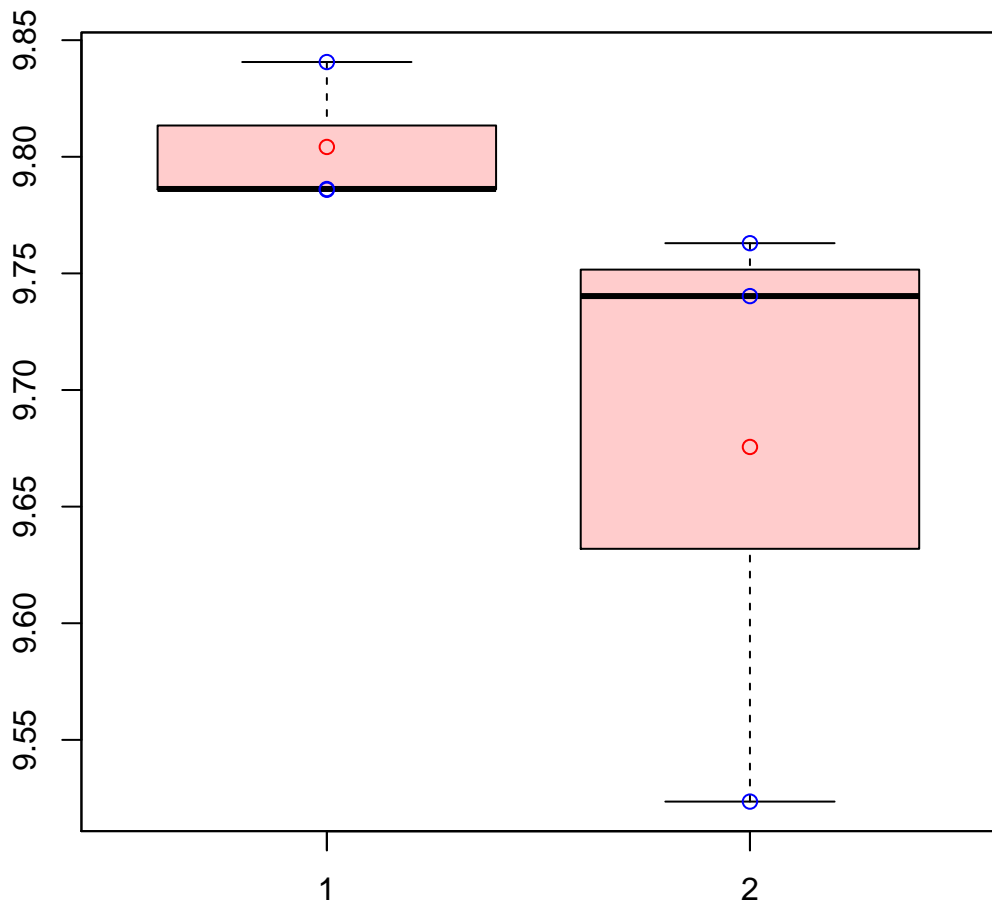

t-Test: p-value = 0.23

# CL3781Contig2|CL3781Contig2

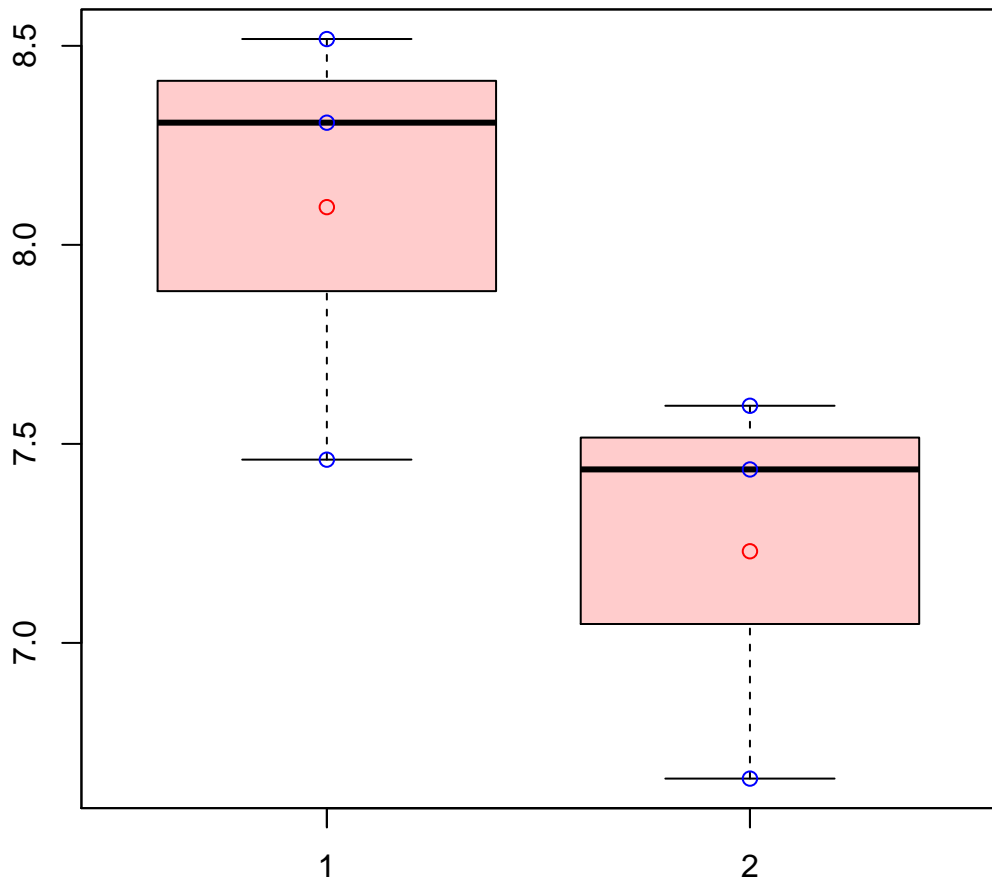

t-Test: p-value = 0.12

# CL3783Contig1|CL3783Contig1

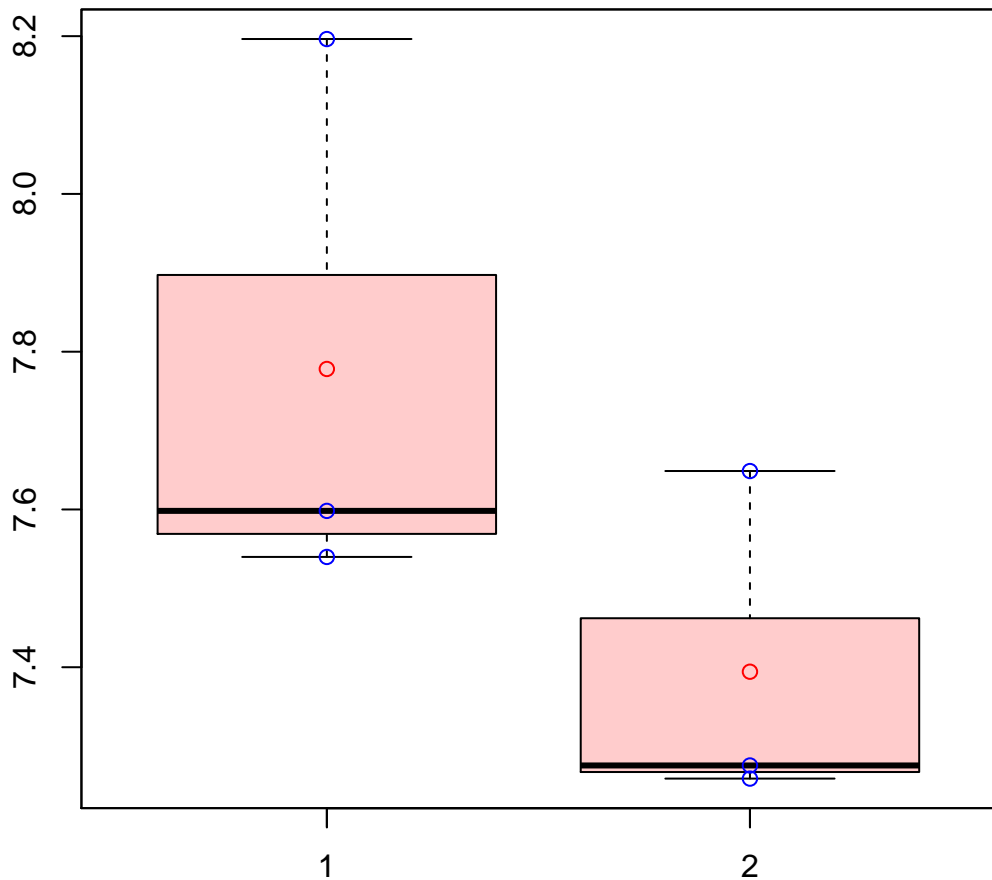

t-Test: p-value = 0.21

# CL3783Contig2|CL3783Contig2

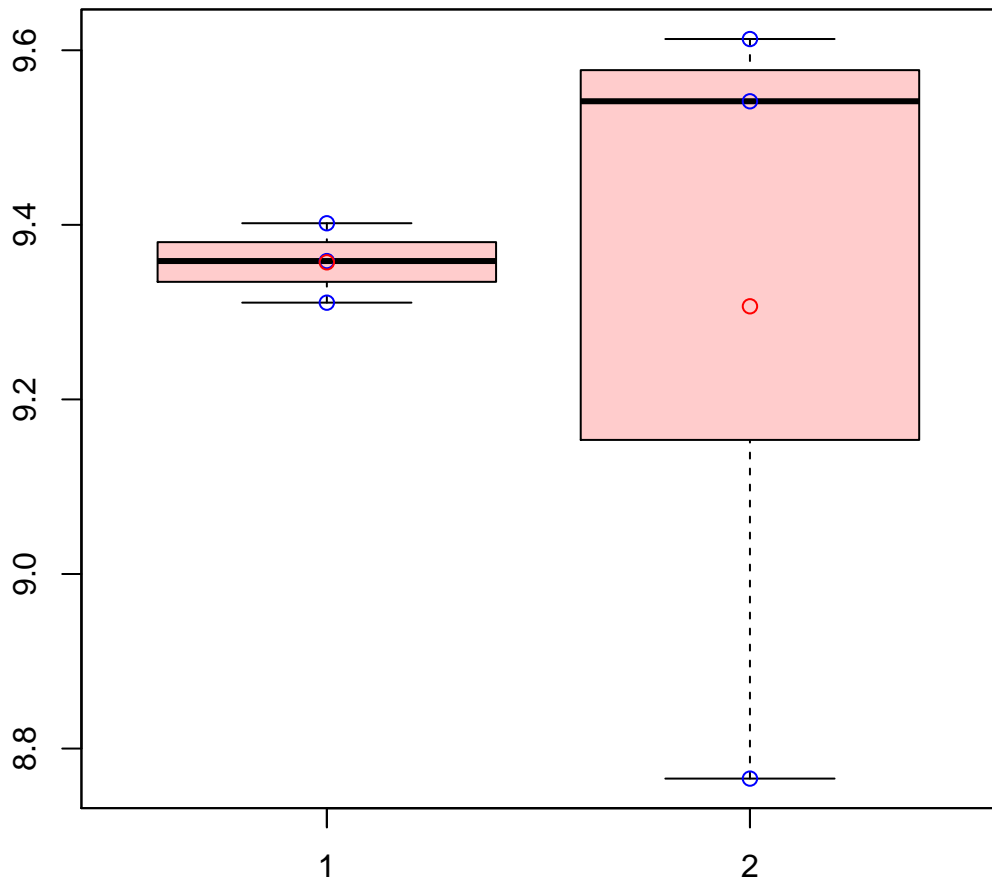

t-Test: p-value = 0.87

# CL3783Contig4|CL3783Contig4

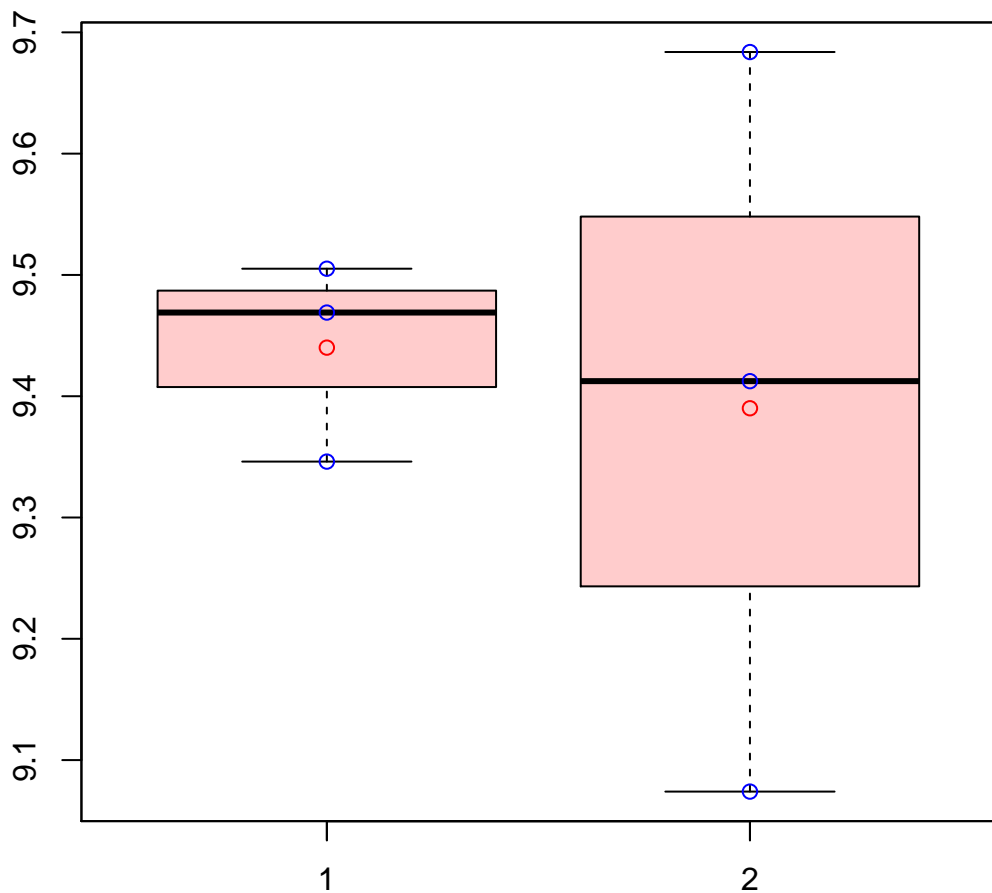

t-Test: p-value = 0.81

# CL3783Contig6|CL3783Contig6

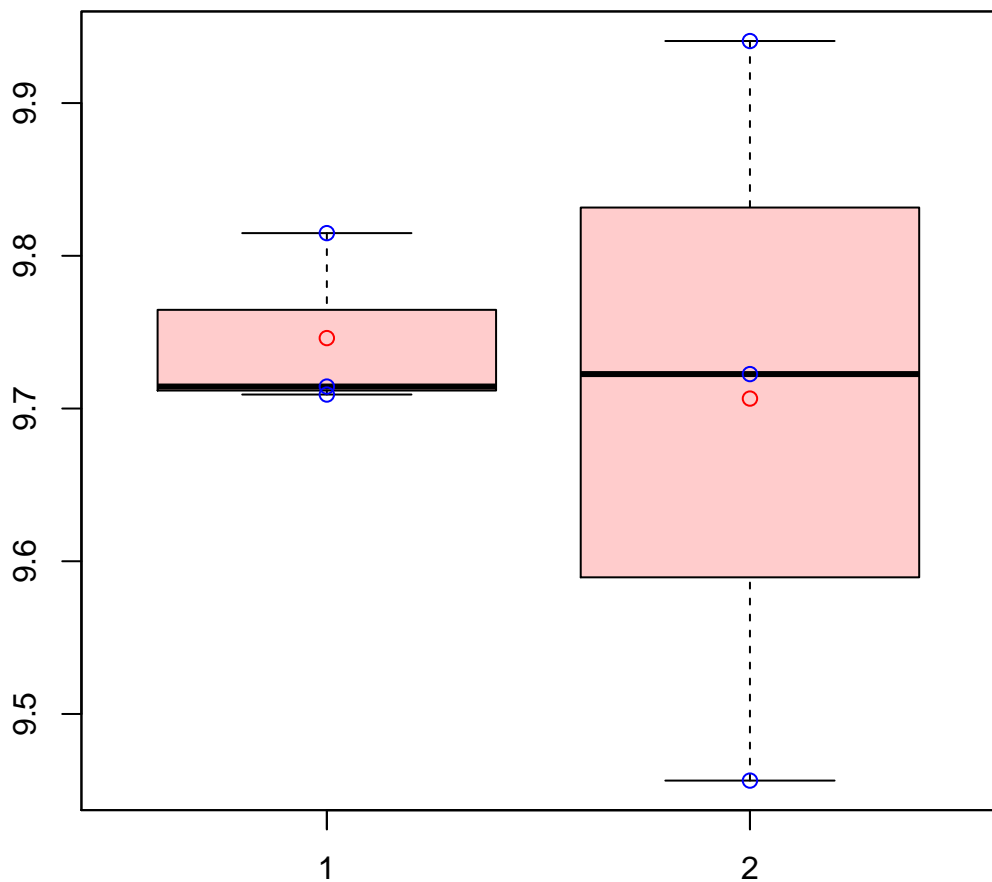

t-Test: p-value = 0.81



# CL3785Contig1|CL3785Contig1

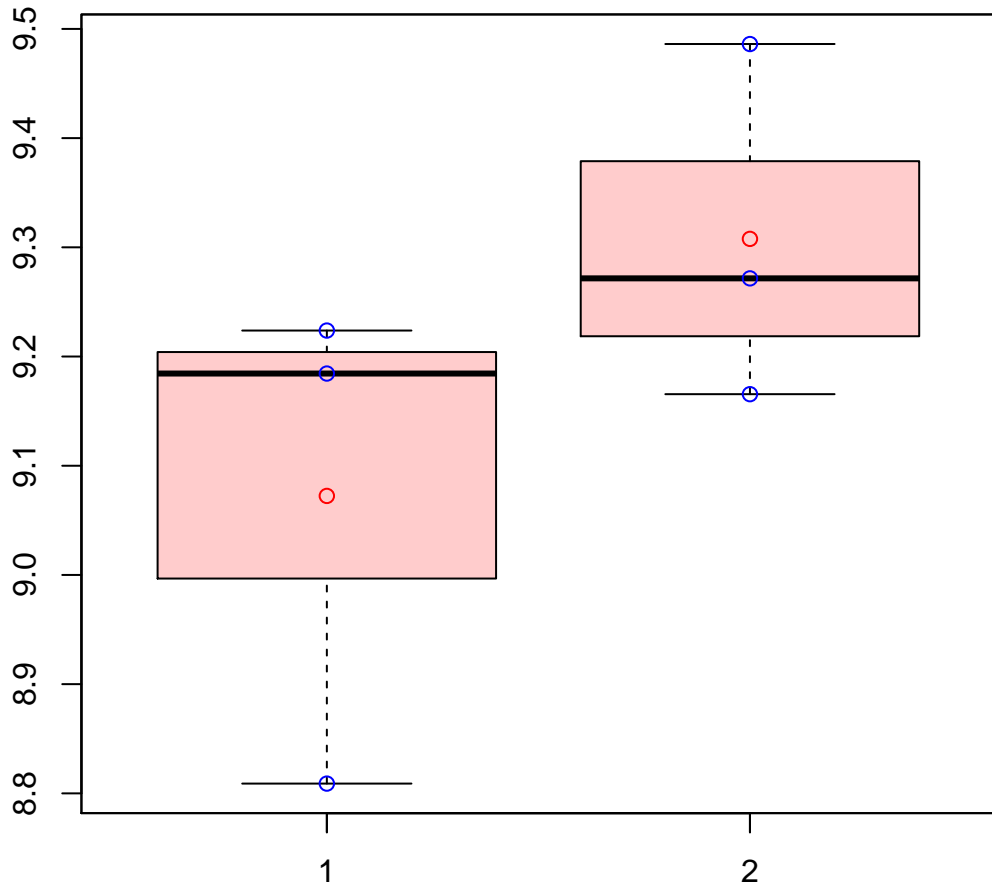

t-Test: p-value = 0.23

# CL3785Contig2|CL3785Contig2

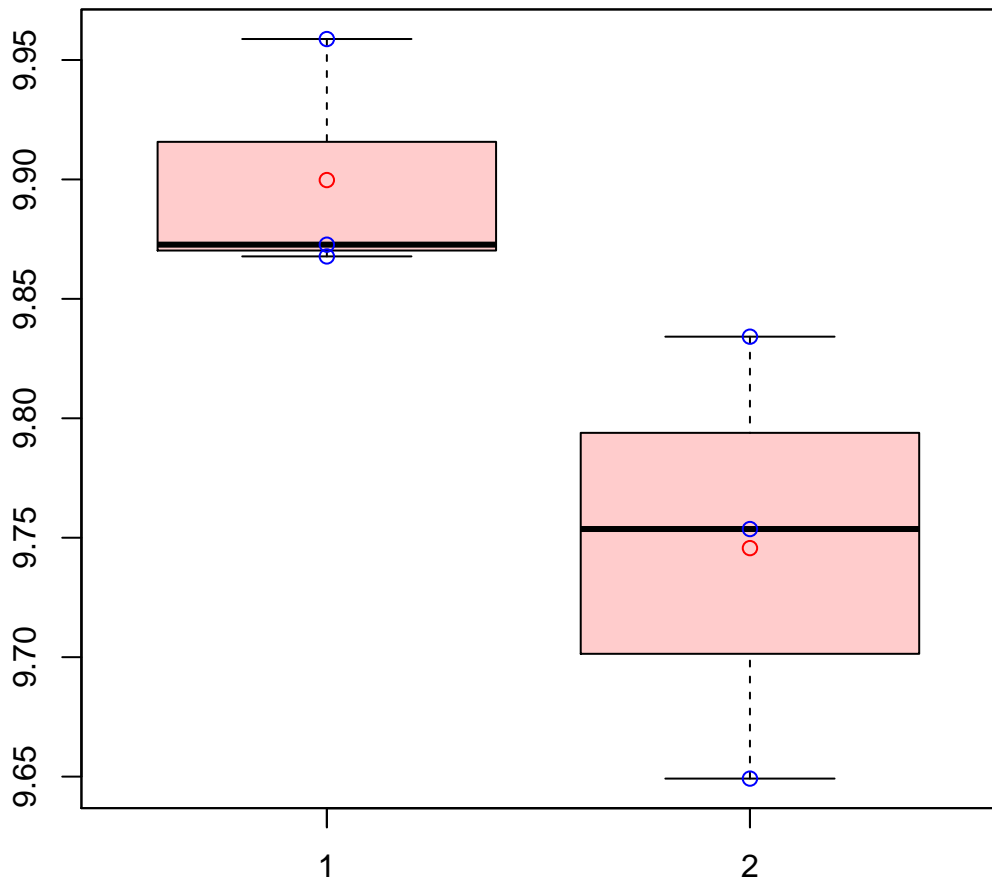

t-Test: p-value = 0.08

# CL3787Contig6|CL3787Contig6

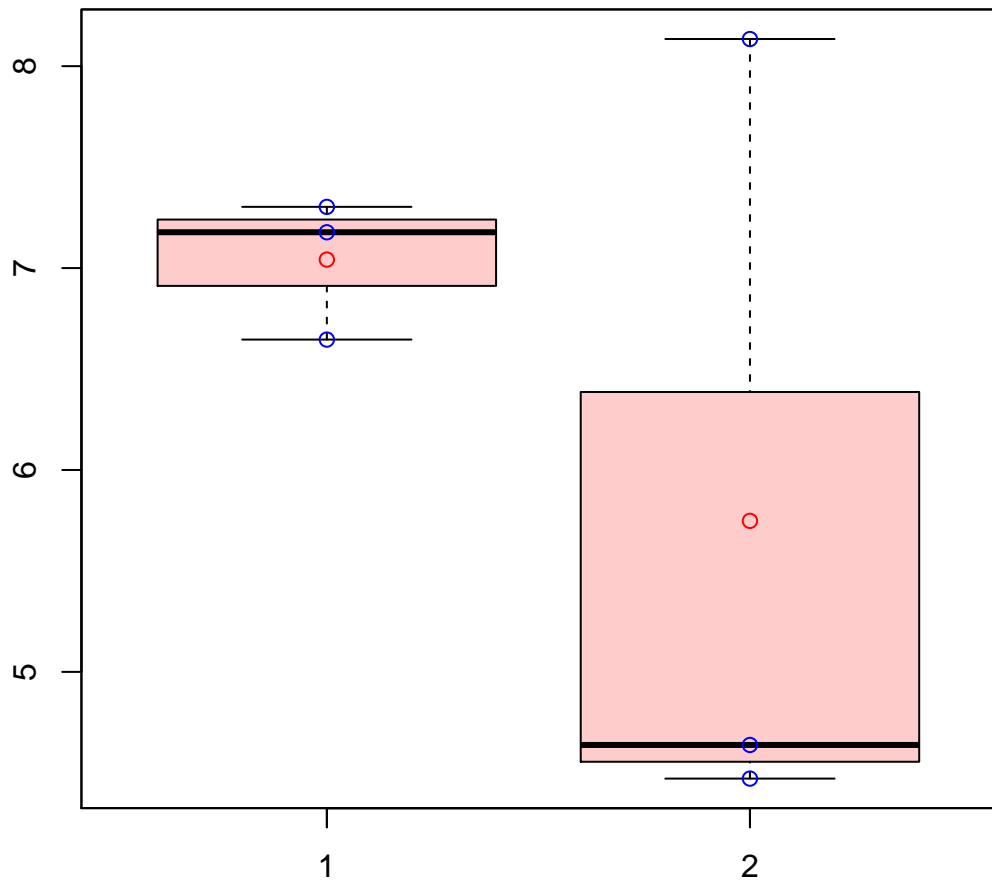

t-Test: p-value = 0.39

# CL378Contig17|CL378Contig17

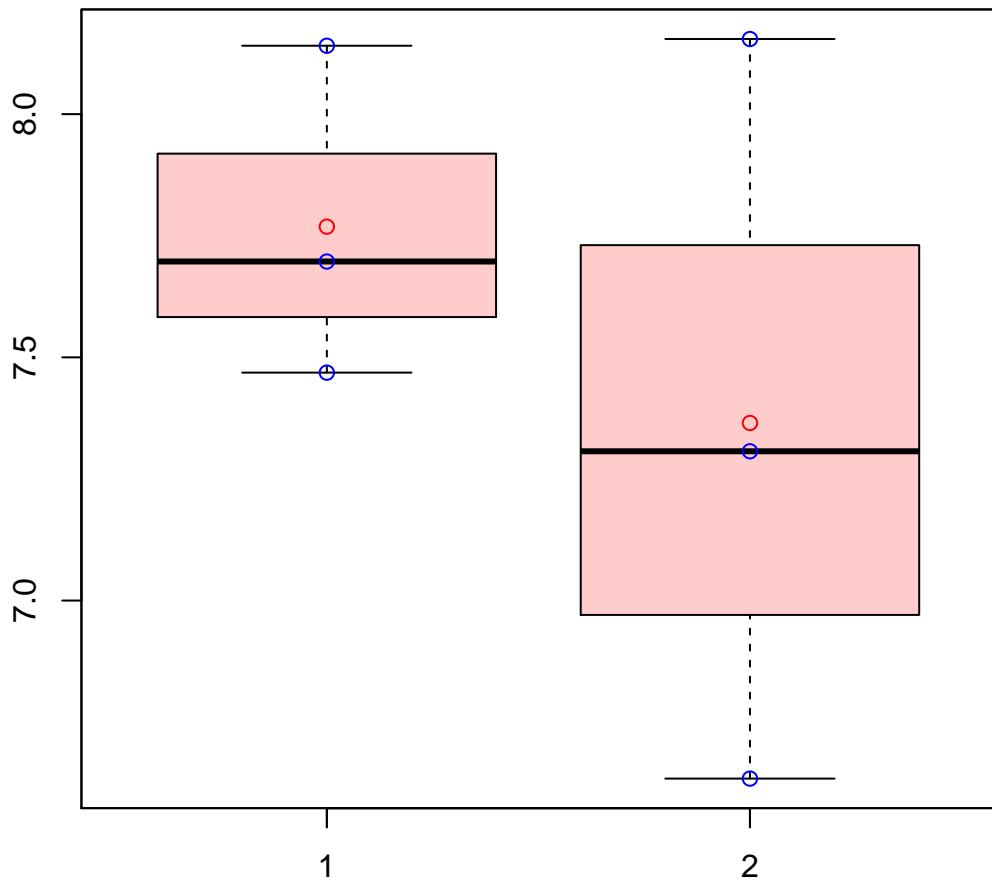

t-Test: p-value = 0.47

# CL378Contig18|CL378Contig18



t-Test: p-value = 0.7

# CL3791Contig3|CL3791Contig3

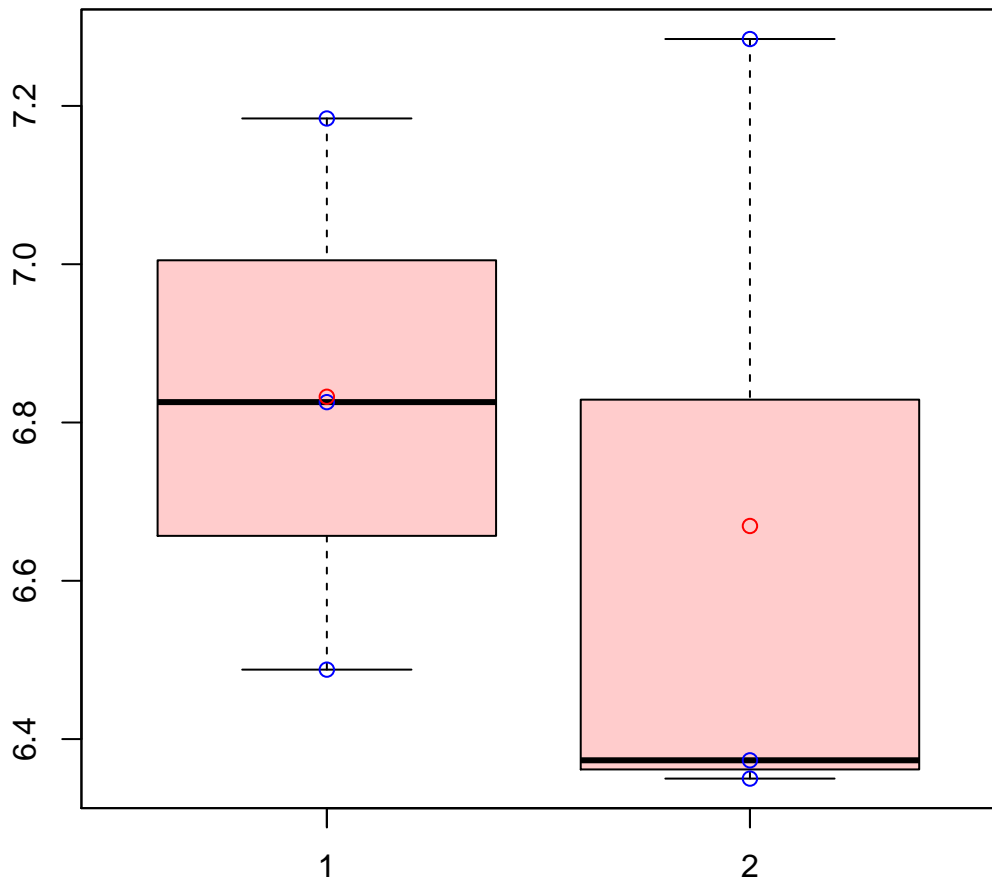

t-Test: p-value = 0.68

# CL3791Contig4|CL3791Contig4



t-Test: p-value = 0.68

# CL3798Contig3|CL3798Contig3

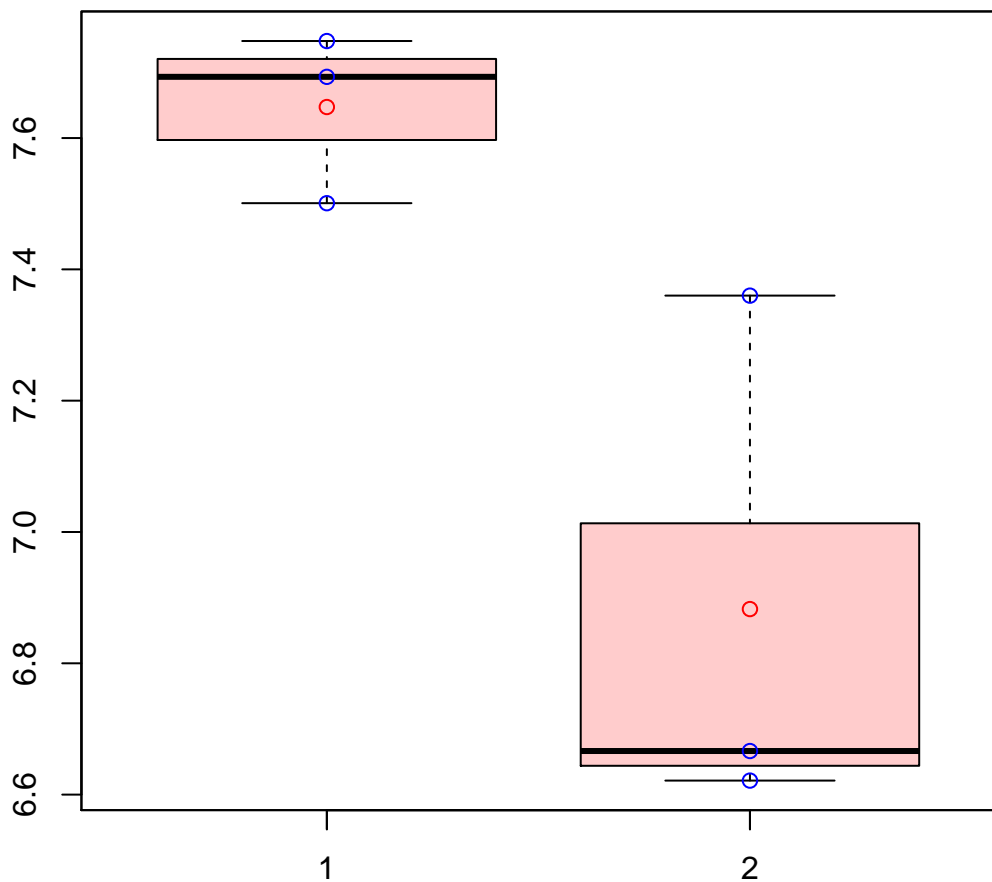

t-Test: p-value = 0.07



# CL3798Contig5|CL3798Contig5

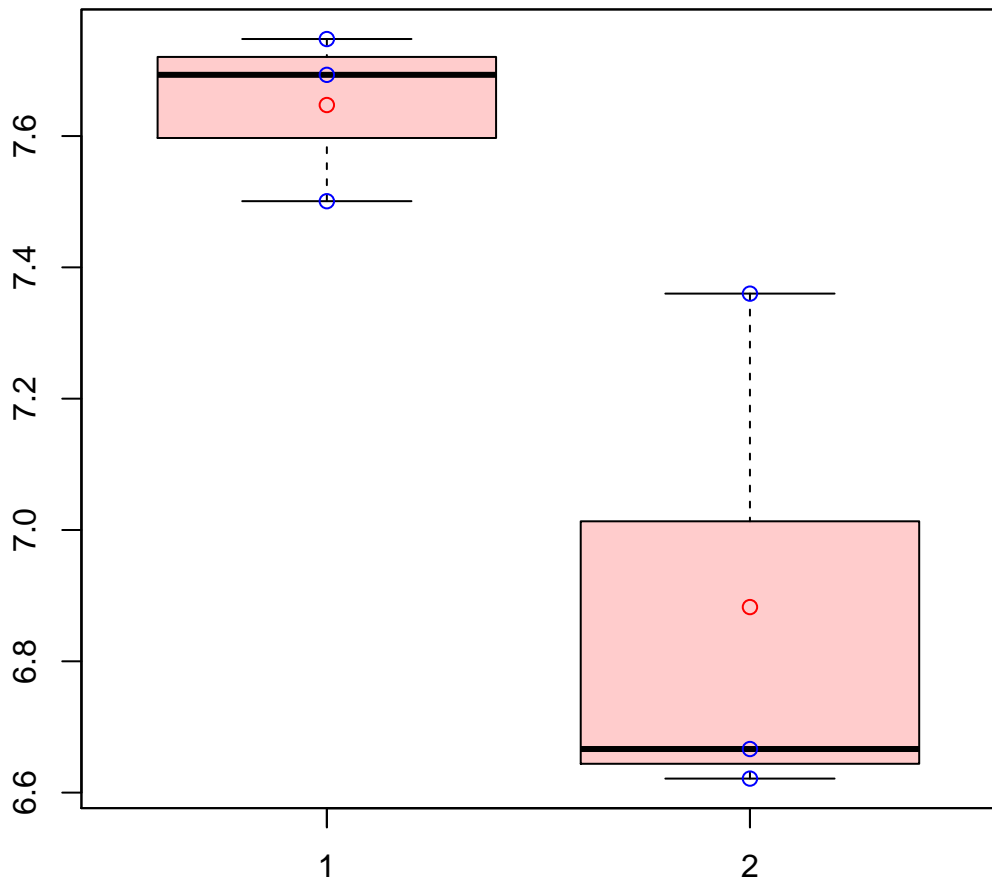

t-Test: p-value = 0.07

# CL379Contig2|CL379Contig2

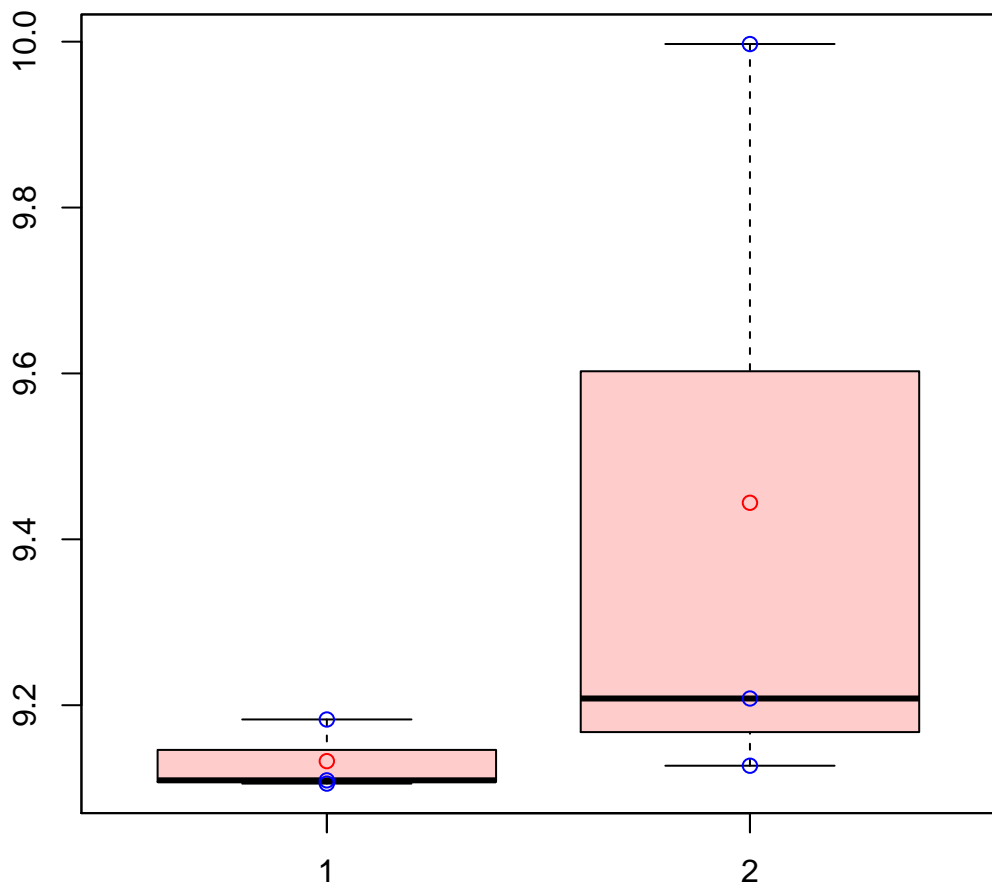

t-Test: p-value = 0.38

# CL379Contig7|CL379Contig7

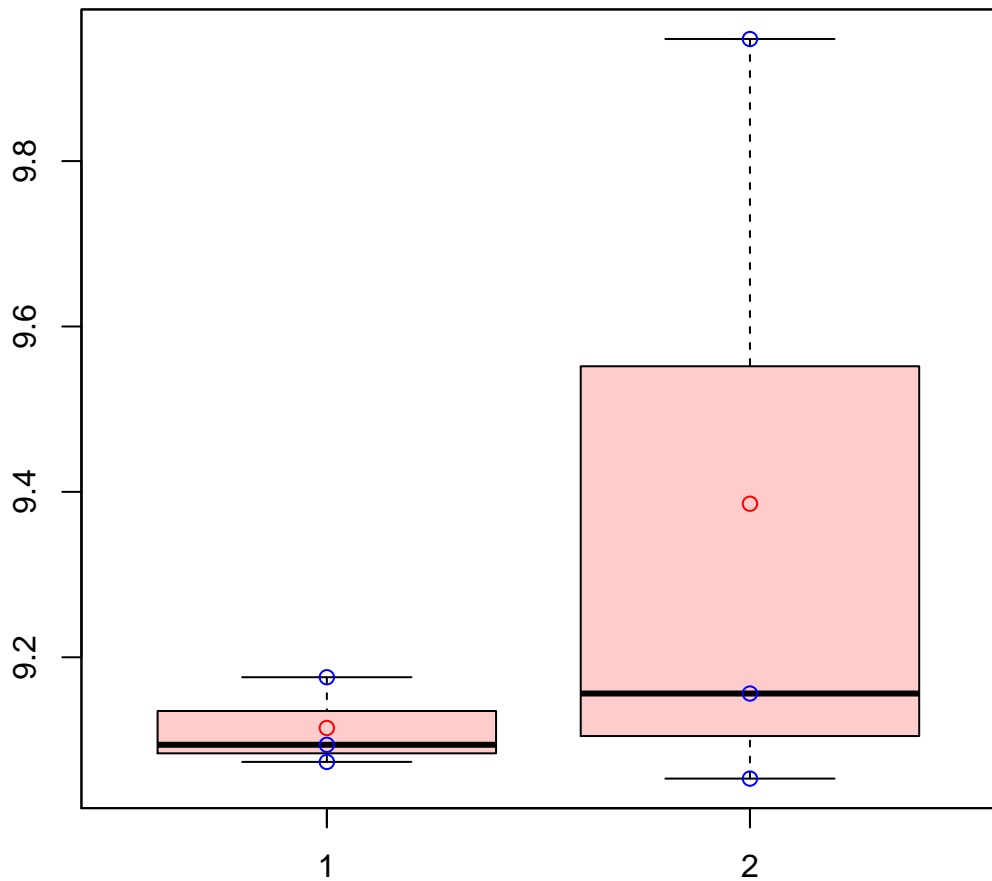

t-Test: p-value = 0.44

# CL379Contig8|CL379Contig8

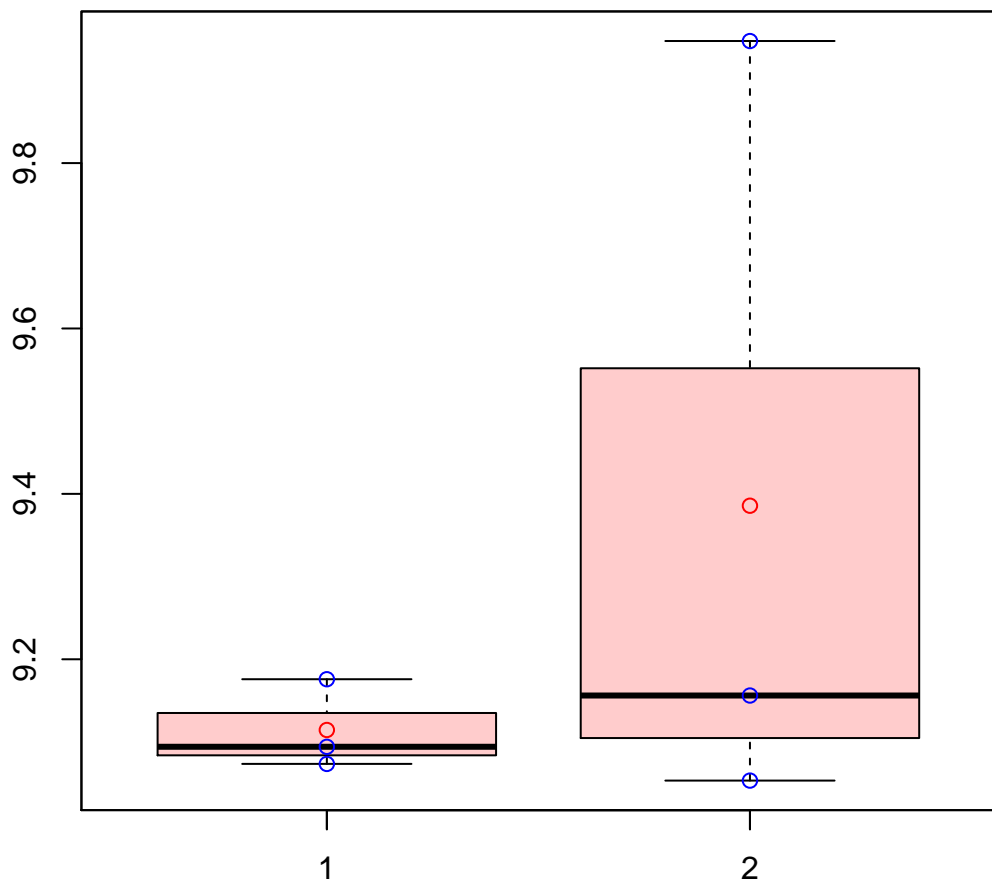

t-Test: p-value = 0.44

# CL37Contig17|CL37Contig17

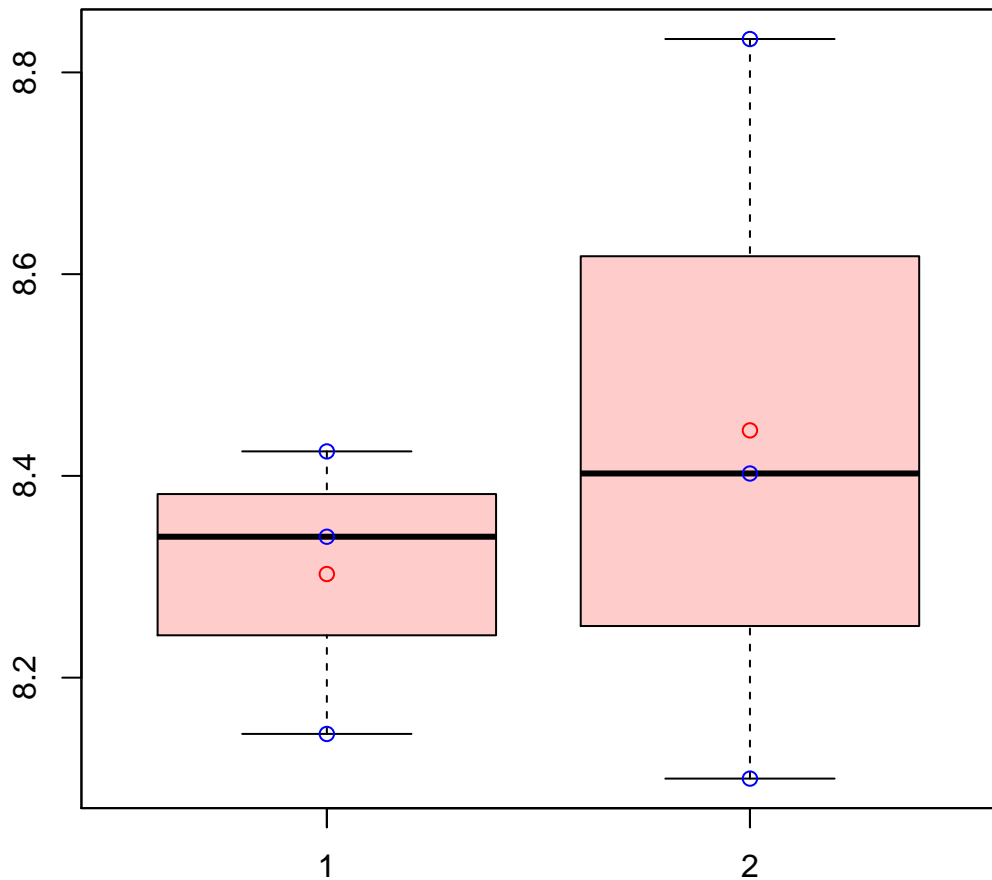

t-Test: p-value = 0.58

# CL37Contig3|CL37Contig3

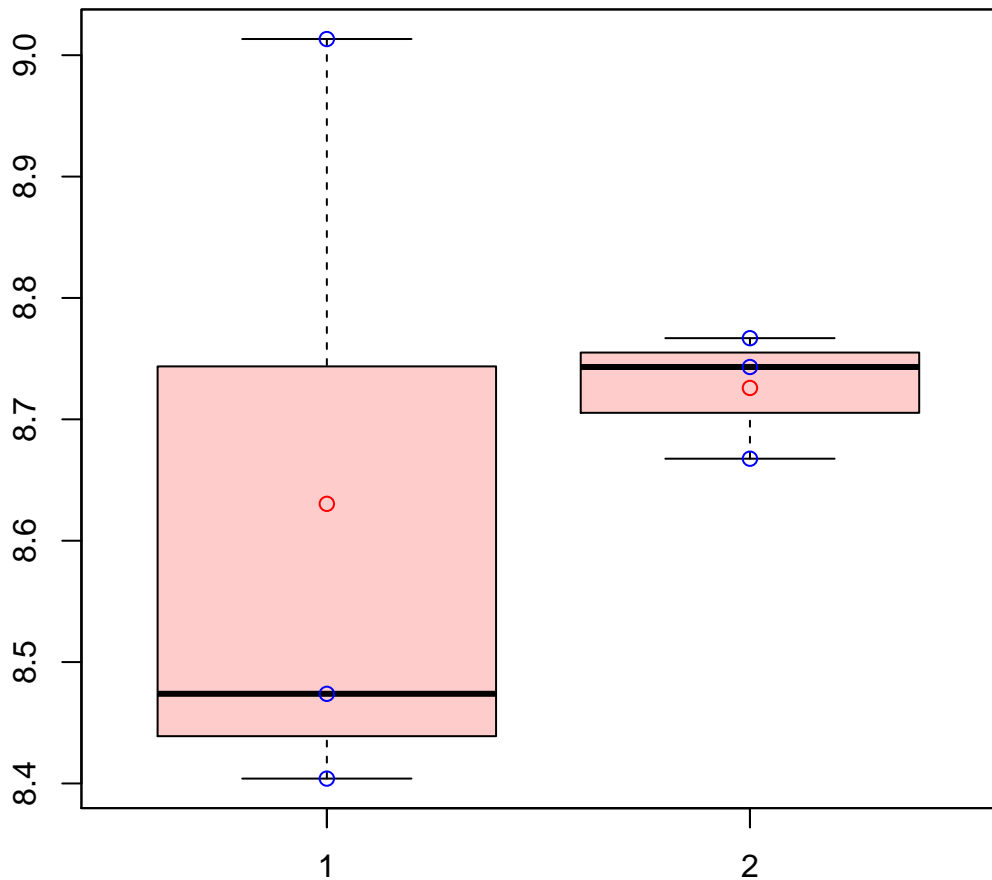

t-Test: p-value = 0.67

# CL3801Contig1|CL3801Contig1

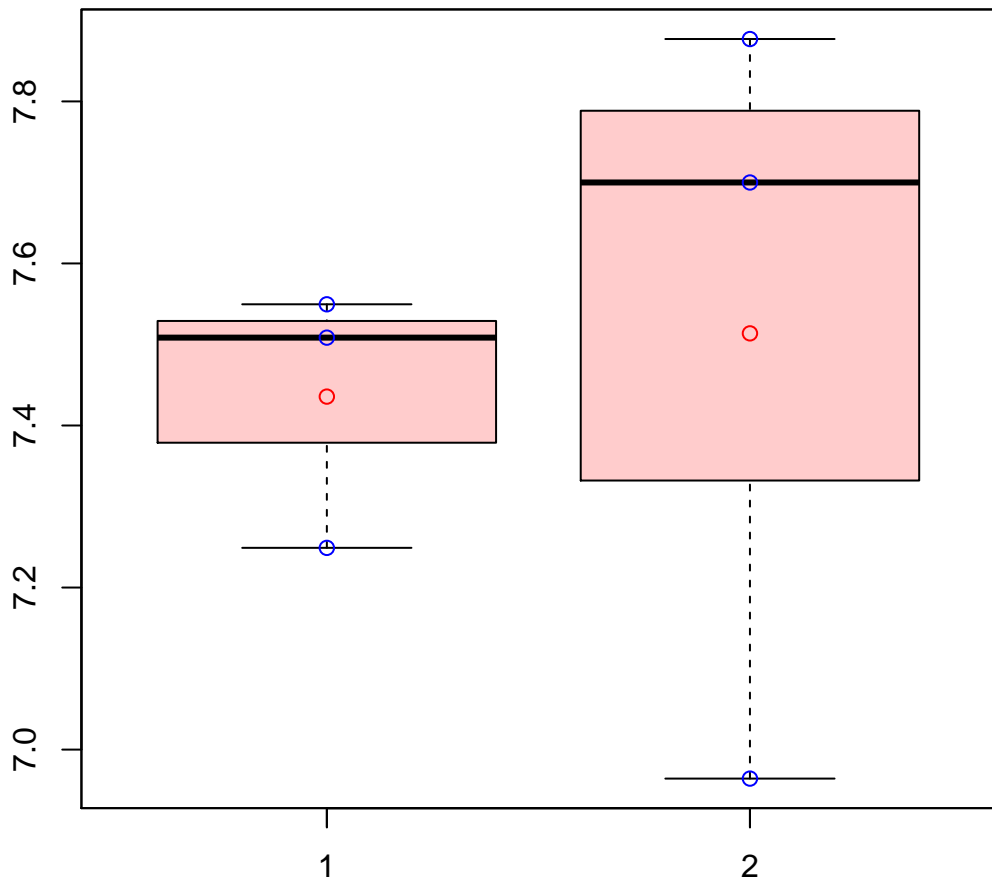

t-Test: p-value = 0.81

# CL3806Contig1|CL3806Contig1

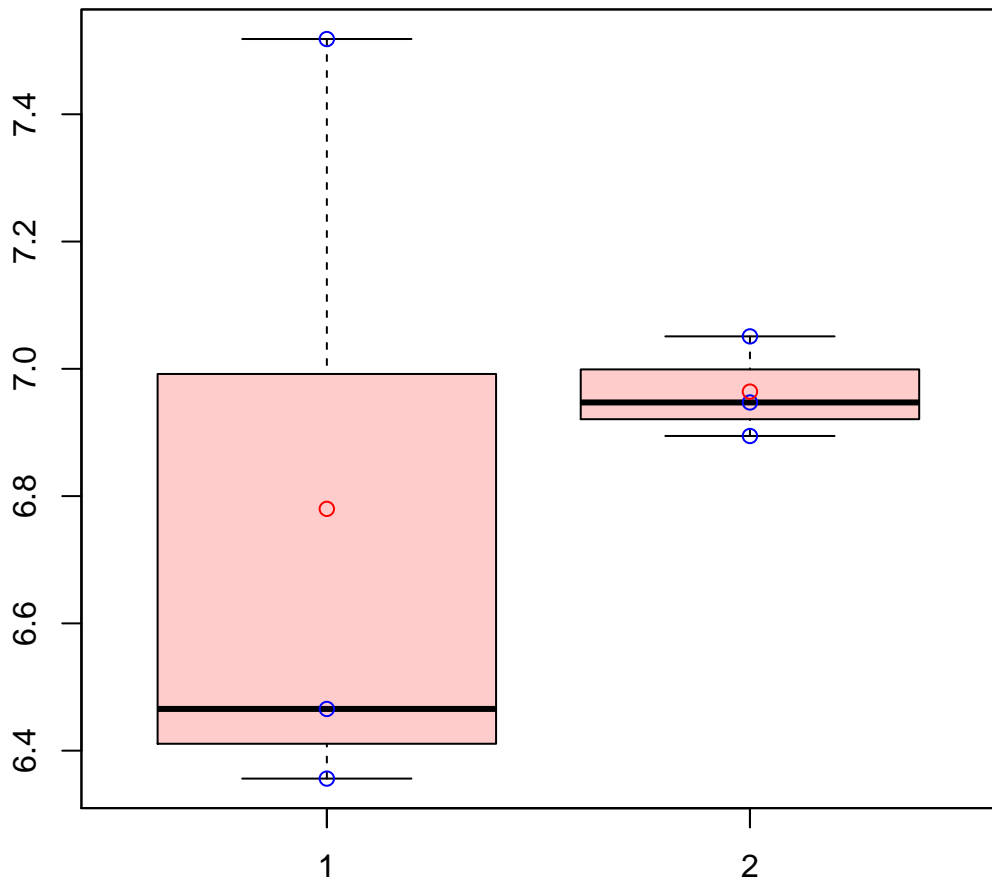

t-Test: p-value = 0.67



# CL3810Contig3|CL3810Contig3

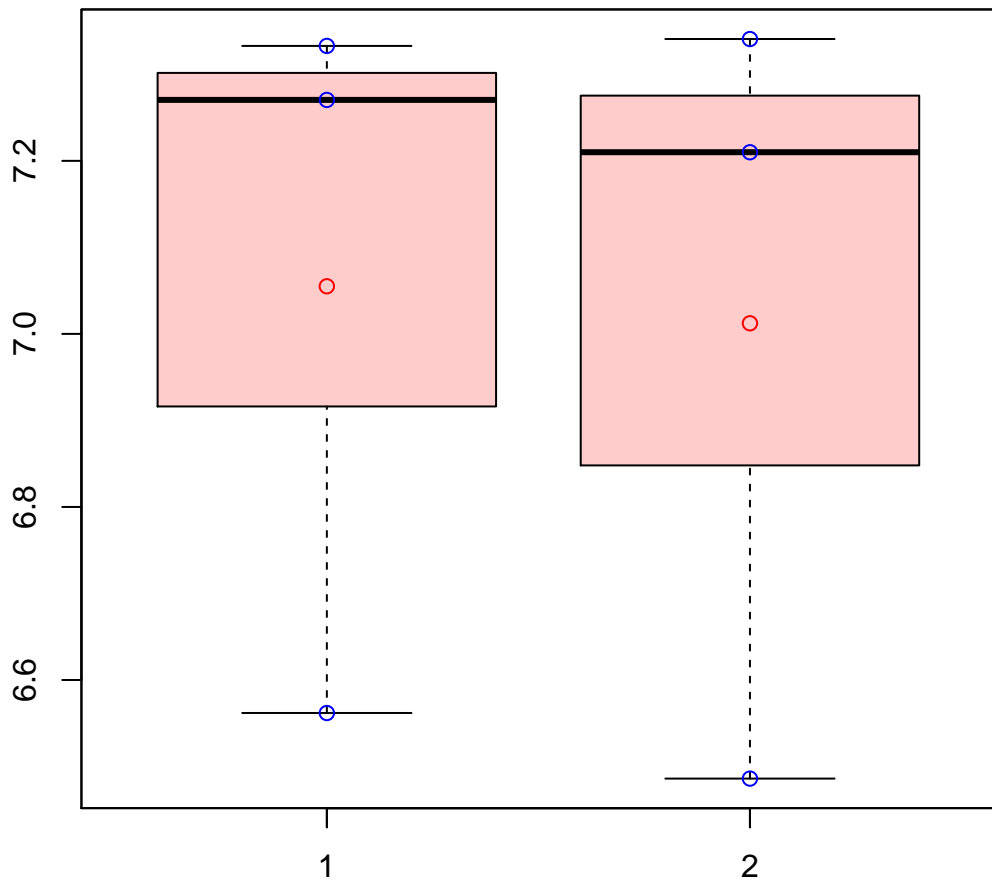

t-Test: p-value = 0.91

# CL3810Contig4|CL3810Contig4

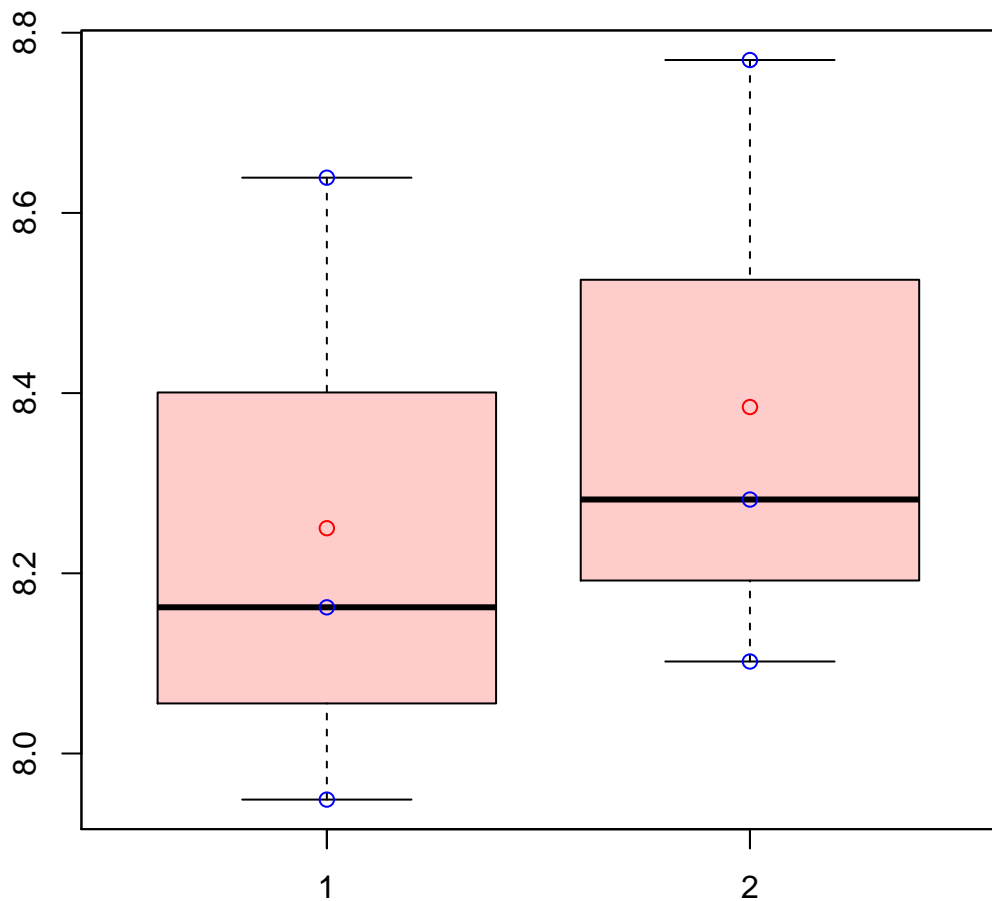

t-Test: p-value = 0.66

# CL3814Contig3|CL3814Contig3

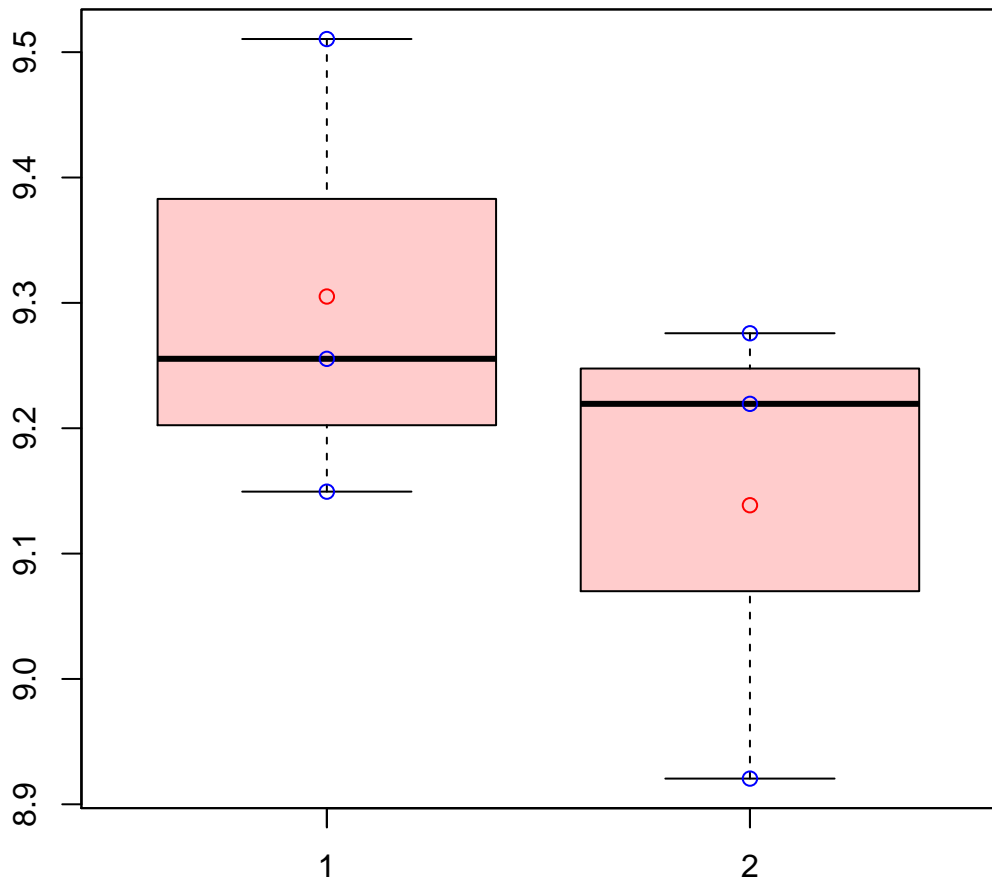

t-Test: p-value = 0.34

# CL3819Contig4|CL3819Contig4

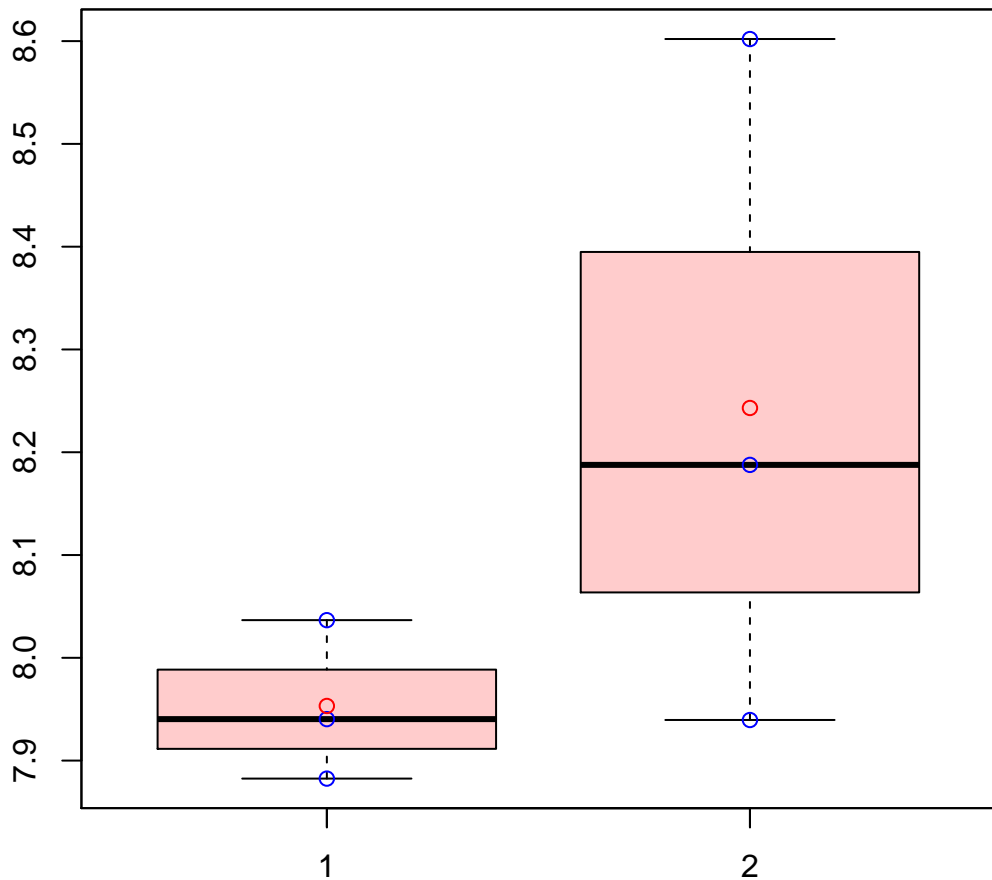

t-Test: p-value = 0.27

# CL381Contig12|CL381Contig12

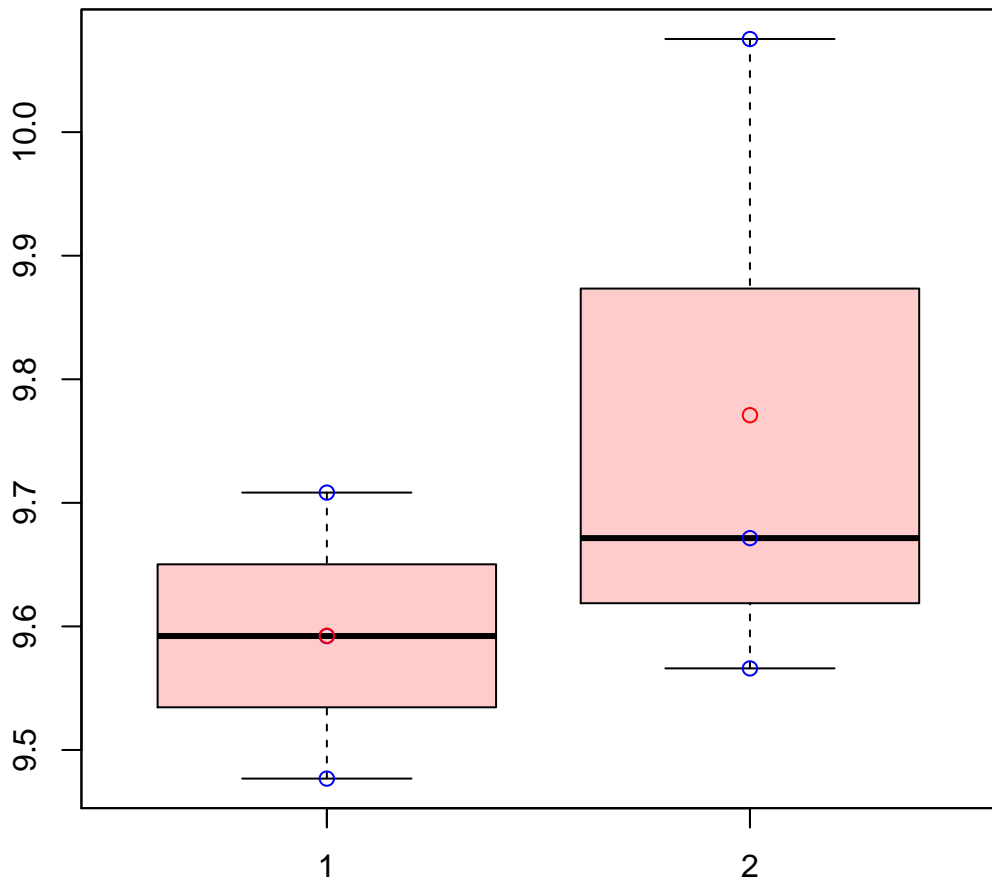

t-Test: p-value = 0.38

# CL3820Contig1|CL3820Contig1

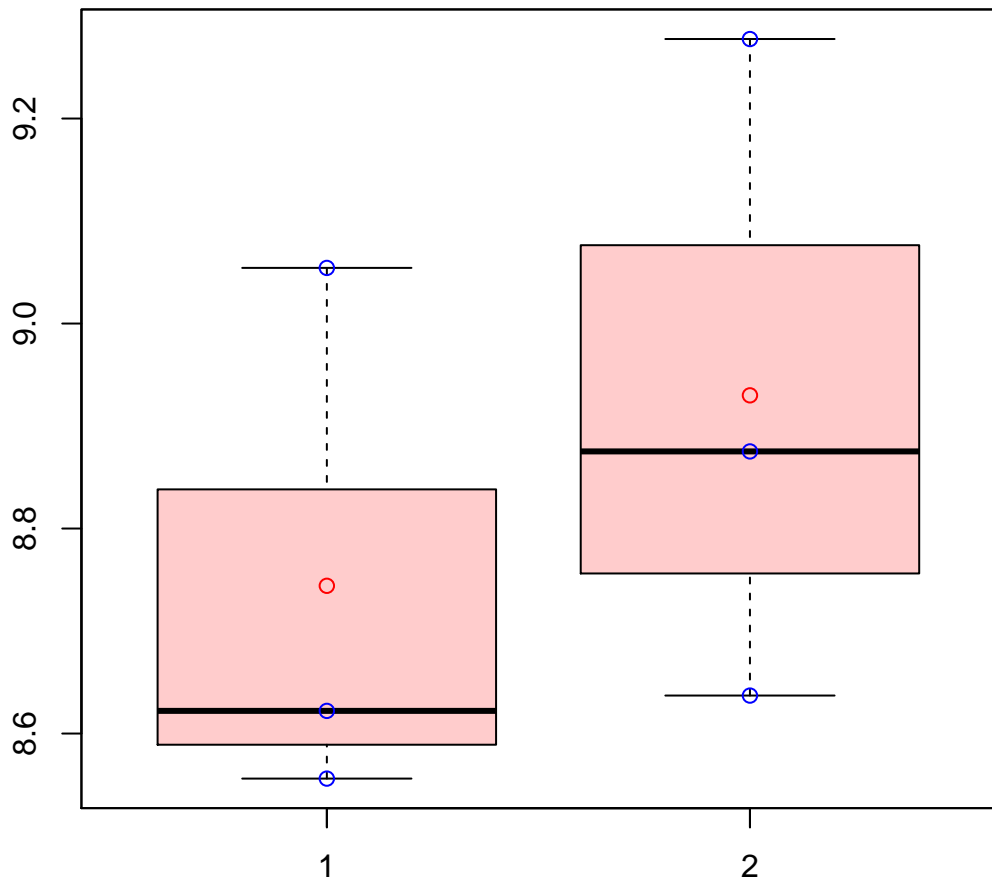

t-Test: p-value = 0.49

# CL3821Contig1|CL3821Contig1

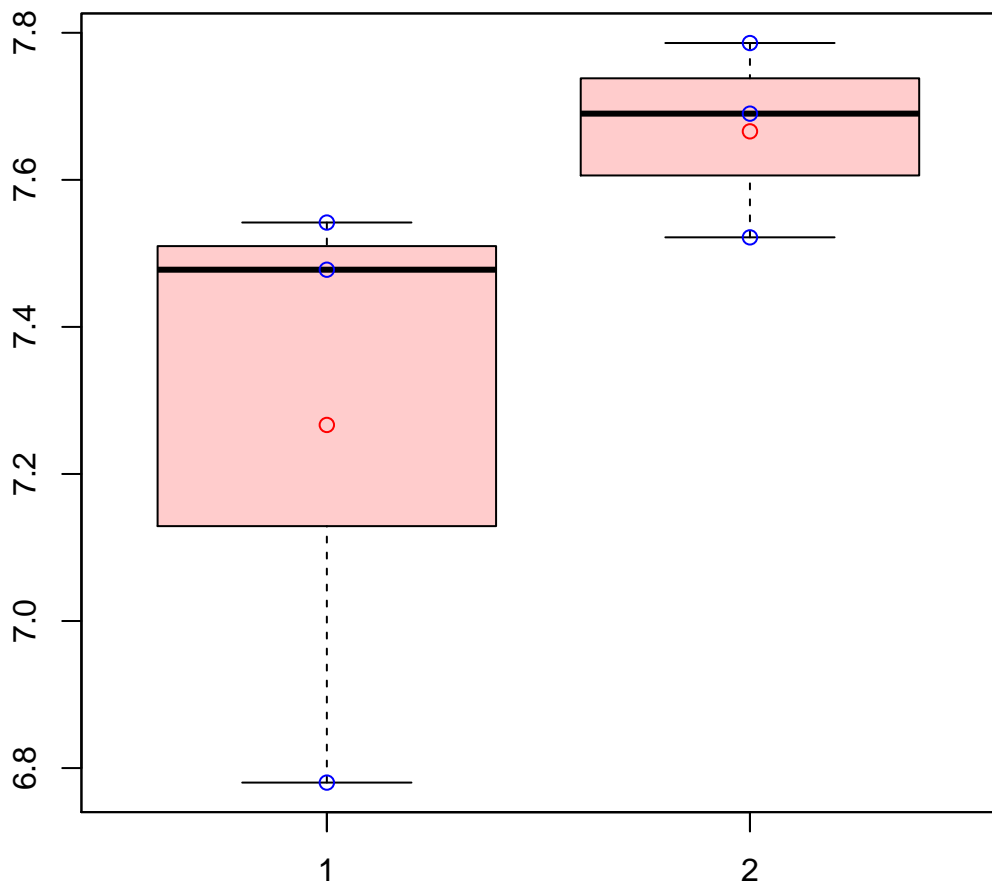

t-Test: p-value = 0.24

# CL382Contig4|CL382Contig4

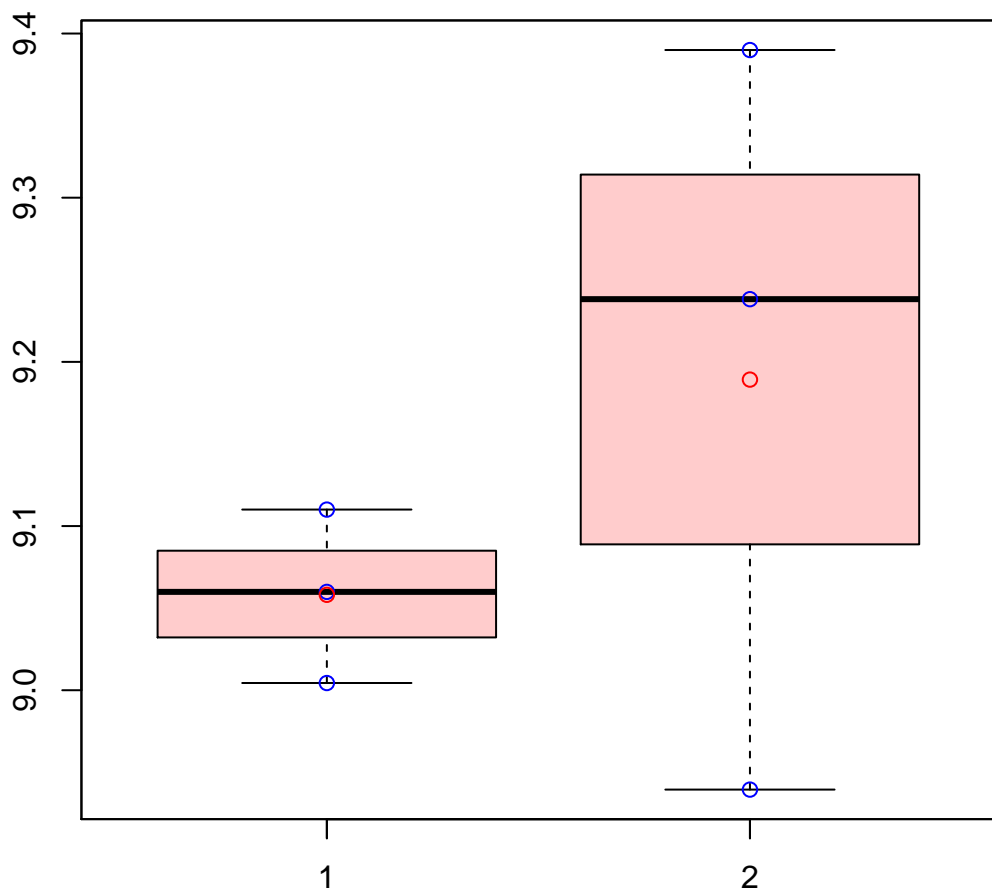

t-Test: p-value = 0.43



# CL382Contig7|CL382Contig7

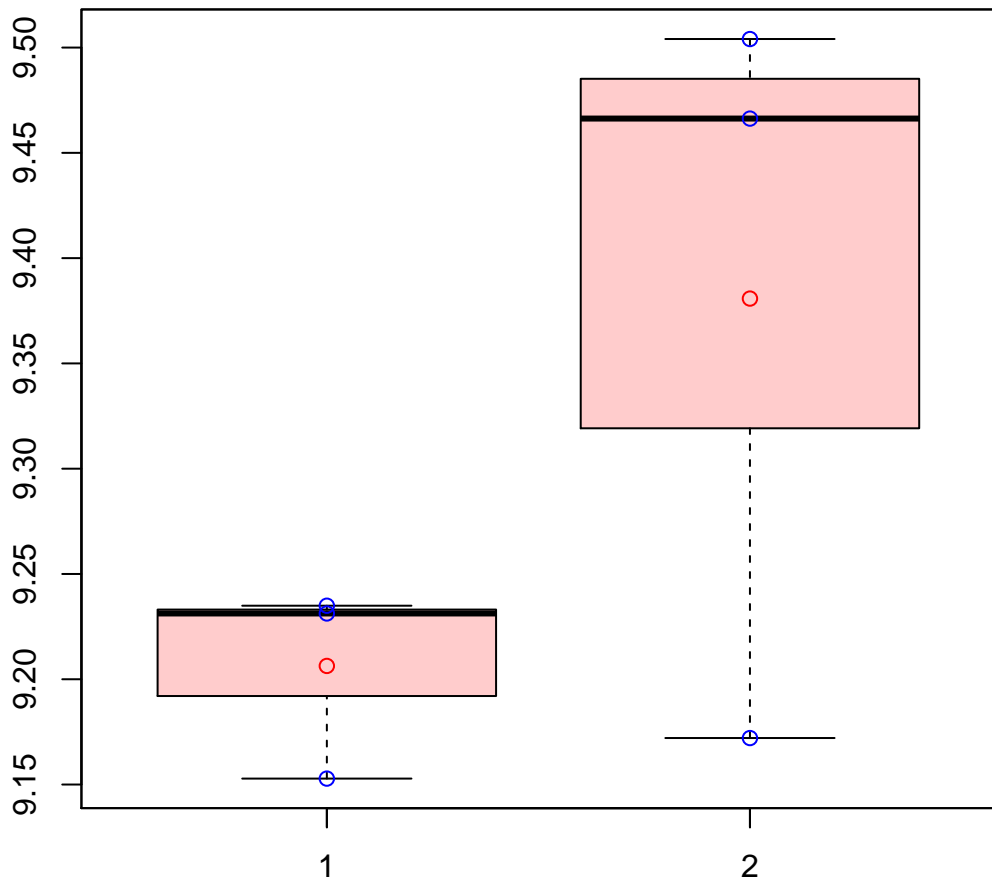

t-Test: p-value = 0.23

# CL3830Contig3|CL3830Contig3

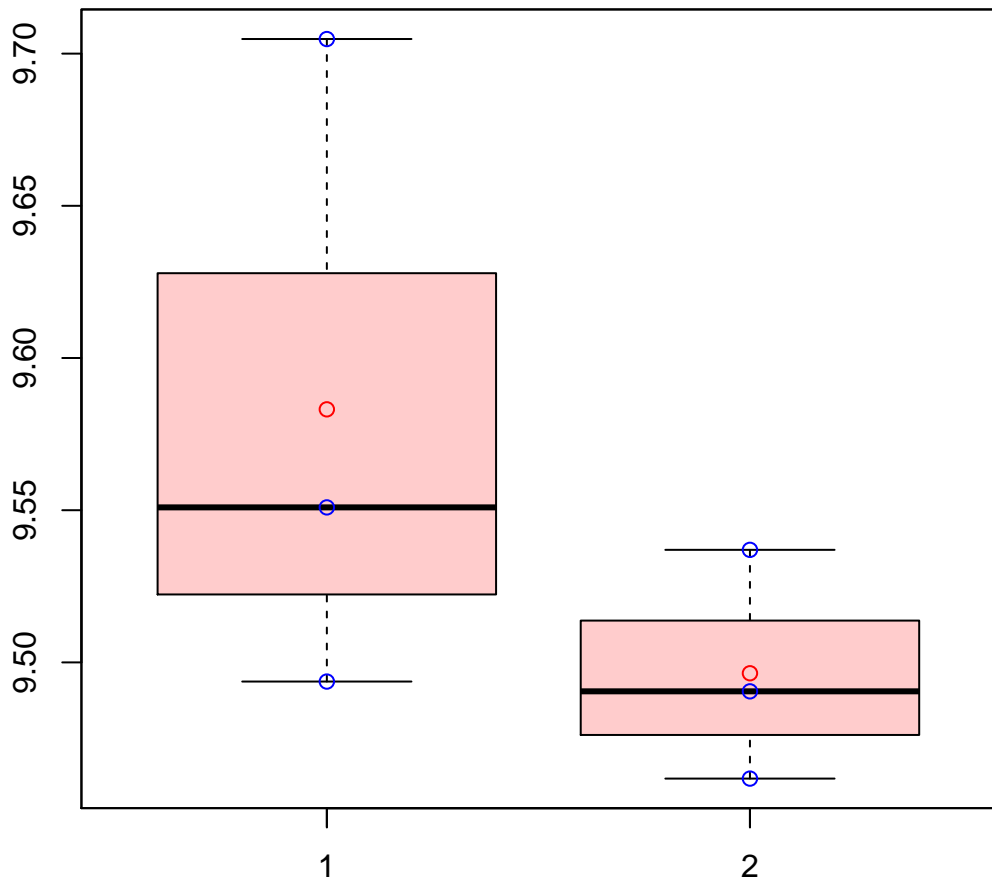

t-Test: p-value = 0.3

# CL3835Contig1|CL3835Contig1

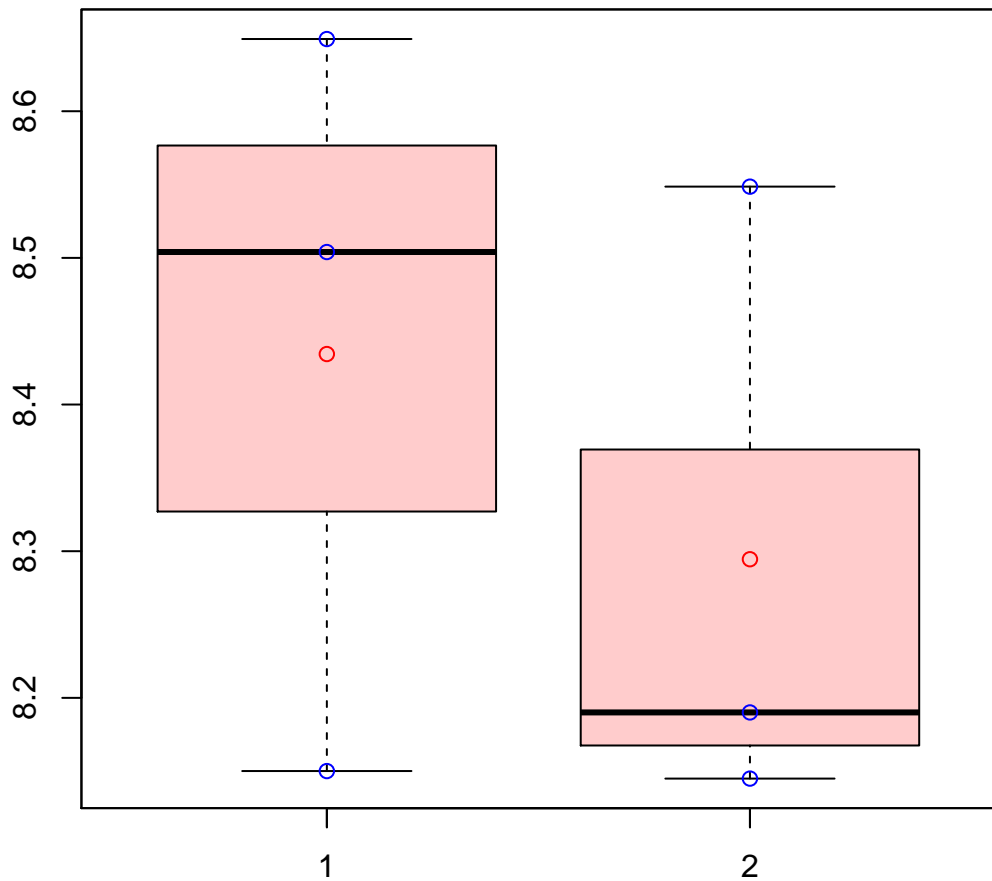

t-Test: p-value = 0.51

# CL3835Contig2|CL3835Contig2

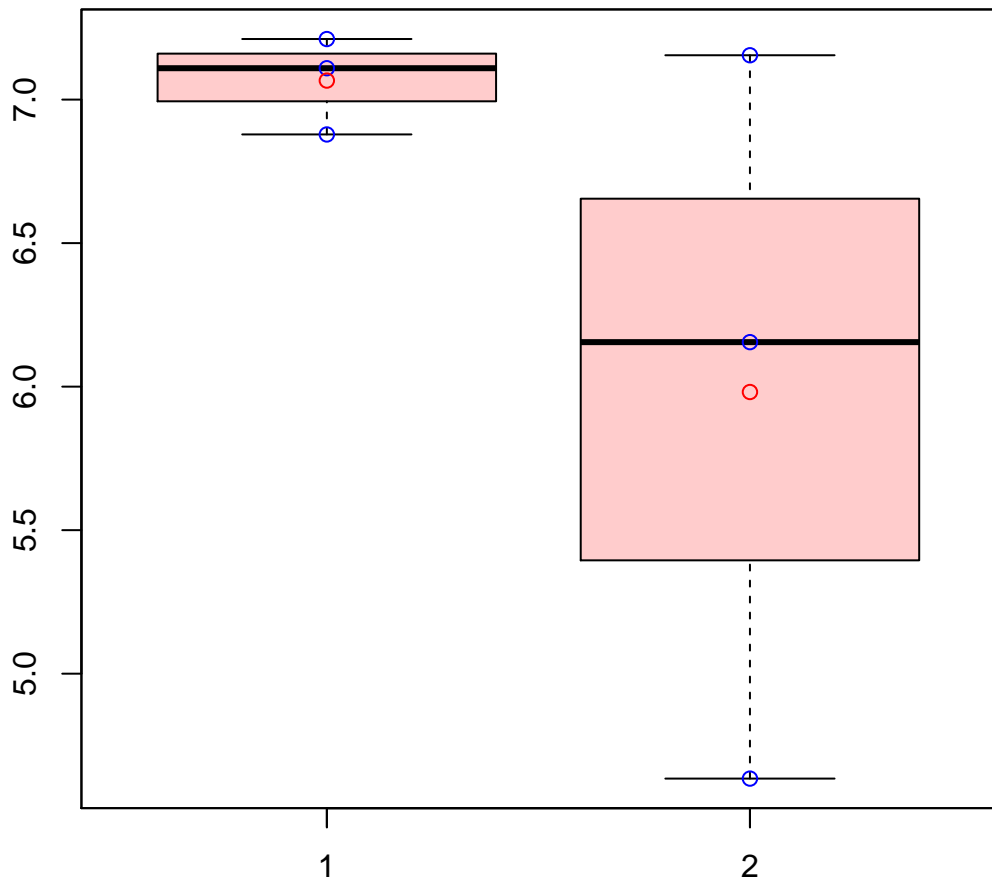

t-Test: p-value = 0.28

# CL3835Contig3|CL3835Contig3

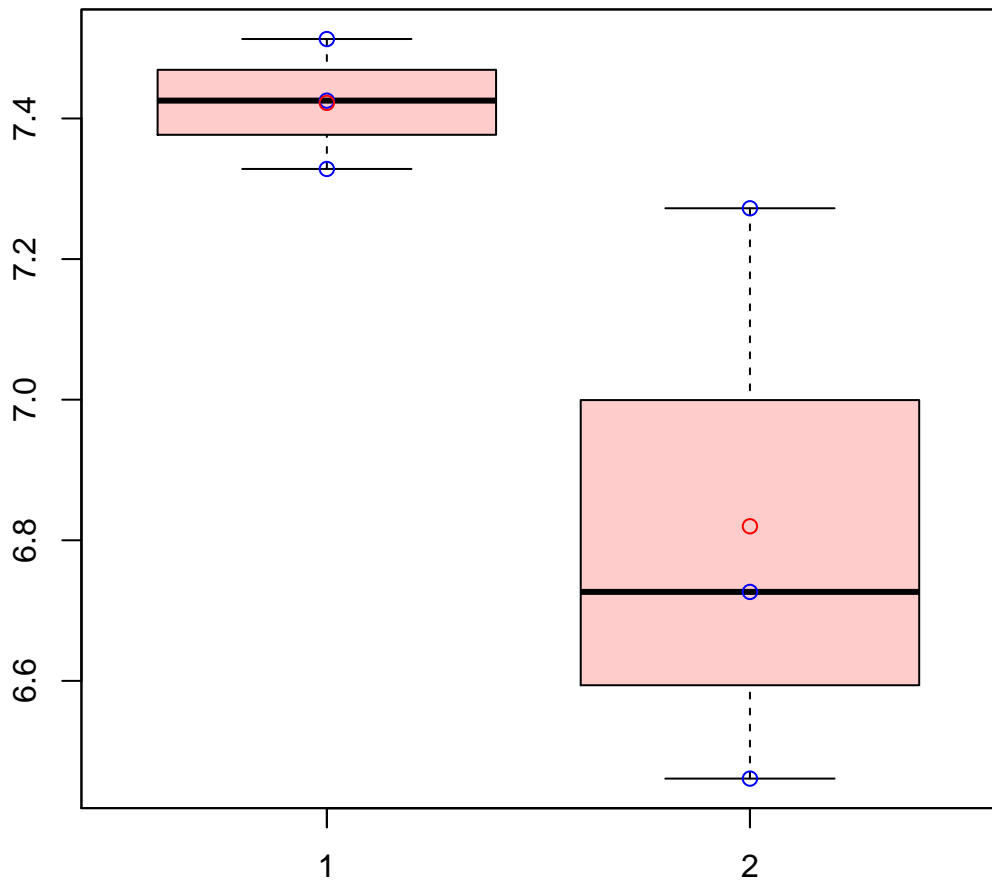

t-Test: p-value = 0.12

# CL3842Contig1|CL3842Contig1

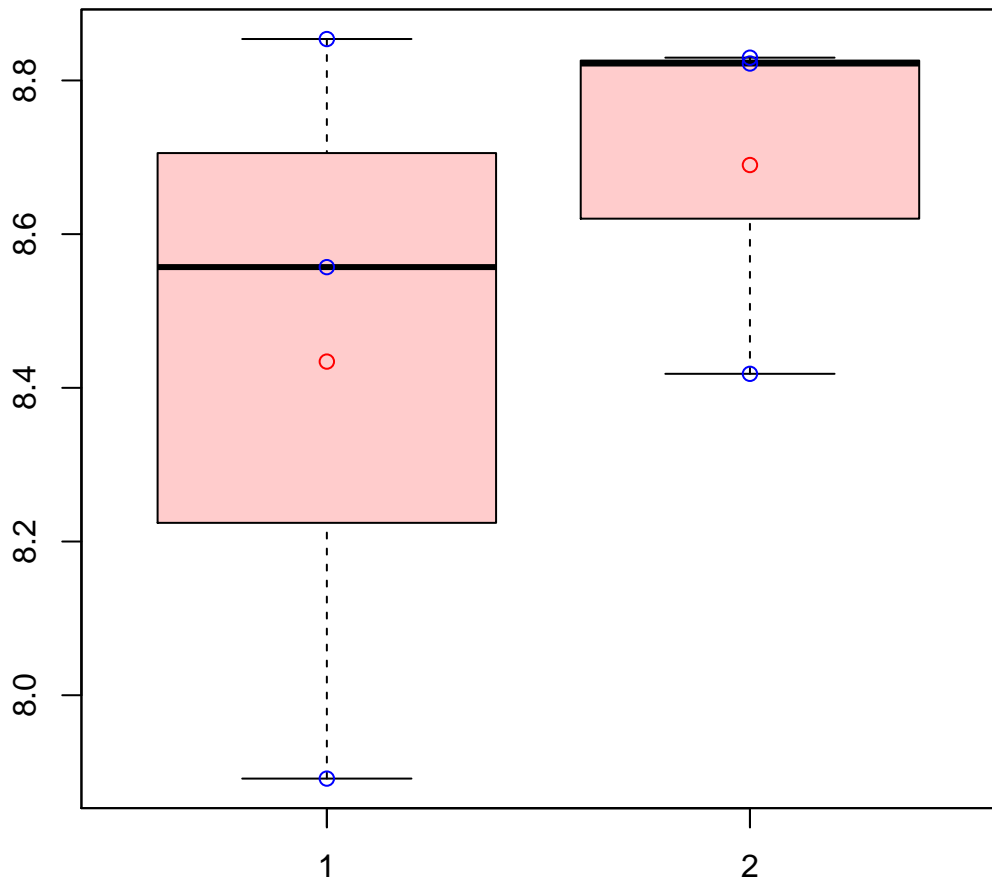

t-Test: p-value = 0.48

# CL3842Contig2|CL3842Contig2

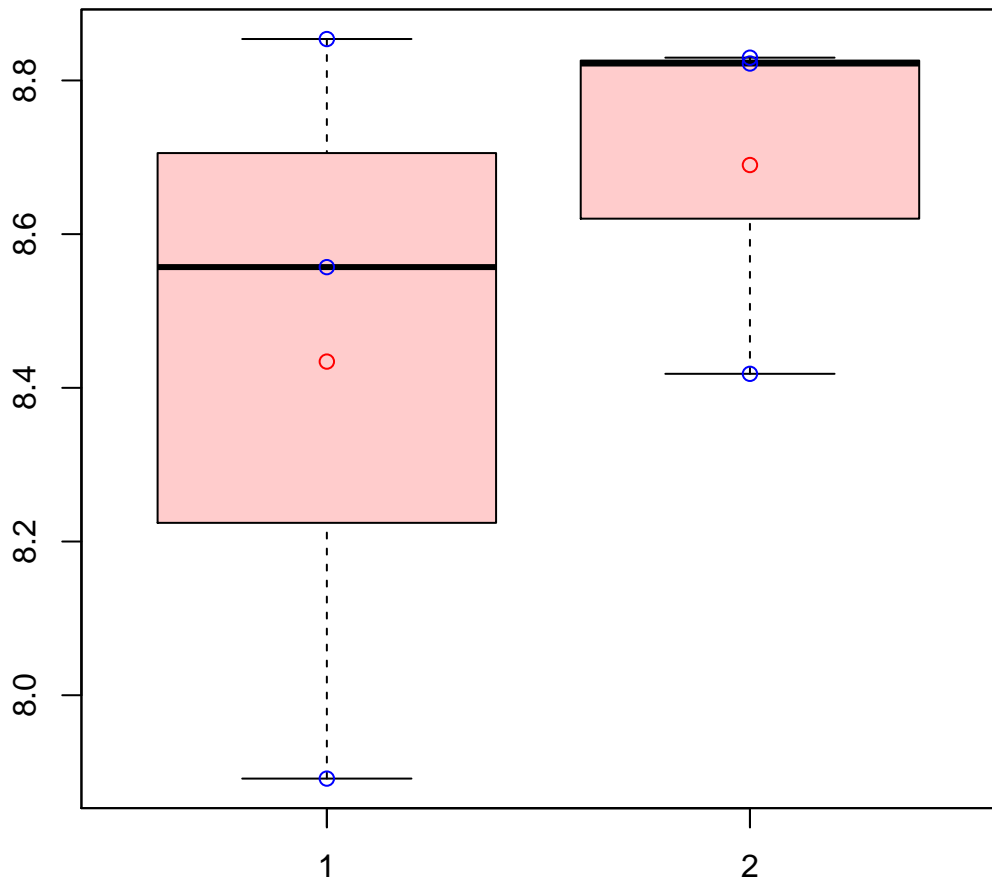

t-Test: p-value = 0.48

# CL3842Contig3|CL3842Contig3



t-Test: p-value = 0.48



# CL3842Contig4|CL3842Contig4



t-Test: p-value = 0.48

# CL3842Contig5|CL3842Contig5



t-Test: p-value = 0.48

# CL3844Contig2|CL3844Contig2

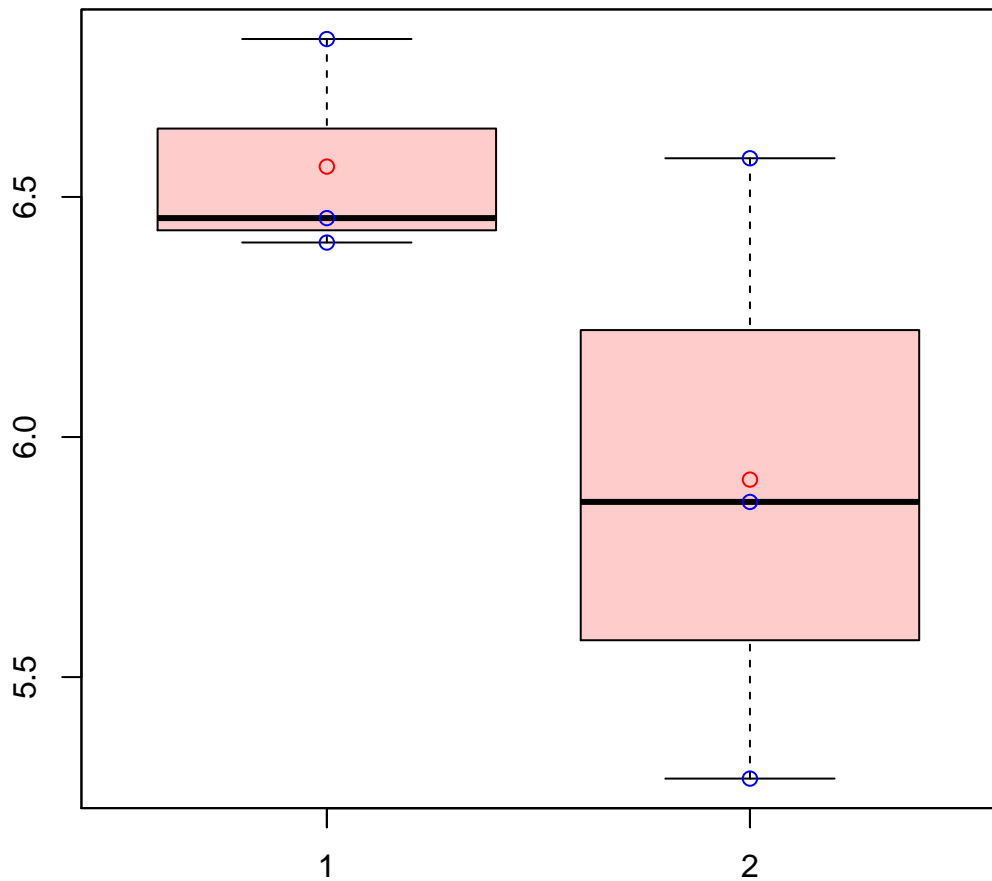

t-Test: p-value = 0.22

# CL3847Contig6|CL3847Contig6

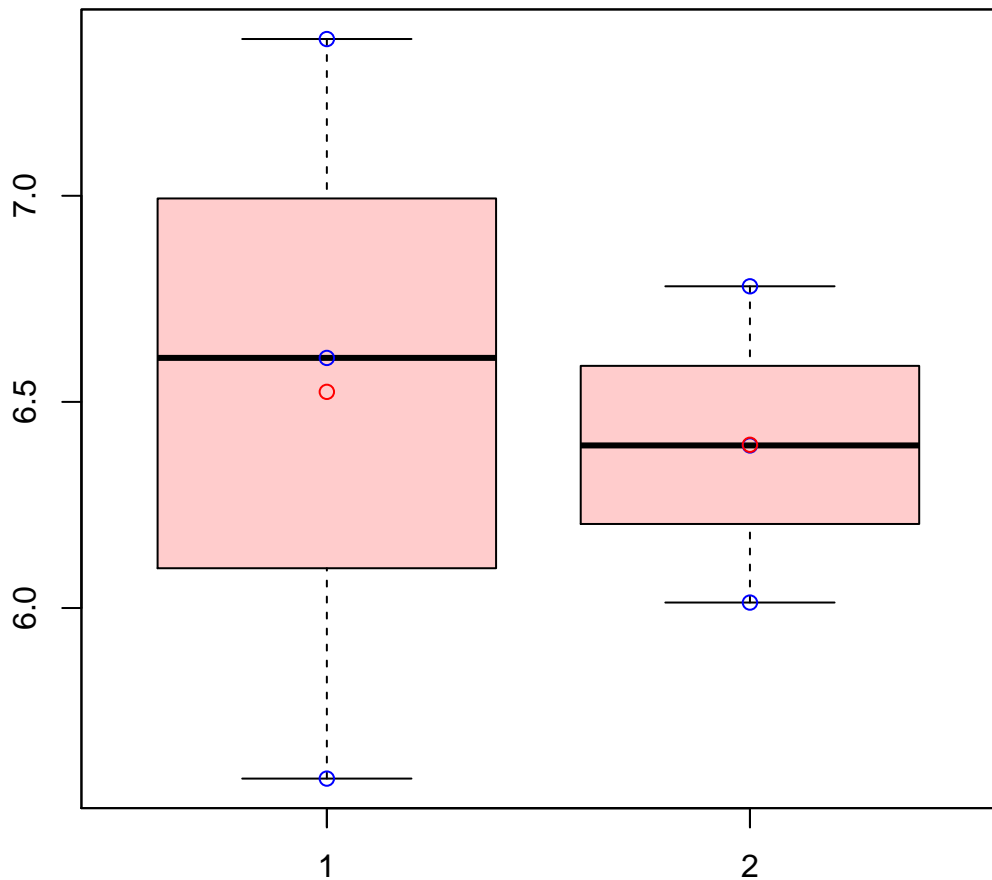

t-Test: p-value = 0.84

# CL3847Contig9|CL3847Contig9



t-Test: p-value = 0.84

# CL3848Contig2|CL3848Contig2

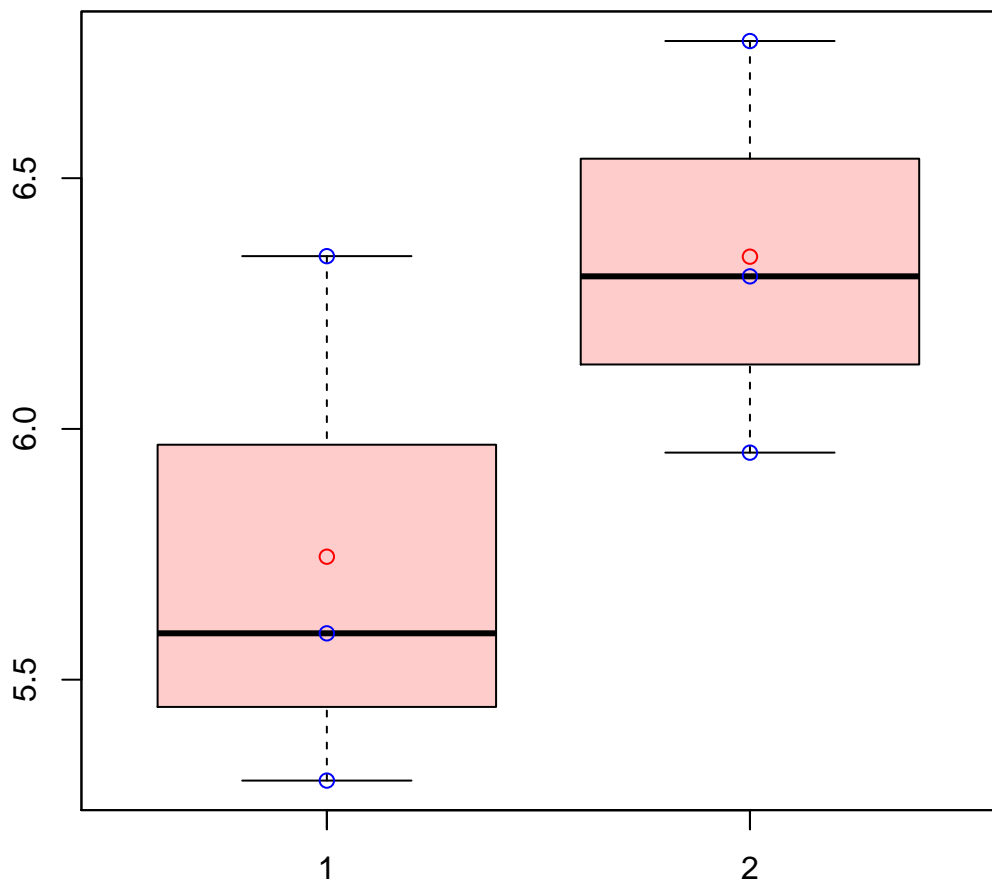

t-Test: p-value = 0.21

# CL3849Contig1|CL3849Contig1

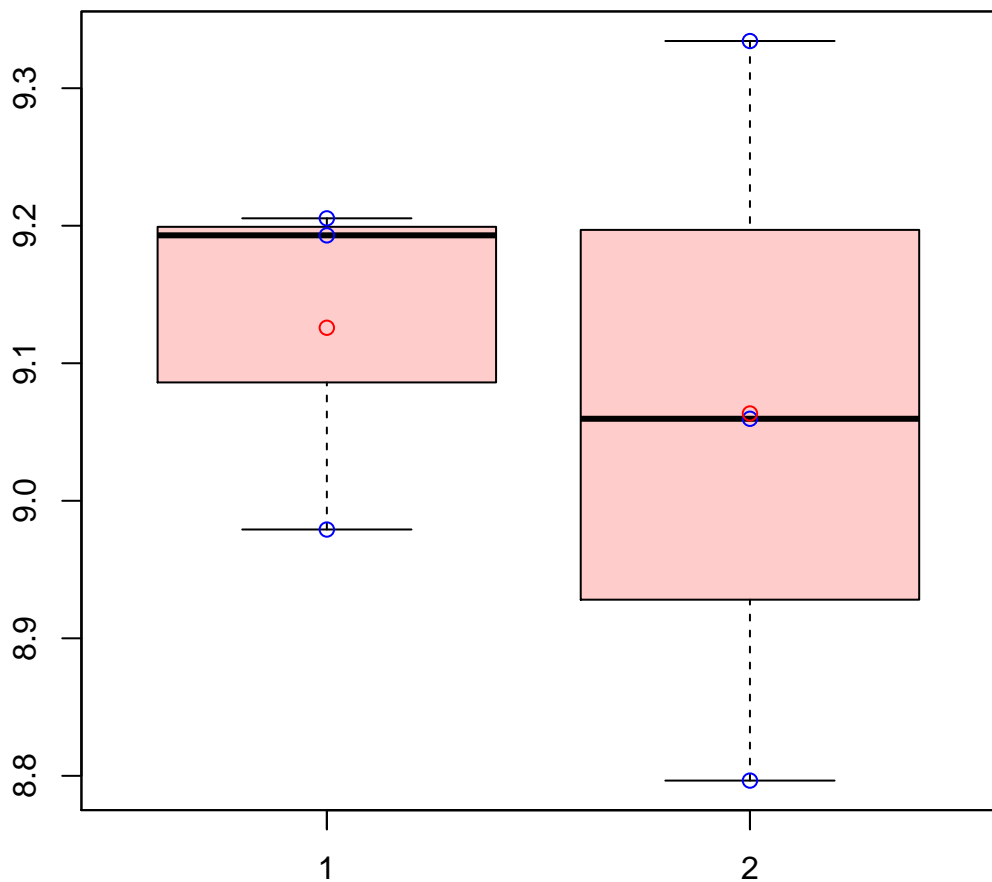

t-Test: p-value = 0.74

# CL3850Contig4|CL3850Contig4

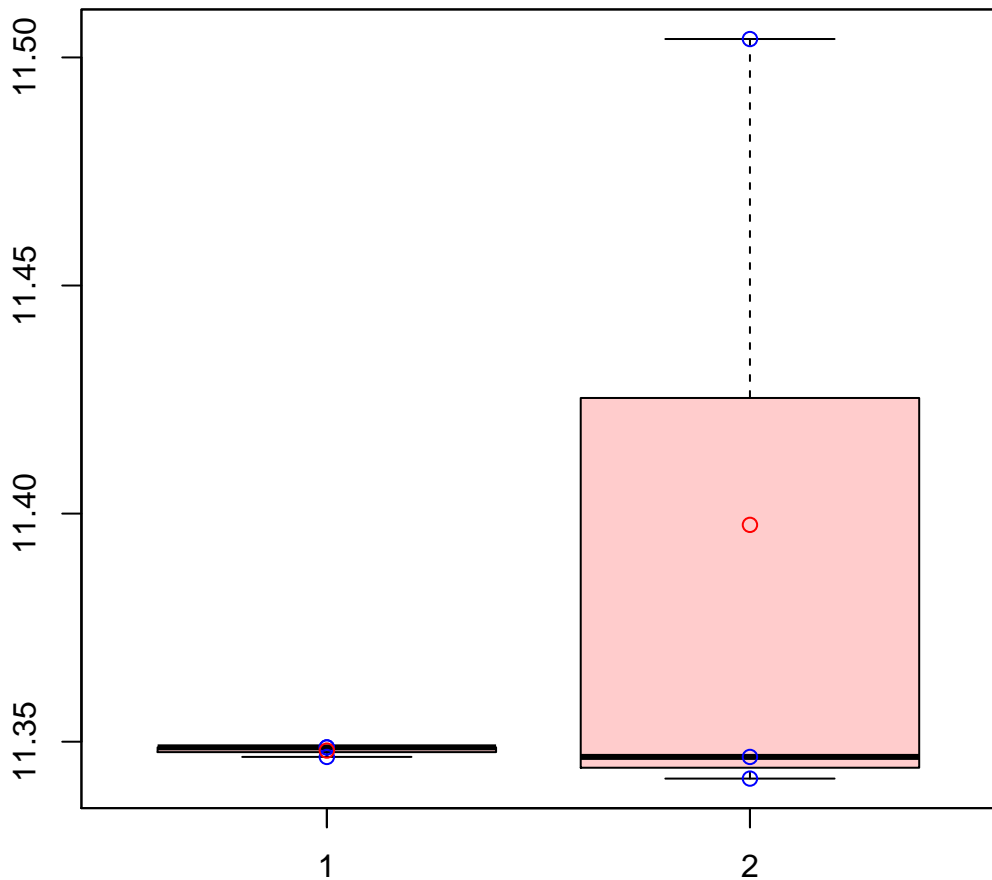

t-Test: p-value = 0.45



# CL3854Contig6|CL3854Contig6

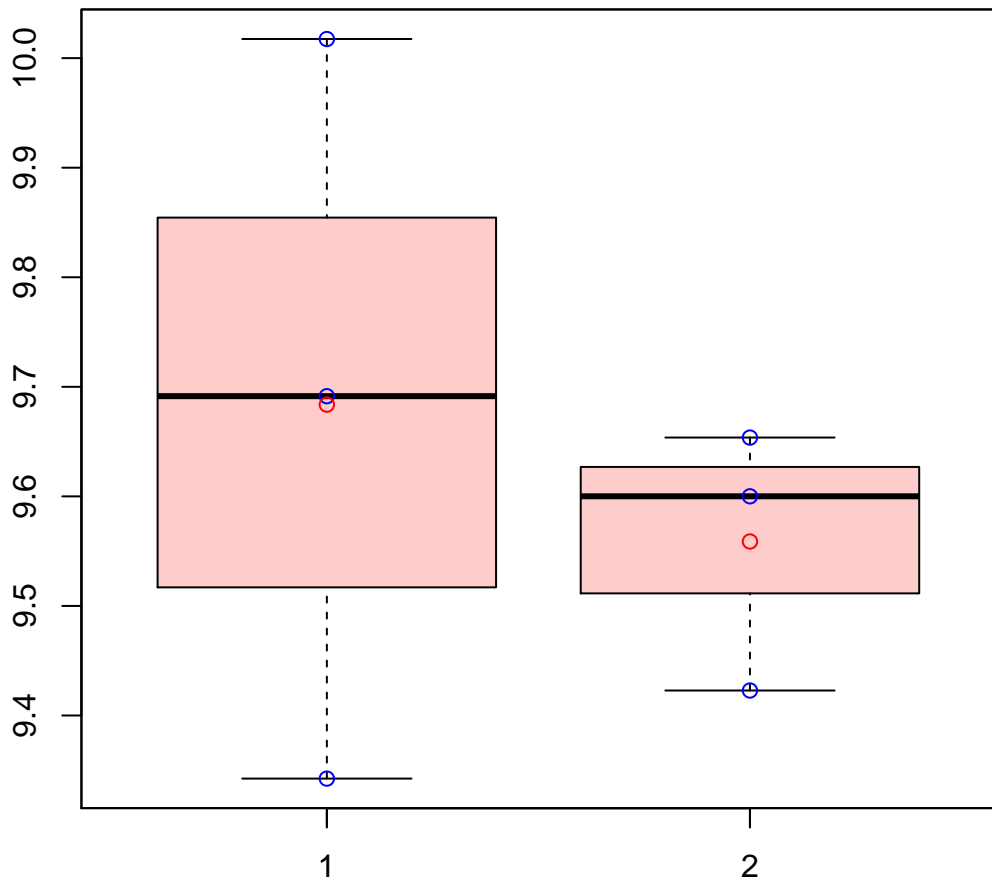

t-Test: p-value = 0.6

# CL3868Contig2|CL3868Contig2



t-Test: p-value = 0.22

# CL3870Contig2|CL3870Contig2

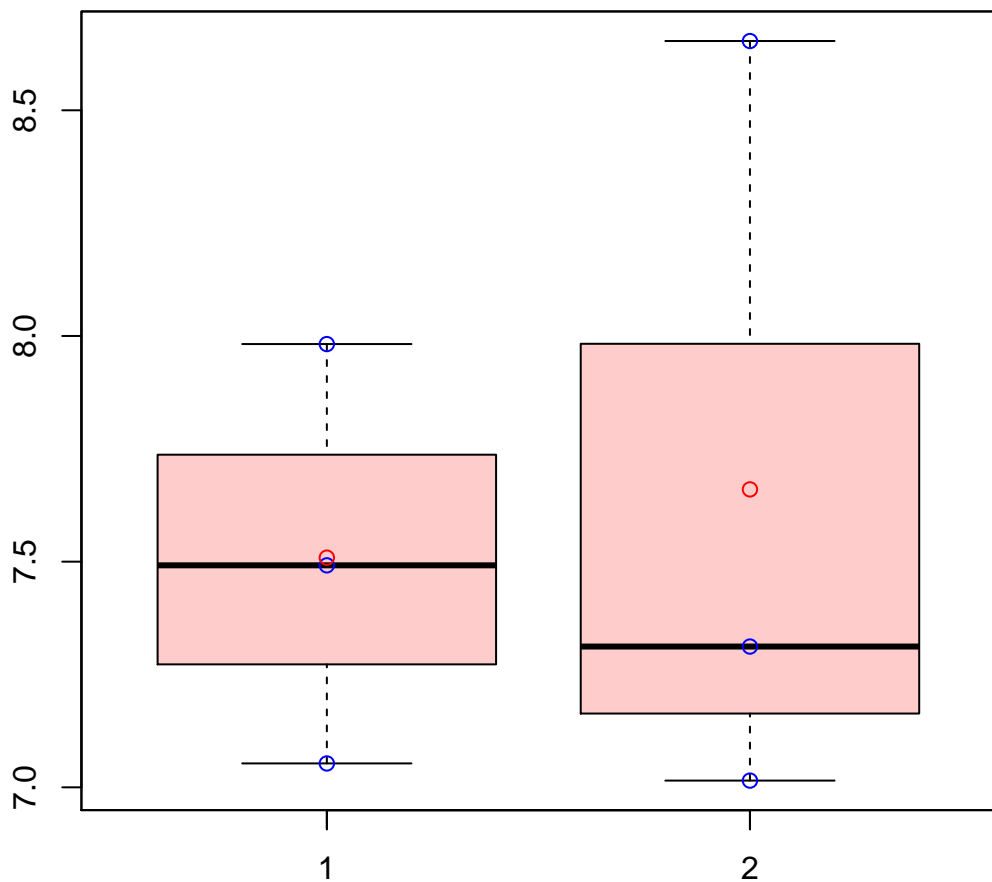

t-Test: p-value = 0.81

# CL3878Contig1|CL3878Contig1

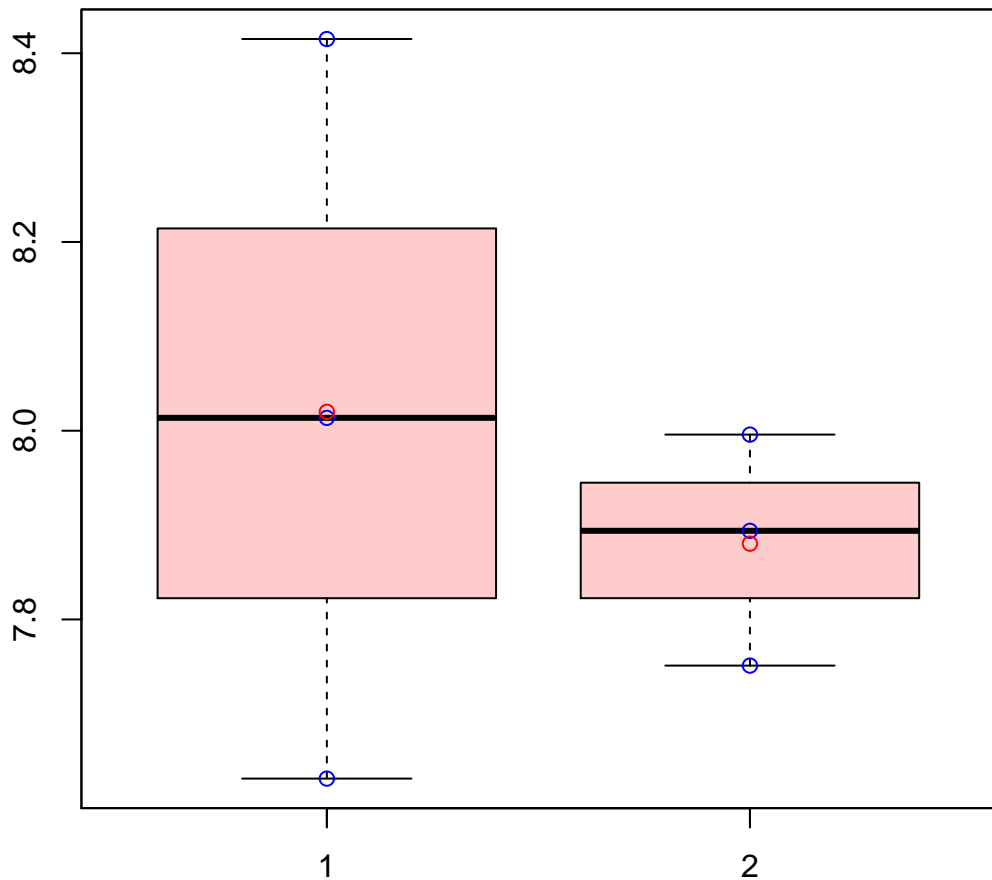

t-Test: p-value = 0.61

# CL3878Contig5|CL3878Contig5



t-Test: p-value = 0.61

# CL387Contig18|CL387Contig18

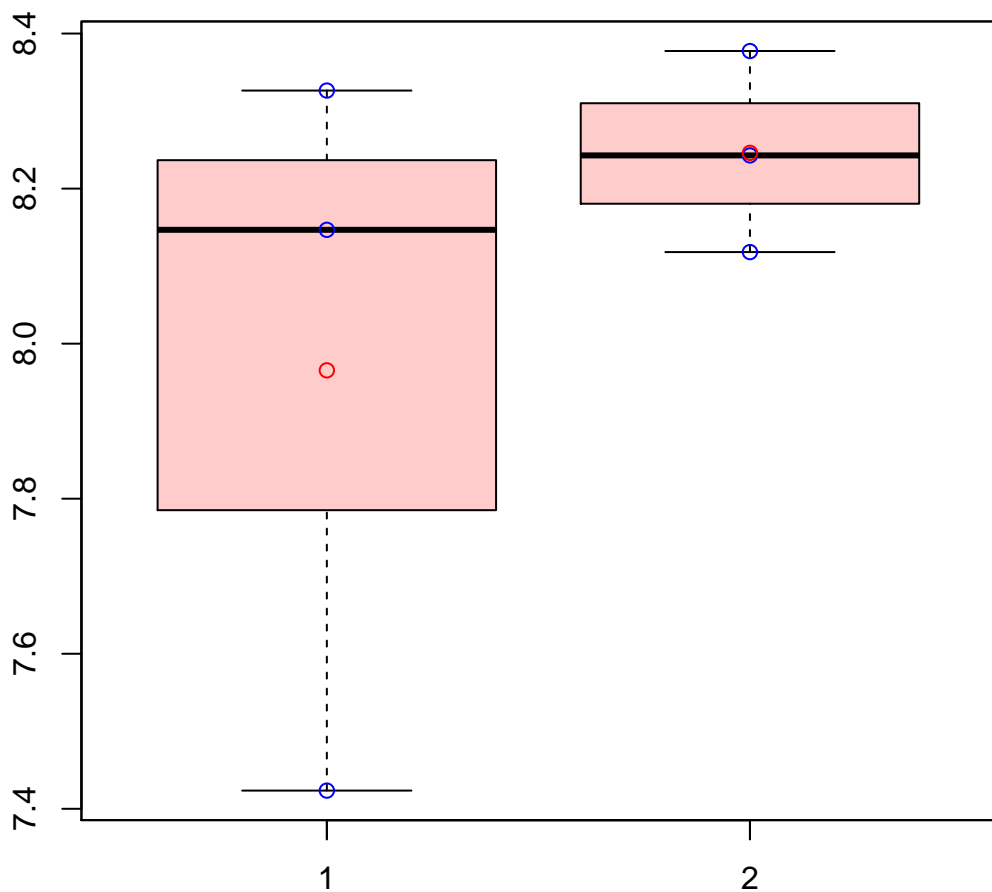

t-Test: p-value = 0.42

# CL3882Contig2|CL3882Contig2

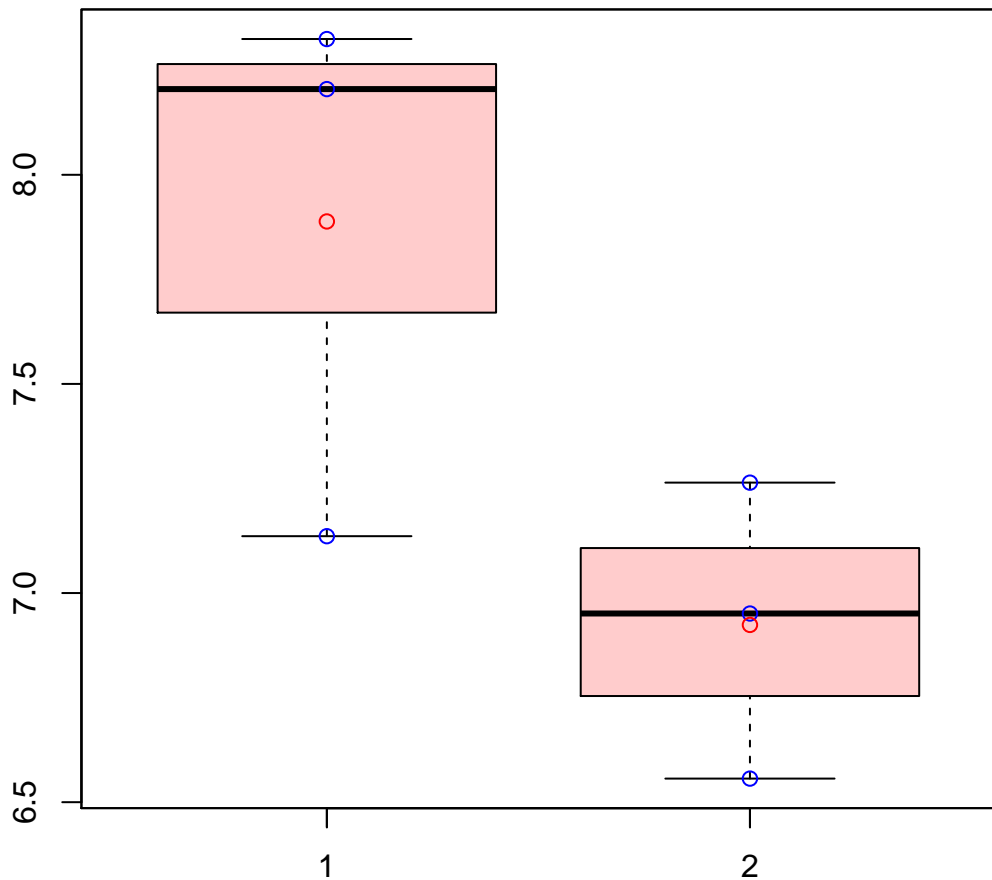

t-Test: p-value = 0.11

# CL3888Contig2|CL3888Contig2

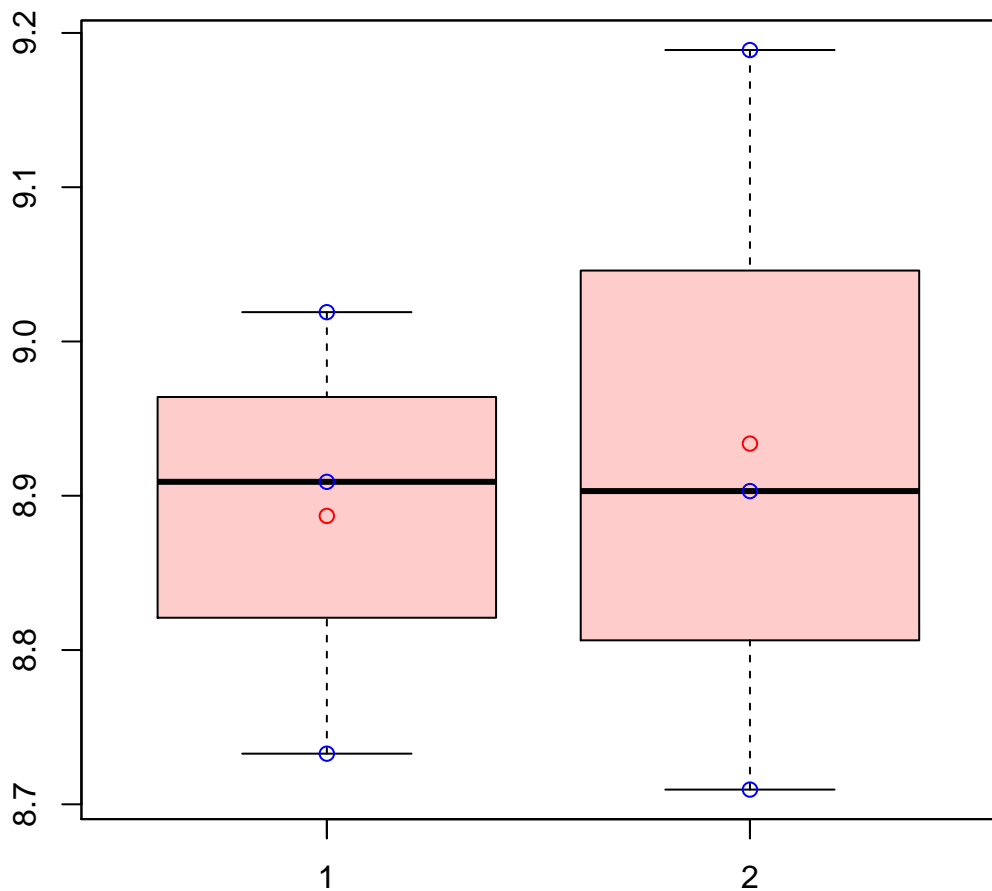

t-Test: p-value = 0.79



# CL3889Contig2|CL3889Contig2

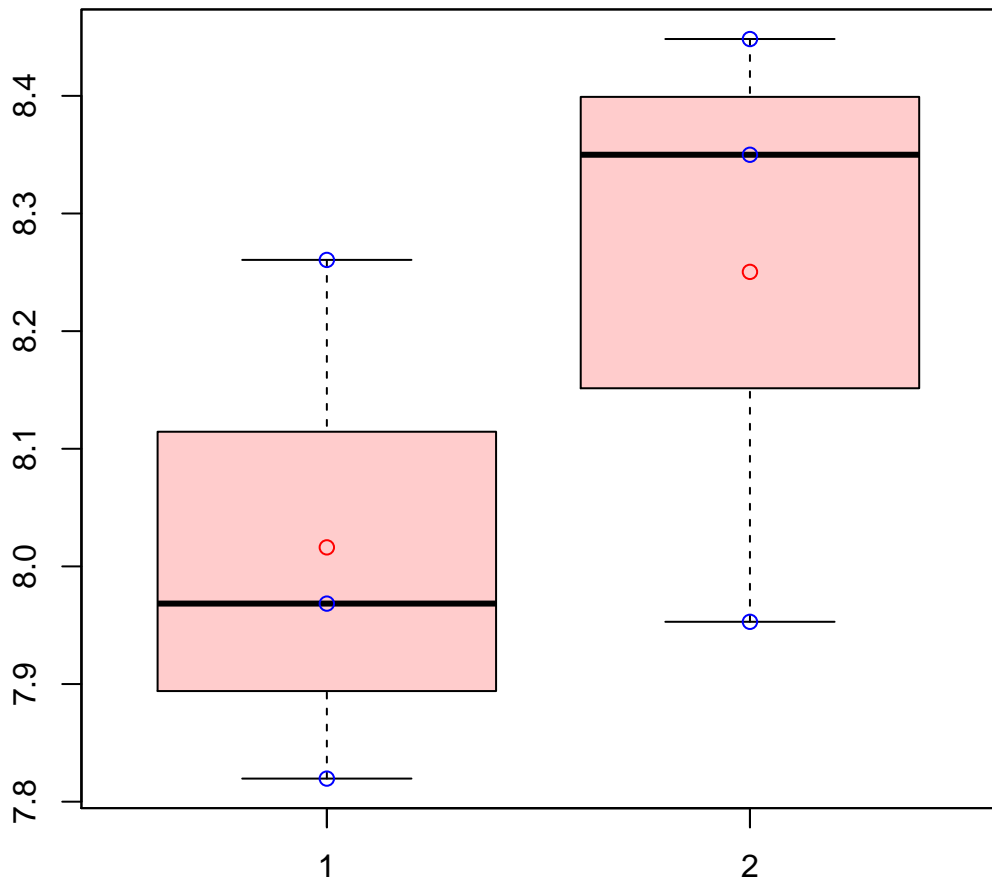

t-Test: p-value = 0.31

# CL3894Contig4|CL3894Contig4

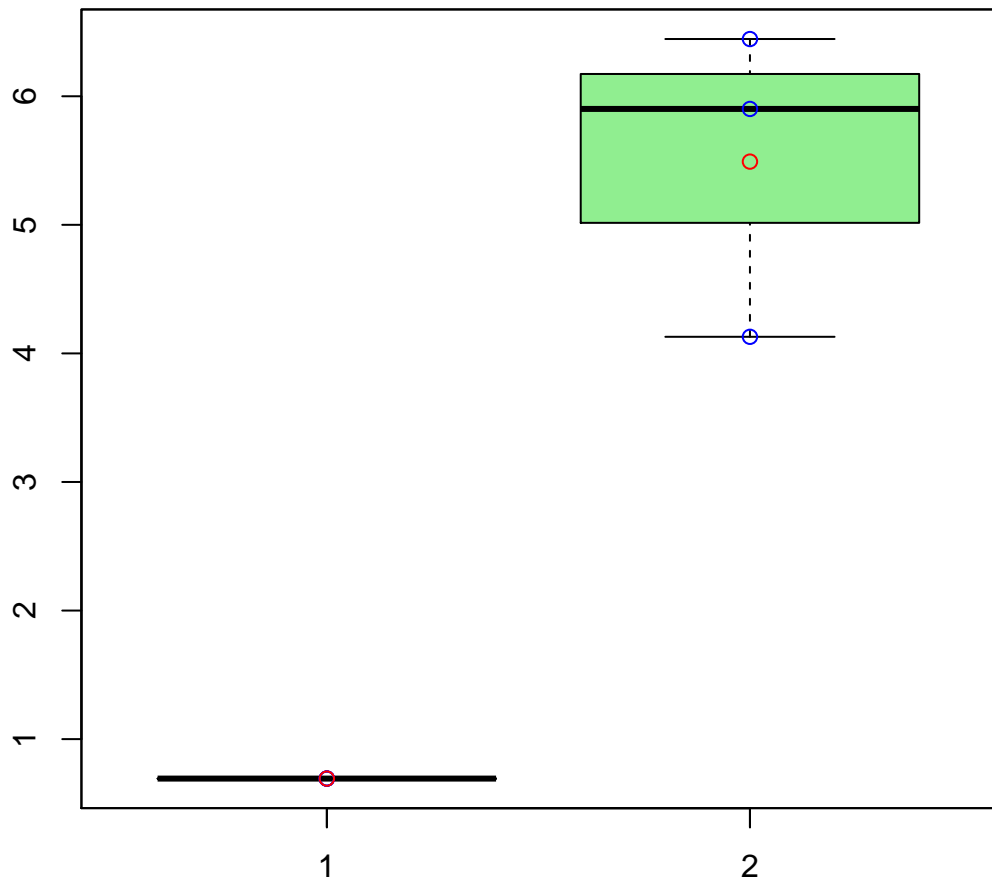

t-Test: p-value = 0.02

# CL3896Contig4|CL3896Contig4

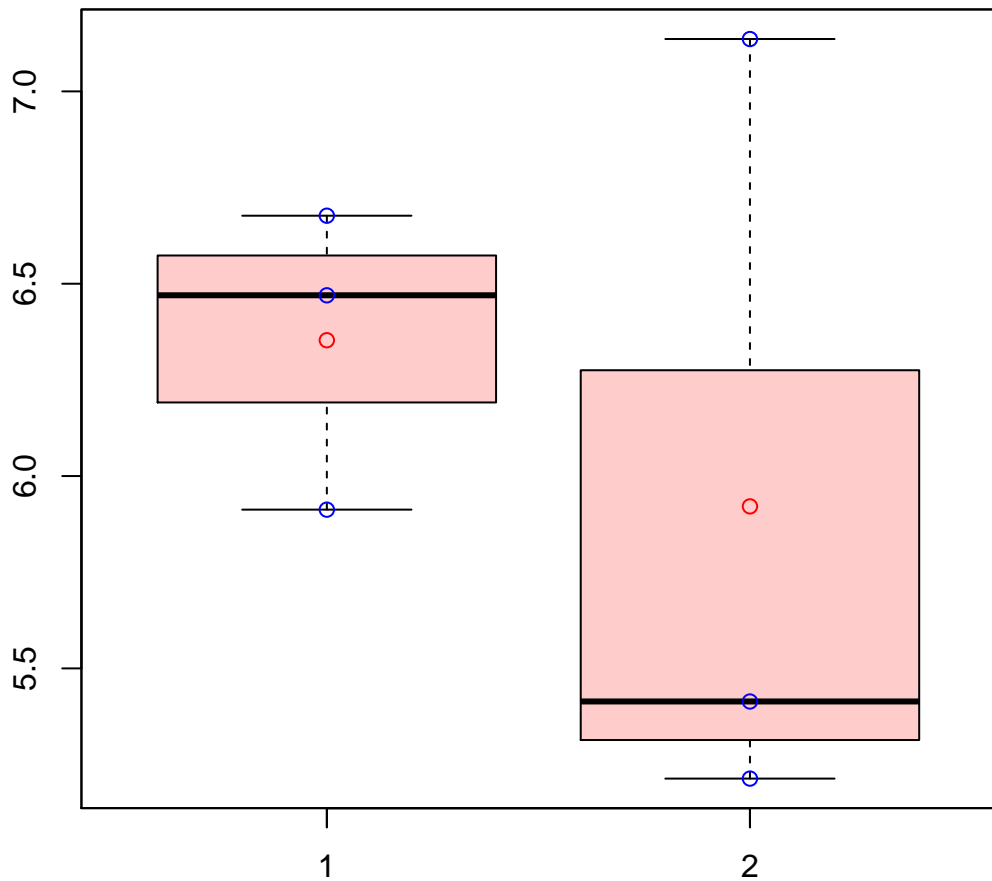

t-Test: p-value = 0.56

# CL38Contig16|CL38Contig16

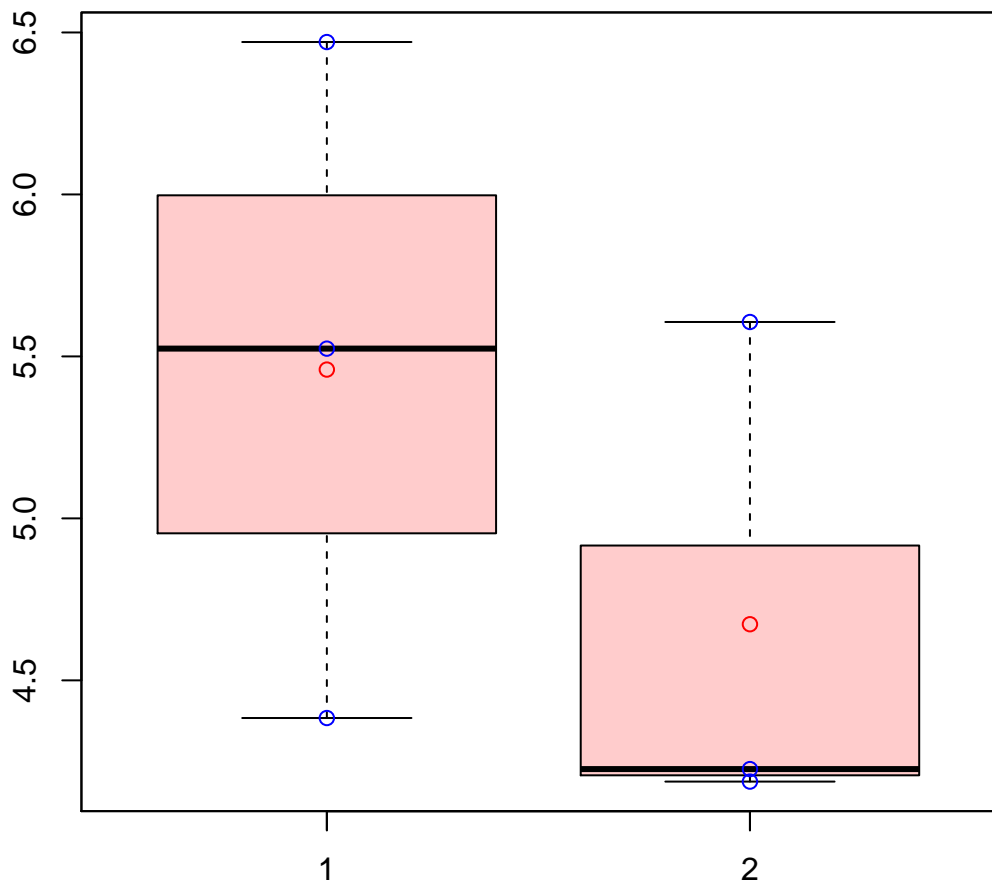

t-Test: p-value = 0.36

# CL38Contig19|CL38Contig19

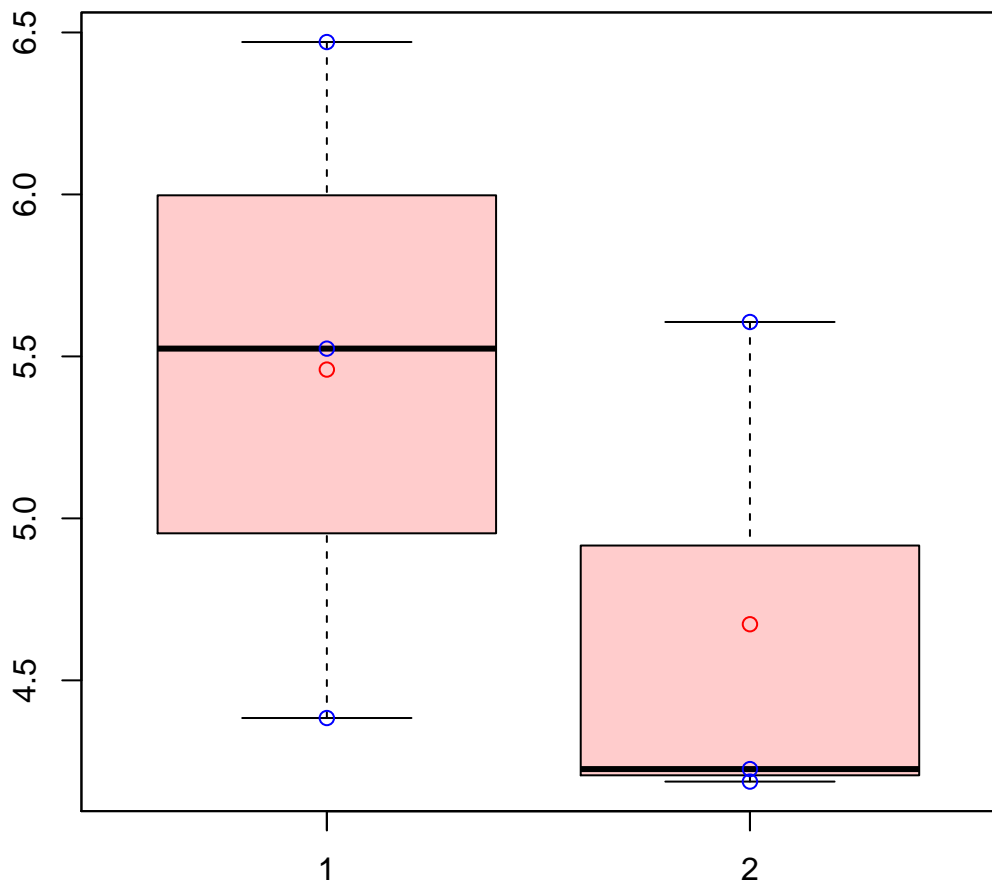

t-Test: p-value = 0.36

# CL38Contig20|CL38Contig20



t-Test: p-value = 0.36

# CL38Contig22|CL38Contig22



t-Test: p-value = 0.36

# CL38Contig31|CL38Contig31



t-Test: p-value = 0.36



# CL38Contig32|CL38Contig32



t-Test: p-value = 0.36

# CL38Contig39|CL38Contig39

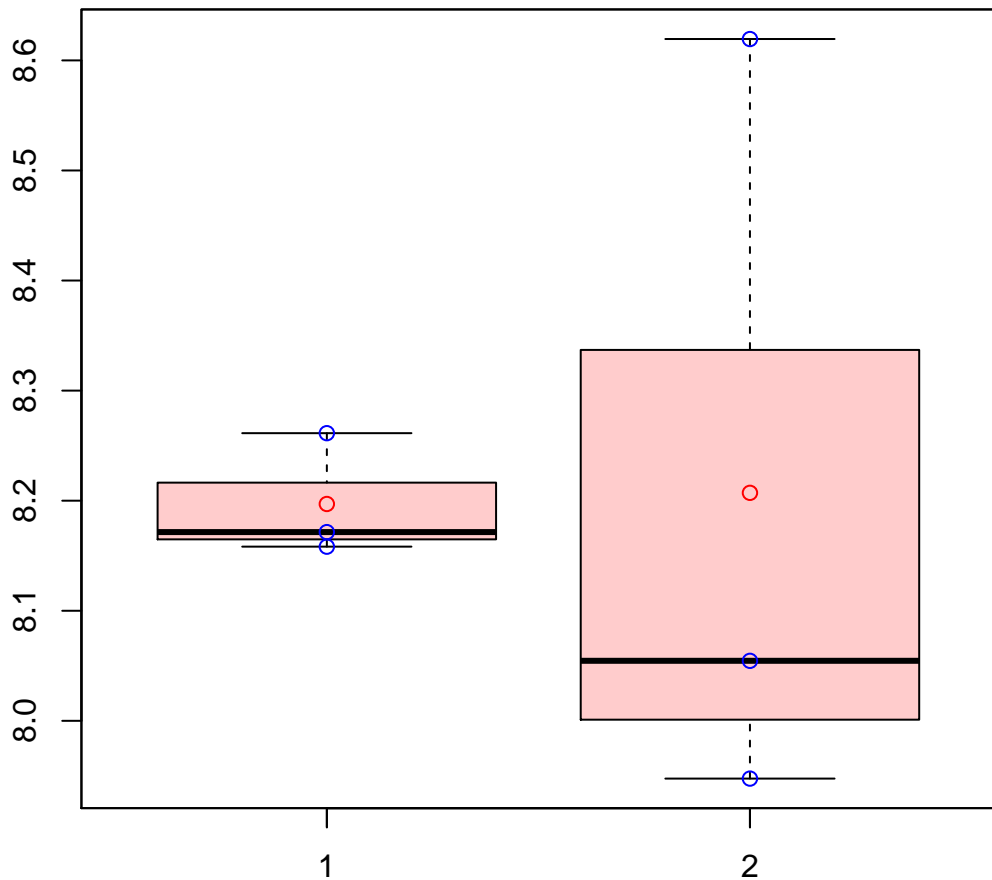

t-Test: p-value = 0.97

# CL38Contig44|CL38Contig44

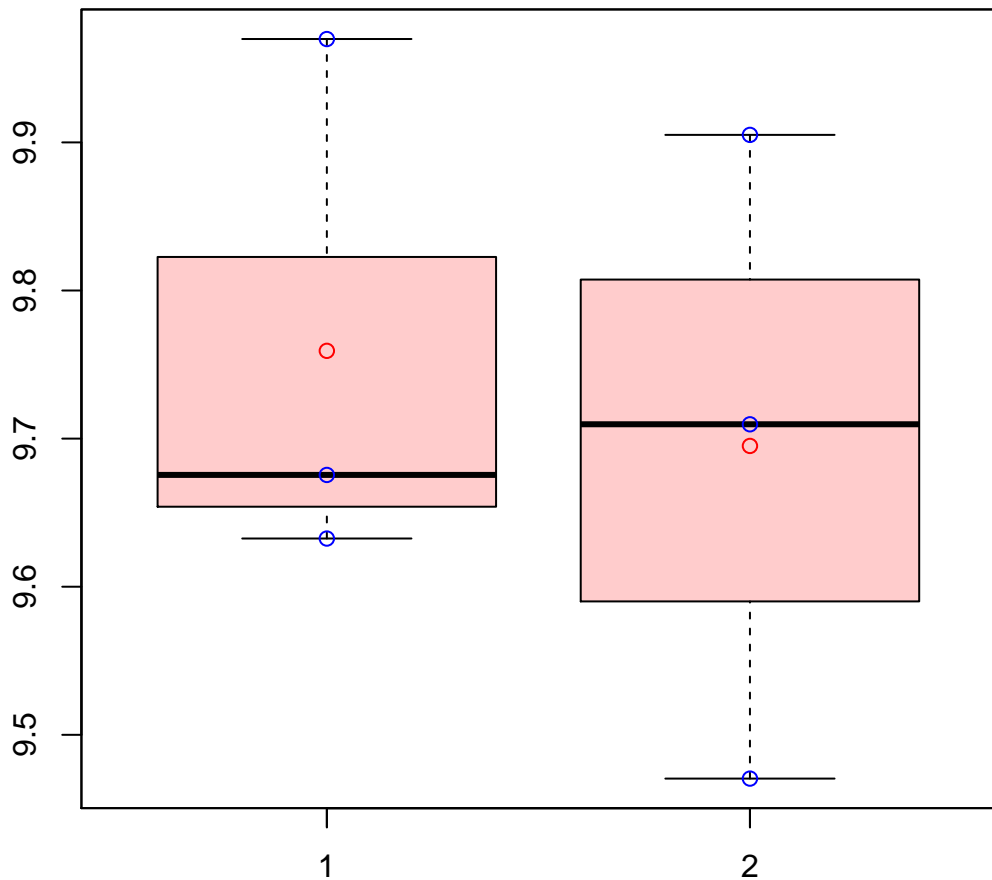

t-Test: p-value = 0.72

# CL3911Contig5|CL3911Contig5

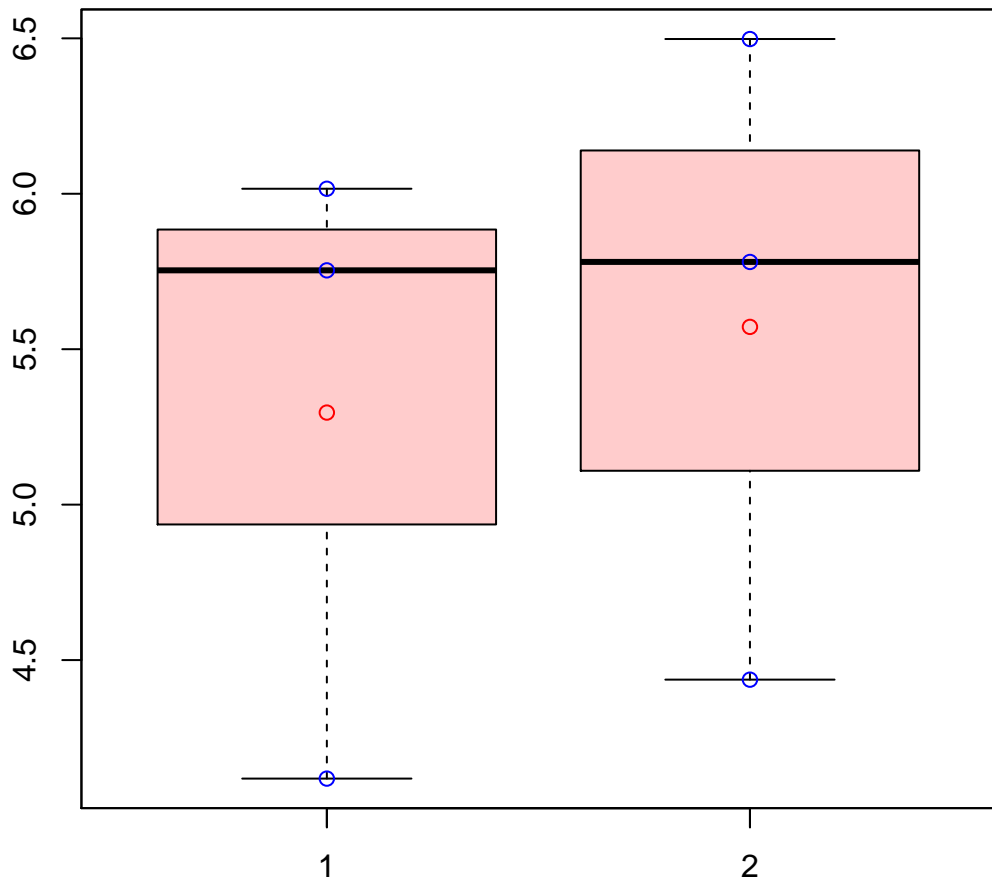

t-Test: p-value = 0.76

# CL3914Contig1|CL3914Contig1

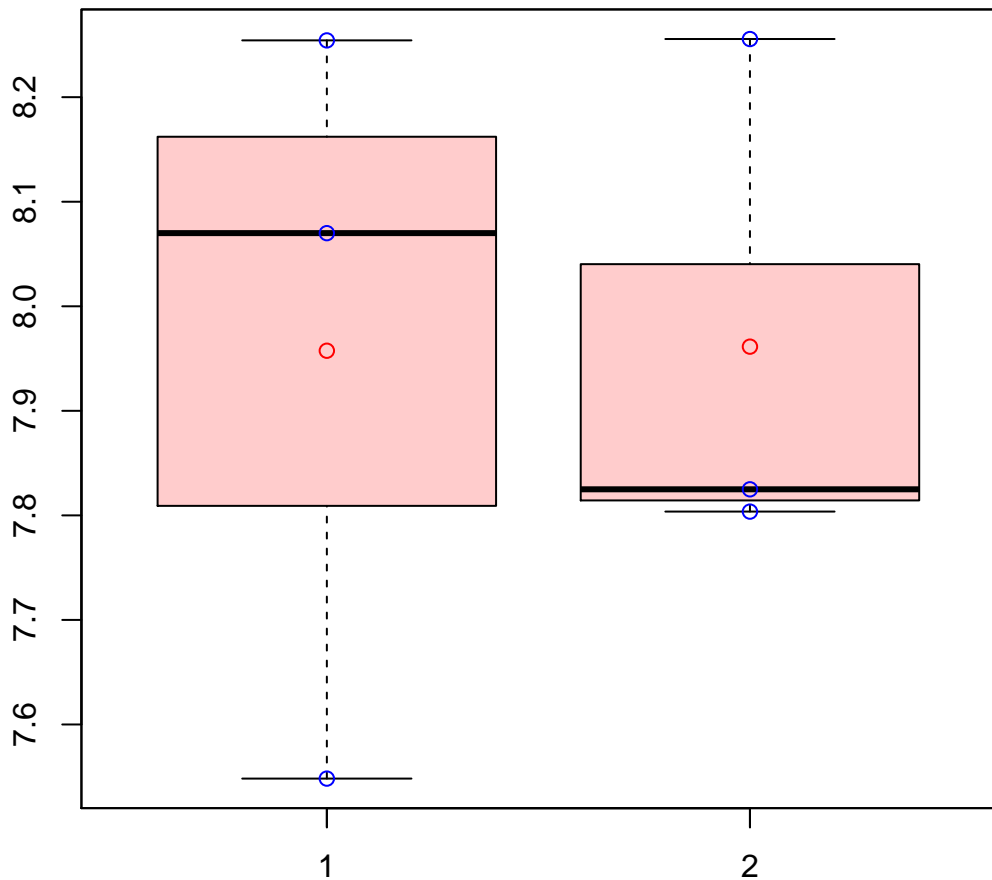

t-Test: p-value = 0.99

# CL3916Contig1|CL3916Contig1

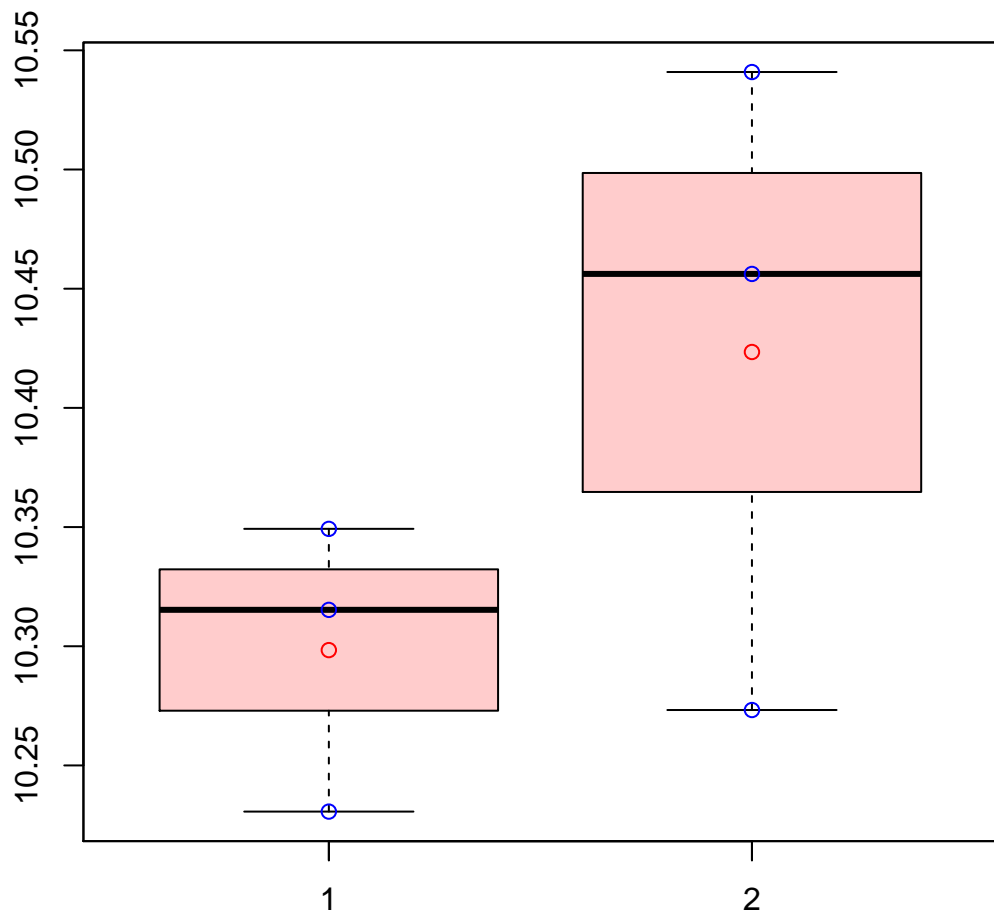

t-Test: p-value = 0.25

# CL3916Contig3|CL3916Contig3

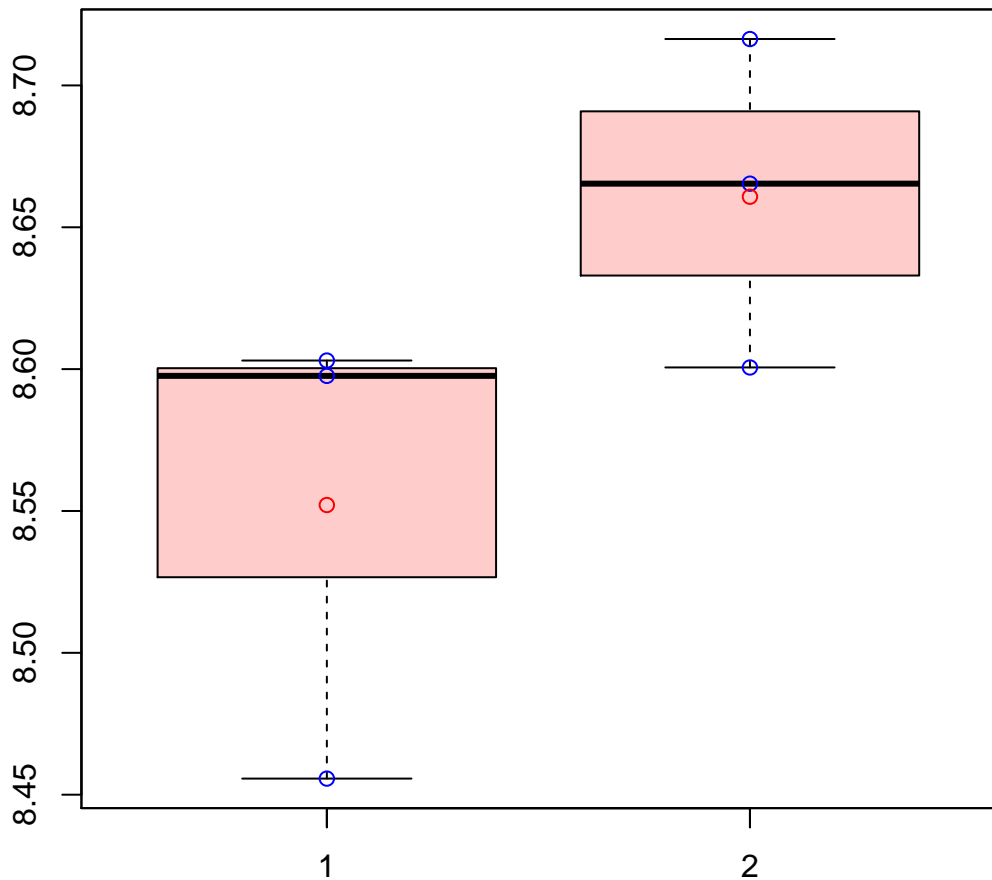

t-Test: p-value = 0.15

# CL3918Contig1|CL3918Contig1

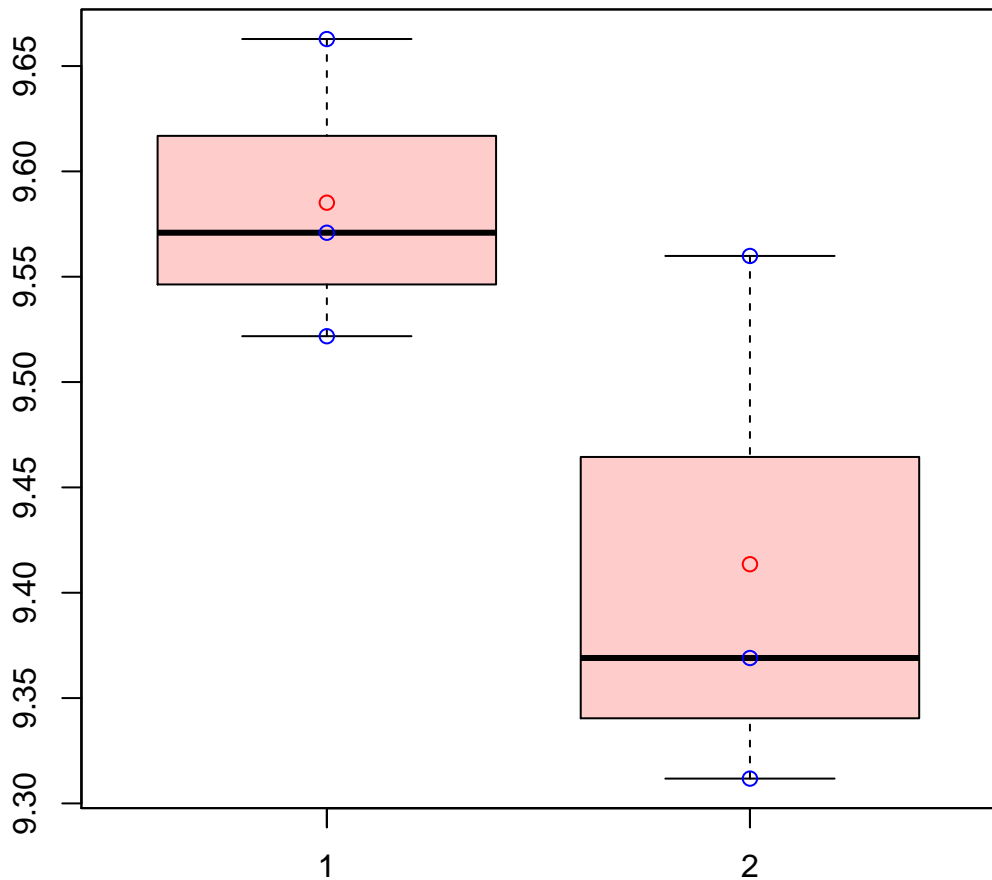

t-Test: p-value = 0.14



# CL3920Contig2|CL3920Contig2

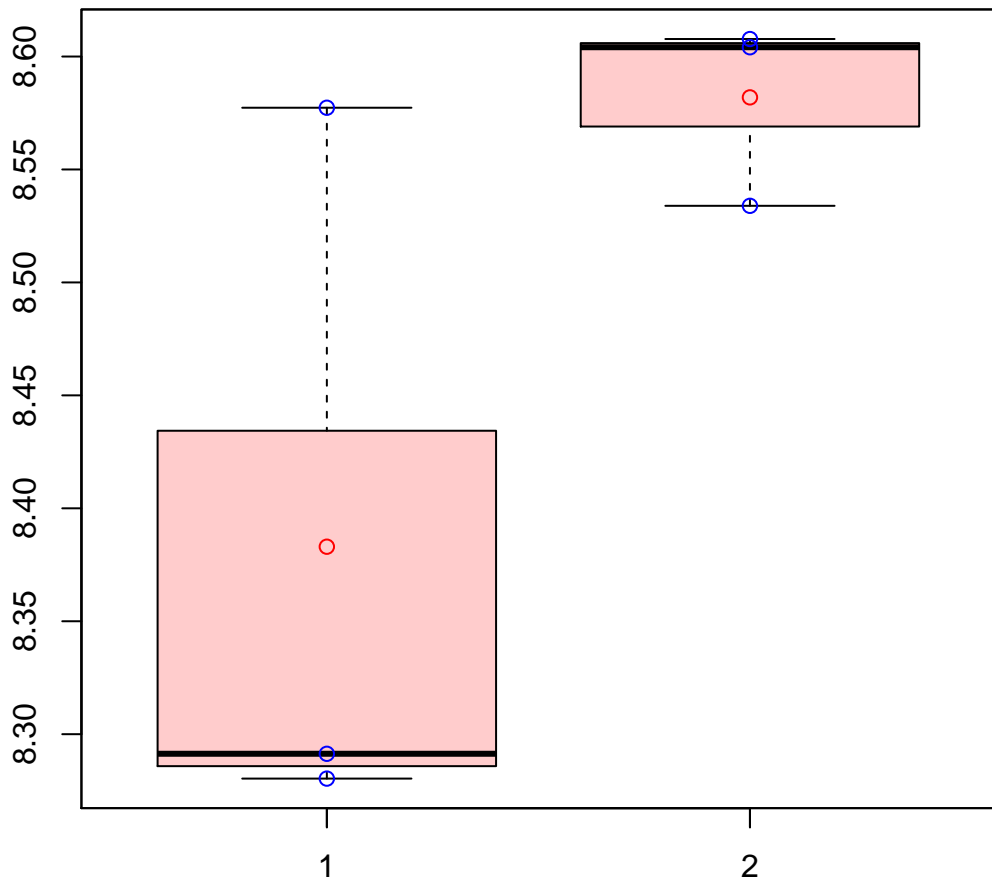

t-Test: p-value = 0.17

# CL3921Contig10|CL3921Contig10

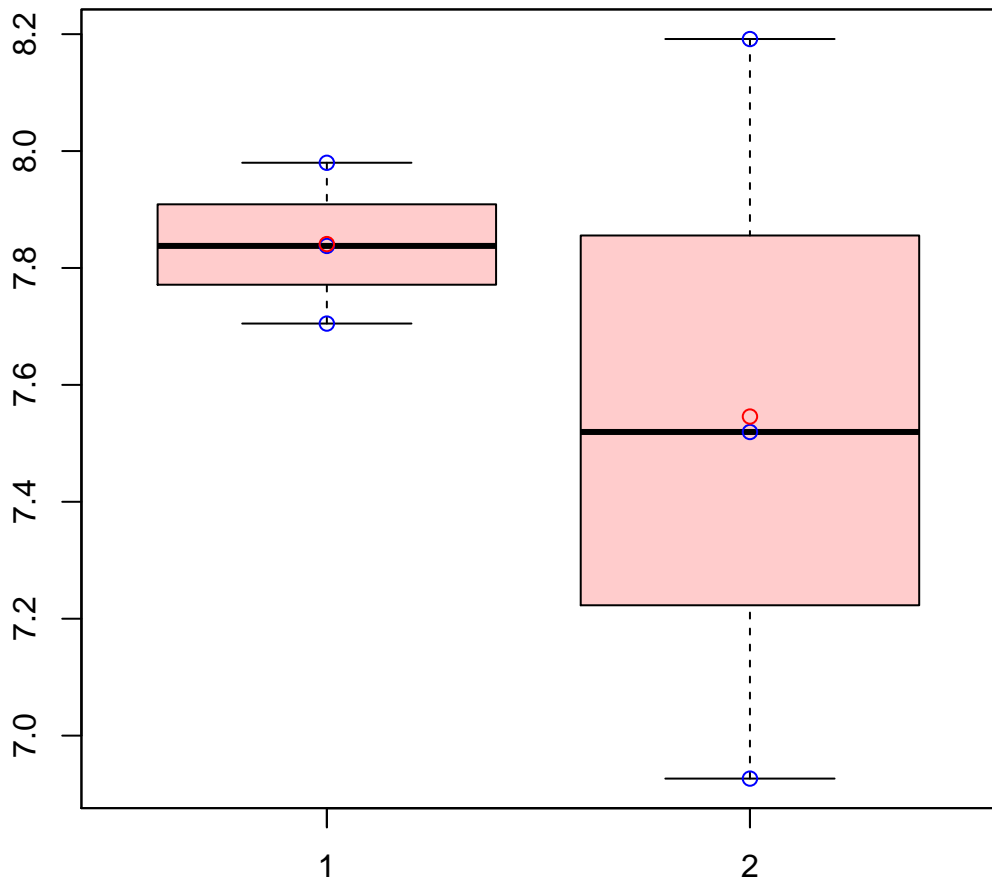

t-Test: p-value = 0.51

# CL3921Contig4|CL3921Contig4



t-Test: p-value = 0.51

# CL3921Contig5|CL3921Contig5

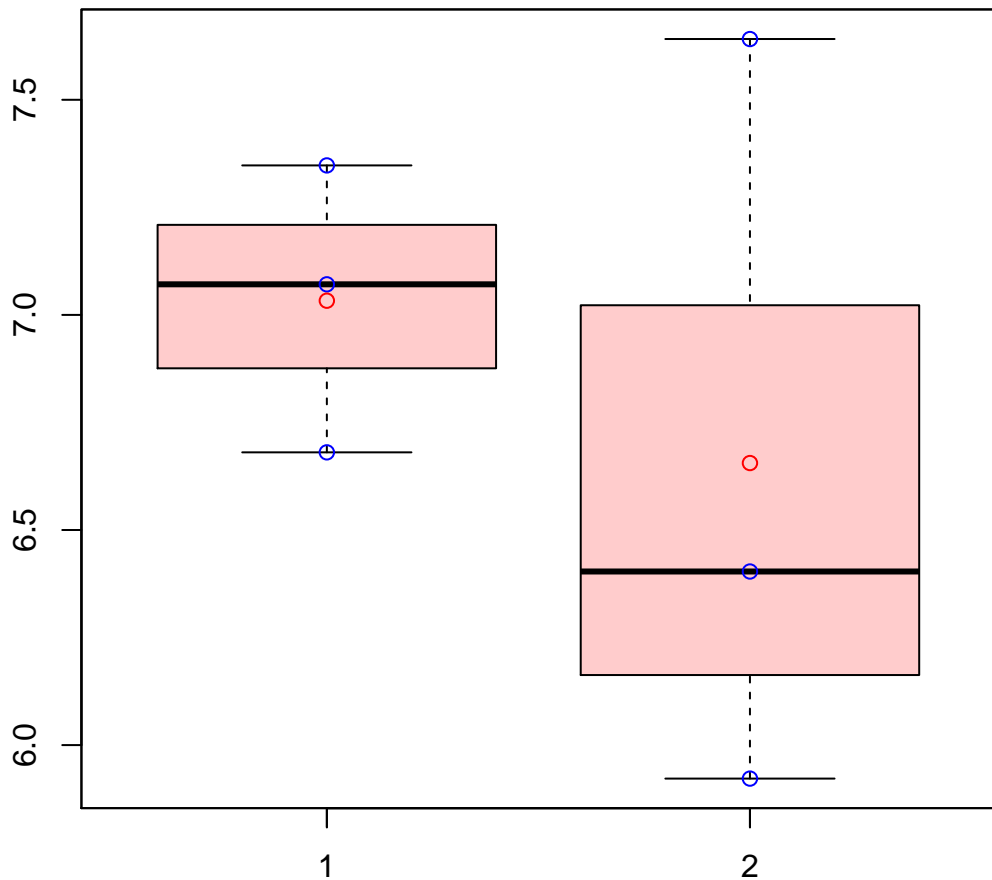

t-Test: p-value = 0.55

# CL3921Contig6|CL3921Contig6



t-Test: p-value = 0.51

# CL3926Contig1|CL3926Contig1

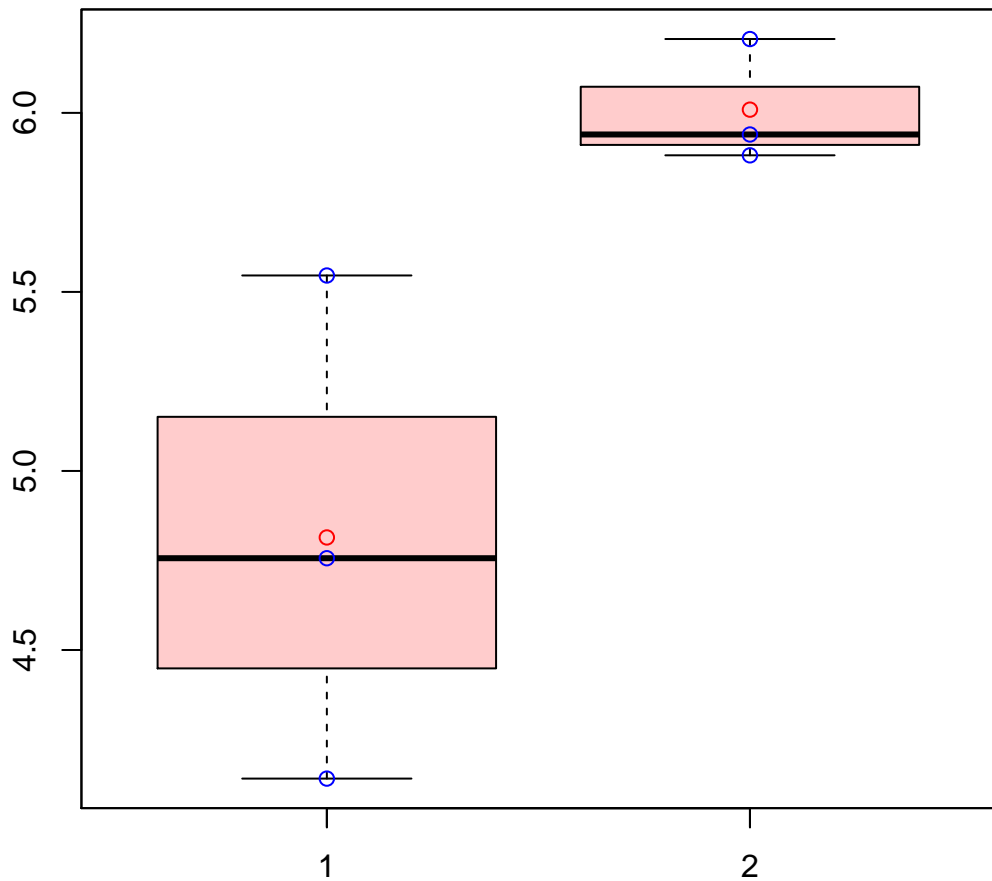

t-Test: p-value = 0.09

# CL393Contig13|CL393Contig13

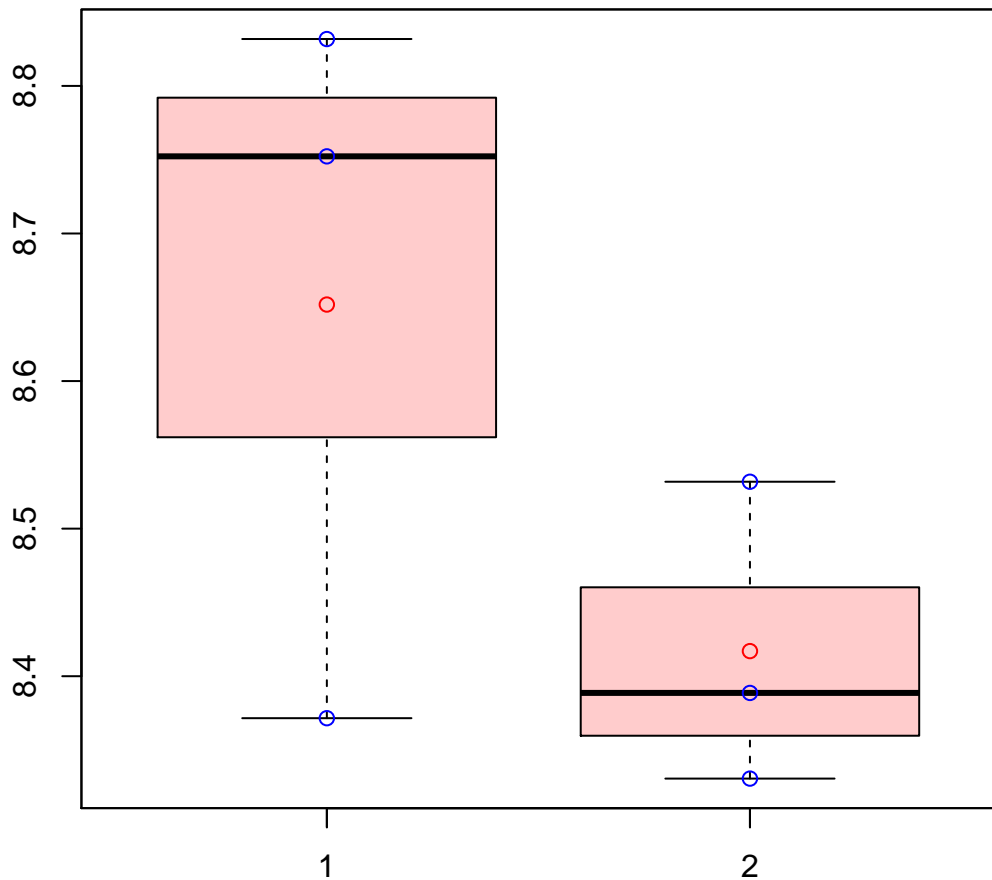

t-Test: p-value = 0.24

# CL393Contig2|CL393Contig2



t-Test: p-value = 0.24



# CL393Contig3|CL393Contig3



t-Test: p-value = 0.24

# CL393Contig4|CL393Contig4

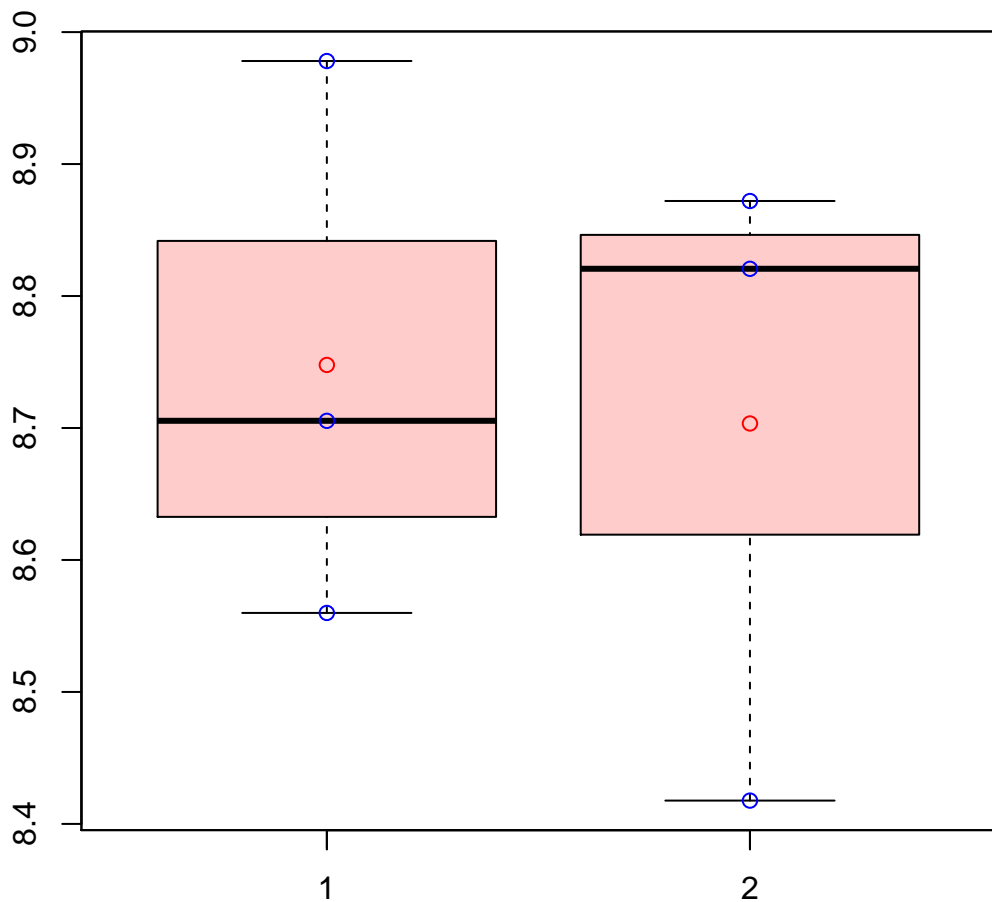

t-Test: p-value = 0.83

# CL3941Contig4|CL3941Contig4

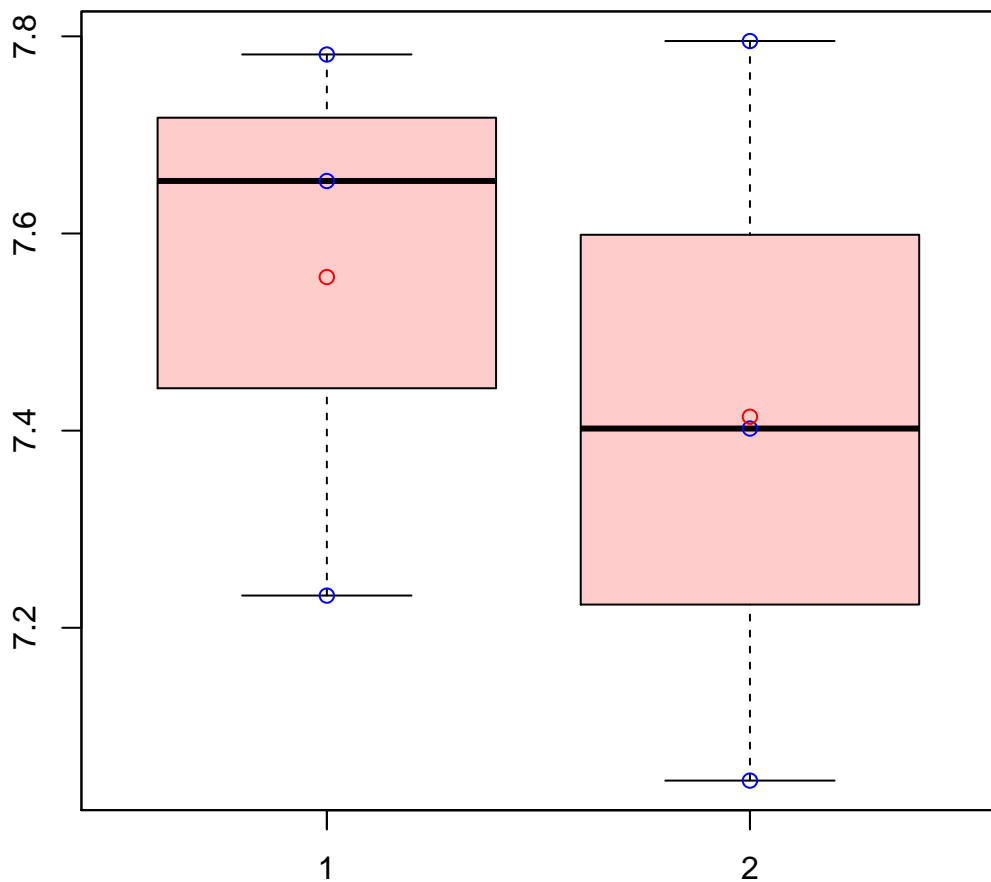

t-Test: p-value = 0.63

# CL3942Contig1|CL3942Contig1

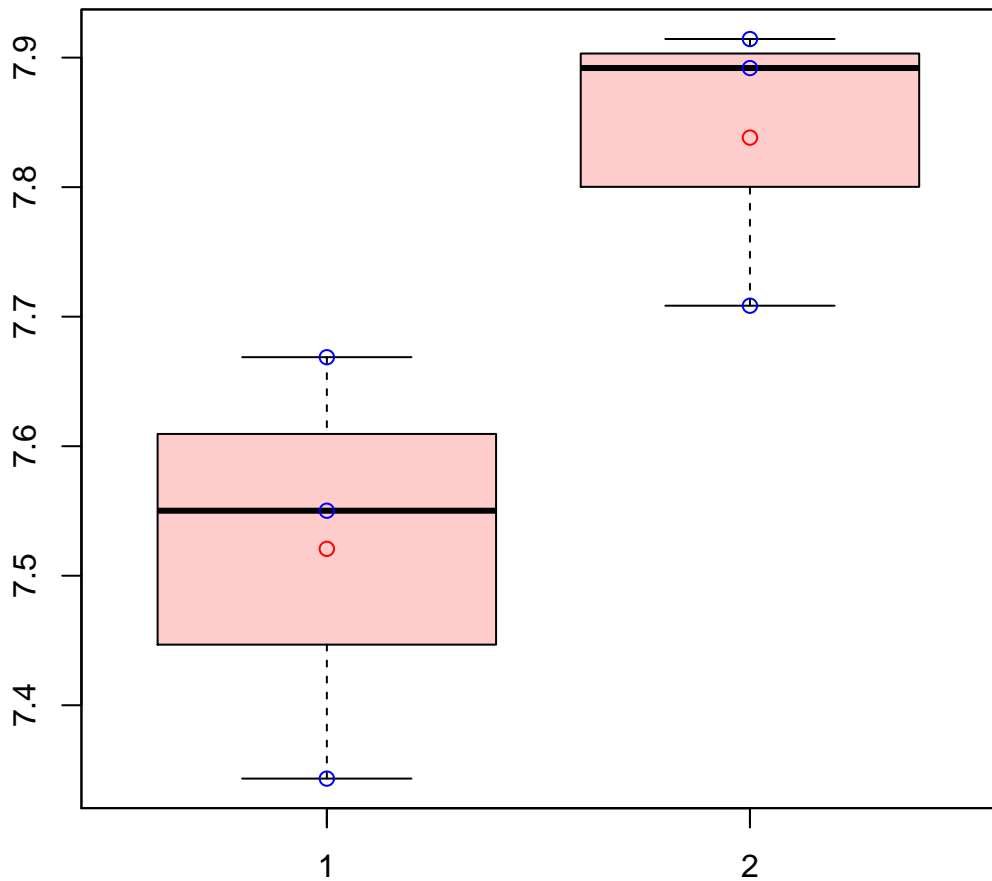

t-Test: p-value = 0.06

# CL3947Contig3|CL3947Contig3

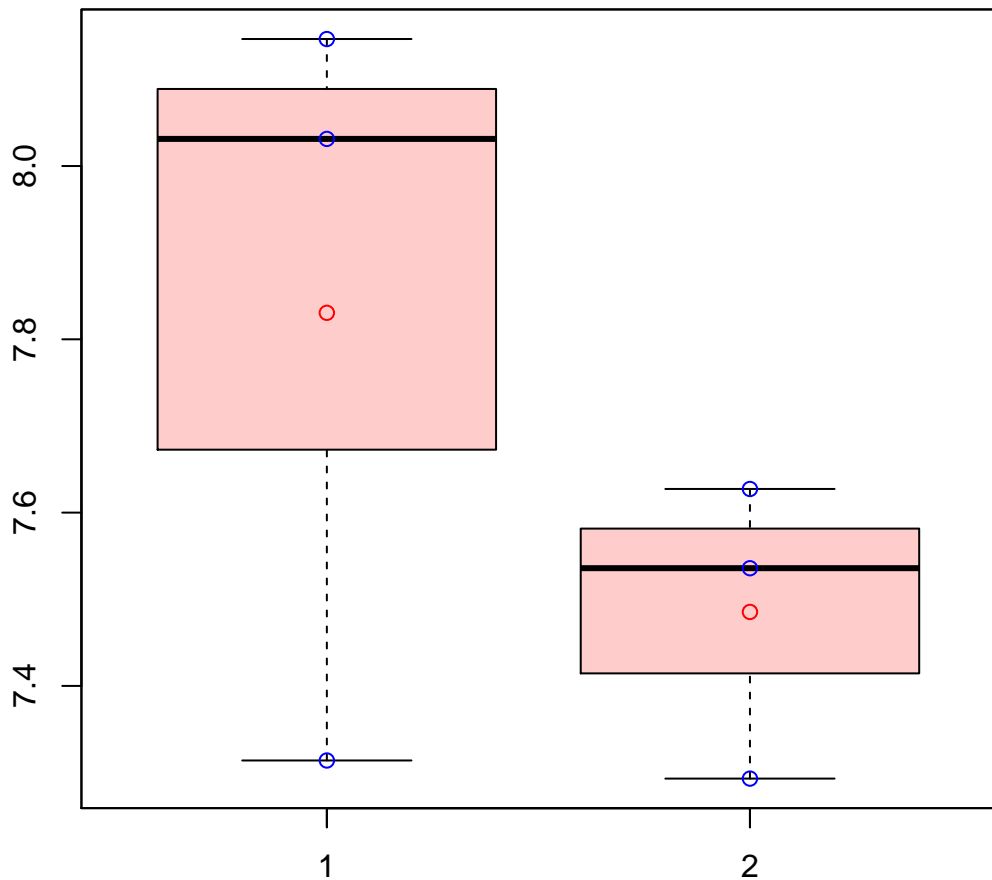

t-Test: p-value = 0.32

# CL3947Contig6|CL3947Contig6

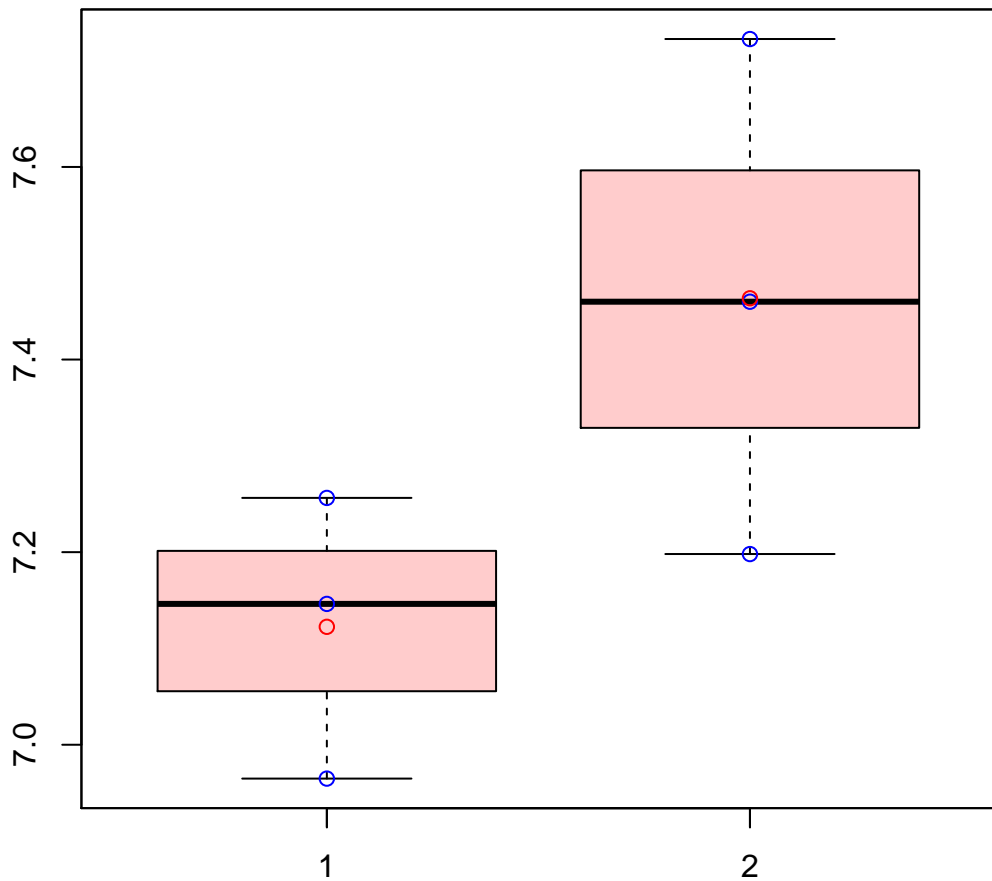

t-Test: p-value = 0.15

# CL394Contig12|CL394Contig12

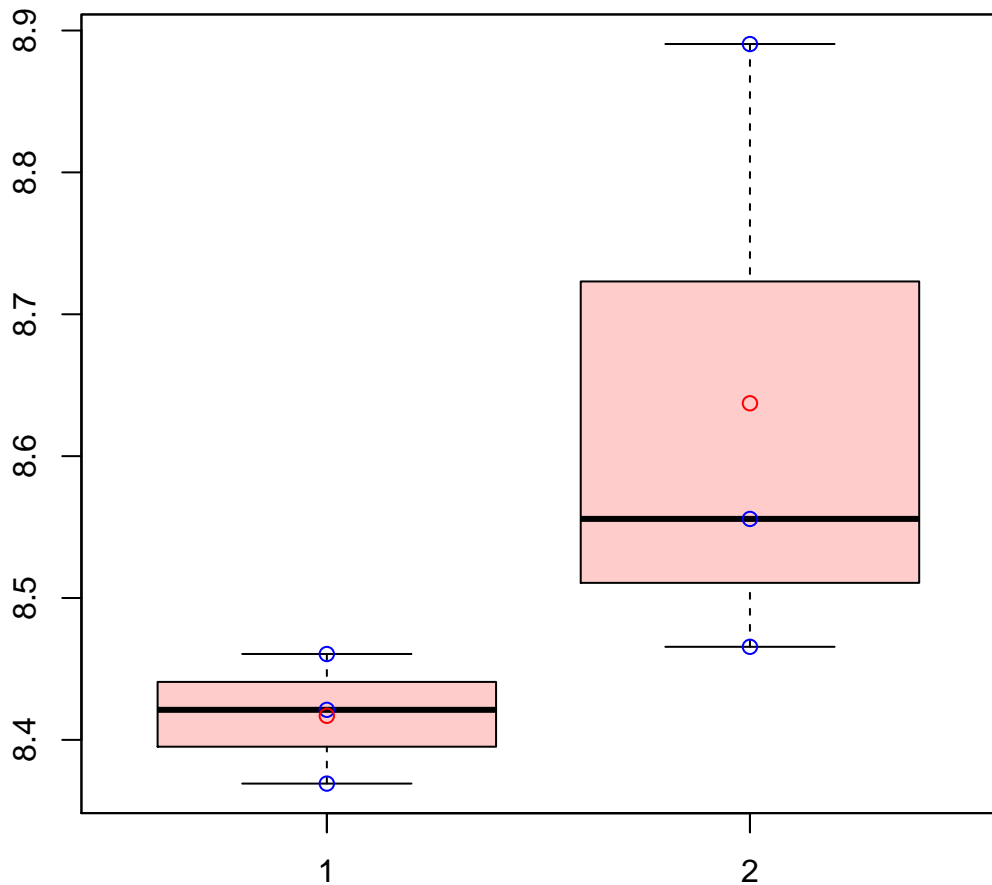

t-Test: p-value = 0.23

# CL394Contig13|CL394Contig13

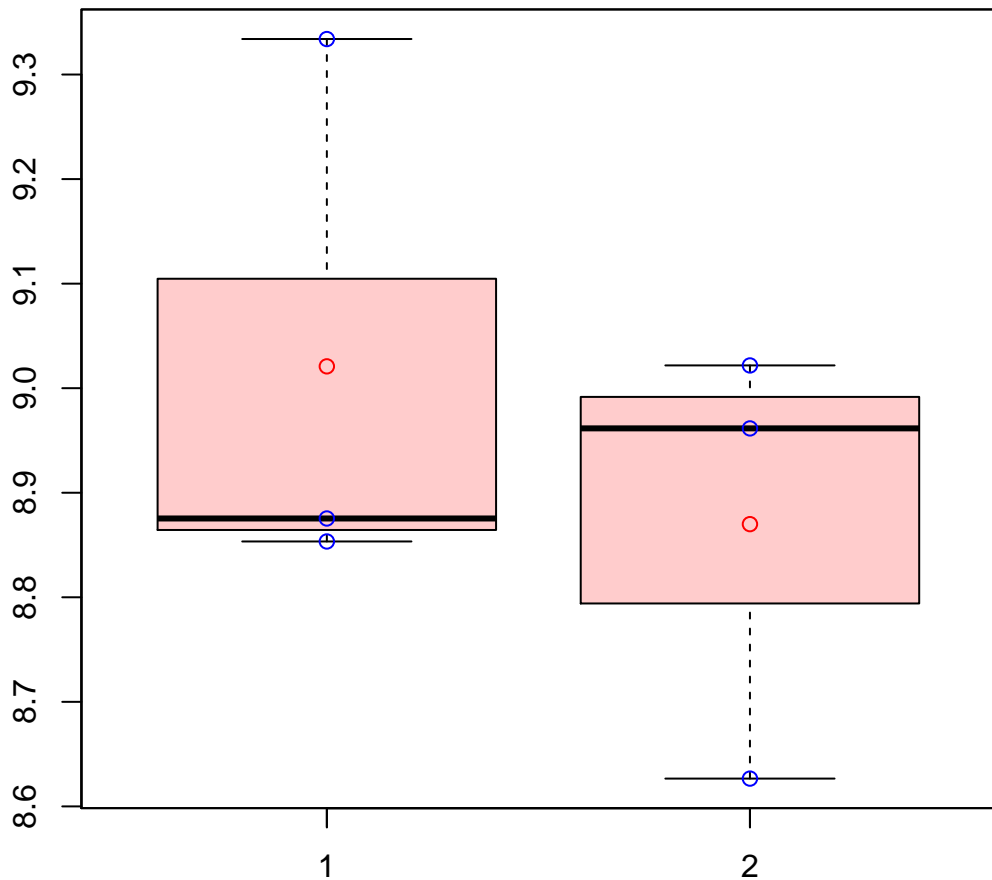

t-Test: p-value = 0.49



# CL394Contig2|CL394Contig2

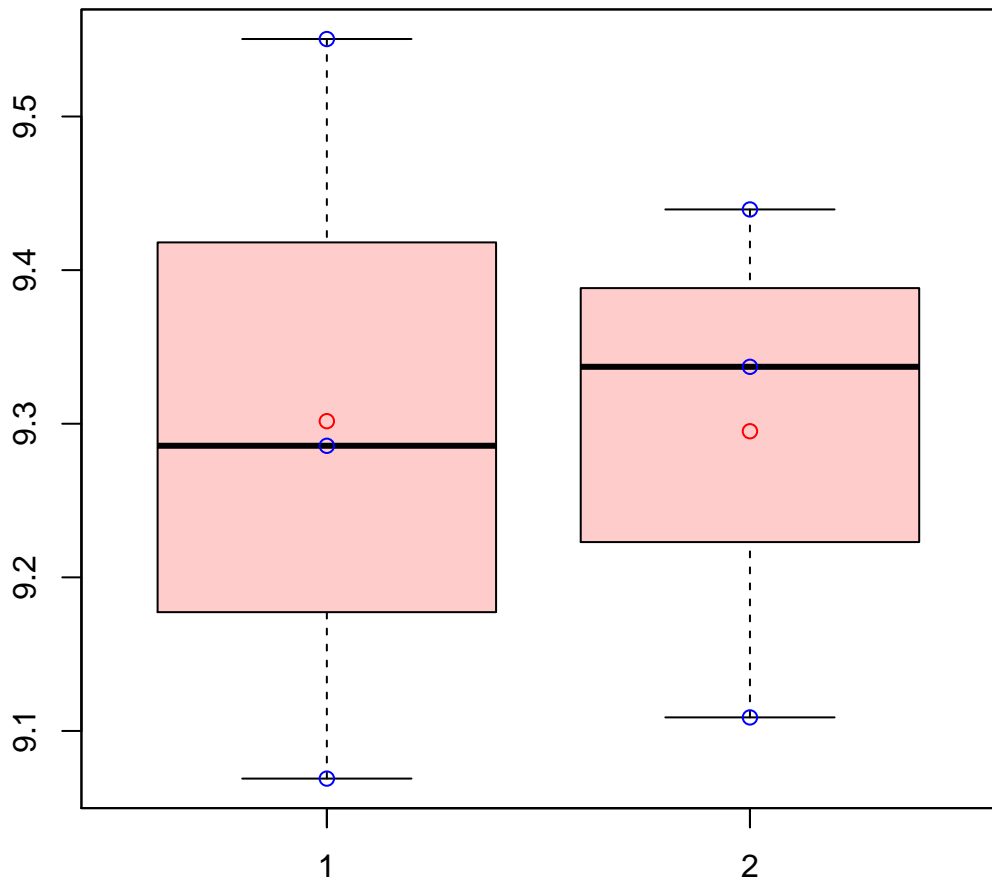

t-Test: p-value = 0.97

# CL3953Contig1|CL3953Contig1

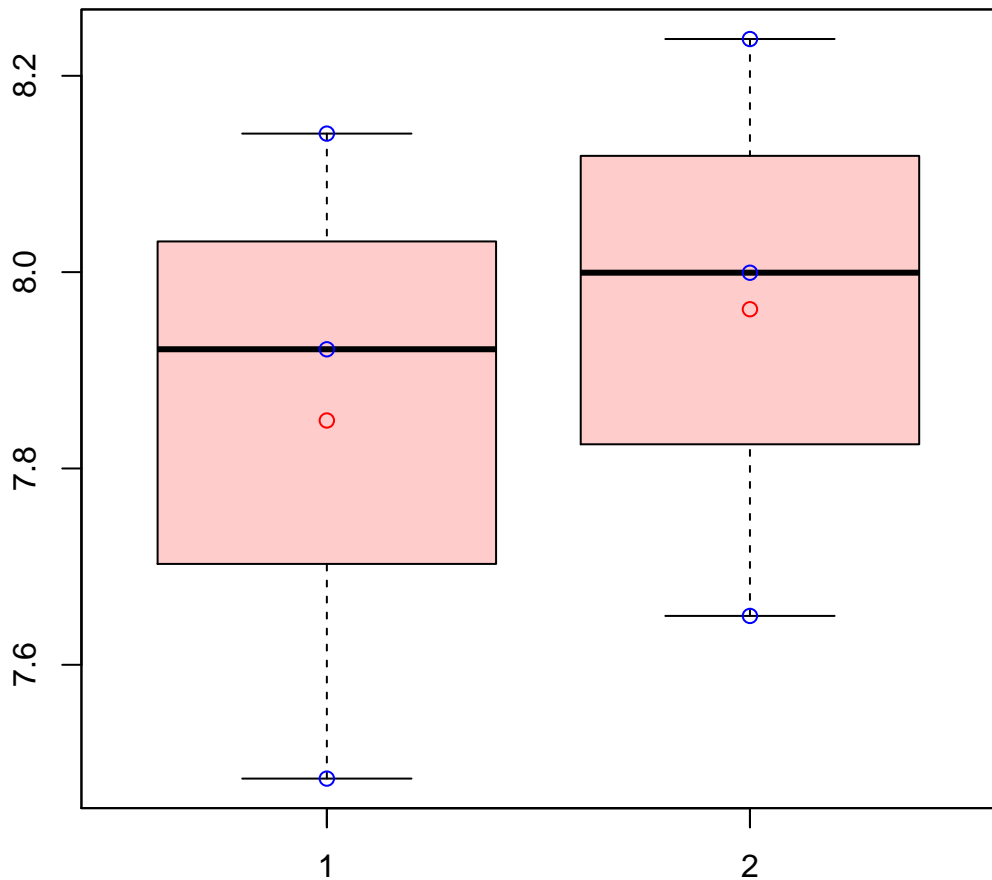

t-Test: p-value = 0.68

# CL395Contig1|CL395Contig1



t-Test: p-value = 0.35

# CL3962Contig2|CL3962Contig2

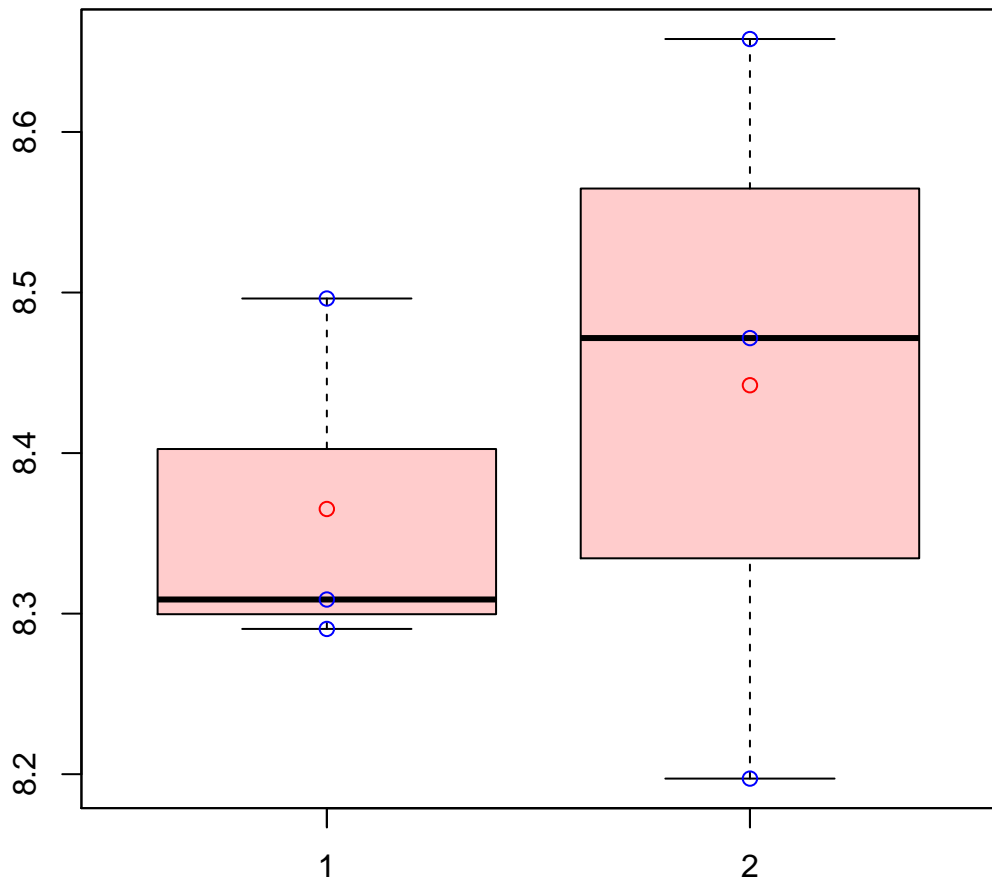

t-Test: p-value = 0.64

# CL396Contig2|CL396Contig2

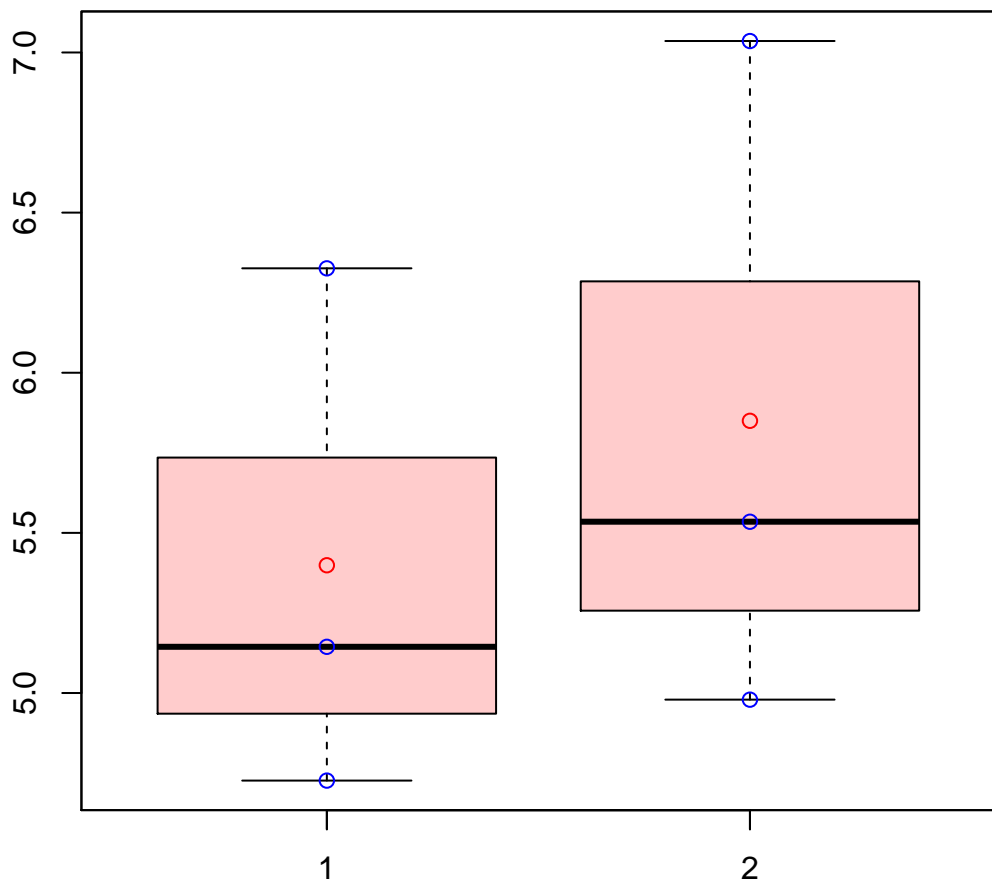

t-Test: p-value = 0.6

# CL396Contig7|CL396Contig7

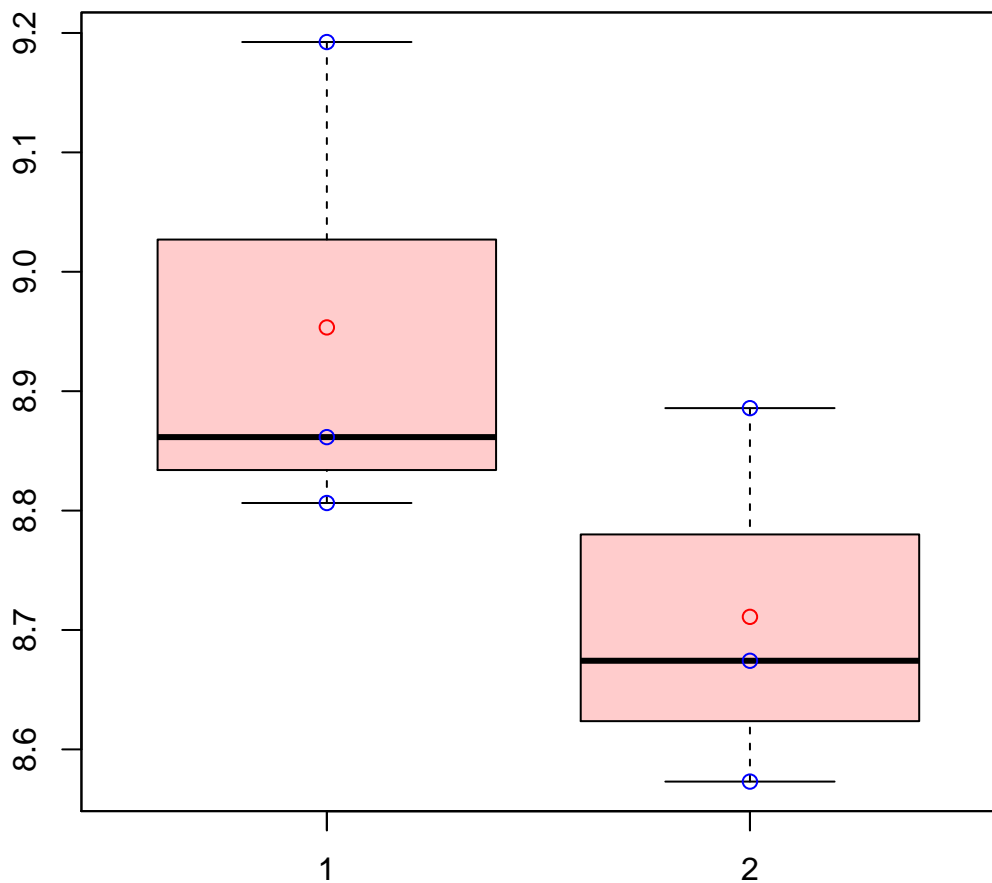

t-Test: p-value = 0.19

# CL3976Contig1|CL3976Contig1

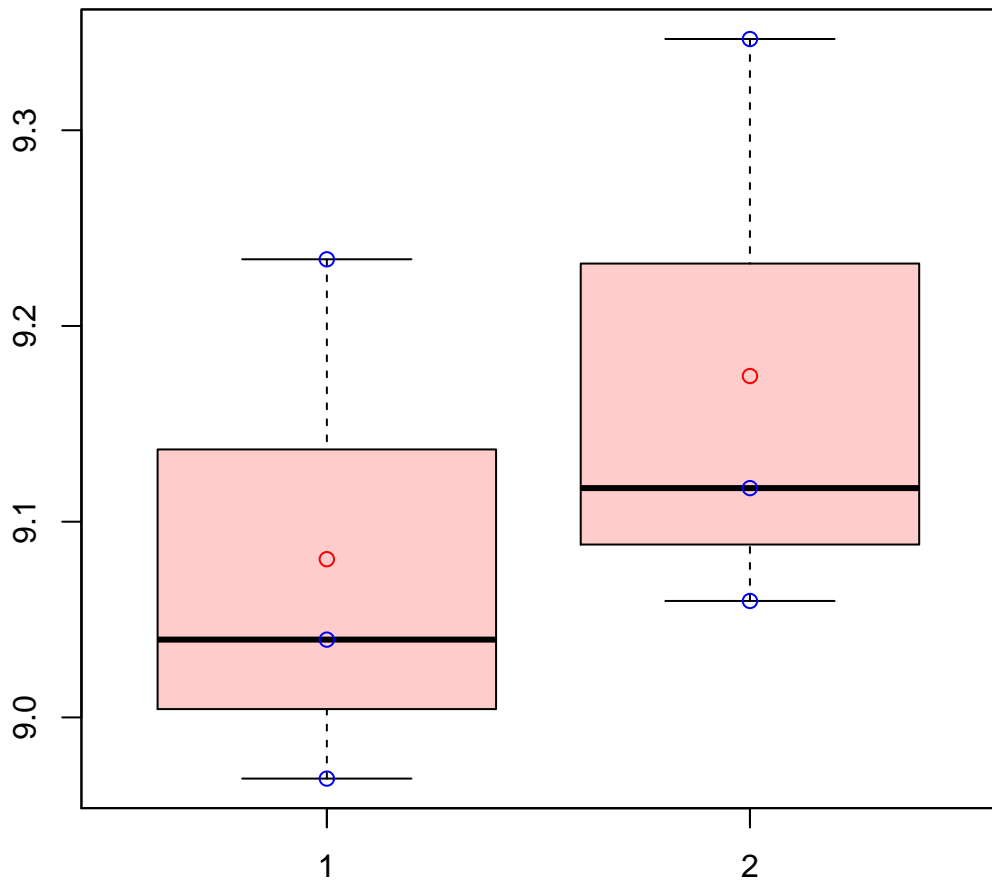

t-Test: p-value = 0.47

# CL3978Contig1|CL3978Contig1

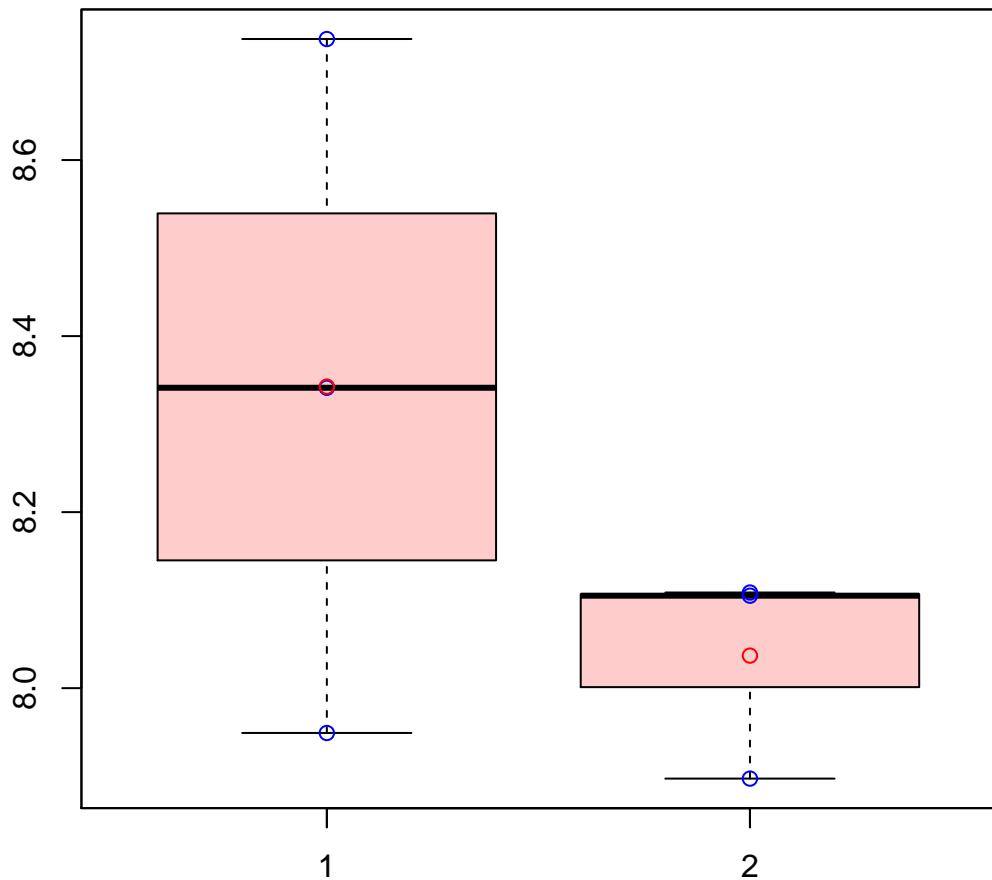

t-Test: p-value = 0.31



# CL3978Contig2|CL3978Contig2



t-Test: p-value = 0.31

# CL397Contig7|CL397Contig7

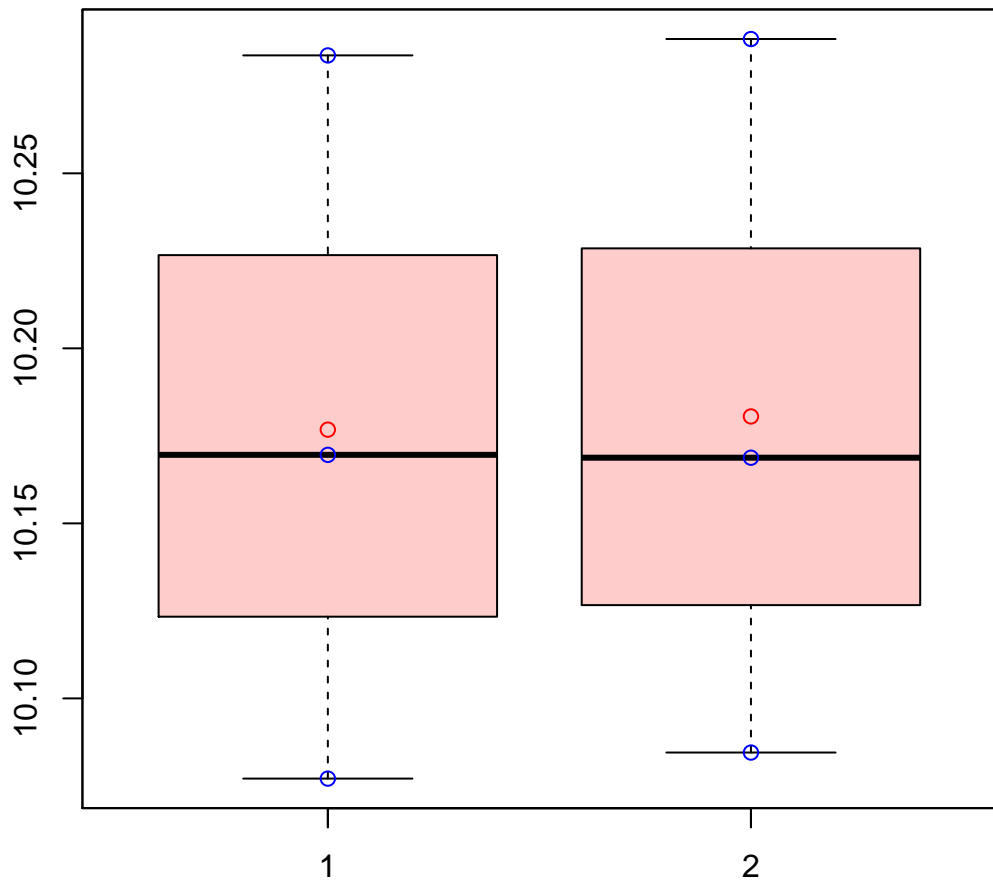

t-Test: p-value = 0.97

# CL397Contig8|CL397Contig8

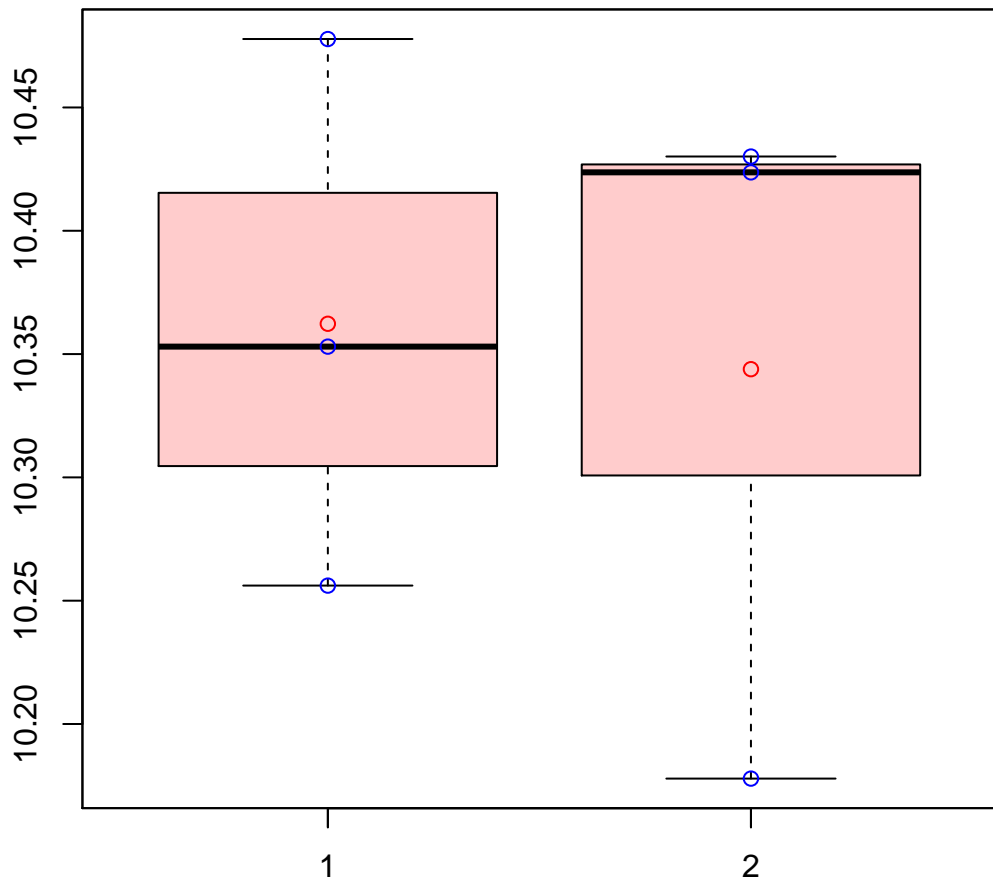

t-Test: p-value = 0.87

# CL3981Contig2|CL3981Contig2

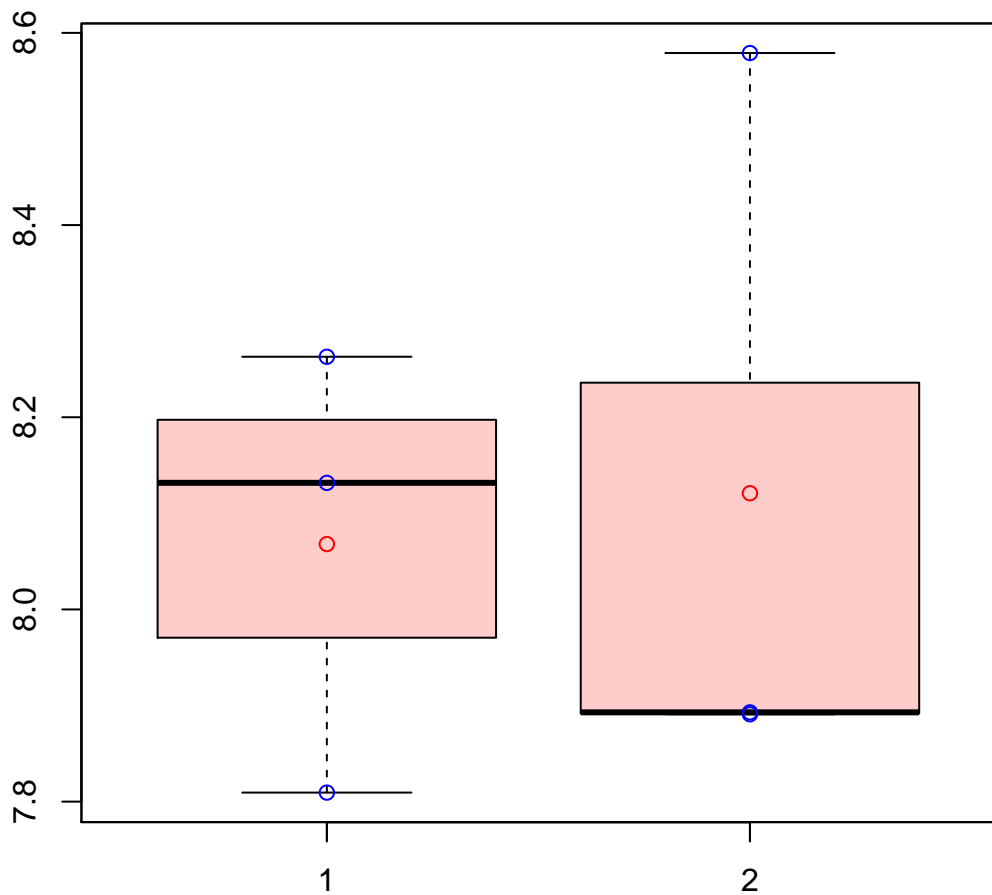

t-Test: p-value = 0.85

# CL3990Contig1|CL3990Contig1

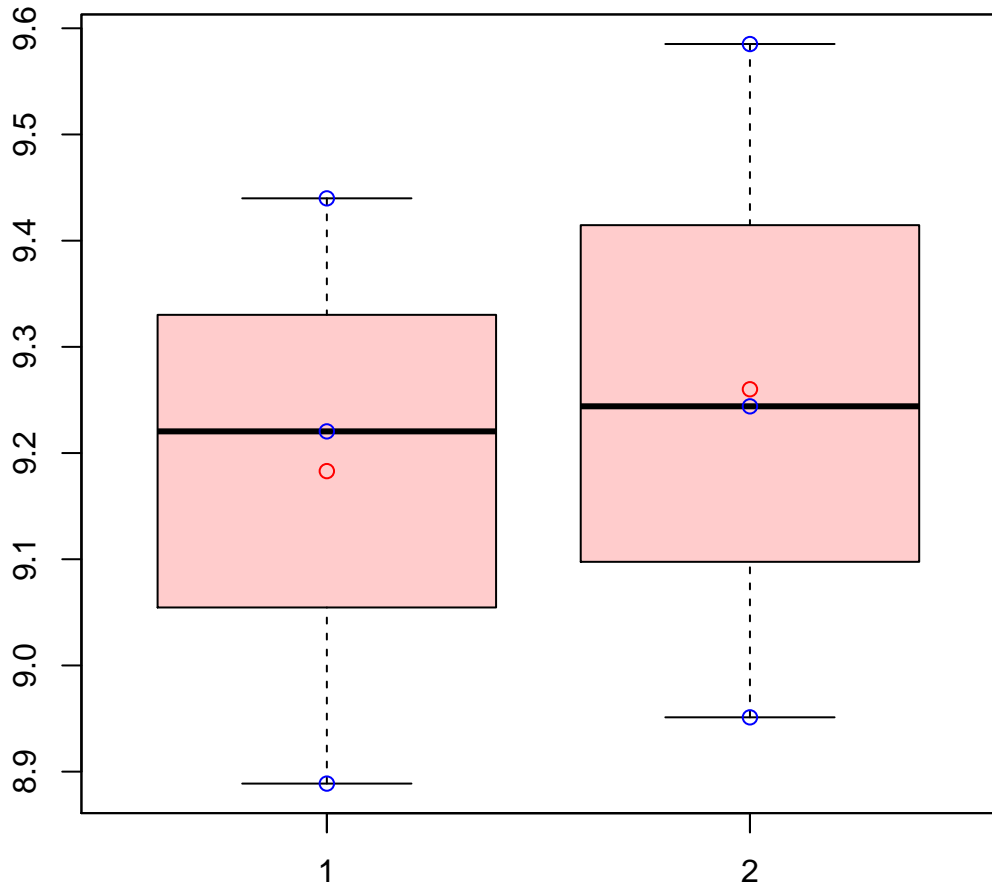

t-Test: p-value = 0.77

# CL3993Contig4|CL3993Contig4

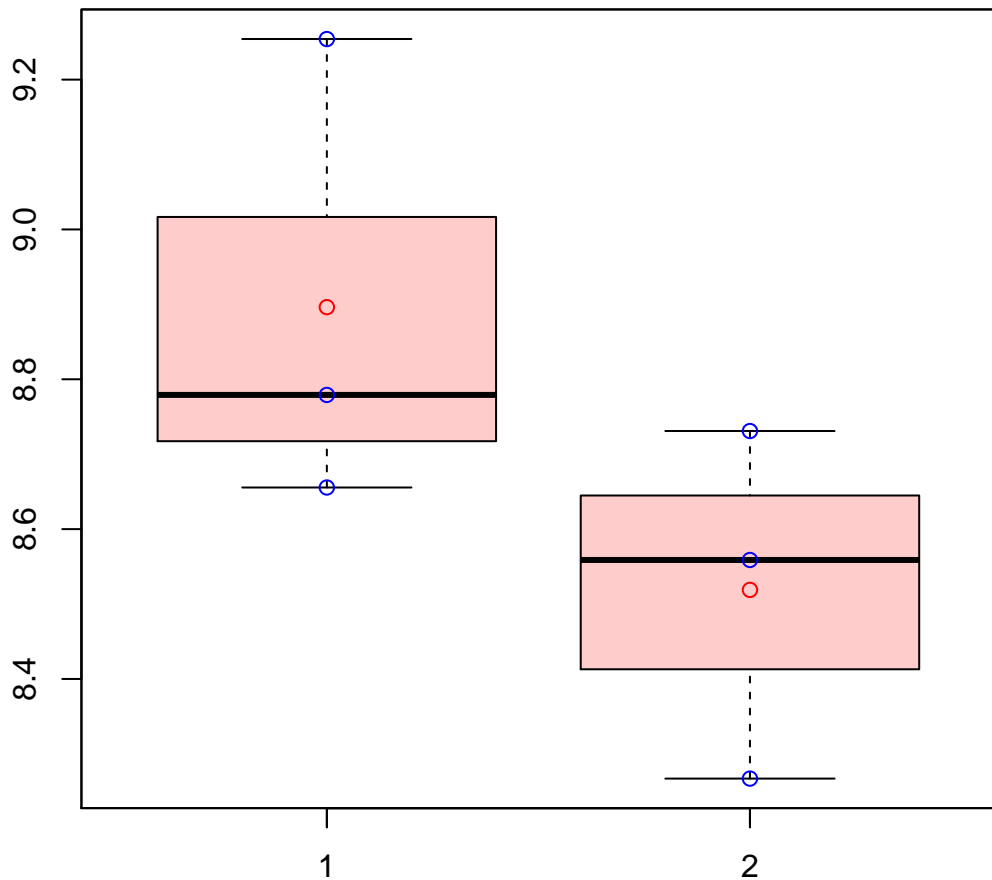

t-Test: p-value = 0.18

# CL3995Contig1|CL3995Contig1

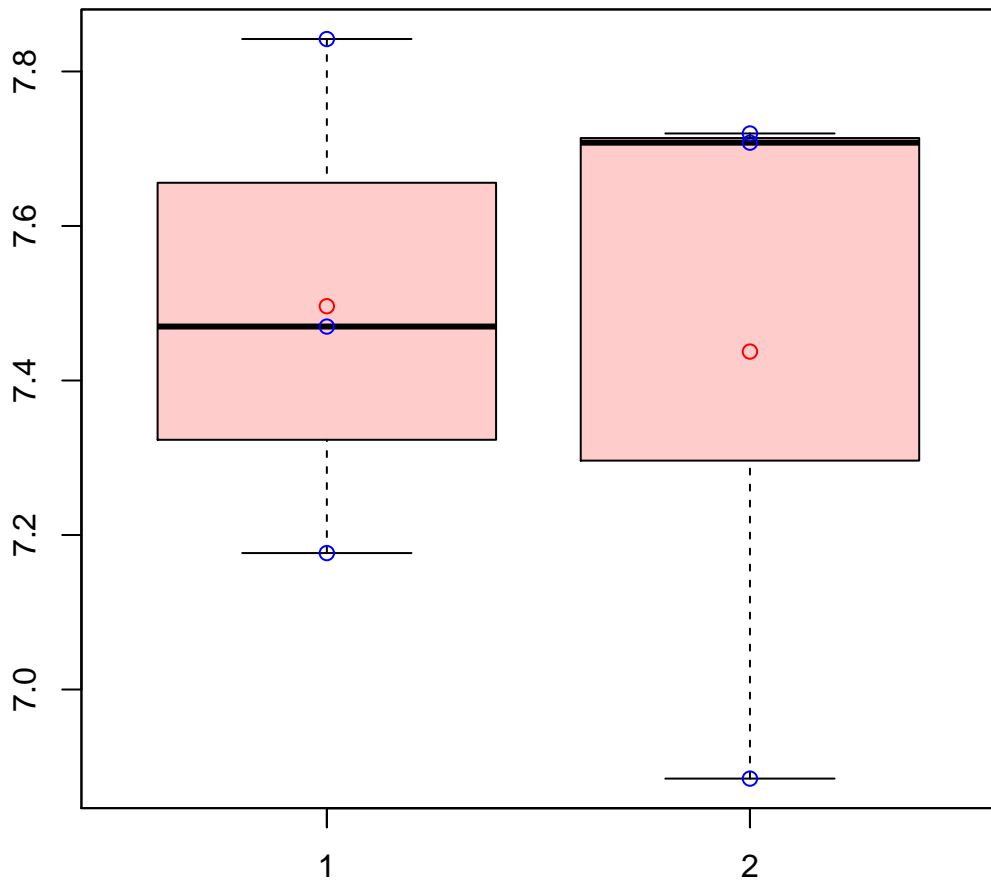

t-Test: p-value = 0.87

# CL3996Contig1|CL3996Contig1

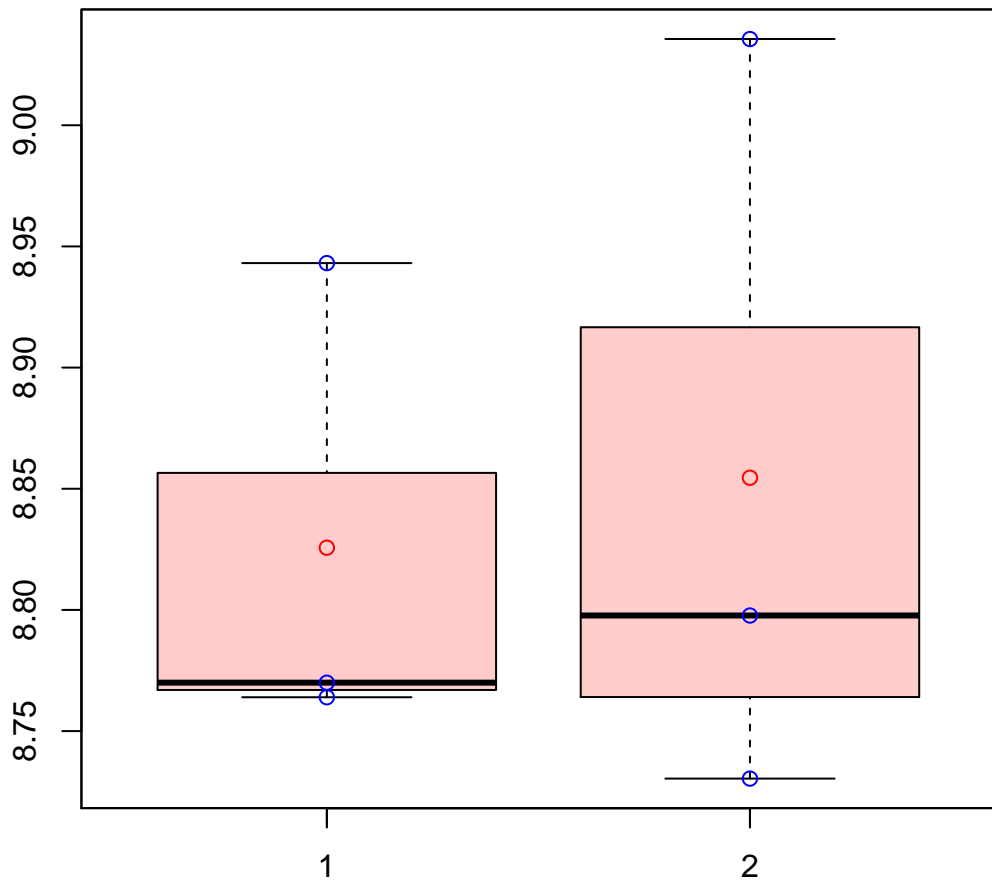

t-Test: p-value = 0.81



# CL399Contig6|CL399Contig6

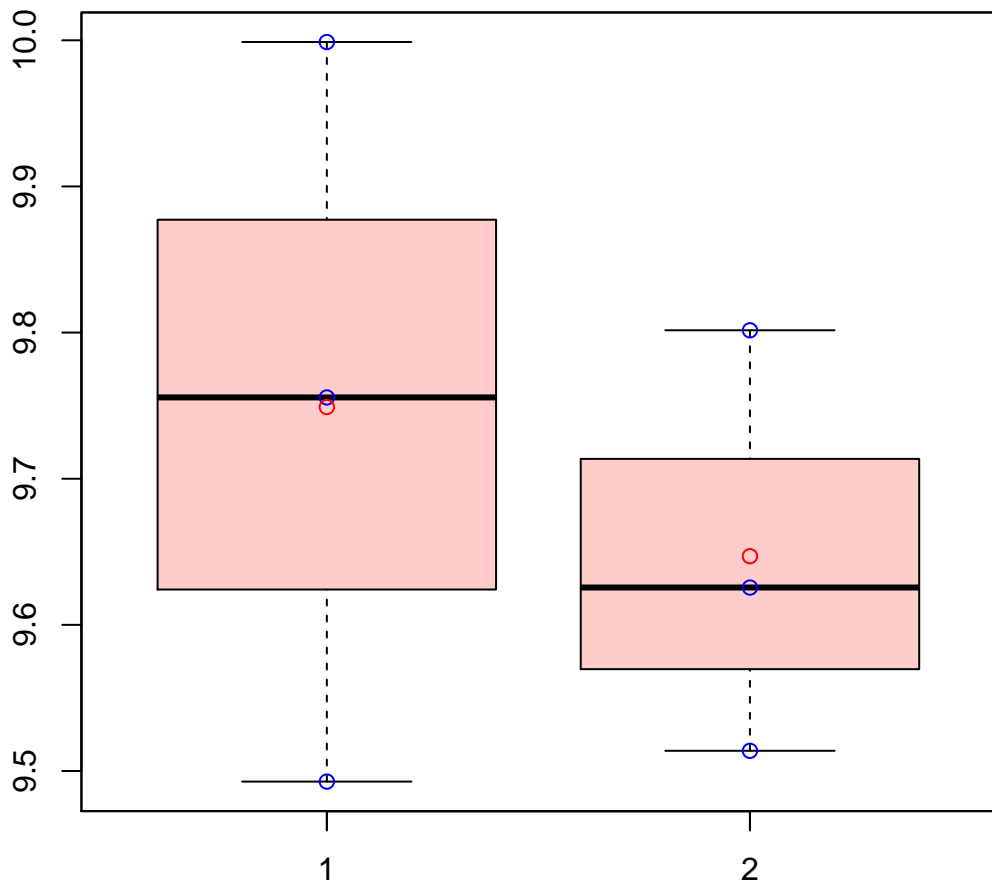

t-Test: p-value = 0.58

# CL3Contig10|CL3Contig10

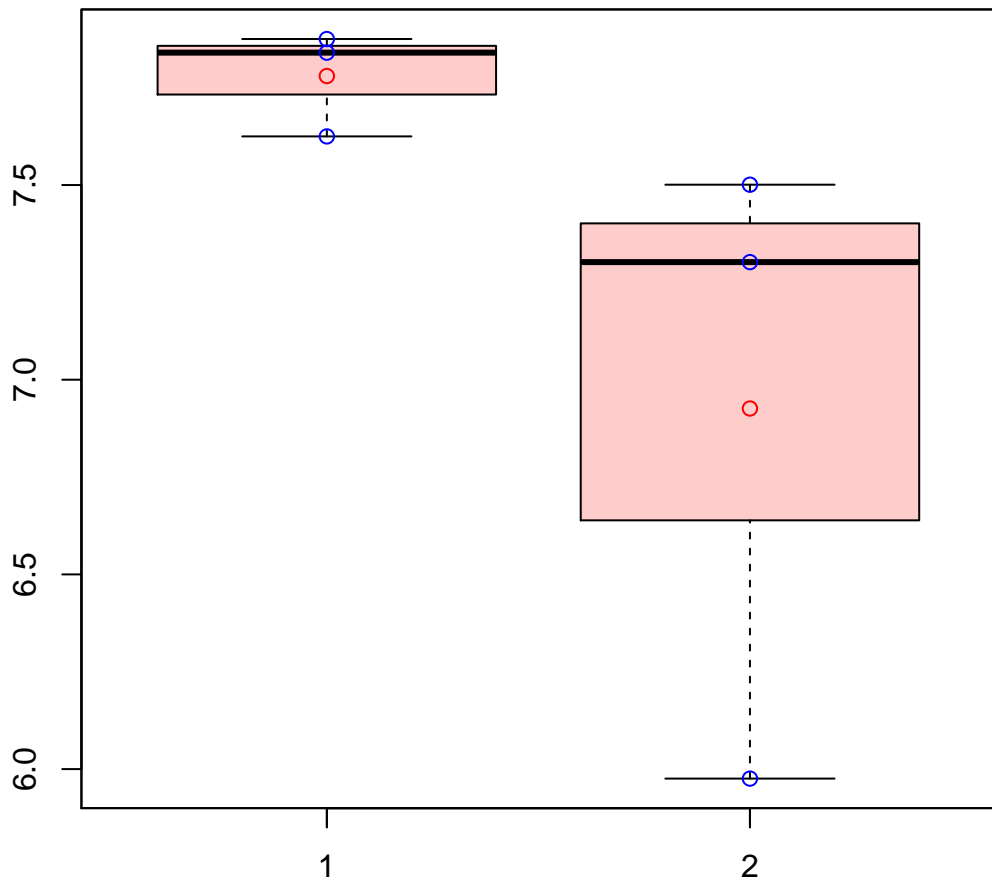

t-Test: p-value = 0.21

# CL3Contig20|CL3Contig20

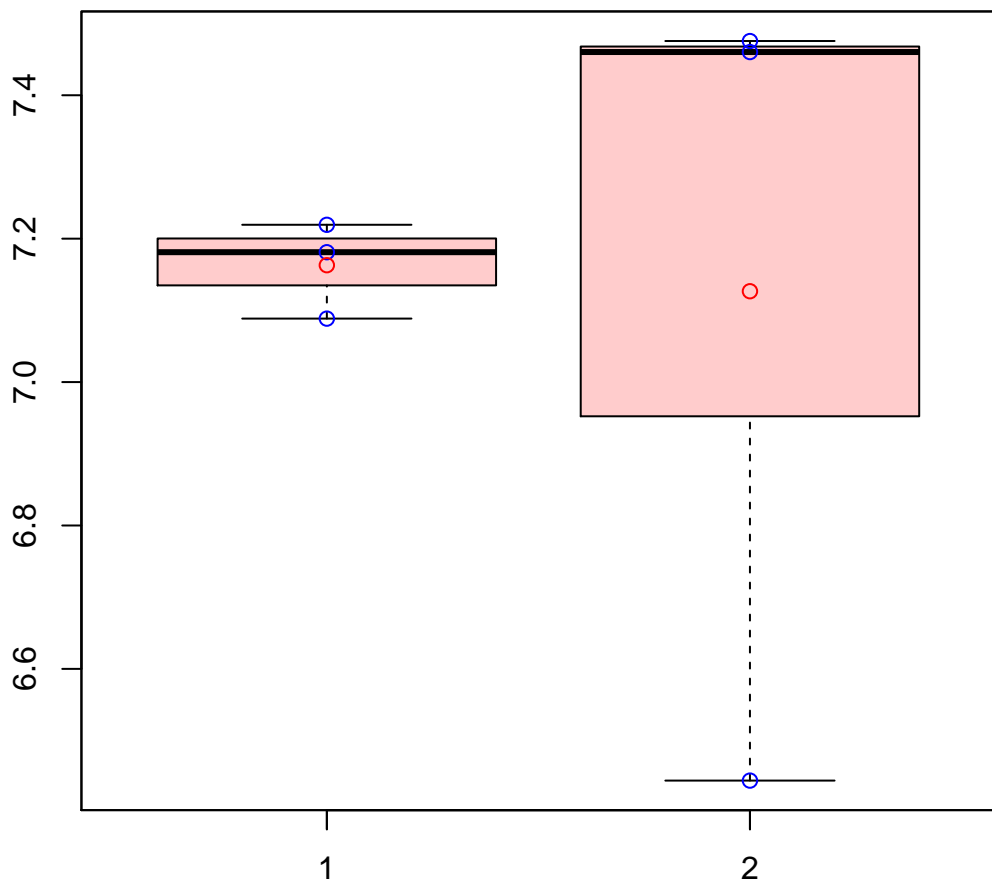

t-Test: p-value = 0.93

# CL3Contig25|CL3Contig25

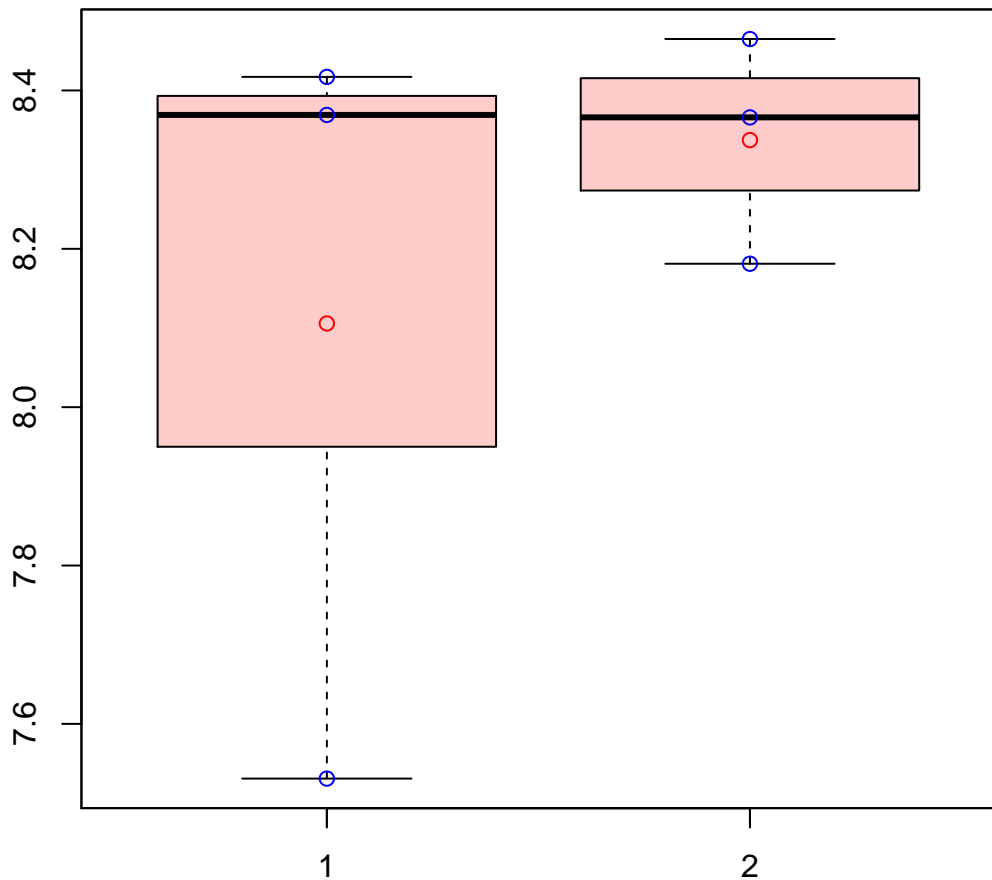

t-Test: p-value = 0.51

# CL3Contig26|CL3Contig26



t-Test: p-value = 0.51

# CL3Contig51|CL3Contig51

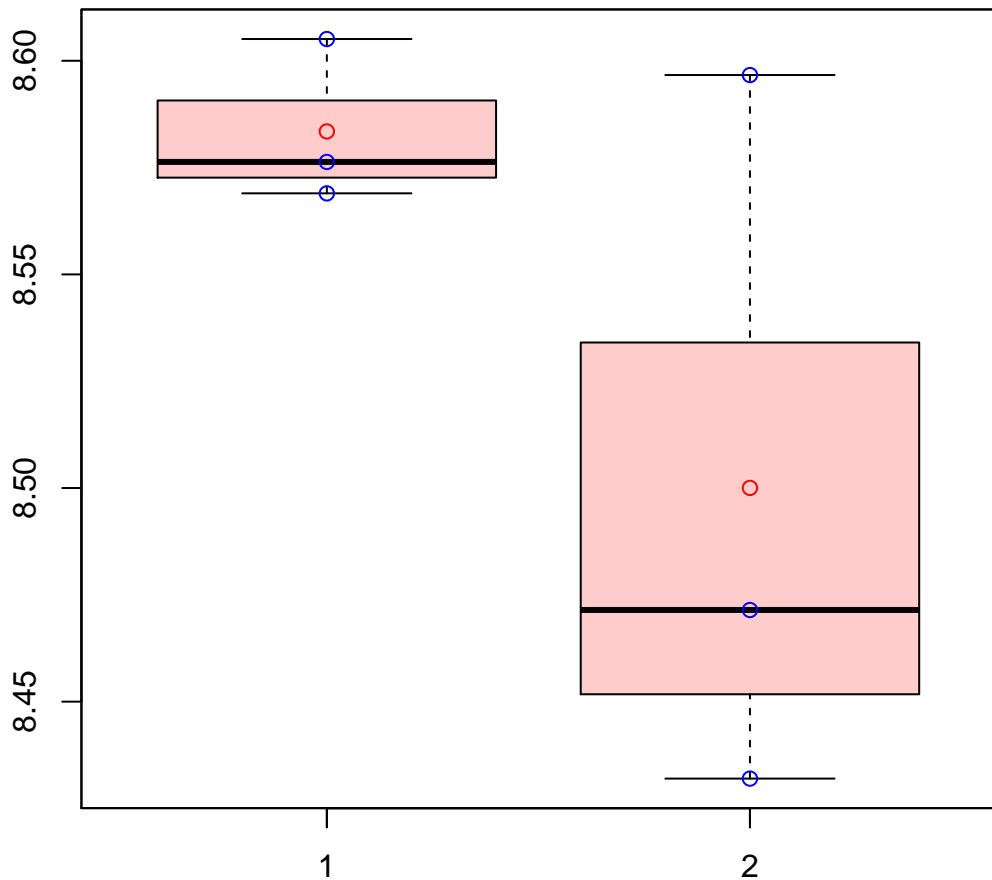

t-Test: p-value = 0.23

# CL3Contig52|CL3Contig52



t-Test: p-value = 0.23

# CL4000Contig1|CL4000Contig1

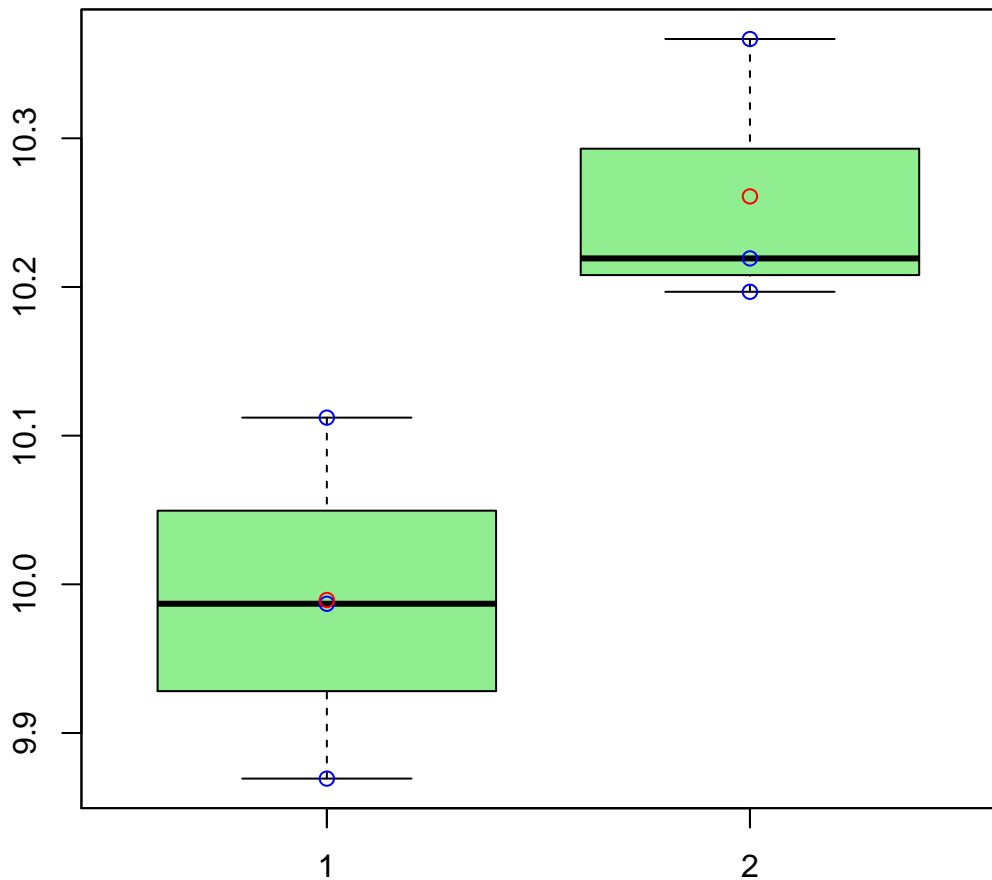

t-Test: p-value = 0.04



# CL4000Contig2|CL4000Contig2



t-Test: p-value = 0.04

# CL4000Contig3|CL4000Contig3



t-Test: p-value = 0.04

# CL4008Contig6|CL4008Contig6

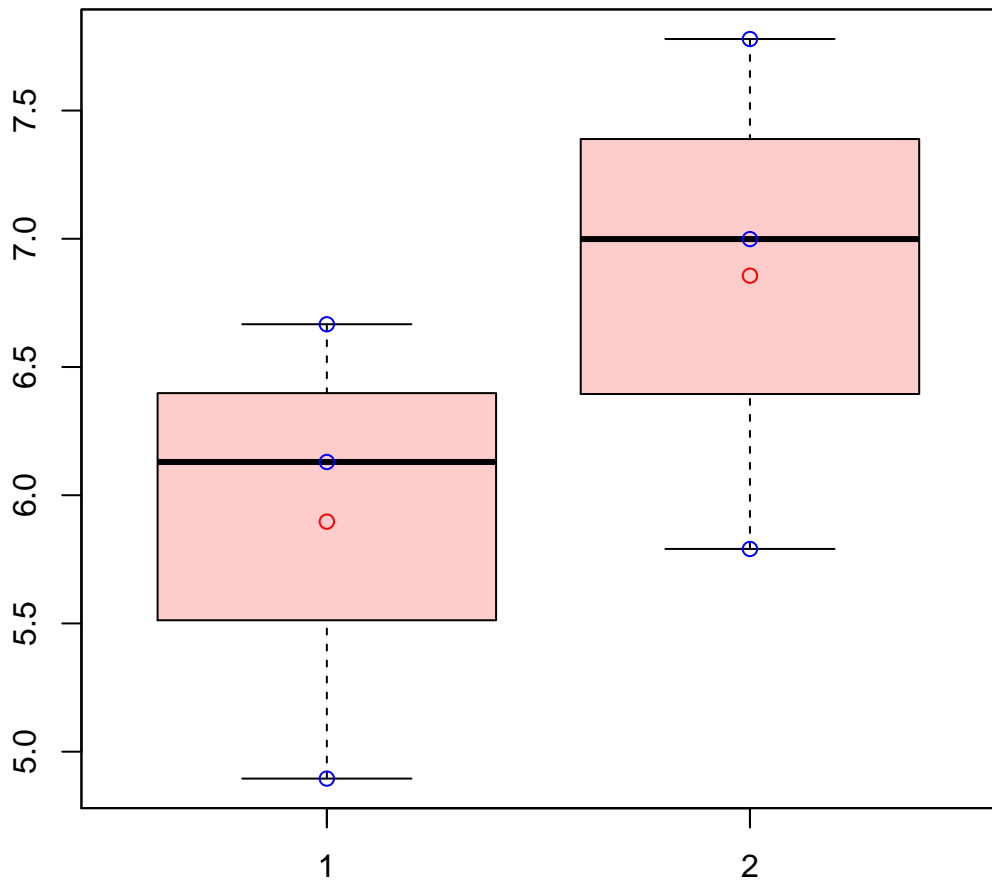

t-Test: p-value = 0.29

# CL4009Contig2|CL4009Contig2

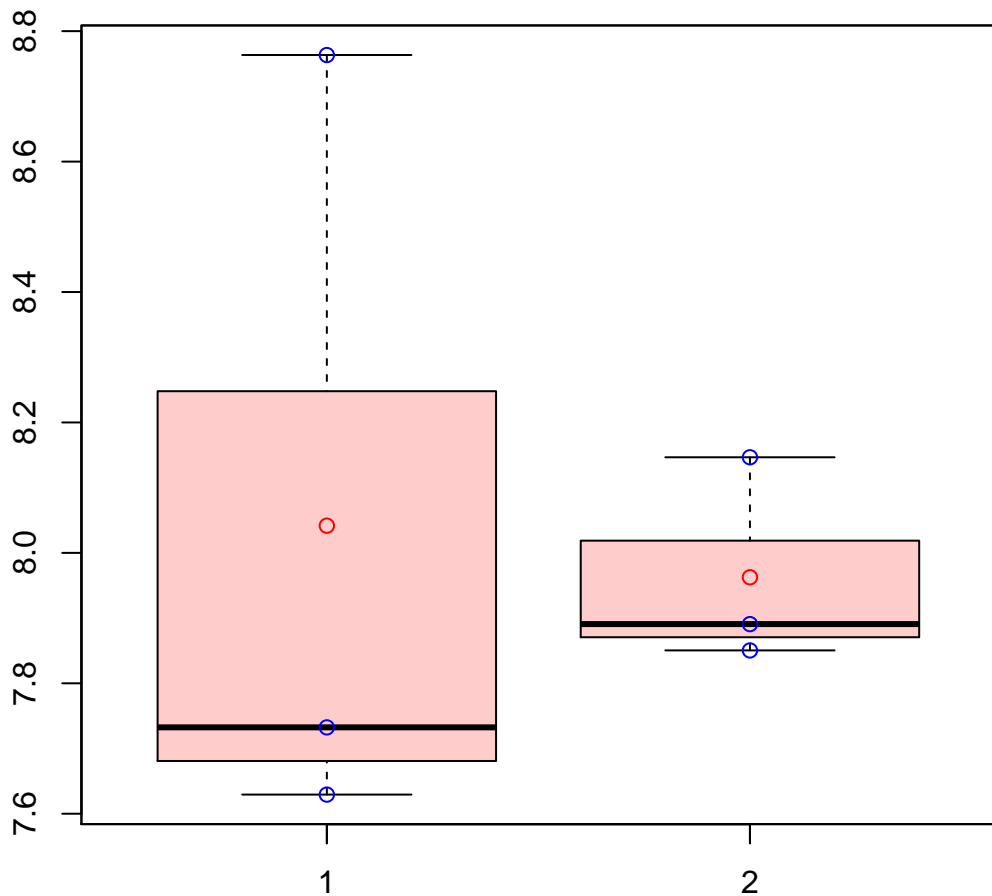

t-Test: p-value = 0.85

# CL400Contig10|CL400Contig10

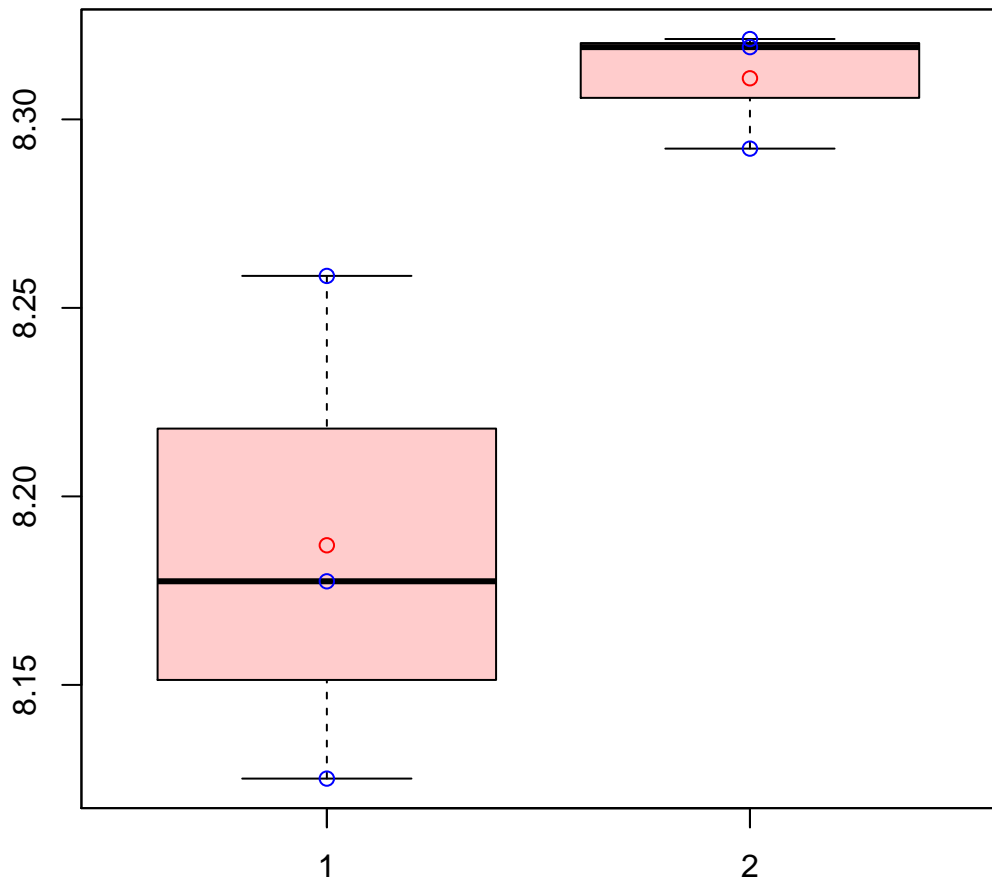

t-Test: p-value = 0.08

# CL400Contig11|CL400Contig11



t-Test: p-value = 0.08

# CL400Contig12|CL400Contig12



t-Test: p-value = 0.31

# CL4011Contig3|CL4011Contig3

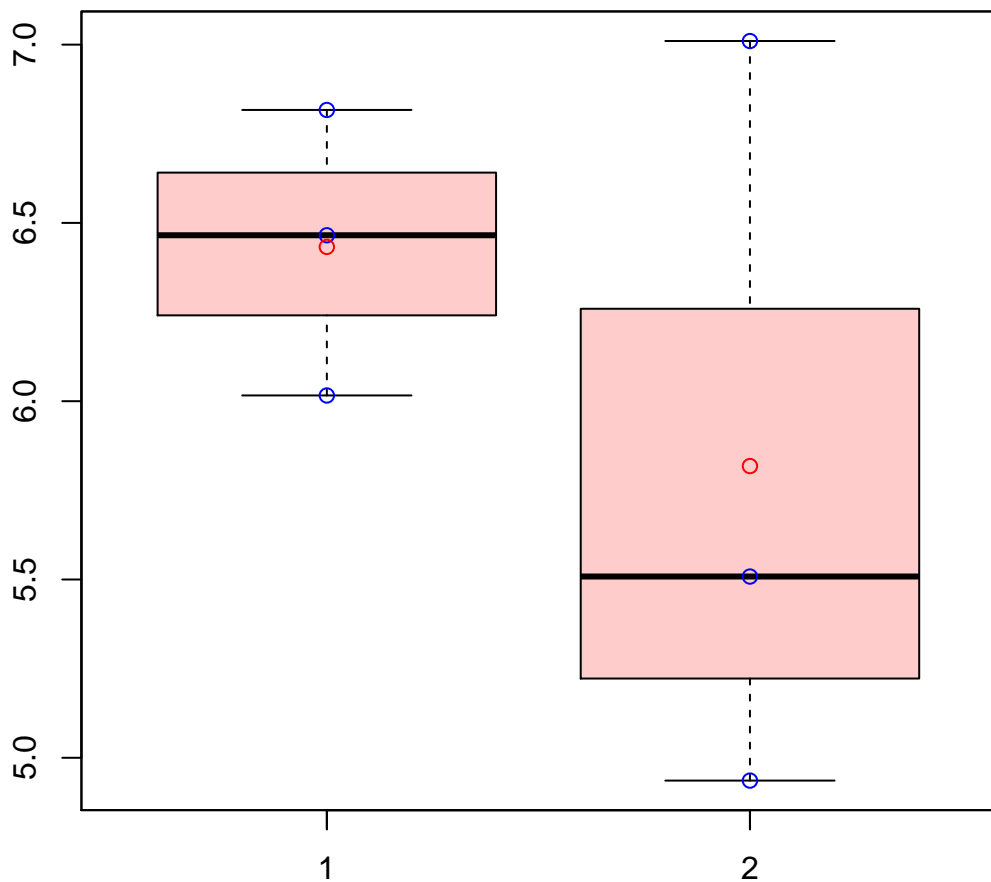

t-Test: p-value = 0.43



# CL4016Contig2|CL4016Contig2

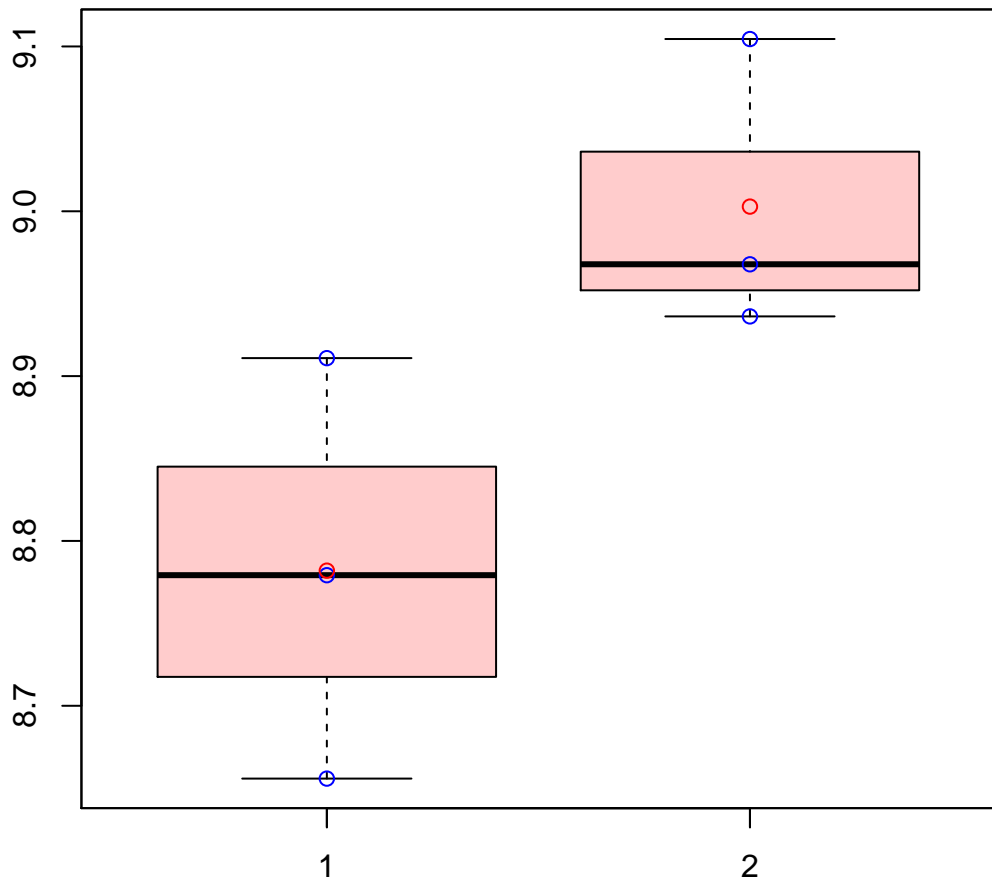

t-Test: p-value = 0.08

# CL4022Contig2|CL4022Contig2

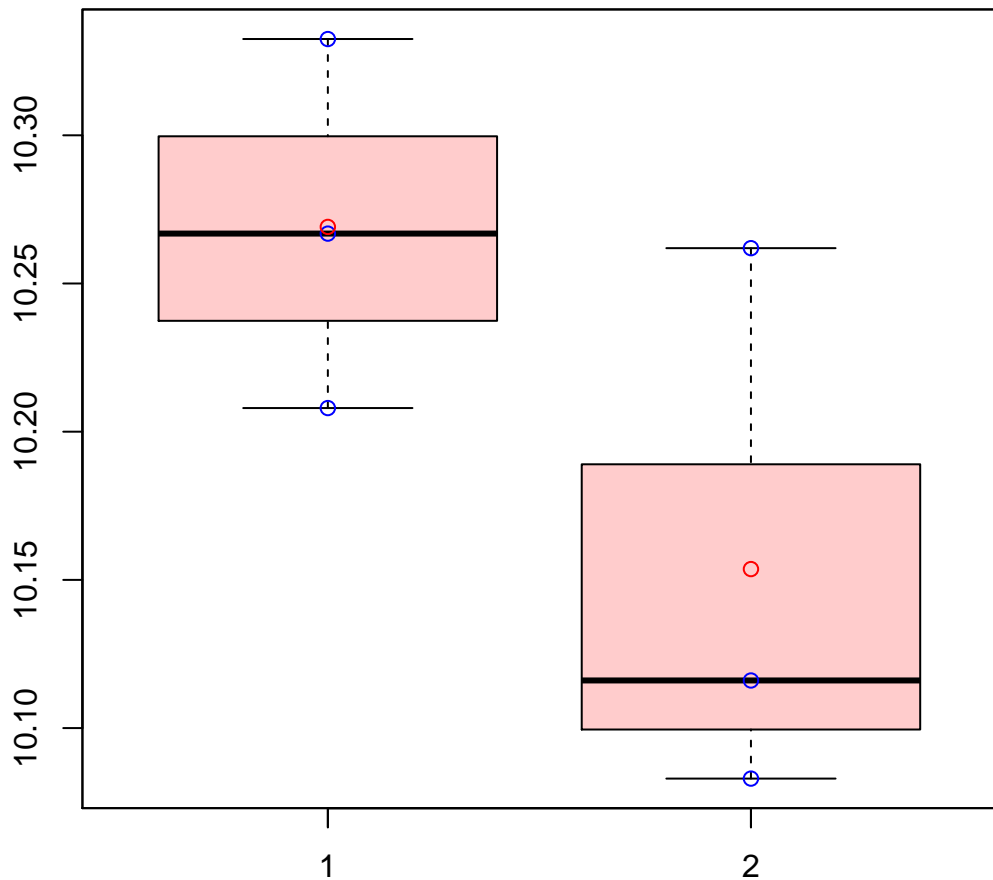

t-Test: p-value = 0.17

# CL4022Contig5|CL4022Contig5

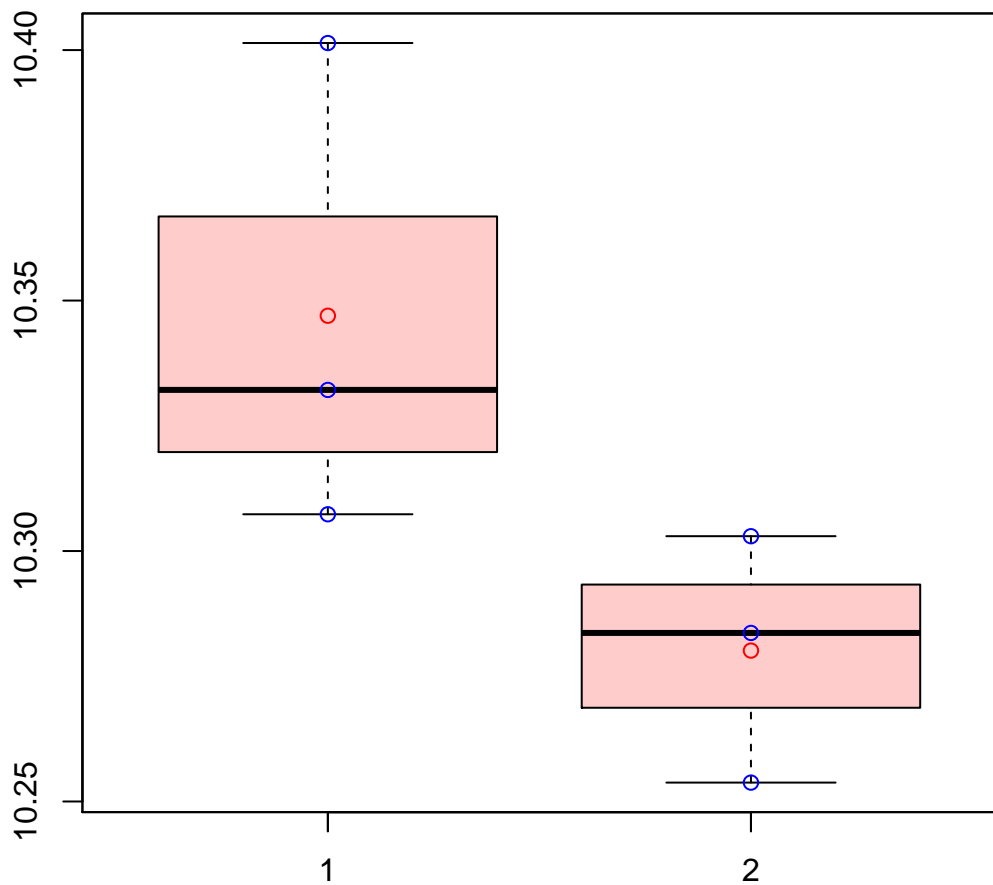

t-Test: p-value = 0.13

# CL4025Contig1|CL4025Contig1

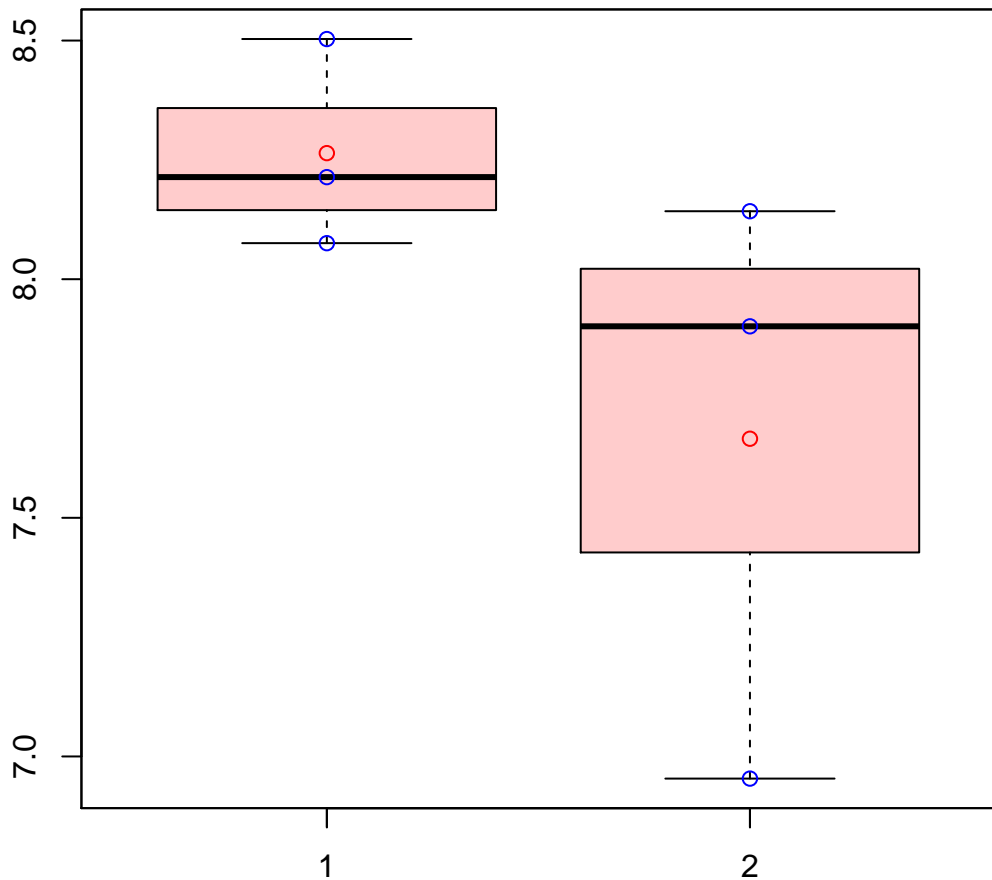

t-Test: p-value = 0.24

# CL4029Contig1|CL4029Contig1

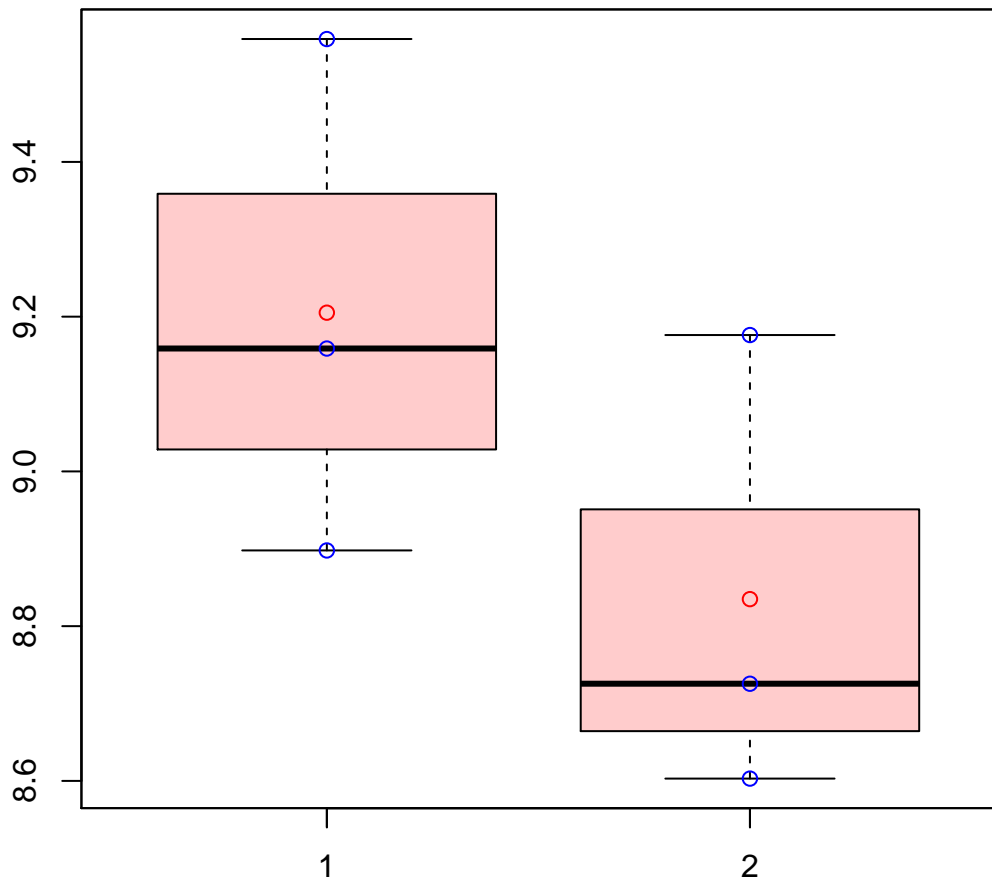

t-Test: p-value = 0.23

# CL402Contig2|CL402Contig2

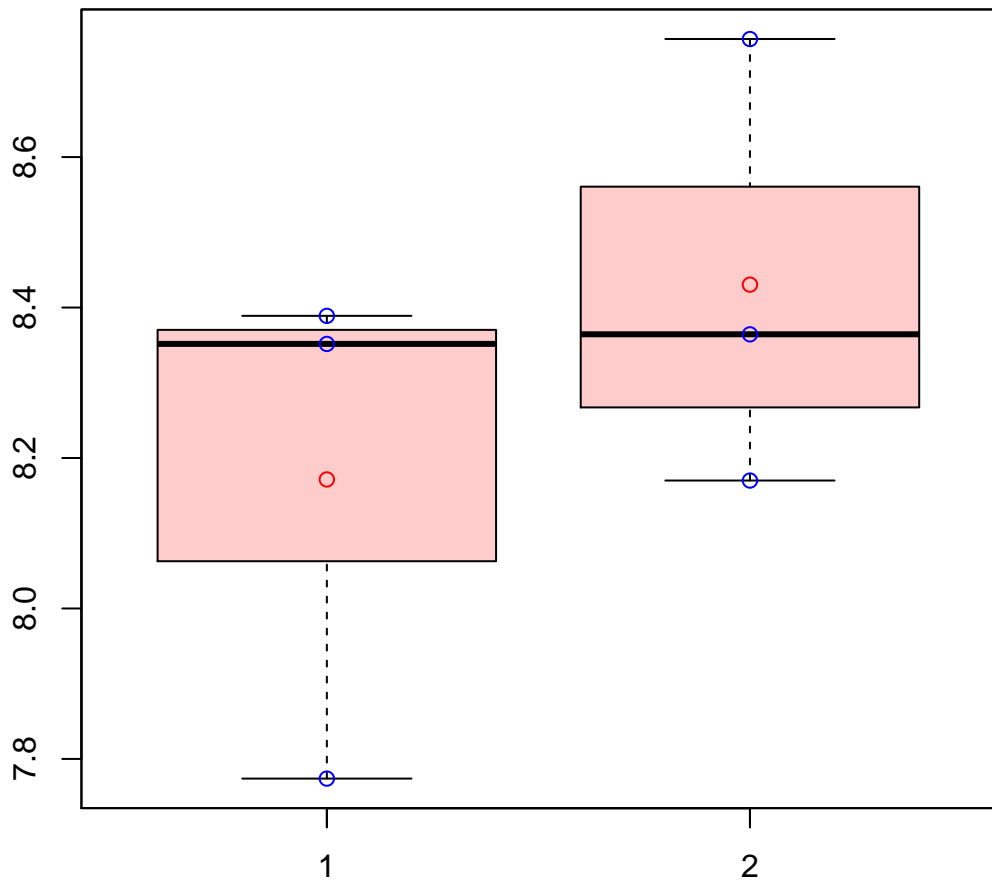

t-Test: p-value = 0.38

# CL4031Contig2|CL4031Contig2

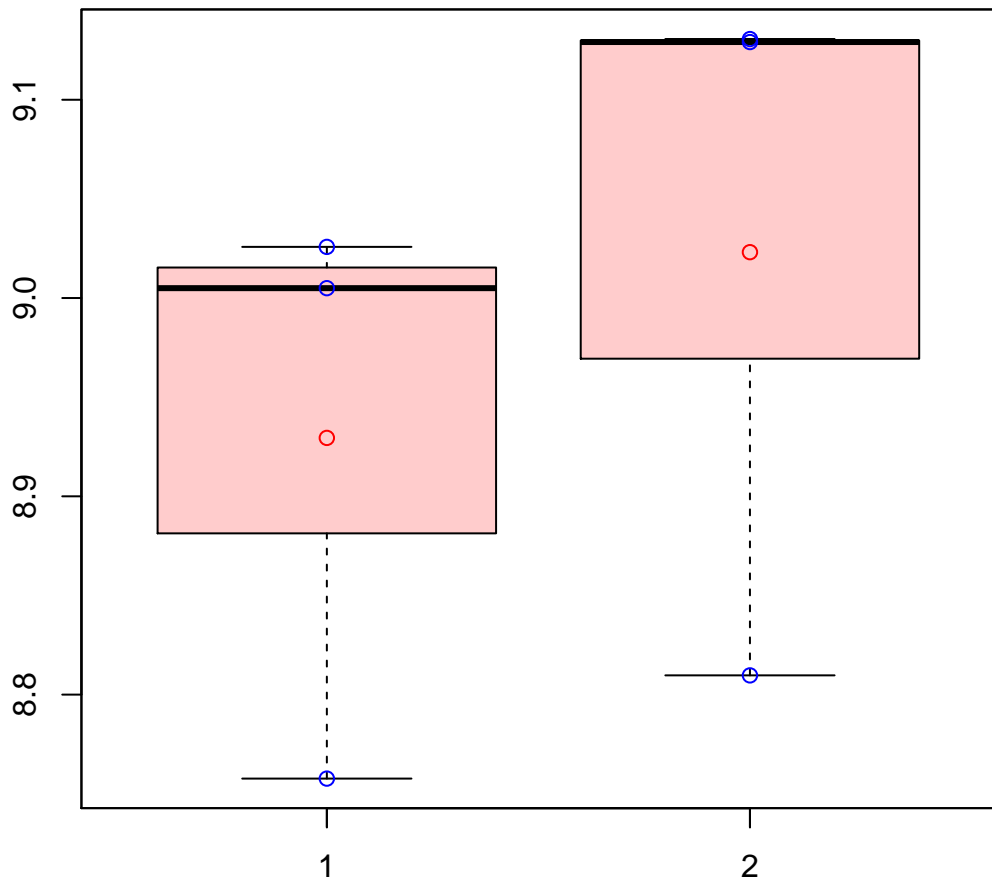

t-Test: p-value = 0.53

# CL4031Contig3|CL4031Contig3

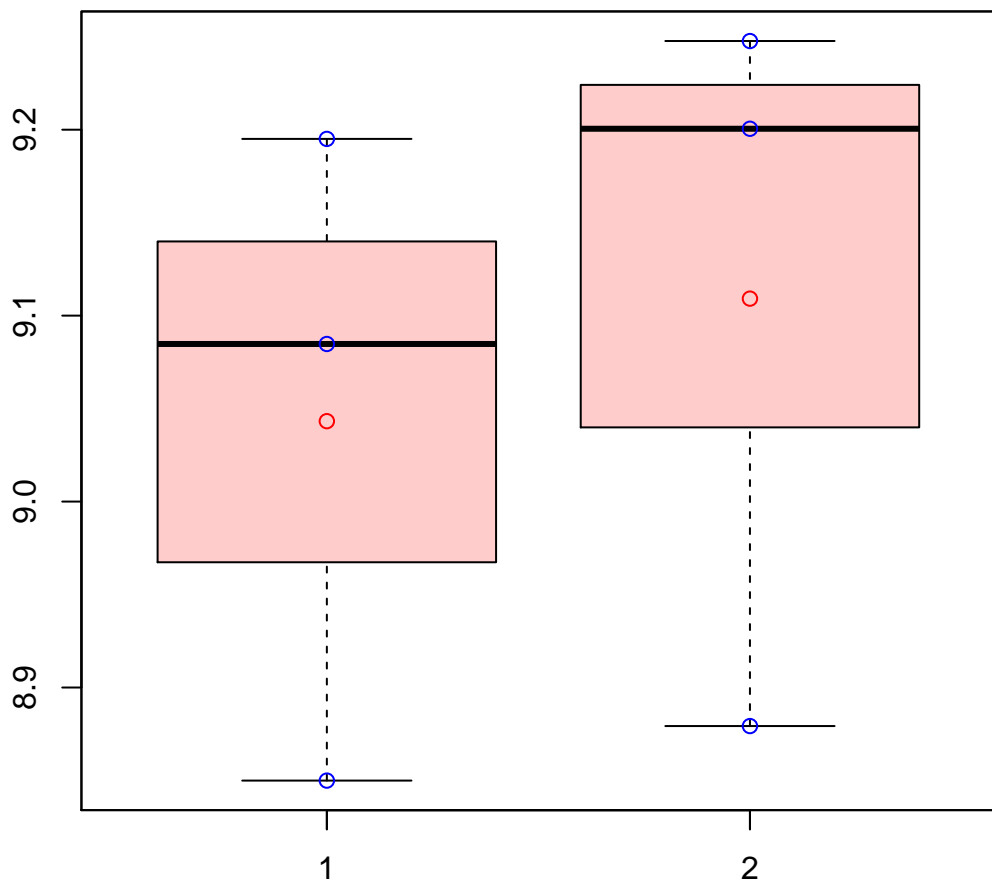

t-Test: p-value = 0.69



# CL4031Contig4|CL4031Contig4

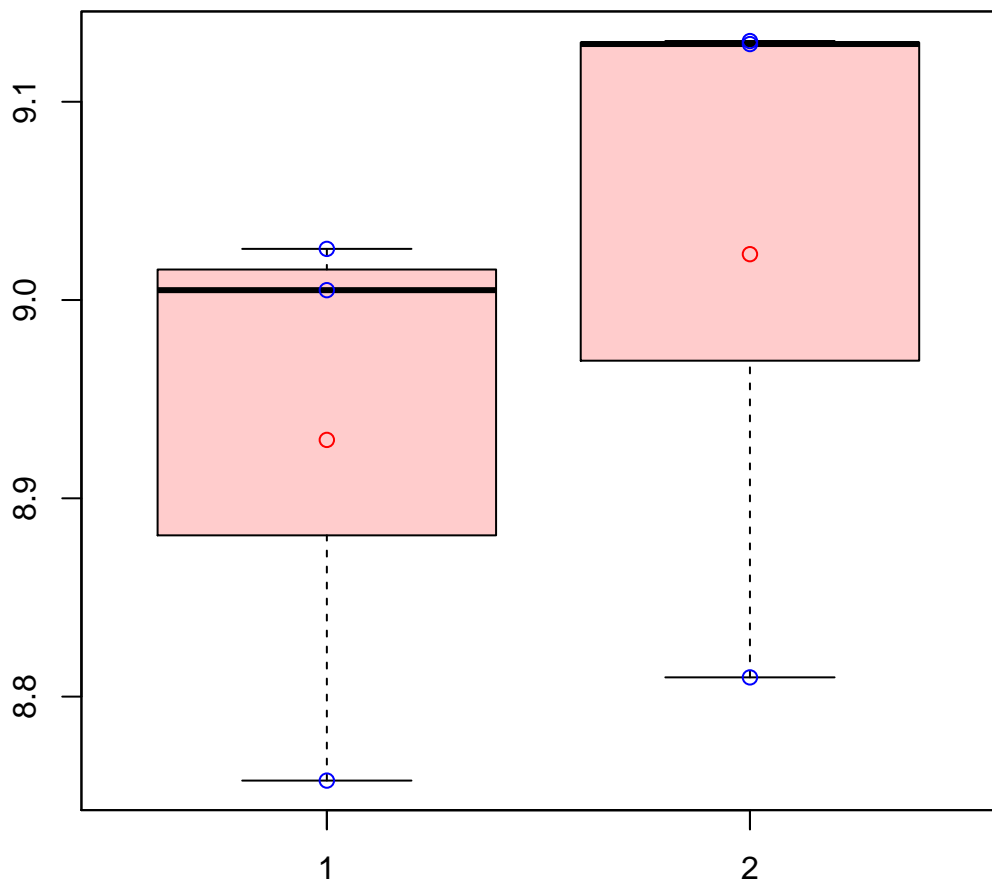

t-Test: p-value = 0.53

# CL4032Contig1|CL4032Contig1

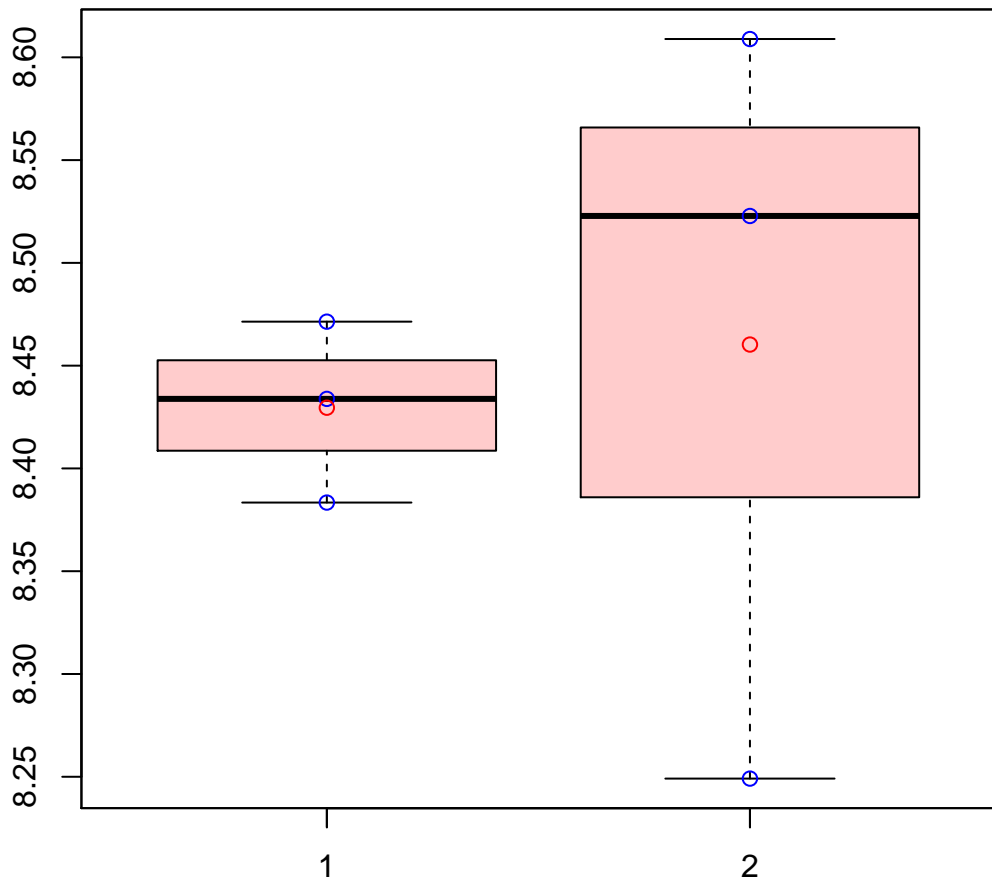

t-Test: p-value = 0.81

# CL4032Contig2|CL4032Contig2

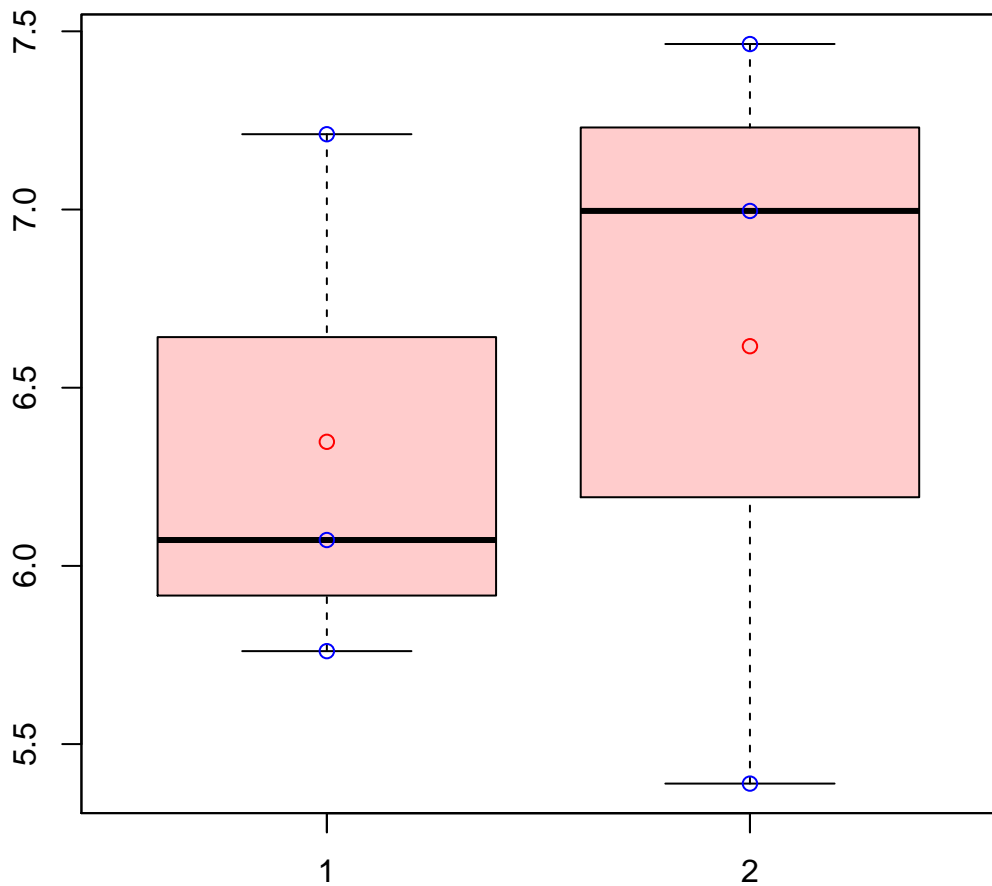

t-Test: p-value = 0.75

# CL4033Contig2|CL4033Contig2

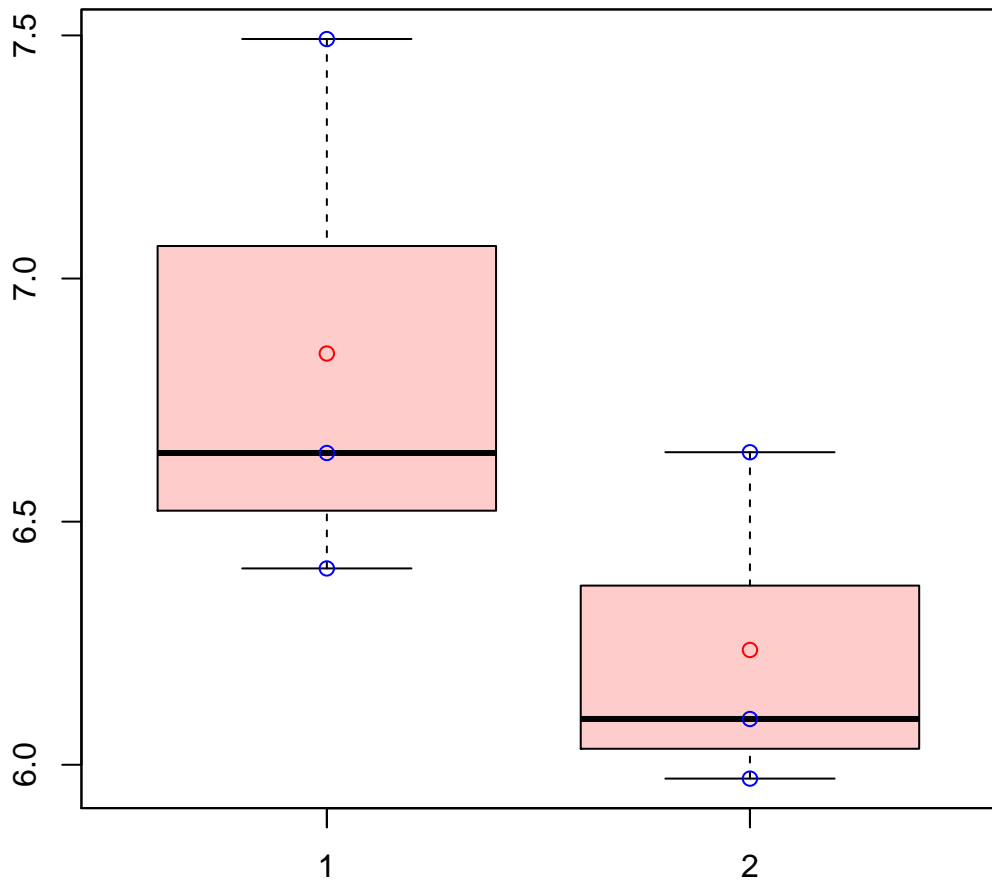

t-Test: p-value = 0.21

# CL4035Contig2|CL4035Contig2

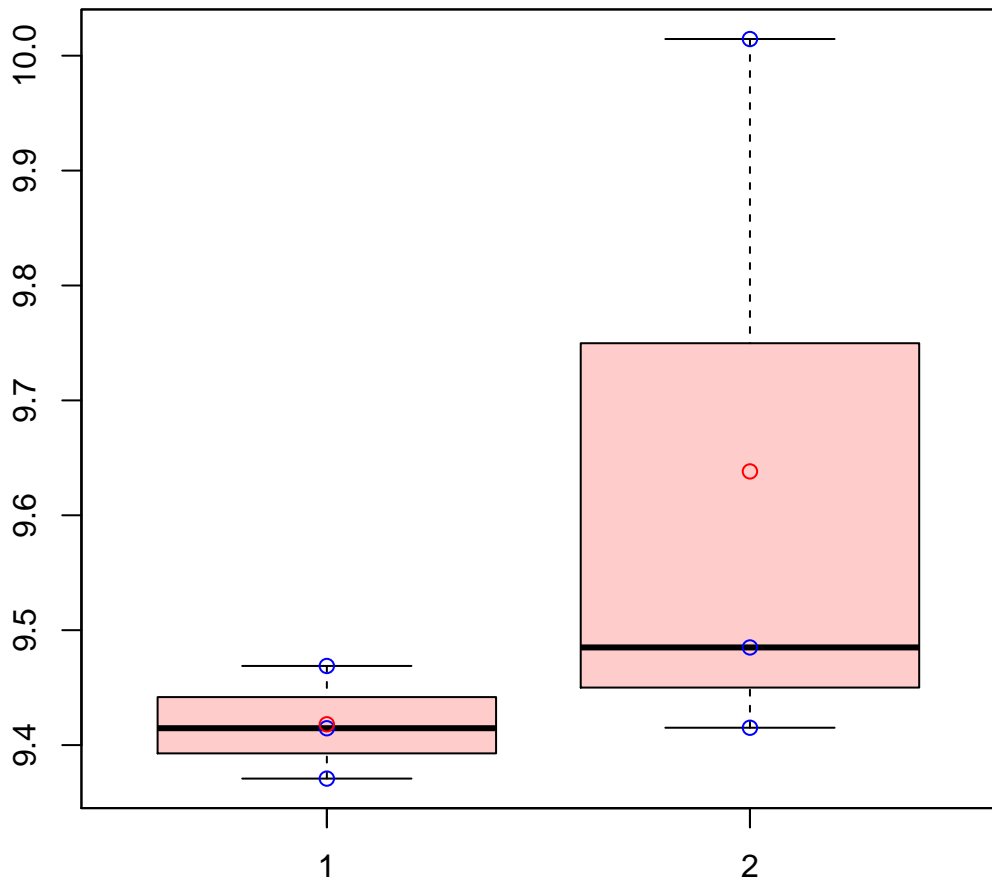

t-Test: p-value = 0.36

# CL4041Contig2|CL4041Contig2

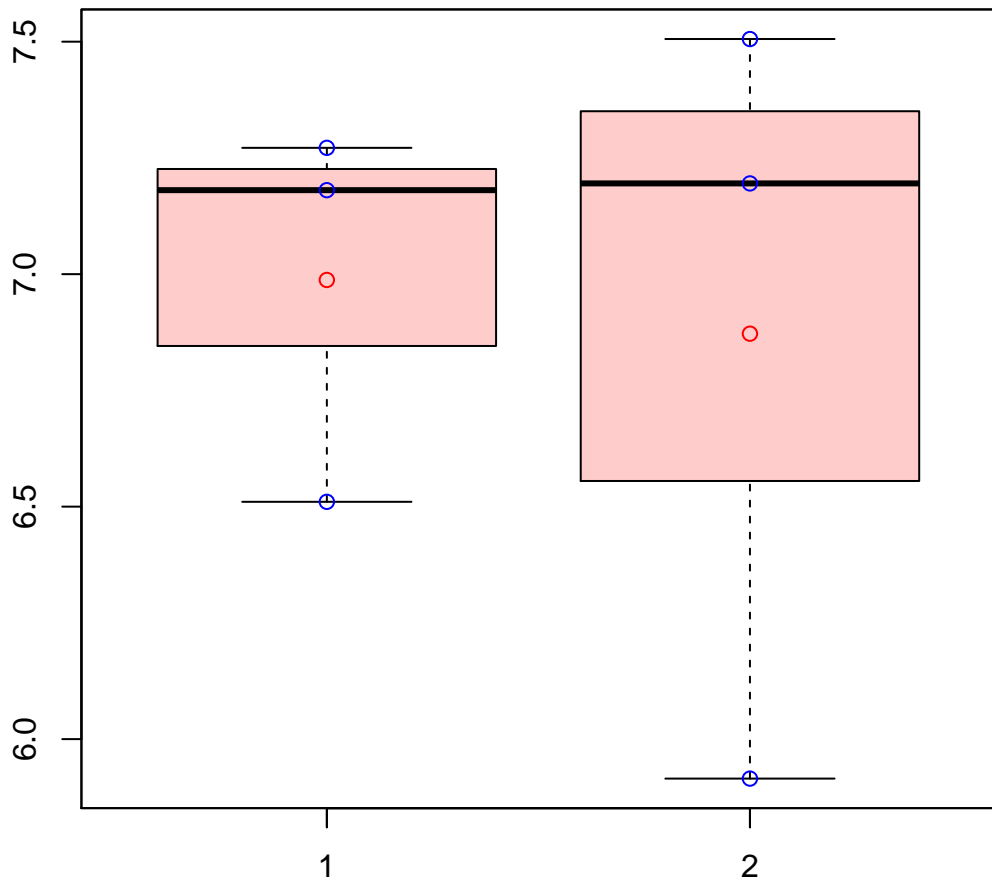

t-Test: p-value = 0.85

# CL4048Contig2|CL4048Contig2

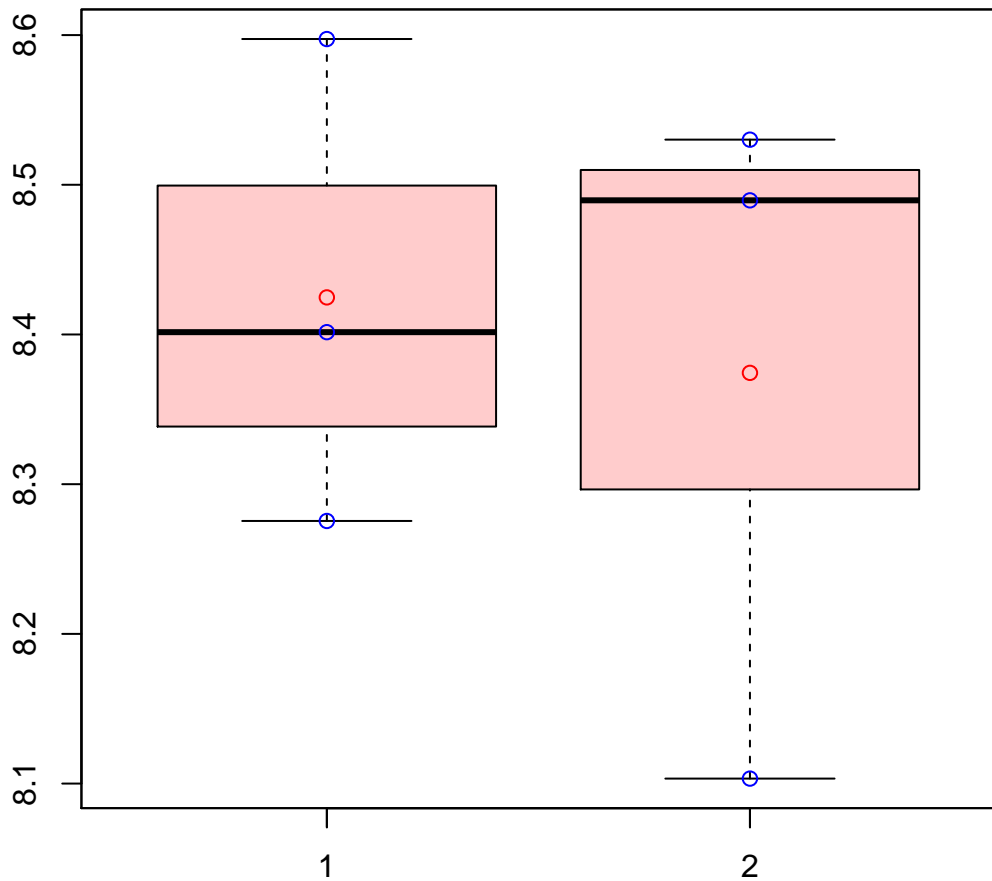

t-Test: p-value = 0.78

# CL404Contig2|CL404Contig2

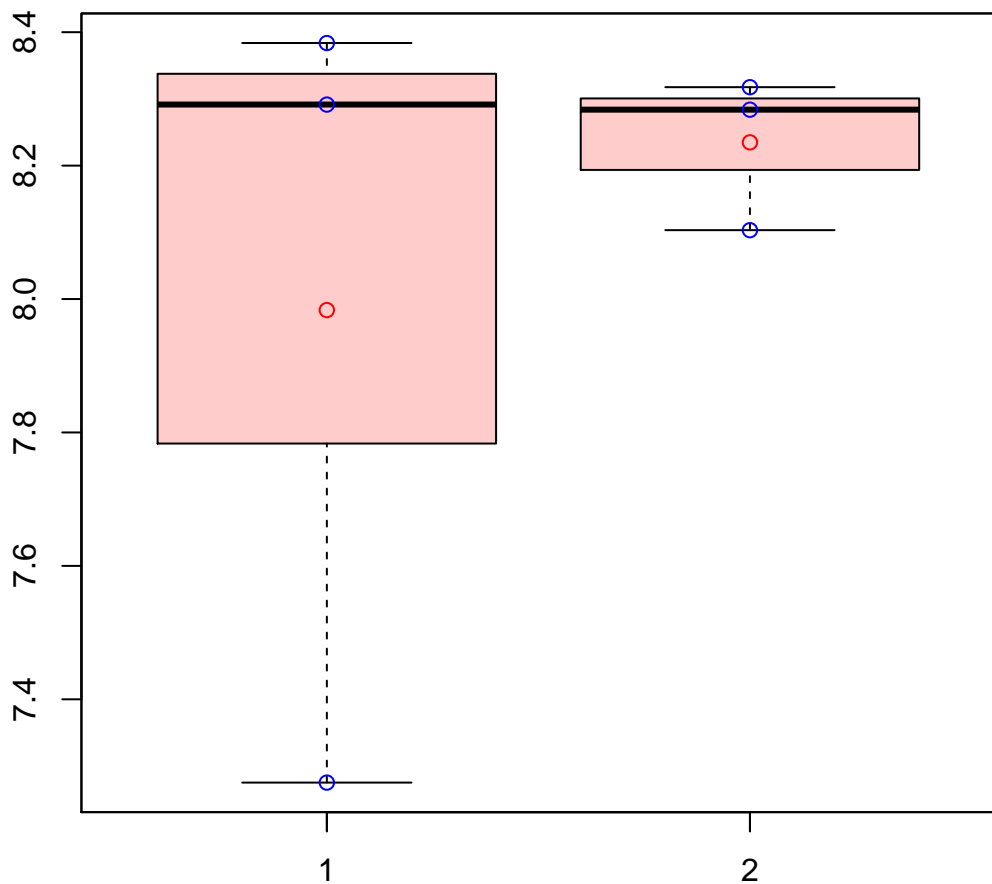

t-Test: p-value = 0.55



# CL4053Contig3|CL4053Contig3

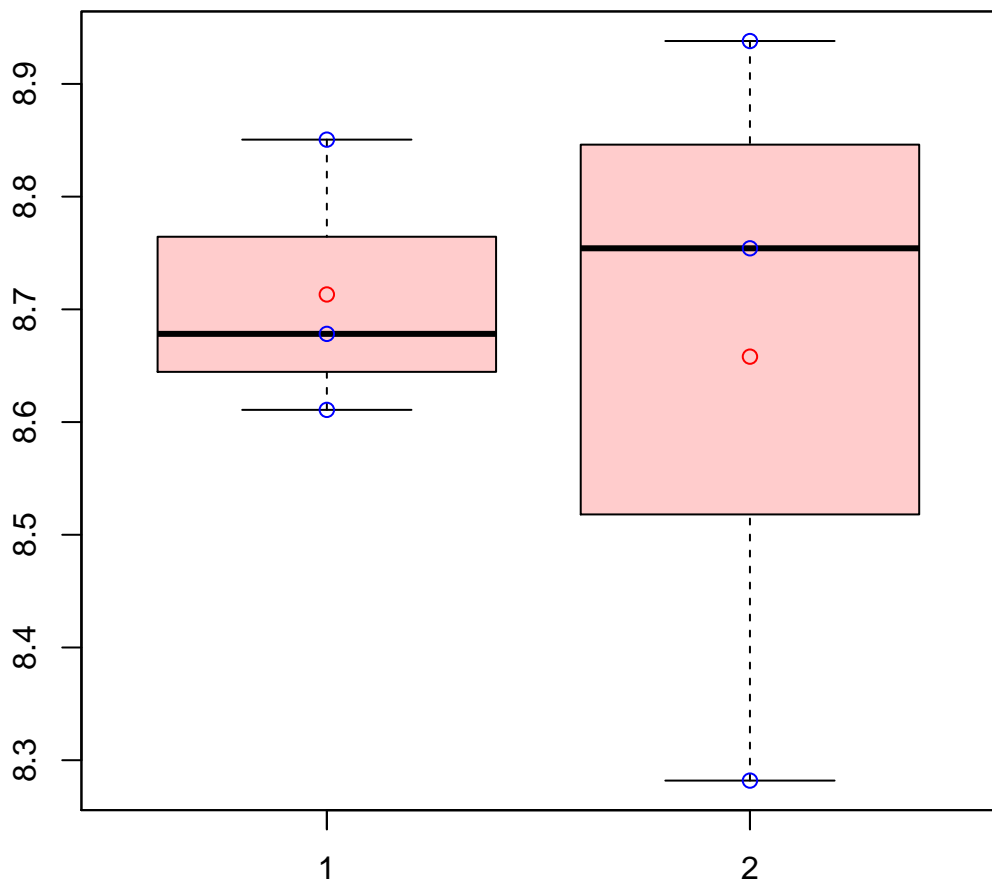

t-Test: p-value = 0.81

# CL405Contig6|CL405Contig6

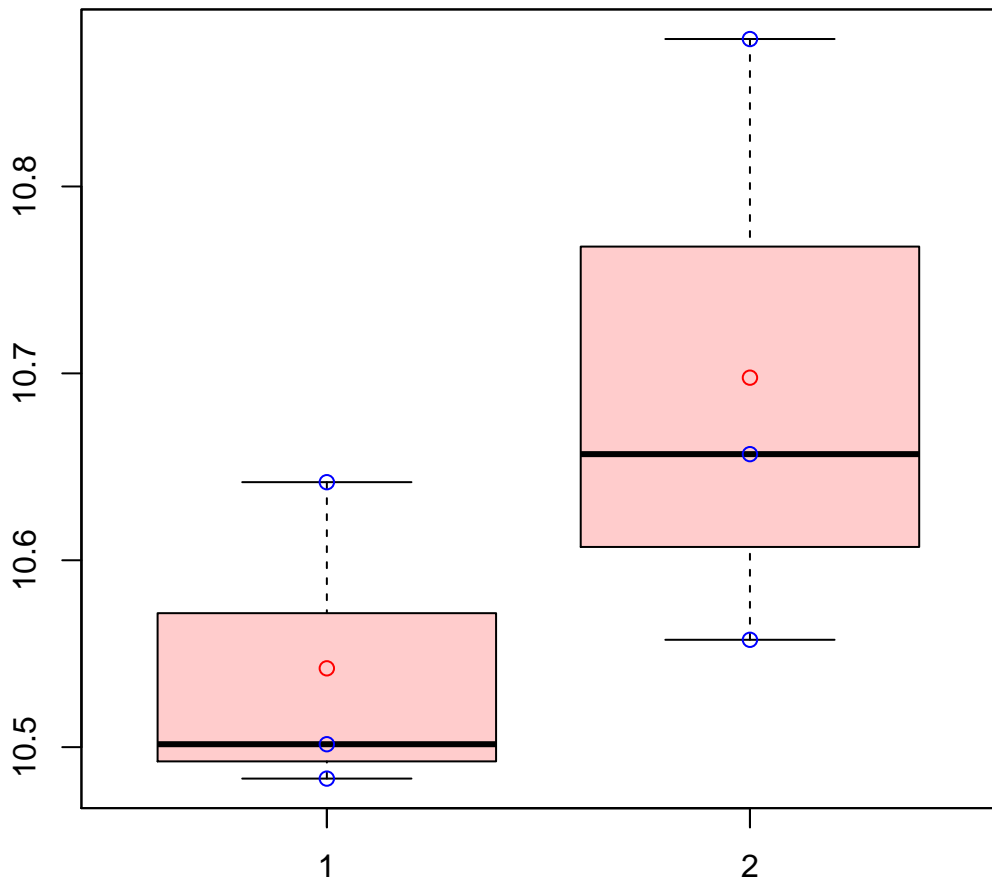

t-Test: p-value = 0.24

# CL4066Contig5|CL4066Contig5

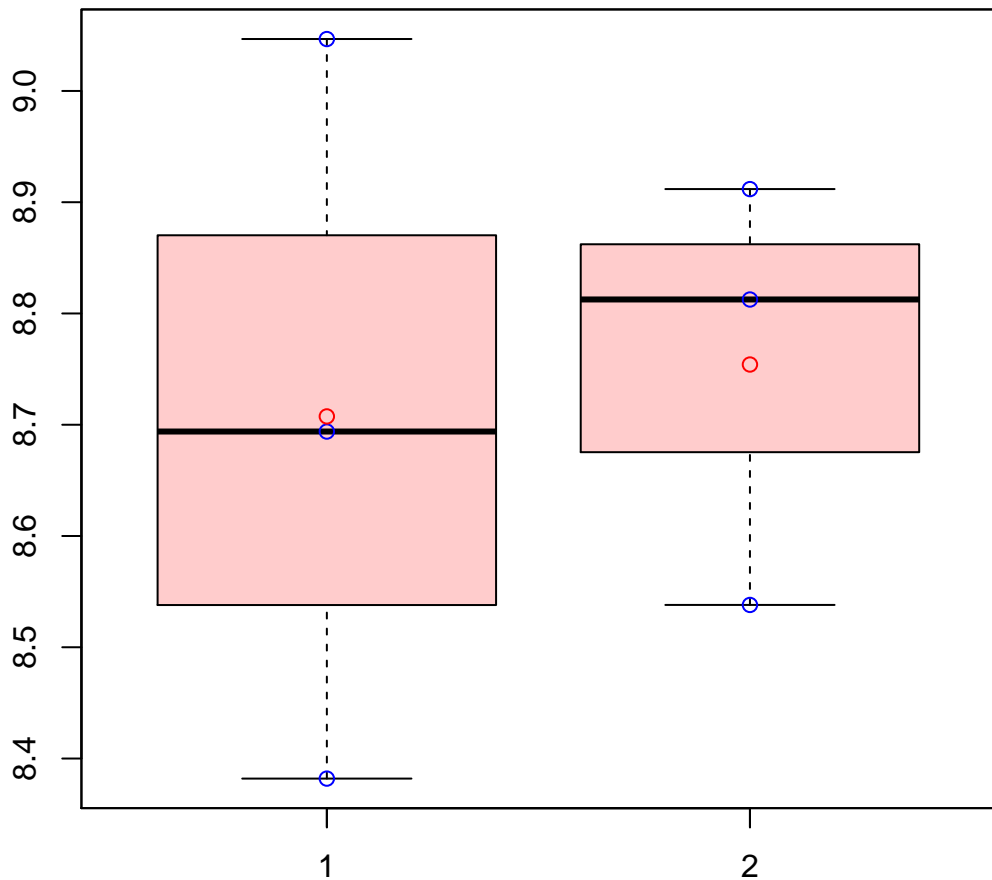

t-Test: p-value = 0.85

# CL406Contig5|CL406Contig5

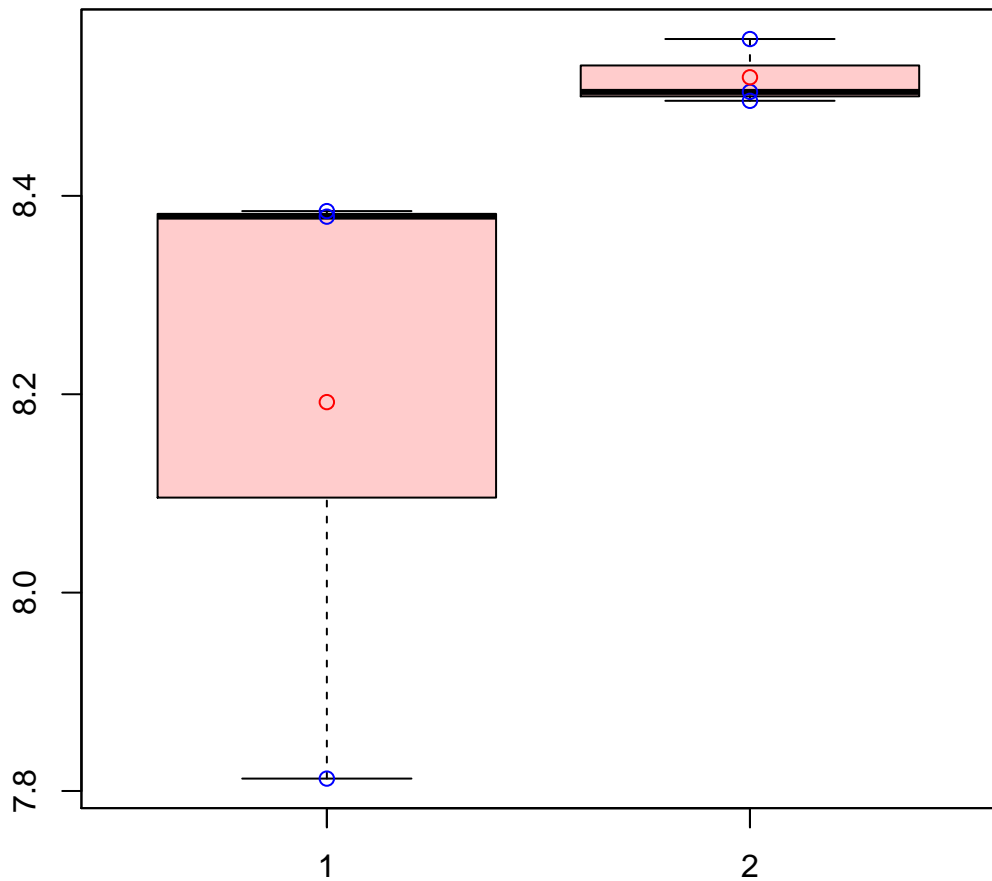

t-Test: p-value = 0.23

# CL4071Contig2|CL4071Contig2

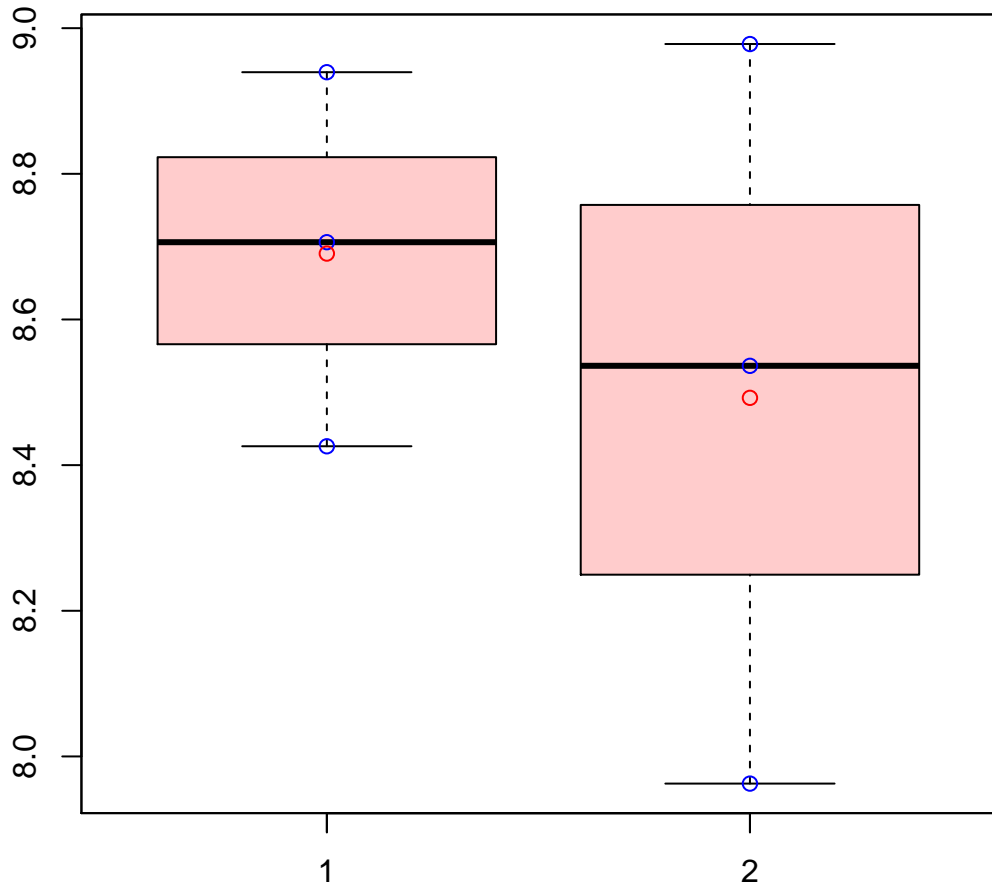

t-Test: p-value = 0.59

# CL4074Contig1|CL4074Contig1

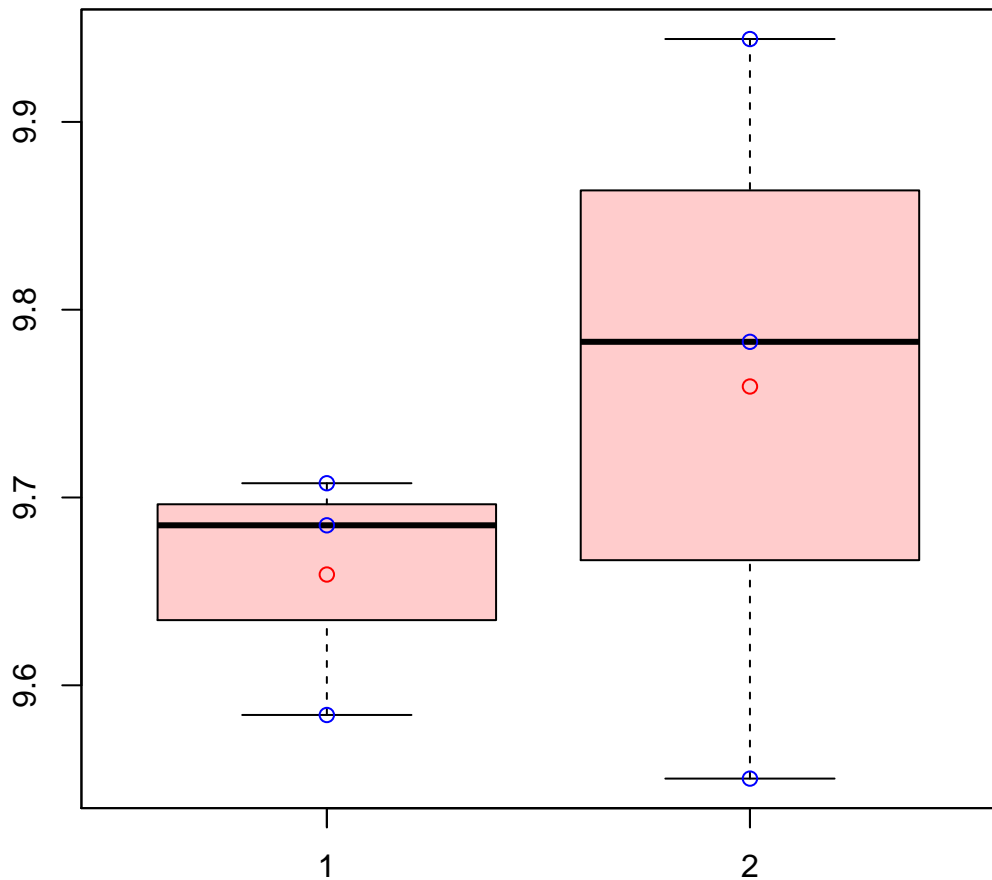

t-Test: p-value = 0.48

# CL4074Contig4|CL4074Contig4

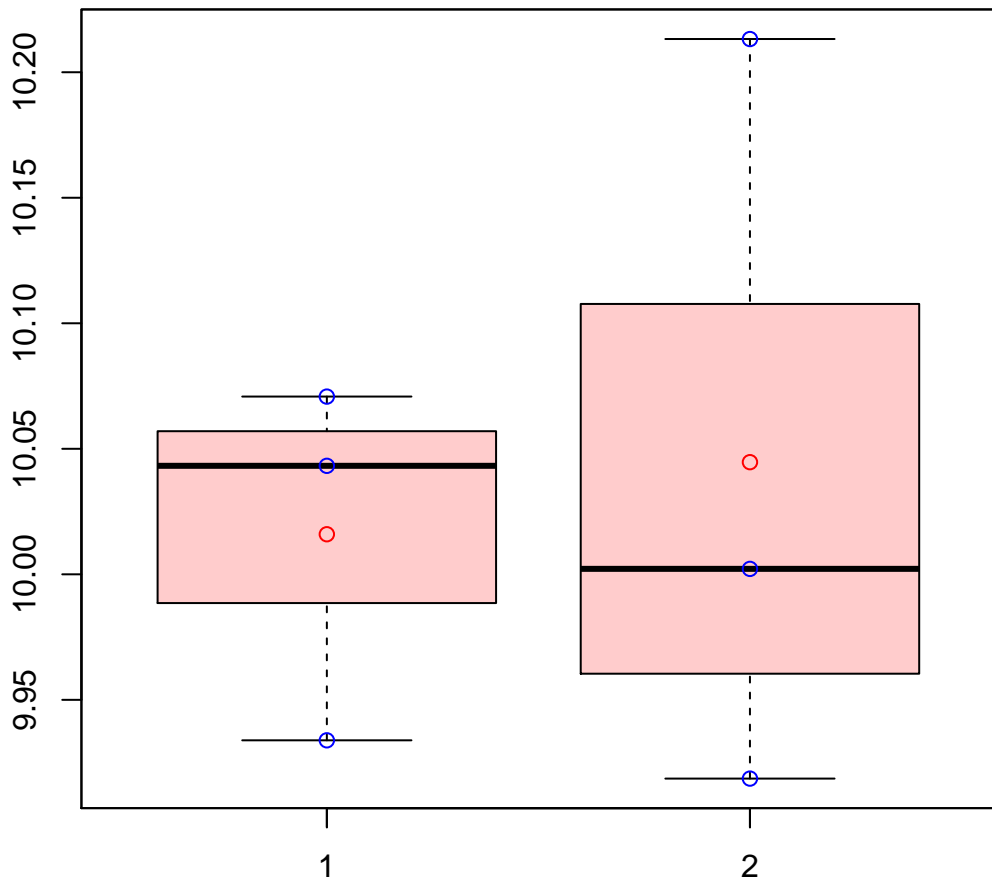

t-Test: p-value = 0.79

# CL4079Contig2|CL4079Contig2

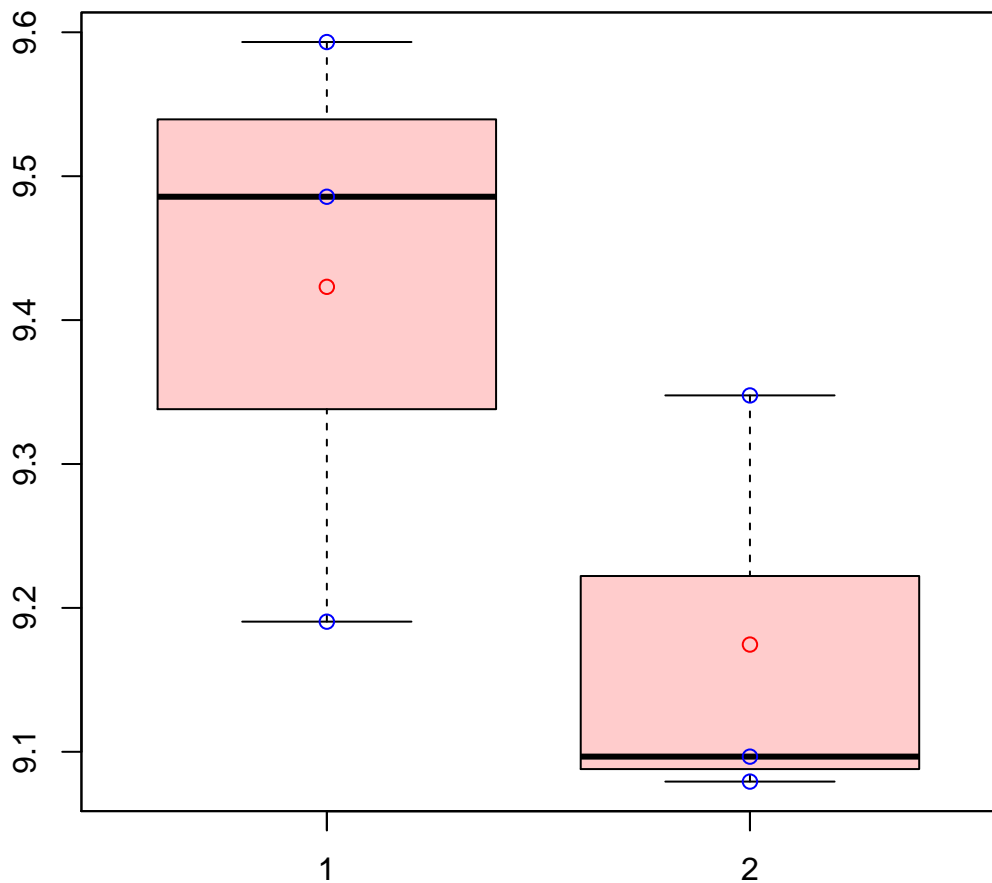

t-Test: p-value = 0.18



# CL4079Contig3|CL4079Contig3

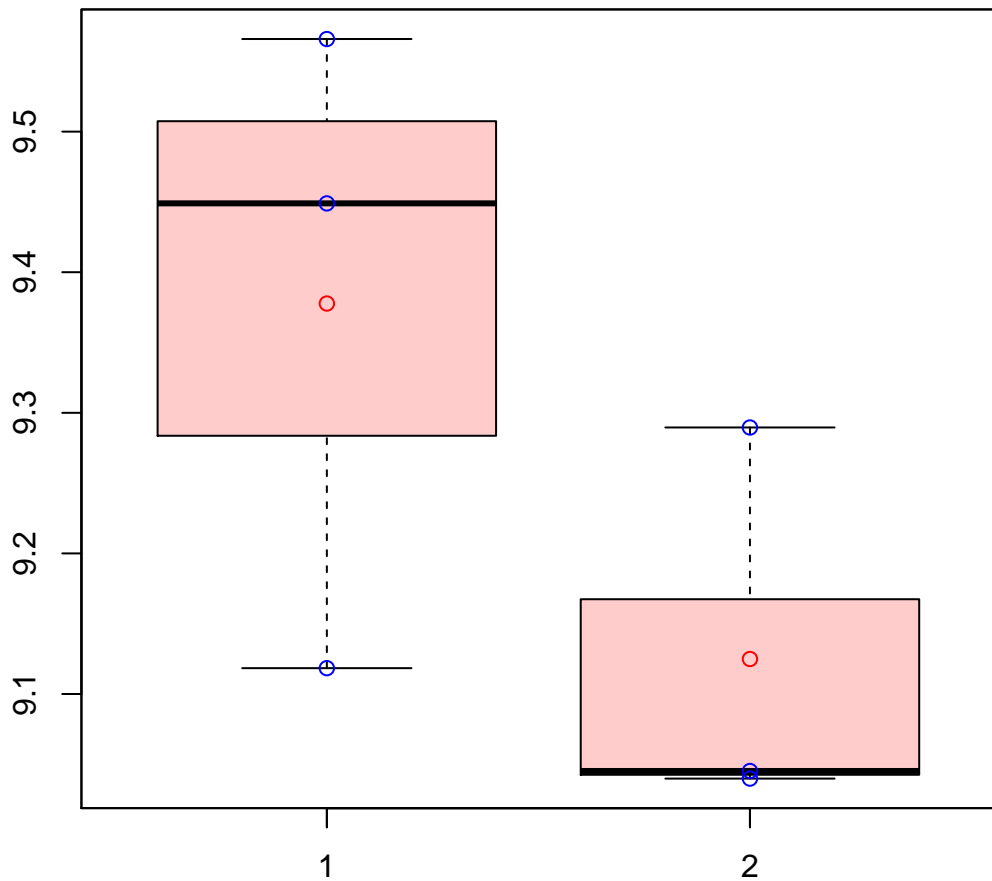

t-Test: p-value = 0.2

# CL4079Contig4|CL4079Contig4

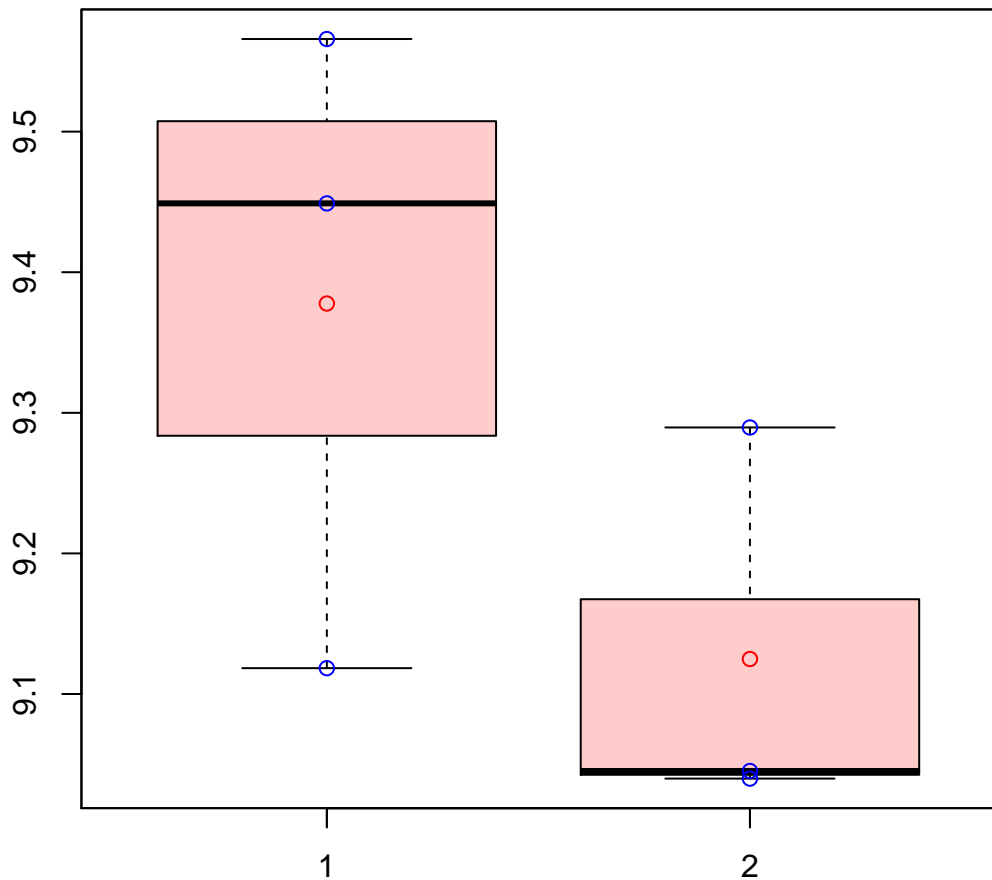

t-Test: p-value = 0.2

# CL4079Contig5|CL4079Contig5



t-Test: p-value = 0.2

# CL4079Contig6|CL4079Contig6

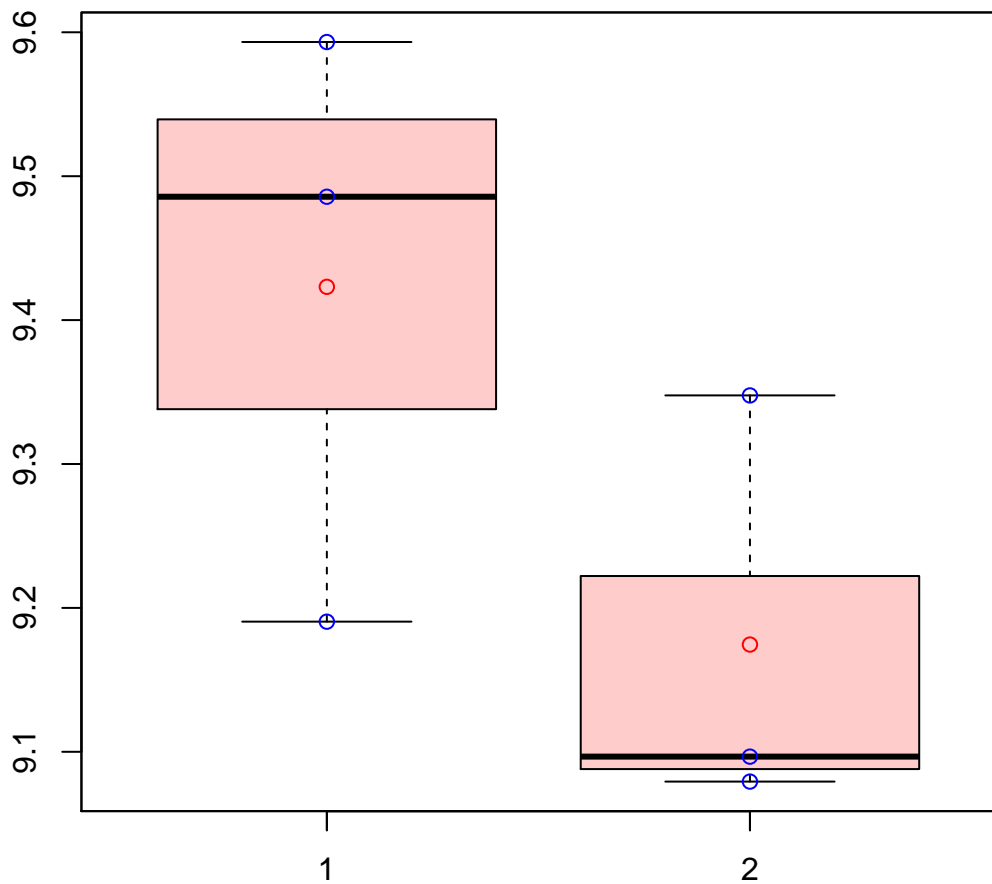

t-Test: p-value = 0.18

# CL4084Contig3|CL4084Contig3

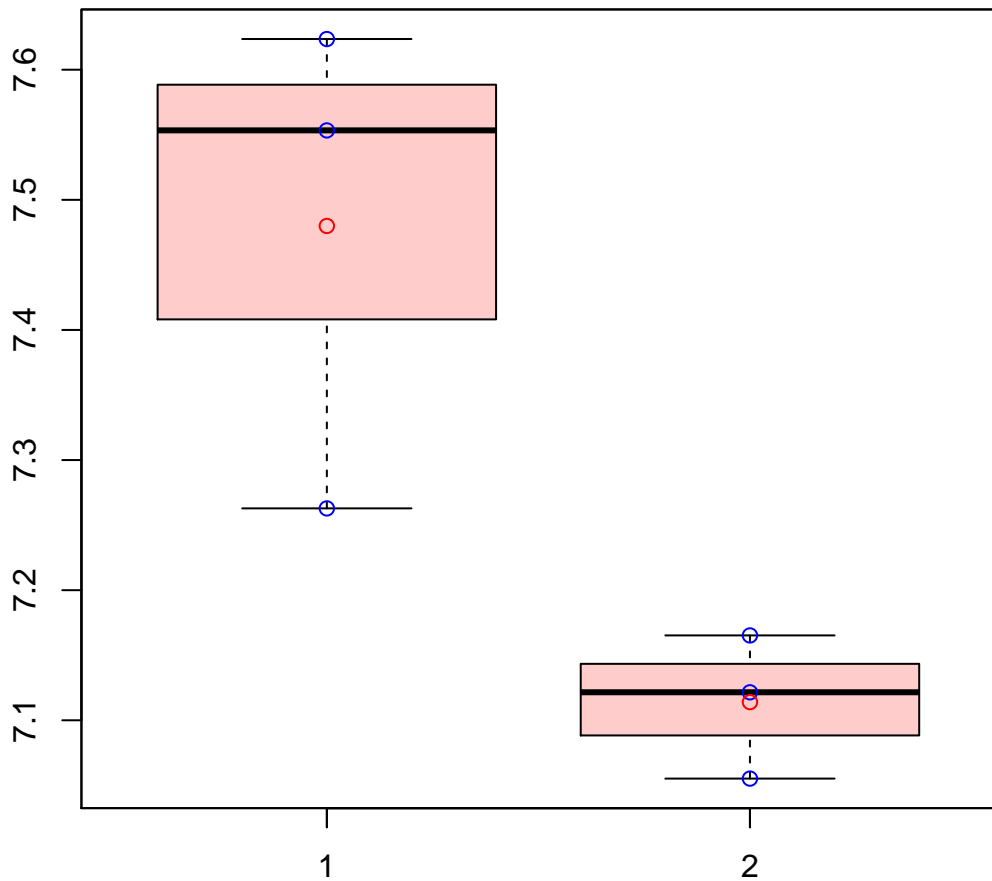

t-Test: p-value = 0.07

# CL408Contig3|CL408Contig3

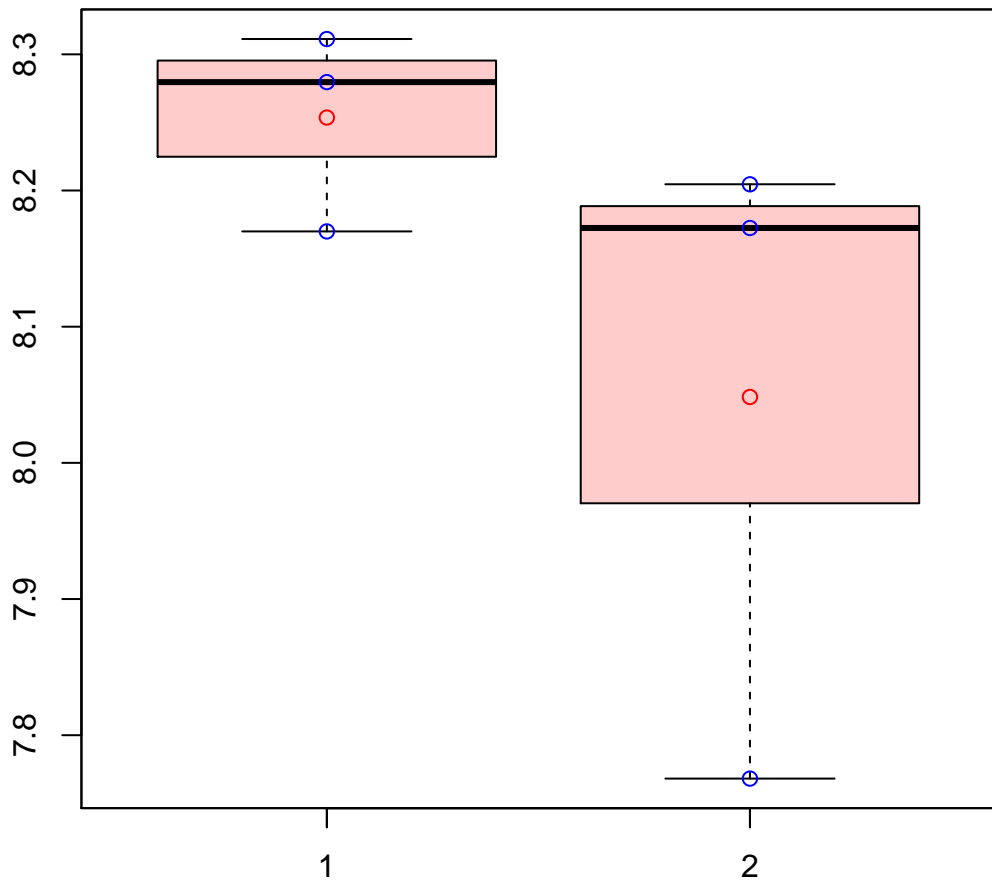

t-Test: p-value = 0.28

# CL4092Contig2|CL4092Contig2

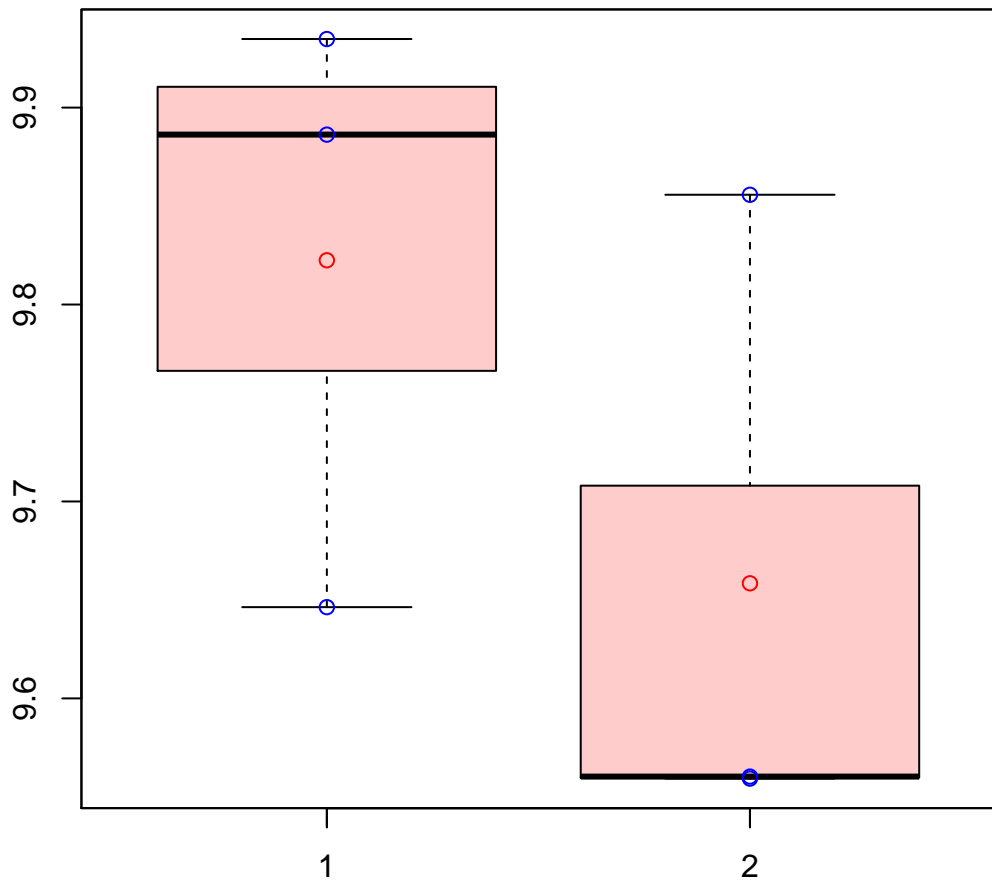

t-Test: p-value = 0.29

# CL409Contig10|CL409Contig10

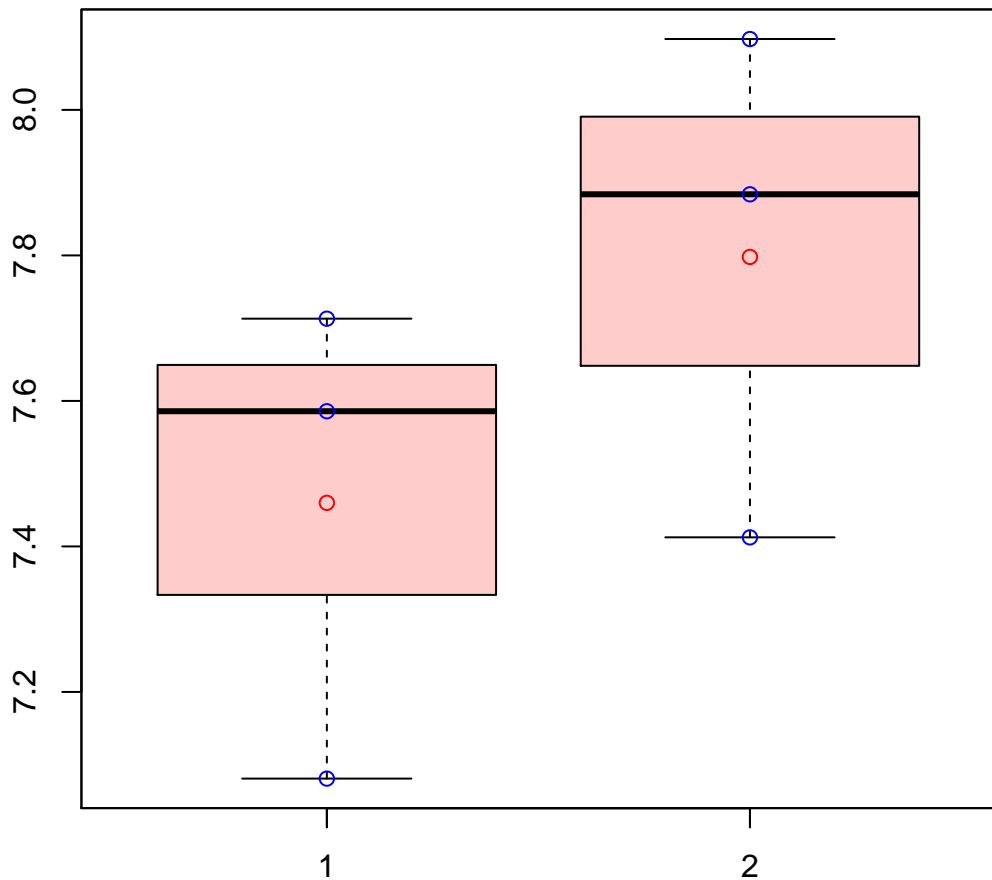

t-Test: p-value = 0.29



# CL409Contig11|CL409Contig11



t-Test: p-value = 0.29

# CL409Contig20|CL409Contig20

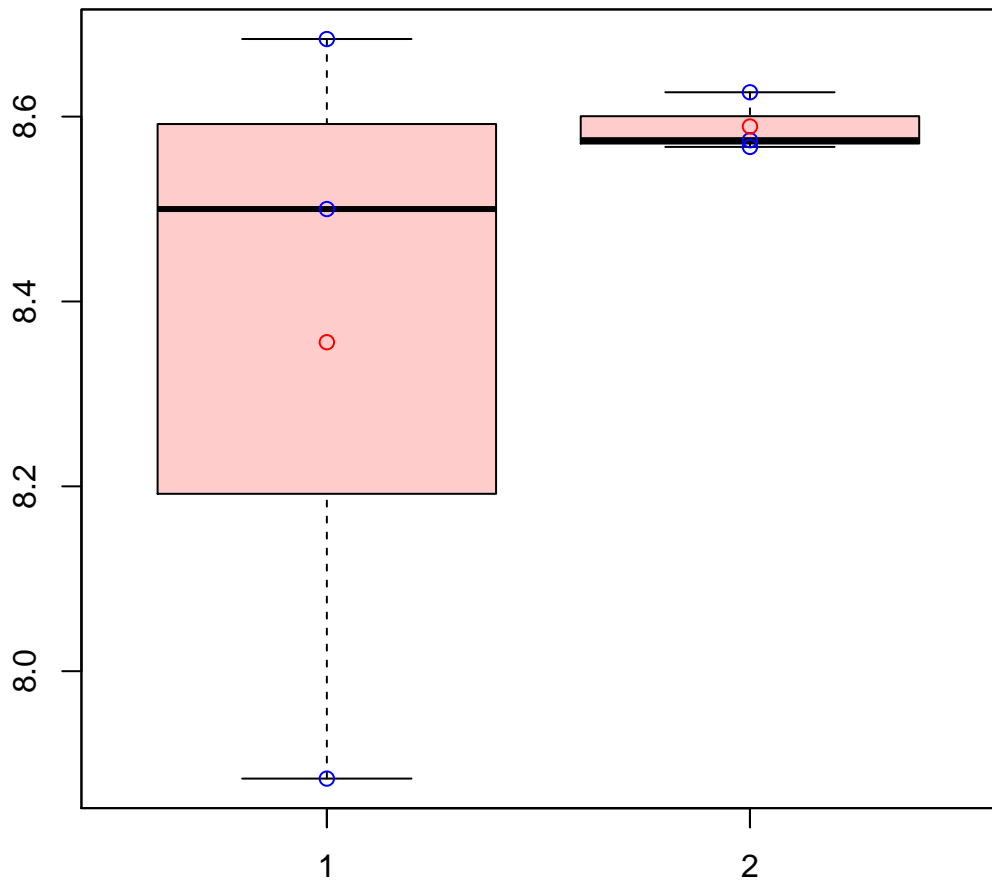

t-Test: p-value = 0.44

# CL40Contig12|CL40Contig12

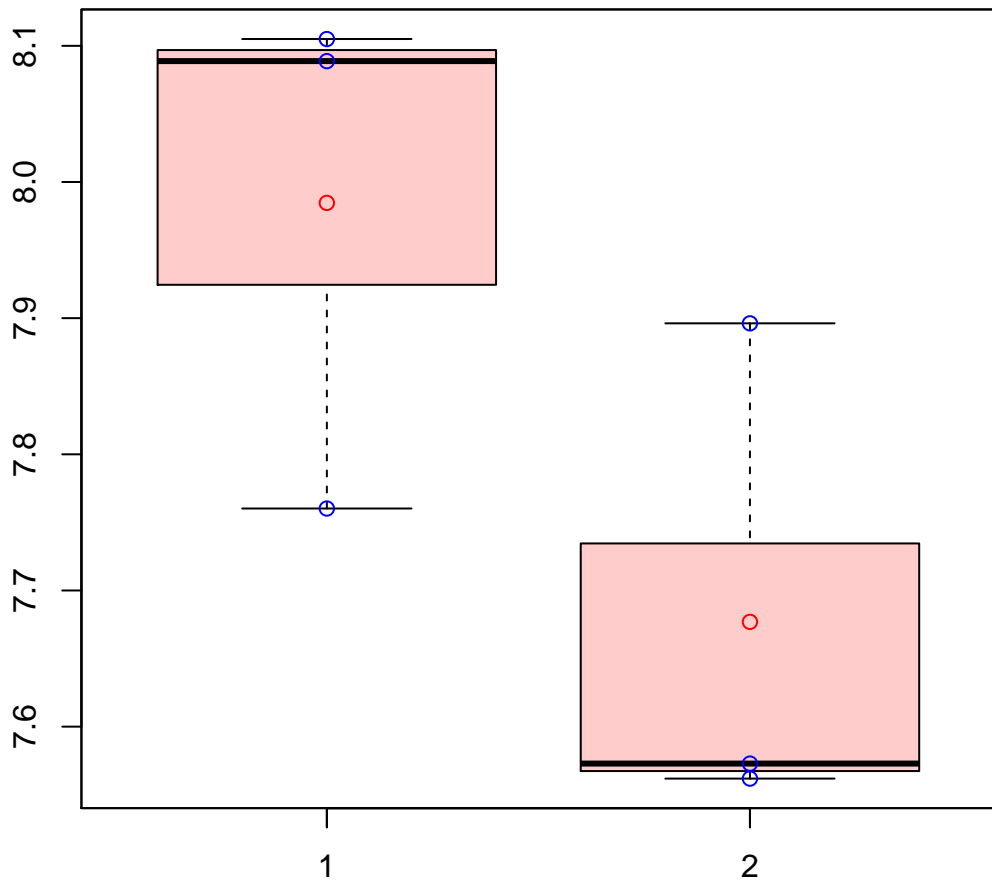

t-Test: p-value = 0.12

# CL4101Contig5|CL4101Contig5

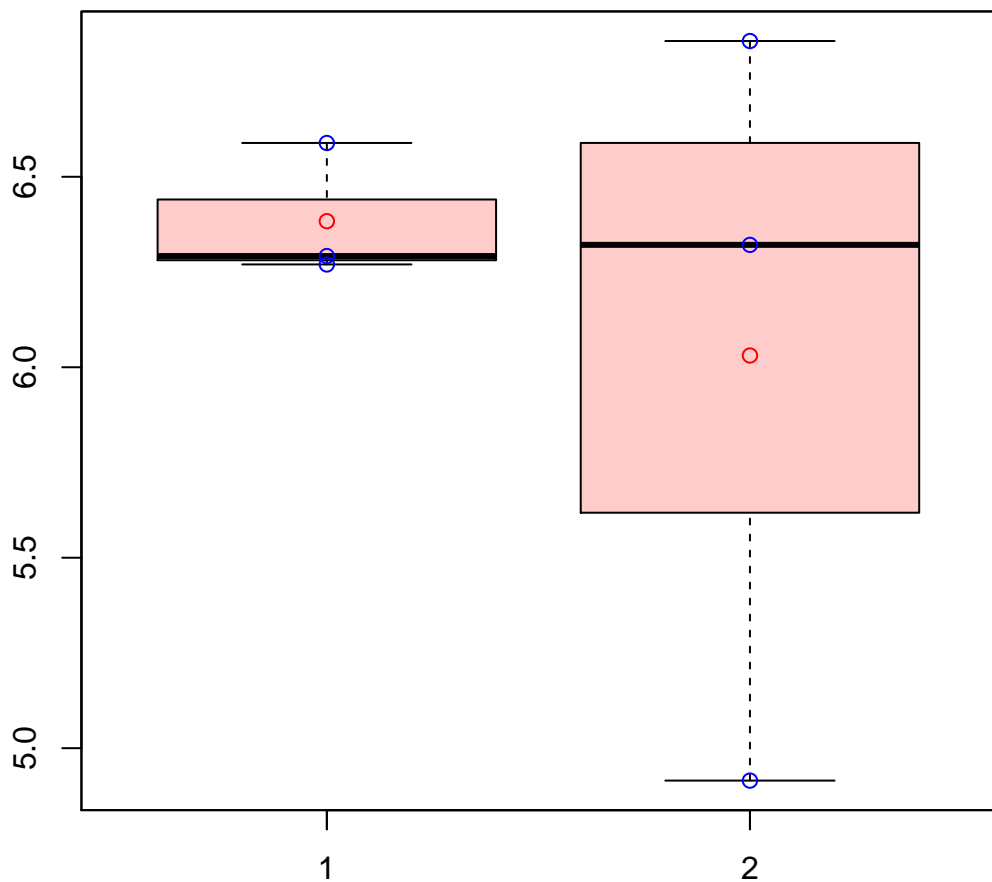

t-Test: p-value = 0.61

# CL4102Contig3|CL4102Contig3



t-Test: p-value = 0.73

# CL4104Contig2|CL4104Contig2

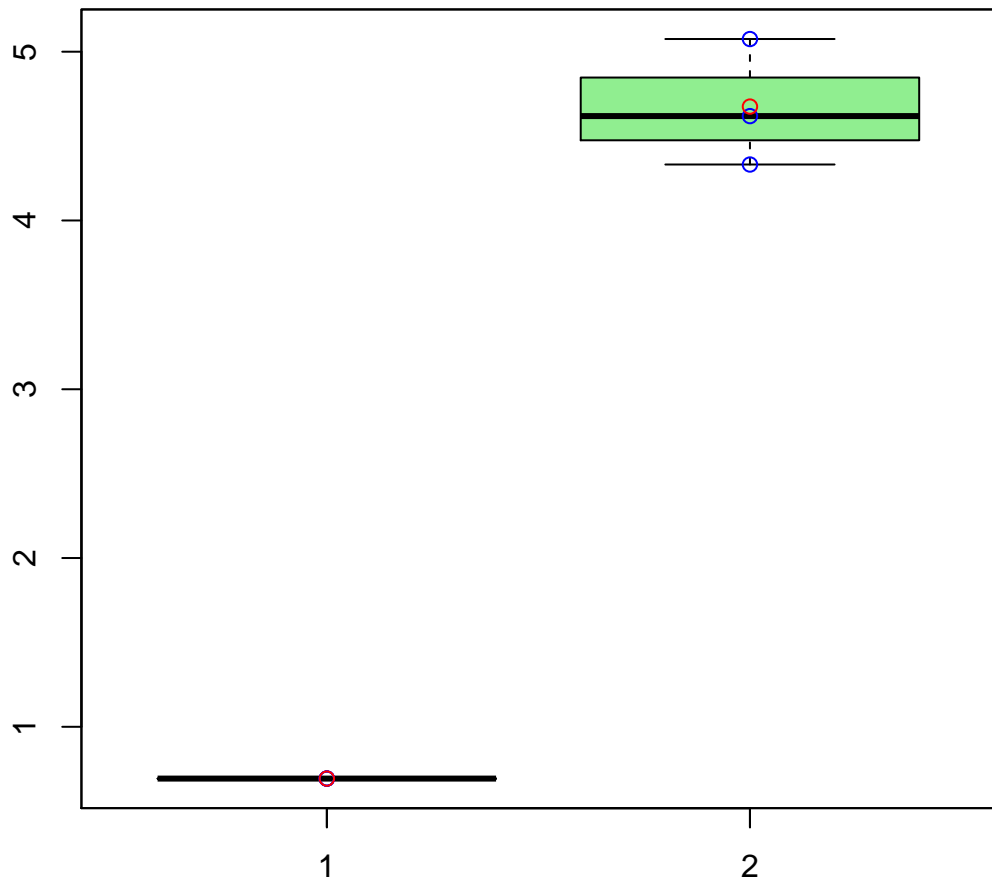

t-Test: p-value = 0

# CL4104Contig5|CL4104Contig5

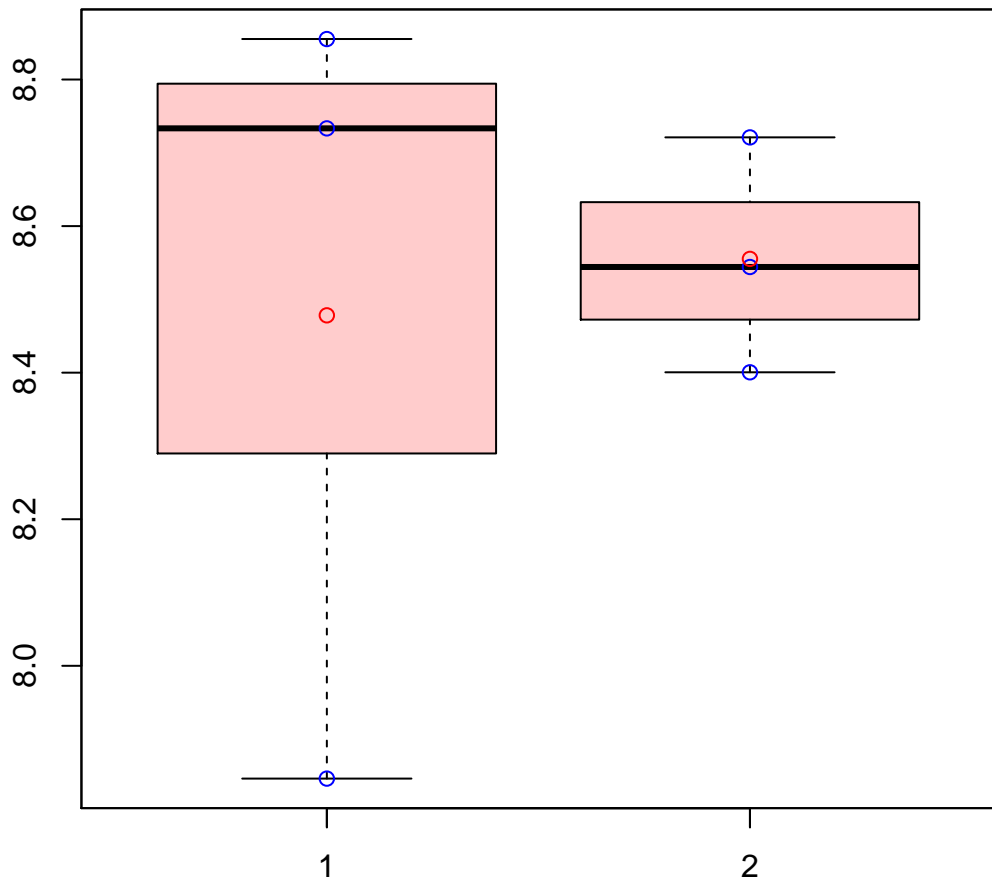

t-Test: p-value = 0.83

# CL4109Contig2|CL4109Contig2

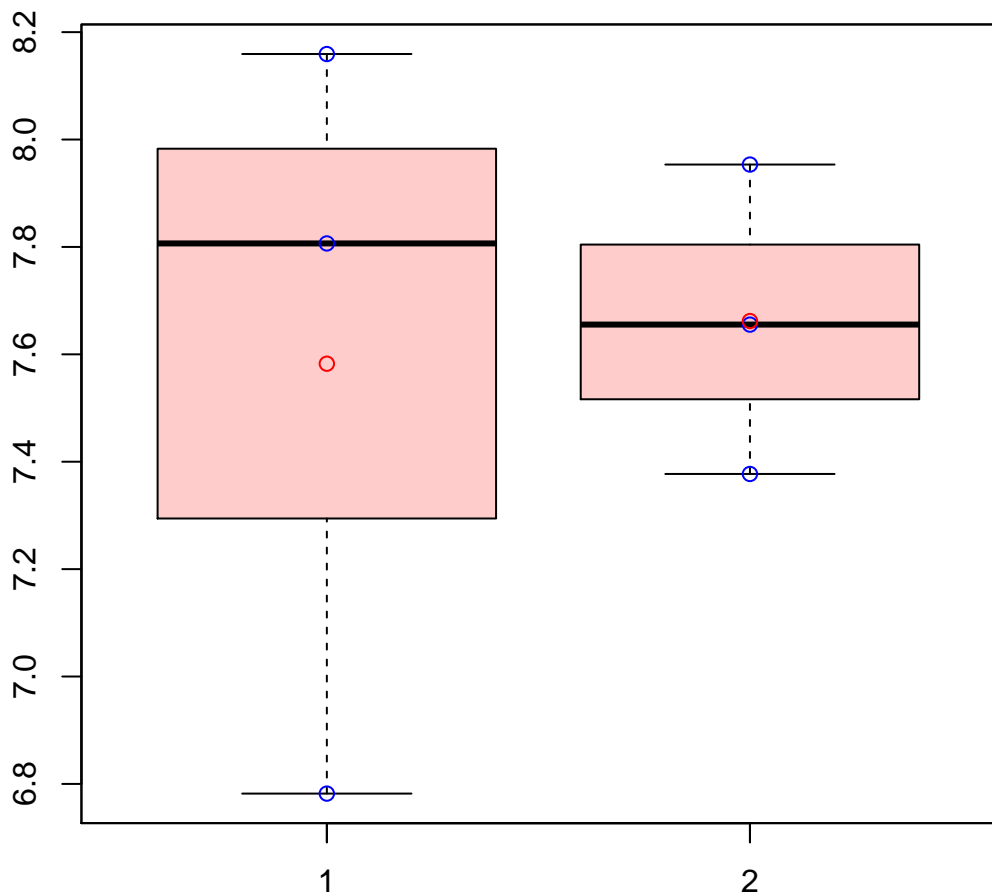

t-Test: p-value = 0.87



# CL410Contig15|CL410Contig15

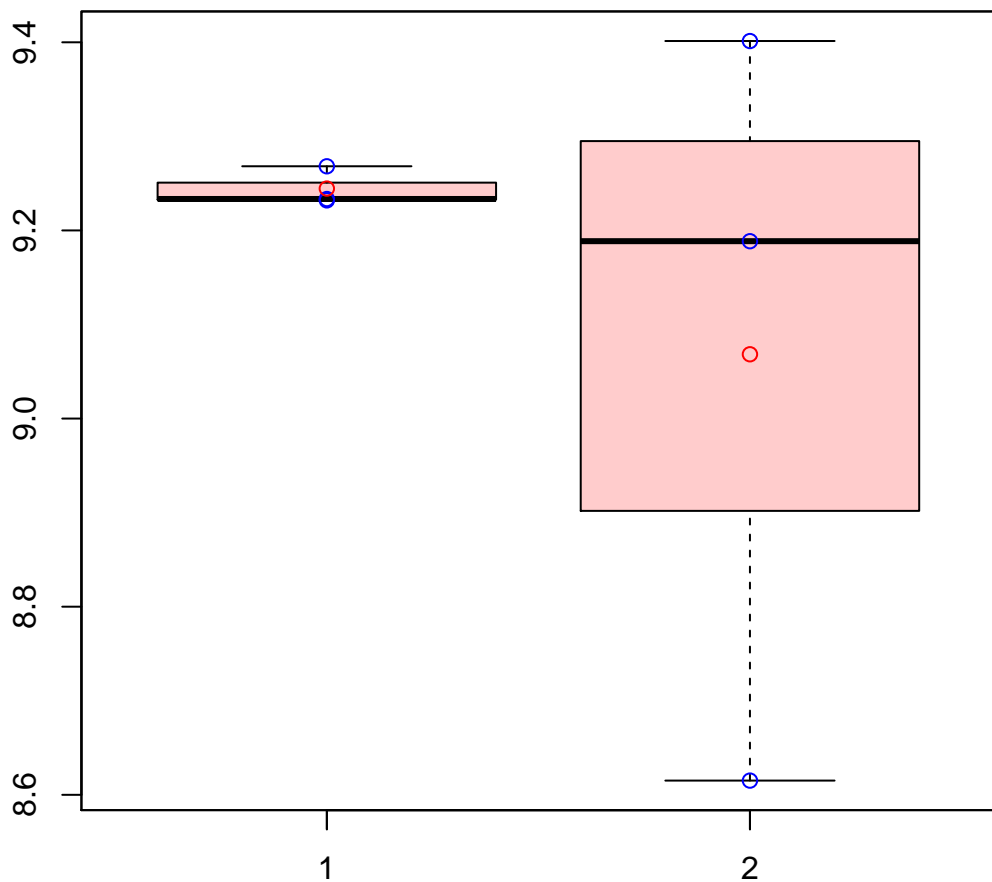

t-Test: p-value = 0.53

# CL410Contig2|CL410Contig2

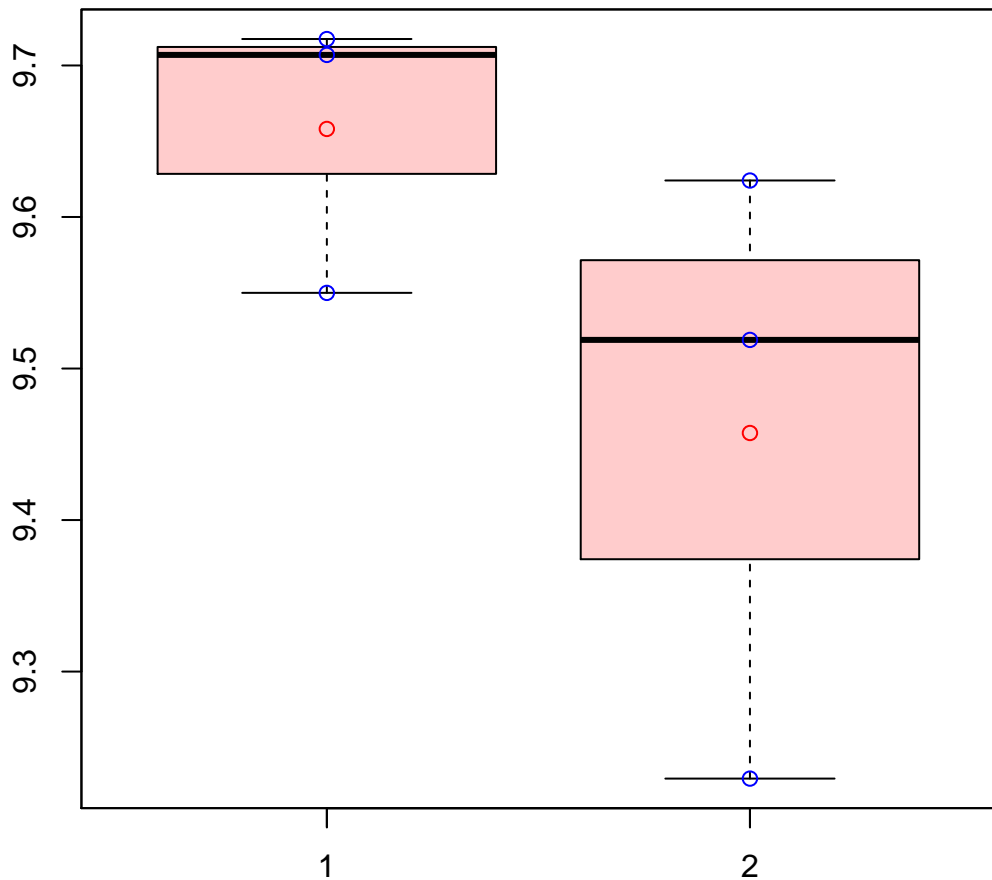

t-Test: p-value = 0.23

# CL410Contig6|CL410Contig6



t-Test: p-value = 0.23

# CL410Contig7|CL410Contig7



t-Test: p-value = 0.23

# CL4125Contig1|CL4125Contig1

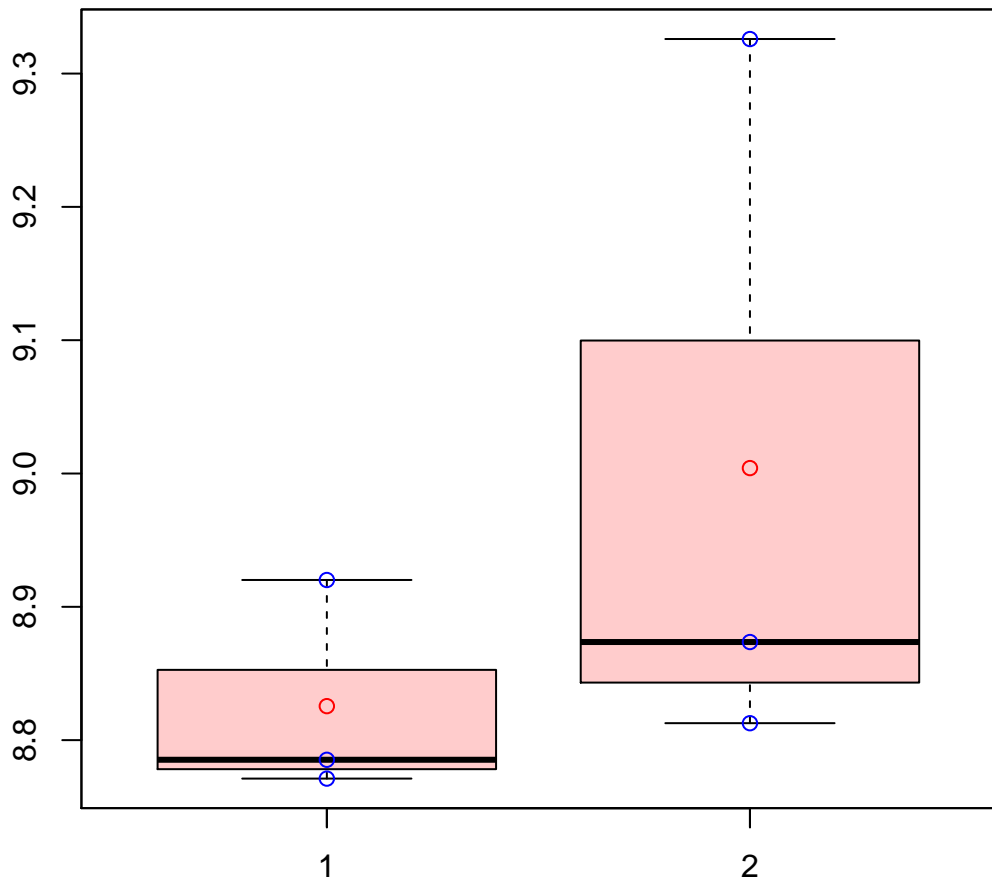

t-Test: p-value = 0.39

# CL4125Contig6|CL4125Contig6

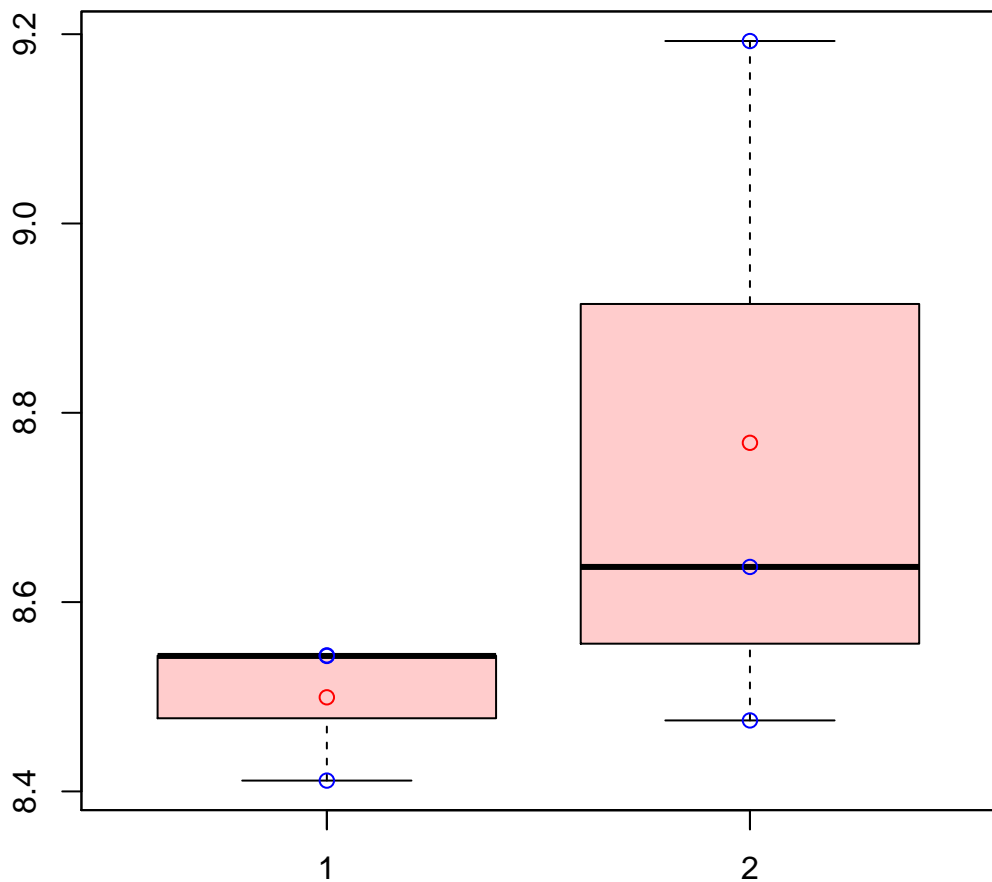

t-Test: p-value = 0.34

# CL4125Contig7|CL4125Contig7

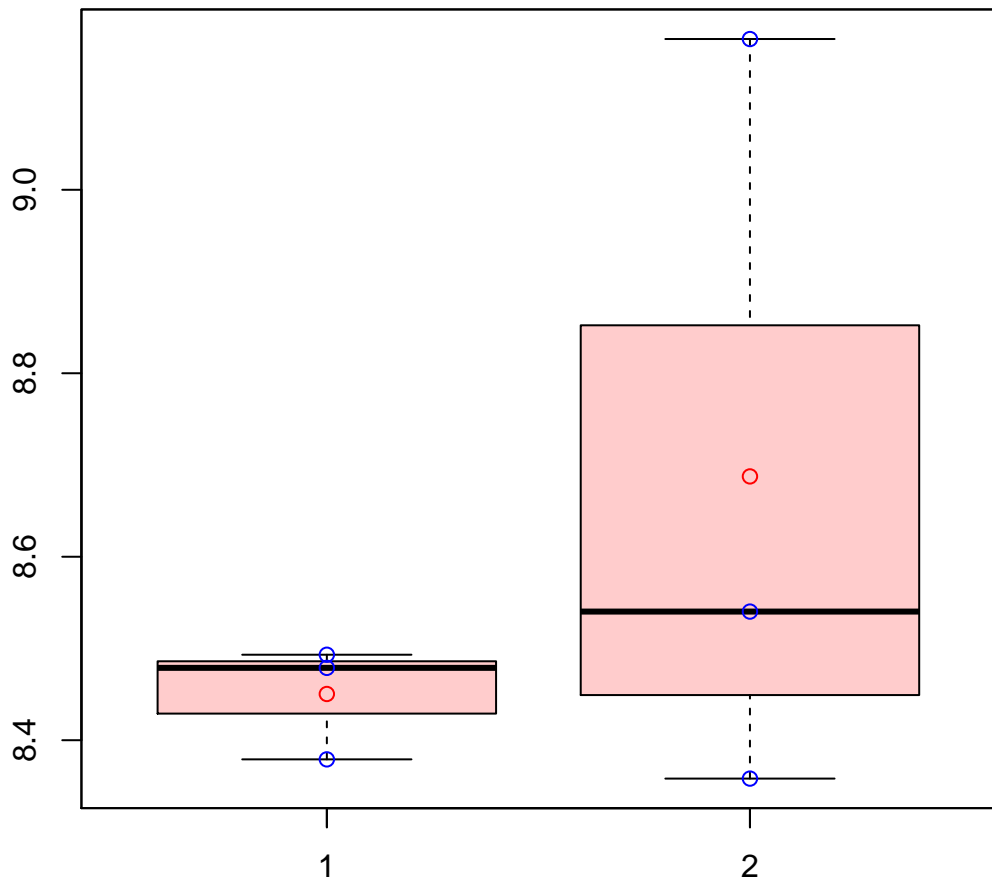

t-Test: p-value = 0.43

# CL4125Contig9|CL4125Contig9

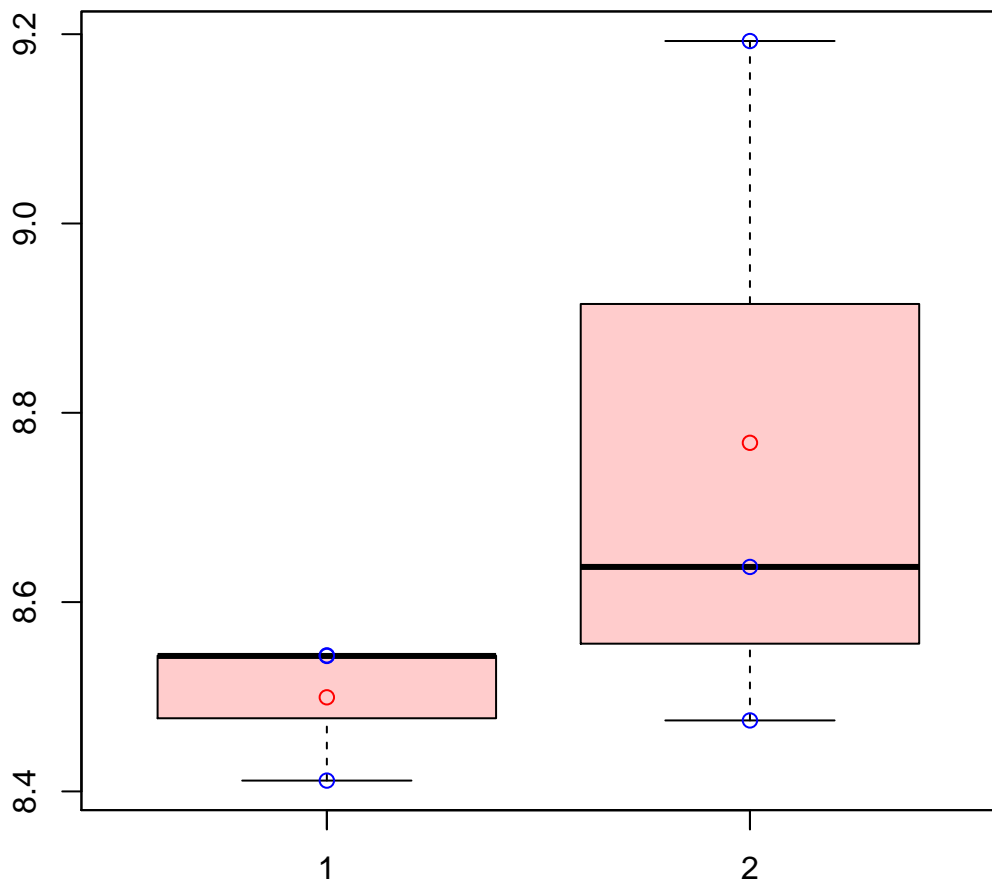

t-Test: p-value = 0.34



# CL4128Contig1|CL4128Contig1

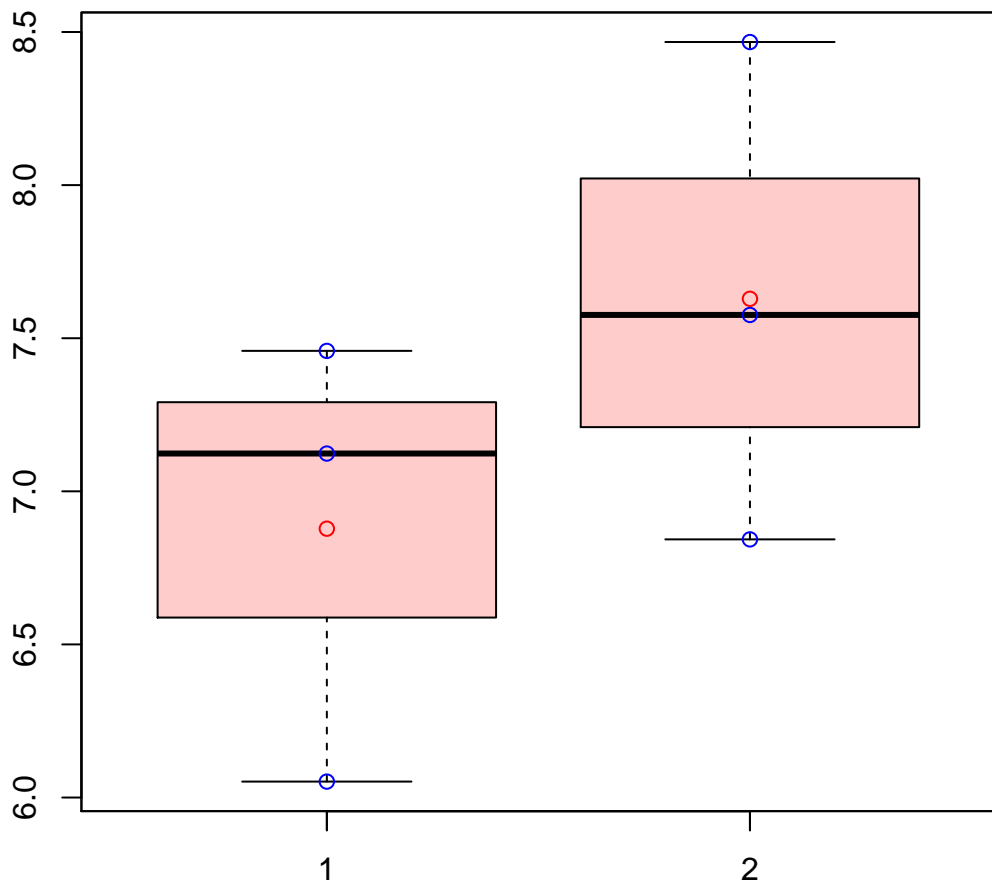

t-Test: p-value = 0.3

# CL4128Contig3|CL4128Contig3



t-Test: p-value = 0.3

# CL4136Contig2|CL4136Contig2

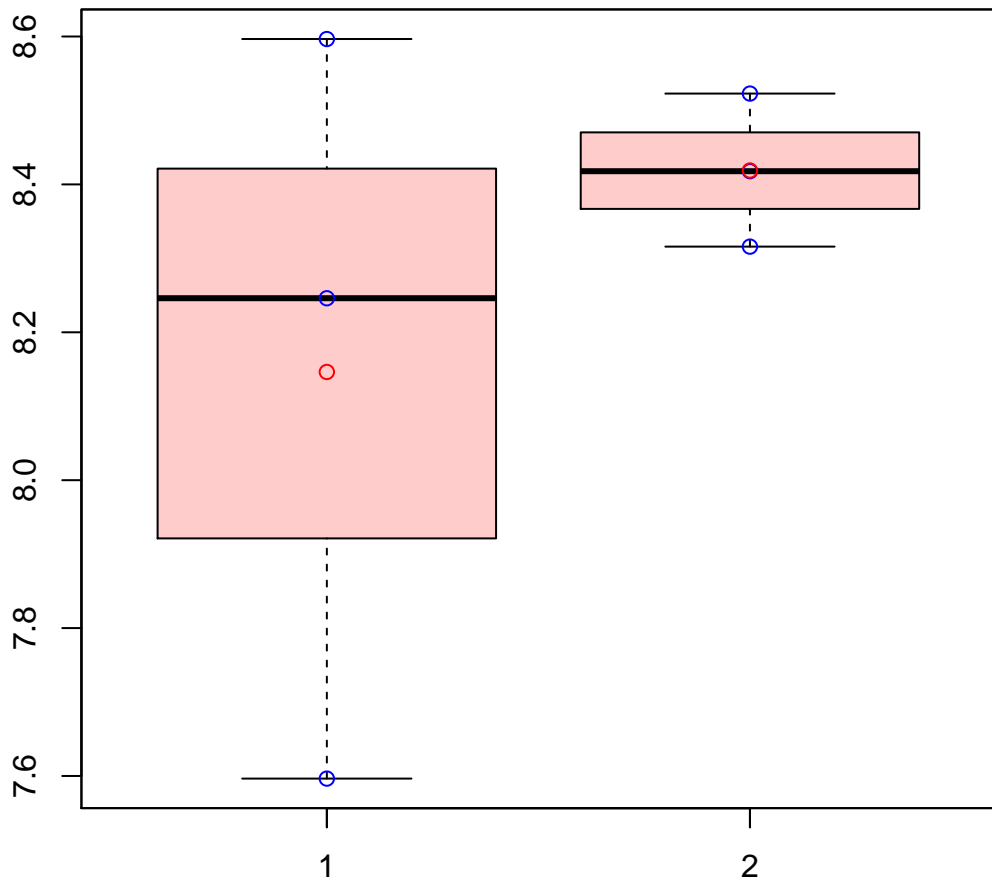

t-Test: p-value = 0.45

# CL413Contig11|CL413Contig11

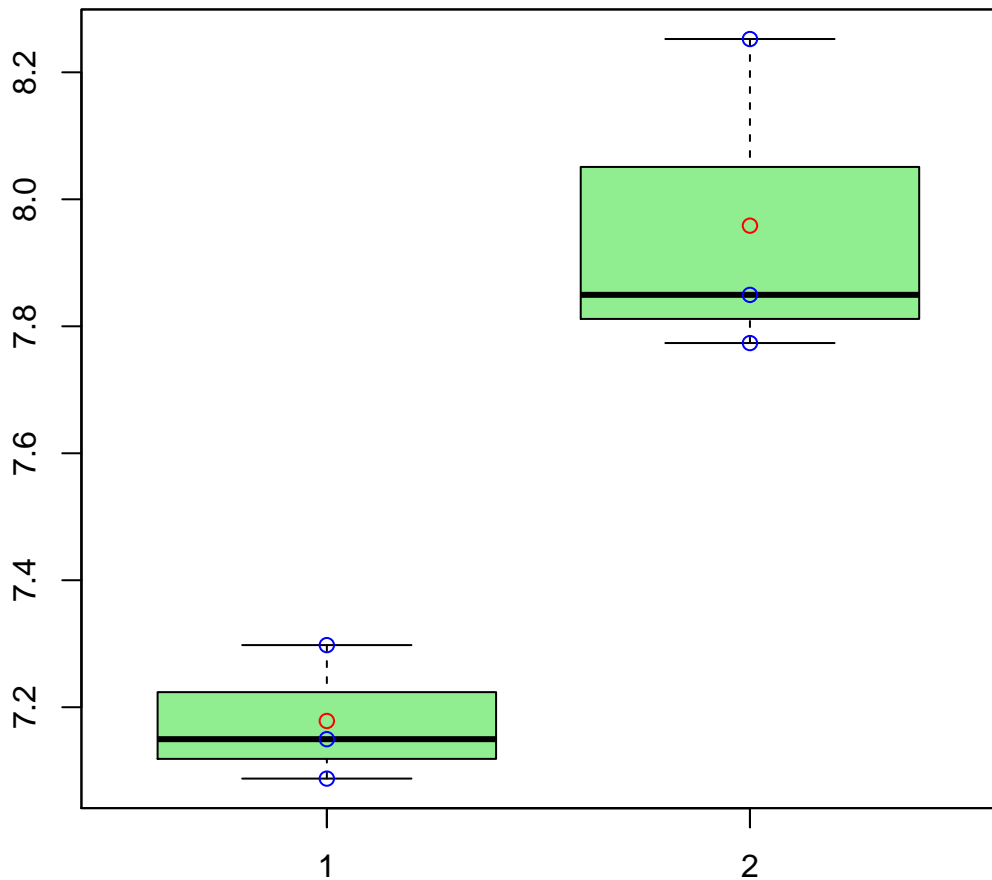

t-Test: p-value = 0.02

# CL413Contig9|CL413Contig9

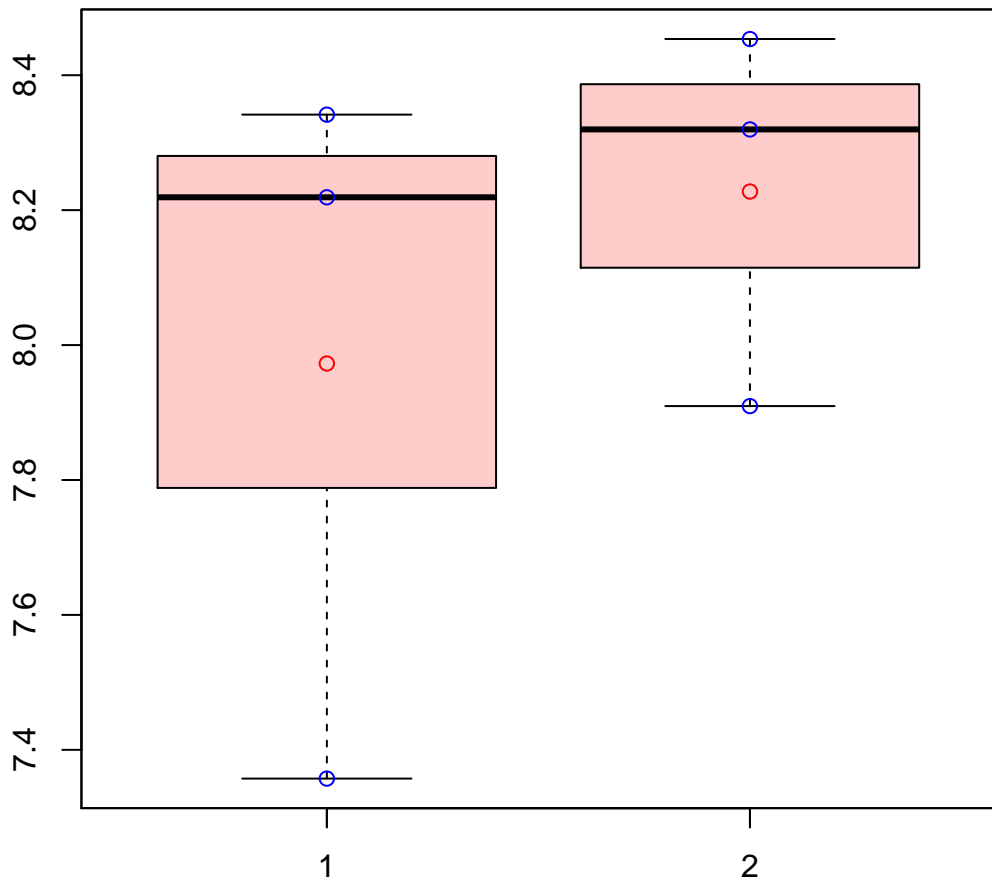

t-Test: p-value = 0.52

# CL4146Contig2|CL4146Contig2

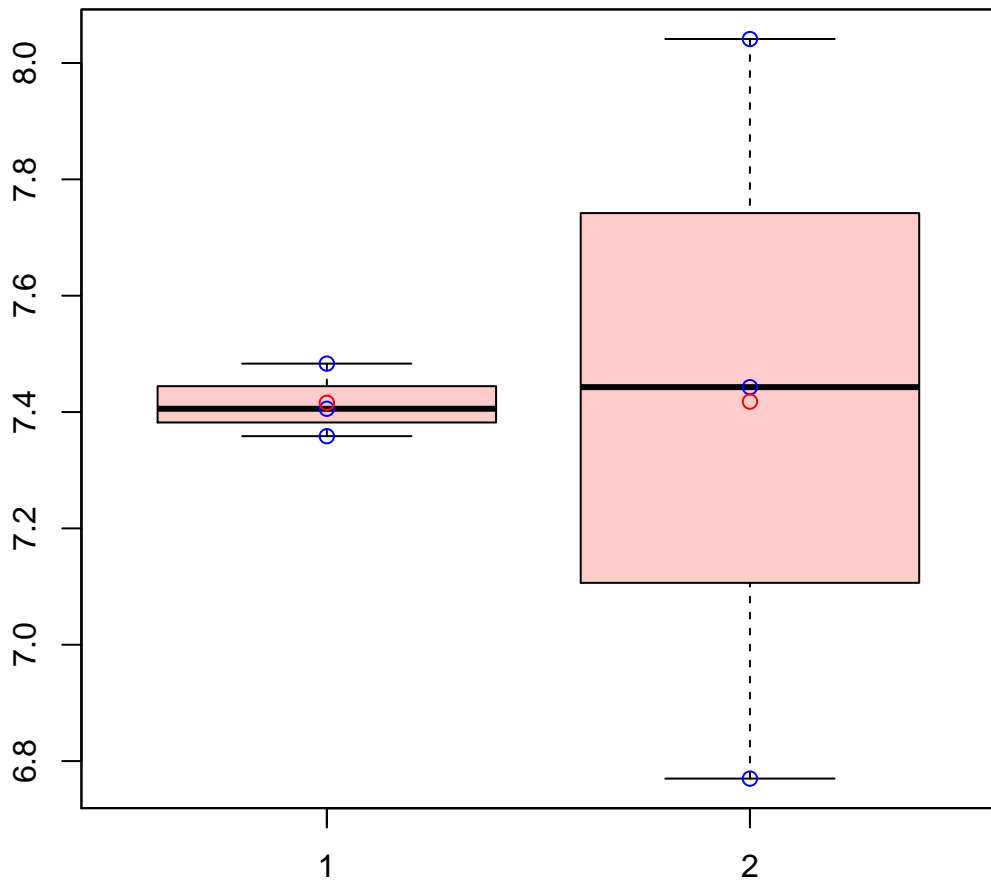

t-Test: p-value = 1

# CL4146Contig3|CL4146Contig3



t-Test: p-value = 0.85

# CL4148Contig1|CL4148Contig1



t-Test: p-value = 0.7



# CL4150Contig5|CL4150Contig5

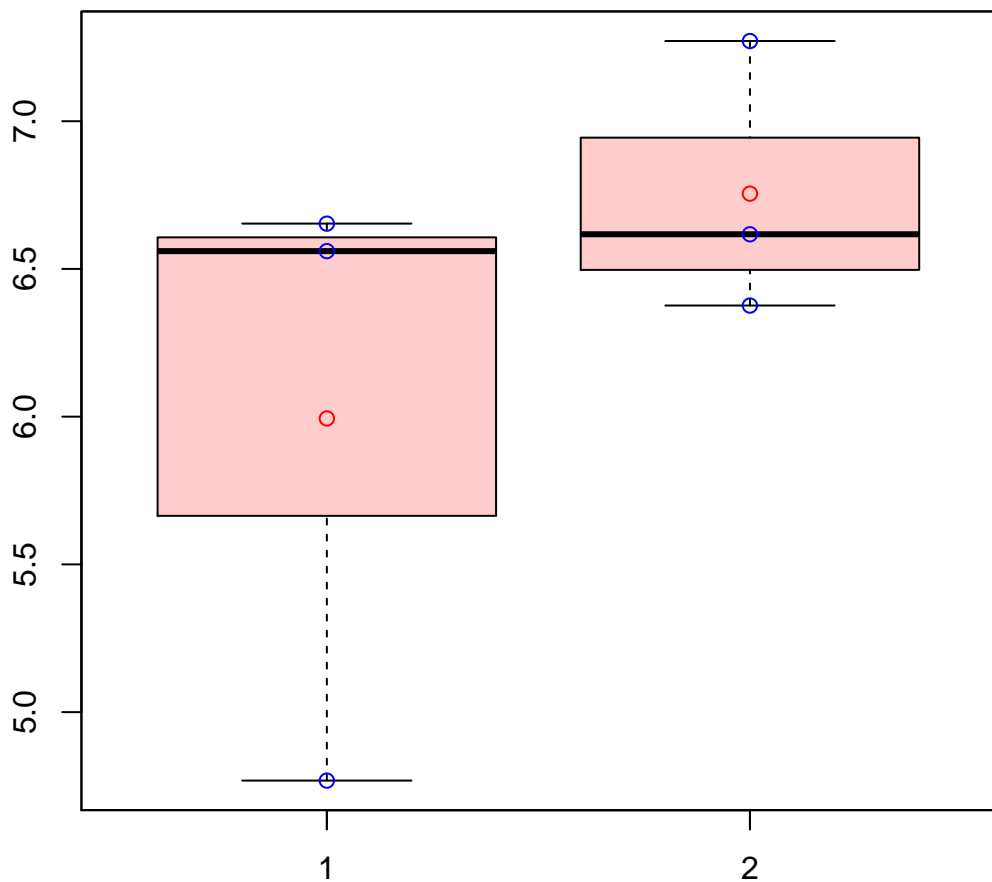

t-Test: p-value = 0.35

# CL4150Contig8|CL4150Contig8



t-Test: p-value = 0.35

# CL4151Contig2|CL4151Contig2

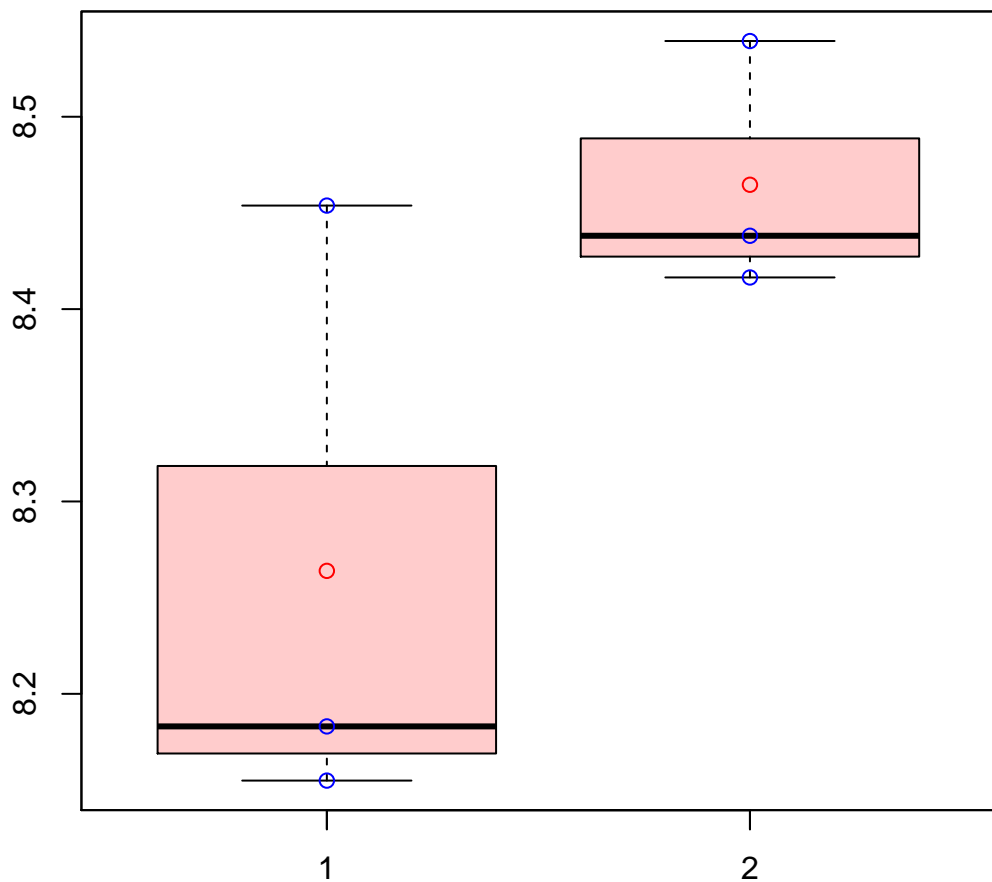

t-Test: p-value = 0.16

# CL4157Contig1|CL4157Contig1



t-Test: p-value = 0.3

# CL4159Contig1|CL4159Contig1

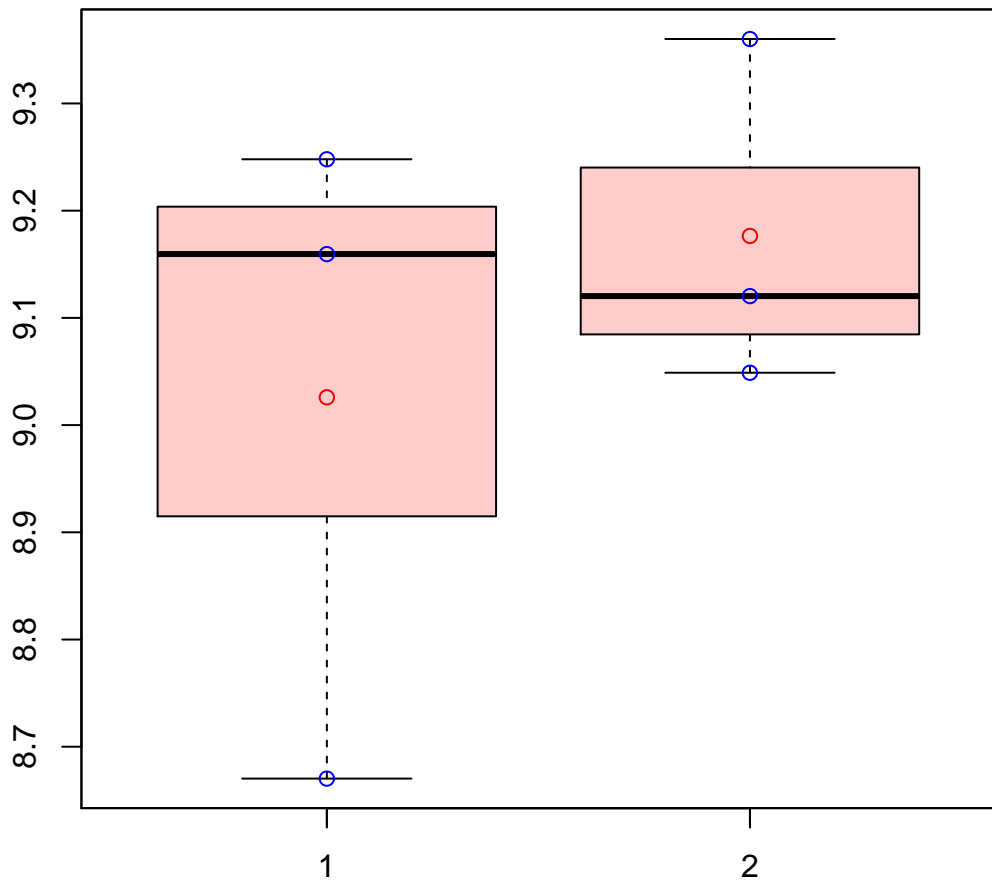

t-Test: p-value = 0.51

# CL415Contig1|CL415Contig1

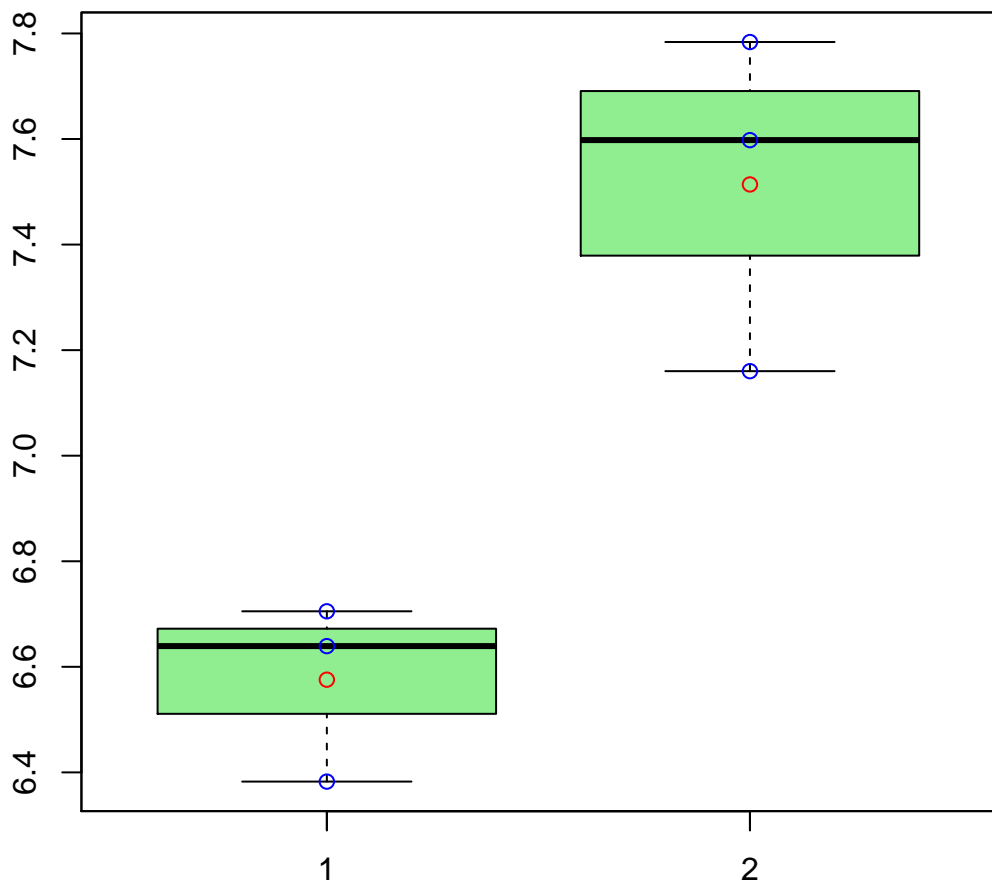

t-Test: p-value = 0.02

# CL415Contig9|CL415Contig9

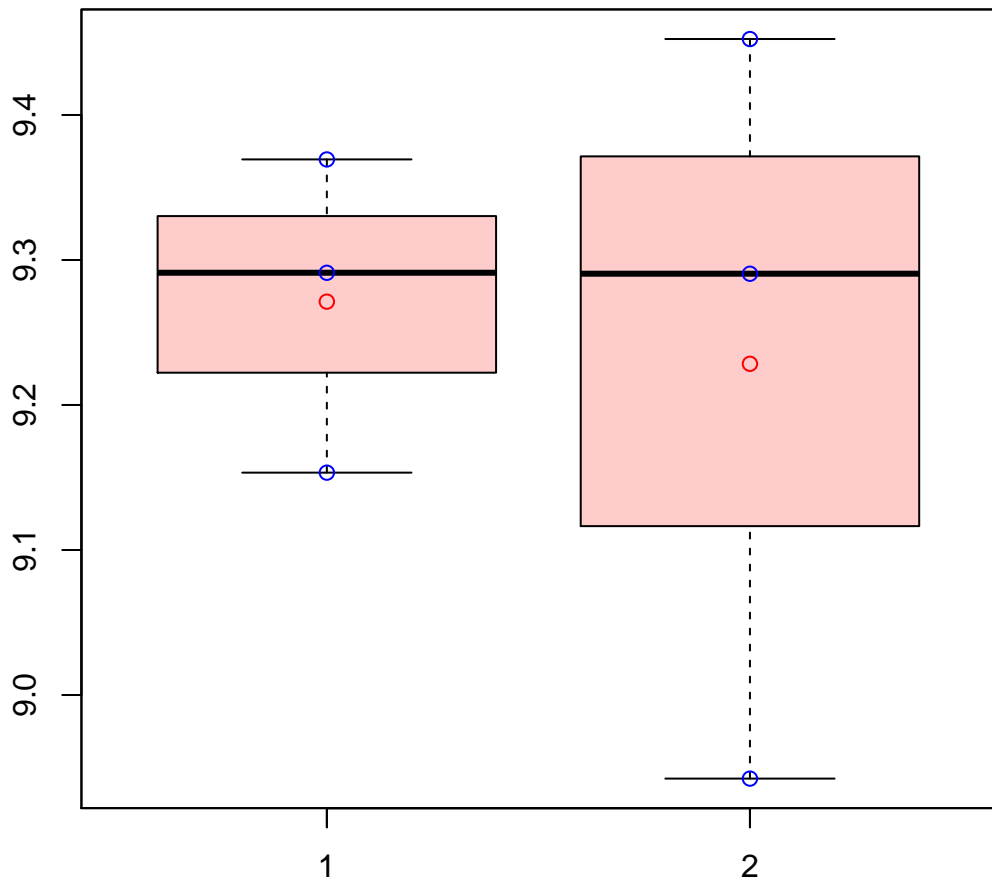

t-Test: p-value = 0.81

# CL4163Contig1|CL4163Contig1

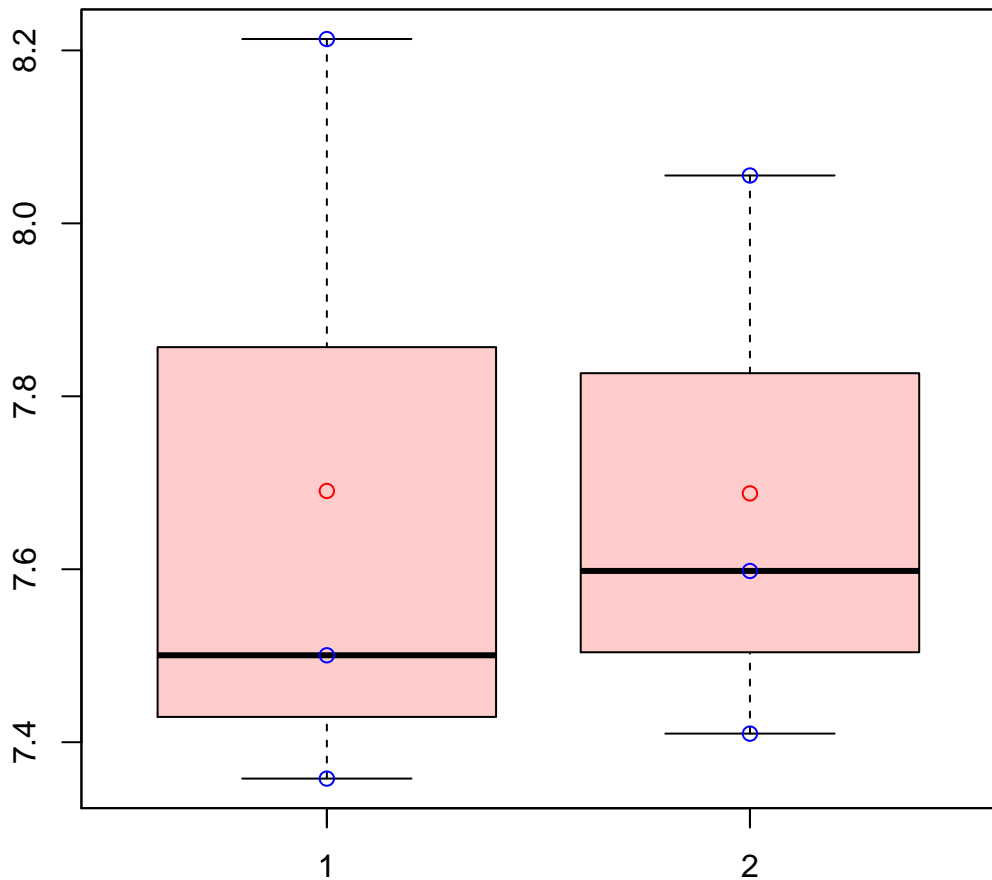

t-Test: p-value = 0.99



# CL4163Contig2|CL4163Contig2

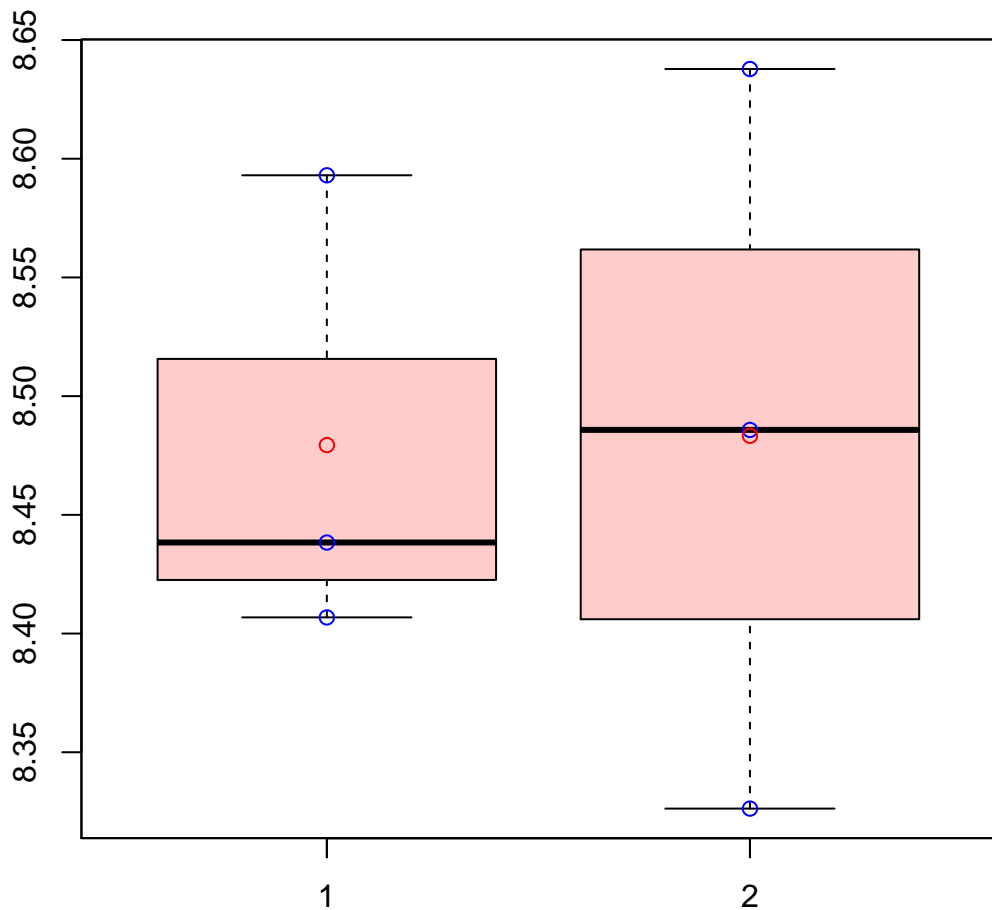

t-Test: p-value = 0.97

# CL4163Contig4|CL4163Contig4

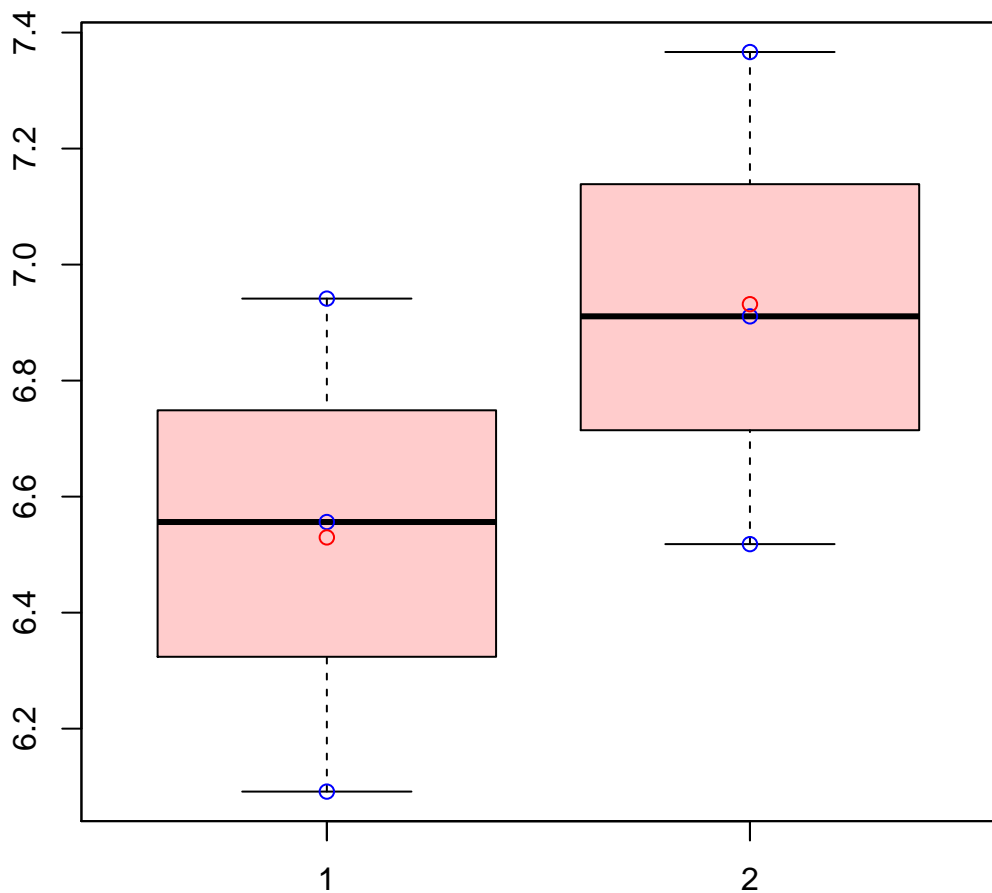

t-Test: p-value = 0.31

# CL4165Contig5|CL4165Contig5

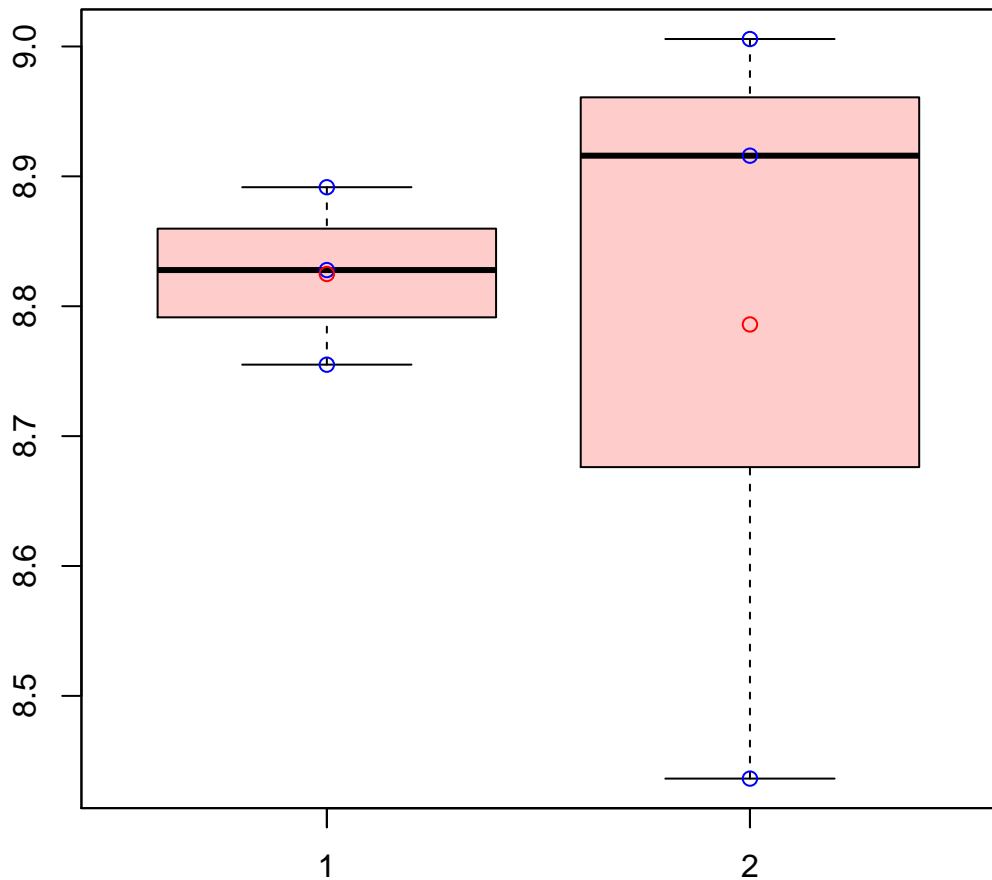

t-Test: p-value = 0.85

# CL416Contig14|CL416Contig14

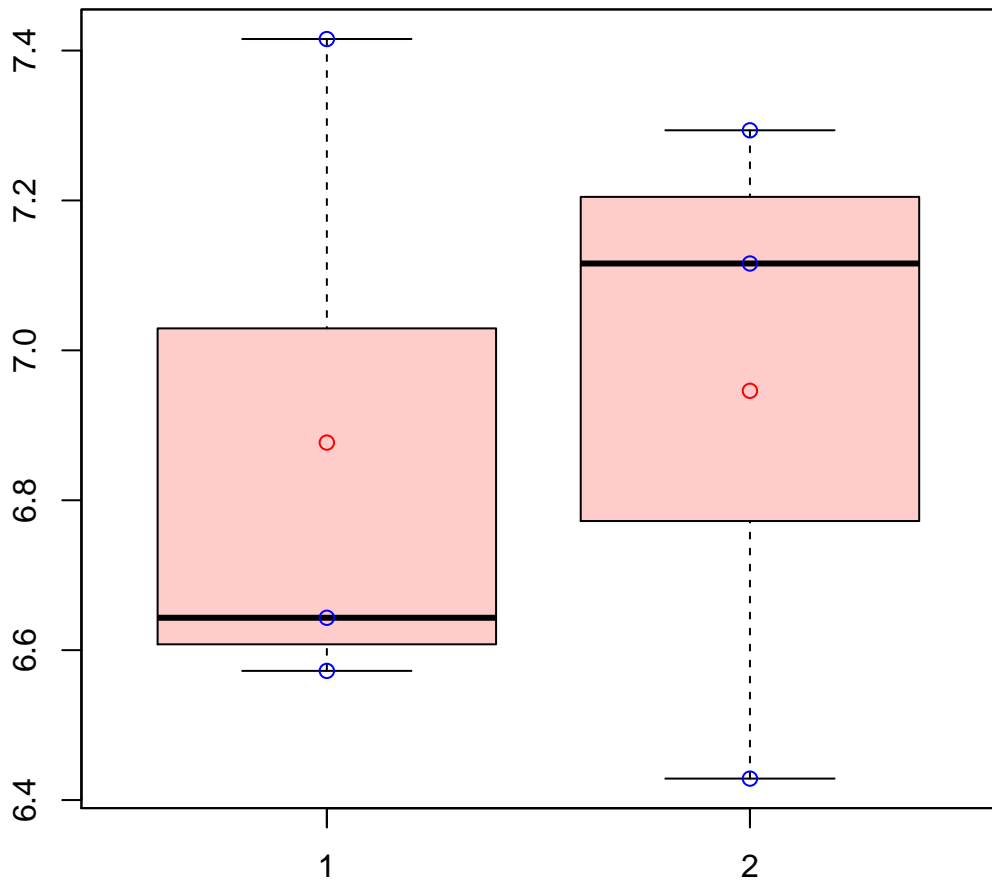

t-Test: p-value = 0.86

# CL4178Contig1|CL4178Contig1

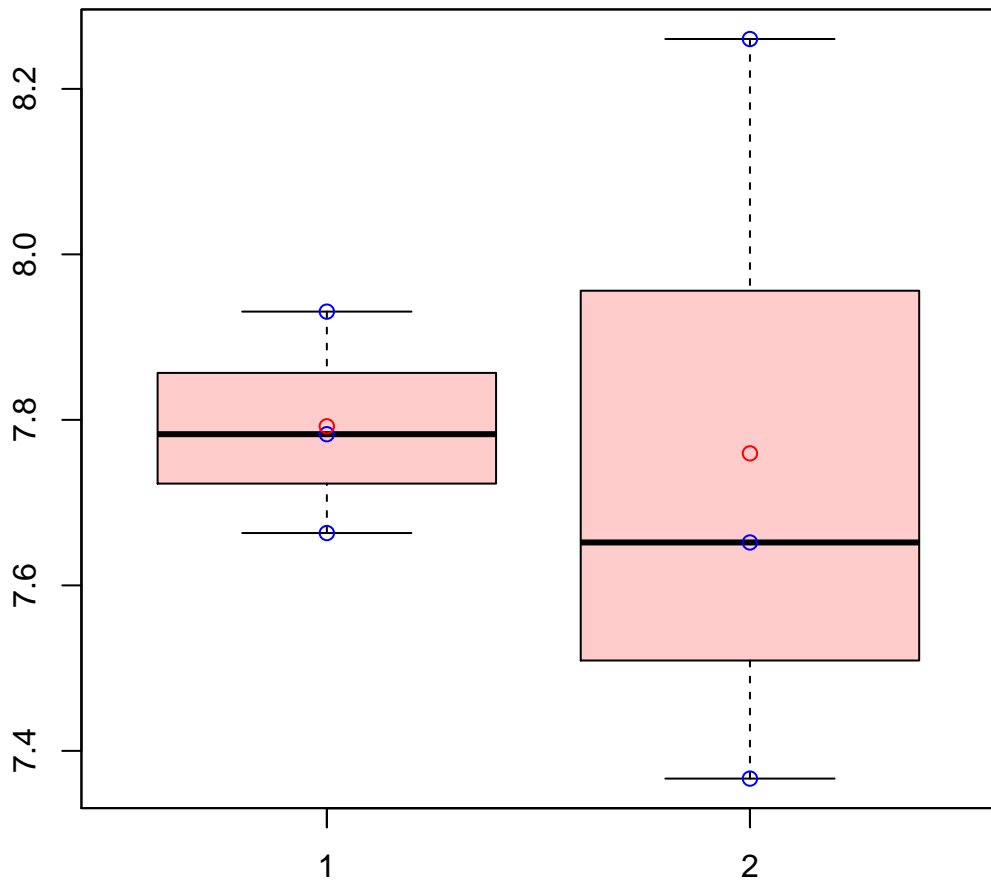

t-Test: p-value = 0.91

# CL417Contig5|CL417Contig5

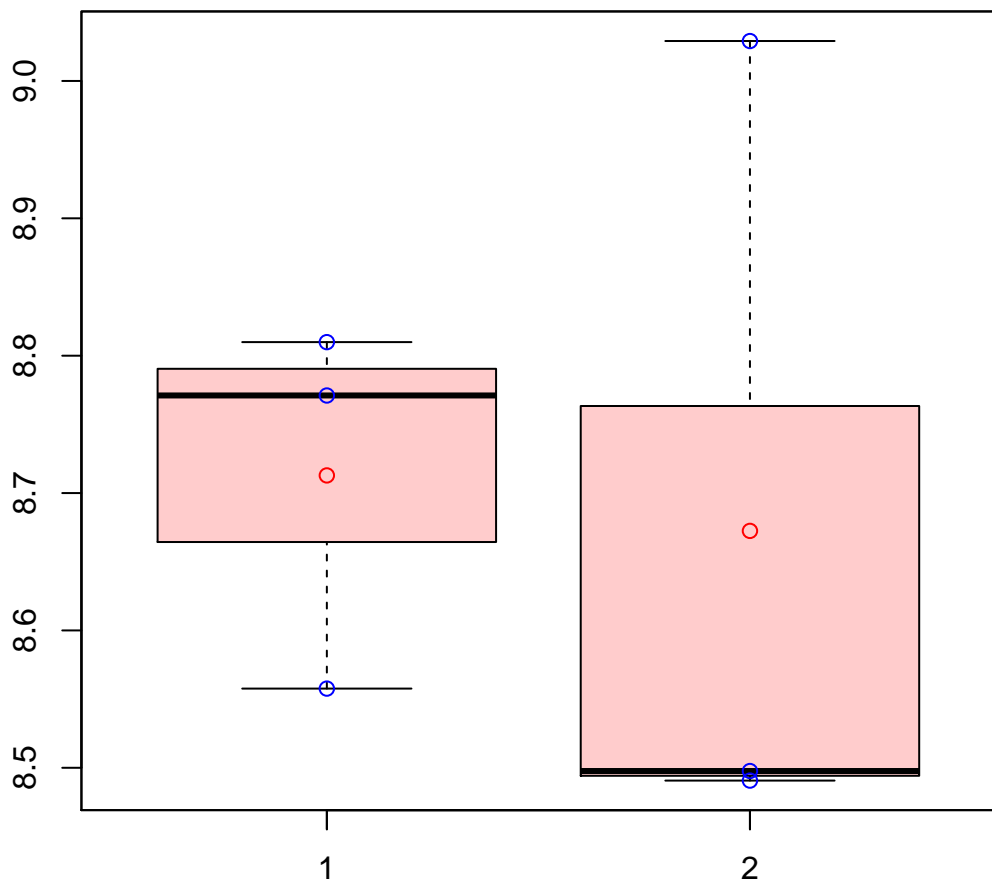

t-Test: p-value = 0.85

# CL418Contig10|CL418Contig10

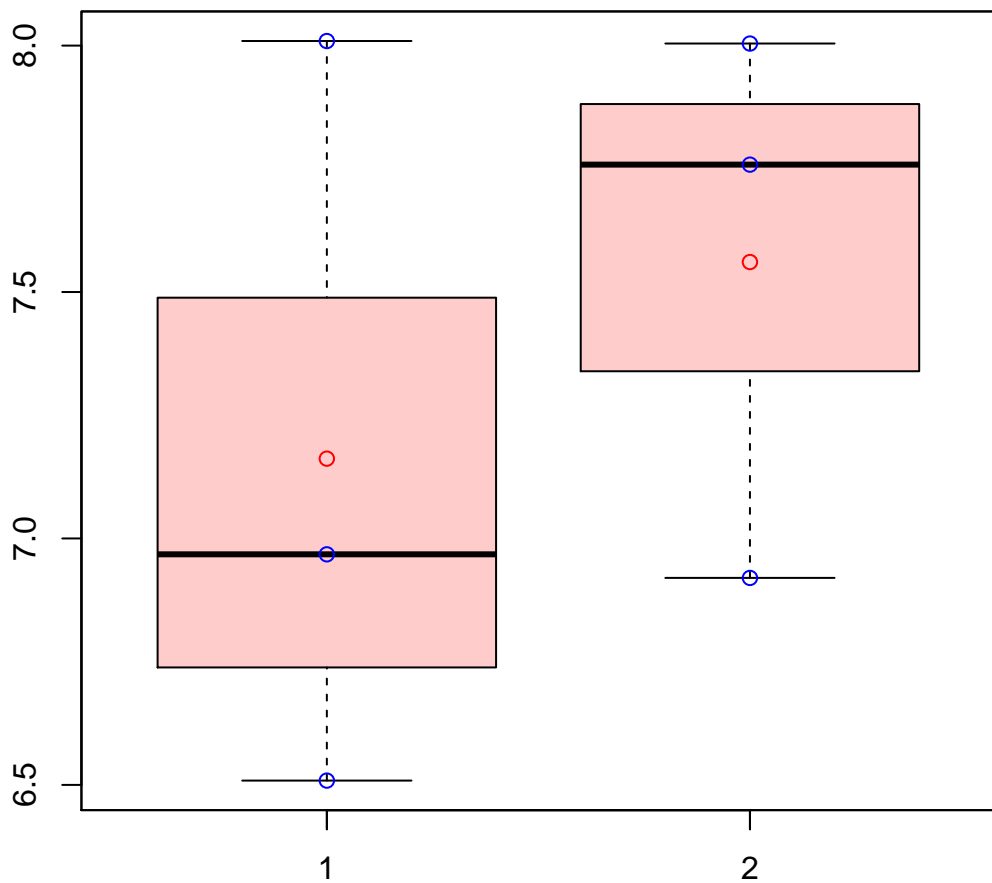

t-Test: p-value = 0.51

# CL418Contig9|CL418Contig9

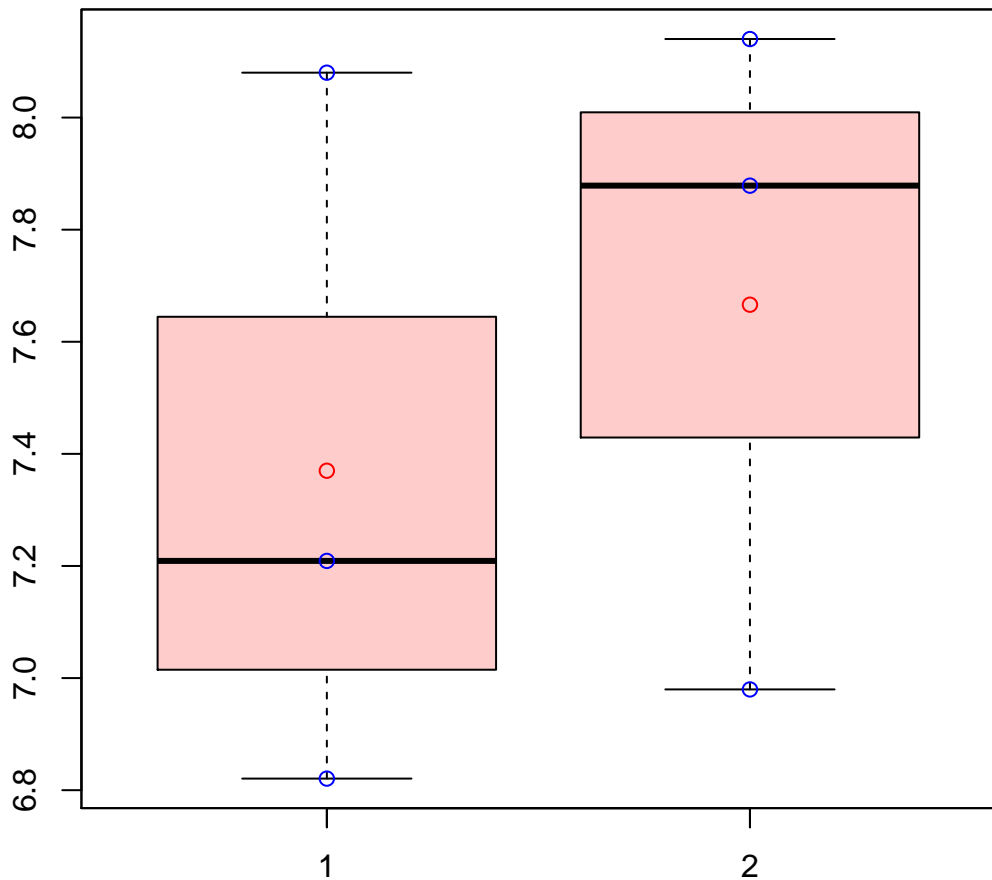

t-Test: p-value = 0.59



# CL4194Contig1|CL4194Contig1

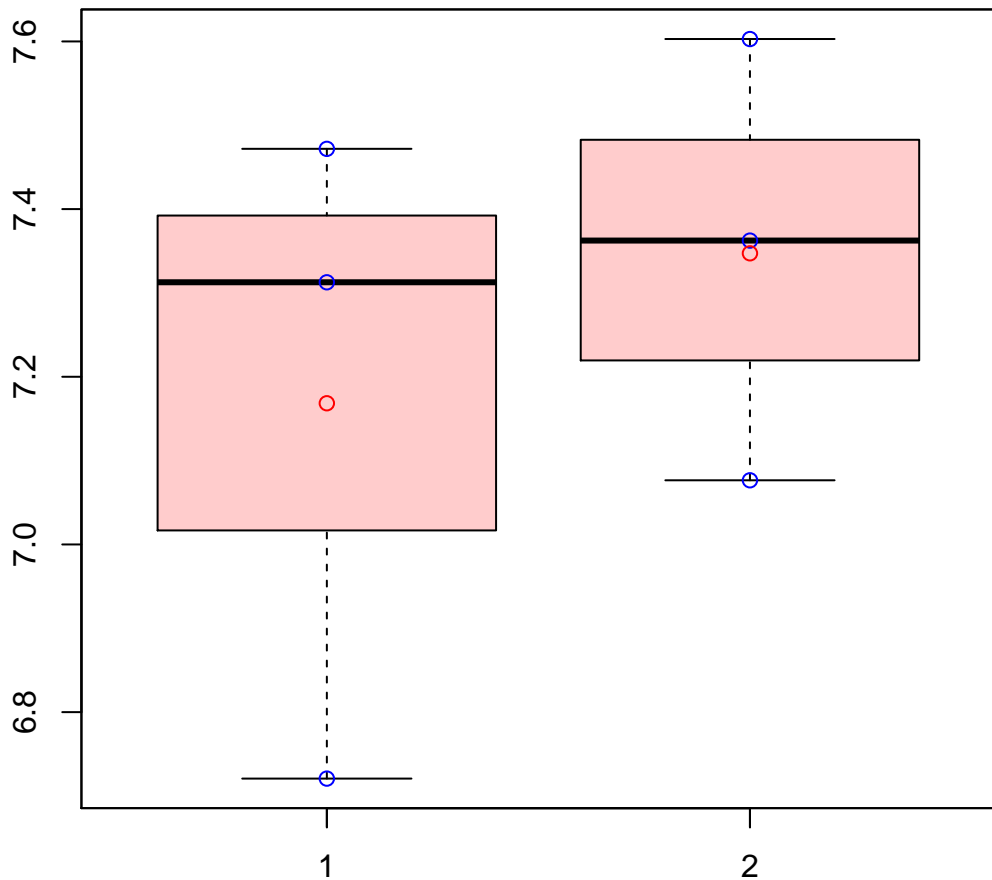

t-Test: p-value = 0.56

# CL4194Contig2|CL4194Contig2



t-Test: p-value = 0.56

# CL4199Contig1|CL4199Contig1



t-Test: p-value = 0.85

# CL41Contig27|CL41Contig27

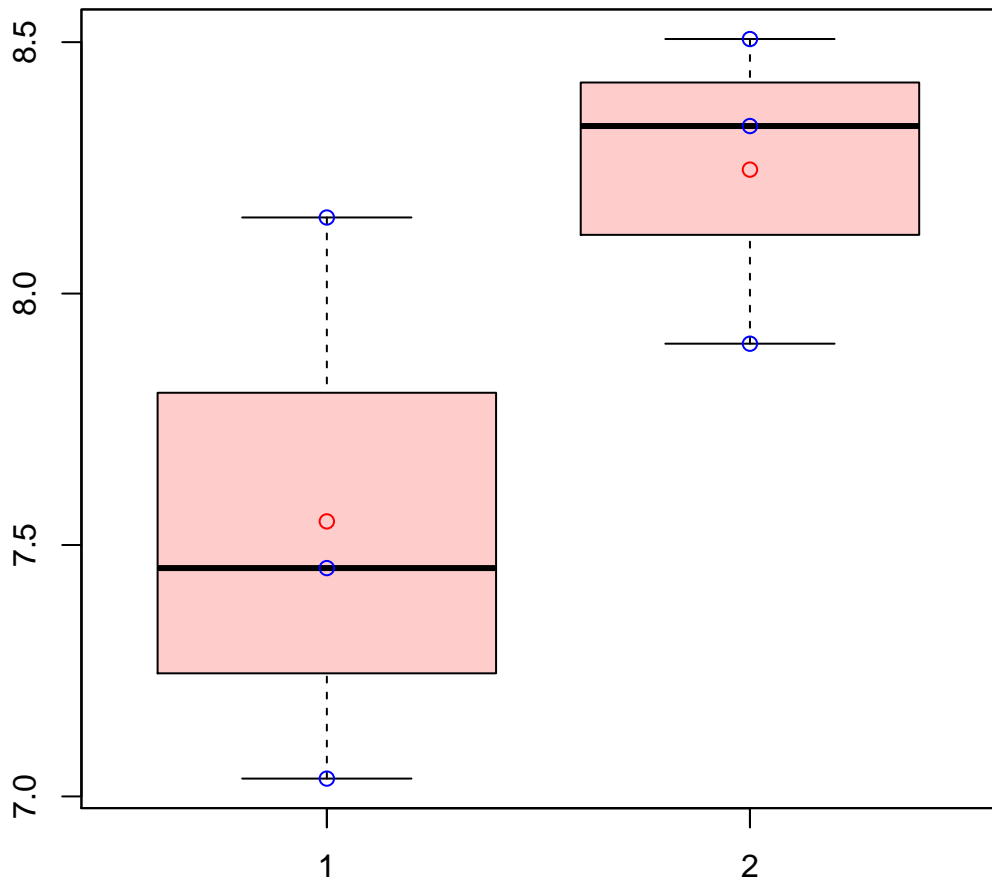

t-Test: p-value = 0.15

# CL41Contig31|CL41Contig31

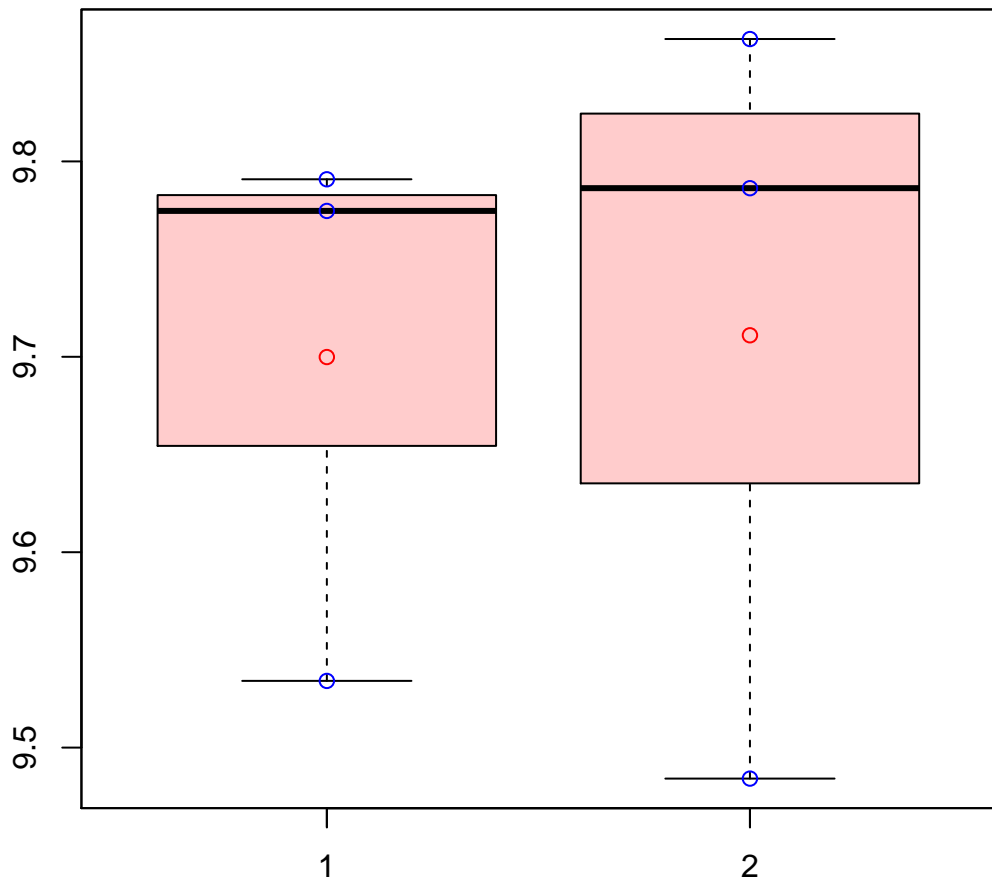

t-Test: p-value = 0.94

# CL41Contig5|CL41Contig5

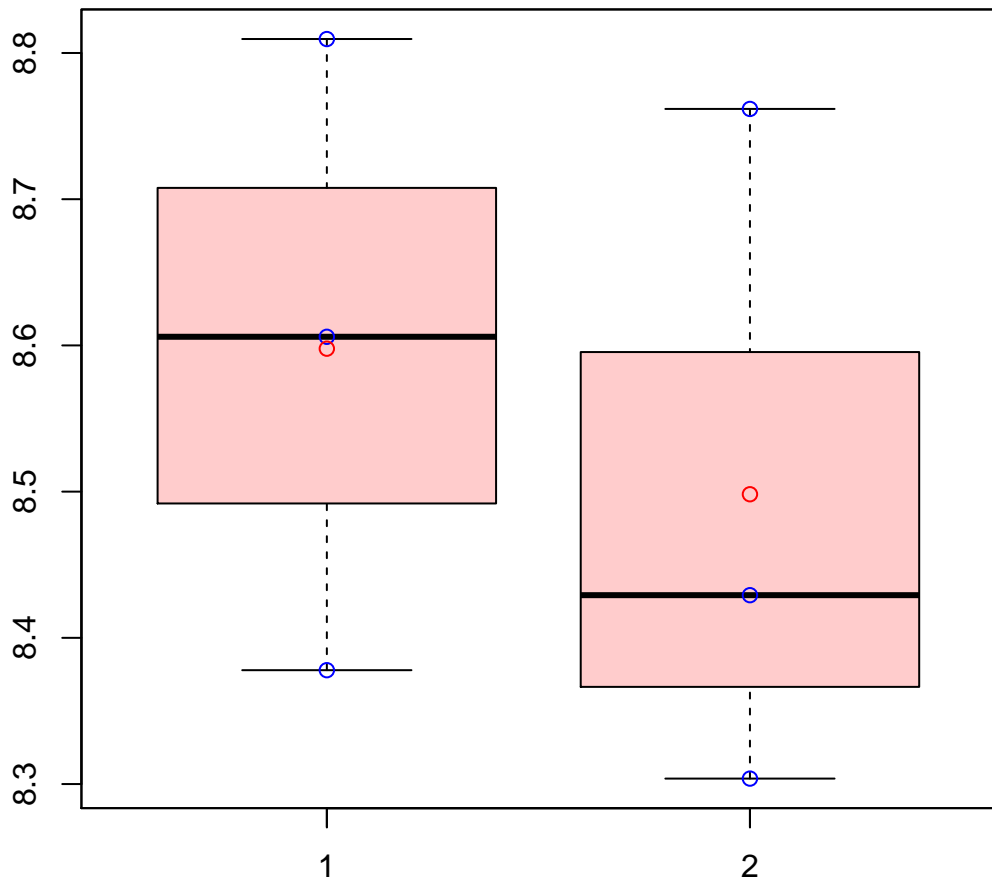

t-Test: p-value = 0.62

# CL41Contig6|CL41Contig6



t-Test: p-value = 0.15

# CL4207Contig1|CL4207Contig1



t-Test: p-value = 0.04



# CL4208Contig1|CL4208Contig1

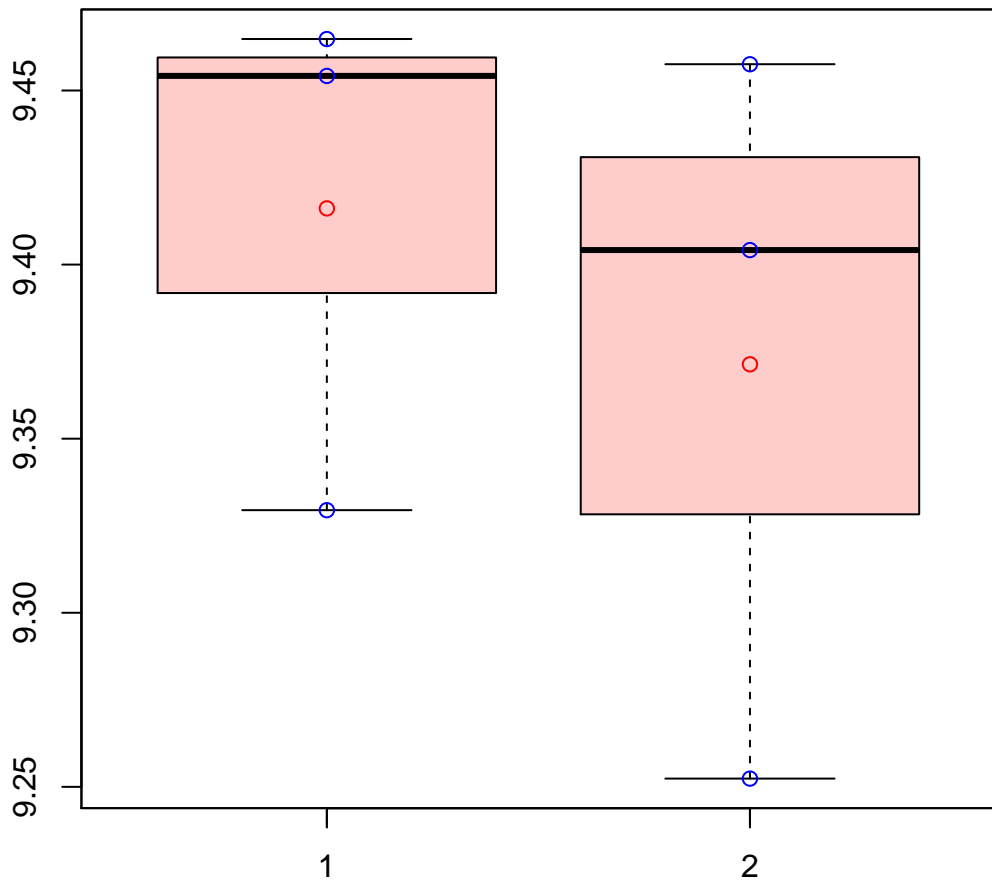

t-Test: p-value = 0.59

# CL4209Contig2|CL4209Contig2

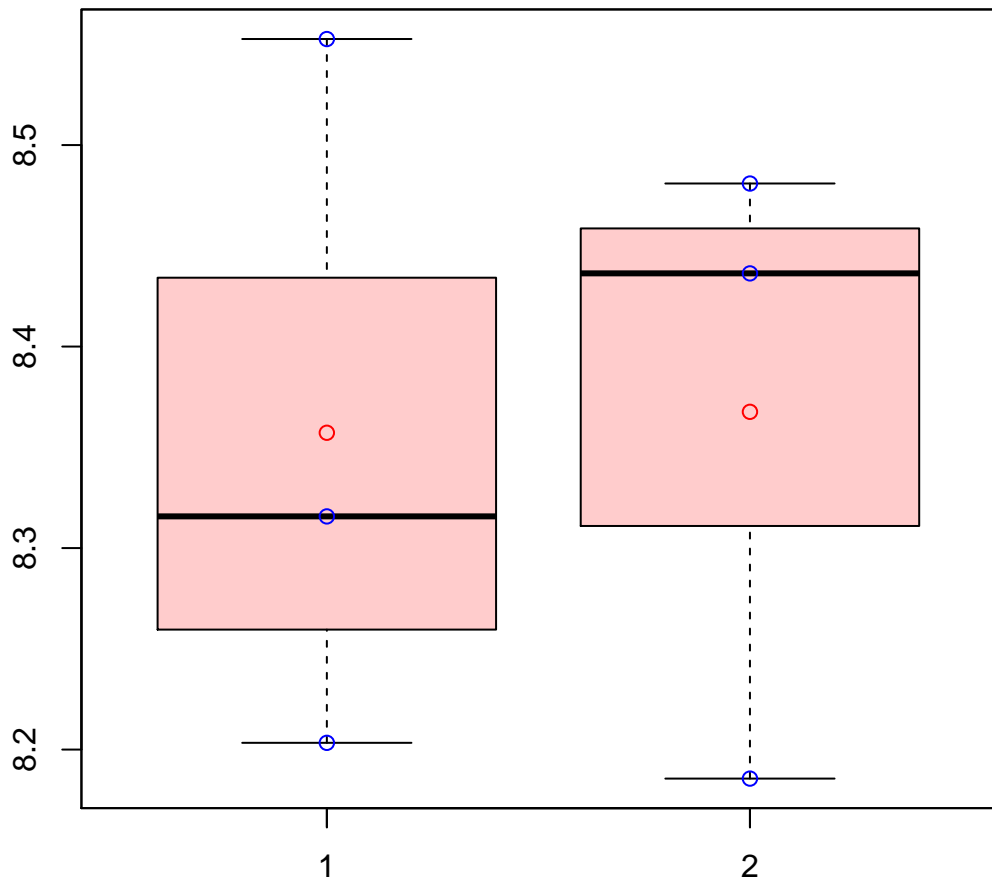

t-Test: p-value = 0.94

# CL420Contig11|CL420Contig11

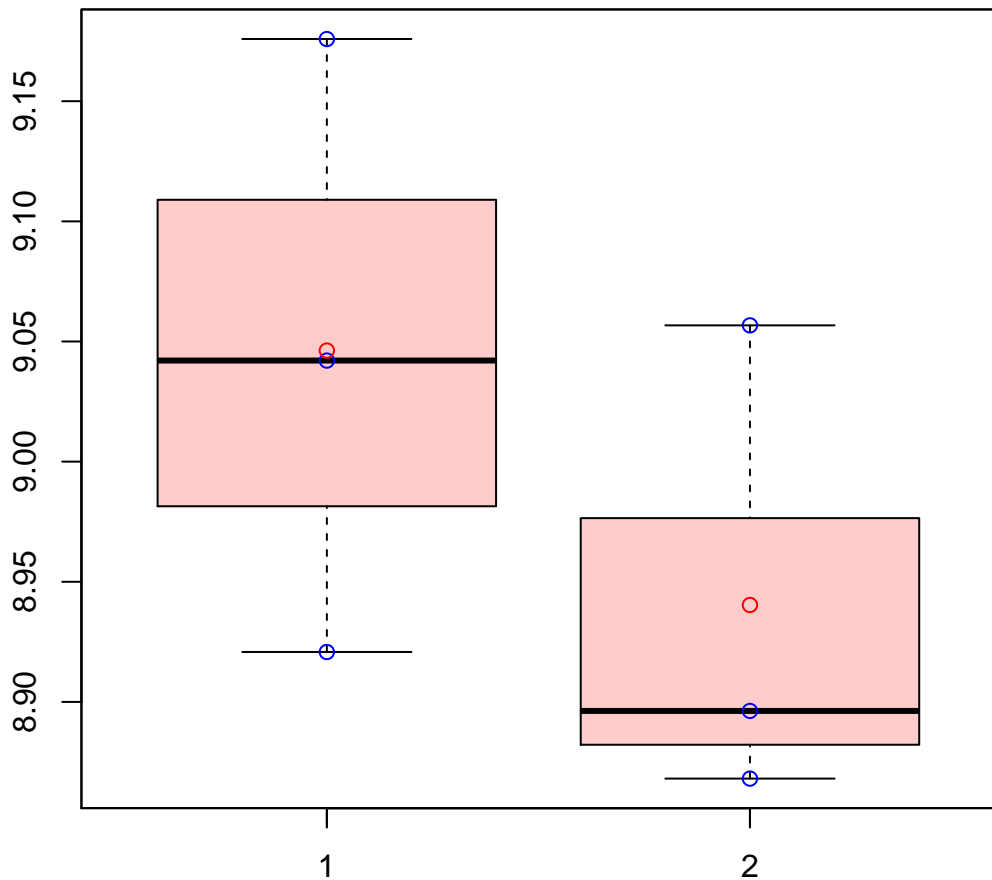

t-Test: p-value = 0.33

# CL4211Contig3|CL4211Contig3

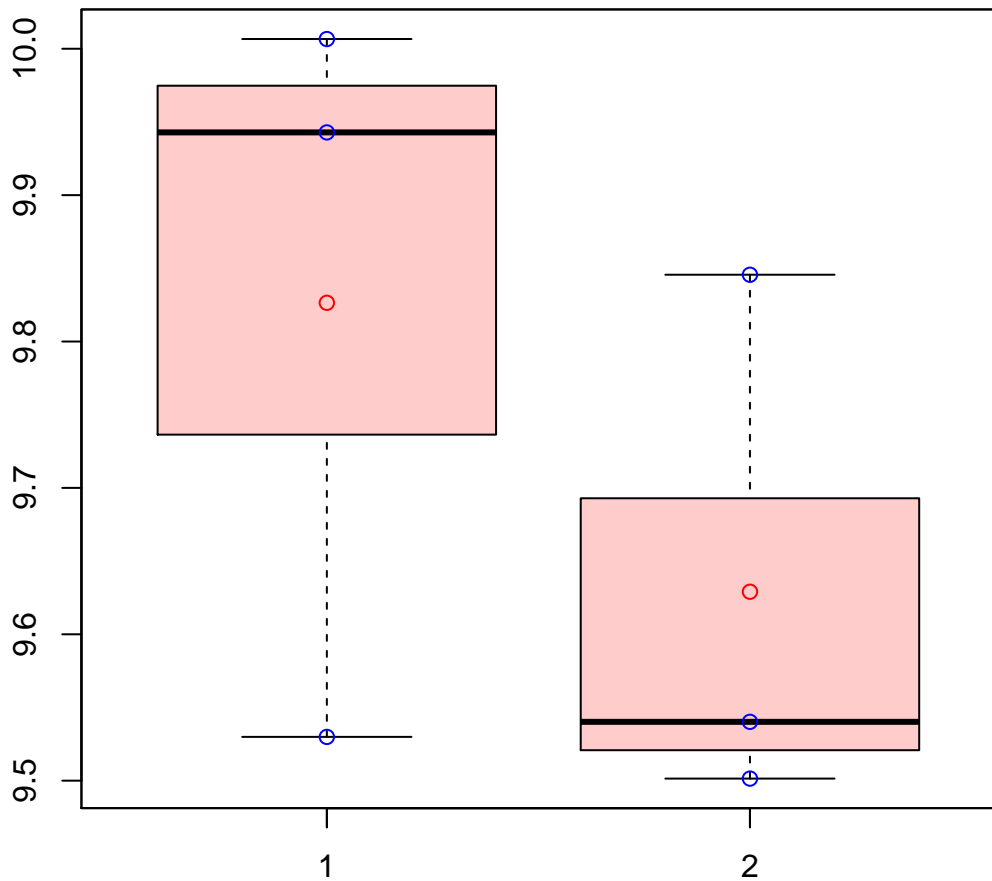

t-Test: p-value = 0.35

# CL4211Contig7|CL4211Contig7

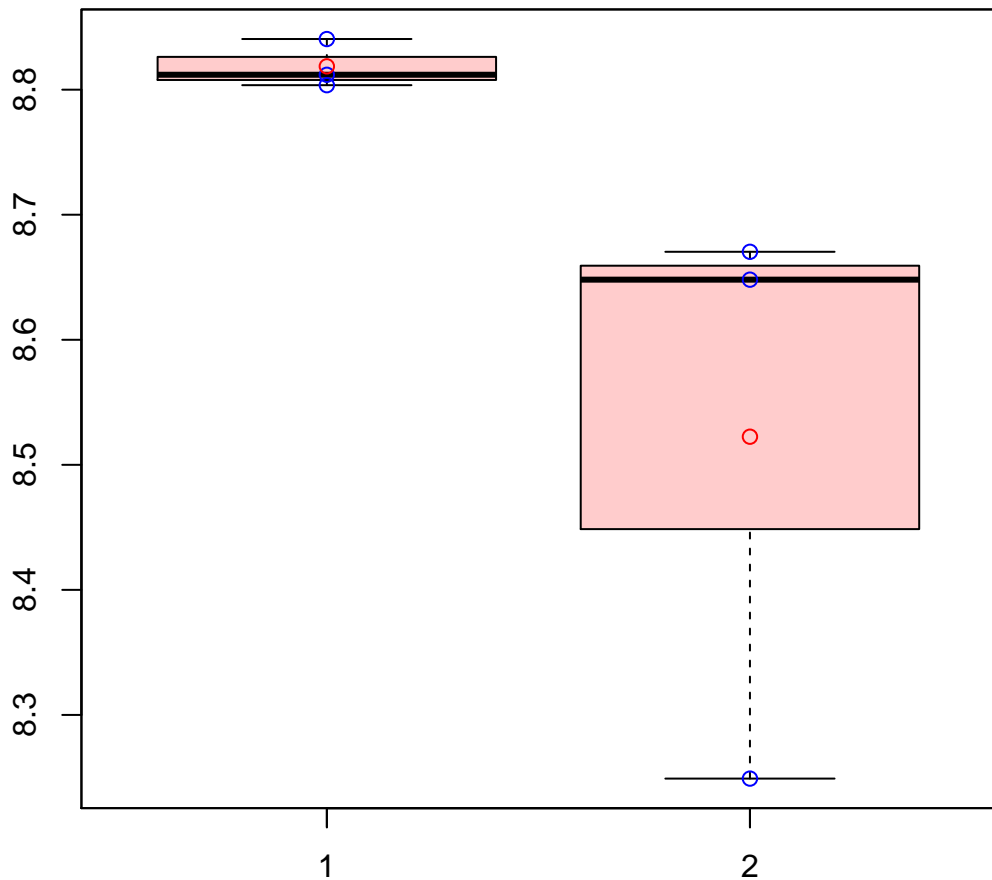

t-Test: p-value = 0.16

# CL4212Contig2|CL4212Contig2

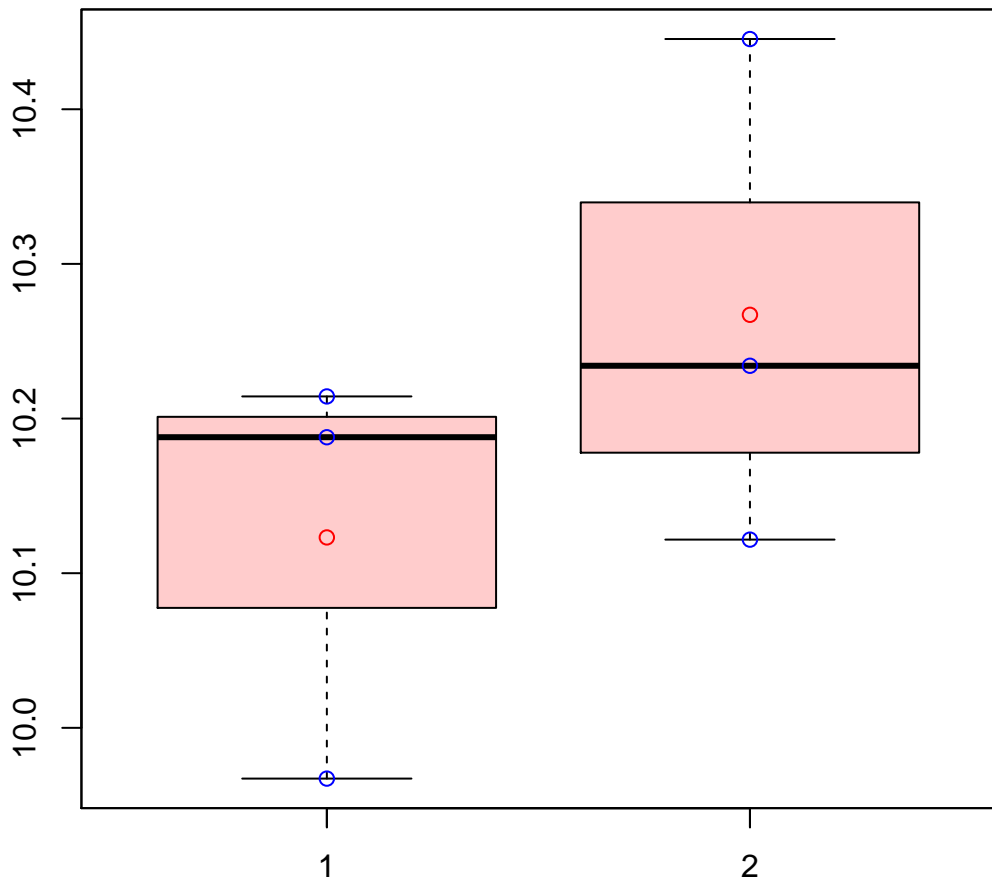

t-Test: p-value = 0.31

# CL4219Contig3|CL4219Contig3

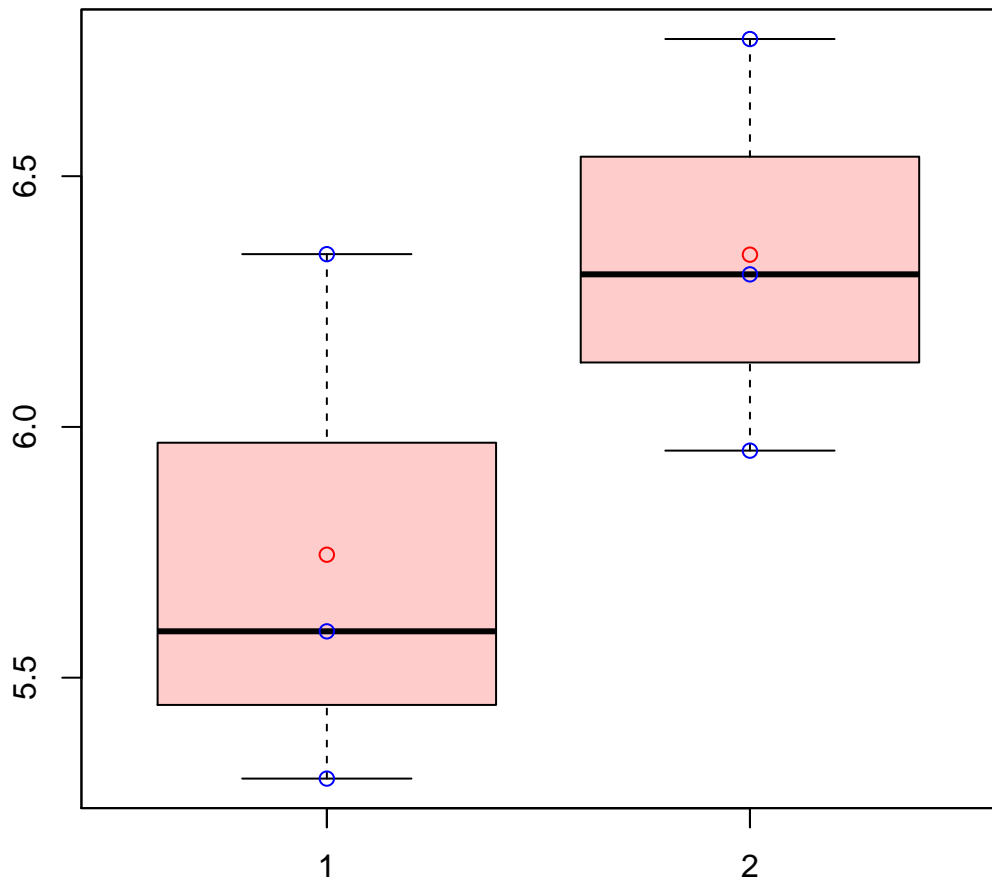

t-Test: p-value = 0.21

# CL4221Contig2|CL4221Contig2

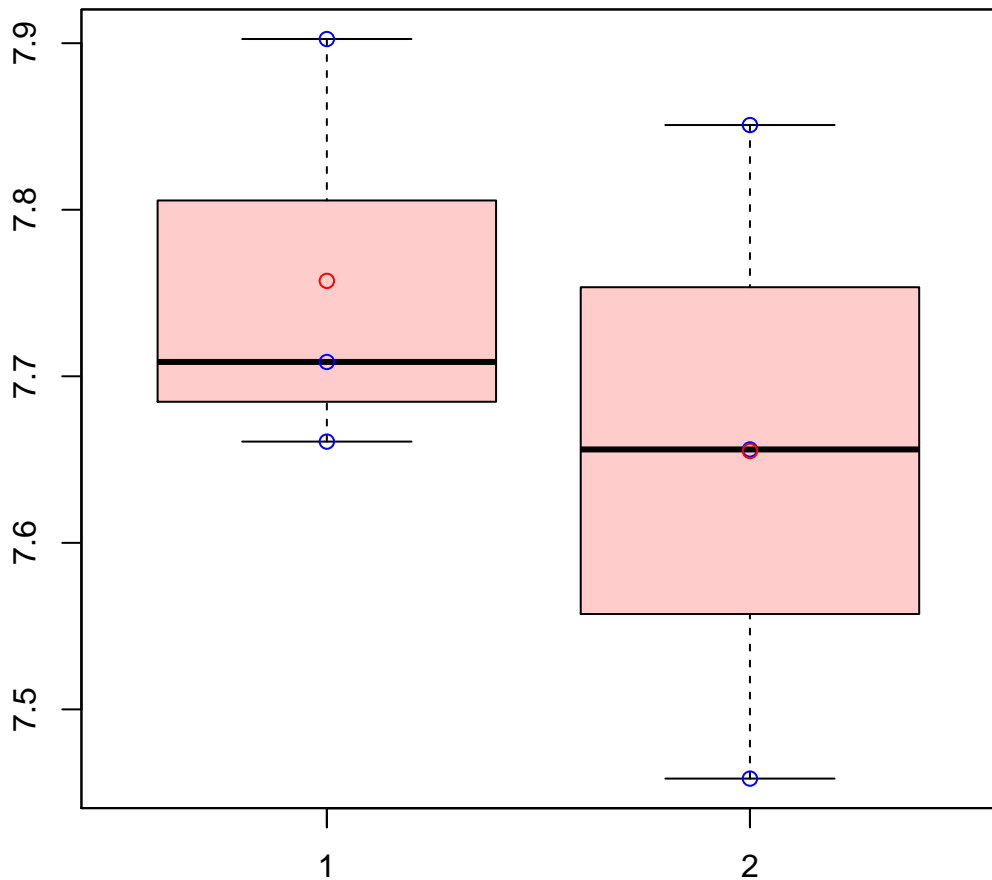

t-Test: p-value = 0.5



# CL4221Contig3|CL4221Contig3

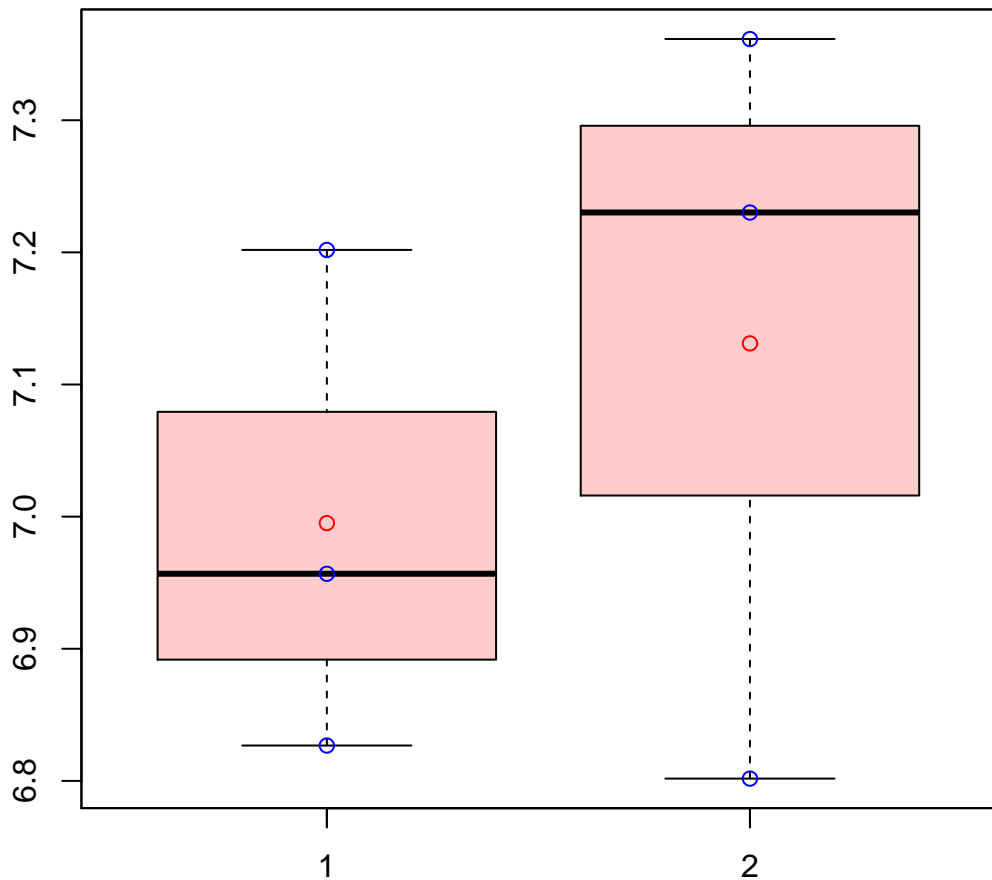

t-Test: p-value = 0.54

# CL4229Contig1|CL4229Contig1

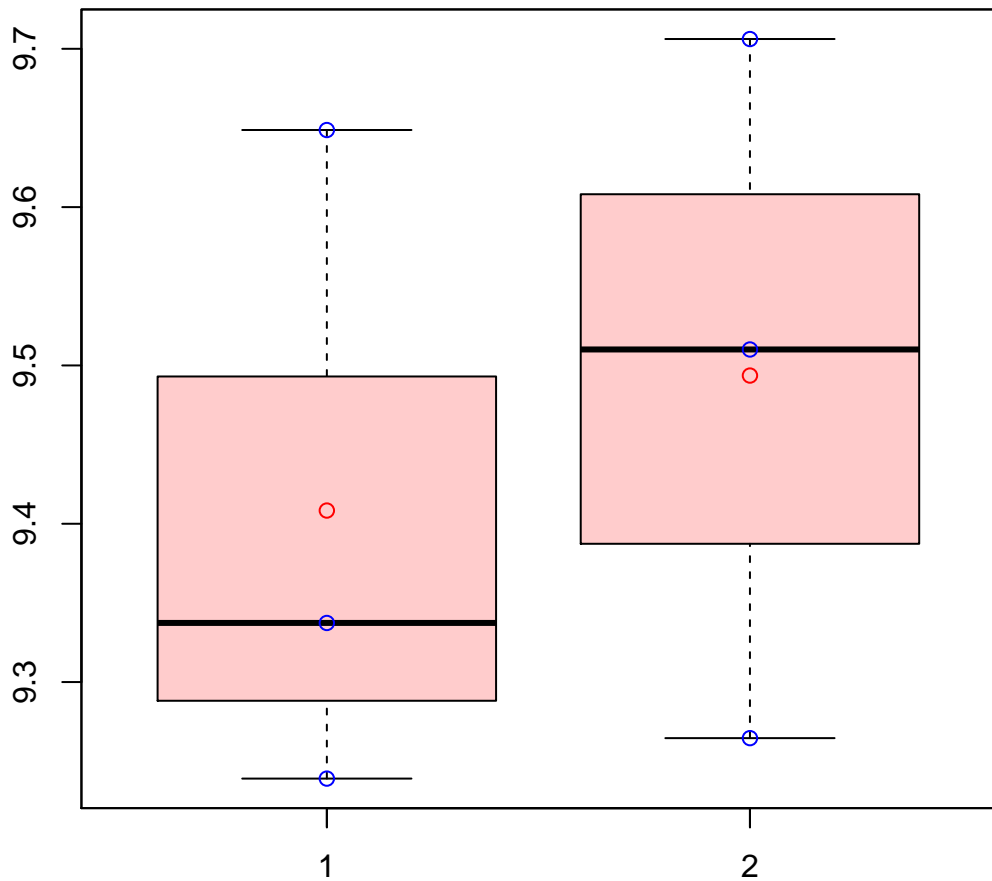

t-Test: p-value = 0.66

# CL423Contig3|CL423Contig3

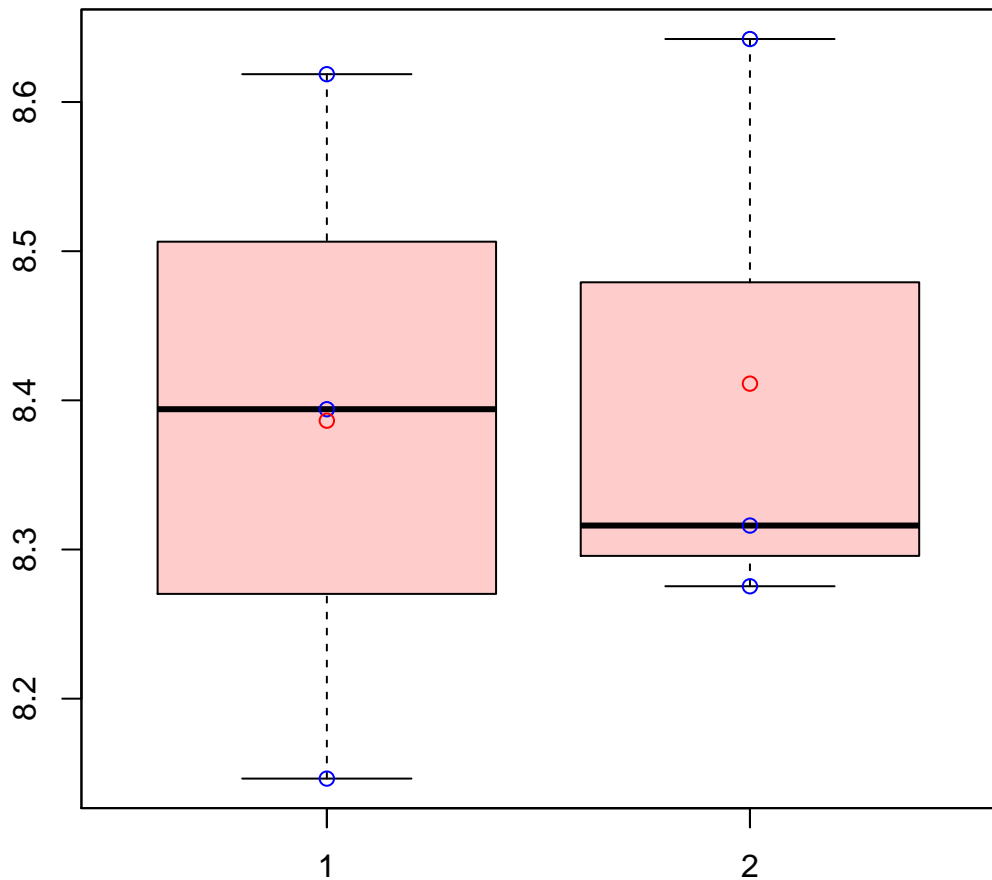

t-Test: p-value = 0.9

# CL423Contig5|CL423Contig5



t-Test: p-value = 0.57

# CL4242Contig1|CL4242Contig1

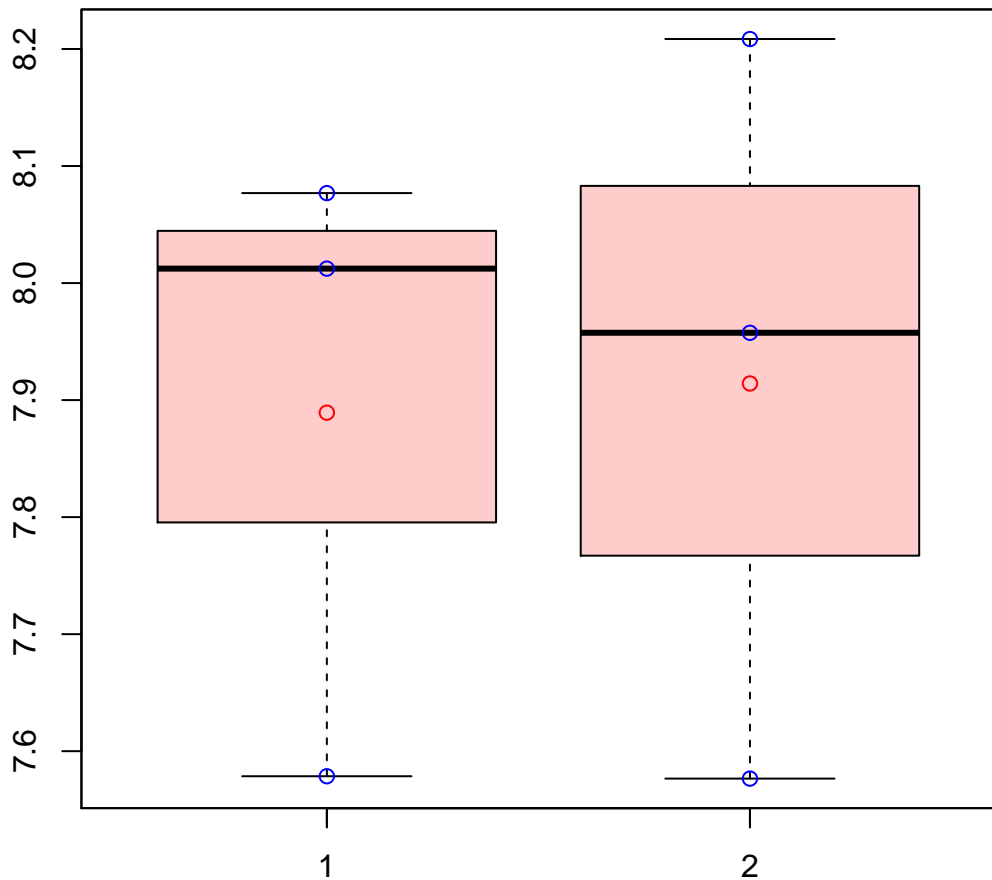

t-Test: p-value = 0.92

# CL4247Contig5|CL4247Contig5

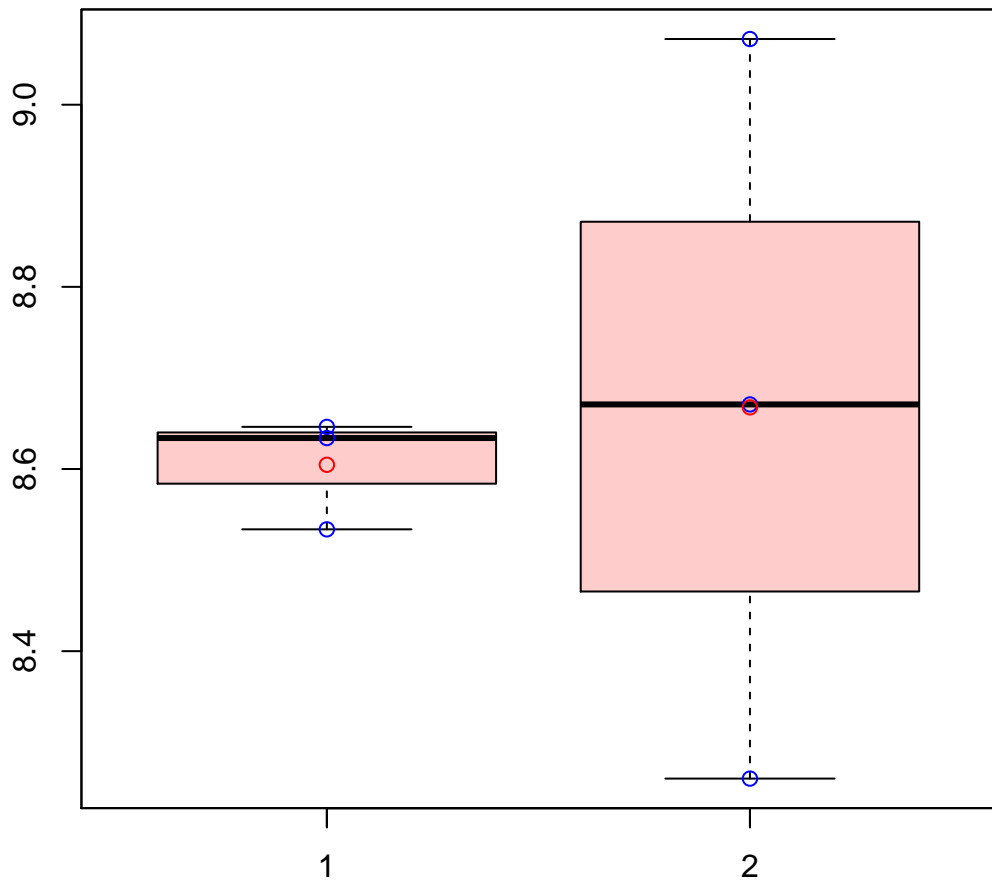

t-Test: p-value = 0.81

# CL424Contig8|CL424Contig8

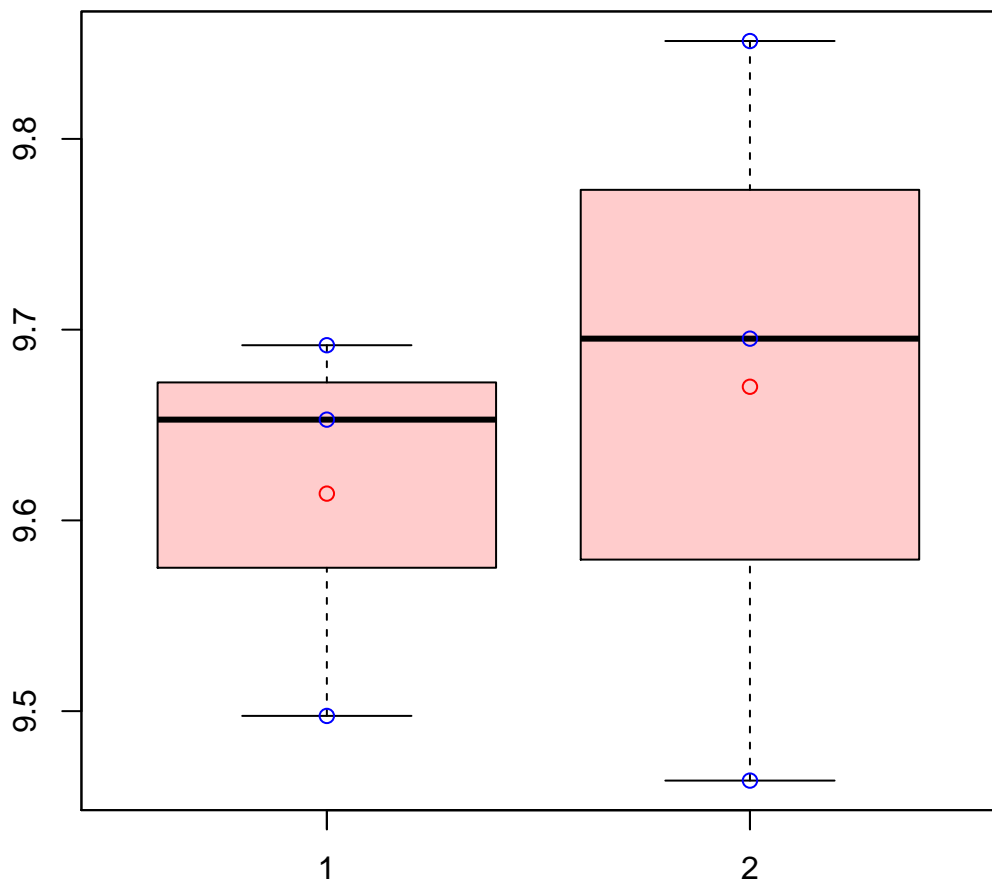

t-Test: p-value = 0.69

# CL424Contig9|CL424Contig9

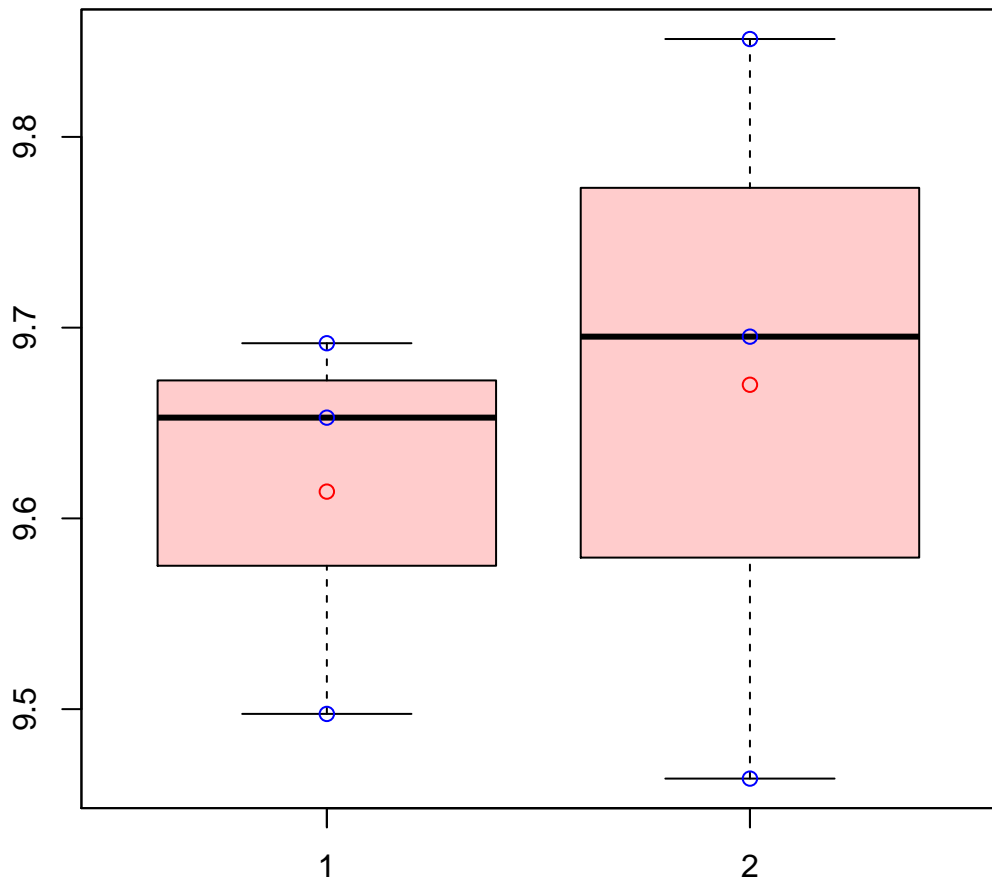

t-Test: p-value = 0.69



# CL4253Contig1|CL4253Contig1

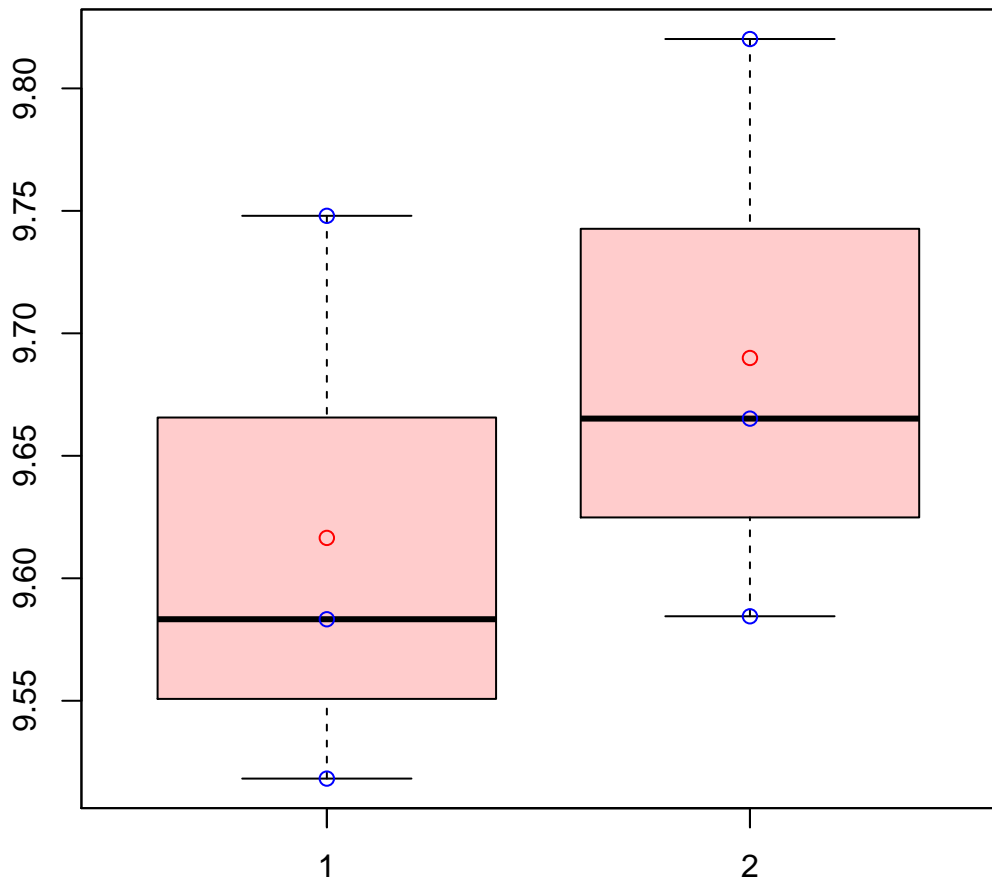

t-Test: p-value = 0.49

# CL4255Contig2|CL4255Contig2

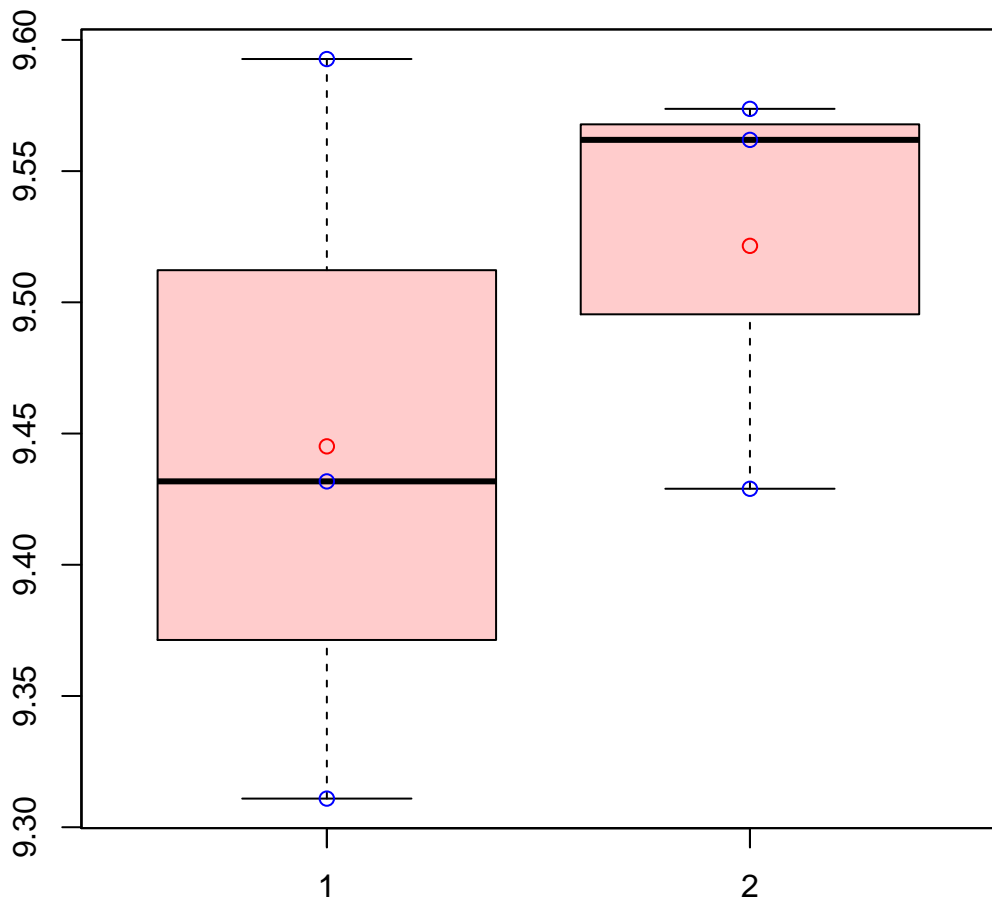

t-Test: p-value = 0.47

# CL4255Contig3|CL4255Contig3

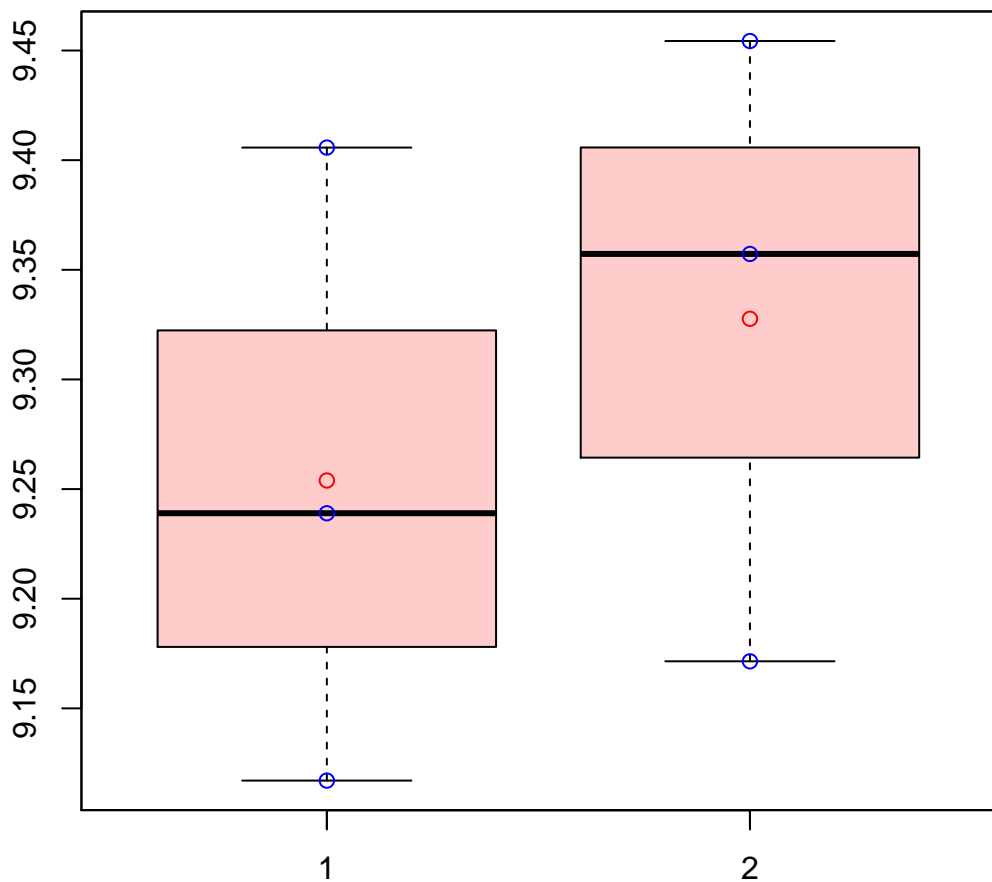

t-Test: p-value = 0.57

# CL4255Contig4|CL4255Contig4

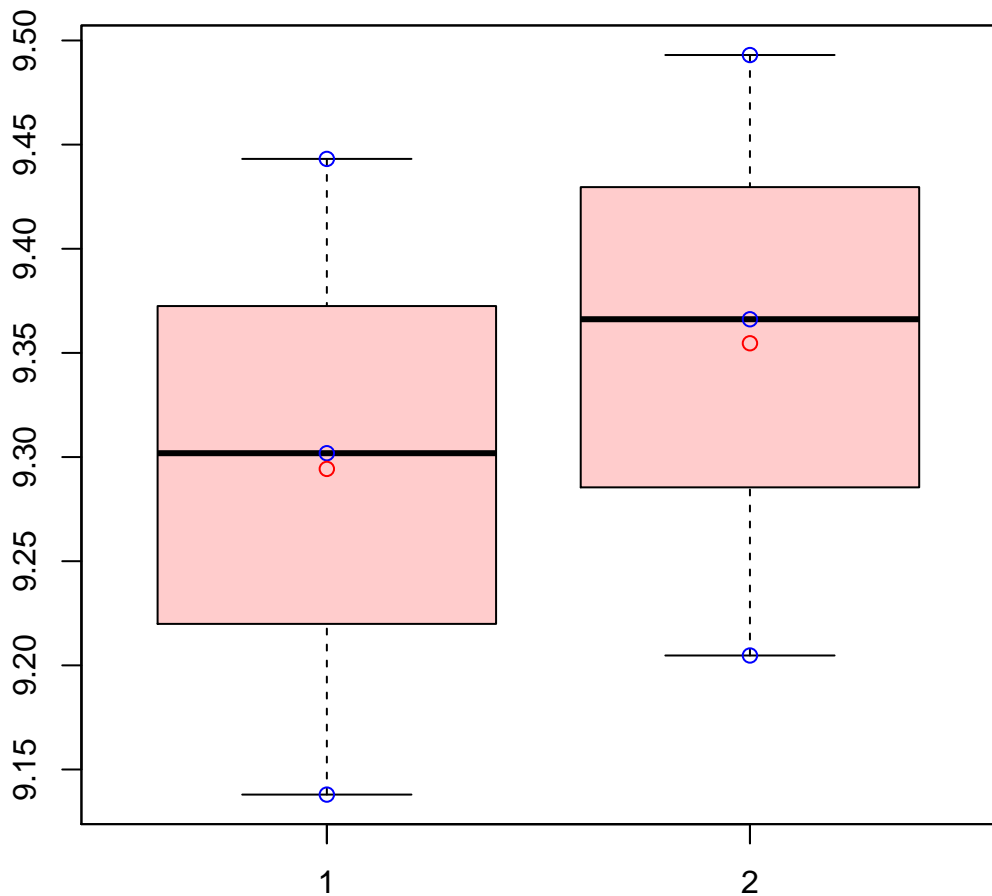

t-Test: p-value = 0.65

# CL425Contig10|CL425Contig10

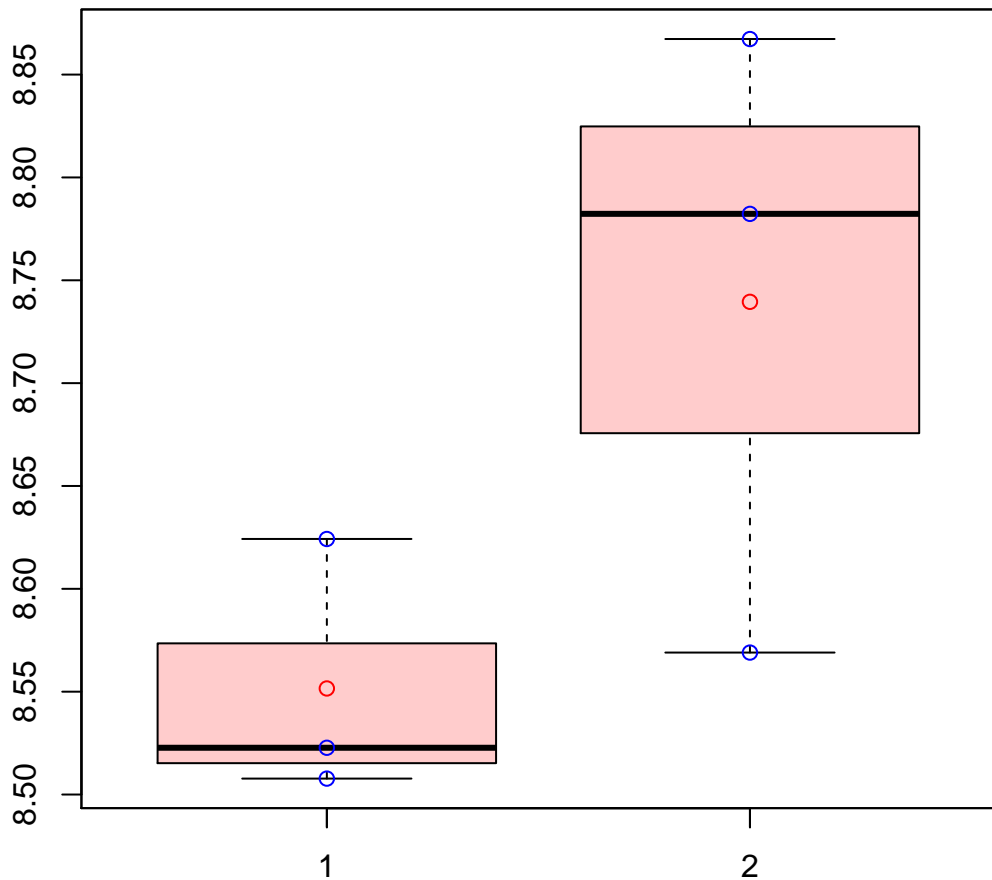

t-Test: p-value = 0.16

# CL425Contig4|CL425Contig4

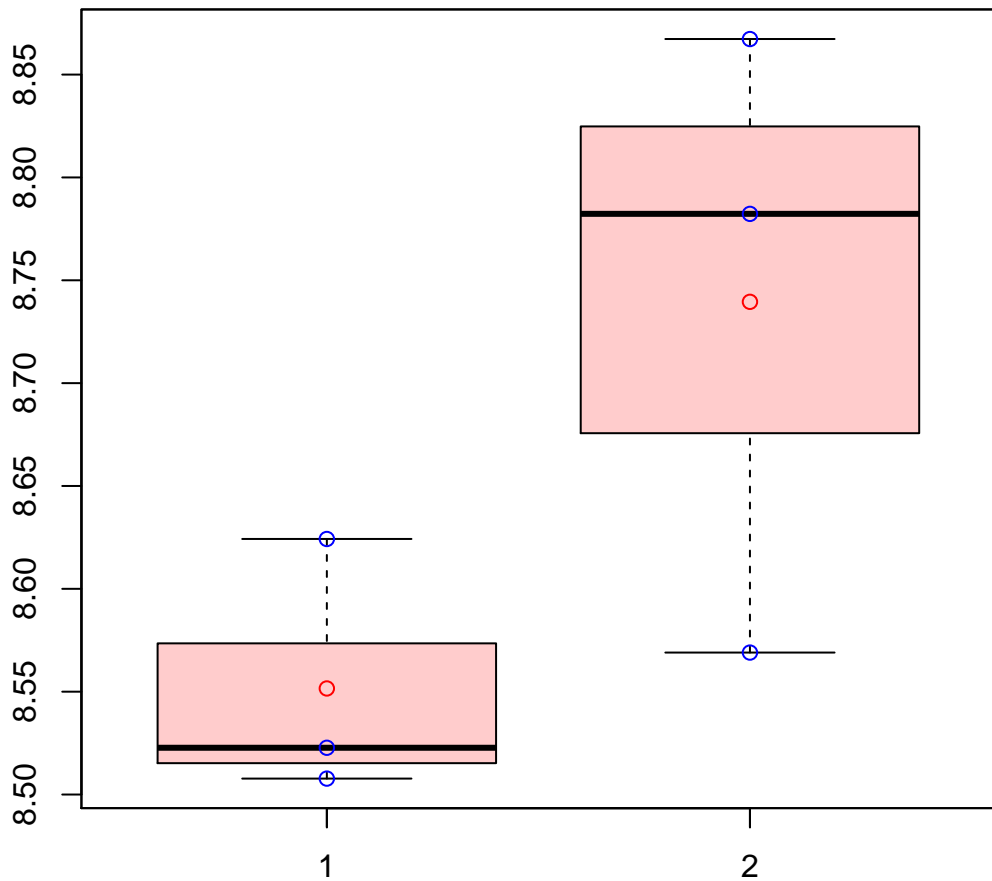

t-Test: p-value = 0.16

# CL425Contig5|CL425Contig5

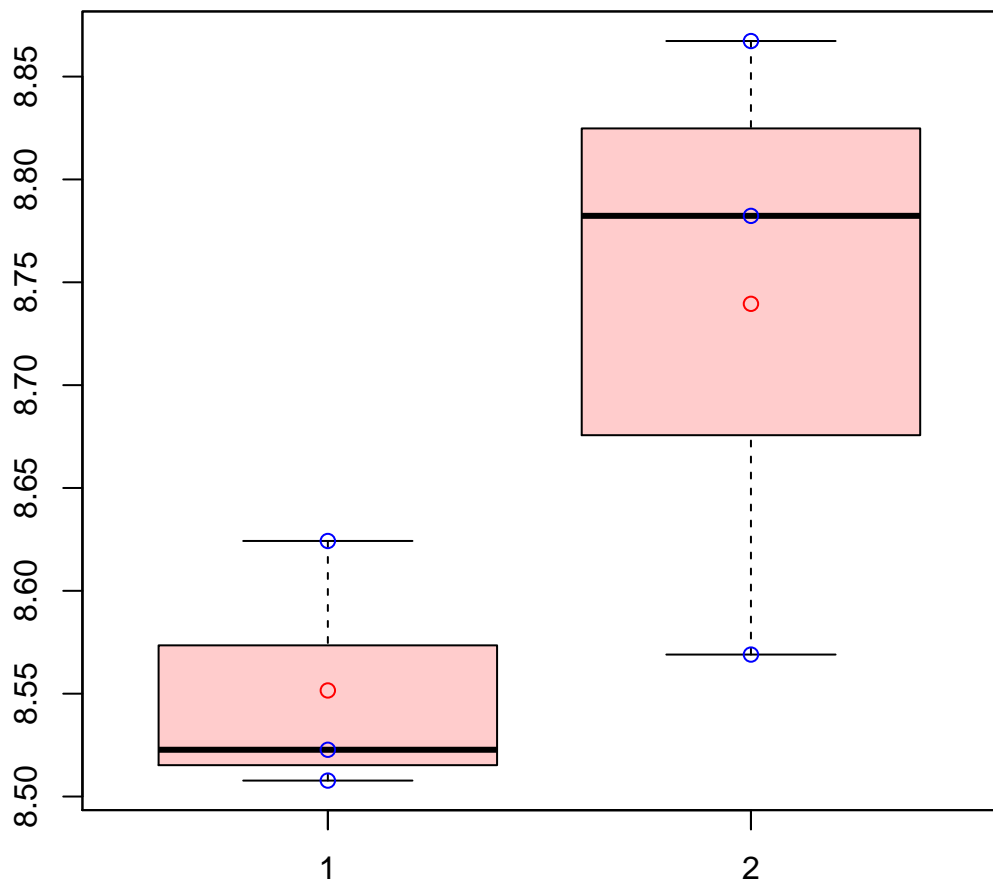

t-Test: p-value = 0.16

# CL425Contig6|CL425Contig6

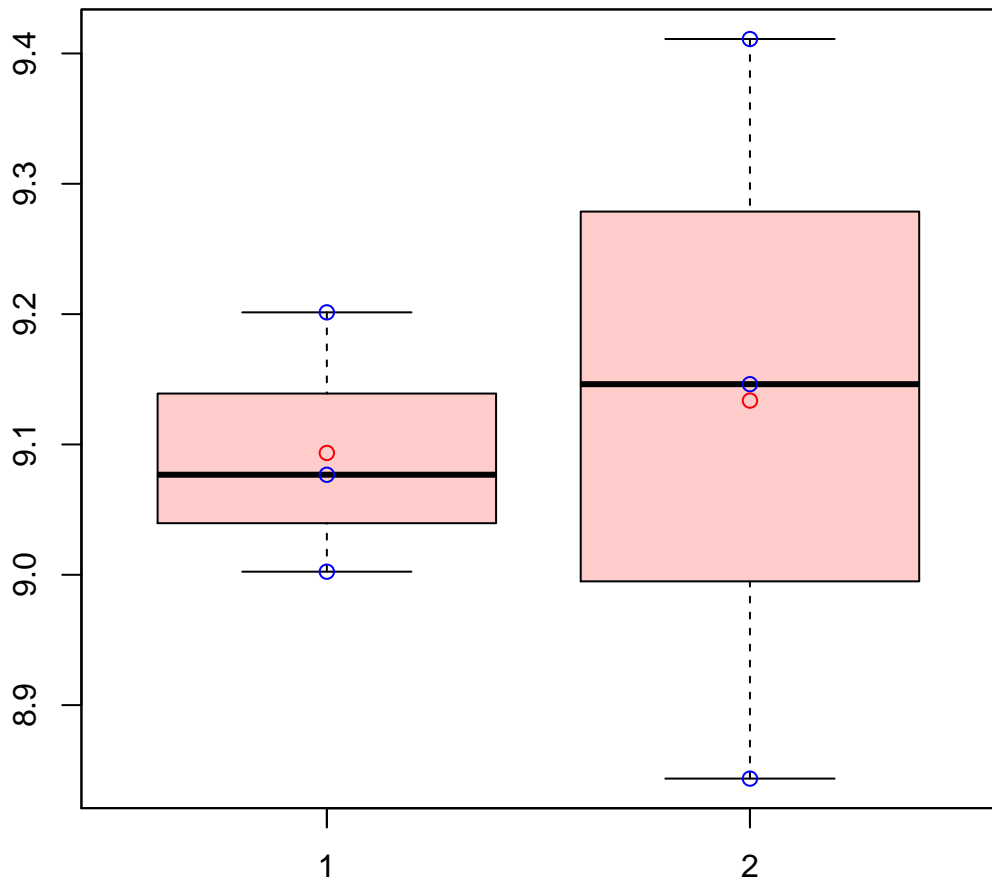

t-Test: p-value = 0.84



# CL425Contig8|CL425Contig8



t-Test: p-value = 0.16

# CL425Contig9|CL425Contig9

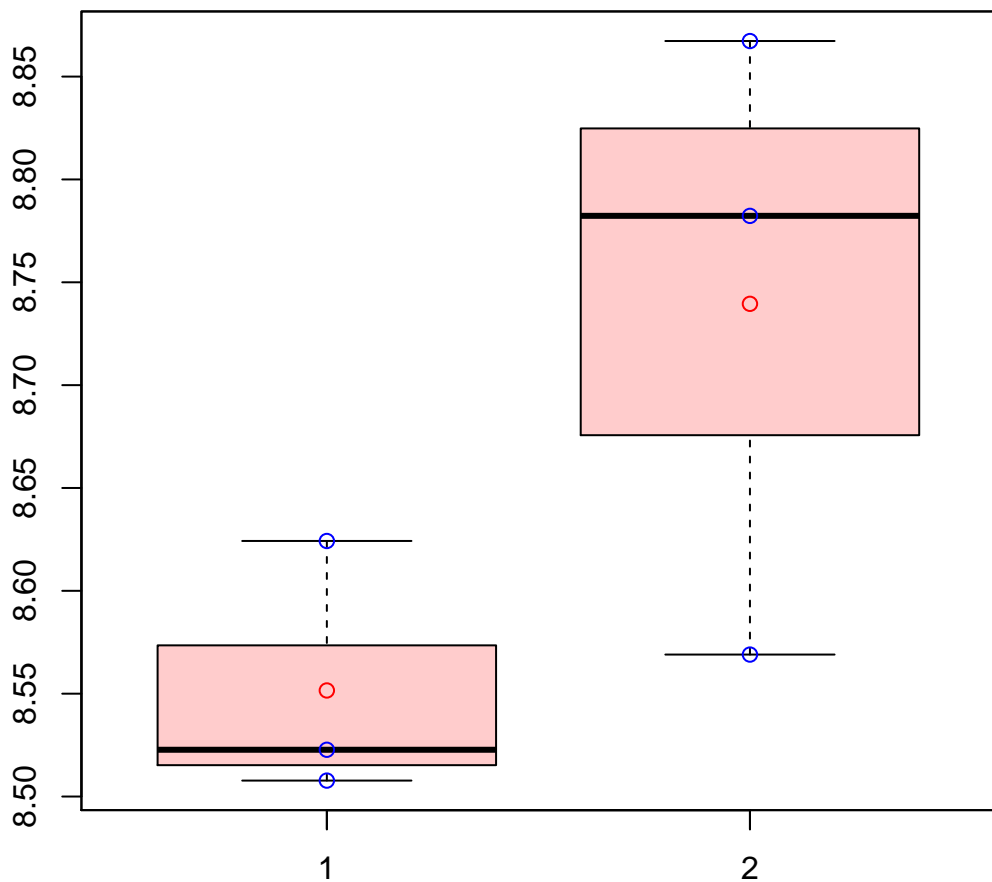

t-Test: p-value = 0.16

# CL426Contig2|CL426Contig2



t-Test: p-value = 0.42

# CL426Contig5|CL426Contig5

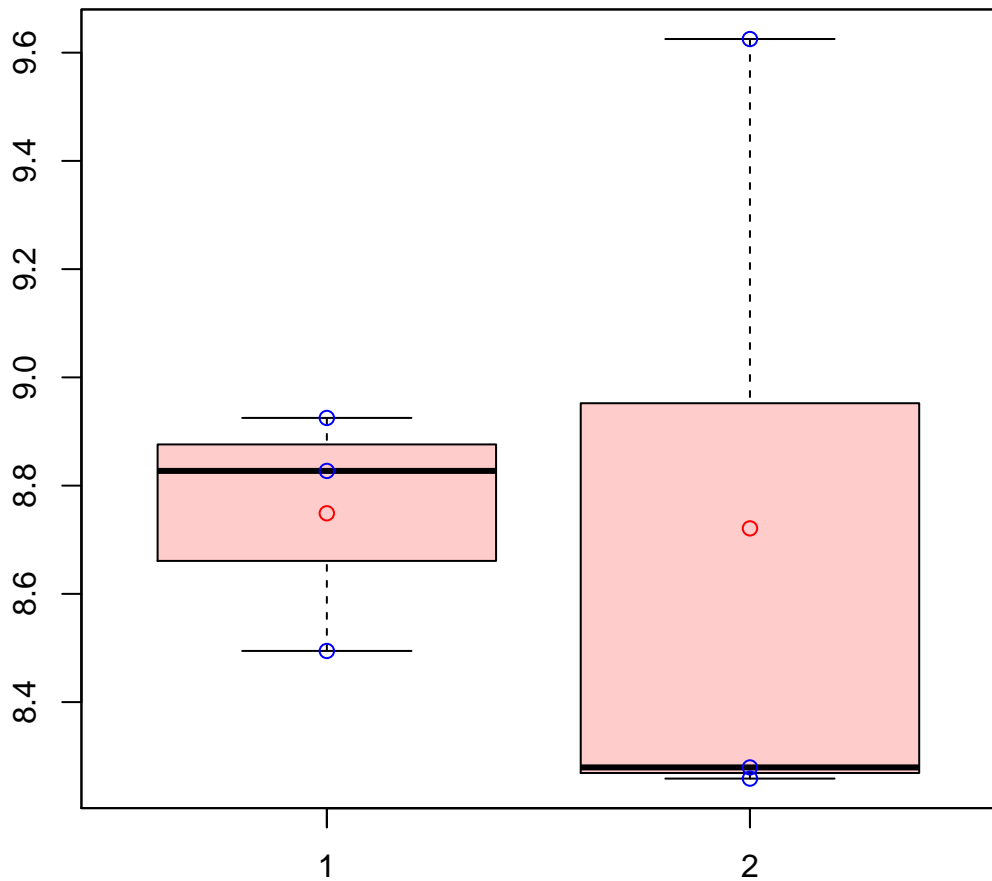

t-Test: p-value = 0.96

# CL426Contig6|CL426Contig6

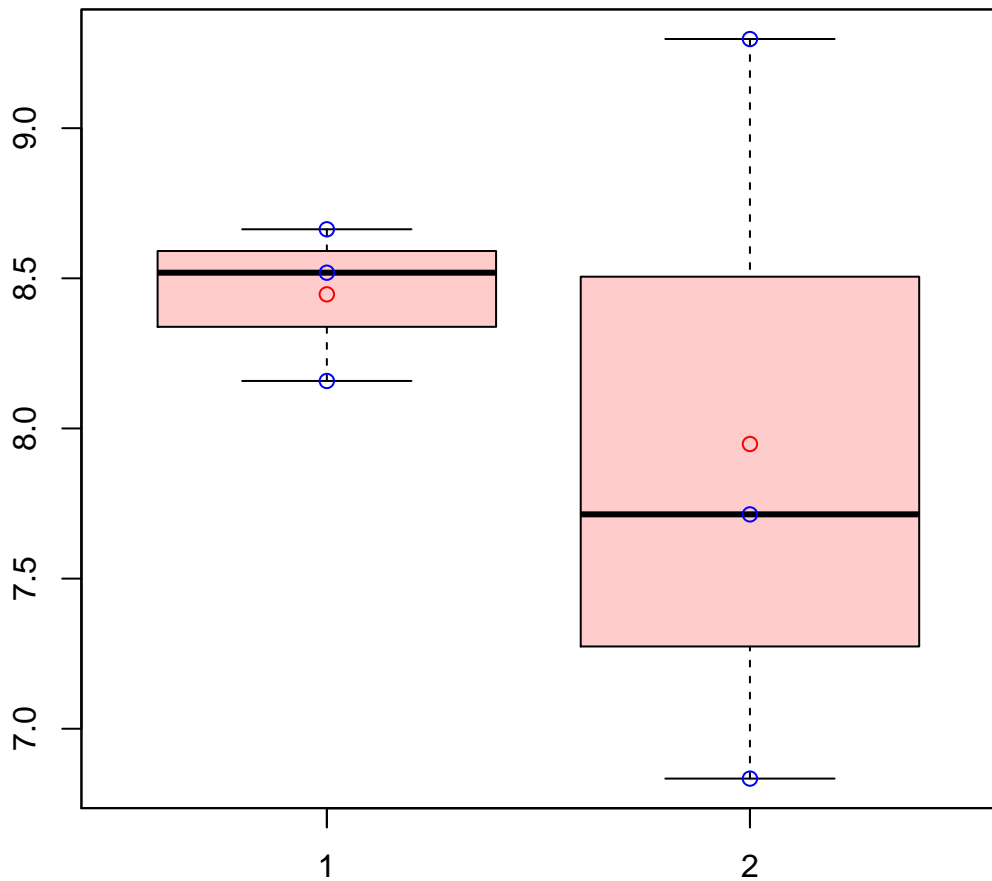

t-Test: p-value = 0.56

# CL426Contig7|CL426Contig7

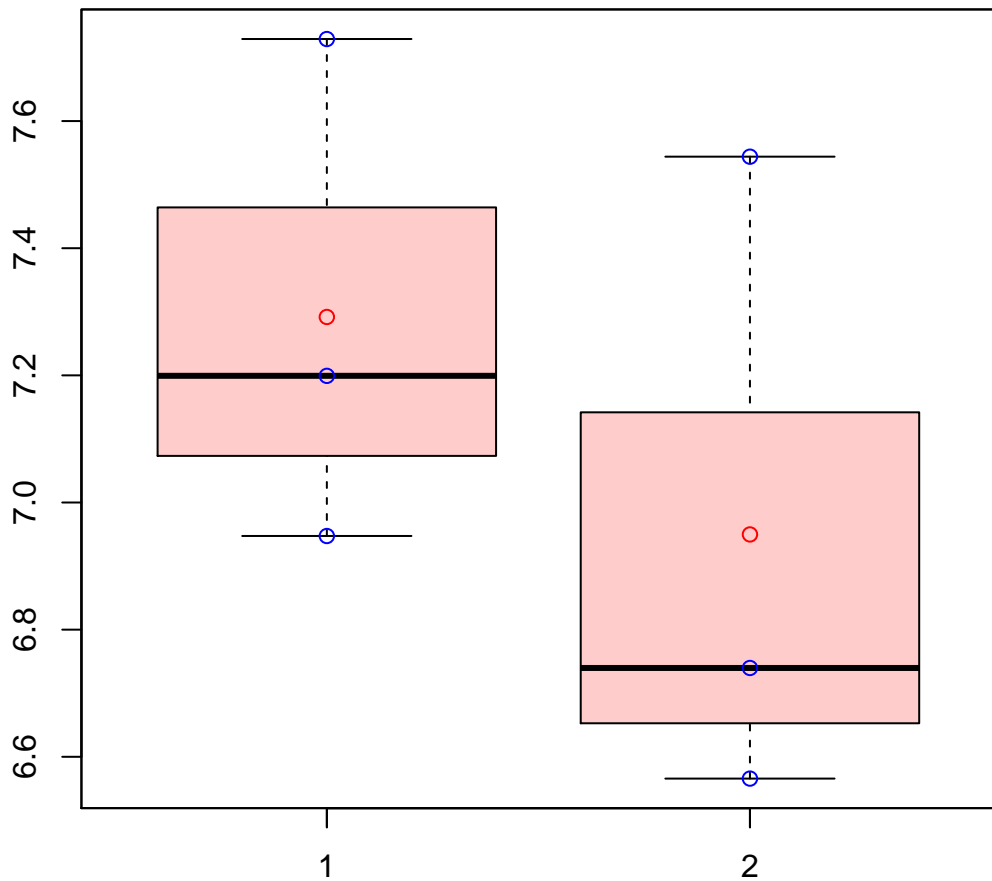

t-Test: p-value = 0.42

# CL4271Contig4|CL4271Contig4

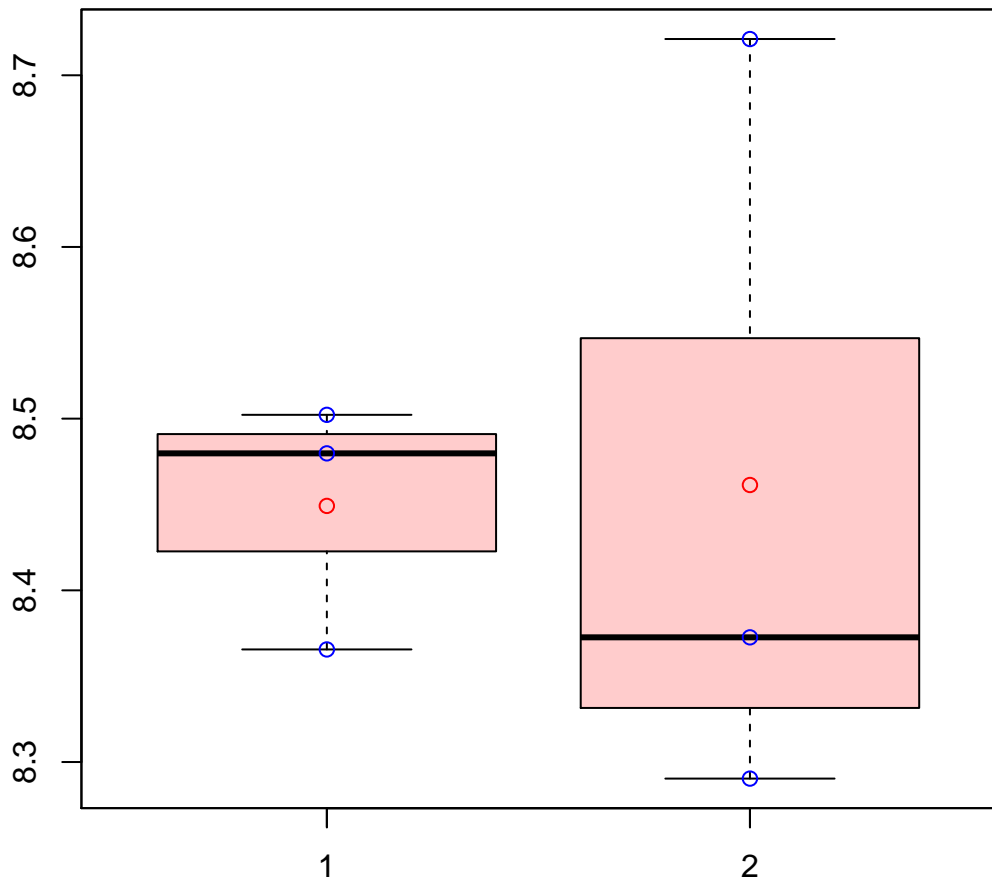

t-Test: p-value = 0.94

# CL4274Contig1|CL4274Contig1

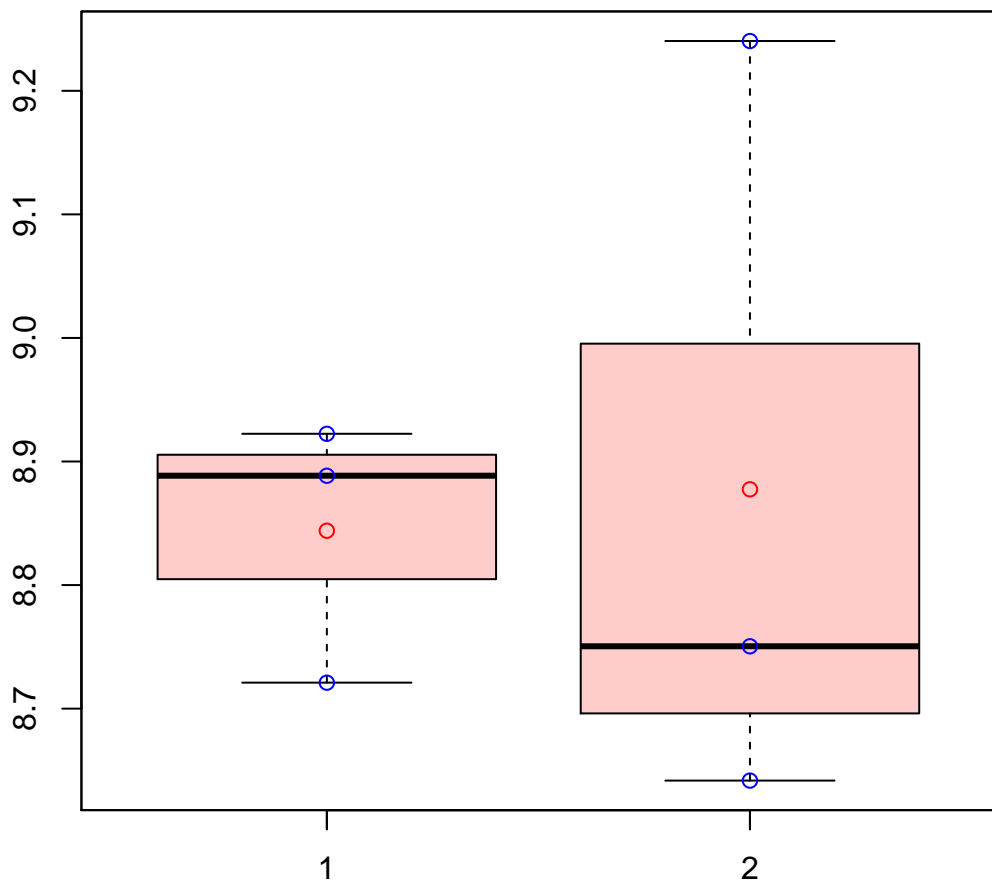

t-Test: p-value = 0.88



# CL4279Contig2|CL4279Contig2

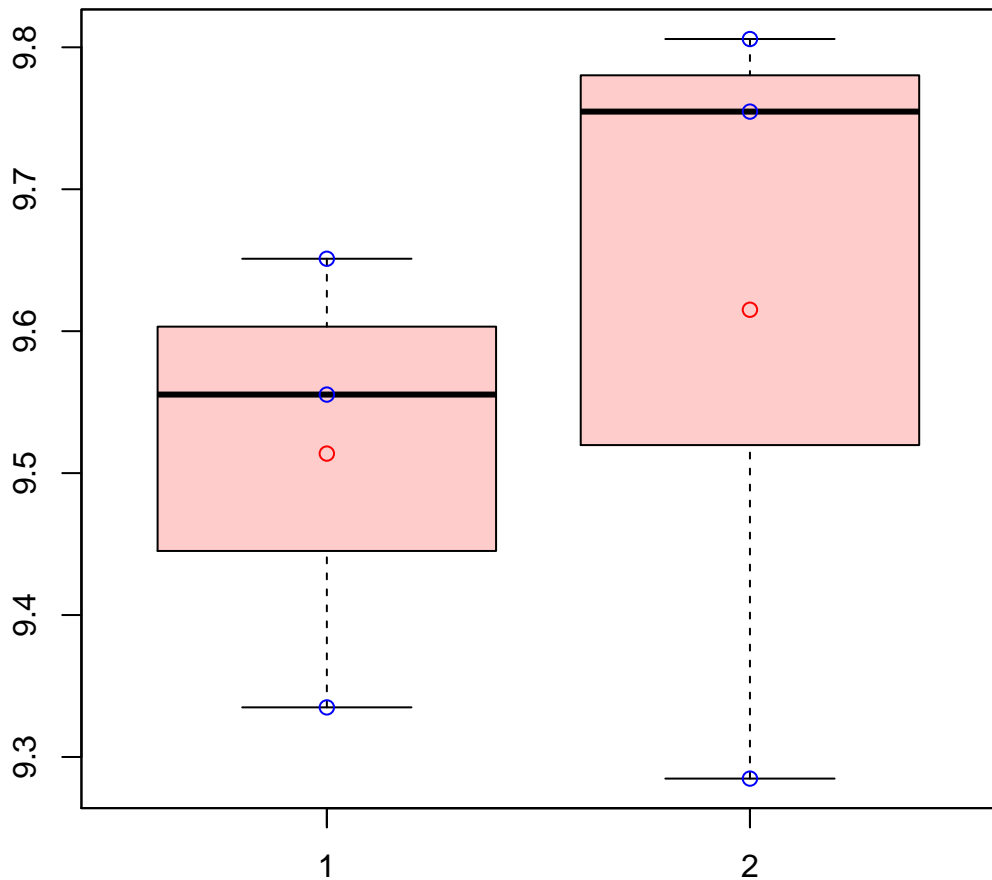

t-Test: p-value = 0.63

# CL4281Contig1|CL4281Contig1

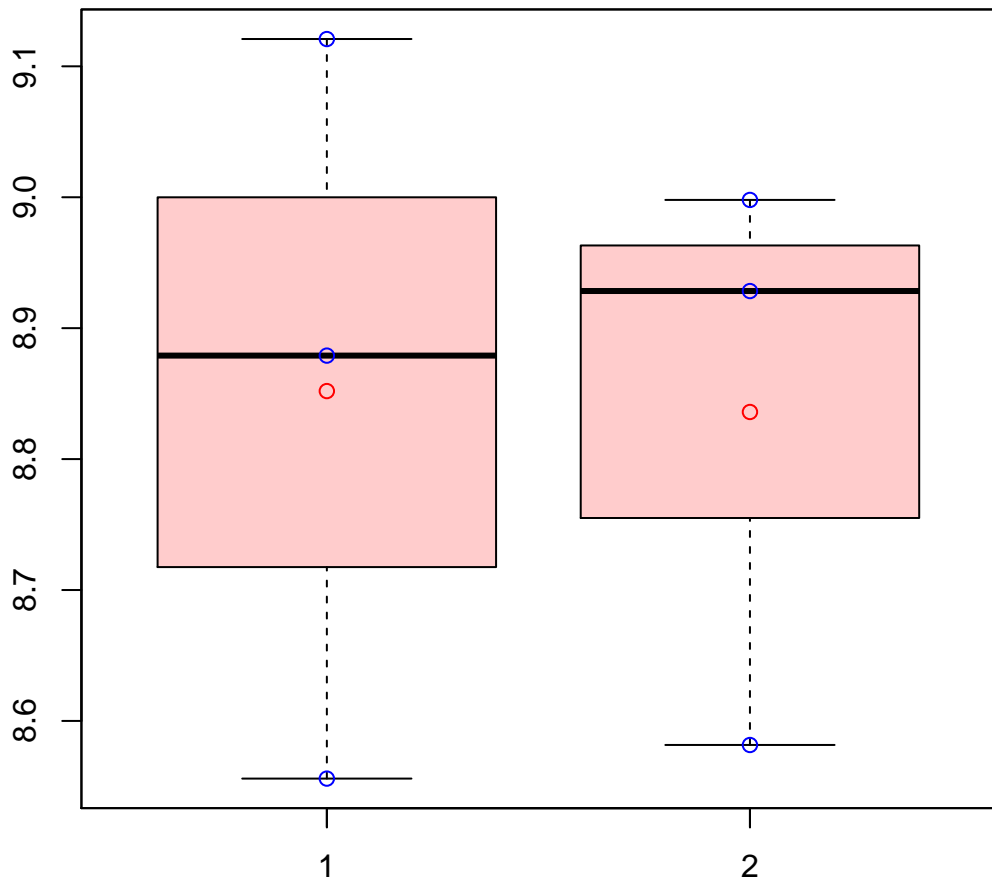

t-Test: p-value = 0.94

# CL4285Contig3|CL4285Contig3

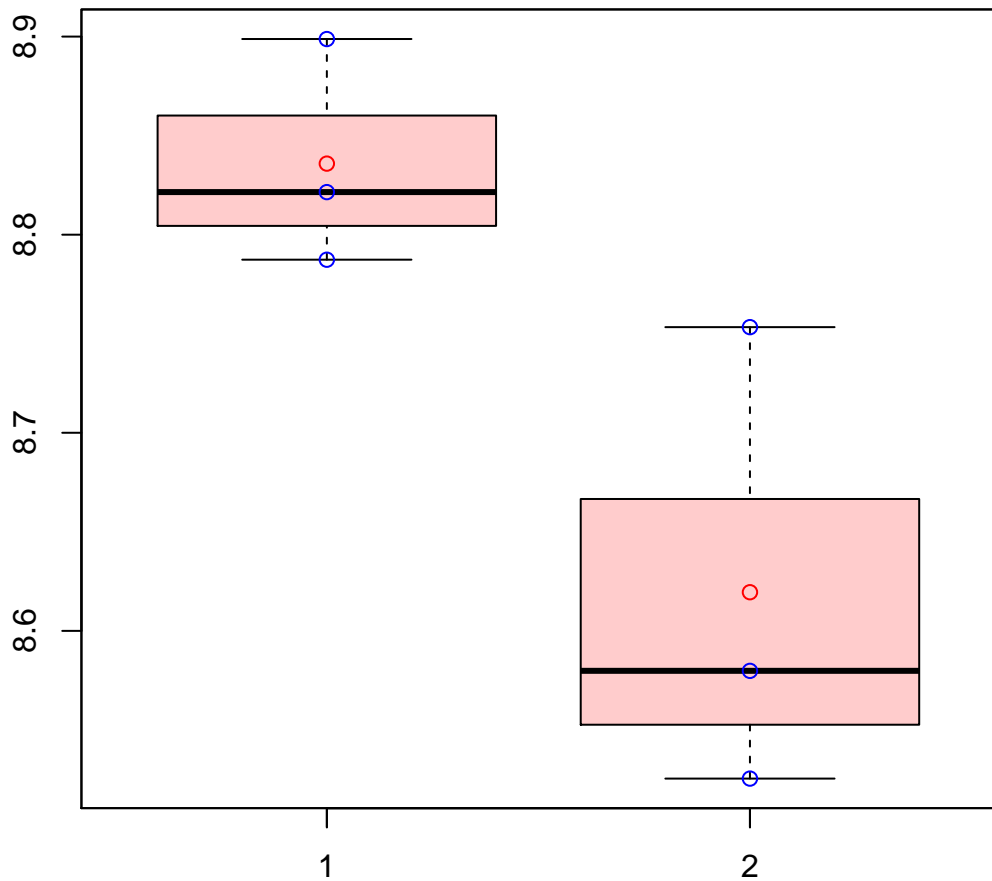

t-Test: p-value = 0.07

# CL4289Contig2|CL4289Contig2



t-Test: p-value = 0.35

# CL4289Contig6|CL4289Contig6

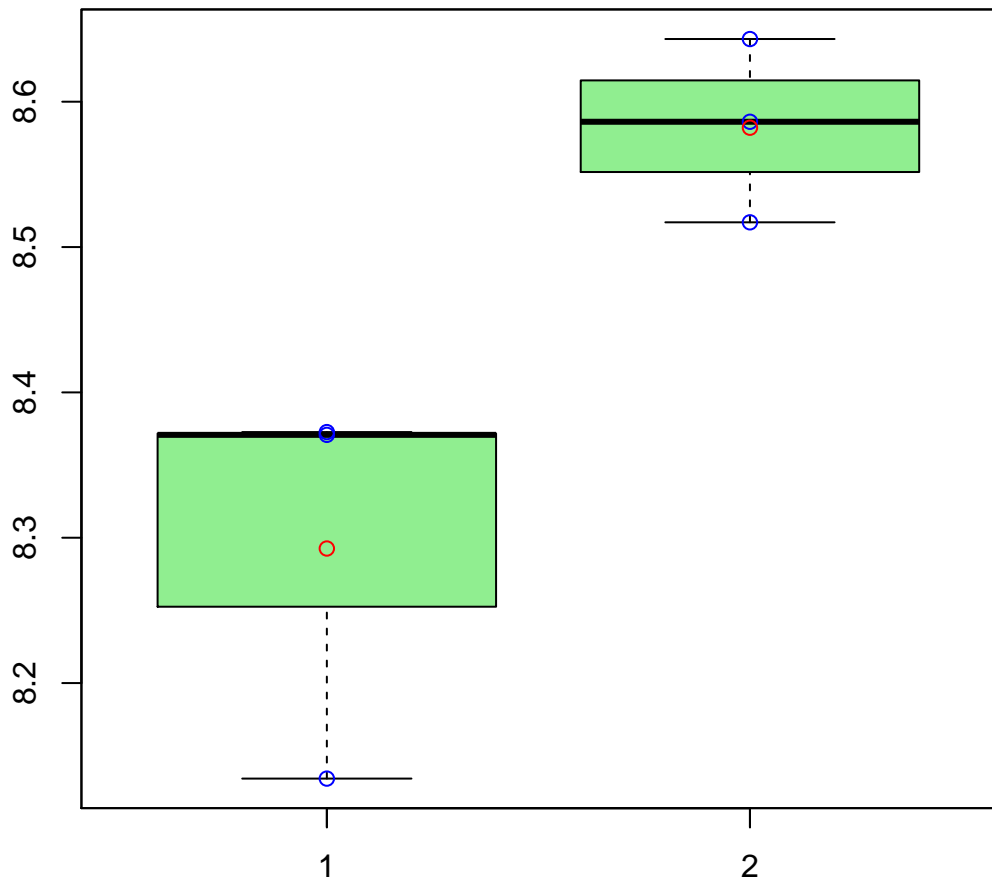

t-Test: p-value = 0.05

# CL4290Contig5|CL4290Contig5

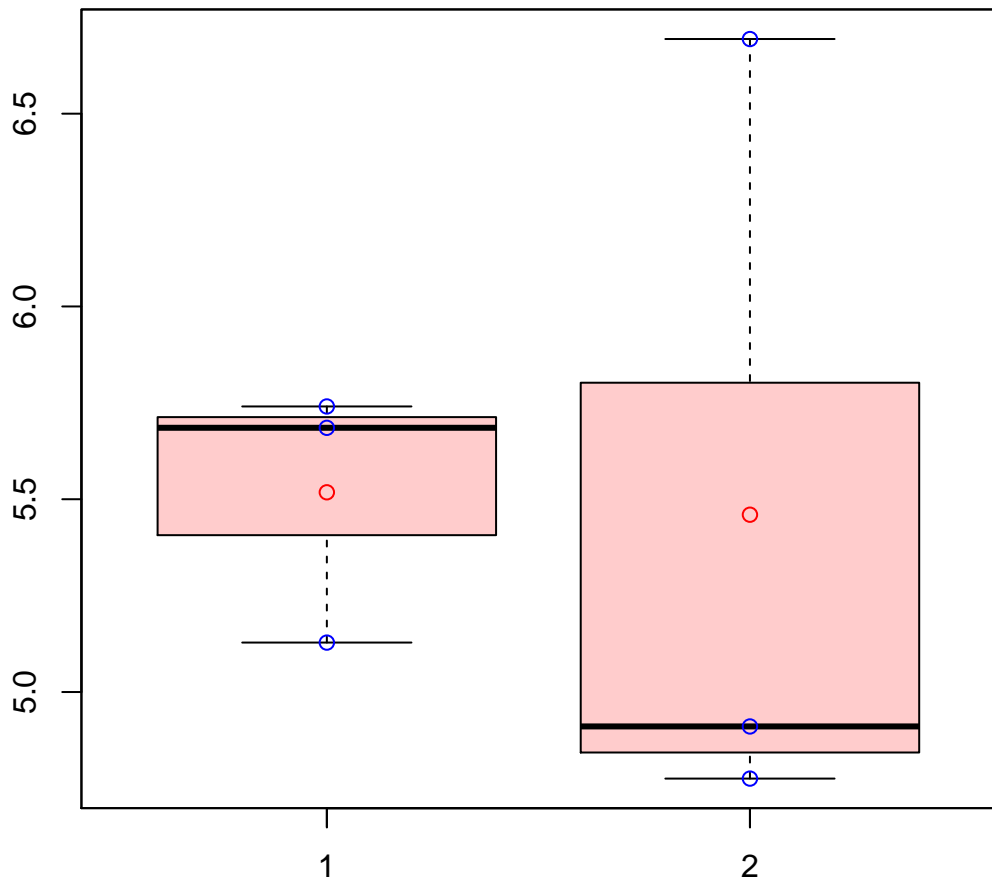

t-Test: p-value = 0.94

# CL42Contig14|CL42Contig14

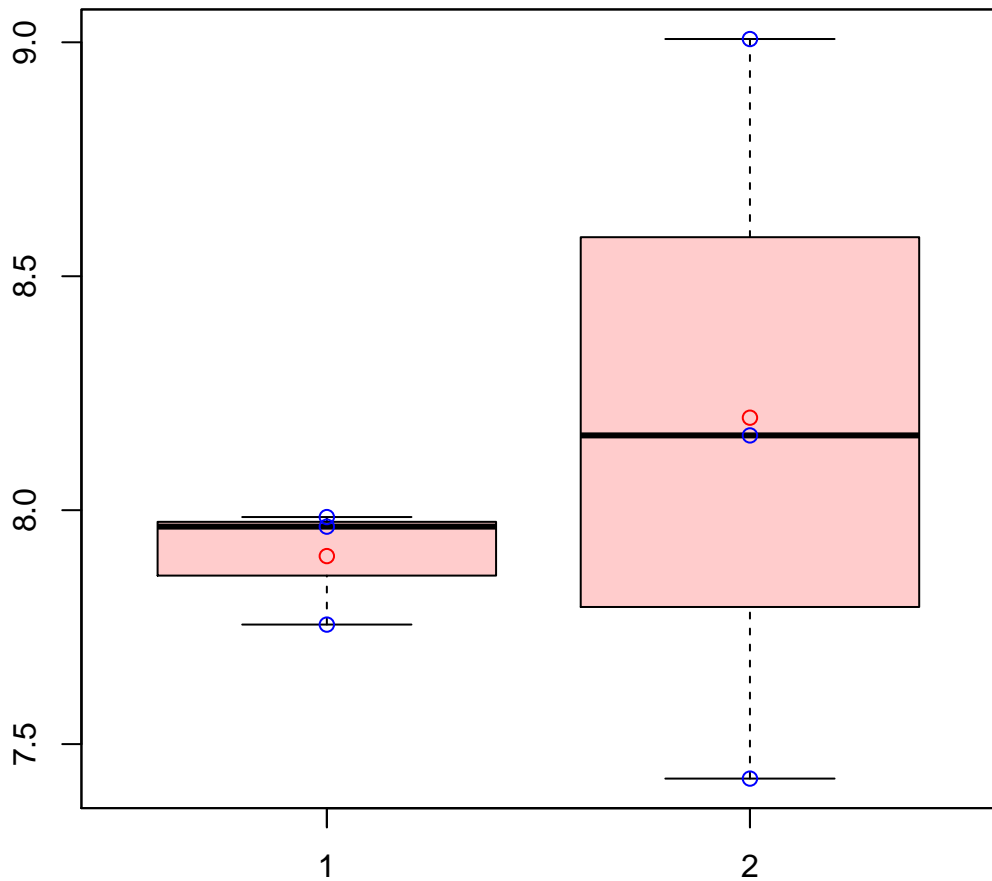

t-Test: p-value = 0.59

# CL42Contig15|CL42Contig15

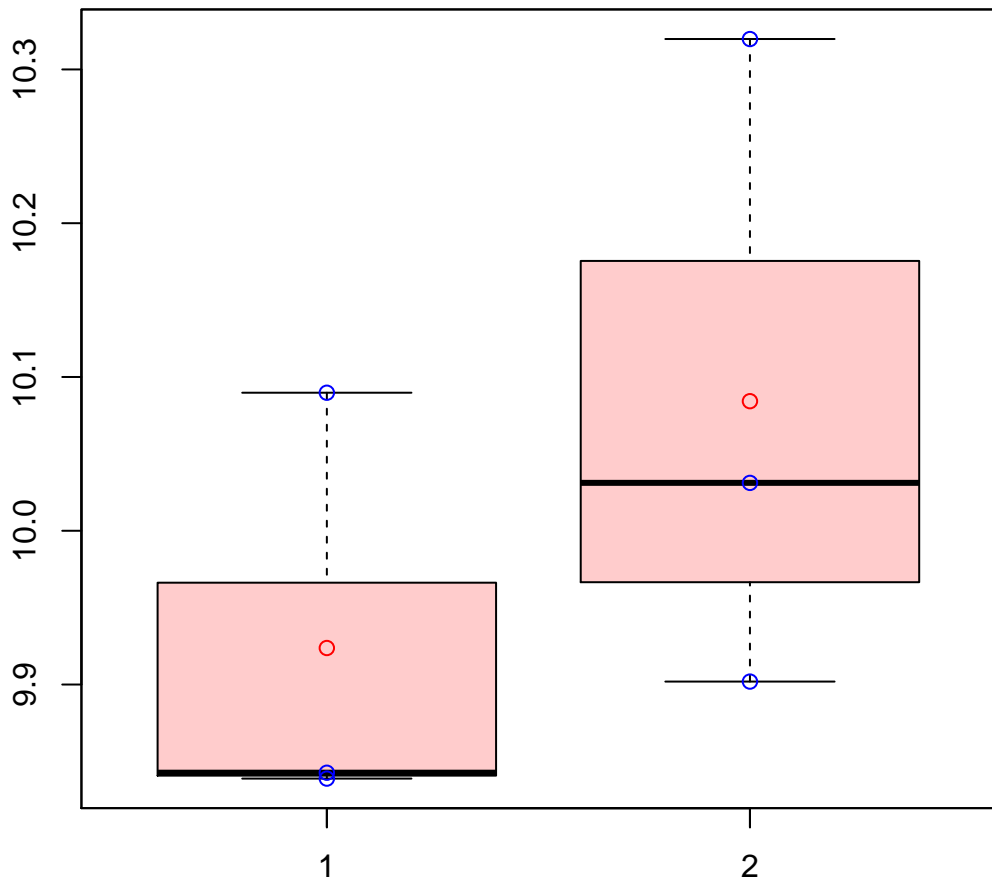

t-Test: p-value = 0.35



# CL42Contig7|CL42Contig7

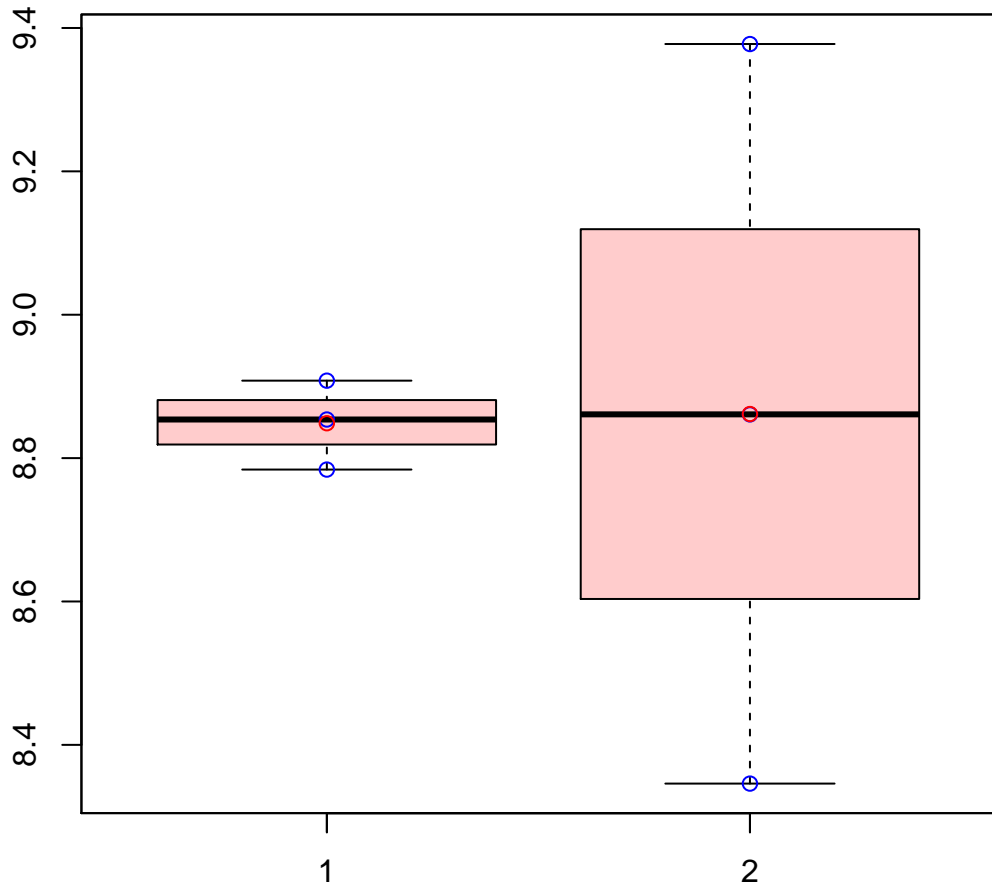

t-Test: p-value = 0.97

# CL42Contig9|CL42Contig9

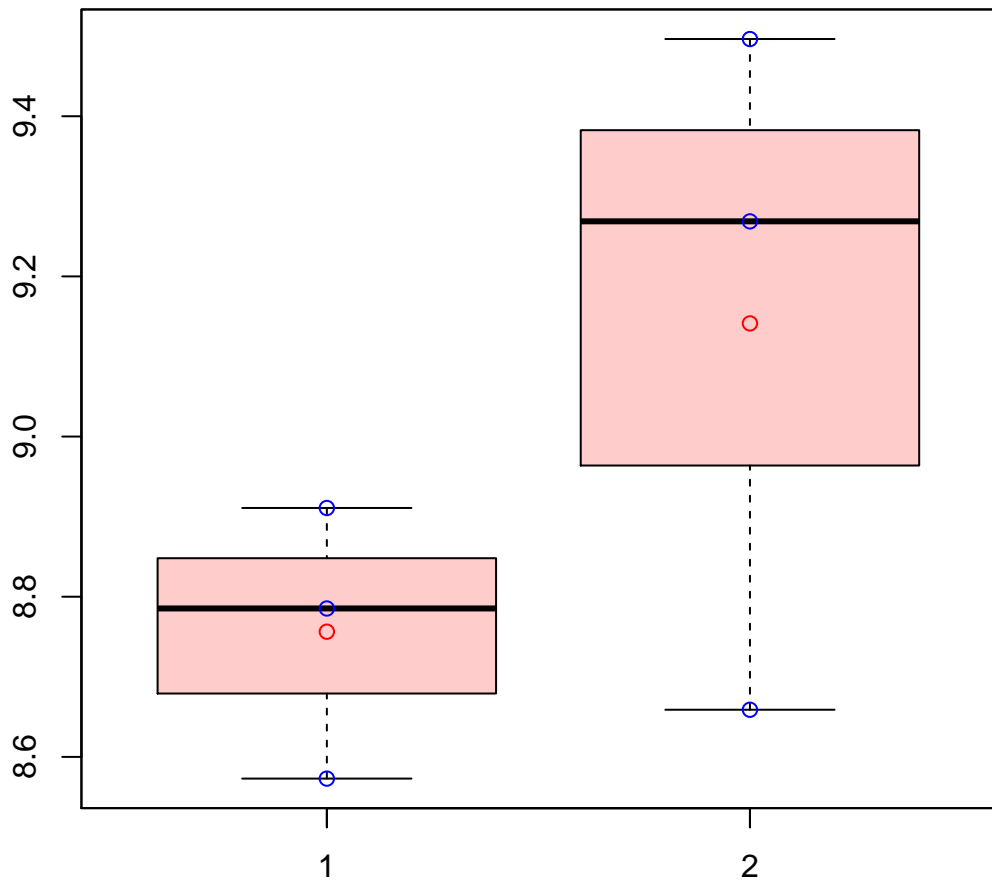

t-Test: p-value = 0.26

# CL4301Contig5|CL4301Contig5



t-Test: p-value = 0.06

# CL430Contig10|CL430Contig10

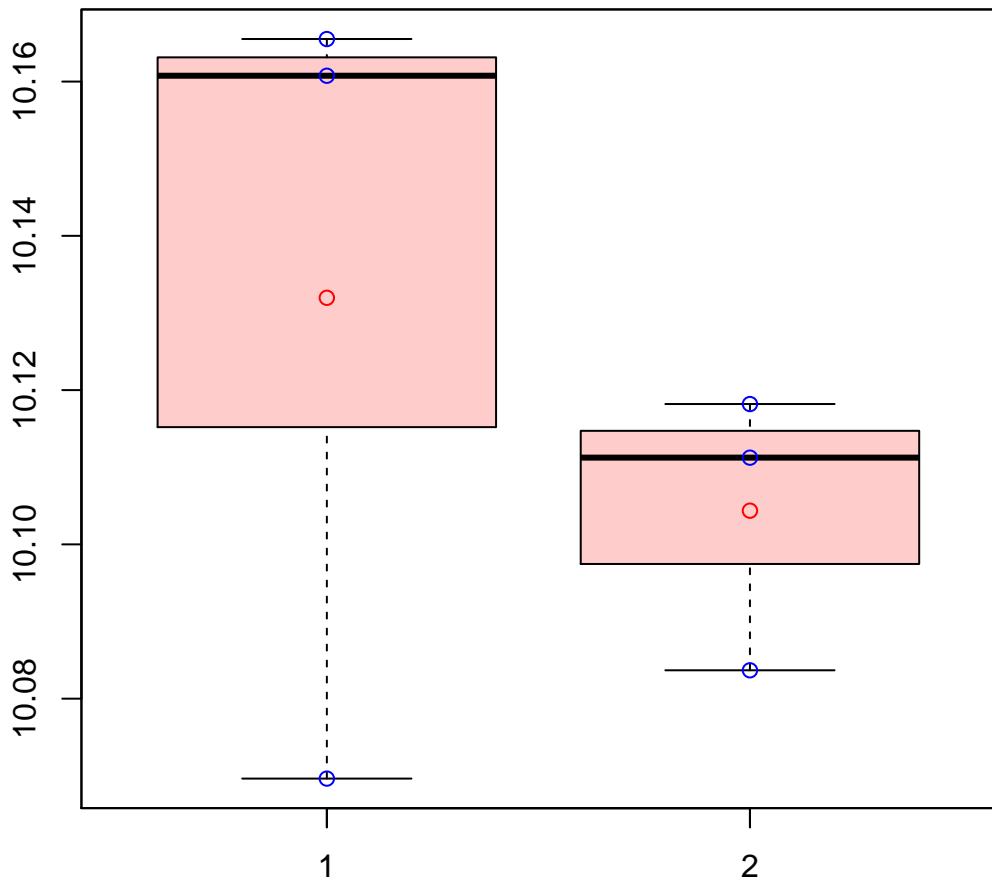

t-Test: p-value = 0.48

# CL430Contig11|CL430Contig11

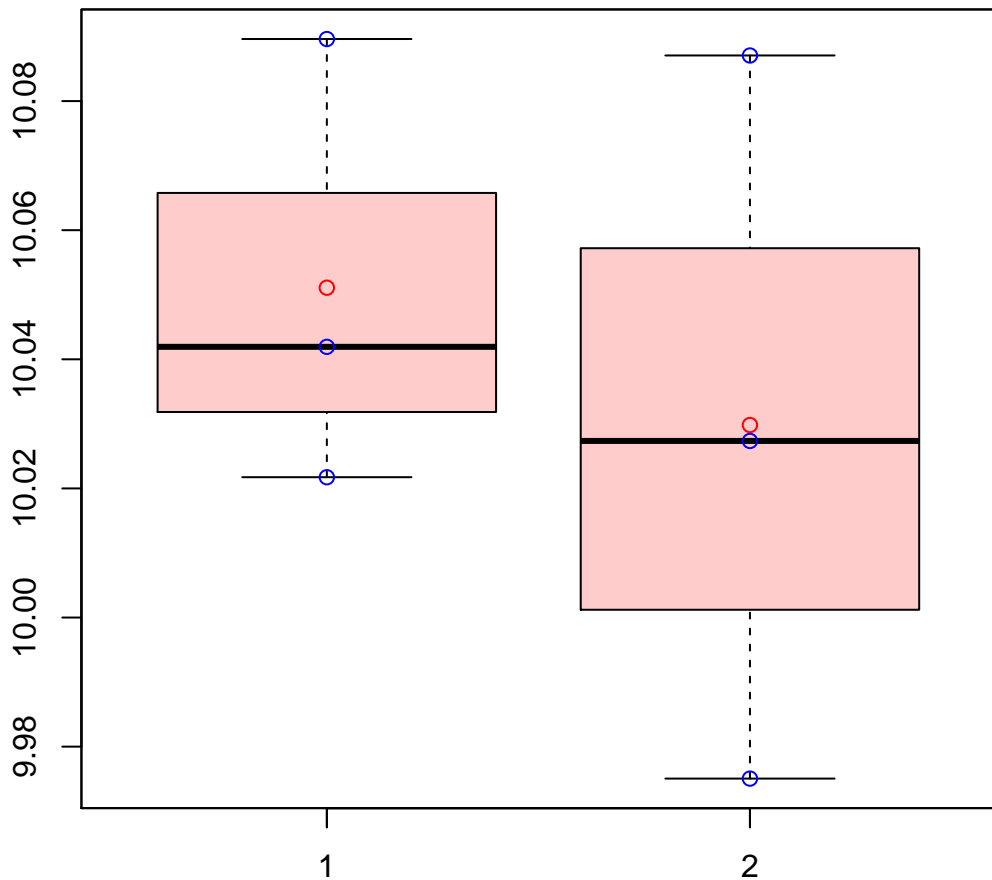

t-Test: p-value = 0.61

# CL430Contig12|CL430Contig12



t-Test: p-value = 0.61

# CL430Contig13|CL430Contig13

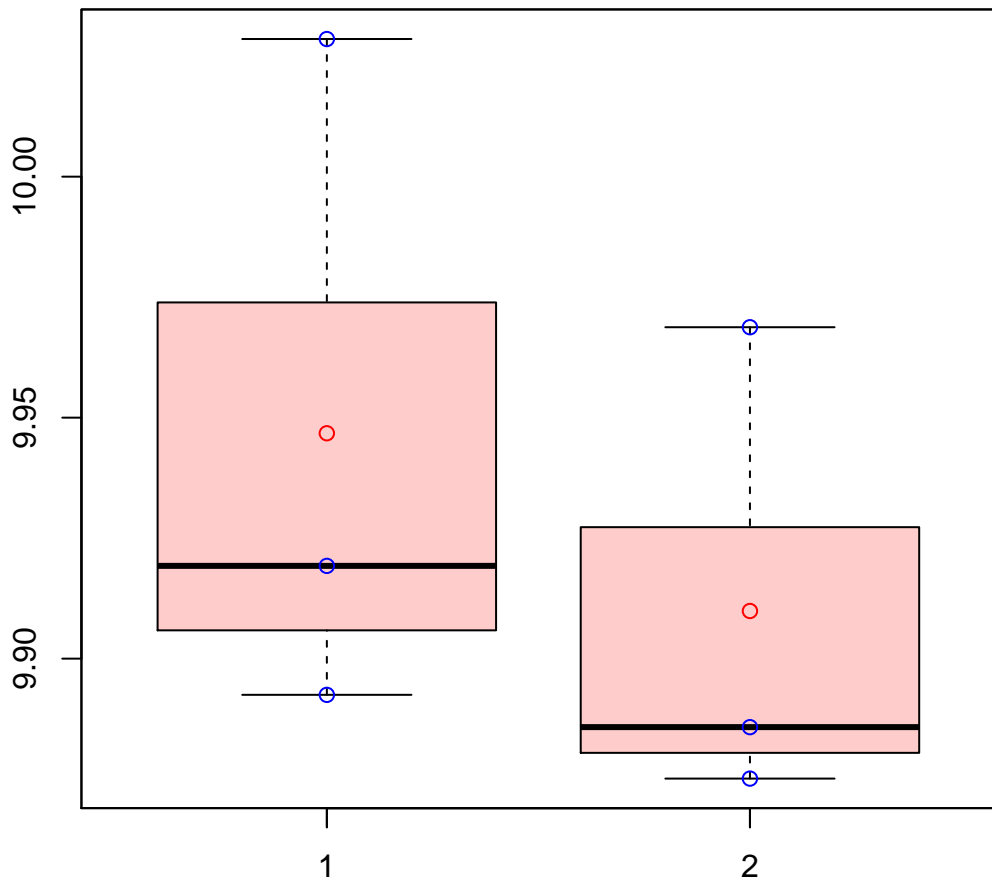

t-Test: p-value = 0.51

# CL430Contig14|CL430Contig14



t-Test: p-value = 0.51



# CL430Contig2|CL430Contig2

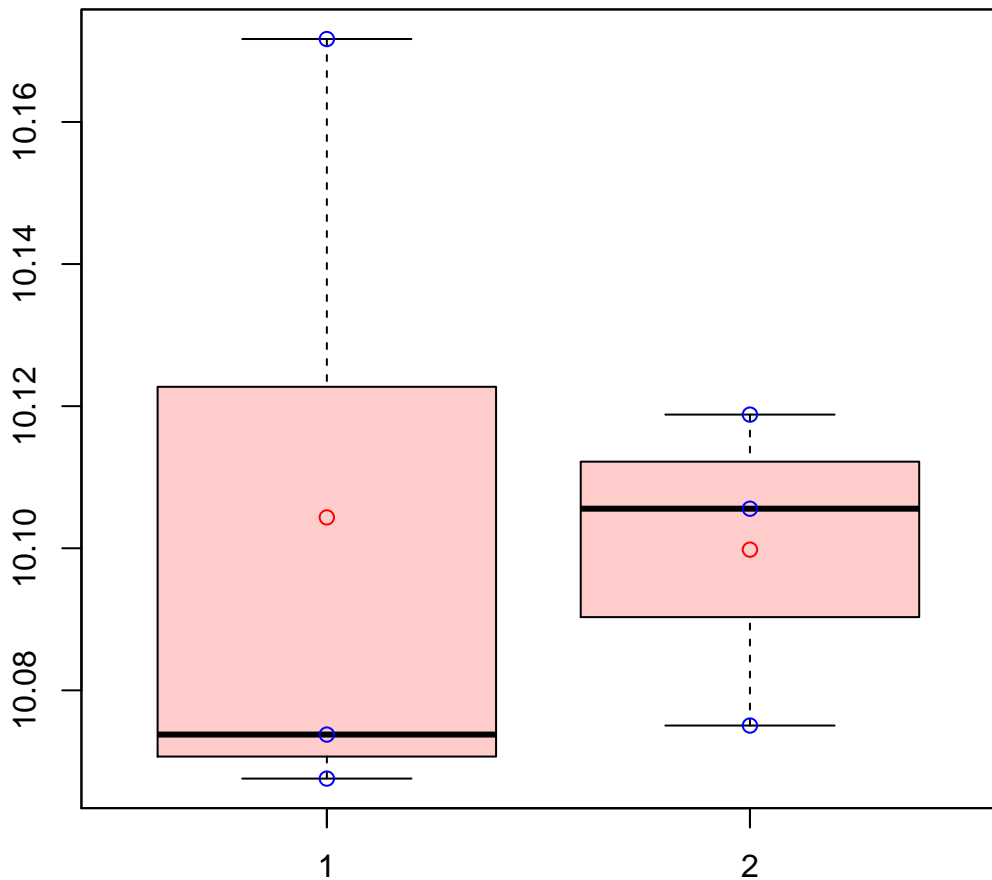

t-Test: p-value = 0.91

# CL430Contig3|CL430Contig3



t-Test: p-value = 0.51

# CL430Contig5|CL430Contig5

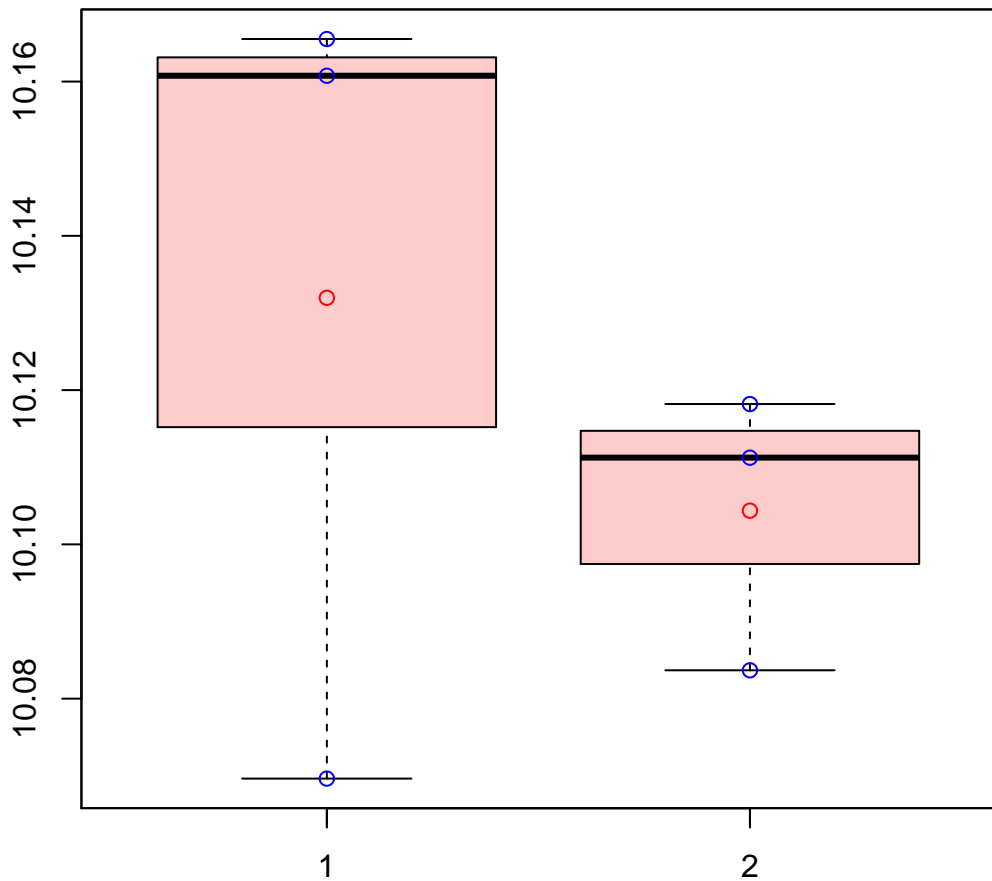

t-Test: p-value = 0.48

# CL430Contig8|CL430Contig8



t-Test: p-value = 0.51

# CL430Contig9|CL430Contig9

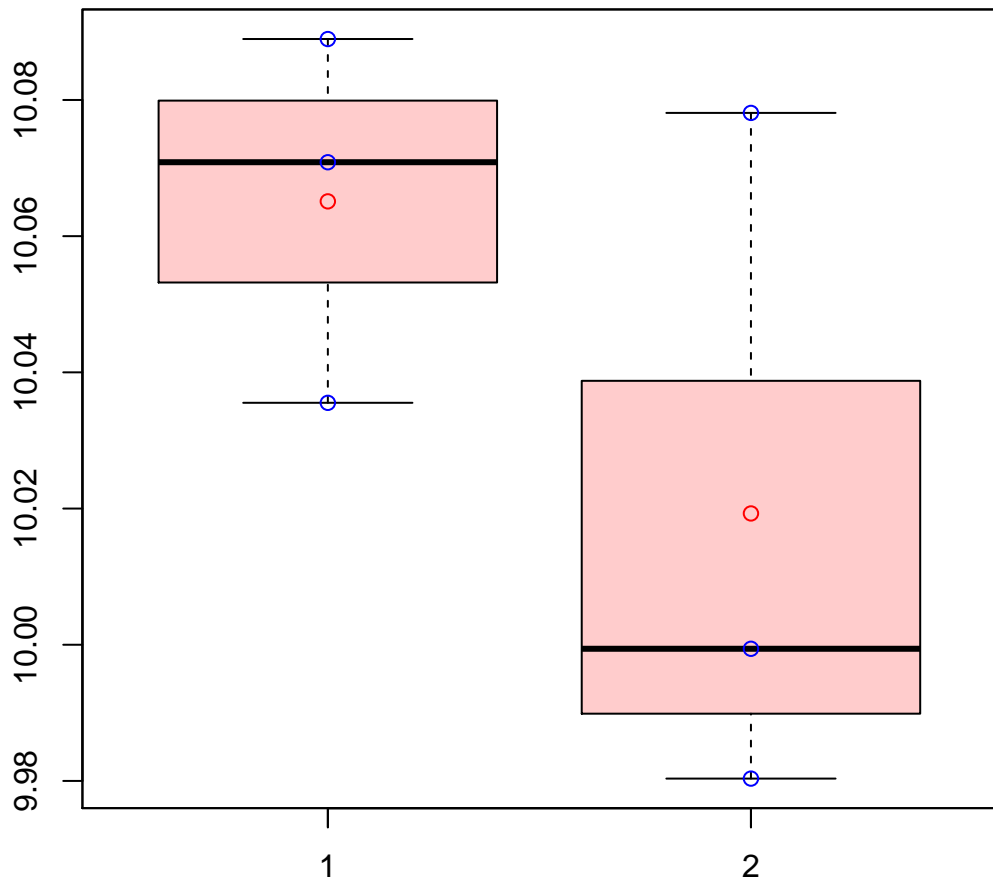

t-Test: p-value = 0.27

# CL4310Contig1|CL4310Contig1

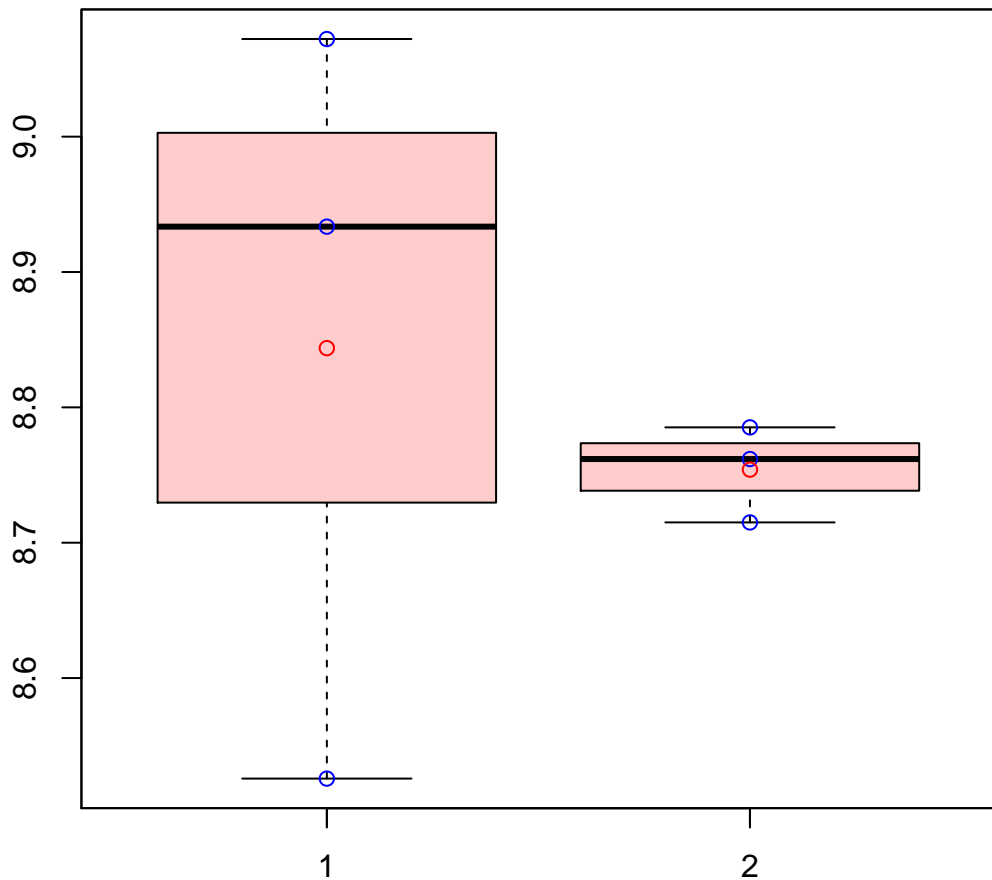

t-Test: p-value = 0.64

# CL4310Contig2|CL4310Contig2

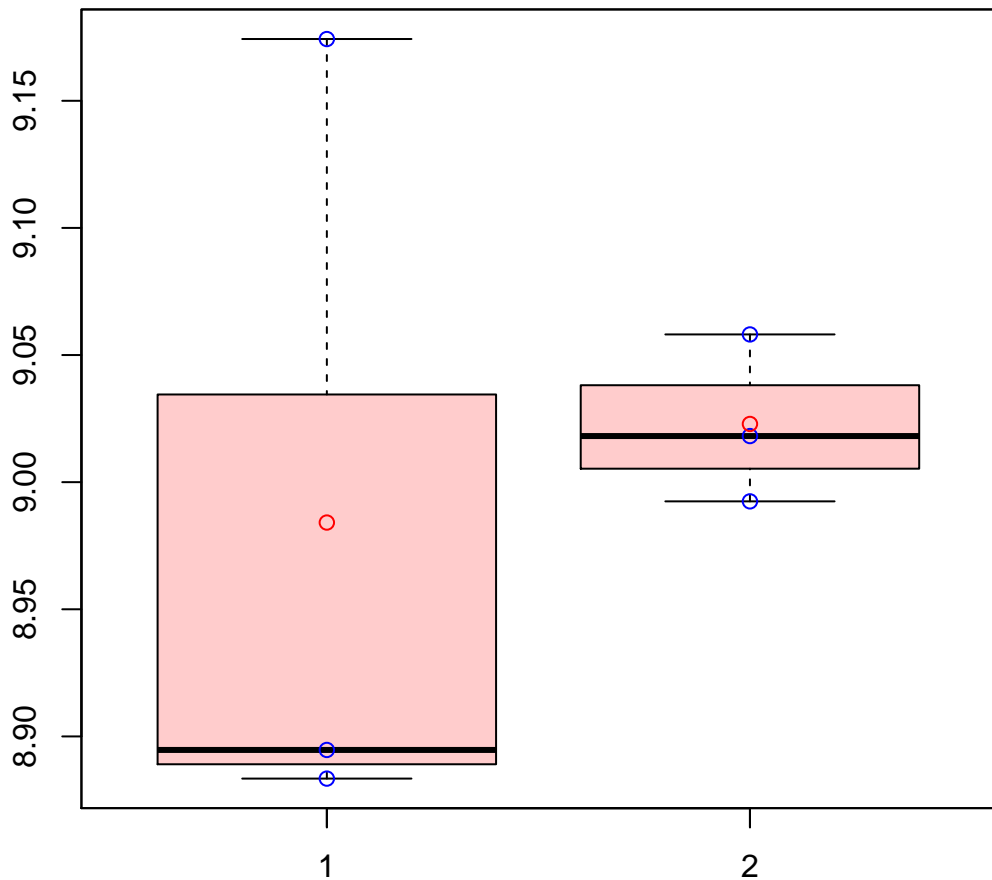

t-Test: p-value = 0.73

# CL4310Contig3|CL4310Contig3

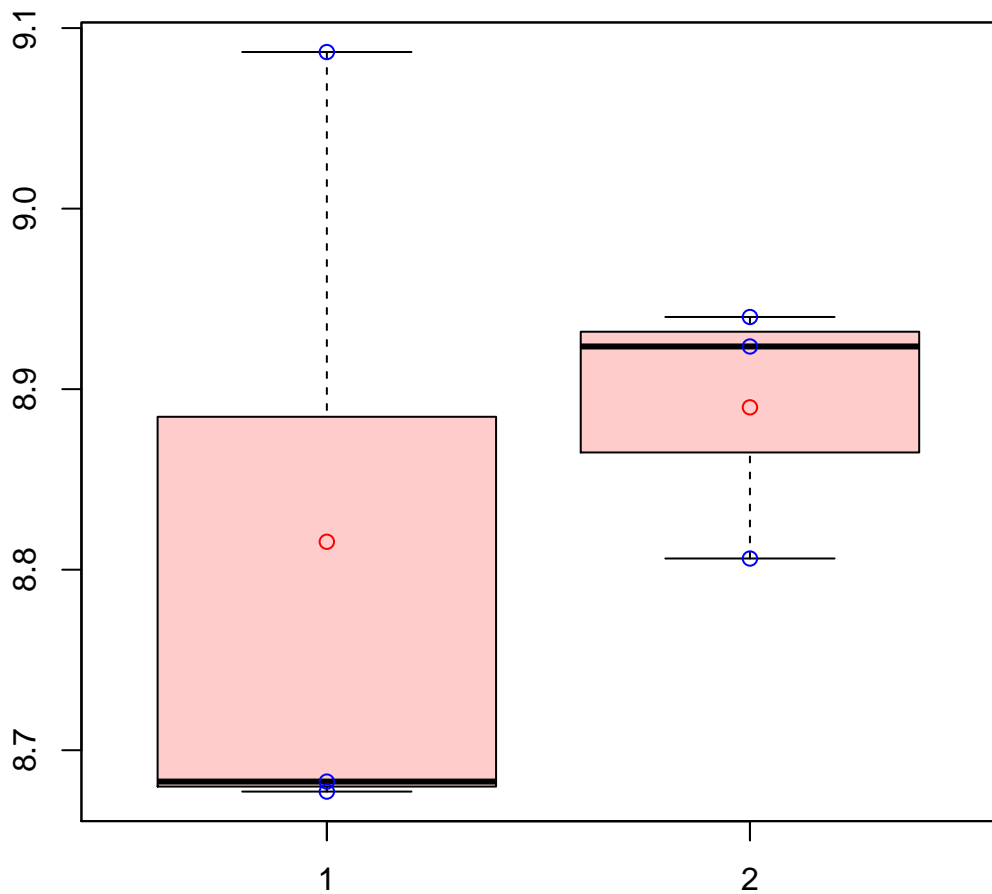

t-Test: p-value = 0.64



# CL4315Contig1|CL4315Contig1

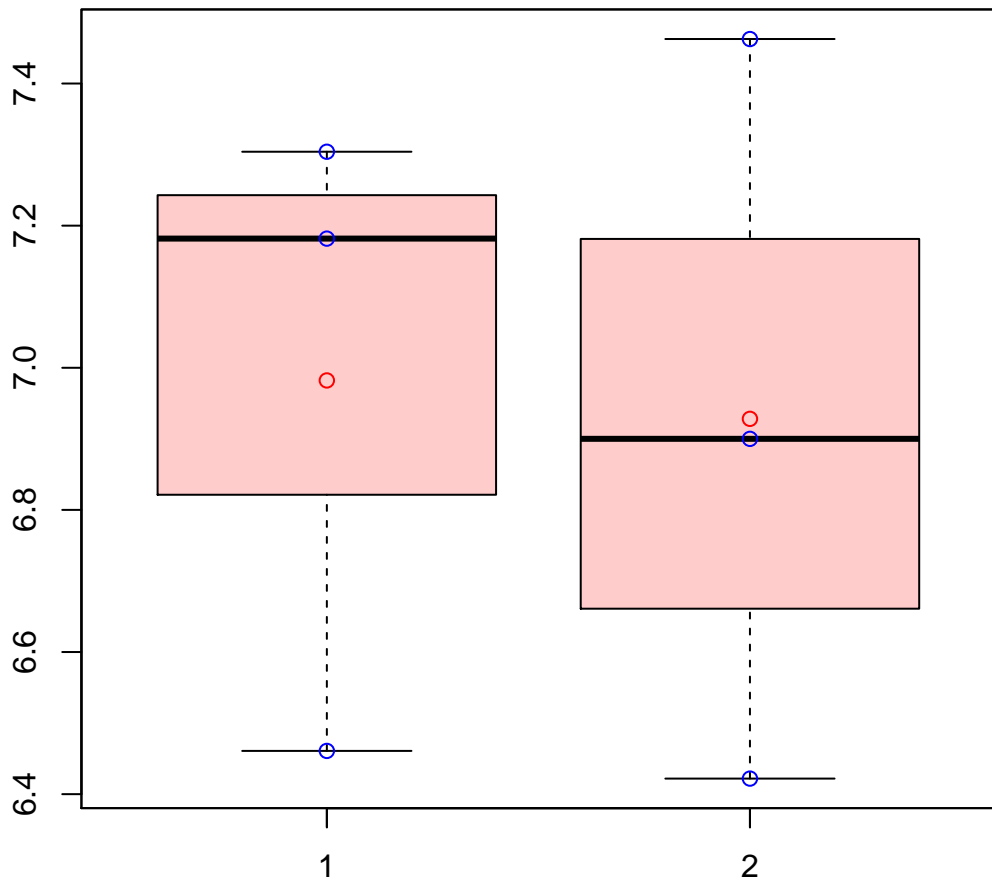

t-Test: p-value = 0.9

# CL4321Contig2|CL4321Contig2

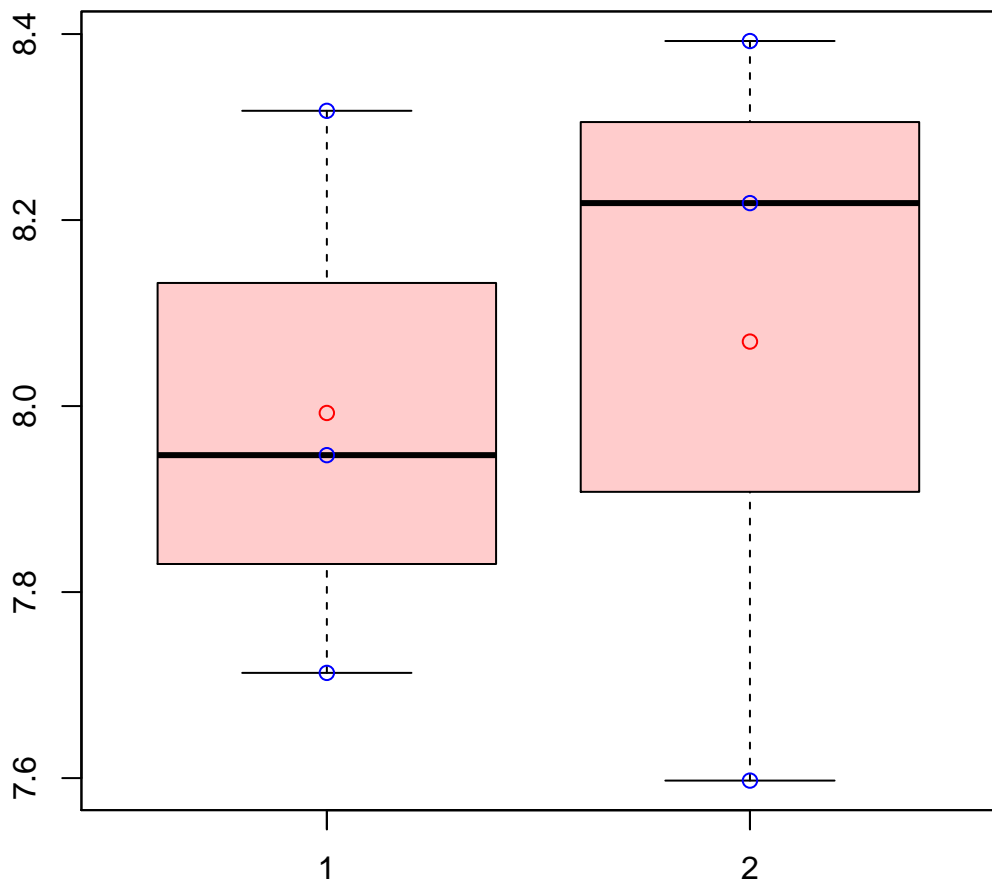

t-Test: p-value = 0.81

# CL4321Contig4|CL4321Contig4



t-Test: p-value = 0.81

# CL4328Contig1|CL4328Contig1

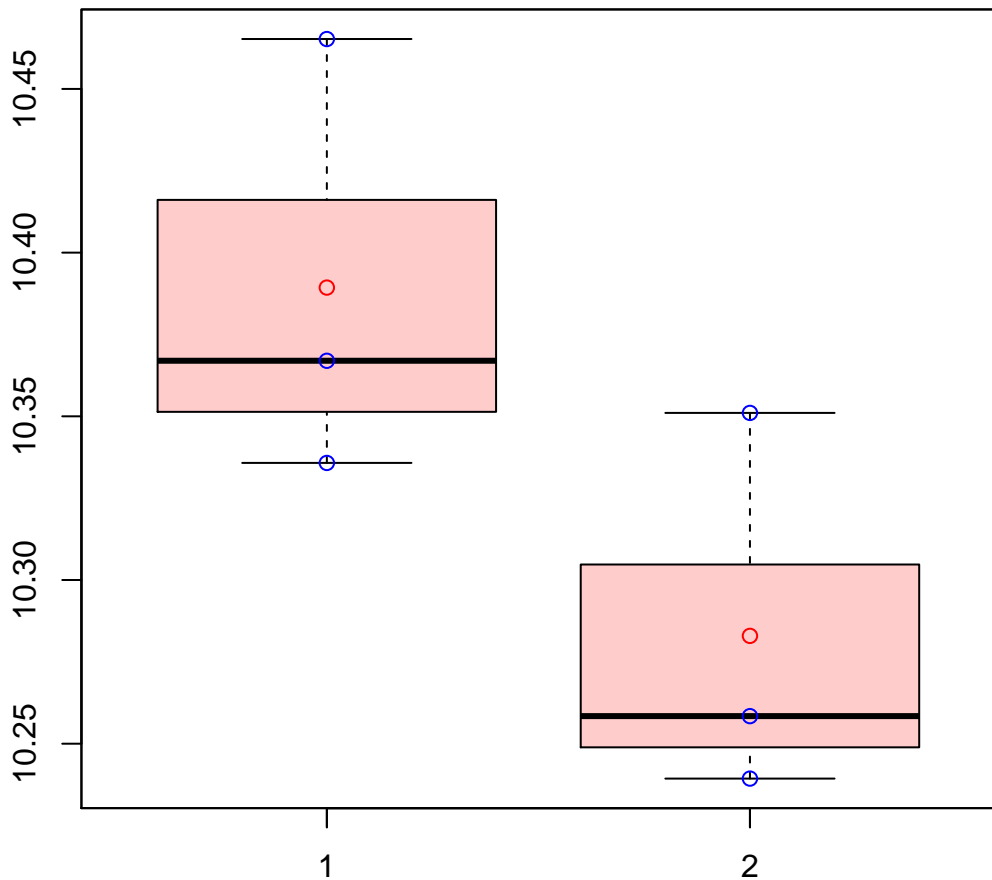

t-Test: p-value = 0.11

# CL4328Contig2|CL4328Contig2



t-Test: p-value = 0.11

# CL432Contig11|CL432Contig11

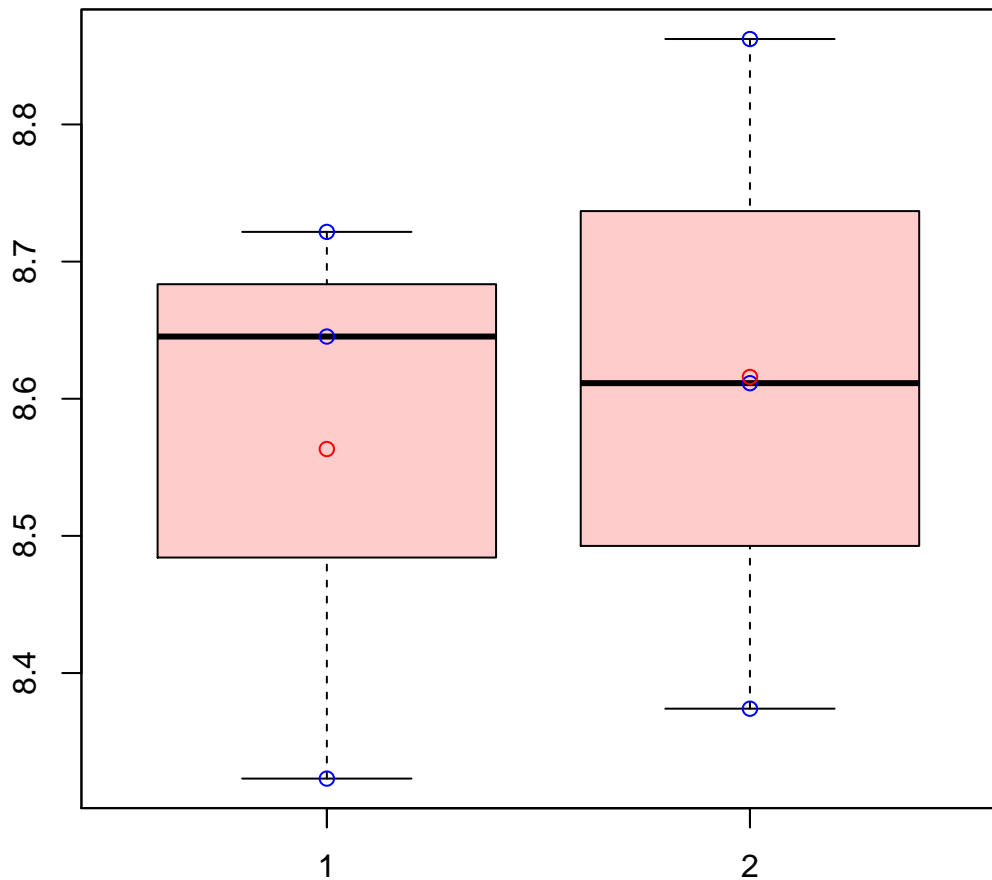

t-Test: p-value = 0.79

# CL432Contig12|CL432Contig12

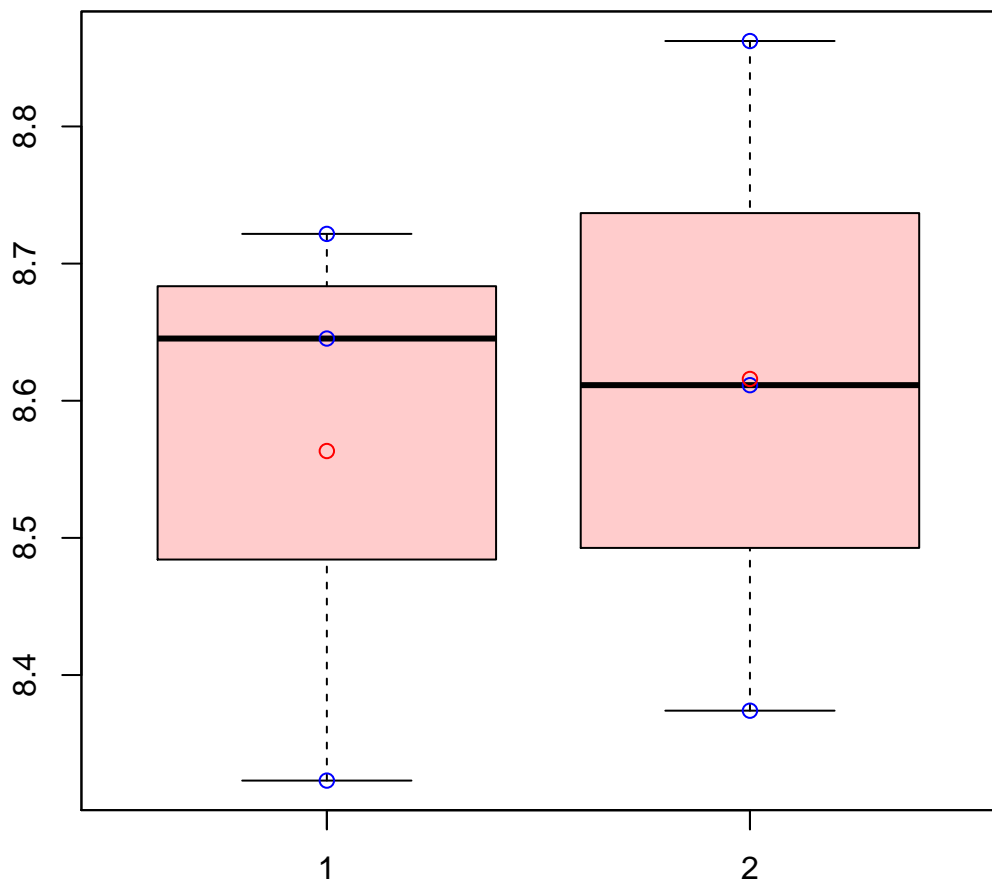

t-Test: p-value = 0.79

# CL432Contig13|CL432Contig13



t-Test: p-value = 0.79



# CL432Contig14|CL432Contig14



t-Test: p-value = 0.79

# CL432Contig15|CL432Contig15



t-Test: p-value = 0.79

# CL432Contig5|CL432Contig5



t-Test: p-value = 0.79

# CL4331Contig1|CL4331Contig1

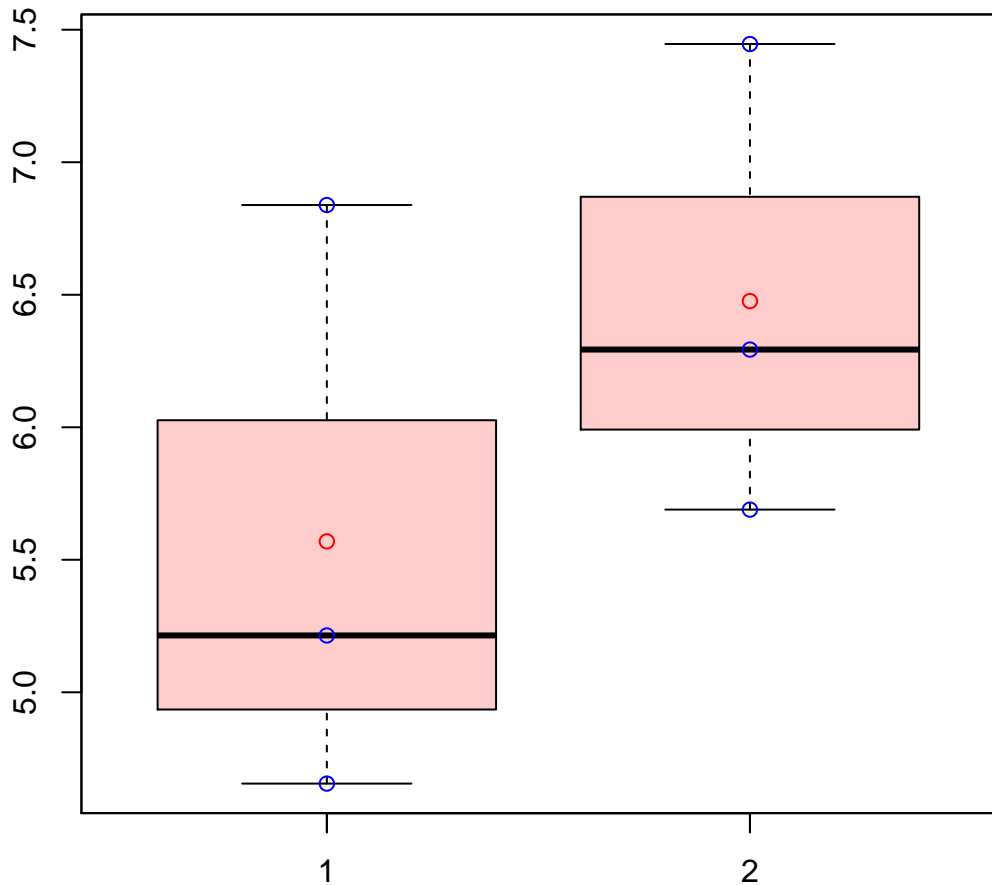

t-Test: p-value = 0.34

# CL4333Contig1|CL4333Contig1

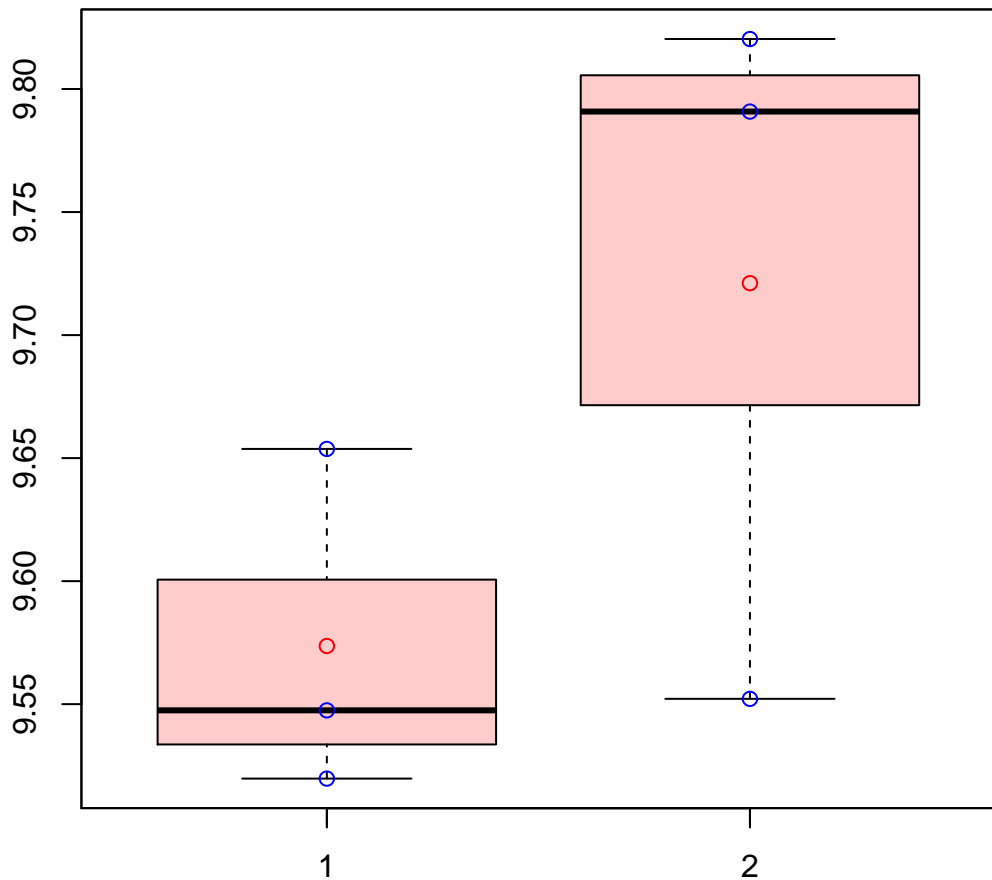

t-Test: p-value = 0.22

# CL4333Contig2|CL4333Contig2

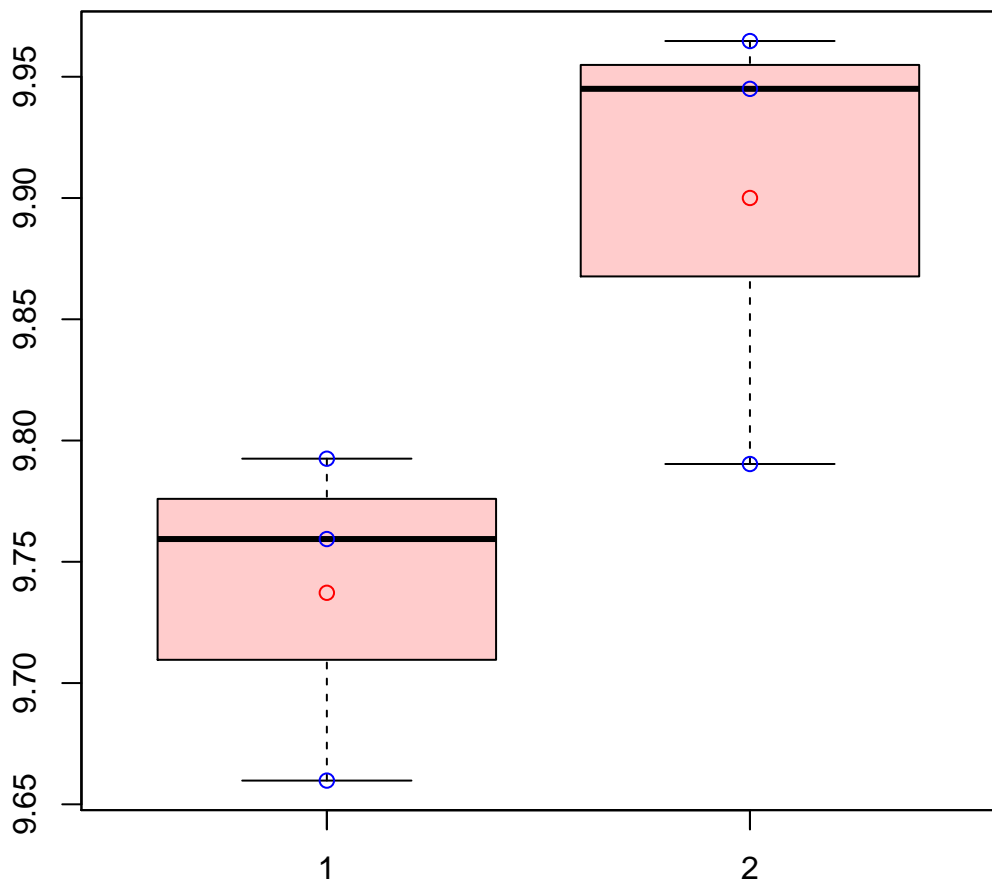

t-Test: p-value = 0.08

# CL433Contig1|CL433Contig1

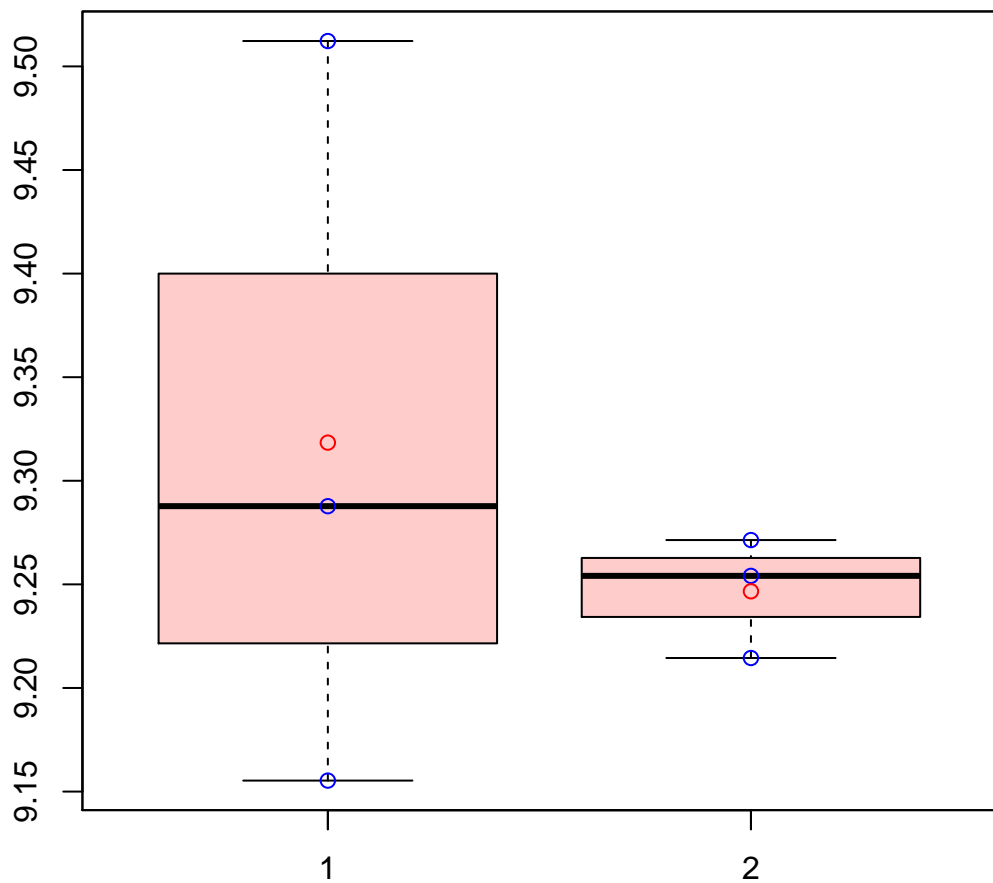

t-Test: p-value = 0.56

# CL433Contig3|CL433Contig3

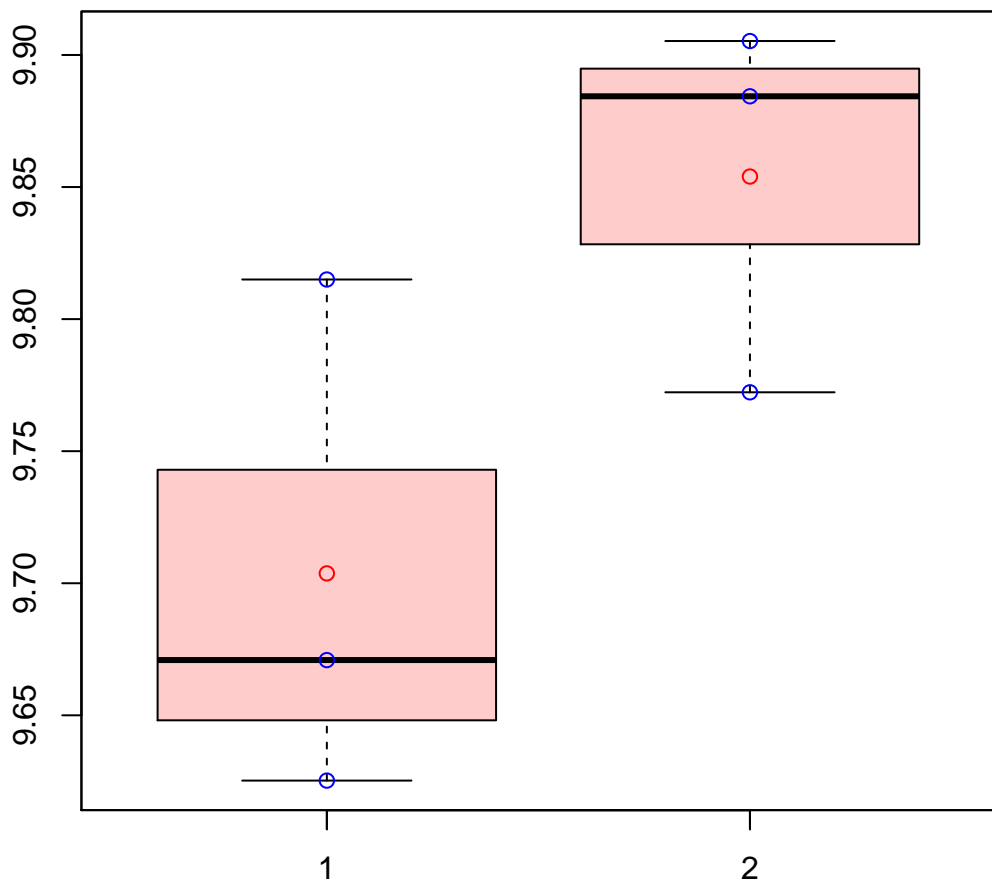

t-Test: p-value = 0.11



# CL4341Contig5|CL4341Contig5

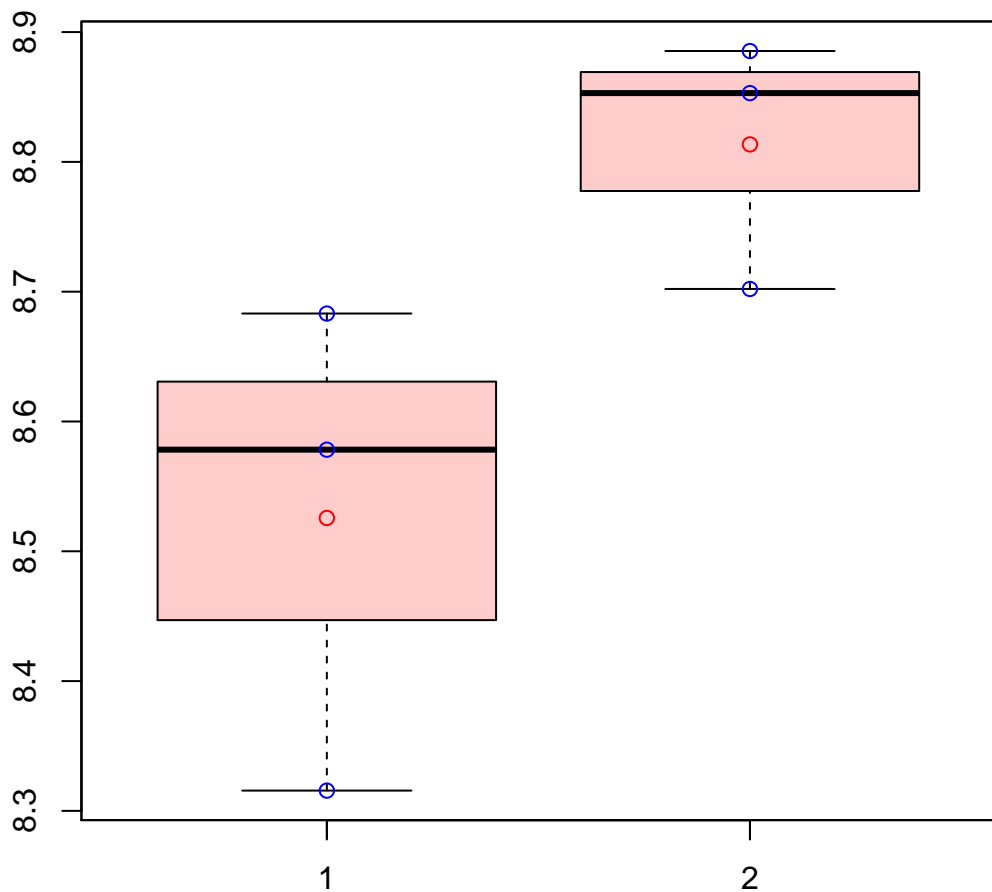

t-Test: p-value = 0.1

# CL434Contig11|CL434Contig11

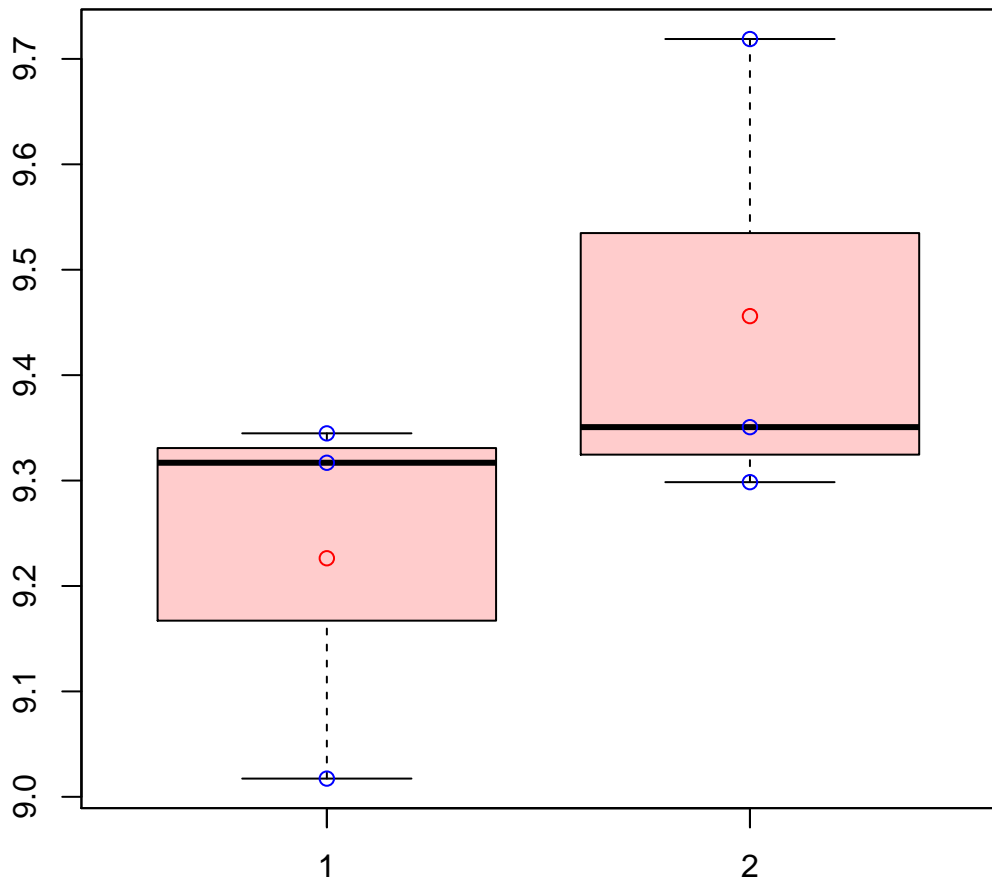

t-Test: p-value = 0.25

# CL434Contig1|CL434Contig1

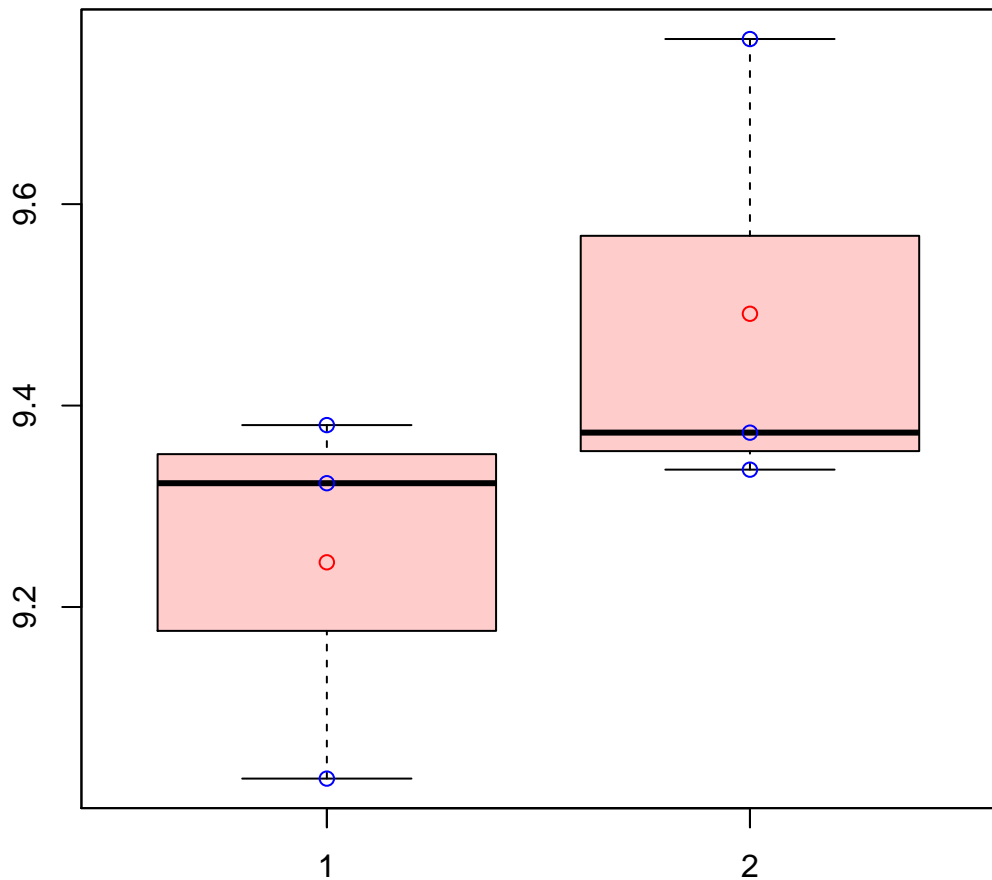

t-Test: p-value = 0.23

# CL434Contig2|CL434Contig2

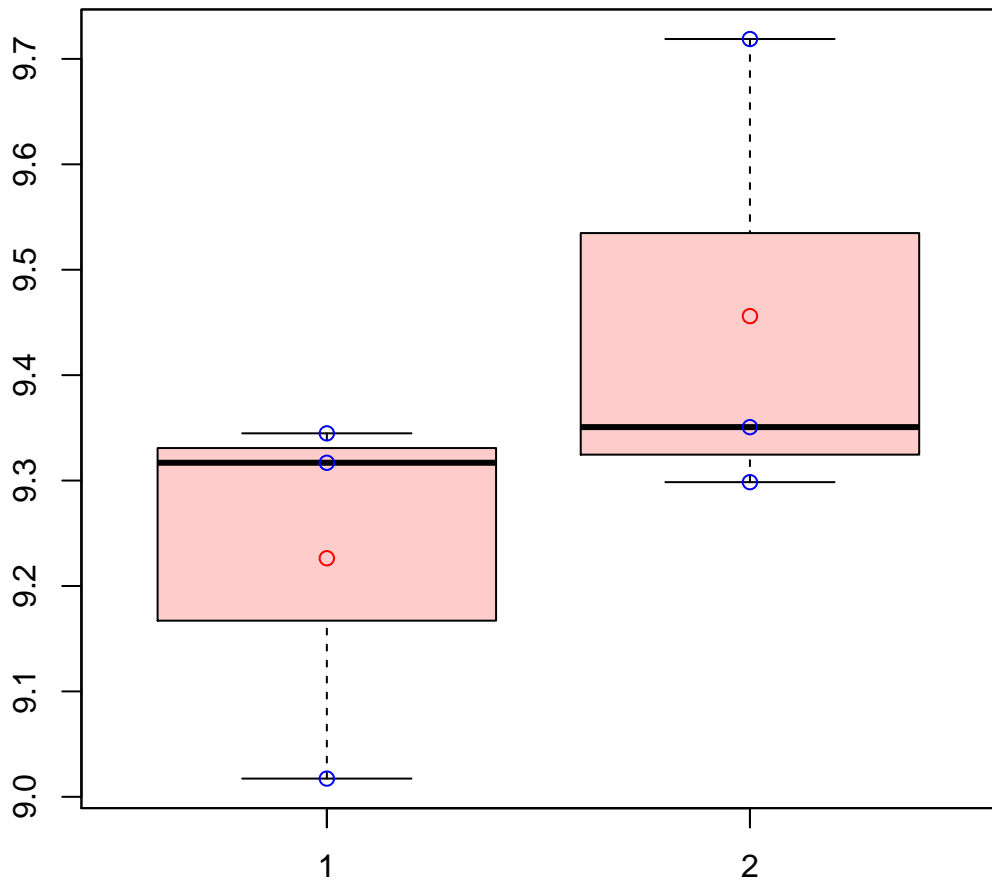

t-Test: p-value = 0.25

# CL434Contig3|CL434Contig3



t-Test: p-value = 0.25

# CL4351Contig2|CL4351Contig2

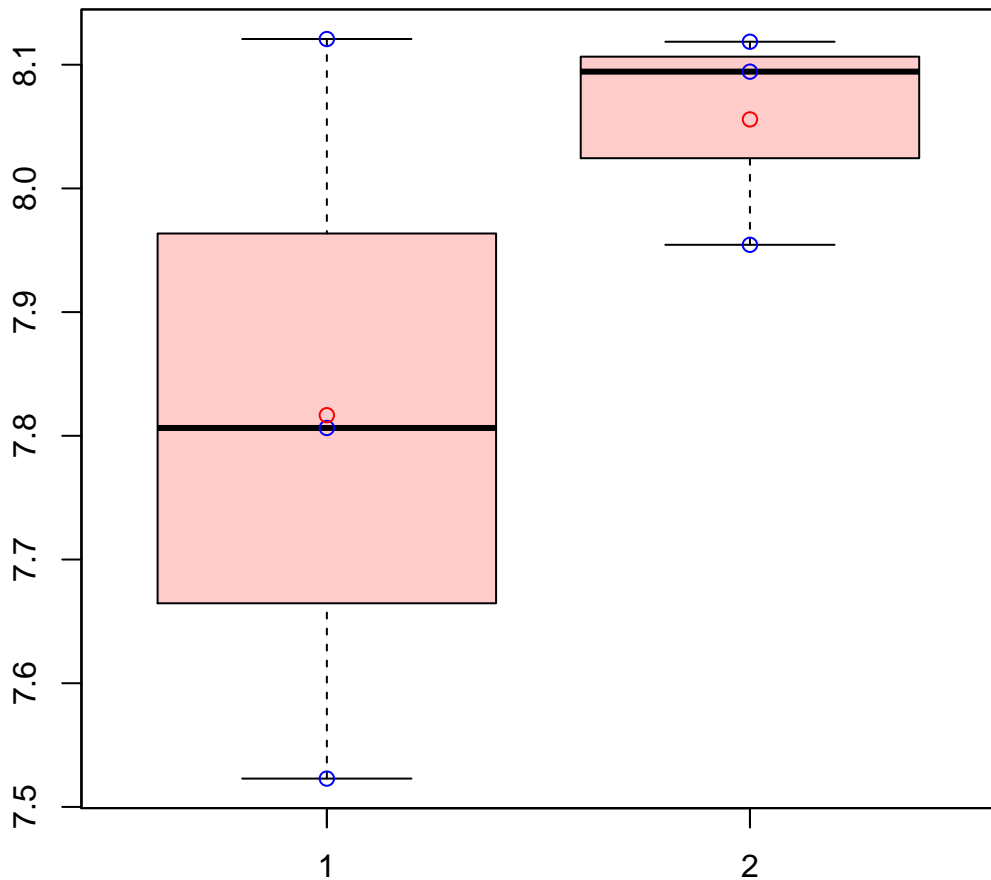

t-Test: p-value = 0.3

# CL4361Contig1|CL4361Contig1

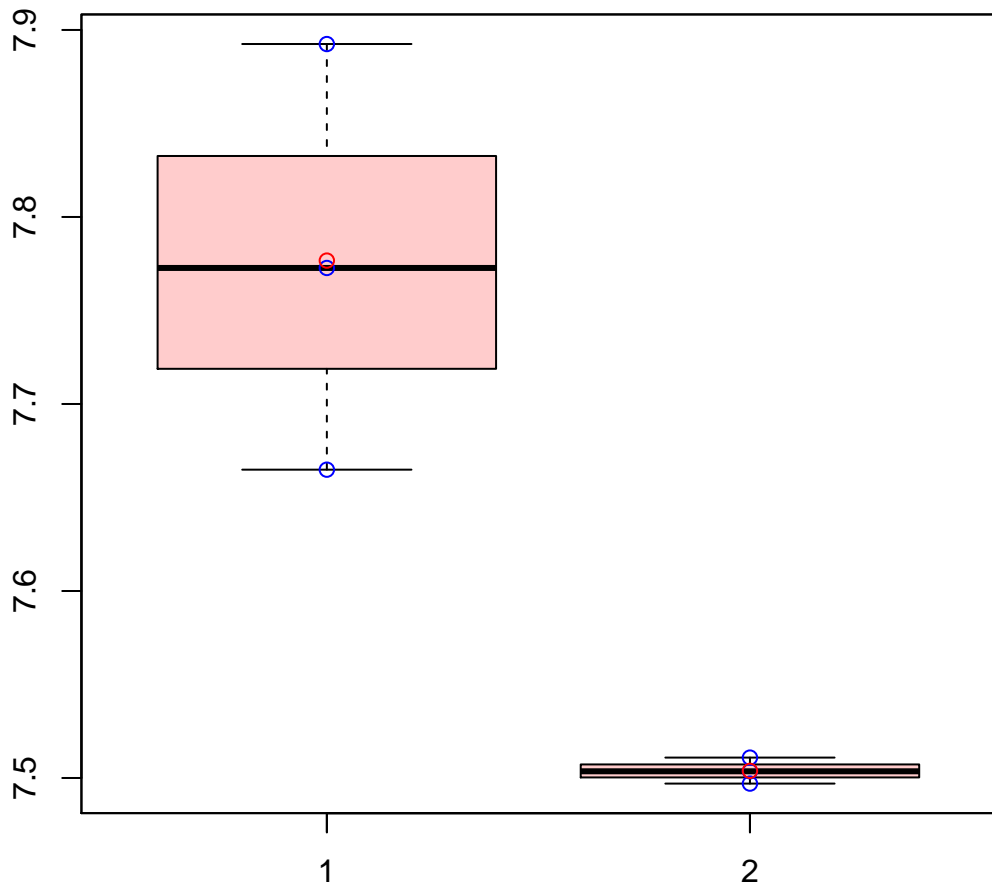

t-Test: p-value = 0.05

# CL4361Contig2|CL4361Contig2



t-Test: p-value = 0.05



# CL4361Contig3|CL4361Contig3



t-Test: p-value = 0.05

# CL4366Contig2|CL4366Contig2

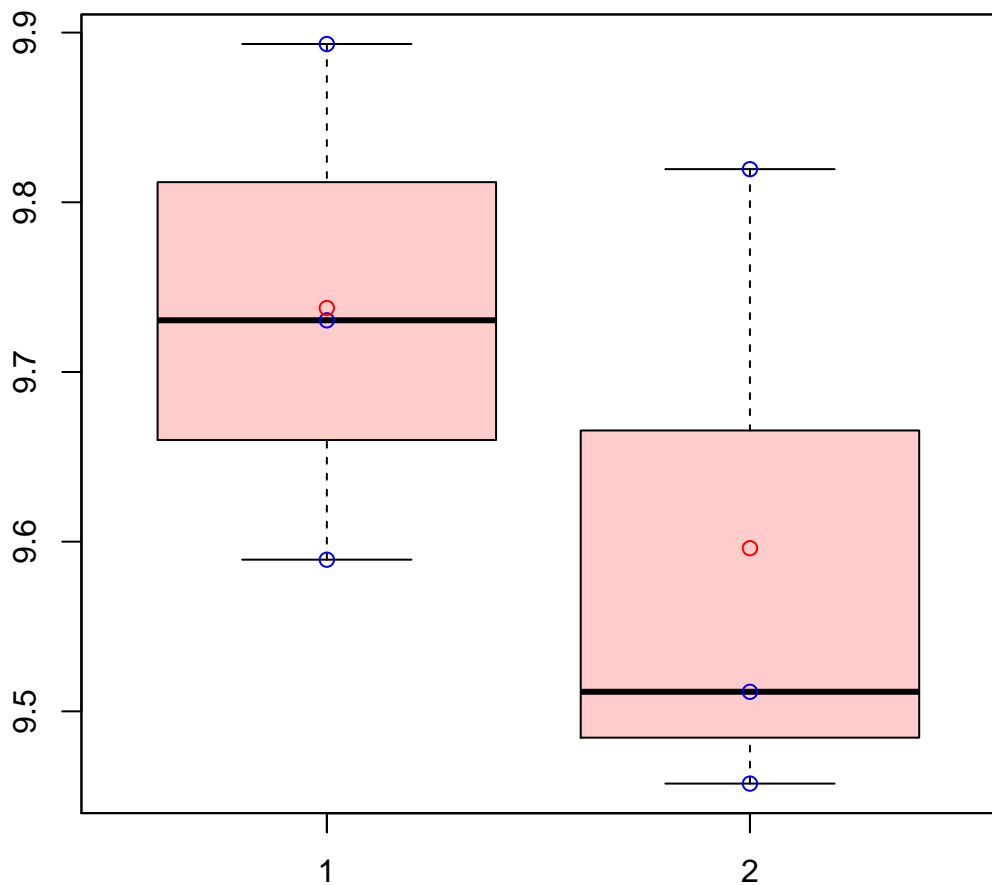

t-Test: p-value = 0.38

# CL4366Contig8|CL4366Contig8

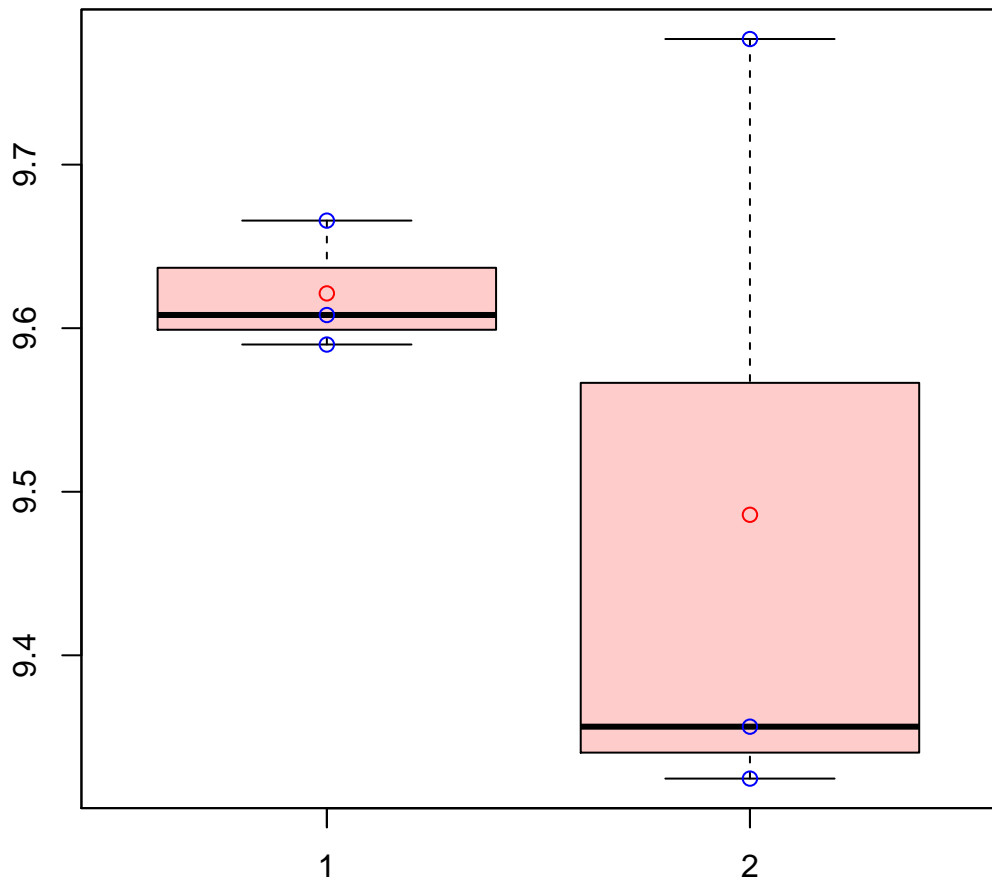

t-Test: p-value = 0.45

# CL4367Contig4|CL4367Contig4

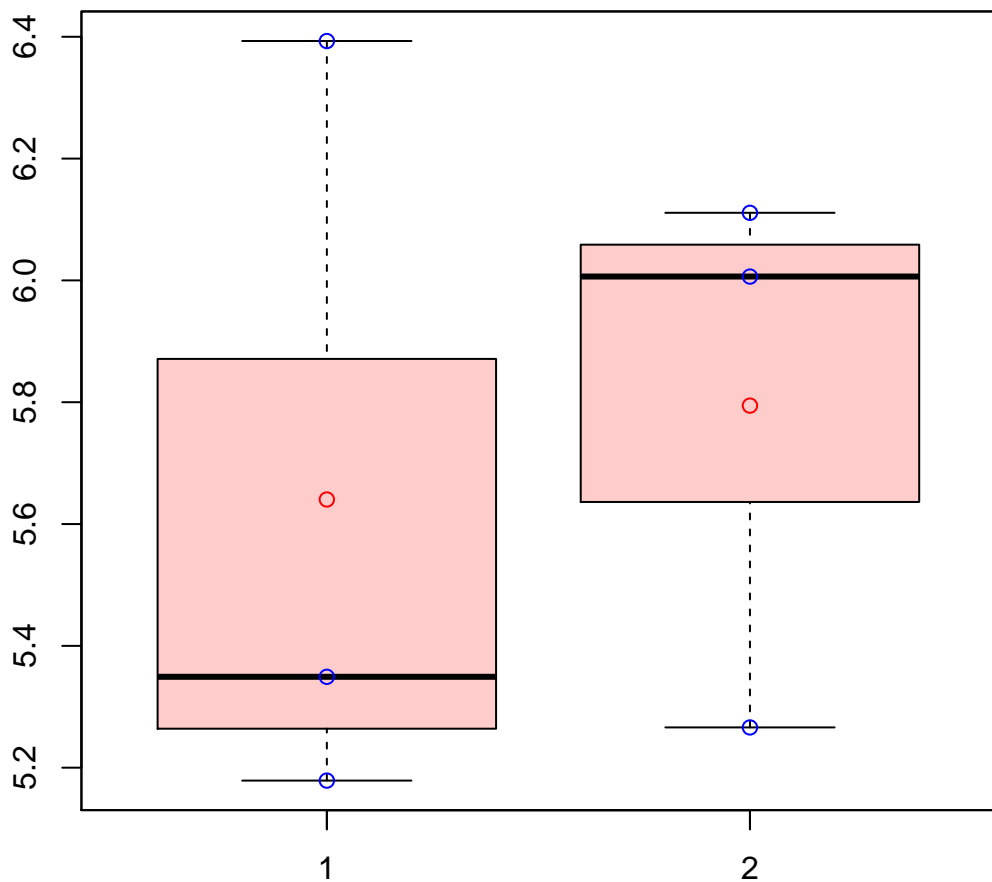

t-Test: p-value = 0.76

# CL436Contig20|CL436Contig20

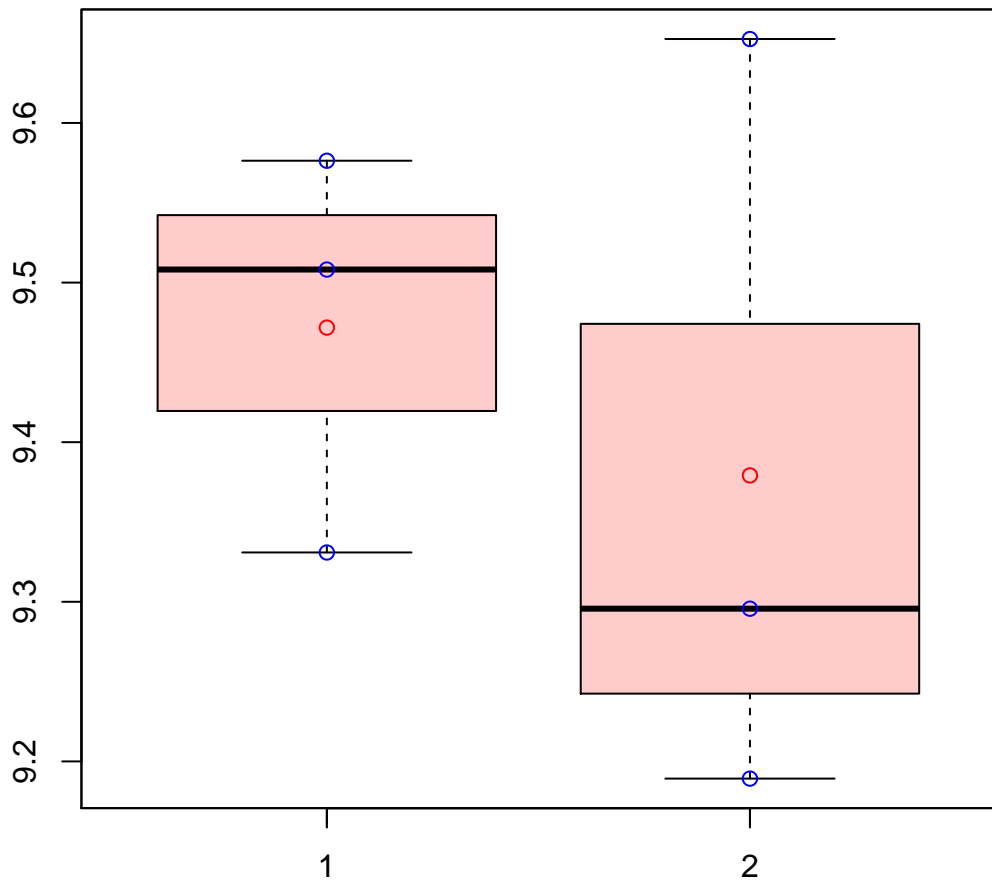

t-Test: p-value = 0.6

# CL4374Contig1|CL4374Contig1

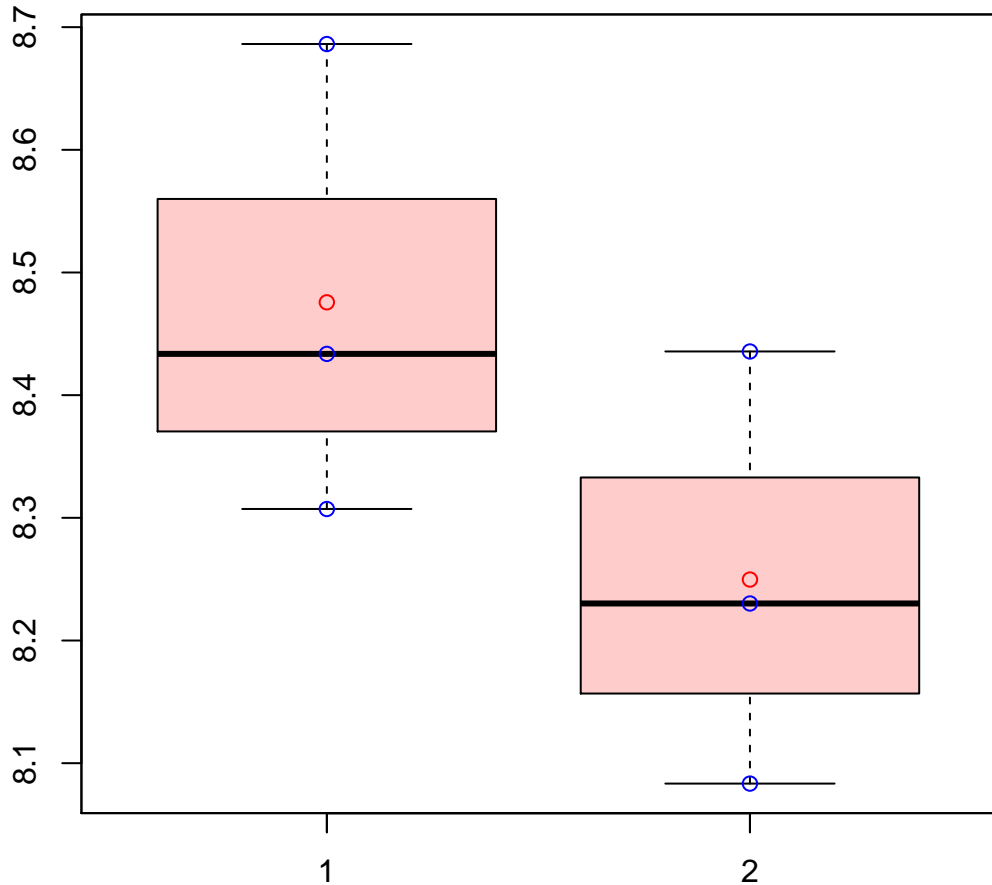

t-Test: p-value = 0.21

# CL4374Contig5|CL4374Contig5



t-Test: p-value = 0.21

# CL4375Contig1|CL4375Contig1

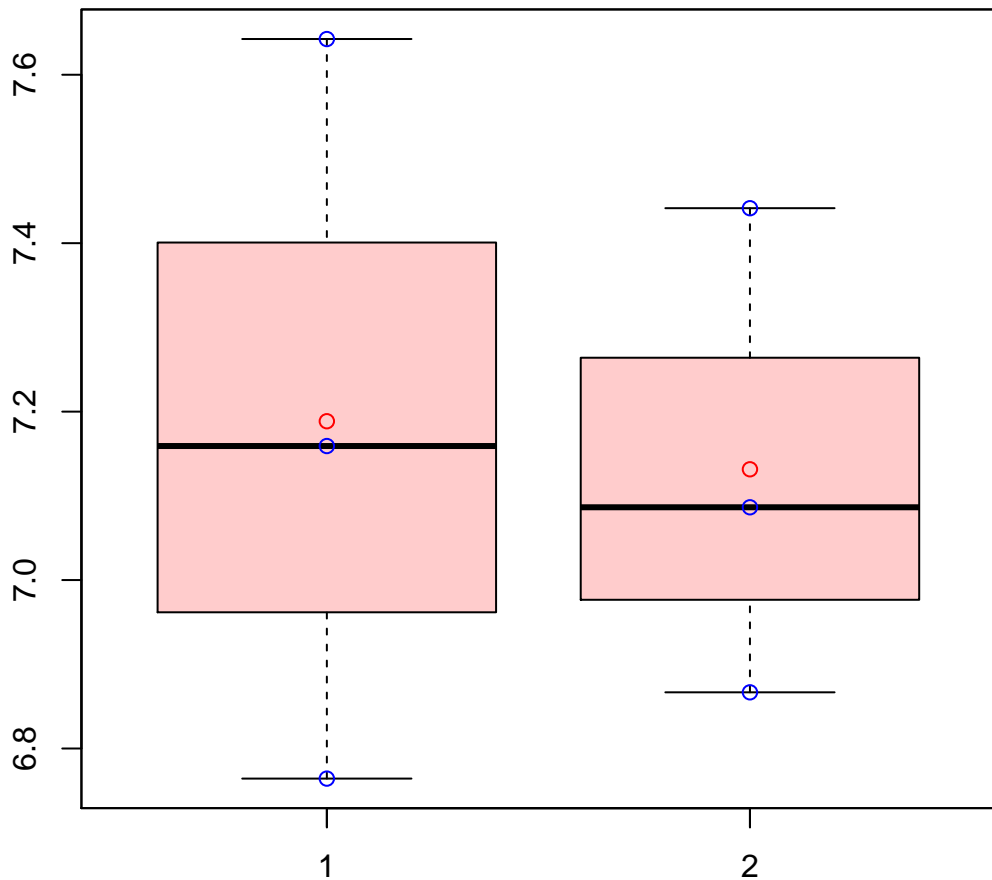

t-Test: p-value = 0.86



# CL4375Contig2|CL4375Contig2

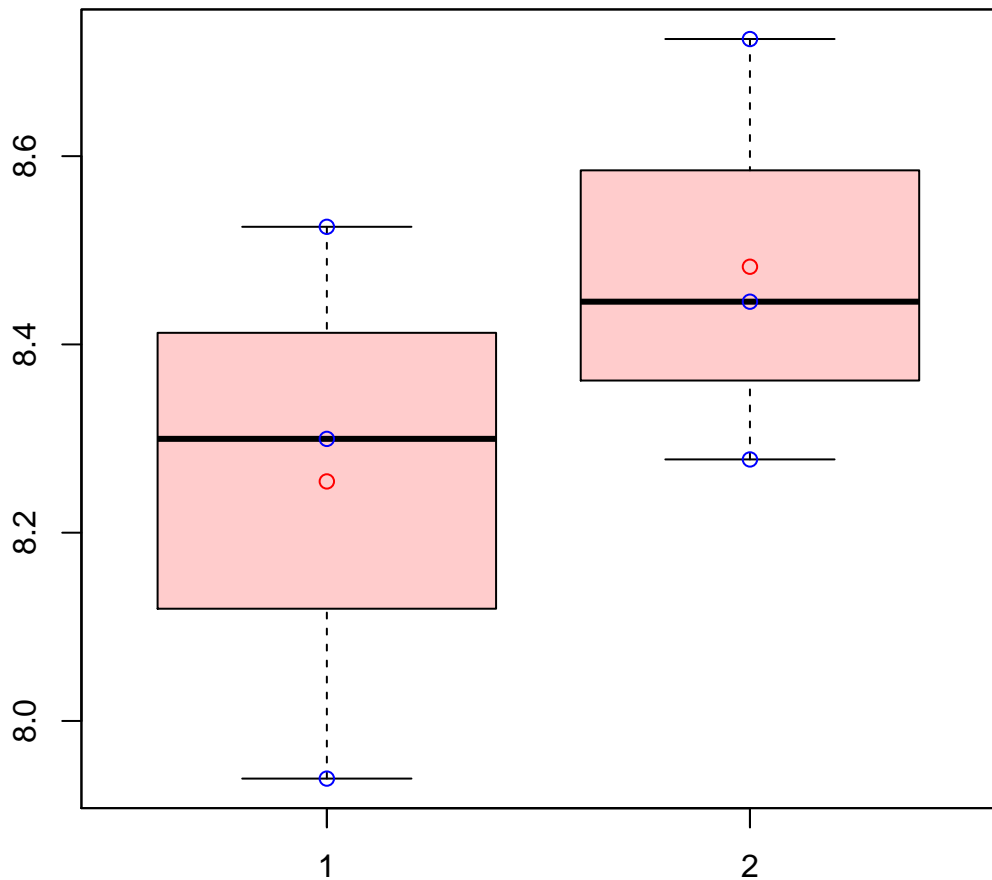

t-Test: p-value = 0.35

# CL4379Contig3|CL4379Contig3



t-Test: p-value = 0.3

# CL437Contig6|CL437Contig6

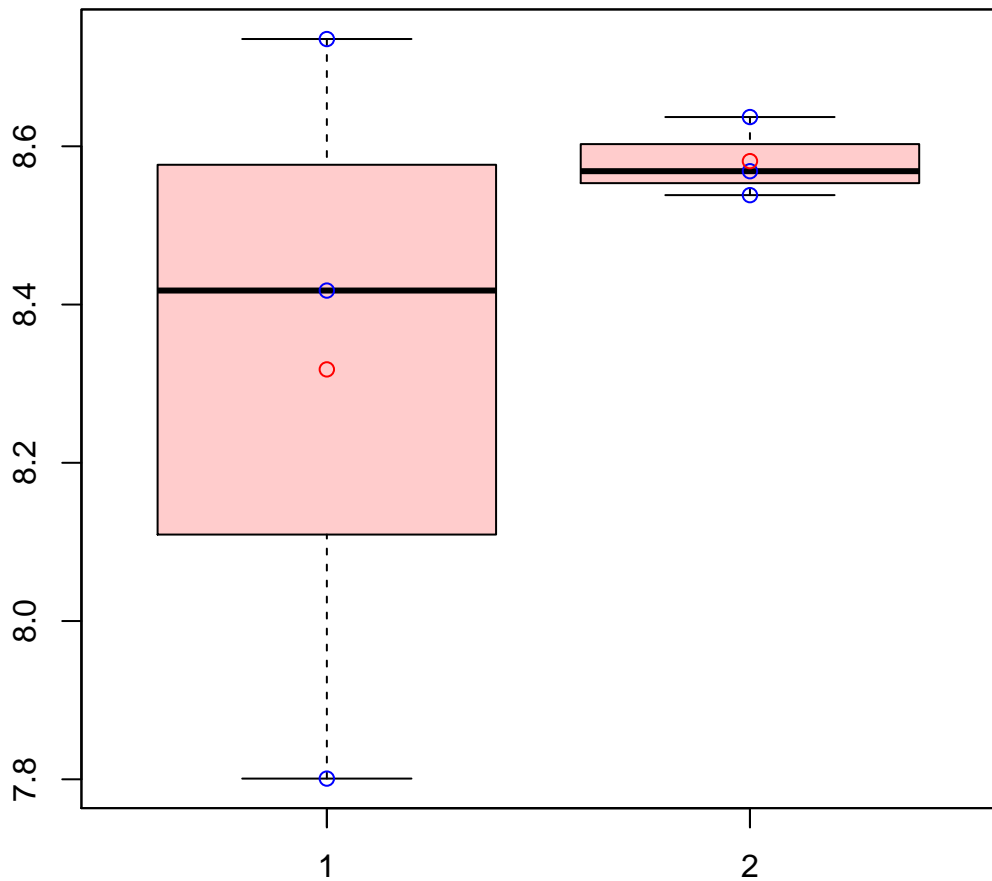

t-Test: p-value = 0.44

# CL4380Contig2|CL4380Contig2

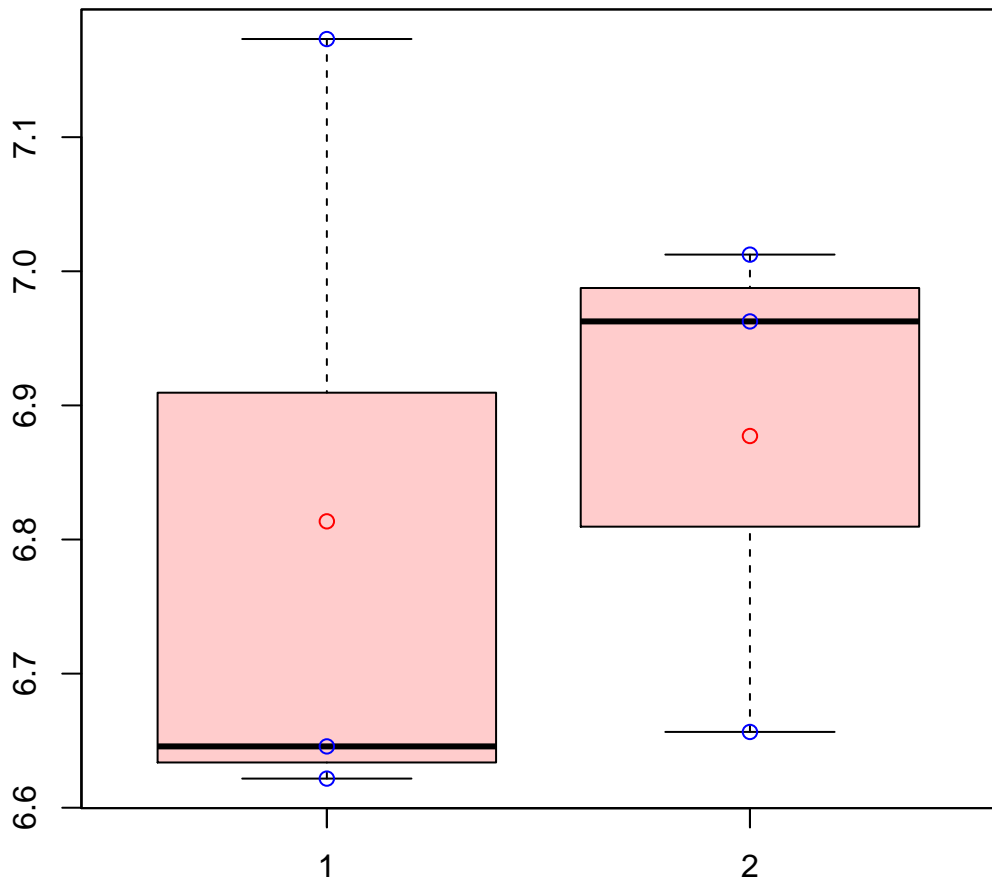

t-Test: p-value = 0.78

# CL4382Contig5|CL4382Contig5

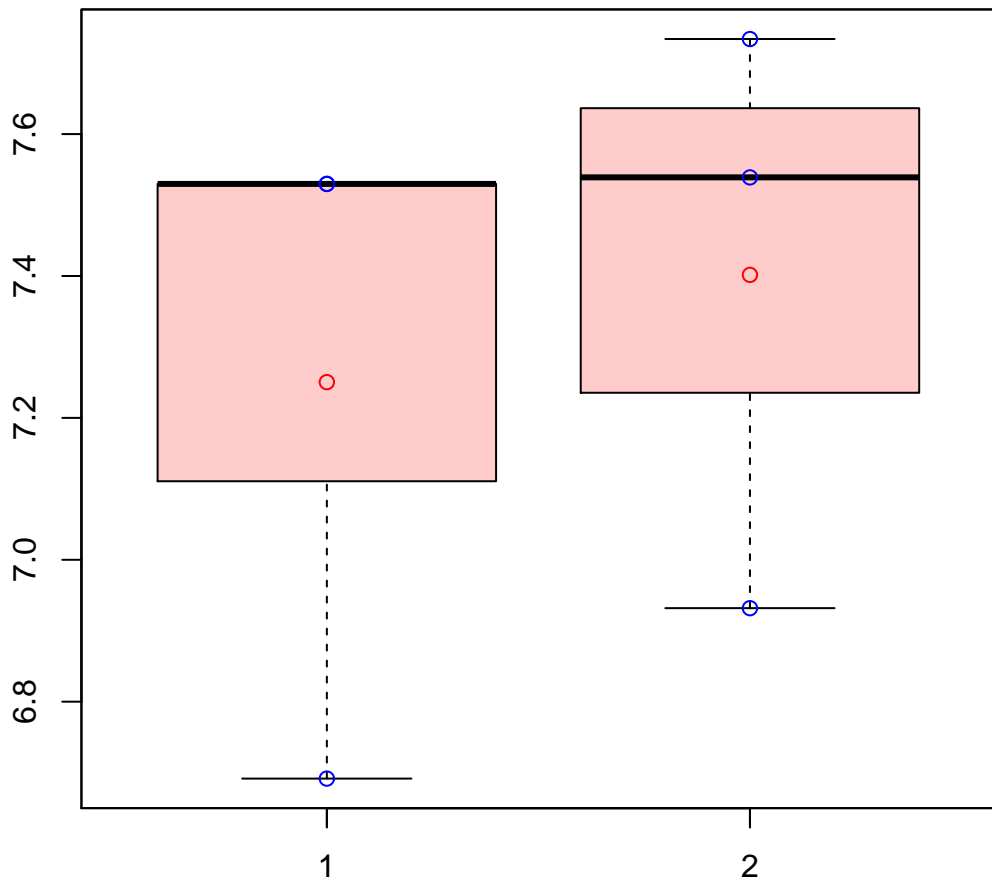

t-Test: p-value = 0.7

# CL4395Contig2|CL4395Contig2

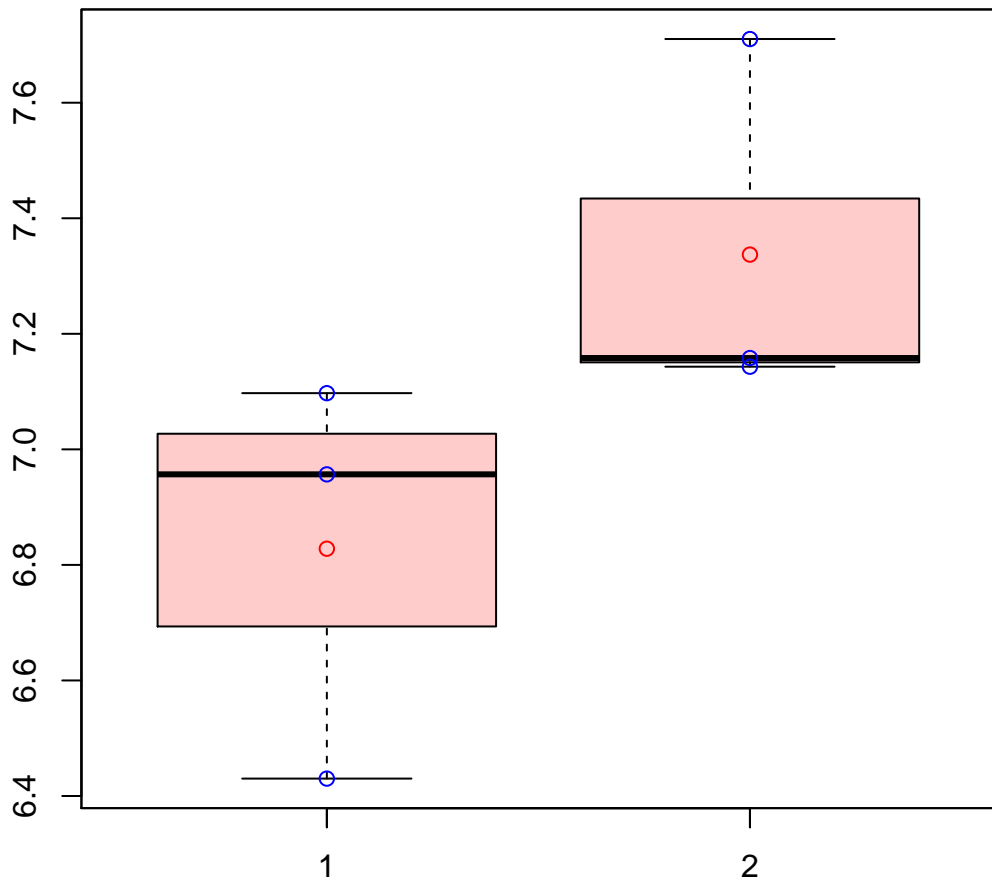

t-Test: p-value = 0.14

# CL4398Contig1|CL4398Contig1

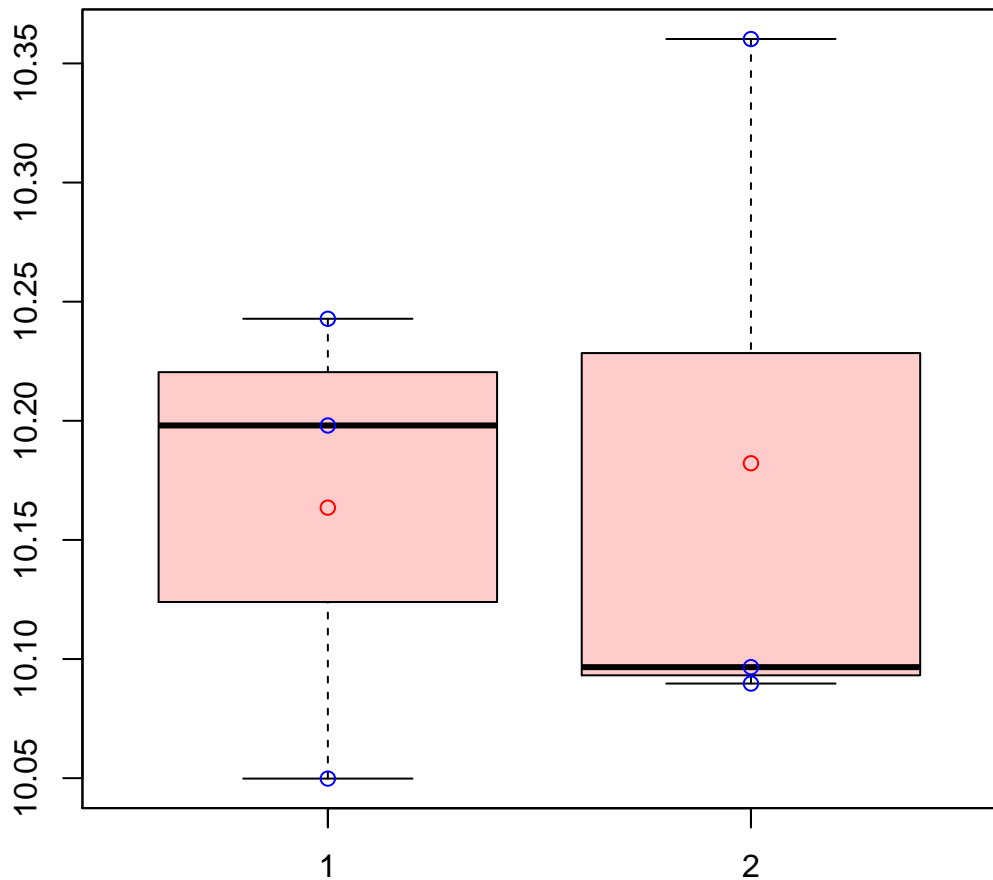

t-Test: p-value = 0.87

# CL4398Contig2|CL4398Contig2

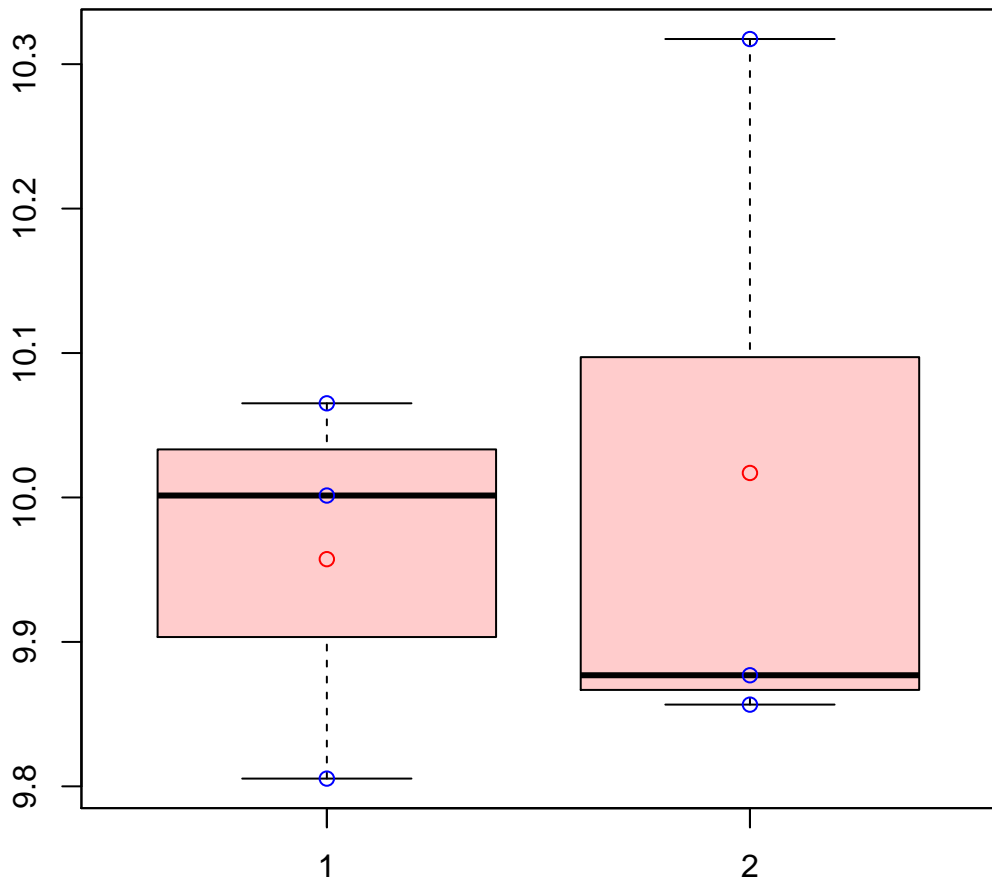

t-Test: p-value = 0.75



# CL43Contig11|CL43Contig11

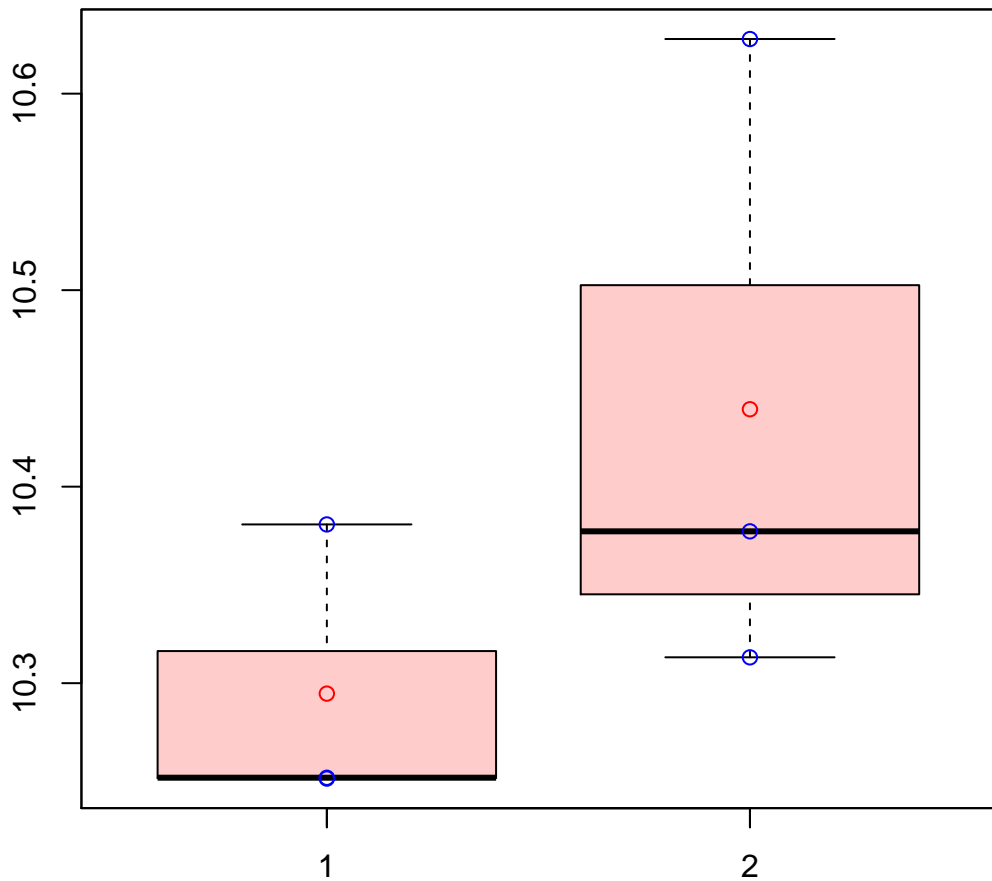

t-Test: p-value = 0.27

# CL43Contig13|CL43Contig13

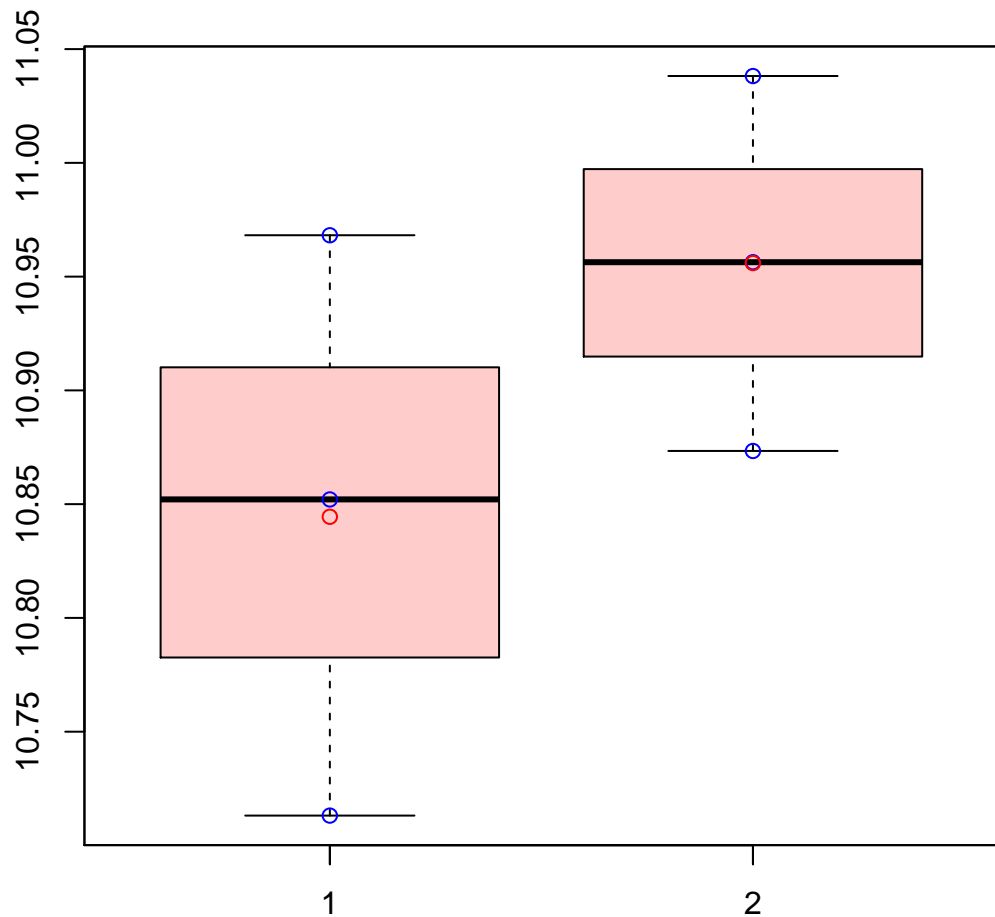

t-Test: p-value = 0.28

# CL43Contig23|CL43Contig23

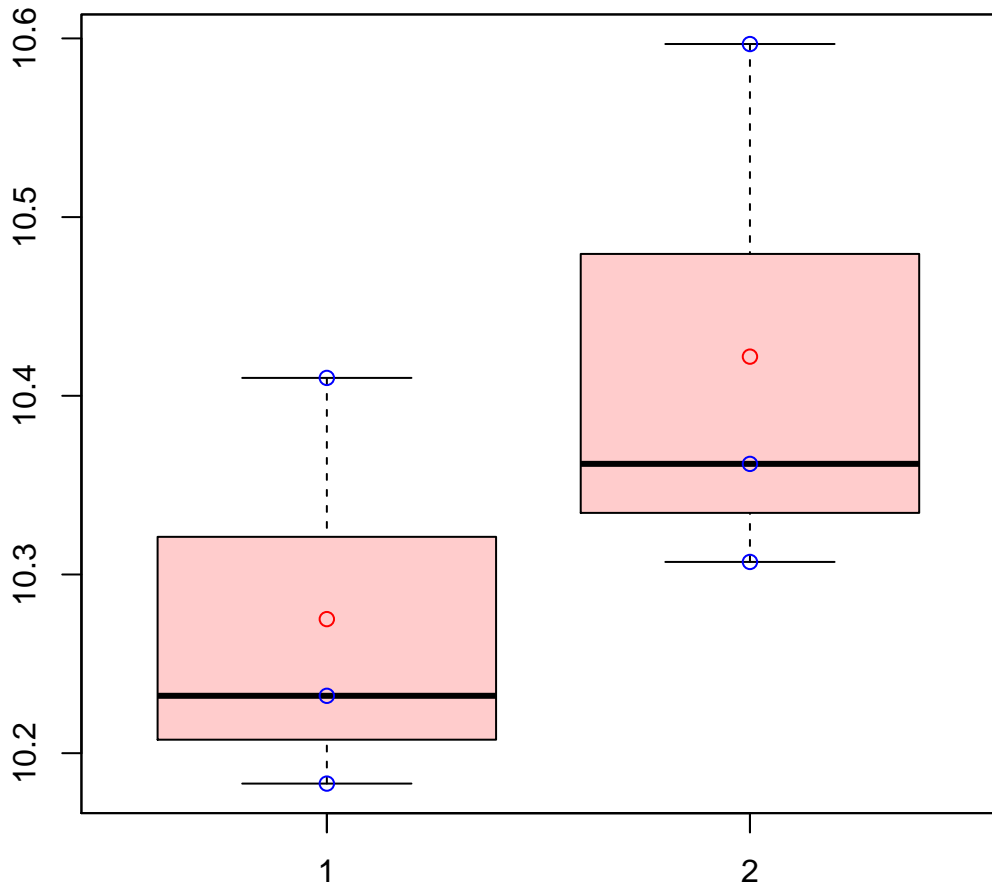

t-Test: p-value = 0.27

# CL43Contig4|CL43Contig4

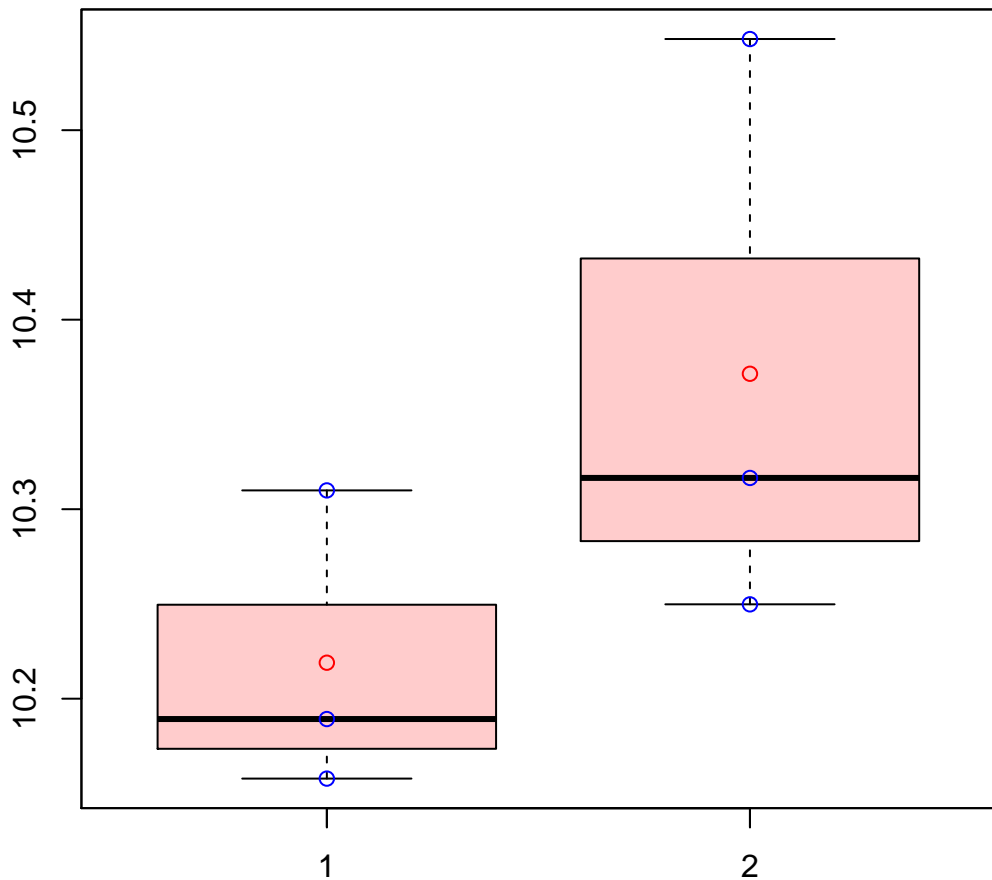

t-Test: p-value = 0.23

# CL4404Contig1|CL4404Contig1

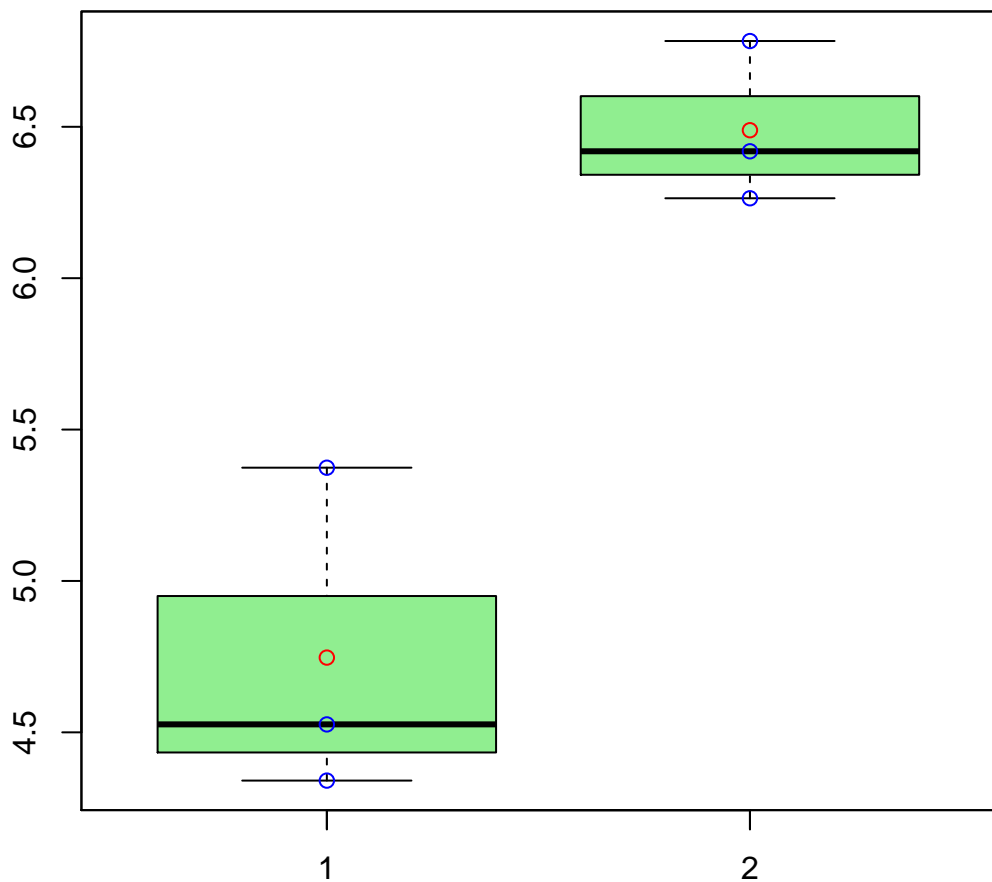

t-Test: p-value = 0.02

# CL4406Contig1|CL4406Contig1

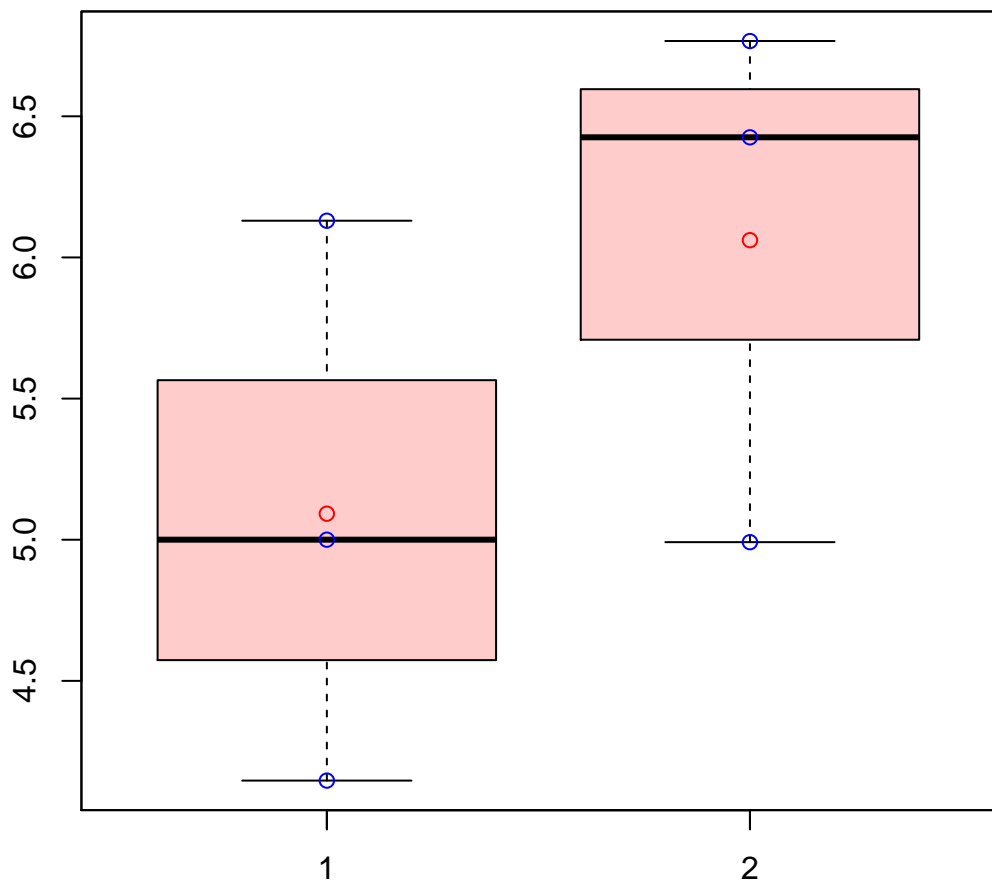

t-Test: p-value = 0.29

# CL4406Contig4|CL4406Contig4

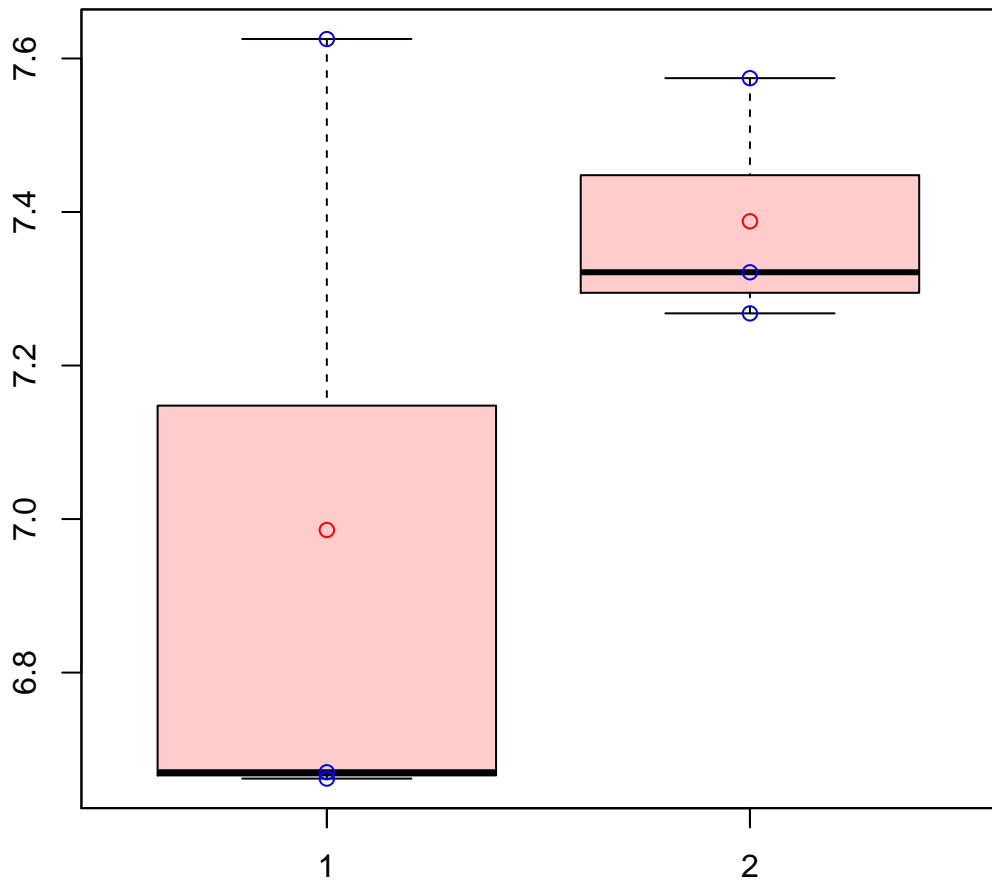

t-Test: p-value = 0.34

# CL4407Contig1|CL4407Contig1

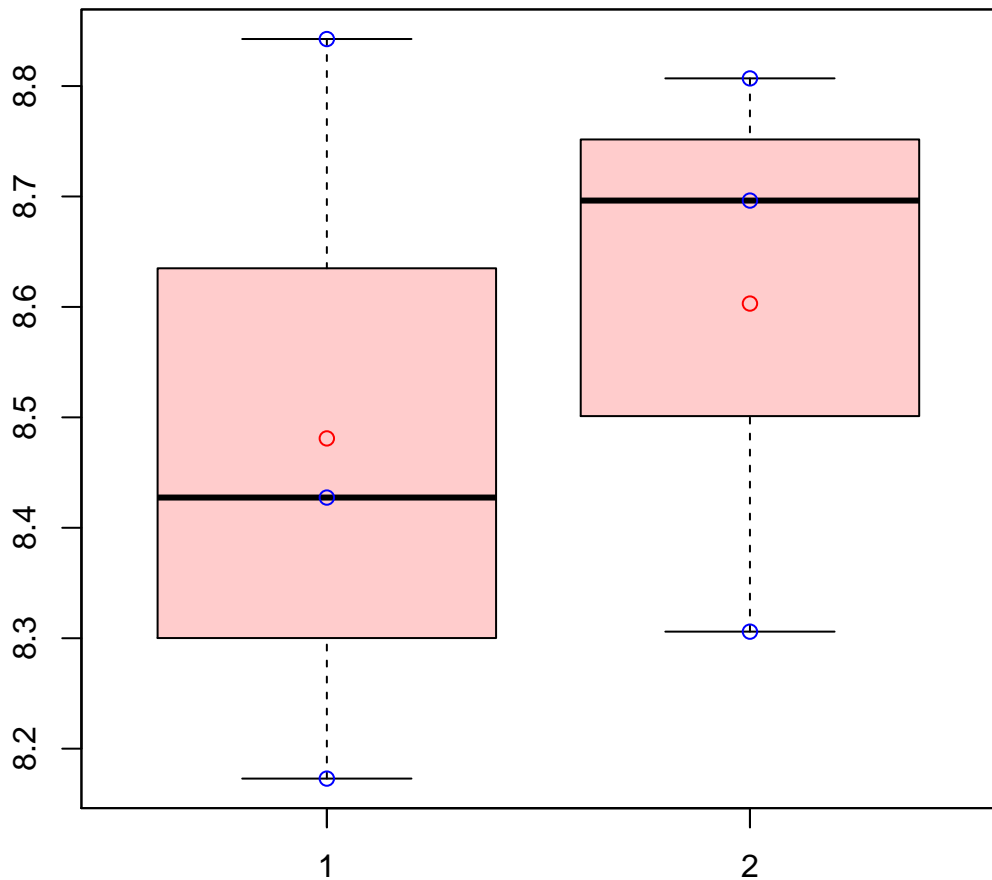

t-Test: p-value = 0.65



# CL4407Contig2|CL4407Contig2

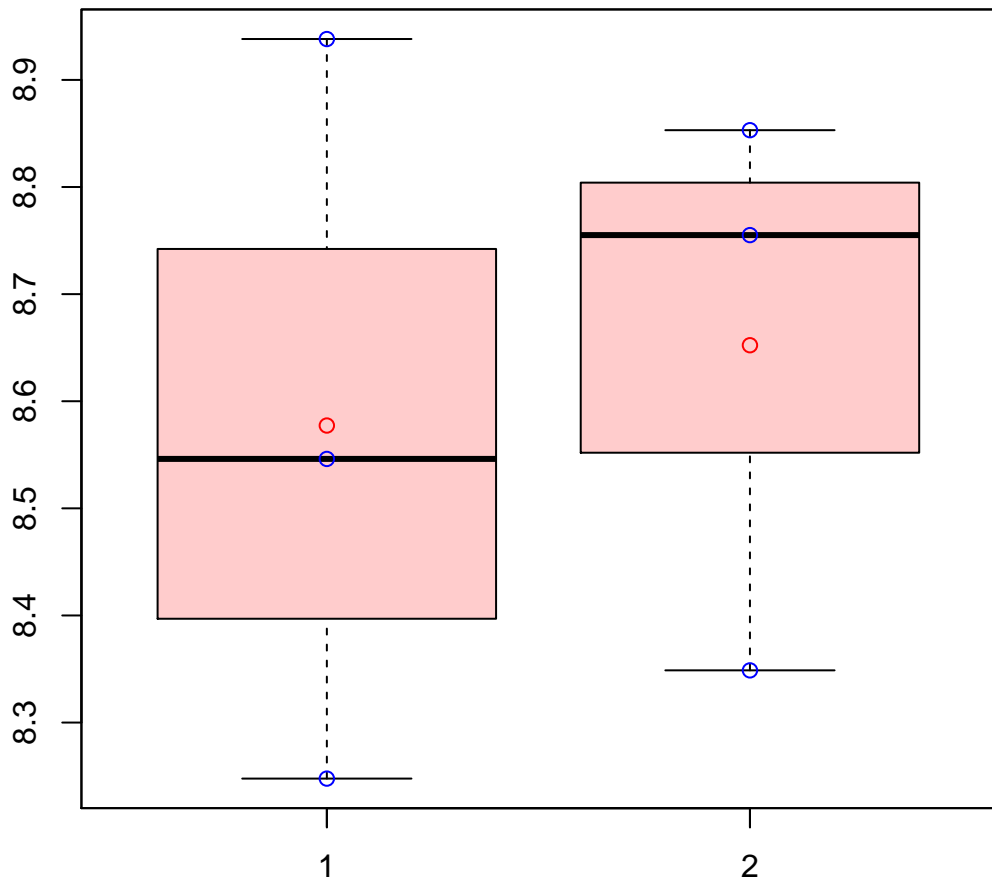

t-Test: p-value = 0.78

# CL440Contig1|CL440Contig1

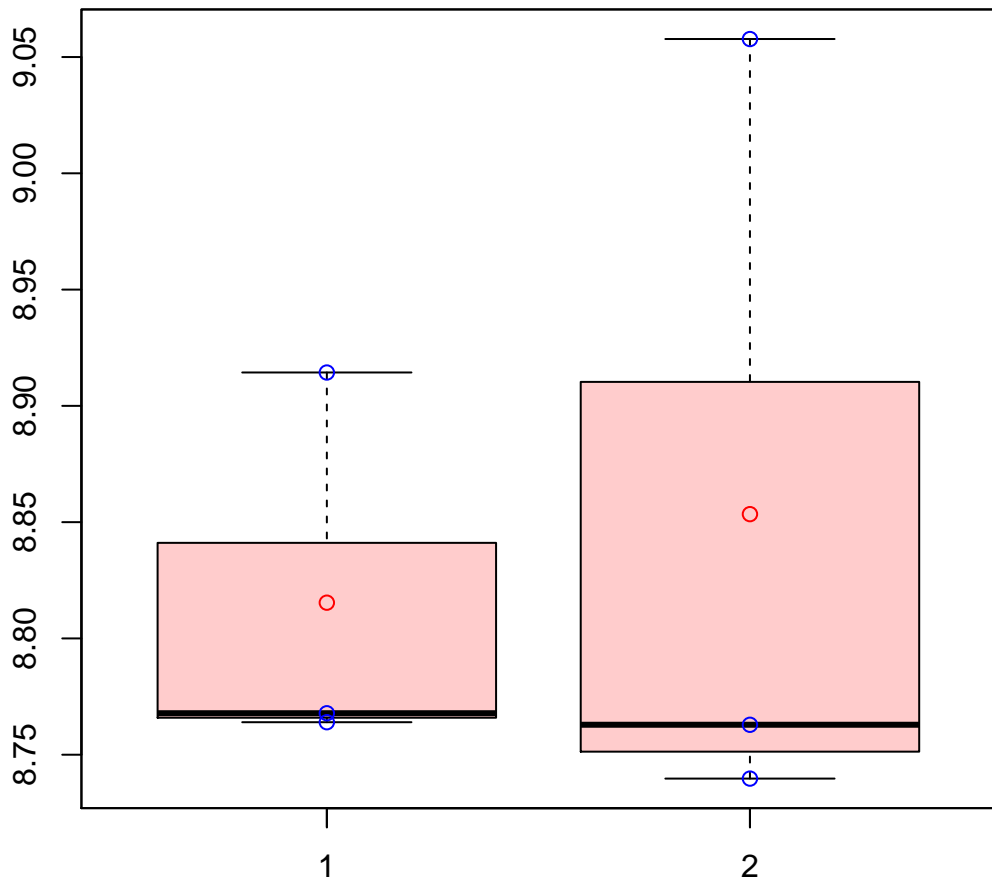

t-Test: p-value = 0.76

# CL440Contig6|CL440Contig6

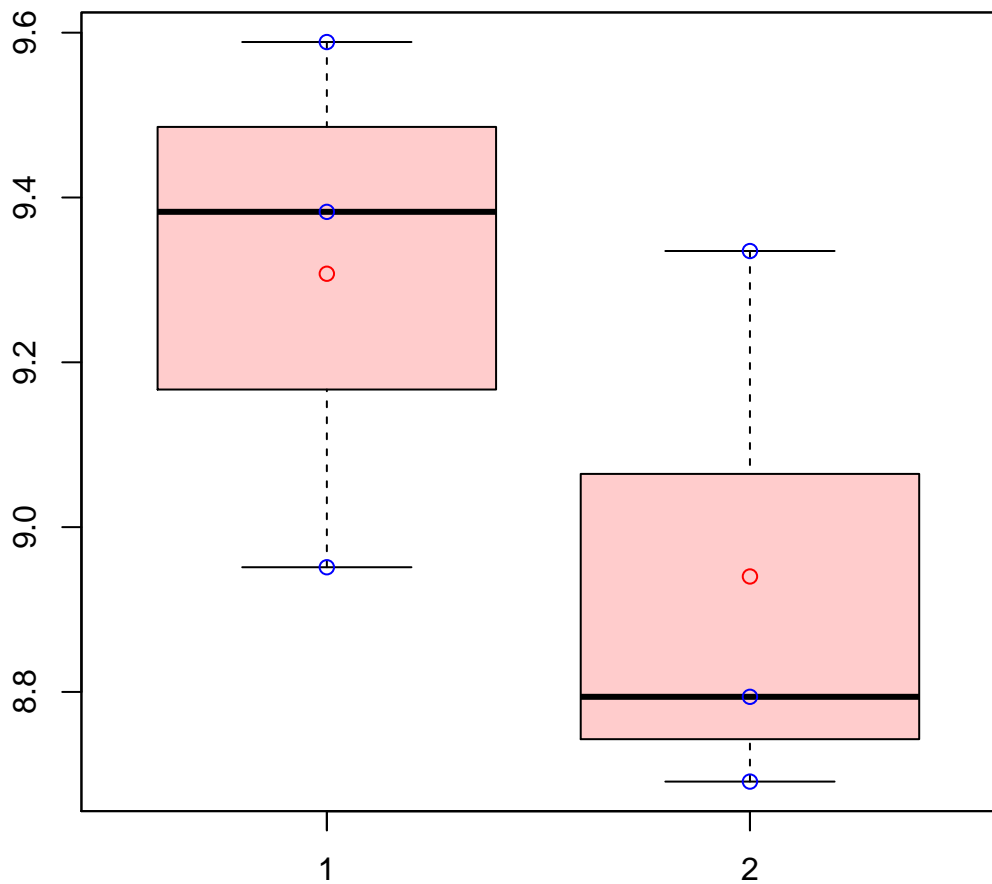

t-Test: p-value = 0.25

# CL4412Contig3|CL4412Contig3

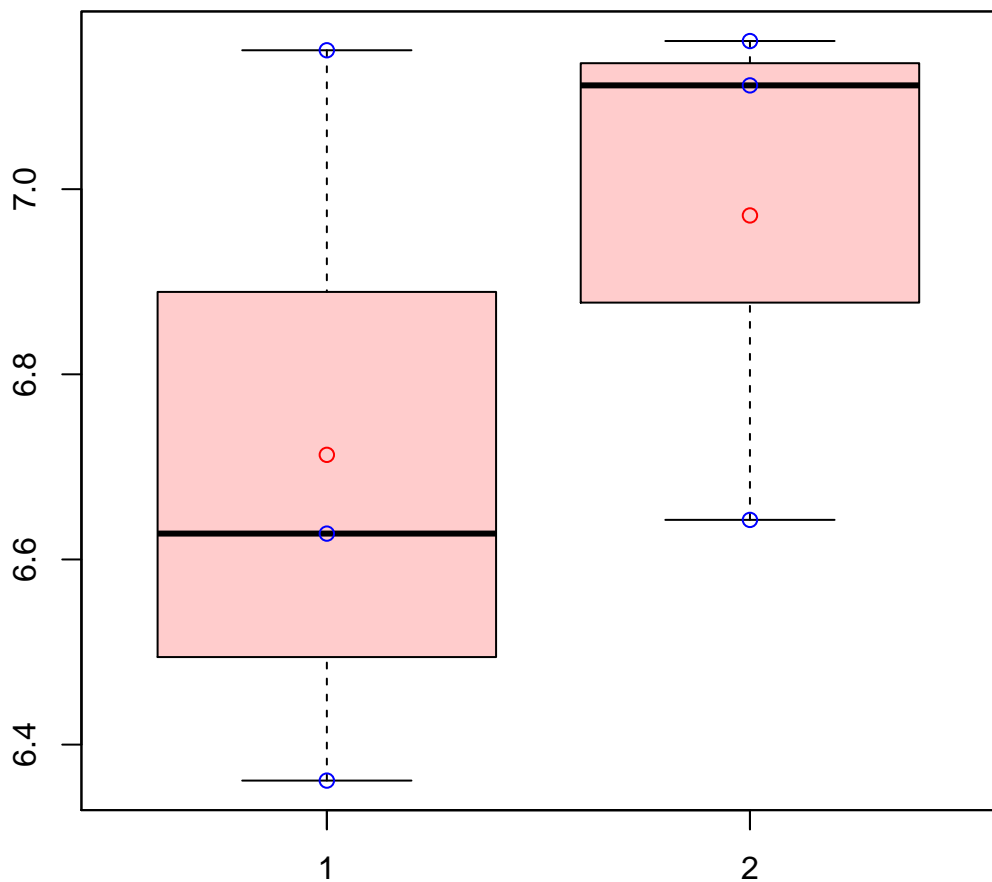

t-Test: p-value = 0.42

# CL4416Contig5|CL4416Contig5

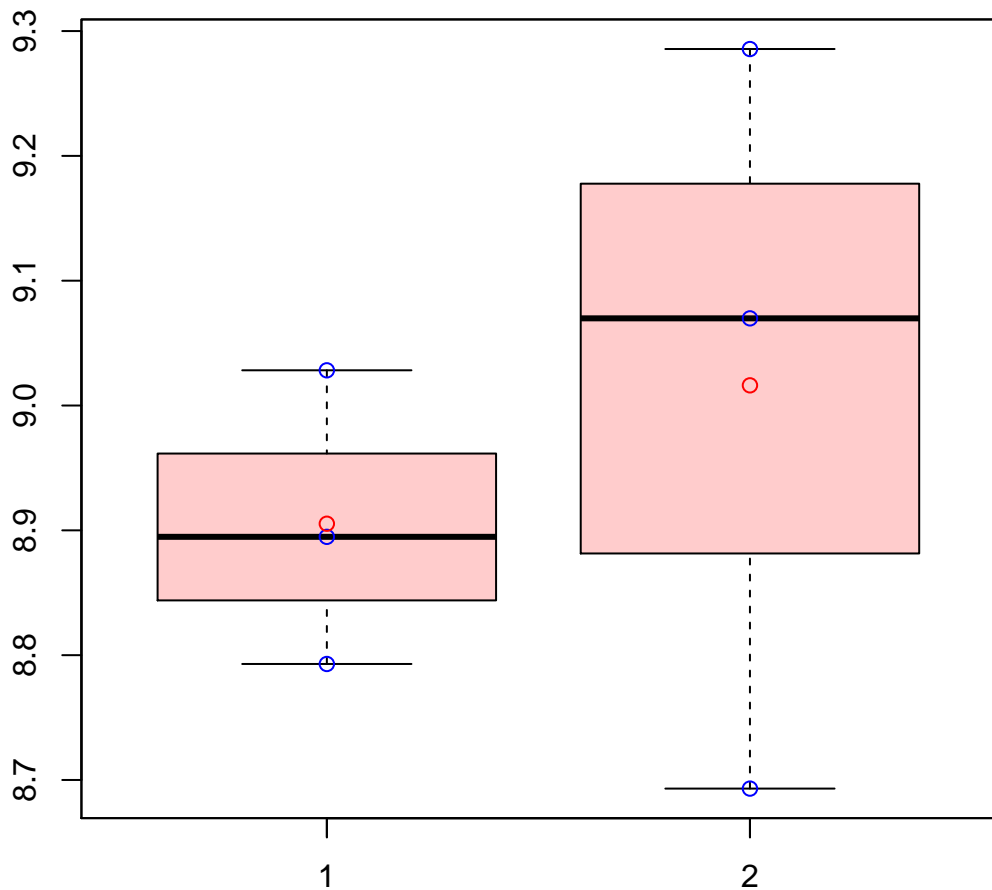

t-Test: p-value = 0.6

# CL441Contig16|CL441Contig16



t-Test: p-value = 0.78

# CL4425Contig2|CL4425Contig2

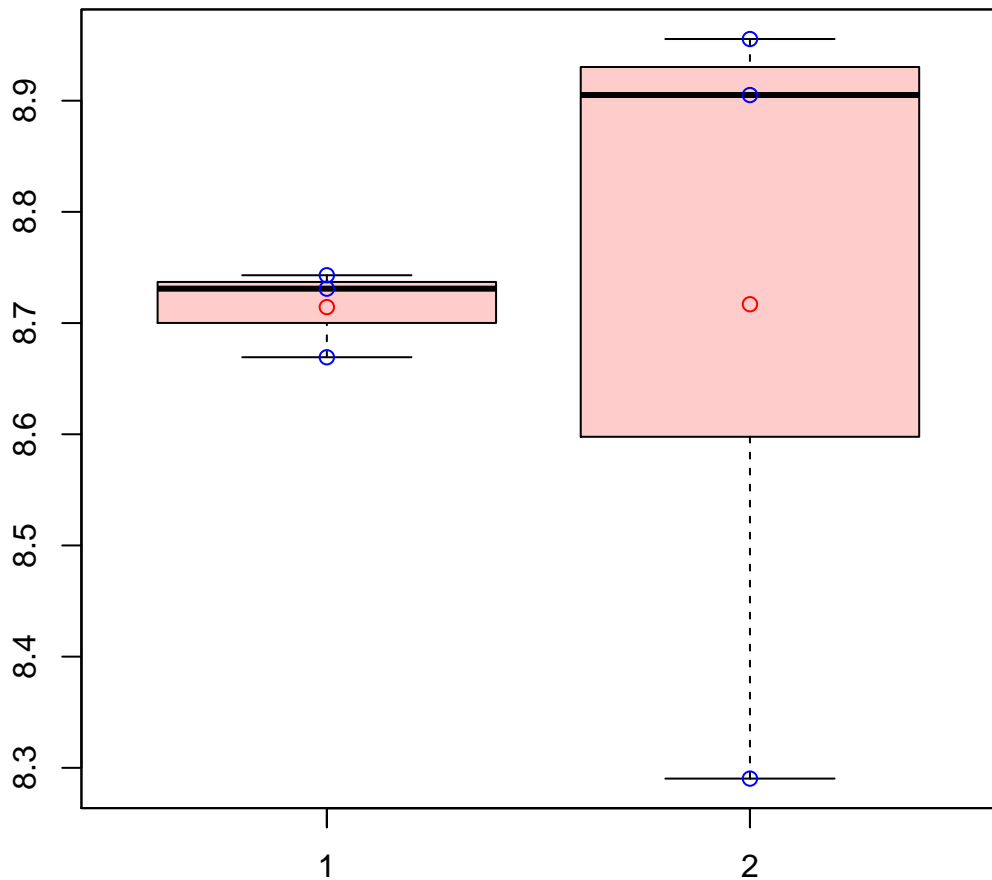

t-Test: p-value = 0.99

# CL442Contig9|CL442Contig9



t-Test: p-value = 0.57



# CL4438Contig2|CL4438Contig2

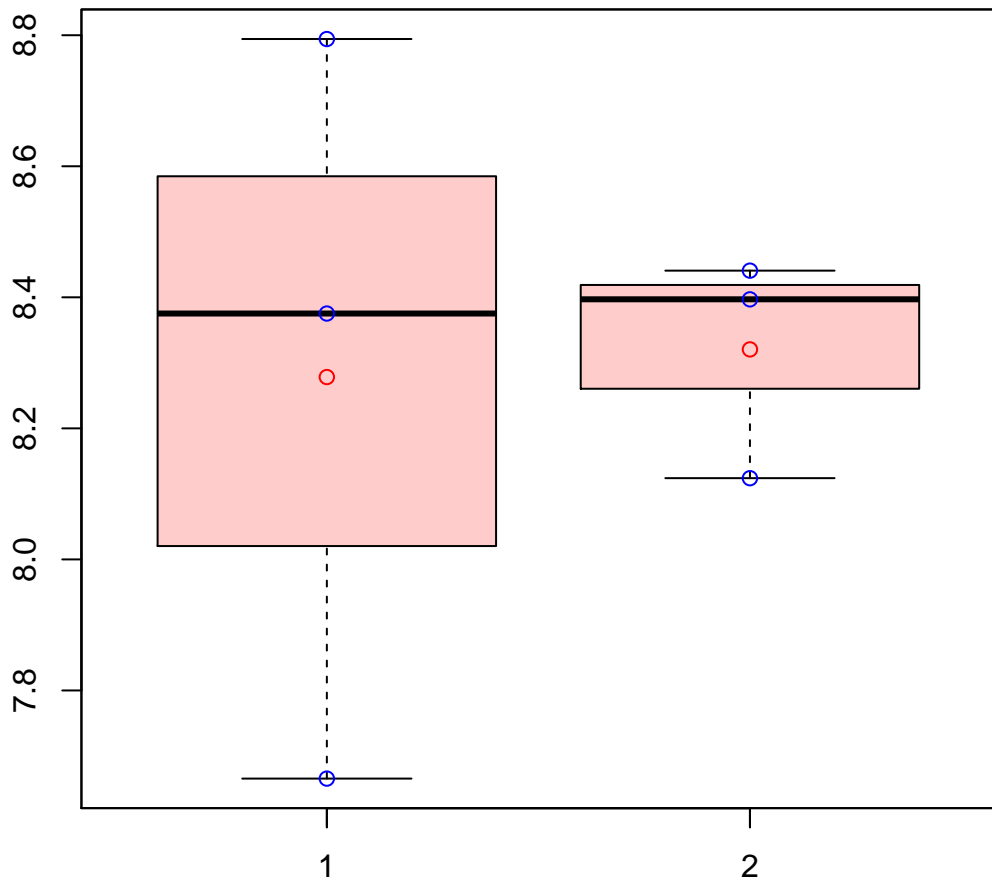

t-Test: p-value = 0.91

# CL4439Contig1|CL4439Contig1

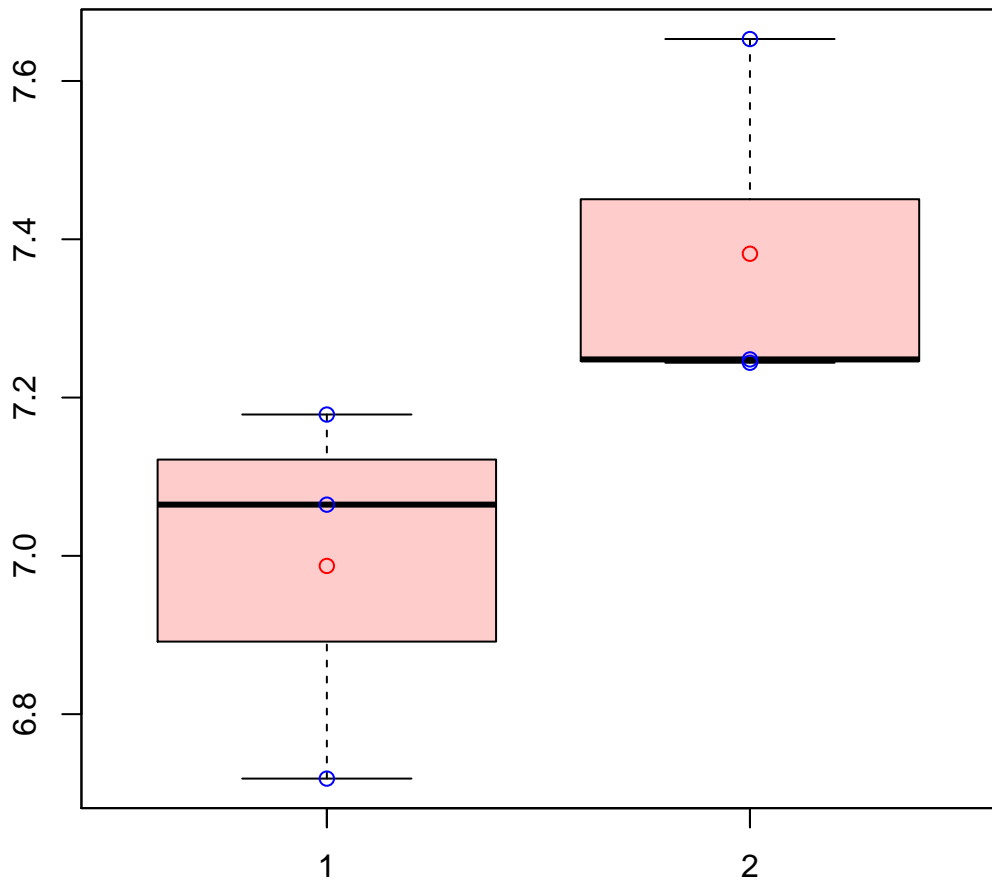

t-Test: p-value = 0.11

# CL443Contig10|CL443Contig10

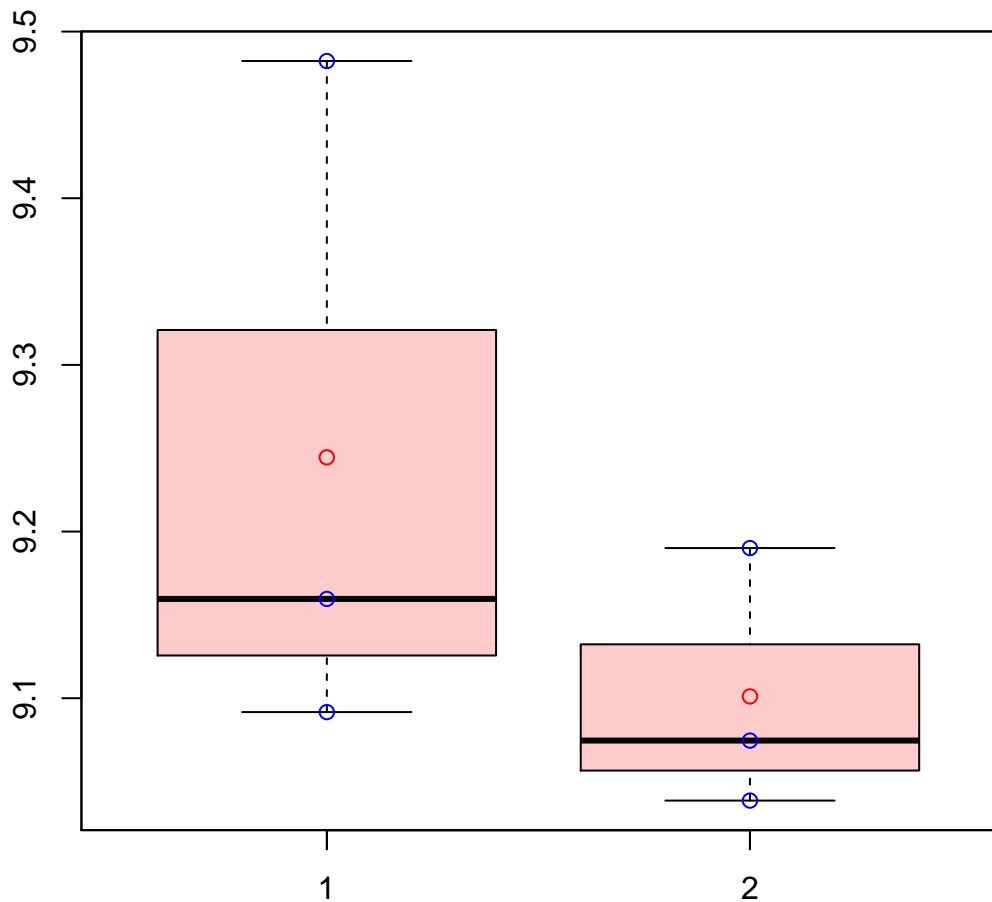

t-Test: p-value = 0.36

# CL4443Contig1|CL4443Contig1

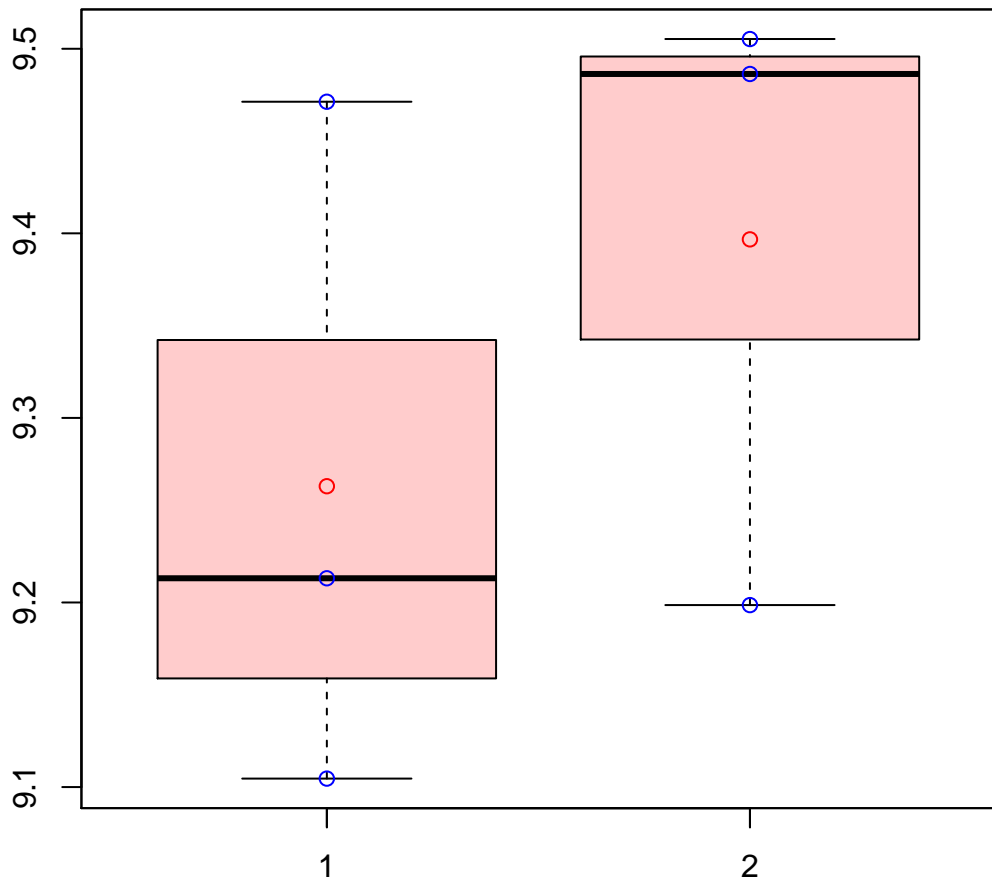

t-Test: p-value = 0.42

# CL4443Contig2|CL4443Contig2

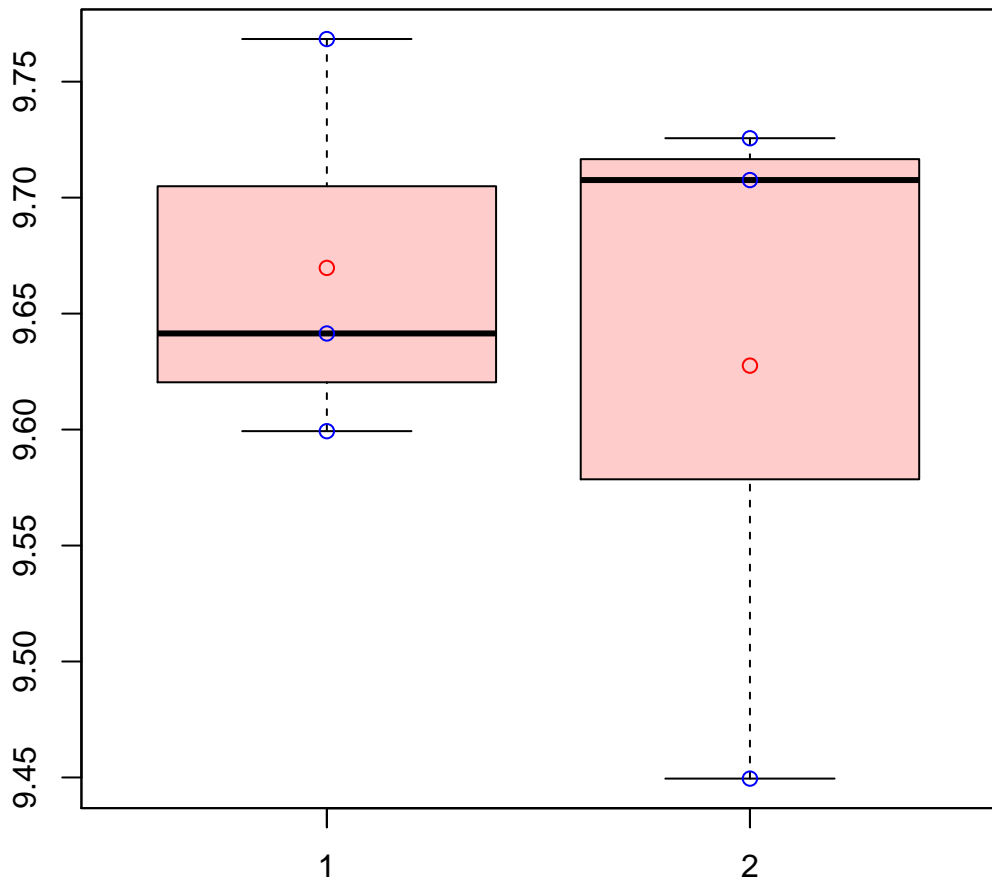

t-Test: p-value = 0.71

# CL4449Contig5|CL4449Contig5

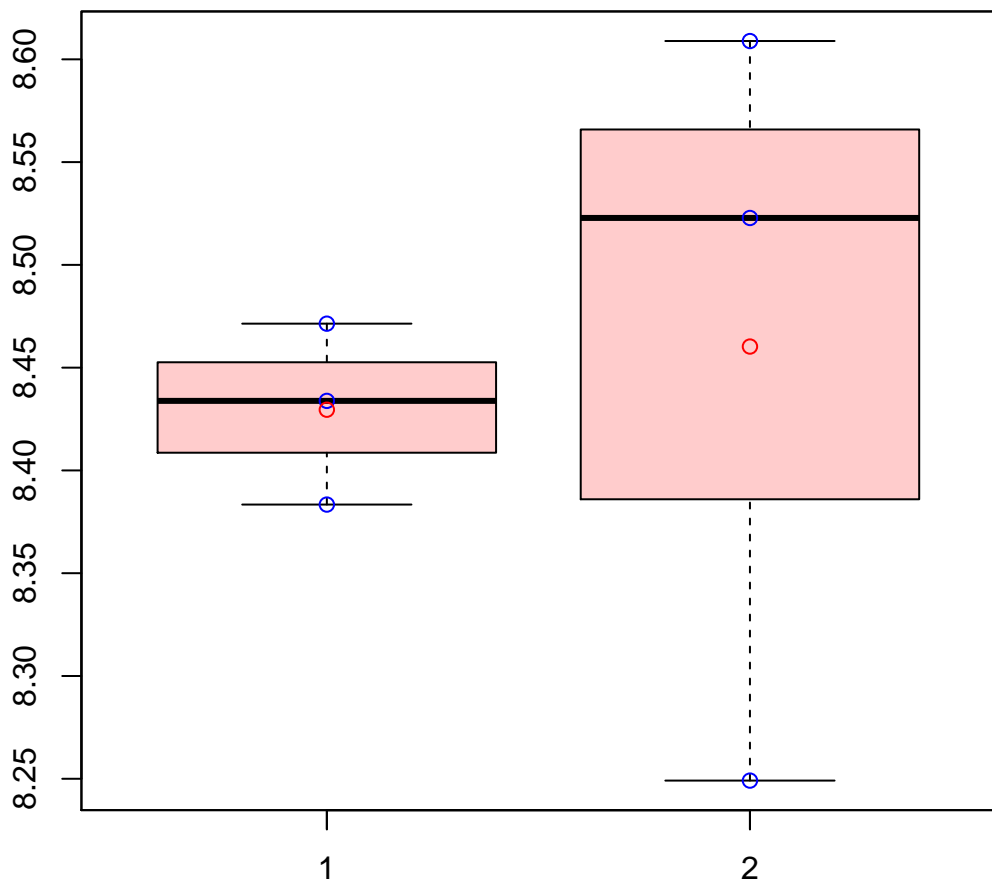

t-Test: p-value = 0.81

# CL445Contig3|CL445Contig3



t-Test: p-value = 0.21

# CL445Contig4|CL445Contig4



t-Test: p-value = 0.04



# CL445Contig6|CL445Contig6



t-Test: p-value = 0.04

# CL4461Contig1|CL4461Contig1



t-Test: p-value = 0.31

# CL4461Contig2|CL4461Contig2



t-Test: p-value = 0.31

# CL4461Contig3|CL4461Contig3

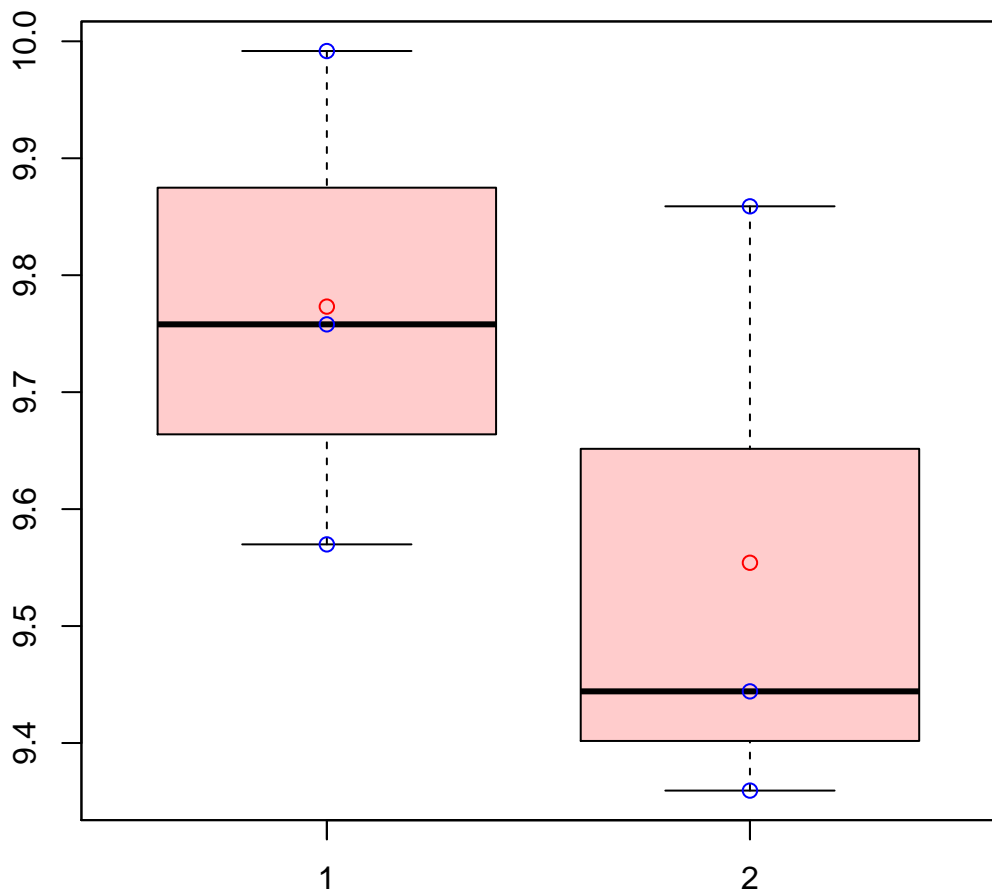

t-Test: p-value = 0.33

# CL4462Contig2|CL4462Contig2

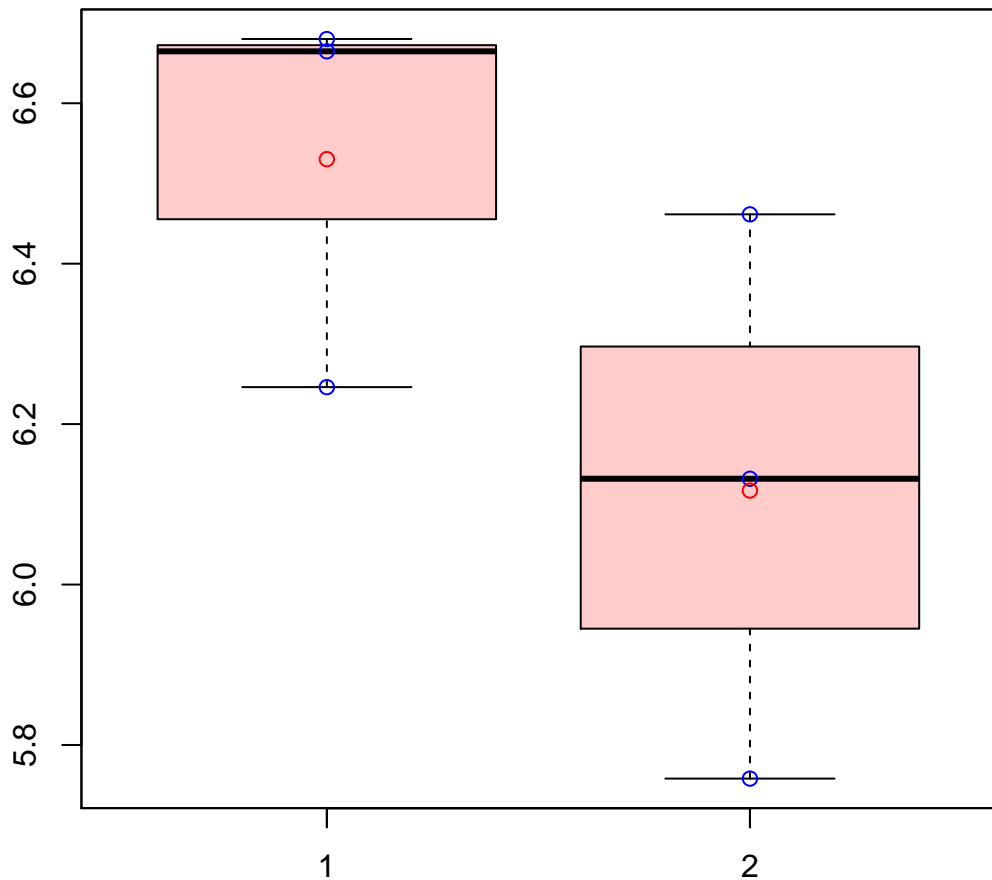

t-Test: p-value = 0.18

# CL4464Contig3|CL4464Contig3

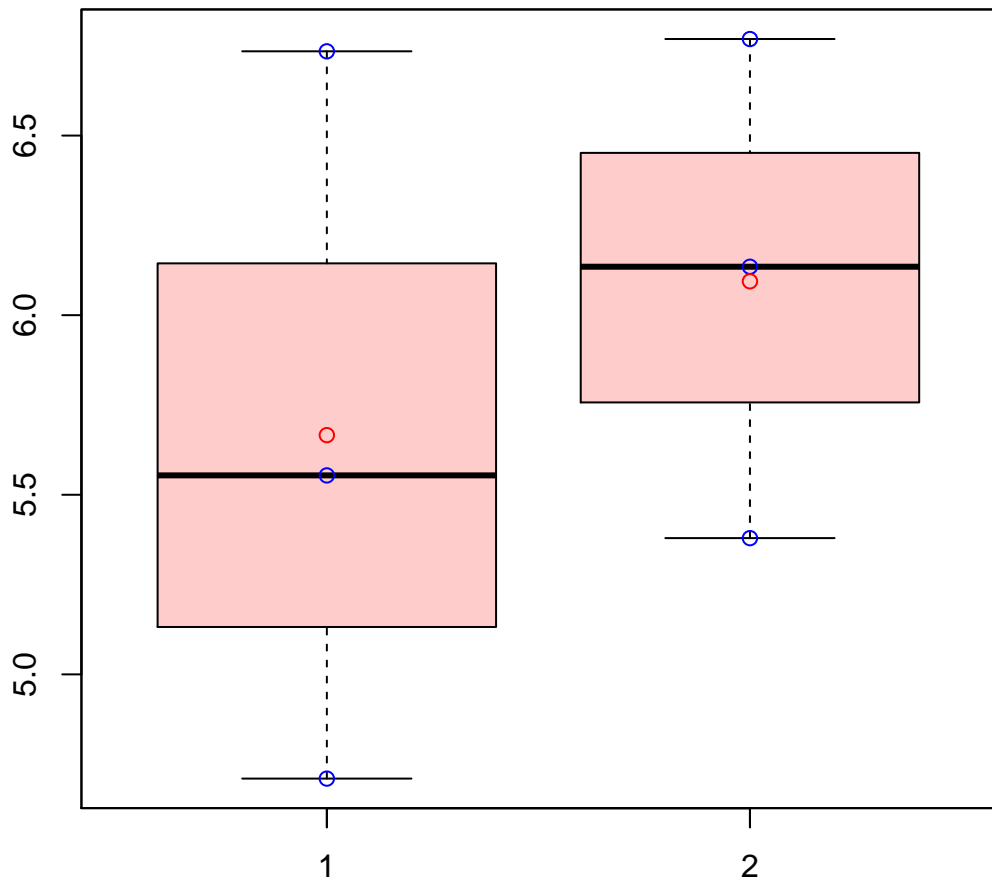

t-Test: p-value = 0.58

# CL4467Contig4|CL4467Contig4

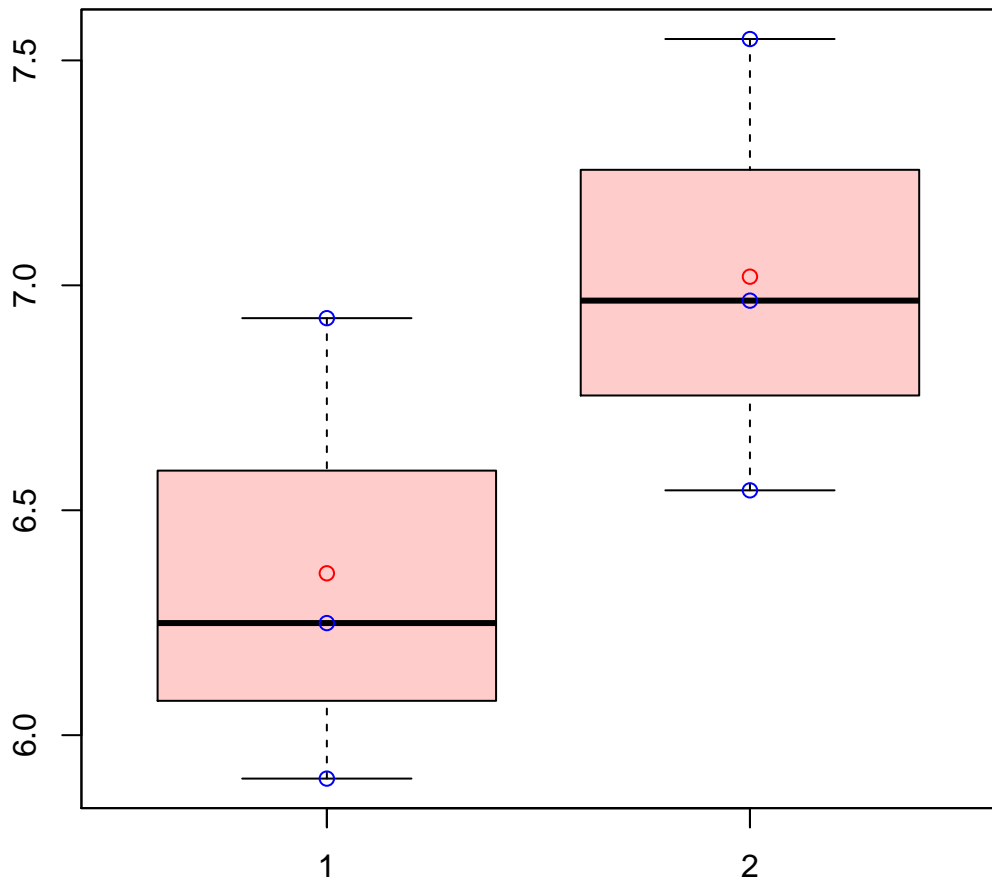

t-Test: p-value = 0.19

# CL4478Contig1|CL4478Contig1

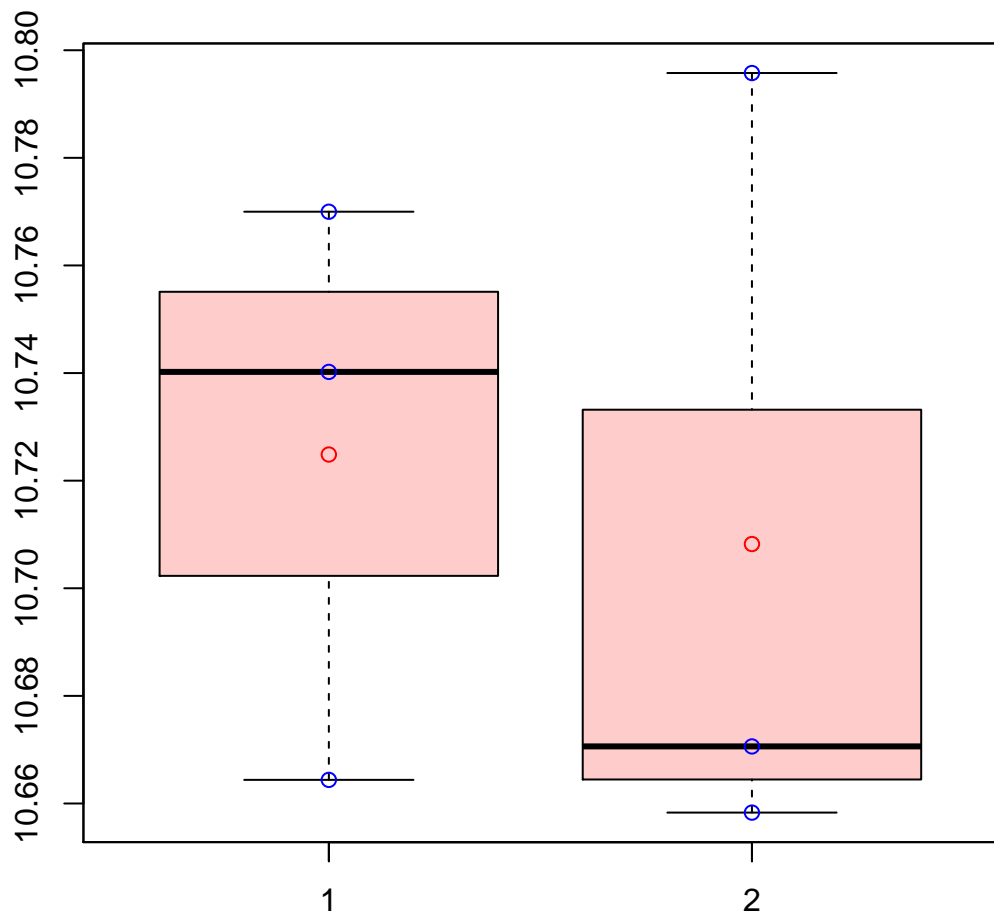

t-Test: p-value = 0.77



# CL4478Contig2|CL4478Contig2

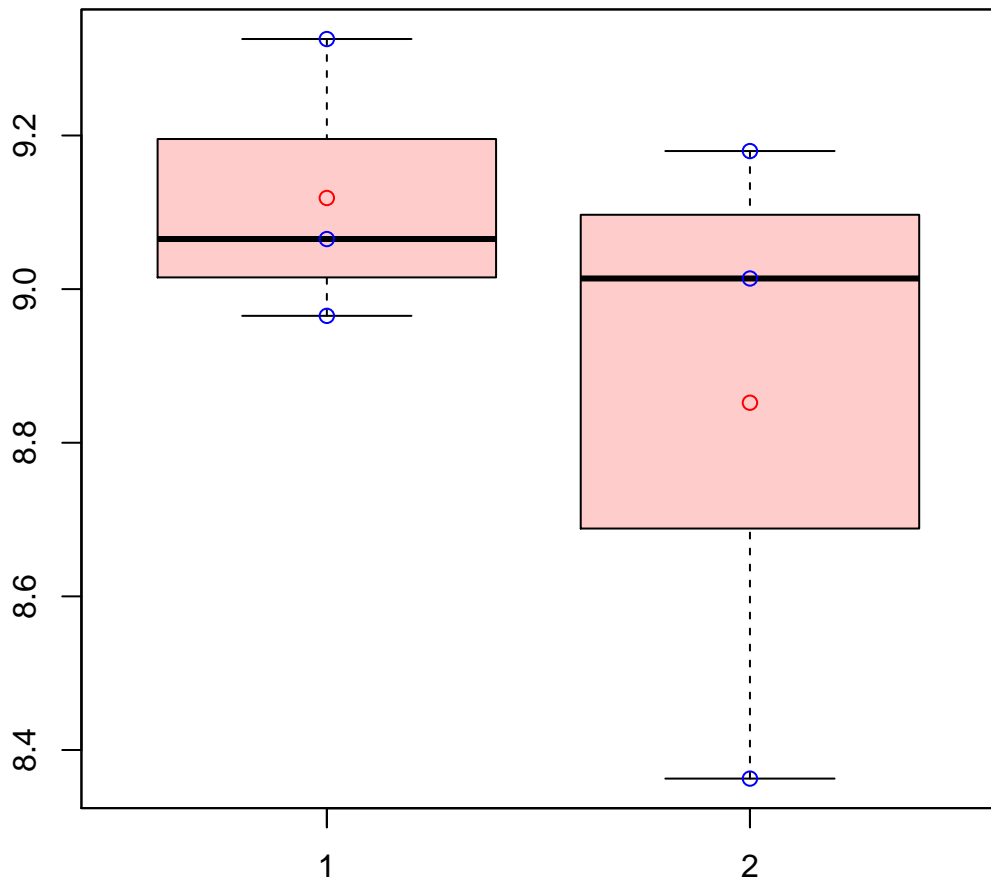

t-Test: p-value = 0.41

# CL4480Contig2|CL4480Contig2

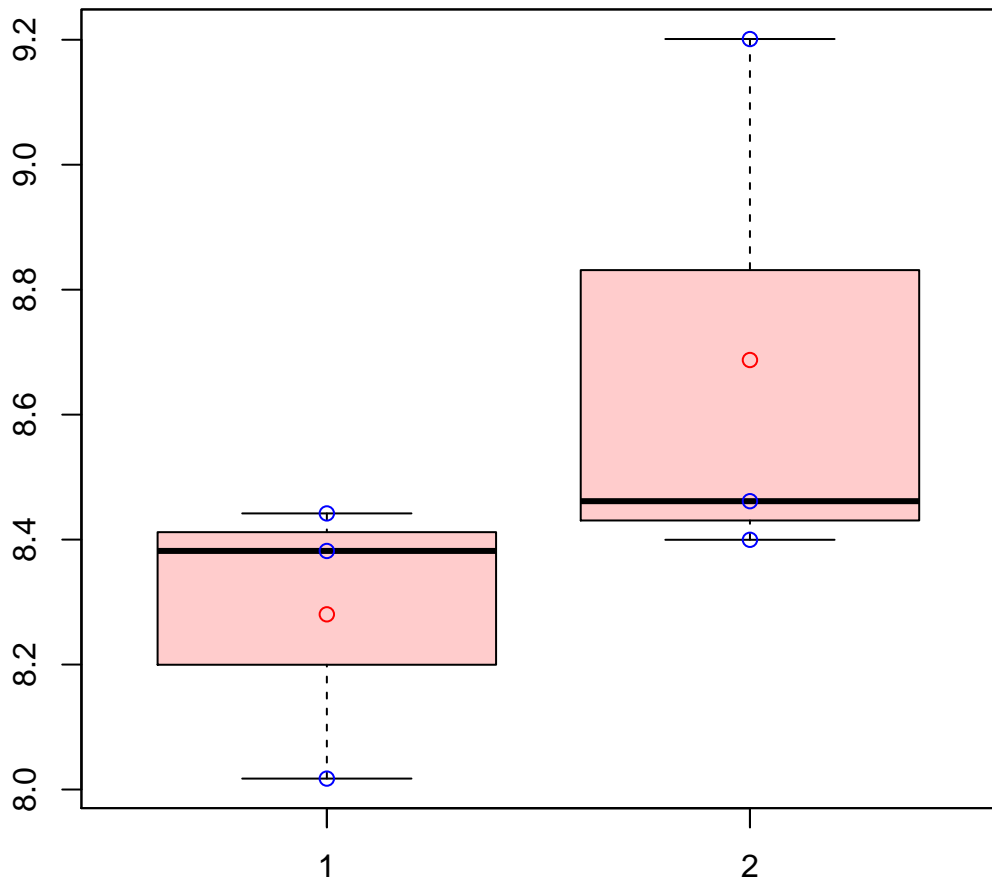

t-Test: p-value = 0.25

# CL448Contig11|CL448Contig11



t-Test: p-value = 0.62

# CL448Contig4|CL448Contig4

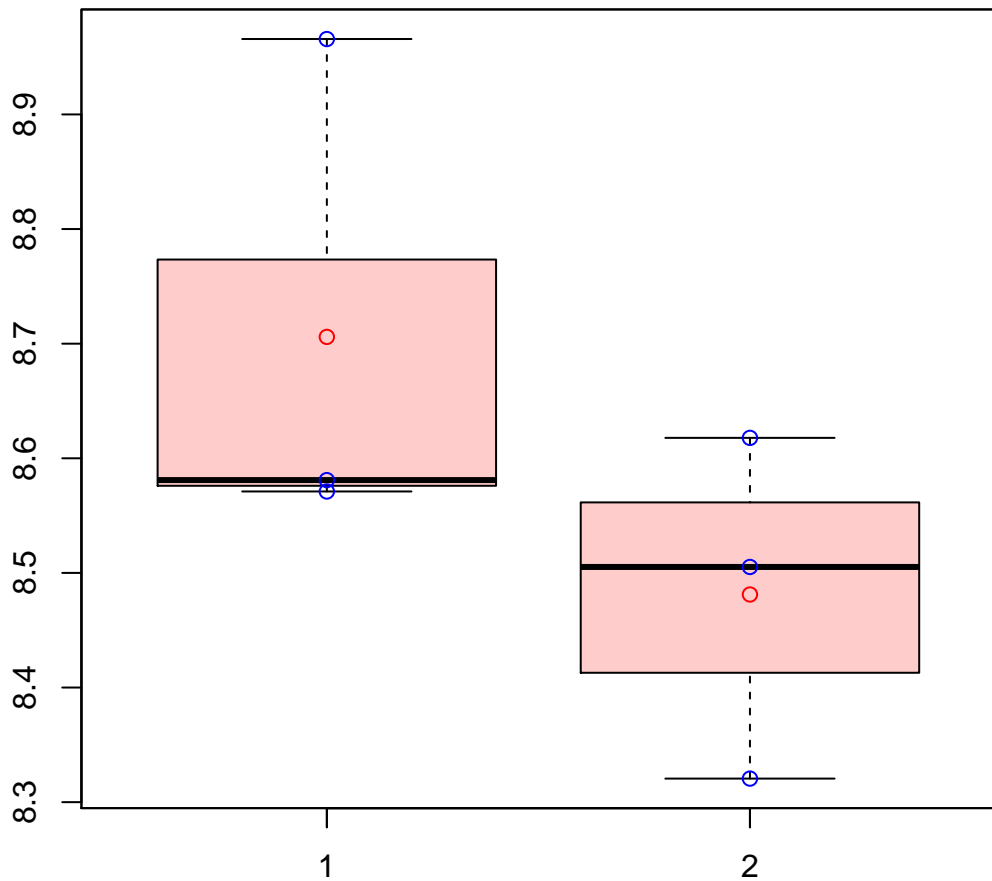

t-Test: p-value = 0.23

# CL448Contig5|CL448Contig5

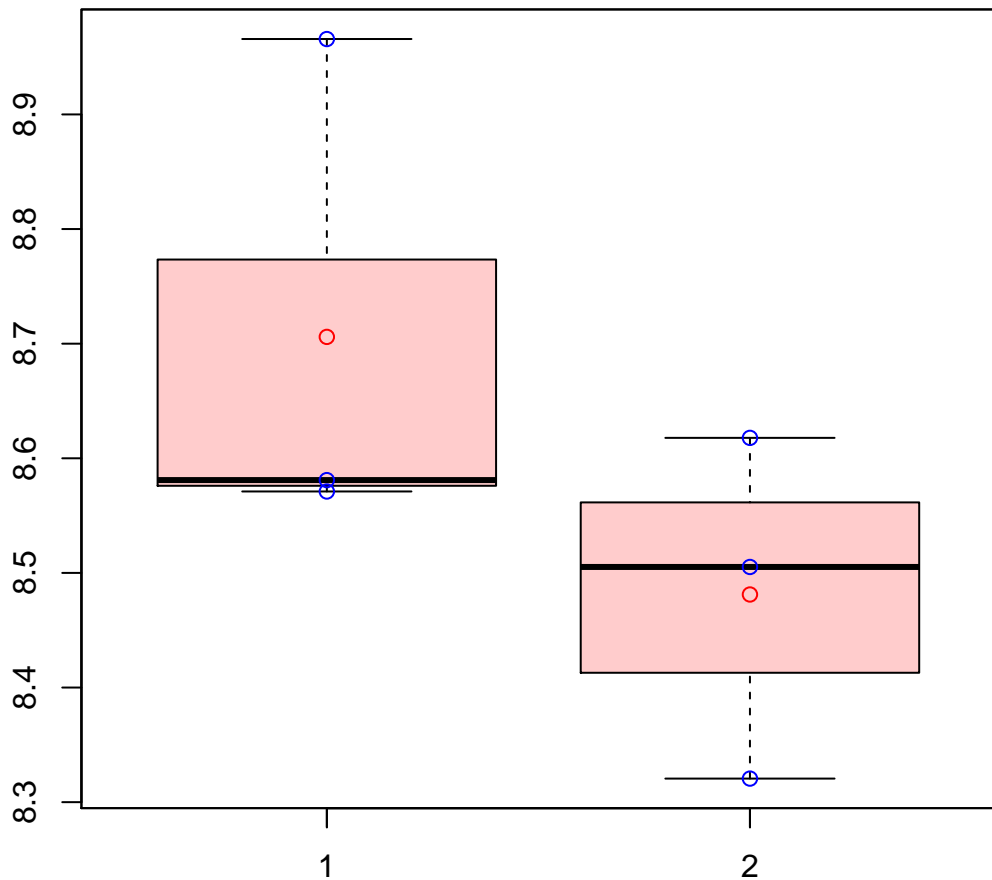

t-Test: p-value = 0.23

# CL448Contig7|CL448Contig7

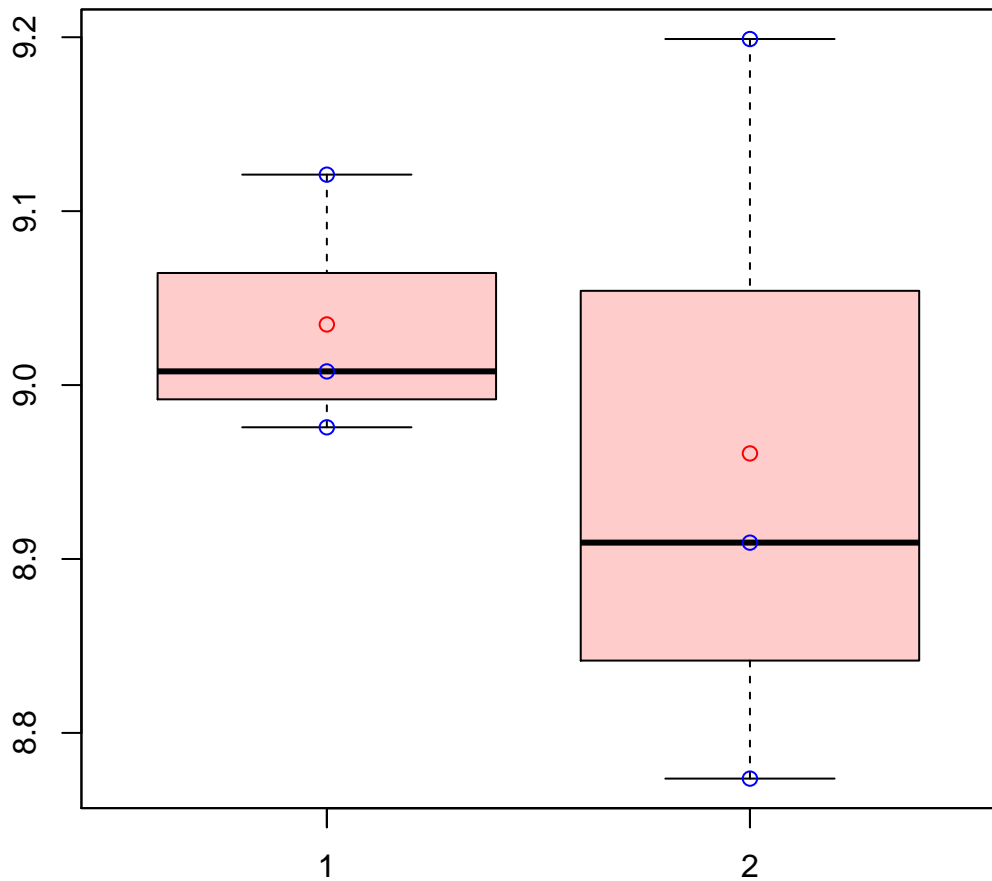

t-Test: p-value = 0.62

# CL4491Contig4|CL4491Contig4

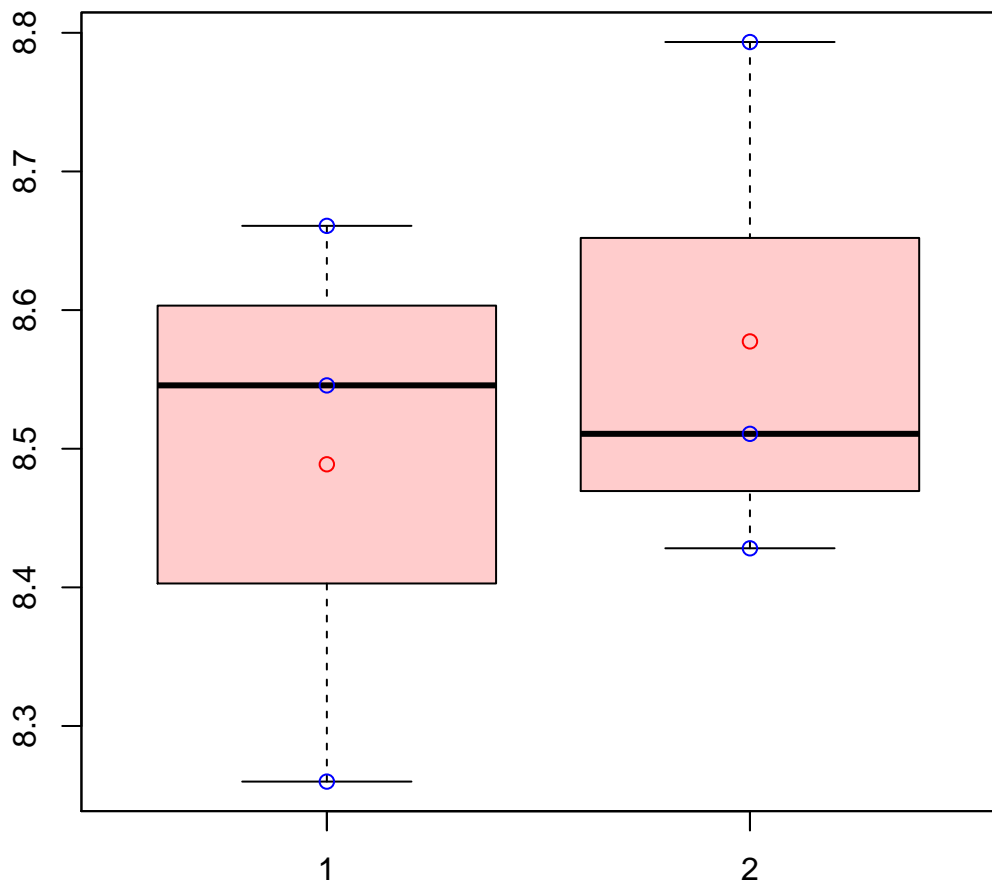

t-Test: p-value = 0.61

# CL4498Contig2|CL4498Contig2

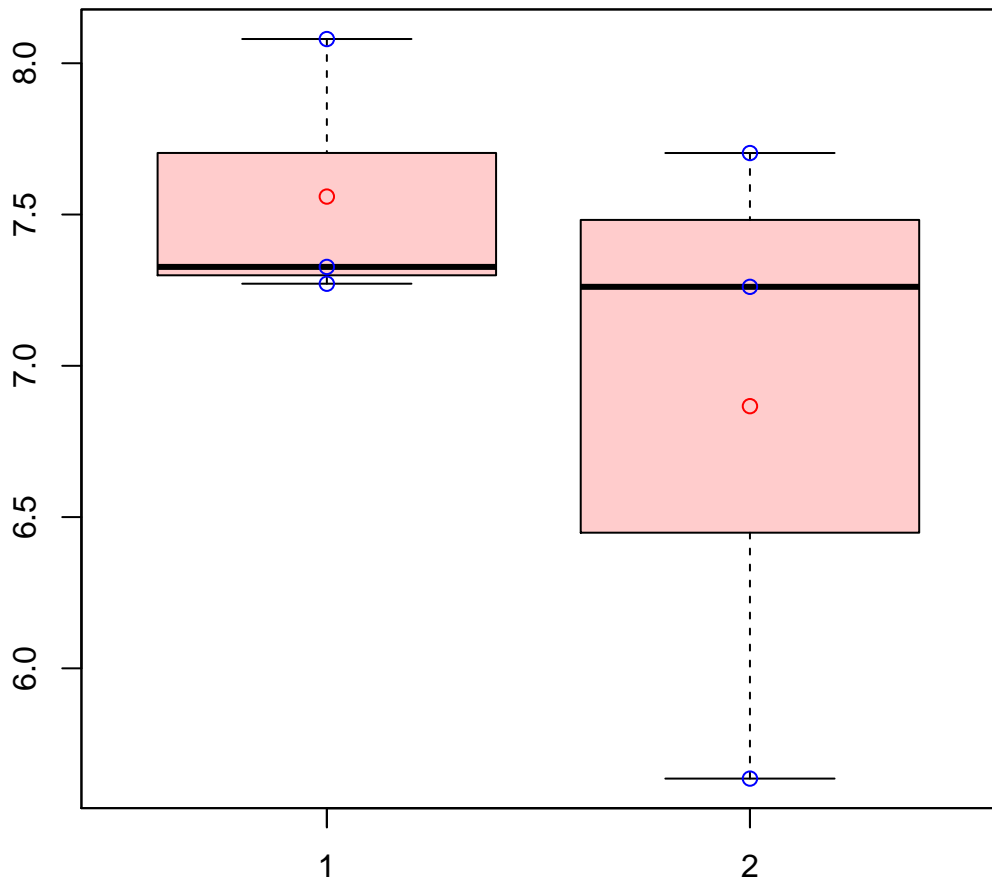

t-Test: p-value = 0.39



# CL4498Contig5|CL4498Contig5

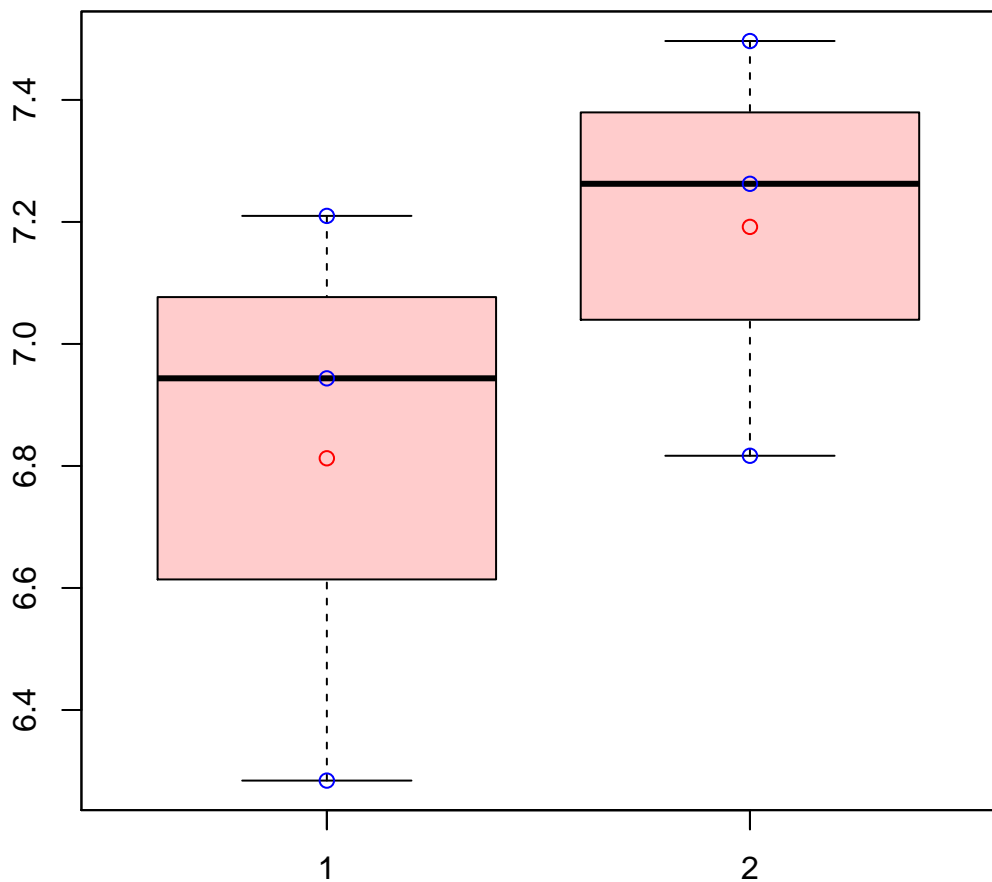

t-Test: p-value = 0.33

# CL4499Contig3|CL4499Contig3

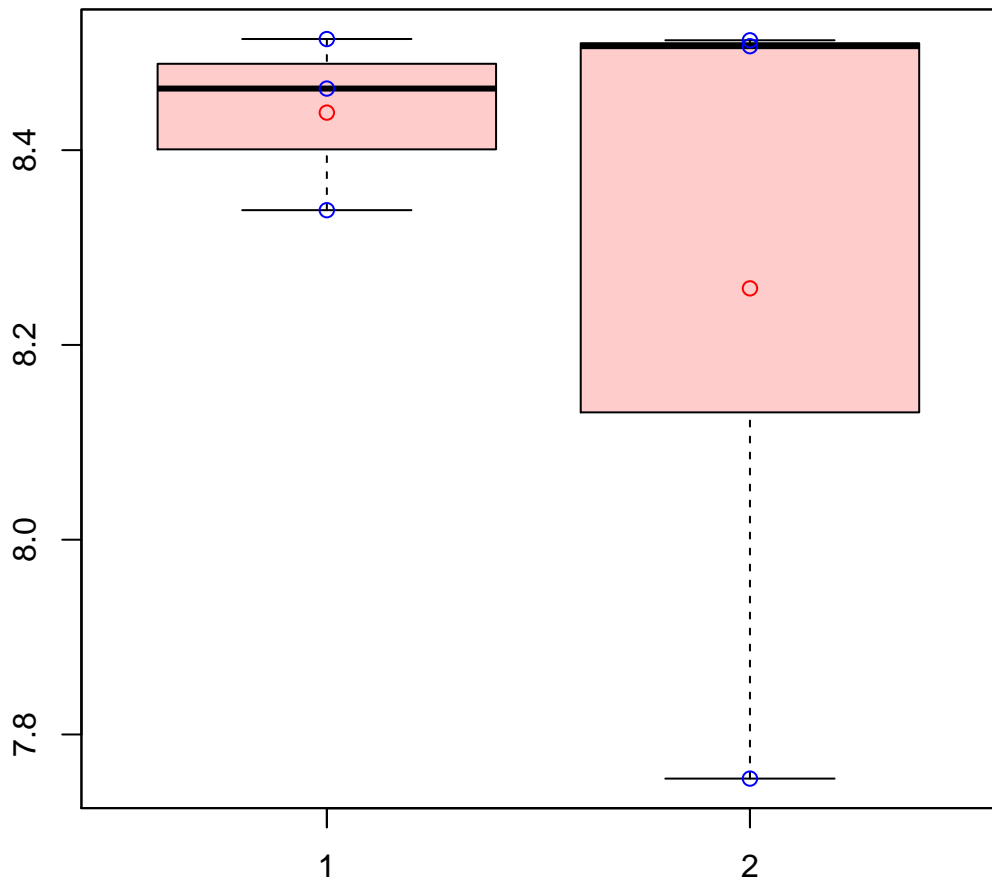

t-Test: p-value = 0.55

# CL449Contig3|CL449Contig3

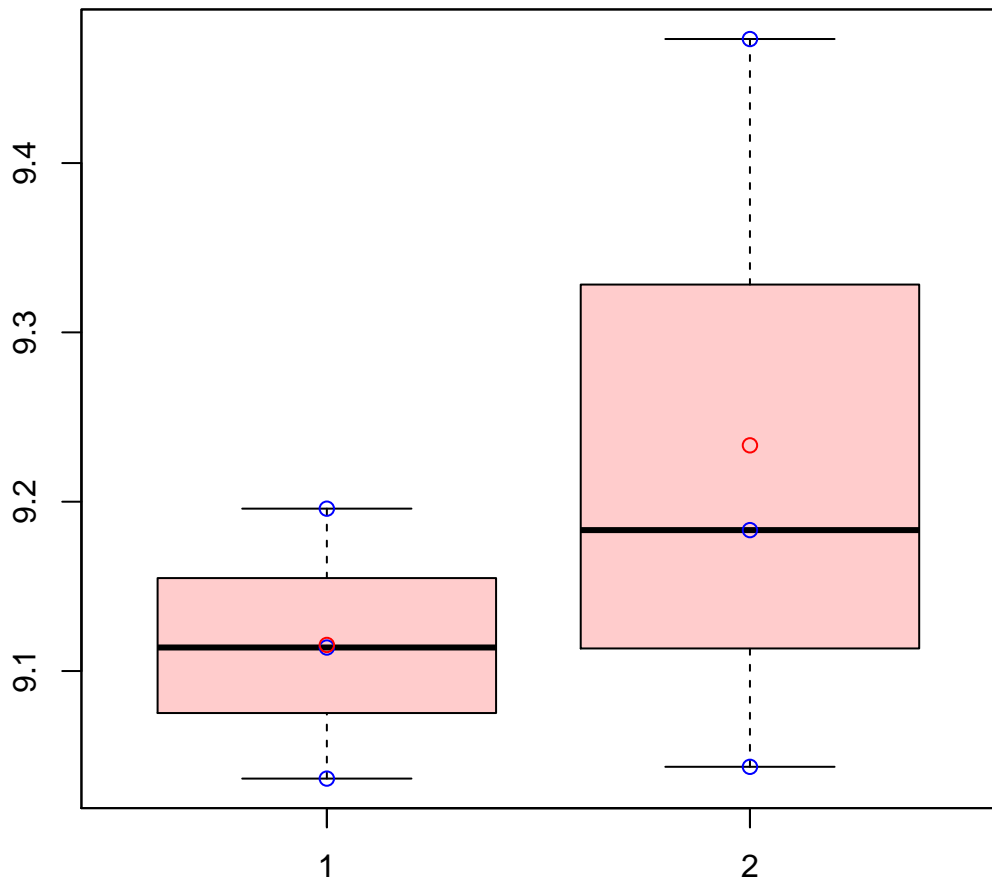

t-Test: p-value = 0.46

# CL44Contig14|CL44Contig14

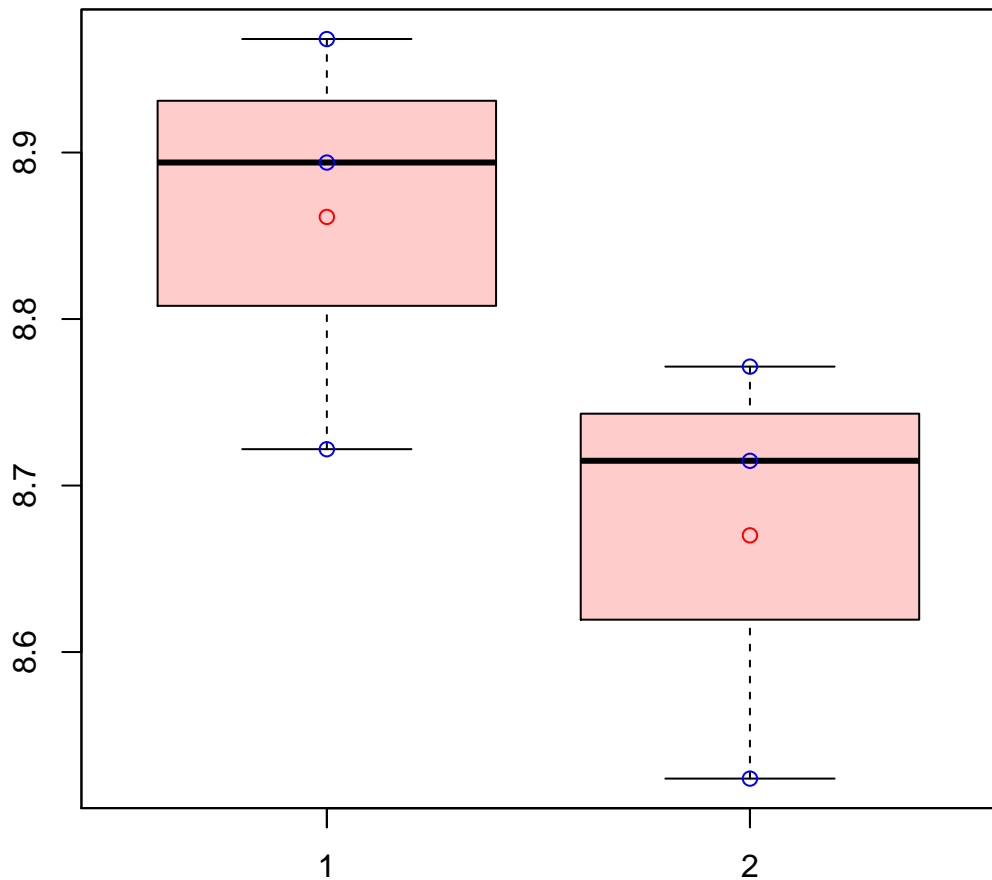

t-Test: p-value = 0.14

# CL44Contig17|CL44Contig17

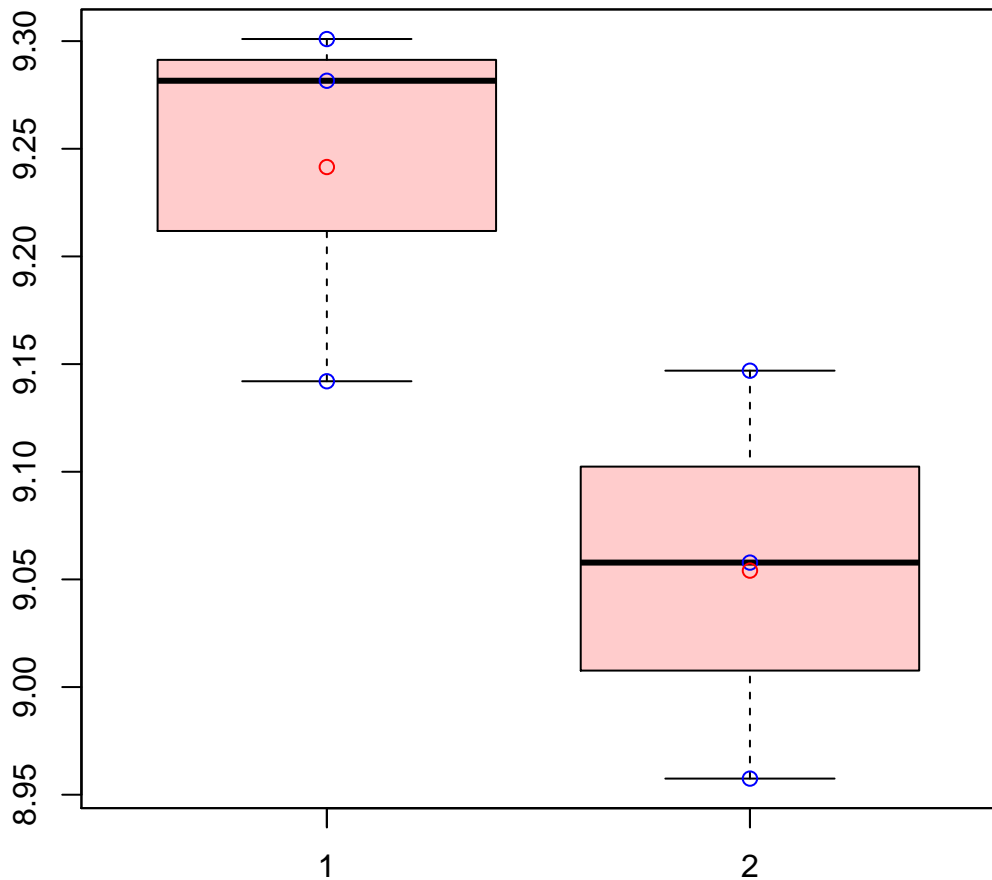

t-Test: p-value = 0.07

# CL44Contig24|CL44Contig24

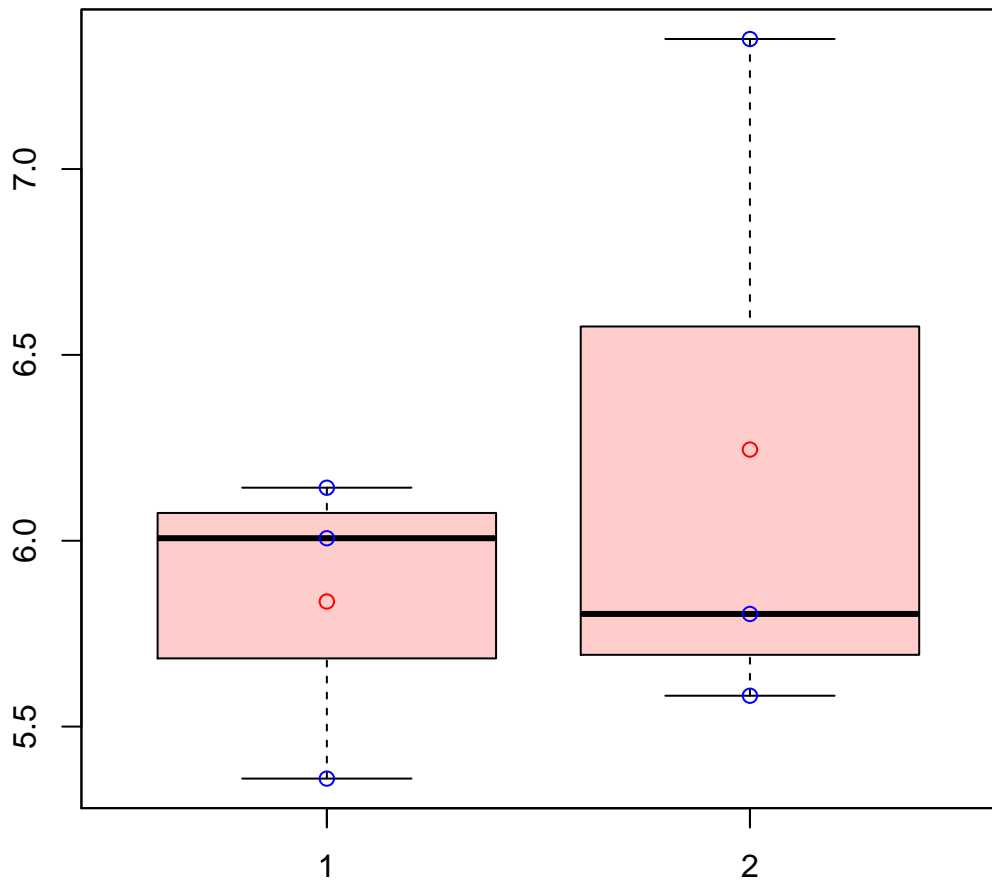

t-Test: p-value = 0.55

# CL44Contig26|CL44Contig26

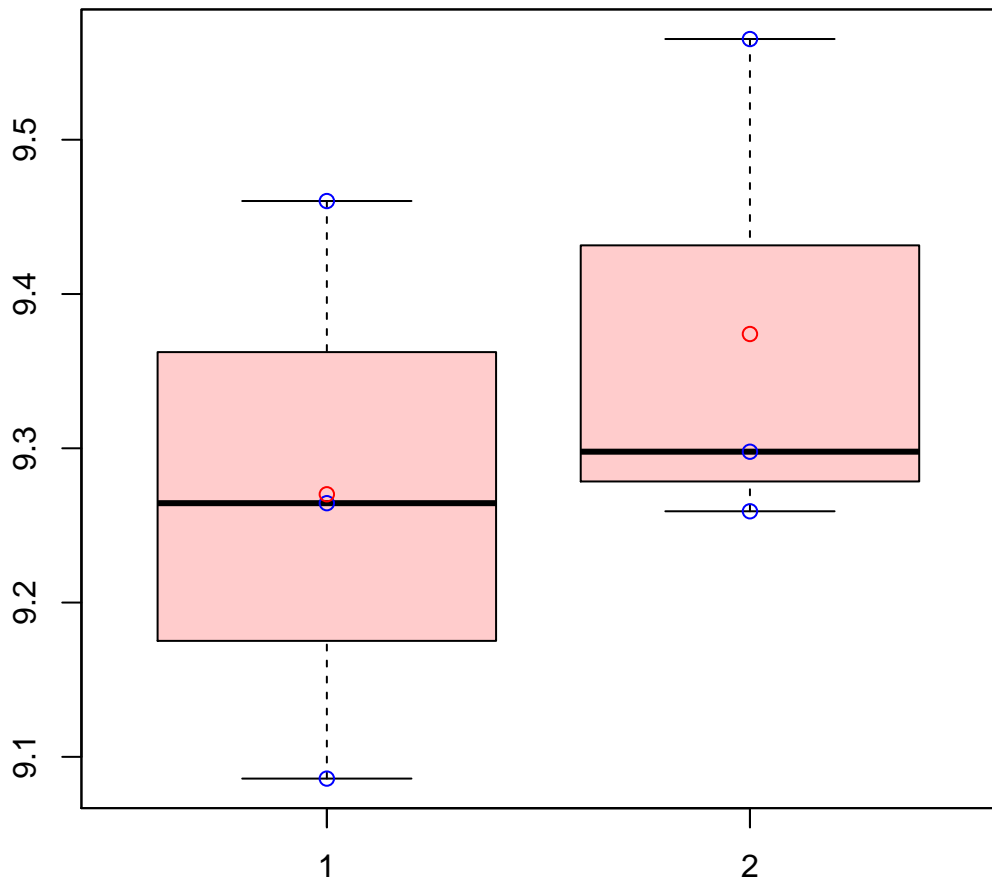

t-Test: p-value = 0.51

# CL44Contig2|CL44Contig2

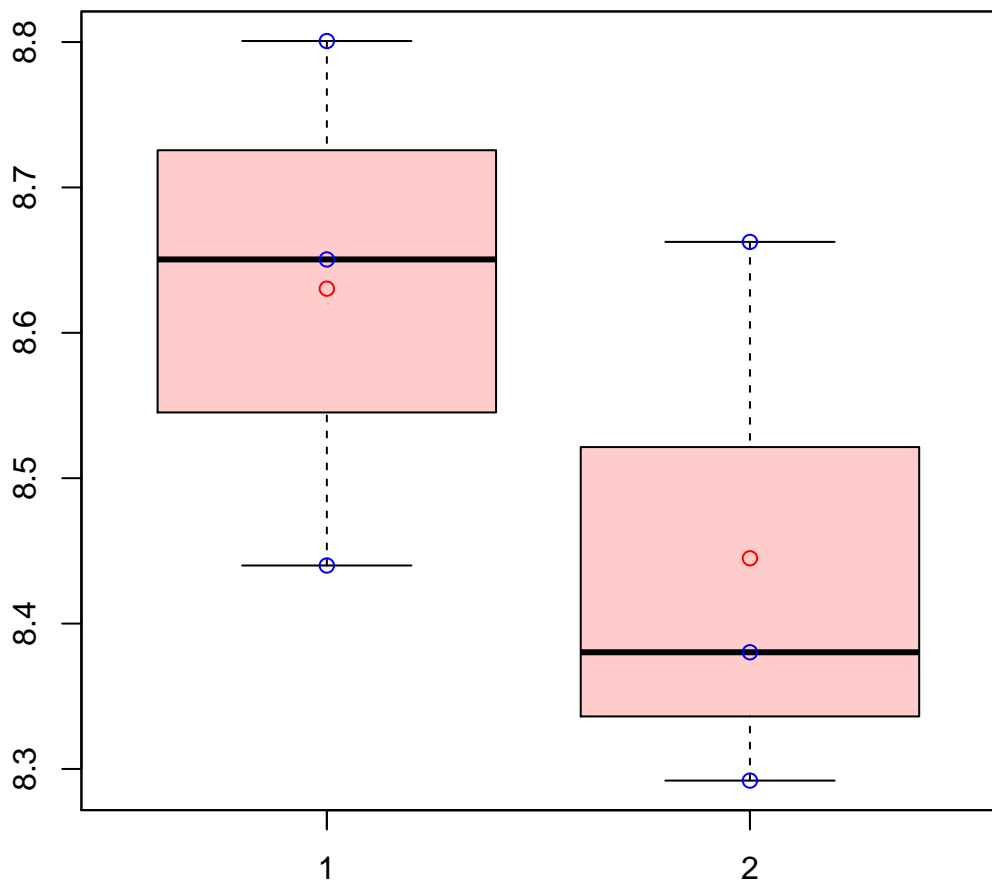

t-Test: p-value = 0.29



# CL44Contig30|CL44Contig30

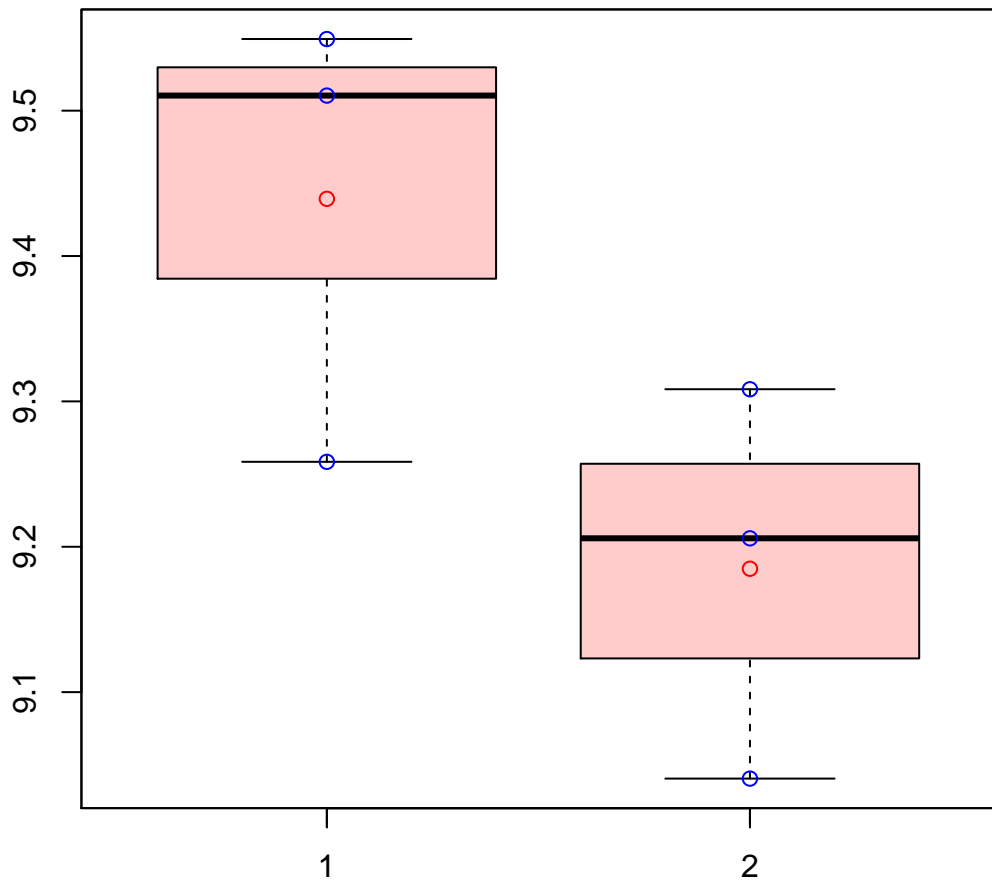

t-Test: p-value = 0.1

# CL44Contig31|CL44Contig31

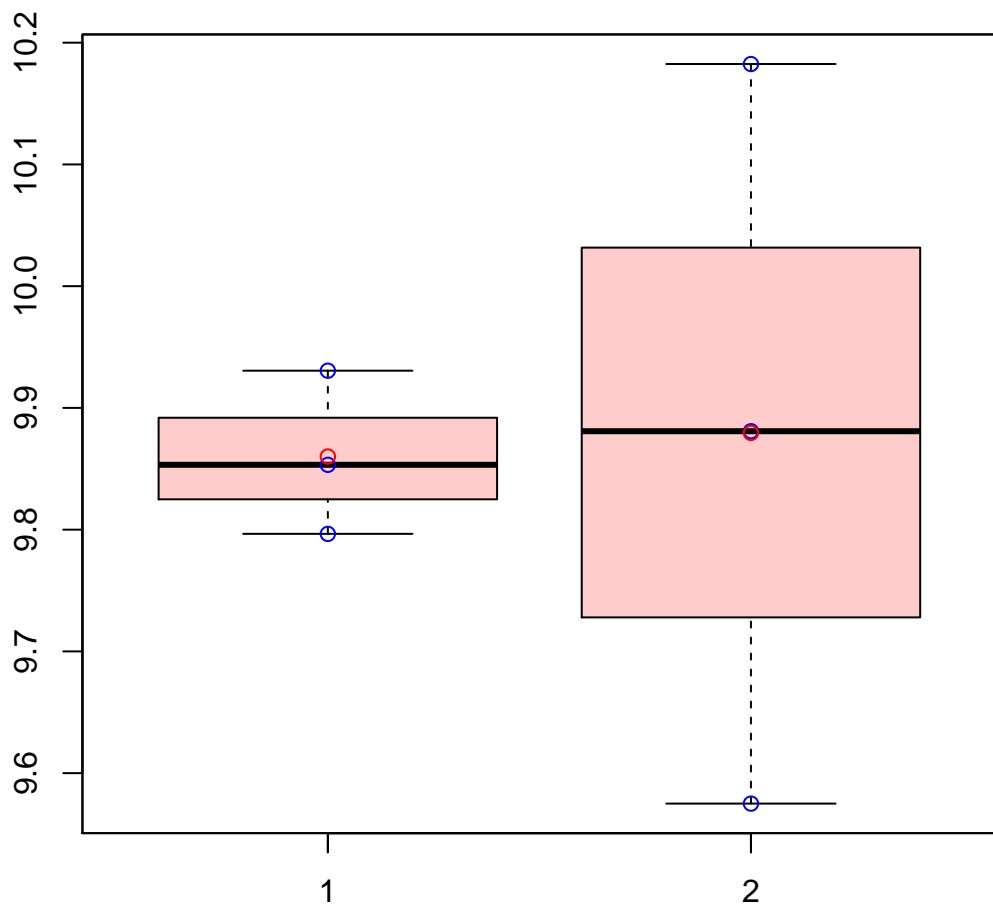

t-Test: p-value = 0.92

# CL44Contig32|CL44Contig32



t-Test: p-value = 0.29

# CL44Contig3|CL44Contig3

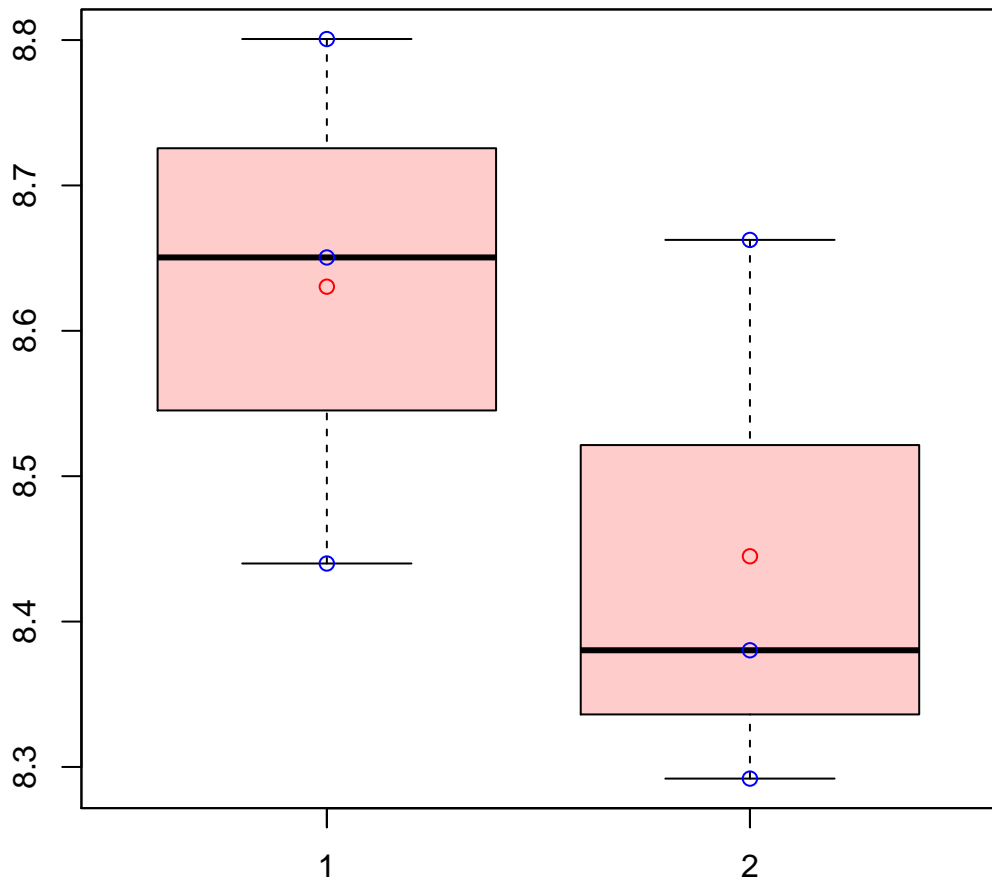

t-Test: p-value = 0.29

# CL44Contig5|CL44Contig5

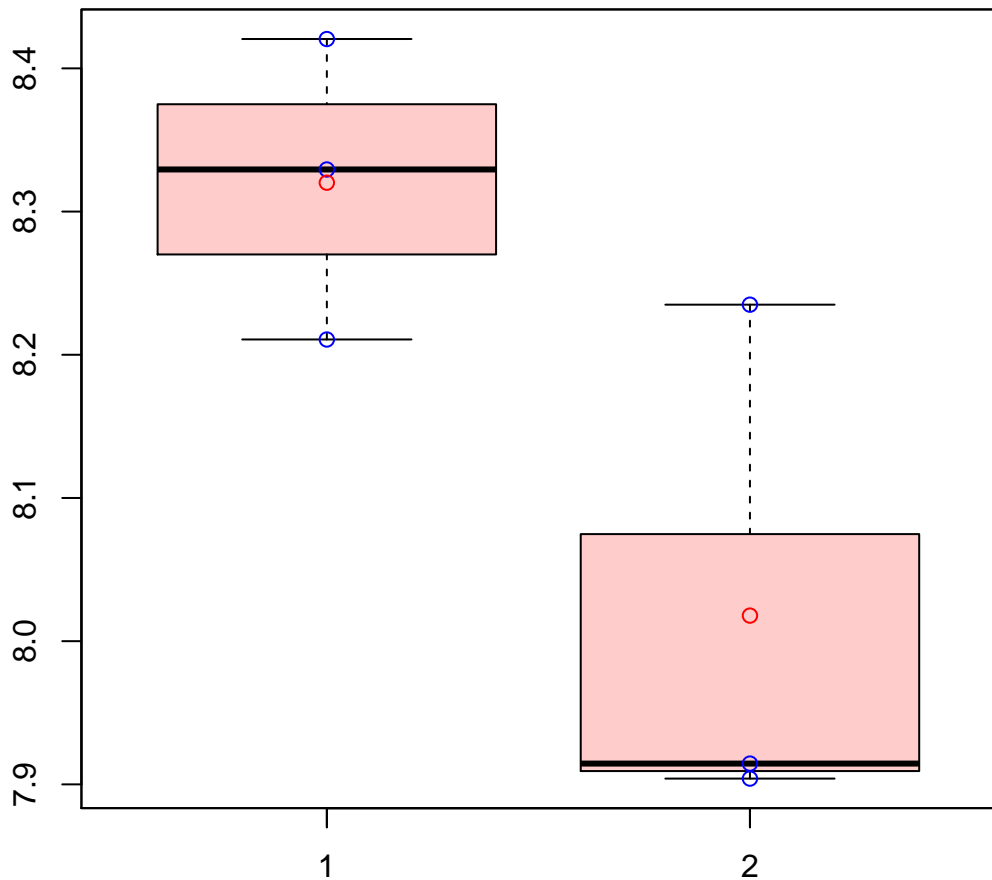

t-Test: p-value = 0.09

# CL44Contig9|CL44Contig9

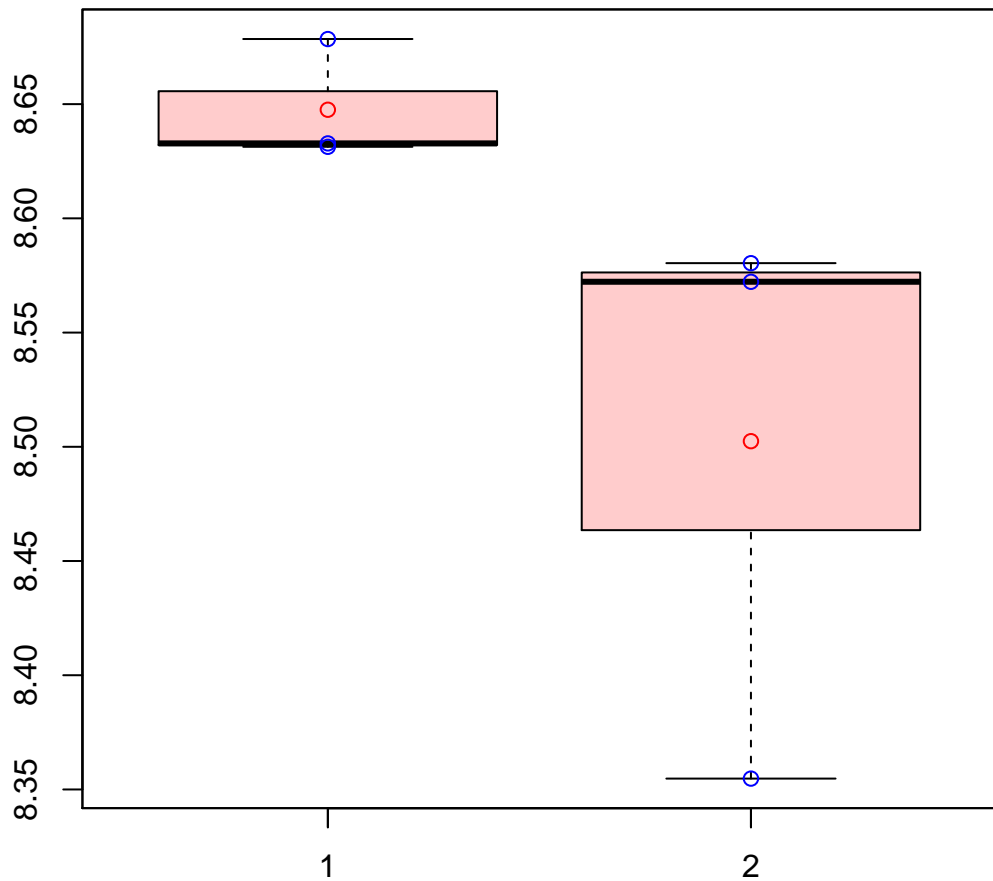

t-Test: p-value = 0.18

# CL4505Contig5|CL4505Contig5

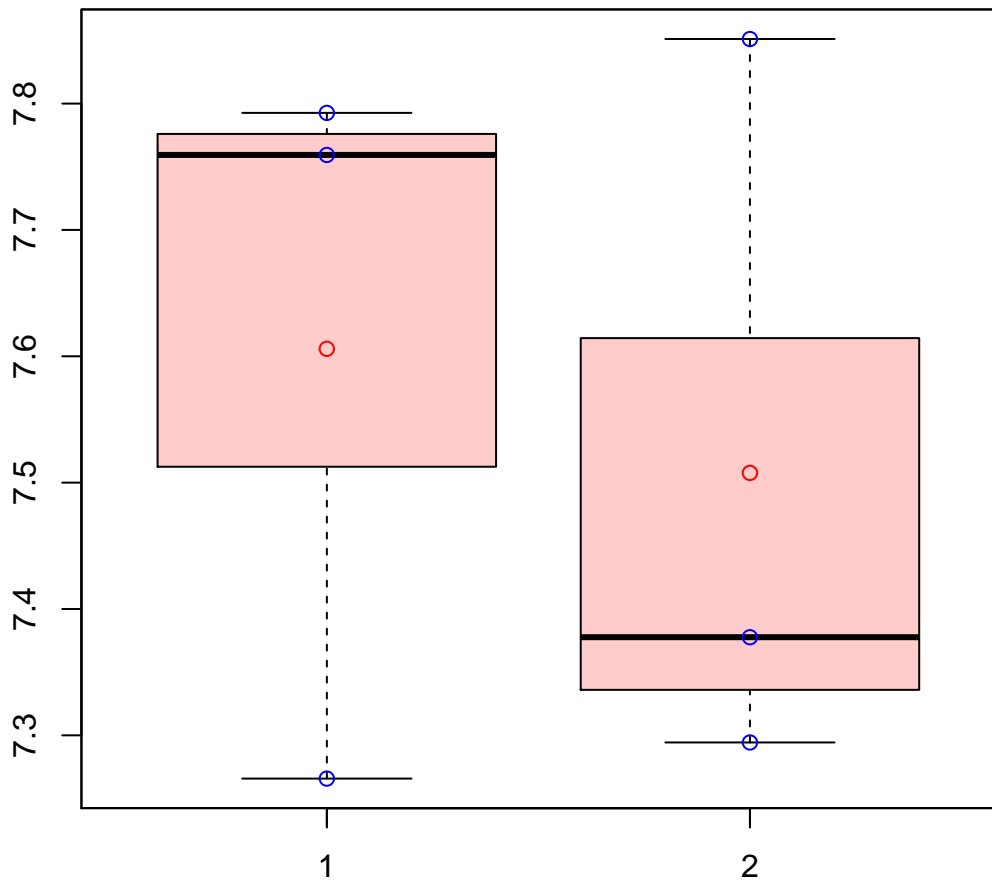

t-Test: p-value = 0.71

# CL4506Contig1|CL4506Contig1

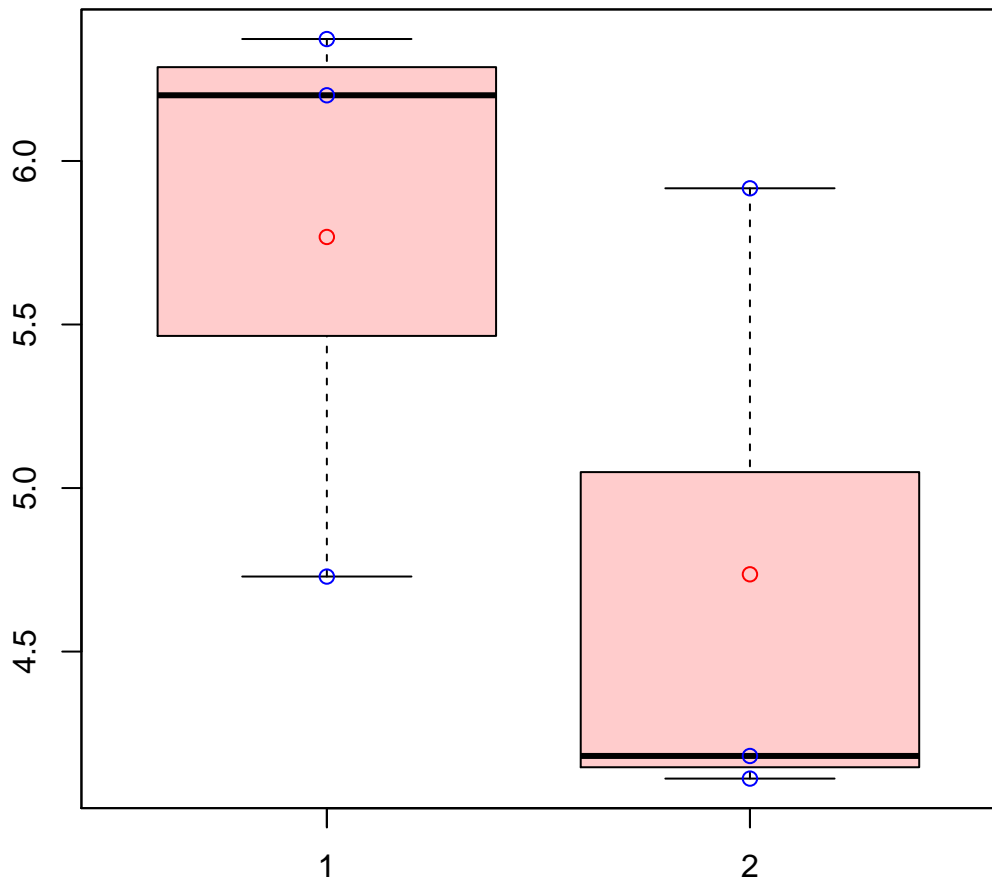

t-Test: p-value = 0.26



# CL4509Contig1|CL4509Contig1

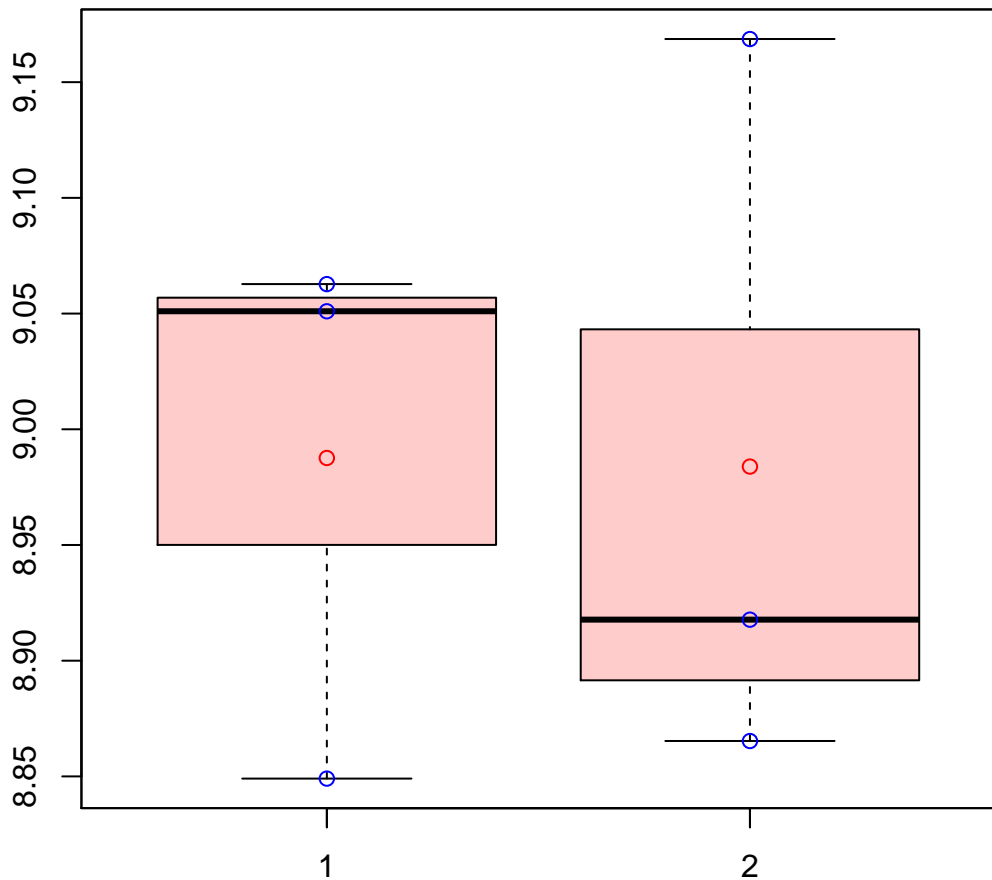

t-Test: p-value = 0.98

# CL4509Contig2|CL4509Contig2



t-Test: p-value = 0.98

# CL450Contig17|CL450Contig17

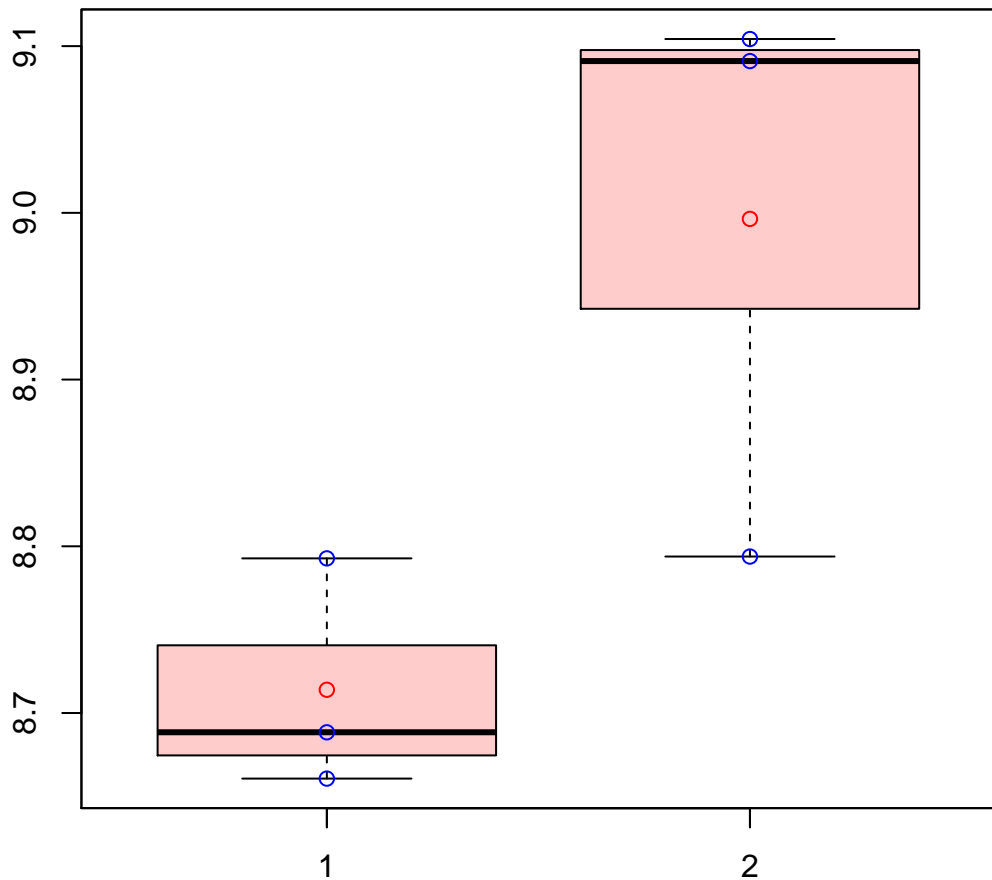

t-Test: p-value = 0.09

# CL4510Contig1|CL4510Contig1

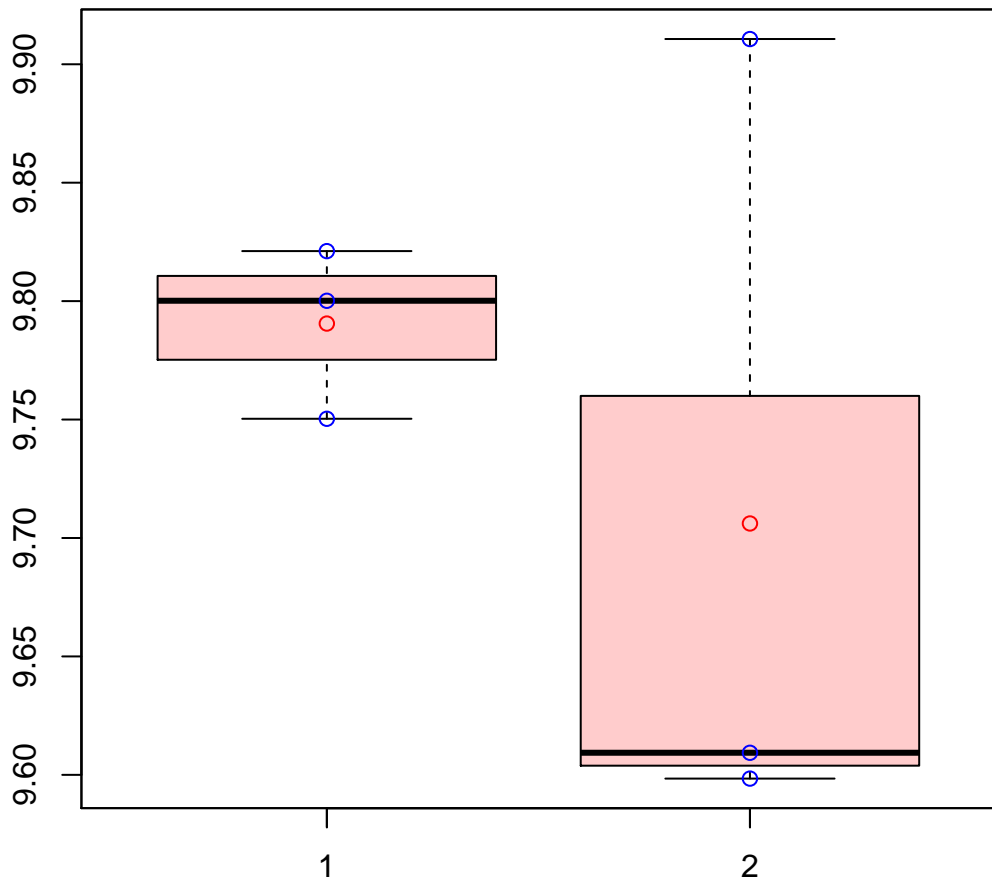

t-Test: p-value = 0.5

# CL4510Contig2|CL4510Contig2

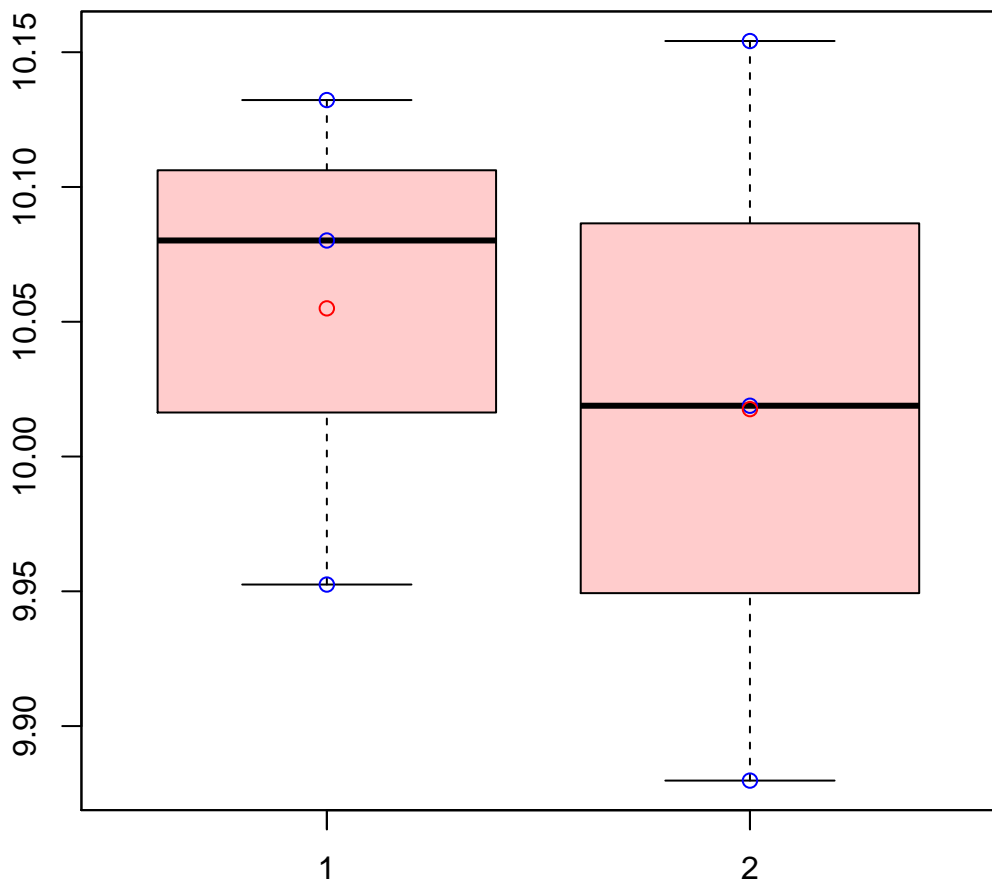

t-Test: p-value = 0.72

# CL4510Contig3|CL4510Contig3

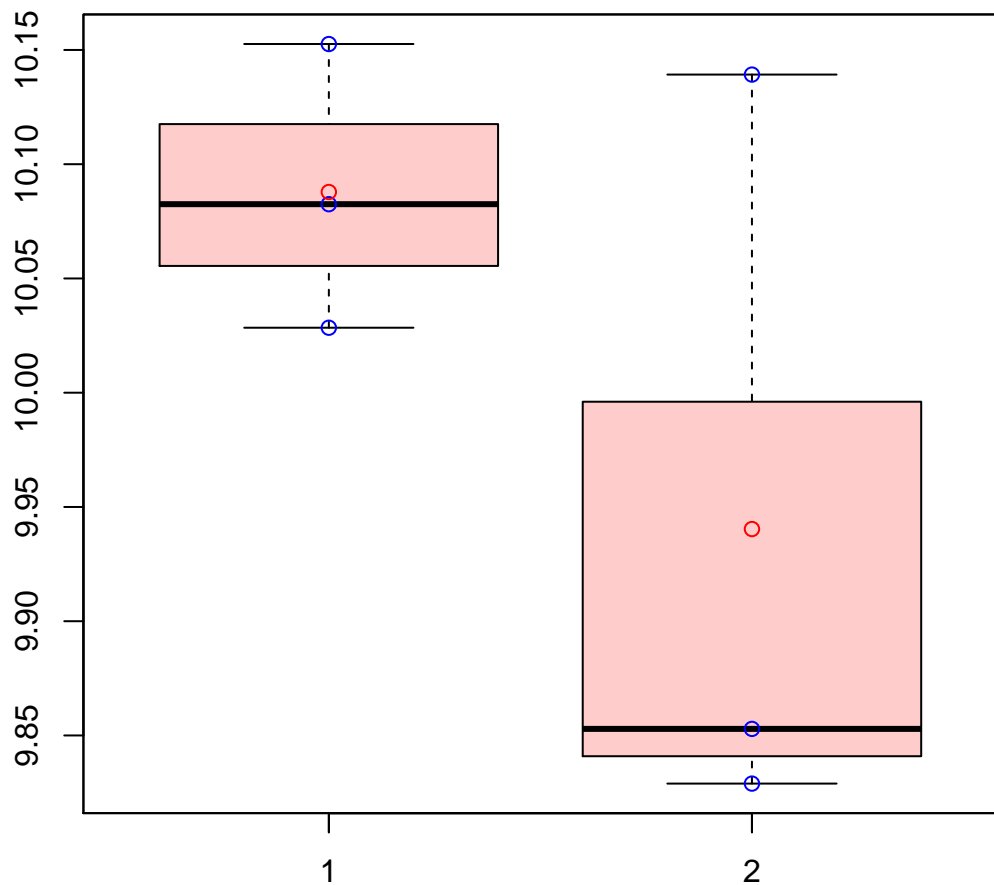

t-Test: p-value = 0.27

# CL4510Contig4|CL4510Contig4

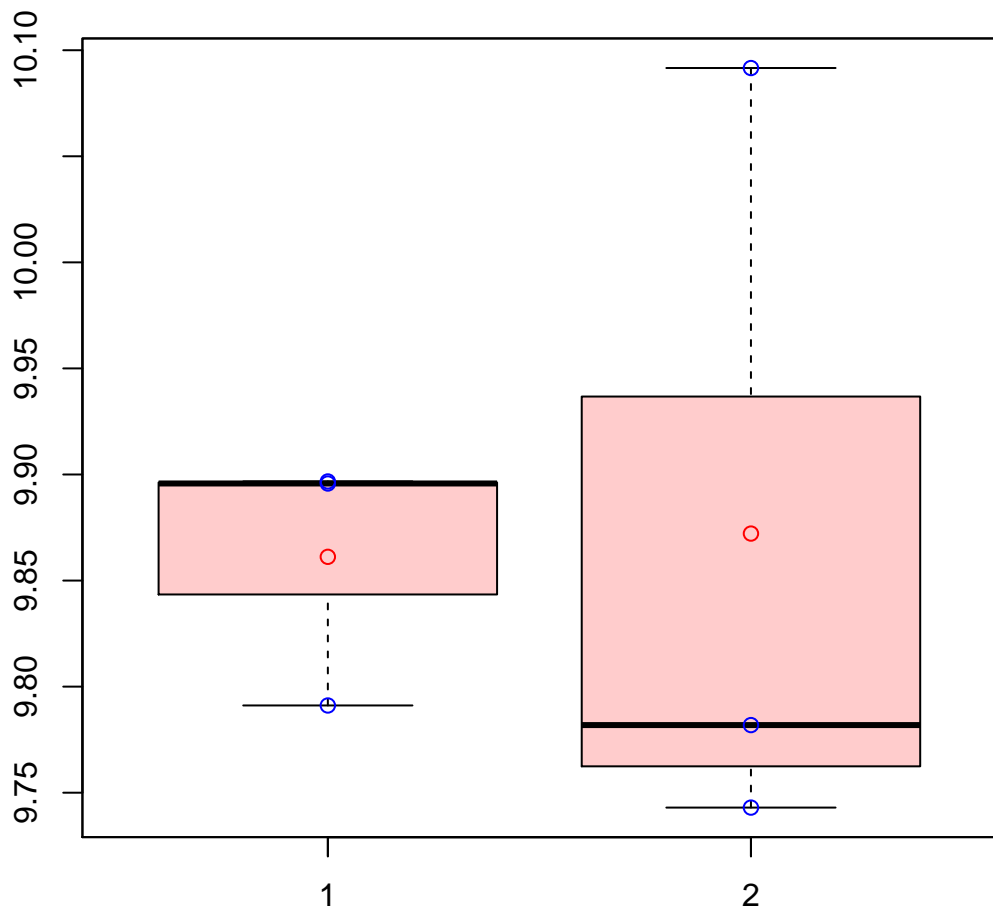

t-Test: p-value = 0.93

# CL4510Contig5|CL4510Contig5

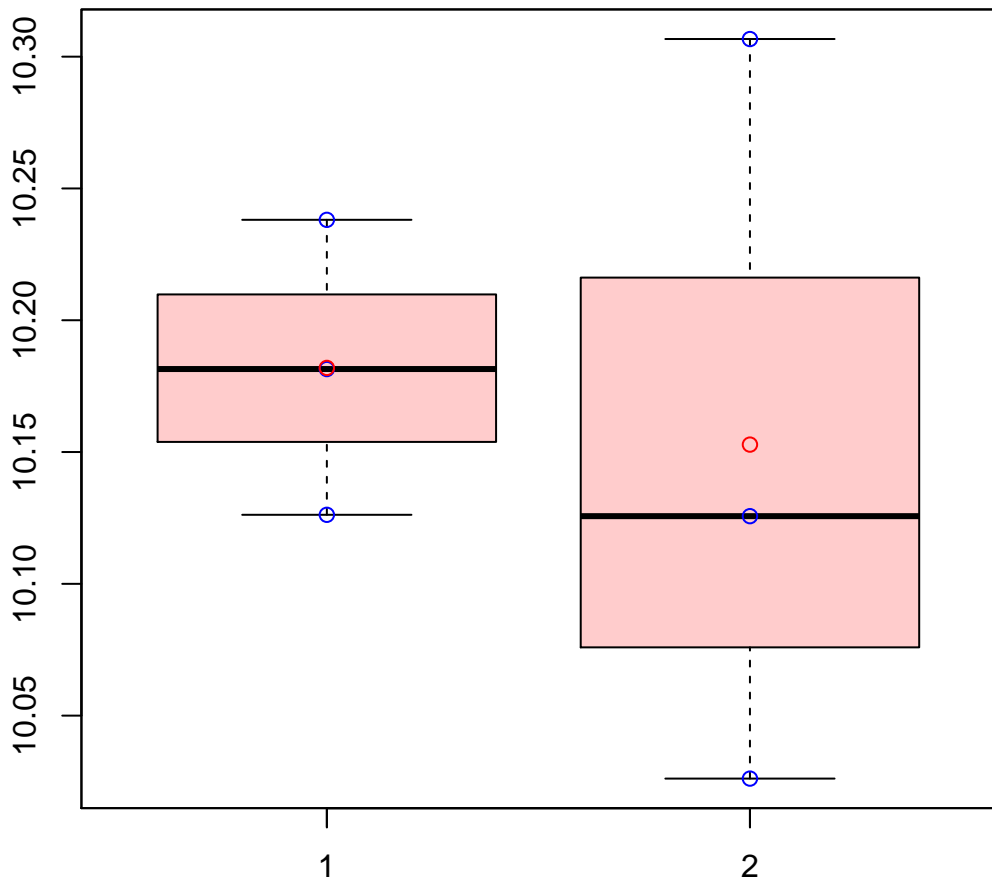

t-Test: p-value = 0.77



# CL4511Contig3|CL4511Contig3

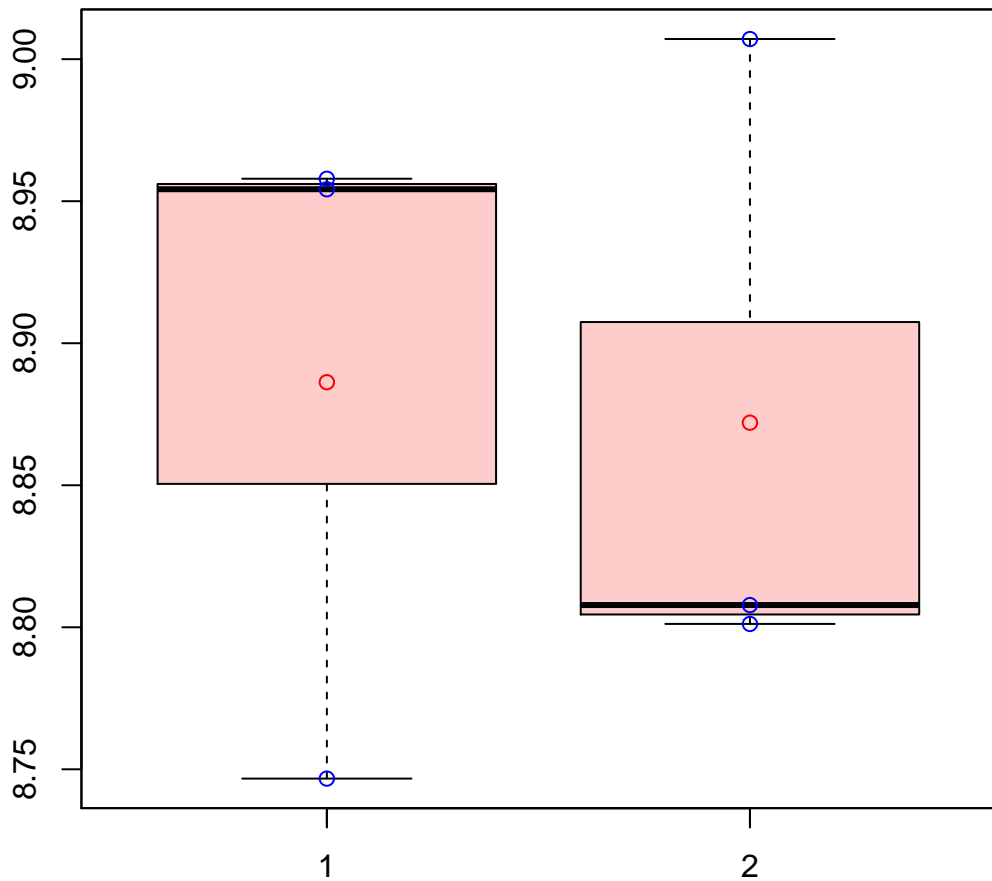

t-Test: p-value = 0.89

# CL4512Contig1|CL4512Contig1

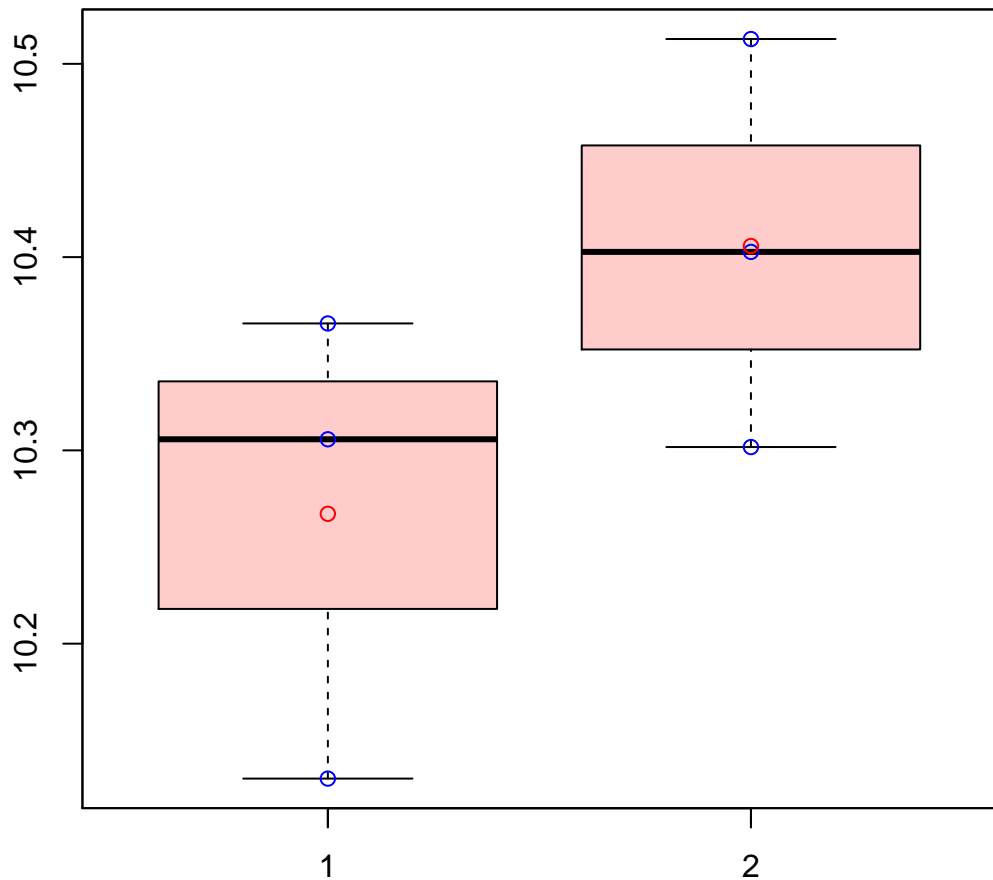

t-Test: p-value = 0.21

# CL4518Contig2|CL4518Contig2

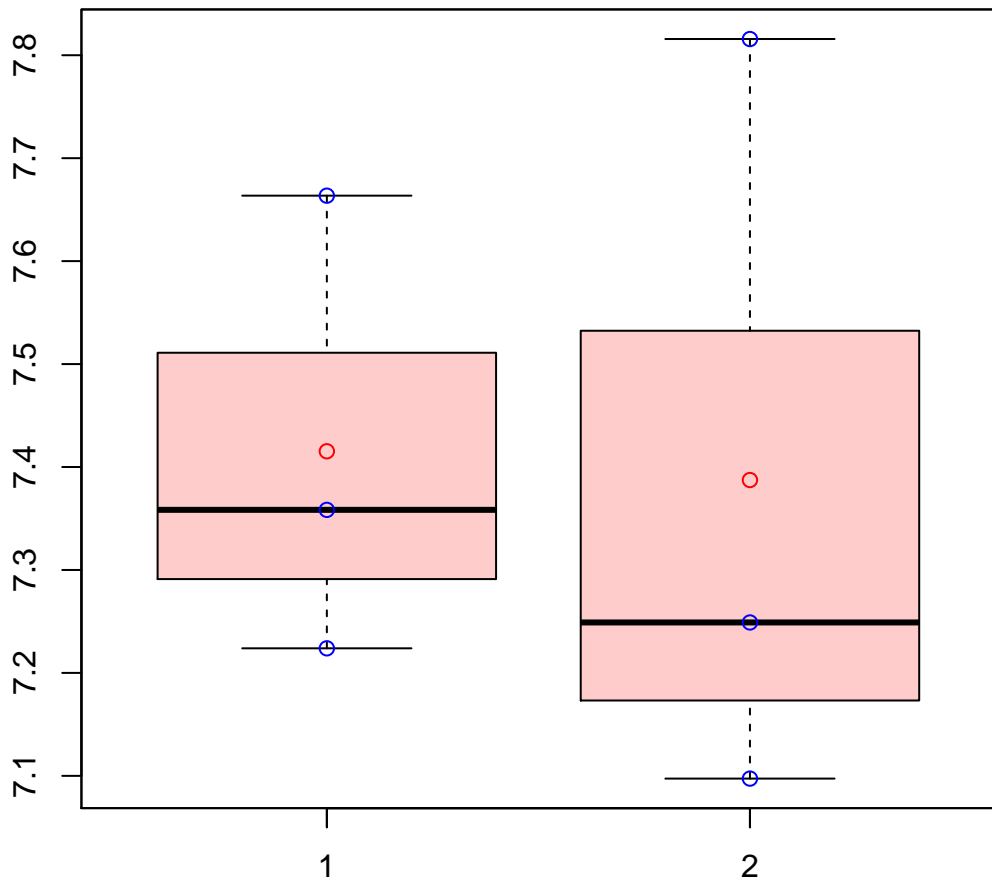

t-Test: p-value = 0.92

# CL451Contig7|CL451Contig7

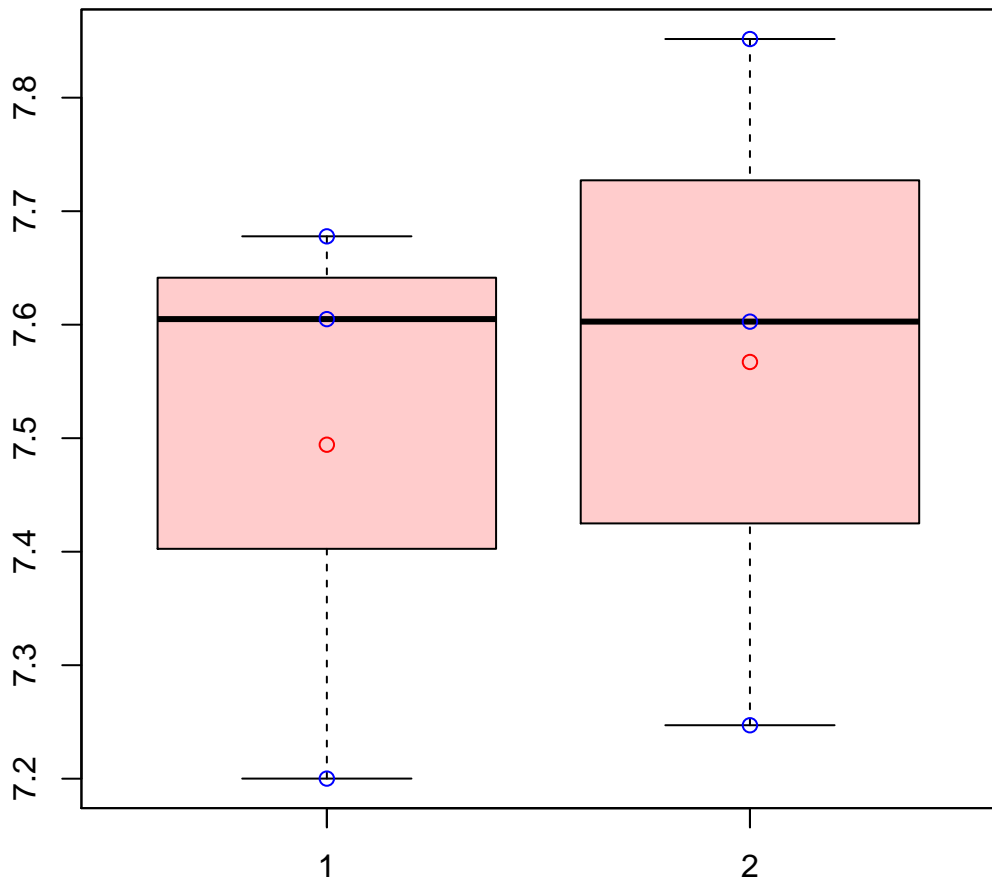

t-Test: p-value = 0.77

# CL4526Contig2|CL4526Contig2

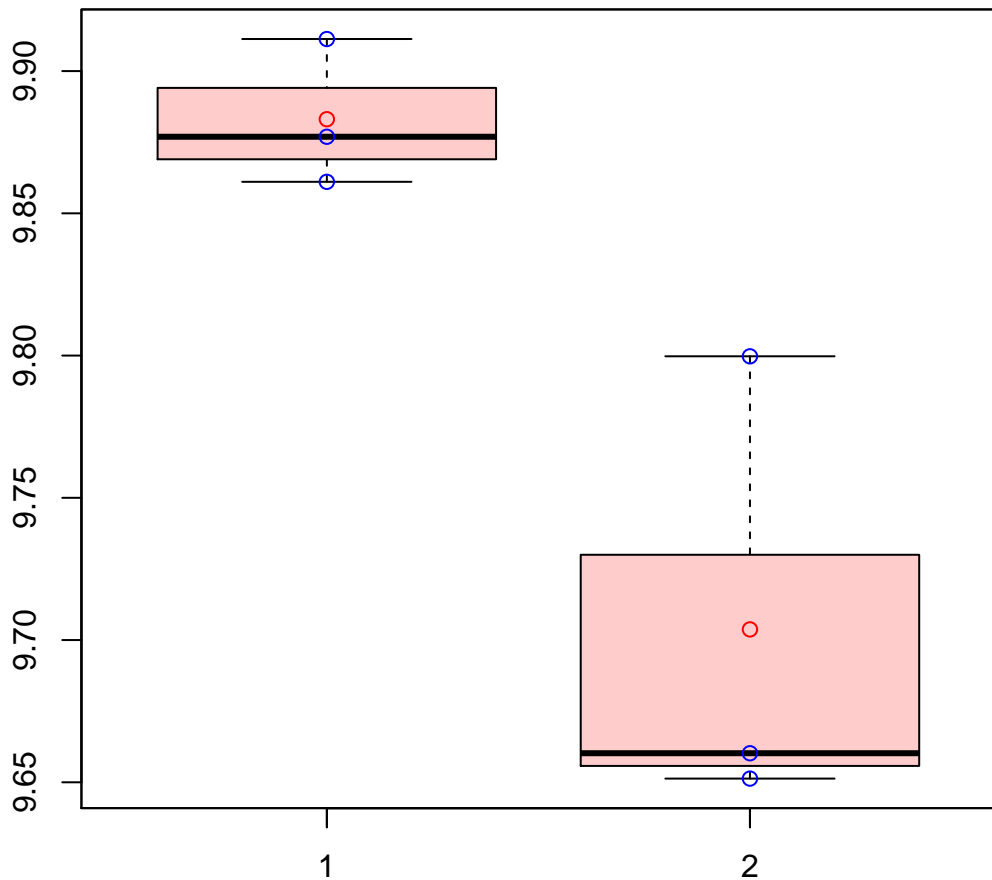

t-Test: p-value = 0.05

# CL4527Contig3|CL4527Contig3

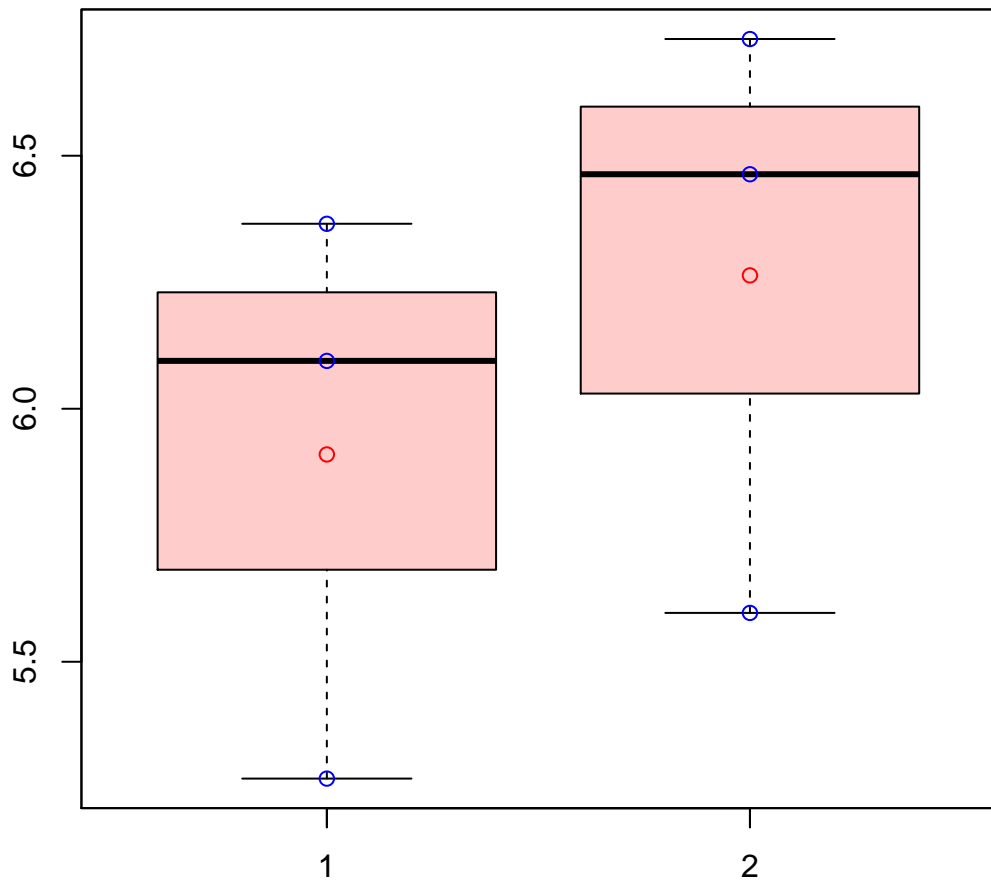

t-Test: p-value = 0.5

# CL4529Contig1|CL4529Contig1

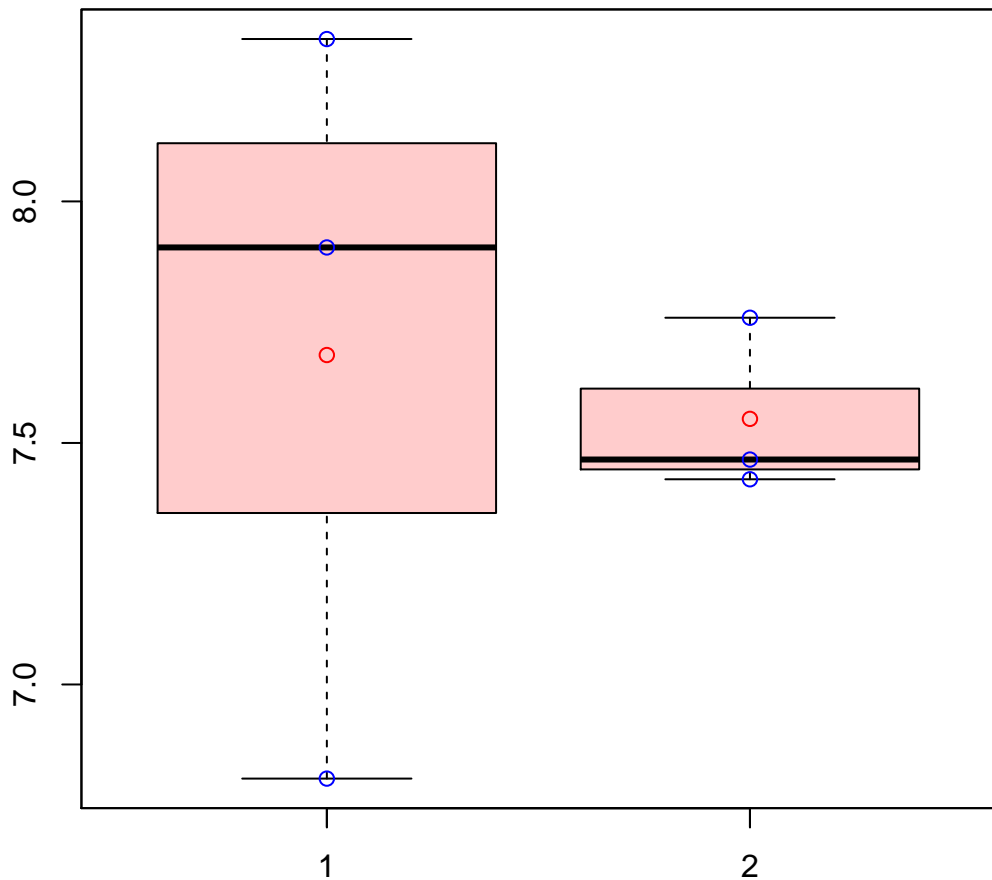

t-Test: p-value = 0.8

# CL4531Contig1|CL4531Contig1

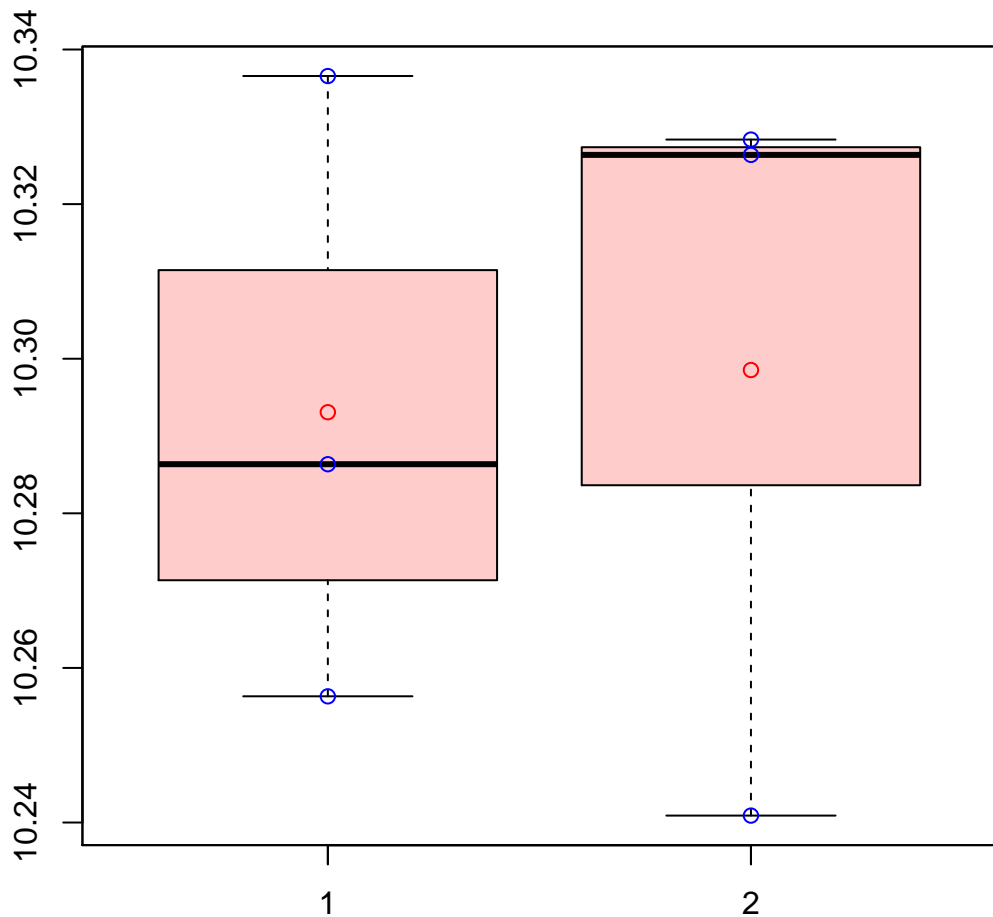

t-Test: p-value = 0.89



# CL4531Contig3|CL4531Contig3

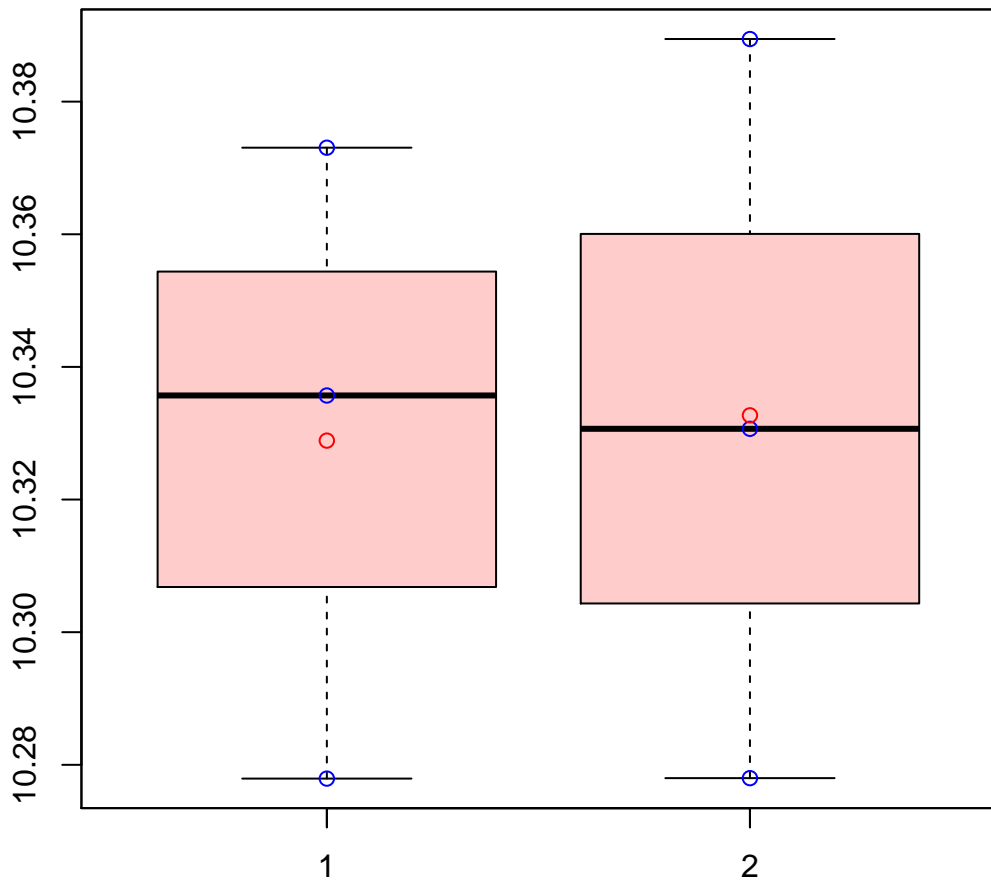

t-Test: p-value = 0.93

# CL4534Contig1|CL4534Contig1

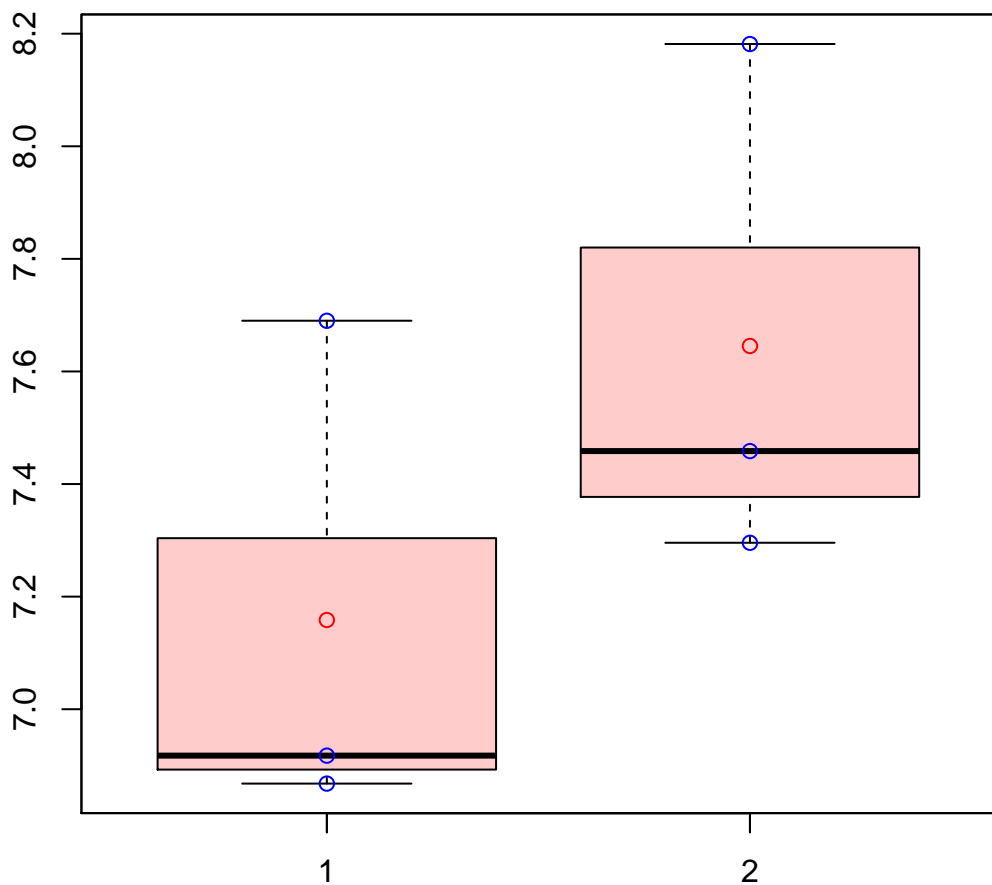

t-Test: p-value = 0.27

# CL4534Contig2|CL4534Contig2

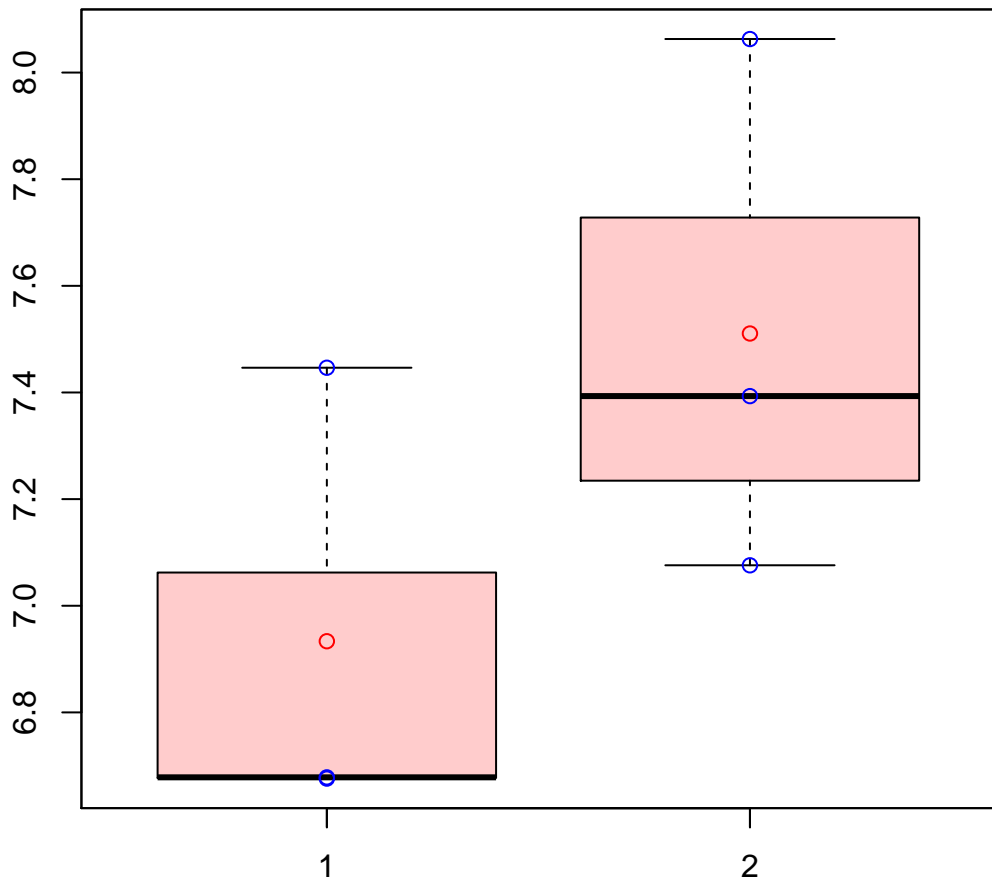

t-Test: p-value = 0.21

# CL4534Contig3|CL4534Contig3

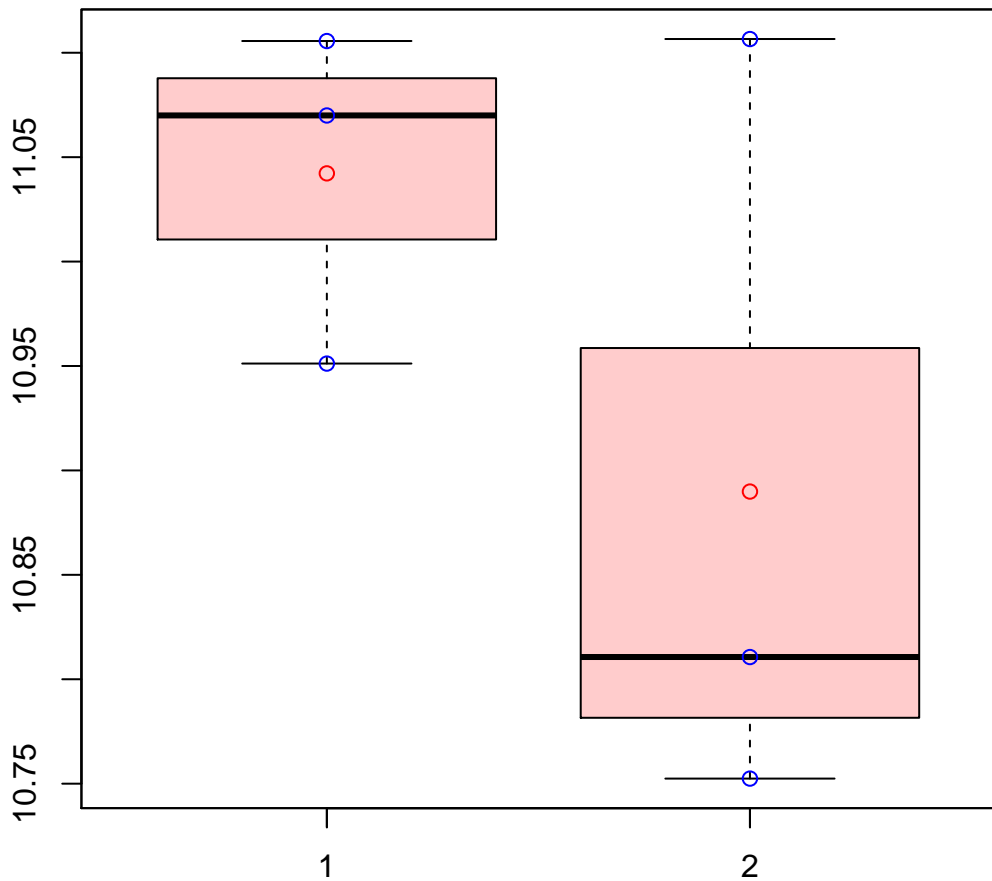

t-Test: p-value = 0.3

# CL4534Contig5|CL4534Contig5

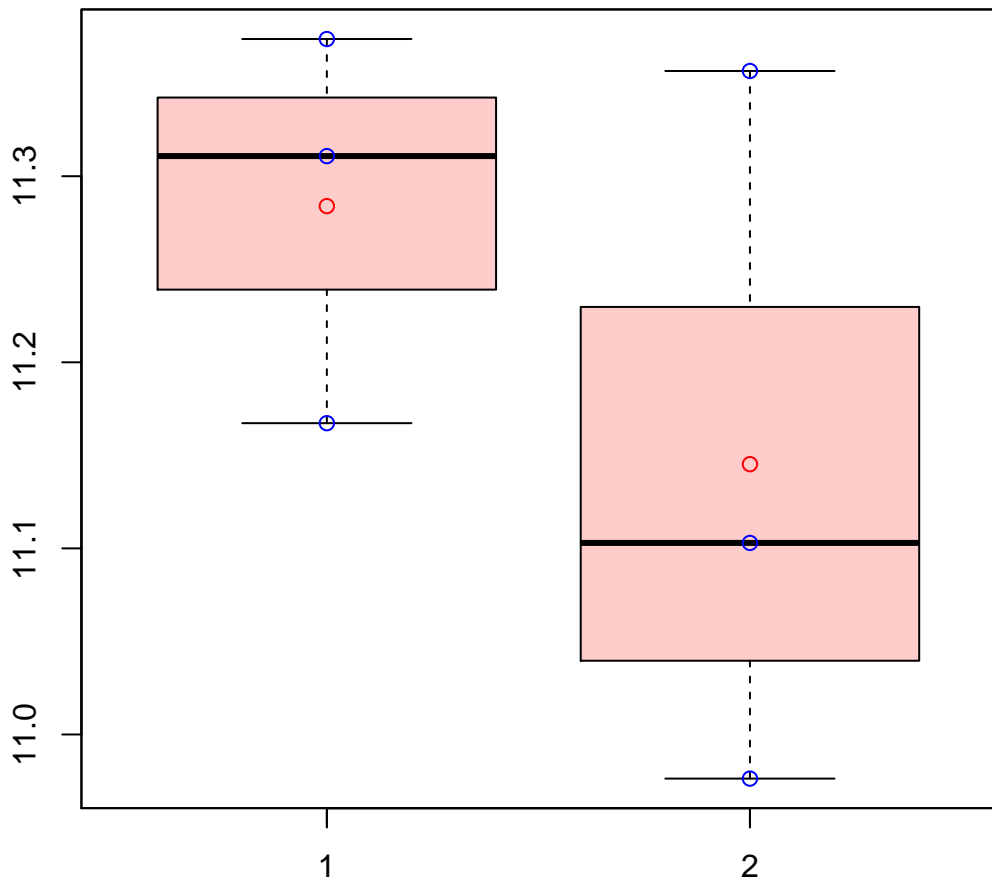

t-Test: p-value = 0.35

# CL4534Contig6|CL4534Contig6

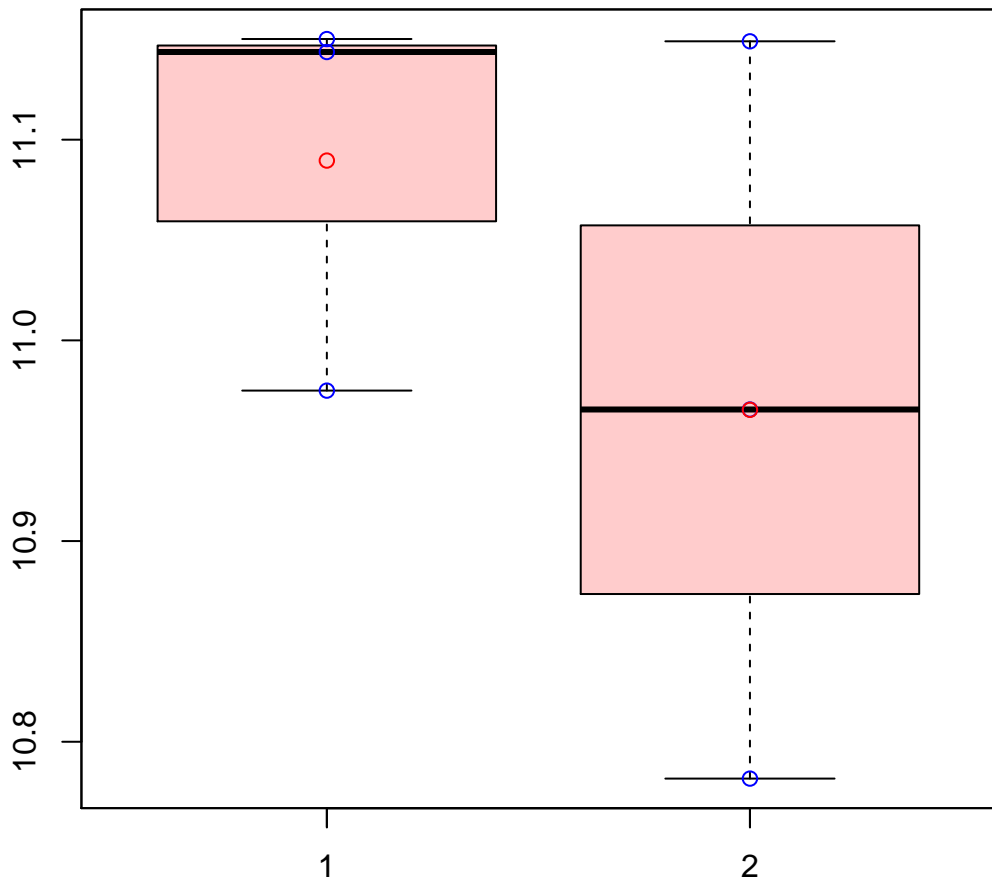

t-Test: p-value = 0.38

# CL4548Contig2|CL4548Contig2

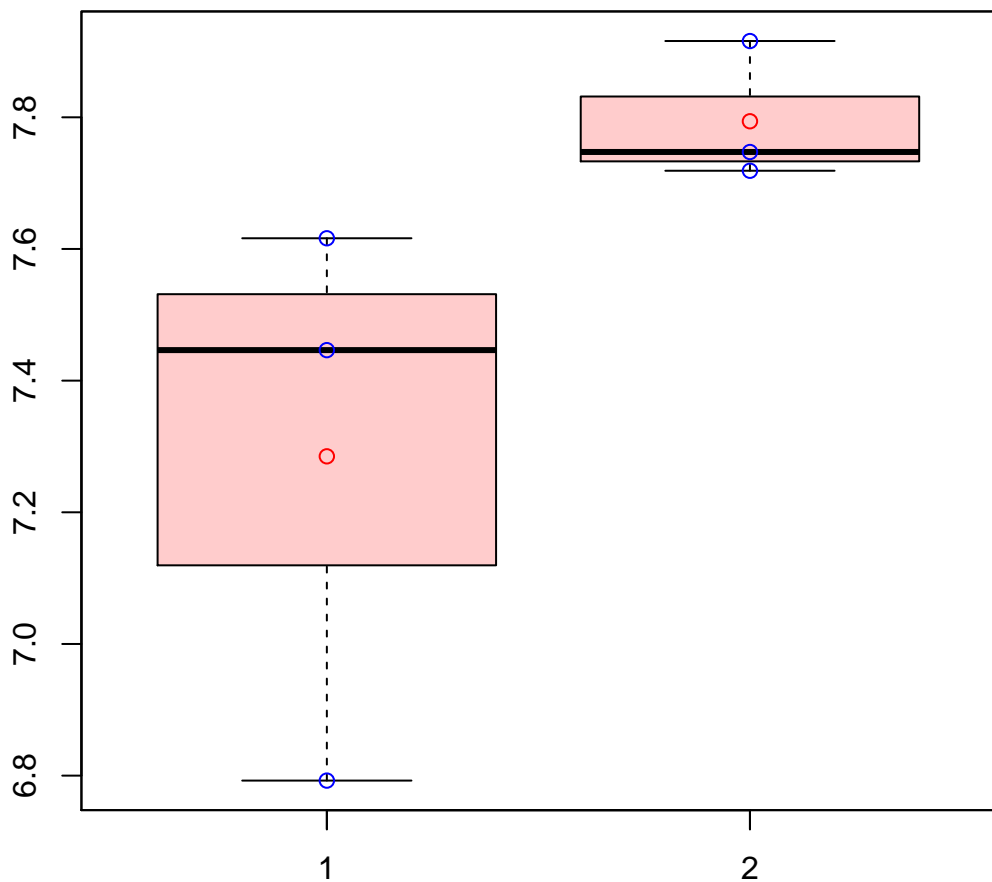

t-Test: p-value = 0.17

# CL4549Contig1|CL4549Contig1

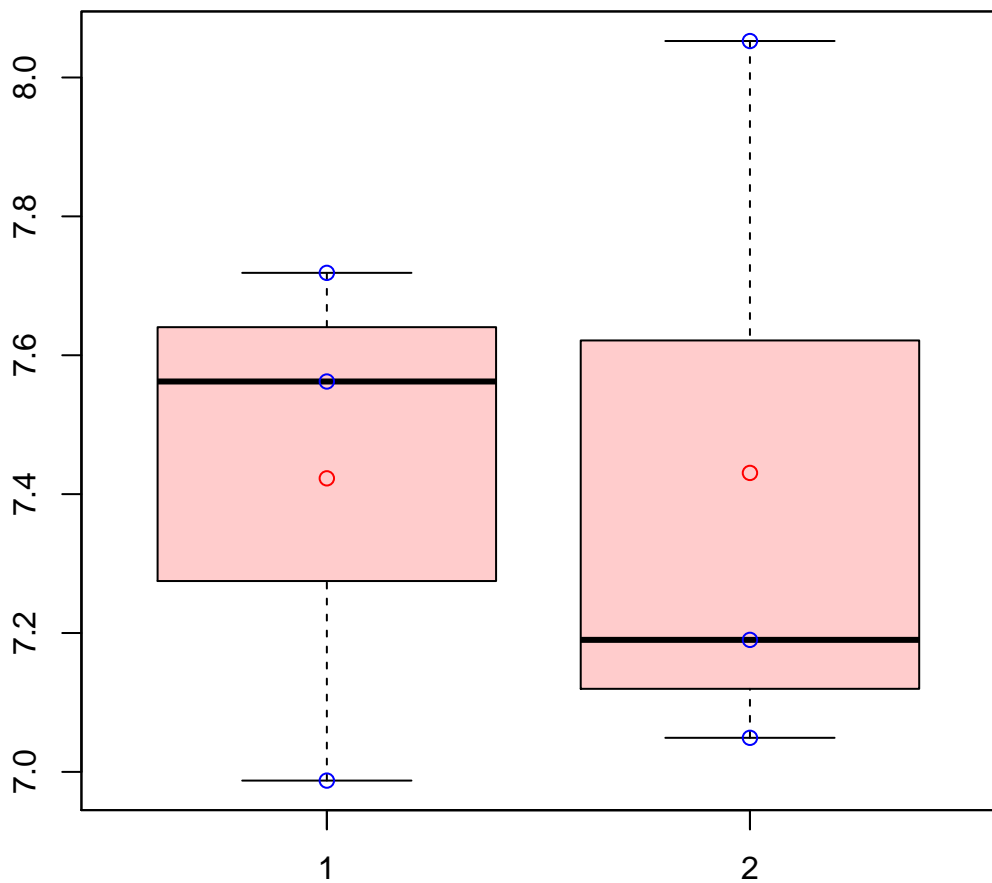

t-Test: p-value = 0.98



# CL4549Contig2|CL4549Contig2

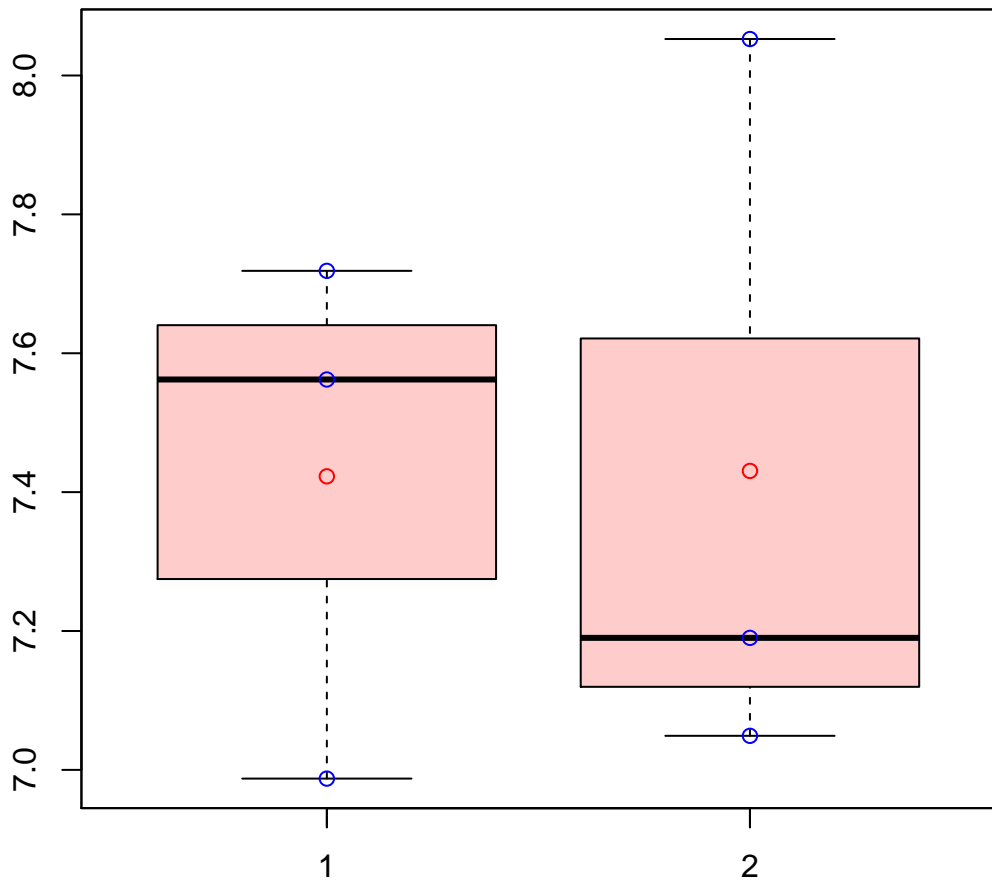

t-Test: p-value = 0.98

# CL4549Contig4|CL4549Contig4

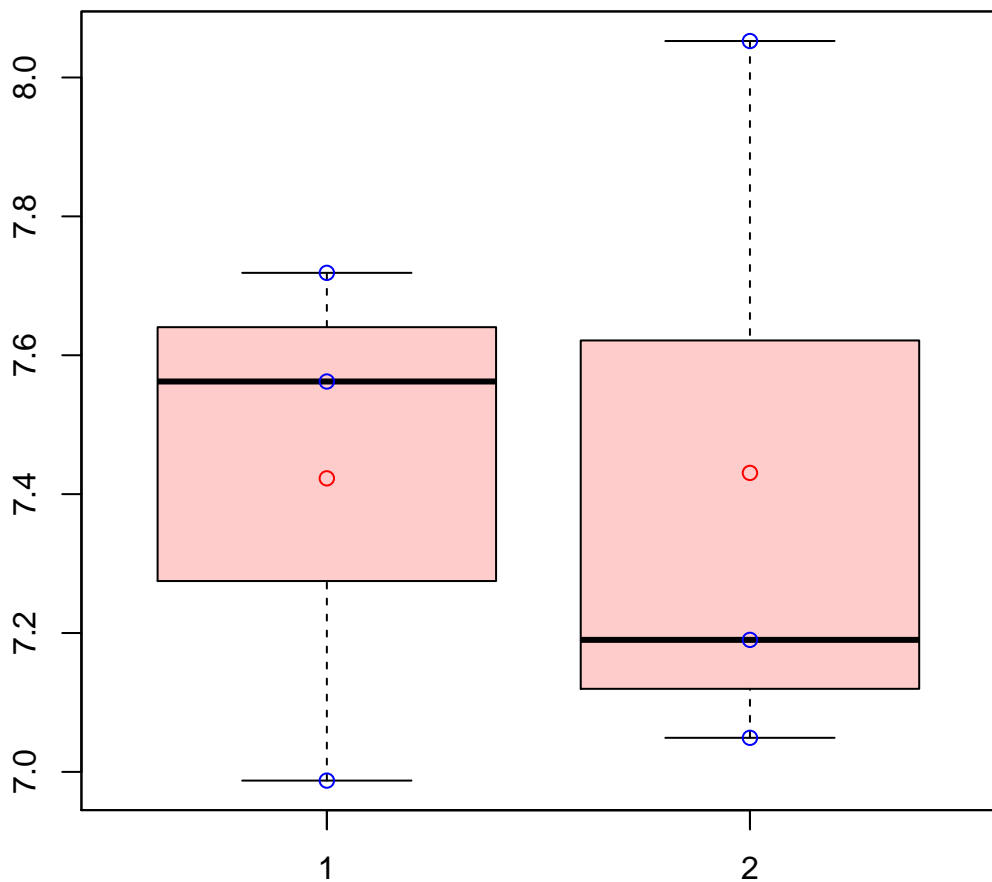

t-Test: p-value = 0.98

# CL454Contig4|CL454Contig4

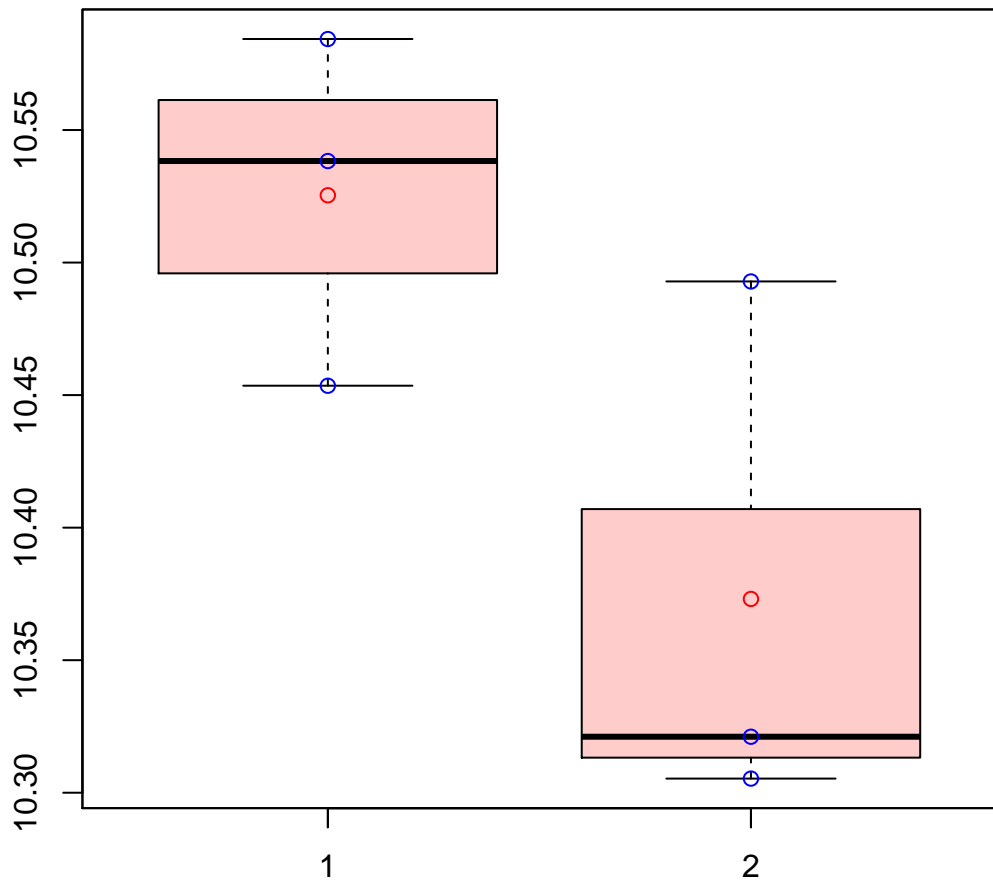

t-Test: p-value = 0.11

# CL454Contig5|CL454Contig5

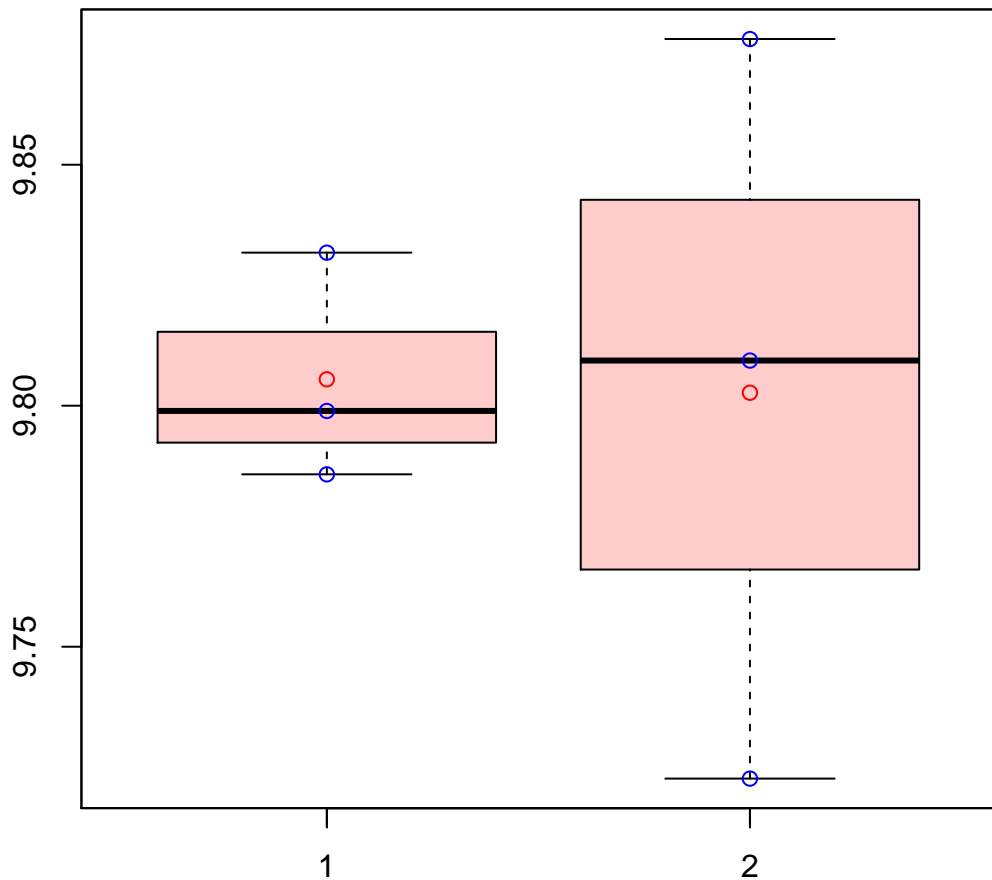

t-Test: p-value = 0.96

# CL454Contig8|CL454Contig8

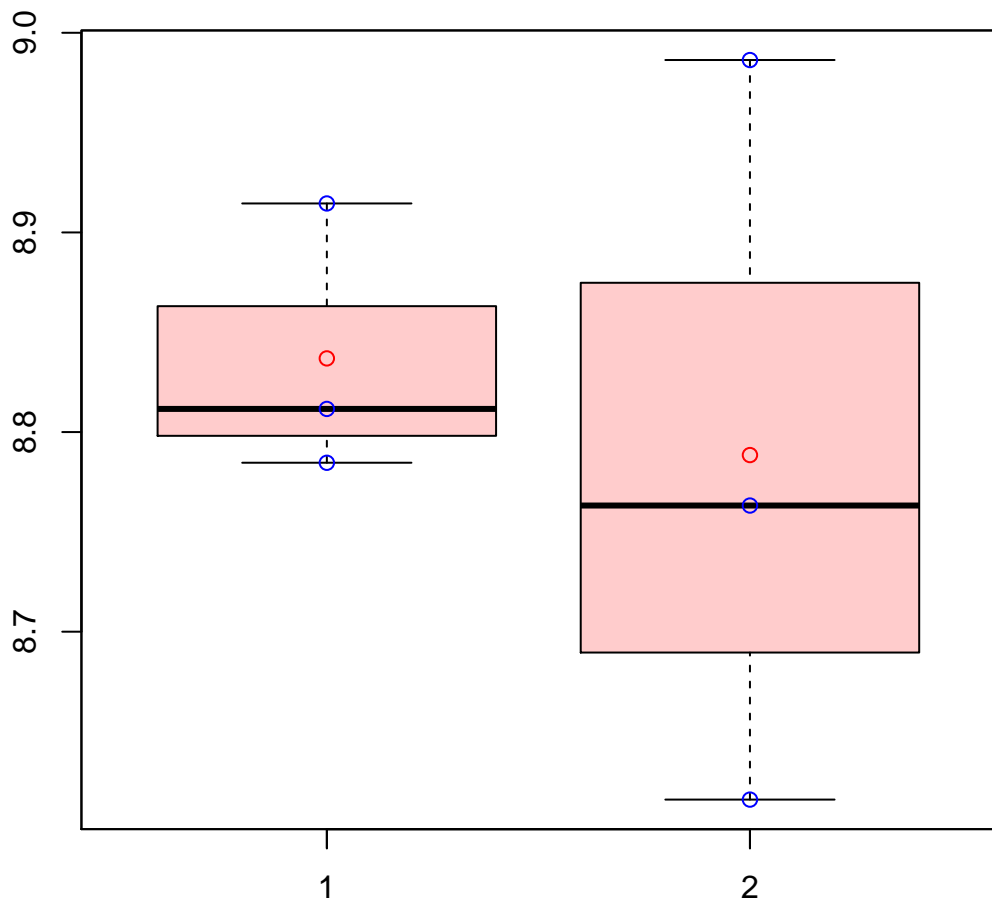

t-Test: p-value = 0.71

# CL4550Contig1|CL4550Contig1

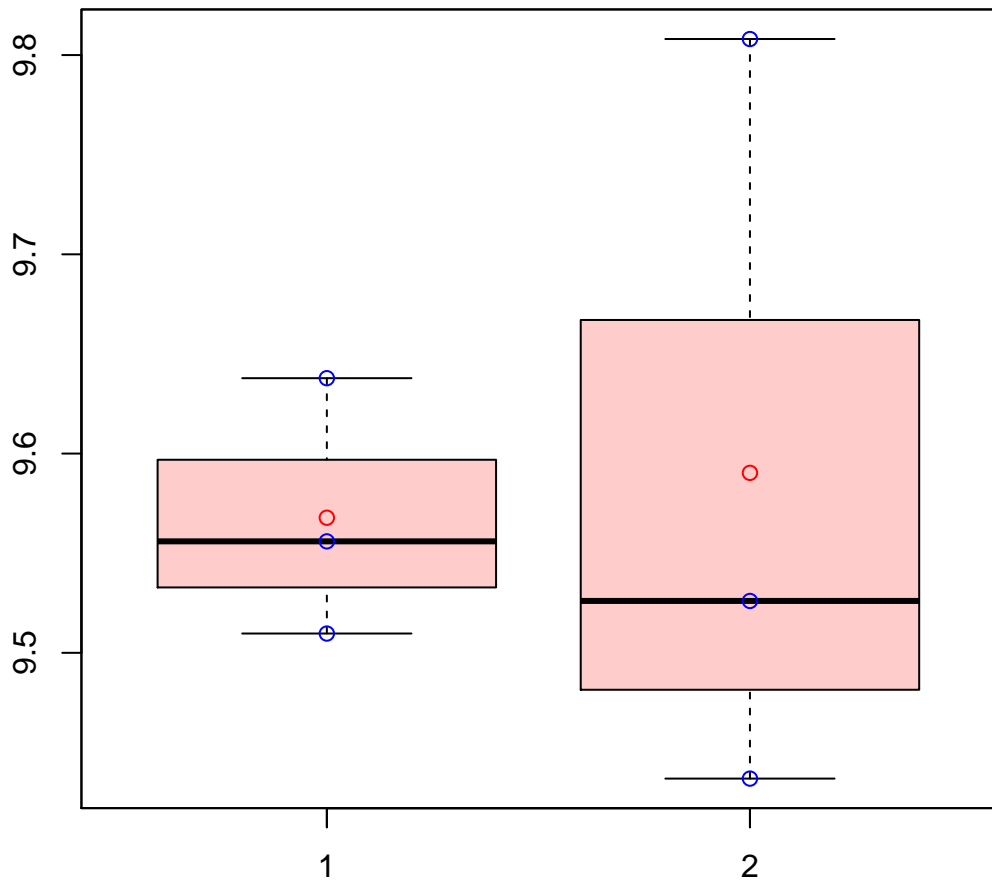

t-Test: p-value = 0.86

# CL4562Contig5|CL4562Contig5

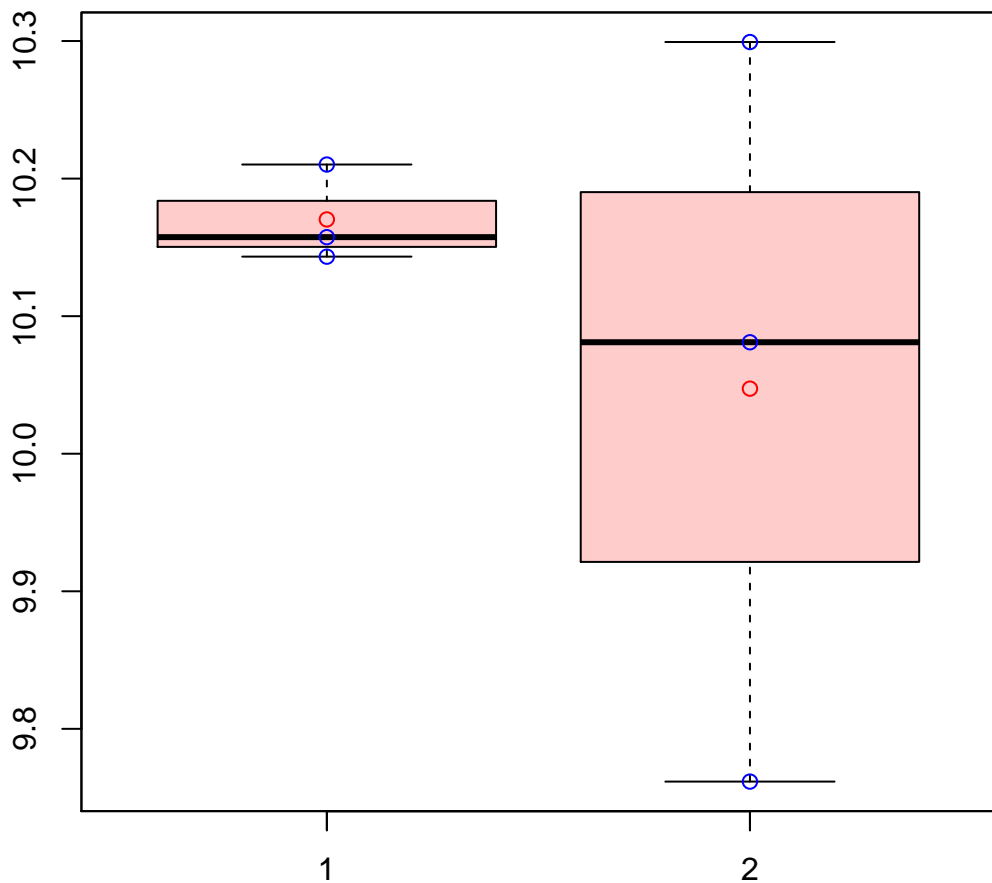

t-Test: p-value = 0.51

# CL4562Contig6|CL4562Contig6



t-Test: p-value = 0.51



# CL4562Contig7|CL4562Contig7

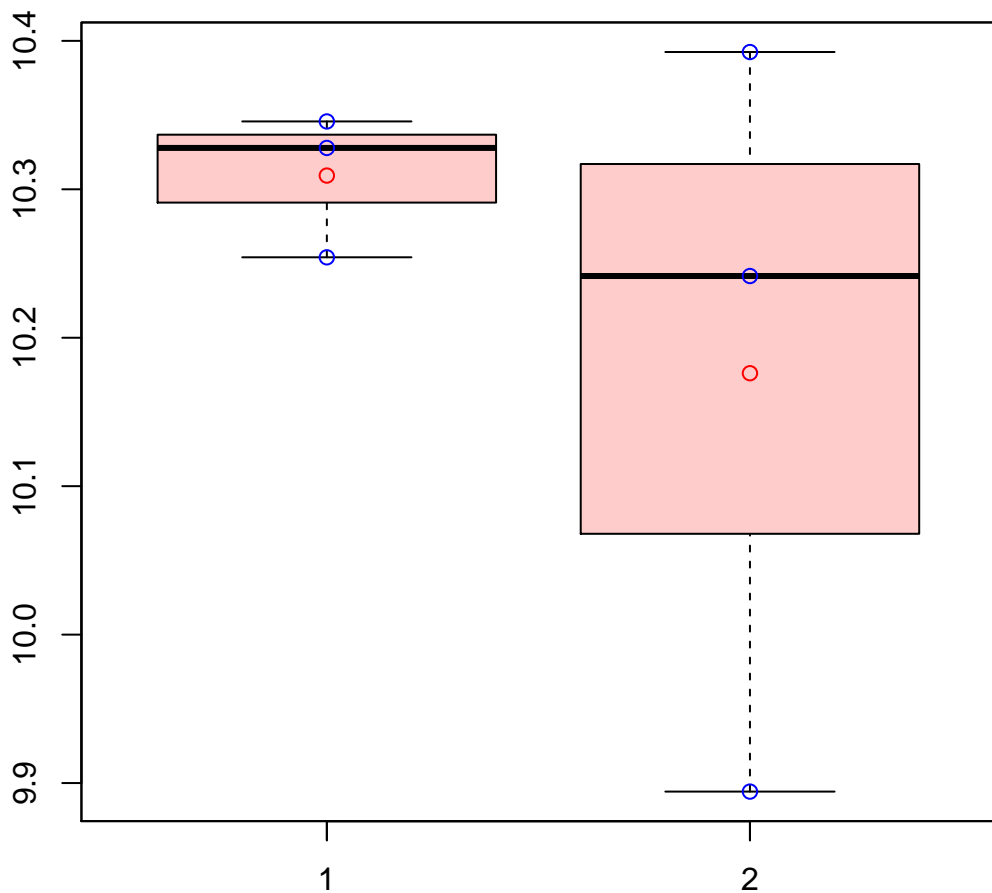

t-Test: p-value = 0.46

# CL4566Contig2|CL4566Contig2

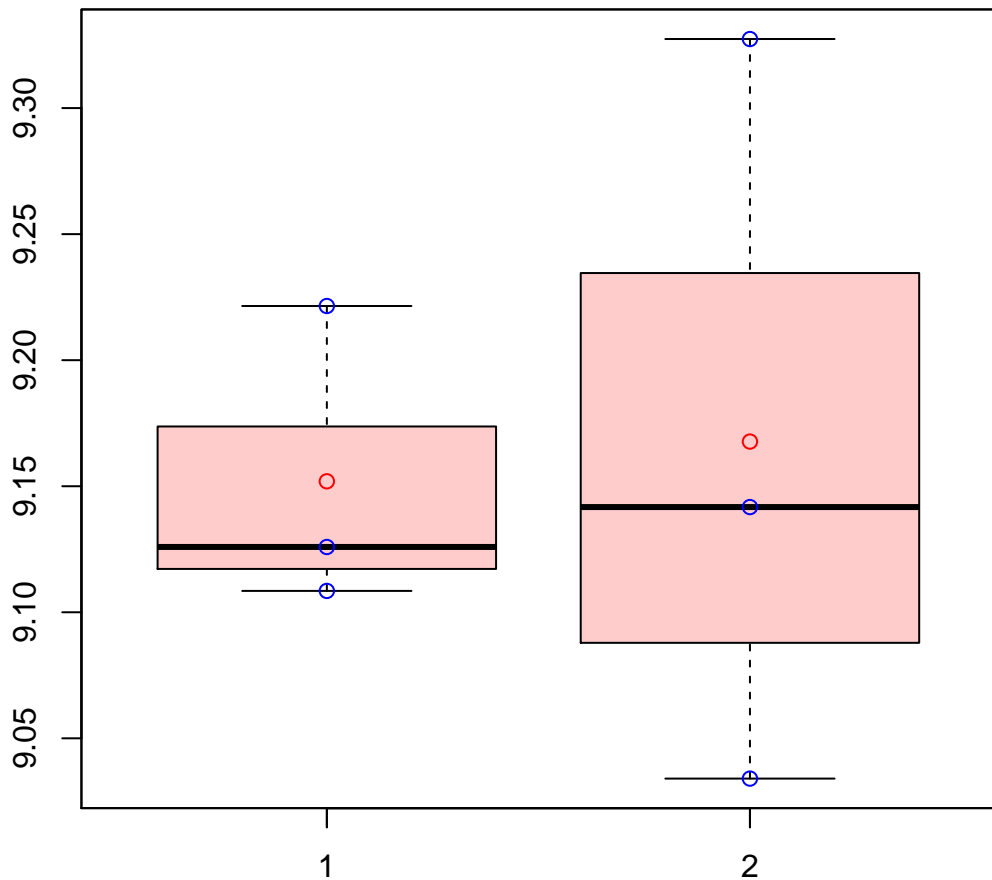

t-Test: p-value = 0.88

# CL456Contig16|CL456Contig16

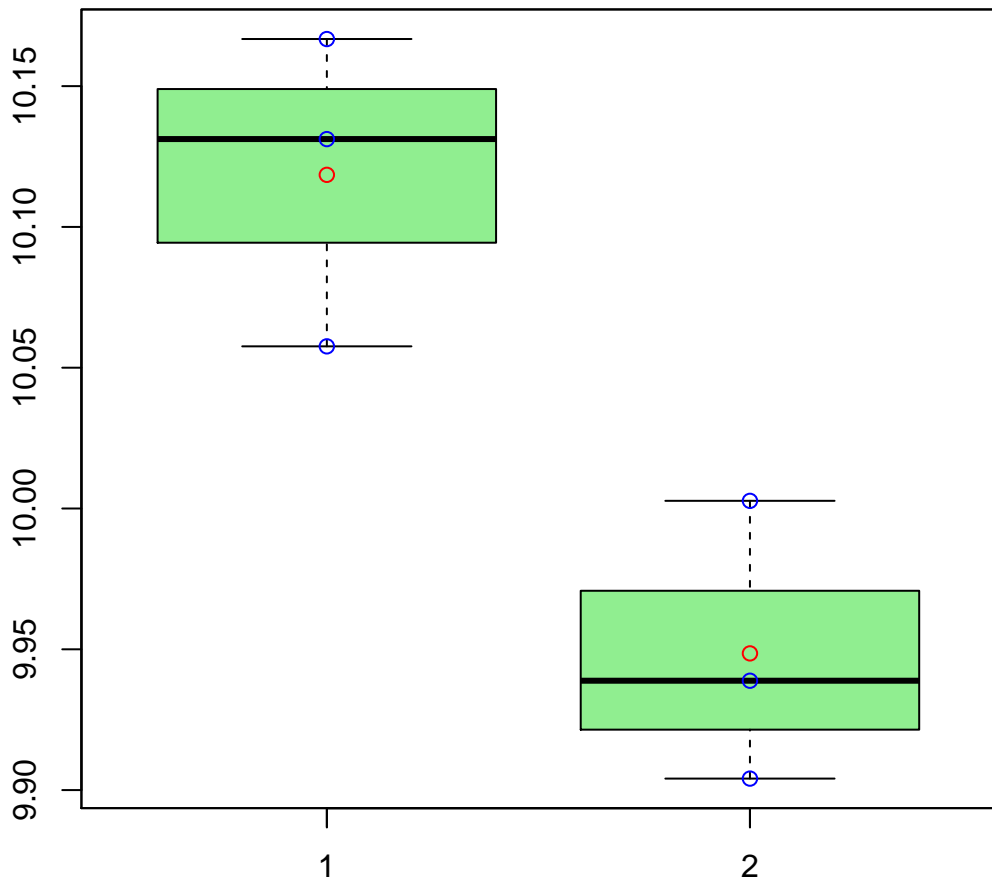

t-Test: p-value = 0.02

# CL456Contig1|CL456Contig1

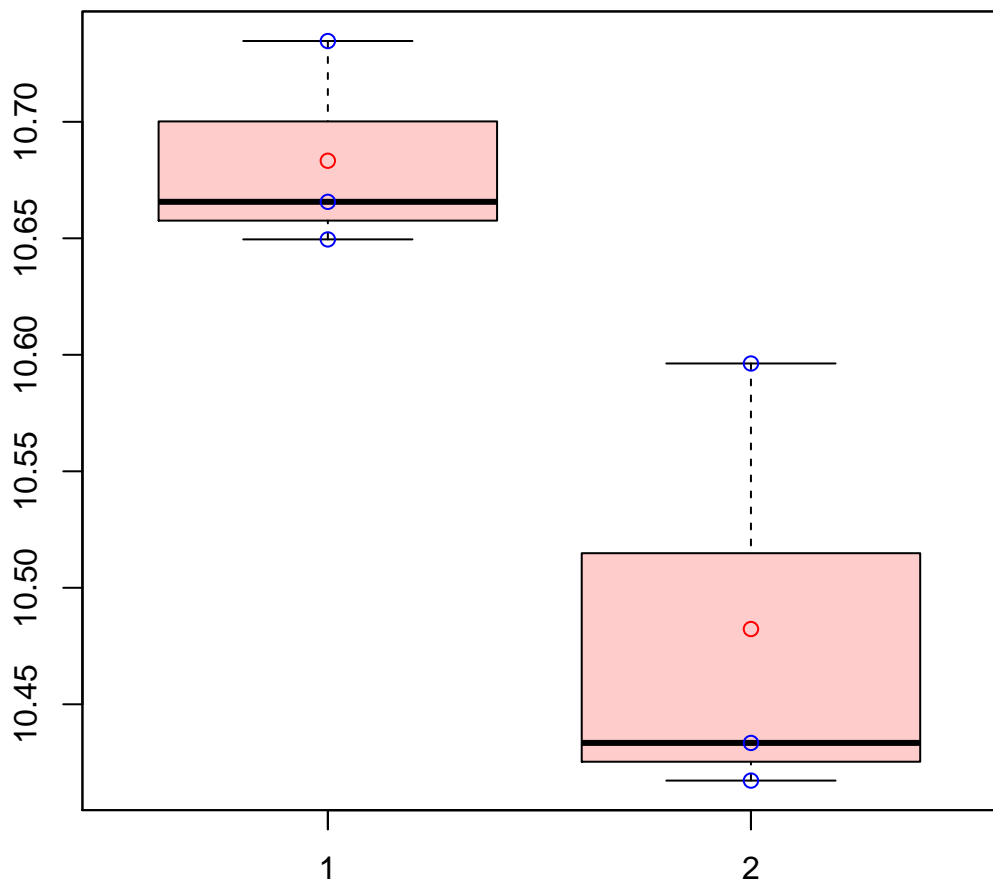

t-Test: p-value = 0.05

# CL456Contig4|CL456Contig4

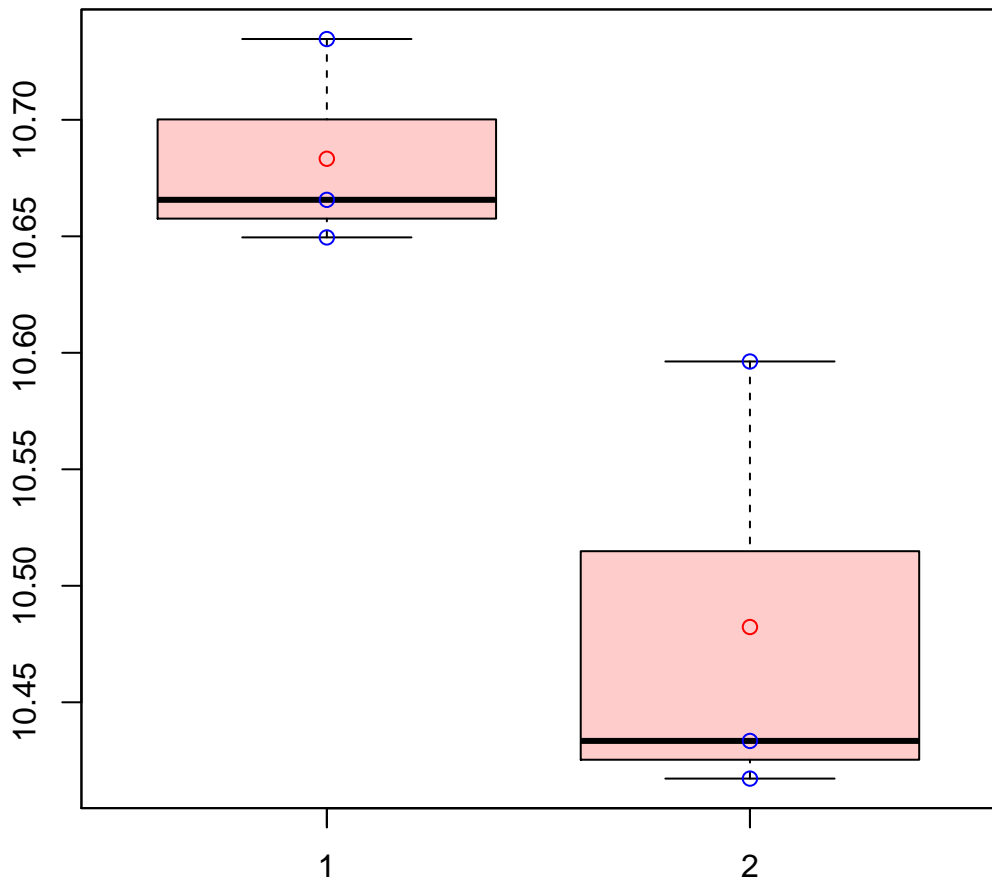

t-Test: p-value = 0.05

# CL456Contig5|CL456Contig5

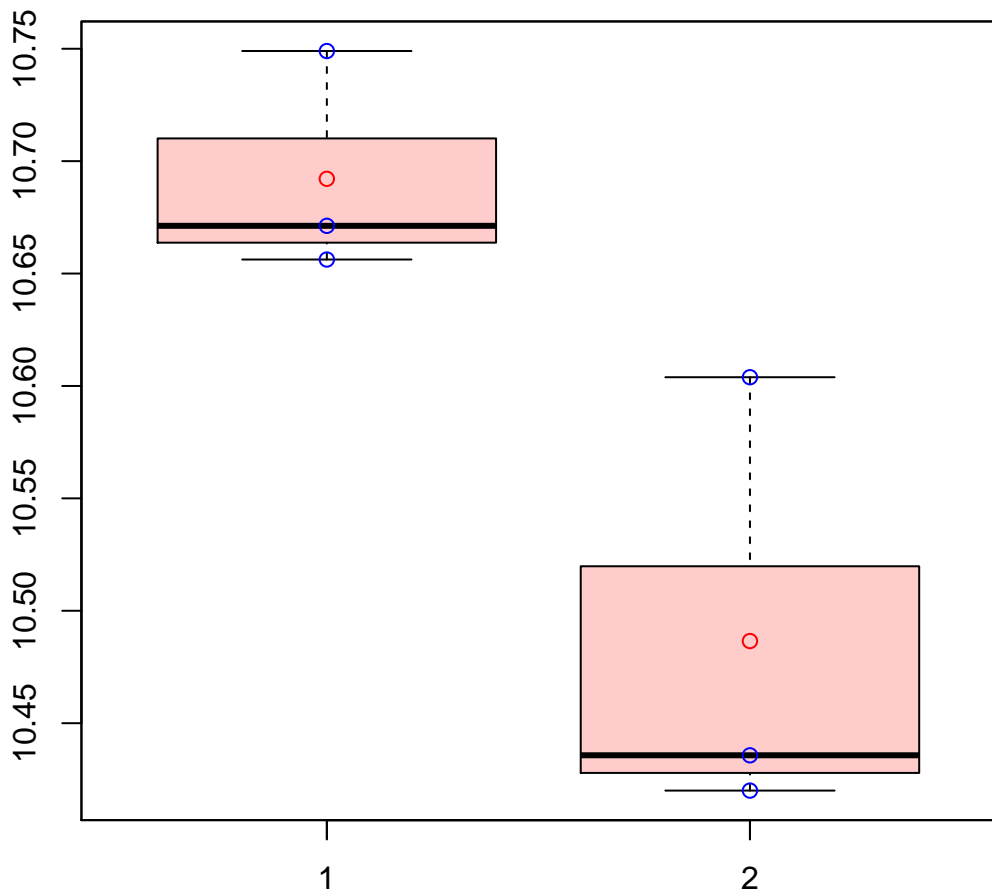

t-Test: p-value = 0.05

# CL4571Contig1|CL4571Contig1

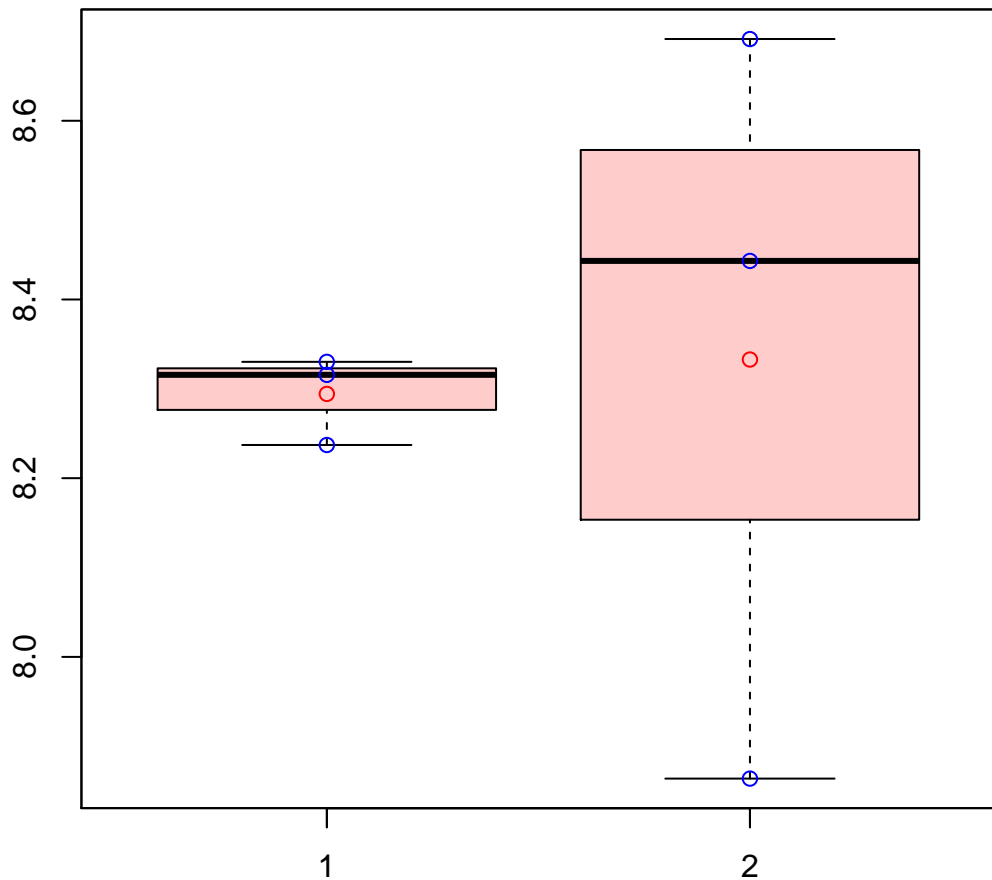

t-Test: p-value = 0.89

# CL4577Contig1|CL4577Contig1

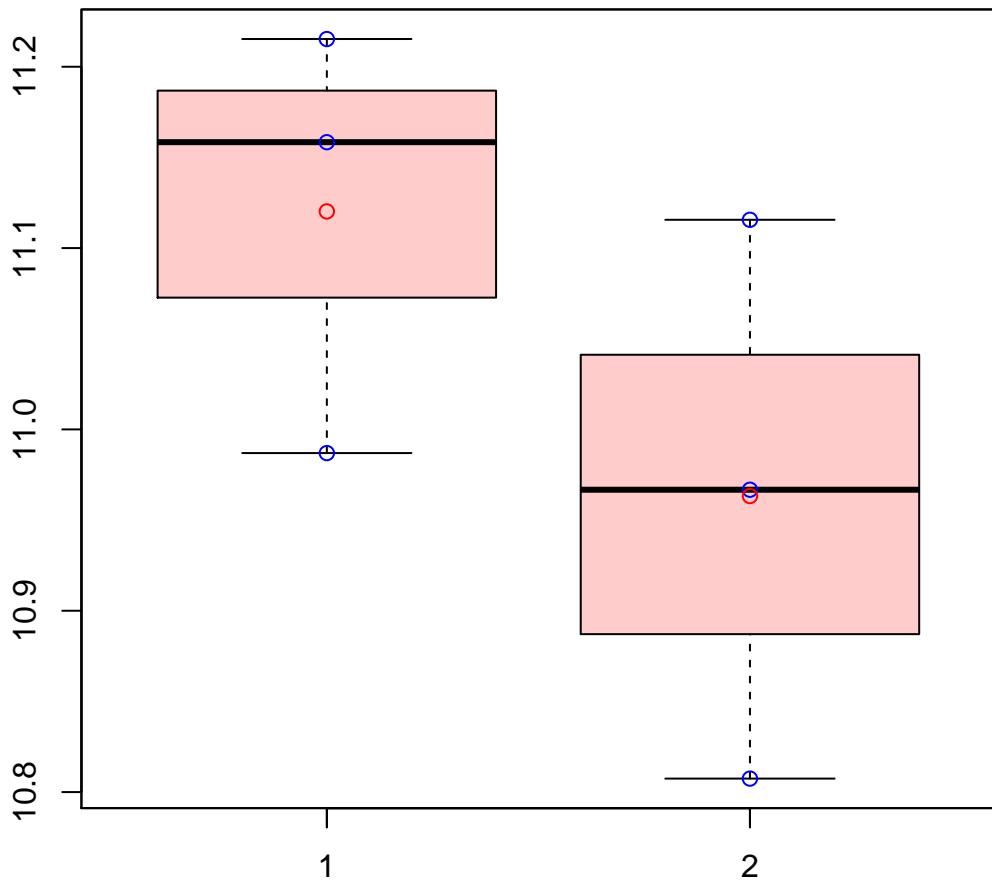

t-Test: p-value = 0.24



# CL4577Contig2|CL4577Contig2



t-Test: p-value = 0.24

# CL4577Contig3|CL4577Contig3

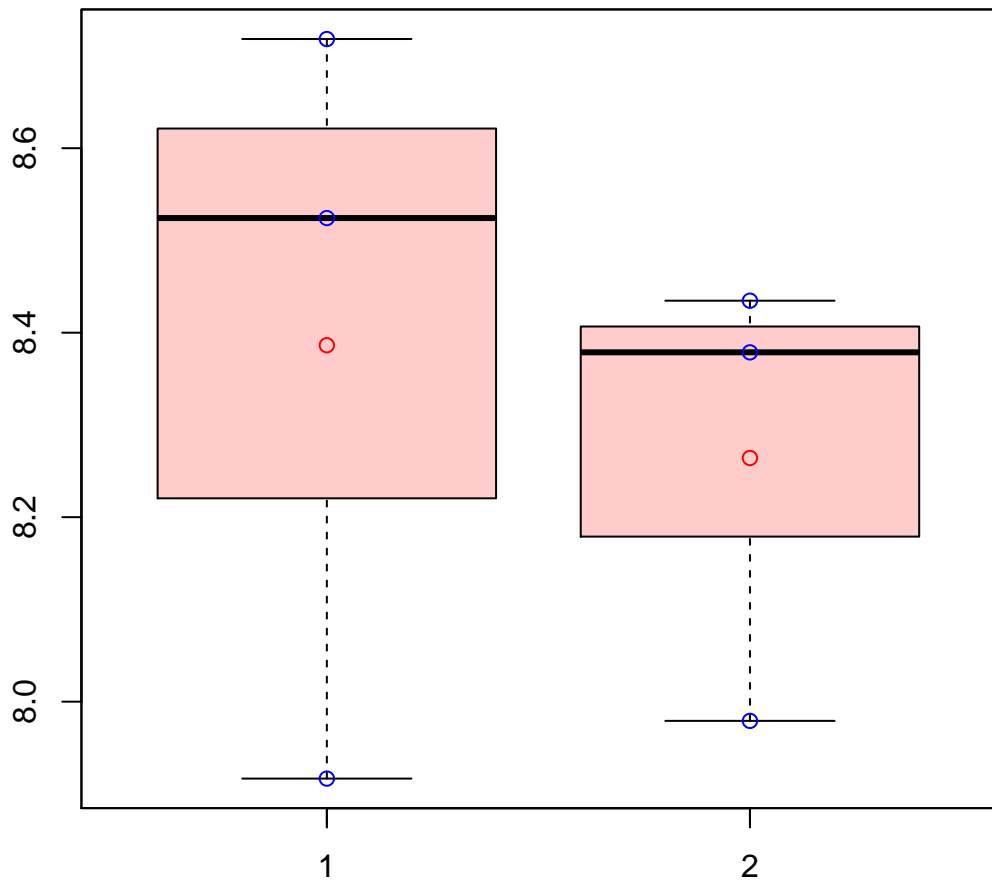

t-Test: p-value = 0.69

# CL4589Contig2|CL4589Contig2

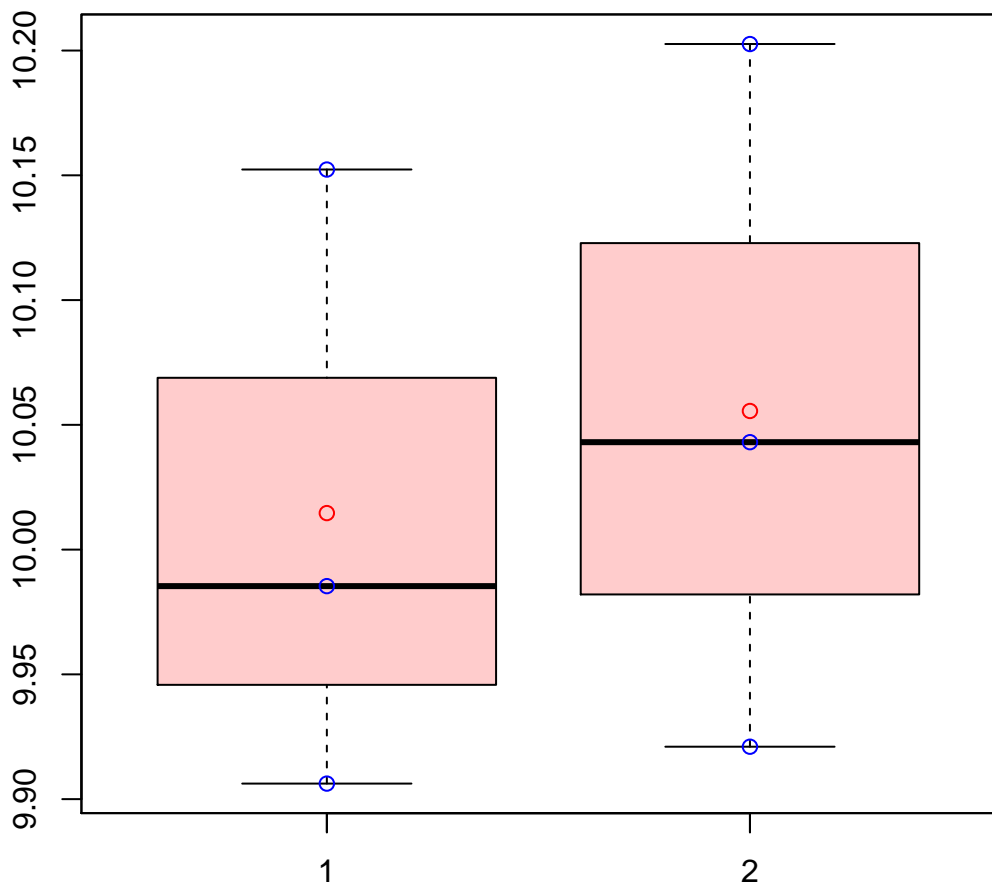

t-Test: p-value = 0.73

# CL4589Contig3|CL4589Contig3

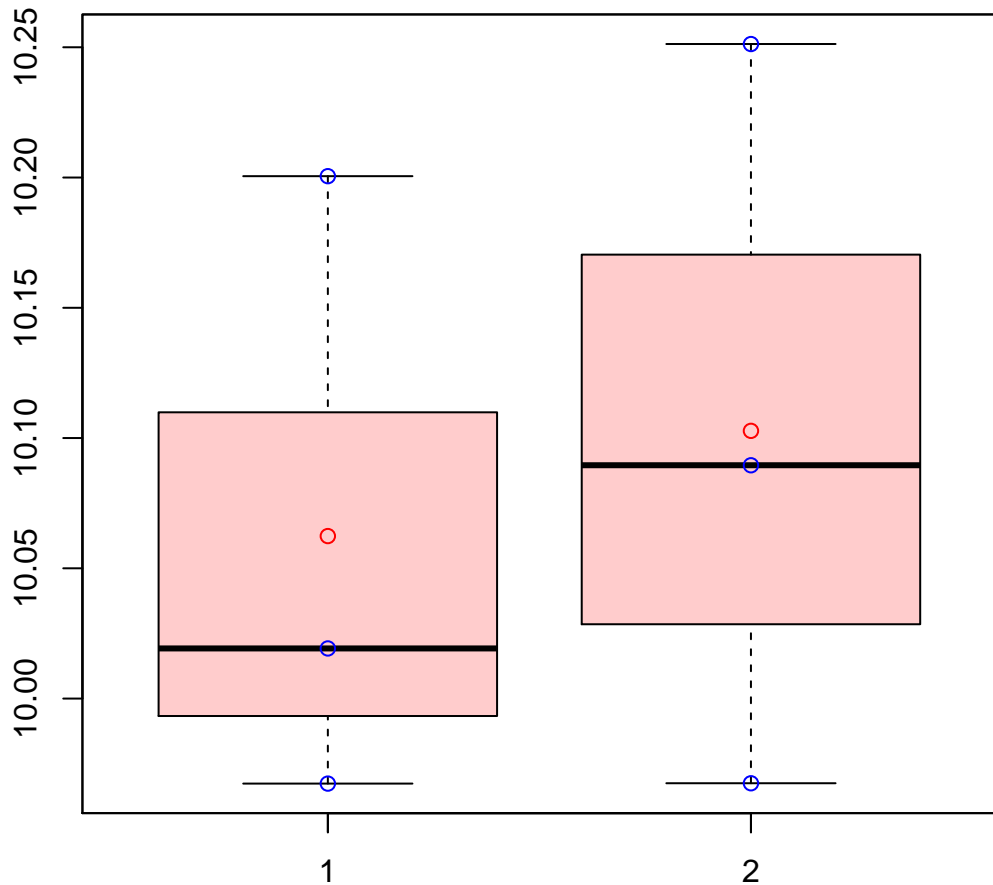

t-Test: p-value = 0.73

# CL4591Contig2|CL4591Contig2

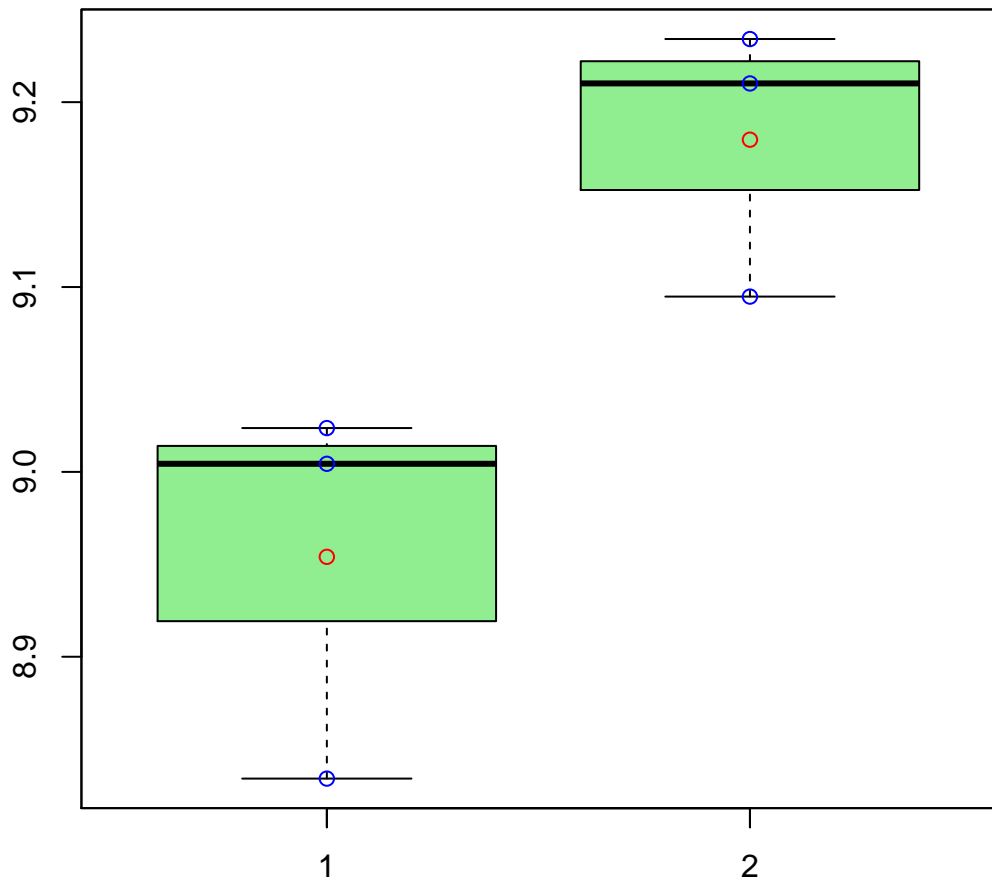

t-Test: p-value = 0.04

# CL4592Contig2|CL4592Contig2

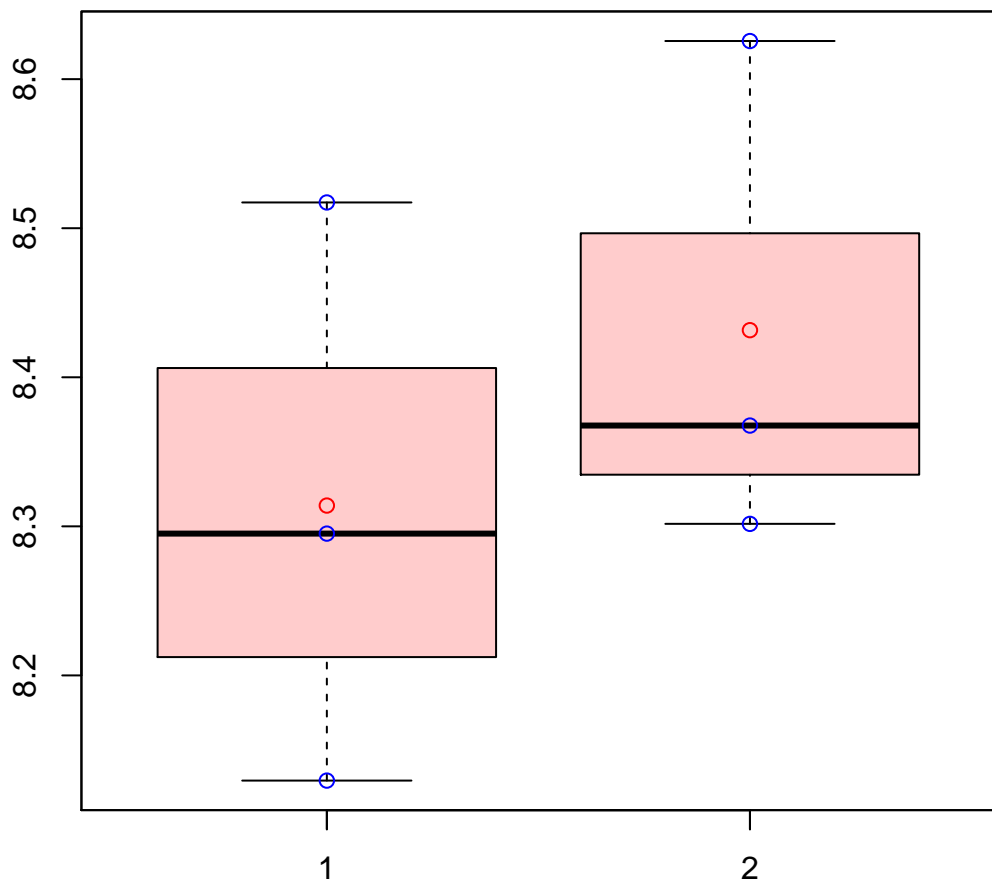

t-Test: p-value = 0.48

# CL4592Contig3|CL4592Contig3

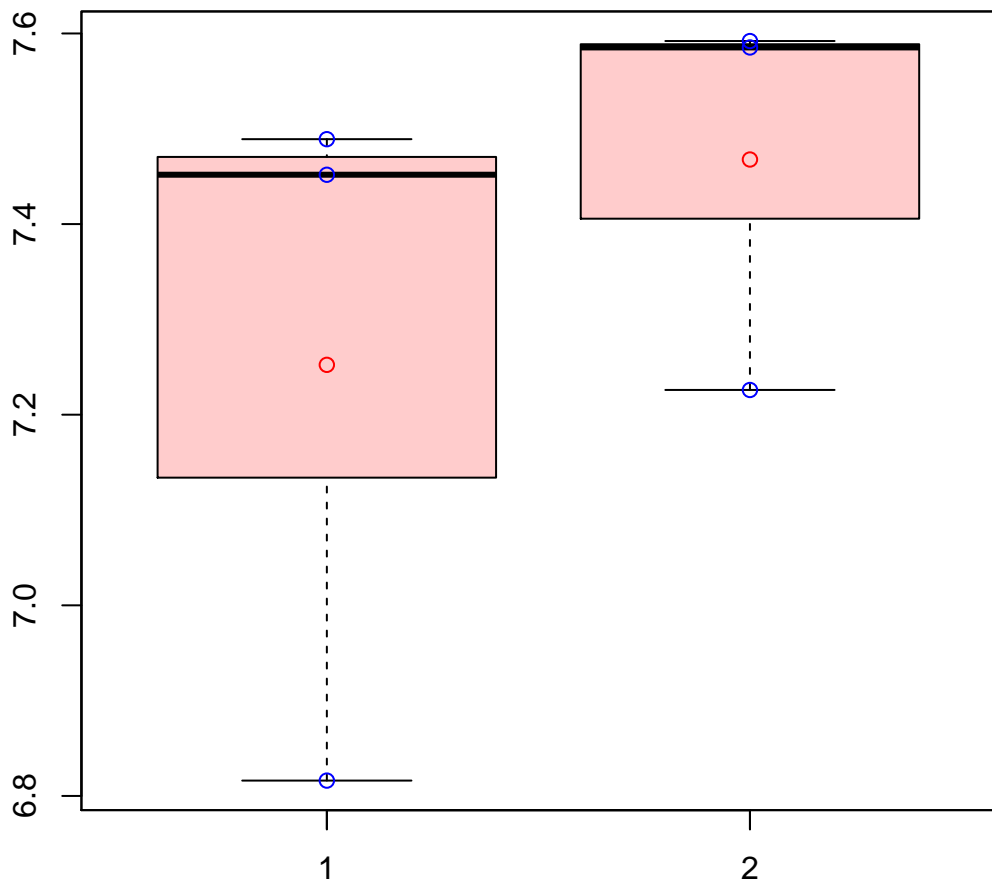

t-Test: p-value = 0.45

# CL4594Contig1|CL4594Contig1

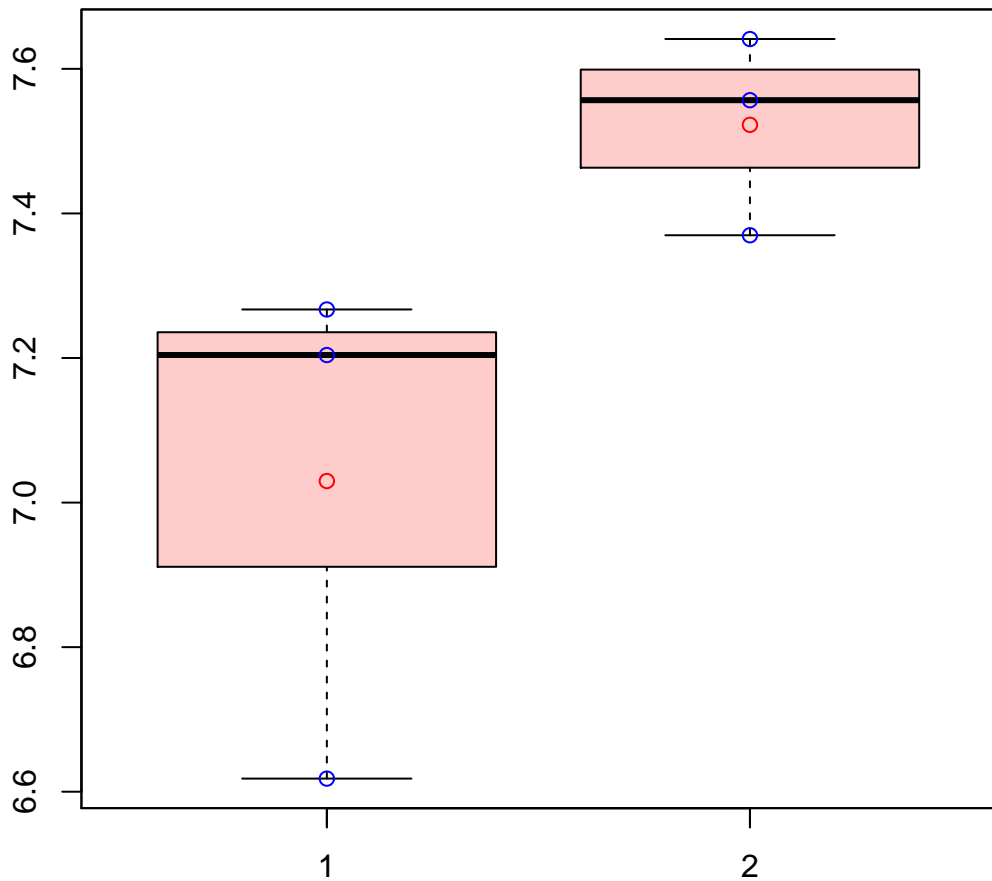

t-Test: p-value = 0.13



# CL4596Contig1|CL4596Contig1

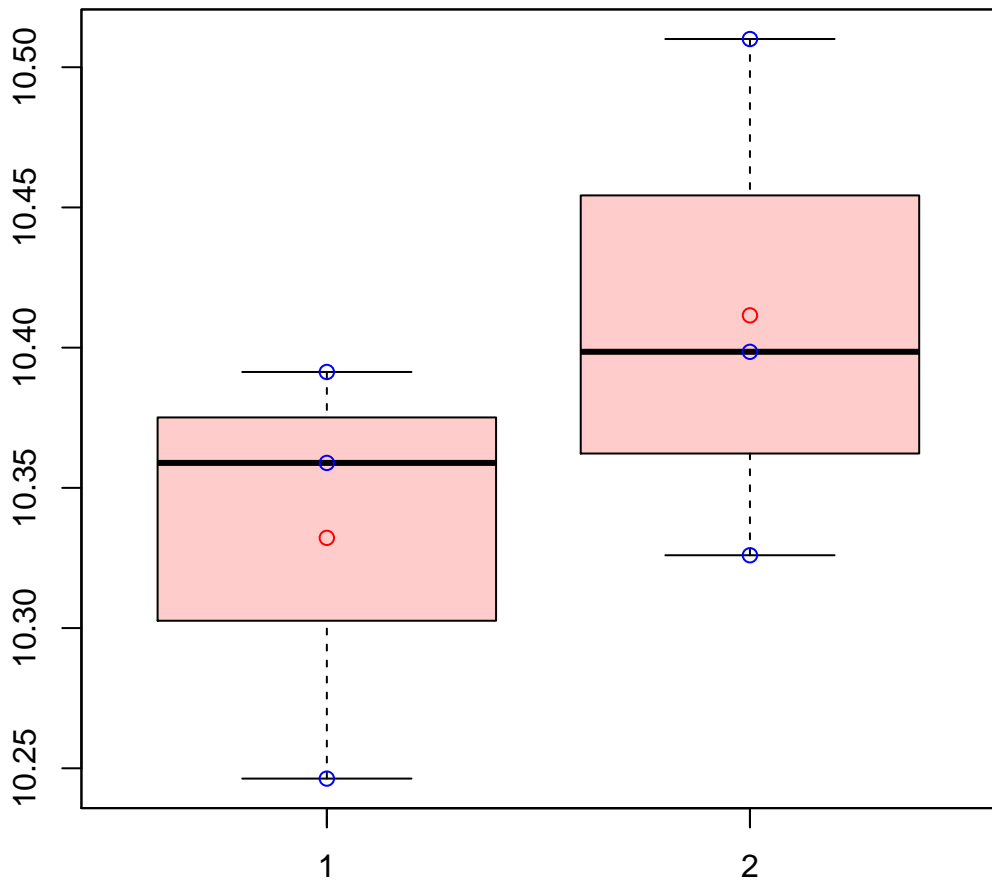

t-Test: p-value = 0.32

# CL4596Contig2|CL4596Contig2



t-Test: p-value = 0.32

# CL4599Contig3|CL4599Contig3

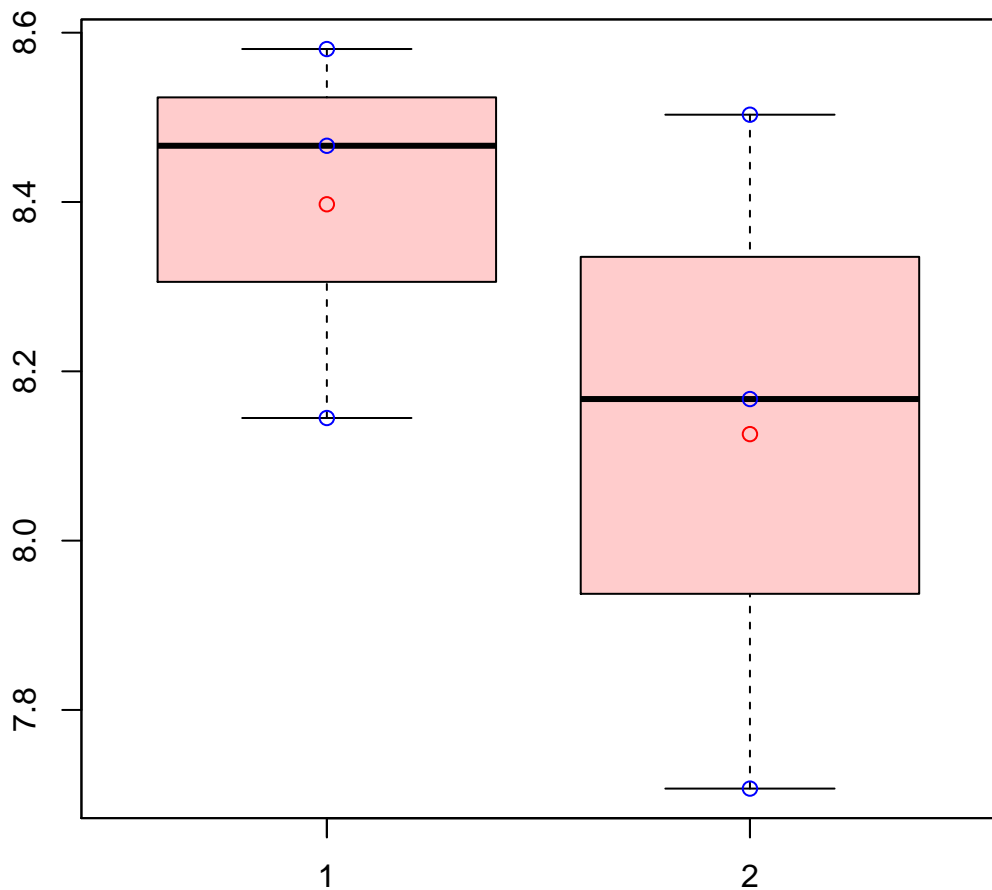

t-Test: p-value = 0.38

# CL4602Contig3|CL4602Contig3

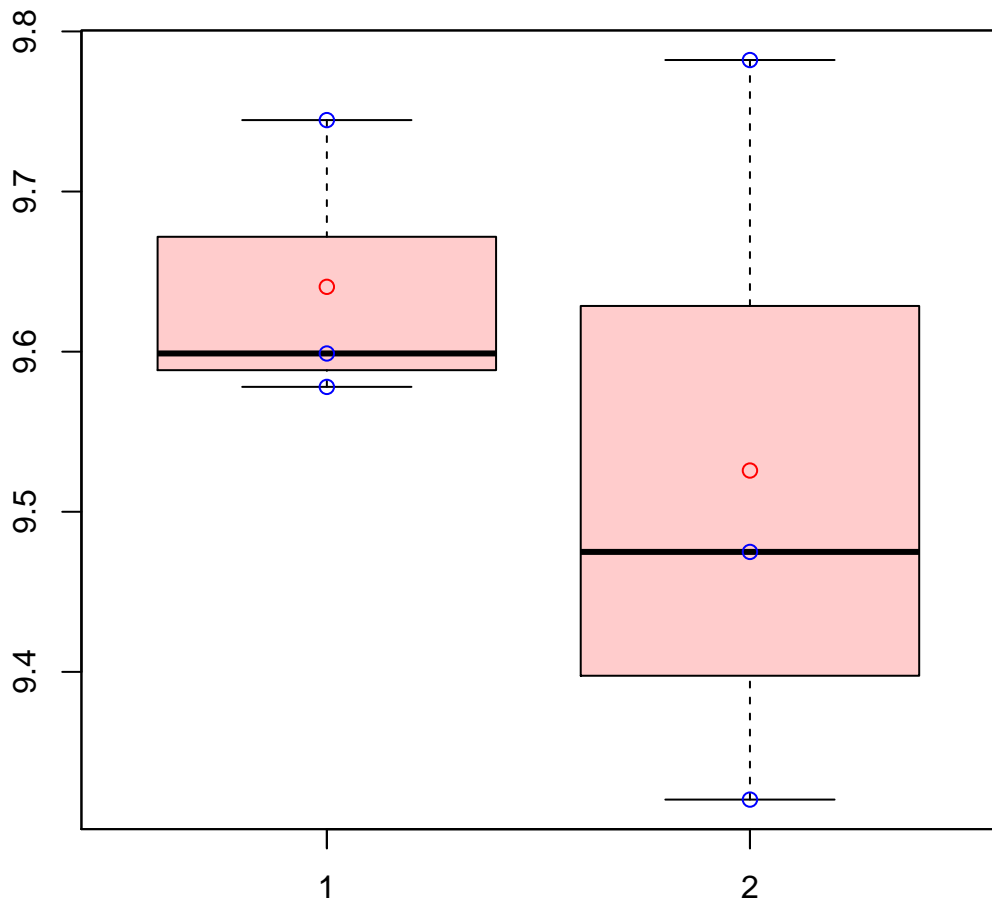

t-Test: p-value = 0.5

# CL460Contig3|CL460Contig3

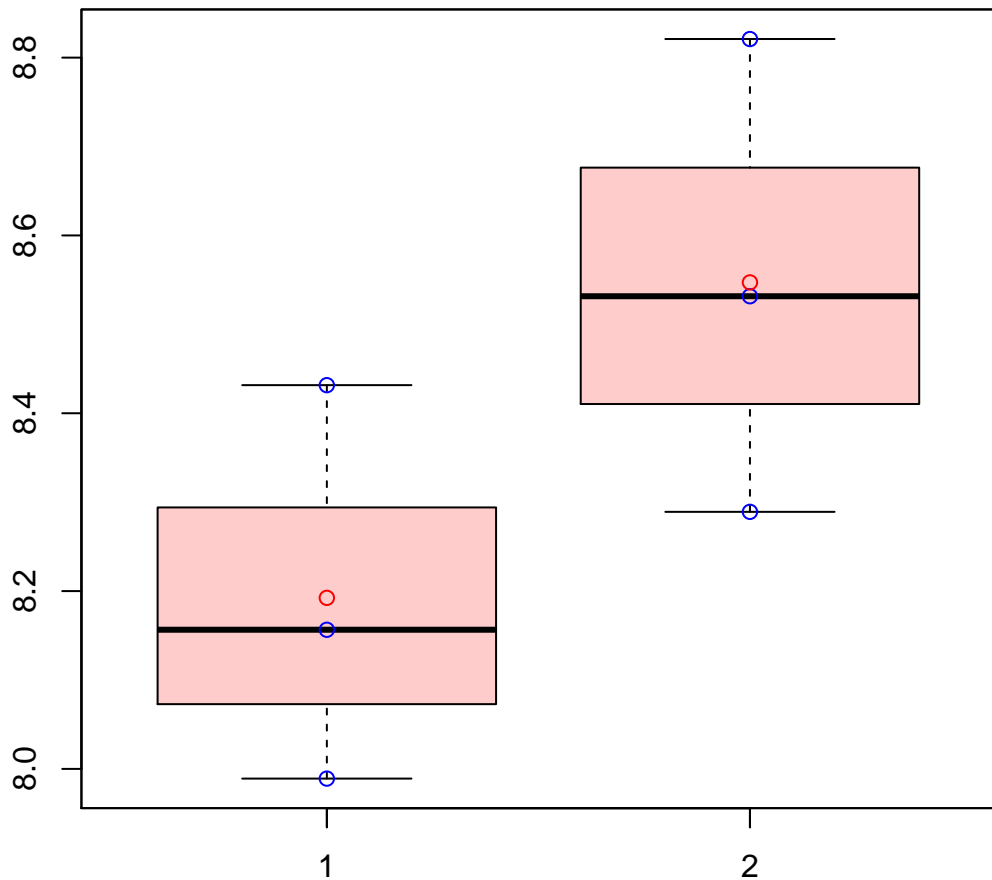

t-Test: p-value = 0.15

# CL4621Contig1|CL4621Contig1

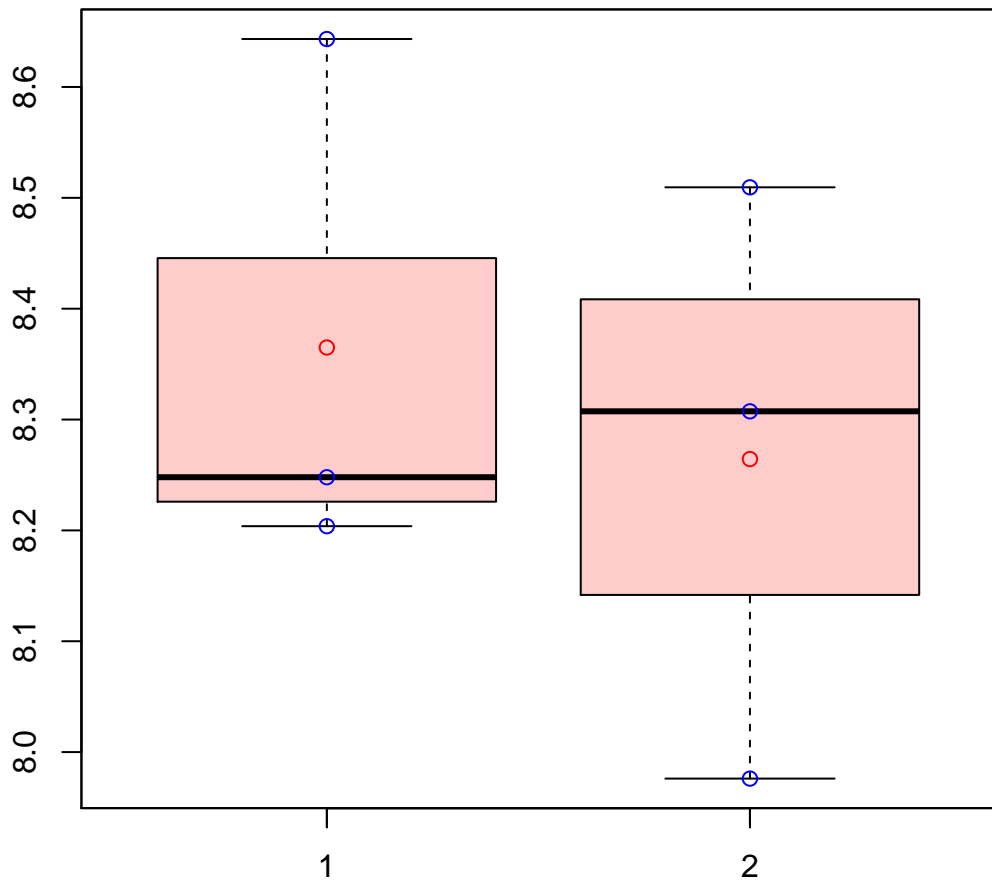

t-Test: p-value = 0.66

# CL4622Contig2|CL4622Contig2

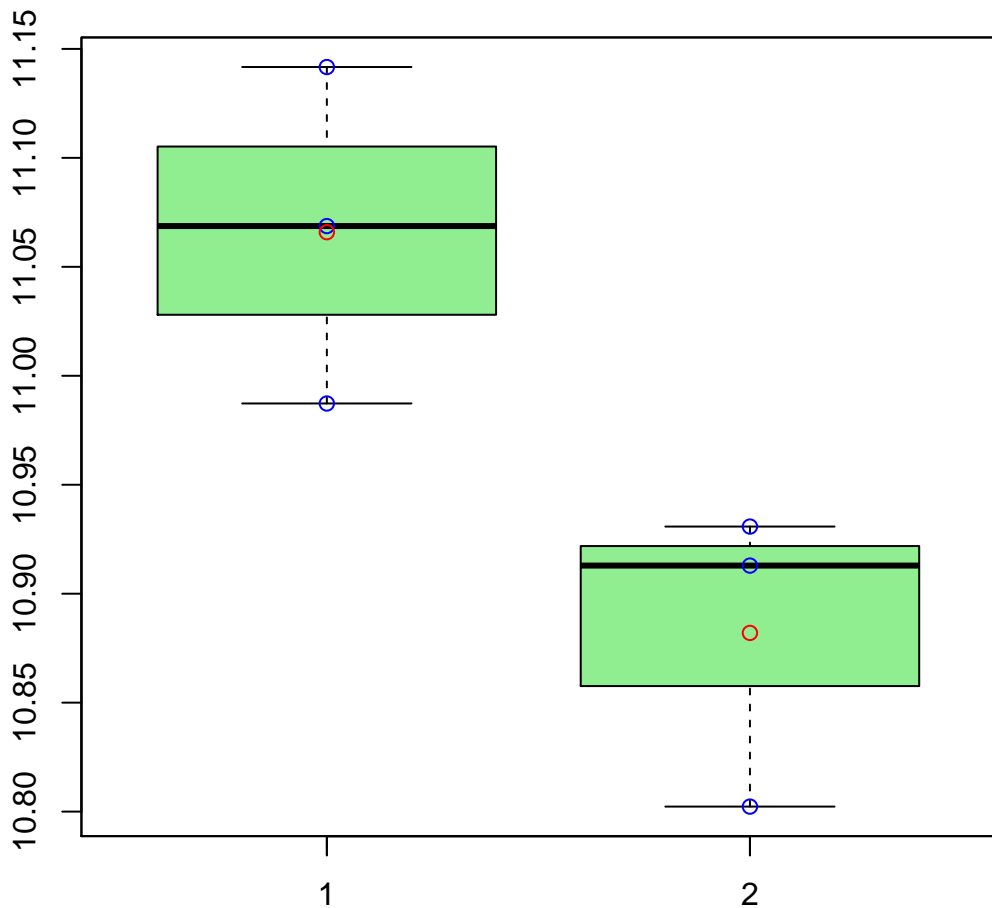

t-Test: p-value = 0.04

# CL4626Contig3|CL4626Contig3

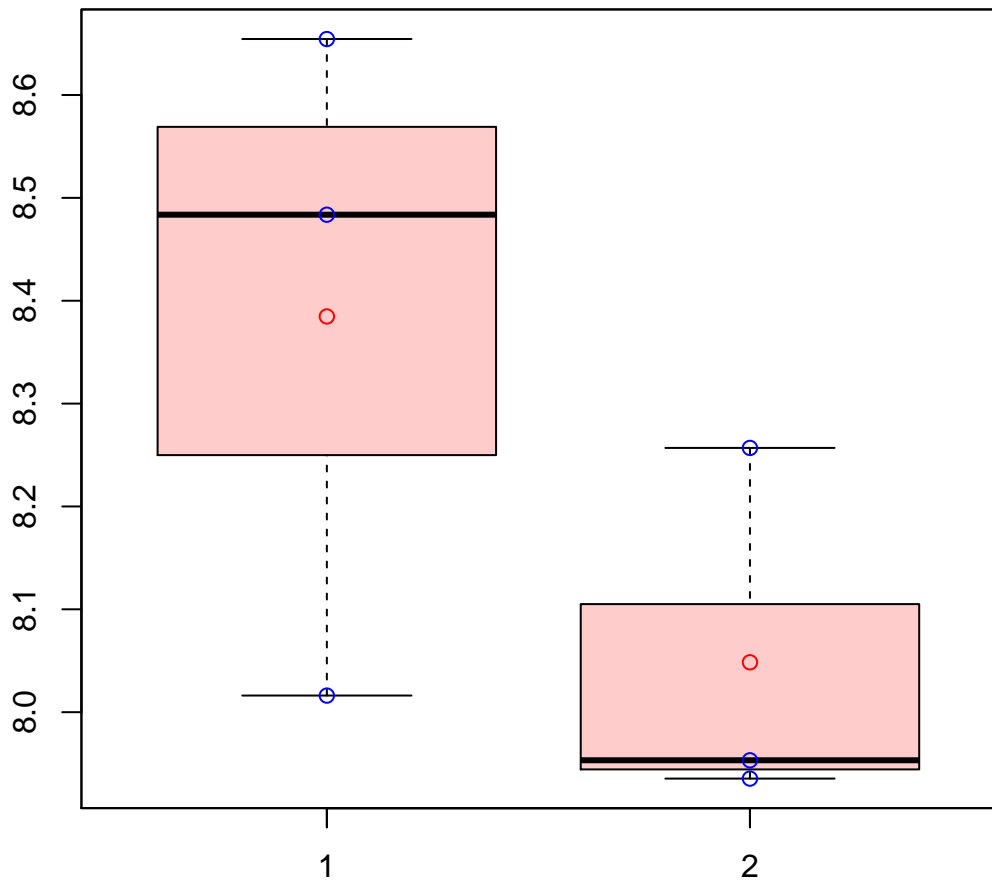

t-Test: p-value = 0.22



# CL4627Contig1|CL4627Contig1

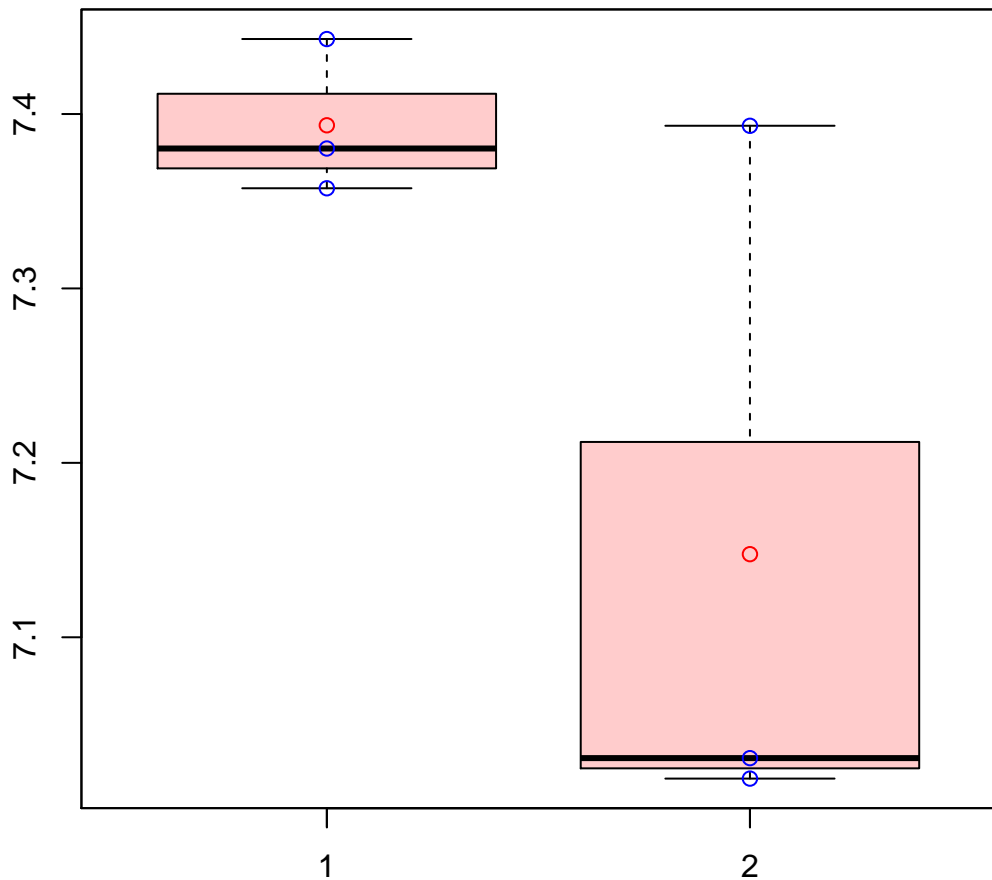

t-Test: p-value = 0.18

# CL4628Contig2|CL4628Contig2

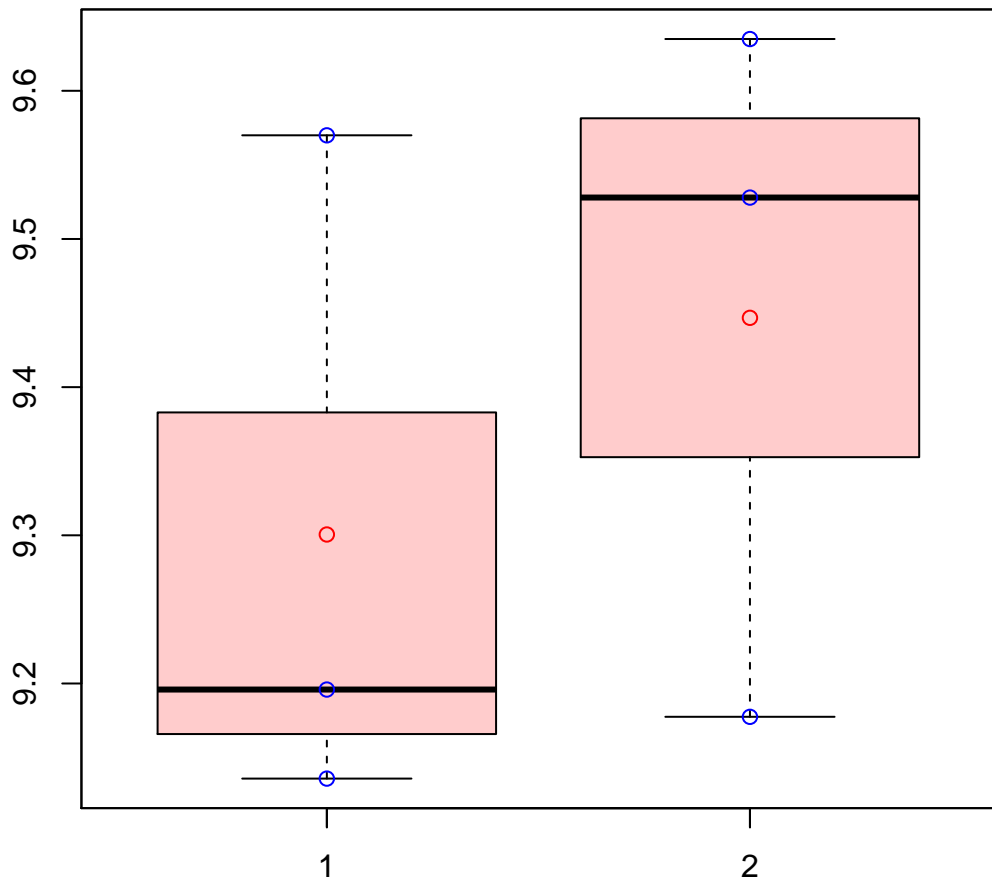

t-Test: p-value = 0.49

# CL462Contig10|CL462Contig10

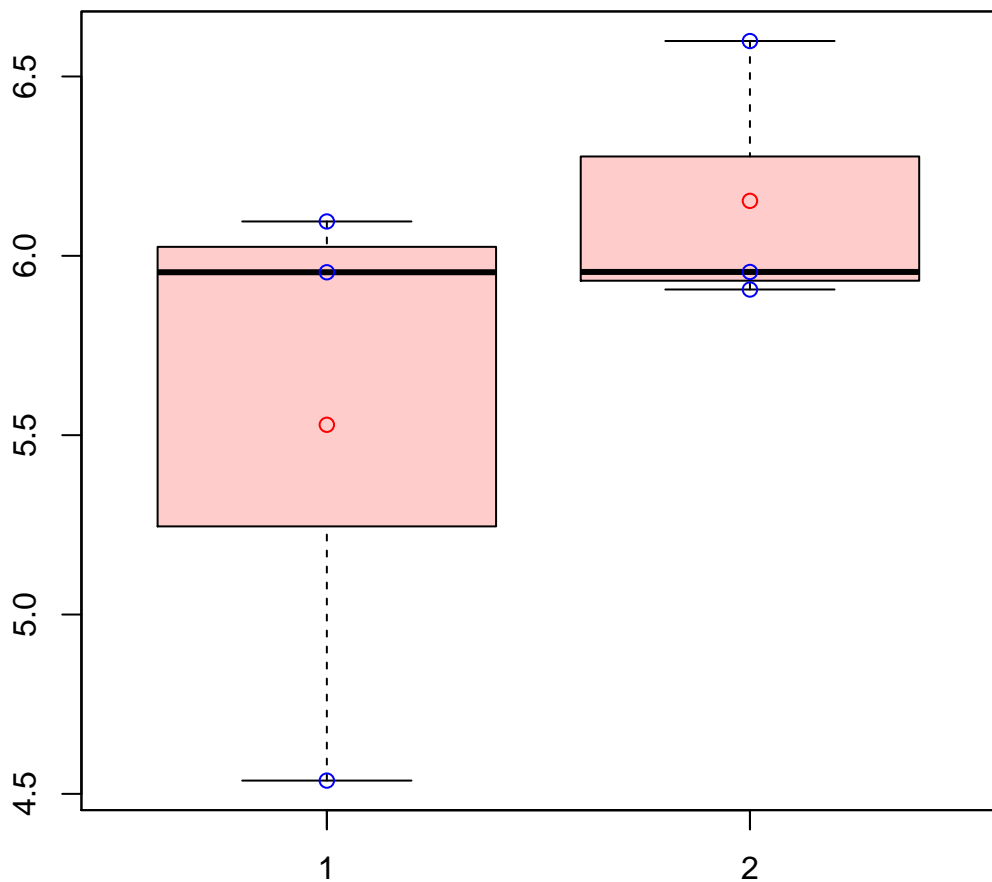

t-Test: p-value = 0.34

# CL462Contig13|CL462Contig13

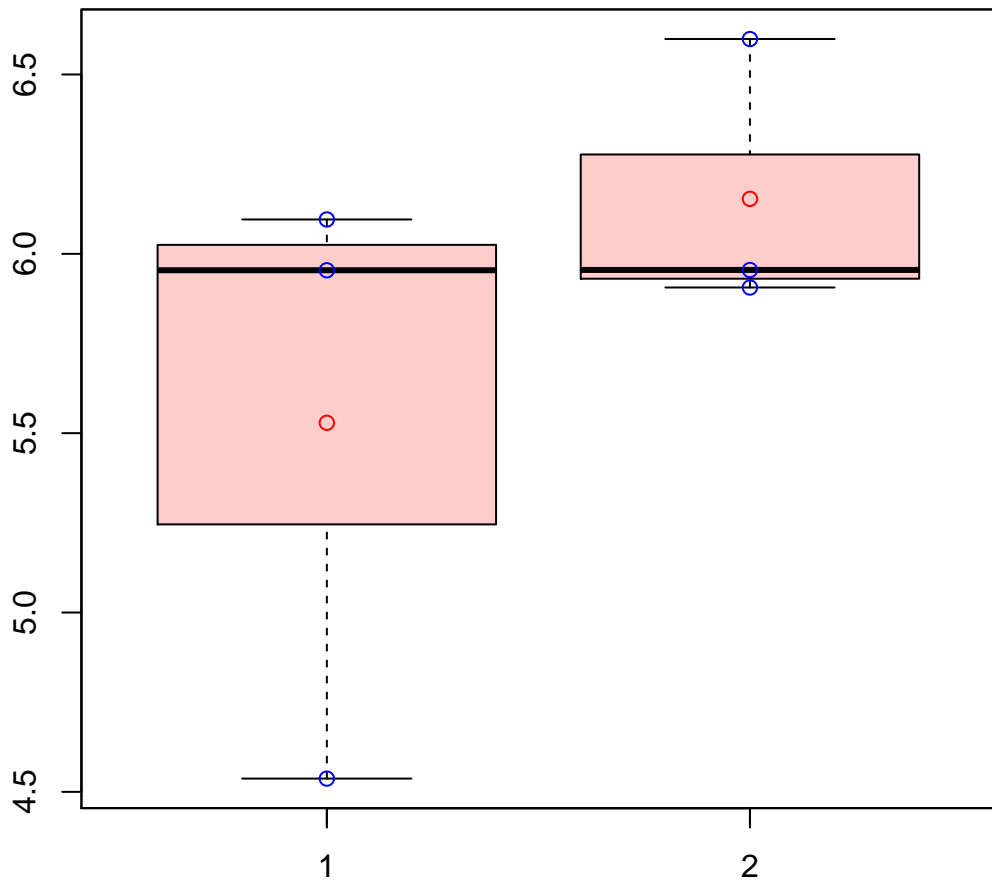

t-Test: p-value = 0.34

# CL462Contig15|CL462Contig15

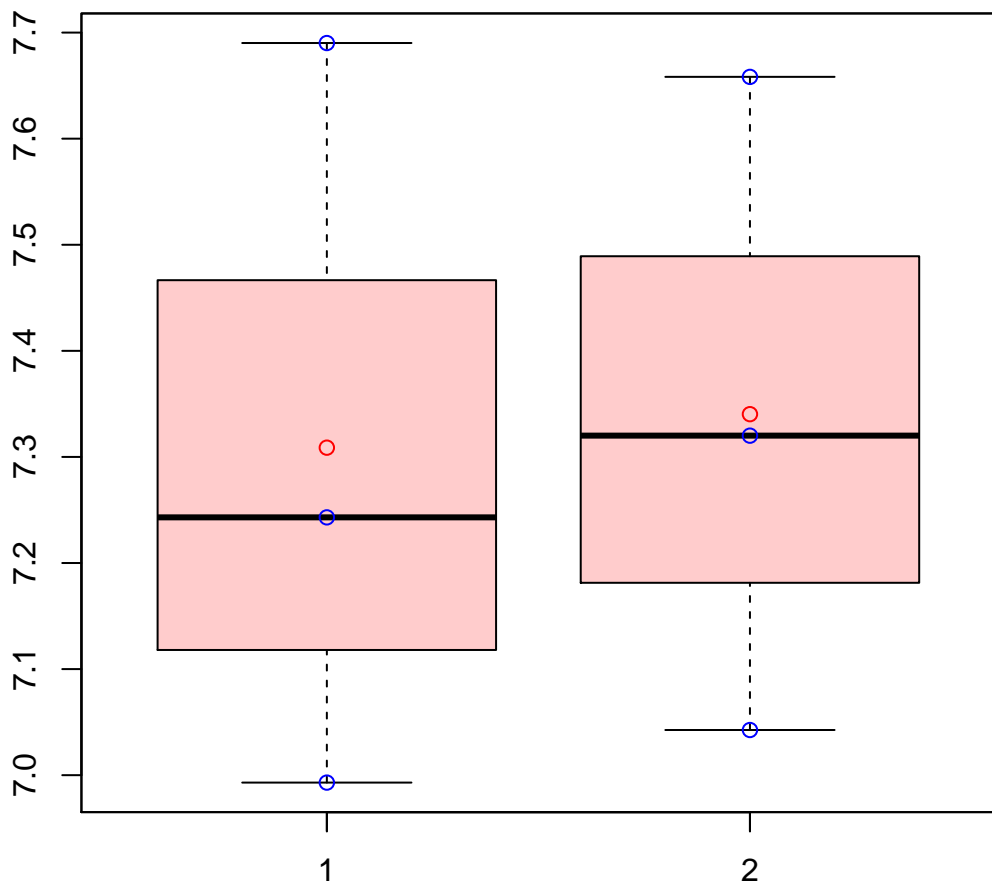

t-Test: p-value = 0.91

# CL4632Contig1|CL4632Contig1

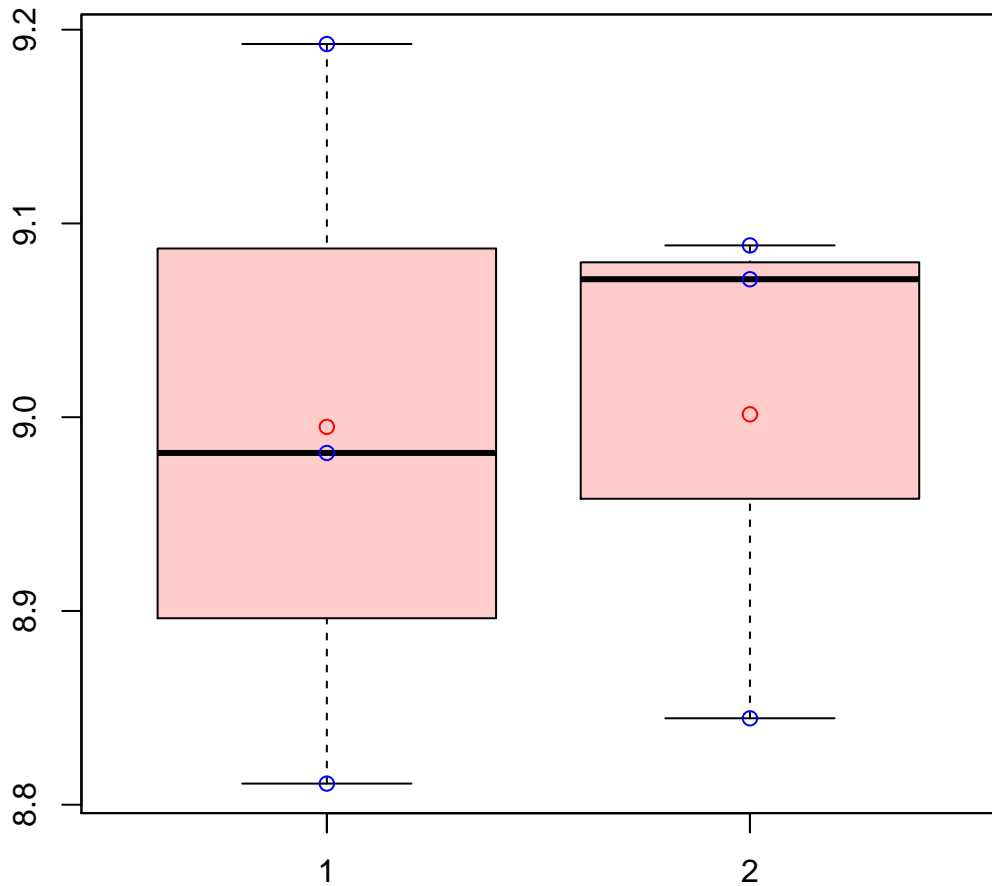

t-Test: p-value = 0.96

# CL4632Contig3|CL4632Contig3

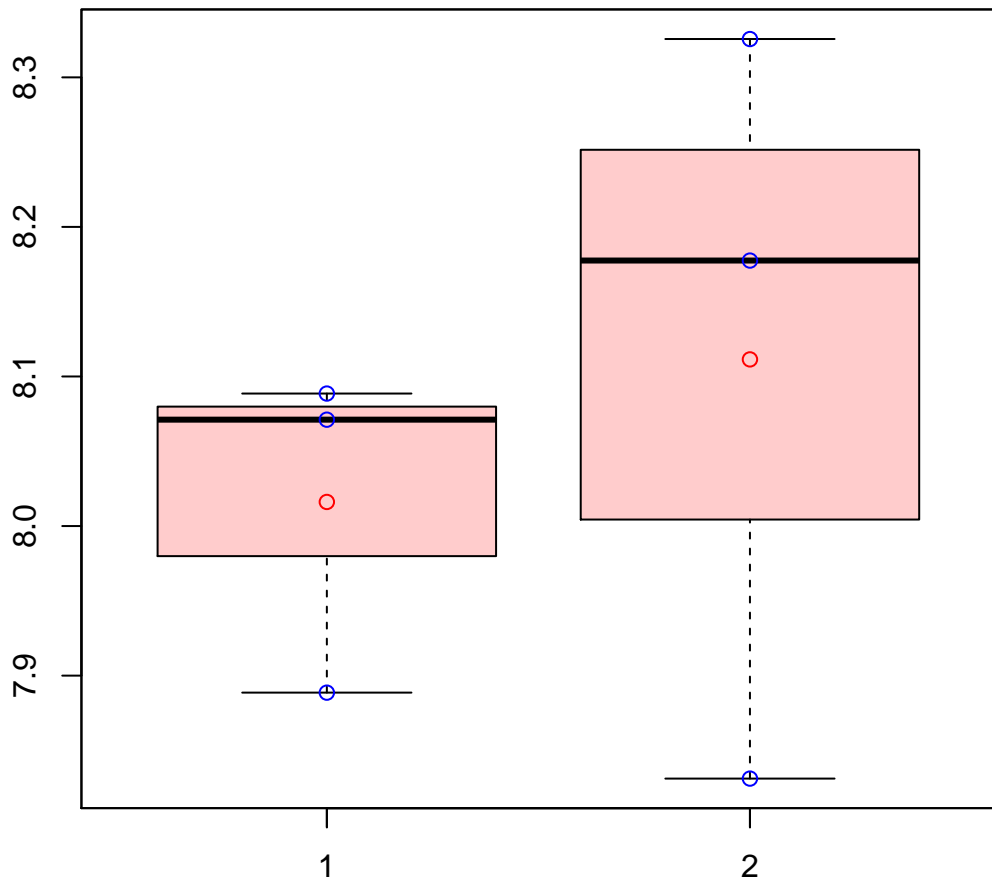

t-Test: p-value = 0.6

# CL4641Contig1|CL4641Contig1

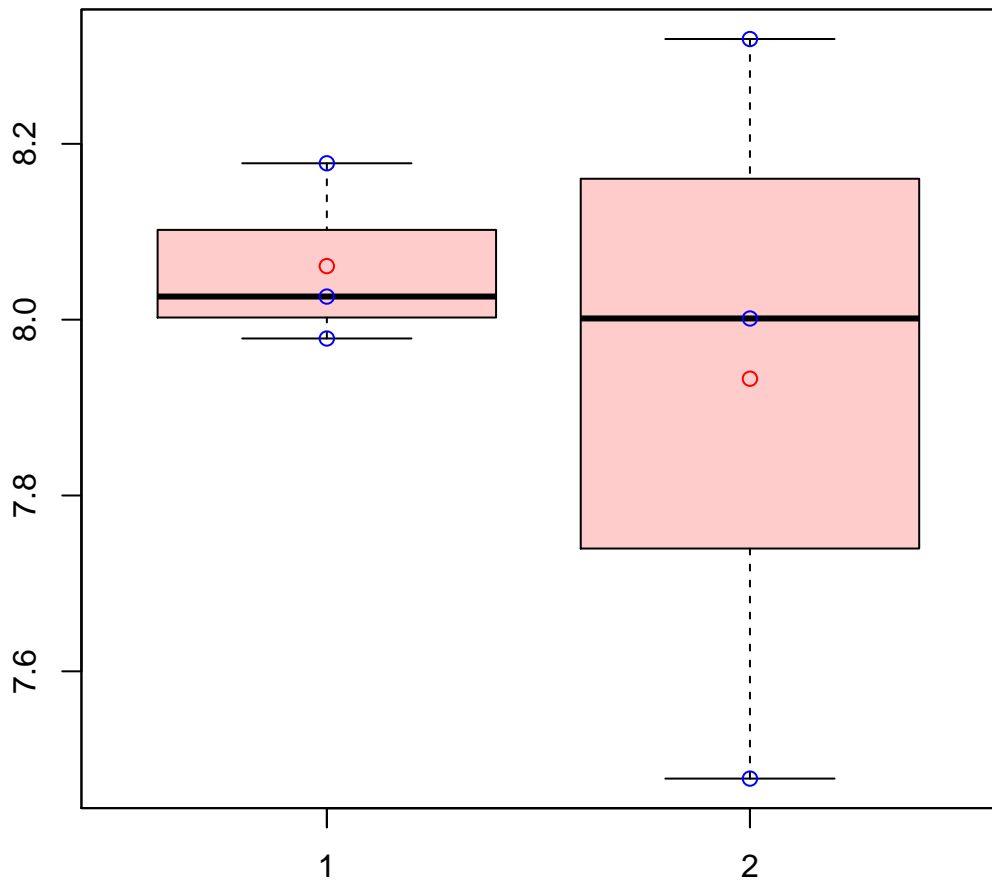

t-Test: p-value = 0.66



# CL4641Contig2|CL4641Contig2

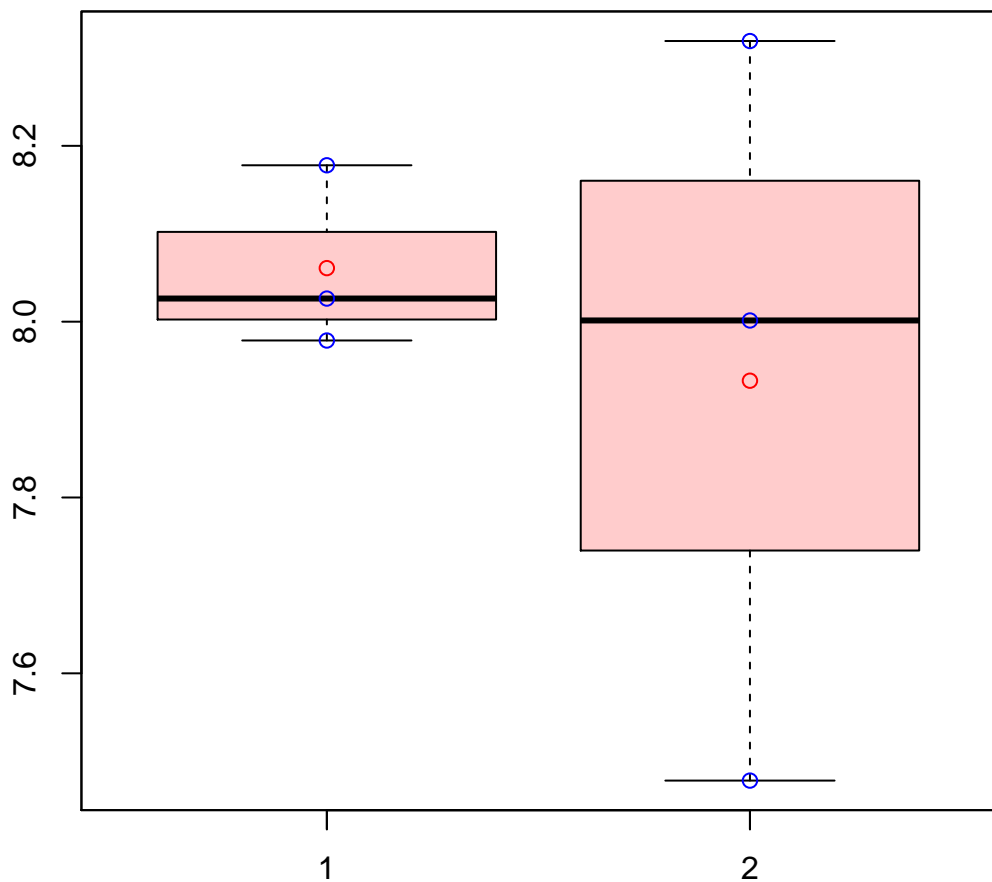

t-Test: p-value = 0.66

# CL4642Contig1|CL4642Contig1



t-Test: p-value = 0.95

# CL4642Contig2|CL4642Contig2



t-Test: p-value = 0.95

# CL4646Contig2|CL4646Contig2

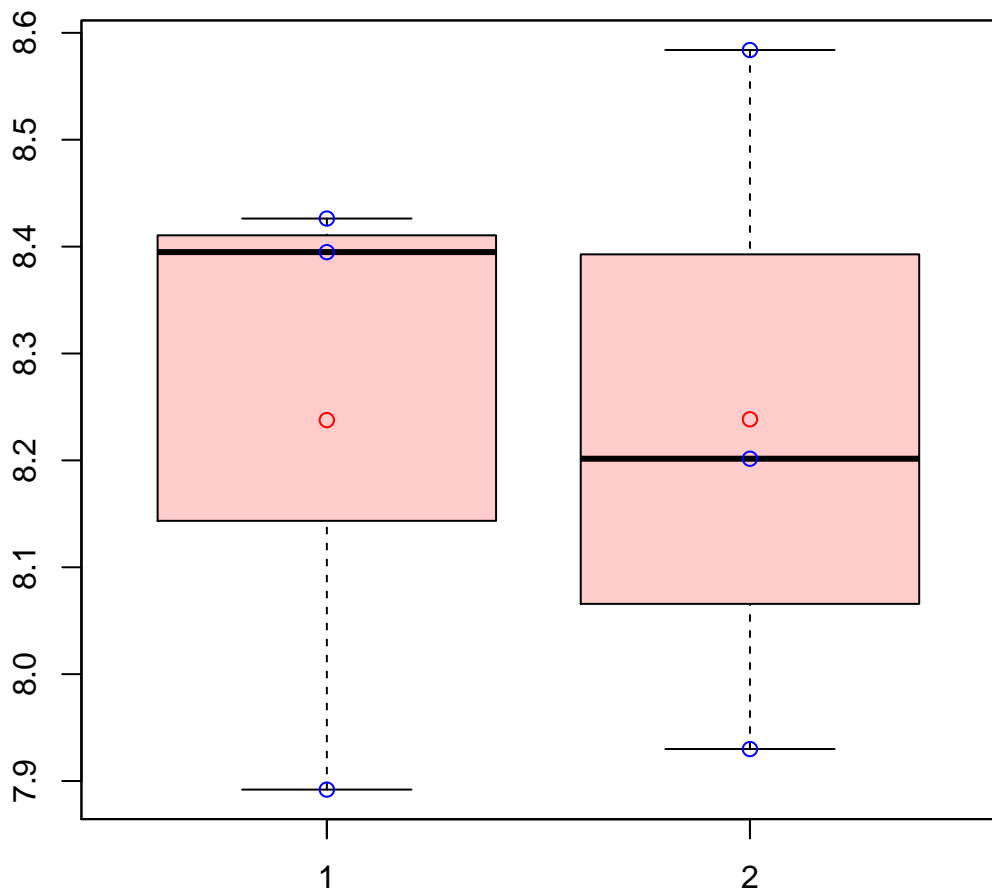

t-Test: p-value = 1

# CL4647Contig2|CL4647Contig2

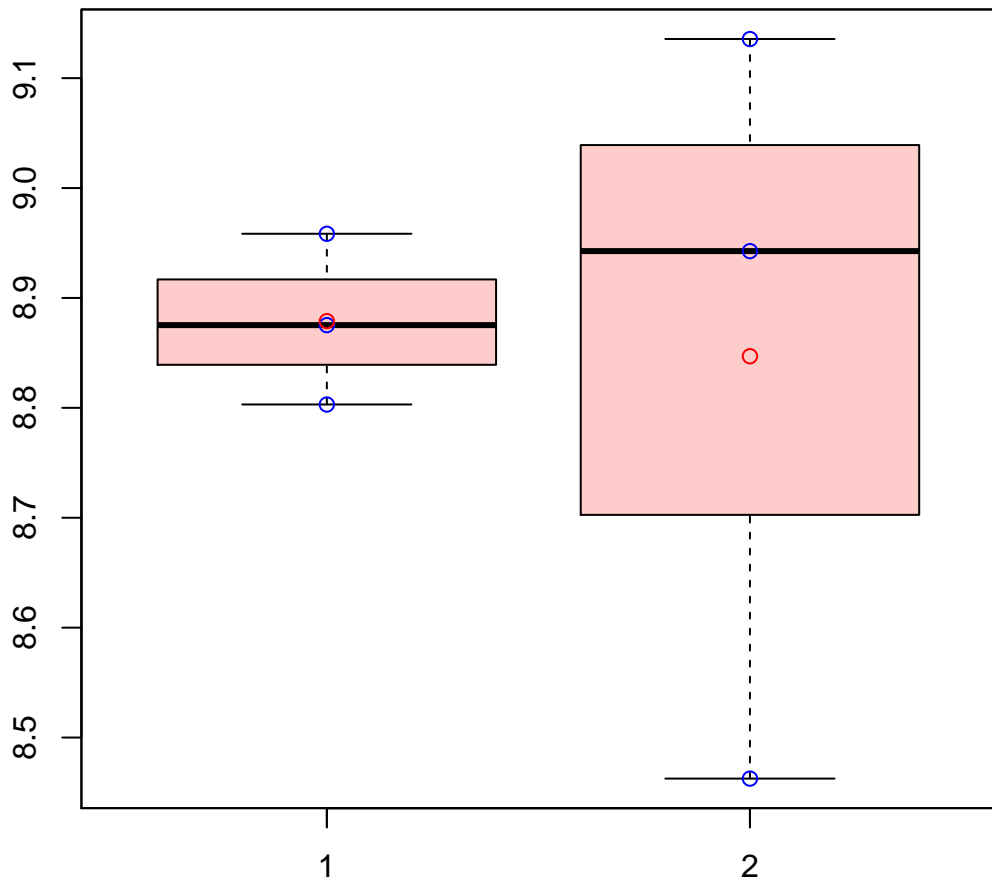

t-Test: p-value = 0.89

# CL4649Contig1|CL4649Contig1



t-Test: p-value = 0.42

# CL4649Contig2|CL4649Contig2

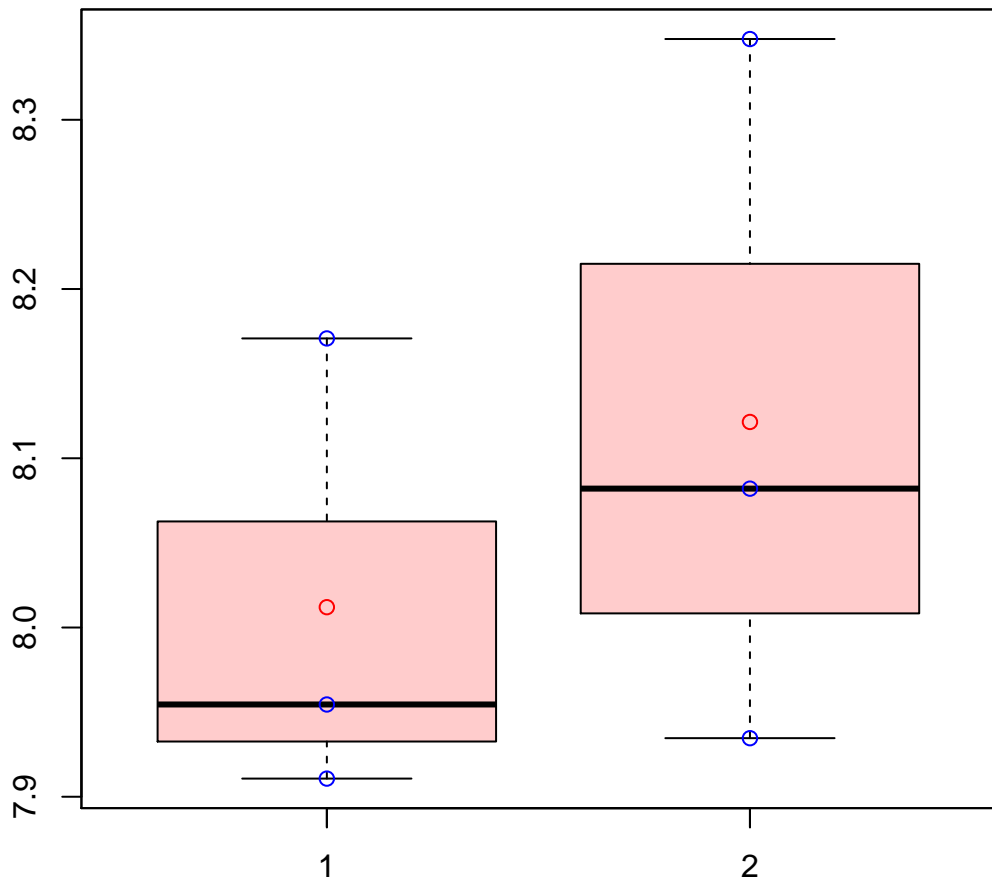

t-Test: p-value = 0.5

# CL464Contig5|CL464Contig5

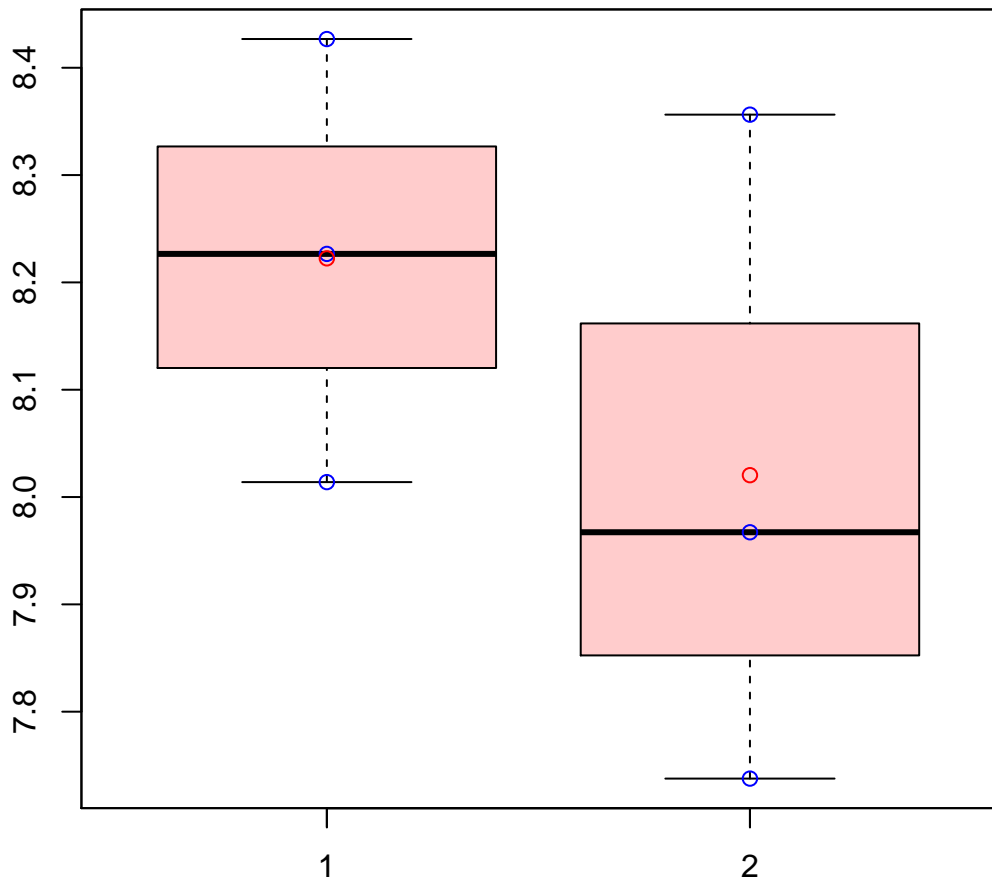

t-Test: p-value = 0.41



# CL4653Contig4|CL4653Contig4

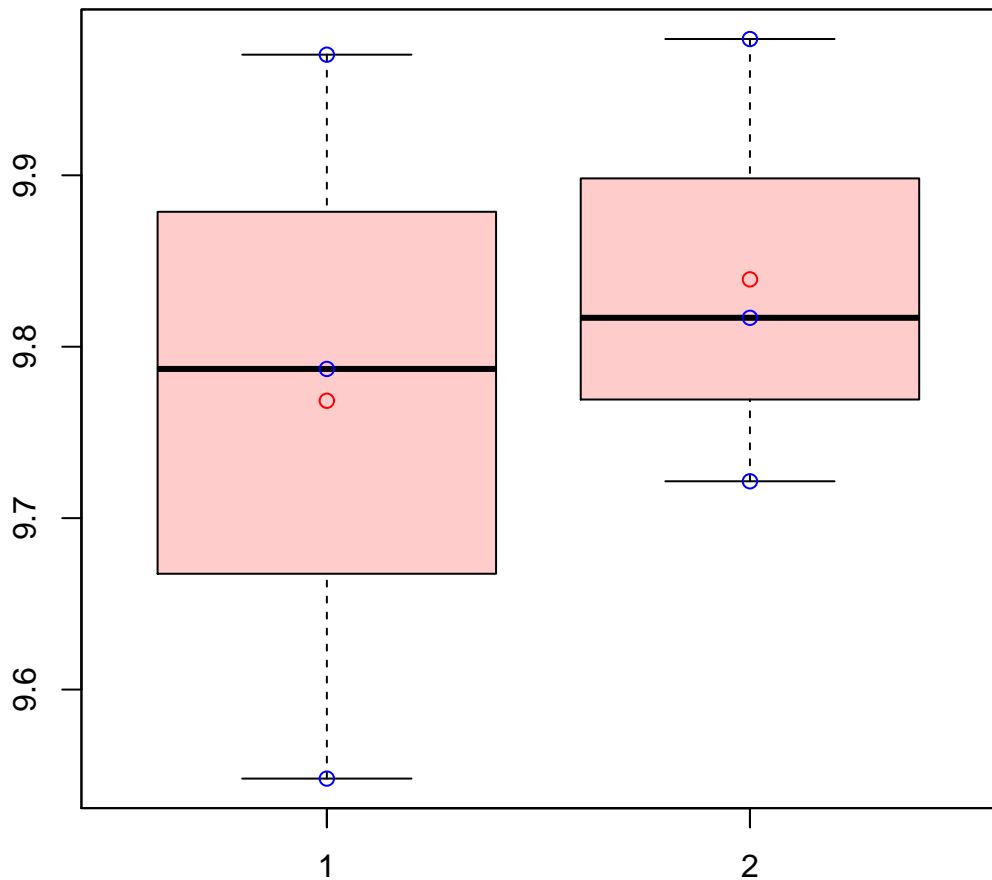

t-Test: p-value = 0.65

# CL4656Contig3|CL4656Contig3

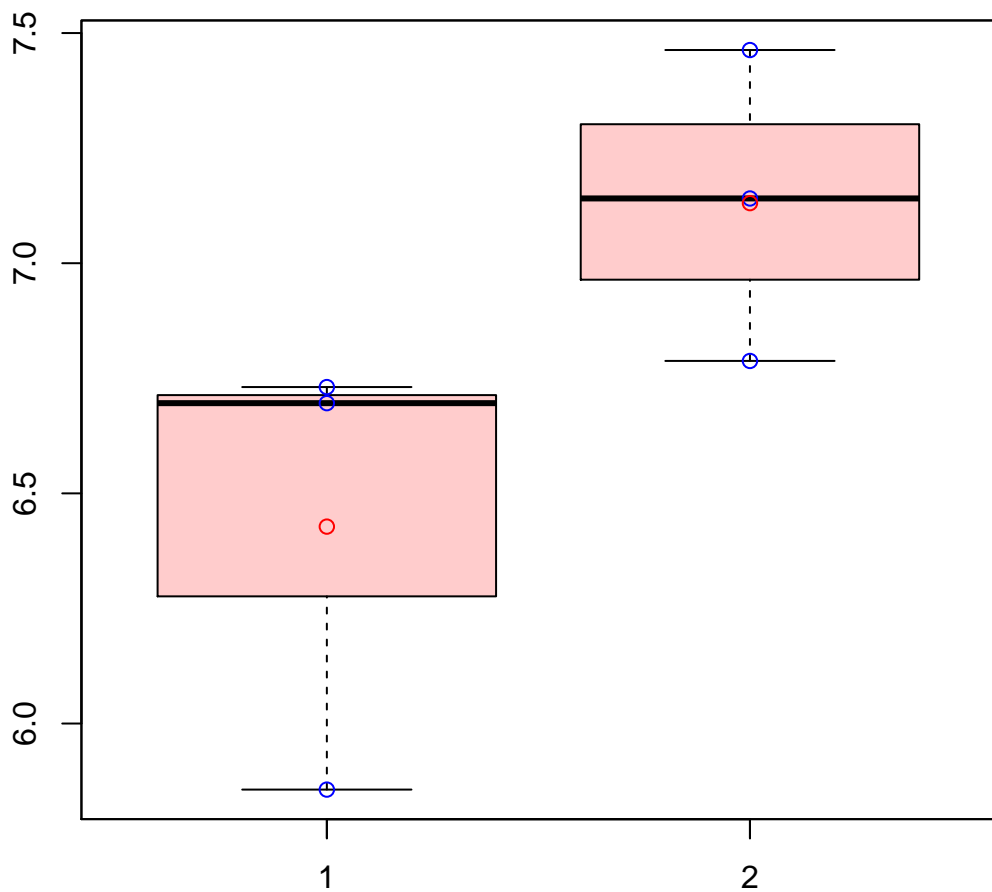

t-Test: p-value = 0.12

# CL4659Contig3|CL4659Contig3

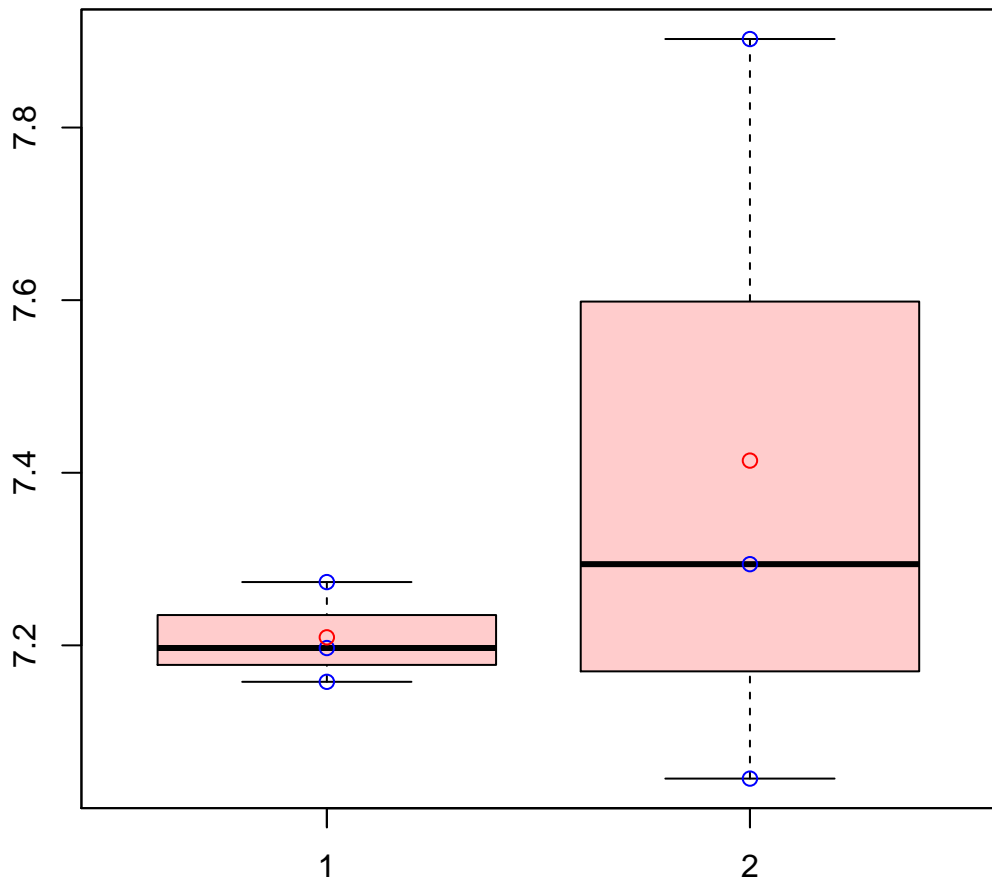

t-Test: p-value = 0.51

# CL465Contig6|CL465Contig6

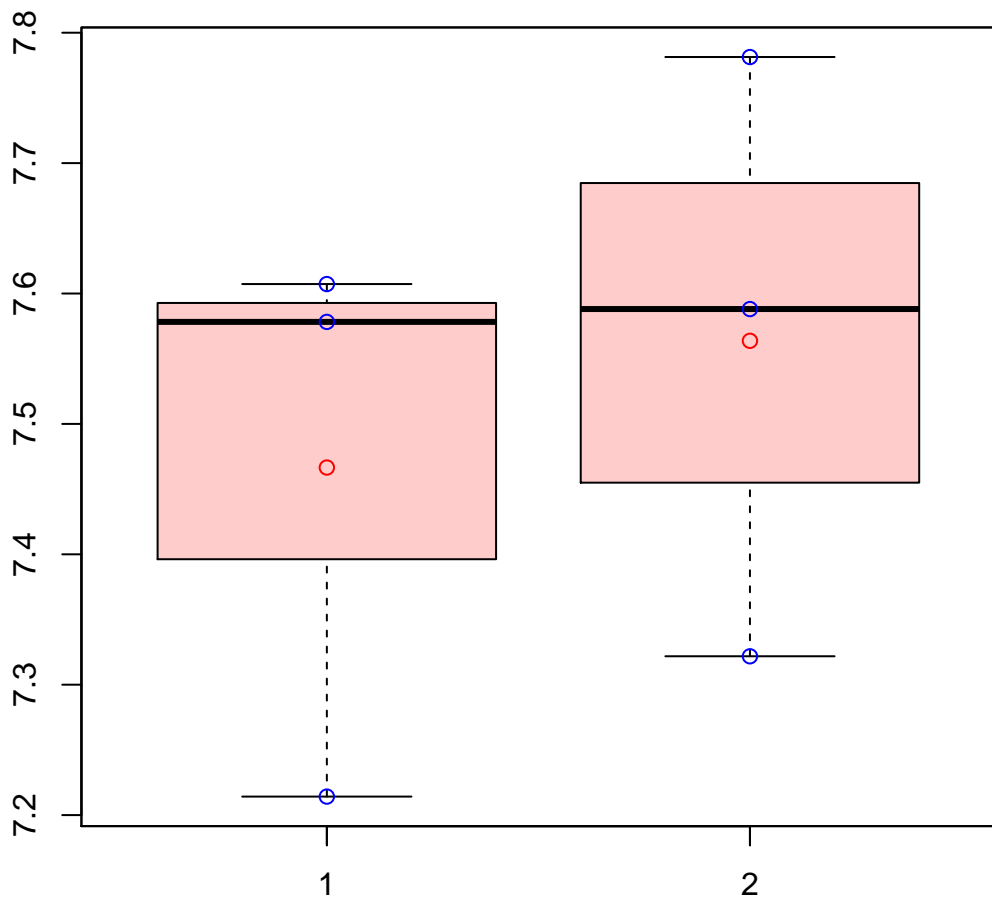

t-Test: p-value = 0.62

# CL4662Contig1|CL4662Contig1

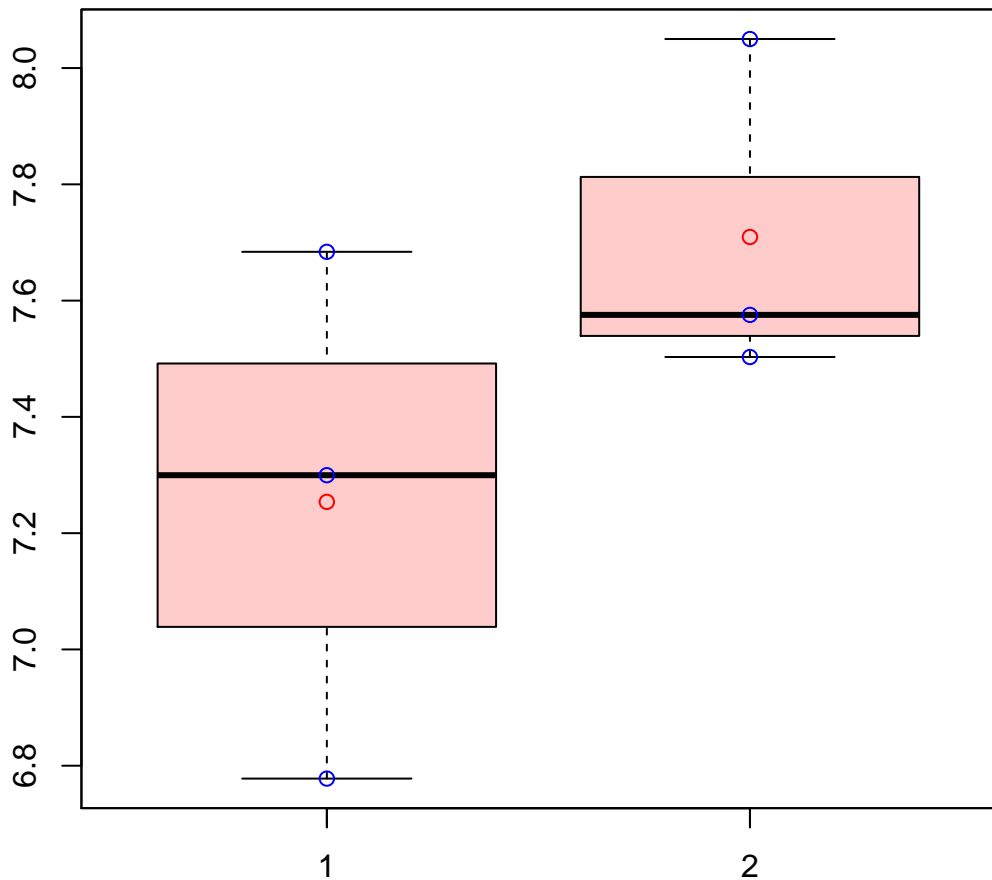

t-Test: p-value = 0.23

# CL4669Contig1|CL4669Contig1

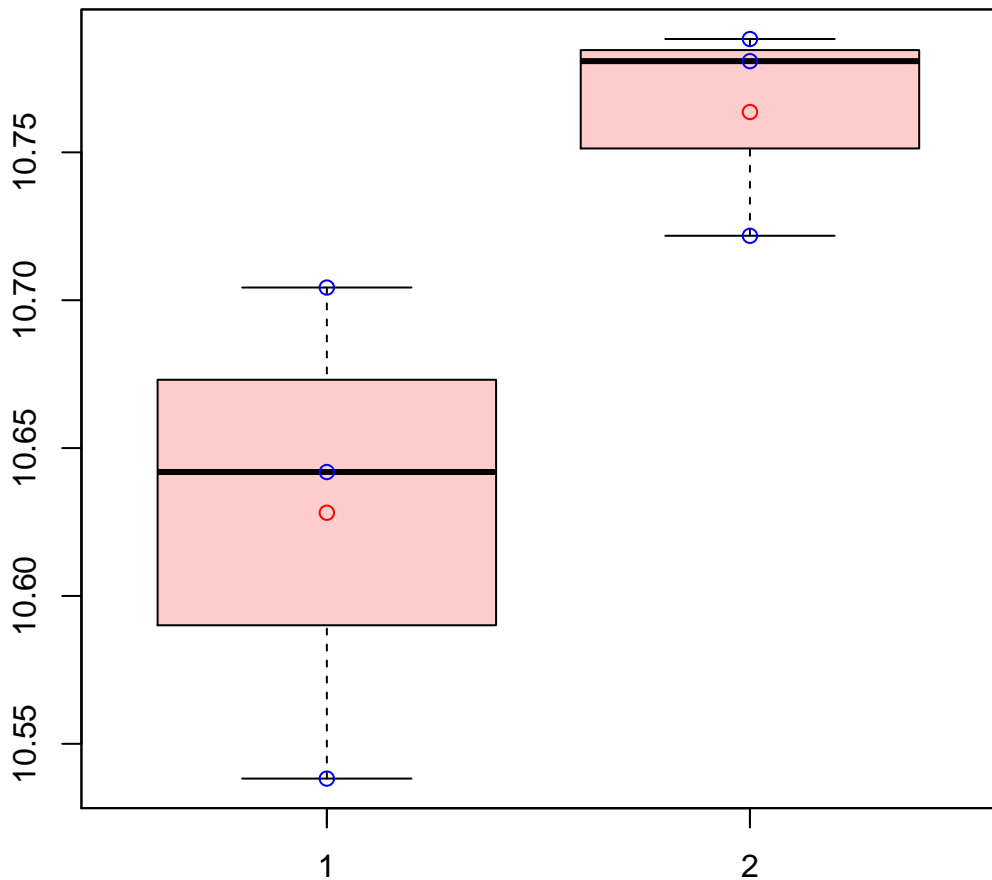

t-Test: p-value = 0.09

# CL4671Contig1|CL4671Contig1

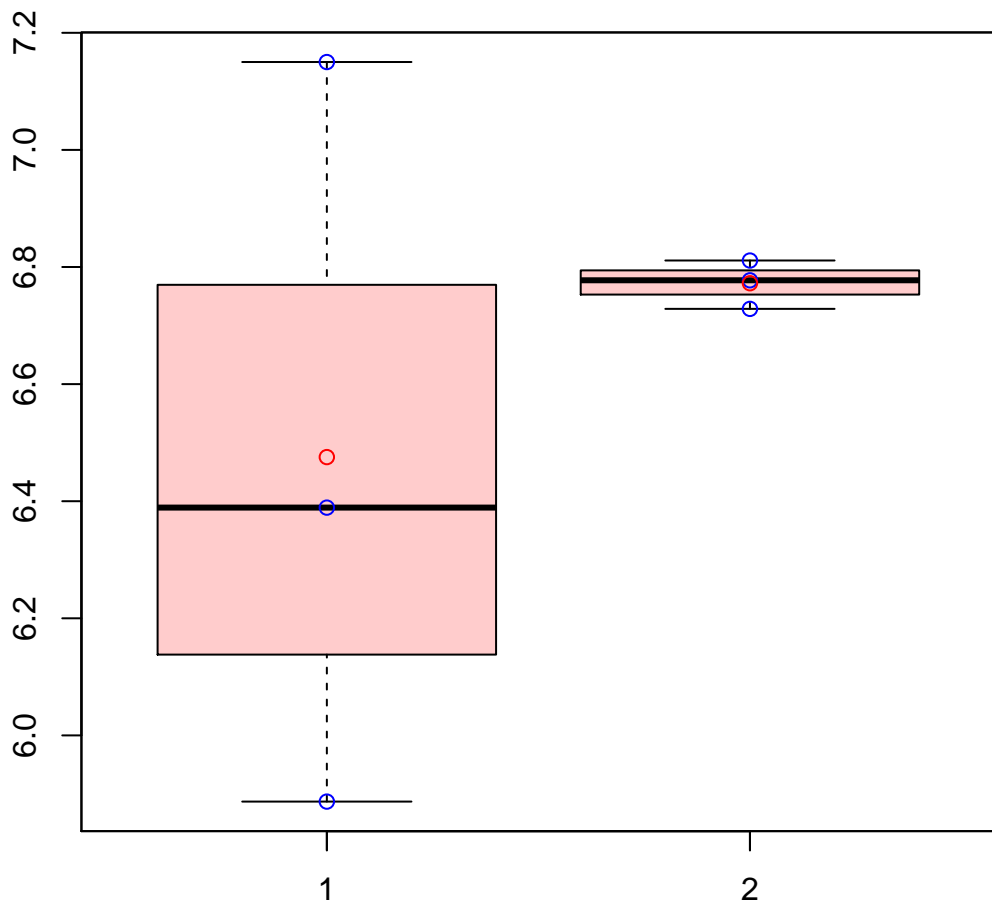

t-Test: p-value = 0.5

# CL4672Contig2|CL4672Contig2

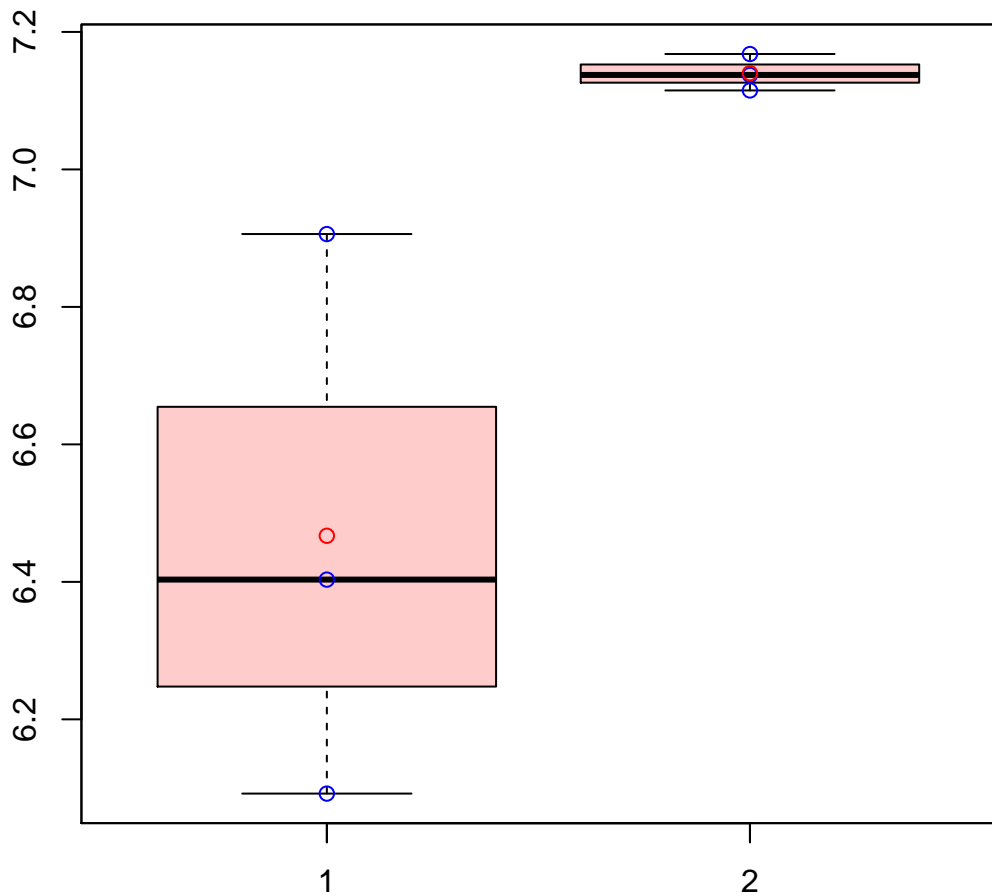

t-Test: p-value = 0.1



# CL4679Contig2|CL4679Contig2

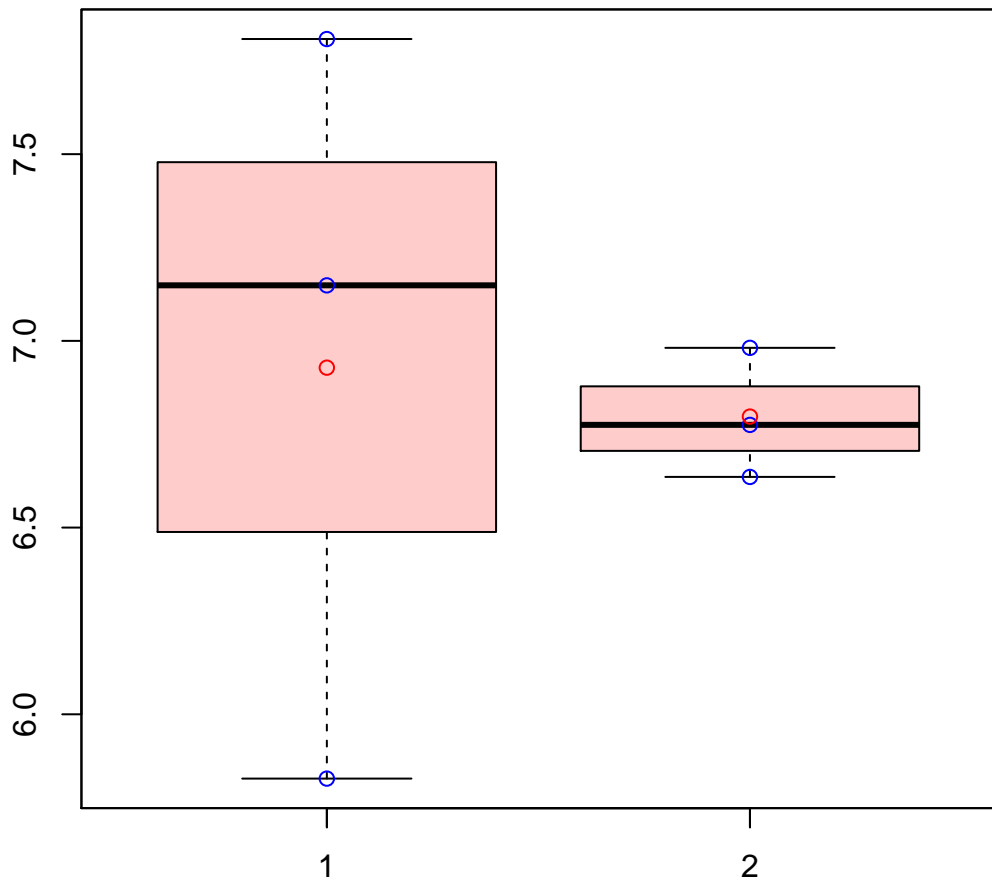

t-Test: p-value = 0.84

# CL4679Contig3|CL4679Contig3

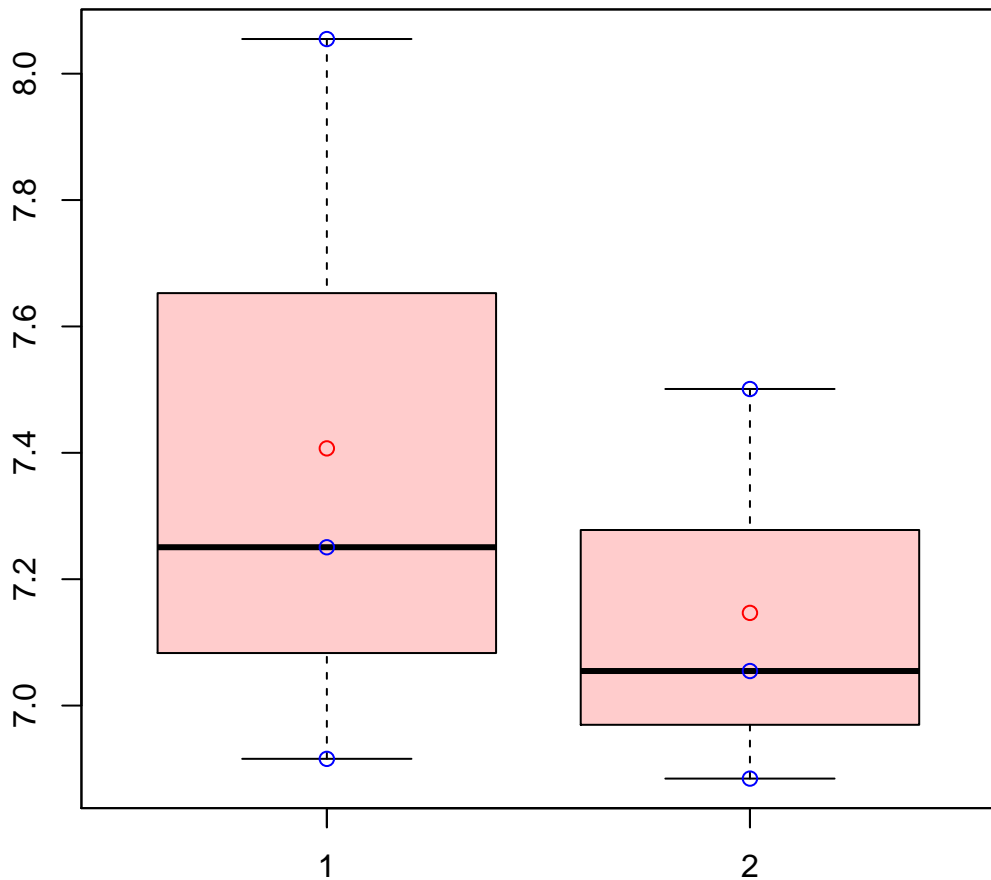

t-Test: p-value = 0.55

# CL4679Contig4|CL4679Contig4

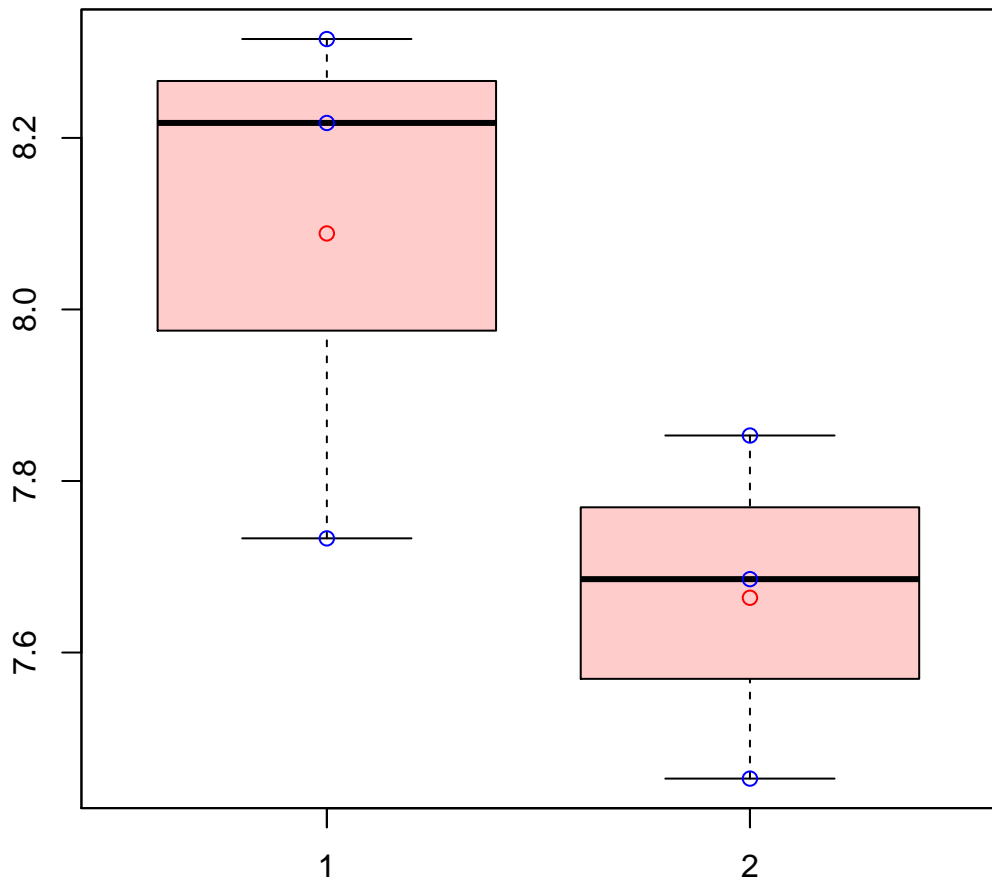

t-Test: p-value = 0.13

# CL467Contig12|CL467Contig12

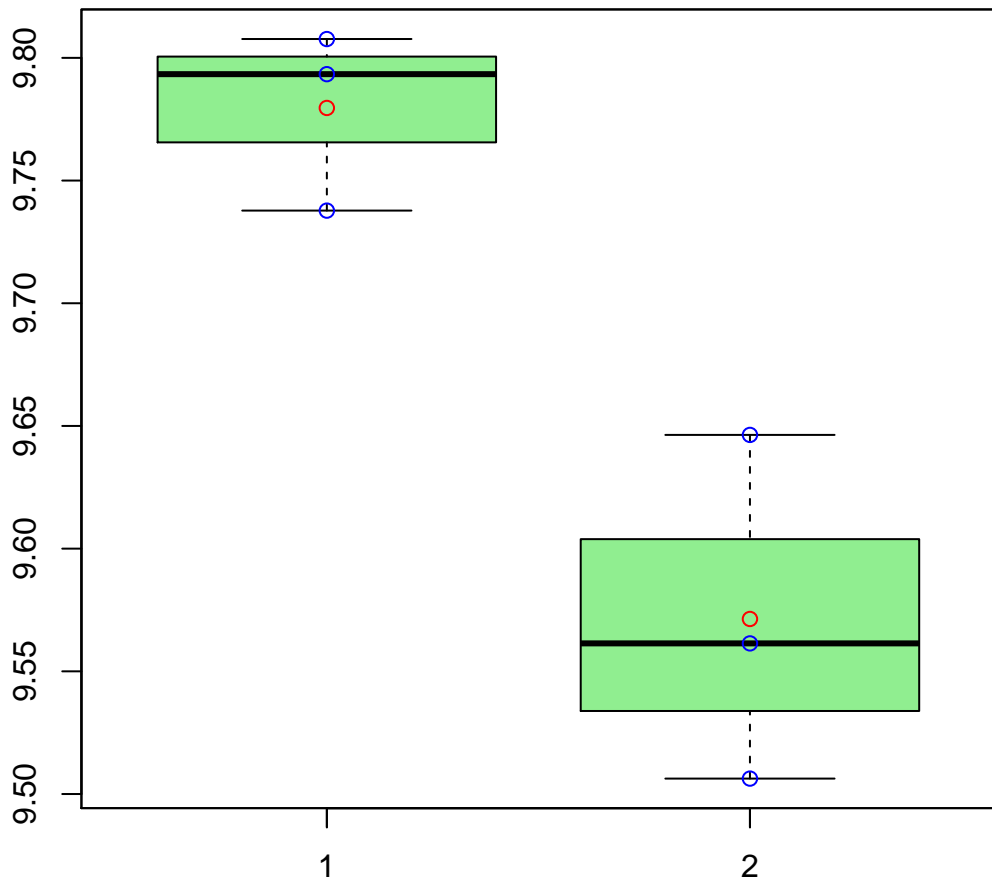

t-Test: p-value = 0.02

# CL4685Contig2|CL4685Contig2

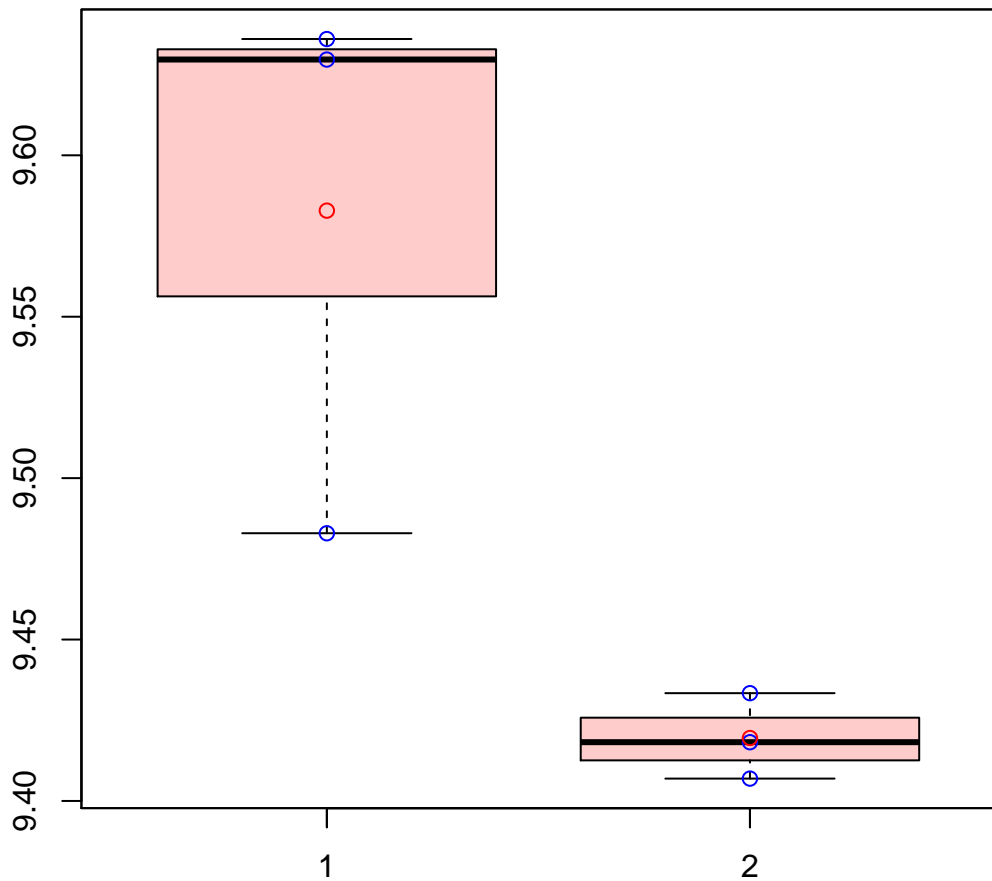

t-Test: p-value = 0.08

# CL4685Contig3|CL4685Contig3

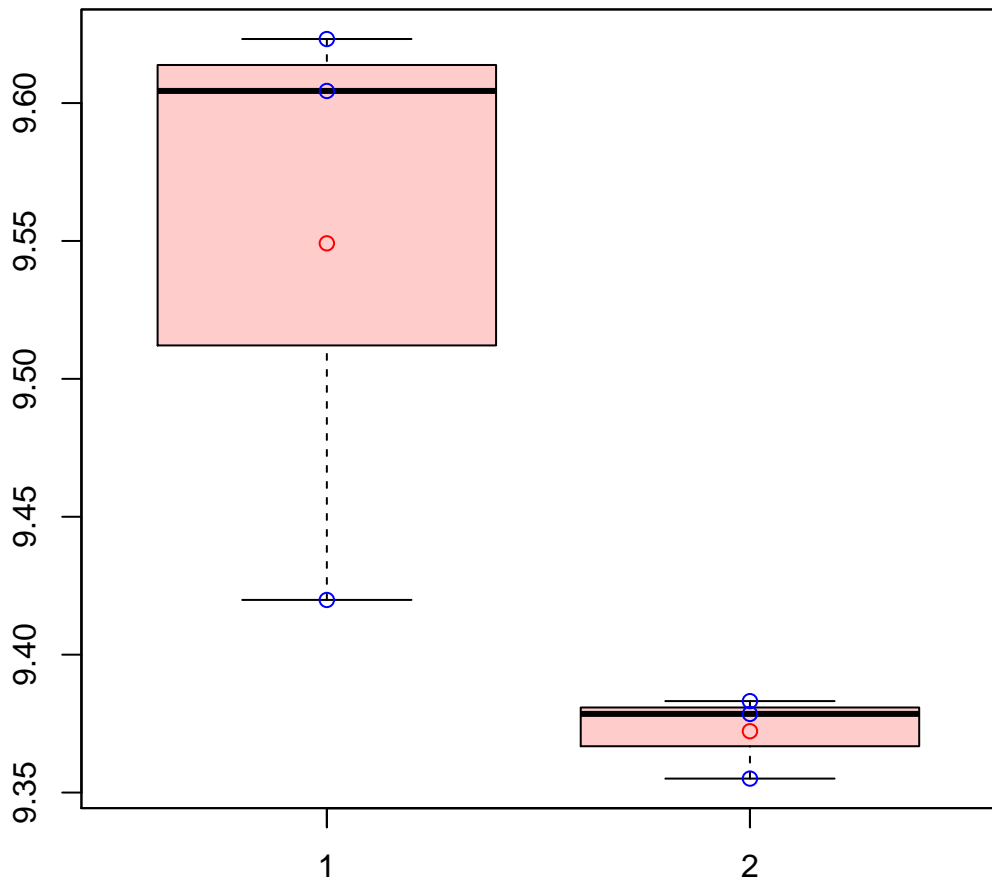

t-Test: p-value = 0.11

# CL4692Contig2|CL4692Contig2



t-Test: p-value = 0.19

# CL4694Contig4|CL4694Contig4

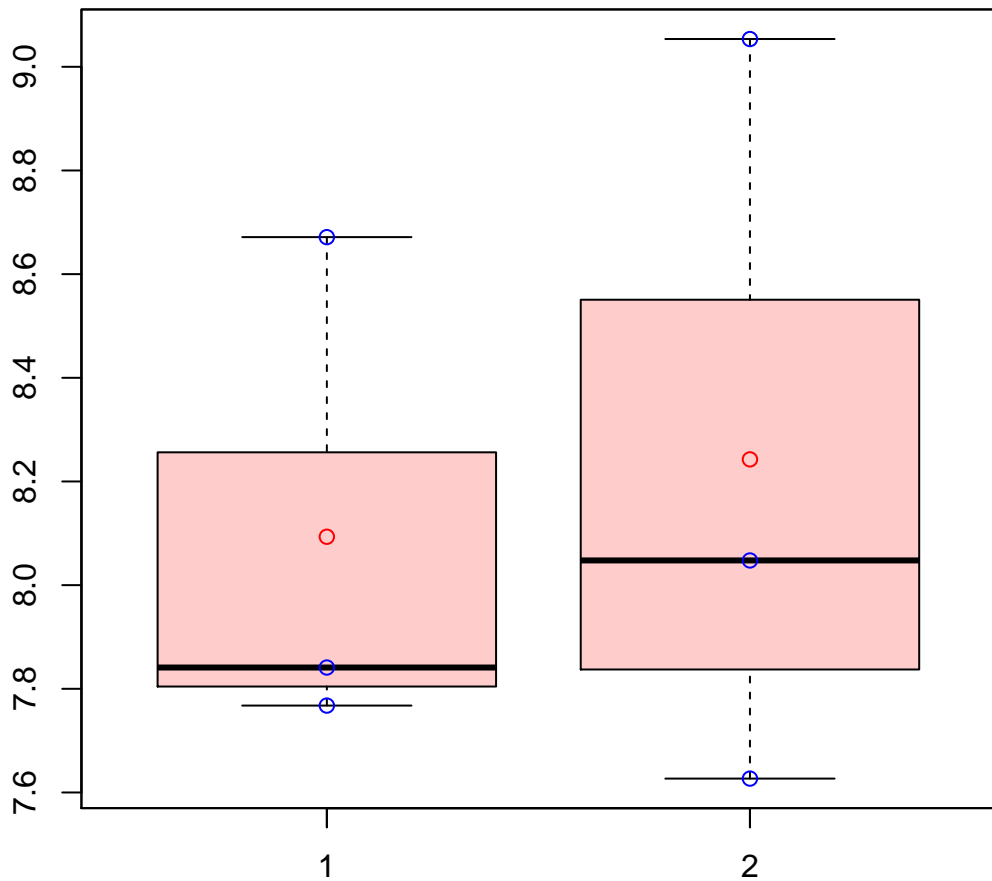

t-Test: p-value = 0.79



# CL4697Contig1|CL4697Contig1

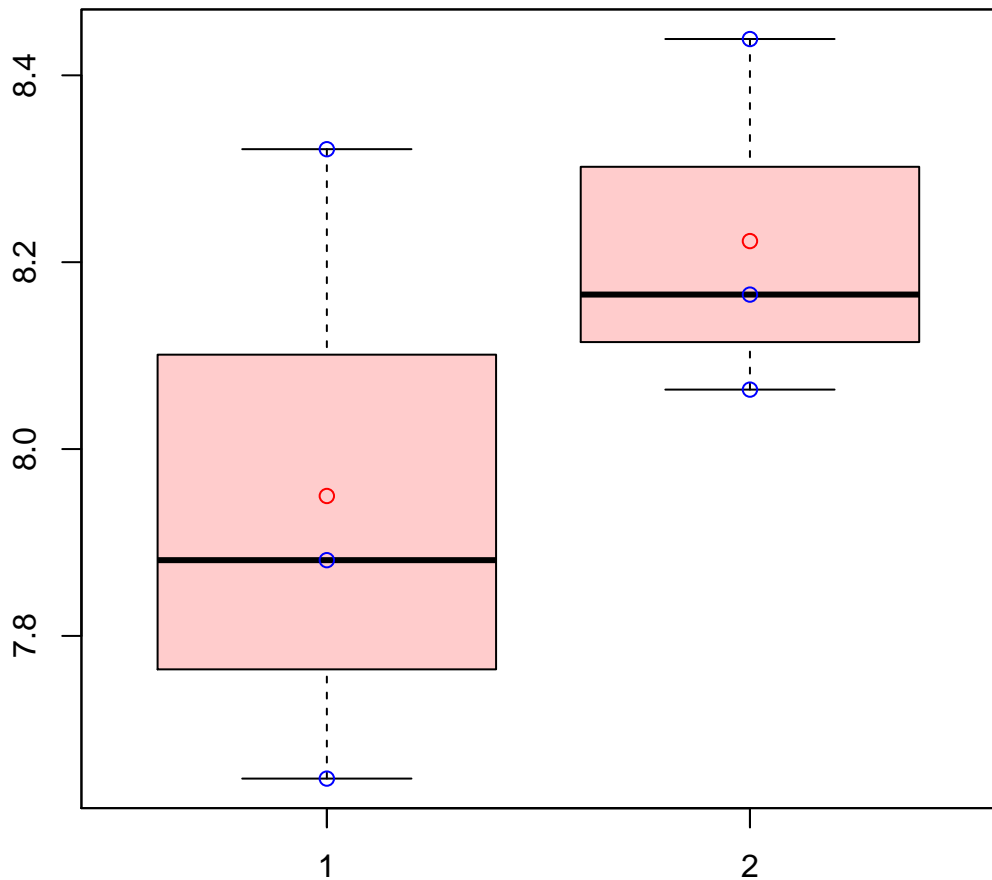

t-Test: p-value = 0.31

# CL4697Contig2|CL4697Contig2

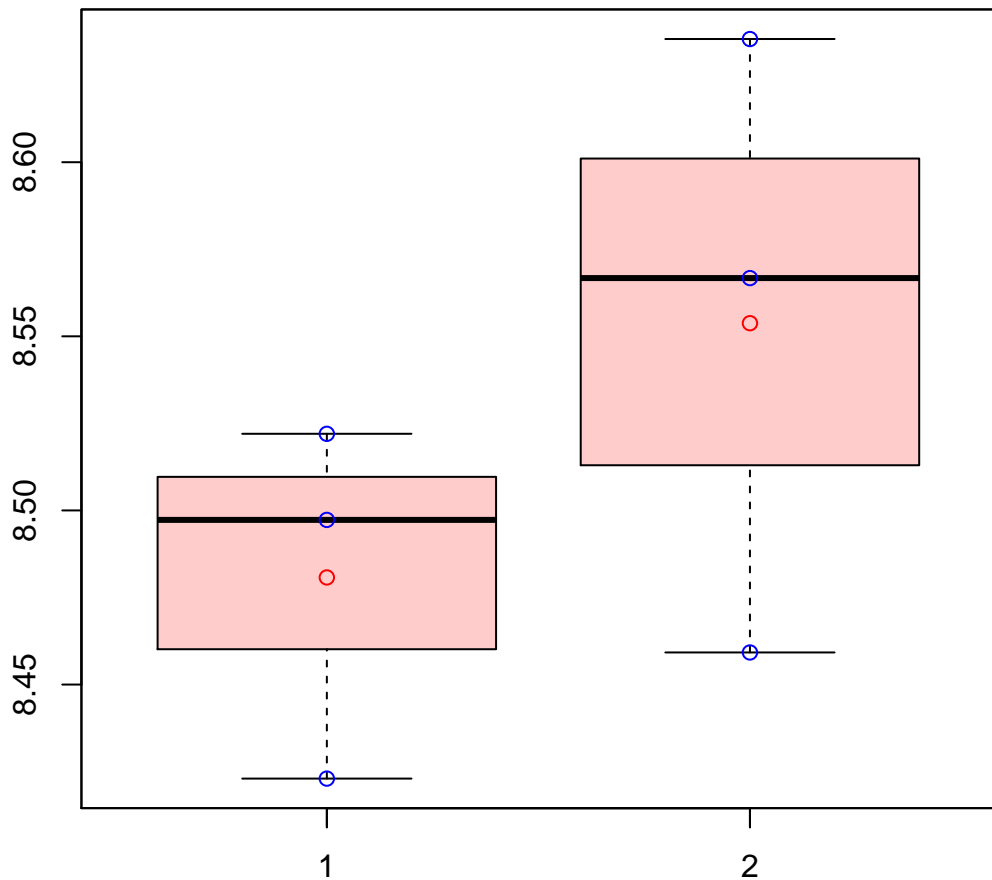

t-Test: p-value = 0.3

# CL4697Contig3|CL4697Contig3

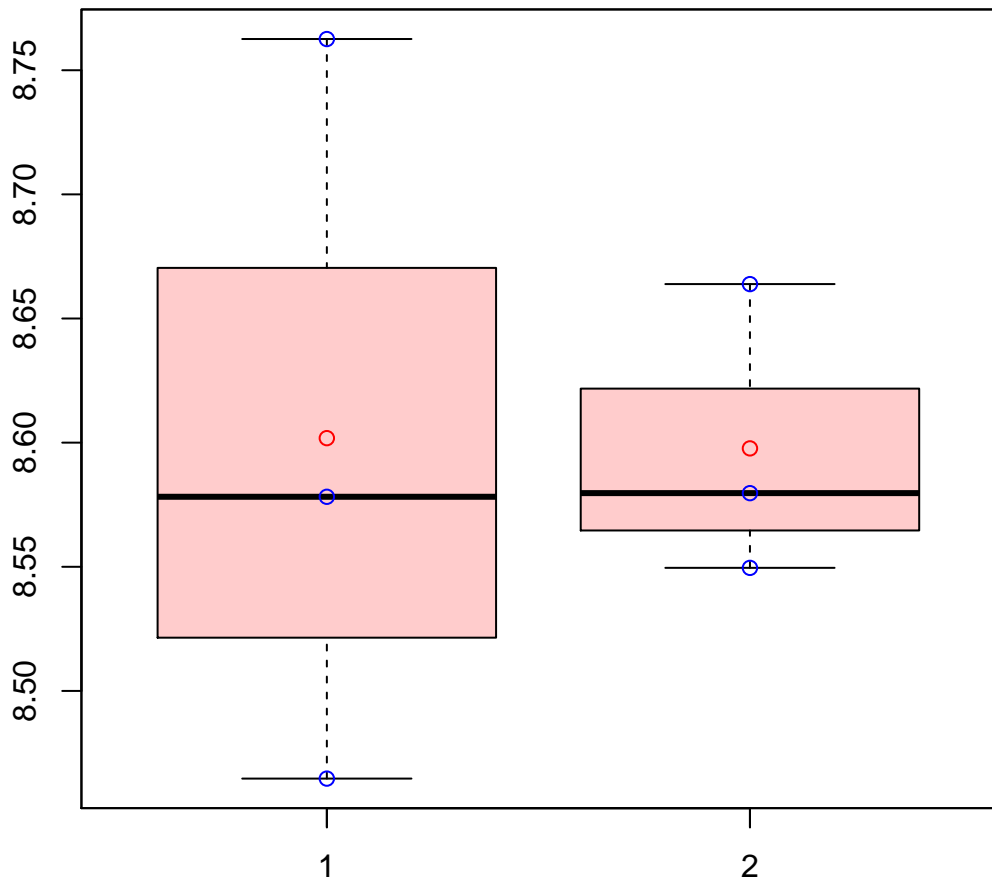

t-Test: p-value = 0.97

# CL4697Contig4|CL4697Contig4



t-Test: p-value = 0.97

# CL469Contig10|CL469Contig10

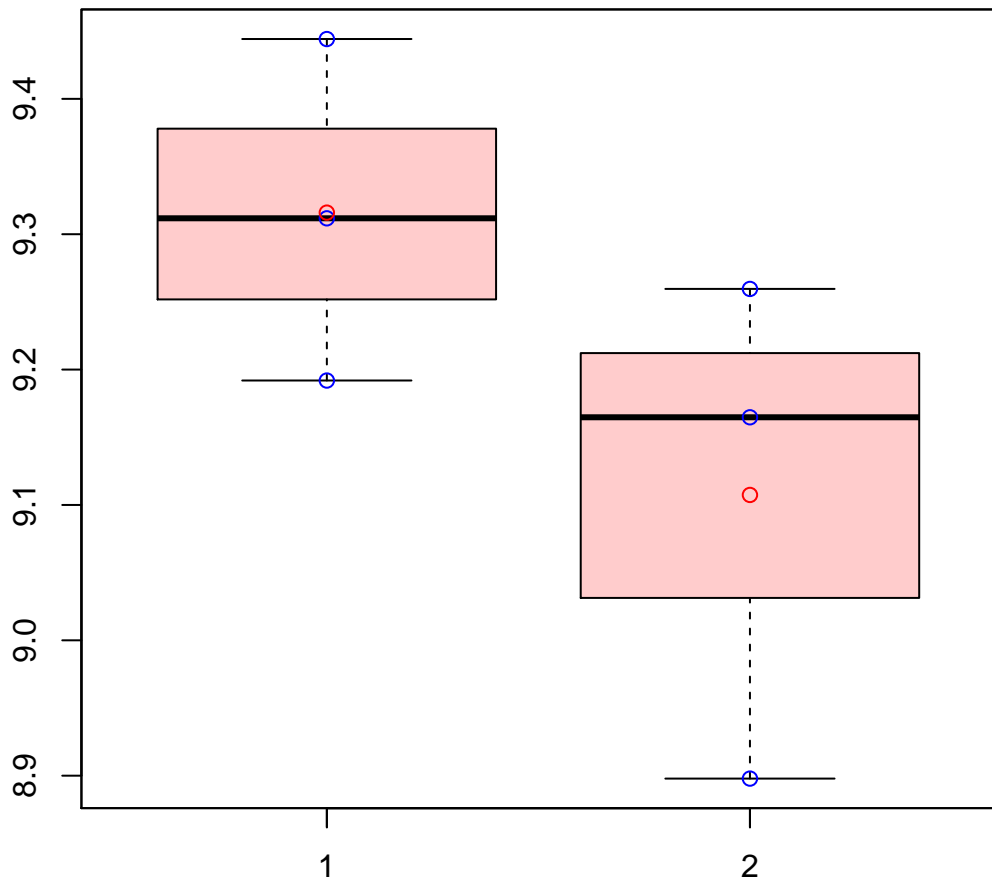

t-Test: p-value = 0.2

# CL46Contig19|CL46Contig19

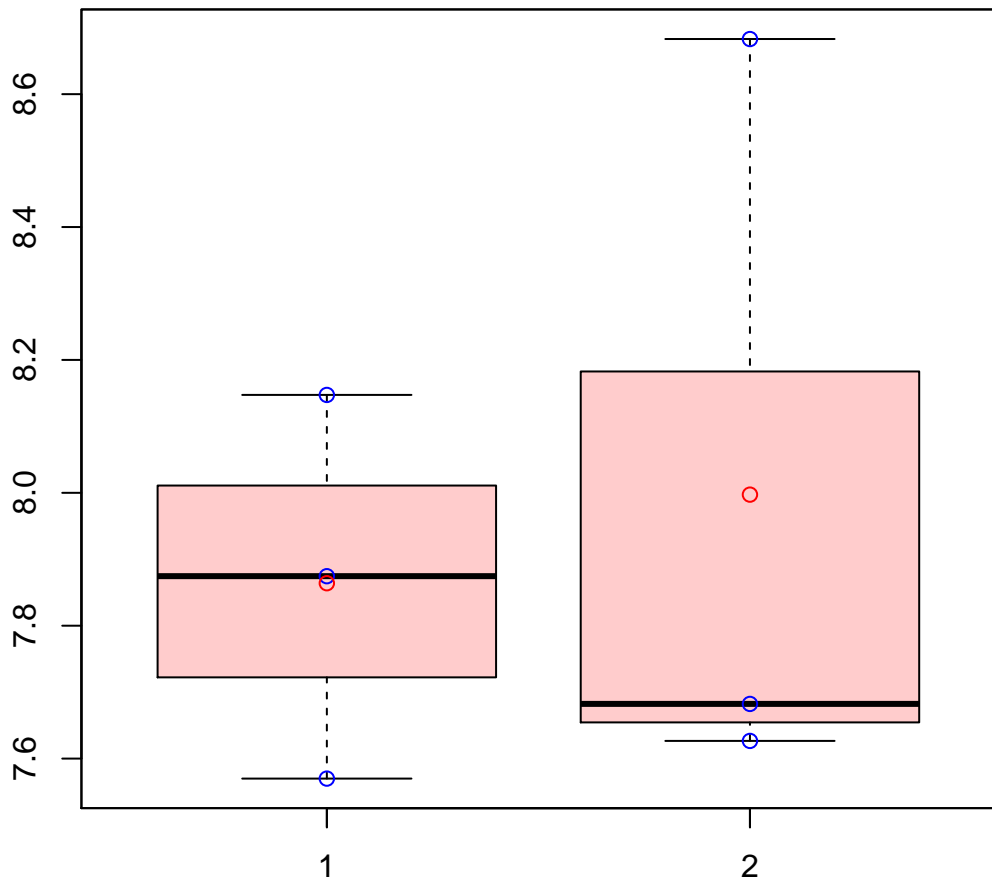

t-Test: p-value = 0.75

# CL46Contig20|CL46Contig20



t-Test: p-value = 0.75

# CL46Contig41|CL46Contig41

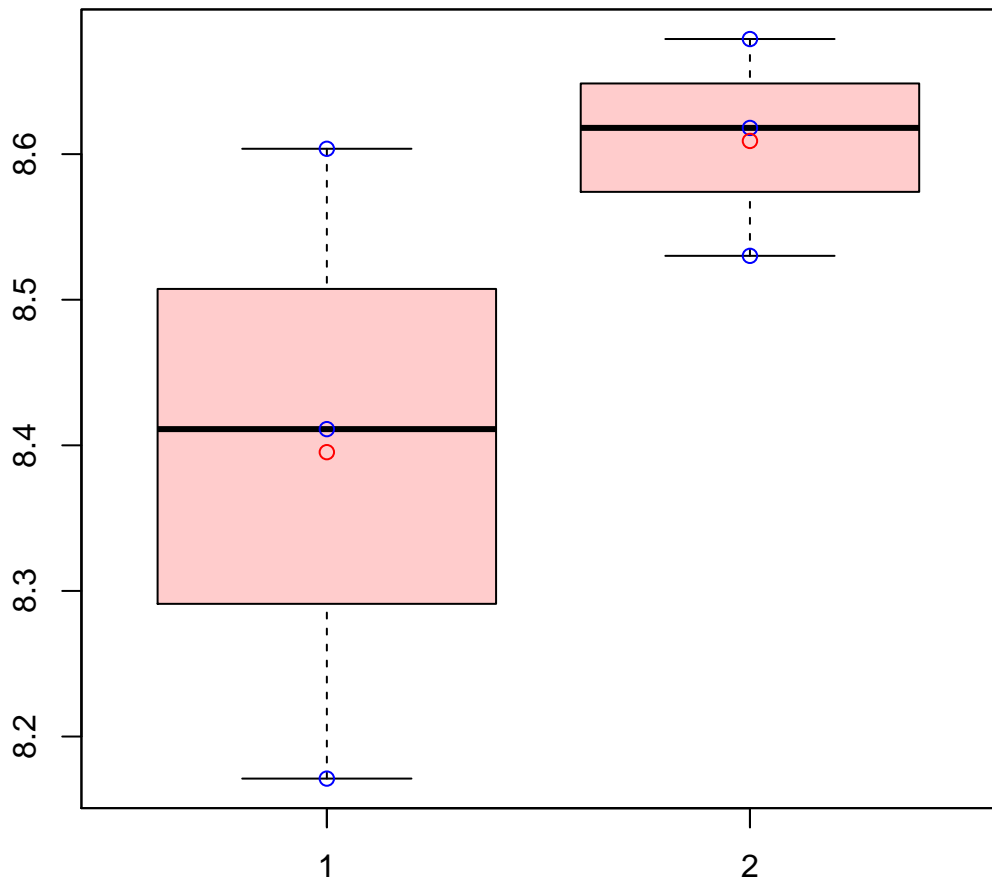

t-Test: p-value = 0.22



# CL4703Contig4|CL4703Contig4

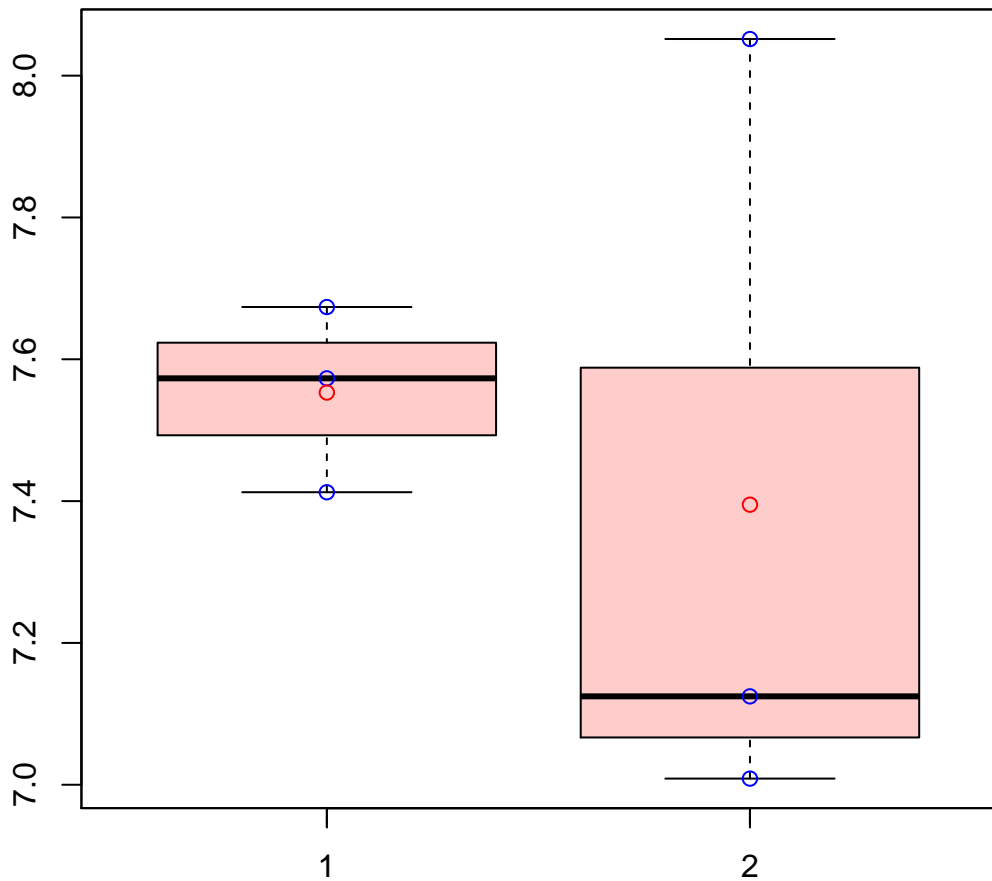

t-Test: p-value = 0.68

# CL4704Contig1|CL4704Contig1

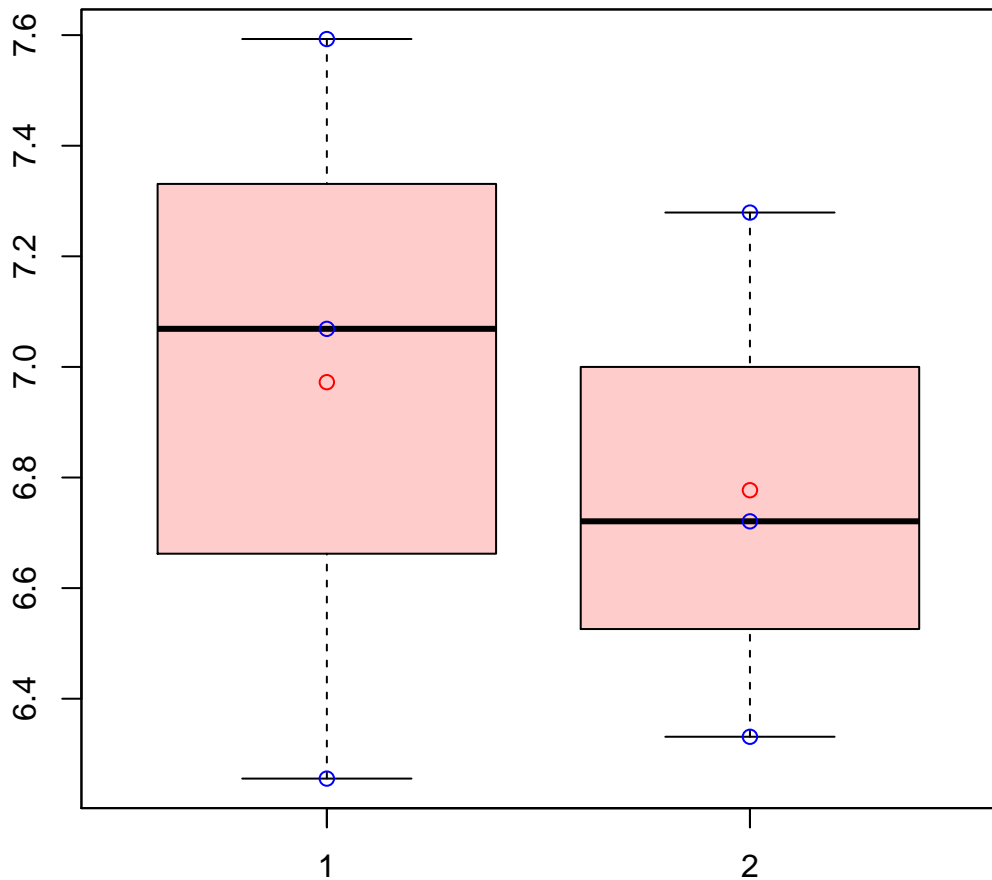

t-Test: p-value = 0.7

# CL4705Contig1|CL4705Contig1

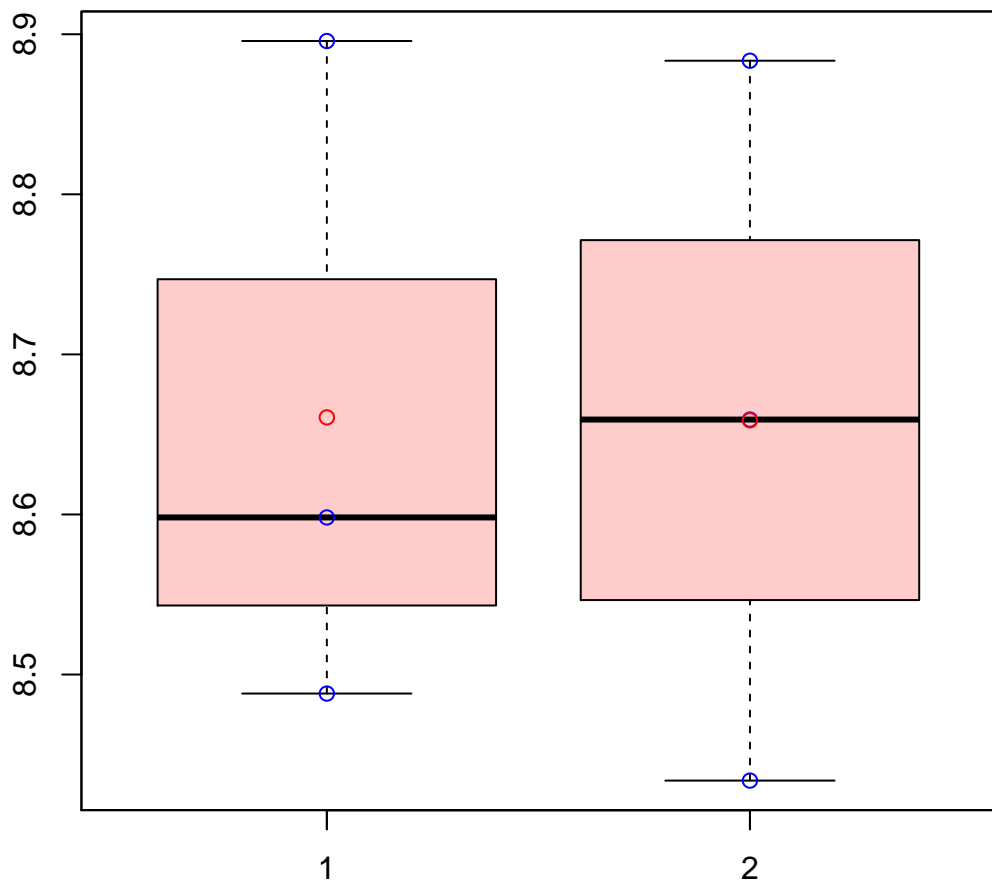

t-Test: p-value = 0.99

# CL4710Contig1|CL4710Contig1

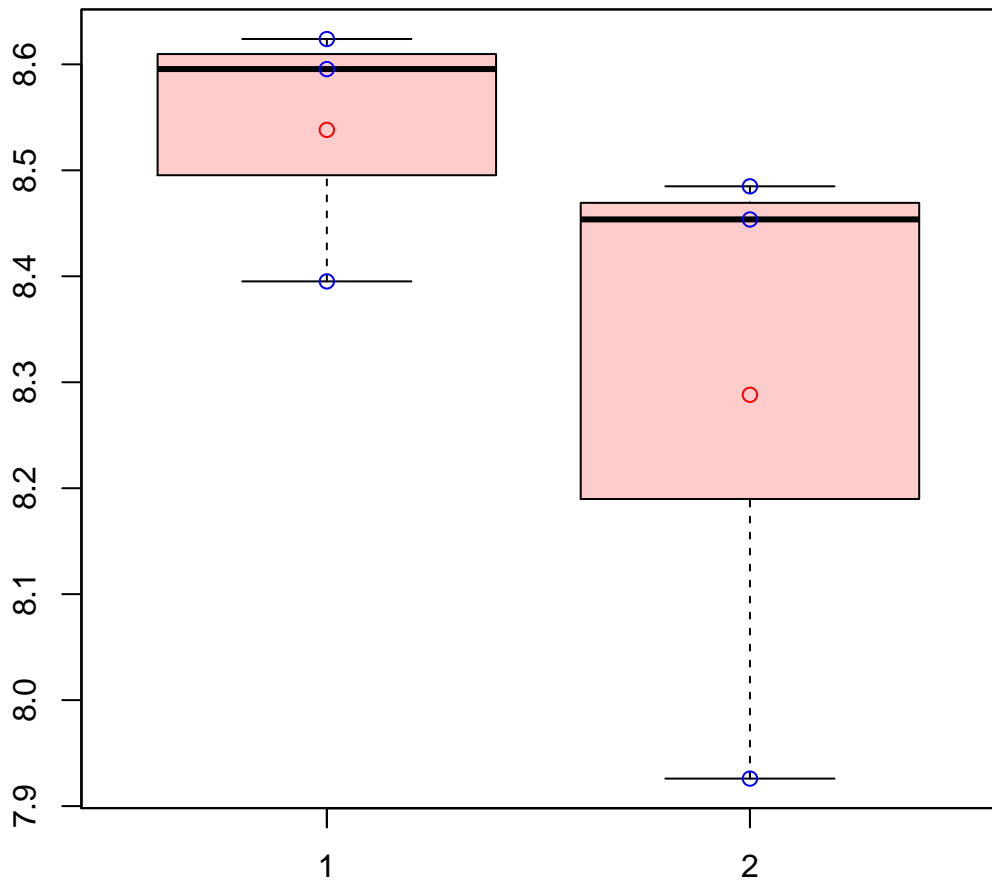

t-Test: p-value = 0.3

# CL4711Contig1|CL4711Contig1

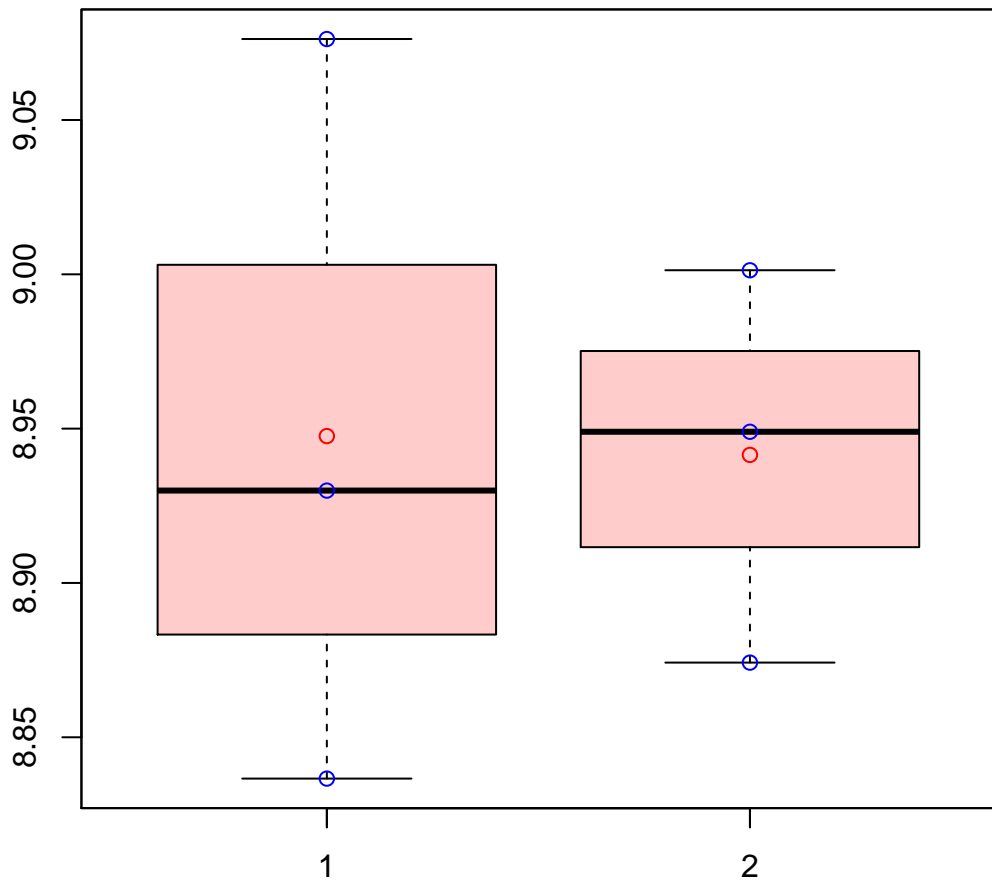

t-Test: p-value = 0.94

# CL471Contig1|CL471Contig1

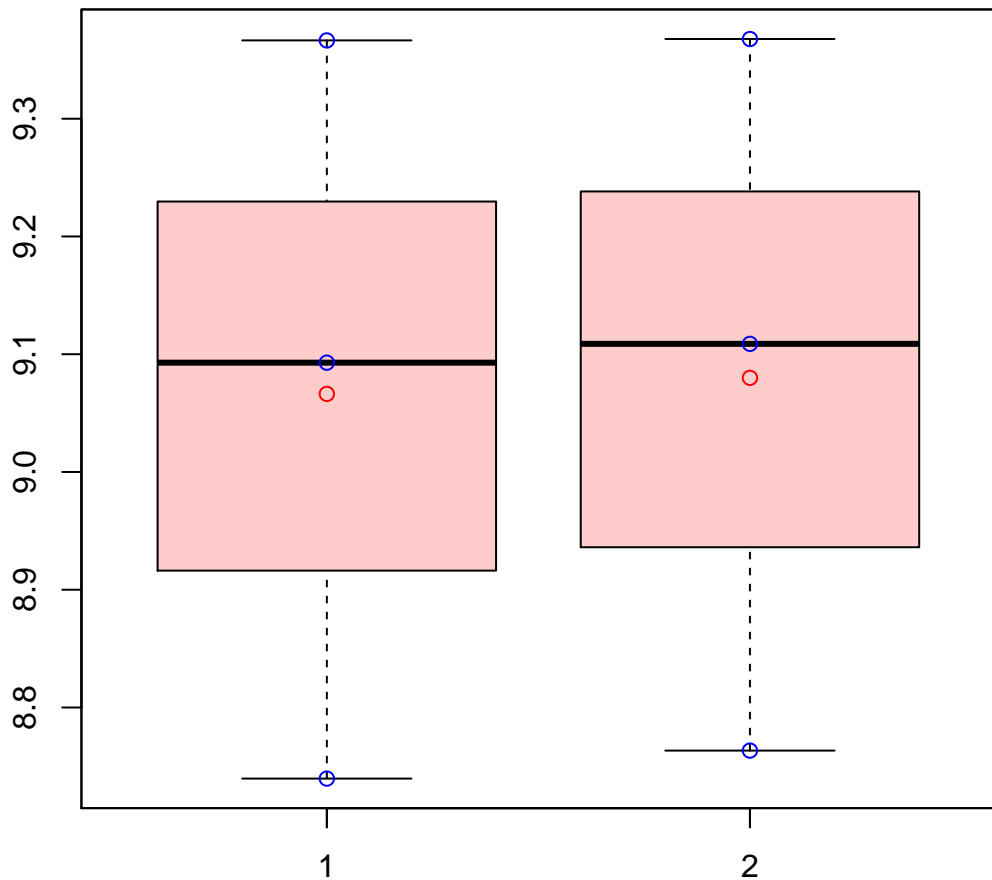

t-Test: p-value = 0.96

# CL471Contig3|CL471Contig3

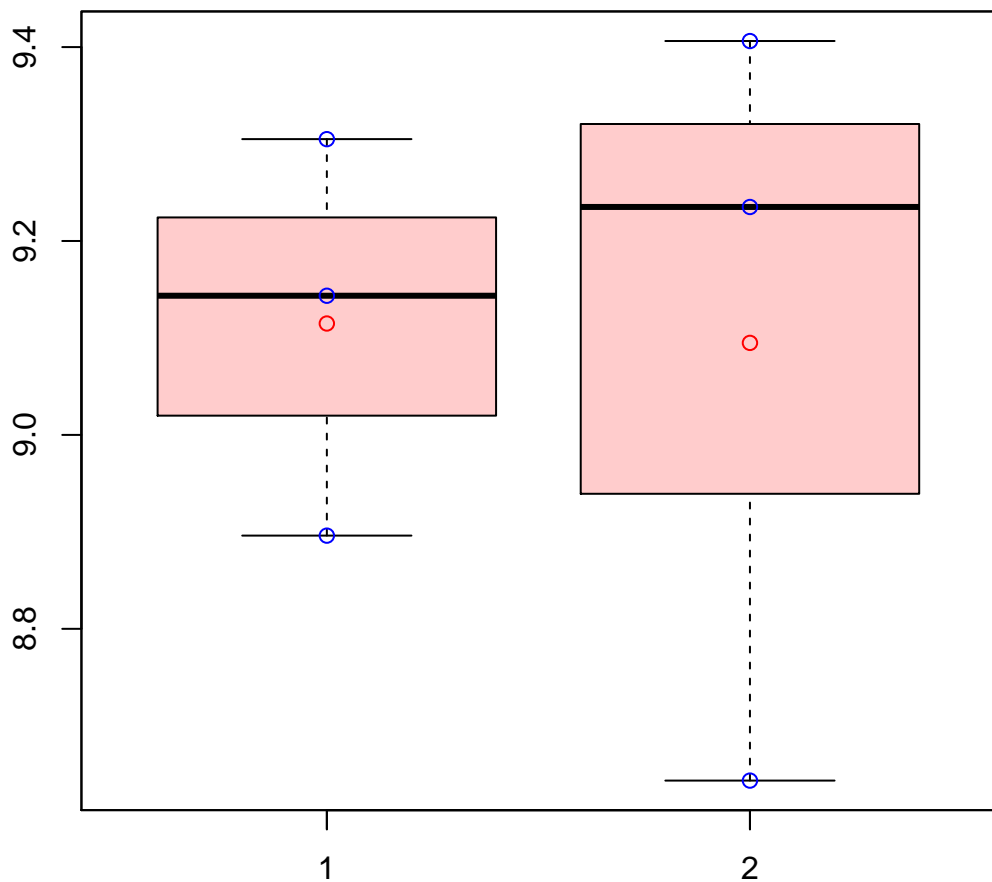

t-Test: p-value = 0.94

# CL471Contig4|CL471Contig4

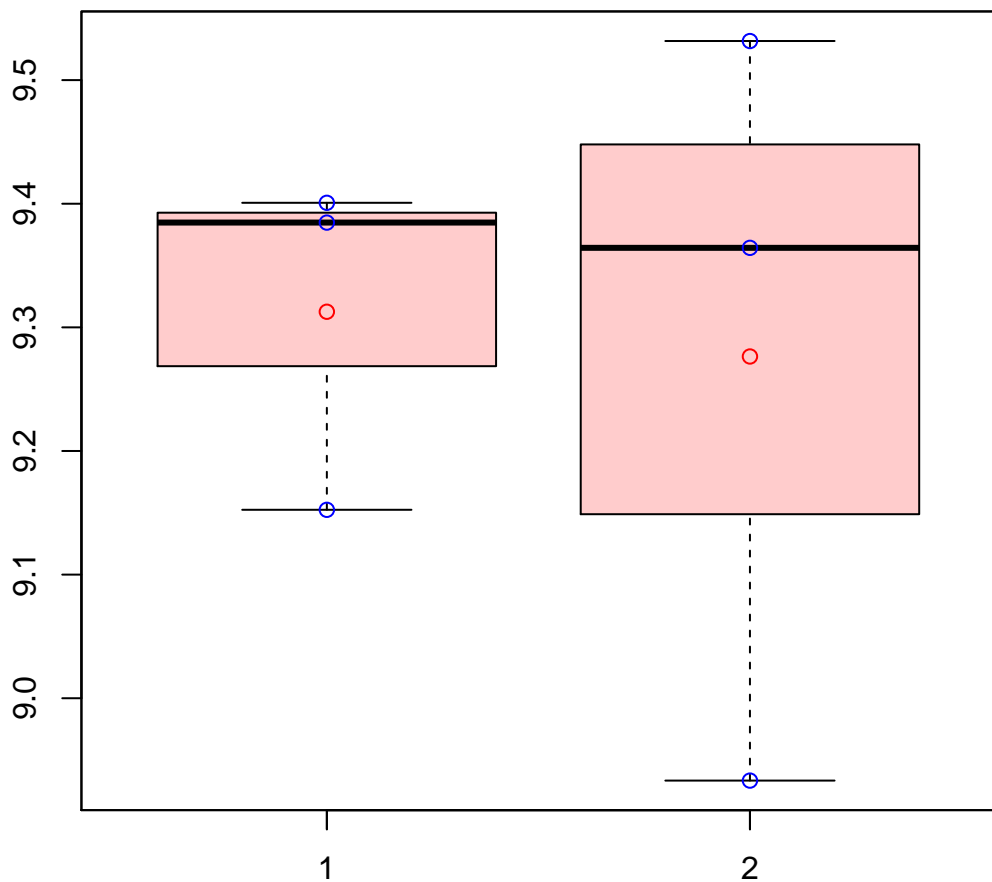

t-Test: p-value = 0.87



# CL471Contig5|CL471Contig5

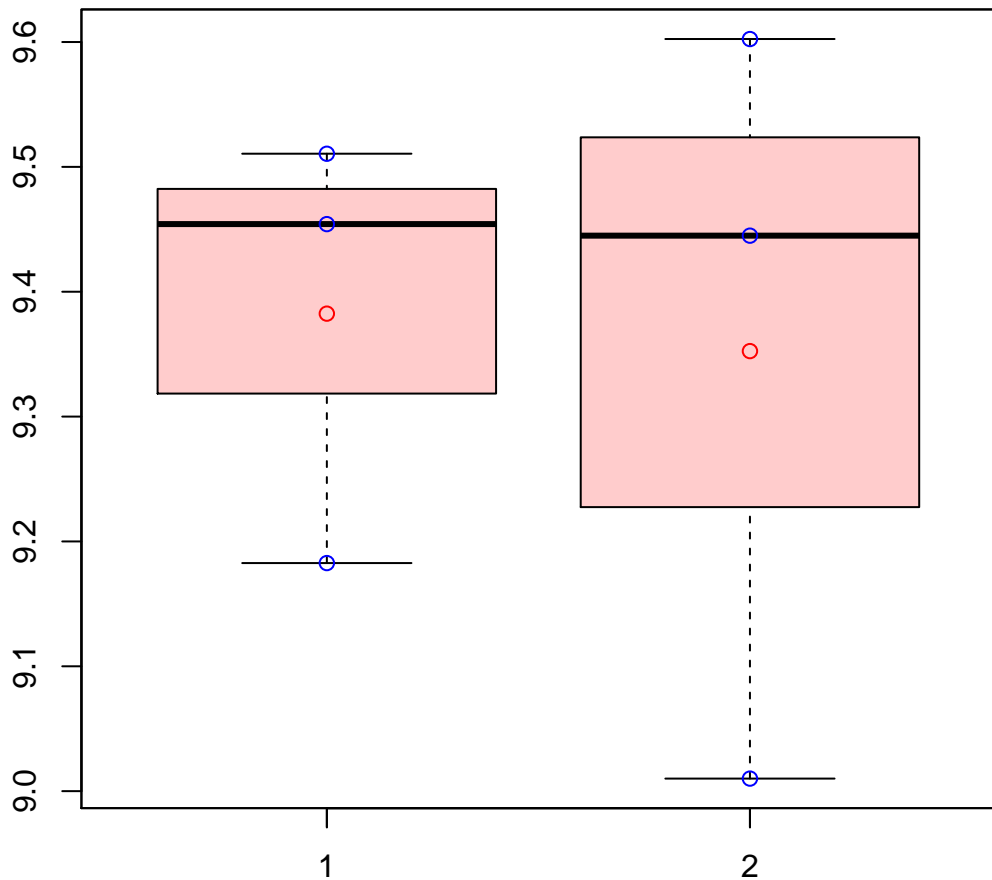

t-Test: p-value = 0.89

# CL471Contig6|CL471Contig6

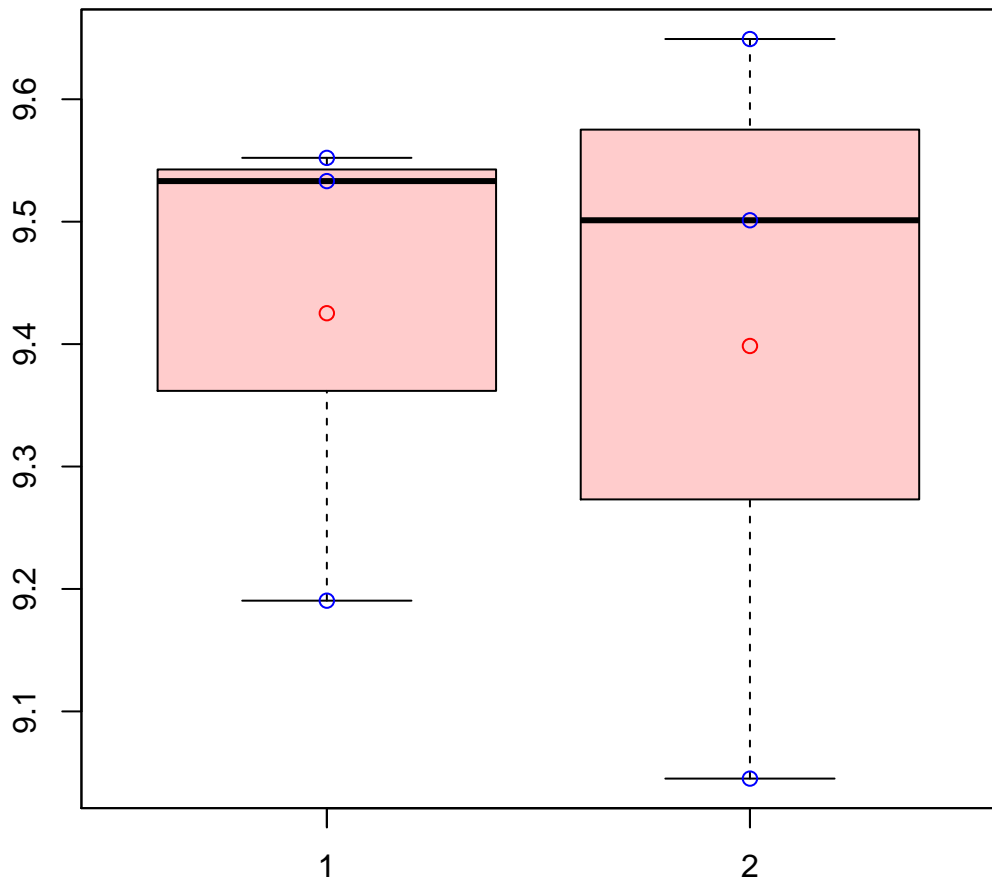

t-Test: p-value = 0.91

# CL471Contig7|CL471Contig7

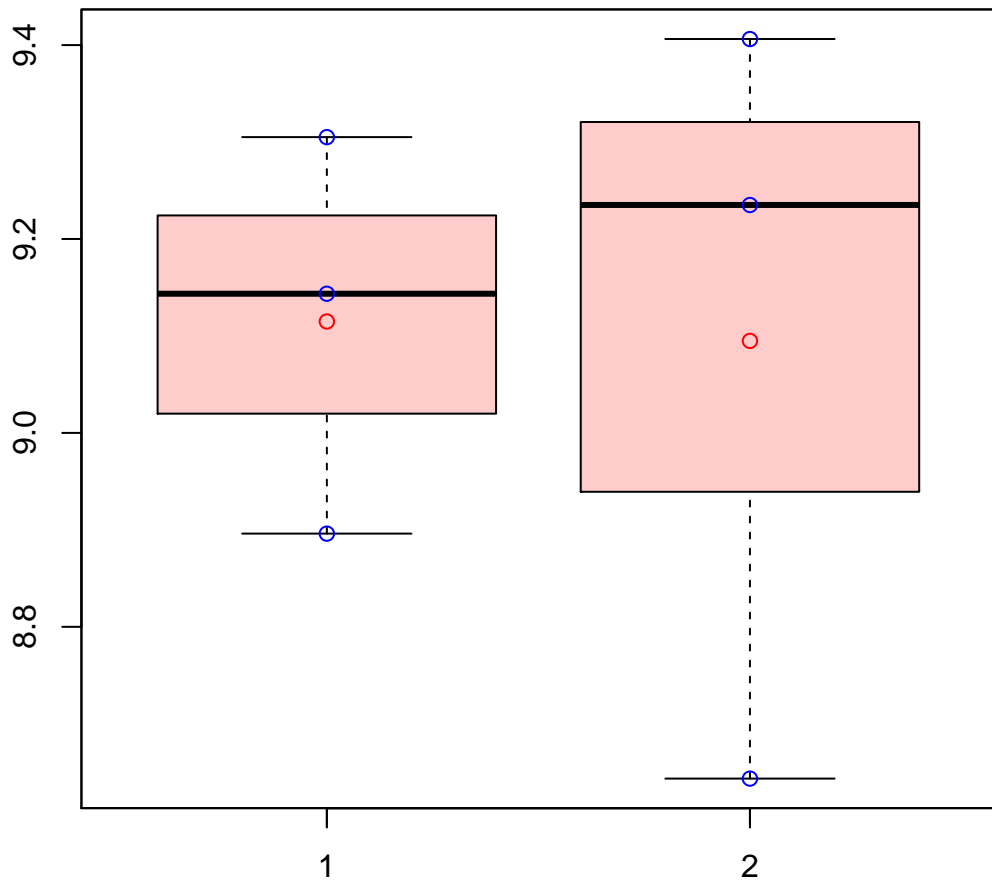

t-Test: p-value = 0.94

# CL4722Contig3|CL4722Contig3

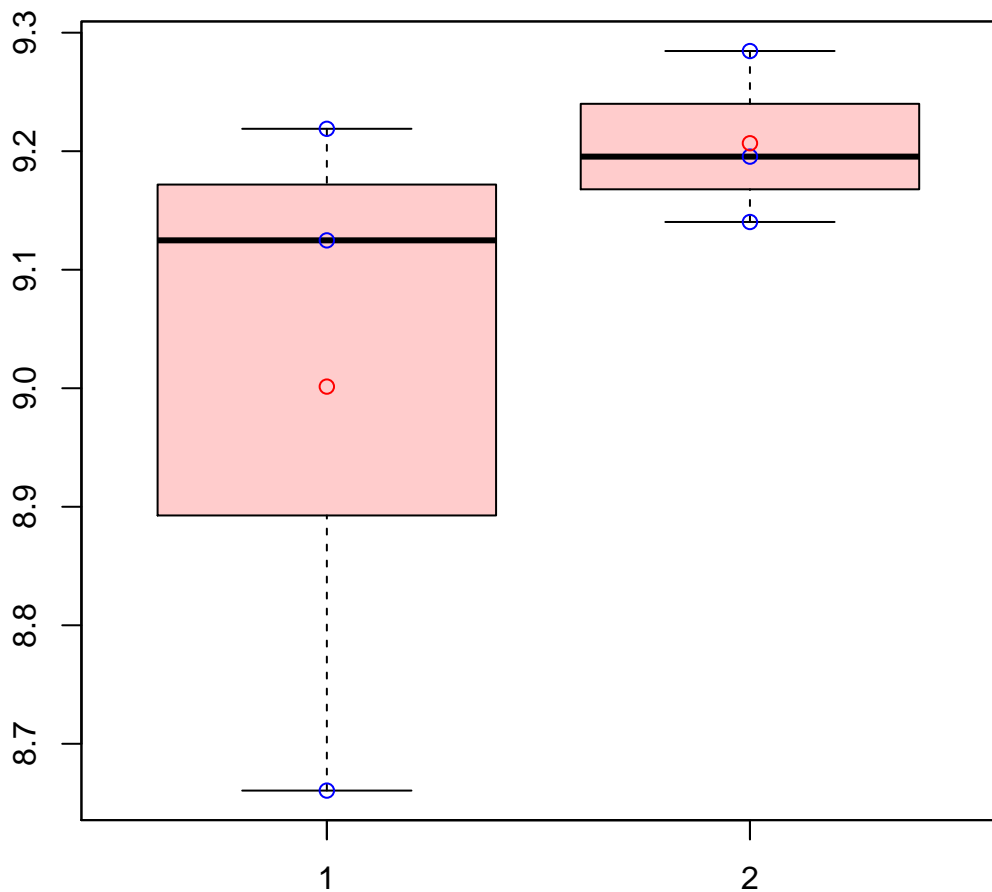

t-Test: p-value = 0.36

# CL4723Contig1|CL4723Contig1

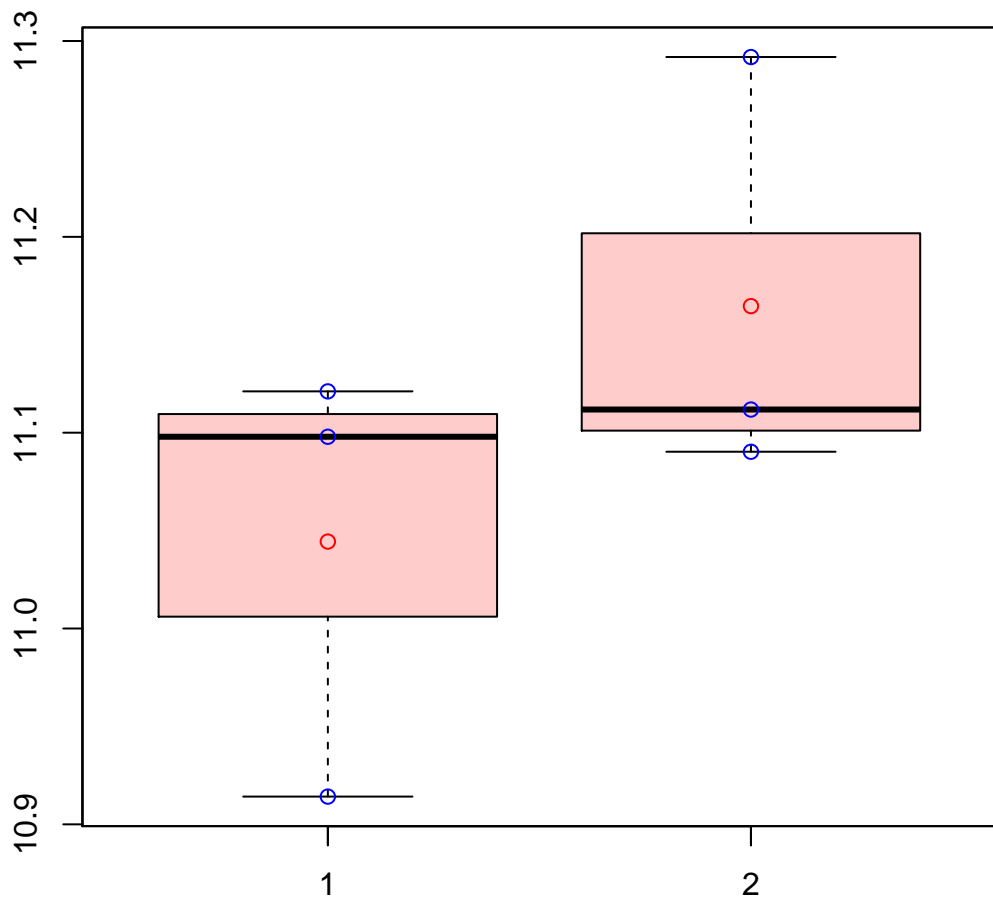

t-Test: p-value = 0.26

# CL4723Contig2|CL4723Contig2

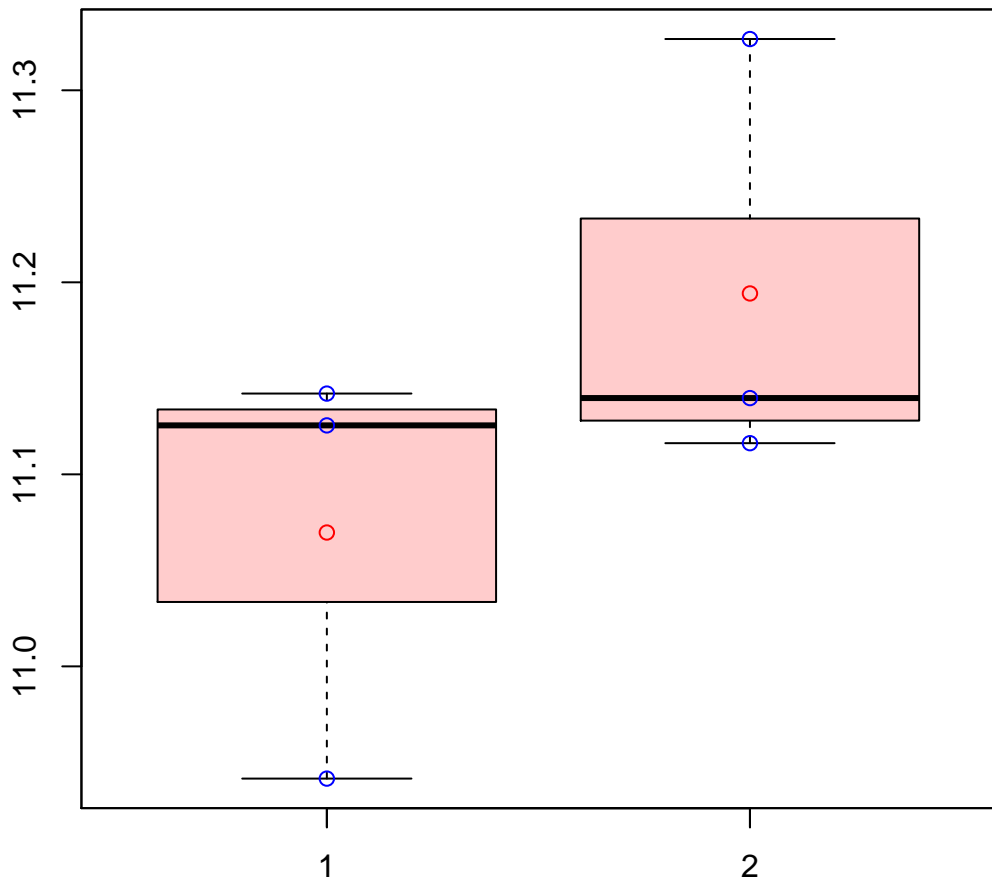

t-Test: p-value = 0.25

# CL4723Contig3|CL4723Contig3

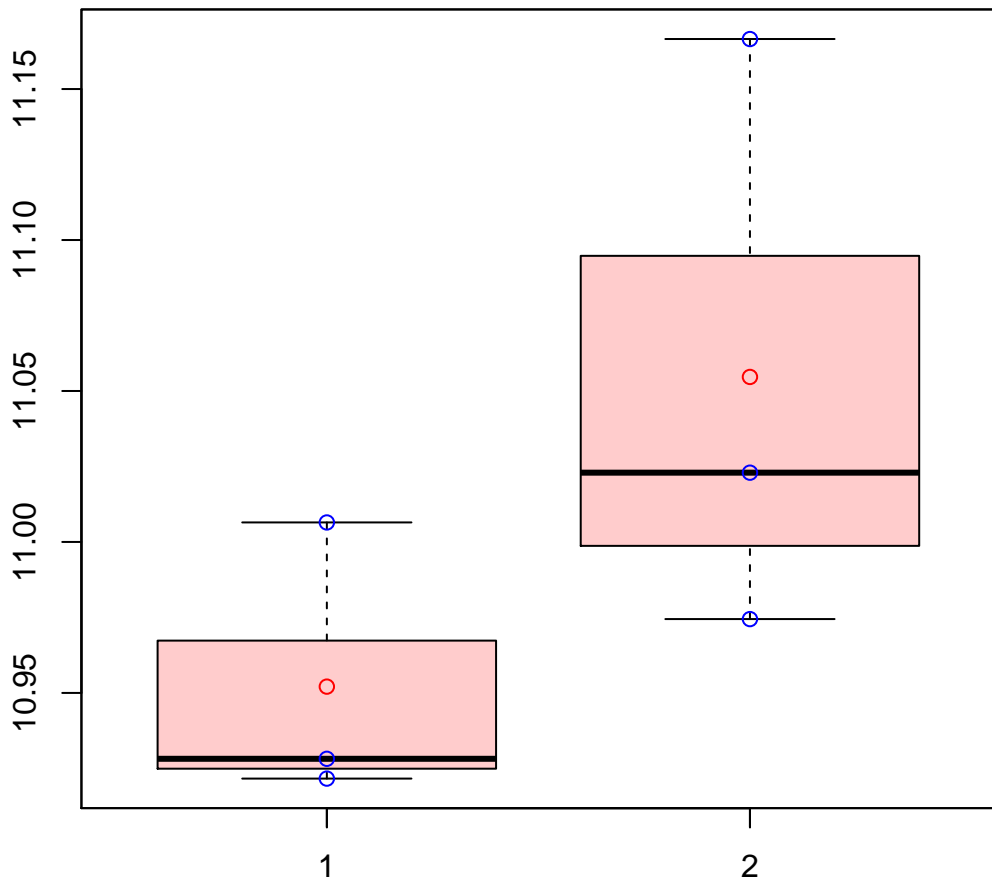

t-Test: p-value = 0.21

# CL4723Contig4|CL4723Contig4

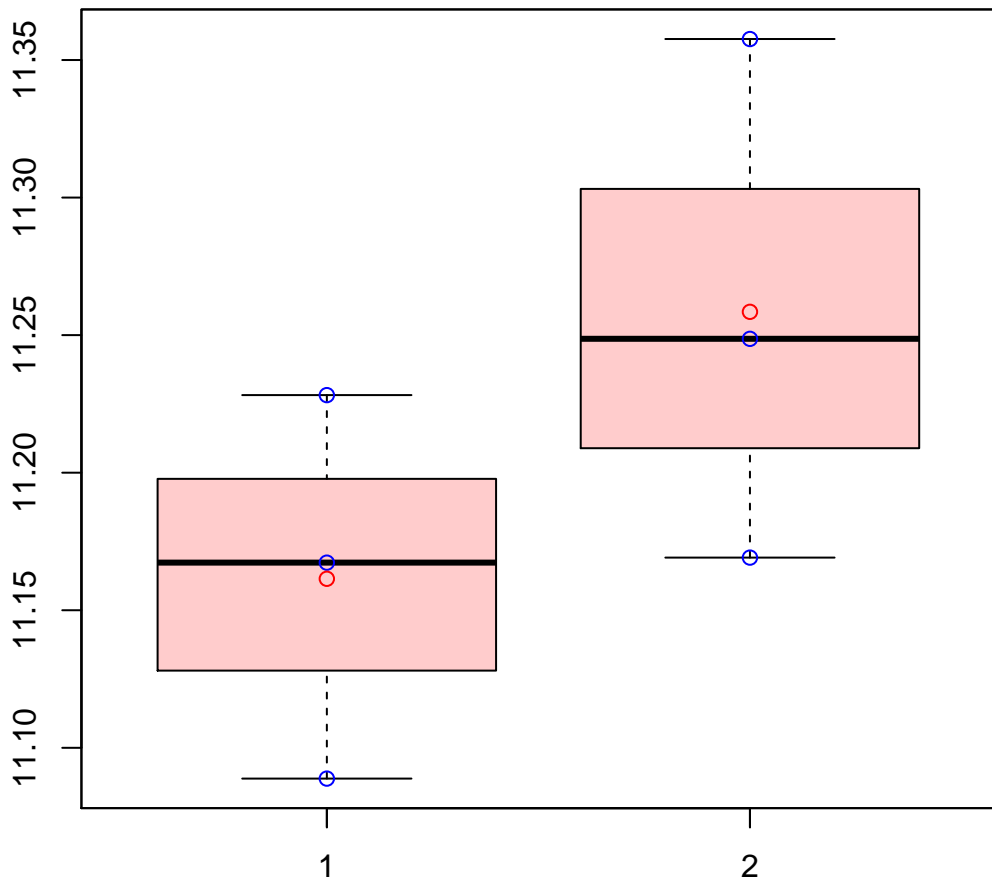

t-Test: p-value = 0.23



# CL4725Contig1|CL4725Contig1

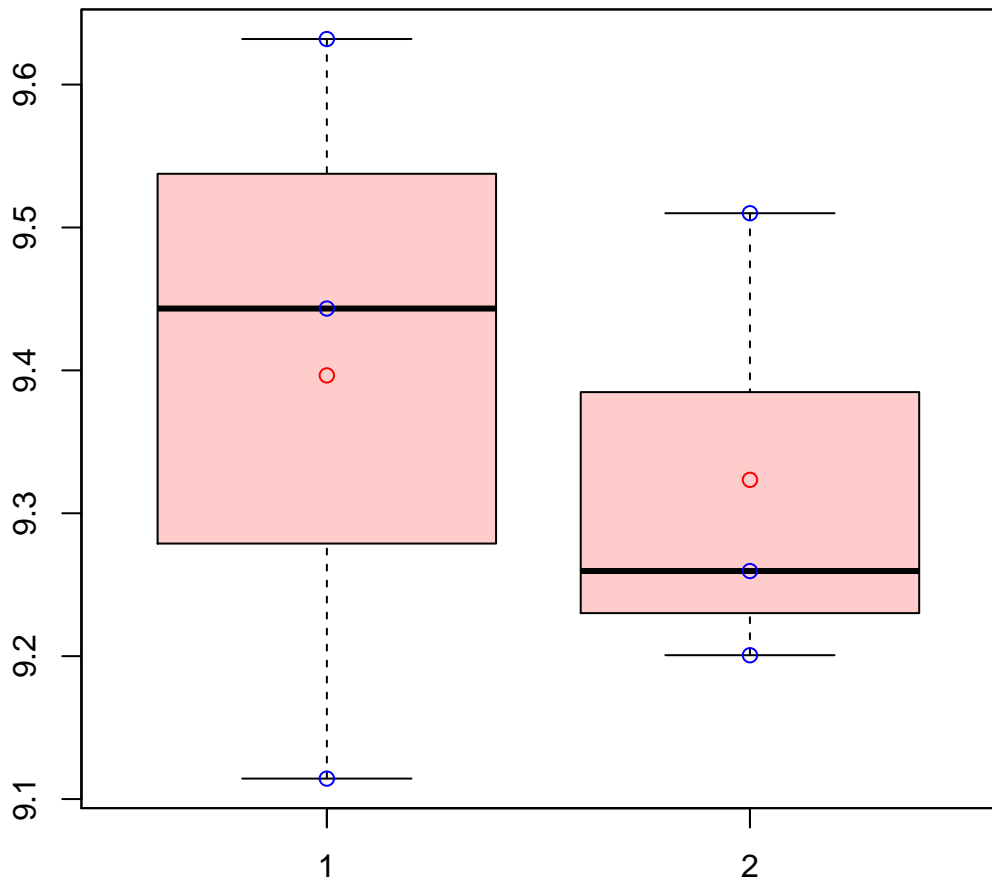

t-Test: p-value = 0.71

# CL472Contig5|CL472Contig5

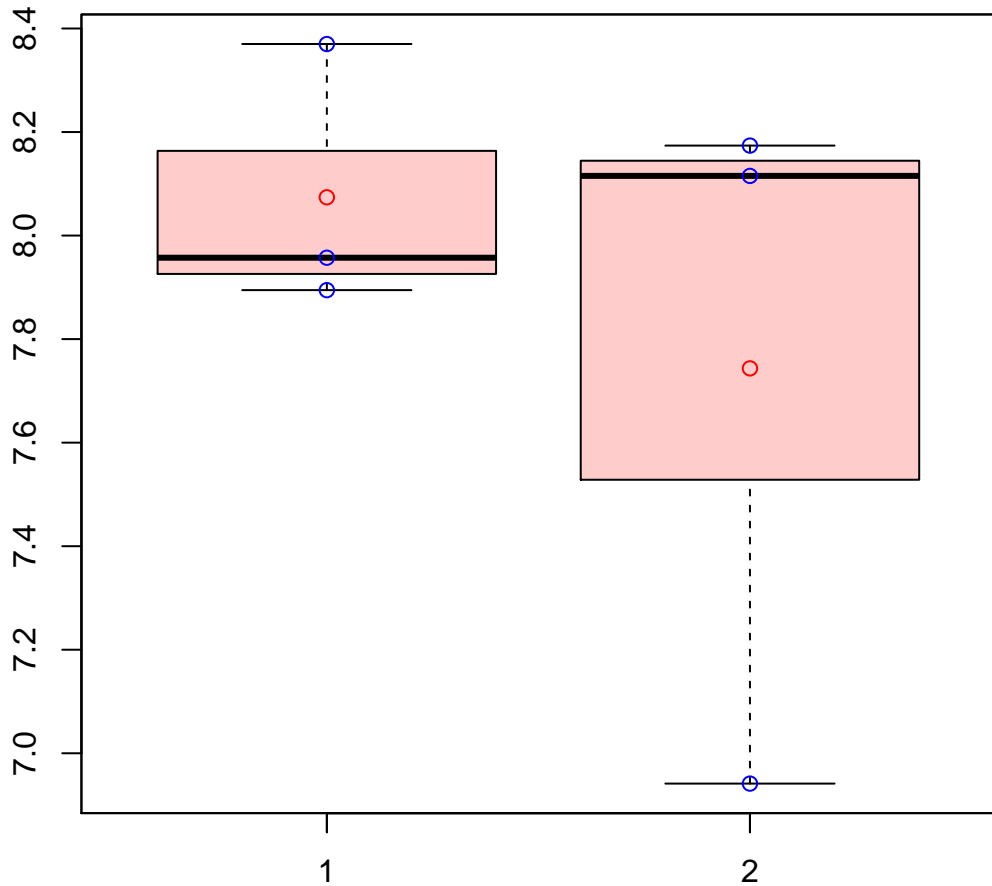

t-Test: p-value = 0.51

# CL4731Contig2|CL4731Contig2

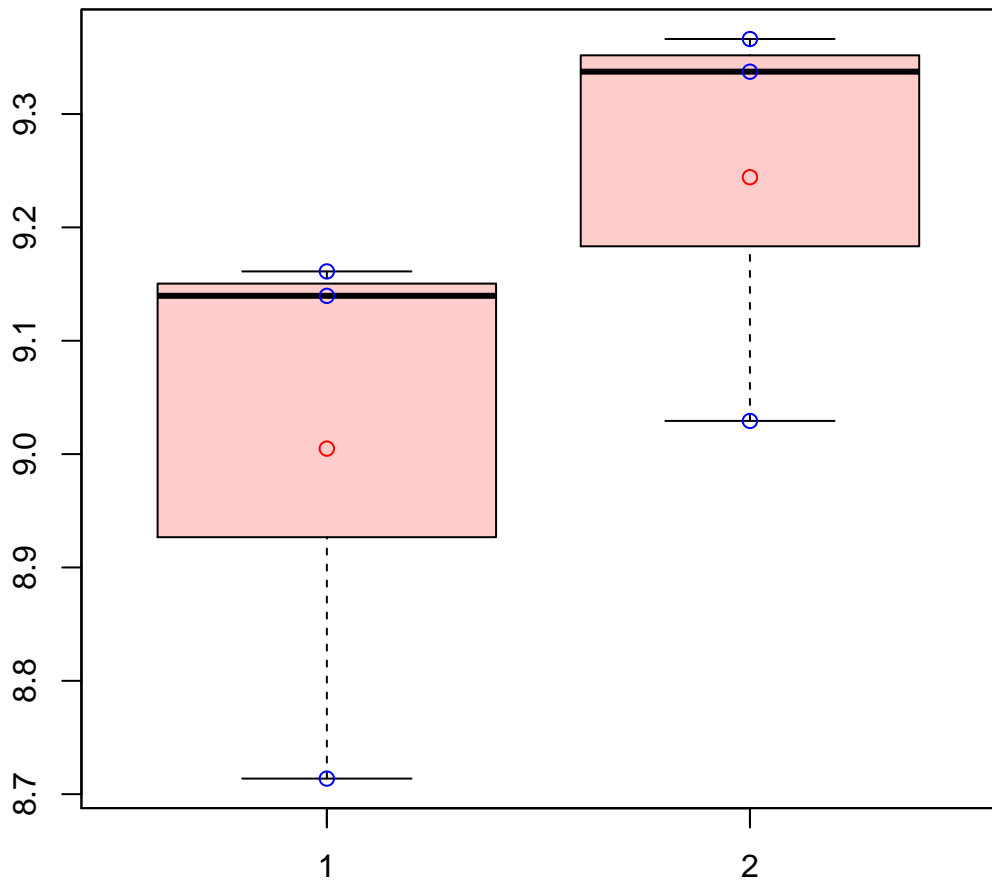

t-Test: p-value = 0.26

# CL4731Contig3|CL4731Contig3

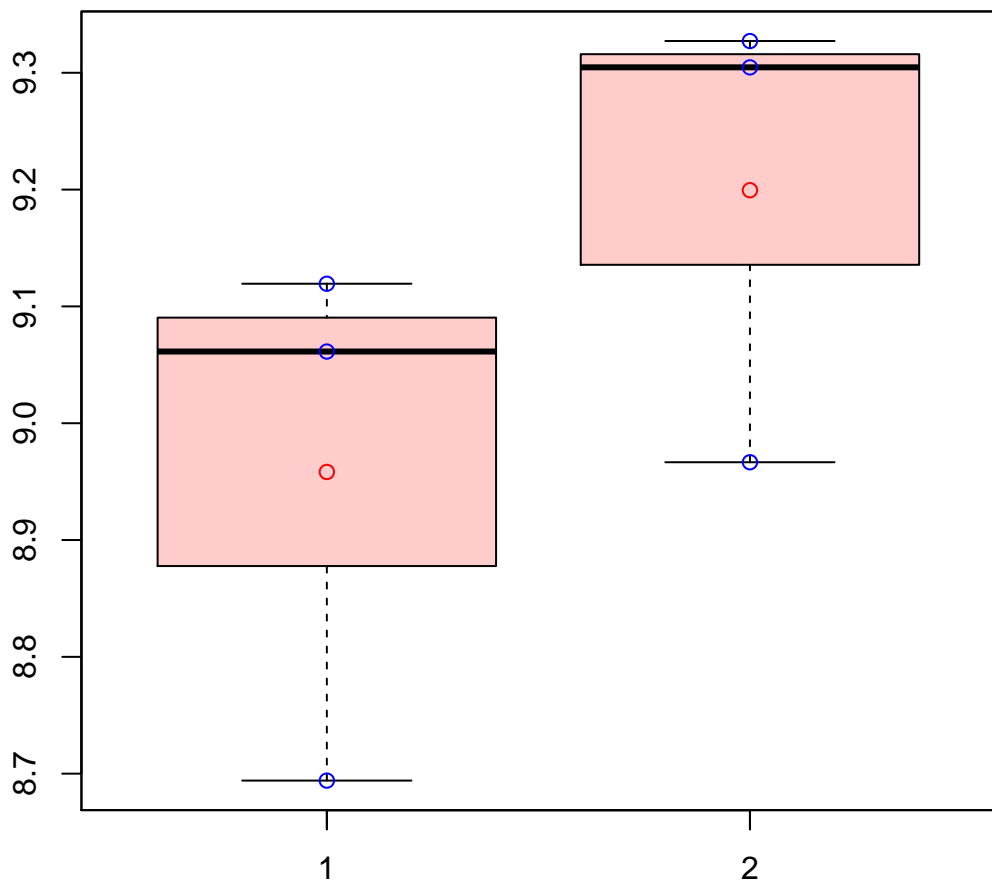

t-Test: p-value = 0.25

# CL4734Contig2|CL4734Contig2

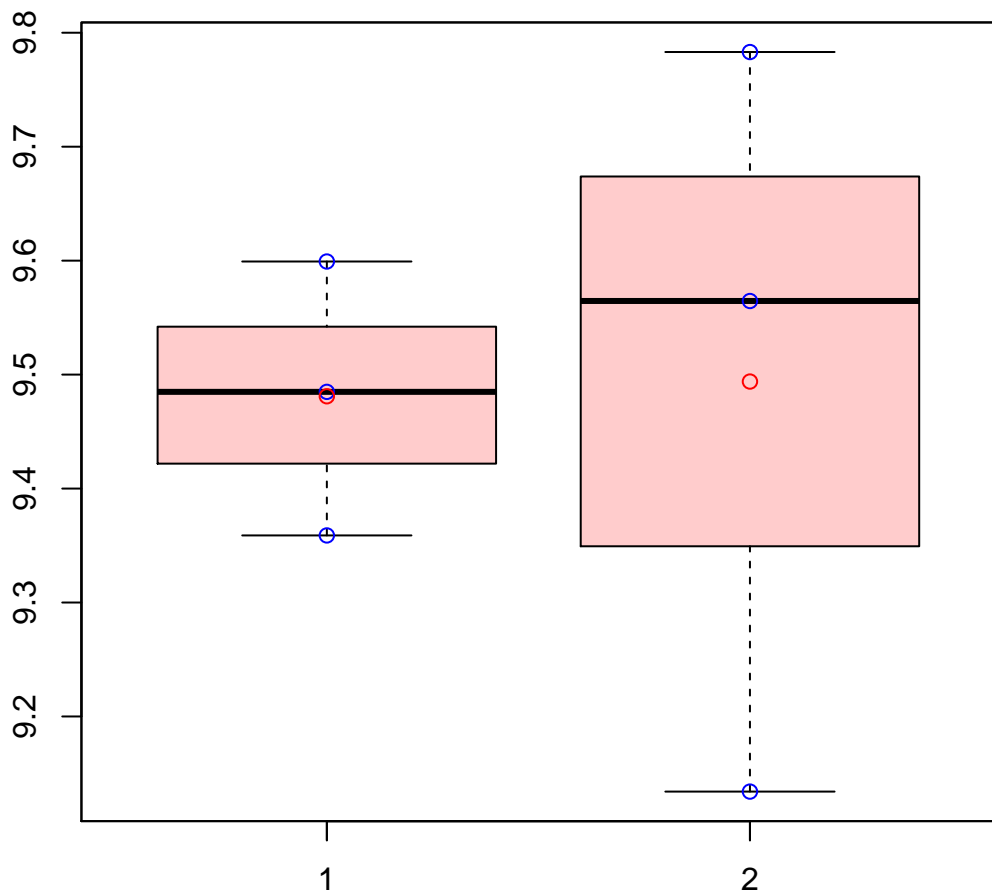

t-Test: p-value = 0.95

# CL4737Contig2|CL4737Contig2

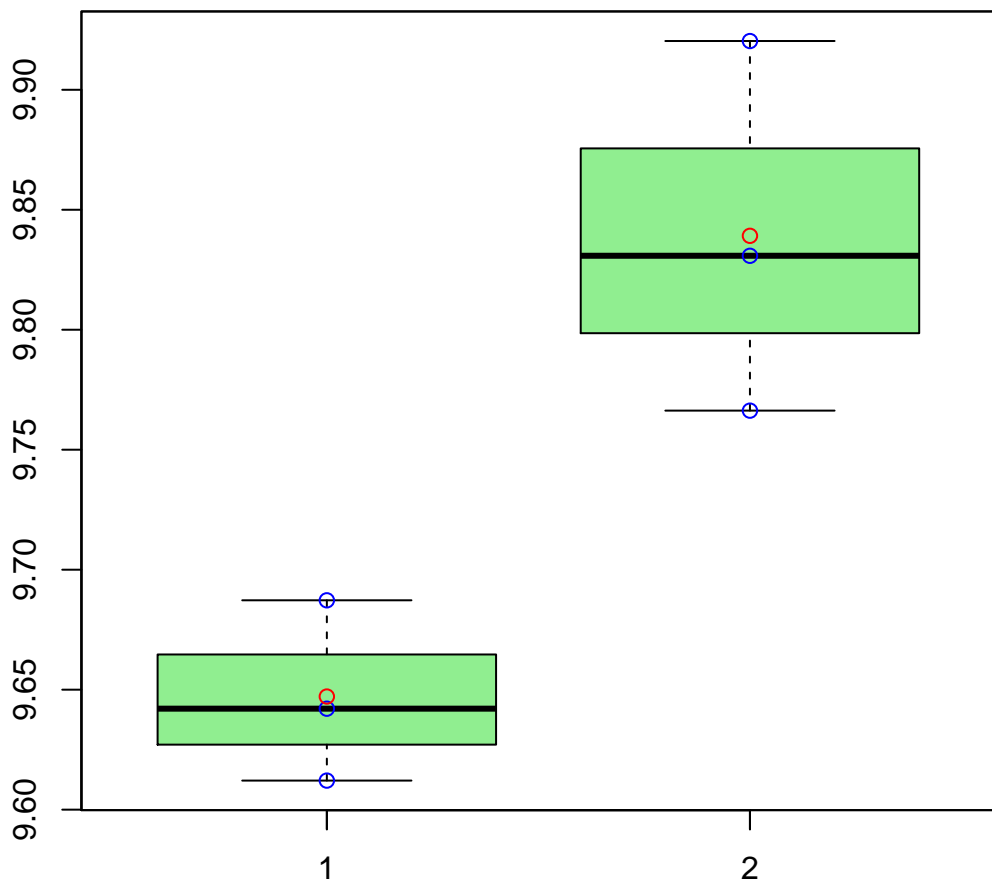

t-Test: p-value = 0.03

# CL474Contig3|CL474Contig3

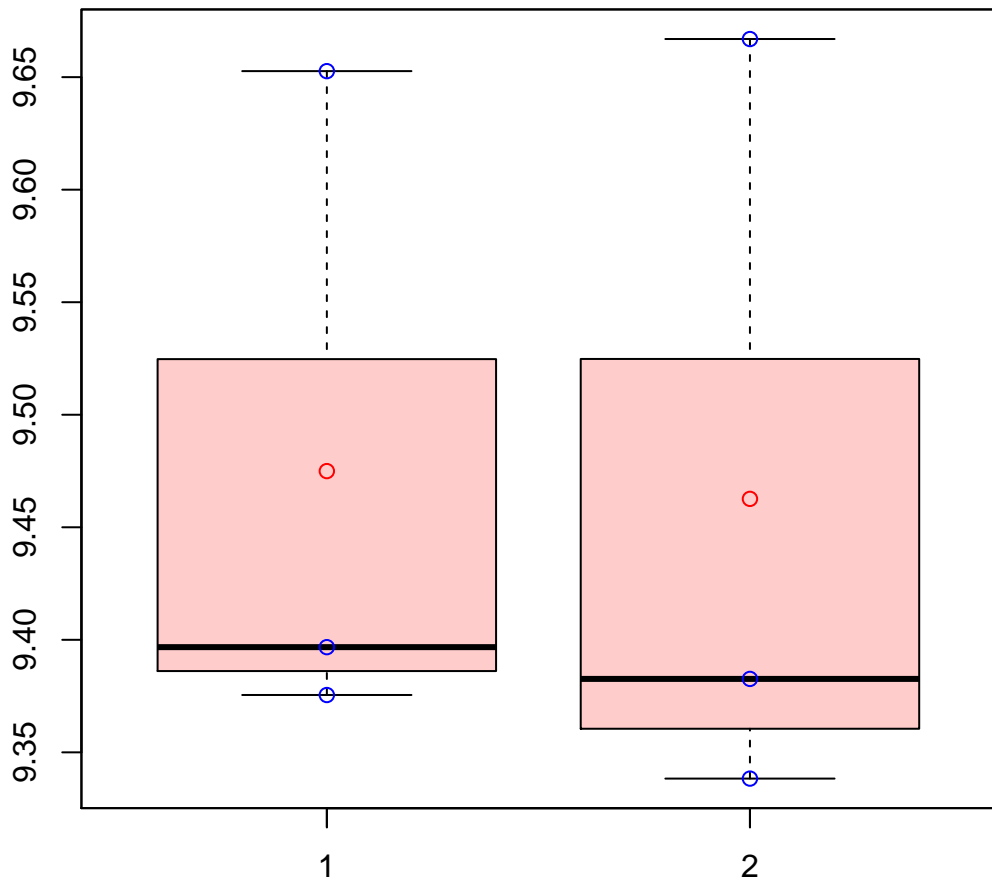

t-Test: p-value = 0.93

# CL474Contig4|CL474Contig4

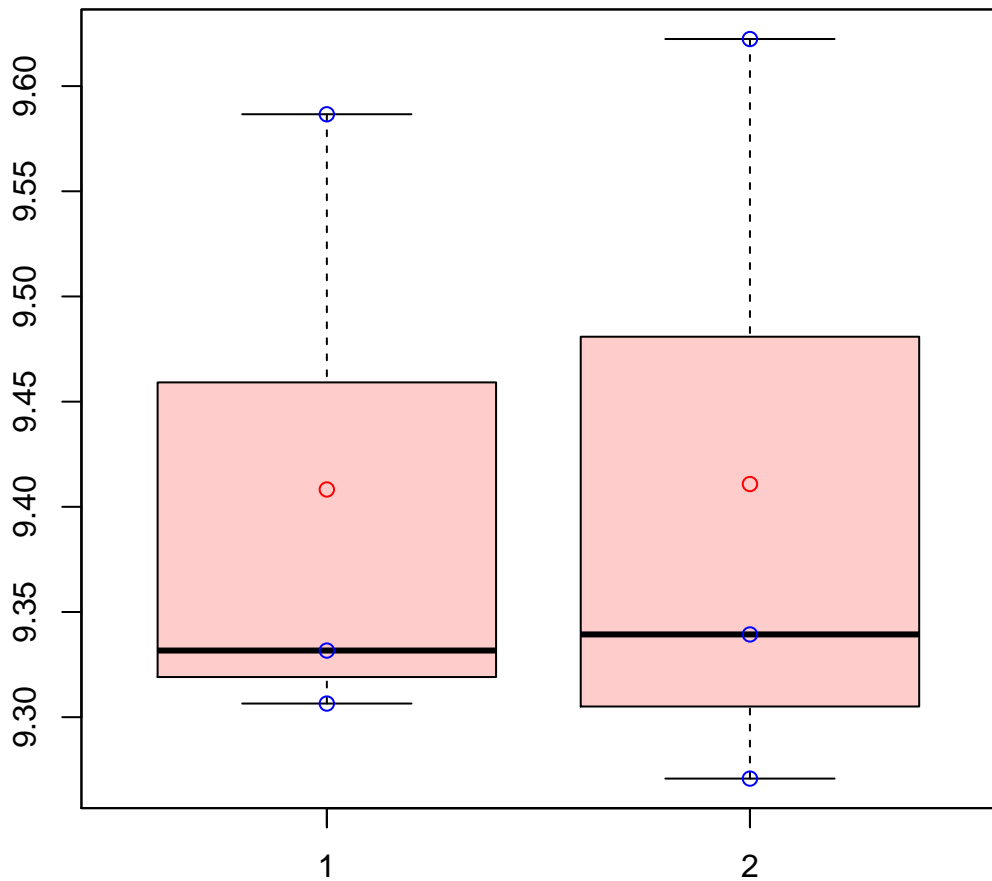

t-Test: p-value = 0.99



# CL4752Contig1|CL4752Contig1

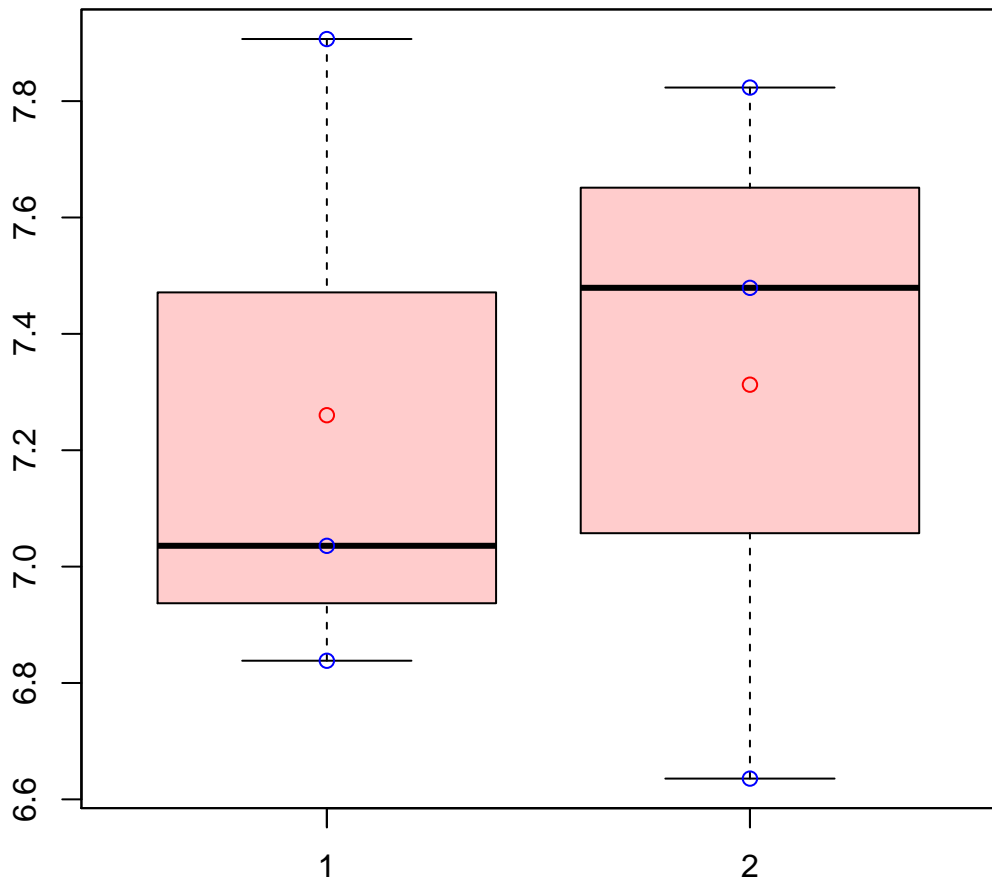

t-Test: p-value = 0.92

# CL4756Contig1|CL4756Contig1



t-Test: p-value = 0.22

# CL475Contig8|CL475Contig8

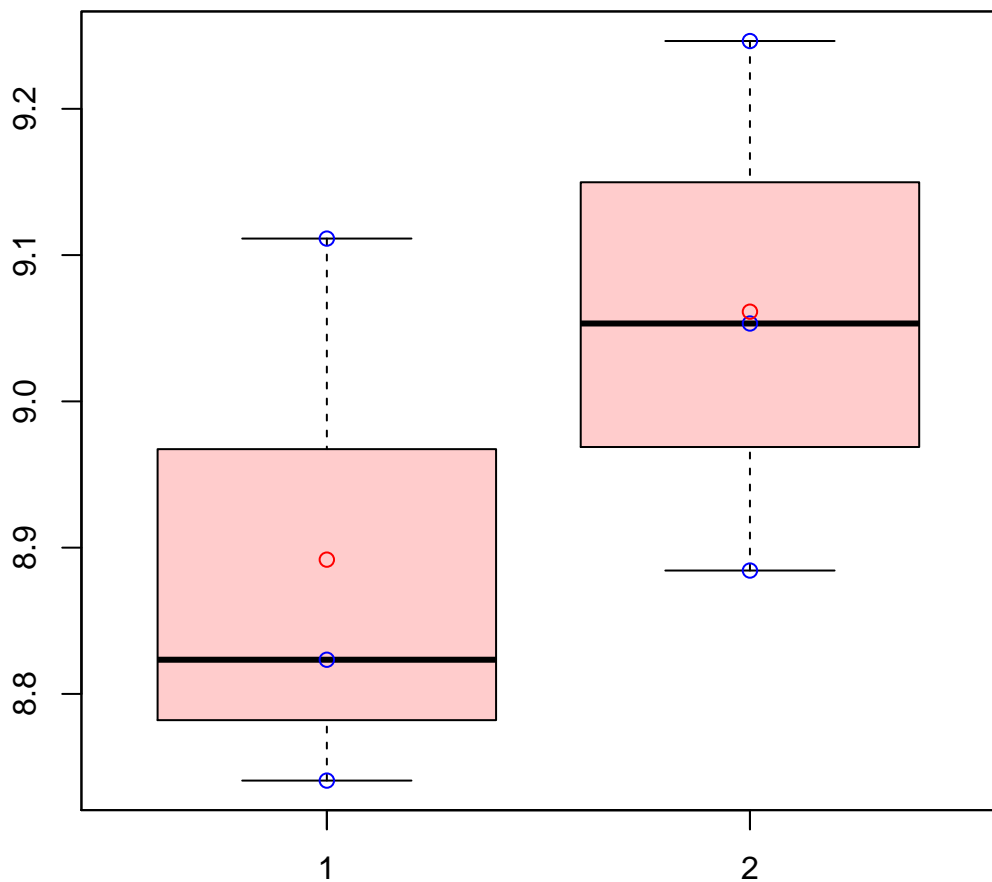

t-Test: p-value = 0.33

# CL4760Contig1|CL4760Contig1

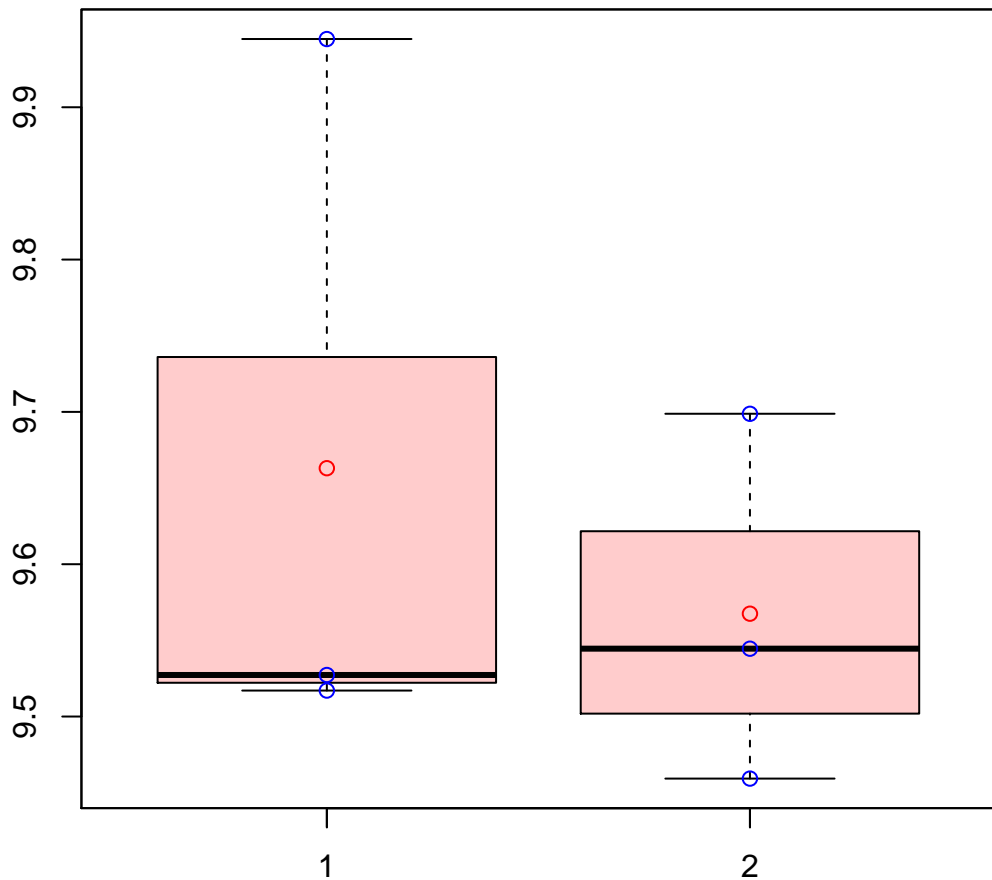

t-Test: p-value = 0.59

# CL4760Contig2|CL4760Contig2

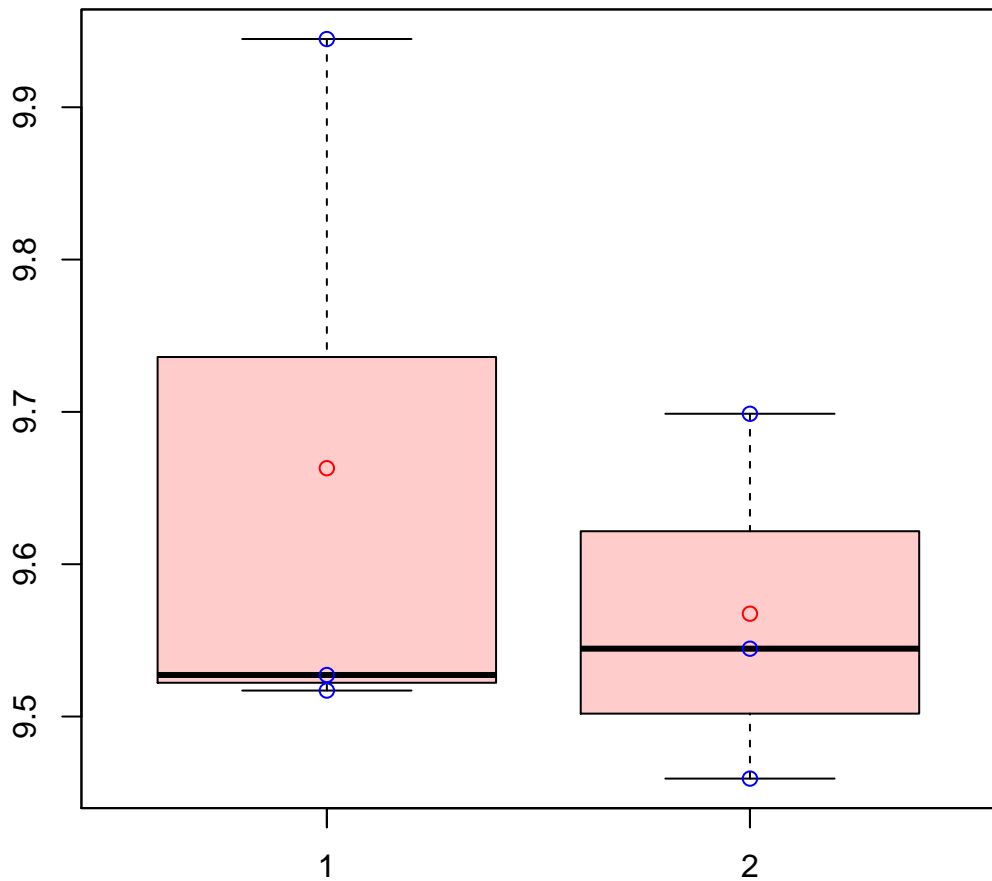

t-Test: p-value = 0.59

# CL4761Contig4|CL4761Contig4



t-Test: p-value = 0.99

# CL4764Contig2|CL4764Contig2

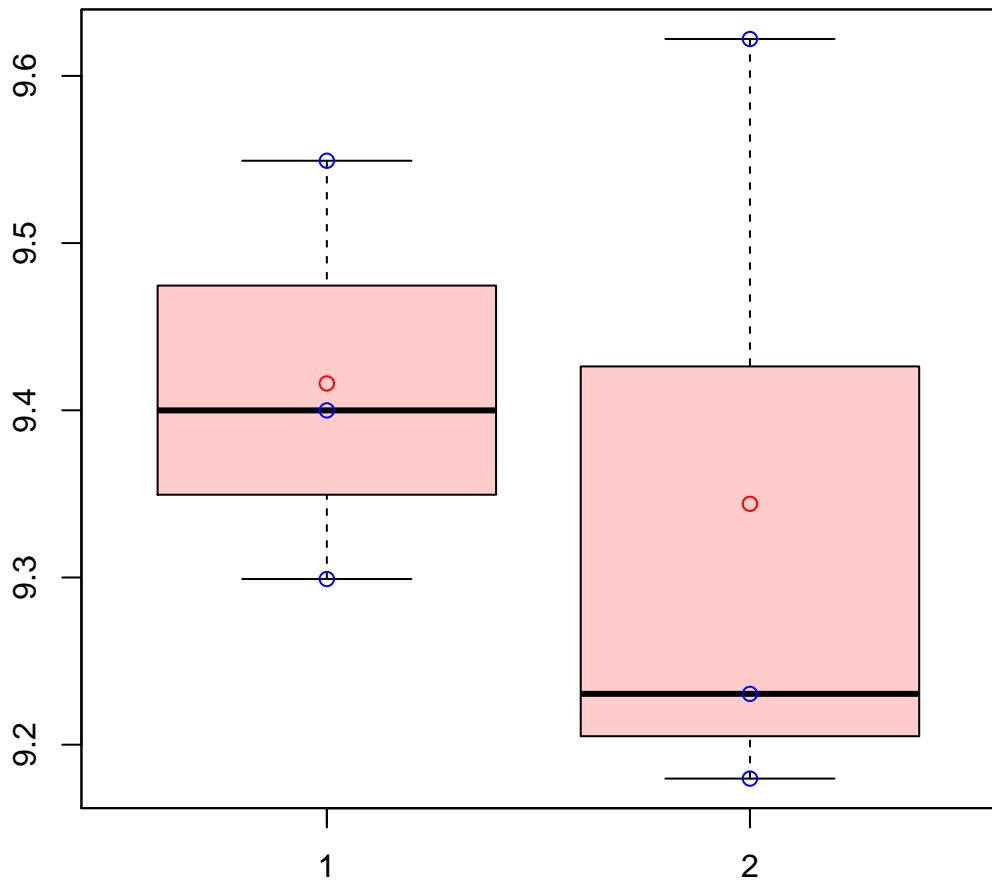

t-Test: p-value = 0.68

# CL4766Contig1|CL4766Contig1

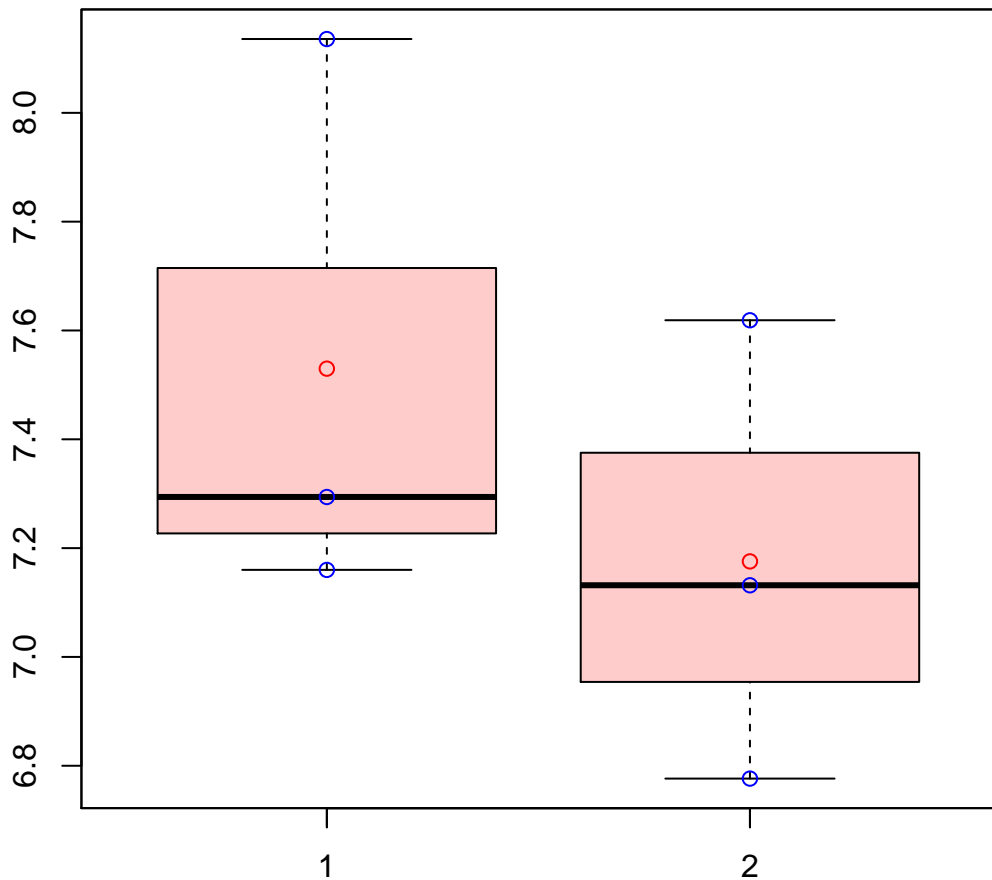

t-Test: p-value = 0.42



# CL4769Contig2|CL4769Contig2

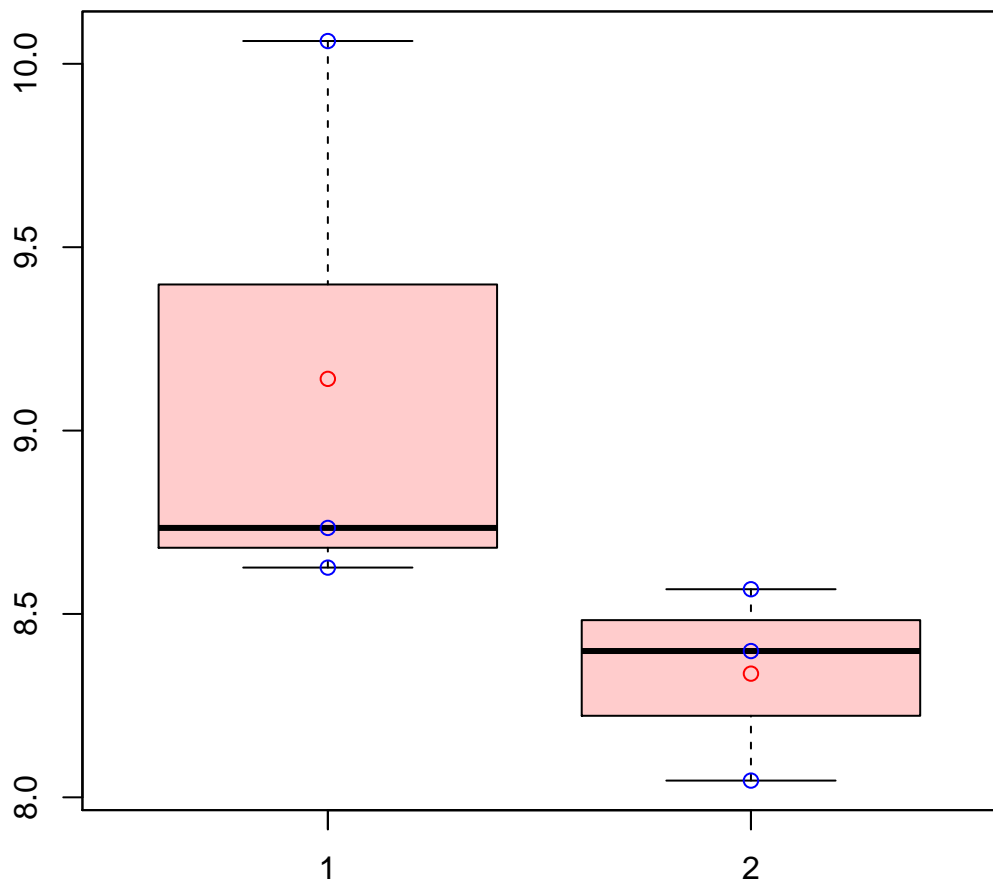

t-Test: p-value = 0.22

# CL476Contig8|CL476Contig8

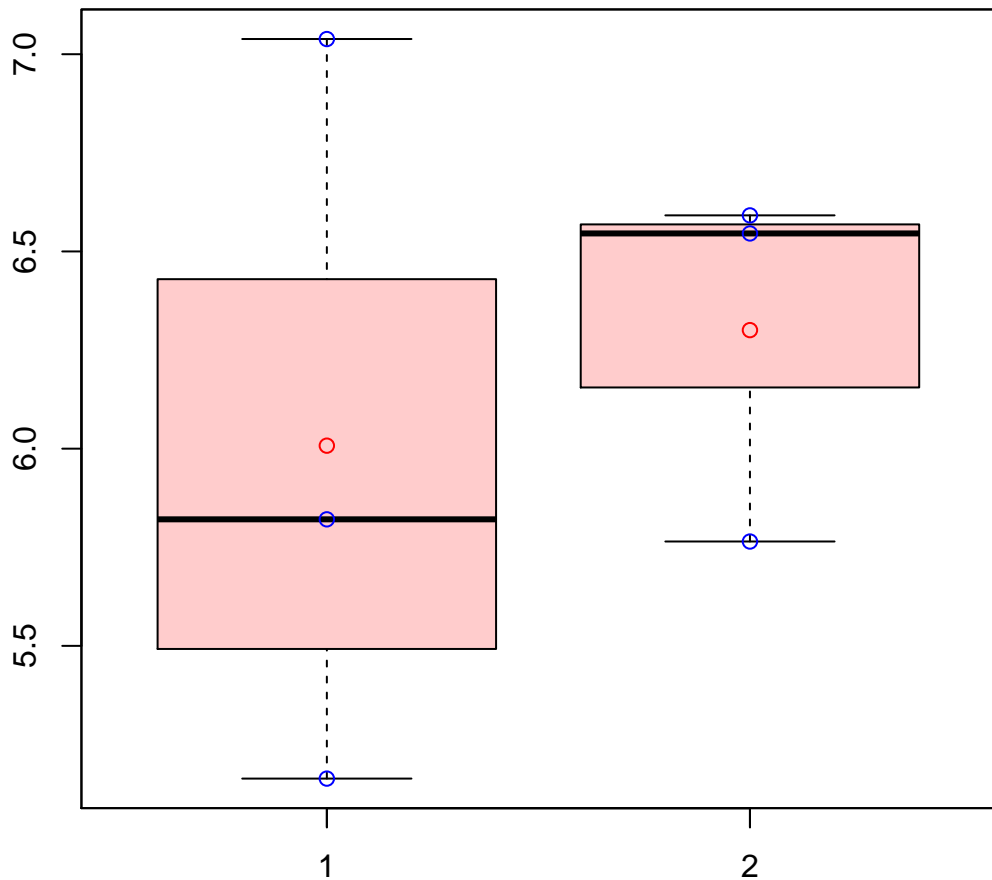

t-Test: p-value = 0.67

# CL4771Contig3|CL4771Contig3



t-Test: p-value = 0.04

# CL4772Contig1|CL4772Contig1

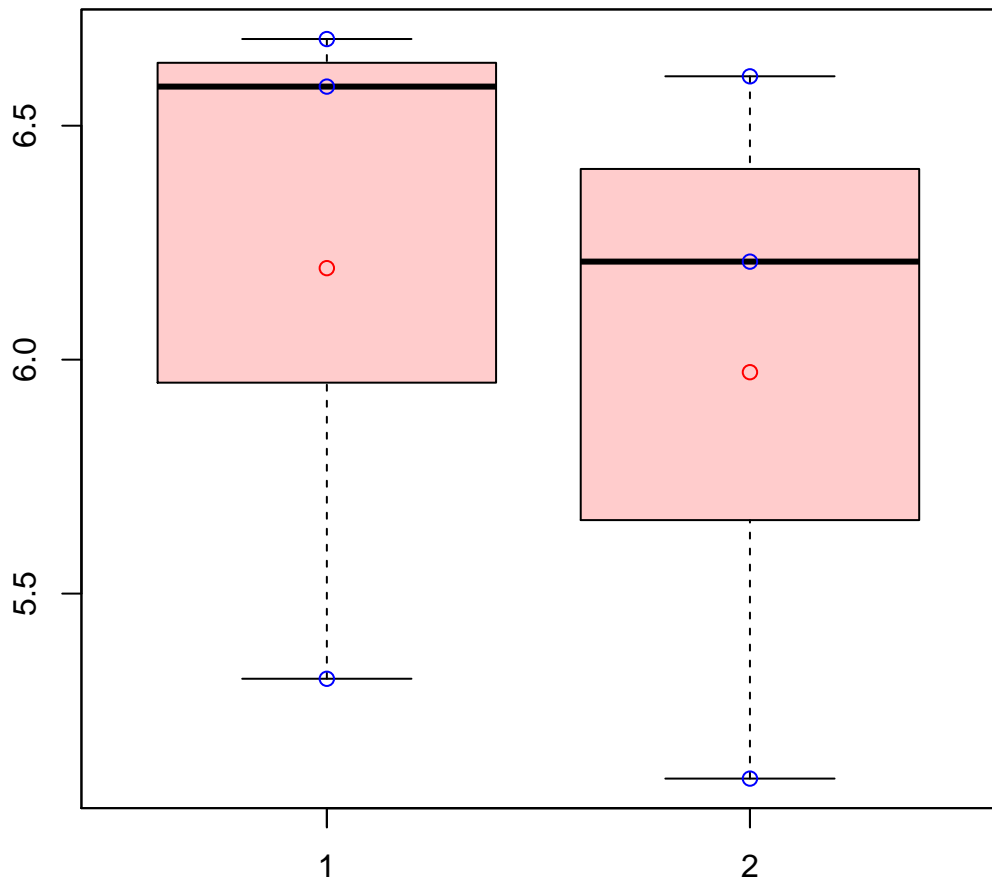

t-Test: p-value = 0.74

# CL477Contig1|CL477Contig1

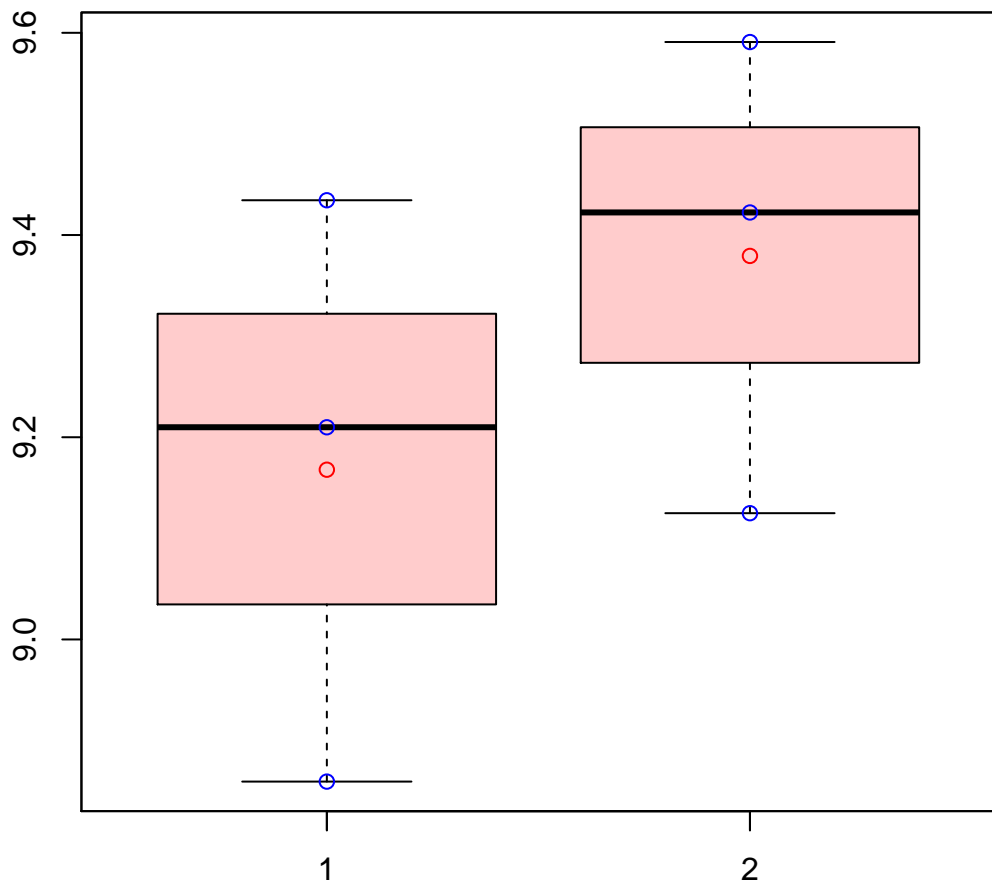

t-Test: p-value = 0.38

# CL477Contig2|CL477Contig2

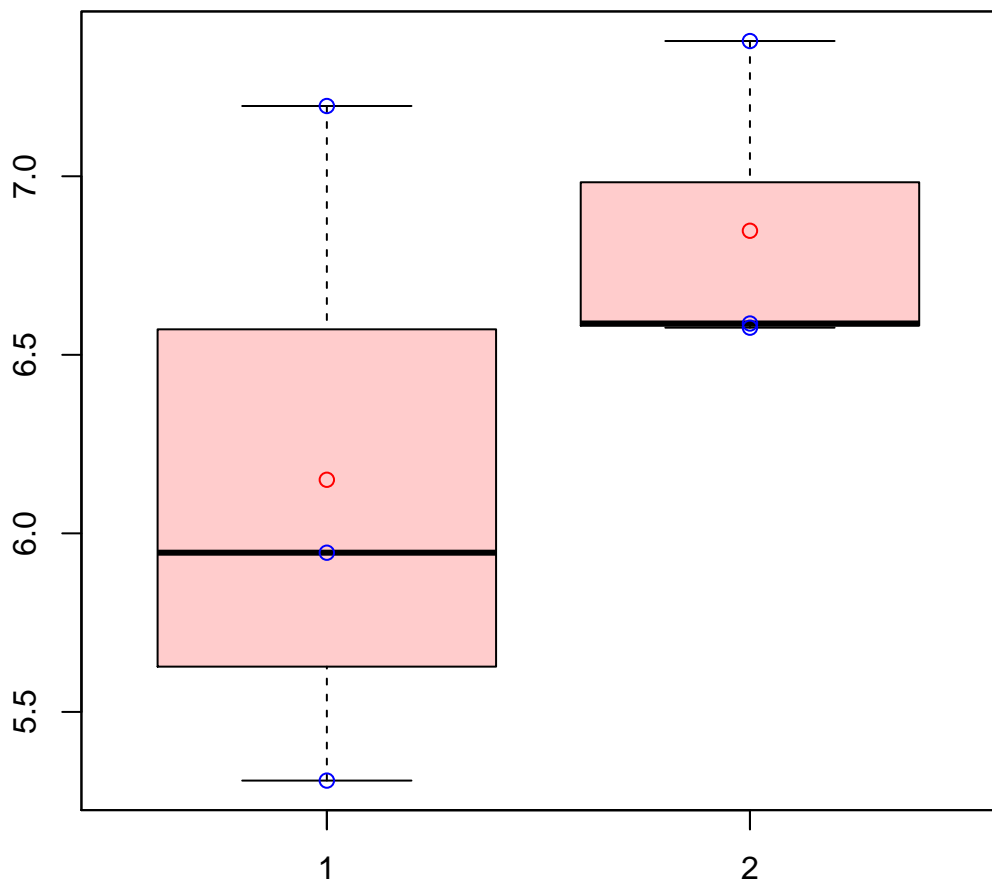

t-Test: p-value = 0.34

# CL478Contig1|CL478Contig1

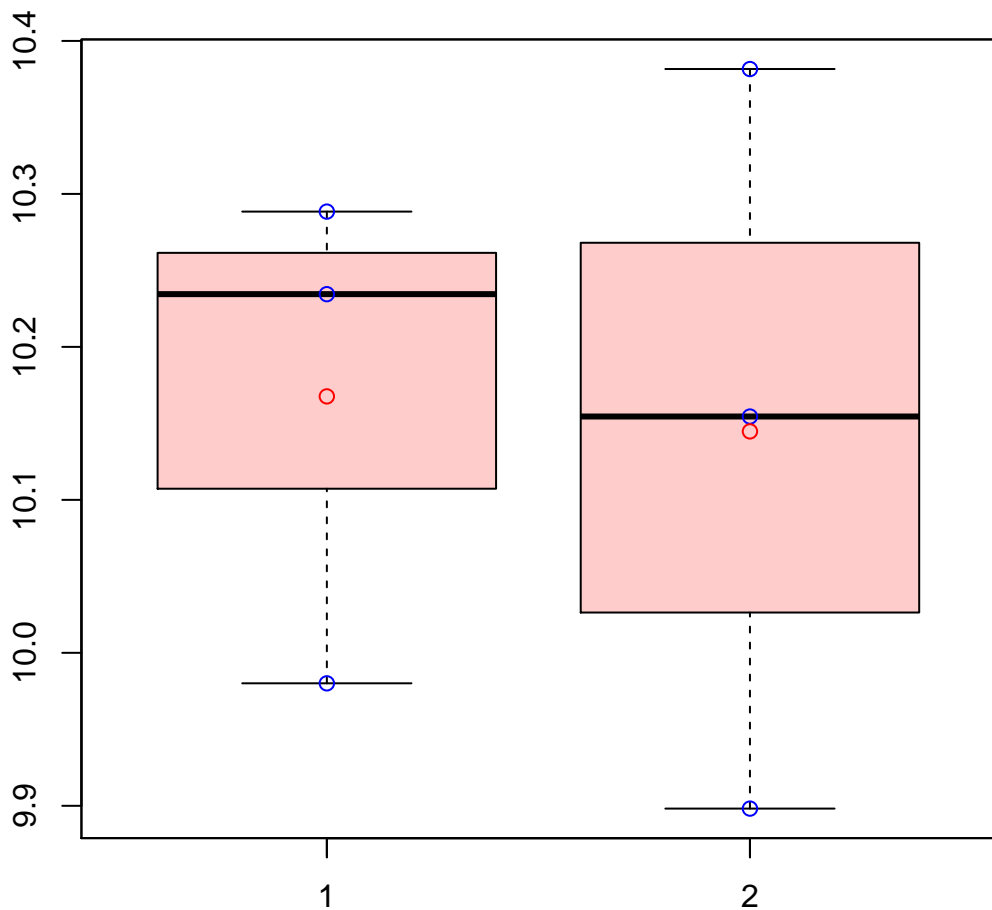

t-Test: p-value = 0.9

# CL478Contig2|CL478Contig2

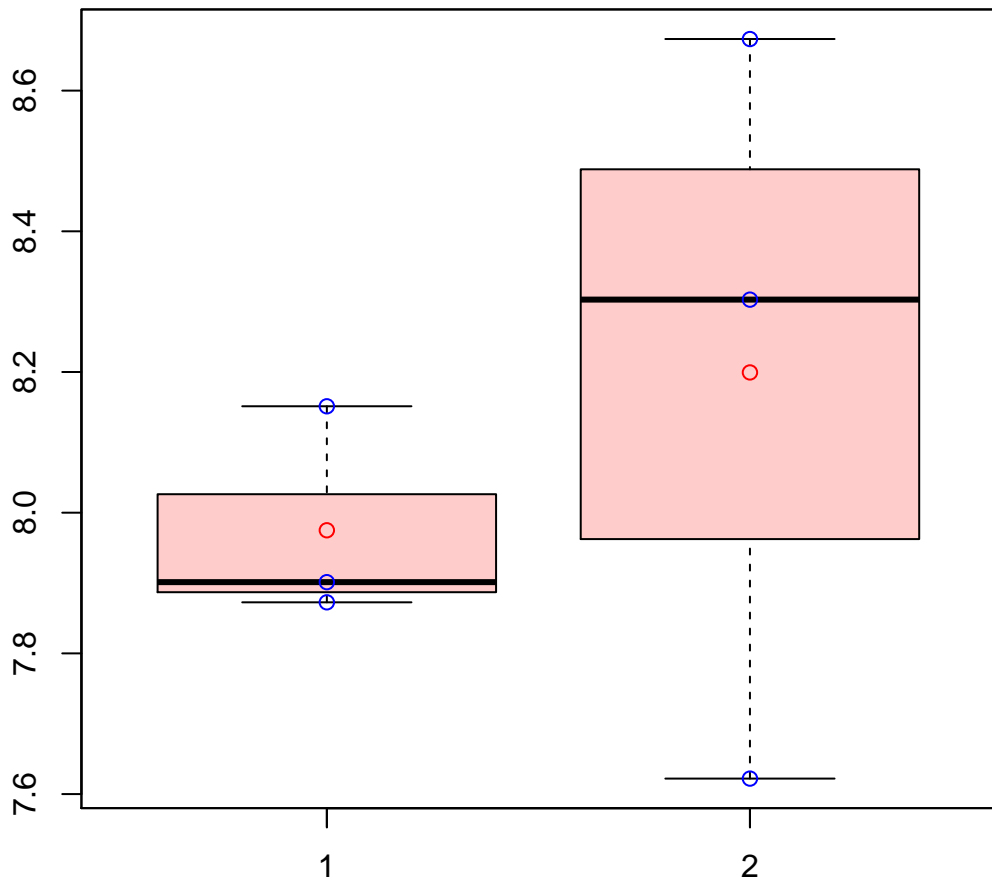

t-Test: p-value = 0.55



# CL478Contig4|CL478Contig4



t-Test: p-value = 0.34

# CL478Contig6|CL478Contig6



t-Test: p-value = 0.21

# CL478Contig7|CL478Contig7



t-Test: p-value = 0.75

# CL4790Contig2|CL4790Contig2

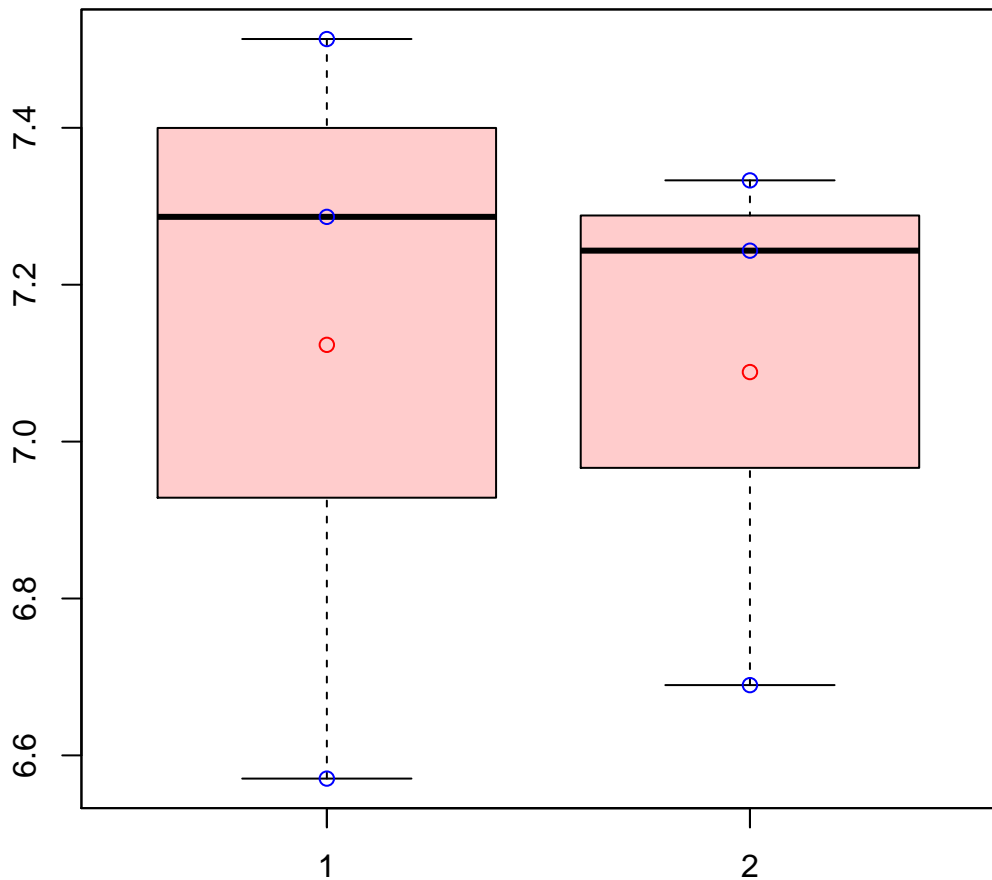

t-Test: p-value = 0.93

# CL4791Contig2|CL4791Contig2

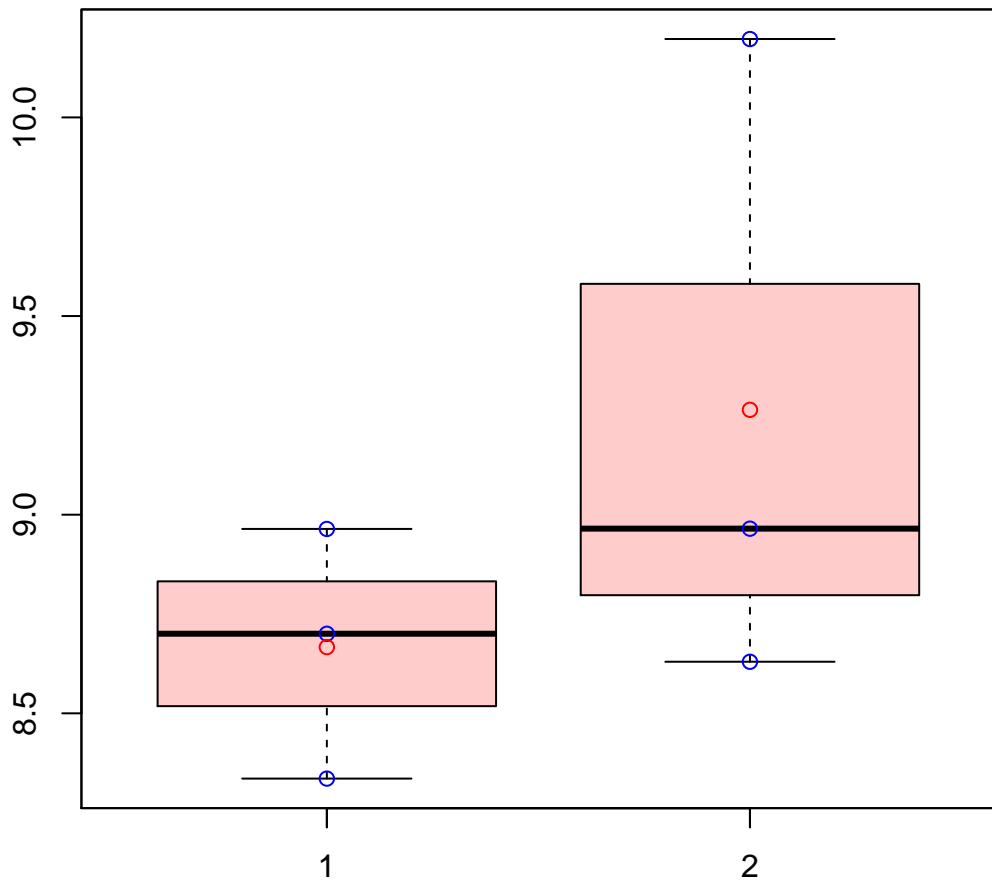

t-Test: p-value = 0.34

# CL4794Contig3|CL4794Contig3



t-Test: p-value = 0.53

# CL479Contig1|CL479Contig1

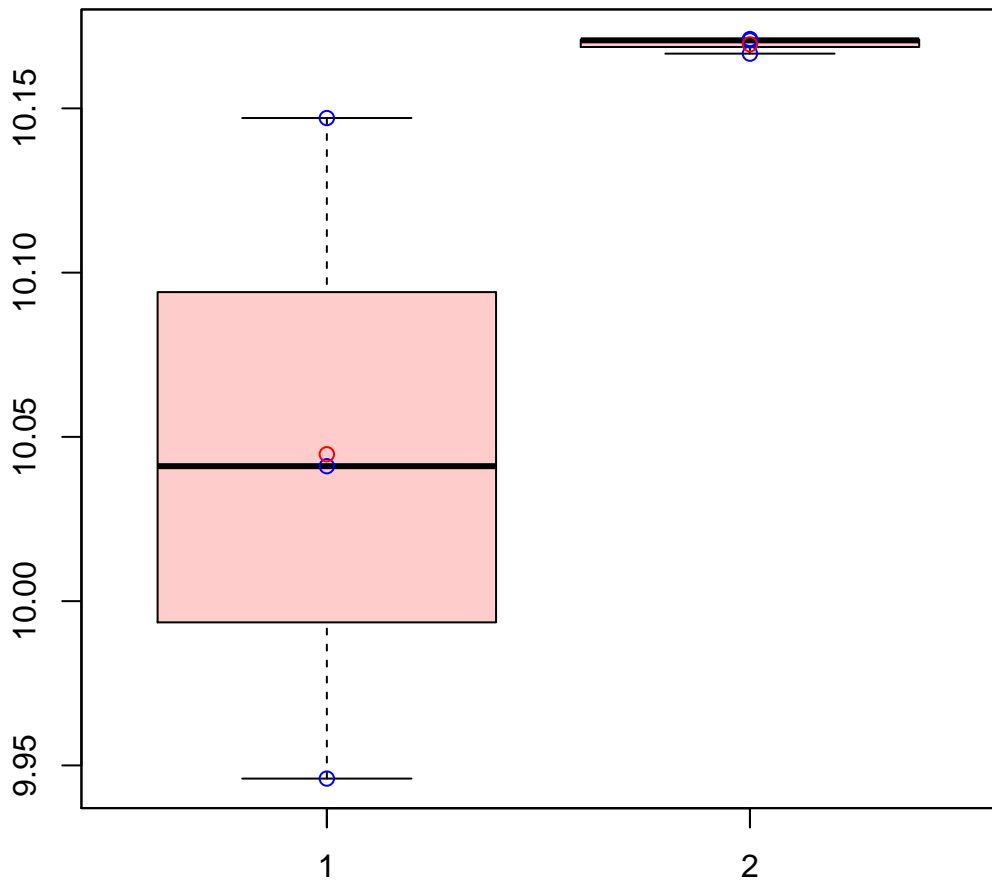

t-Test: p-value = 0.16

# CL47Contig45|CL47Contig45

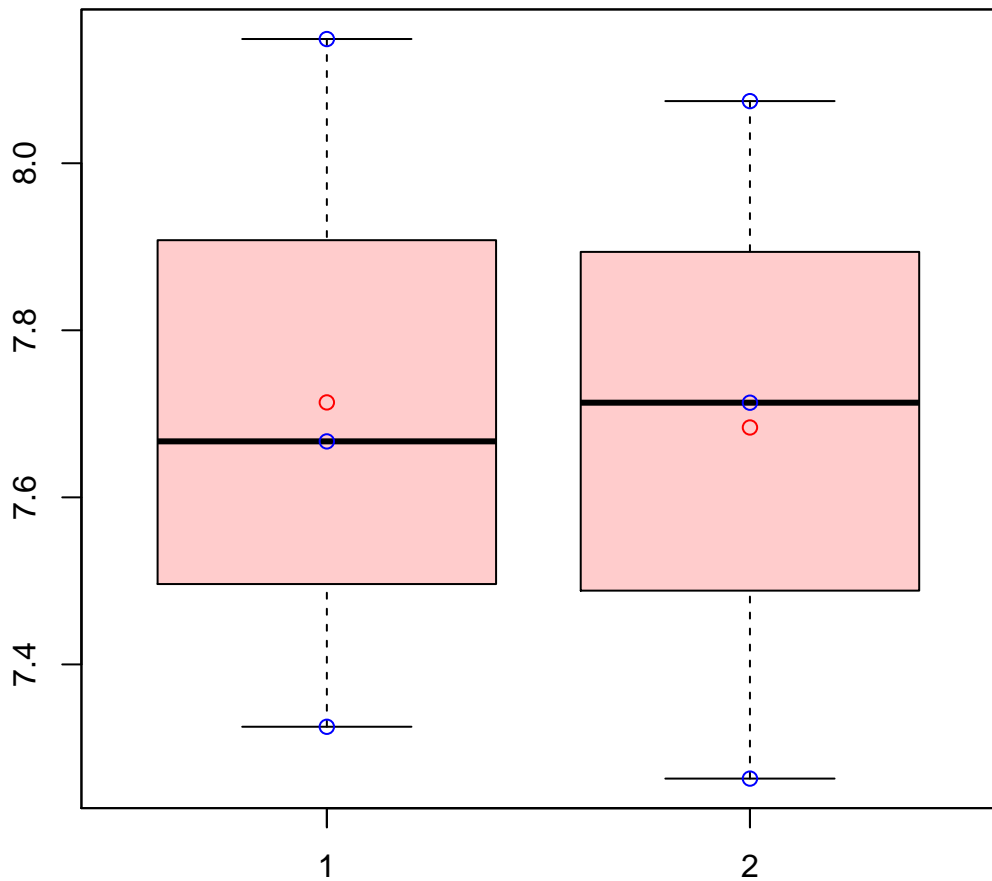

t-Test: p-value = 0.93



# CL47Contig46|CL47Contig46

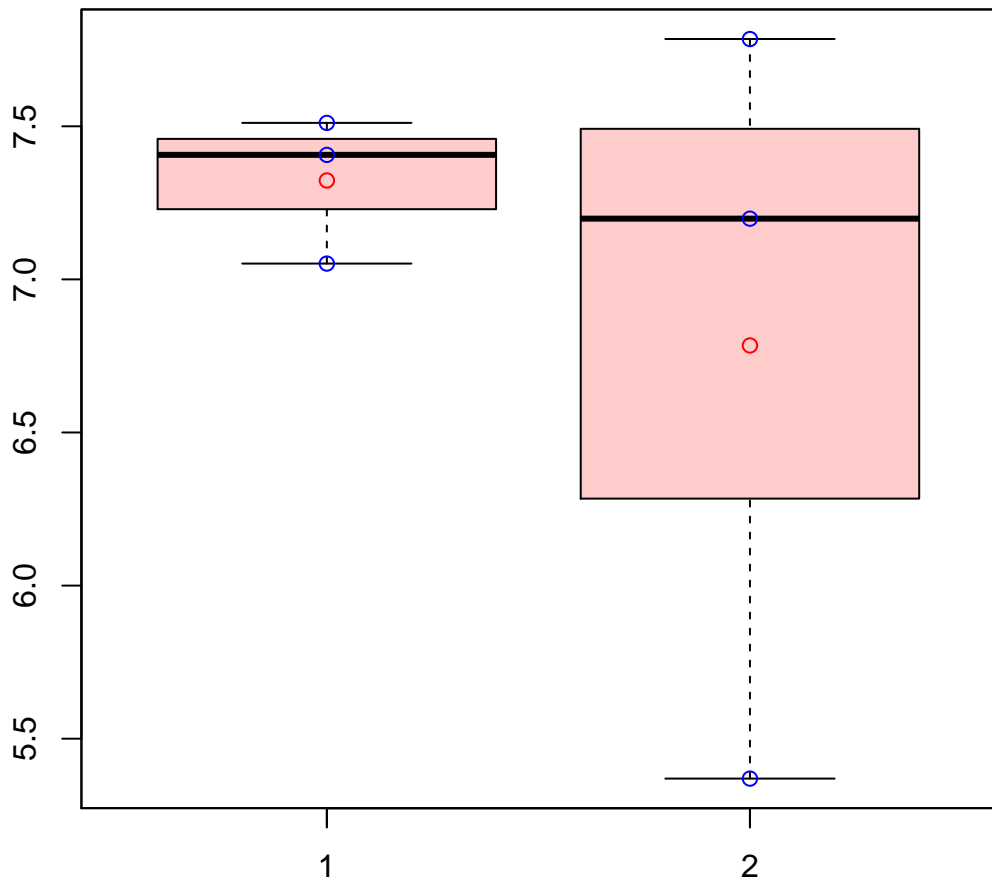

t-Test: p-value = 0.54

# CL4801Contig1|CL4801Contig1

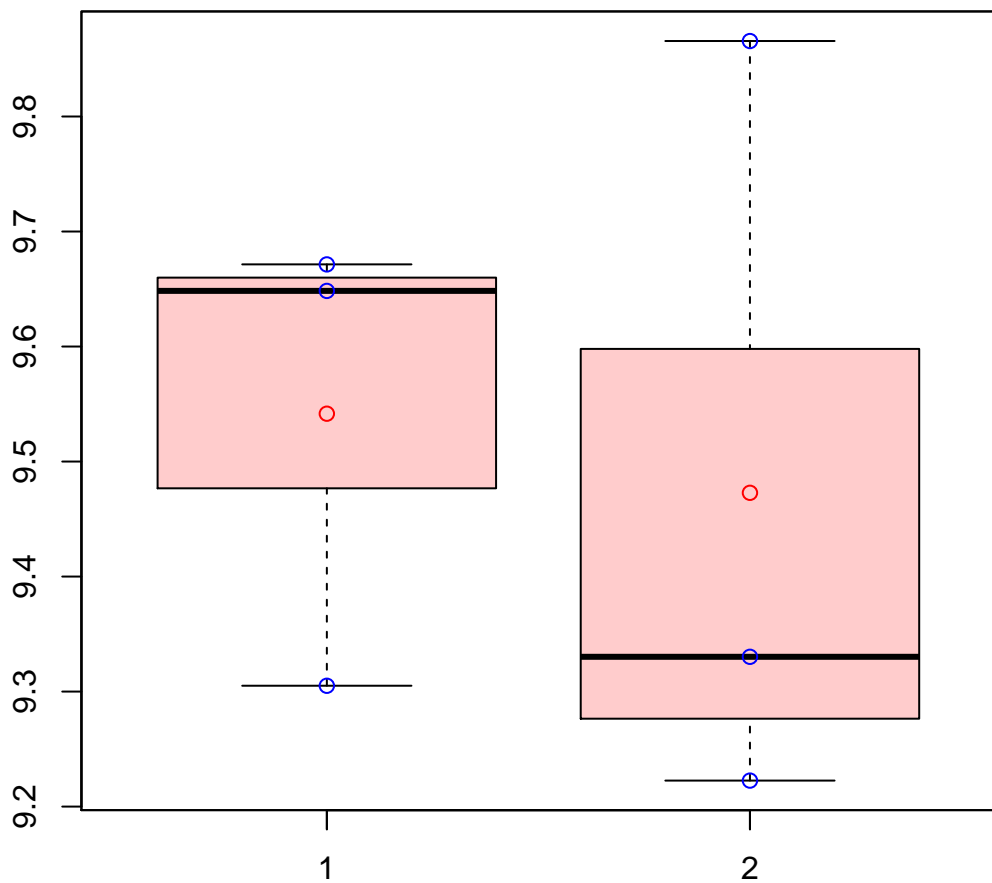

t-Test: p-value = 0.78

# CL4802Contig1|CL4802Contig1

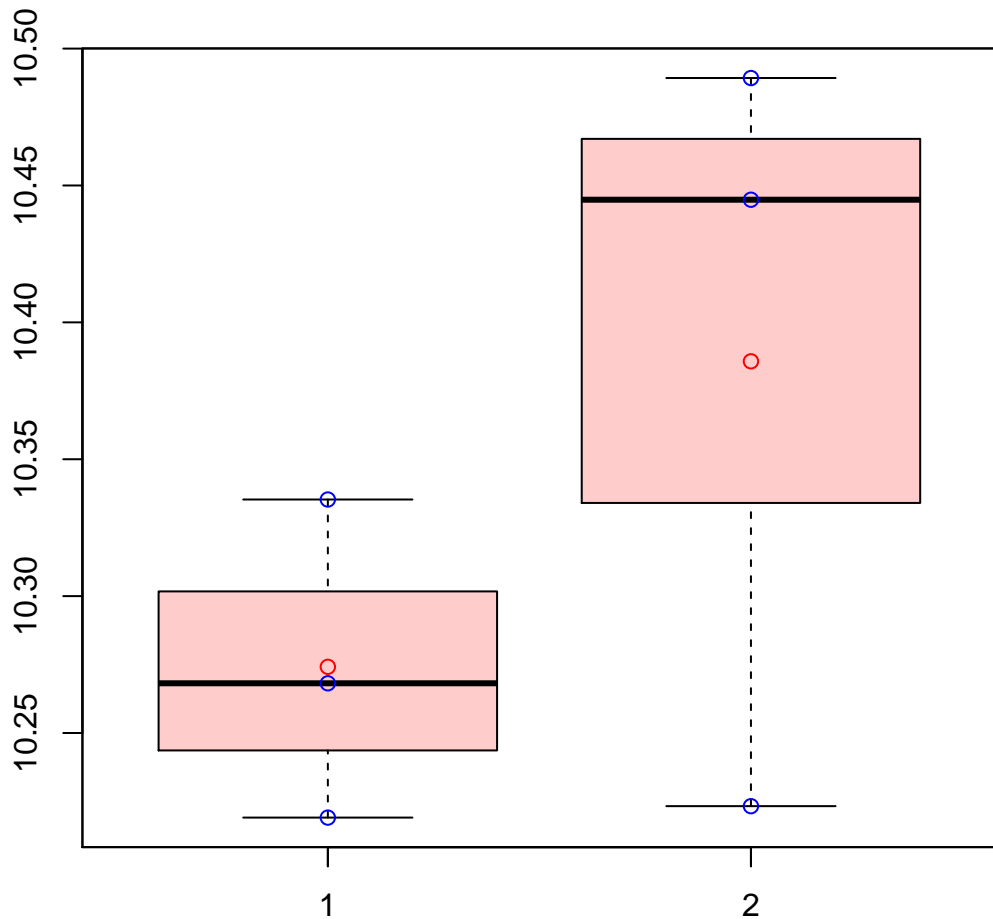

t-Test: p-value = 0.31

# CL4809Contig1|CL4809Contig1

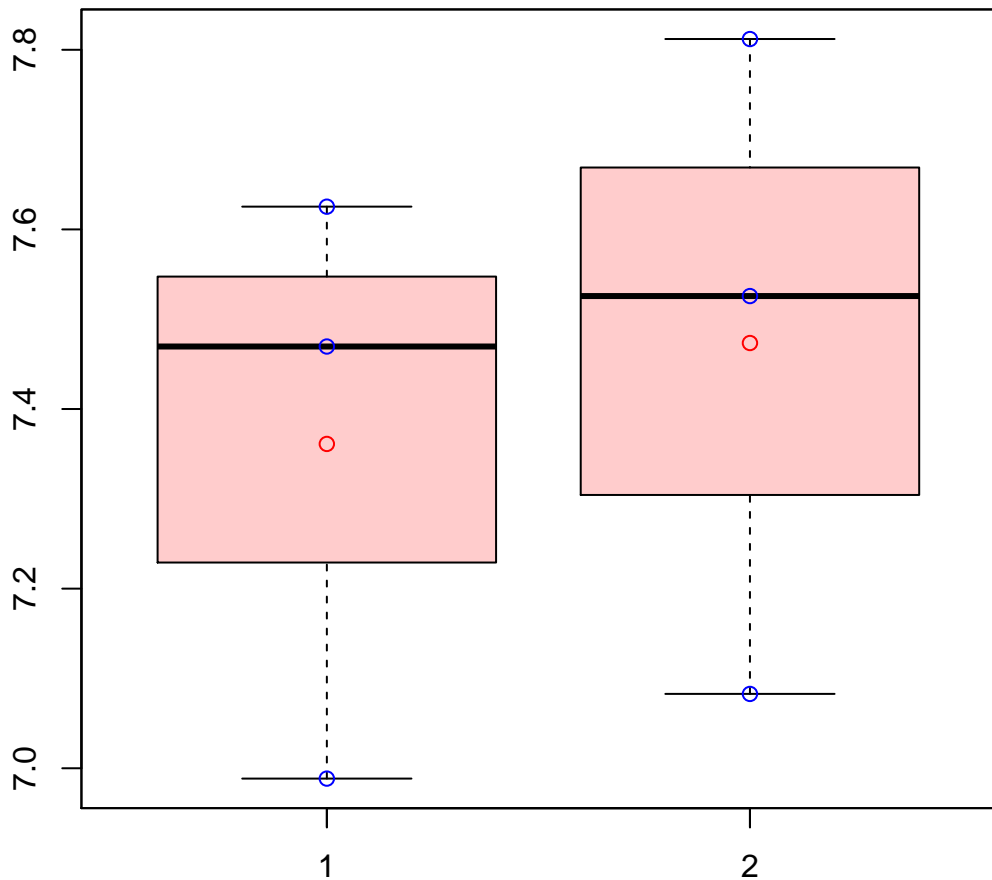

t-Test: p-value = 0.71

# CL482Contig10|CL482Contig10

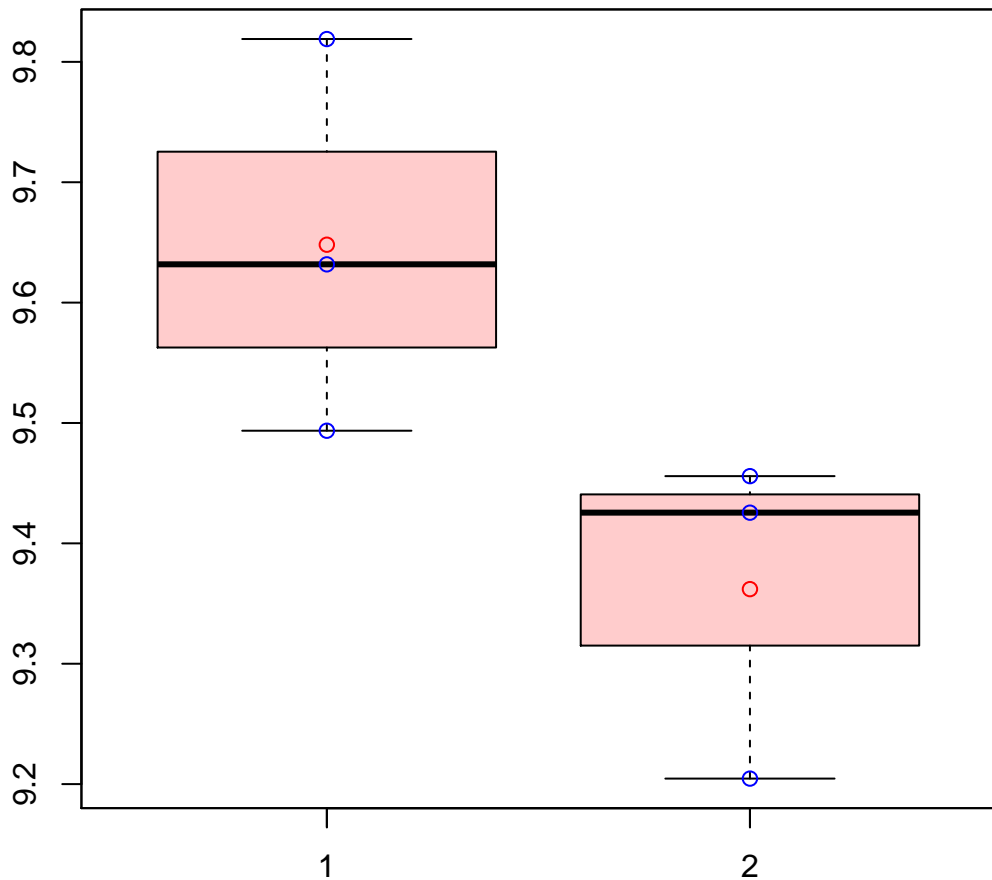

t-Test: p-value = 0.08

# CL482Contig7|CL482Contig7

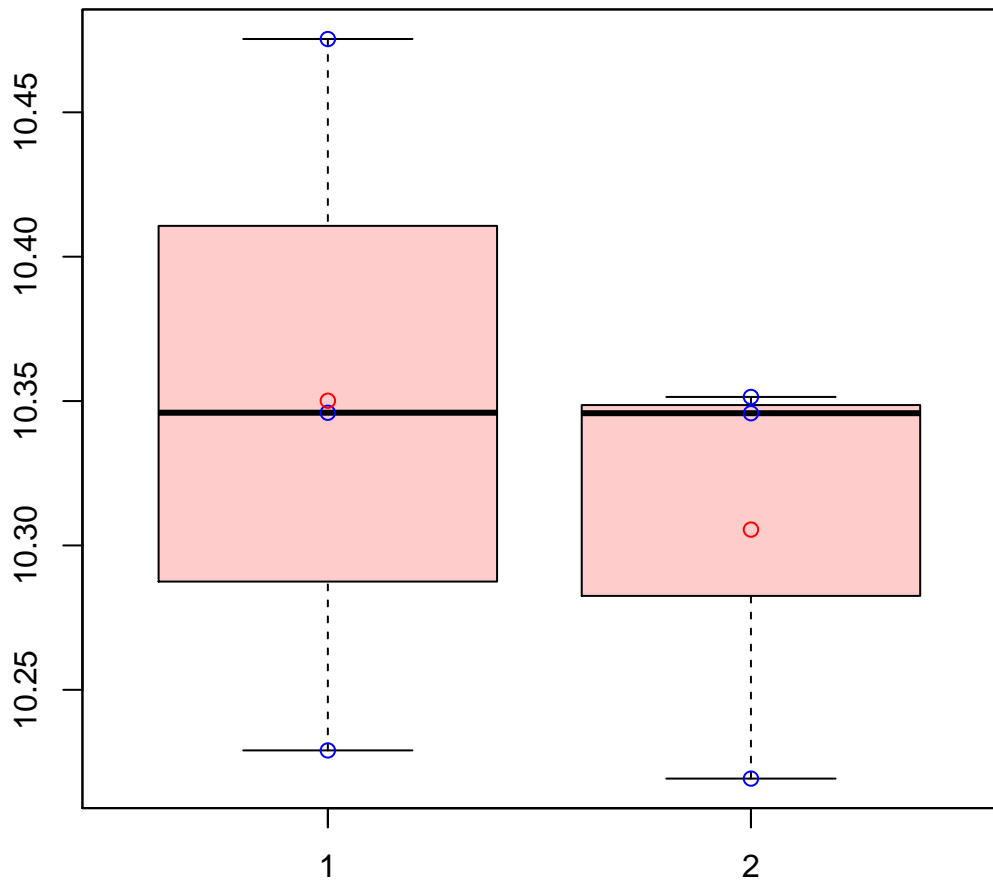

t-Test: p-value = 0.63

# CL4834Contig1|CL4834Contig1

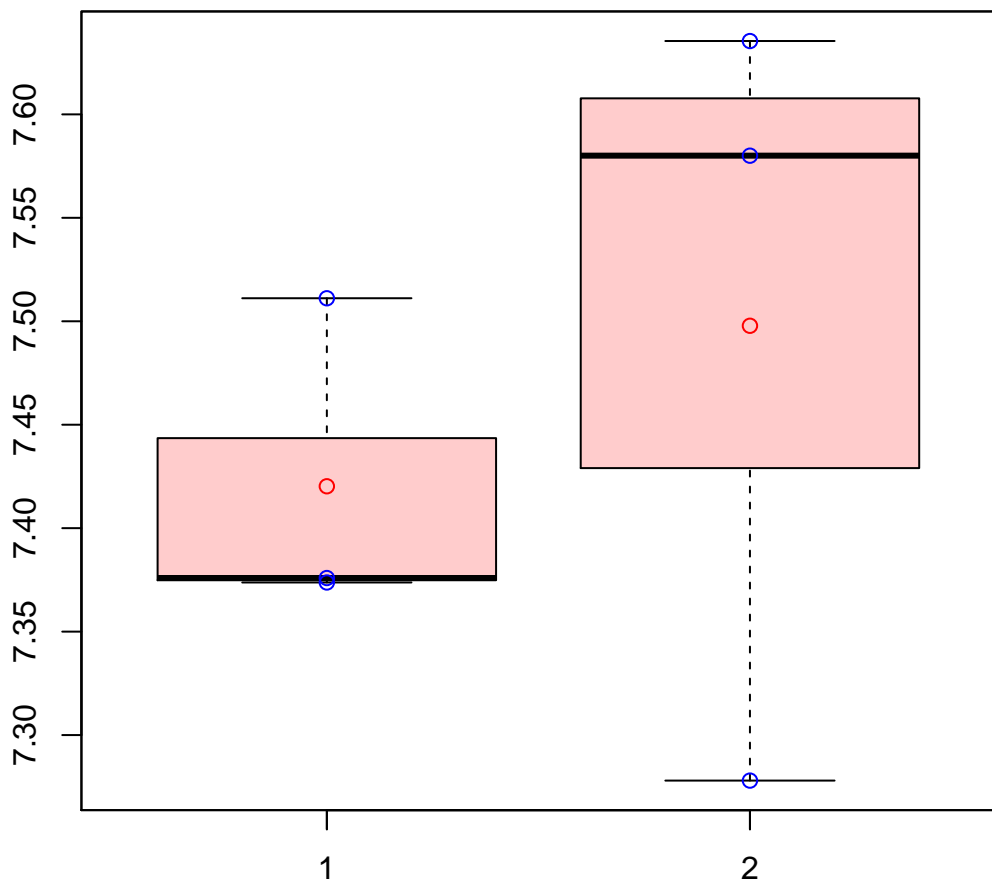

t-Test: p-value = 0.57

# CL4837Contig1|CL4837Contig1

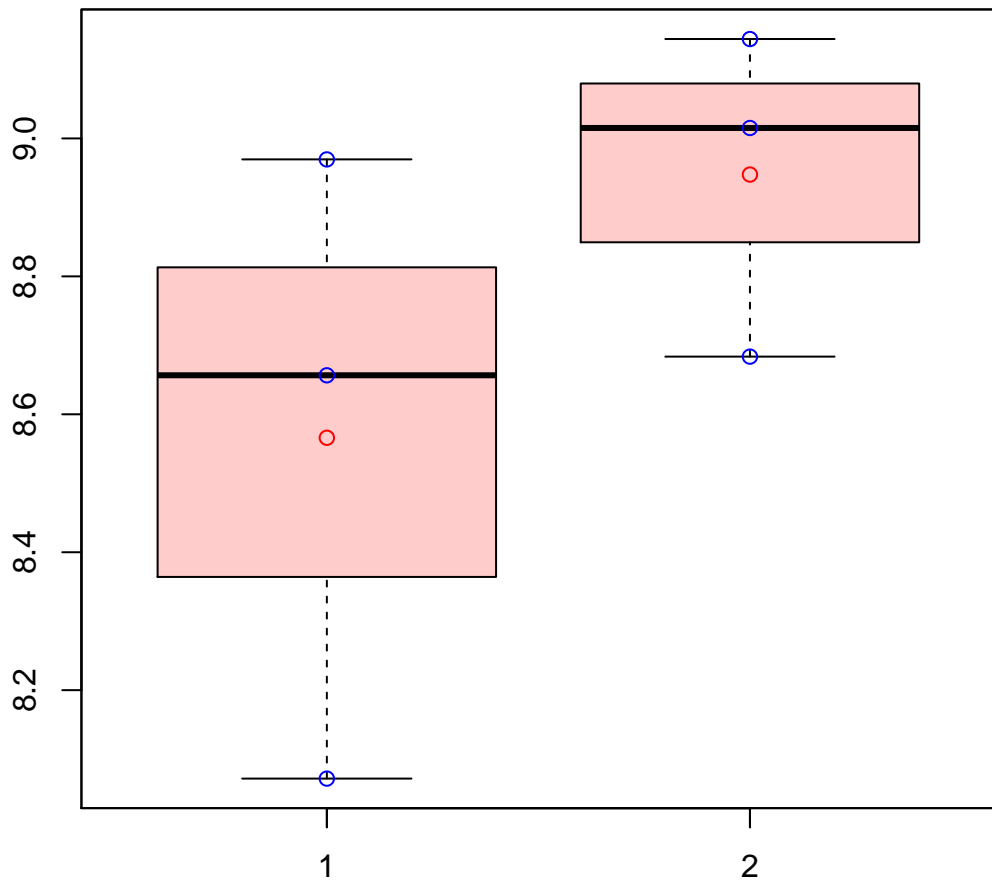

t-Test: p-value = 0.29



# CL4837Contig2|CL4837Contig2

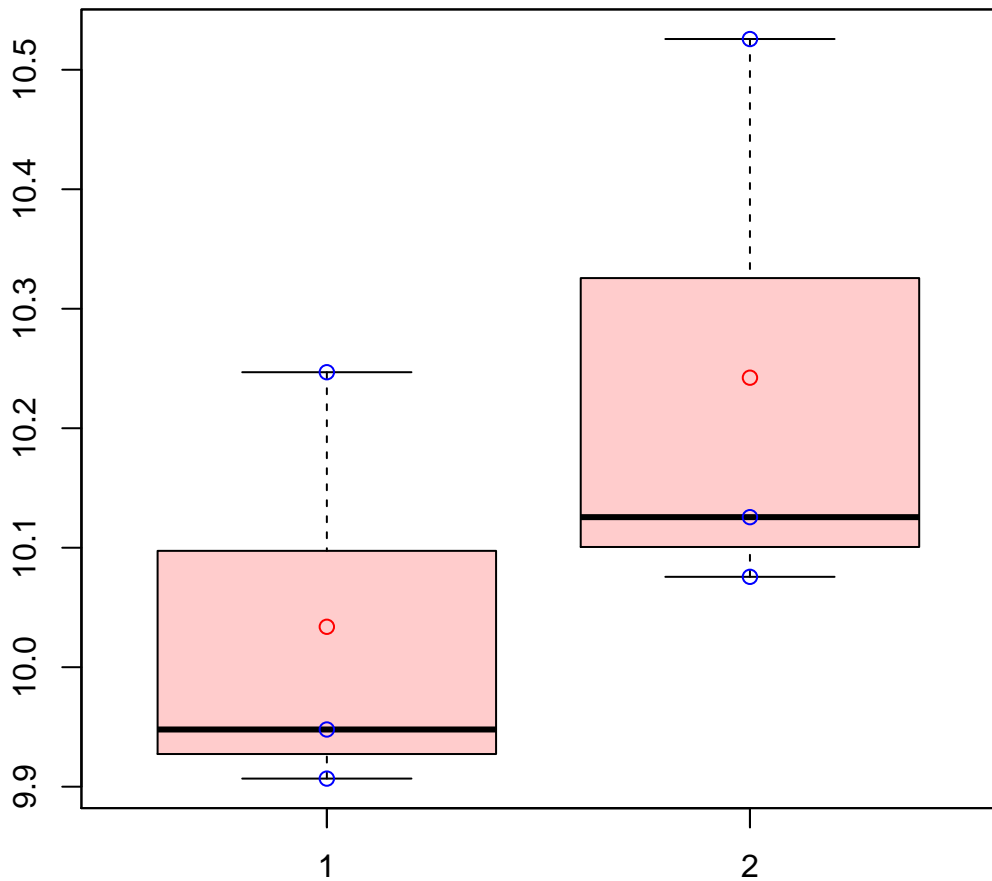

t-Test: p-value = 0.31

# CL4841Contig1|CL4841Contig1



t-Test: p-value = 0.92

# CL4849Contig1|CL4849Contig1

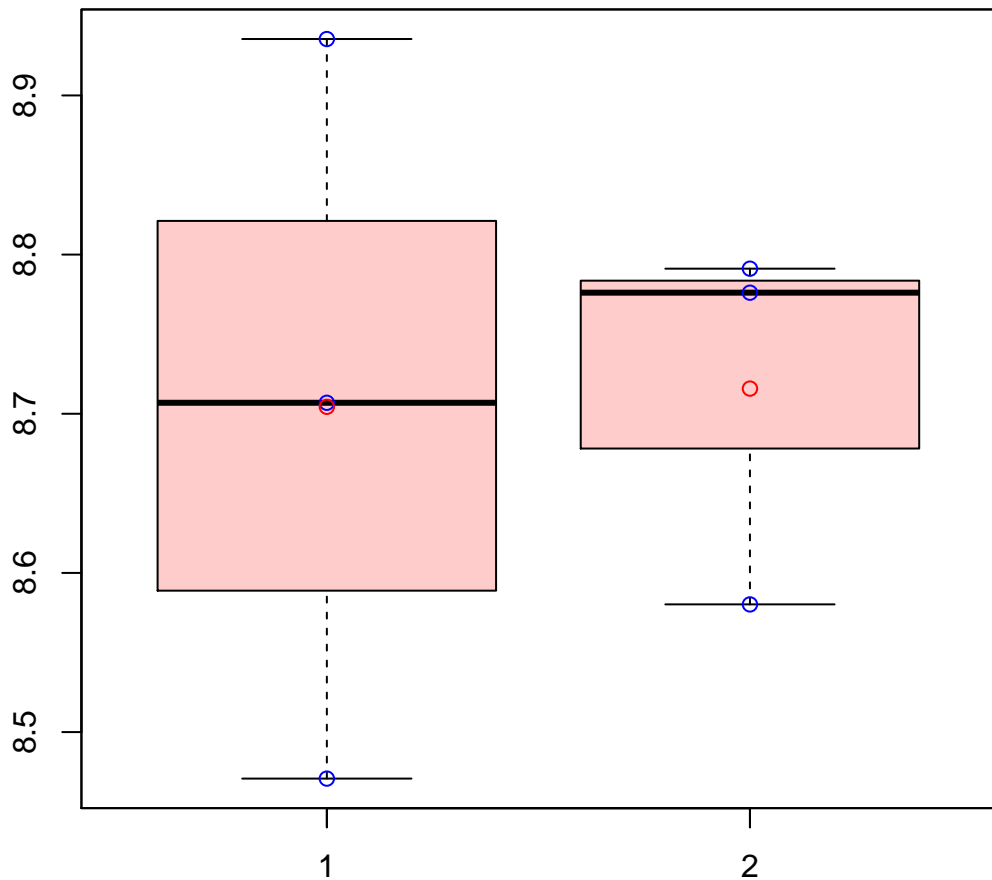

t-Test: p-value = 0.94

# CL4849Contig2|CL4849Contig2

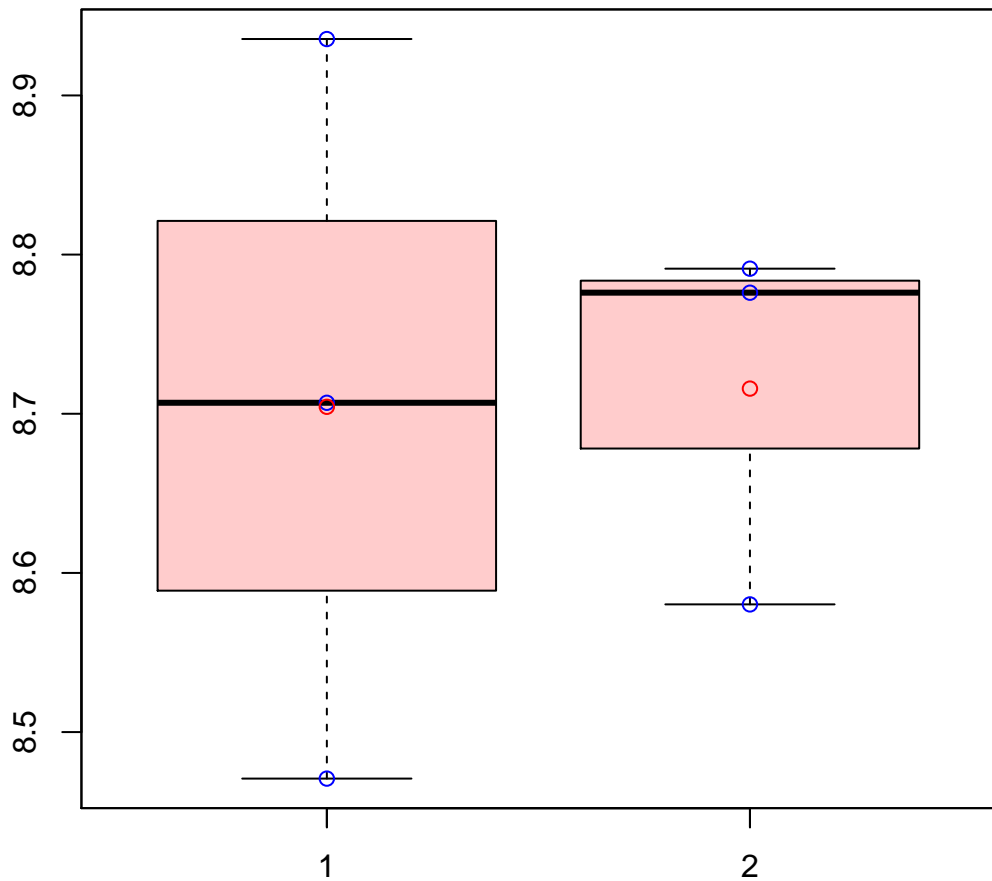

t-Test: p-value = 0.94

# CL4849Contig3|CL4849Contig3



t-Test: p-value = 0.94

# CL4851Contig3|CL4851Contig3

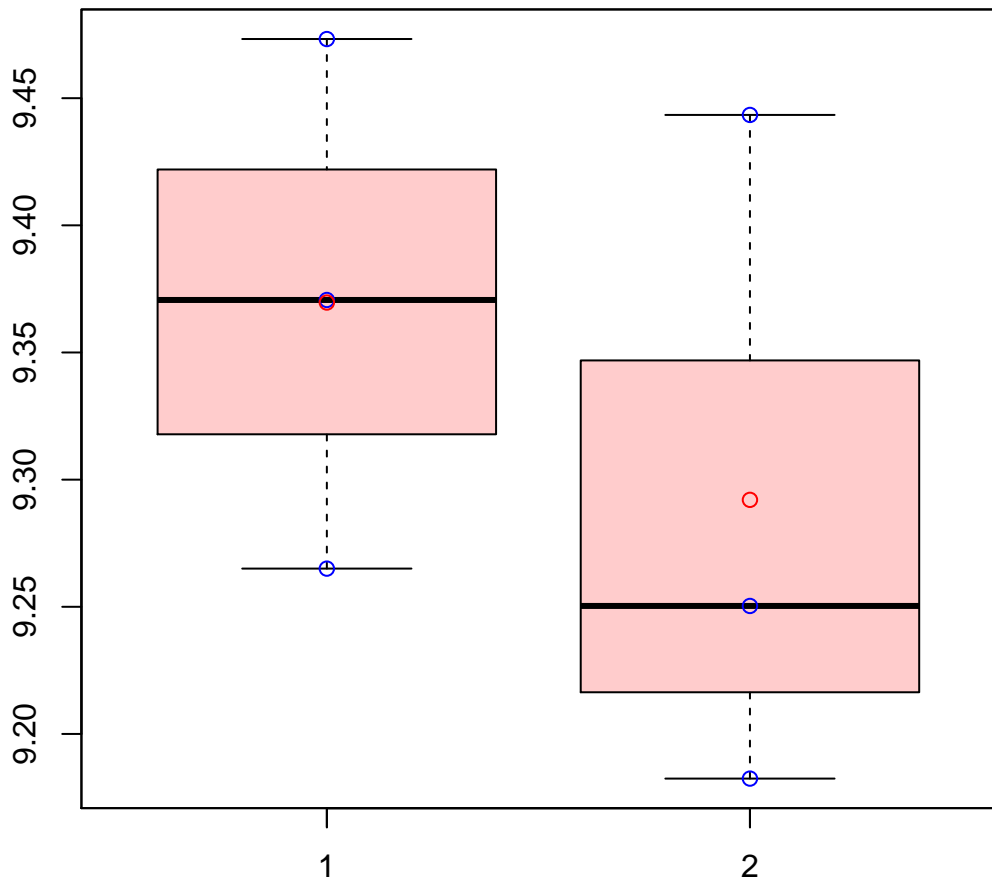

t-Test: p-value = 0.48

# CL4852Contig2|CL4852Contig2

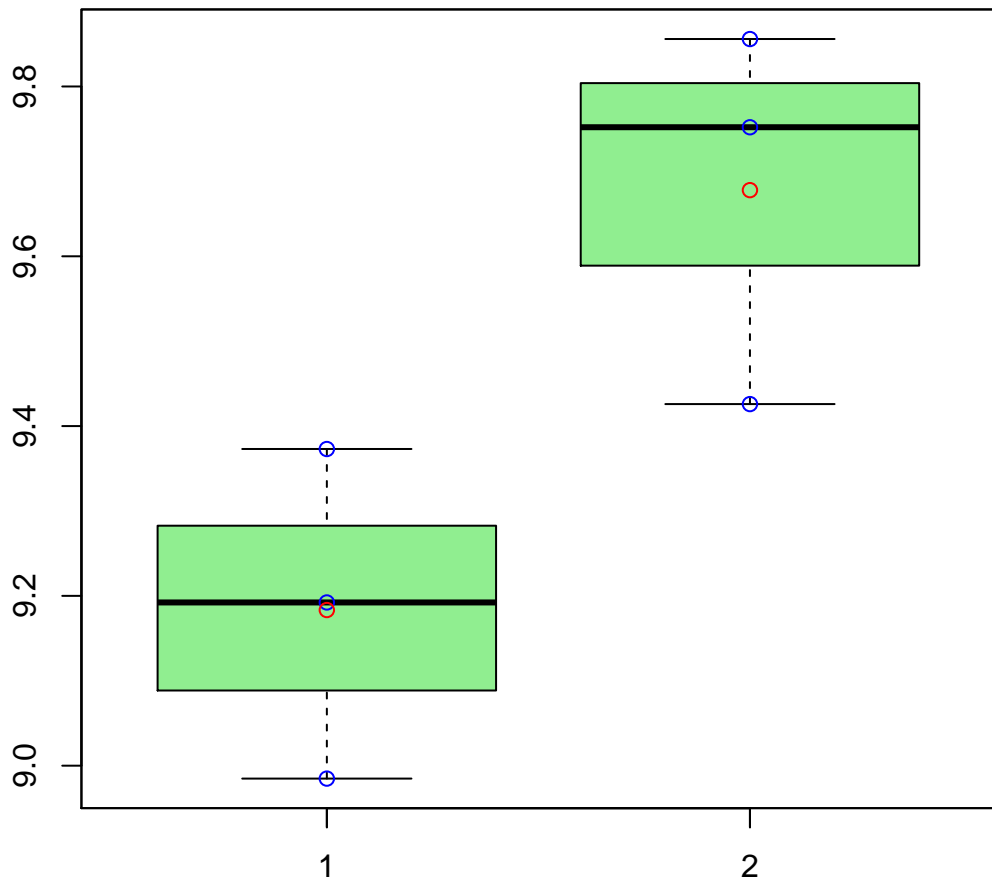

t-Test: p-value = 0.05

# CL4852Contig5|CL4852Contig5

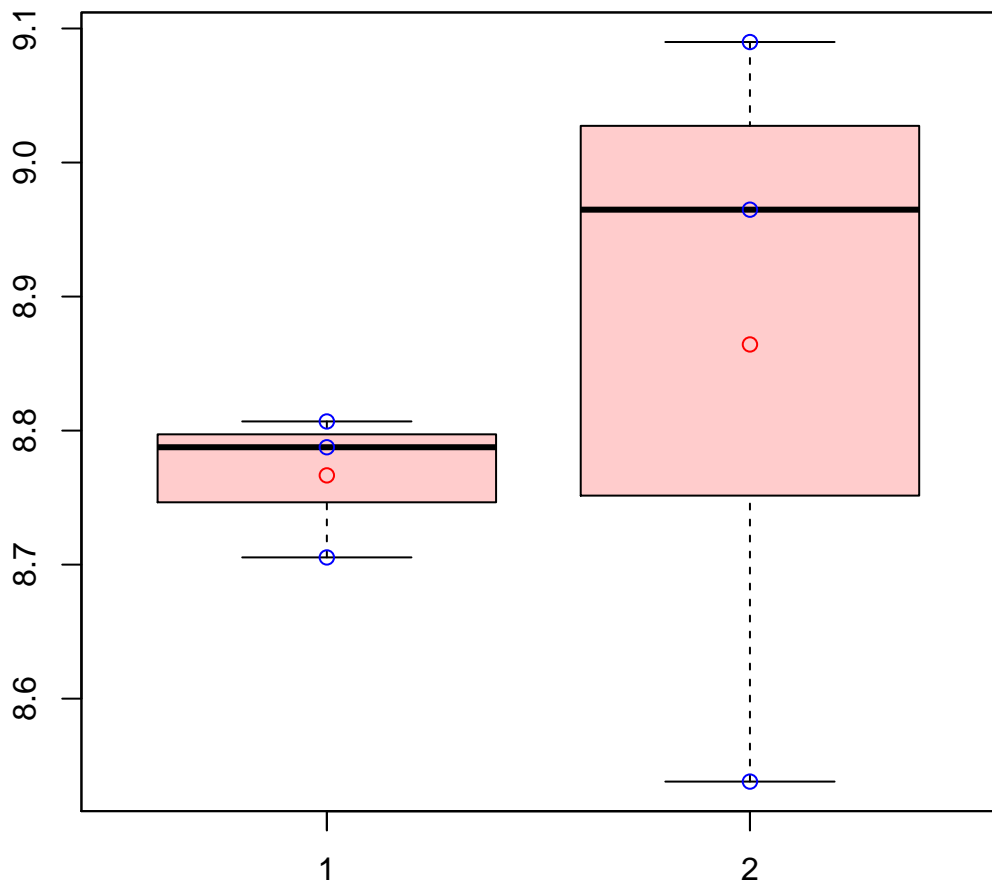

t-Test: p-value = 0.62



# CL4854Contig1|CL4854Contig1

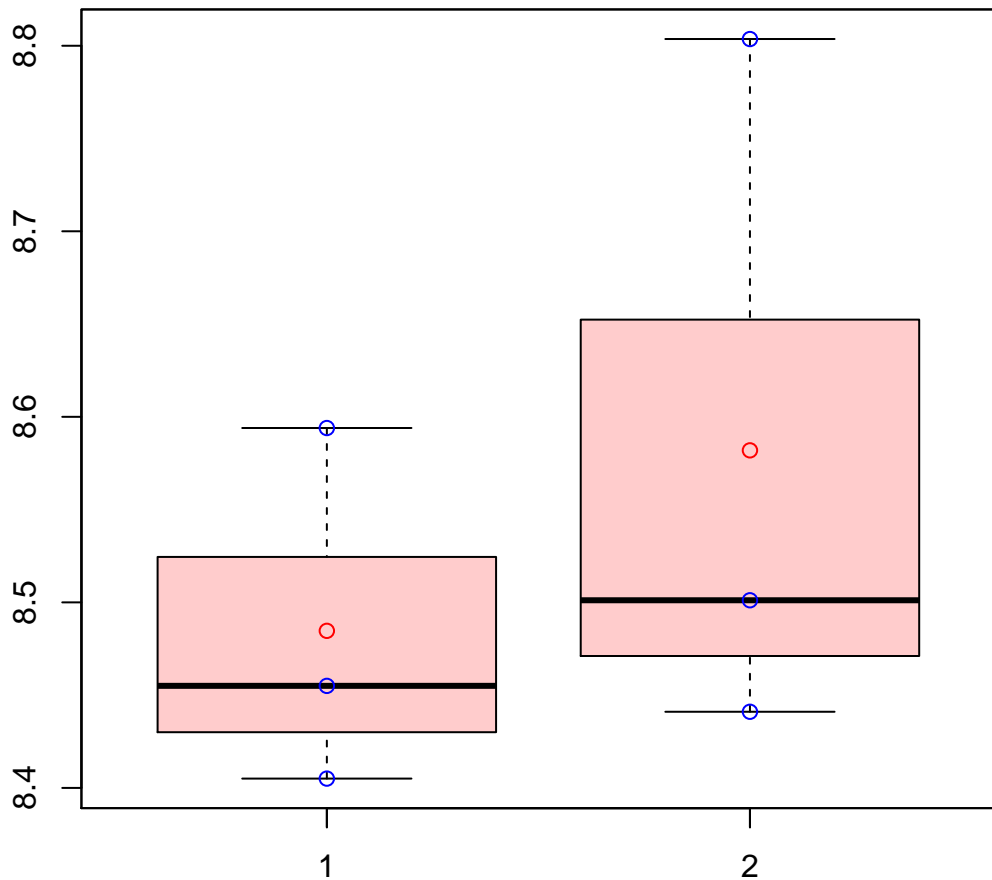

t-Test: p-value = 0.5

# CL4854Contig2|CL4854Contig2

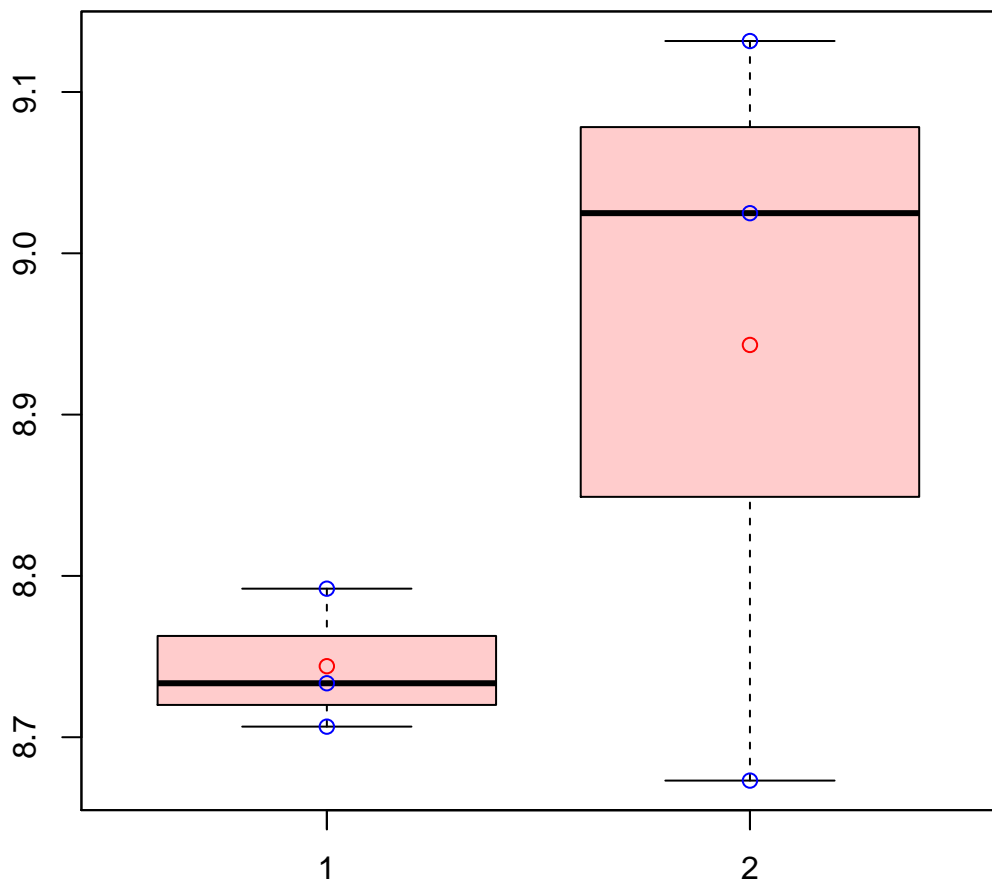

t-Test: p-value = 0.29

# CL4857Contig1|CL4857Contig1

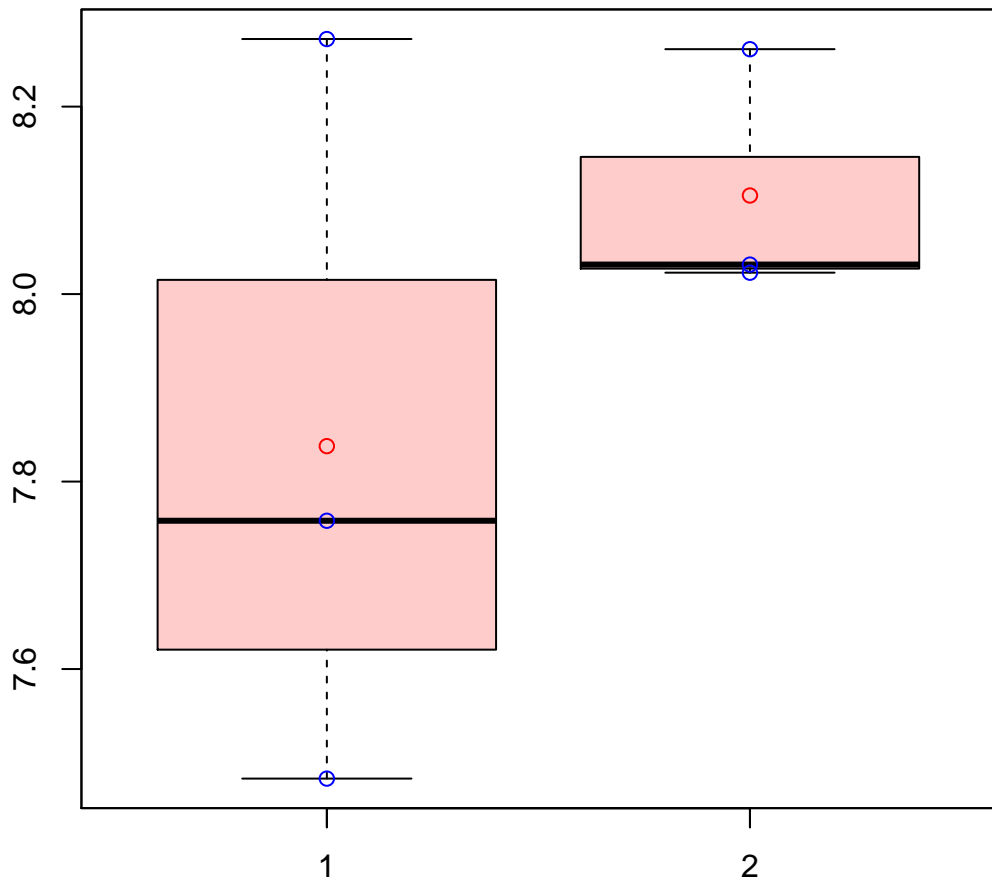

t-Test: p-value = 0.37

# CL4857Contig2|CL4857Contig2

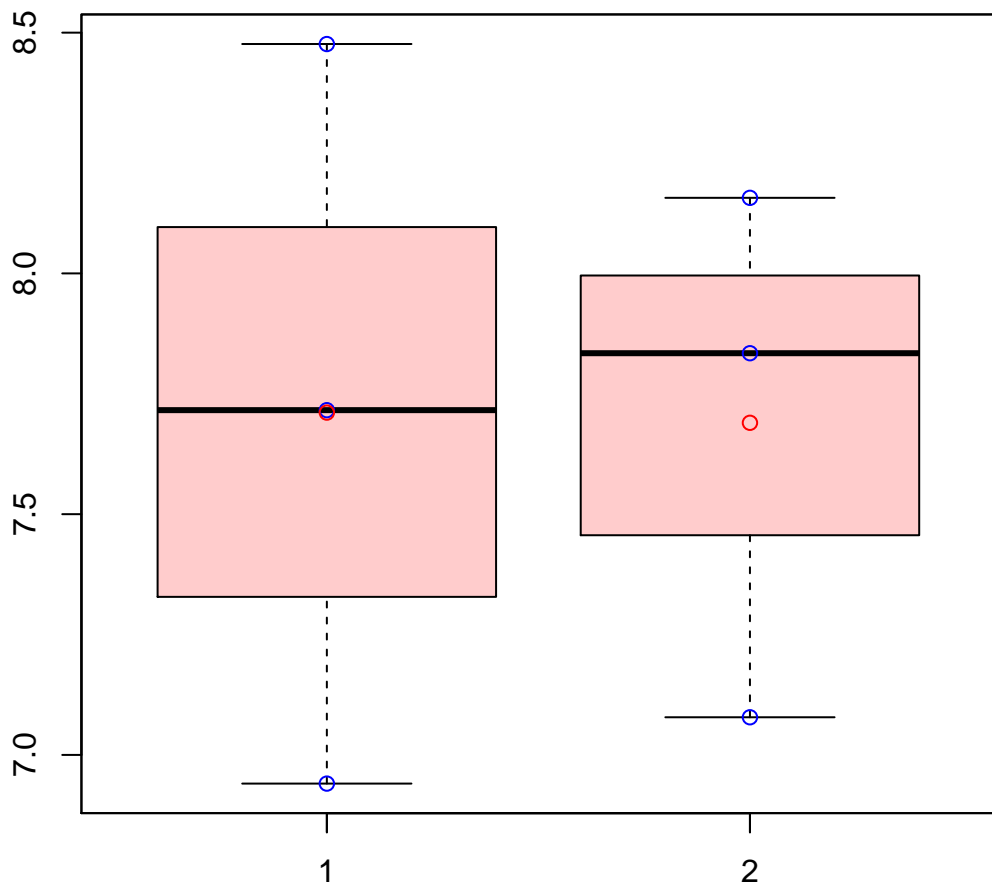

t-Test: p-value = 0.97

# CL4857Contig3|CL4857Contig3

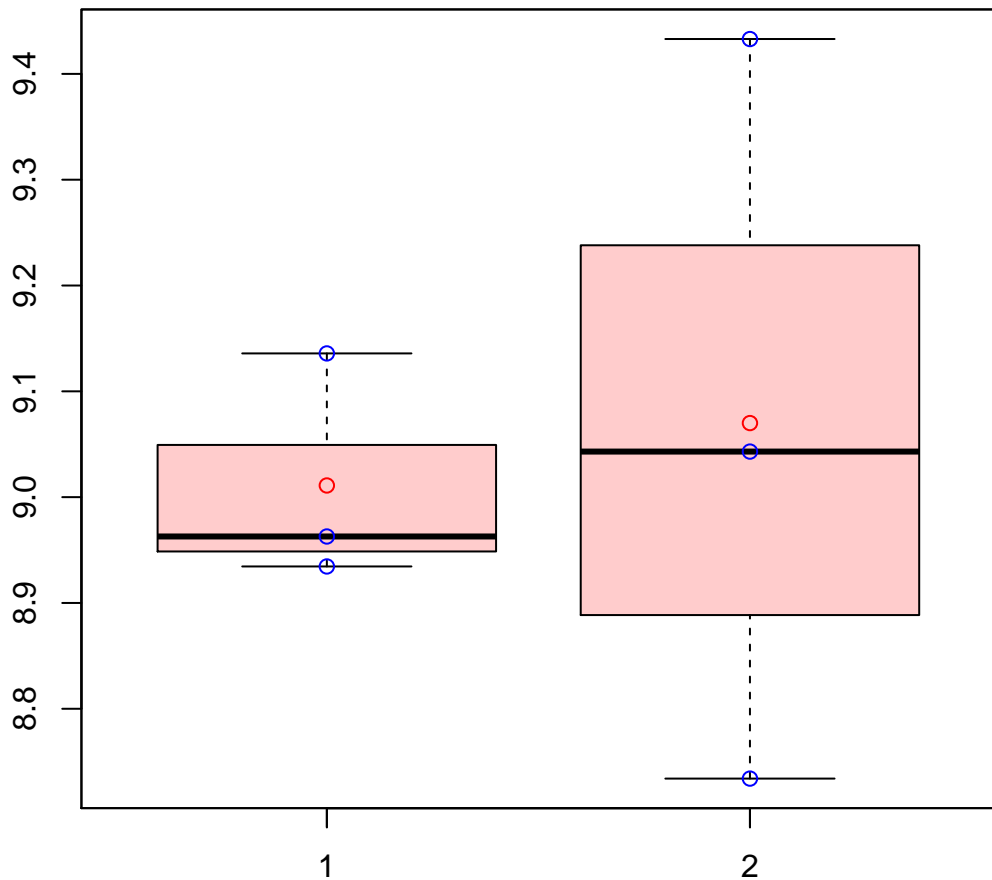

t-Test: p-value = 0.8

# CL485Contig4|CL485Contig4

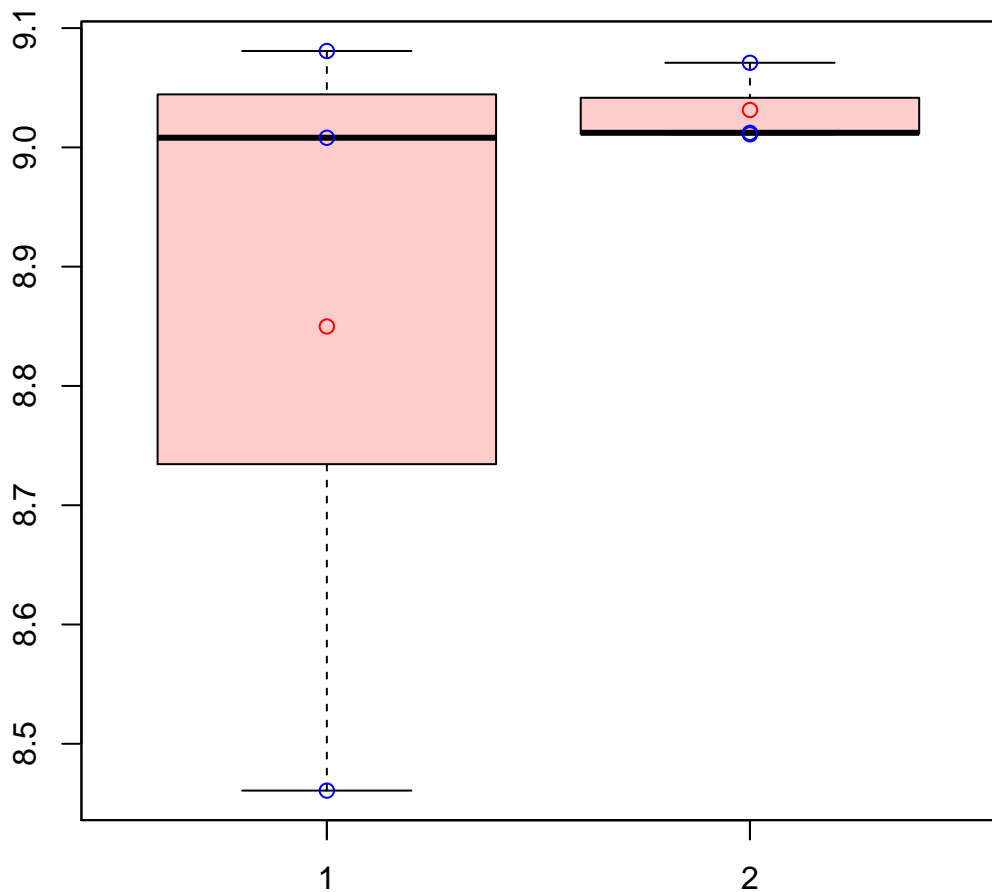

t-Test: p-value = 0.45

# CL4863Contig3|CL4863Contig3

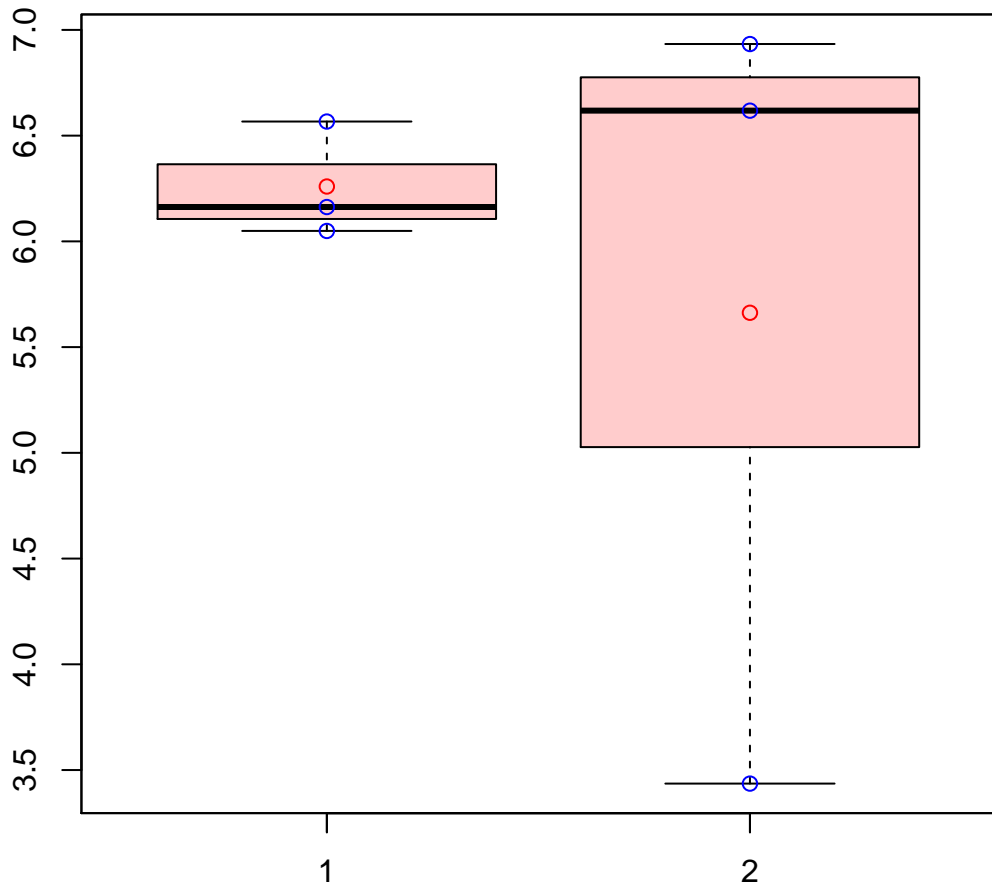

t-Test: p-value = 0.65

# CL4864Contig1|CL4864Contig1

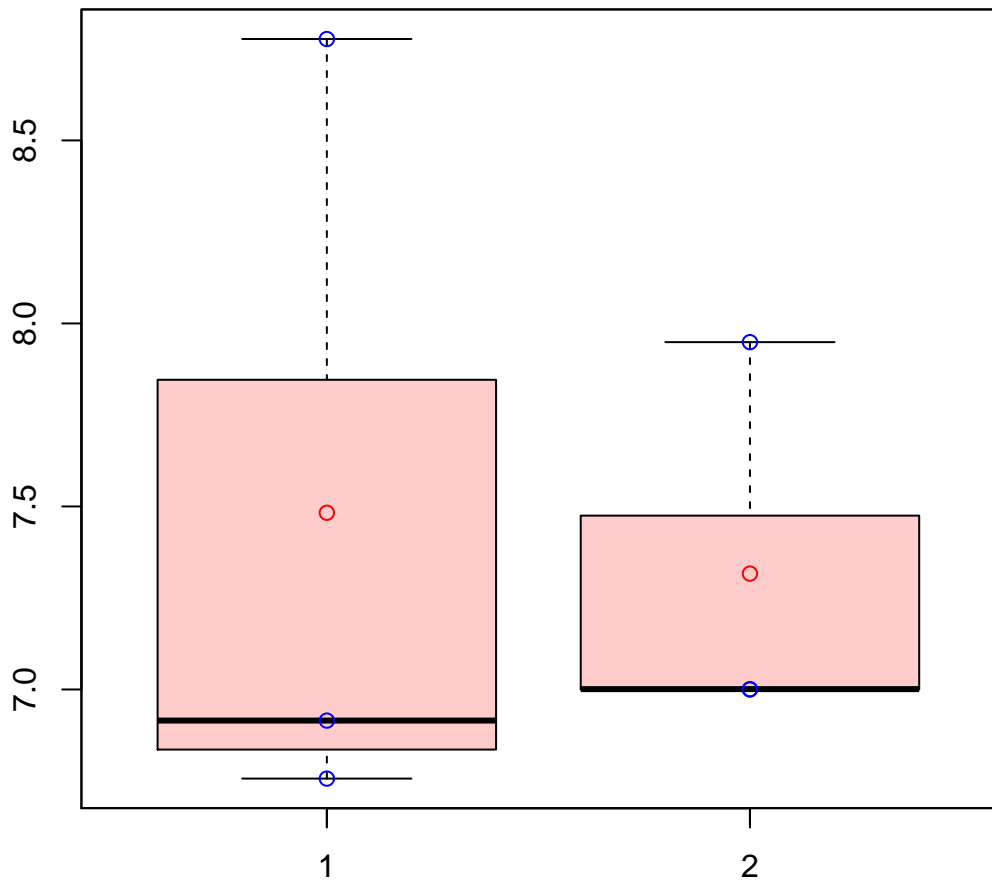

t-Test: p-value = 0.83



# CL4867Contig1|CL4867Contig1



t-Test: p-value = 0.55

# CL487Contig5|CL487Contig5

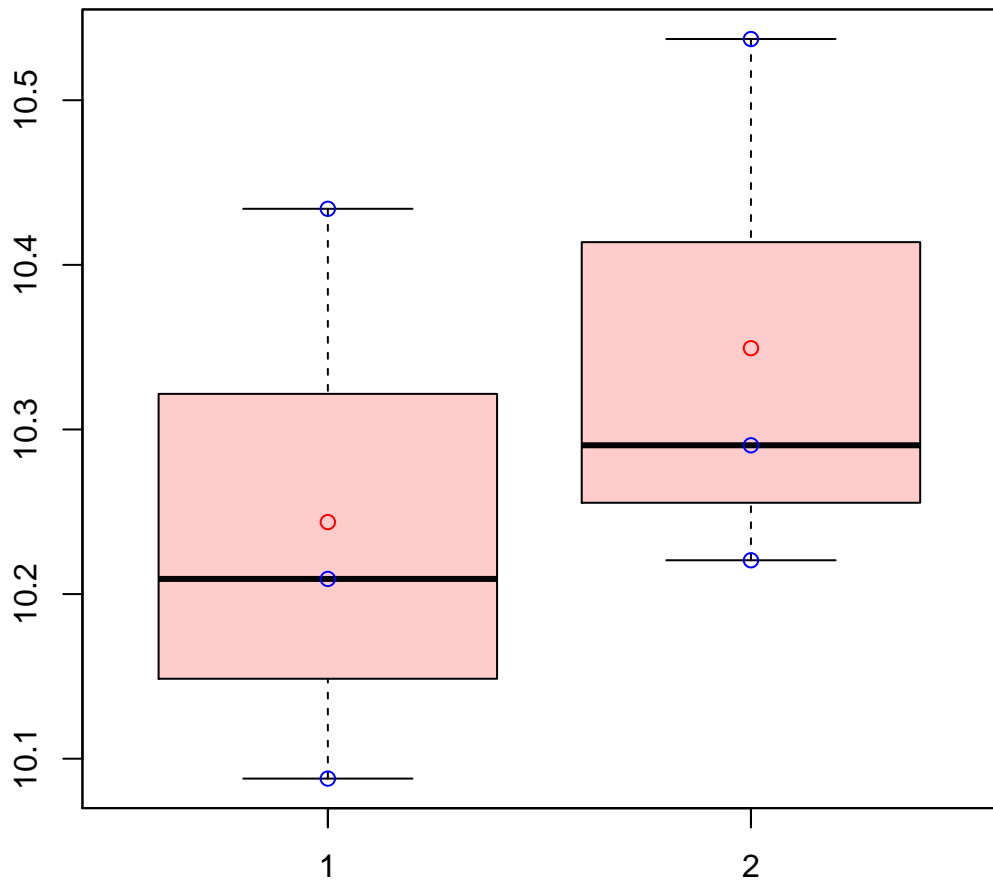

t-Test: p-value = 0.49

# CL487Contig6|CL487Contig6

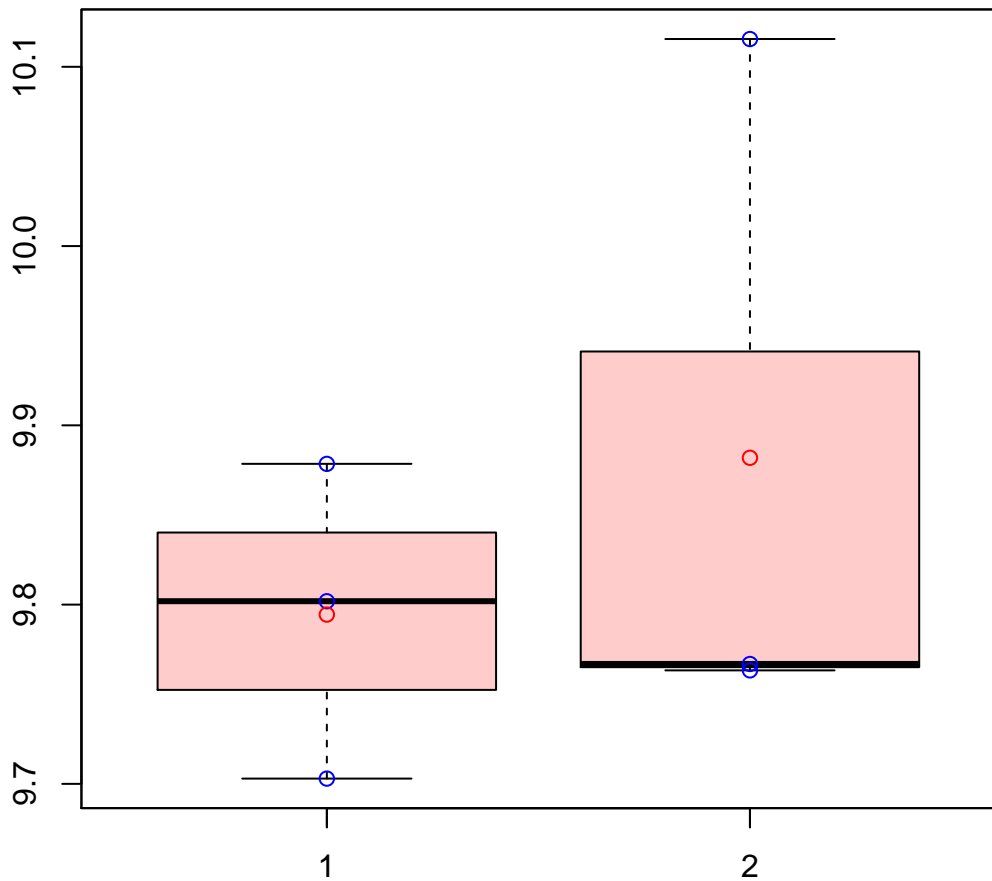

t-Test: p-value = 0.55

# CL487Contig9|CL487Contig9

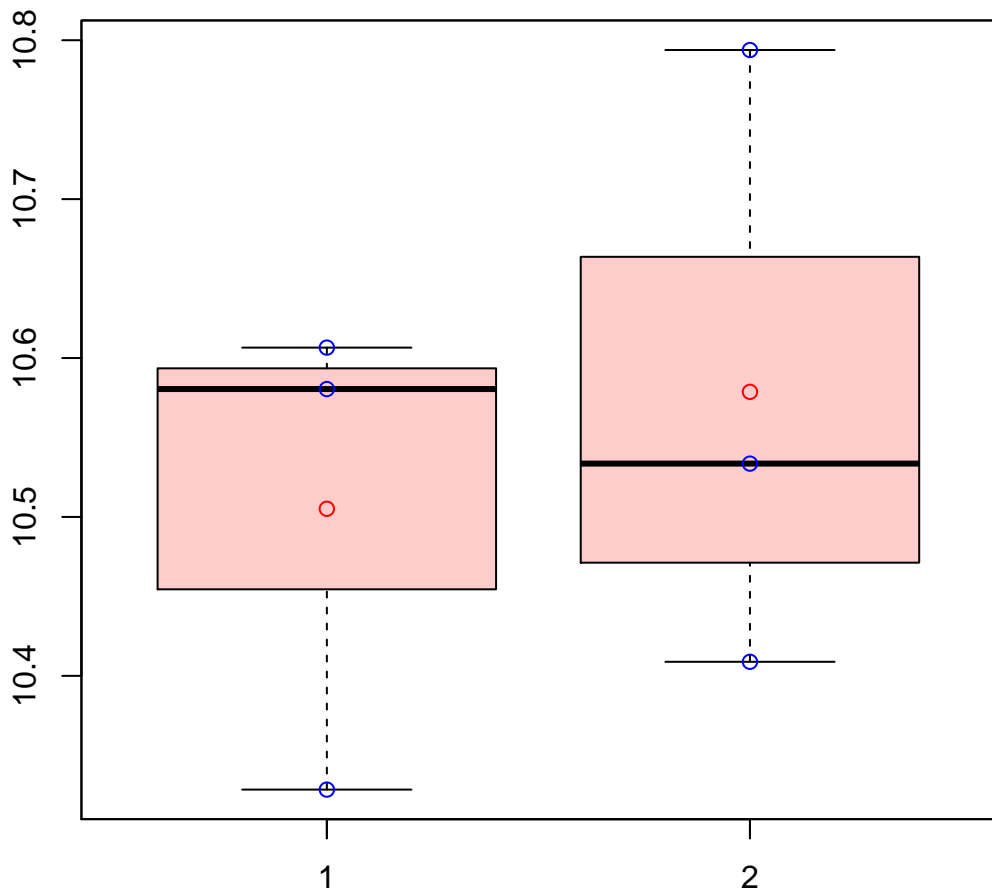

t-Test: p-value = 0.64

# CL4881Contig1|CL4881Contig1

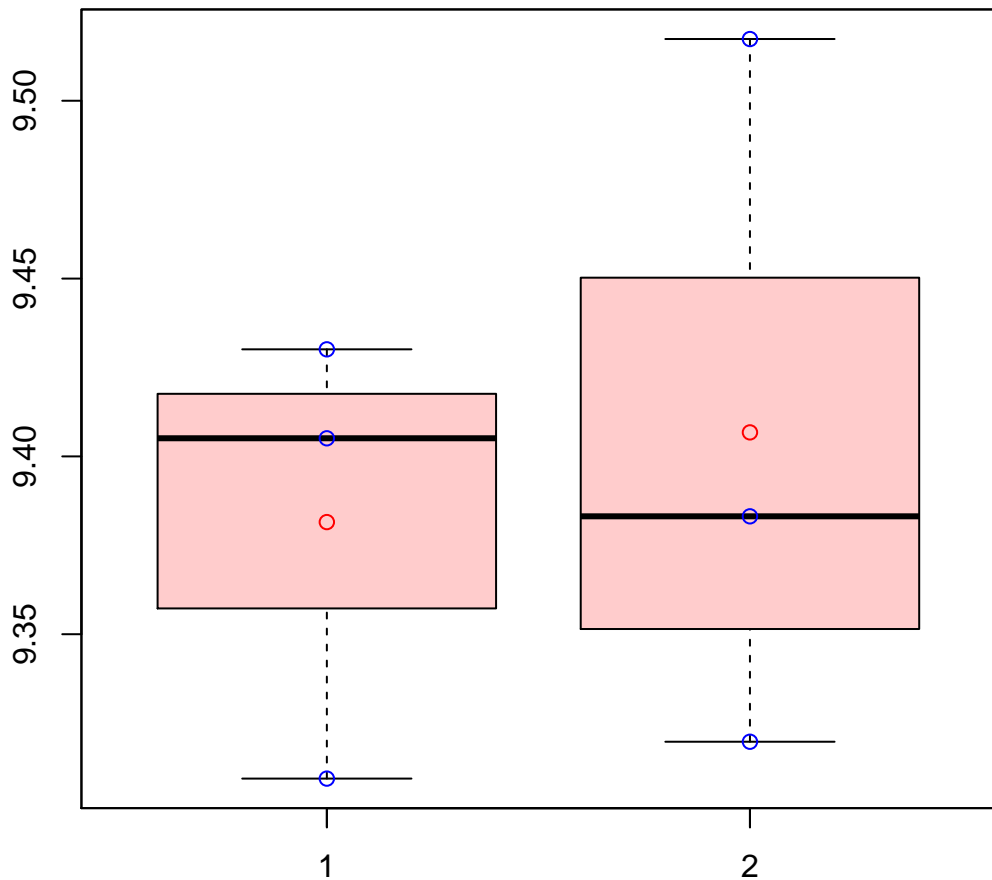

t-Test: p-value = 0.74

# CL4885Contig1|CL4885Contig1

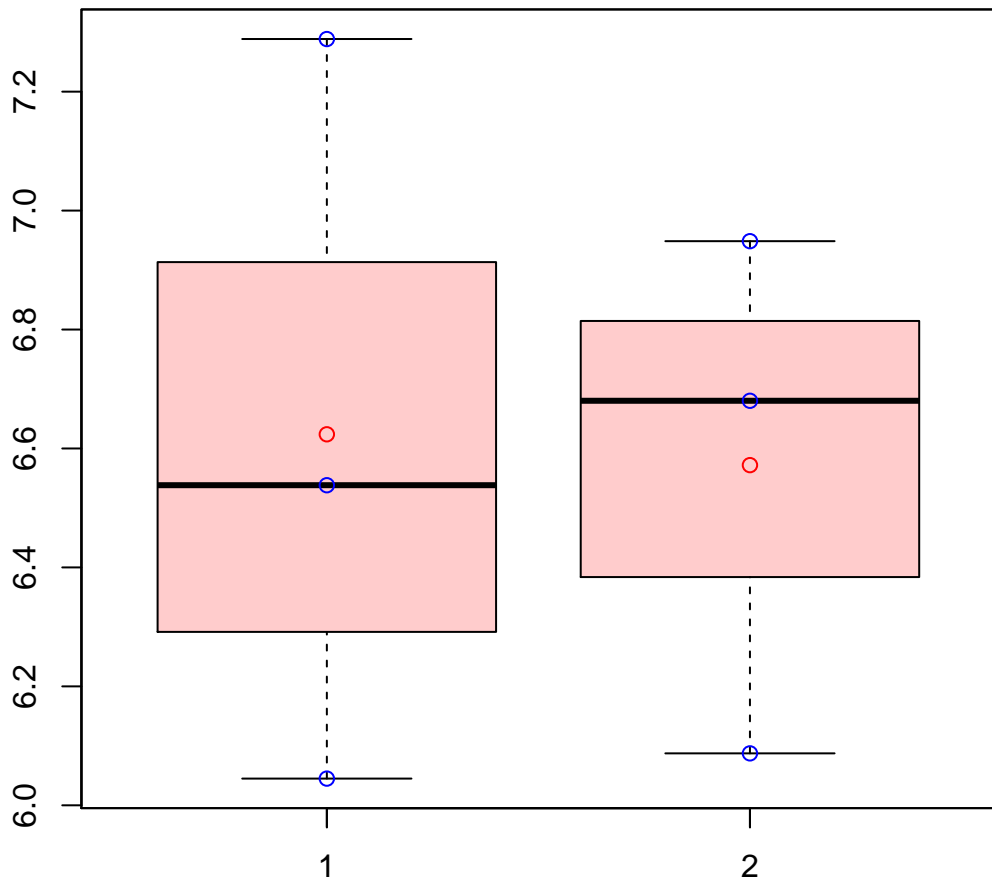

t-Test: p-value = 0.91

# CL4890Contig2|CL4890Contig2

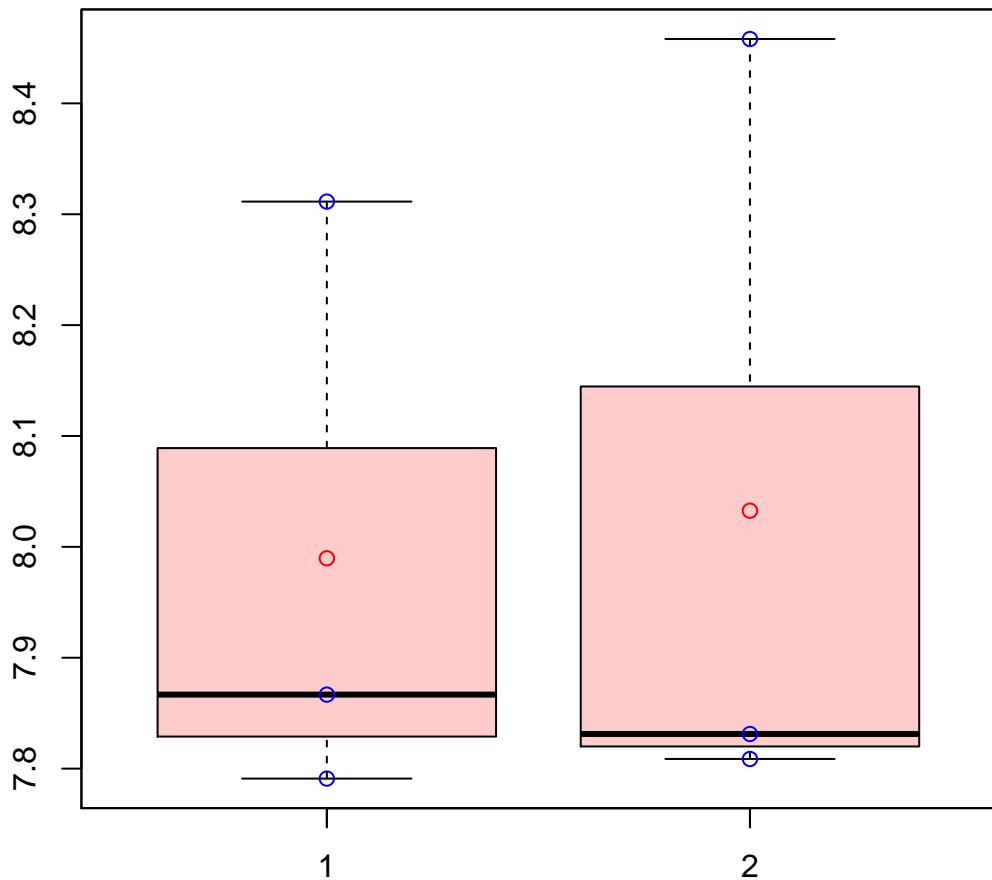

t-Test: p-value = 0.88

# CL48Contig14|CL48Contig14

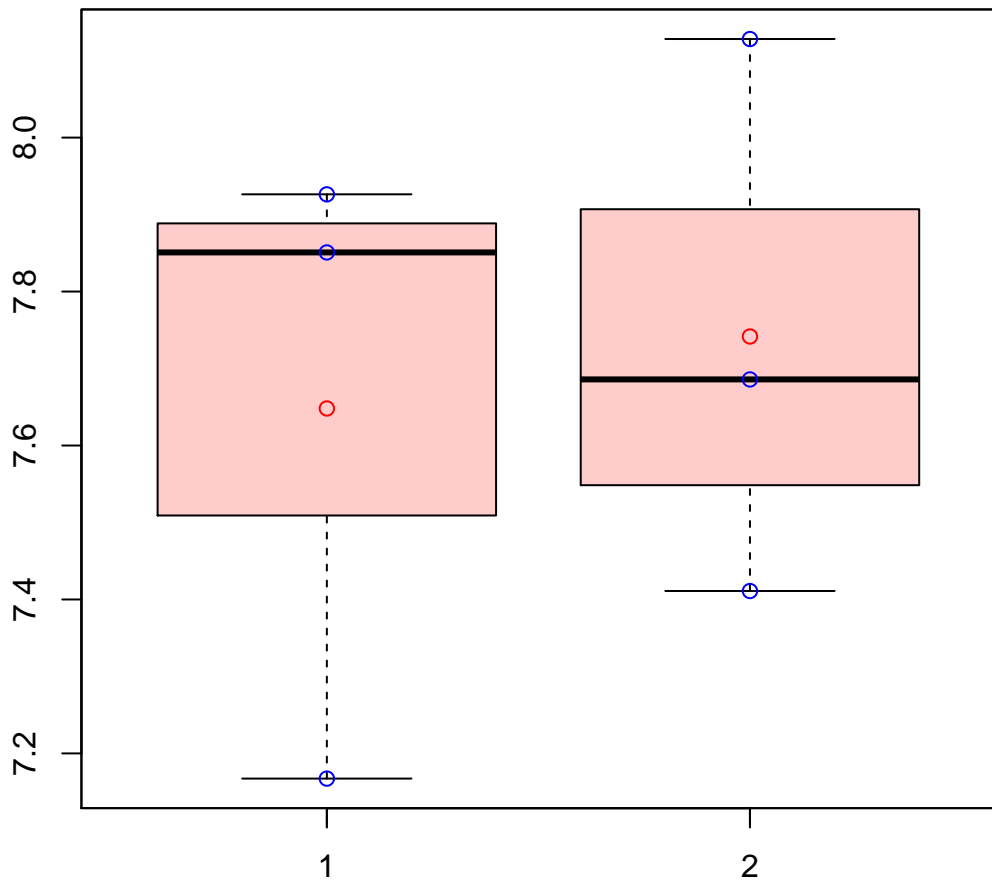

t-Test: p-value = 0.78



# CL4904Contig3|CL4904Contig3

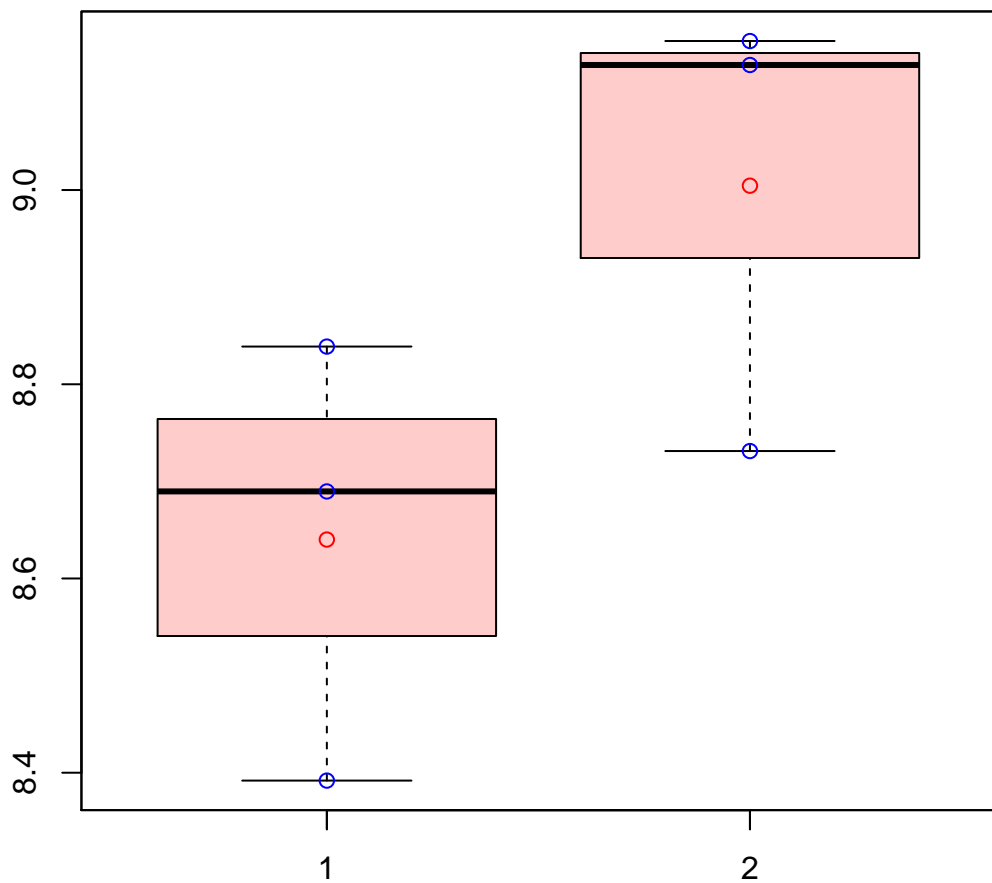

t-Test: p-value = 0.13

# CL4906Contig2|CL4906Contig2

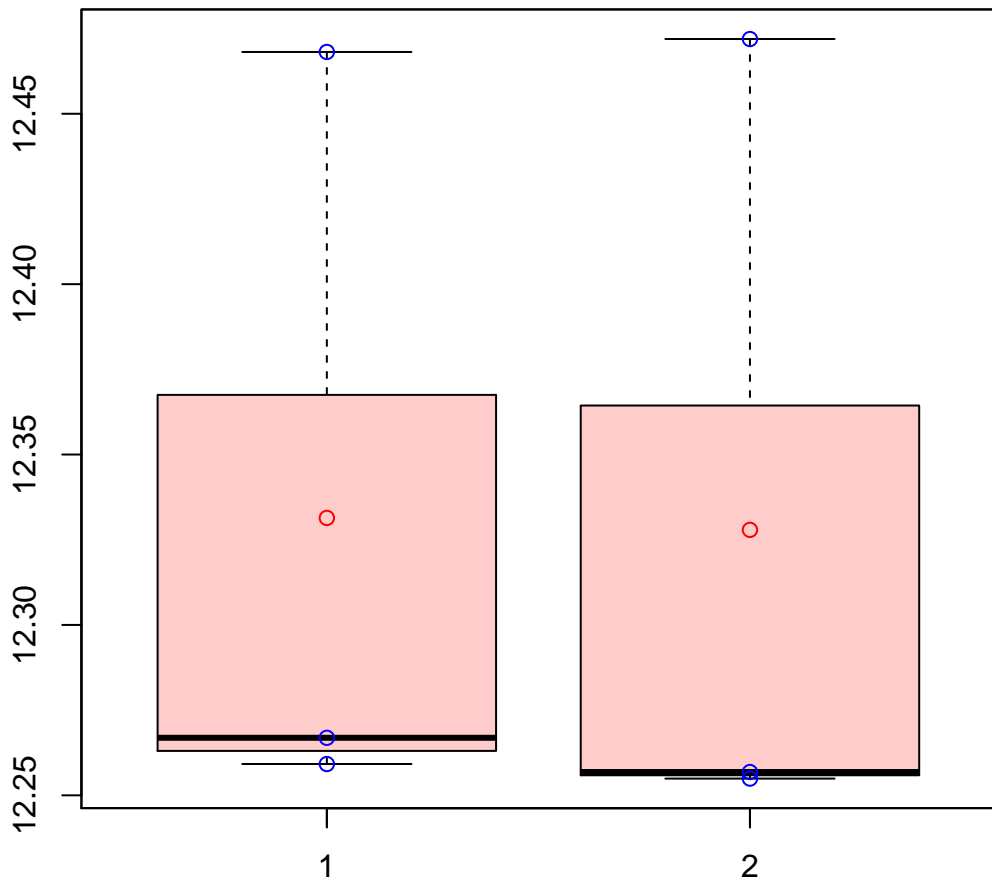

t-Test: p-value = 0.97

# CL4914Contig1|CL4914Contig1

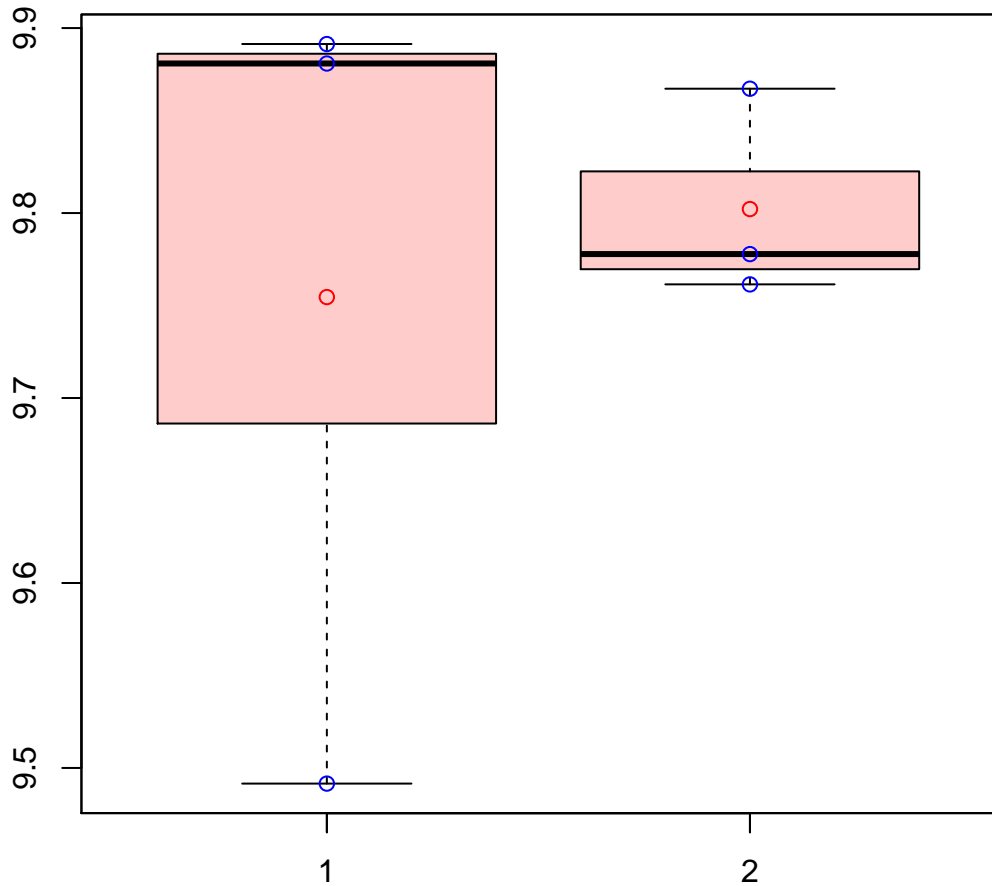

t-Test: p-value = 0.76

# CL4914Contig2|CL4914Contig2

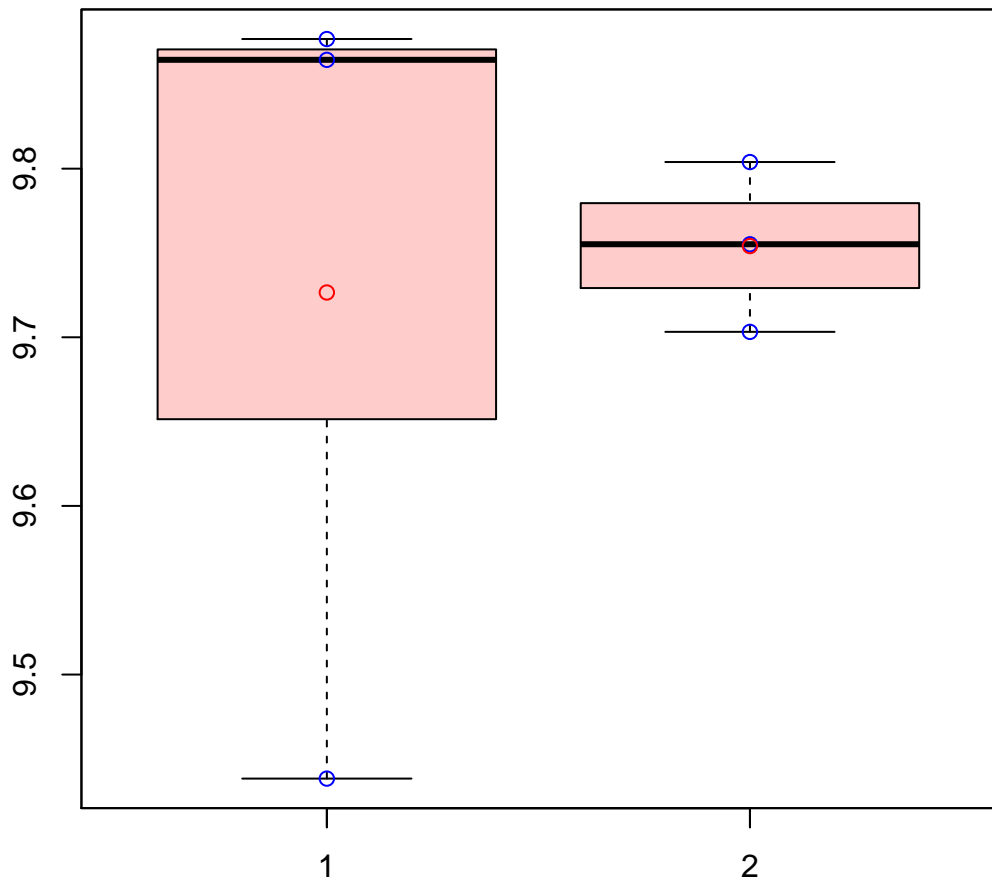

t-Test: p-value = 0.87

# CL4914Contig4|CL4914Contig4



t-Test: p-value = 0.87

# CL4918Contig2|CL4918Contig2

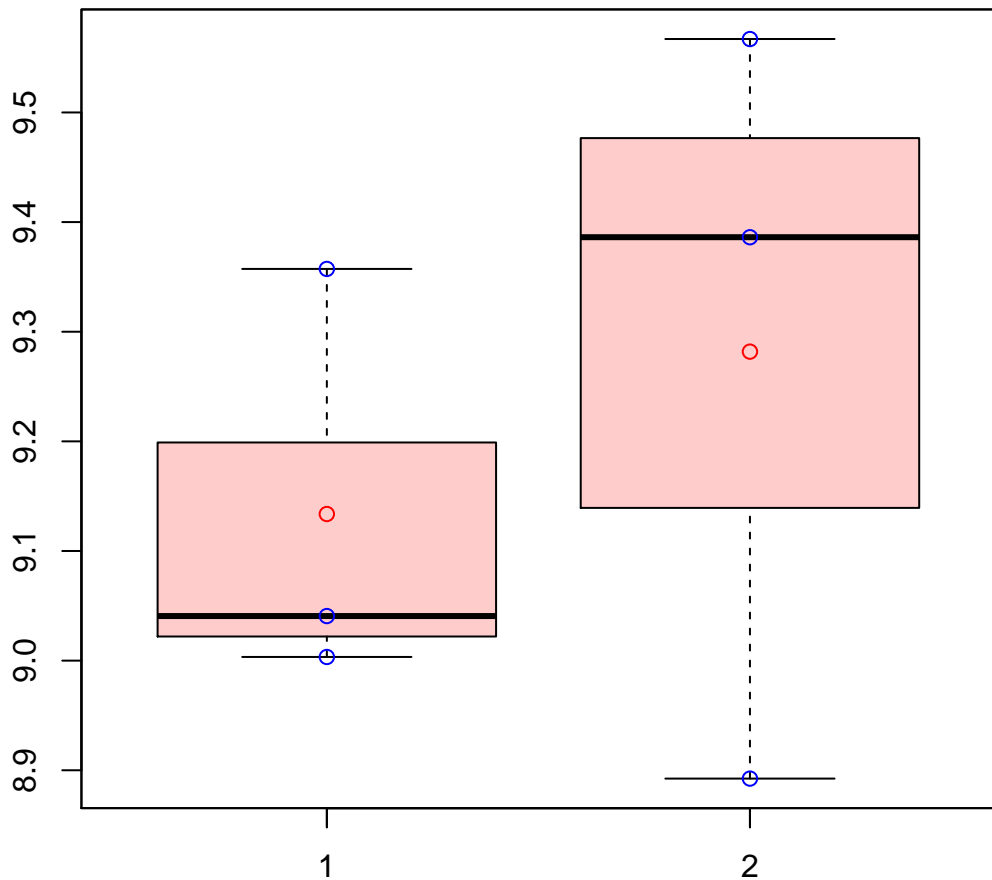

t-Test: p-value = 0.56

# CL4919Contig1|CL4919Contig1

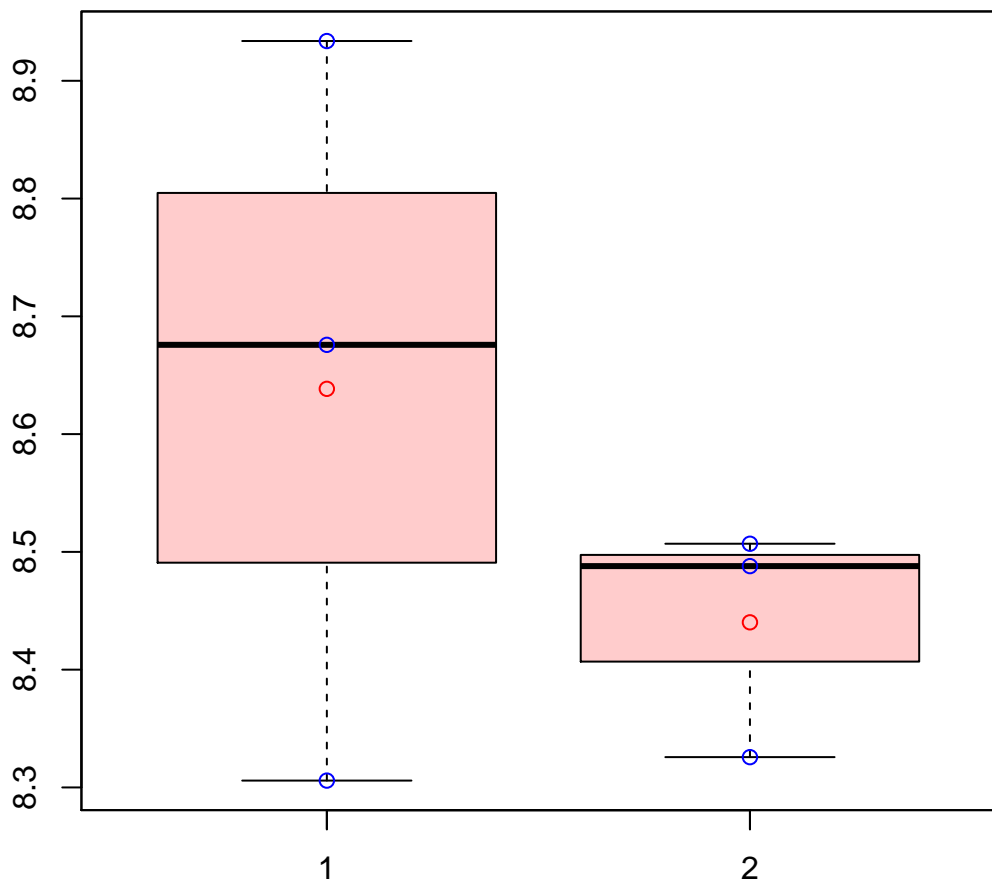

t-Test: p-value = 0.39

# CL4919Contig3|CL4919Contig3

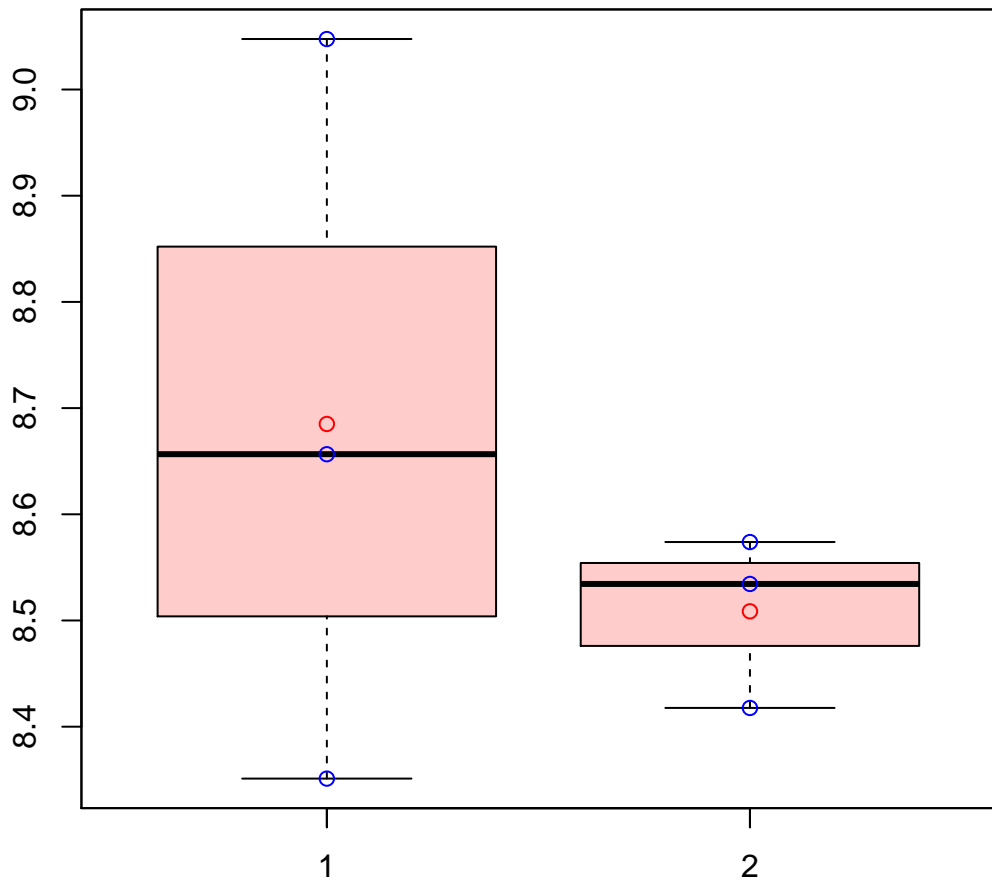

t-Test: p-value = 0.48



# CL491Contig4|CL491Contig4

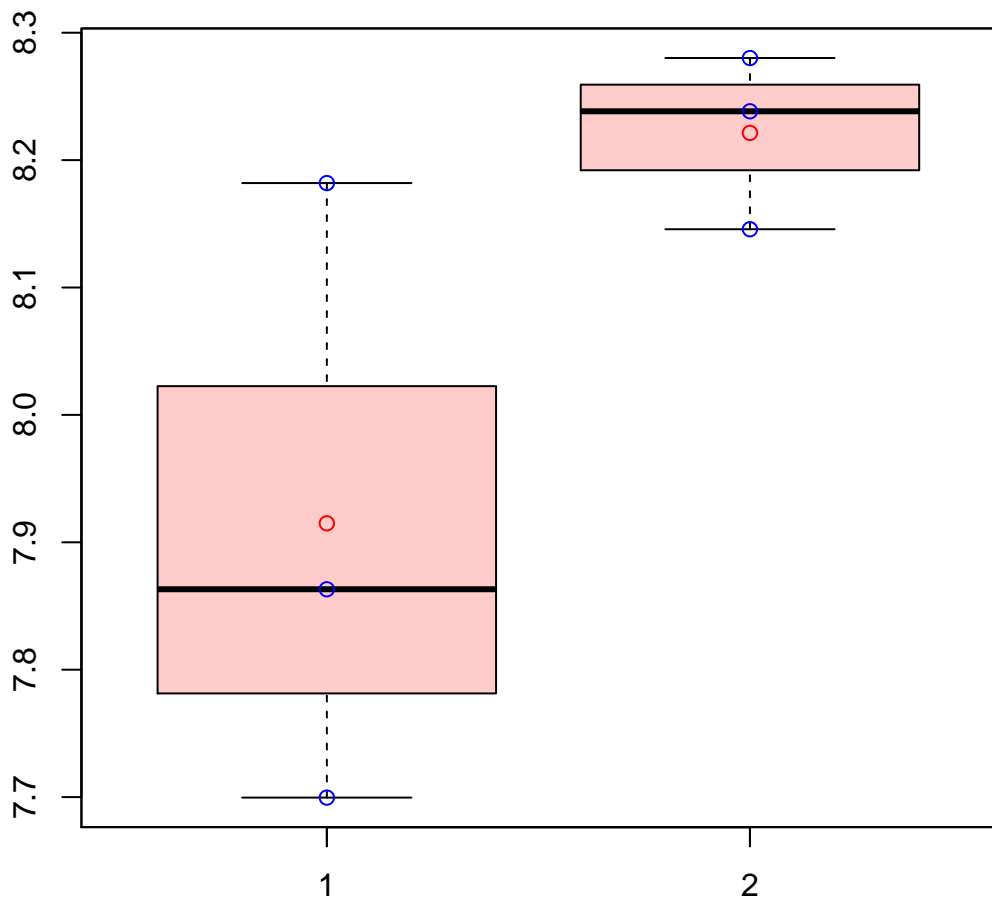

t-Test: p-value = 0.16

# CL4920Contig2|CL4920Contig2

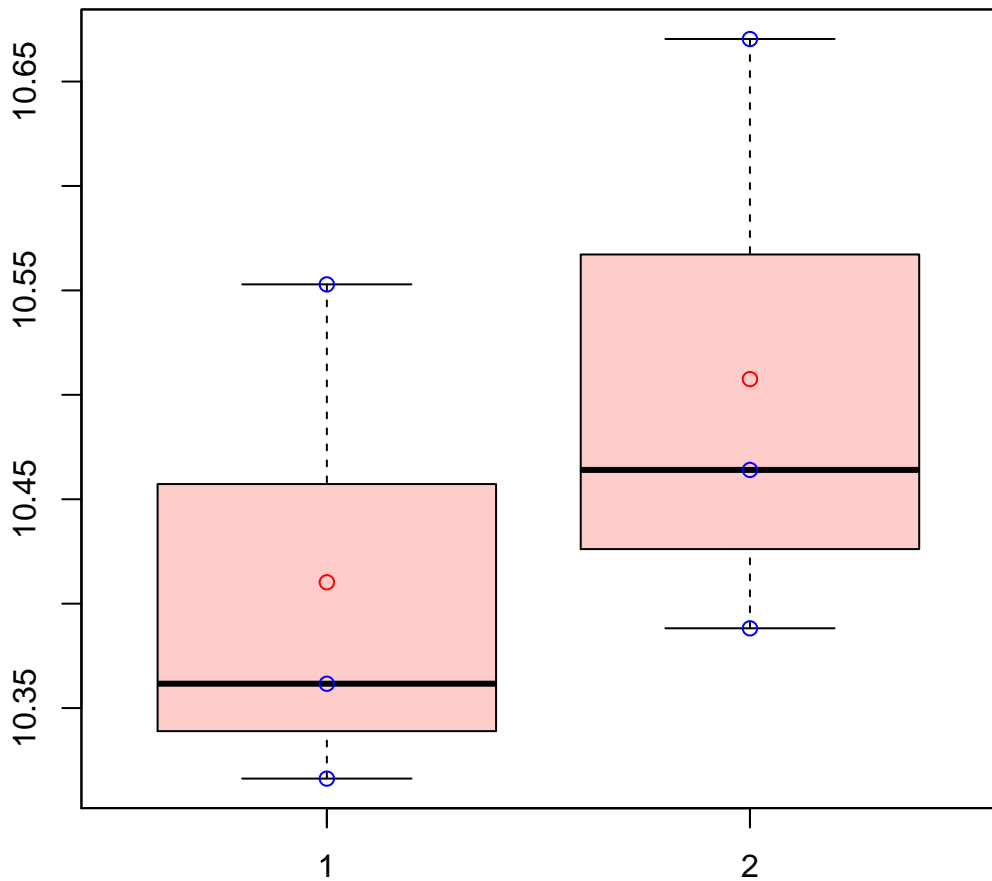

t-Test: p-value = 0.43

# CL4922Contig2|CL4922Contig2

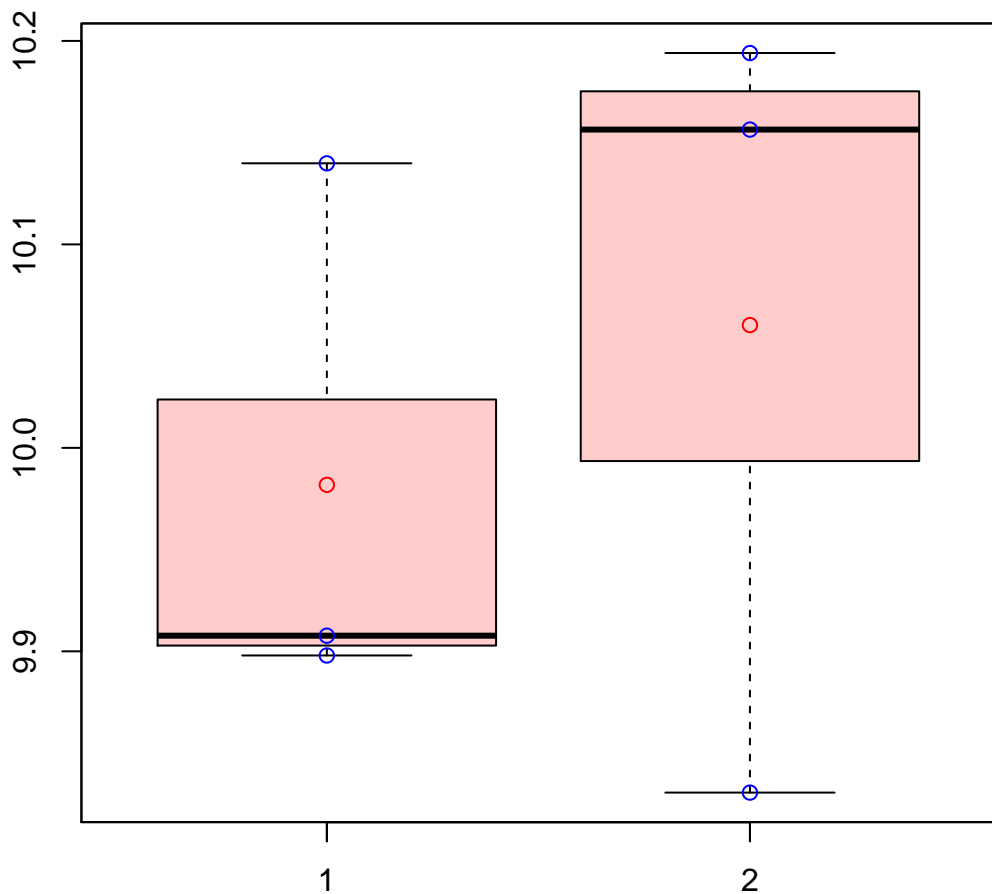

t-Test: p-value = 0.61

# CL4922Contig4|CL4922Contig4

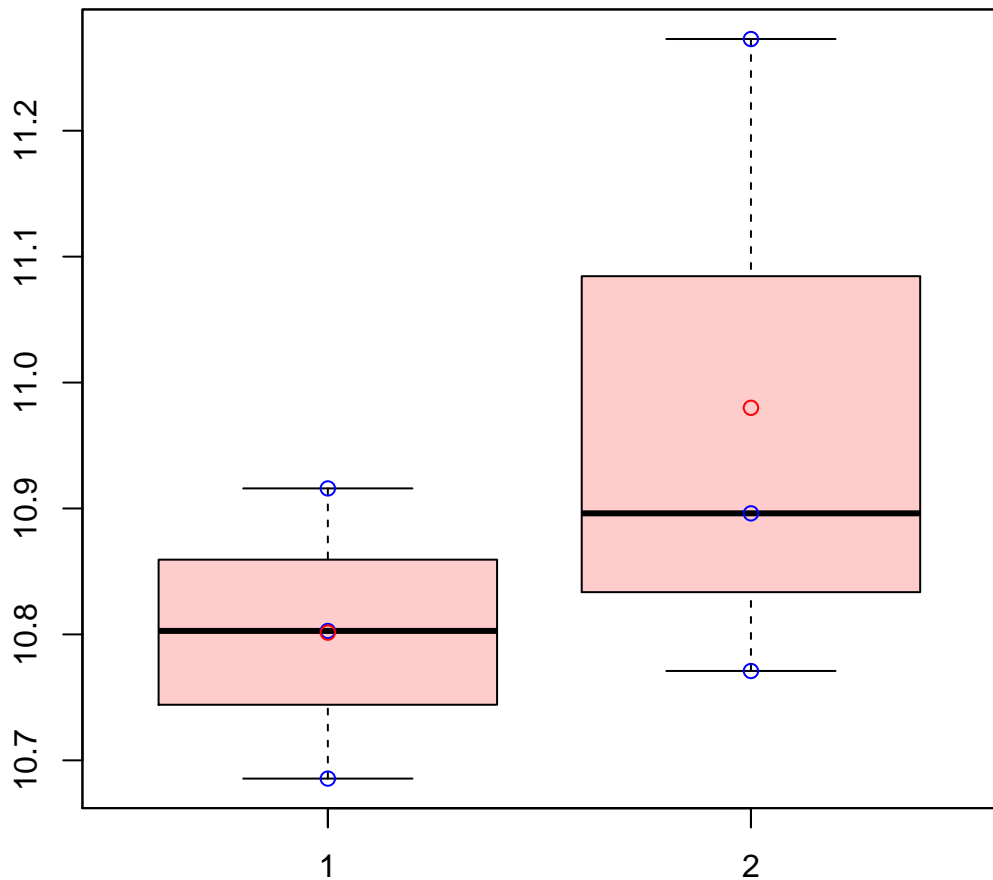

t-Test: p-value = 0.36

# CL4927Contig4|CL4927Contig4

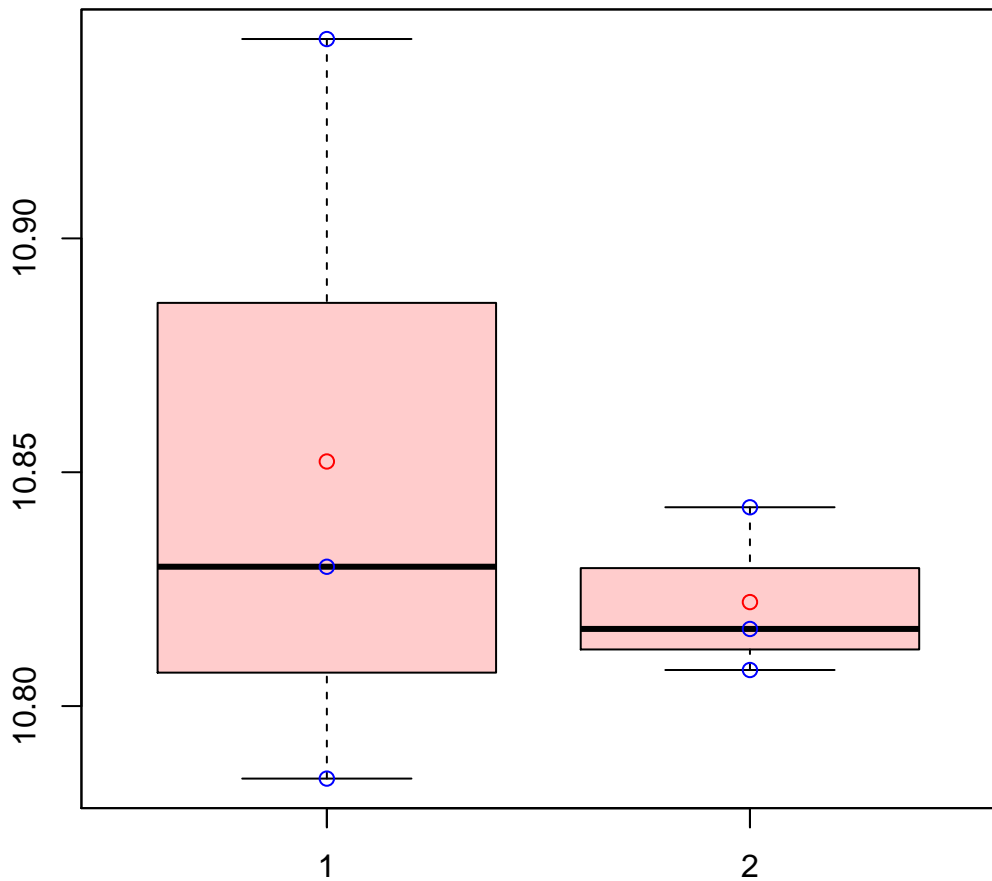

t-Test: p-value = 0.59

# CL4928Contig1|CL4928Contig1

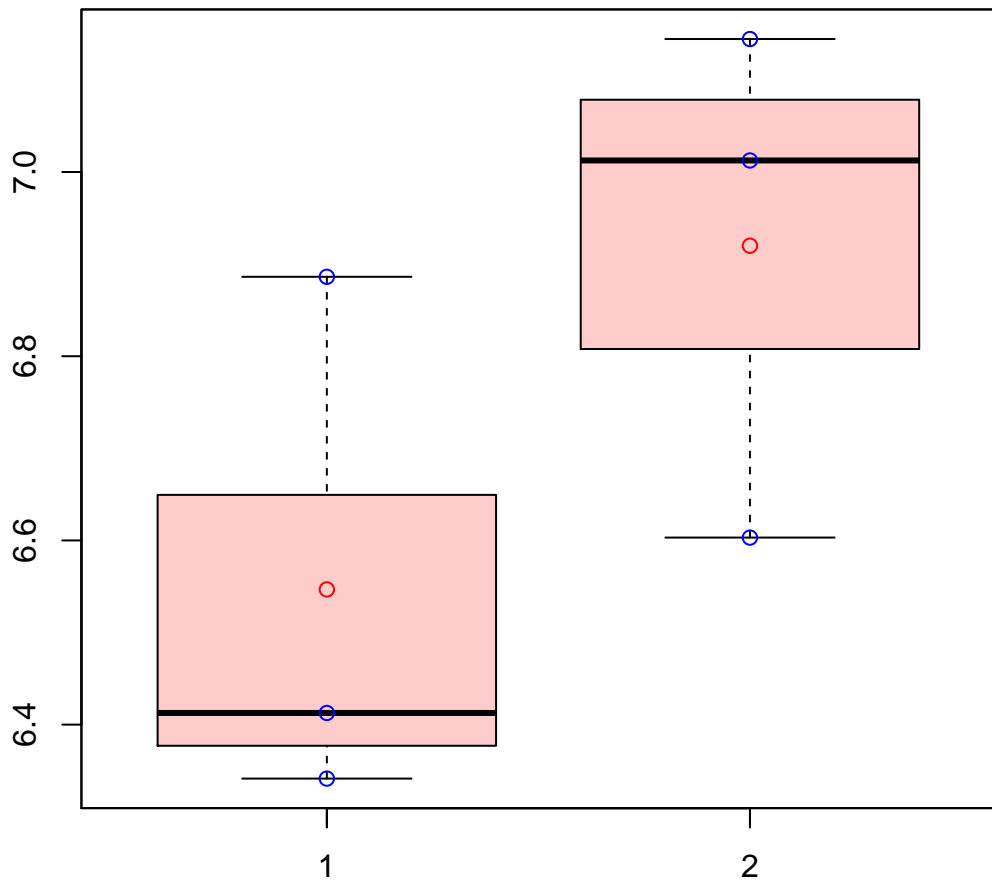

t-Test: p-value = 0.19

# CL4928Contig2|CL4928Contig2

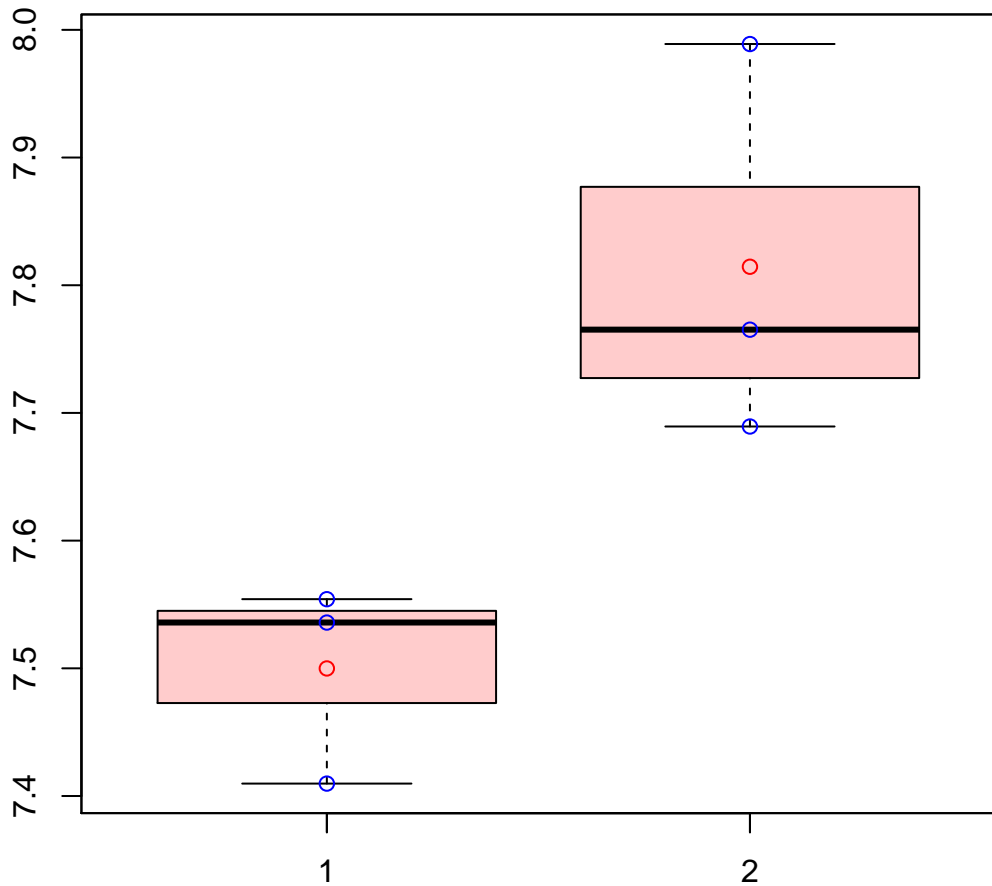

t-Test: p-value = 0.05

# CL4928Contig5|CL4928Contig5



t-Test: p-value = 0.05



# CL4931Contig2|CL4931Contig2

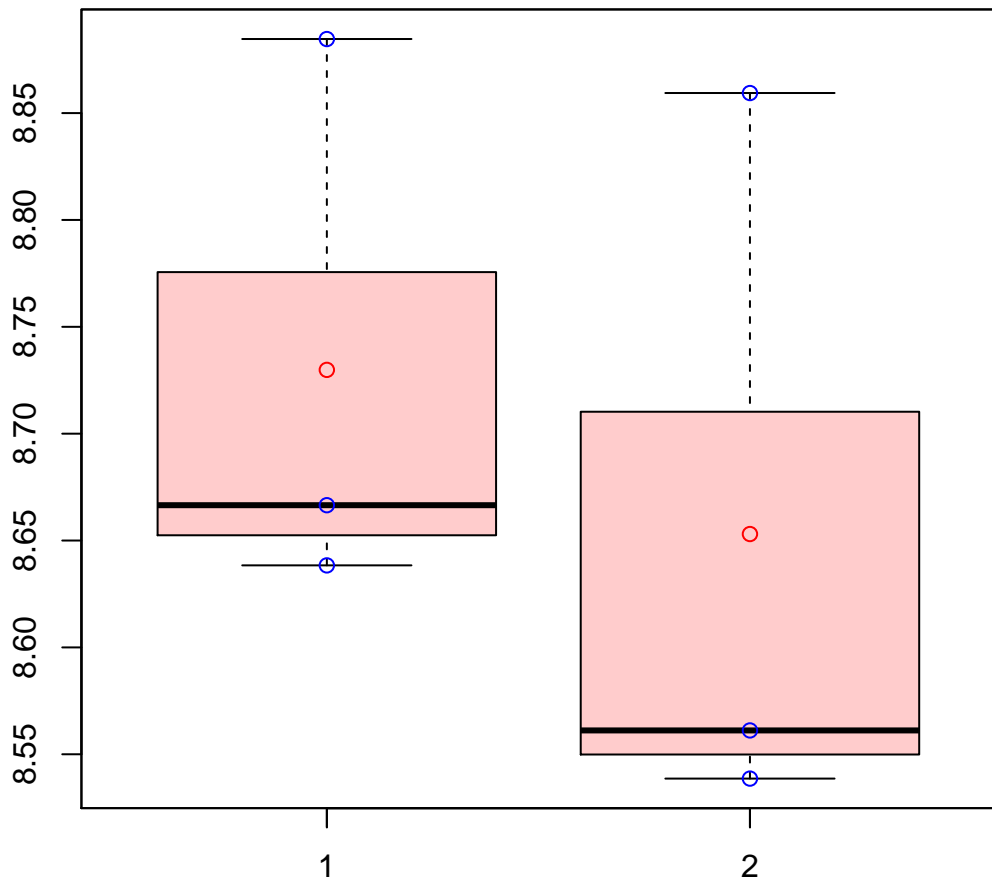

t-Test: p-value = 0.59

# CL4940Contig3|CL4940Contig3

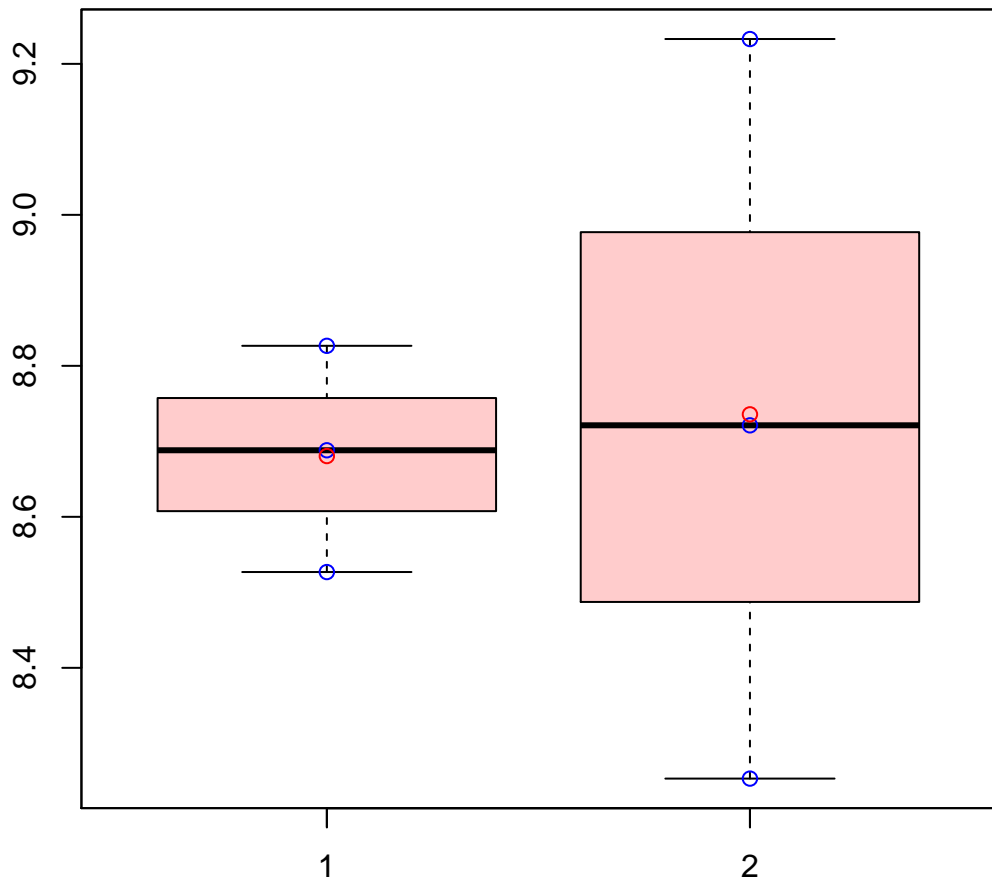

t-Test: p-value = 0.87

# CL4940Contig4|CL4940Contig4



t-Test: p-value = 0.87

# CL4940Contig6|CL4940Contig6



t-Test: p-value = 0.87

# CL4941Contig2|CL4941Contig2



t-Test: p-value = 0.62

# CL4944Contig4|CL4944Contig4

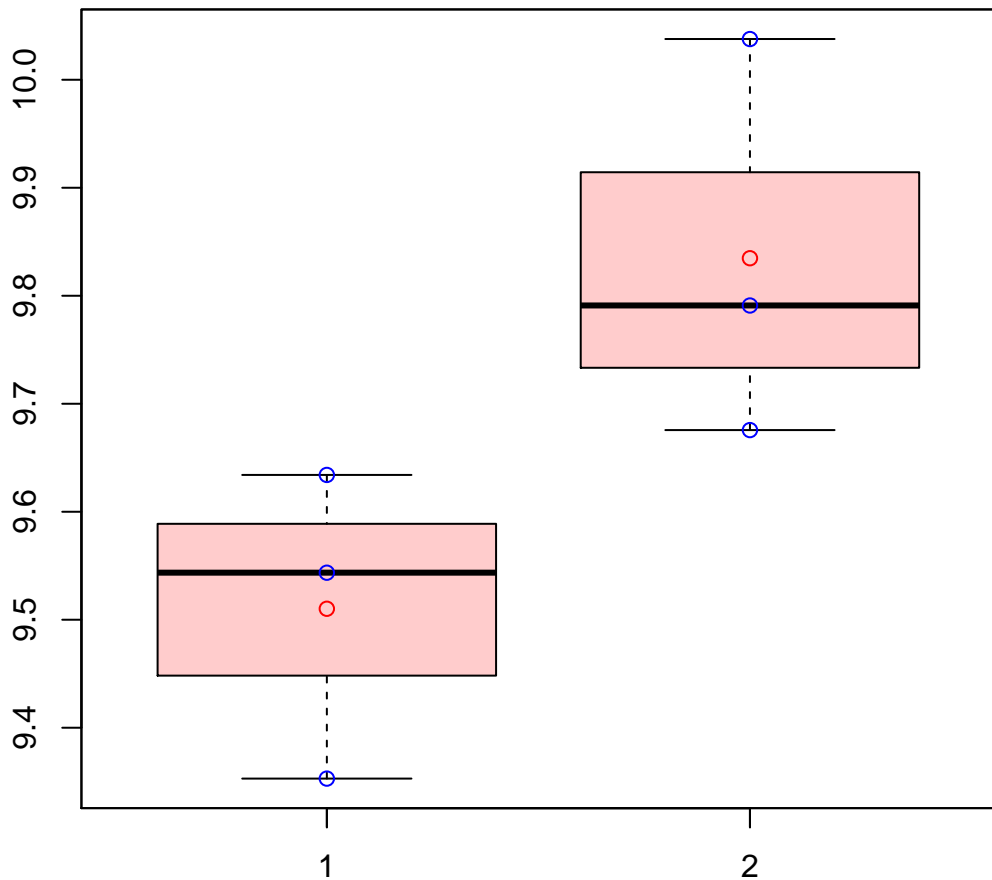

t-Test: p-value = 0.08

# CL494Contig2|CL494Contig2

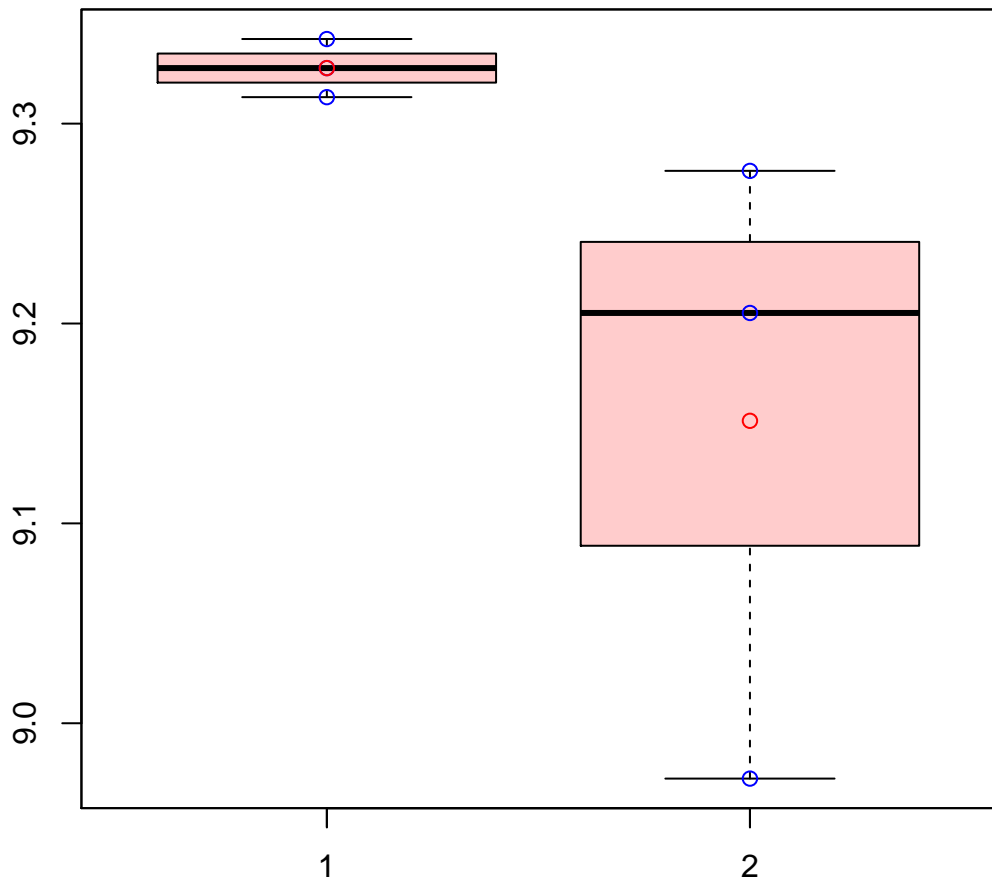

t-Test: p-value = 0.19

# CL4953Contig4|CL4953Contig4



t-Test: p-value = 0.39



# CL4956Contig2|CL4956Contig2

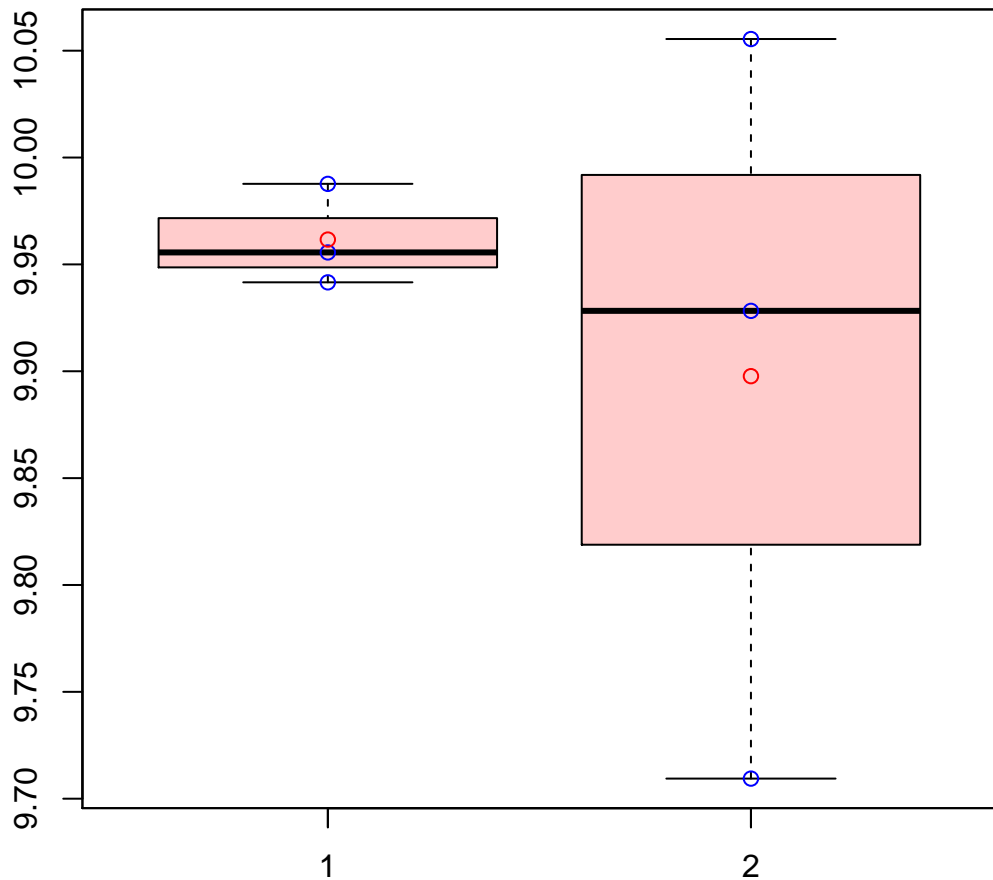

t-Test: p-value = 0.59

# CL4956Contig4|CL4956Contig4



t-Test: p-value = 0.04

# CL4956Contig6|CL4956Contig6

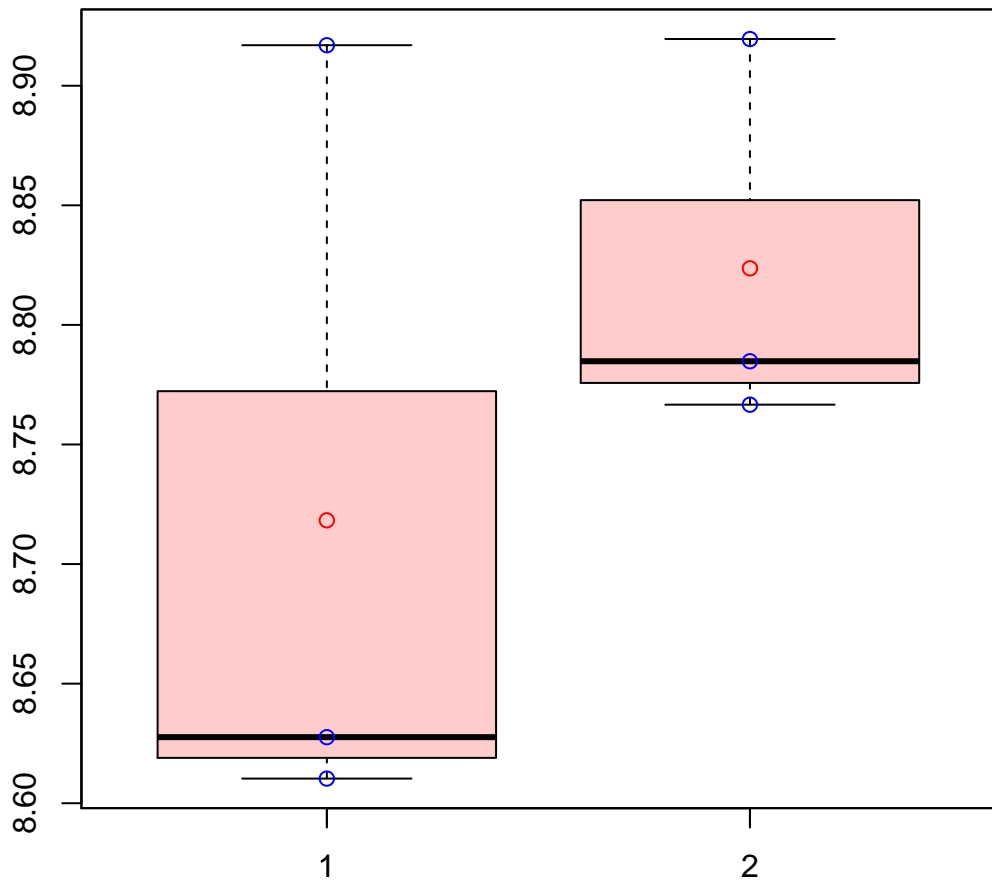

t-Test: p-value = 0.41

# CL495Contig1|CL495Contig1

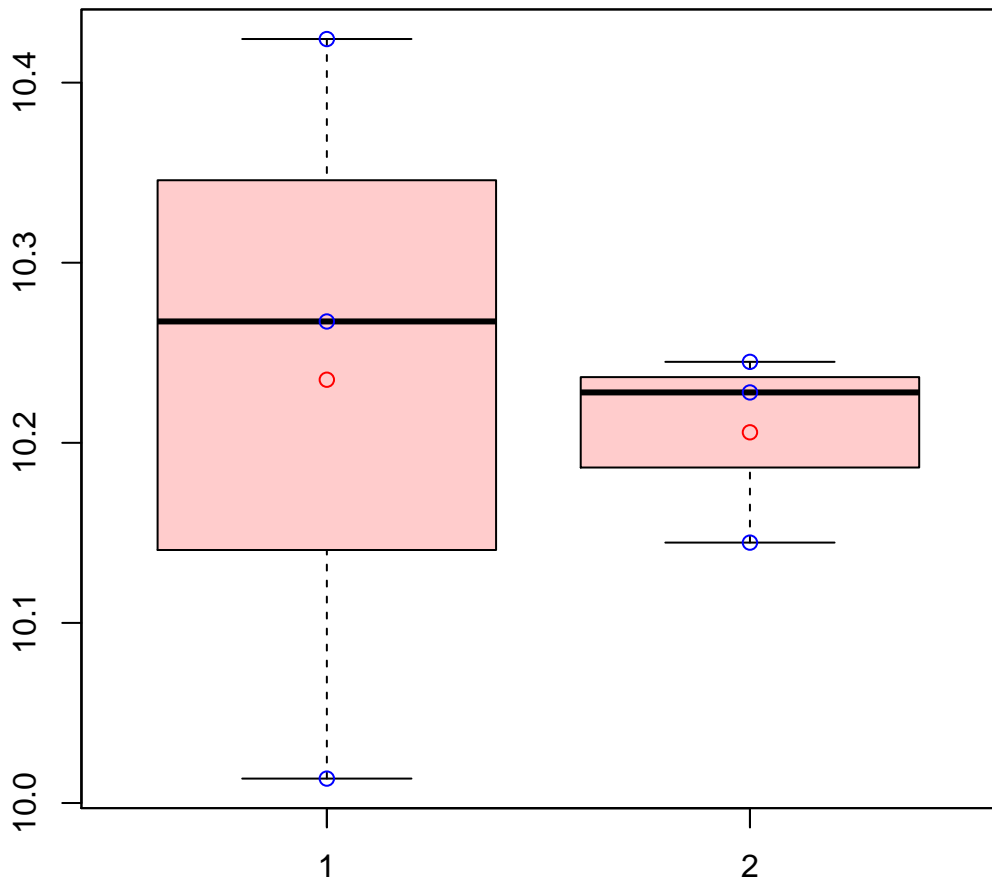

t-Test: p-value = 0.83

# CL495Contig2|CL495Contig2

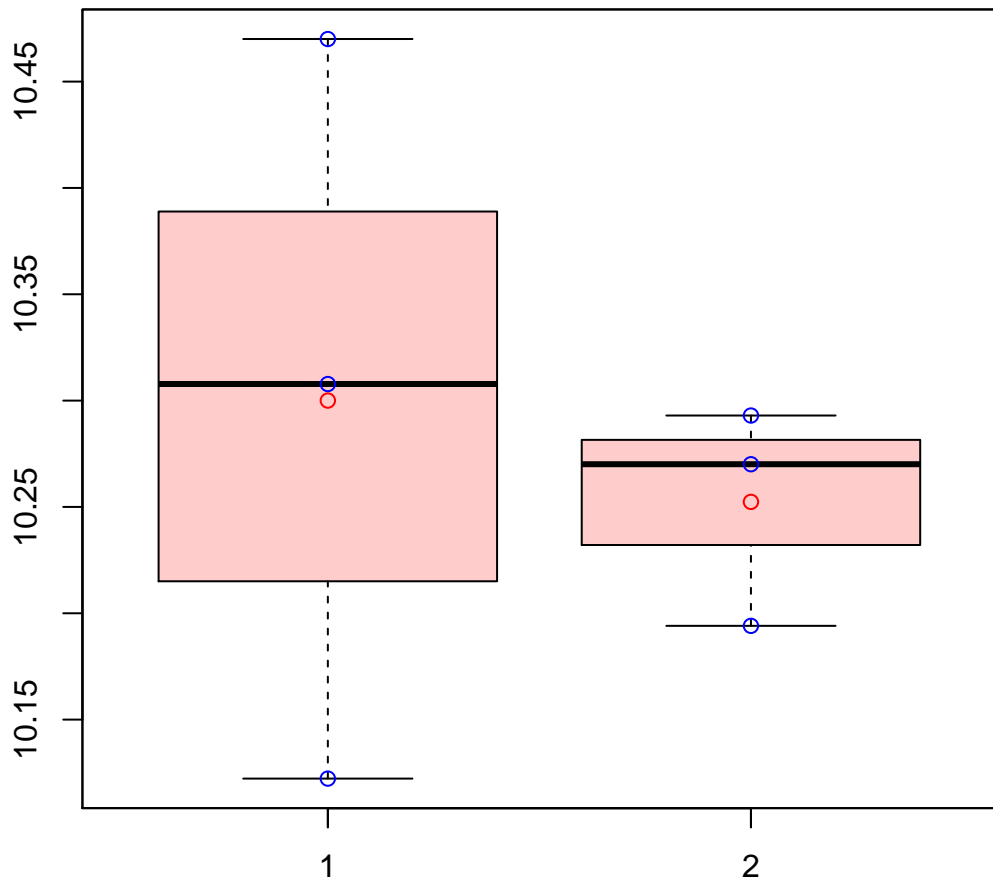

t-Test: p-value = 0.69

# CL495Contig4|CL495Contig4



t-Test: p-value = 0.83

# CL4966Contig1|CL4966Contig1



t-Test: p-value = 0.1

# CL4966Contig5|CL4966Contig5



t-Test: p-value = 0.1



# CL496Contig4|CL496Contig4

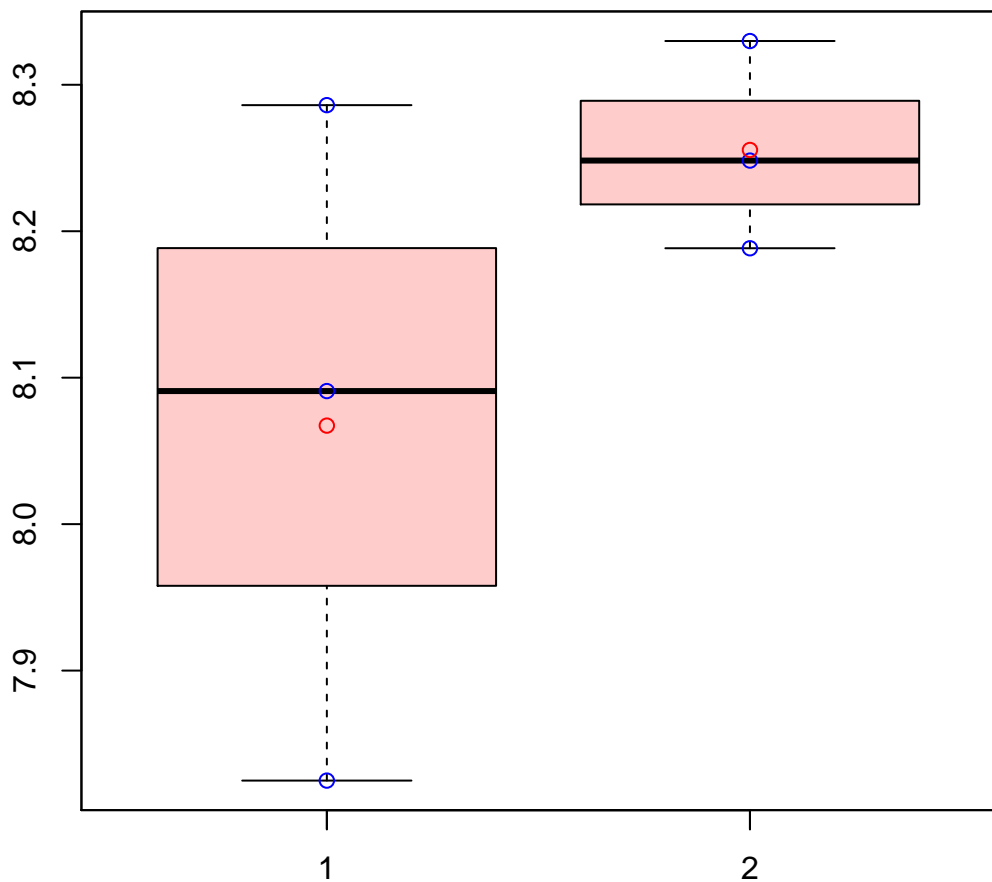

t-Test: p-value = 0.29

# CL496Contig6|CL496Contig6

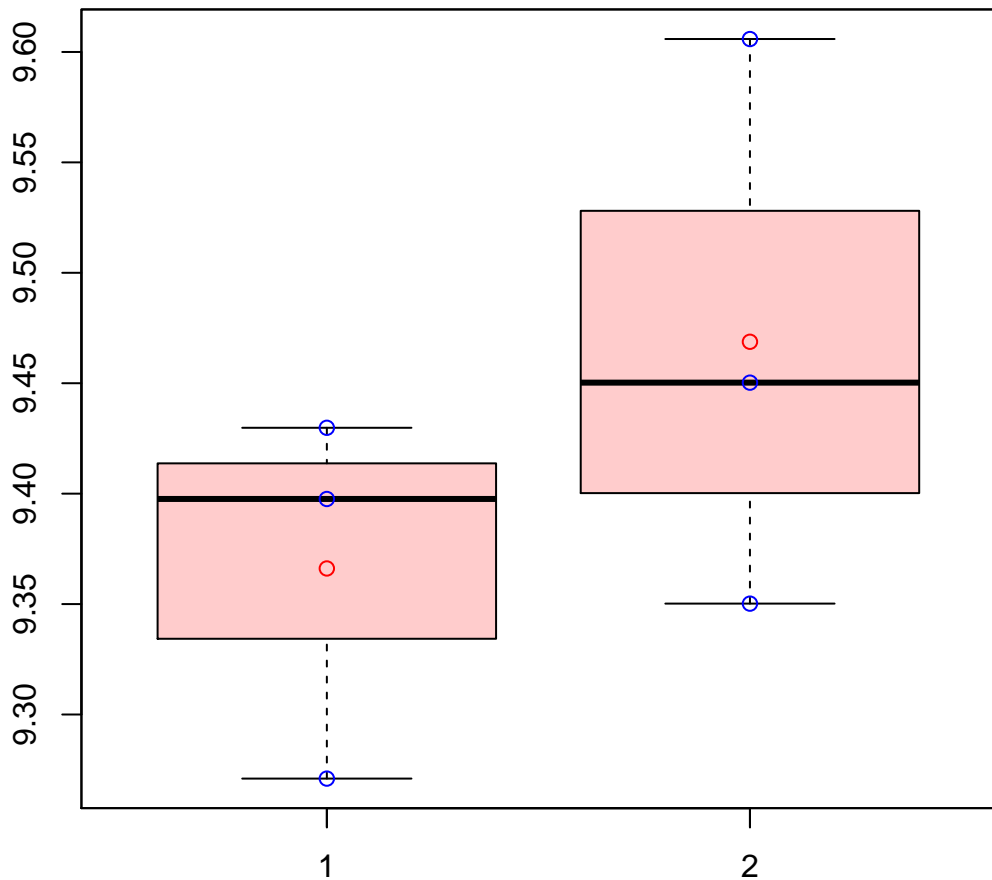

t-Test: p-value = 0.32

# CL4978Contig2|CL4978Contig2

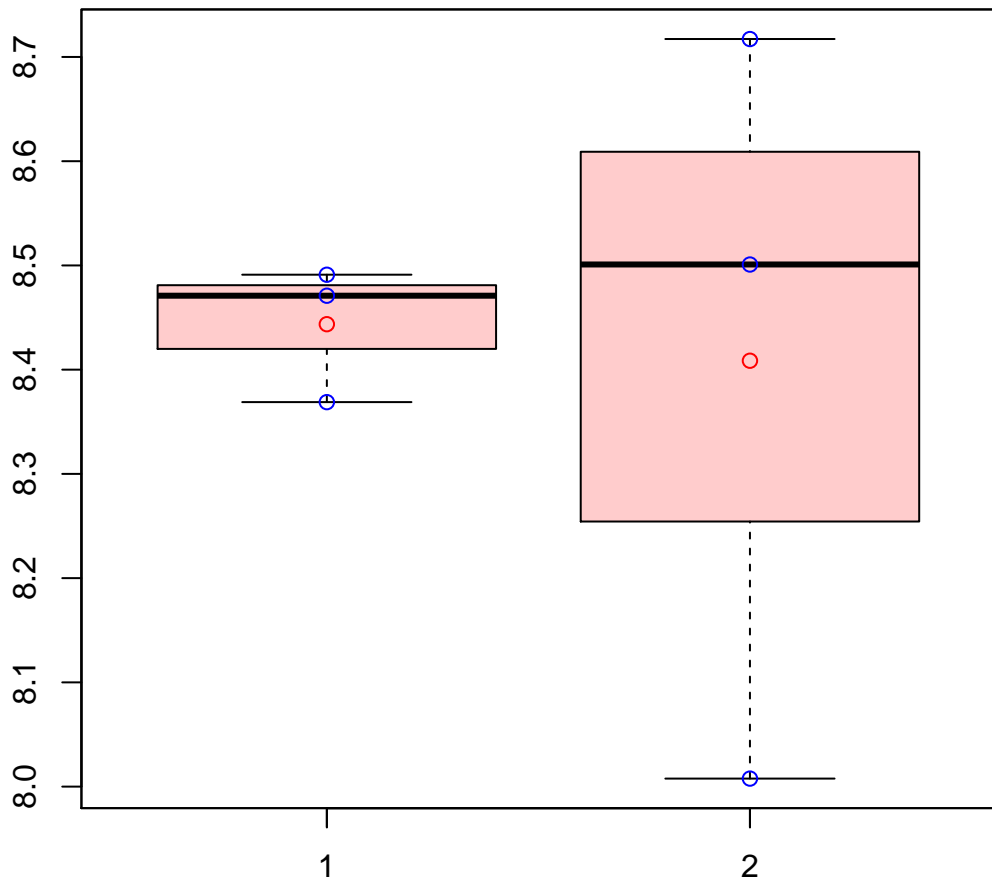

t-Test: p-value = 0.88

# CL4982Contig2|CL4982Contig2

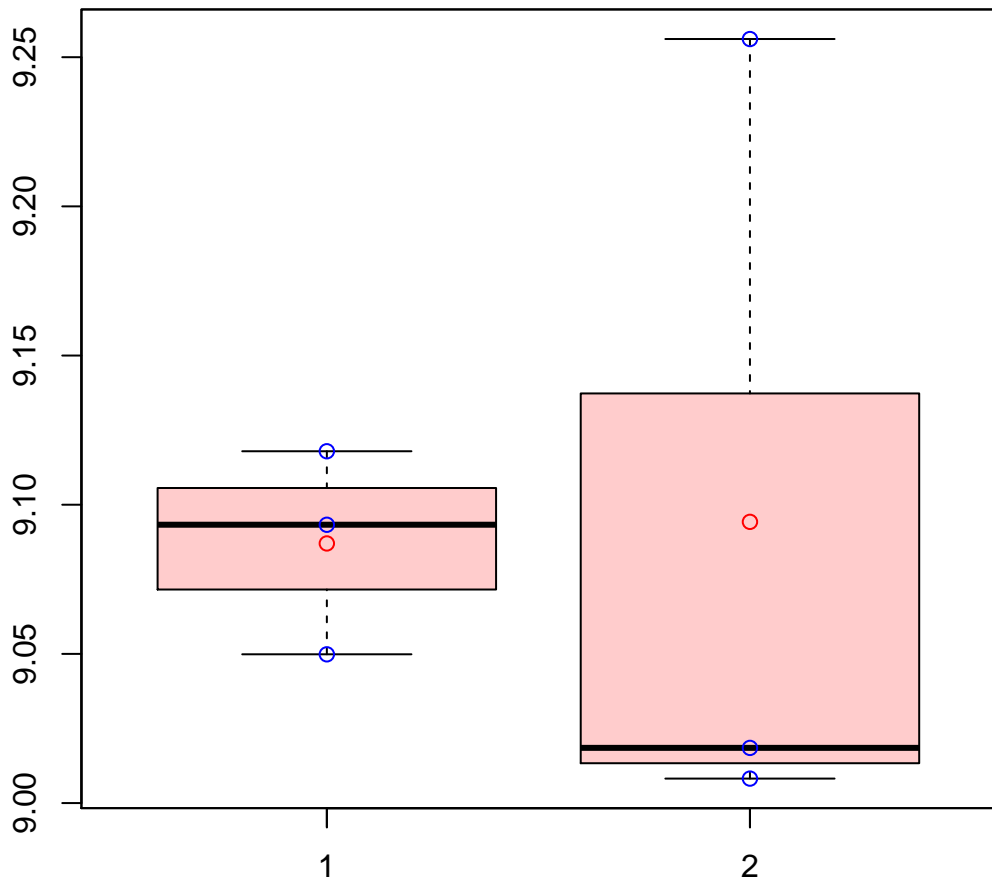

t-Test: p-value = 0.94

# CL4989Contig1|CL4989Contig1

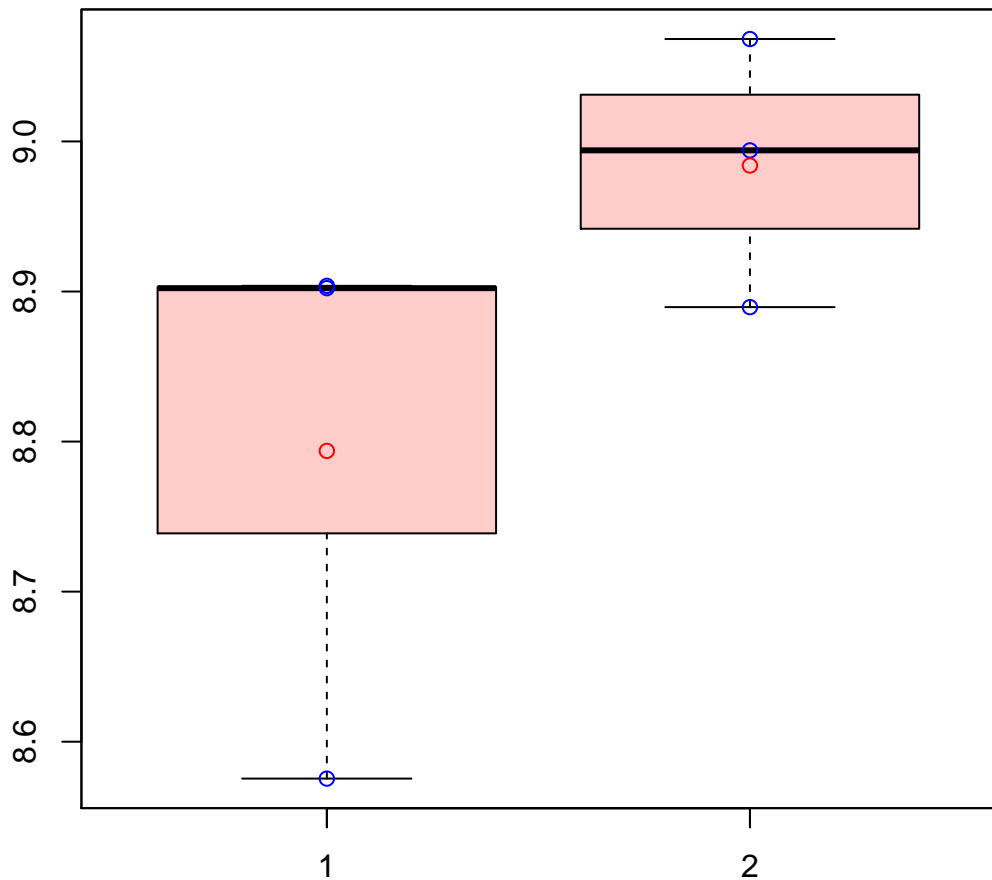

t-Test: p-value = 0.22

# CL4990Contig2|CL4990Contig2



t-Test: p-value = 0.91

# CL4995Contig1|CL4995Contig1

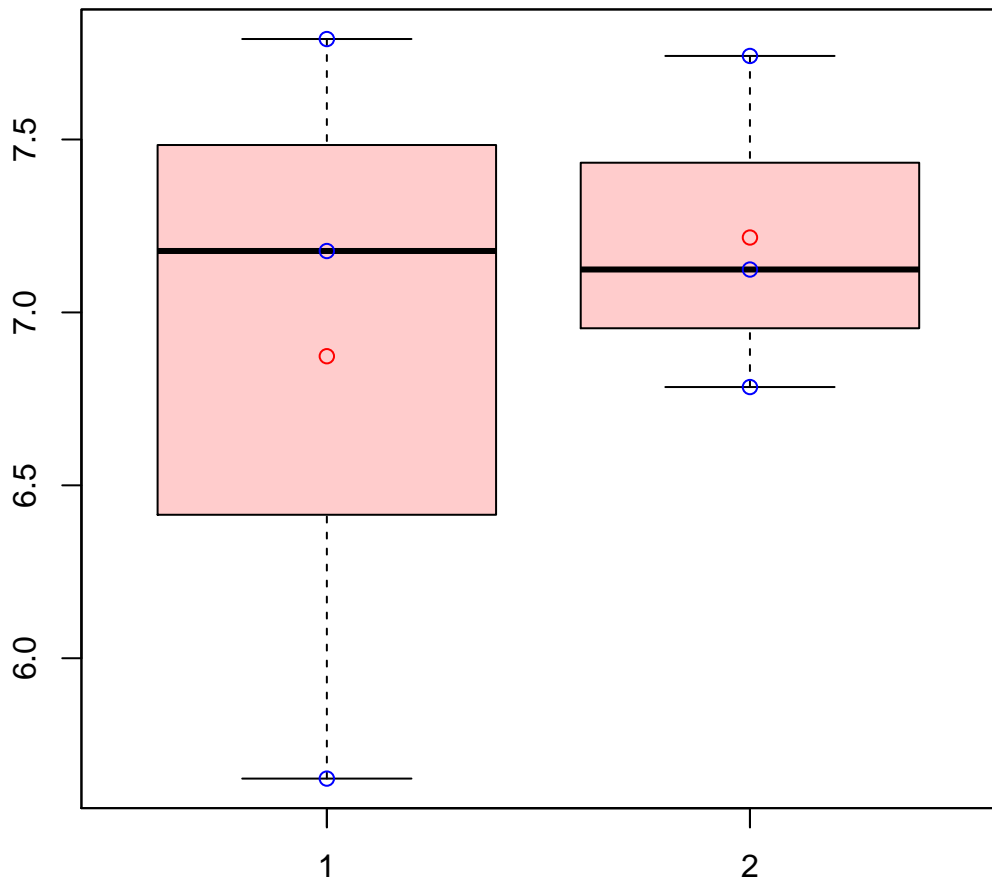

t-Test: p-value = 0.66

# CL499Contig1|CL499Contig1

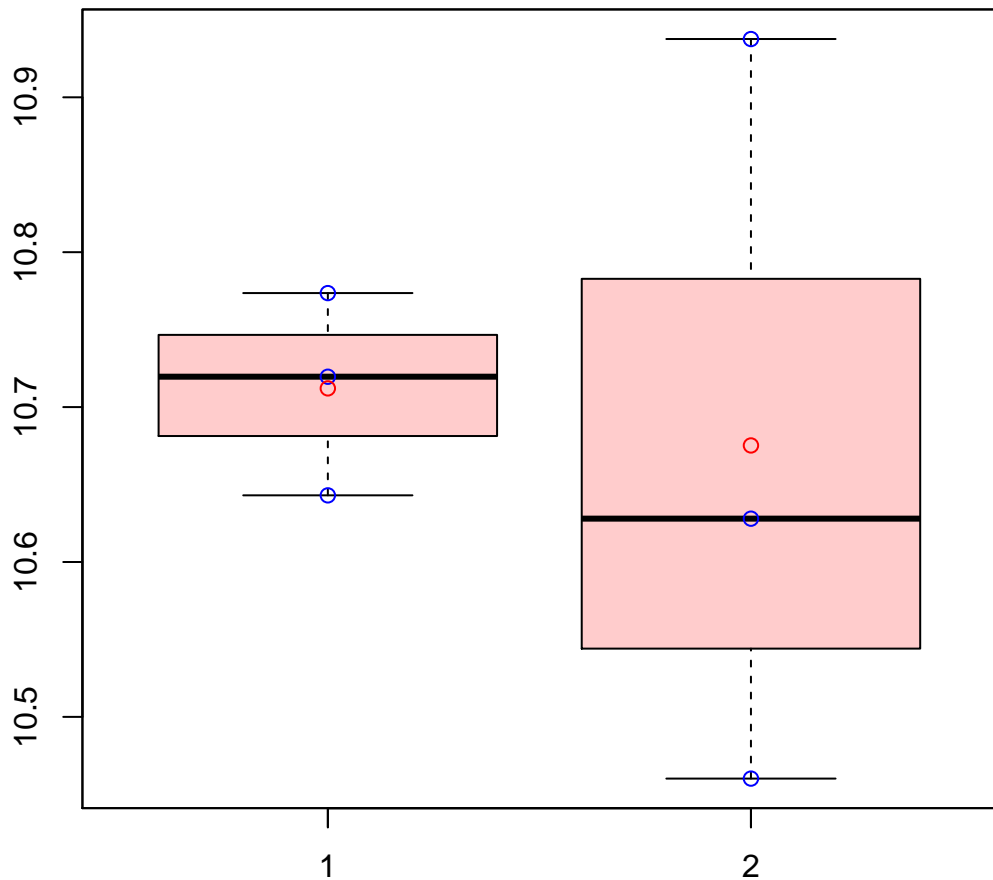

t-Test: p-value = 0.82



# CL499Contig3|CL499Contig3

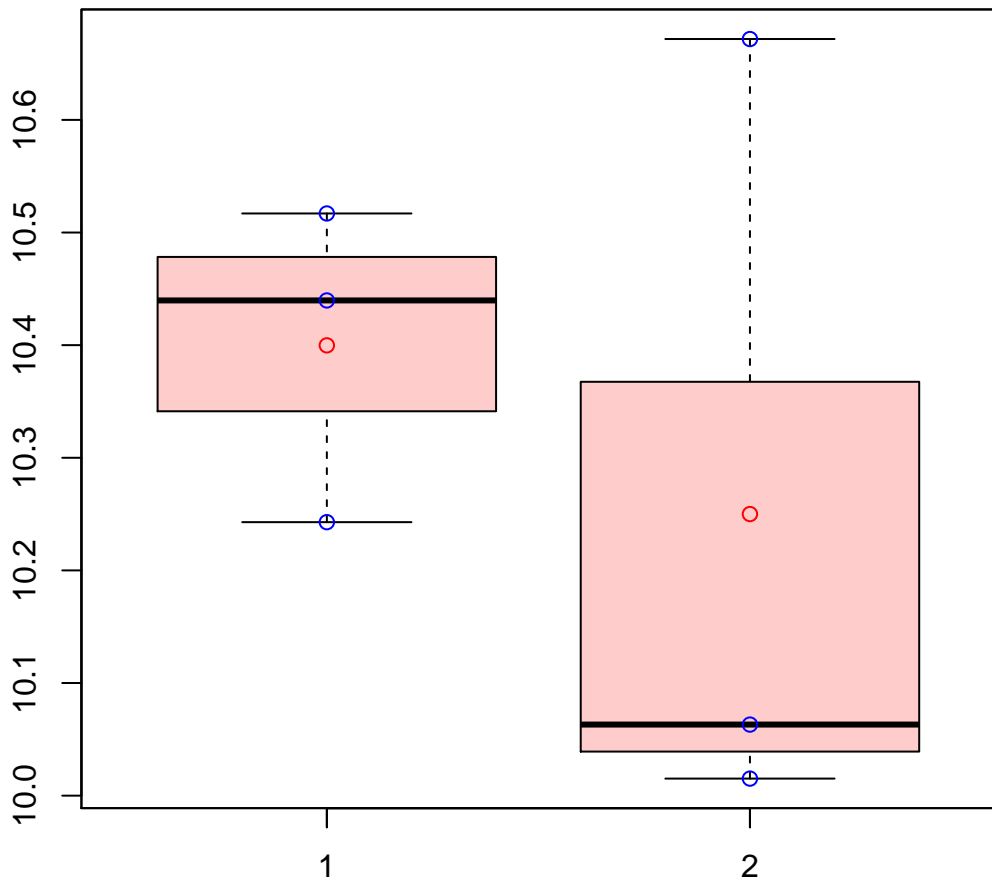

t-Test: p-value = 0.56

# CL49Contig18|CL49Contig18

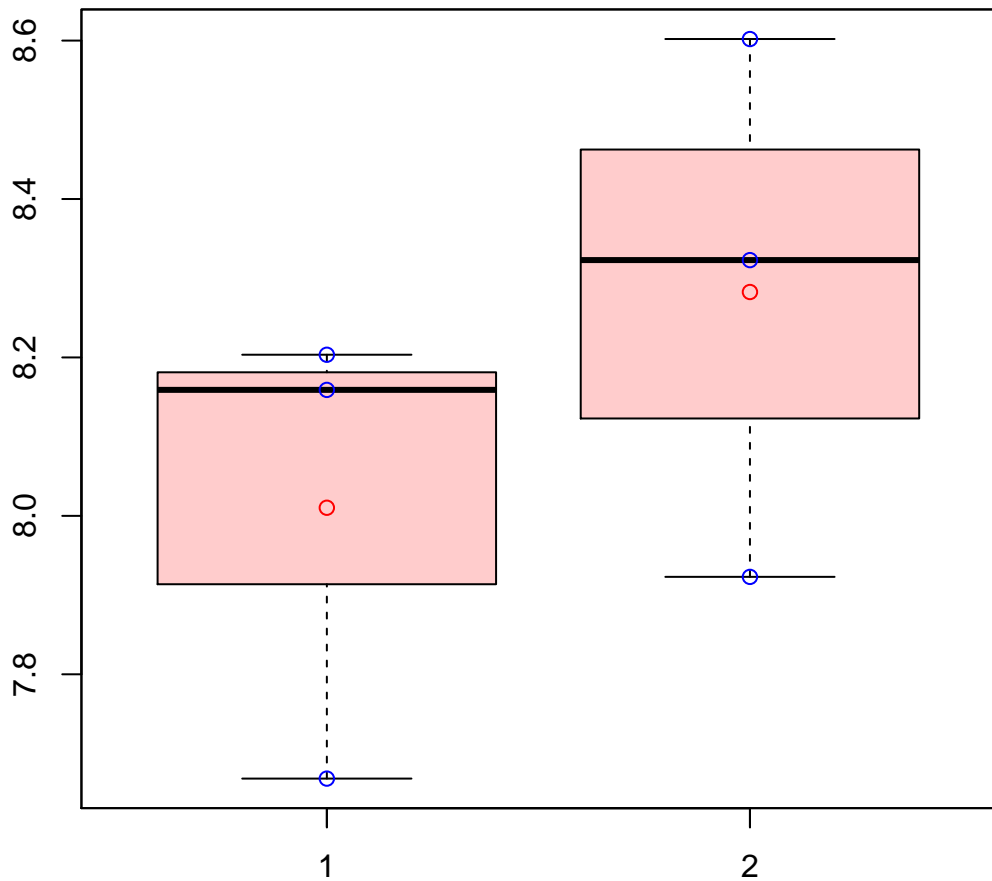

t-Test: p-value = 0.36

# CL4Contig15|CL4Contig15

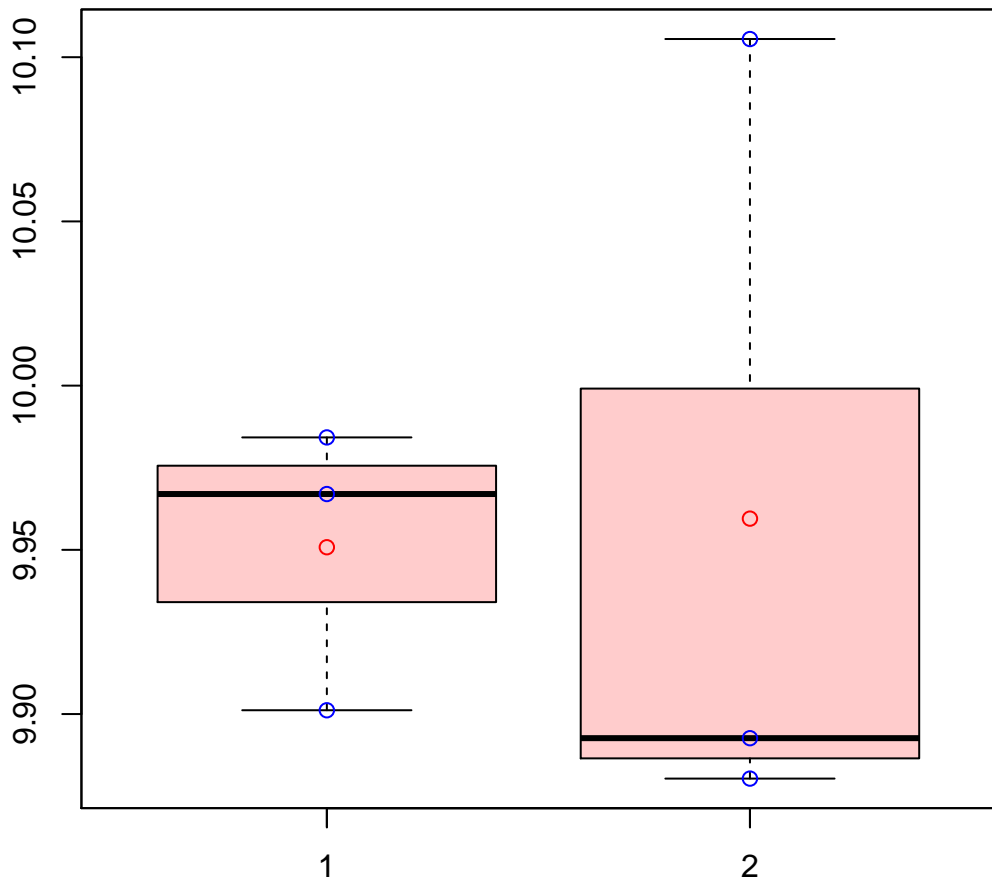

t-Test: p-value = 0.92

# CL4Contig18|CL4Contig18

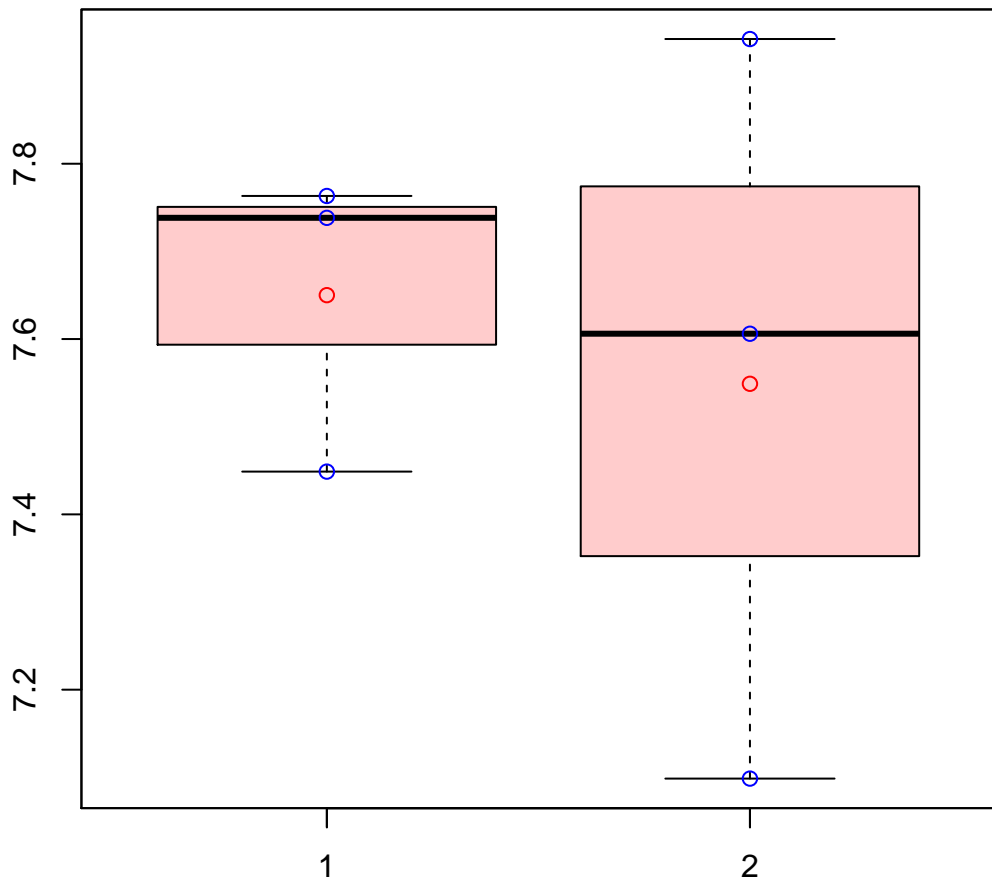

t-Test: p-value = 0.73

# CL4Contig20|CL4Contig20

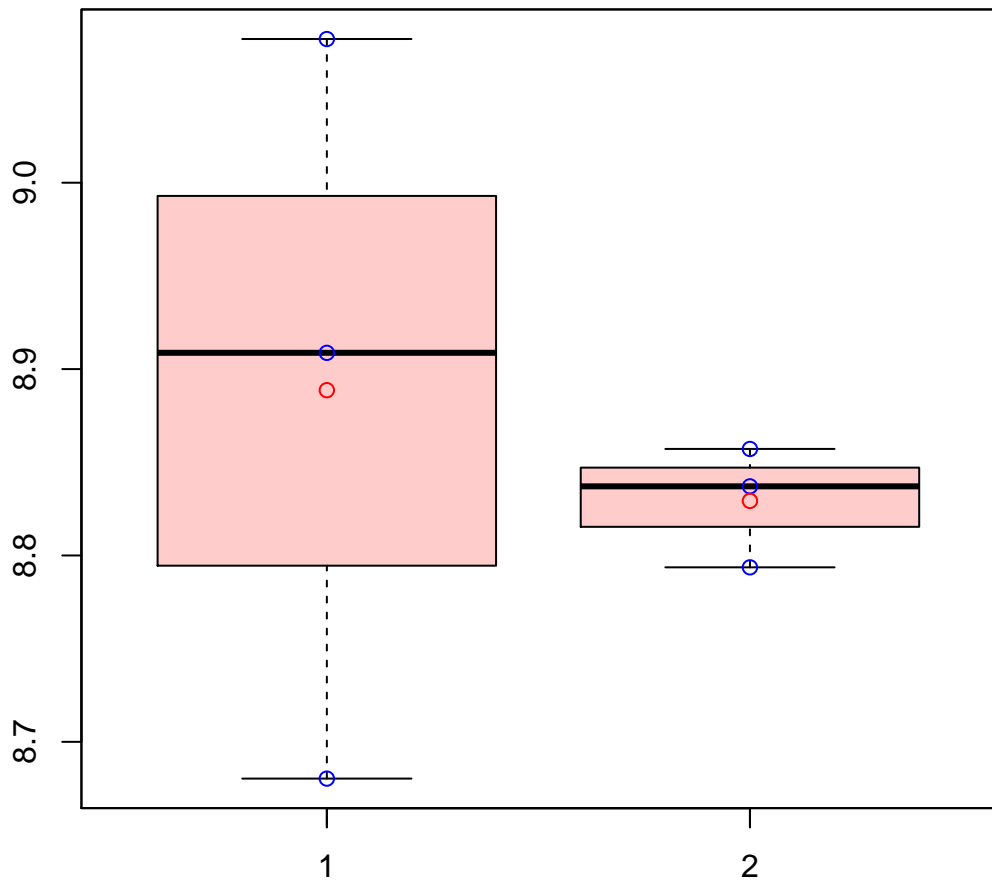

t-Test: p-value = 0.66

# CL4Contig24|CL4Contig24

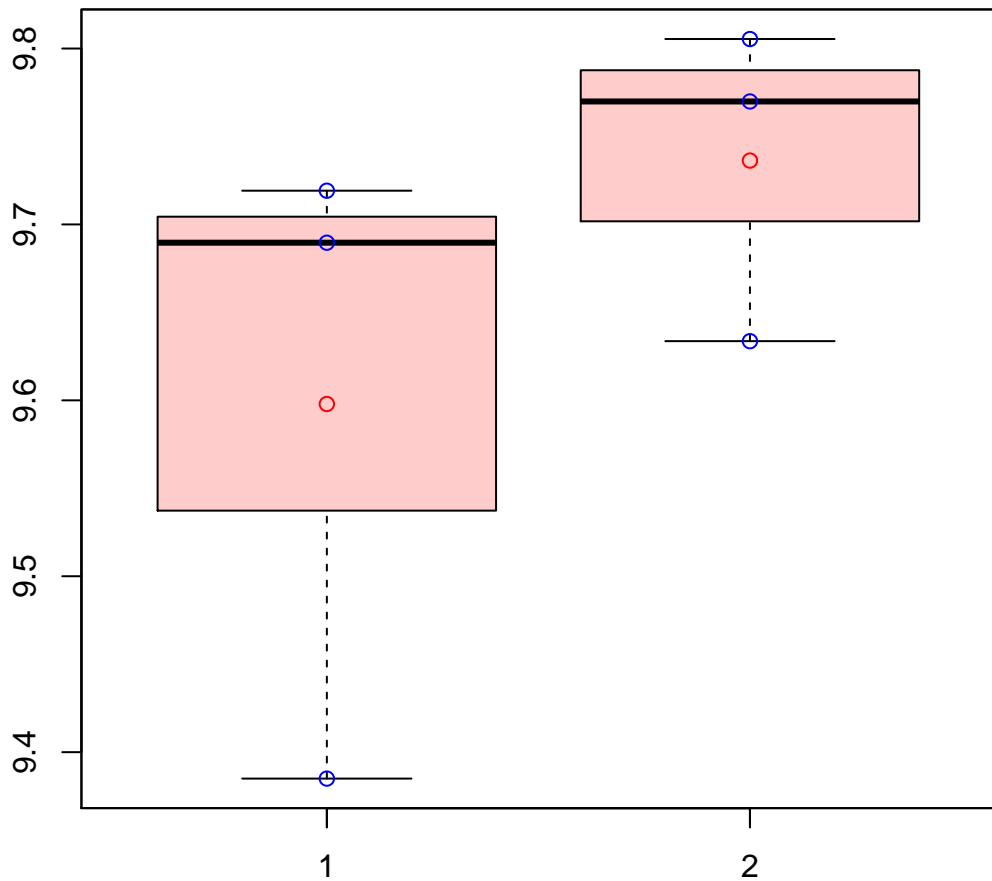

t-Test: p-value = 0.33

# CL4Contig26|CL4Contig26

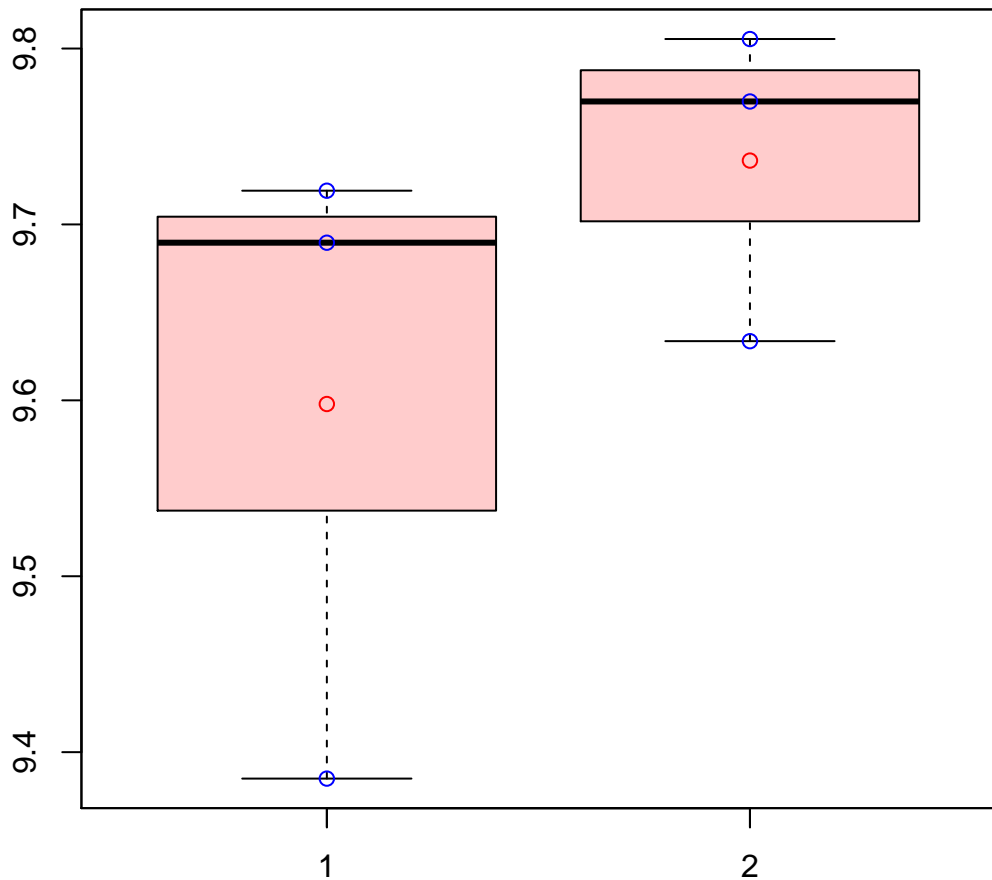

t-Test: p-value = 0.33

# CL4Contig27|CL4Contig27

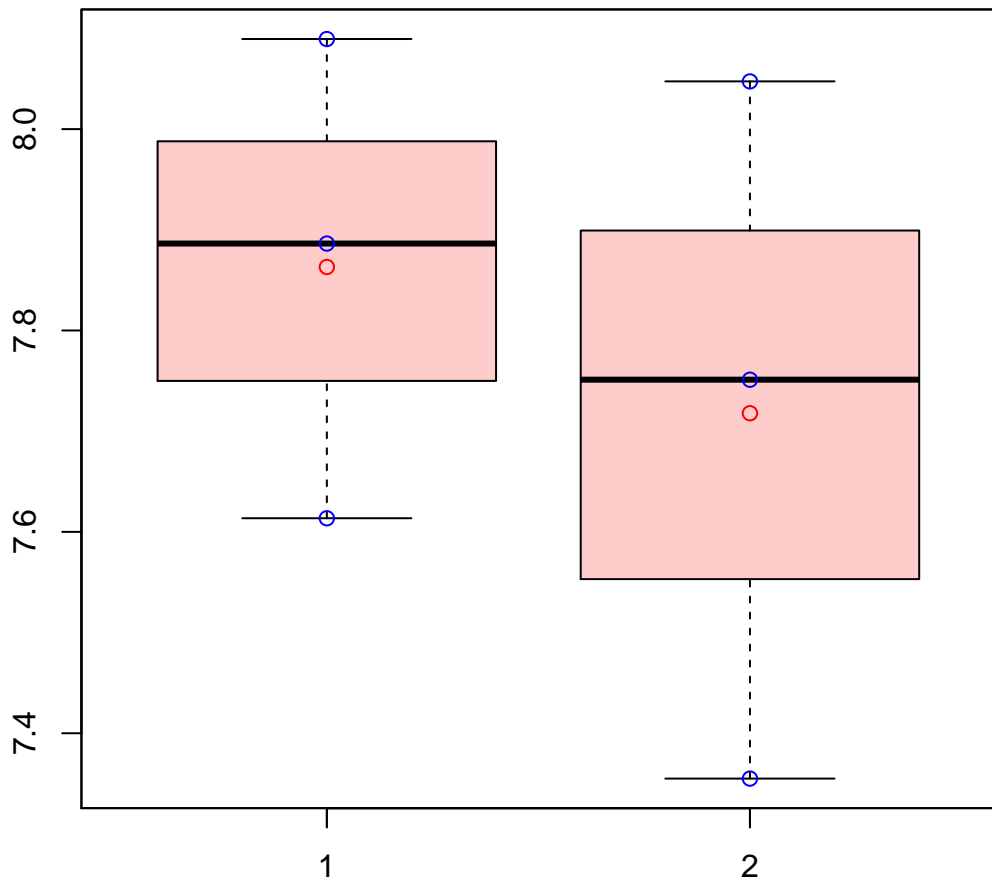

t-Test: p-value = 0.59



# CL4Contig32|CL4Contig32

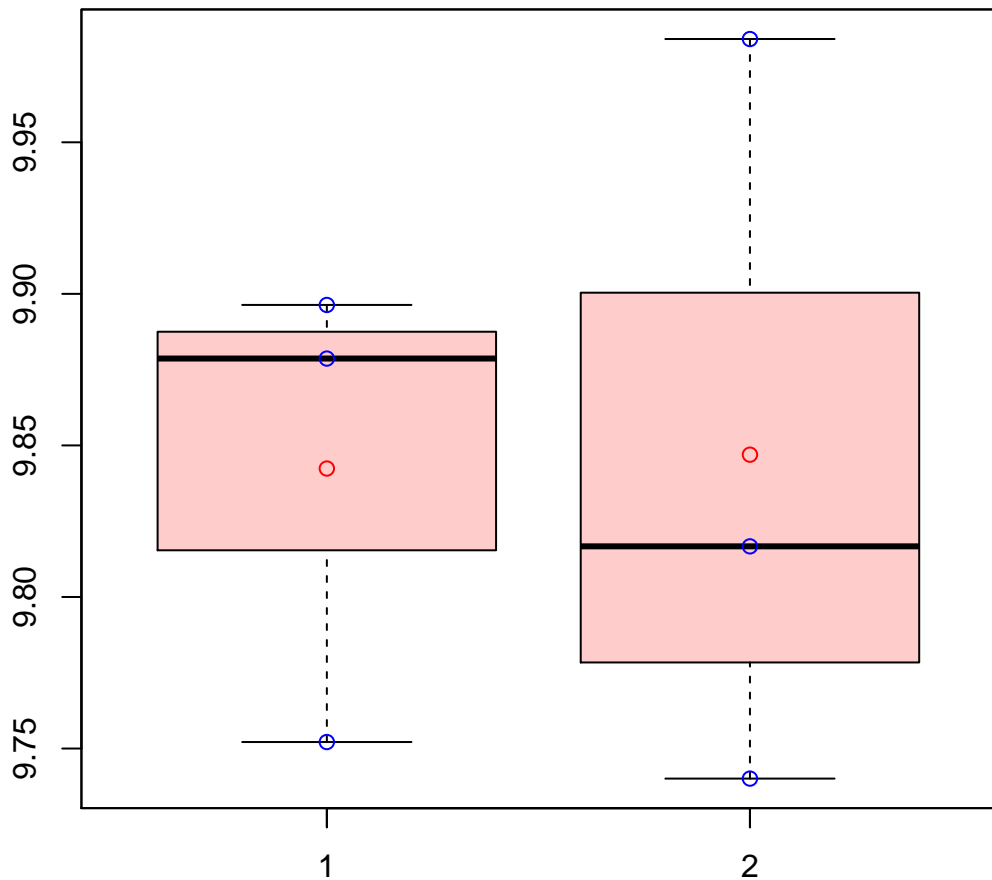

t-Test: p-value = 0.96

# CL4Contig33|CL4Contig33

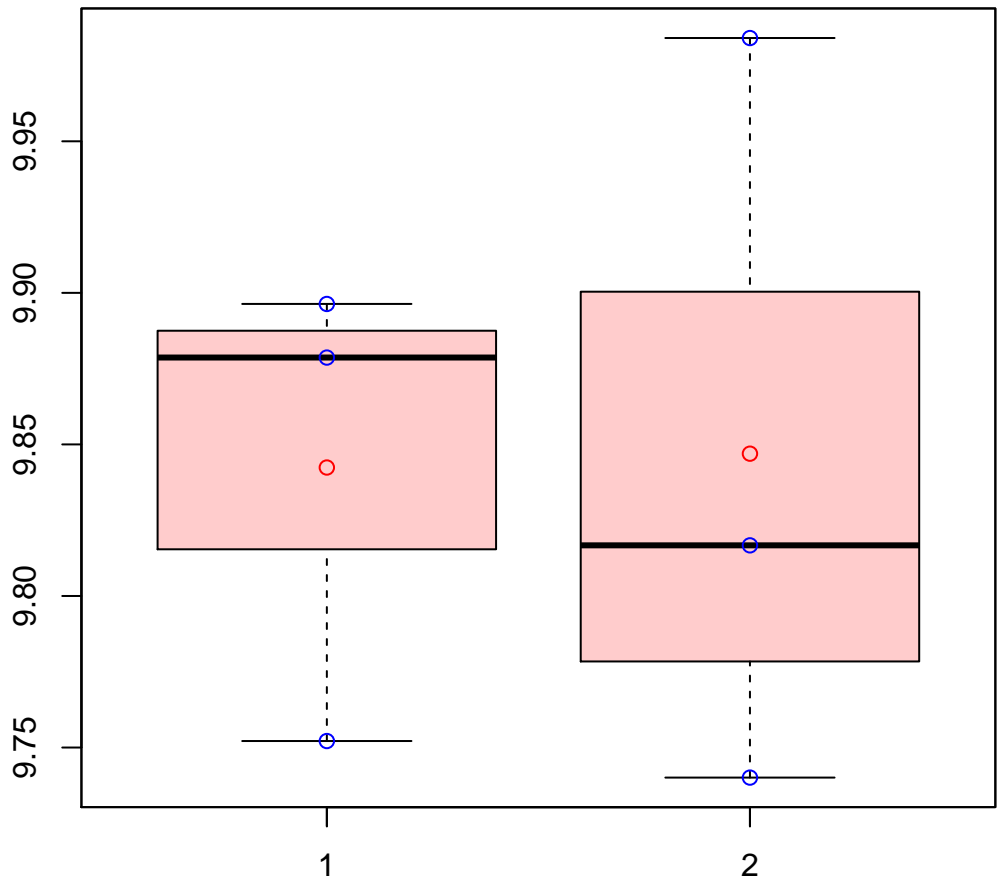

t-Test: p-value = 0.96

# CL4Contig39|CL4Contig39

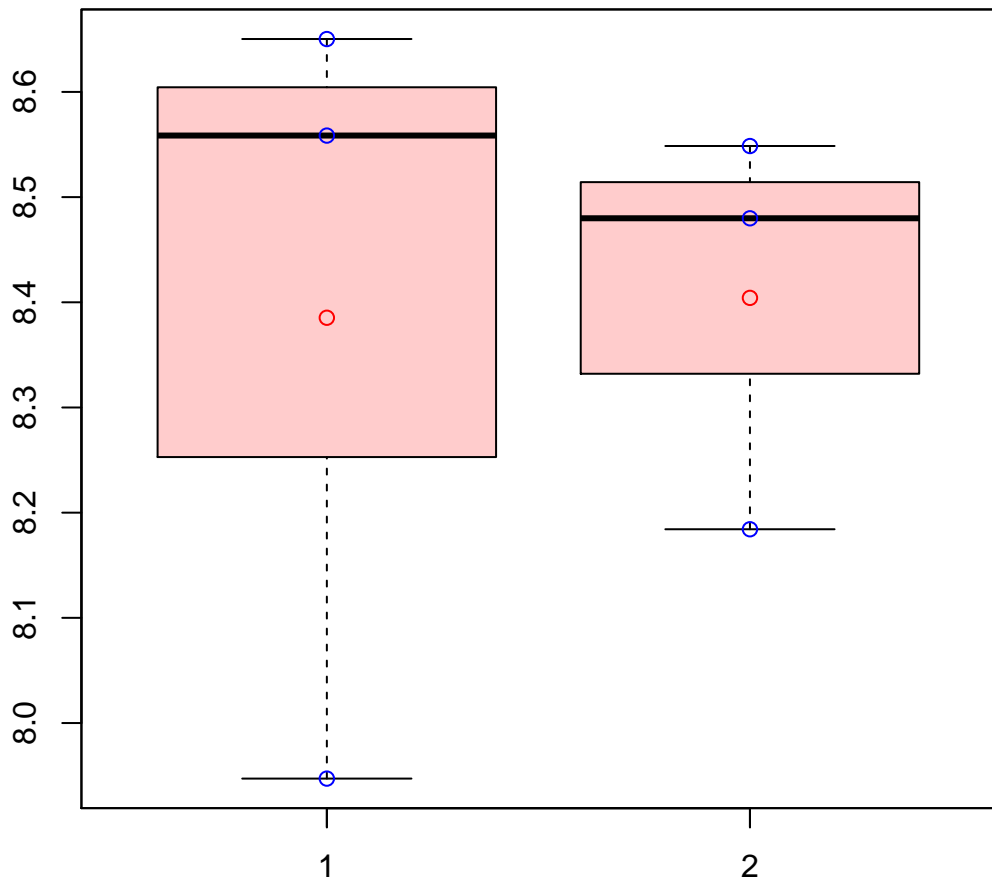

t-Test: p-value = 0.94

# CL4Contig3|CL4Contig3

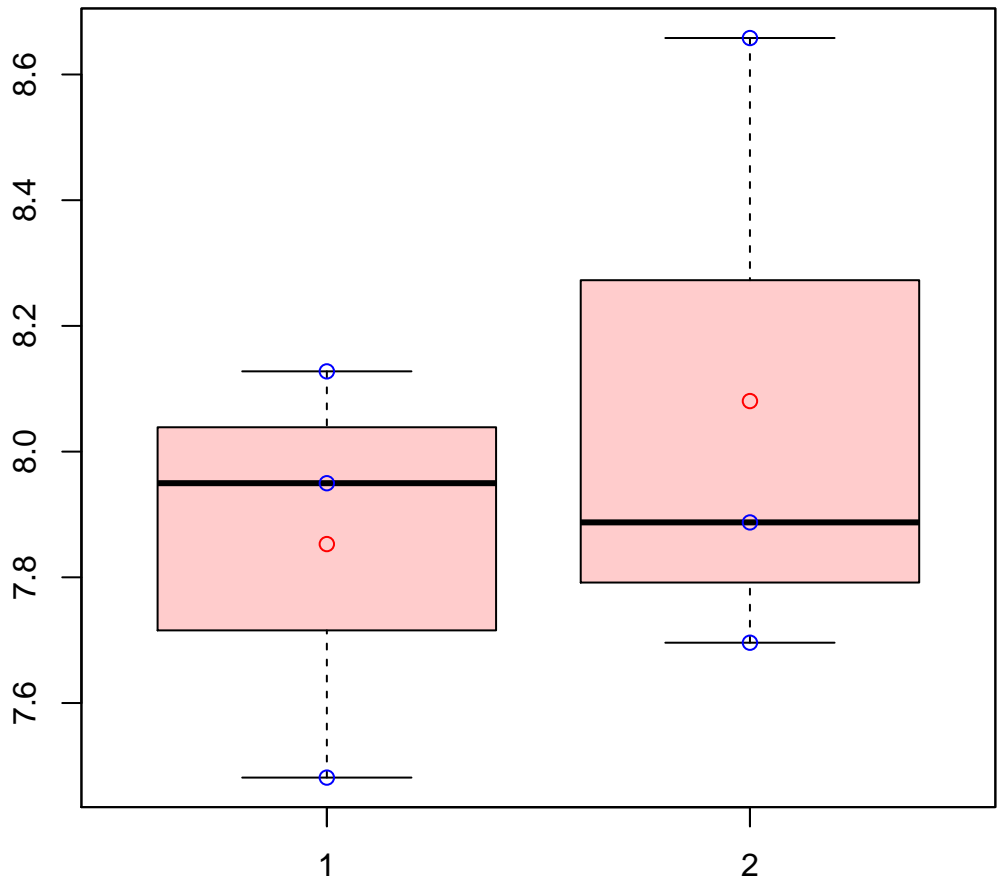

t-Test: p-value = 0.56

# CL4Contig54|CL4Contig54

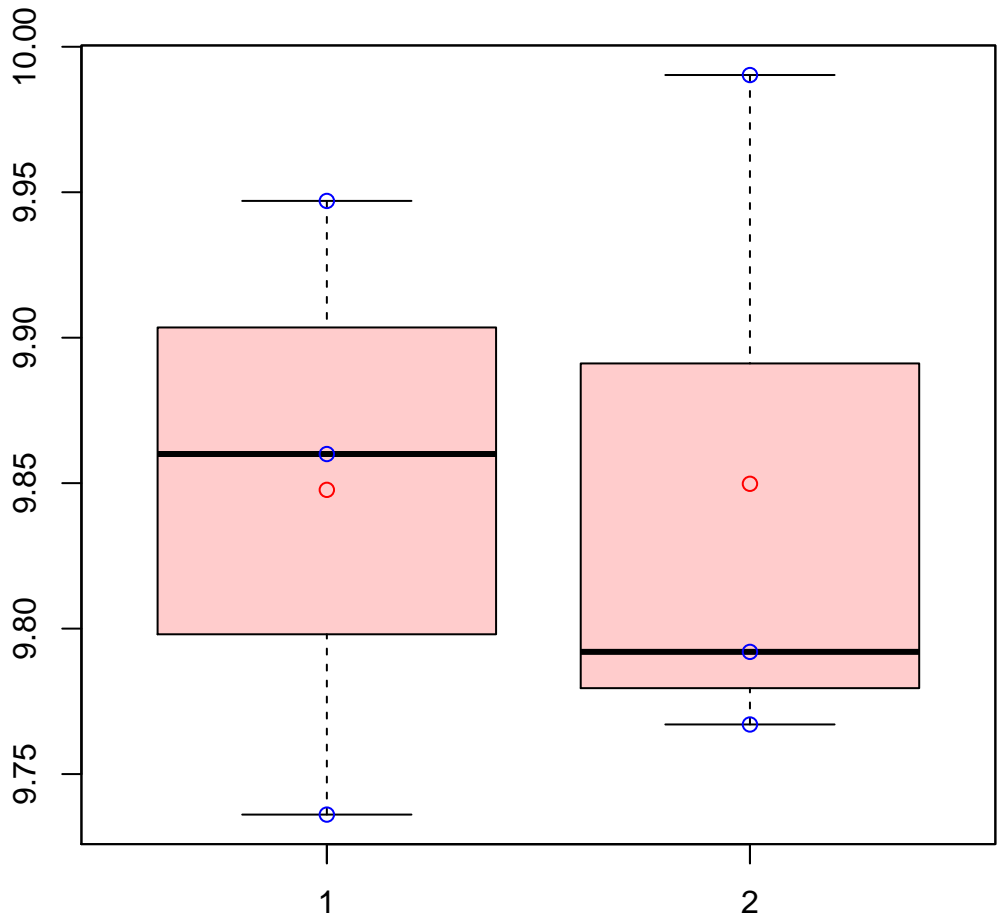

t-Test: p-value = 0.98

# CL4Contig55|CL4Contig55

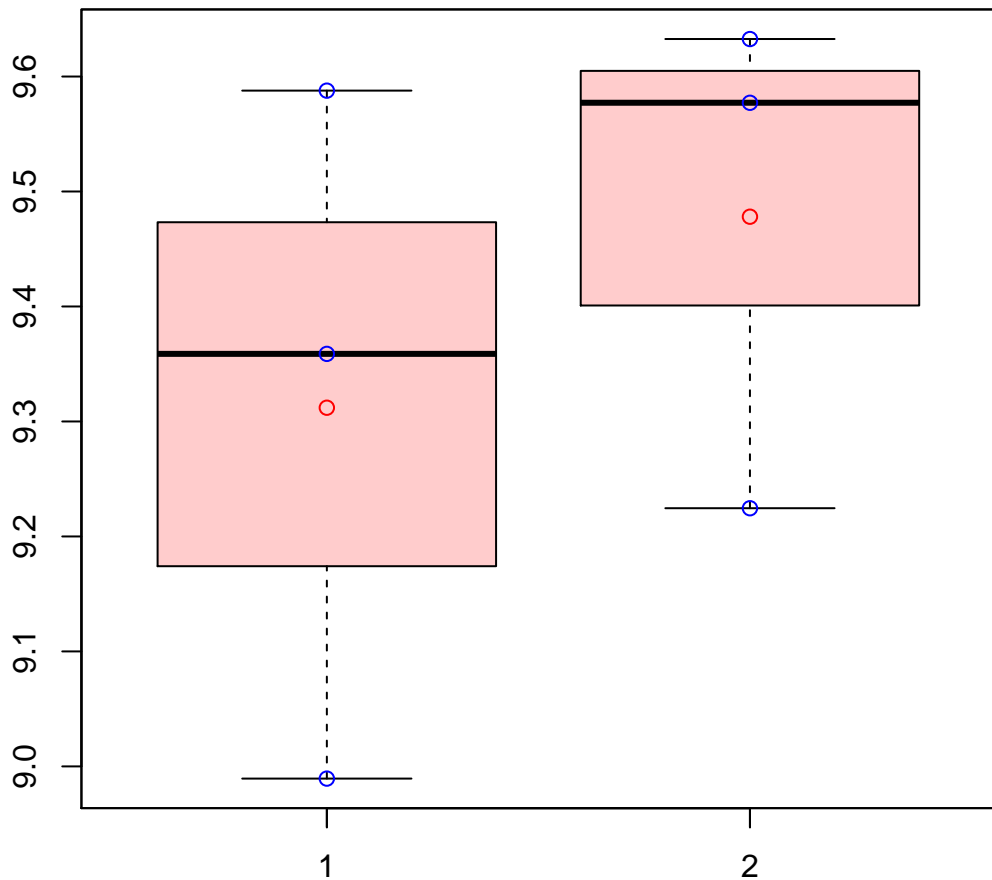

t-Test: p-value = 0.49

# CL4Contig5|CL4Contig5

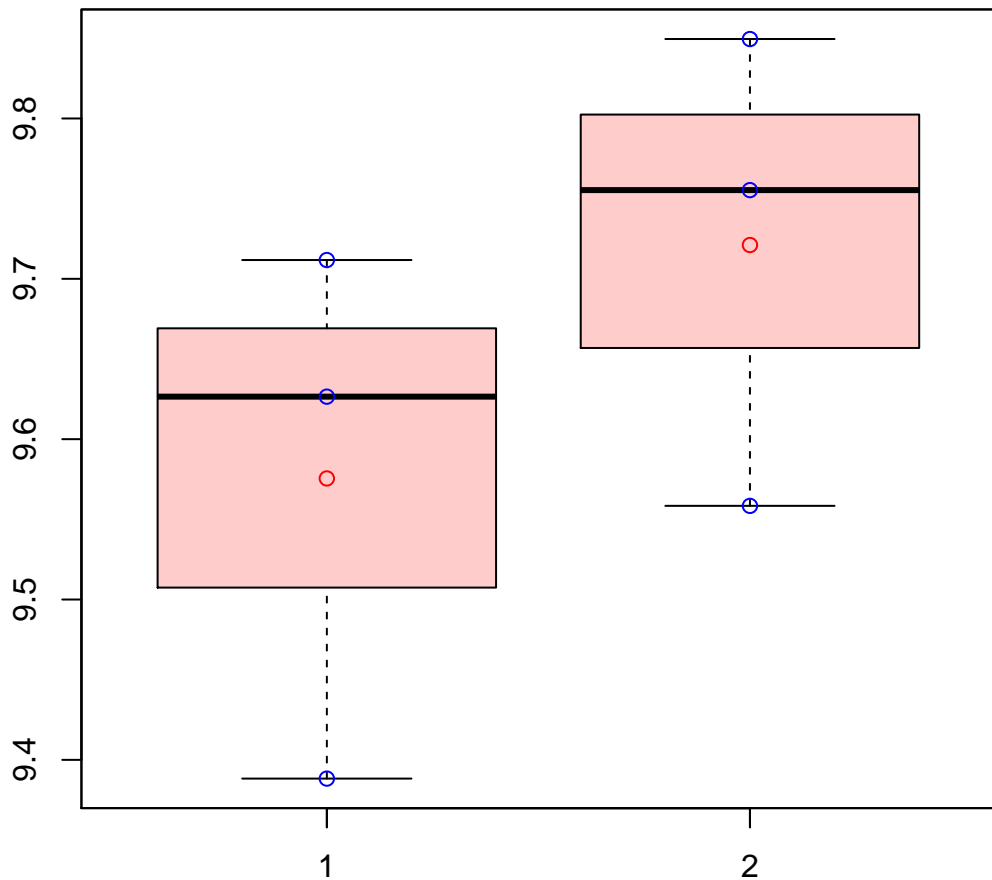

t-Test: p-value = 0.32

# CL4Contig64|CL4Contig64



t-Test: p-value = 0.94



# CL4Contig66|CL4Contig66

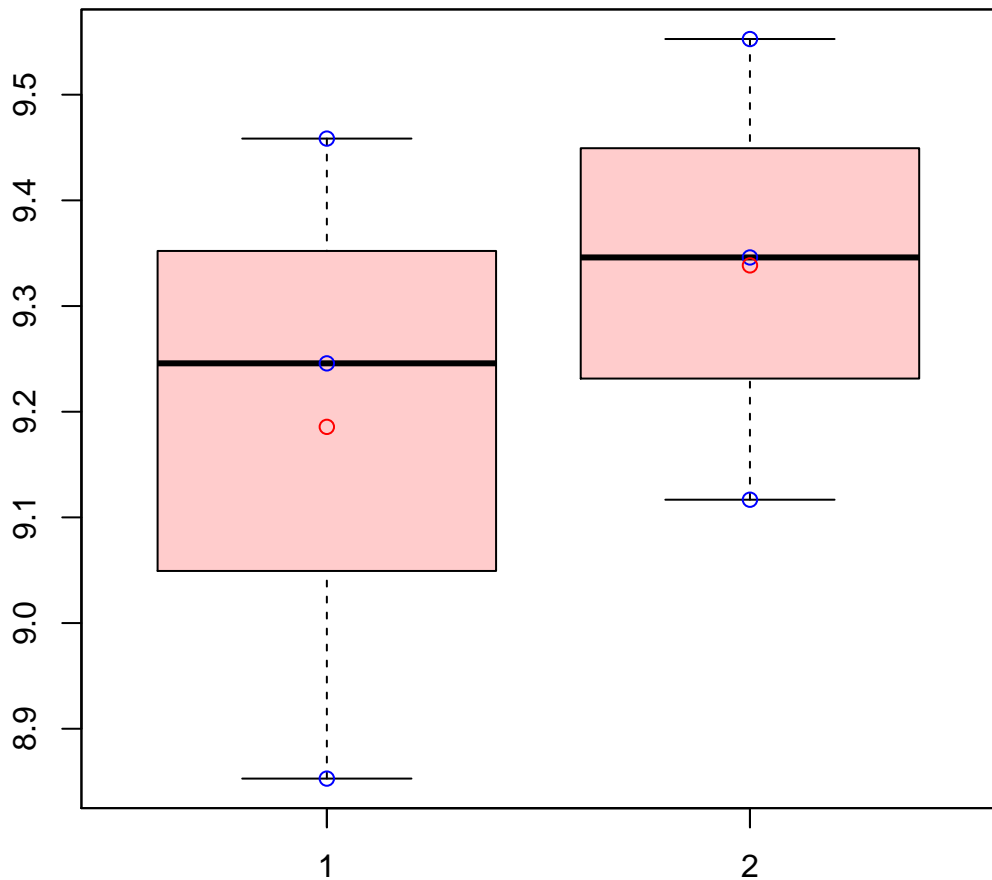

t-Test: p-value = 0.53

# CL4Contig67|CL4Contig67

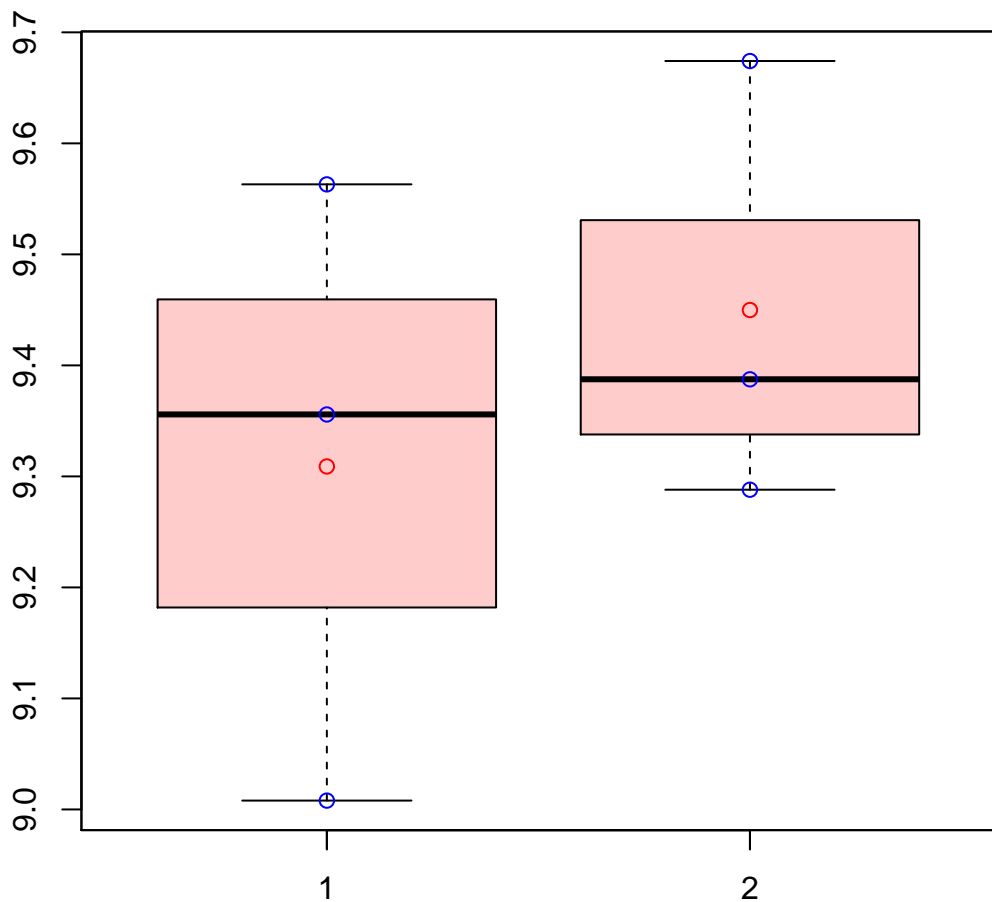

t-Test: p-value = 0.52

# CL4Contig6|CL4Contig6

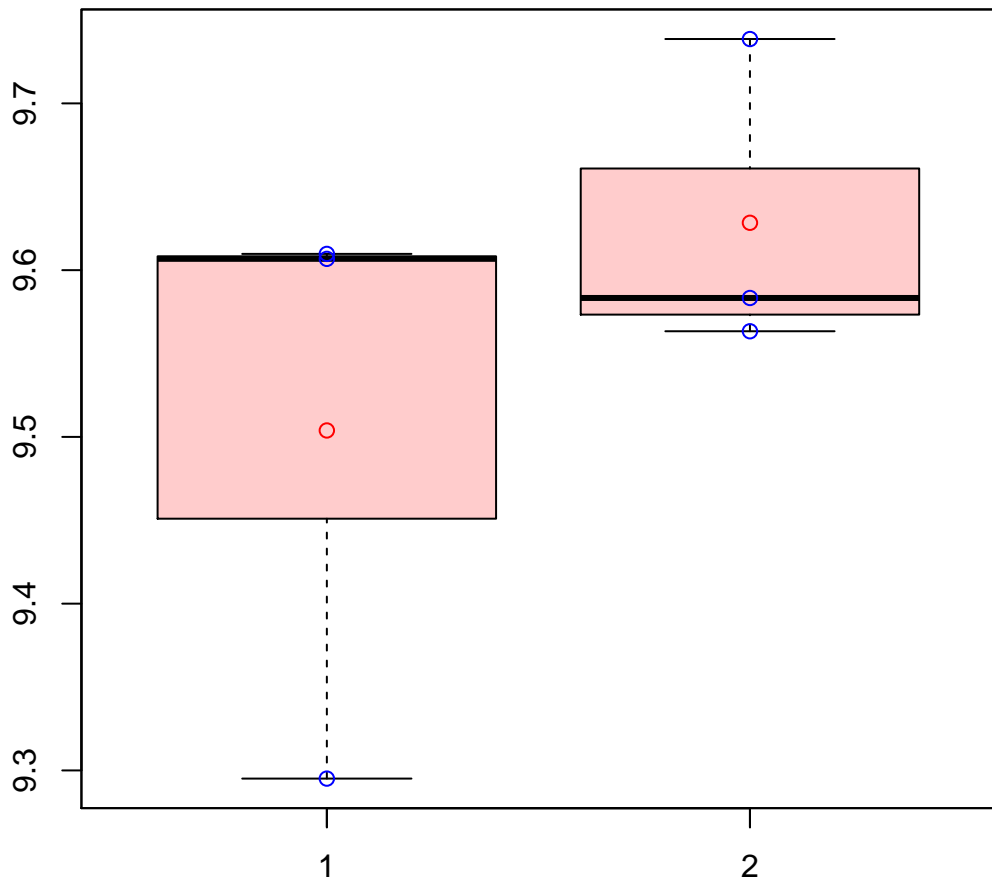

t-Test: p-value = 0.37

# CL5008Contig2|CL5008Contig2

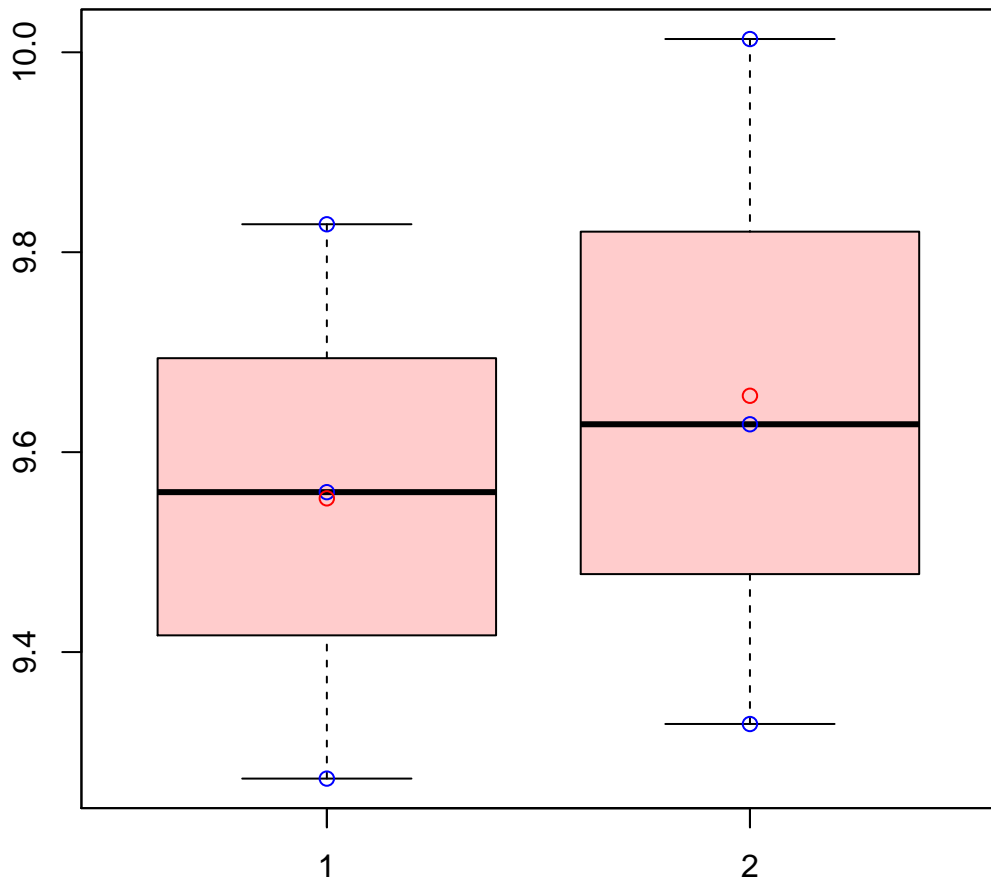

t-Test: p-value = 0.71

# CL5008Contig3|CL5008Contig3

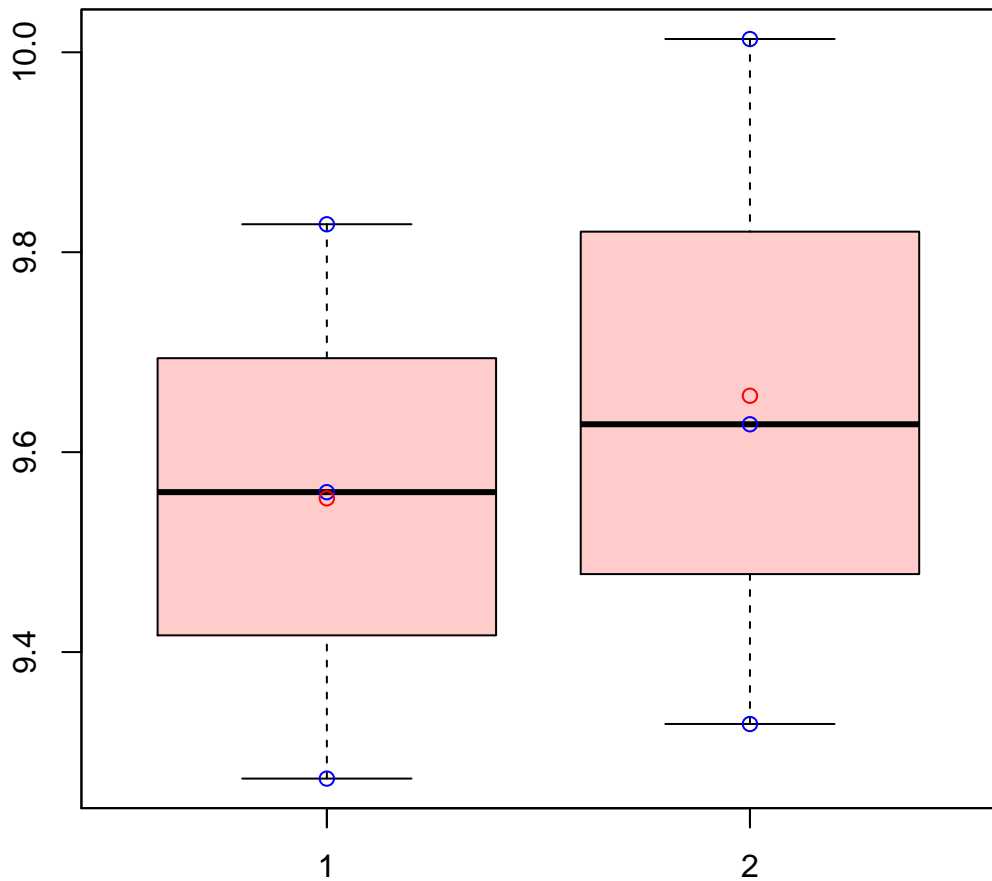

t-Test: p-value = 0.71

# CL5008Contig4|CL5008Contig4

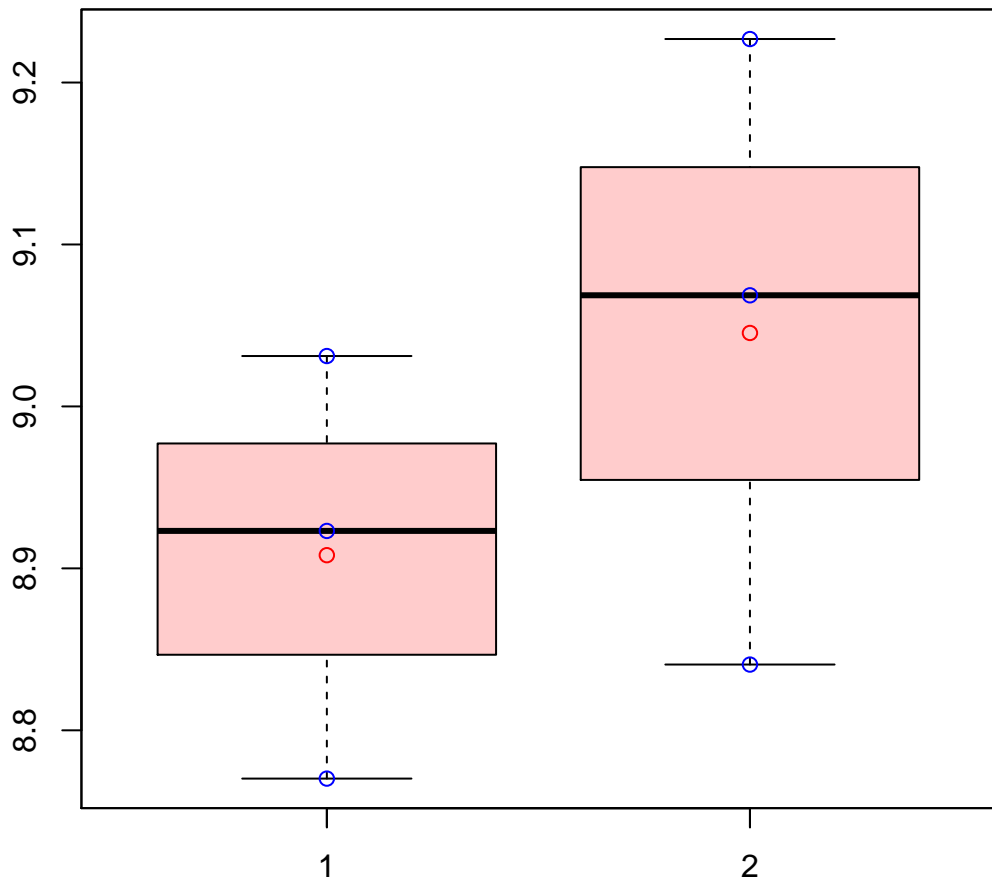

t-Test: p-value = 0.38

# CL5008Contig5|CL5008Contig5



t-Test: p-value = 0.71

# CL500Contig8|CL500Contig8

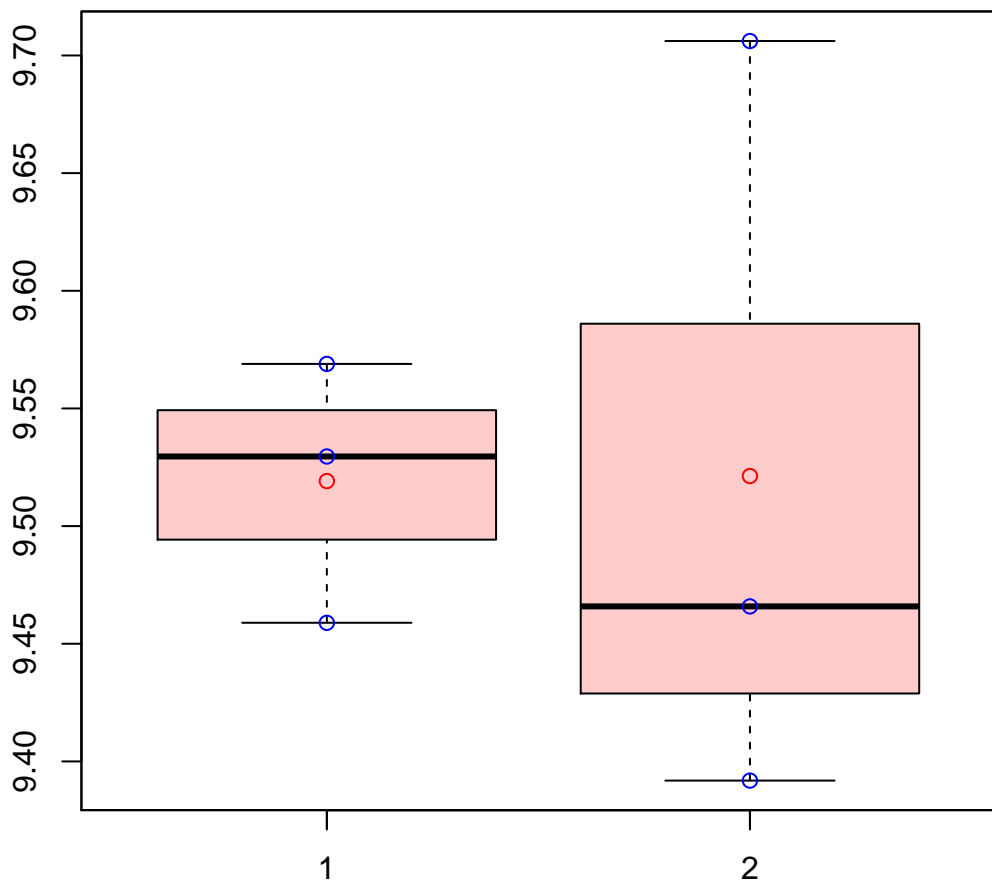

t-Test: p-value = 0.98



# CL5014Contig2|CL5014Contig2

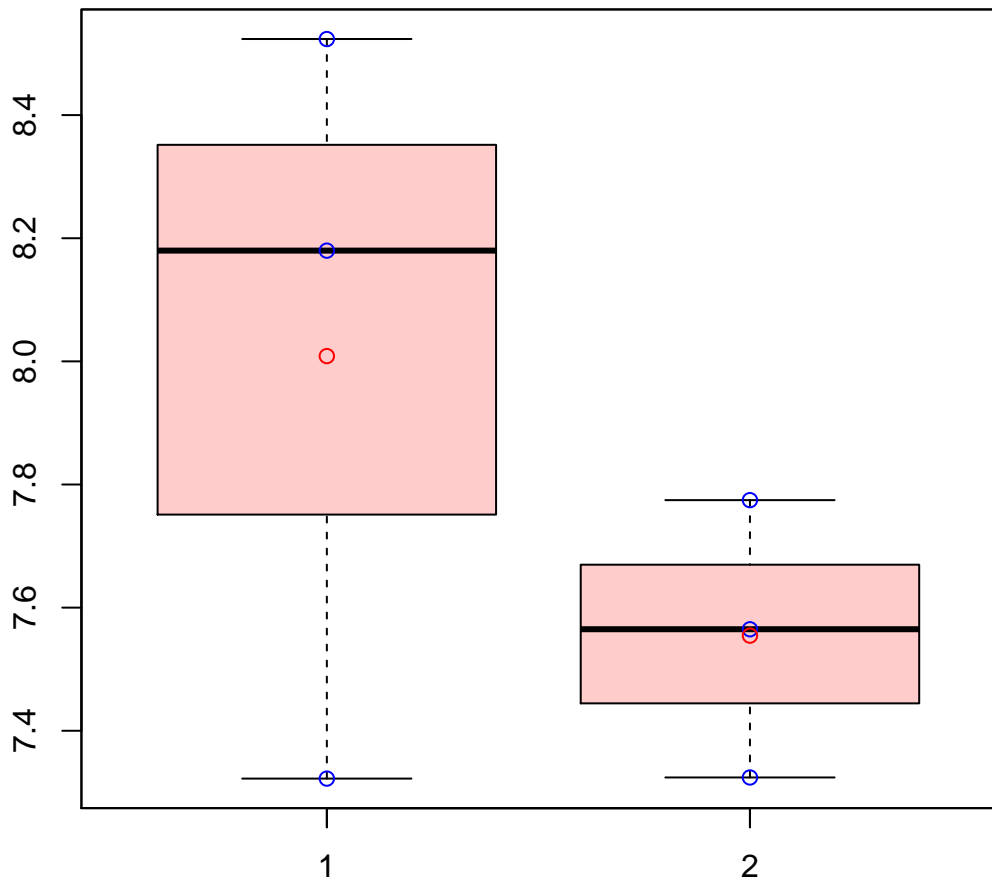

t-Test: p-value = 0.33

# CL501Contig14|CL501Contig14

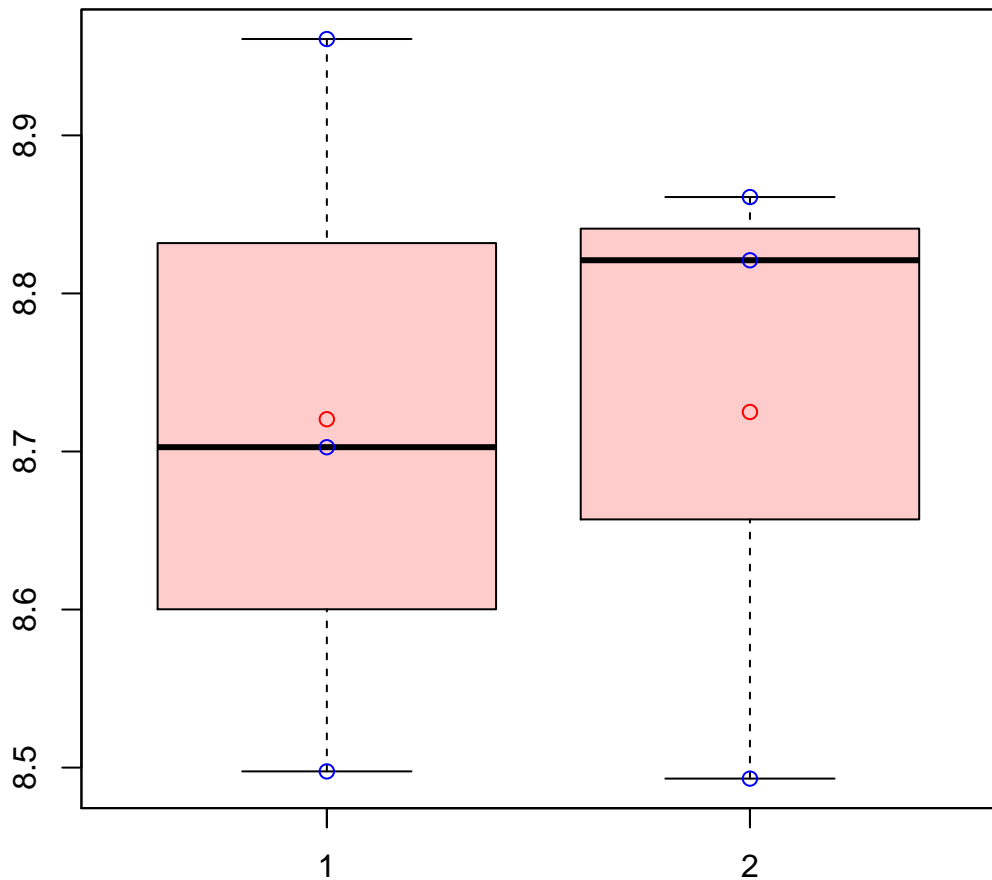

t-Test: p-value = 0.98

# CL501Contig15|CL501Contig15

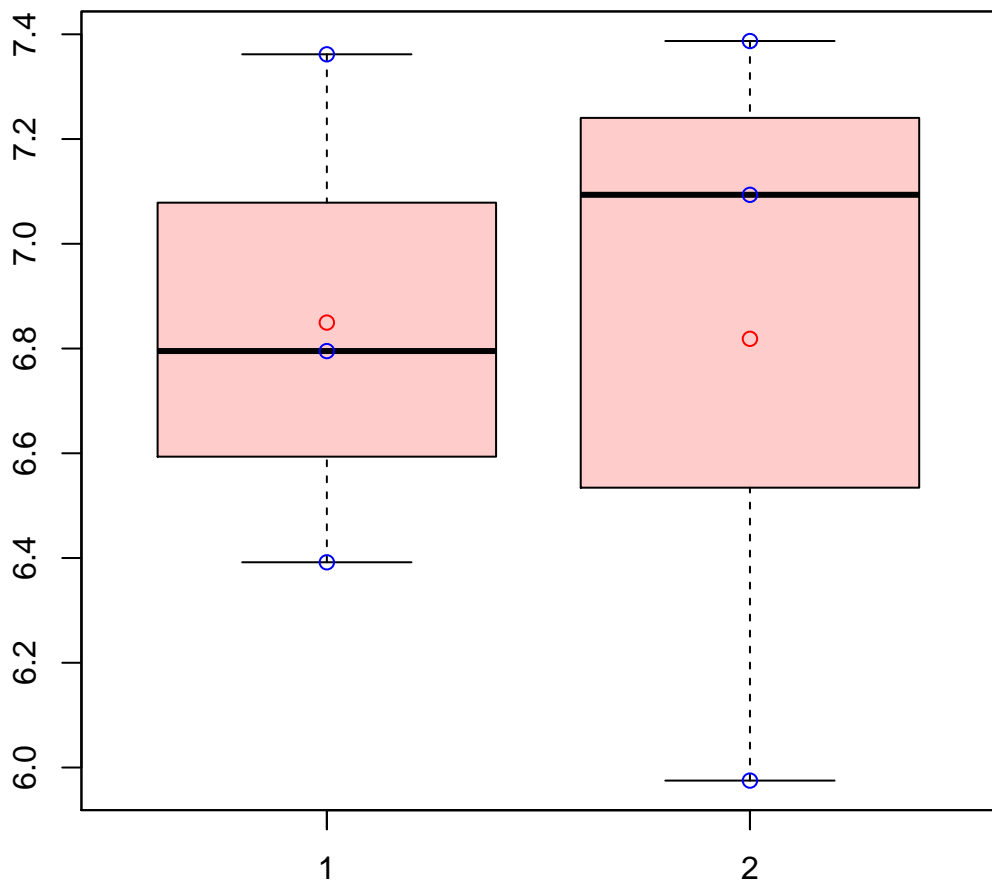

t-Test: p-value = 0.96

# CL501Contig16|CL501Contig16



t-Test: p-value = 0.96

# CL501Contig17|CL501Contig17



t-Test: p-value = 0.96

# CL501Contig18|CL501Contig18



t-Test: p-value = 0.96

# CL501Contig4|CL501Contig4

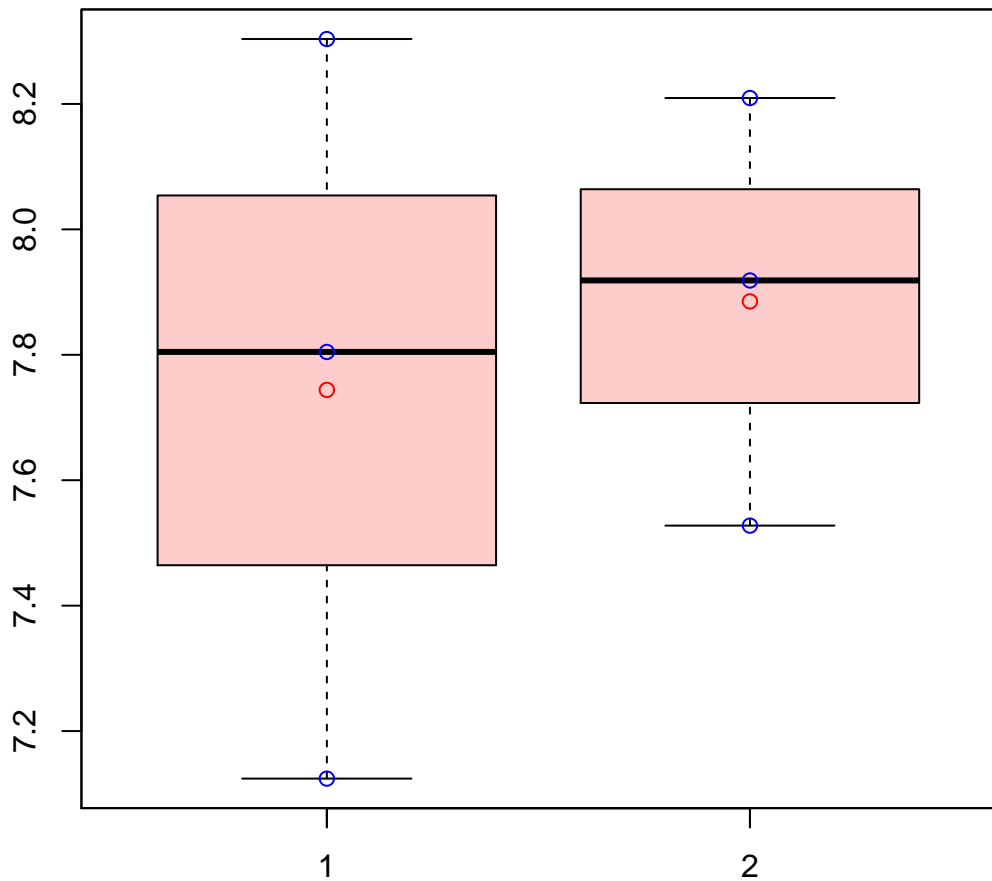

t-Test: p-value = 0.74

# CL5028Contig3|CL5028Contig3

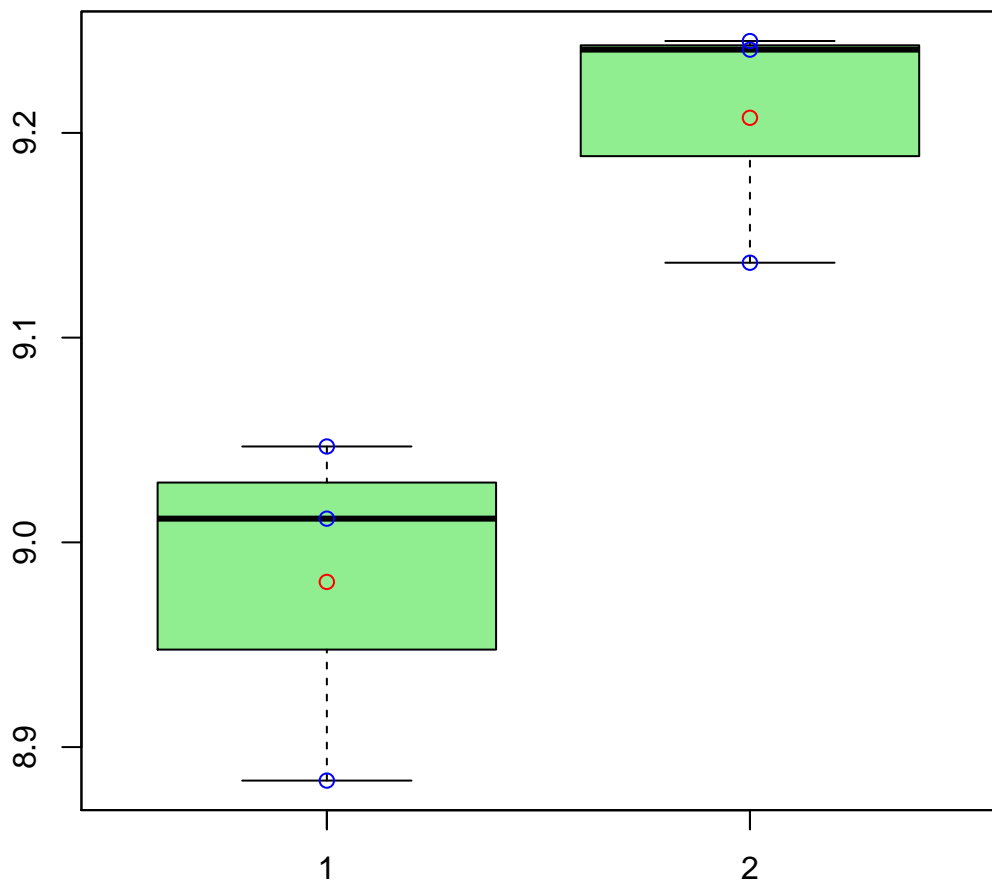

t-Test: p-value = 0.02



# CL5031Contig5|CL5031Contig5

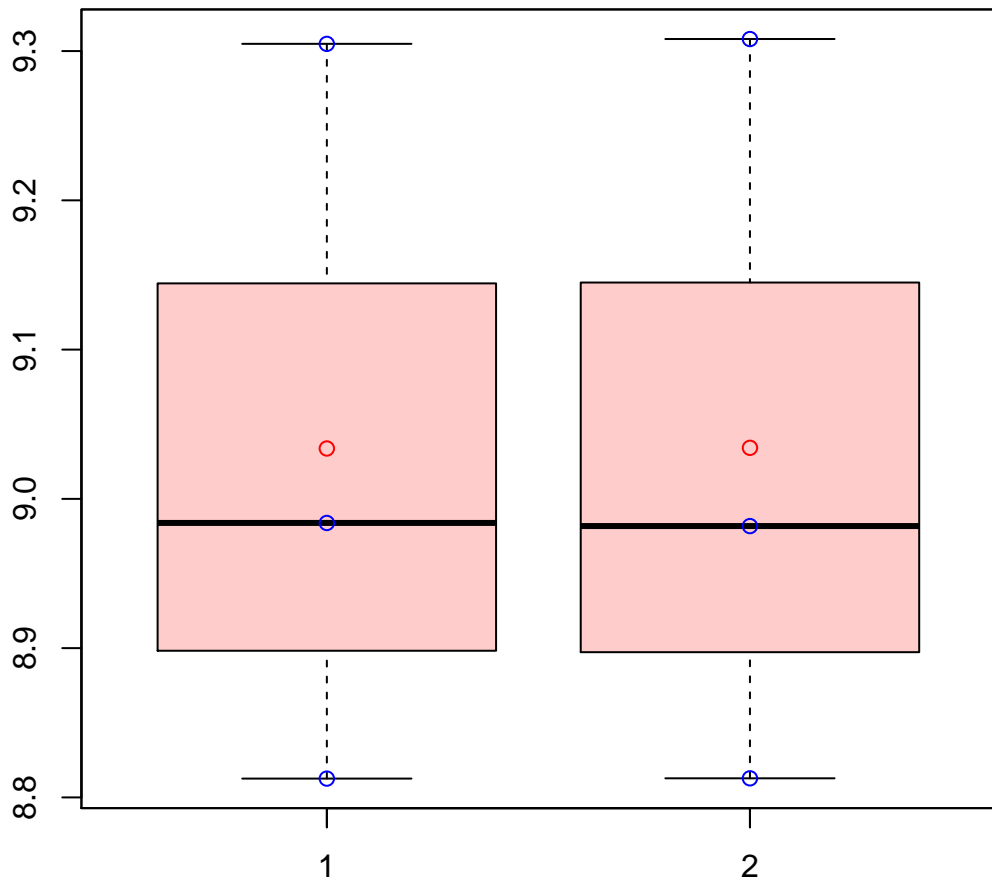

t-Test: p-value = 1

# CL5033Contig1|CL5033Contig1

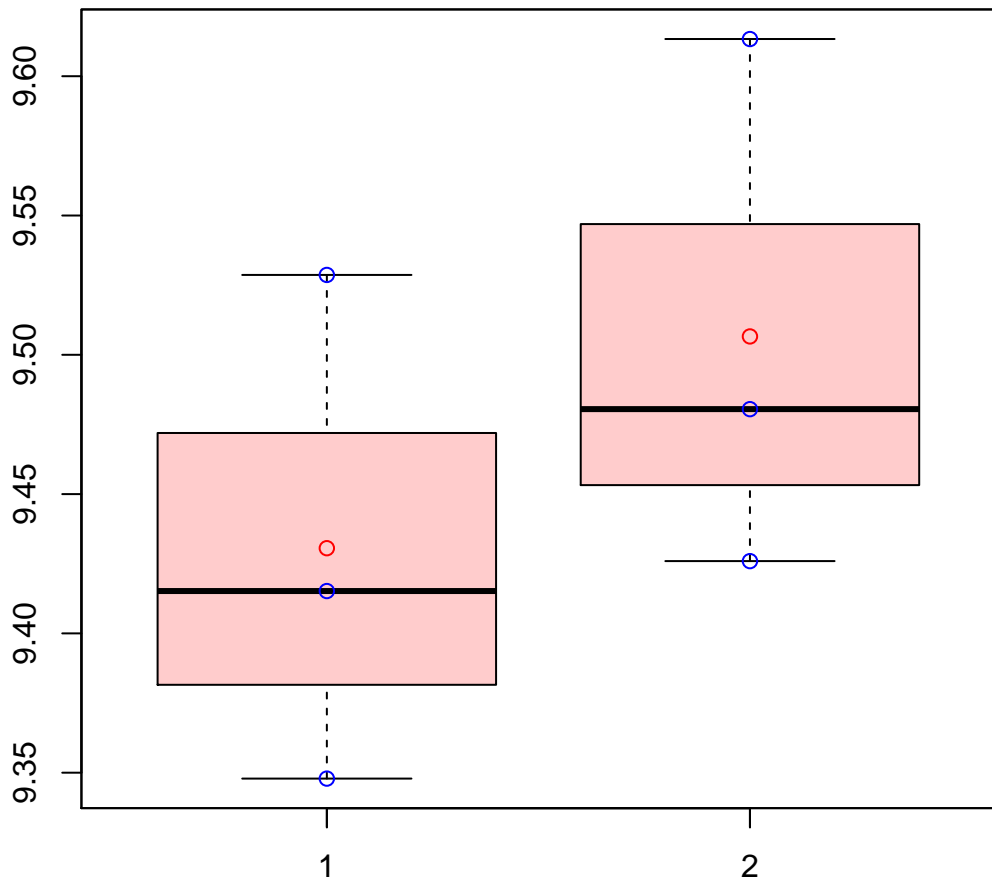

t-Test: p-value = 0.38

# CL5033Contig2|CL5033Contig2



t-Test: p-value = 0.38

# CL5033Contig3|CL5033Contig3

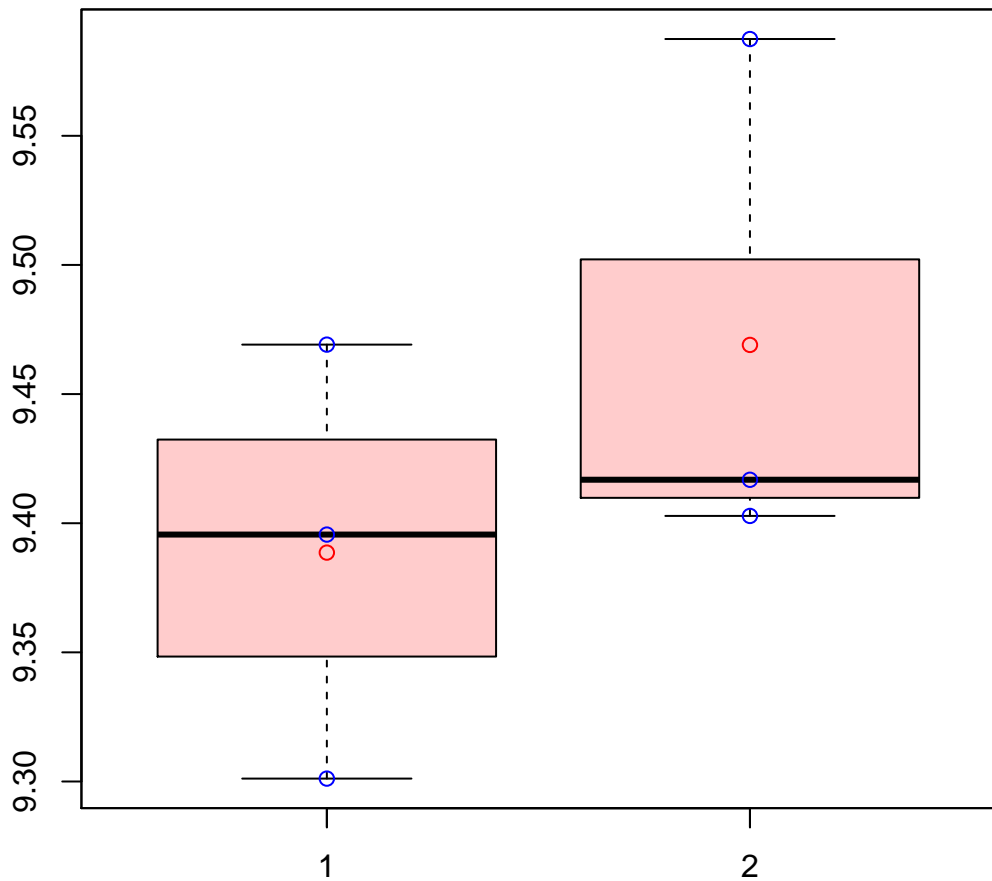

t-Test: p-value = 0.36

# CL5039Contig2|CL5039Contig2

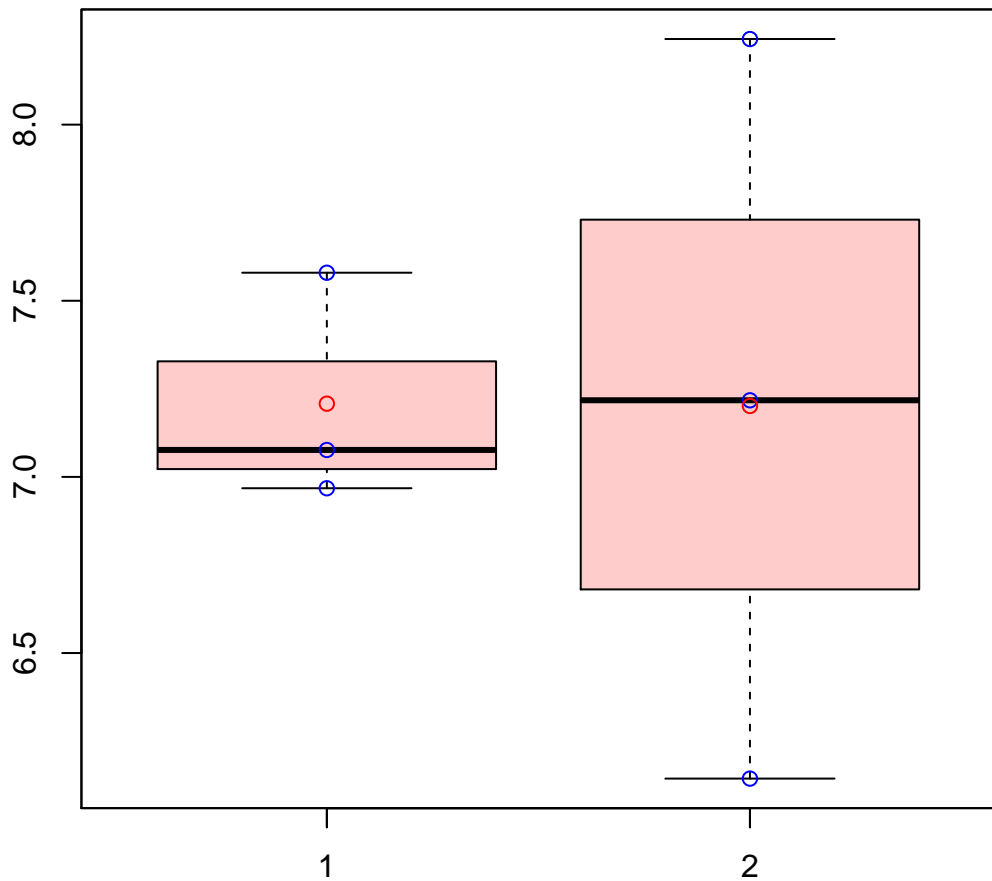

t-Test: p-value = 0.99

# CL5039Contig3|CL5039Contig3

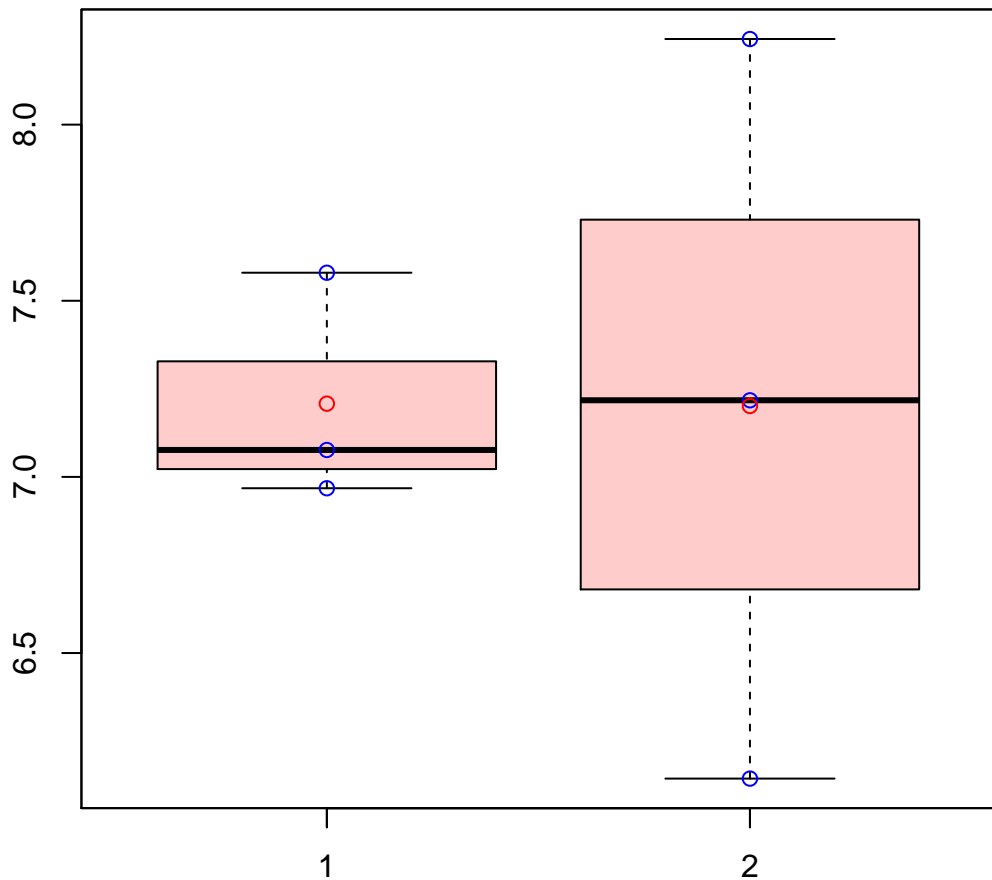

t-Test: p-value = 0.99

# CL5040Contig1|CL5040Contig1

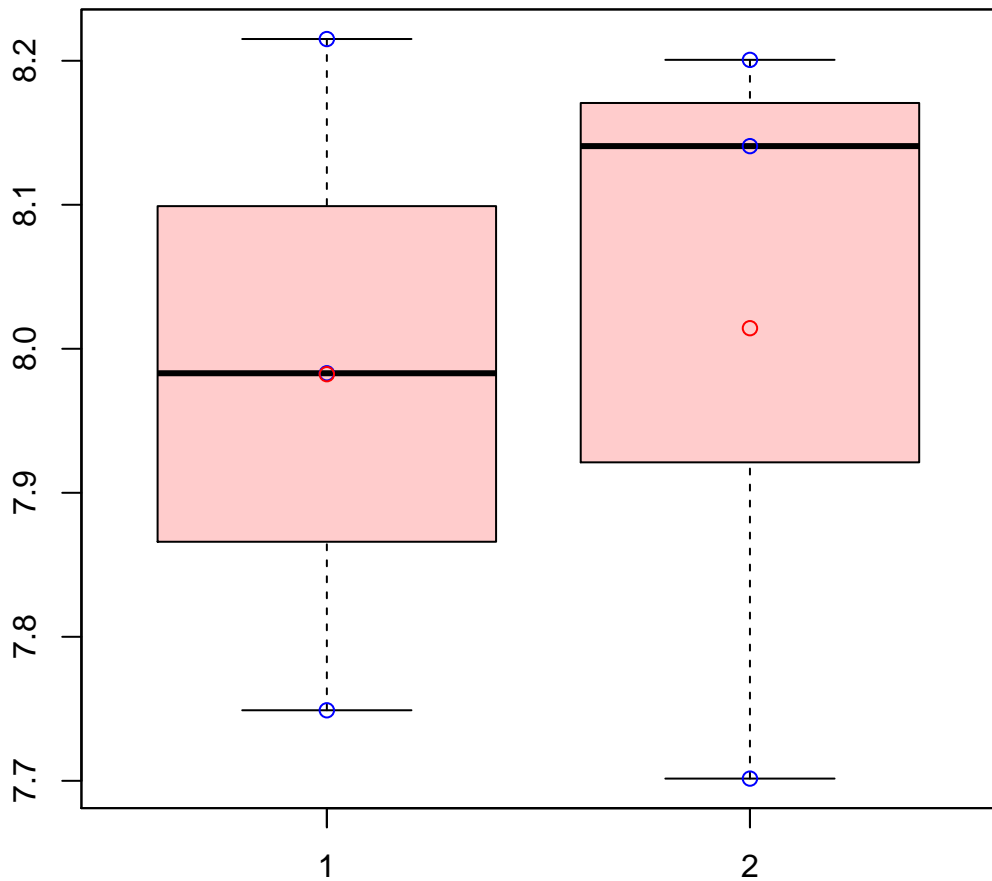

t-Test: p-value = 0.89

# CL5041Contig2|CL5041Contig2

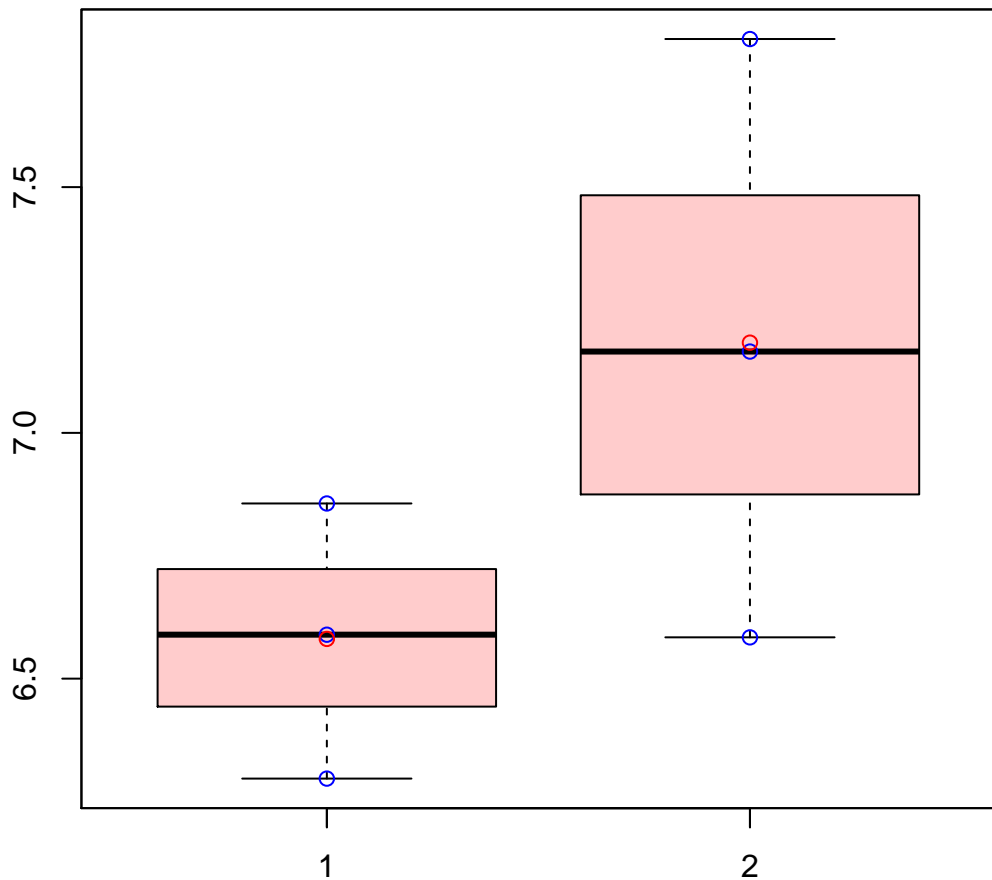

t-Test: p-value = 0.22



# CL5043Contig3|CL5043Contig3



t-Test: p-value = 0.78

# CL5045Contig6|CL5045Contig6

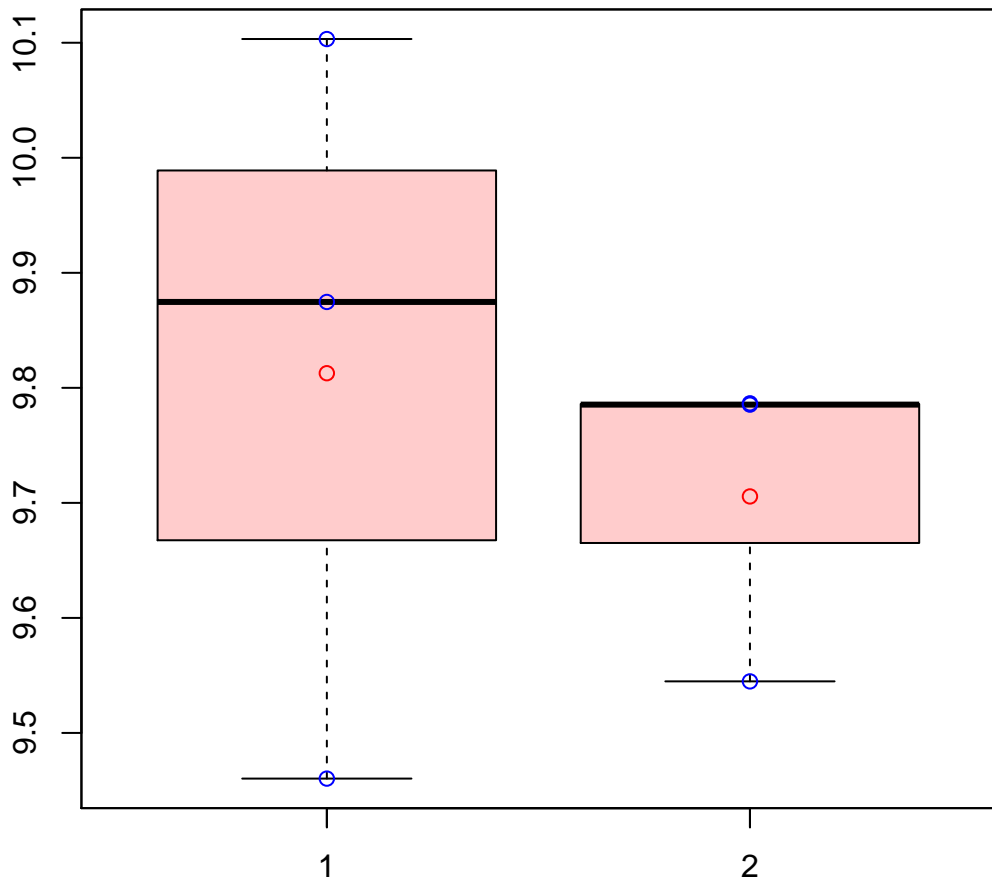

t-Test: p-value = 0.64

# CL5046Contig1|CL5046Contig1

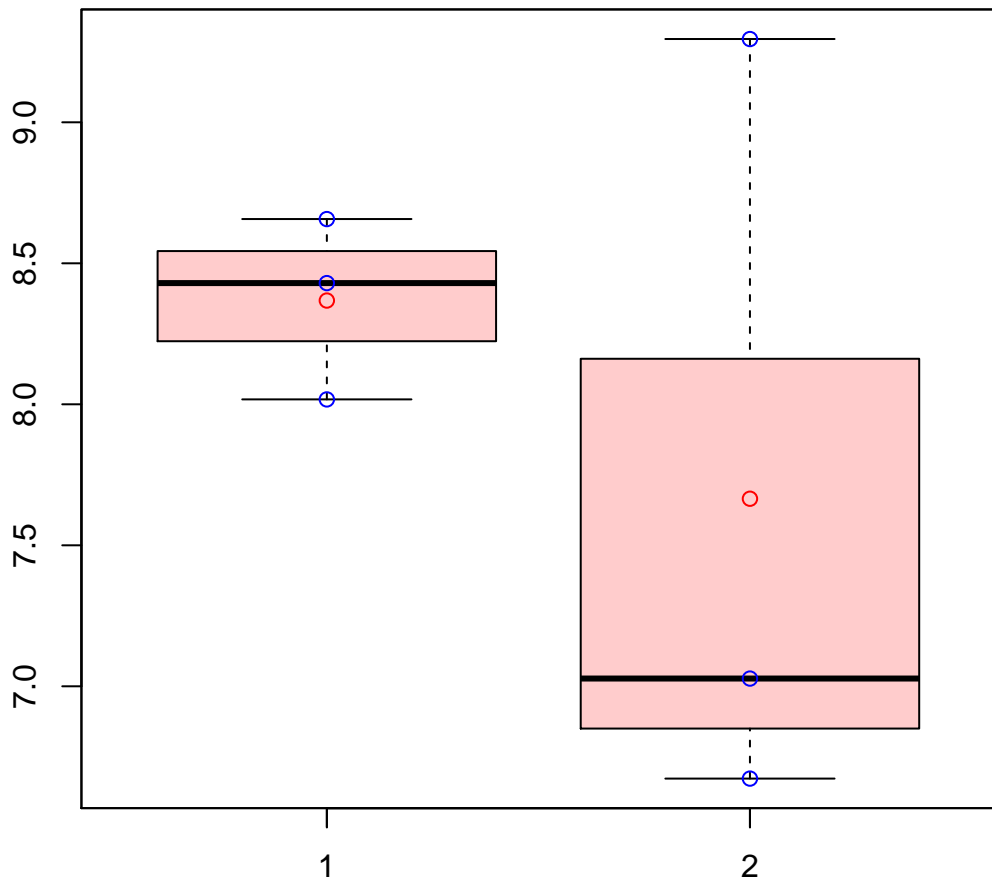

t-Test: p-value = 0.48

# CL5049Contig1|CL5049Contig1

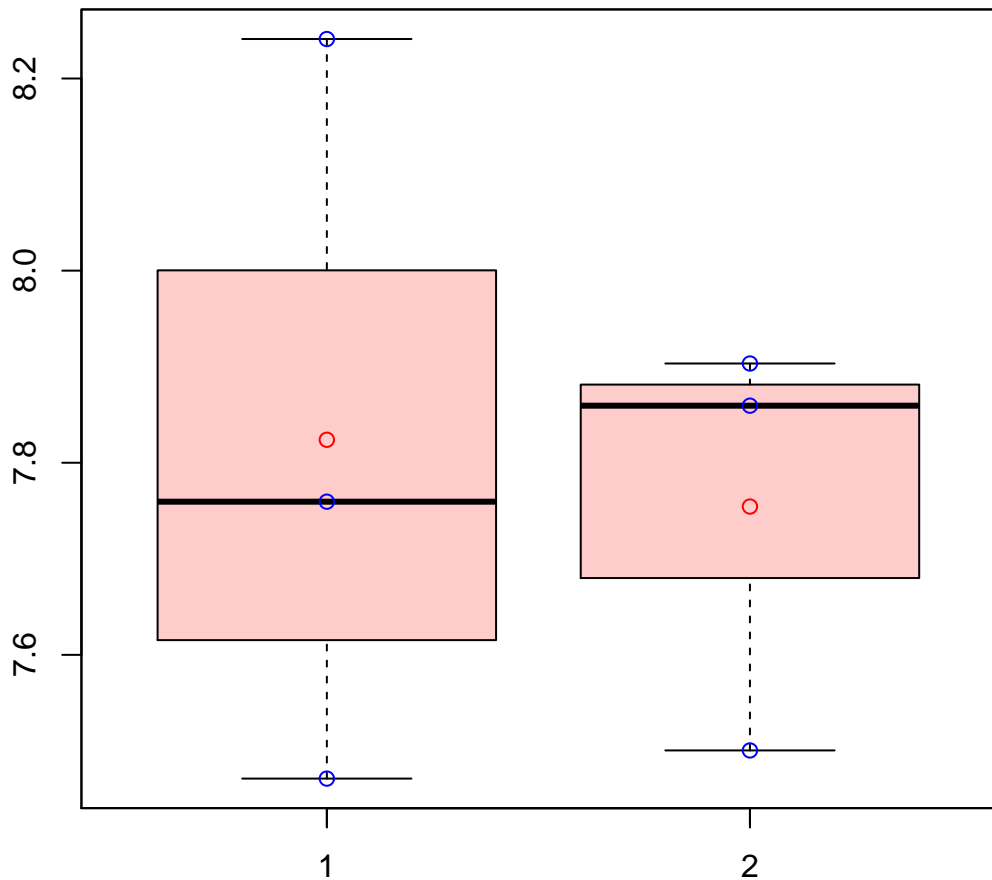

t-Test: p-value = 0.8

# CL5065Contig5|CL5065Contig5

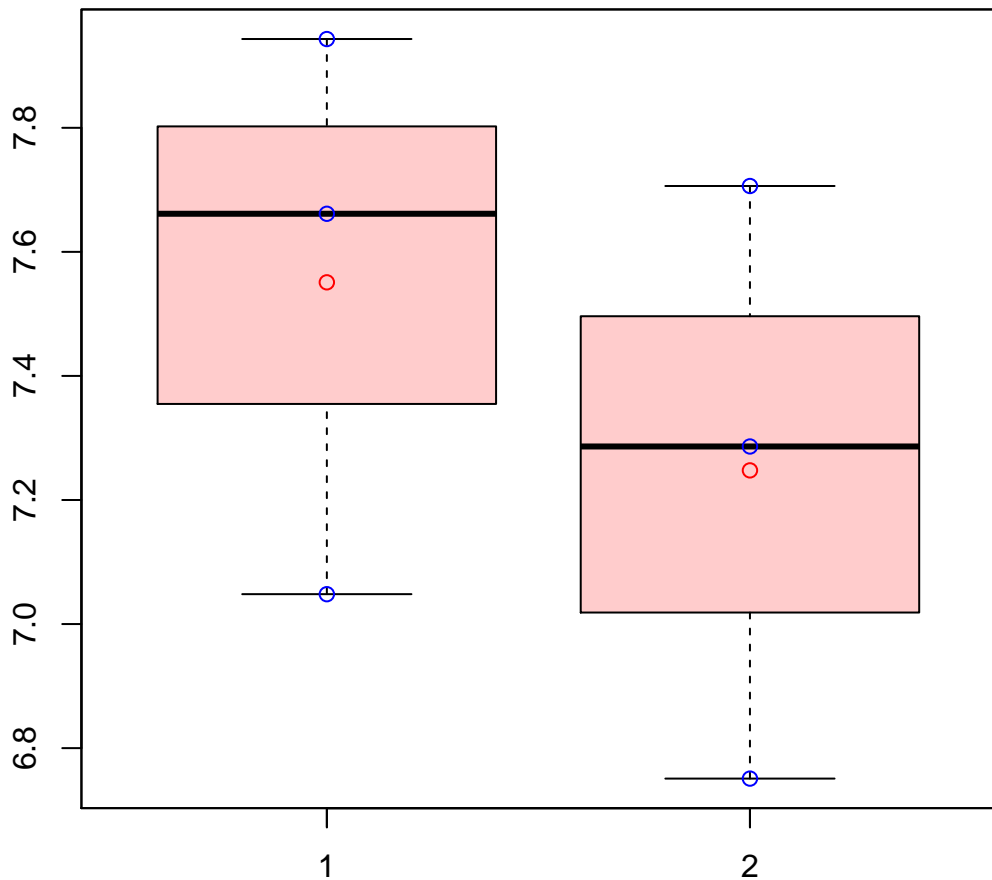

t-Test: p-value = 0.47

# CL5066Contig5|CL5066Contig5



t-Test: p-value = 0.9

# CL506Contig2|CL506Contig2

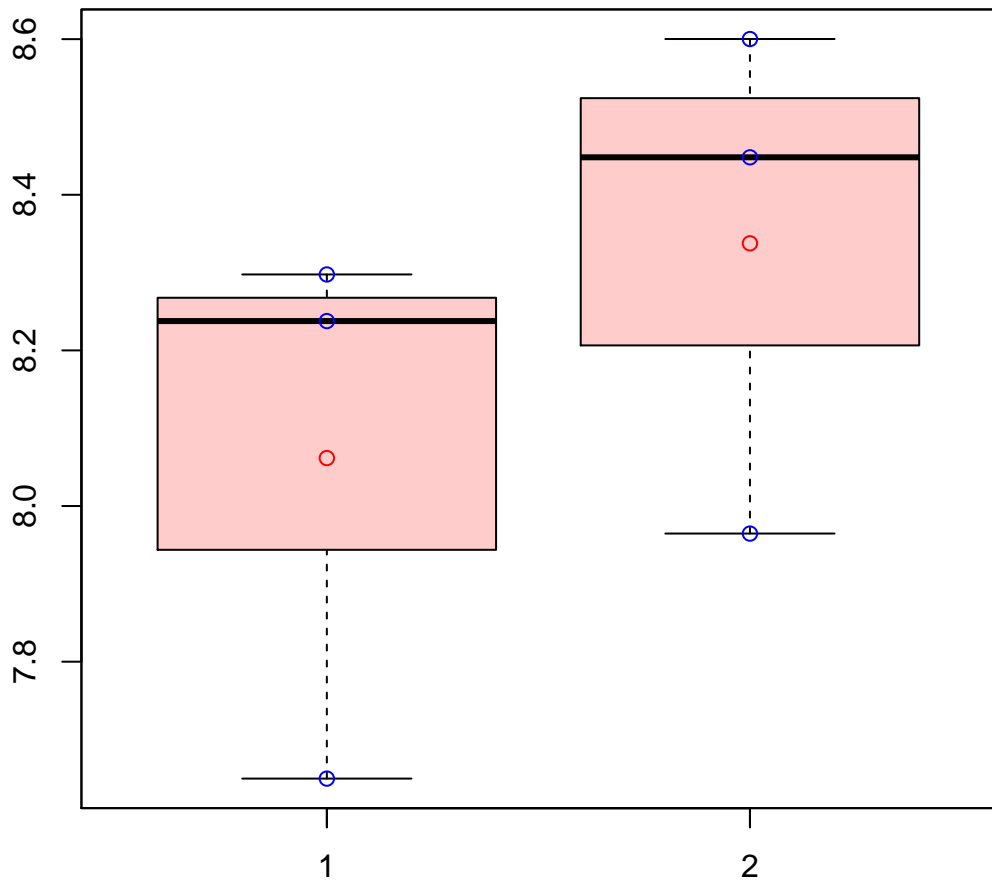

t-Test: p-value = 0.38

# CL506Contig6|CL506Contig6

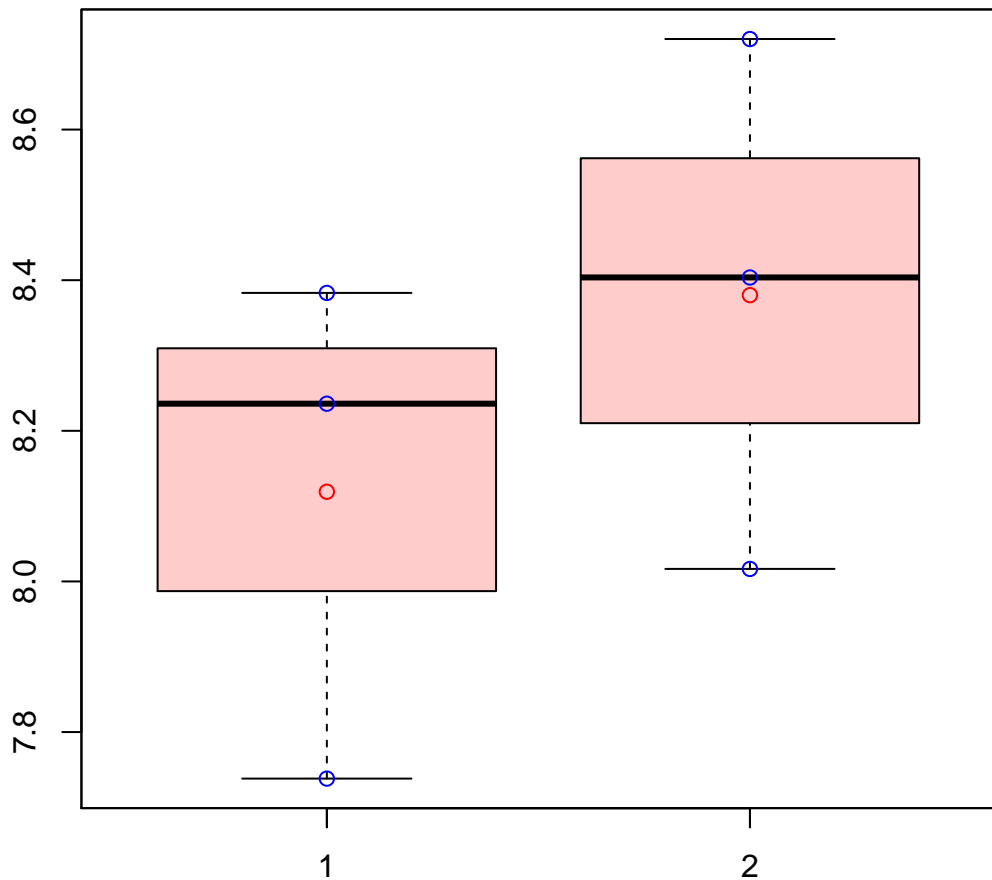

t-Test: p-value = 0.41



# CL5077Contig4|CL5077Contig4



t-Test: p-value = 0.72

# CL5082Contig1|CL5082Contig1

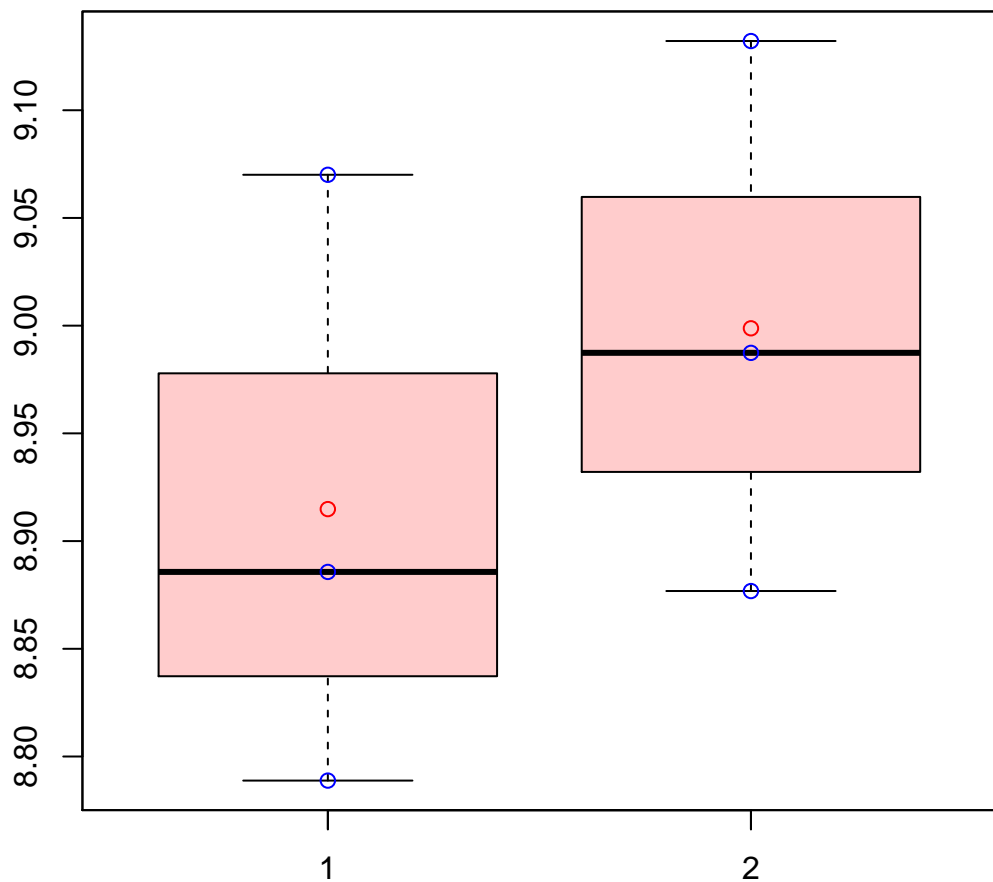

t-Test: p-value = 0.49

# CL5082Contig2|CL5082Contig2



t-Test: p-value = 0.49

# CL5082Contig4|CL5082Contig4

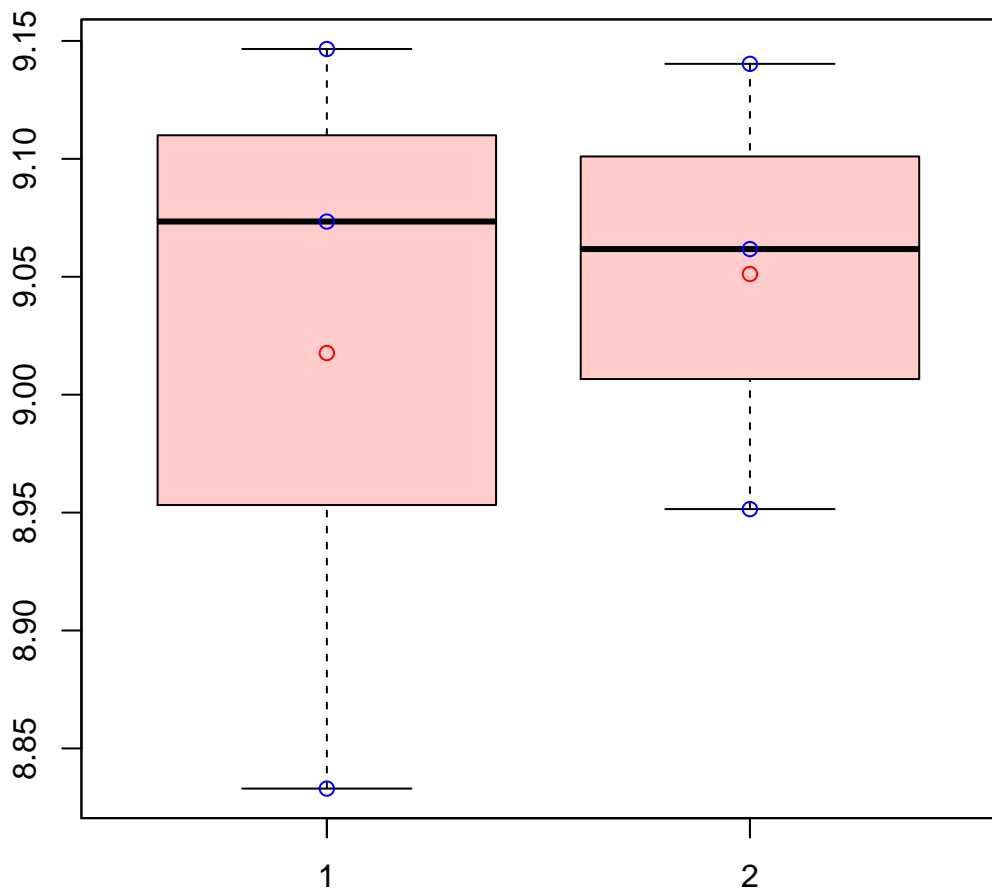

t-Test: p-value = 0.78

# CL5082Contig5|CL5082Contig5

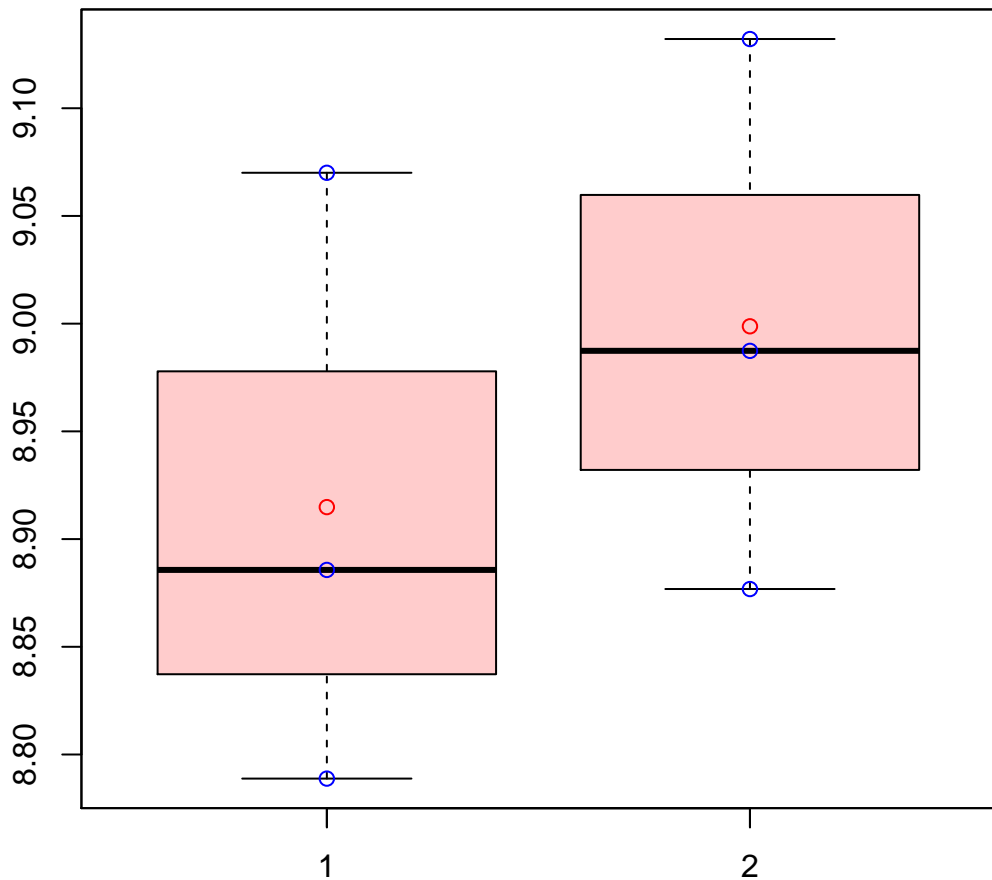

t-Test: p-value = 0.49

# CL5082Contig6|CL5082Contig6

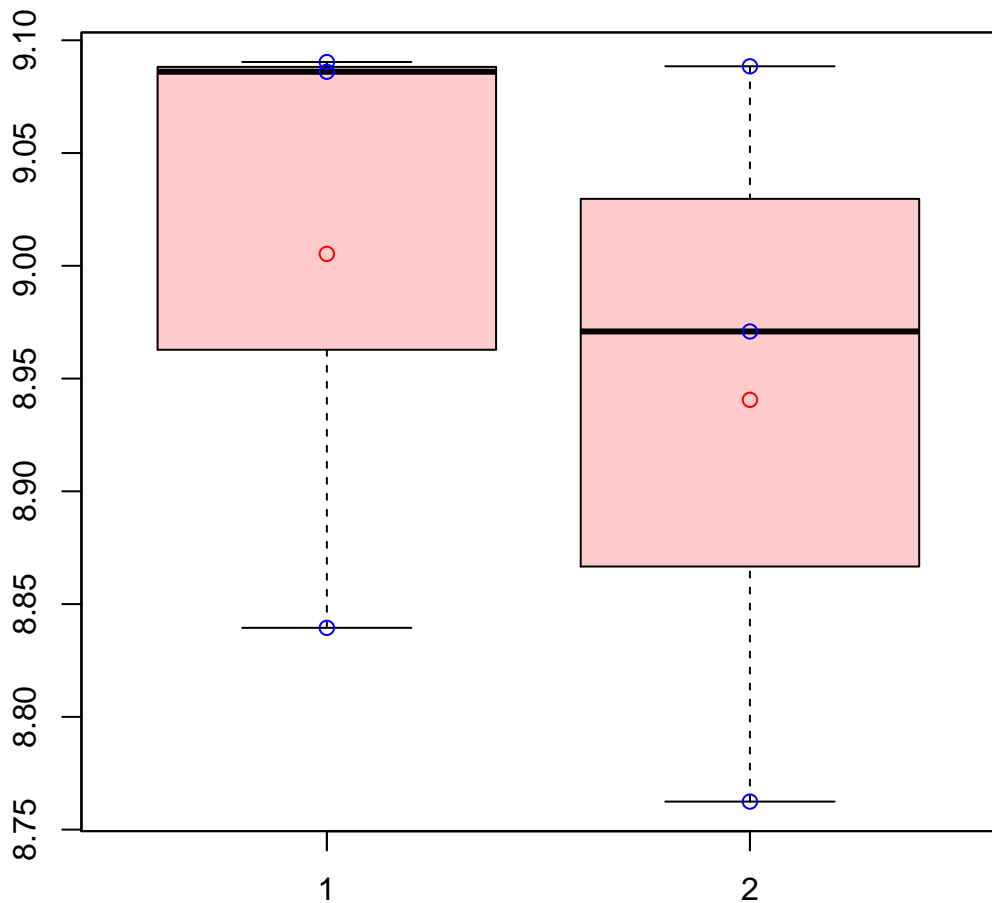

t-Test: p-value = 0.64

# CL508Contig2|CL508Contig2

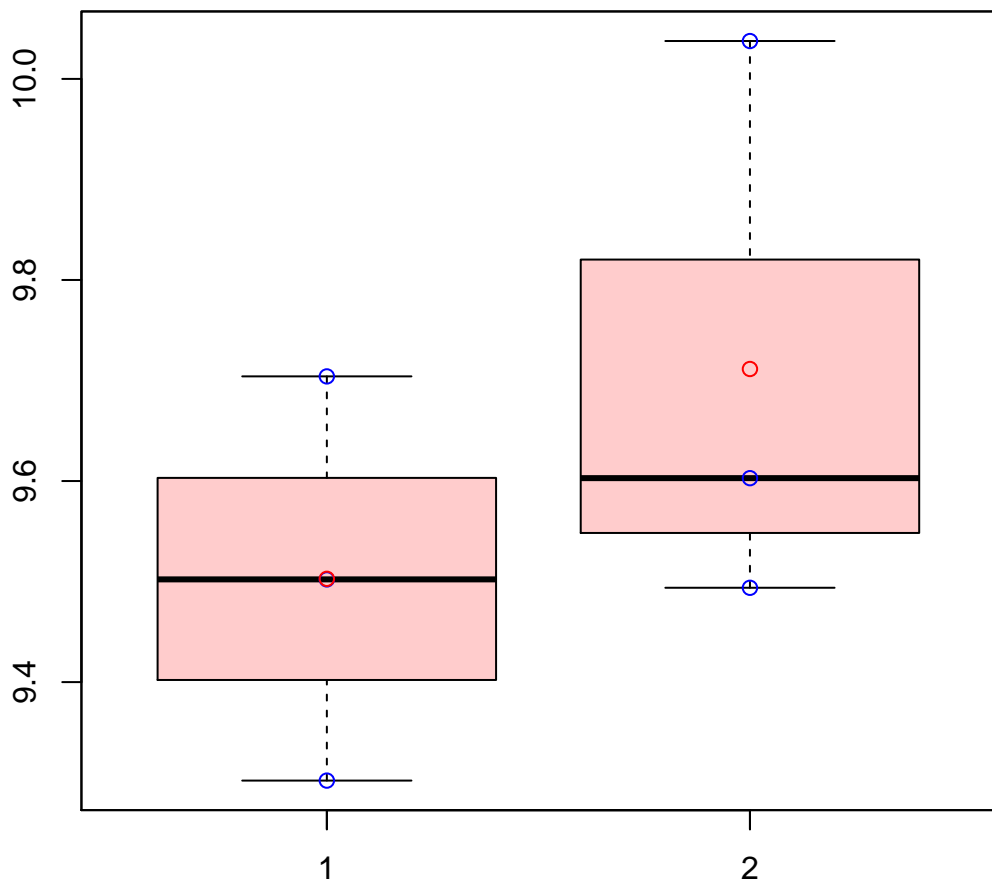

t-Test: p-value = 0.37

# CL508Contig8|CL508Contig8

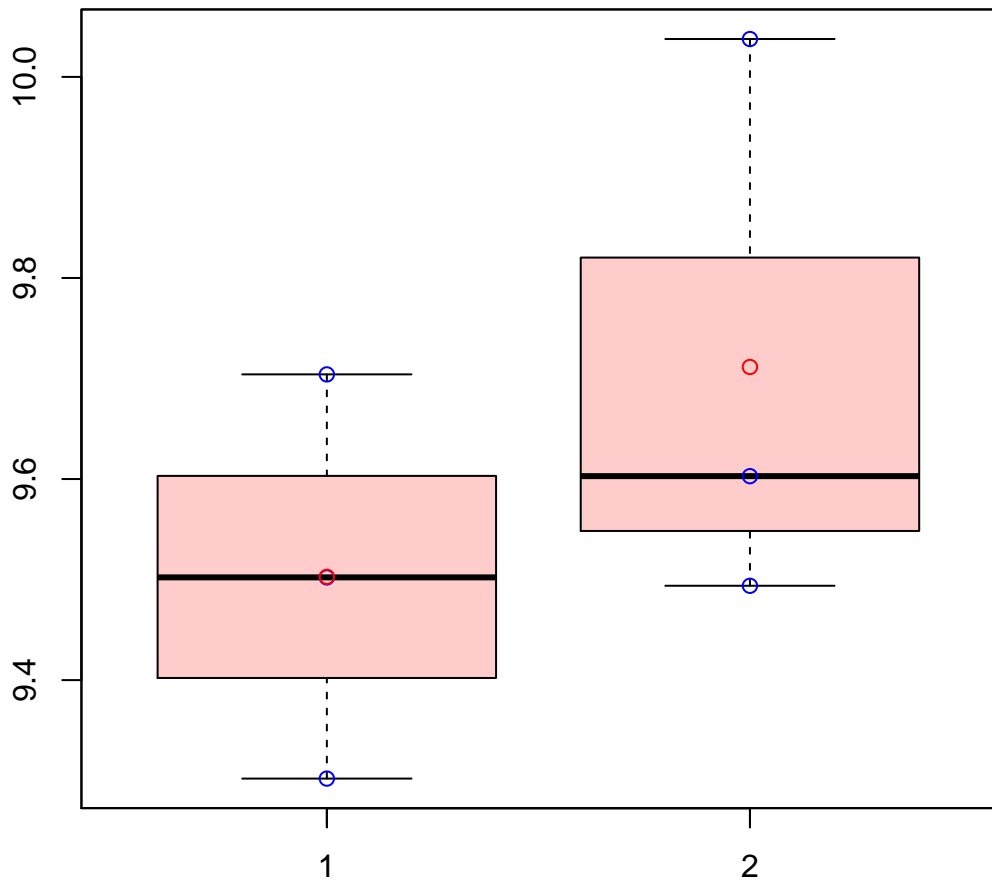

t-Test: p-value = 0.37



# CL508Contig9|CL508Contig9

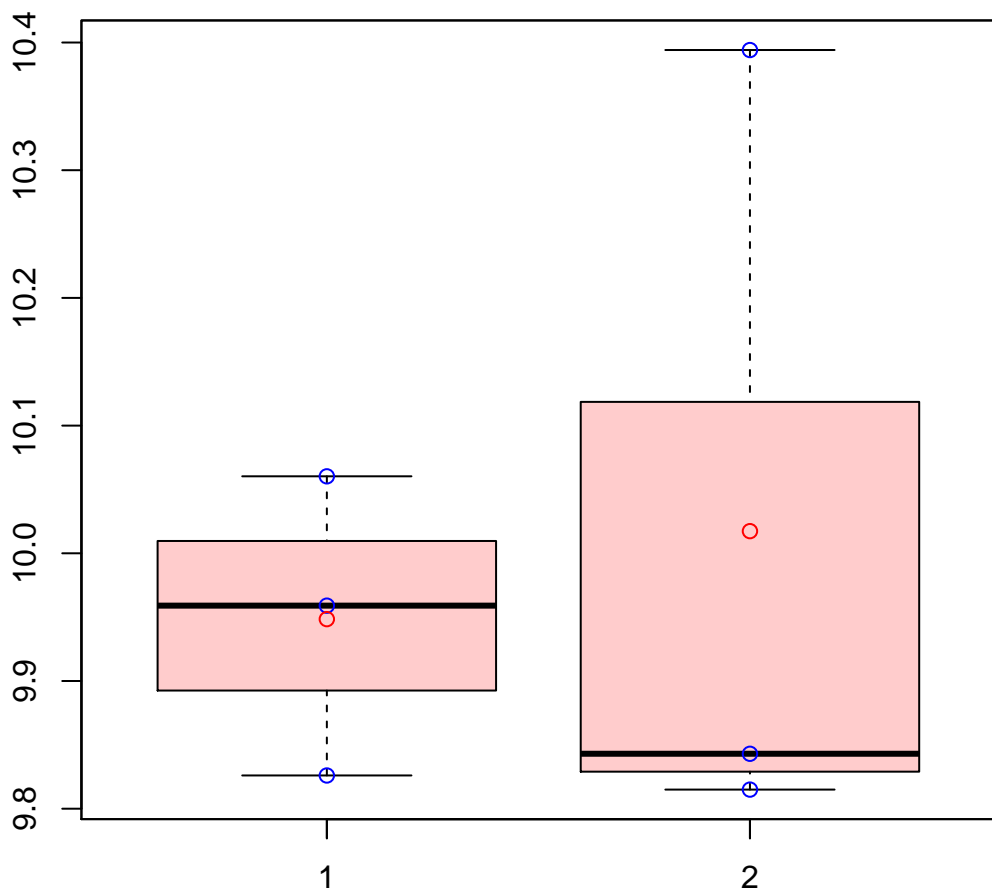

t-Test: p-value = 0.76

# CL5091Contig2|CL5091Contig2

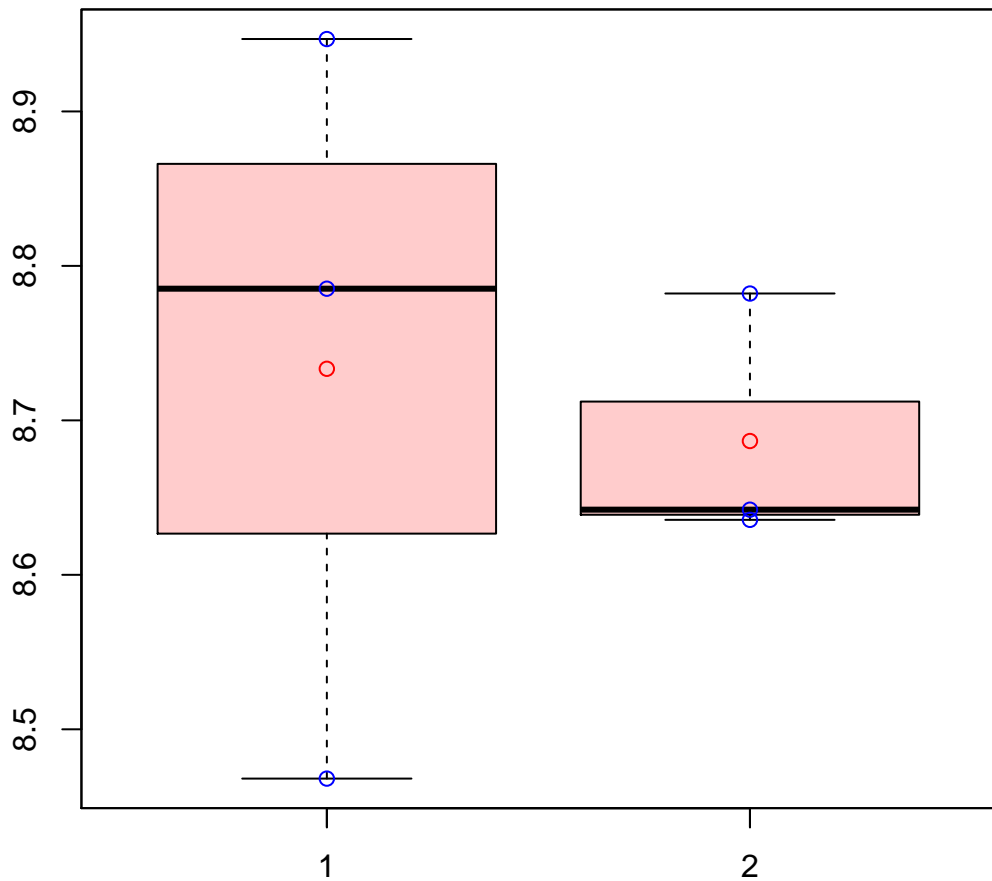

t-Test: p-value = 0.78

# CL5093Contig2|CL5093Contig2

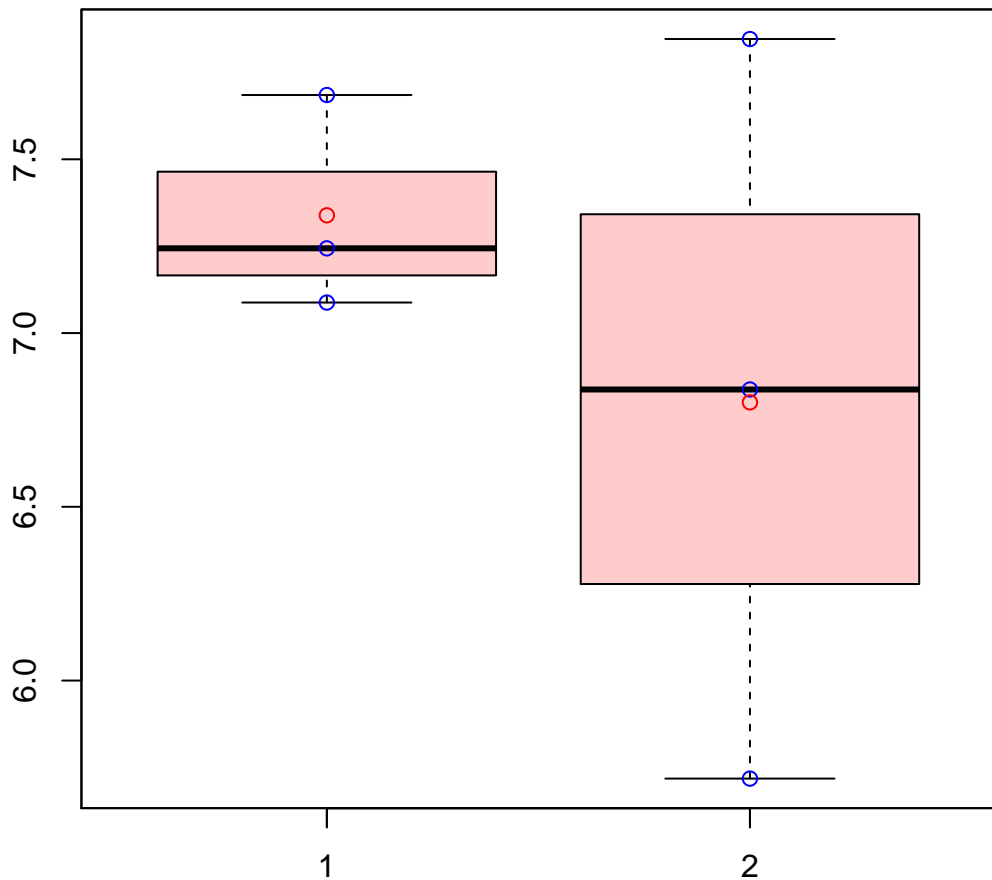

t-Test: p-value = 0.48

# CL5095Contig1|CL5095Contig1

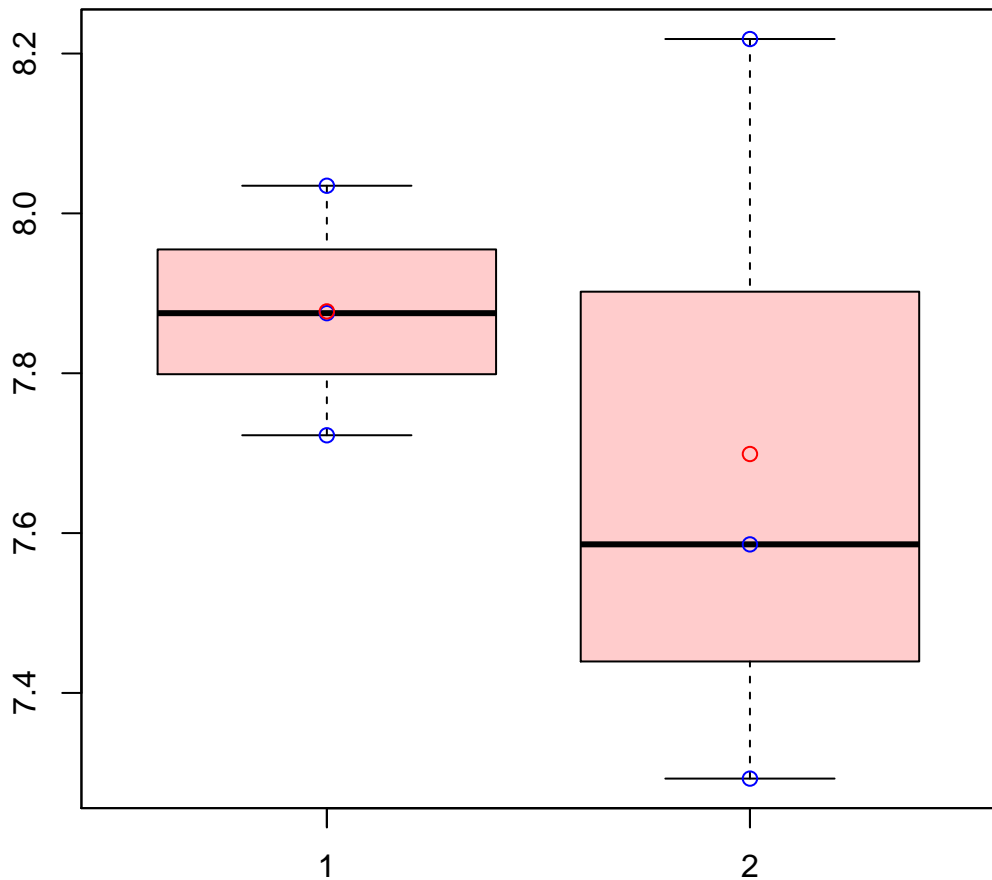

t-Test: p-value = 0.59

# CL5097Contig1|CL5097Contig1

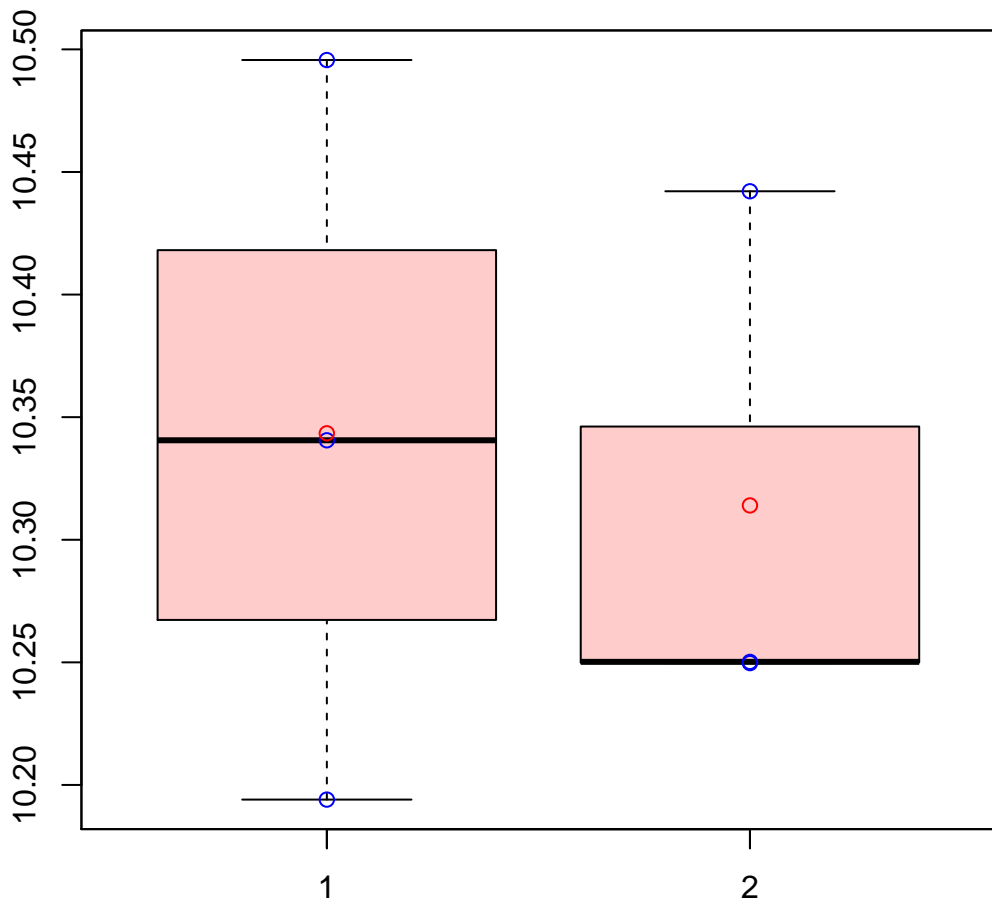

t-Test: p-value = 0.8

# CL5097Contig3|CL5097Contig3

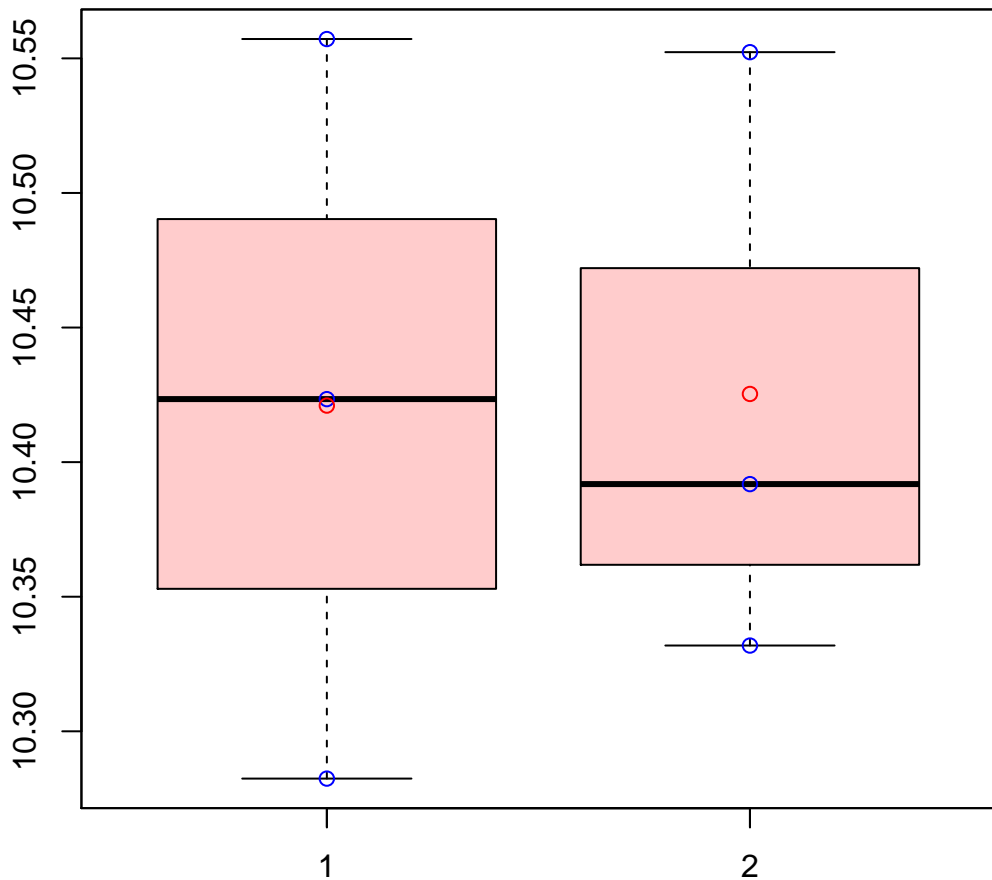

t-Test: p-value = 0.97

# CL5099Contig1|CL5099Contig1



t-Test: p-value = 0.31

# CL509Contig3|CL509Contig3

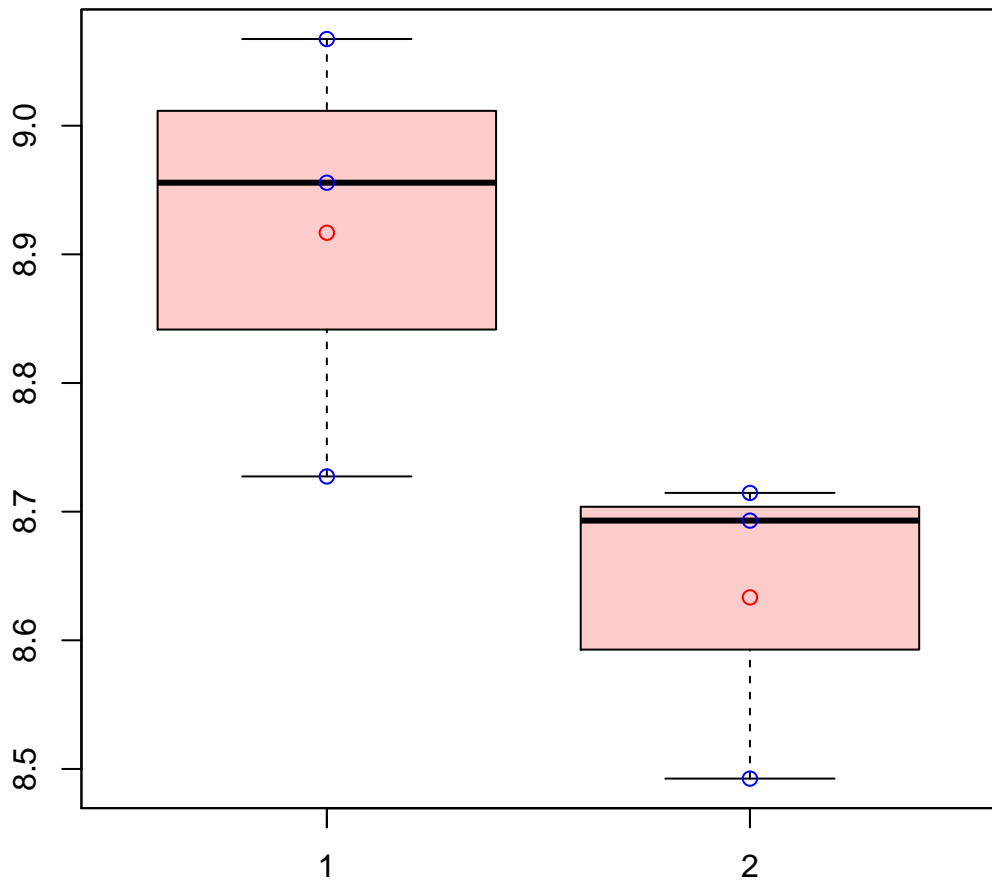

t-Test: p-value = 0.09



# CL50Contig6|CL50Contig6

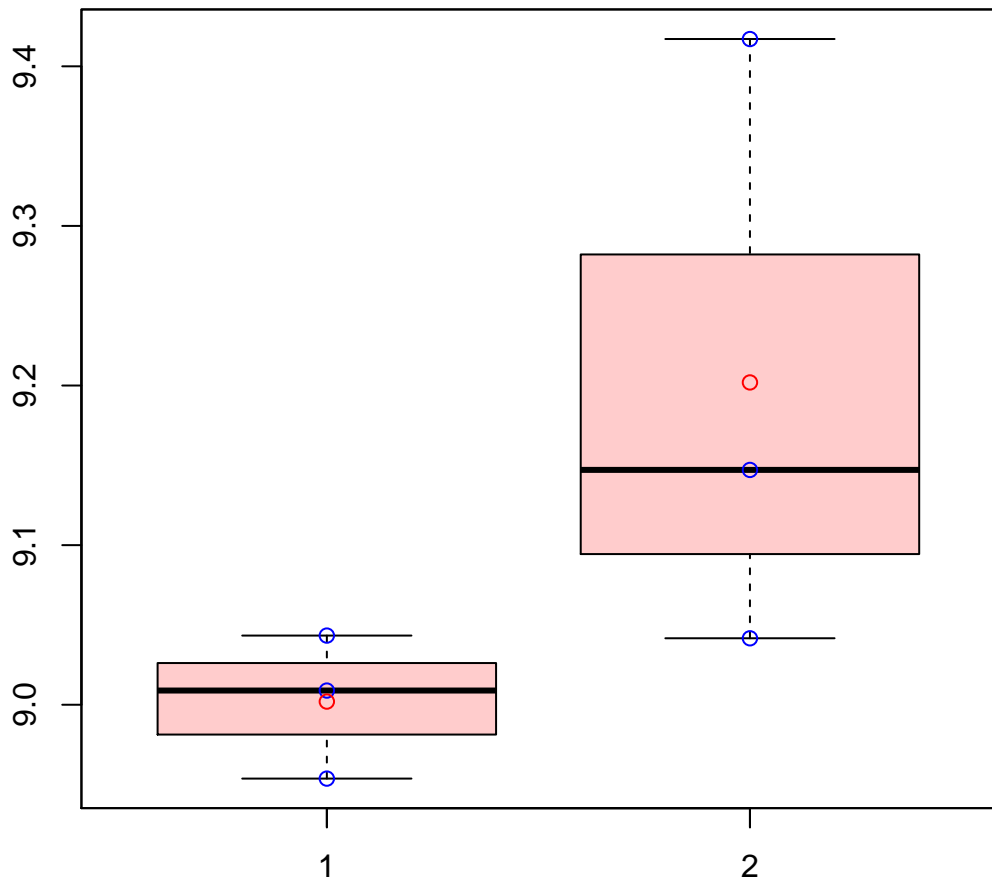

t-Test: p-value = 0.21

# CL5104Contig1|CL5104Contig1

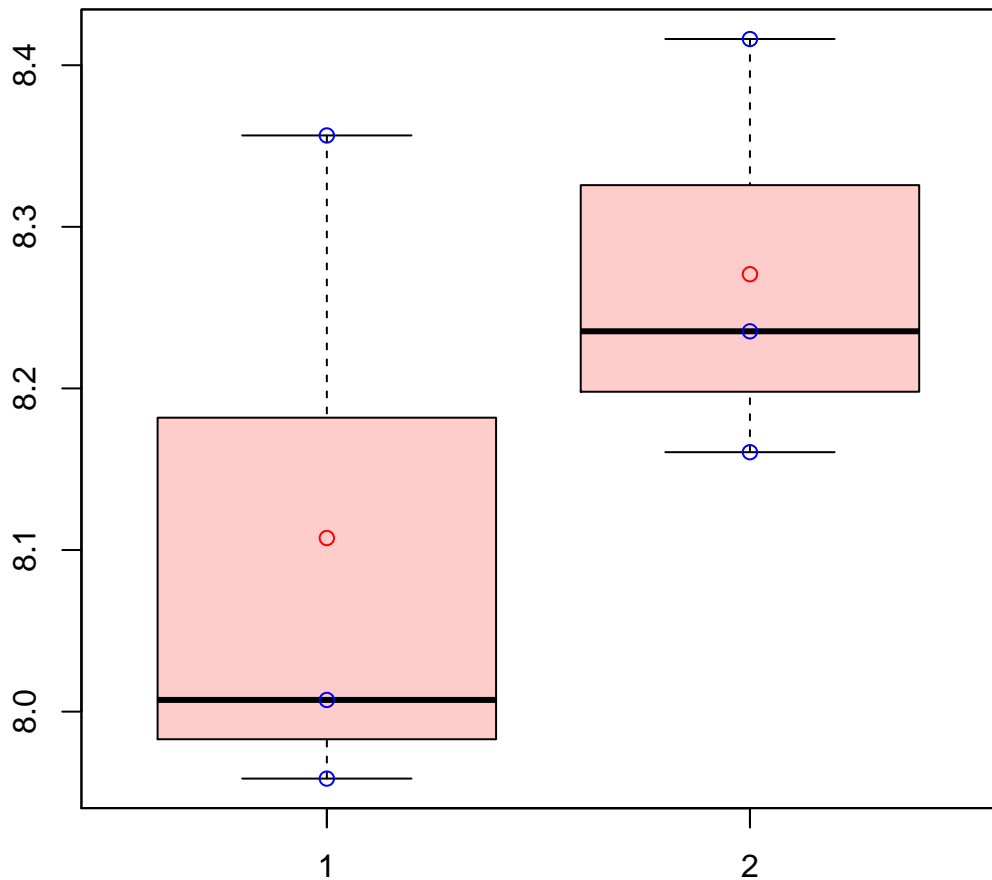

t-Test: p-value = 0.34

# CL5105Contig4|CL5105Contig4

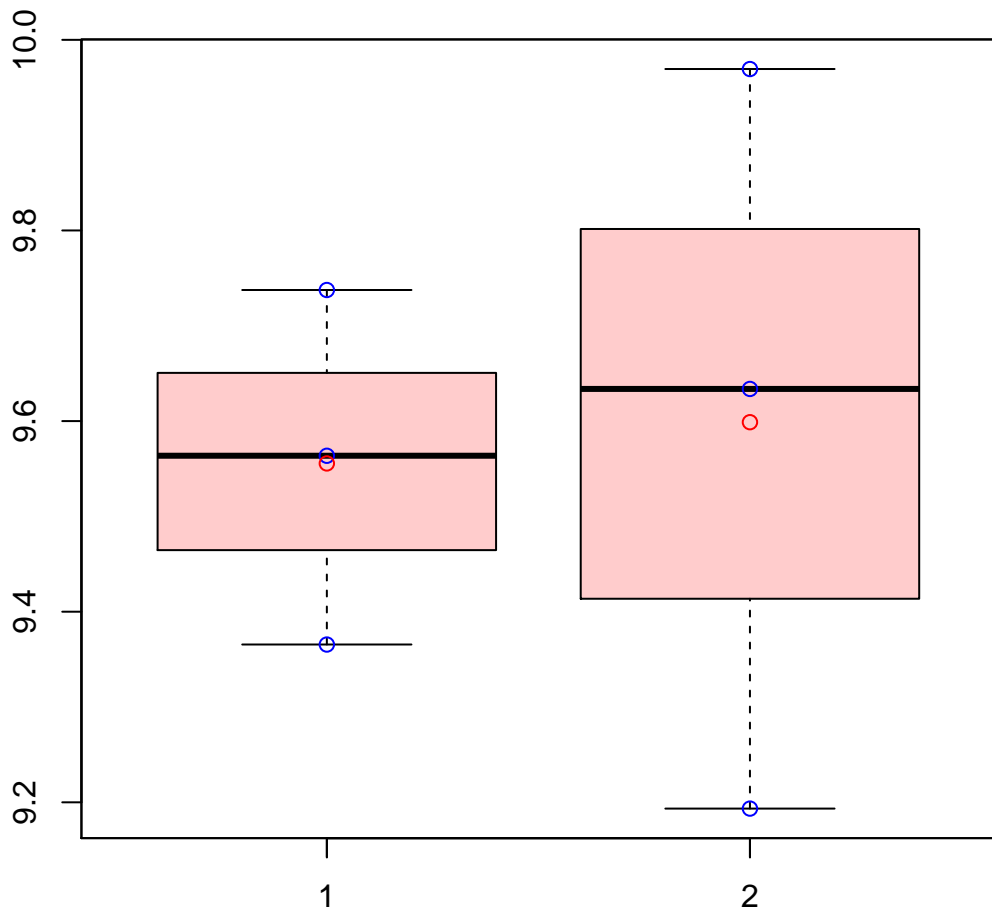

t-Test: p-value = 0.87

# CL5105Contig6|CL5105Contig6

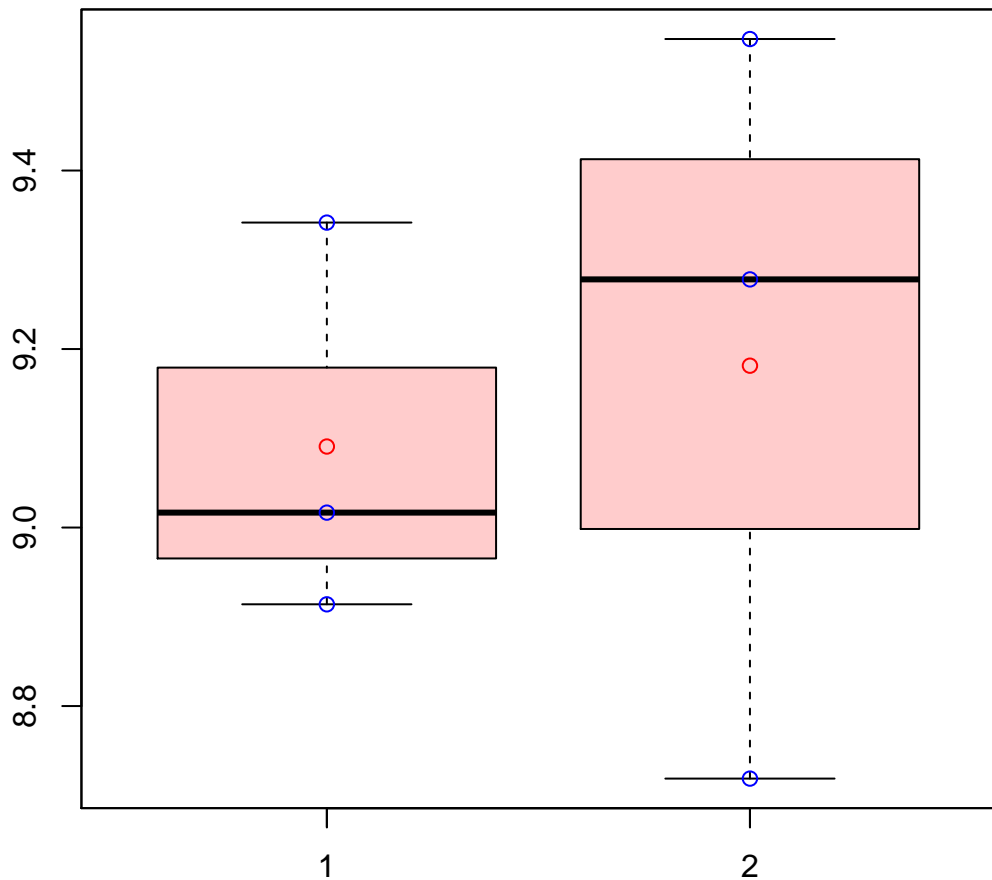

t-Test: p-value = 0.76

# CL5109Contig1|CL5109Contig1

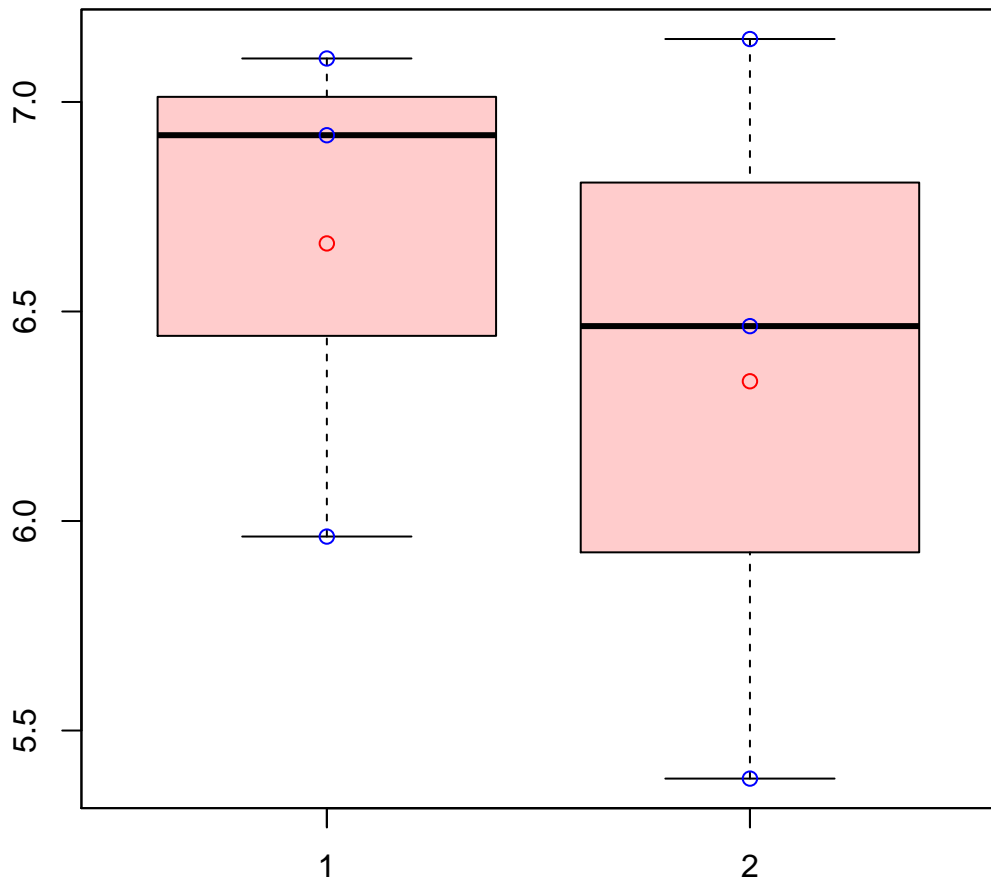

t-Test: p-value = 0.63

# CL510Contig10|CL510Contig10

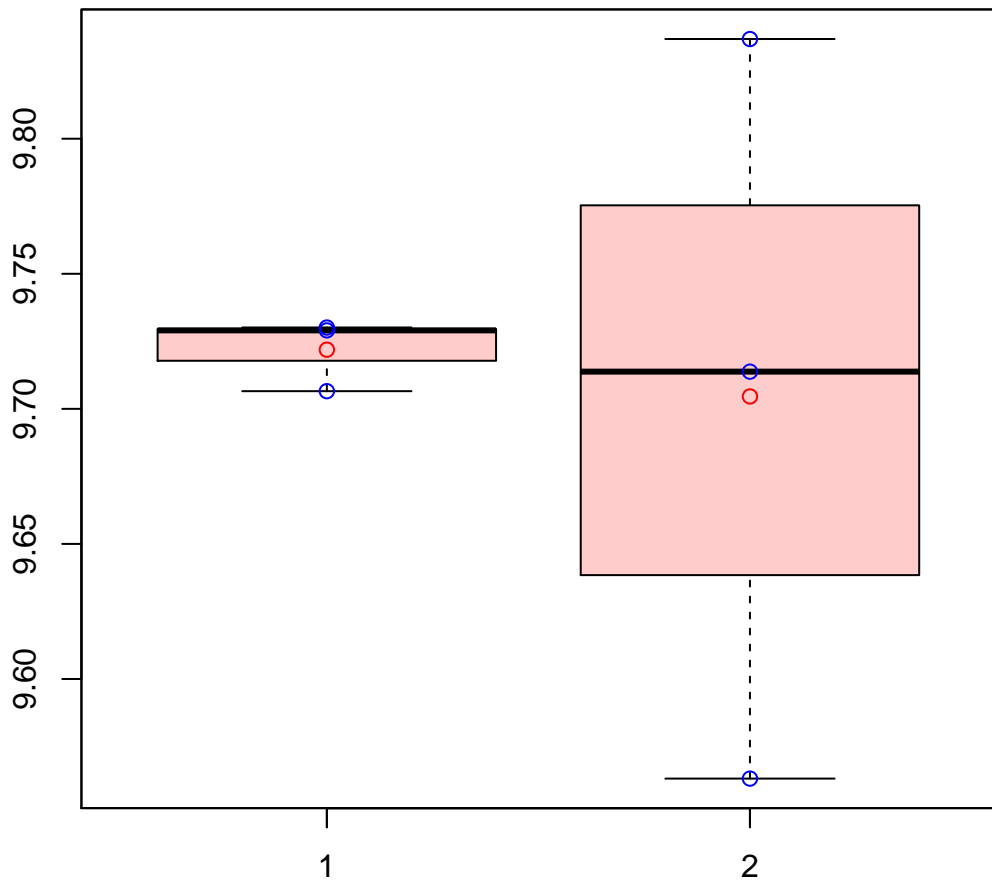

t-Test: p-value = 0.85

# CL510Contig14|CL510Contig14

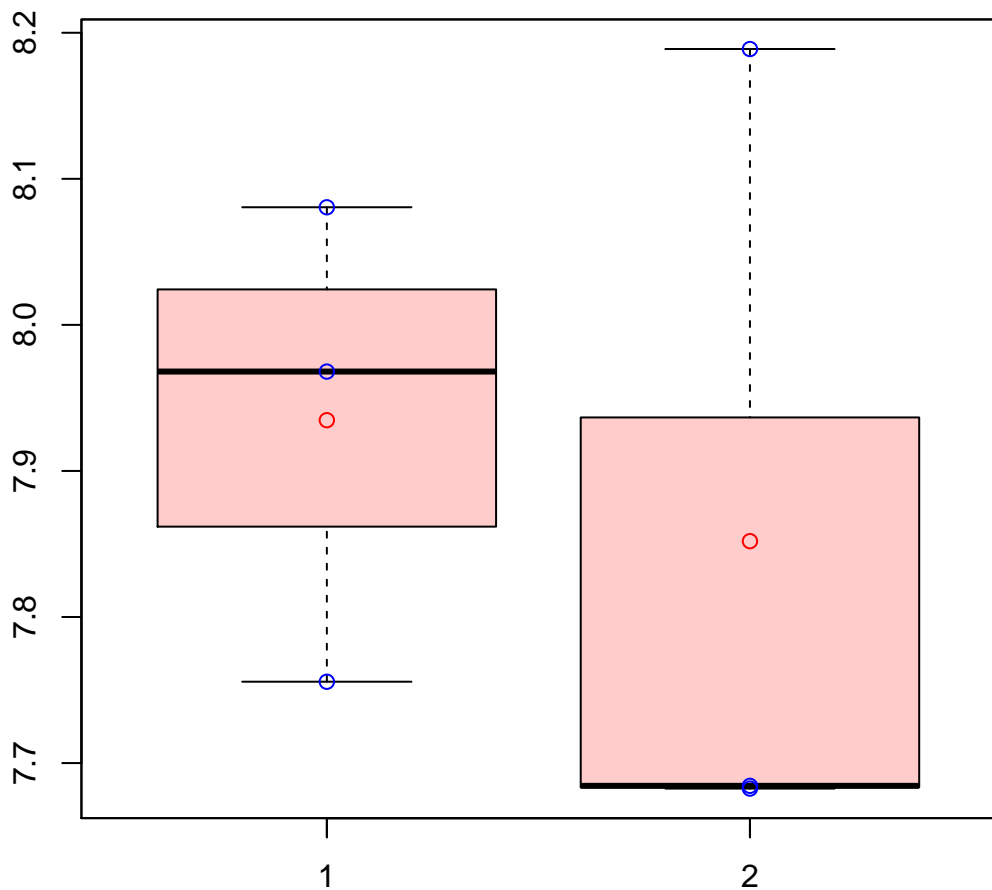

t-Test: p-value = 0.7

# CL5114Contig2|CL5114Contig2



t-Test: p-value = 0.97



## CL5116Contig2|CL5116Contig2

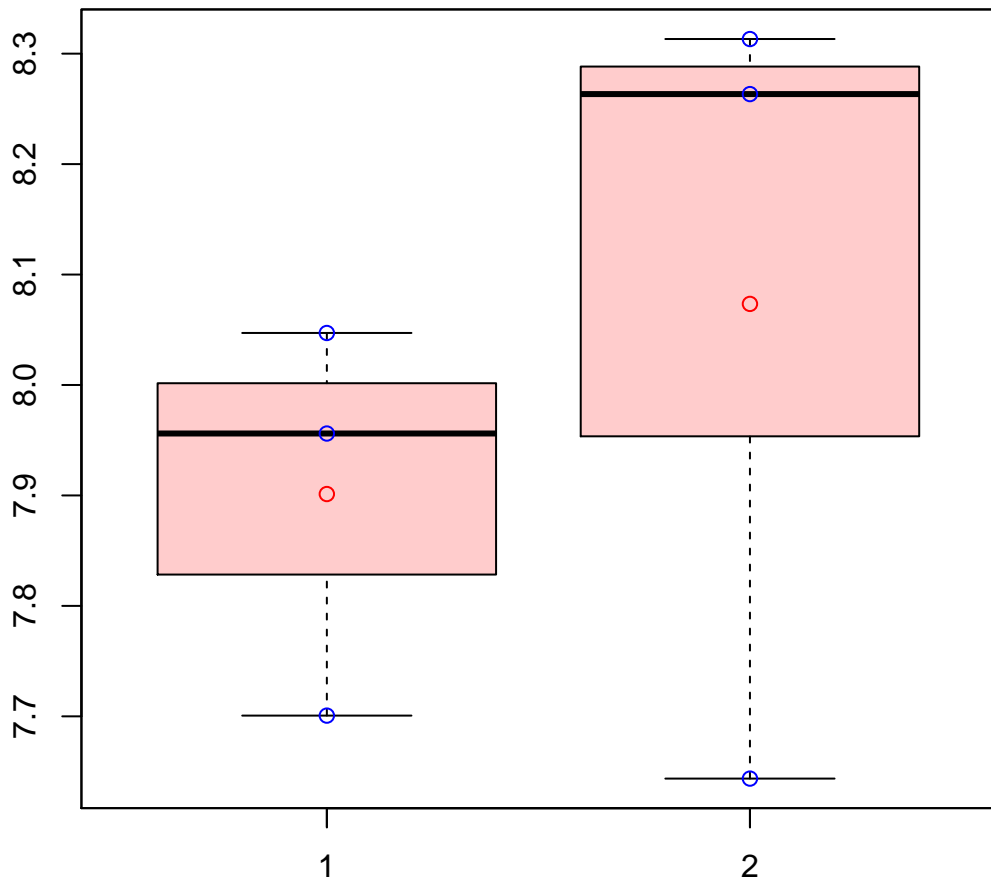

t-Test: p-value = 0.53

# CL5116Contig3|CL5116Contig3

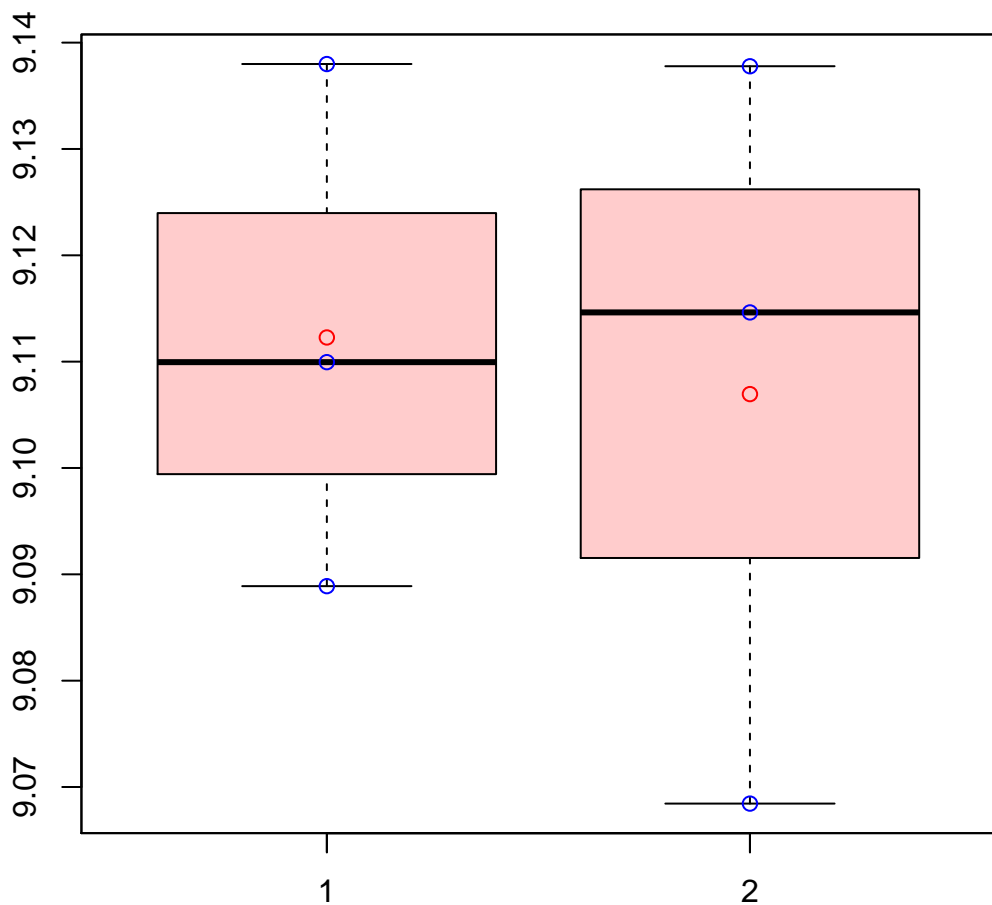

t-Test: p-value = 0.84

# CL5124Contig2|CL5124Contig2

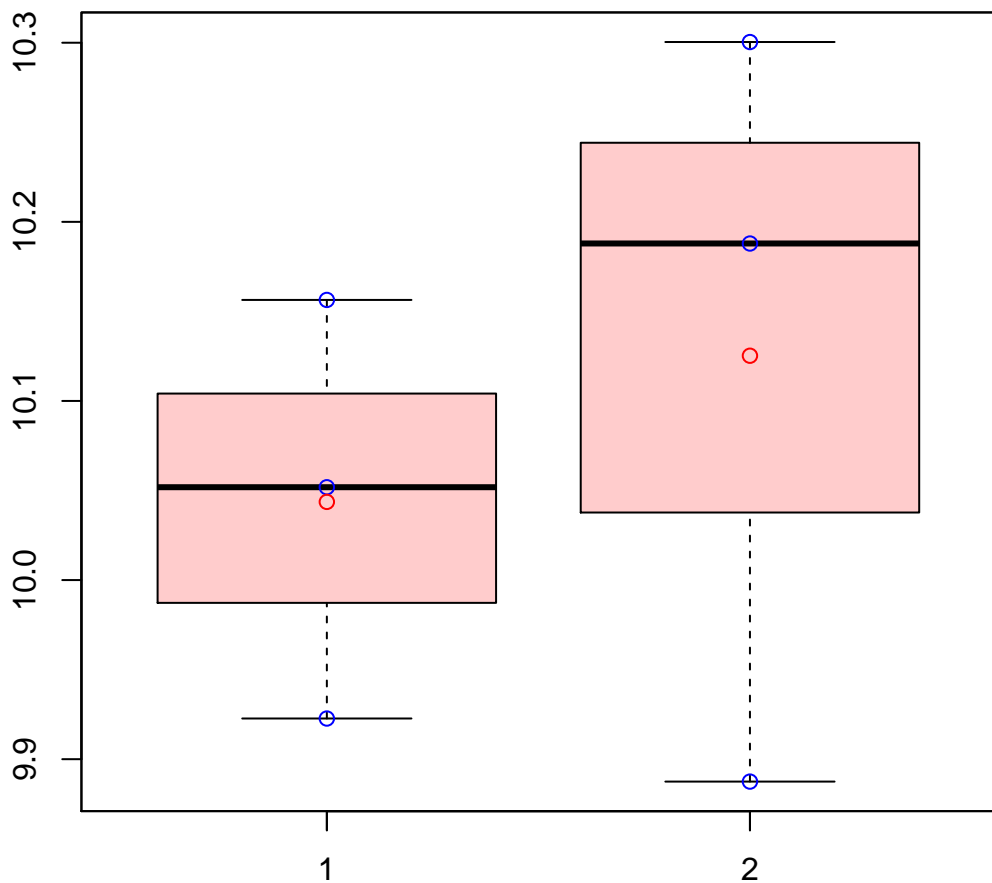

t-Test: p-value = 0.6

# CL5128Contig1|CL5128Contig1

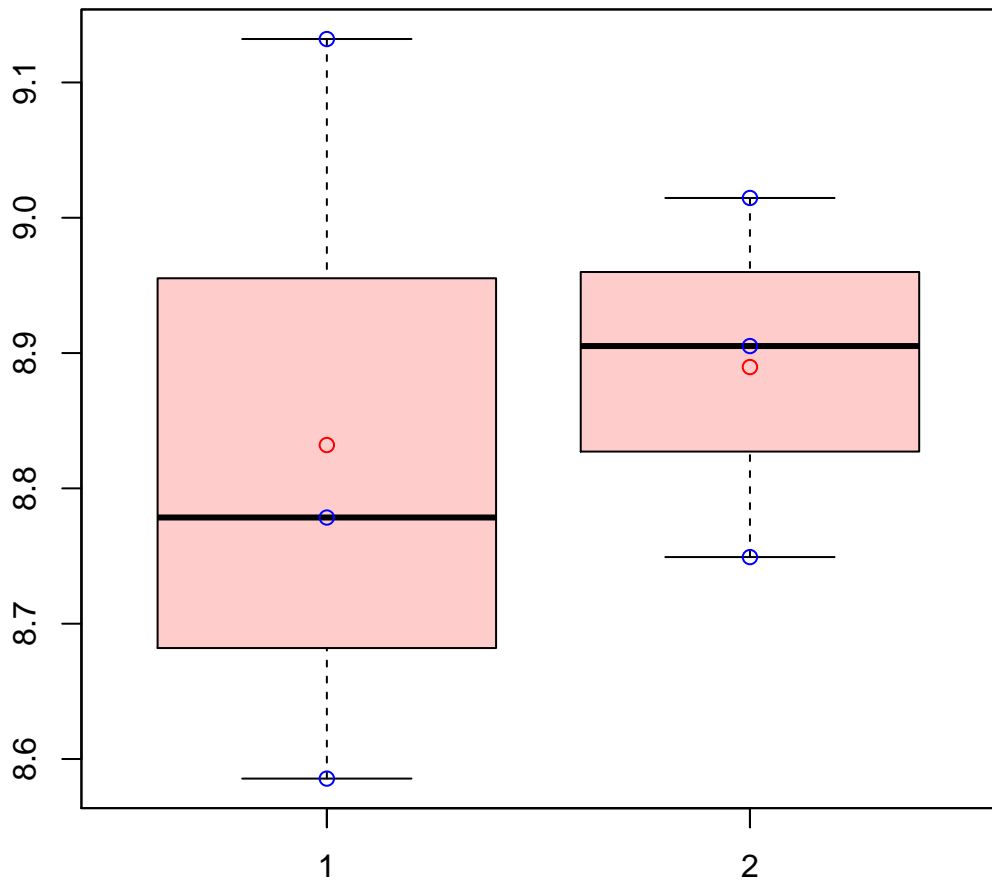

t-Test: p-value = 0.77

# CL512Contig4|CL512Contig4

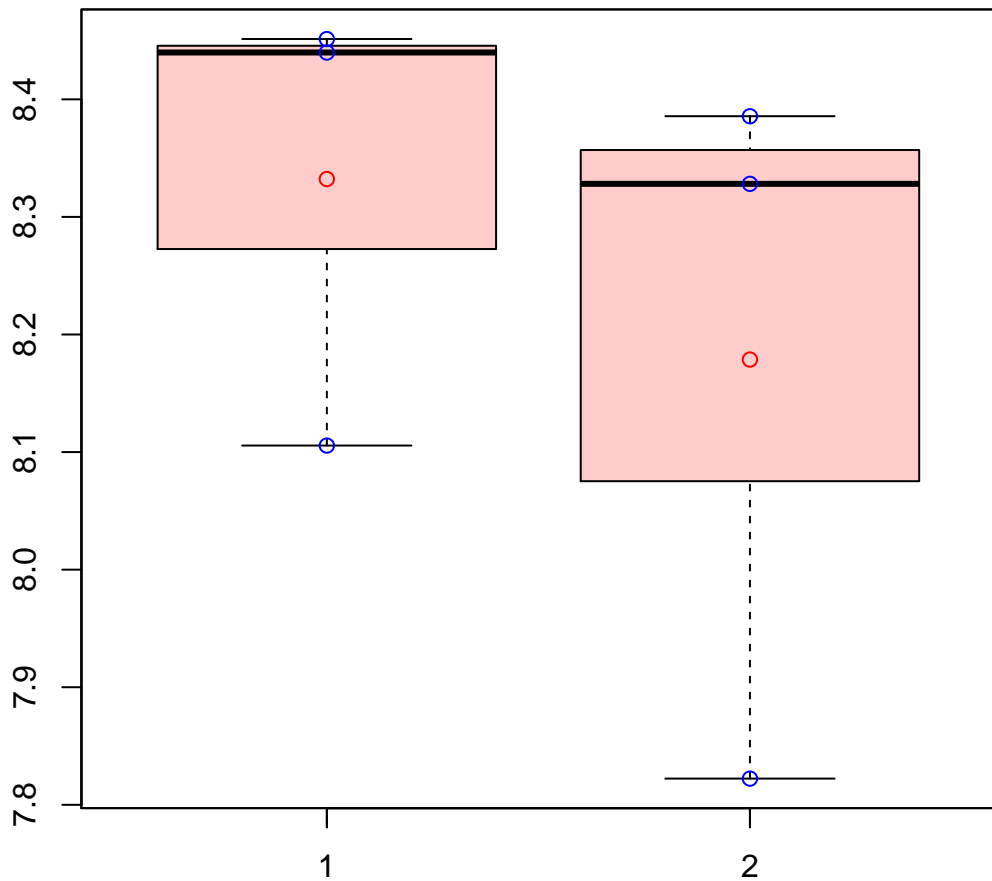

t-Test: p-value = 0.52

# CL5134Contig1|CL5134Contig1

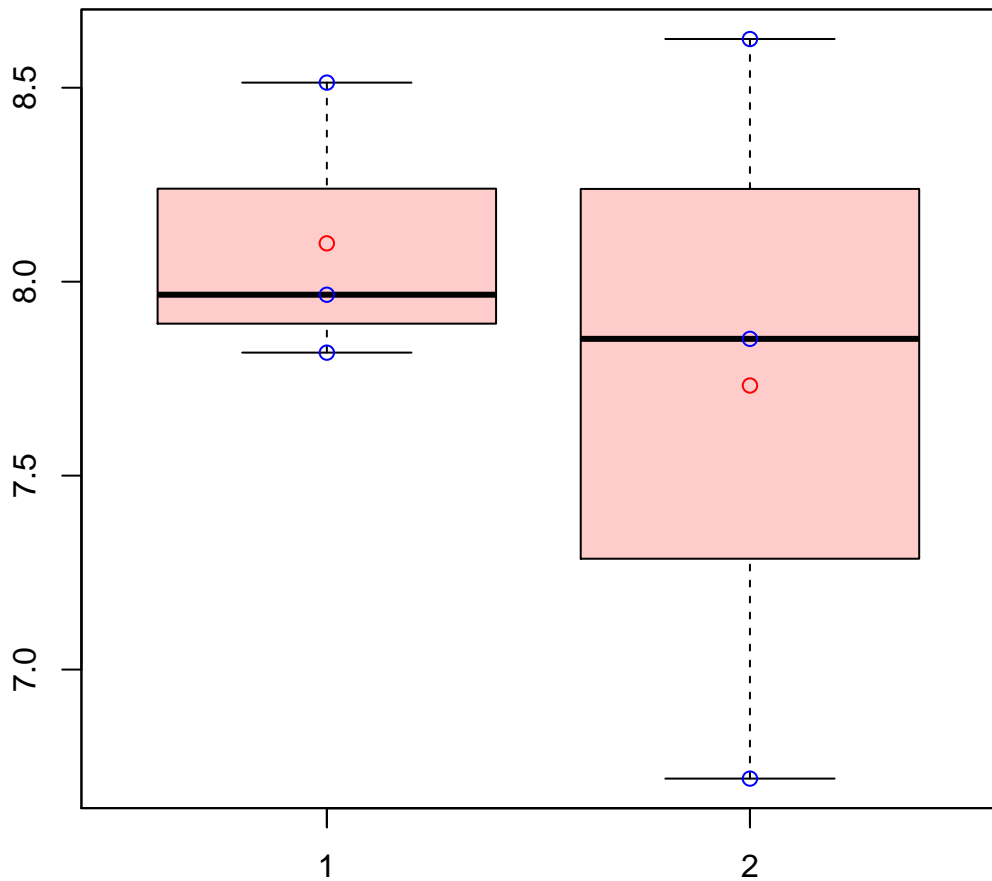

t-Test: p-value = 0.59

# CL5135Contig2|CL5135Contig2



t-Test: p-value = 0.85

# CL513Contig10|CL513Contig10

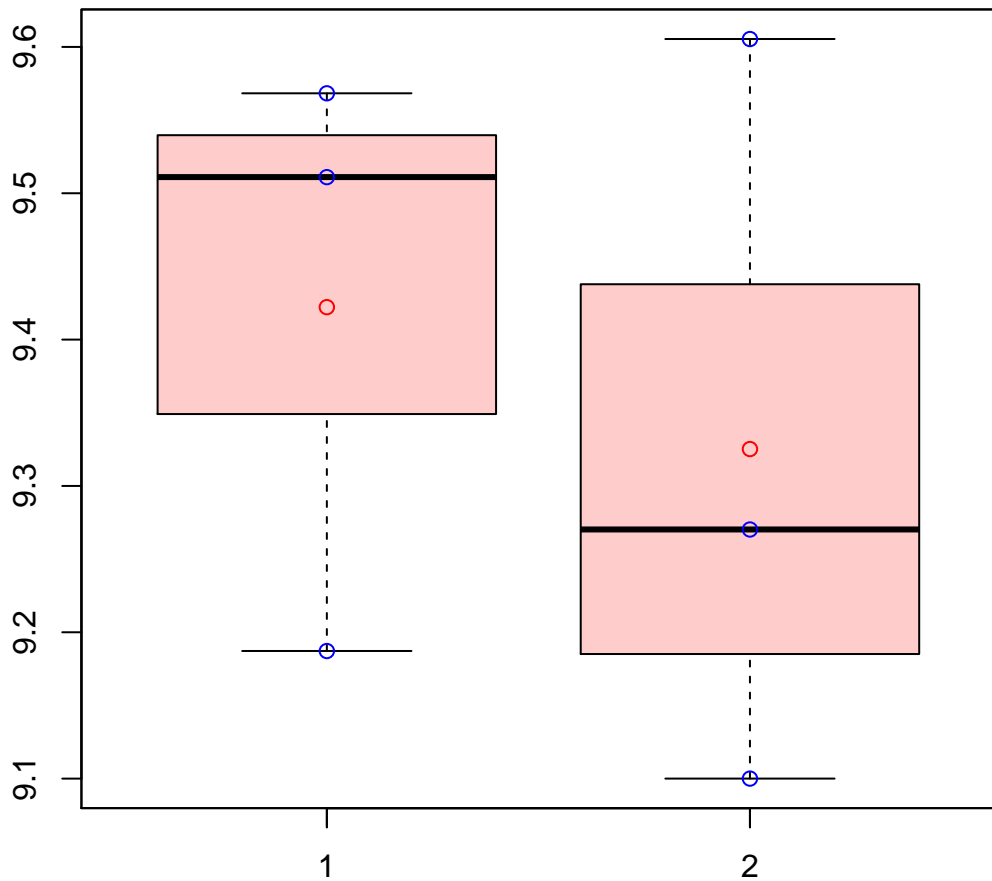

t-Test: p-value = 0.64



# CL5140Contig4|CL5140Contig4



t-Test: p-value = 0.13

# CL5144Contig2|CL5144Contig2

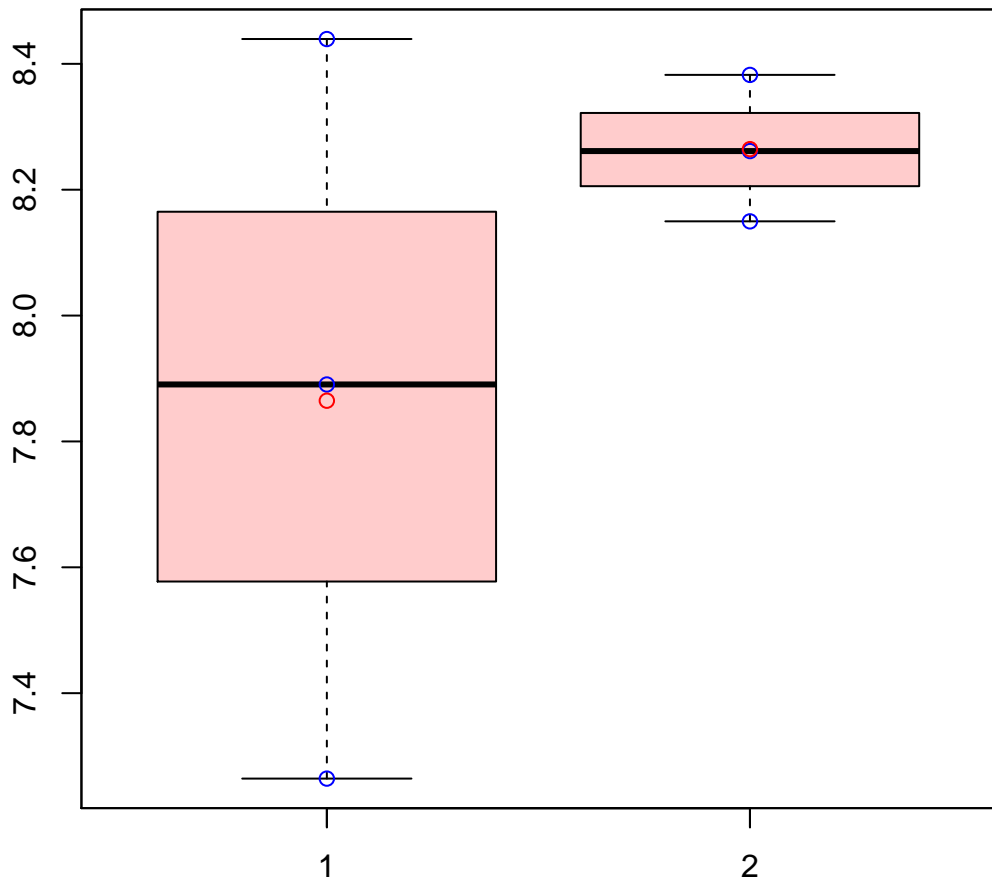

t-Test: p-value = 0.36

# CL5144Contig3|CL5144Contig3



t-Test: p-value = 0.36

# CL514Contig12|CL514Contig12

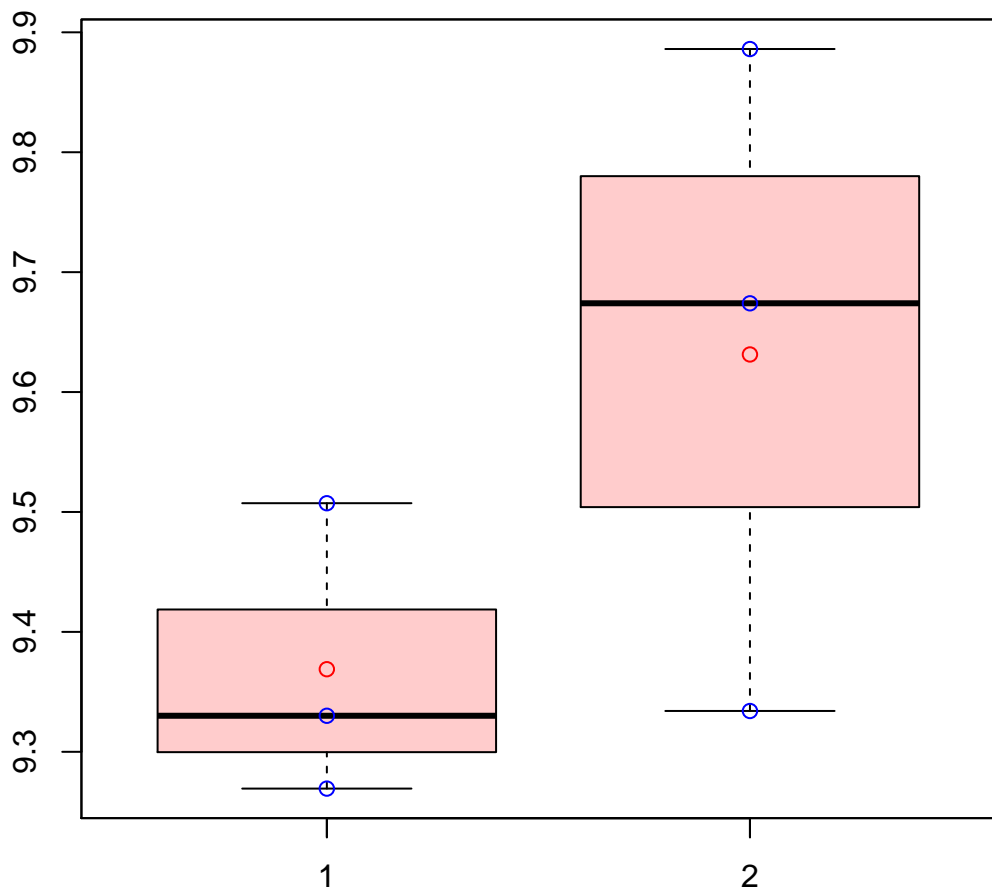

t-Test: p-value = 0.24

# CL514Contig1|CL514Contig1

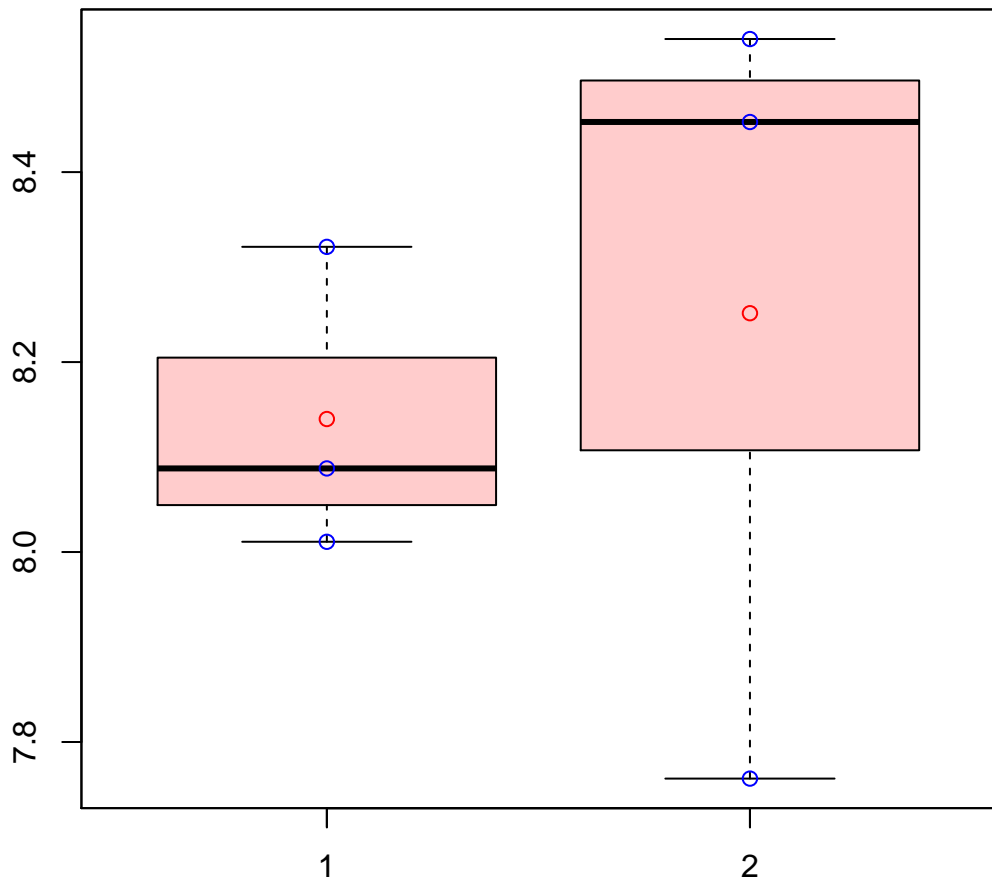

t-Test: p-value = 0.71

# CL514Contig2|CL514Contig2

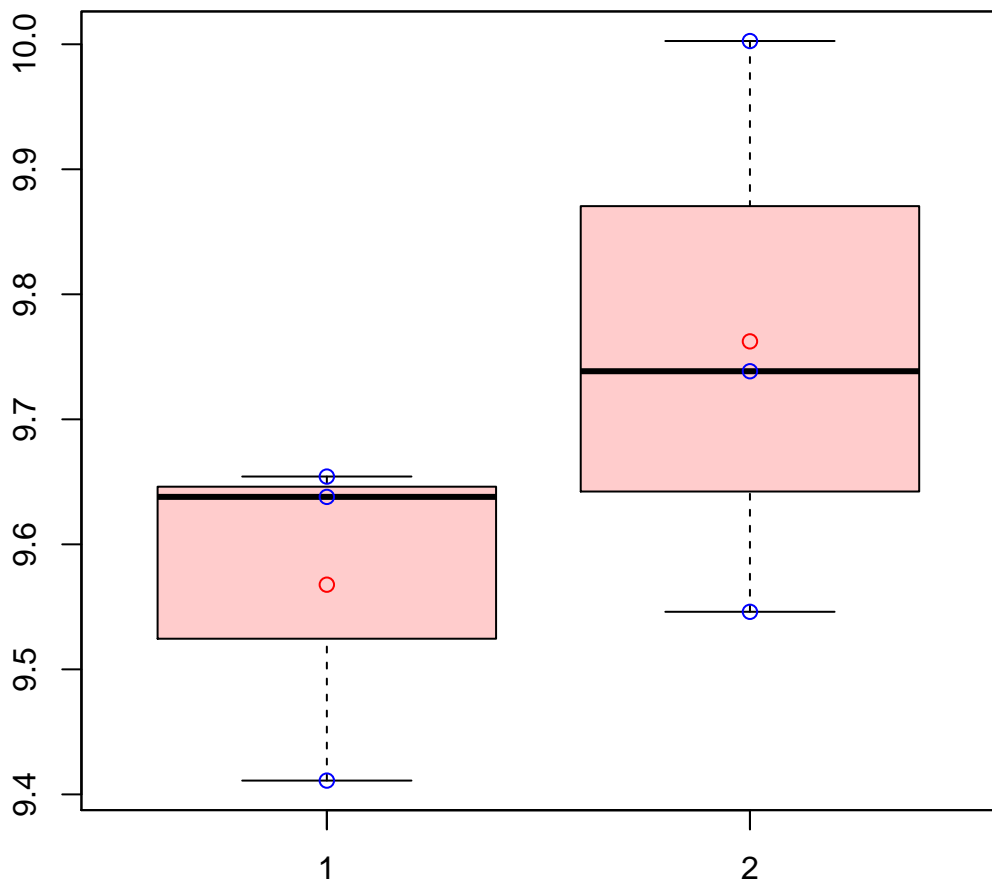

t-Test: p-value = 0.29

# CL5154Contig1|CL5154Contig1

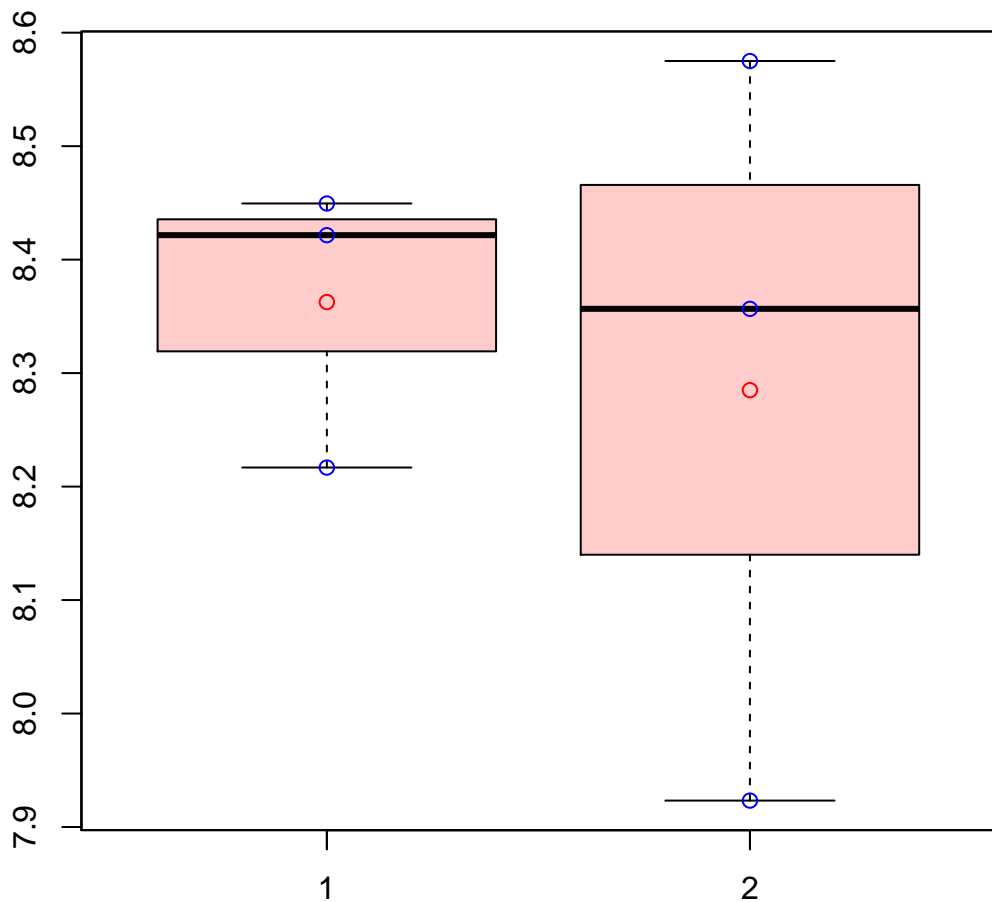

t-Test: p-value = 0.73

# CL5159Contig4|CL5159Contig4

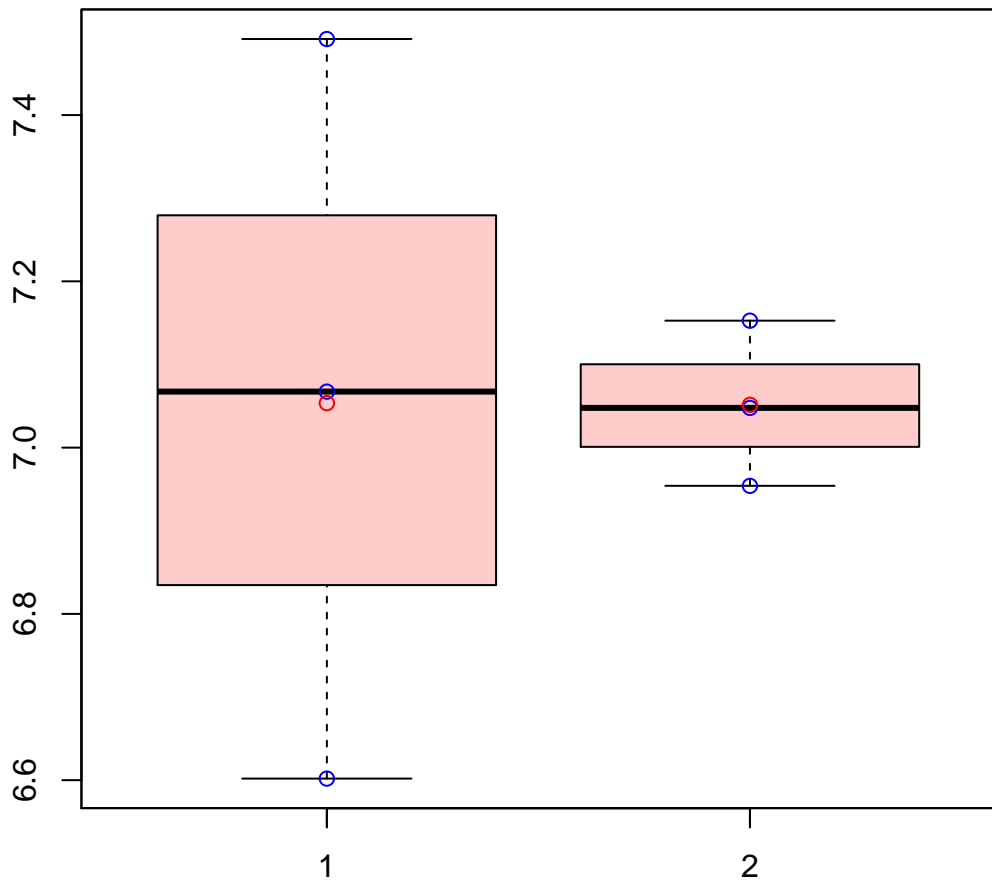

t-Test: p-value = 0.99



# CL5167Contig2|CL5167Contig2

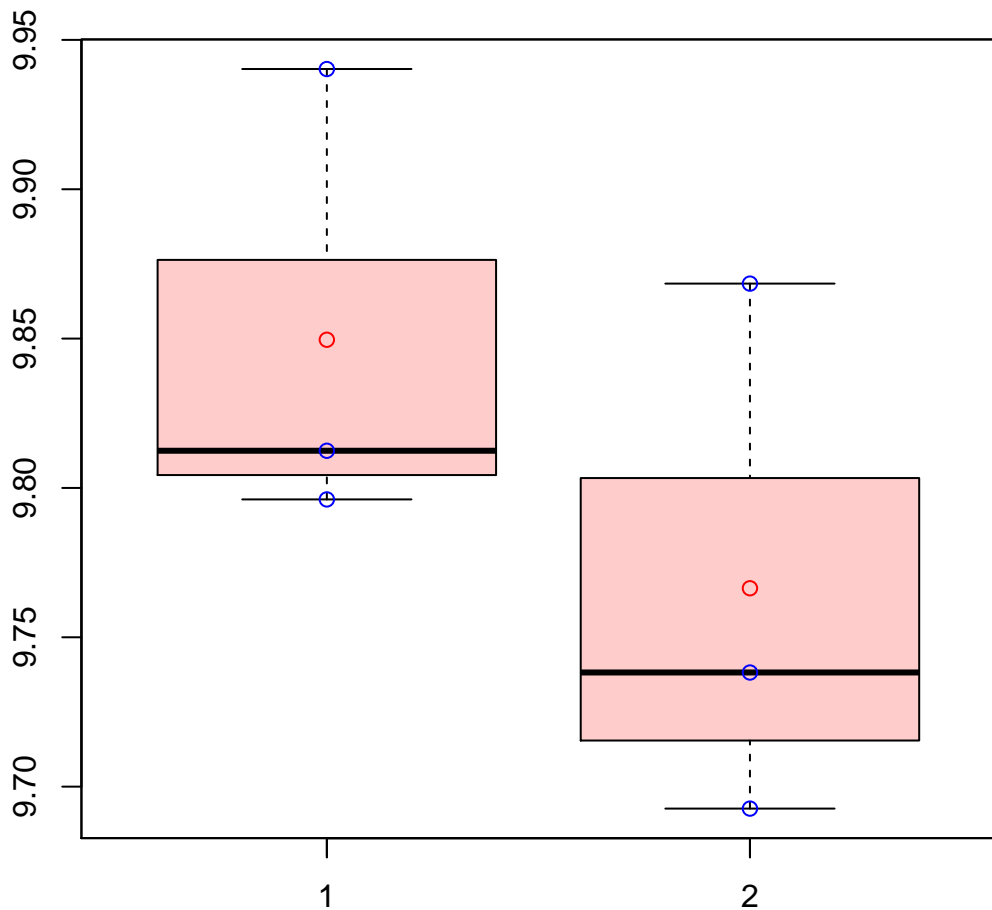

t-Test: p-value = 0.3

# CL5169Contig3|CL5169Contig3

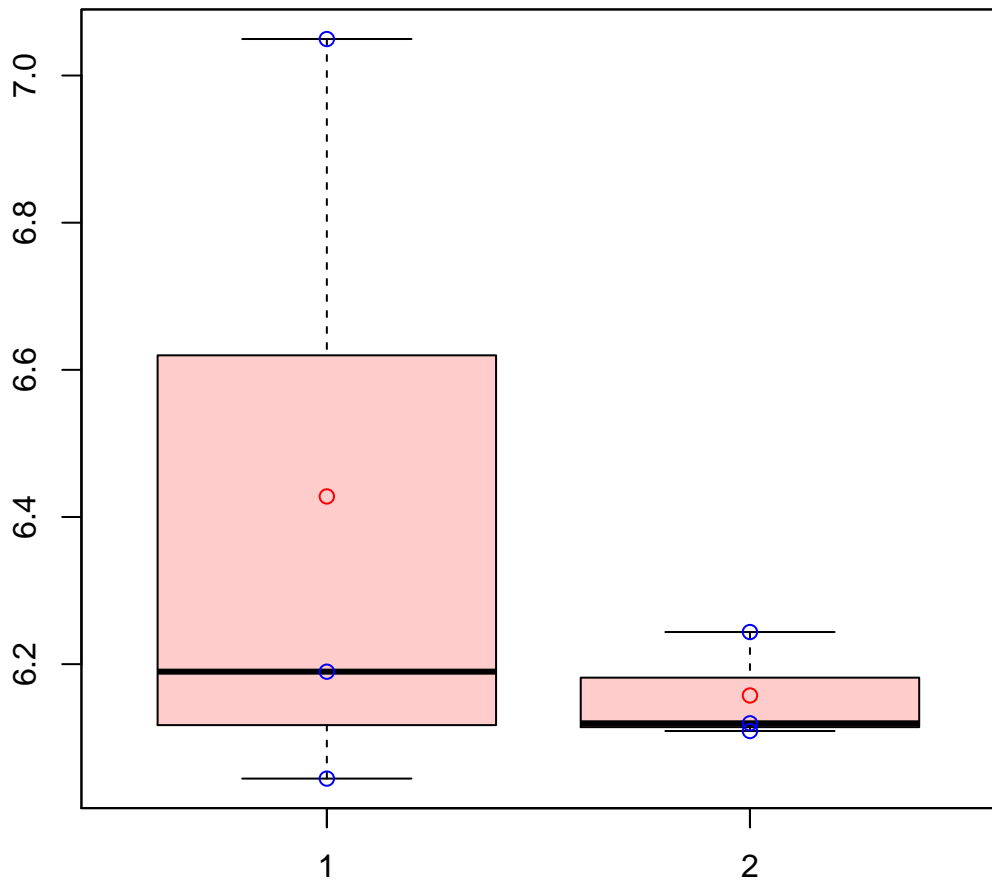

t-Test: p-value = 0.48

# CL516Contig10|CL516Contig10

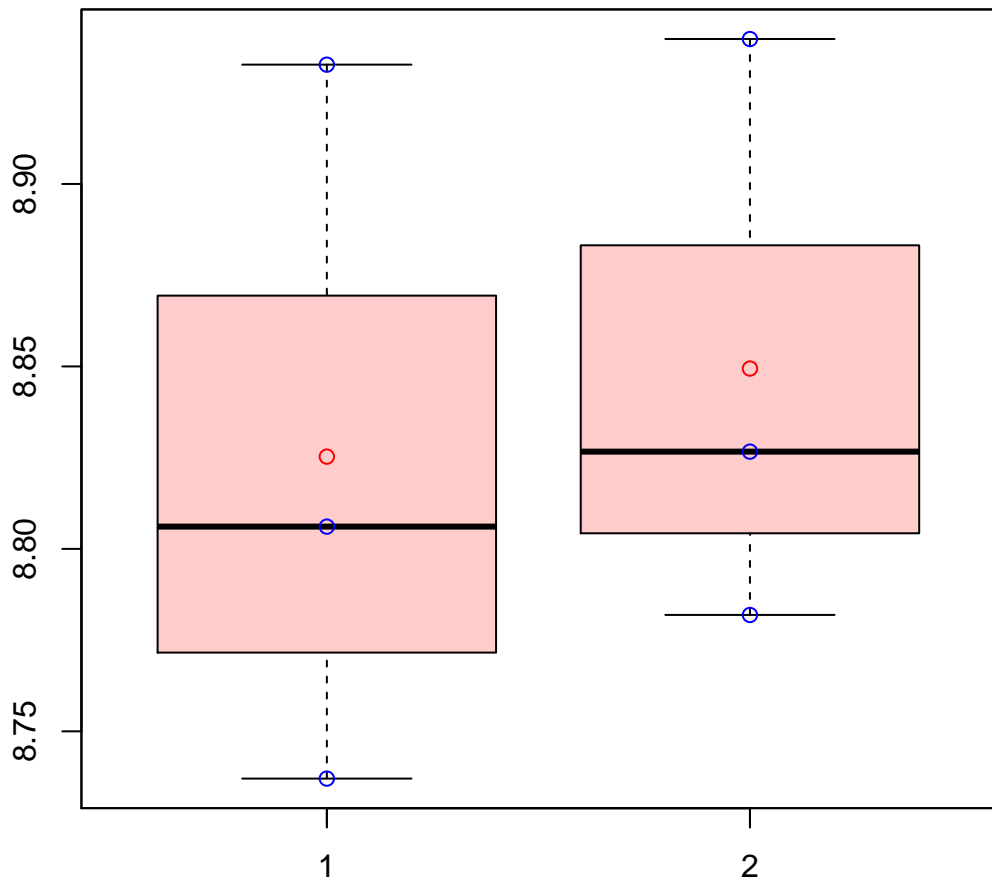

t-Test: p-value = 0.76

# CL516Contig11|CL516Contig11

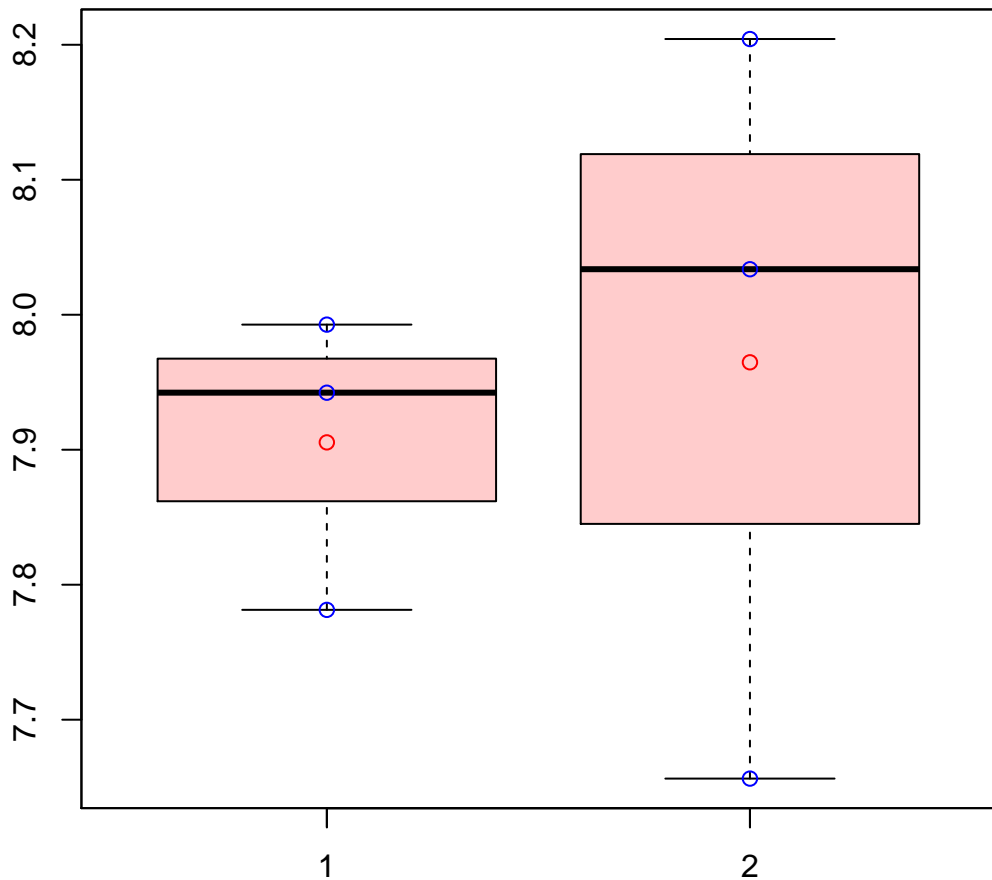

t-Test: p-value = 0.76

# CL516Contig13|CL516Contig13

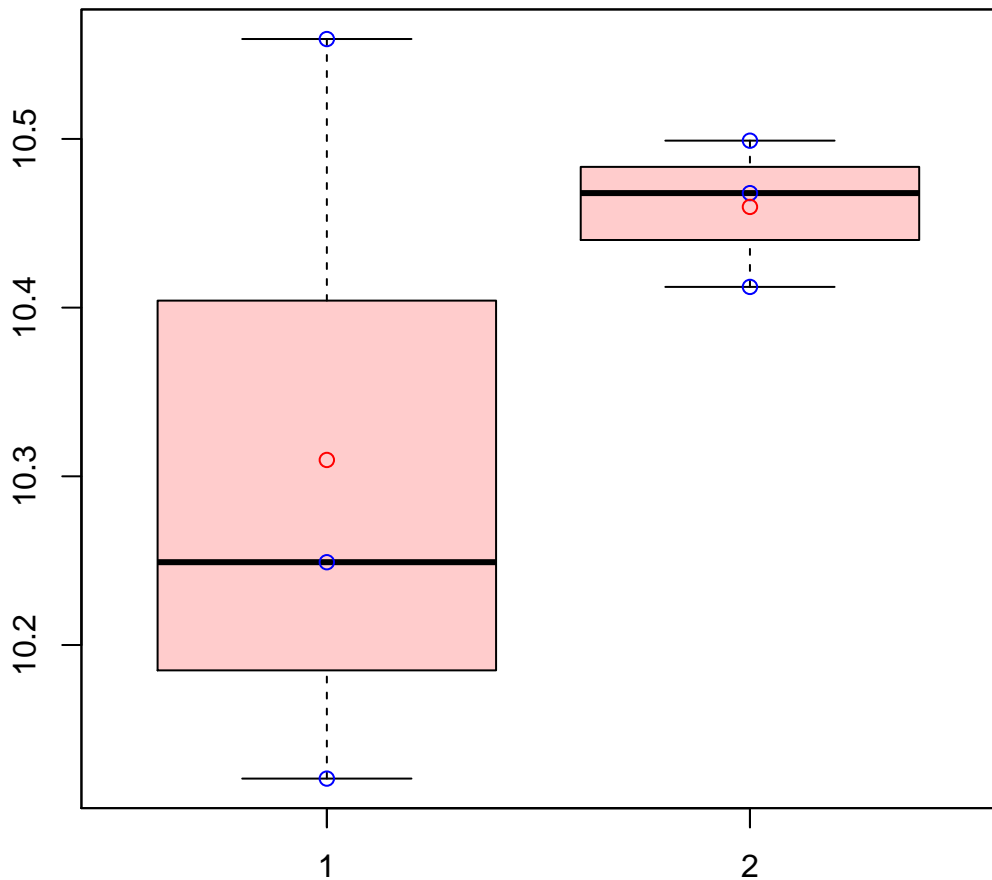

t-Test: p-value = 0.37

# CL516Contig1|CL516Contig1

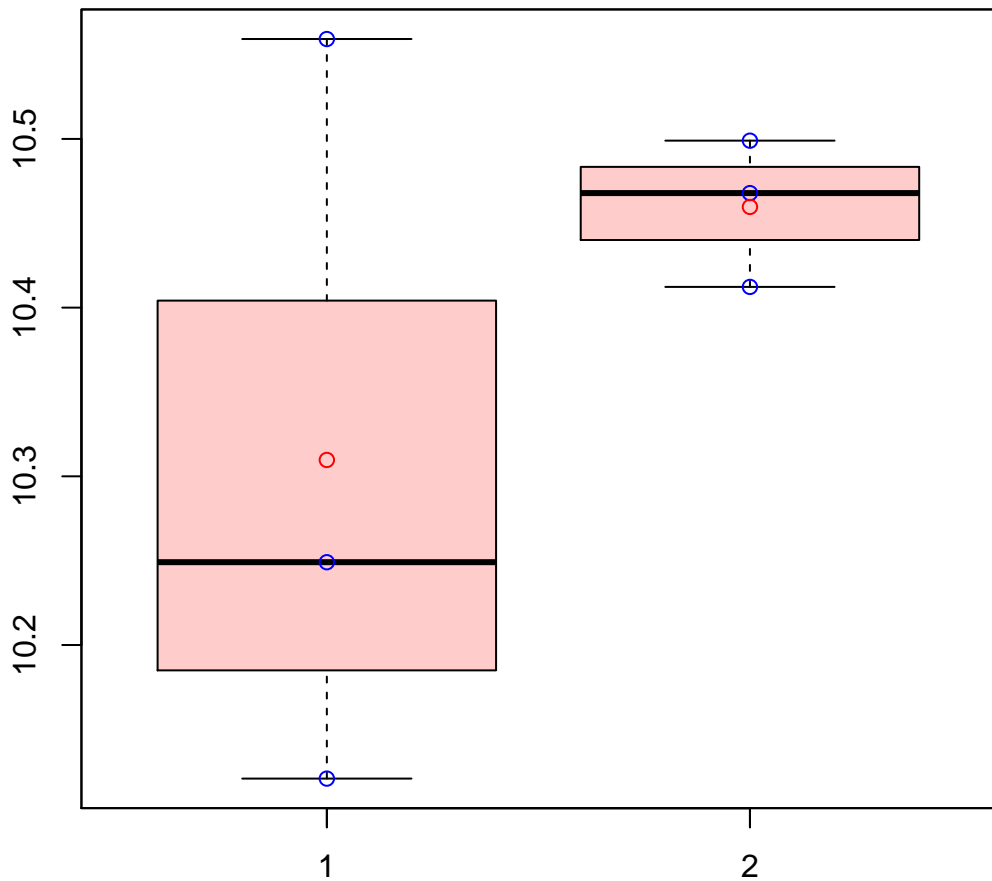

t-Test: p-value = 0.37

# CL516Contig3|CL516Contig3

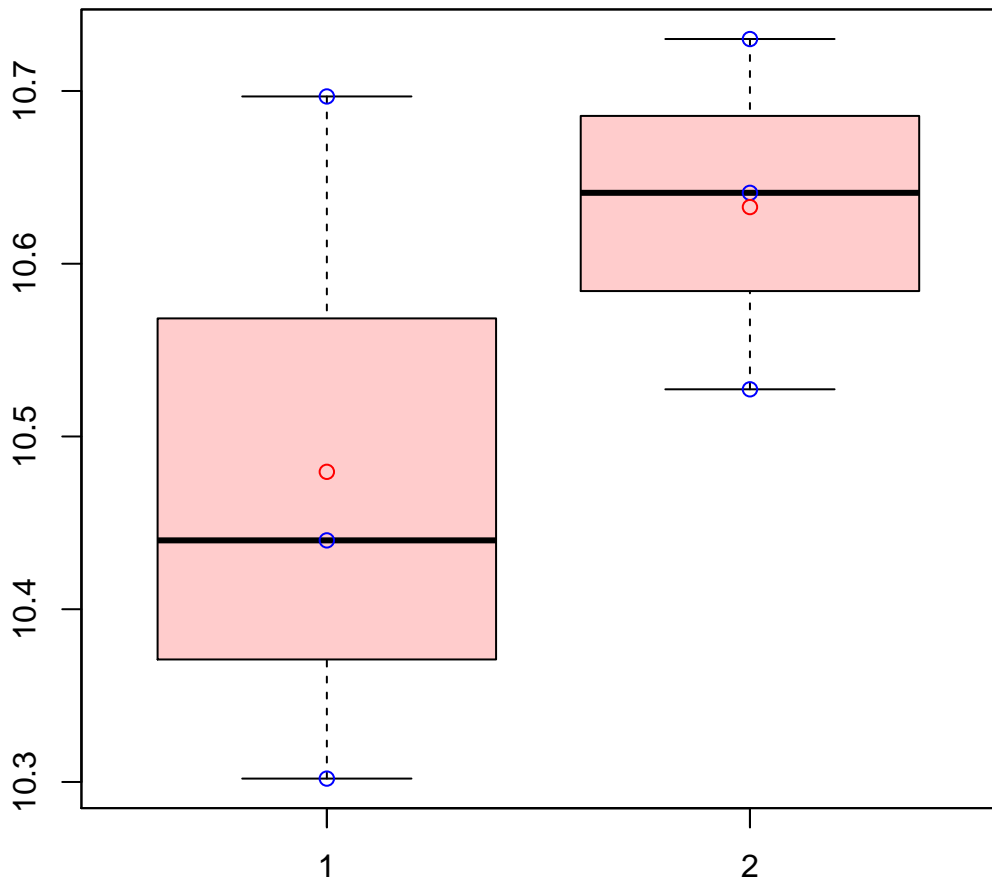

t-Test: p-value = 0.32

# CL516Contig4|CL516Contig4



t-Test: p-value = 0.37



# CL516Contig5|CL516Contig5

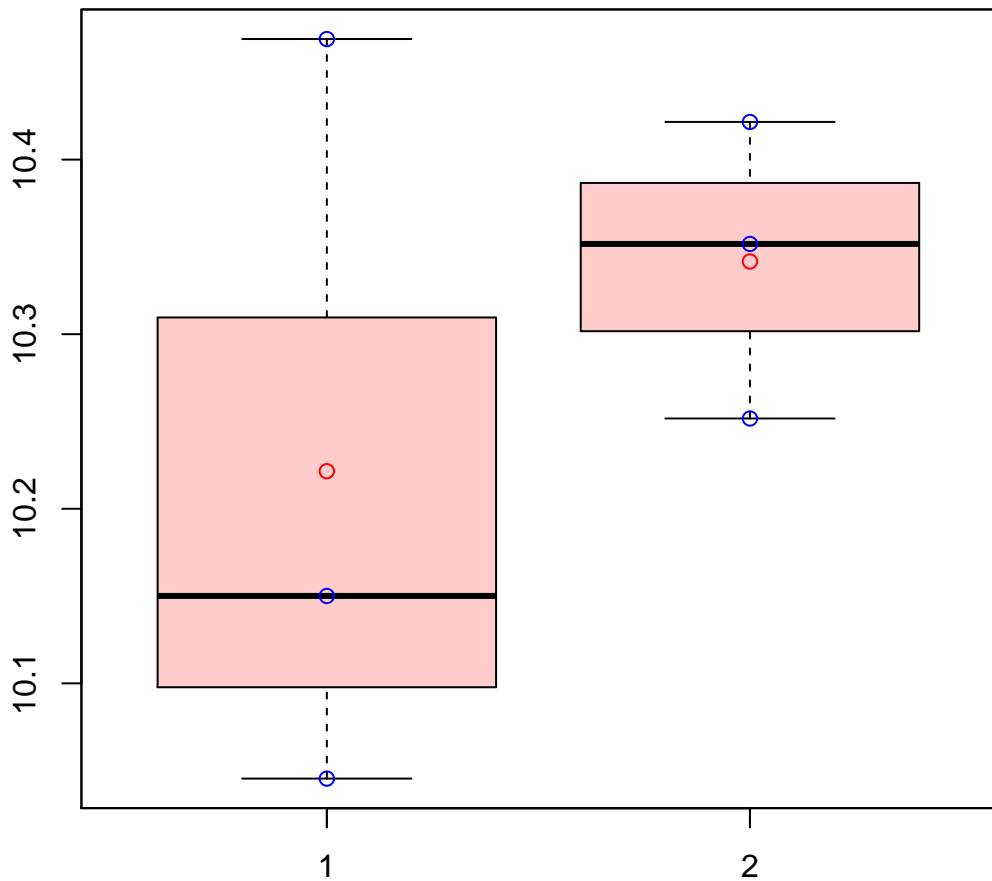

t-Test: p-value = 0.45

# CL516Contig6|CL516Contig6



t-Test: p-value = 0.32

# CL516Contig7|CL516Contig7



t-Test: p-value = 0.37

# CL5175Contig1|CL5175Contig1

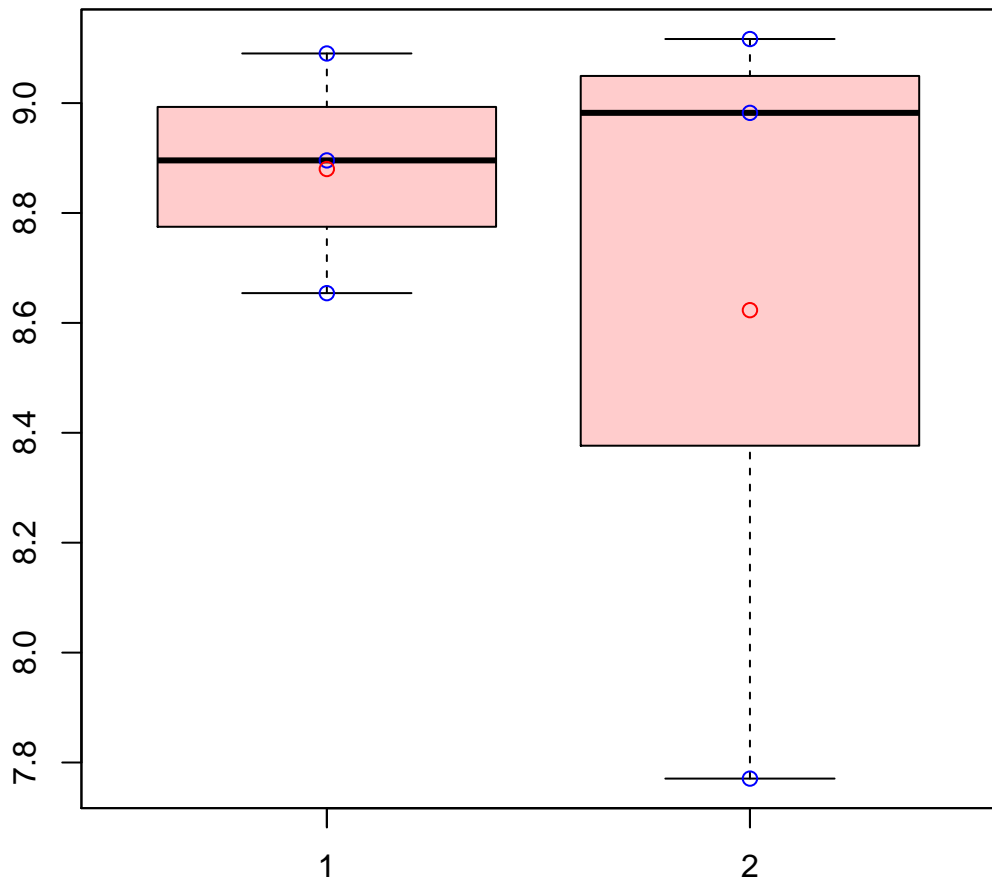

t-Test: p-value = 0.62

# CL5180Contig1|CL5180Contig1

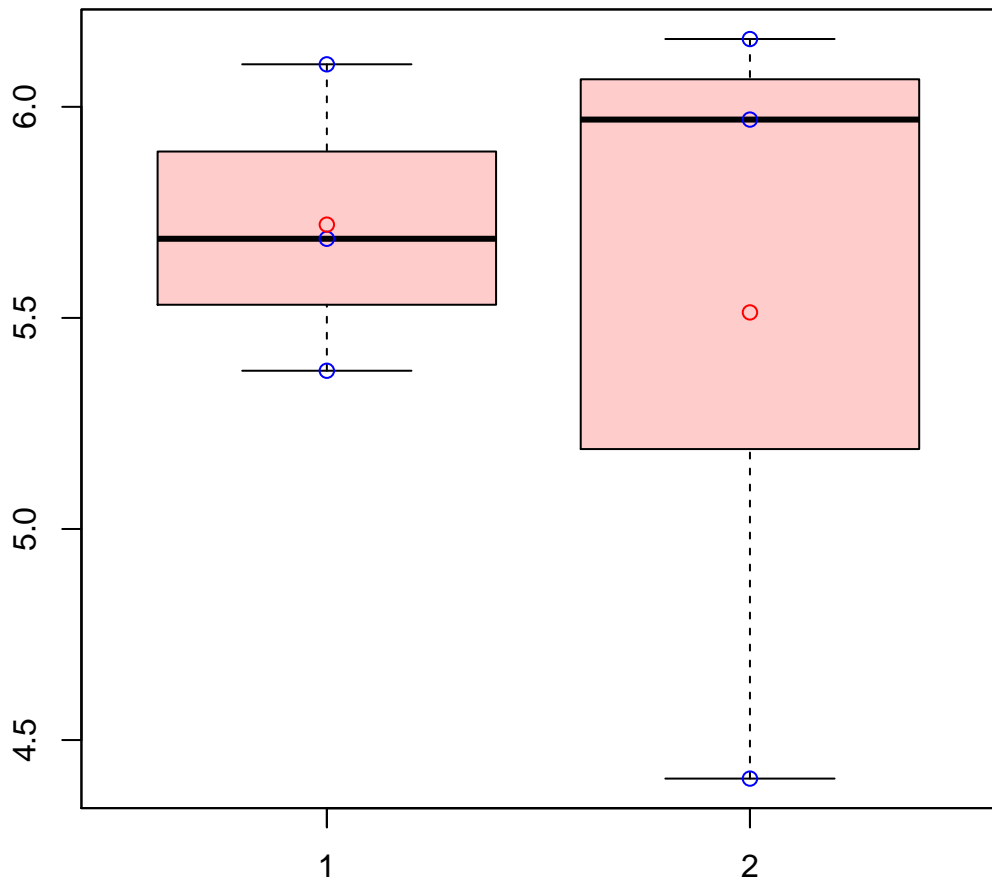

t-Test: p-value = 0.75

# CL5180Contig3|CL5180Contig3



t-Test: p-value = 0.75

# CL5183Contig1|CL5183Contig1

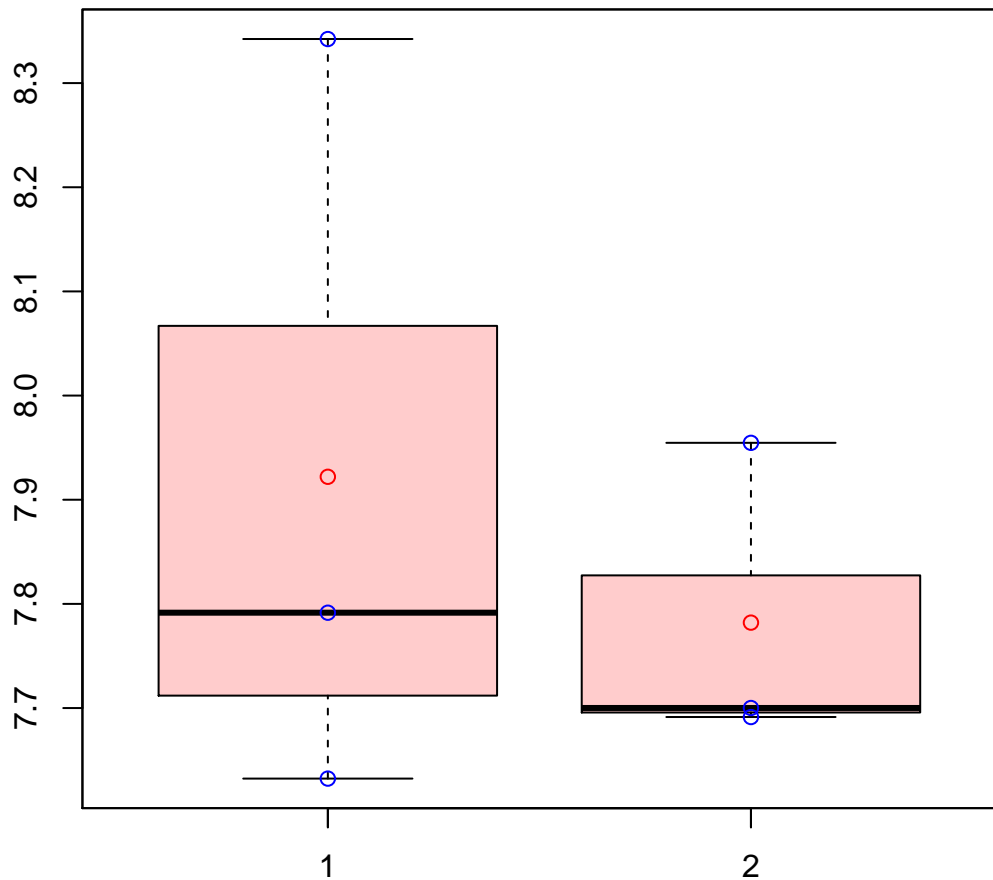

t-Test: p-value = 0.59

# CL5185Contig1|CL5185Contig1

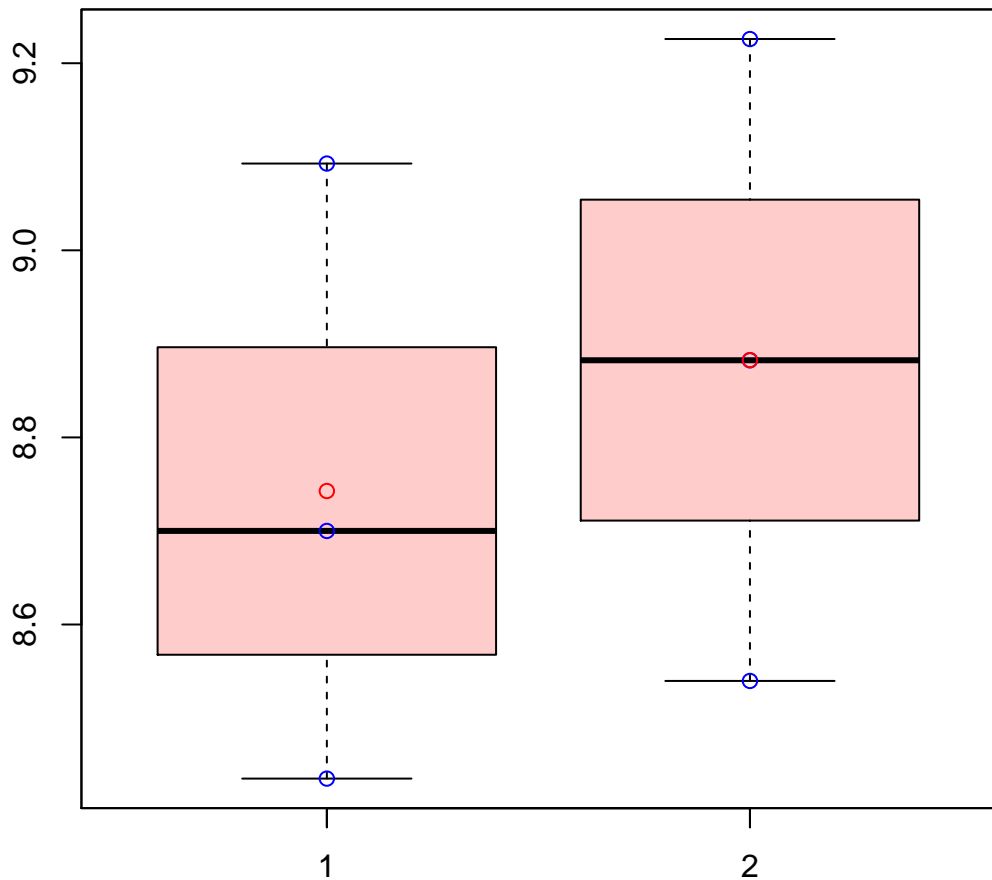

t-Test: p-value = 0.64



# CL5185Contig2|CL5185Contig2



t-Test: p-value = 0.64

# CL5185Contig3|CL5185Contig3



t-Test: p-value = 0.64

# CL5193Contig1|CL5193Contig1



t-Test: p-value = 0.49

# CL5197Contig1|CL5197Contig1

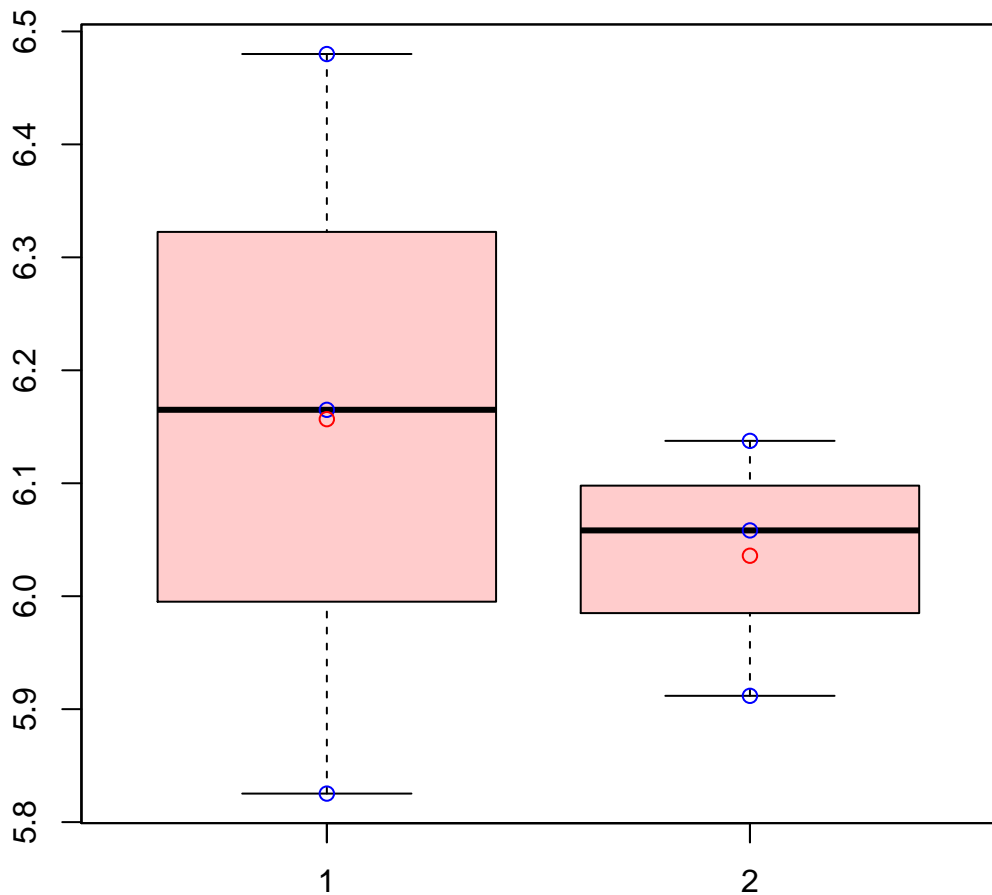

t-Test: p-value = 0.6

# CL5197Contig4|CL5197Contig4



t-Test: p-value = 0.6

# CL5197Contig5|CL5197Contig5

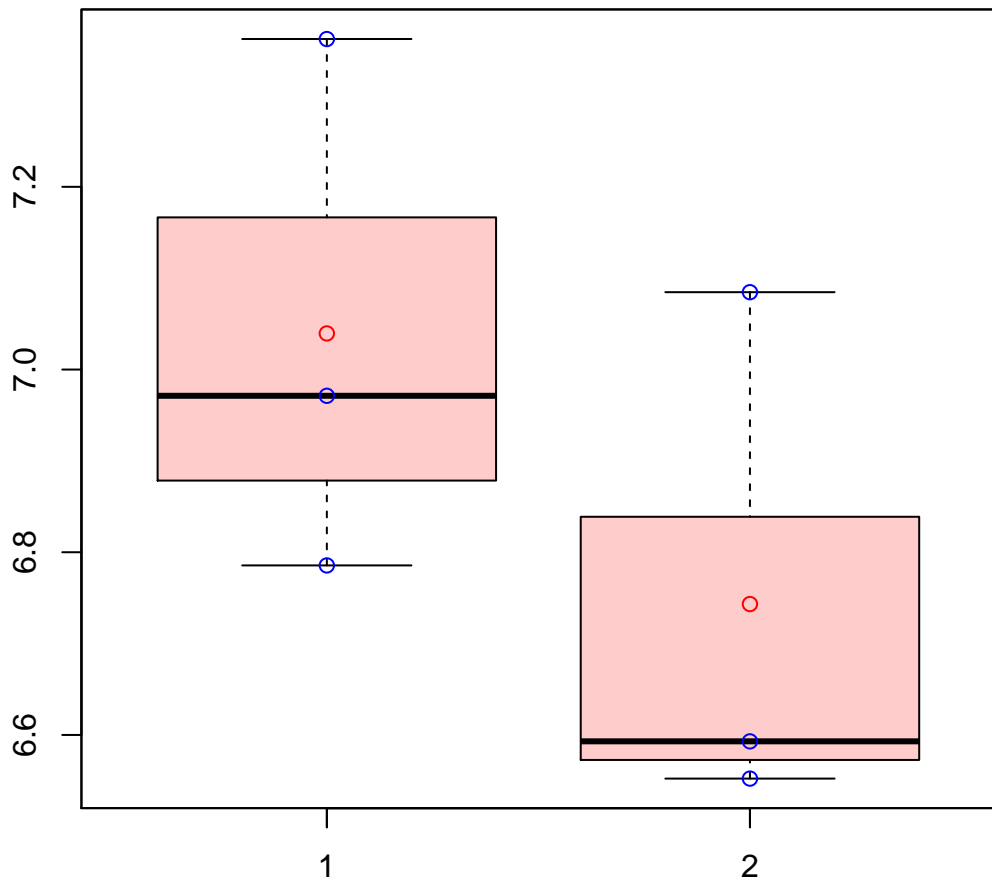

t-Test: p-value = 0.29

# CL5199Contig1|CL5199Contig1

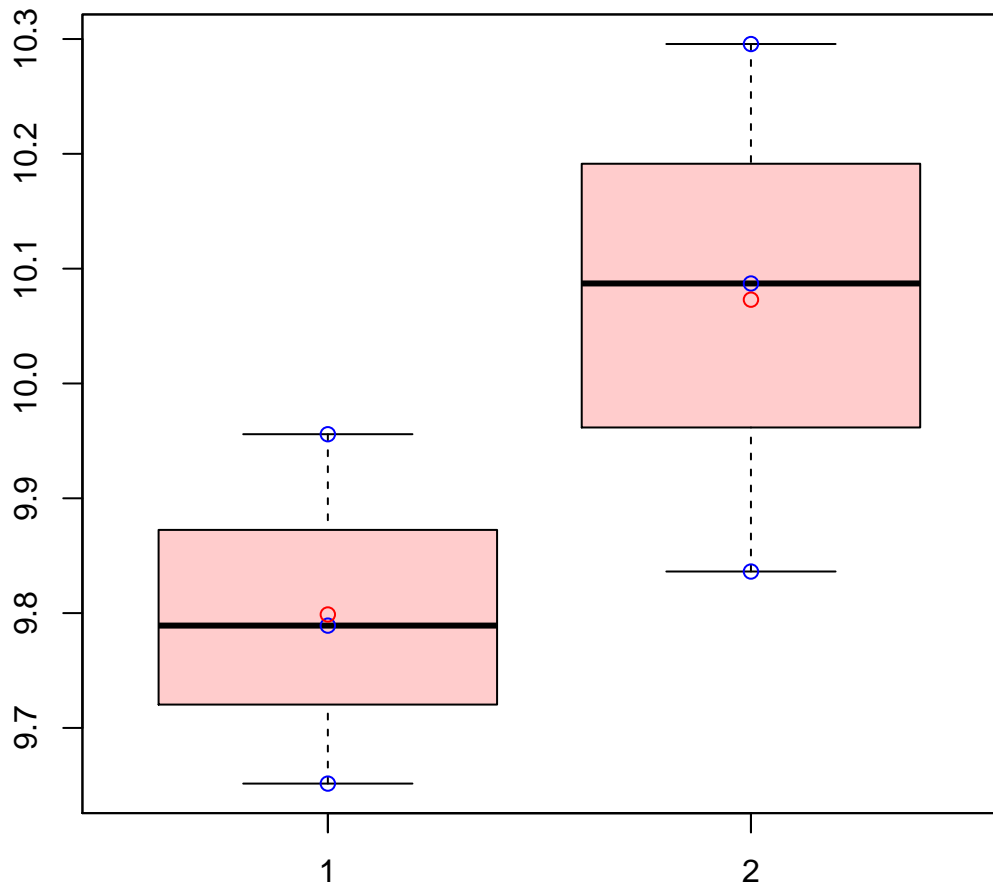

t-Test: p-value = 0.17

# CL5199Contig3|CL5199Contig3

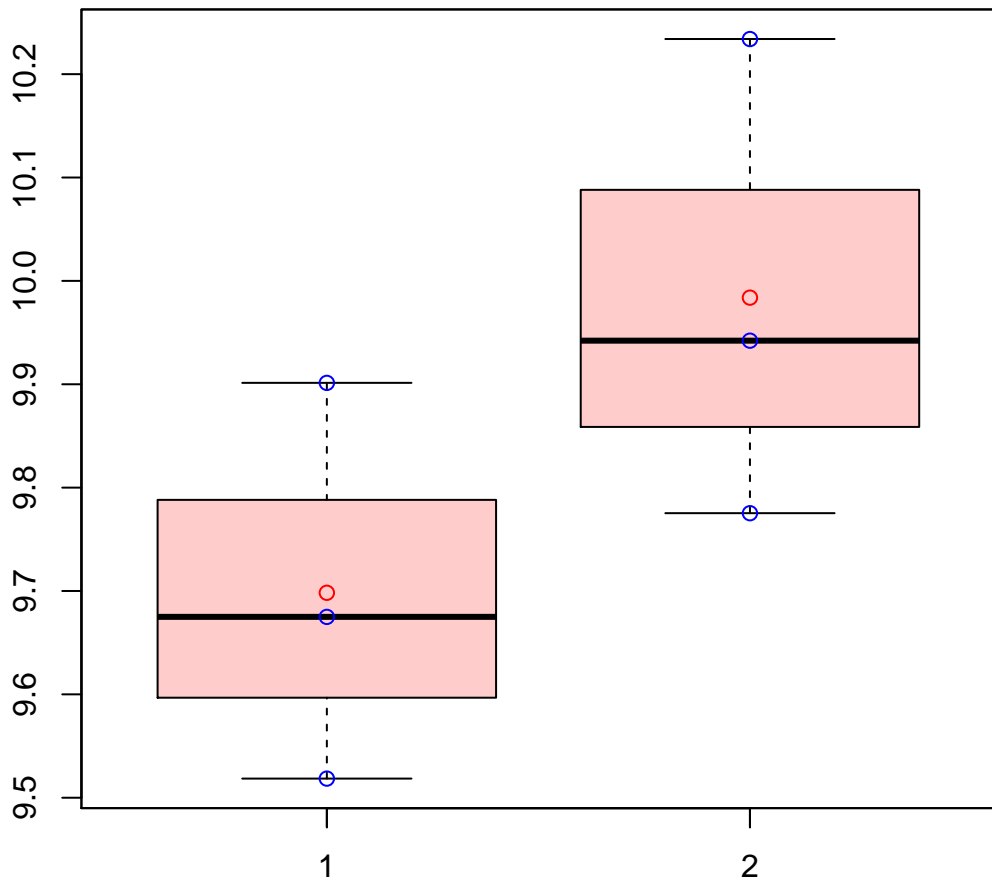

t-Test: p-value = 0.18



# CL5199Contig4|CL5199Contig4

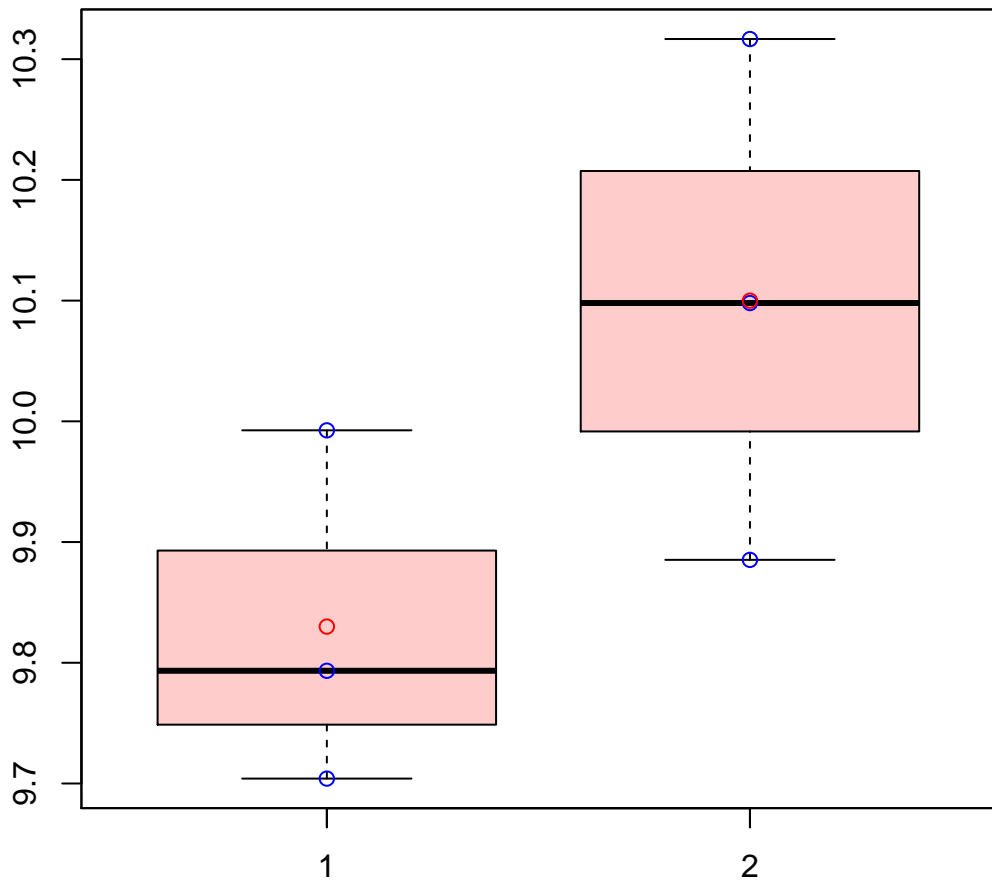

t-Test: p-value = 0.16

# CL519Contig11|CL519Contig11

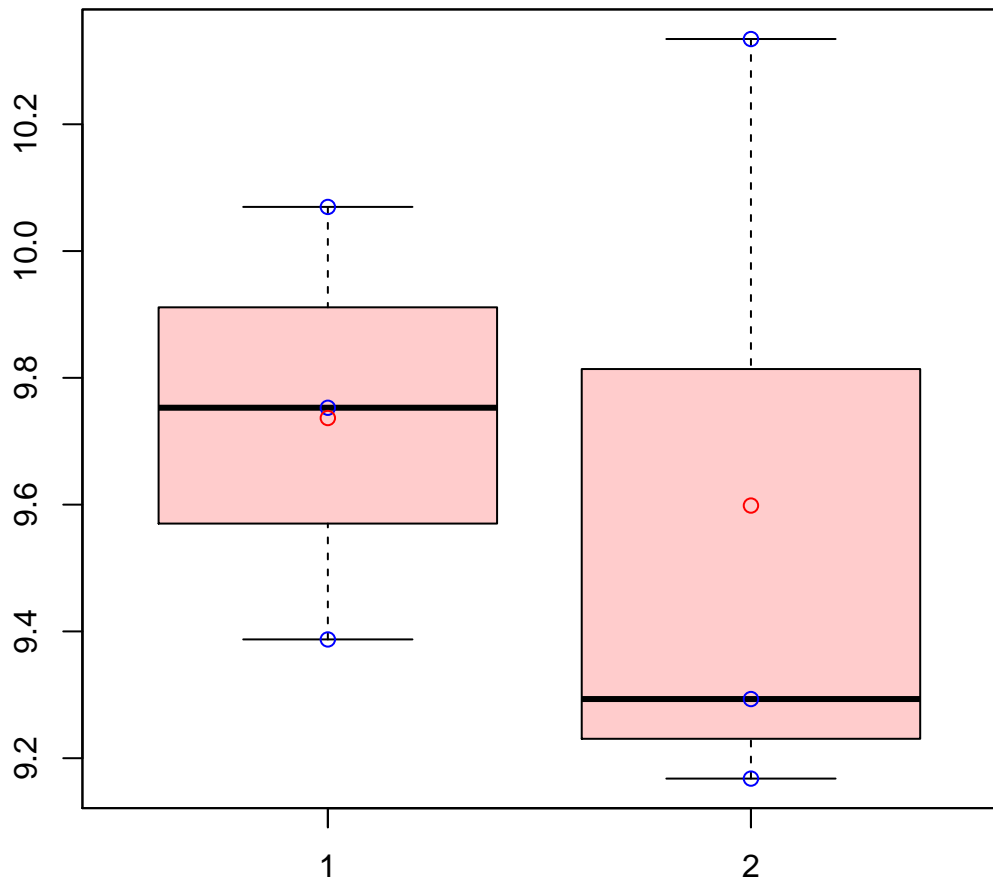

t-Test: p-value = 0.76

# CL519Contig15|CL519Contig15

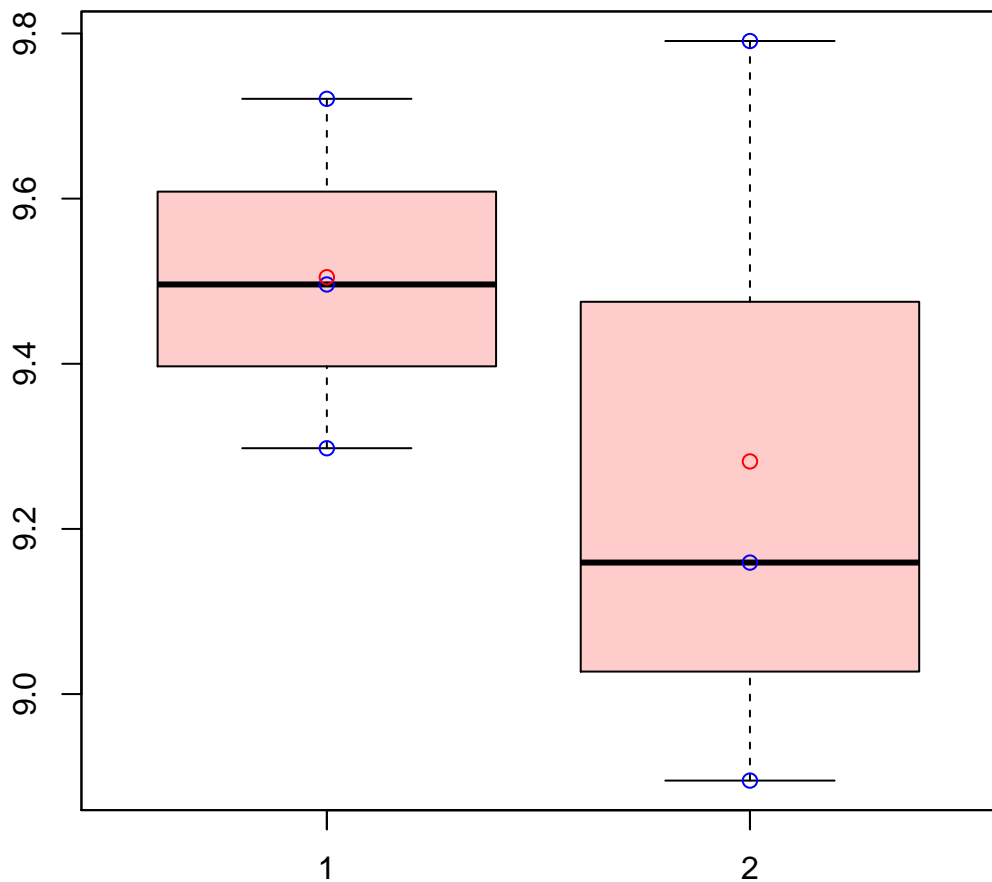

t-Test: p-value = 0.5

# CL519Contig19|CL519Contig19

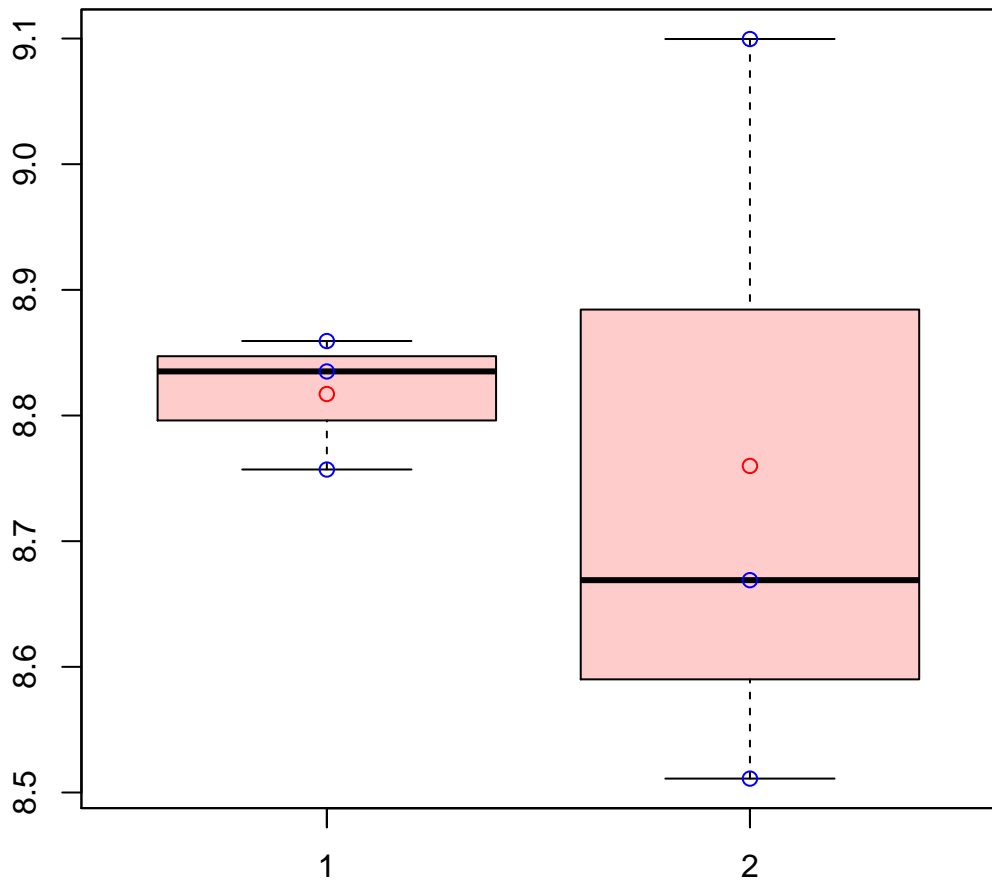

t-Test: p-value = 0.78

# CL519Contig1|CL519Contig1

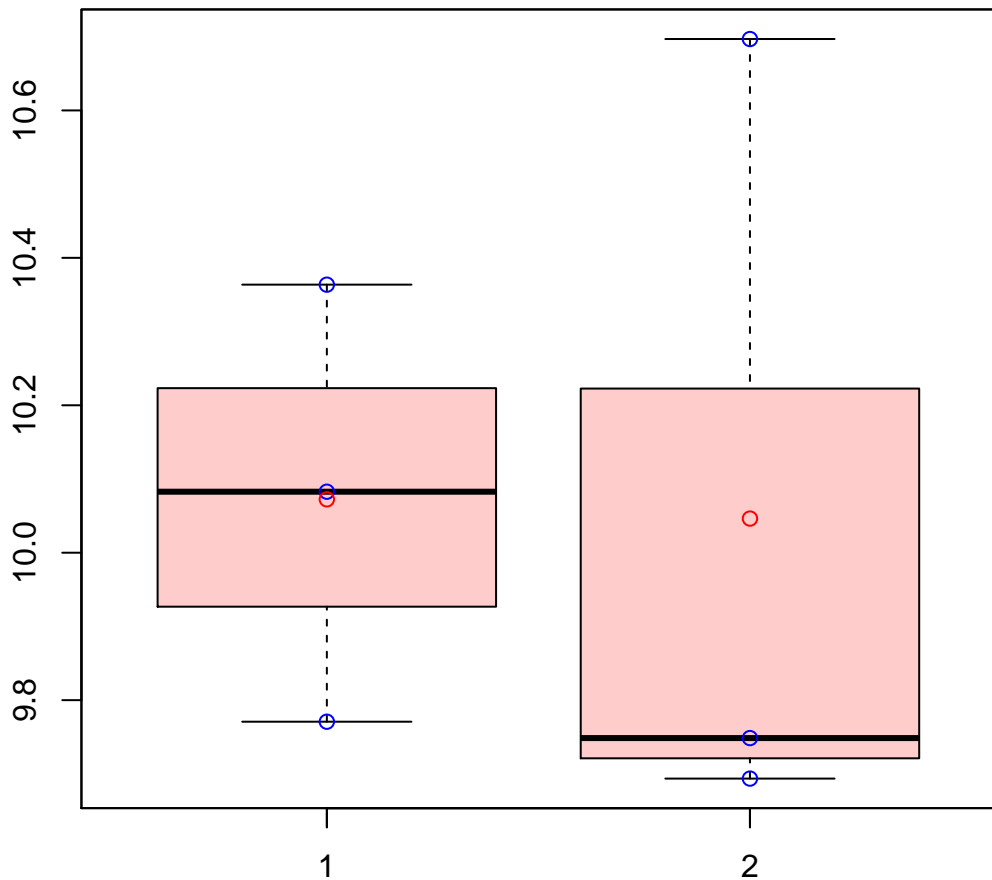

t-Test: p-value = 0.95

# CL5203Contig2|CL5203Contig2

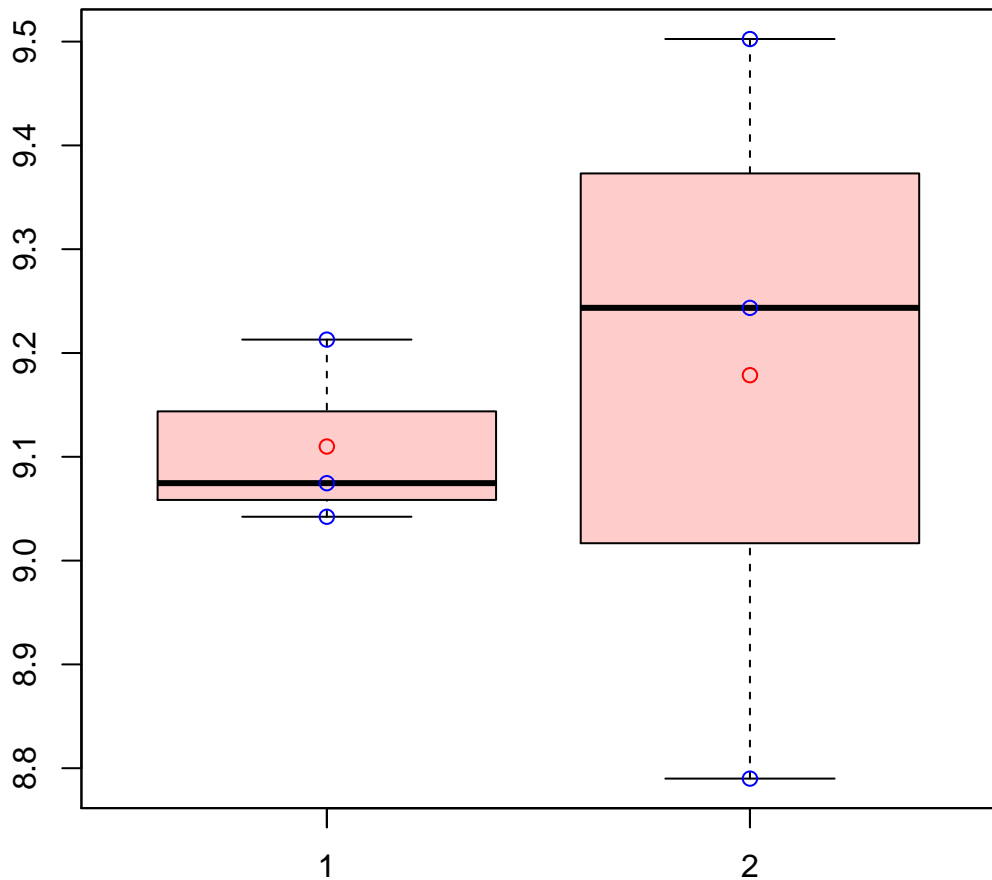

t-Test: p-value = 0.78

# CL520Contig10|CL520Contig10

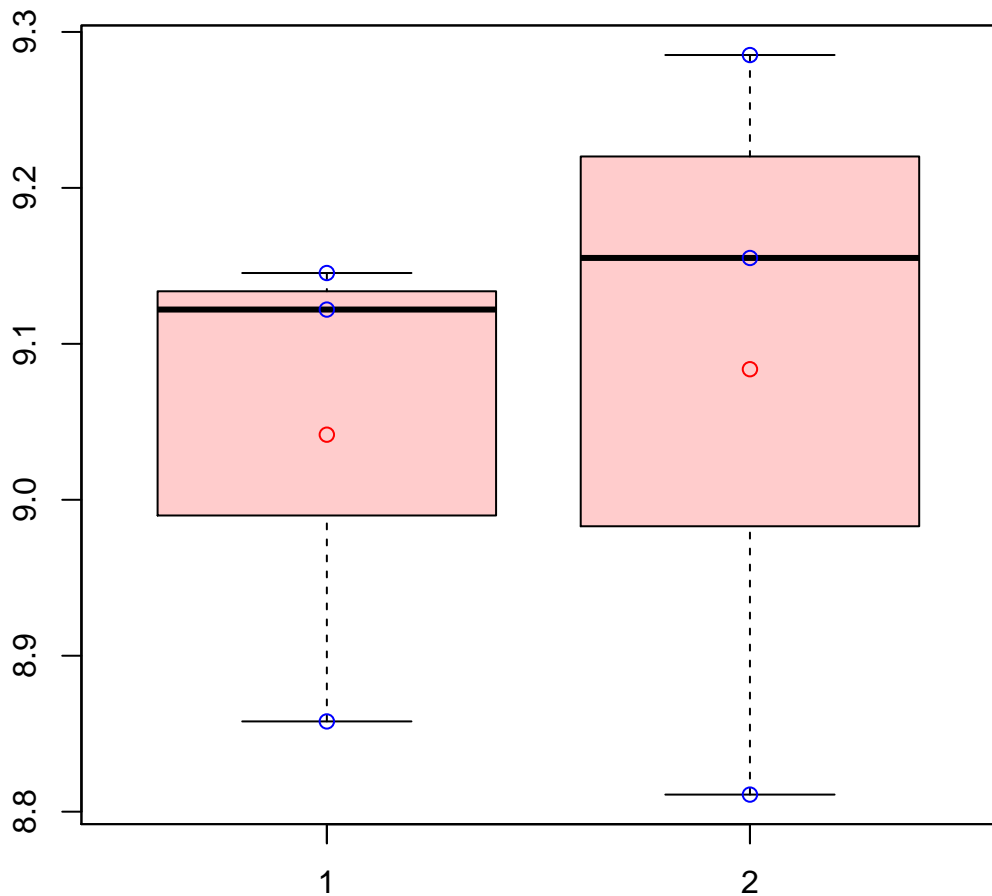

t-Test: p-value = 0.82

# CL520Contig16|CL520Contig16

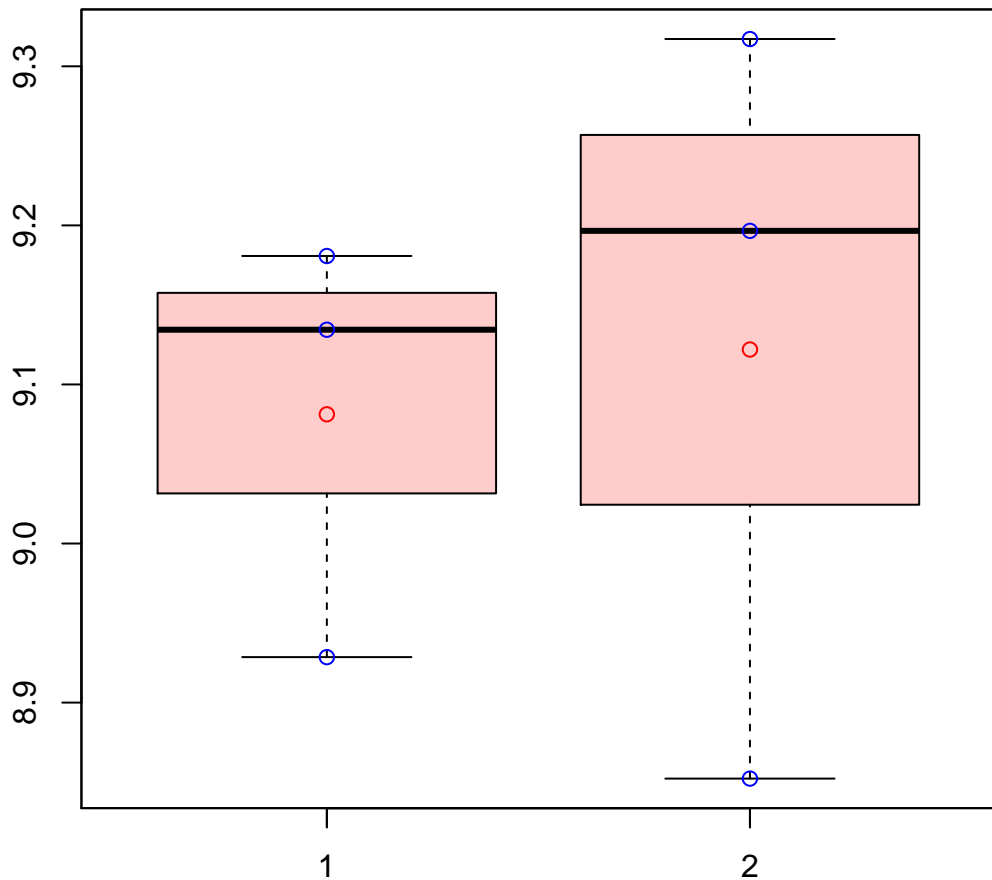

t-Test: p-value = 0.81



# CL520Contig1|CL520Contig1

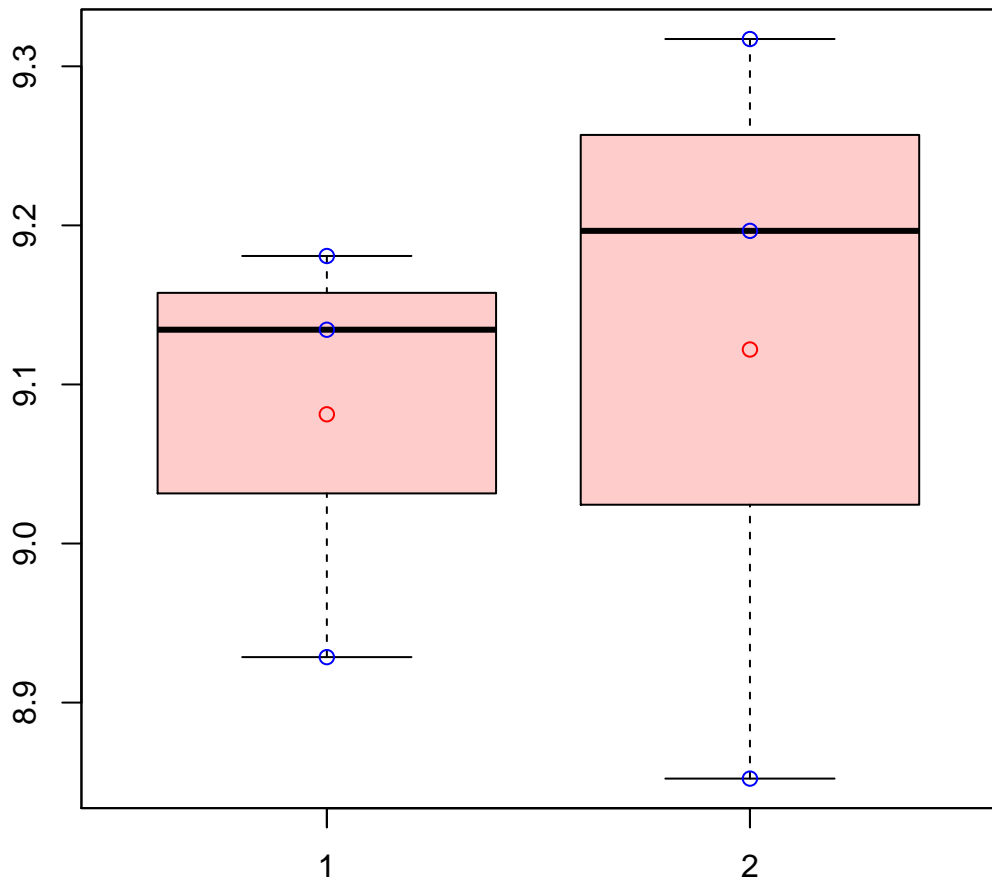

t-Test: p-value = 0.81

# CL520Contig8|CL520Contig8

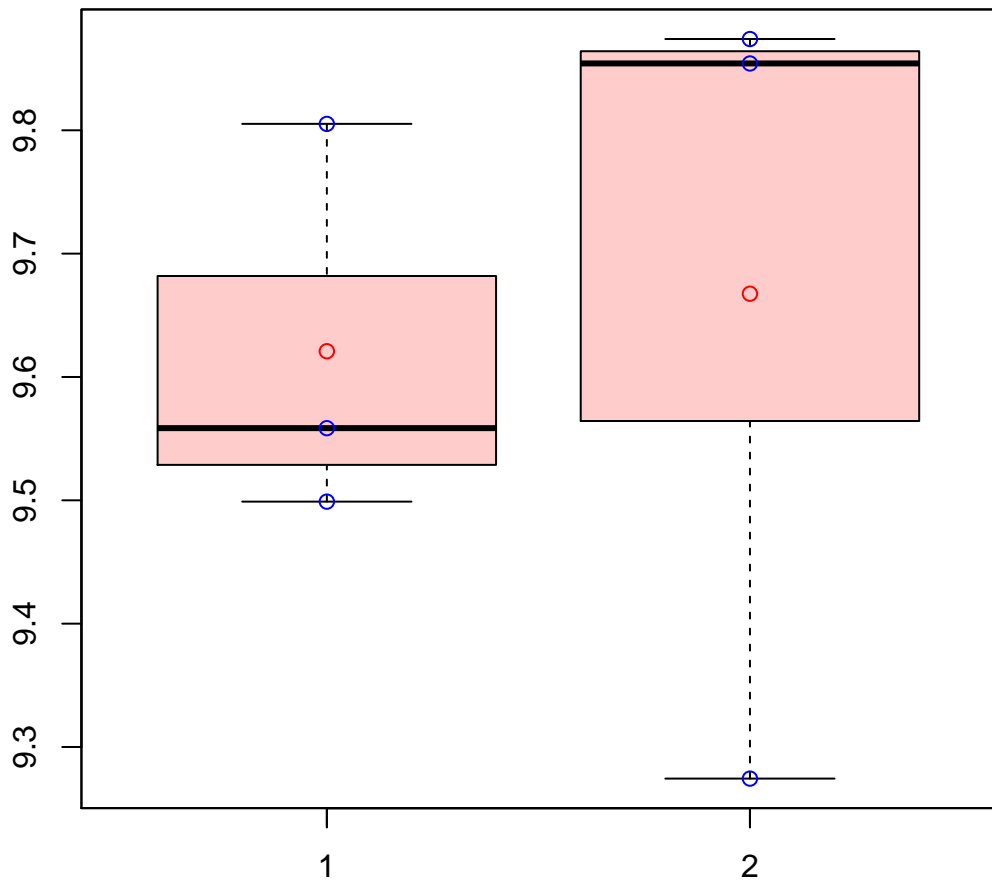

t-Test: p-value = 0.84

# CL520Contig9|CL520Contig9

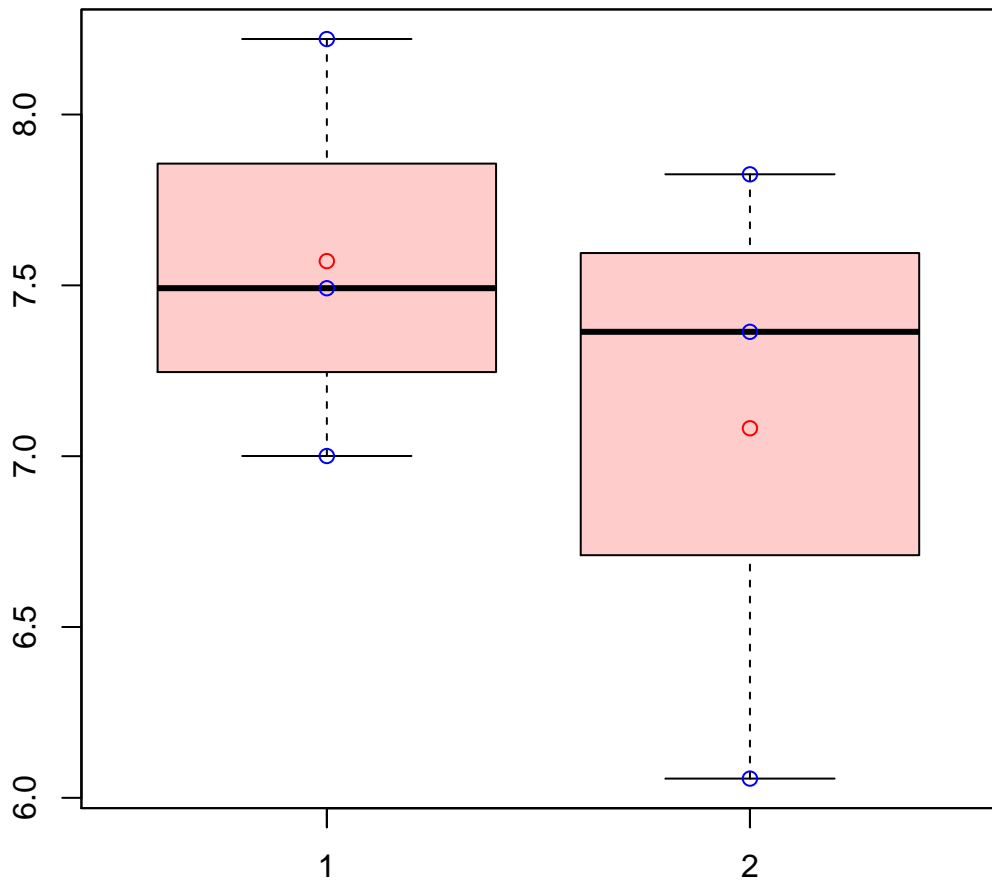

t-Test: p-value = 0.49

# CL5215Contig2|CL5215Contig2

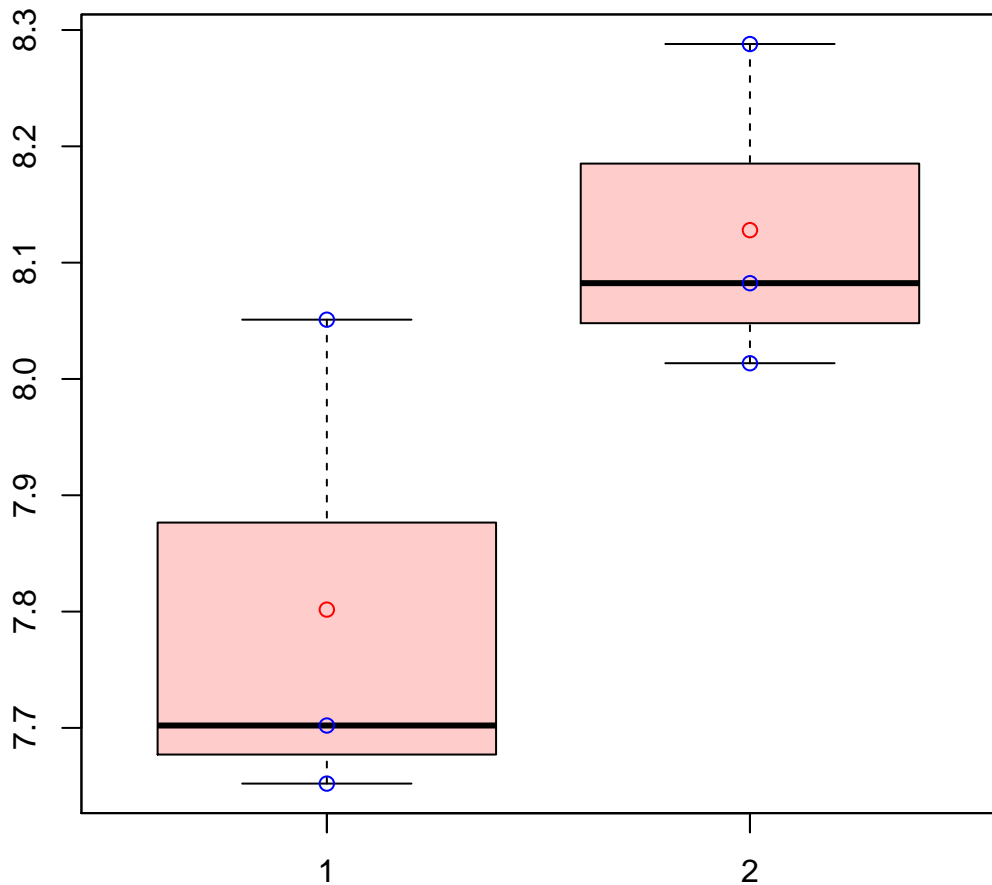

t-Test: p-value = 0.11

# CL5219Contig2|CL5219Contig2



t-Test: p-value = 0.83

# CL5220Contig3|CL5220Contig3

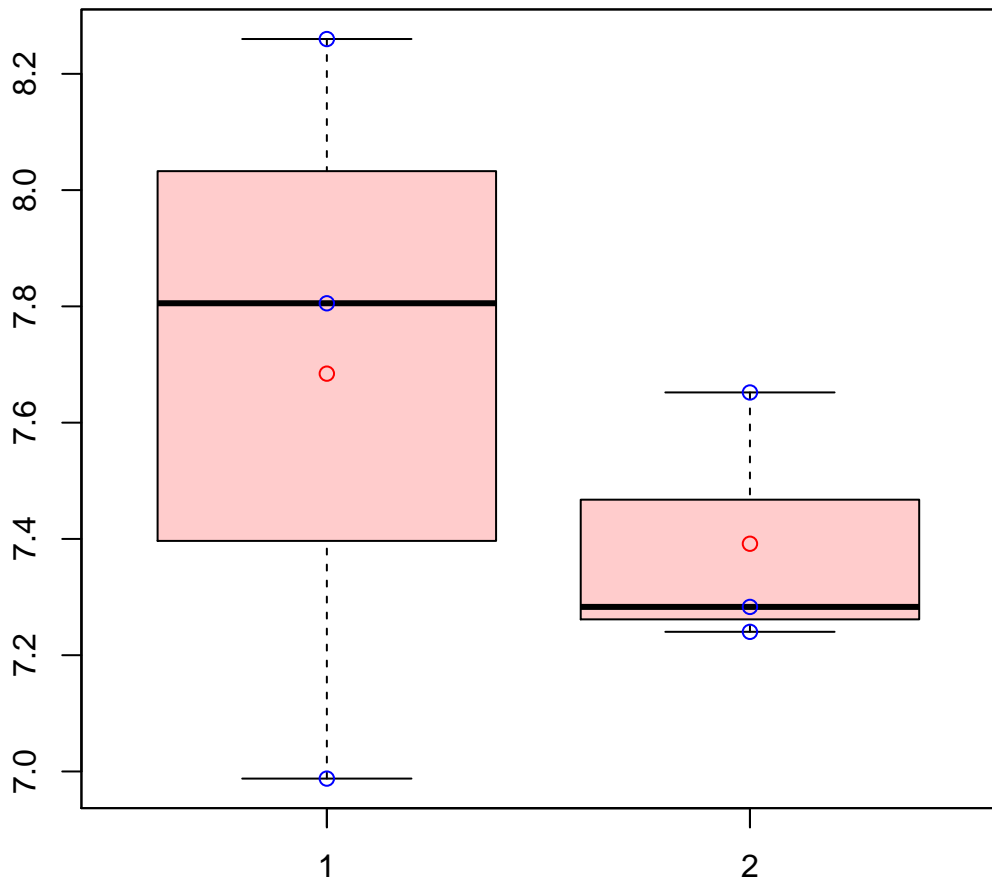

t-Test: p-value = 0.52

# CL5220Contig4|CL5220Contig4

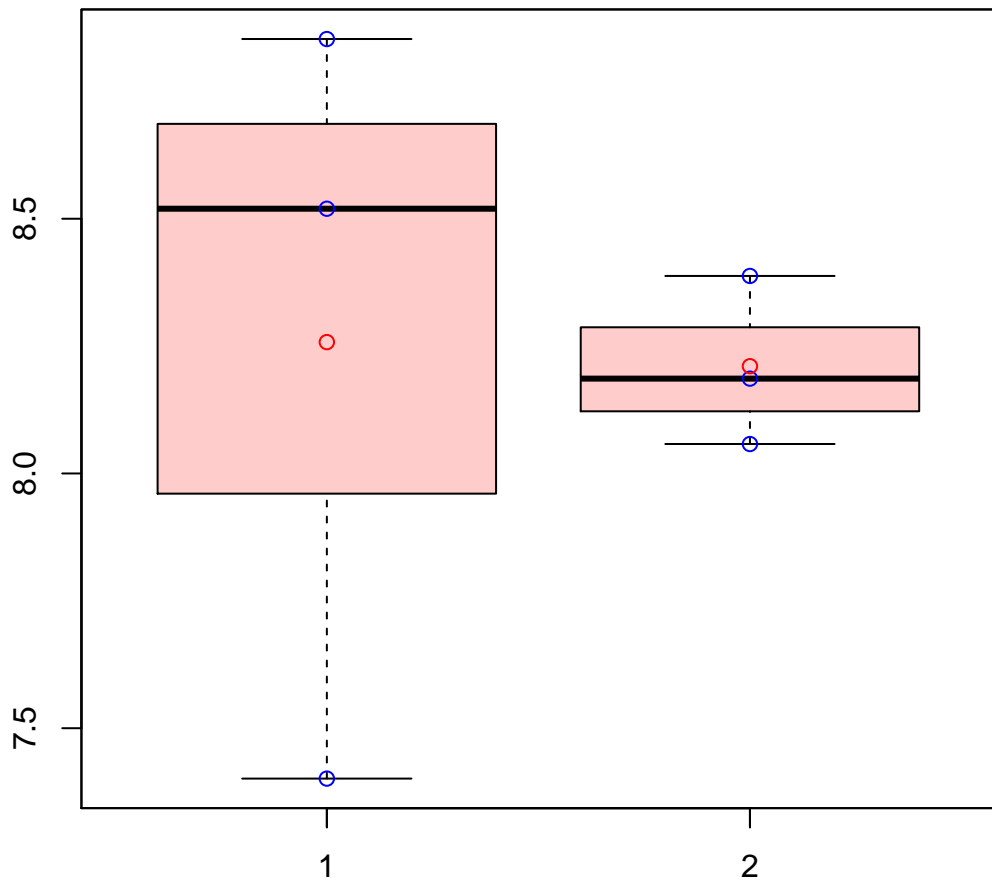

t-Test: p-value = 0.93

# CL5228Contig2|CL5228Contig2

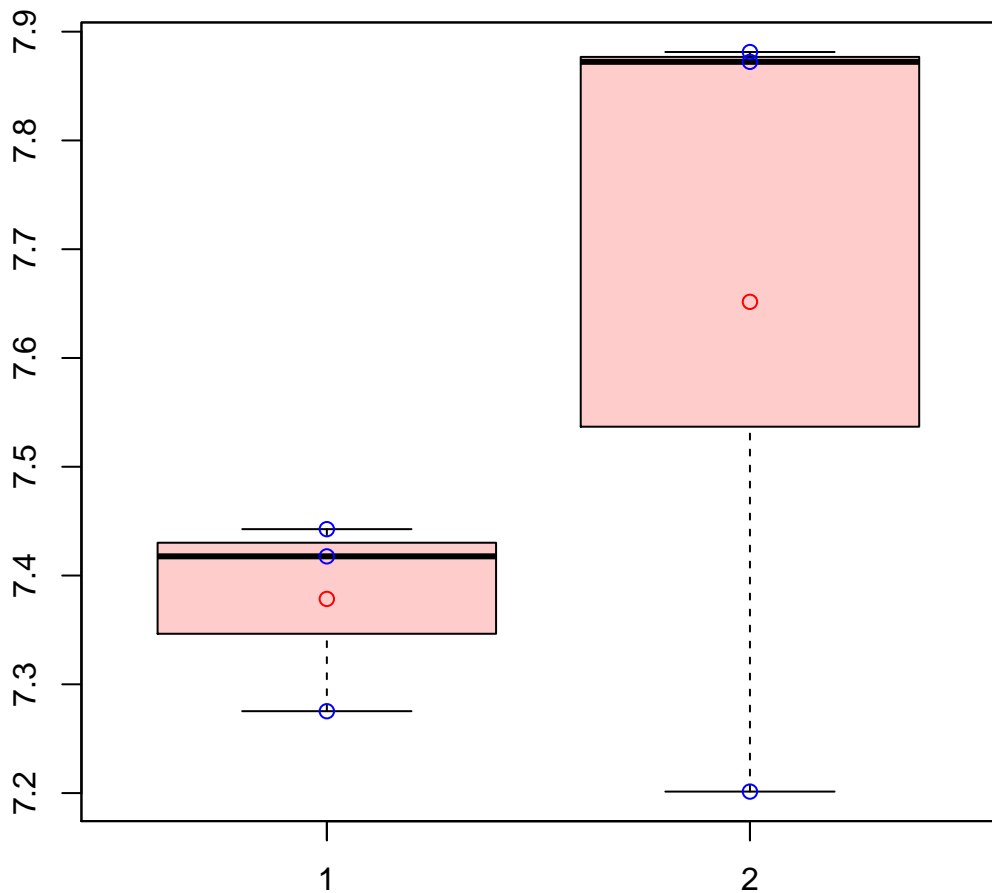

t-Test: p-value = 0.35



# CL522Contig8|CL522Contig8



t-Test: p-value = 0.04

# CL5231Contig3|CL5231Contig3

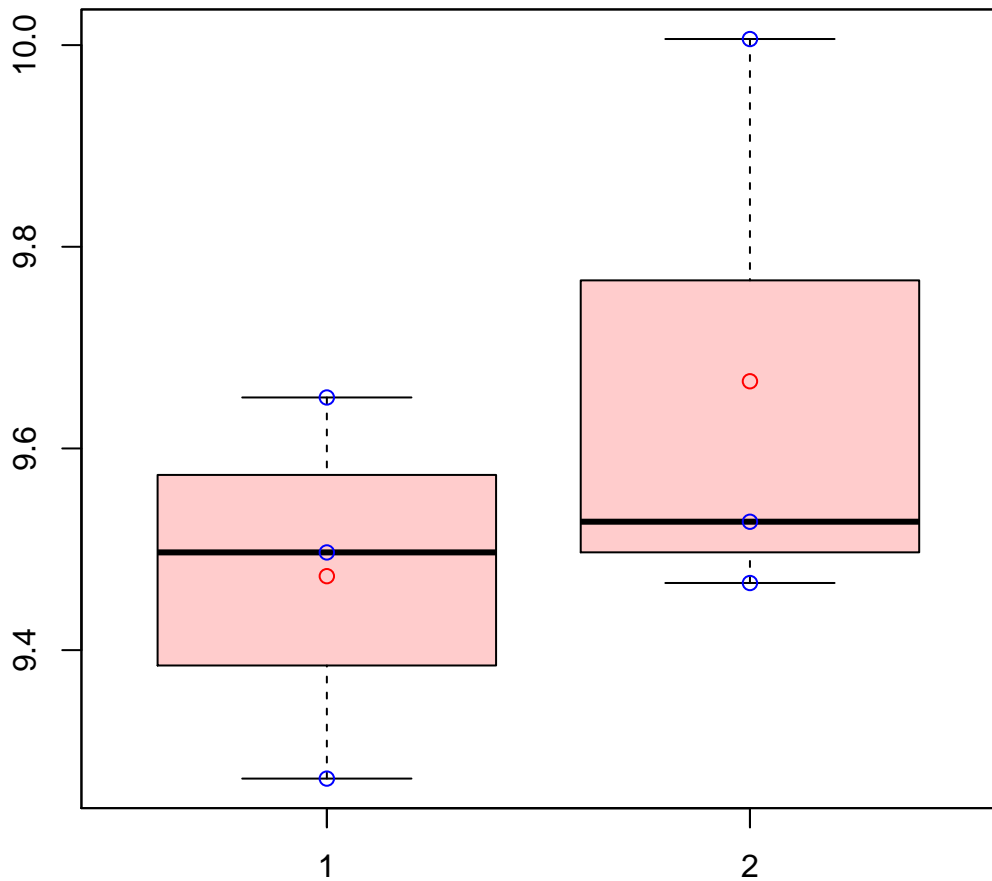

t-Test: p-value = 0.4

# CL5232Contig4|CL5232Contig4

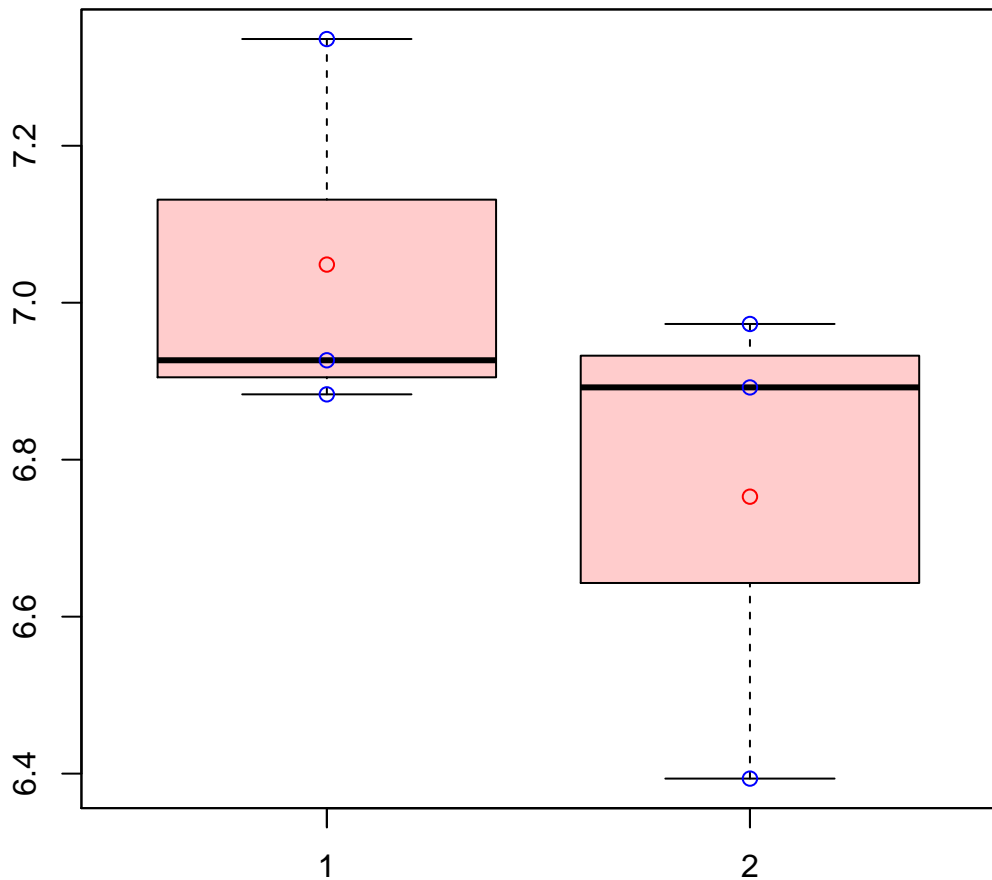

t-Test: p-value = 0.27

# CL5233Contig1|CL5233Contig1

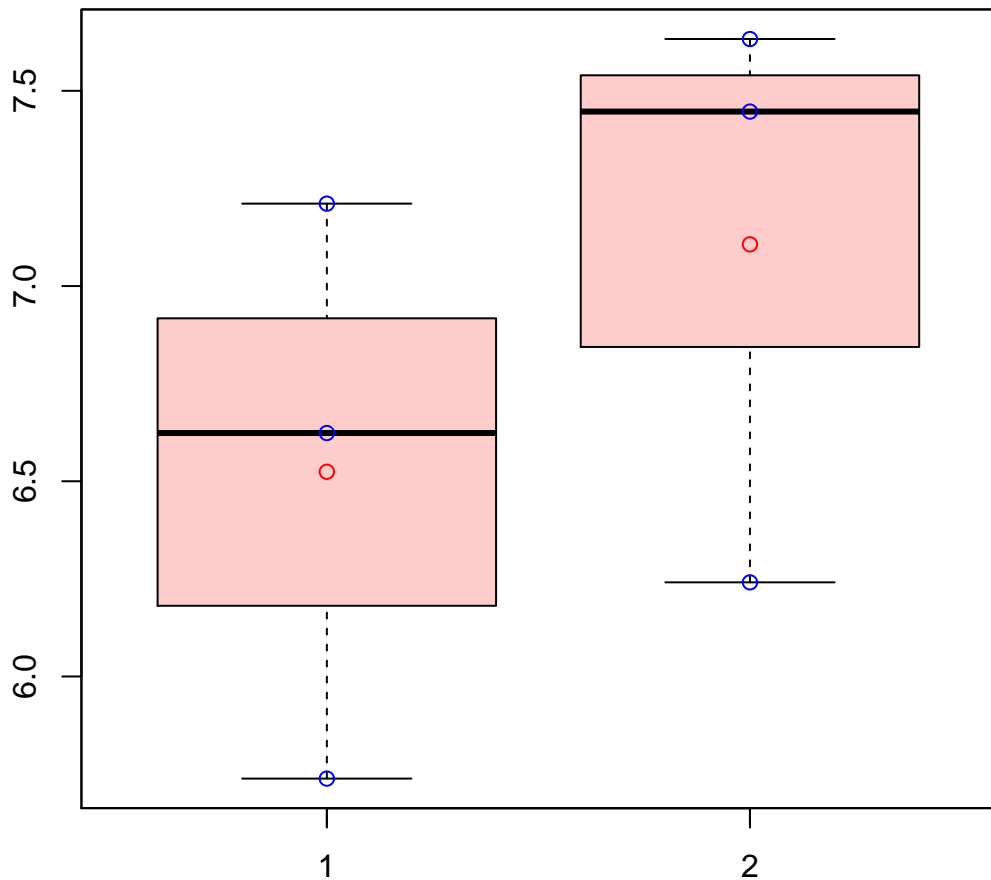

t-Test: p-value = 0.39

# CL5233Contig2|CL5233Contig2

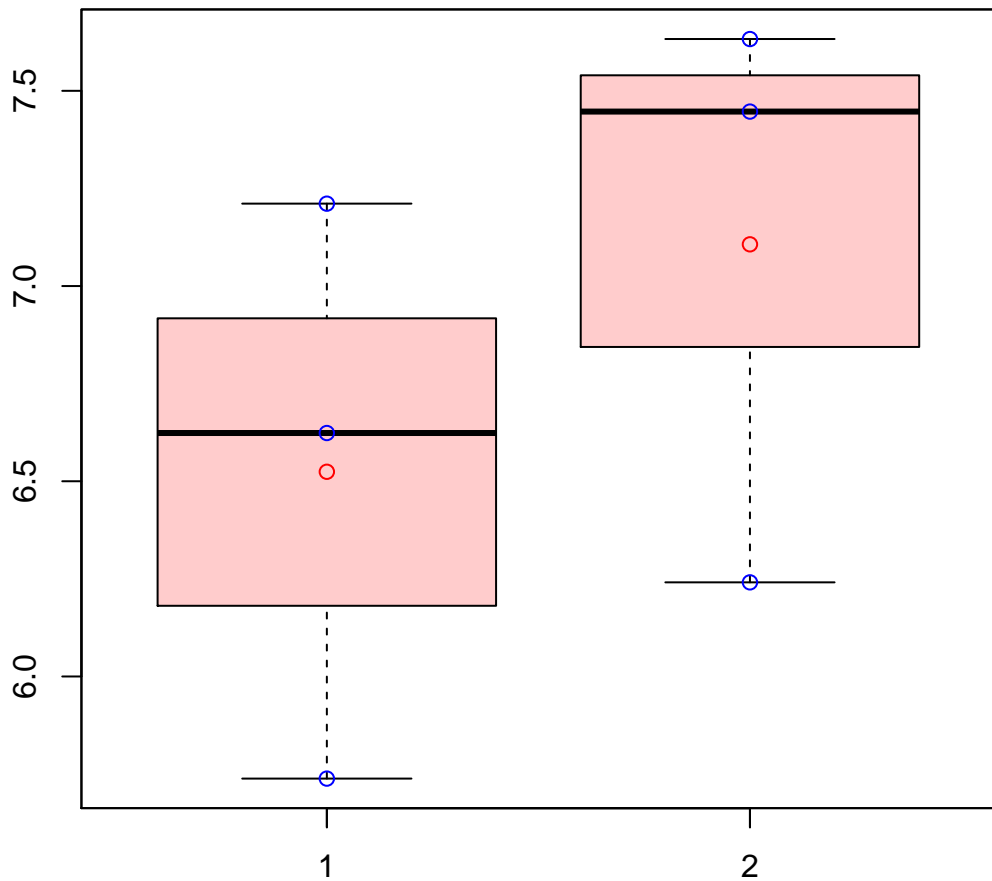

t-Test: p-value = 0.39

# CL5237Contig2|CL5237Contig2



t-Test: p-value = 0.39

# CL5237Contig3|CL5237Contig3



t-Test: p-value = 0.39

# CL523Contig11|CL523Contig11

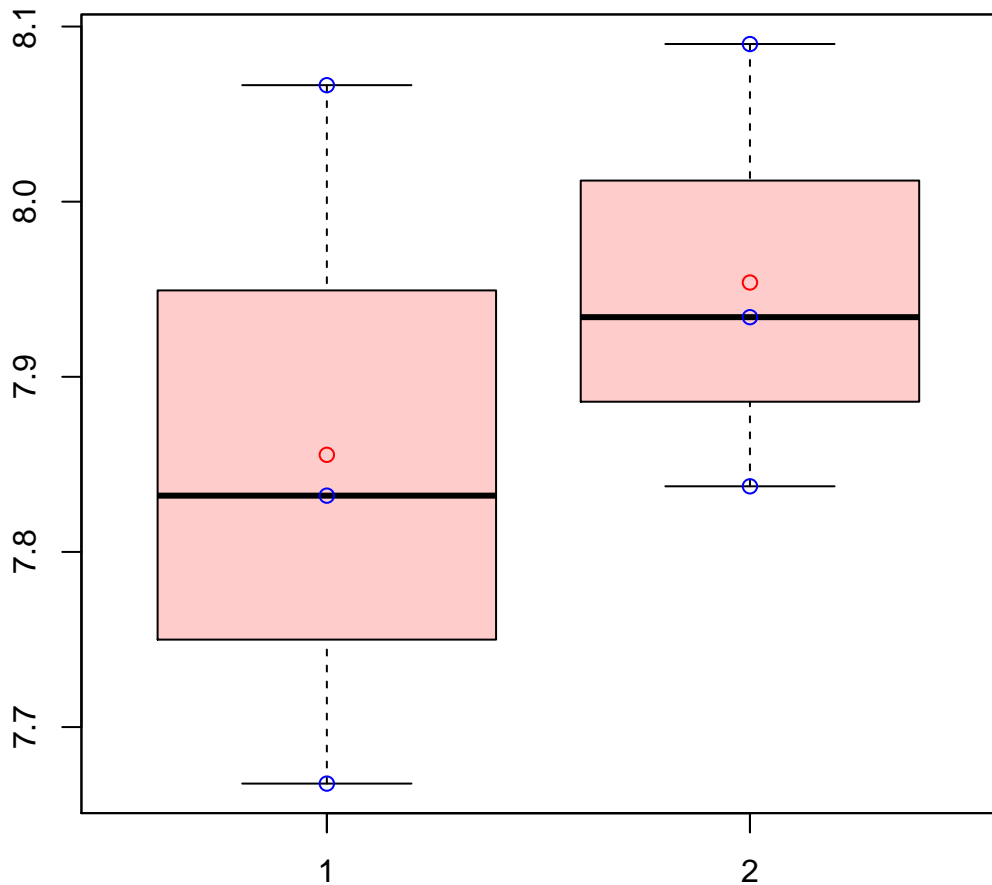

t-Test: p-value = 0.52



# CL523Contig7|CL523Contig7

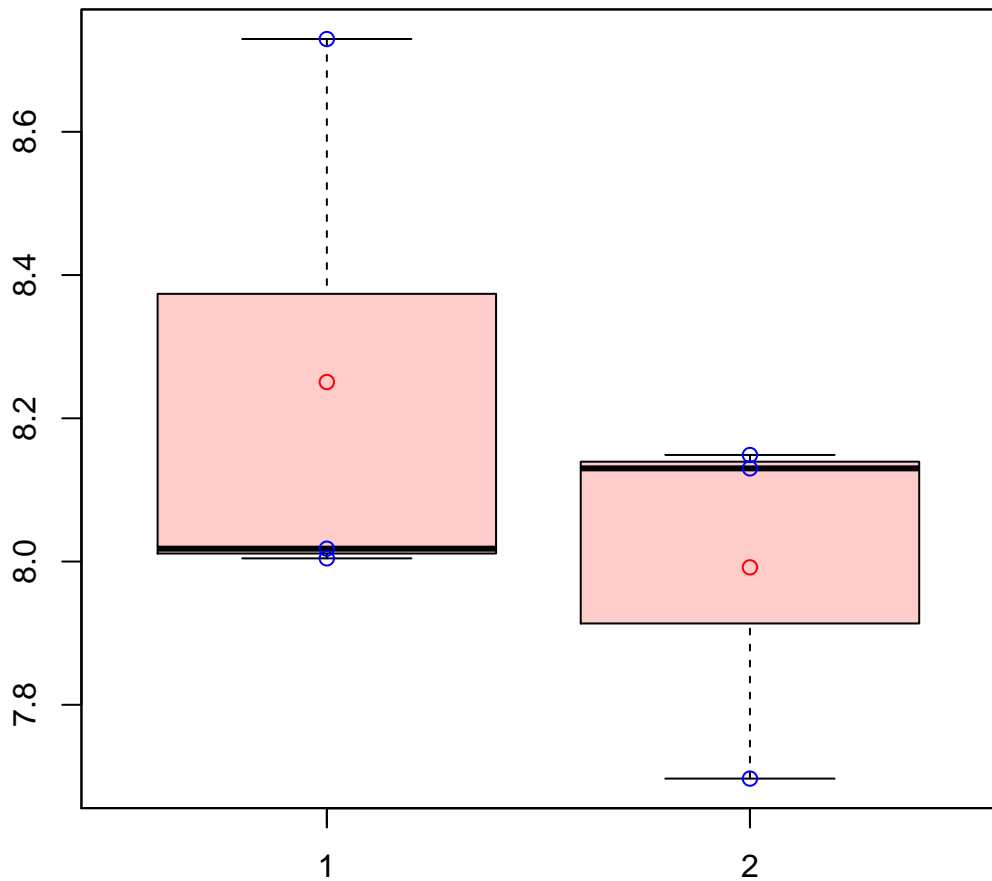

t-Test: p-value = 0.42

# CL5245Contig1|CL5245Contig1

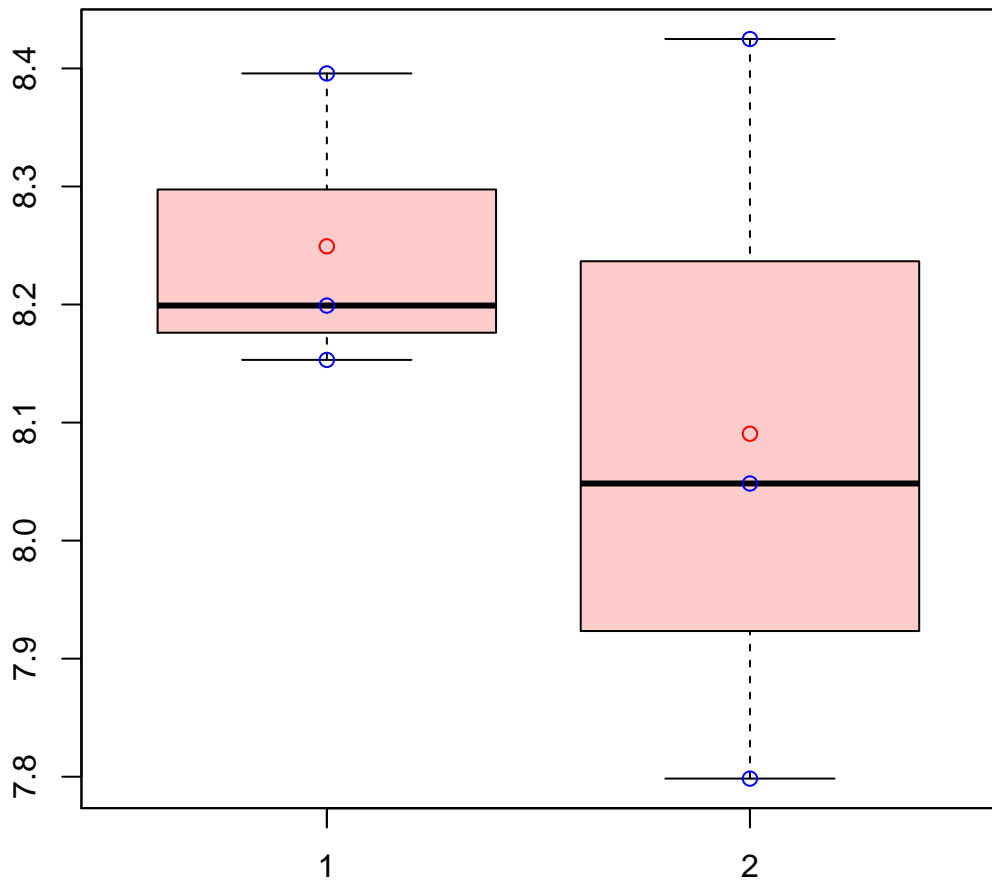

t-Test: p-value = 0.49

# CL5245Contig2|CL5245Contig2

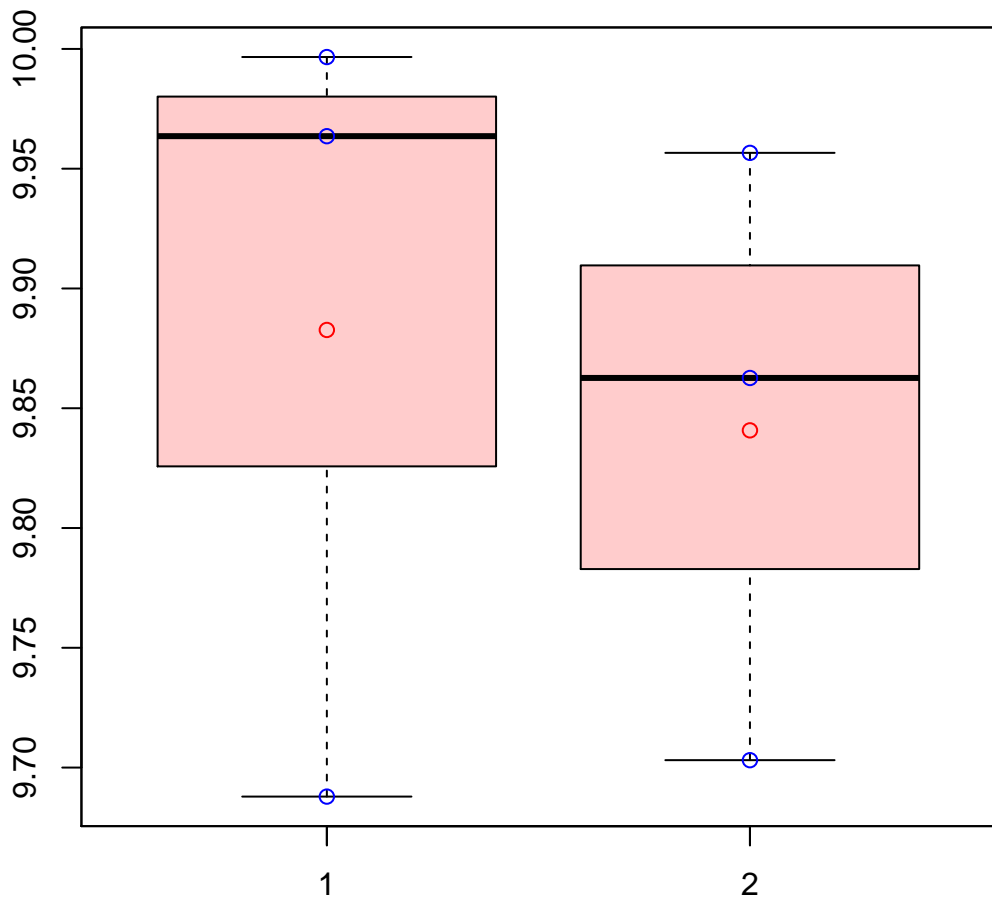

t-Test: p-value = 0.75

# CL5246Contig3|CL5246Contig3

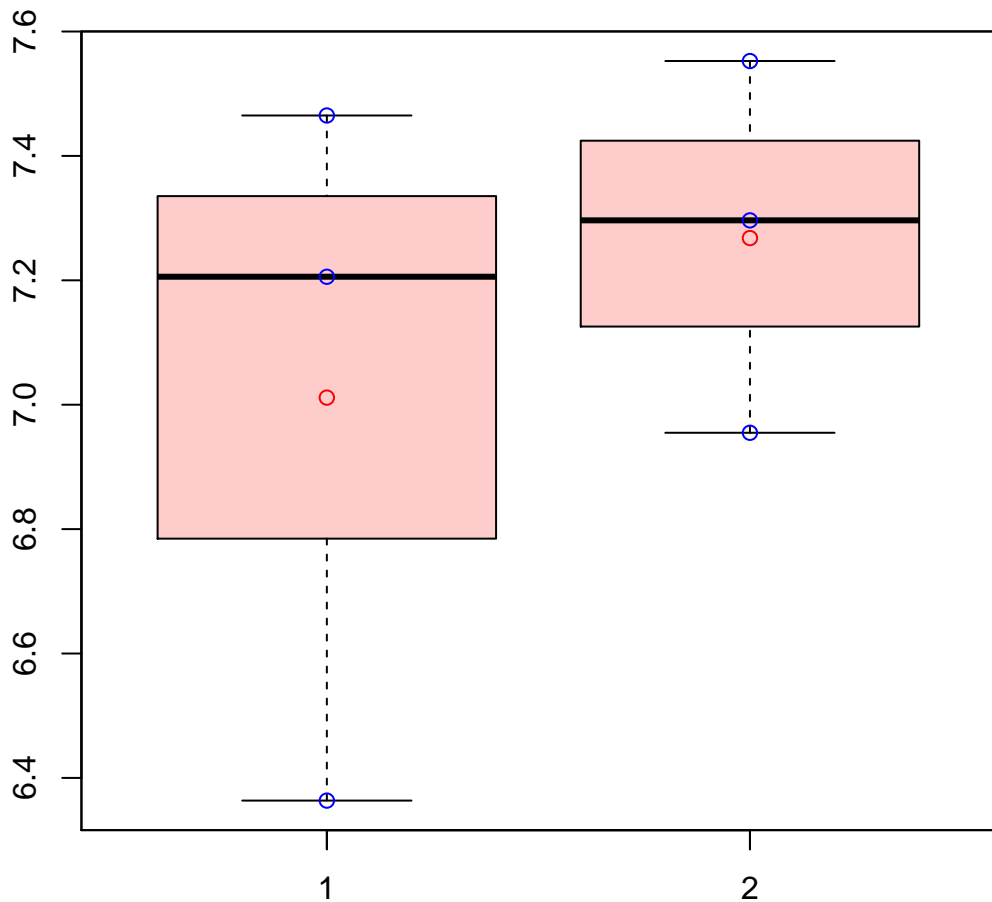

t-Test: p-value = 0.54

# CL5247Contig1|CL5247Contig1

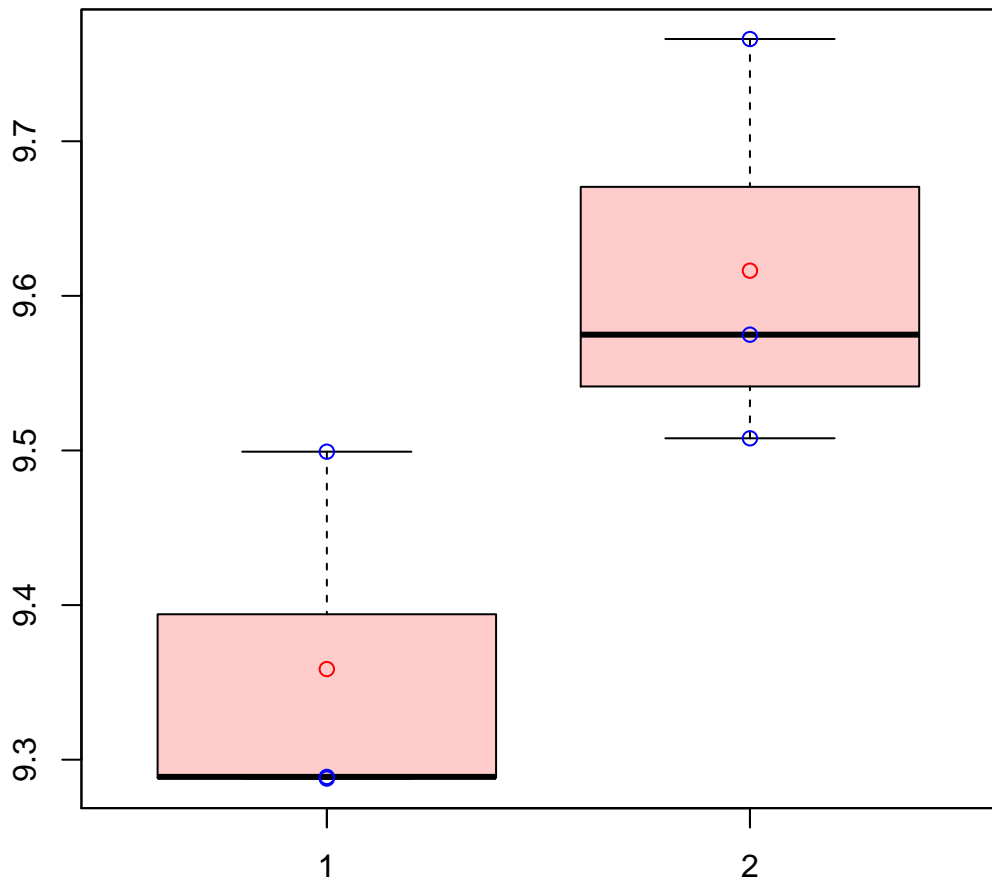

t-Test: p-value = 0.07

# CL5247Contig3|CL5247Contig3

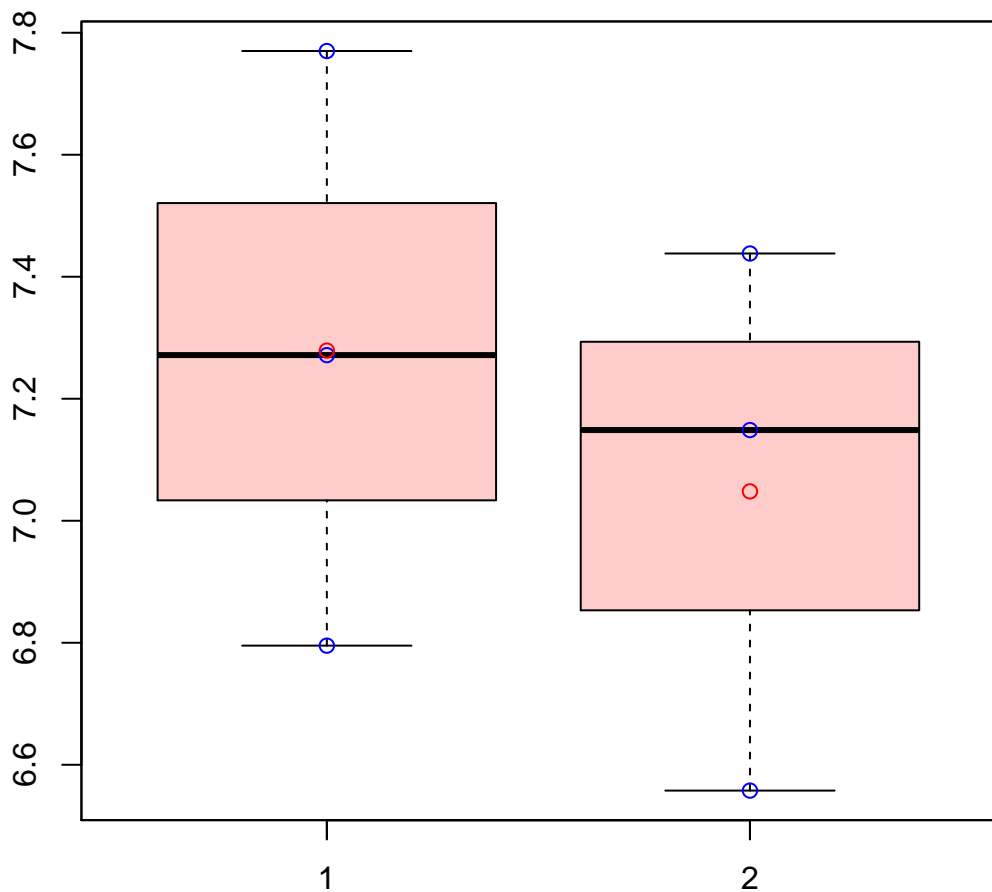

t-Test: p-value = 0.58

# CL524Contig1|CL524Contig1

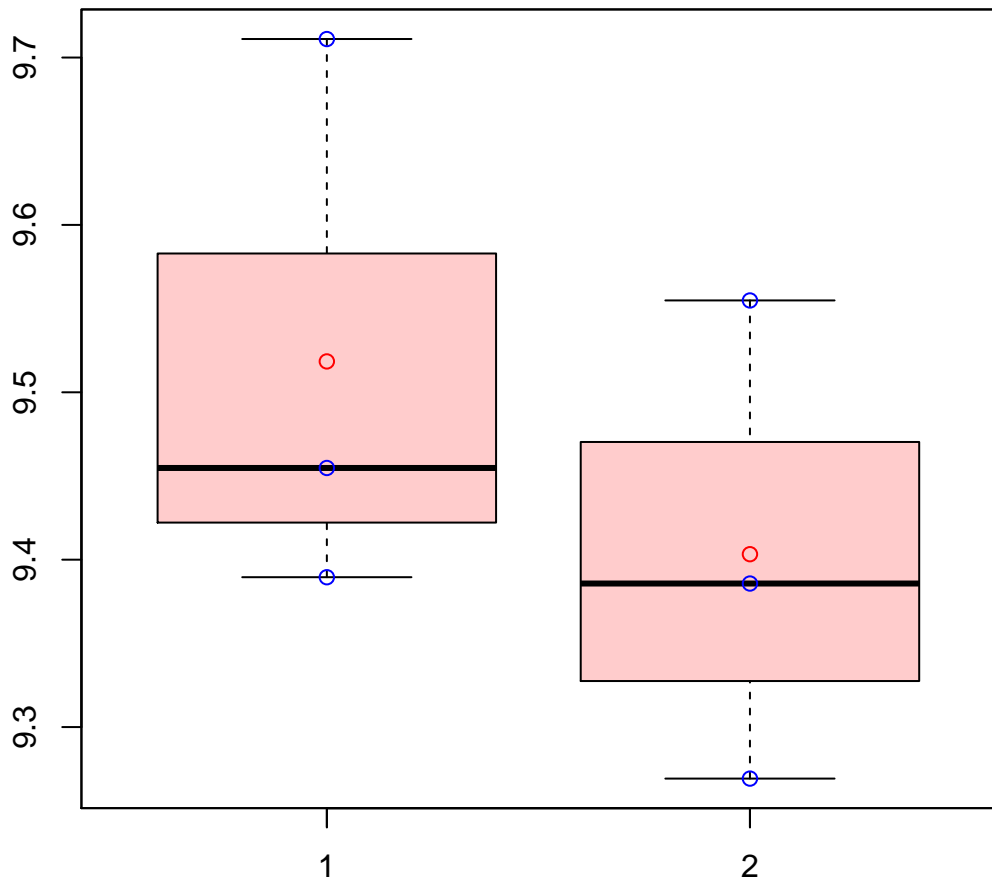

t-Test: p-value = 0.42

# CL524Contig6|CL524Contig6

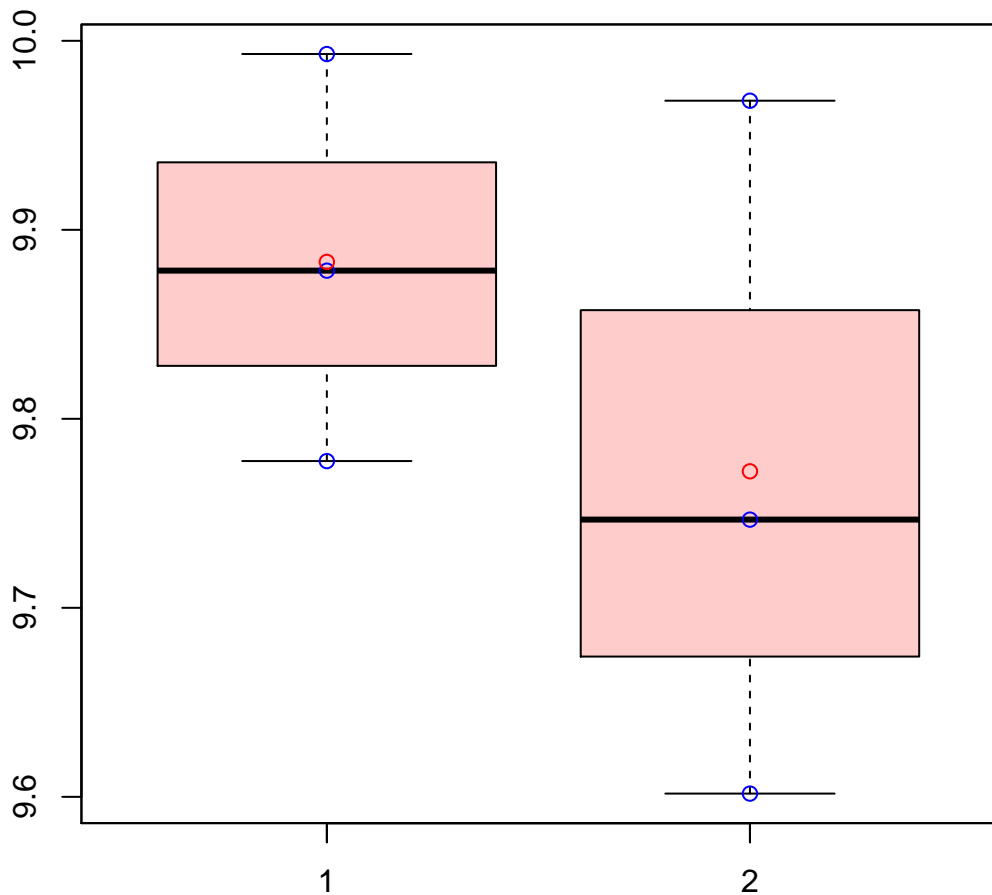

t-Test: p-value = 0.43



# CL5257Contig1|CL5257Contig1

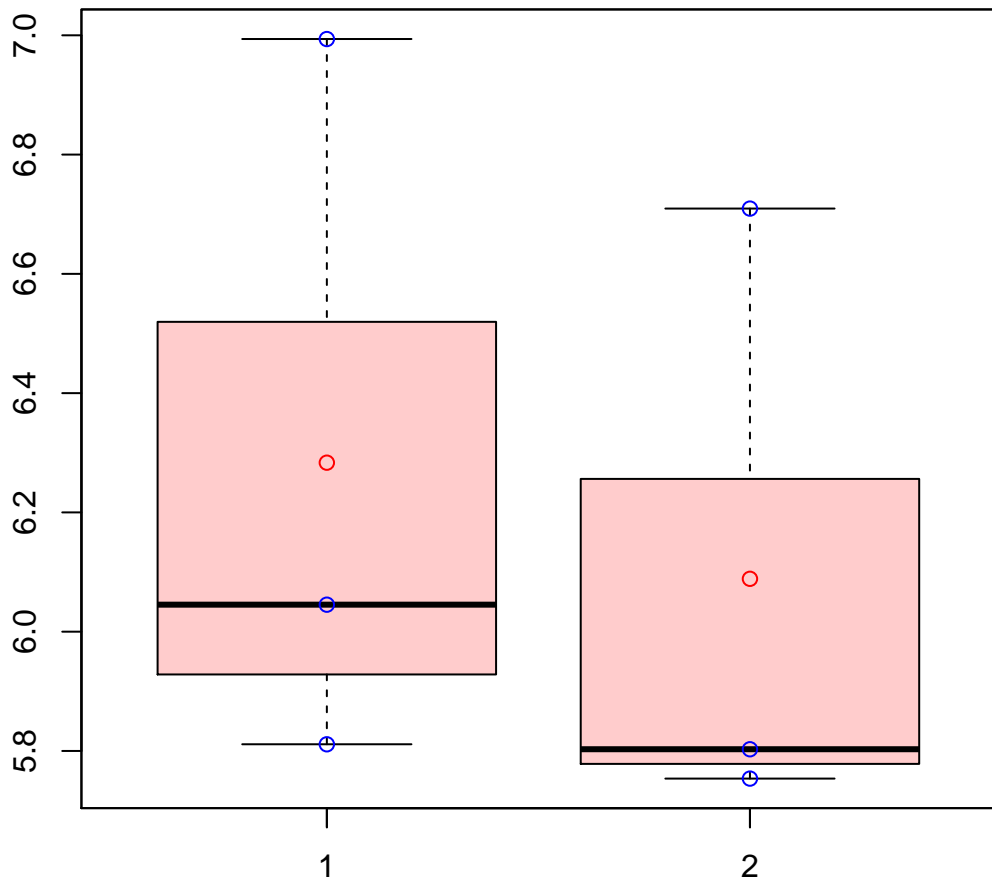

t-Test: p-value = 0.7

# CL5266Contig2|CL5266Contig2

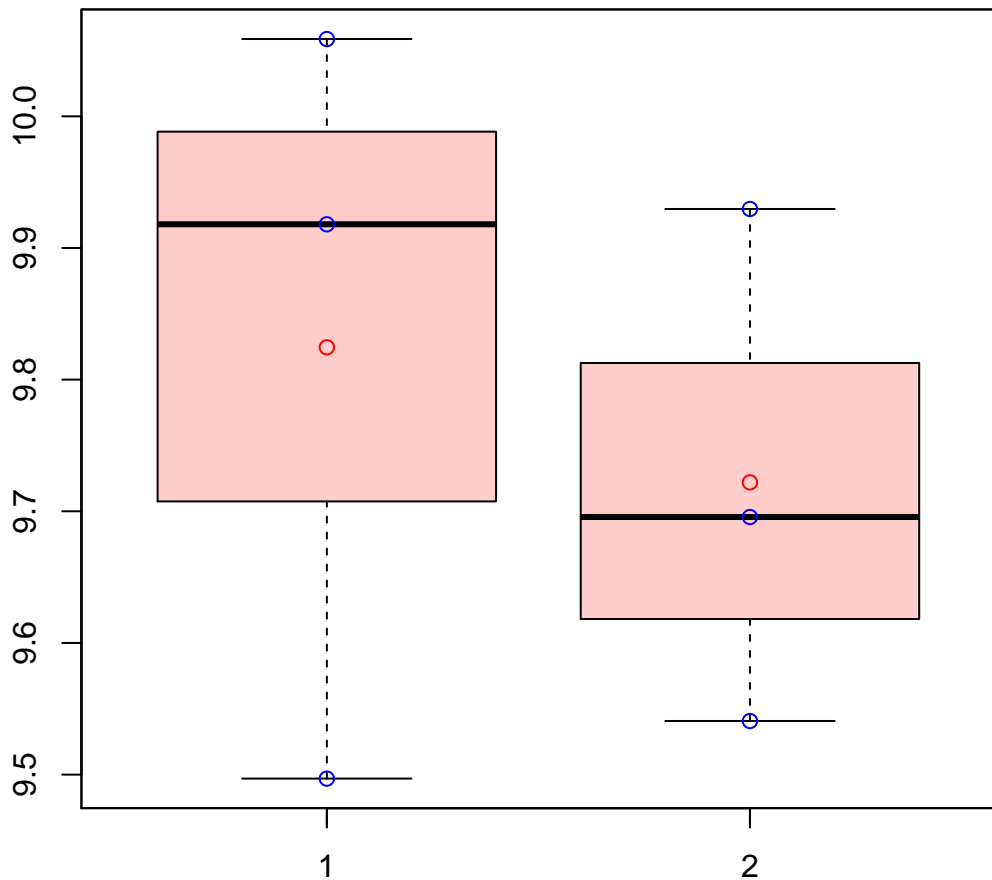

t-Test: p-value = 0.64

# CL526Contig1|CL526Contig1

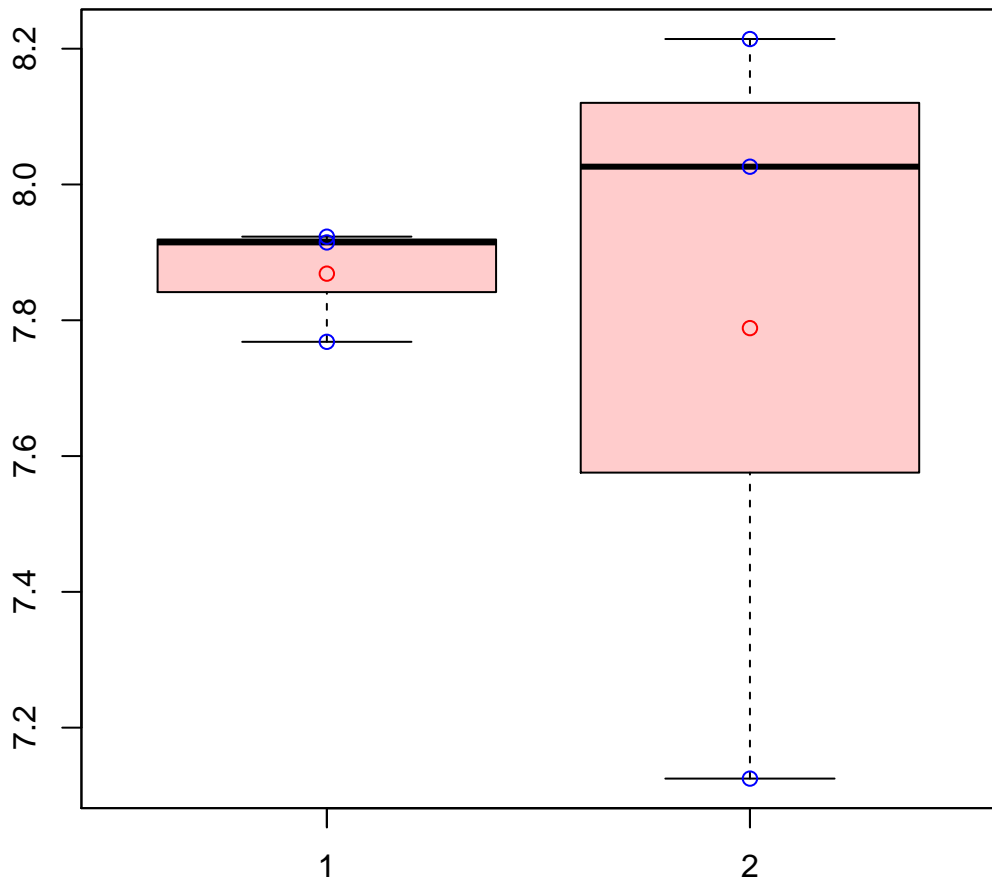

t-Test: p-value = 0.83

# CL5285Contig1|CL5285Contig1

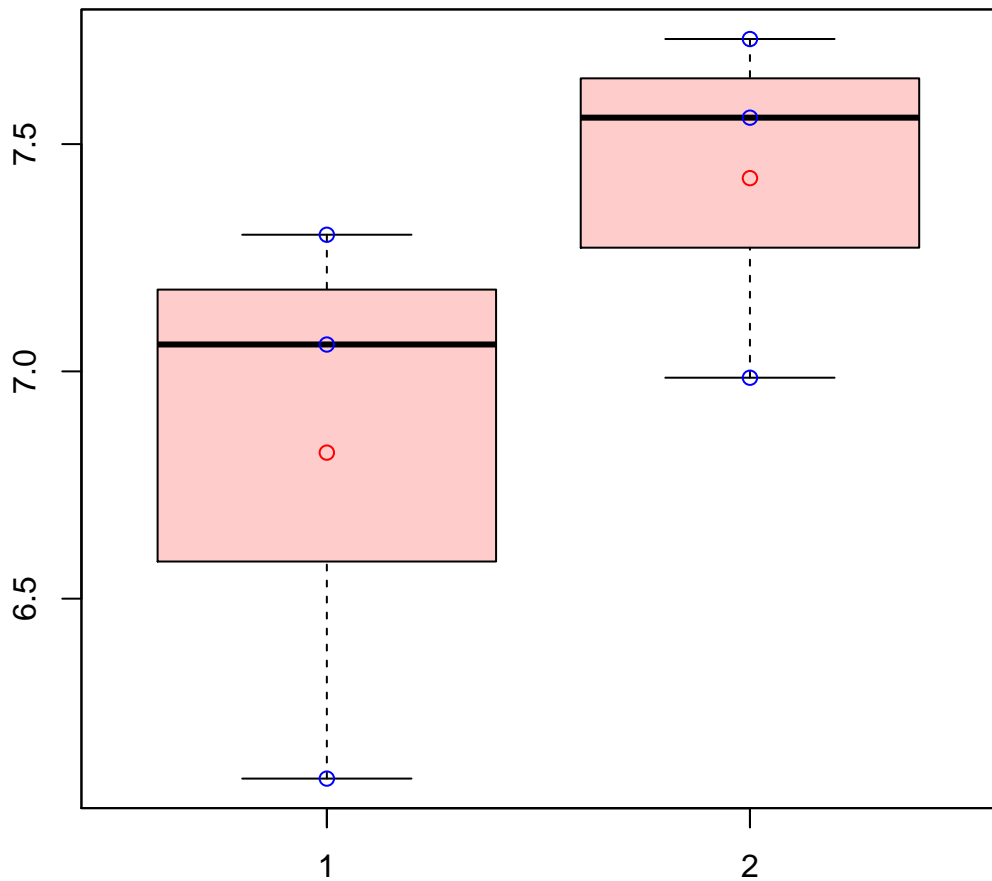

t-Test: p-value = 0.25

# CL5286Contig1|CL5286Contig1



t-Test: p-value = 0.21

# CL5286Contig2|CL5286Contig2



t-Test: p-value = 0.21

# CL5286Contig3|CL5286Contig3

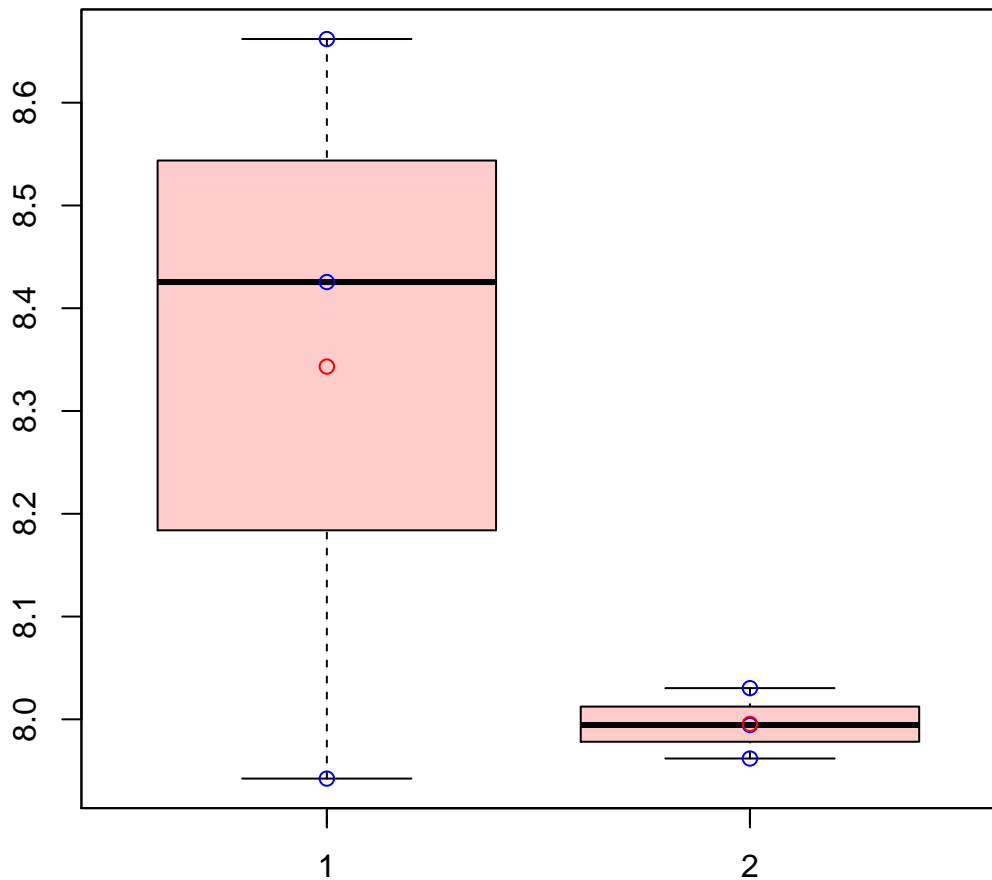

t-Test: p-value = 0.24

# CL5286Contig4|CL5286Contig4

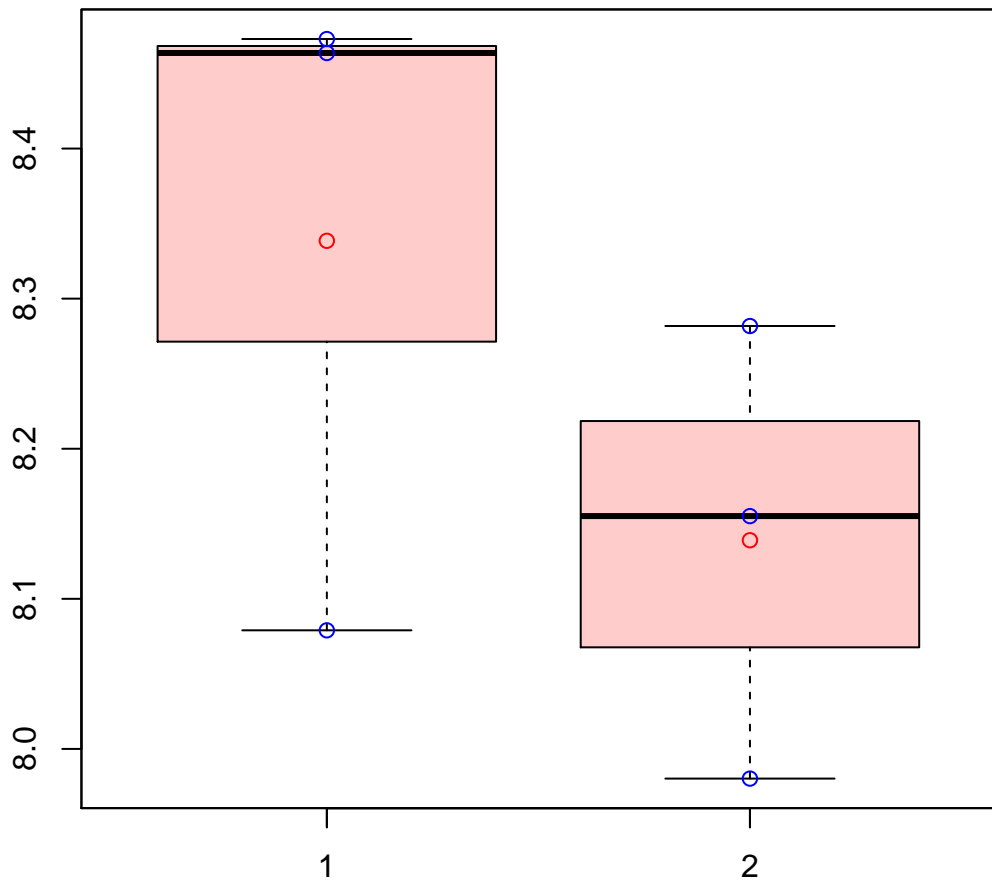

t-Test: p-value = 0.28



# CL5290Contig2|CL5290Contig2

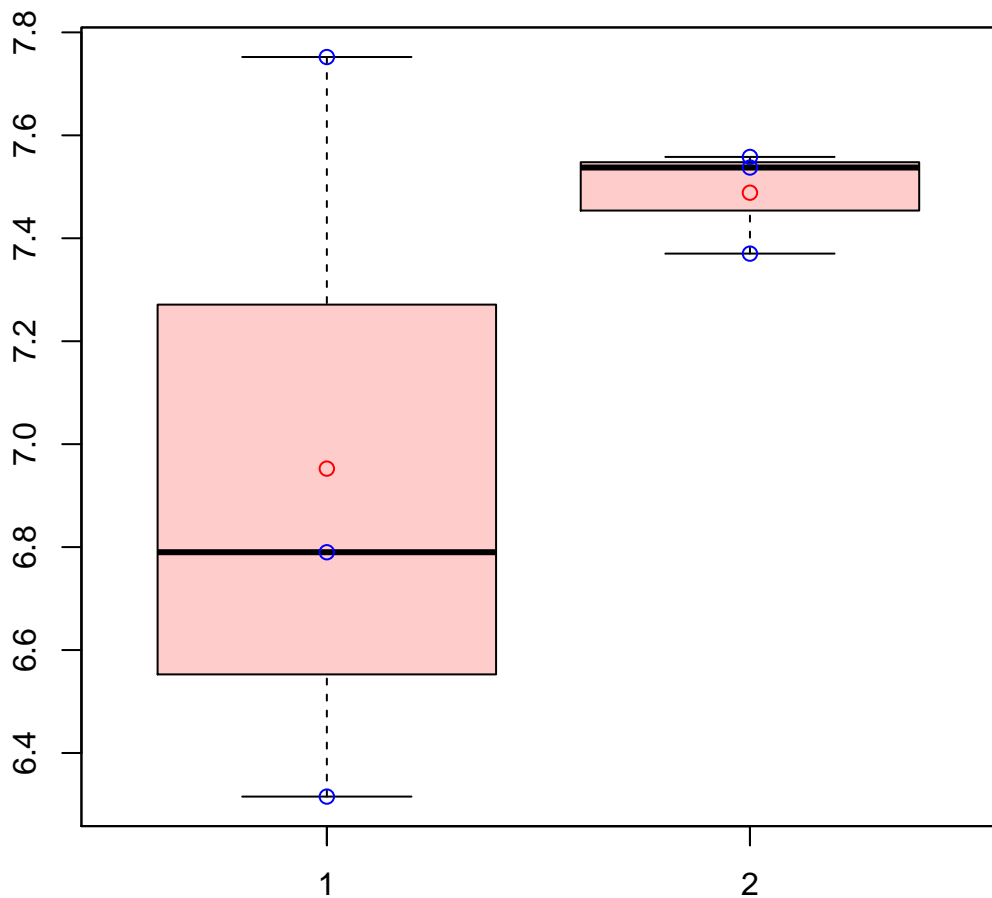

t-Test: p-value = 0.33

# CL529Contig1|CL529Contig1



t-Test: p-value = 0.67

# CL52Contig13|CL52Contig13

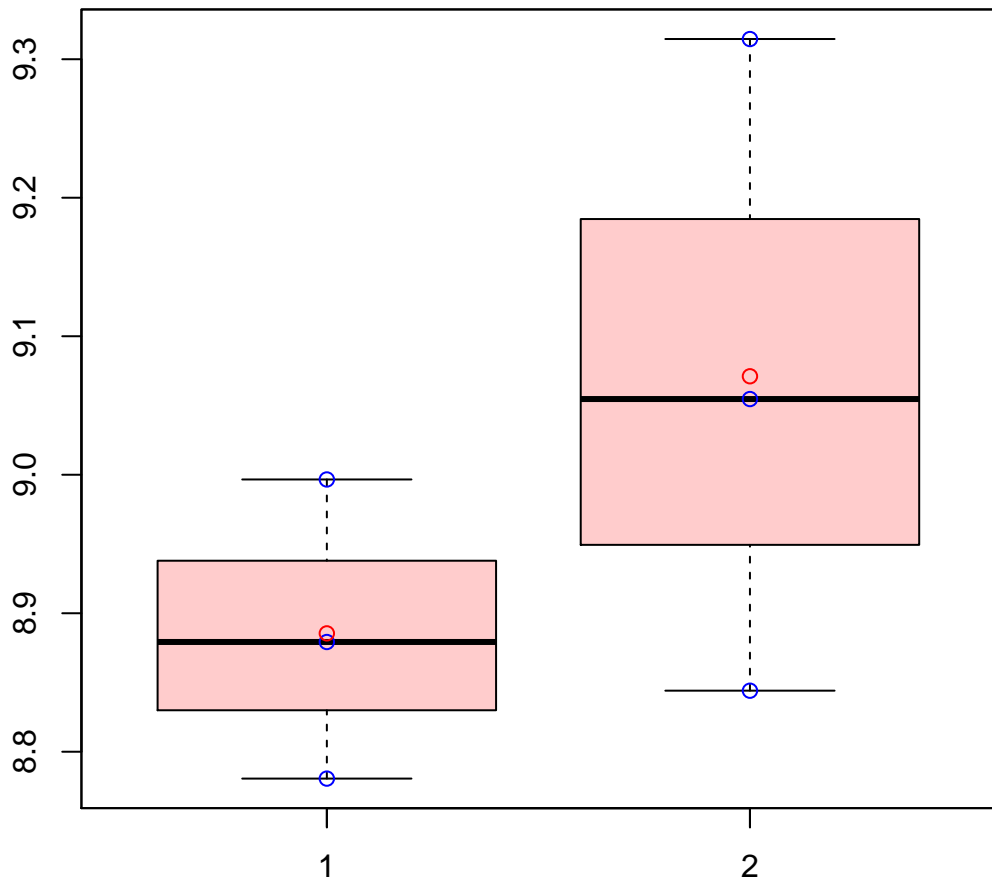

t-Test: p-value = 0.31

# CL52Contig23|CL52Contig23

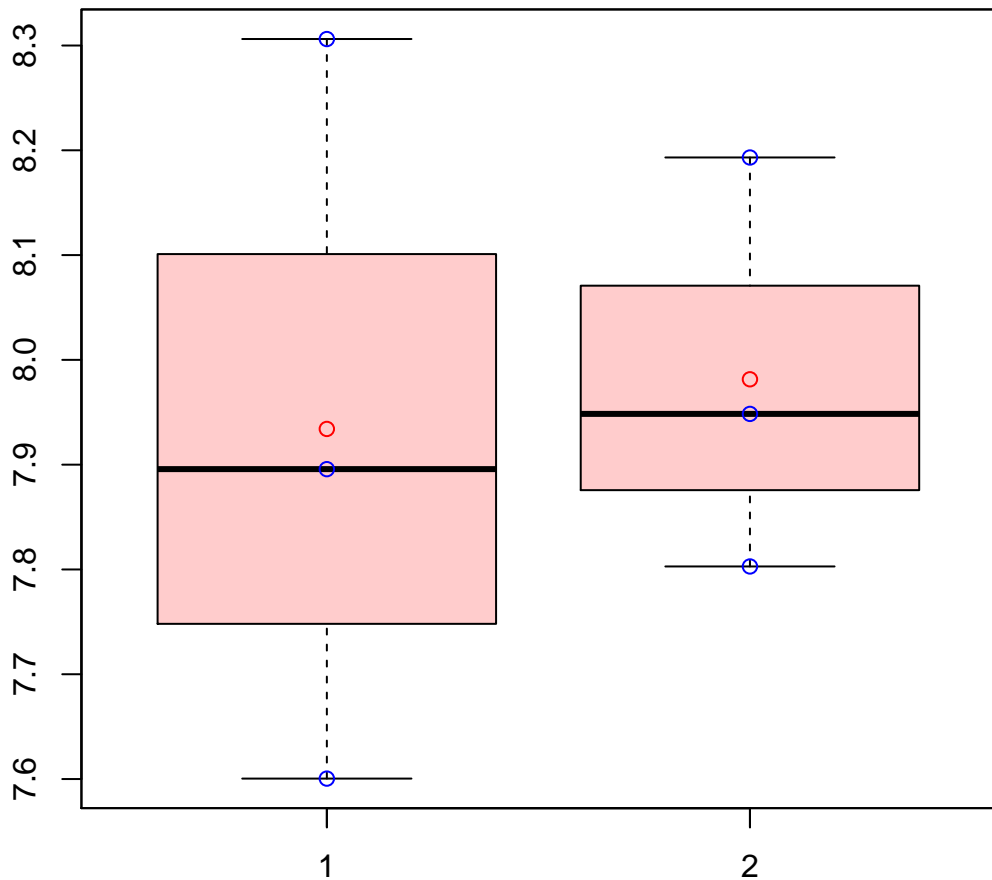

t-Test: p-value = 0.85

# CL52Contig24|CL52Contig24



t-Test: p-value = 0.85

# CL52Contig25|CL52Contig25



t-Test: p-value = 0.85

# CL52Contig26|CL52Contig26

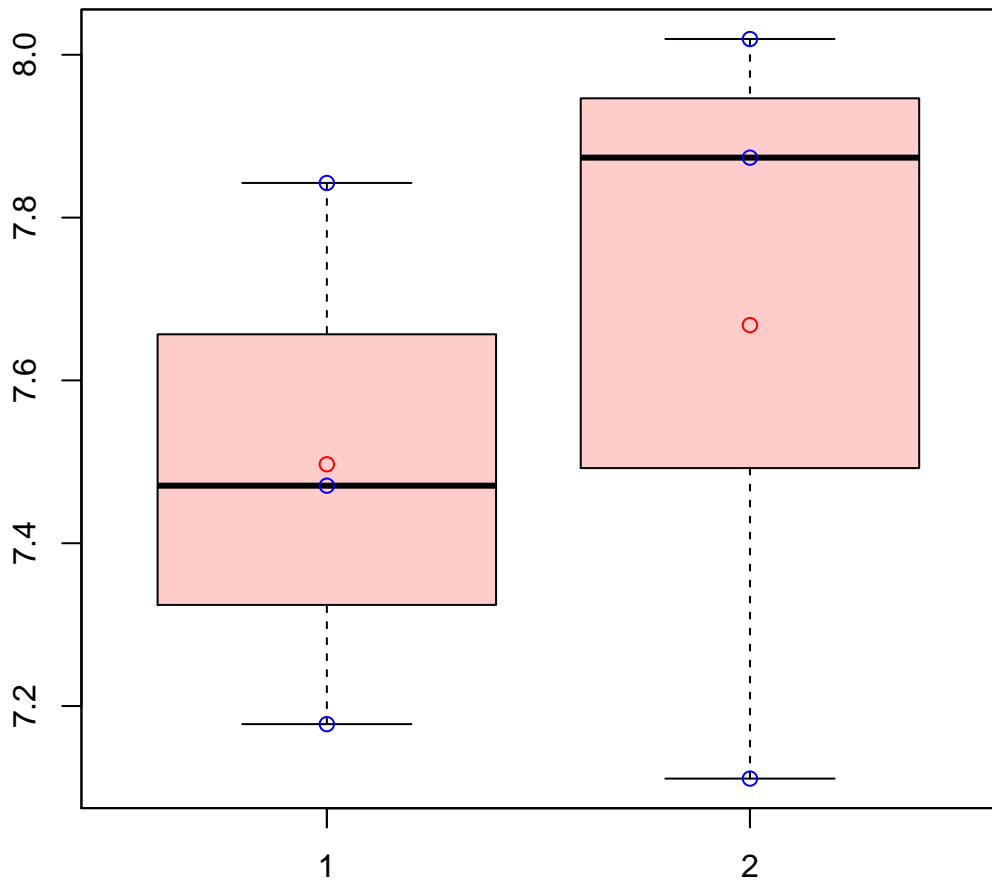

t-Test: p-value = 0.65

# CL52Contig34|CL52Contig34

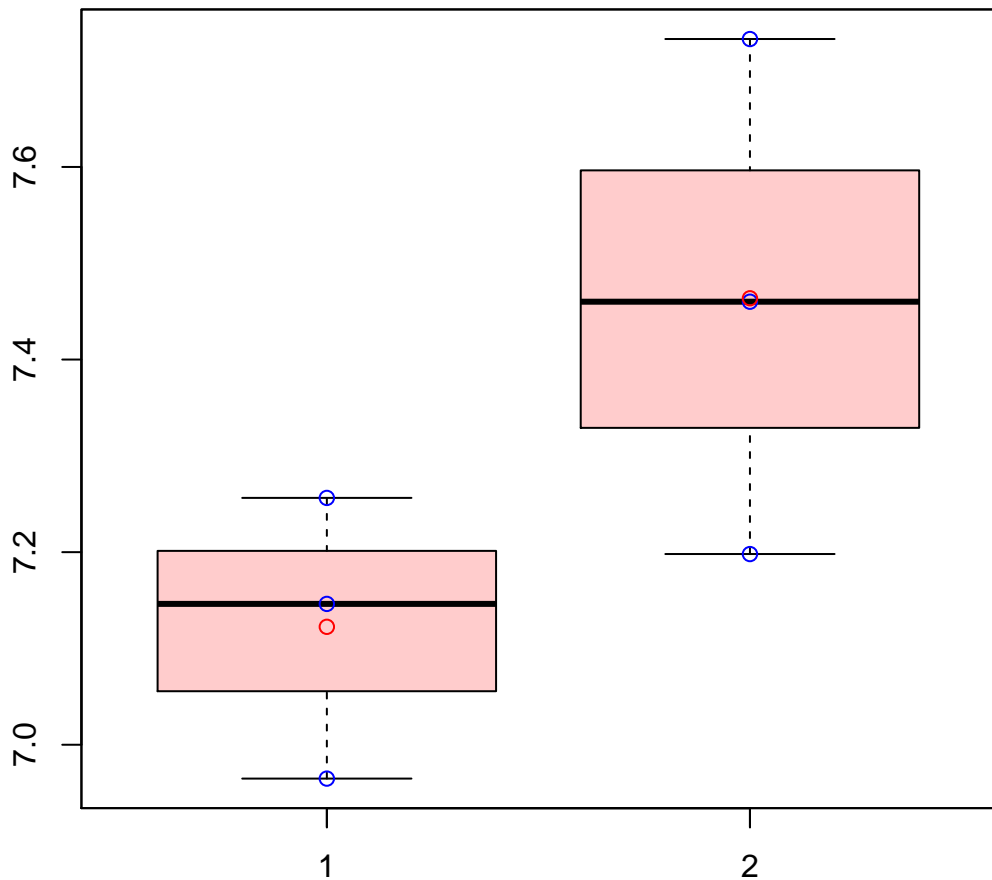

t-Test: p-value = 0.15



# CL52Contig6|CL52Contig6

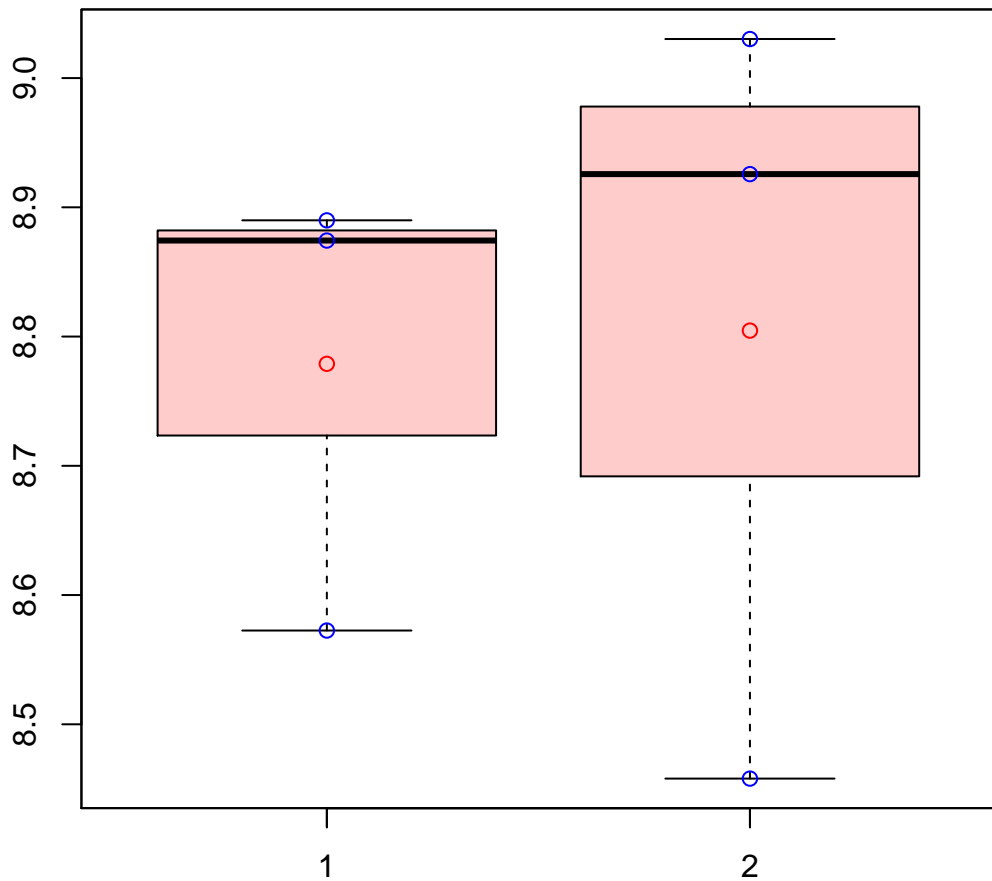

t-Test: p-value = 0.91

# CL52Contig7|CL52Contig7



t-Test: p-value = 0.85

# CL5304Contig2|CL5304Contig2

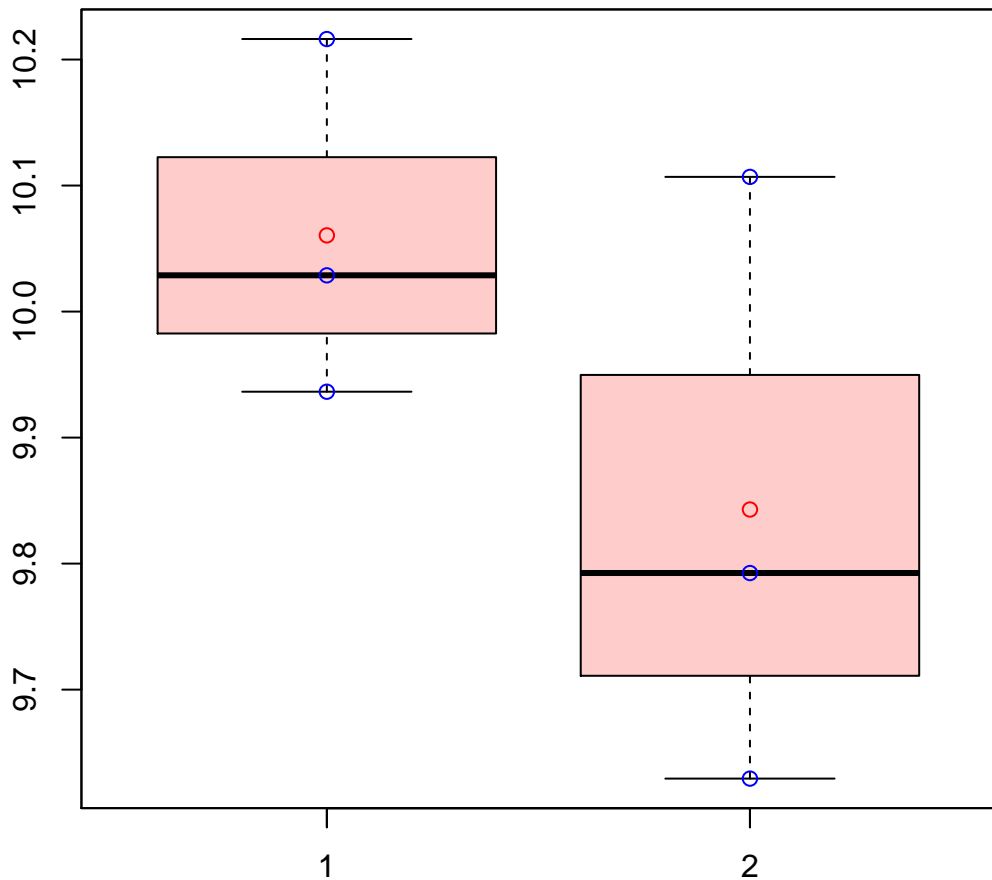

t-Test: p-value = 0.27

# CL5308Contig1|CL5308Contig1

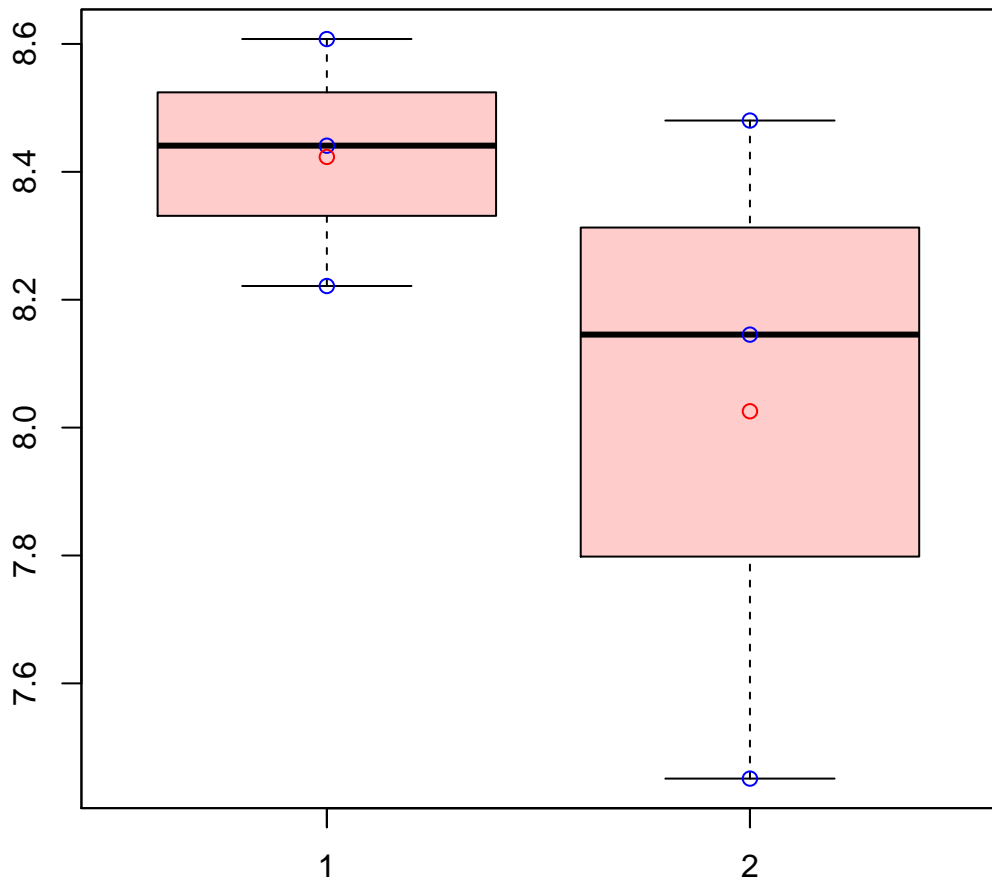

t-Test: p-value = 0.32

# CL5317Contig2|CL5317Contig2

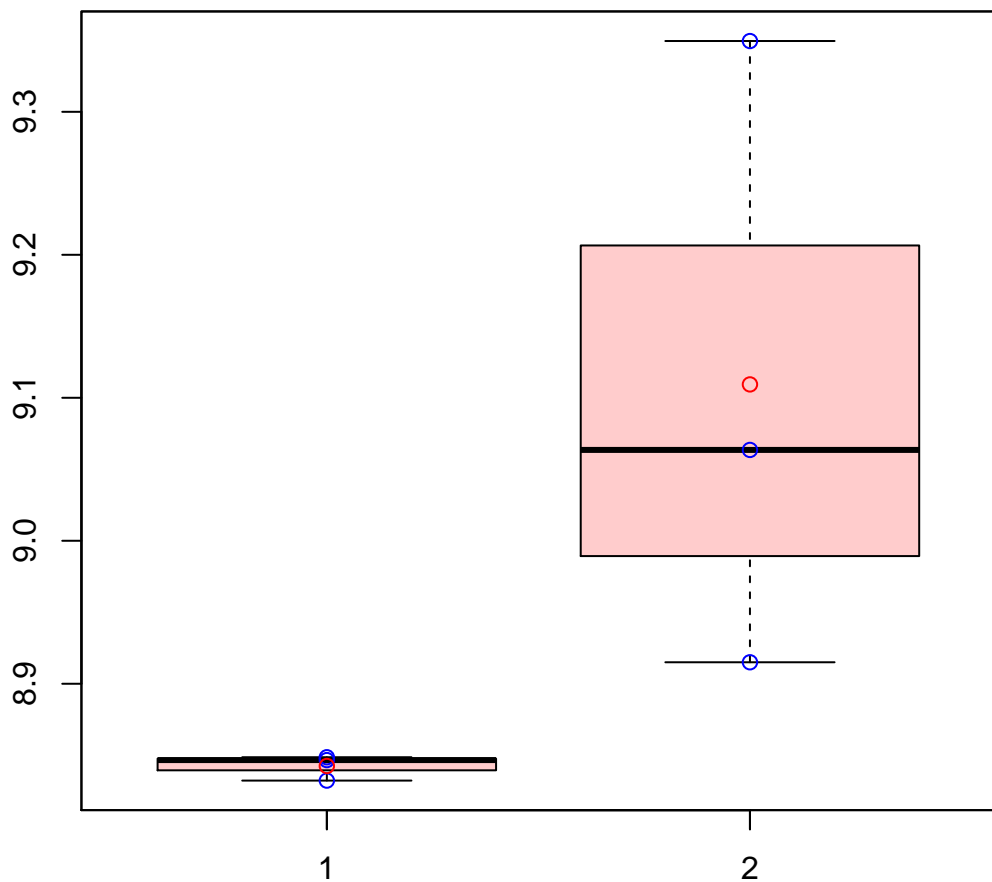

t-Test: p-value = 0.17

# CL5317Contig5|CL5317Contig5

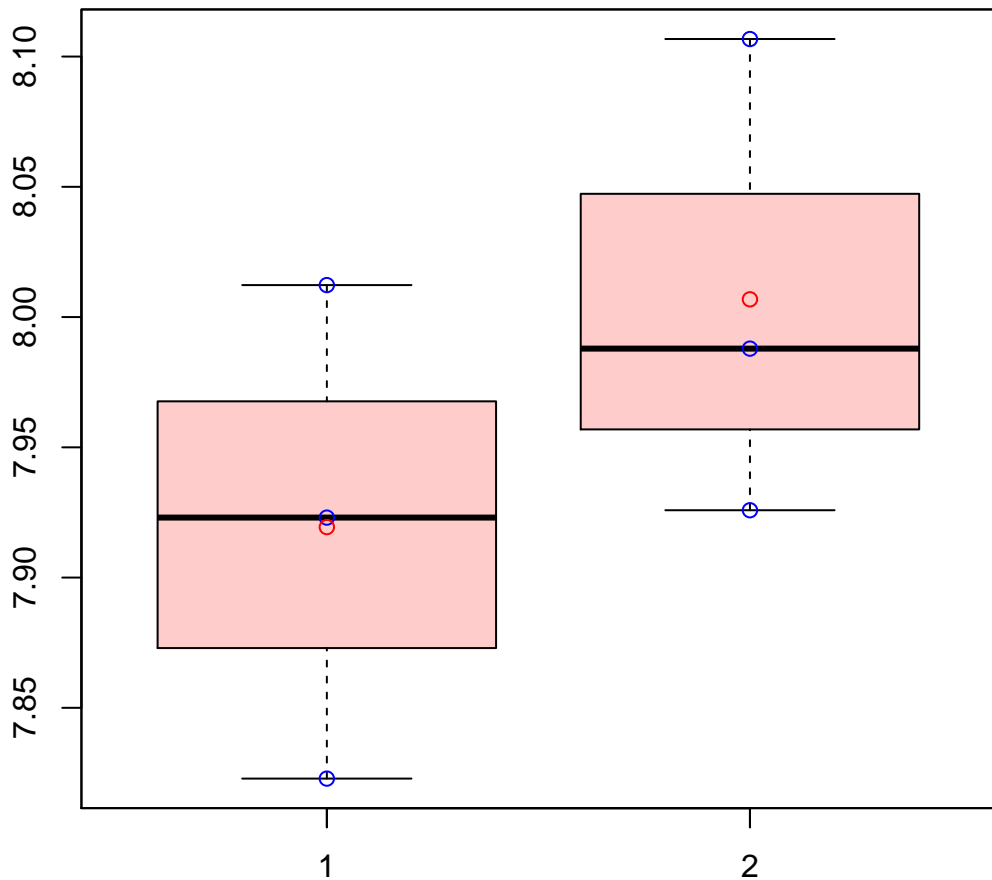

t-Test: p-value = 0.32

# CL5319Contig1|CL5319Contig1

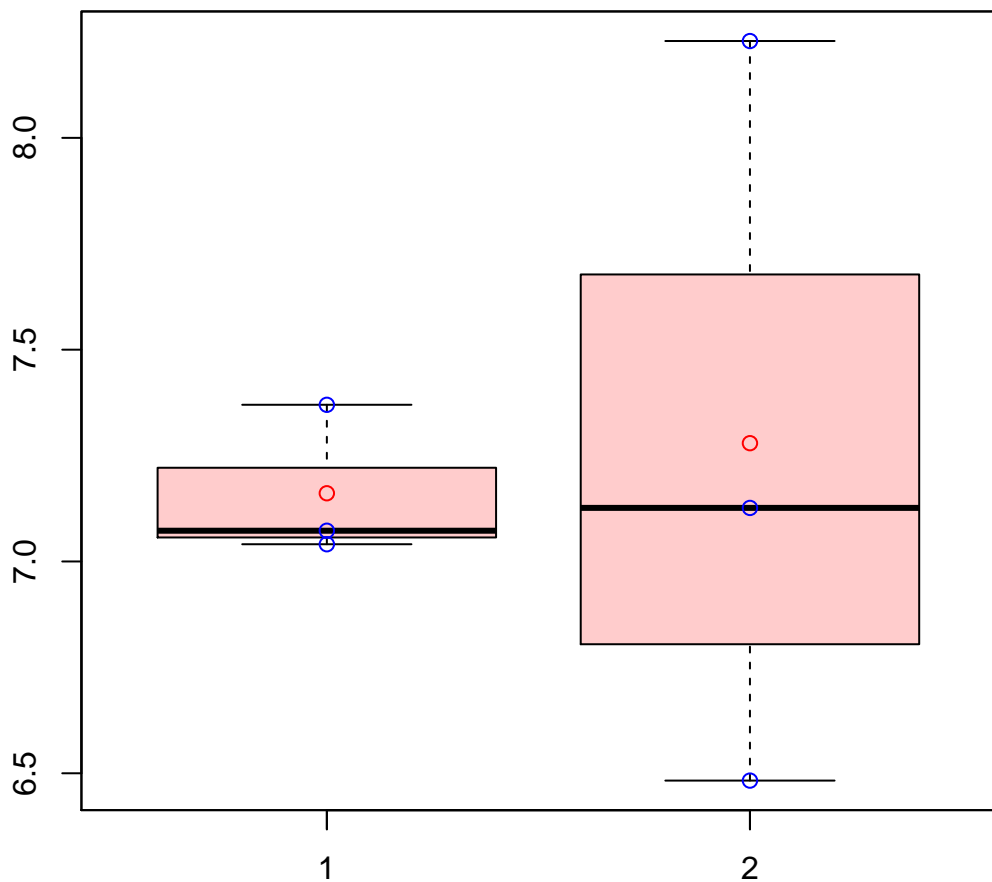

t-Test: p-value = 0.84

# CL5319Contig3|CL5319Contig3



t-Test: p-value = 0.84



# CL5320Contig1|CL5320Contig1



t-Test: p-value = 0.85

# CL5320Contig2|CL5320Contig2

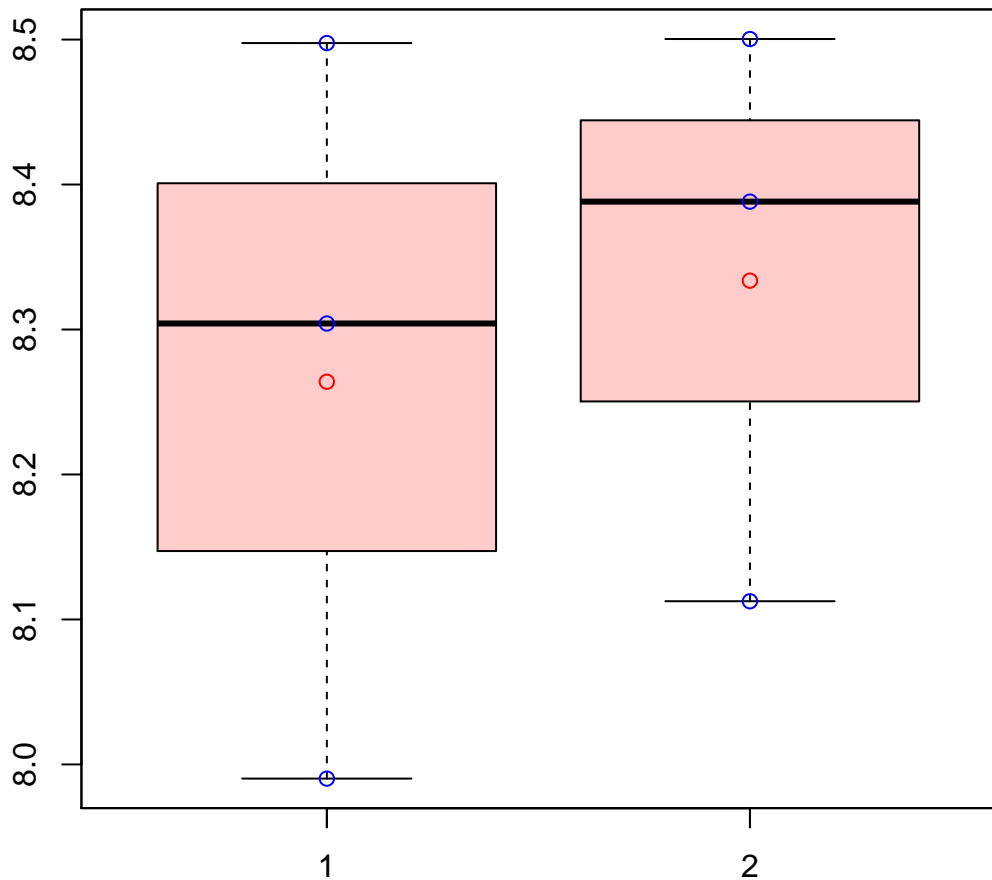

t-Test: p-value = 0.73

# CL5320Contig7|CL5320Contig7



t-Test: p-value = 0.85

# CL5320Contig8|CL5320Contig8

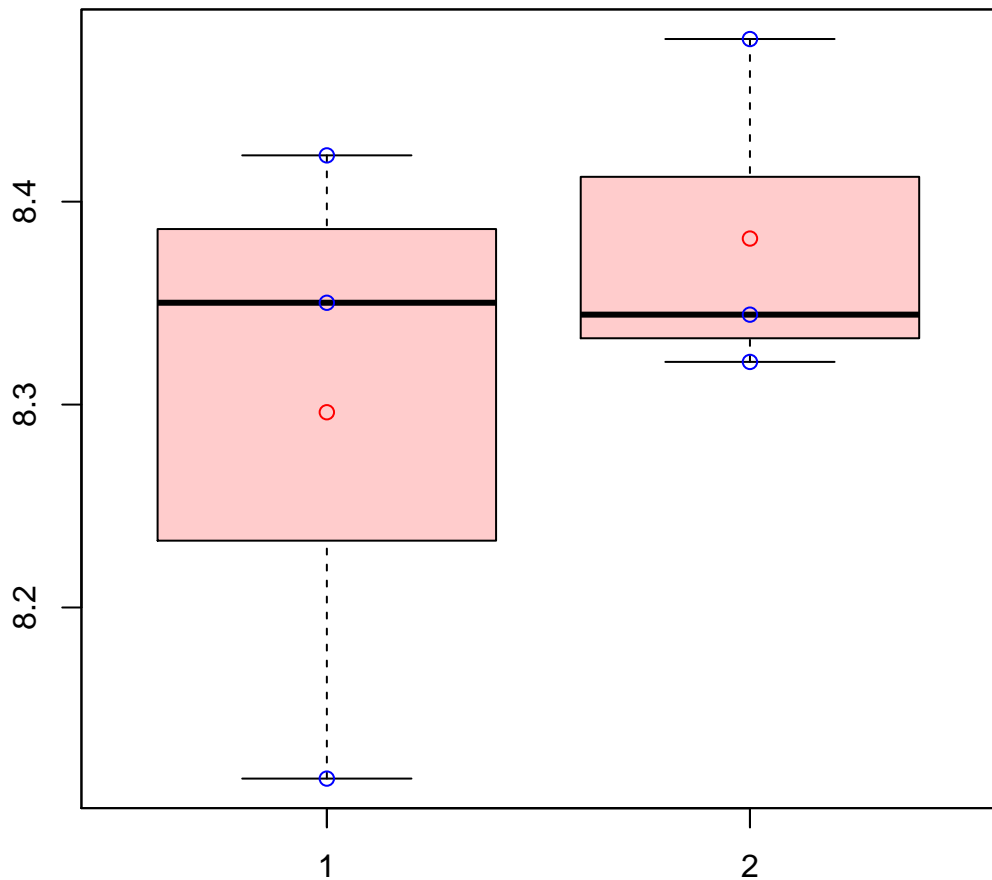

t-Test: p-value = 0.47

# CL5322Contig2|CL5322Contig2

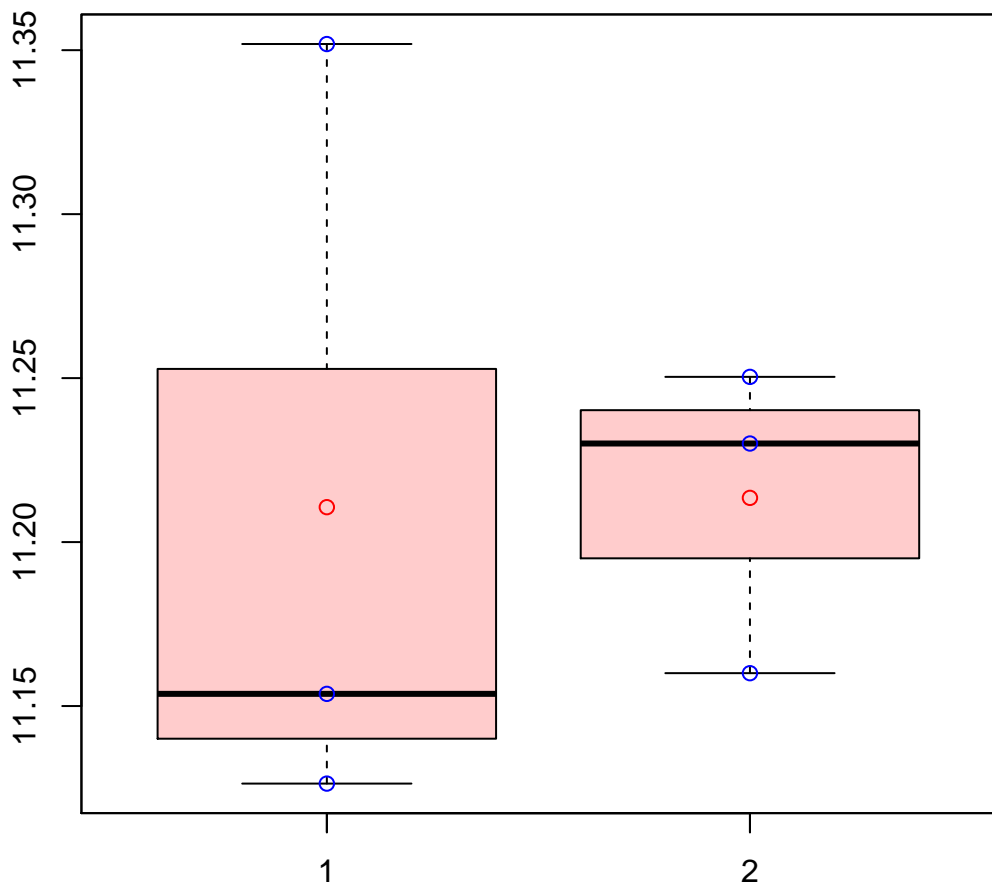

t-Test: p-value = 0.97

# CL5322Contig3|CL5322Contig3



t-Test: p-value = 0.97

# CL5326Contig1|CL5326Contig1

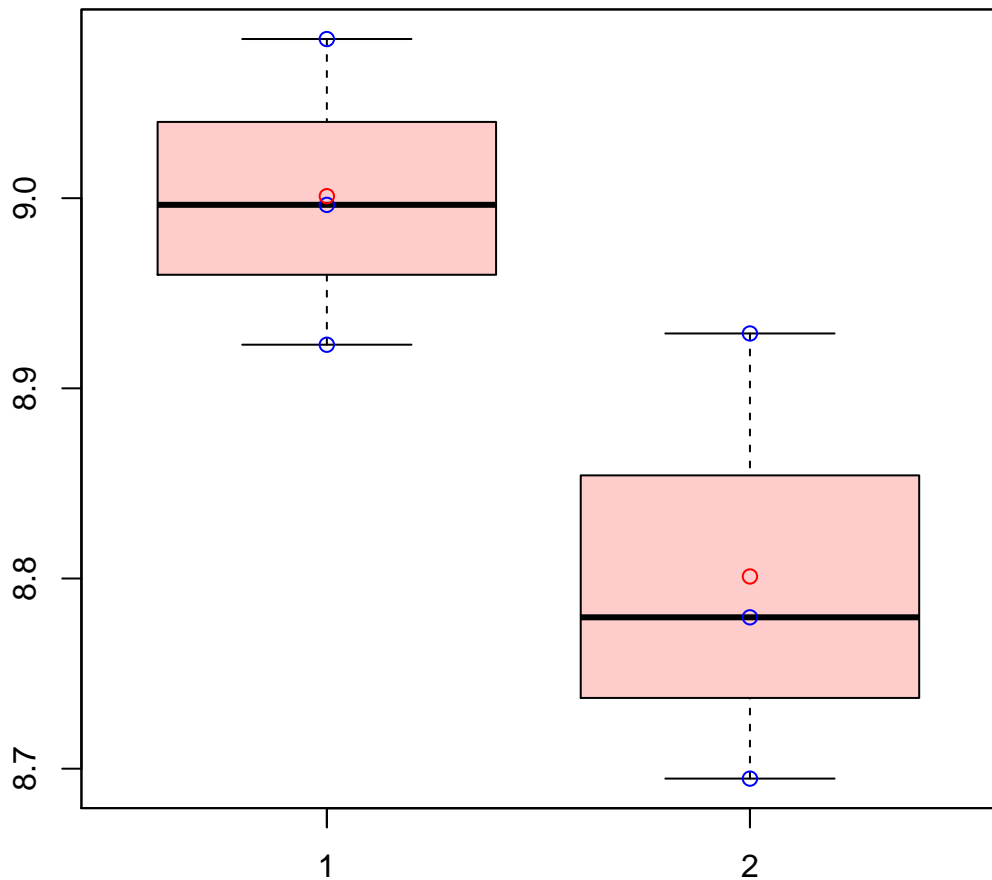

t-Test: p-value = 0.08

# CL532Contig1|CL532Contig1

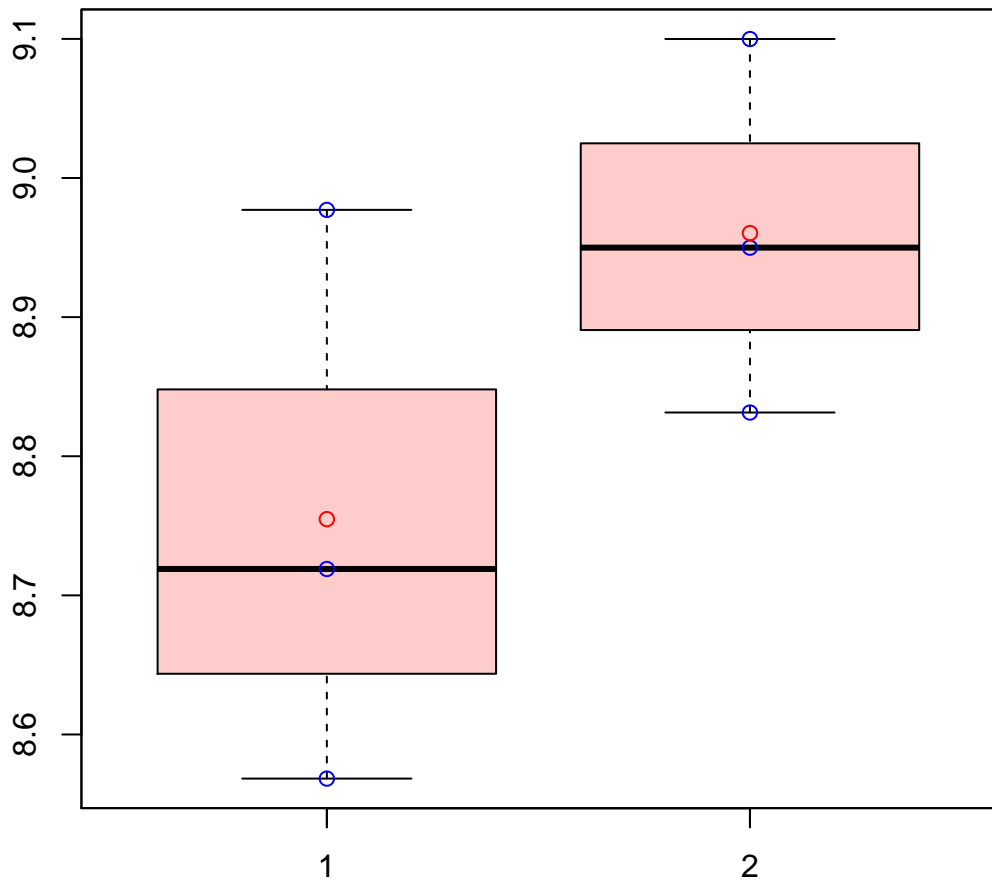

t-Test: p-value = 0.23



# CL532Contig4|CL532Contig4

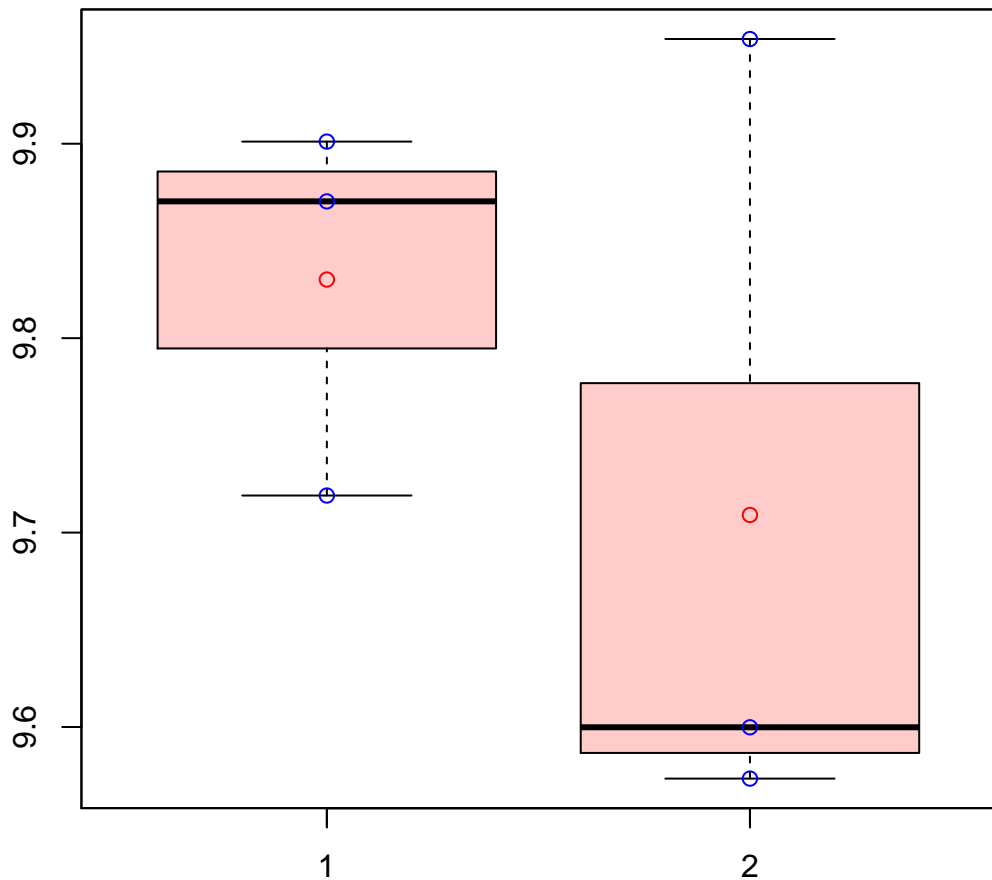

t-Test: p-value = 0.44

# CL5336Contig5|CL5336Contig5

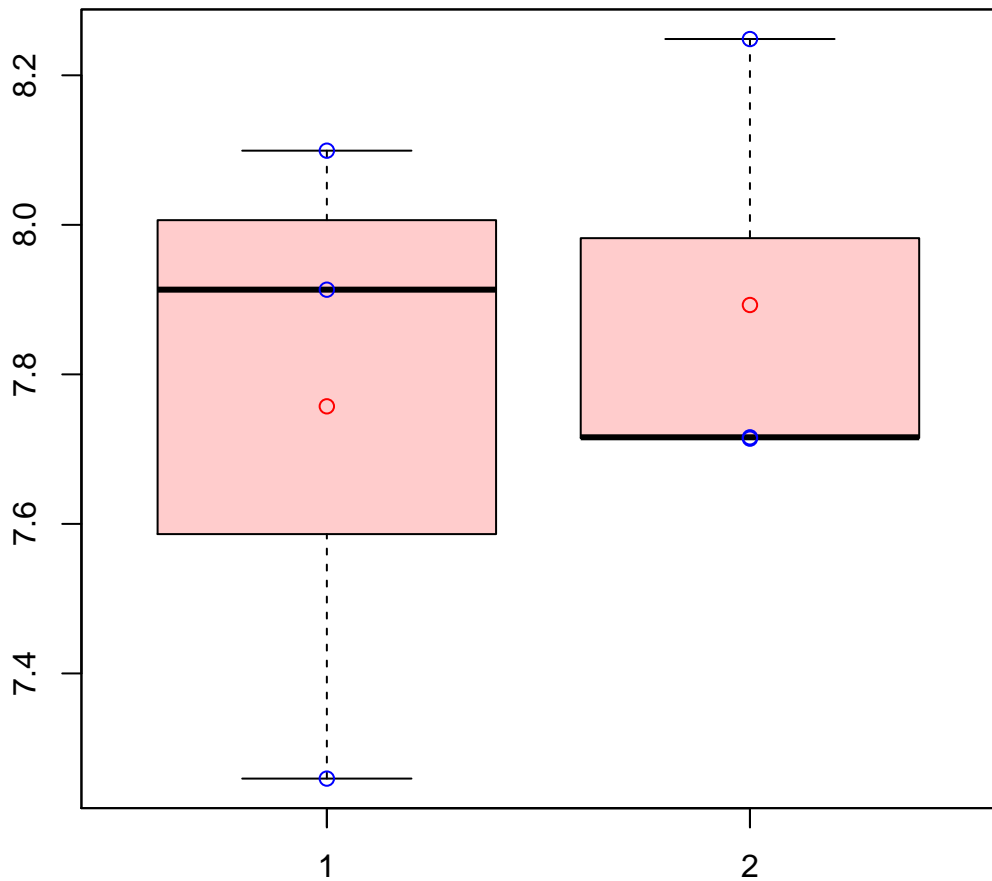

t-Test: p-value = 0.69

# CL533Contig10|CL533Contig10

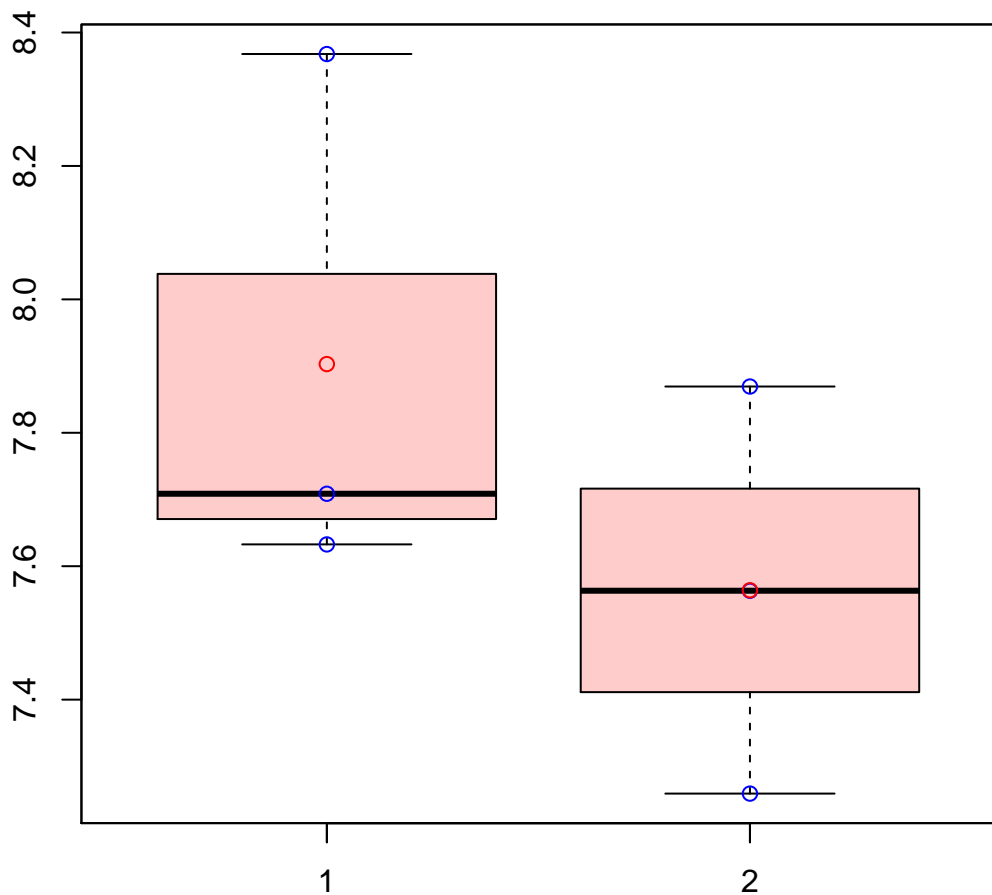

t-Test: p-value = 0.32

# CL533Contig11|CL533Contig11



t-Test: p-value = 0.32

# CL533Contig12|CL533Contig12

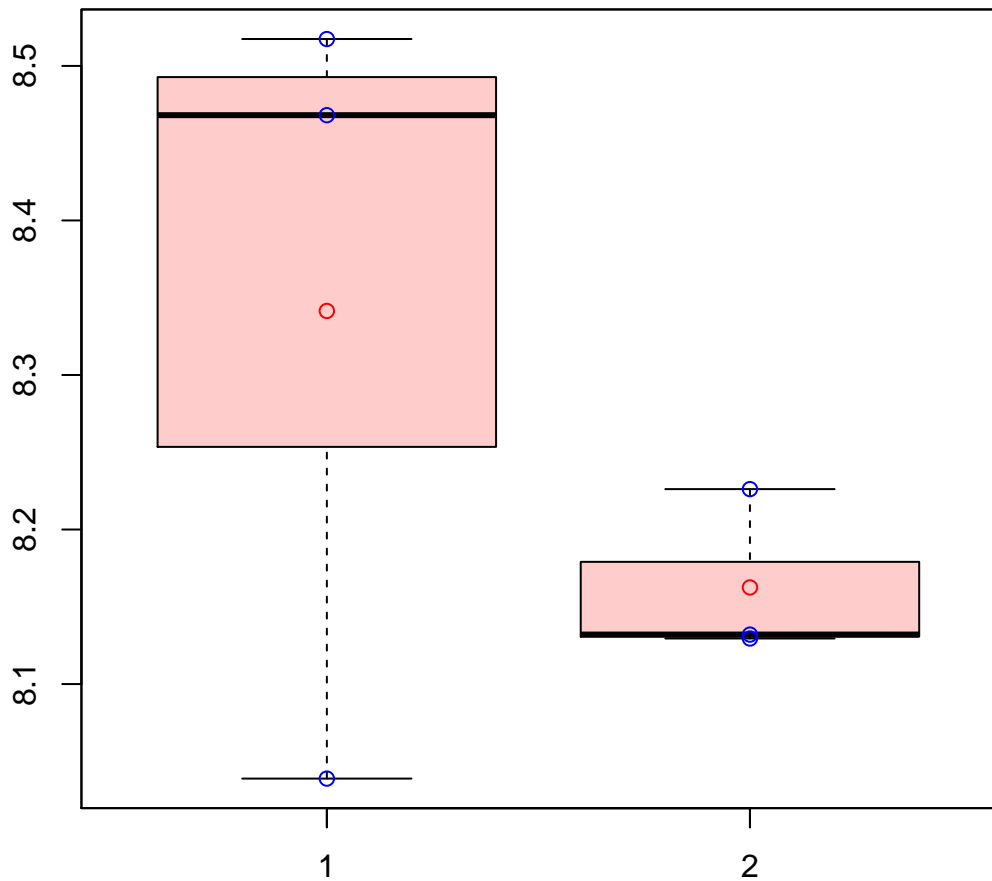

t-Test: p-value = 0.36

# CL5342Contig3|CL5342Contig3

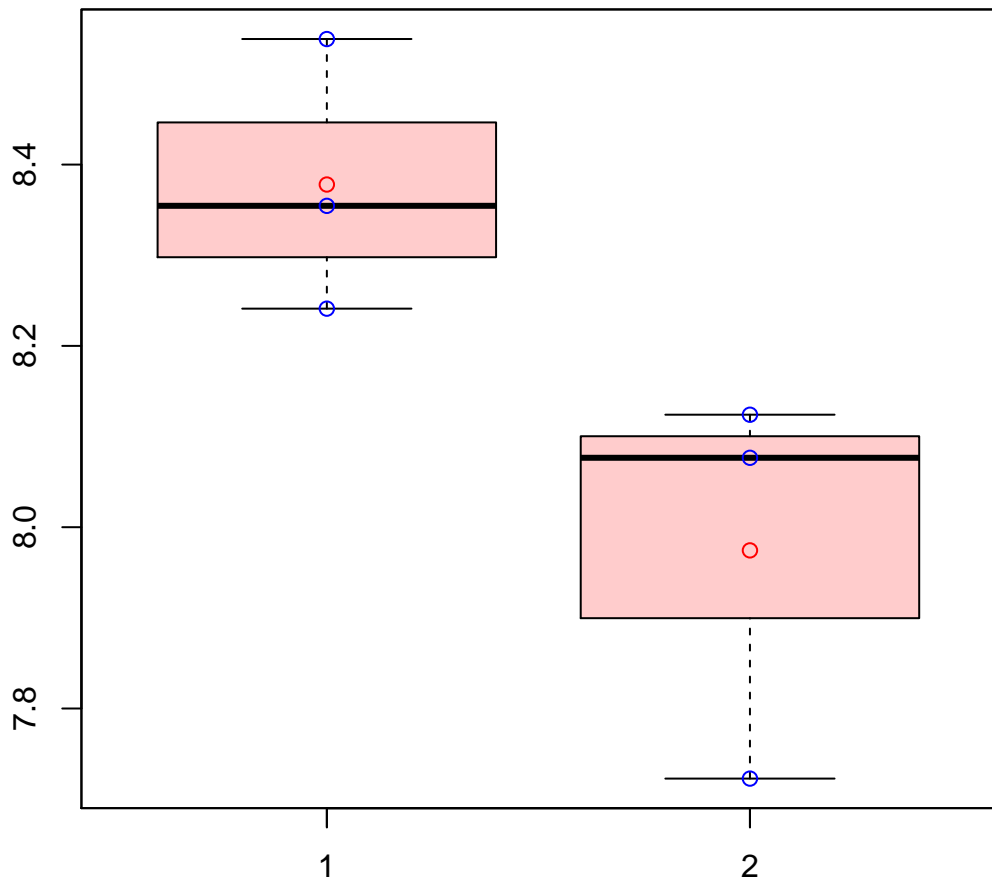

t-Test: p-value = 0.07

# CL5348Contig1|CL5348Contig1

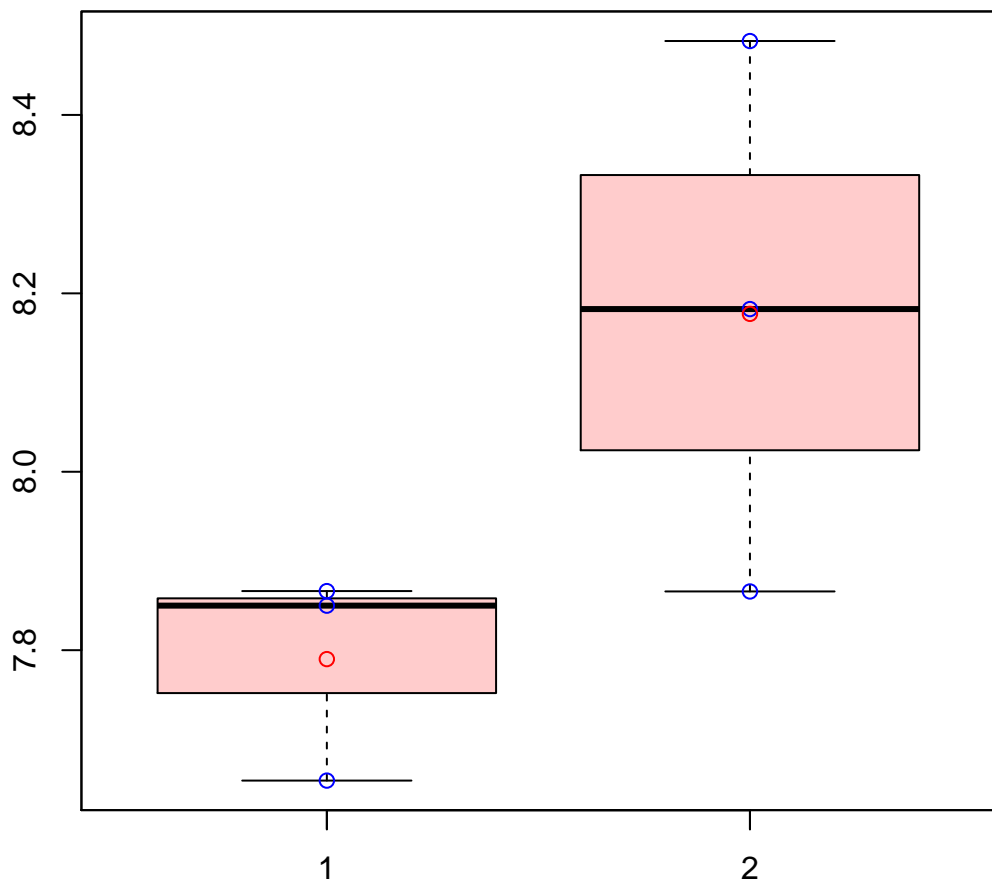

t-Test: p-value = 0.15

# CL5356Contig1|CL5356Contig1

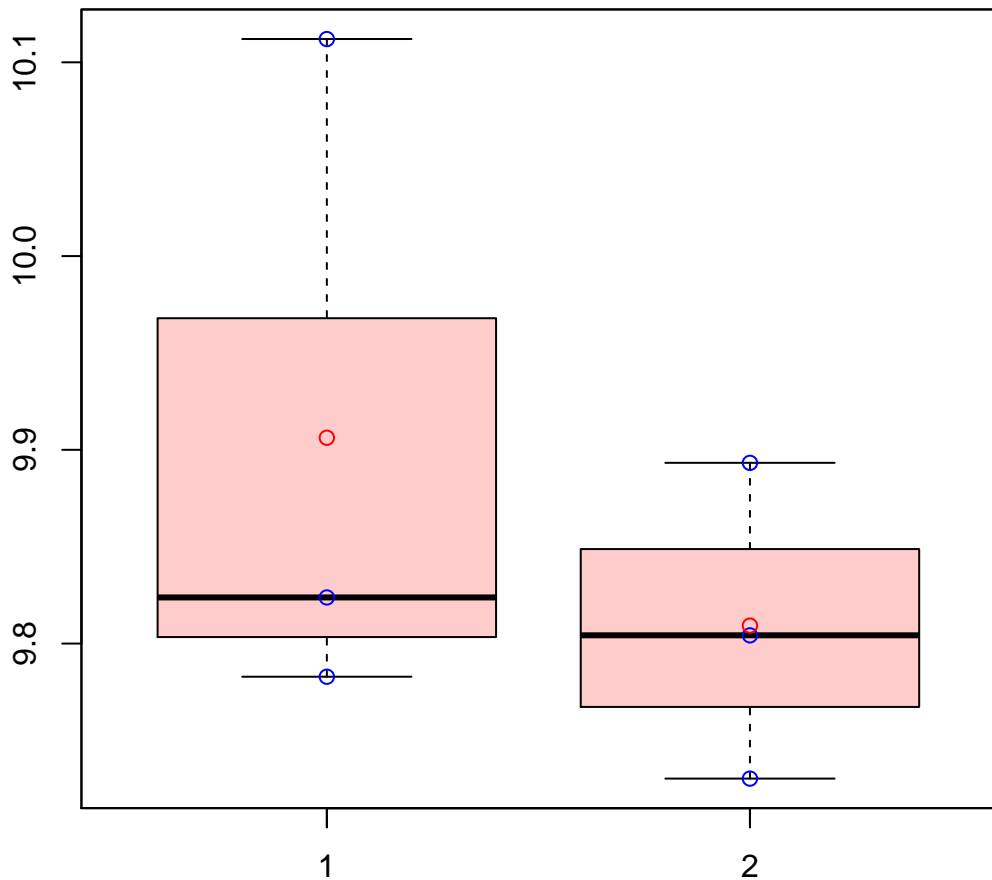

t-Test: p-value = 0.46



# CL5356Contig2|CL5356Contig2

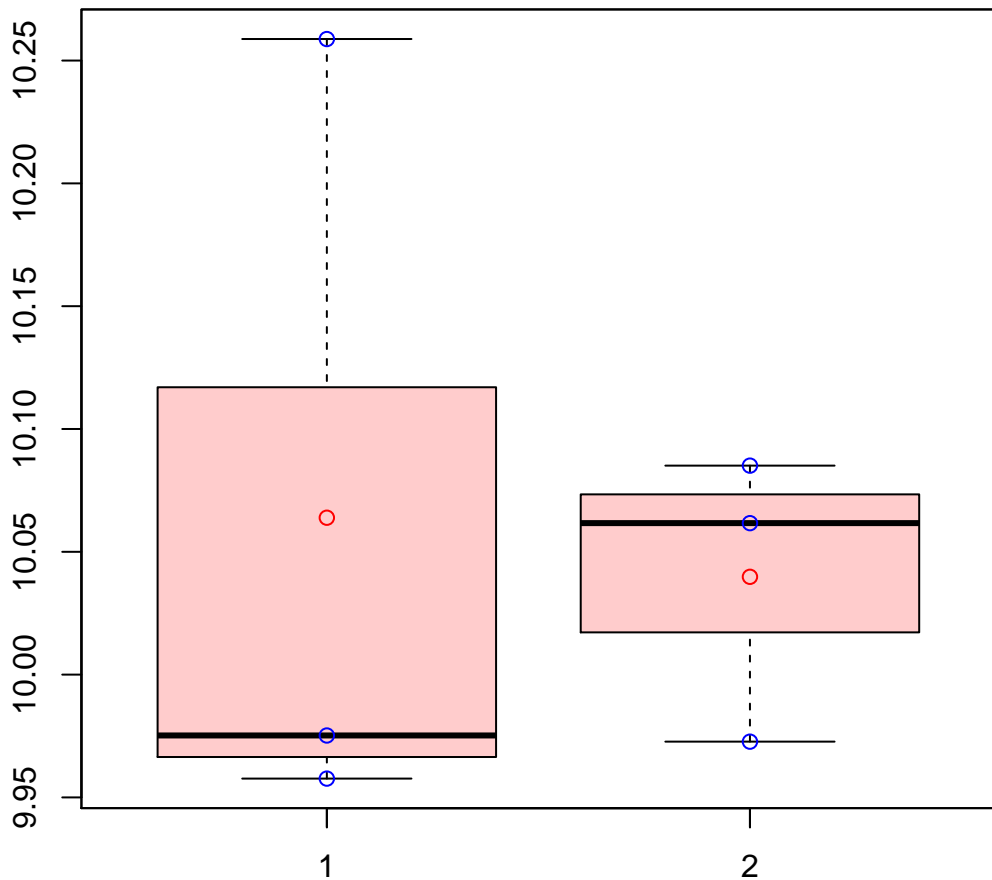

t-Test: p-value = 0.83

# CL5357Contig1|CL5357Contig1

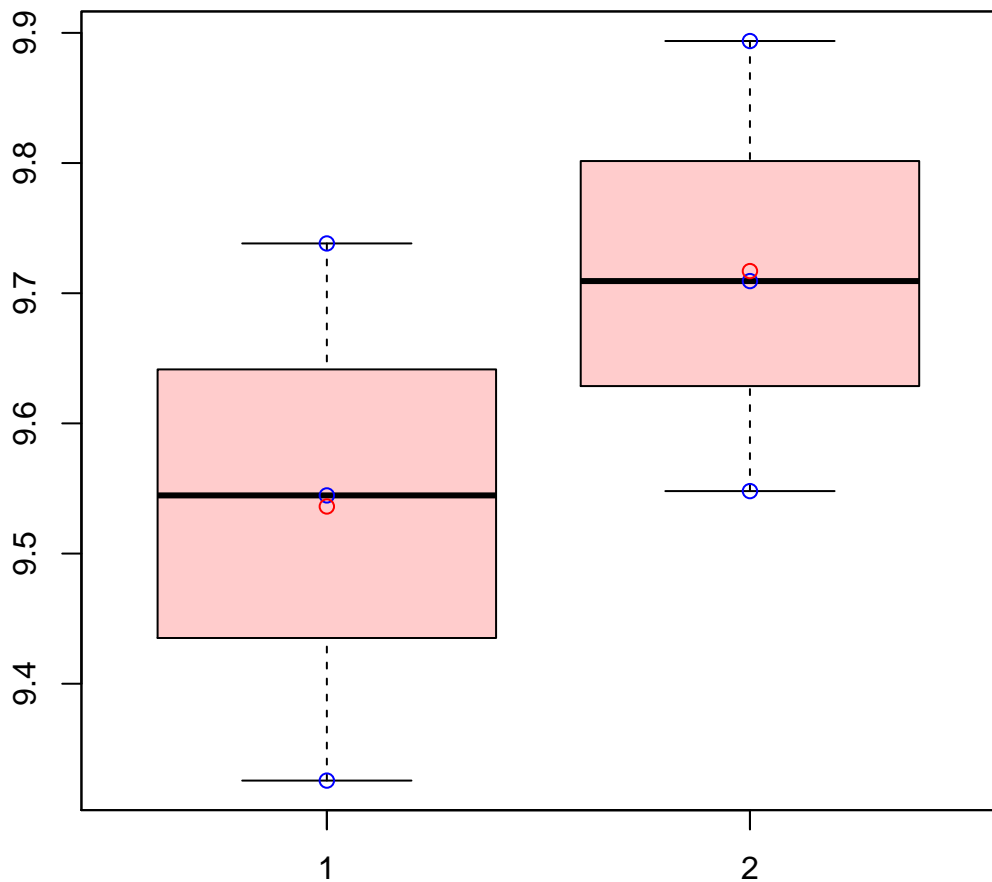

t-Test: p-value = 0.31

# CL535Contig1|CL535Contig1

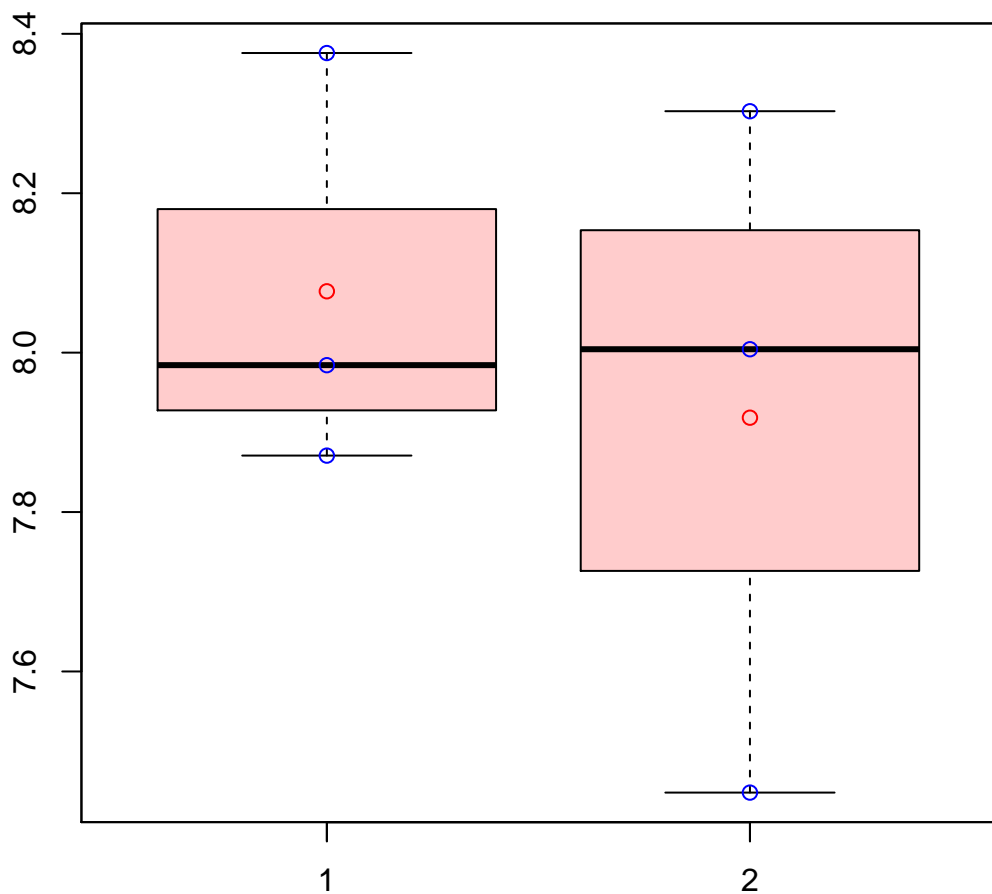

t-Test: p-value = 0.62

# CL5361Contig3|CL5361Contig3

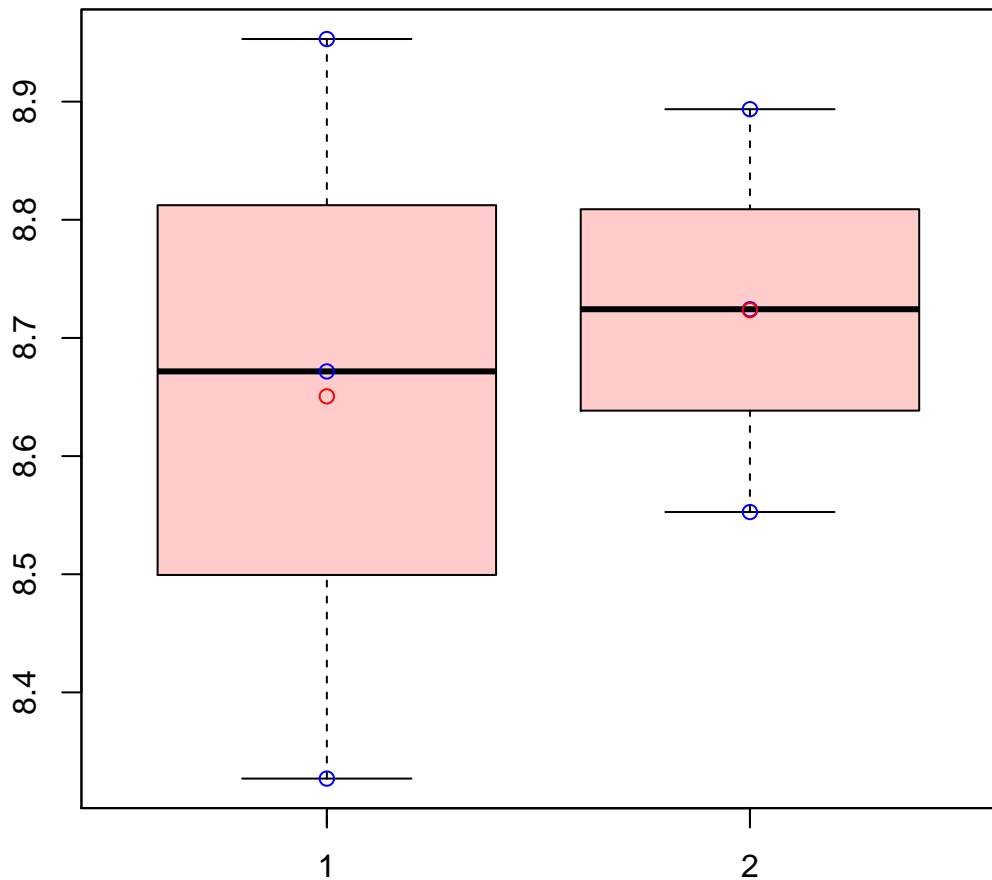

t-Test: p-value = 0.75

# CL536Contig5|CL536Contig5

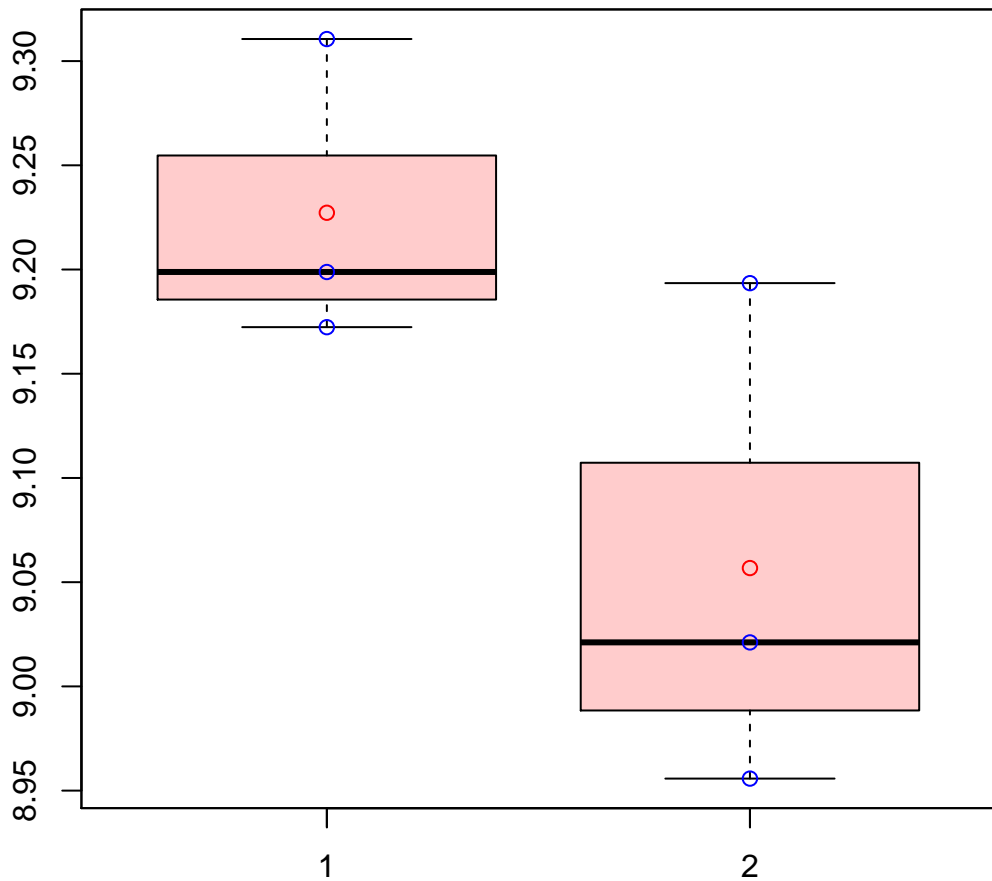

t-Test: p-value = 0.12

# CL536Contig6|CL536Contig6

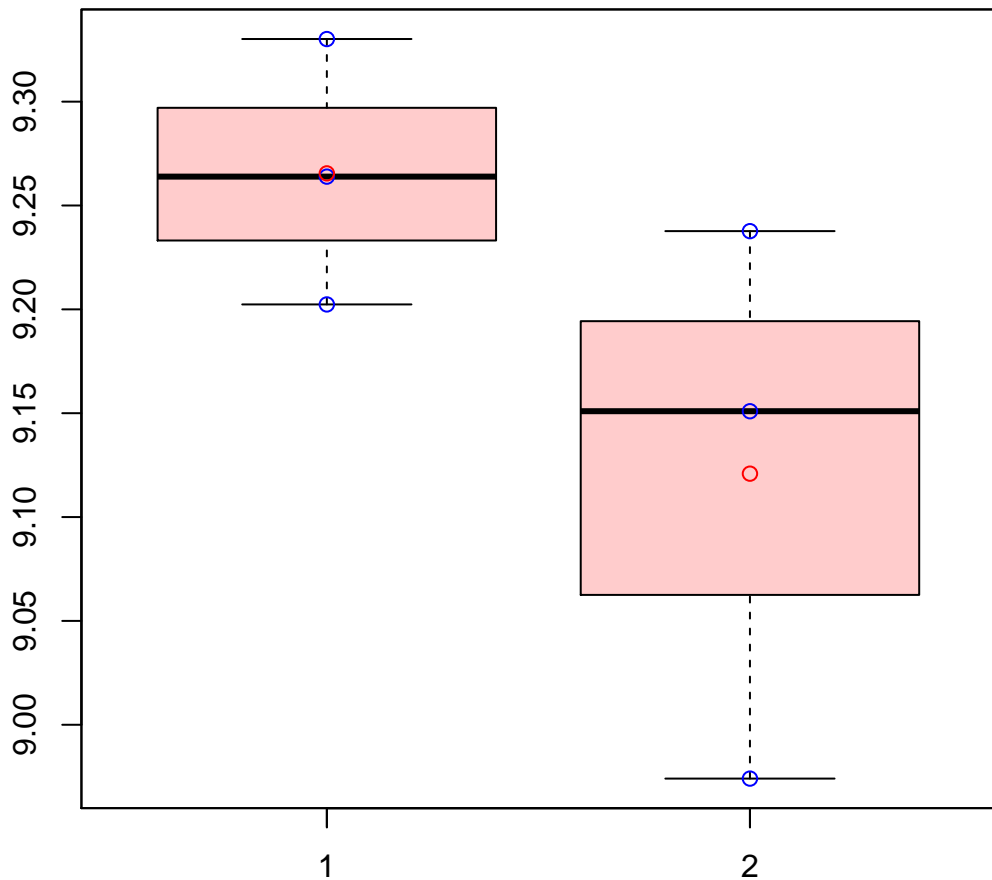

t-Test: p-value = 0.2

# CL5370Contig2|CL5370Contig2

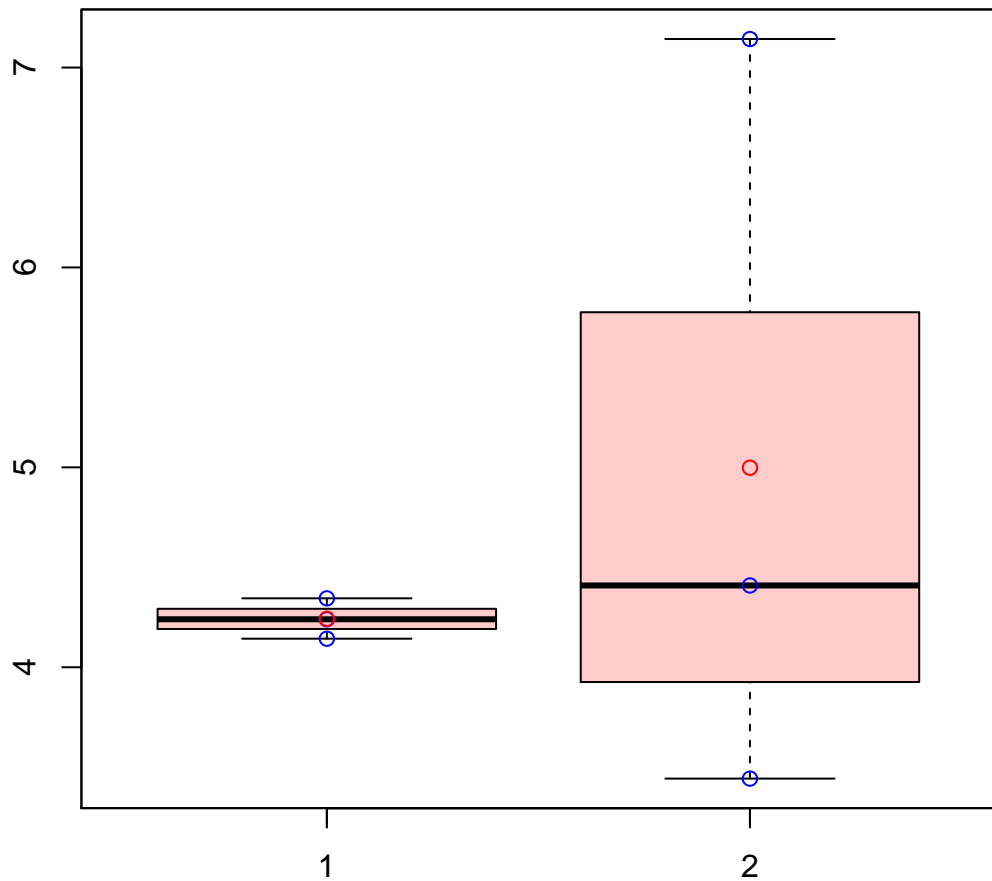

t-Test: p-value = 0.57

# CL5379Contig1|CL5379Contig1

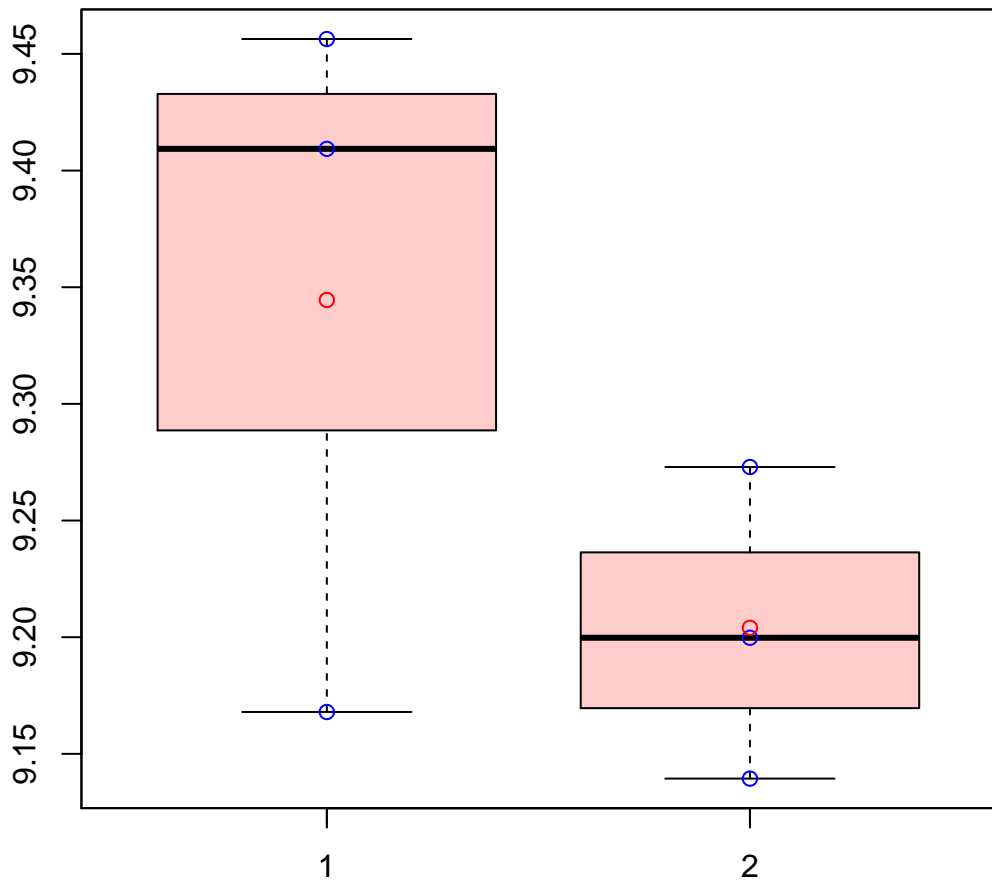

t-Test: p-value = 0.25



# CL5380Contig1|CL5380Contig1

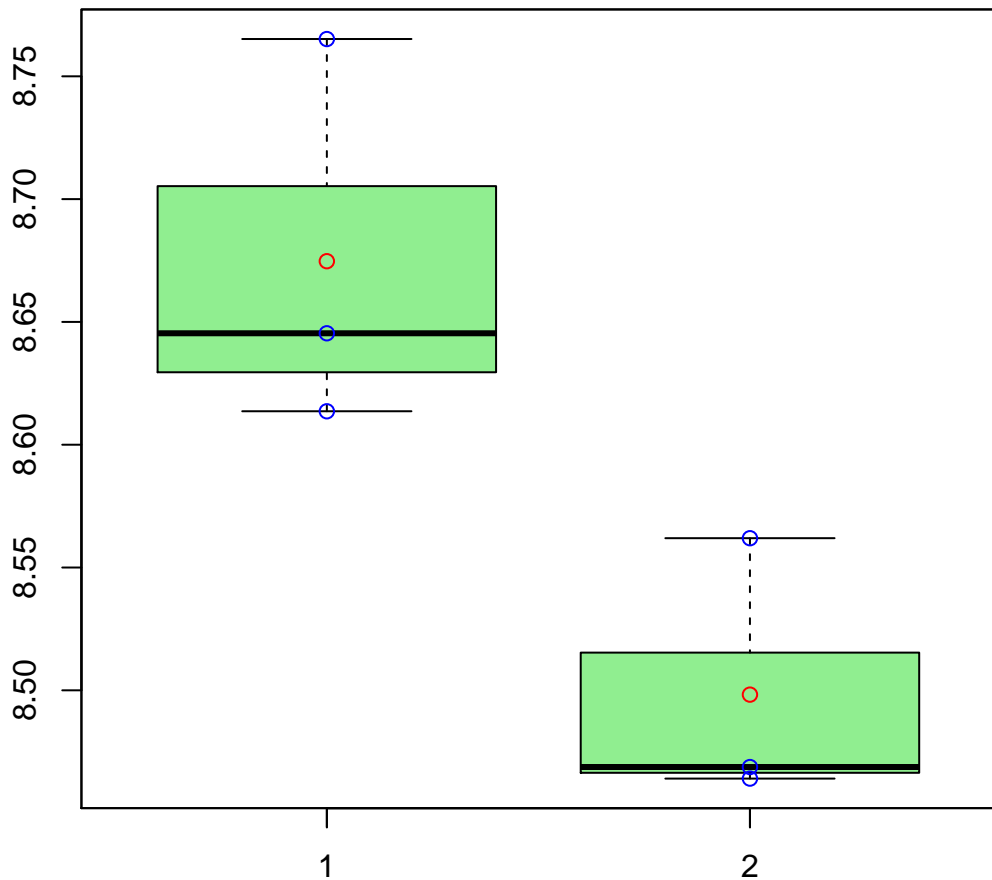

t-Test: p-value = 0.04

# CL5388Contig1|CL5388Contig1

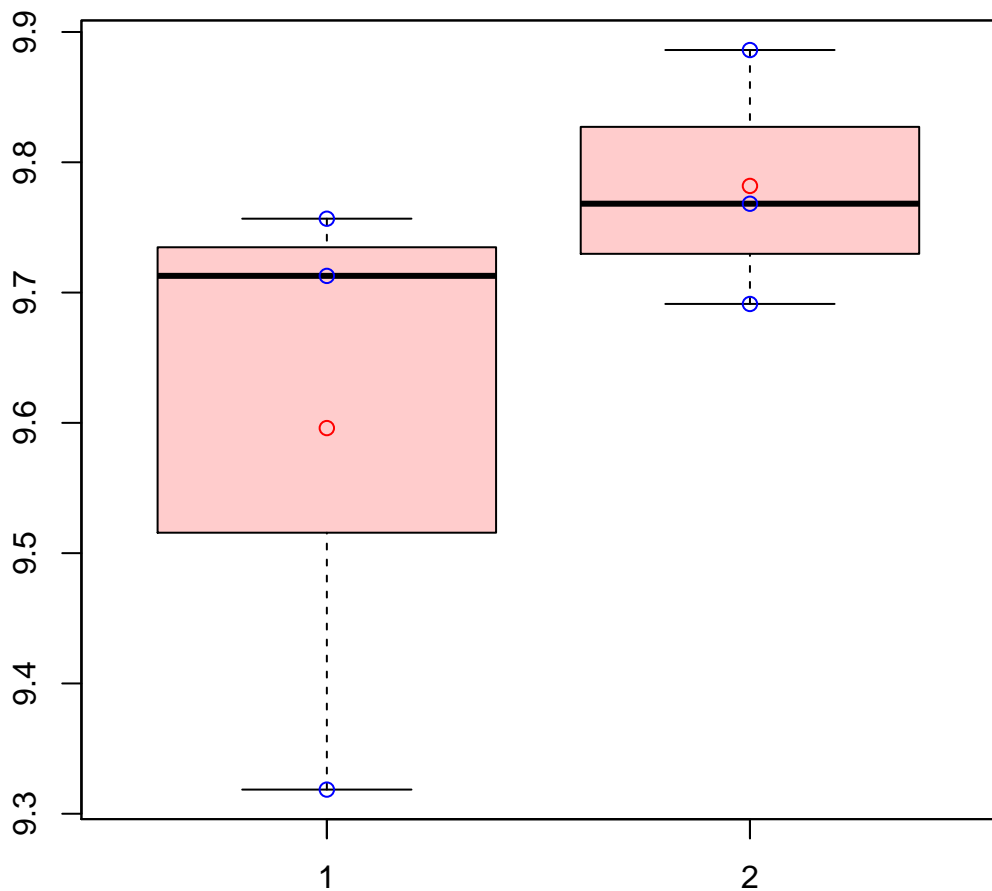

t-Test: p-value = 0.32

# CL5395Contig3|CL5395Contig3

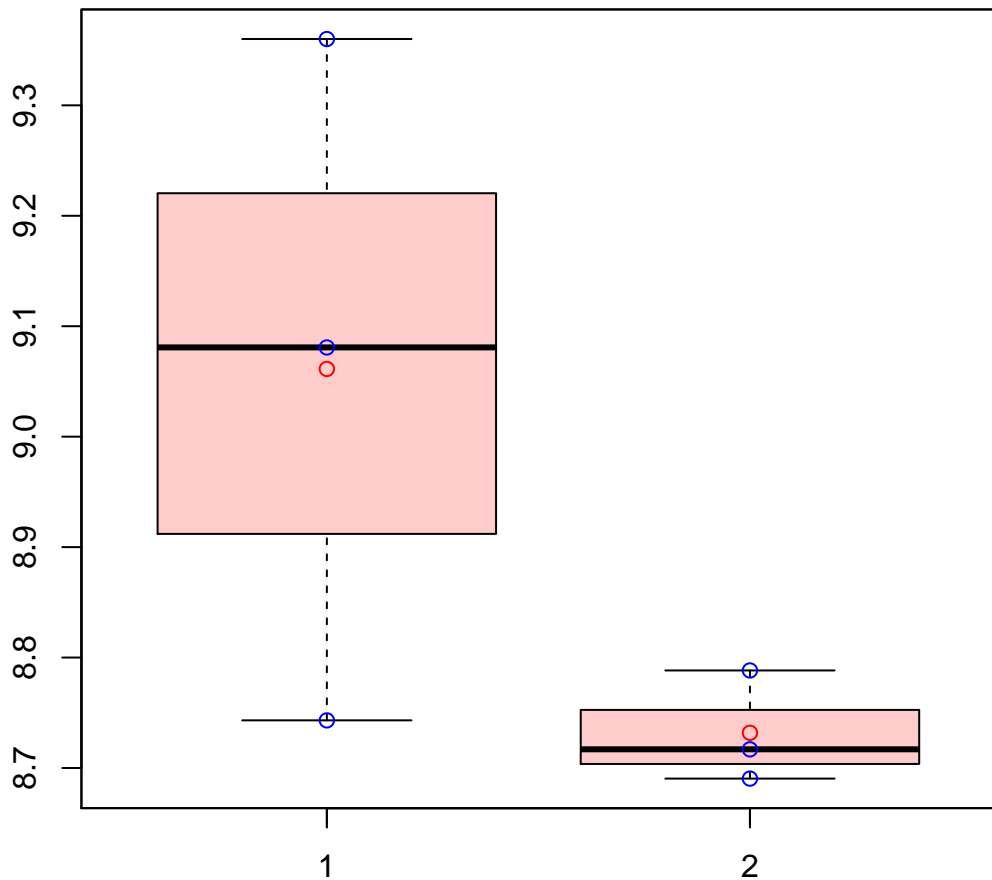

t-Test: p-value = 0.2

# CL5396Contig1|CL5396Contig1

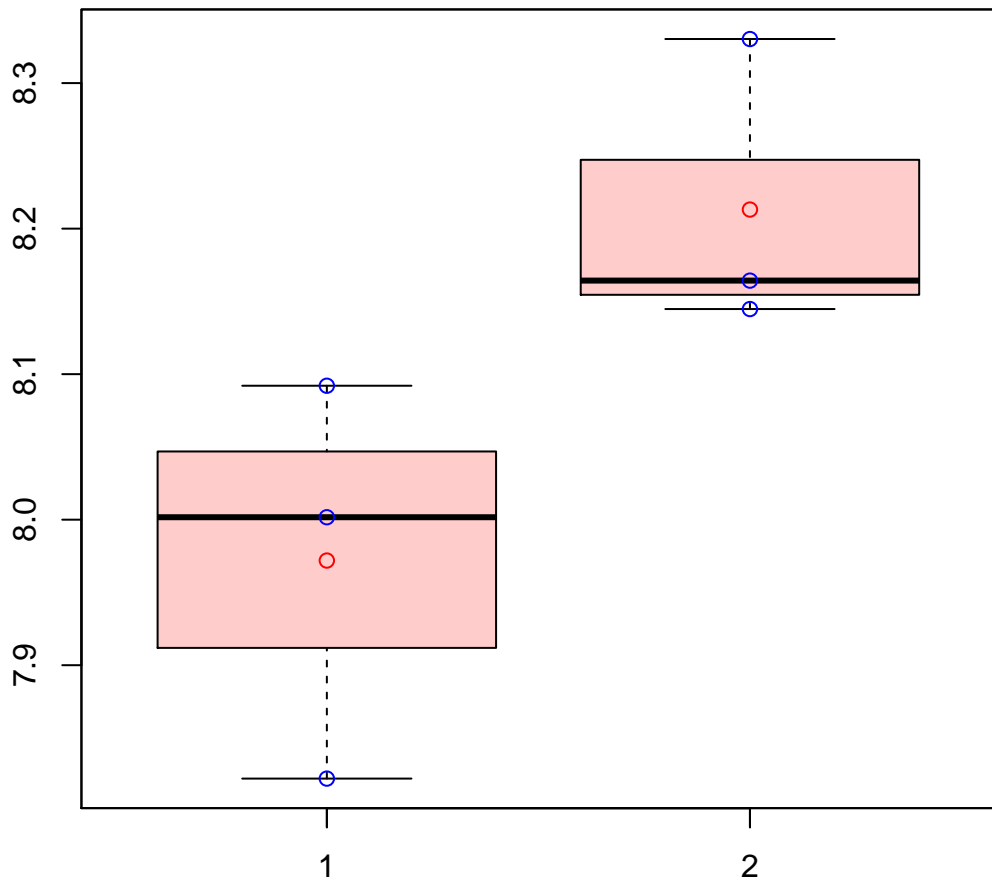

t-Test: p-value = 0.08

# CL53Contig14|CL53Contig14

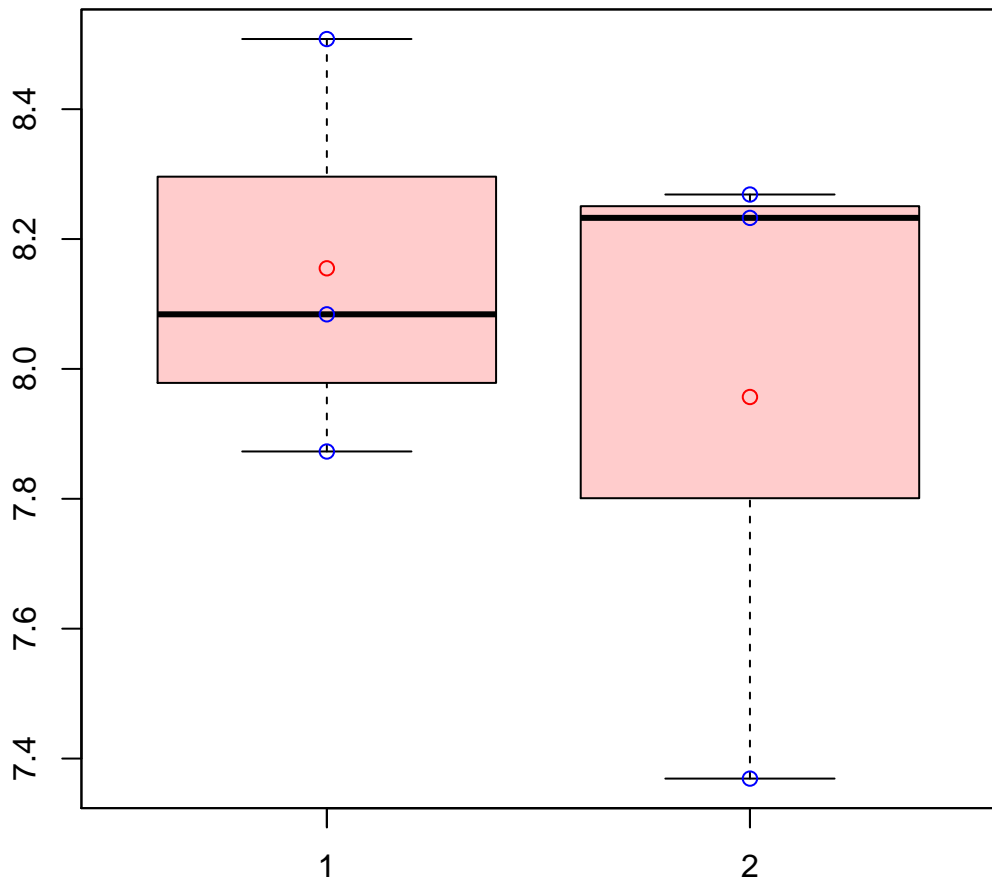

t-Test: p-value = 0.6

# CL5404Contig1|CL5404Contig1

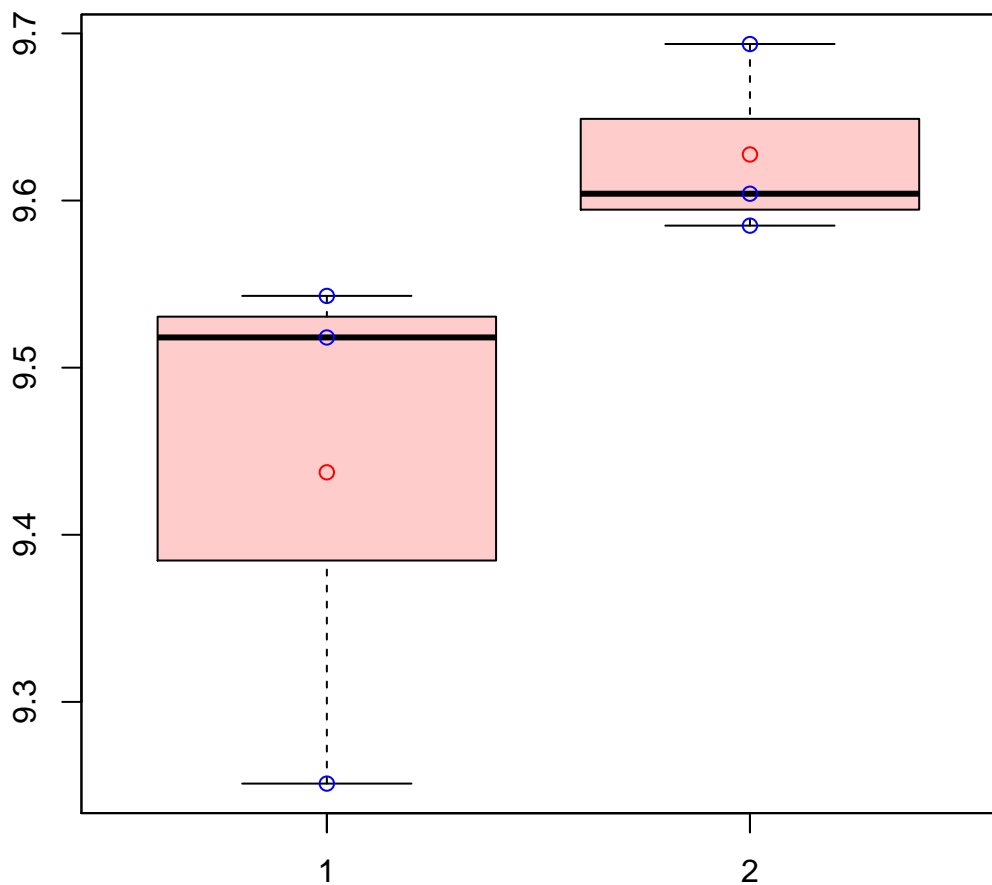

t-Test: p-value = 0.17

# CL5407Contig2|CL5407Contig2

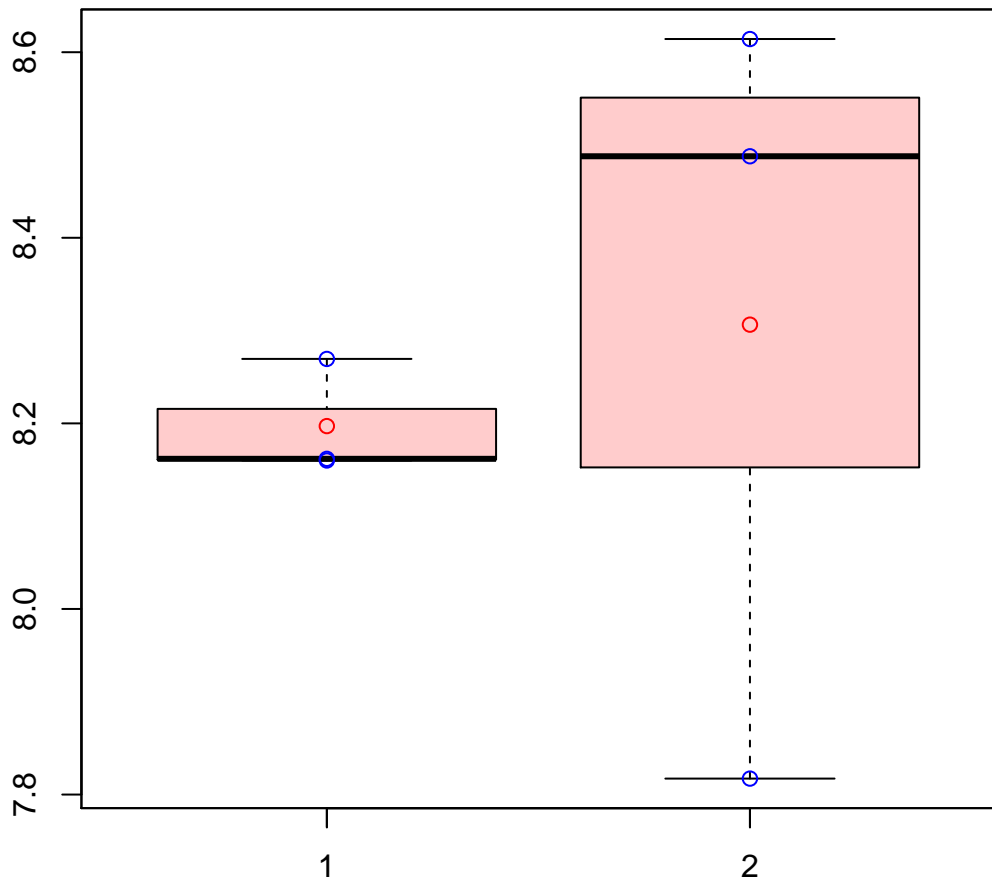

t-Test: p-value = 0.7

# CL540Contig10|CL540Contig10

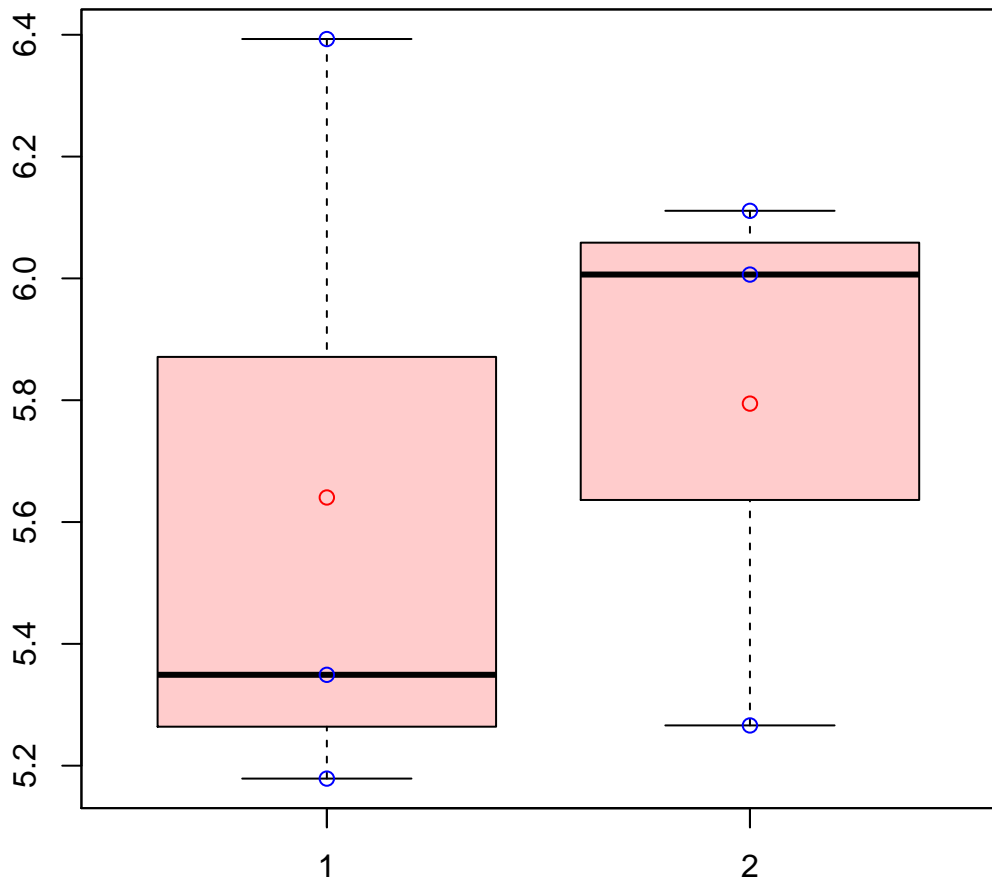

t-Test: p-value = 0.76



# CL540Contig6|CL540Contig6

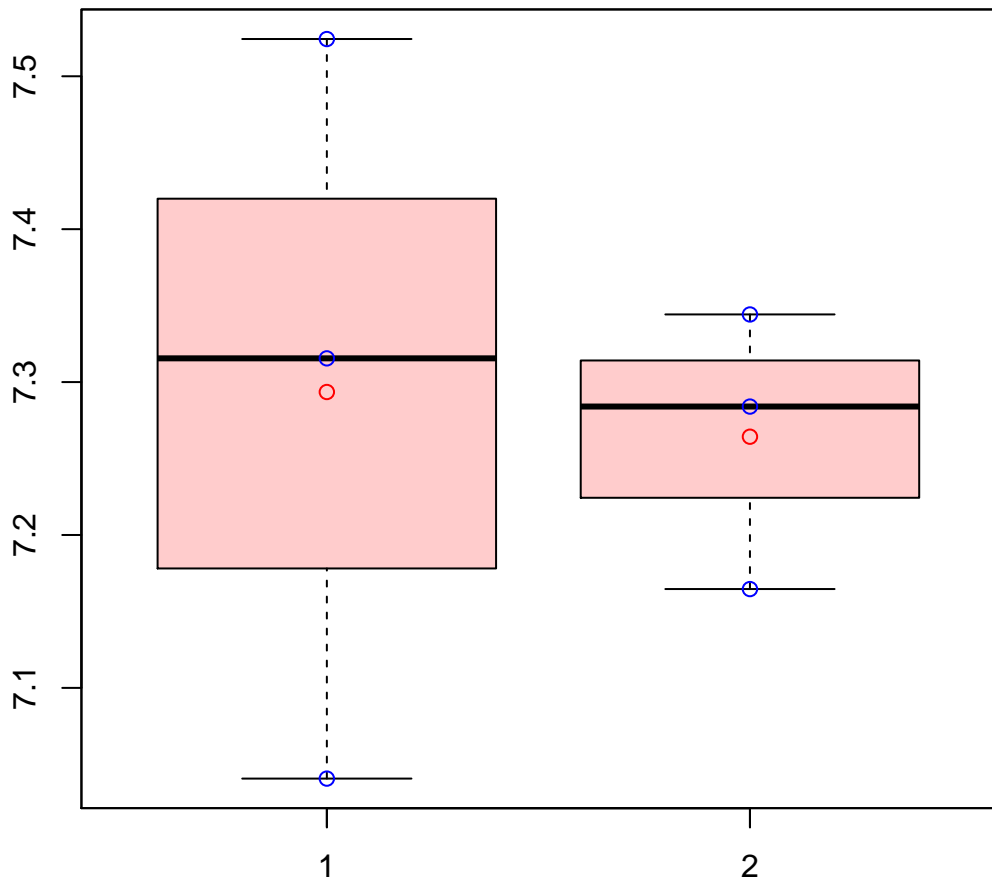

t-Test: p-value = 0.86

# CL5413Contig2|CL5413Contig2

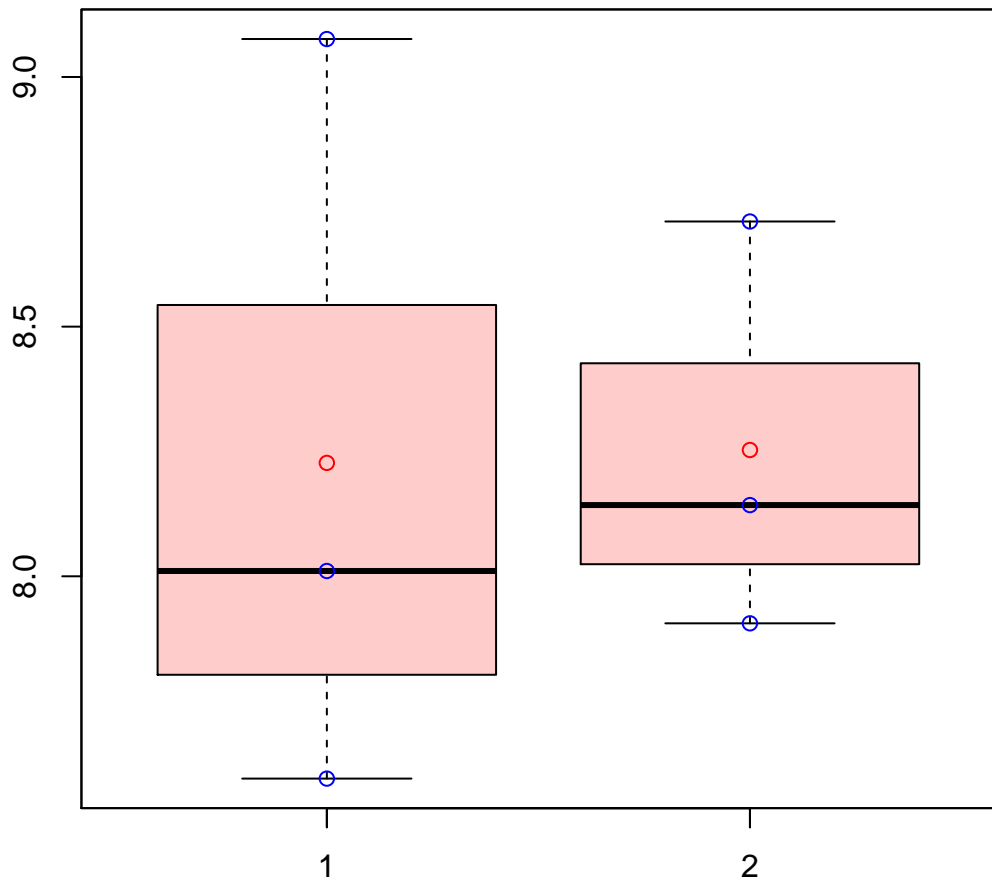

t-Test: p-value = 0.96

# CL542Contig15|CL542Contig15

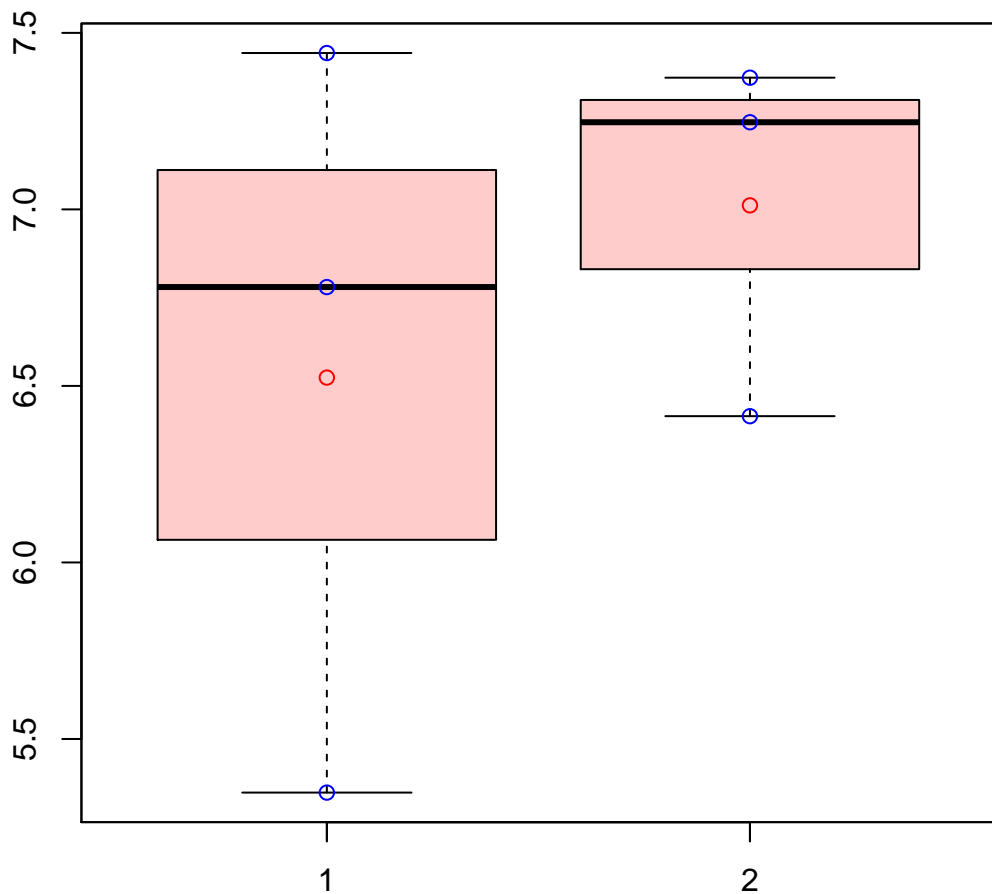

t-Test: p-value = 0.53

# CL542Contig9|CL542Contig9

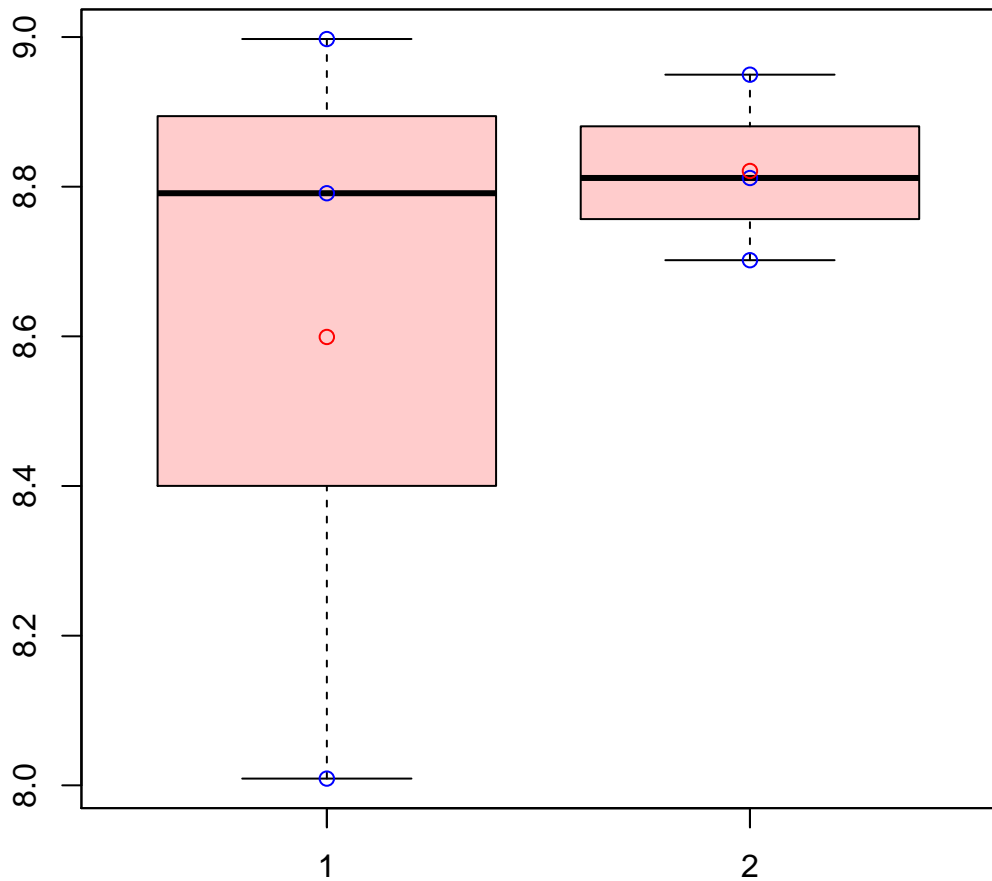

t-Test: p-value = 0.54

# CL5436Contig2|CL5436Contig2

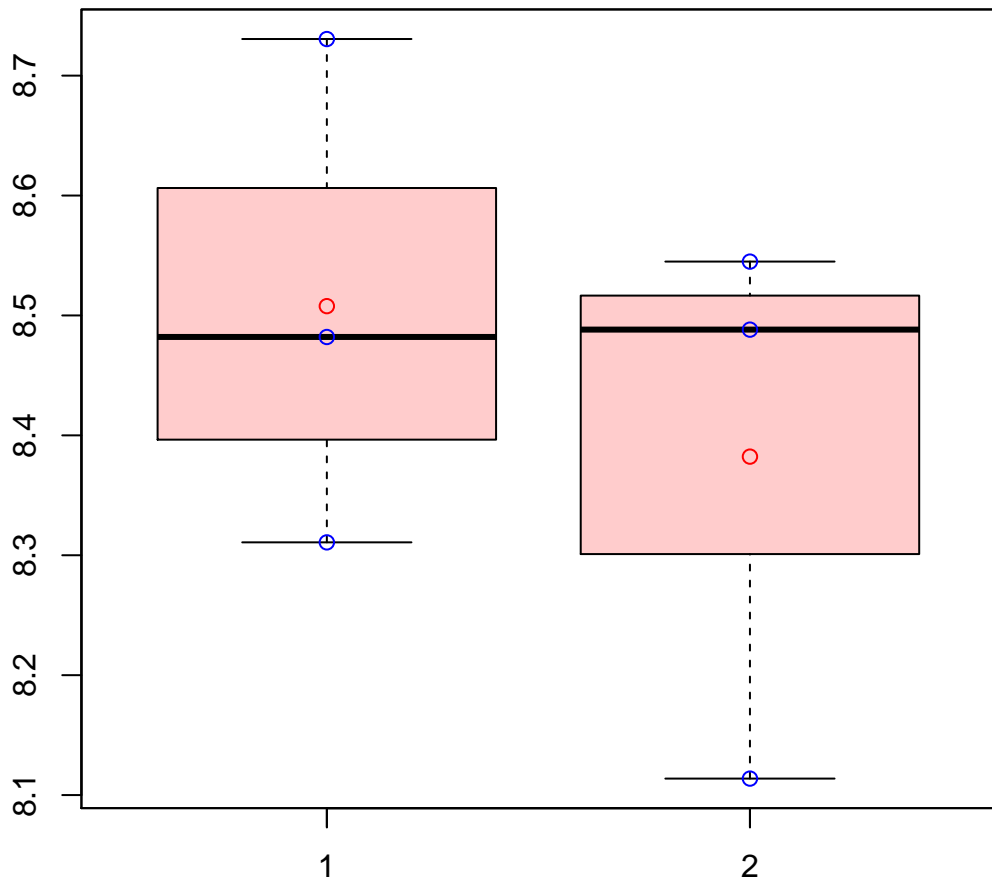

t-Test: p-value = 0.53

# CL5445Contig1|CL5445Contig1

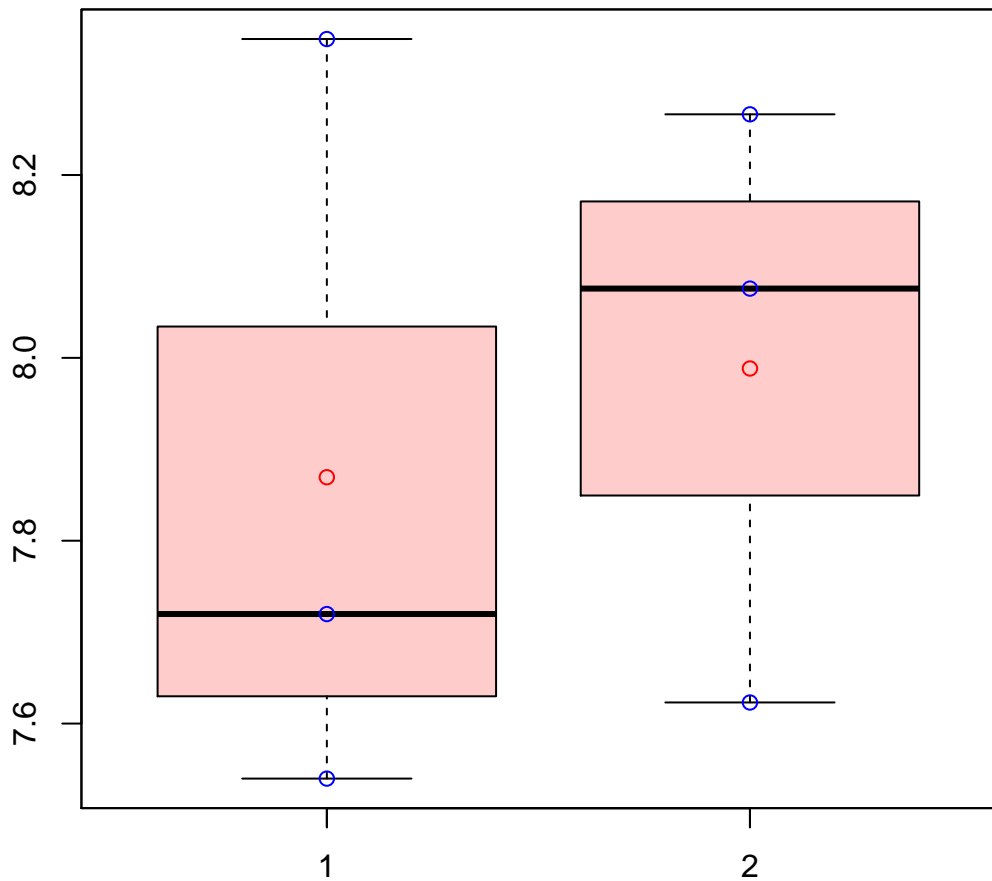

t-Test: p-value = 0.72

# CL5448Contig1|CL5448Contig1

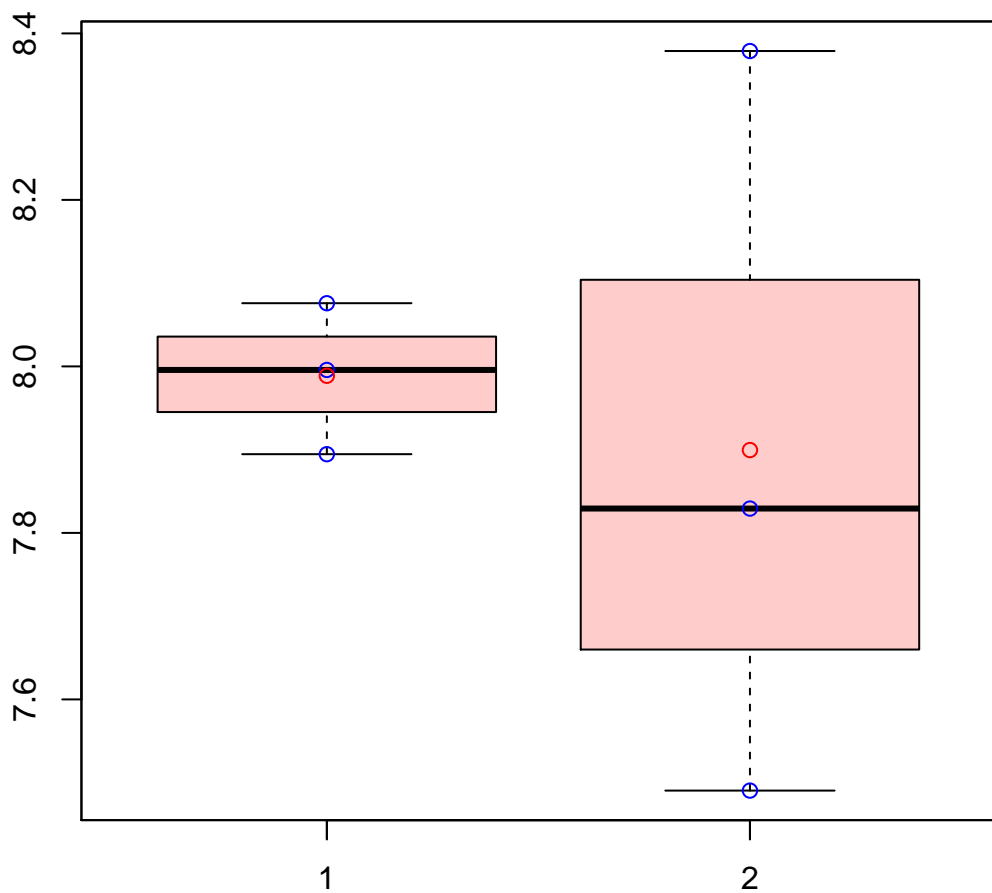

t-Test: p-value = 0.77

# CL5453Contig8|CL5453Contig8

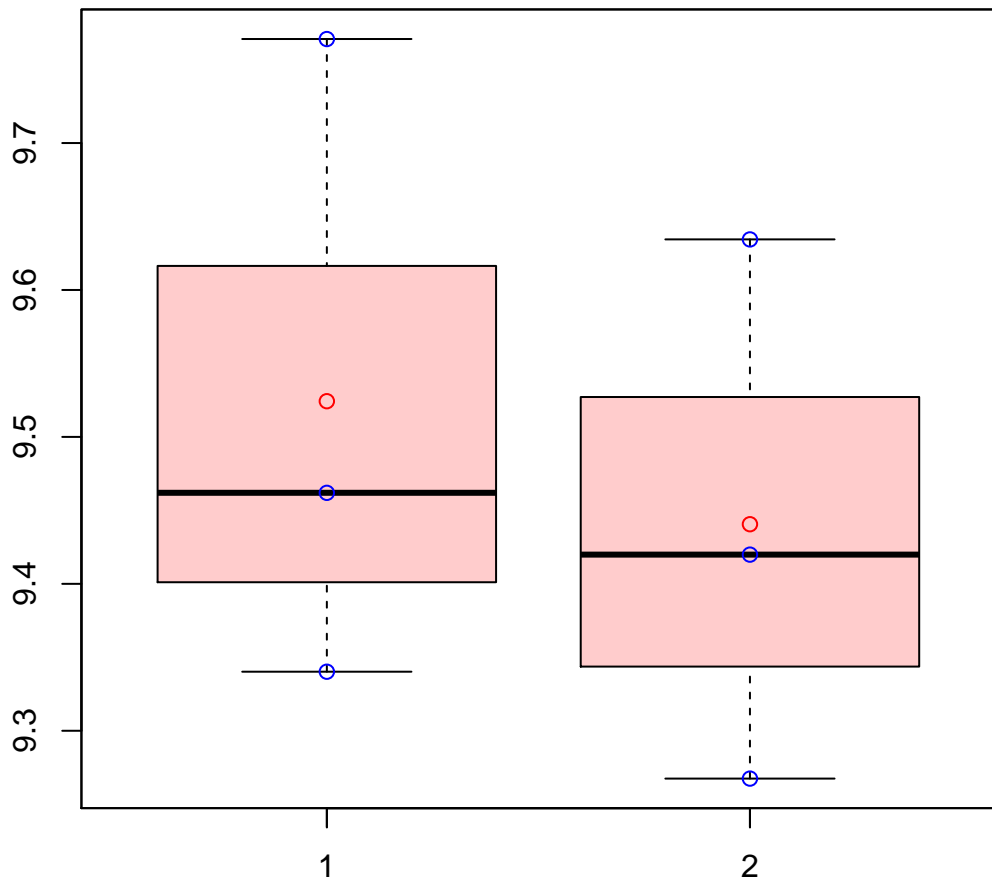

t-Test: p-value = 0.64



# CL5454Contig1|CL5454Contig1

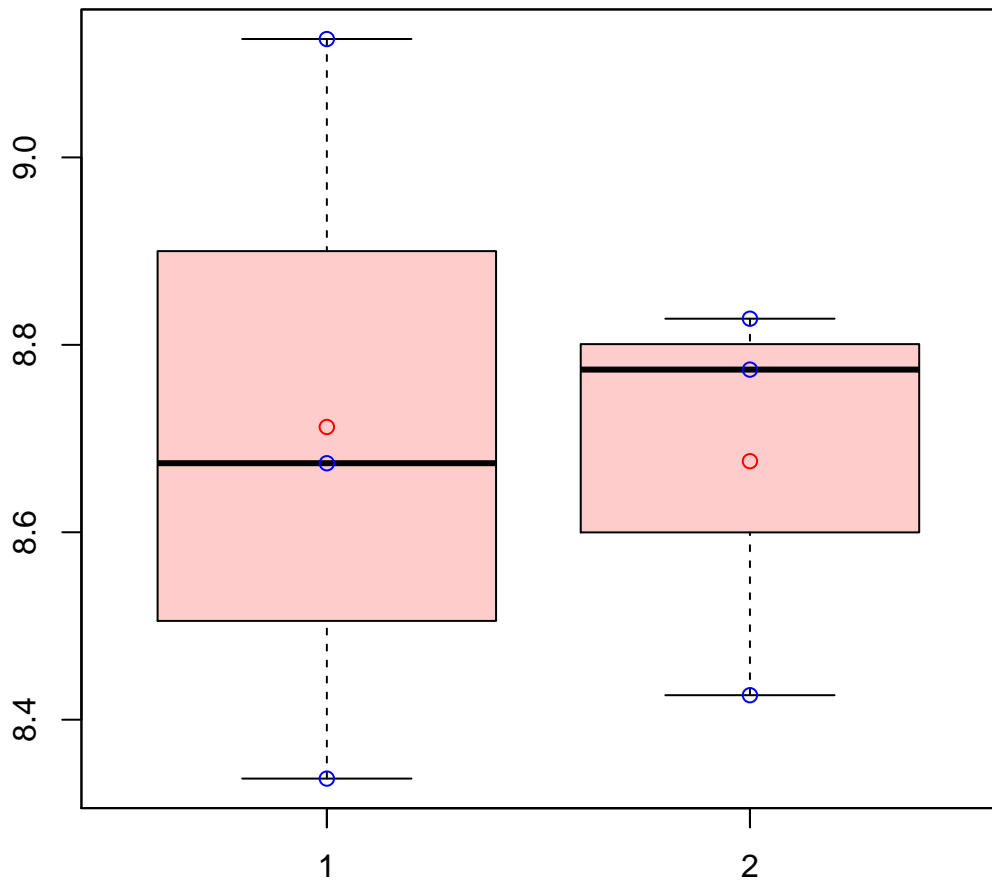

t-Test: p-value = 0.9

# CL5454Contig2|CL5454Contig2

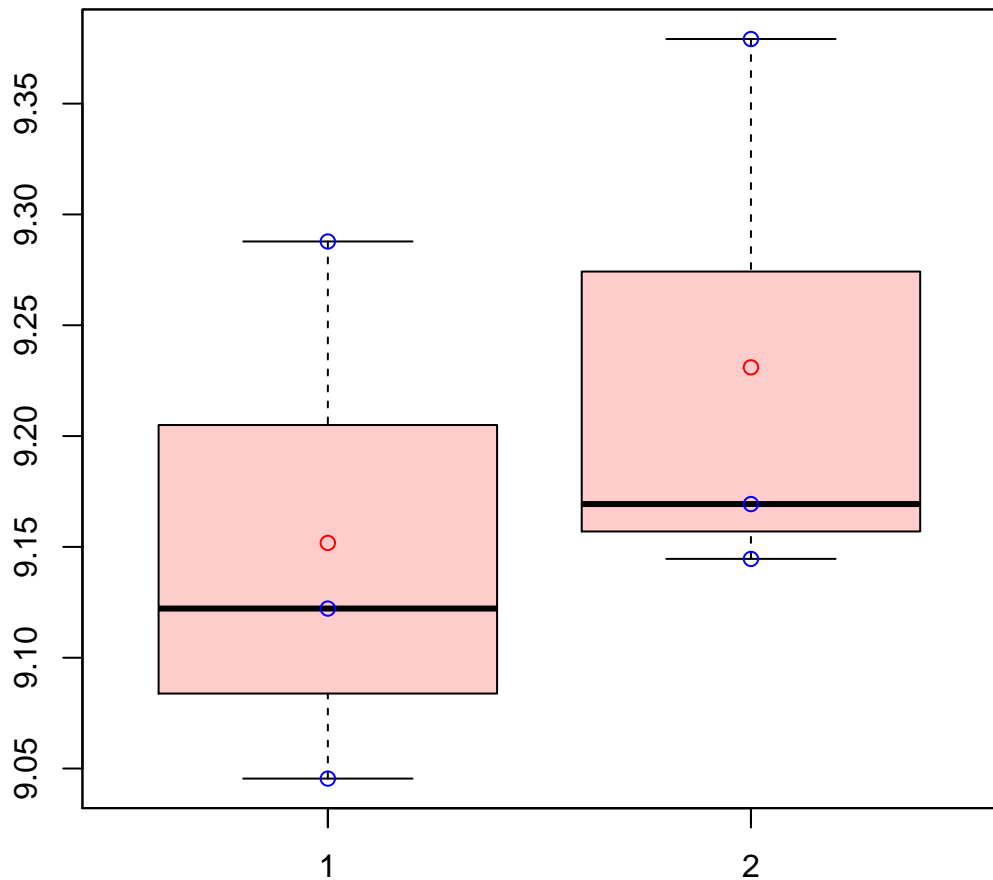

t-Test: p-value = 0.49

# CL5454Contig5|CL5454Contig5

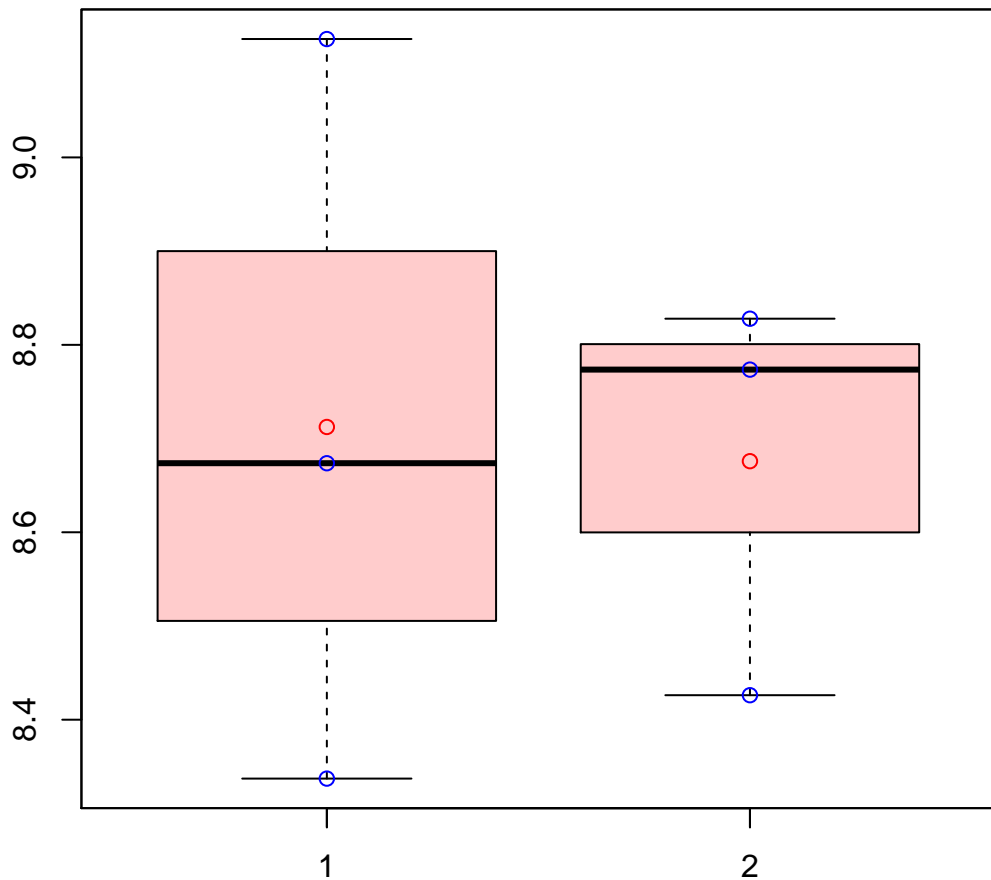

t-Test: p-value = 0.9

# CL5454Contig6|CL5454Contig6

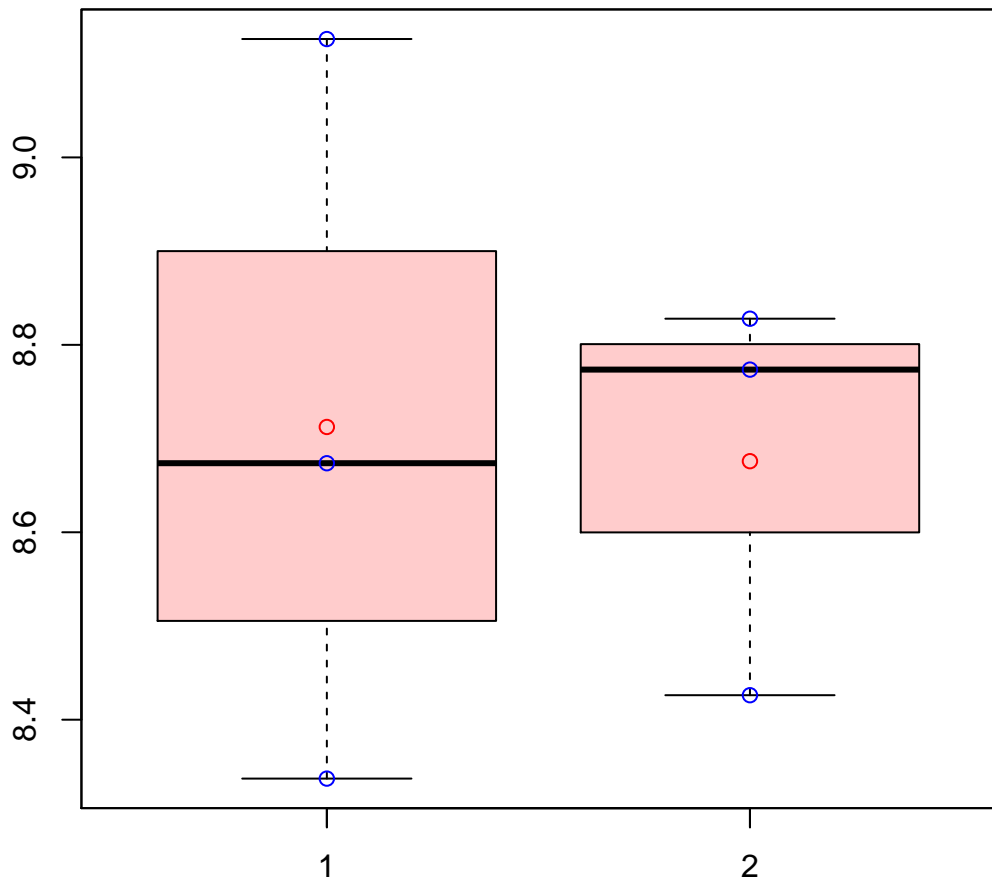

t-Test: p-value = 0.9

# CL5457Contig2|CL5457Contig2

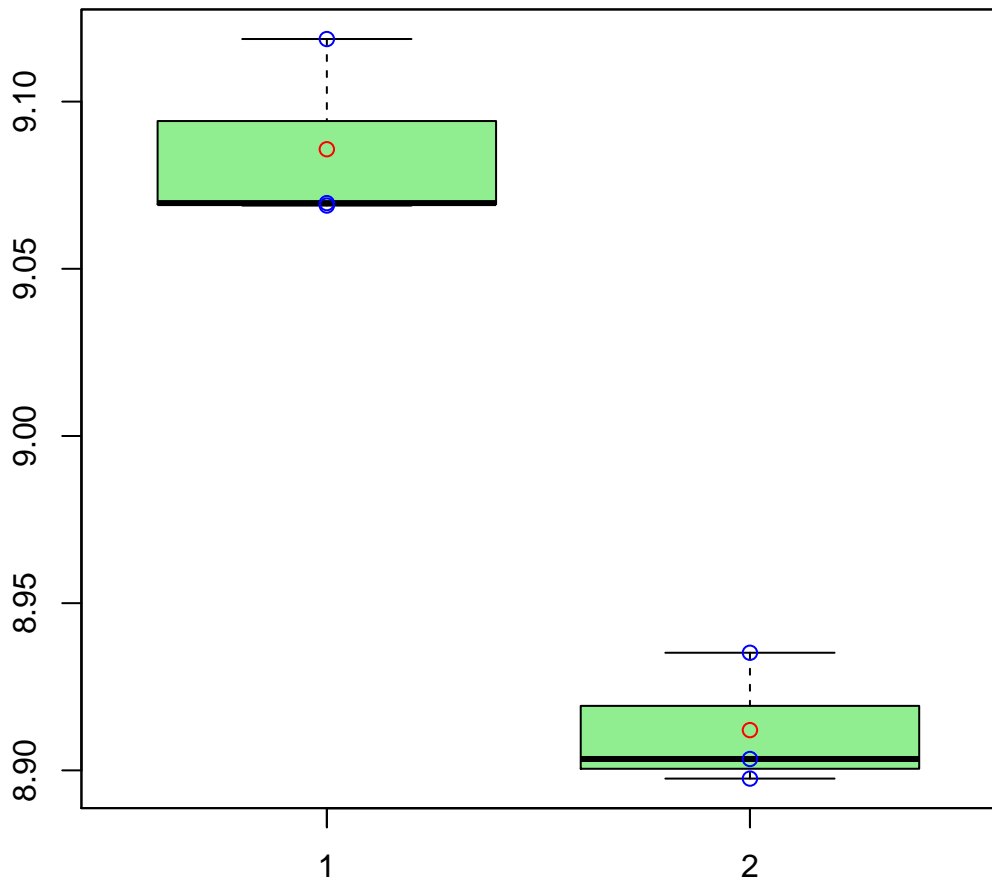

t-Test: p-value = 0

# CL5458Contig1|CL5458Contig1

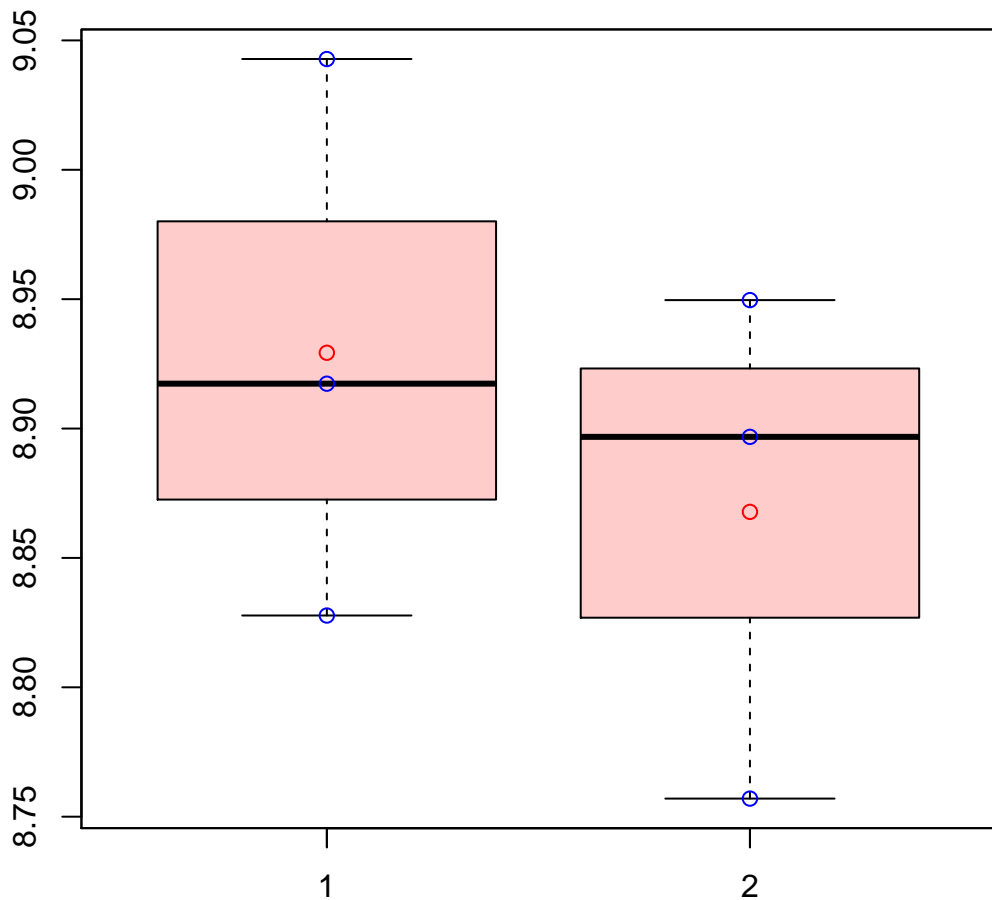

t-Test: p-value = 0.51

# CL5458Contig2|CL5458Contig2

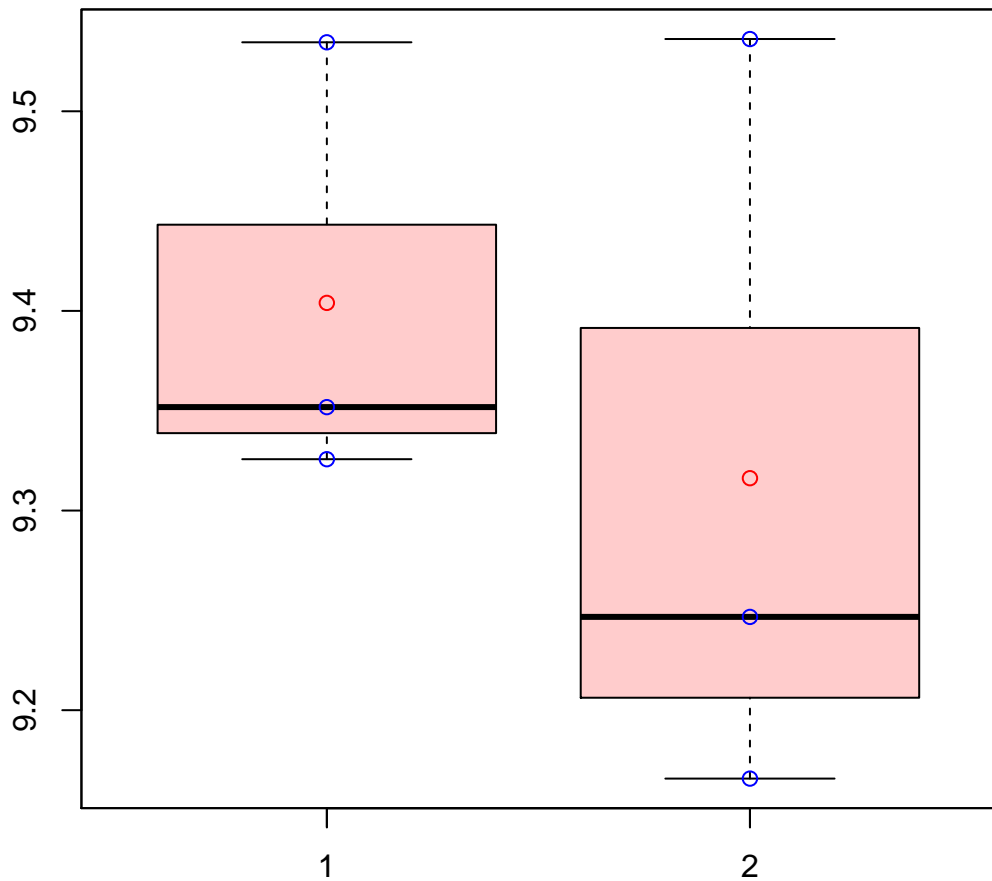

t-Test: p-value = 0.55

# CL5458Contig3|CL5458Contig3

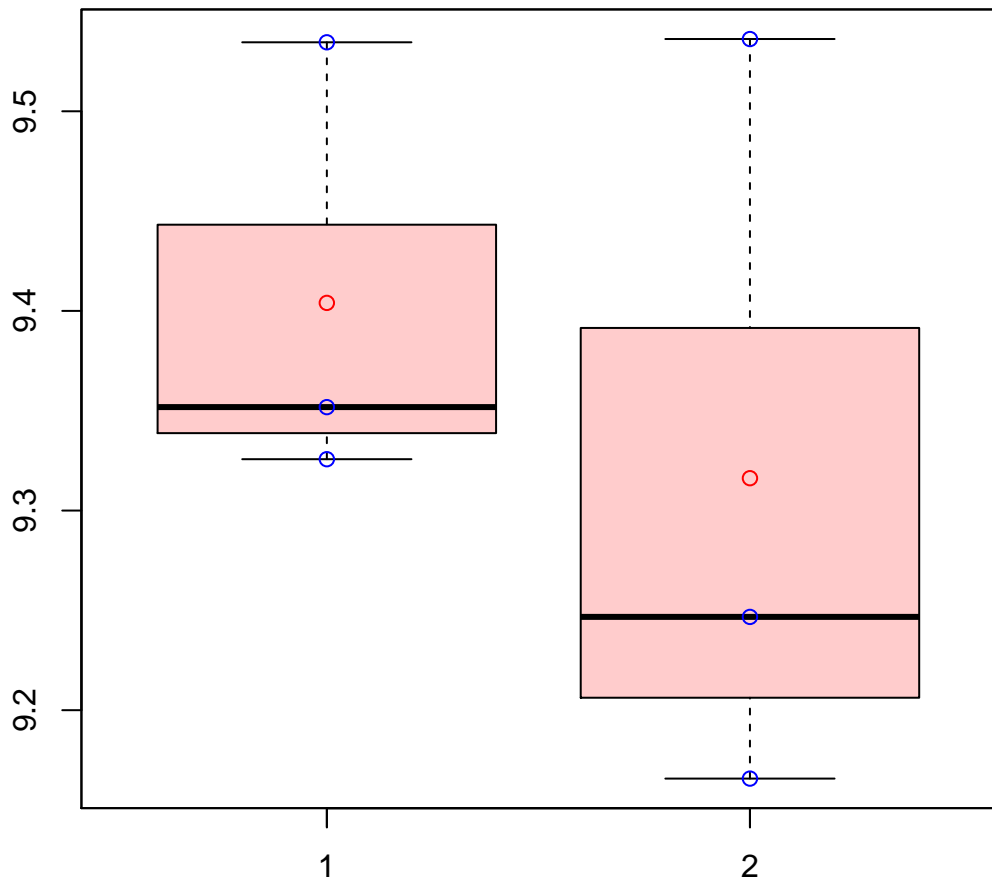

t-Test: p-value = 0.55



# CL545Contig5|CL545Contig5

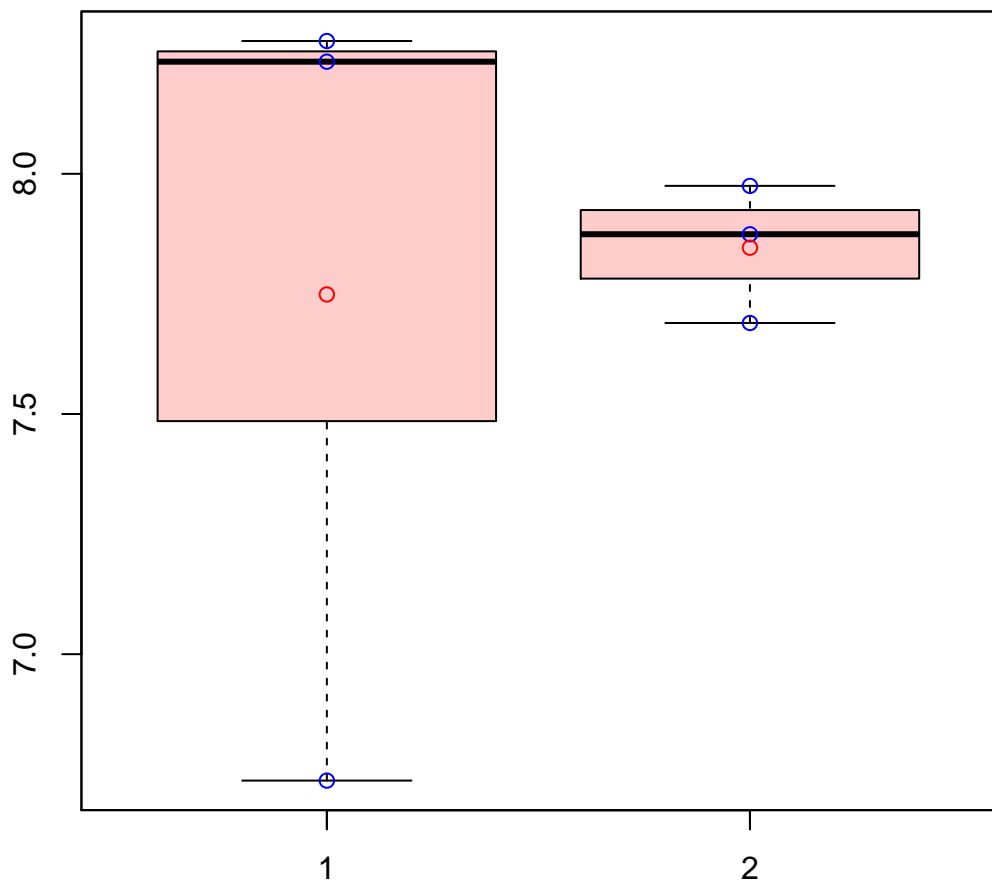

t-Test: p-value = 0.87

# CL5460Contig3|CL5460Contig3



t-Test: p-value = 0.35

# CL5463Contig7|CL5463Contig7

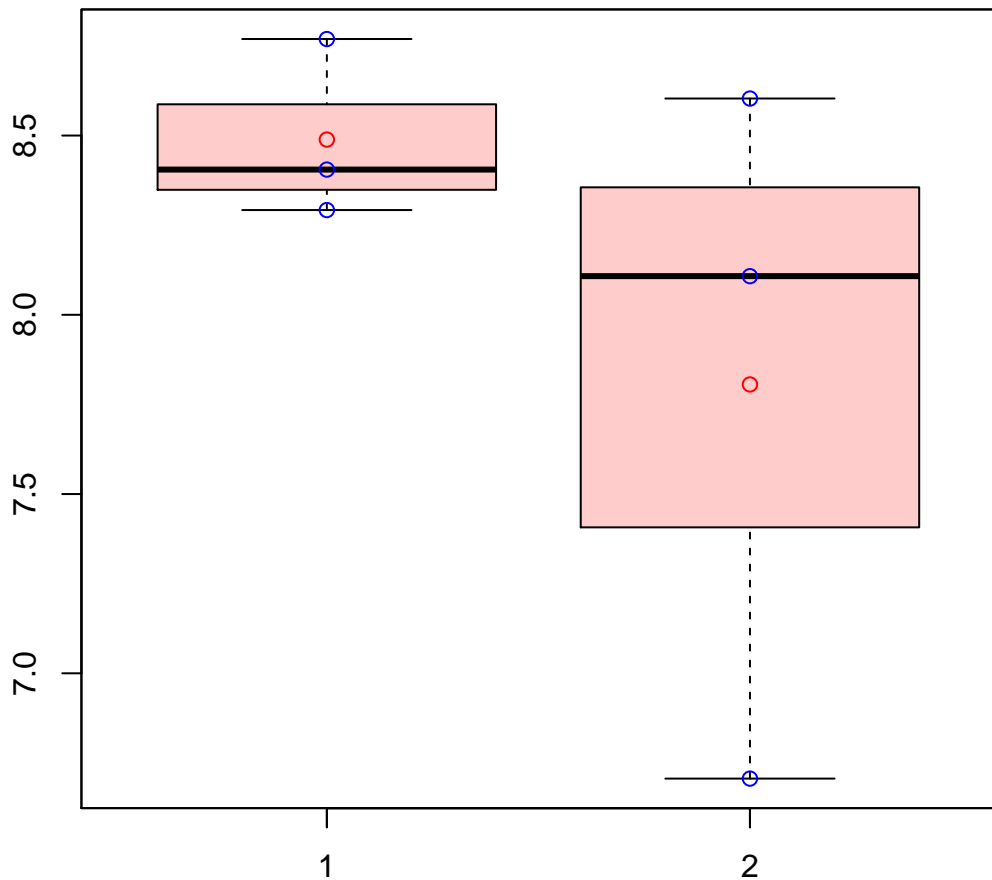

t-Test: p-value = 0.35

# CL546Contig2|CL546Contig2

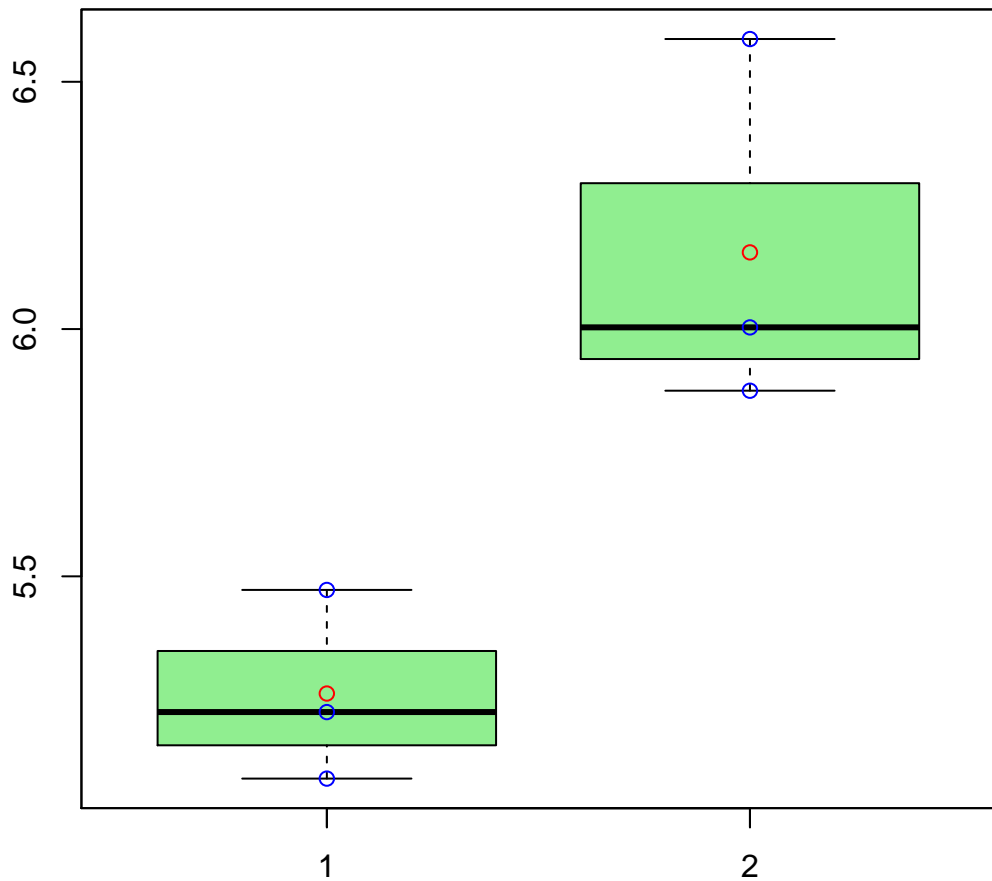

t-Test: p-value = 0.04

# CL546Contig5|CL546Contig5

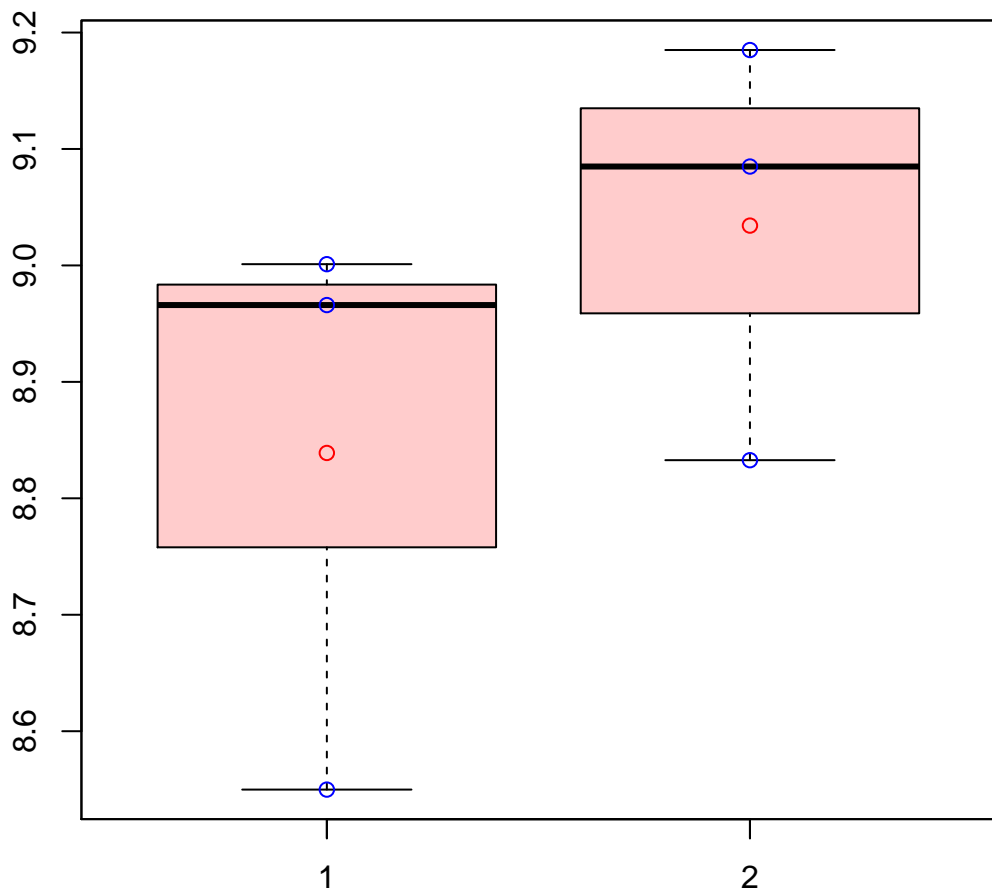

t-Test: p-value = 0.34

# CL546Contig6|CL546Contig6

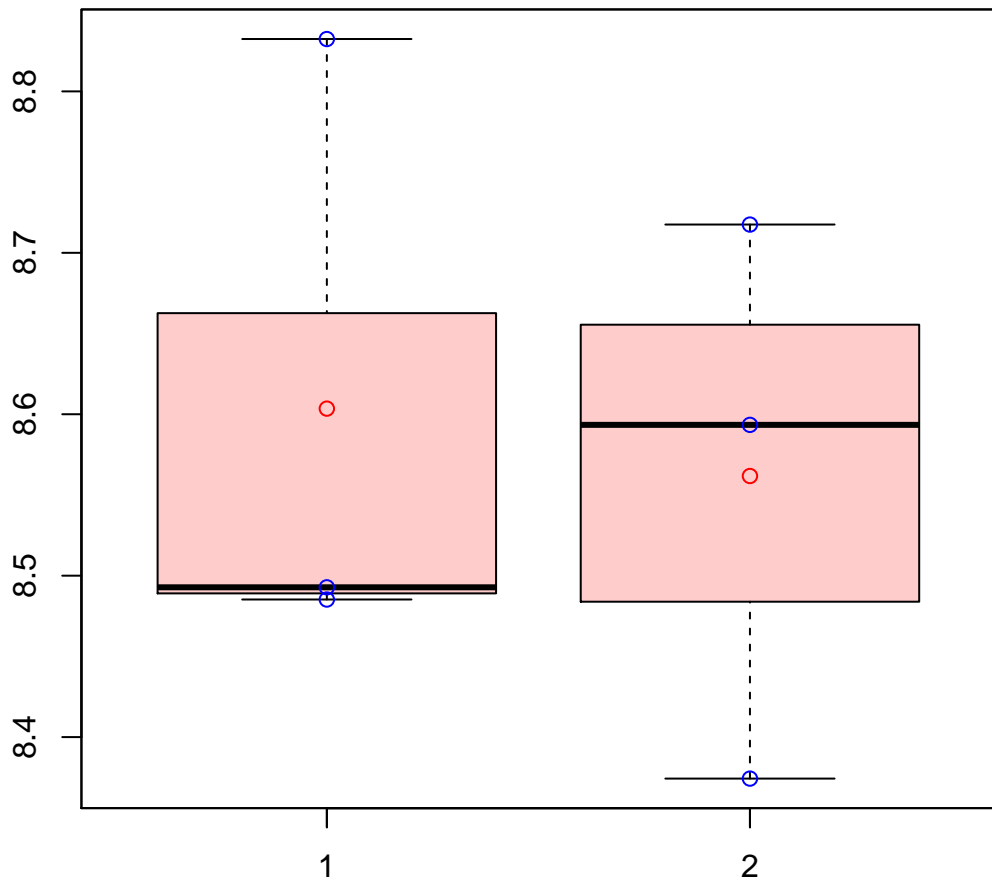

t-Test: p-value = 0.8

# CL5474Contig2|CL5474Contig2

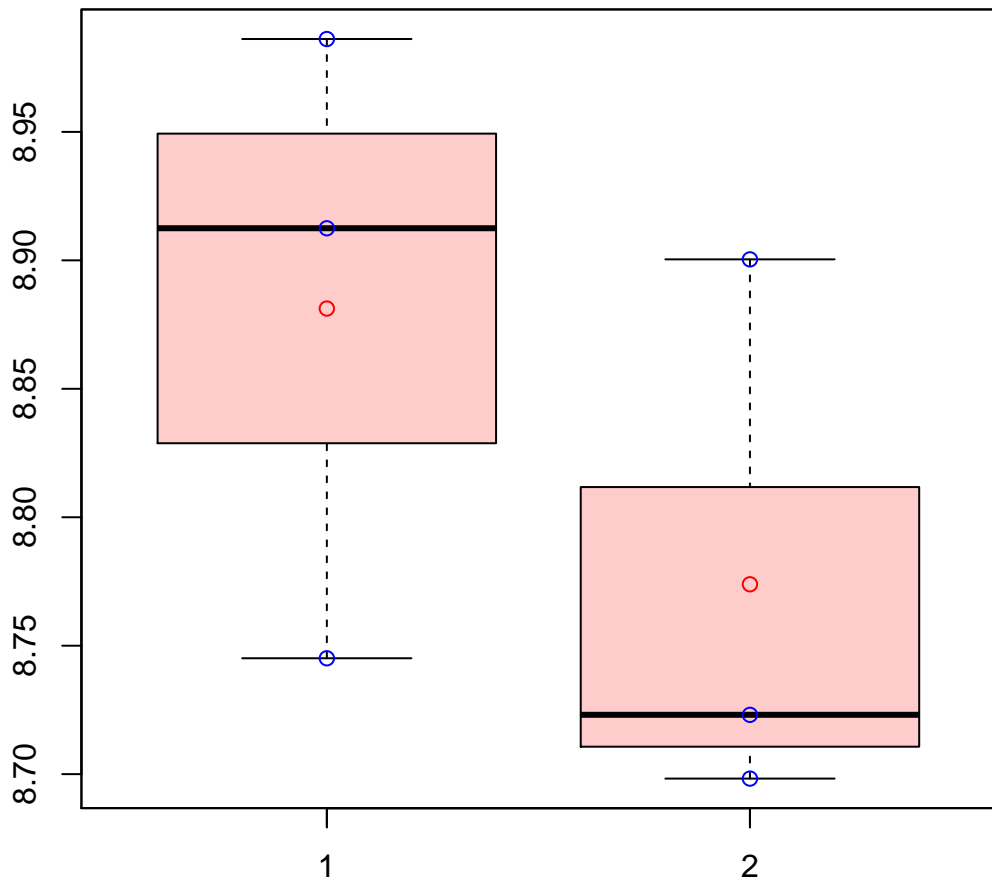

t-Test: p-value = 0.33

# CL5478Contig2|CL5478Contig2

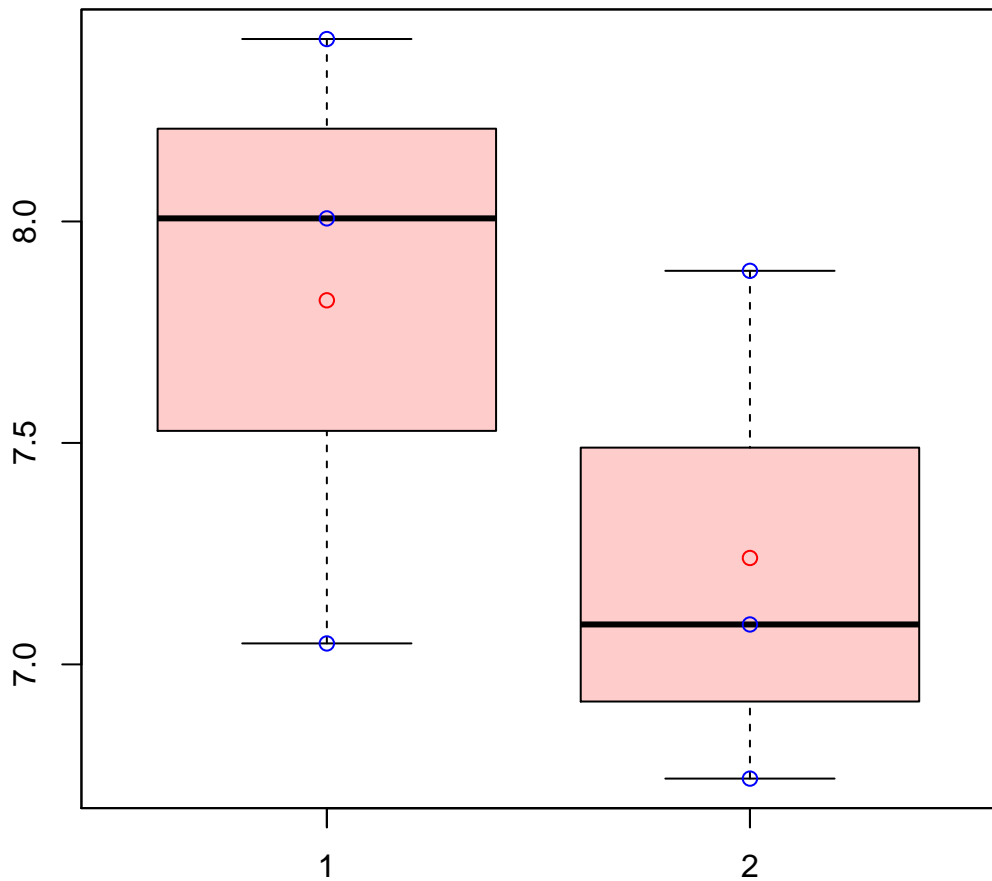

t-Test: p-value = 0.33



# CL5482Contig2|CL5482Contig2

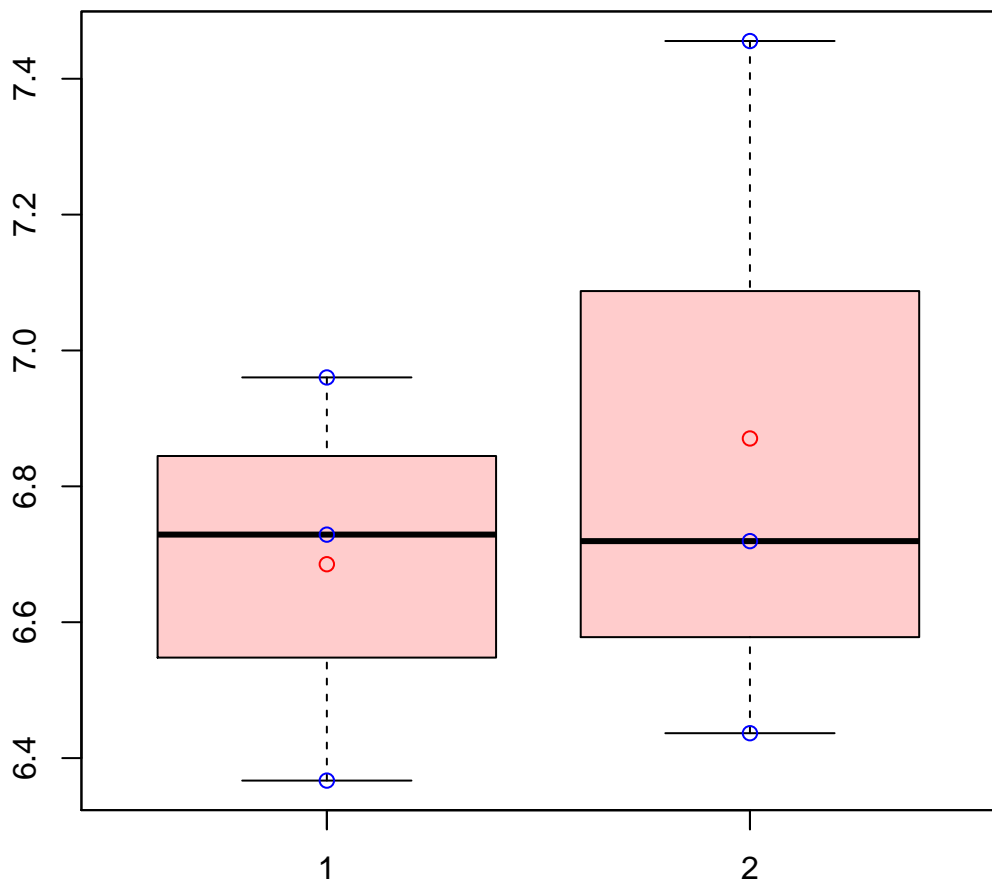

t-Test: p-value = 0.63

# CL5483Contig1|CL5483Contig1

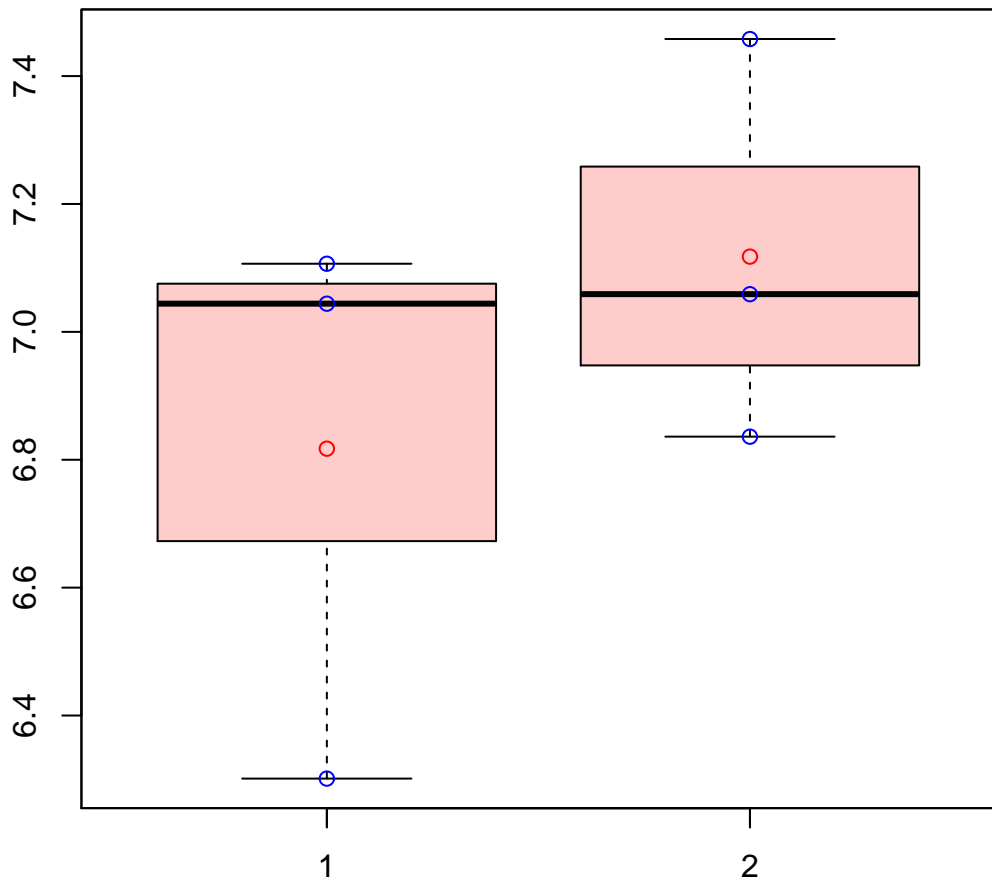

t-Test: p-value = 0.4

# CL548Contig9|CL548Contig9

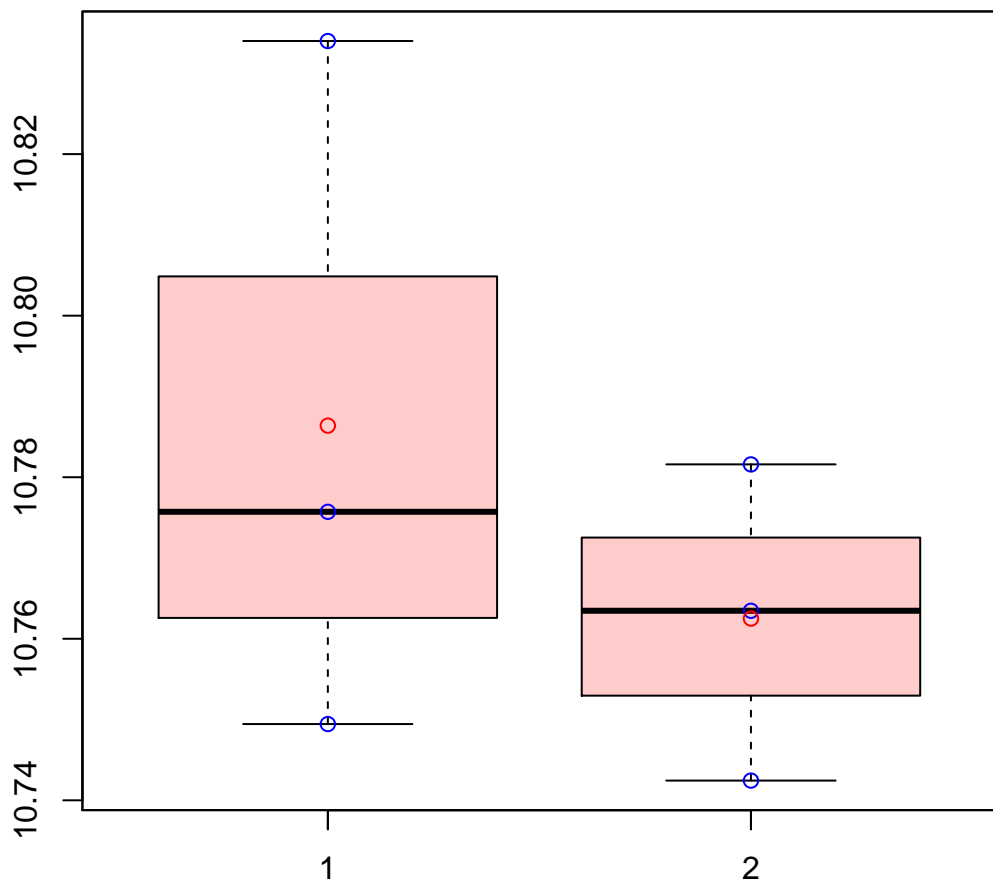

t-Test: p-value = 0.45

# CL5492Contig1|CL5492Contig1

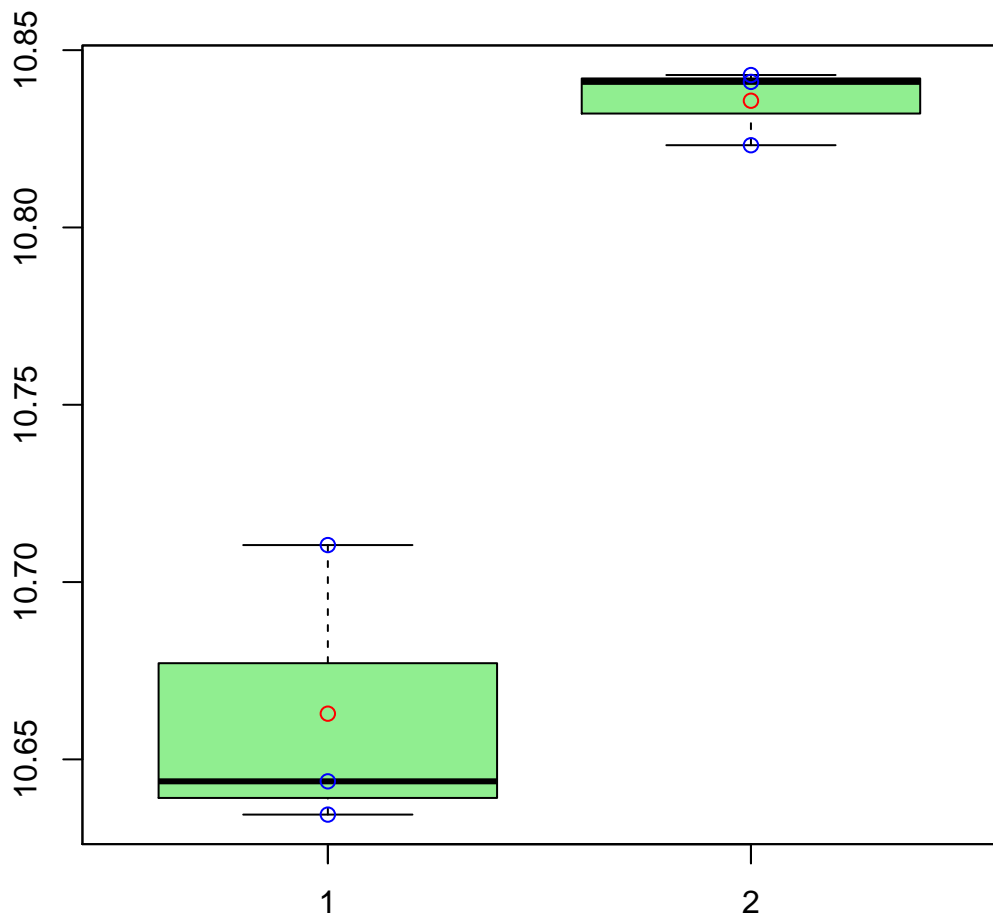

t-Test: p-value = 0.01

# CL5492Contig2|CL5492Contig2

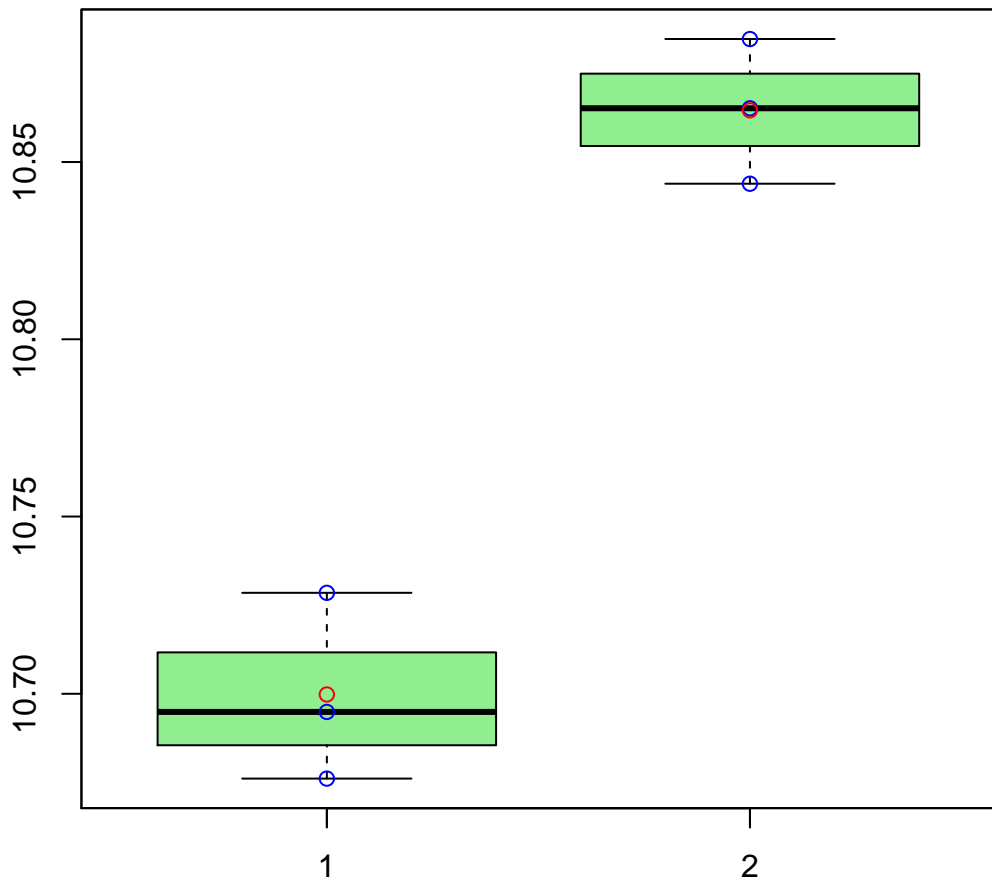

t-Test: p-value = 0

# CL5494Contig2|CL5494Contig2

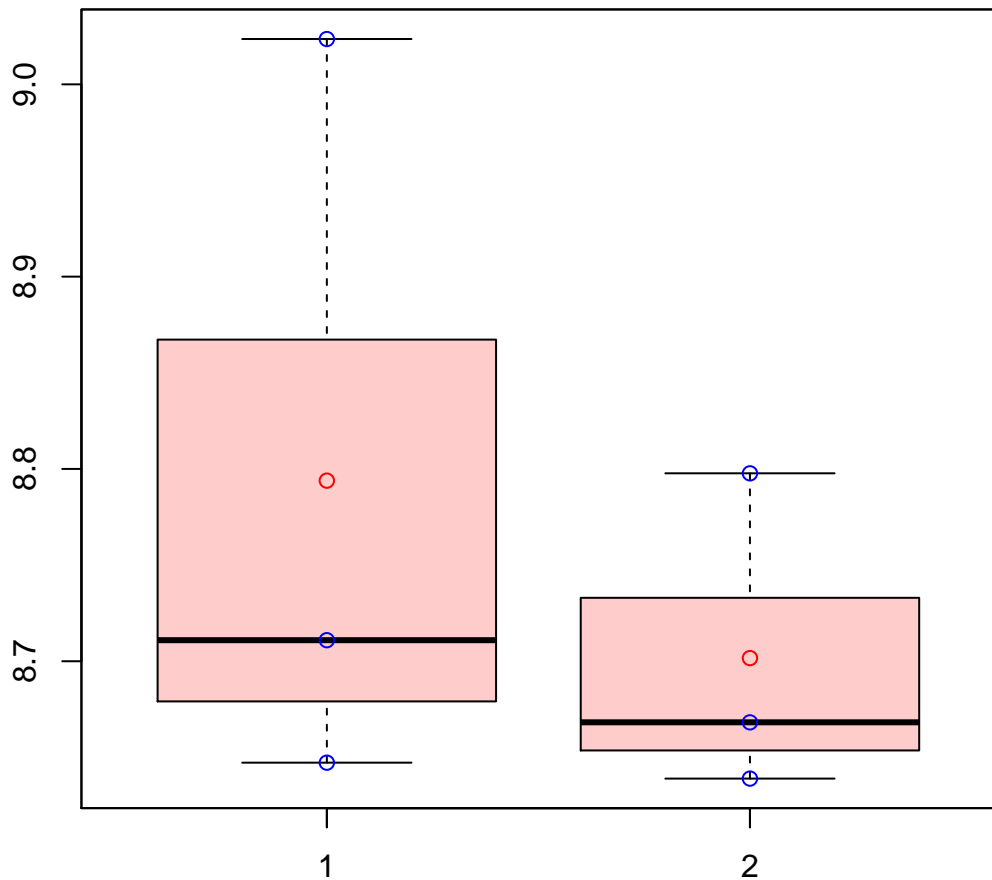

t-Test: p-value = 0.52

# CL54Contig14|CL54Contig14

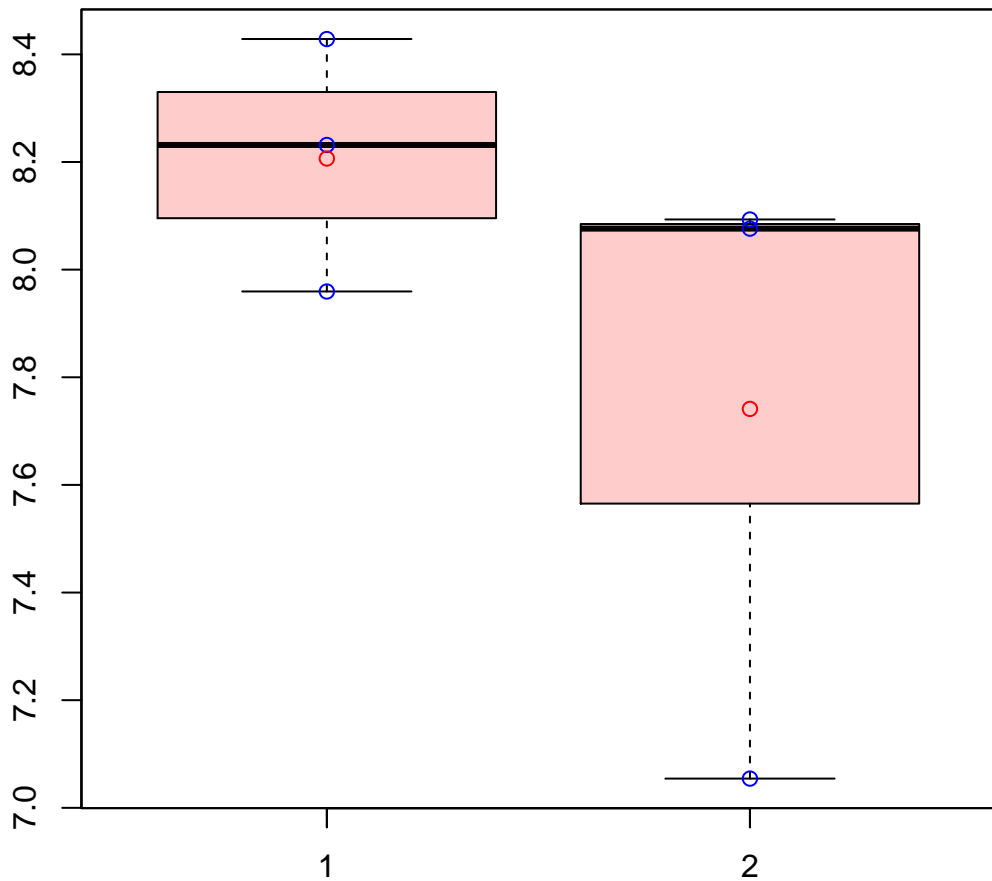

t-Test: p-value = 0.31

# CL54Contig17|CL54Contig17

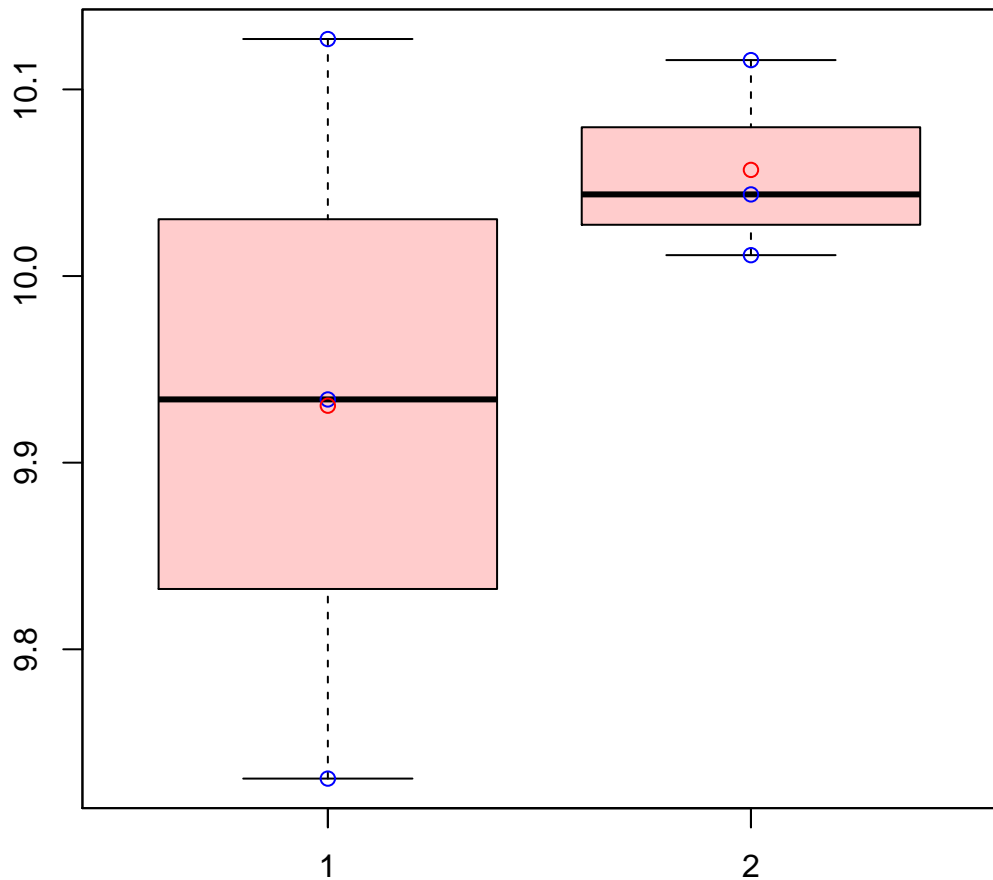

t-Test: p-value = 0.39



# CL54Contig18|CL54Contig18

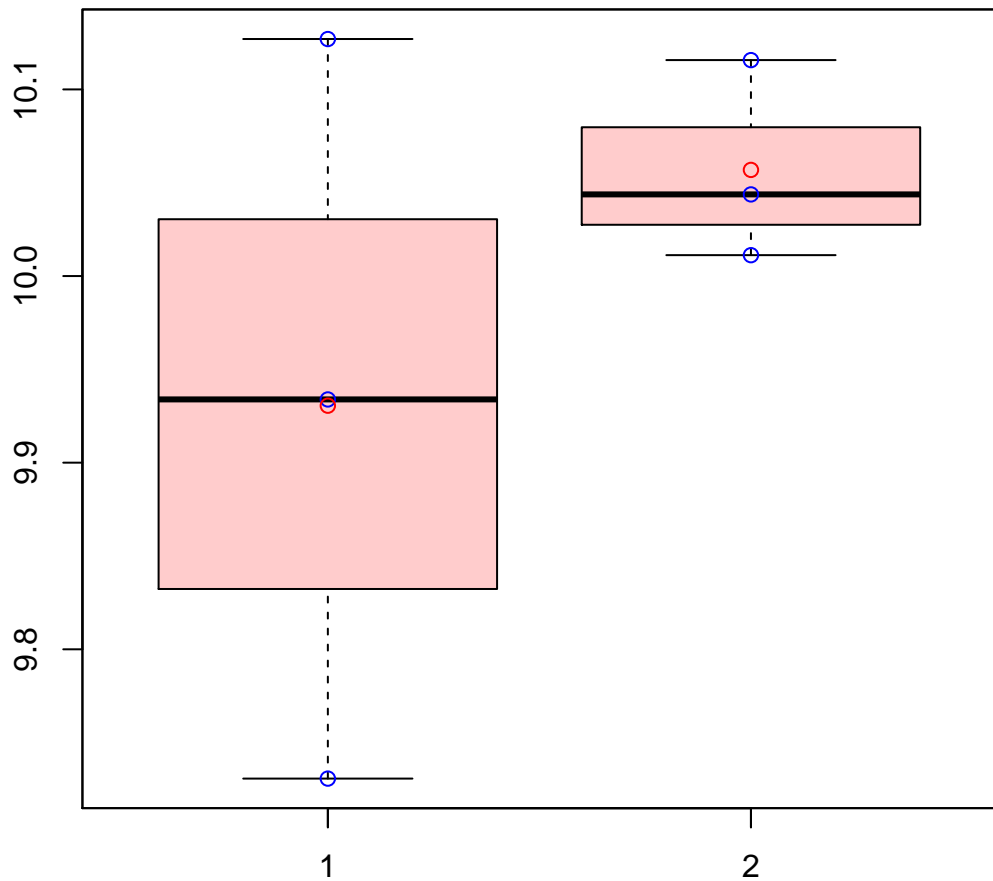

t-Test: p-value = 0.39

# CL54Contig19|CL54Contig19

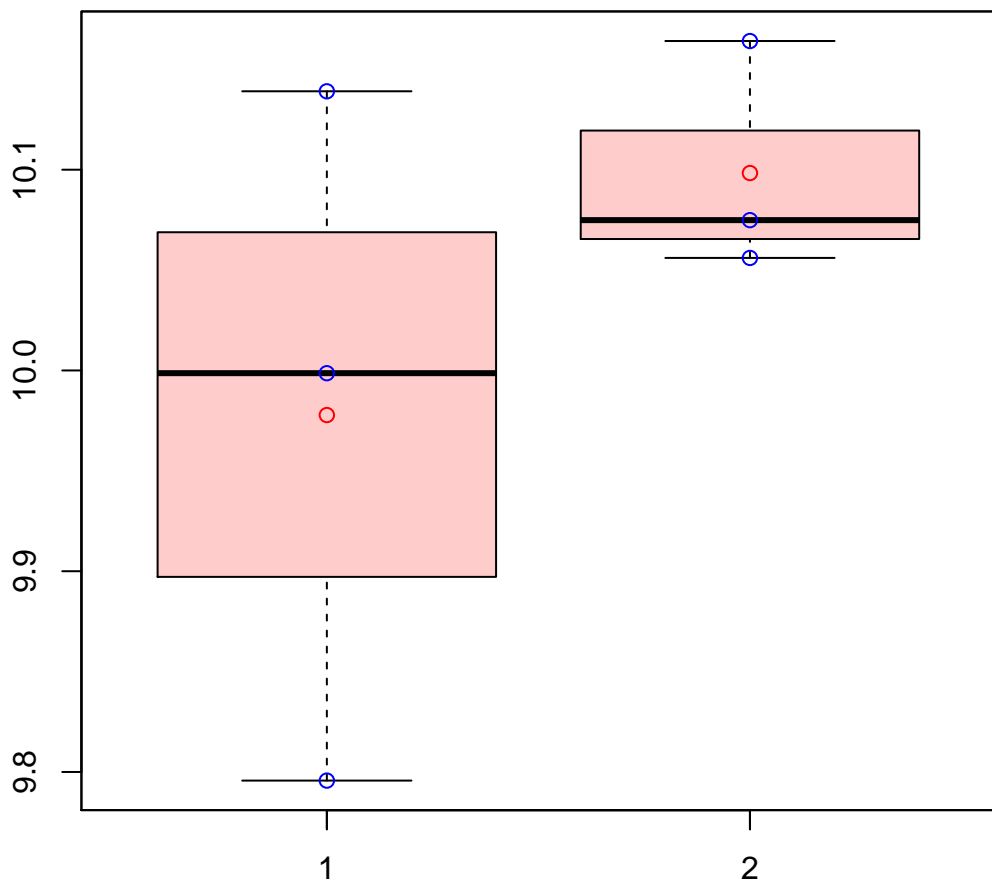

t-Test: p-value = 0.35

# CL54Contig23|CL54Contig23

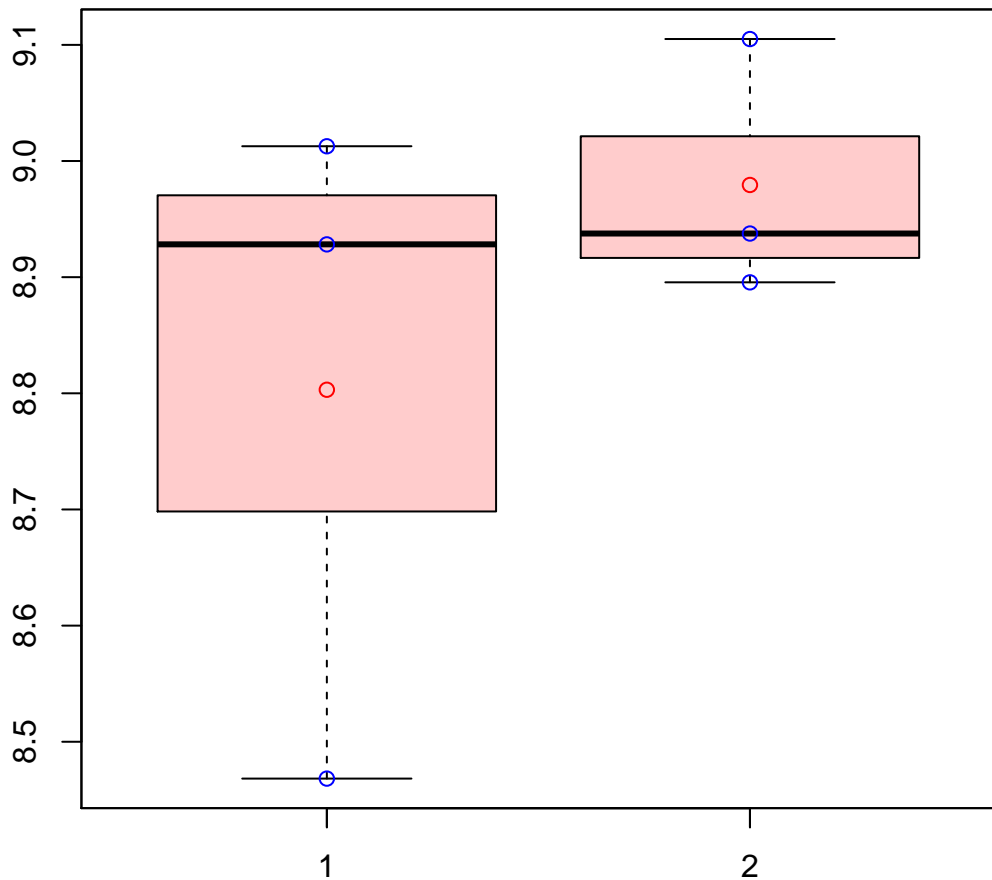

t-Test: p-value = 0.41

# CL54Contig24|CL54Contig24

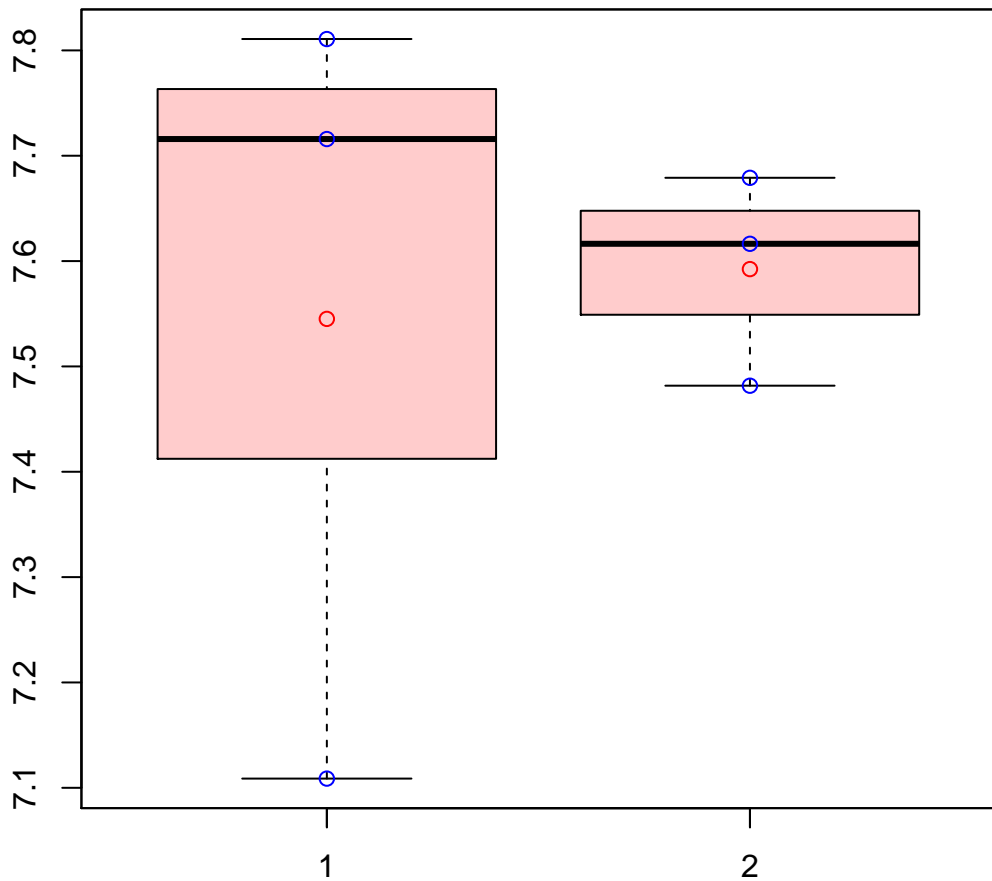

t-Test: p-value = 0.85

# CL5503Contig3|CL5503Contig3

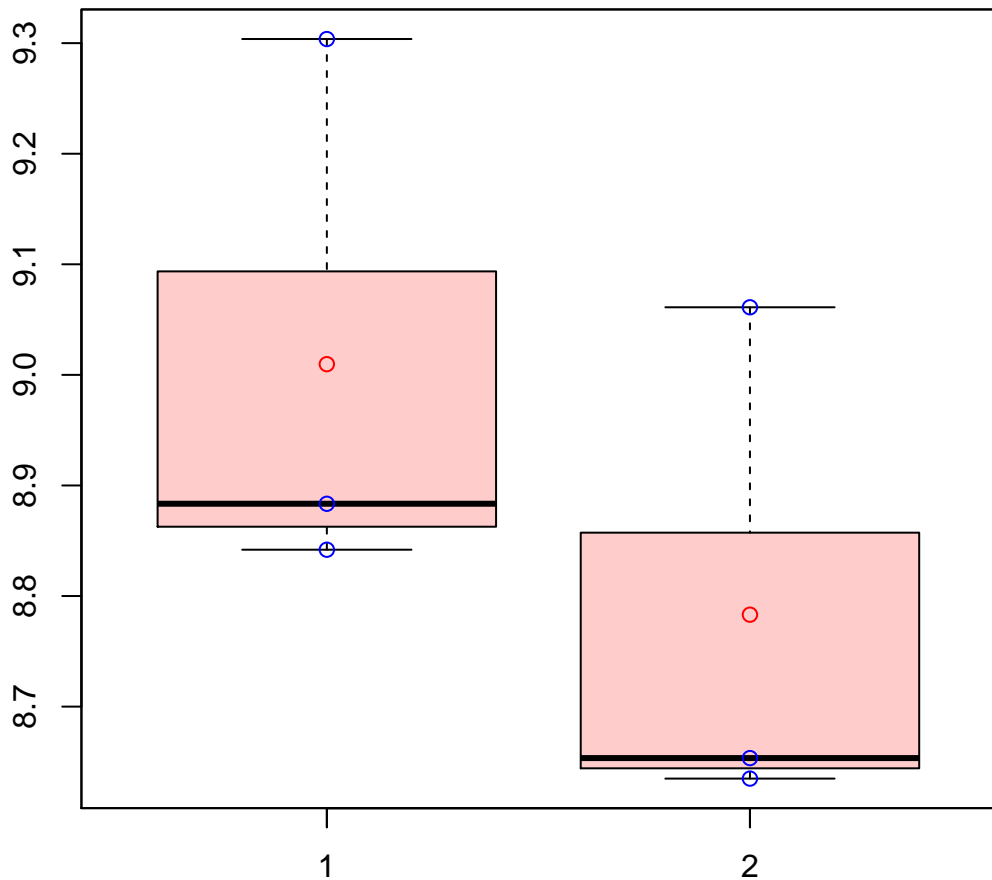

t-Test: p-value = 0.33

# CL550Contig11|CL550Contig11

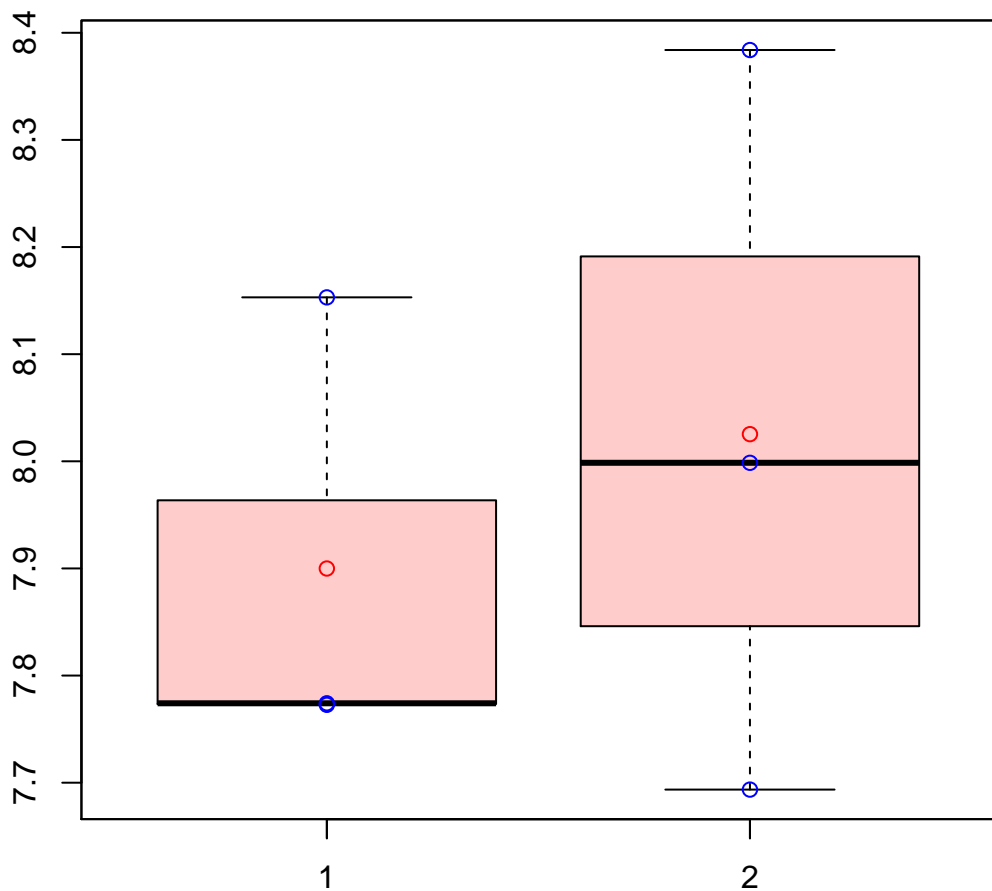

t-Test: p-value = 0.63

# CL5513Contig2|CL5513Contig2

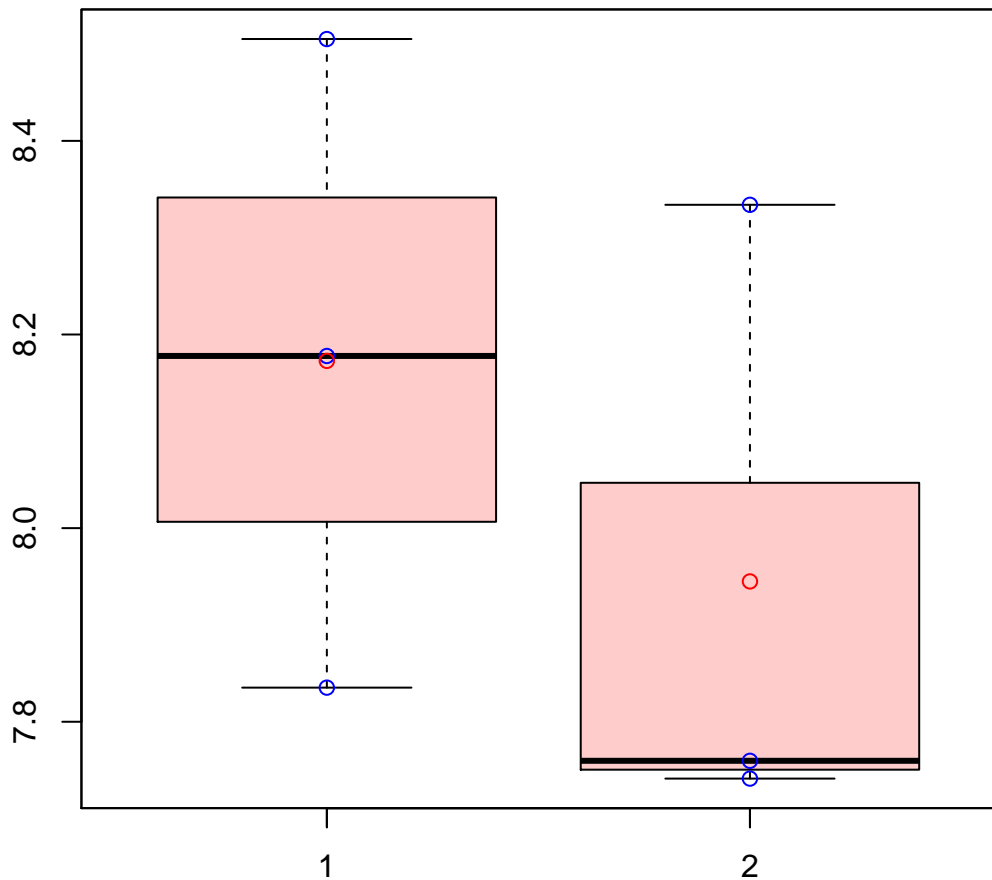

t-Test: p-value = 0.45

# CL552Contig3|CL552Contig3

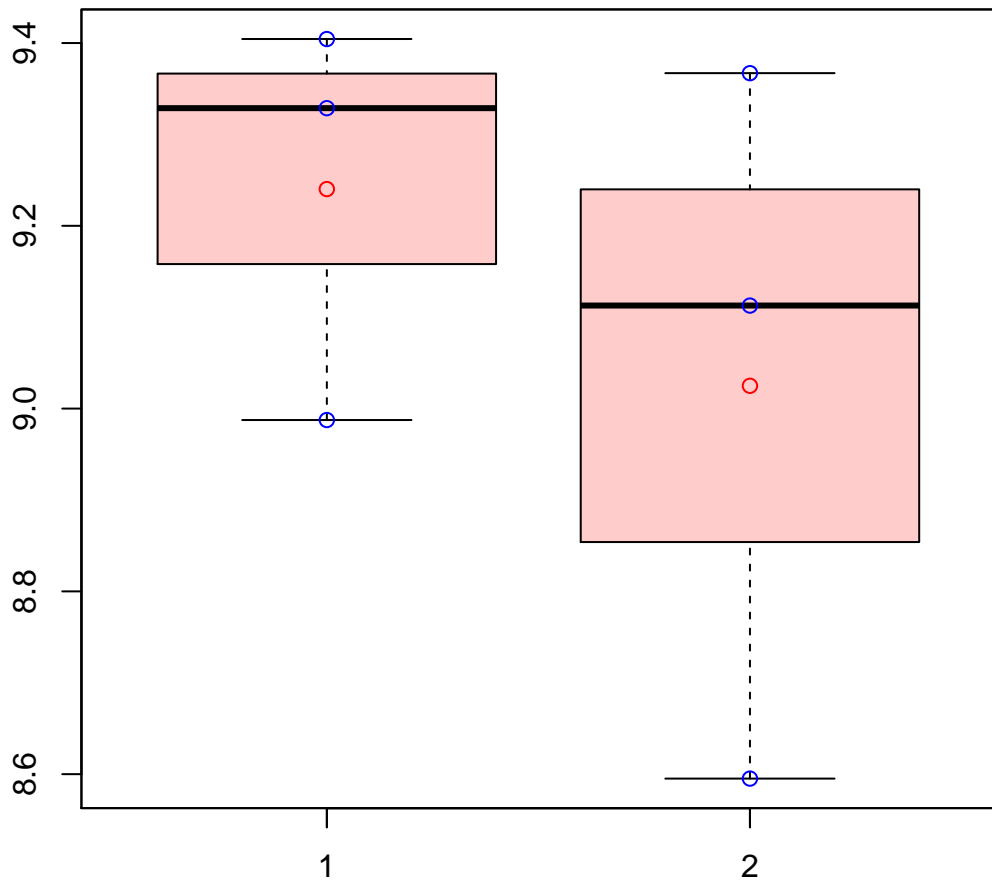

t-Test: p-value = 0.47



# CL552Contig7|CL552Contig7

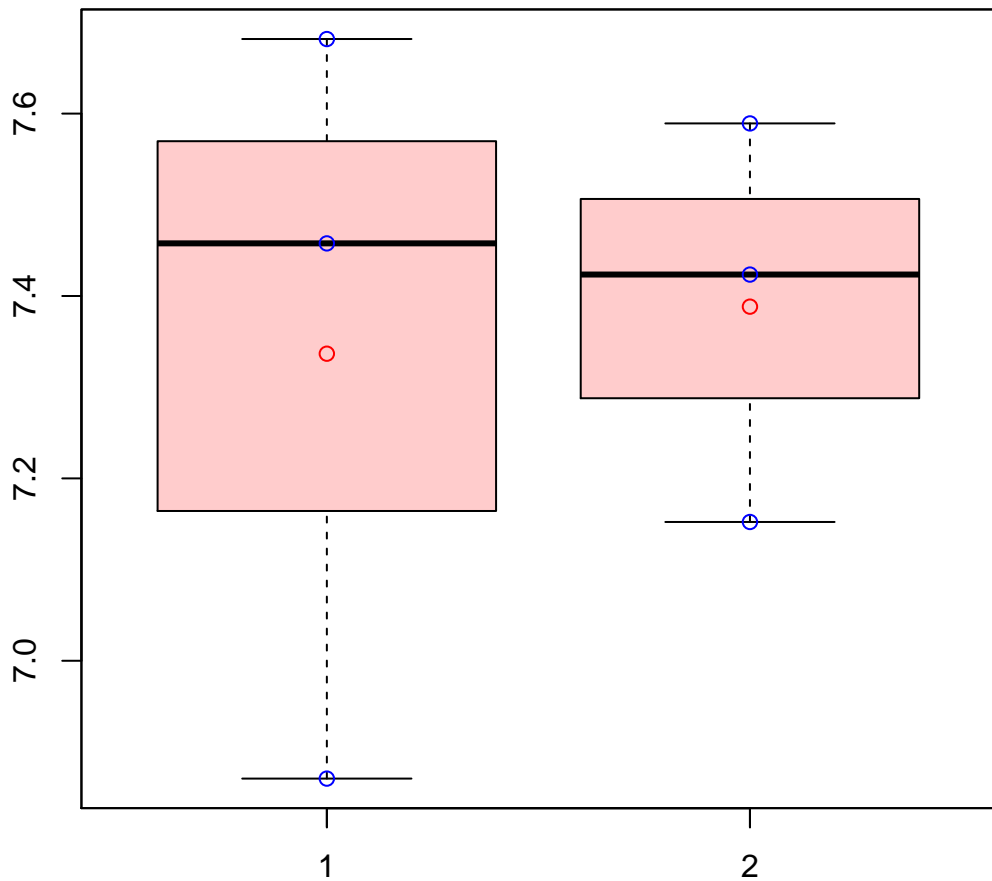

t-Test: p-value = 0.86

# CL5530Contig2|CL5530Contig2

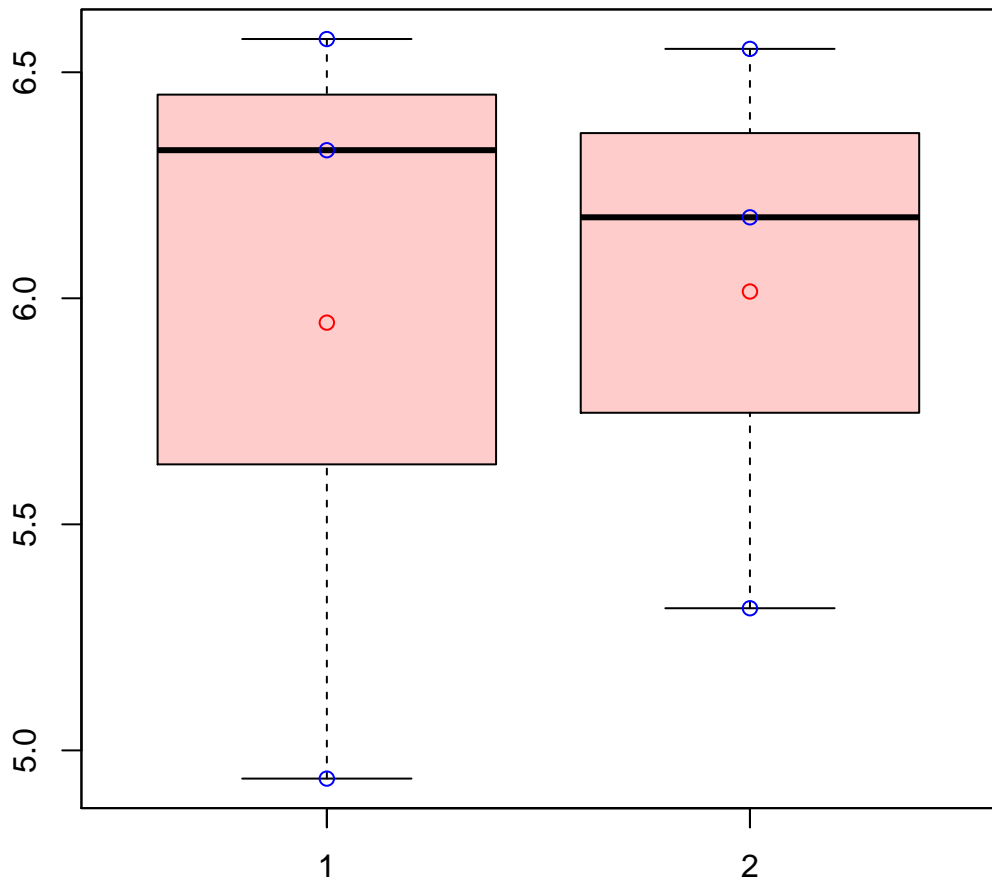

t-Test: p-value = 0.92

# CL5530Contig3|CL5530Contig3

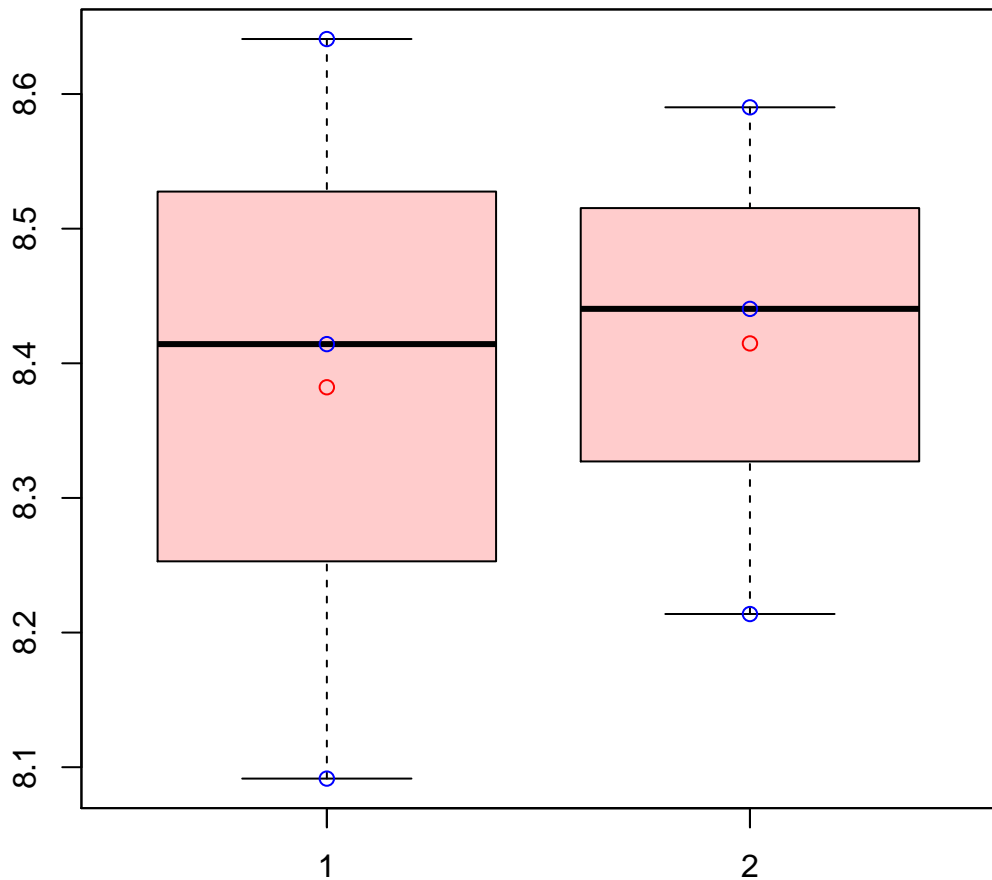

t-Test: p-value = 0.88

# CL5535Contig1|CL5535Contig1

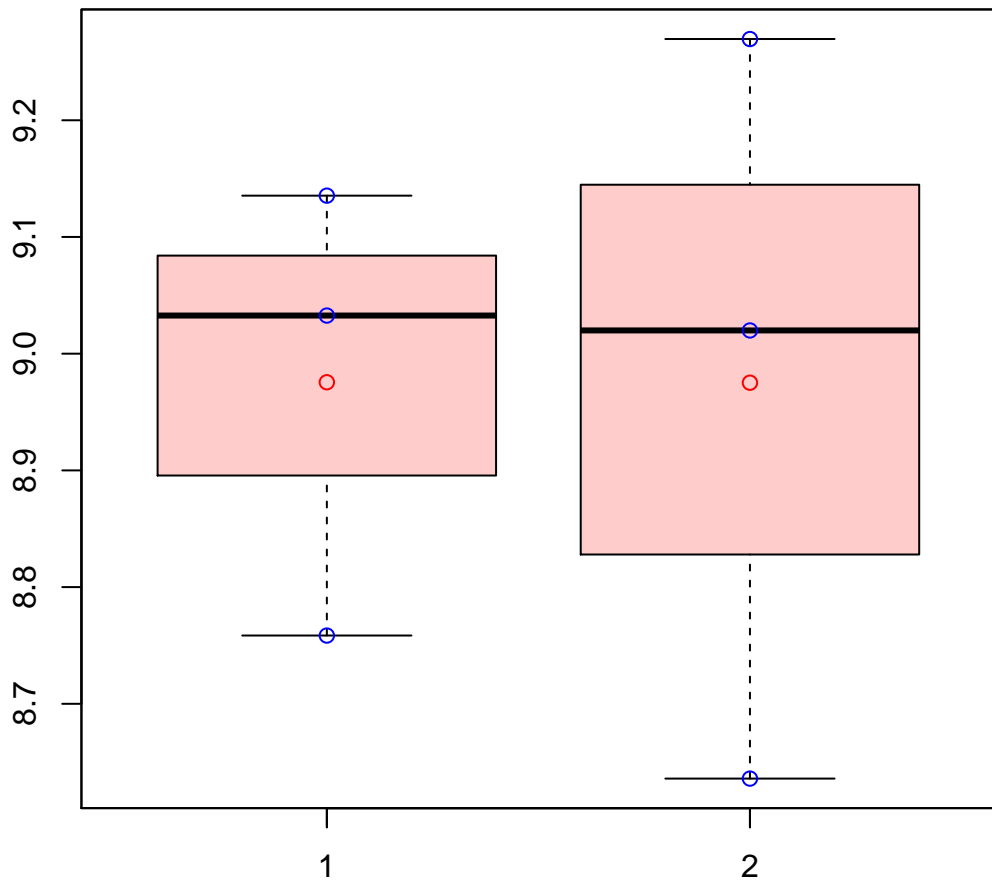

t-Test: p-value = 1

# CL5537Contig4|CL5537Contig4

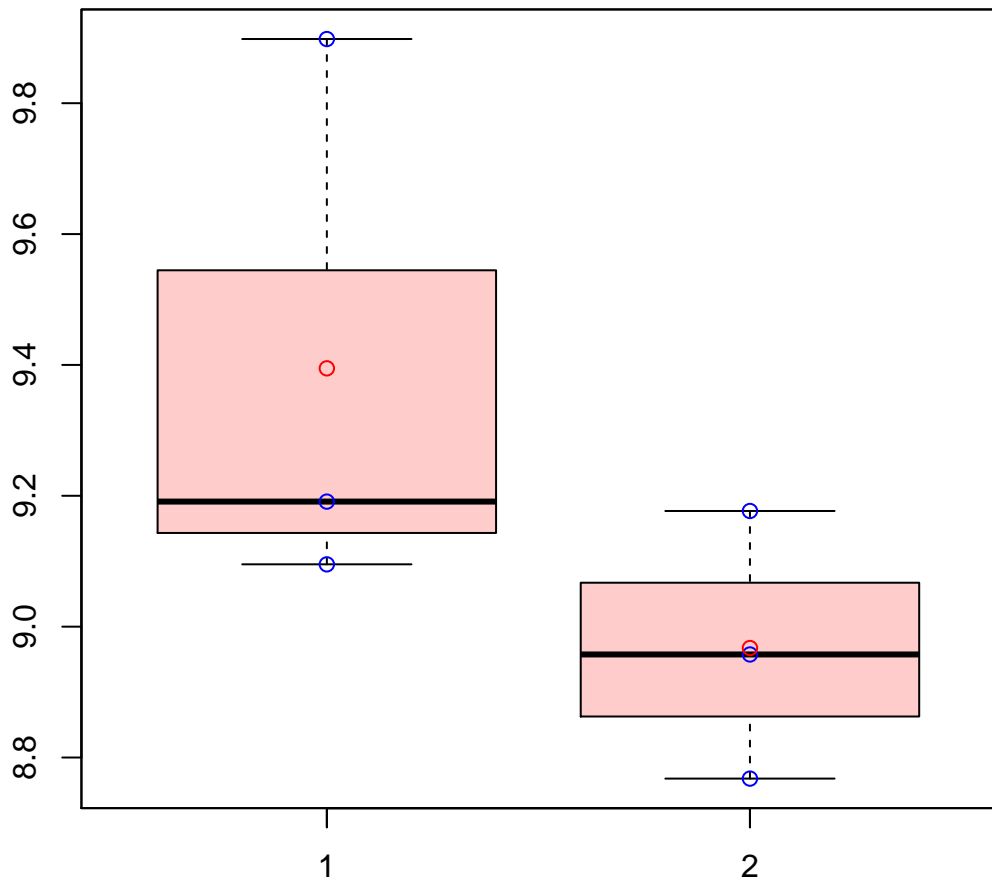

t-Test: p-value = 0.23

# CL5538Contig2|CL5538Contig2

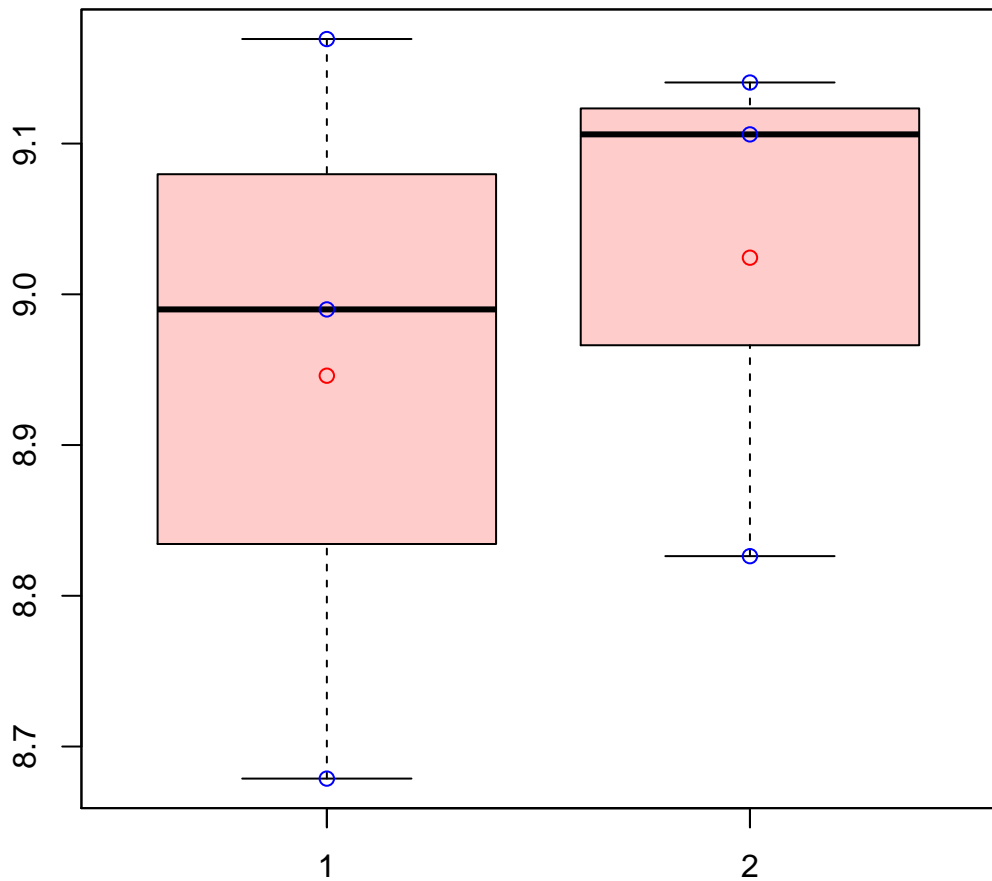

t-Test: p-value = 0.68

# CL5539Contig1|CL5539Contig1

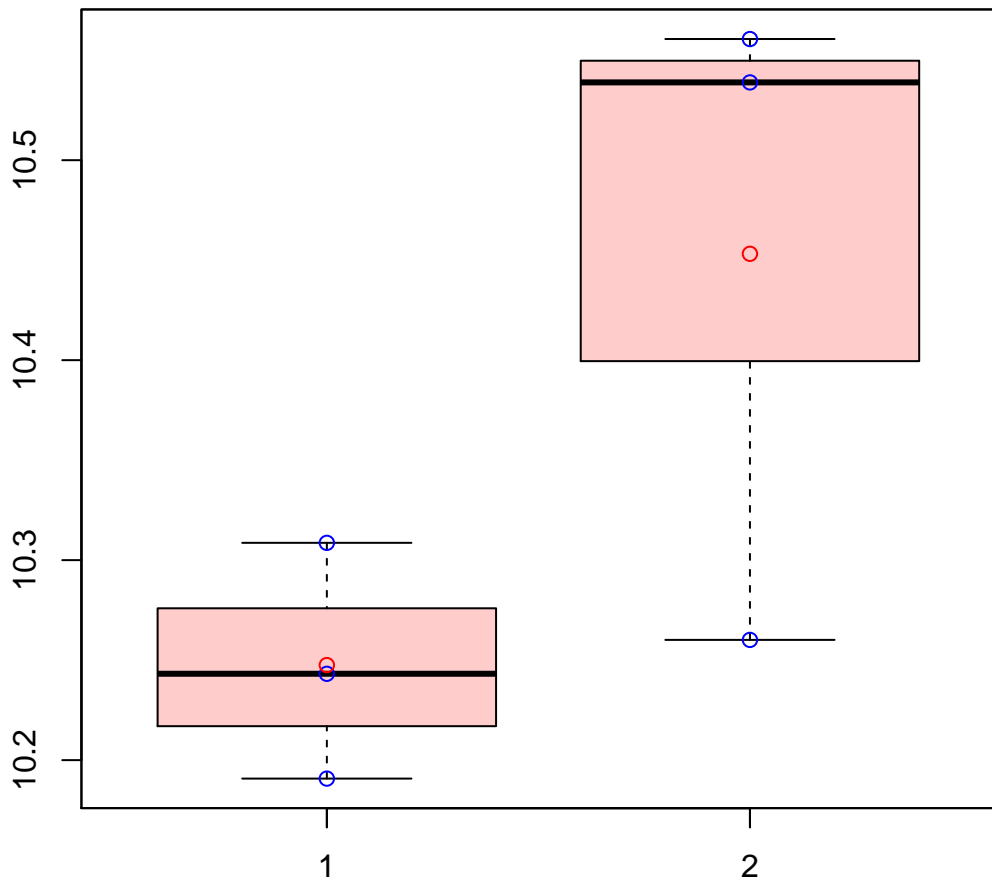

t-Test: p-value = 0.16

# CL5539Contig2|CL5539Contig2

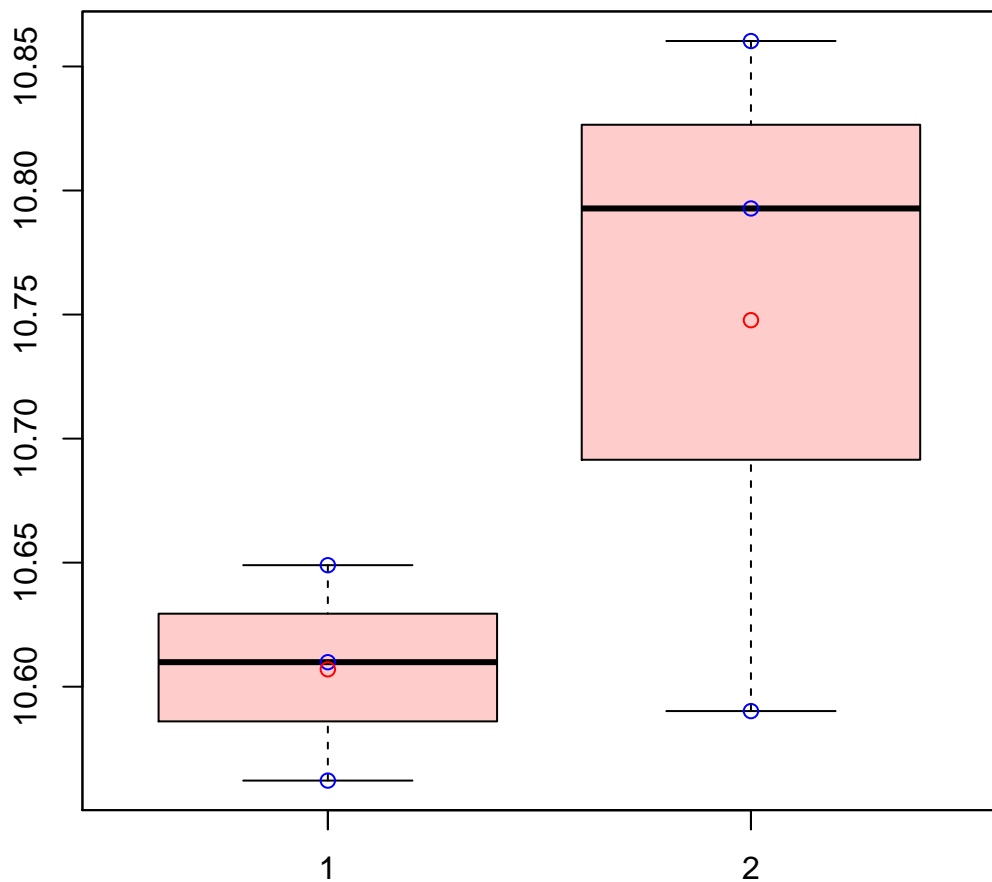

t-Test: p-value = 0.22



# CL5539Contig4|CL5539Contig4

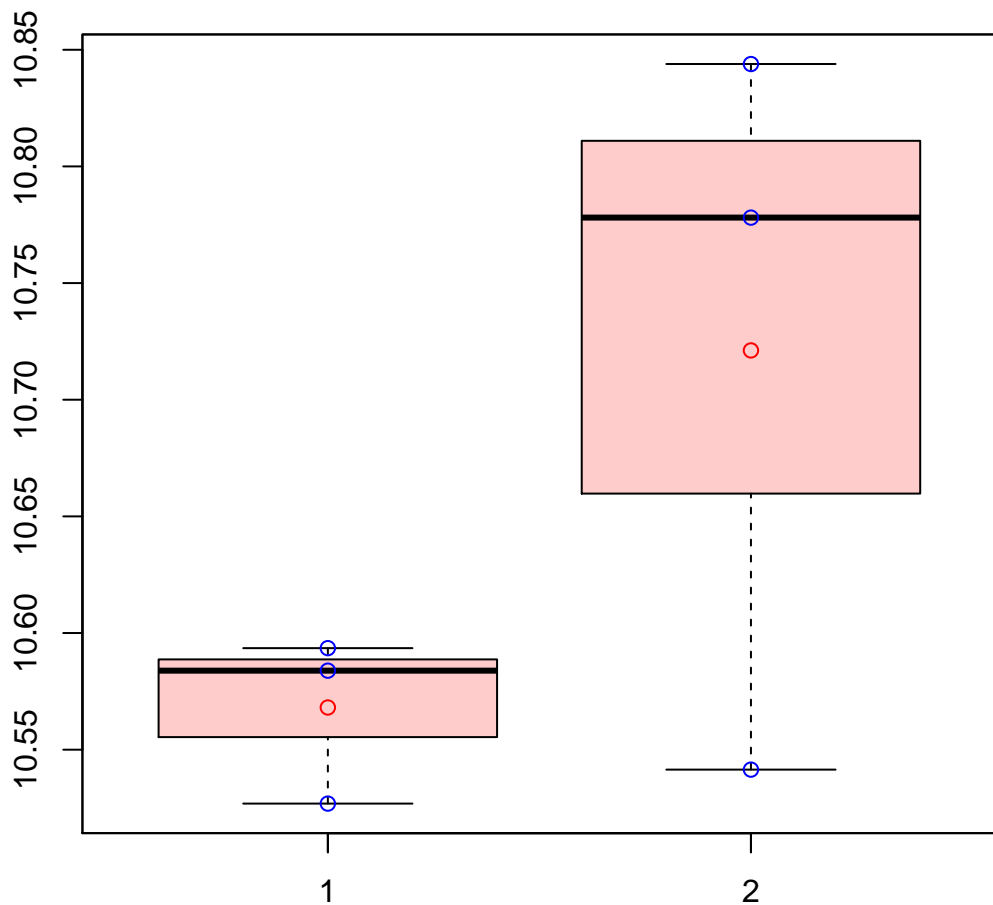

t-Test: p-value = 0.23

# CL5539Contig6|CL5539Contig6

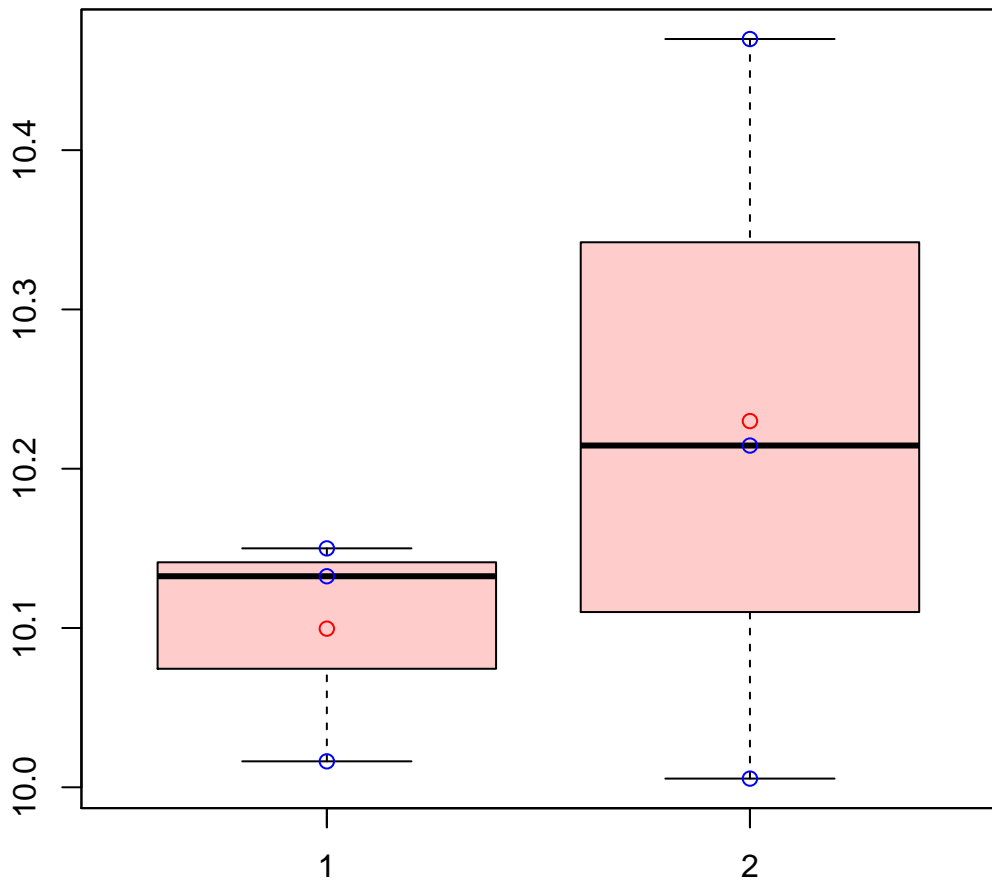

t-Test: p-value = 0.44

# CL5544Contig1|CL5544Contig1

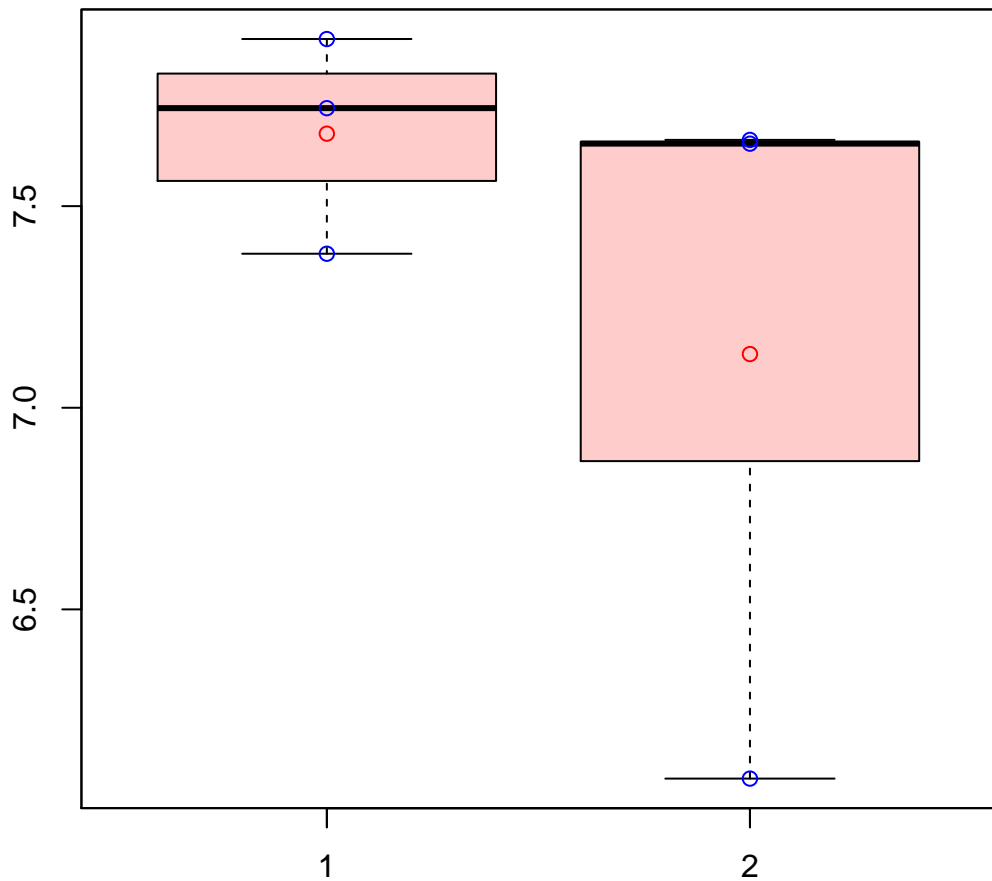

t-Test: p-value = 0.41

# CL5547Contig4|CL5547Contig4

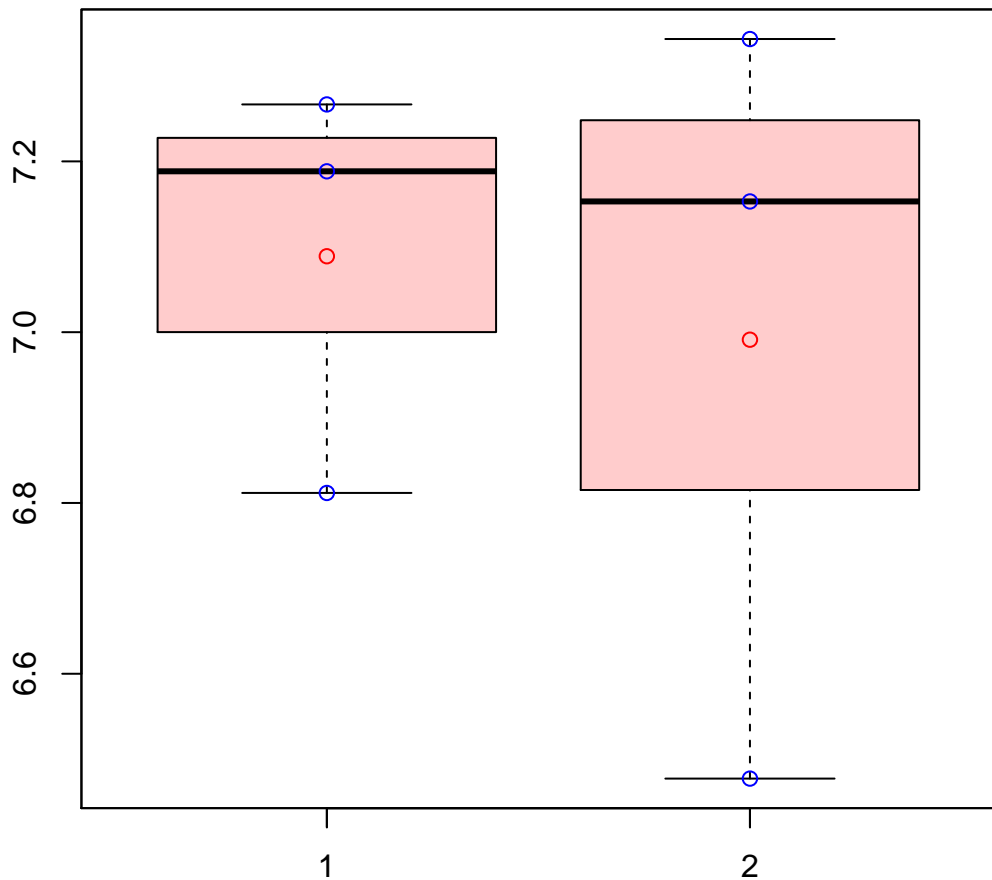

t-Test: p-value = 0.76

# CL5559Contig2|CL5559Contig2

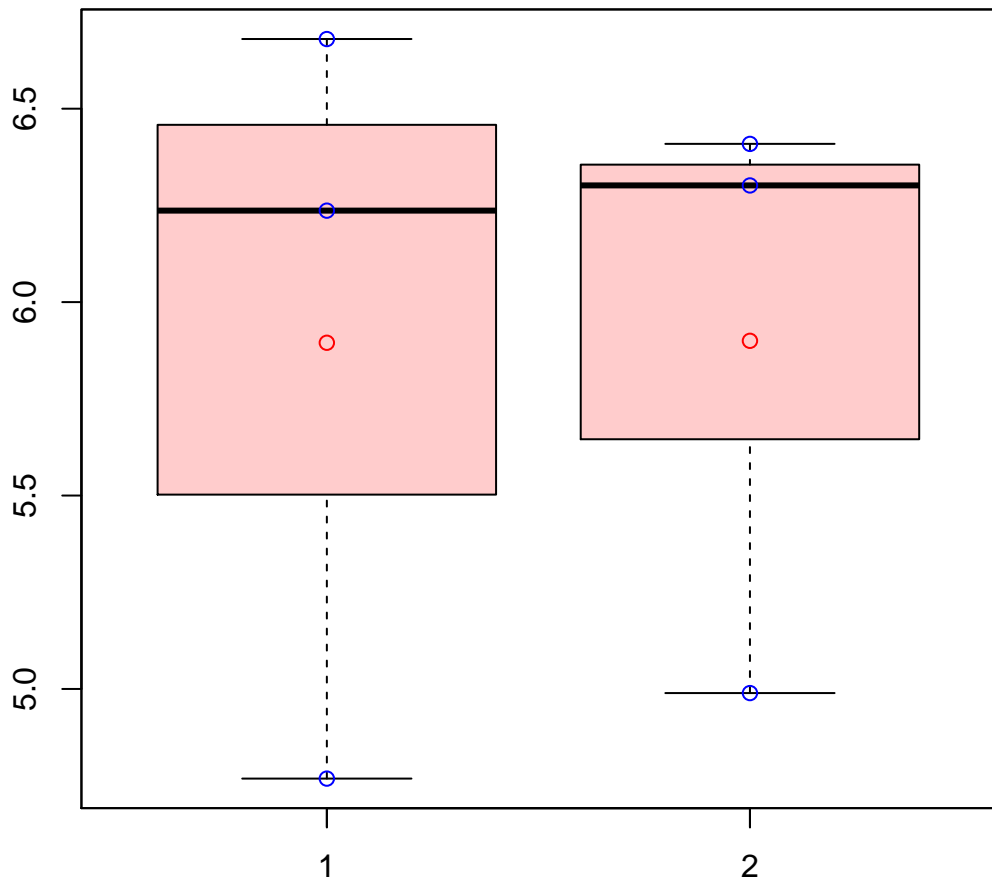

t-Test: p-value = 0.99

# CL5559Contig3|CL5559Contig3



t-Test: p-value = 0.99

# CL5559Contig4|CL5559Contig4

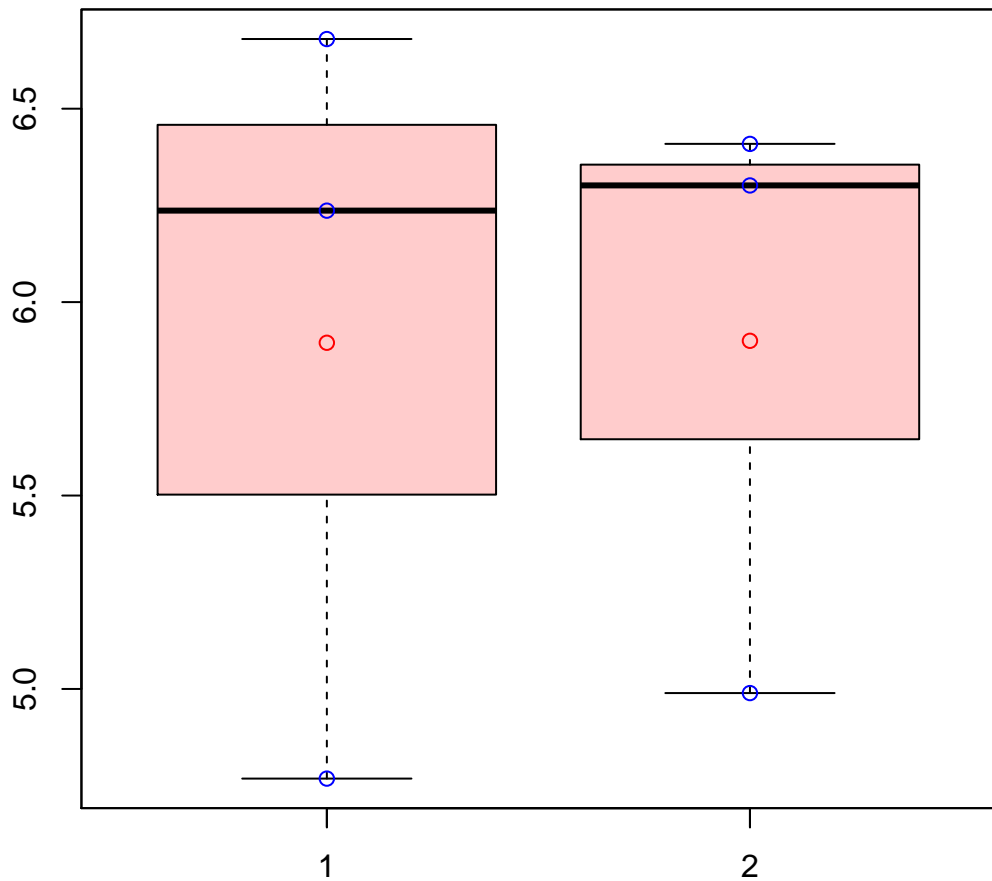

t-Test: p-value = 0.99

# CL555Contig11|CL555Contig11

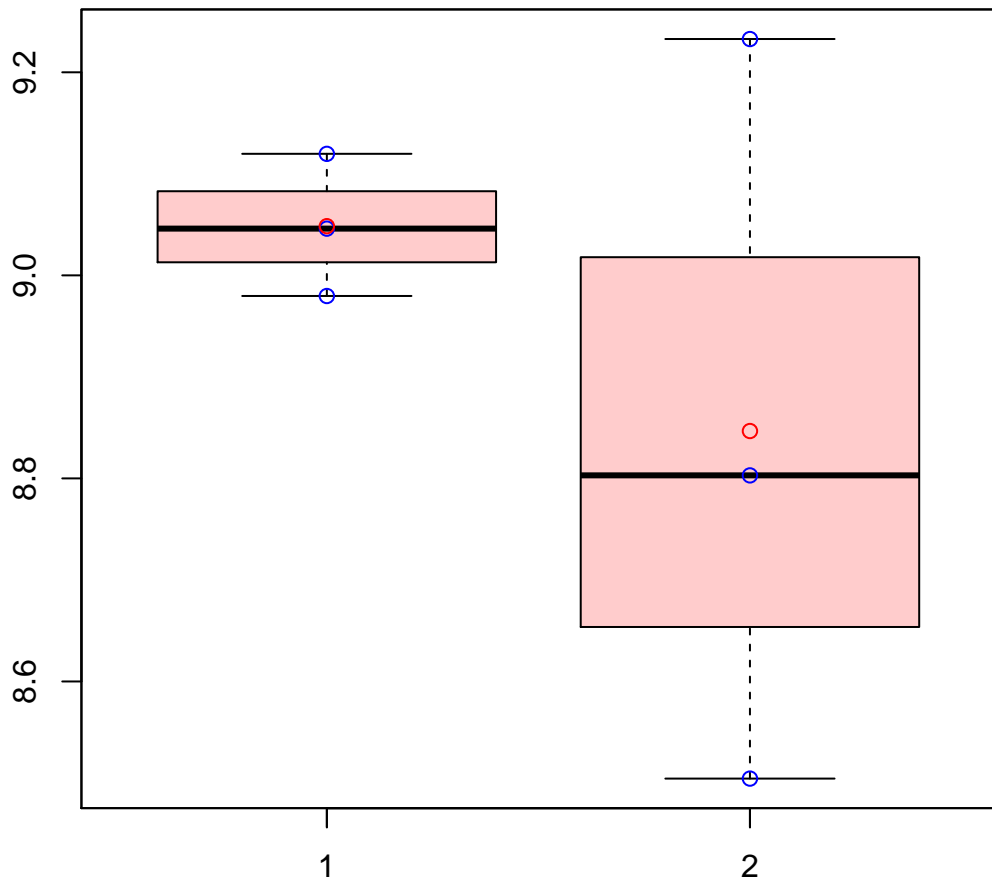

t-Test: p-value = 0.44



# CL555Contig7|CL555Contig7

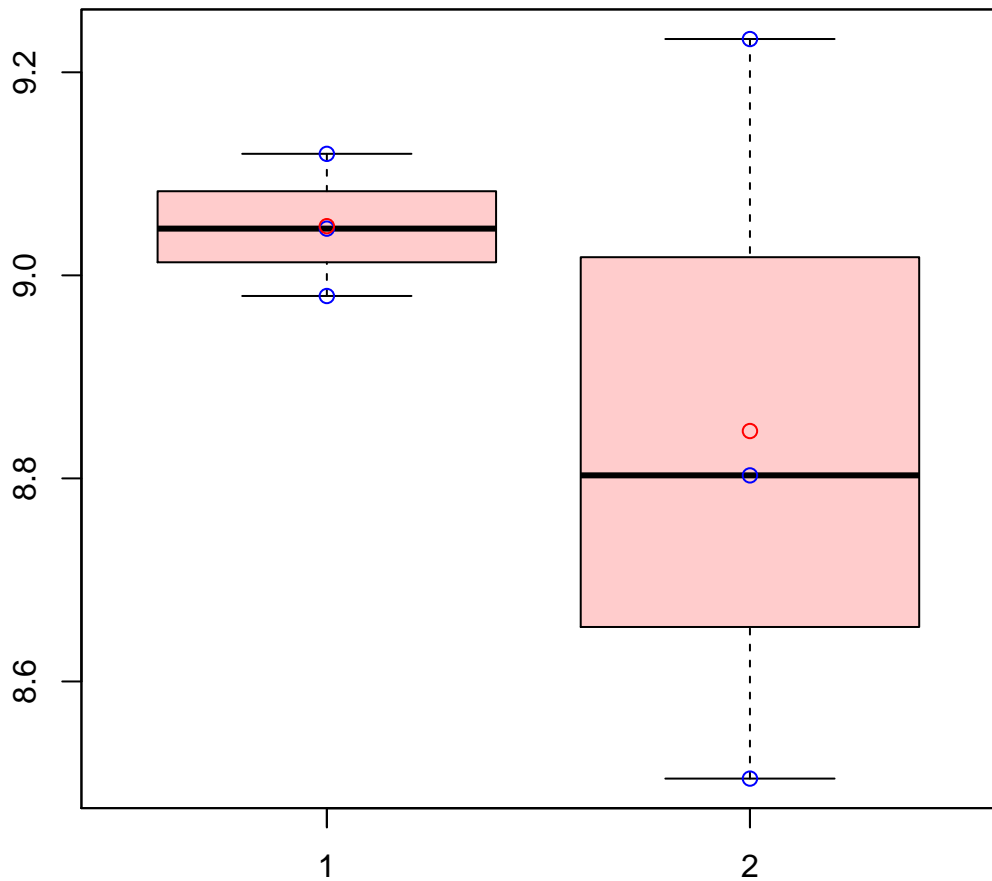

t-Test: p-value = 0.44

# CL555Contig8|CL555Contig8



t-Test: p-value = 0.44

# CL5563Contig3|CL5563Contig3

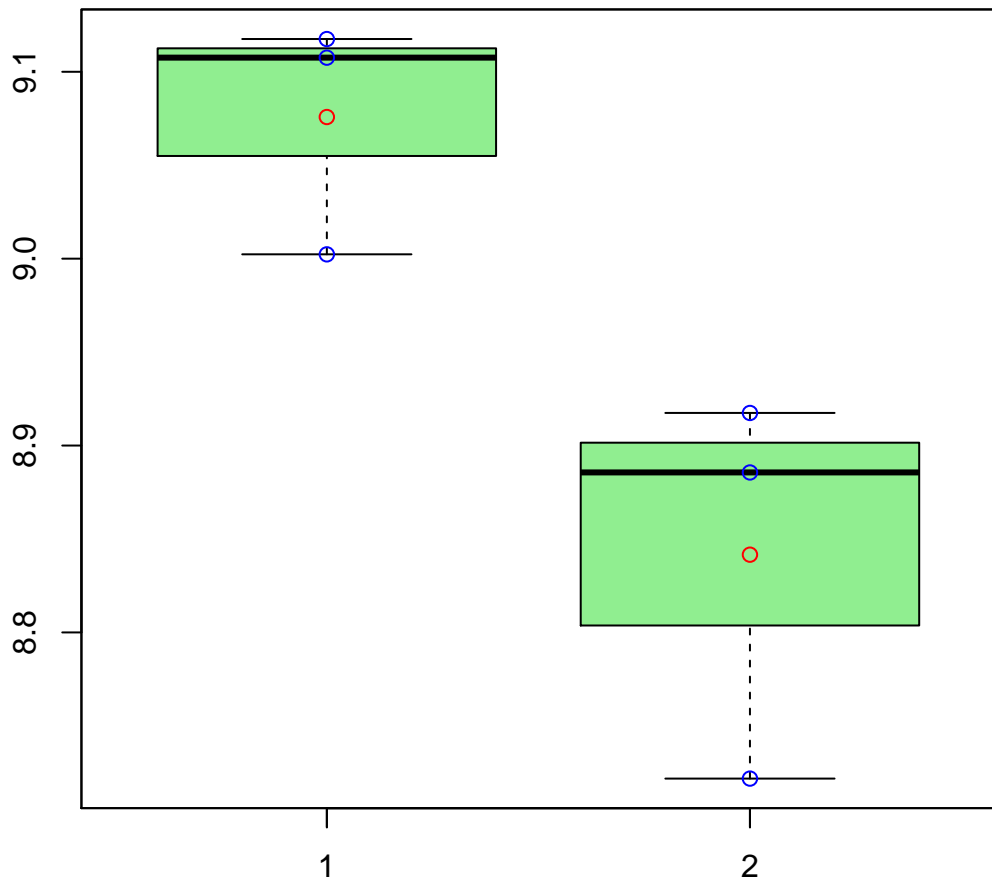

t-Test: p-value = 0.04

# CL5575Contig1|CL5575Contig1

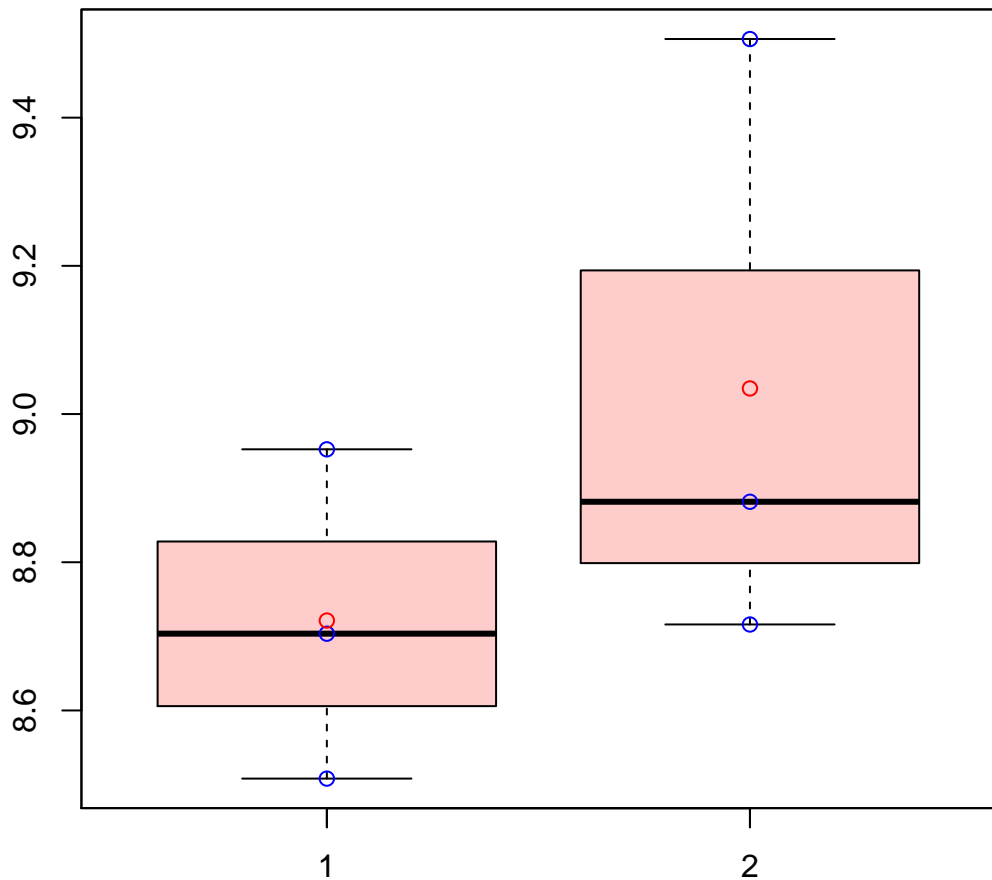

t-Test: p-value = 0.33

# CL5575Contig3|CL5575Contig3

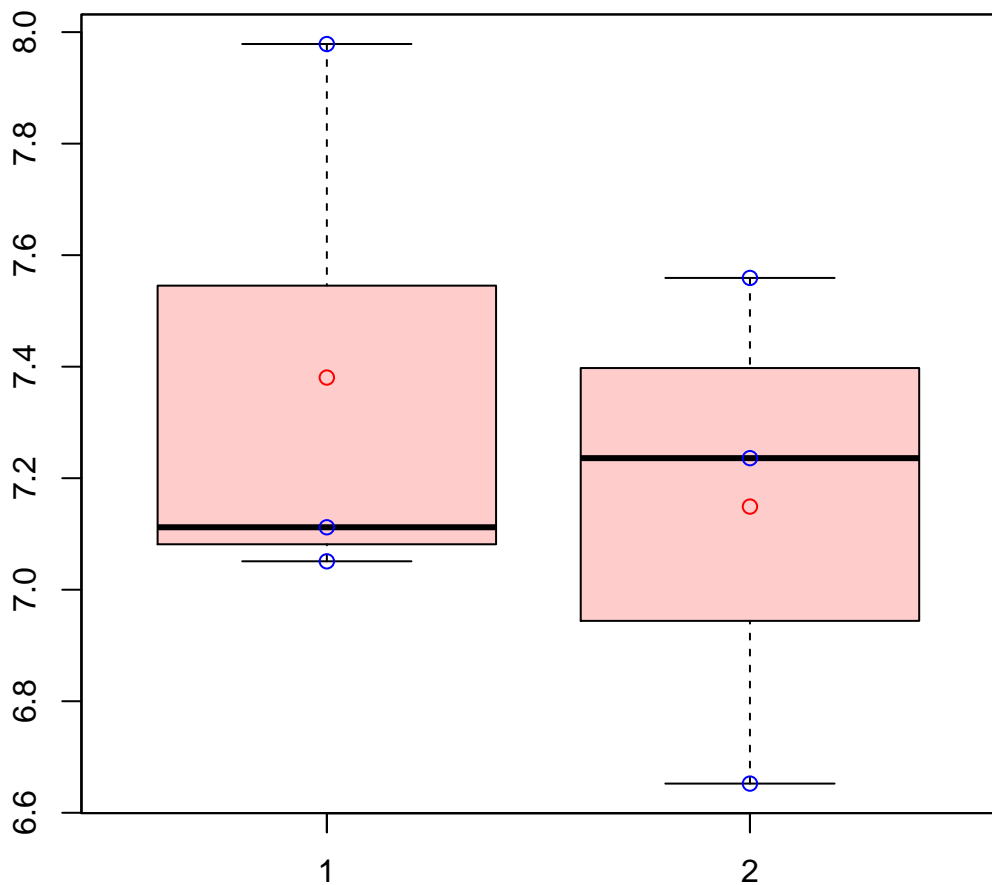

t-Test: p-value = 0.59

# CL5577Contig3|CL5577Contig3

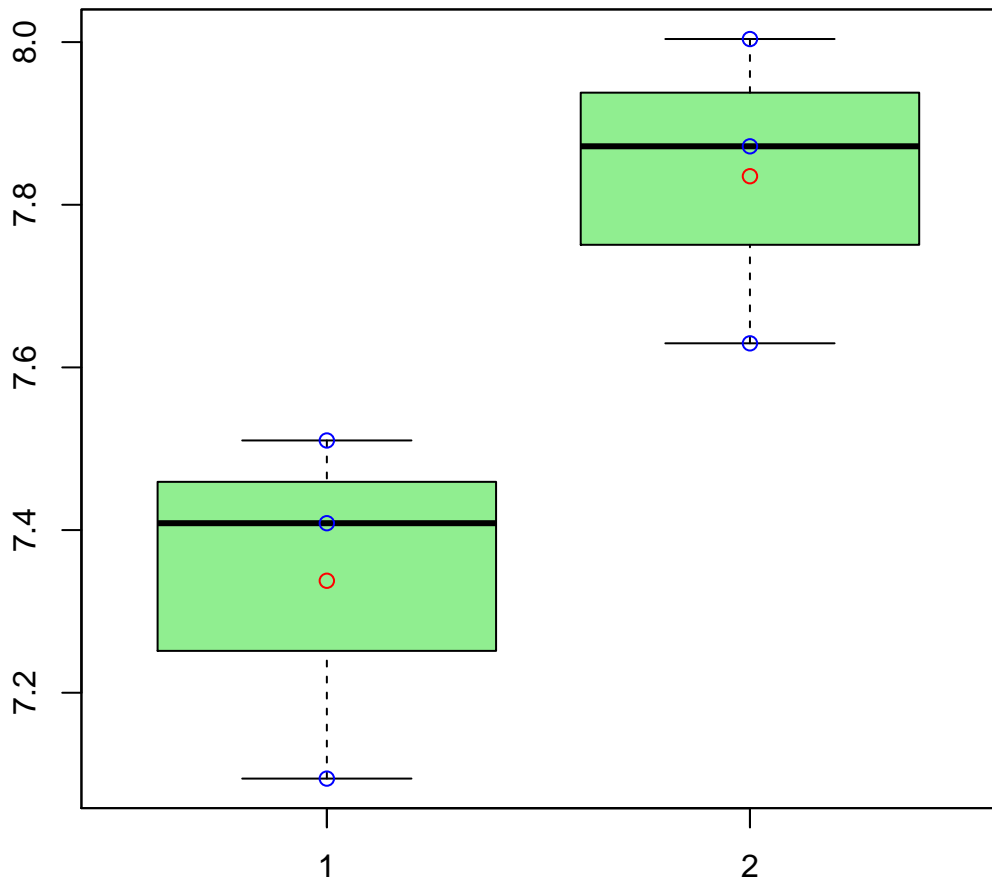

t-Test: p-value = 0.04

# CL5581Contig1|CL5581Contig1

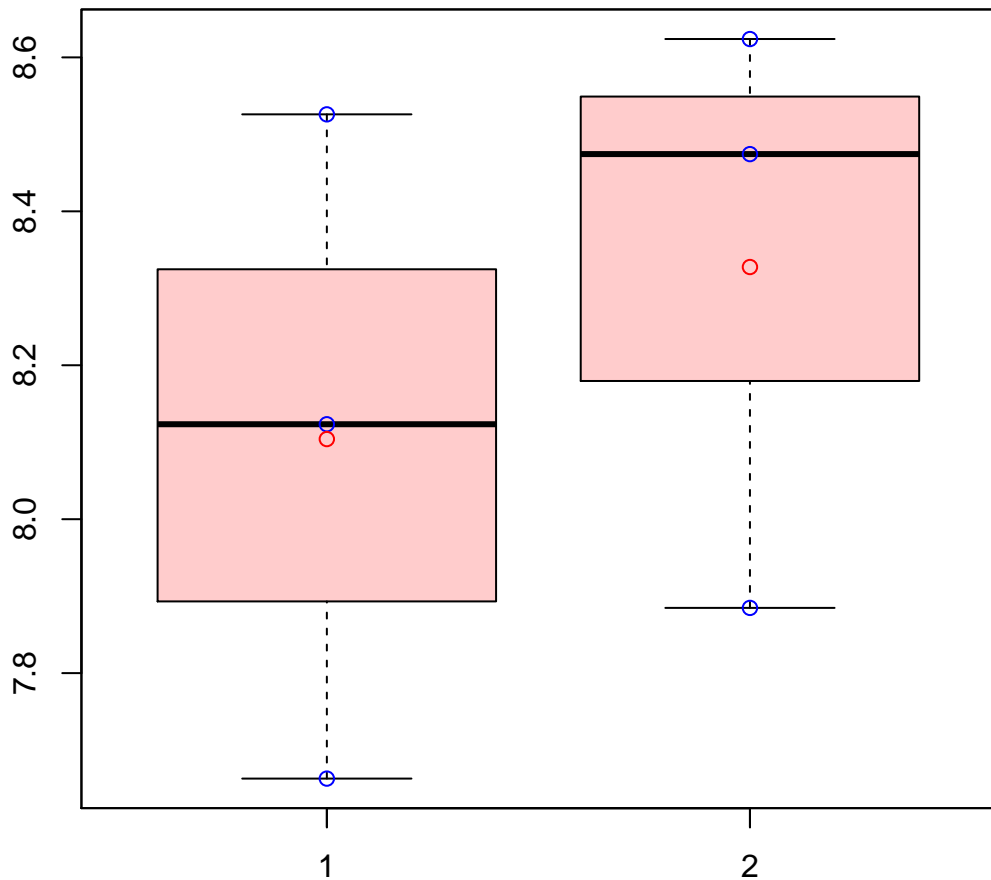

t-Test: p-value = 0.54

# CL5582Contig1|CL5582Contig1

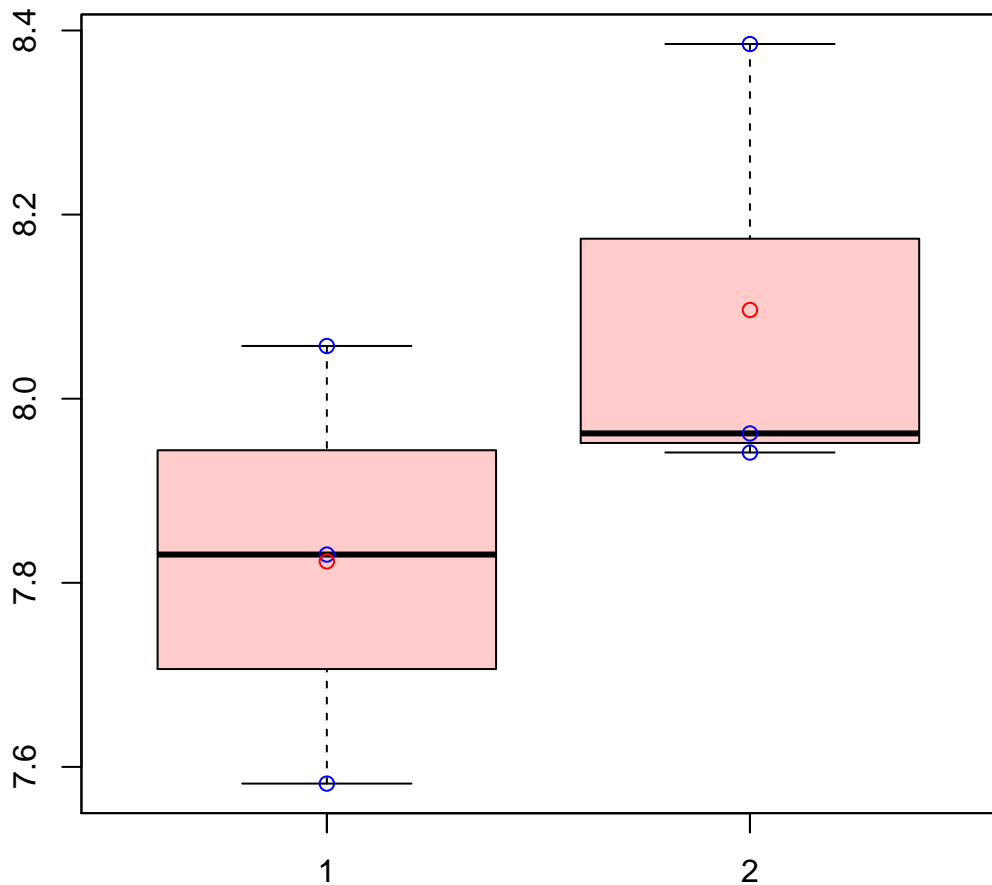

t-Test: p-value = 0.24



# CL5582Contig2|CL5582Contig2



t-Test: p-value = 0.24

# CL5594Contig1|CL5594Contig1

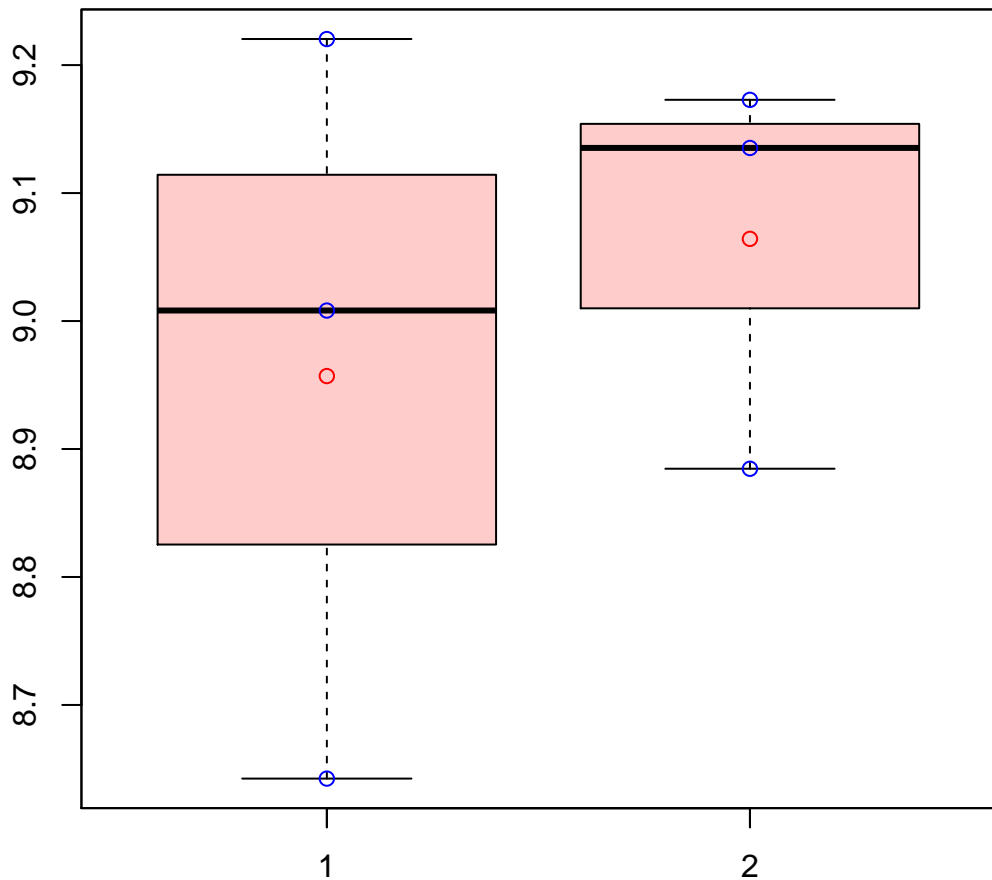

t-Test: p-value = 0.61

# CL559Contig4|CL559Contig4

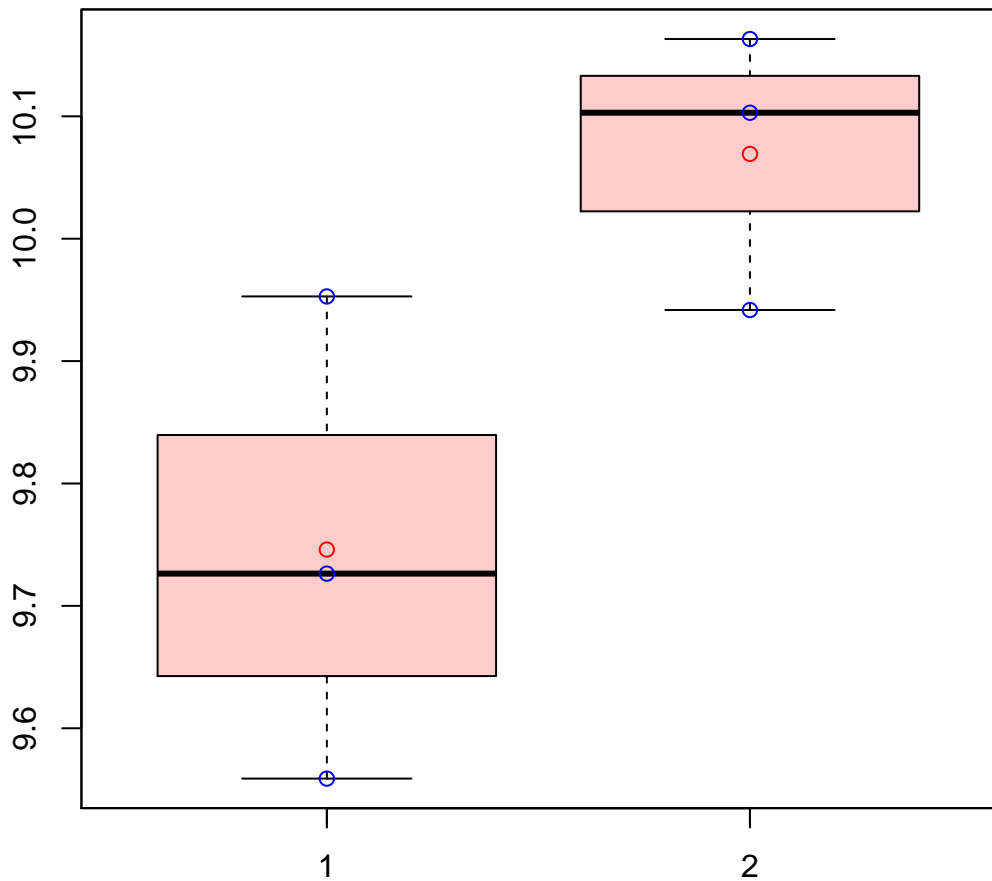

t-Test: p-value = 0.09

# CL55Contig12|CL55Contig12



t-Test: p-value = 0.7

# CL5602Contig1|CL5602Contig1

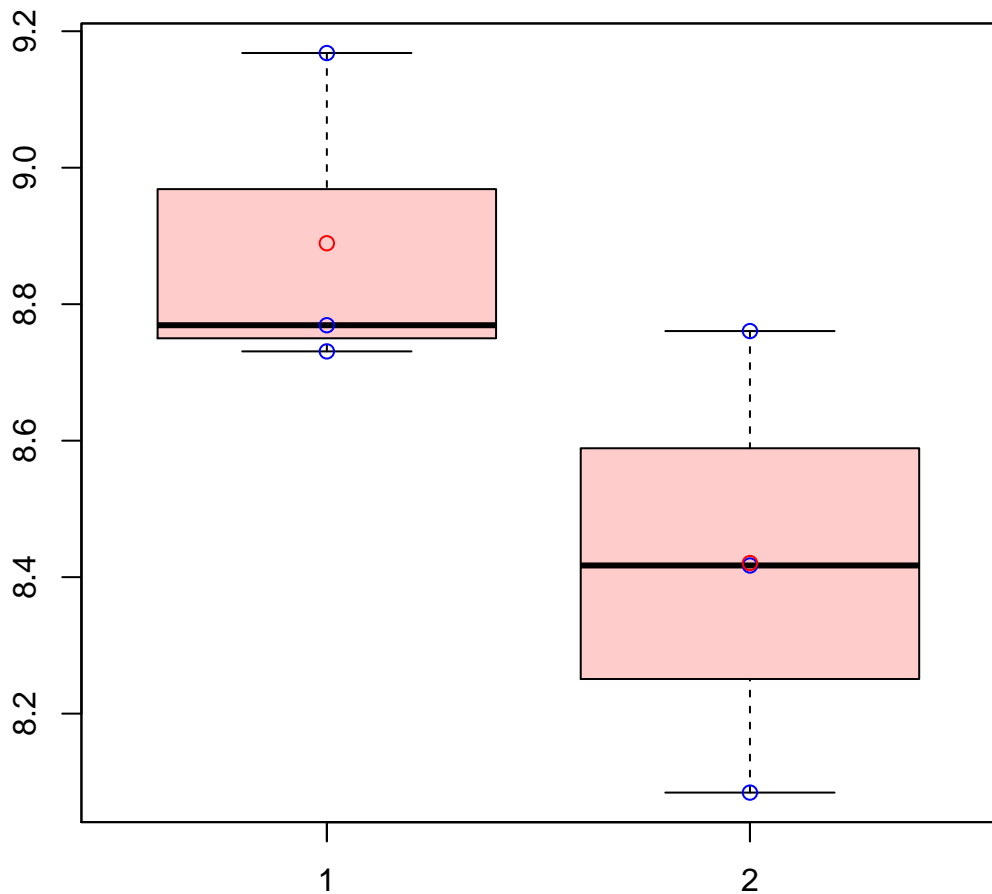

t-Test: p-value = 0.13

## CL5602Contig2|CL5602Contig2

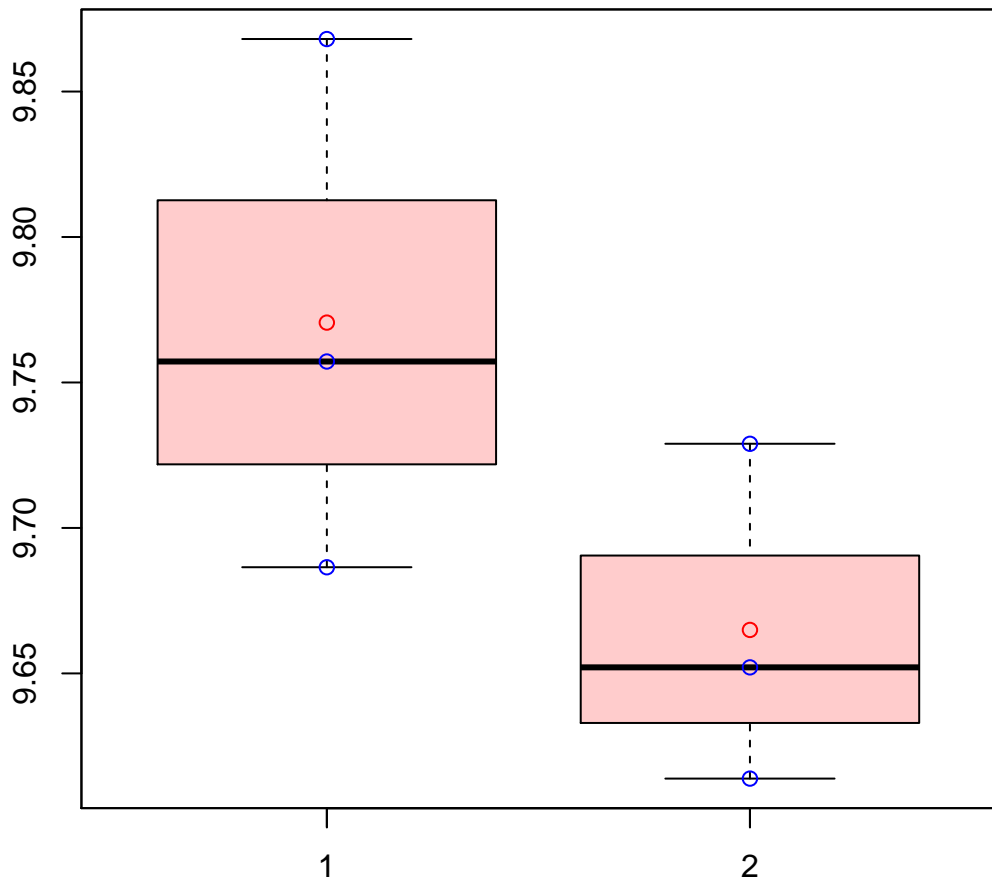

t-Test: p-value = 0.18

# CL5604Contig1|CL5604Contig1

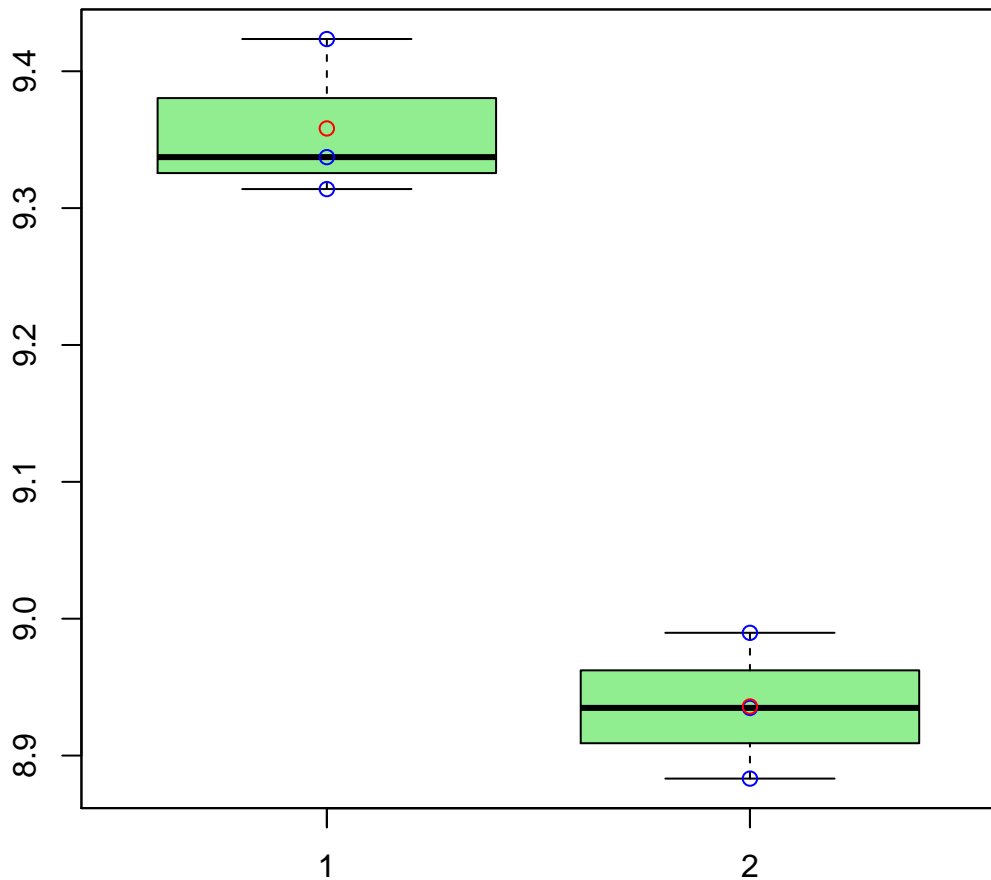

t-Test: p-value = 0

# CL560Contig2|CL560Contig2

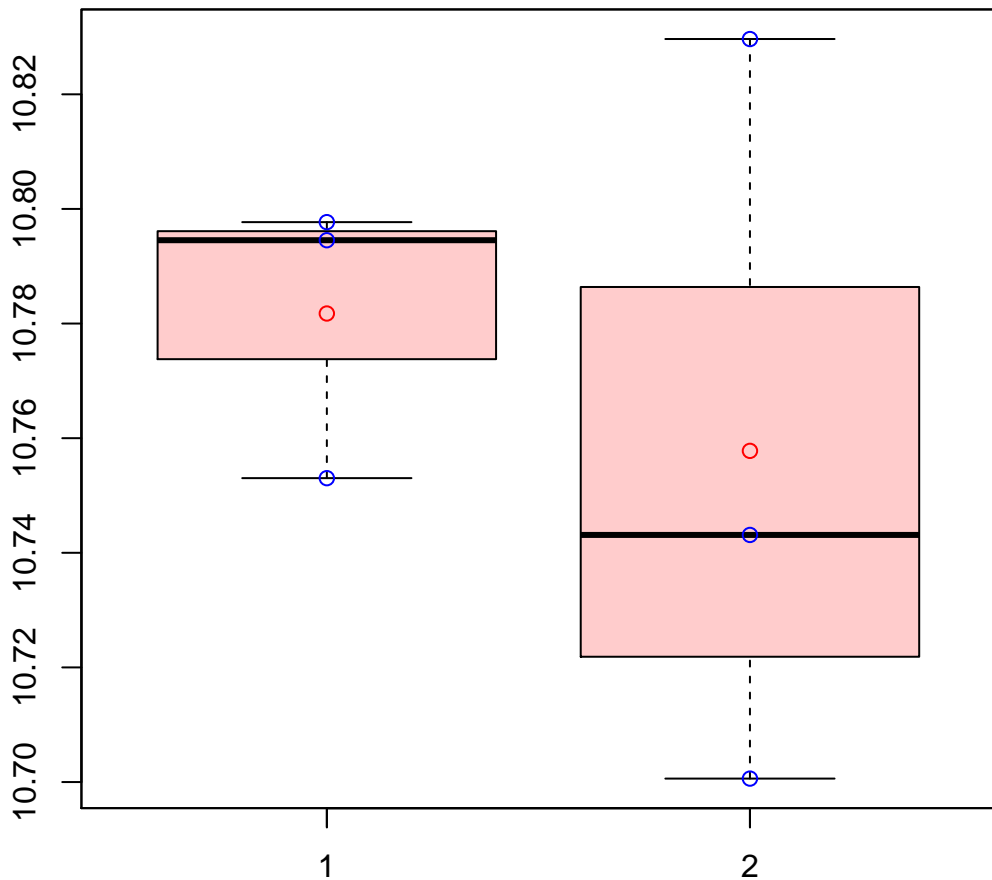

t-Test: p-value = 0.6



# CL5616Contig2|CL5616Contig2

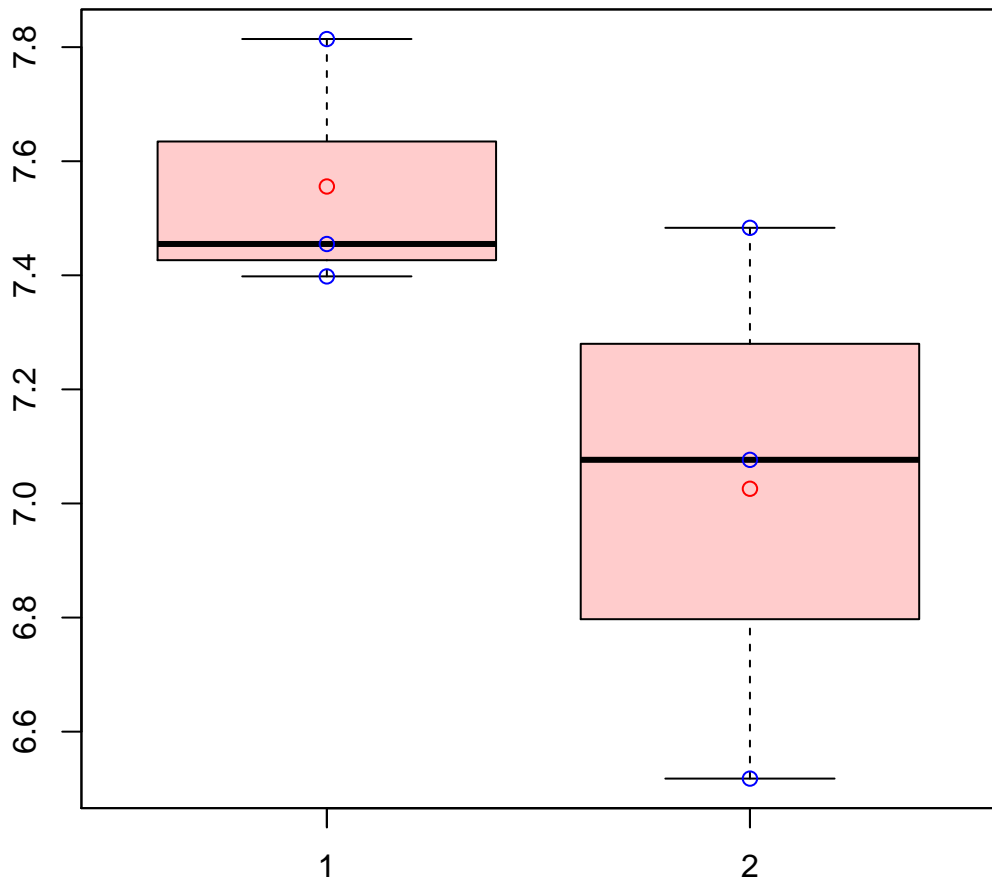

t-Test: p-value = 0.19

# CL5616Contig3|CL5616Contig3

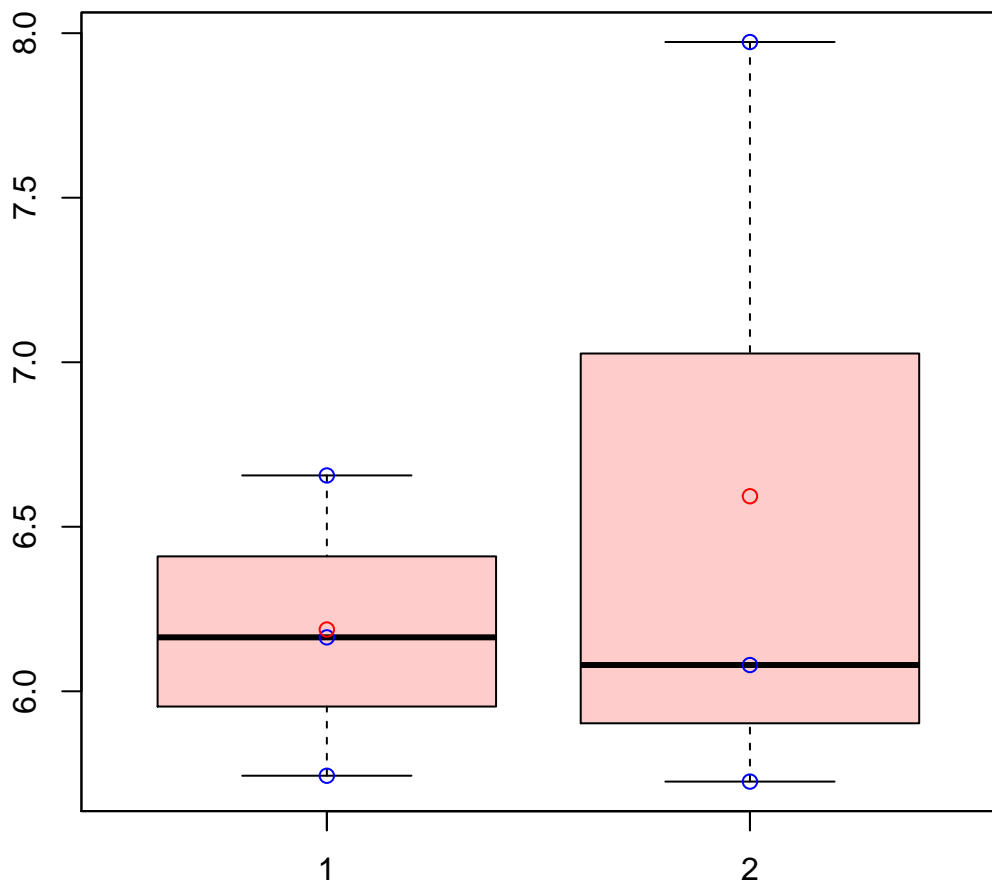

t-Test: p-value = 0.63

# CL561Contig7|CL561Contig7

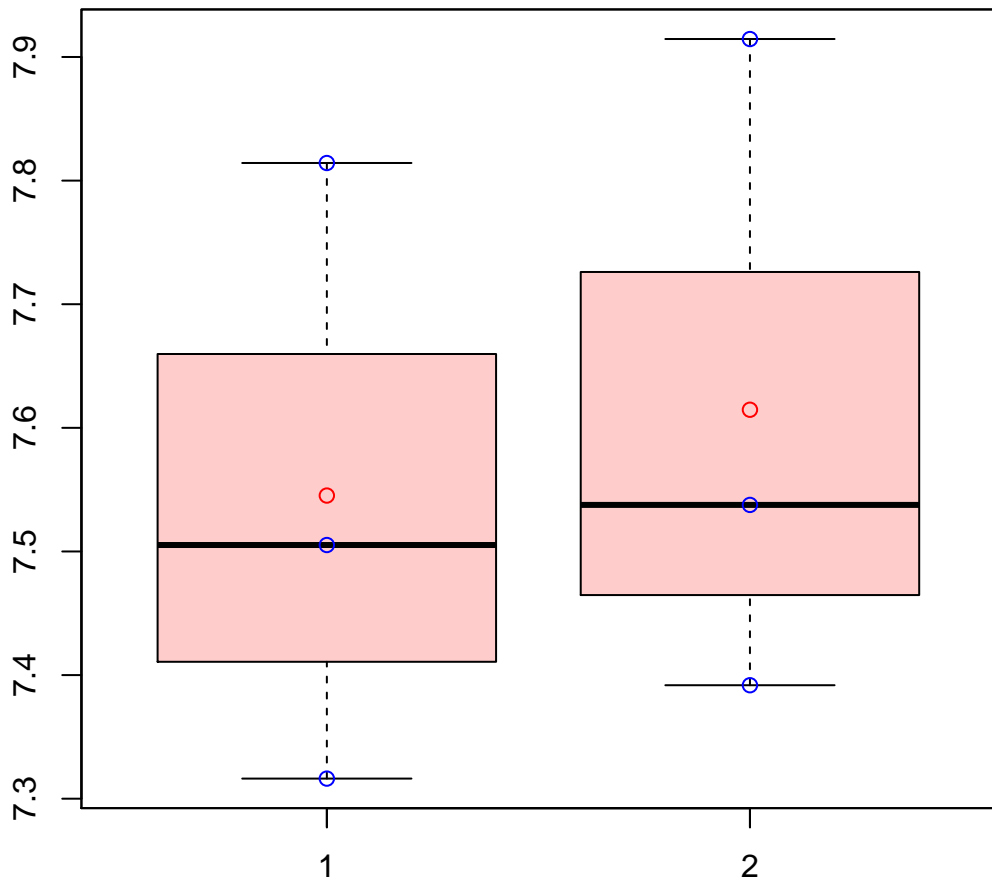

t-Test: p-value = 0.76

# CL5624Contig2|CL5624Contig2

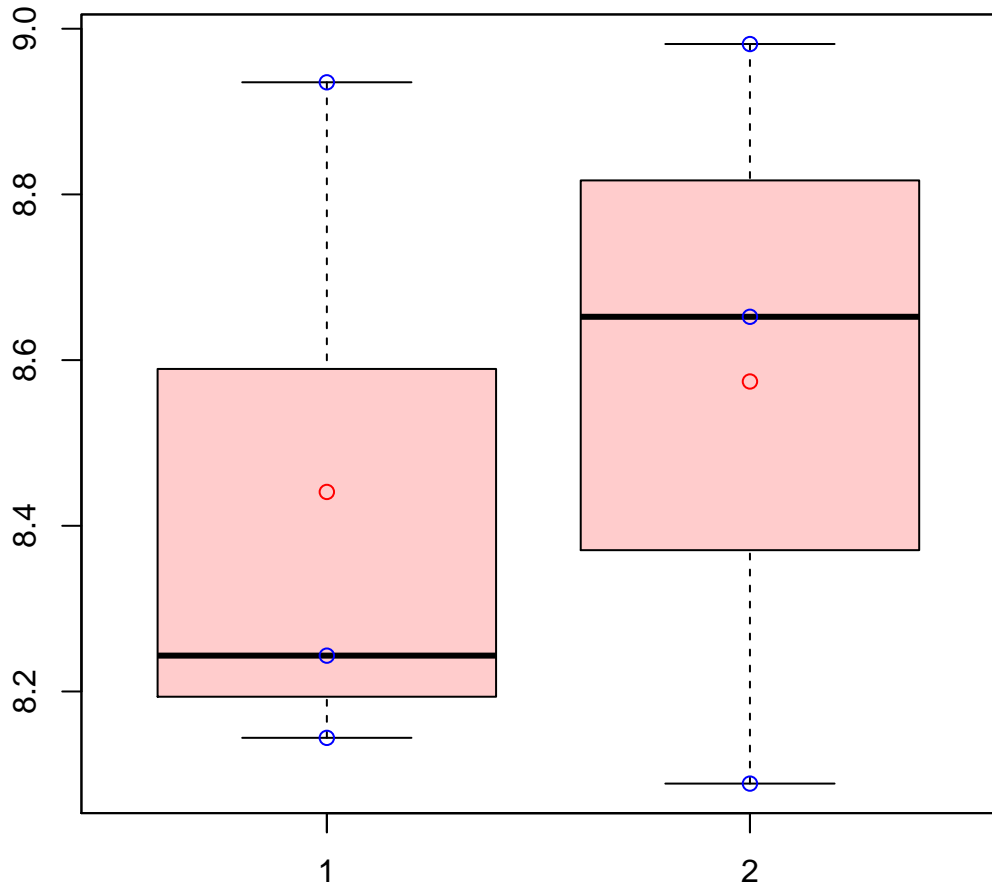

t-Test: p-value = 0.73

# CL5631Contig1|CL5631Contig1

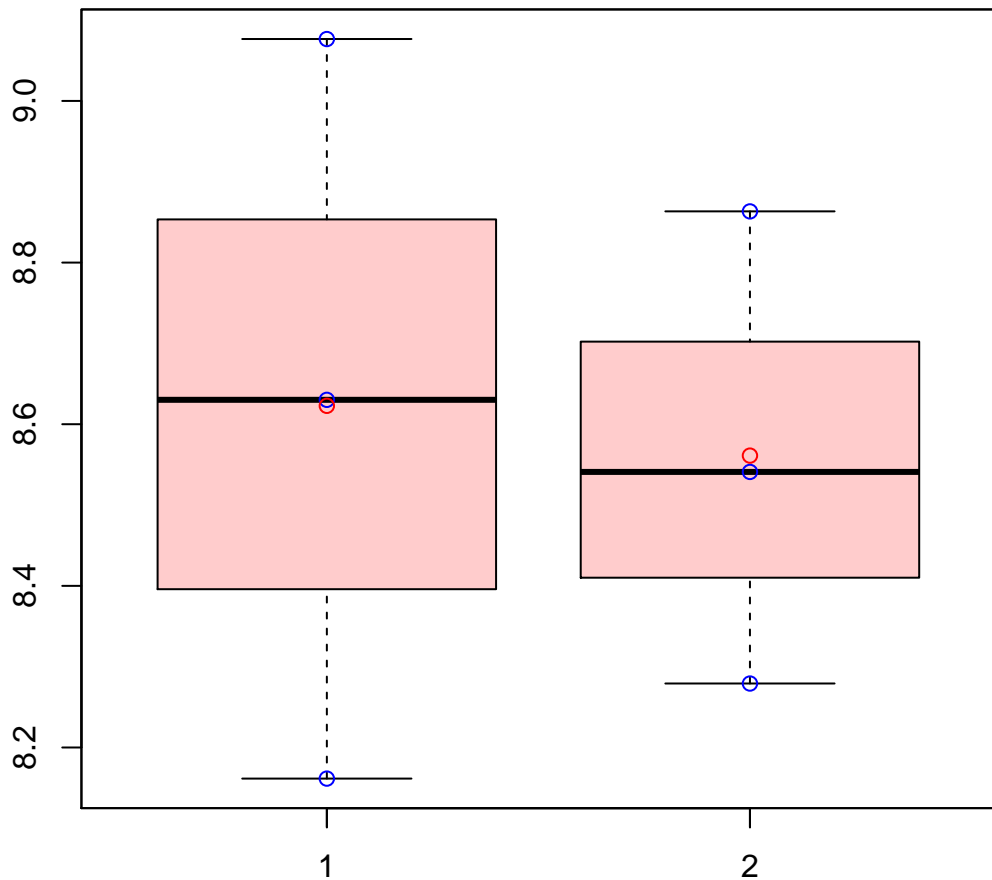

t-Test: p-value = 0.86

# CL5635Contig1|CL5635Contig1

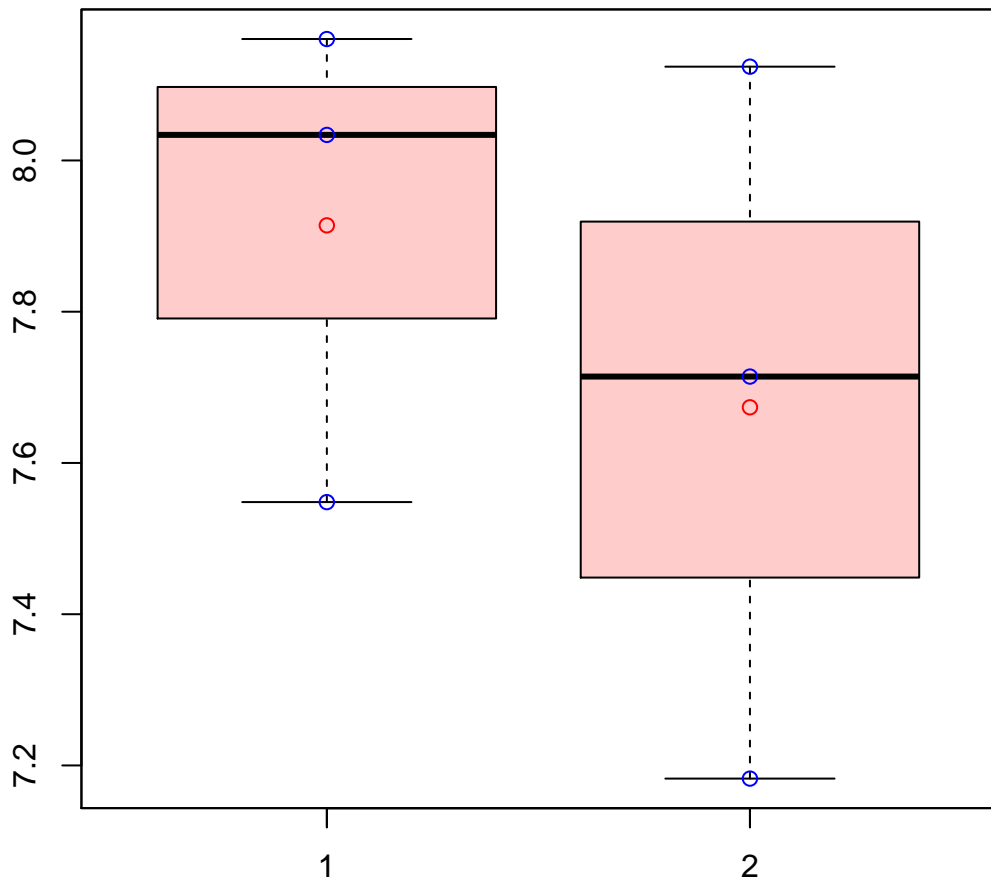

t-Test: p-value = 0.51

# CL5635Contig3|CL5635Contig3

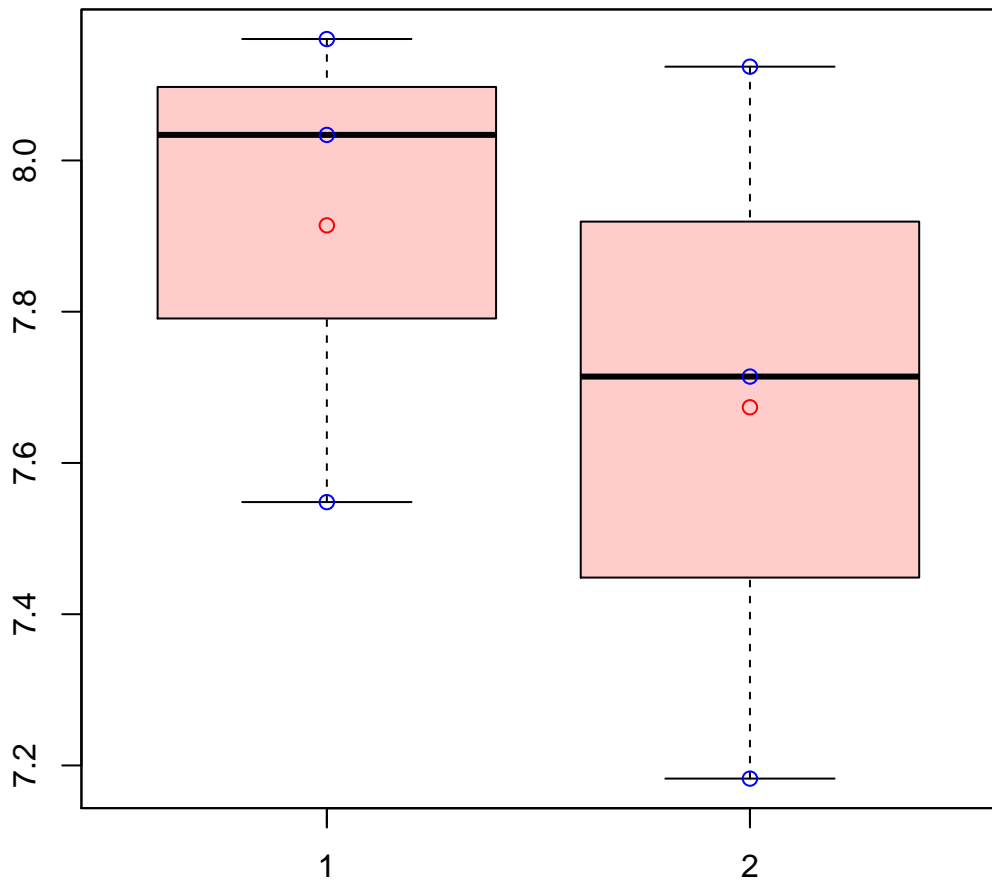

t-Test: p-value = 0.51

# CL5636Contig2|CL5636Contig2

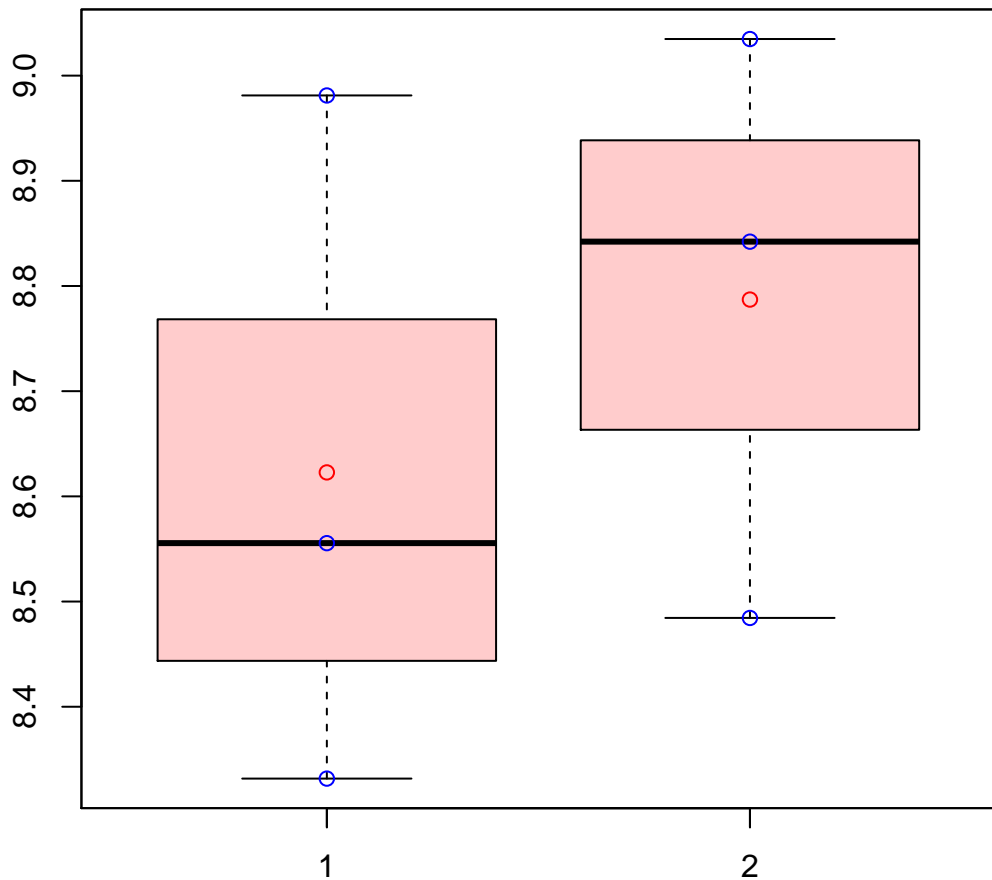

t-Test: p-value = 0.55



# CL5637Contig1|CL5637Contig1

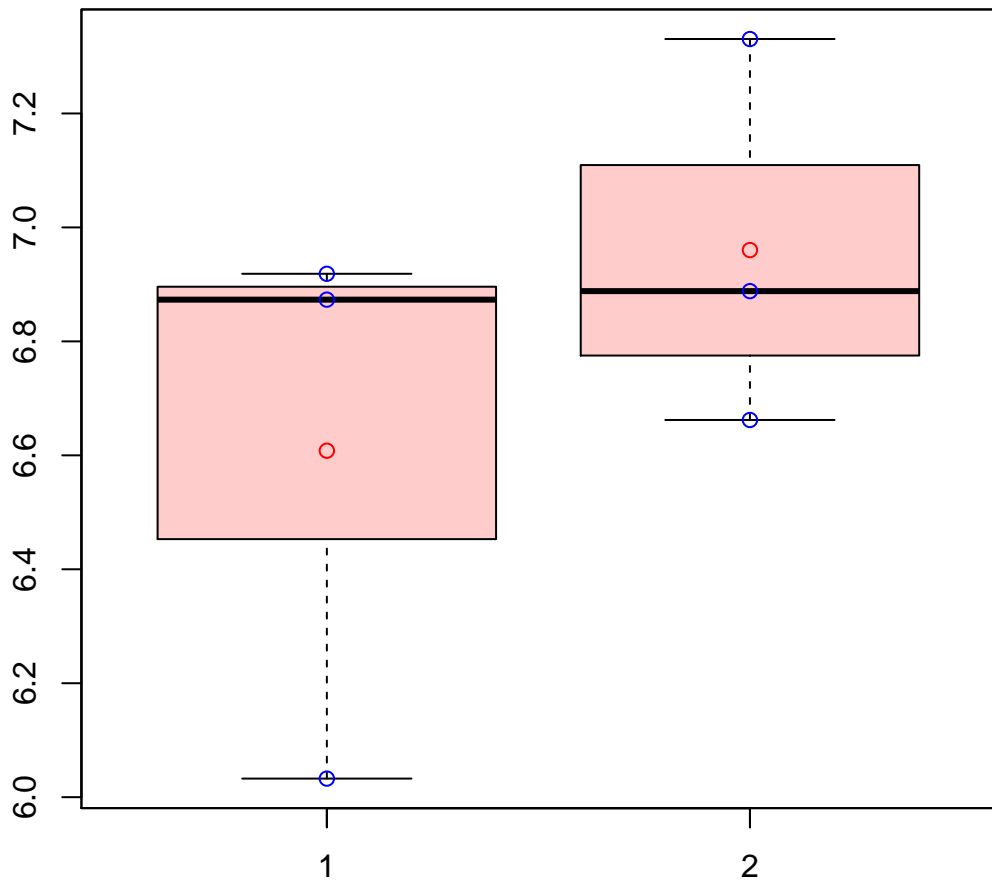

t-Test: p-value = 0.38

# CL563Contig1|CL563Contig1



t-Test: p-value = 0.47

# CL5640Contig1|CL5640Contig1

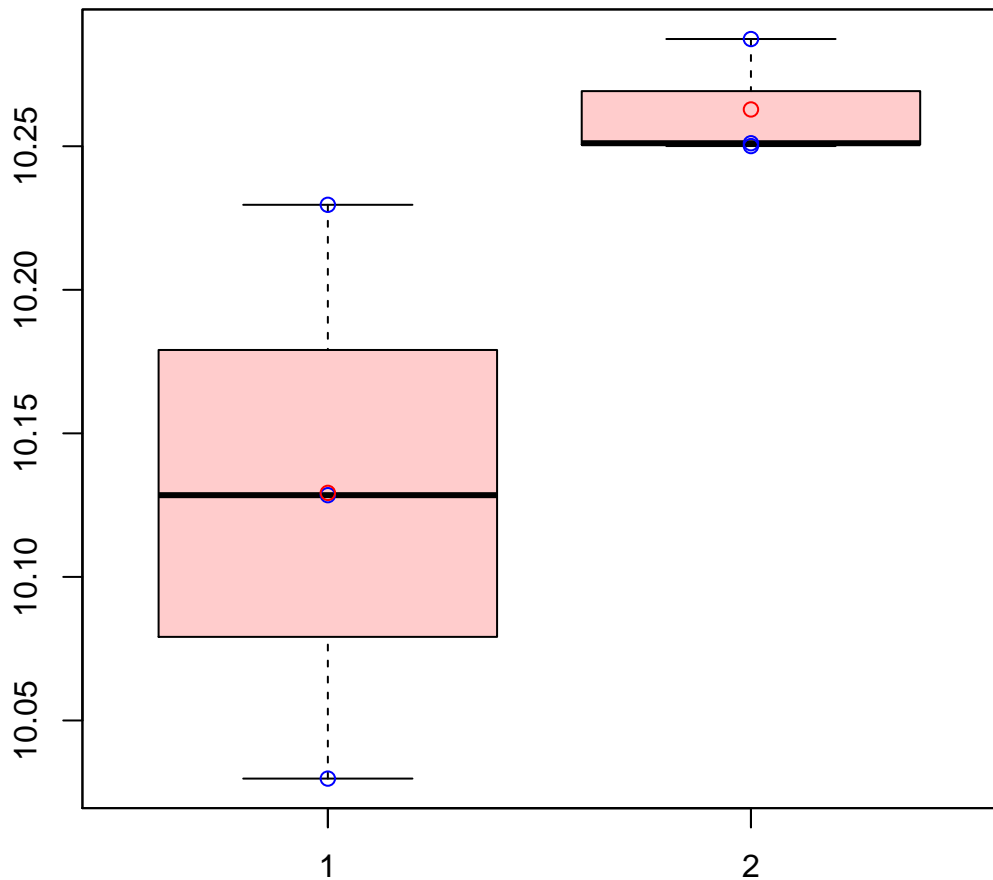

t-Test: p-value = 0.14

# CL5645Contig3|CL5645Contig3

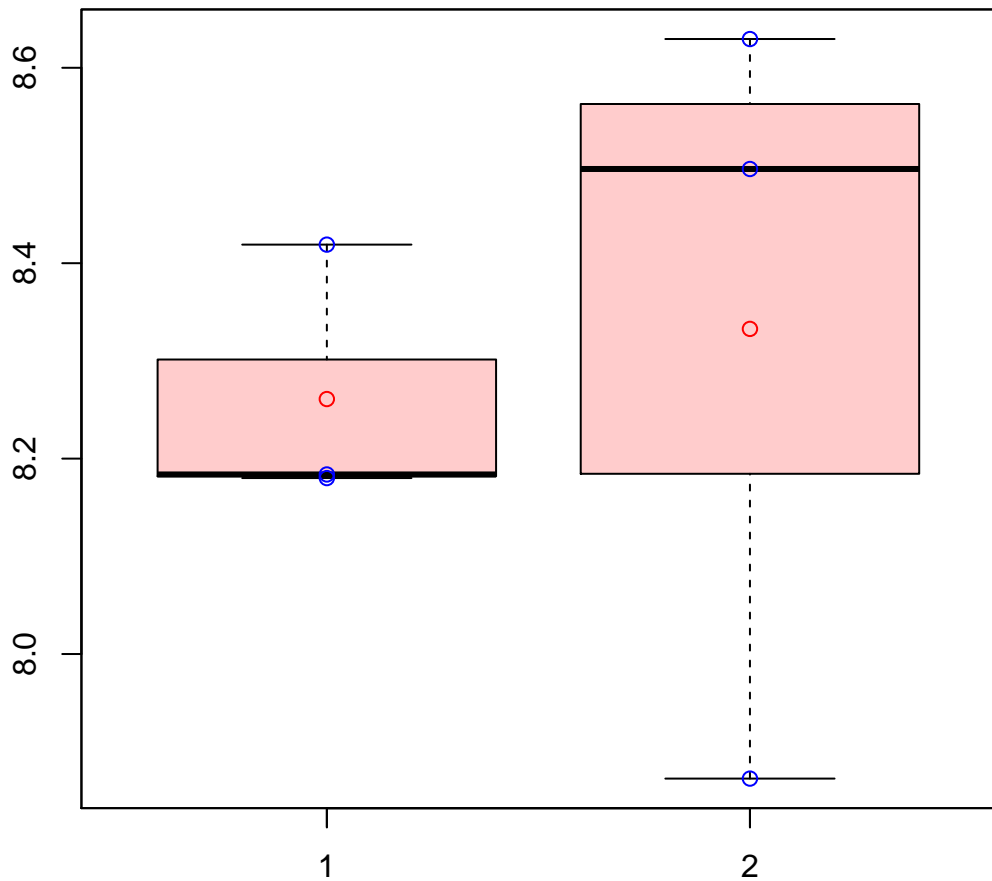

t-Test: p-value = 0.79

# CL5651Contig3|CL5651Contig3

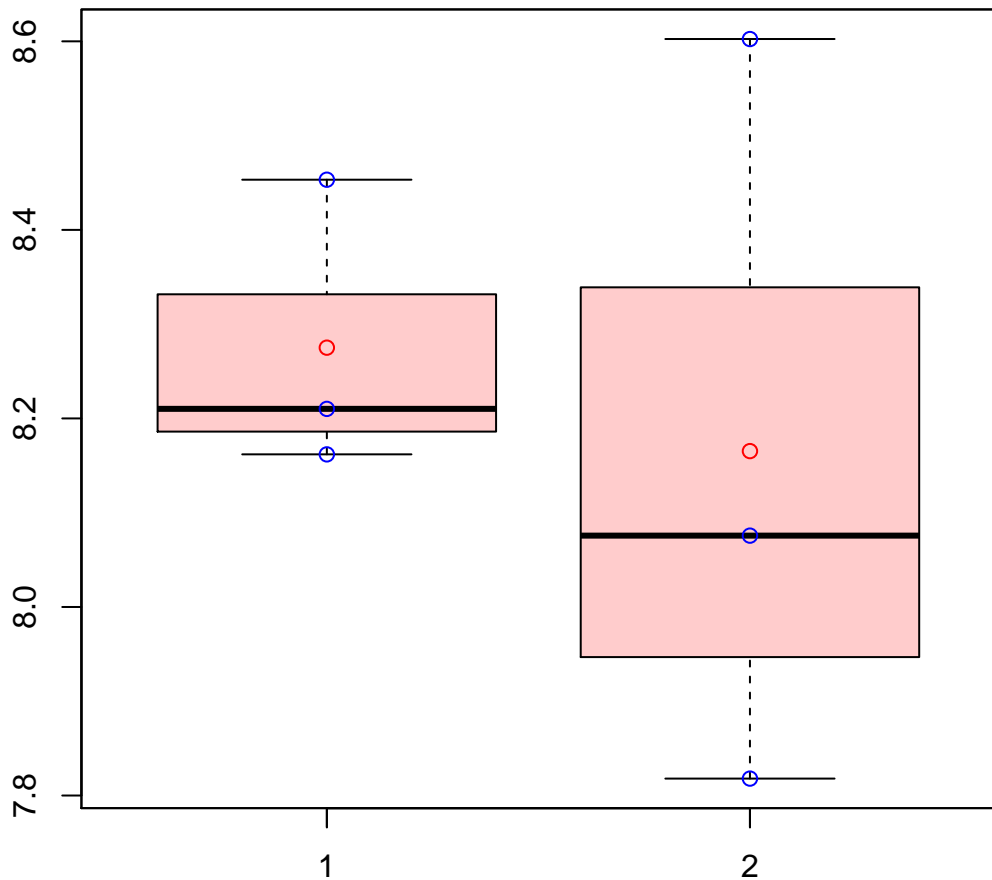

t-Test: p-value = 0.69

# CL565Contig10|CL565Contig10

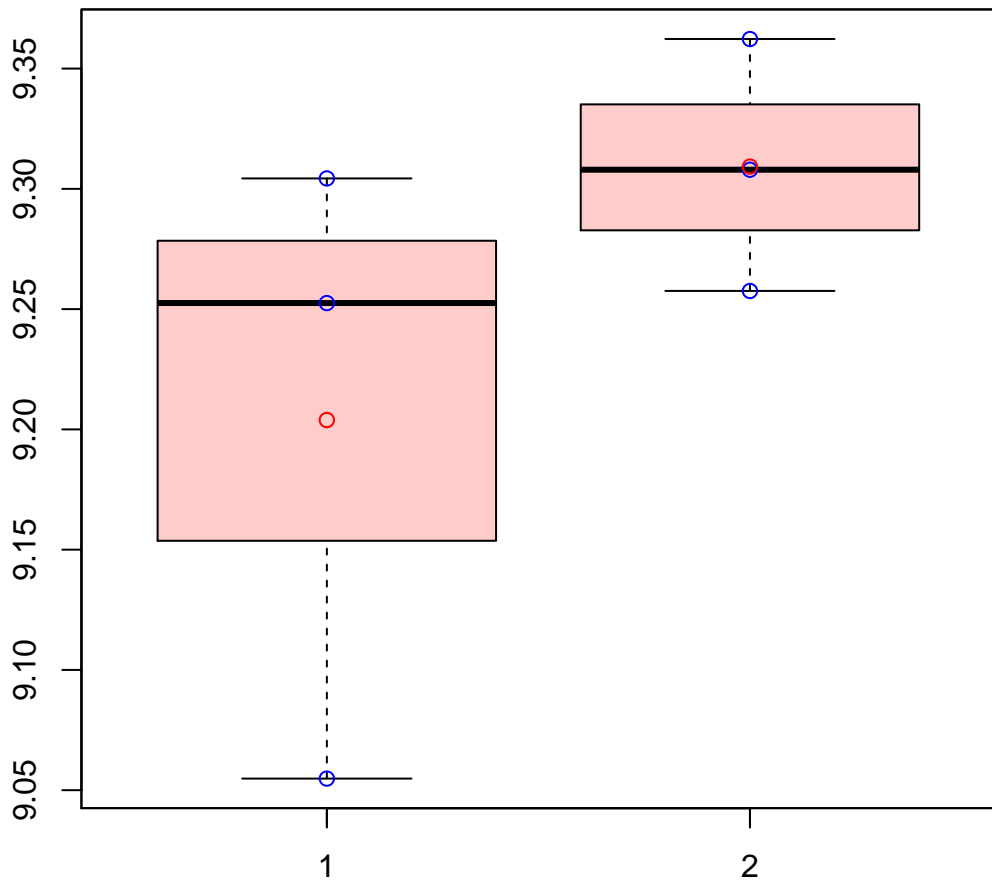

t-Test: p-value = 0.3

# CL5663Contig1|CL5663Contig1

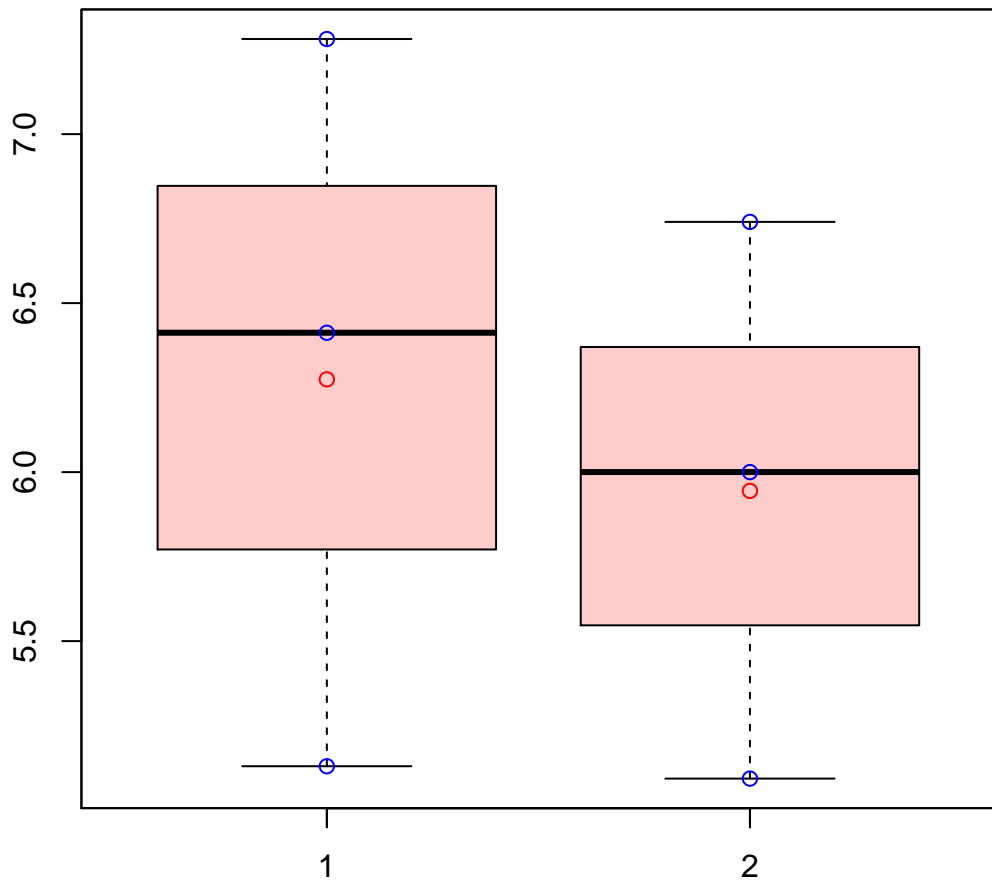

t-Test: p-value = 0.7

# CL566Contig2|CL566Contig2

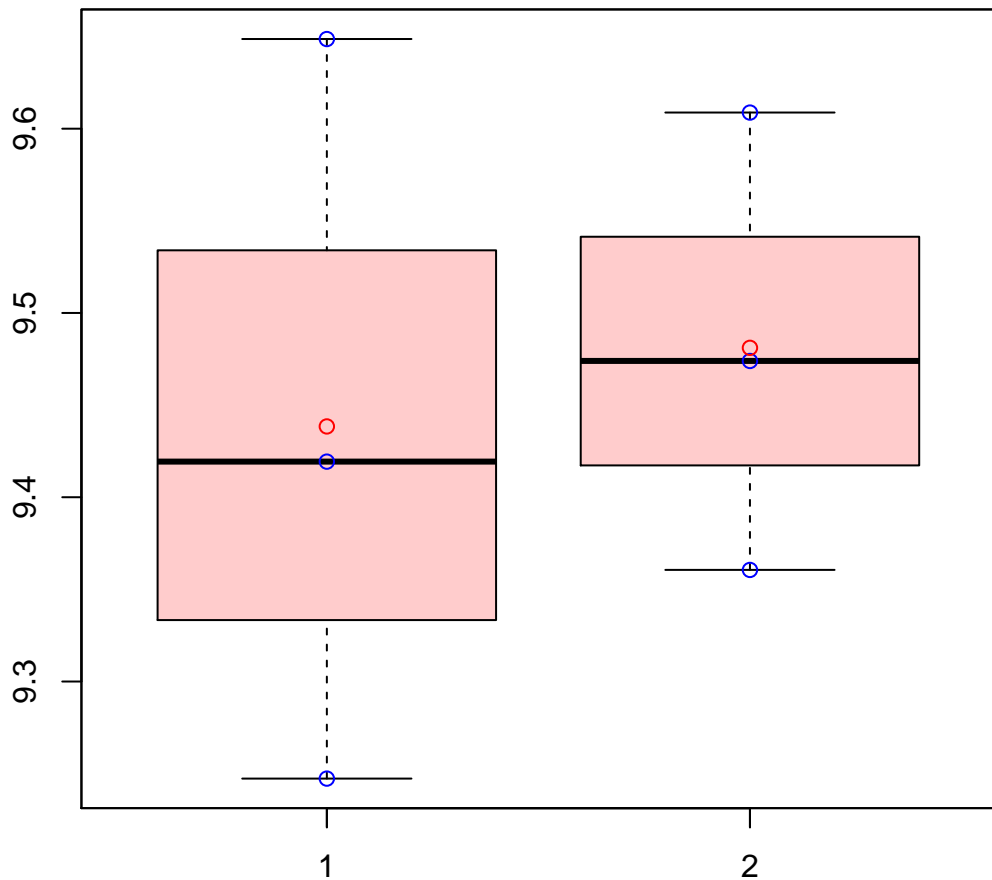

t-Test: p-value = 0.77



# CL566Contig7|CL566Contig7

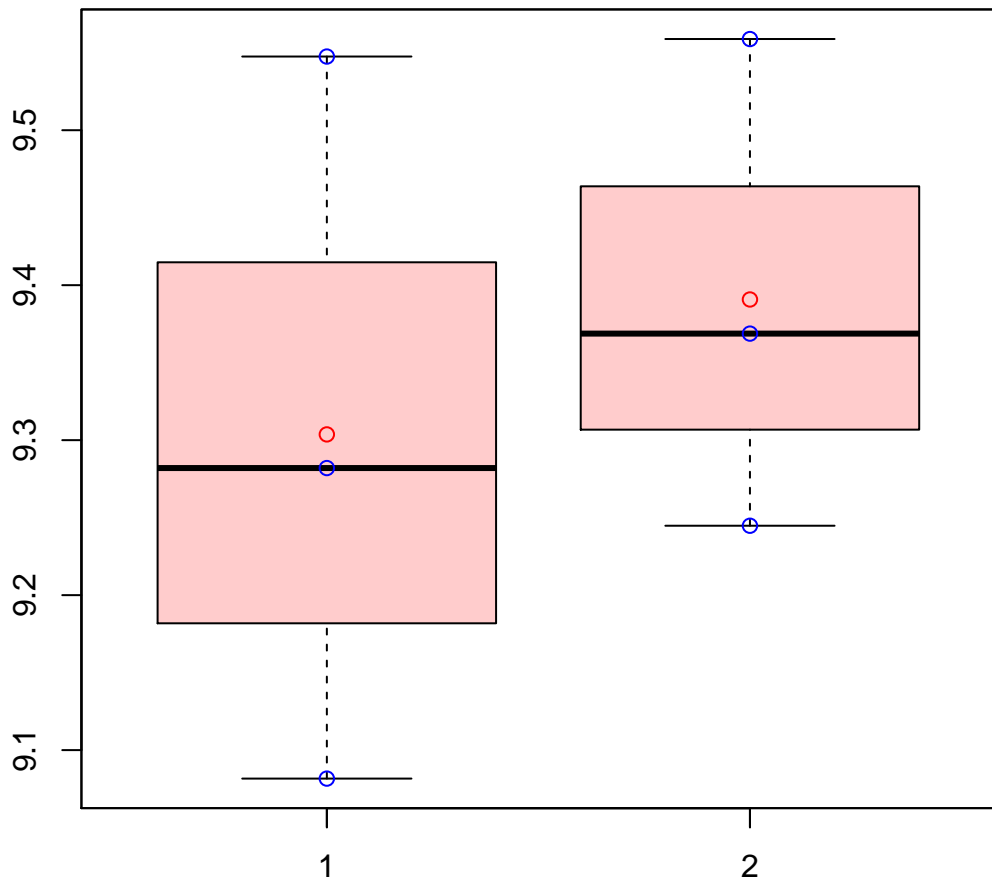

t-Test: p-value = 0.63

# CL5672Contig2|CL5672Contig2

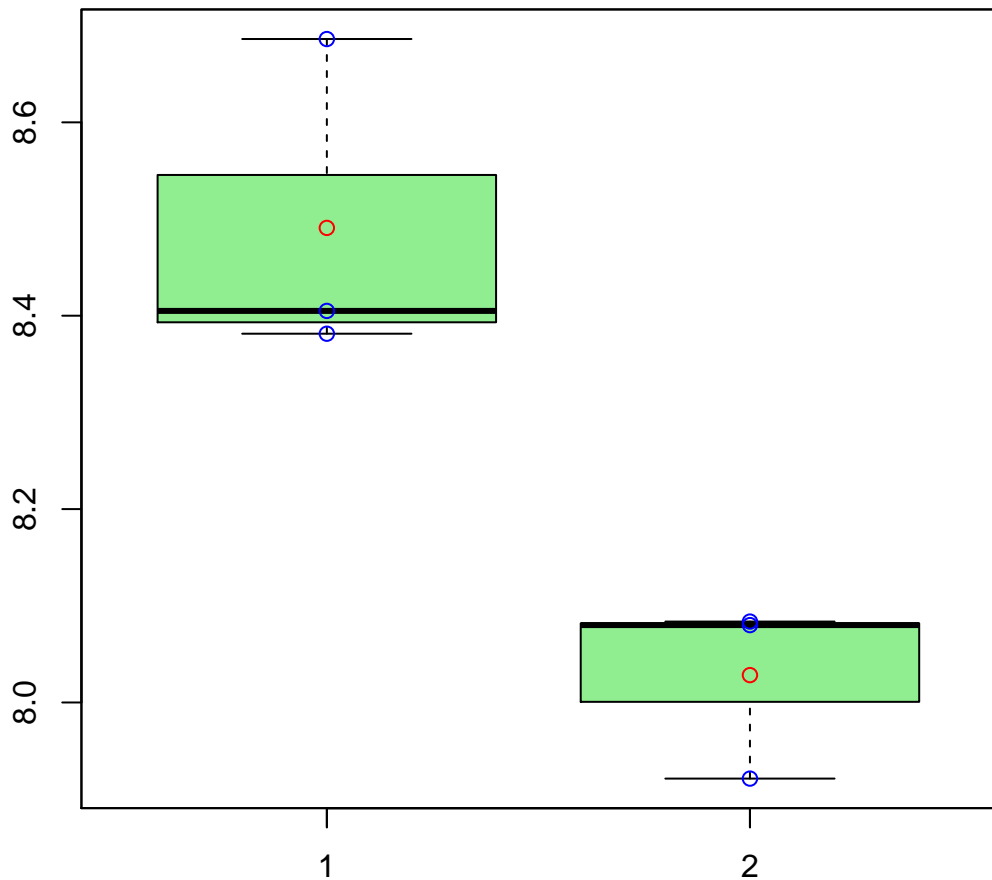

t-Test: p-value = 0.02

# CL5673Contig2|CL5673Contig2

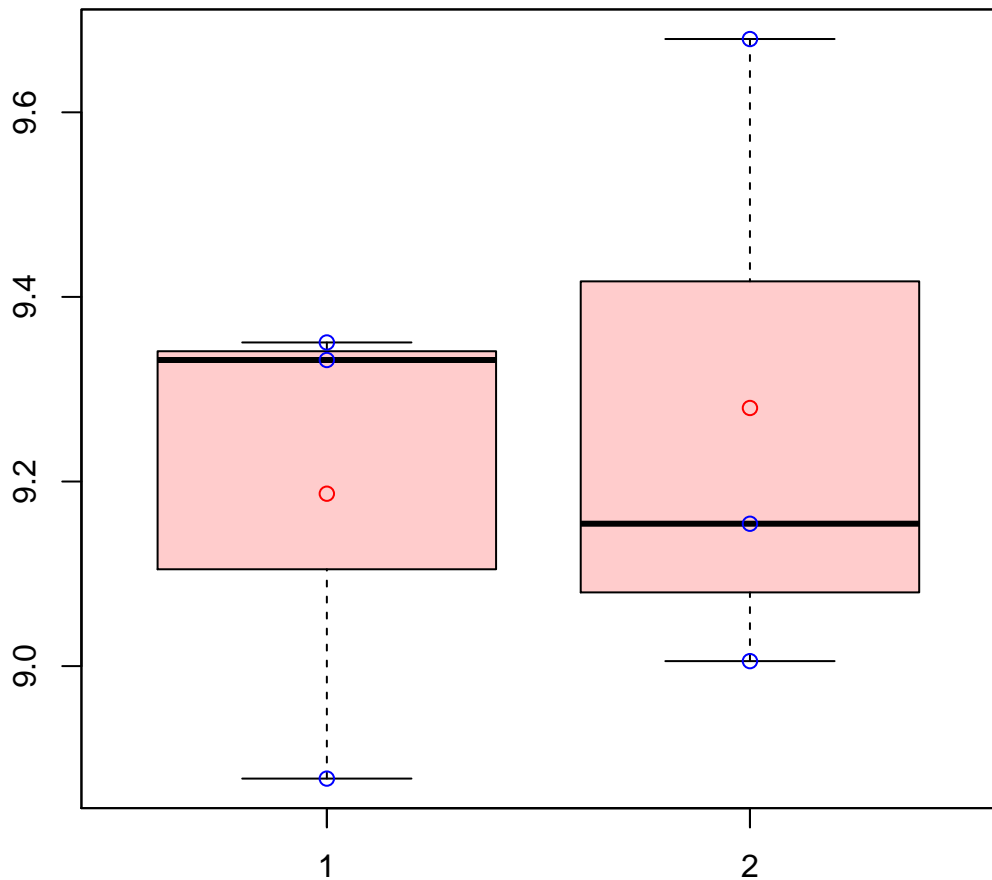

t-Test: p-value = 0.74

# CL5679Contig1|CL5679Contig1

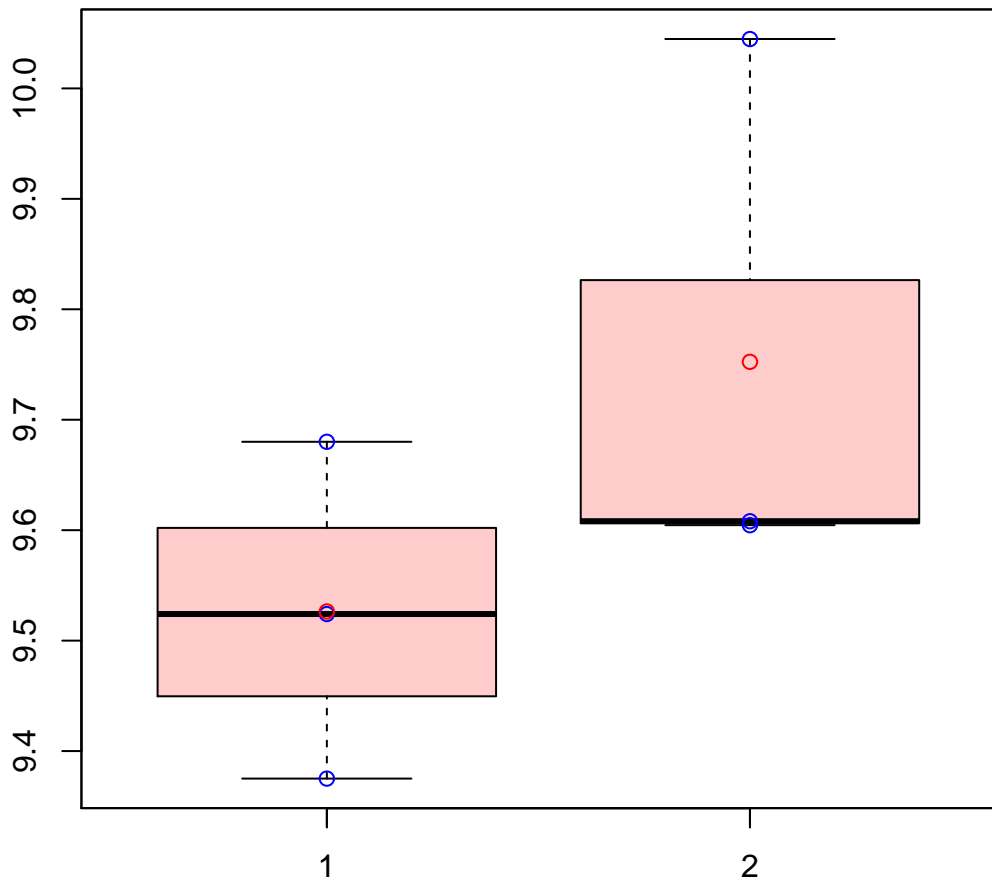

t-Test: p-value = 0.27

# CL5679Contig2|CL5679Contig2

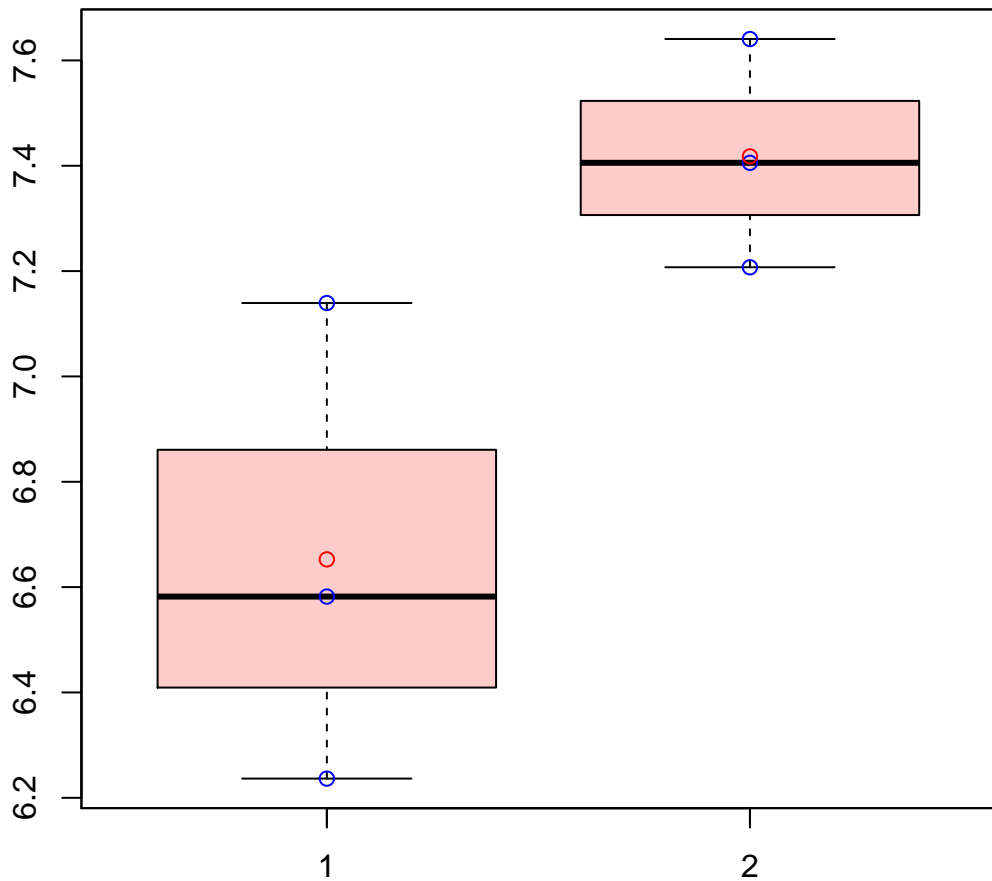

t-Test: p-value = 0.08

# CL567Contig15|CL567Contig15

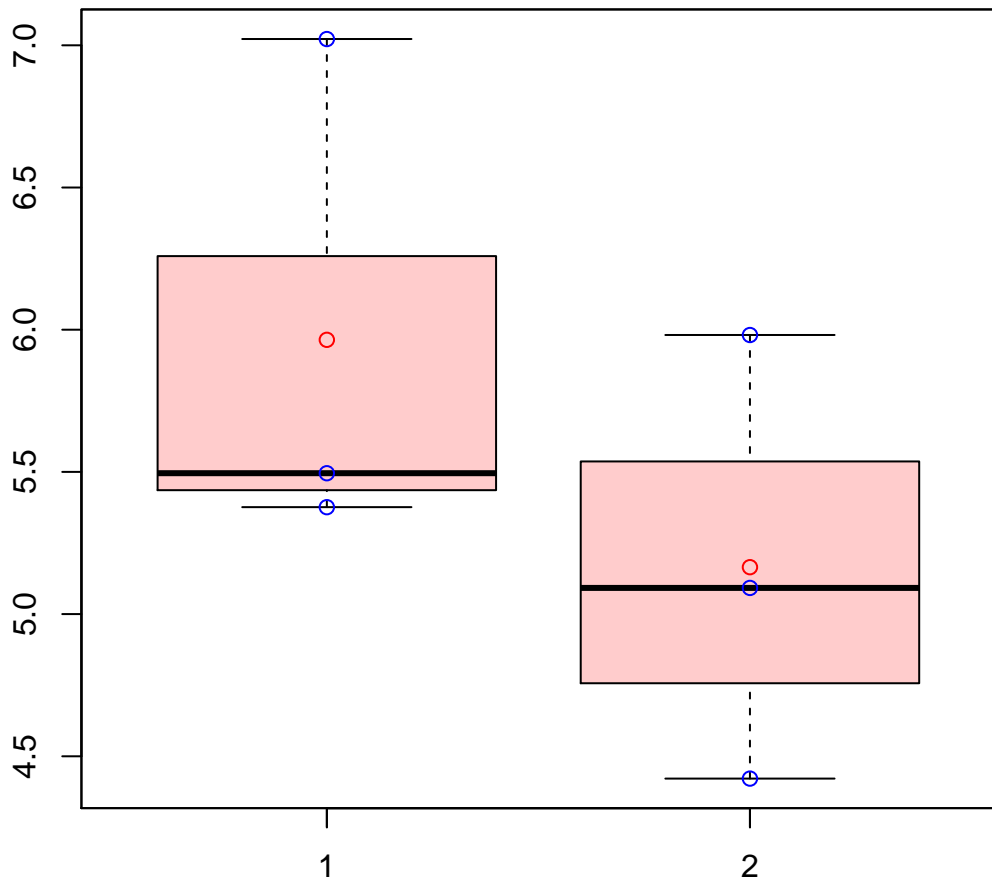

t-Test: p-value = 0.32

# CL567Contig16|CL567Contig16

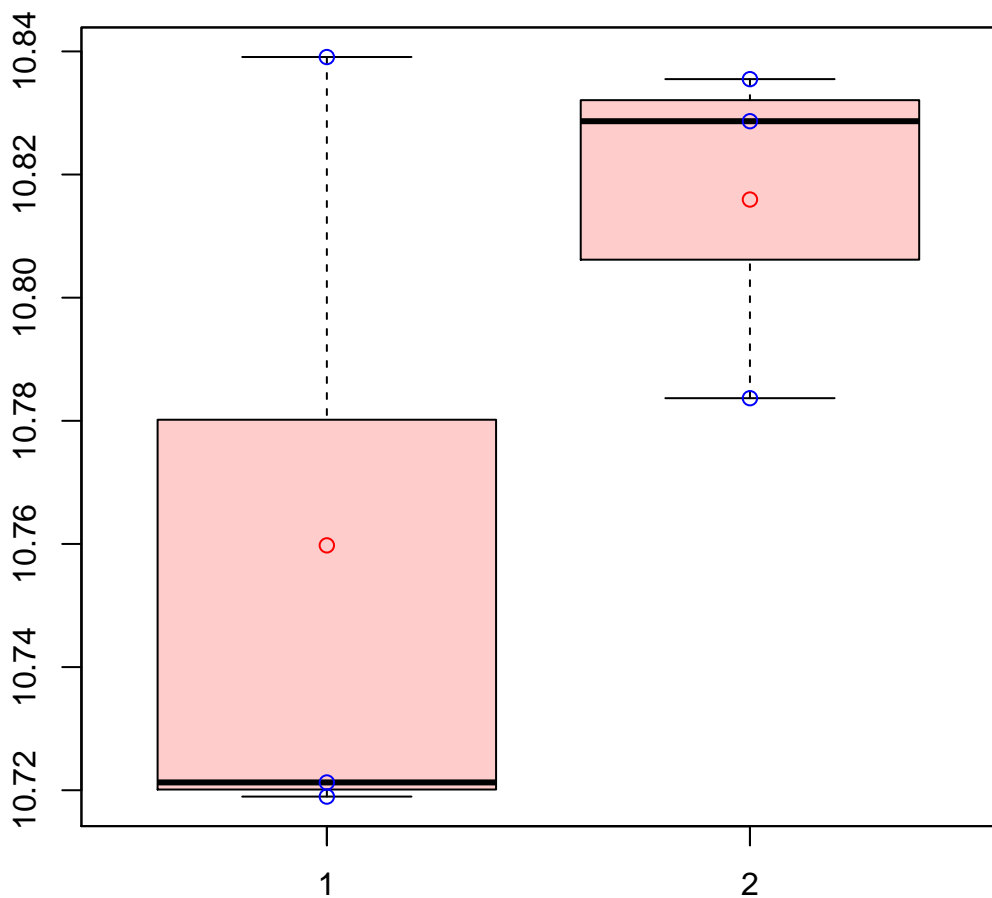

t-Test: p-value = 0.29

# CL567Contig18|CL567Contig18

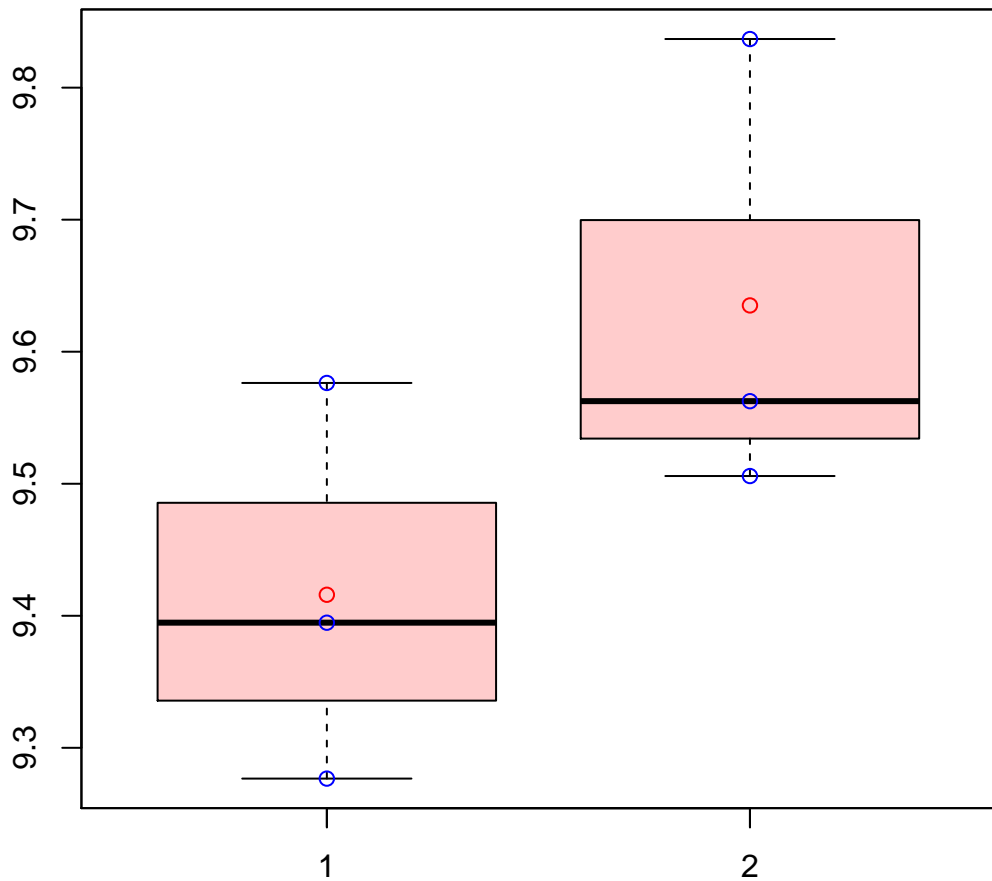

t-Test: p-value = 0.18



# CL567Contig1|CL567Contig1

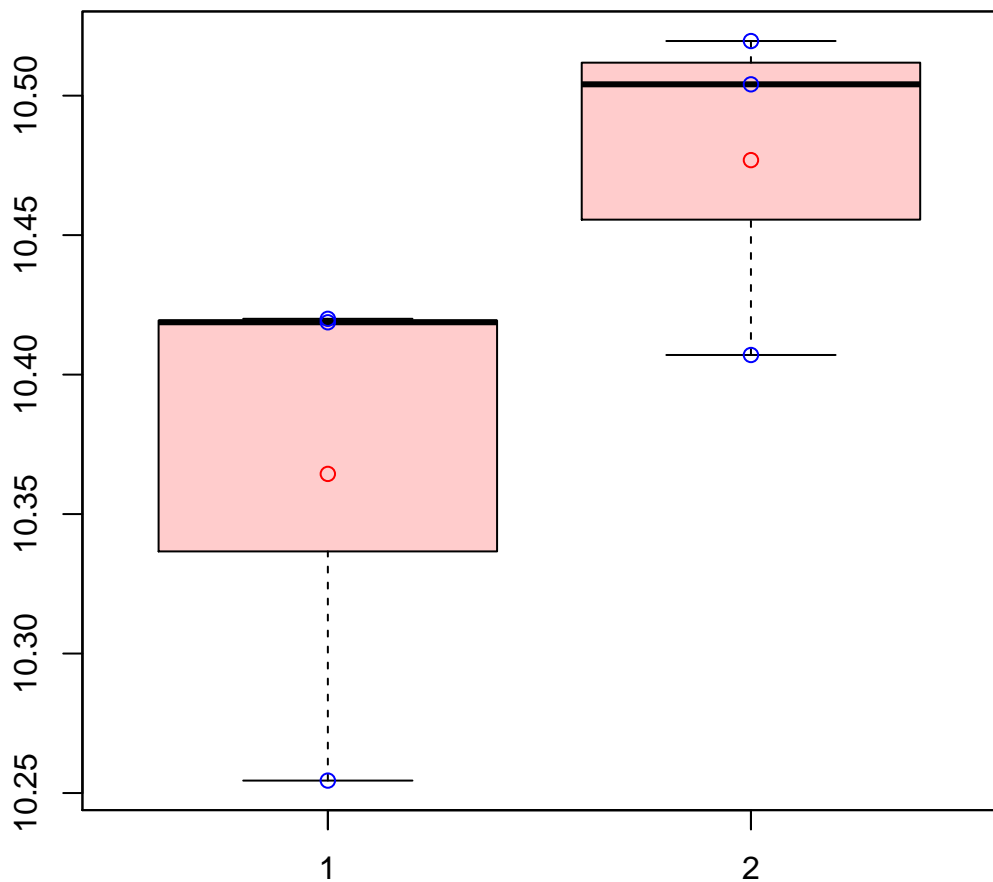

t-Test: p-value = 0.17

# CL567Contig3|CL567Contig3

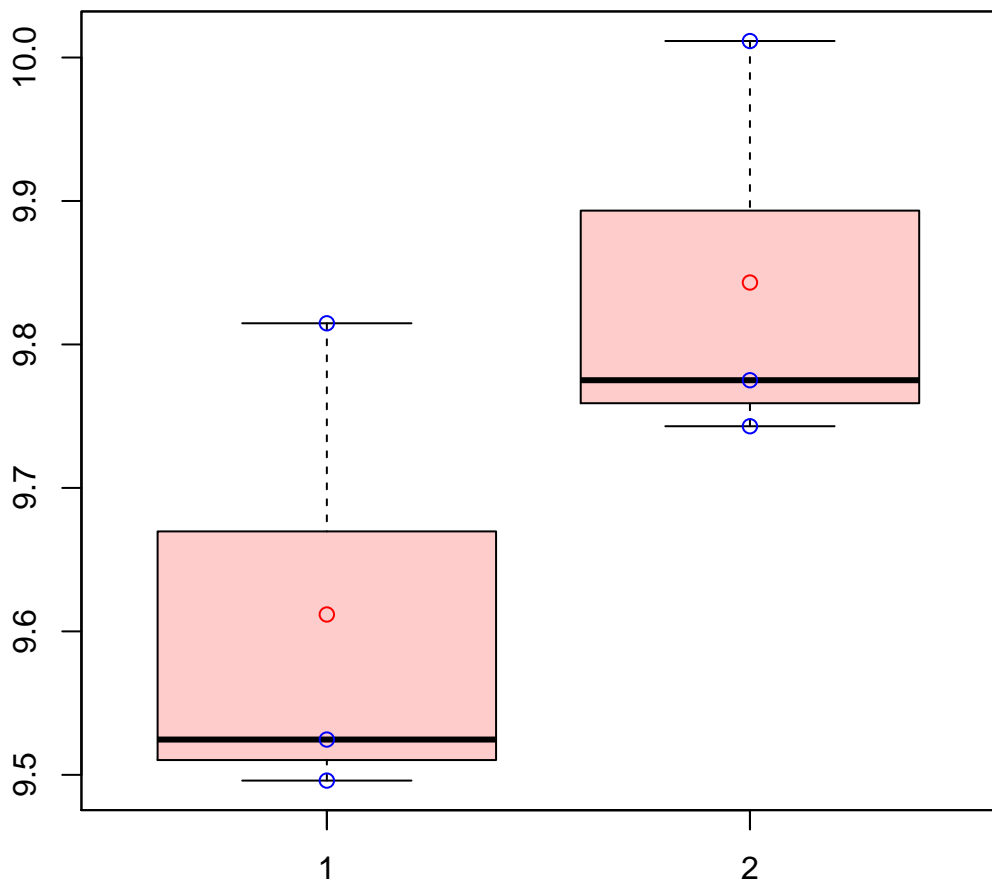

t-Test: p-value = 0.16

# CL567Contig8|CL567Contig8

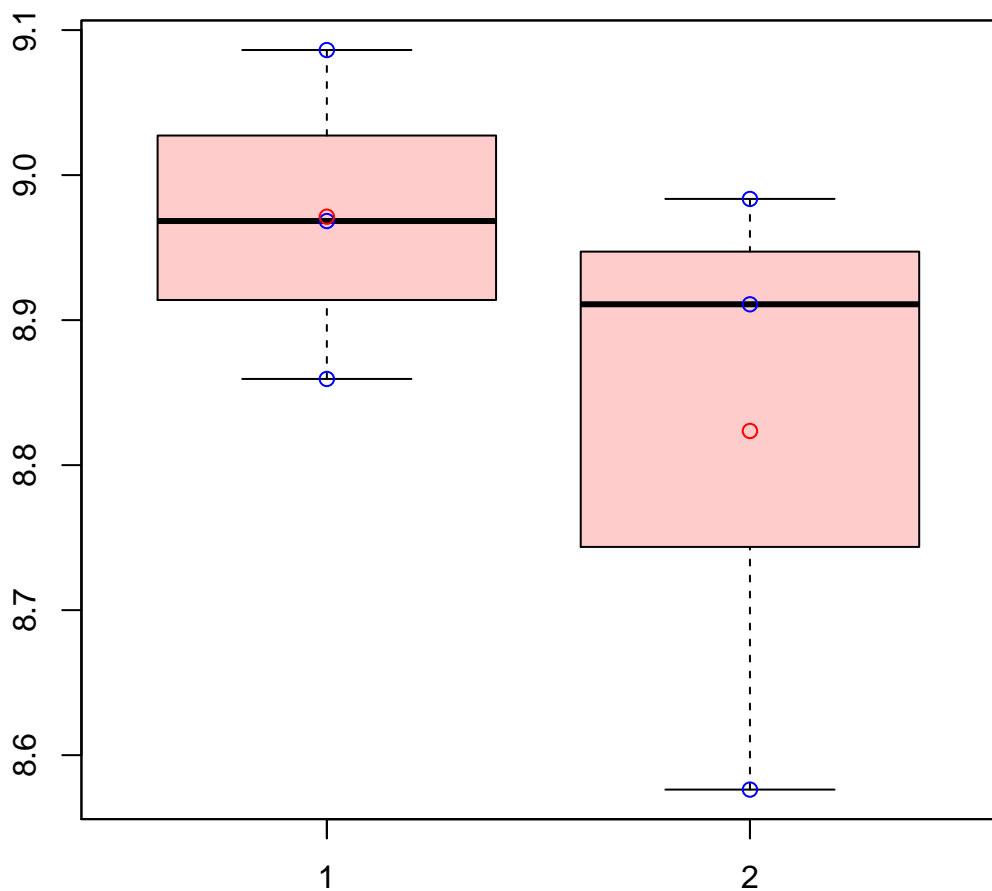

t-Test: p-value = 0.37

# CL5680Contig4|CL5680Contig4

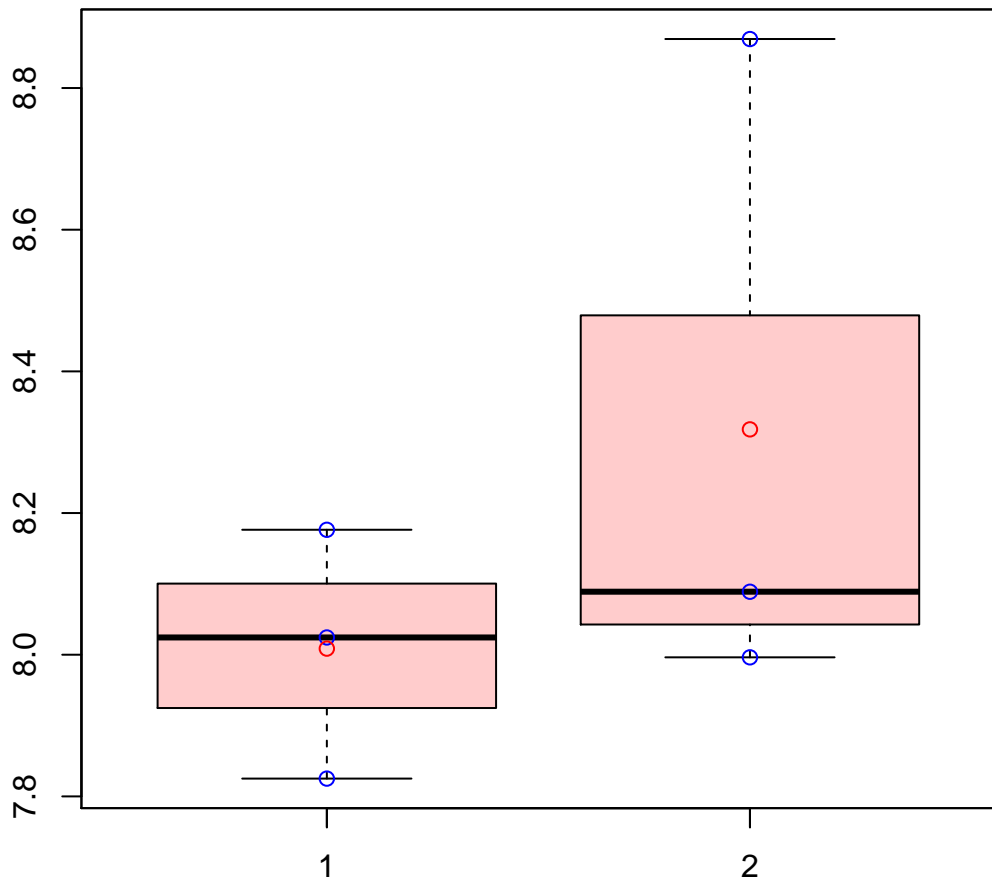

t-Test: p-value = 0.38

# CL5693Contig3|CL5693Contig3

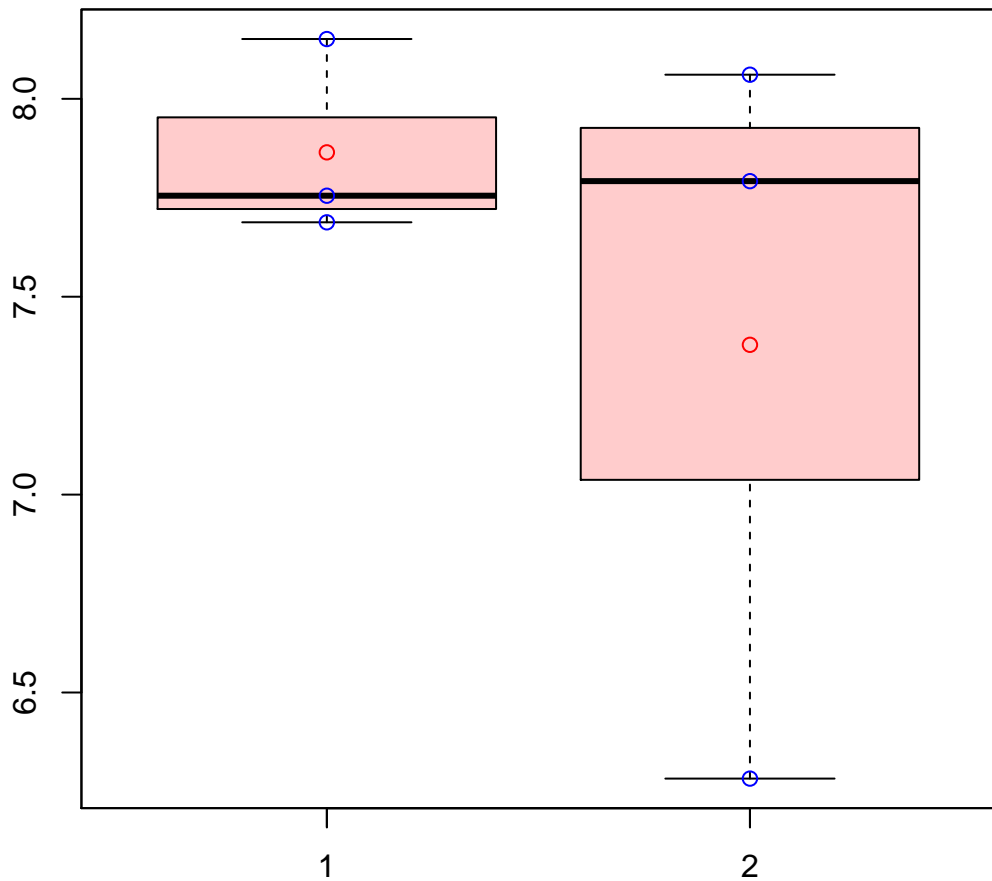

t-Test: p-value = 0.48

# CL5698Contig2|CL5698Contig2

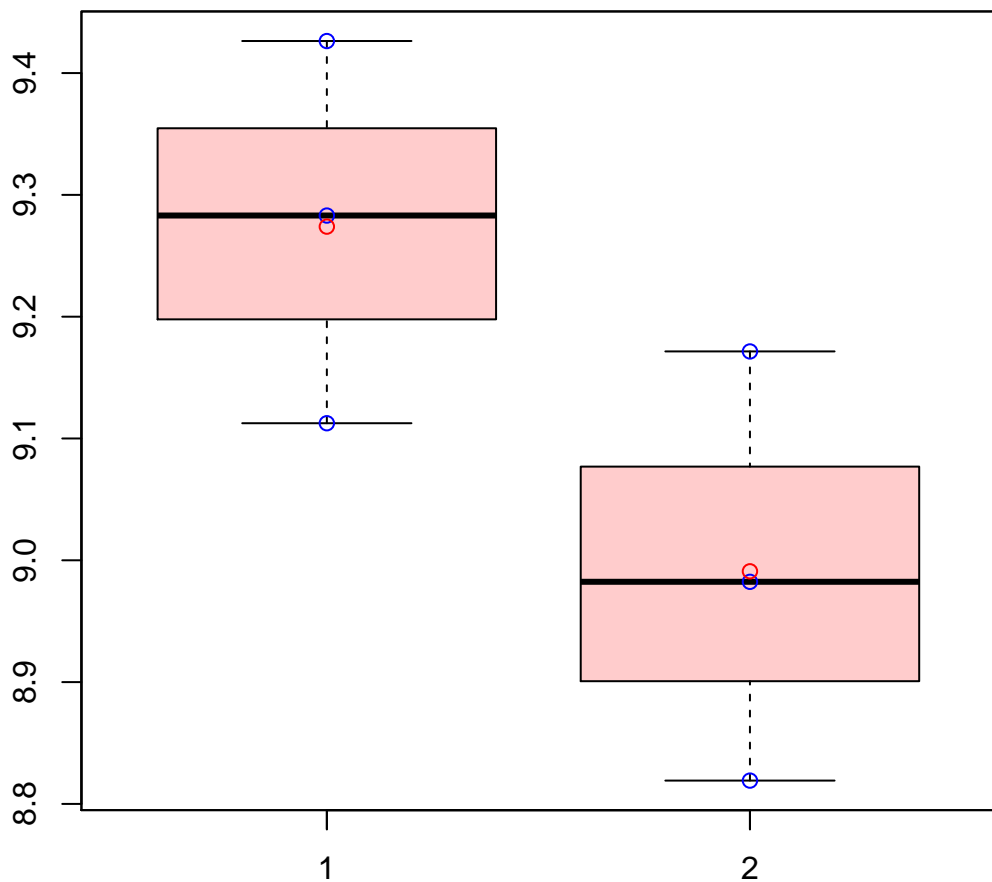

t-Test: p-value = 0.11

# CL5715Contig1|CL5715Contig1



t-Test: p-value = 0.85

# CL5717Contig2|CL5717Contig2

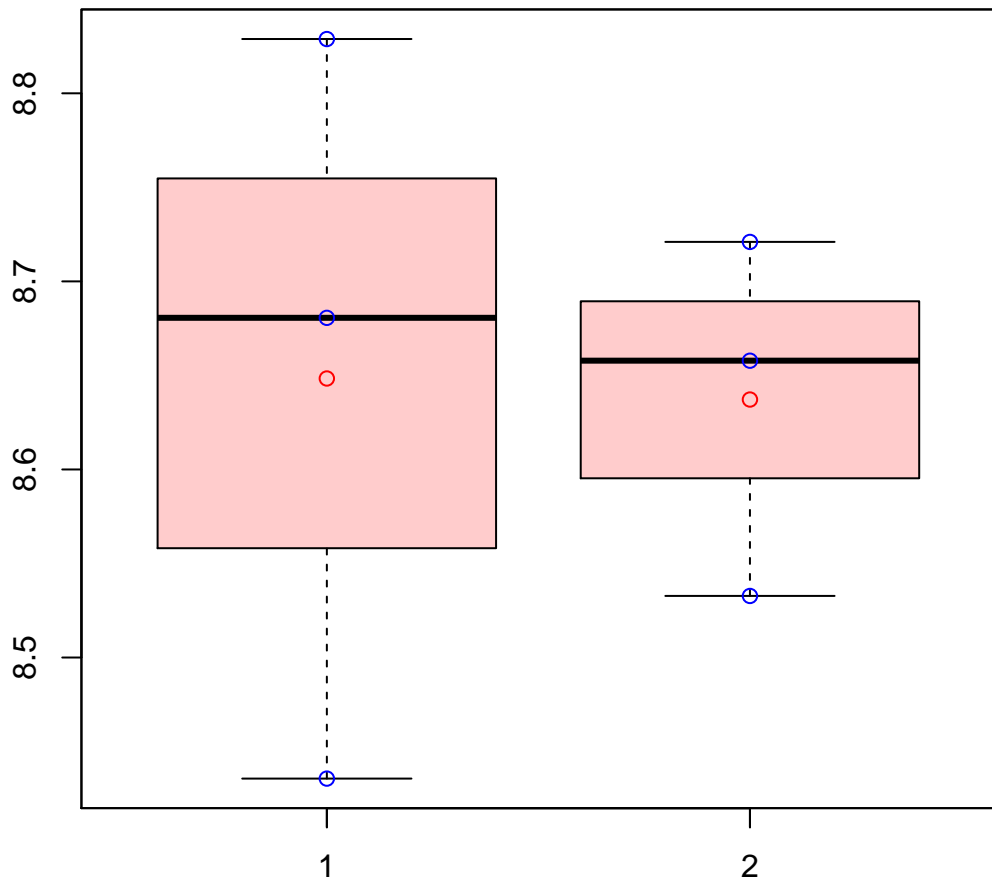

t-Test: p-value = 0.94



# CL5717Contig6|CL5717Contig6

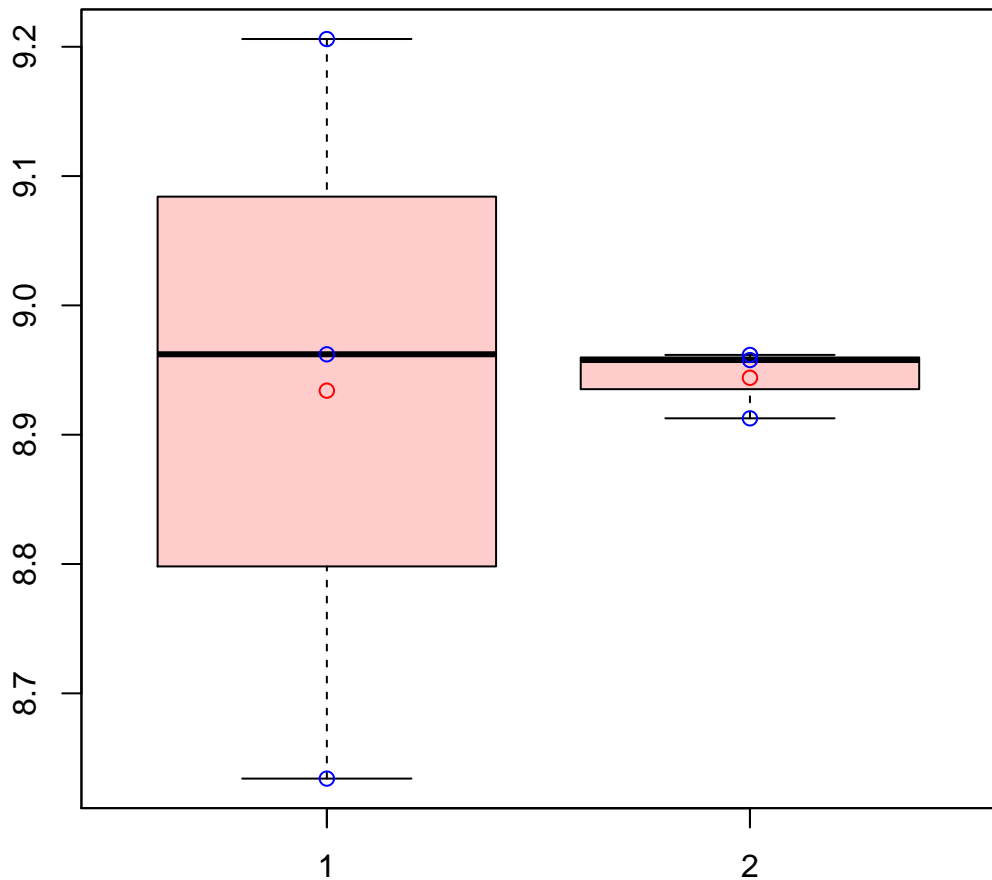

t-Test: p-value = 0.96

# CL5717Contig7|CL5717Contig7

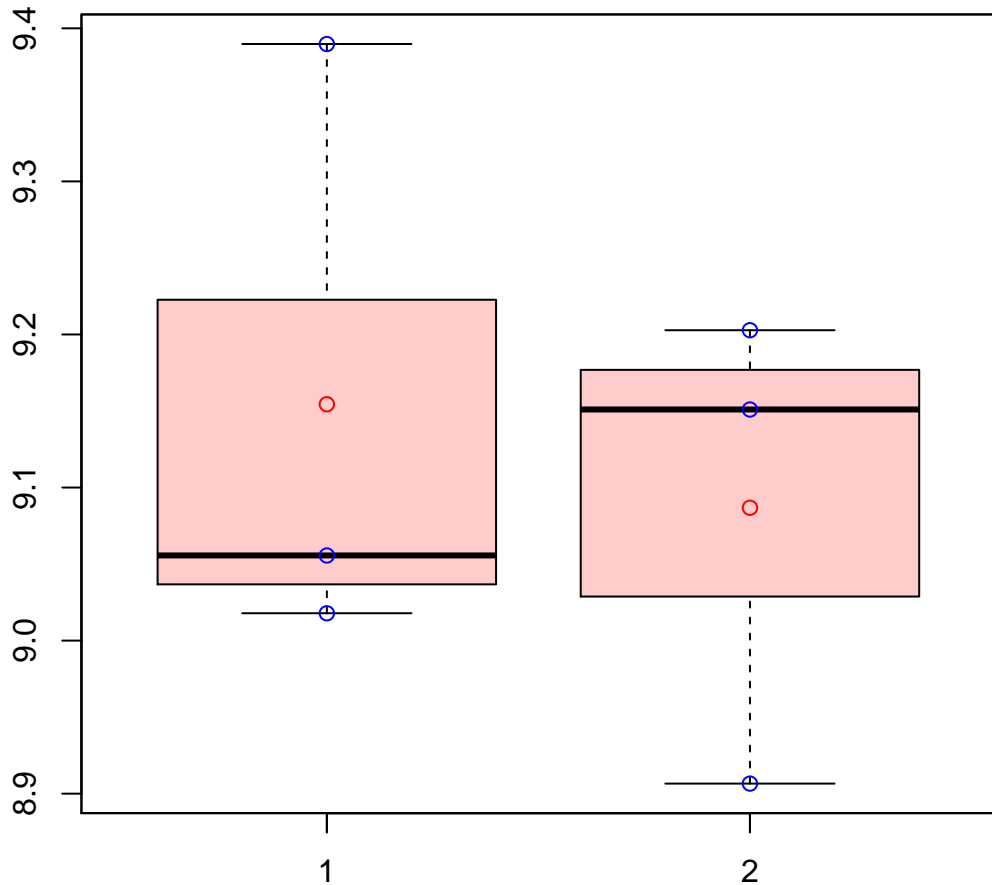

t-Test: p-value = 0.68

# CL5719Contig1|CL5719Contig1

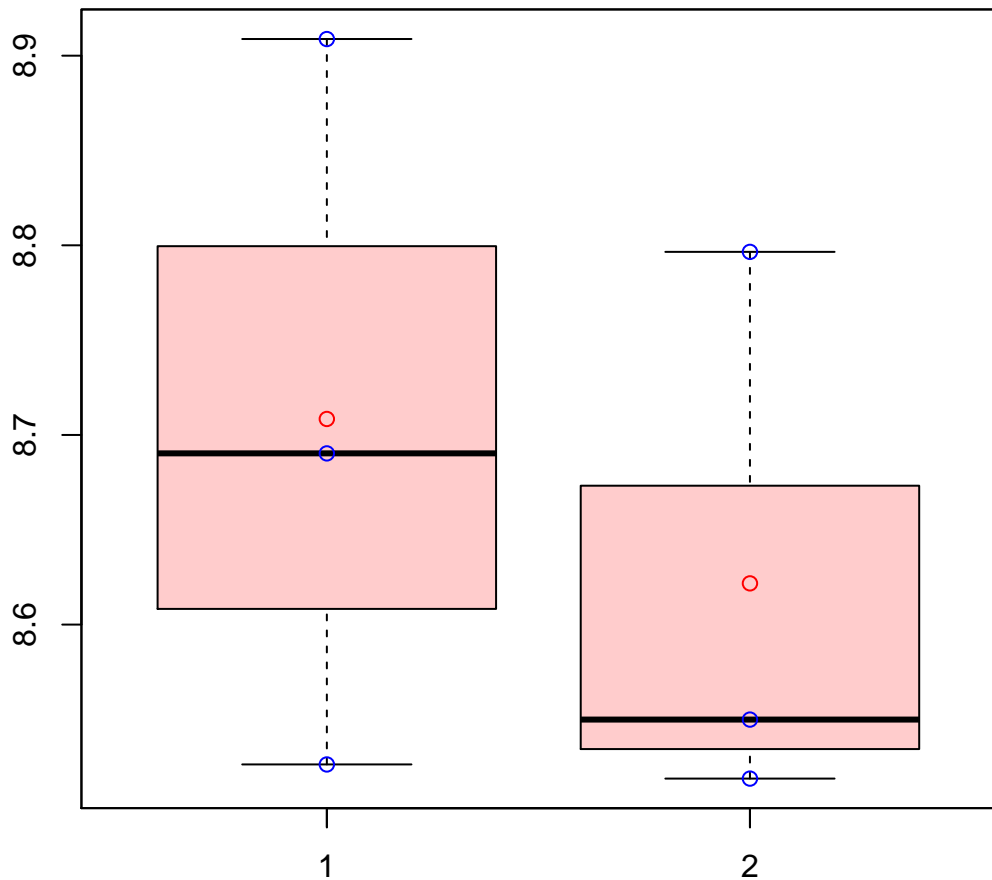

t-Test: p-value = 0.57

# CL5719Contig2|CL5719Contig2

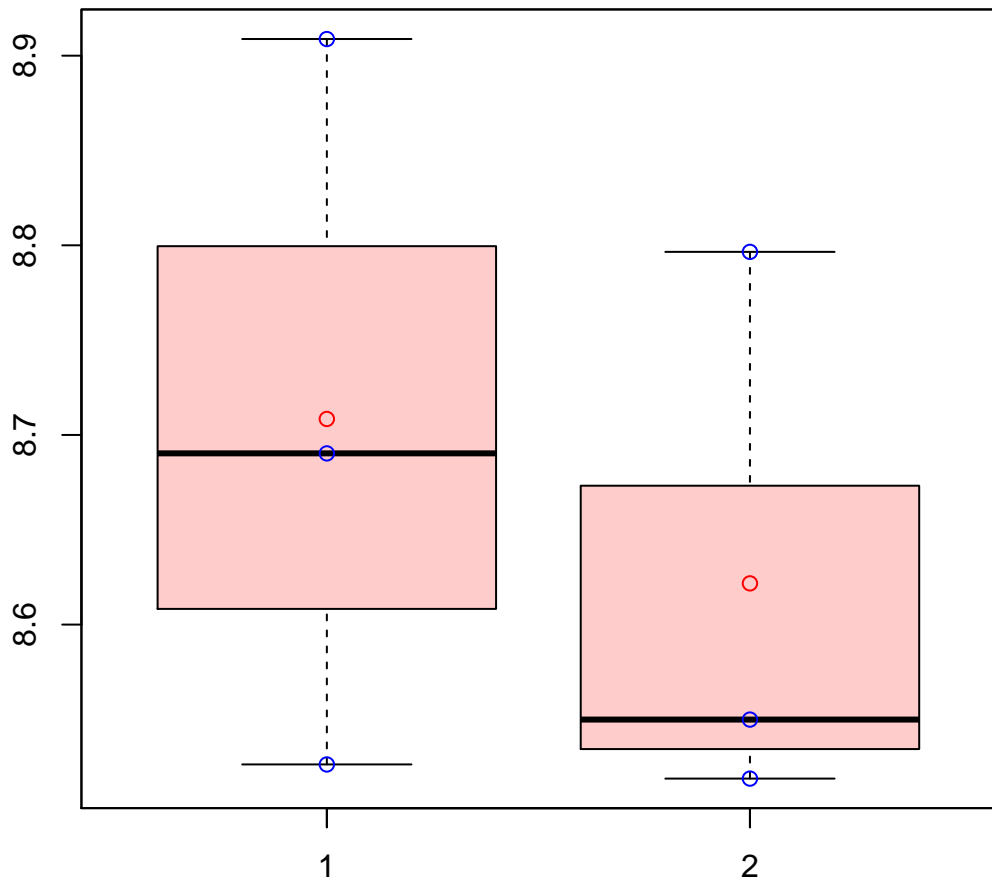

t-Test: p-value = 0.57

# CL5725Contig1|CL5725Contig1

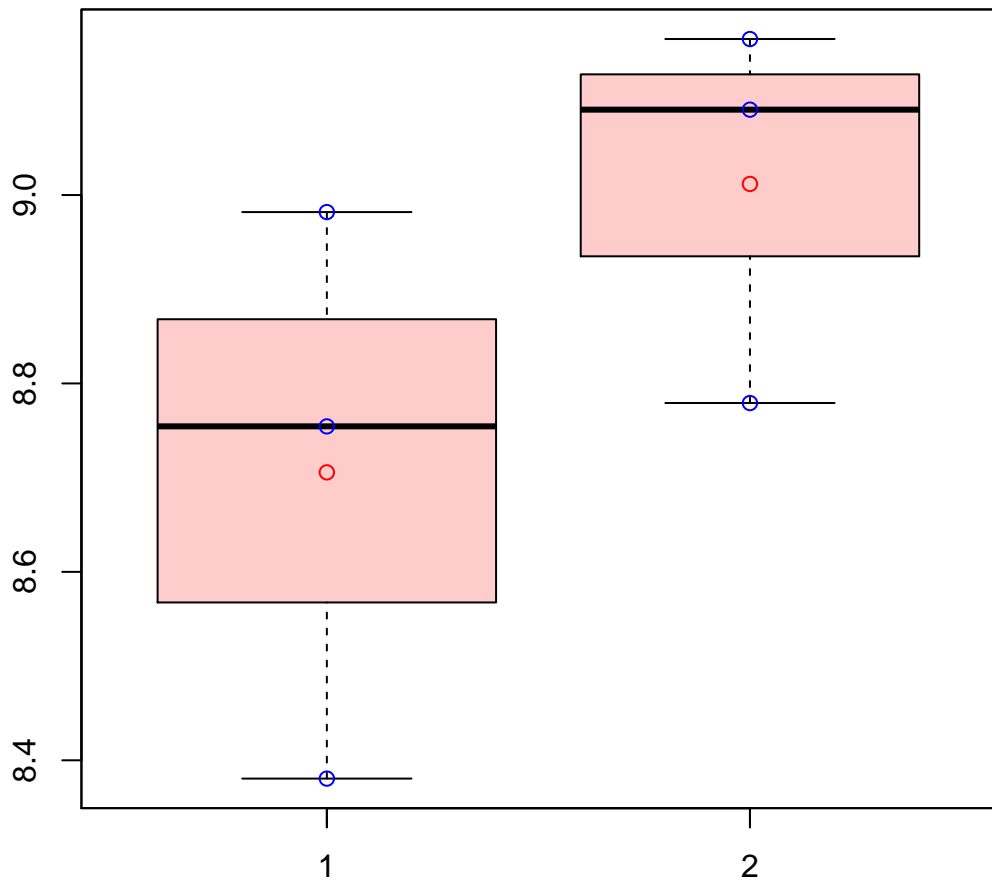

t-Test: p-value = 0.23

# CL572Contig4|CL572Contig4

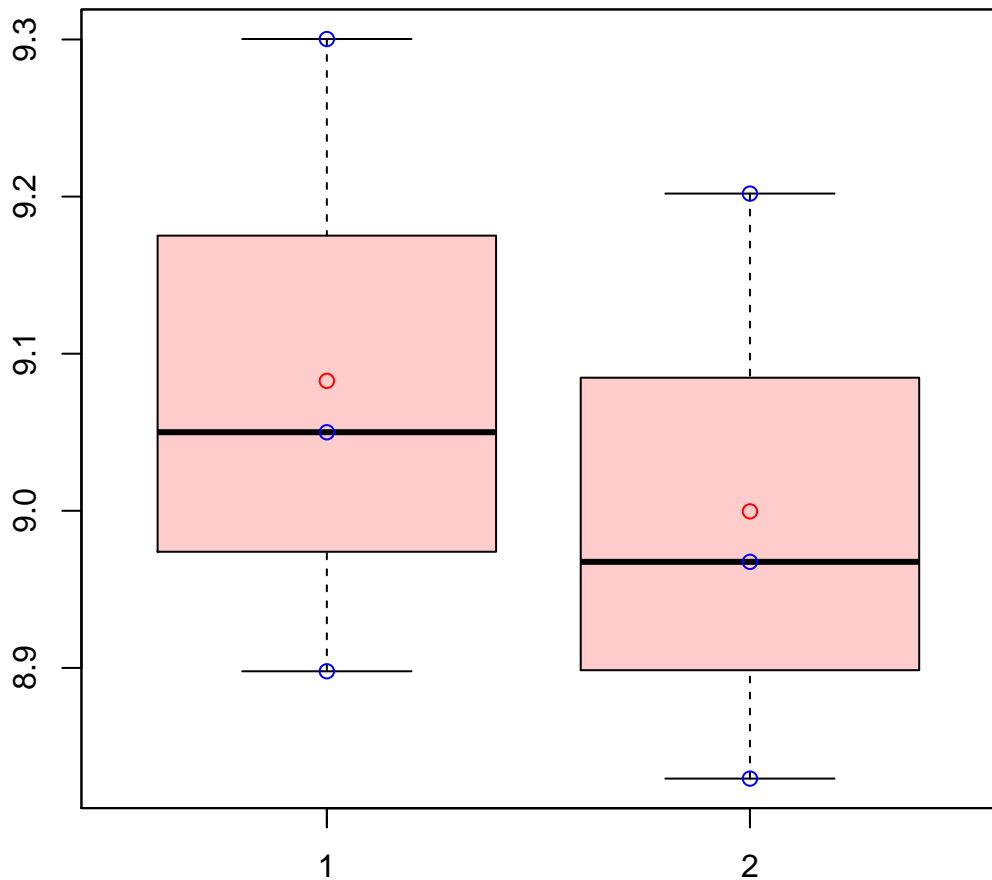

t-Test: p-value = 0.63

# CL5734Contig1|CL5734Contig1

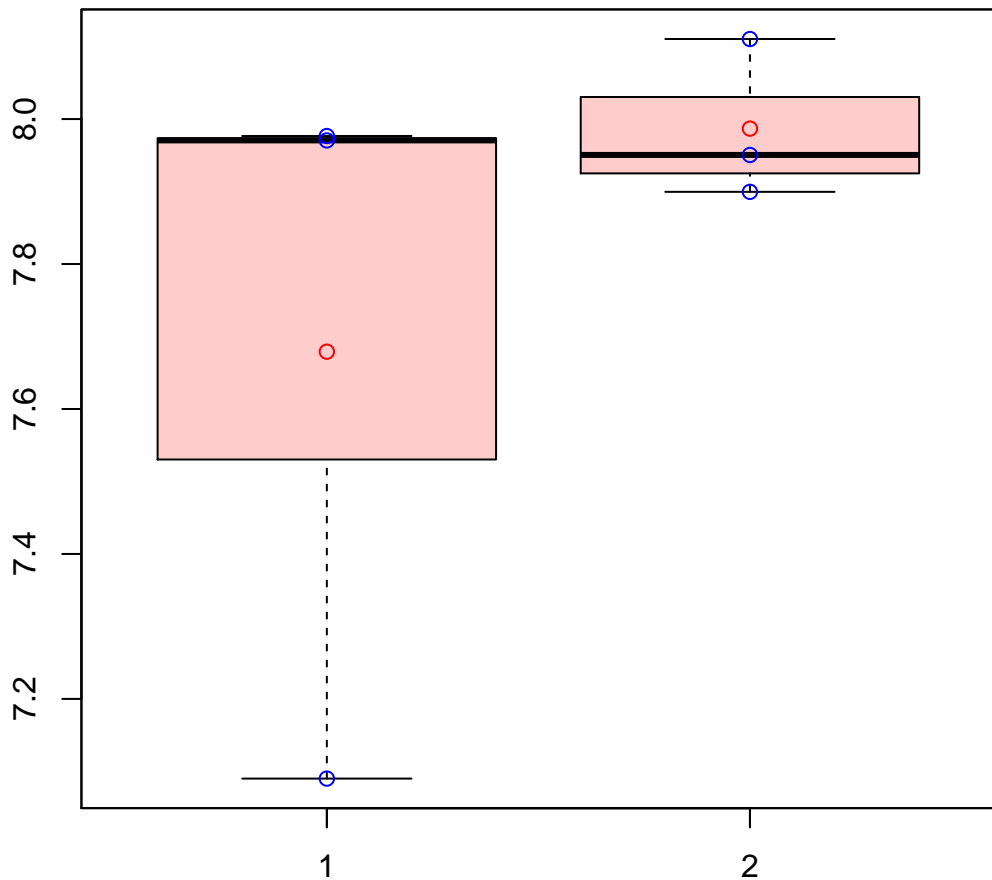

t-Test: p-value = 0.41

# CL5734Contig2|CL5734Contig2

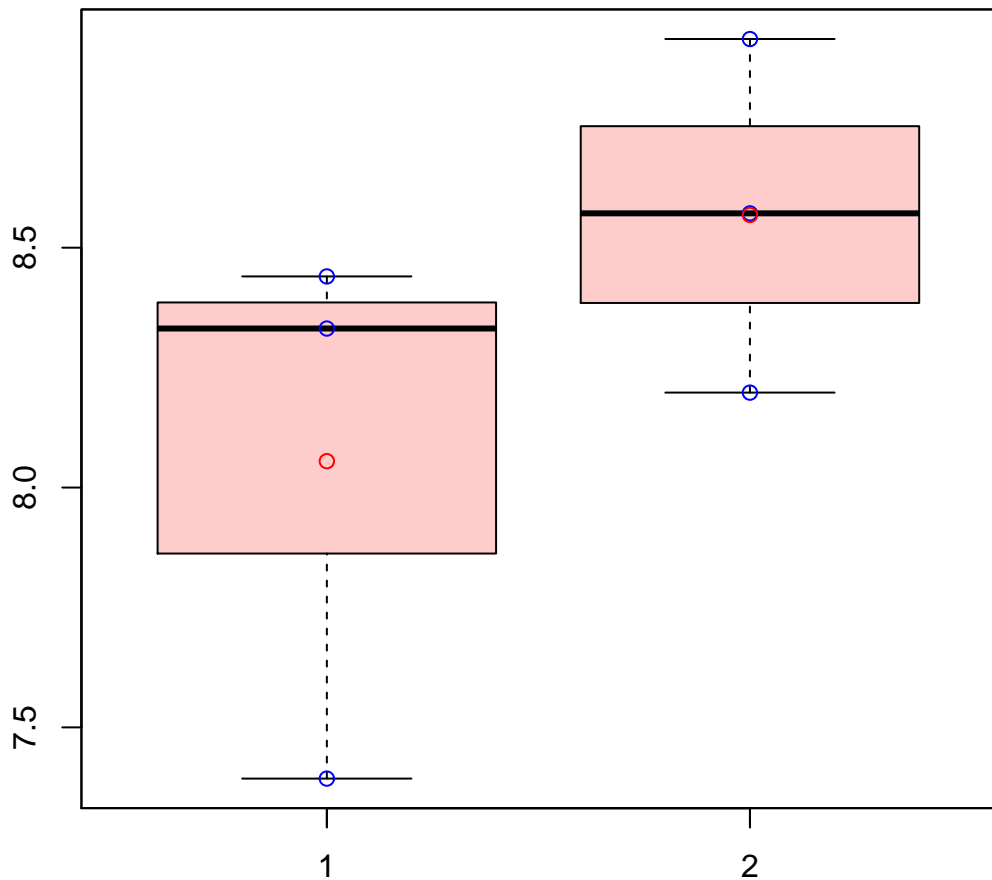

t-Test: p-value = 0.27



# CL5734Contig3|CL5734Contig3



t-Test: p-value = 0.27

# CL5734Contig5|CL5734Contig5

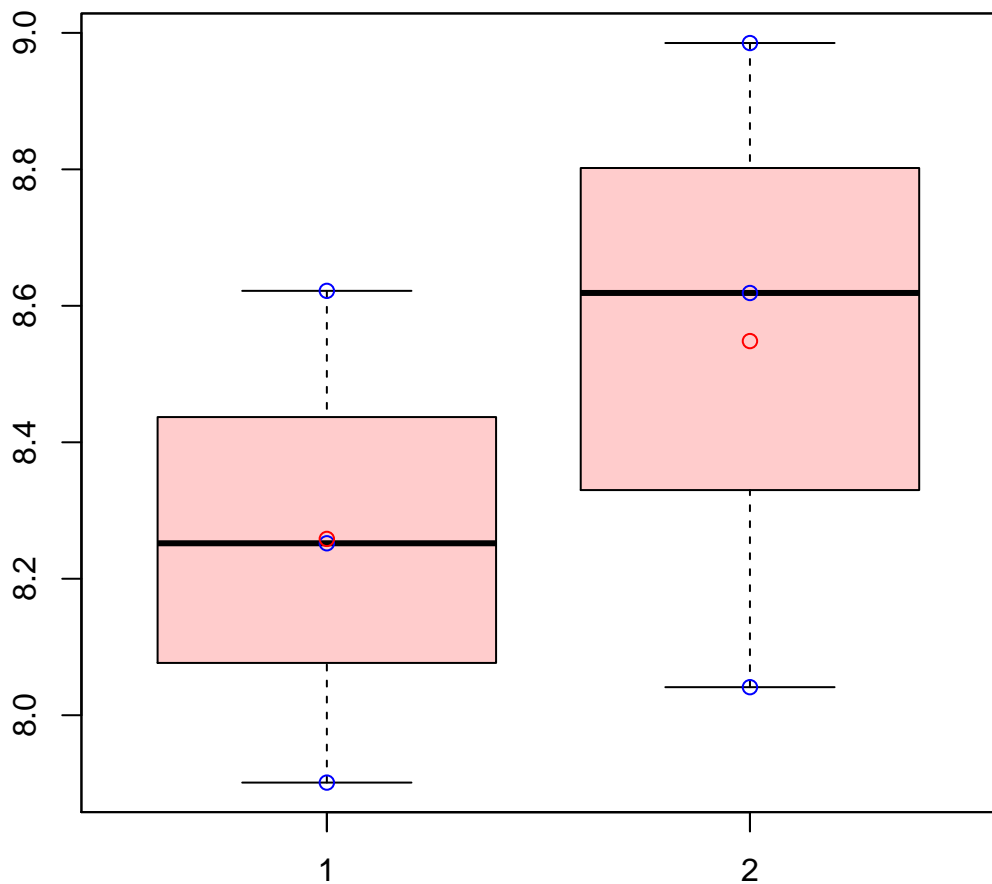

t-Test: p-value = 0.45

# CL5739Contig1|CL5739Contig1

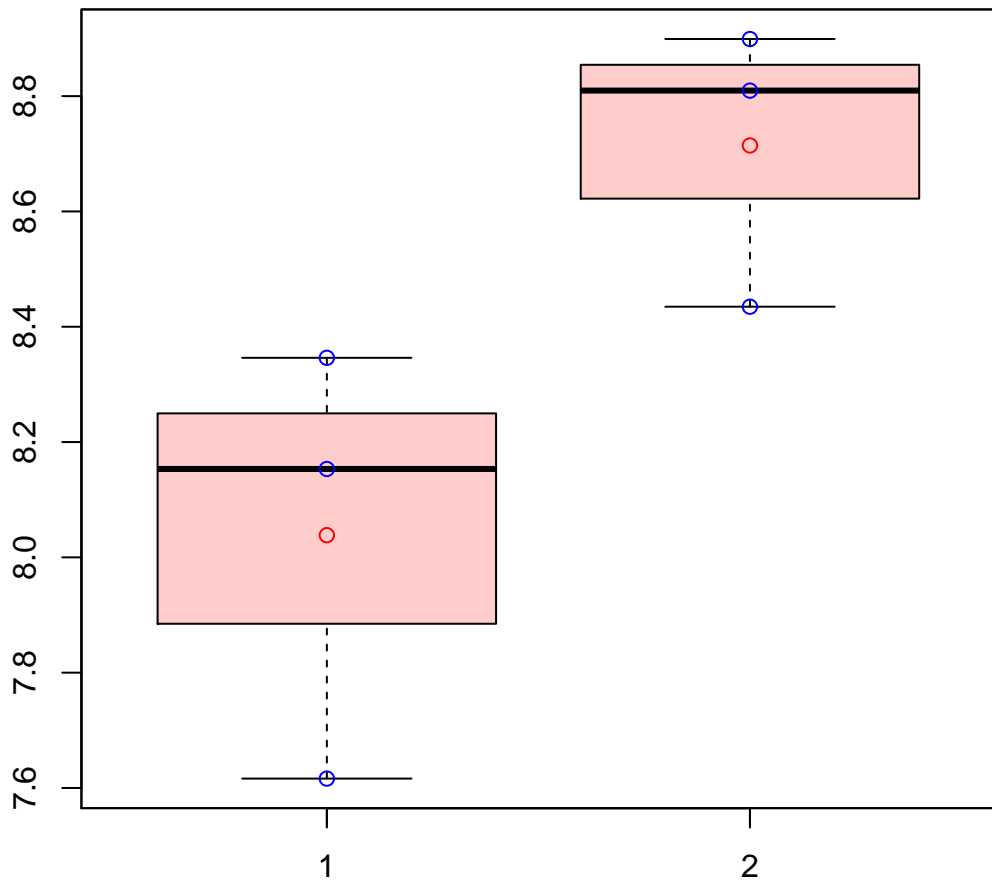

t-Test: p-value = 0.07

# CL5741Contig2|CL5741Contig2

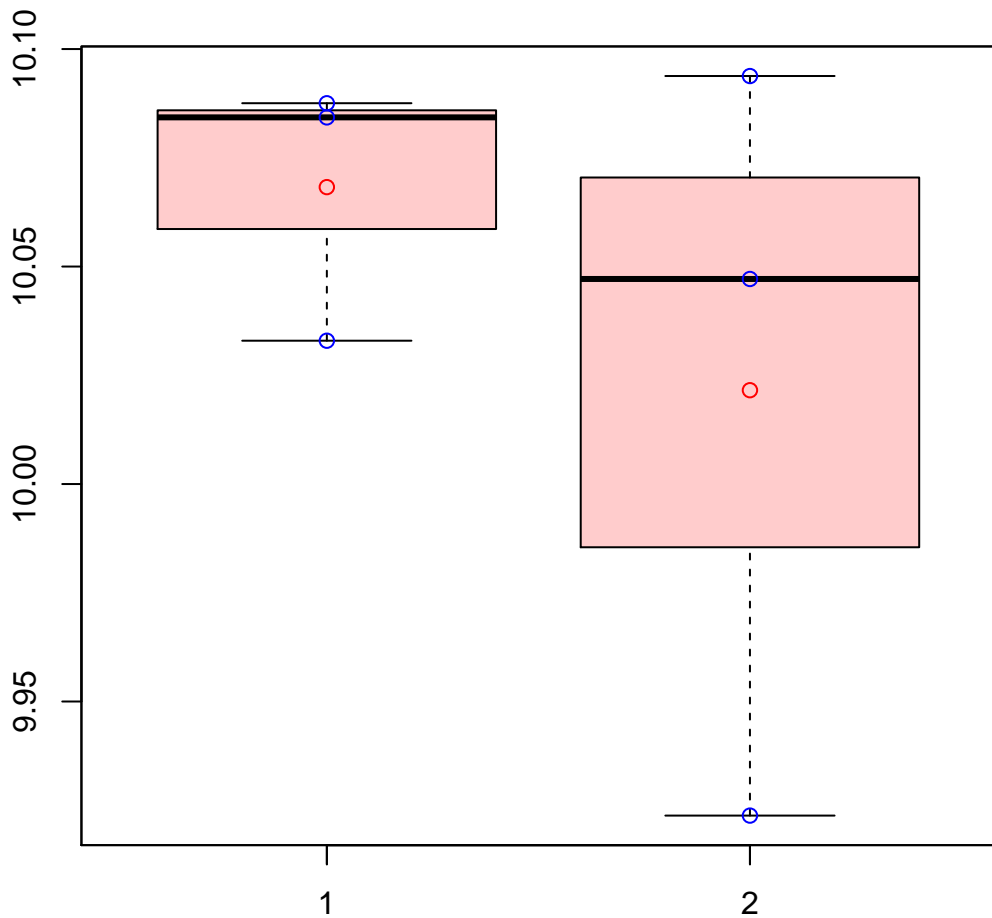

t-Test: p-value = 0.46

# CL5755Contig1|CL5755Contig1

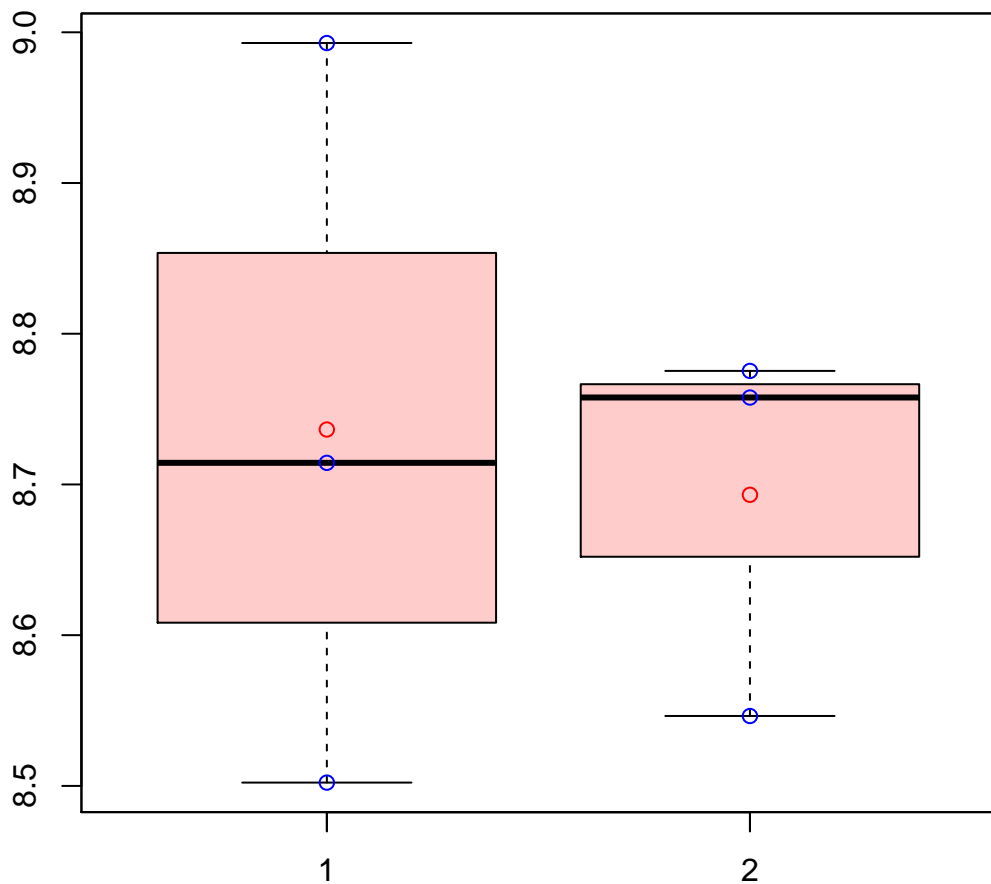

t-Test: p-value = 0.8

# CL5774Contig1|CL5774Contig1

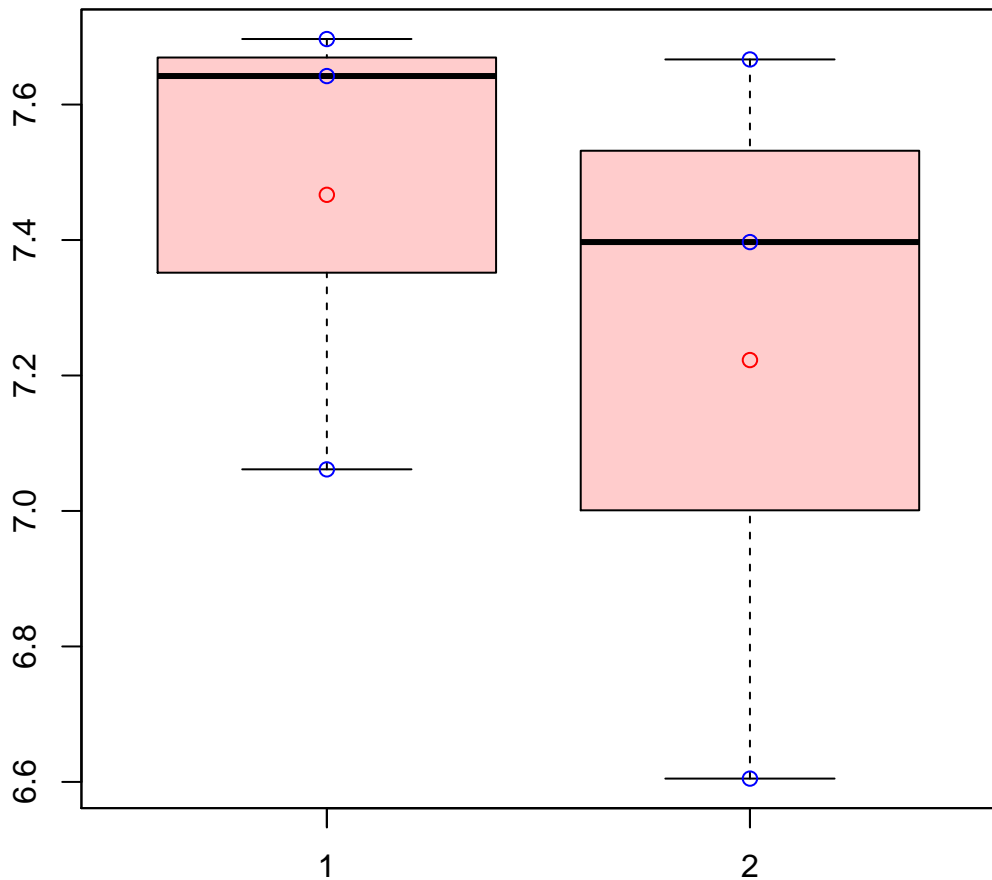

t-Test: p-value = 0.56

# CL5774Contig2|CL5774Contig2

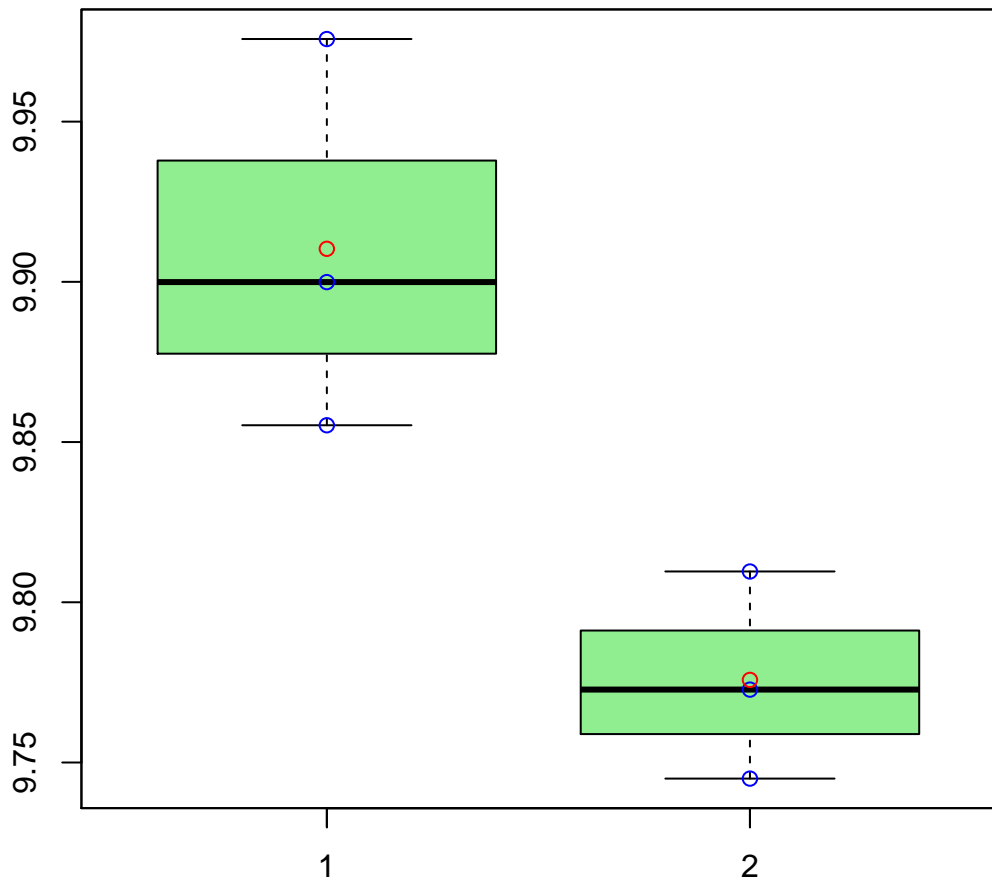

t-Test: p-value = 0.04

# CL5778Contig4|CL5778Contig4

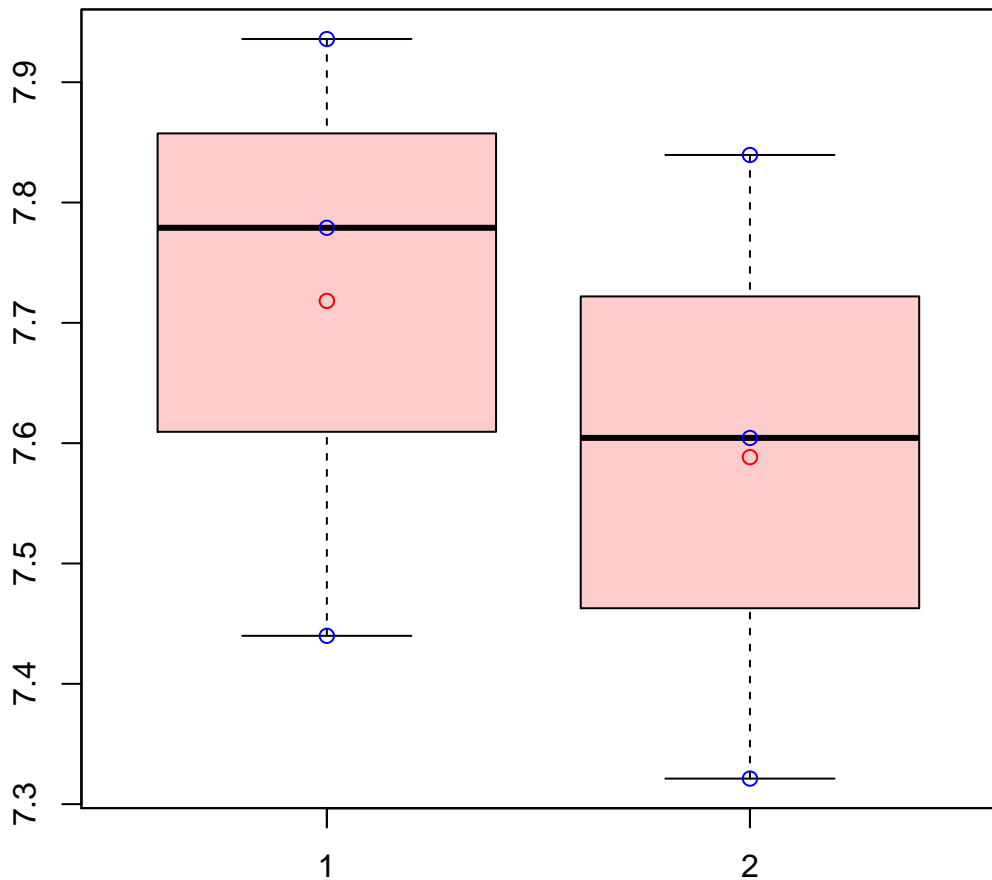

t-Test: p-value = 0.57



# CL577Contig13|CL577Contig13

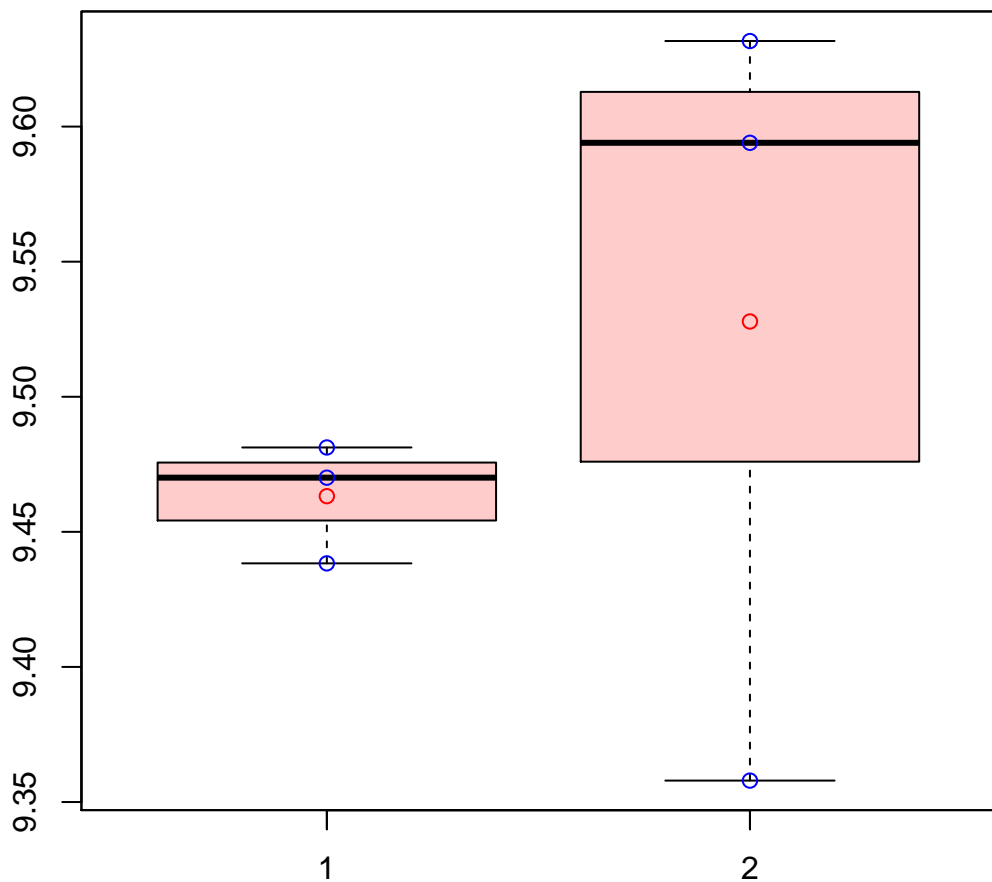

t-Test: p-value = 0.53

# CL577Contig14|CL577Contig14

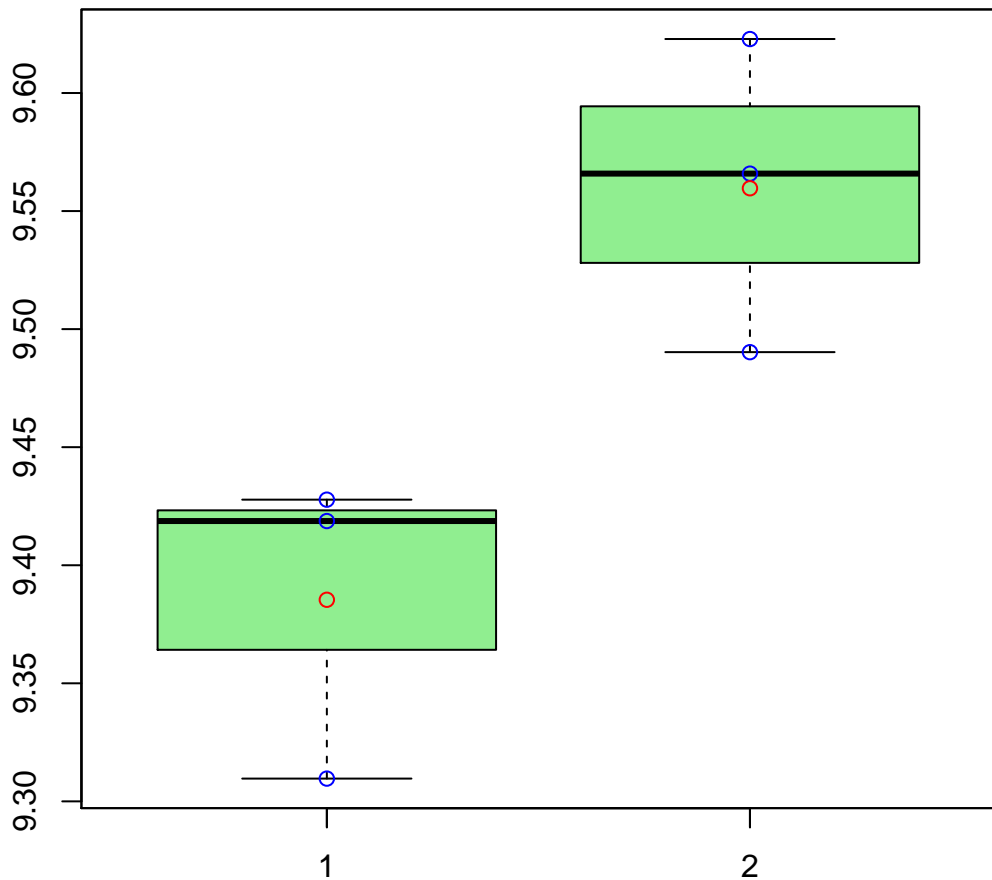

t-Test: p-value = 0.03

# CL5782Contig1|CL5782Contig1

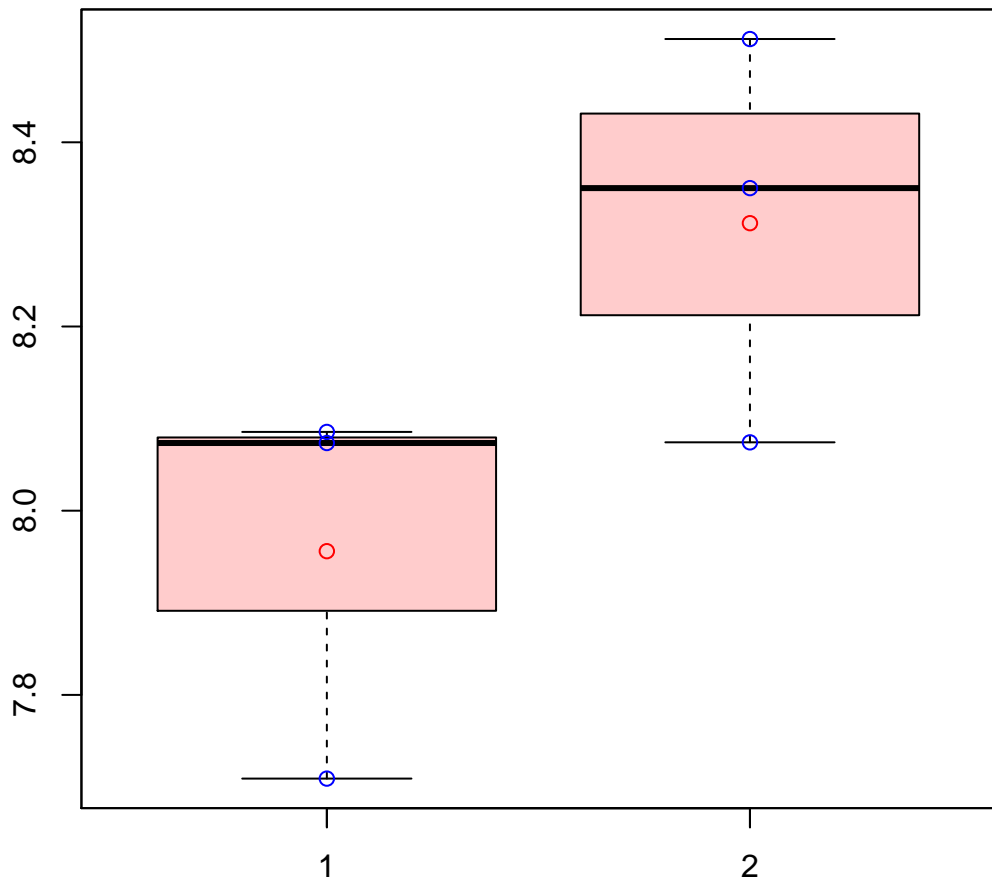

t-Test: p-value = 0.12

# CL5782Contig4|CL5782Contig4



t-Test: p-value = 0.12

# CL5784Contig1|CL5784Contig1

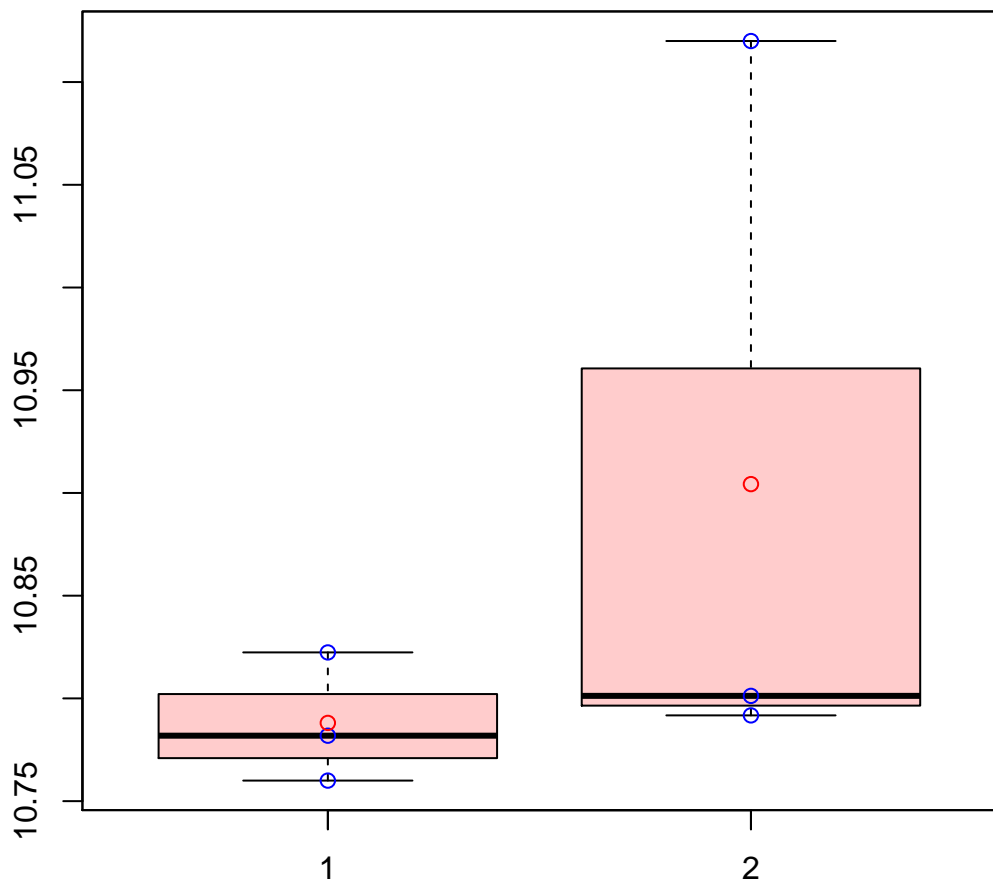

t-Test: p-value = 0.39

# CL5788Contig2|CL5788Contig2

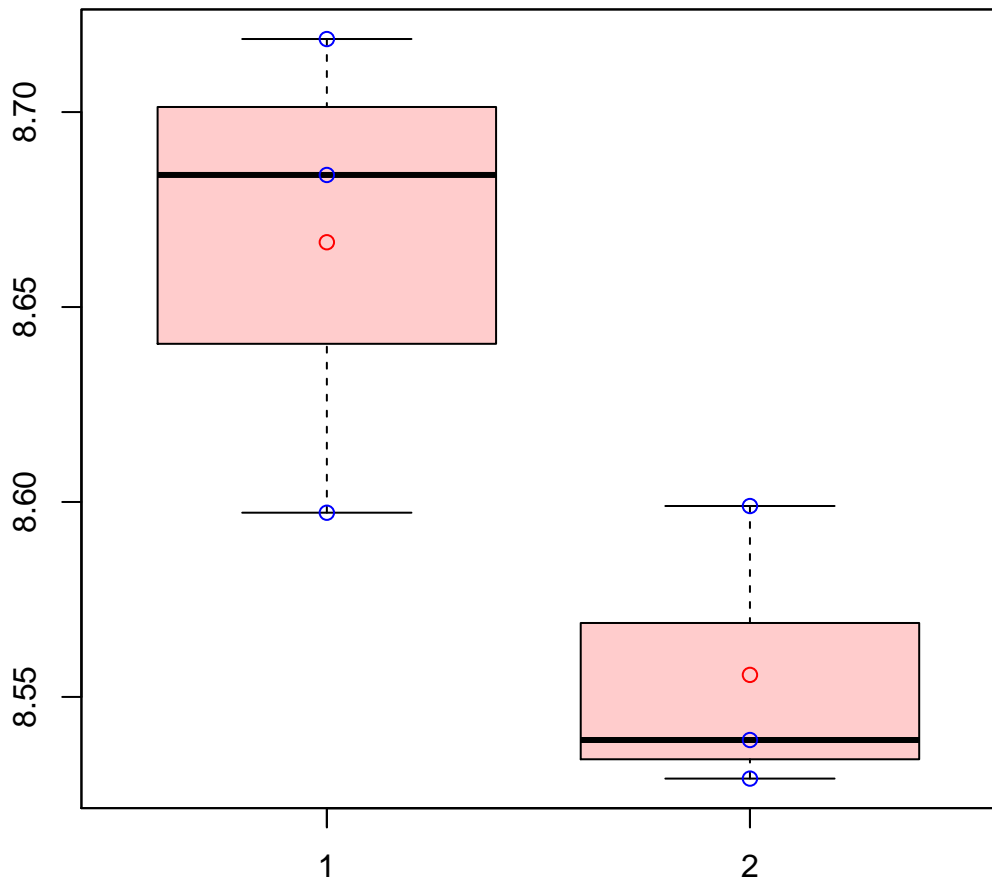

t-Test: p-value = 0.07

# CL5793Contig1|CL5793Contig1

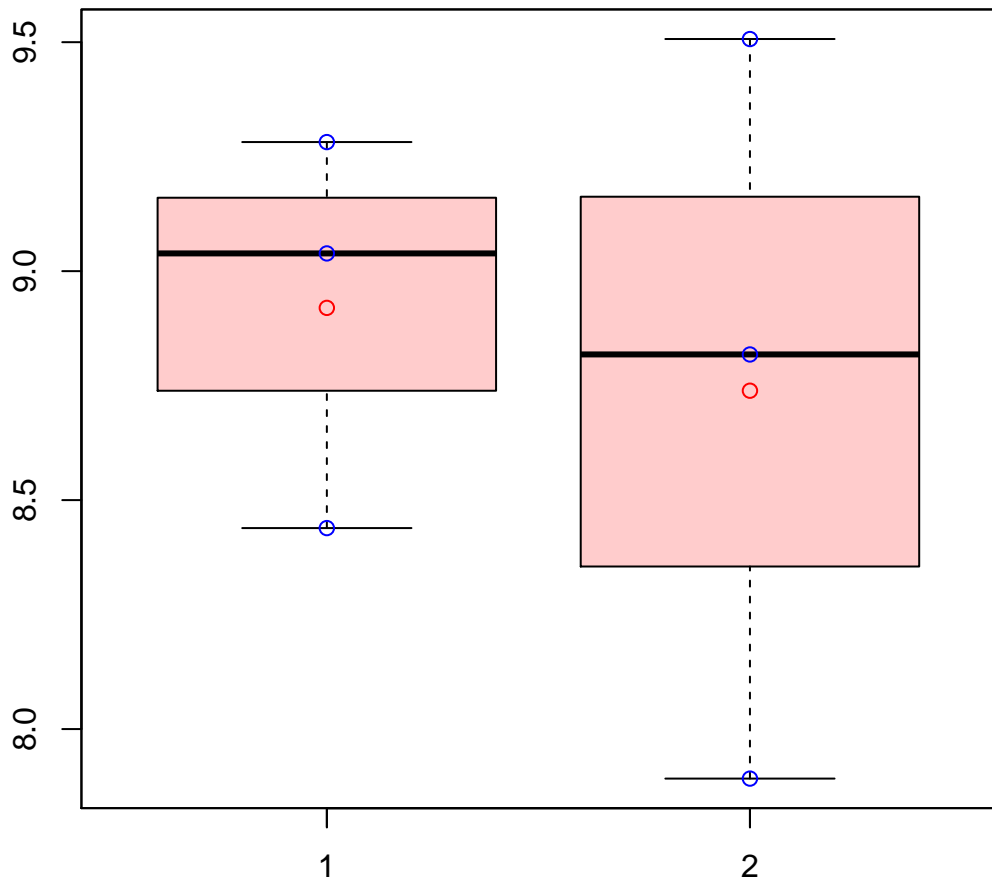

t-Test: p-value = 0.76

# CL5794Contig4|CL5794Contig4

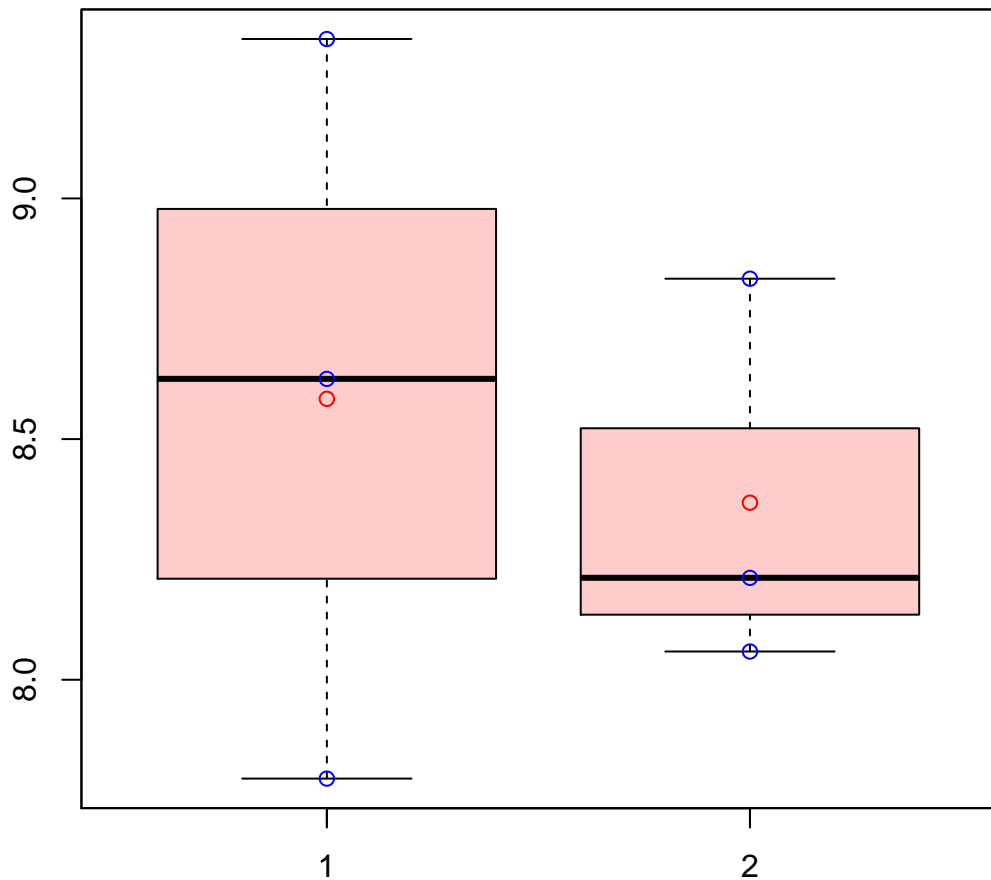

t-Test: p-value = 0.7



# CL579Contig13|CL579Contig13

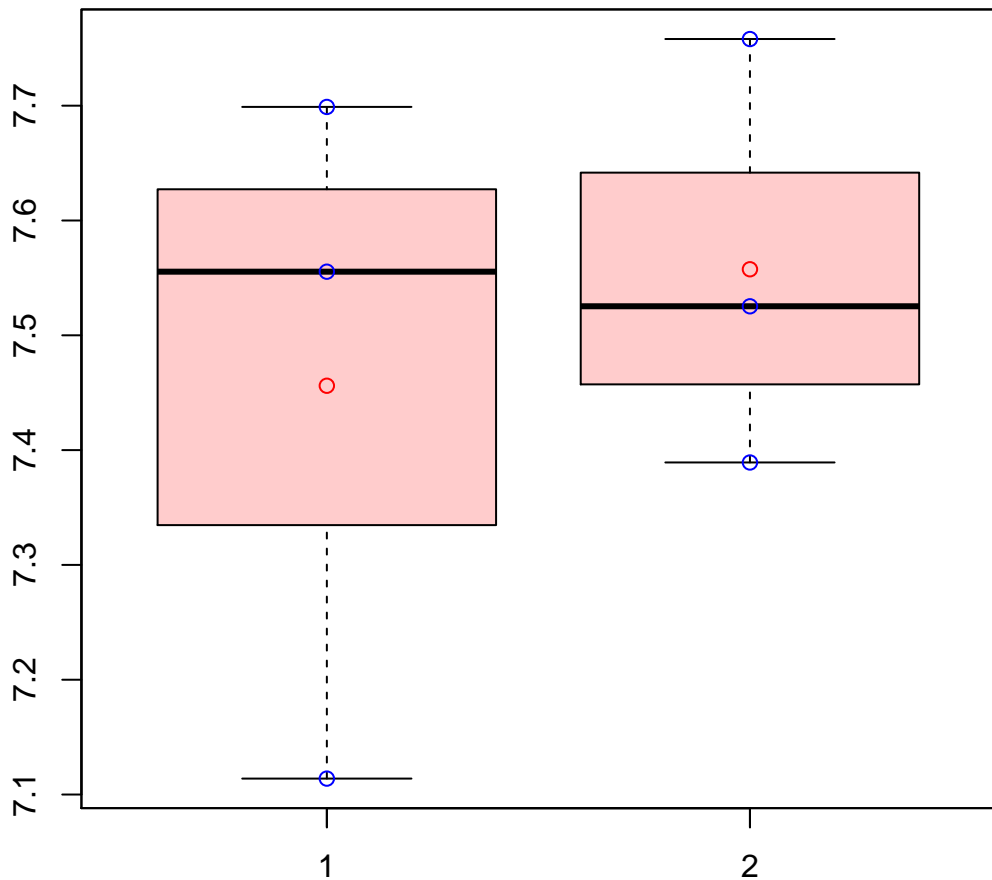

t-Test: p-value = 0.65

# CL579Contig1|CL579Contig1

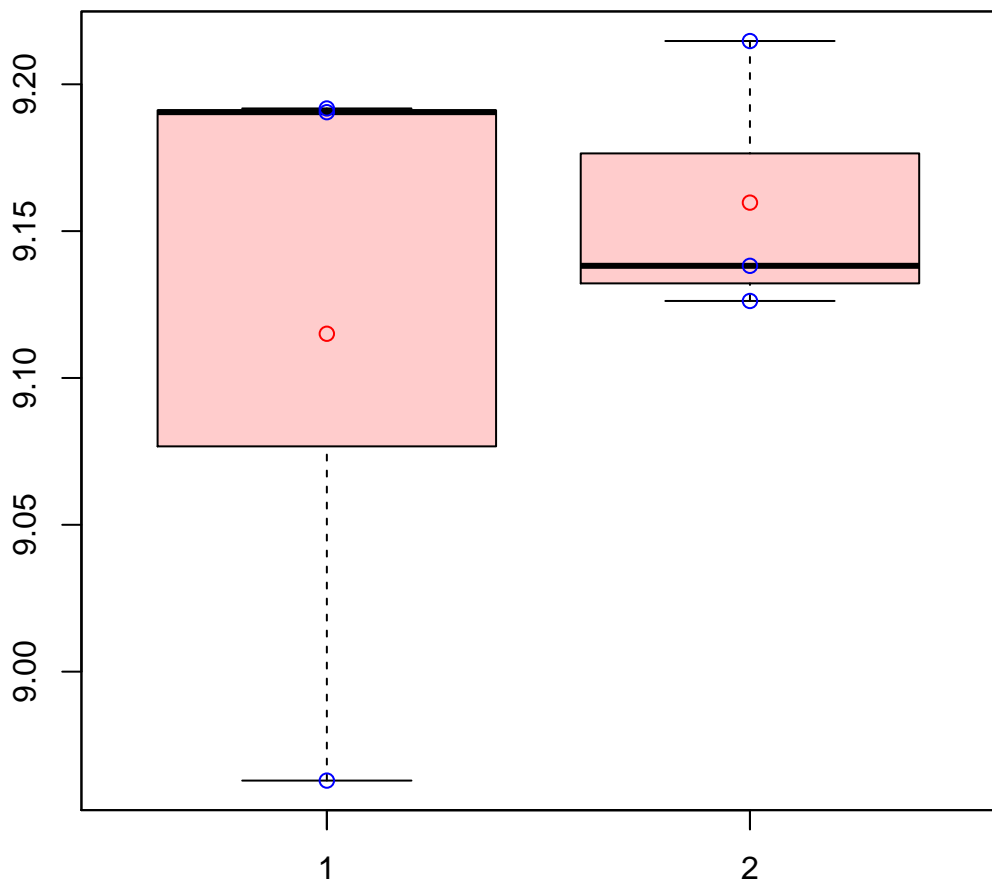

t-Test: p-value = 0.63

# CL579Contig2|CL579Contig2

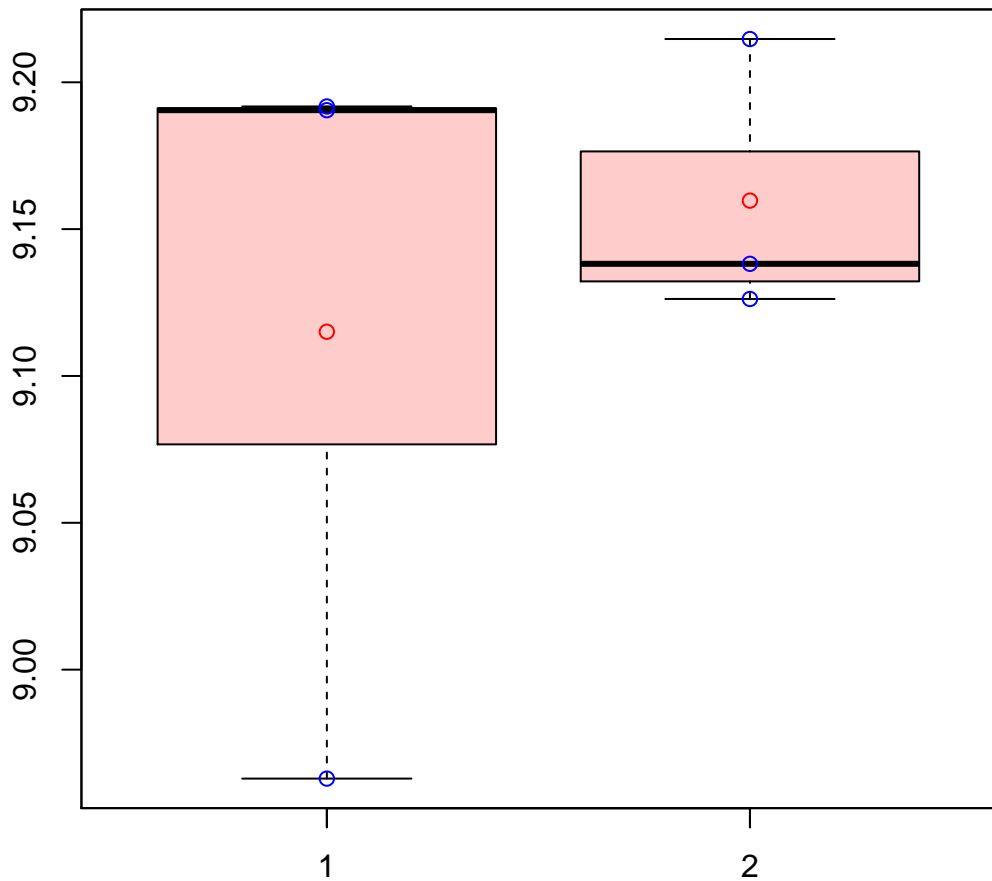

t-Test: p-value = 0.63

# CL57Contig23|CL57Contig23



t-Test: p-value = 0.02

# CL5816Contig5|CL5816Contig5

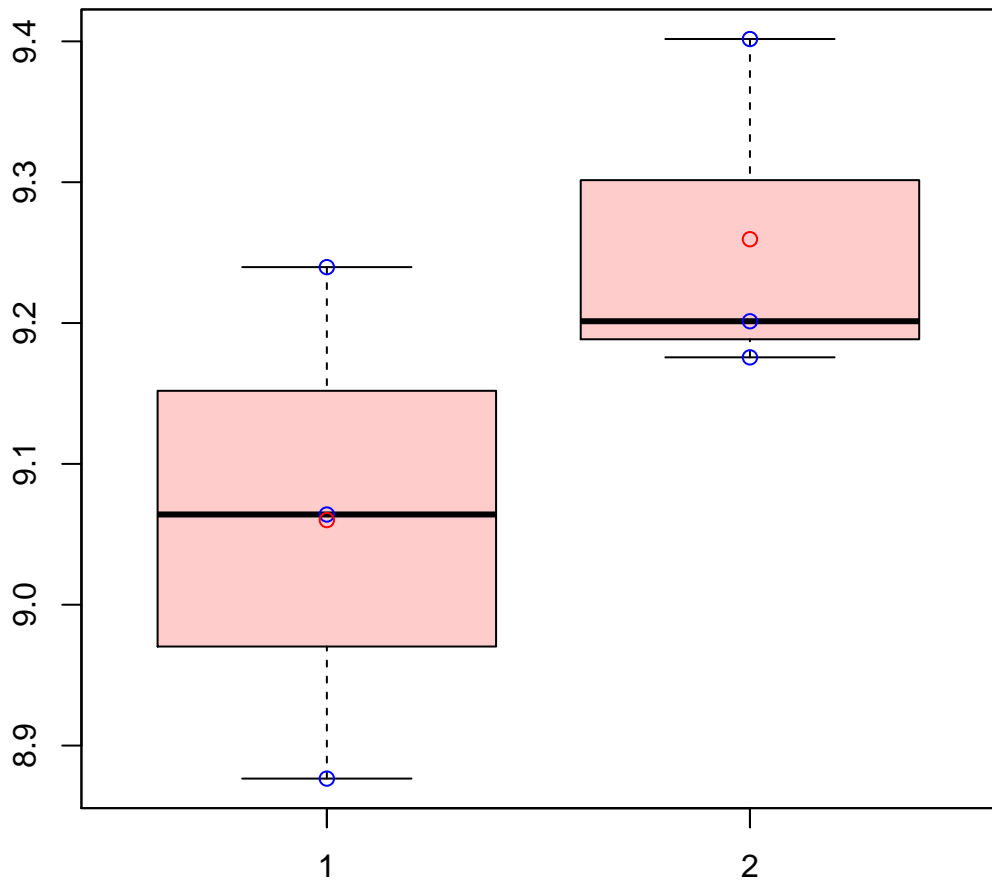

t-Test: p-value = 0.2

**CL5818Contig1|CL5818Contig1**

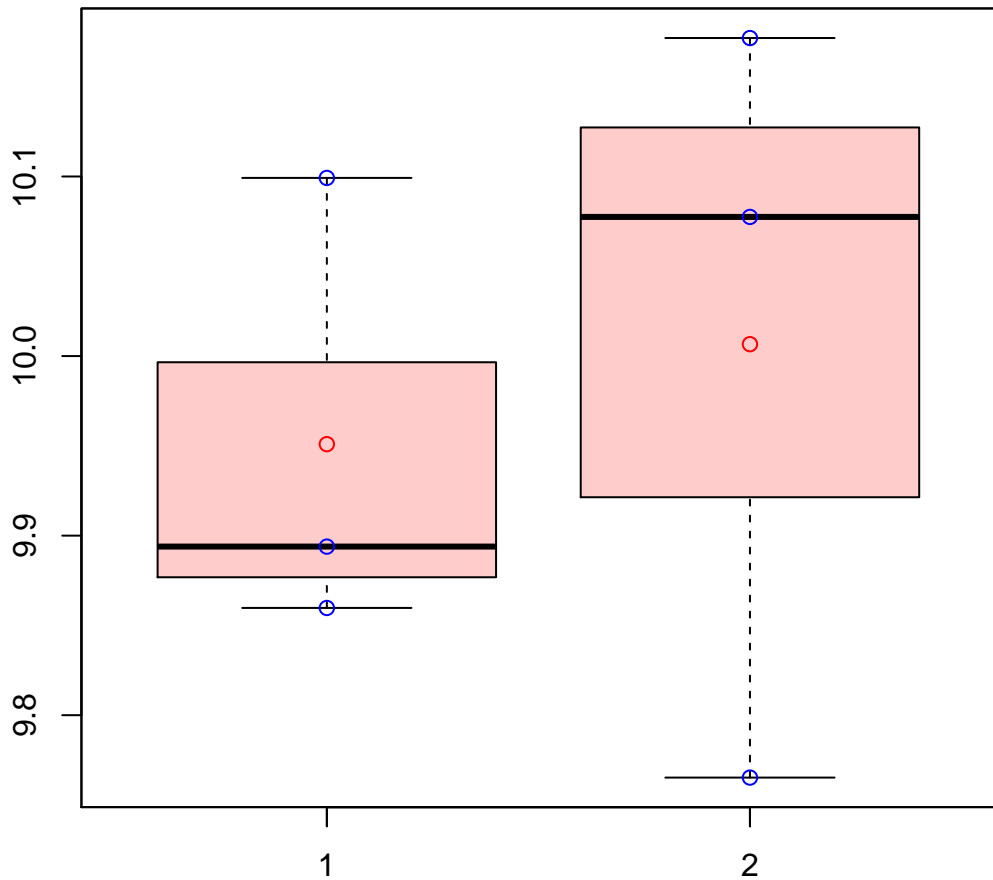

t-Test: p-value = 0.72

# CL5818Contig2|CL5818Contig2

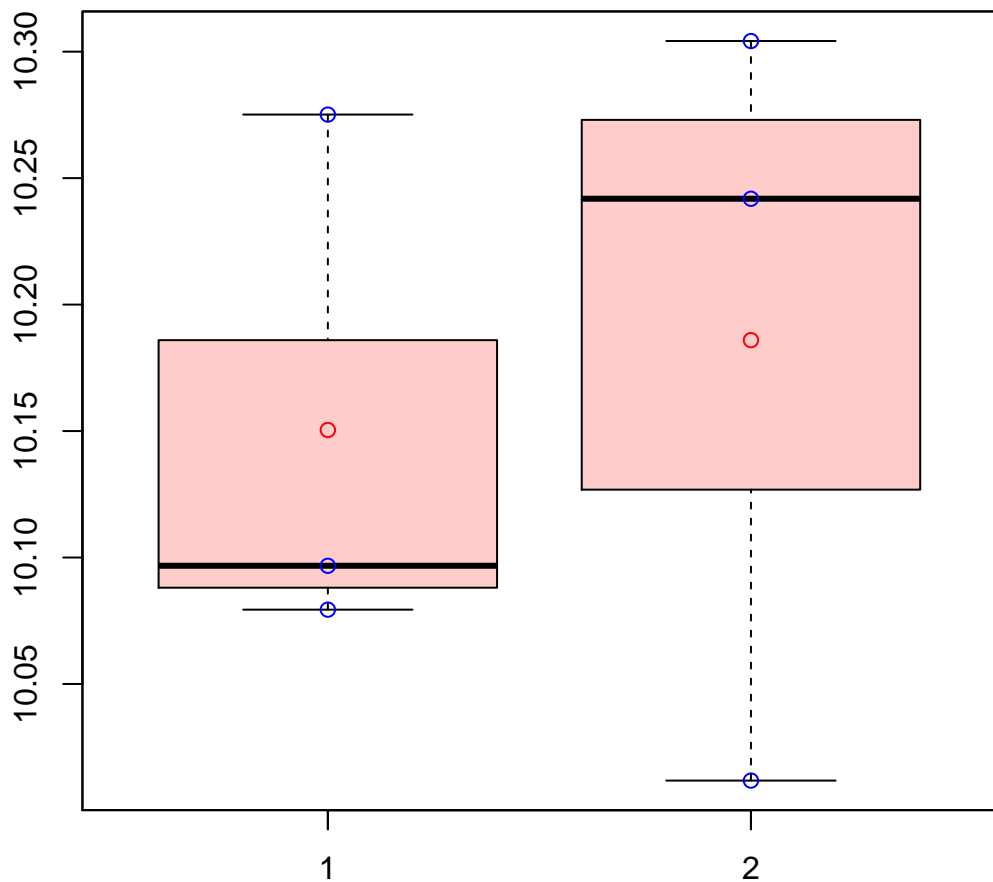

t-Test: p-value = 0.76

# CL5826Contig1|CL5826Contig1

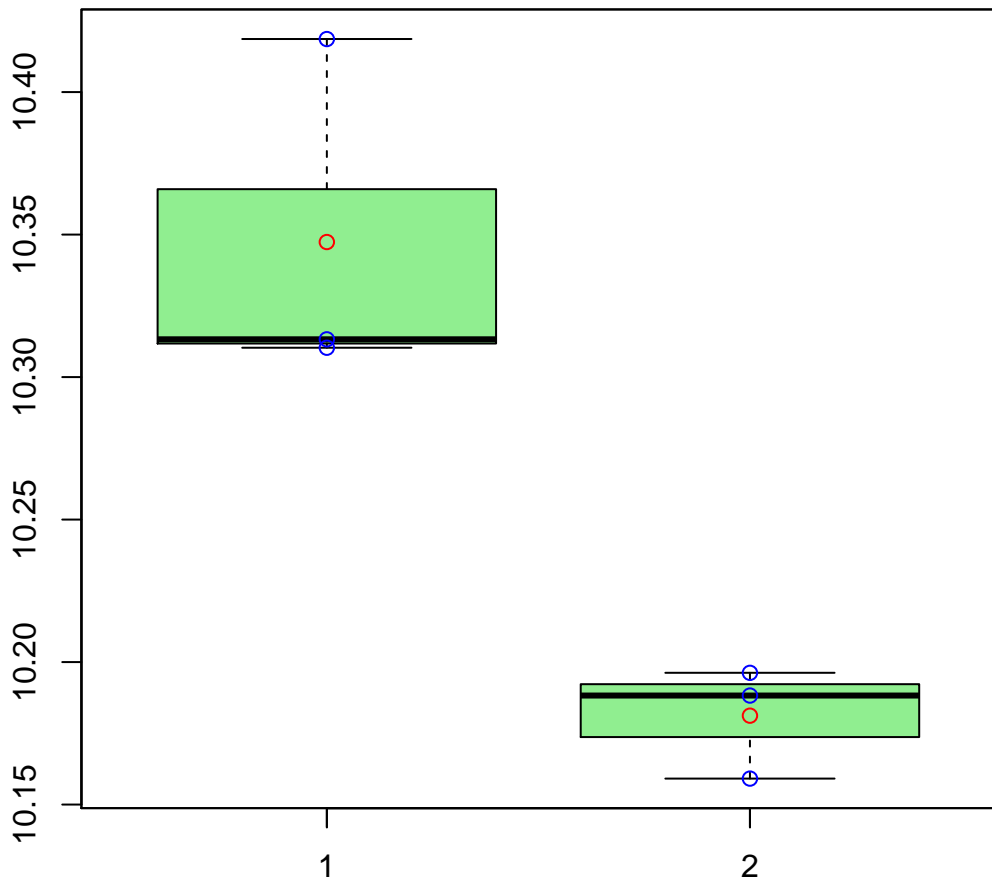

t-Test: p-value = 0.03



# CL5826Contig2|CL5826Contig2

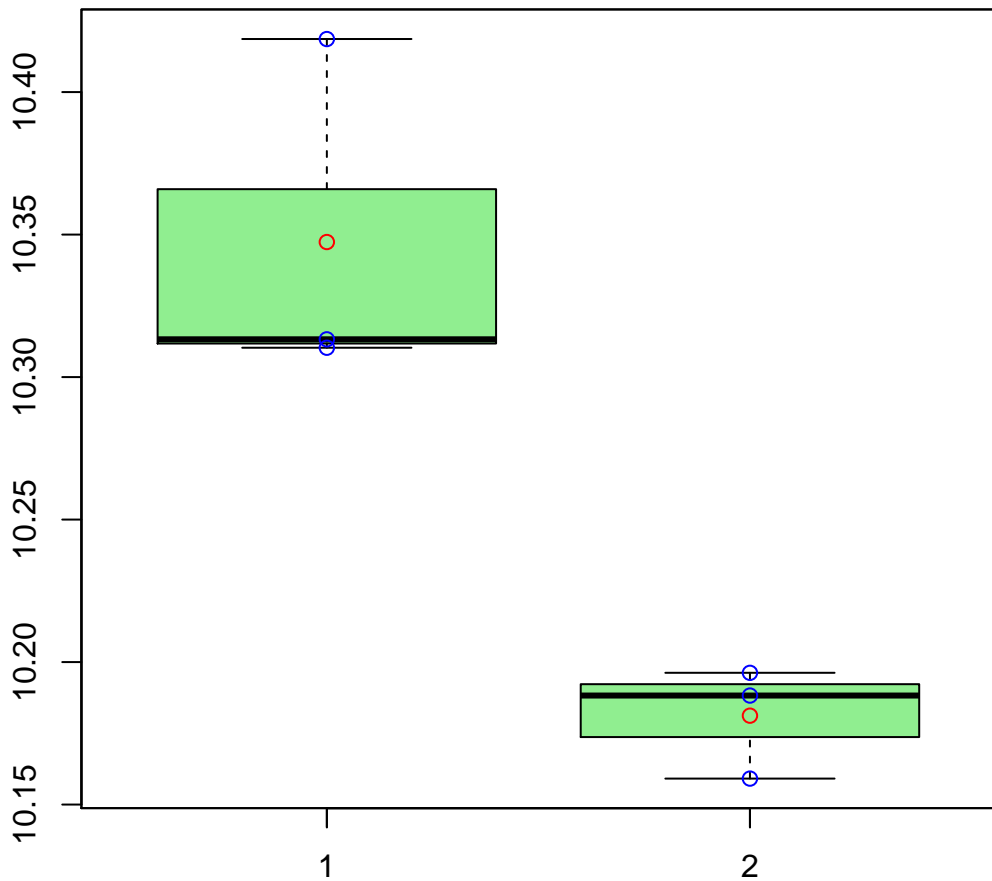

t-Test: p-value = 0.03

# CL5827Contig1|CL5827Contig1

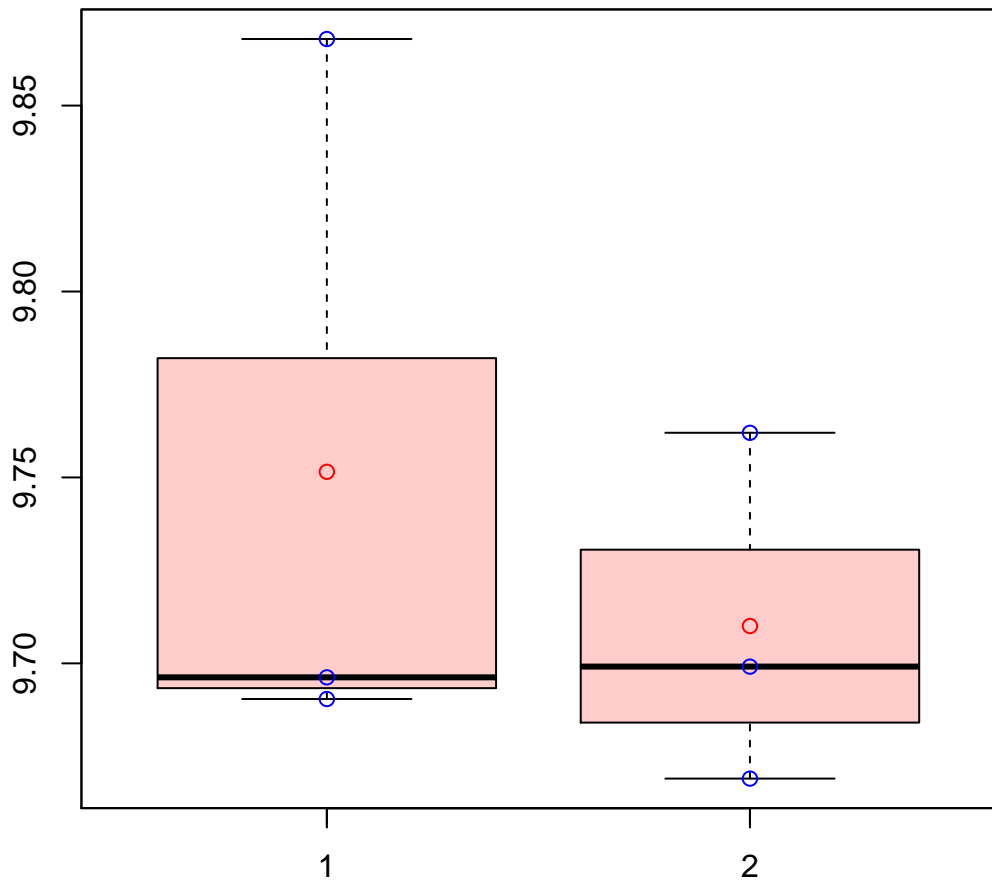

t-Test: p-value = 0.57

# CL5827Contig5|CL5827Contig5

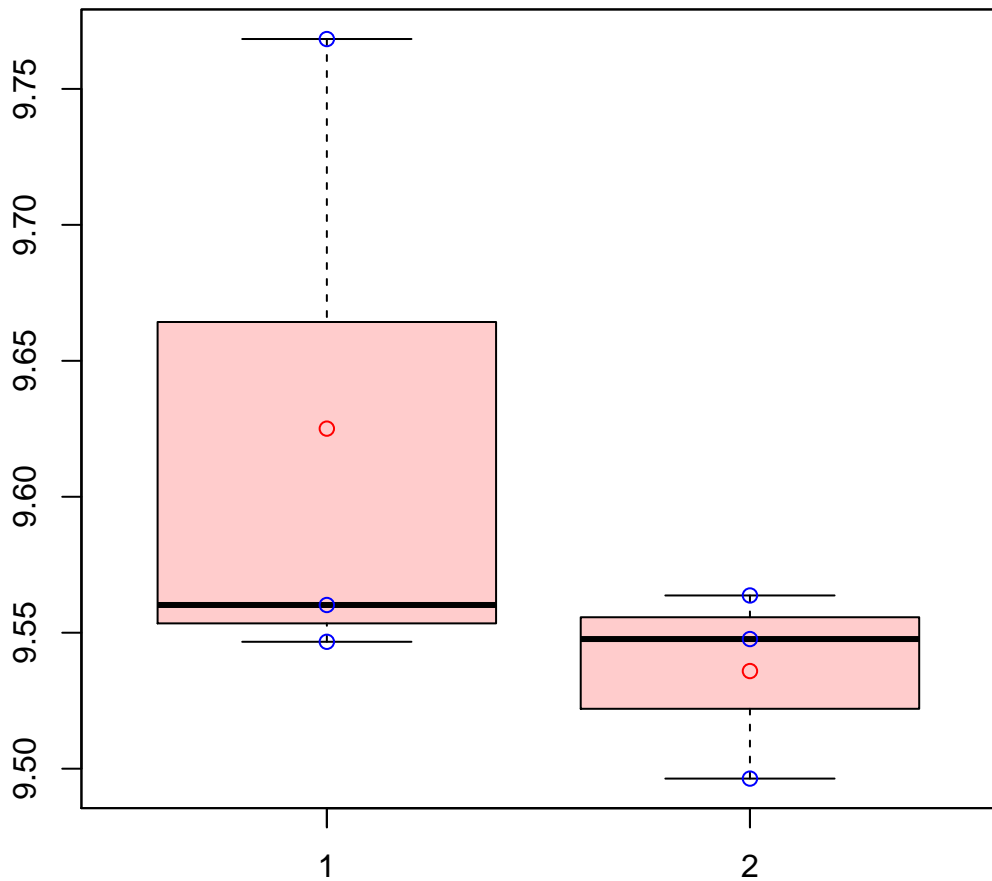

t-Test: p-value = 0.34

# CL5828Contig1|CL5828Contig1

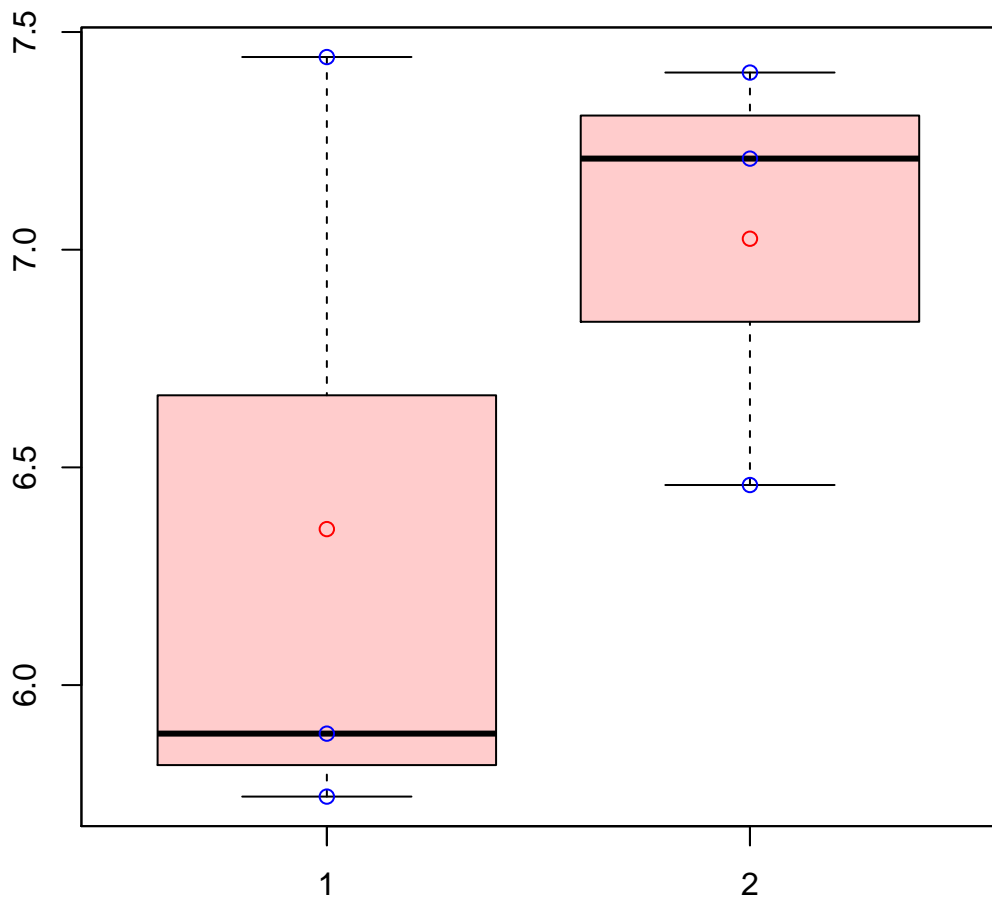

t-Test: p-value = 0.36

# CL5828Contig2|CL5828Contig2

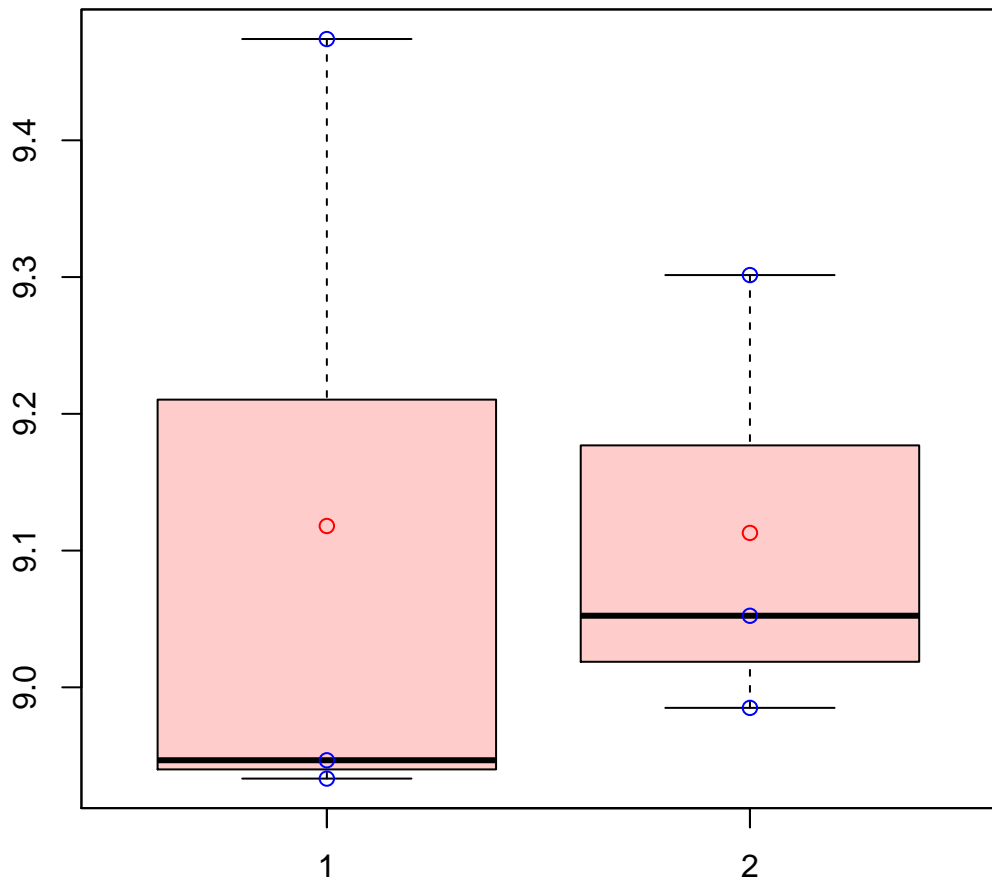

t-Test: p-value = 0.98

# CL5828Contig3|CL5828Contig3



t-Test: p-value = 0.36

# CL582Contig2|CL582Contig2

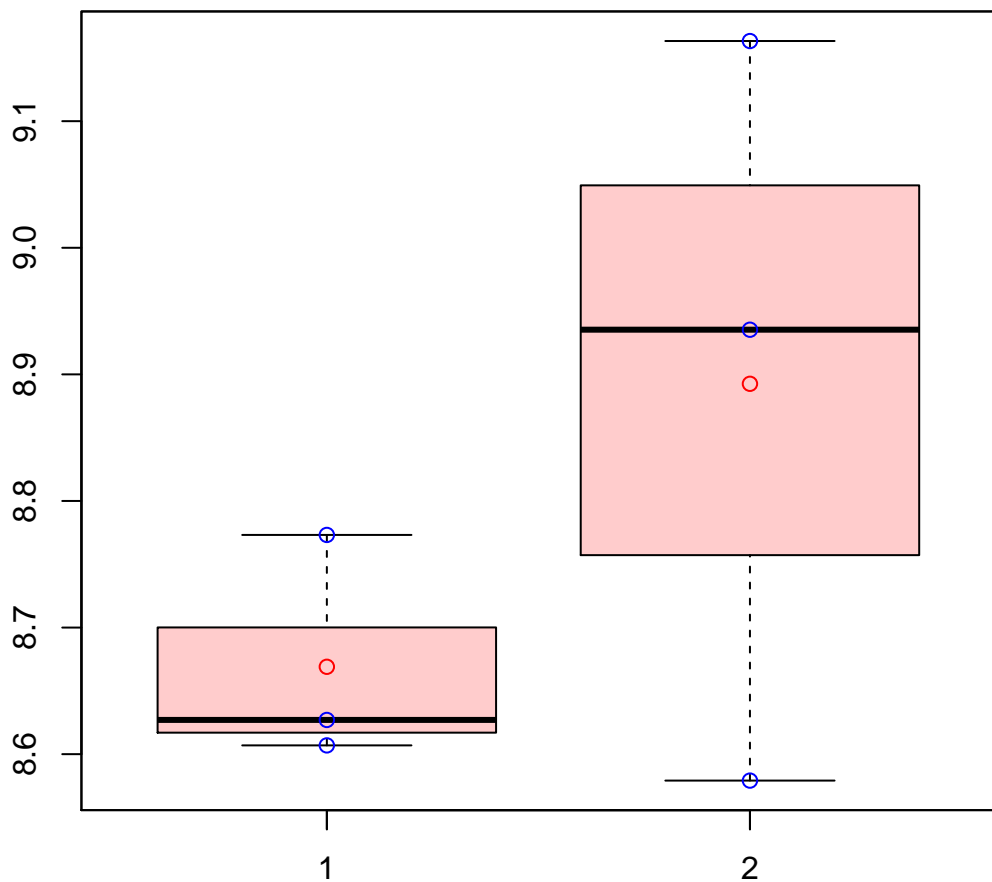

t-Test: p-value = 0.32

# CL5834Contig4|CL5834Contig4

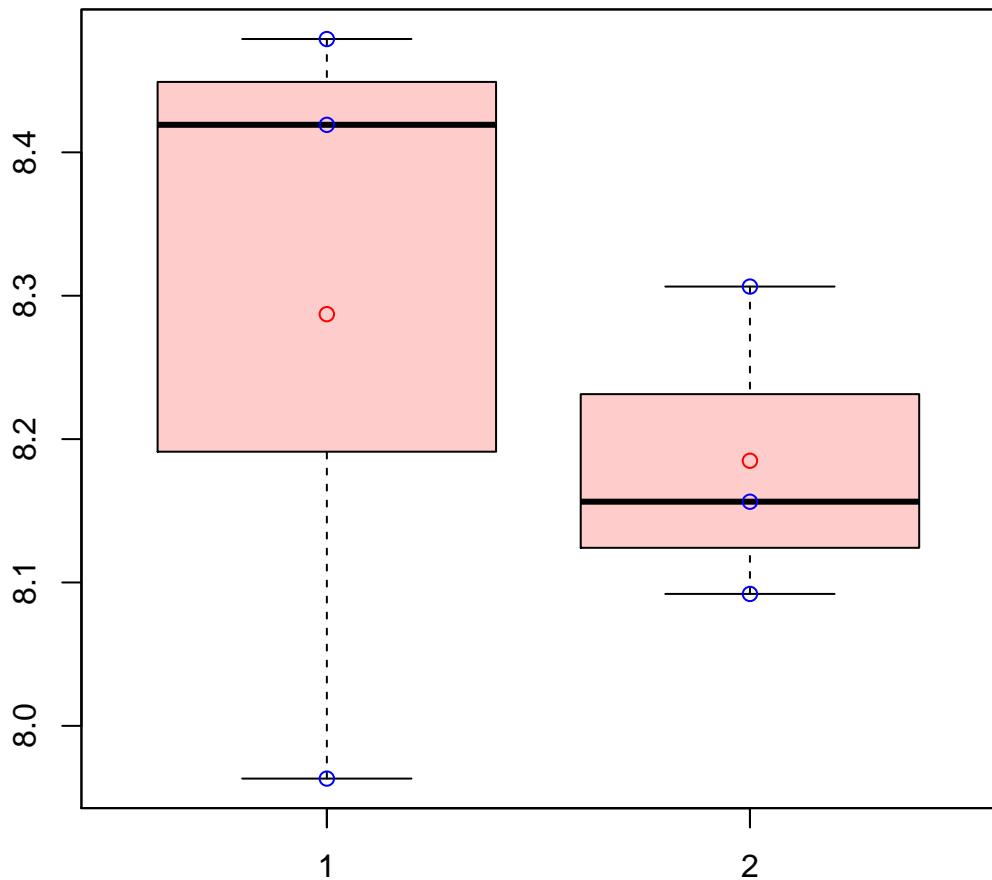

t-Test: p-value = 0.61



# CL5839Contig1|CL5839Contig1

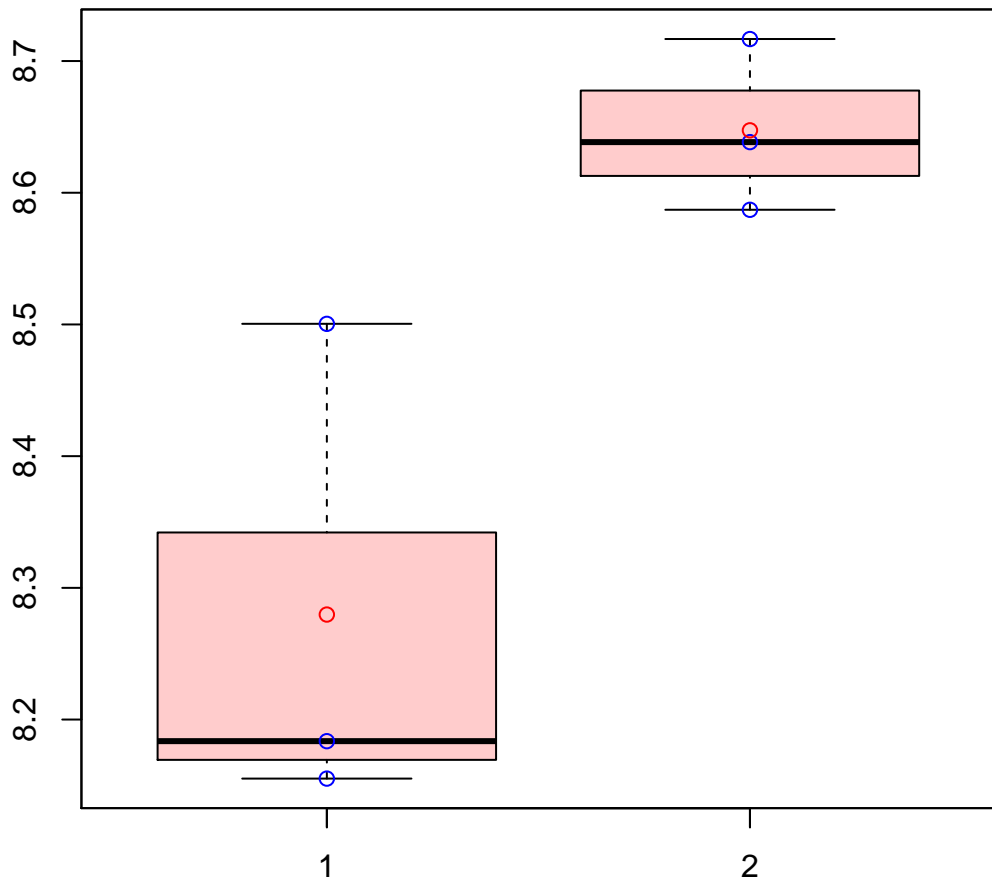

t-Test: p-value = 0.07

# CL583Contig4|CL583Contig4

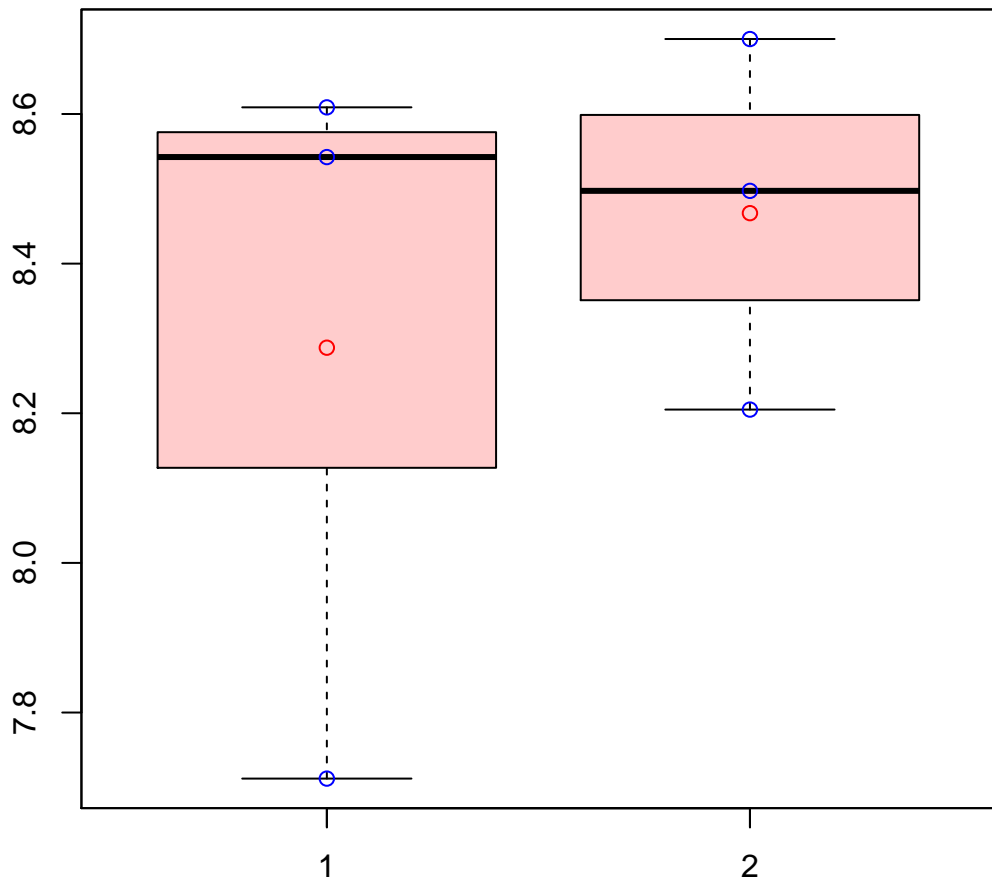

t-Test: p-value = 0.62

# CL5848Contig4|CL5848Contig4

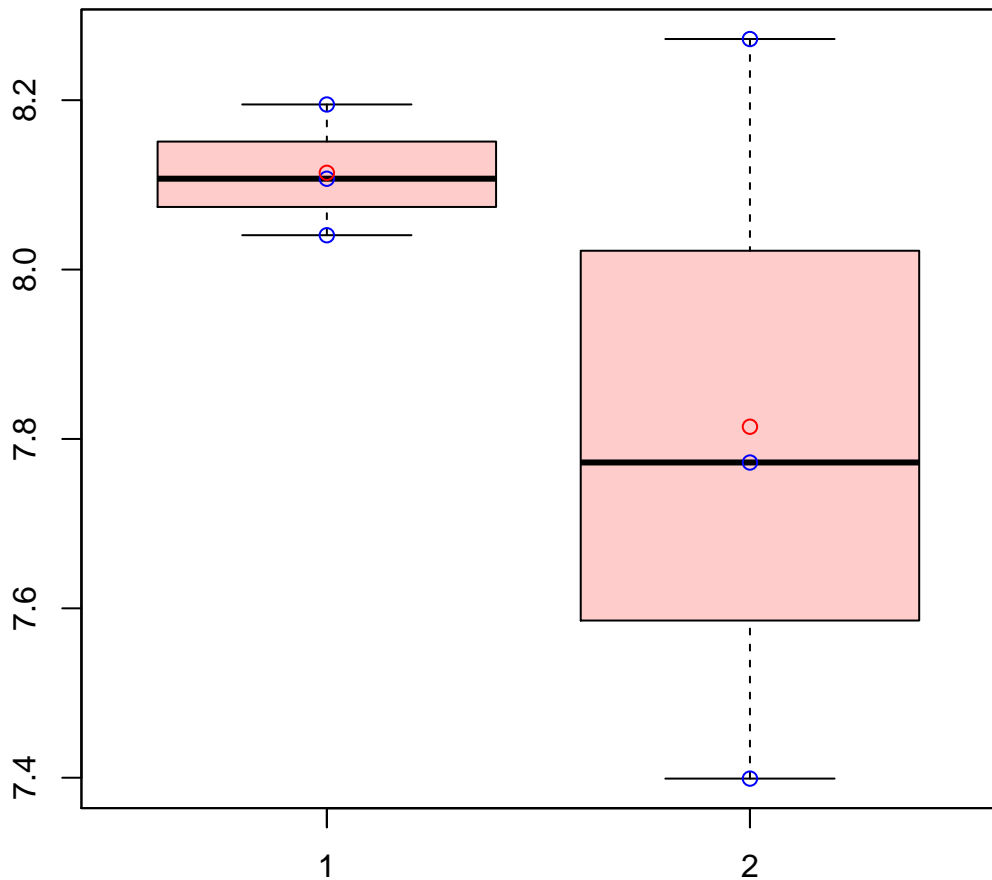

t-Test: p-value = 0.36

# CL584Contig1|CL584Contig1

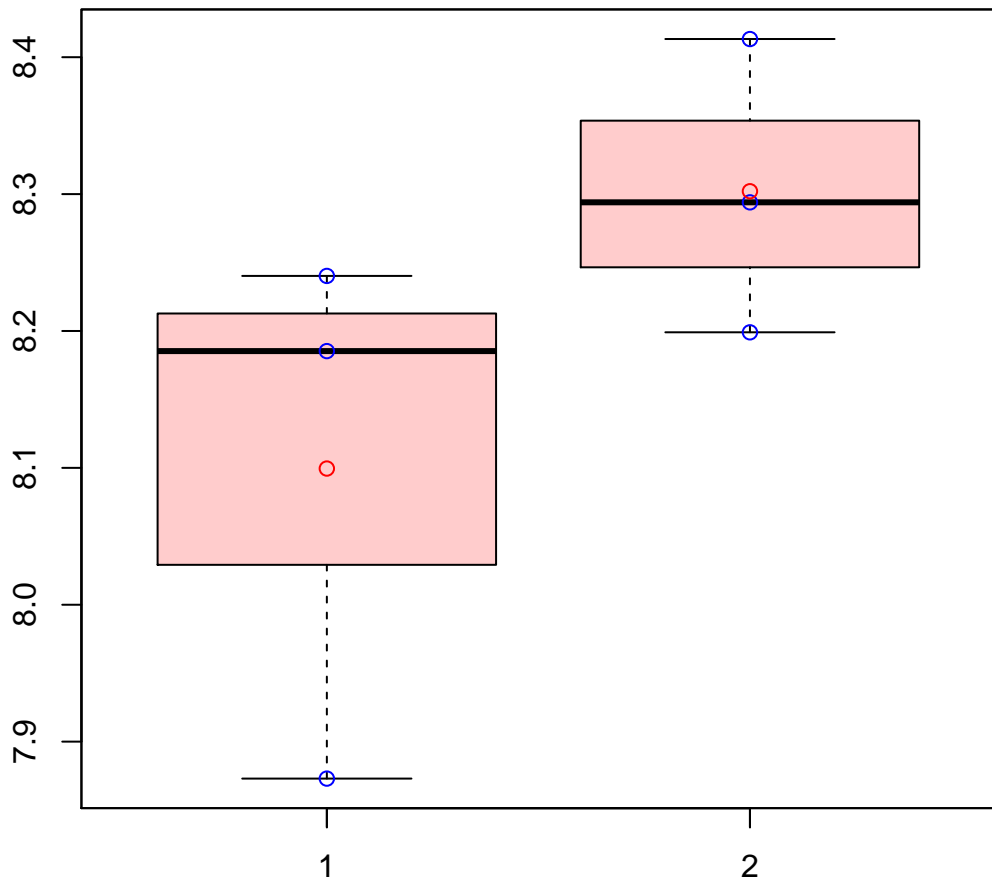

t-Test: p-value = 0.21

# CL584Contig6|CL584Contig6

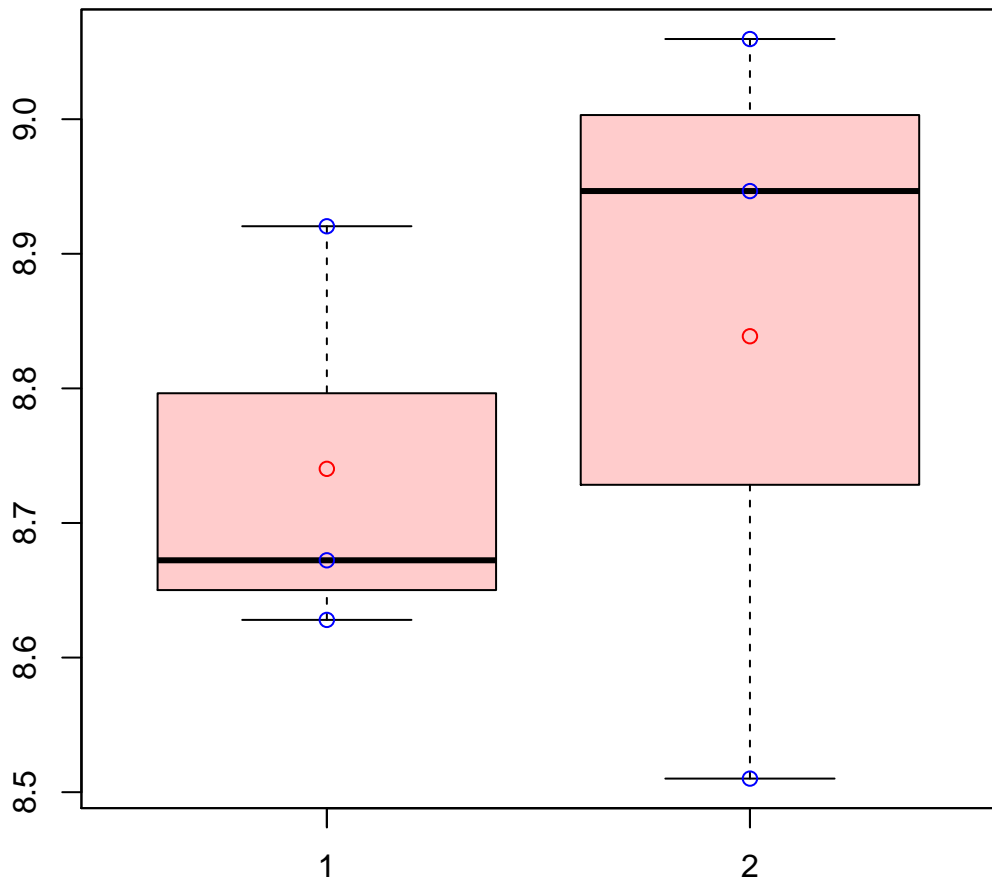

t-Test: p-value = 0.64

# CL5856Contig1|CL5856Contig1

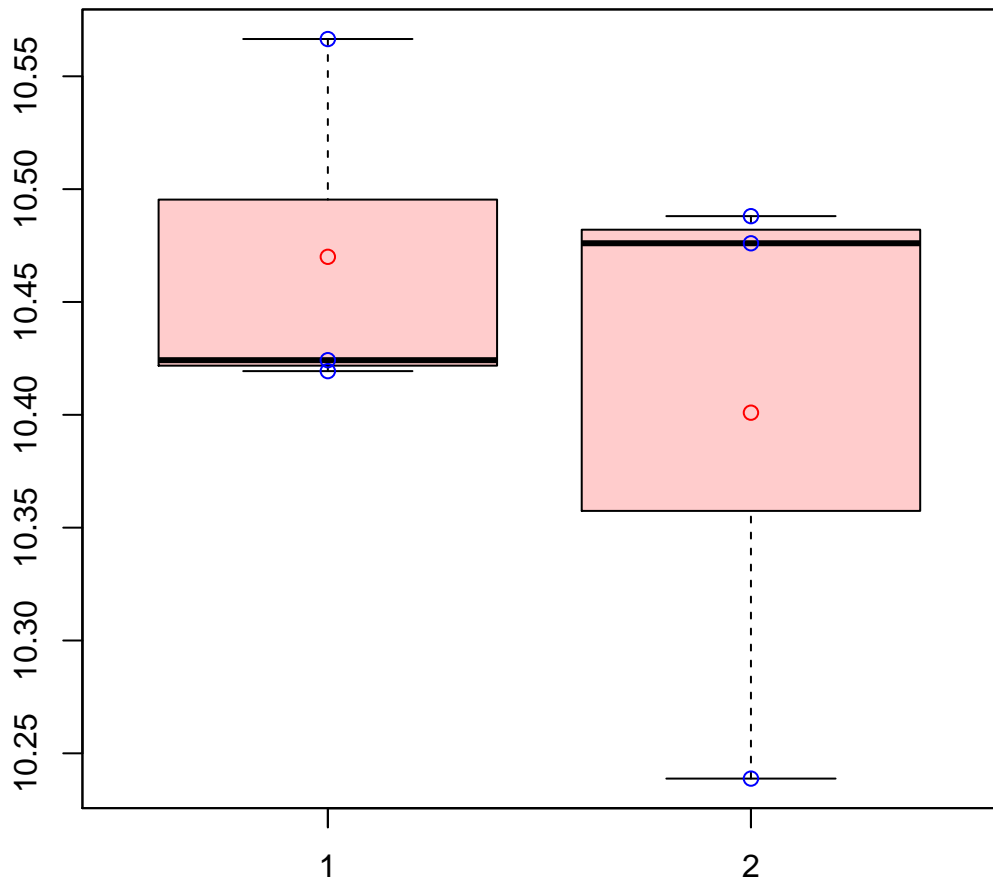

t-Test: p-value = 0.51

# CL5858Contig1|CL5858Contig1

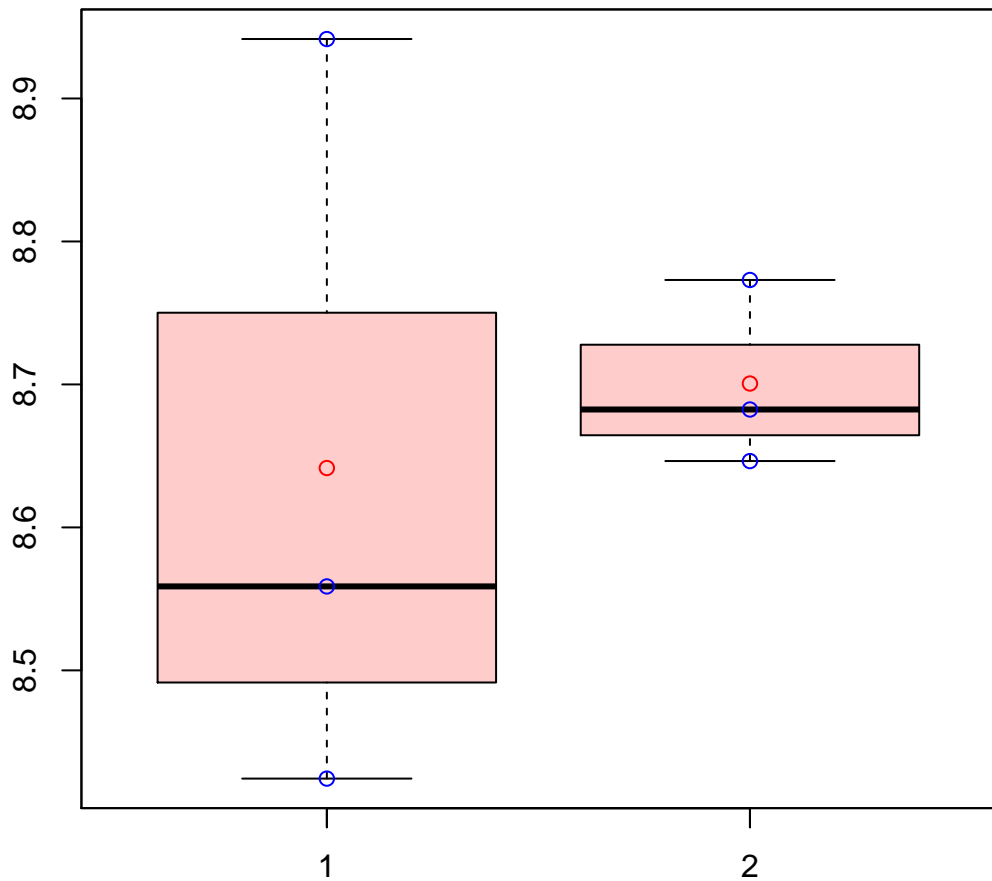

t-Test: p-value = 0.74

# CL5858Contig5|CL5858Contig5



t-Test: p-value = 0.93



# CL5859Contig1|CL5859Contig1

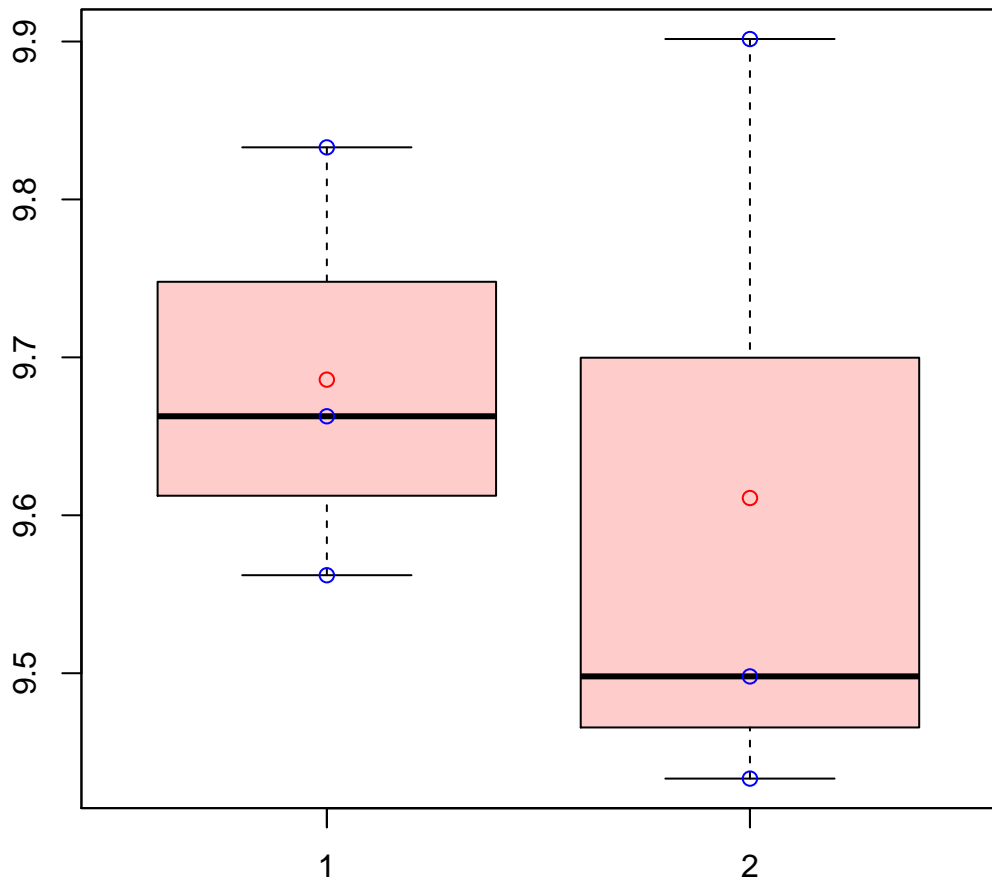

t-Test: p-value = 0.68

# CL5866Contig1|CL5866Contig1

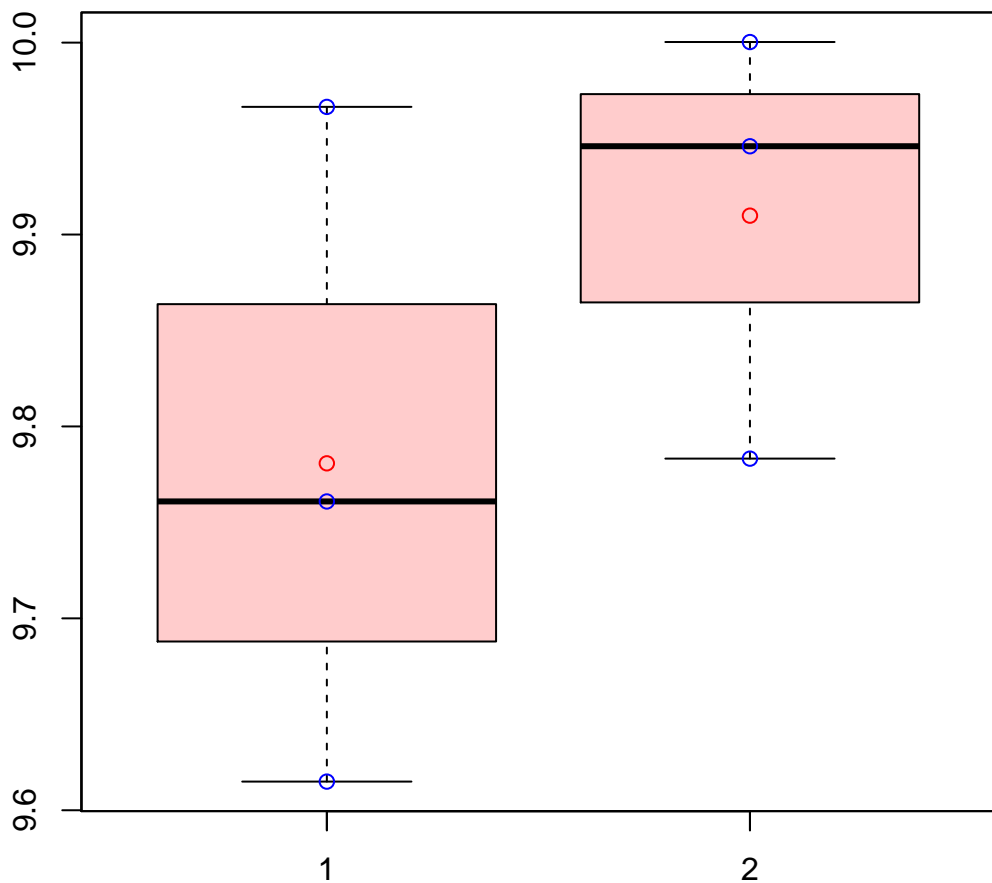

t-Test: p-value = 0.36

# CL5866Contig2|CL5866Contig2

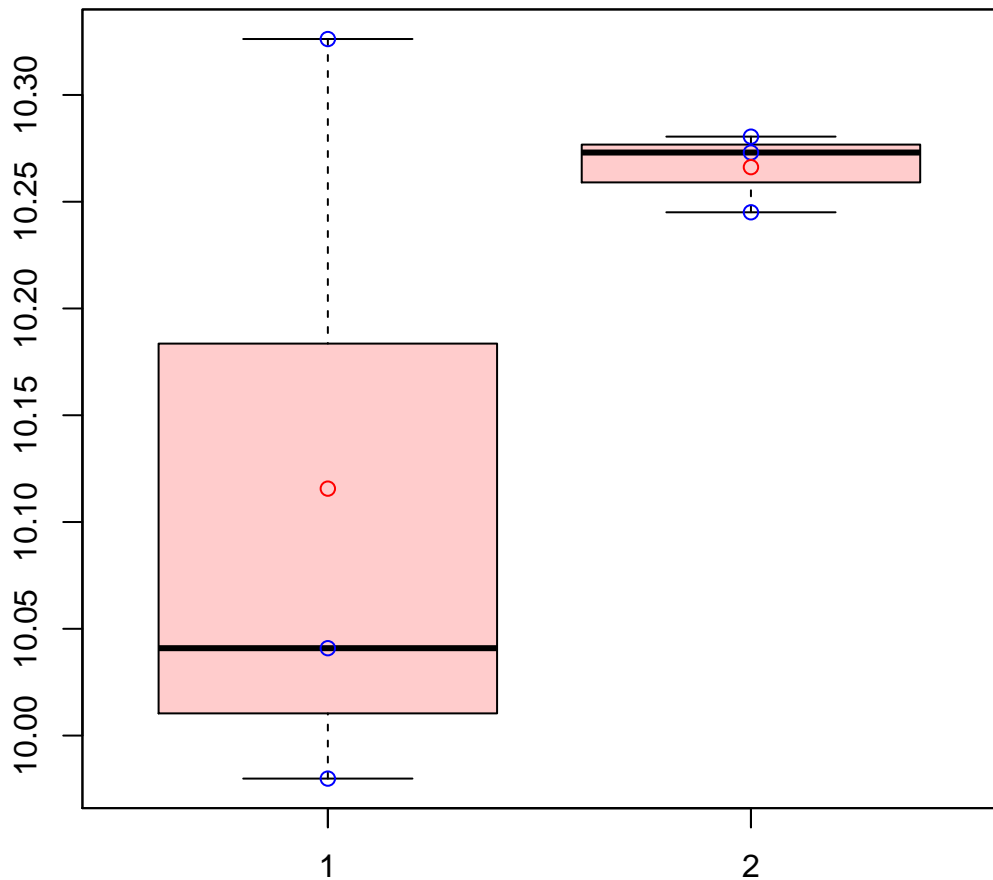

t-Test: p-value = 0.29

# CL5866Contig3|CL5866Contig3

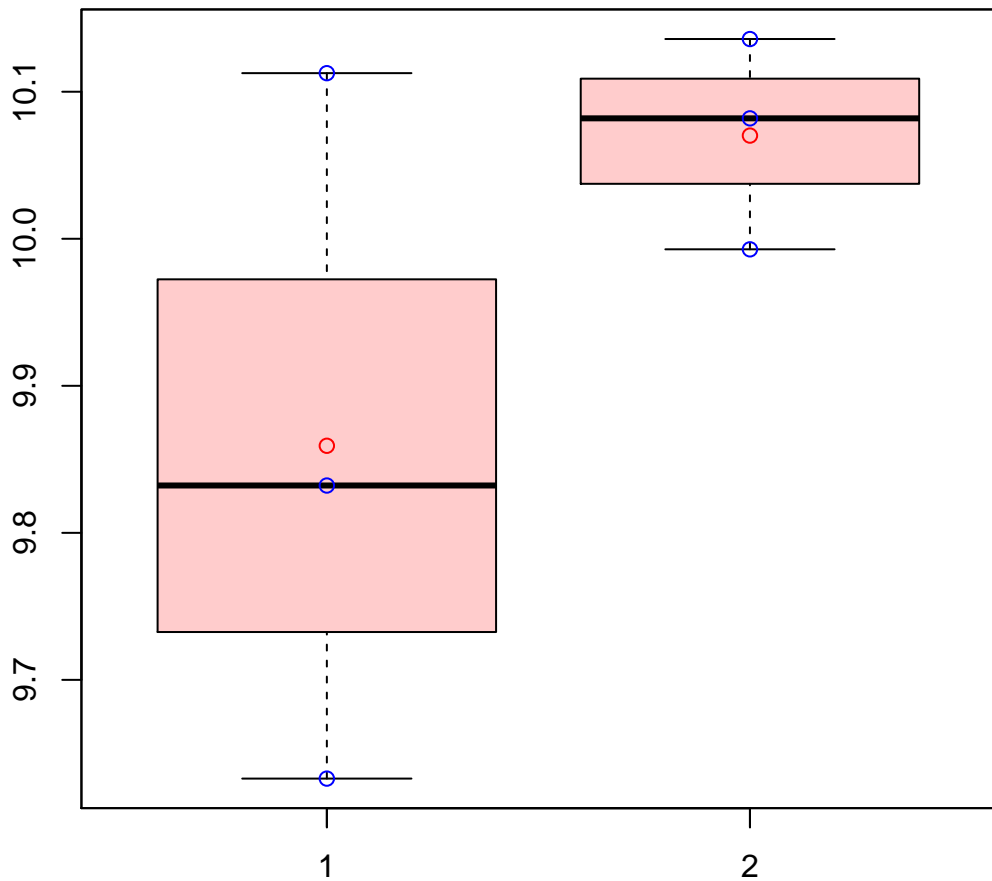

t-Test: p-value = 0.27

# CL5870Contig2|CL5870Contig2

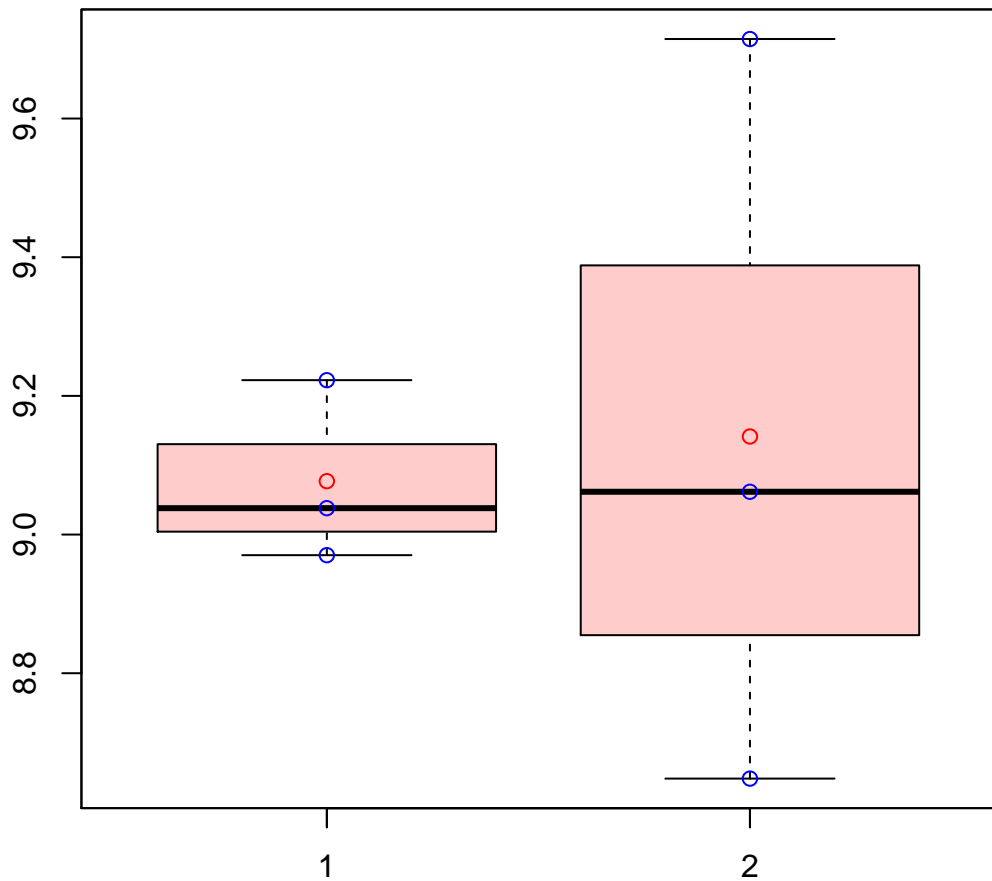

t-Test: p-value = 0.86

# CL5878Contig3|CL5878Contig3

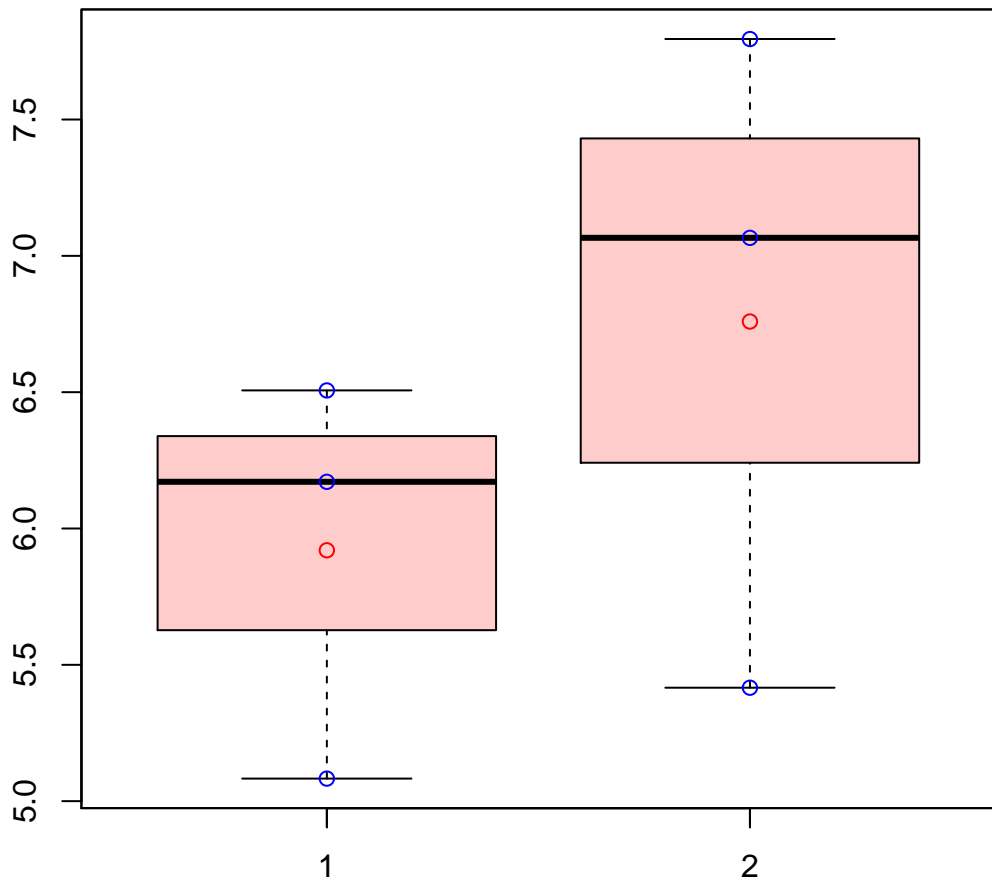

t-Test: p-value = 0.38

# CL5880Contig1|CL5880Contig1

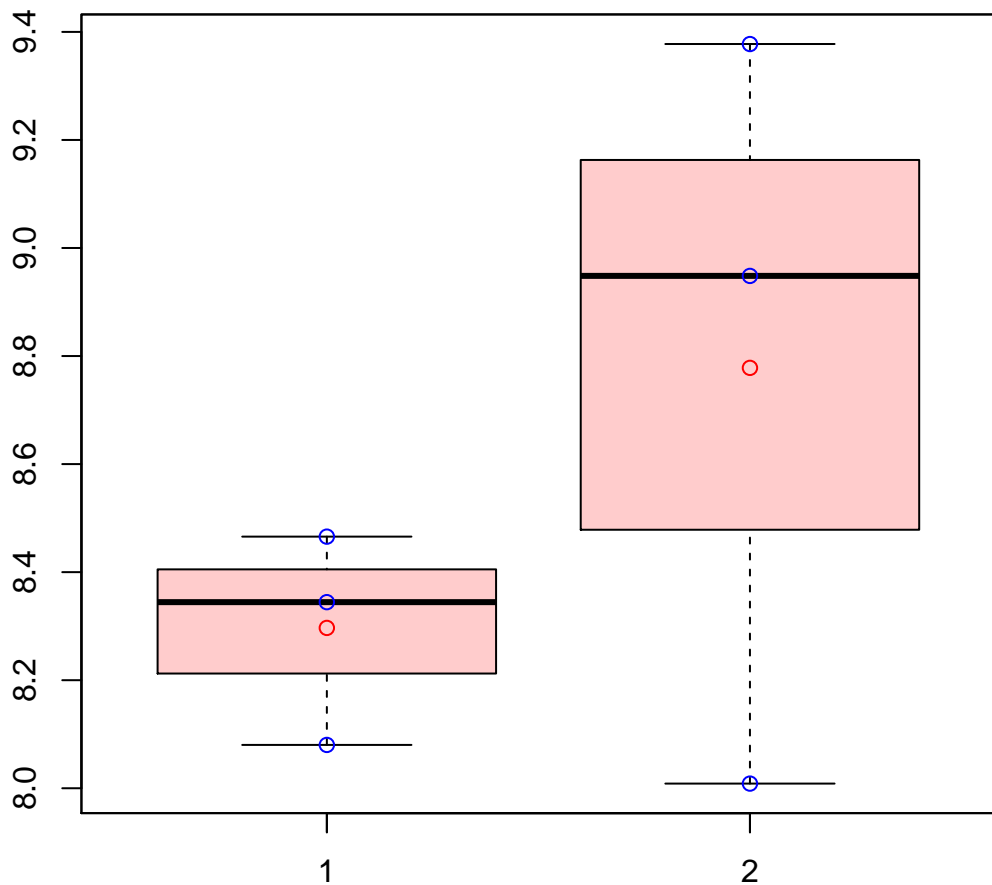

t-Test: p-value = 0.36

# CL5888Contig3|CL5888Contig3

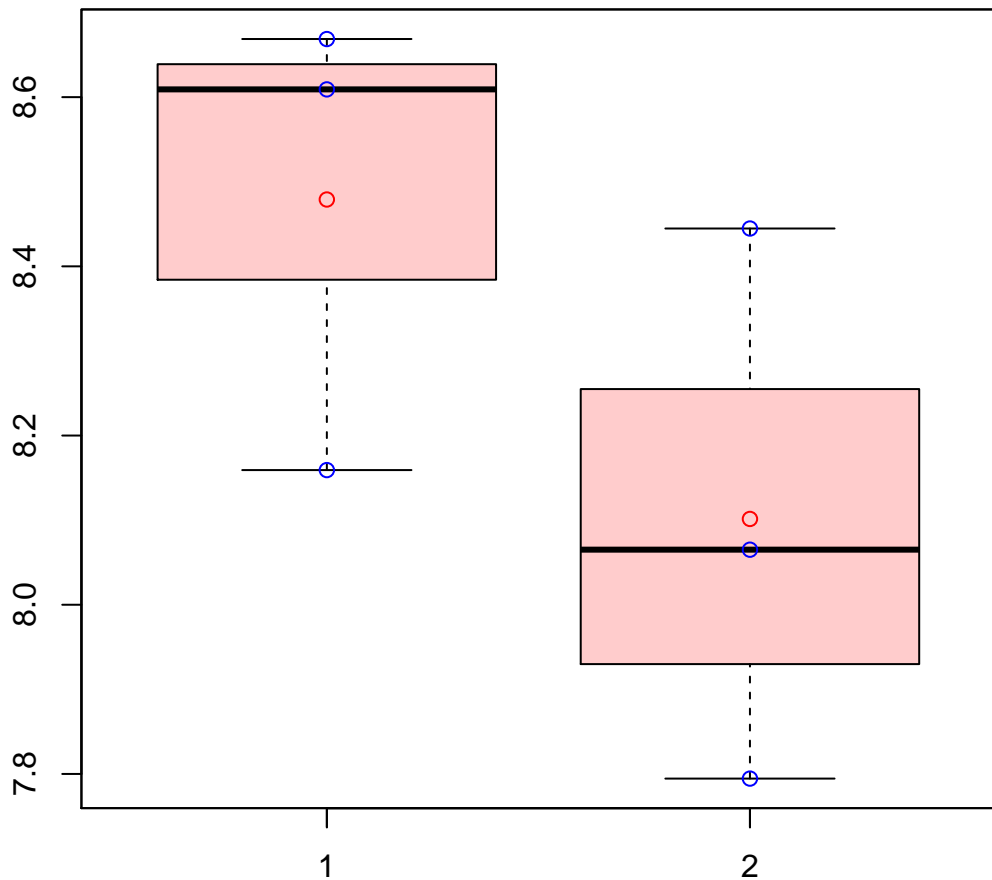

t-Test: p-value = 0.2



# CL5894Contig3|CL5894Contig3

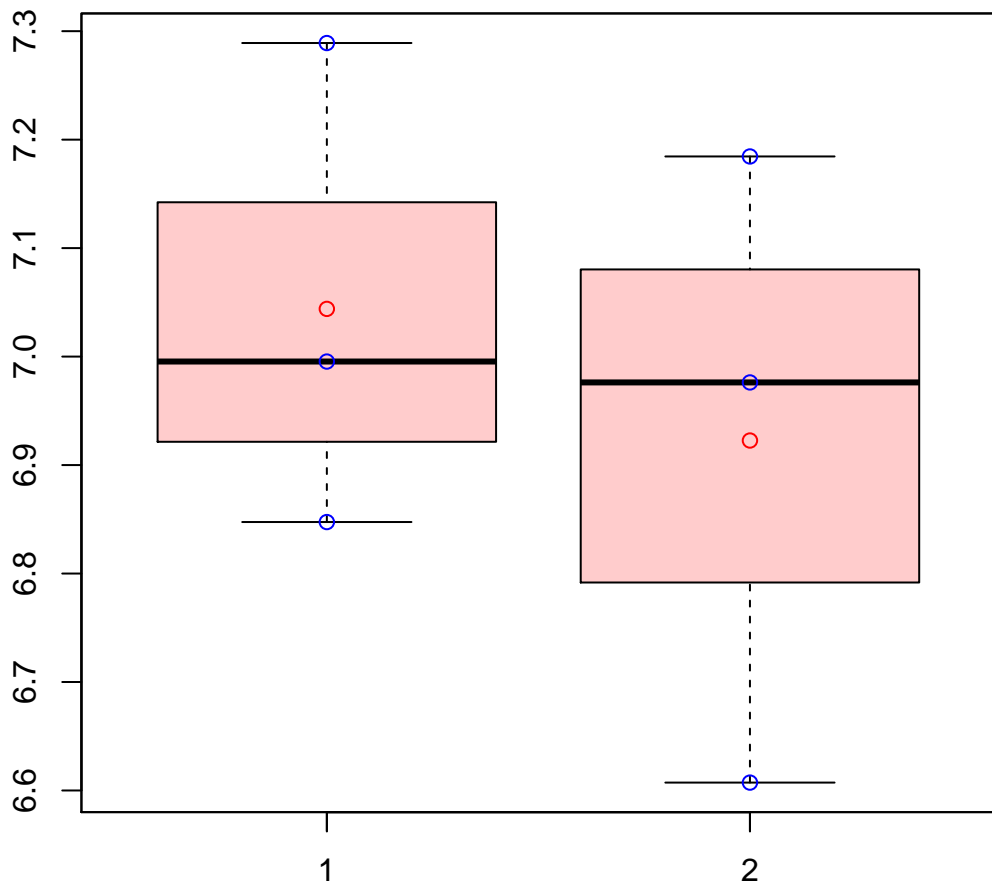

t-Test: p-value = 0.6

# CL5895Contig2|CL5895Contig2

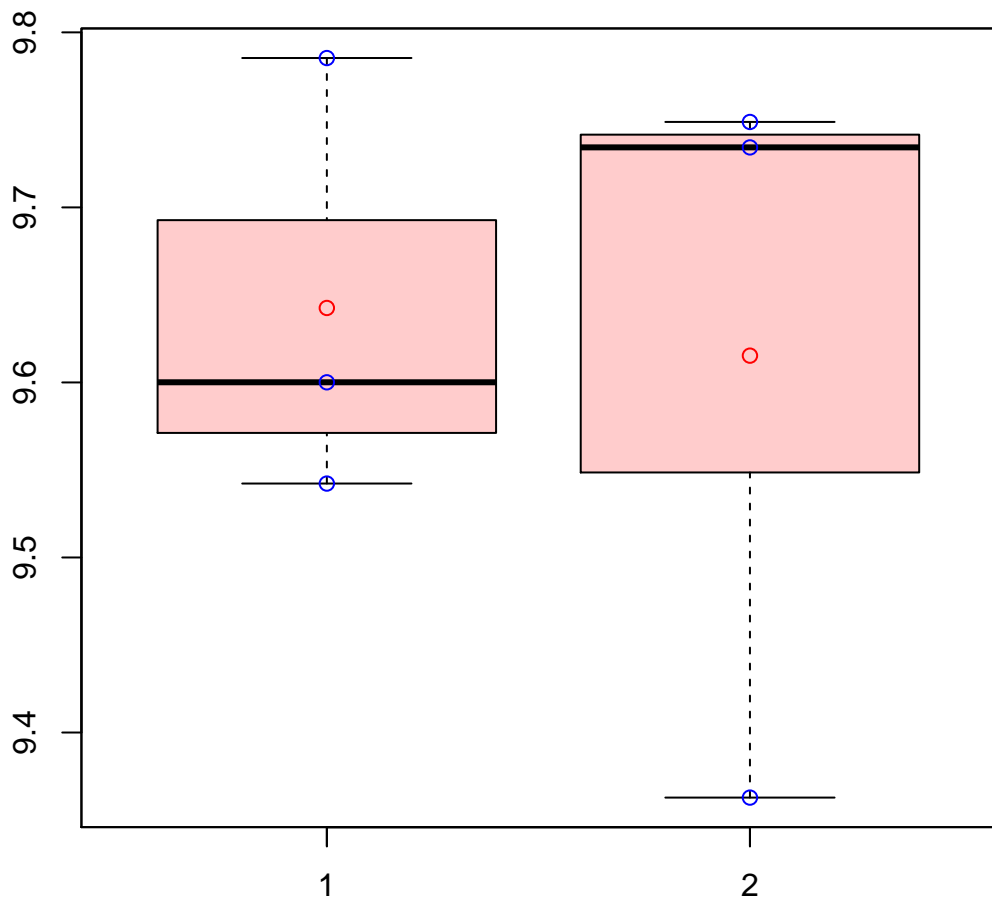

t-Test: p-value = 0.86

# CL5895Contig3|CL5895Contig3

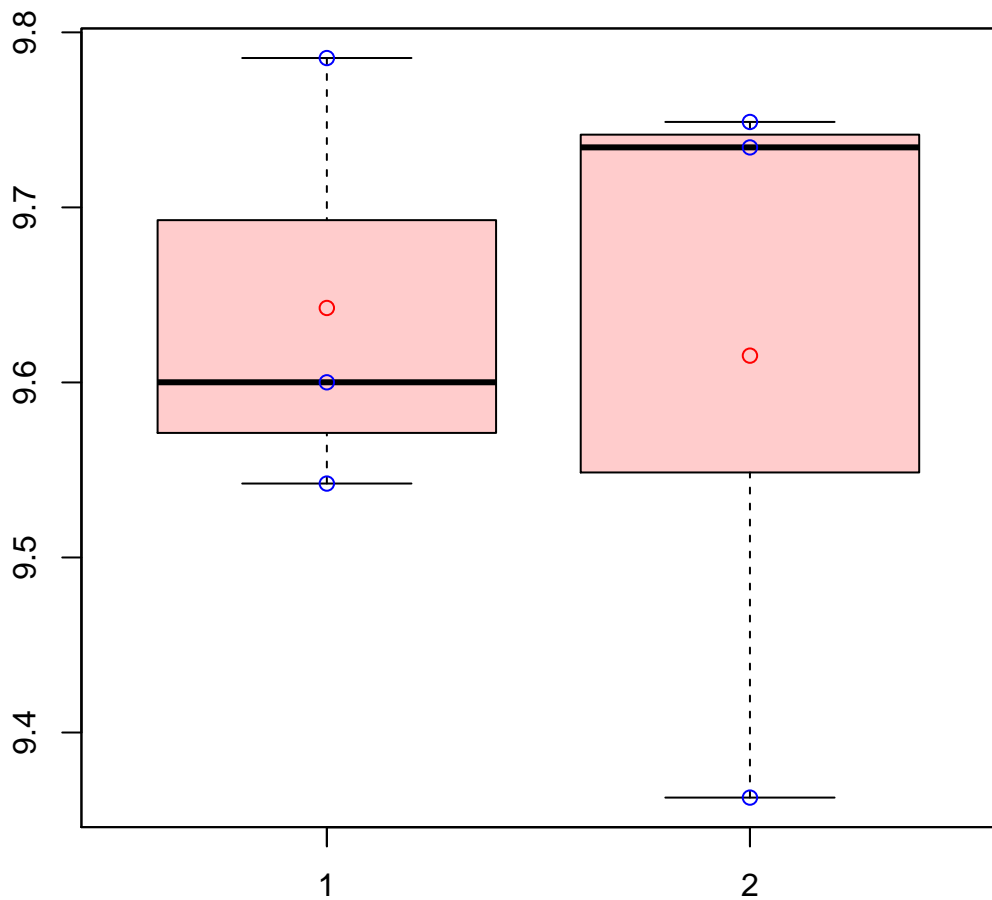

t-Test: p-value = 0.86

# CL5895Contig4|CL5895Contig4



t-Test: p-value = 0.86

# CL5895Contig5|CL5895Contig5

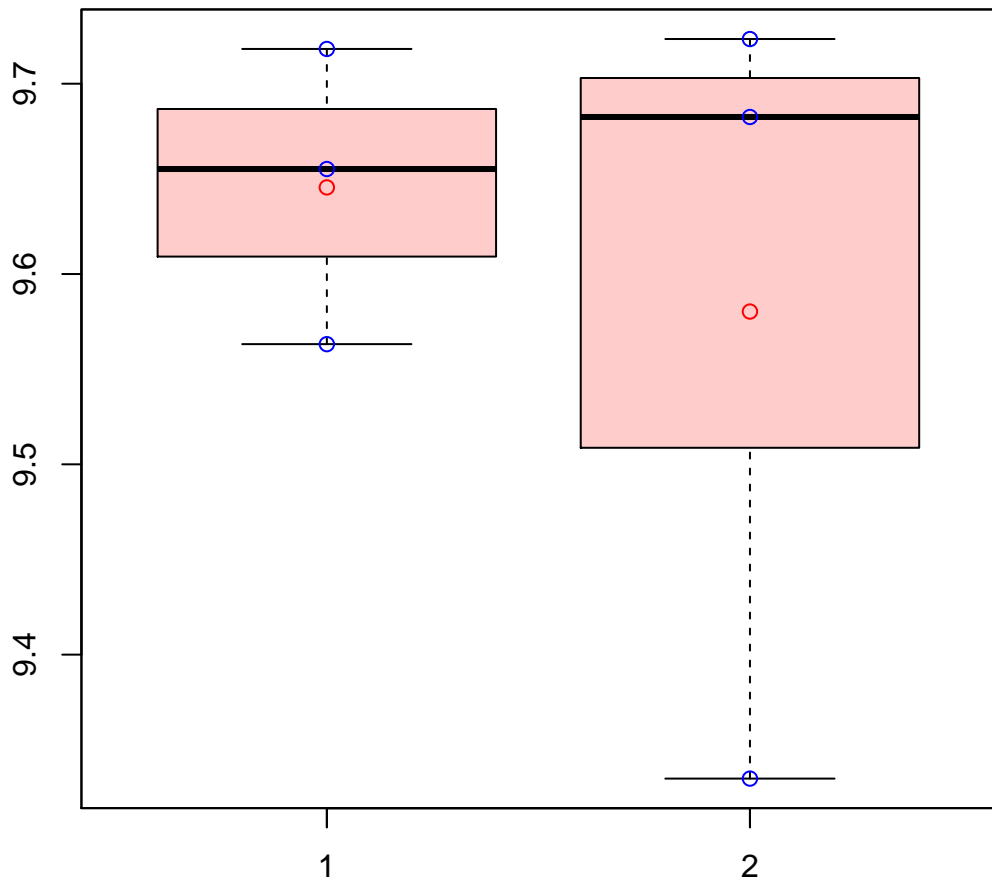

t-Test: p-value = 0.66

# CL58Contig14|CL58Contig14



t-Test: p-value = 0.02

# CL58Contig28|CL58Contig28

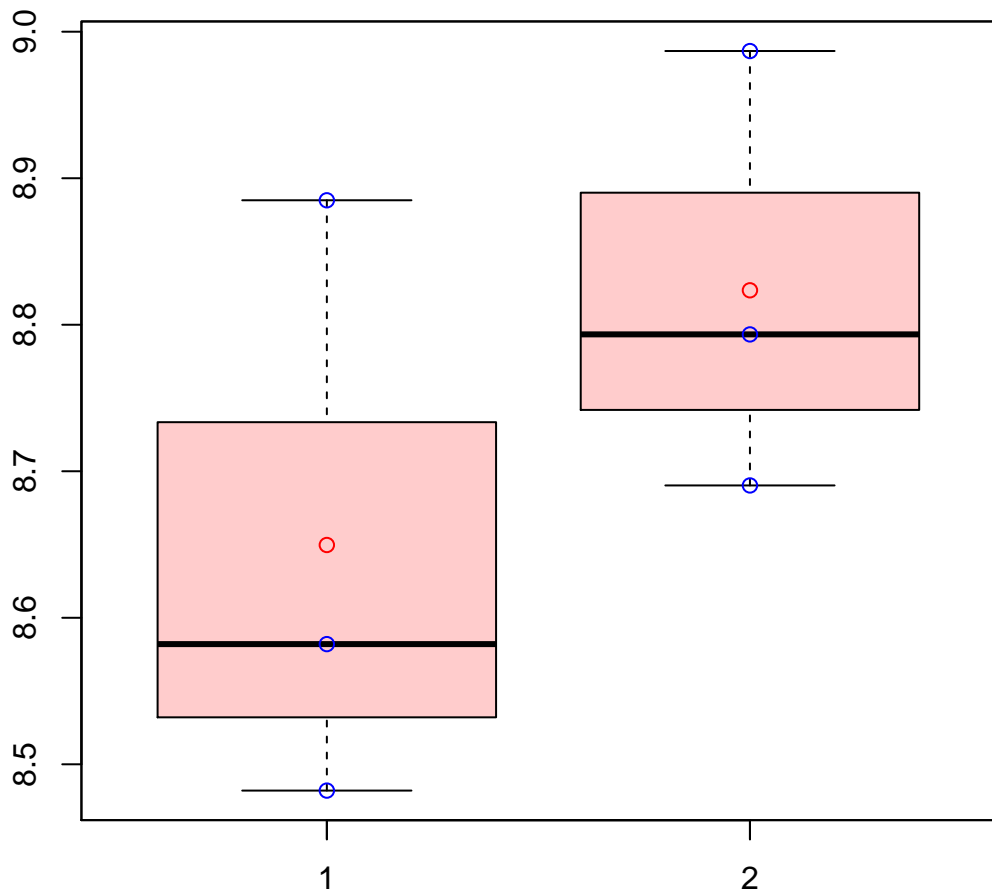

t-Test: p-value = 0.31

# CL58Contig2|CL58Contig2



t-Test: p-value = 0.02



# CL58Contig38|CL58Contig38

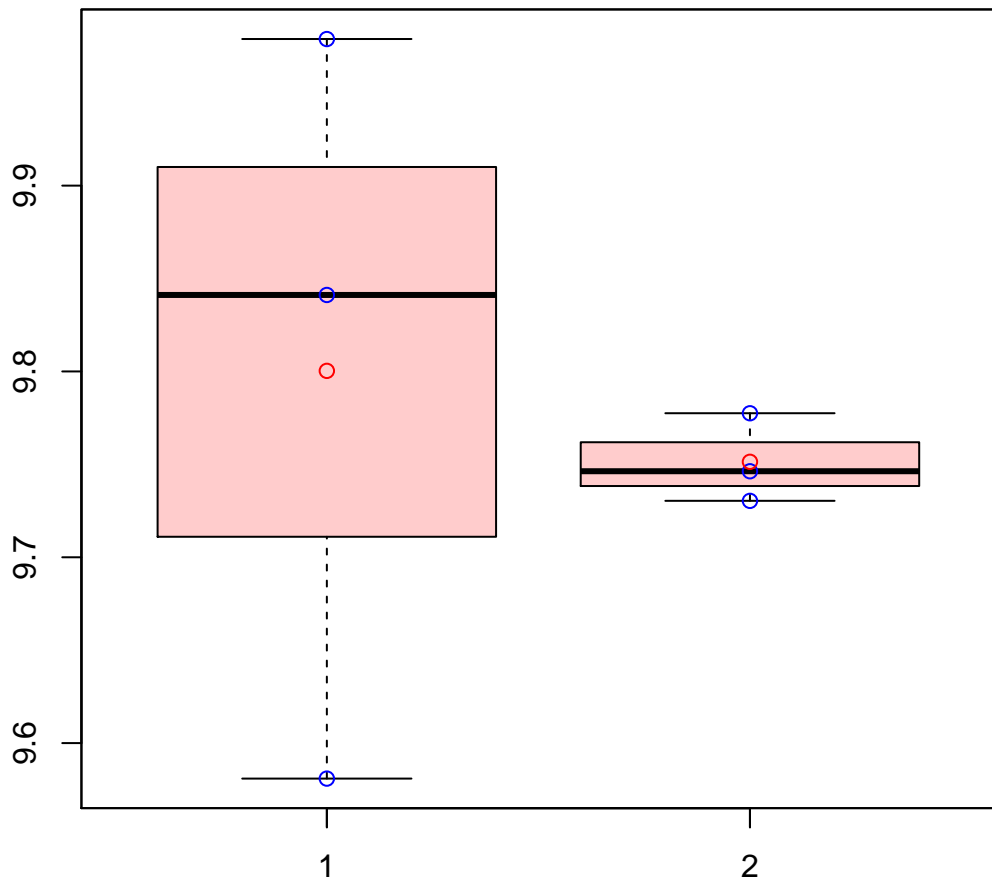

t-Test: p-value = 0.72

# CL58Contig7|CL58Contig7

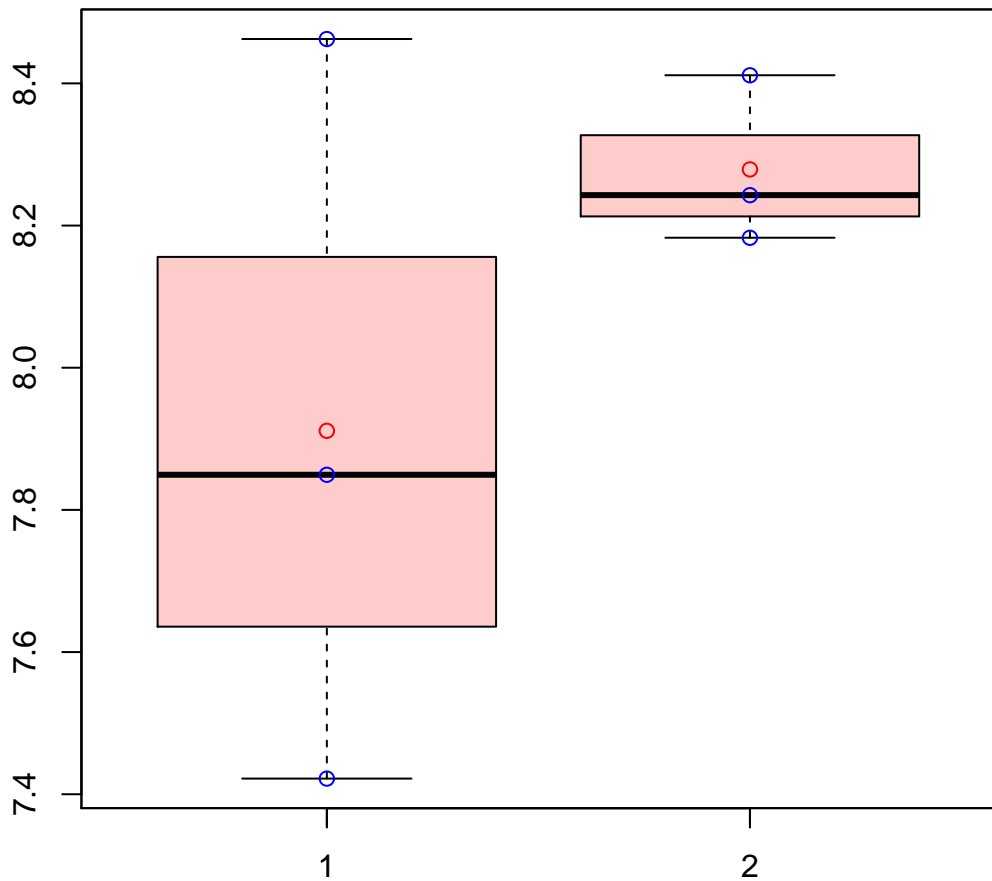

t-Test: p-value = 0.35

# CL5905Contig3|CL5905Contig3

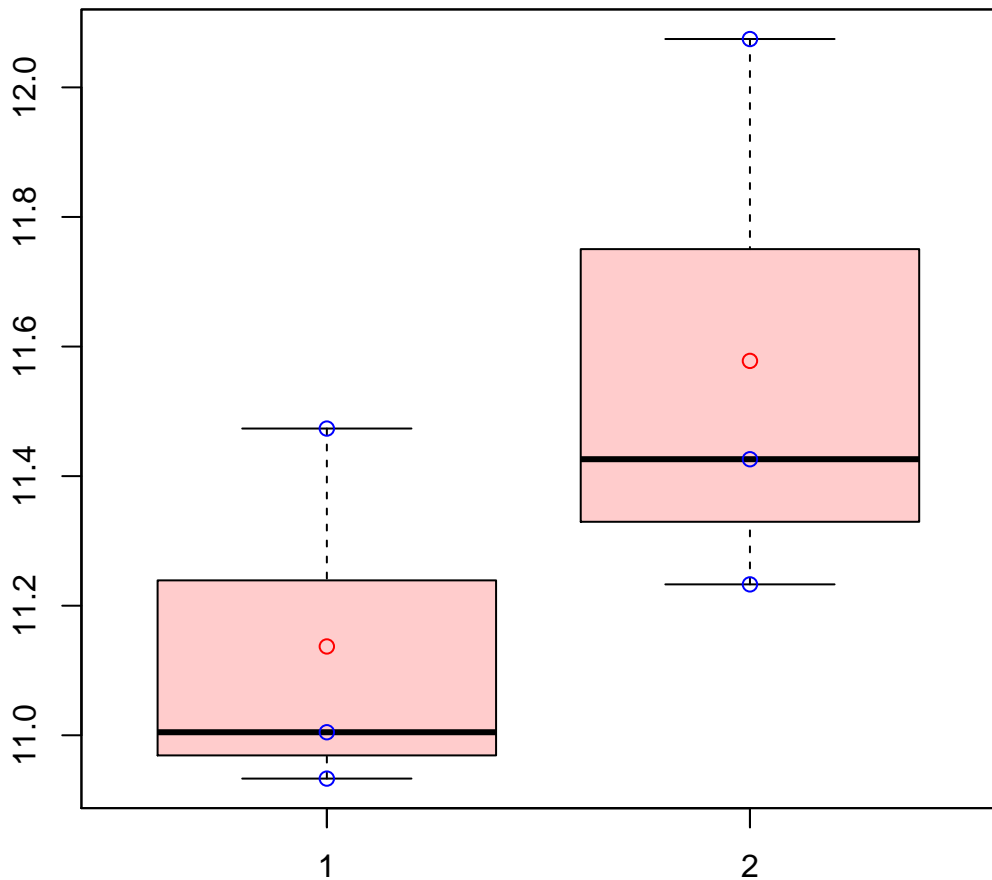

t-Test: p-value = 0.23

# CL5905Contig4|CL5905Contig4

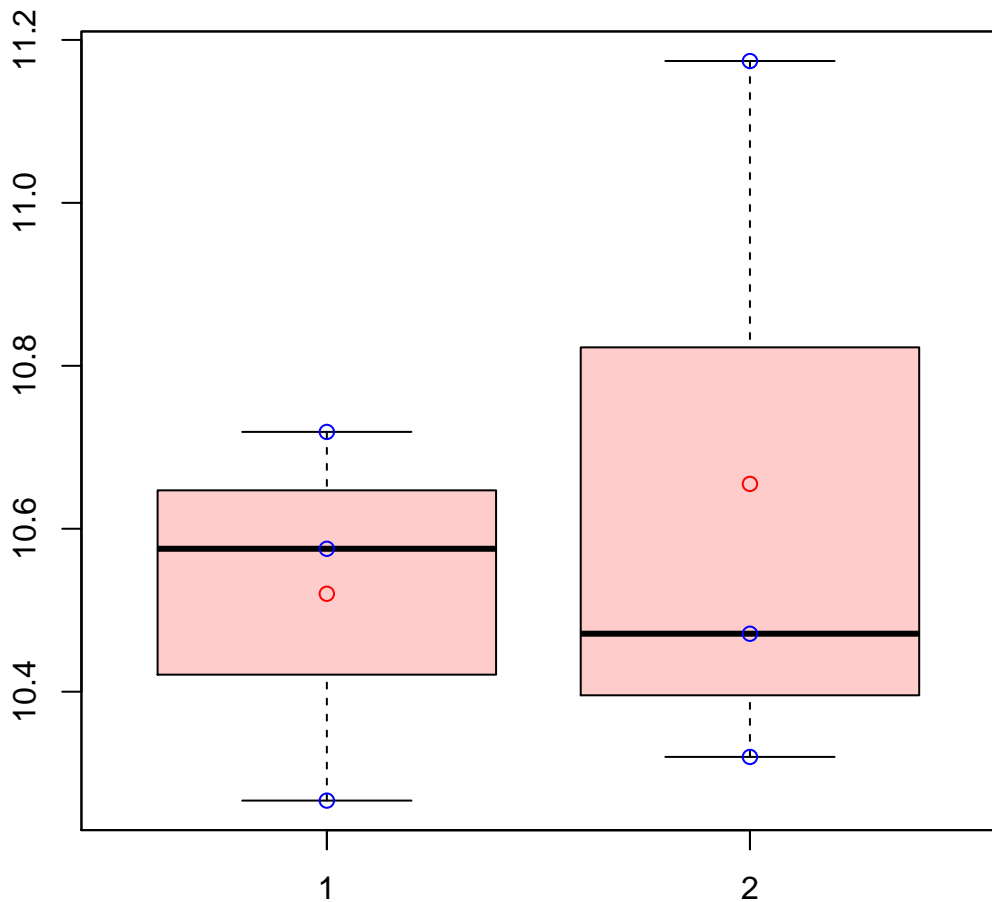

t-Test: p-value = 0.68

# CL5905Contig5|CL5905Contig5

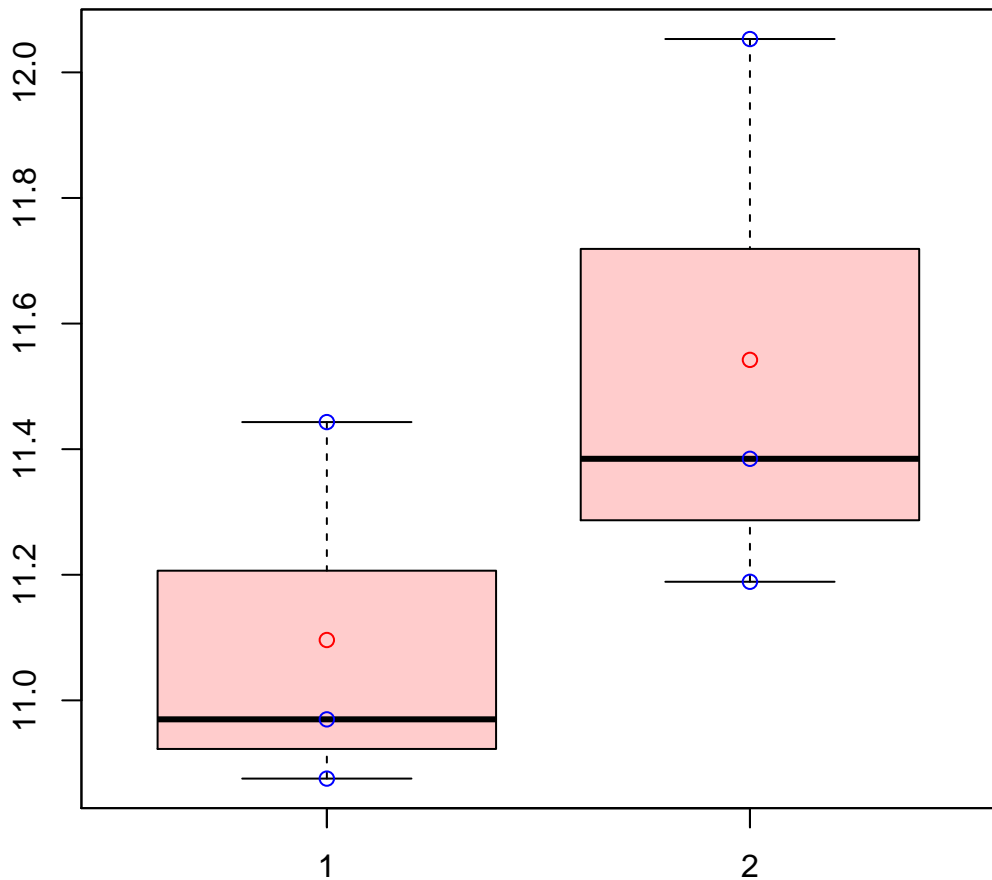

t-Test: p-value = 0.24

# CL5905Contig7|CL5905Contig7

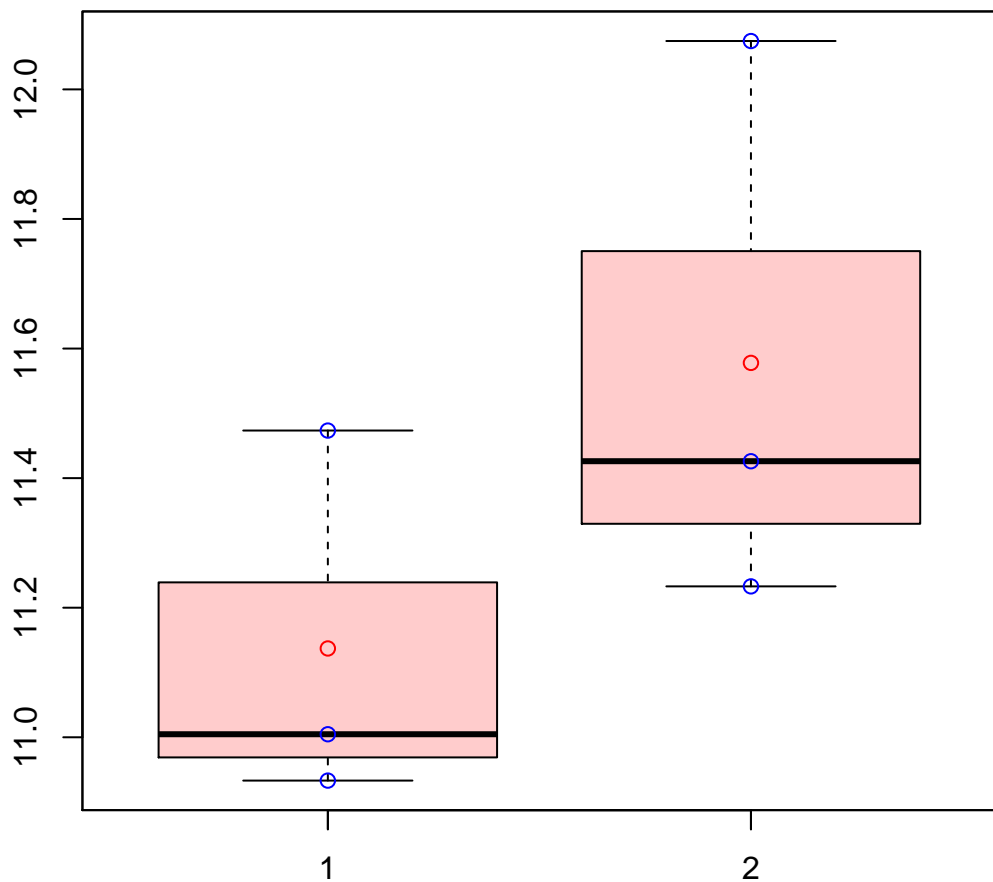

t-Test: p-value = 0.23

# CL590Contig1|CL590Contig1

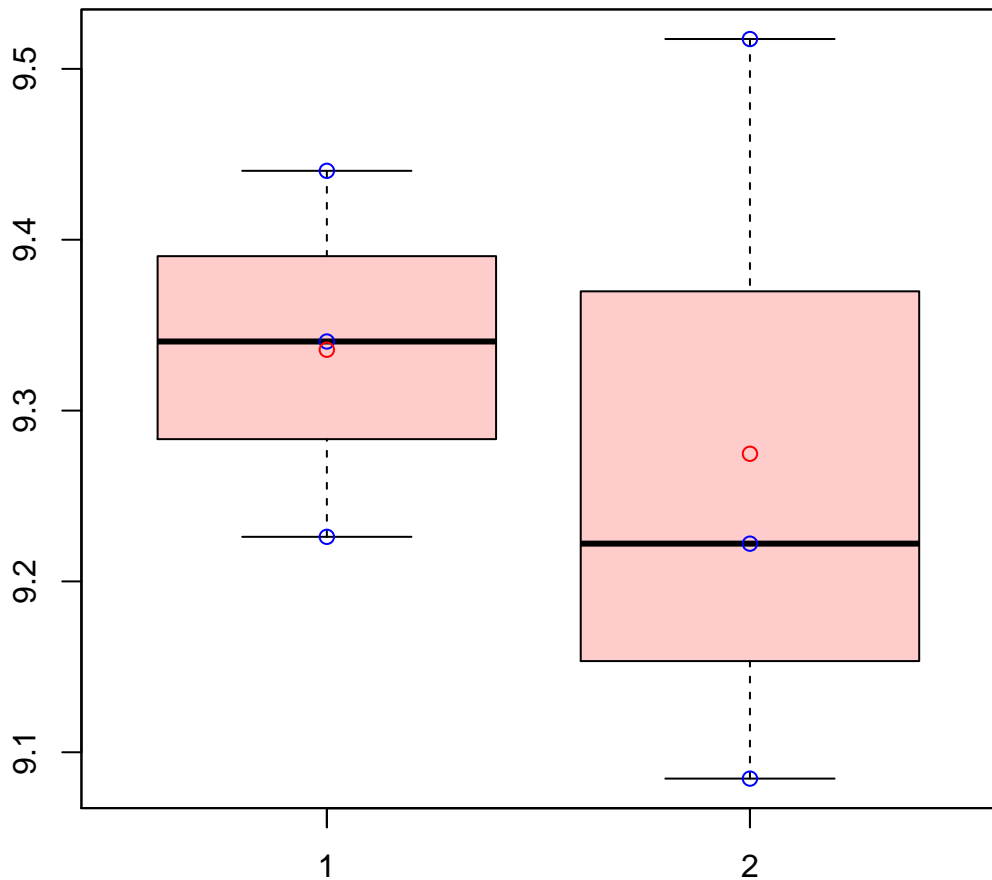

t-Test: p-value = 0.7

# CL5914Contig1|CL5914Contig1

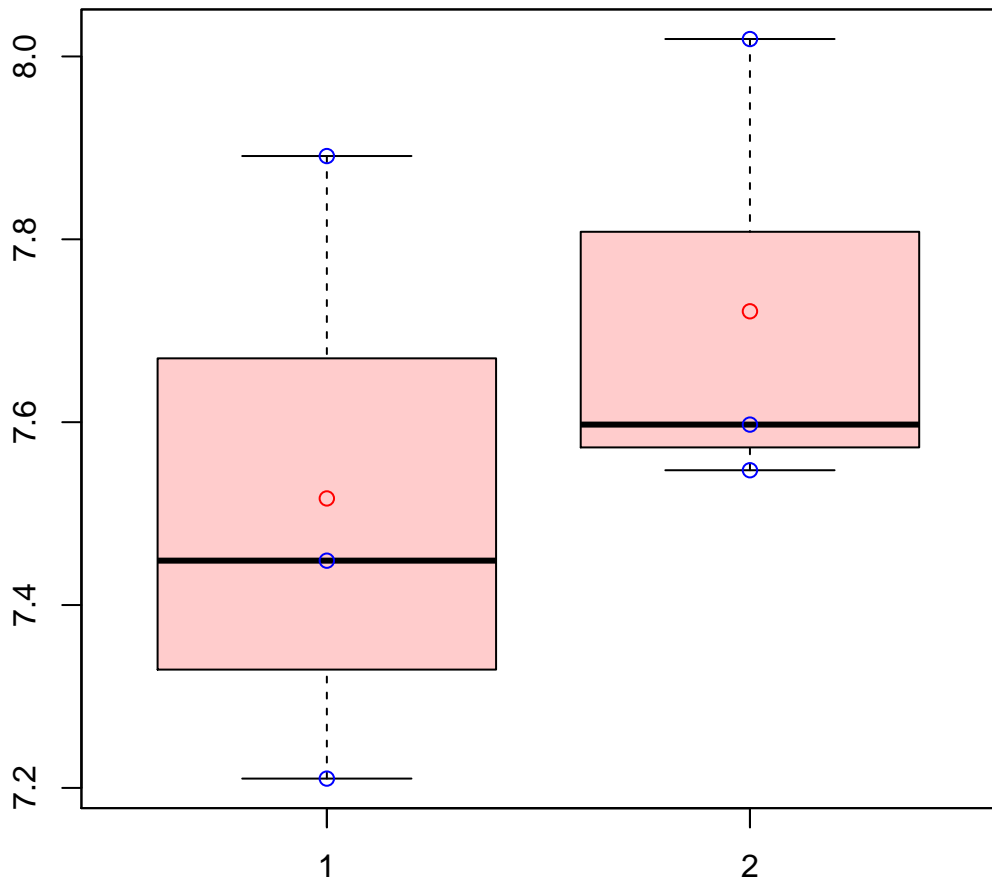

t-Test: p-value = 0.46



# CL5924Contig2|CL5924Contig2

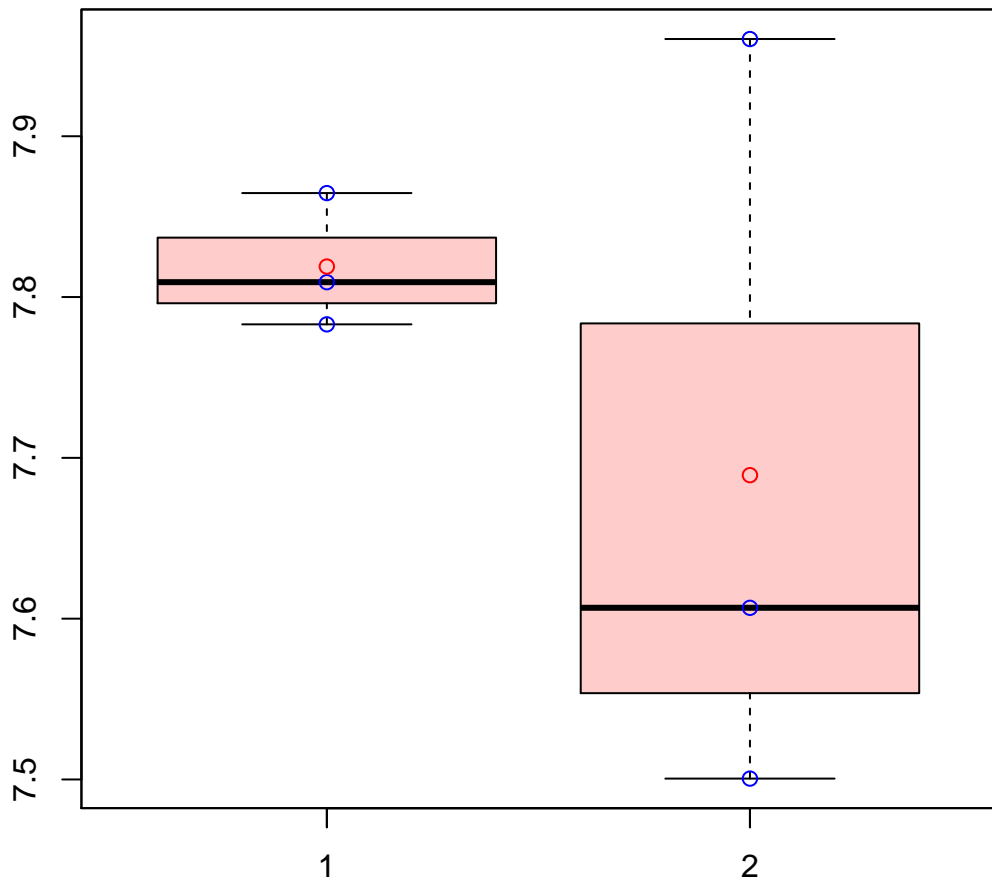

t-Test: p-value = 0.45

# CL5924Contig4|CL5924Contig4

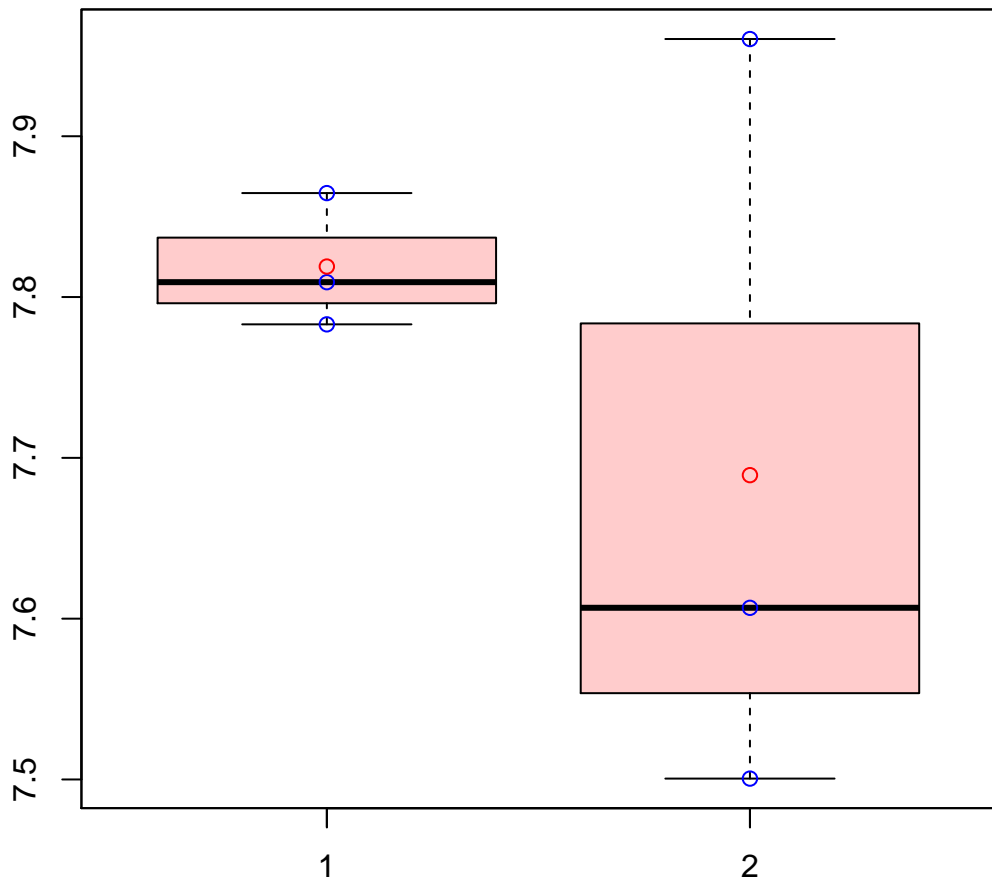

t-Test: p-value = 0.45

# CL5936Contig4|CL5936Contig4

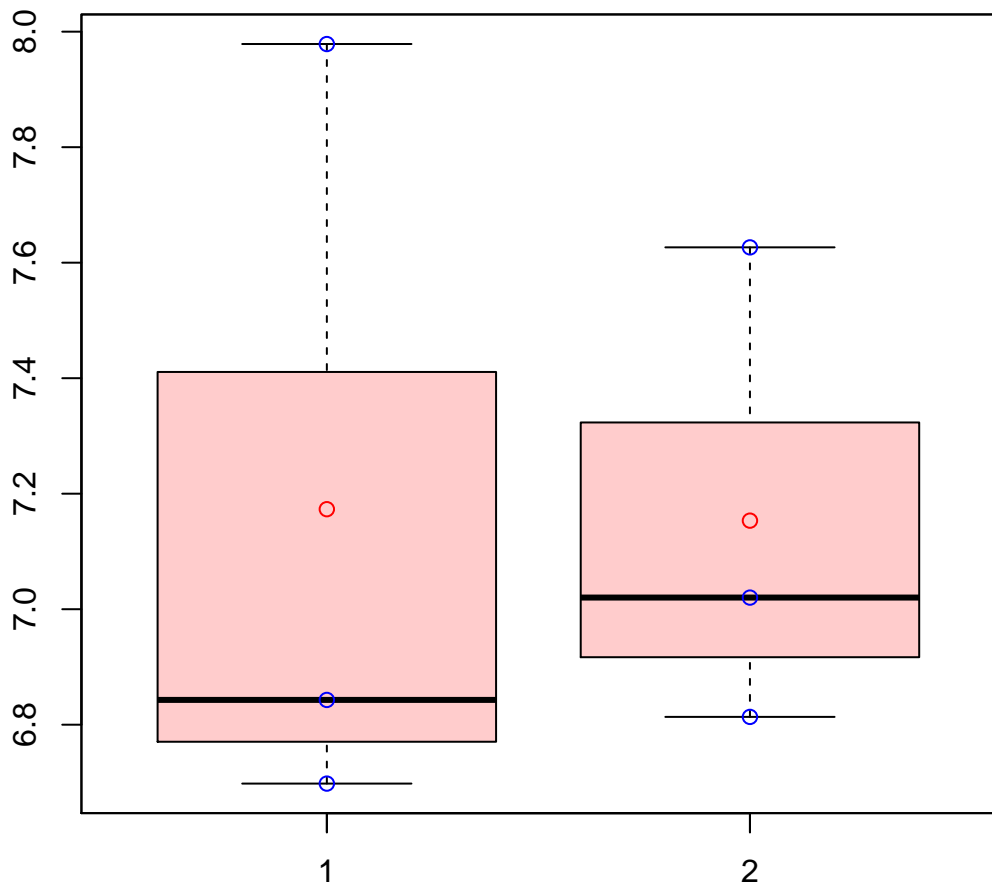

t-Test: p-value = 0.97

# CL5941Contig3|CL5941Contig3

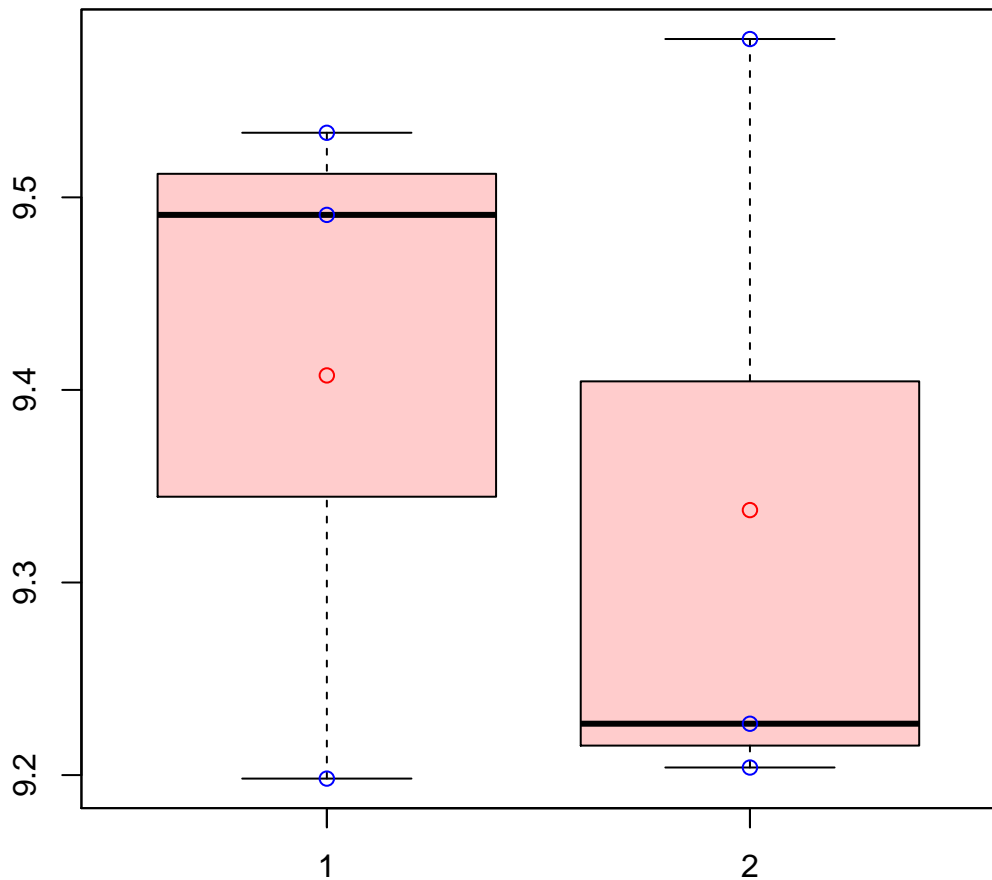

t-Test: p-value = 0.69

# CL5942Contig6|CL5942Contig6

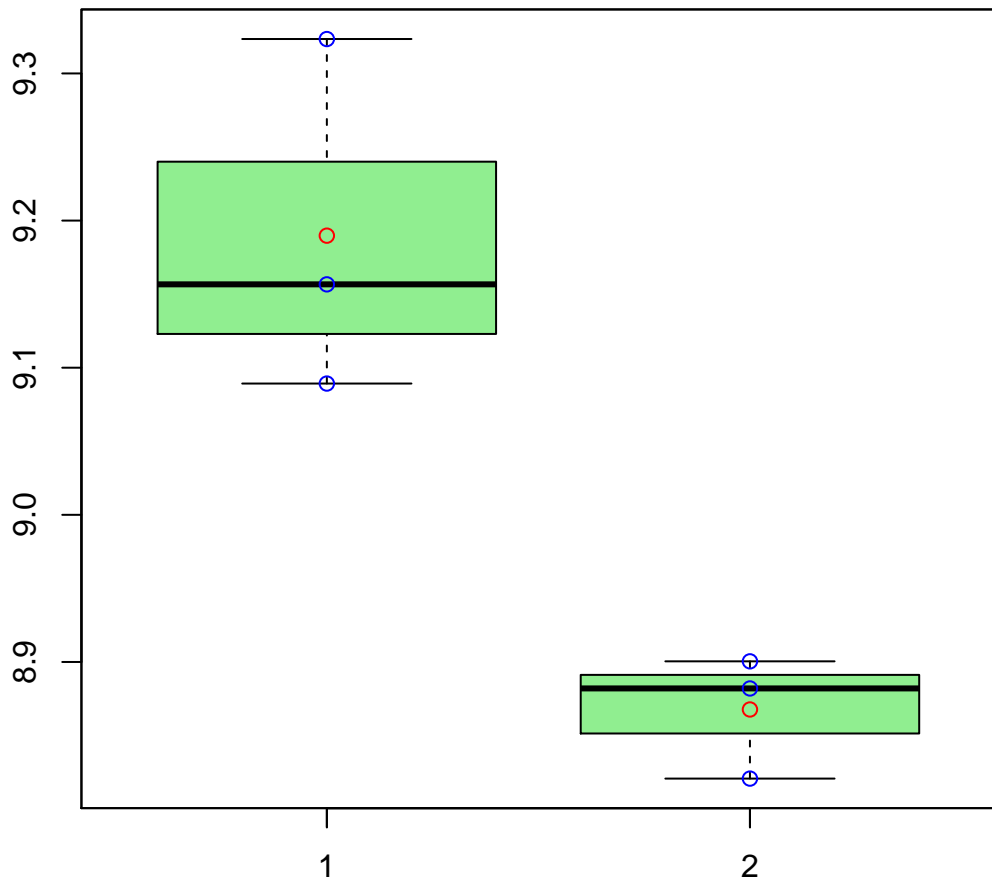

t-Test: p-value = 0.03

# CL5944Contig1|CL5944Contig1

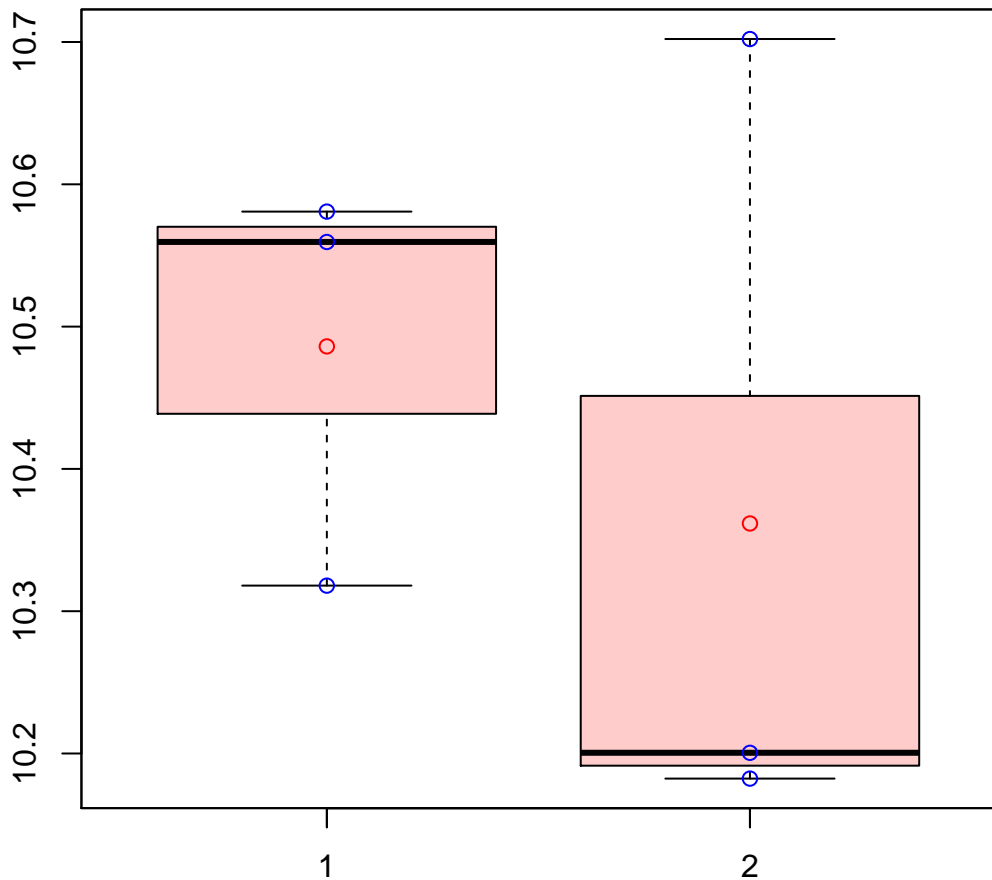

t-Test: p-value = 0.56

# CL5946Contig1|CL5946Contig1

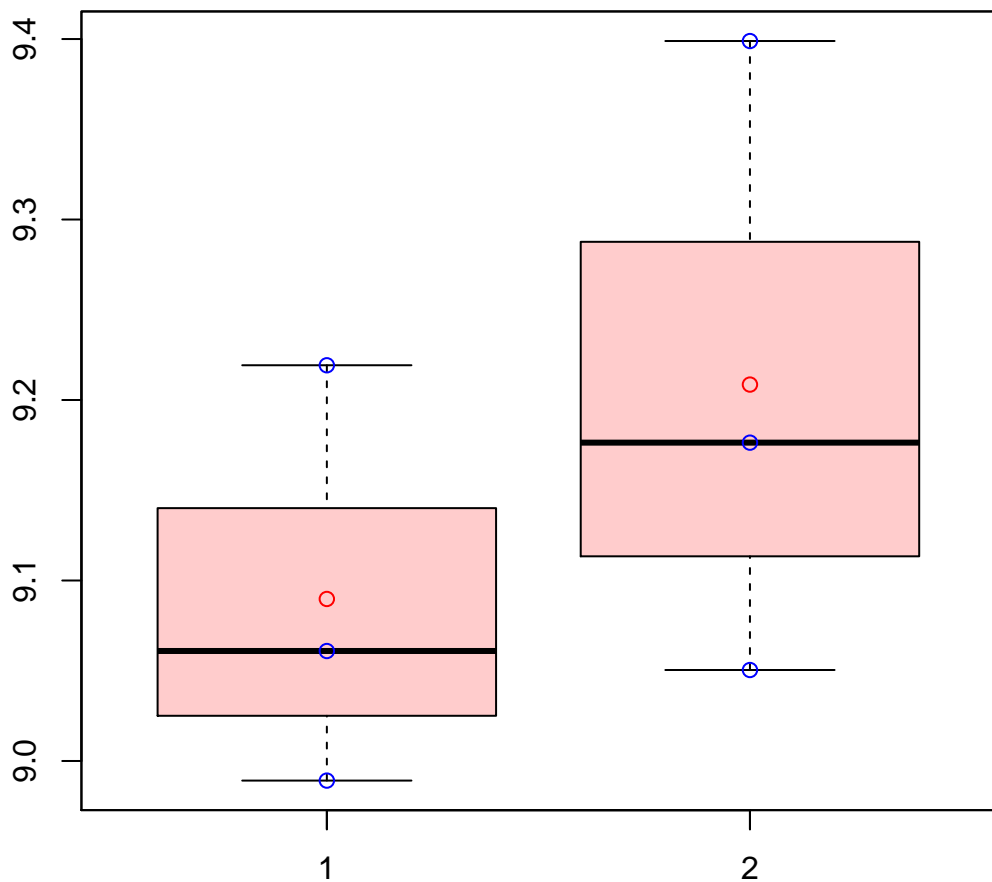

t-Test: p-value = 0.39

# CL5946Contig3|CL5946Contig3

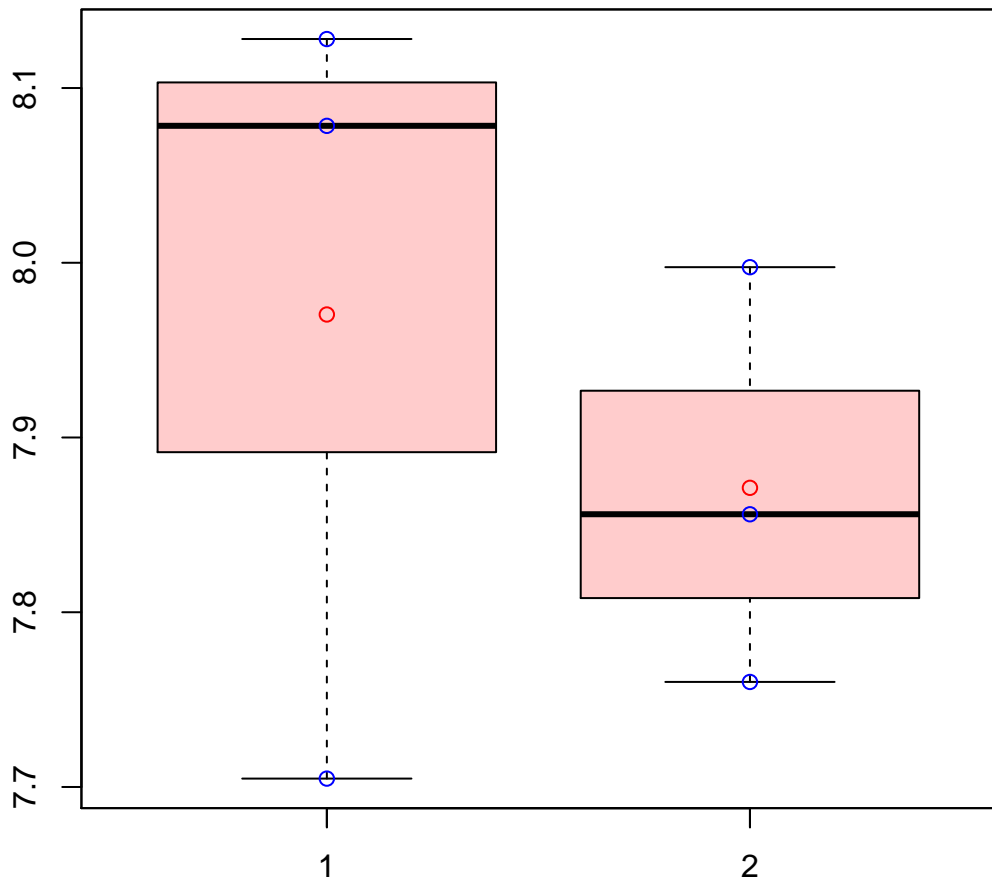

t-Test: p-value = 0.56



# CL594Contig6|CL594Contig6

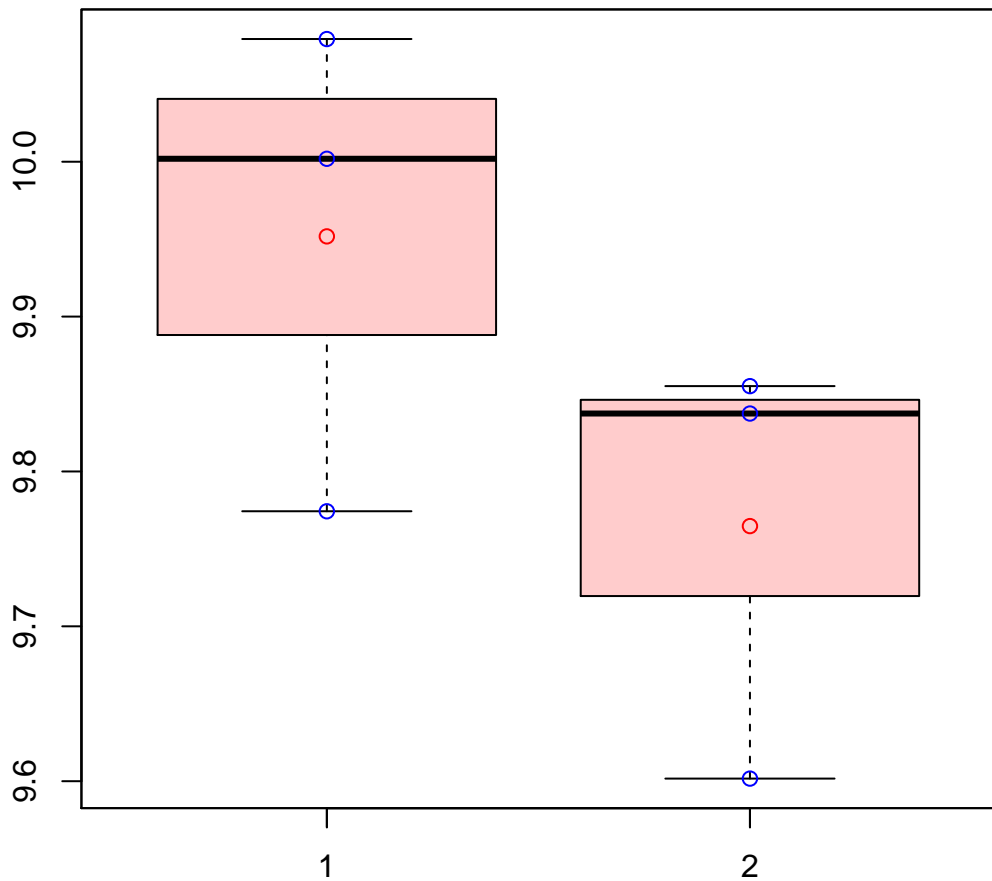

t-Test: p-value = 0.2

# CL5950Contig3|CL5950Contig3



t-Test: p-value = 0.39

# CL595Contig10|CL595Contig10

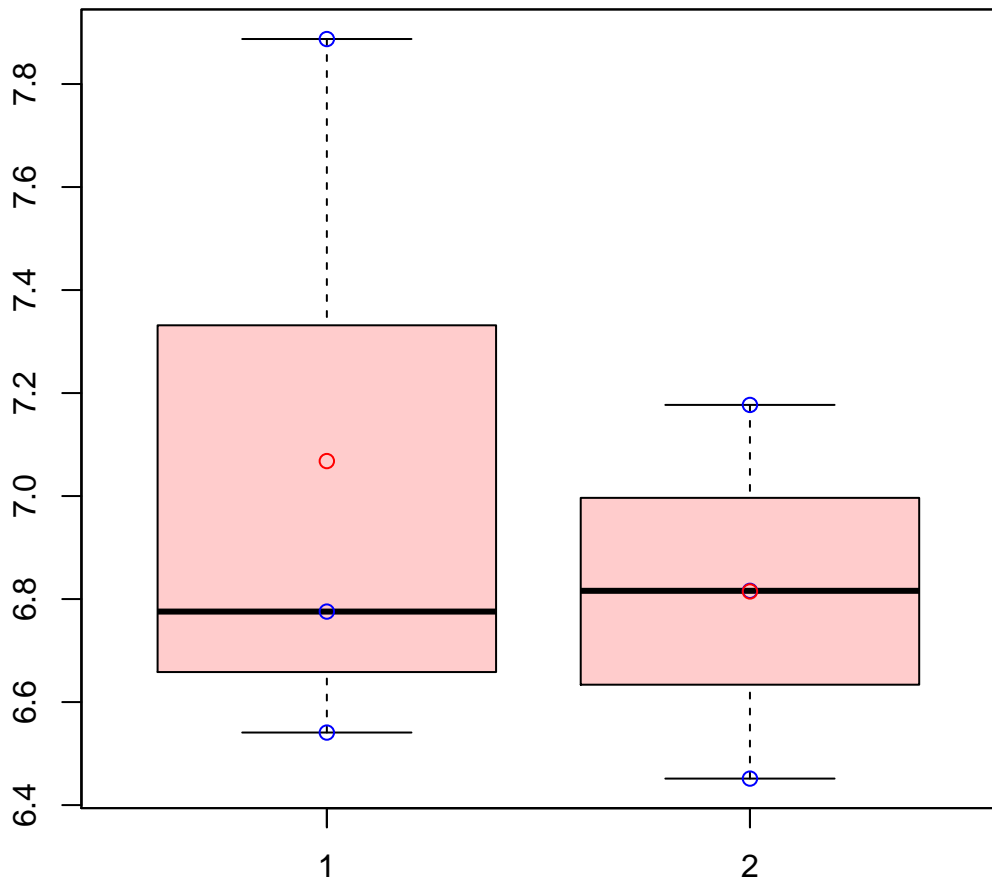

t-Test: p-value = 0.62

# CL595Contig11|CL595Contig11

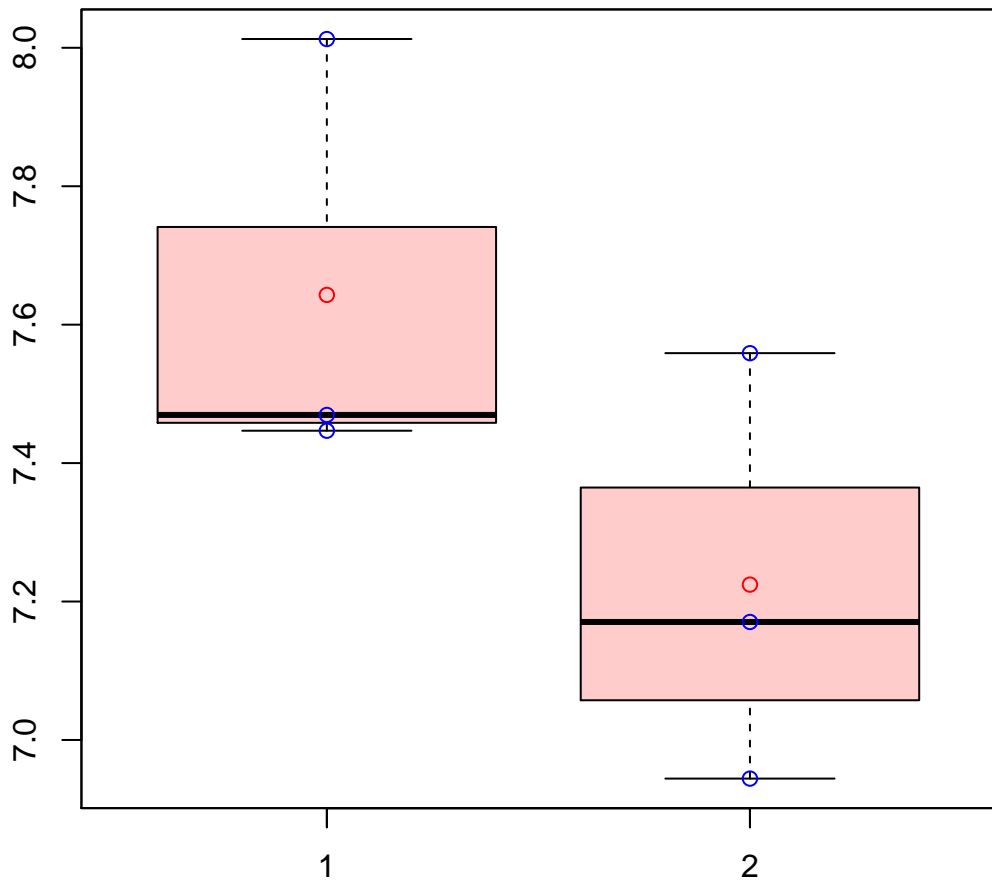

t-Test: p-value = 0.18

# CL595Contig3|CL595Contig3

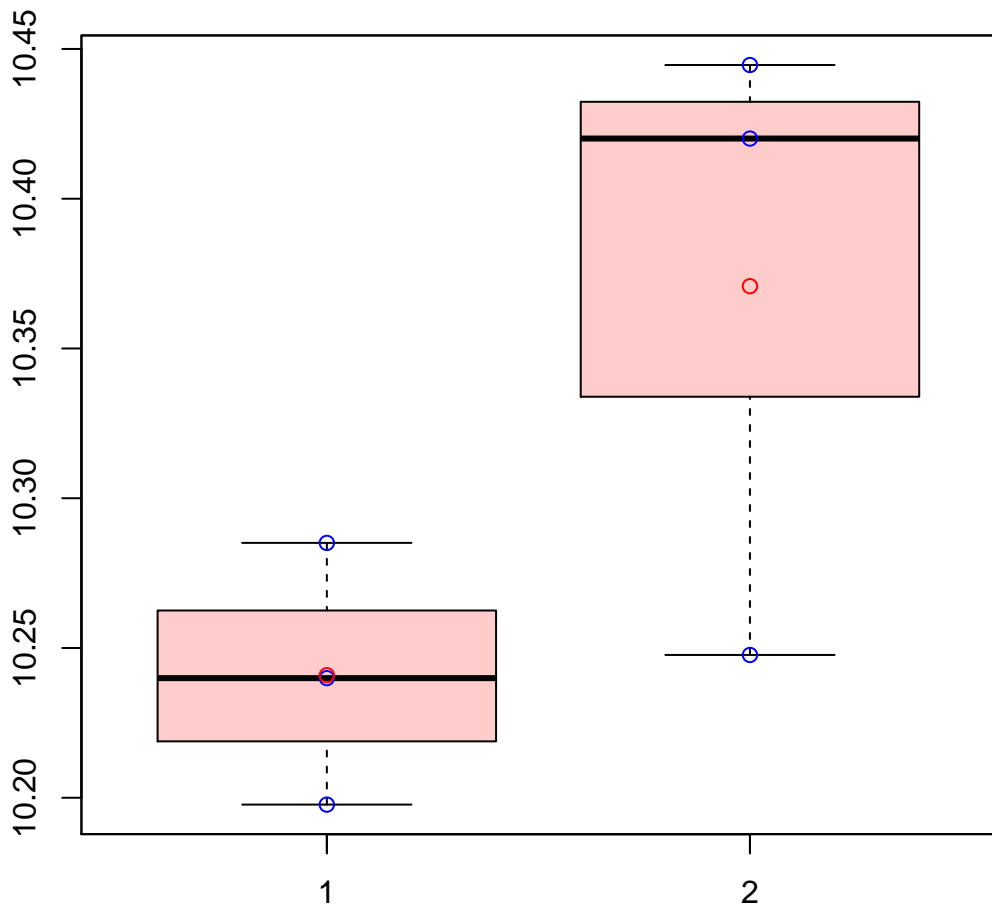

t-Test: p-value = 0.16

# CL595Contig4|CL595Contig4

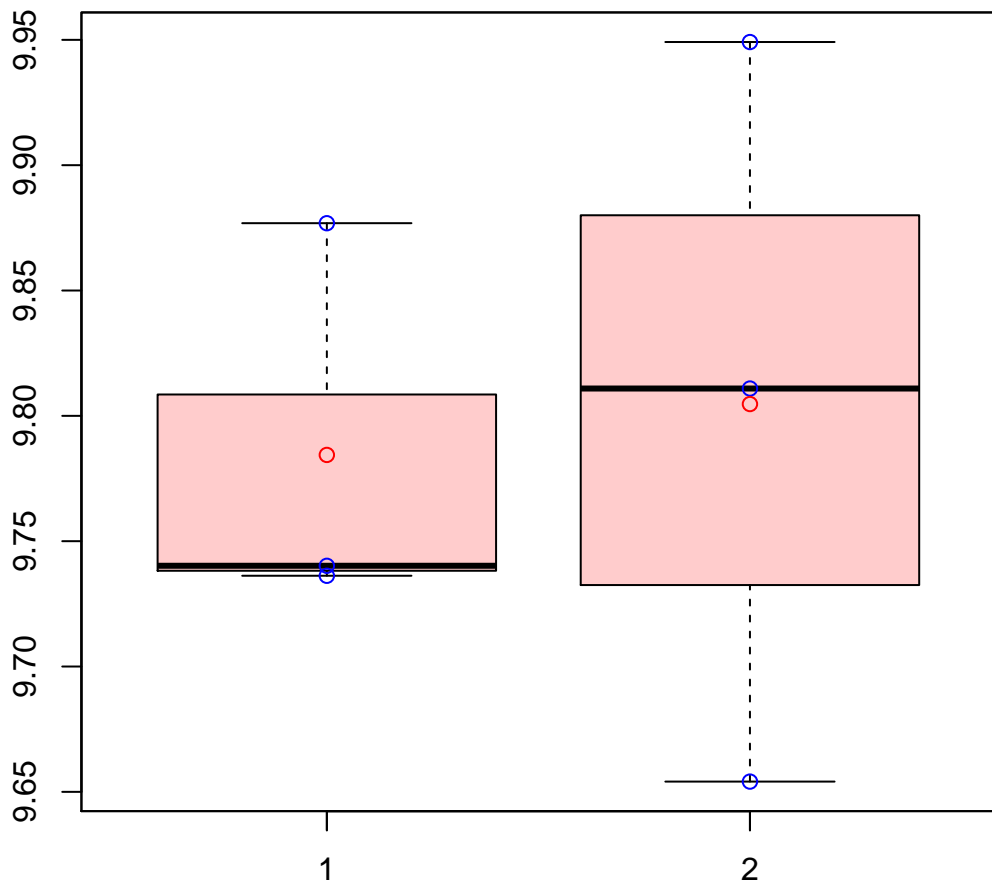

t-Test: p-value = 0.85

# CL5963Contig1|CL5963Contig1

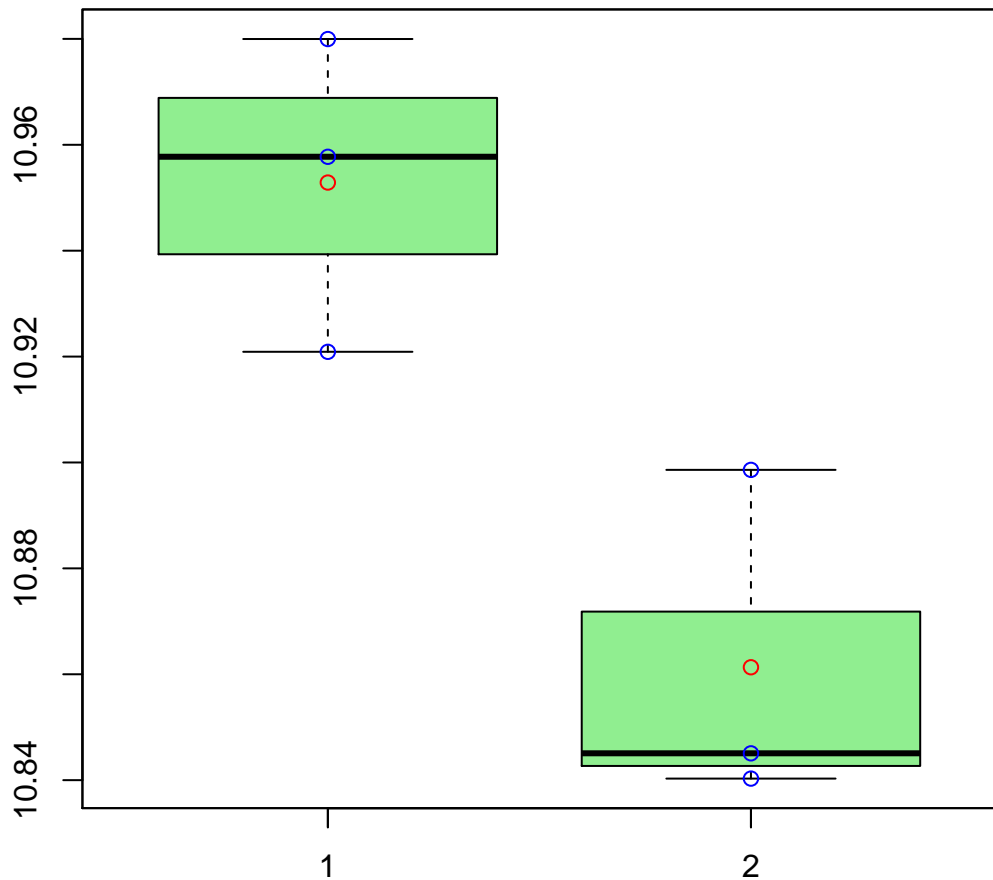

t-Test: p-value = 0.02

# CL5968Contig1|CL5968Contig1



t-Test: p-value = 0.89



# CL5968Contig2|CL5968Contig2

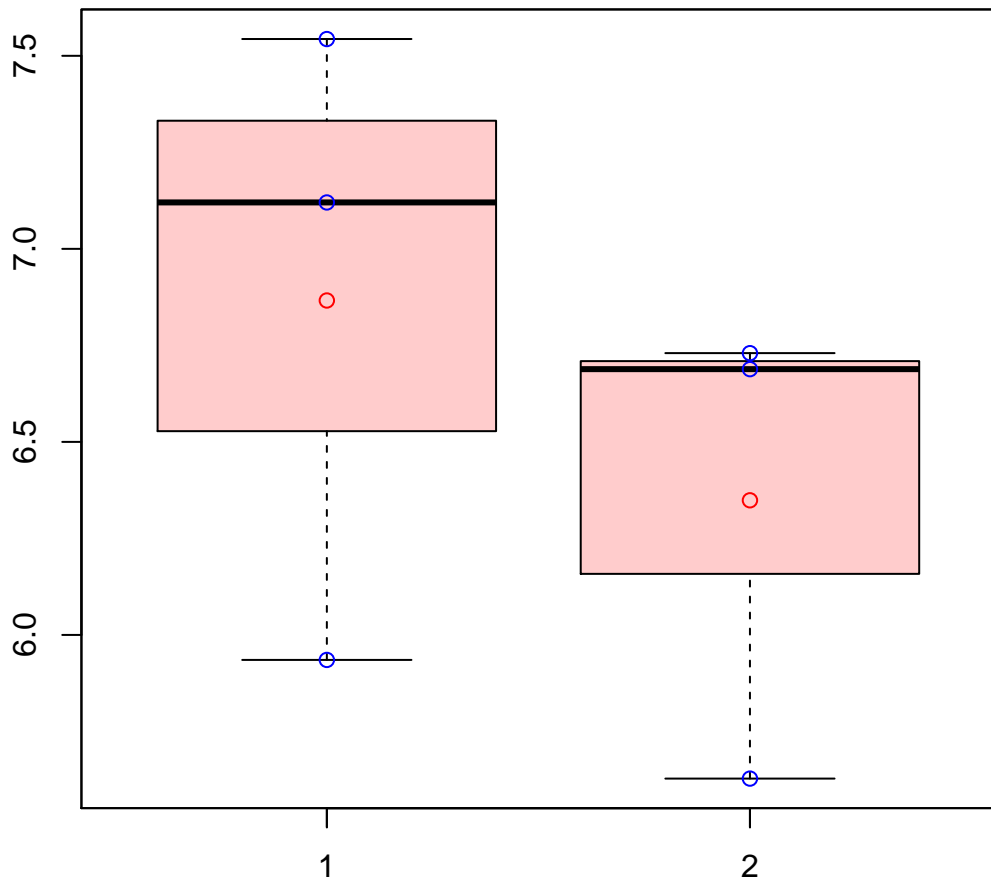

t-Test: p-value = 0.44

# CL5973Contig1|CL5973Contig1

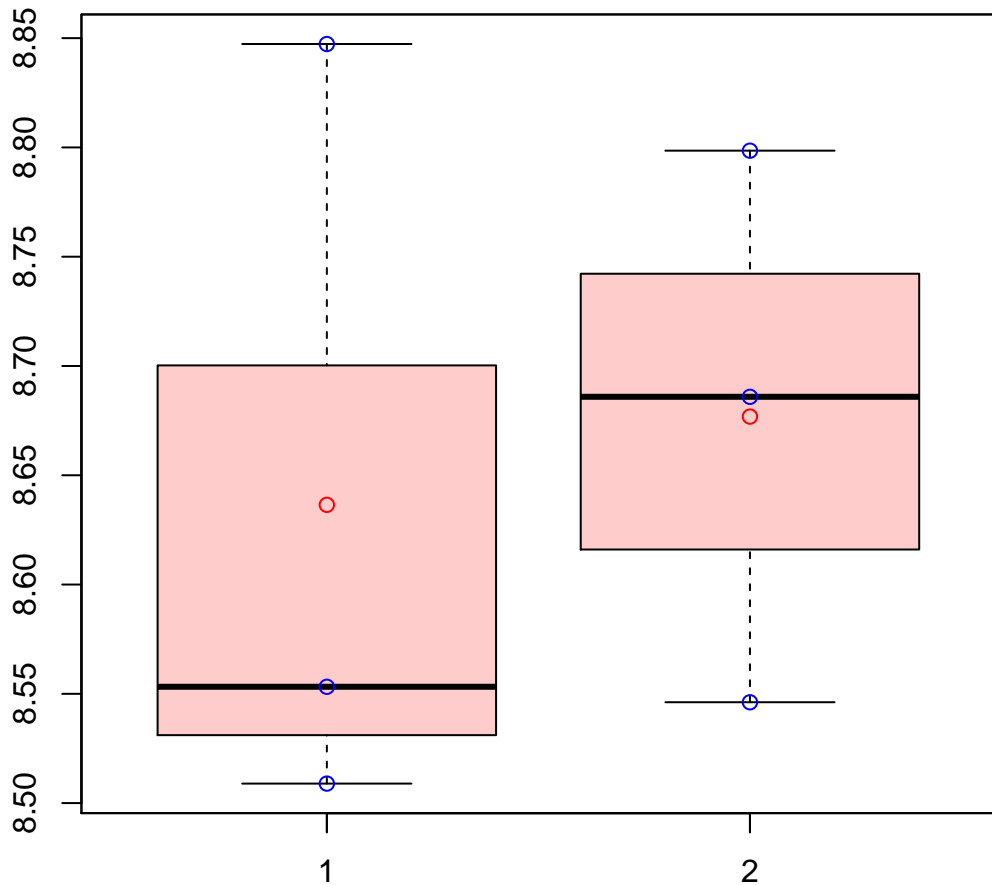

t-Test: p-value = 0.77

# CL5974Contig1|CL5974Contig1



t-Test: p-value = 0.42

# CL5975Contig10|CL5975Contig10

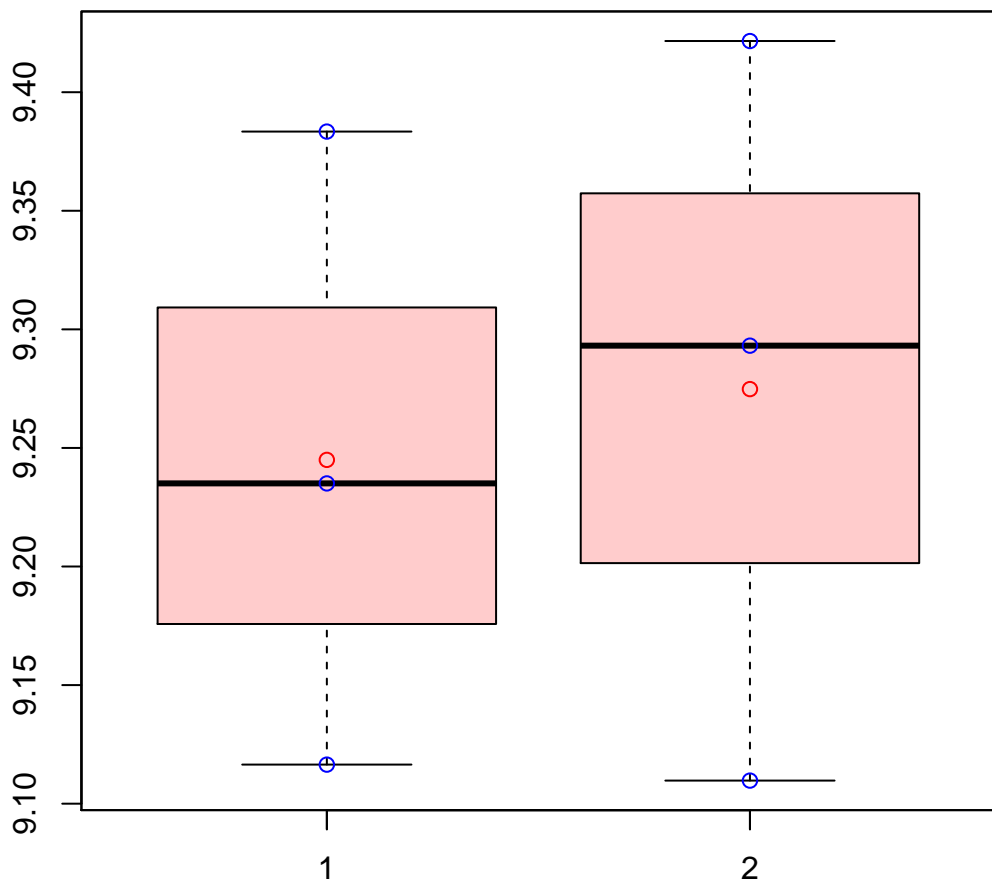

t-Test: p-value = 0.81

# CL5975Contig11|CL5975Contig11

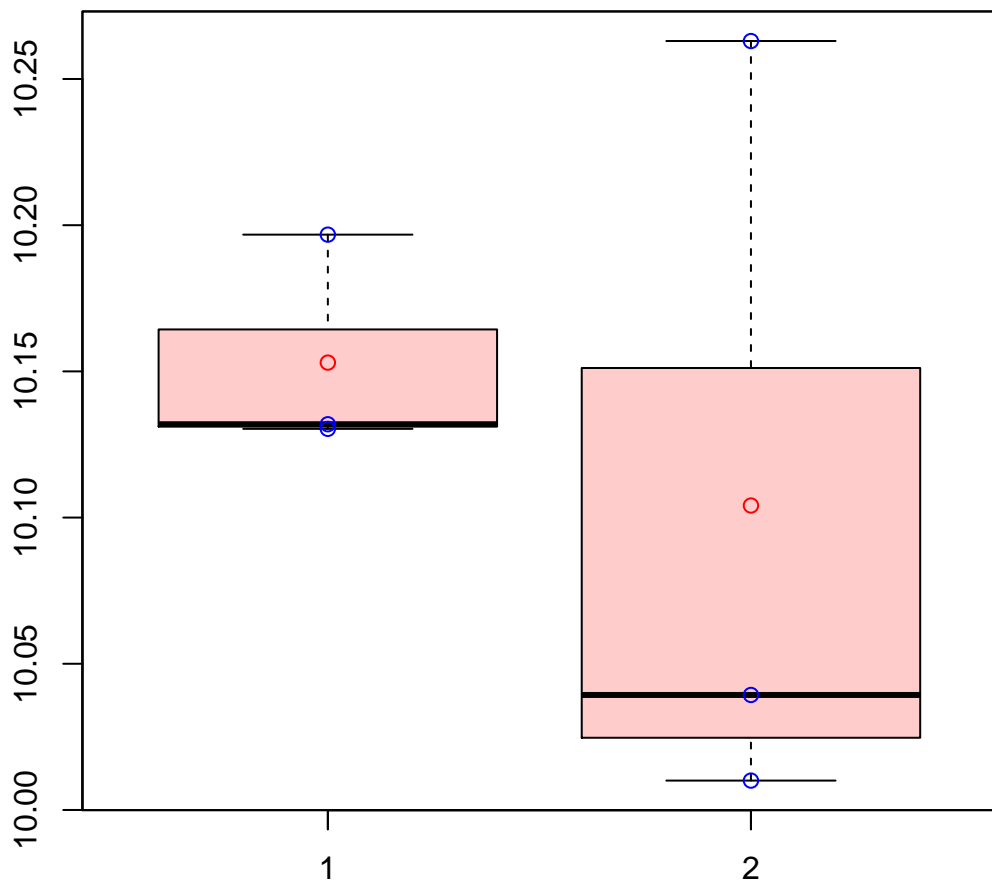

t-Test: p-value = 0.61

# CL5975Contig12|CL5975Contig12

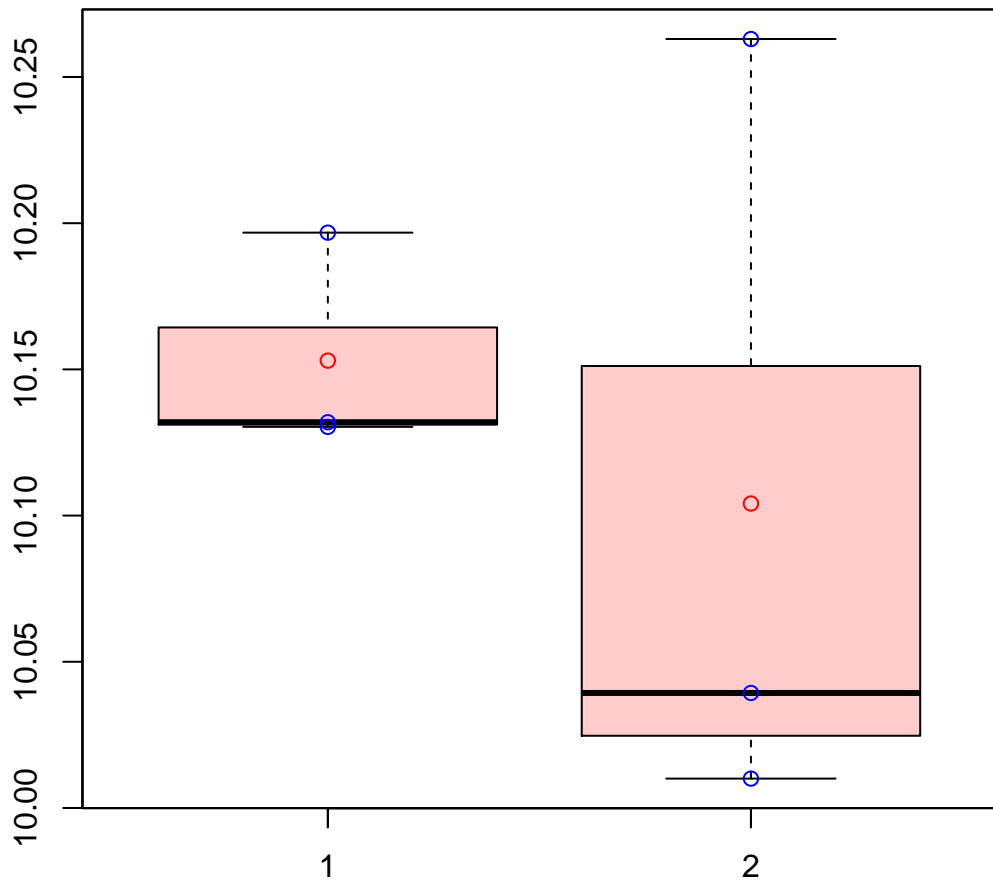

t-Test: p-value = 0.61

# CL5975Contig1|CL5975Contig1

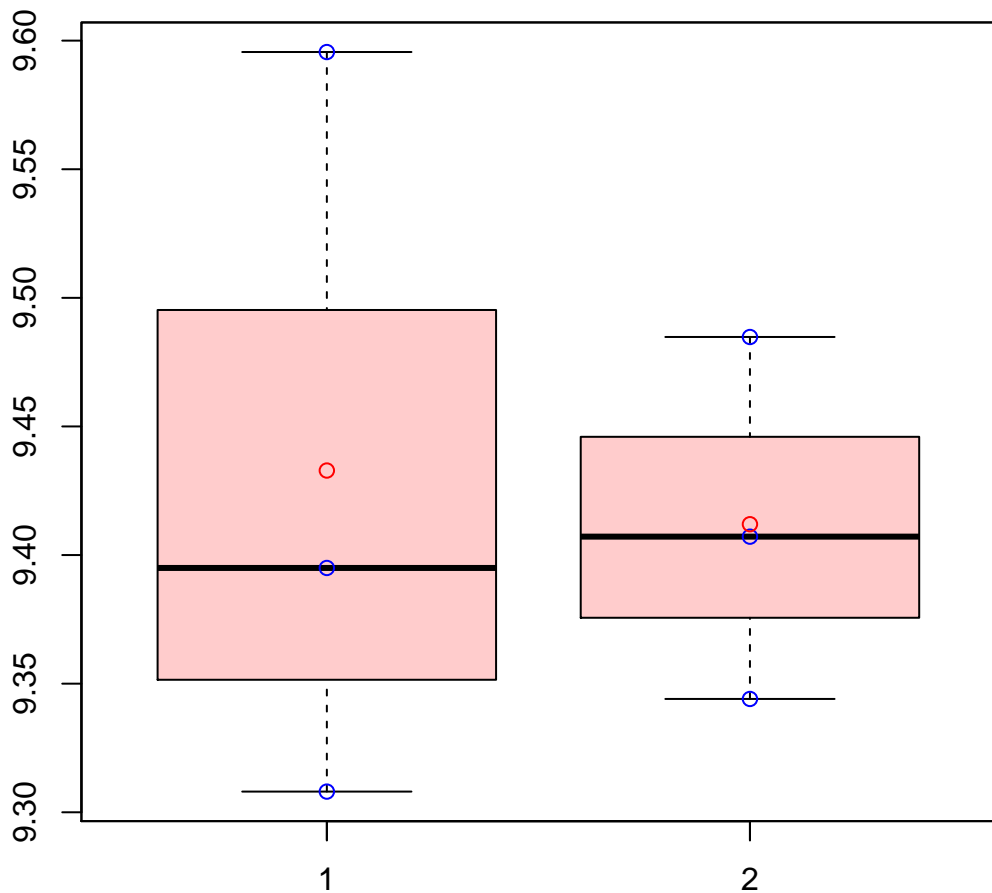

t-Test: p-value = 0.84

# CL5975Contig2|CL5975Contig2



t-Test: p-value = 0.84



# CL5975Contig3|CL5975Contig3



t-Test: p-value = 0.84

# CL5975Contig4|CL5975Contig4



t-Test: p-value = 0.84

# CL5975Contig6|CL5975Contig6



t-Test: p-value = 0.84

# CL5975Contig7|CL5975Contig7



t-Test: p-value = 0.84

# CL5975Contig8|CL5975Contig8

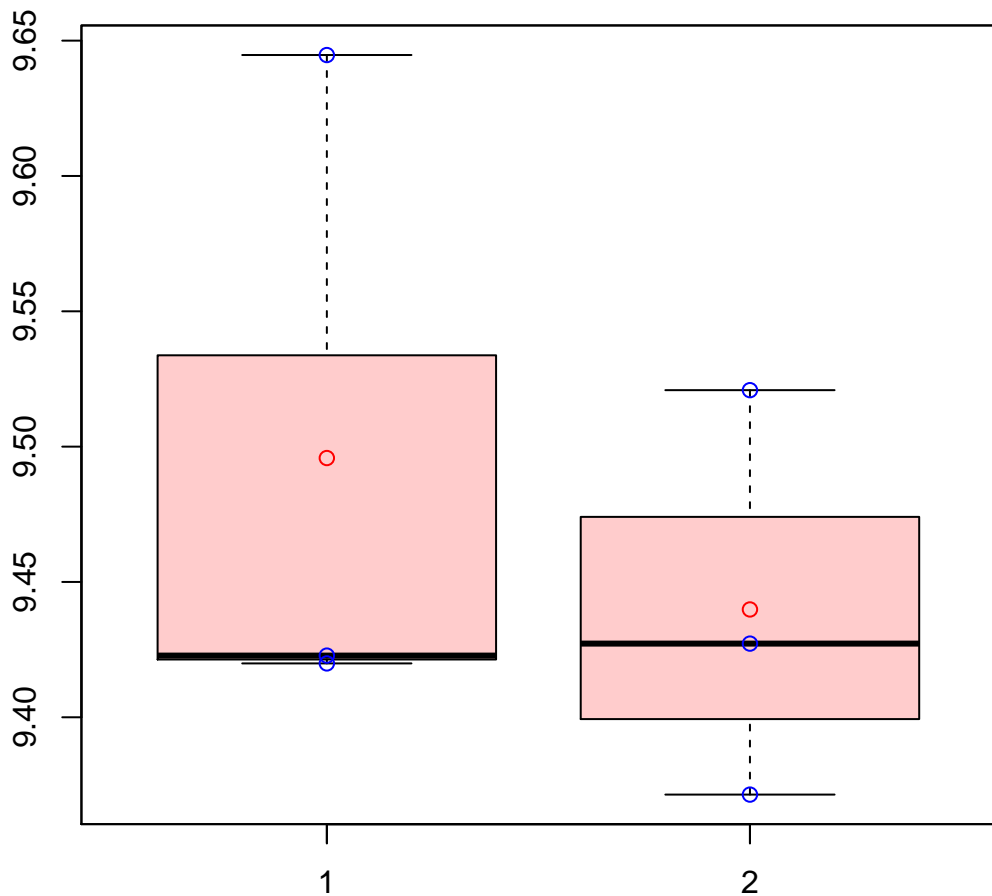

t-Test: p-value = 0.56

# CL5975Contig9|CL5975Contig9

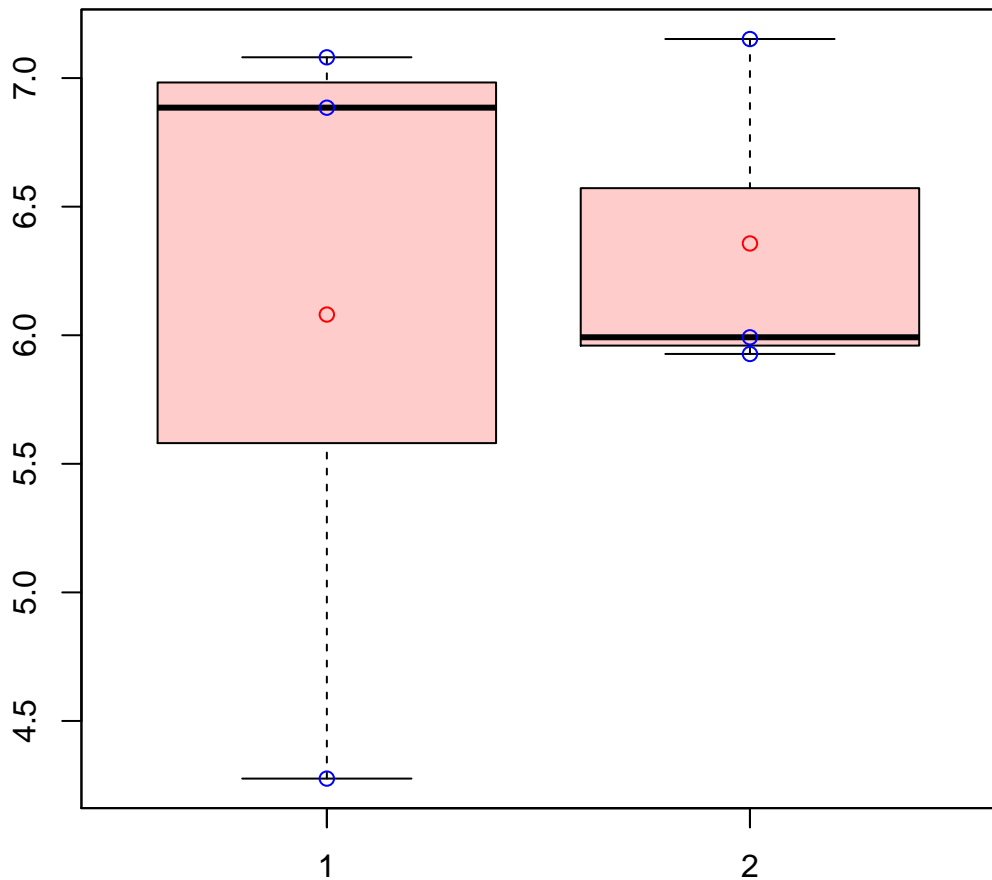

t-Test: p-value = 0.8

# CL5983Contig3|CL5983Contig3

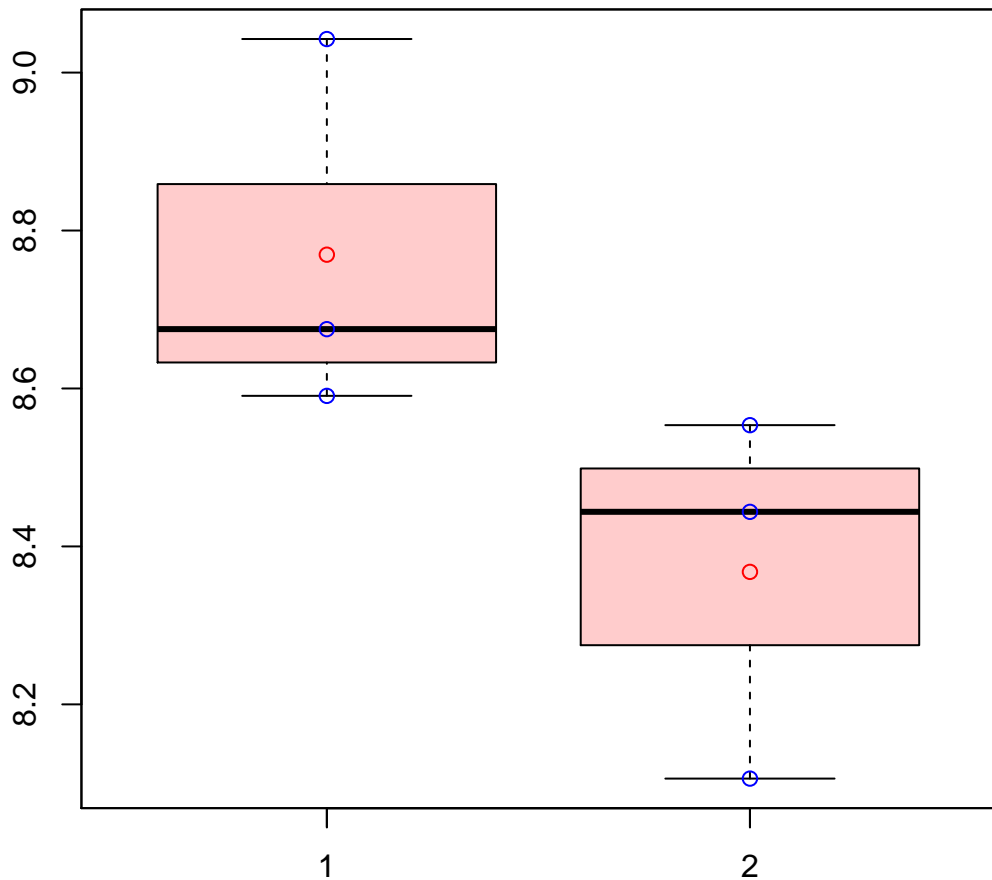

t-Test: p-value = 0.11

# CL5983Contig4|CL5983Contig4

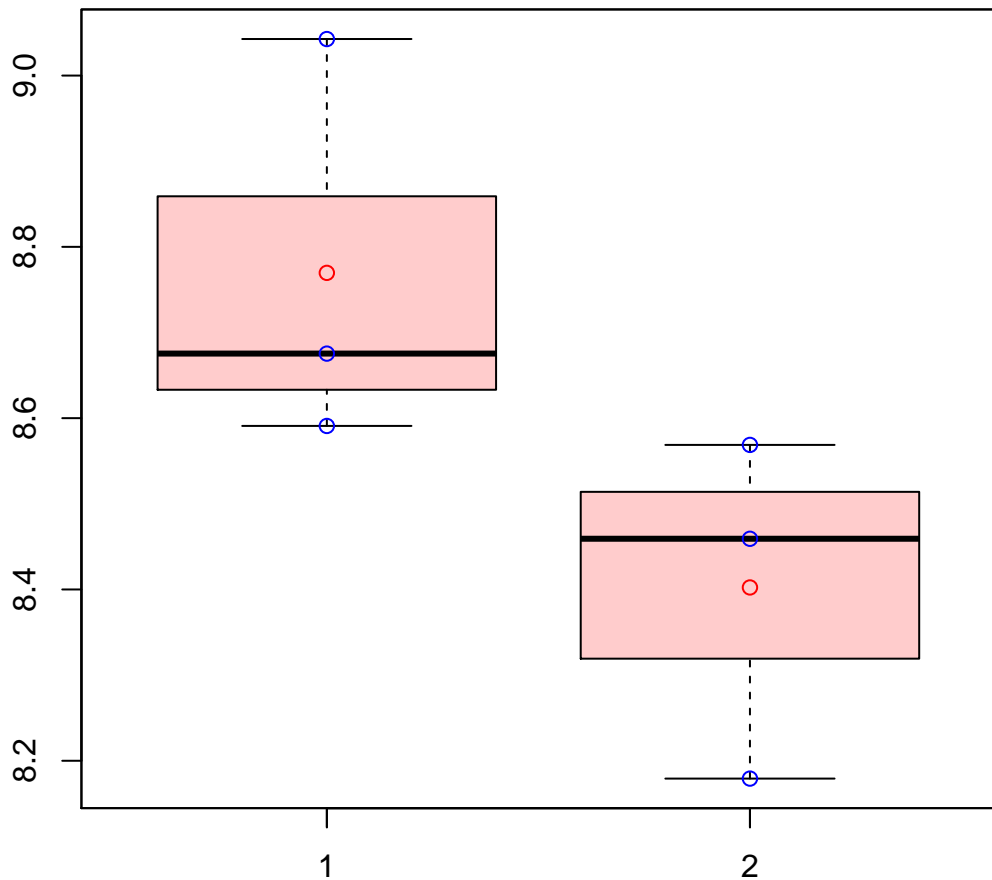

t-Test: p-value = 0.11



# CL5983Contig5|CL5983Contig5



t-Test: p-value = 0.11

# CL5999Contig1|CL5999Contig1

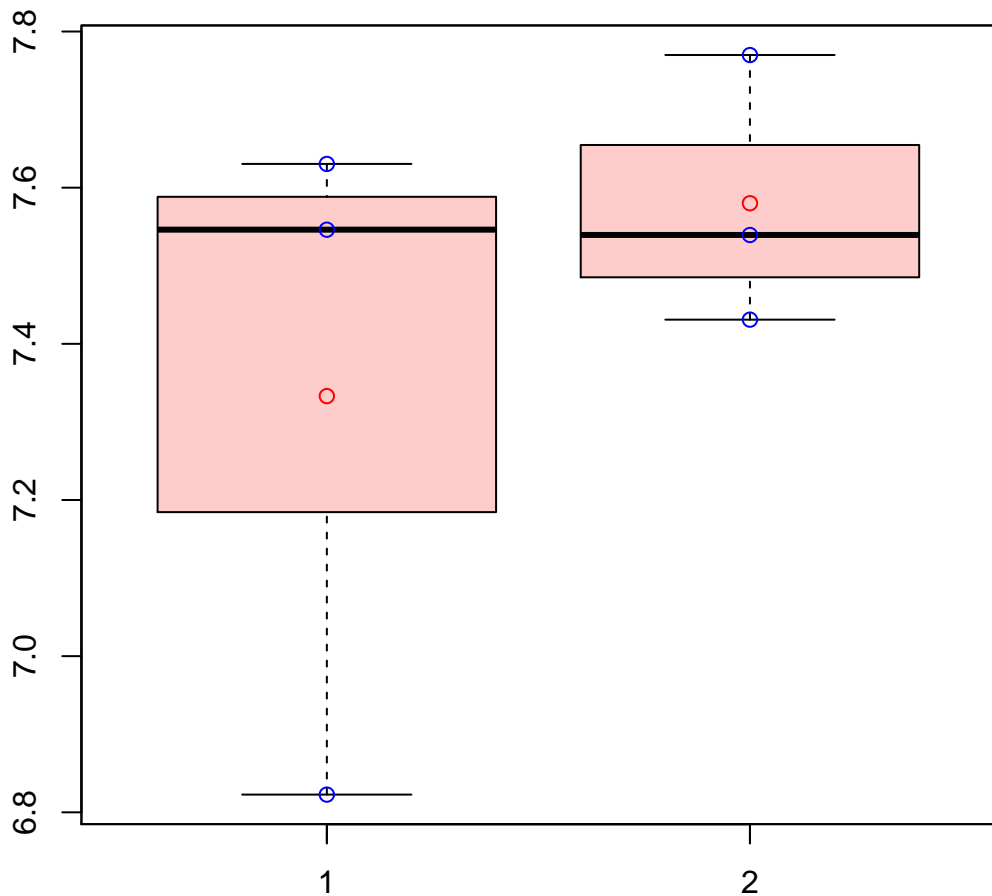

t-Test: p-value = 0.44

# CL599Contig1|CL599Contig1

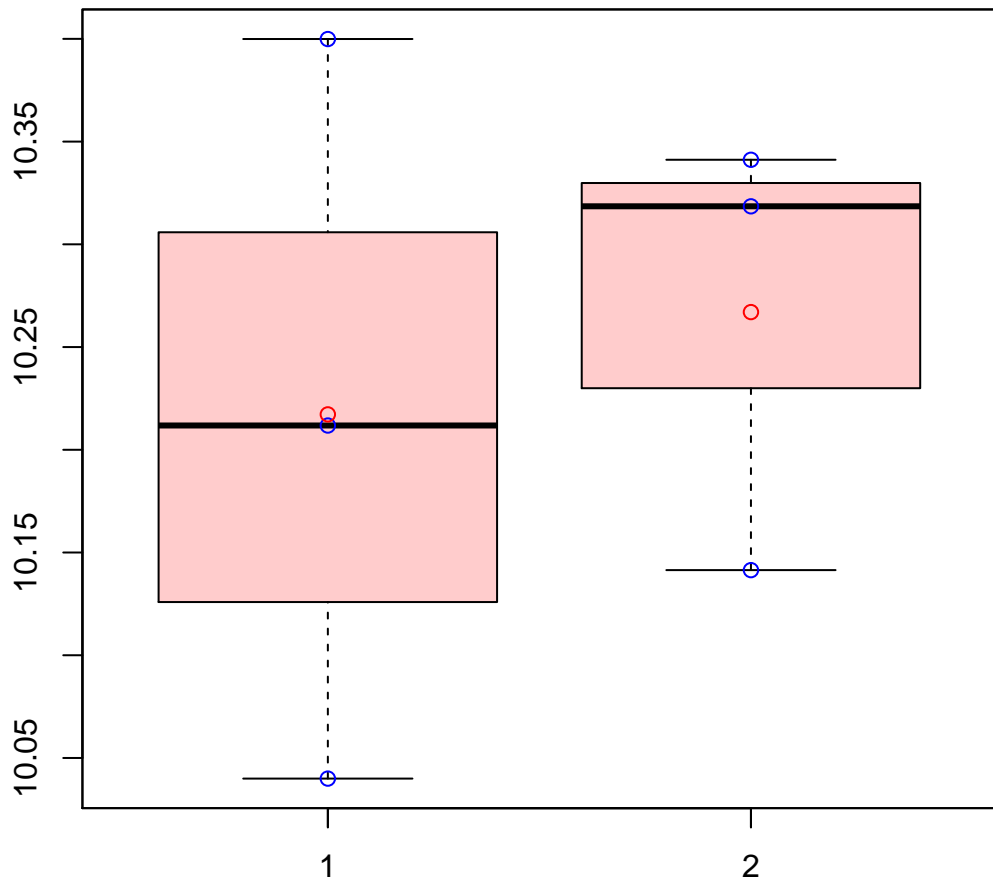

t-Test: p-value = 0.71

# CL5Contig13|CL5Contig13

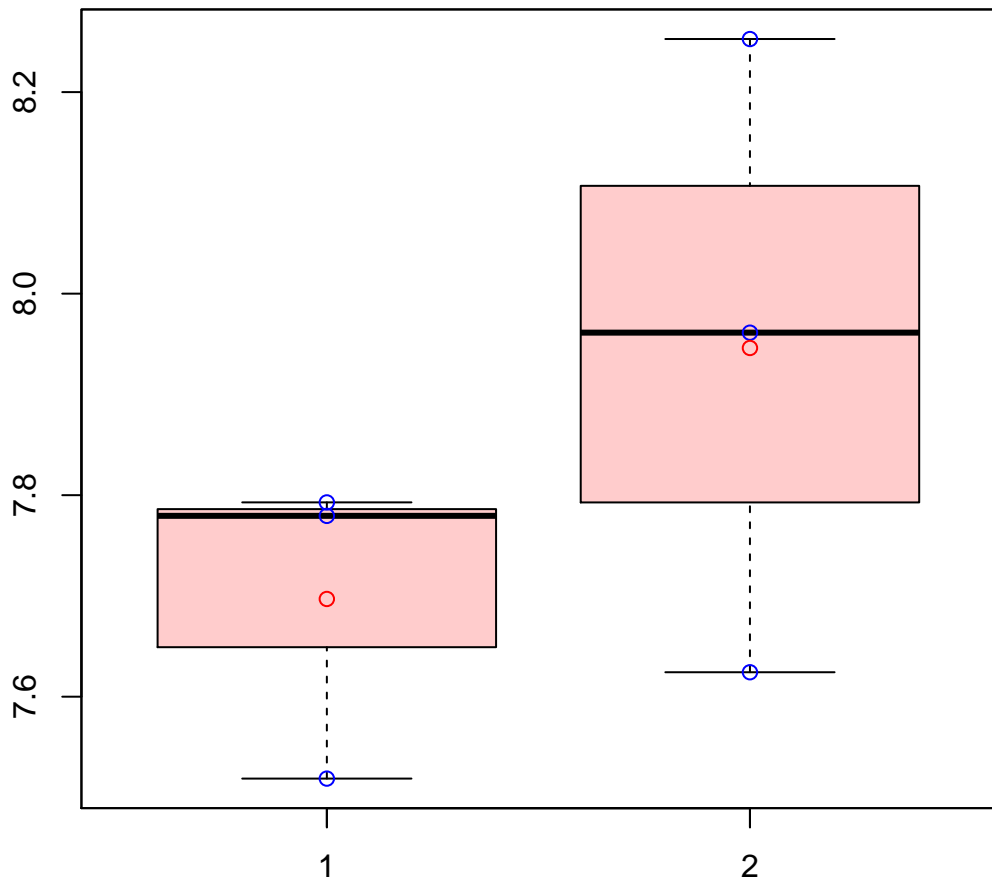

t-Test: p-value = 0.31

# CL5Contig21|CL5Contig21

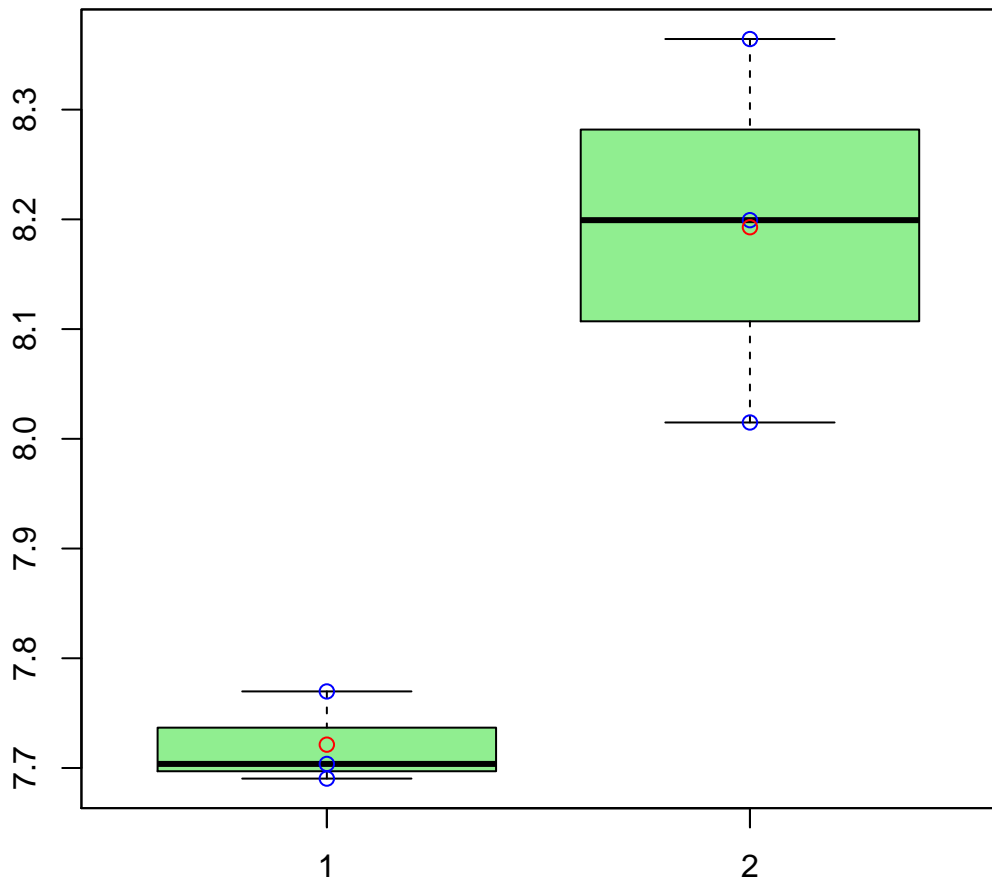

t-Test: p-value = 0.04

# CL5Contig49|CL5Contig49

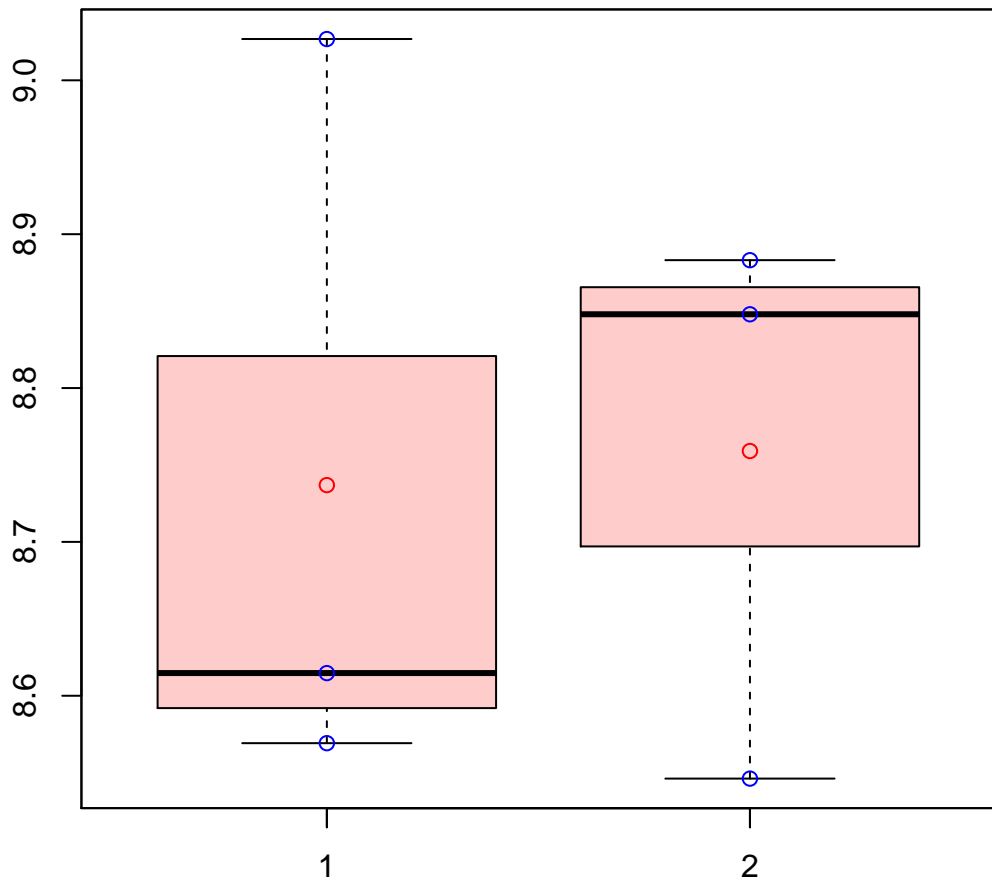

t-Test: p-value = 0.91

# CL5Contig53|CL5Contig53

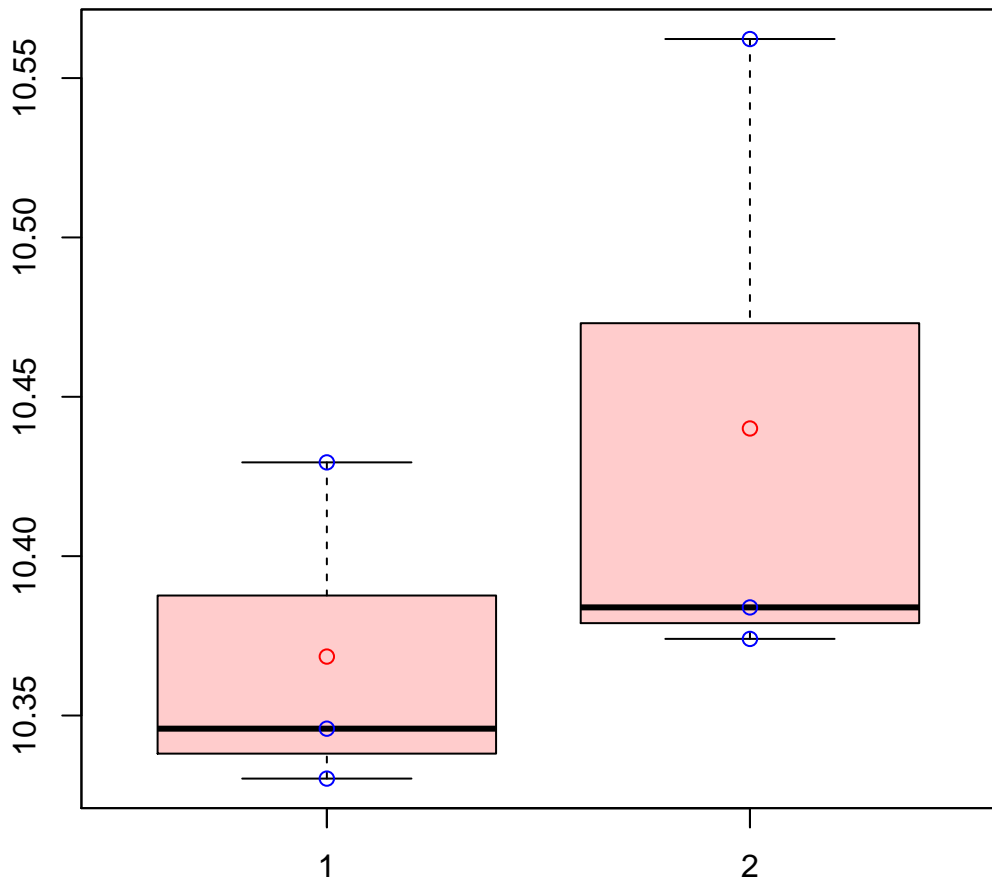

t-Test: p-value = 0.37

# CL5Contig54|CL5Contig54

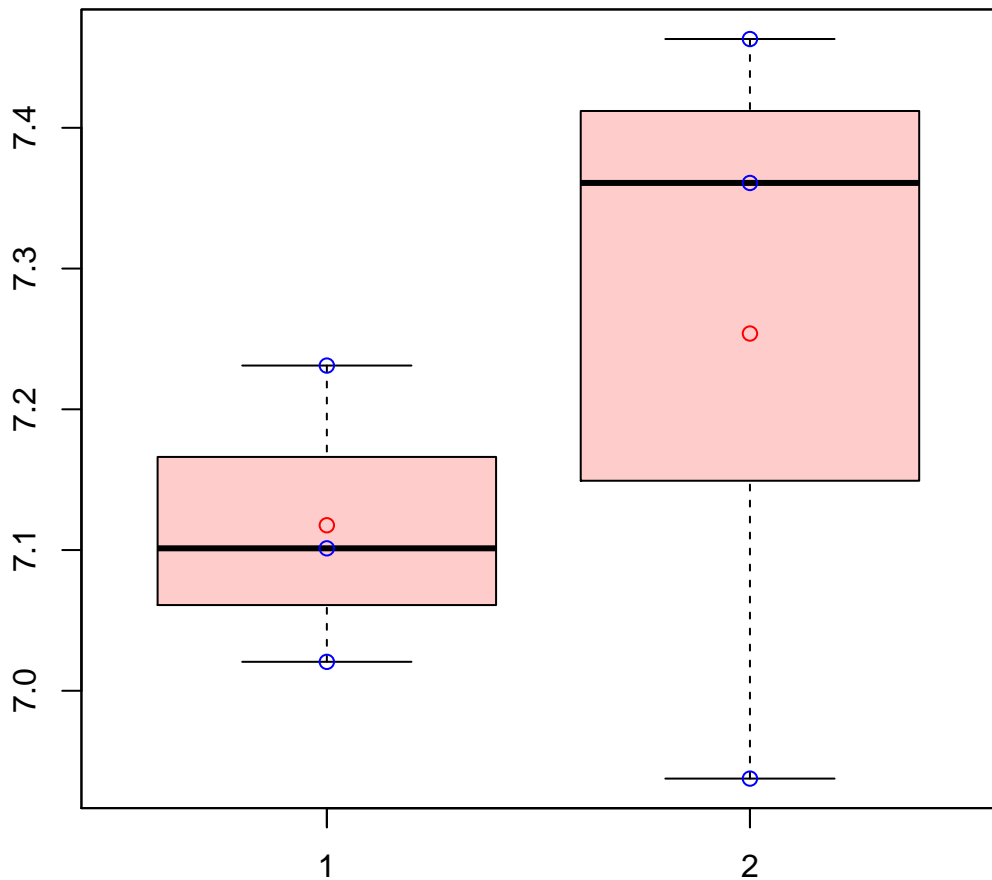

t-Test: p-value = 0.5



# CL5Contig9|CL5Contig9

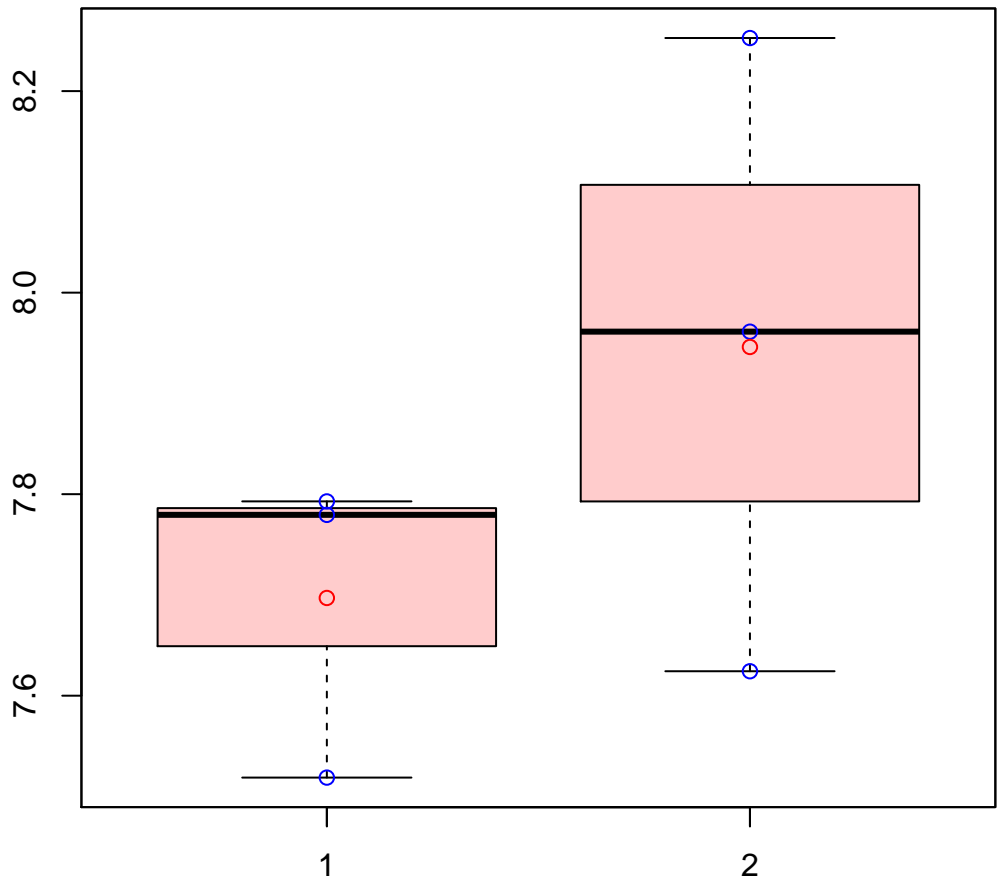

t-Test: p-value = 0.31

# CL6004Contig1|CL6004Contig1

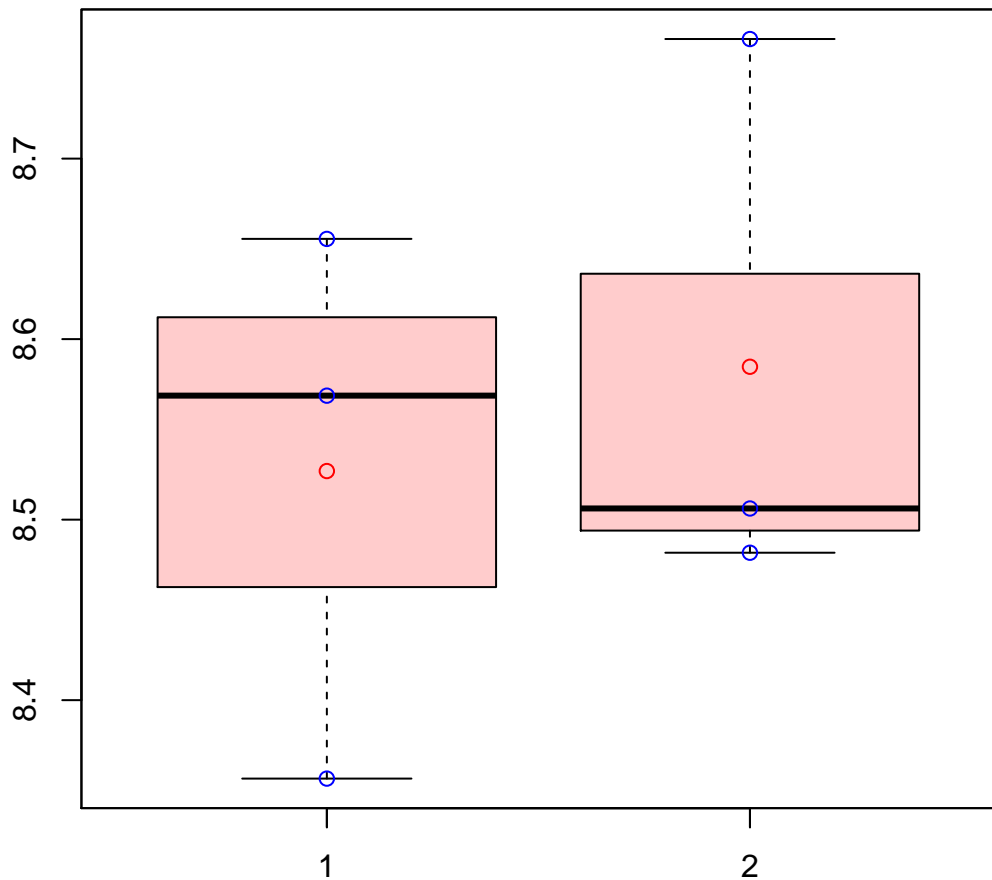

t-Test: p-value = 0.67

# CL6004Contig2|CL6004Contig2



t-Test: p-value = 0.67

# CL6009Contig2|CL6009Contig2

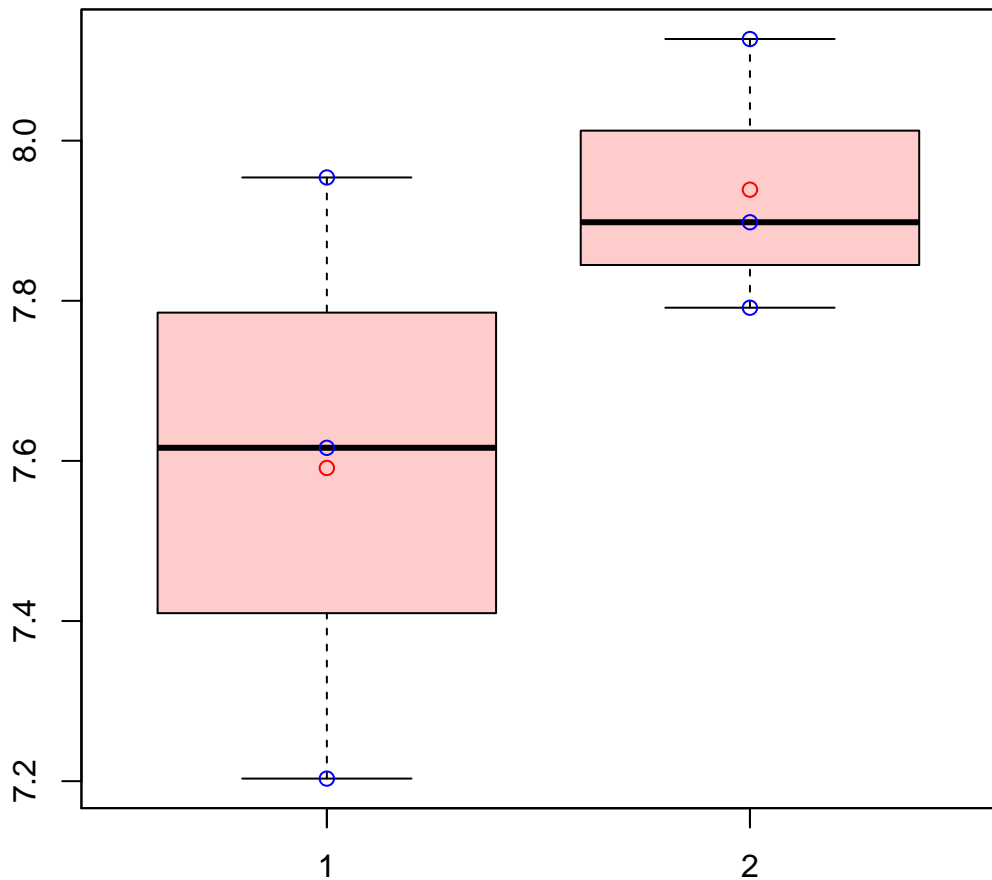

t-Test: p-value = 0.25

# CL6013Contig1|CL6013Contig1

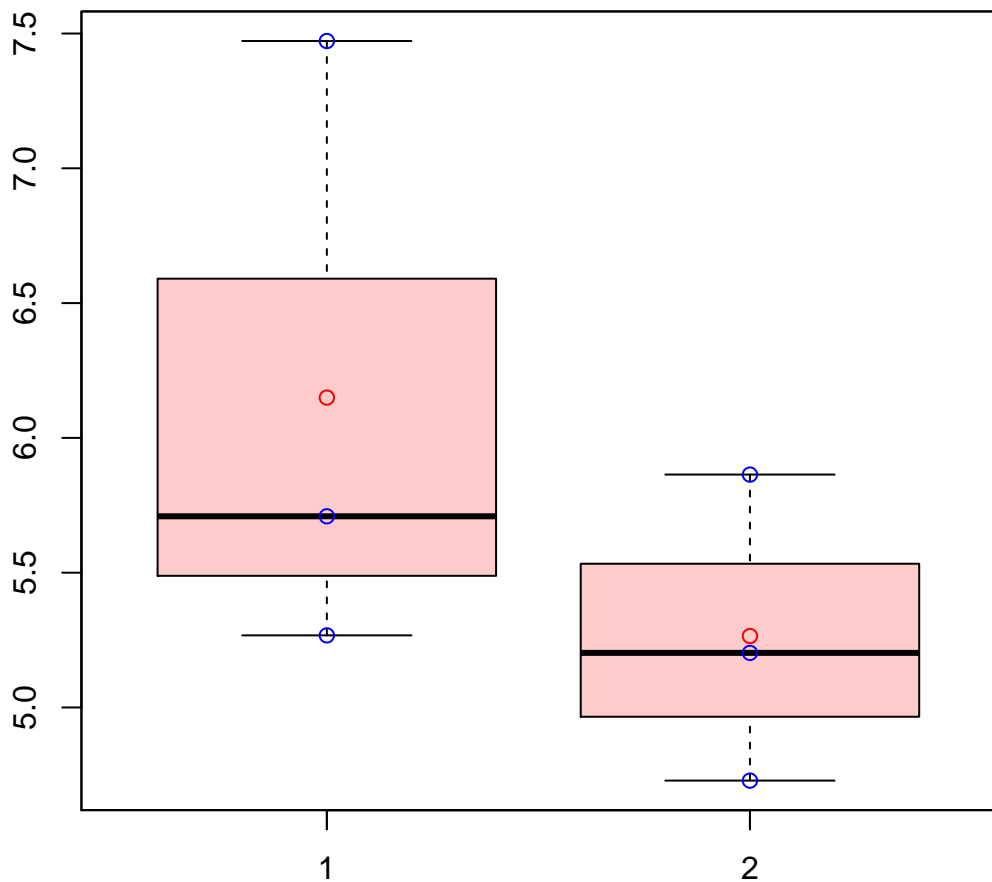

t-Test: p-value = 0.33

# CL6013Contig2|CL6013Contig2

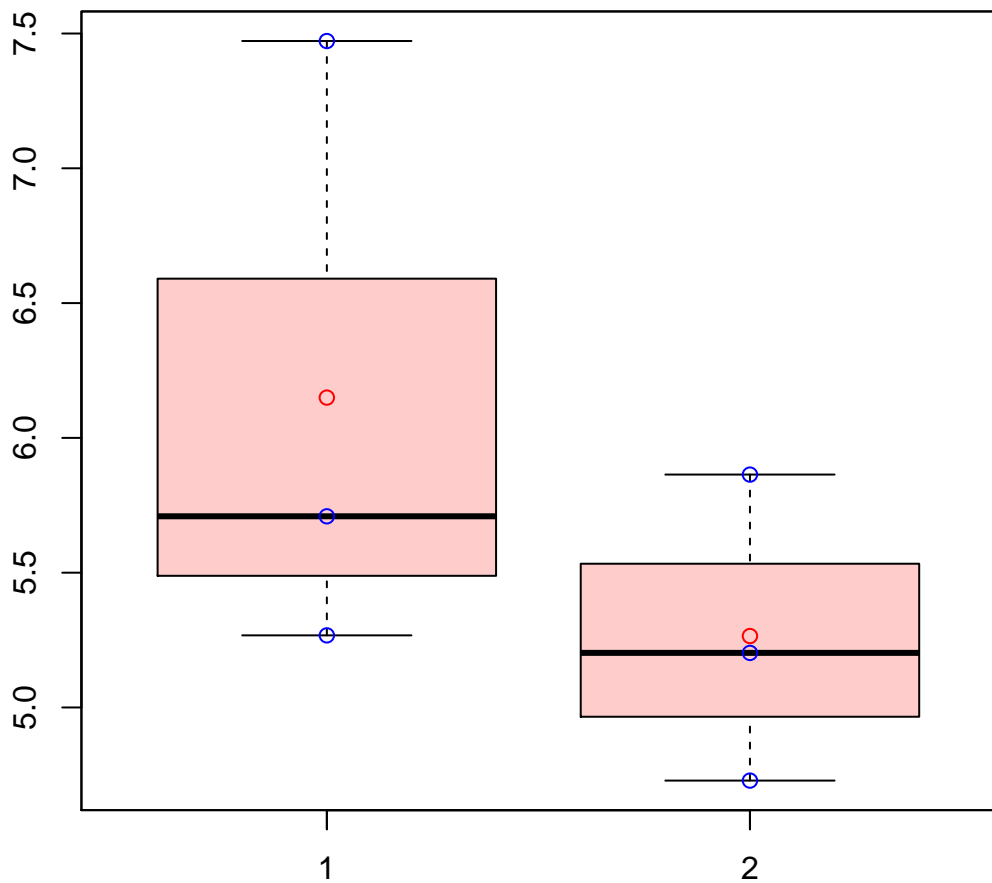

t-Test: p-value = 0.33

# CL6019Contig3|CL6019Contig3

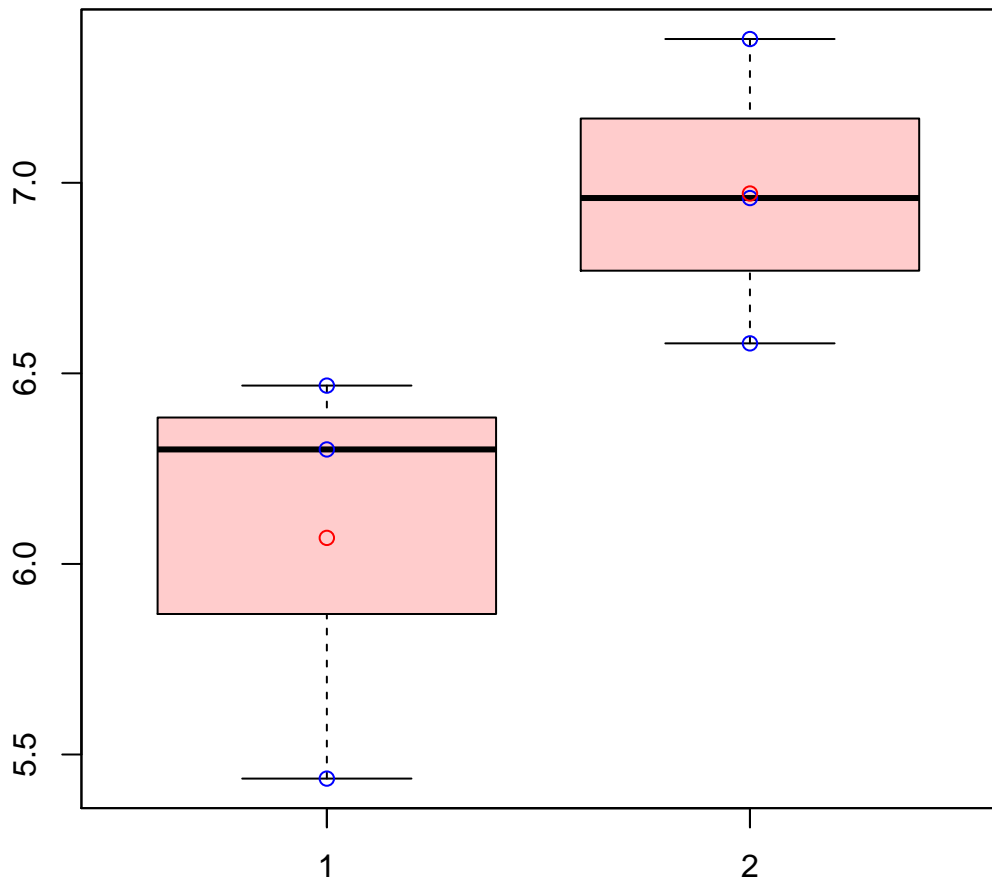

t-Test: p-value = 0.09

# CL6021Contig6|CL6021Contig6

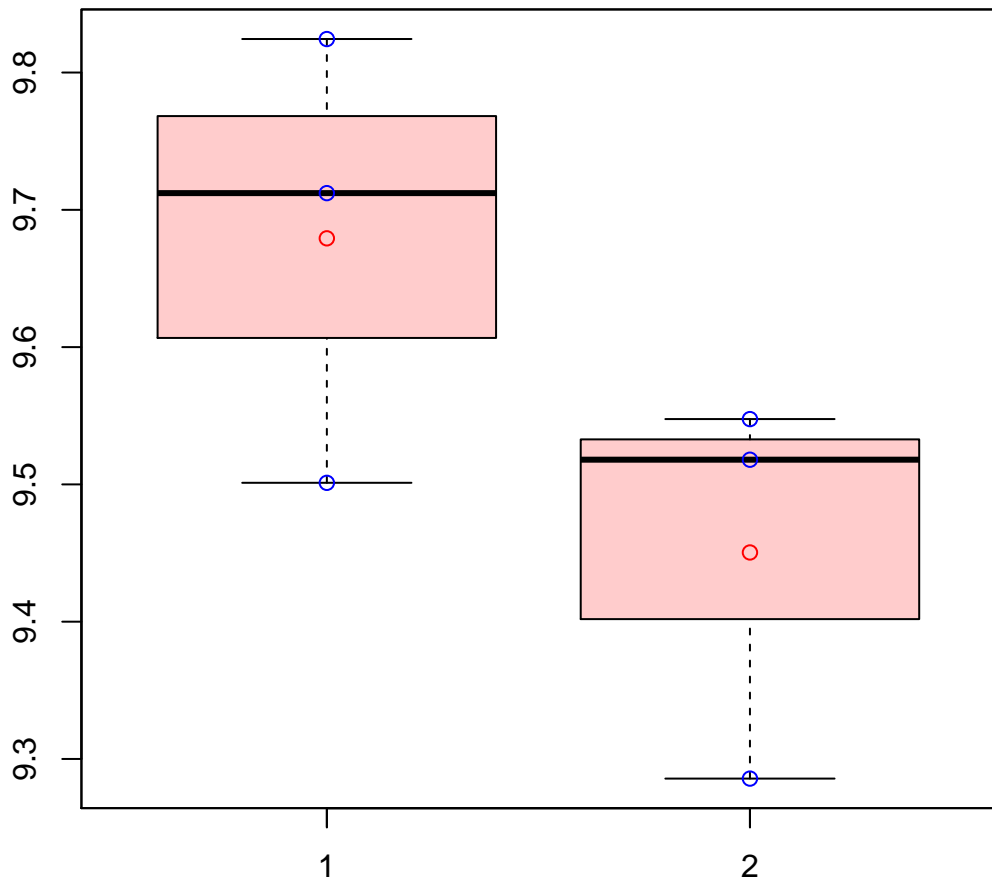

t-Test: p-value = 0.14



# CL6029Contig4|CL6029Contig4

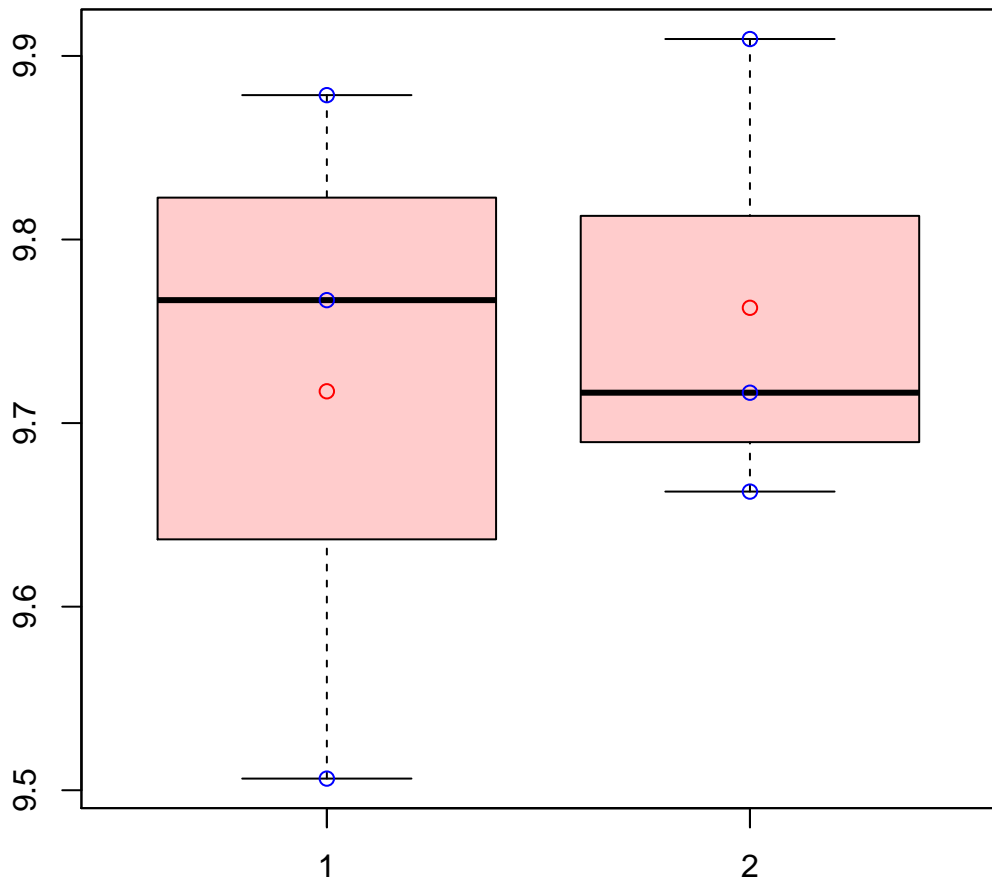

t-Test: p-value = 0.75

# CL602Contig10|CL602Contig10

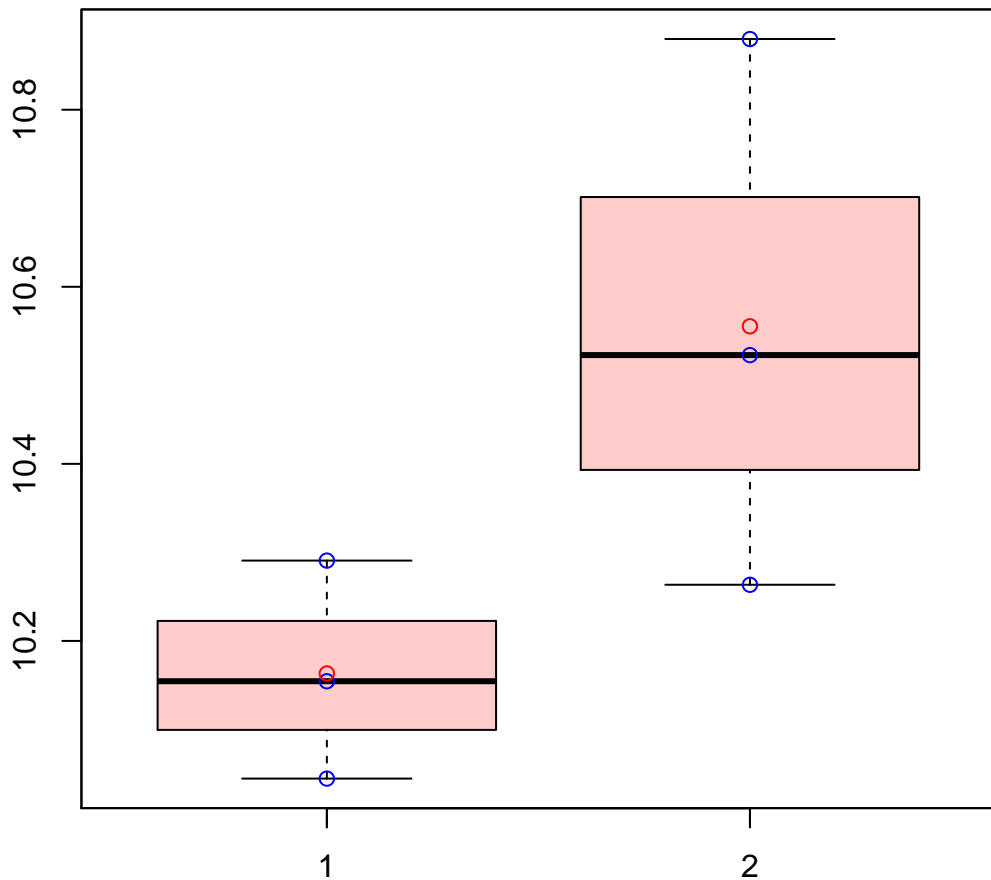

t-Test: p-value = 0.15

# CL602Contig13|CL602Contig13

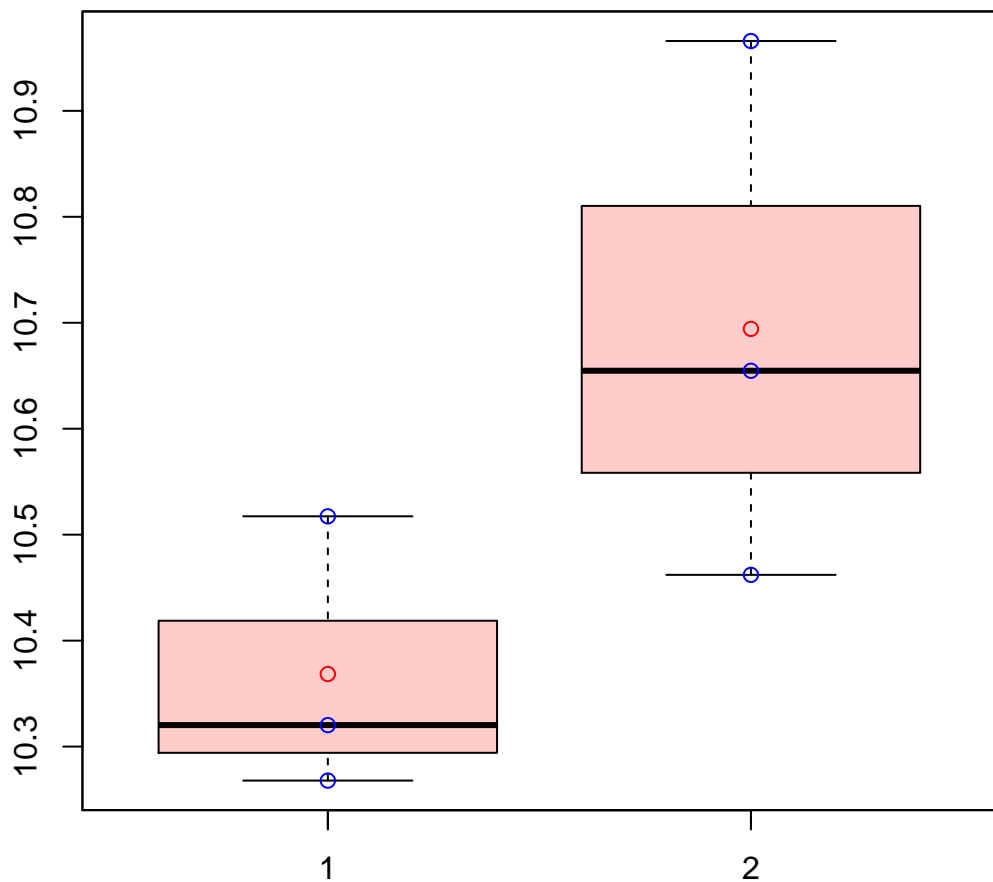

t-Test: p-value = 0.14

# CL602Contig14|CL602Contig14

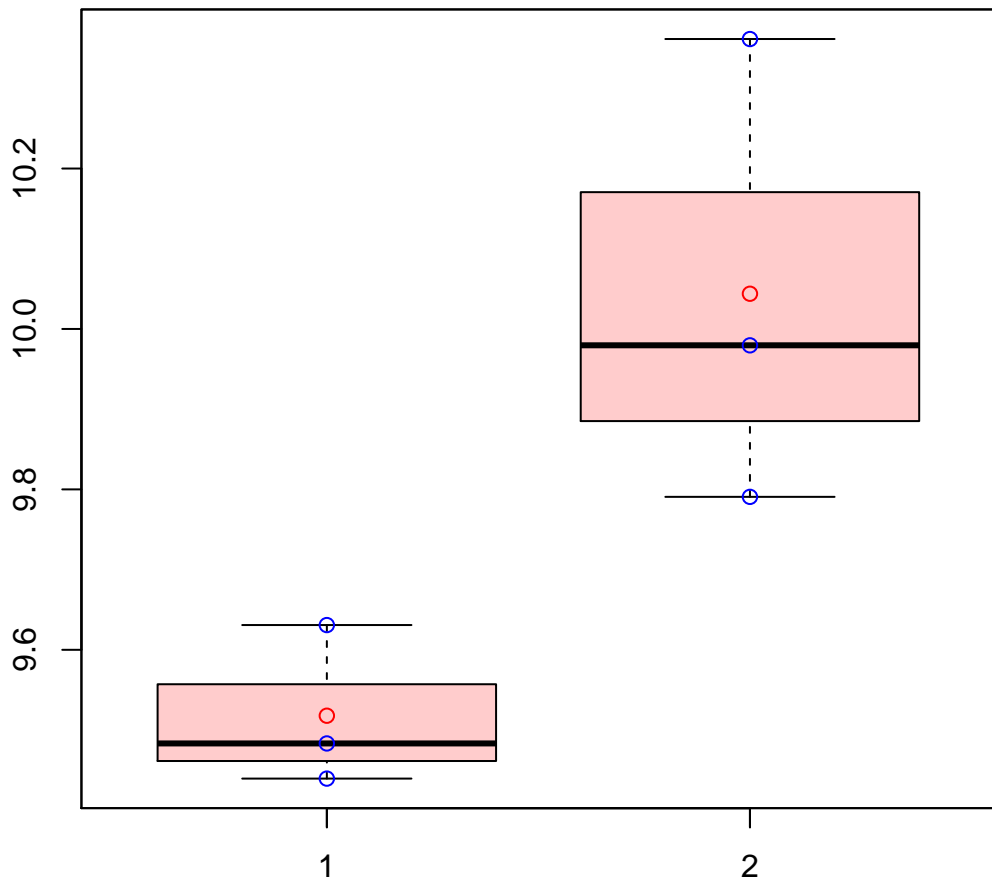

t-Test: p-value = 0.08

# CL602Contig2|CL602Contig2

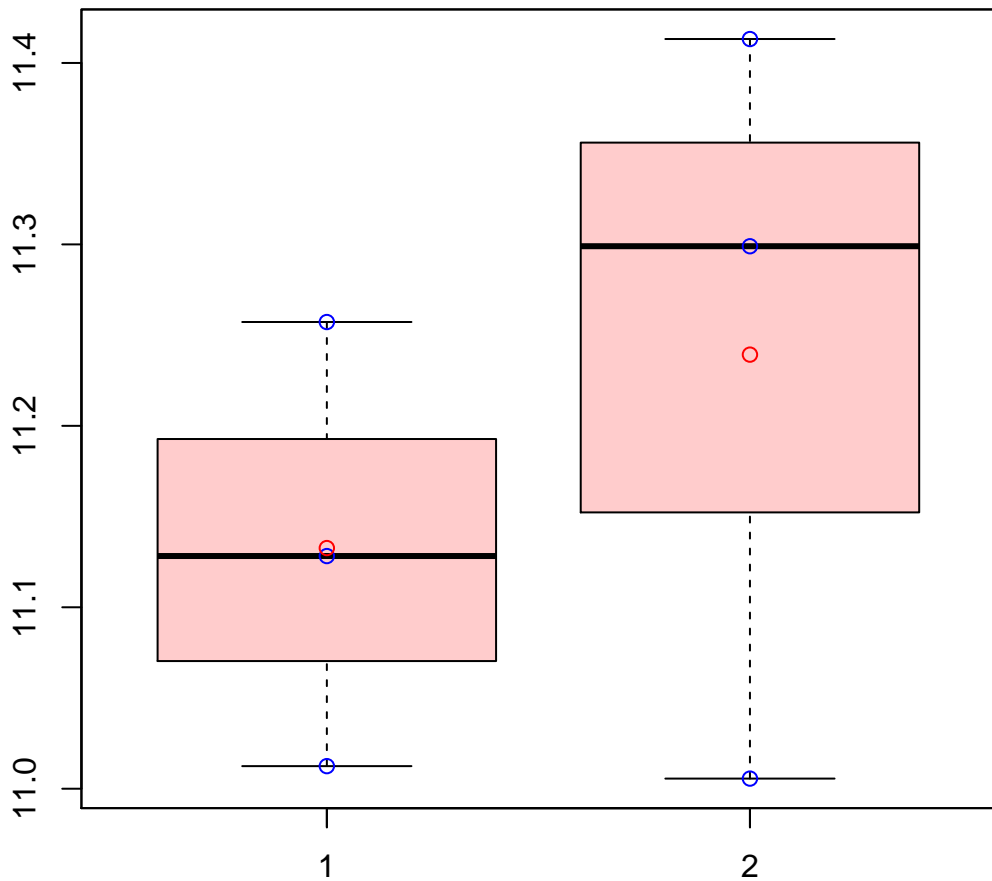

t-Test: p-value = 0.5

# CL602Contig5|CL602Contig5

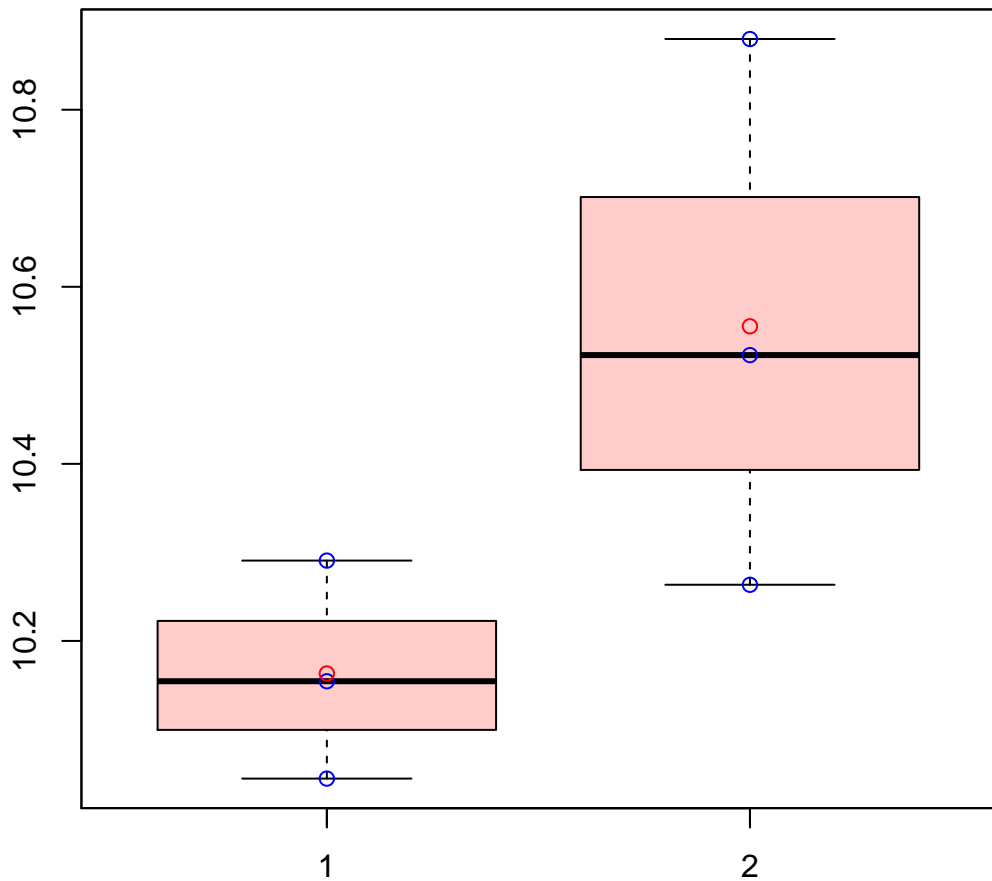

t-Test: p-value = 0.15

# CL602Contig6|CL602Contig6

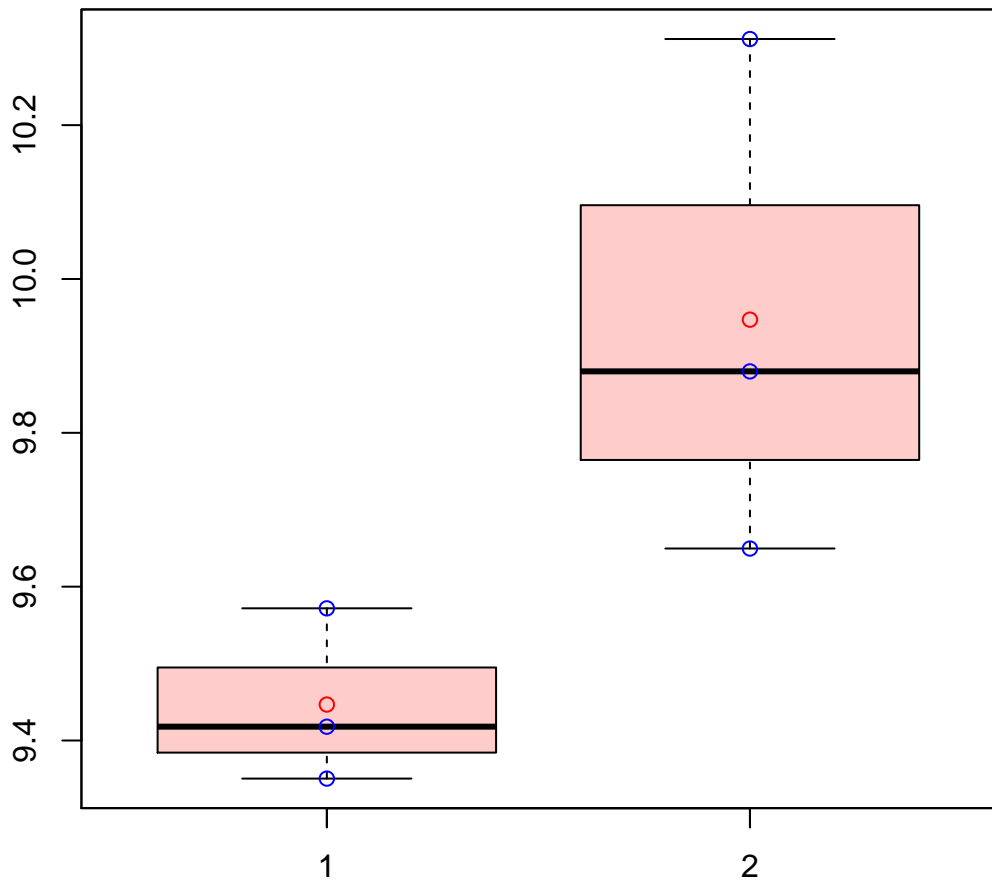

t-Test: p-value = 0.11

# CL602Contig7|CL602Contig7



t-Test: p-value = 0.15



# CL602Contig8|CL602Contig8

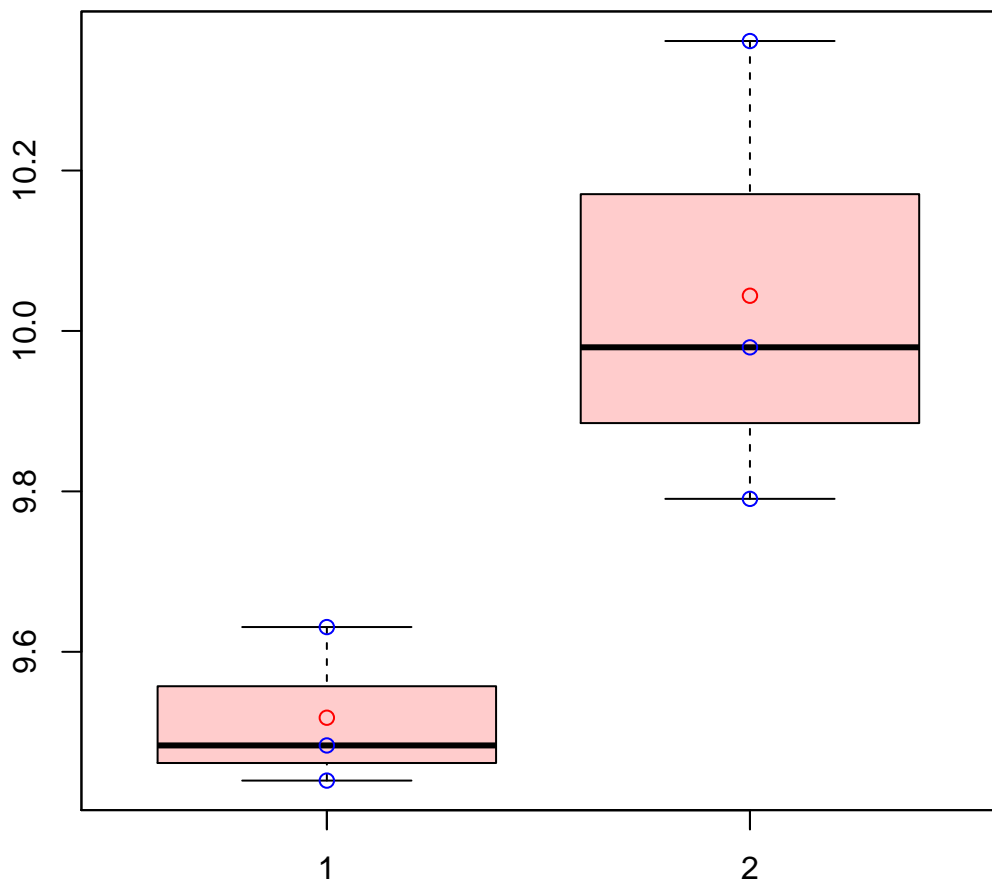

t-Test: p-value = 0.08

# CL602Contig9|CL602Contig9



t-Test: p-value = 0.15

# CL603Contig3|CL603Contig3

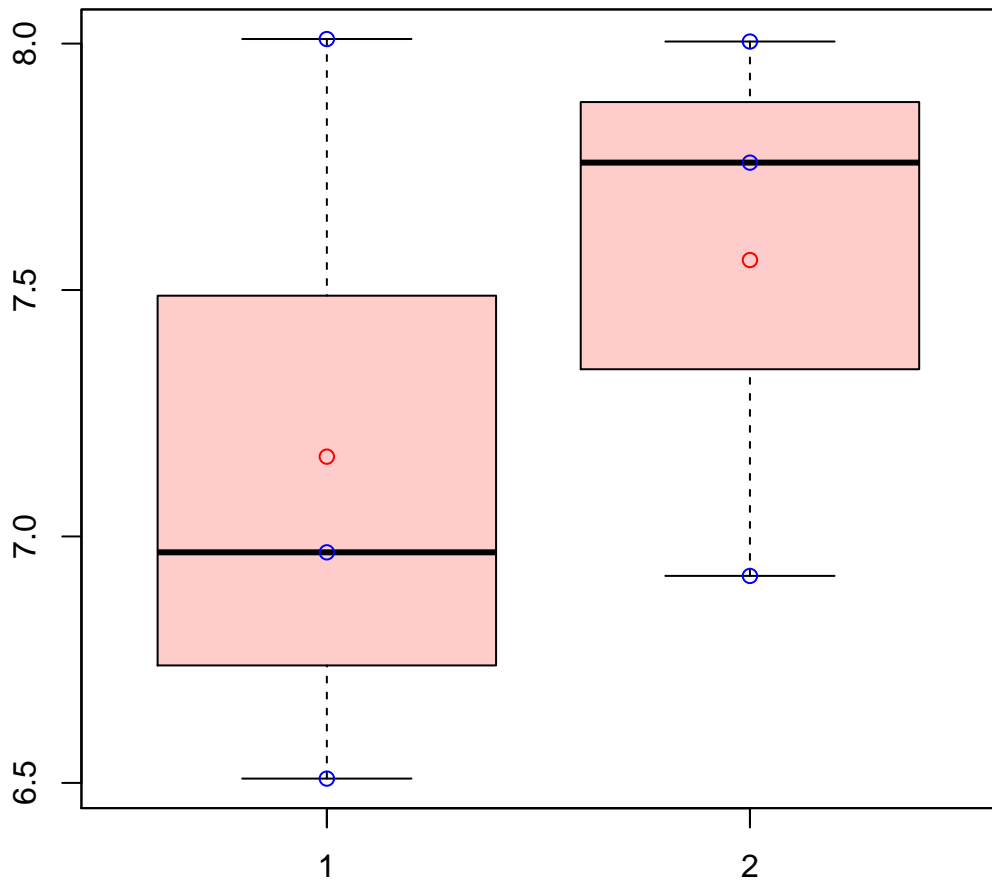

t-Test: p-value = 0.51

# CL604Contig11|CL604Contig11

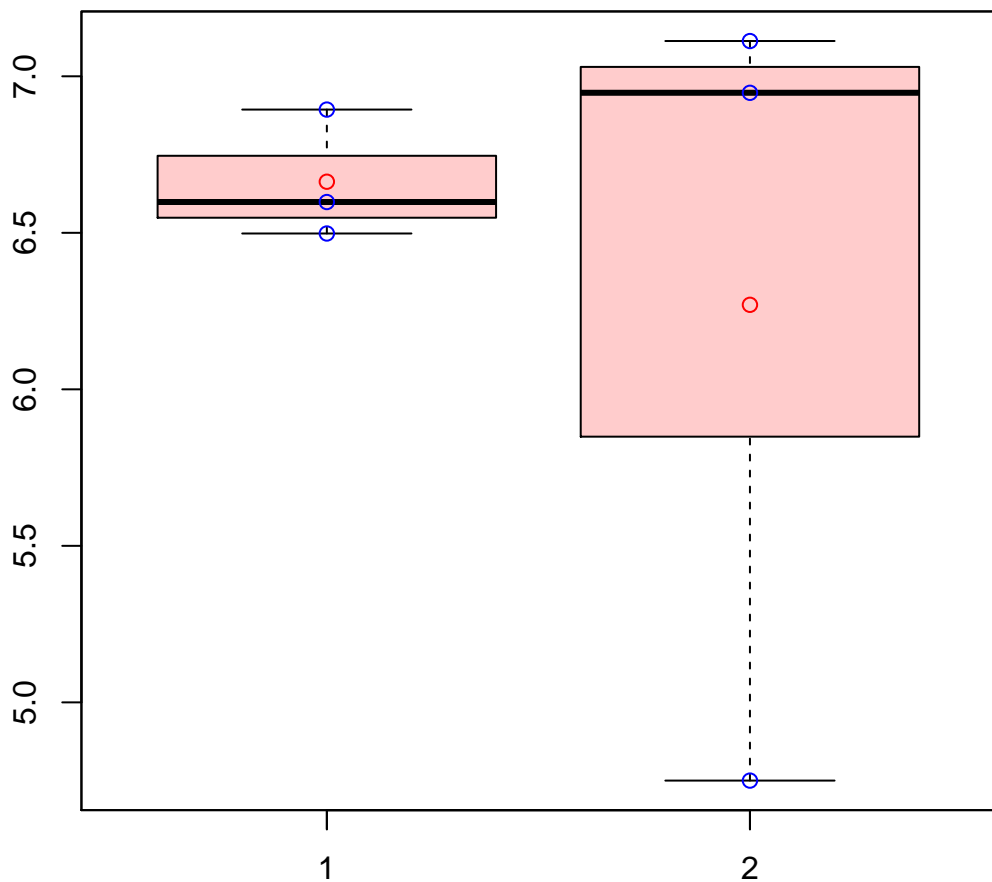

t-Test: p-value = 0.66

# CL6050Contig1|CL6050Contig1



t-Test: p-value = 0.04

# CL6051Contig2|CL6051Contig2

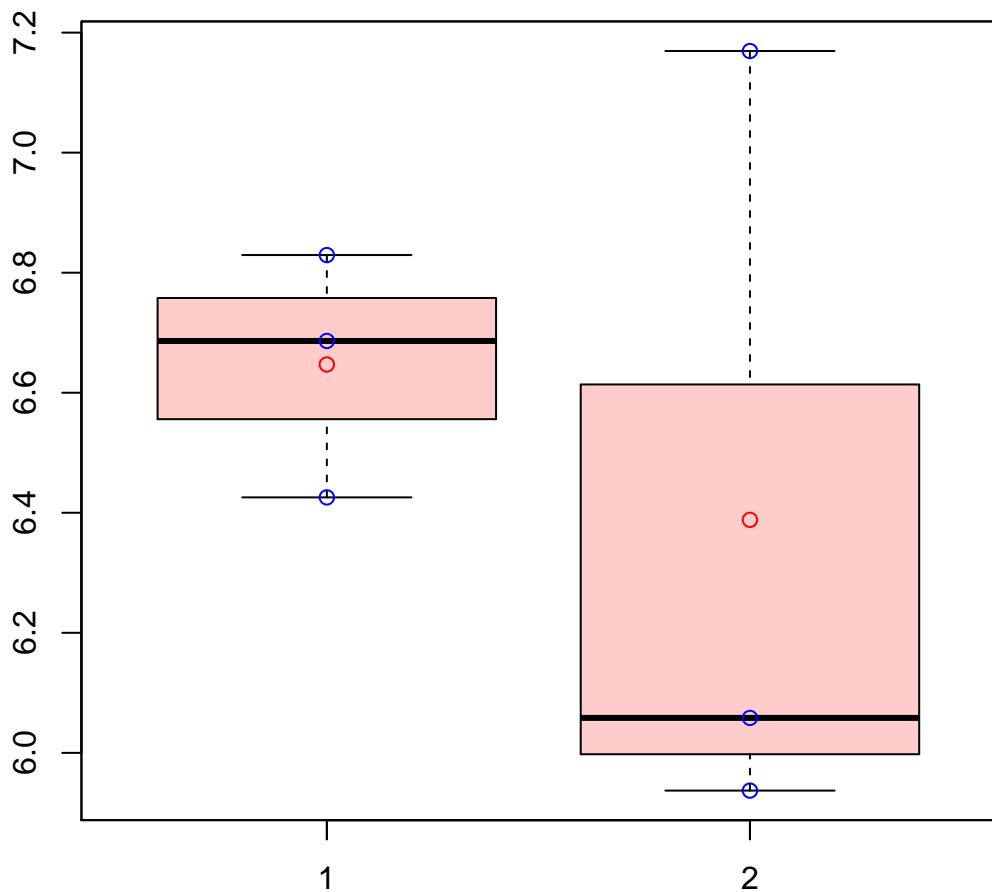

t-Test: p-value = 0.58

# CL6056Contig2|CL6056Contig2

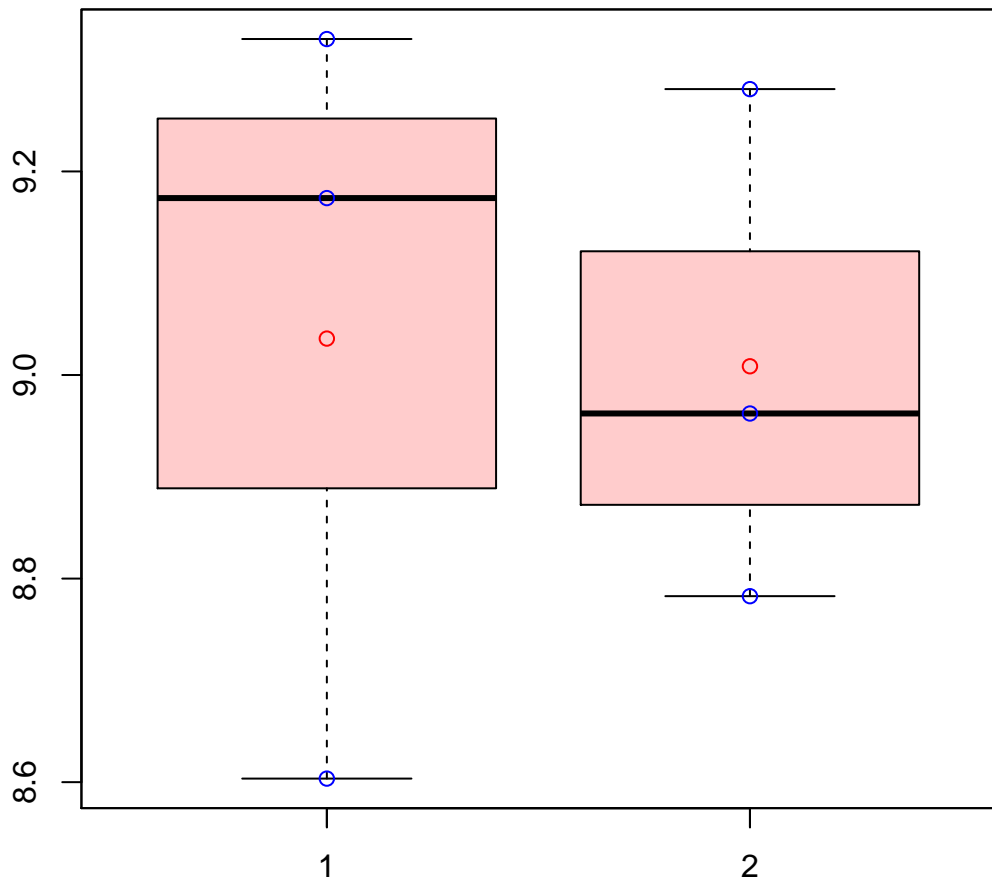

t-Test: p-value = 0.92

# CL6056Contig6|CL6056Contig6

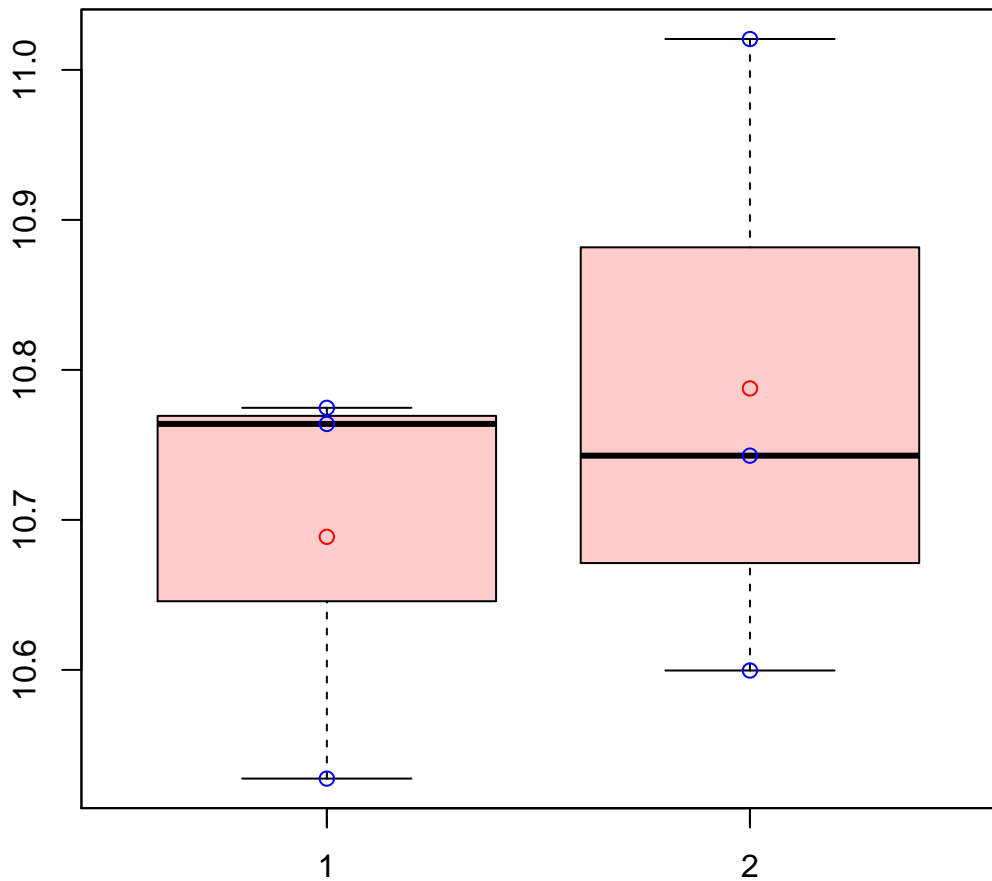

t-Test: p-value = 0.54



# CL6056Contig9|CL6056Contig9

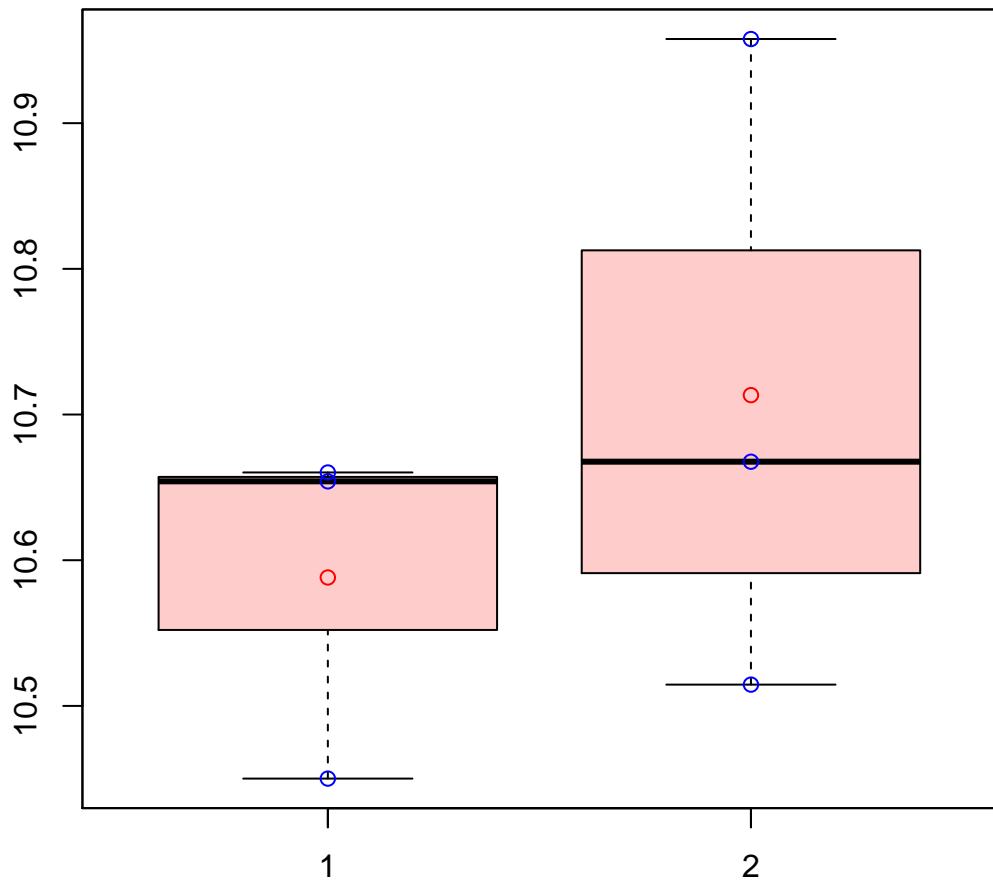

t-Test: p-value = 0.46

# CL6060Contig1|CL6060Contig1

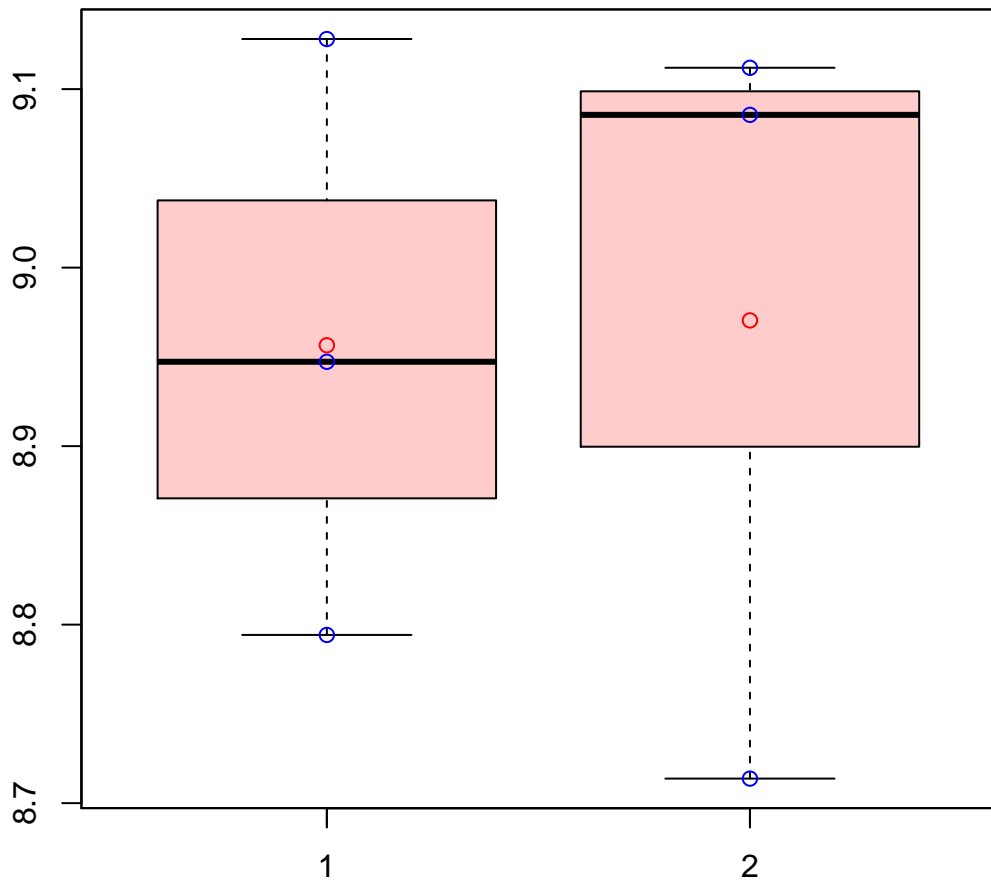

t-Test: p-value = 0.94

# CL6061Contig1|CL6061Contig1

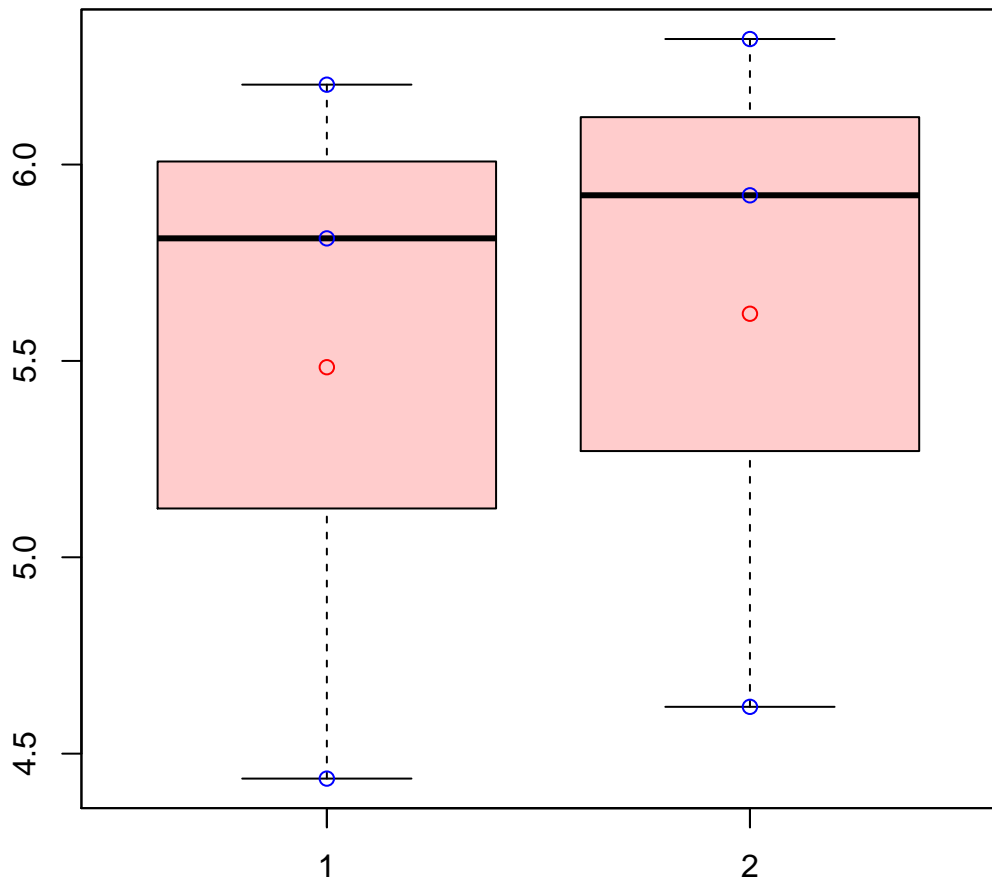

t-Test: p-value = 0.86

# CL6064Contig2|CL6064Contig2

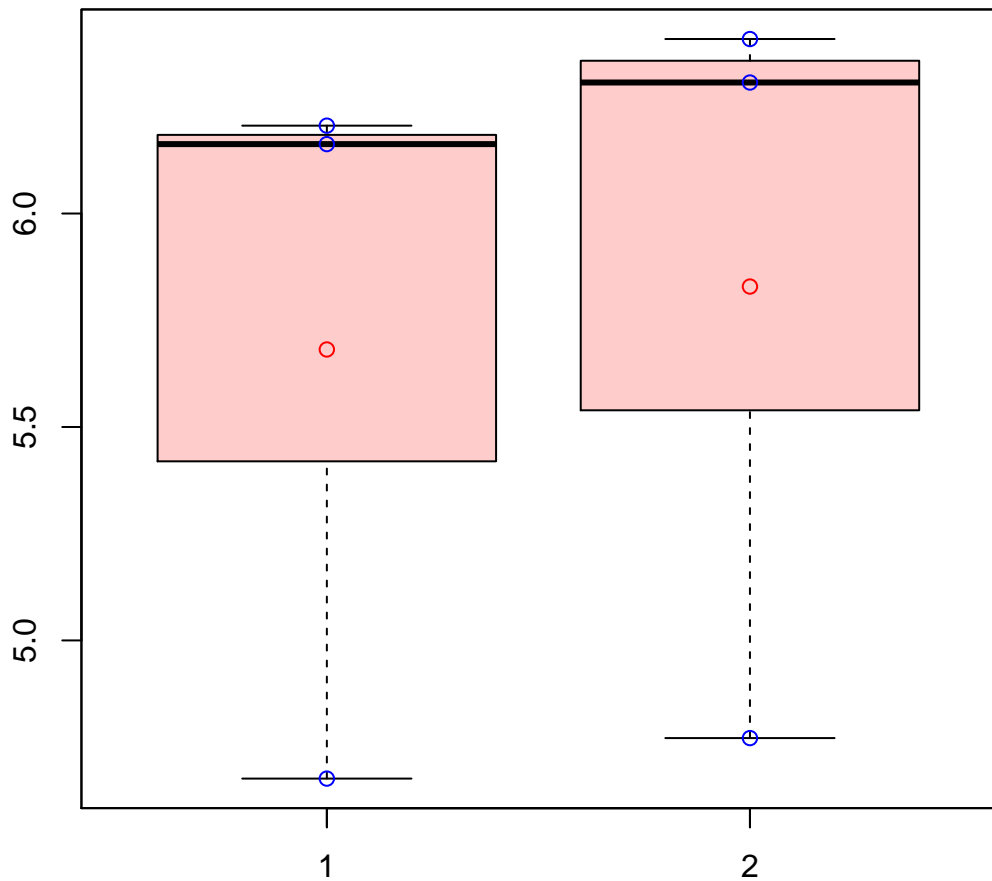

t-Test: p-value = 0.85

# CL6066Contig1|CL6066Contig1

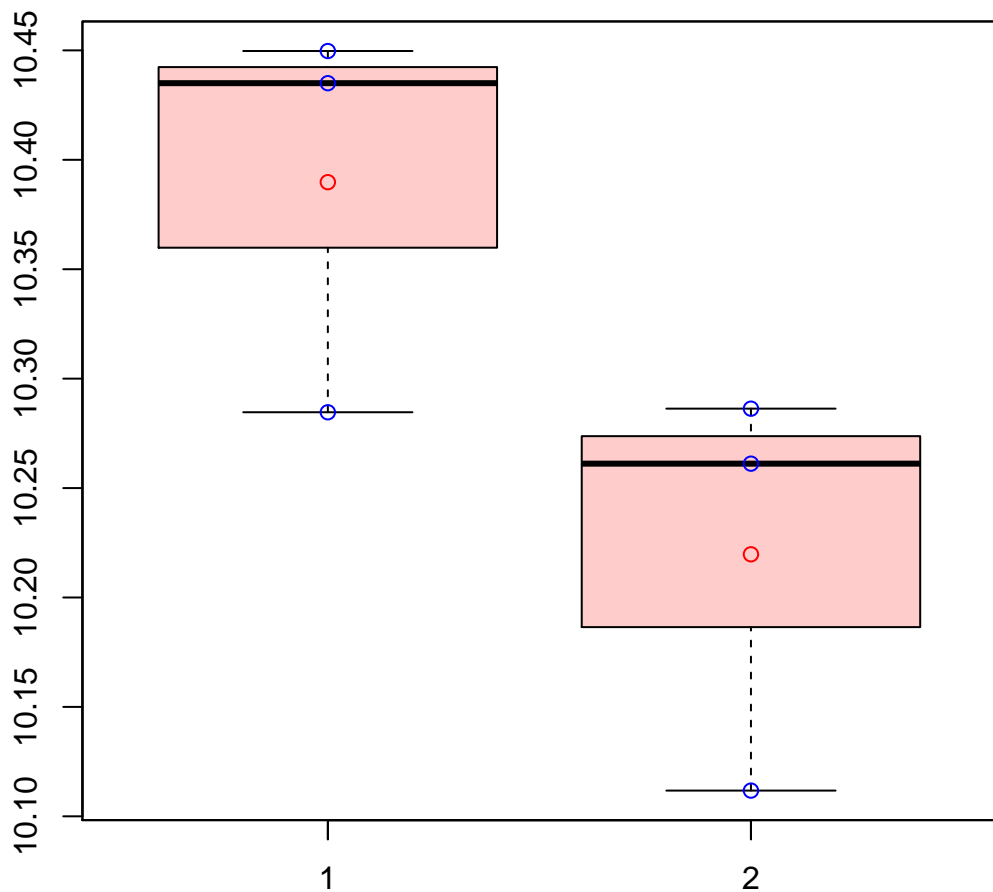

t-Test: p-value = 0.09

# CL6067Contig1|CL6067Contig1

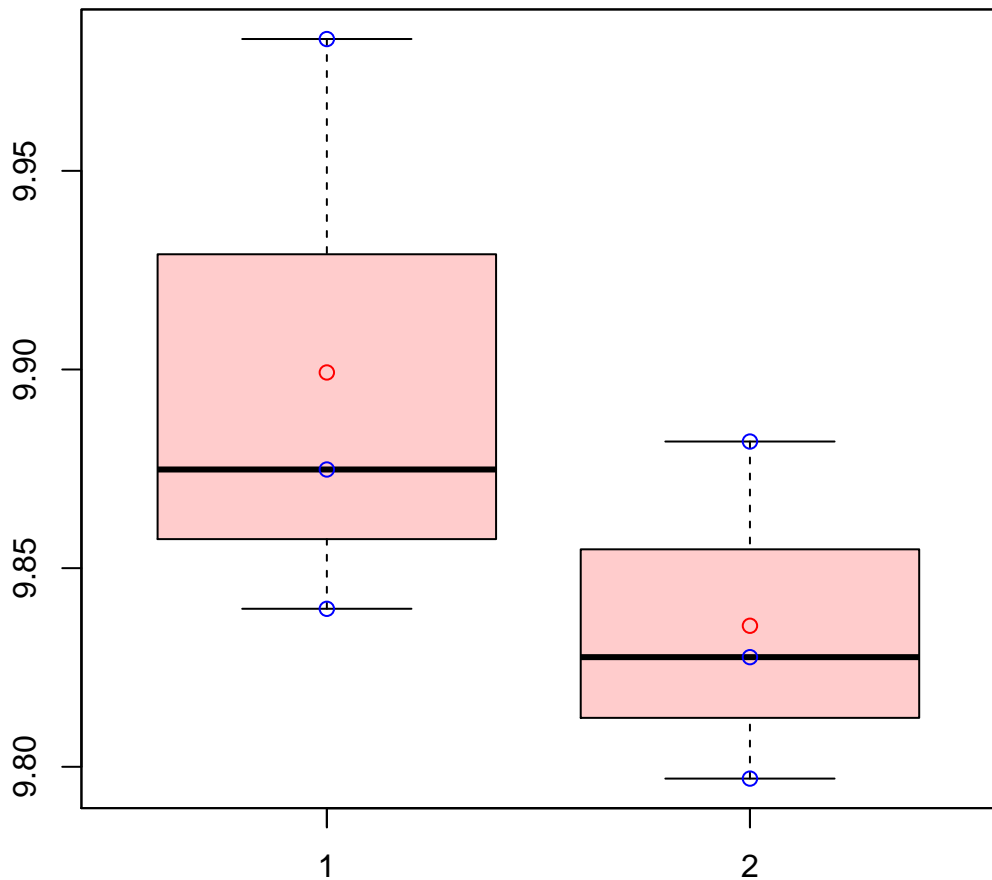

t-Test: p-value = 0.29

# CL6067Contig2|CL6067Contig2



t-Test: p-value = 0.29

# CL6073Contig1|CL6073Contig1

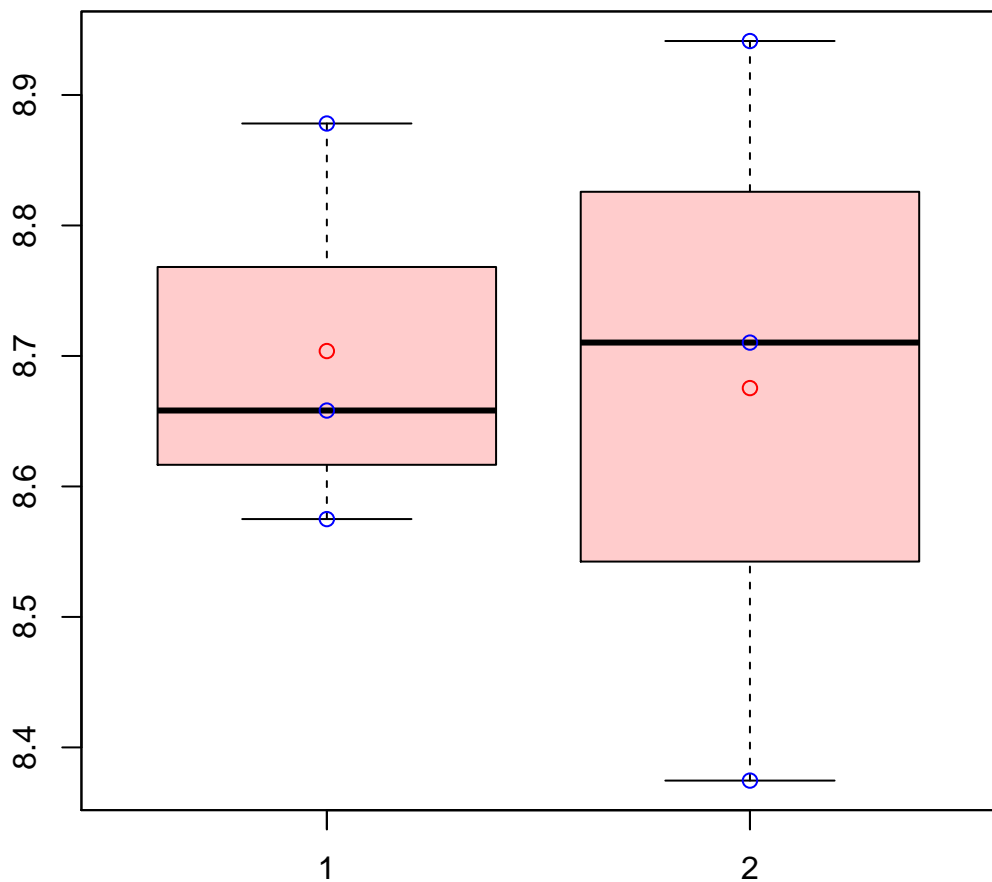

t-Test: p-value = 0.89



# CL6073Contig2|CL6073Contig2

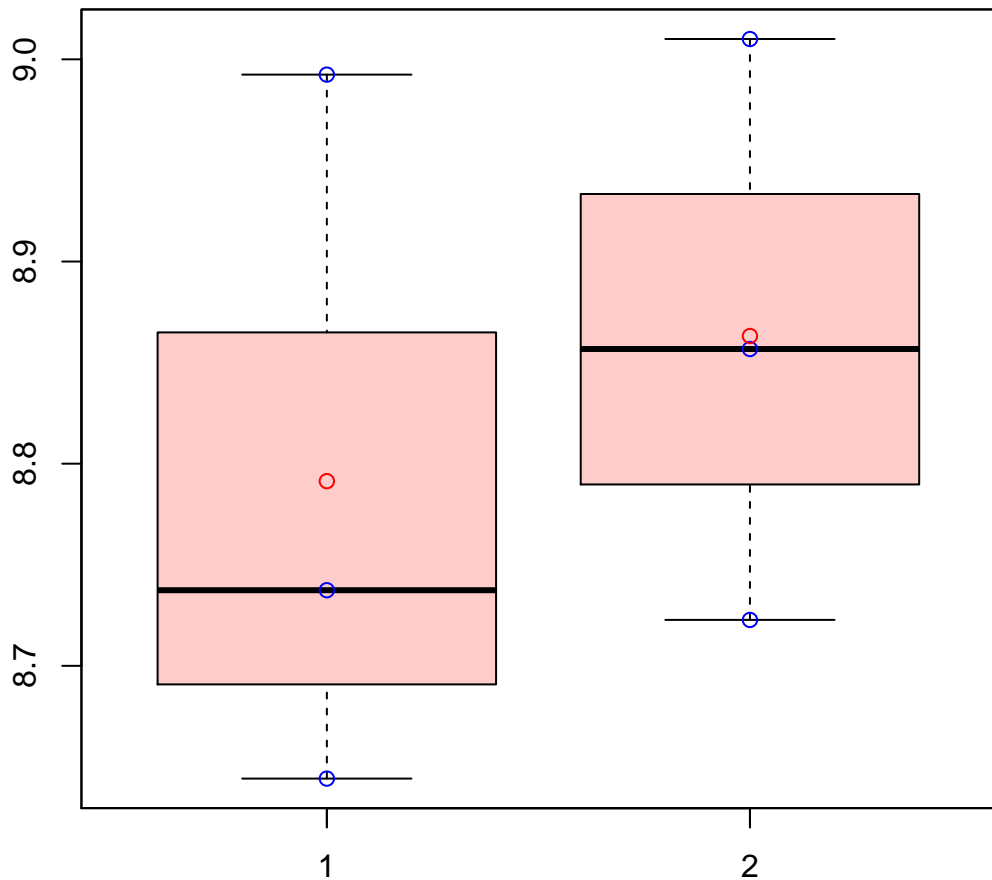

t-Test: p-value = 0.62

# CL6075Contig2|CL6075Contig2

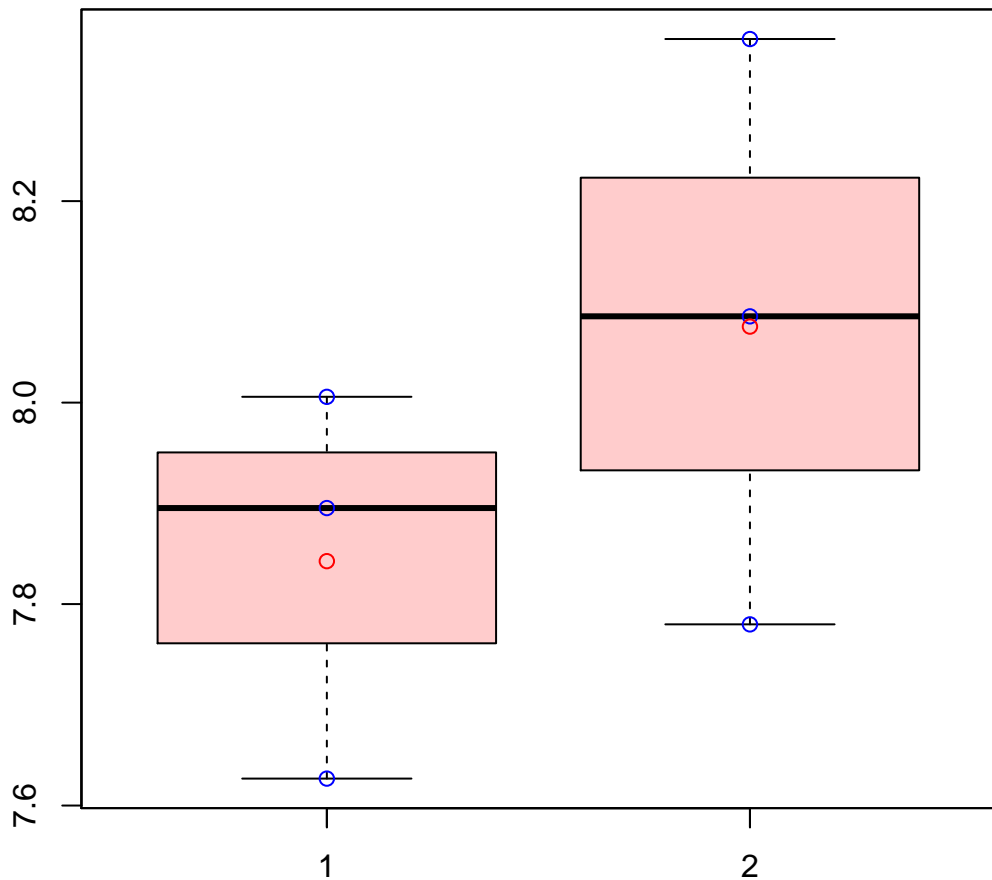

t-Test: p-value = 0.32

# CL6078Contig1|CL6078Contig1

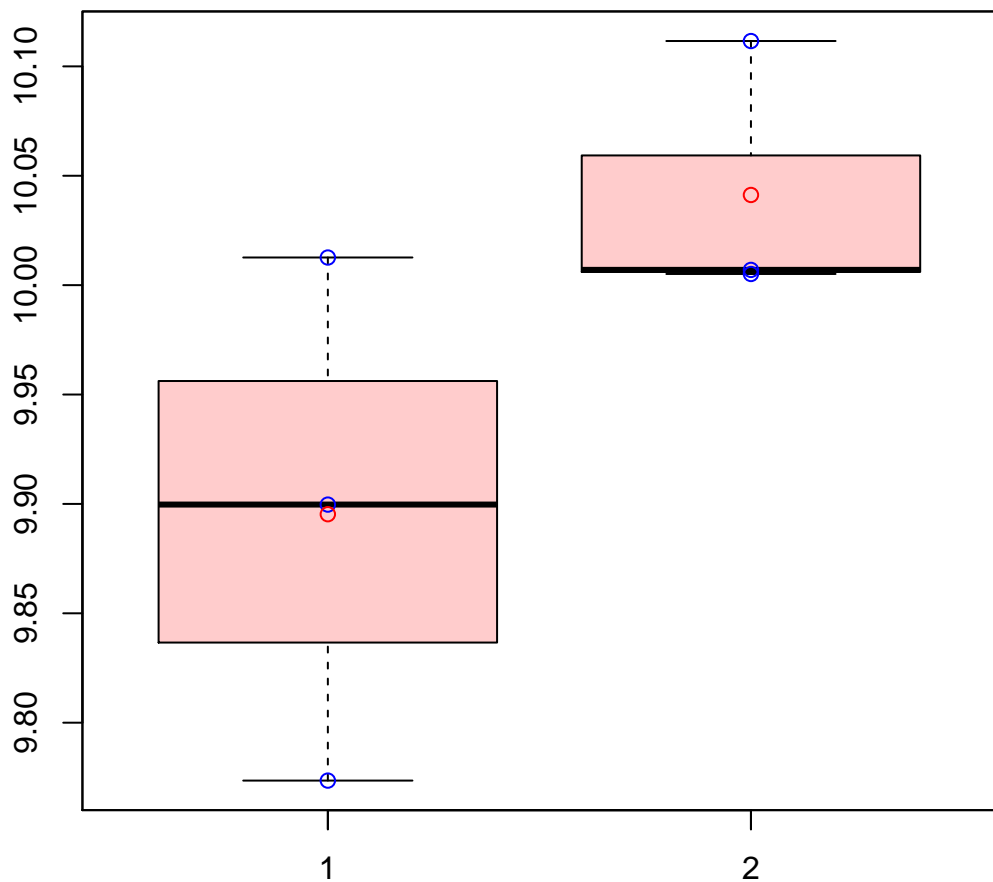

t-Test: p-value = 0.16

# CL6078Contig6|CL6078Contig6

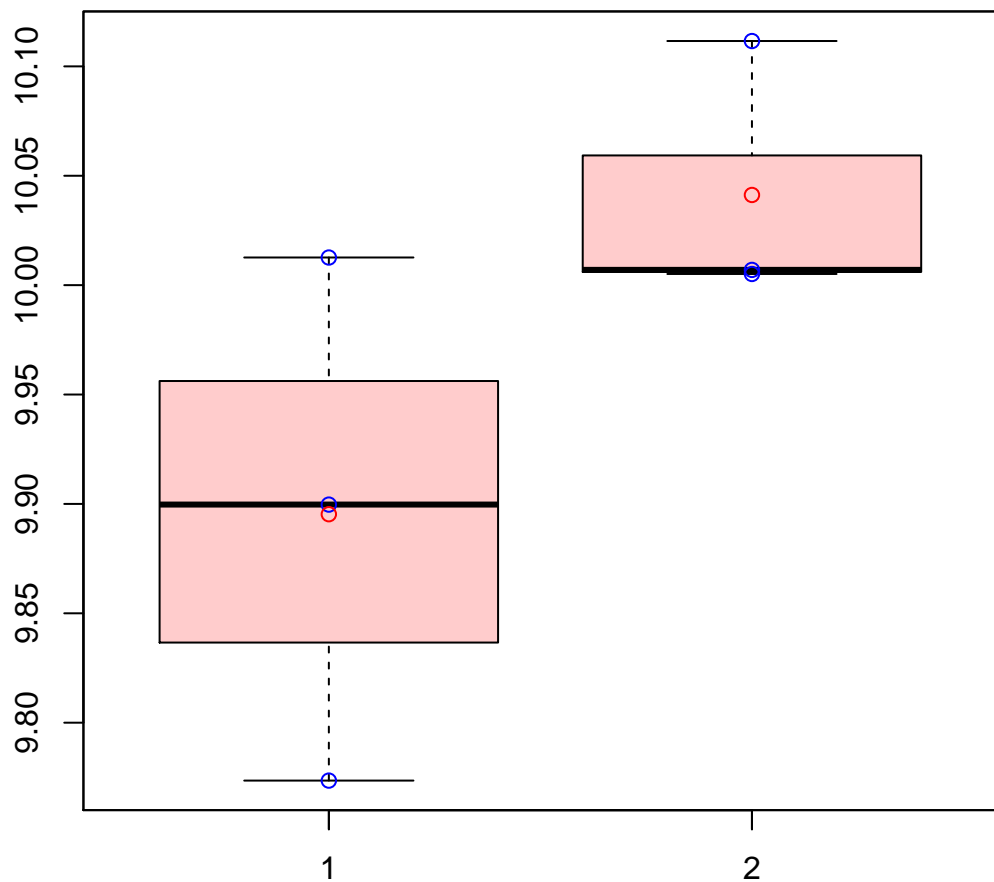

t-Test: p-value = 0.16

# CL6079Contig2|CL6079Contig2

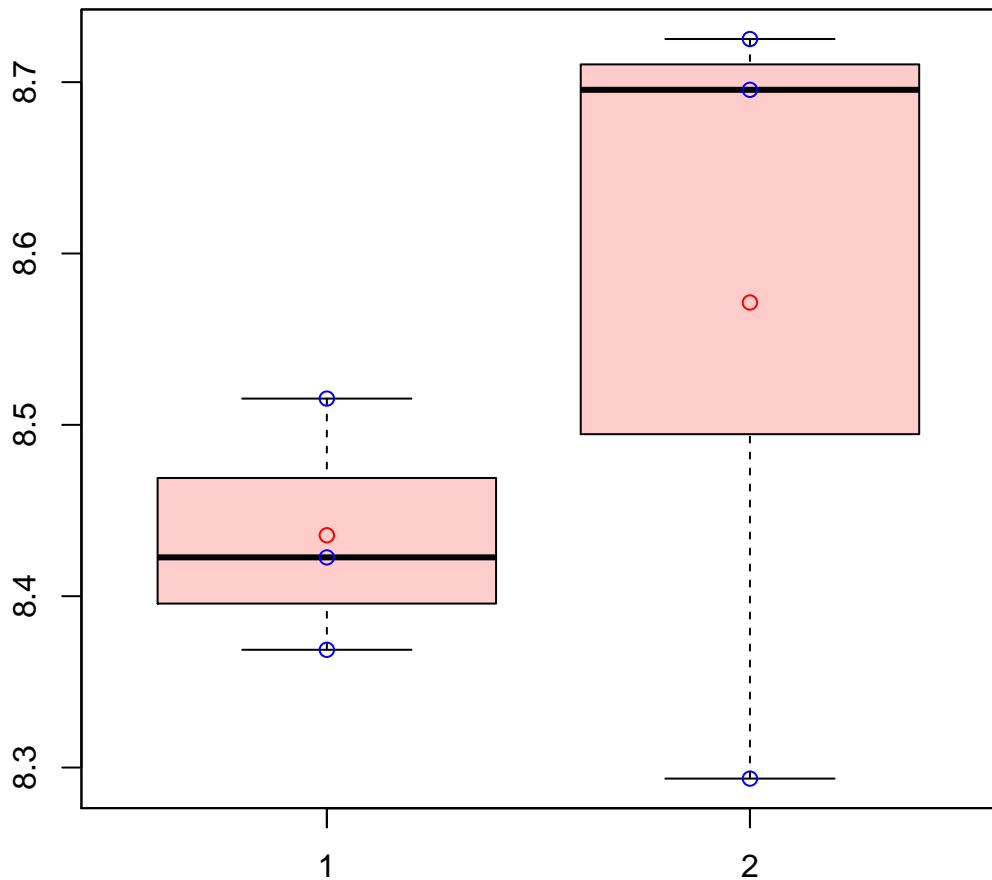

t-Test: p-value = 0.44

# CL607Contig1|CL607Contig1

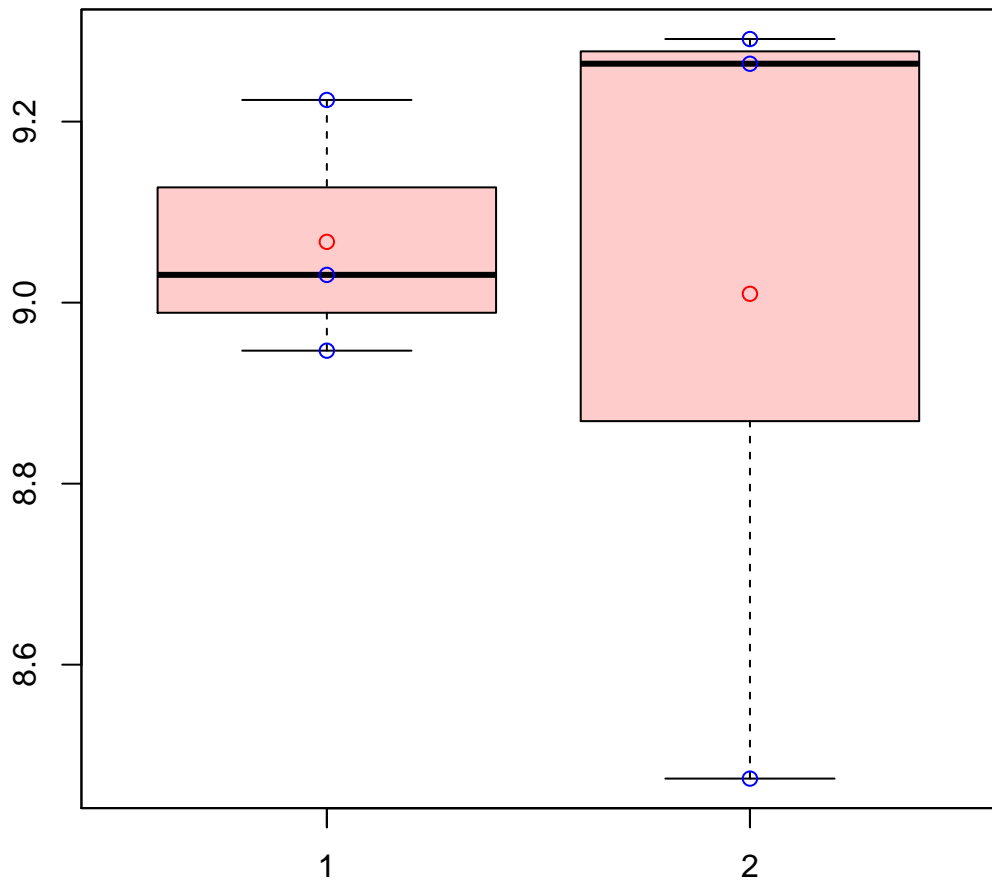

t-Test: p-value = 0.85

# CL607Contig2|CL607Contig2

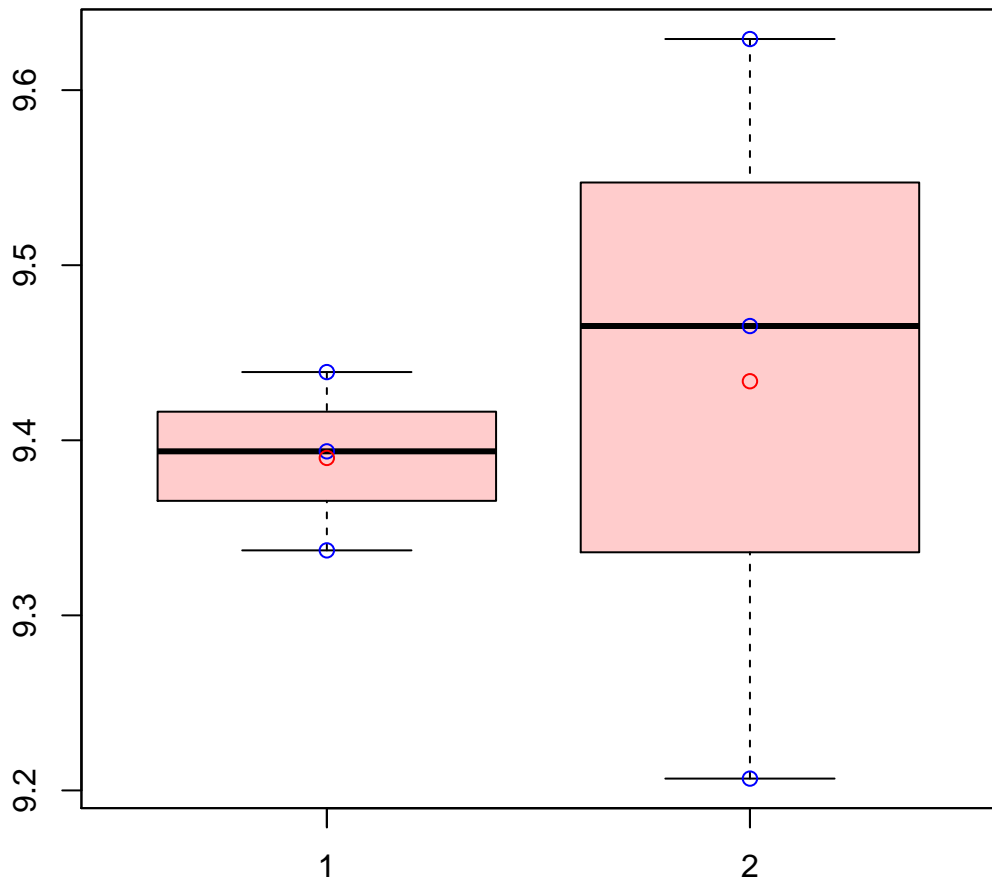

t-Test: p-value = 0.76

# CL607Contig3|CL607Contig3

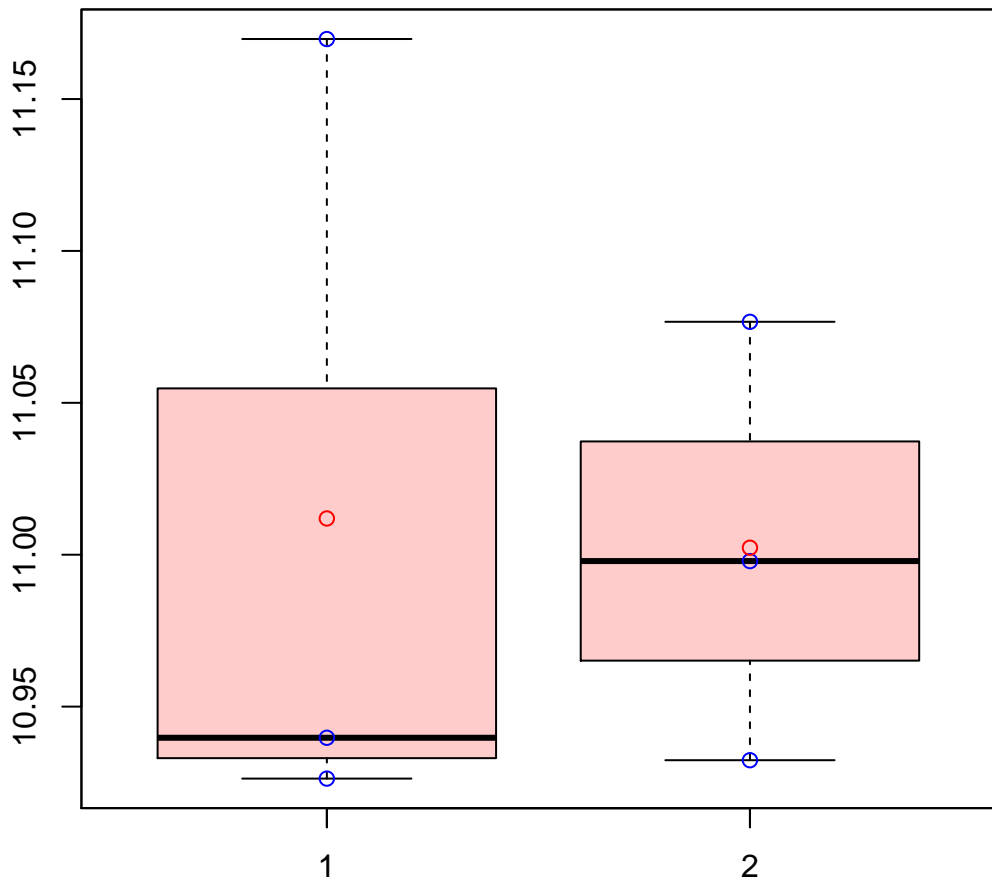

t-Test: p-value = 0.92



# CL608Contig1|CL608Contig1

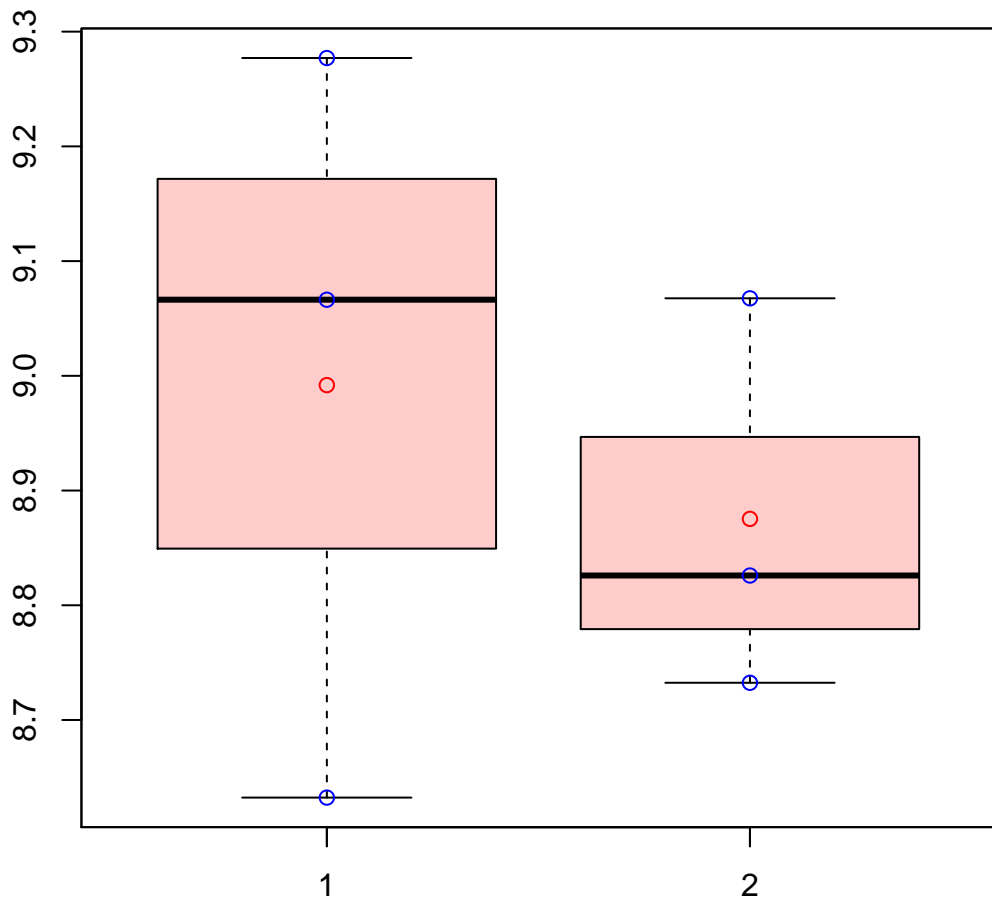

t-Test: p-value = 0.62

# CL60Contig22|CL60Contig22

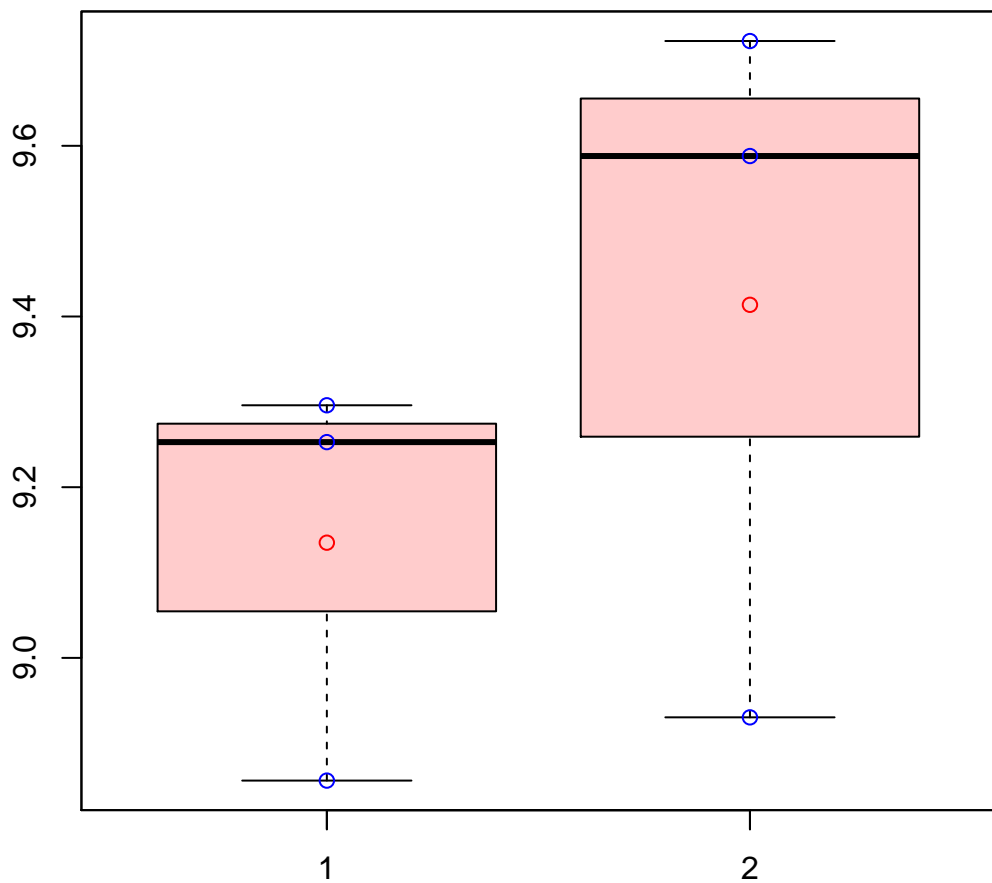

t-Test: p-value = 0.39

# CL60Contig33|CL60Contig33

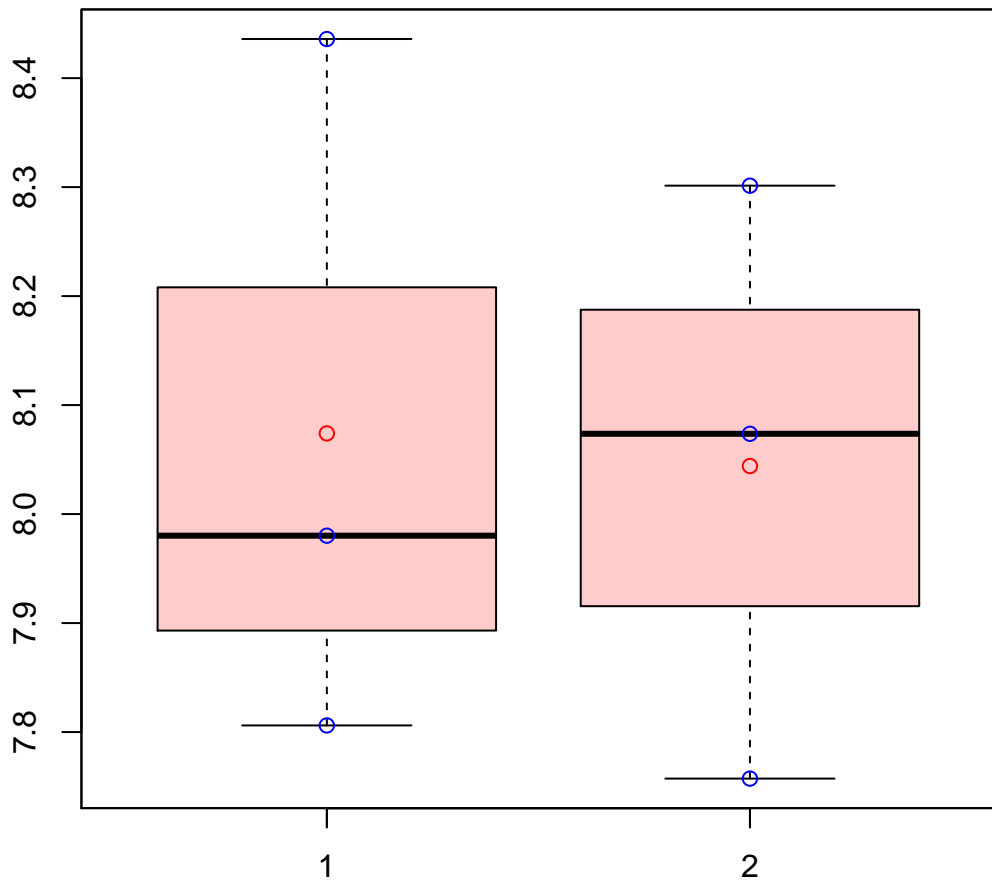

t-Test: p-value = 0.91

# CL60Contig34|CL60Contig34

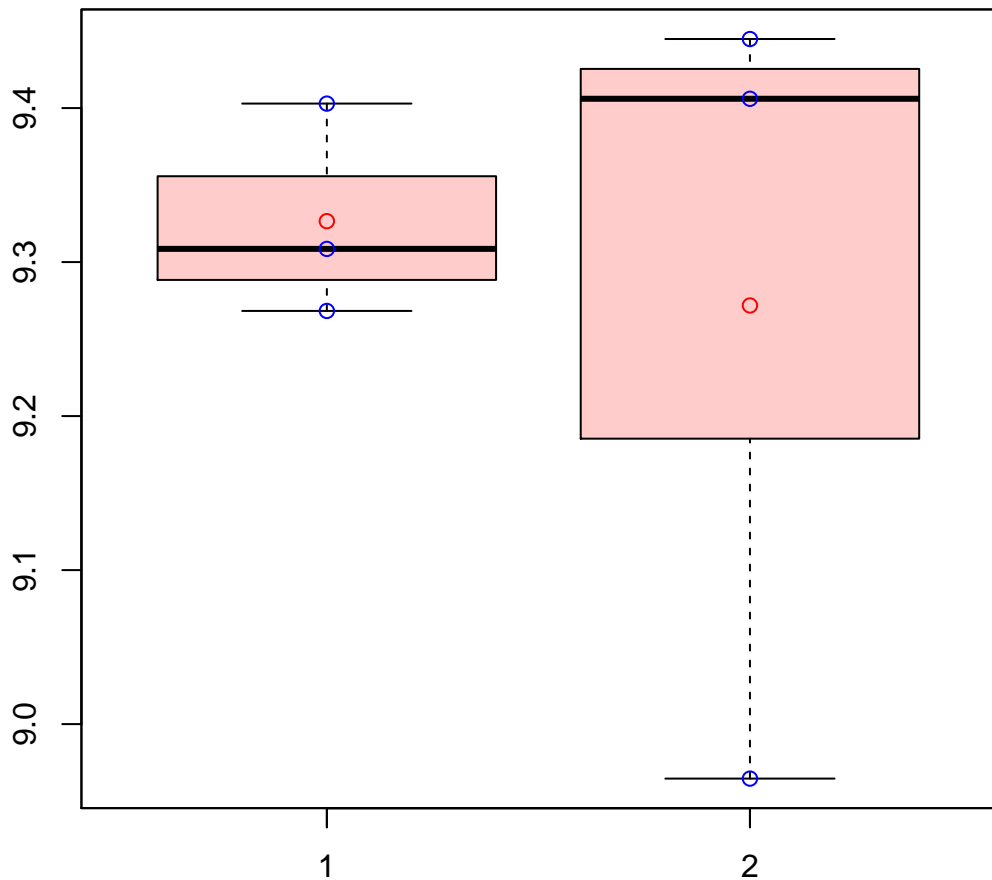

t-Test: p-value = 0.76

# CL6109Contig2|CL6109Contig2

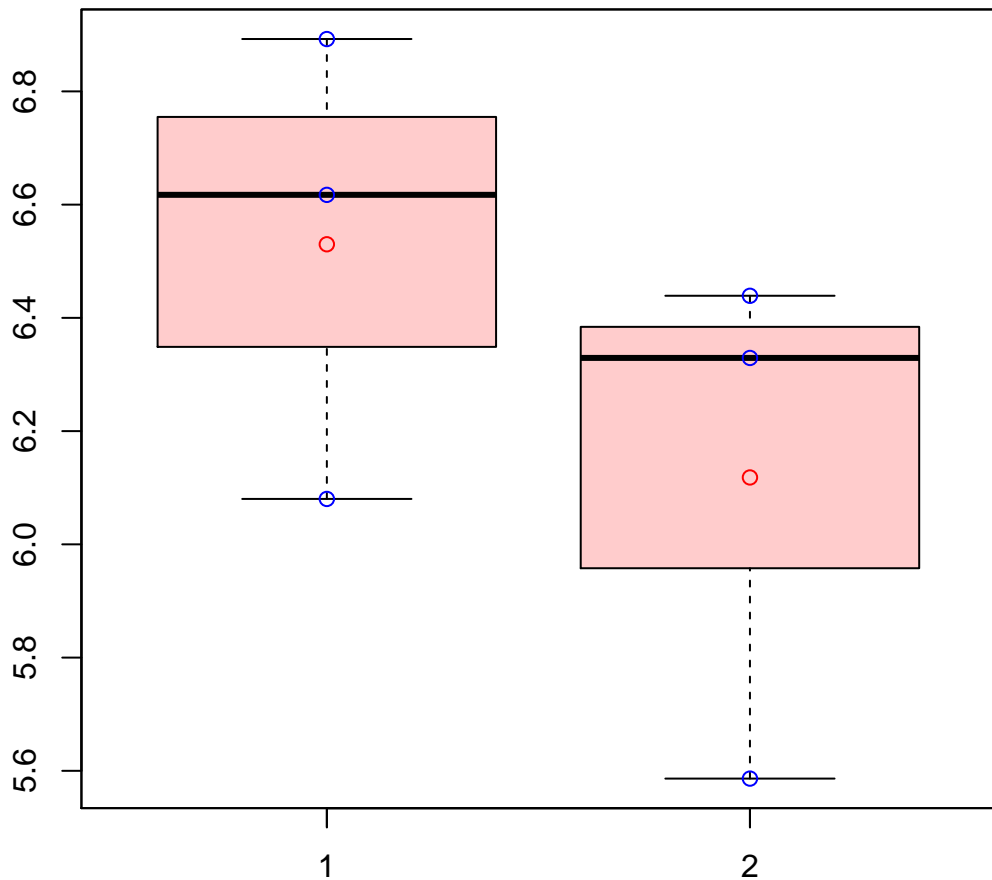

t-Test: p-value = 0.32

# CL610Contig2|CL610Contig2

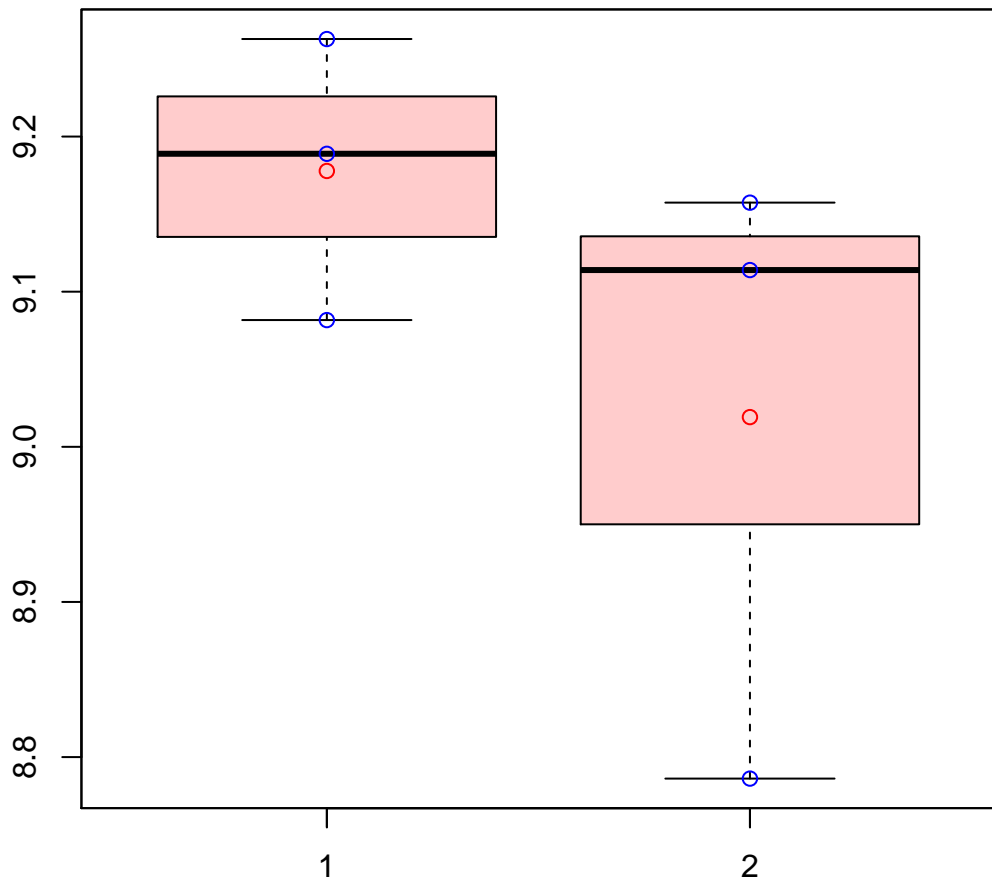

t-Test: p-value = 0.31

# CL6112Contig1|CL6112Contig1

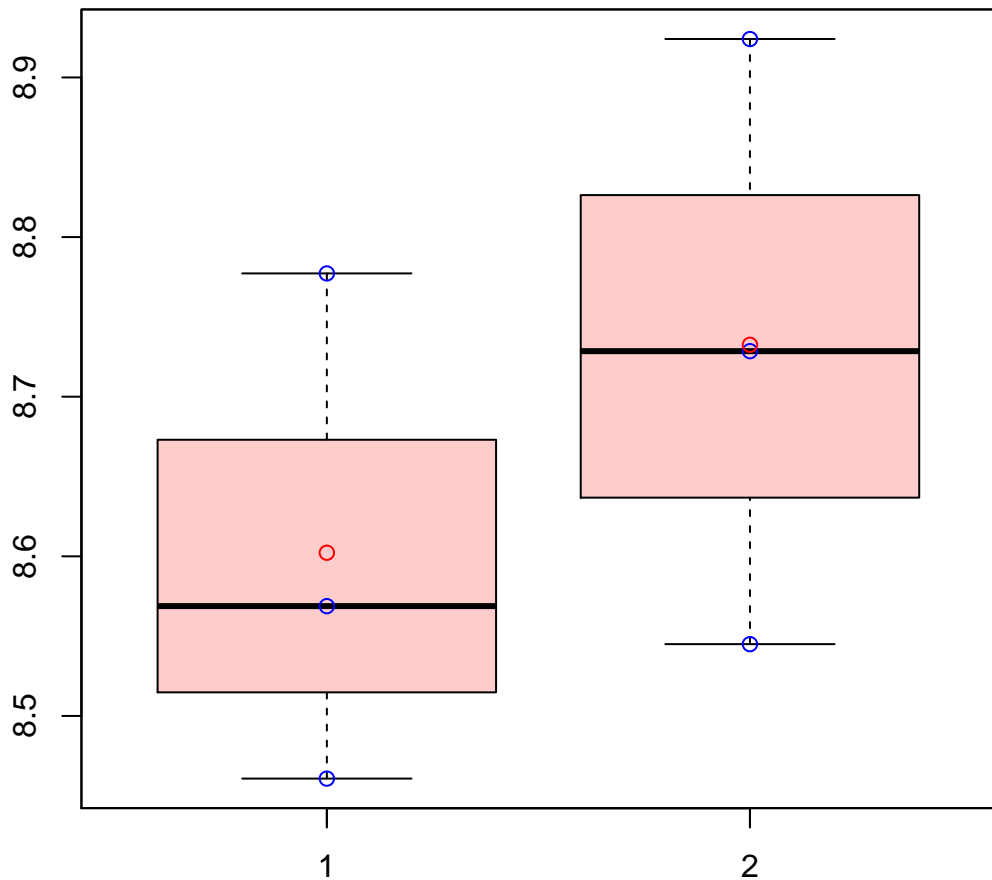

t-Test: p-value = 0.42

# CL612Contig6|CL612Contig6

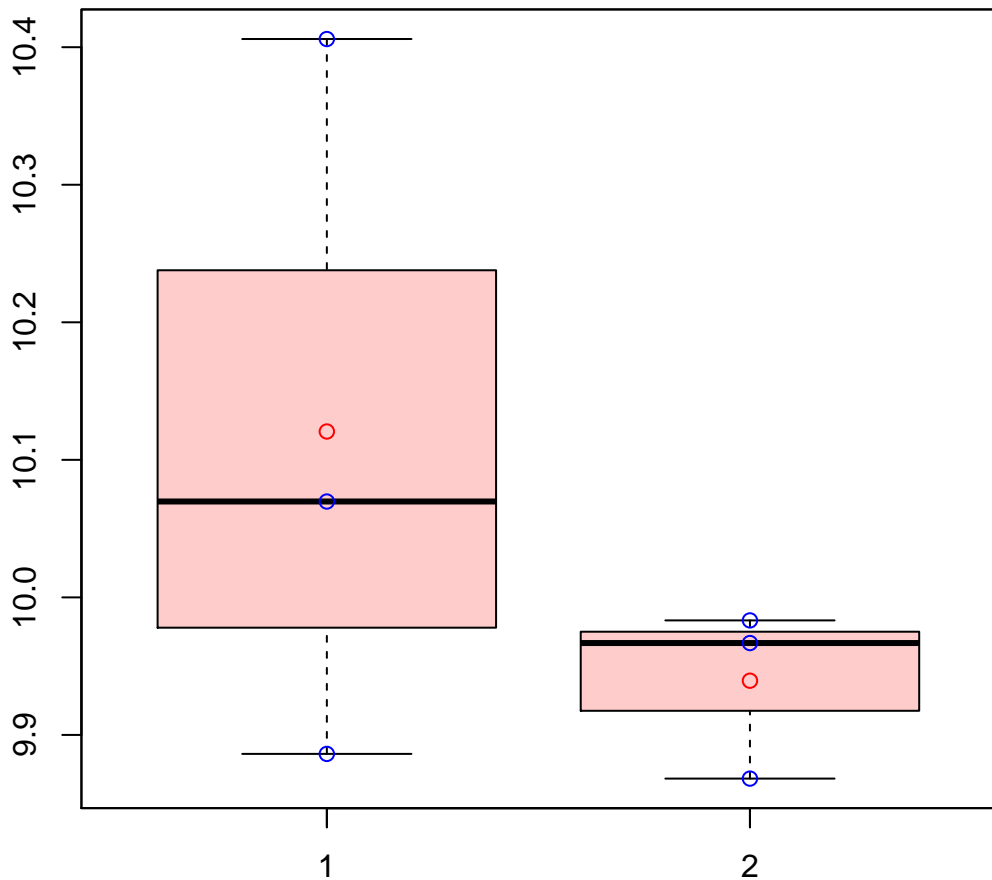

t-Test: p-value = 0.36



# CL612Contig8|CL612Contig8

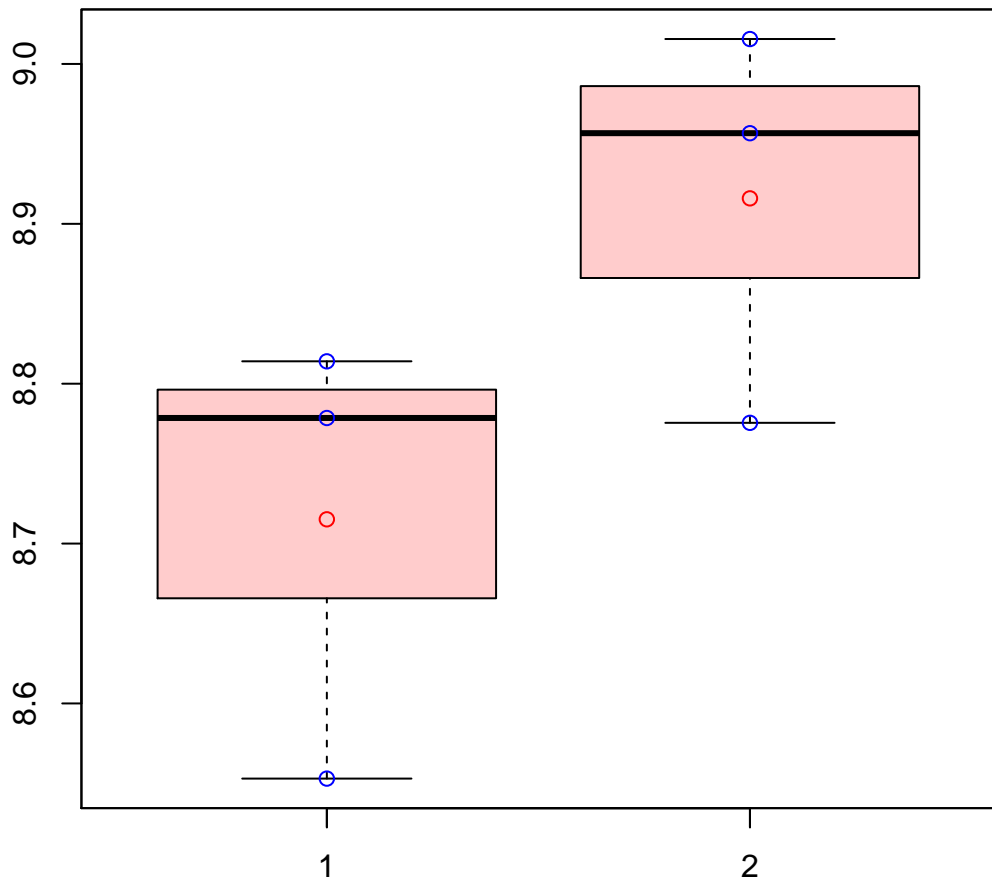

t-Test: p-value = 0.14

# CL6145Contig2|CL6145Contig2

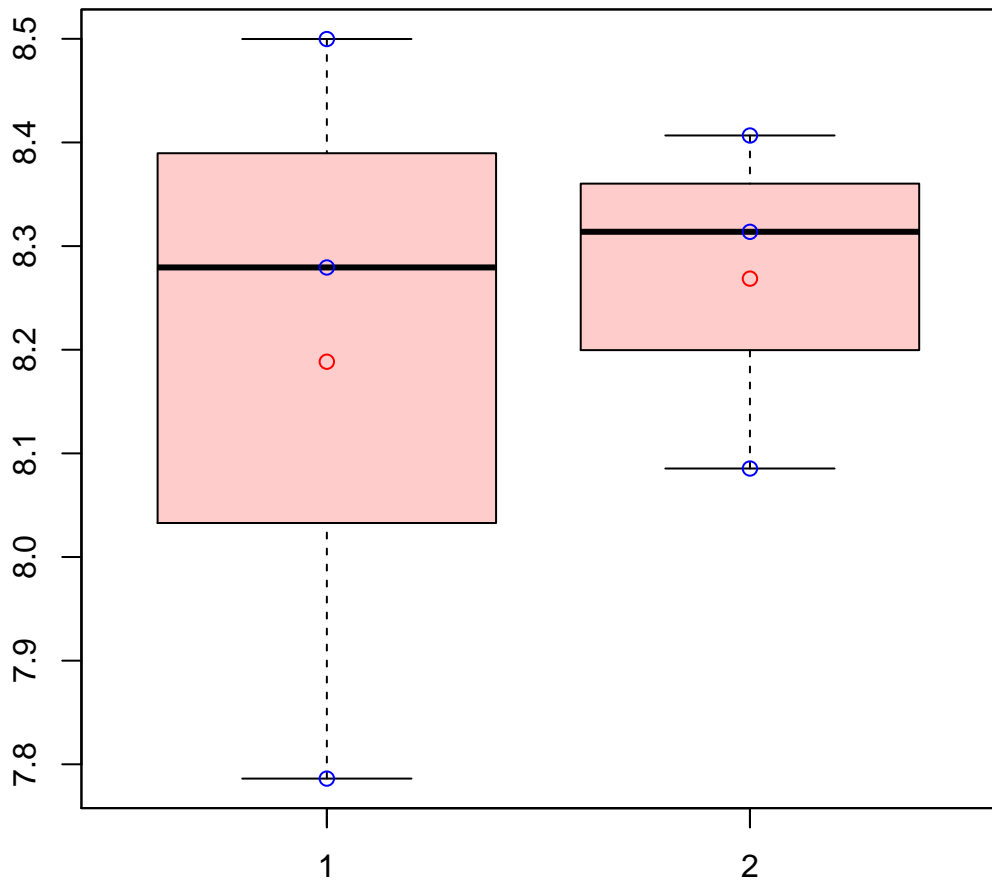

t-Test: p-value = 0.75

# CL614Contig11|CL614Contig11

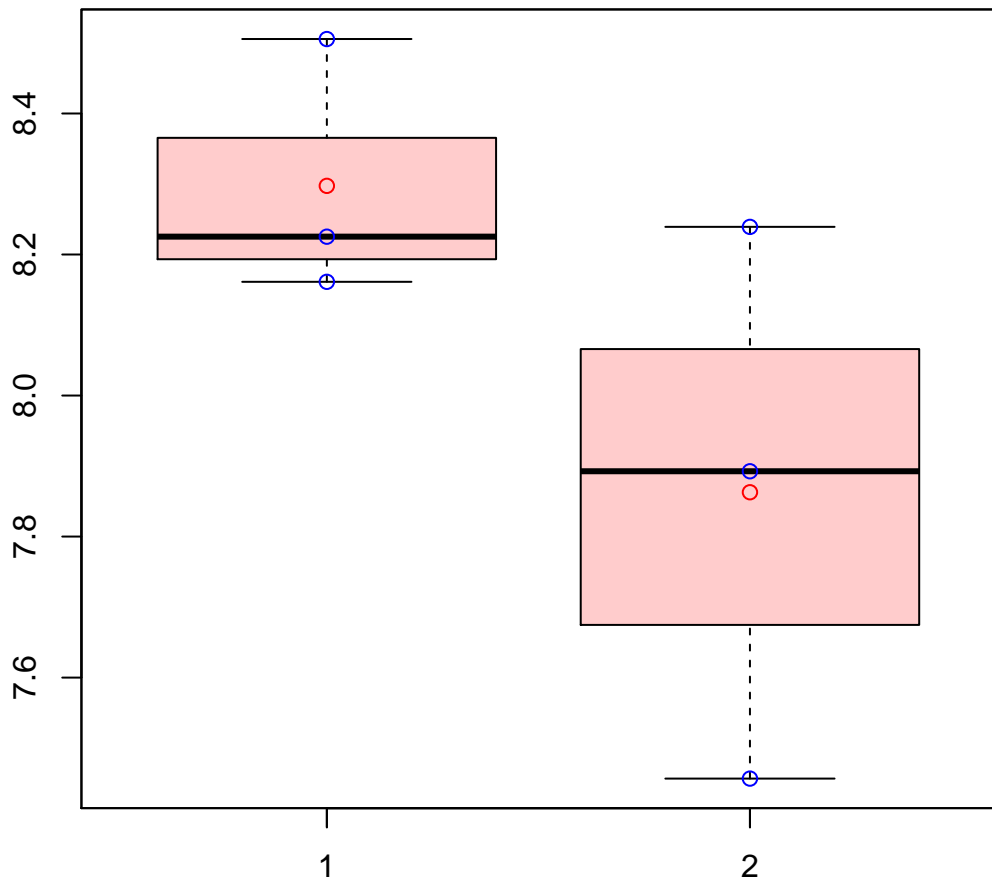

t-Test: p-value = 0.19

# CL6157Contig3|CL6157Contig3

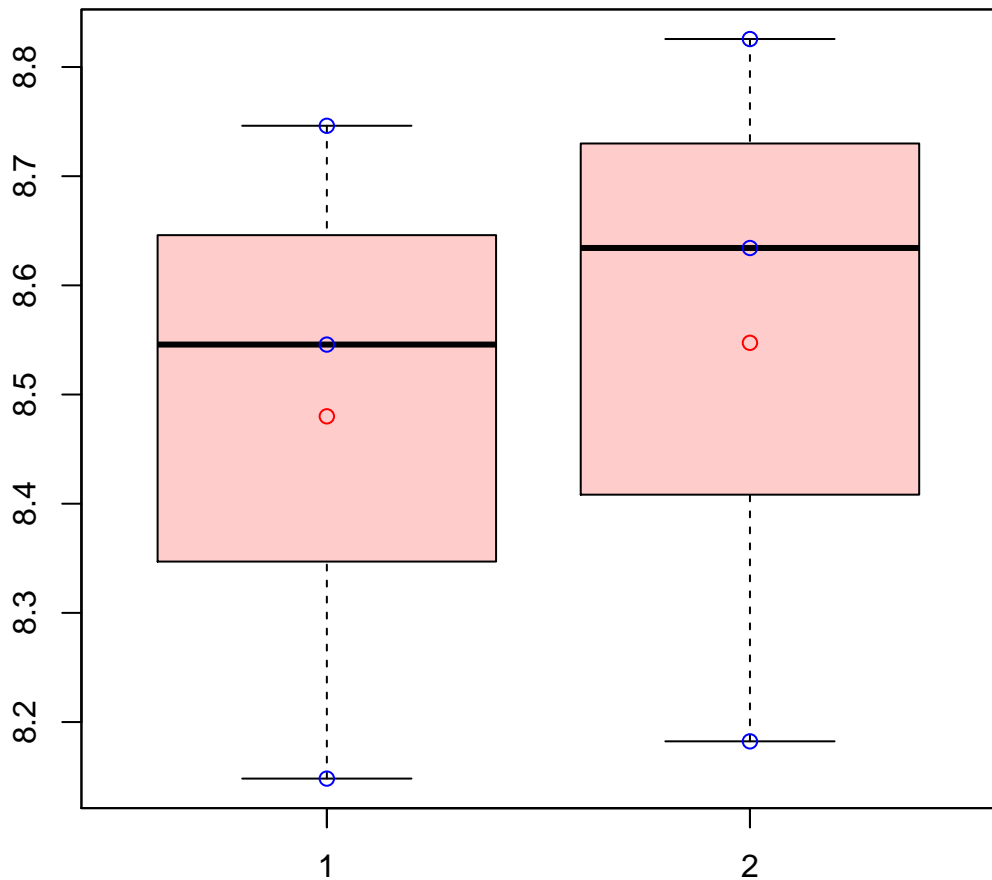

t-Test: p-value = 0.81

# CL6164Contig1|CL6164Contig1

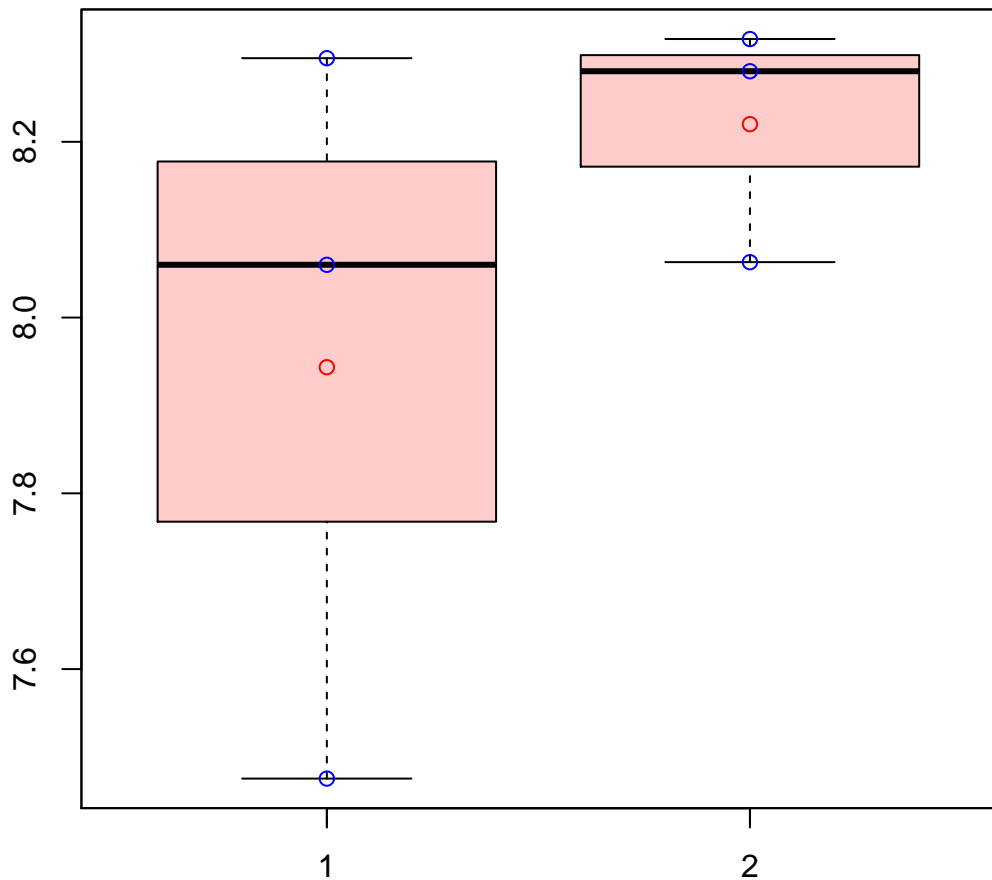

t-Test: p-value = 0.38

# CL6165Contig1|CL6165Contig1

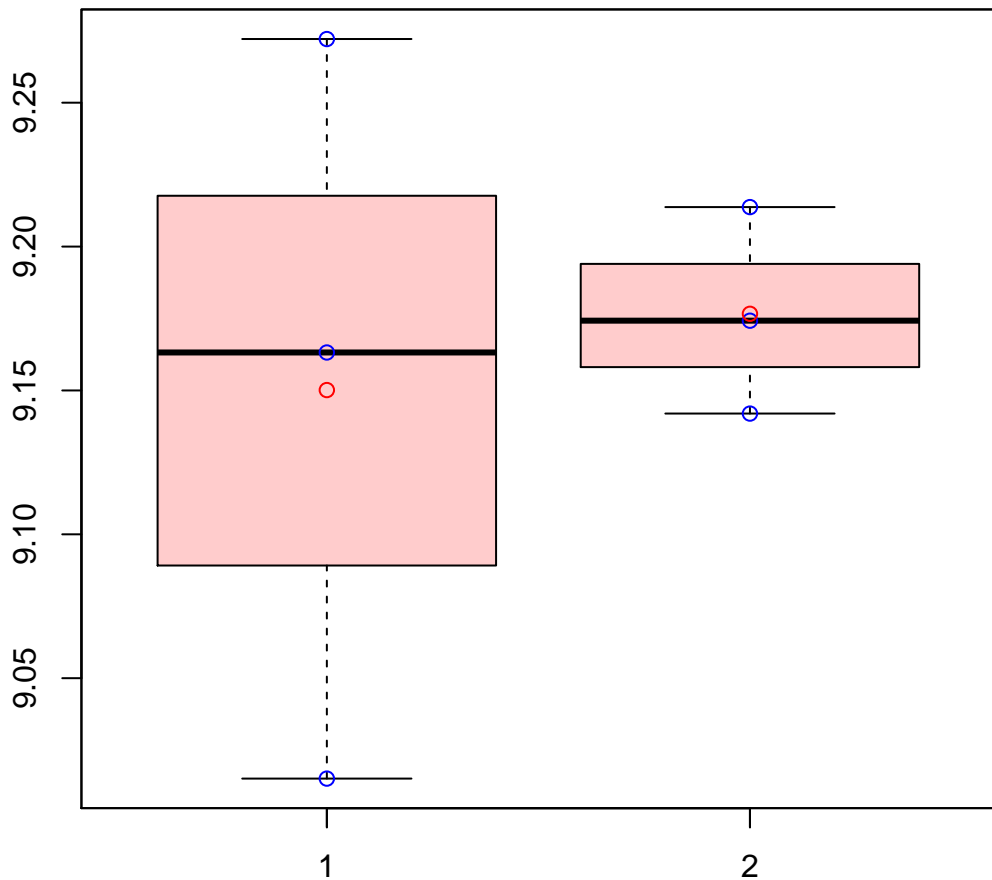

t-Test: p-value = 0.76

# CL616Contig5|CL616Contig5

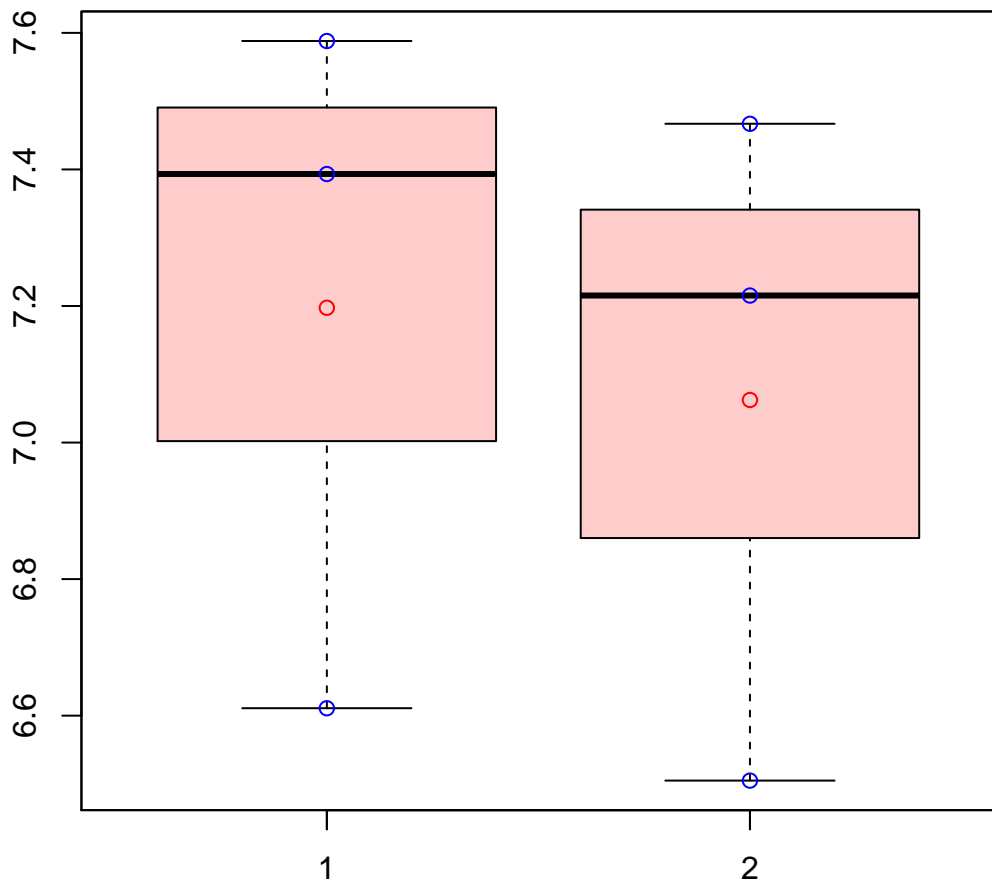

t-Test: p-value = 0.76

# CL6178Contig2|CL6178Contig2

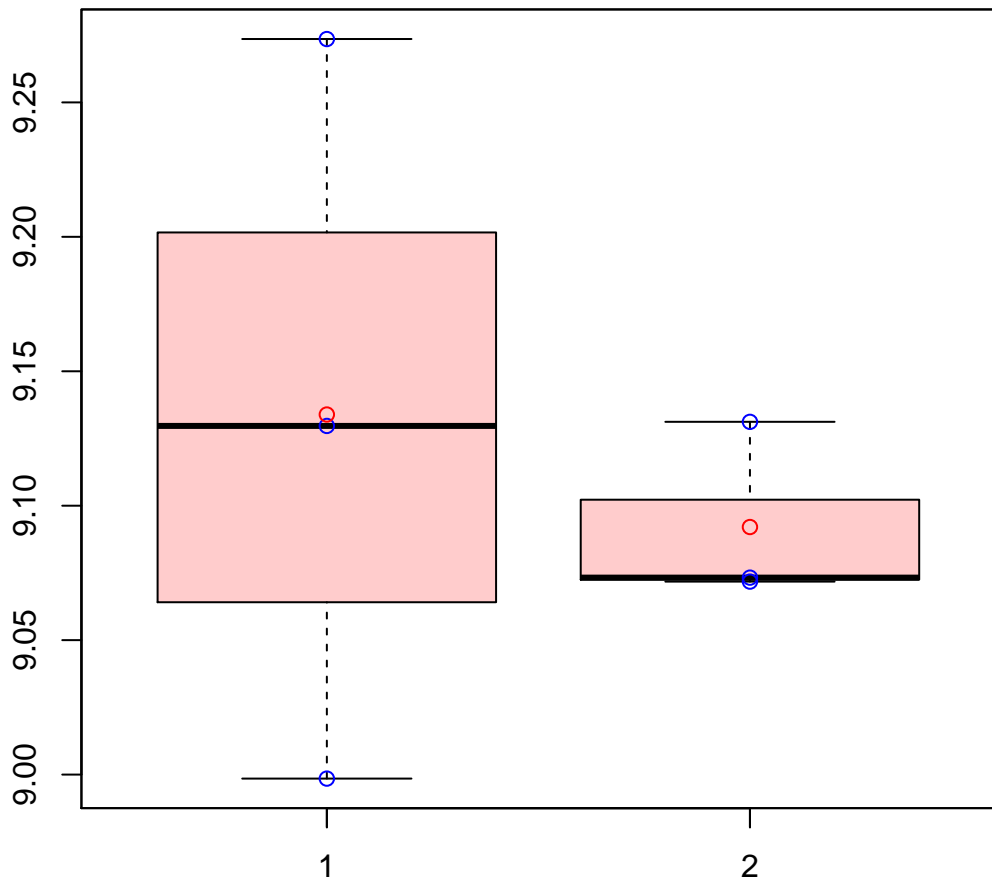

t-Test: p-value = 0.65



# CL6186Contig1|CL6186Contig1

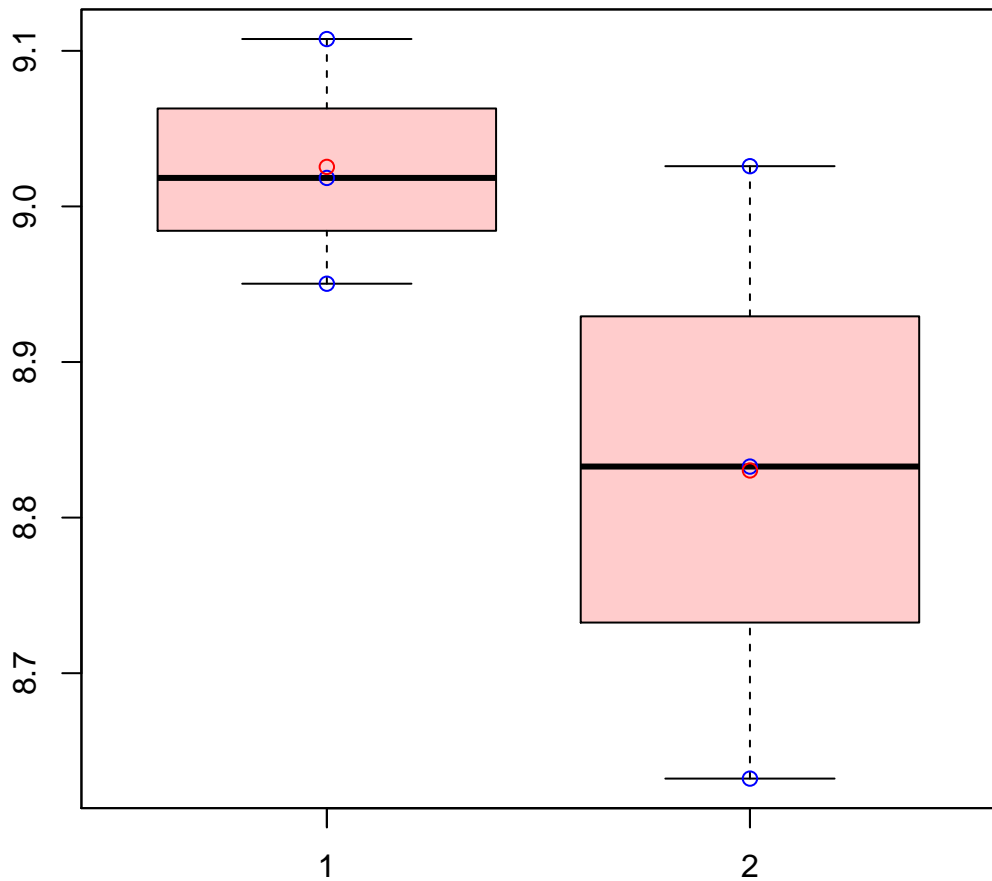

t-Test: p-value = 0.22

# CL6189Contig1|CL6189Contig1

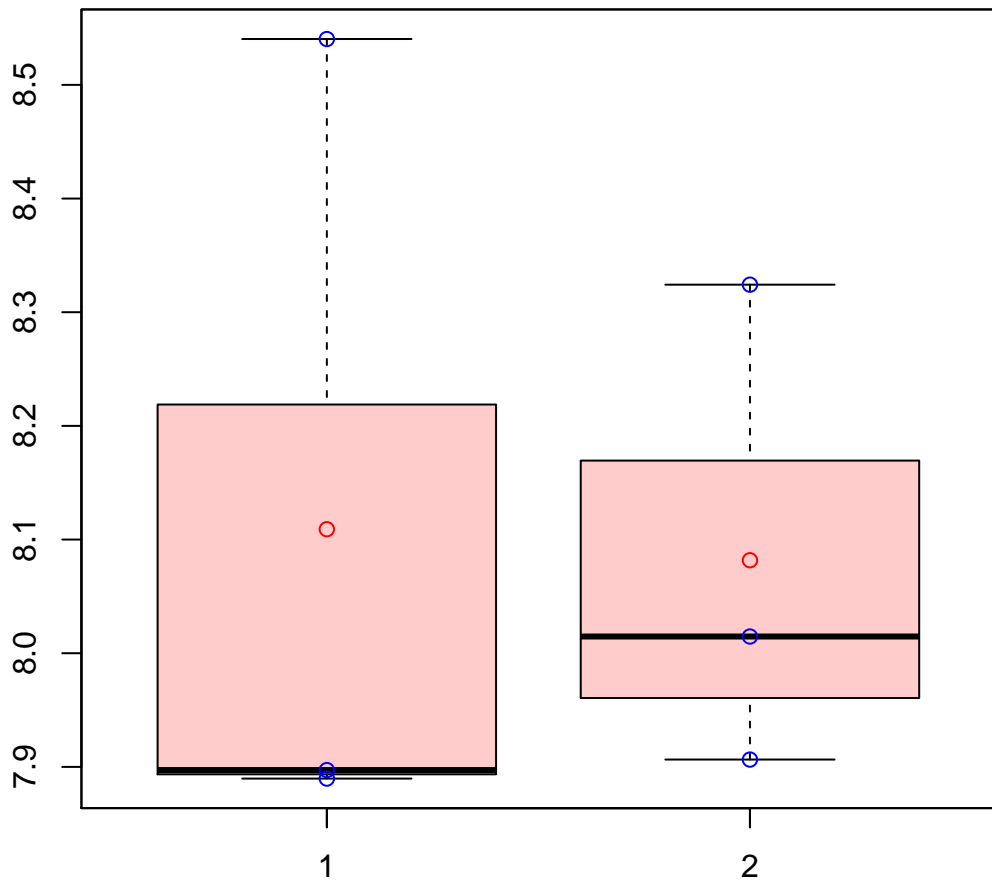

t-Test: p-value = 0.92

# CL6190Contig1|CL6190Contig1

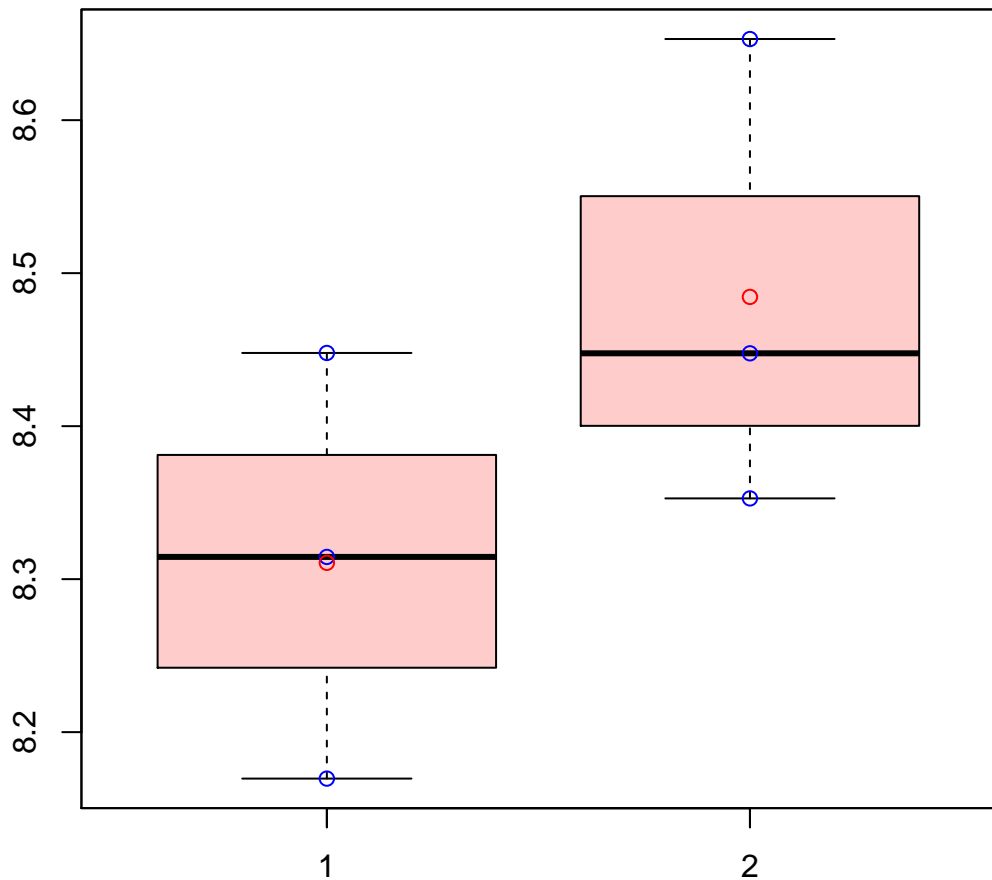

t-Test: p-value = 0.22

# CL6193Contig2|CL6193Contig2

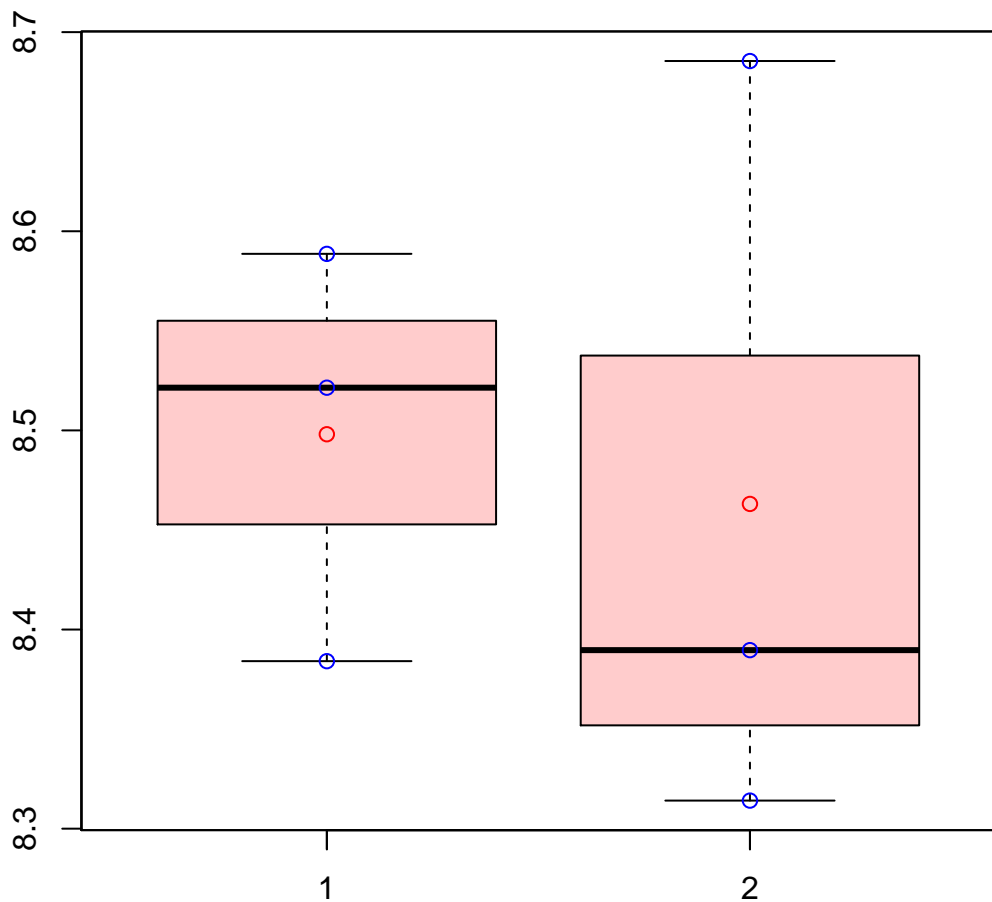

t-Test: p-value = 0.8

# CL6193Contig3|CL6193Contig3



t-Test: p-value = 0.8

# CL6193Contig5|CL6193Contig5

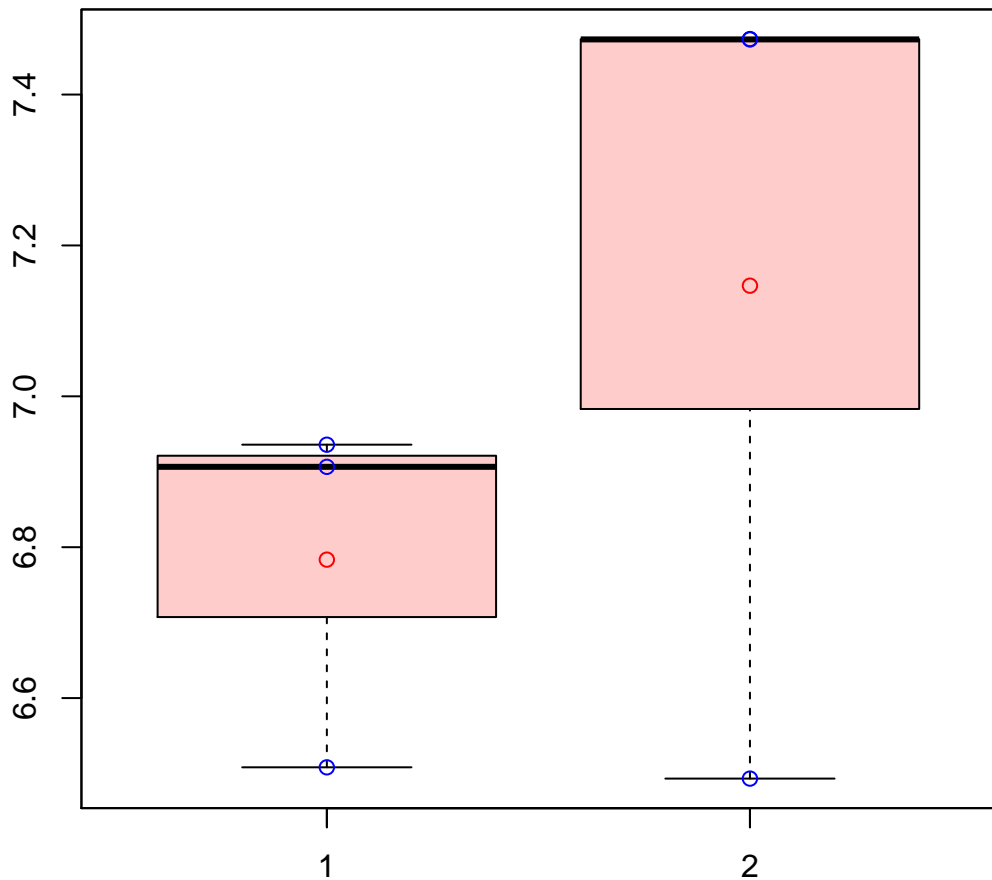

t-Test: p-value = 0.39

# CL6193Contig6|CL6193Contig6



t-Test: p-value = 0.39

# CL6199Contig1|CL6199Contig1

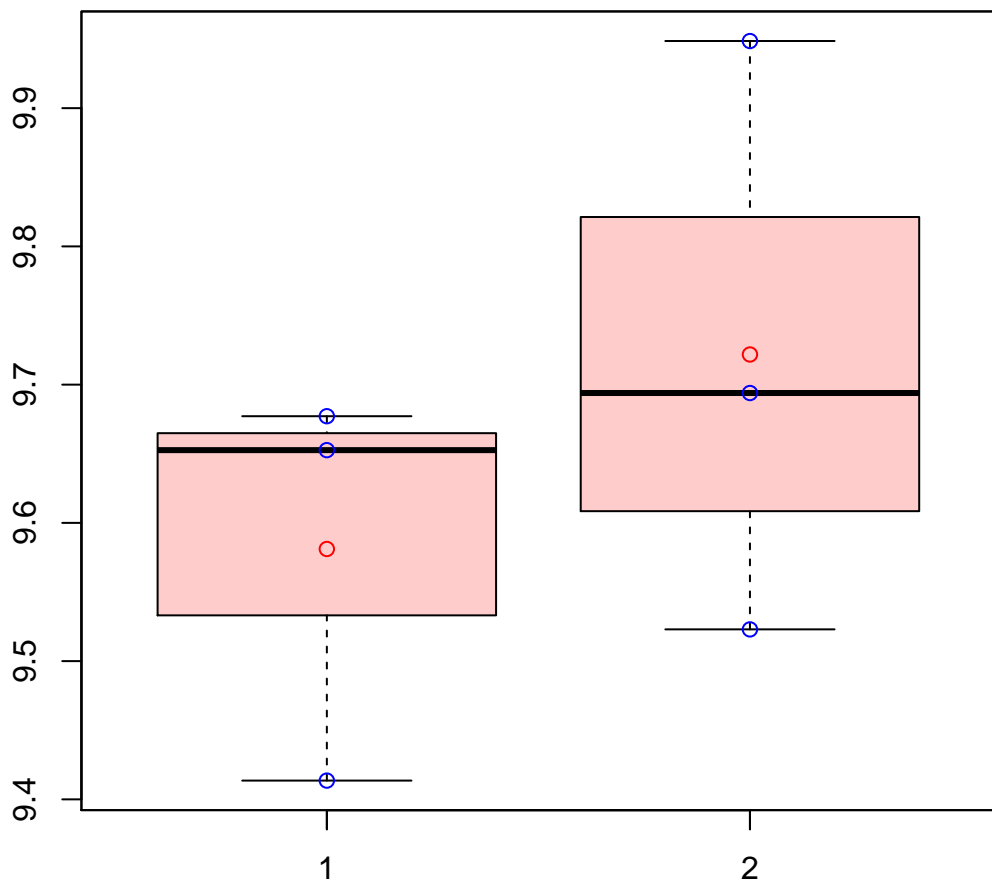

t-Test: p-value = 0.41



# CL61Contig20|CL61Contig20

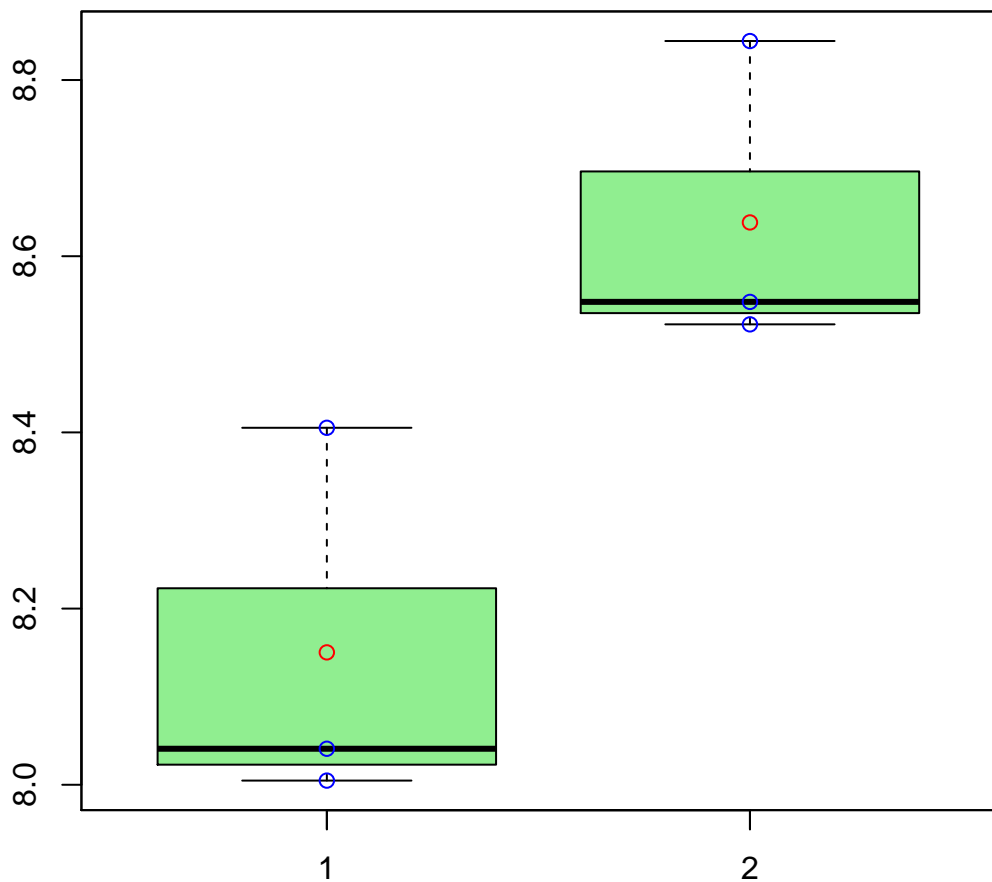

t-Test: p-value = 0.04

# CL61Contig7|CL61Contig7

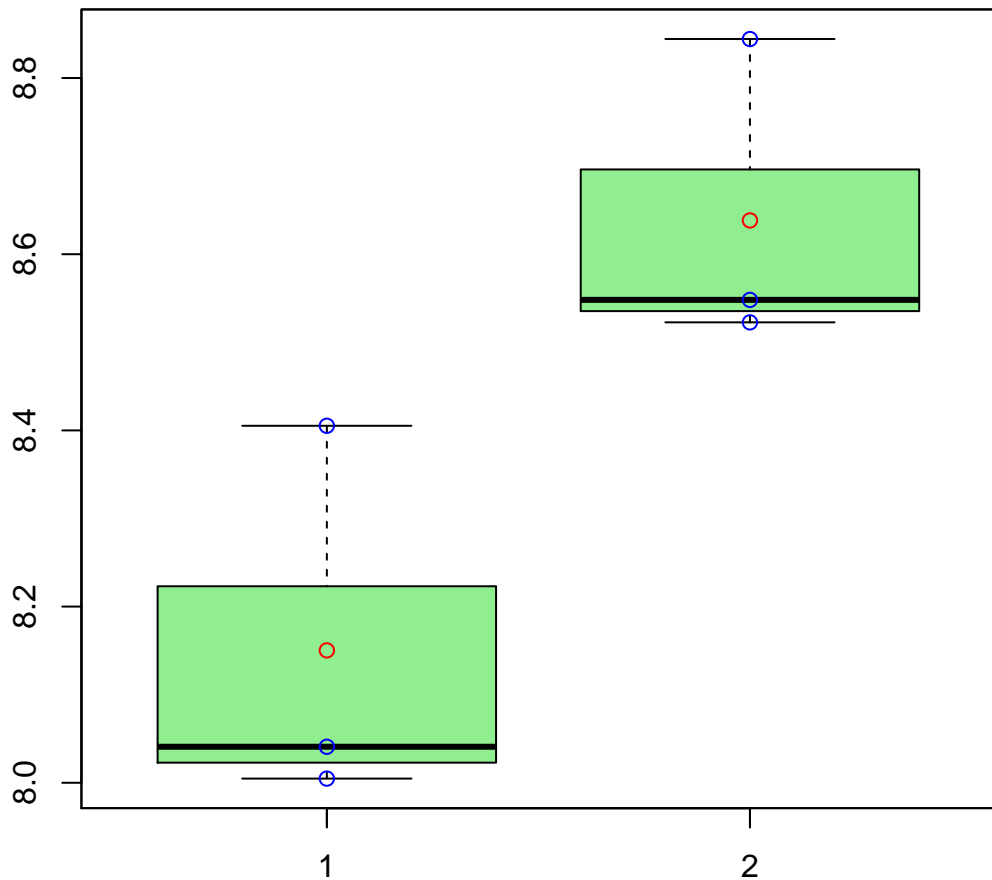

t-Test: p-value = 0.04

# CL620Contig3|CL620Contig3

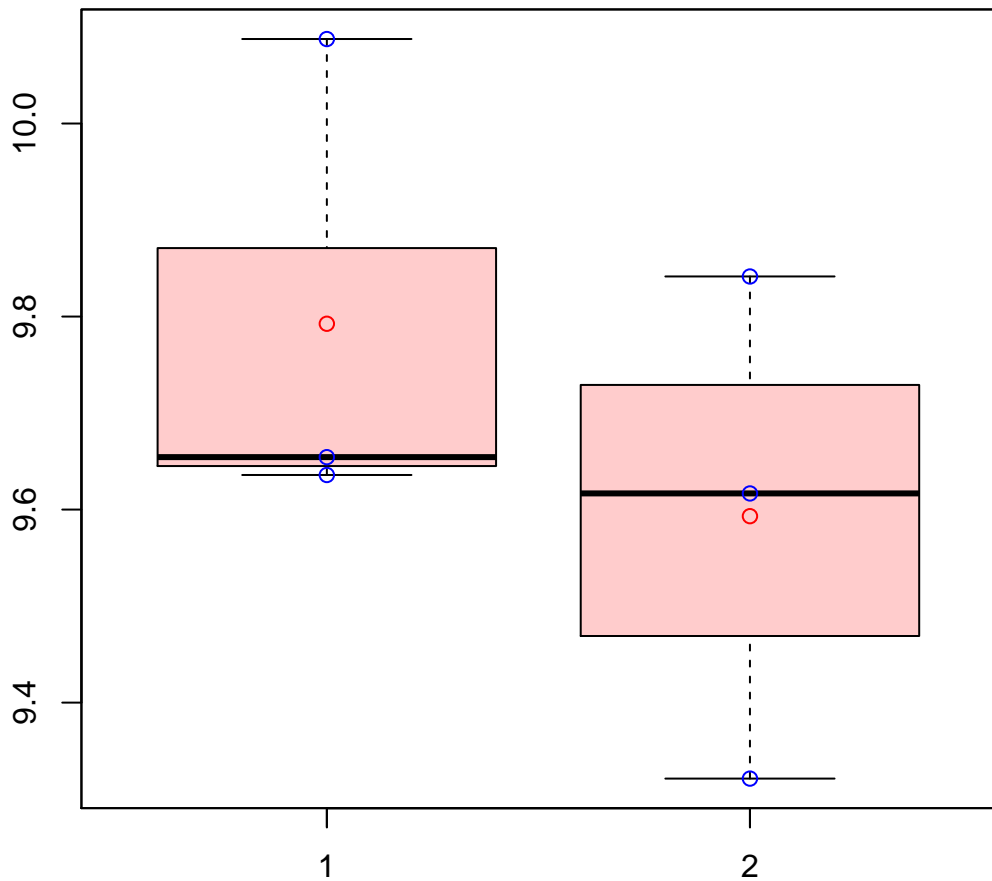

t-Test: p-value = 0.4

# CL6228Contig3|CL6228Contig3



t-Test: p-value = 0.71

# CL6233Contig1|CL6233Contig1

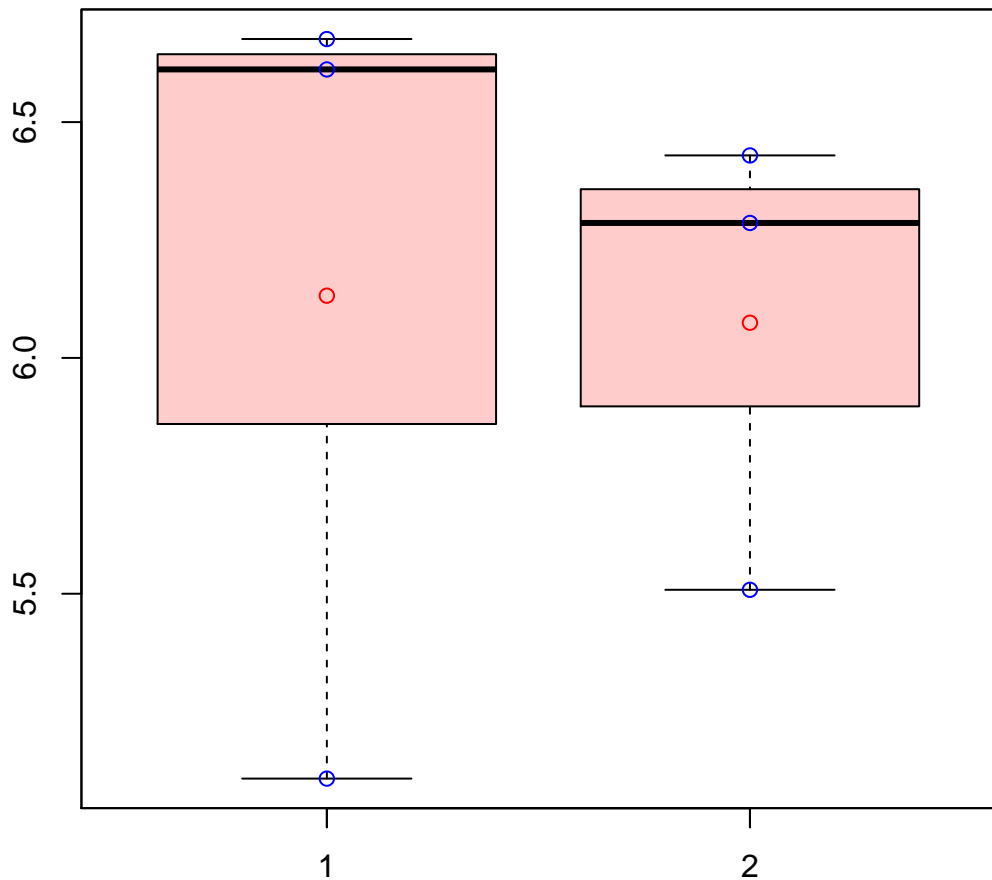

t-Test: p-value = 0.93

# CL6235Contig1|CL6235Contig1

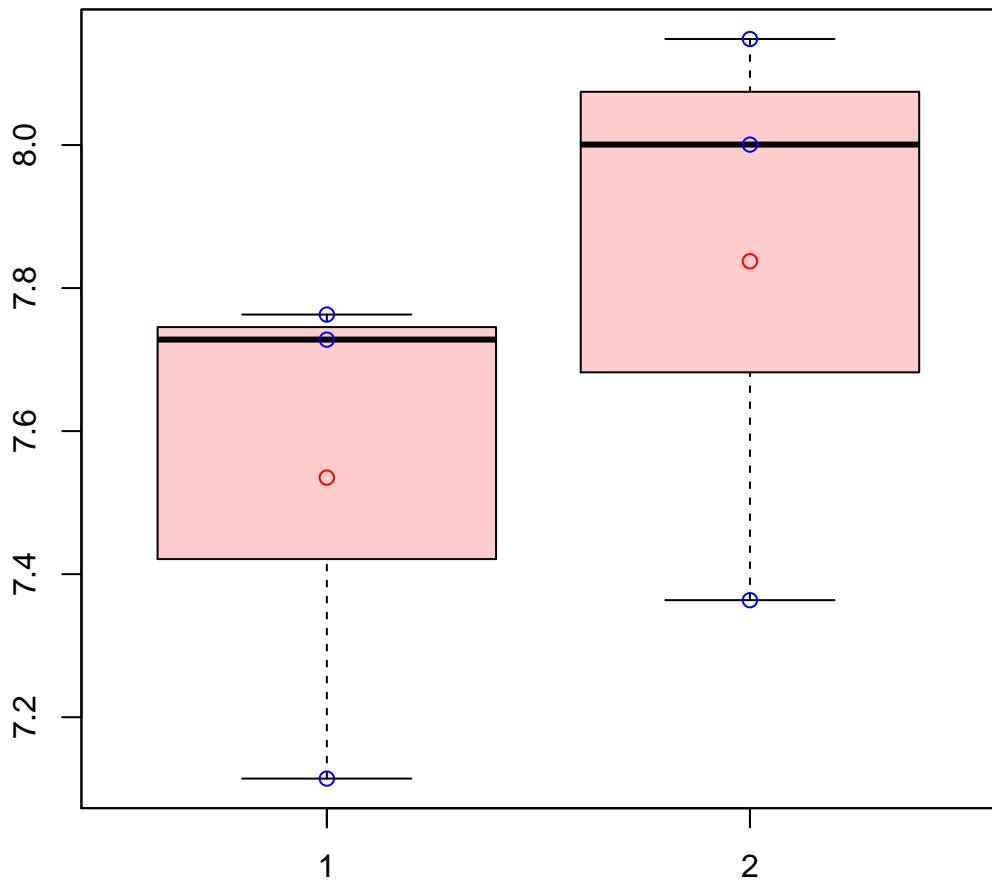

t-Test: p-value = 0.4

# CL623Contig5|CL623Contig5

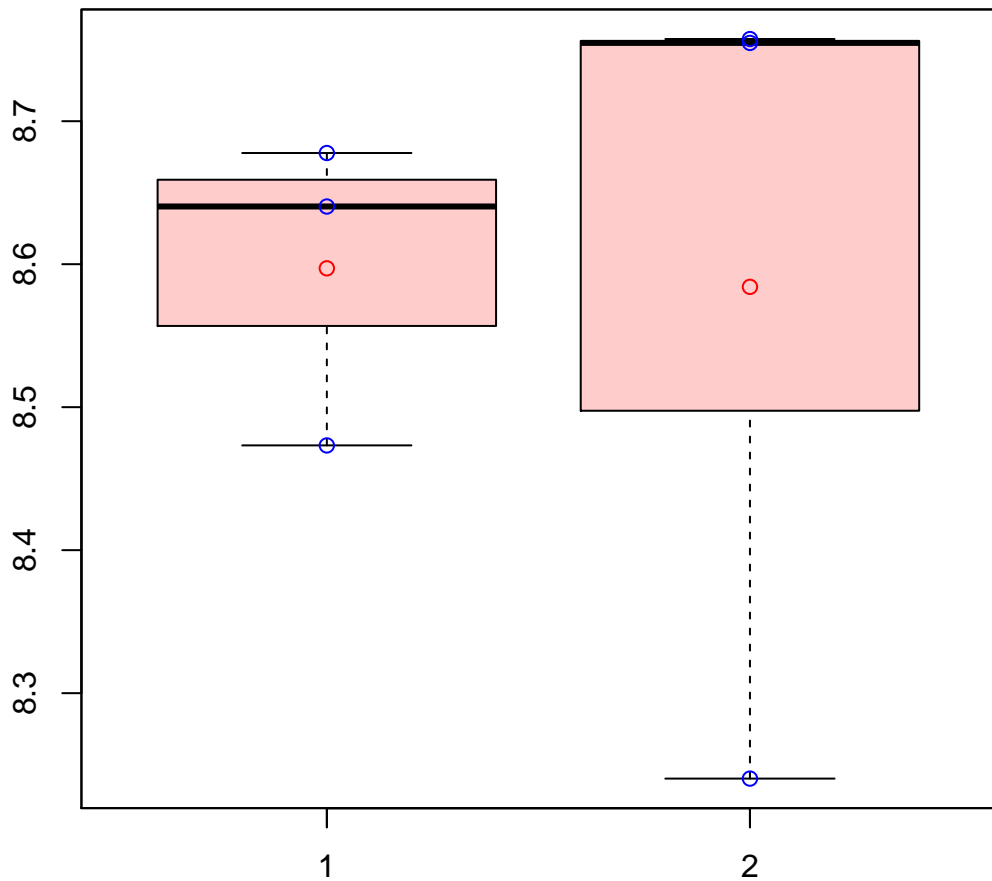

t-Test: p-value = 0.95

# CL6242Contig1|CL6242Contig1

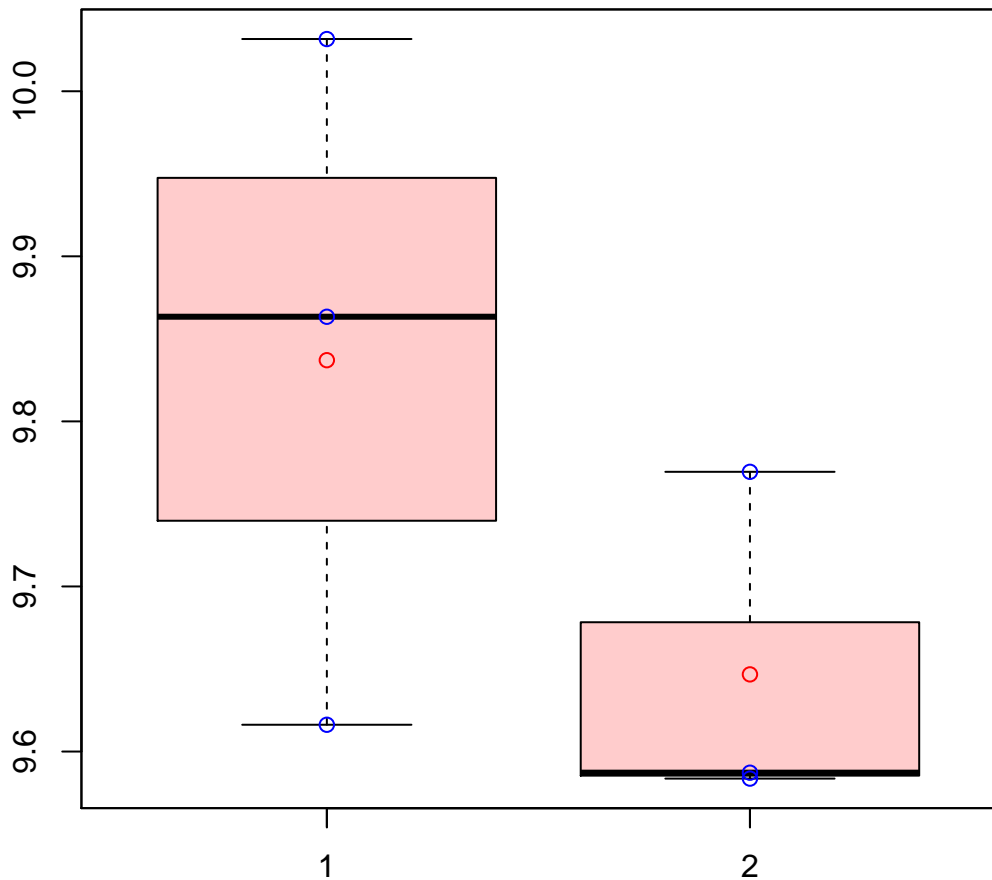

t-Test: p-value = 0.26



# CL6253Contig2|CL6253Contig2

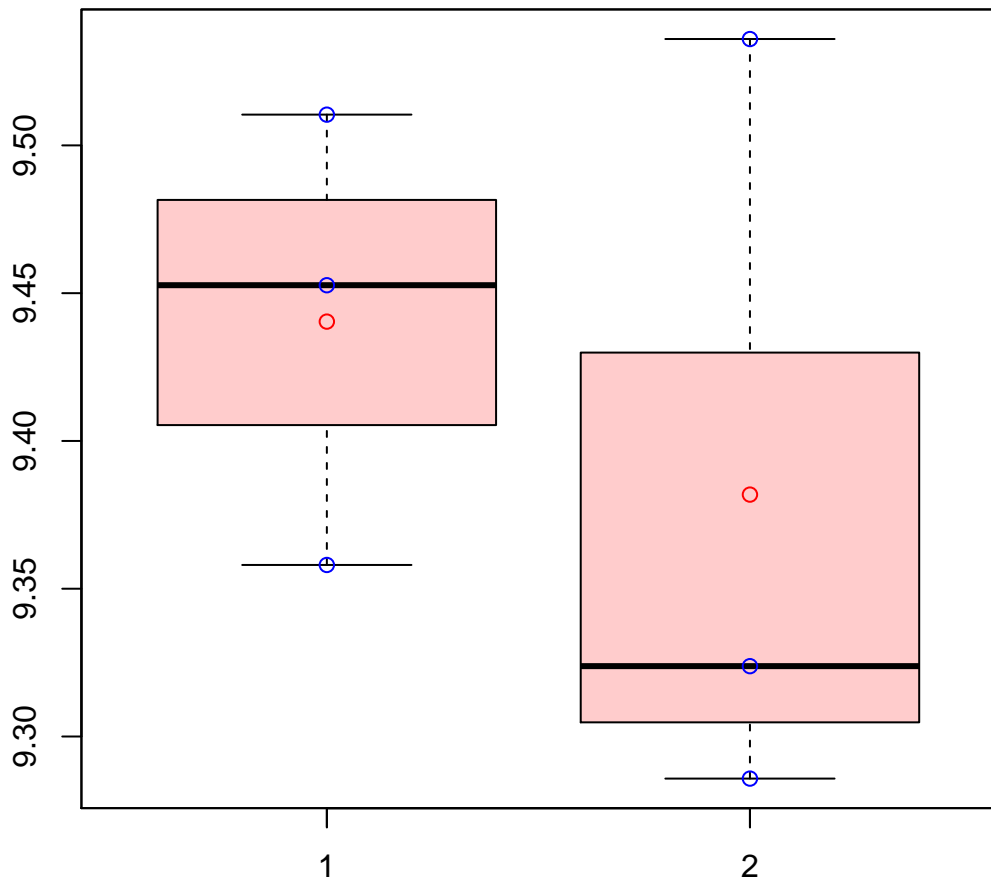

t-Test: p-value = 0.56

# CL625Contig1|CL625Contig1

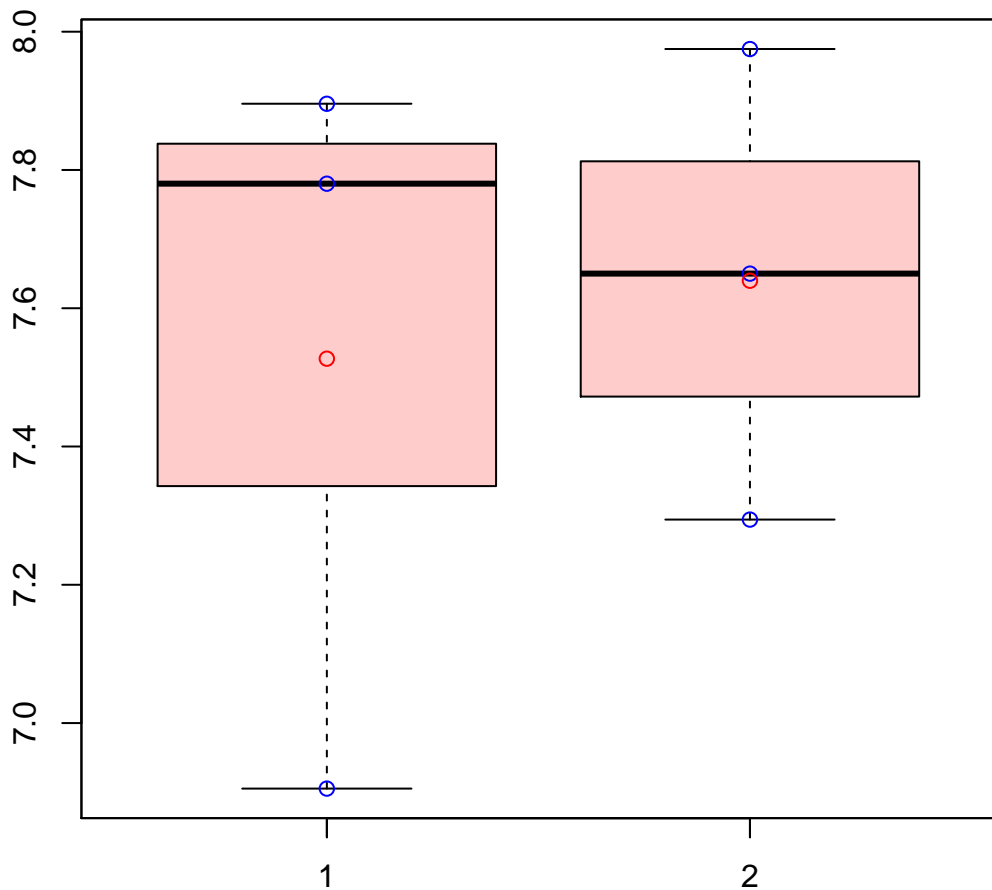

t-Test: p-value = 0.78

# CL625Contig2|CL625Contig2

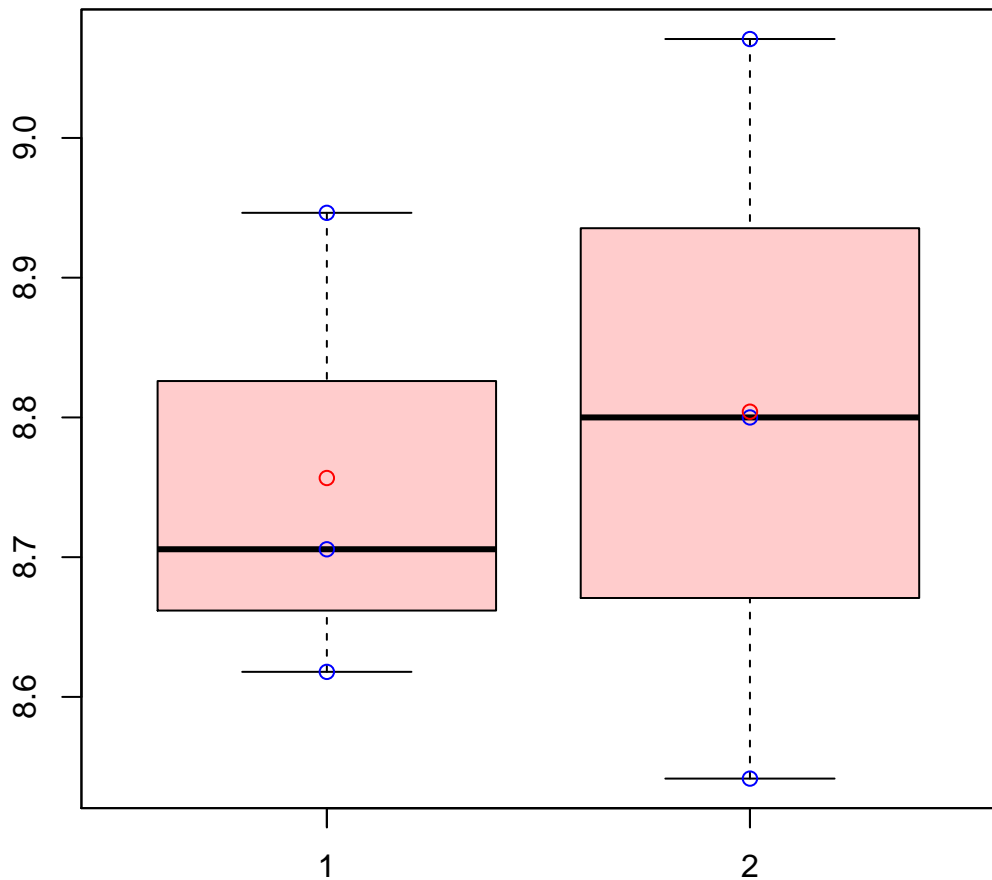

t-Test: p-value = 0.81

# CL625Contig4|CL625Contig4

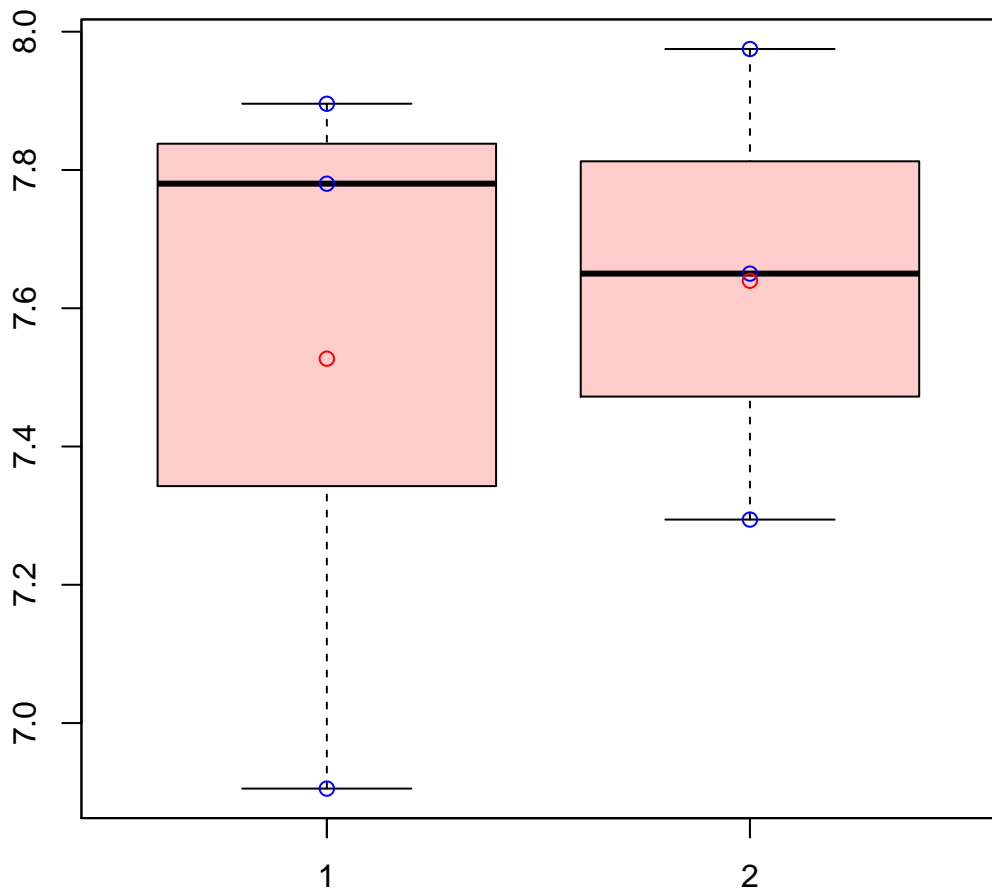

t-Test: p-value = 0.78

# CL625Contig6|CL625Contig6



t-Test: p-value = 0.81

# CL625Contig8|CL625Contig8

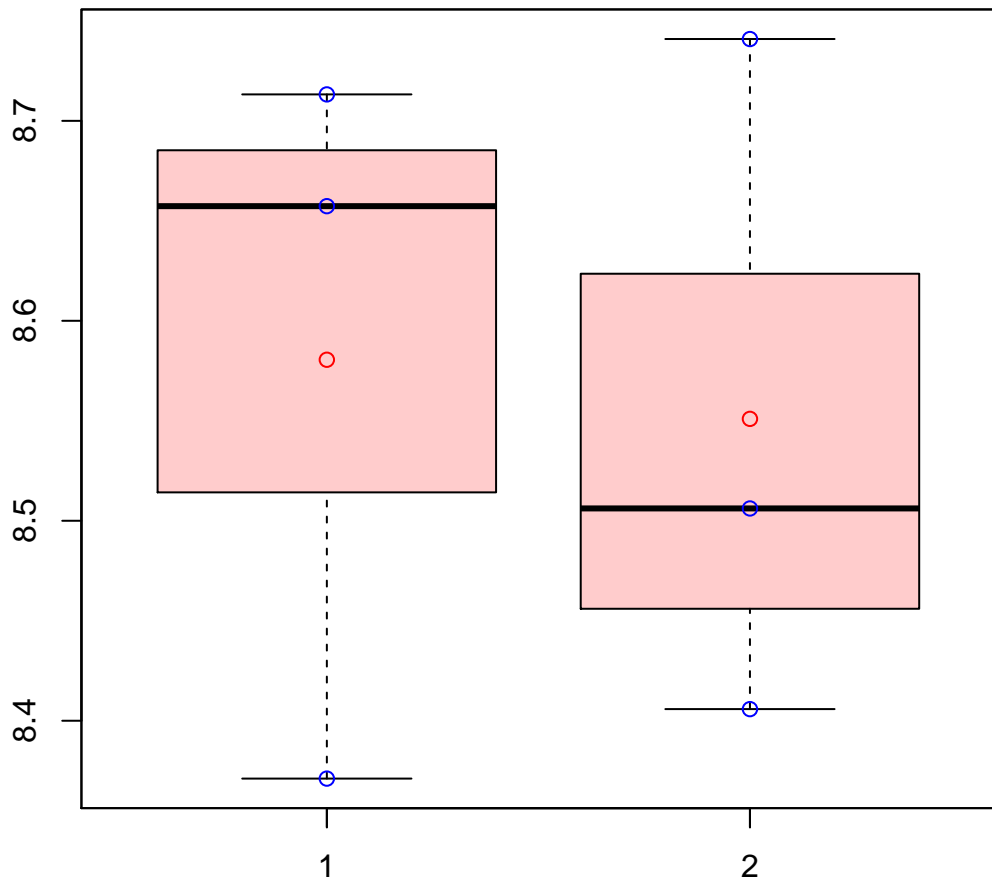

t-Test: p-value = 0.85

# CL6263Contig2|CL6263Contig2

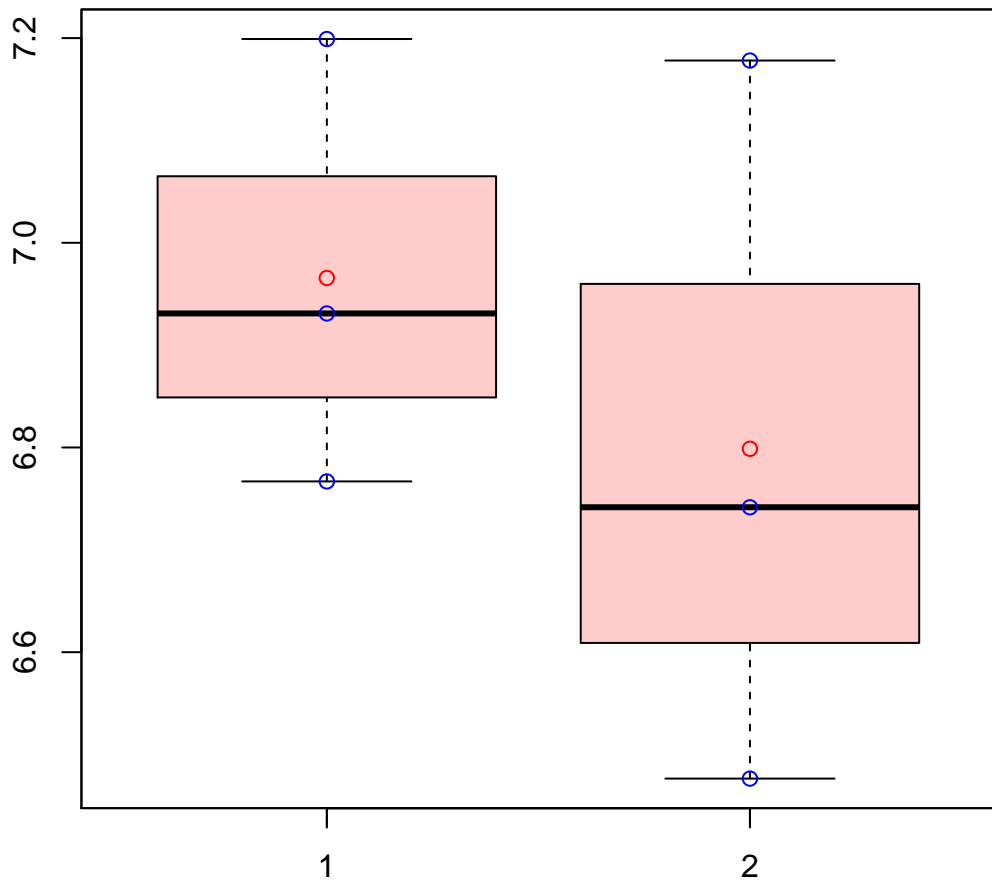

t-Test: p-value = 0.53

# CL6264Contig1|CL6264Contig1



t-Test: p-value = 0.42



# CL6267Contig4|CL6267Contig4



t-Test: p-value = 0.88

# CL626Contig3|CL626Contig3



t-Test: p-value = 0.06

# CL6270Contig2|CL6270Contig2

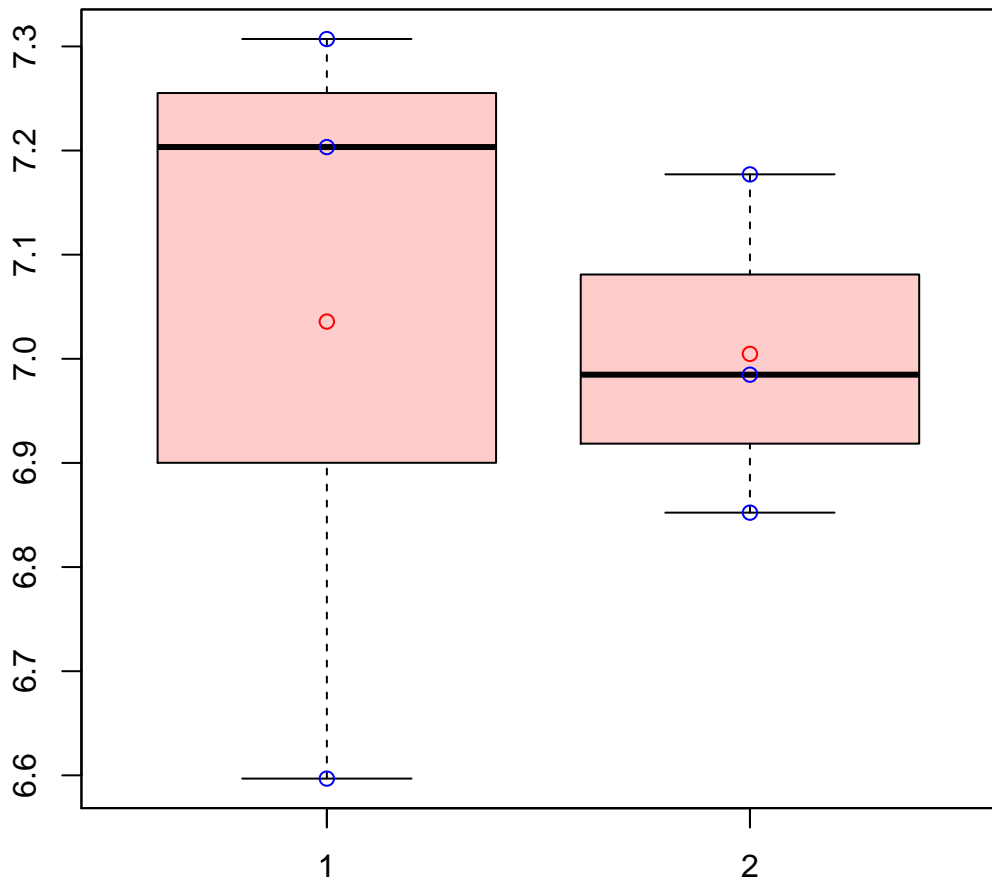

t-Test: p-value = 0.91

# CL627Contig7|CL627Contig7

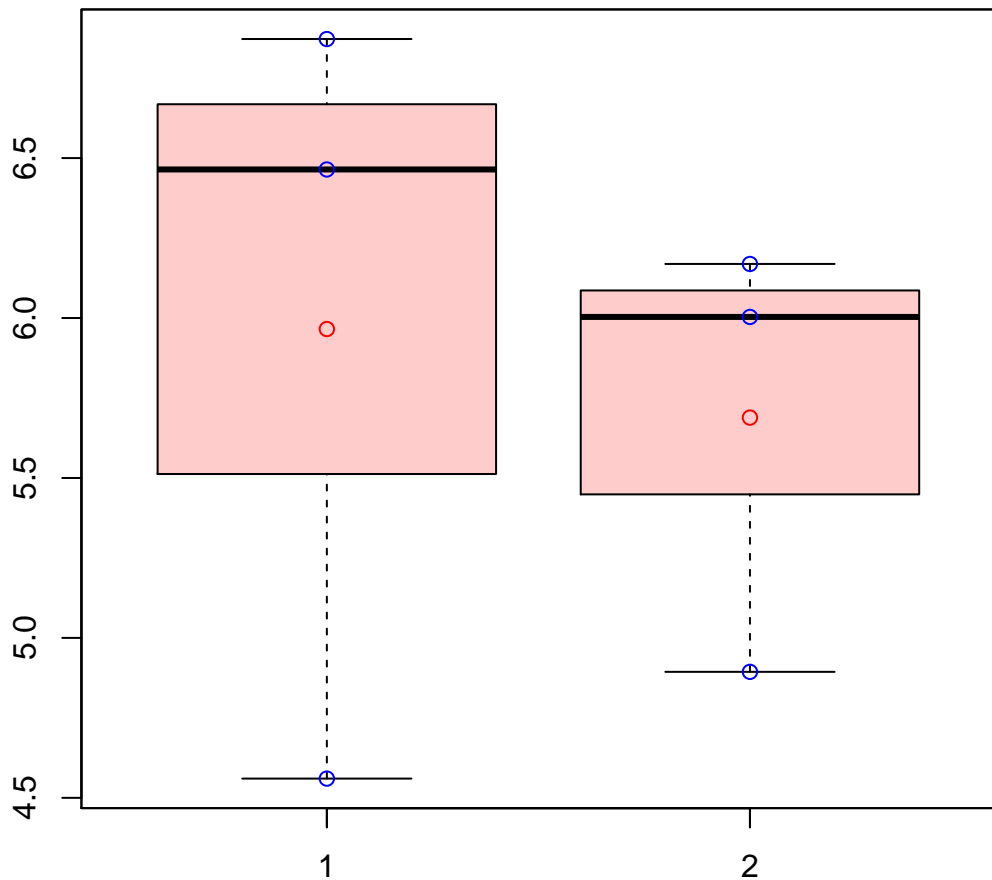

t-Test: p-value = 0.76

# CL628Contig2|CL628Contig2

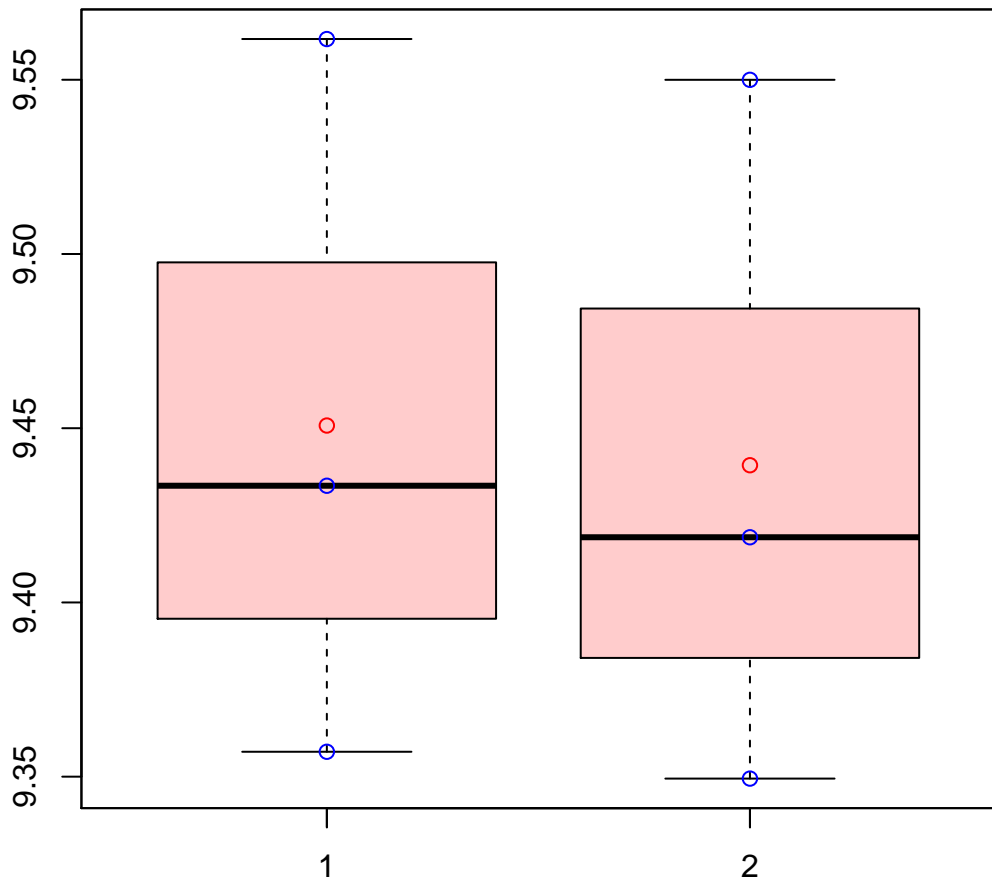

t-Test: p-value = 0.9

# CL629Contig11|CL629Contig11

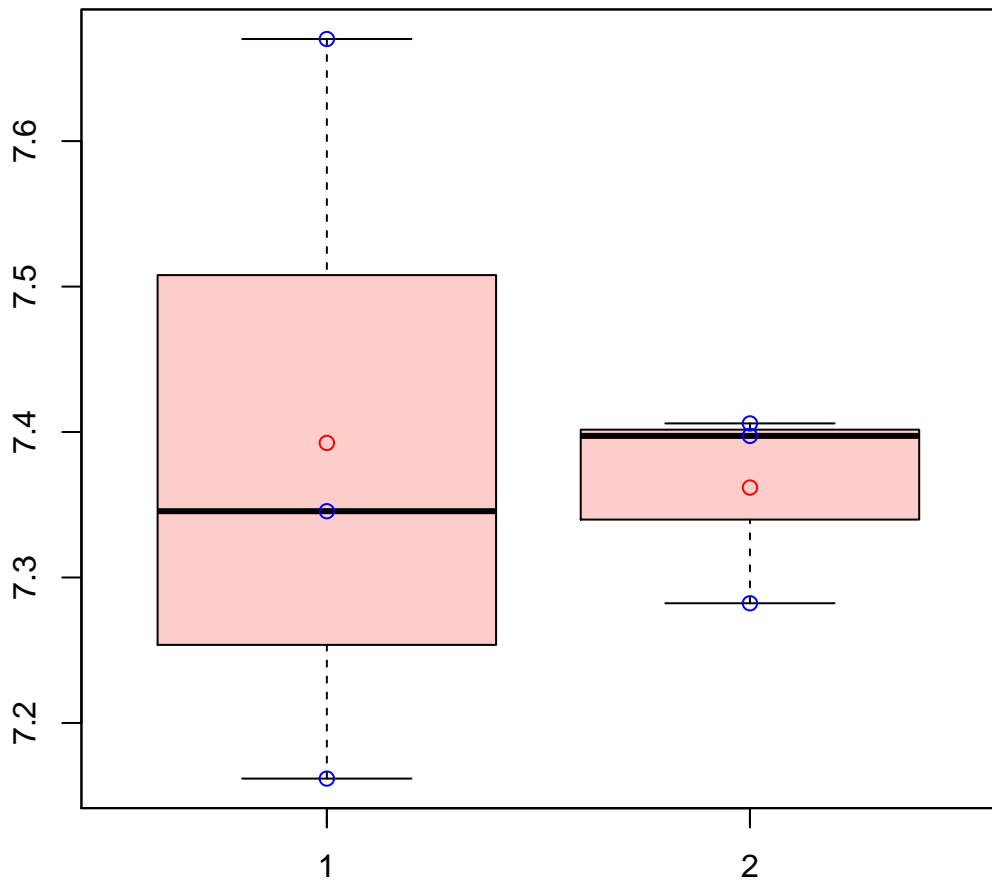

t-Test: p-value = 0.86

# CL629Contig13|CL629Contig13

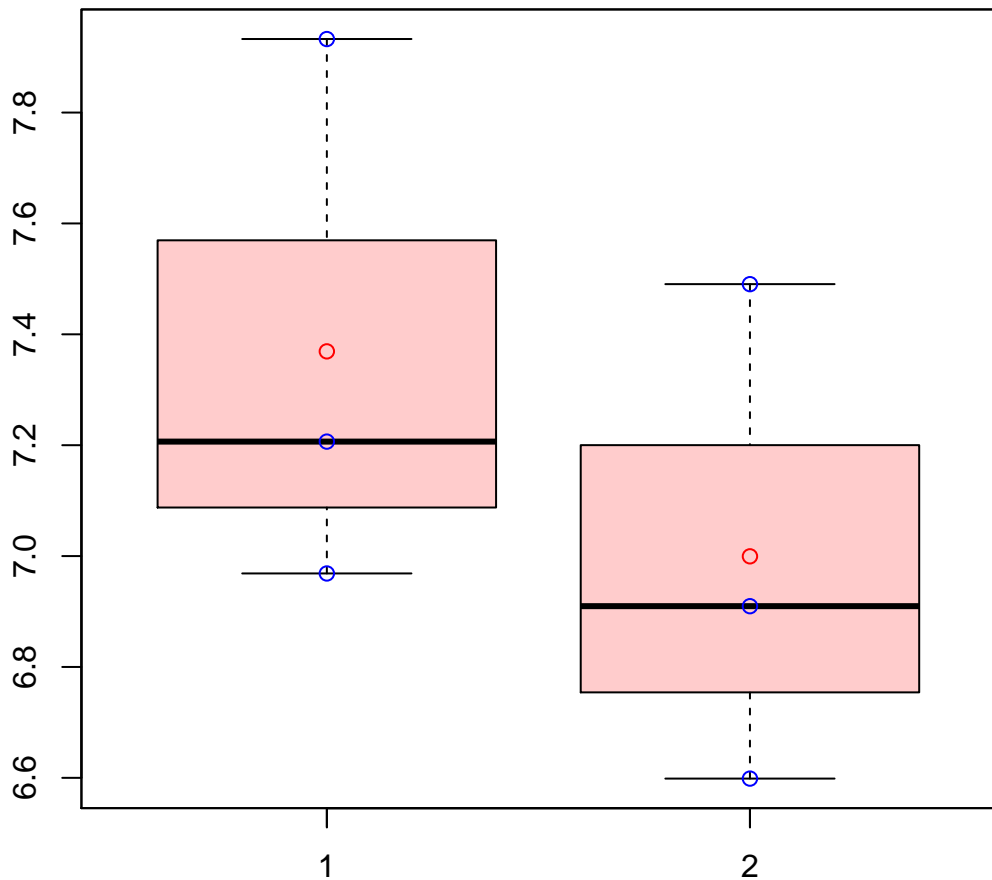

t-Test: p-value = 0.4

# CL629Contig14|CL629Contig14

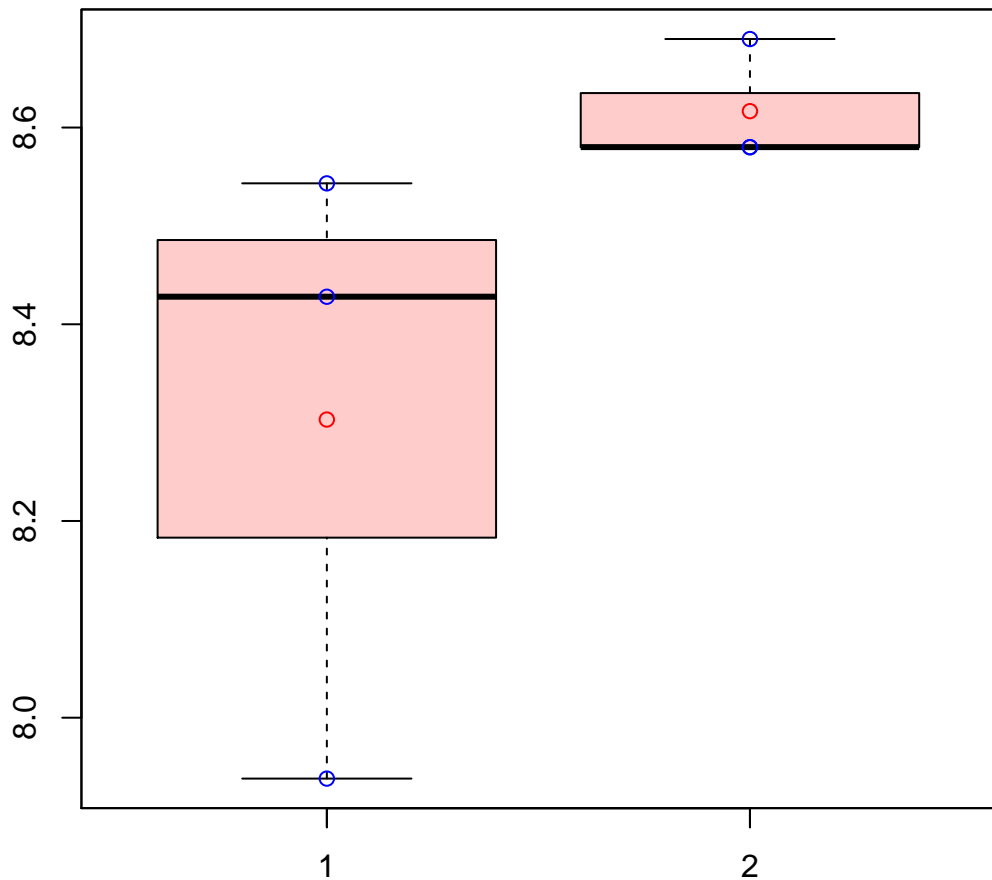

t-Test: p-value = 0.23



# CL629Contig1|CL629Contig1

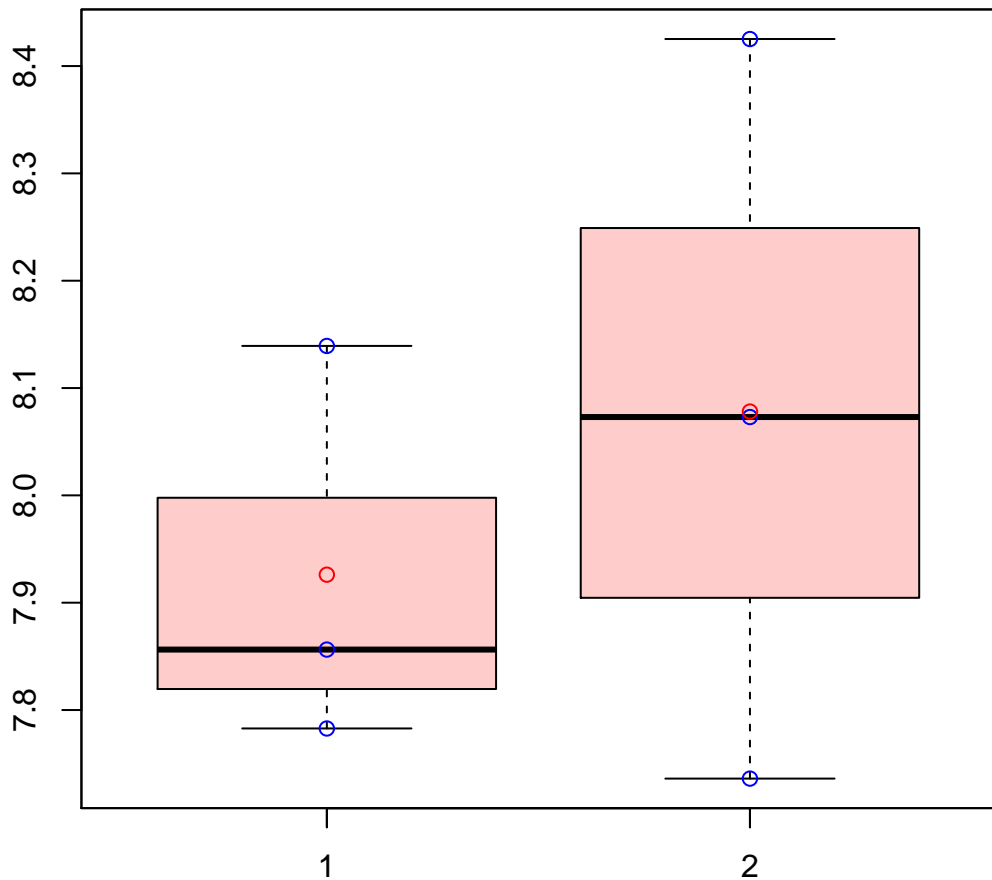

t-Test: p-value = 0.55

# CL629Contig2|CL629Contig2

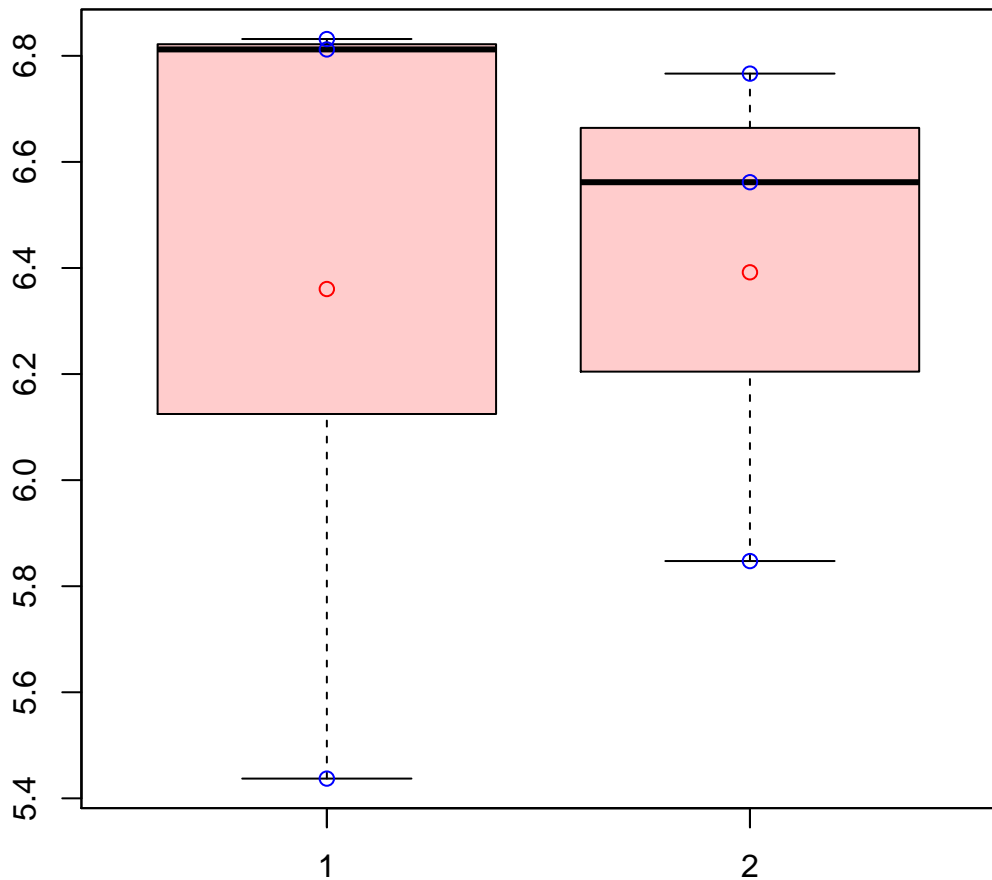

t-Test: p-value = 0.96

# CL629Contig3|CL629Contig3

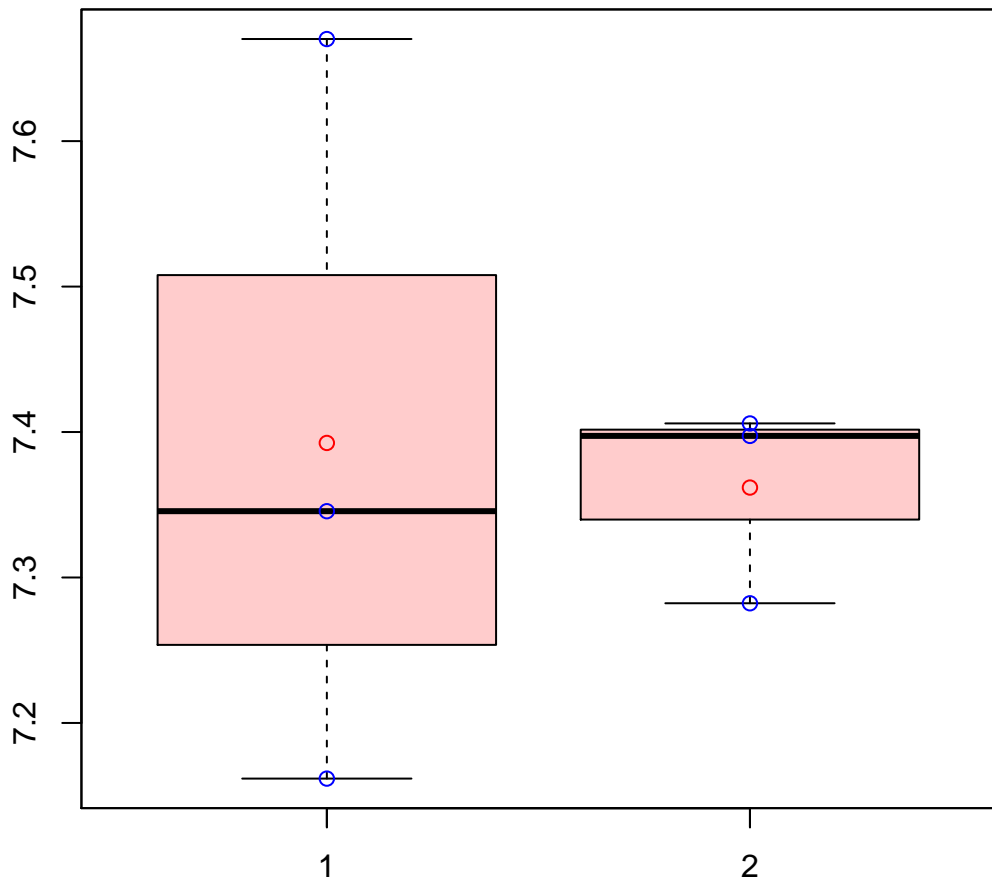

t-Test: p-value = 0.86

# CL629Contig4|CL629Contig4

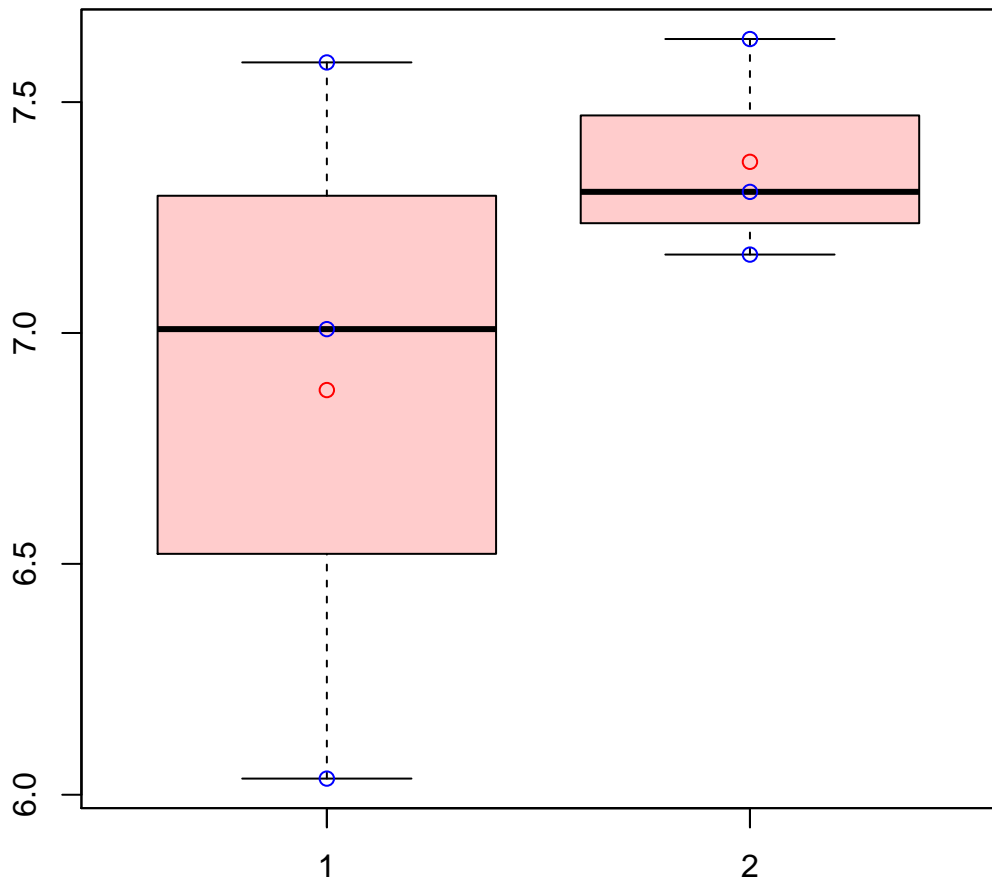

t-Test: p-value = 0.39

# CL629Contig5|CL629Contig5

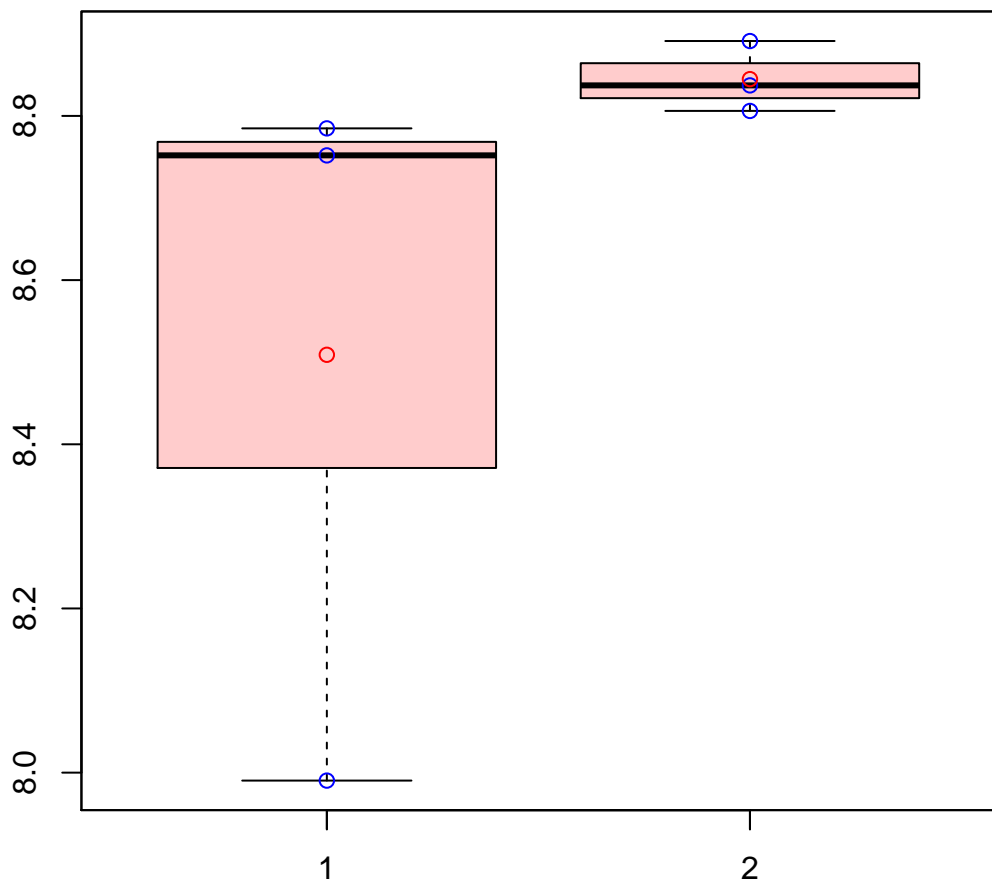

t-Test: p-value = 0.32

# CL62Contig12|CL62Contig12

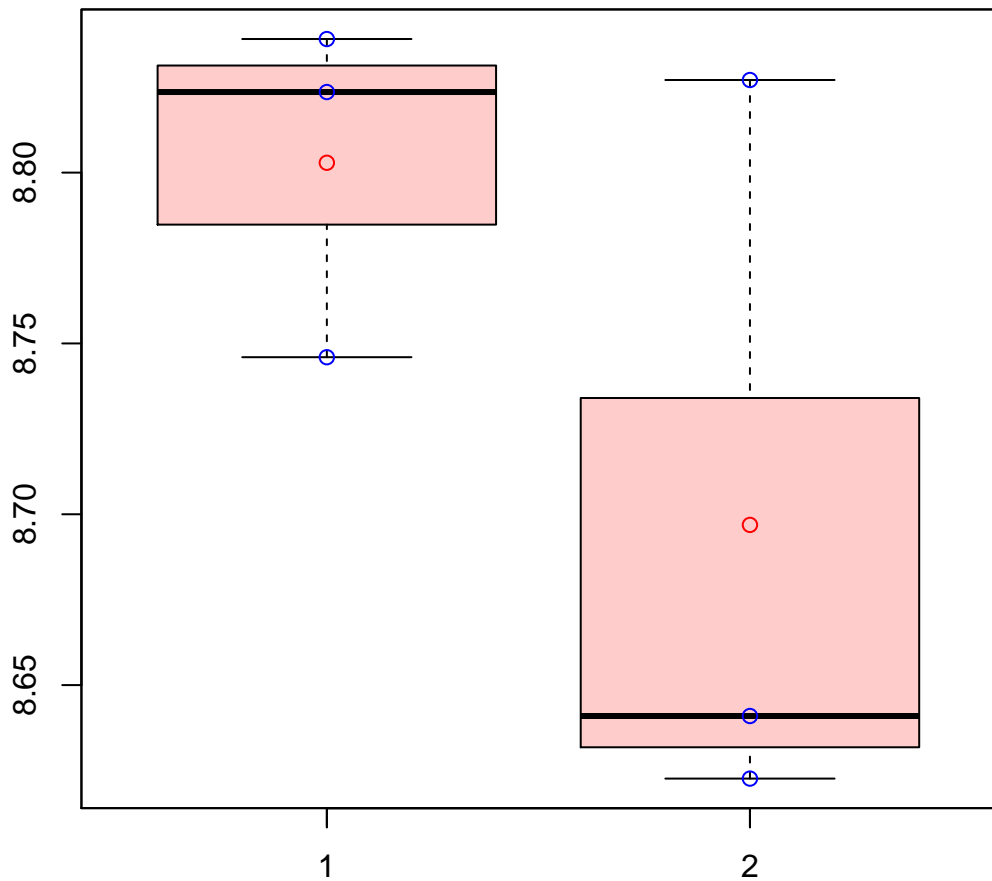

t-Test: p-value = 0.24

# CL62Contig34|CL62Contig34

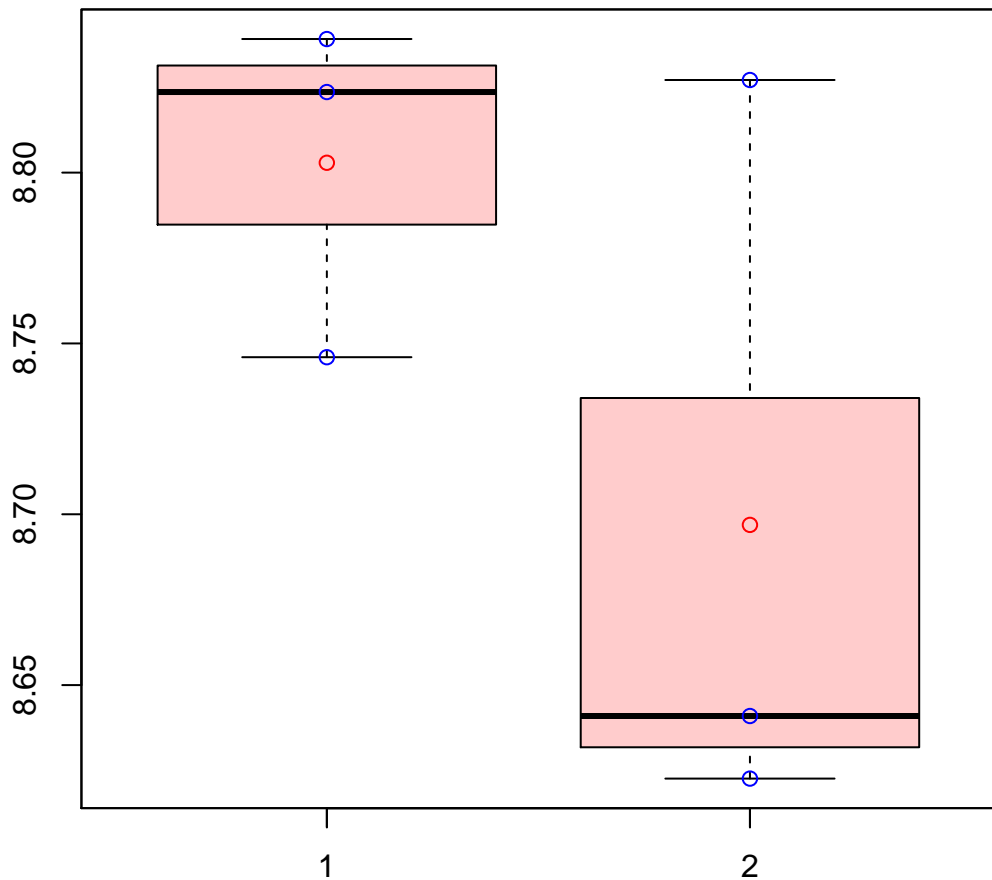

t-Test: p-value = 0.24

# CL62Contig4|CL62Contig4



t-Test: p-value = 0.68



# CL62Contig5|CL62Contig5



t-Test: p-value = 0.68

# CL62Contig7|CL62Contig7



t-Test: p-value = 0.68

# CL6308Contig3|CL6308Contig3

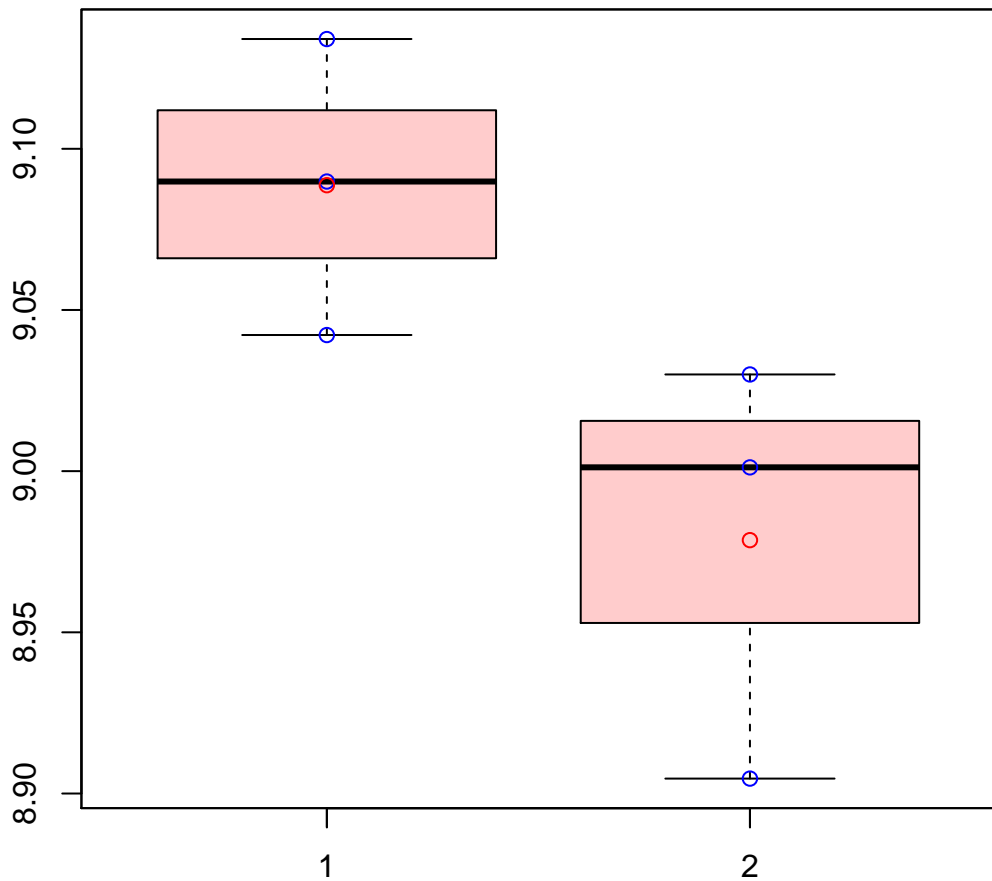

t-Test: p-value = 0.08

# CL630Contig2|CL630Contig2

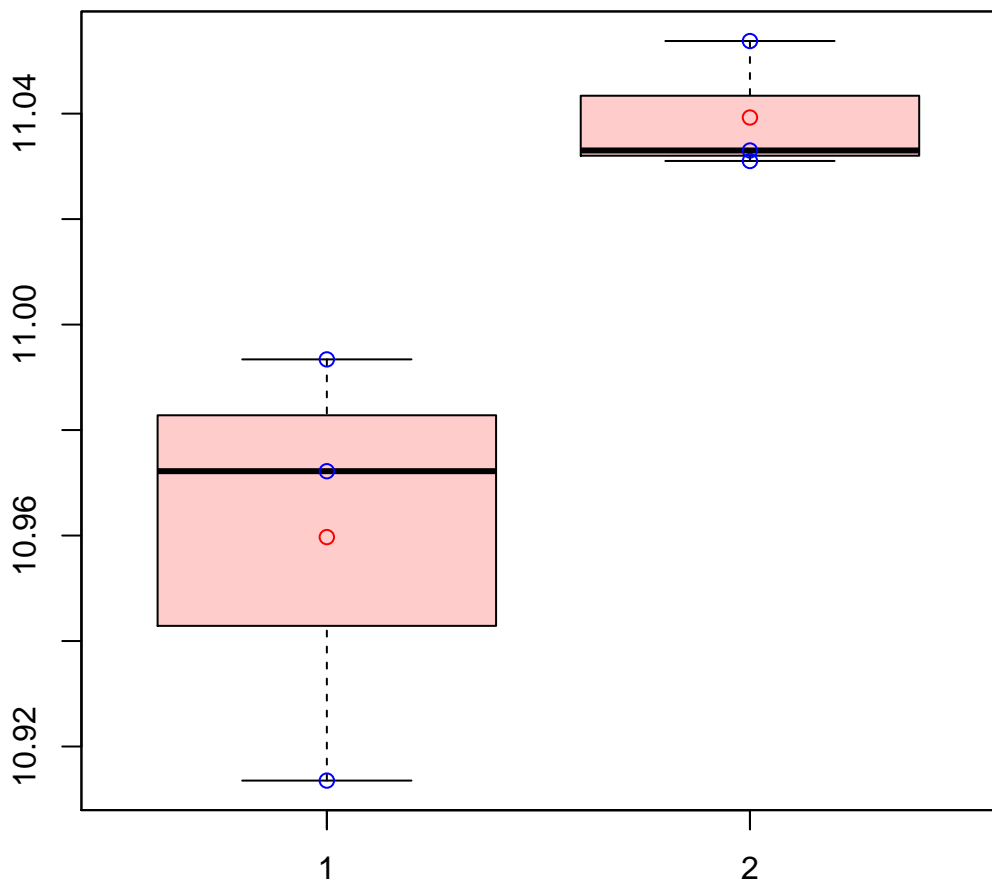

t-Test: p-value = 0.07

# CL630Contig3|CL630Contig3

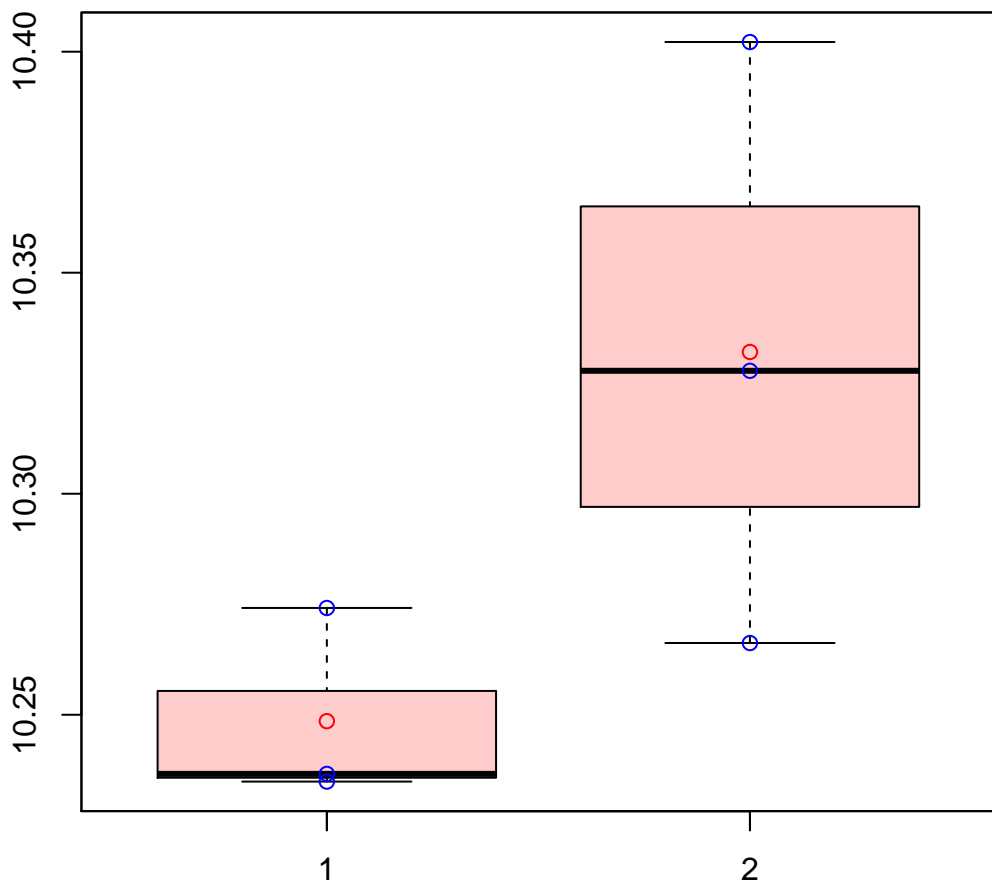

t-Test: p-value = 0.16

# CL630Contig4|CL630Contig4

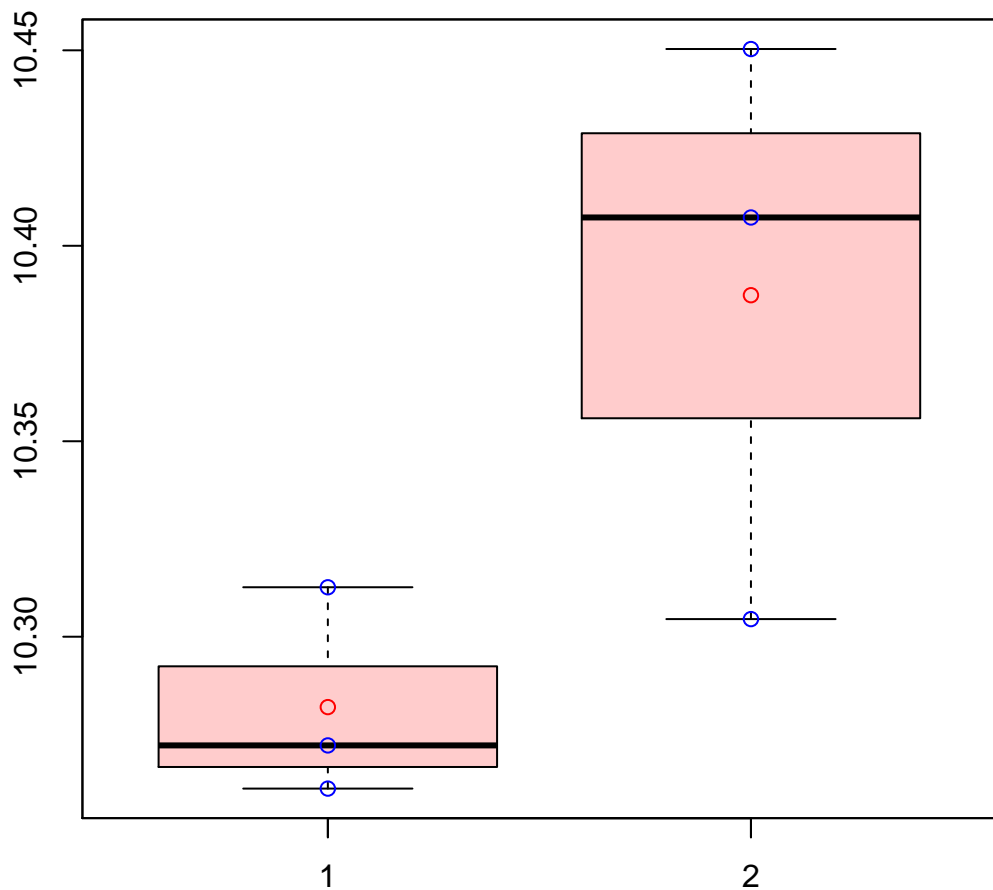

t-Test: p-value = 0.12

# CL630Contig6|CL630Contig6

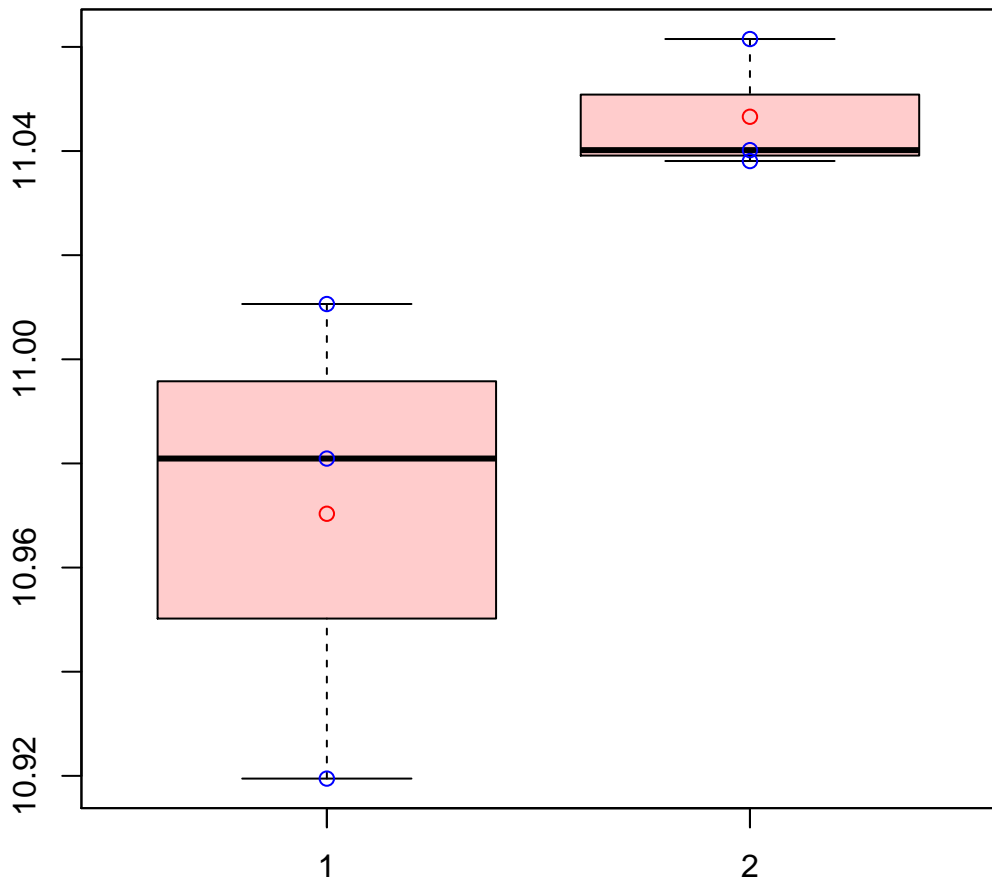

t-Test: p-value = 0.1

# CL6311Contig2|CL6311Contig2



t-Test: p-value = 0.51



# CL6314Contig1|CL6314Contig1

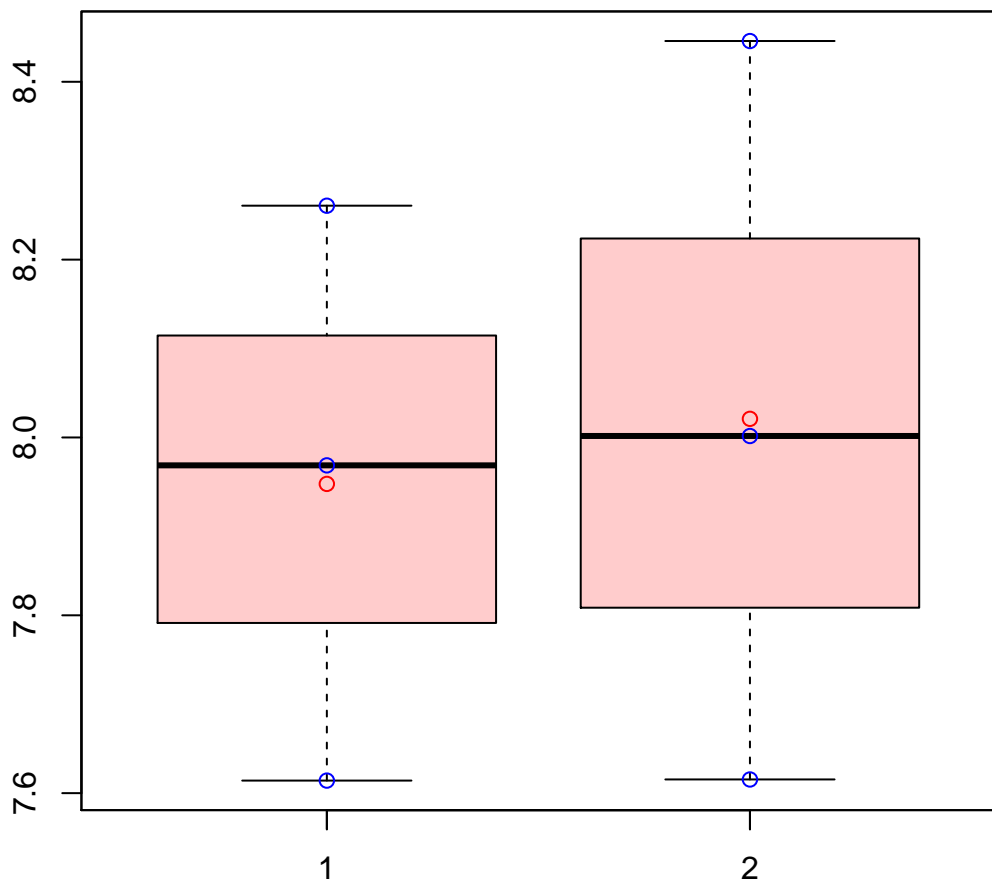

t-Test: p-value = 0.82

# CL6314Contig3|CL6314Contig3

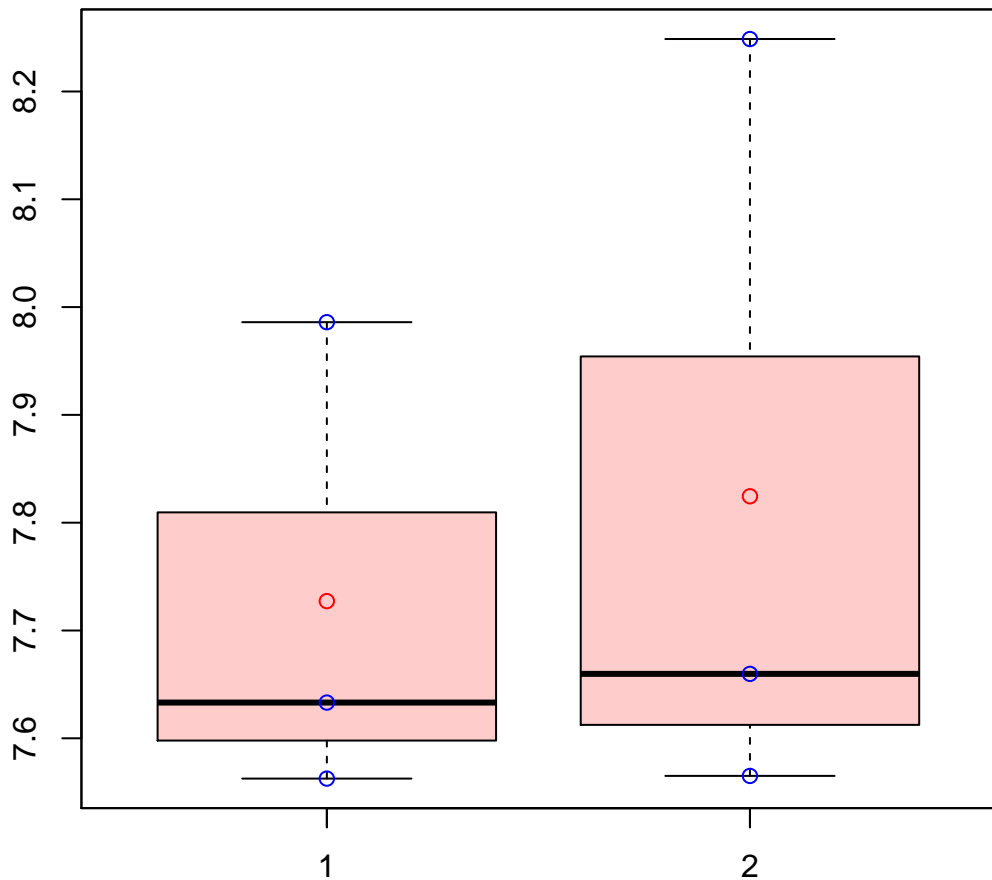

t-Test: p-value = 0.72

# CL6318Contig2|CL6318Contig2

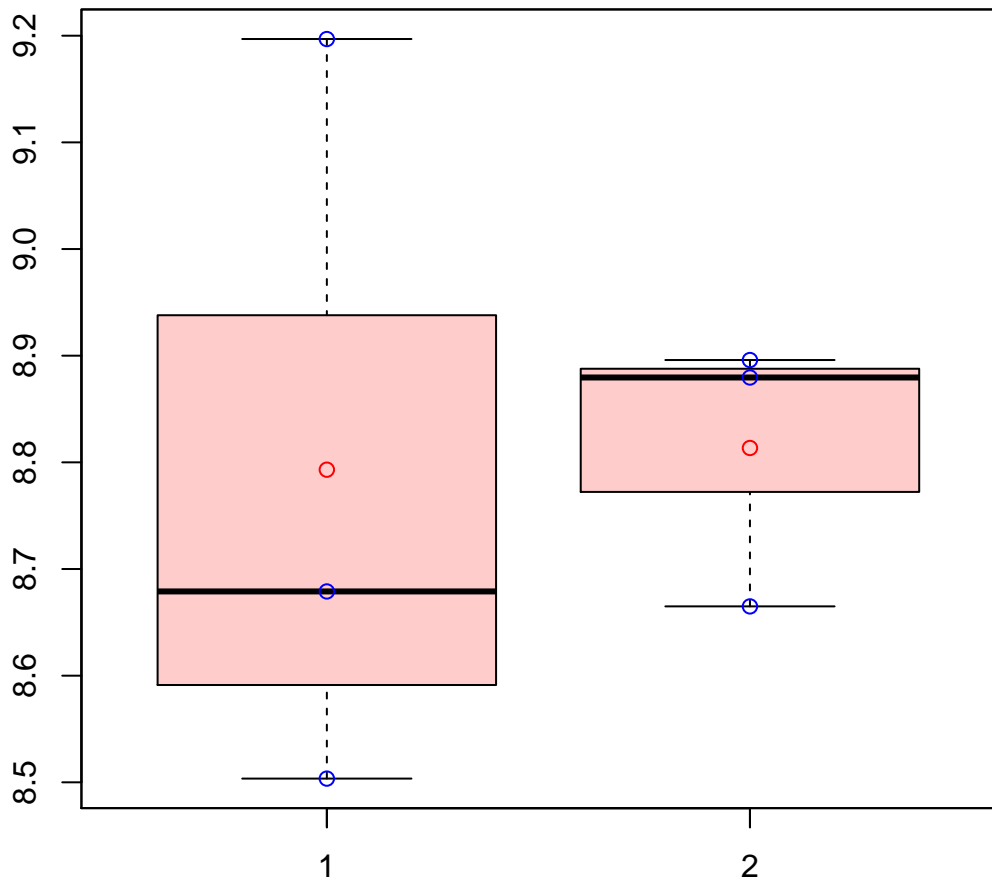

t-Test: p-value = 0.93

# CL6319Contig2|CL6319Contig2

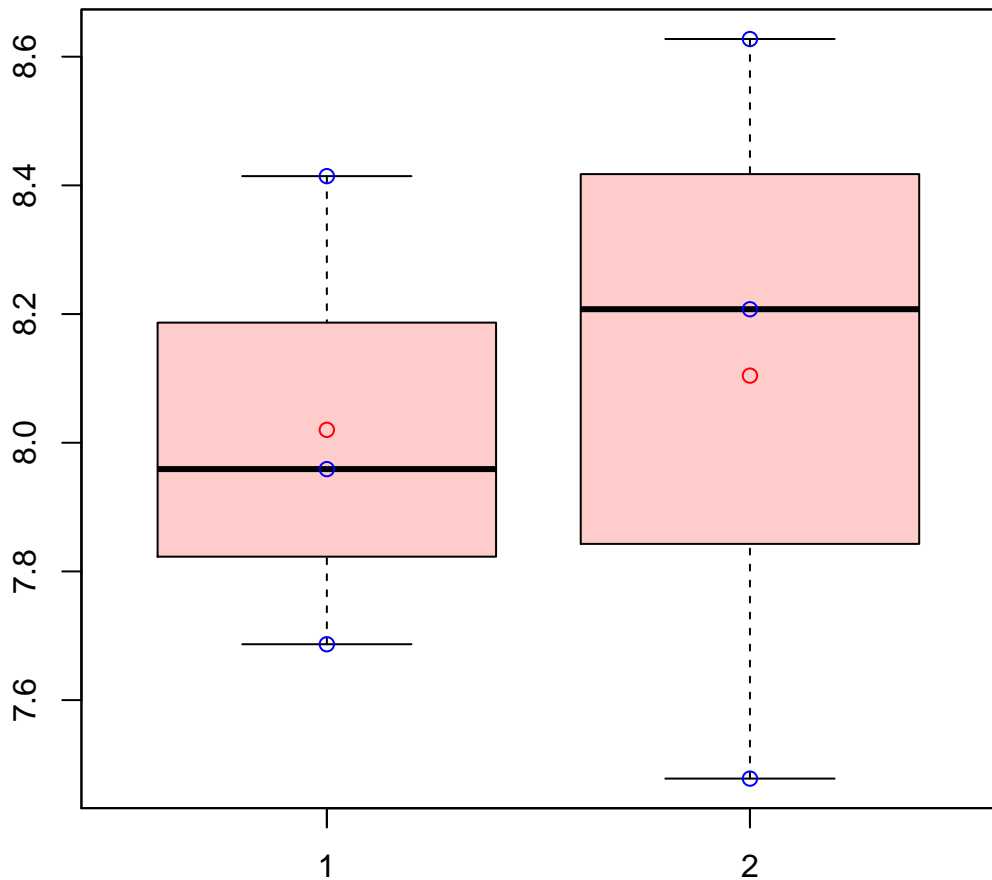

t-Test: p-value = 0.84

# CL631Contig13|CL631Contig13

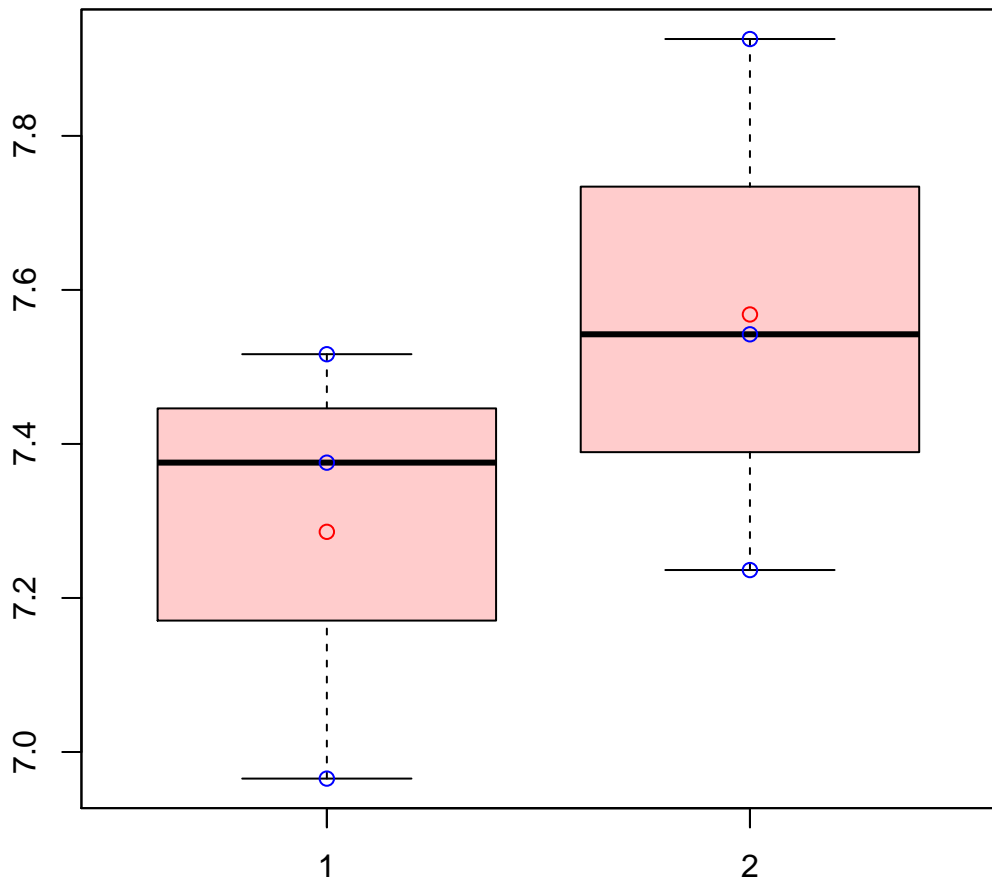

t-Test: p-value = 0.34

# CL631Contig9|CL631Contig9

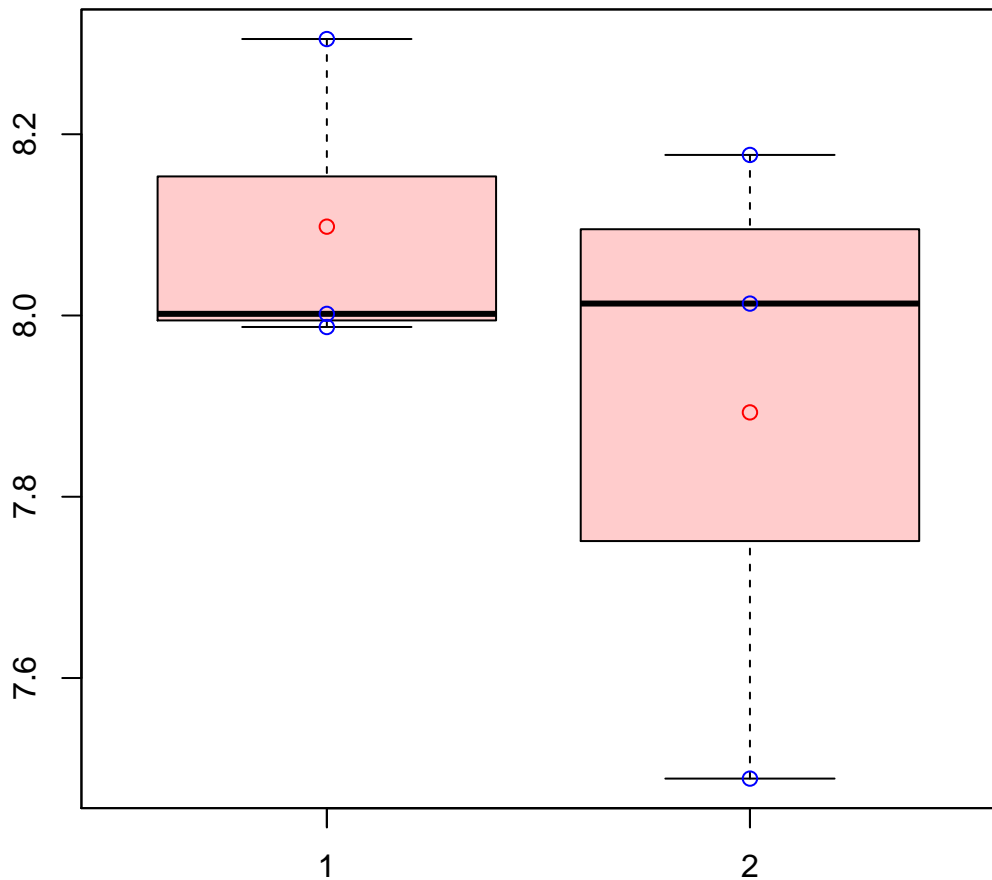

t-Test: p-value = 0.44

# CL6320Contig1|CL6320Contig1

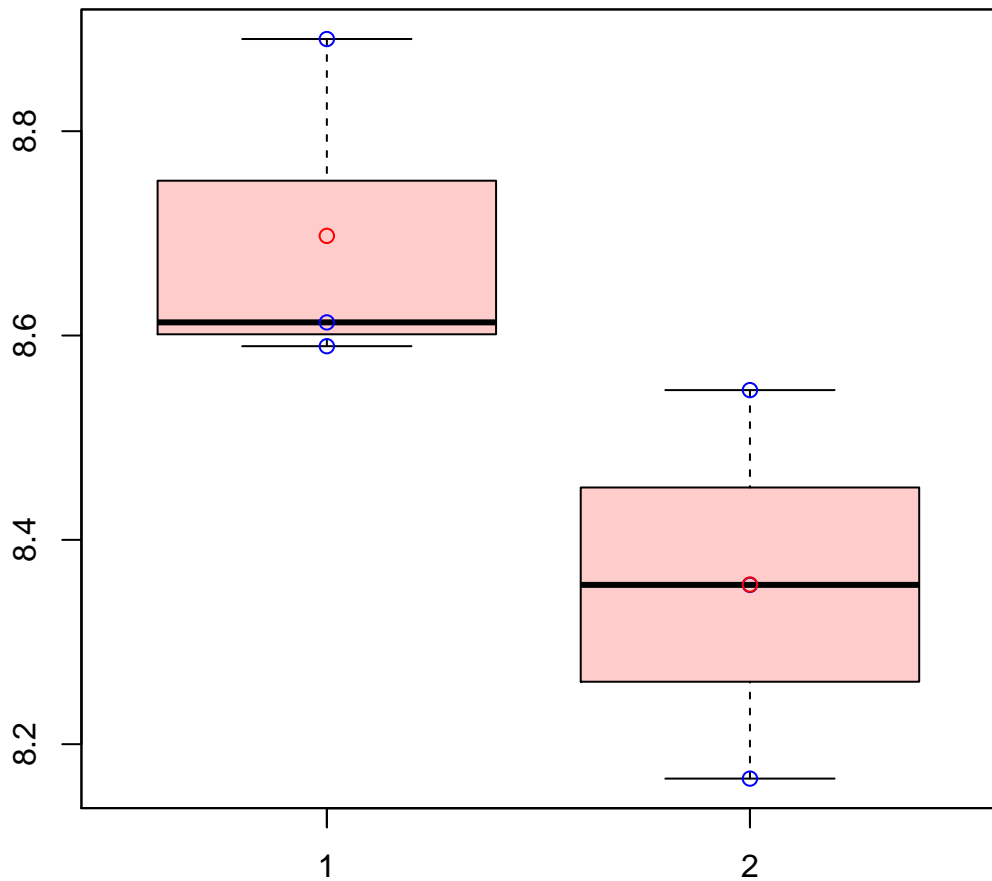

t-Test: p-value = 0.08

# CL6329Contig3|CL6329Contig3

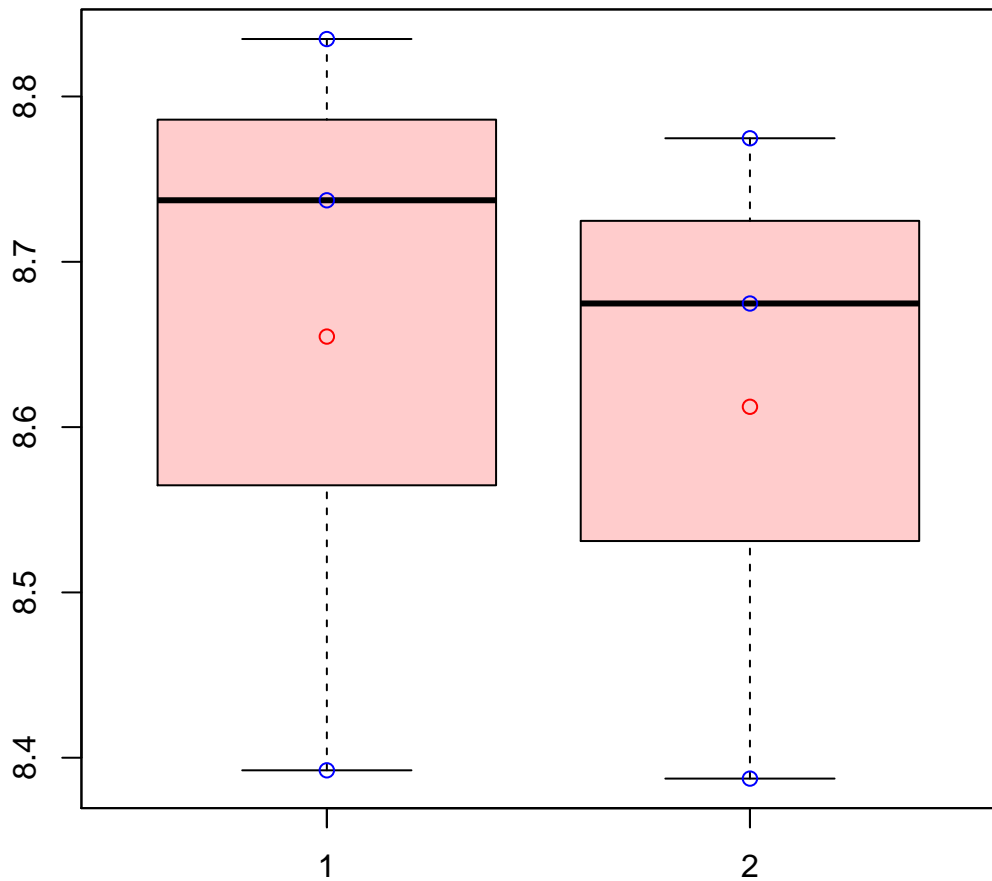

t-Test: p-value = 0.82



# CL632Contig10|CL632Contig10

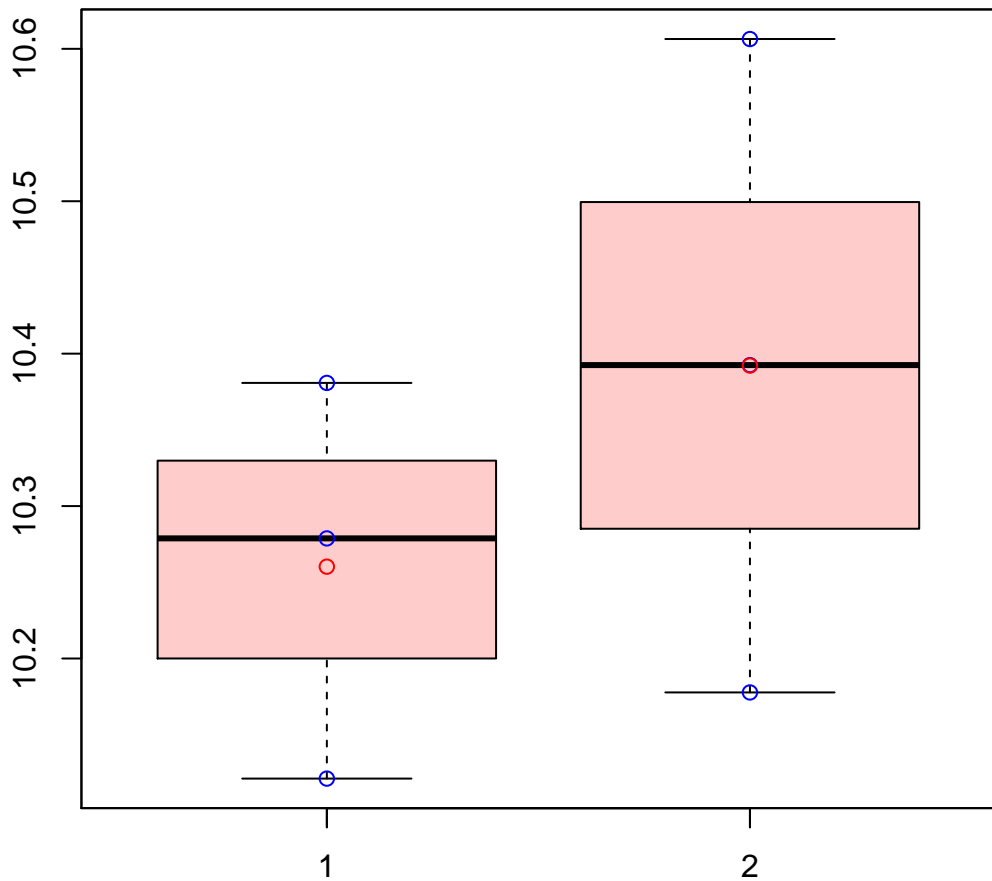

t-Test: p-value = 0.42

# CL632Contig11|CL632Contig11

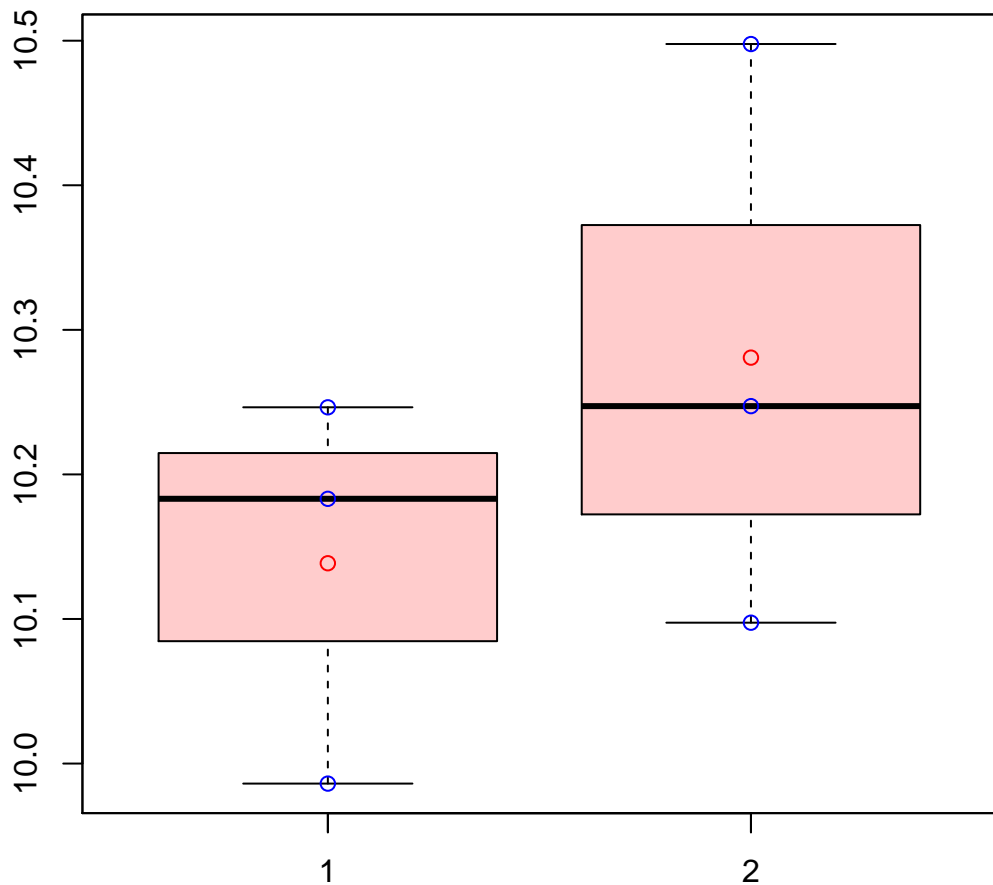

t-Test: p-value = 0.38

# CL632Contig14|CL632Contig14

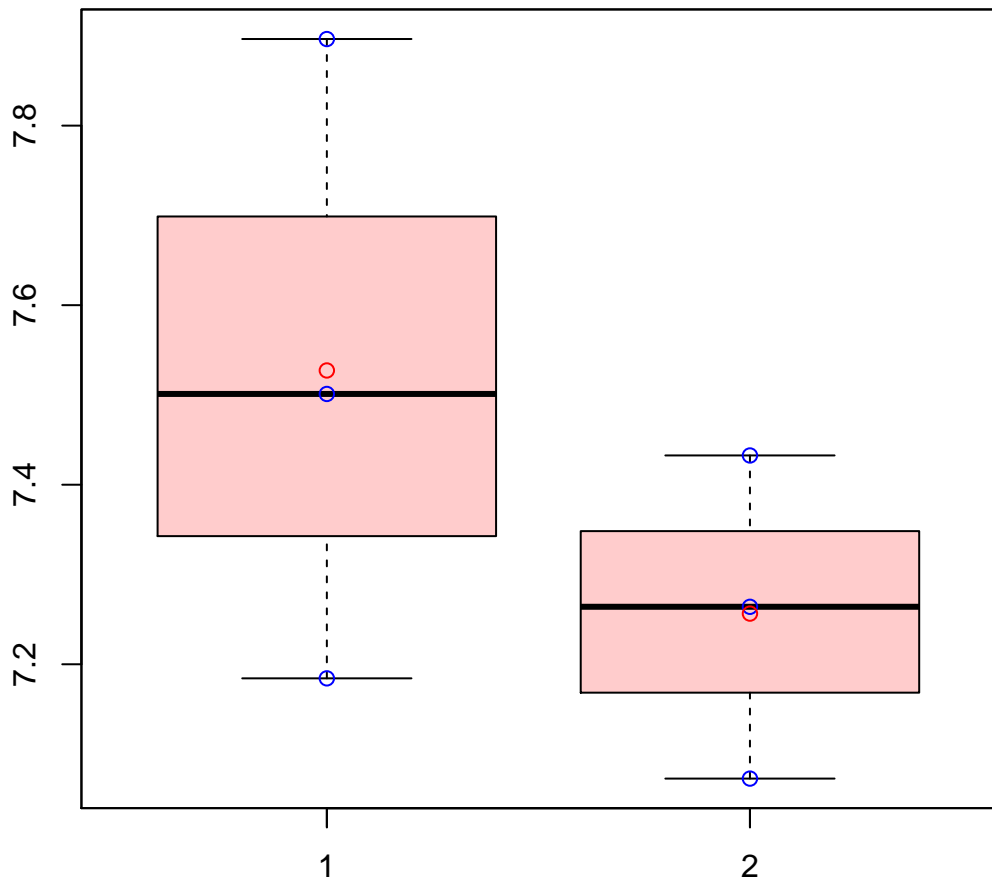

t-Test: p-value = 0.33

# CL632Contig15|CL632Contig15



t-Test: p-value = 0.33

# CL632Contig16|CL632Contig16

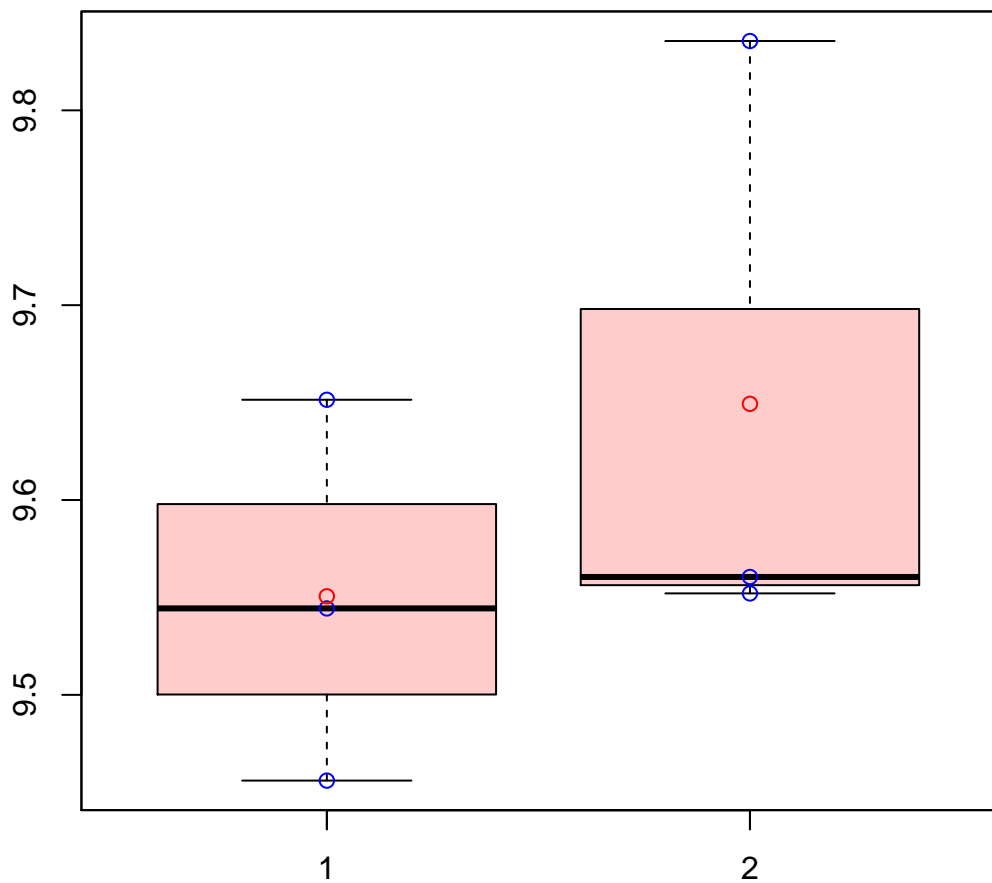

t-Test: p-value = 0.43

# CL632Contig4|CL632Contig4

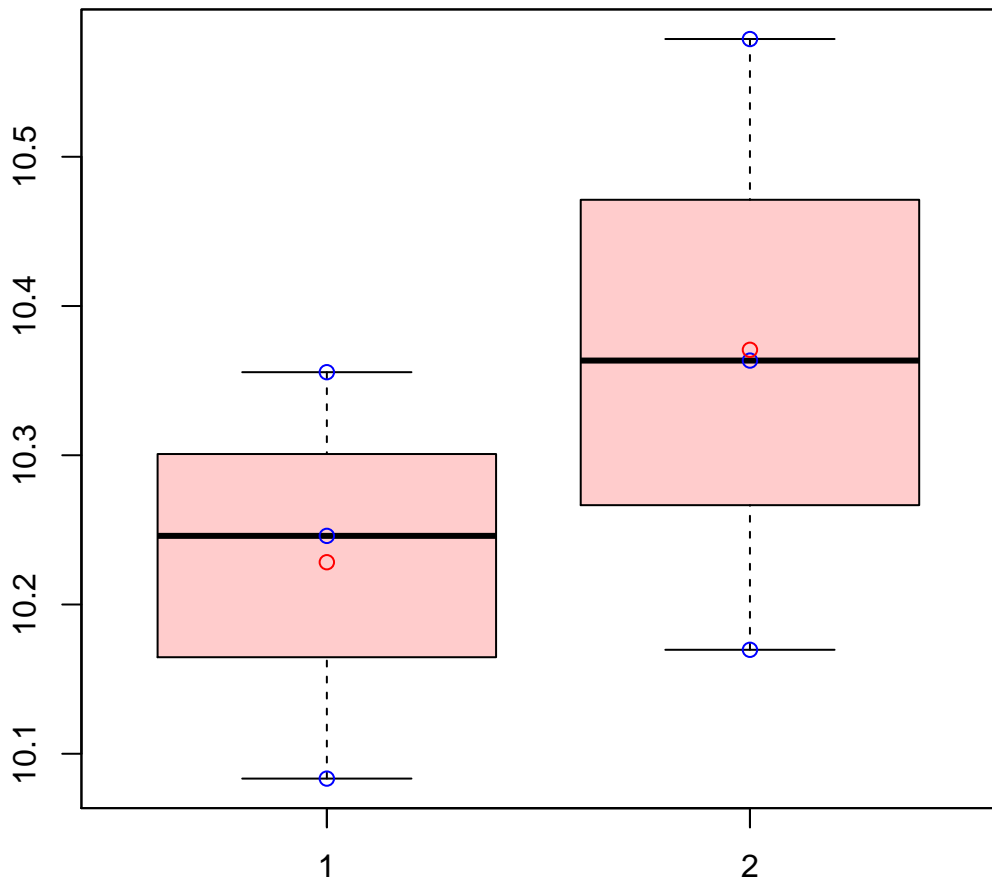

t-Test: p-value = 0.38

# CL632Contig5|CL632Contig5

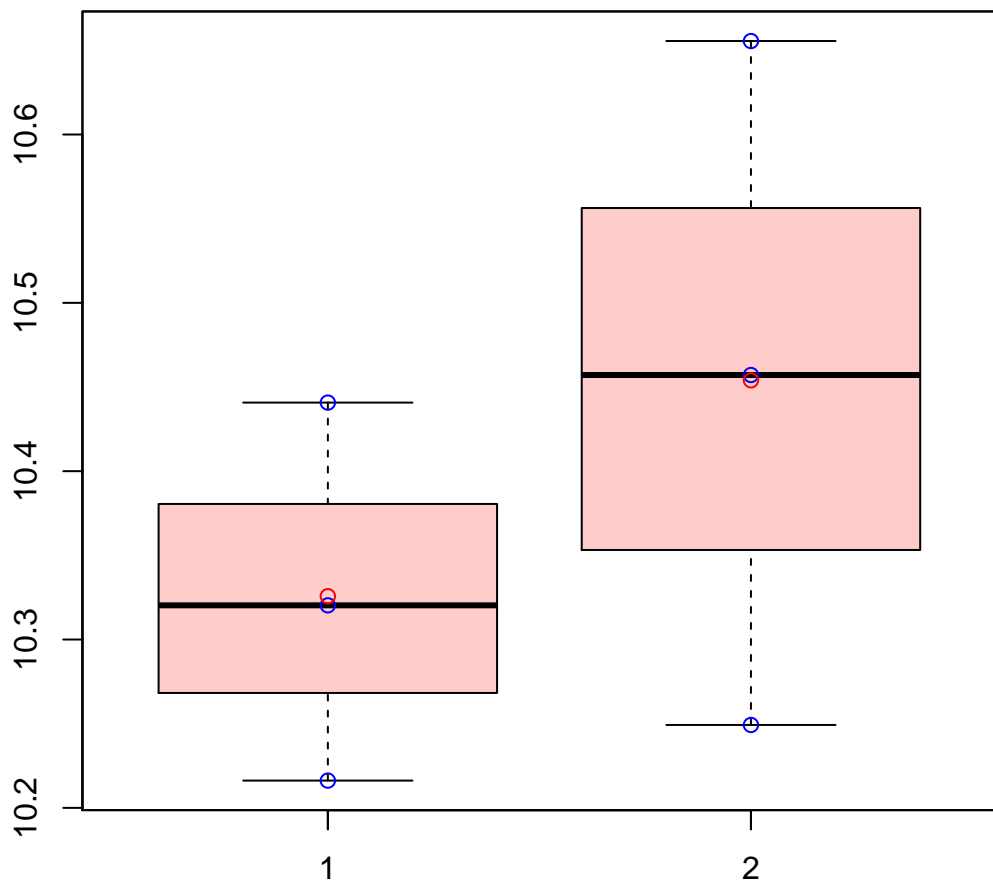

t-Test: p-value = 0.41

# CL632Contig6|CL632Contig6

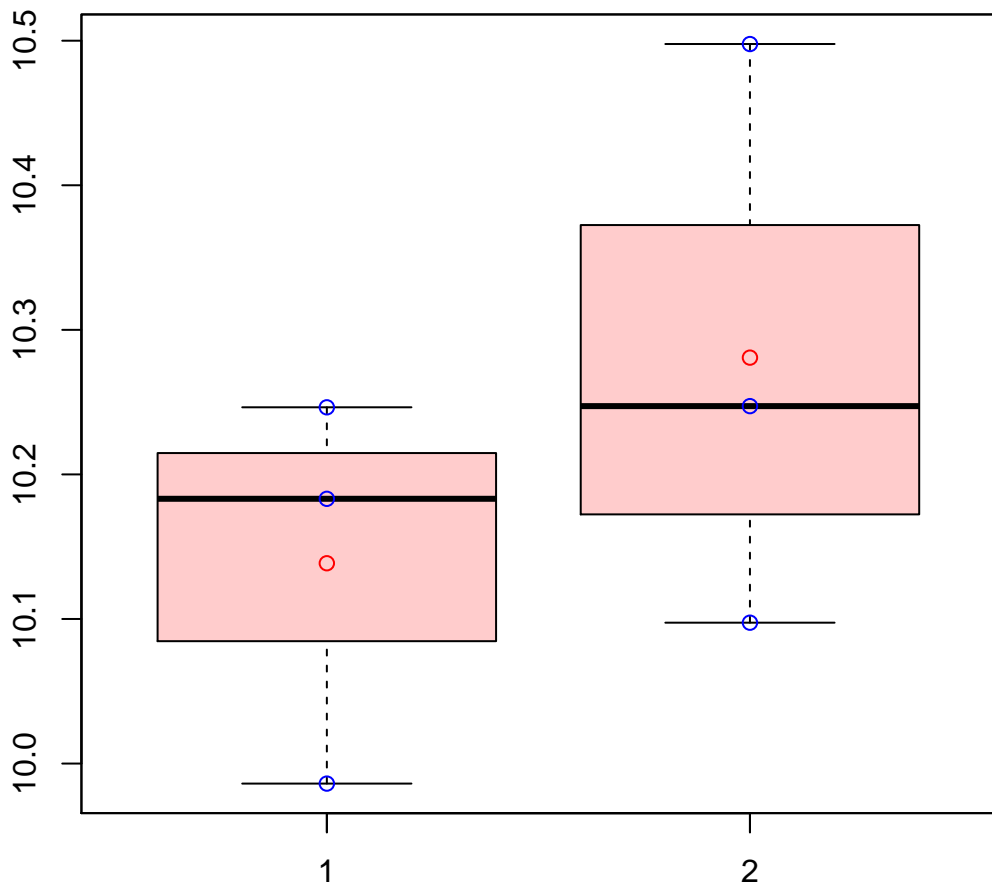

t-Test: p-value = 0.38



# CL632Contig7|CL632Contig7

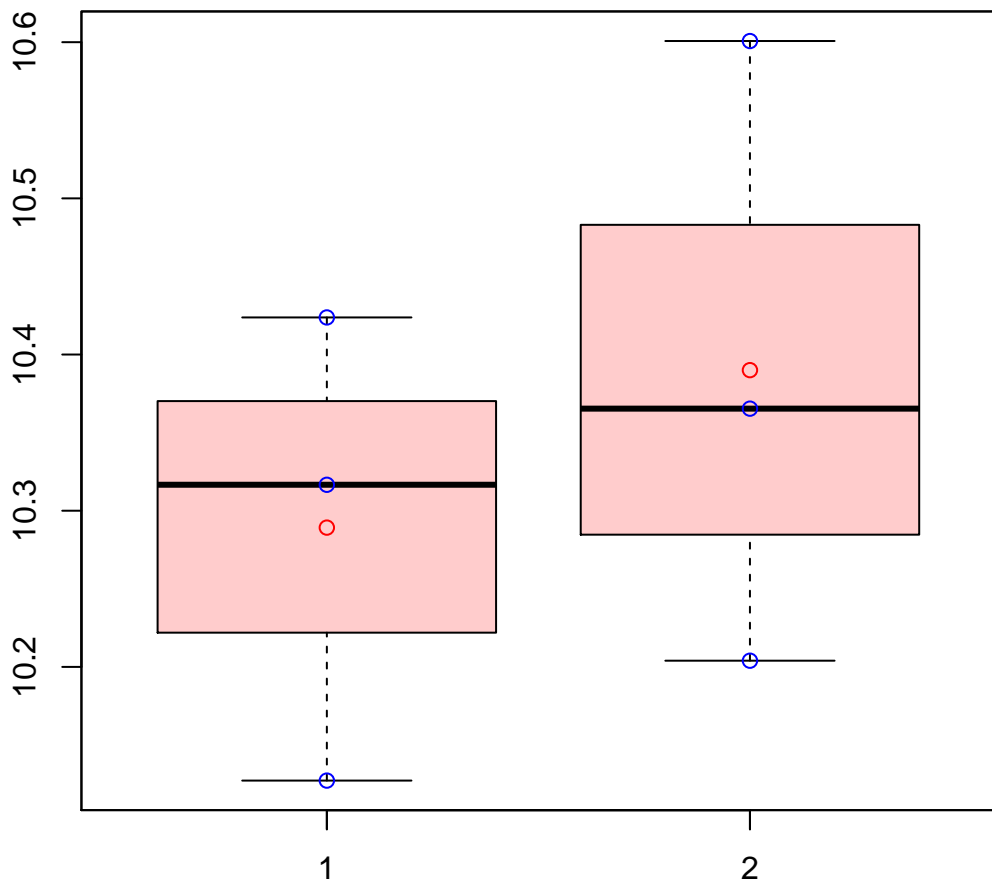

t-Test: p-value = 0.53

# CL632Contig8|CL632Contig8

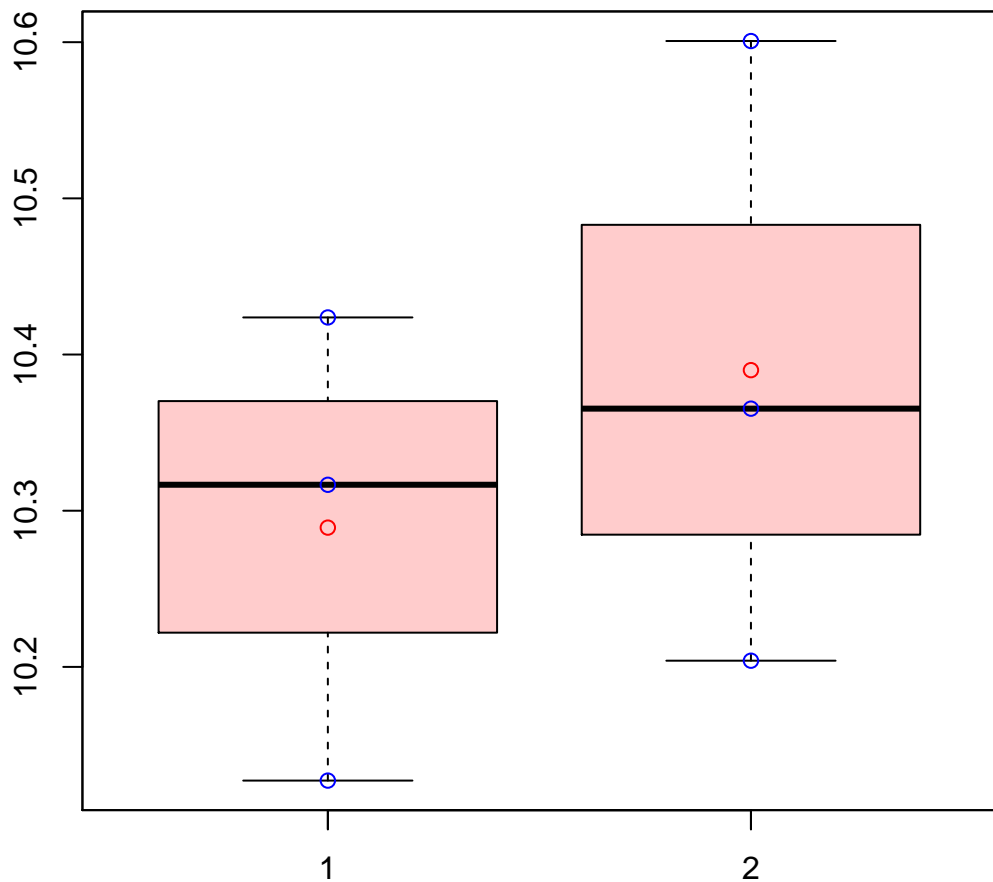

t-Test: p-value = 0.53

# CL632Contig9|CL632Contig9

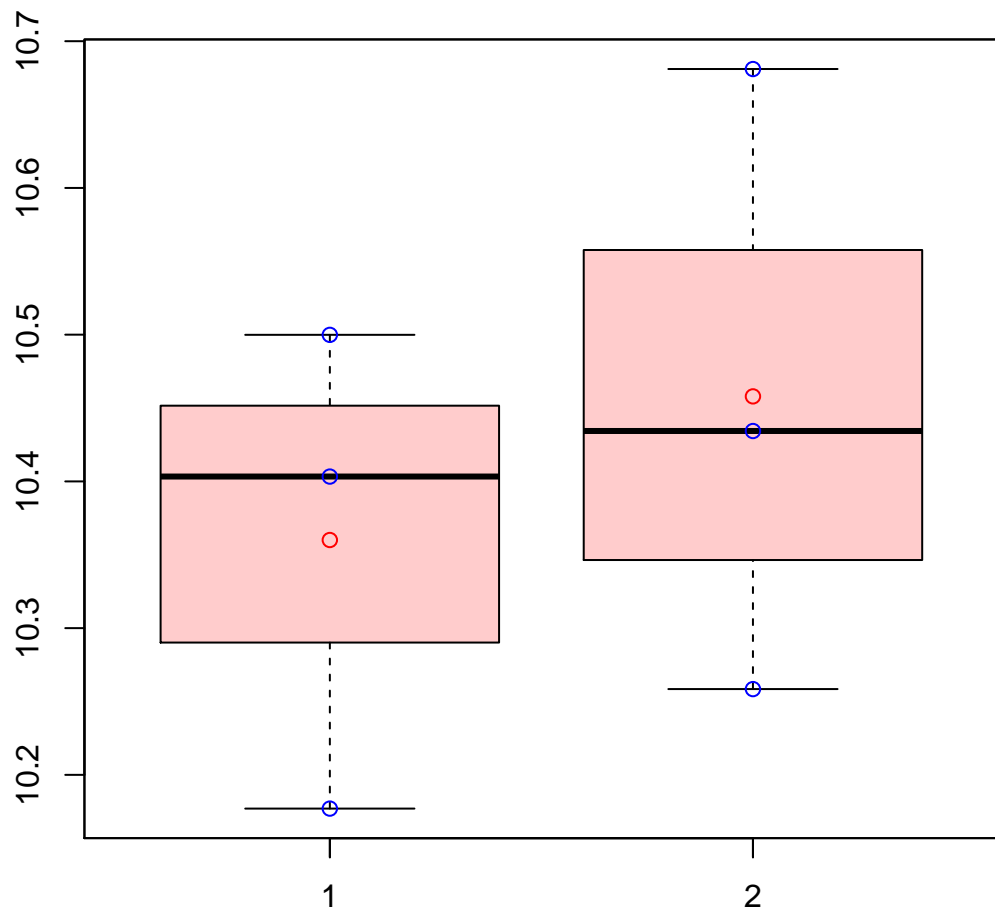

t-Test: p-value = 0.57

# CL6331Contig2|CL6331Contig2

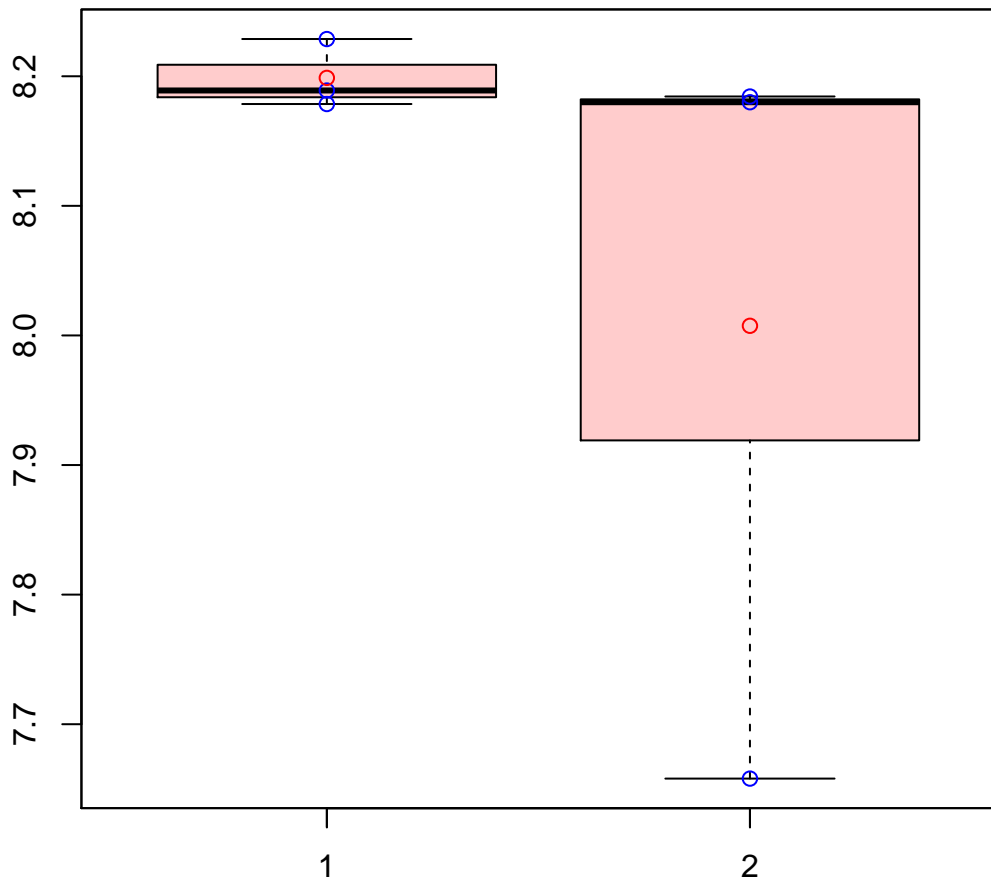

t-Test: p-value = 0.39

# CL6339Contig1|CL6339Contig1



t-Test: p-value = 0.84

# CL6340Contig4|CL6340Contig4

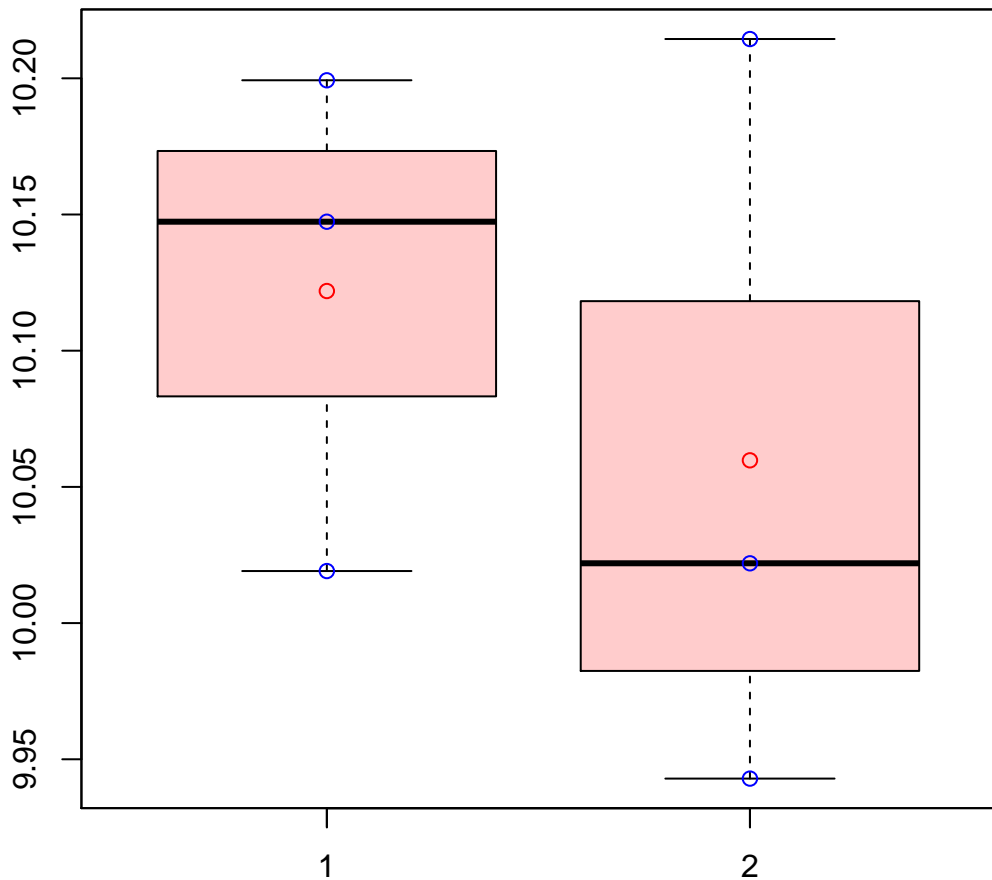

t-Test: p-value = 0.56

# CL6341Contig1|CL6341Contig1

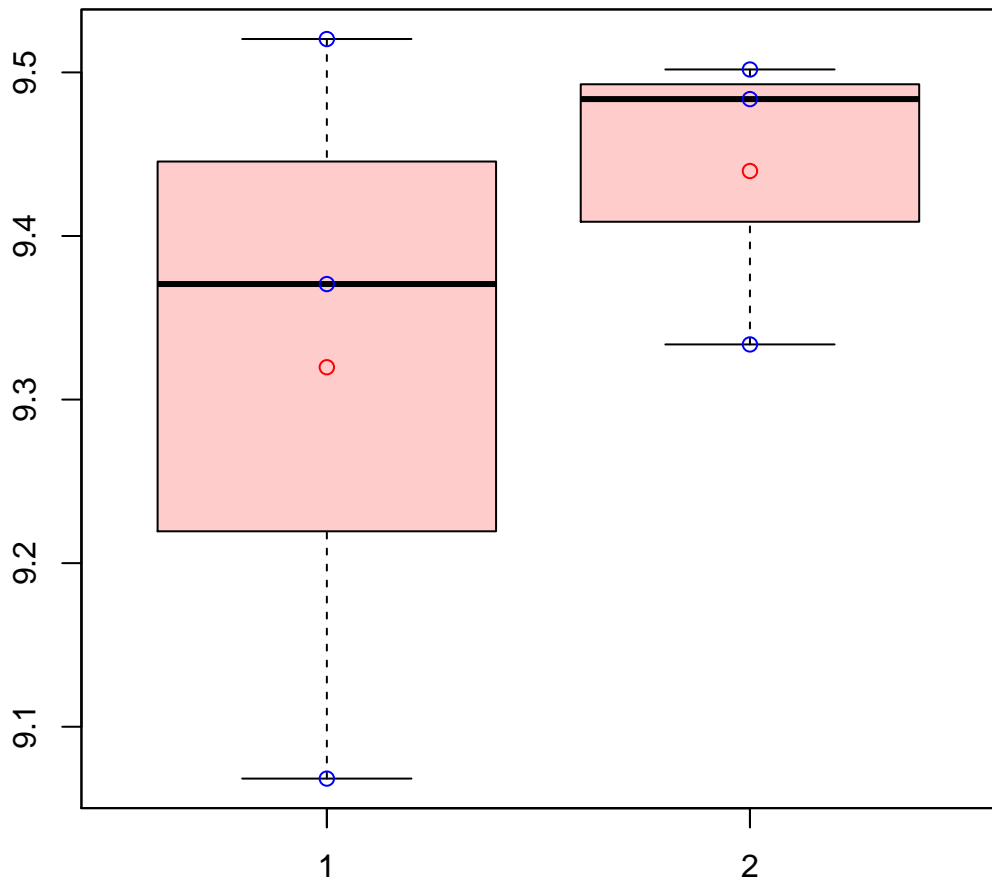

t-Test: p-value = 0.47

# CL6341Contig4|CL6341Contig4



t-Test: p-value = 0.92



# CL634Contig2|CL634Contig2

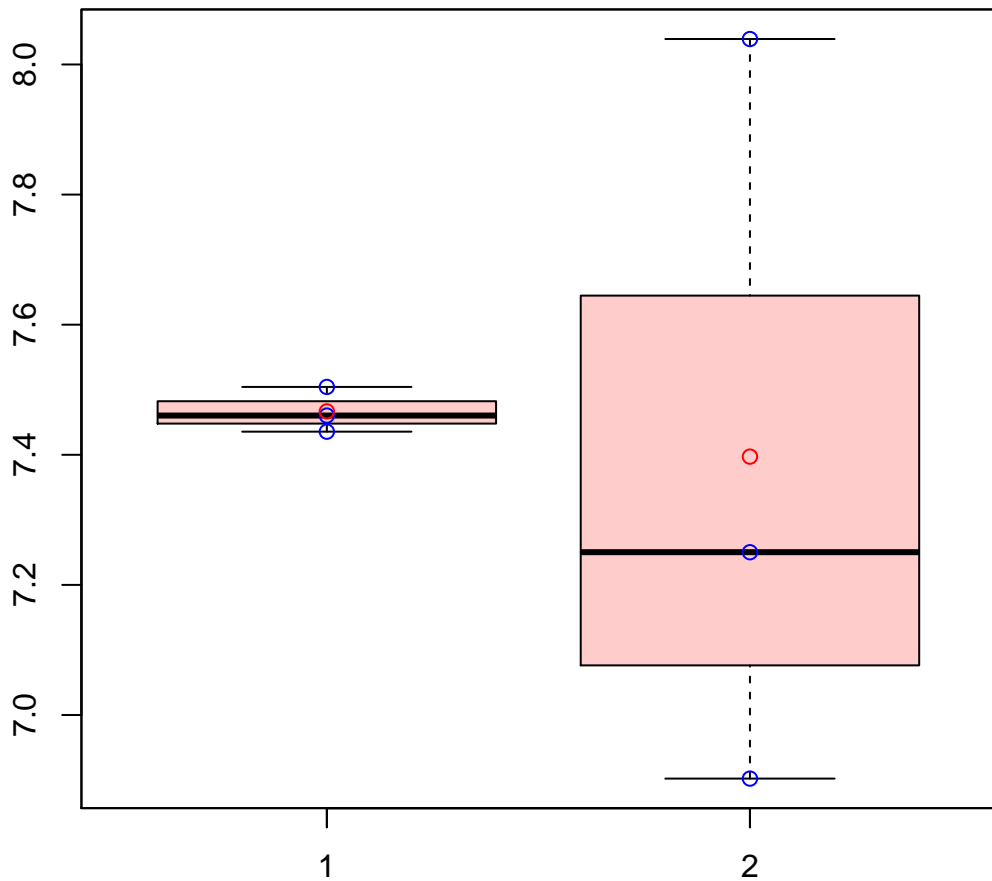

t-Test: p-value = 0.86

# CL634Contig4|CL634Contig4



t-Test: p-value = 0.65

# CL634Contig8|CL634Contig8

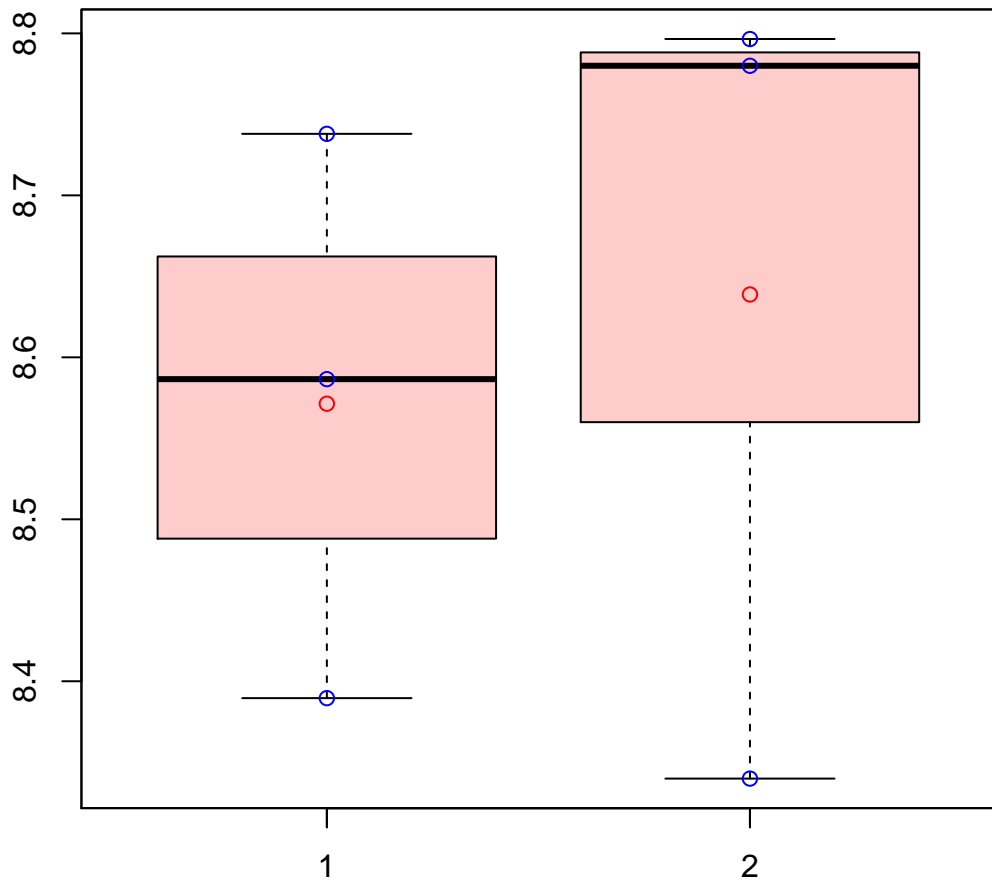

t-Test: p-value = 0.73

# CL6369Contig2|CL6369Contig2

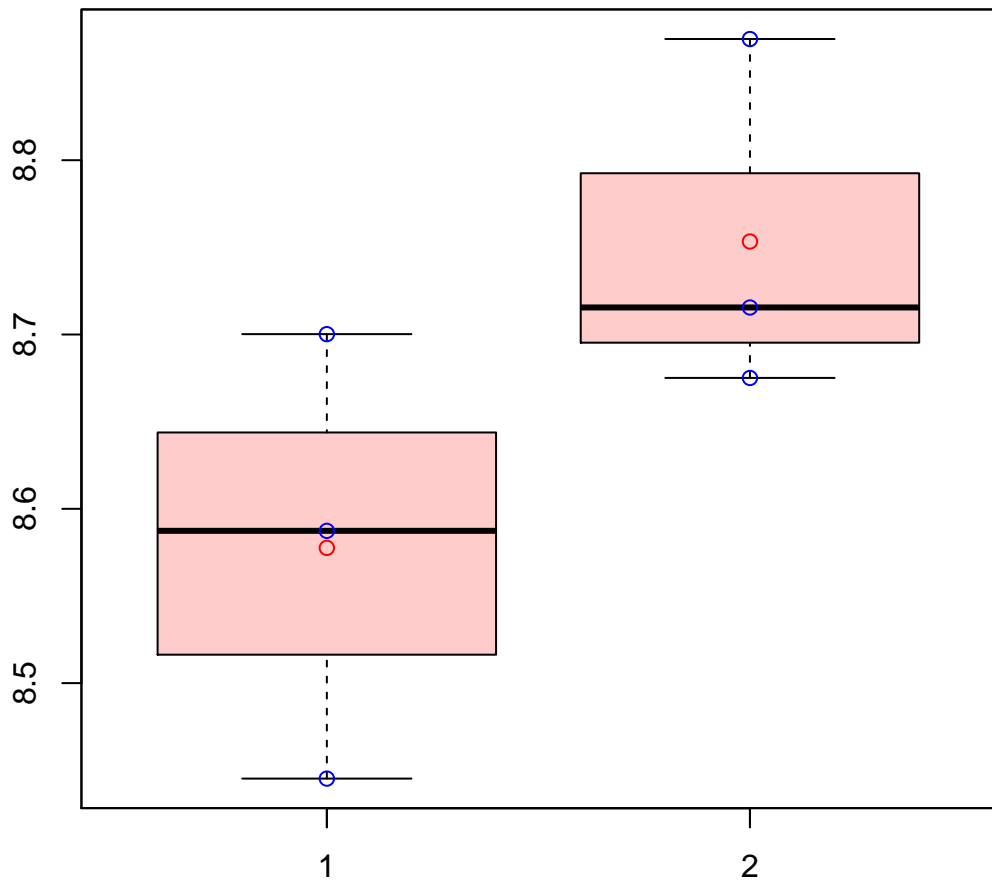

t-Test: p-value = 0.14

# CL6369Contig5|CL6369Contig5

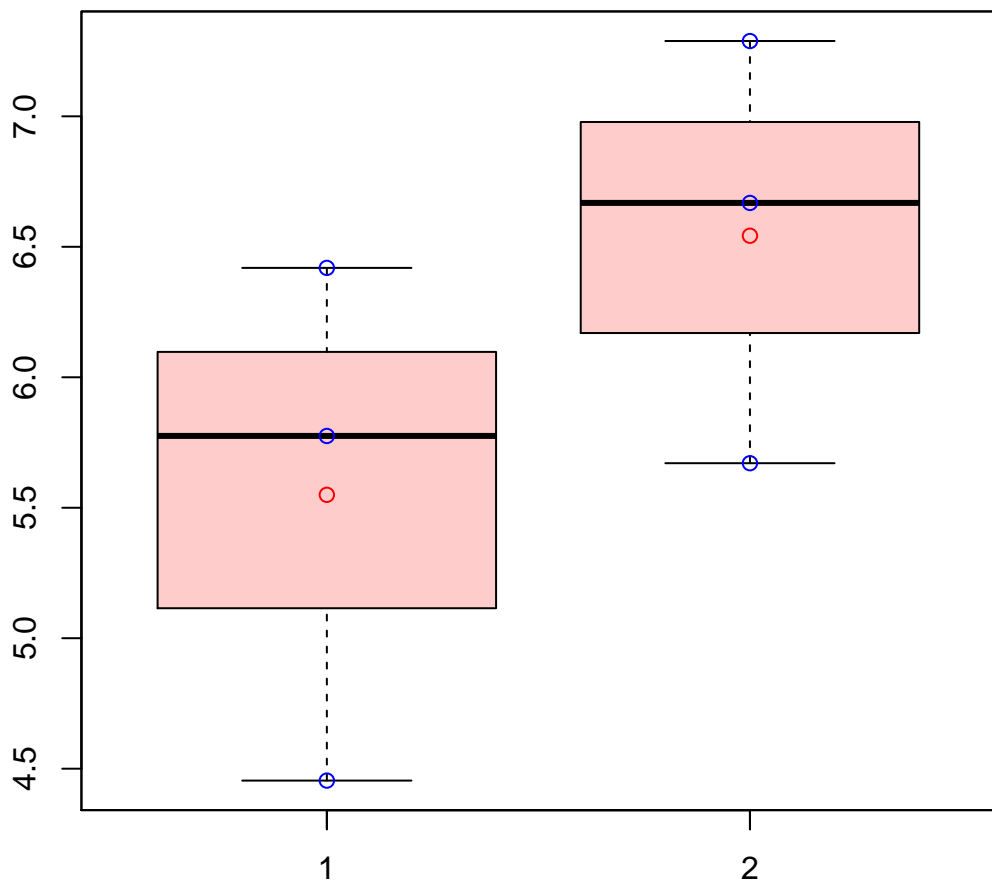

t-Test: p-value = 0.26

# CL636Contig10|CL636Contig10

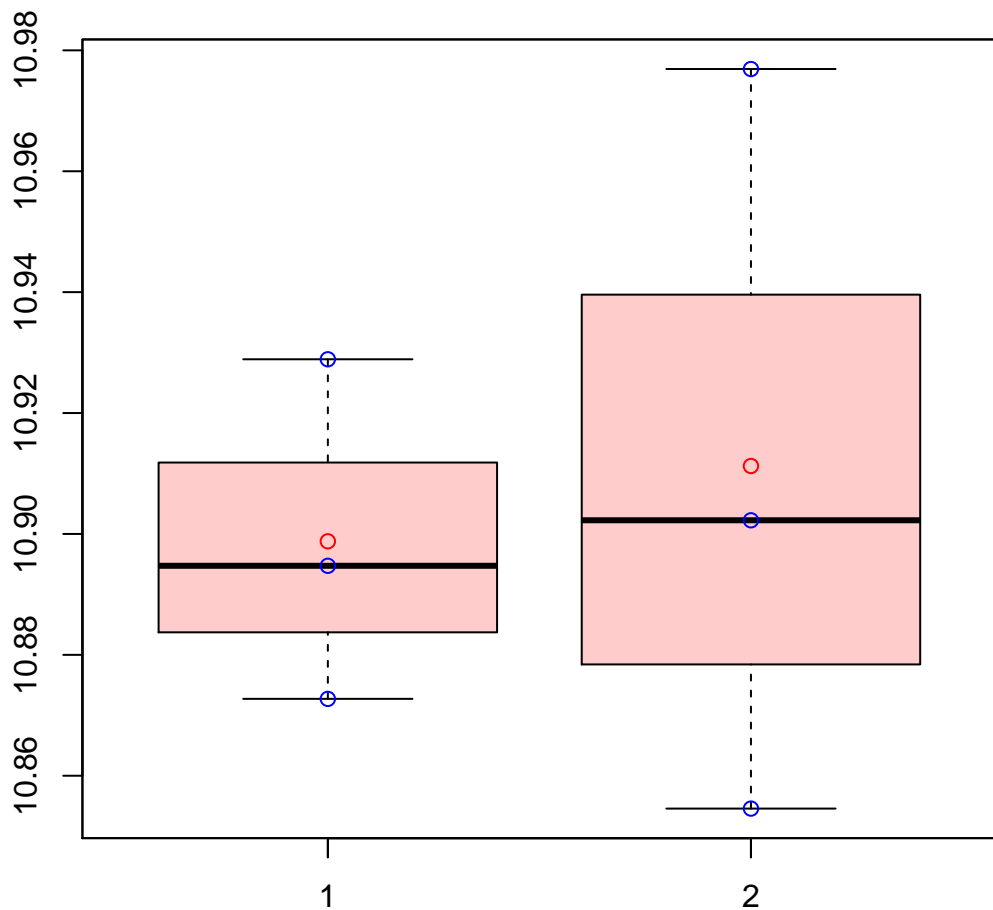

t-Test: p-value = 0.77

# CL6371Contig1|CL6371Contig1

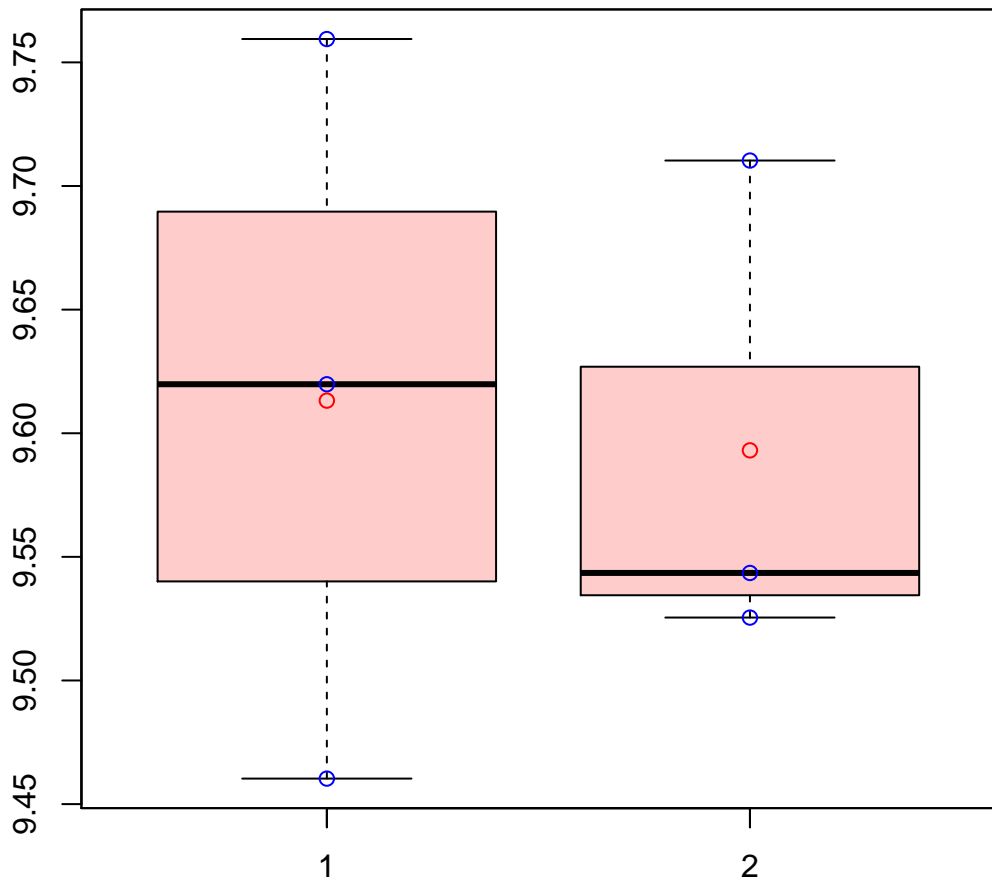

t-Test: p-value = 0.86

# CL6371Contig3|CL6371Contig3



t-Test: p-value = 0.86



# CL6373Contig4|CL6373Contig4

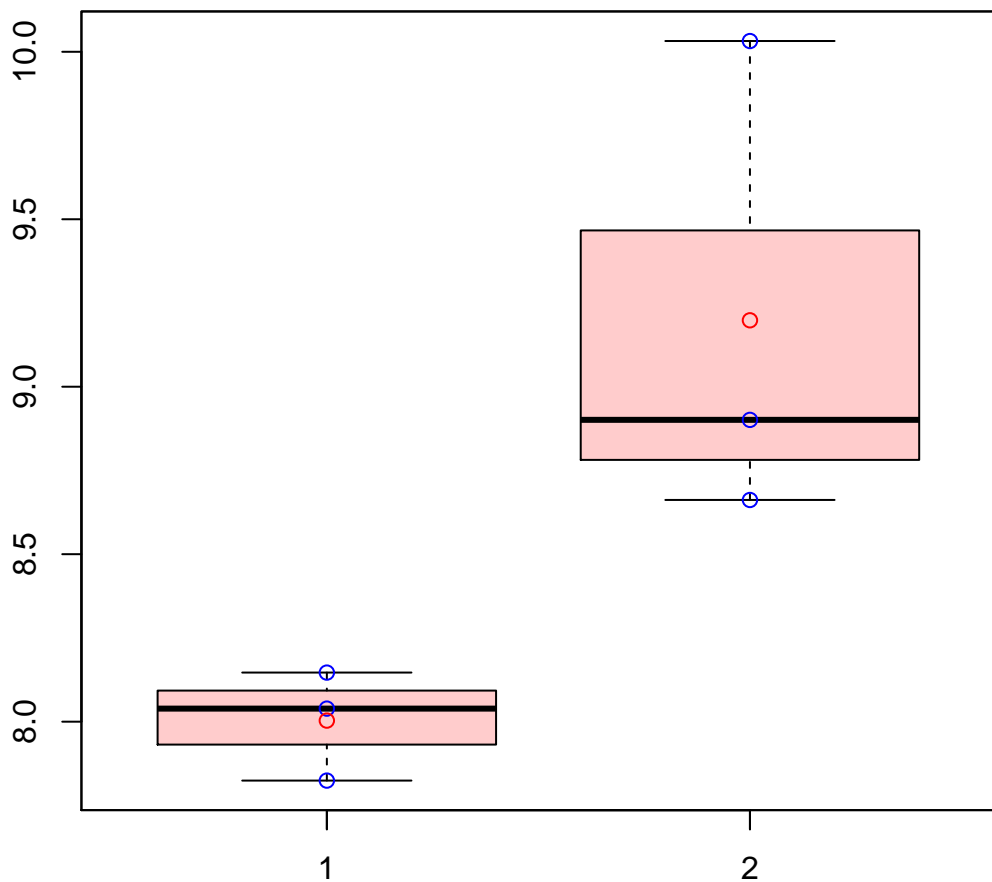

t-Test: p-value = 0.1

# CL637Contig1|CL637Contig1

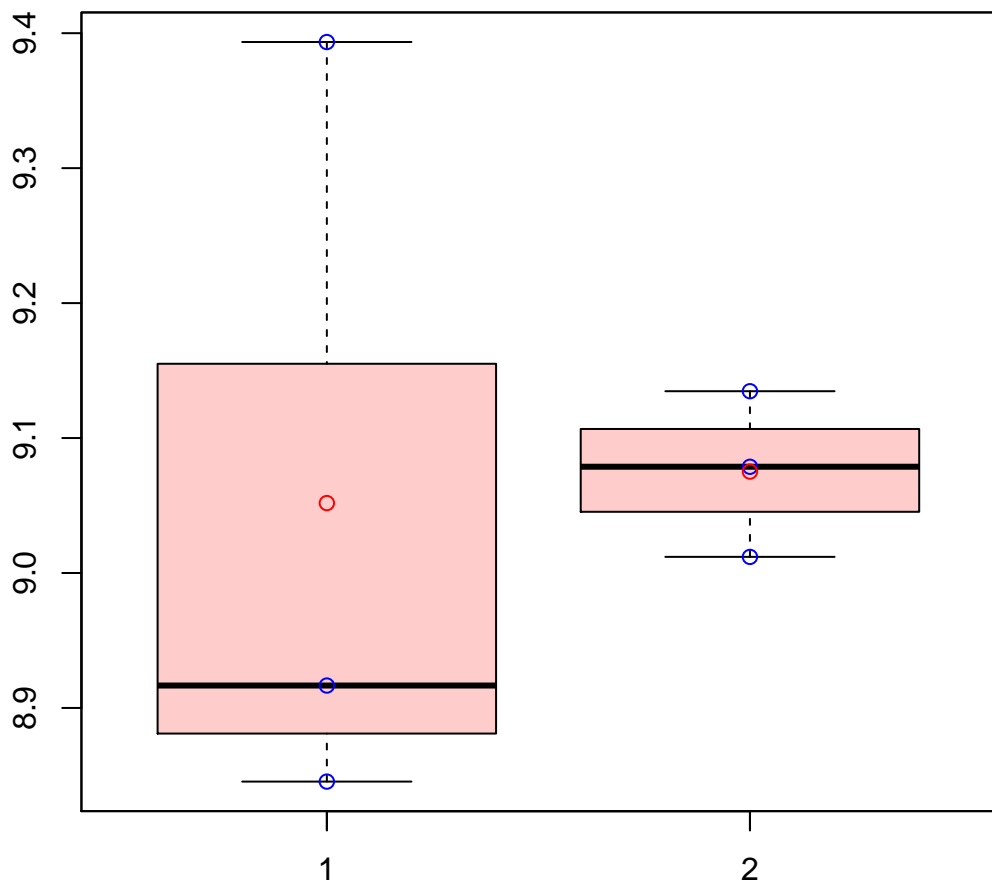

t-Test: p-value = 0.91

# CL6385Contig2|CL6385Contig2

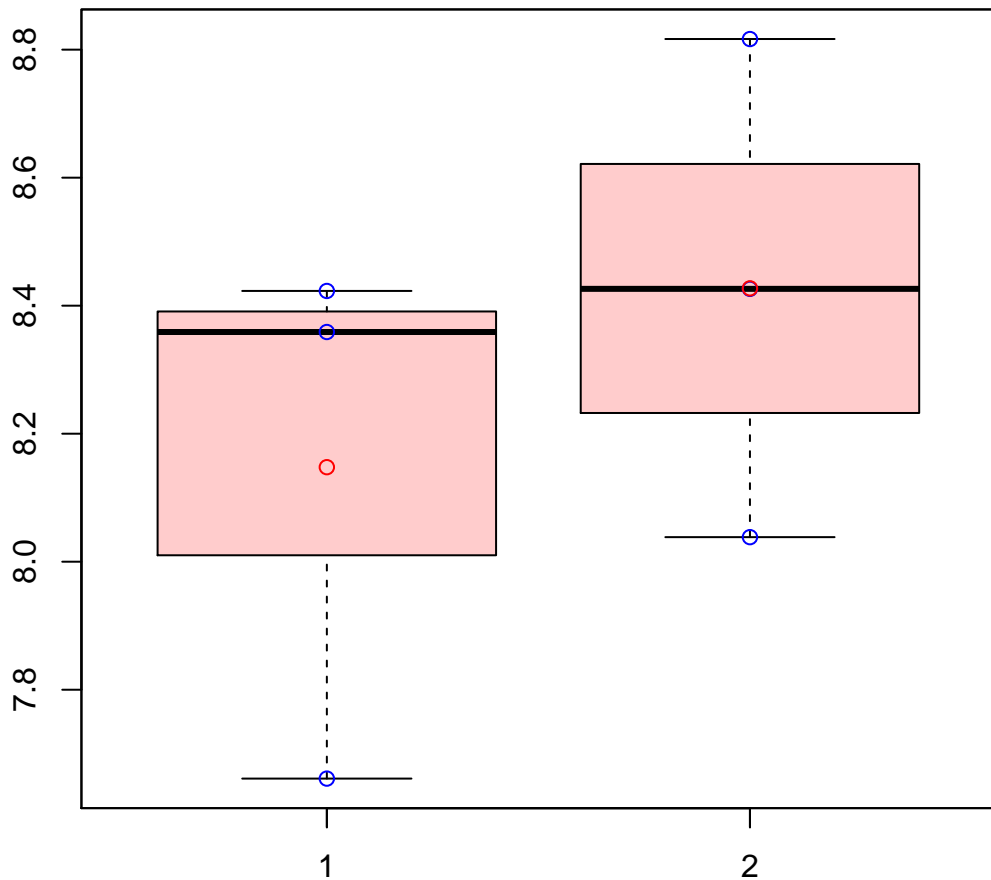

t-Test: p-value = 0.45

# CL6385Contig3|CL6385Contig3

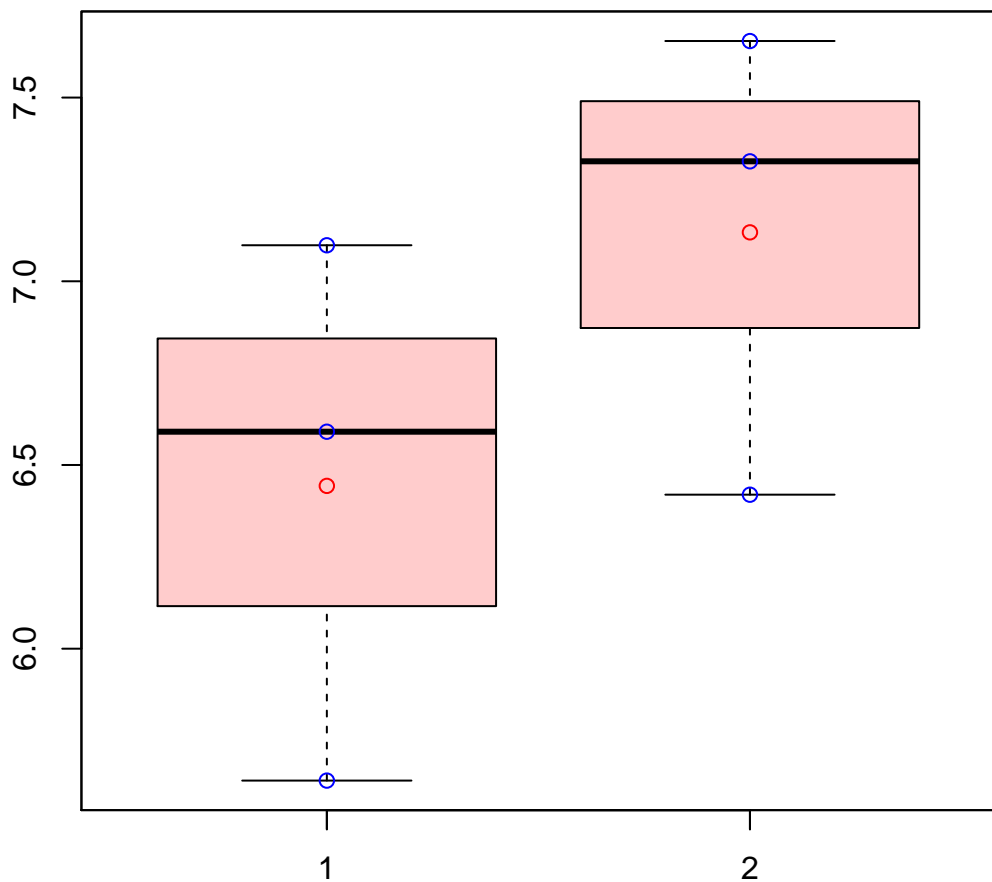

t-Test: p-value = 0.29

# CL6387Contig3|CL6387Contig3

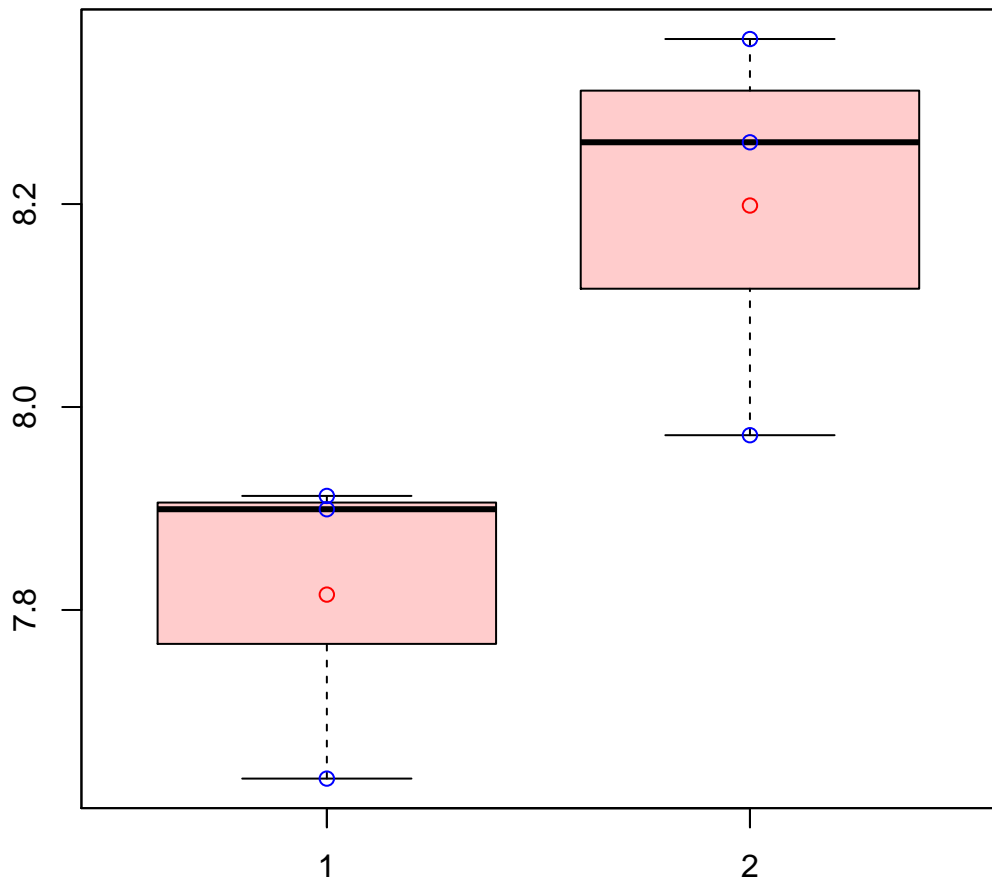

t-Test: p-value = 0.06

# CL638Contig10|CL638Contig10

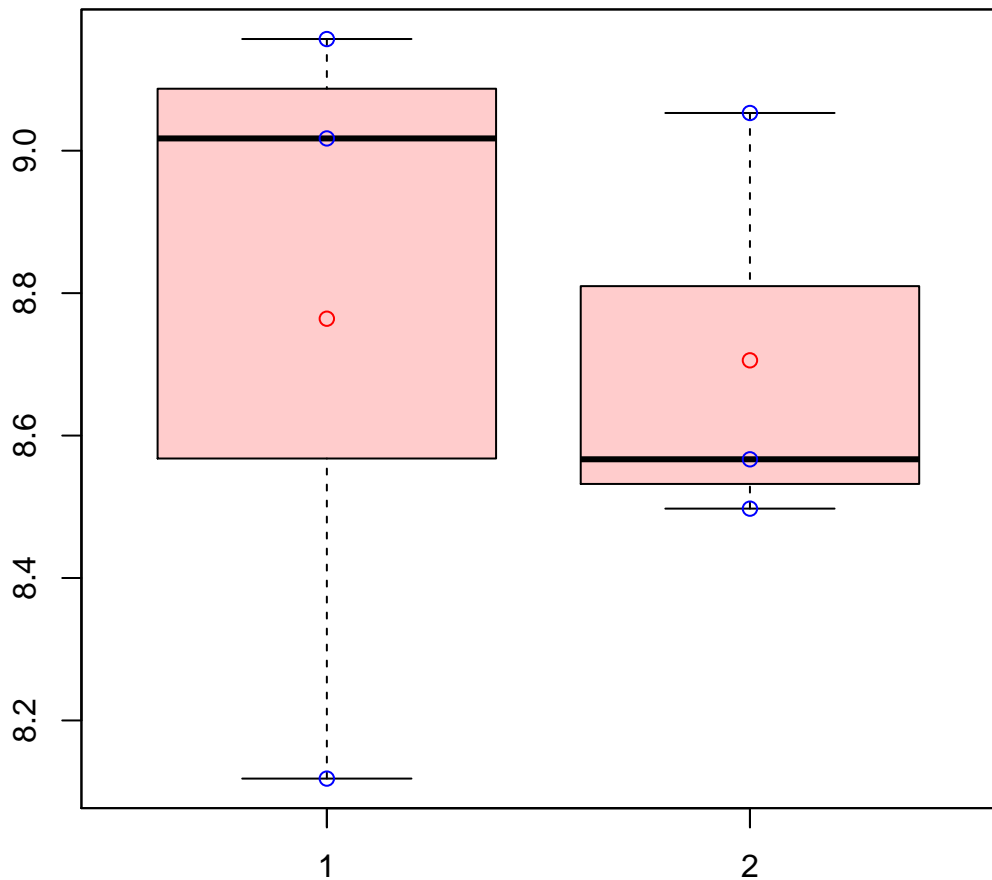

t-Test: p-value = 0.88

# CL6391Contig1|CL6391Contig1

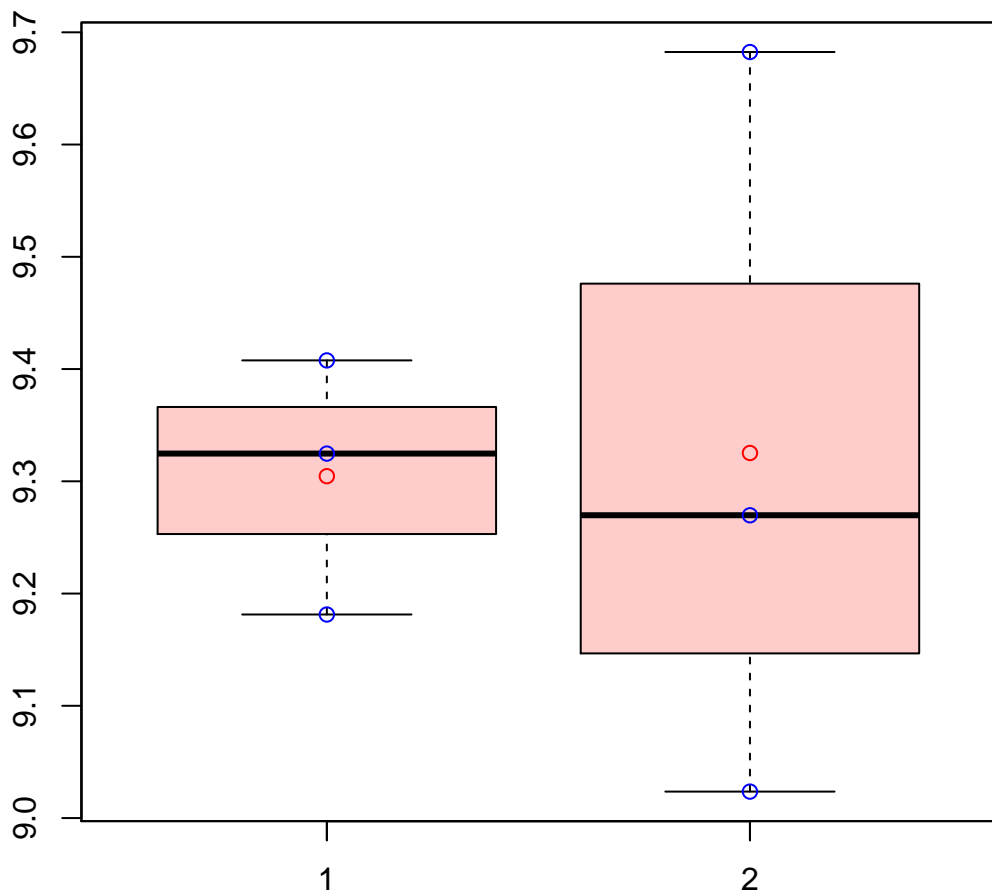

t-Test: p-value = 0.93

# CL6391Contig3|CL6391Contig3

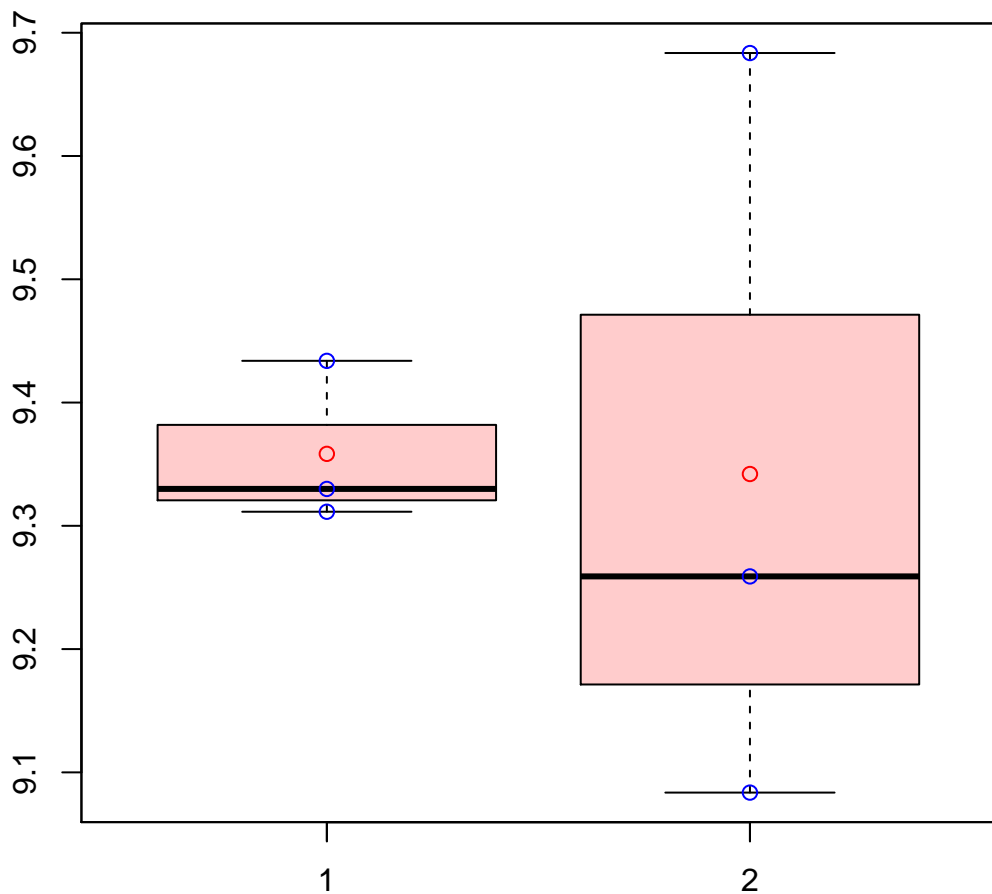

t-Test: p-value = 0.94



# CL6392Contig1|CL6392Contig1

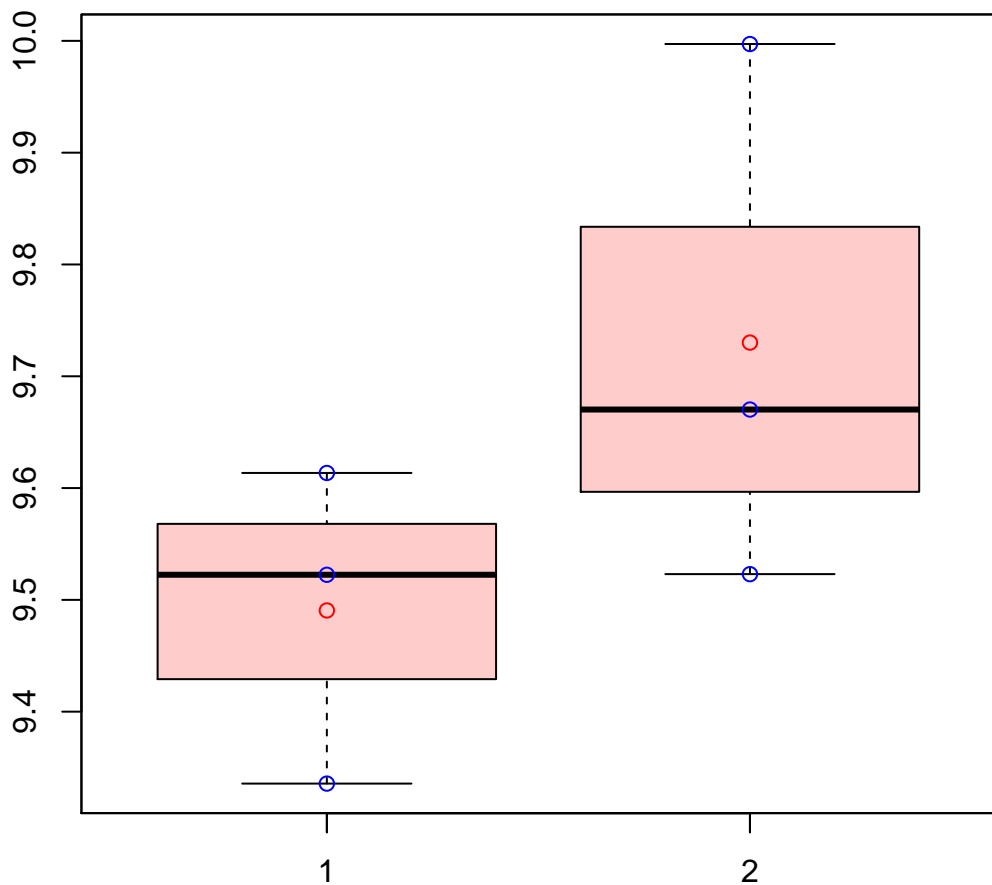

t-Test: p-value = 0.23

# CL6392Contig4|CL6392Contig4

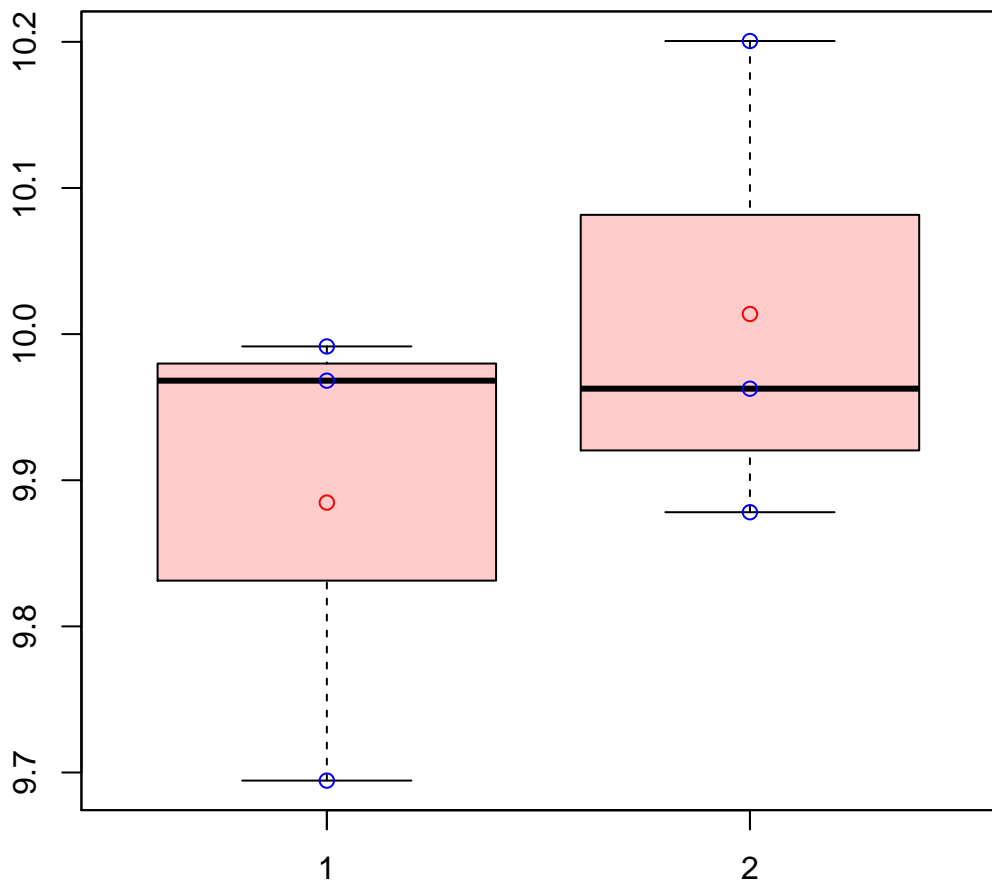

t-Test: p-value = 0.4

# CL6393Contig2|CL6393Contig2

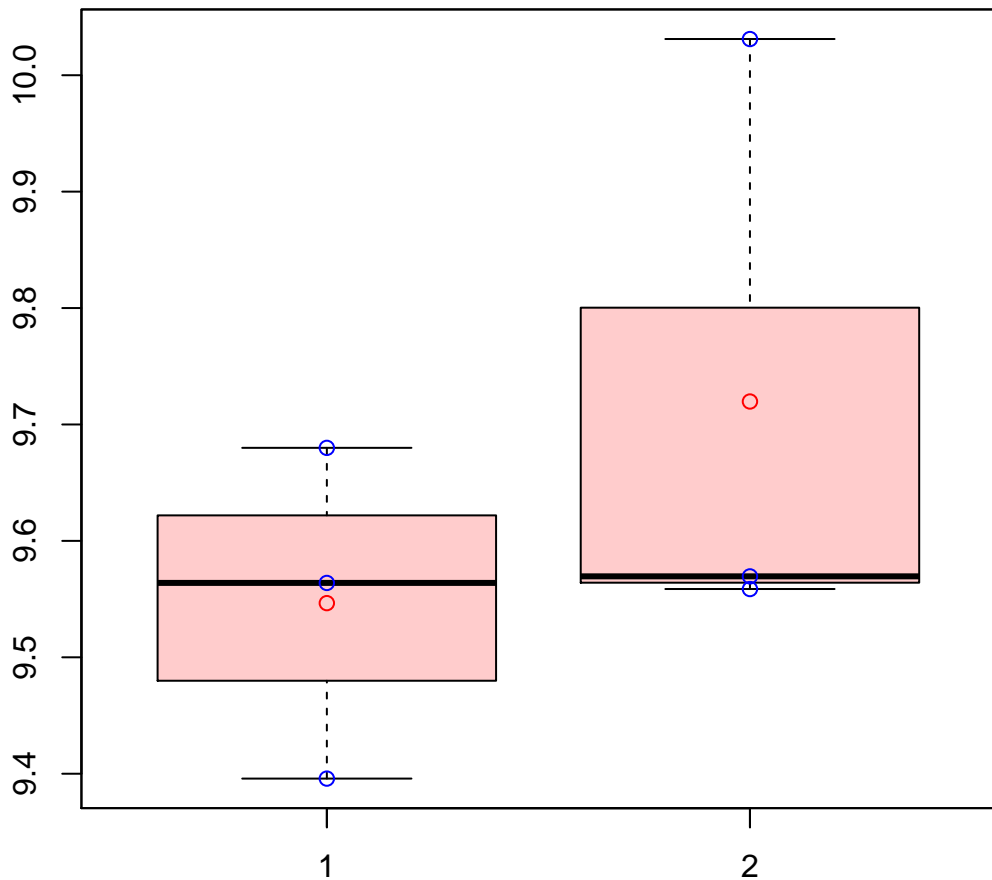

t-Test: p-value = 0.4

# CL6397Contig2|CL6397Contig2

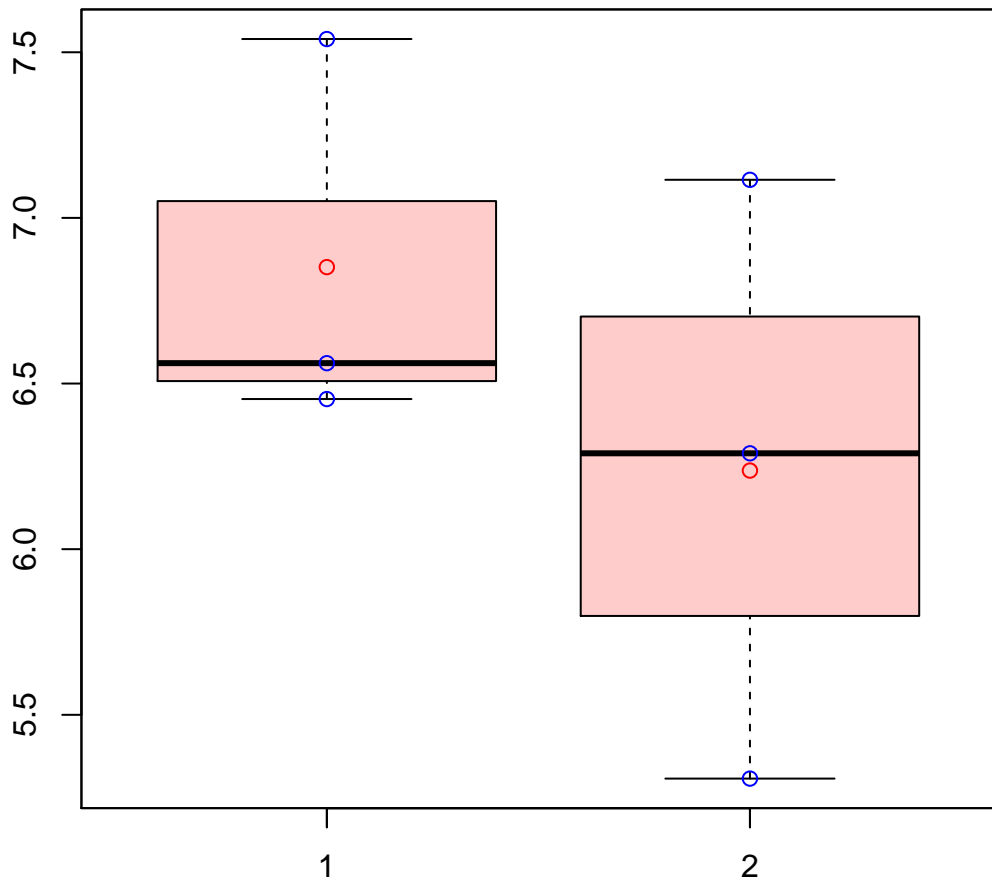

t-Test: p-value = 0.39

# CL639Contig1|CL639Contig1

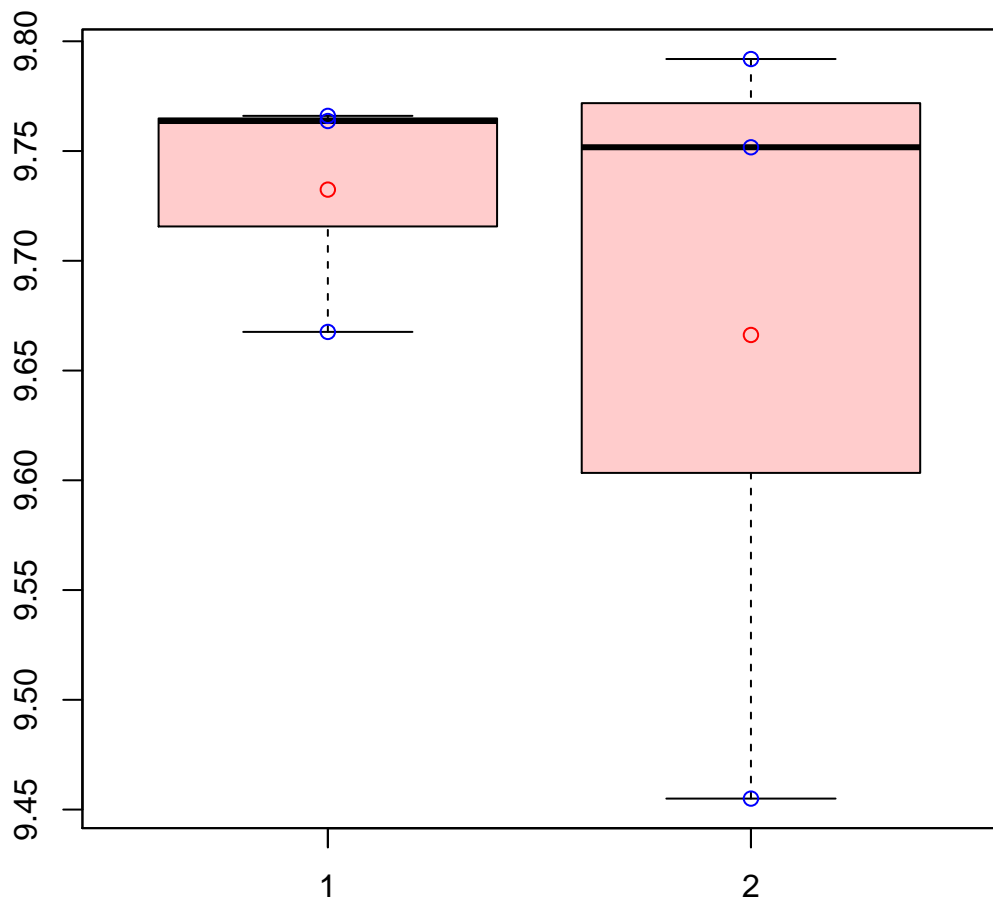

t-Test: p-value = 0.6

# CL639Contig5|CL639Contig5

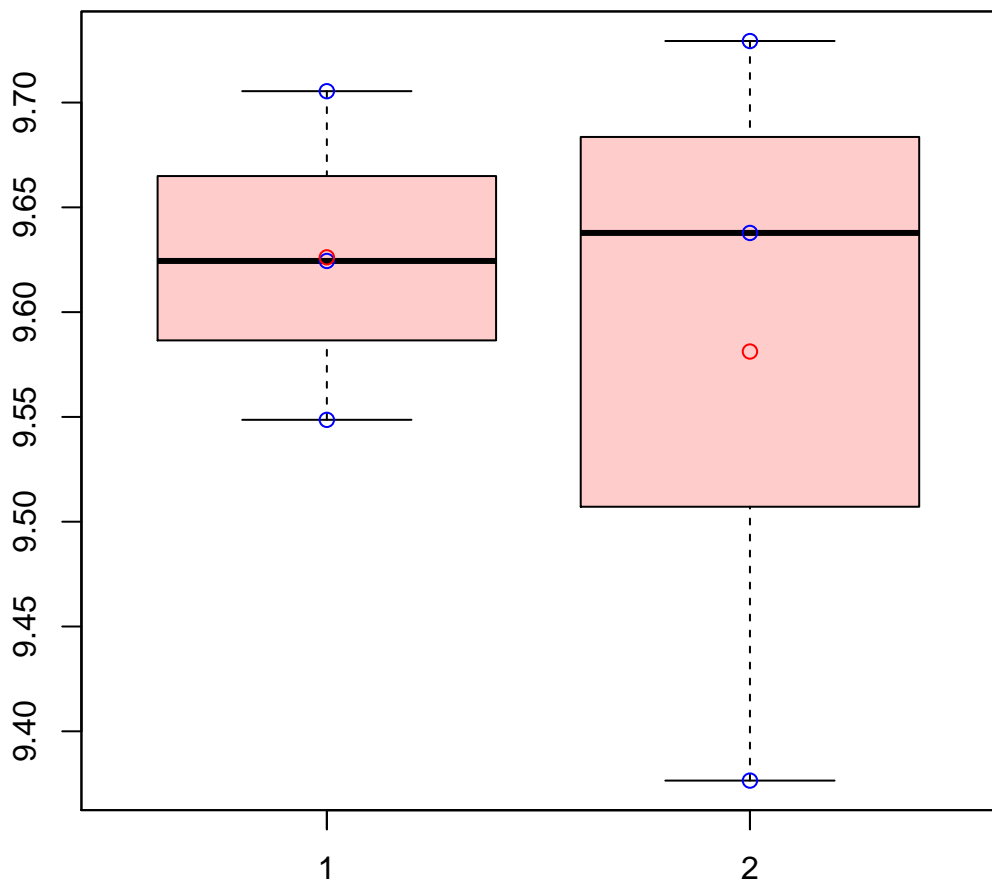

t-Test: p-value = 0.72

# CL639Contig6|CL639Contig6

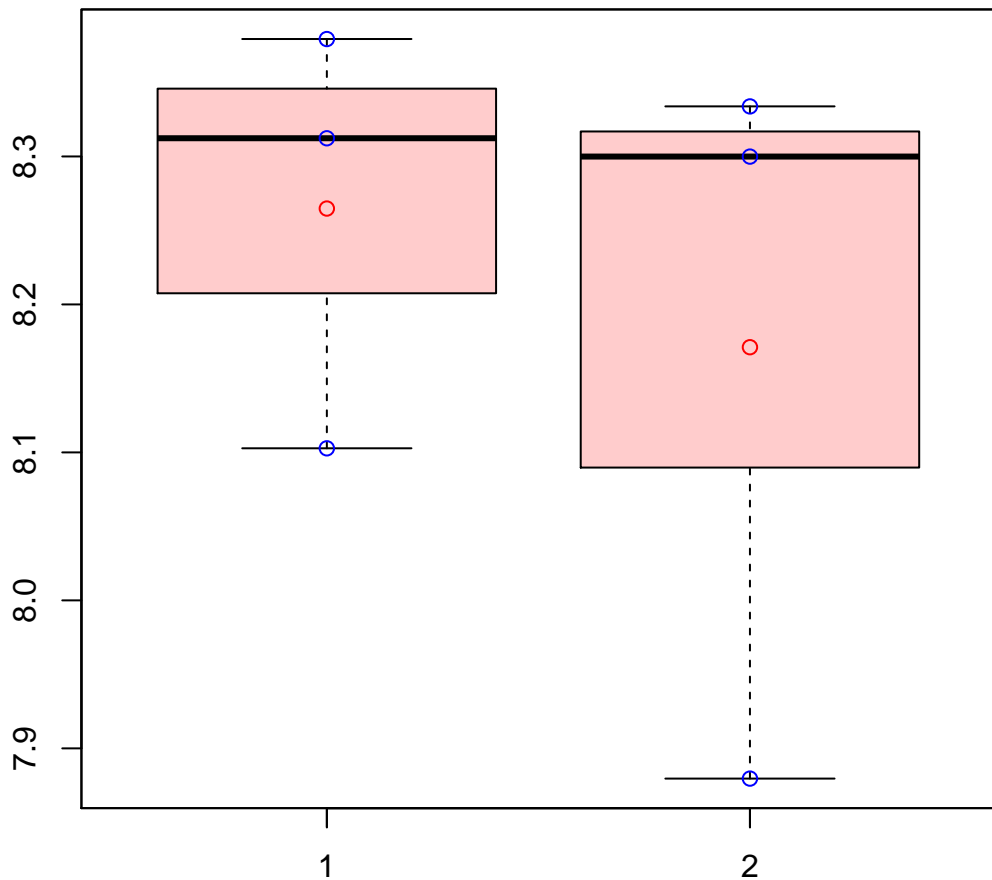

t-Test: p-value = 0.61

# CL63Contig13|CL63Contig13

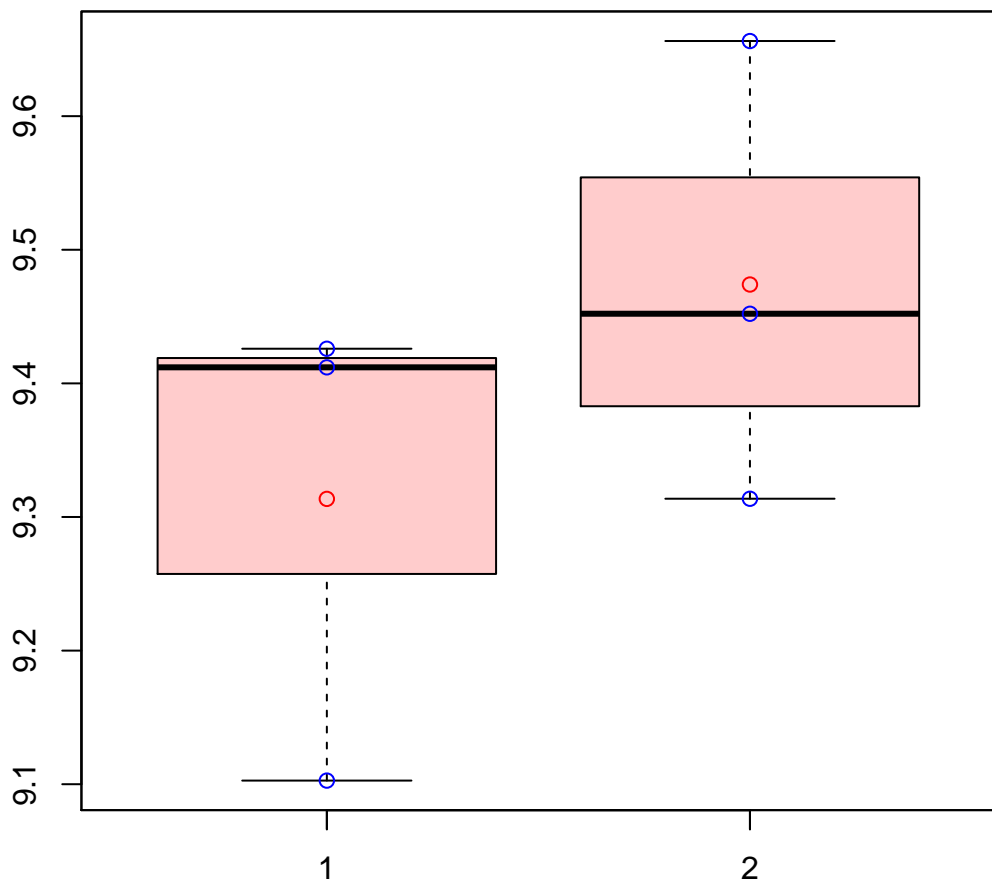

t-Test: p-value = 0.33



# CL63Contig14|CL63Contig14

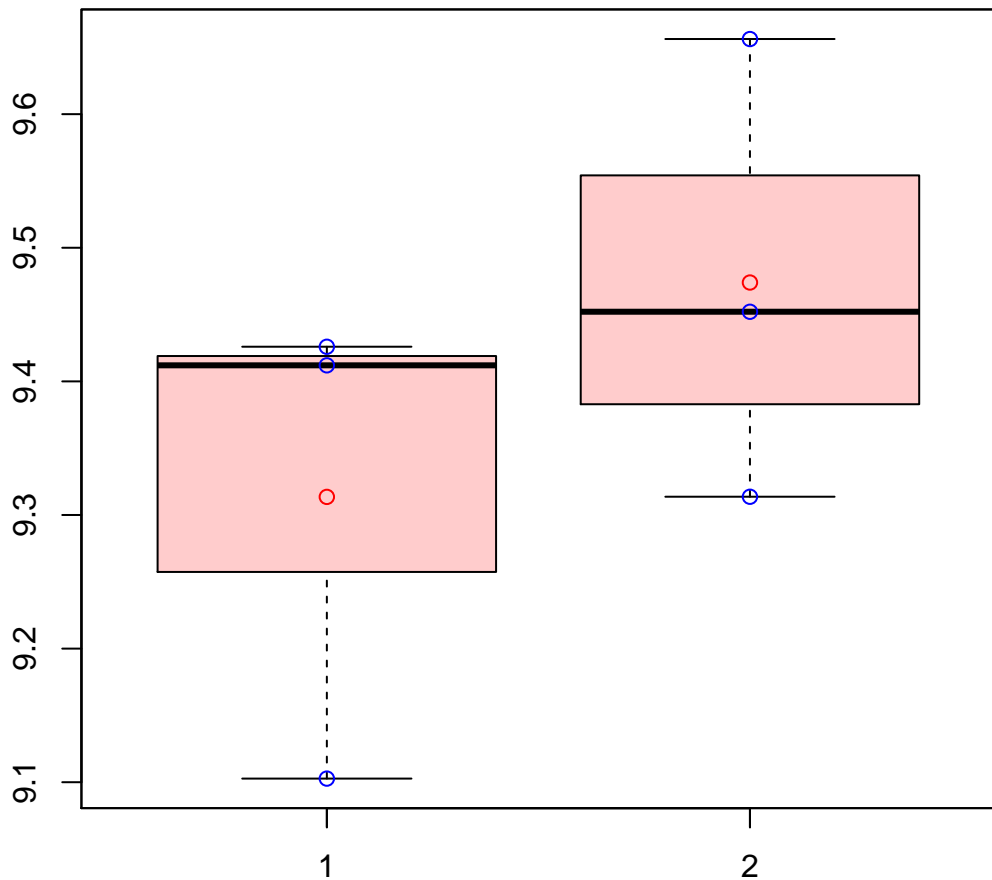

t-Test: p-value = 0.33

# CL63Contig17|CL63Contig17

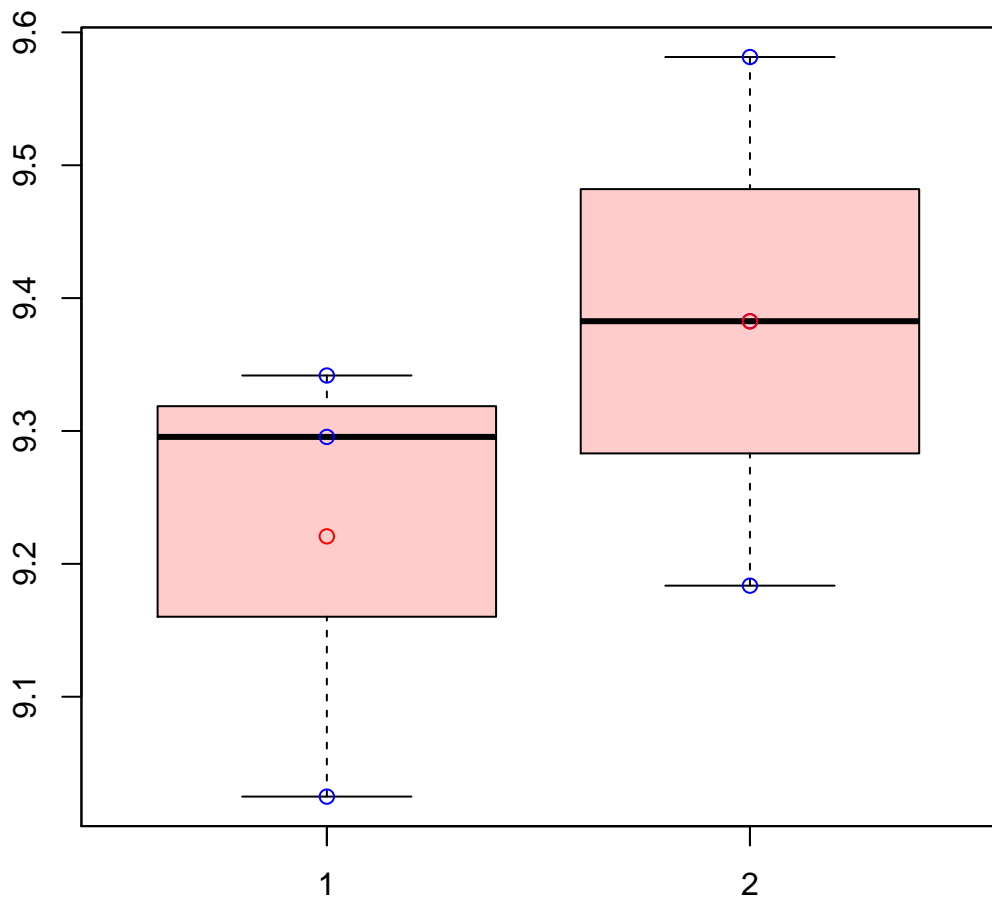

t-Test: p-value = 0.35

# CL63Contig22|CL63Contig22

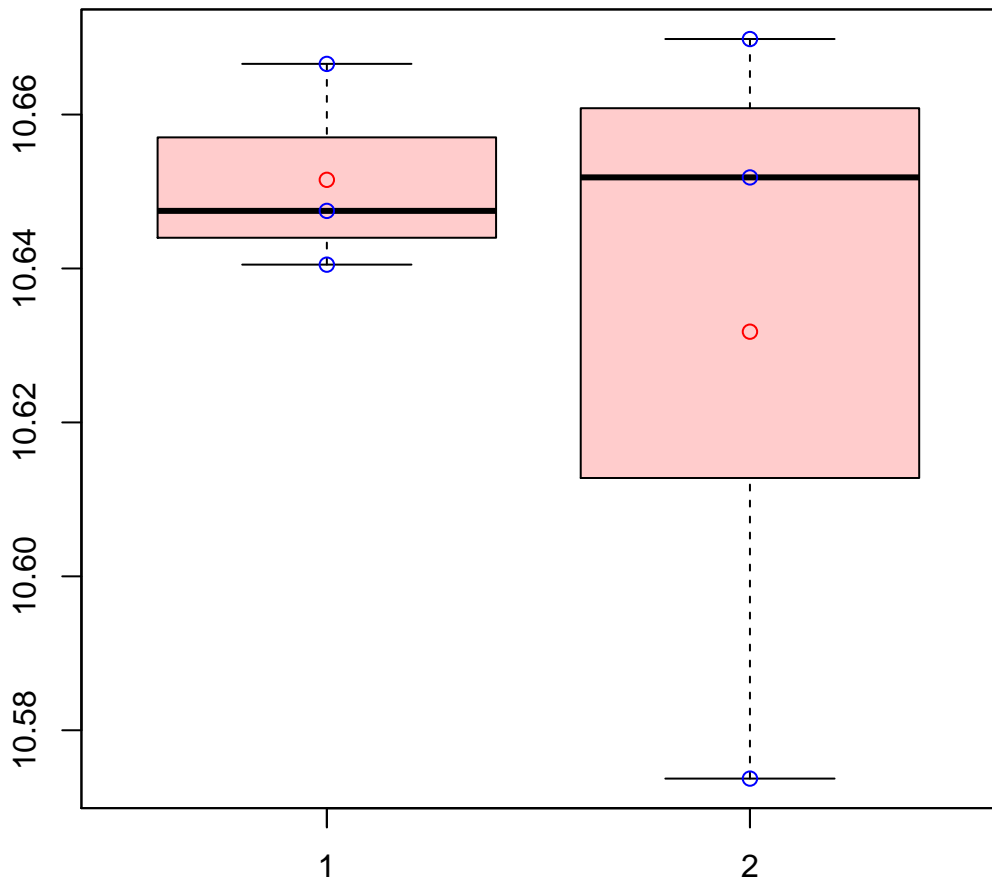

t-Test: p-value = 0.58

# CL63Contig23|CL63Contig23

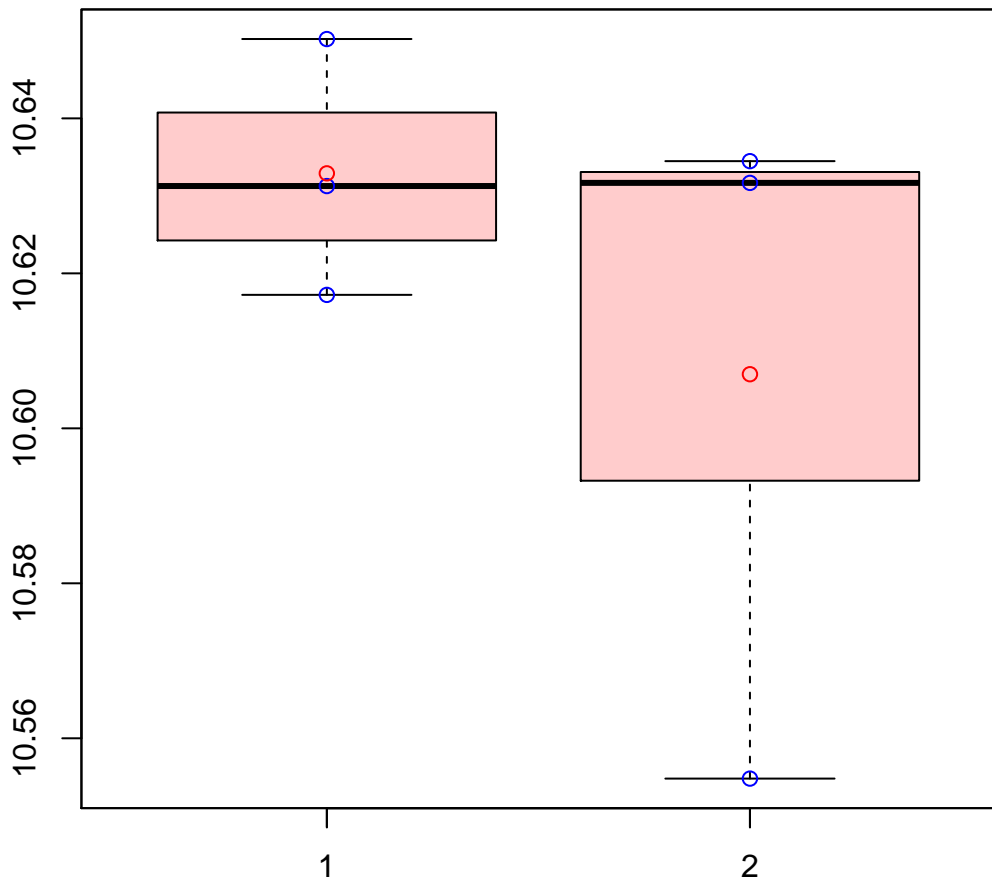

t-Test: p-value = 0.43

# CL63Contig29|CL63Contig29

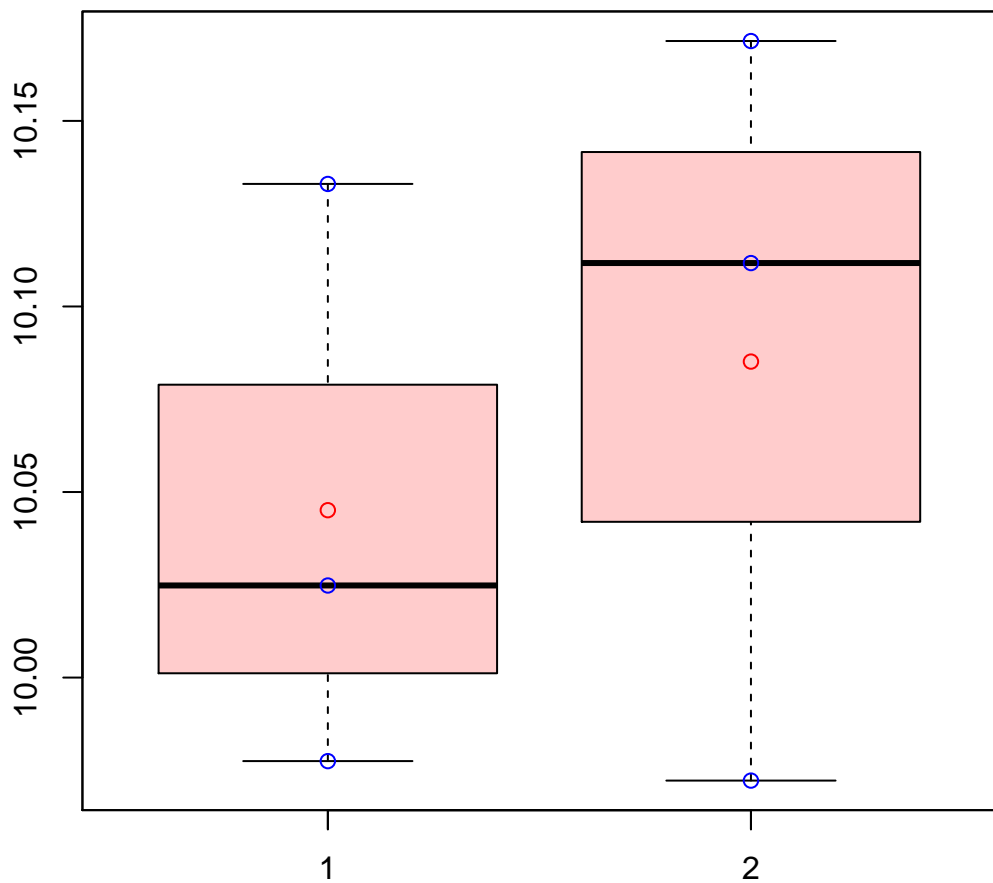

t-Test: p-value = 0.62

# CL63Contig2|CL63Contig2



t-Test: p-value = 0.35

# CL63Contig30|CL63Contig30

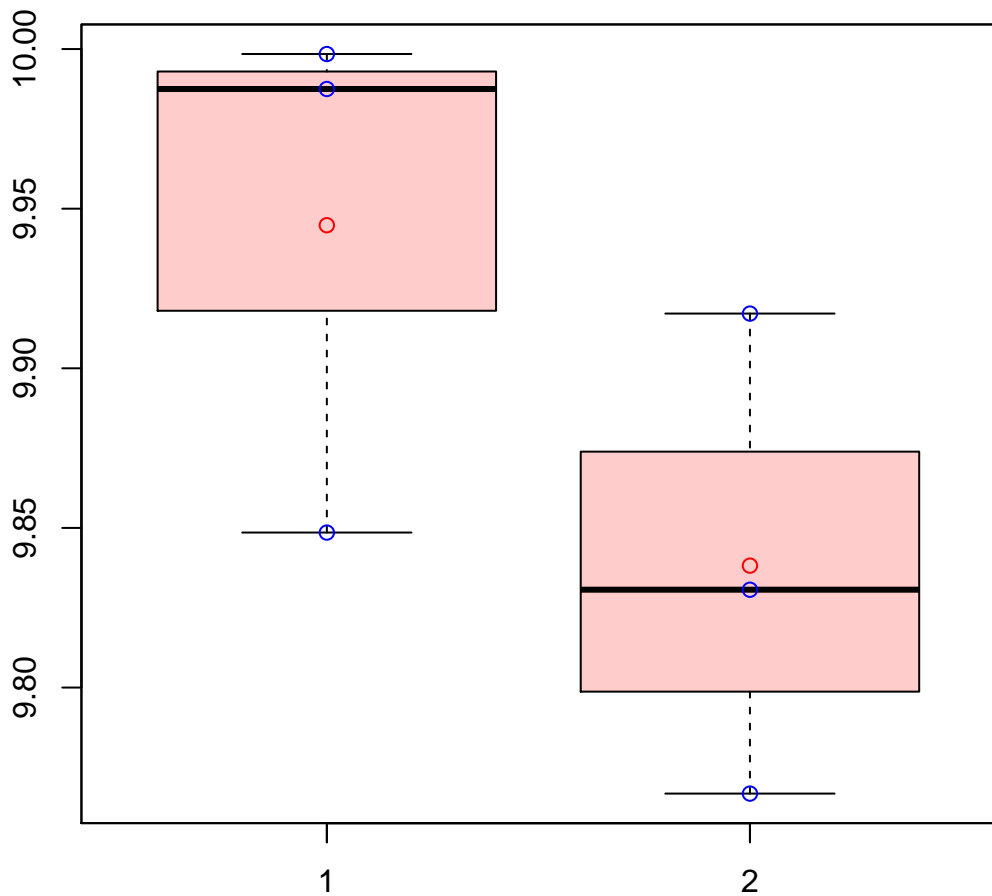

t-Test: p-value = 0.18

# CL63Contig31|CL63Contig31

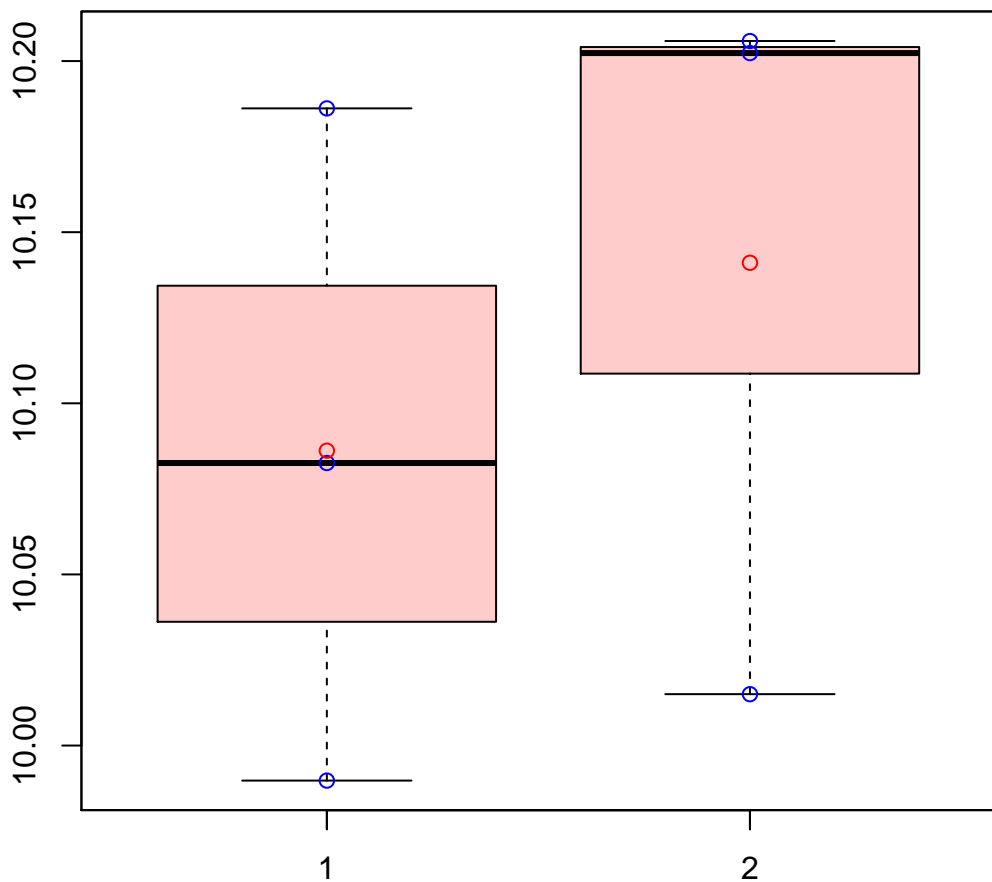

t-Test: p-value = 0.55



# CL63Contig4|CL63Contig4



t-Test: p-value = 0.35

# CL6407Contig3|CL6407Contig3

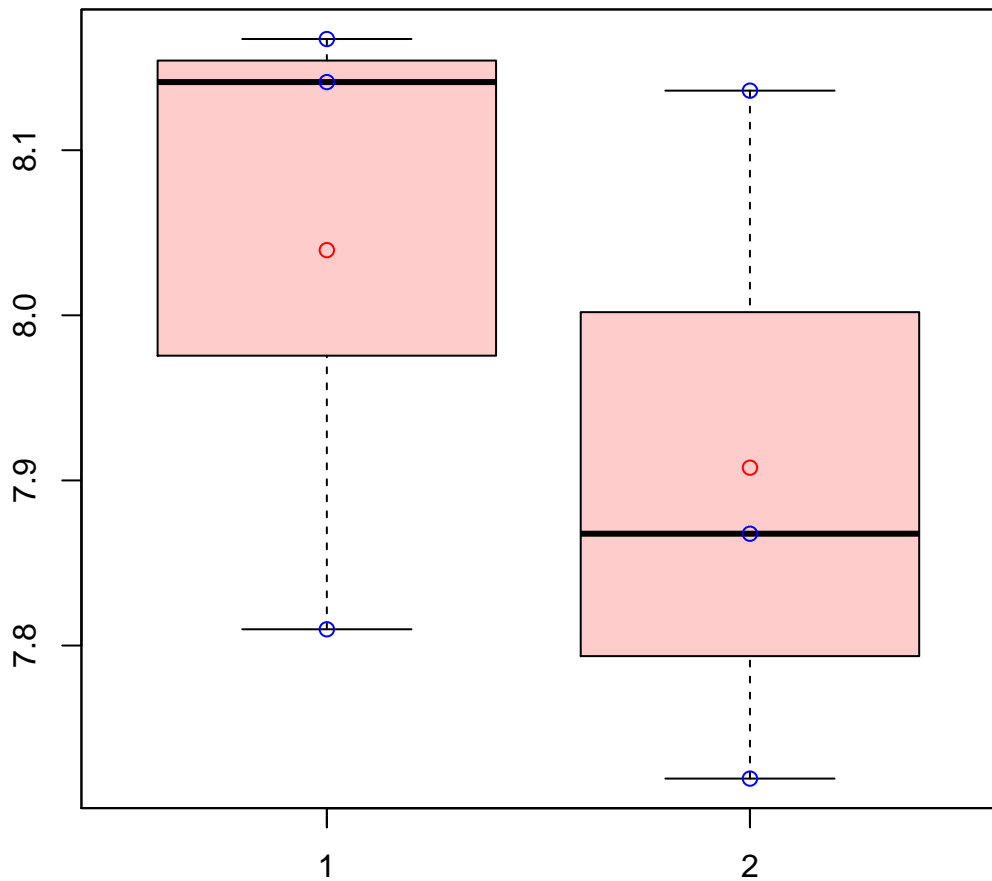

t-Test: p-value = 0.48

# CL6424Contig1|CL6424Contig1

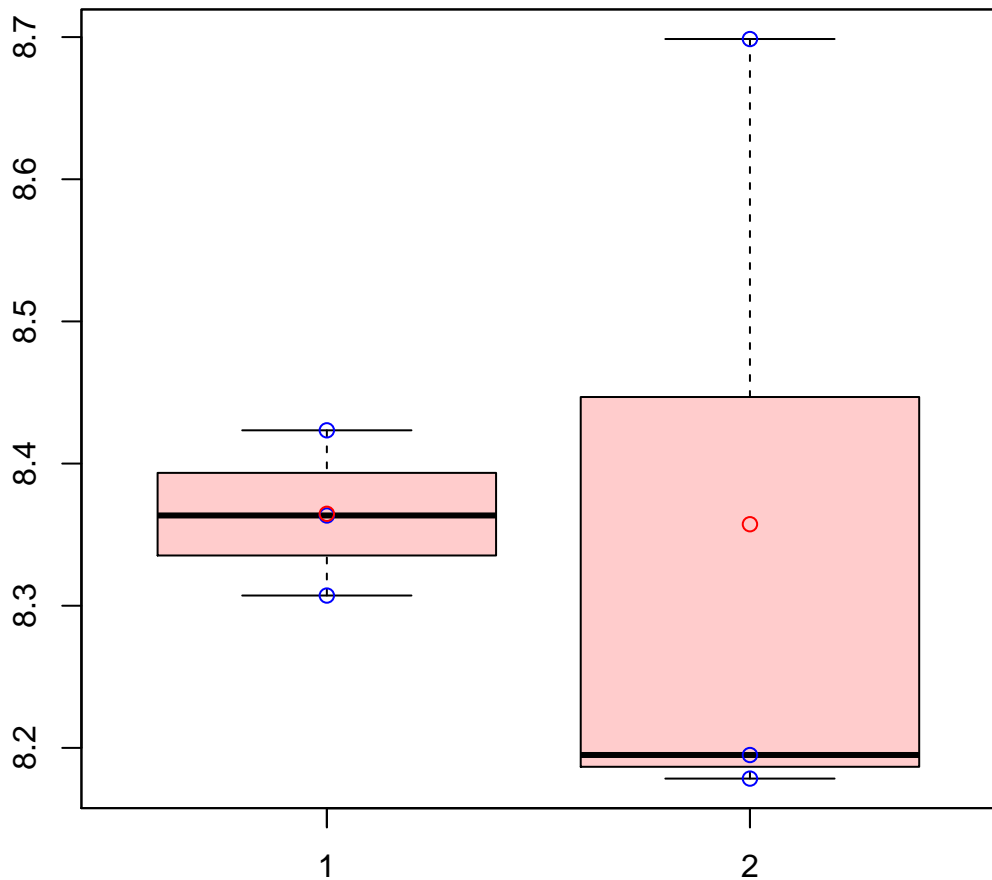

t-Test: p-value = 0.97

# CL6428Contig1|CL6428Contig1

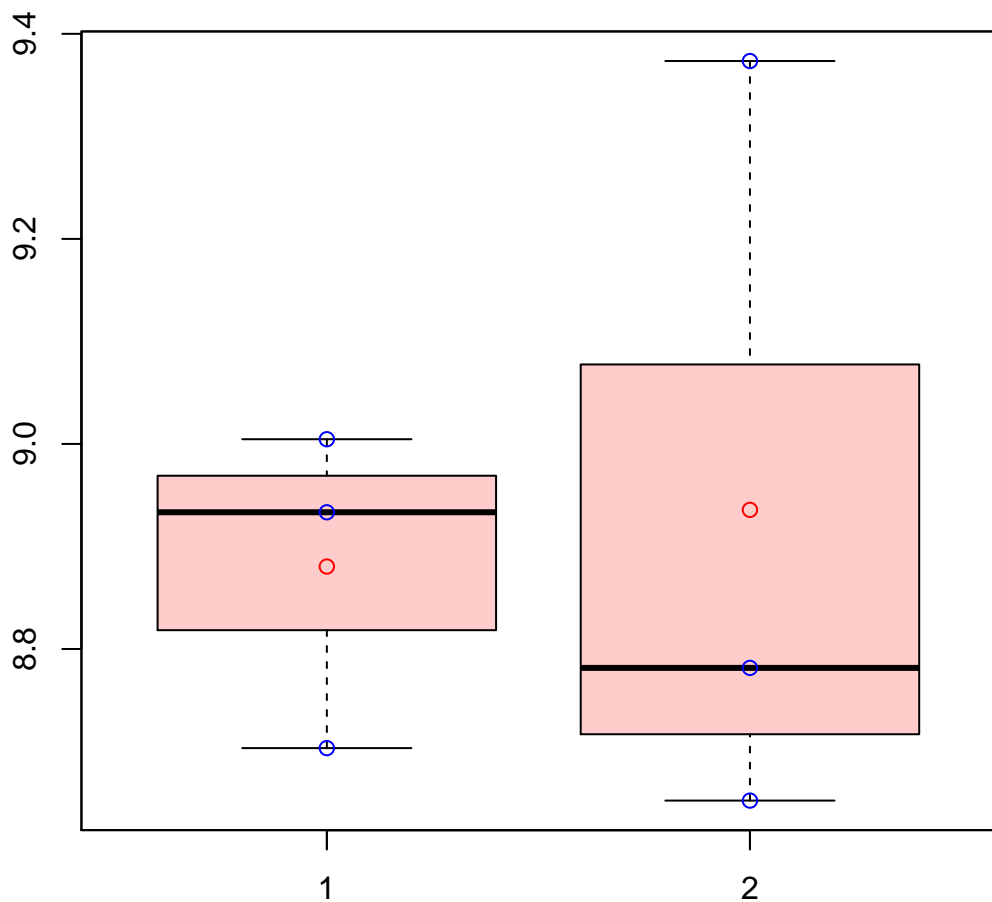

t-Test: p-value = 0.83

# CL6428Contig2|CL6428Contig2

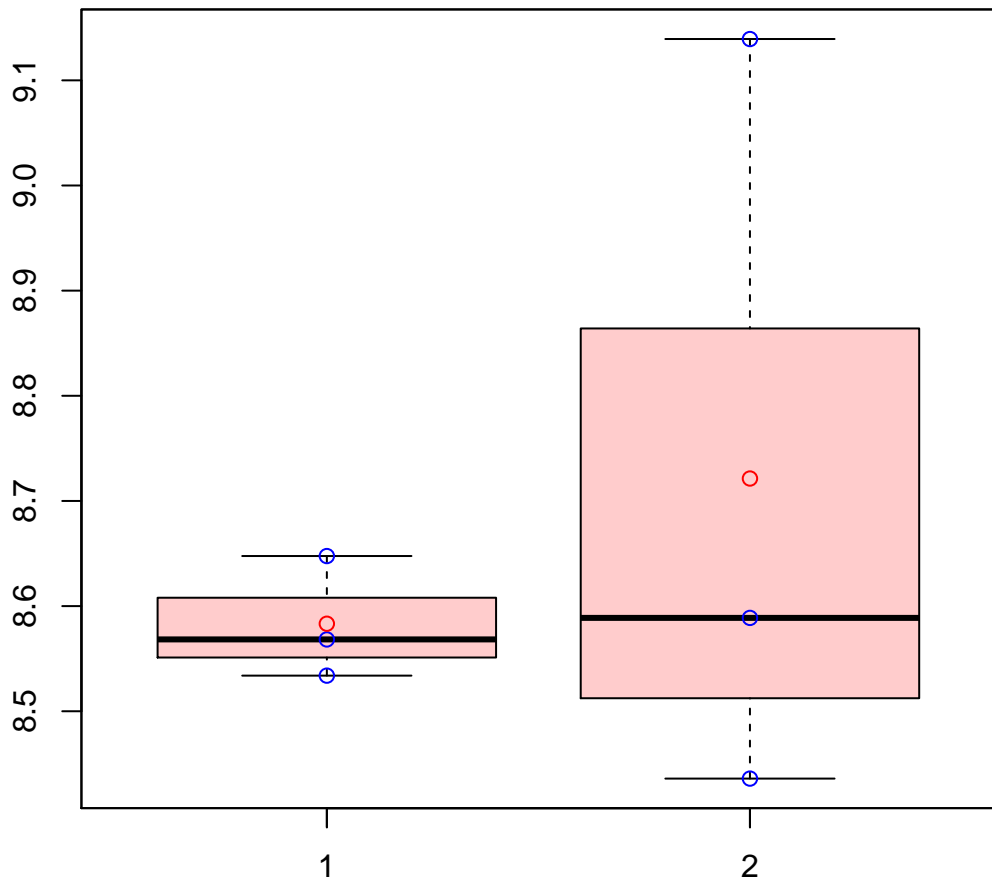

t-Test: p-value = 0.59

# CL6441Contig4|CL6441Contig4



t-Test: p-value = 0.35

# CL6443Contig1|CL6443Contig1

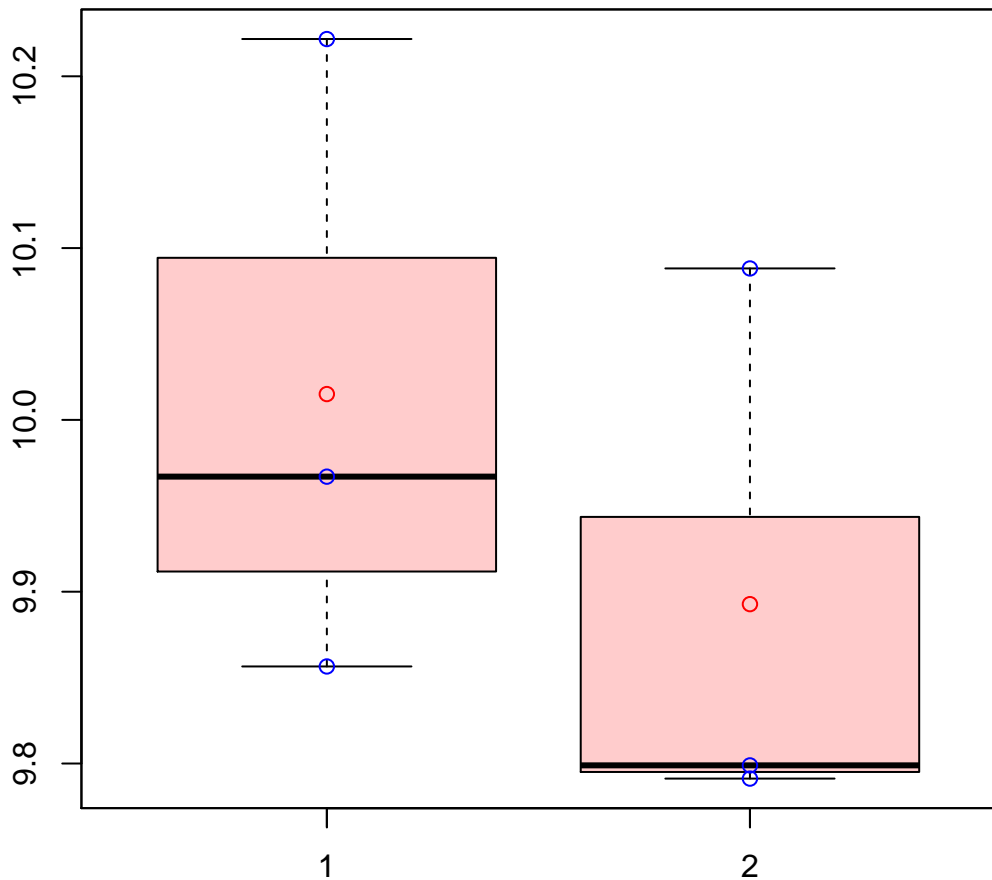

t-Test: p-value = 0.45

# CL6443Contig3|CL6443Contig3



t-Test: p-value = 0.45



# CL6443Contig4|CL6443Contig4

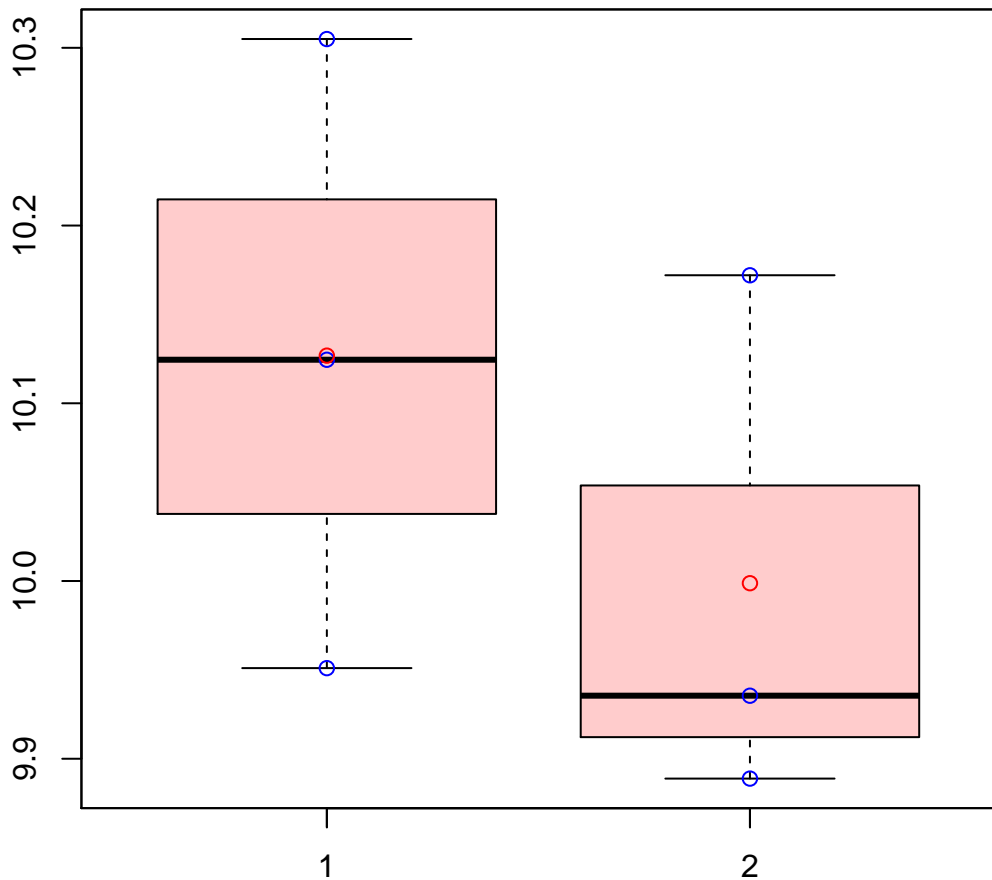

t-Test: p-value = 0.4

# CL6450Contig1|CL6450Contig1

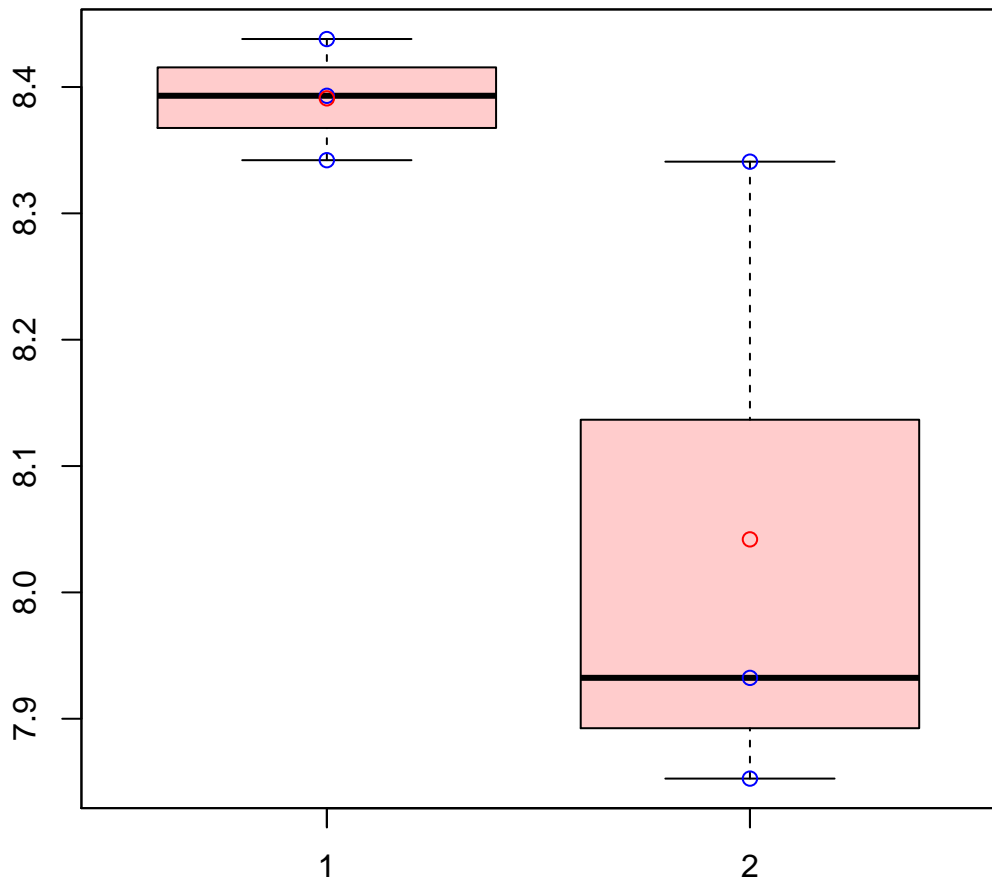

t-Test: p-value = 0.14

# CL6459Contig1|CL6459Contig1

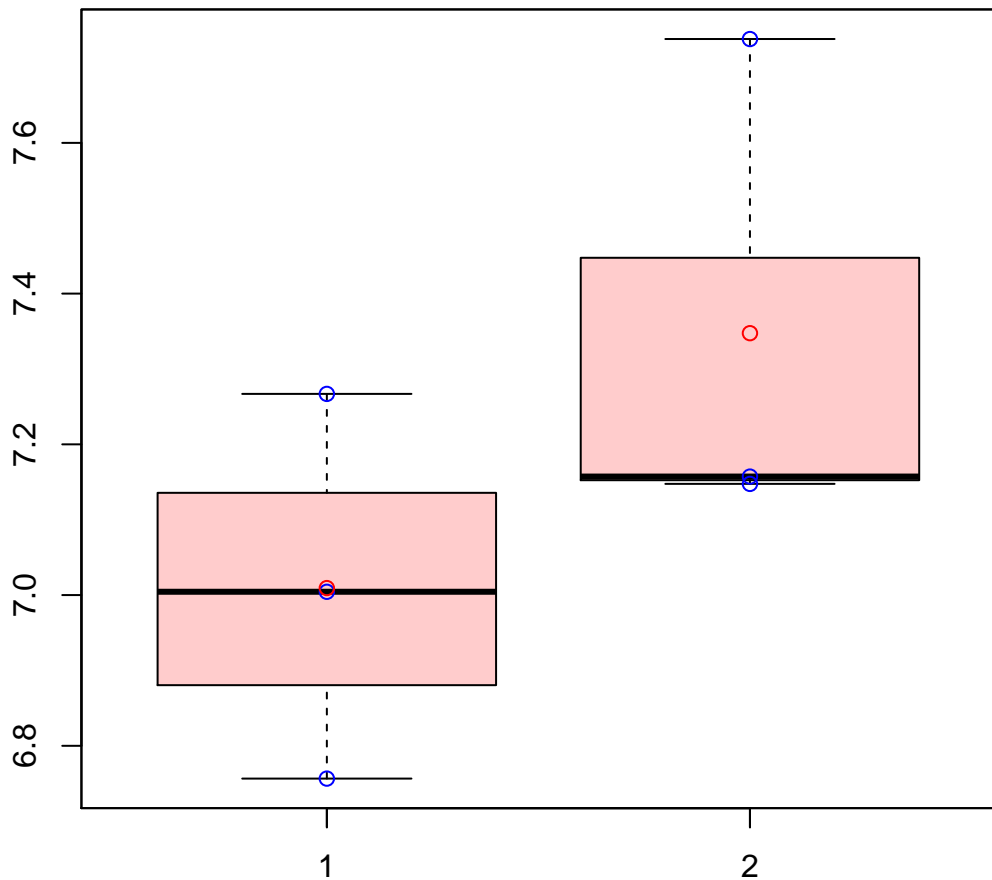

t-Test: p-value = 0.24

# CL645Contig1|CL645Contig1

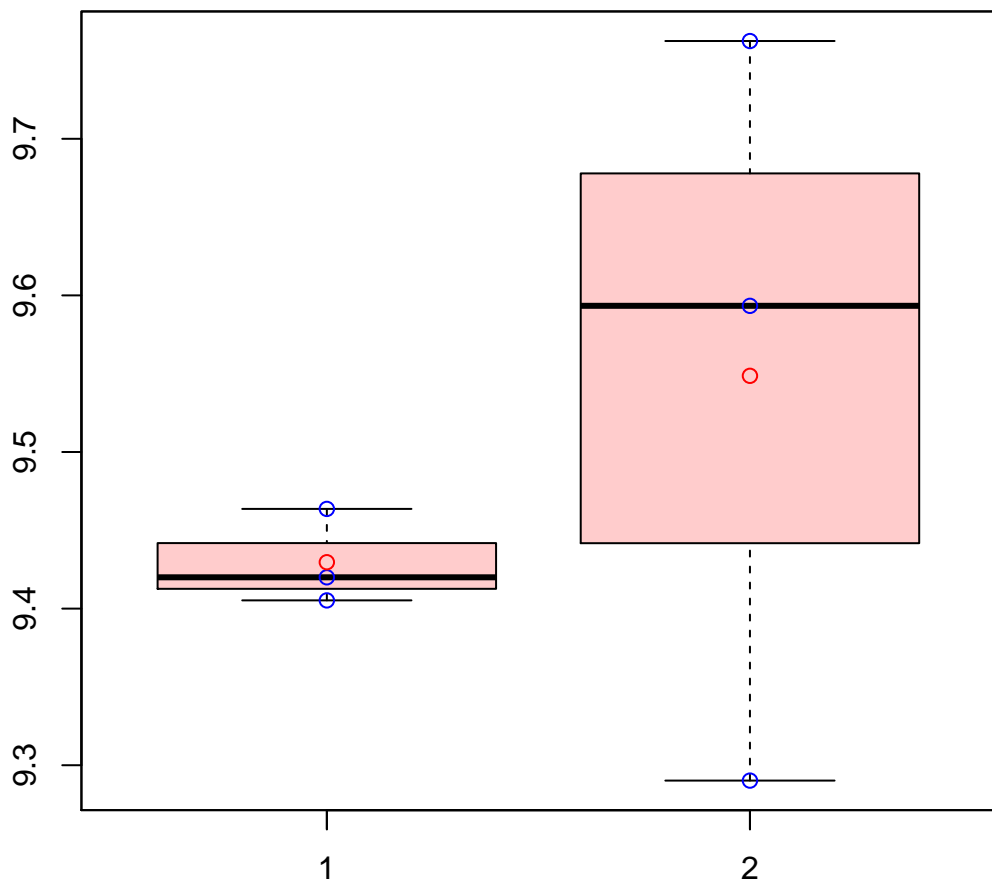

t-Test: p-value = 0.48

# CL6460Contig1|CL6460Contig1

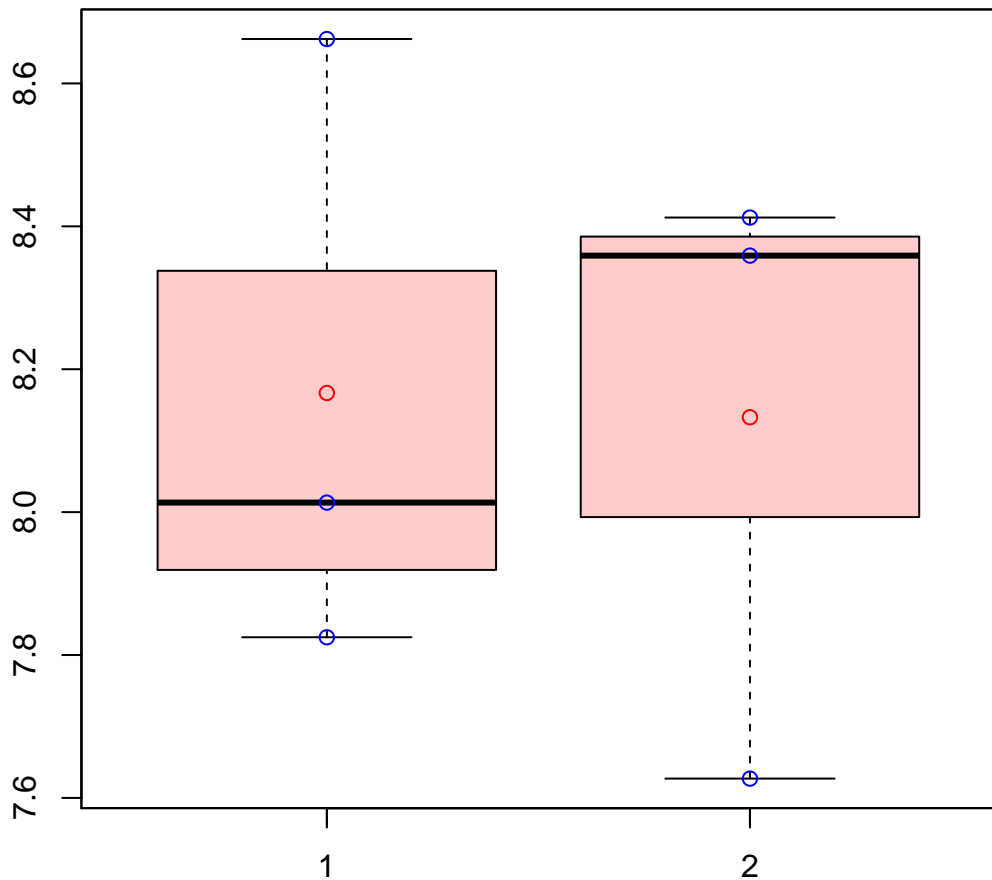

t-Test: p-value = 0.93

# CL6468Contig1|CL6468Contig1

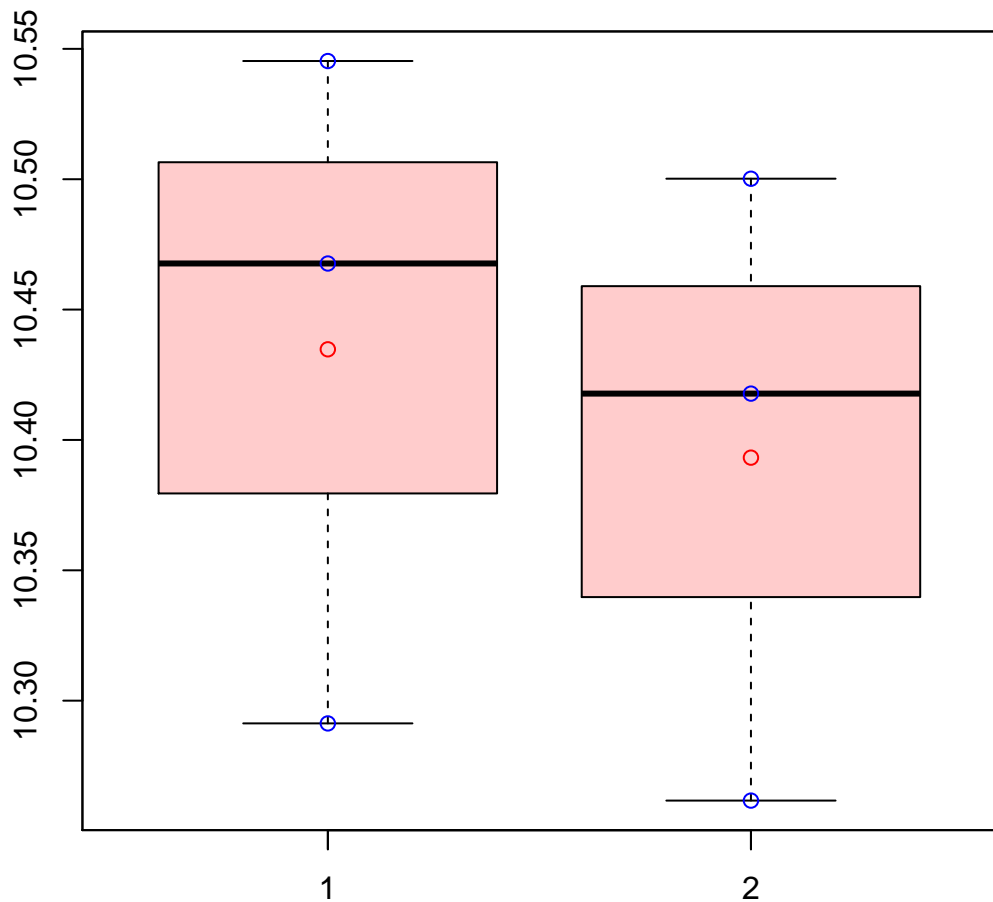

t-Test: p-value = 0.71

# CL6468Contig2|CL6468Contig2



t-Test: p-value = 0.71

# CL6470Contig1|CL6470Contig1

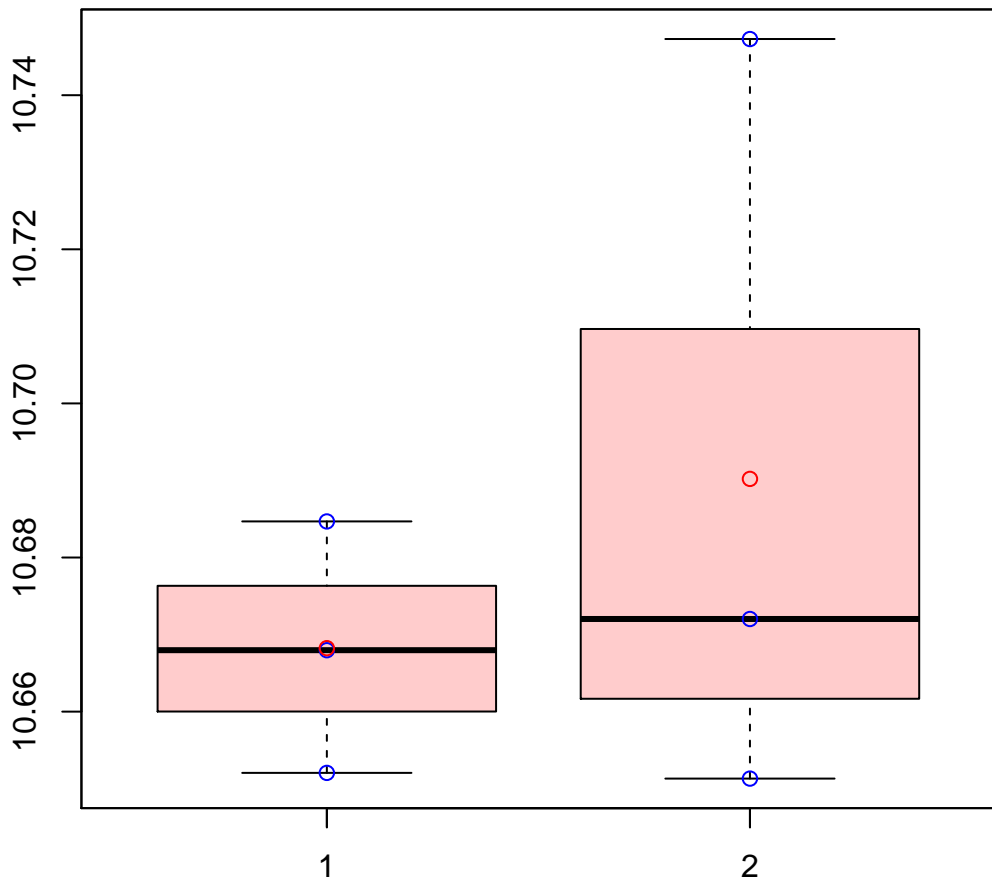

t-Test: p-value = 0.54



# CL6470Contig4|CL6470Contig4

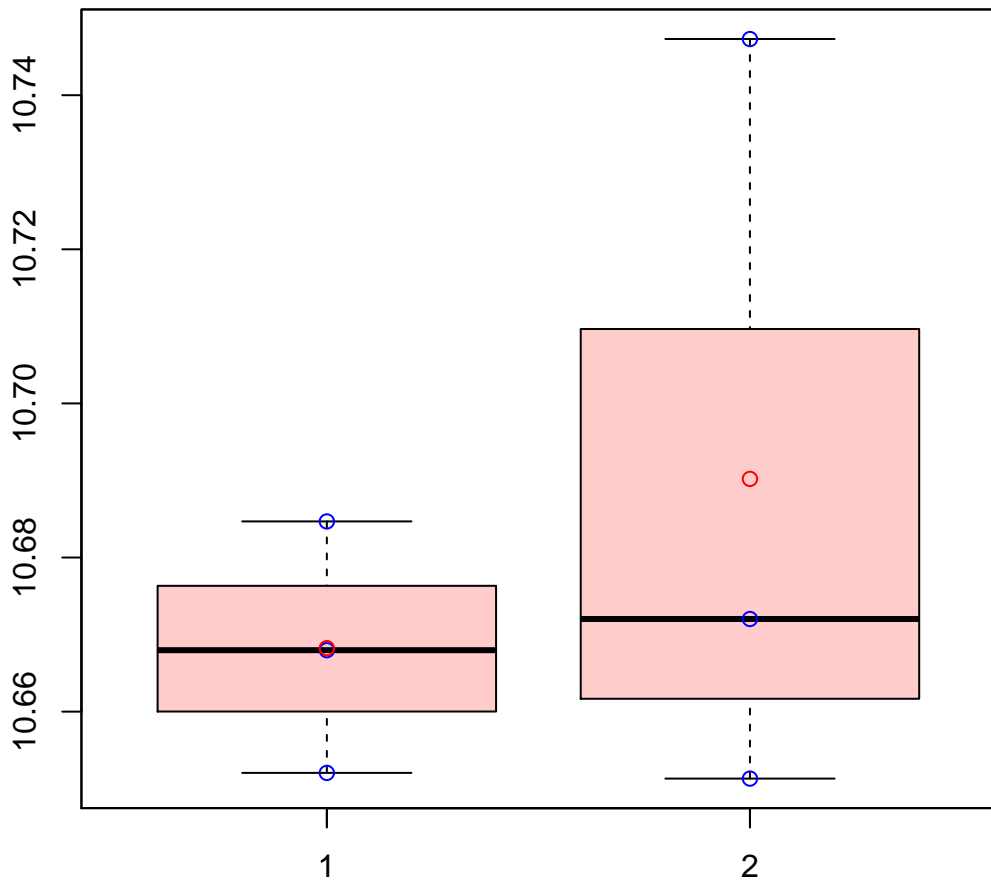

t-Test: p-value = 0.54

# CL6471Contig2|CL6471Contig2

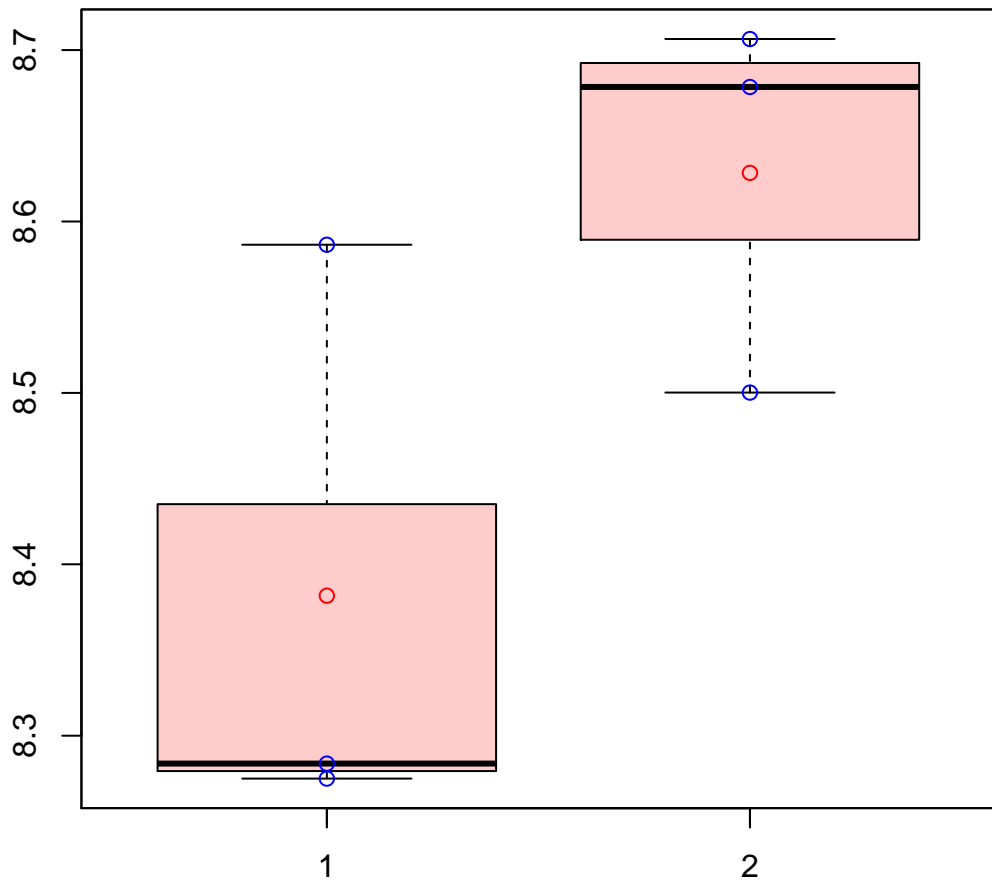

t-Test: p-value = 0.12

# CL6476Contig3|CL6476Contig3

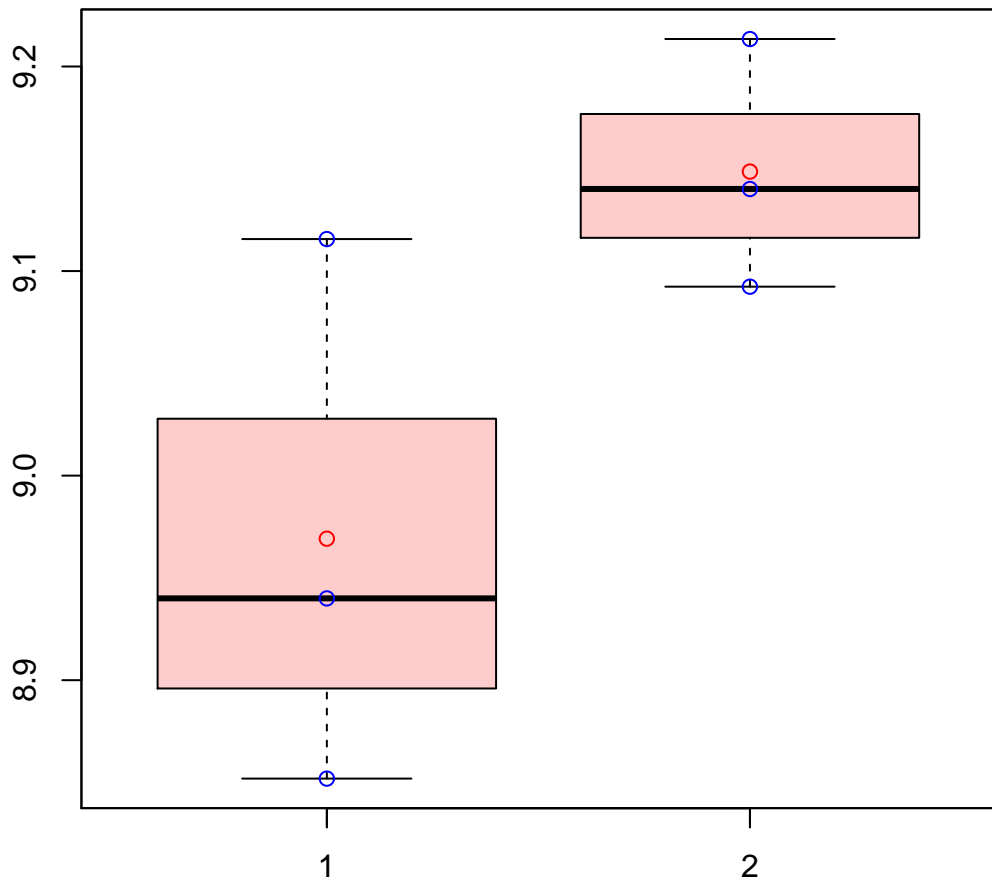

t-Test: p-value = 0.13

# CL6481Contig1|CL6481Contig1

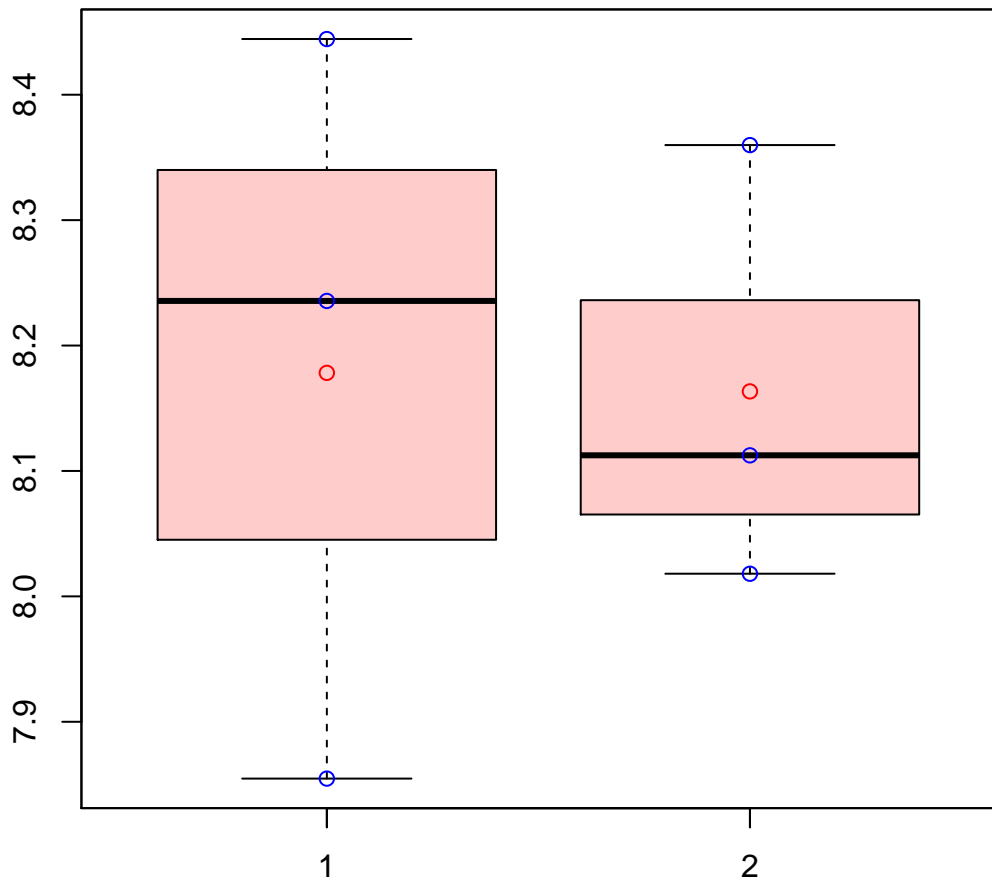

t-Test: p-value = 0.95

# CL6481Contig3|CL6481Contig3

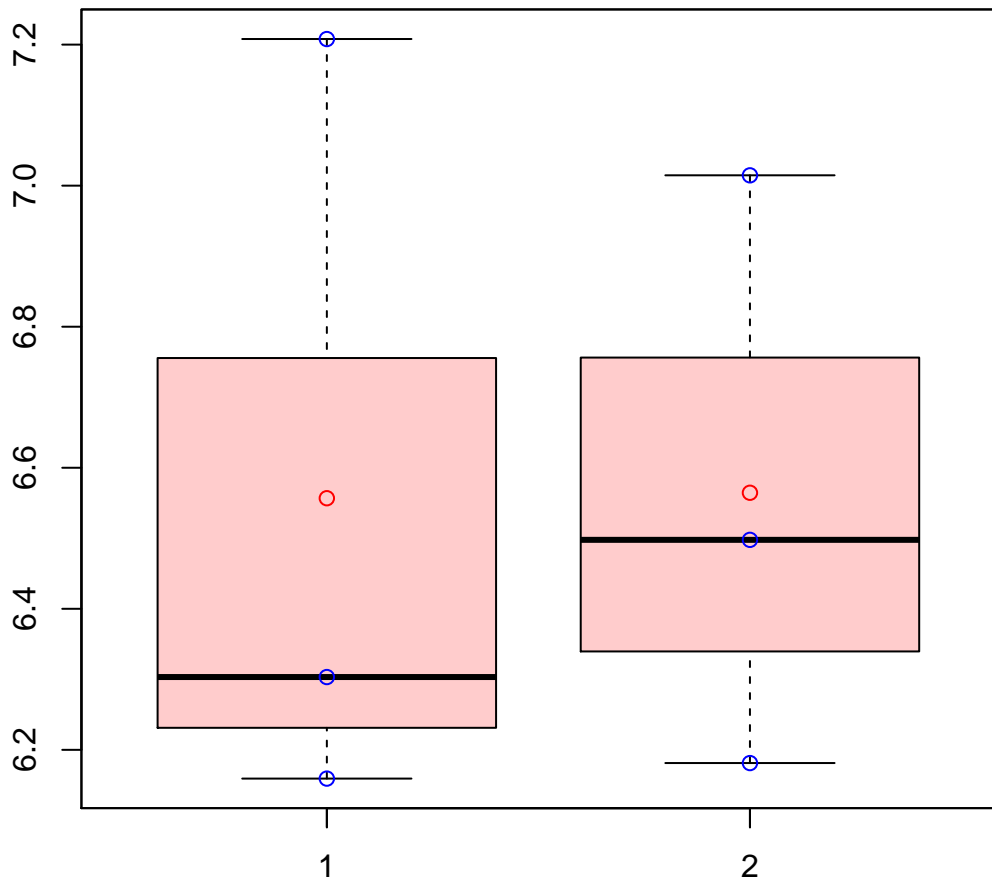

t-Test: p-value = 0.99

# CL6481Contig4|CL6481Contig4



t-Test: p-value = 0.99

# CL6483Contig3|CL6483Contig3

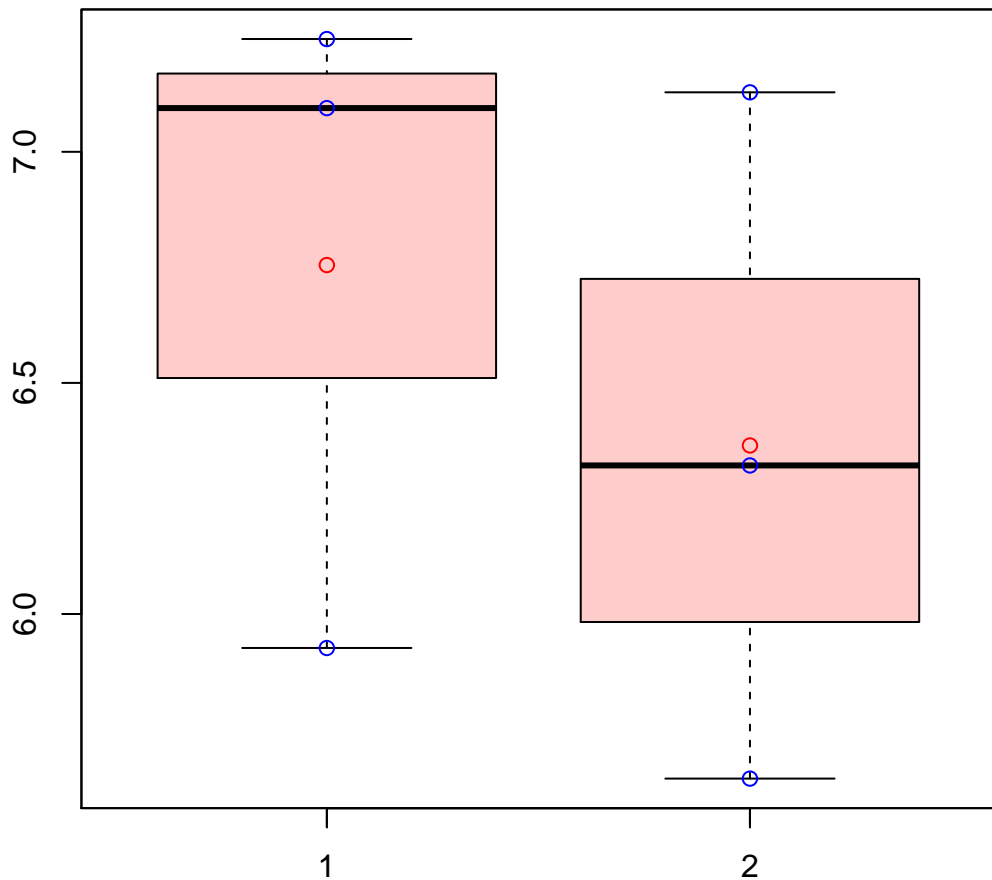

t-Test: p-value = 0.55

# CL6491Contig4|CL6491Contig4

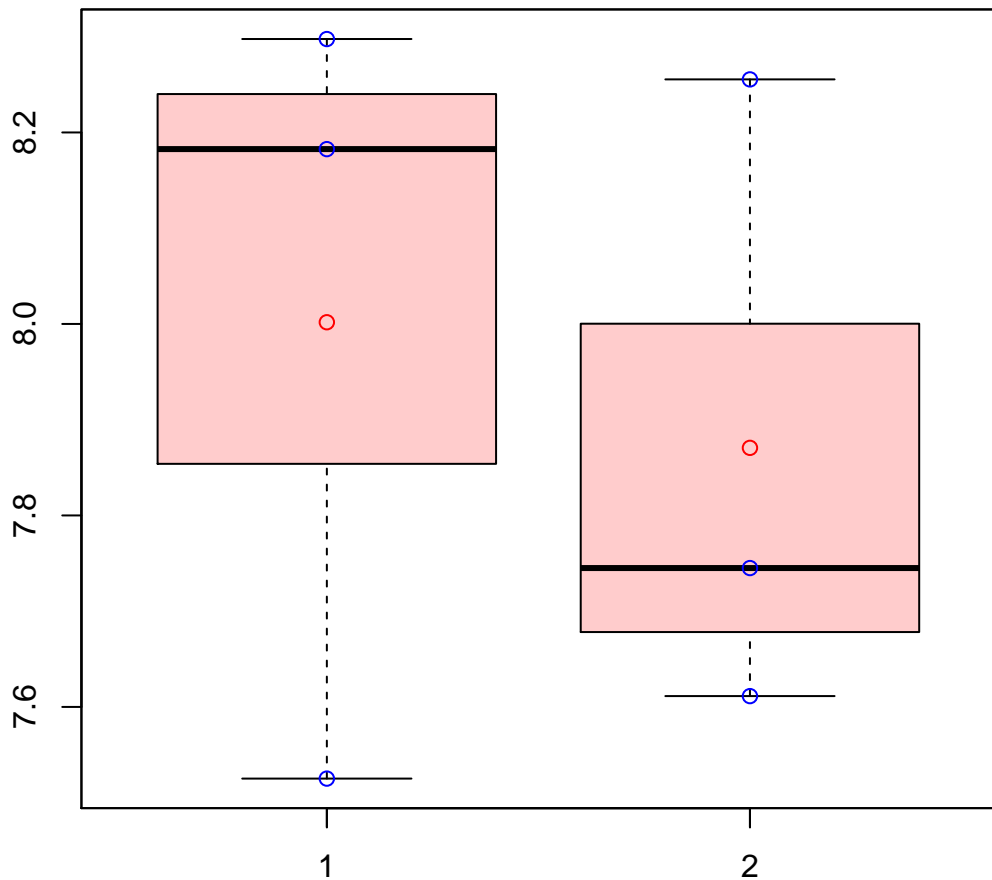

t-Test: p-value = 0.7



# CL6492Contig1|CL6492Contig1

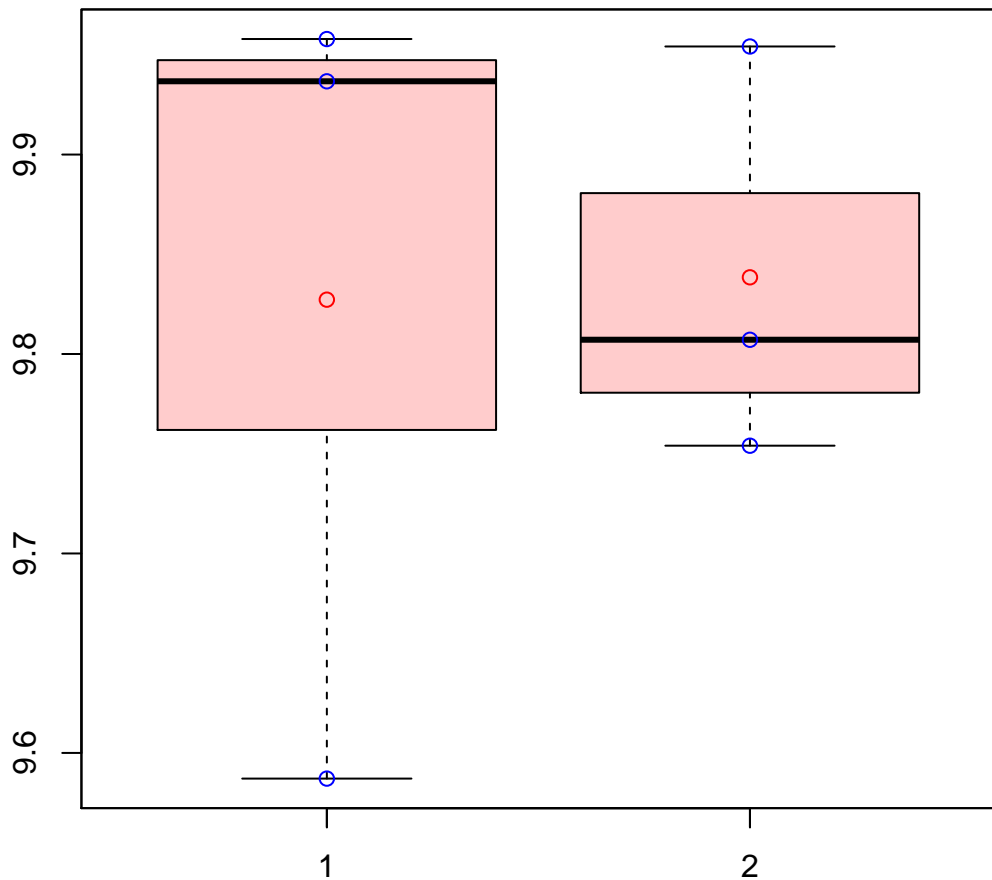

t-Test: p-value = 0.94

# CL6495Contig2|CL6495Contig2

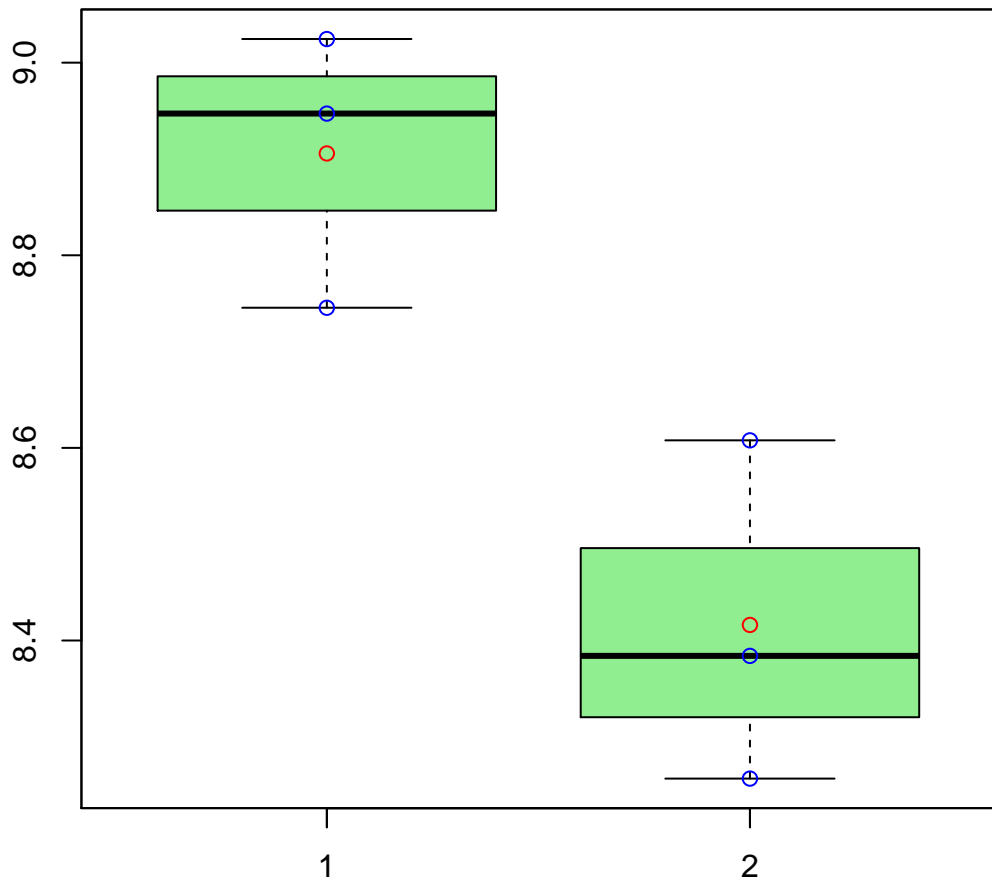

t-Test: p-value = 0.02

# CL6504Contig2|CL6504Contig2

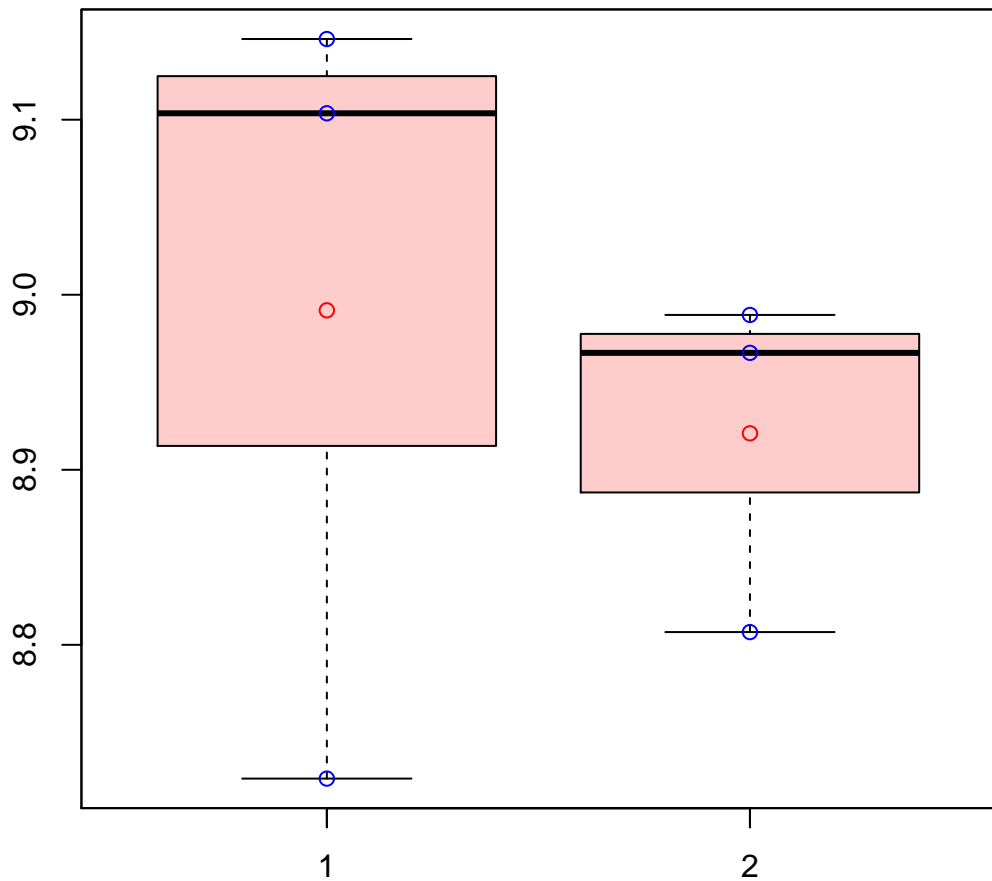

t-Test: p-value = 0.67

# CL6509Contig1|CL6509Contig1

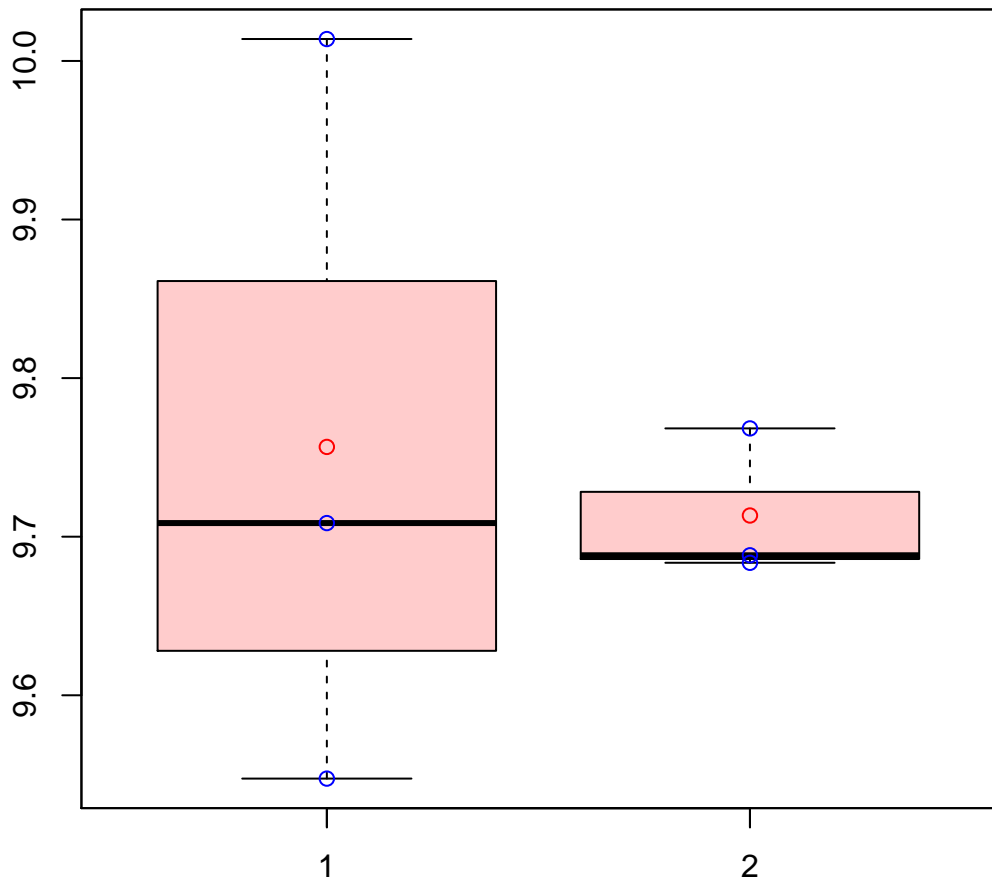

t-Test: p-value = 0.78

# CL650Contig12|CL650Contig12

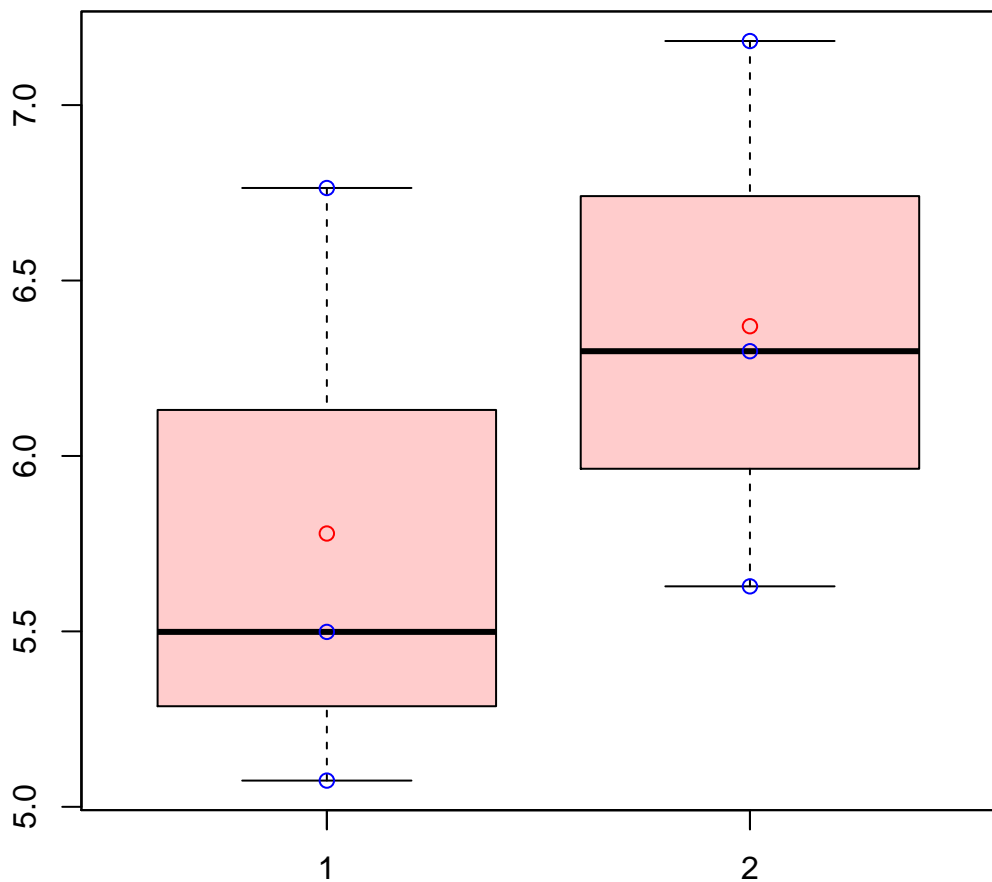

t-Test: p-value = 0.43

# CL6510Contig2|CL6510Contig2

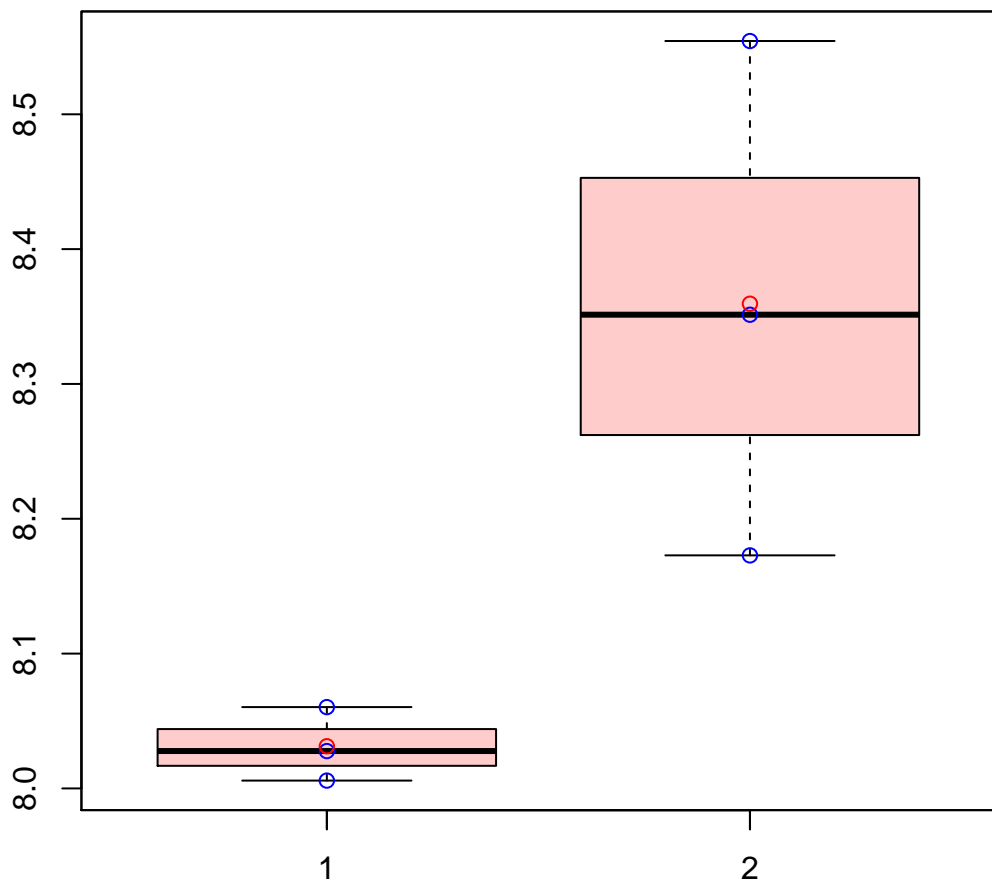

t-Test: p-value = 0.09

# CL6511Contig1|CL6511Contig1

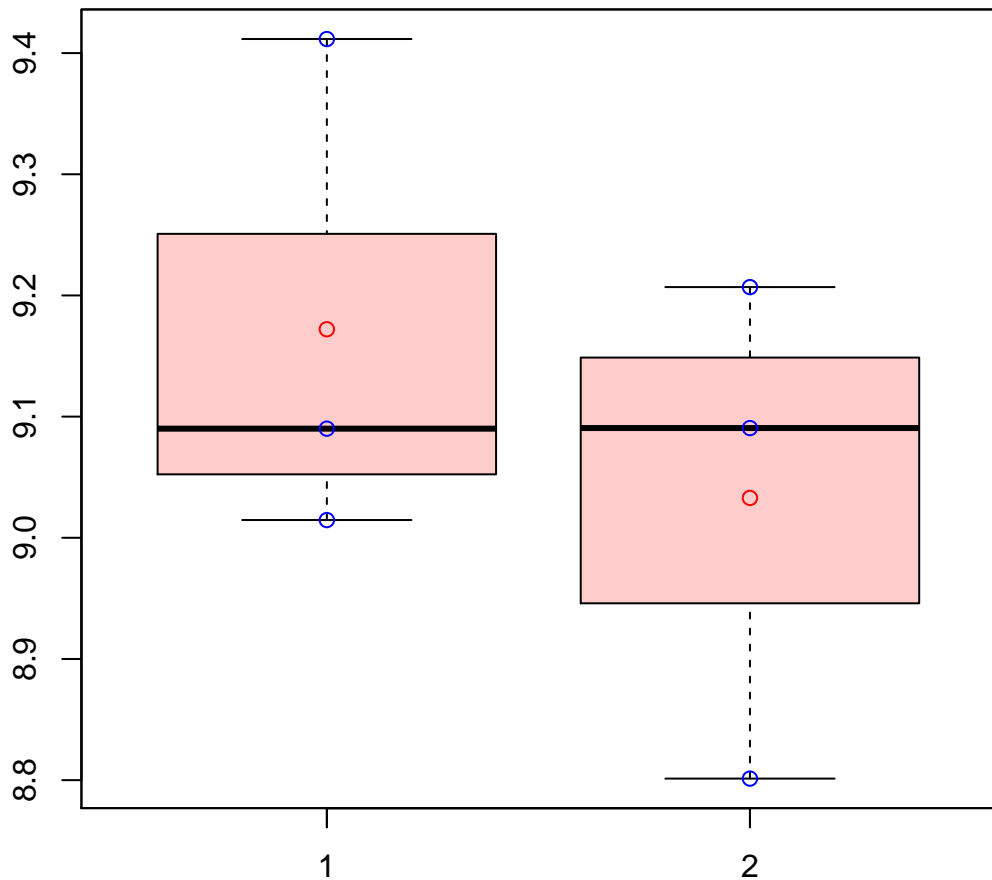

t-Test: p-value = 0.46

# CL6511Contig2|CL6511Contig2

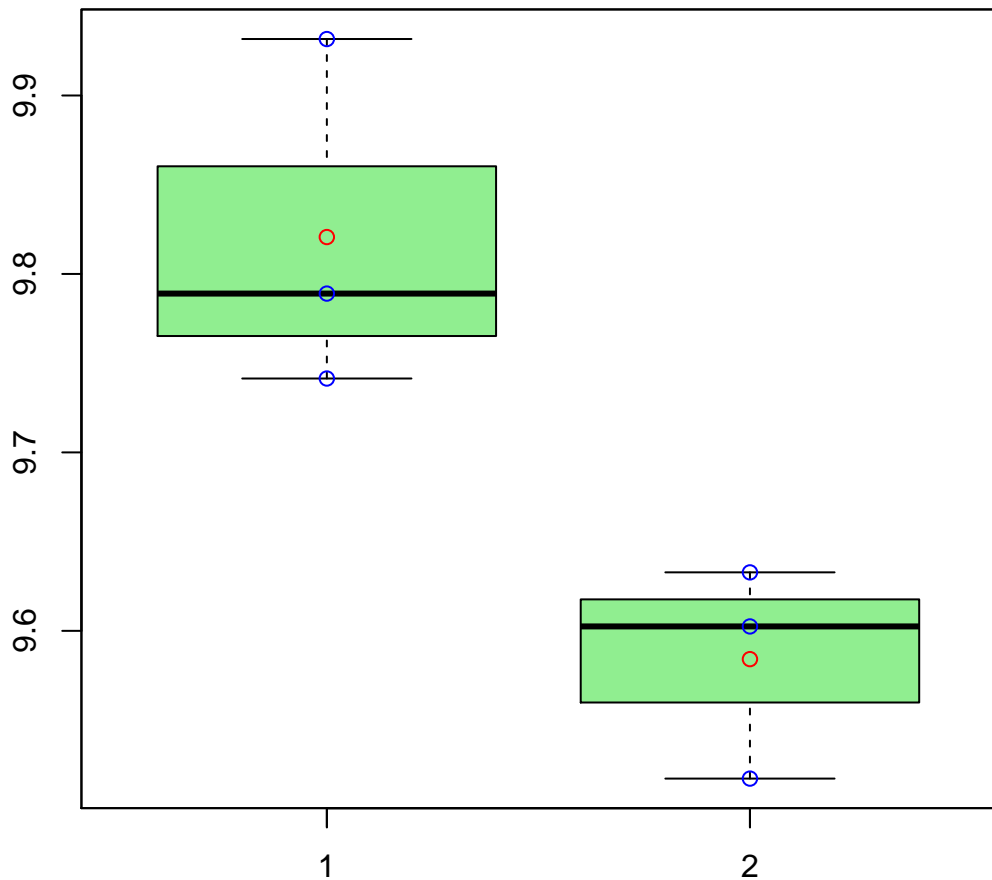

t-Test: p-value = 0.03



# CL6512Contig2|CL6512Contig2

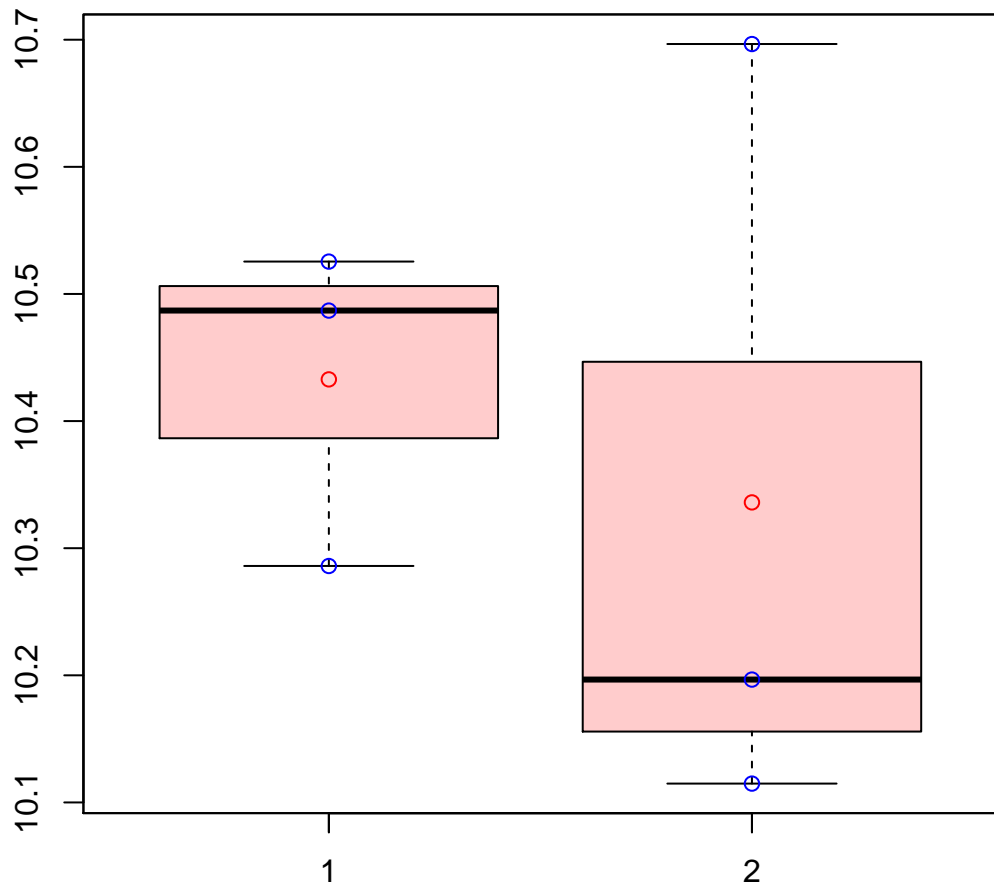

t-Test: p-value = 0.66

# CL6513Contig1|CL6513Contig1

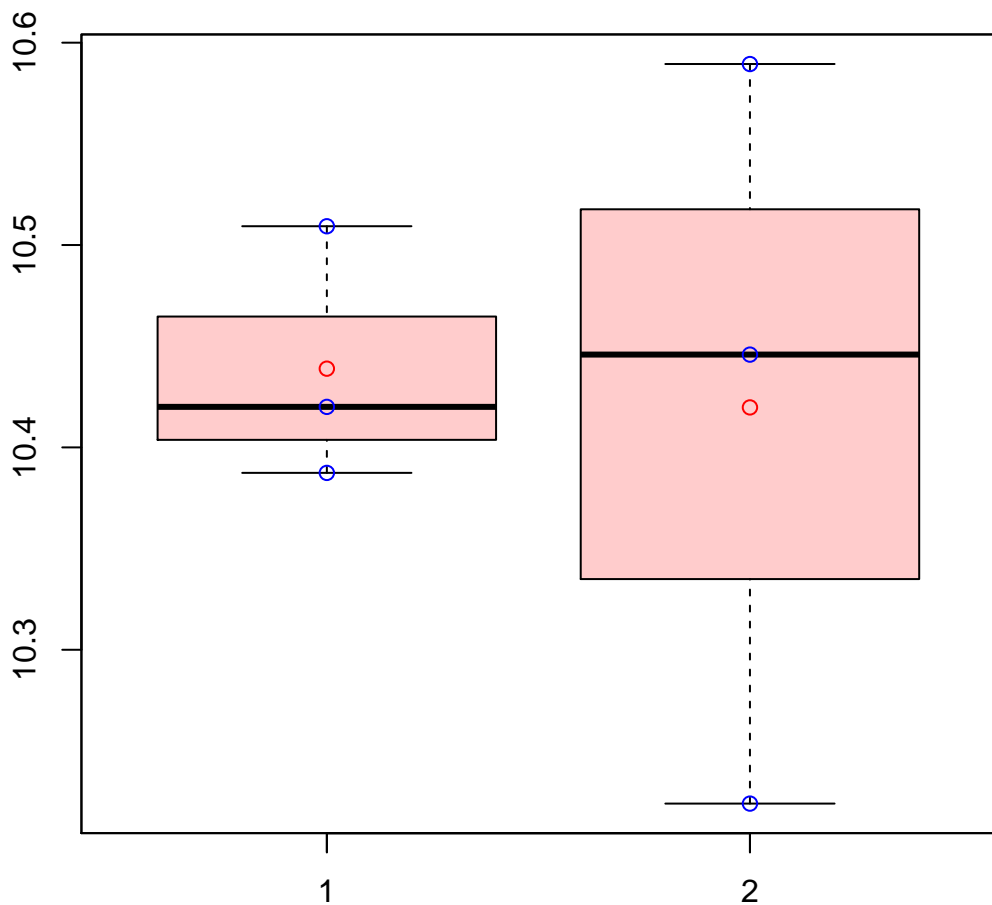

t-Test: p-value = 0.88

# CL6513Contig2|CL6513Contig2

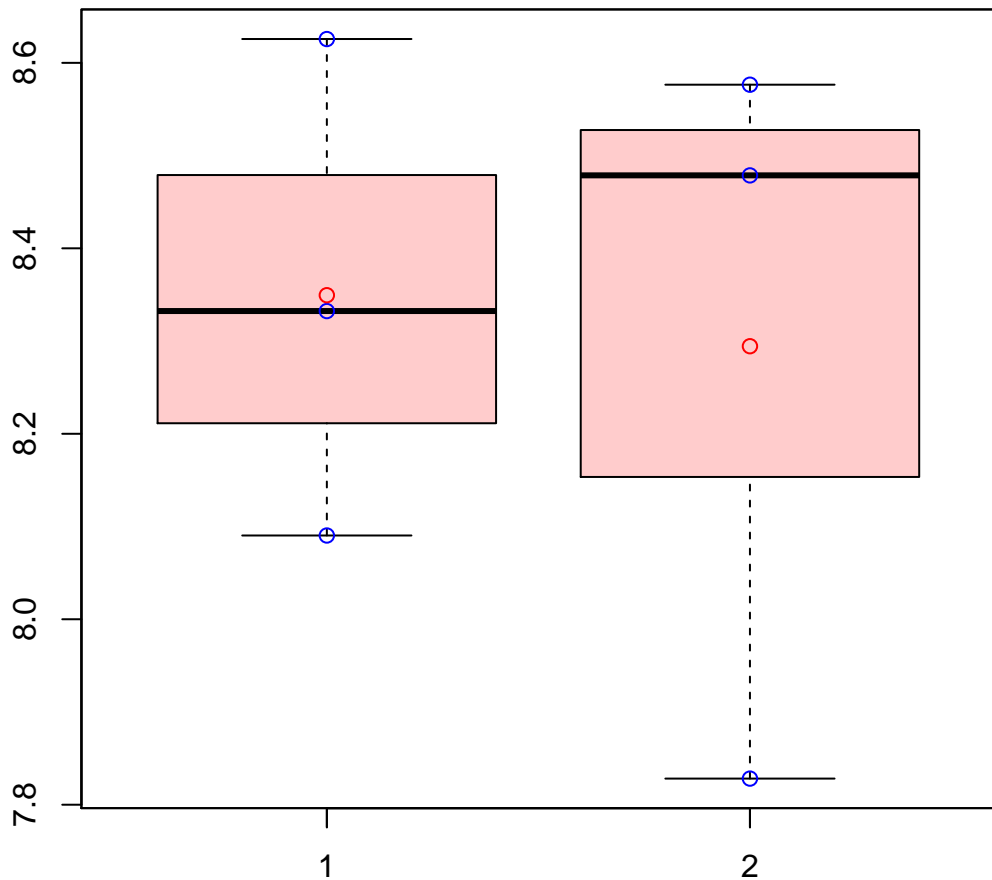

t-Test: p-value = 0.86

# CL6517Contig1|CL6517Contig1

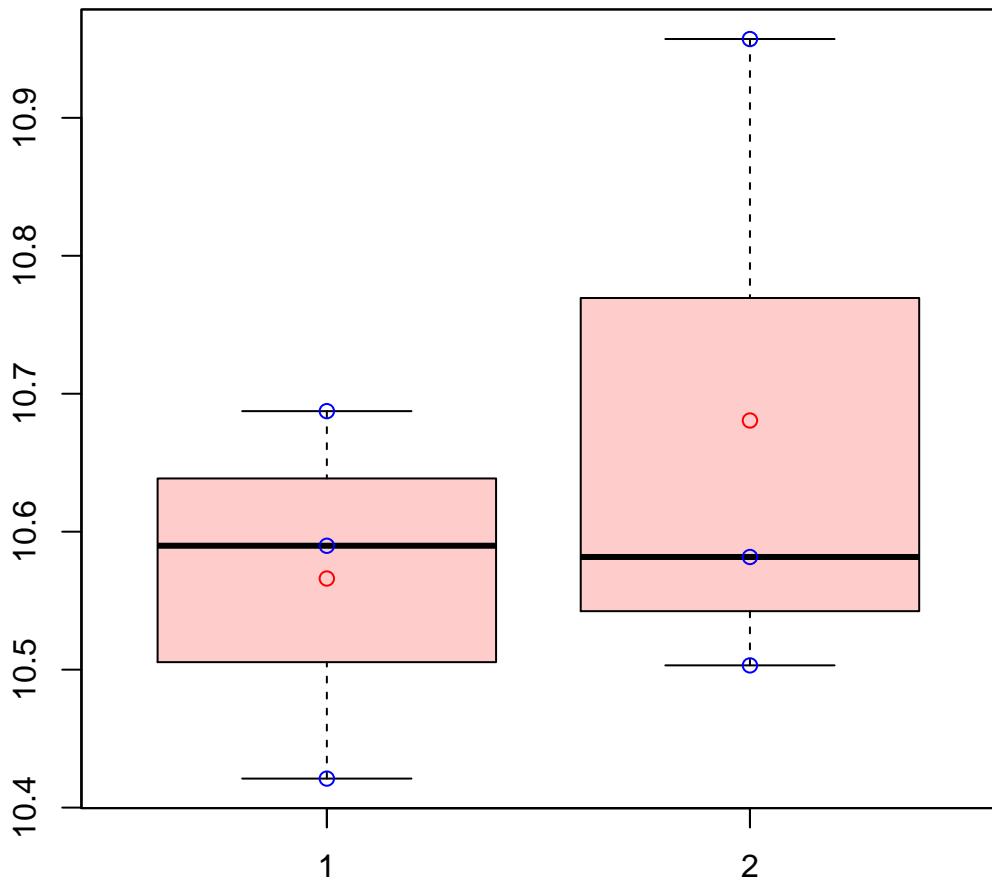

t-Test: p-value = 0.52

# CL6517Contig3|CL6517Contig3

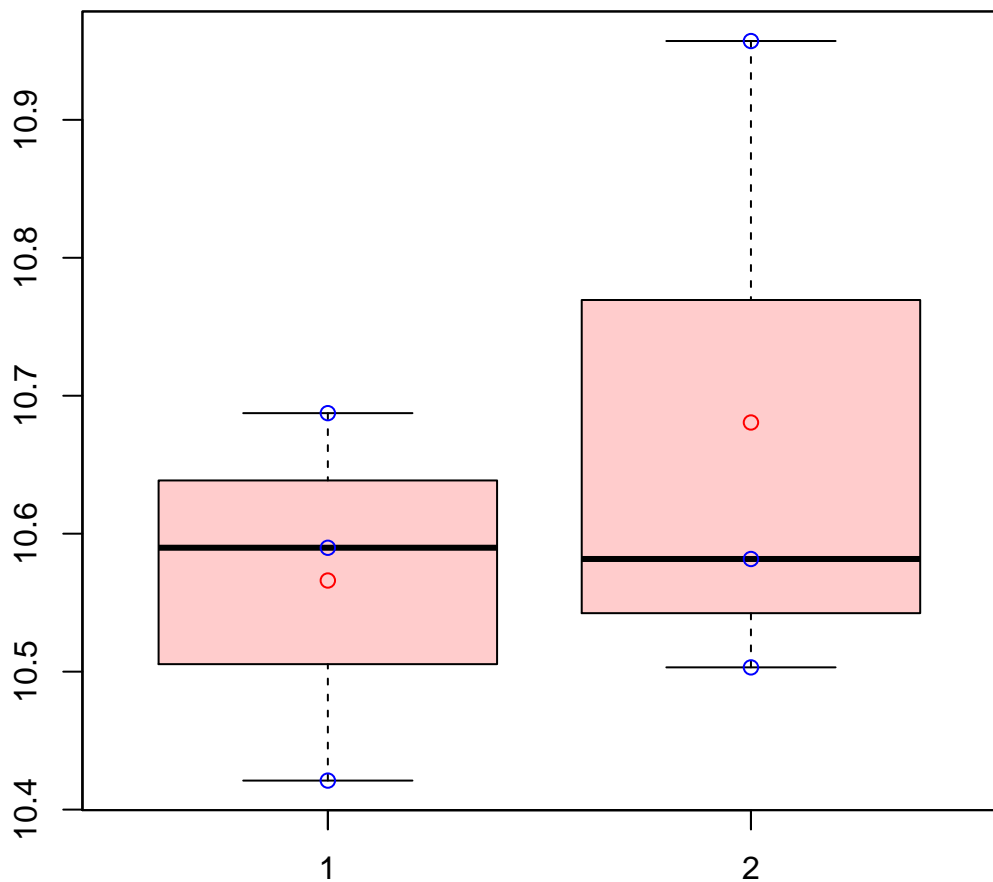

t-Test: p-value = 0.52

# CL6520Contig1|CL6520Contig1

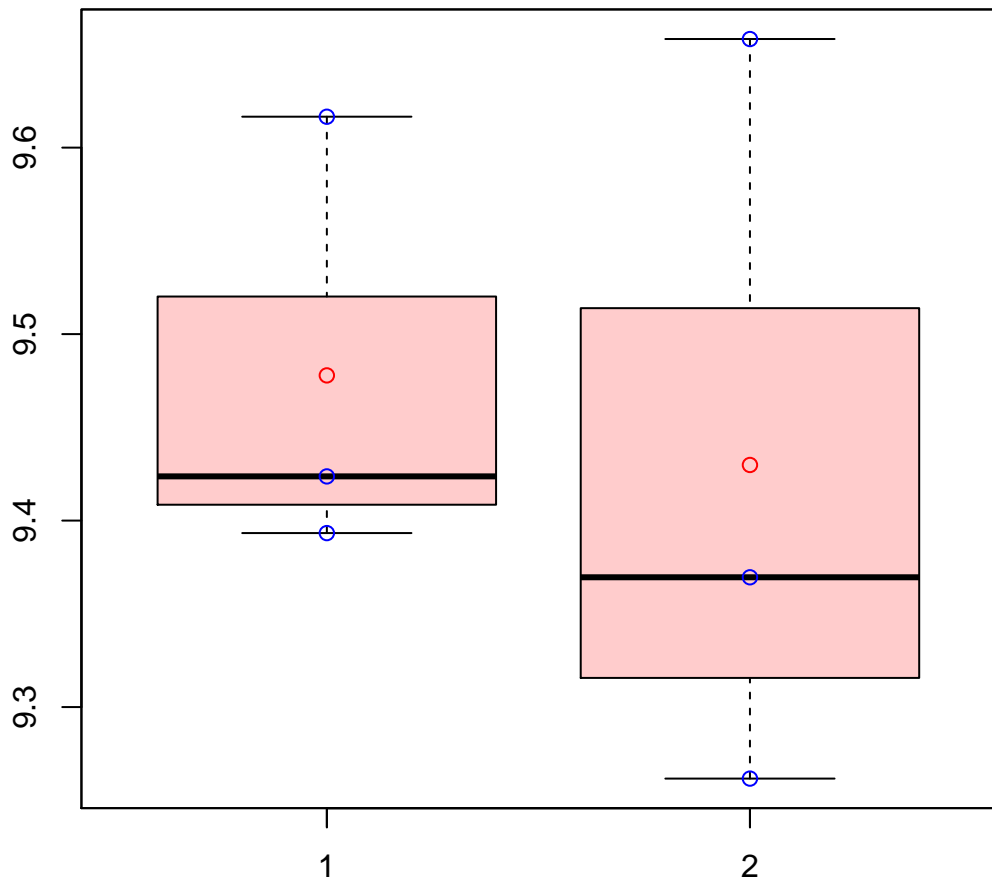

t-Test: p-value = 0.75

# CL6522Contig1|CL6522Contig1

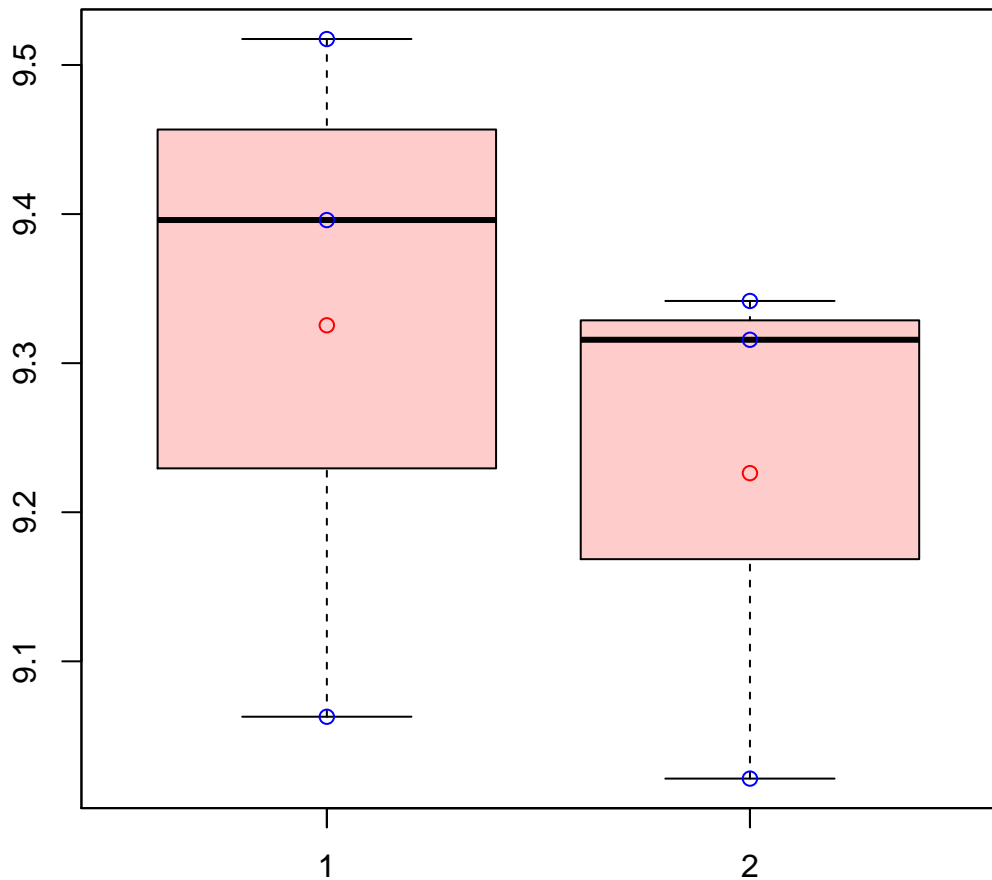

t-Test: p-value = 0.59

# CL6522Contig2|CL6522Contig2

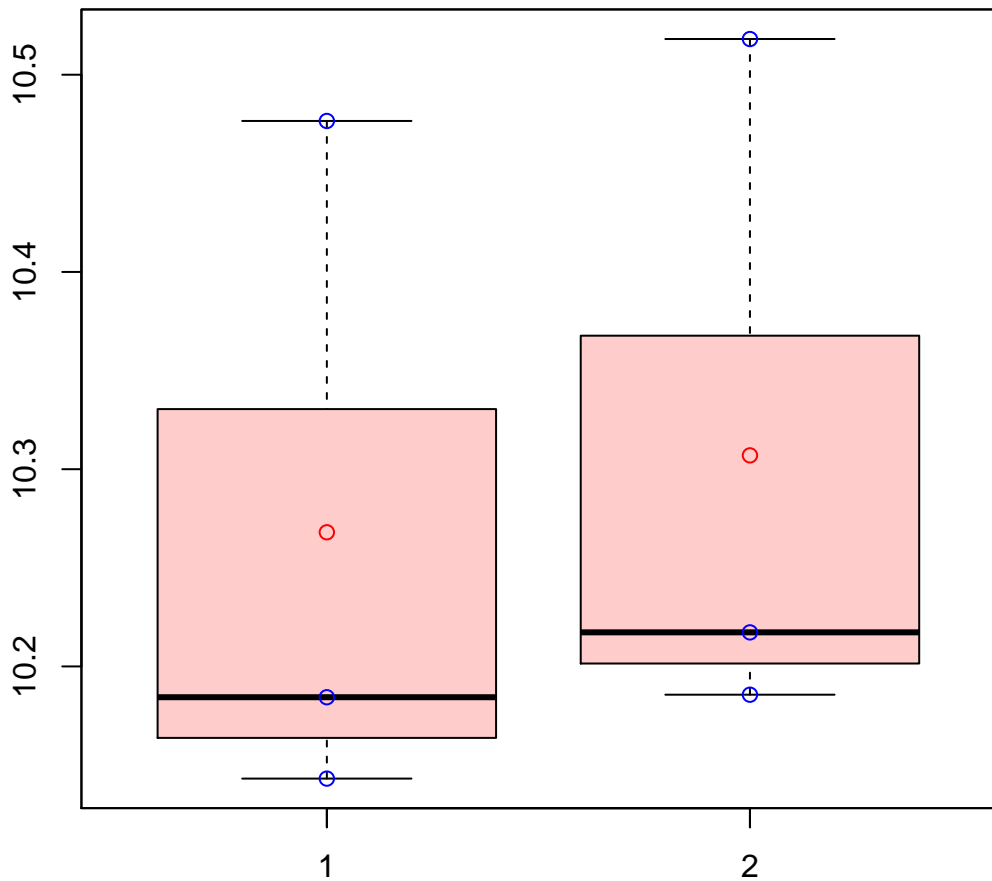

t-Test: p-value = 0.81



# CL6525Contig1|CL6525Contig1

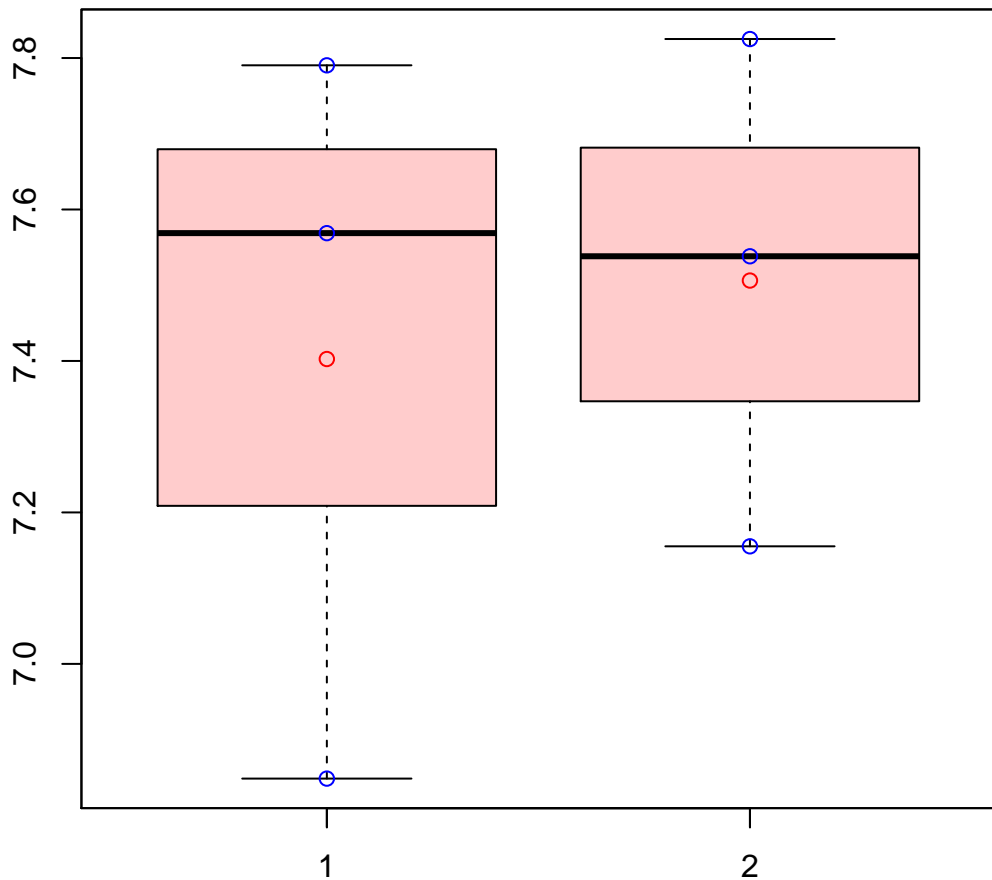

t-Test: p-value = 0.78

# CL652Contig3|CL652Contig3

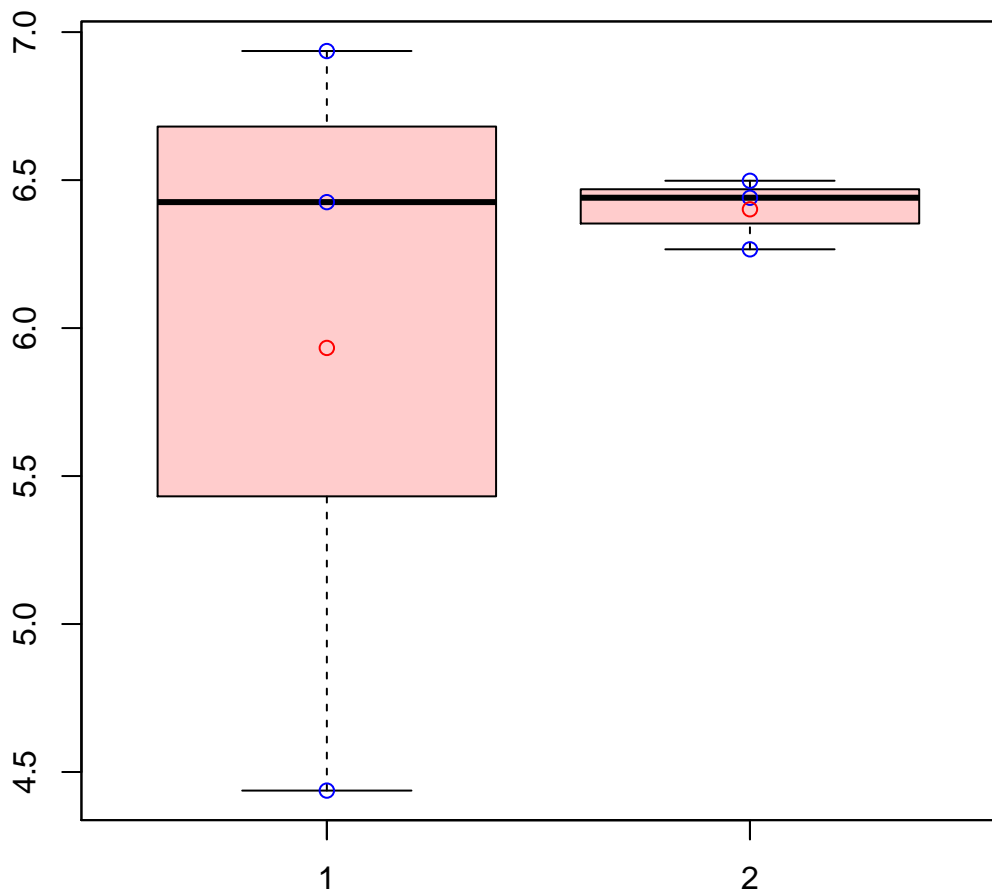

t-Test: p-value = 0.6

# CL6530Contig1|CL6530Contig1

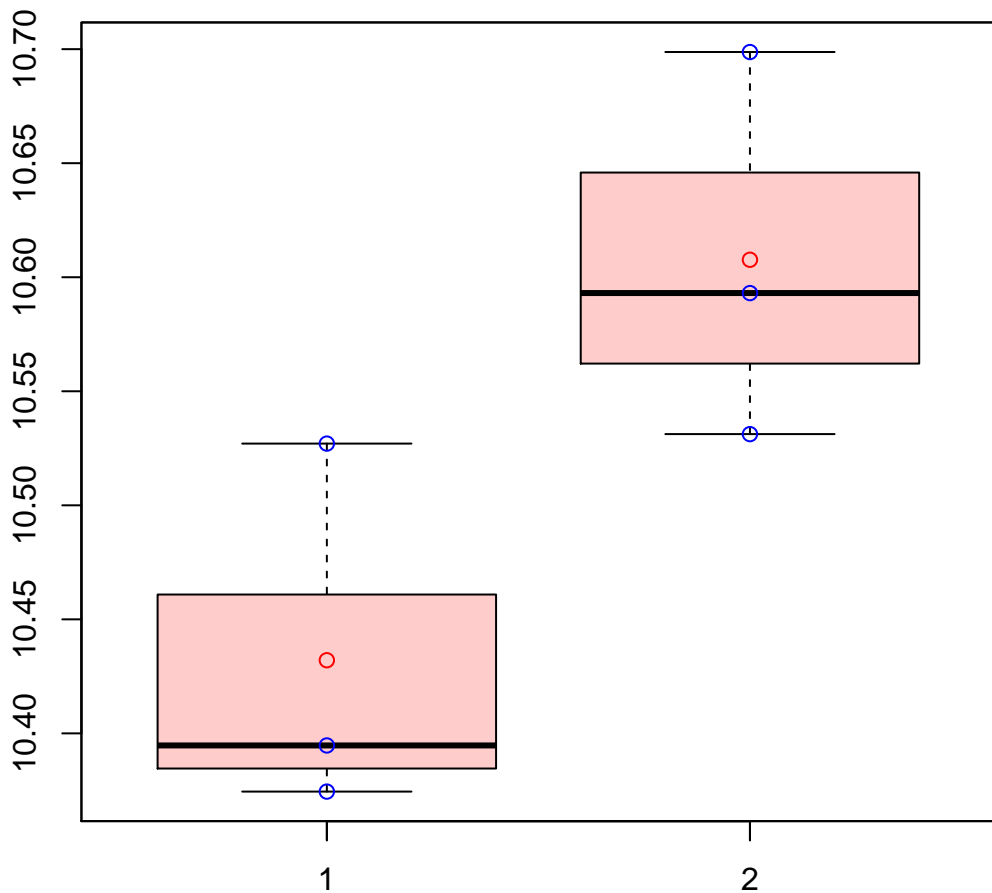

t-Test: p-value = 0.06

# CL6530Contig2|CL6530Contig2



t-Test: p-value = 0.06

# CL6530Contig3|CL6530Contig3

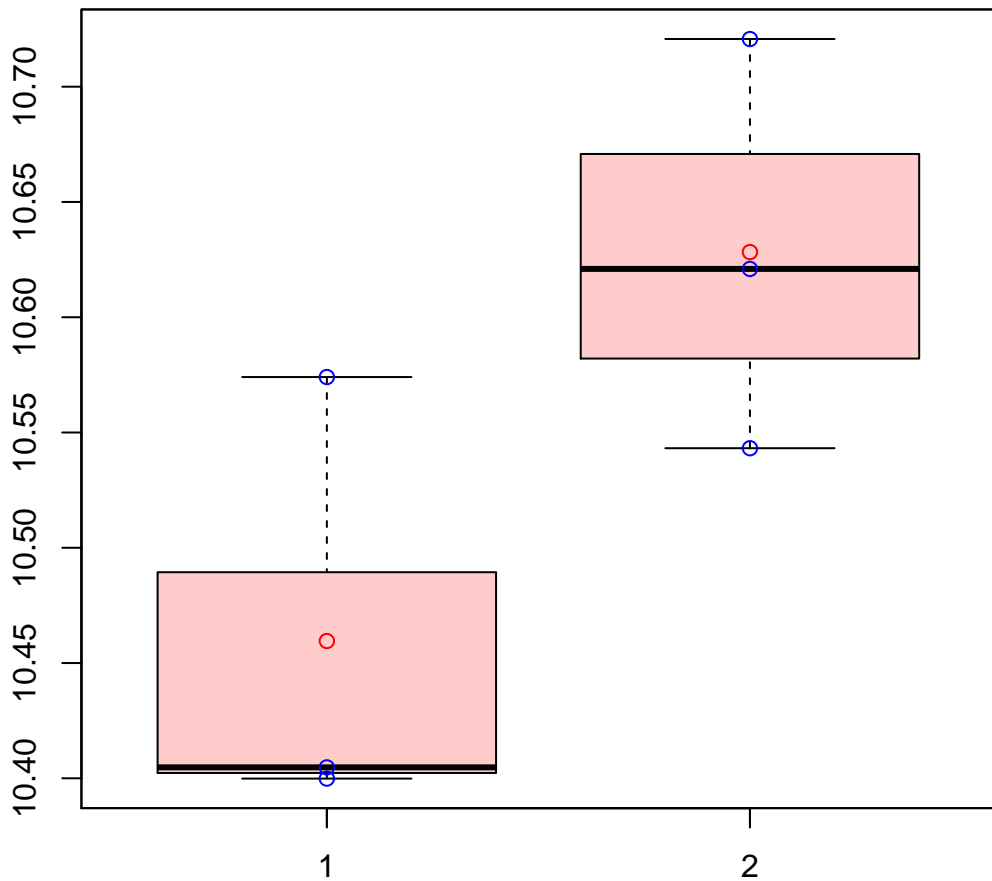

t-Test: p-value = 0.09

# CL6532Contig2|CL6532Contig2

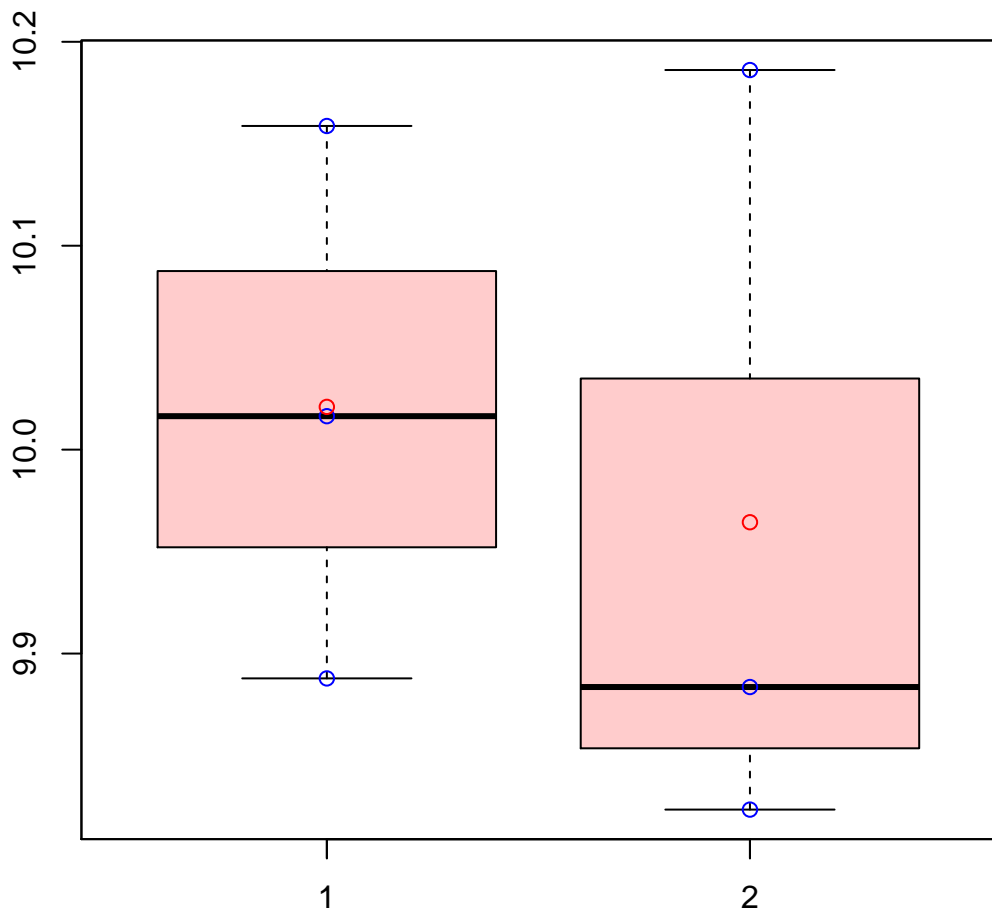

t-Test: p-value = 0.7

# CL6535Contig2|CL6535Contig2

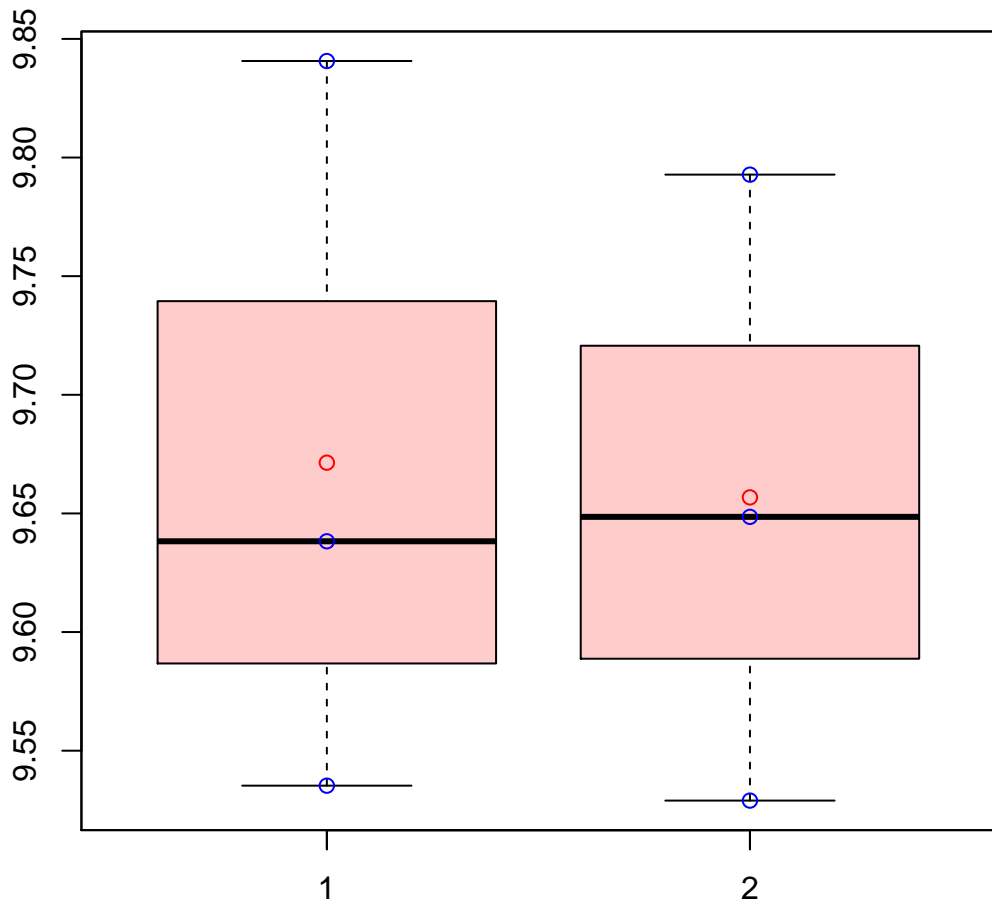

t-Test: p-value = 0.91

# CL6539Contig1|CL6539Contig1



t-Test: p-value = 0.42



## CL653Contig2|CL653Contig2

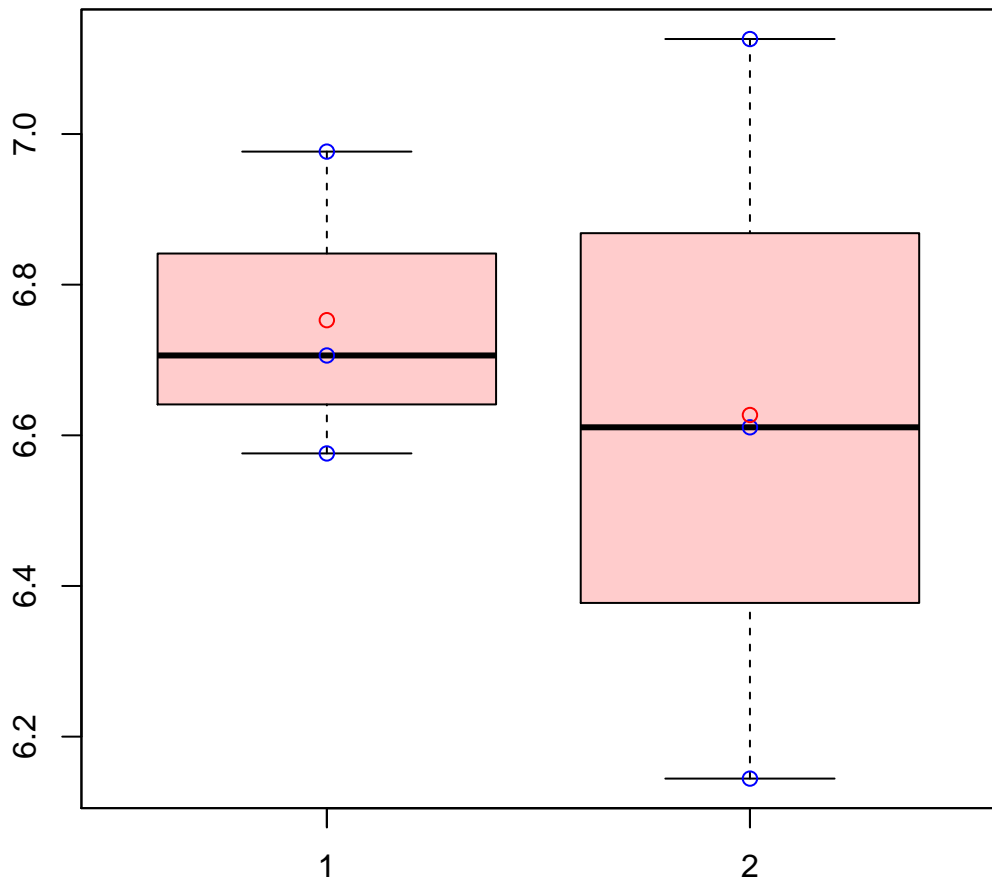

t-Test: p-value = 0.71

# CL653Contig3|CL653Contig3

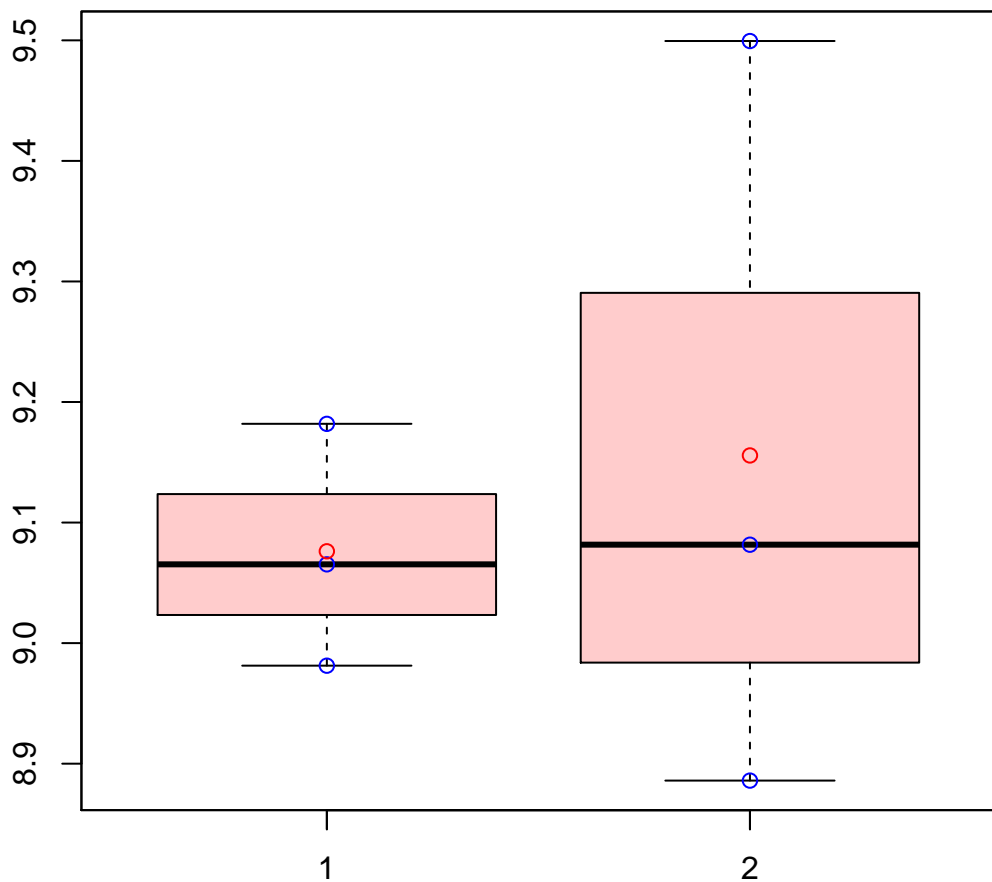

t-Test: p-value = 0.71

# CL653Contig4|CL653Contig4

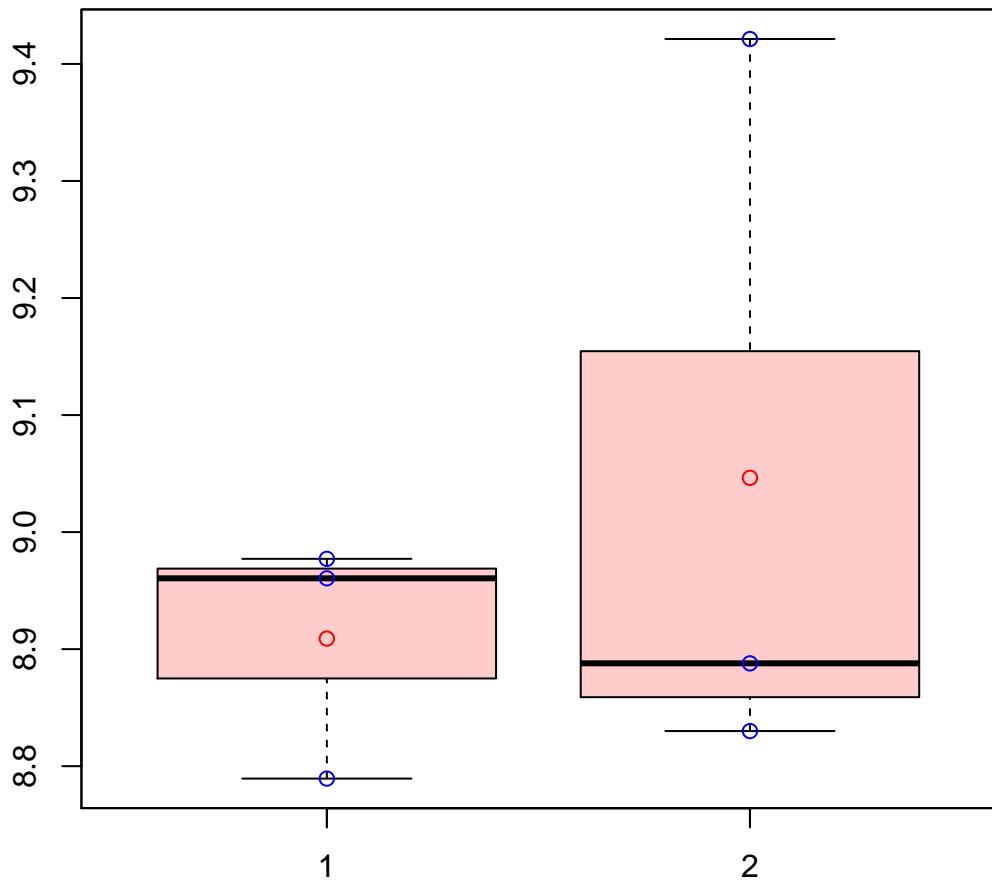

t-Test: p-value = 0.55

# CL653Contig6|CL653Contig6

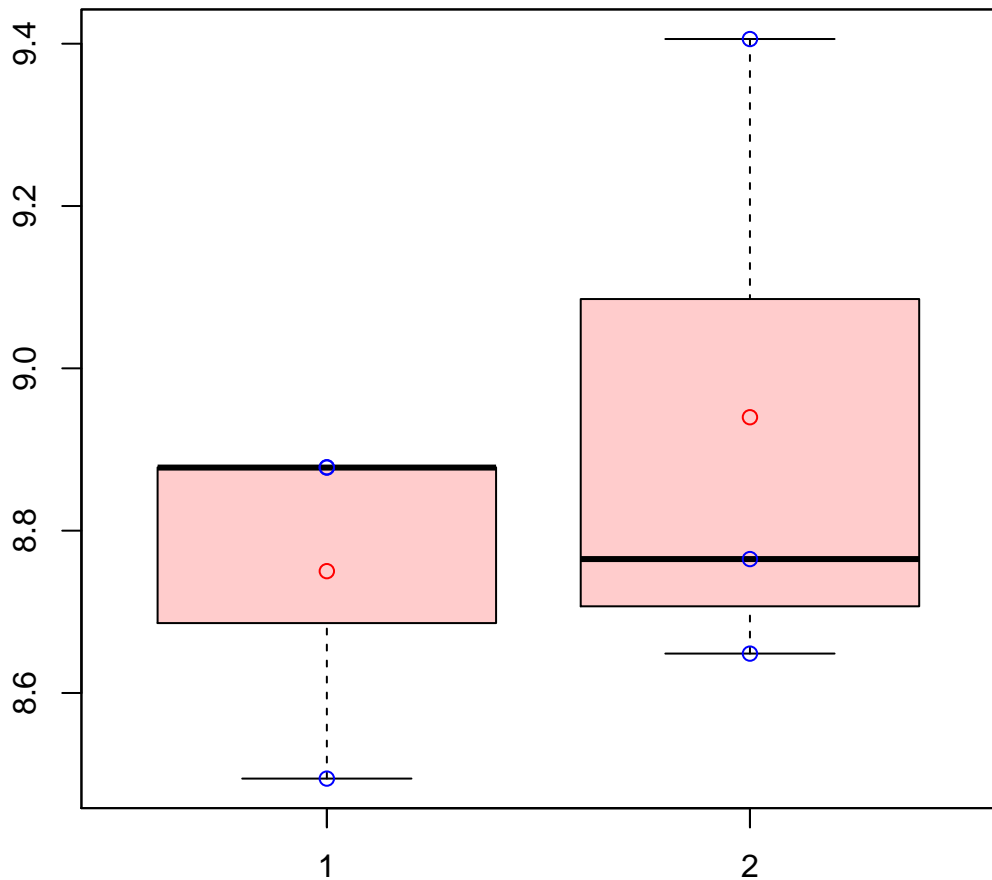

# CL6544Contig3|CL6544Contig3



t-Test: p-value = 0.59

# CL6545Contig2|CL6545Contig2

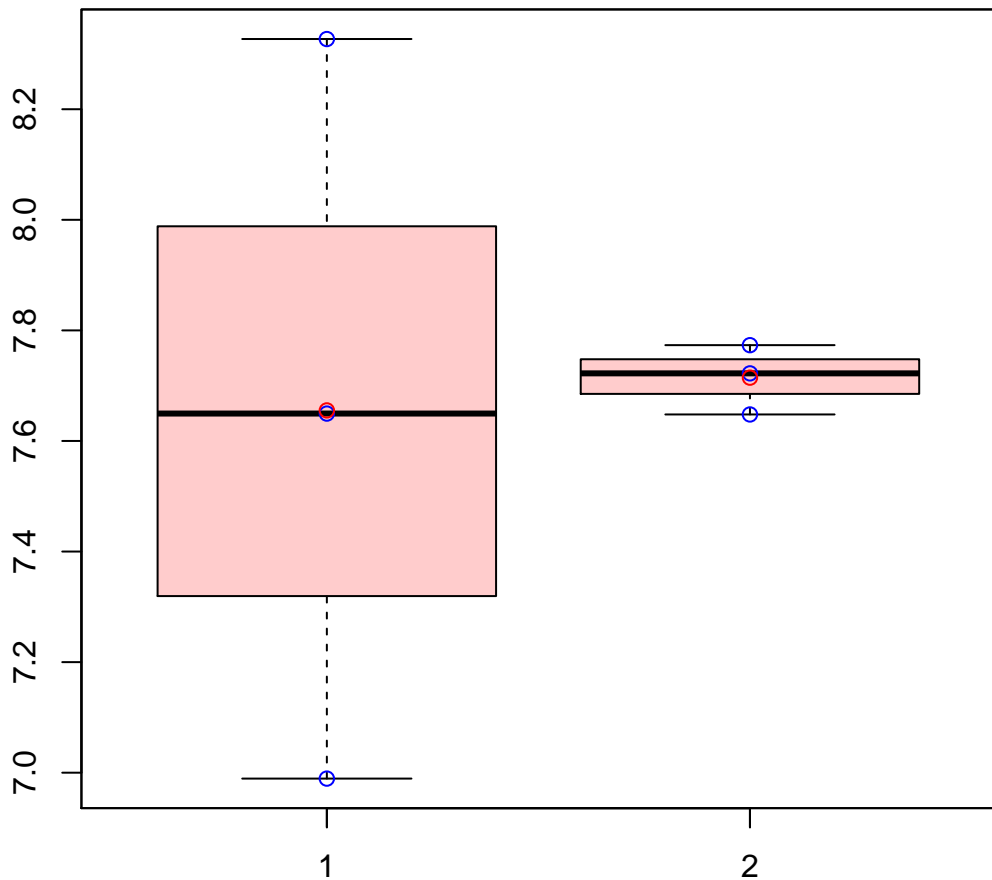

t-Test: p-value = 0.89

# CL654Contig5|CL654Contig5

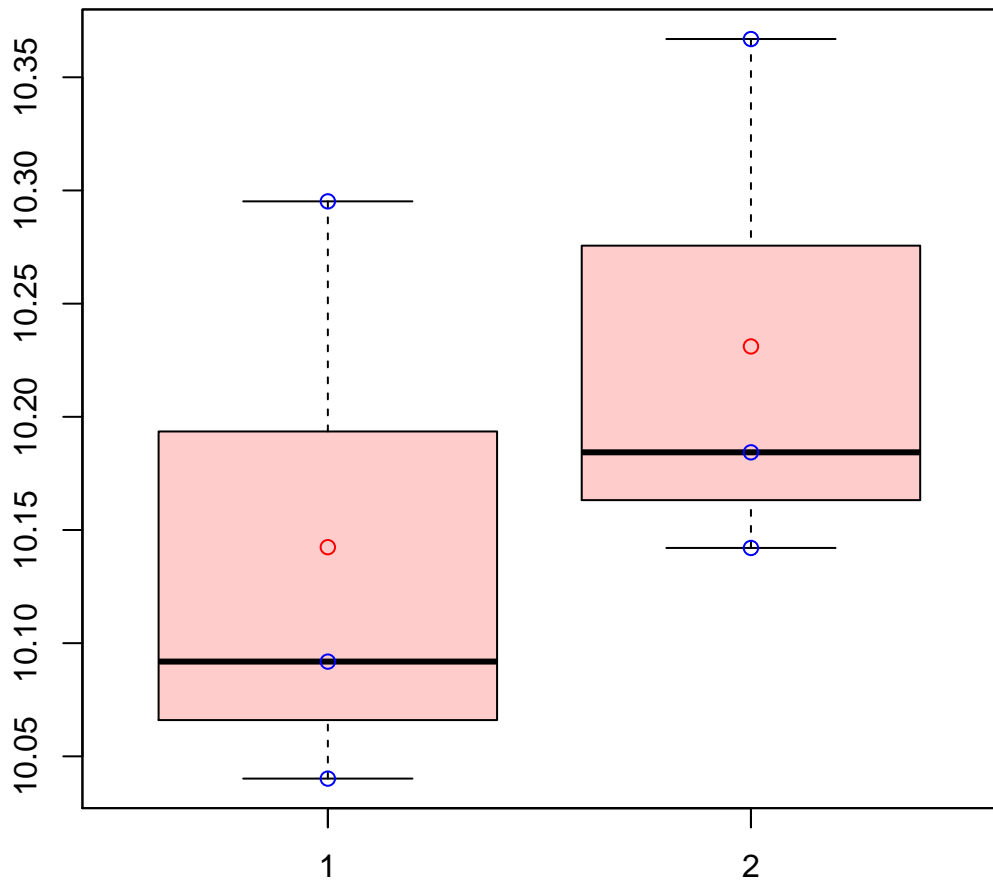

t-Test: p-value = 0.44

# CL6563Contig5|CL6563Contig5

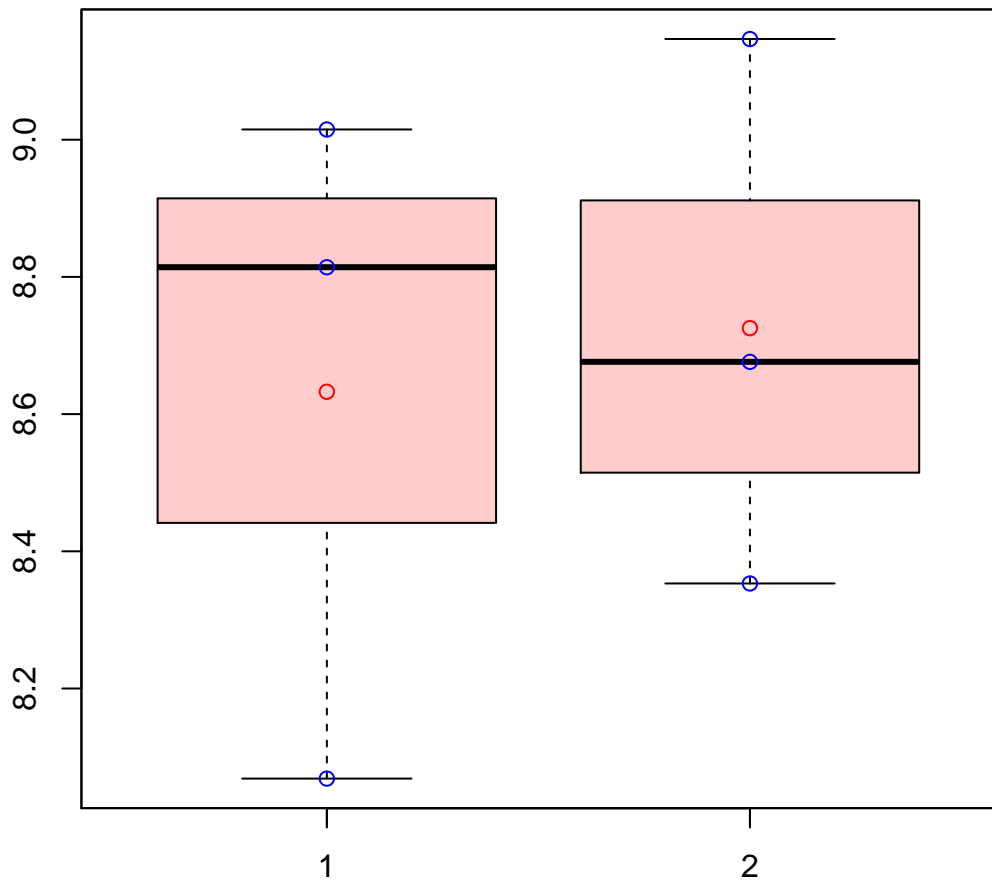

t-Test: p-value = 0.81



# CL6565Contig2|CL6565Contig2

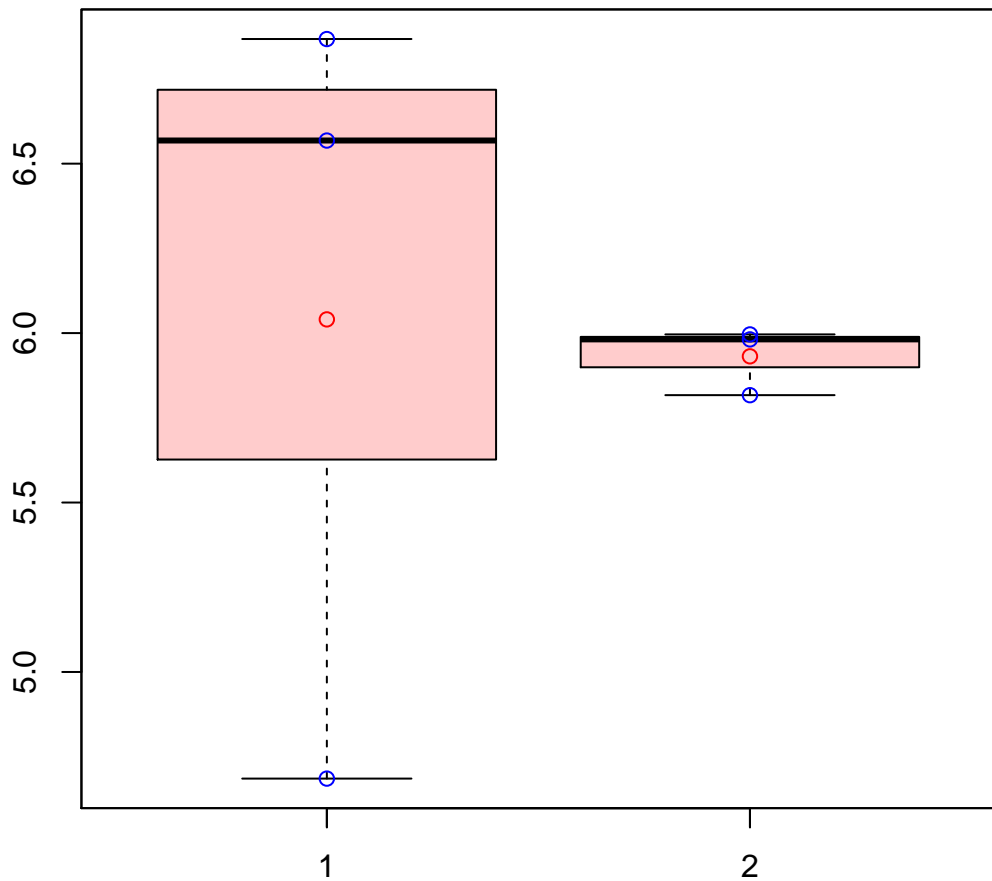

t-Test: p-value = 0.89

# CL6569Contig2|CL6569Contig2

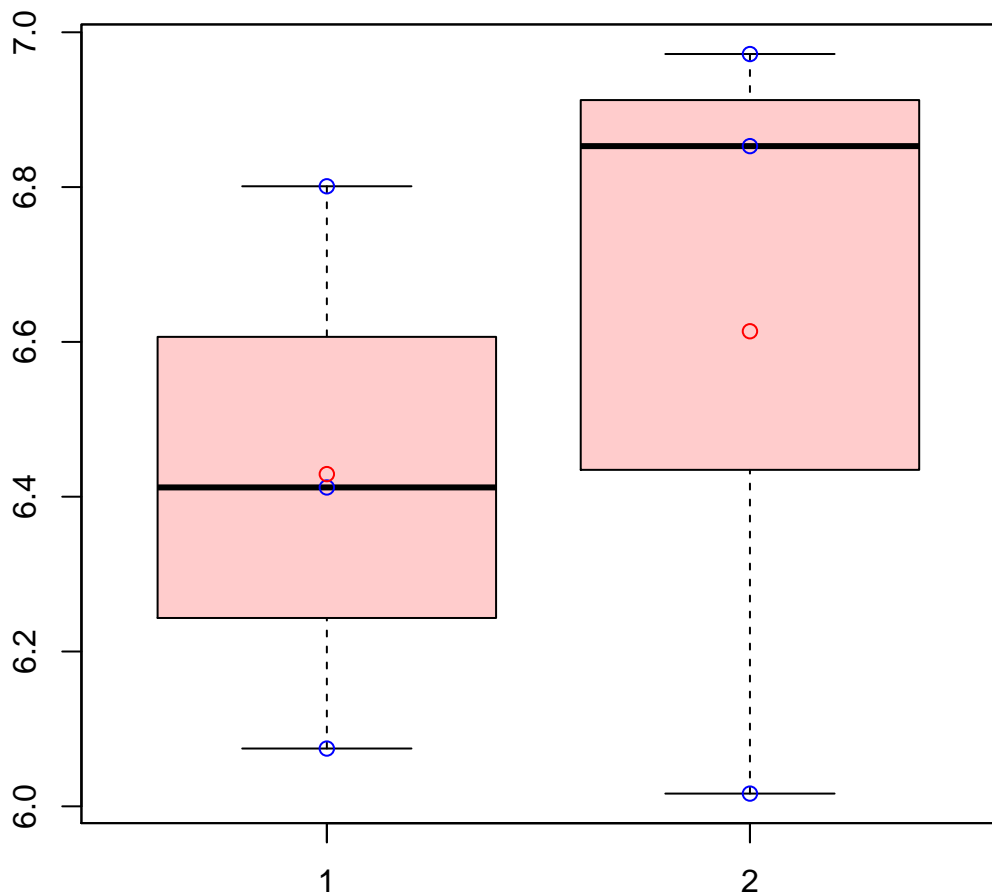

t-Test: p-value = 0.64

# CL6573Contig2|CL6573Contig2

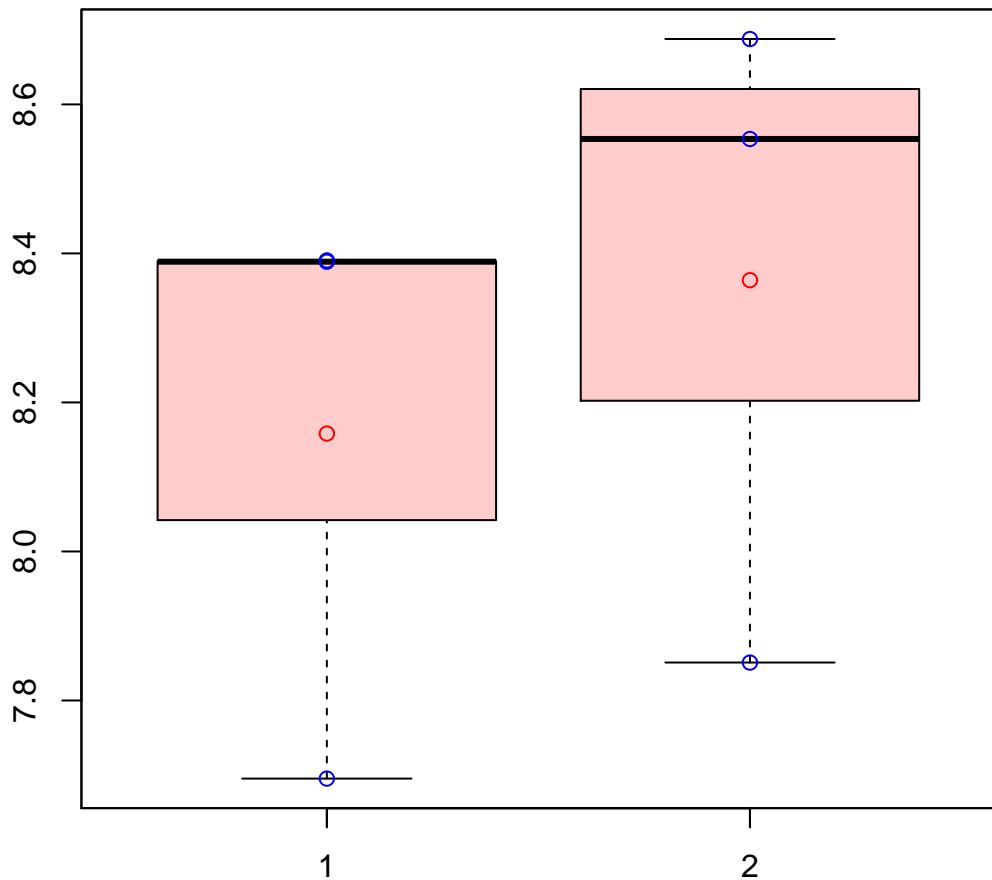

t-Test: p-value = 0.59

# CL65Contig6|CL65Contig6

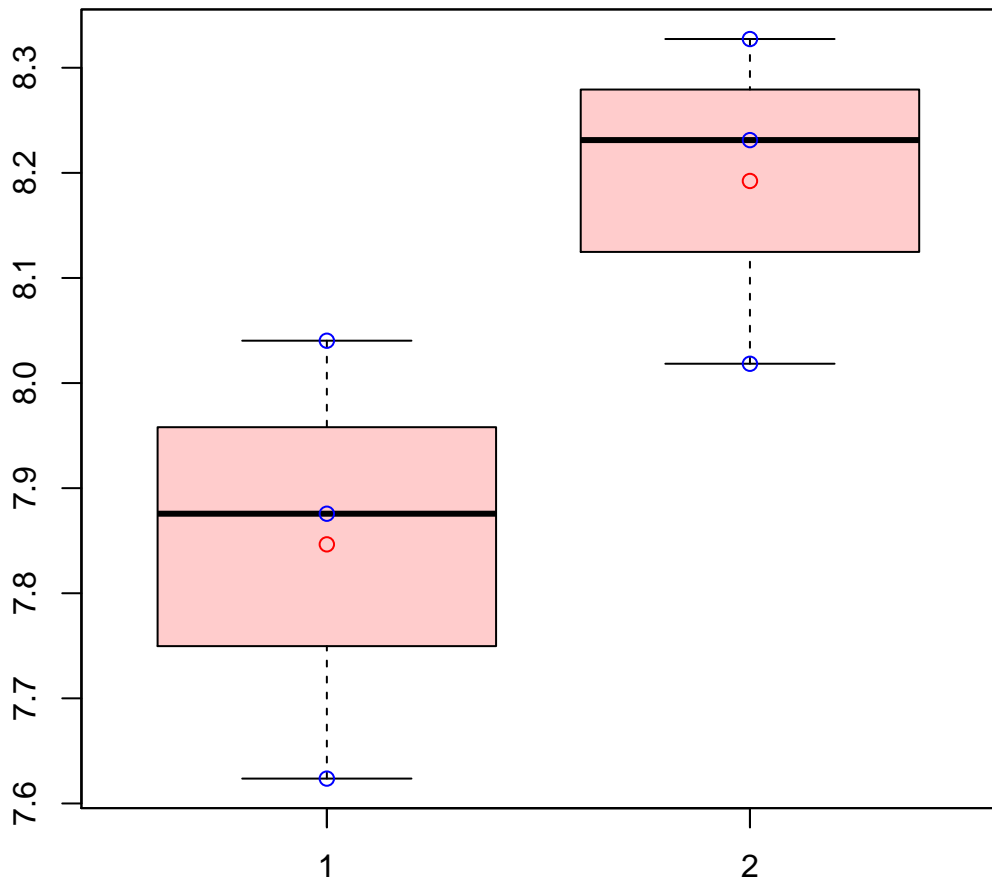

t-Test: p-value = 0.09

# CL6607Contig2|CL6607Contig2

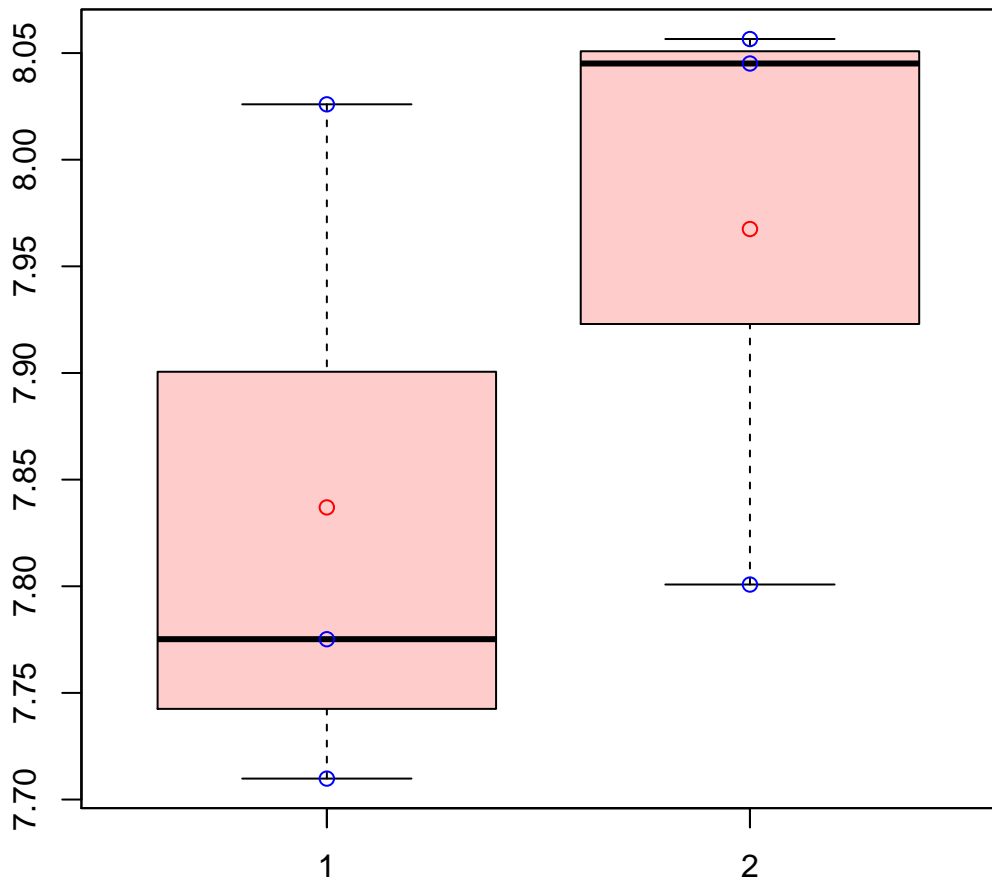

t-Test: p-value = 0.36

# CL6622Contig3|CL6622Contig3

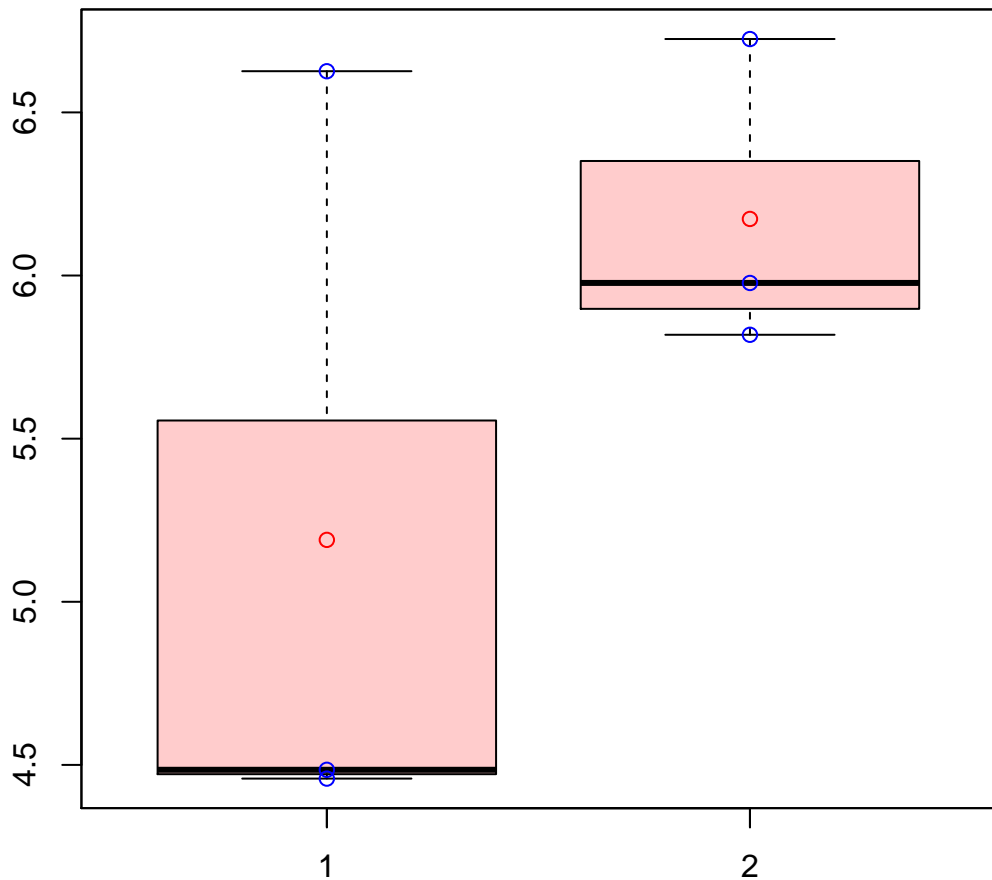

t-Test: p-value = 0.3

# CL662Contig1|CL662Contig1

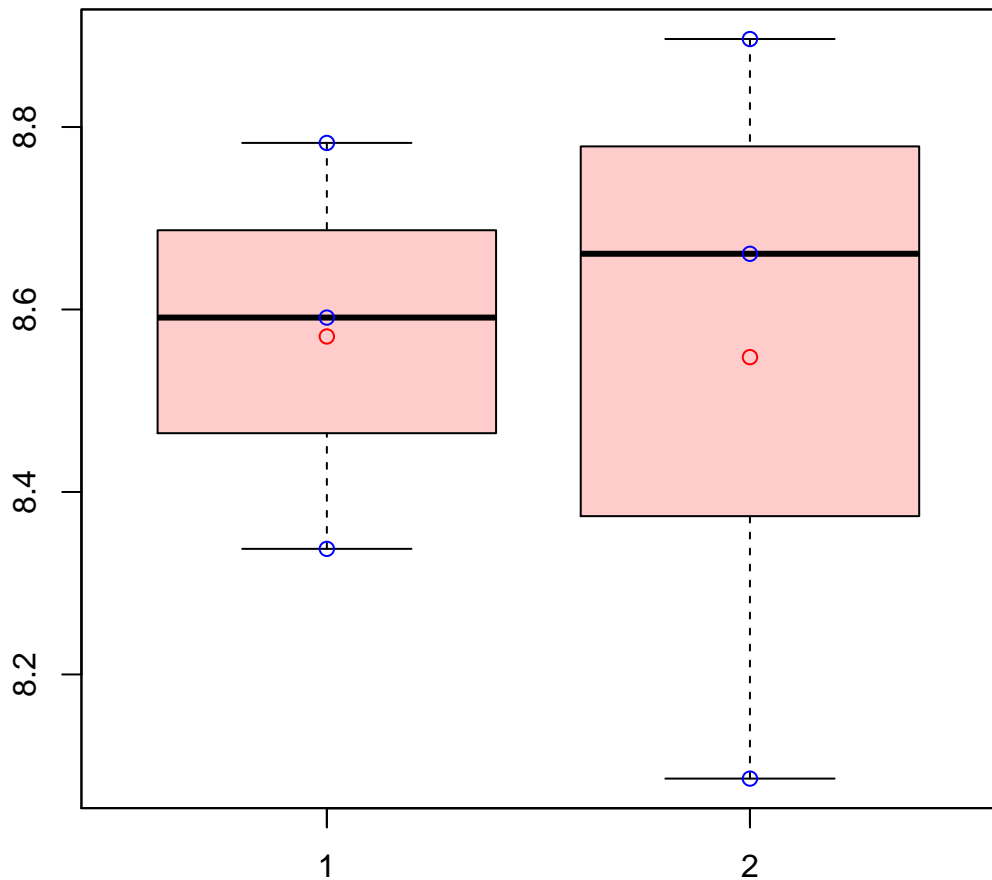

t-Test: p-value = 0.94

# CL6630Contig1|CL6630Contig1

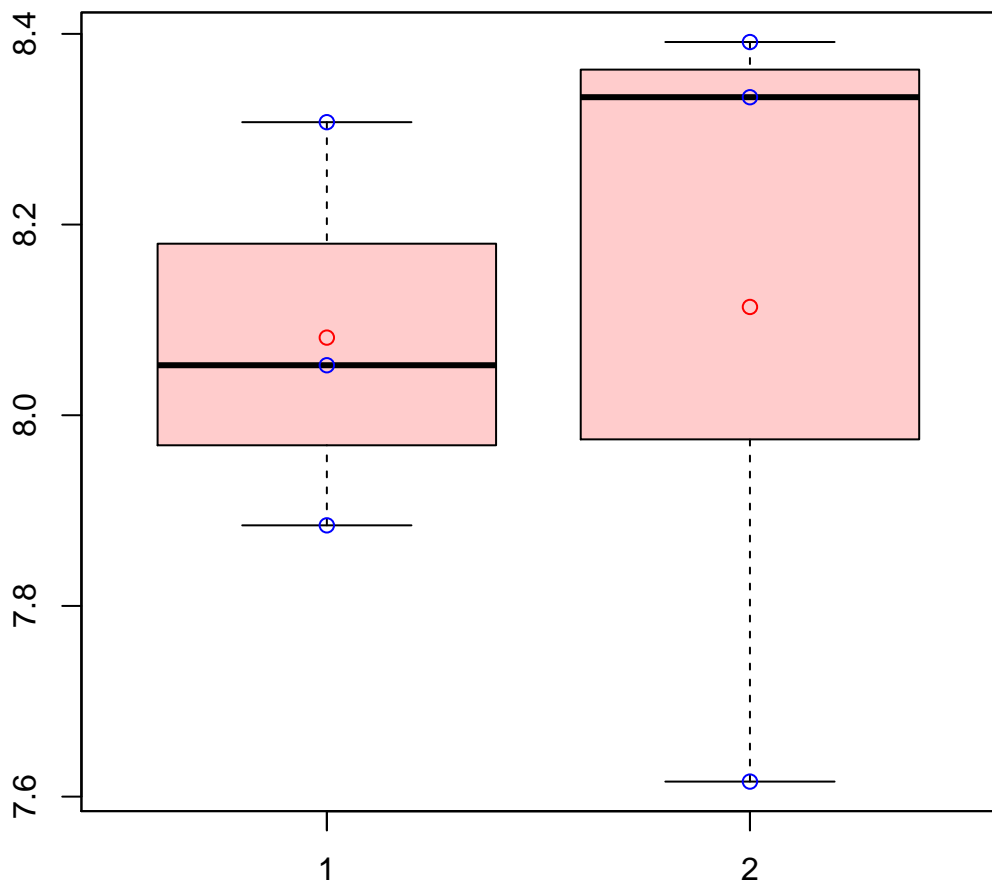

t-Test: p-value = 0.92



# CL6633Contig2|CL6633Contig2

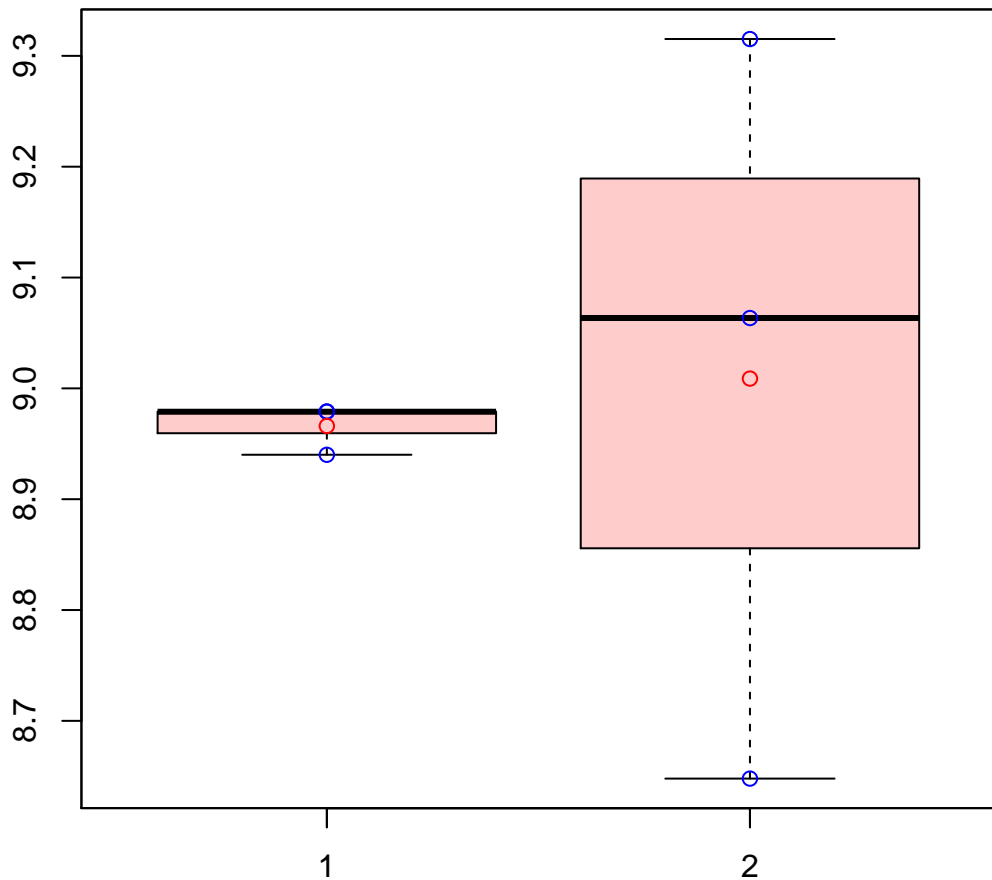

t-Test: p-value = 0.85

# CL6634Contig1|CL6634Contig1



t-Test: p-value = 0.42

# CL6640Contig1|CL6640Contig1

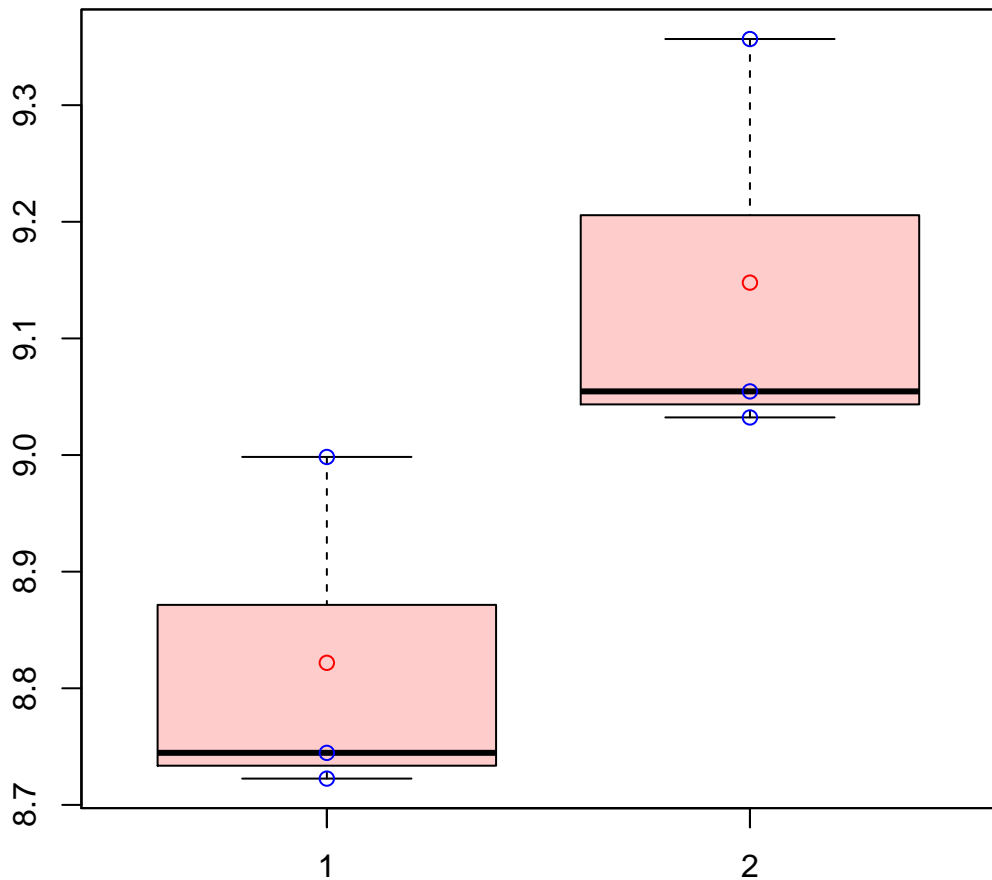

t-Test: p-value = 0.08

# CL6640Contig3|CL6640Contig3

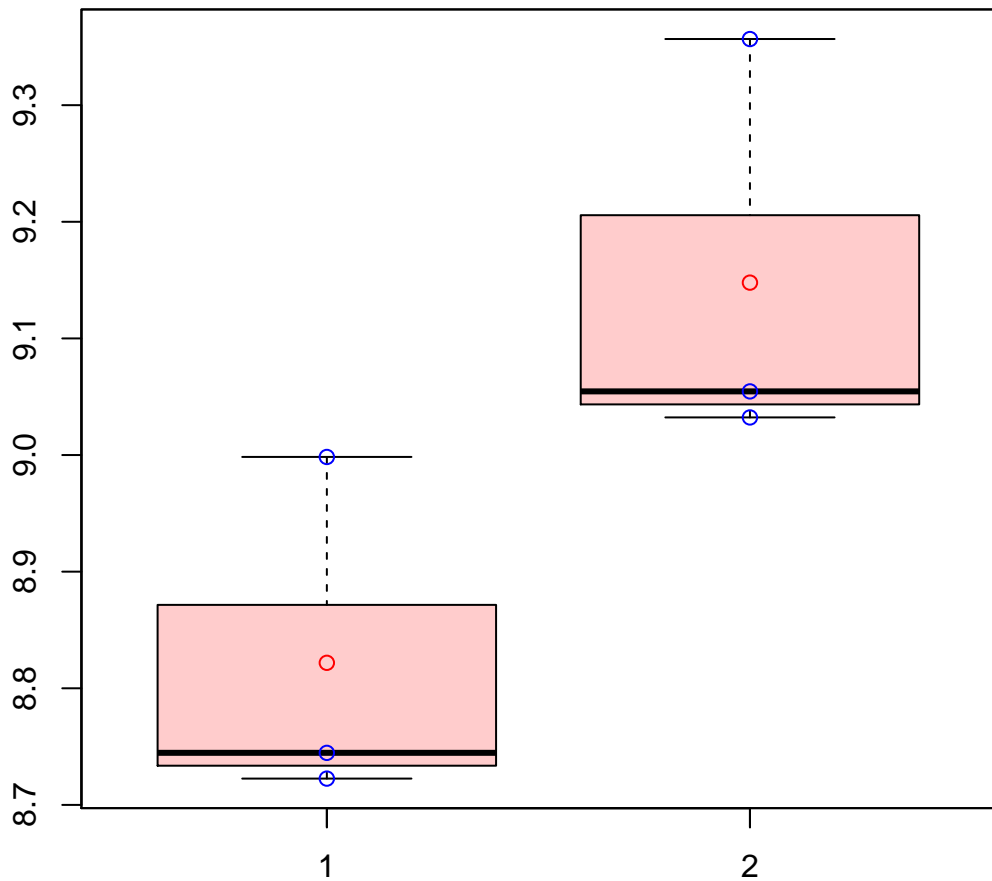

t-Test: p-value = 0.08

# CL6651Contig3|CL6651Contig3

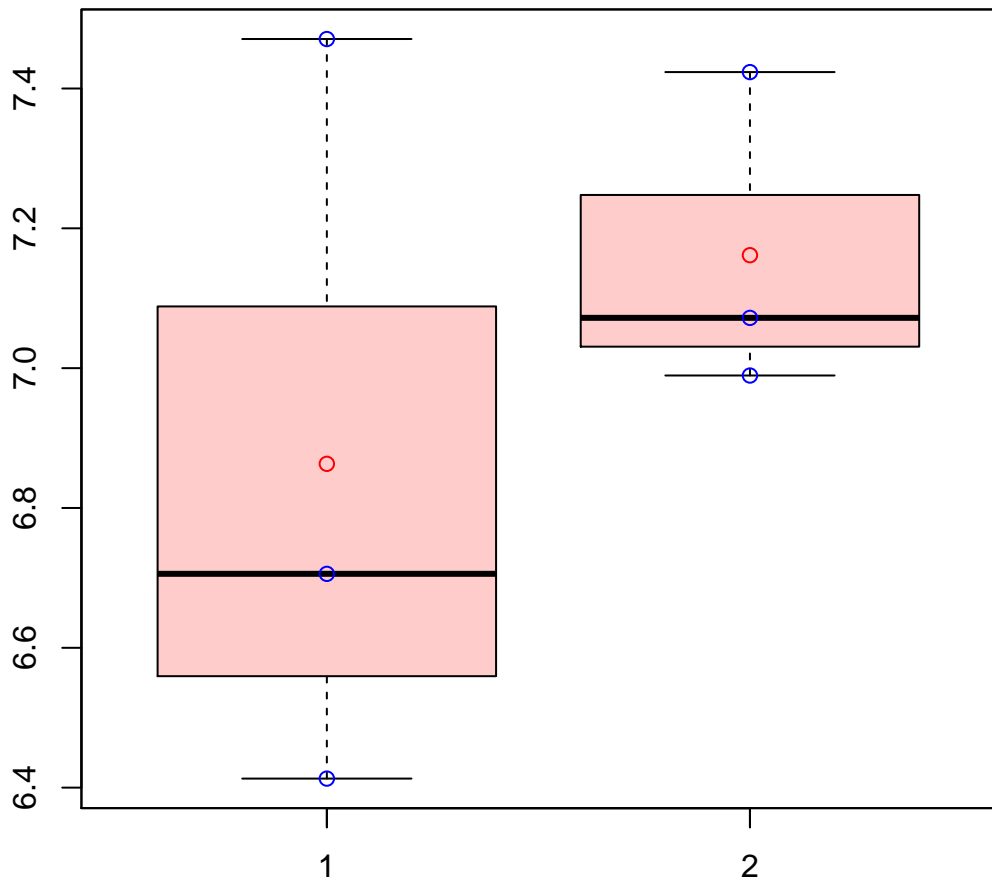

t-Test: p-value = 0.45

# CL6653Contig2|CL6653Contig2



t-Test: p-value = 0.85

# CL6654Contig2|CL6654Contig2

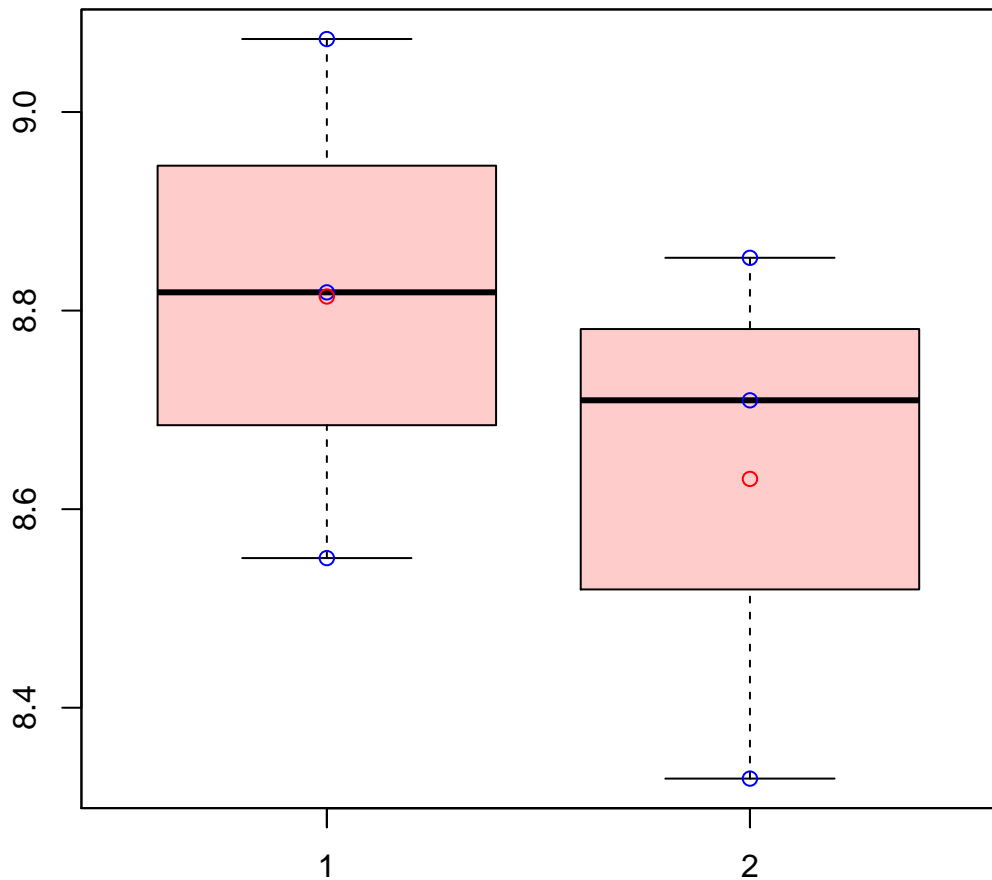

t-Test: p-value = 0.45

# CL6655Contig1|CL6655Contig1

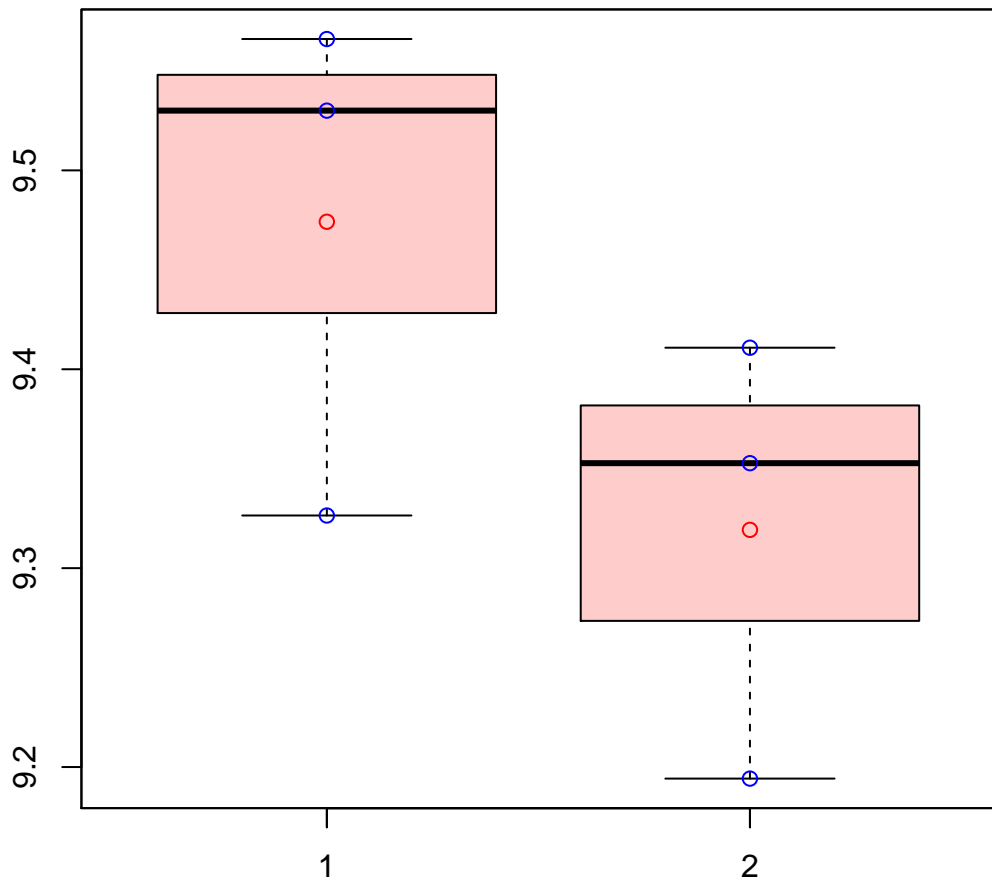

t-Test: p-value = 0.19



# CL6655Contig5|CL6655Contig5

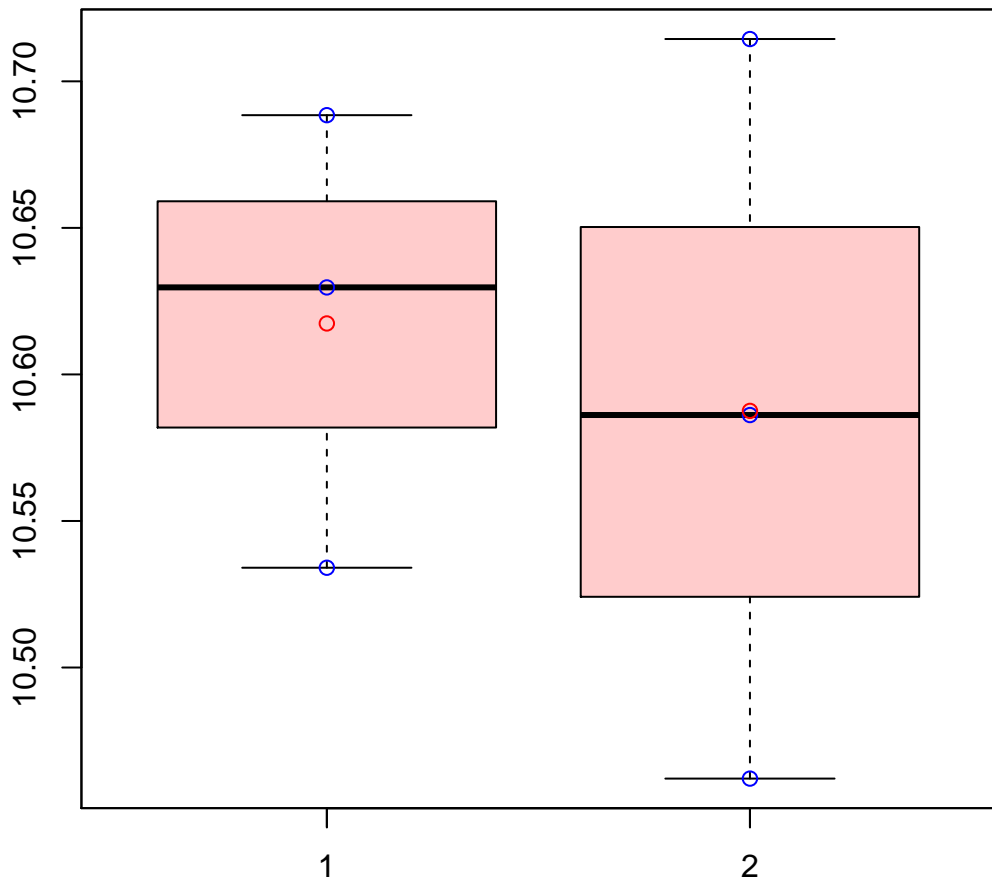

t-Test: p-value = 0.75

# CL6669Contig1|CL6669Contig1

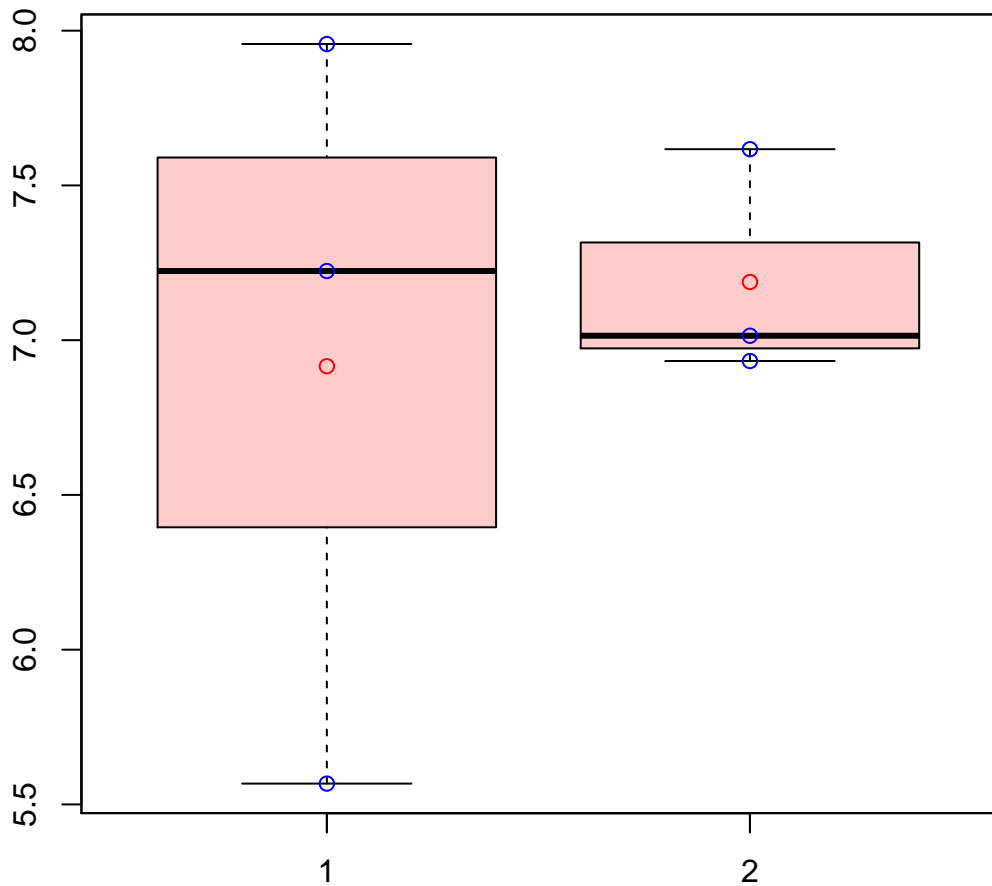

t-Test: p-value = 0.74

# CL667Contig9|CL667Contig9

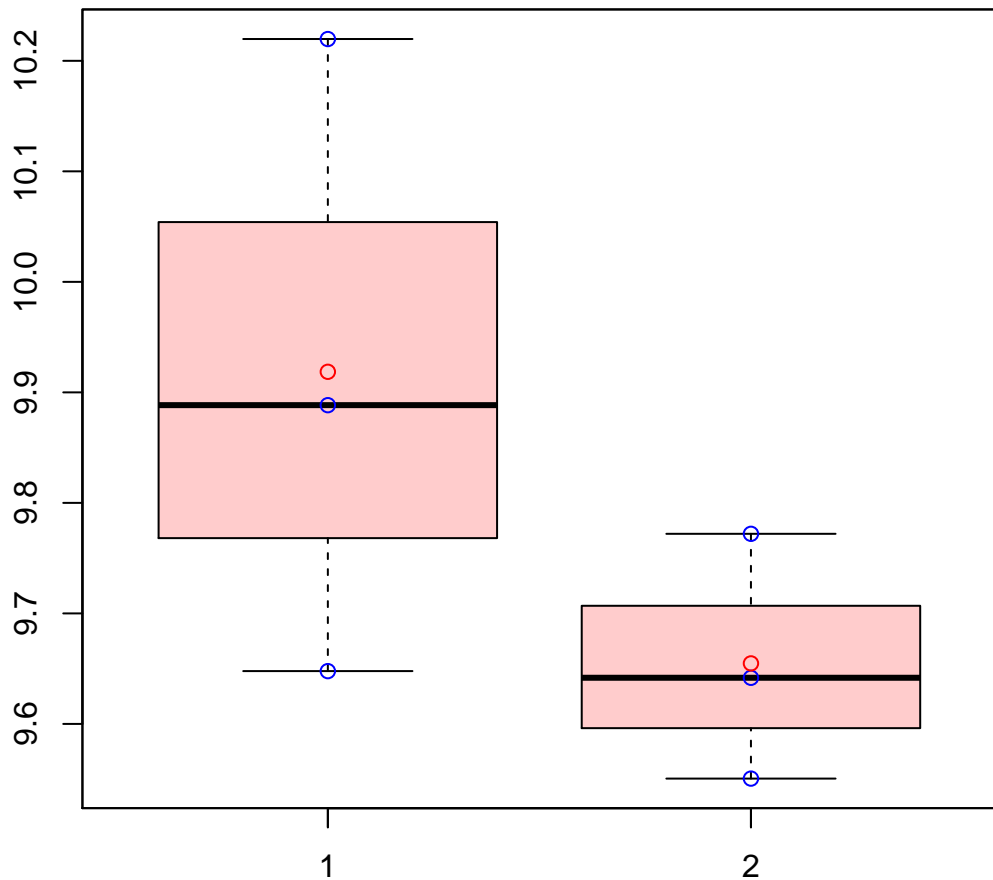

t-Test: p-value = 0.25

# CL6680Contig1|CL6680Contig1

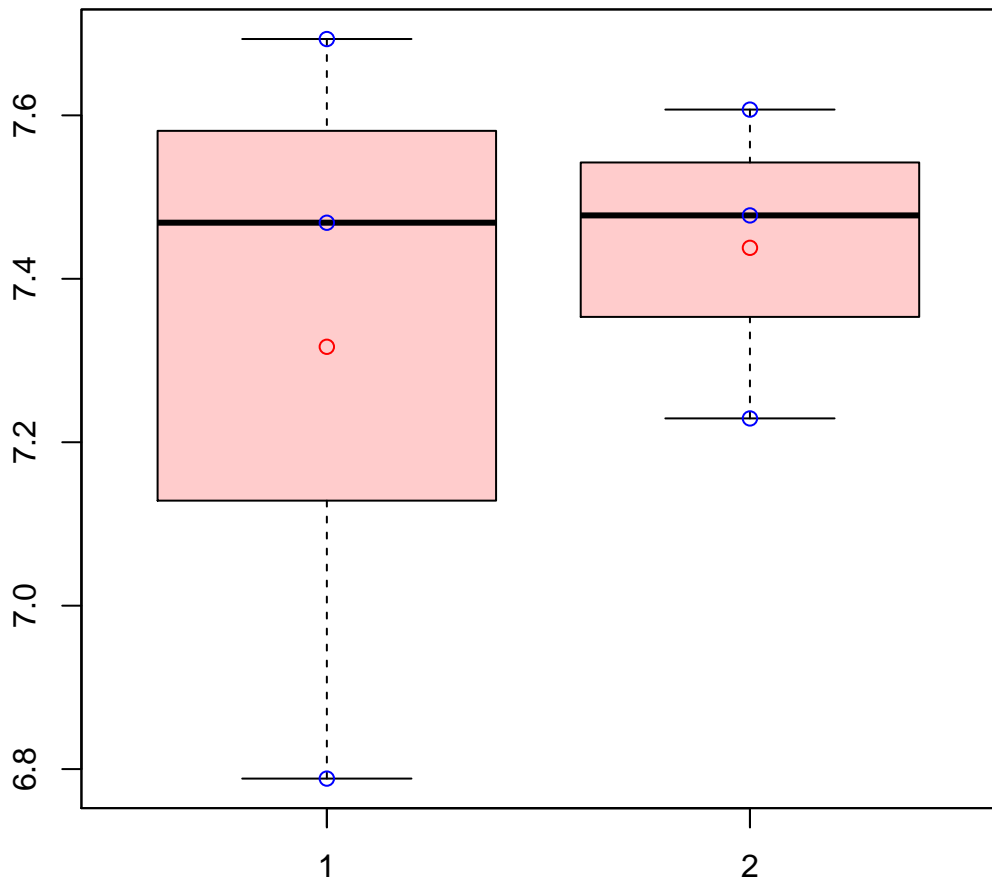

t-Test: p-value = 0.71

# CL6681Contig3|CL6681Contig3

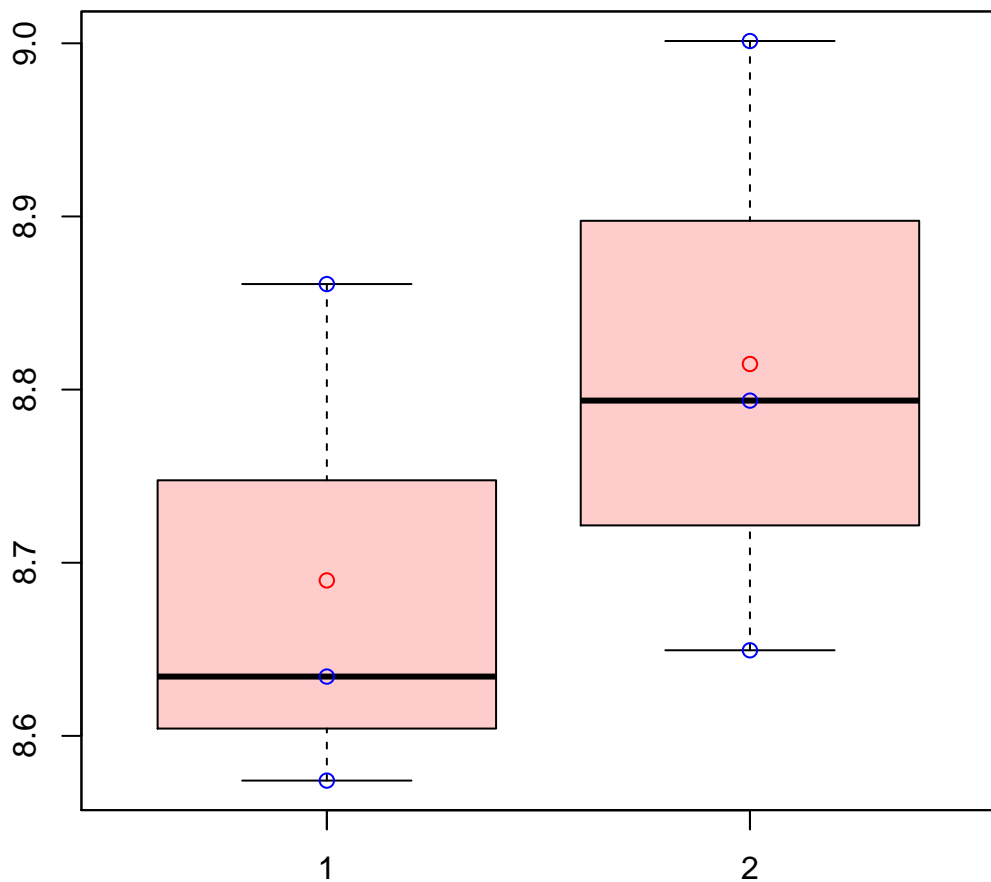

t-Test: p-value = 0.41

# CL6687Contig2|CL6687Contig2

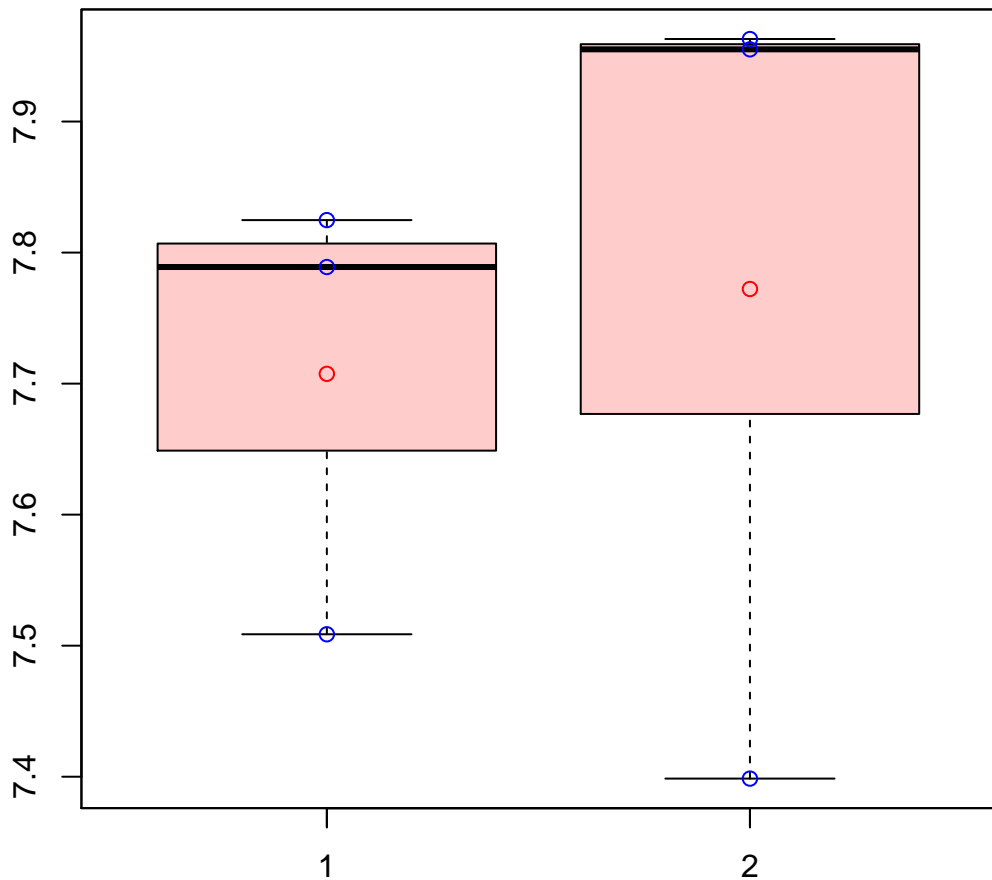

t-Test: p-value = 0.78

# CL6688Contig1|CL6688Contig1

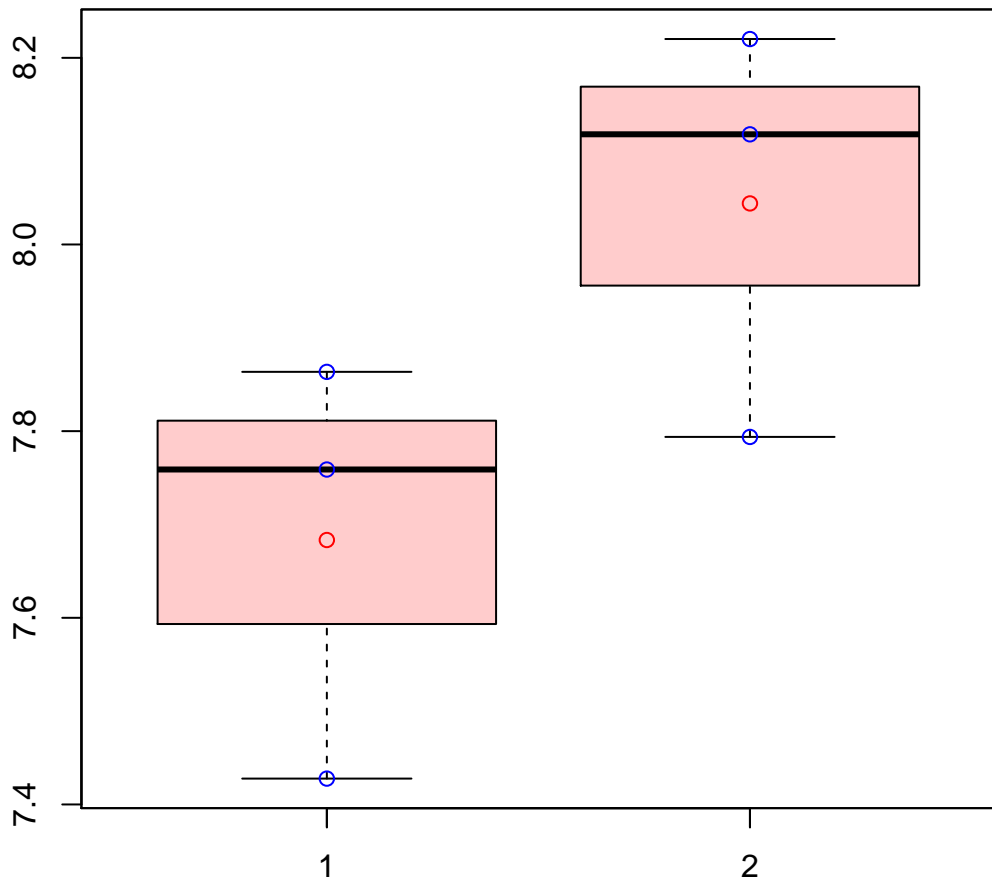

t-Test: p-value = 0.12

# CL6695Contig2|CL6695Contig2

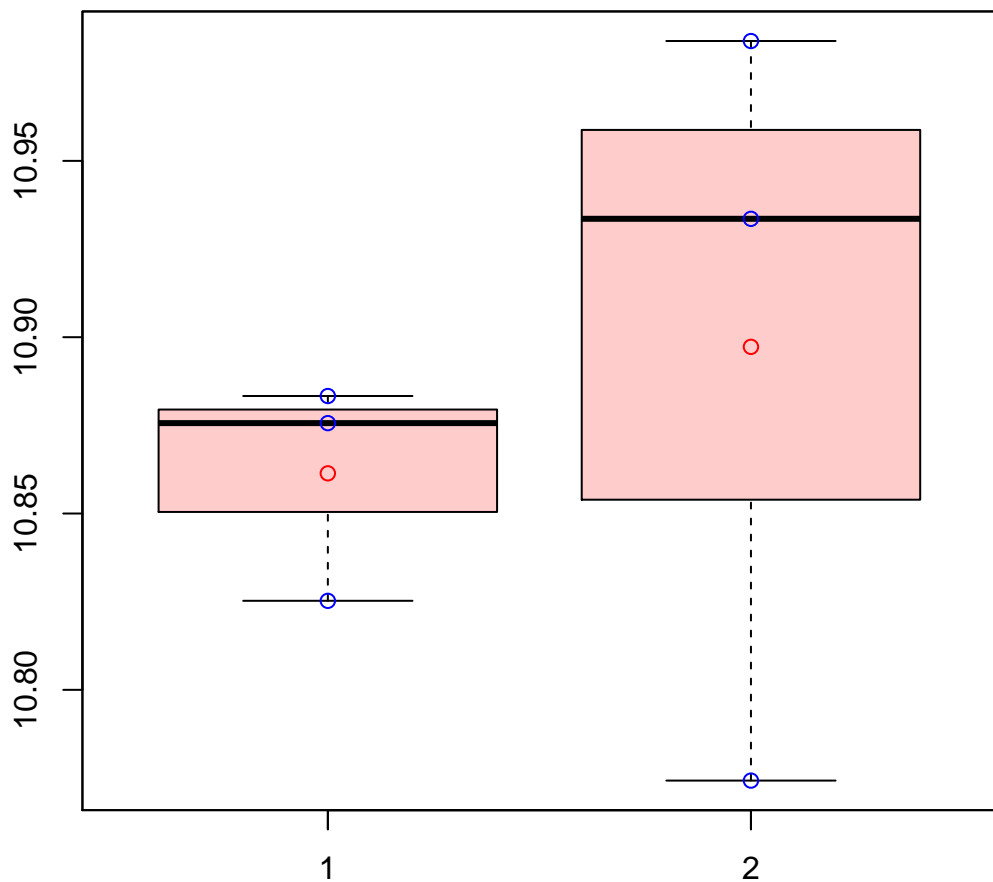

t-Test: p-value = 0.63



# CL66Contig14|CL66Contig14

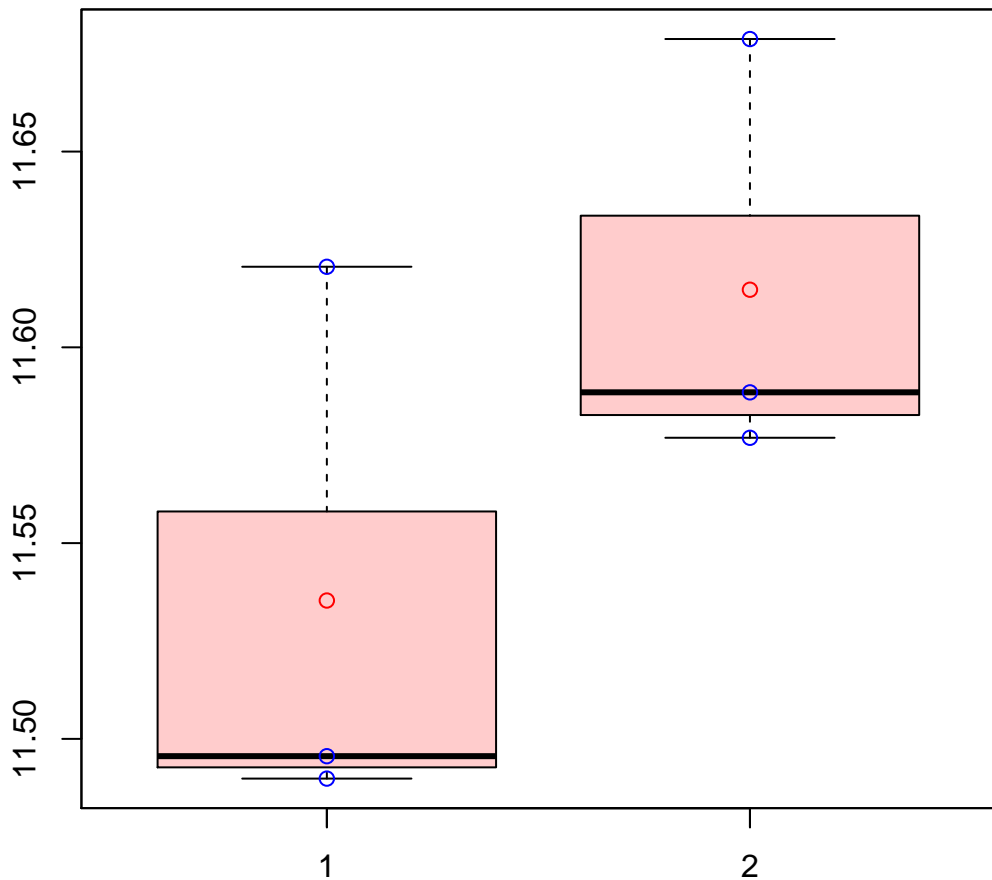

t-Test: p-value = 0.22

# CL66Contig1|CL66Contig1

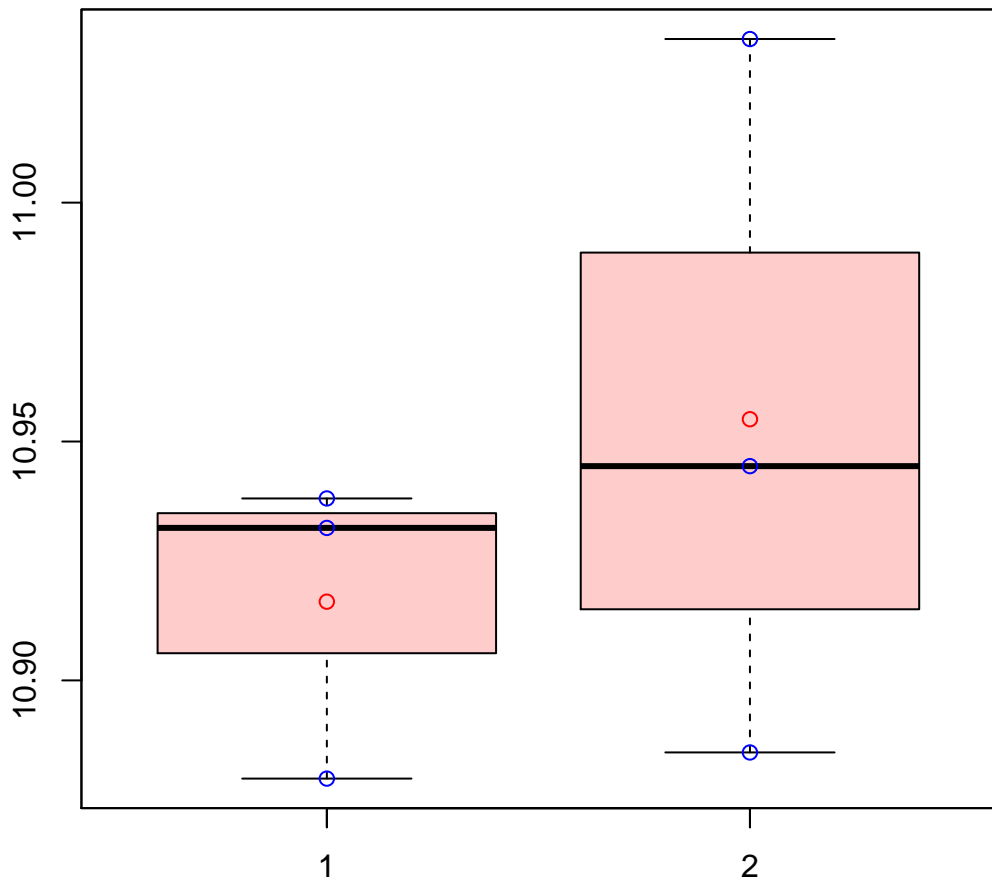

t-Test: p-value = 0.48

# CL66Contig2|CL66Contig2



t-Test: p-value = 0.22

# CL66Contig5|CL66Contig5

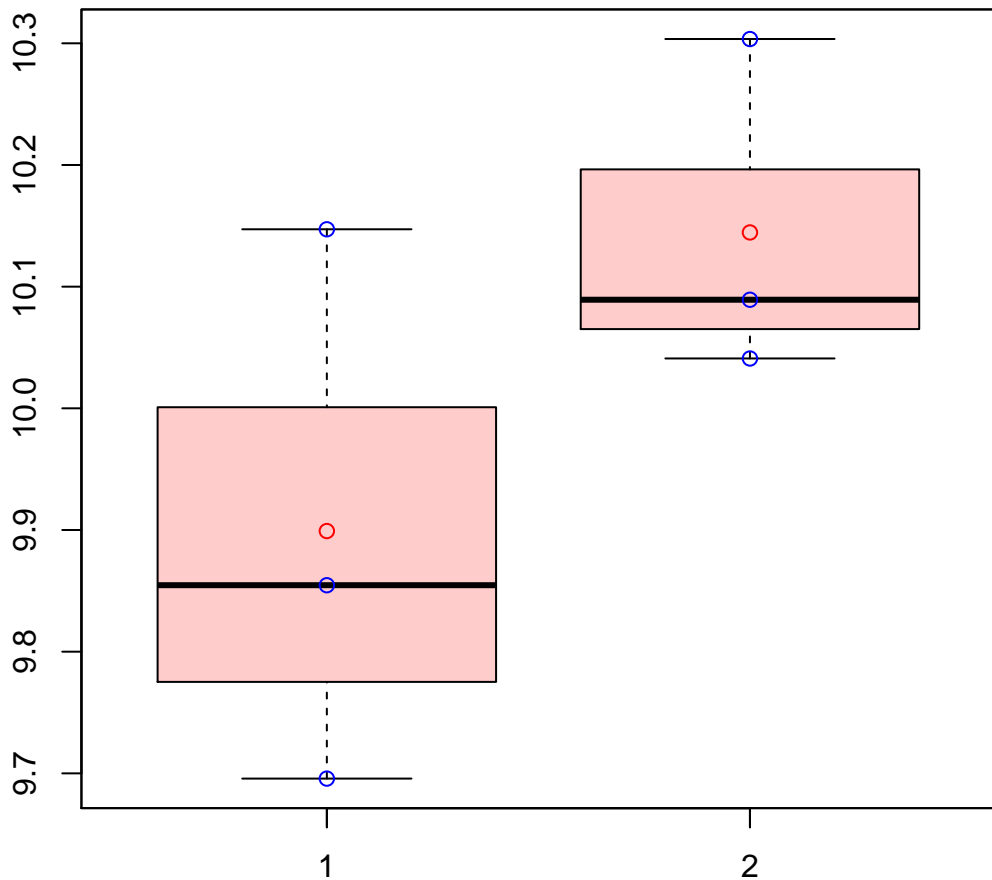

t-Test: p-value = 0.2

# CL66Contig8|CL66Contig8

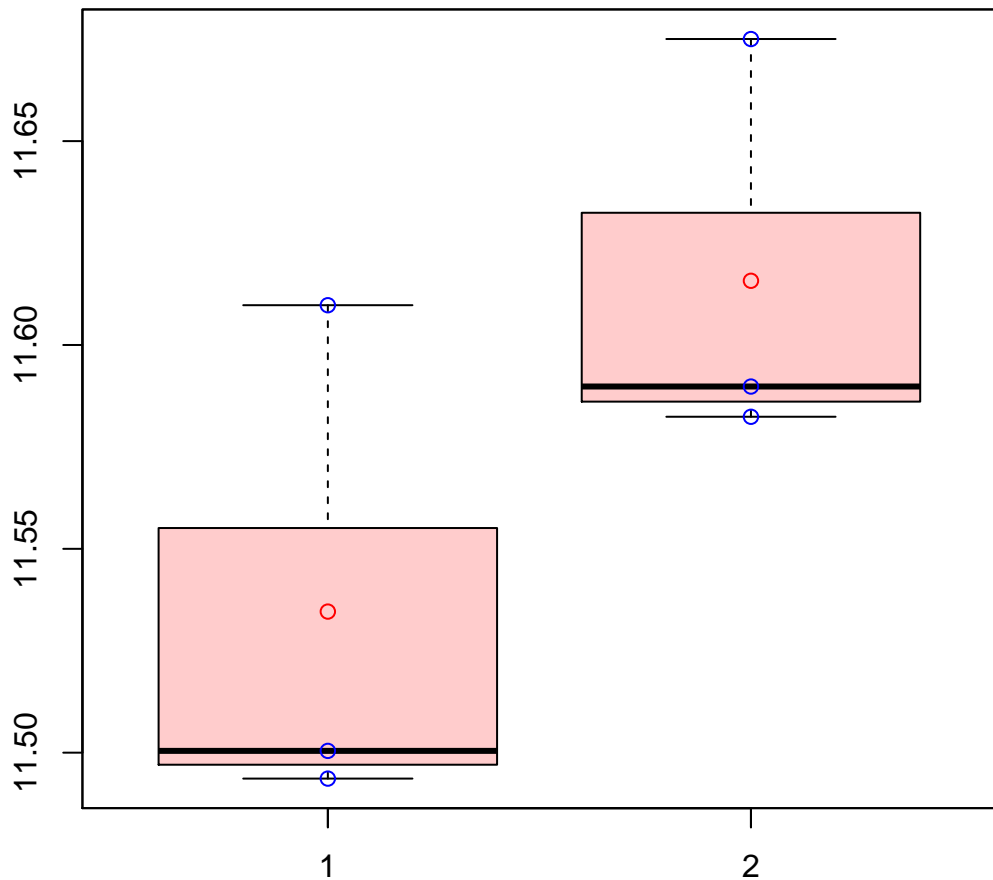

t-Test: p-value = 0.17

# CL6706Contig1|CL6706Contig1

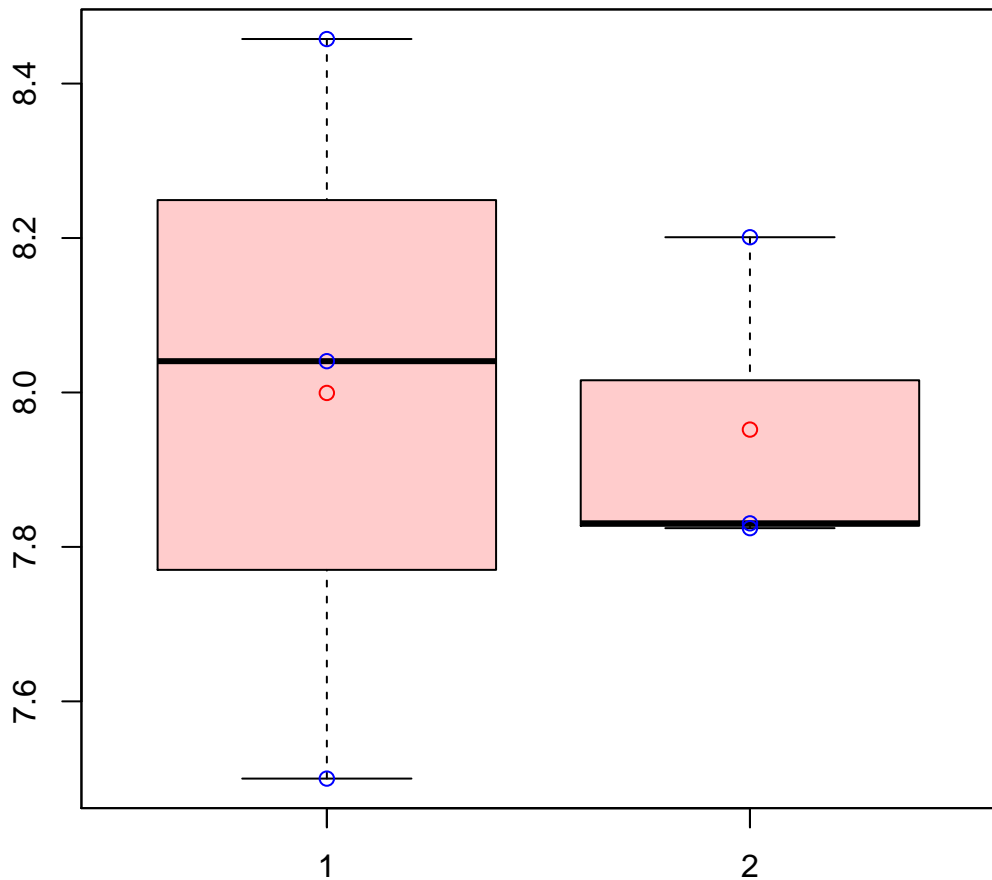

t-Test: p-value = 0.89

# CL6706Contig2|CL6706Contig2



t-Test: p-value = 0.89

# CL6710Contig4|CL6710Contig4

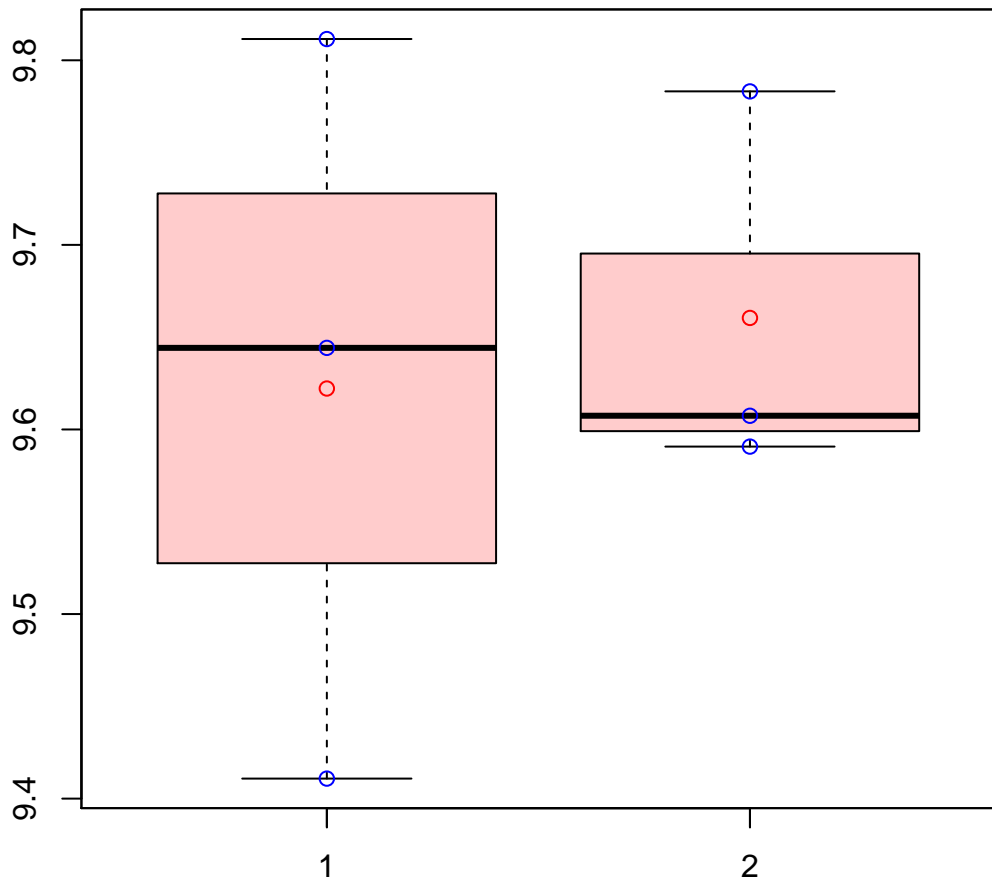

t-Test: p-value = 0.79



# CL6718Contig1|CL6718Contig1

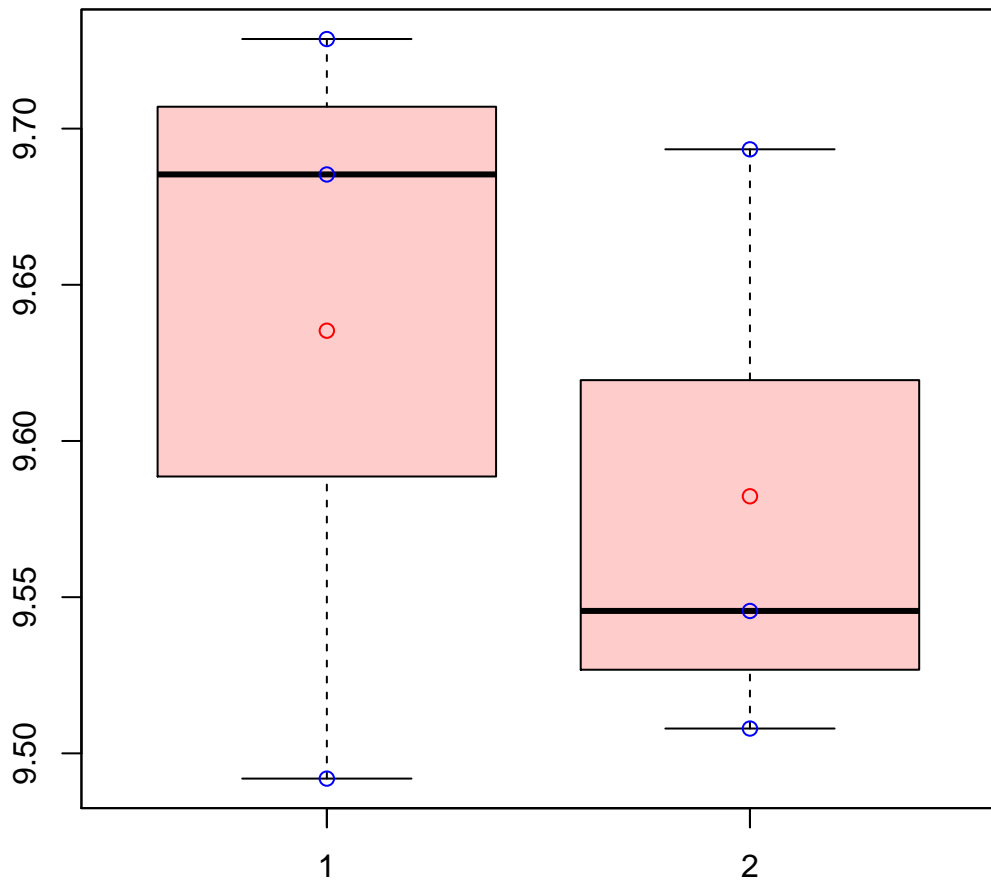

t-Test: p-value = 0.6

# CL6718Contig3|CL6718Contig3

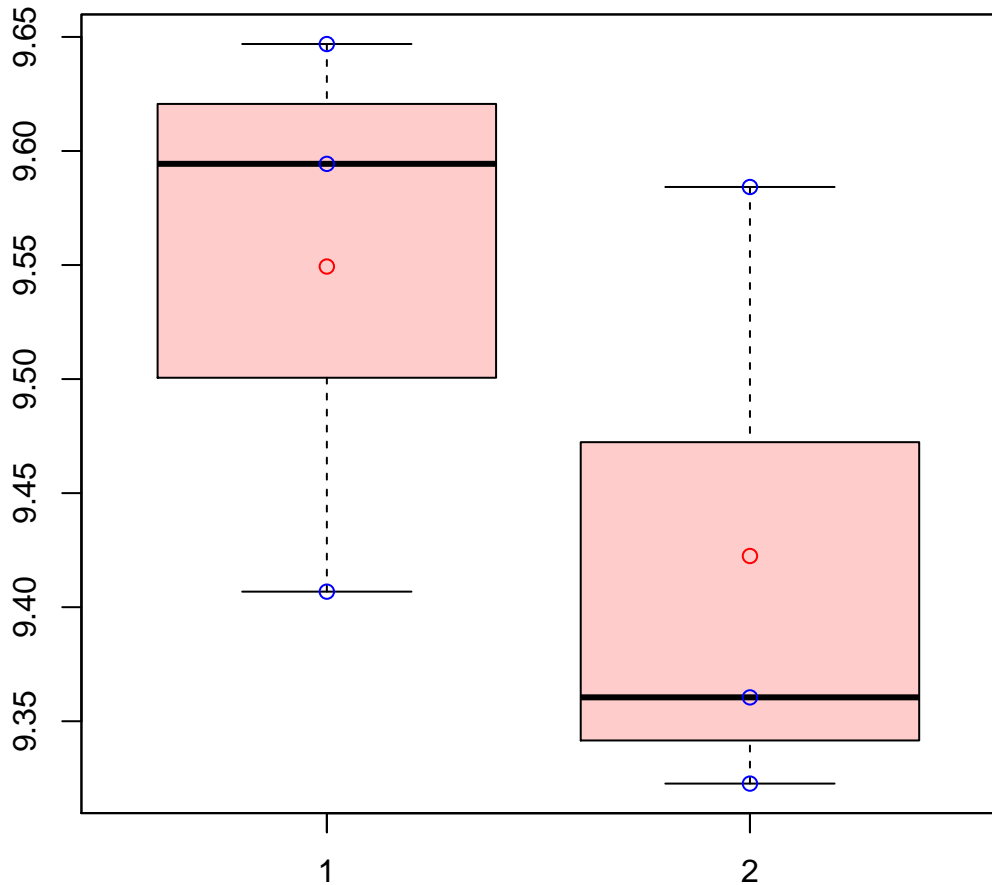

t-Test: p-value = 0.31

# CL671Contig4|CL671Contig4

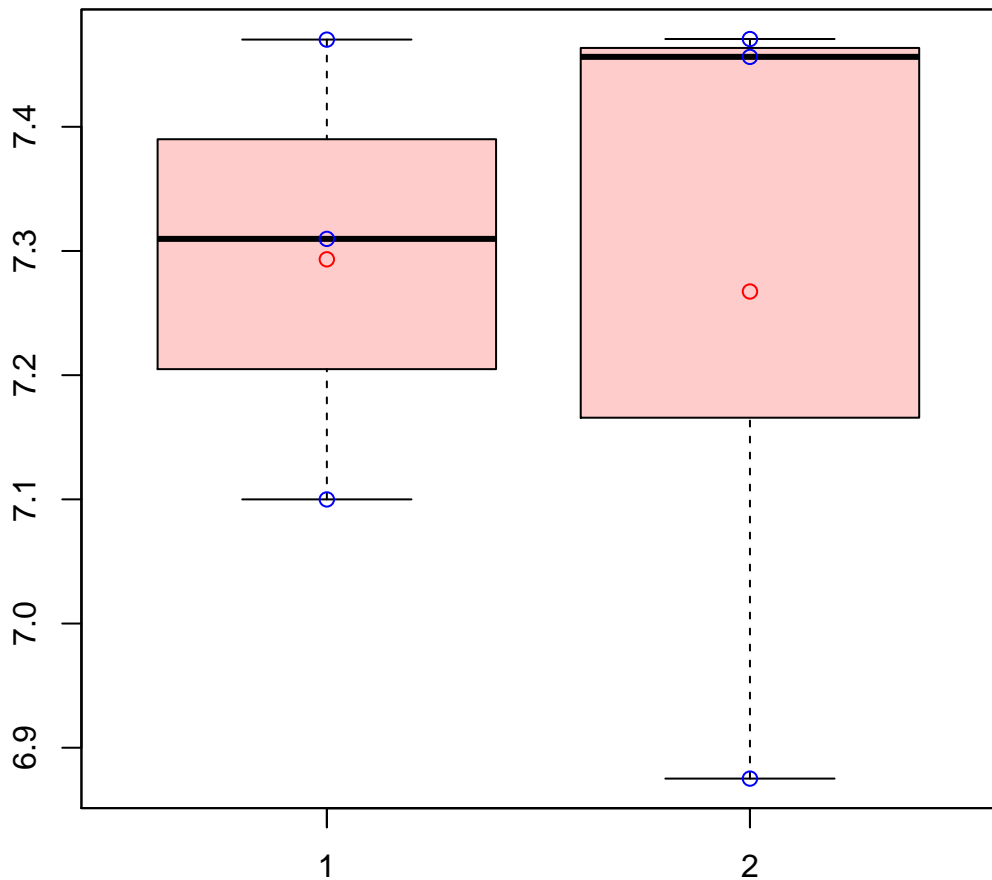

t-Test: p-value = 0.91

# CL671Contig5|CL671Contig5



t-Test: p-value = 0.91

# CL671Contig7|CL671Contig7

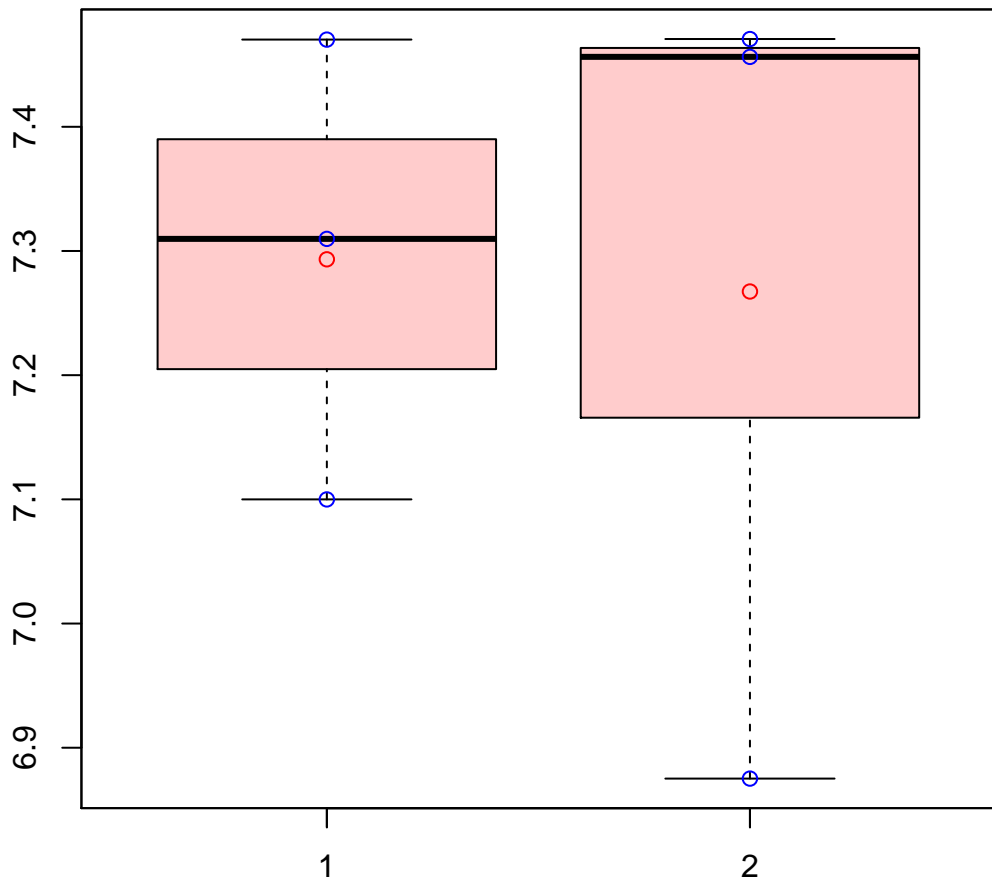

t-Test: p-value = 0.91

# CL6720Contig1|CL6720Contig1

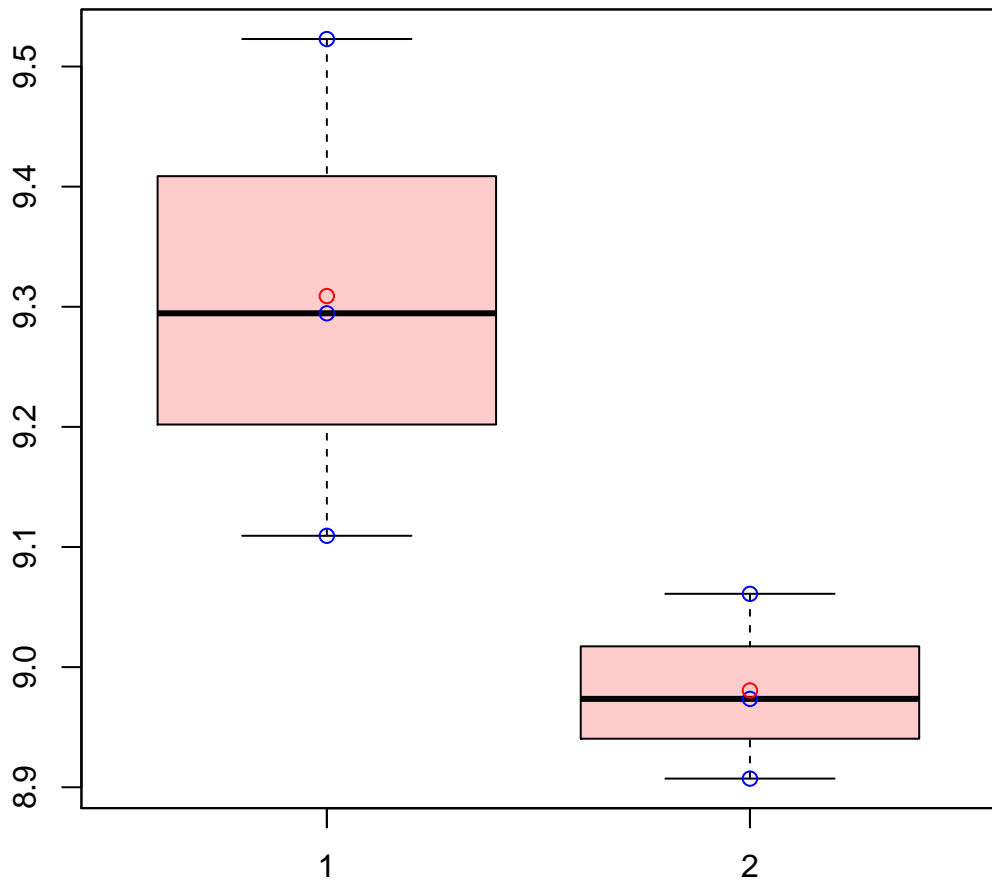

t-Test: p-value = 0.1

# CL6723Contig2|CL6723Contig2

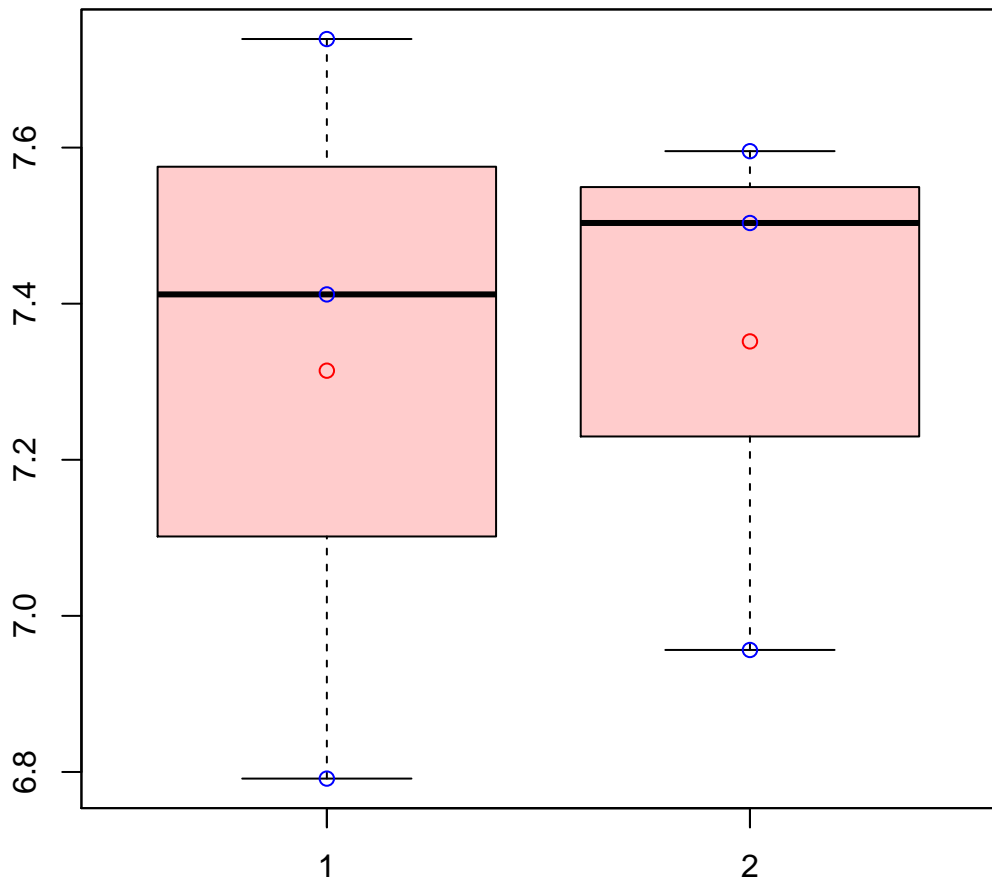

t-Test: p-value = 0.92

# CL6728Contig1|CL6728Contig1

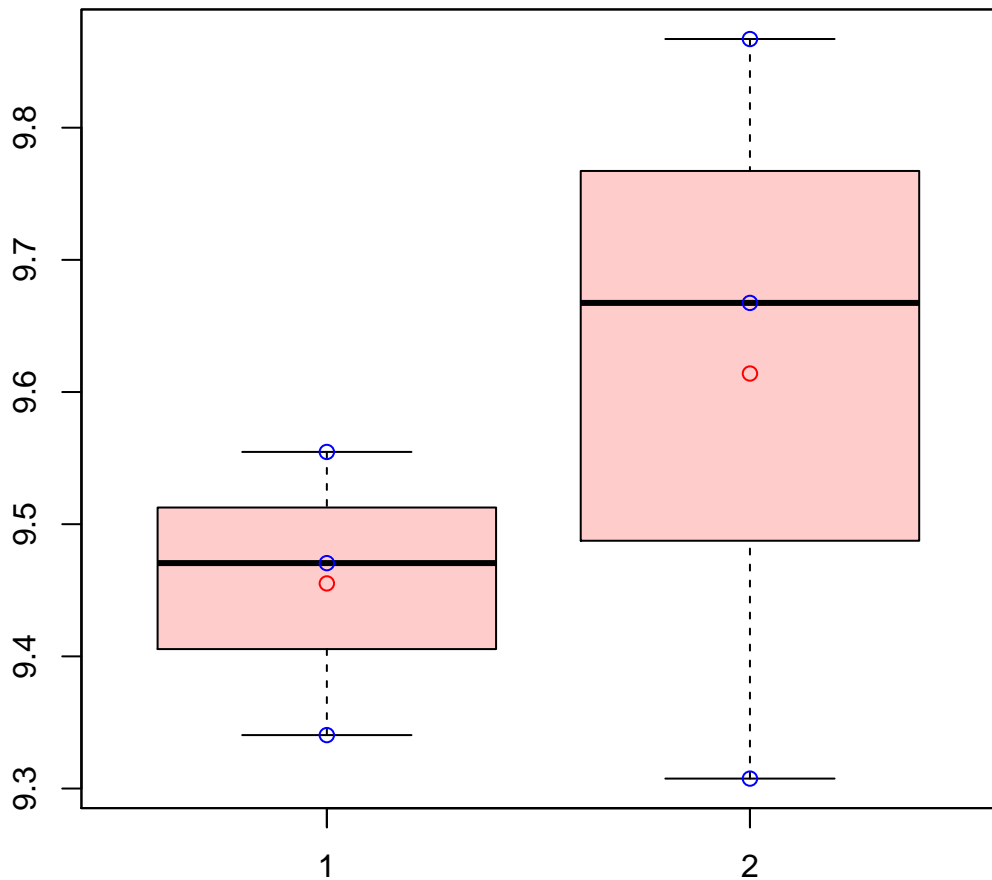

t-Test: p-value = 0.44



# CL6735Contig1|CL6735Contig1



t-Test: p-value = 0.43

# CL6736Contig1|CL6736Contig1

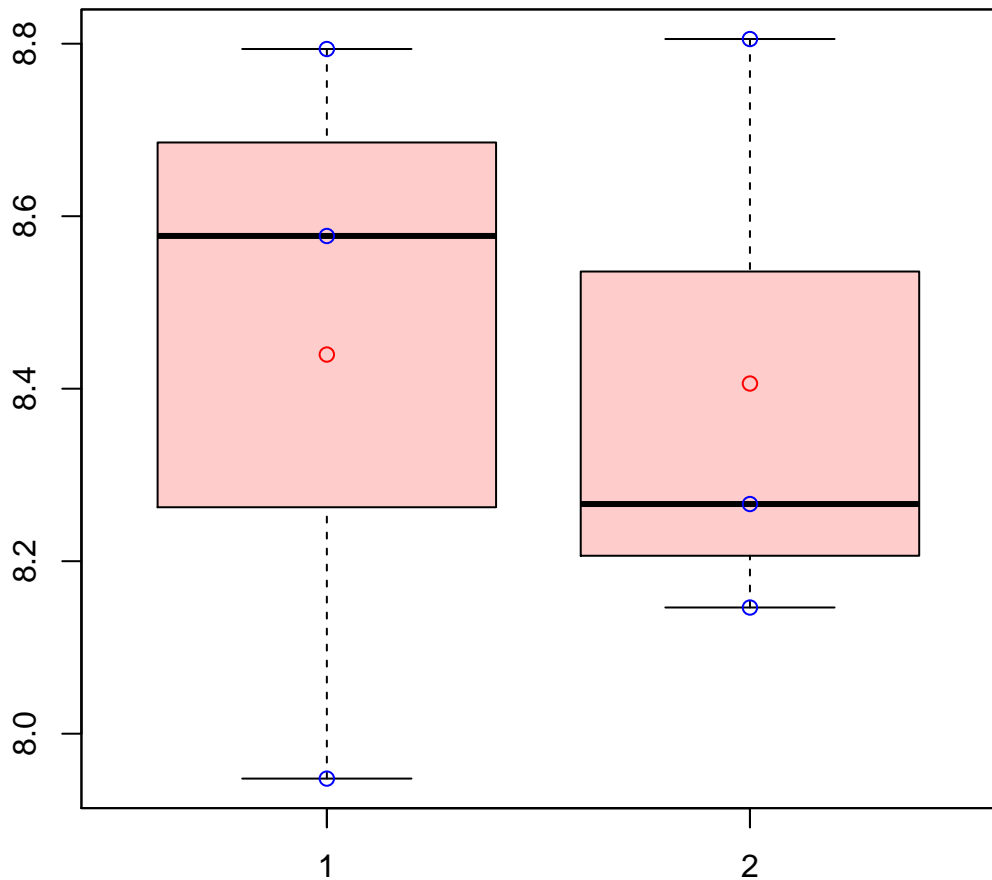

t-Test: p-value = 0.92

# CL6736Contig2|CL6736Contig2

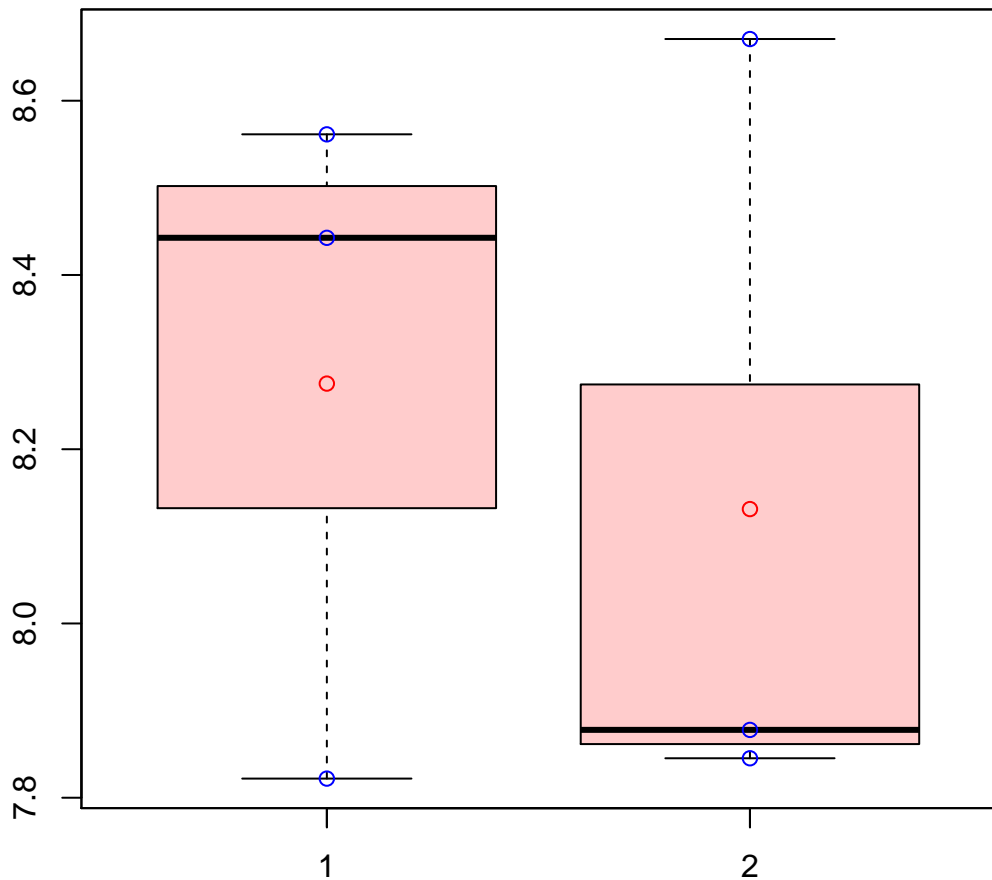

t-Test: p-value = 0.71

# CL673Contig5|CL673Contig5

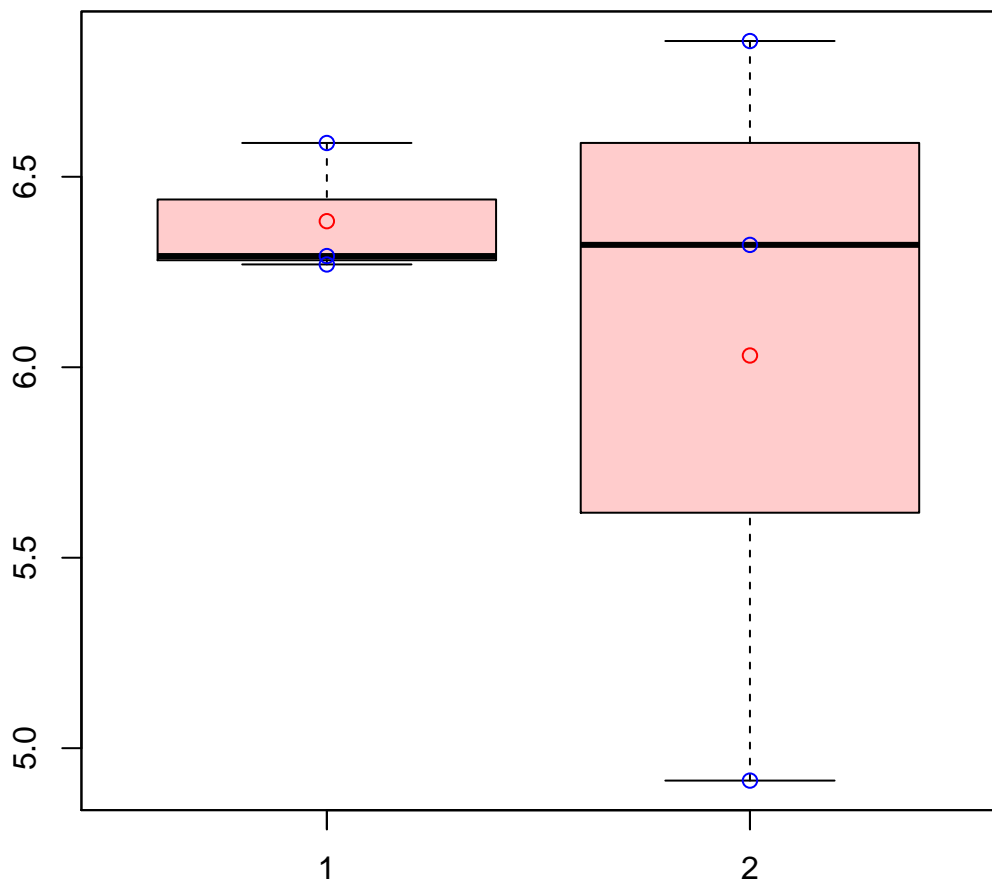

t-Test: p-value = 0.61

# CL673Contig6|CL673Contig6



t-Test: p-value = 0.61

# CL6749Contig1|CL6749Contig1

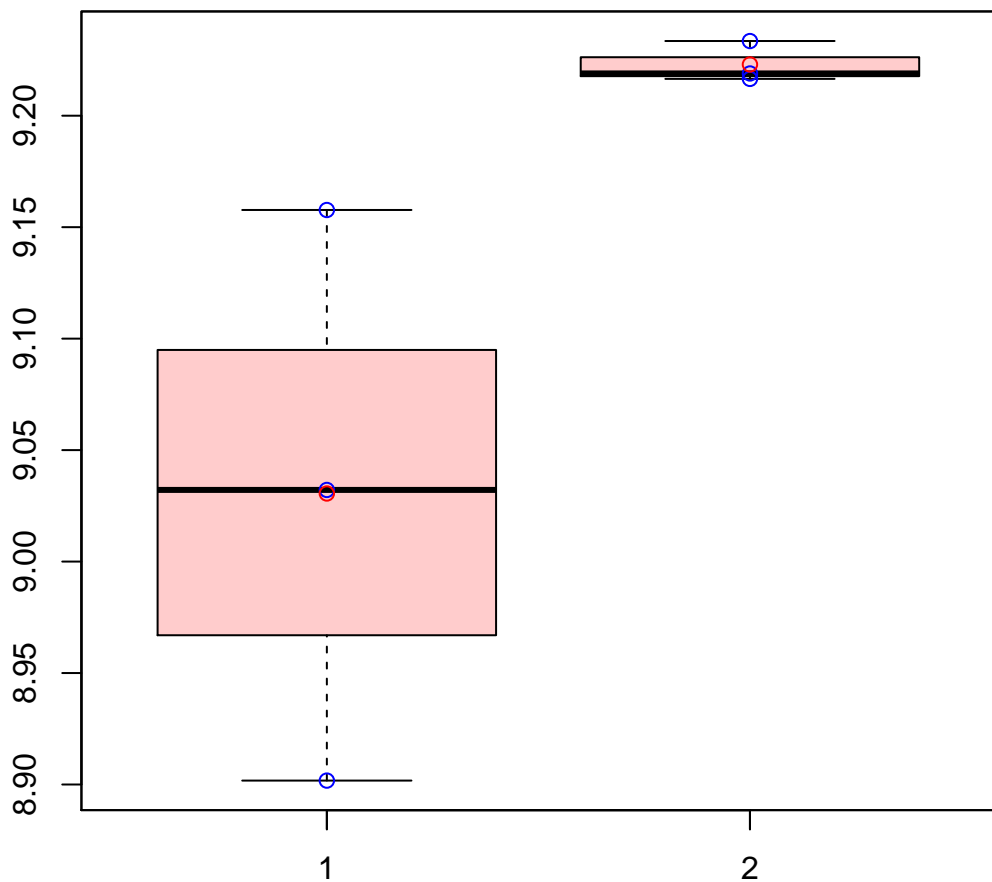

t-Test: p-value = 0.12

# CL6749Contig2|CL6749Contig2

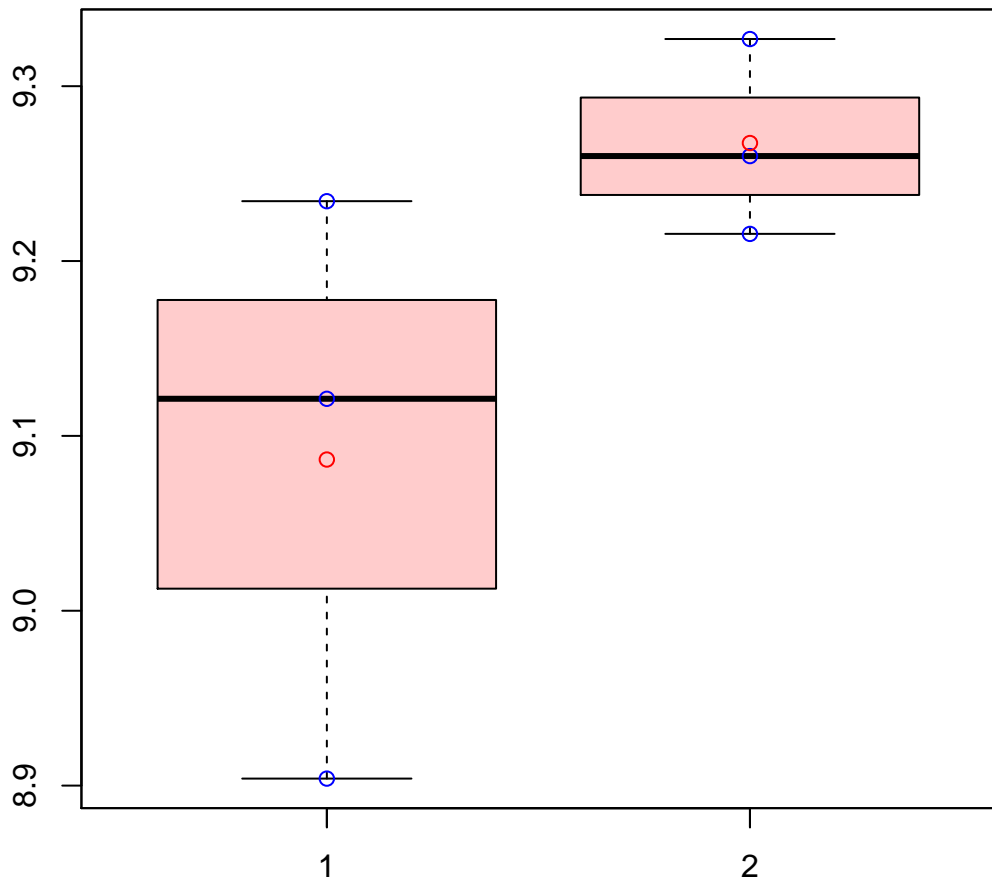

t-Test: p-value = 0.2

# CL674Contig4|CL674Contig4

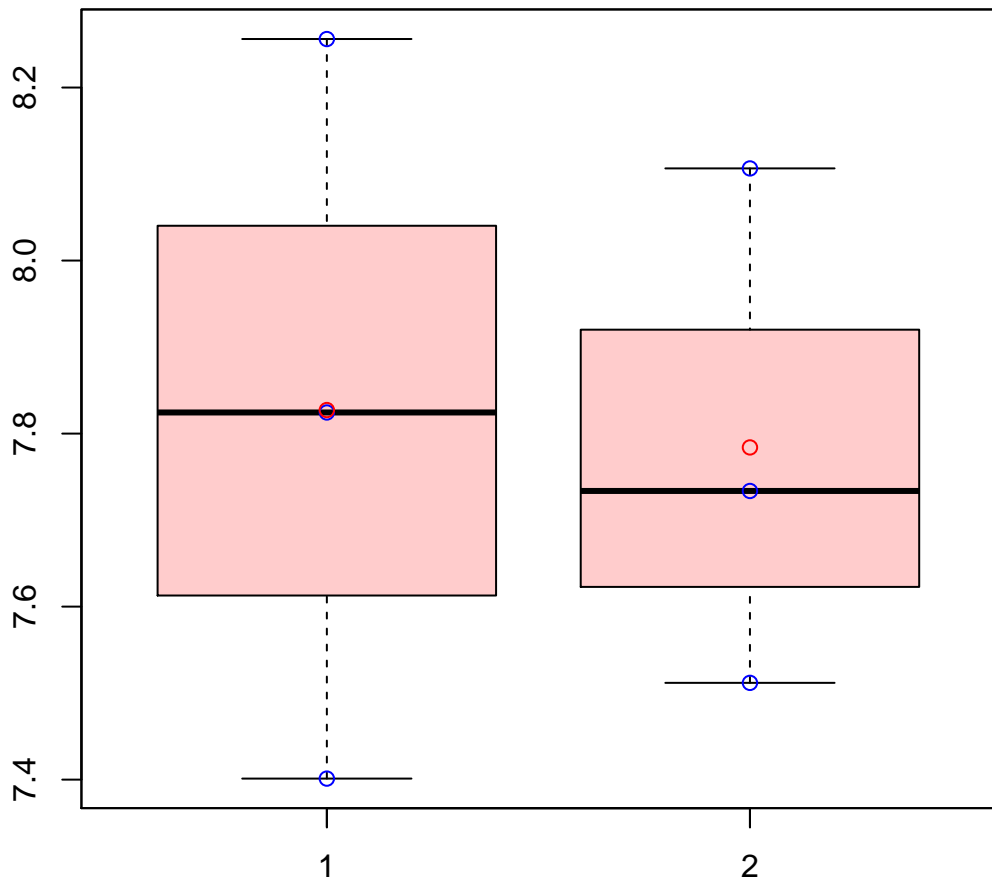

t-Test: p-value = 0.89



# CL674Contig5|CL674Contig5



t-Test: p-value = 0.89

# CL676Contig2|CL676Contig2

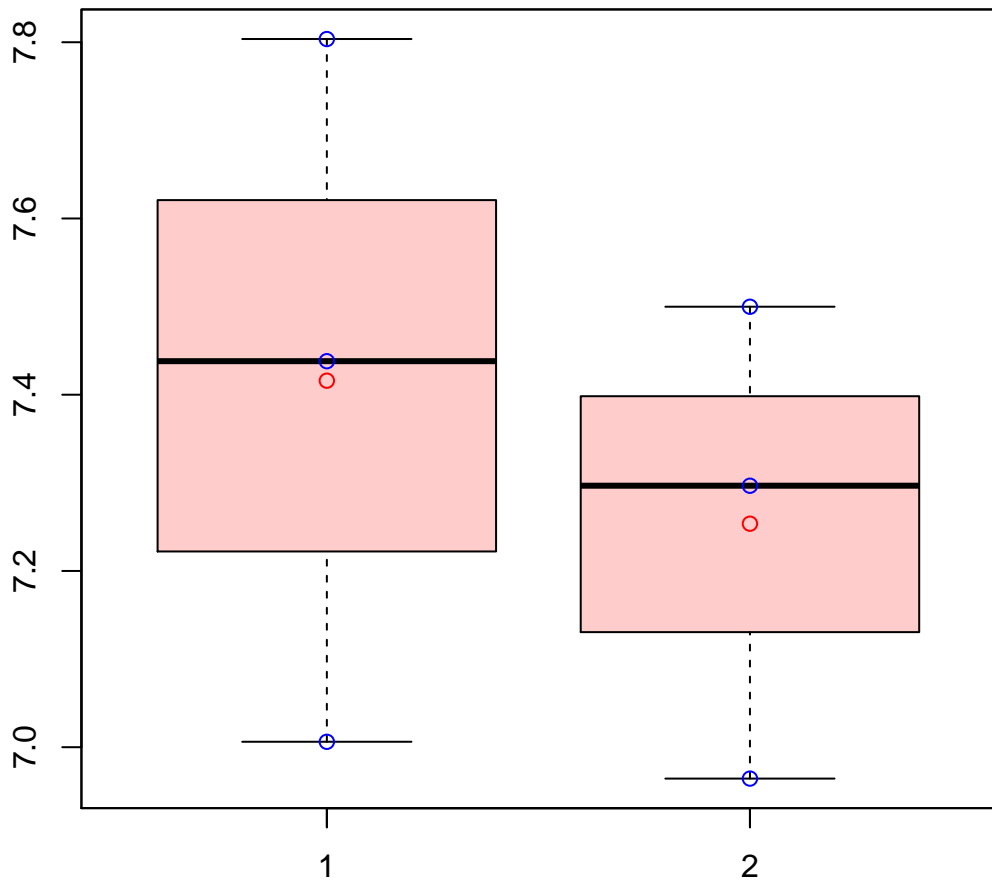

t-Test: p-value = 0.6

# CL676Contig5|CL676Contig5



t-Test: p-value = 0.77

# CL6773Contig2|CL6773Contig2

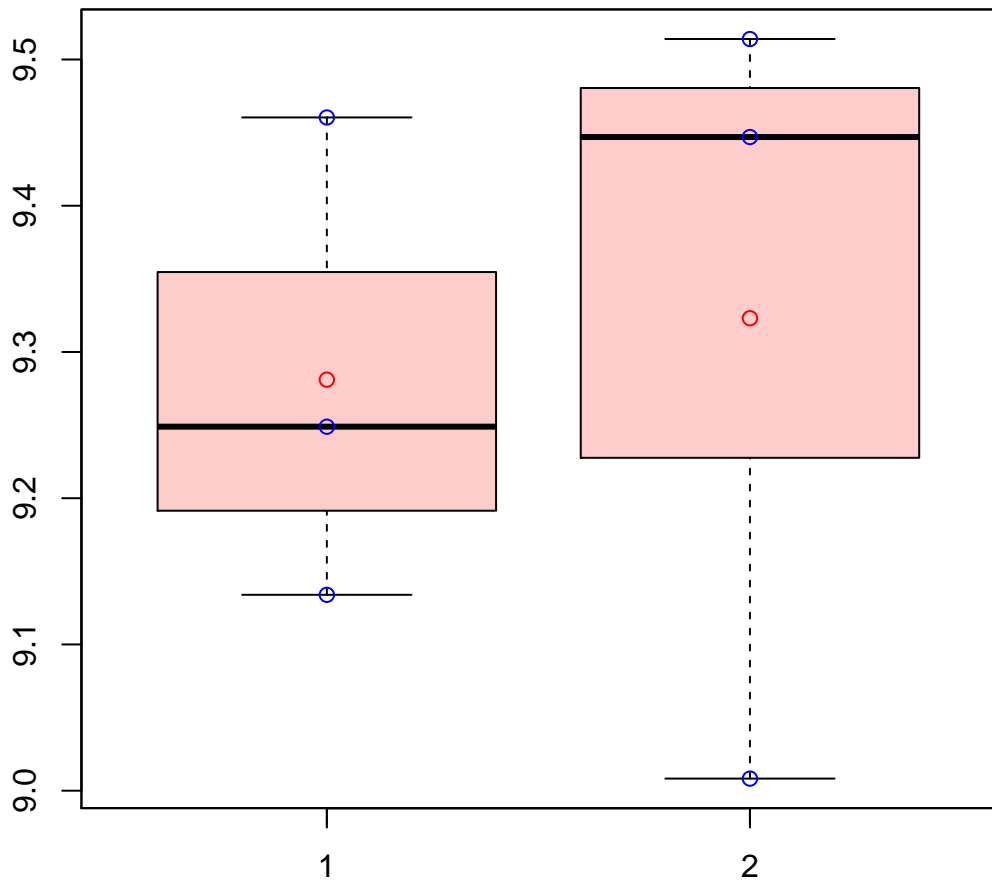

t-Test: p-value = 0.83

# CL6773Contig4|CL6773Contig4

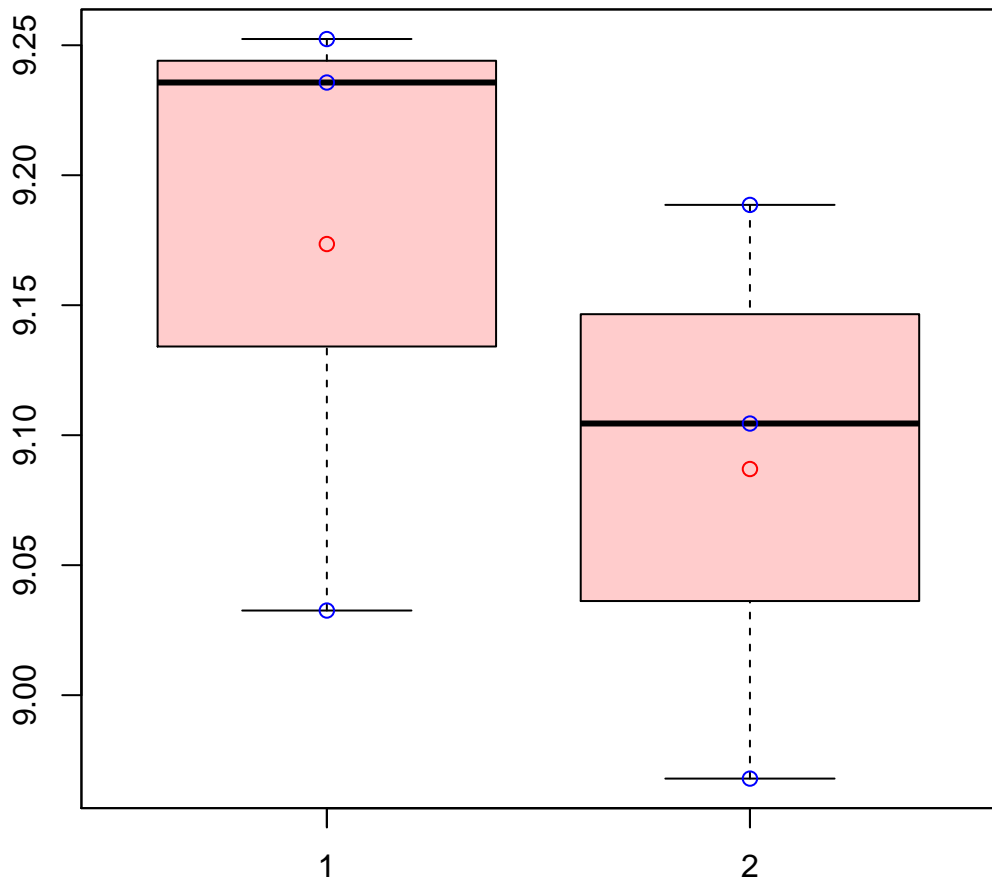

t-Test: p-value = 0.42

# CL678Contig11|CL678Contig11

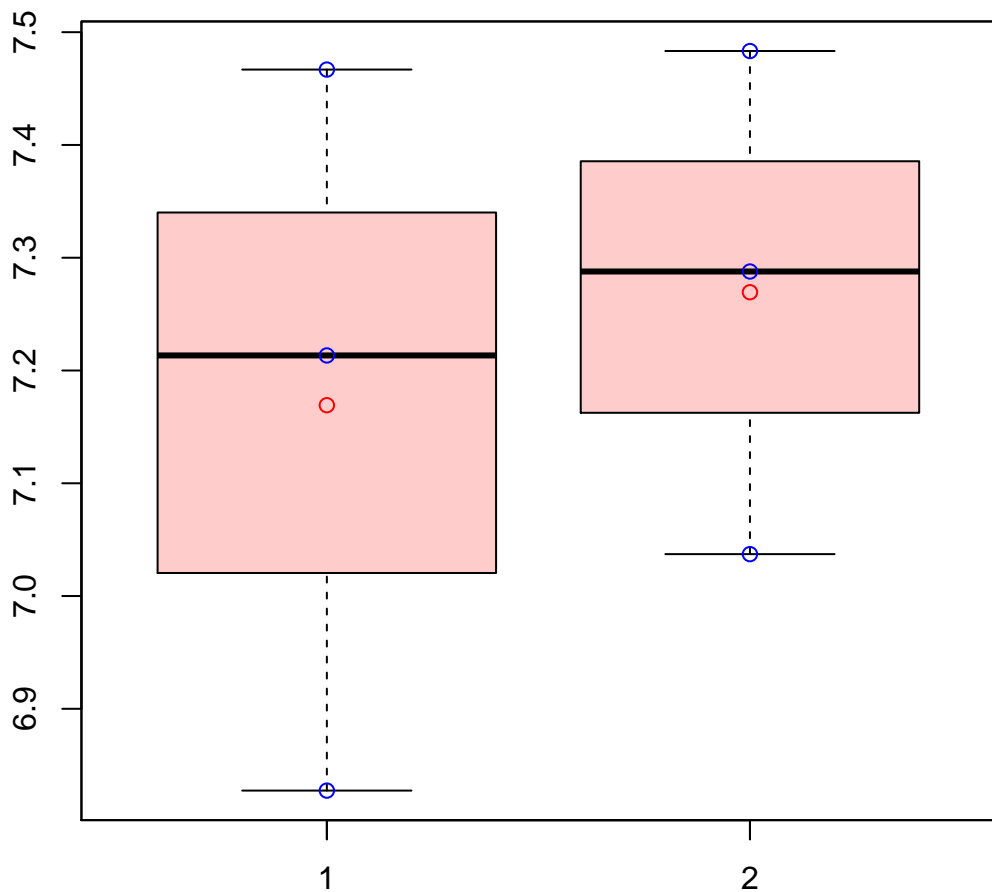

t-Test: p-value = 0.68

# CL678Contig5|CL678Contig5

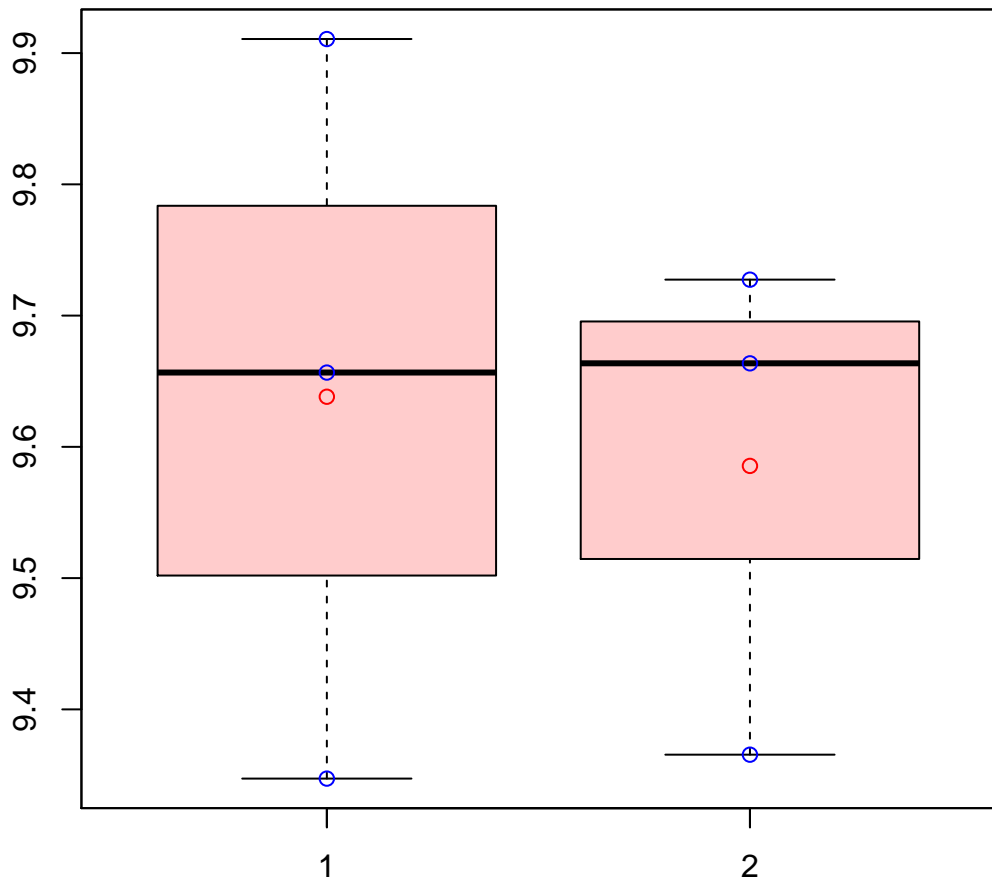

t-Test: p-value = 0.8

# CL6790Contig1|CL6790Contig1

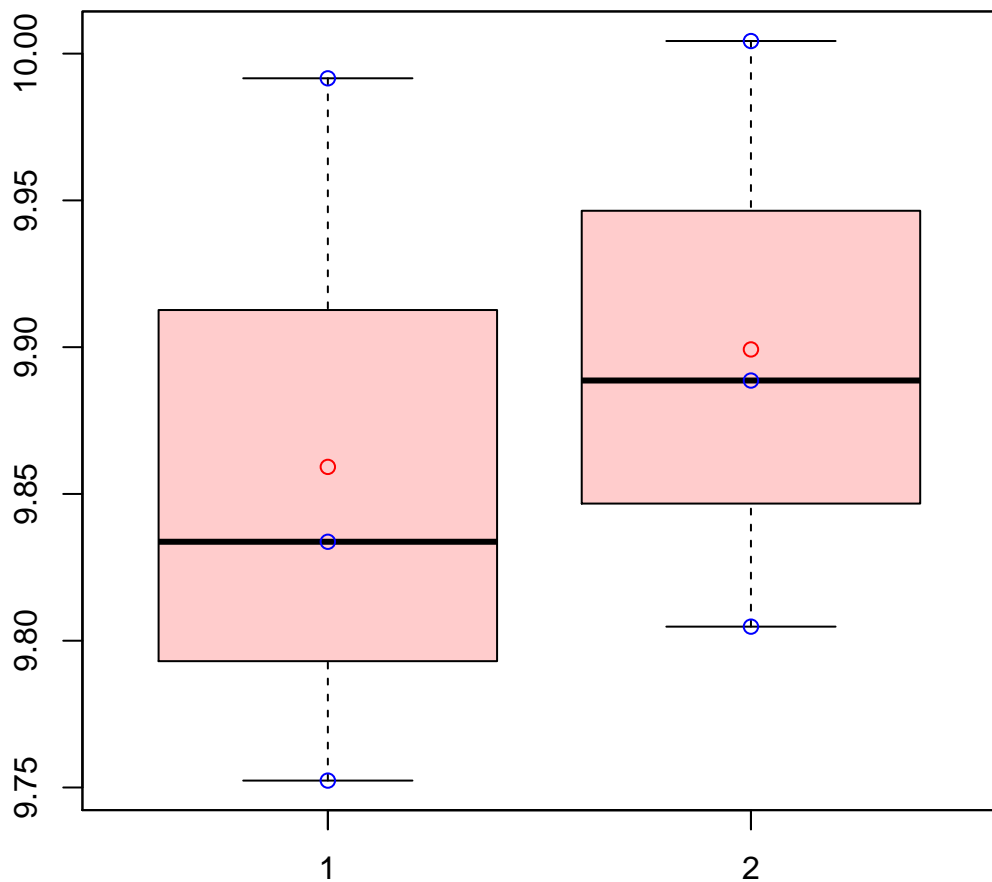

t-Test: p-value = 0.68



# CL6792Contig2|CL6792Contig2

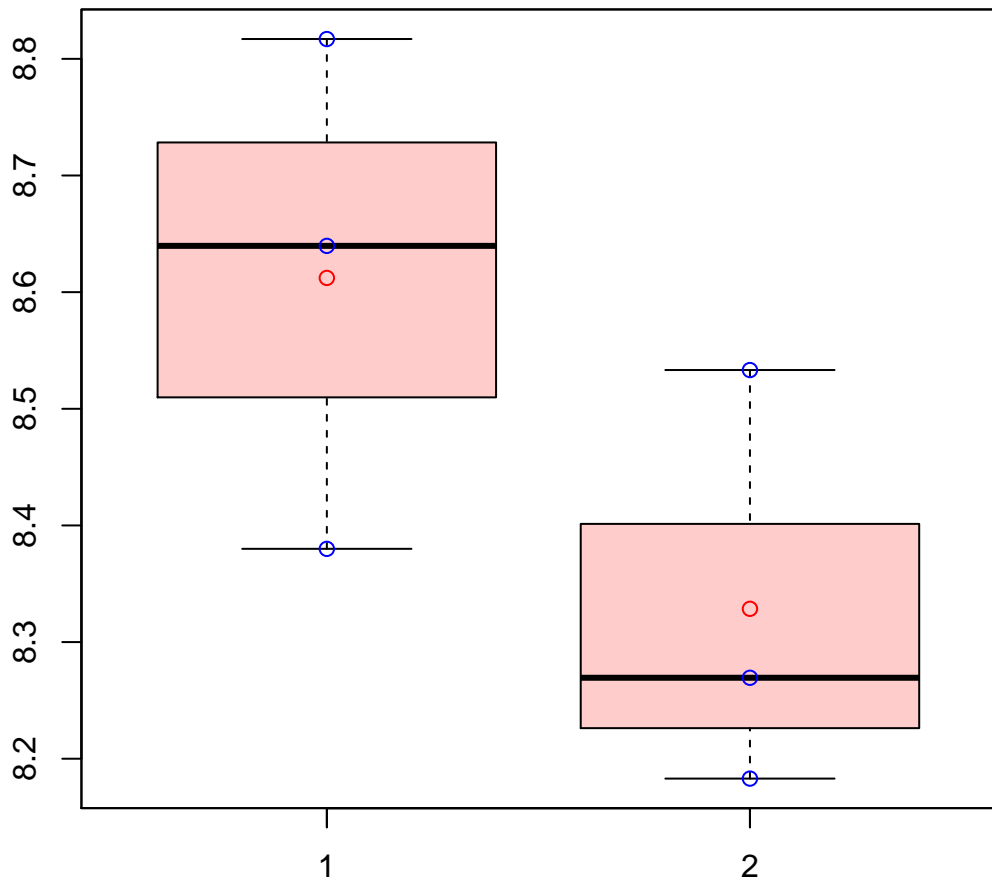

t-Test: p-value = 0.16

# CL6796Contig2|CL6796Contig2

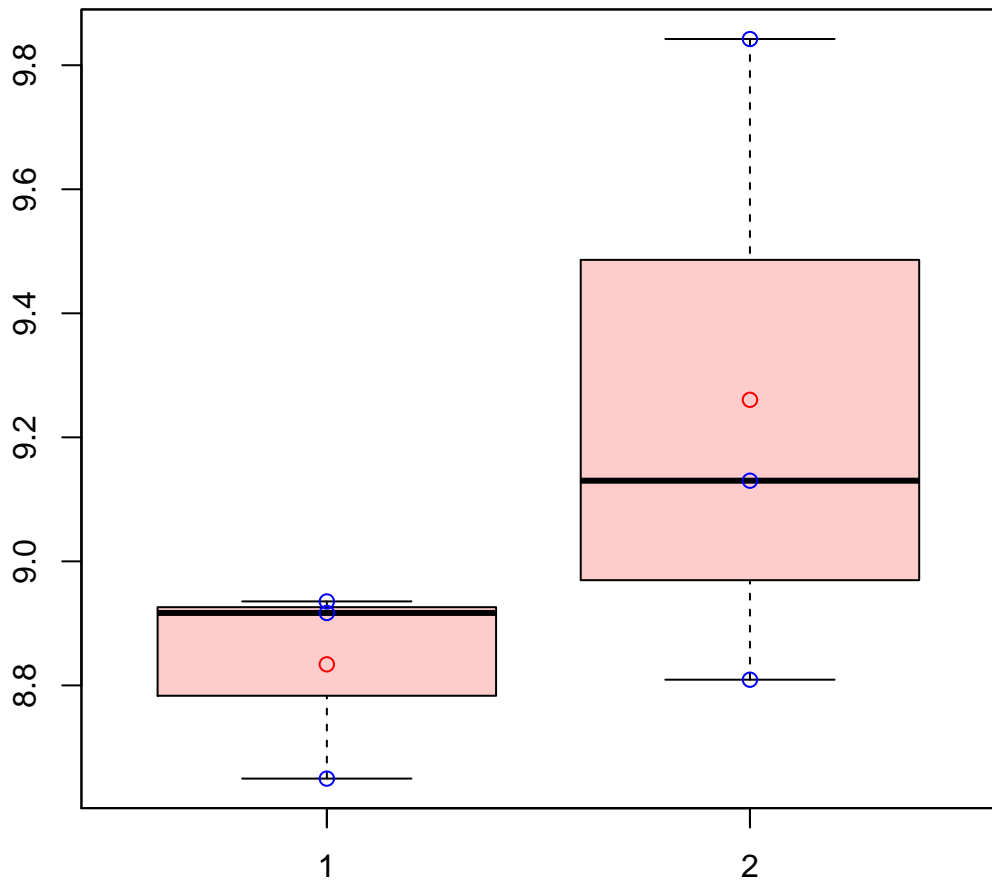

t-Test: p-value = 0.3

# CL6796Contig3|CL6796Contig3

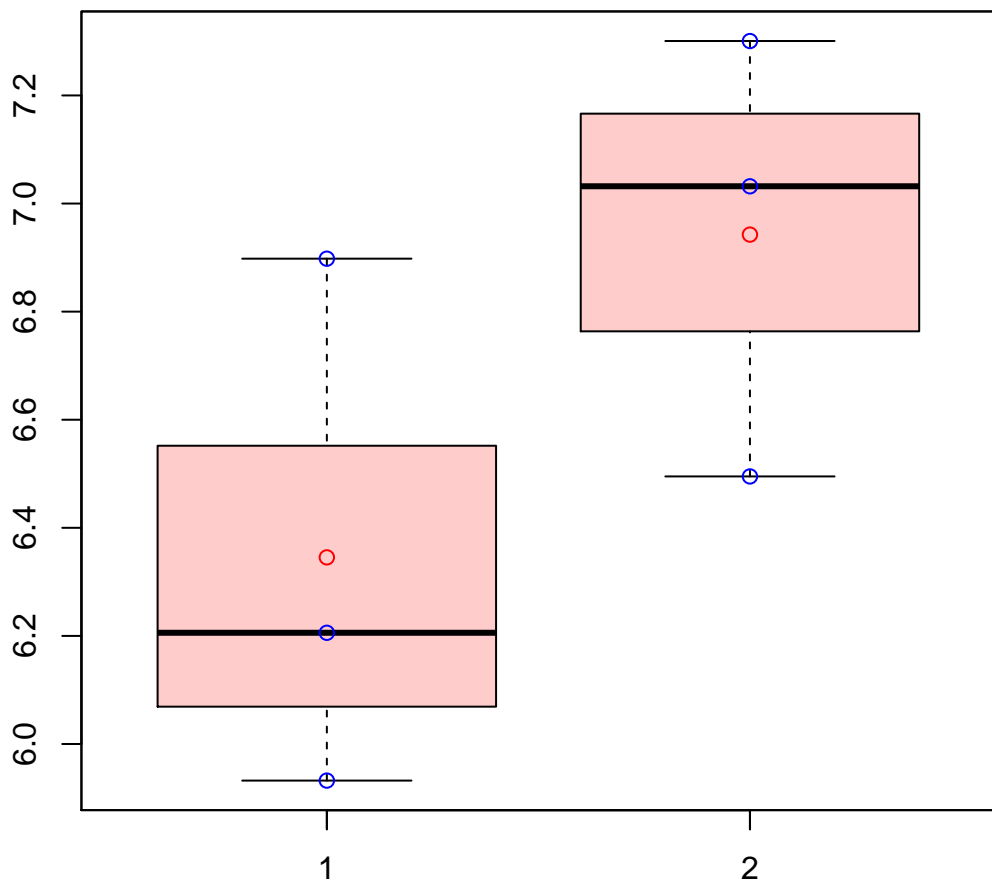

t-Test: p-value = 0.19

# CL679Contig5|CL679Contig5

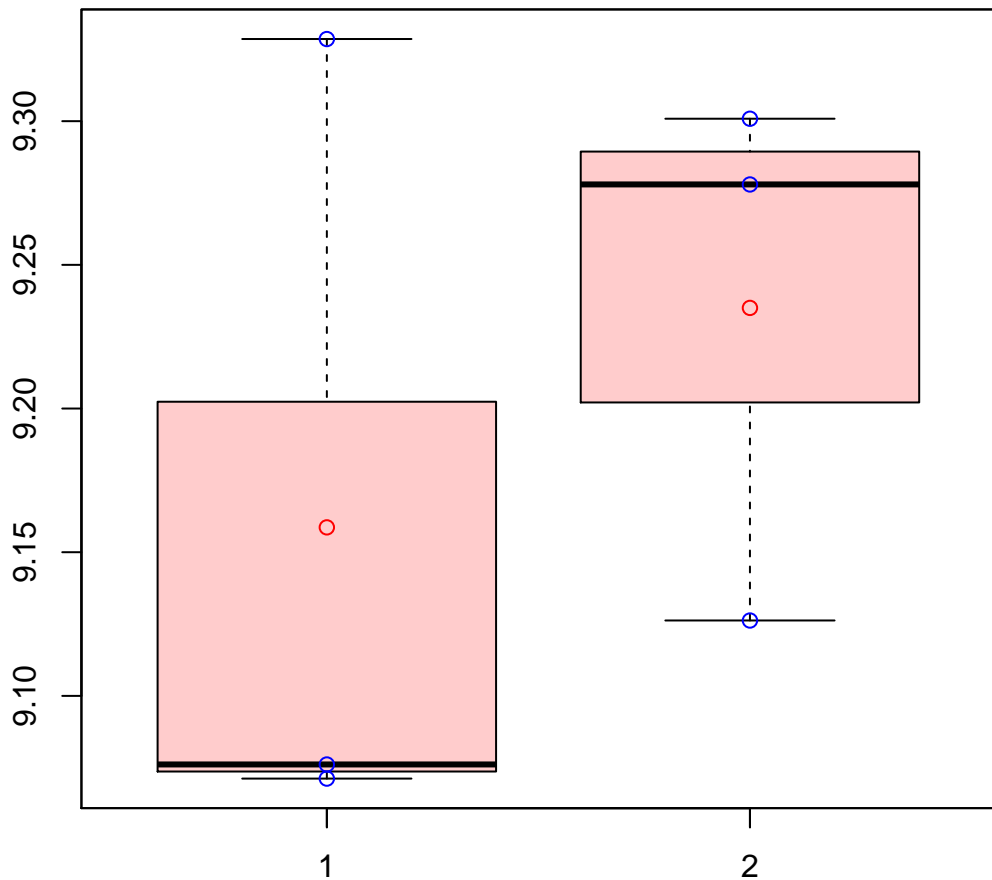

t-Test: p-value = 0.5

# CL67Contig12|CL67Contig12

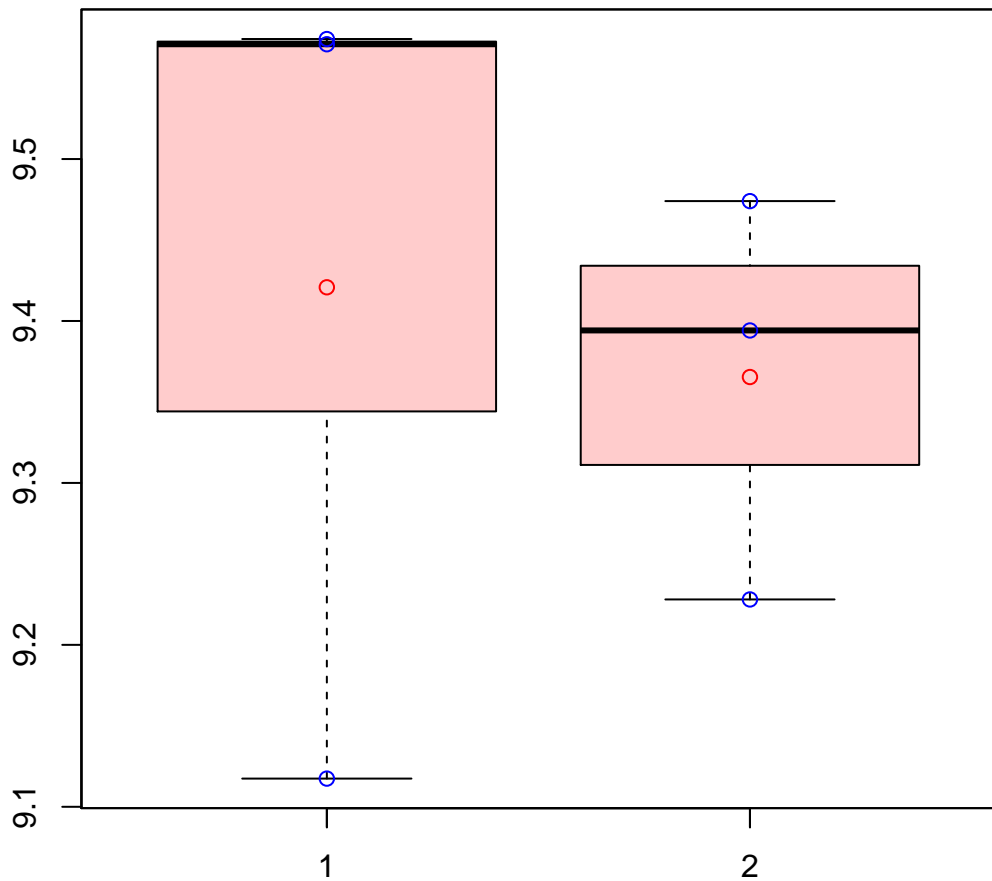

t-Test: p-value = 0.76

# CL67Contig2|CL67Contig2

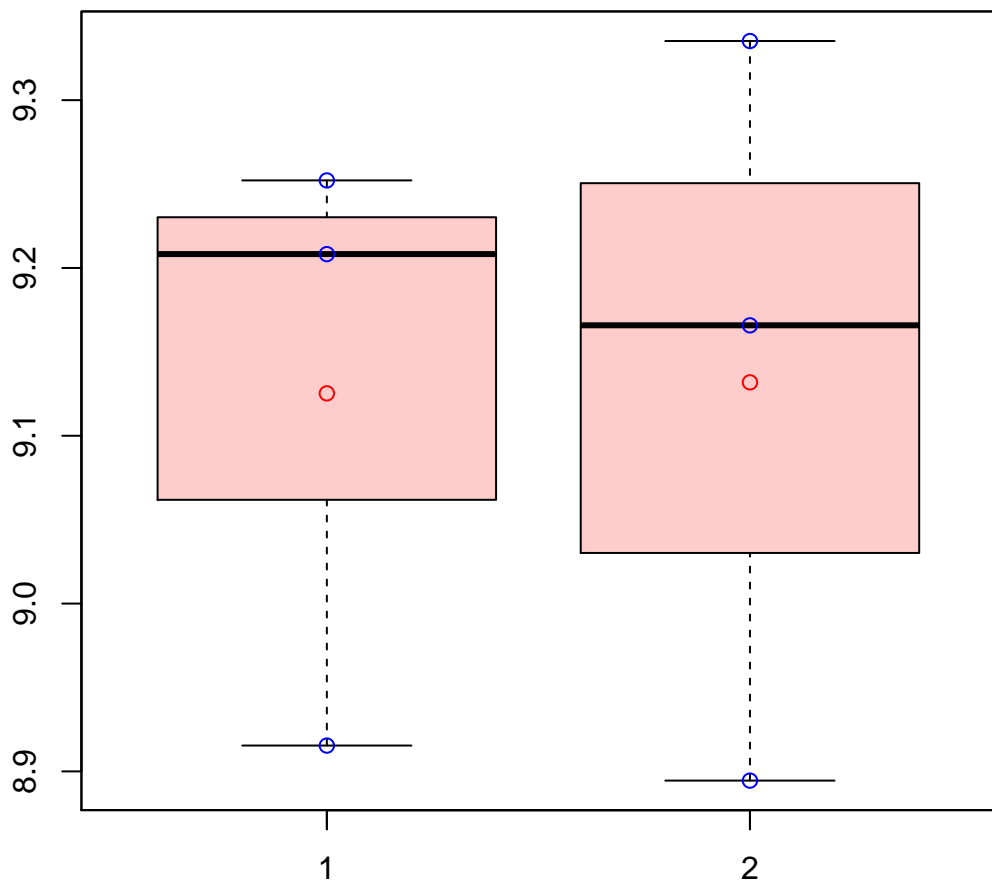

t-Test: p-value = 0.97

# CL67Contig3|CL67Contig3

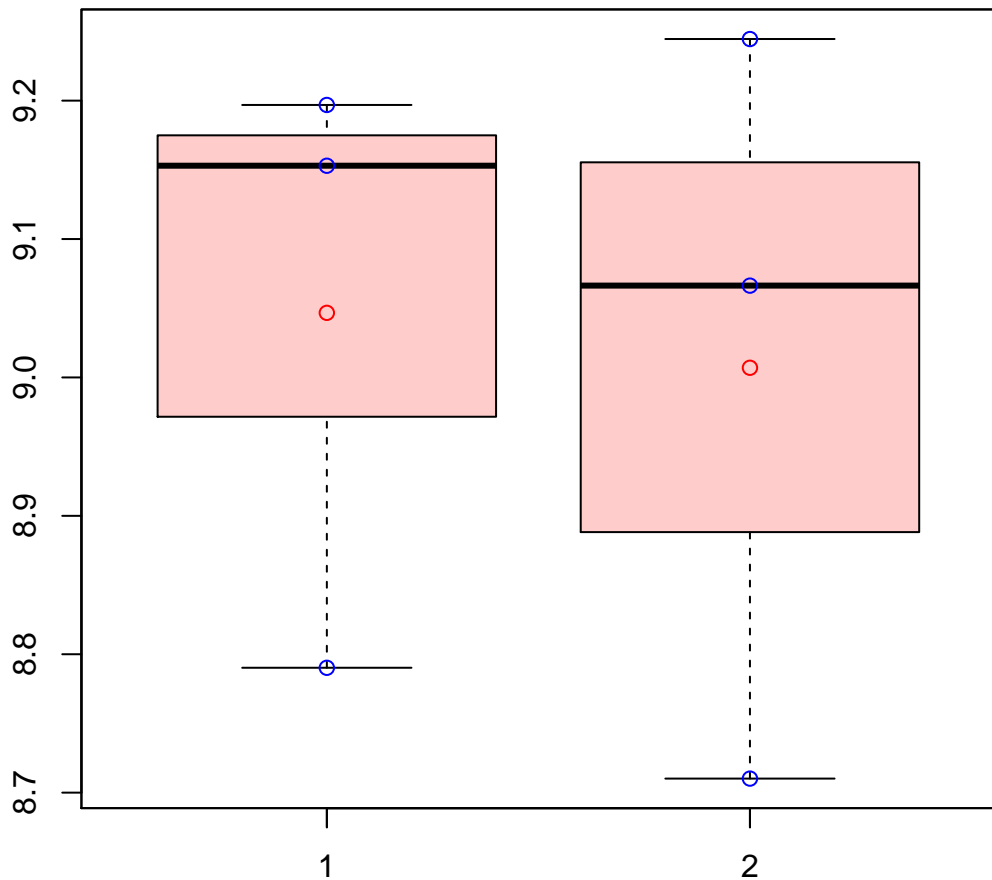

t-Test: p-value = 0.85

# CL680Contig10|CL680Contig10

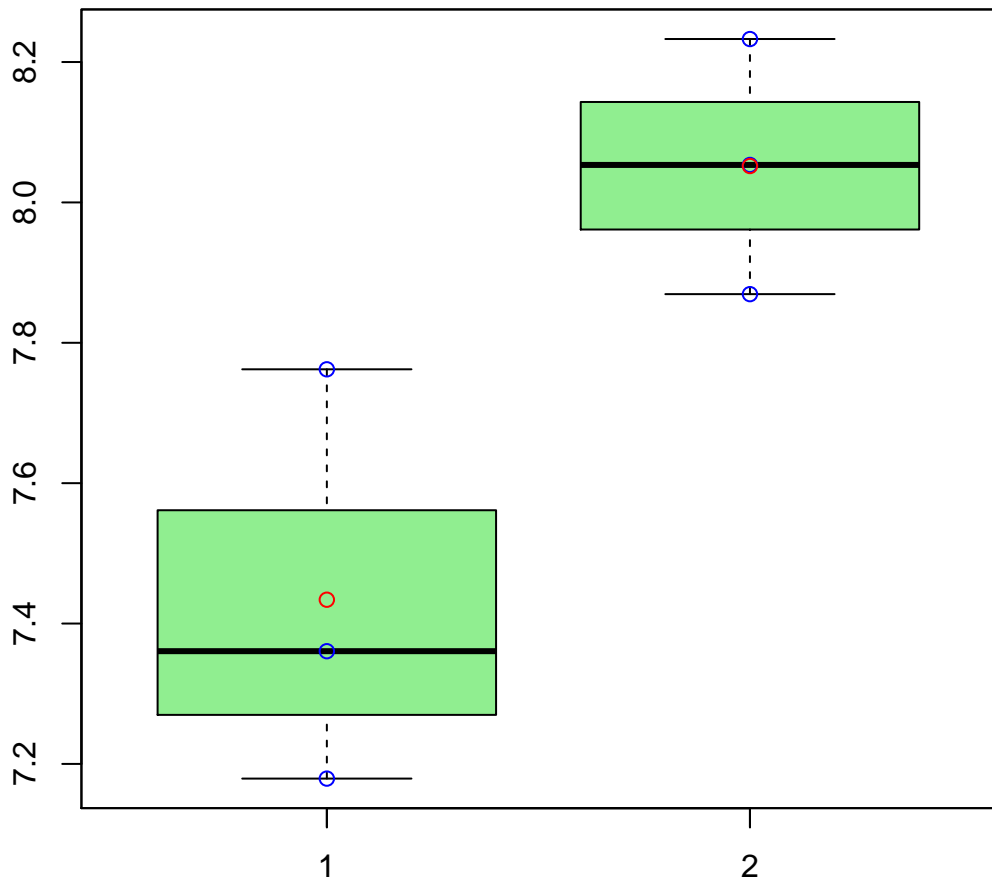

t-Test: p-value = 0.05



# CL680Contig5|CL680Contig5

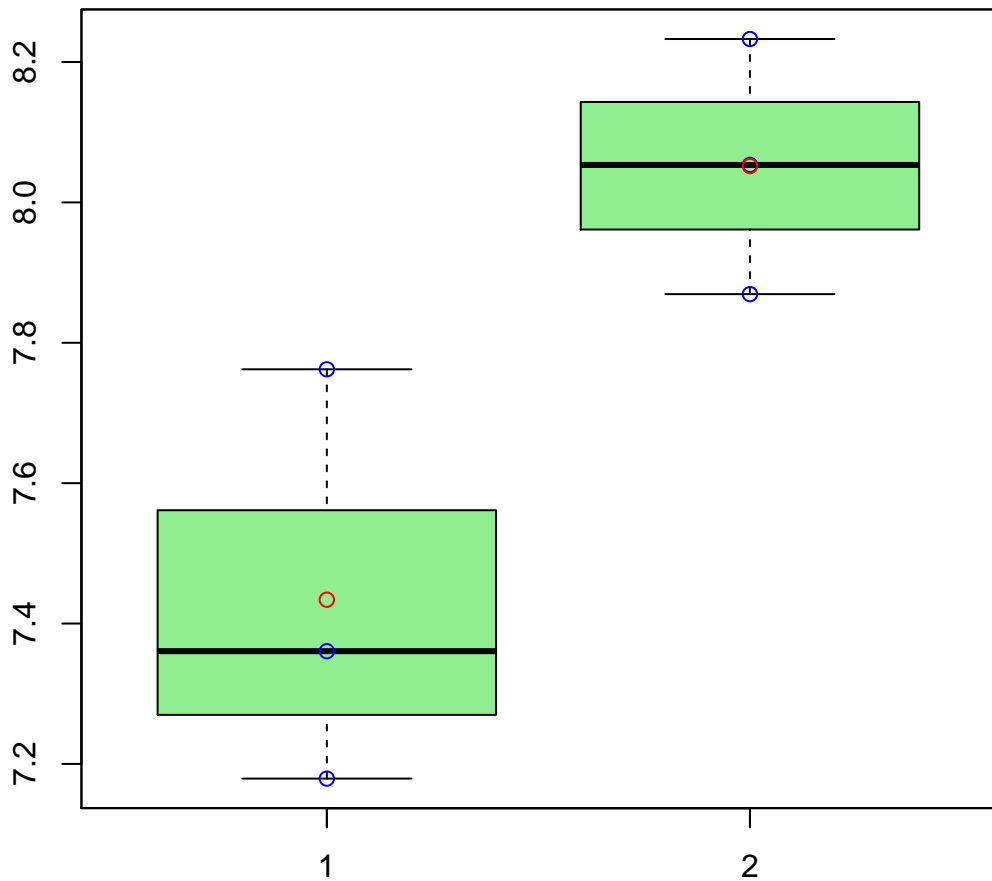

t-Test: p-value = 0.05

# CL6816Contig2|CL6816Contig2

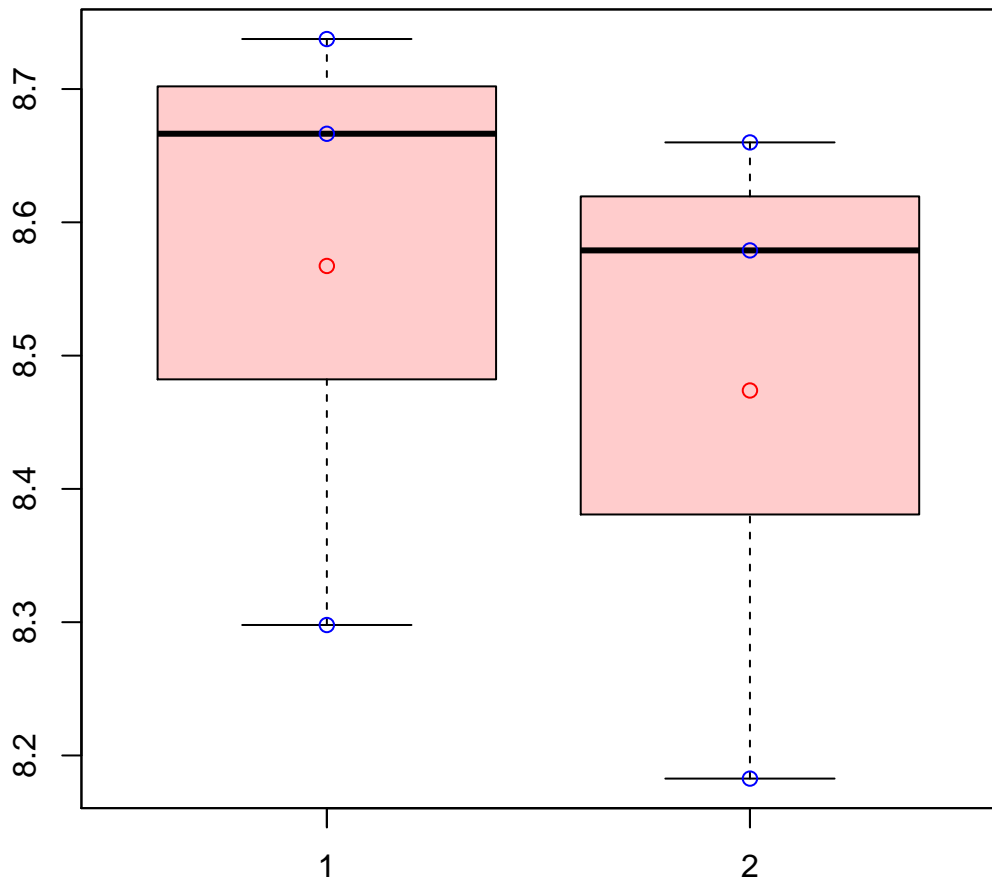

t-Test: p-value = 0.67

# CL6816Contig4|CL6816Contig4



t-Test: p-value = 0.67

# CL6820Contig1|CL6820Contig1

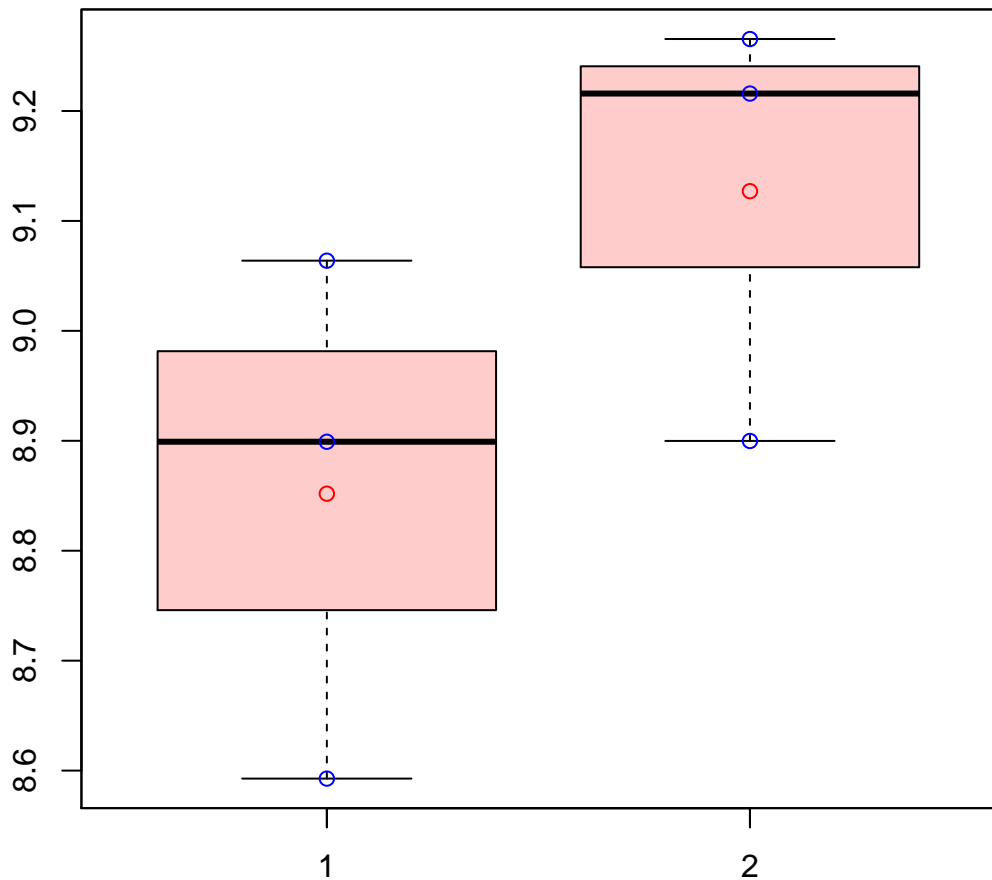

t-Test: p-value = 0.2

# CL6822Contig1|CL6822Contig1



t-Test: p-value = 0.43

# CL682Contig1|CL682Contig1

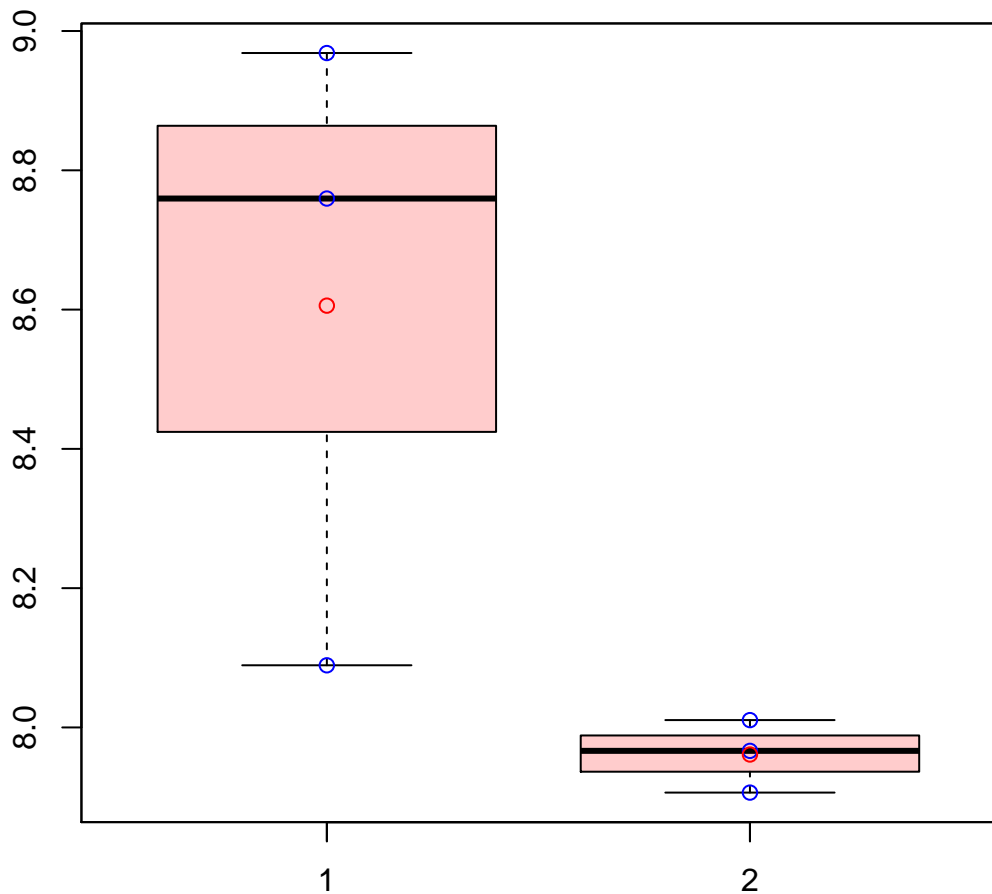

t-Test: p-value = 0.13

# CL6832Contig2|CL6832Contig2

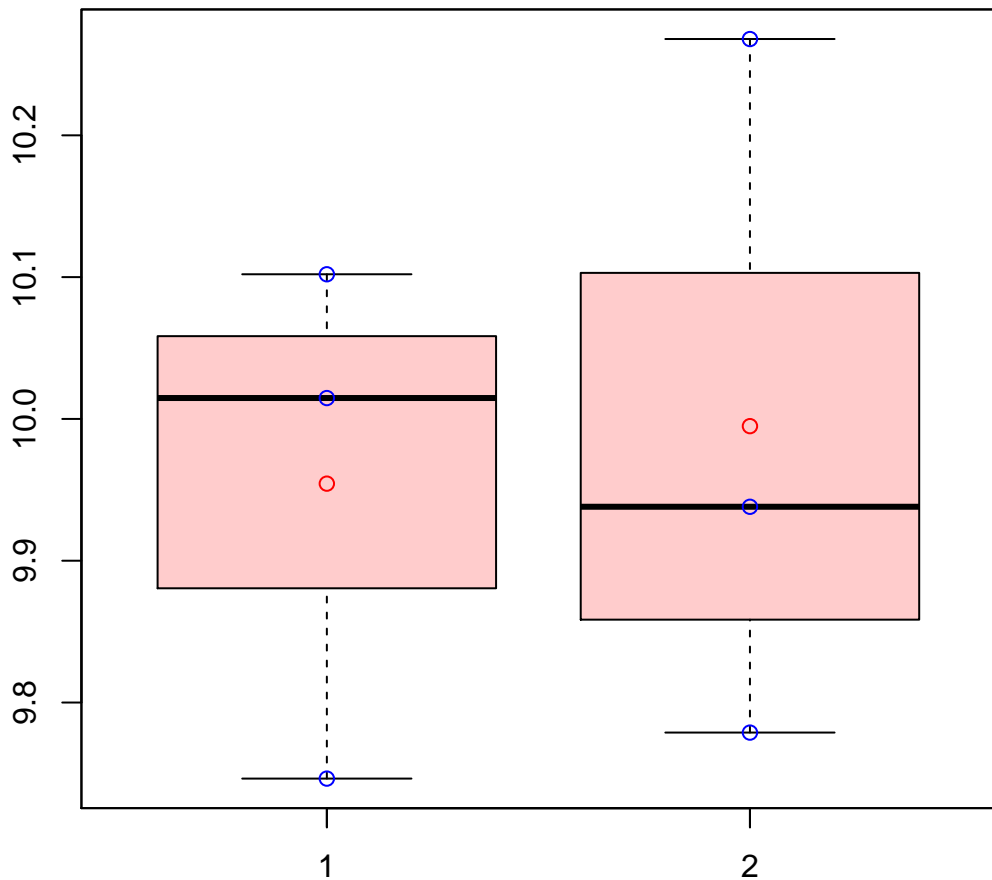

t-Test: p-value = 0.83

# CL6836Contig1|CL6836Contig1

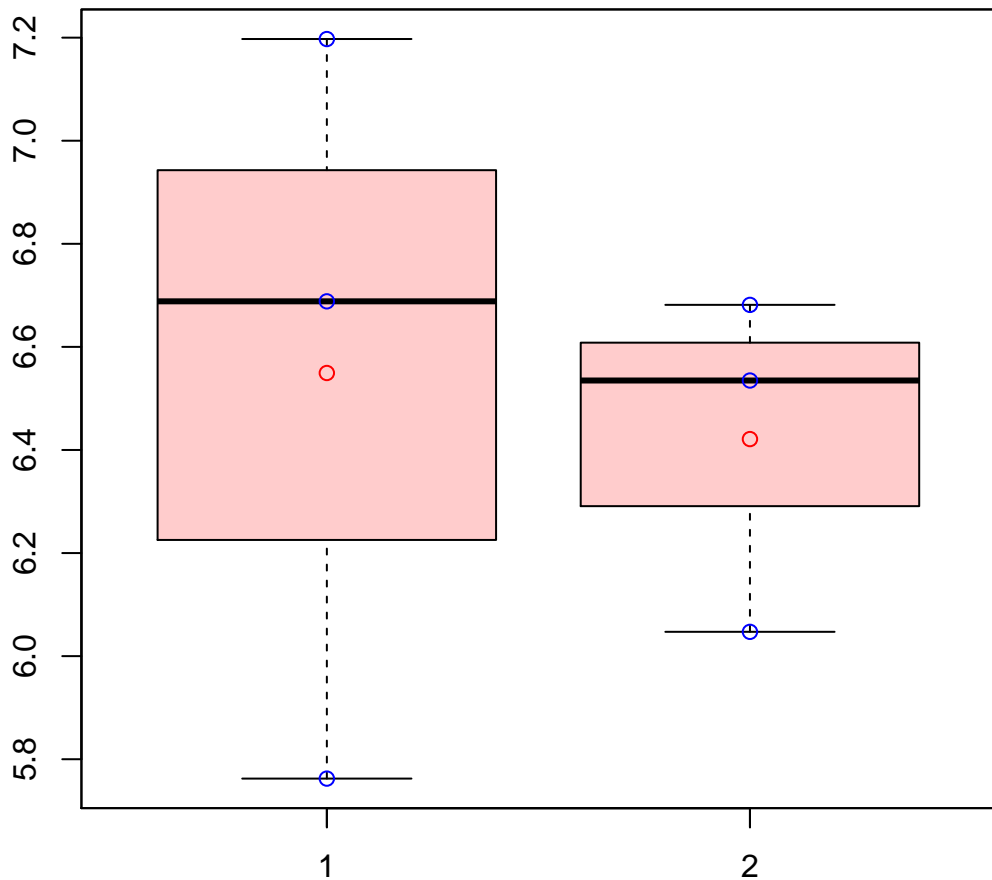

t-Test: p-value = 0.8



# CL6836Contig2|CL6836Contig2



t-Test: p-value = 0.8

# CL6840Contig4|CL6840Contig4

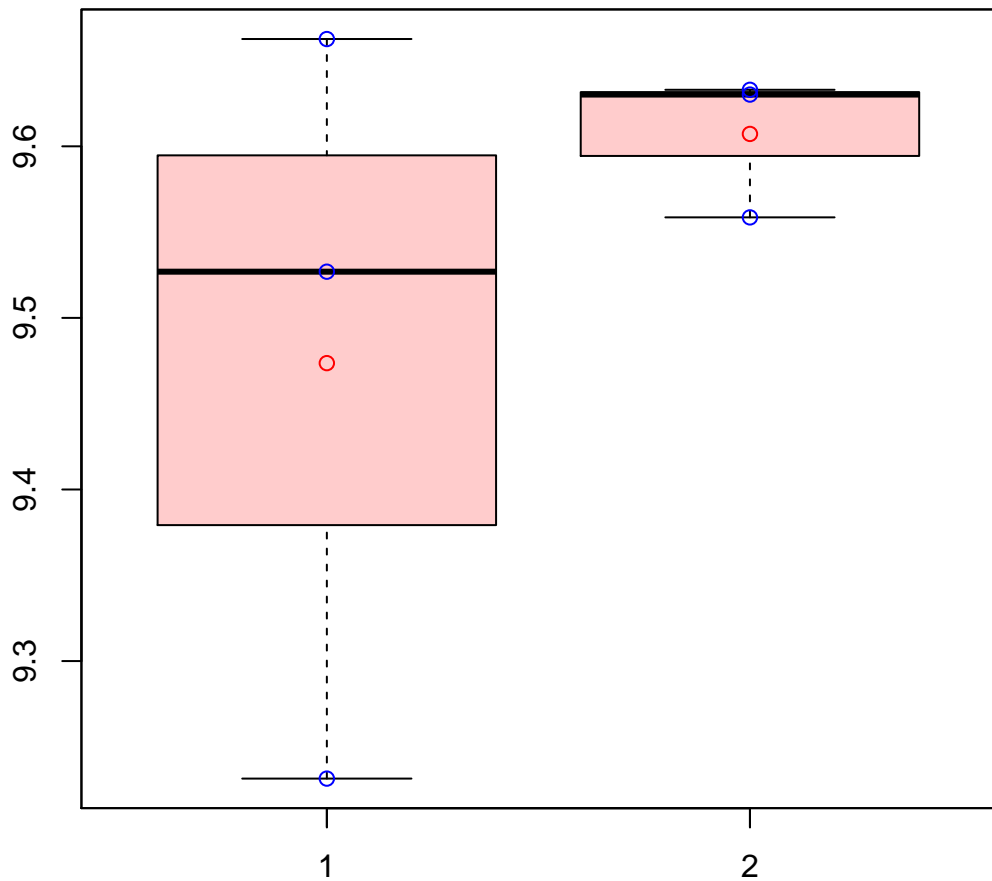

t-Test: p-value = 0.4

# CL6841Contig1|CL6841Contig1

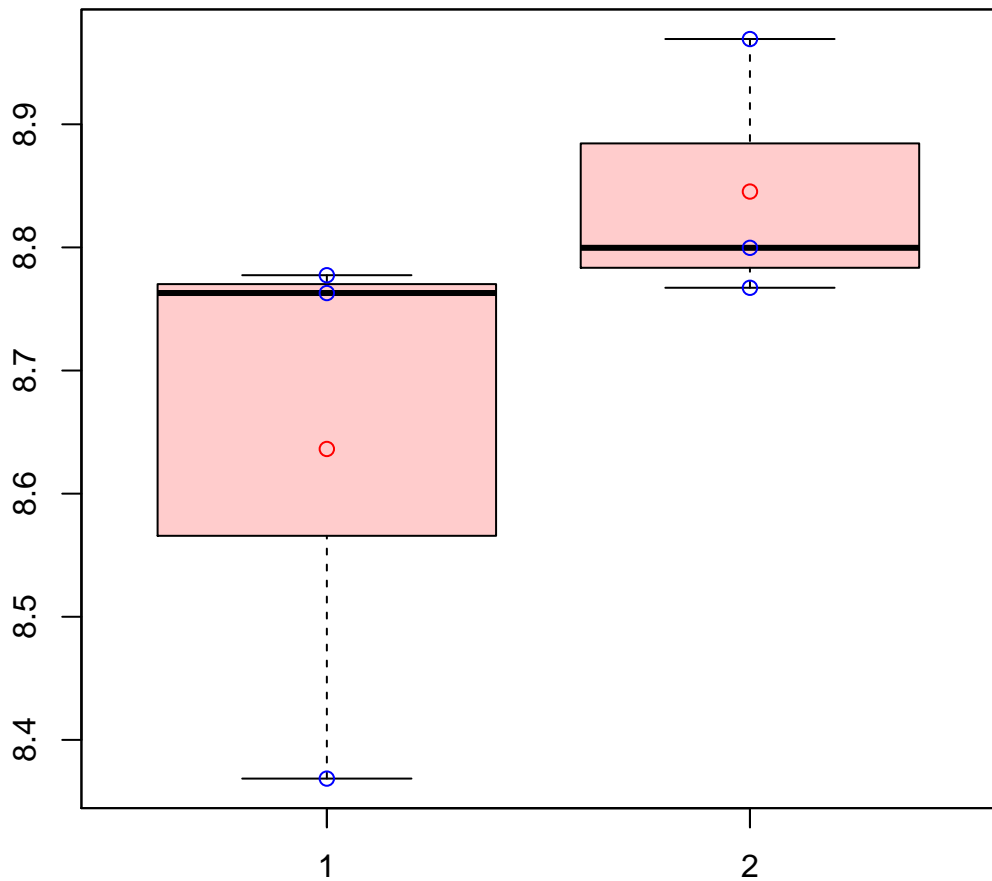

t-Test: p-value = 0.26

# CL6841Contig3|CL6841Contig3



t-Test: p-value = 0.26

# CL6842Contig6|CL6842Contig6

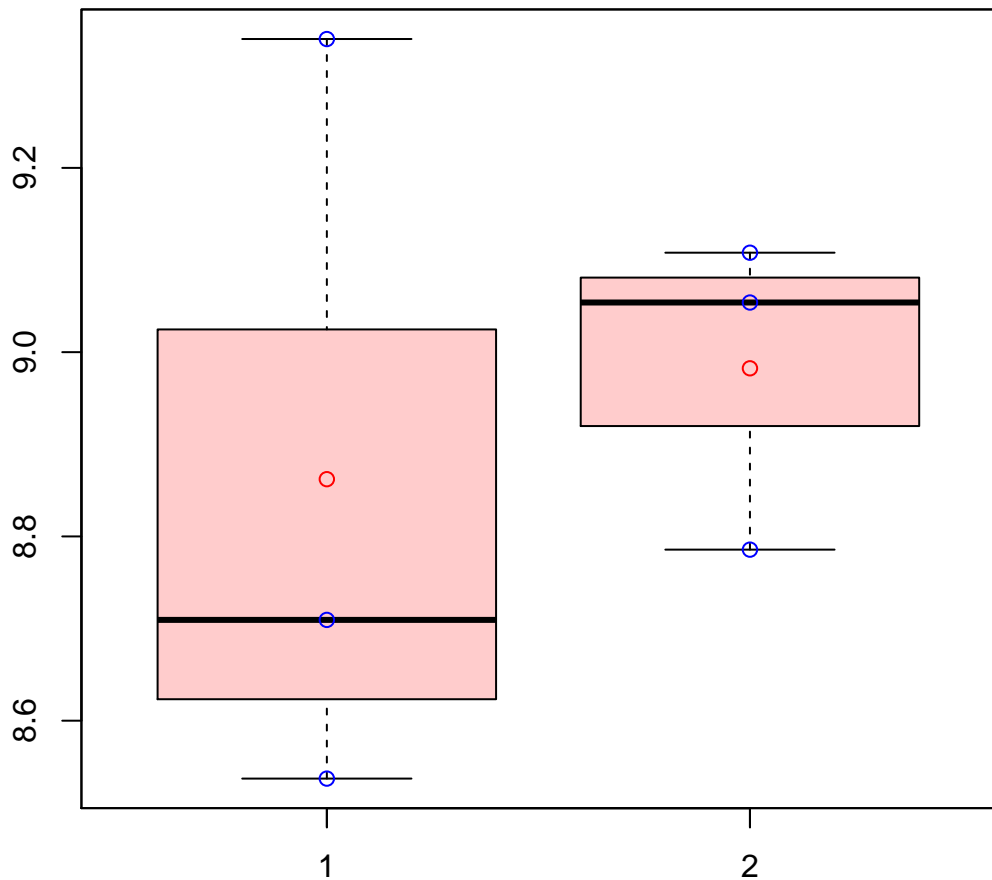

t-Test: p-value = 0.68

# CL6845Contig2|CL6845Contig2

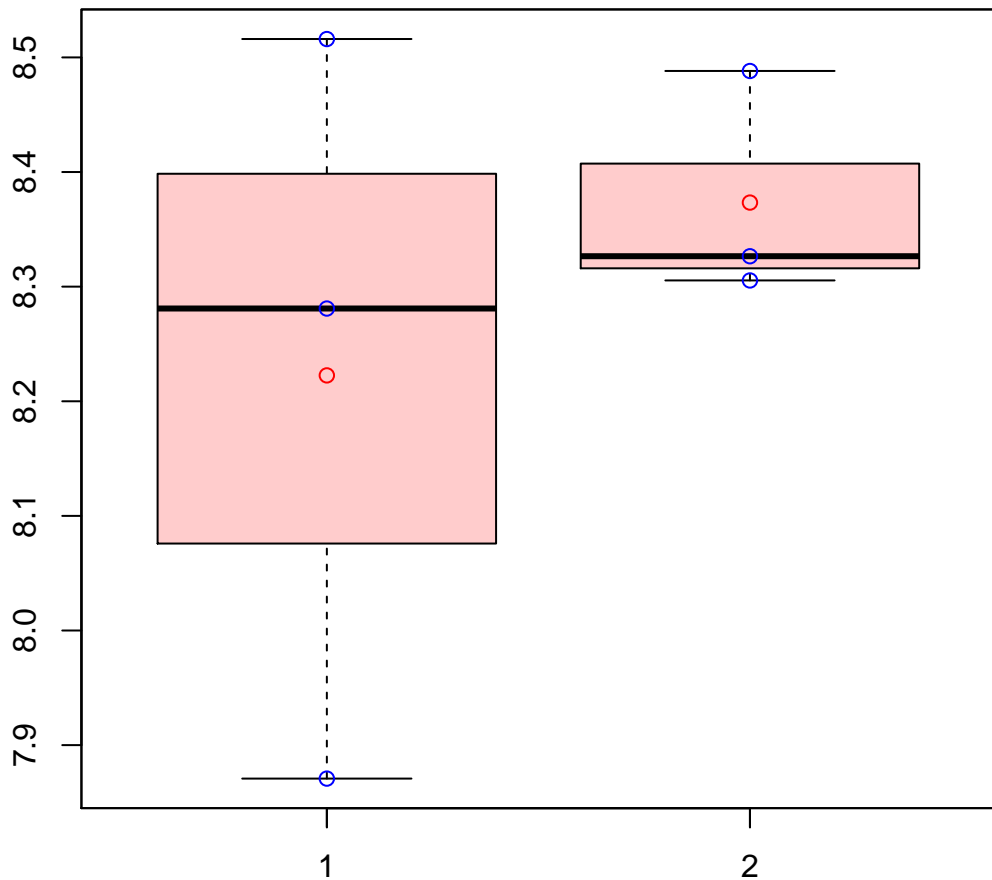

t-Test: p-value = 0.51

# CL684Contig1|CL684Contig1

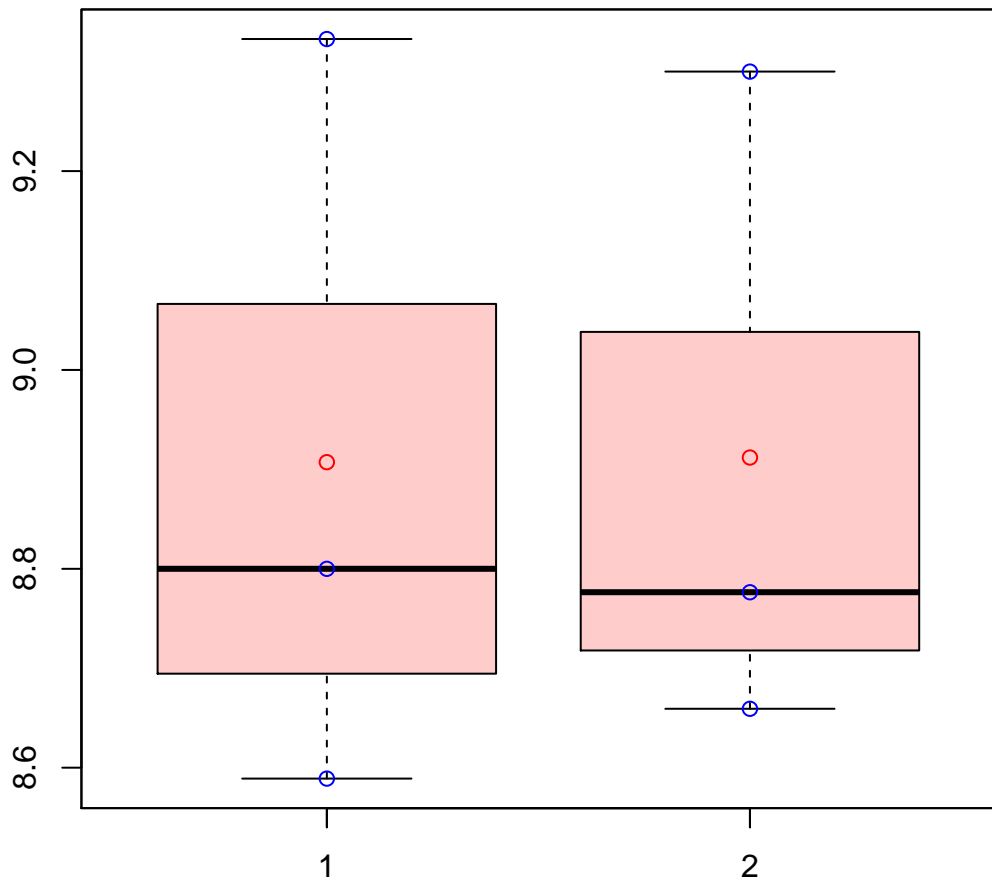

t-Test: p-value = 0.99

# CL684Contig2|CL684Contig2



t-Test: p-value = 0.99



# CL684Contig4|CL684Contig4



t-Test: p-value = 0.99

# CL684Contig8|CL684Contig8

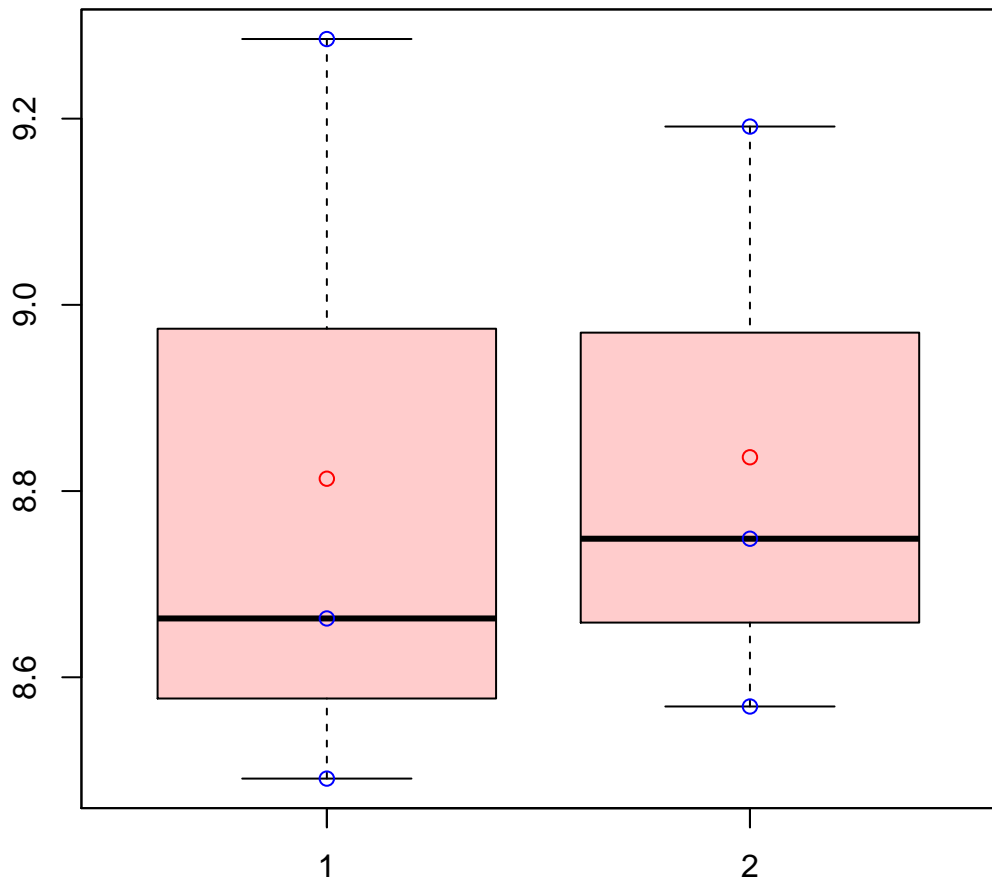

t-Test: p-value = 0.94

# CL6851Contig1|CL6851Contig1

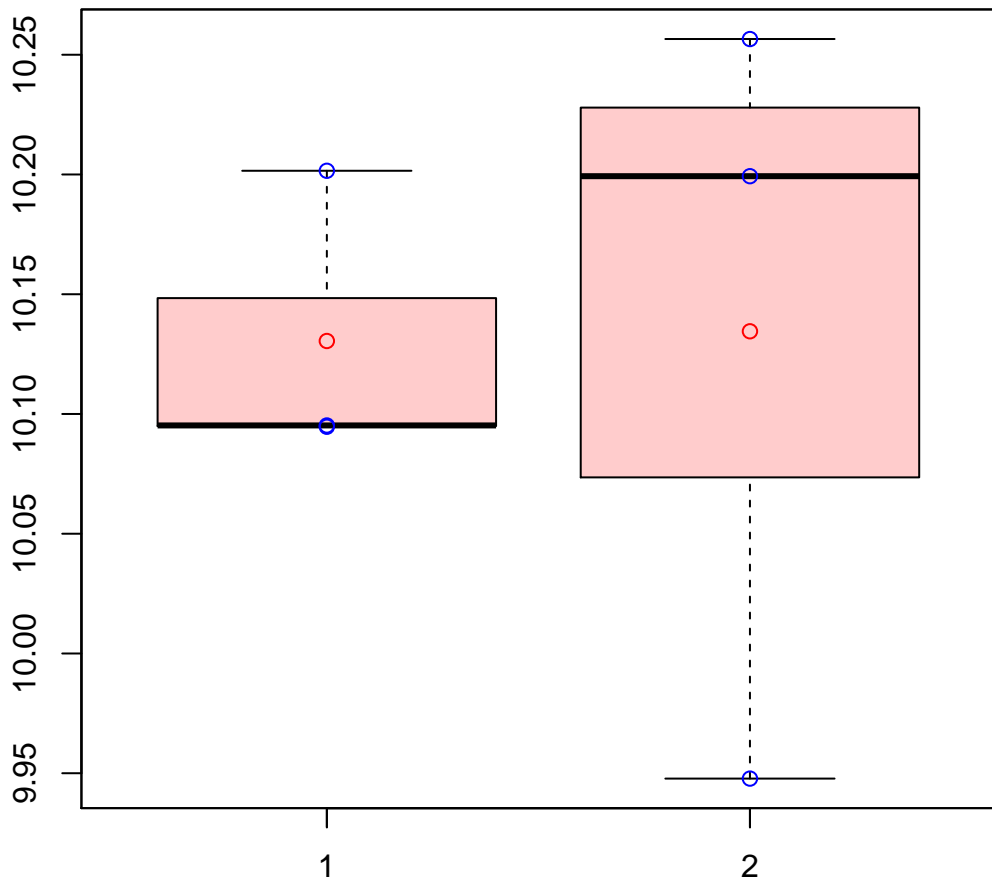

t-Test: p-value = 0.97

# CL6851Contig2|CL6851Contig2

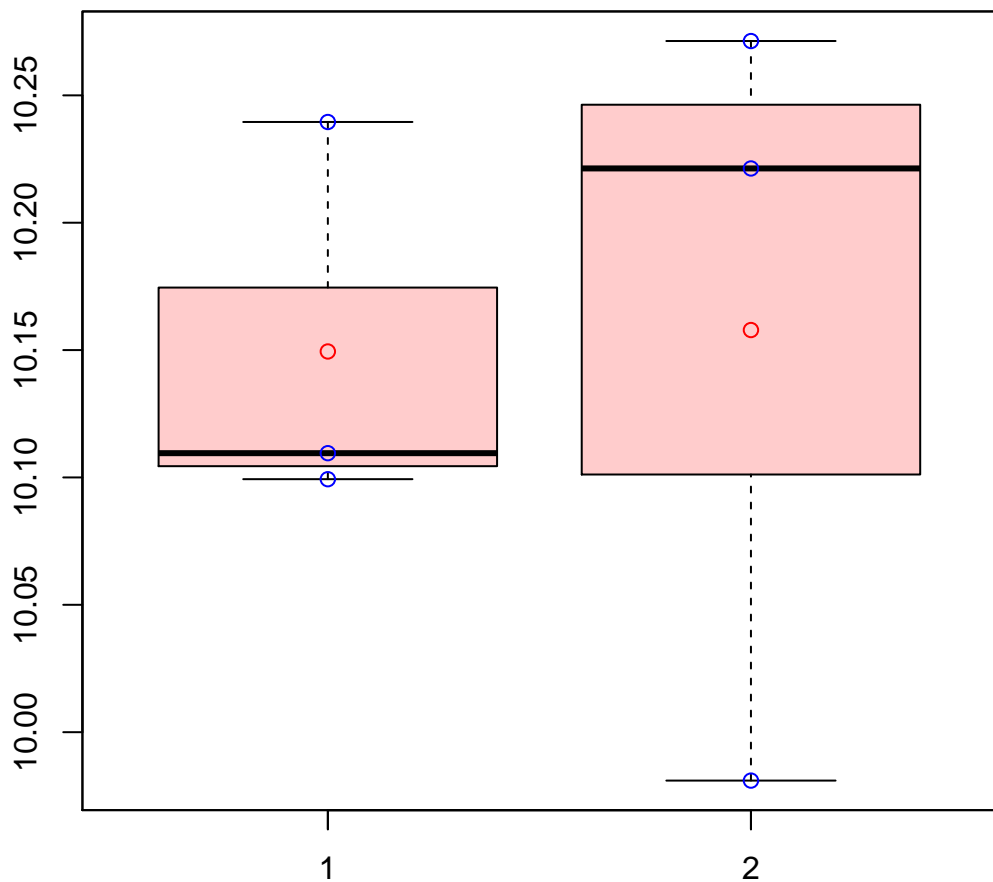

t-Test: p-value = 0.94

# CL6851Contig4|CL6851Contig4

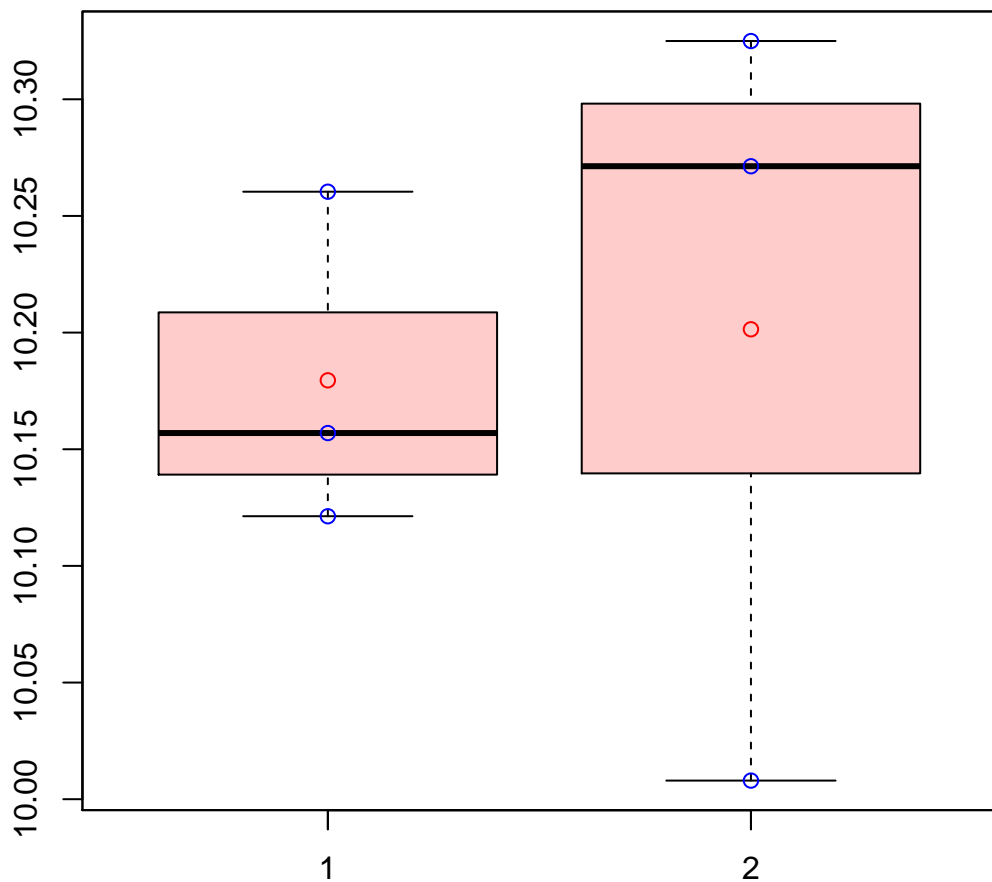

t-Test: p-value = 0.85

# CL6857Contig3|CL6857Contig3

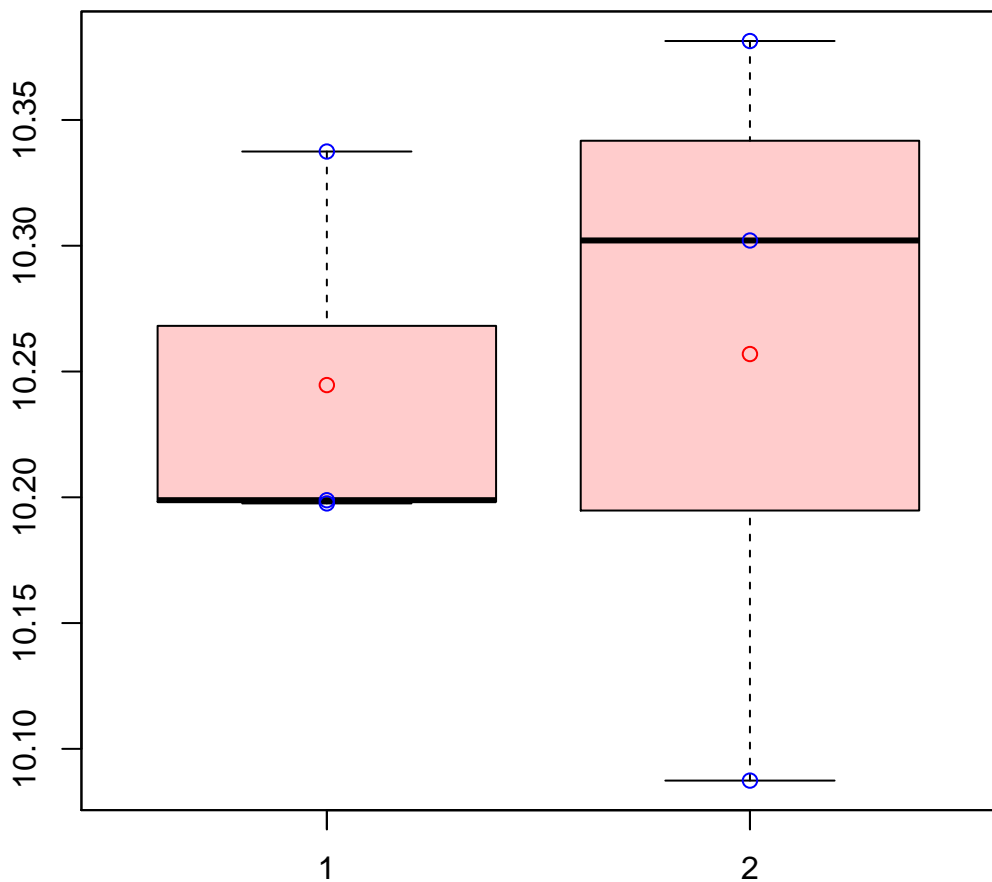

t-Test: p-value = 0.91

# CL6858Contig2|CL6858Contig2

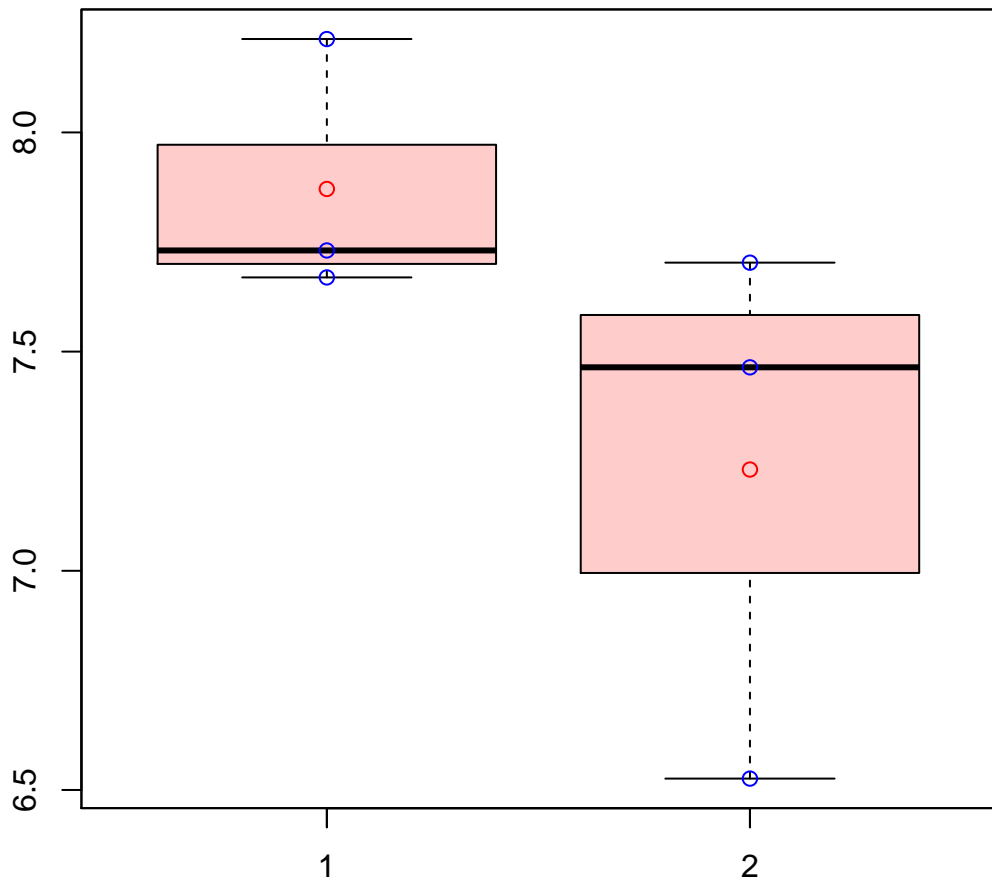

t-Test: p-value = 0.21

# CL6858Contig3|CL6858Contig3

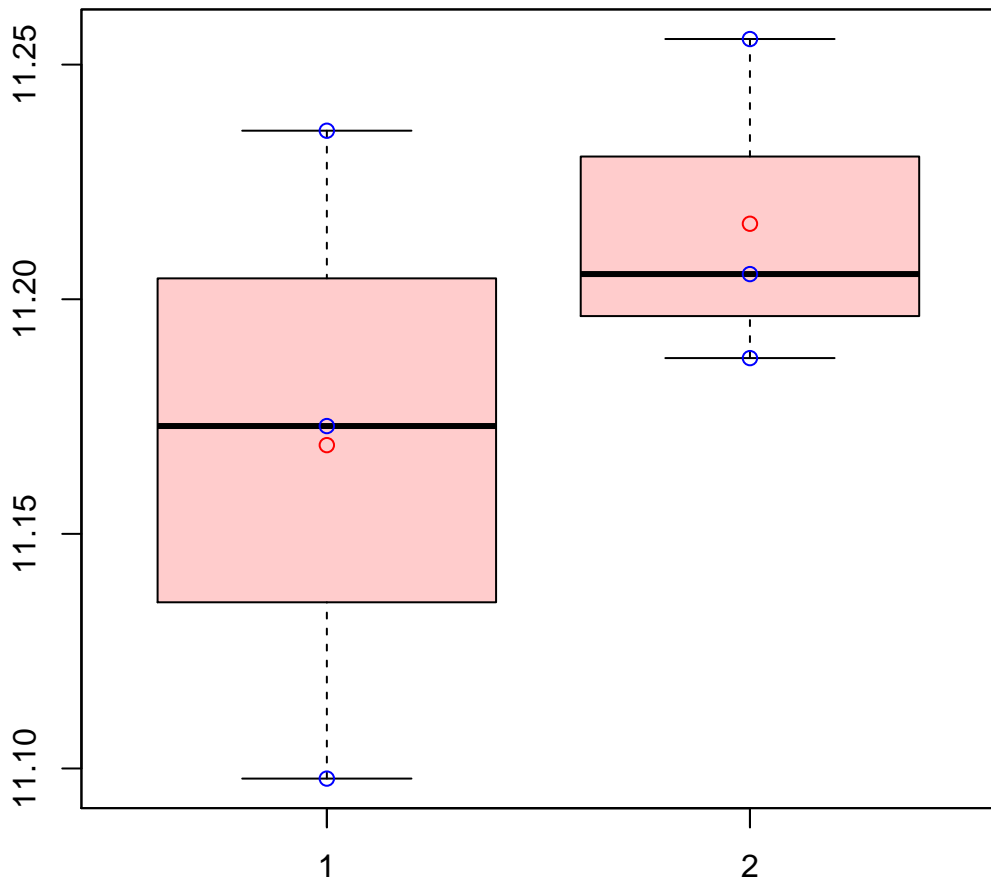

t-Test: p-value = 0.37



# CL6859Contig1|CL6859Contig1

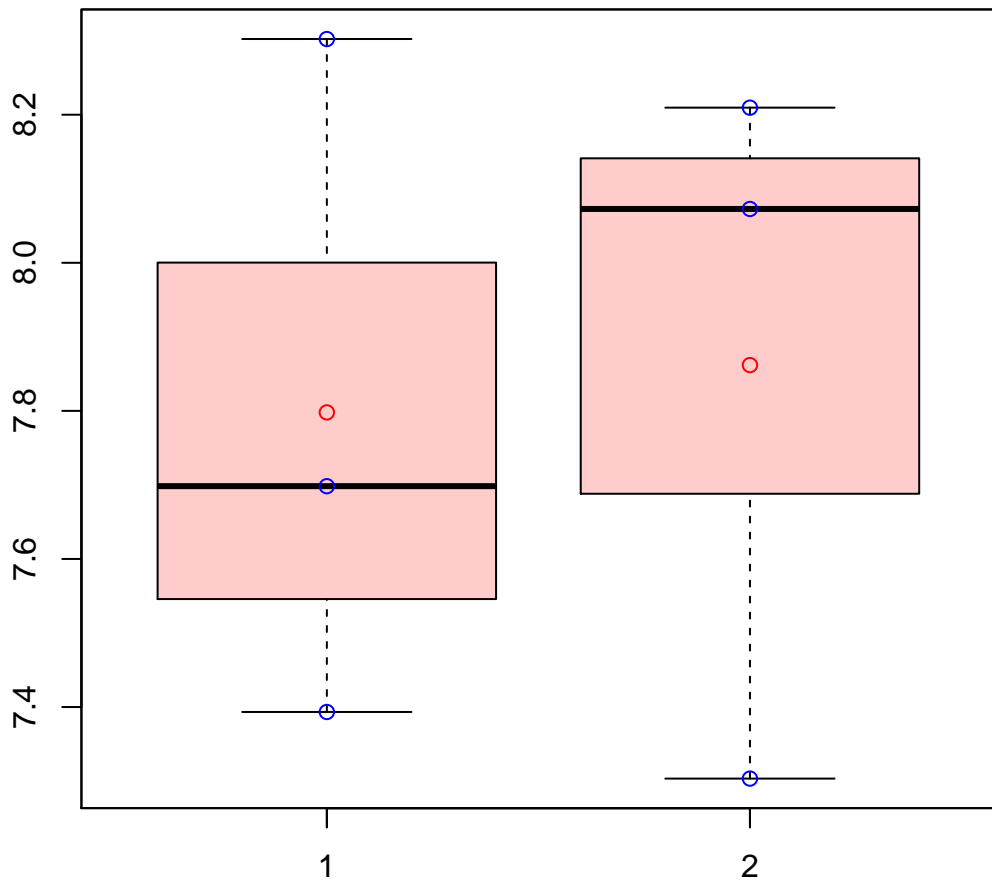

t-Test: p-value = 0.88

# CL6862Contig2|CL6862Contig2



t-Test: p-value = 0.41

# CL6864Contig1|CL6864Contig1

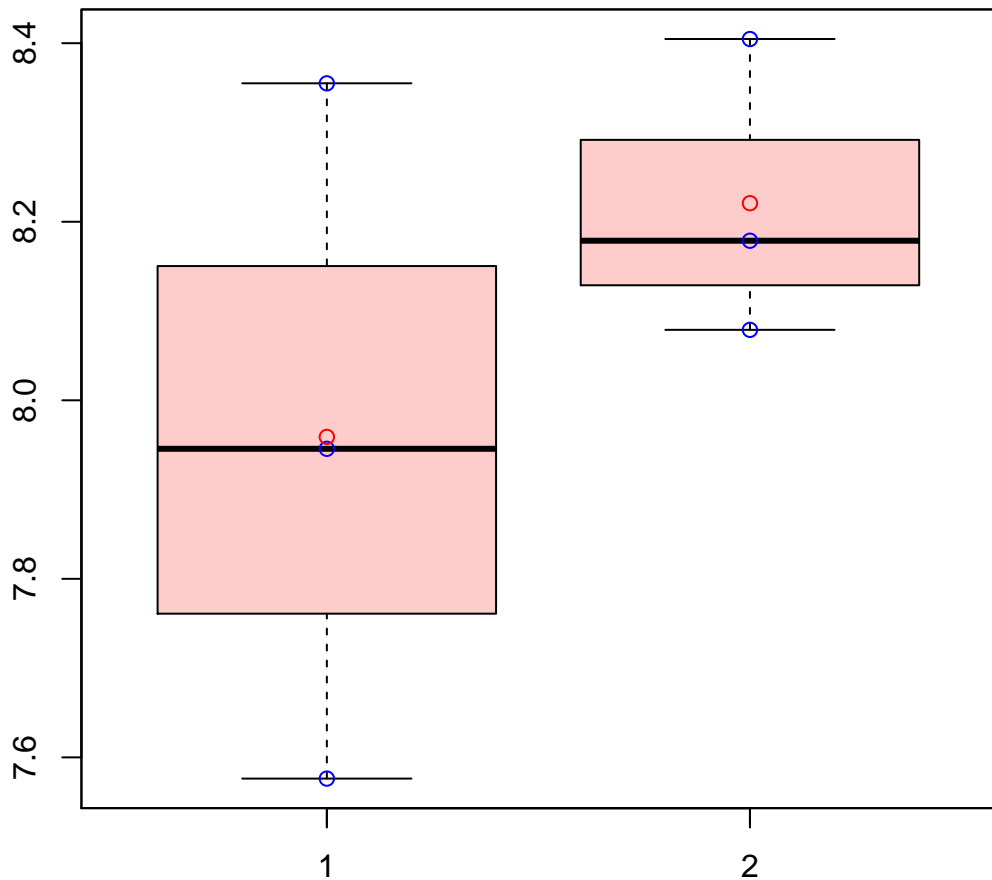

t-Test: p-value = 0.37

# CL6864Contig2|CL6864Contig2



t-Test: p-value = 0.37

## CL686Contig2|CL686Contig2

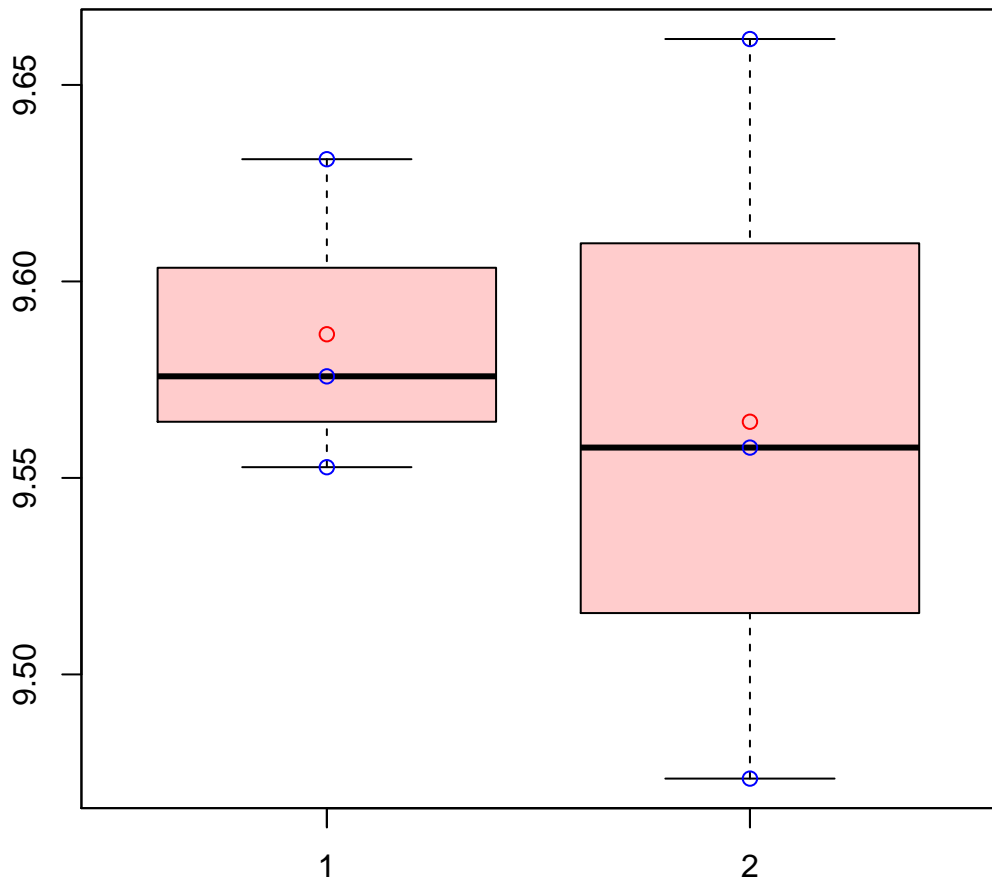

t-Test: p-value = 0.73

# CL6873Contig1|CL6873Contig1

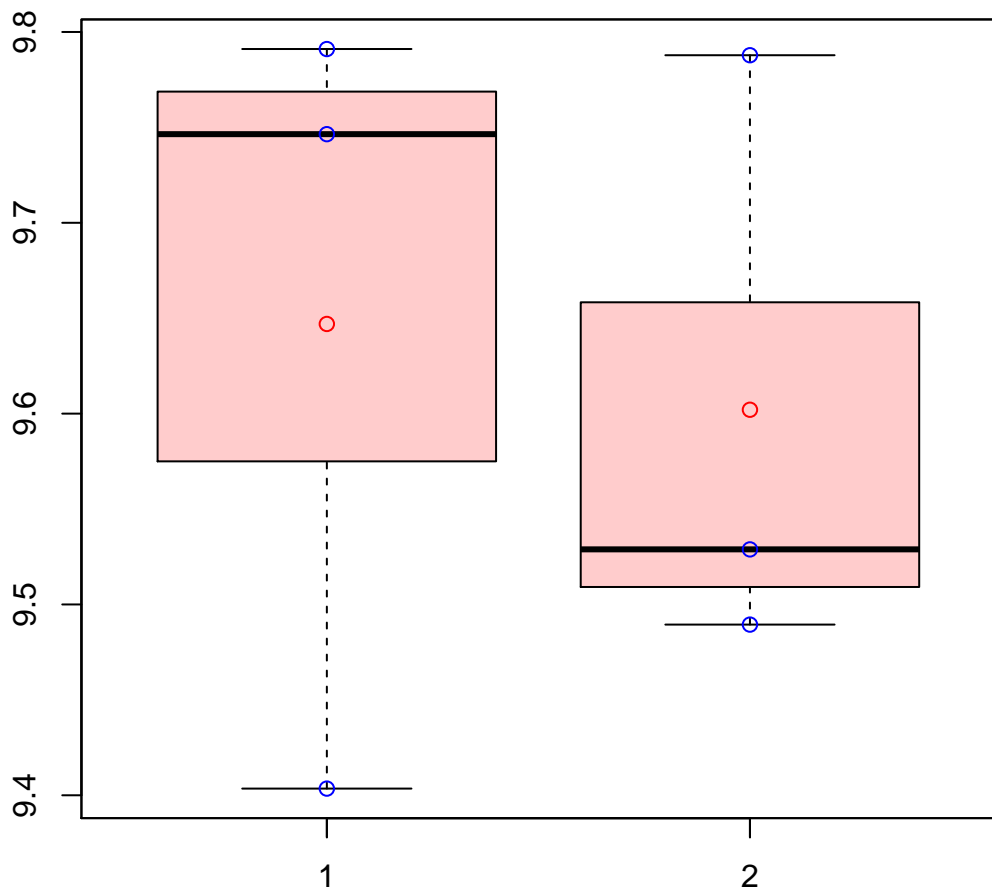

t-Test: p-value = 0.79

# CL6873Contig2|CL6873Contig2

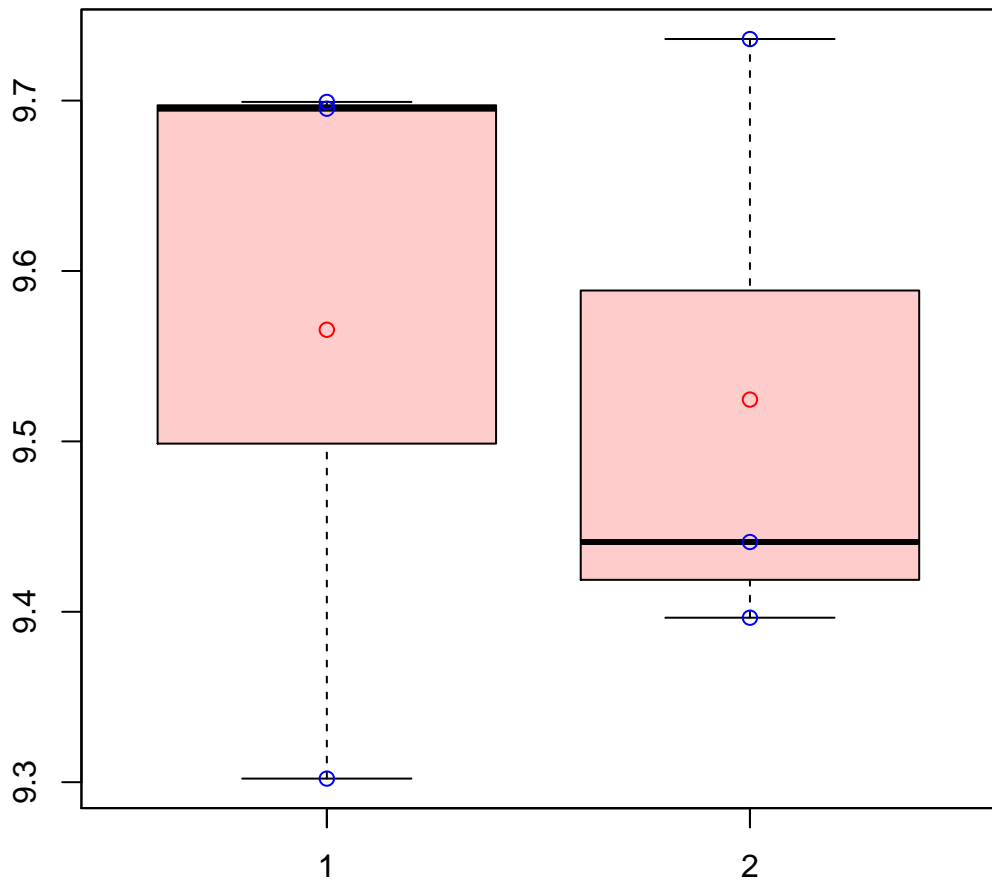

t-Test: p-value = 0.82

# CL6873Contig3|CL6873Contig3

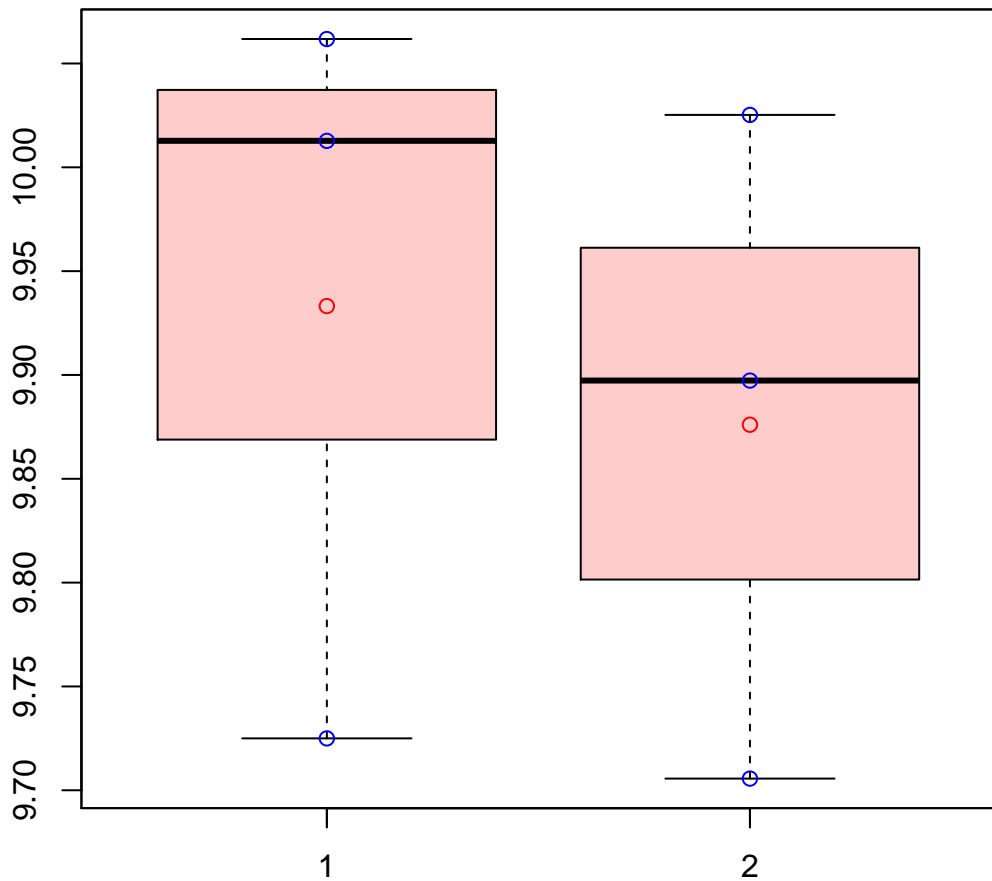

t-Test: p-value = 0.7



# CL6873Contig5|CL6873Contig5

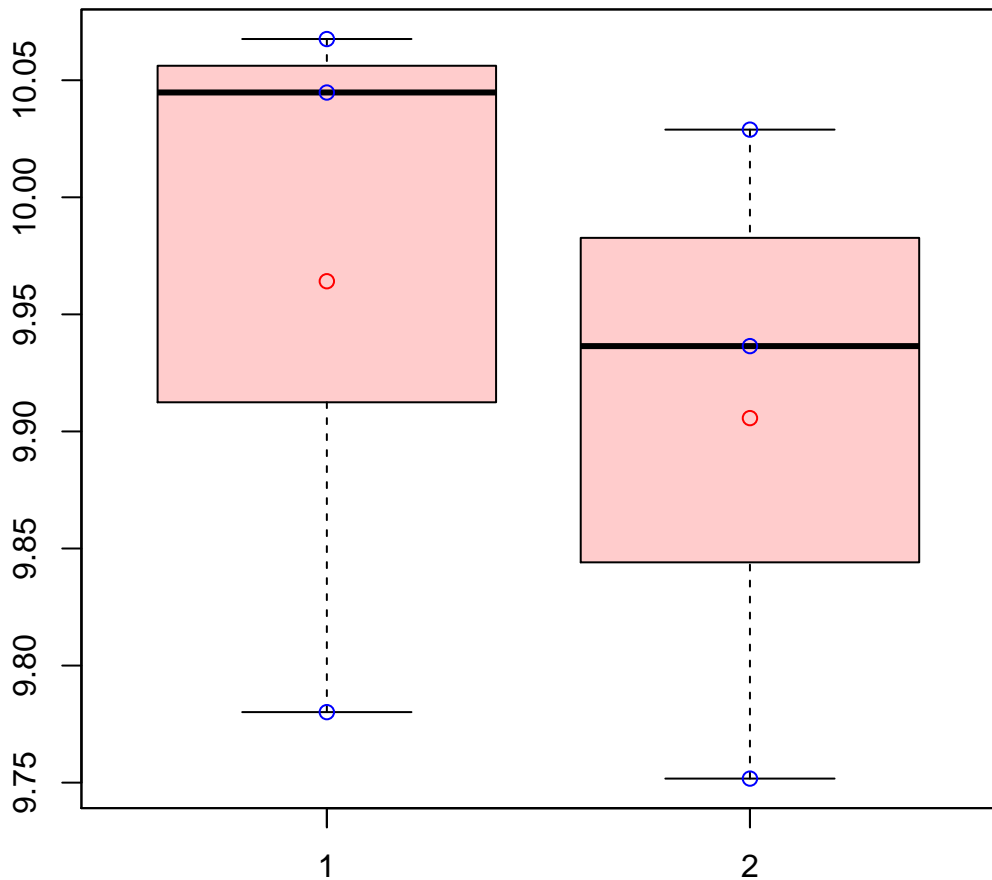

t-Test: p-value = 0.66

# CL687Contig1|CL687Contig1

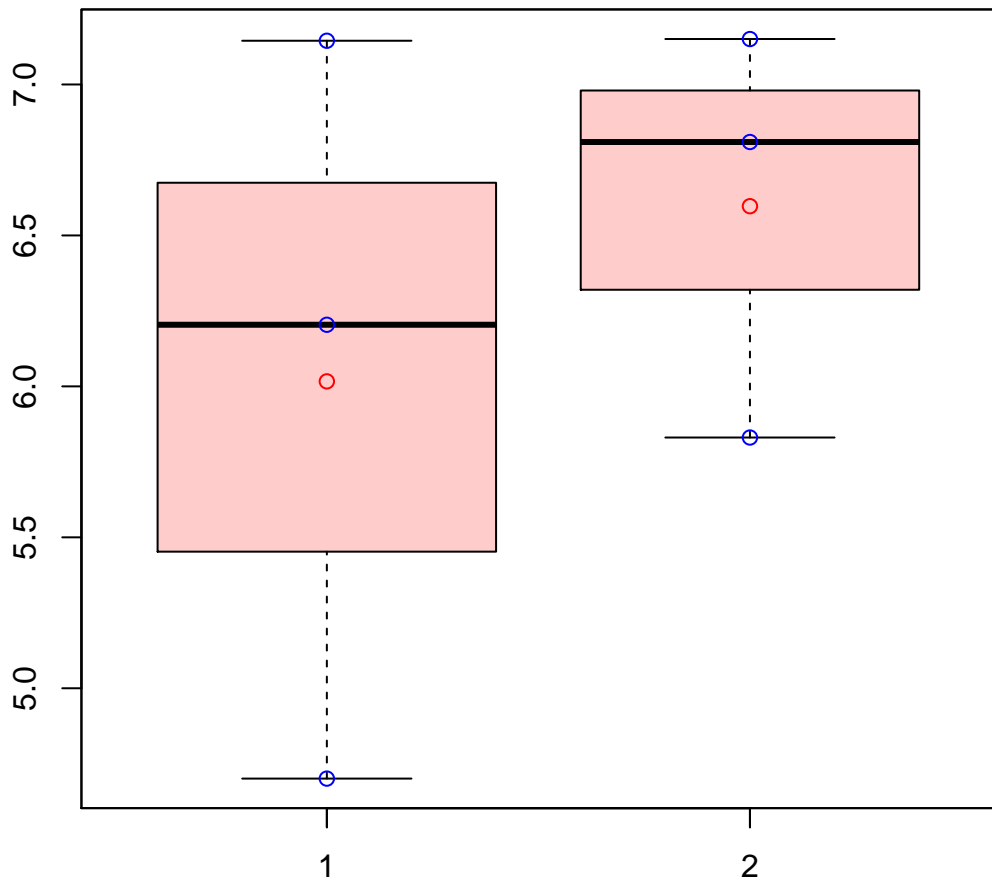

t-Test: p-value = 0.53

# CL6898Contig2|CL6898Contig2

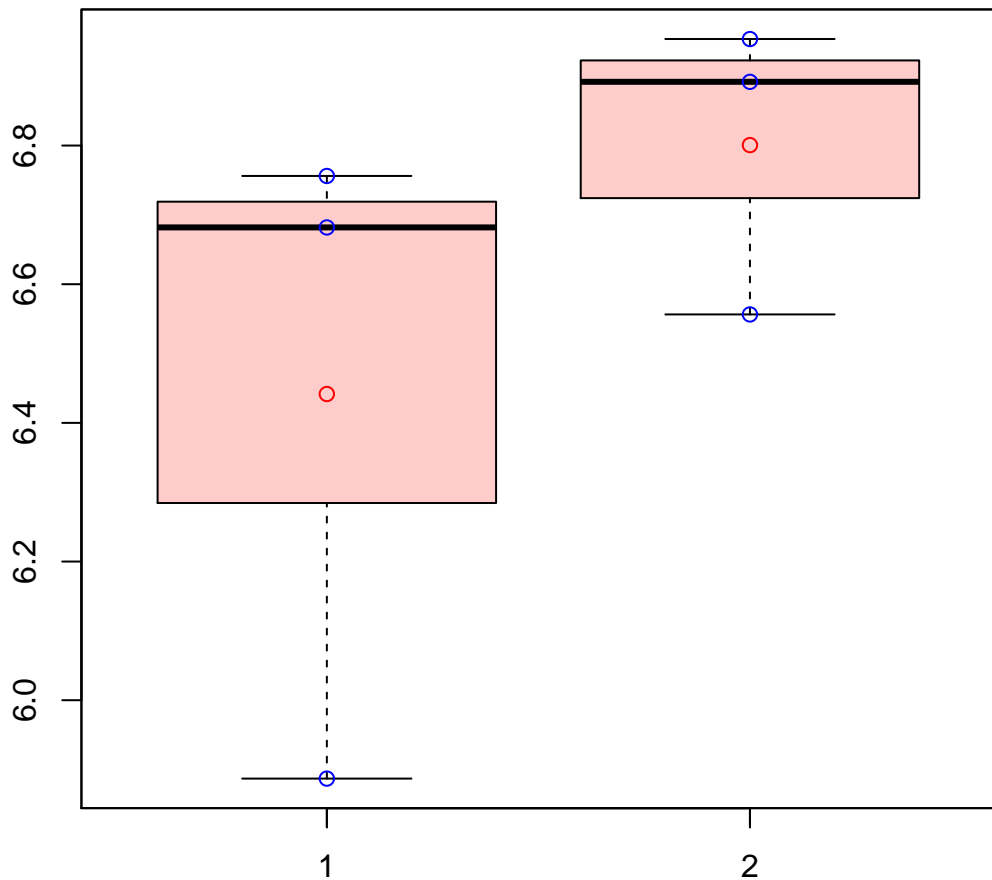

t-Test: p-value = 0.33

# CL6898Contig4|CL6898Contig4

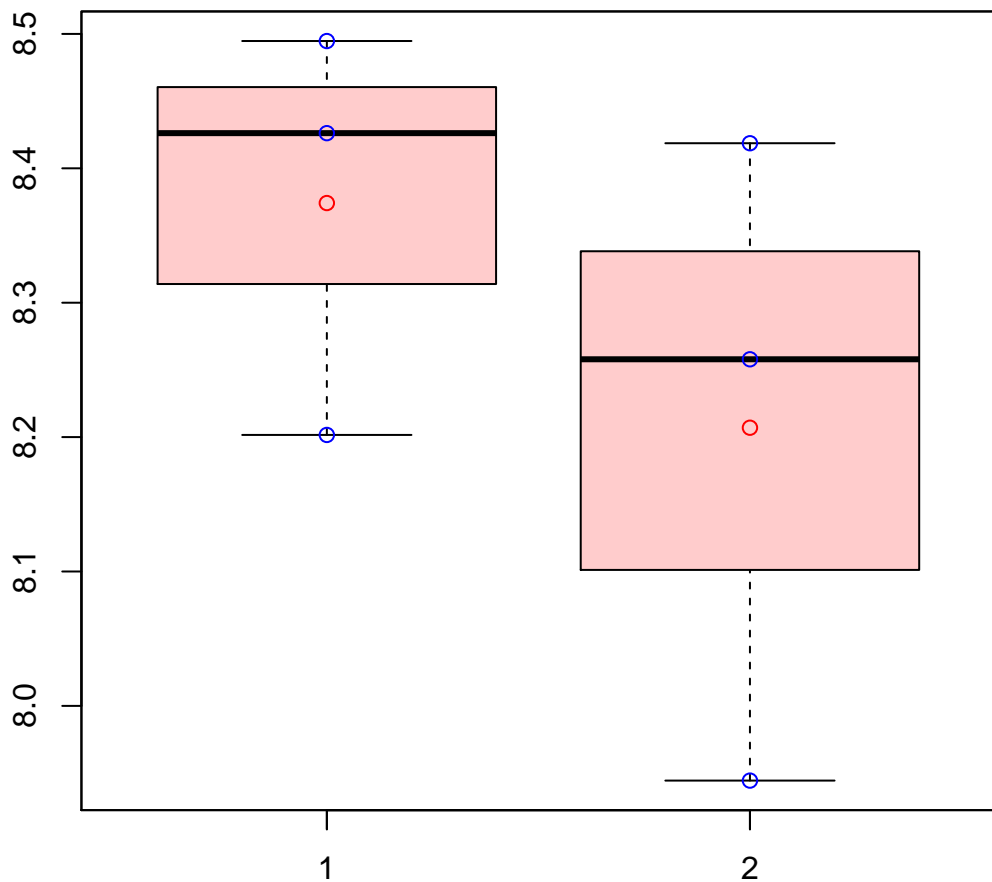

t-Test: p-value = 0.38

# CL68Contig16|CL68Contig16

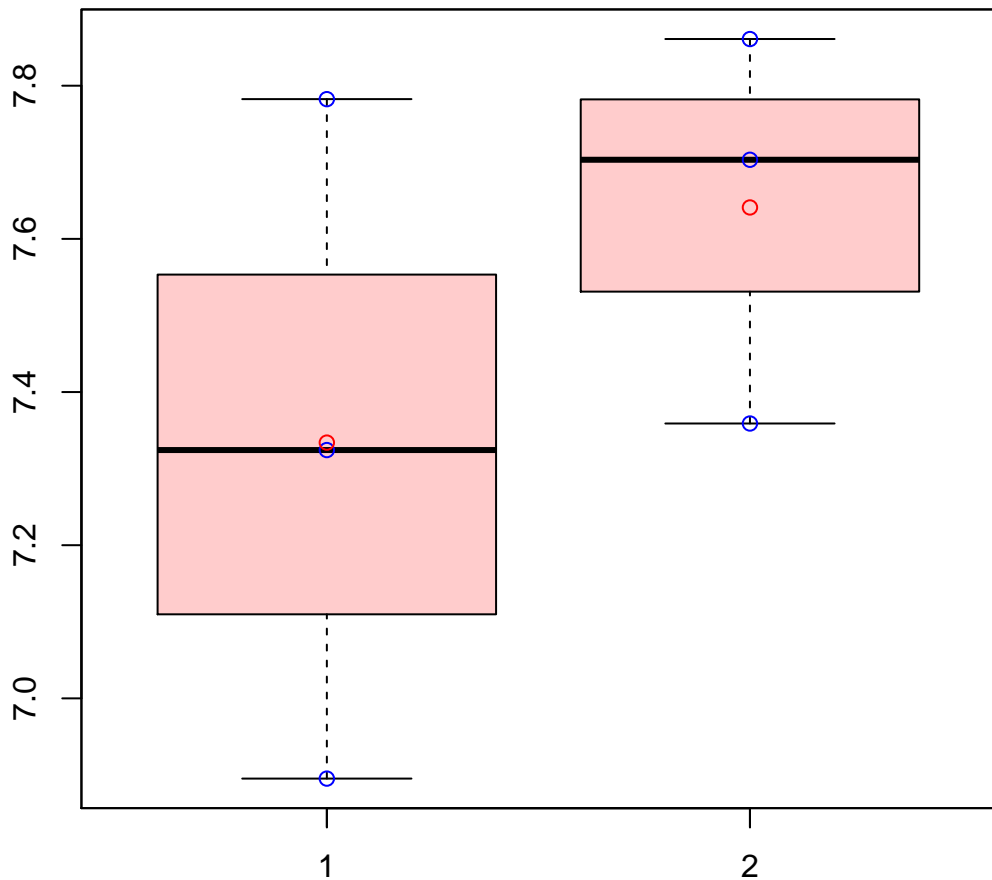

t-Test: p-value = 0.37

# CL68Contig19|CL68Contig19

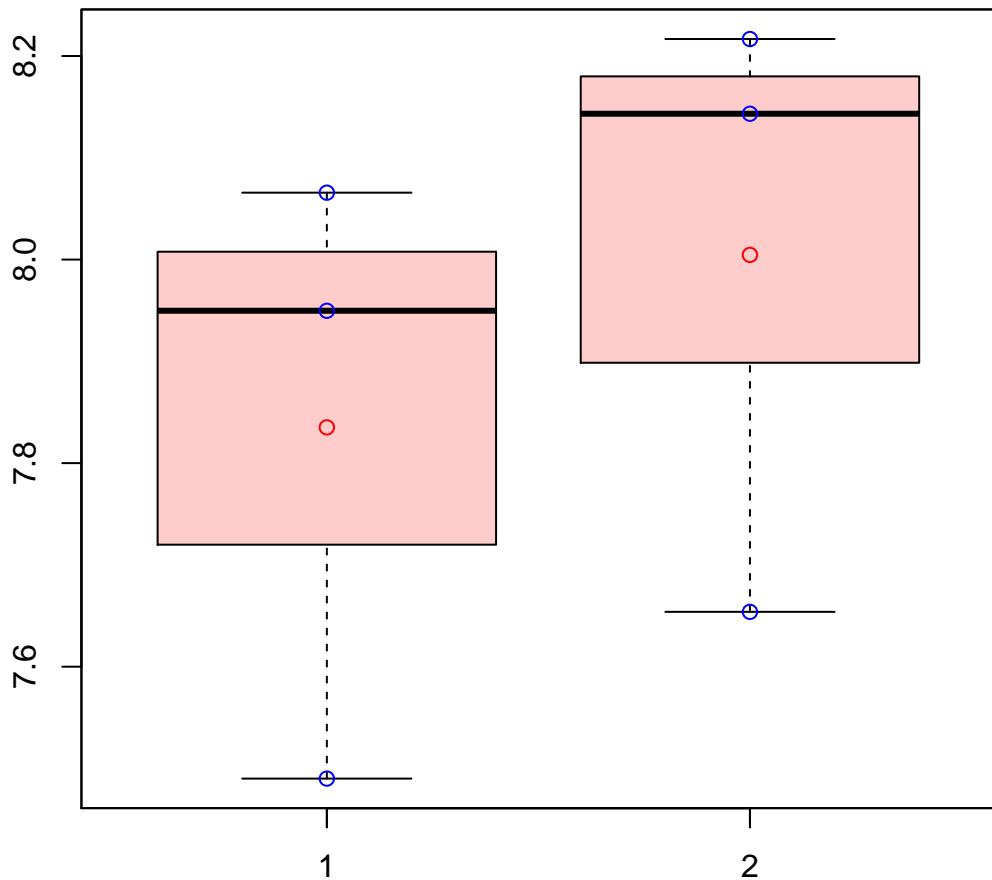

t-Test: p-value = 0.53

# CL68Contig21|CL68Contig21

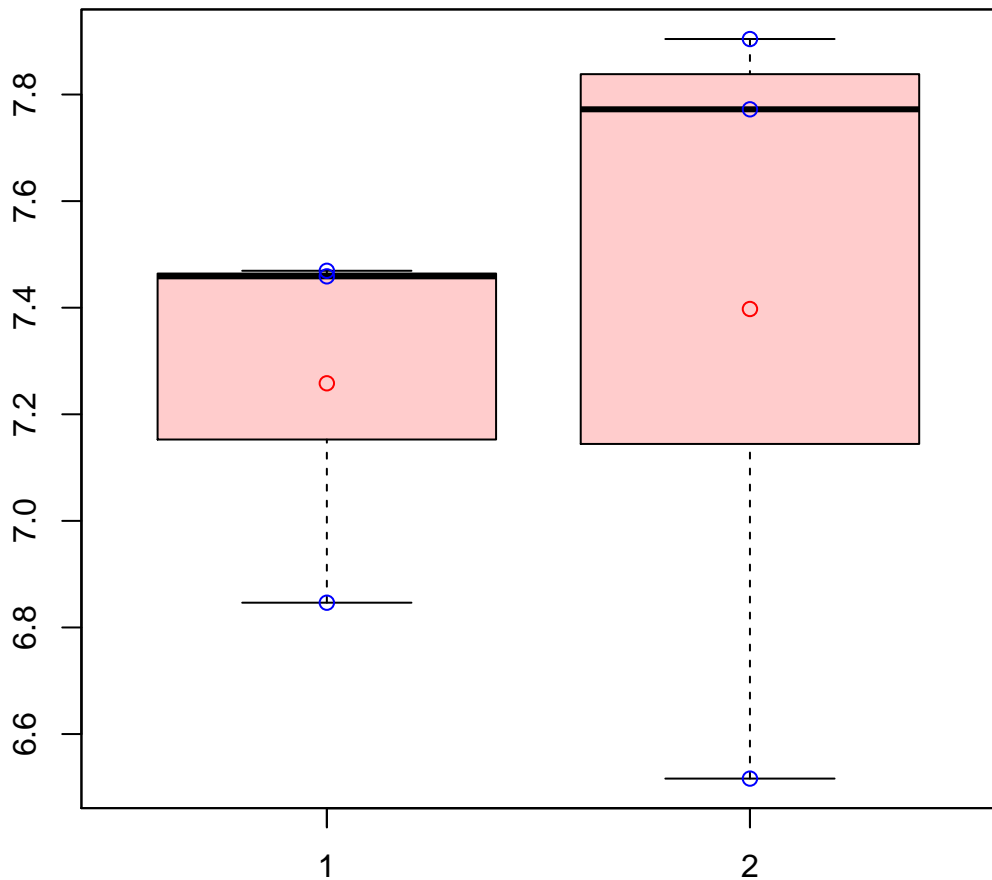

t-Test: p-value = 0.79

# CL68Contig22|CL68Contig22



t-Test: p-value = 0.79



# CL68Contig25|CL68Contig25

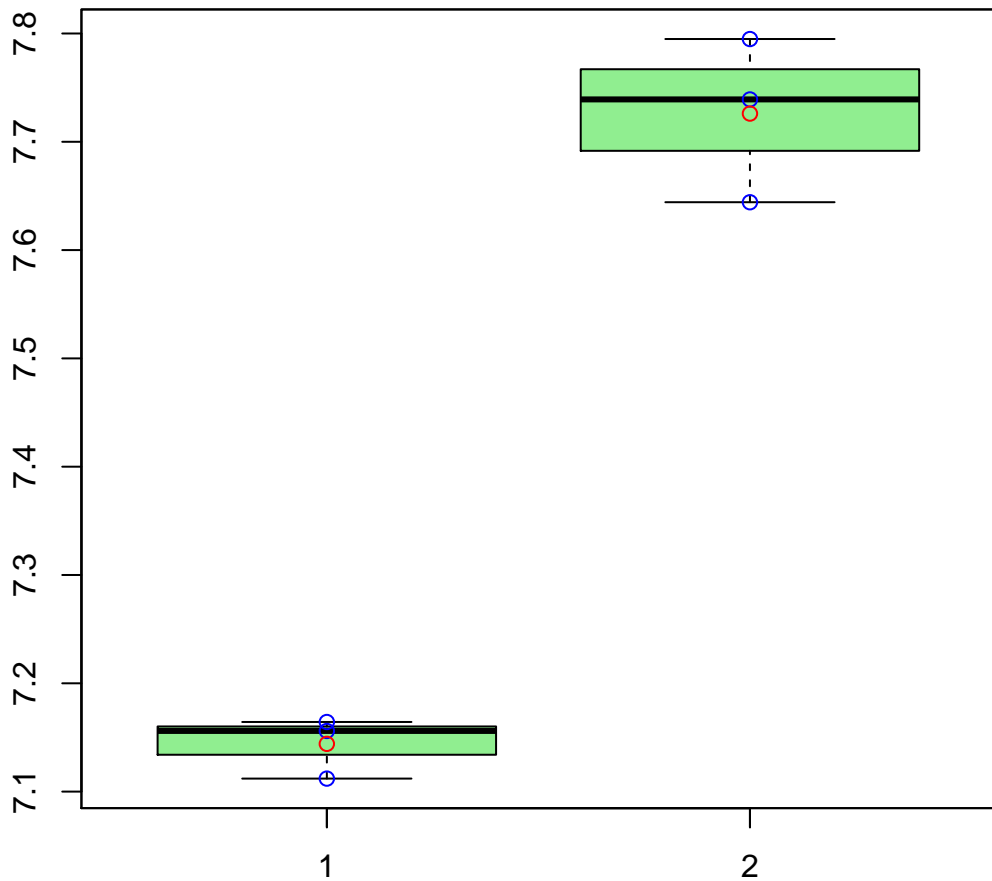

t-Test: p-value = 0

# CL68Contig32|CL68Contig32

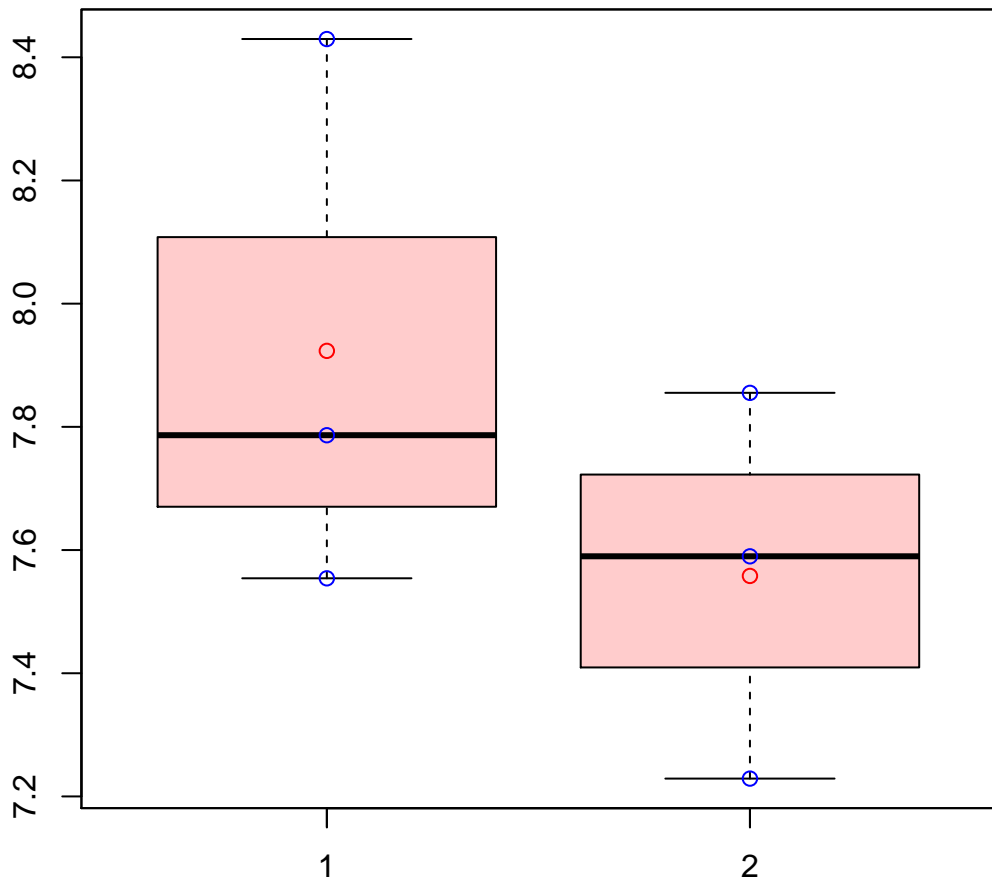

t-Test: p-value = 0.32

# CL68Contig36|CL68Contig36



t-Test: p-value = 0.71

# CL68Contig3|CL68Contig3

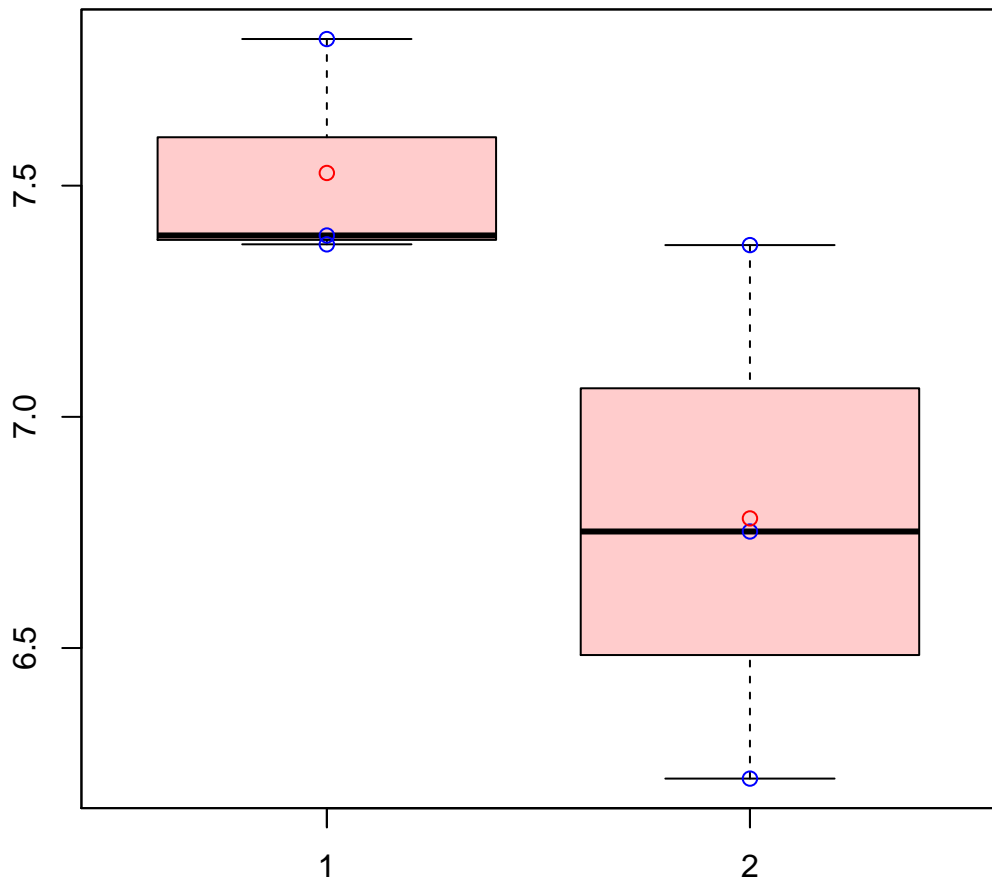

t-Test: p-value = 0.14

# CL68Contig6|CL68Contig6

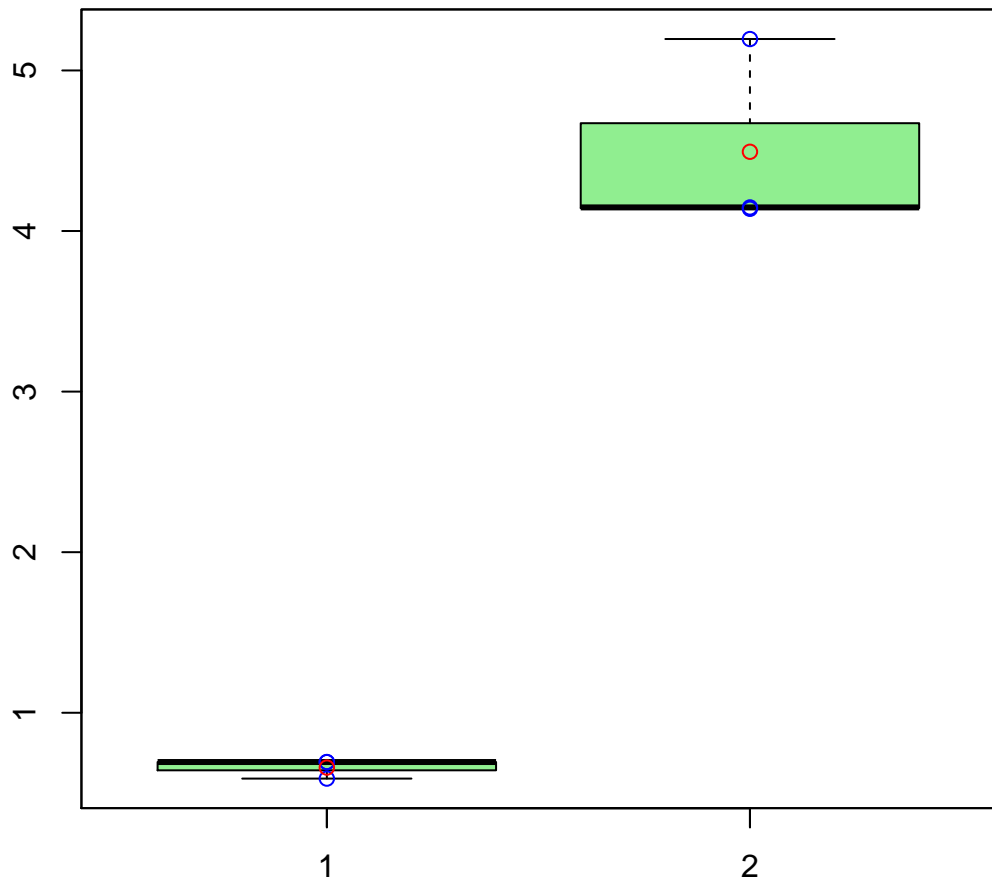

t-Test: p-value = 0.01

# CL6917Contig1|CL6917Contig1

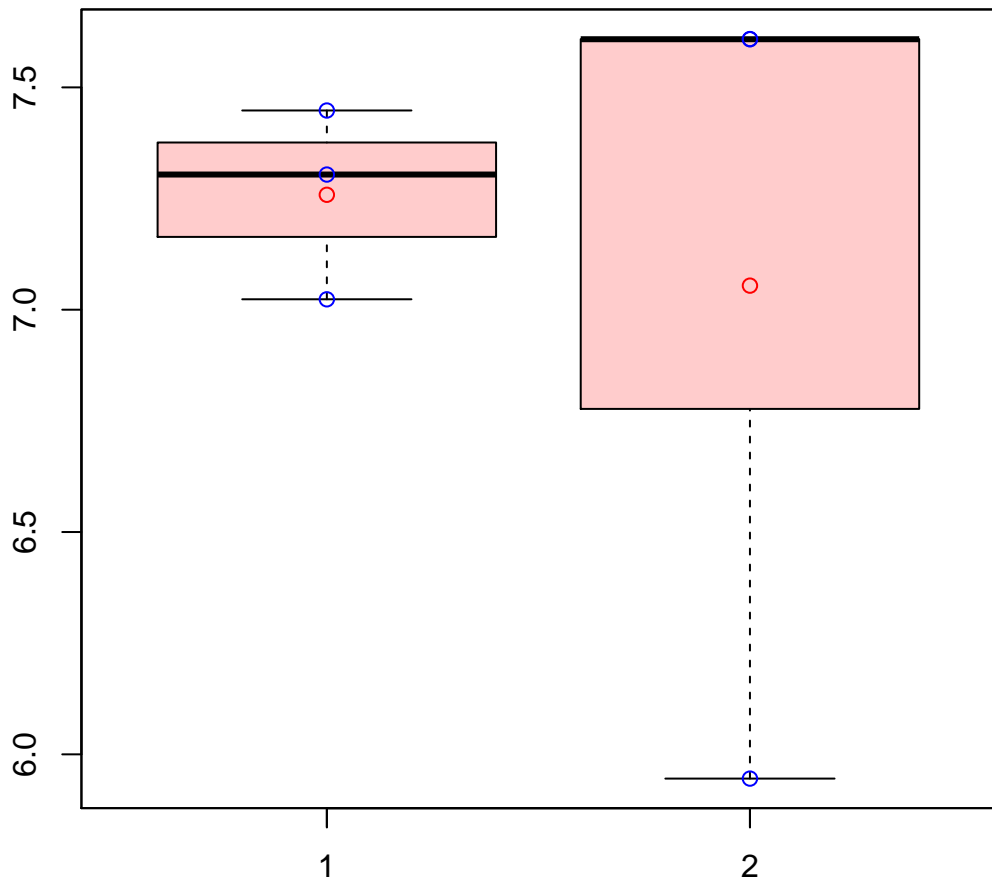

t-Test: p-value = 0.75

# CL6917Contig2|CL6917Contig2



t-Test: p-value = 0.75

# CL6927Contig1|CL6927Contig1

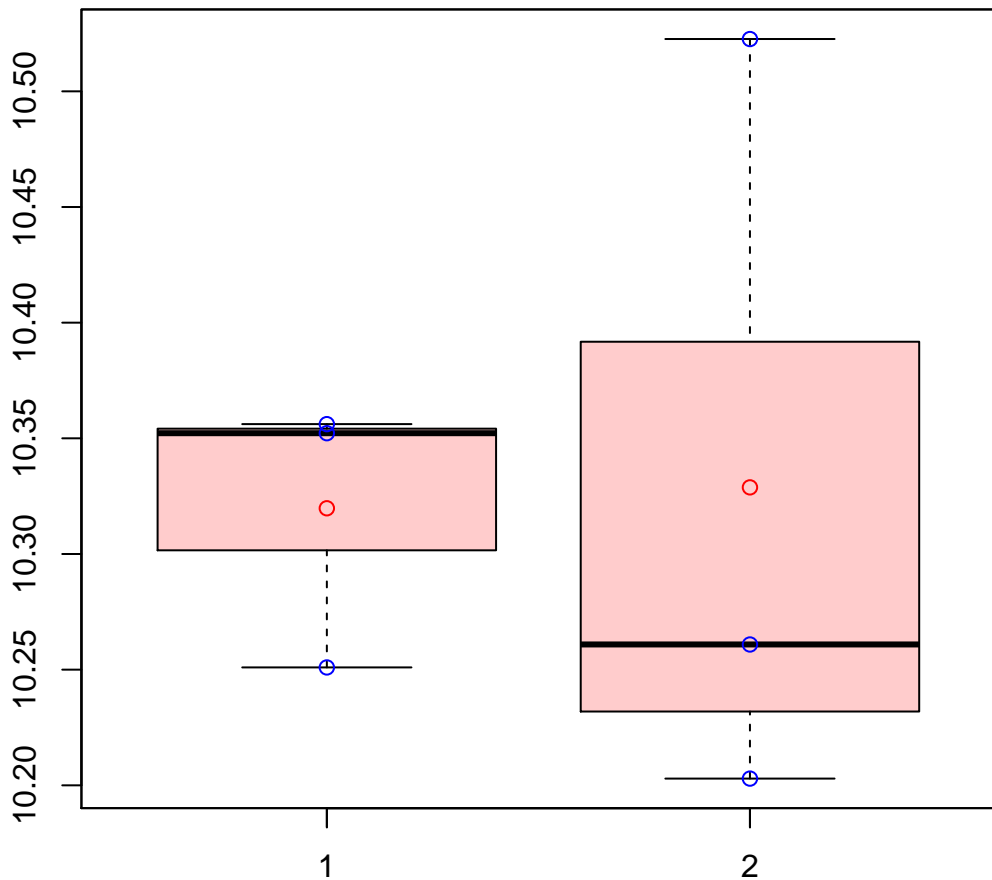

t-Test: p-value = 0.94



# CL6927Contig2|CL6927Contig2

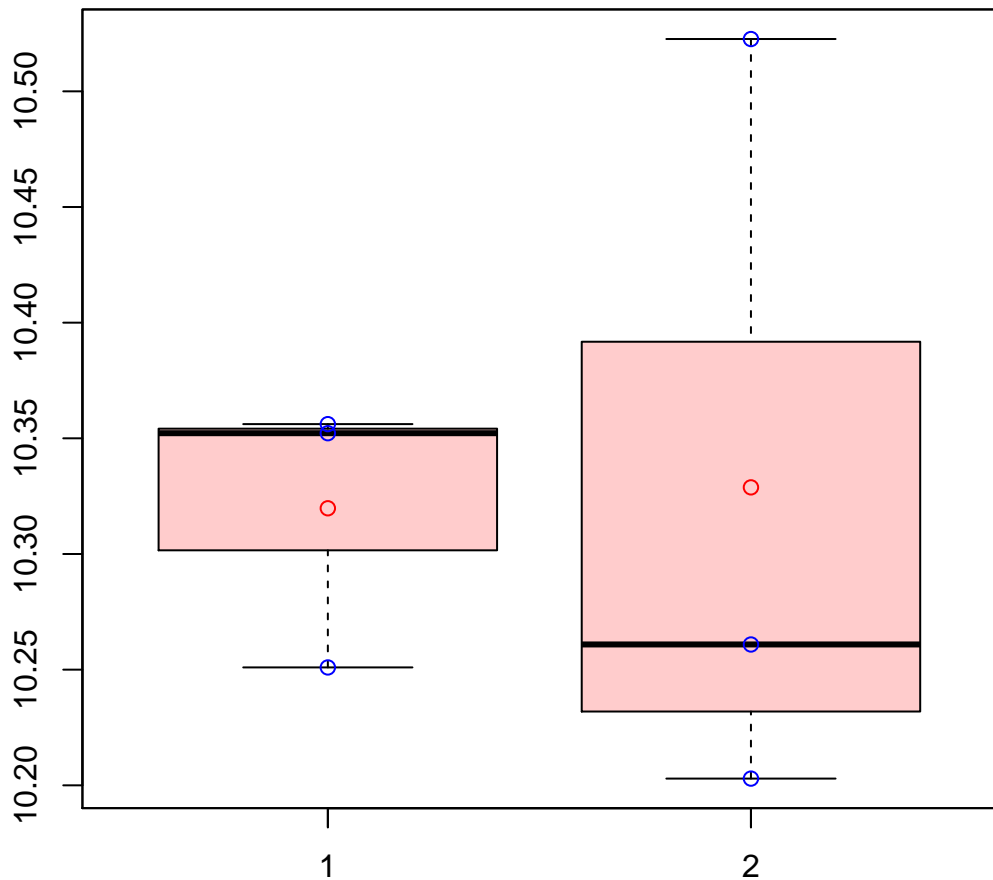

t-Test: p-value = 0.94

# CL692Contig1|CL692Contig1

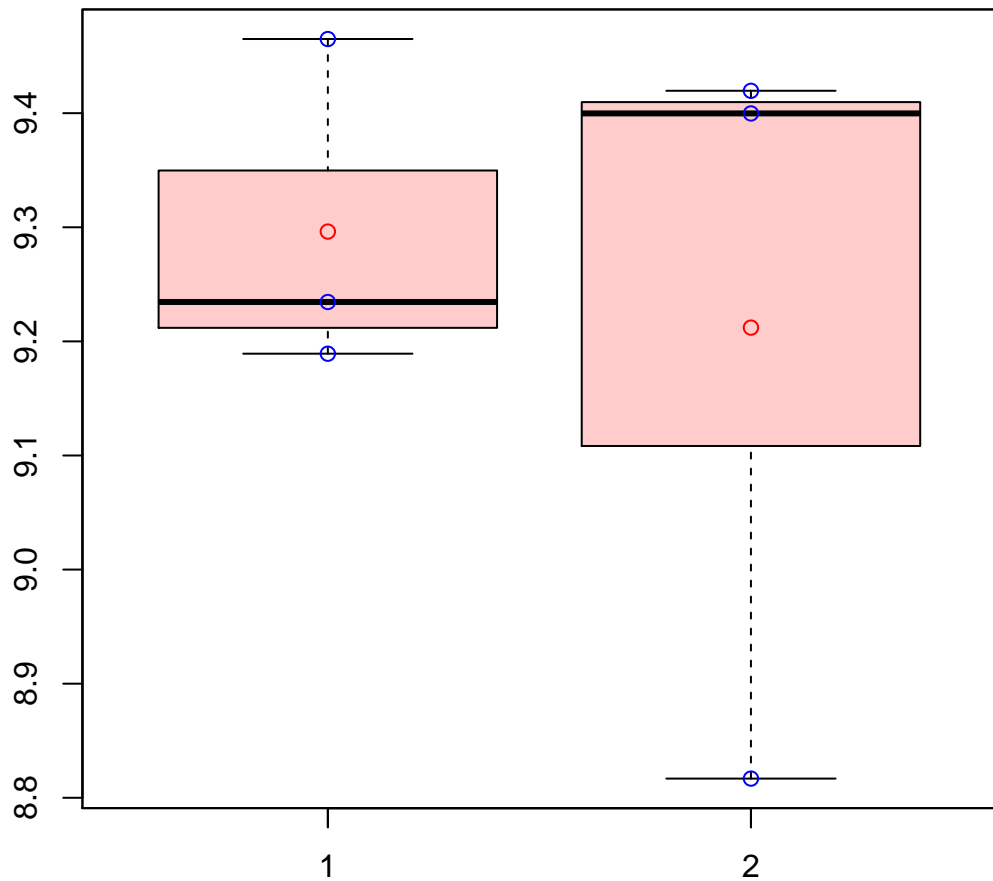

t-Test: p-value = 0.72

# CL6932Contig1|CL6932Contig1

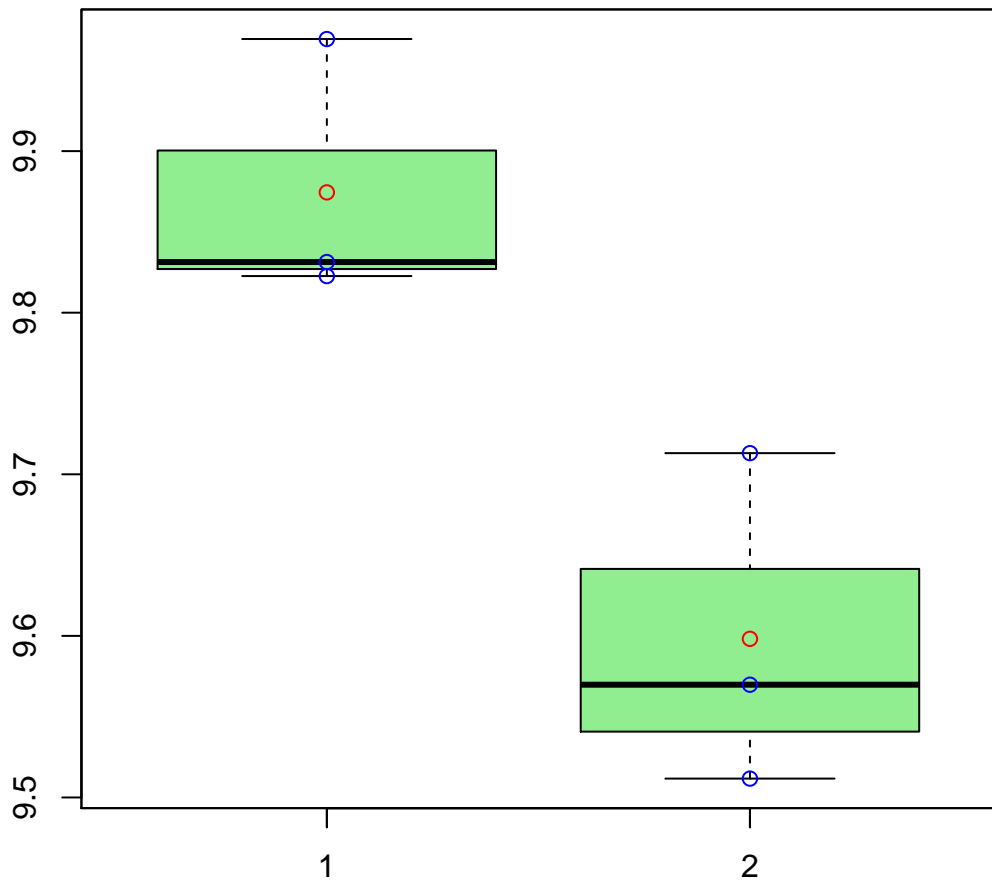

t-Test: p-value = 0.02

# CL6938Contig1|CL6938Contig1

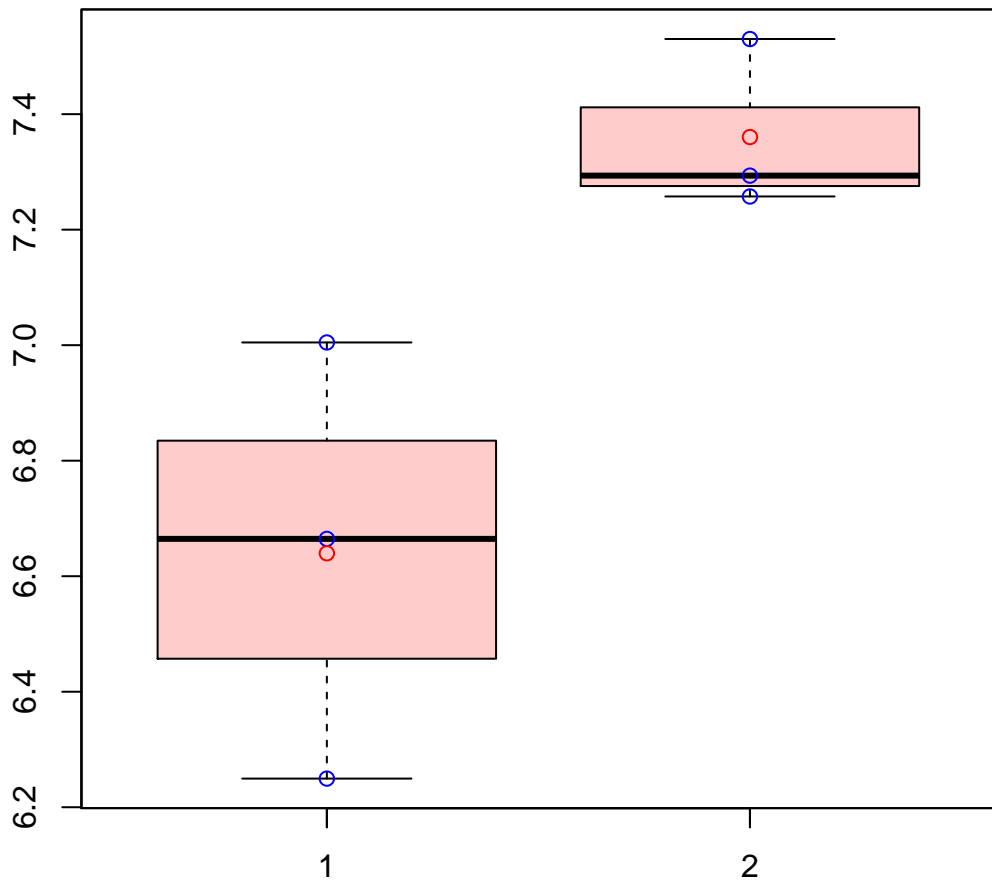

t-Test: p-value = 0.07

# CL6938Contig2|CL6938Contig2

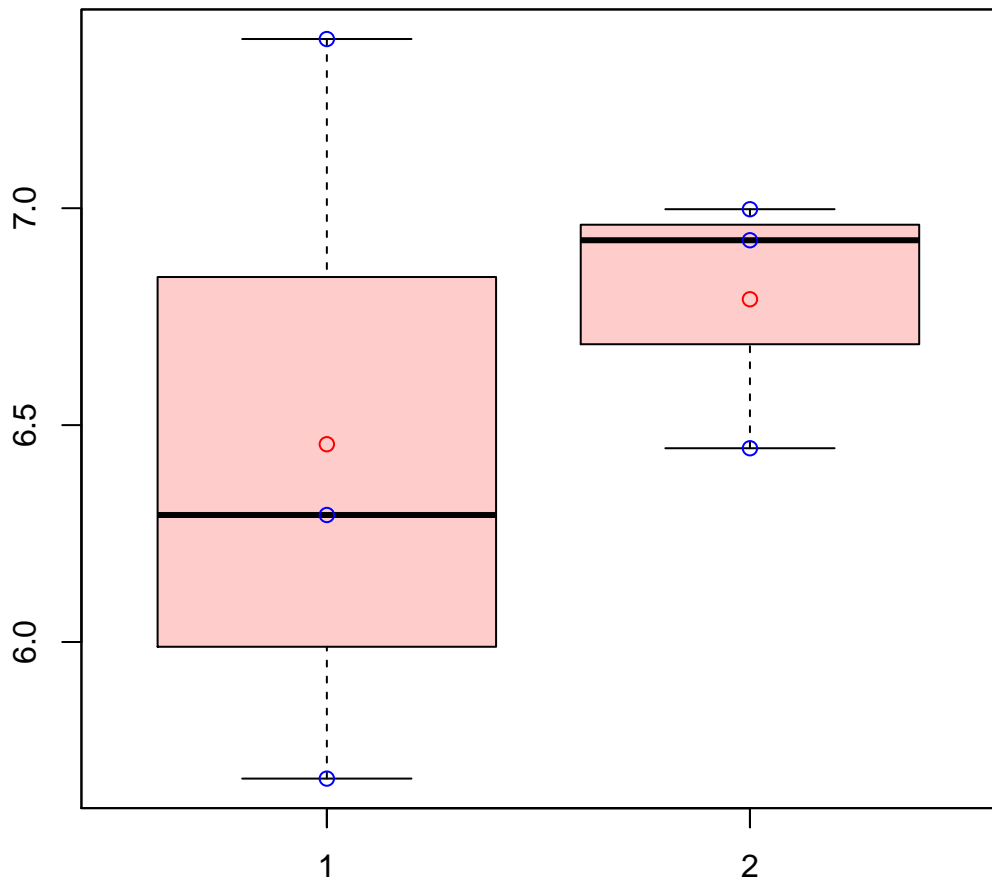

t-Test: p-value = 0.58

# CL6940Contig2|CL6940Contig2

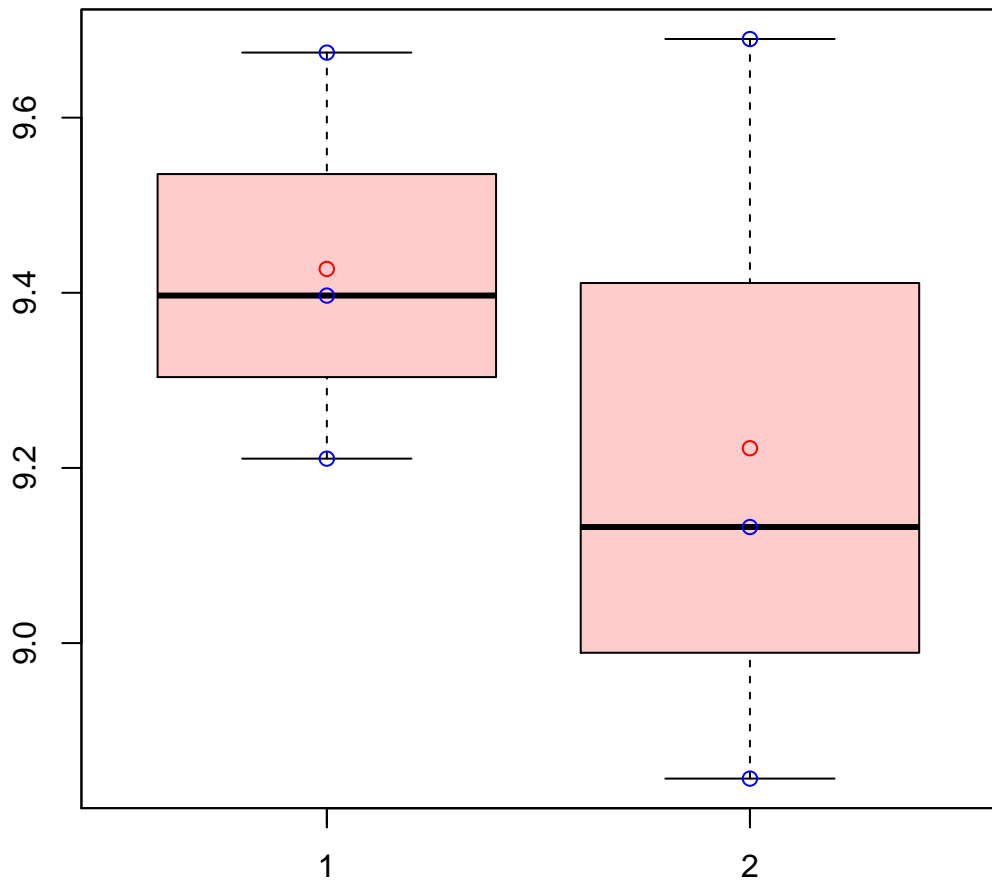

t-Test: p-value = 0.52

# CL6947Contig3|CL6947Contig3

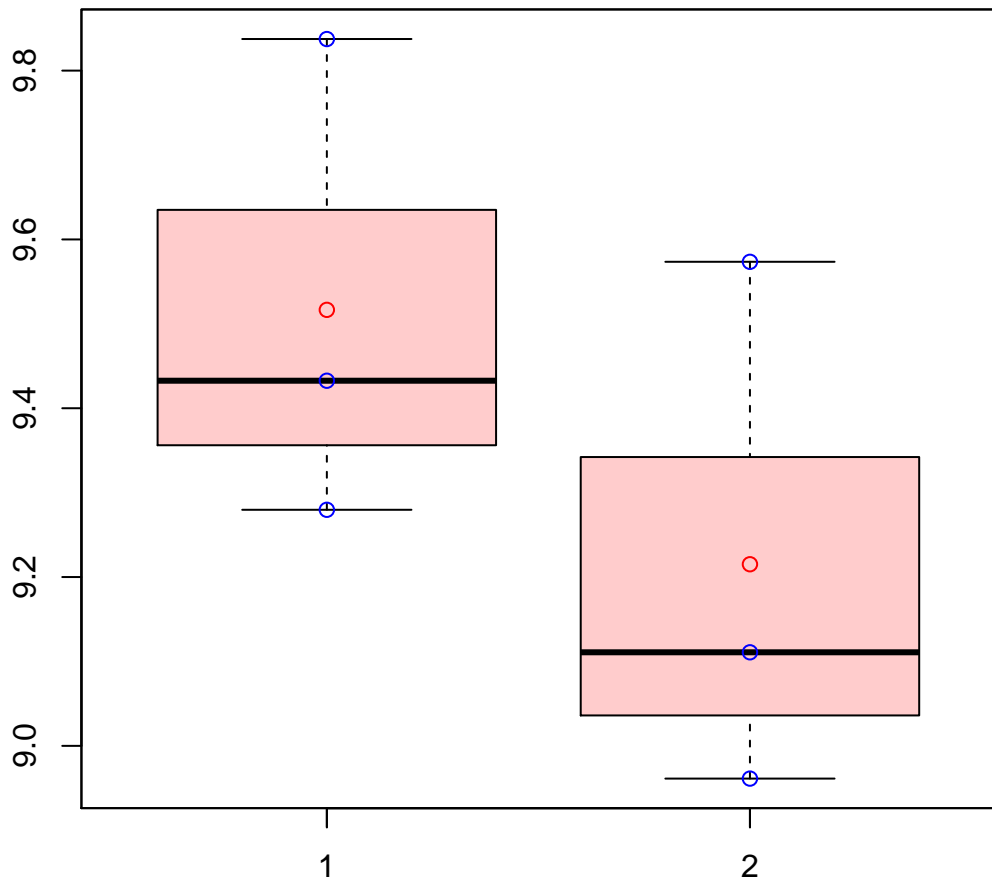

t-Test: p-value = 0.29

# CL694Contig1|CL694Contig1

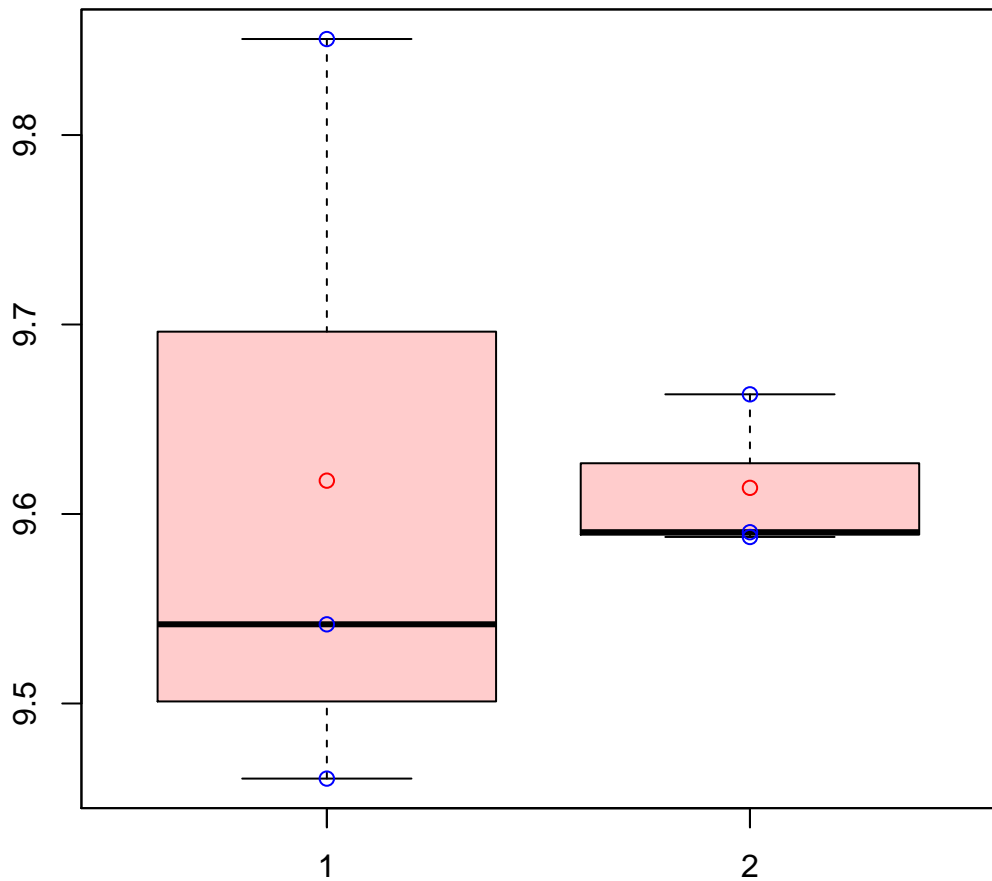

t-Test: p-value = 0.98



# CL694Contig2|CL694Contig2

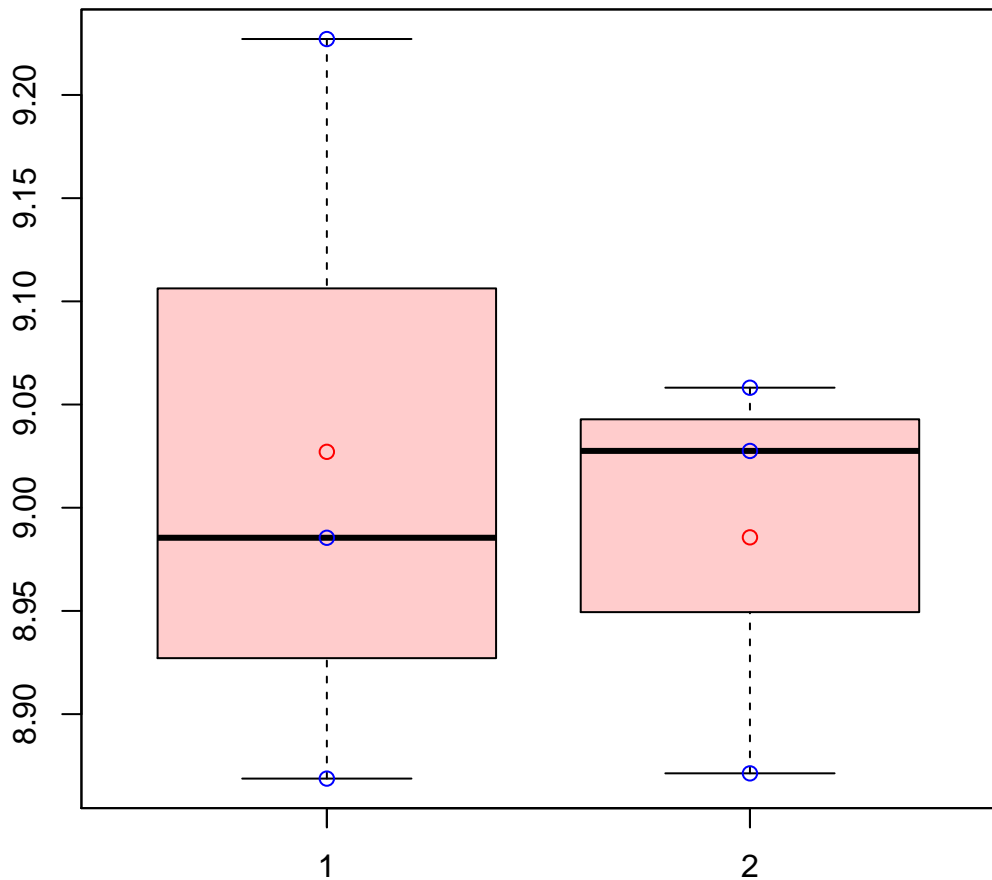

t-Test: p-value = 0.75

# CL694Contig6|CL694Contig6

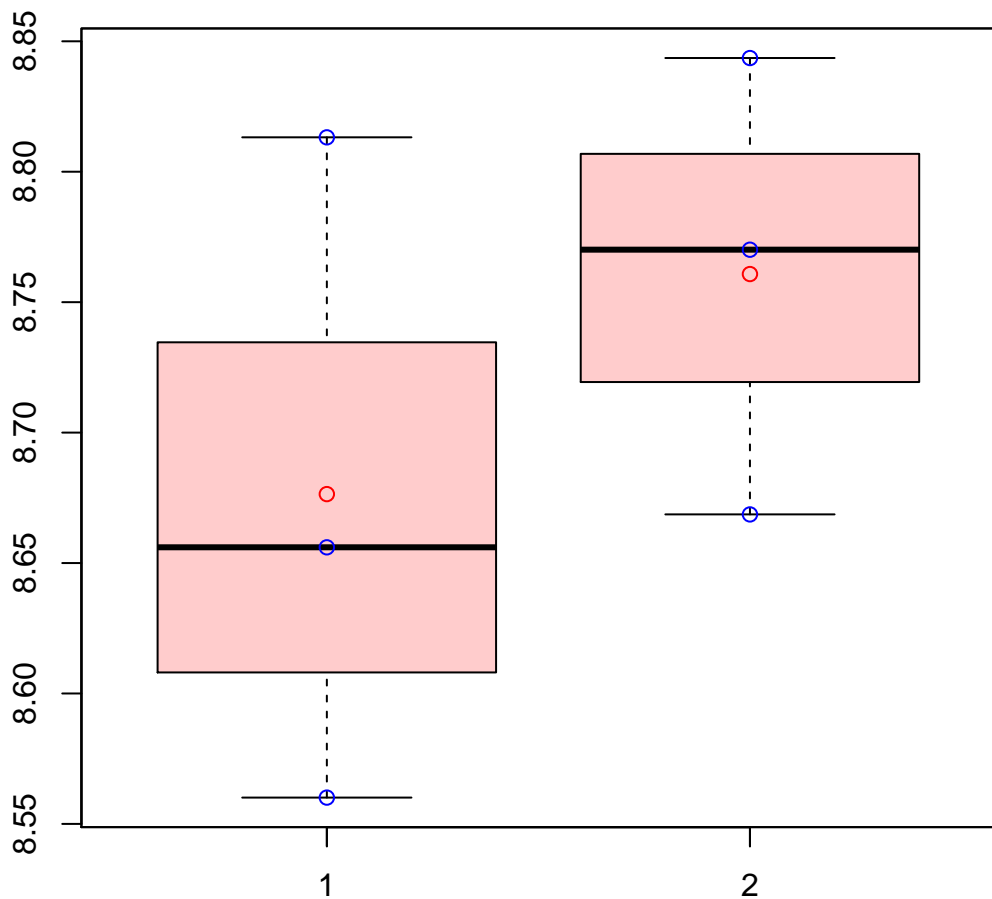

t-Test: p-value = 0.41

# CL694Contig7|CL694Contig7

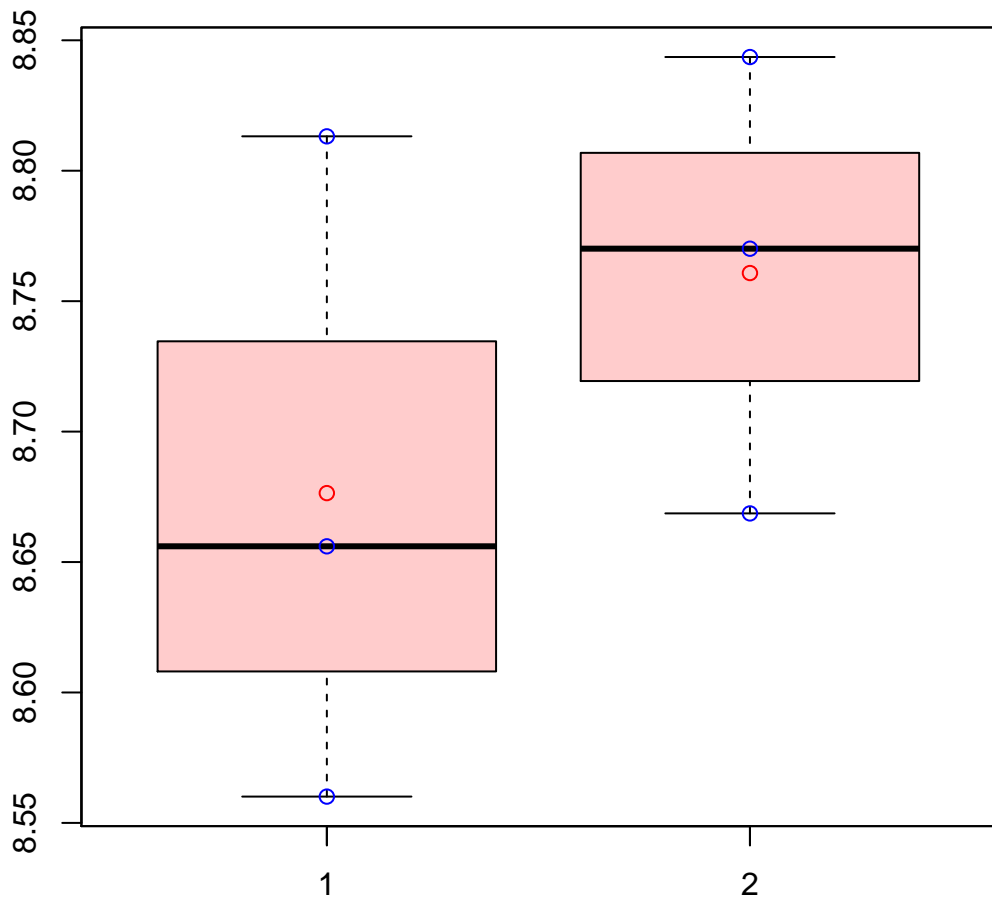

t-Test: p-value = 0.41

# CL694Contig9|CL694Contig9

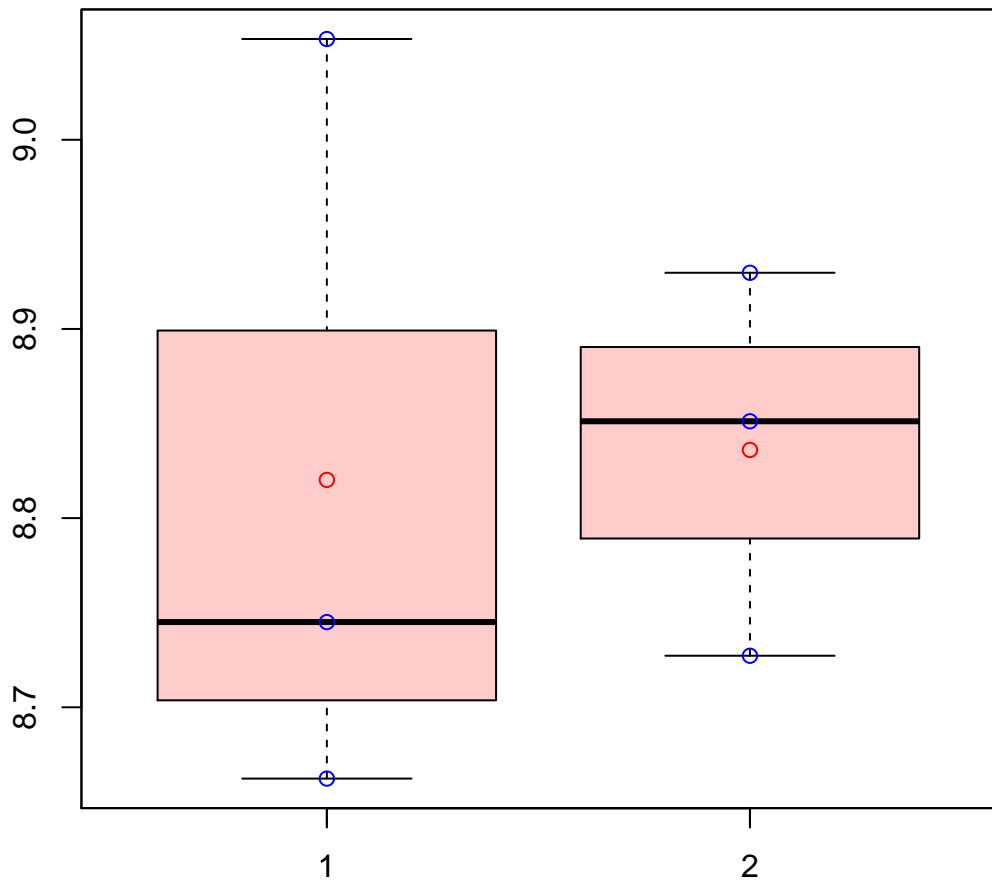

t-Test: p-value = 0.91

# CL6963Contig2|CL6963Contig2

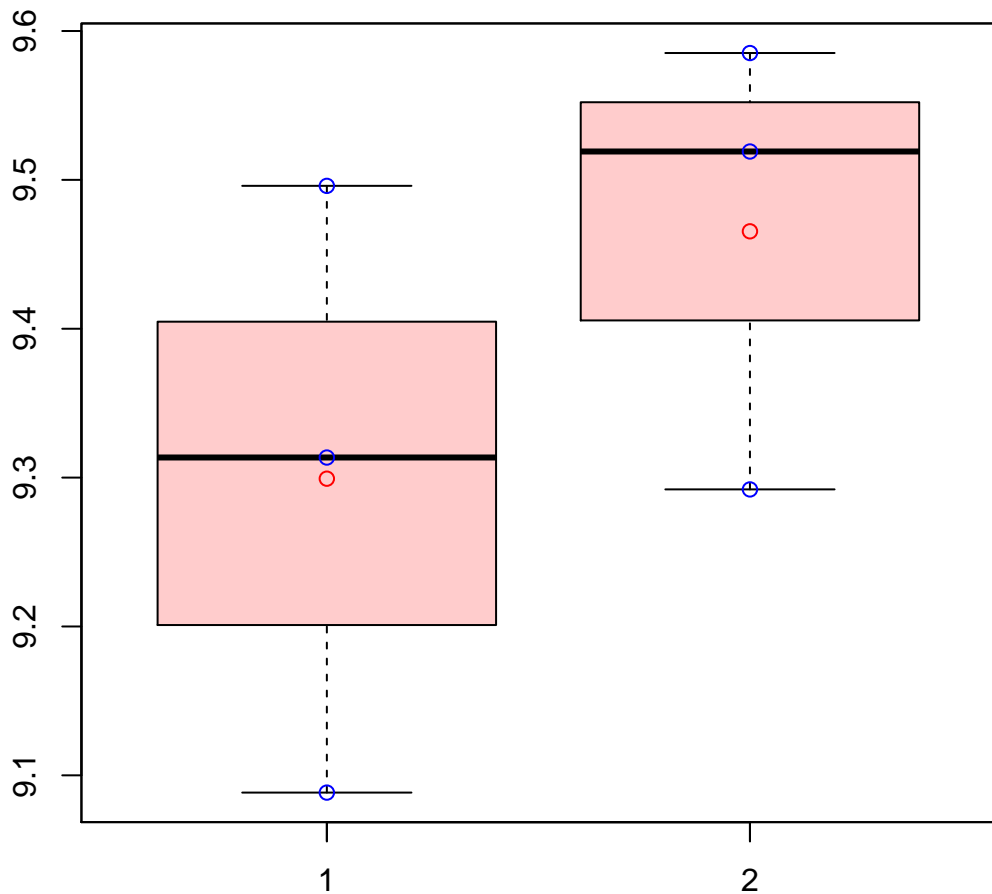

t-Test: p-value = 0.33

# CL6974Contig4|CL6974Contig4



t-Test: p-value = 0

# CL6975Contig1|CL6975Contig1



t-Test: p-value = 0.92

# CL698Contig2|CL698Contig2

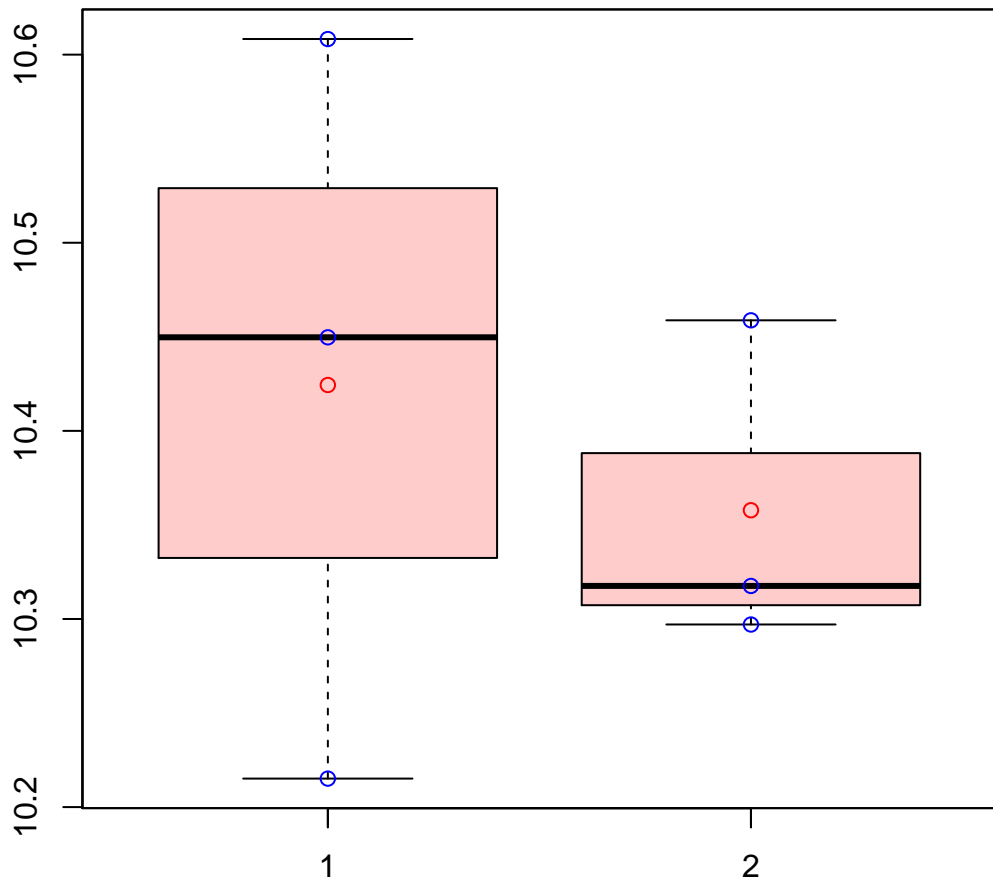

t-Test: p-value = 0.63



# CL698Contig3|CL698Contig3

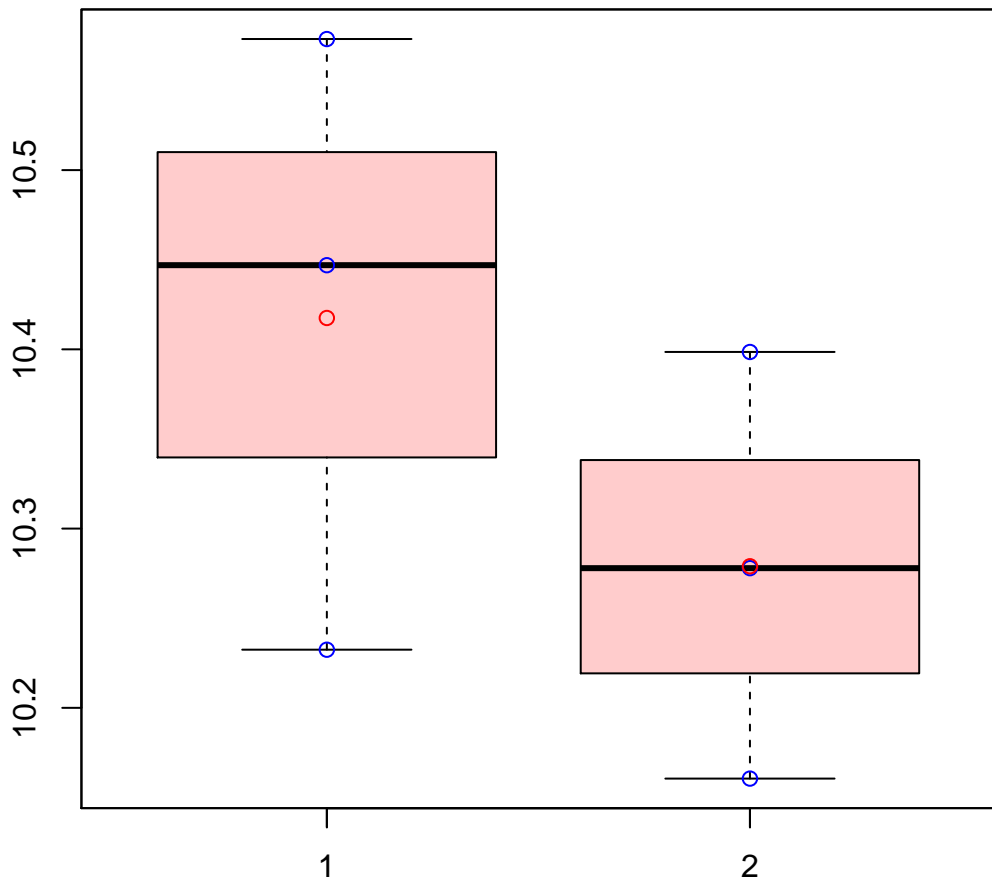

t-Test: p-value = 0.32

# CL698Contig9|CL698Contig9

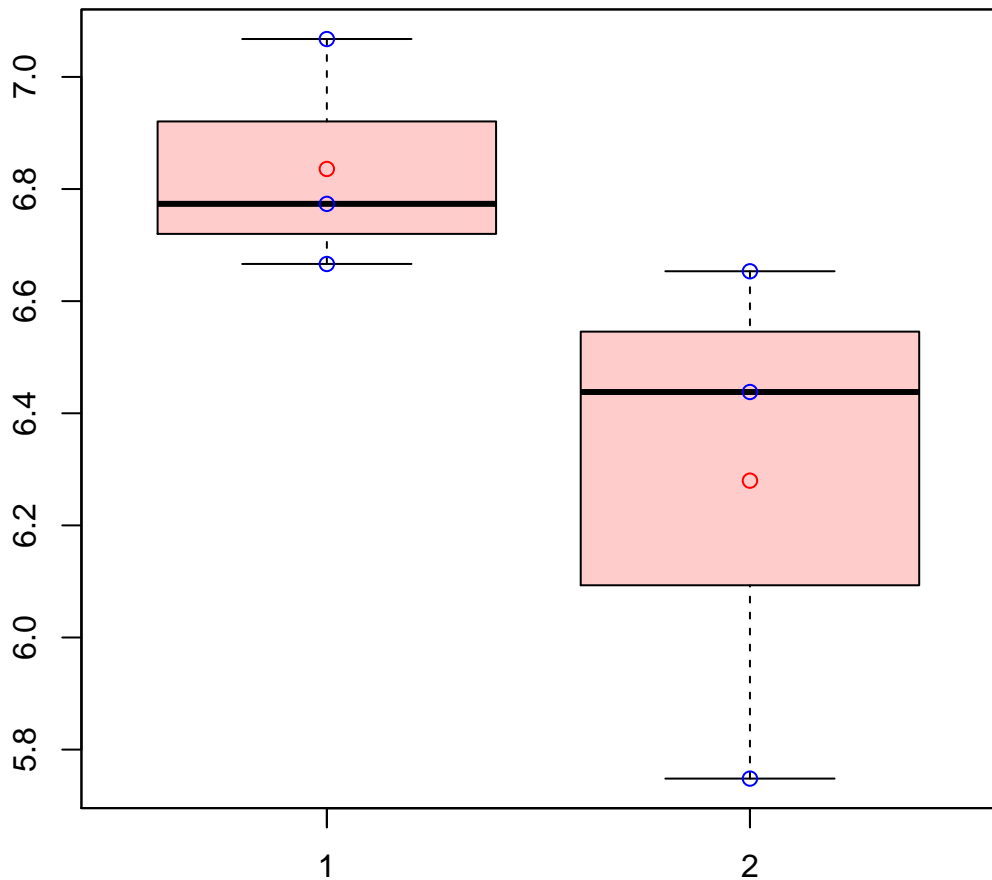

t-Test: p-value = 0.17

# CL6993Contig2|CL6993Contig2

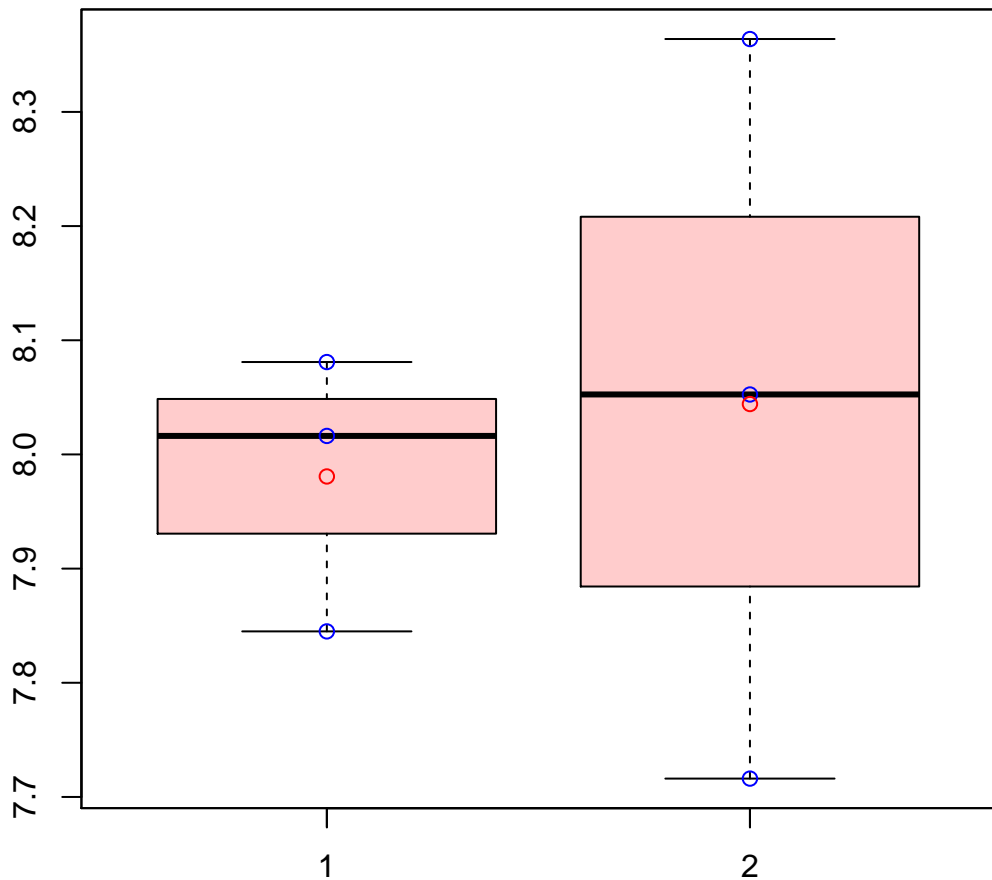

t-Test: p-value = 0.78

# CL699Contig6|CL699Contig6

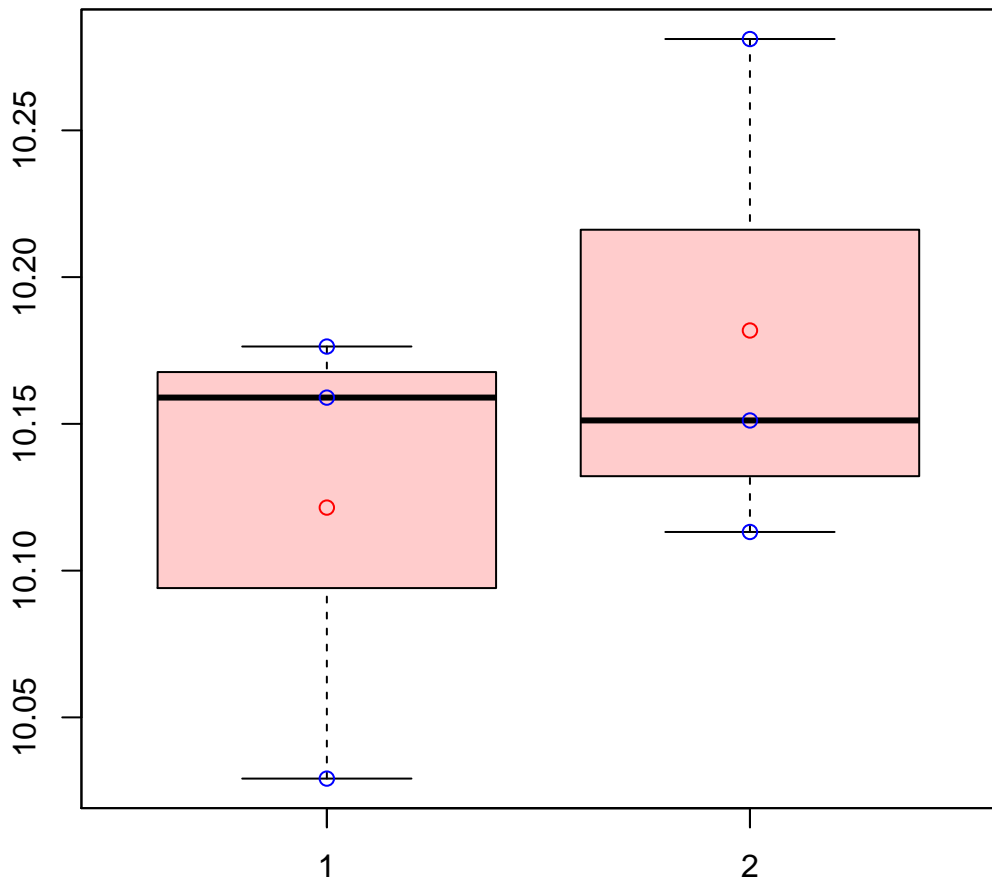

t-Test: p-value = 0.43

# CL699Contig7|CL699Contig7

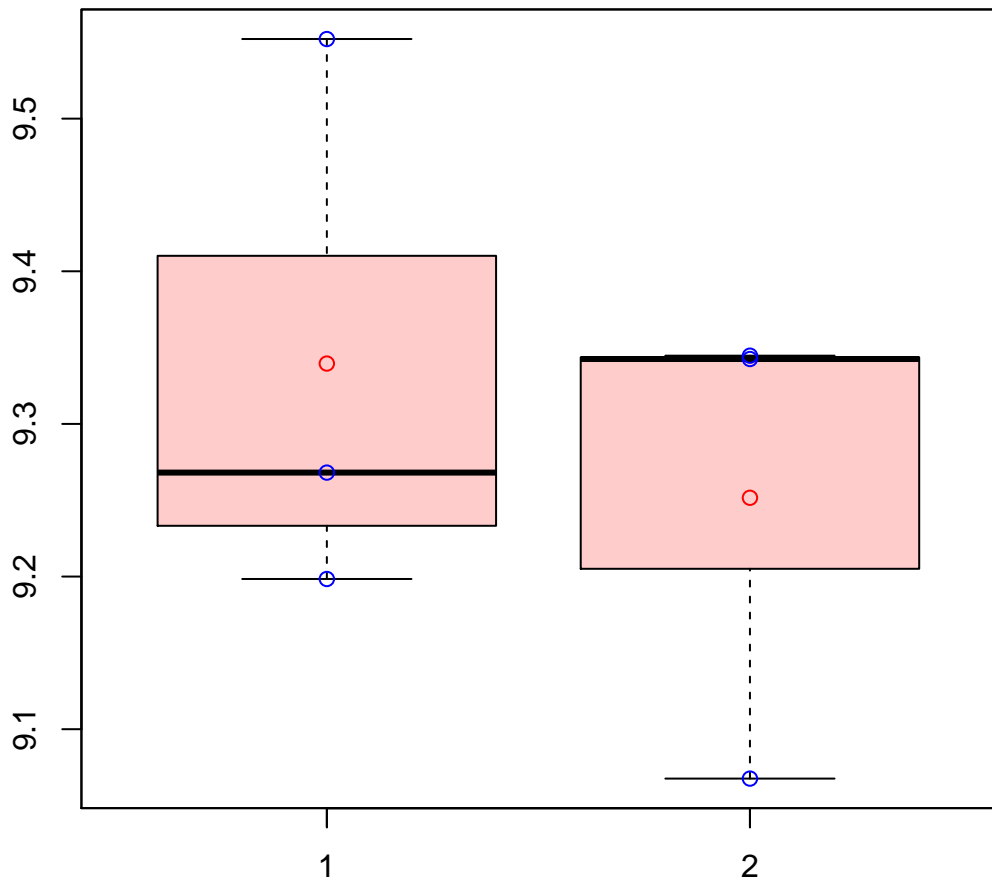

t-Test: p-value = 0.57

# CL6Contig18|CL6Contig18

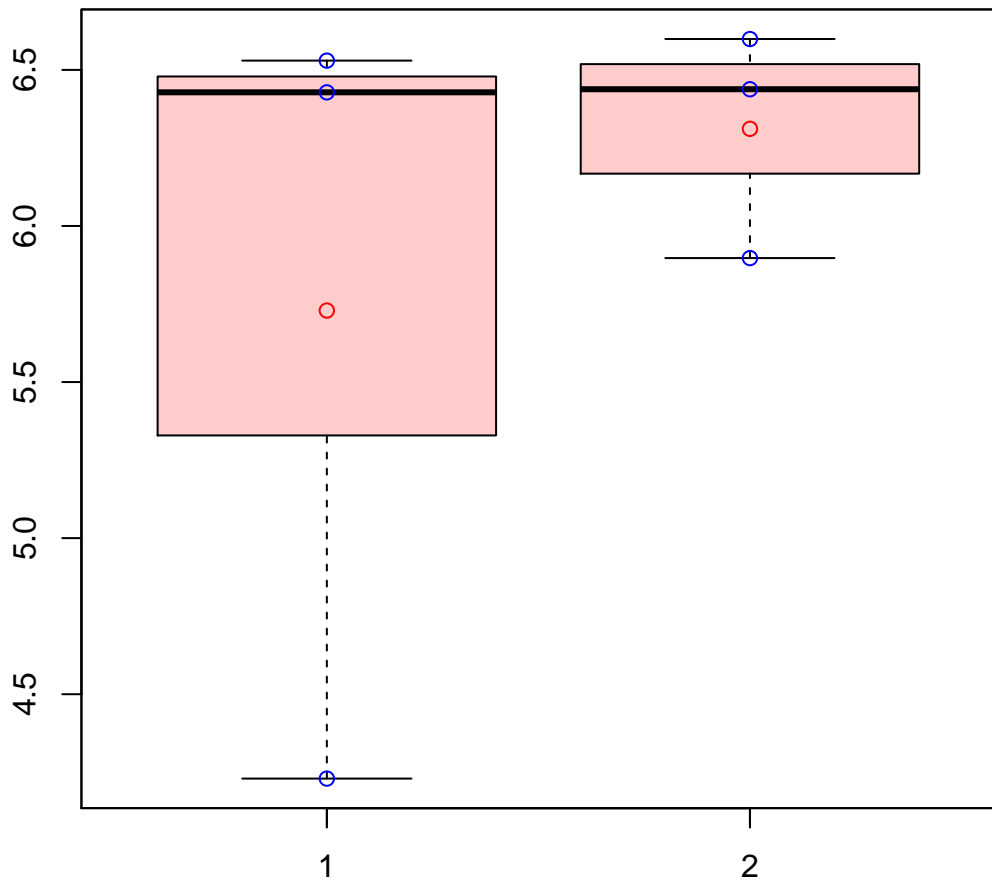

t-Test: p-value = 0.52

# CL6Contig21|CL6Contig21

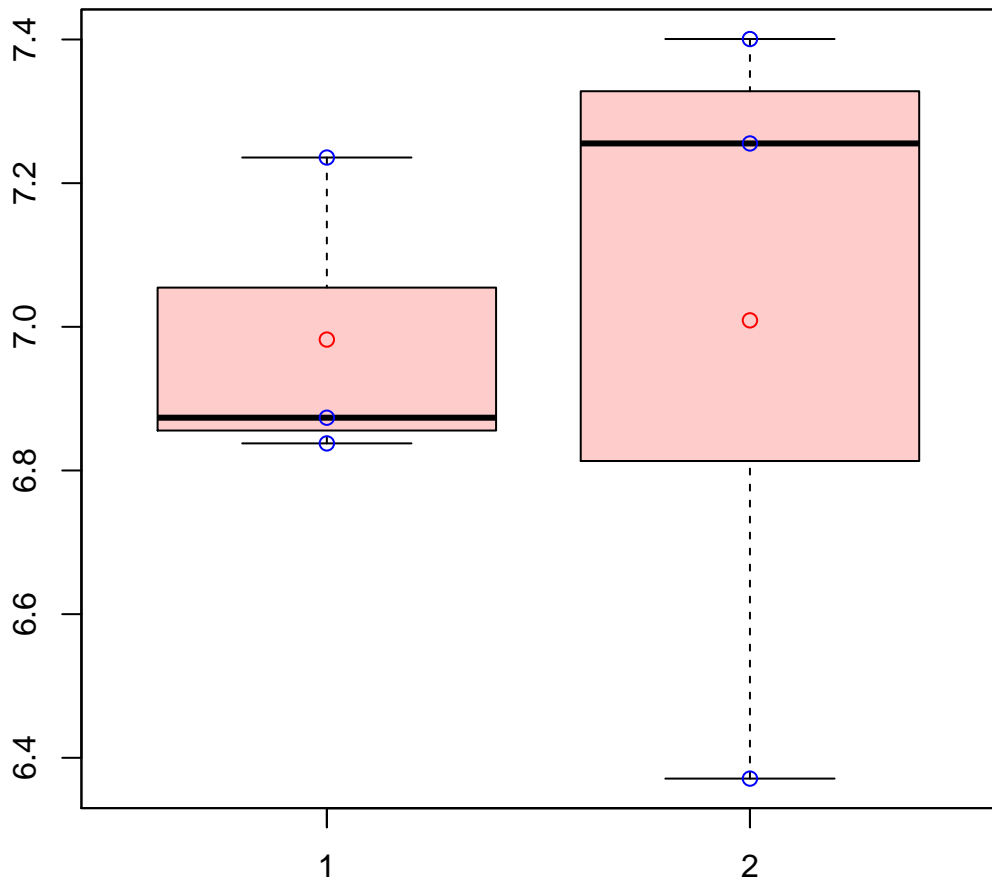

t-Test: p-value = 0.94

# CL6Contig28|CL6Contig28

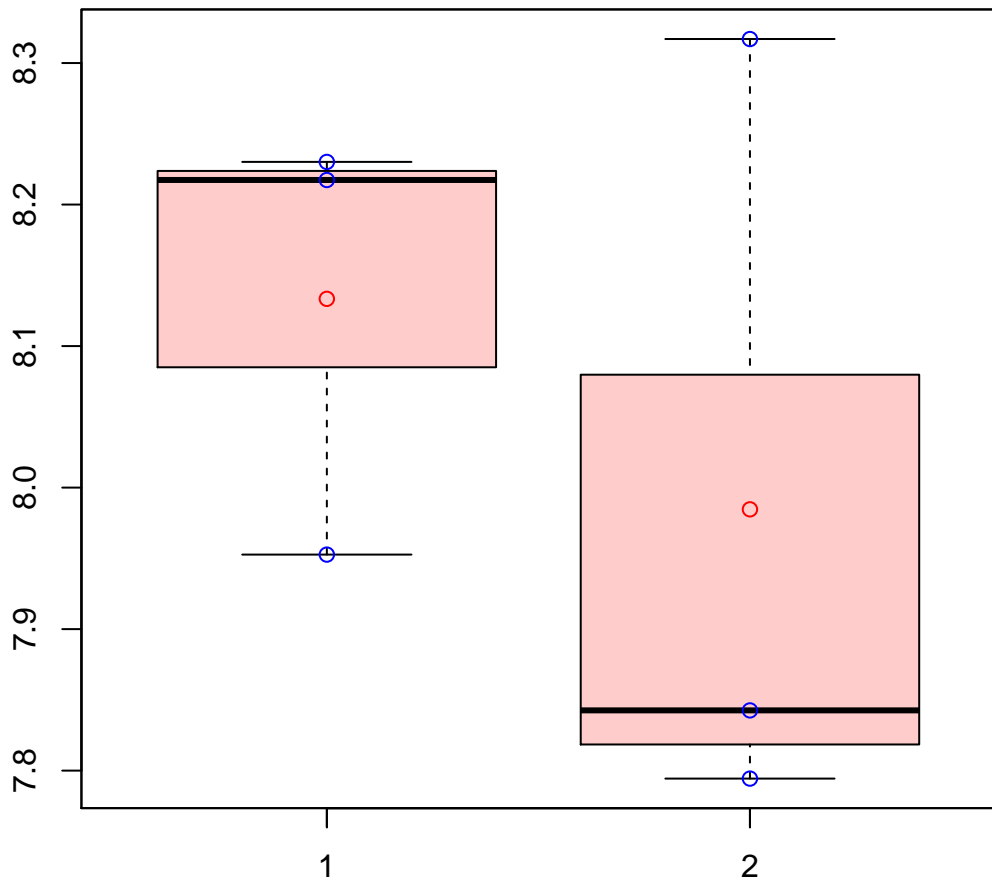

t-Test: p-value = 0.49



## CL6Contig35|CL6Contig35



t-Test: p-value = 0.9

# CL6Contig61|CL6Contig61

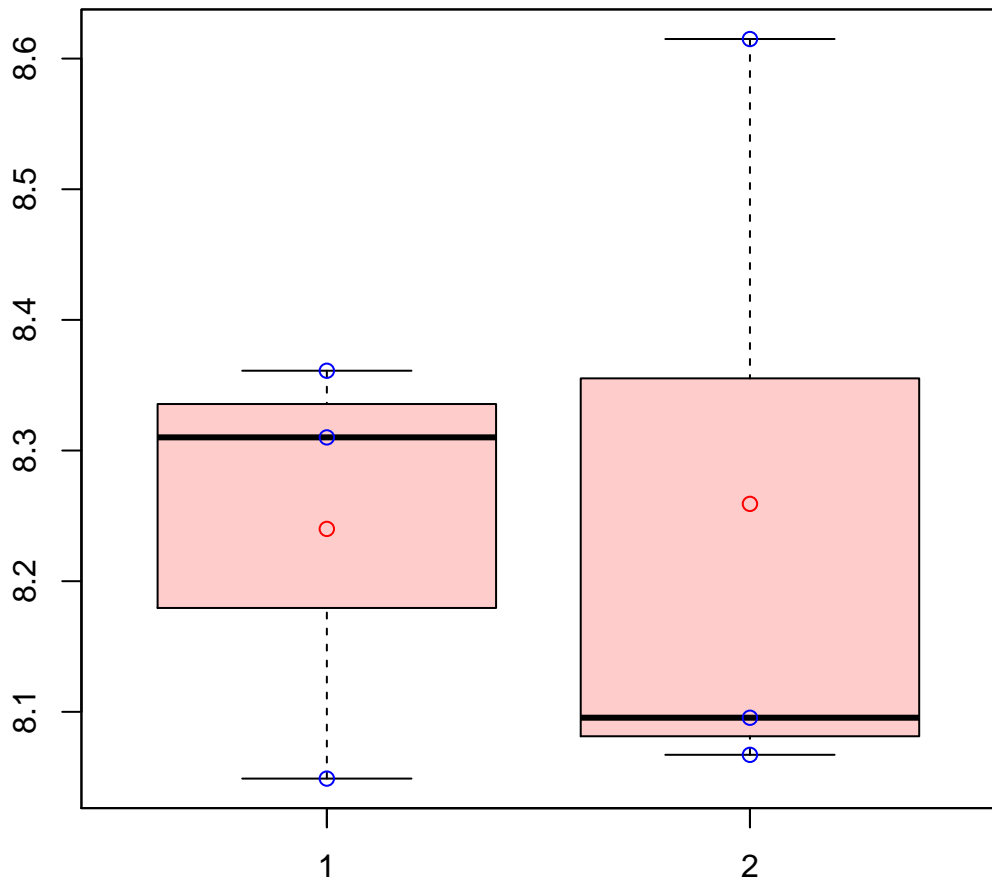

t-Test: p-value = 0.93

# CL6Contig64|CL6Contig64

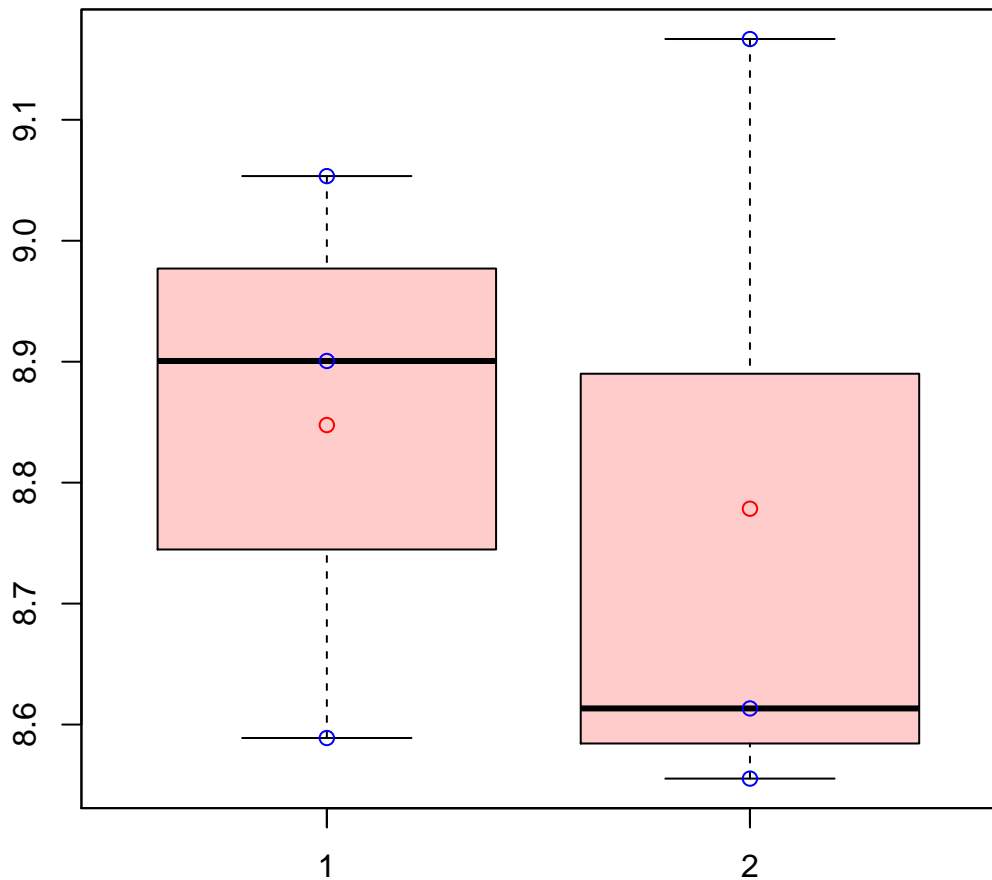

t-Test: p-value = 0.79

# CL7007Contig2|CL7007Contig2

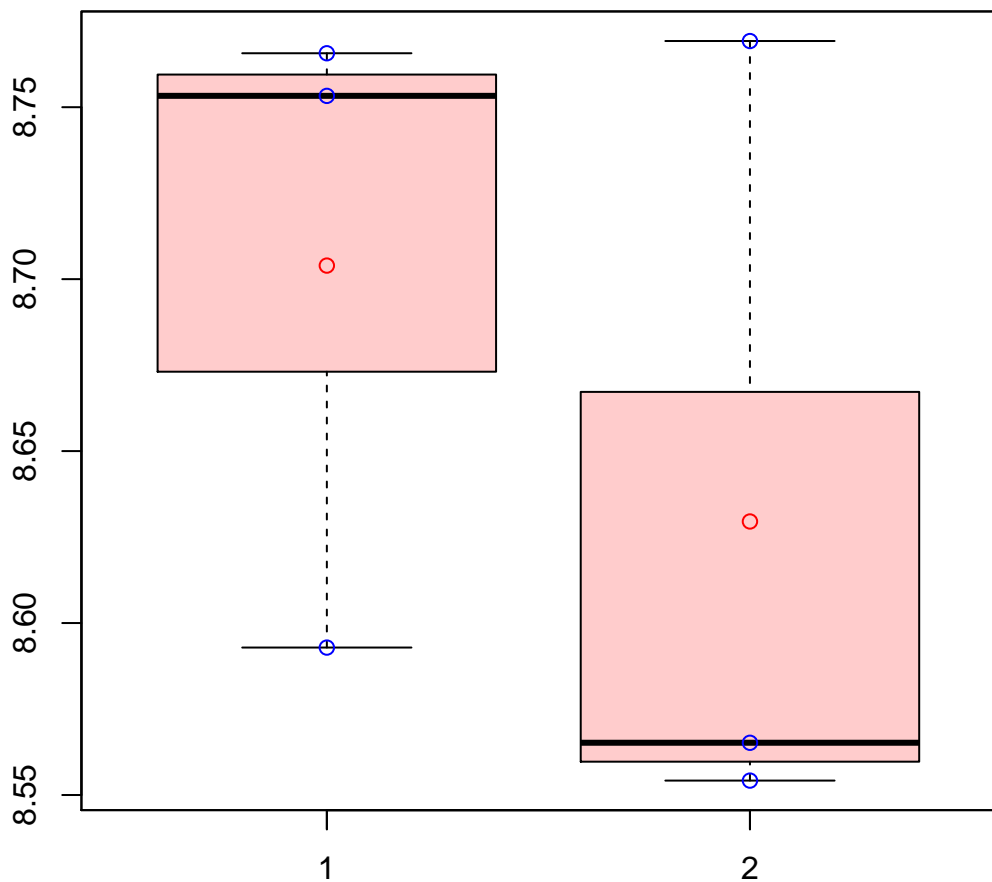

t-Test: p-value = 0.45

# CL7007Contig3|CL7007Contig3

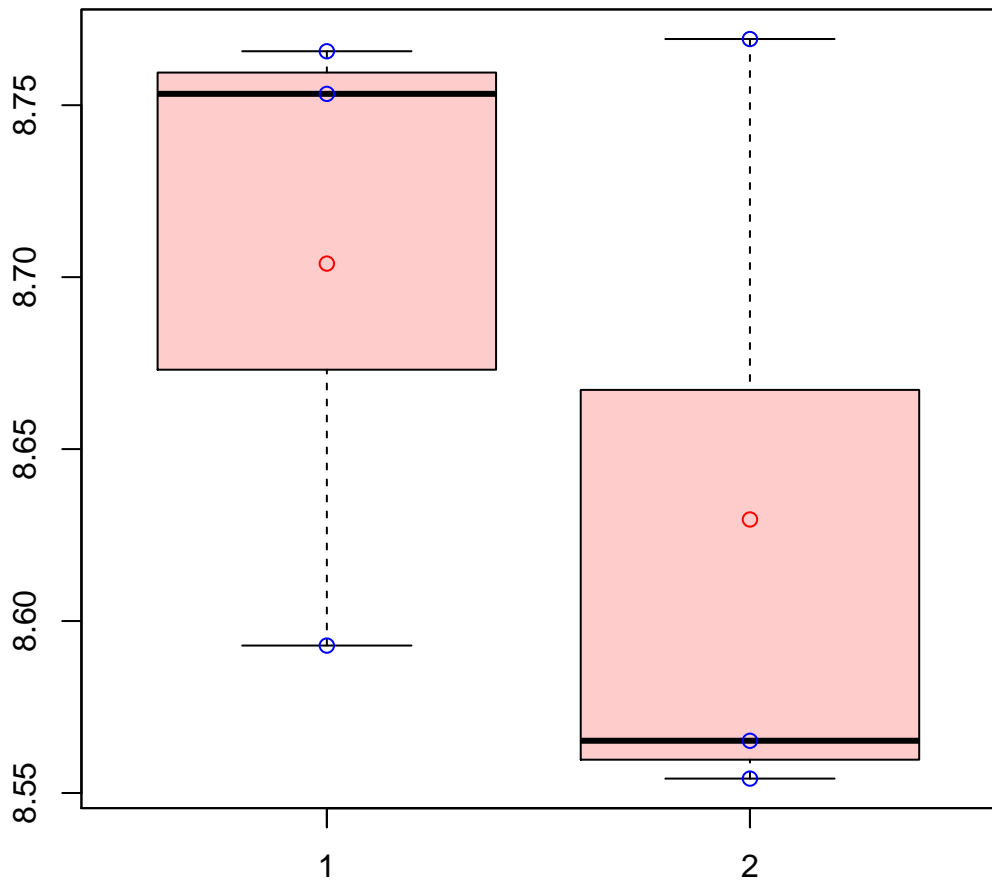

t-Test: p-value = 0.45

# CL700Contig1|CL700Contig1

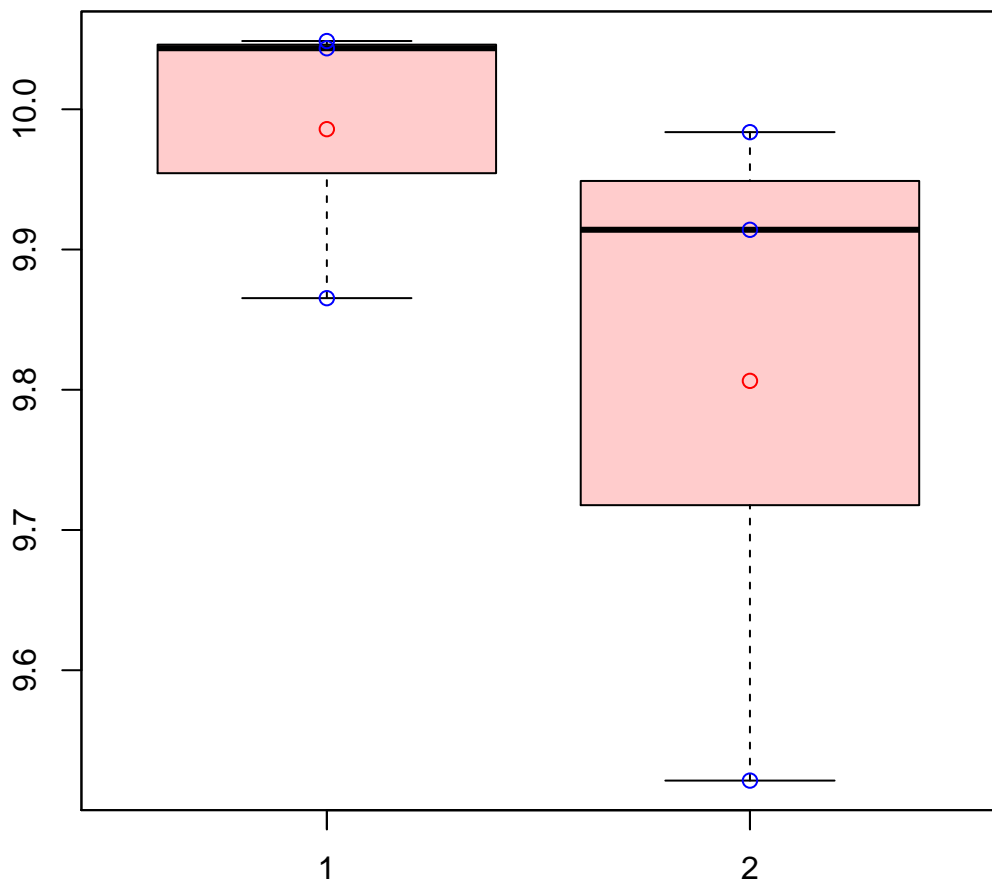

t-Test: p-value = 0.34

# CL700Contig3|CL700Contig3

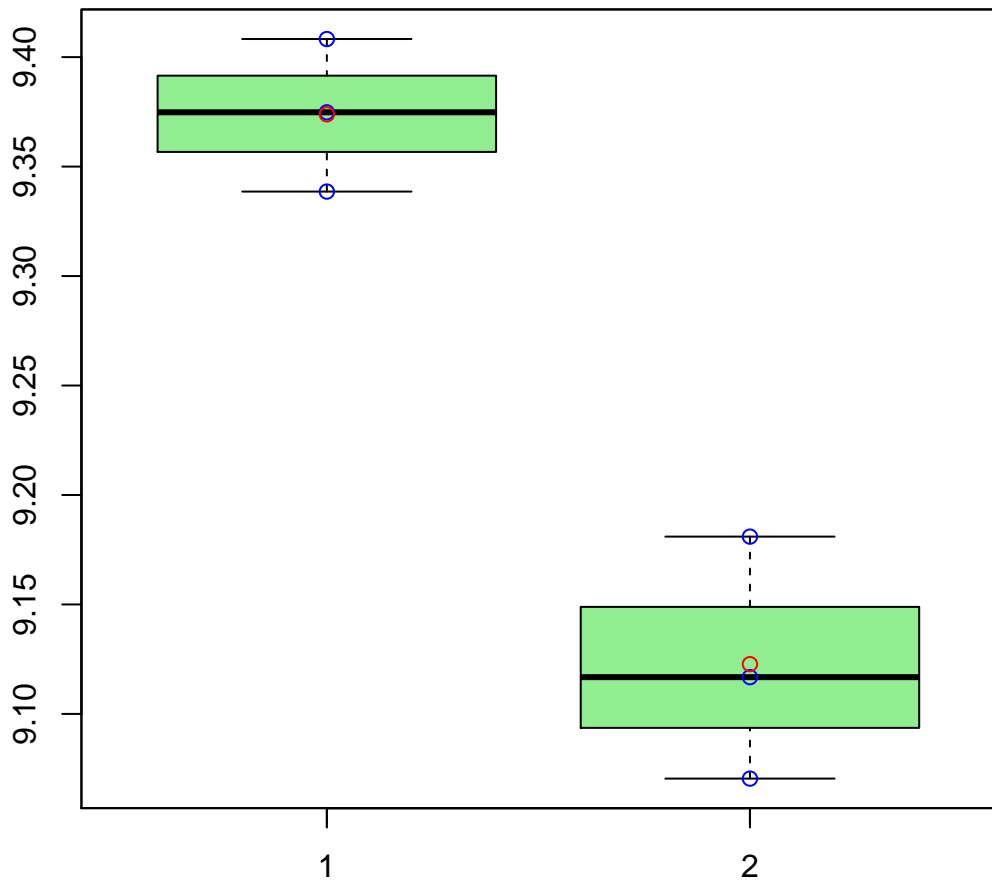

t-Test: p-value = 0

# CL702Contig1|CL702Contig1

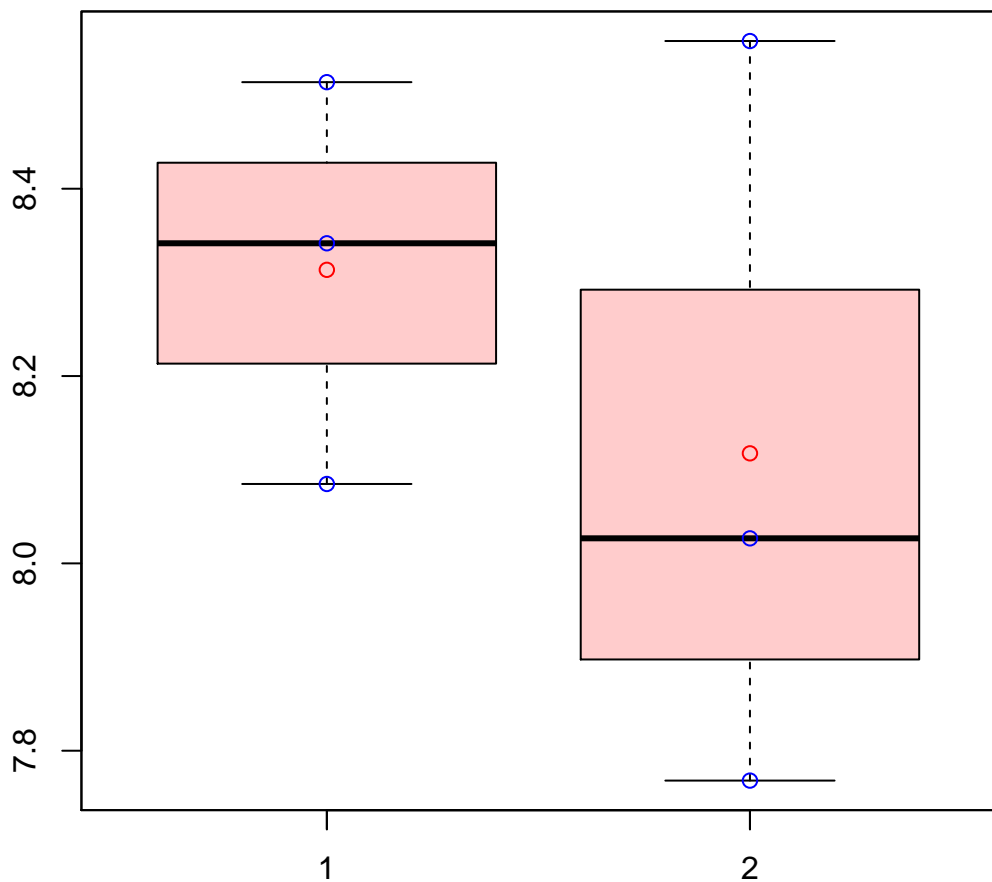

t-Test: p-value = 0.51



# CL702Contig2|CL702Contig2

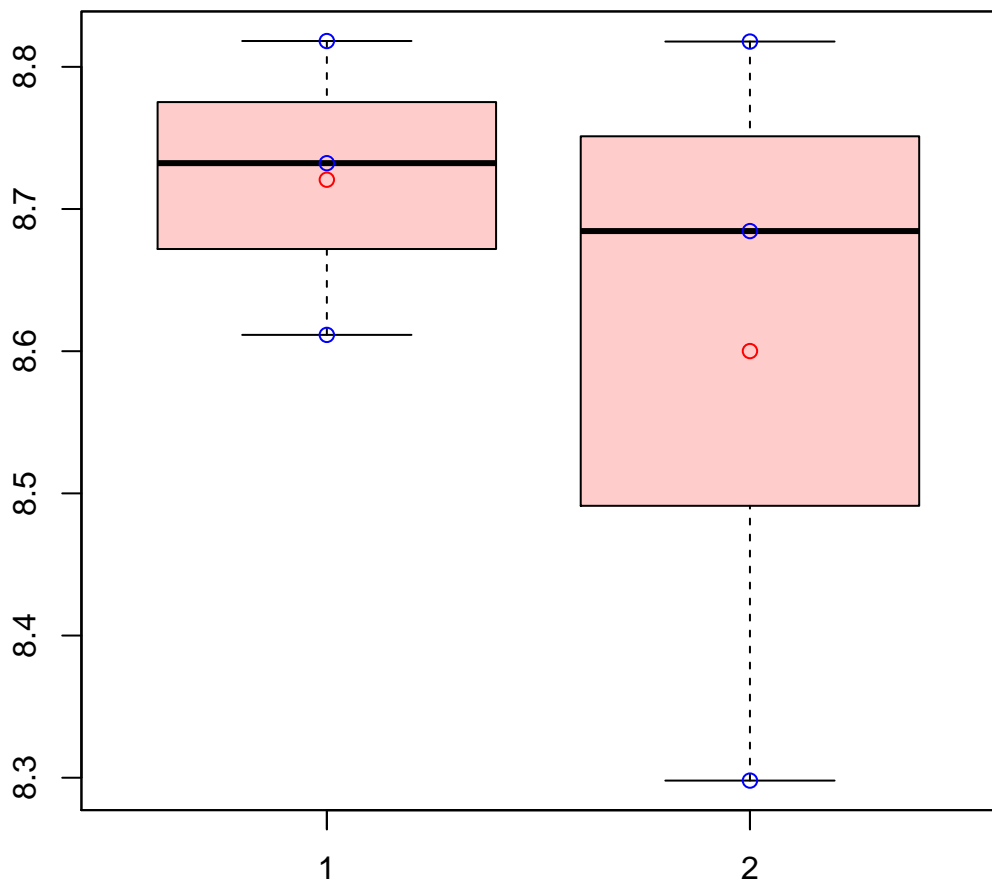

t-Test: p-value = 0.53

# CL702Contig3|CL702Contig3

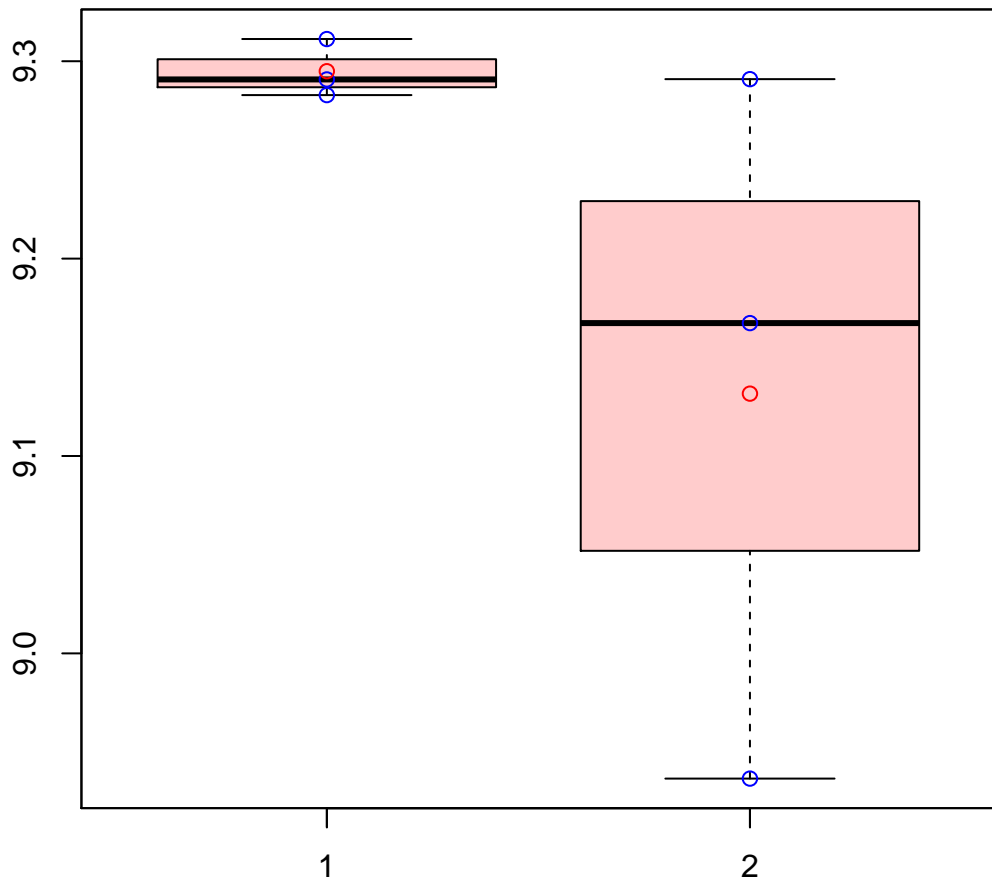

t-Test: p-value = 0.26

# CL703Contig5|CL703Contig5

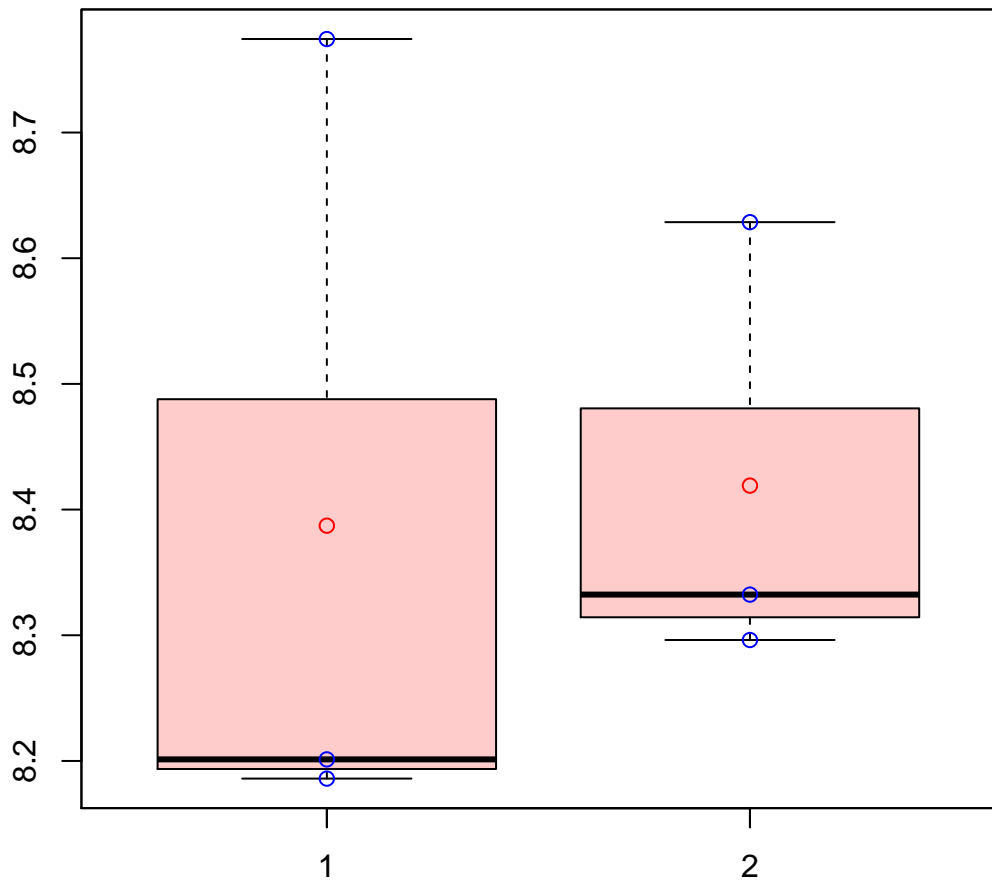

t-Test: p-value = 0.89

# CL7040Contig3|CL7040Contig3



t-Test: p-value = 0.86

# CL7048Contig1|CL7048Contig1

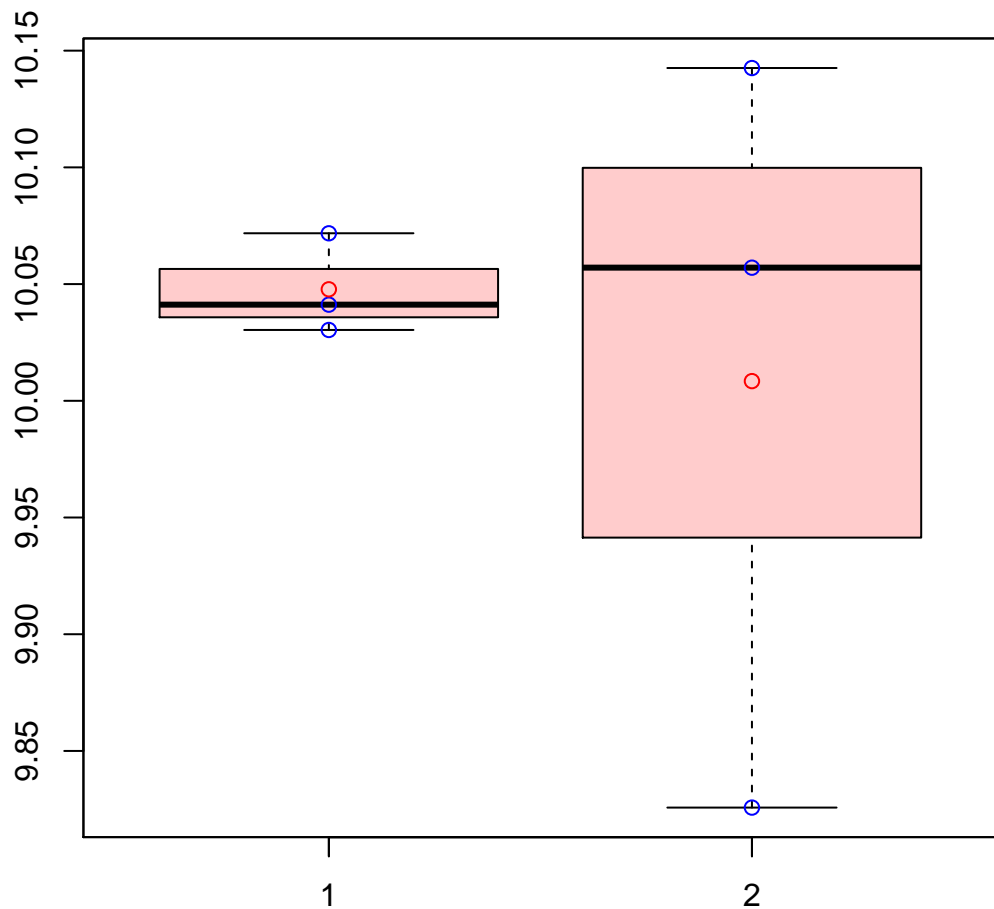

t-Test: p-value = 0.72

# CL7059Contig2|CL7059Contig2

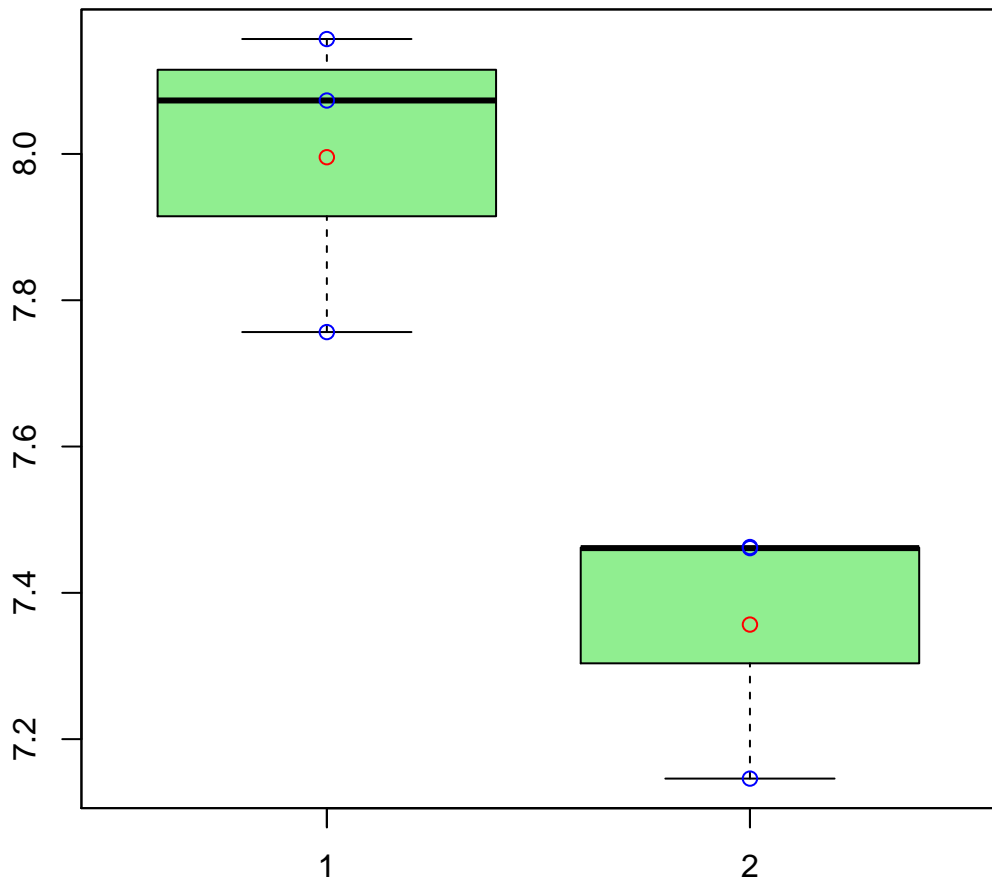

t-Test: p-value = 0.02

# CL705Contig3|CL705Contig3

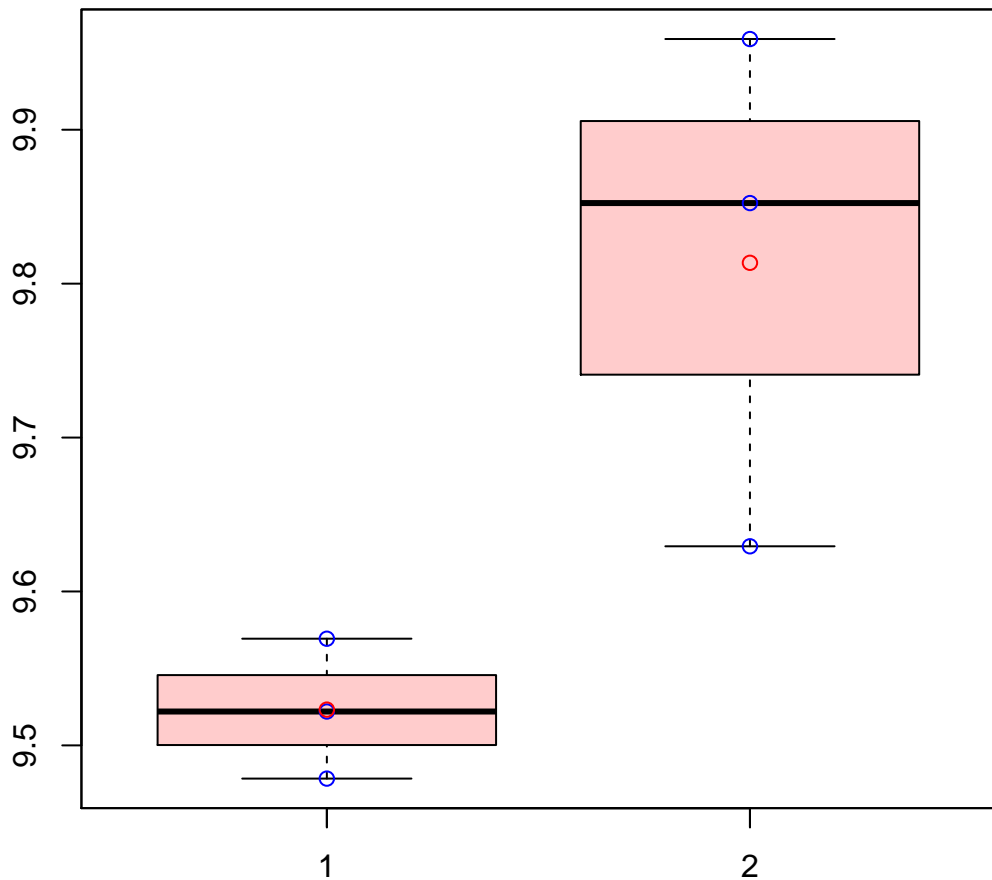

t-Test: p-value = 0.09

# CL7060Contig1|CL7060Contig1

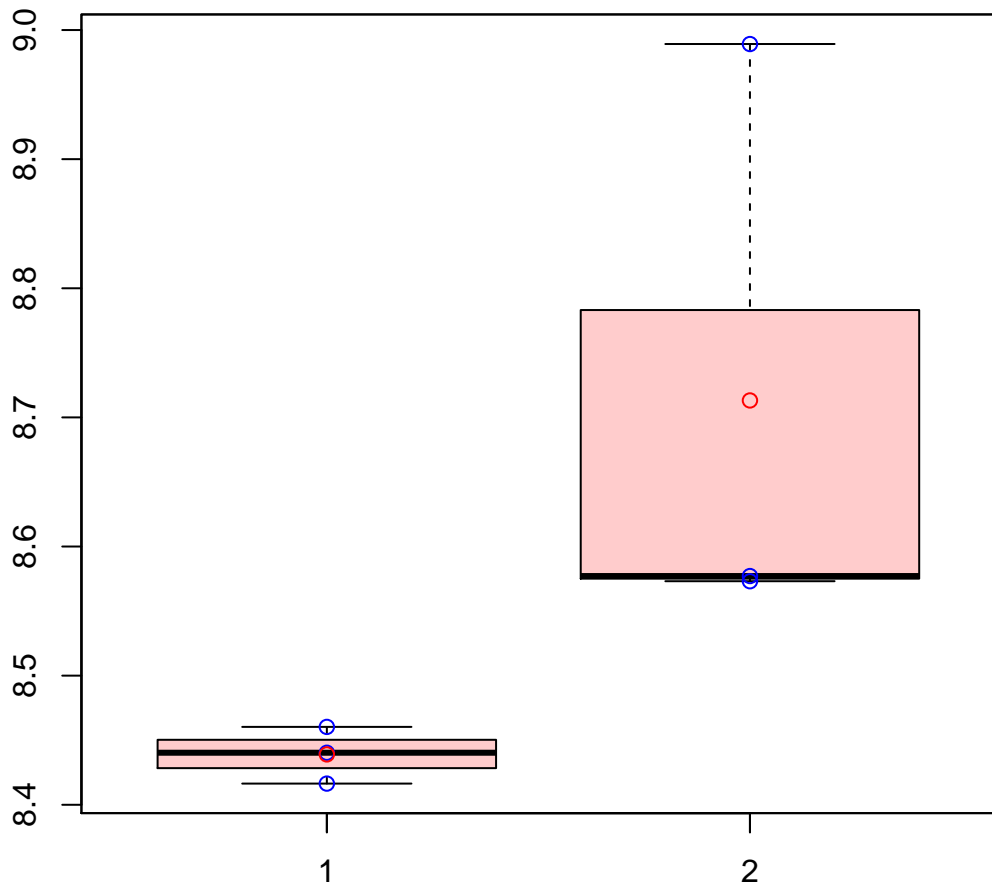

t-Test: p-value = 0.18



# CL7060Contig2|CL7060Contig2



t-Test: p-value = 0.18

# CL7060Contig3|CL7060Contig3

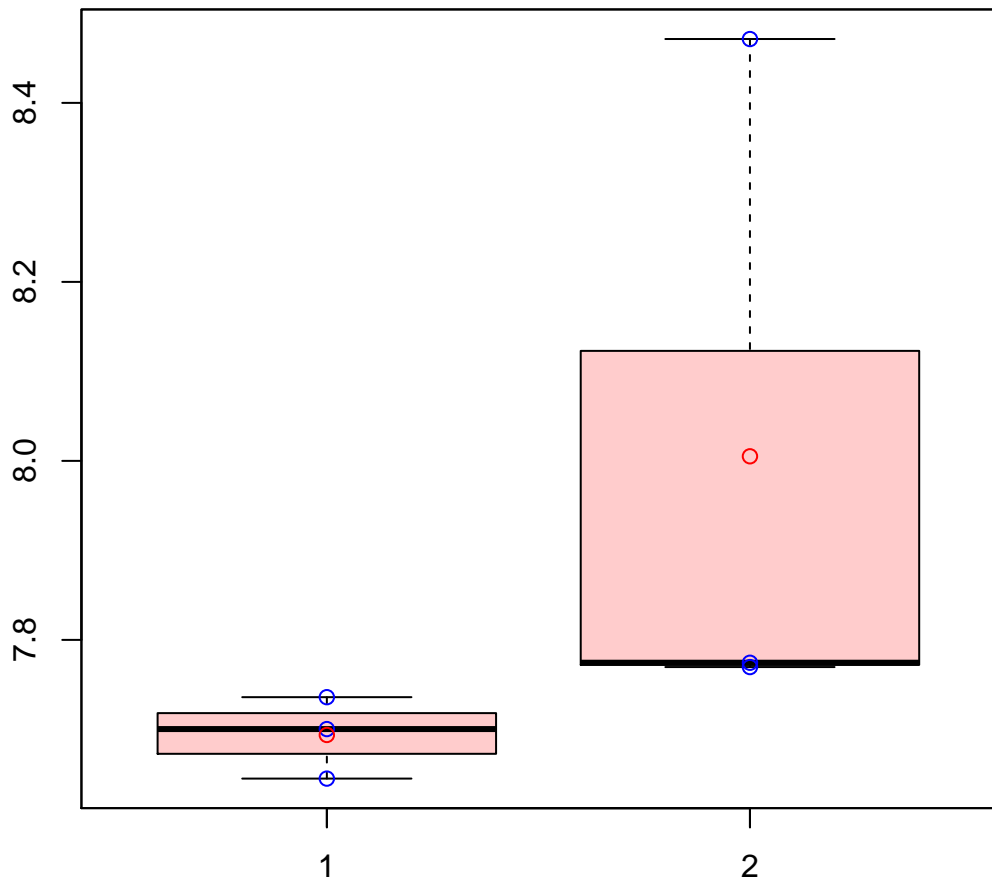

t-Test: p-value = 0.31

# CL7065Contig1|CL7065Contig1

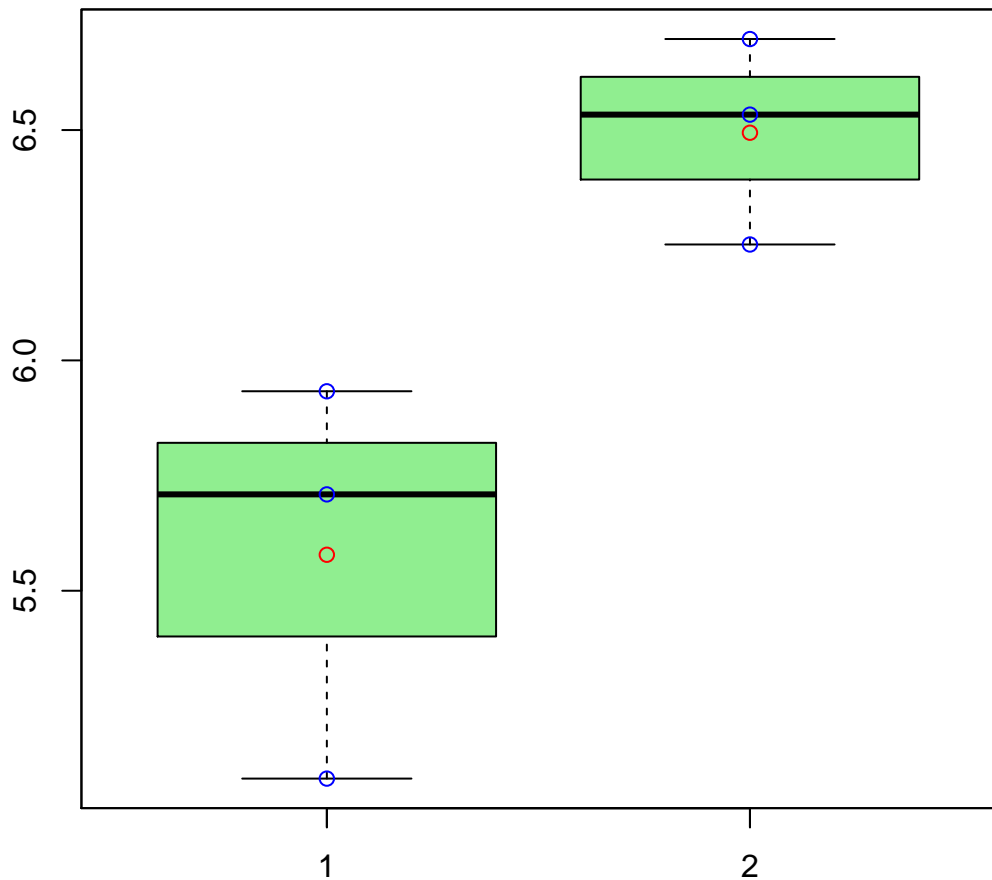

t-Test: p-value = 0.05

# CL7065Contig2|CL7065Contig2



t-Test: p-value = 0.05

# CL7068Contig1|CL7068Contig1

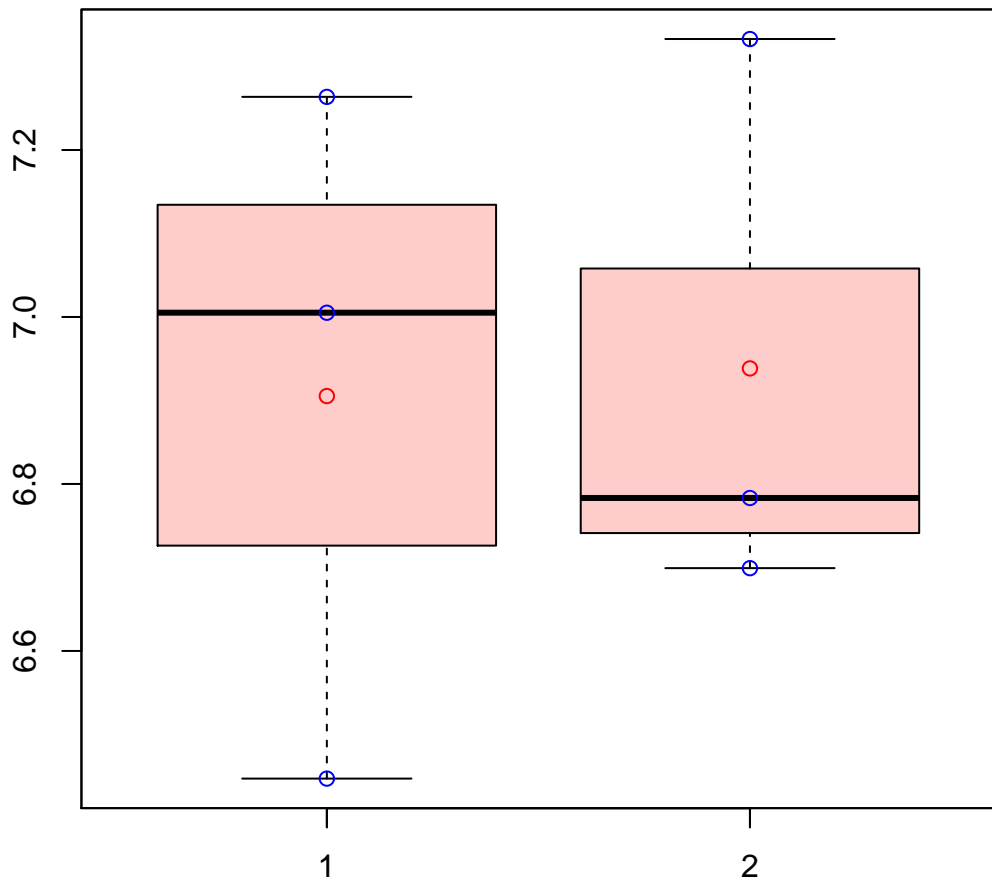

t-Test: p-value = 0.92

# CL7074Contig4|CL7074Contig4

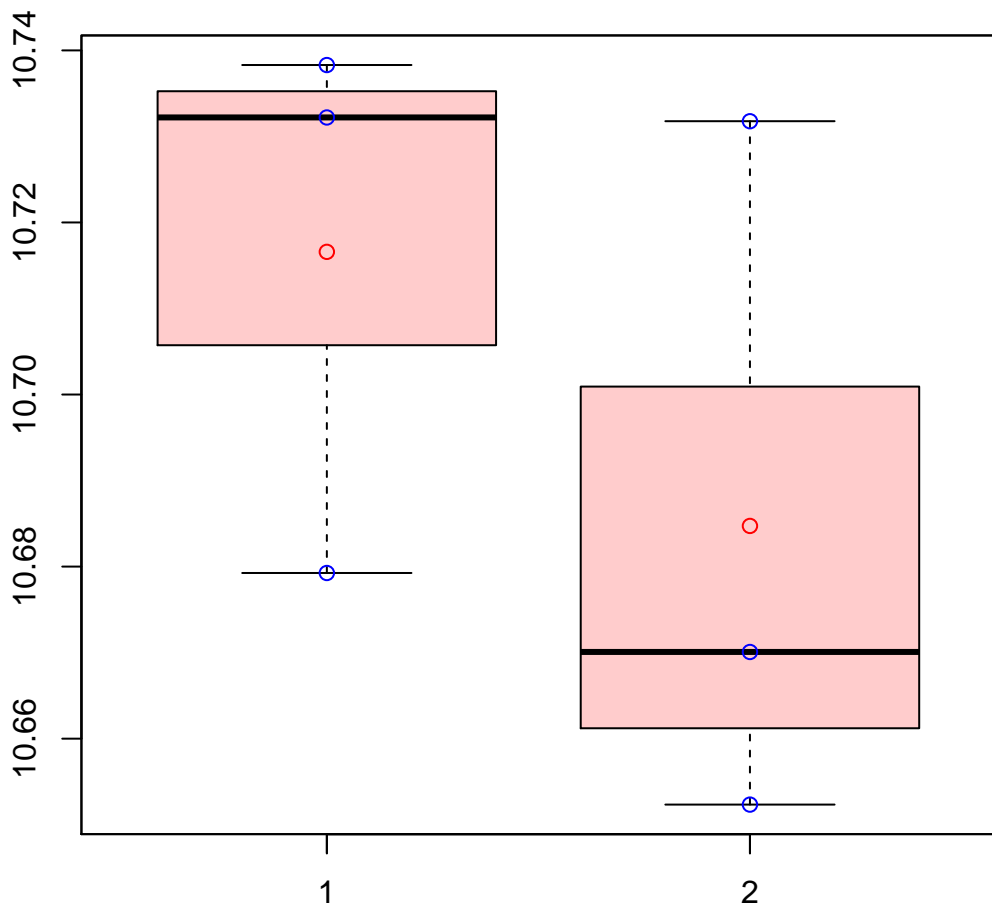

t-Test: p-value = 0.36

# CL7079Contig1|CL7079Contig1



t-Test: p-value = 0.76

## CL7082Contig2|CL7082Contig2

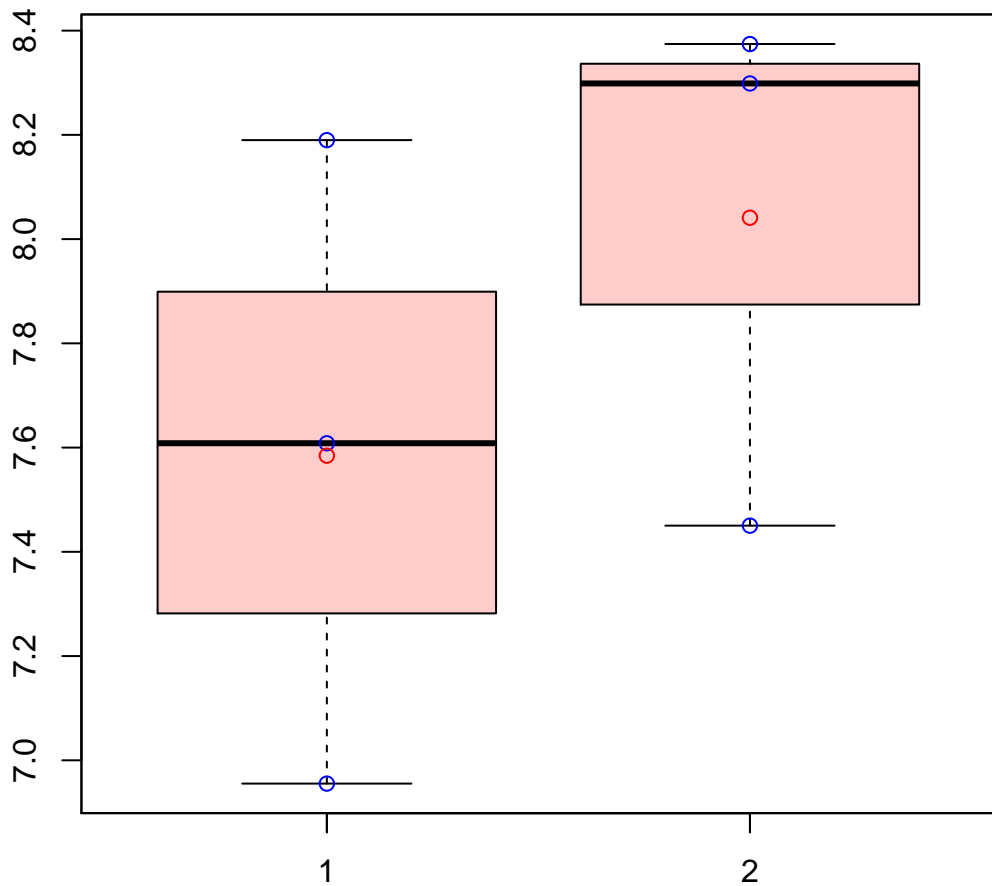

t-Test: p-value = 0.38



# CL7088Contig2|CL7088Contig2

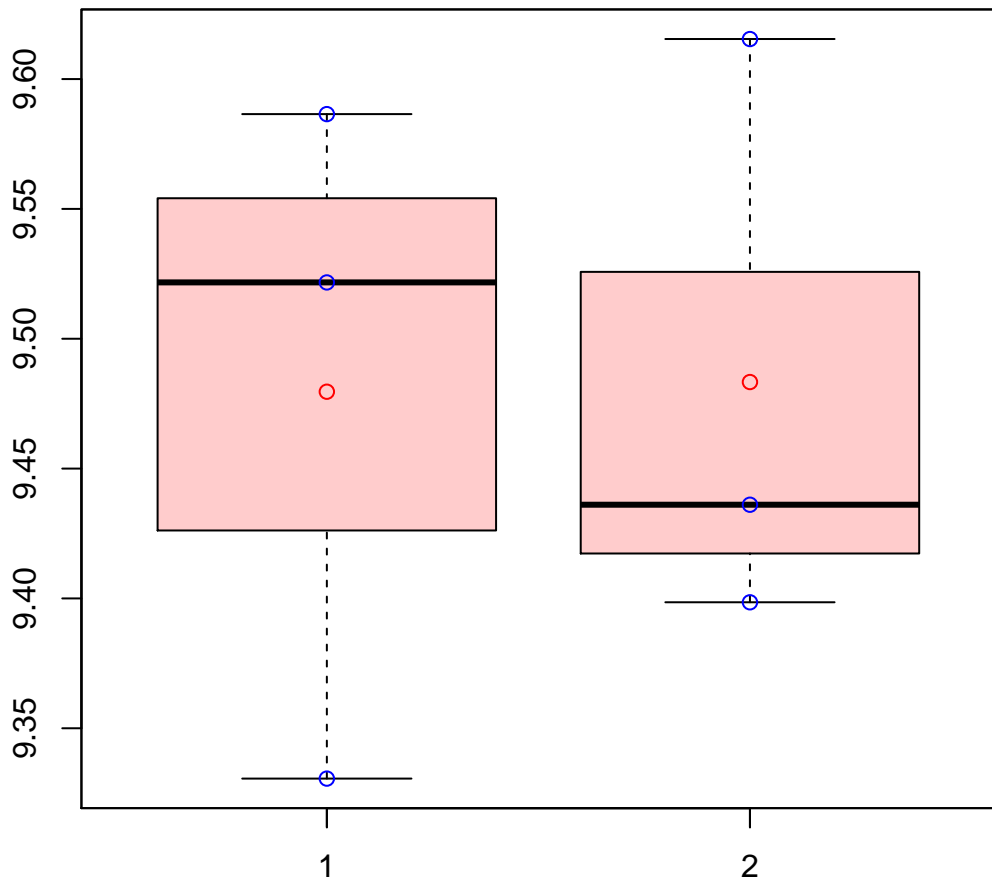

t-Test: p-value = 0.97

# CL7088Contig3|CL7088Contig3



t-Test: p-value = 0.97

# CL7088Contig4|CL7088Contig4

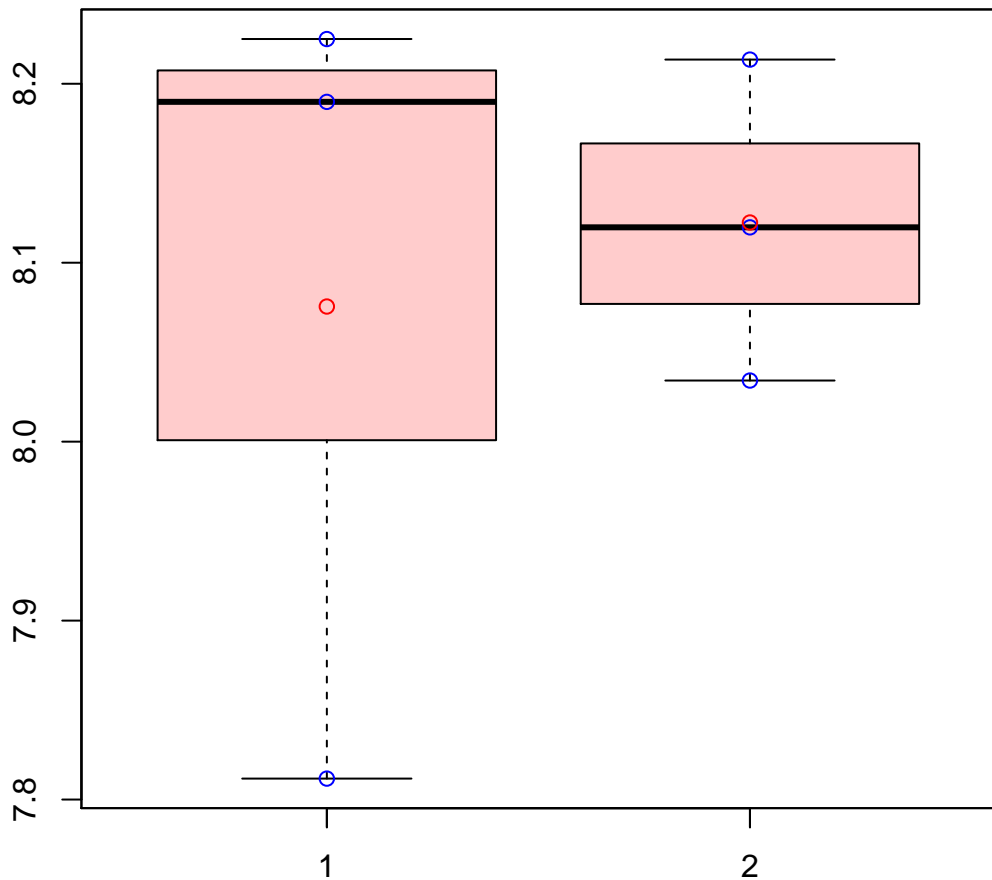

t-Test: p-value = 0.77

# CL7088Contig5|CL7088Contig5



t-Test: p-value = 0.97

# CL7092Contig1|CL7092Contig1



t-Test: p-value = 0.57

# CL7095Contig1|CL7095Contig1

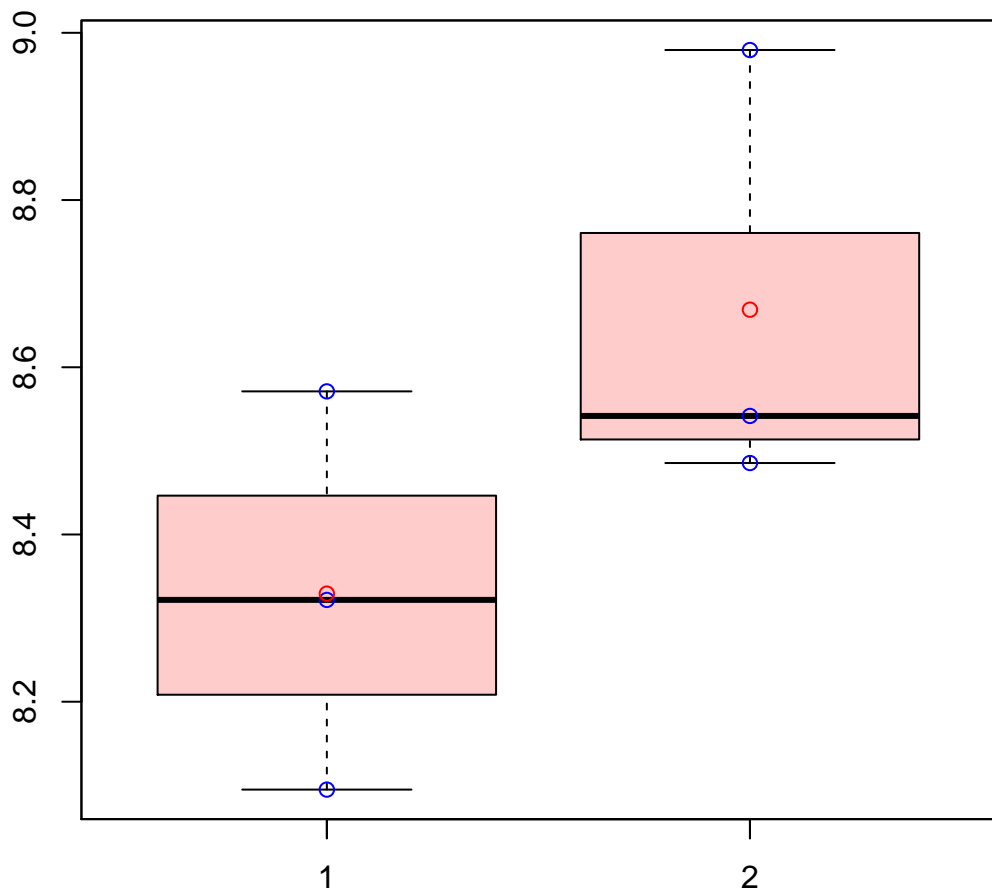

t-Test: p-value = 0.18

# CL7099Contig1|CL7099Contig1

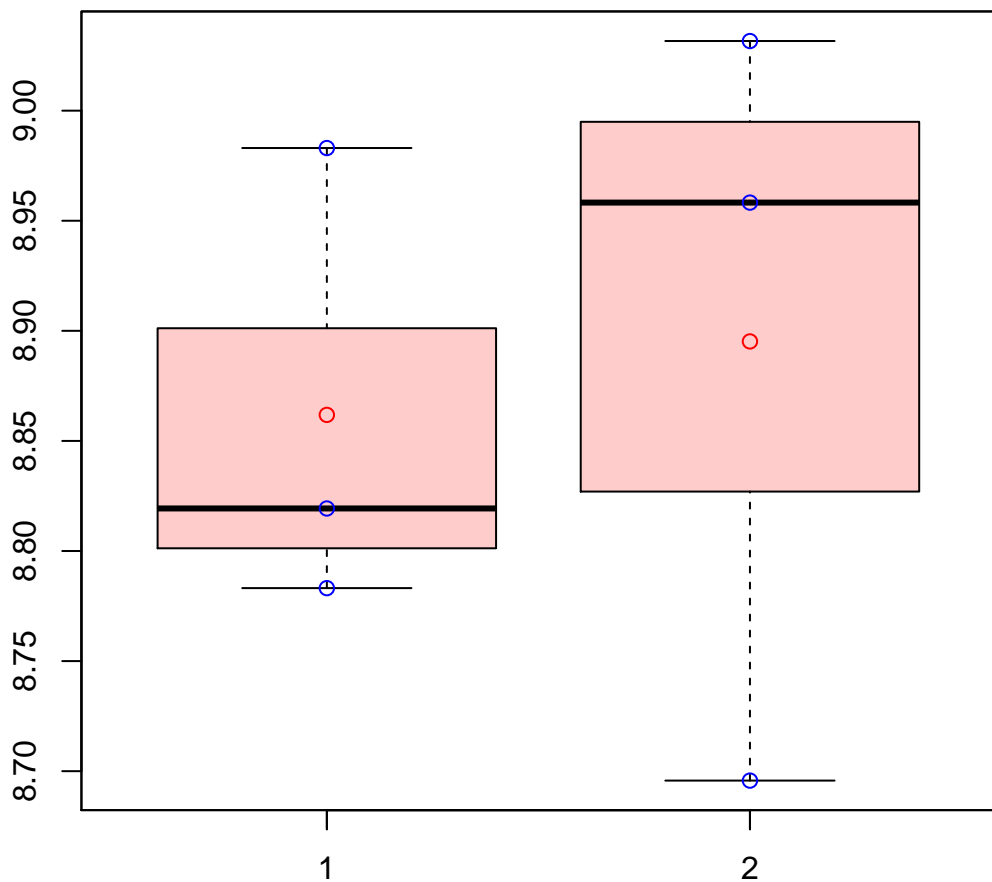

t-Test: p-value = 0.8

# CL70Contig5|CL70Contig5

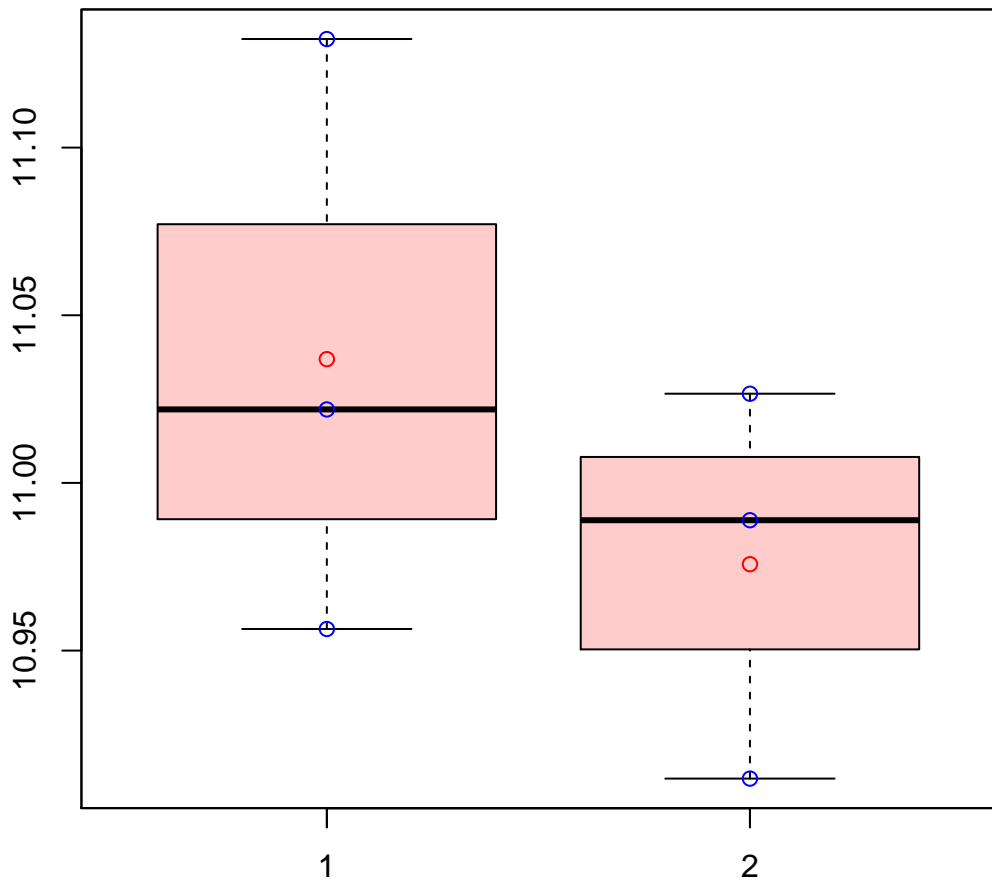

t-Test: p-value = 0.38



# CL70Contig6|CL70Contig6

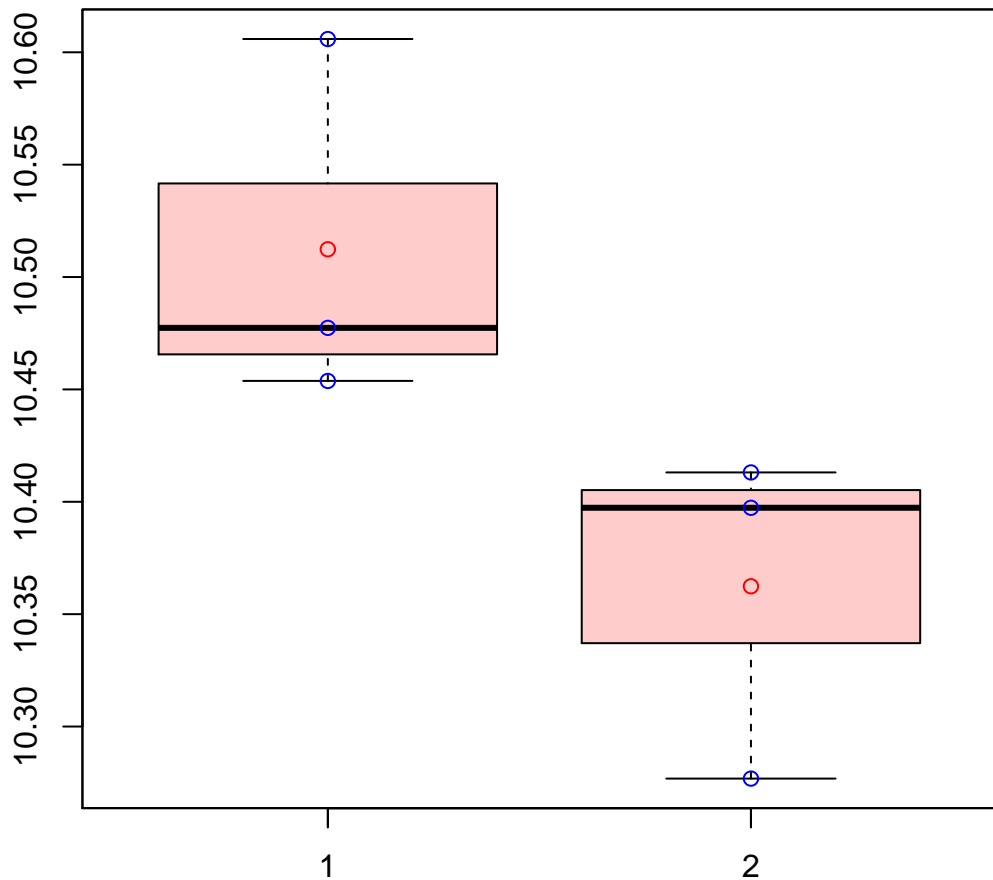

t-Test: p-value = 0.08

# CL7101Contig1|CL7101Contig1

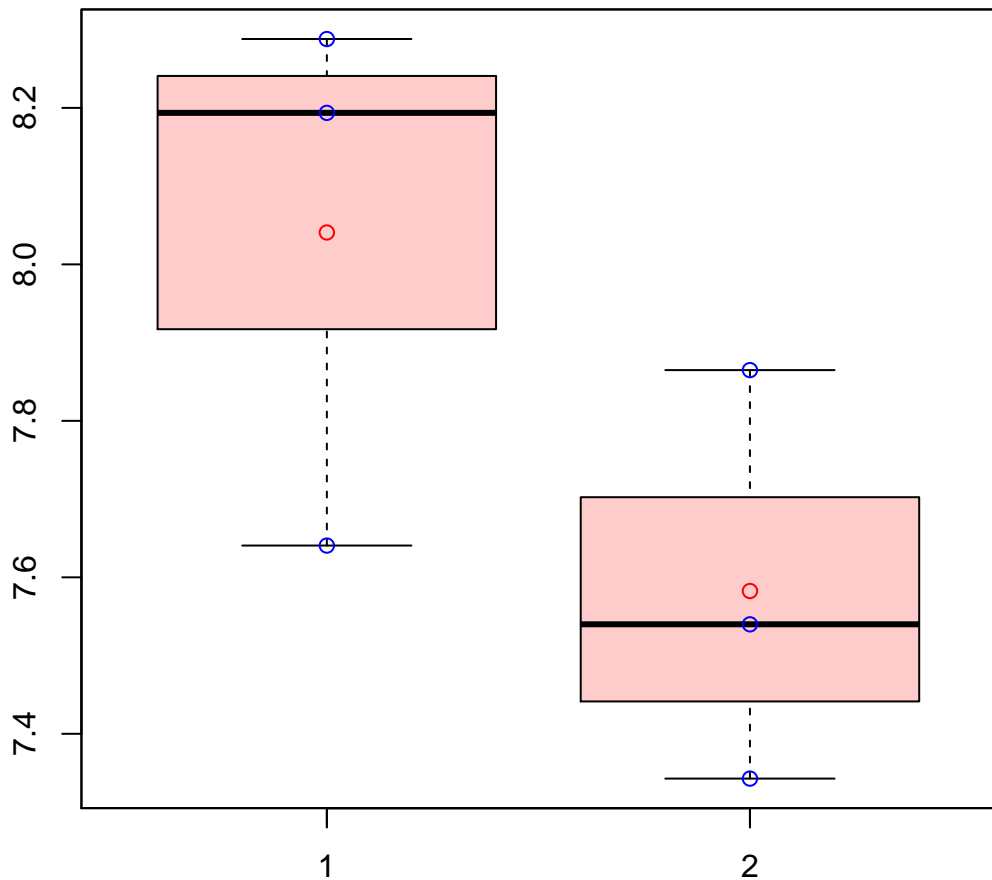

t-Test: p-value = 0.15

# CL7102Contig1|CL7102Contig1

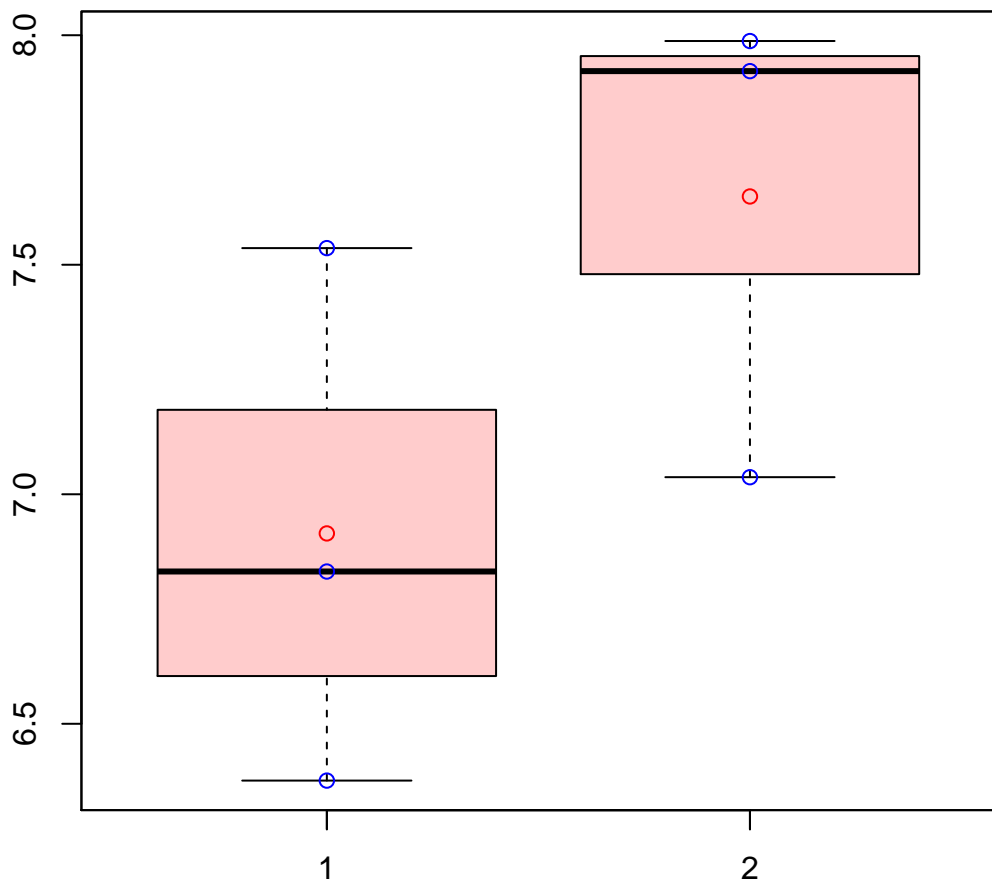

t-Test: p-value = 0.18

# CL7109Contig1|CL7109Contig1

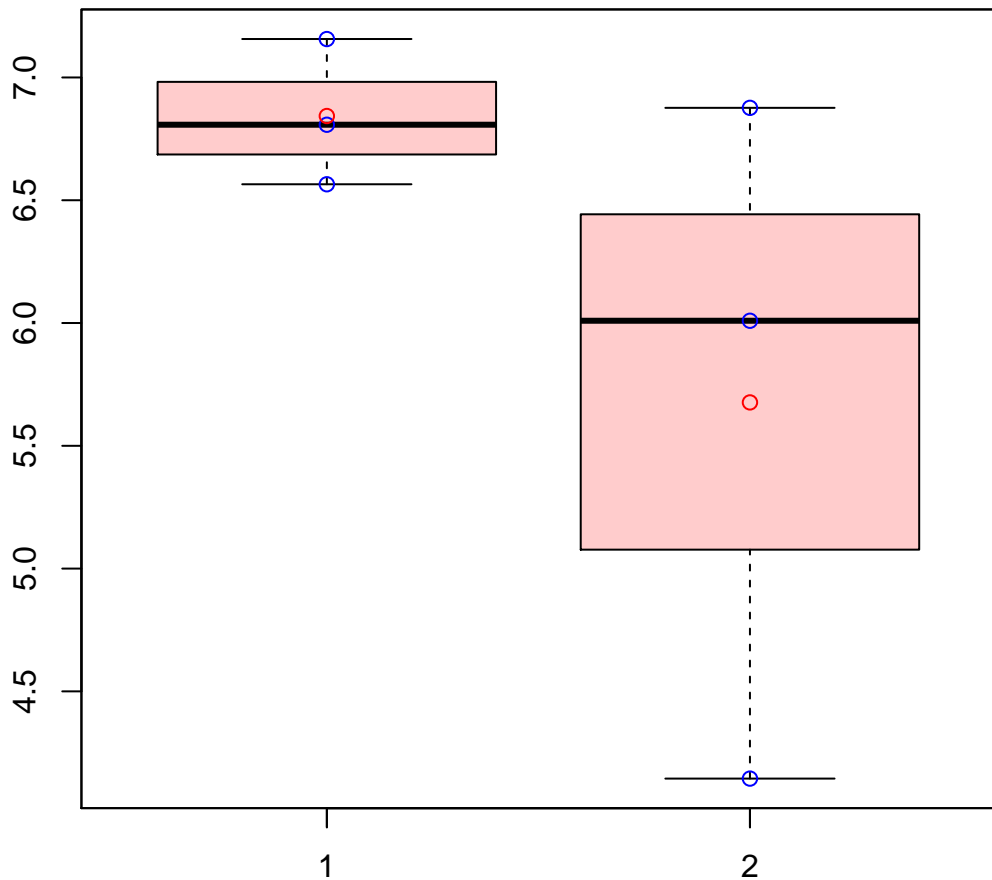

t-Test: p-value = 0.28

# CL7110Contig1|CL7110Contig1

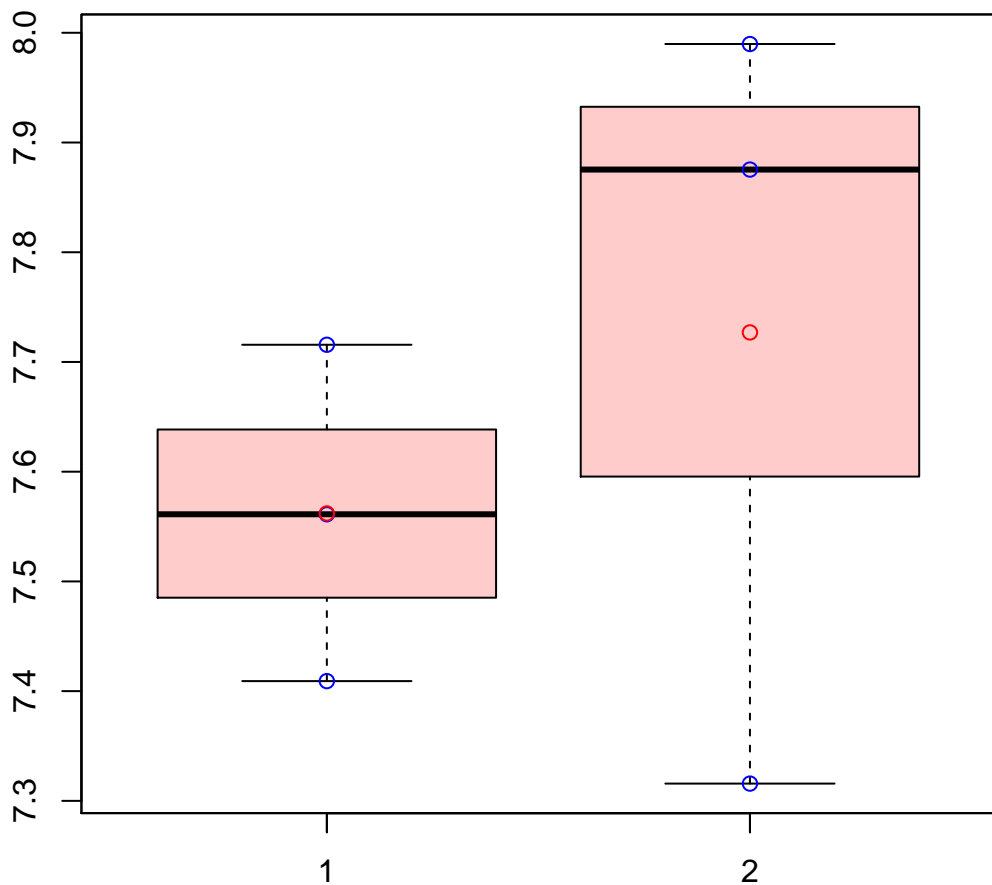

t-Test: p-value = 0.52

# CL7110Contig2|CL7110Contig2

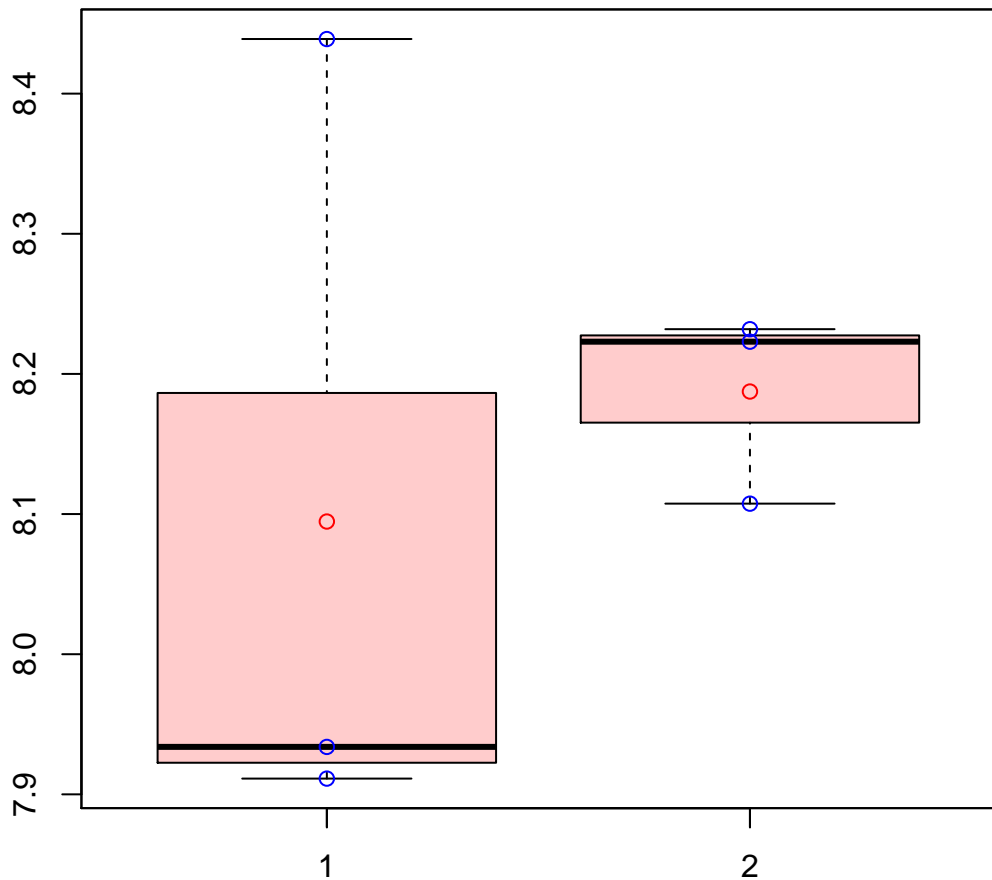

t-Test: p-value = 0.65

# CL711Contig1|CL711Contig1

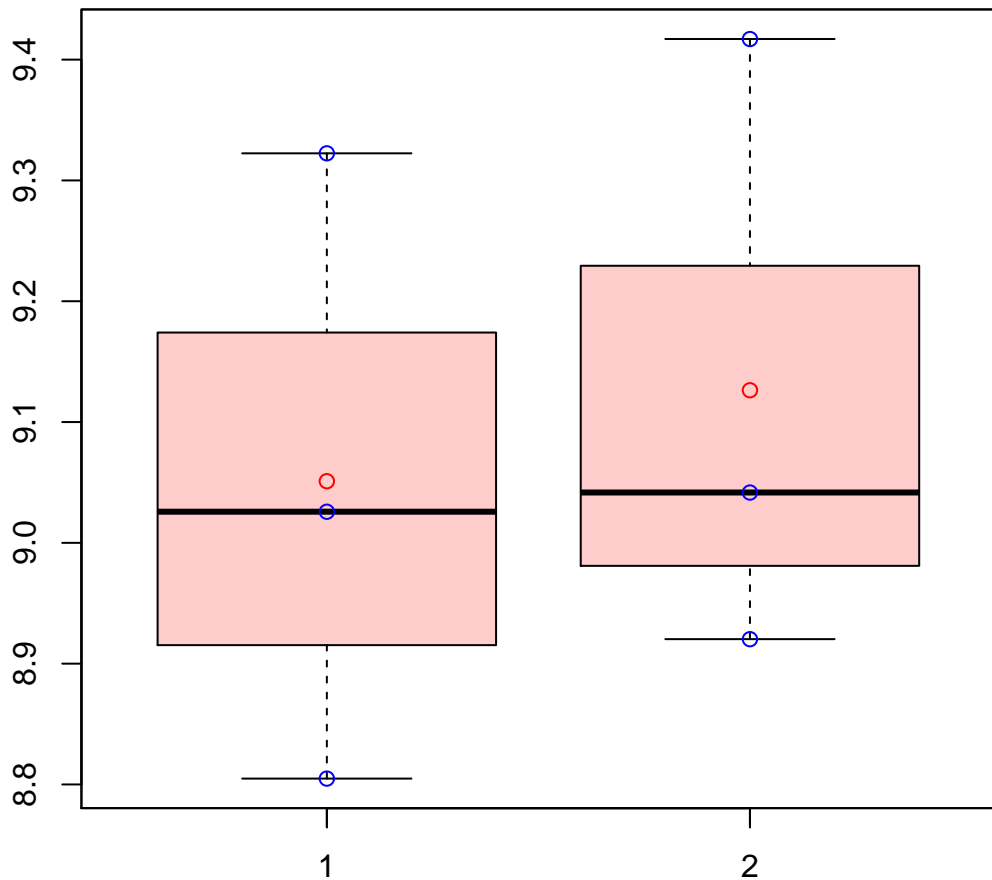

t-Test: p-value = 0.74

# CL711Contig2|CL711Contig2

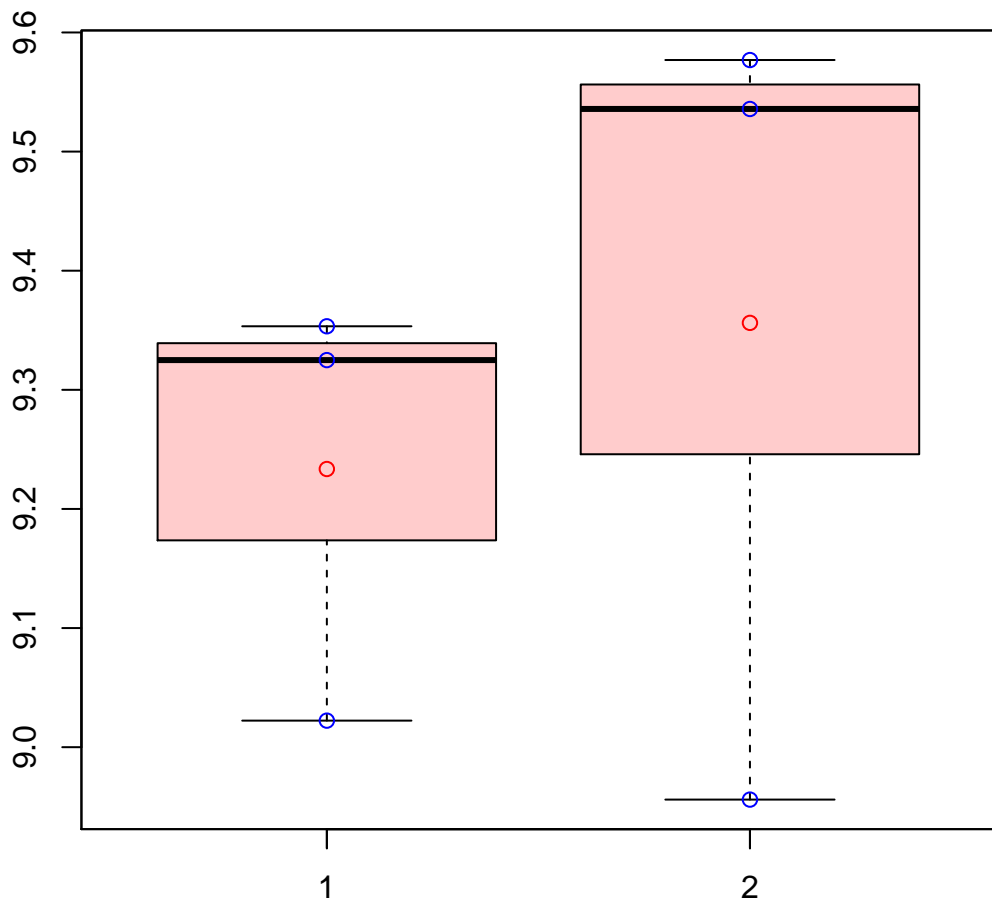

t-Test: p-value = 0.63



# CL711Contig4|CL711Contig4

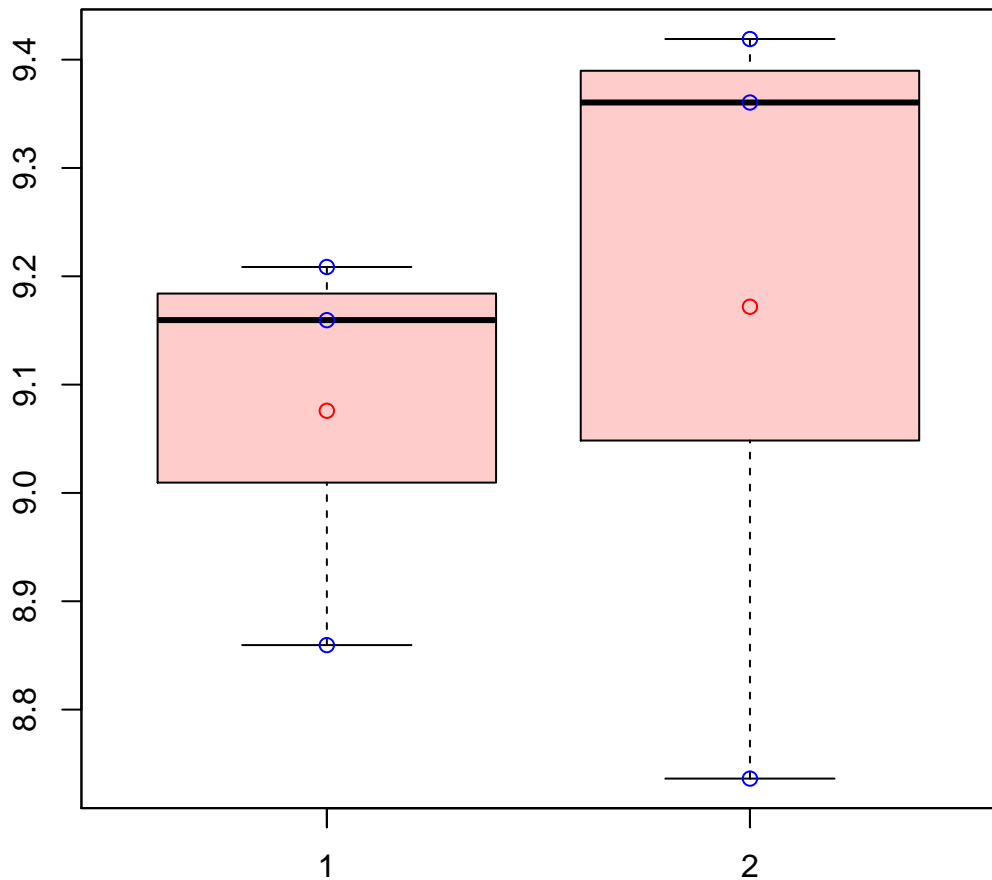

t-Test: p-value = 0.72

# CL711Contig5|CL711Contig5

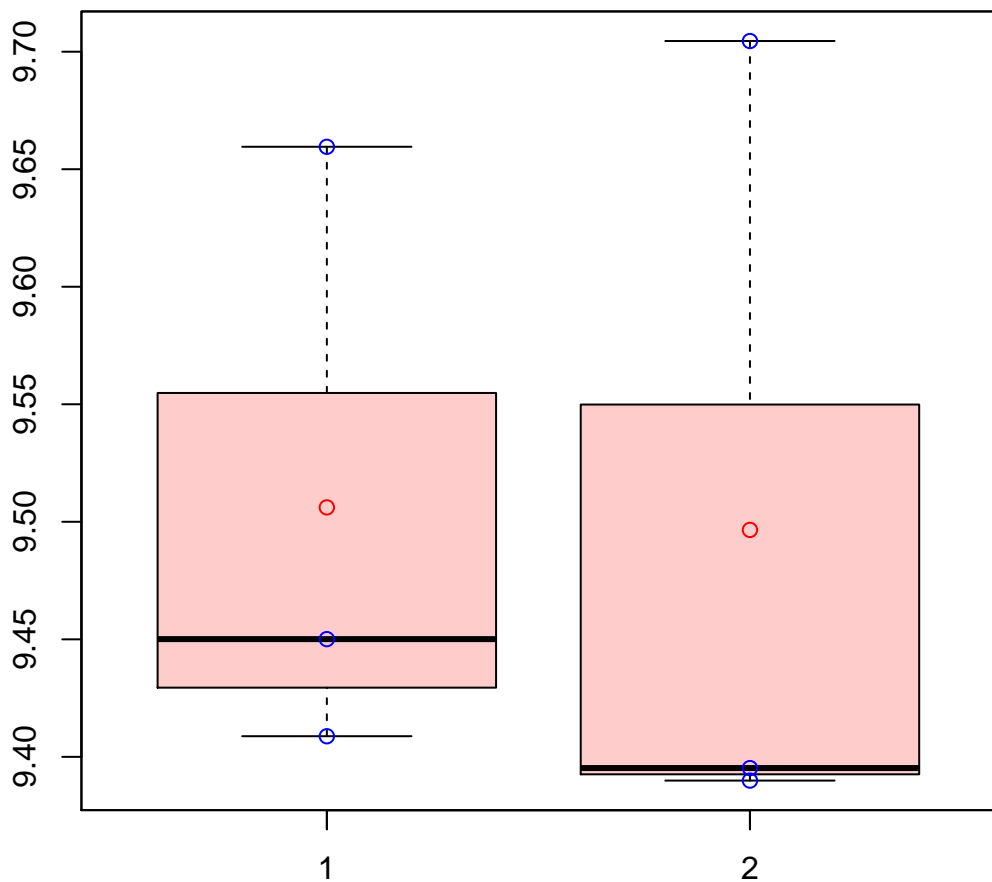

t-Test: p-value = 0.94

# CL7124Contig2|CL7124Contig2

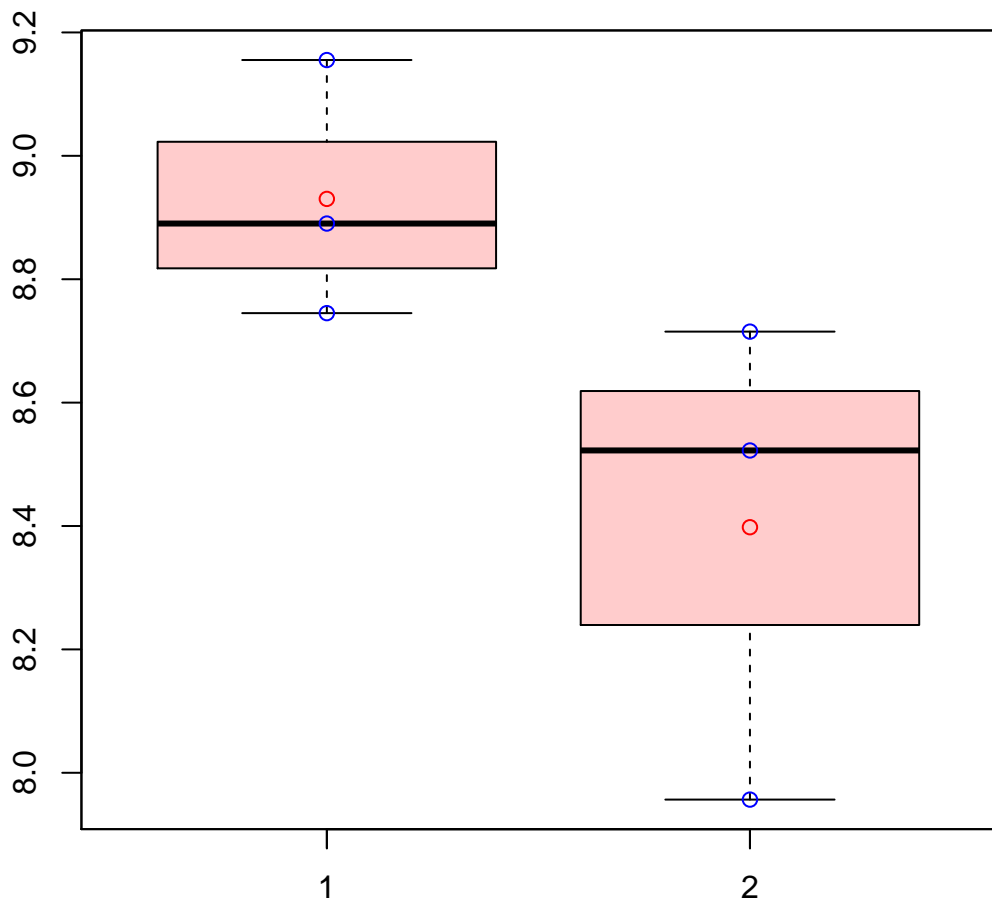

t-Test: p-value = 0.13

# CL7130Contig2|CL7130Contig2

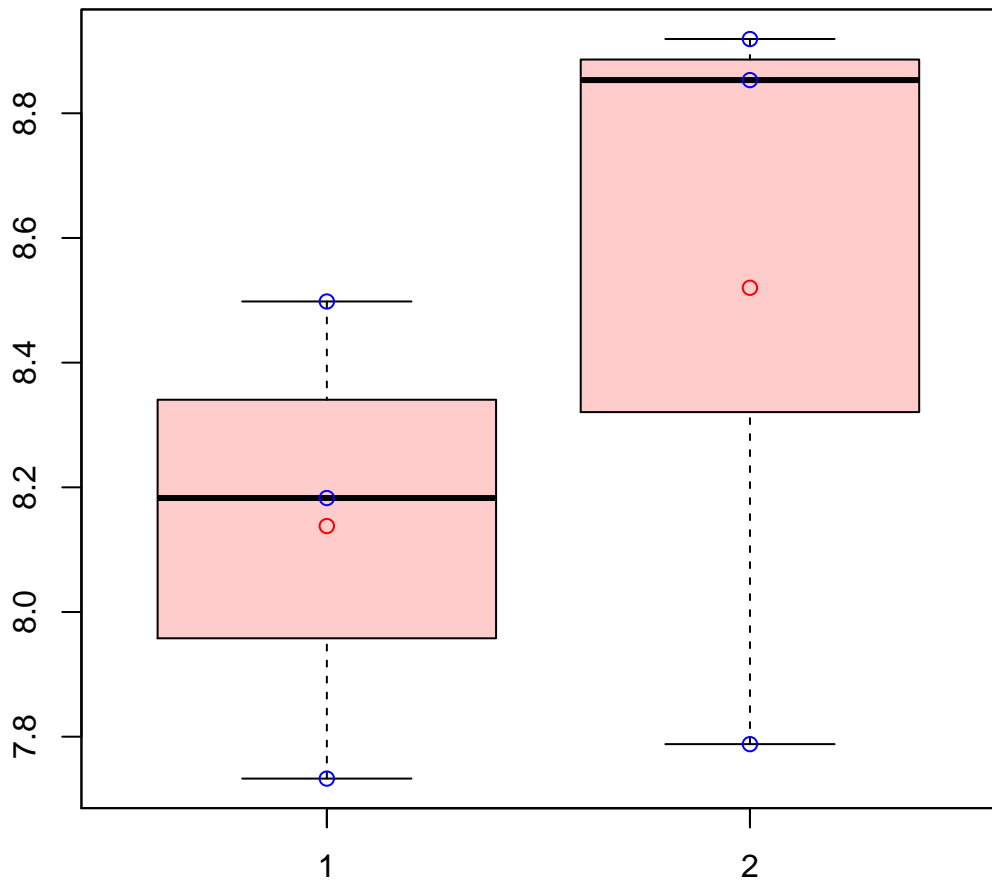

t-Test: p-value = 0.43

# CL7130Contig4|CL7130Contig4

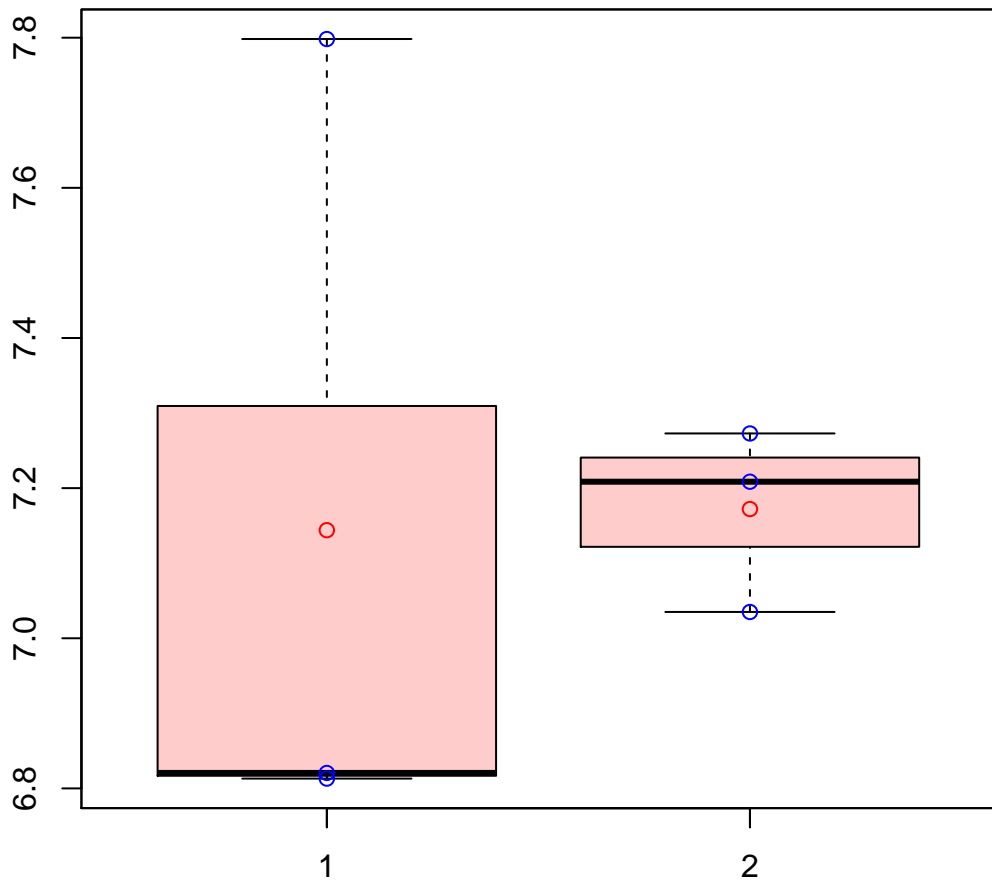

t-Test: p-value = 0.94

# CL7130Contig5|CL7130Contig5

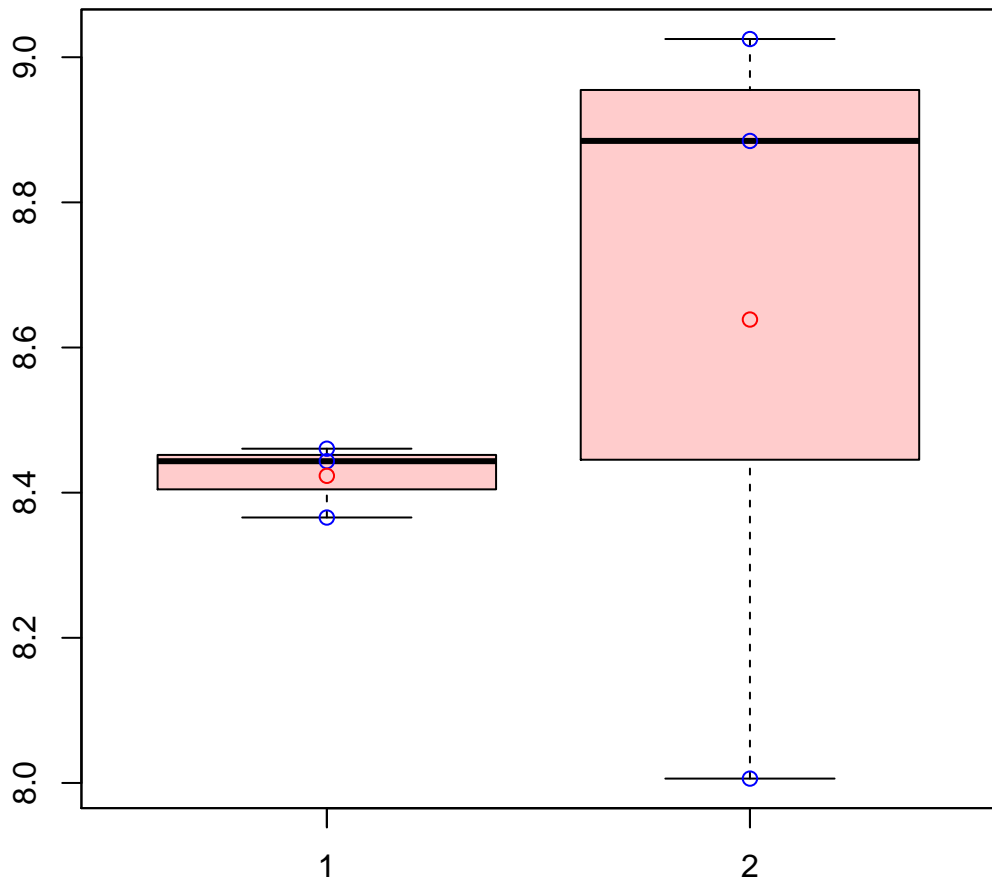

t-Test: p-value = 0.57

# CL7134Contig4|CL7134Contig4

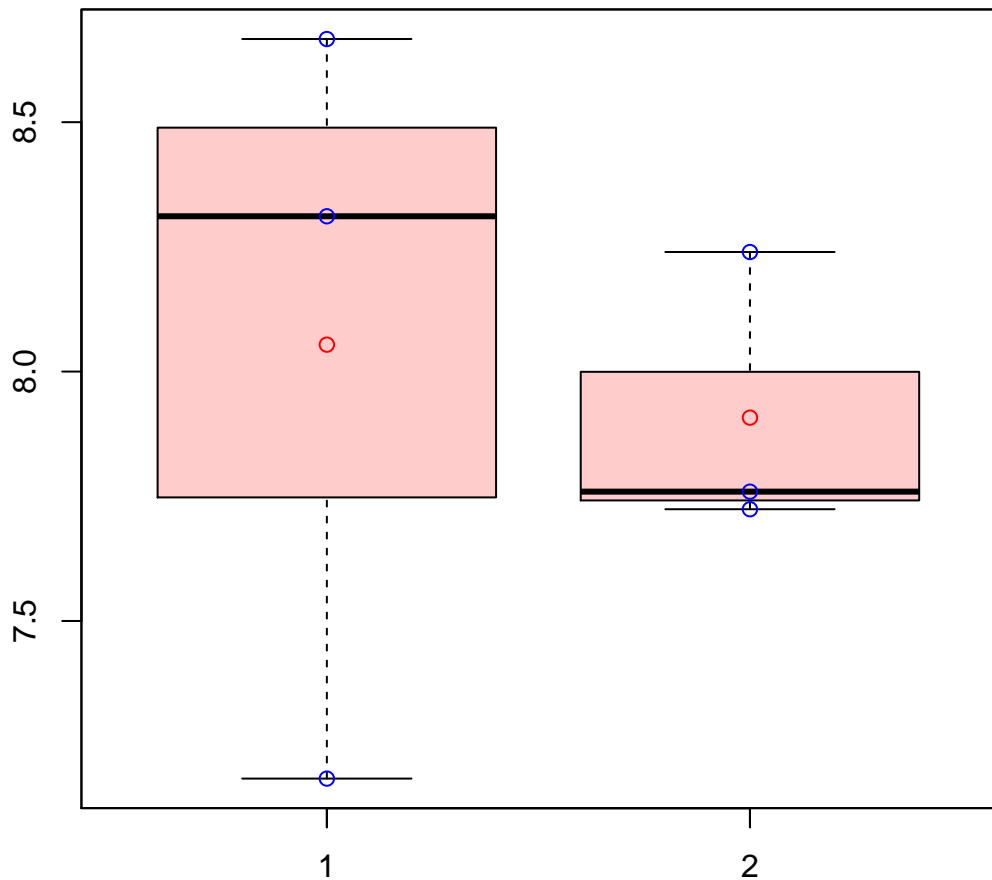

t-Test: p-value = 0.78

# CL7140Contig2|CL7140Contig2

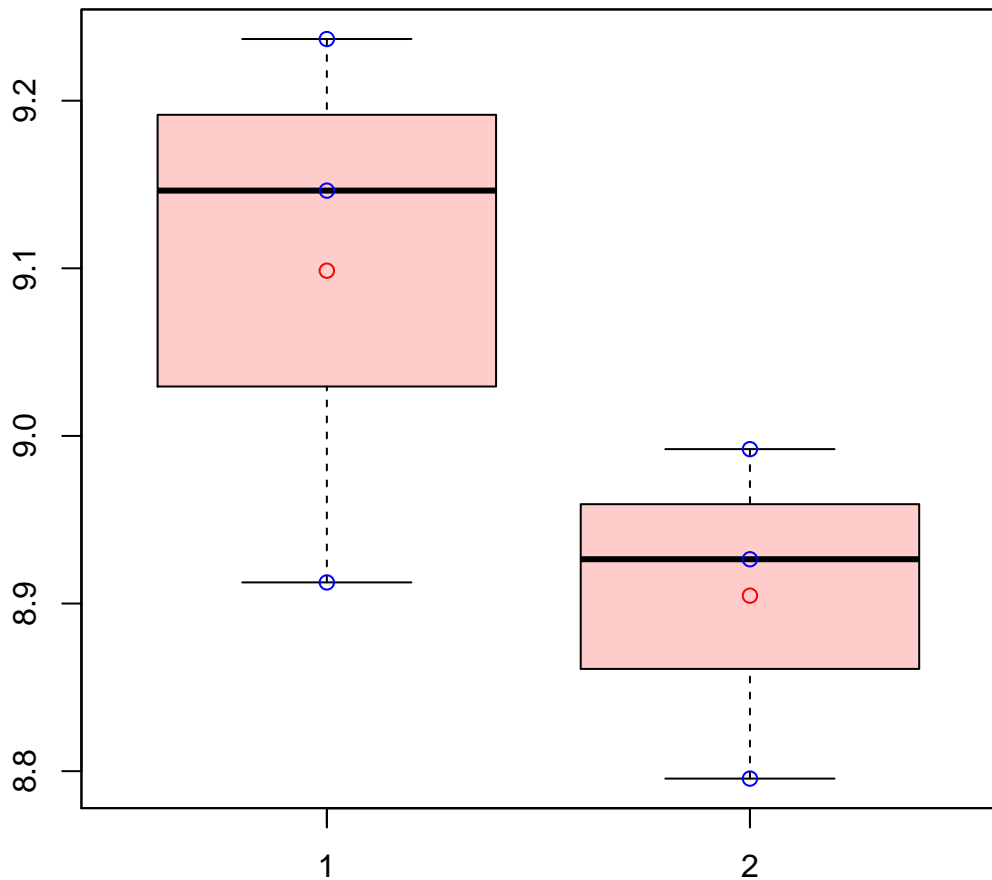

t-Test: p-value = 0.18



# CL7140Contig3|CL7140Contig3

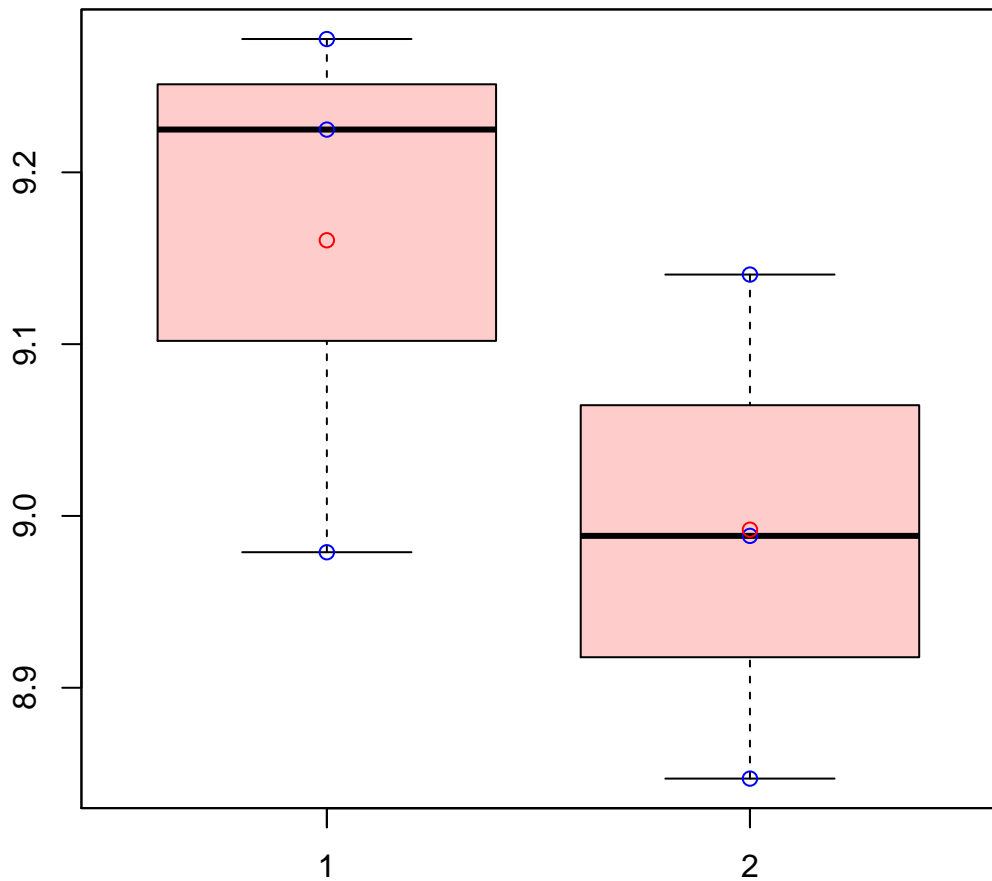

t-Test: p-value = 0.25

# CL7142Contig1|CL7142Contig1

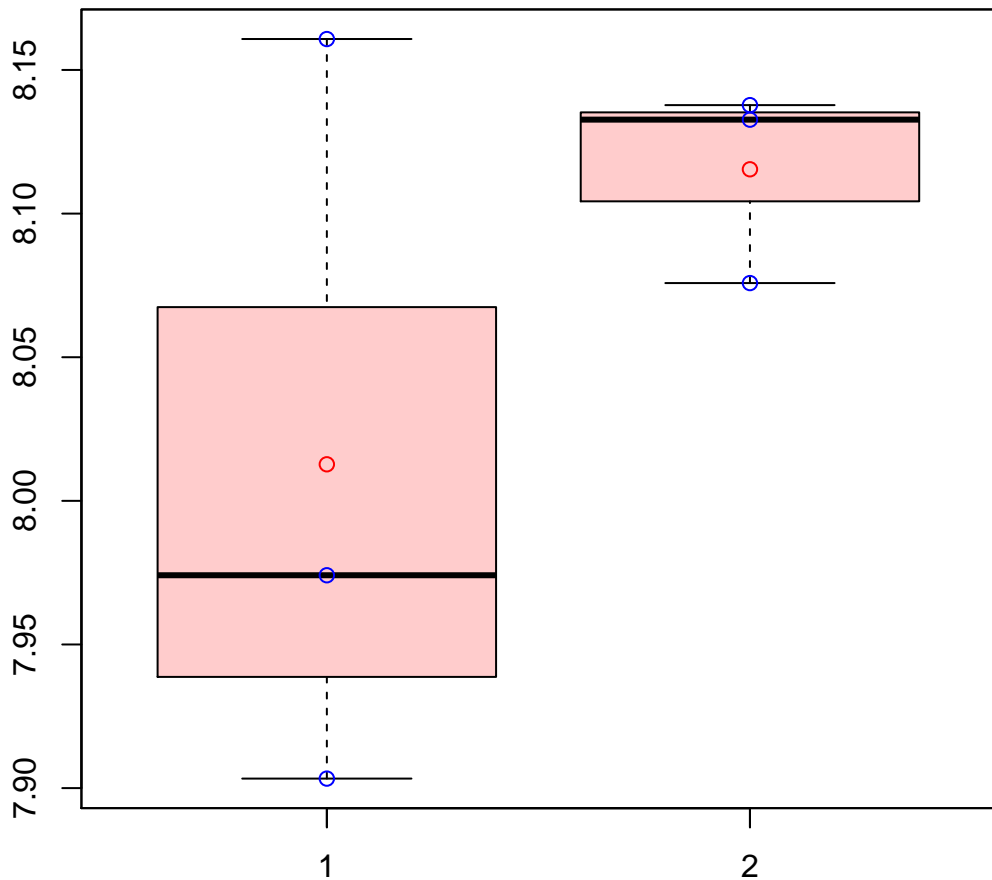

t-Test: p-value = 0.31

# CL7142Contig2|CL7142Contig2

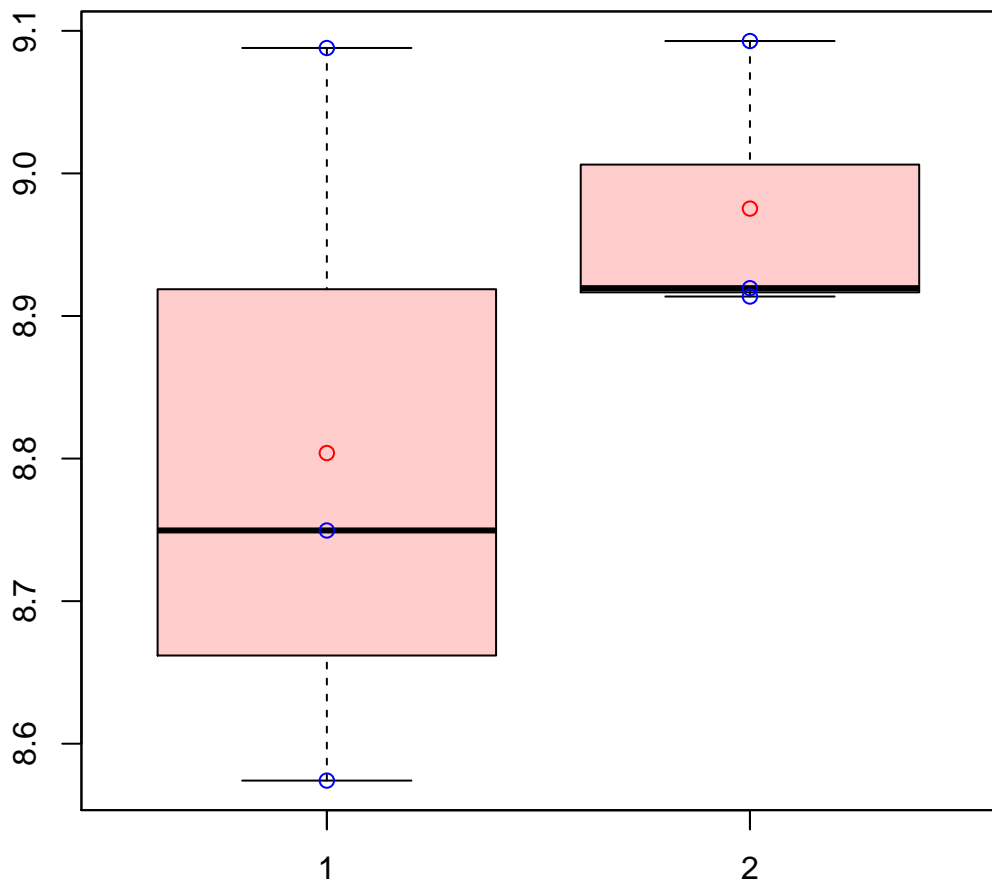

t-Test: p-value = 0.38

# CL7147Contig1|CL7147Contig1

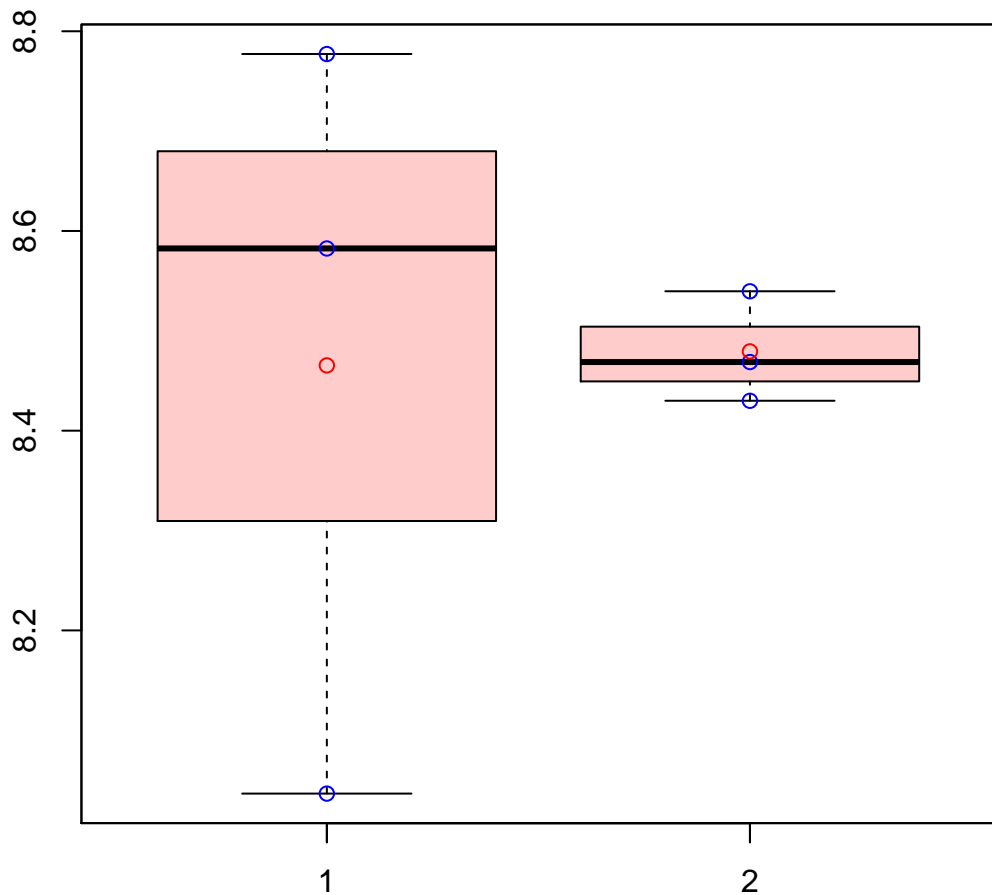

t-Test: p-value = 0.96

# CL7148Contig1|CL7148Contig1

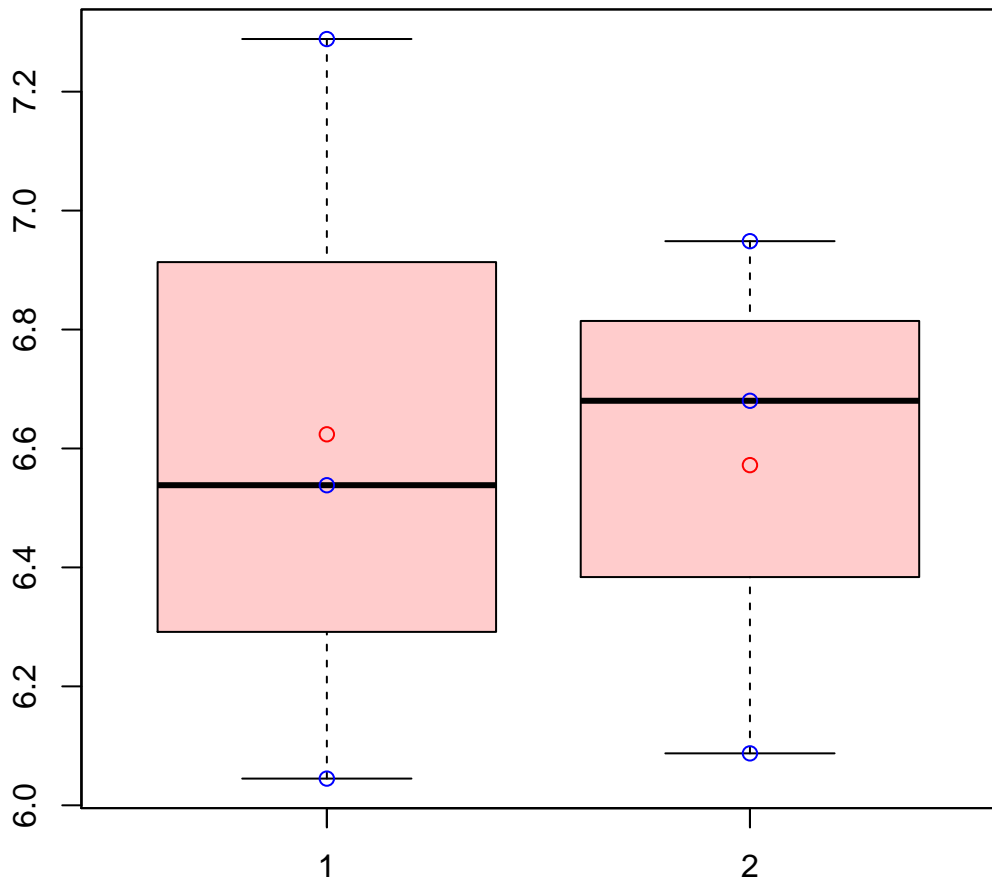

t-Test: p-value = 0.91

# CL714Contig1|CL714Contig1

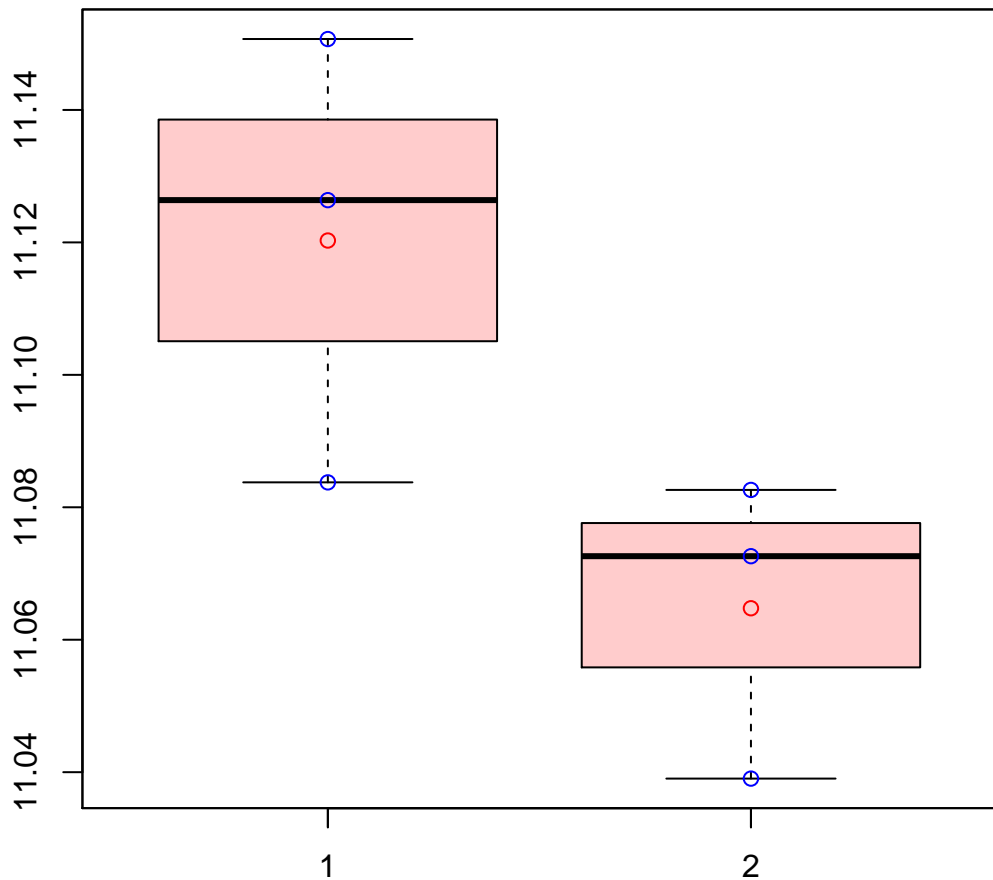

t-Test: p-value = 0.09

# CL714Contig2|CL714Contig2

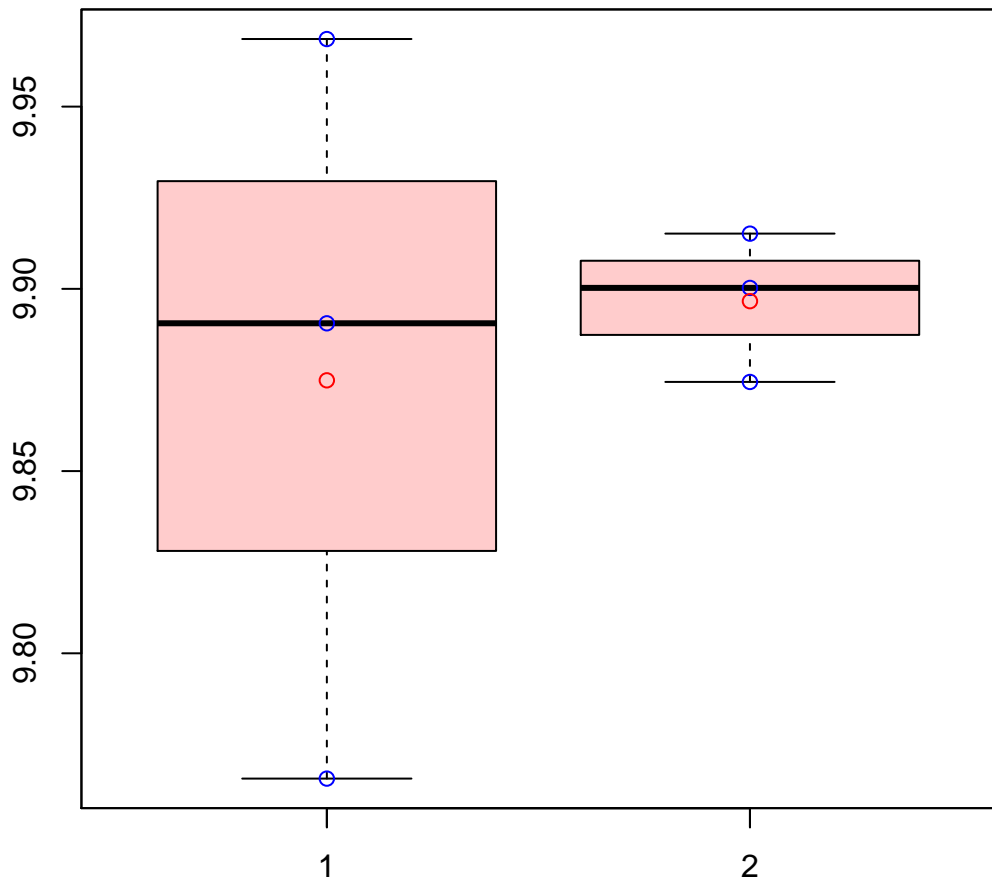

t-Test: p-value = 0.75

# CL714Contig3|CL714Contig3

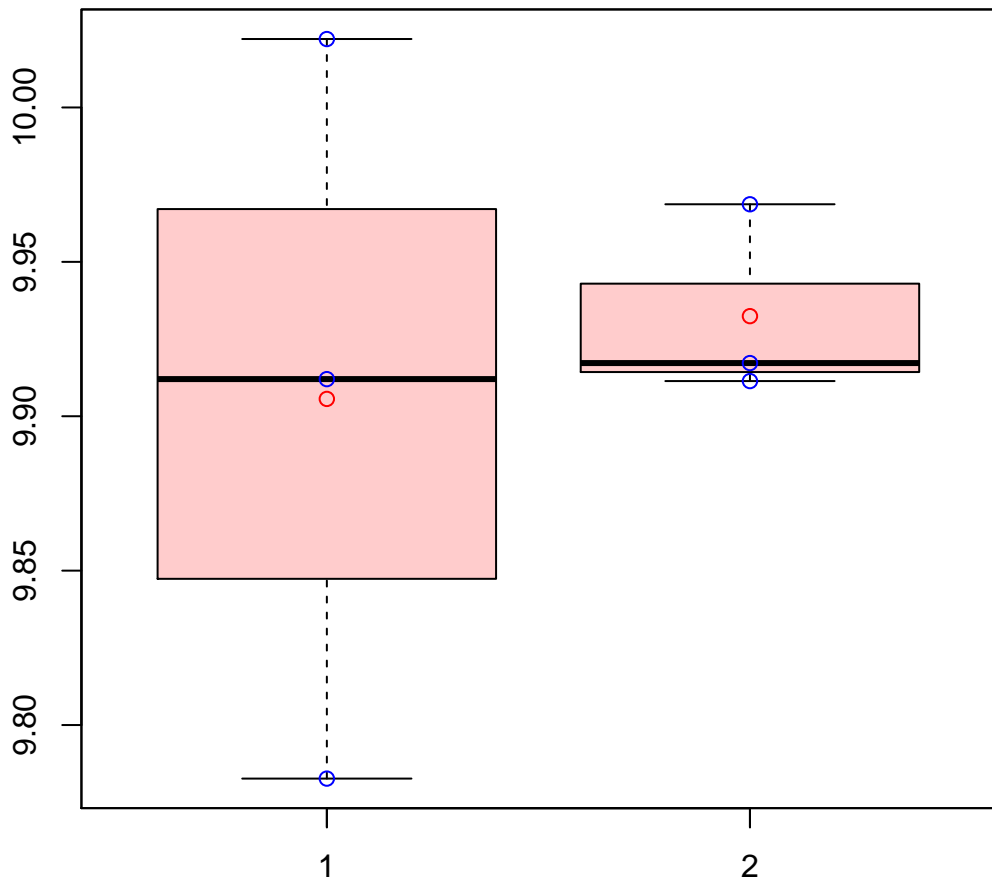

t-Test: p-value = 0.74



# CL714Contig4|CL714Contig4

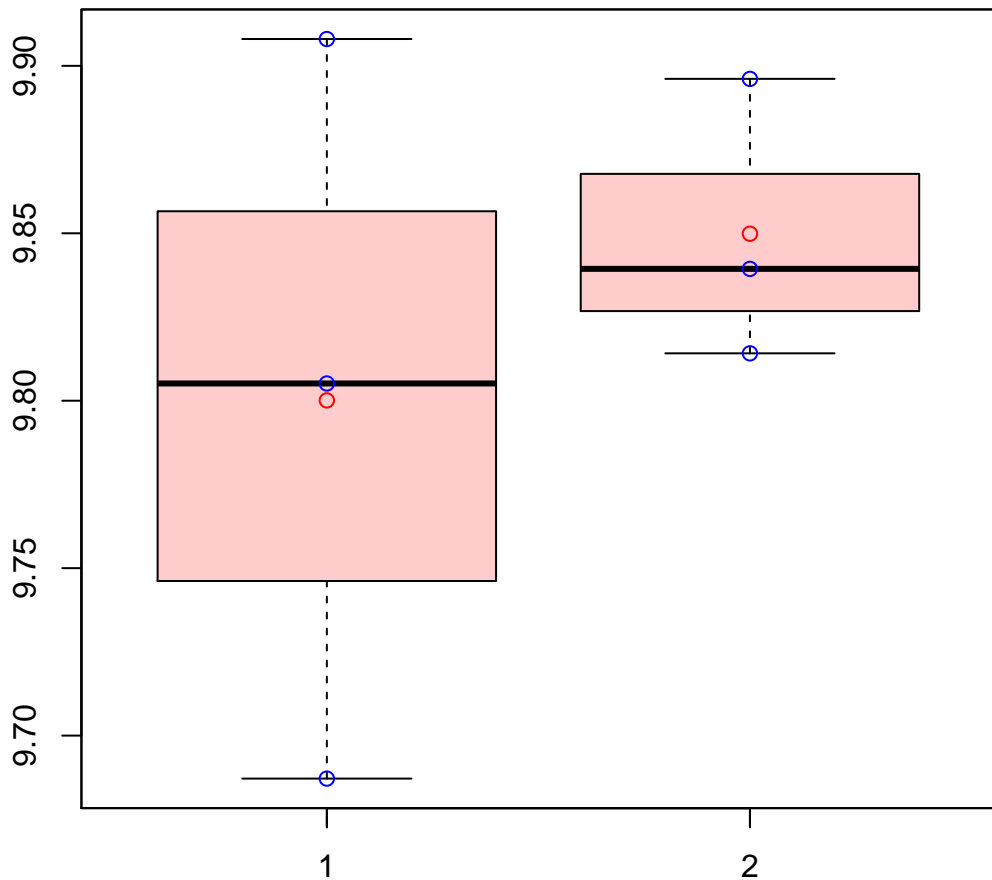

t-Test: p-value = 0.53

# CL714Contig5|CL714Contig5

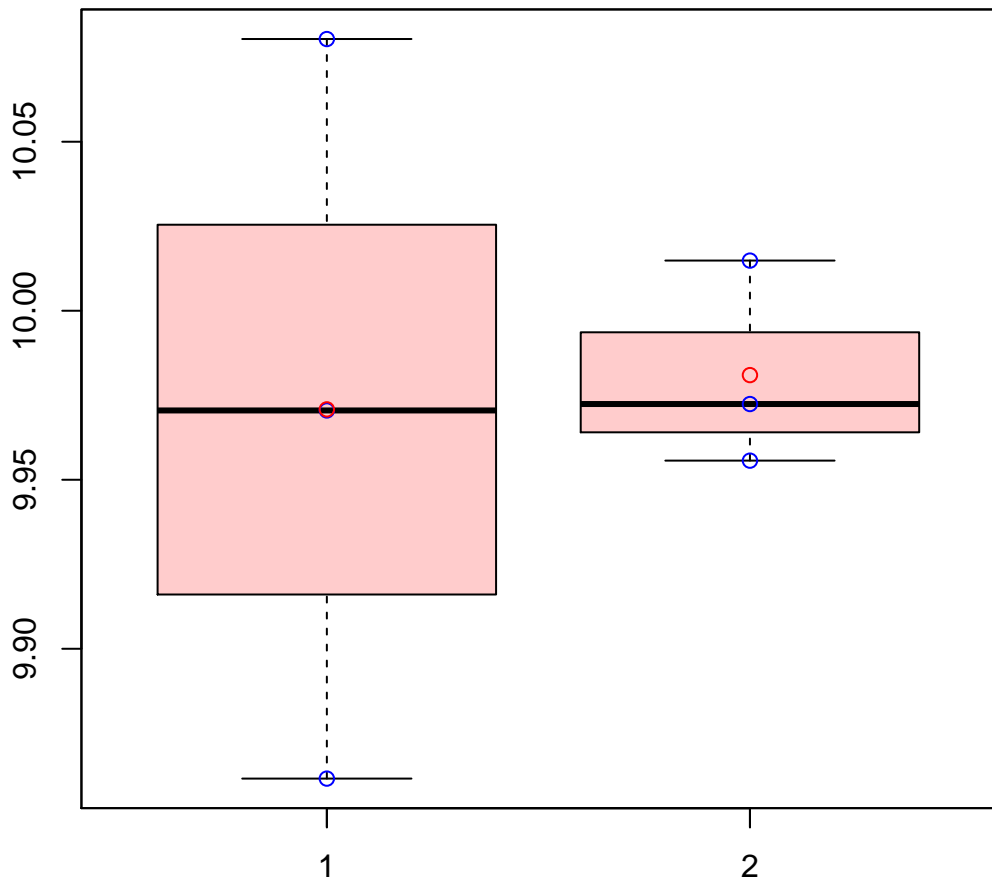

t-Test: p-value = 0.89

# CL714Contig6|CL714Contig6

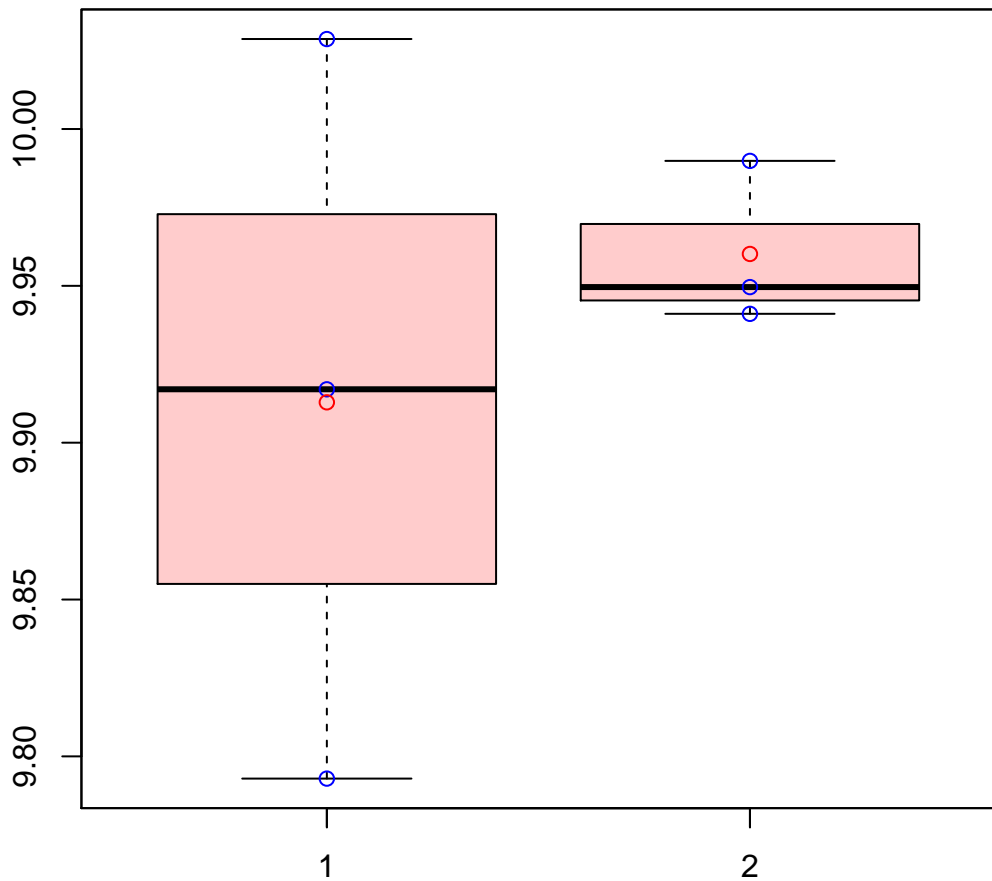

t-Test: p-value = 0.56

# CL714Contig7|CL714Contig7

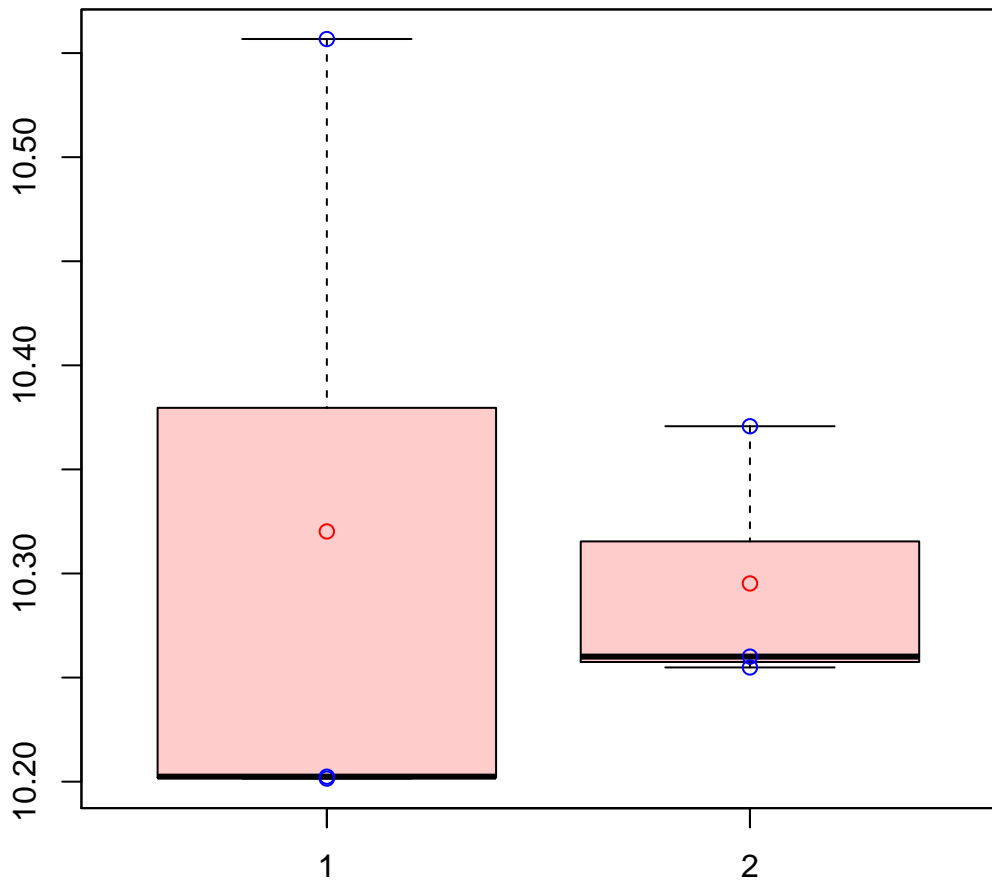

t-Test: p-value = 0.86

# CL714Contig8|CL714Contig8

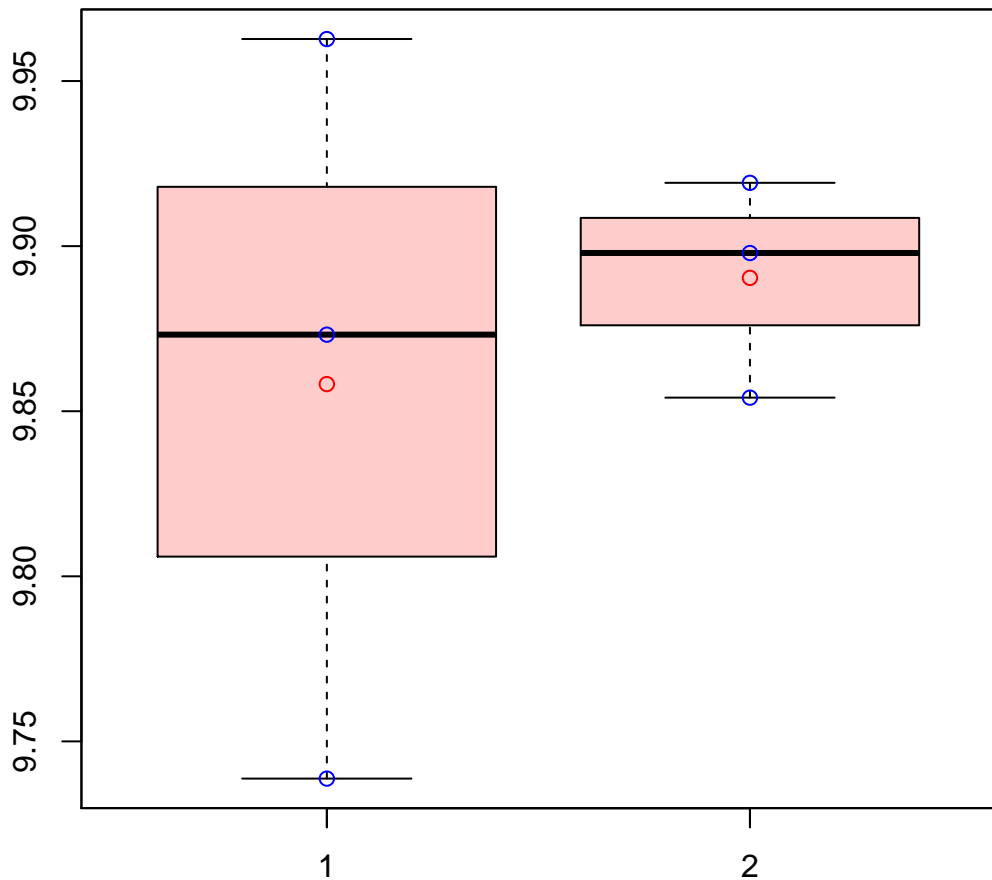

t-Test: p-value = 0.68

# CL7151Contig1|CL7151Contig1

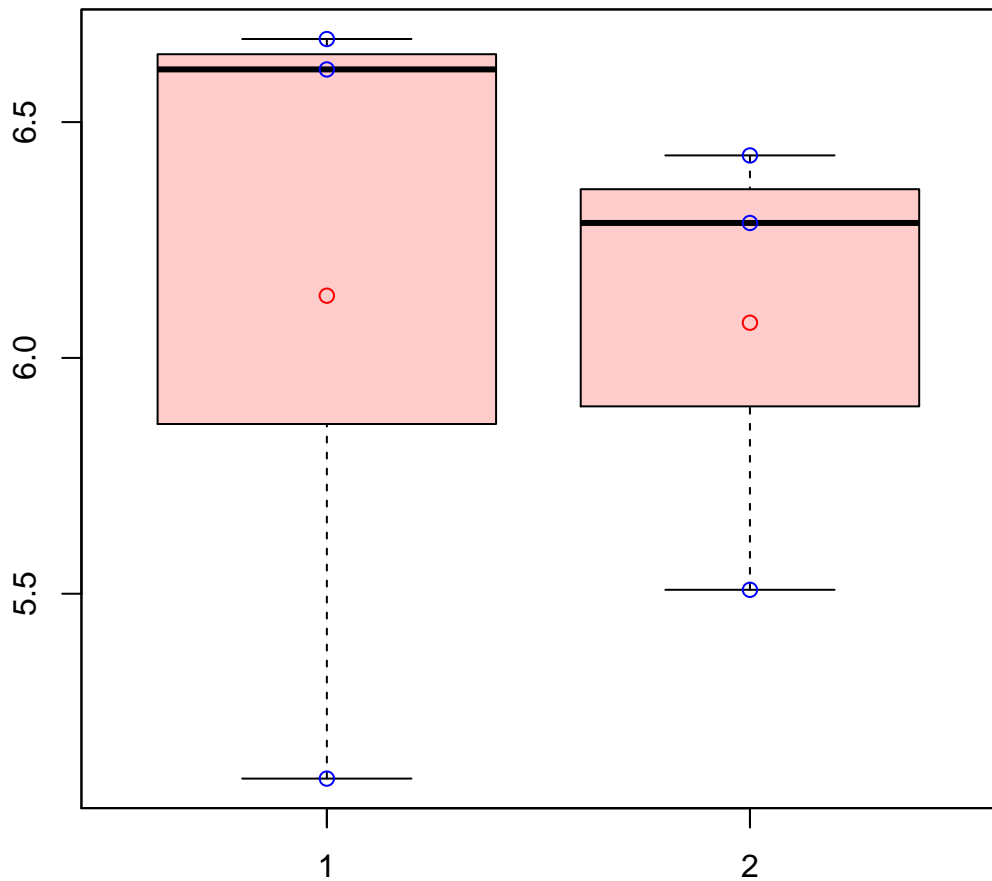

t-Test: p-value = 0.93

# CL7151Contig2|CL7151Contig2



t-Test: p-value = 0.93

# CL7159Contig3|CL7159Contig3

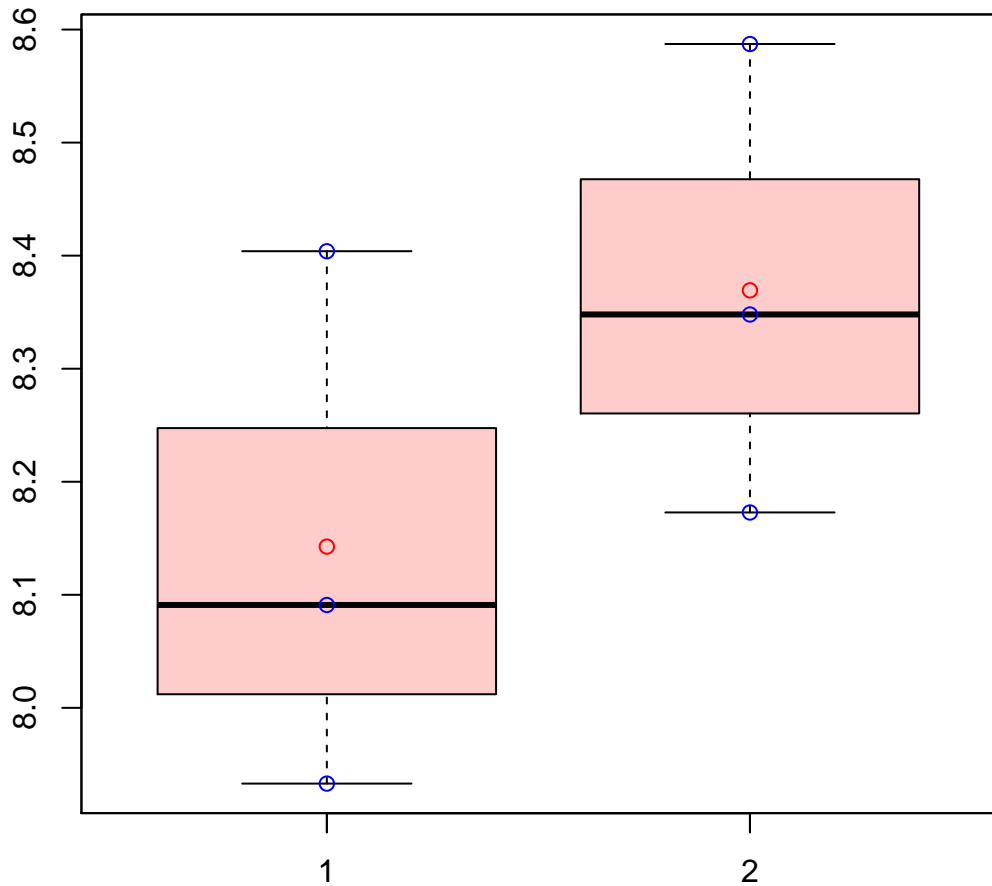

t-Test: p-value = 0.28



# CL715Contig2|CL715Contig2

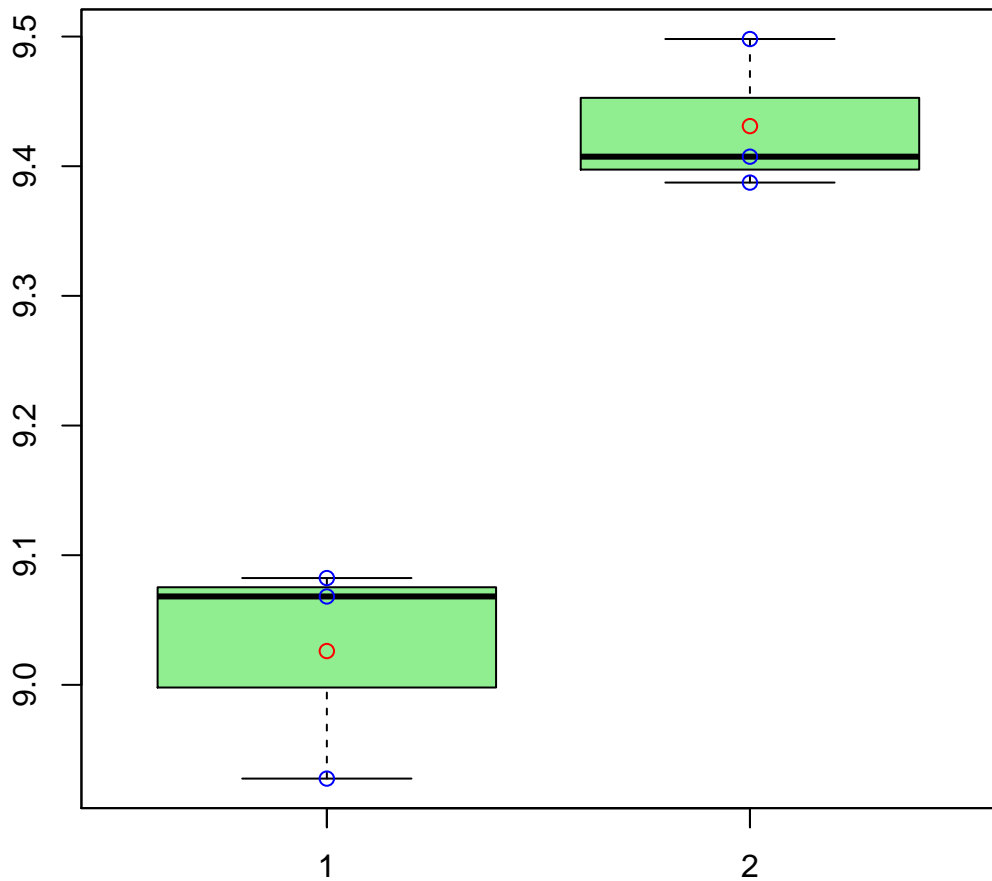

t-Test: p-value = 0

# CL7169Contig2|CL7169Contig2

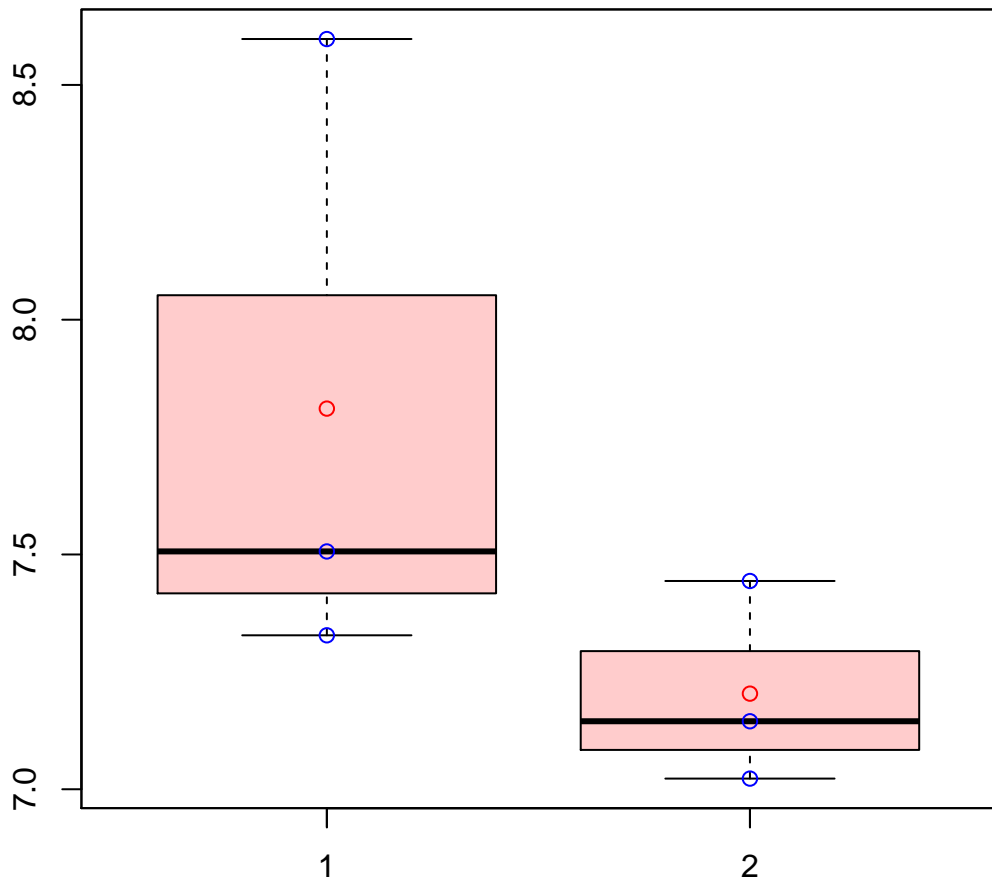

t-Test: p-value = 0.26

# CL716Contig2|CL716Contig2

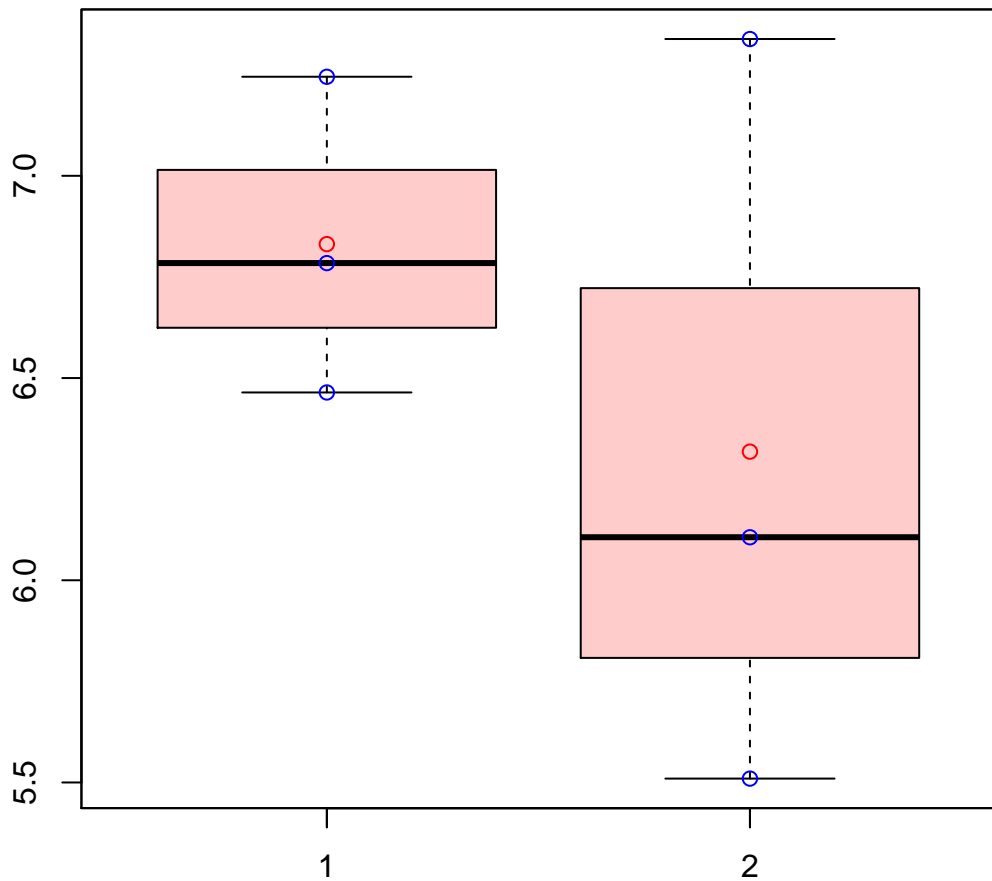

t-Test: p-value = 0.45

# CL716Contig5|CL716Contig5

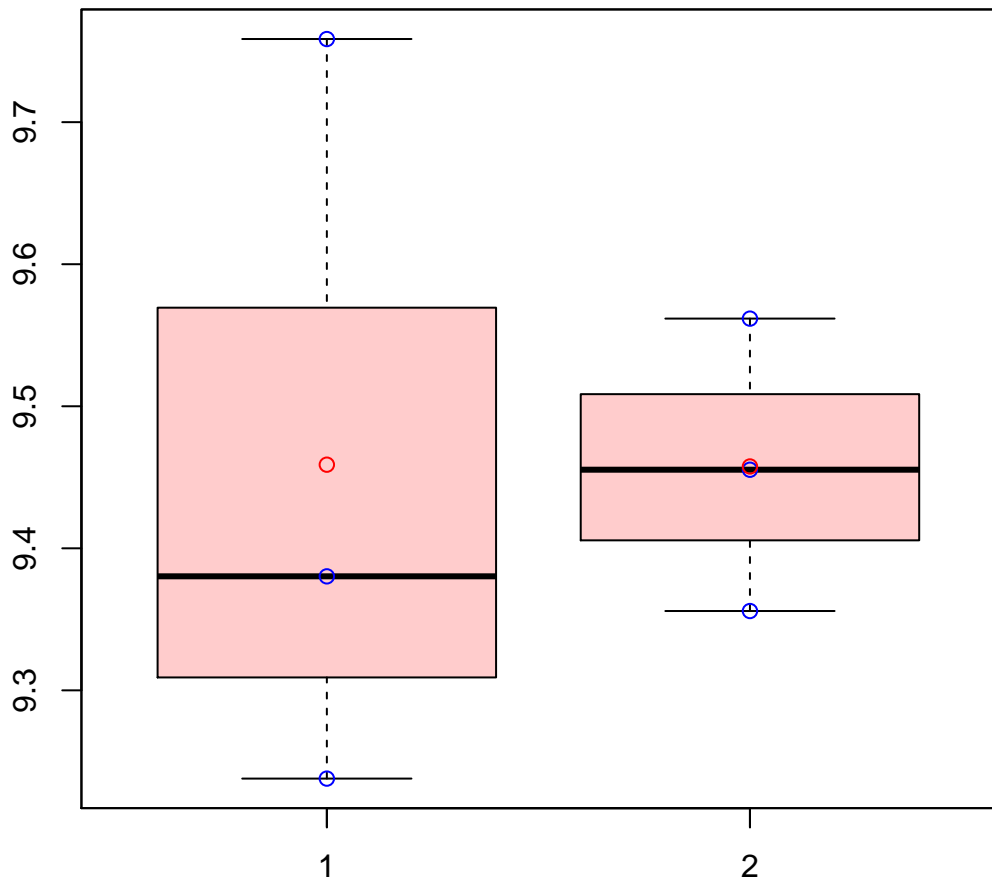

t-Test: p-value = 0.99

# CL7170Contig2|CL7170Contig2

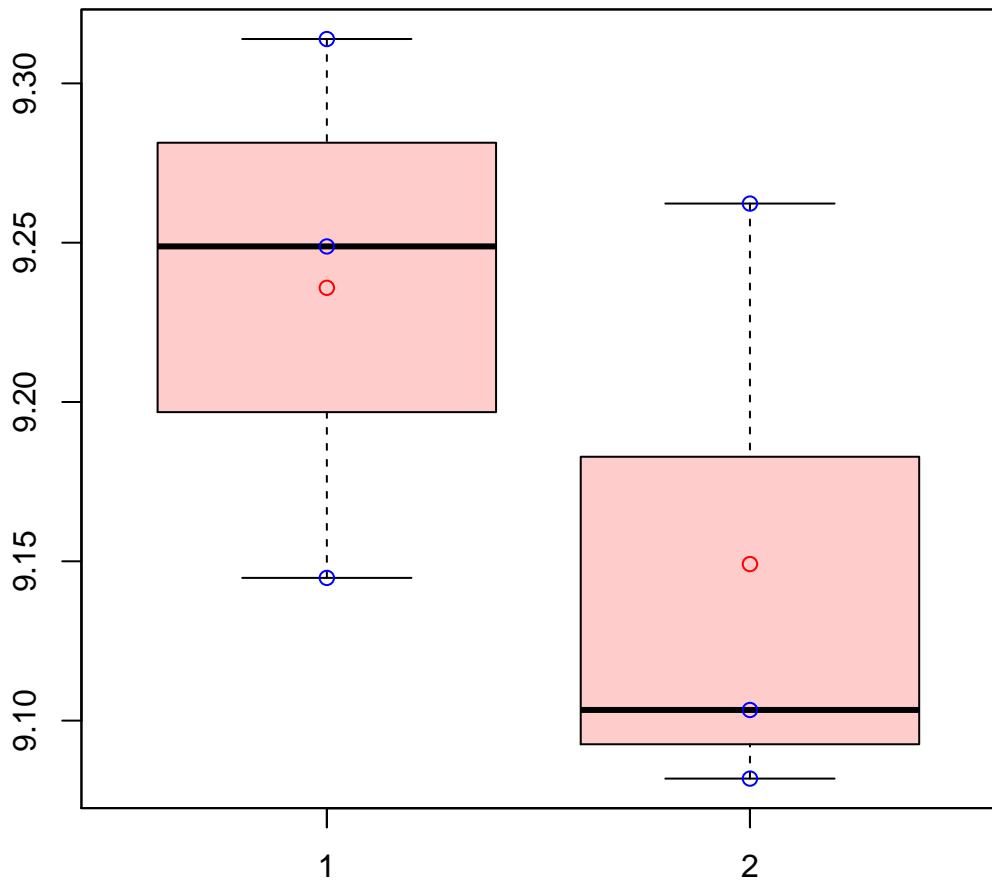

t-Test: p-value = 0.31

# CL7175Contig1|CL7175Contig1

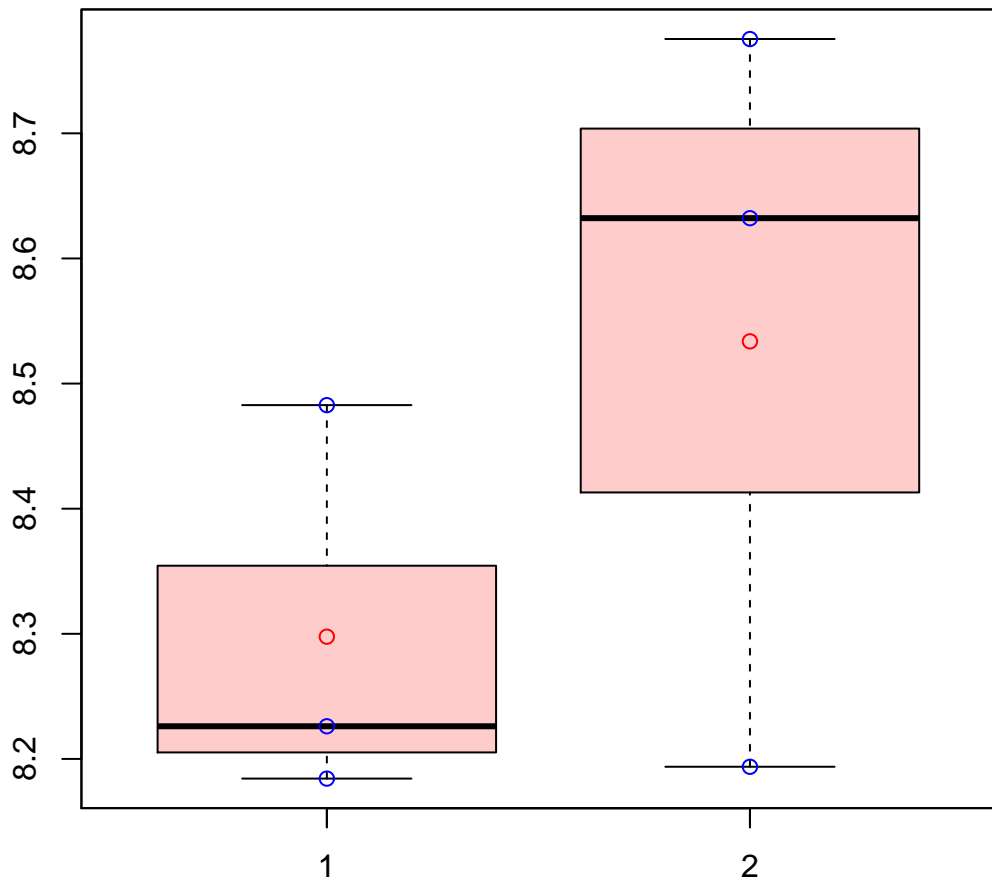

t-Test: p-value = 0.32

# CL7188Contig1|CL7188Contig1

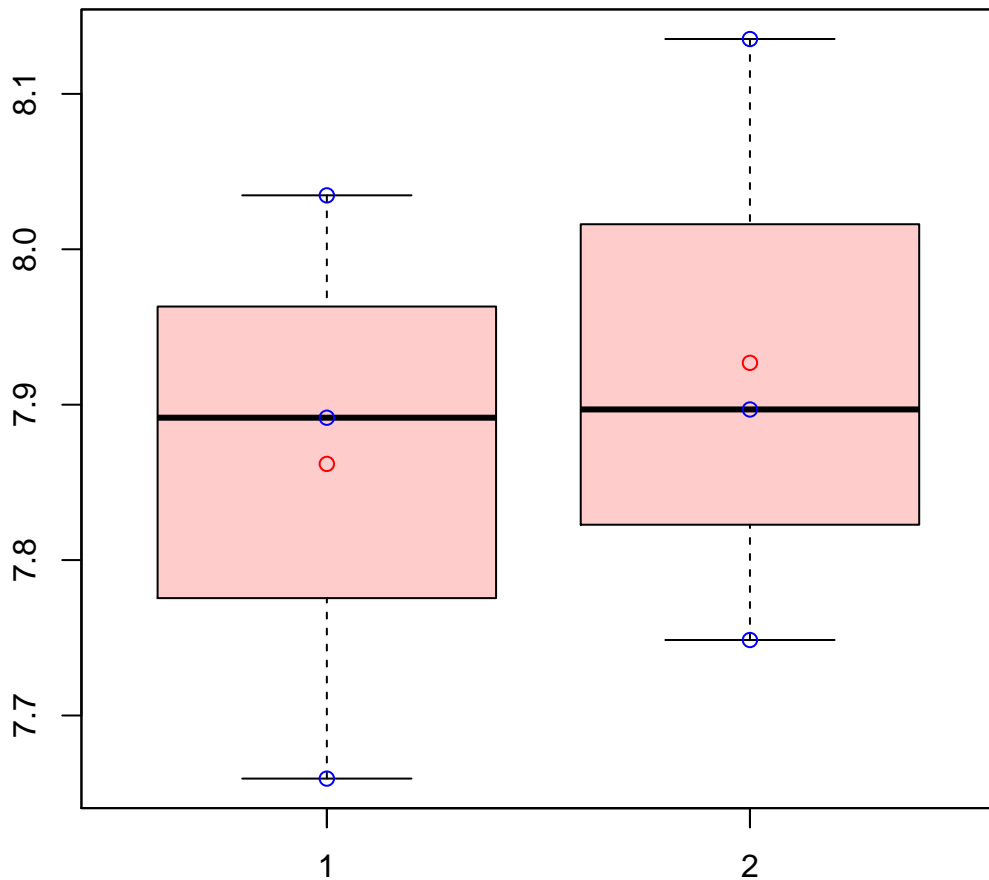

t-Test: p-value = 0.7

# CL718Contig4|CL718Contig4

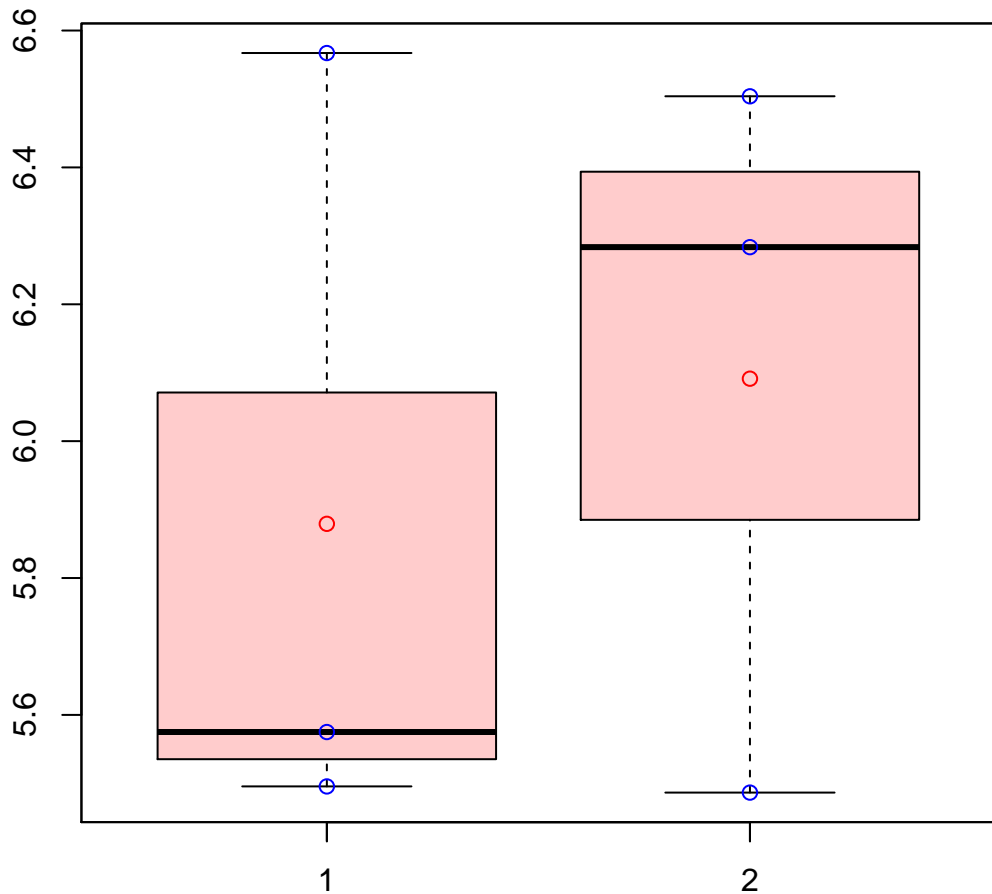

t-Test: p-value = 0.67



# CL7194Contig2|CL7194Contig2

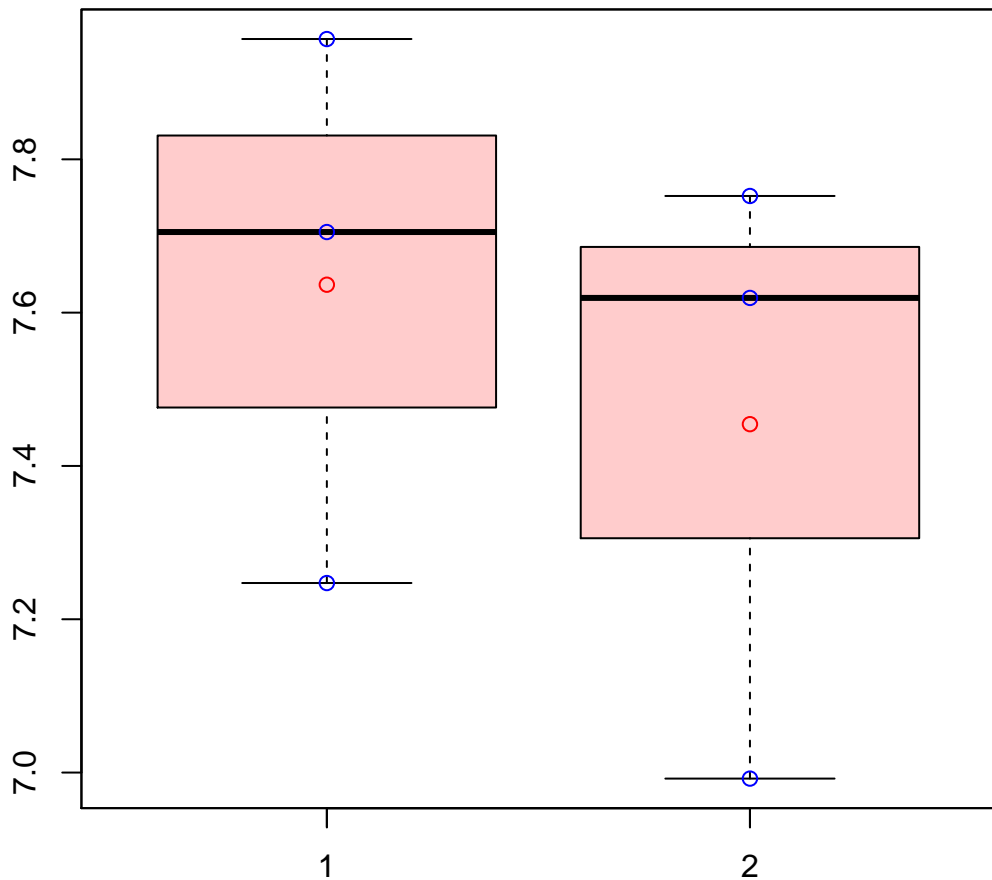

t-Test: p-value = 0.59

# CL7196Contig1|CL7196Contig1

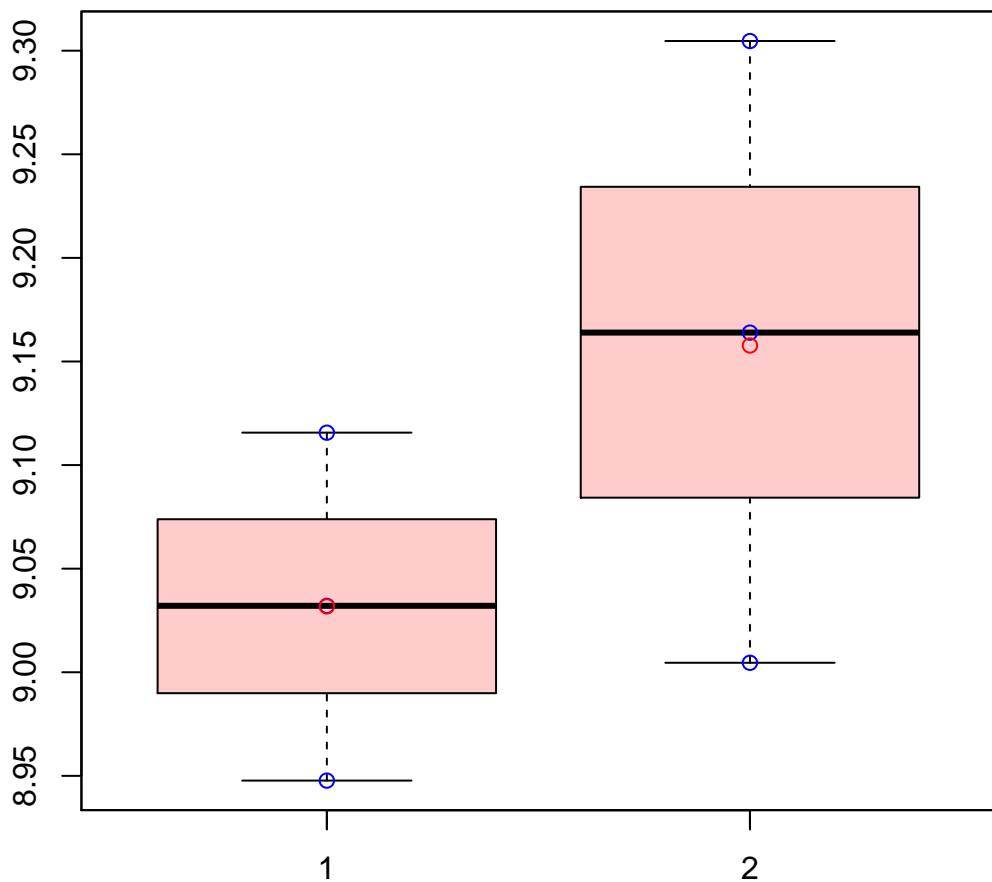

t-Test: p-value = 0.29

# CL7196Contig2|CL7196Contig2

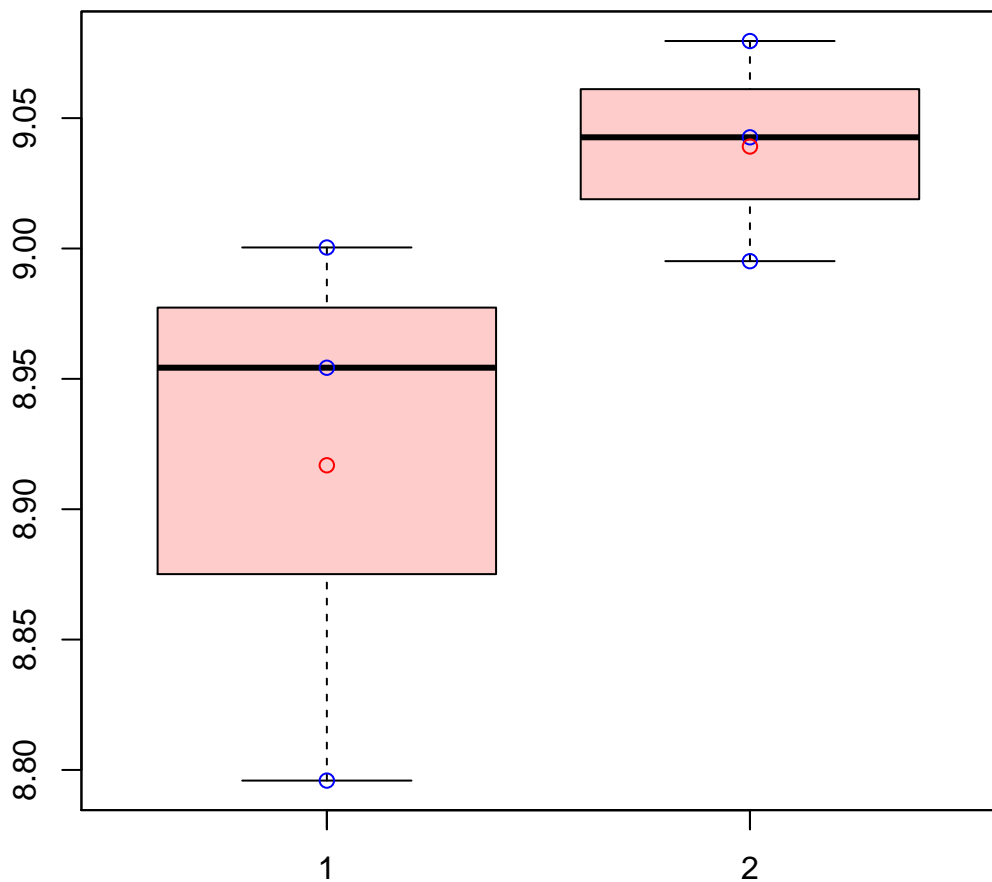

t-Test: p-value = 0.18

# CL7196Contig3|CL7196Contig3



t-Test: p-value = 0.29

# CL720Contig2|CL720Contig2

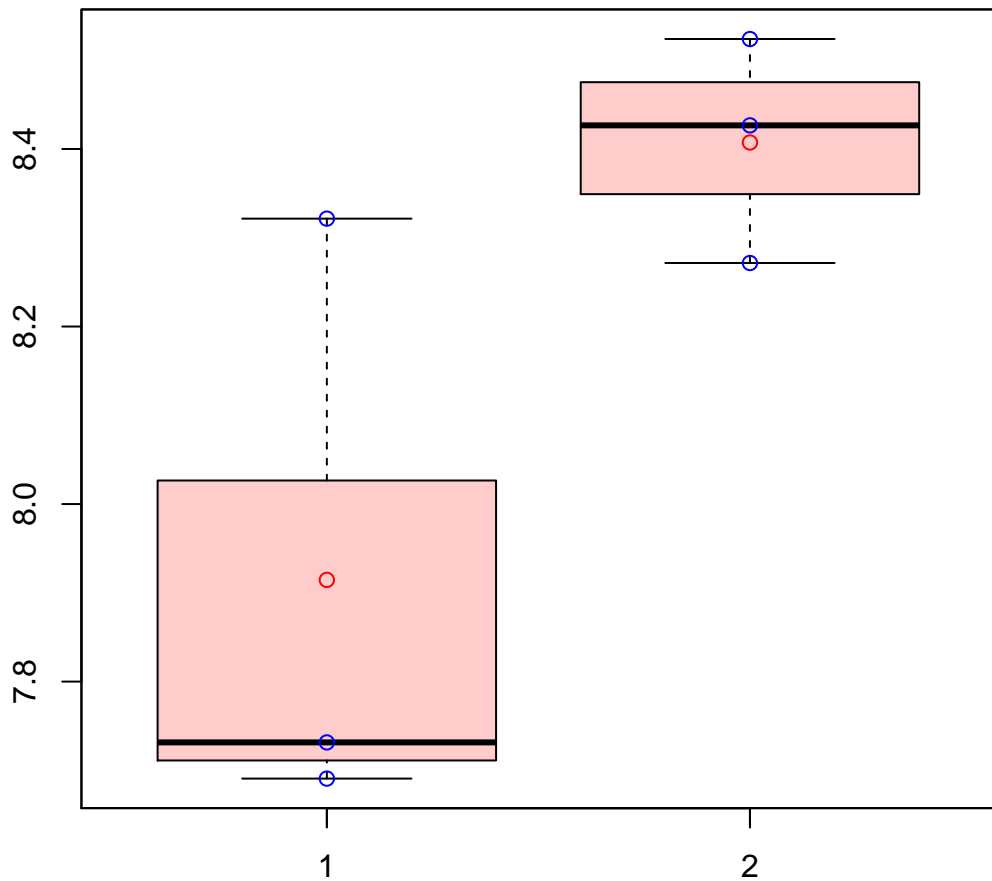

t-Test: p-value = 0.12

# CL7210Contig2|CL7210Contig2

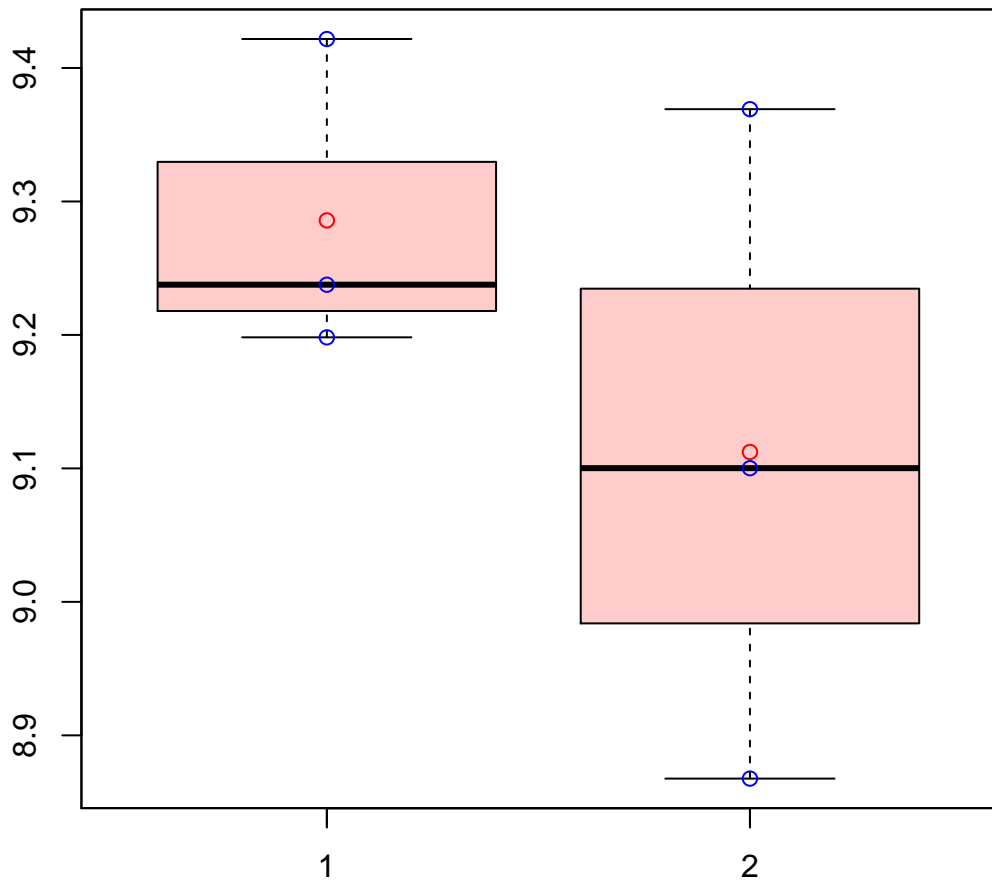

t-Test: p-value = 0.36

# CL7211Contig1|CL7211Contig1

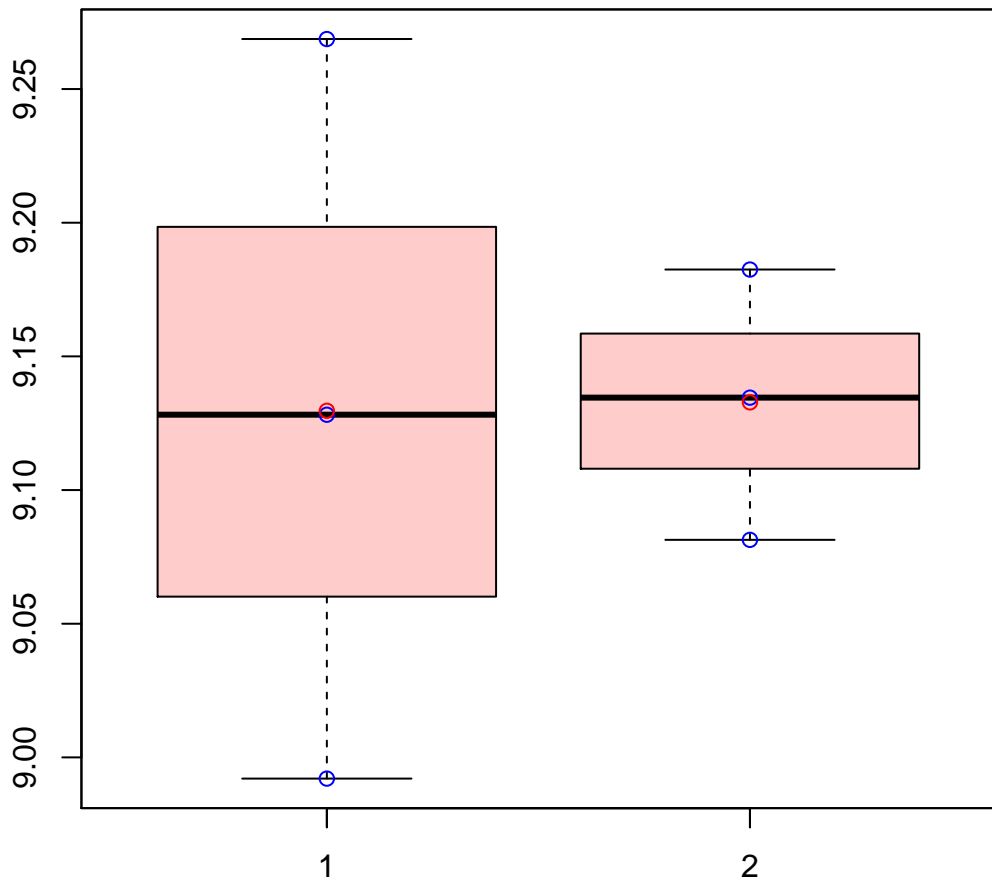

t-Test: p-value = 0.97

# CL7211Contig2|CL7211Contig2



t-Test: p-value = 0.97



# CL7211Contig3|CL7211Contig3



t-Test: p-value = 0.97

# CL7215Contig2|CL7215Contig2

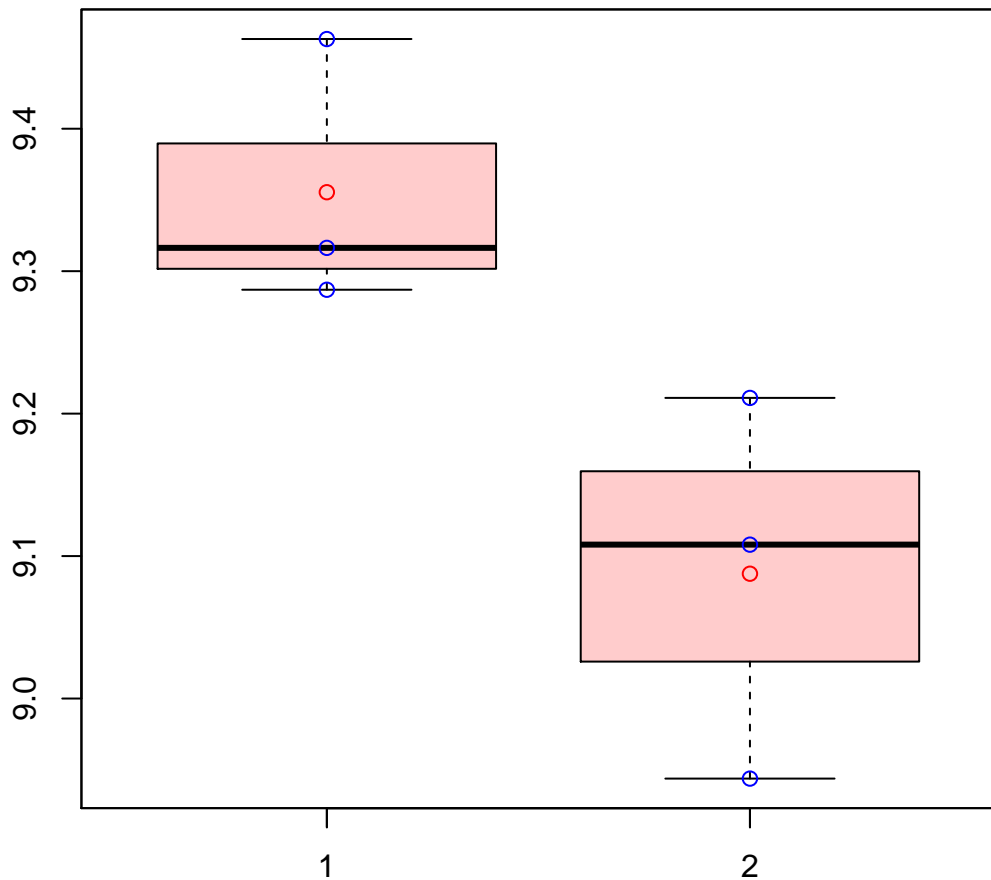

t-Test: p-value = 0.05

# CL721Contig4|CL721Contig4

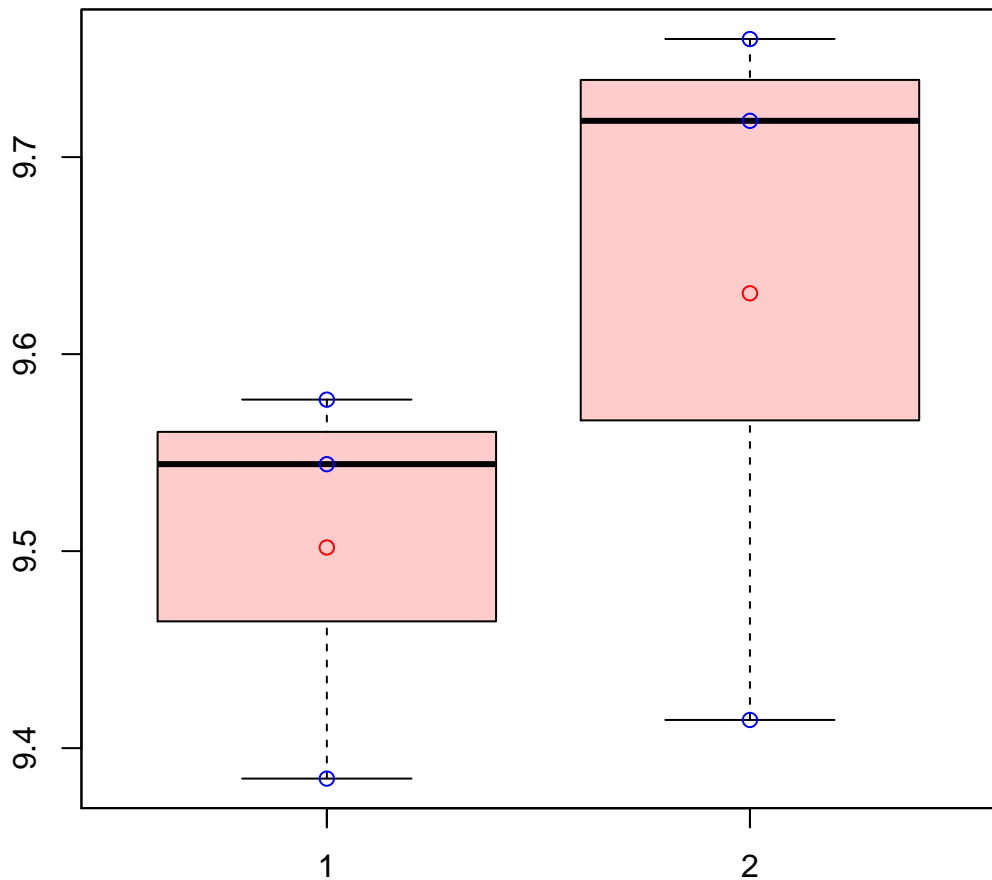

t-Test: p-value = 0.37

# CL7228Contig2|CL7228Contig2

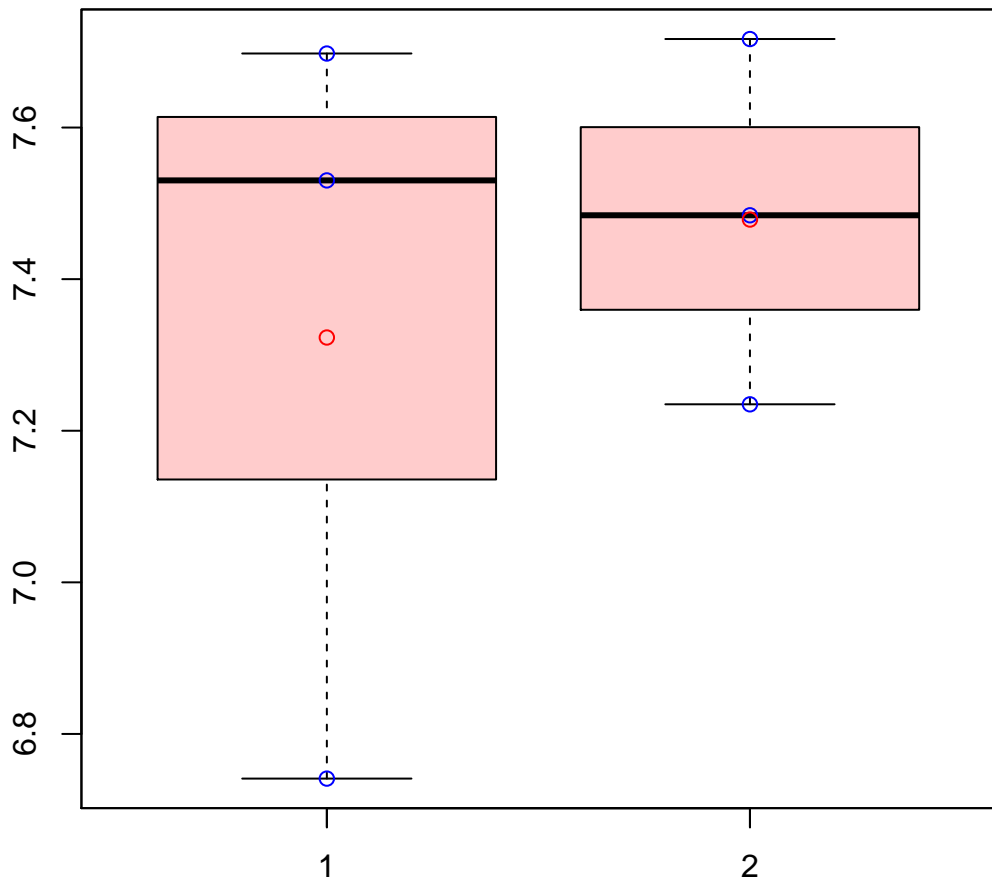

t-Test: p-value = 0.67

# CL722Contig8|CL722Contig8

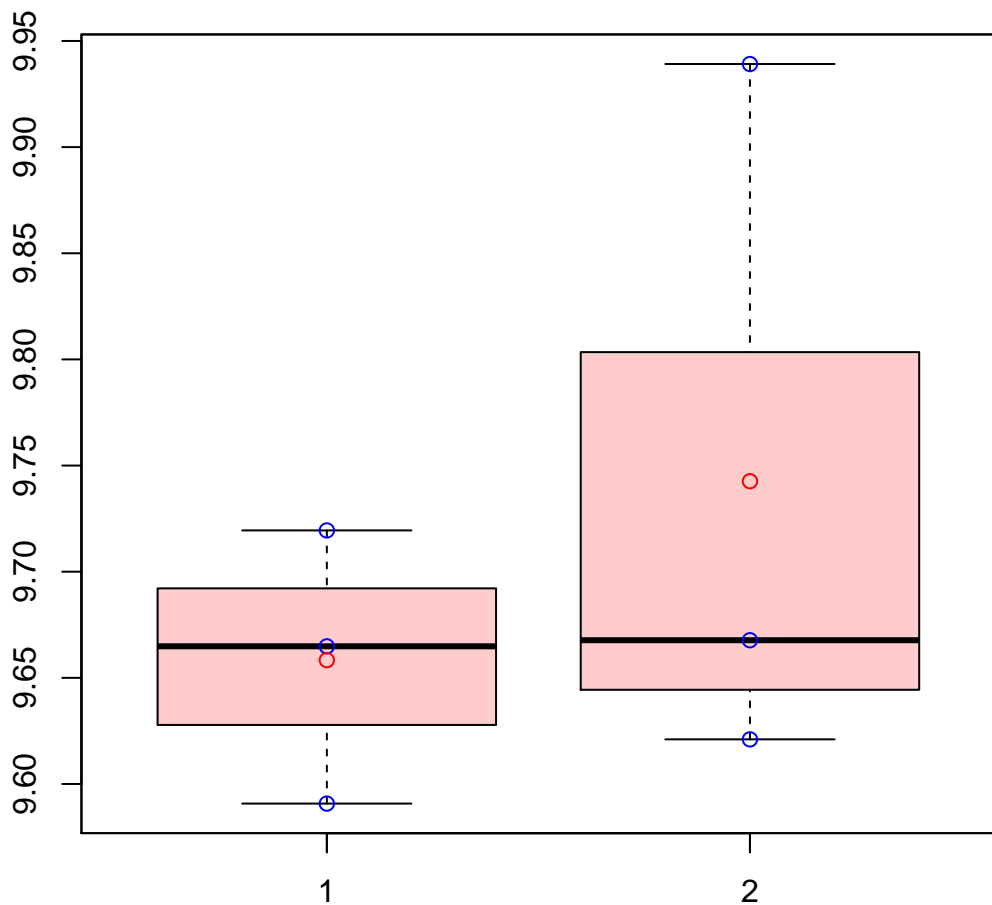

t-Test: p-value = 0.49

# CL7247Contig2|CL7247Contig2

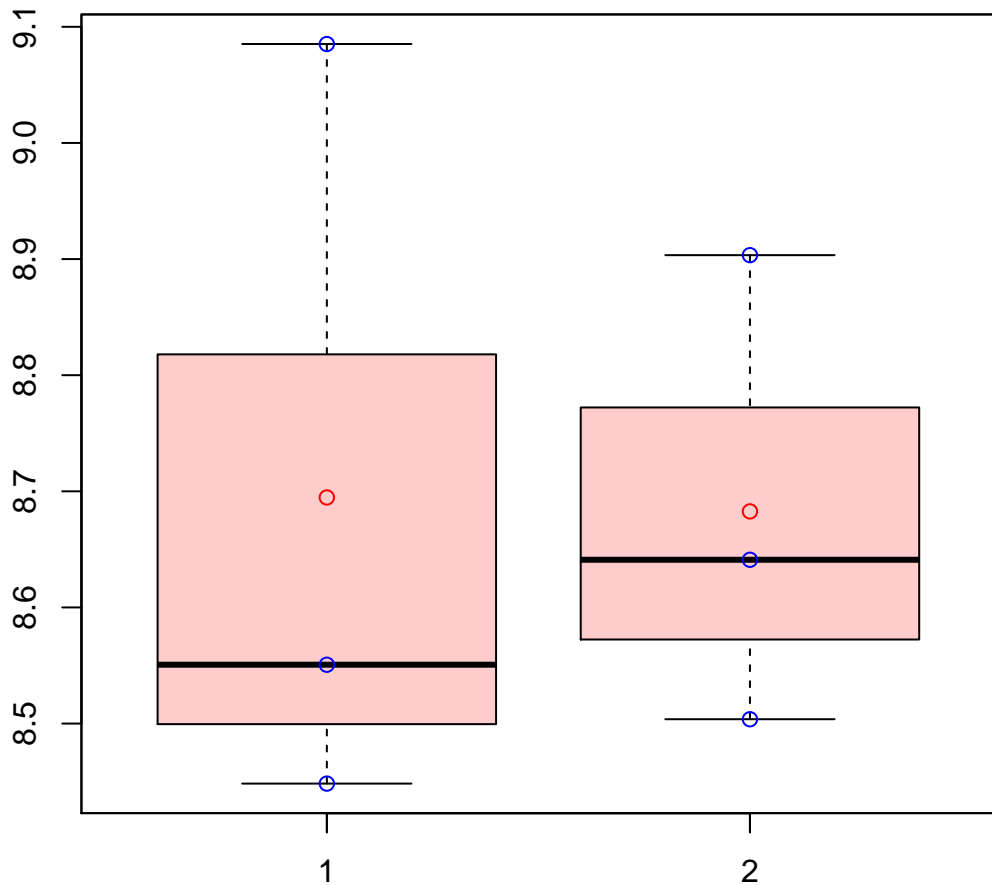

t-Test: p-value = 0.96

# CL7247Contig4|CL7247Contig4

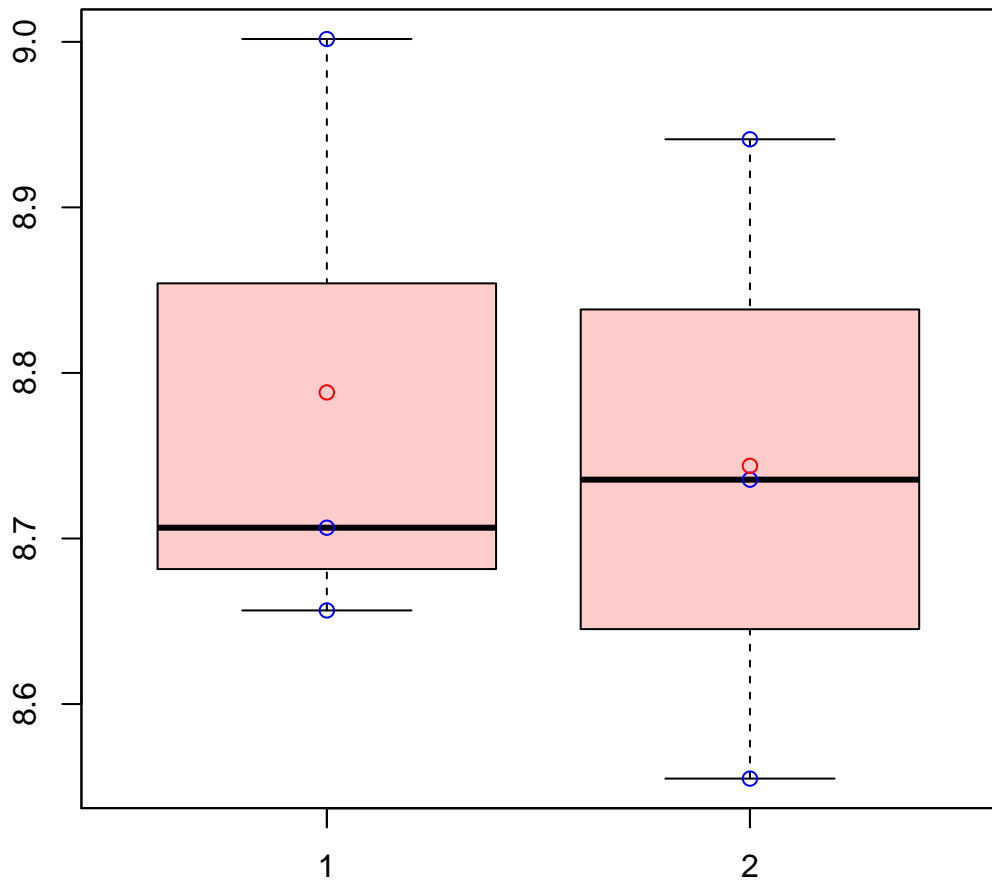

t-Test: p-value = 0.79

# CL724Contig15|CL724Contig15

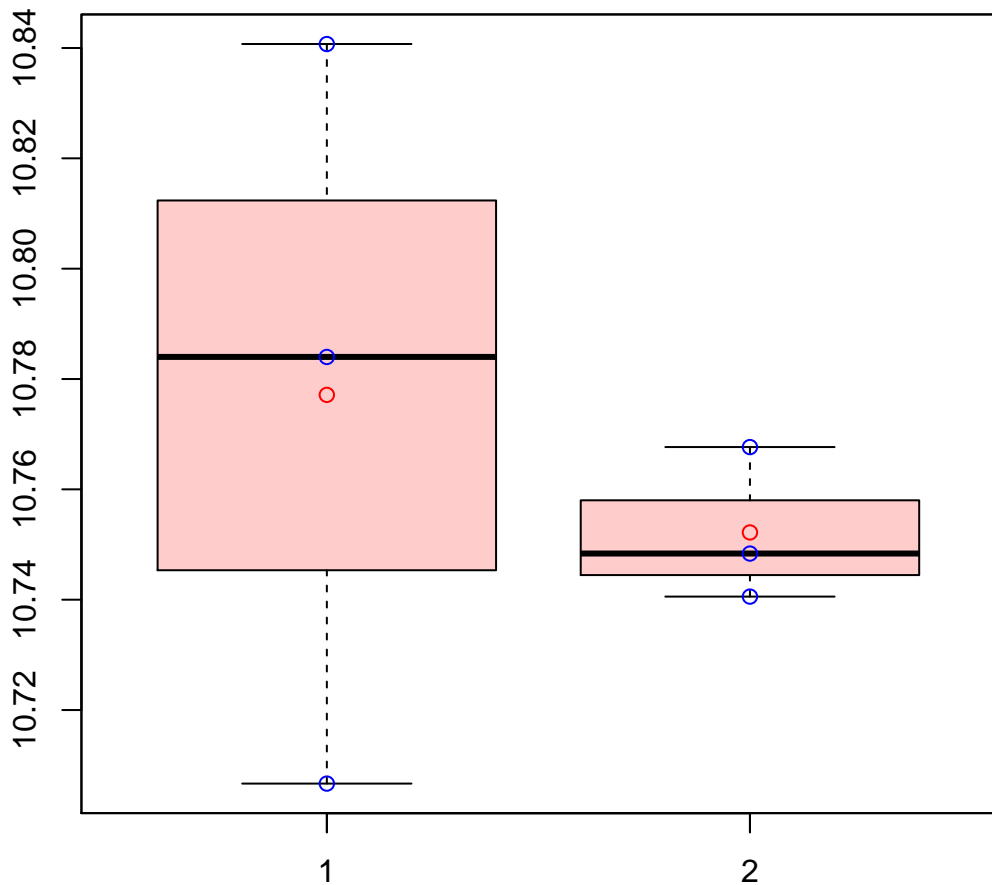

t-Test: p-value = 0.59



# CL724Contig16|CL724Contig16

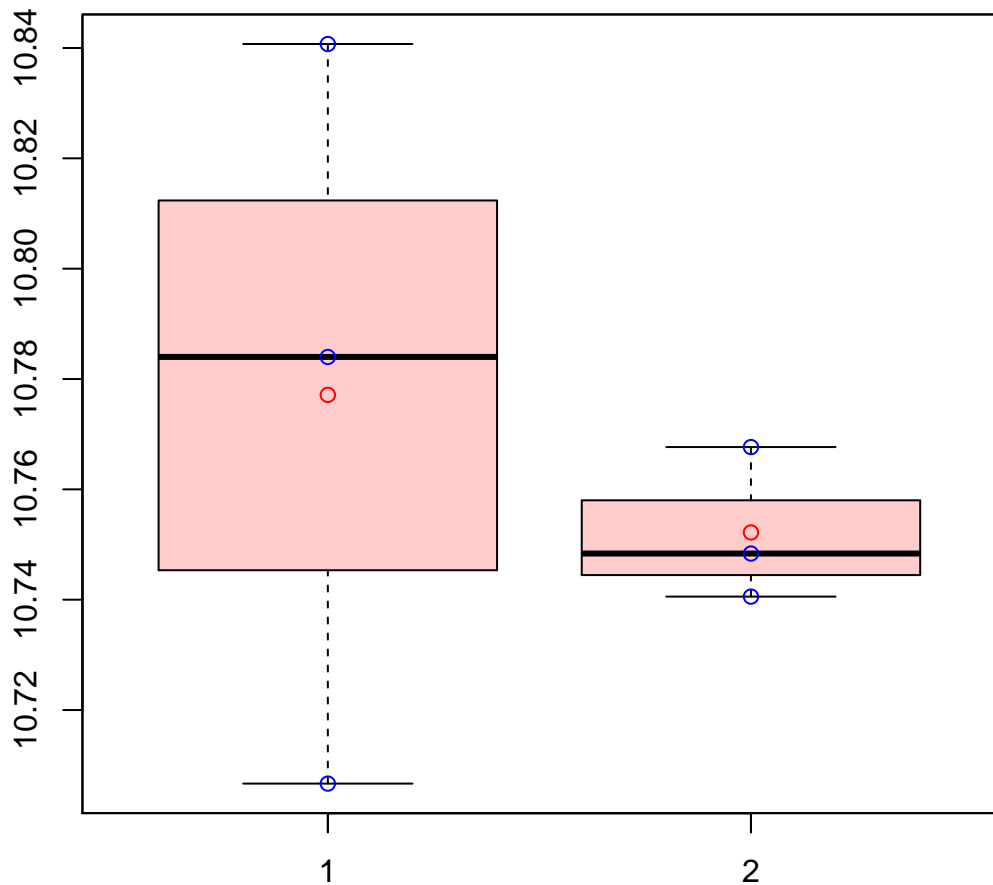

t-Test: p-value = 0.59

# CL724Contig17|CL724Contig17

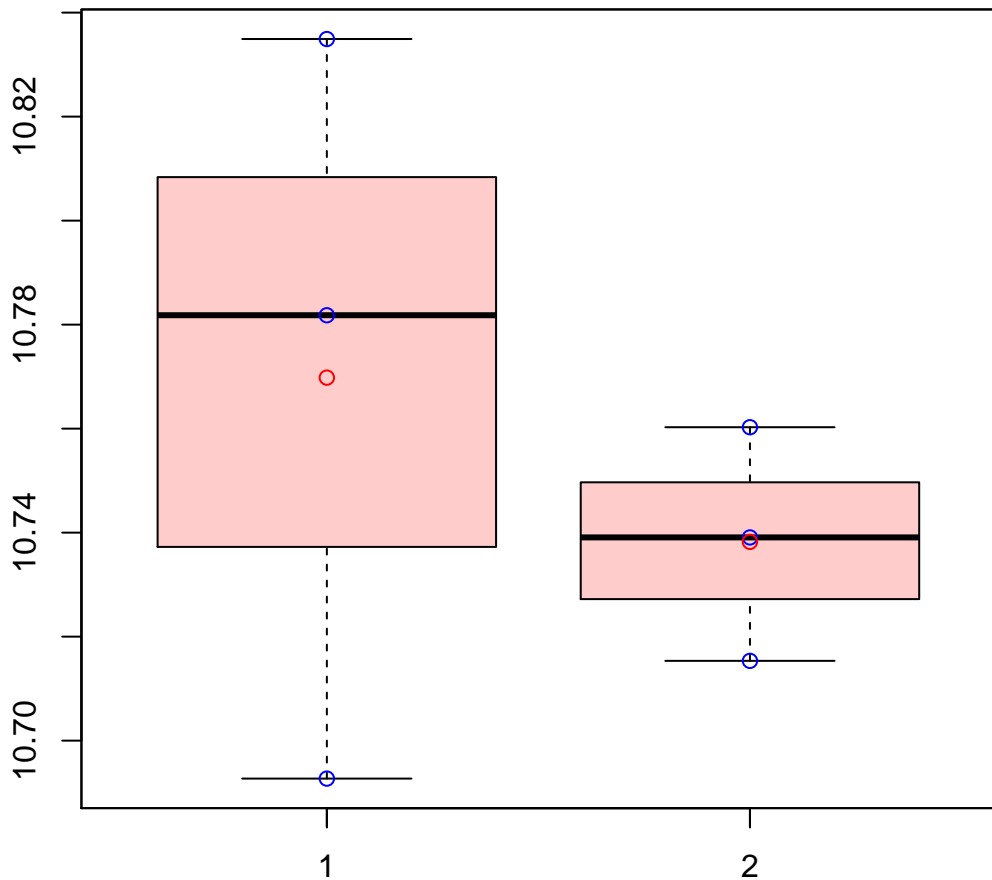

t-Test: p-value = 0.53

# CL724Contig2|CL724Contig2

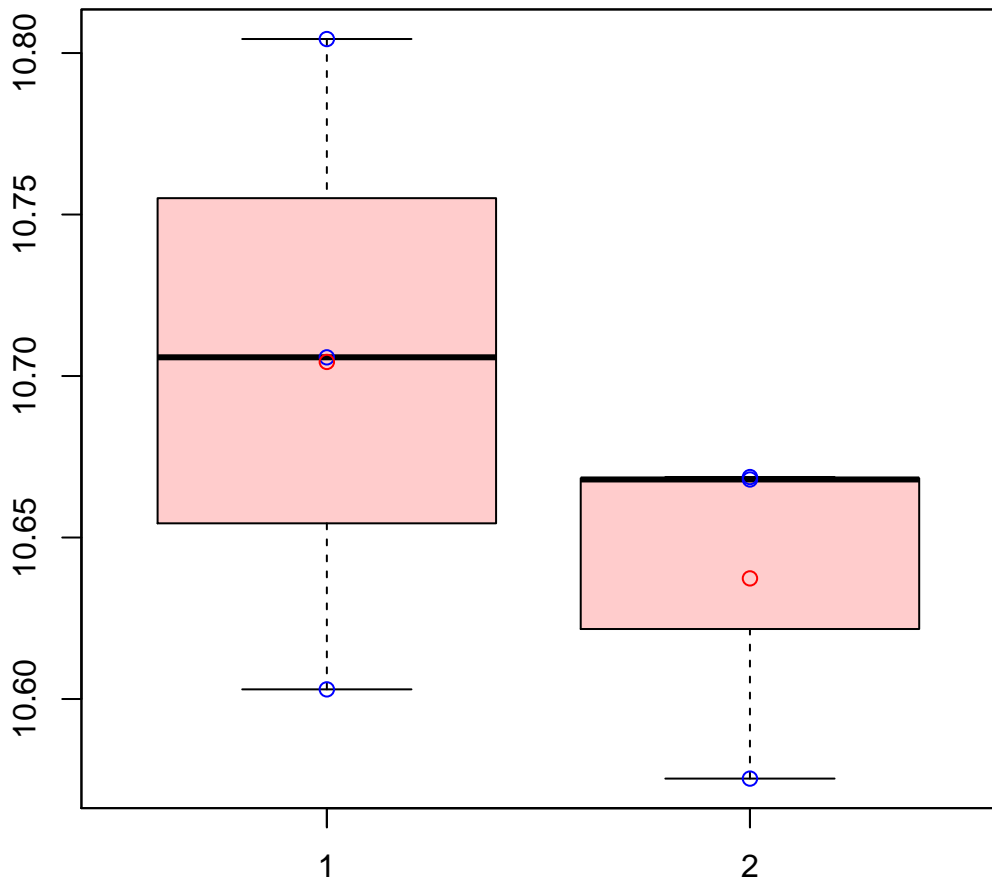

t-Test: p-value = 0.38

# CL724Contig6|CL724Contig6

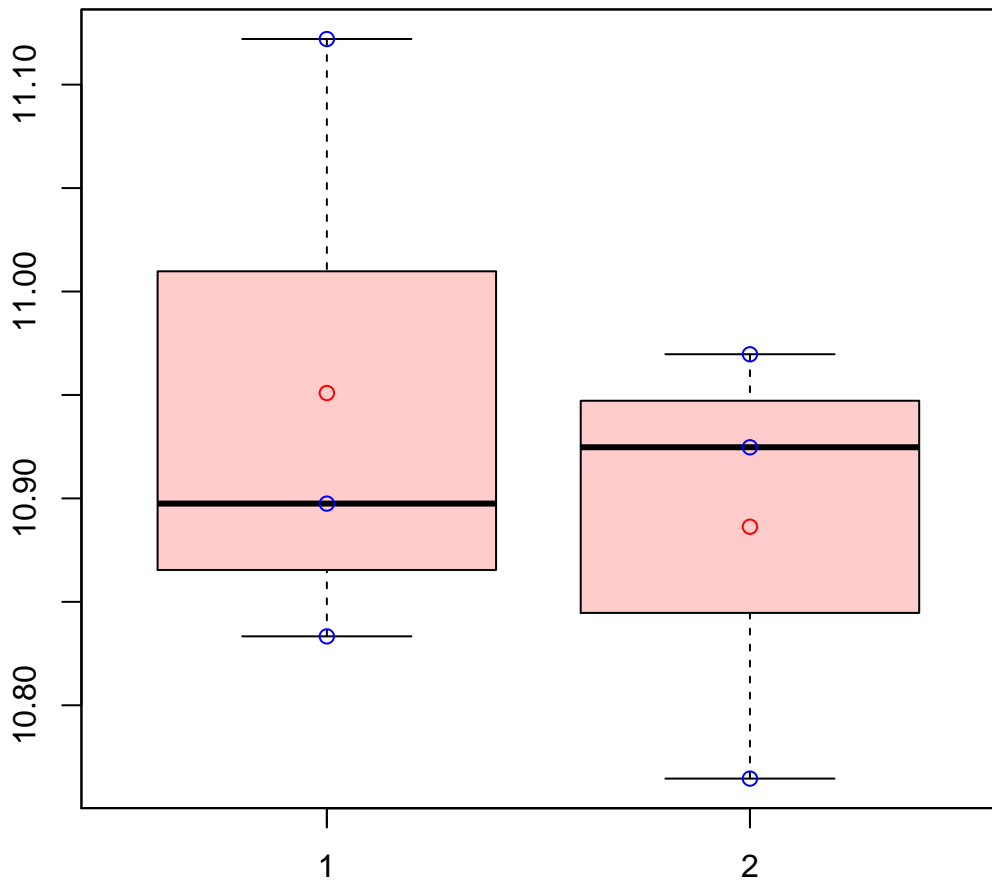

t-Test: p-value = 0.58

# CL7259Contig2|CL7259Contig2

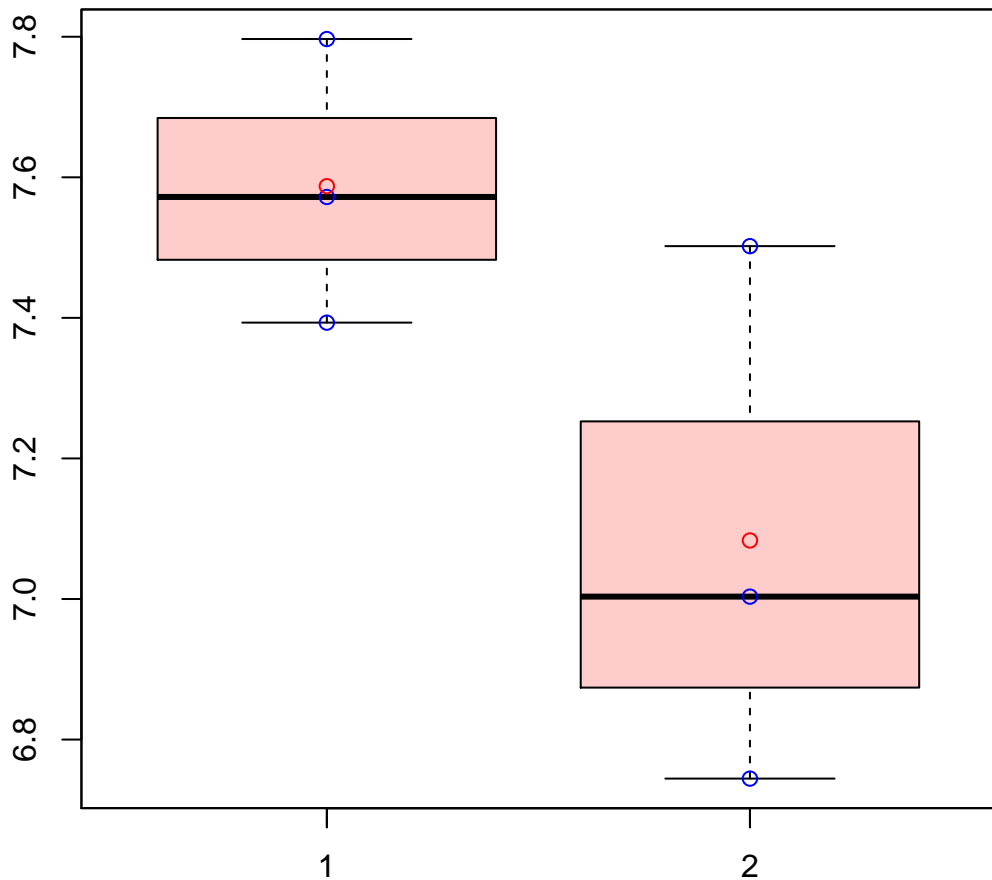

t-Test: p-value = 0.14

# CL7267Contig2|CL7267Contig2

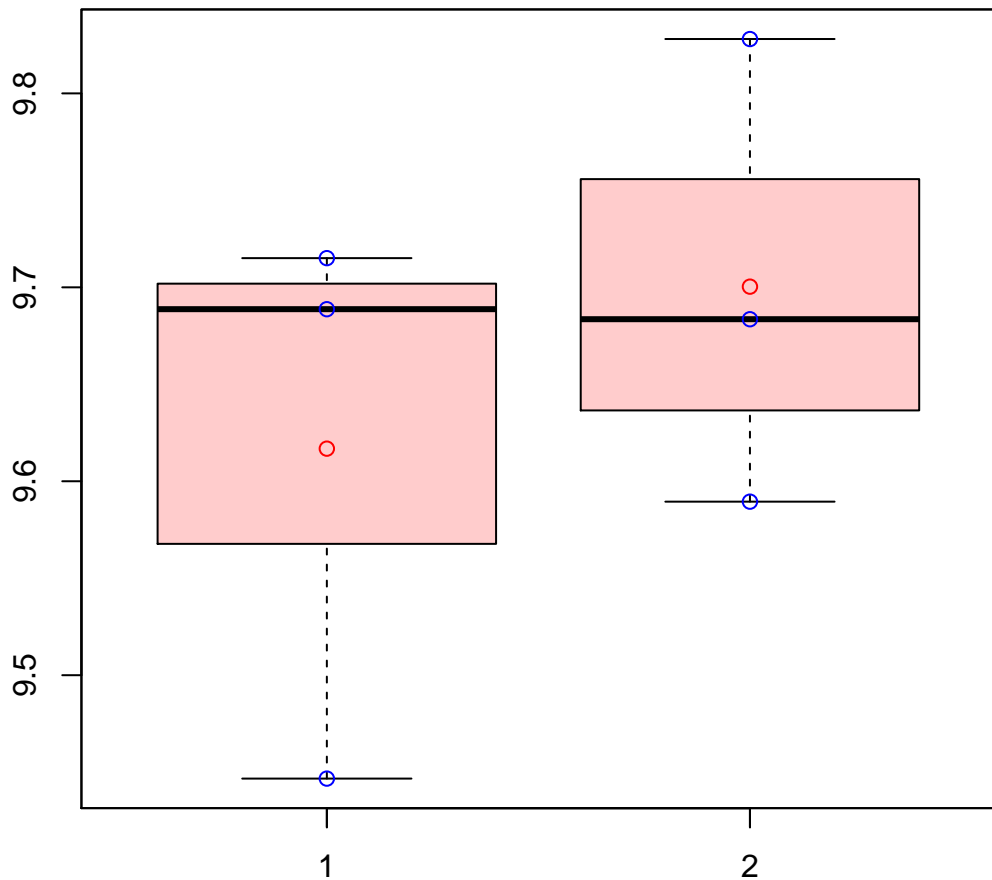

t-Test: p-value = 0.49

# CL7269Contig3|CL7269Contig3

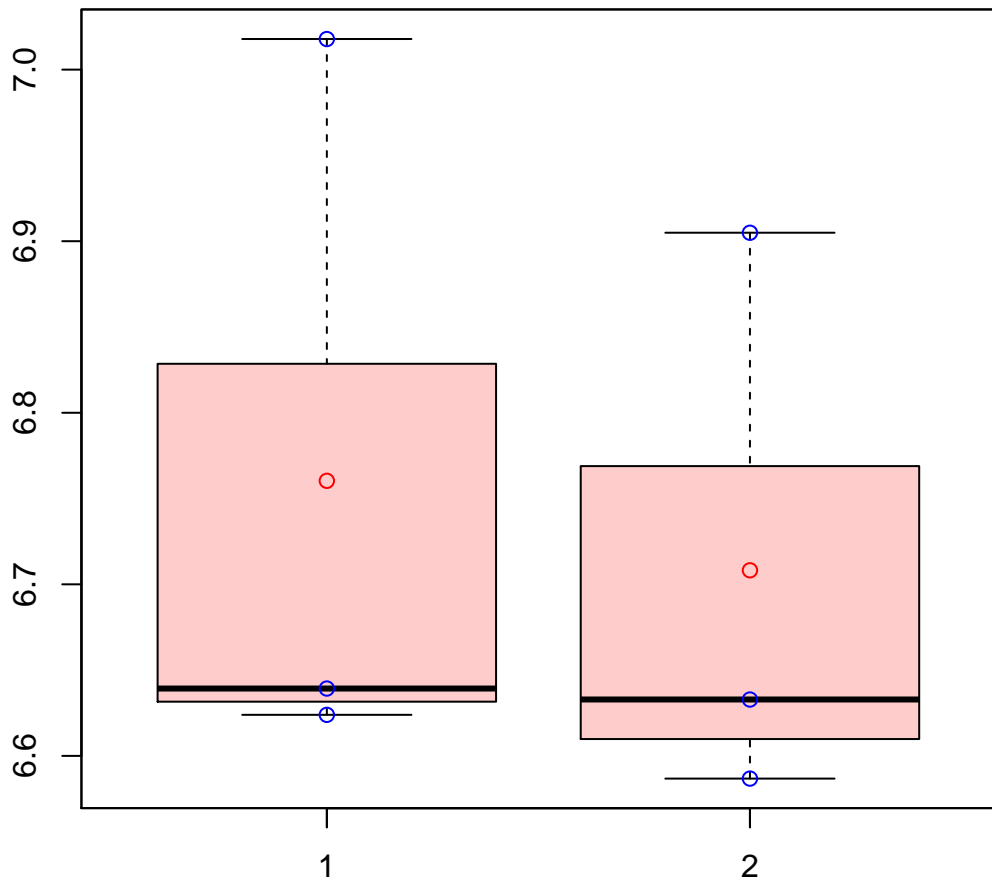

t-Test: p-value = 0.77

# CL727Contig5|CL727Contig5

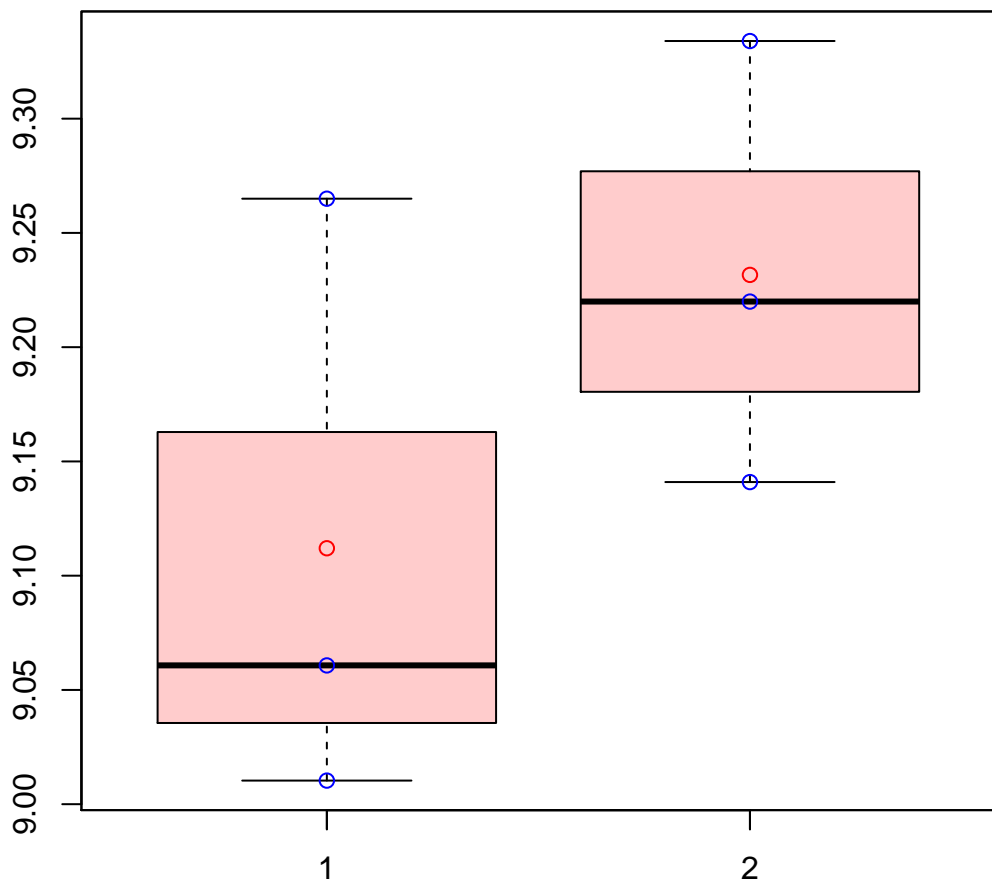

t-Test: p-value = 0.29



# CL7283Contig1|CL7283Contig1

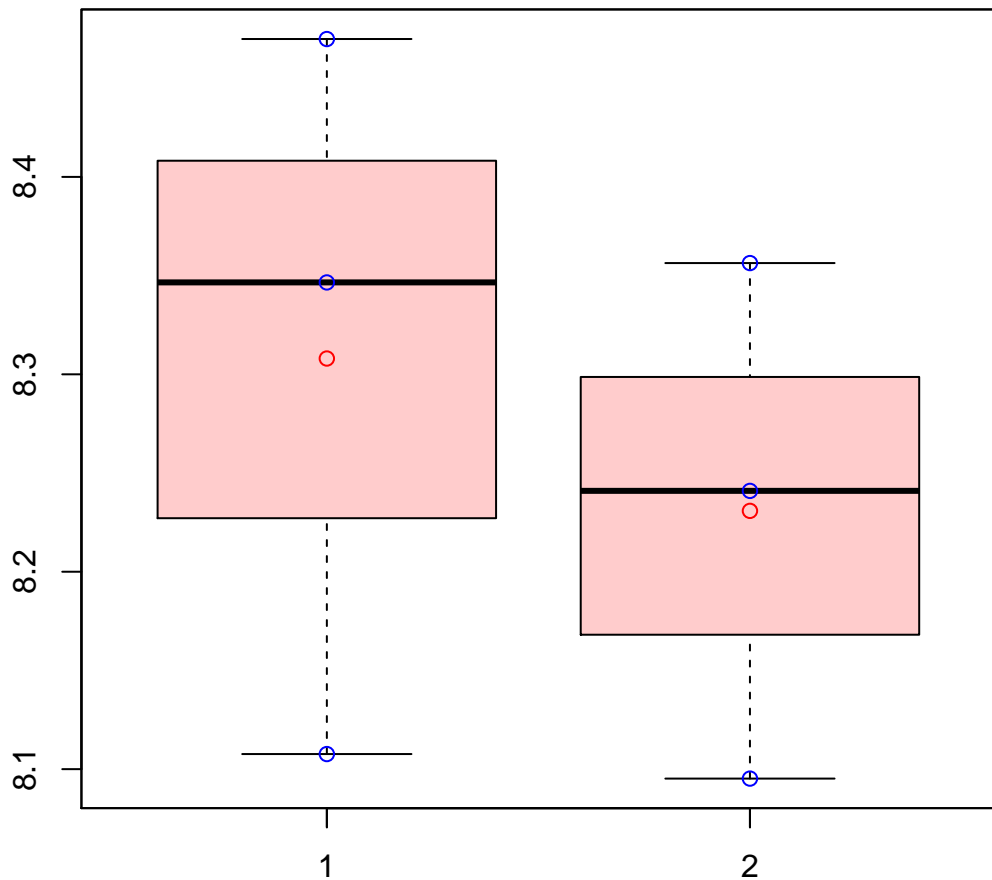

t-Test: p-value = 0.59

# CL7287Contig1|CL7287Contig1

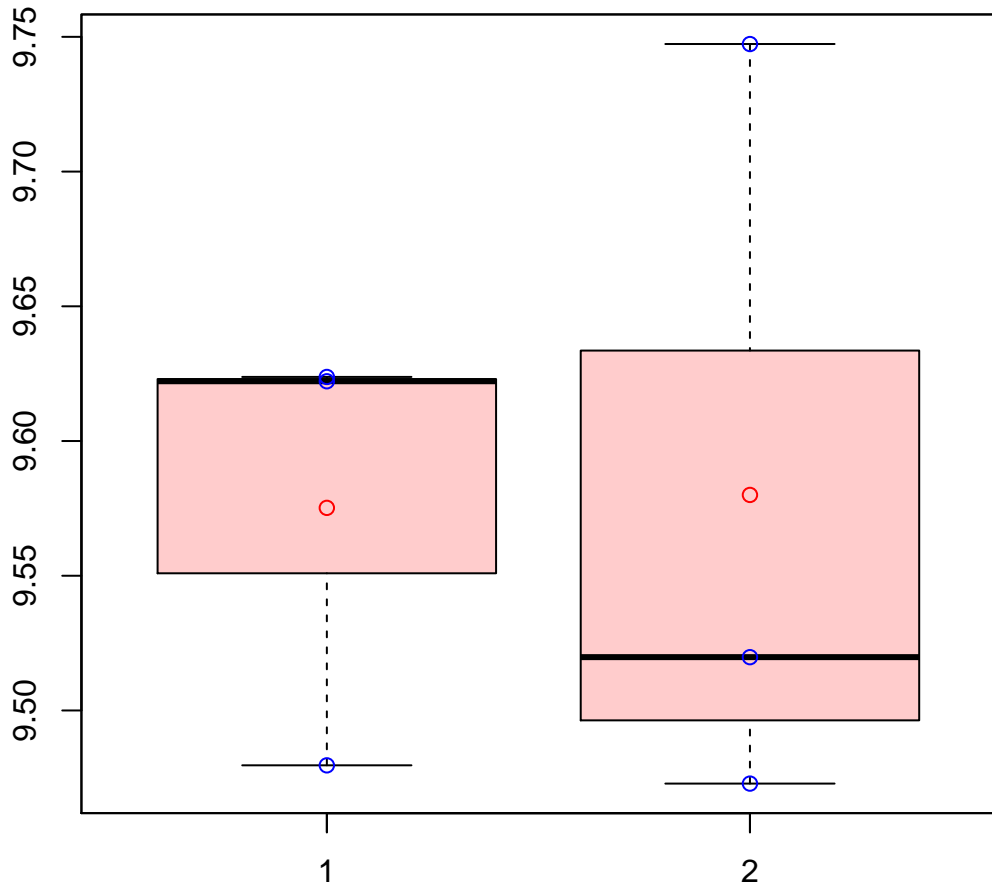

t-Test: p-value = 0.96

# CL7287Contig3|CL7287Contig3

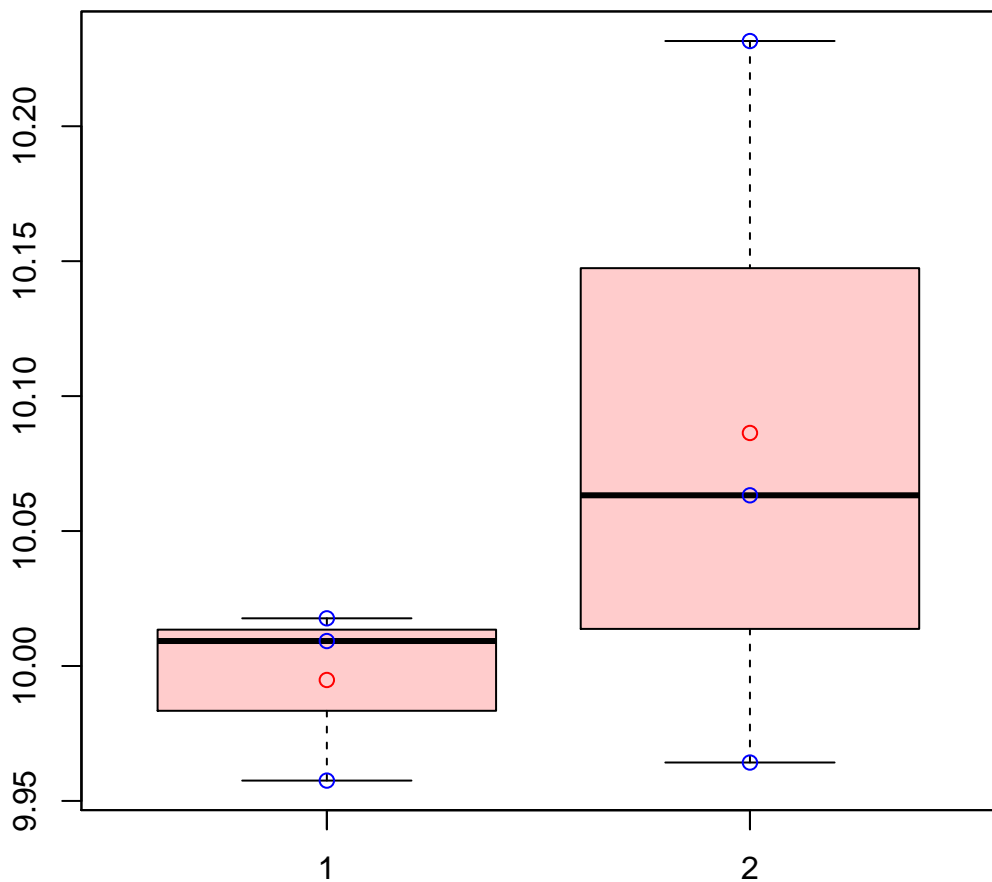

t-Test: p-value = 0.36

# CL7288Contig1|CL7288Contig1

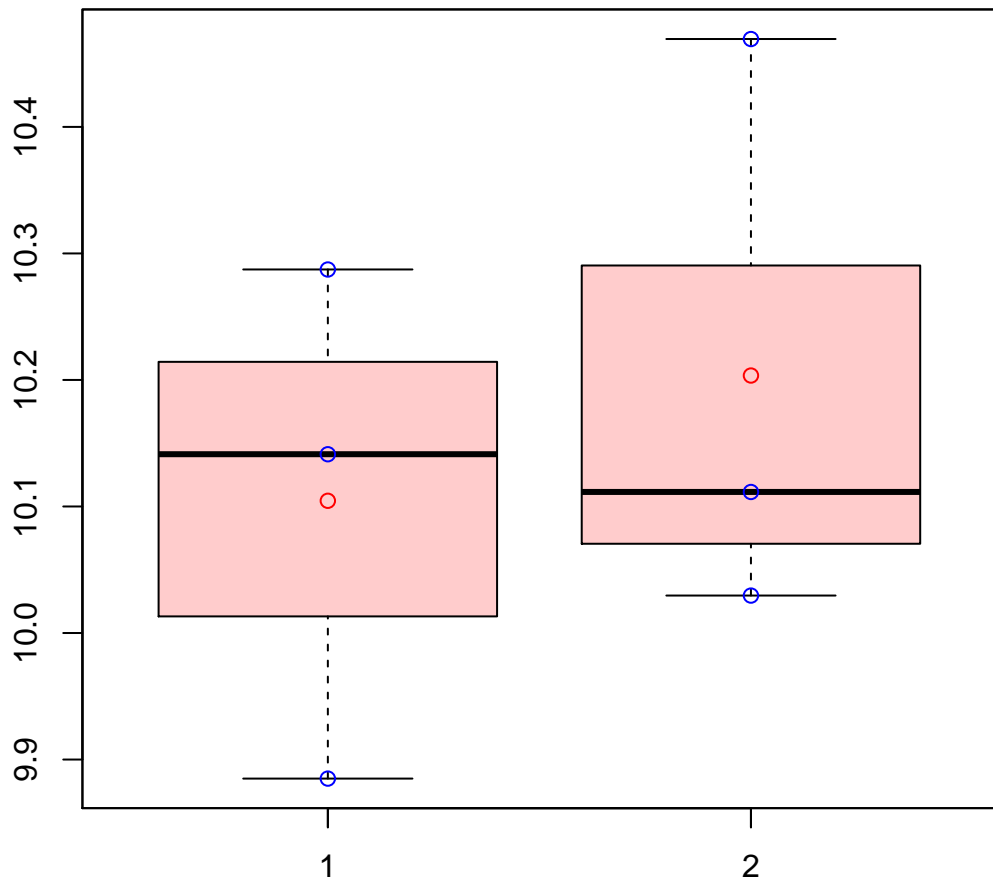

t-Test: p-value = 0.61

# CL728Contig5|CL728Contig5

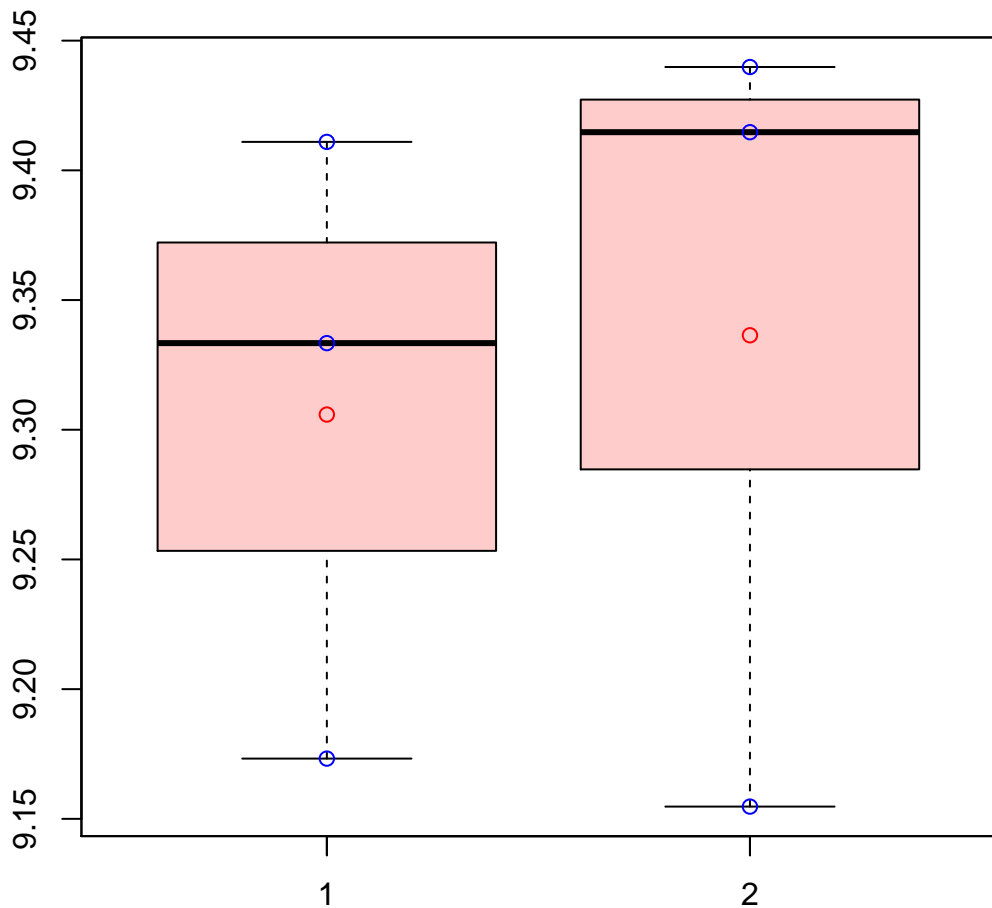

t-Test: p-value = 0.8

# CL7294Contig1|CL7294Contig1

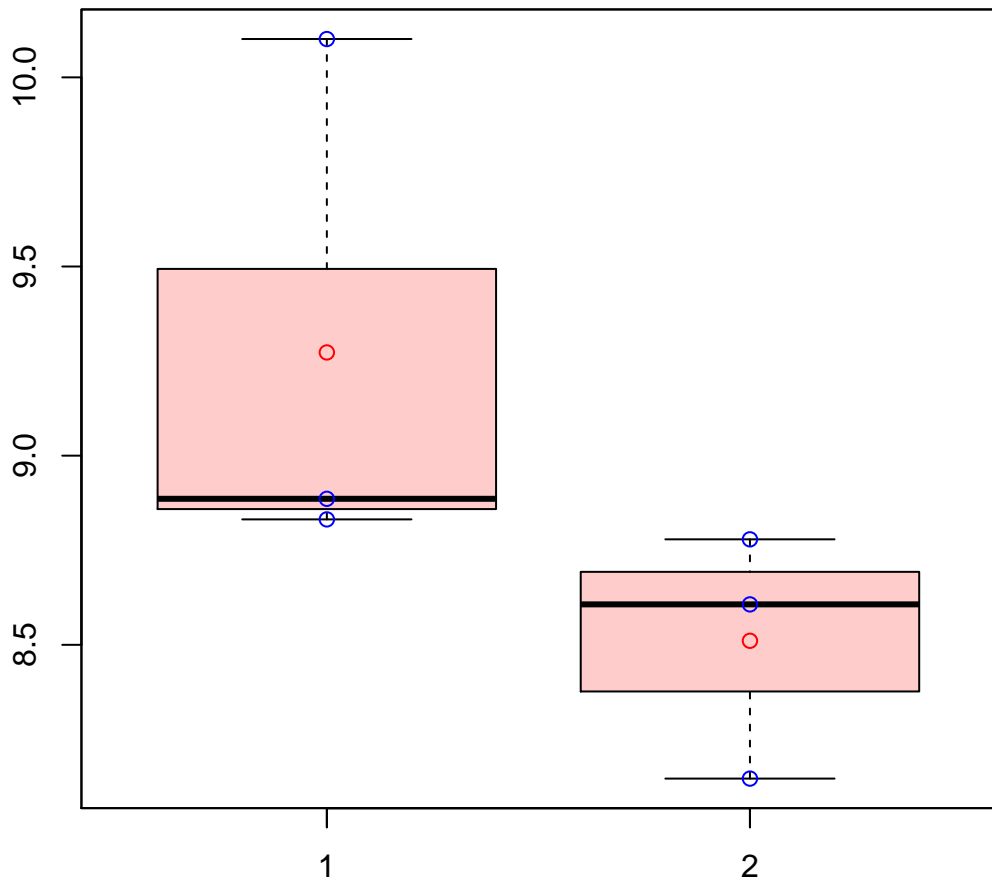

t-Test: p-value = 0.2

# CL7299Contig5|CL7299Contig5

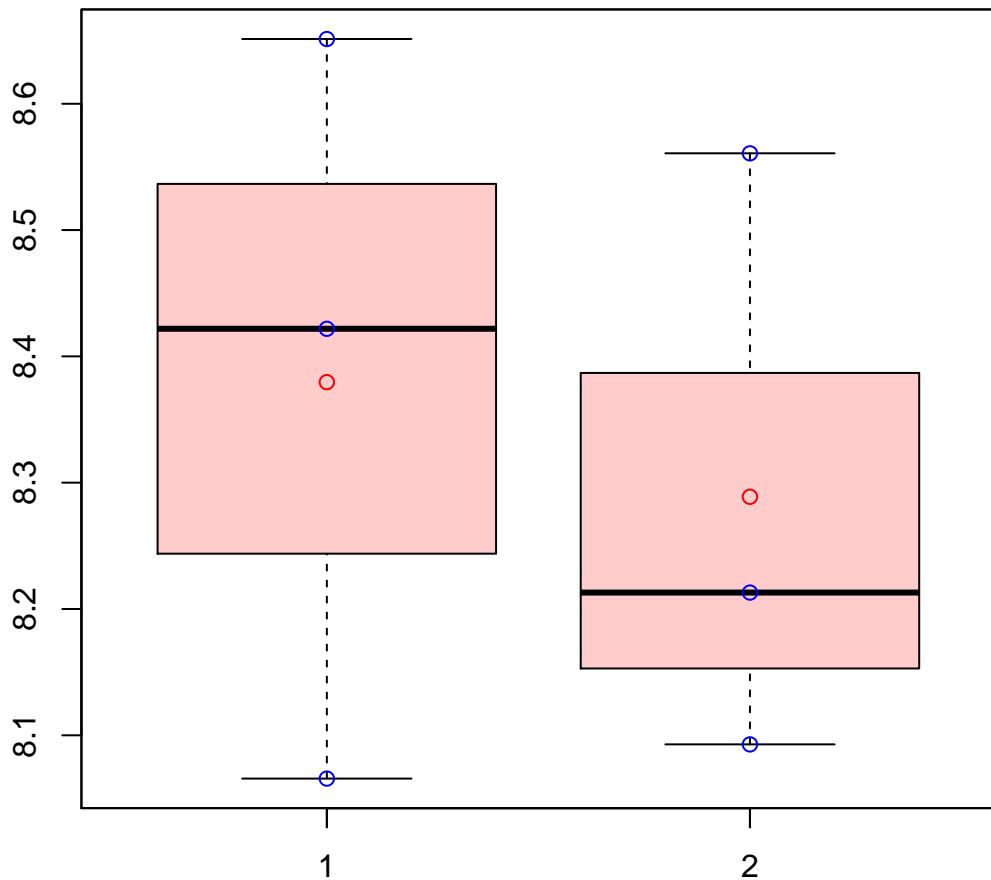

t-Test: p-value = 0.7

# CL72Contig10|CL72Contig10

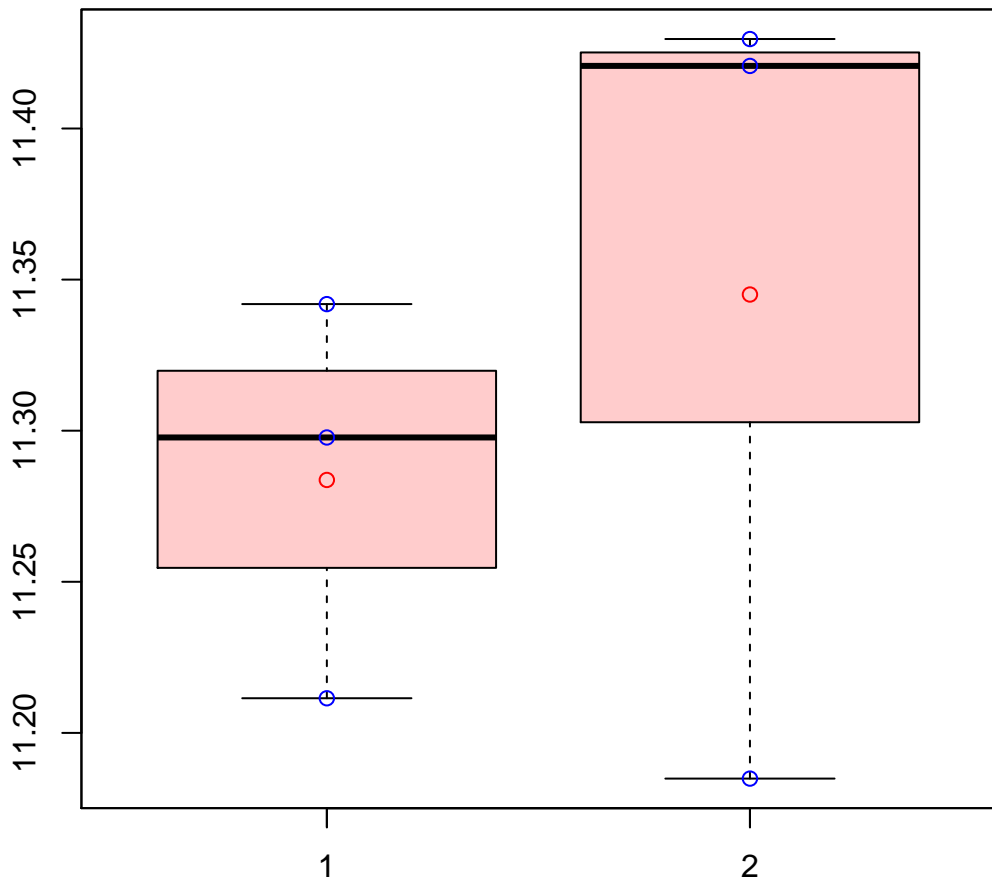

t-Test: p-value = 0.54



# CL72Contig17|CL72Contig17

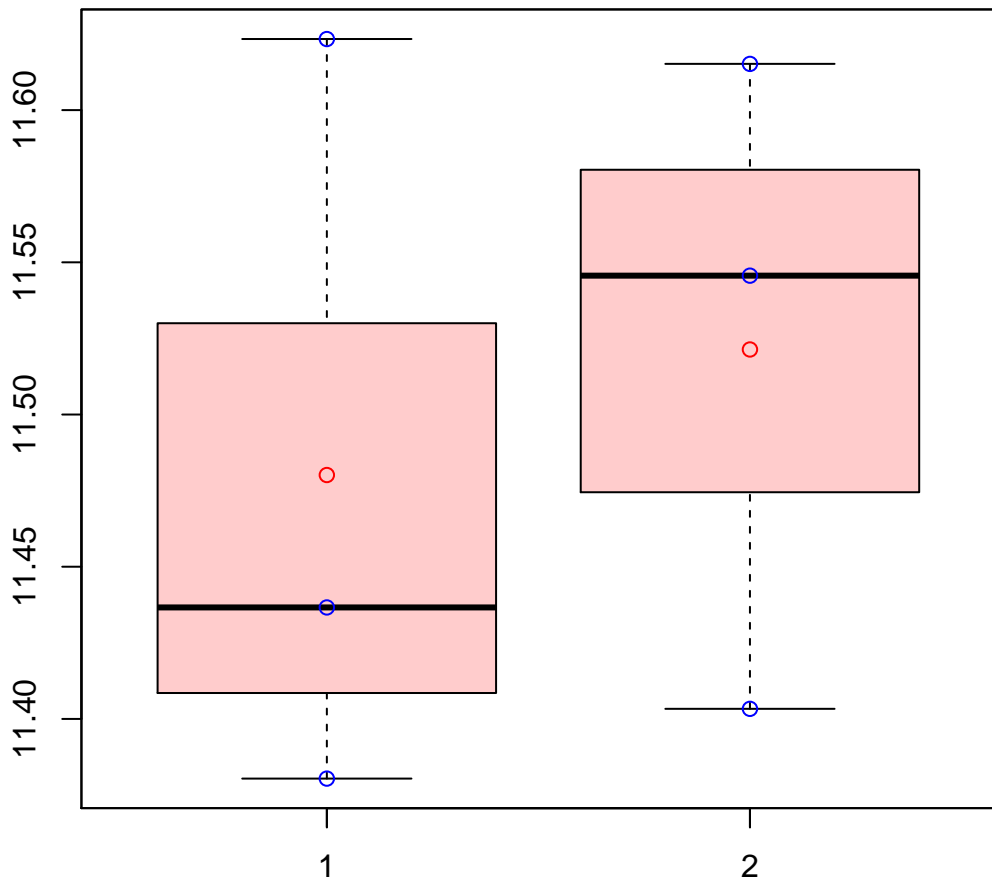

t-Test: p-value = 0.69

# CL72Contig18|CL72Contig18

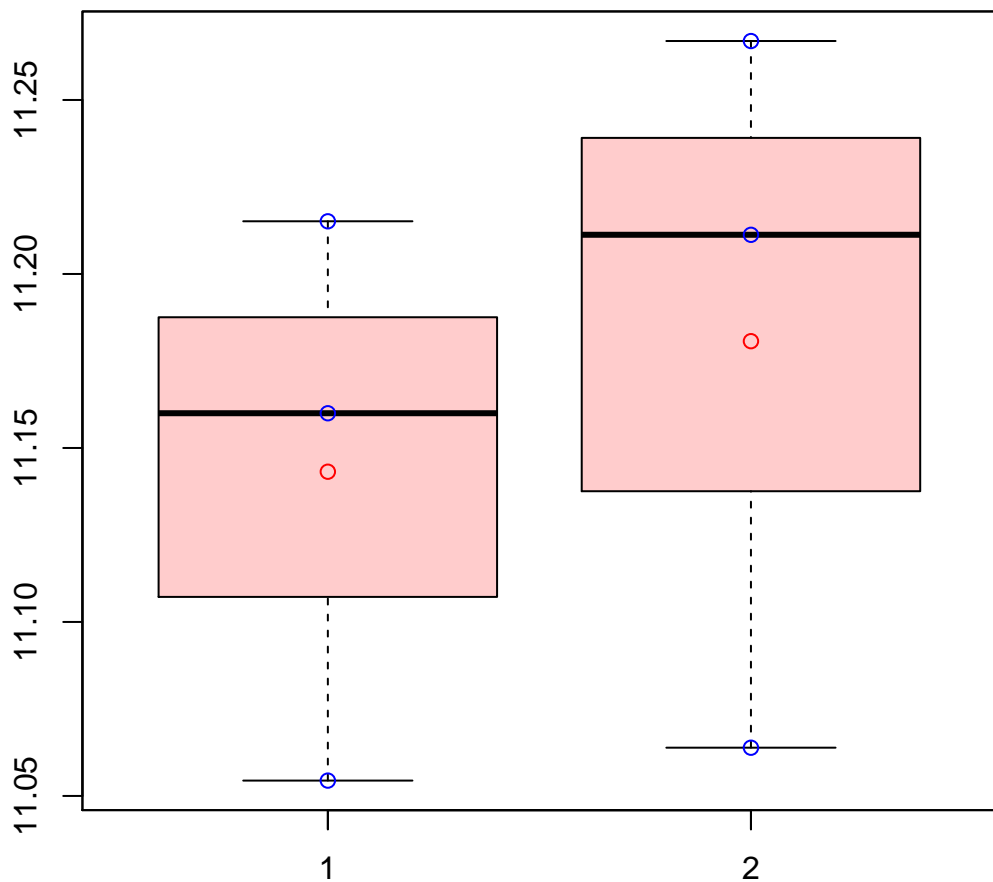

t-Test: p-value = 0.65

# CL72Contig19|CL72Contig19

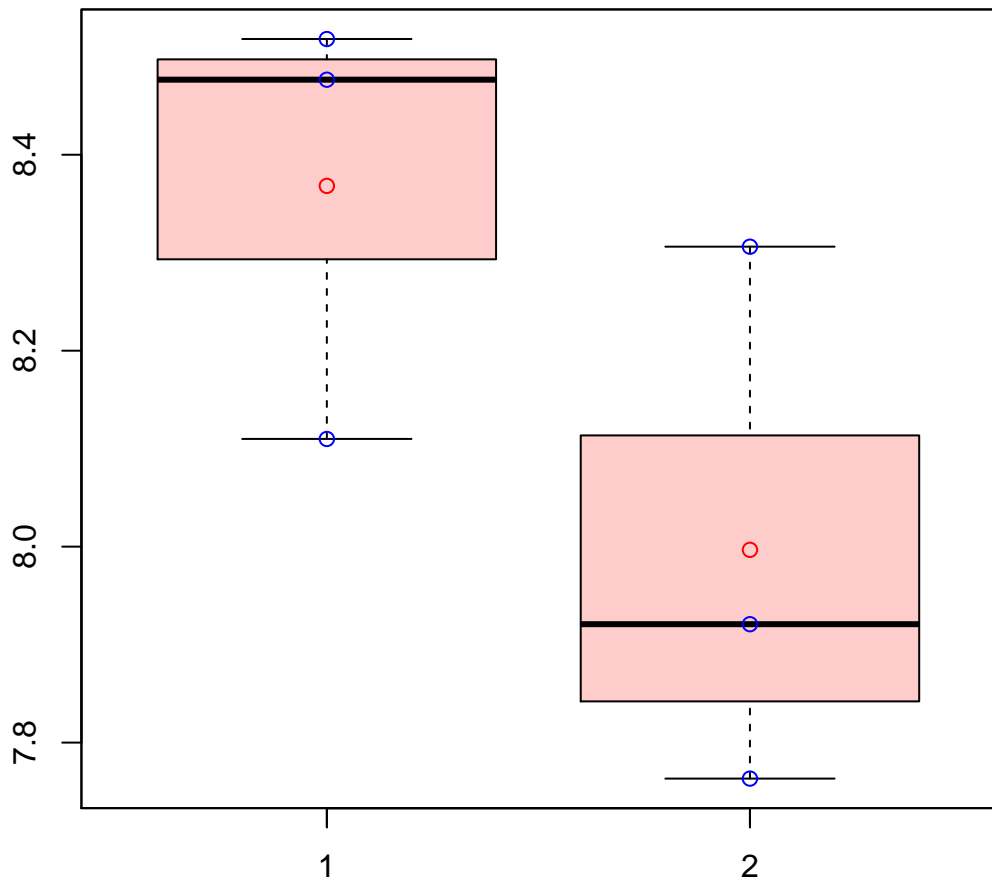

t-Test: p-value = 0.15

# CL72Contig1|CL72Contig1

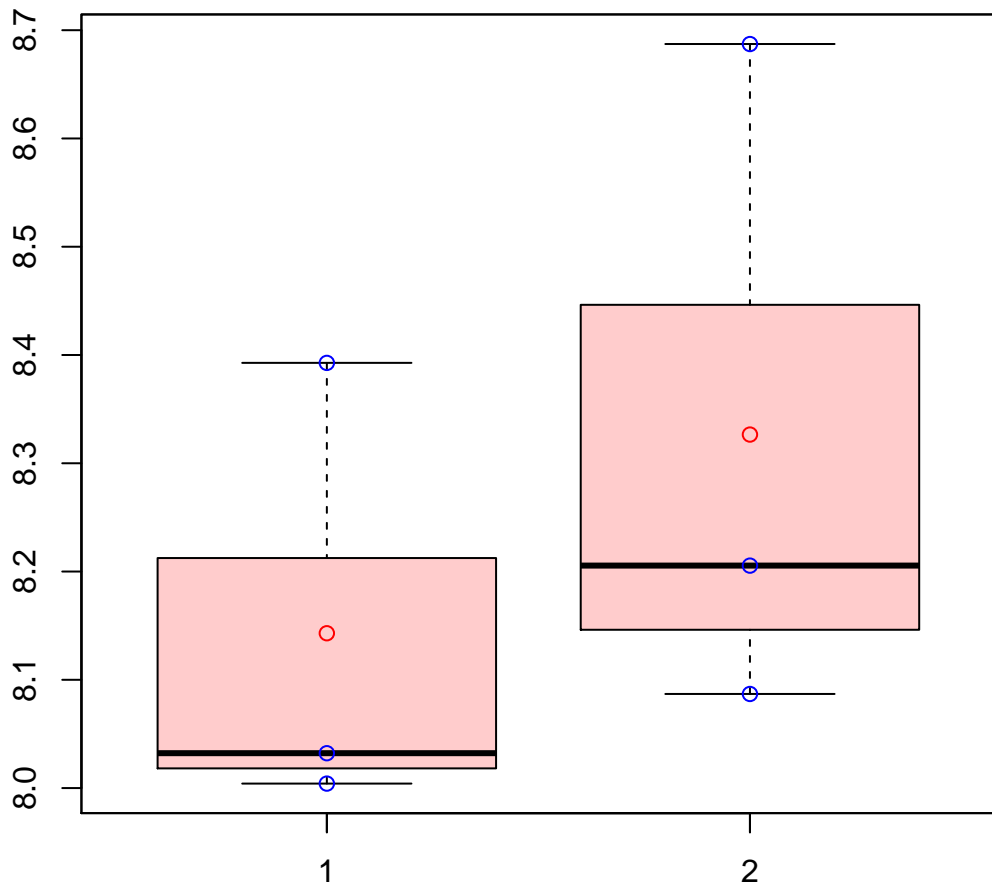

t-Test: p-value = 0.46

# CL72Contig20|CL72Contig20

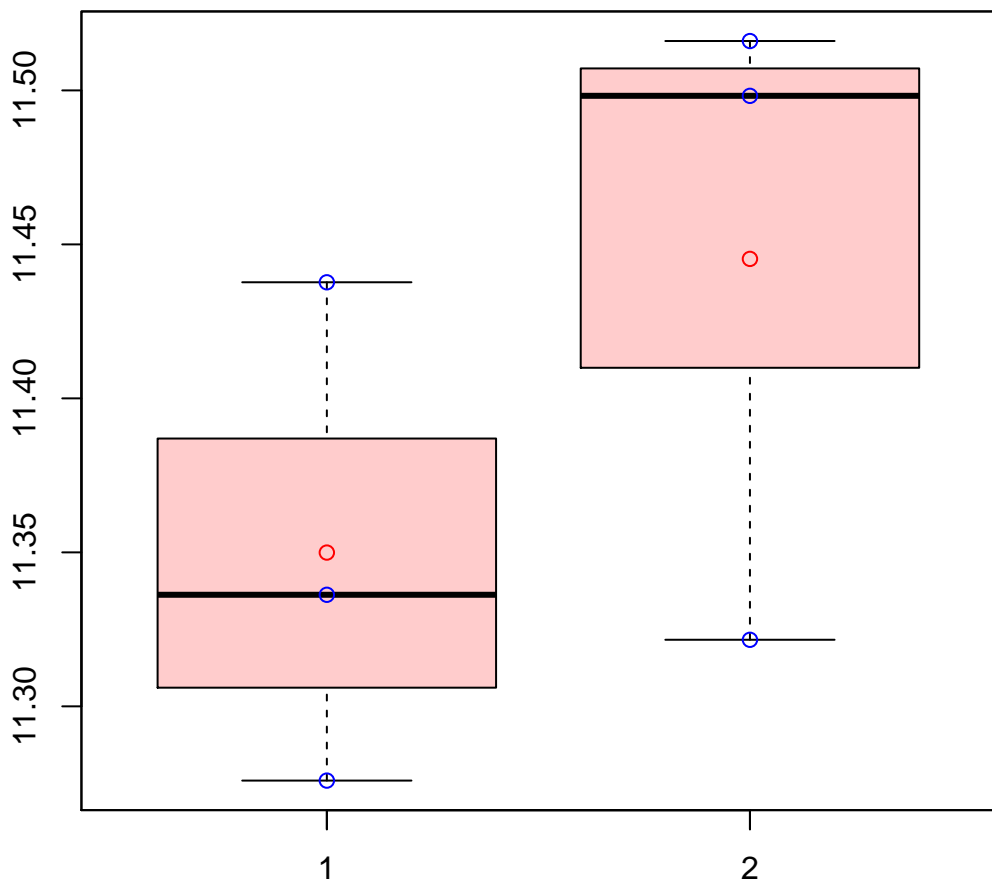

t-Test: p-value = 0.29

# CL72Contig21|CL72Contig21

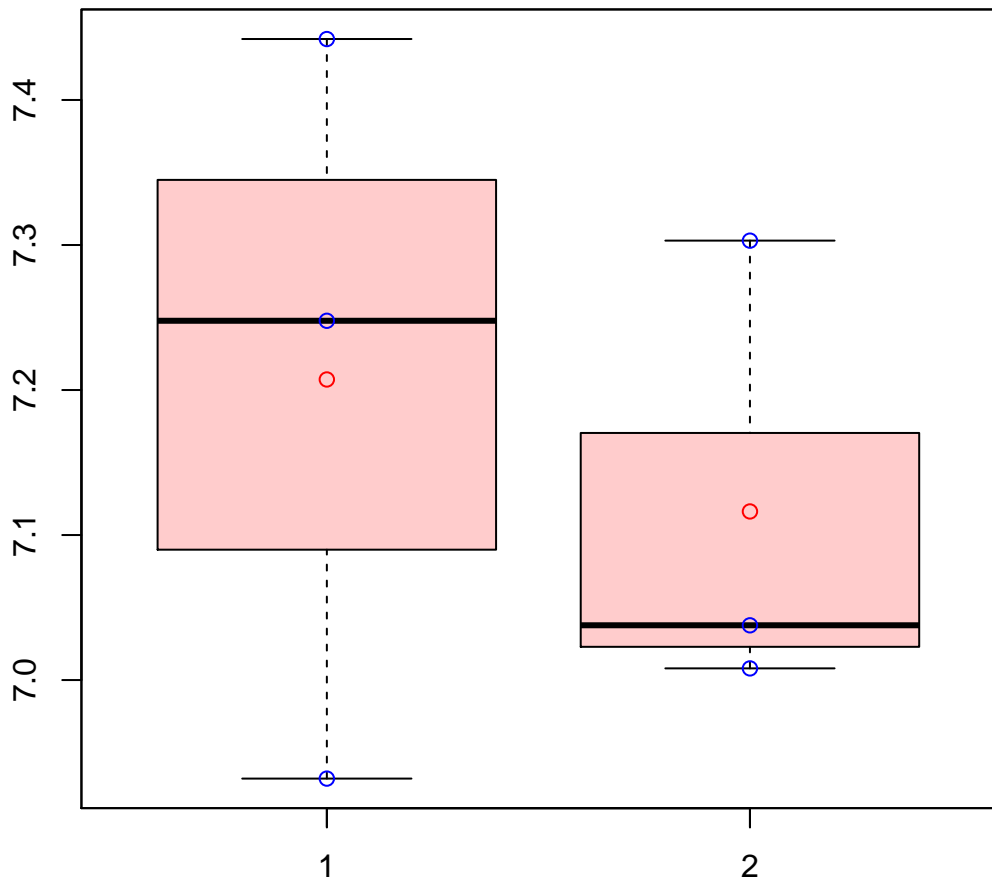

t-Test: p-value = 0.64

# CL72Contig23|CL72Contig23

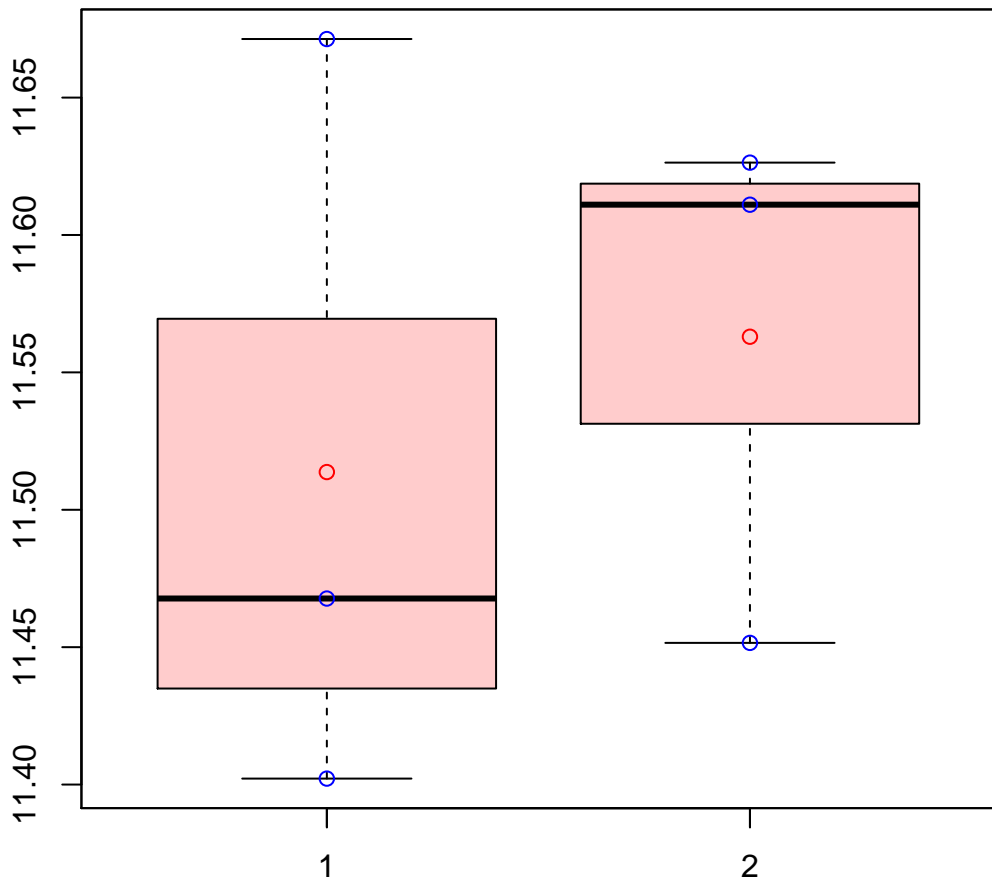

t-Test: p-value = 0.65

# CL72Contig3|CL72Contig3

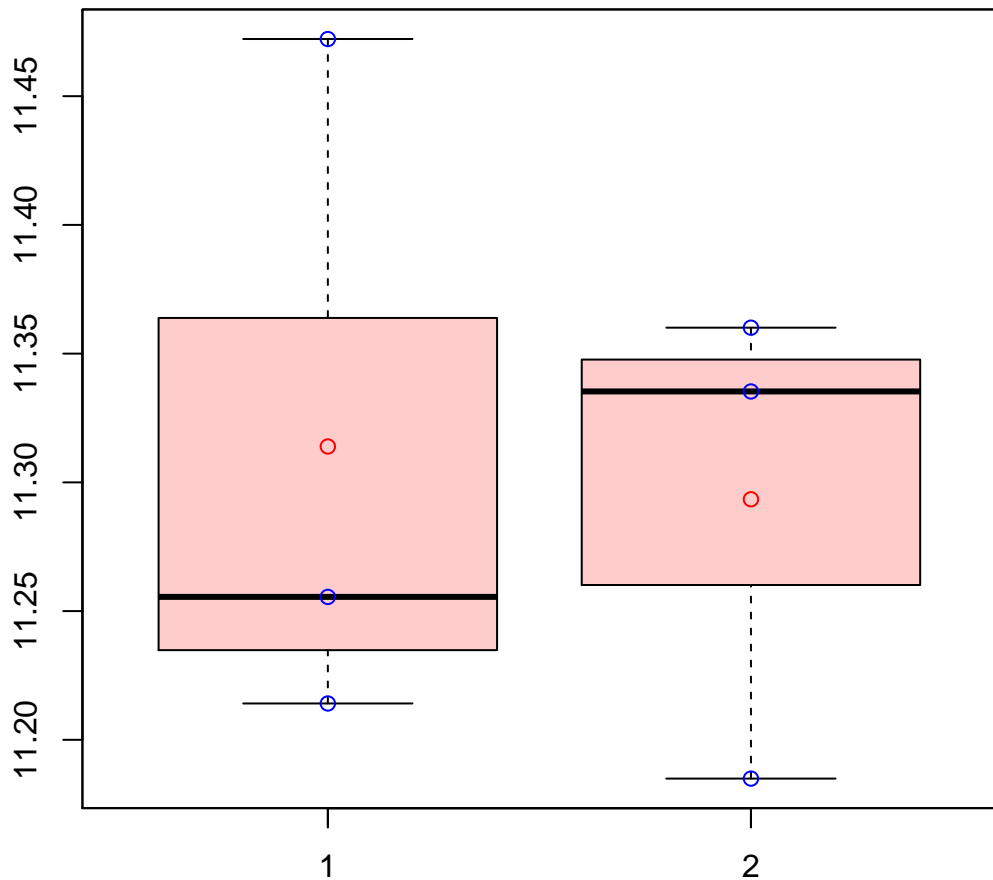

t-Test: p-value = 0.84



# CL72Contig5|CL72Contig5

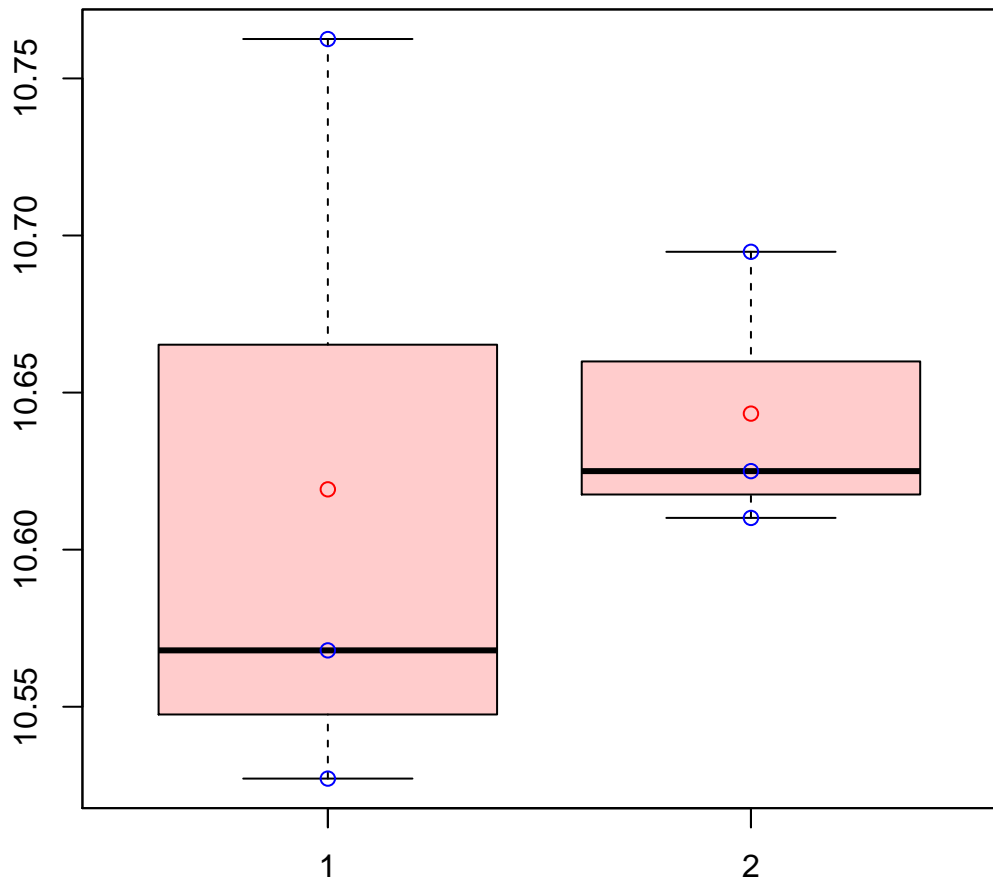

t-Test: p-value = 0.78

# CL72Contig6|CL72Contig6

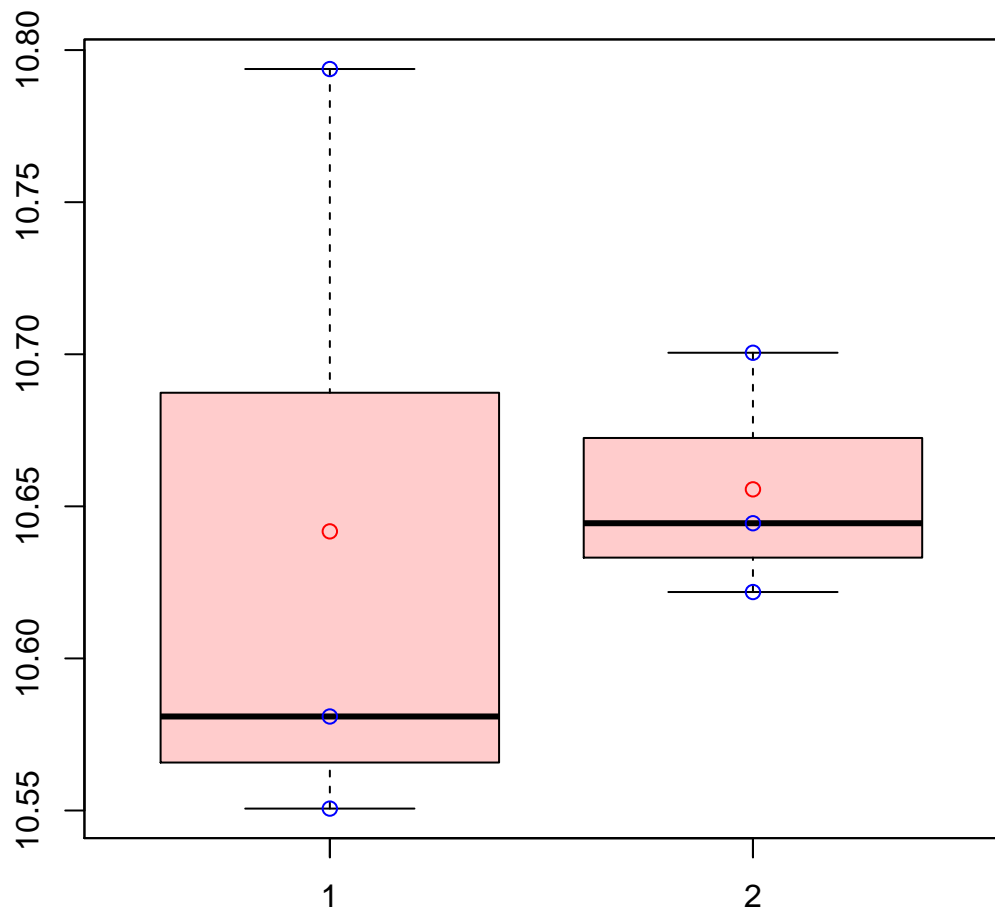

t-Test: p-value = 0.88

# CL72Contig8|CL72Contig8

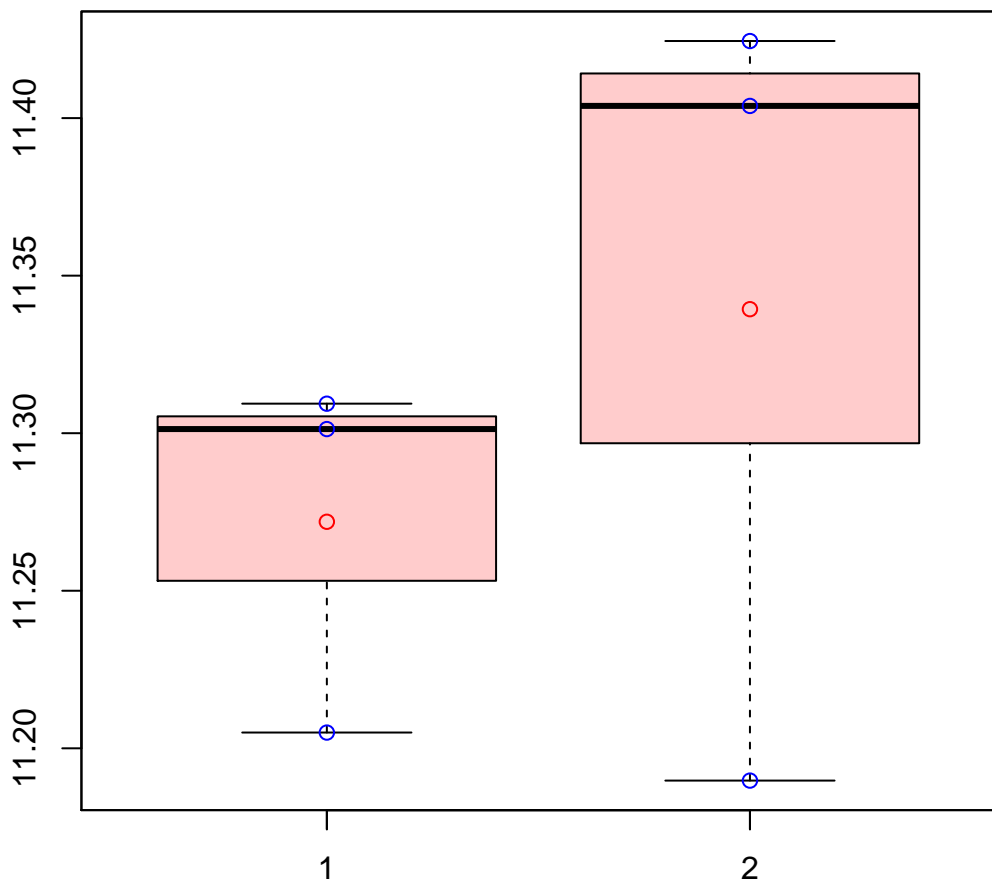

t-Test: p-value = 0.48

# CL72Contig9|CL72Contig9

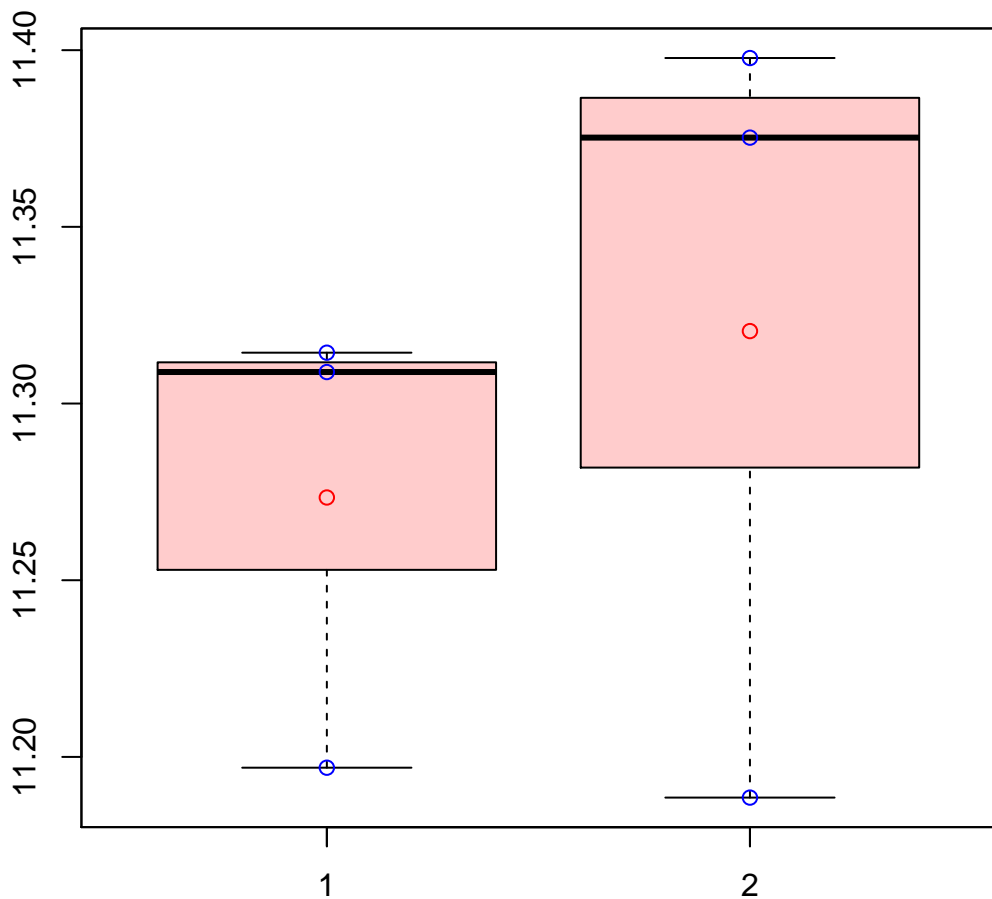

t-Test: p-value = 0.58

# CL7302Contig1|CL7302Contig1

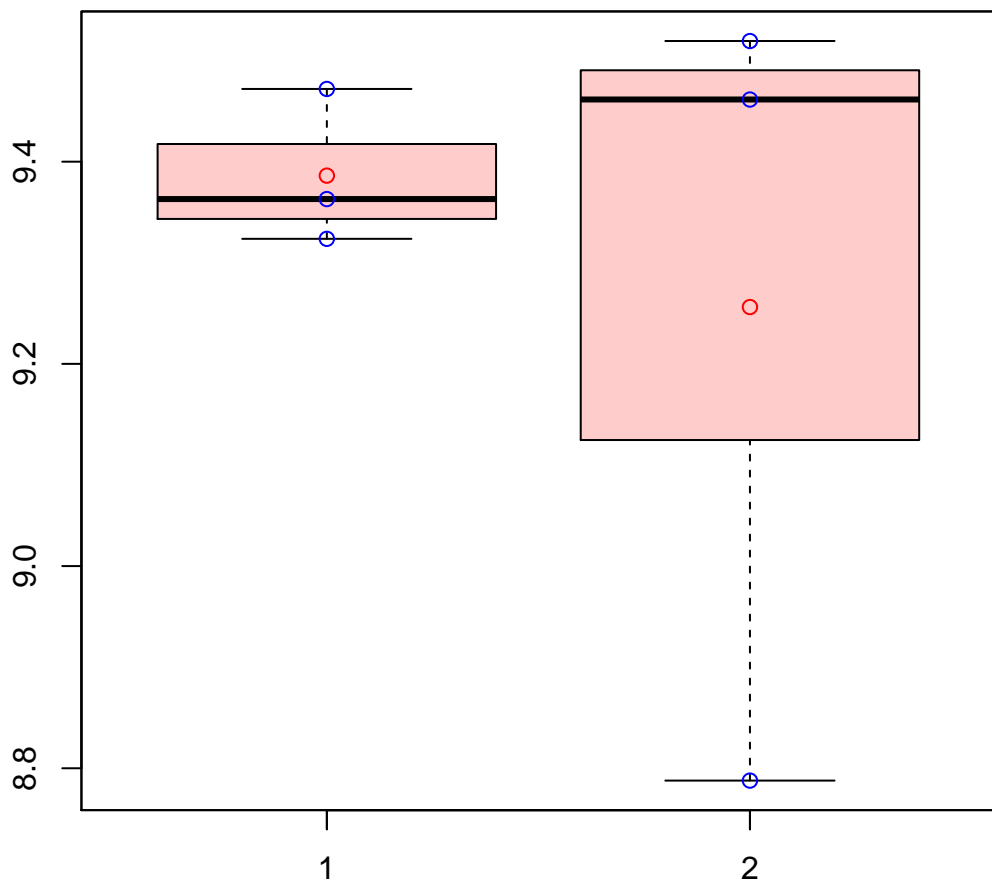

t-Test: p-value = 0.64

# CL7302Contig2|CL7302Contig2

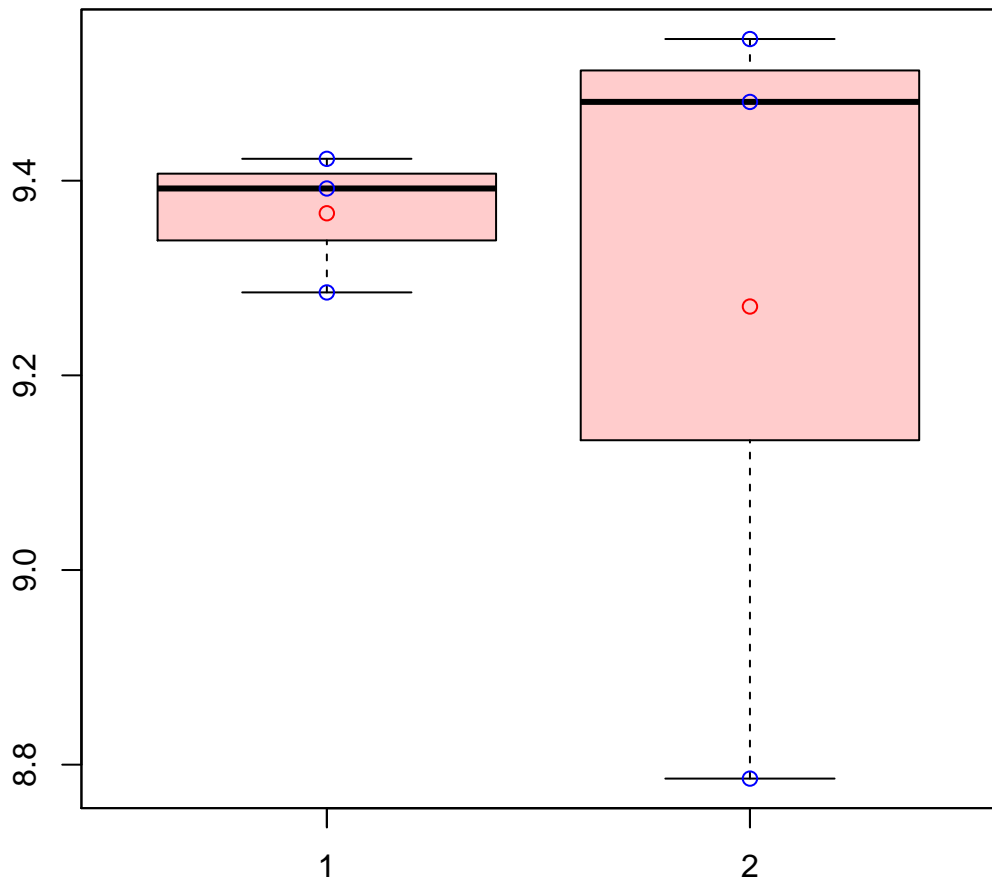

t-Test: p-value = 0.73

# CL7302Contig5|CL7302Contig5

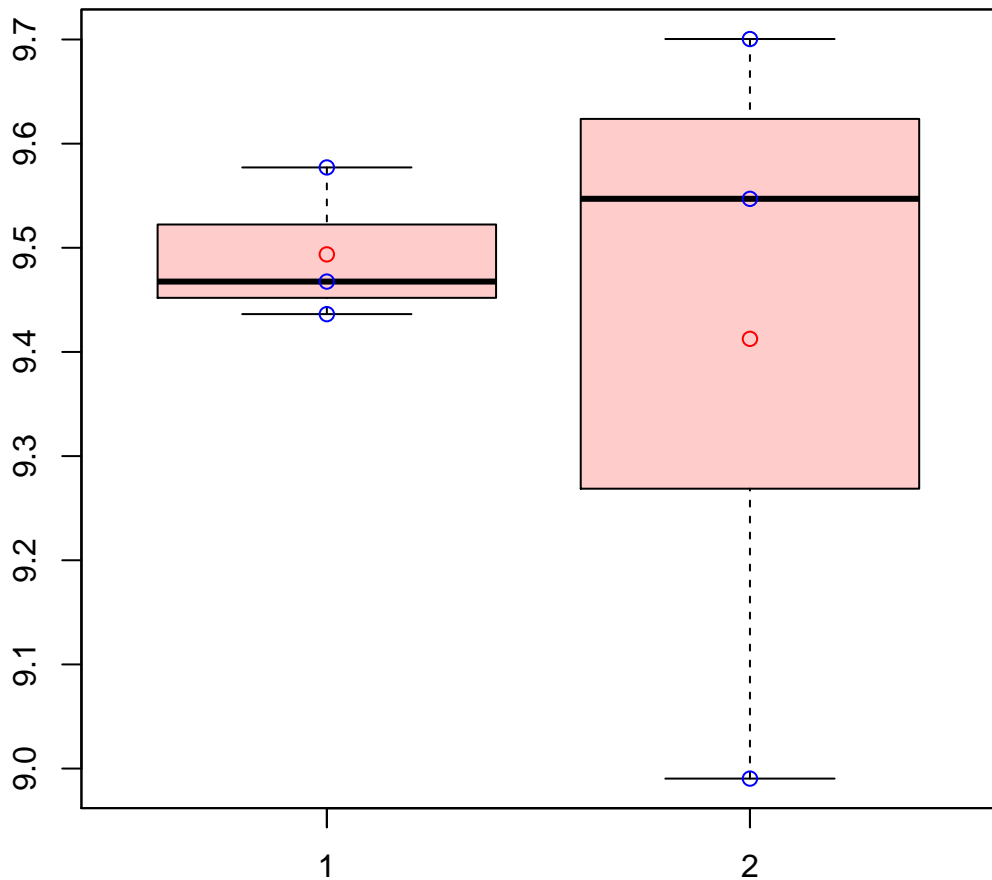

t-Test: p-value = 0.75

# CL7302Contig6|CL7302Contig6

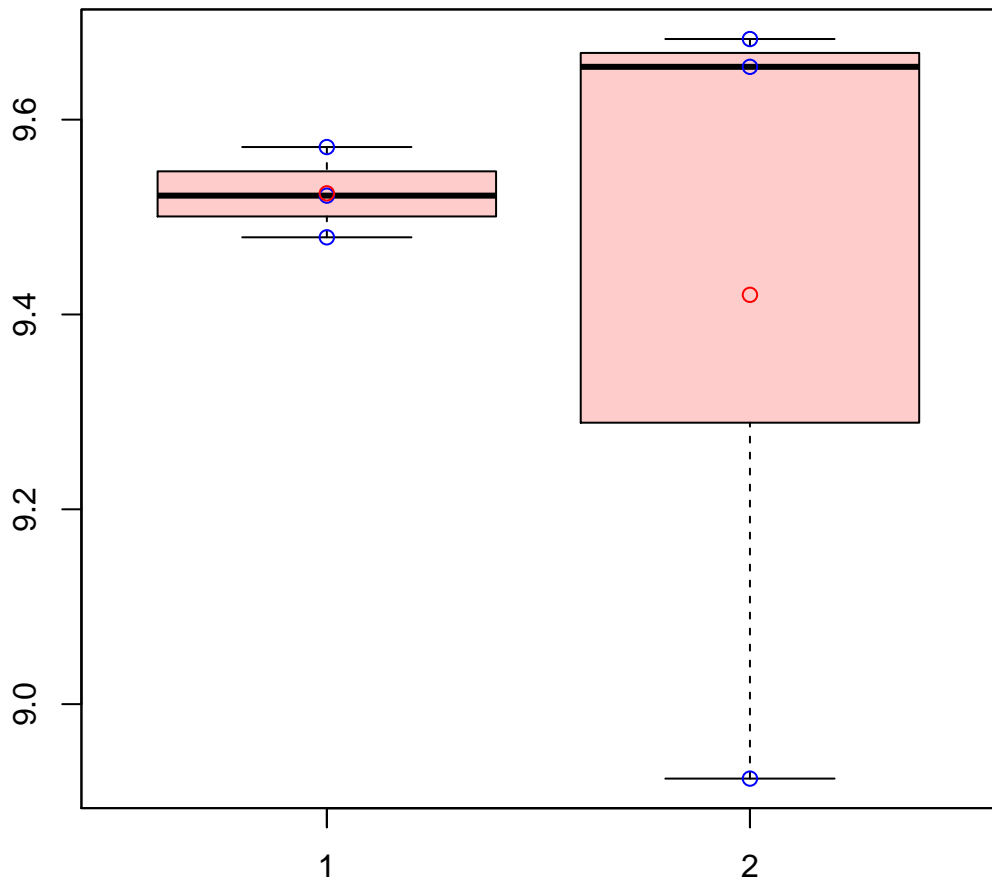

t-Test: p-value = 0.72



# CL730Contig5|CL730Contig5

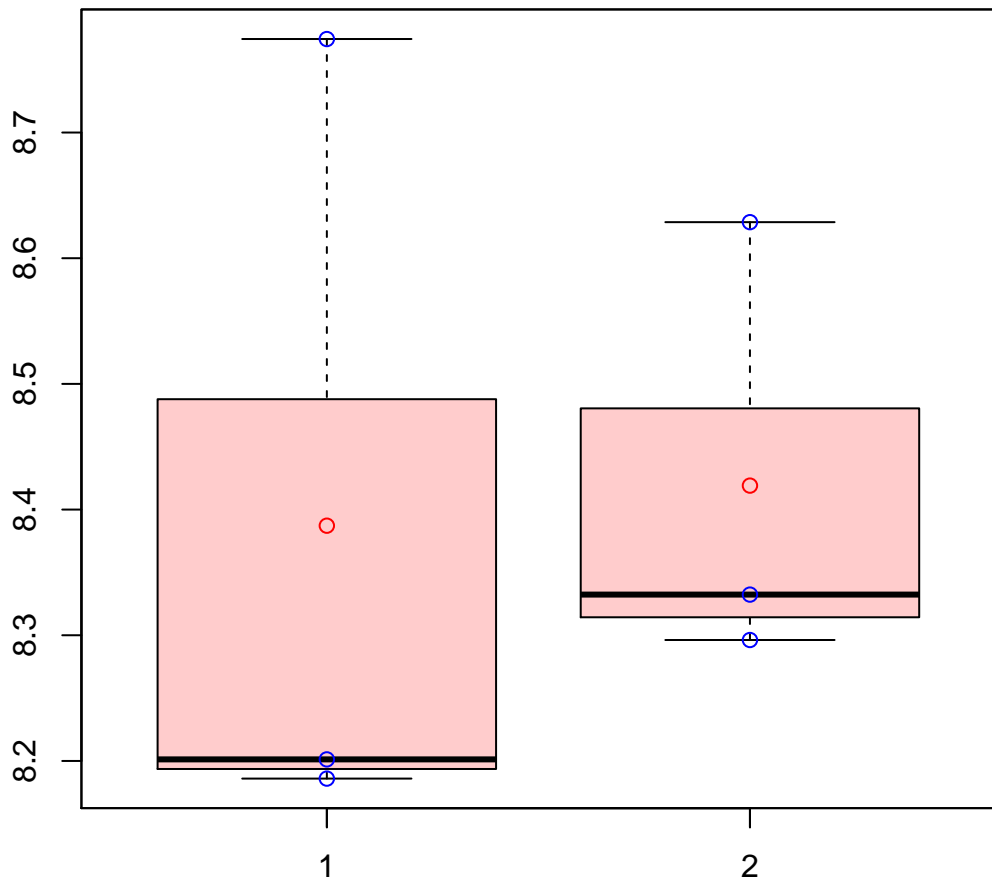

t-Test: p-value = 0.89

# CL7310Contig3|CL7310Contig3

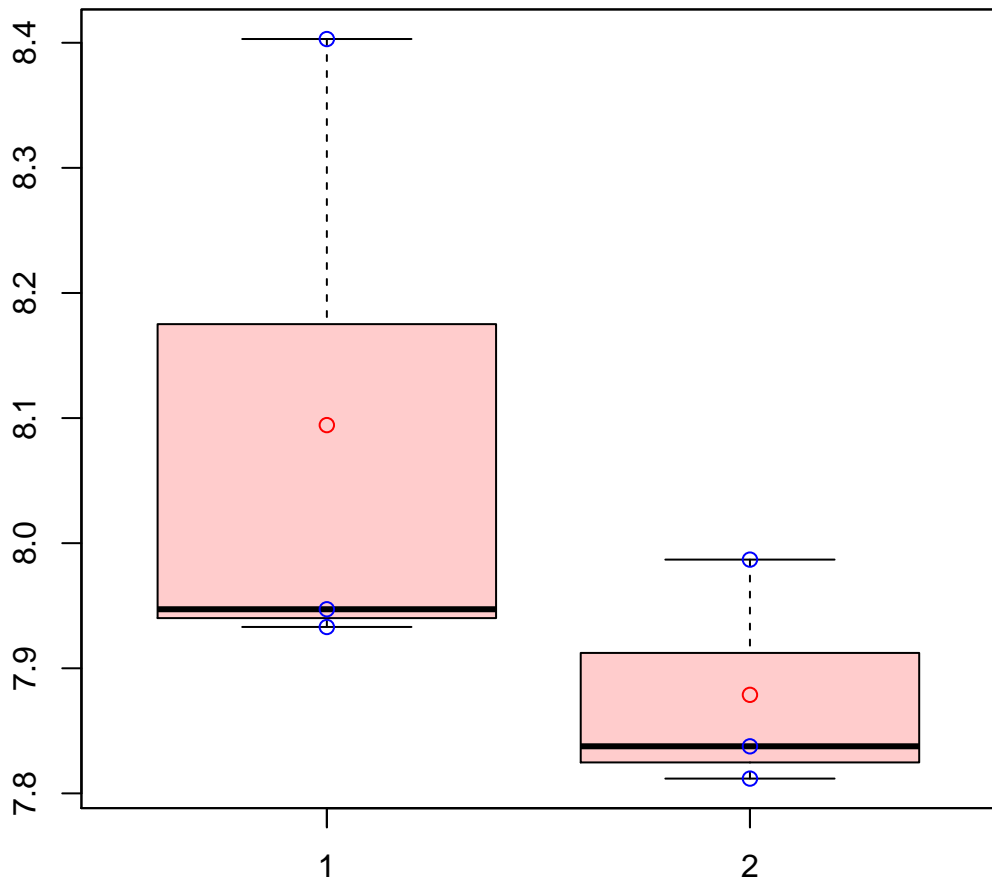

t-Test: p-value = 0.3

# CL7310Contig4|CL7310Contig4



t-Test: p-value = 0.3

# CL7311Contig3|CL7311Contig3

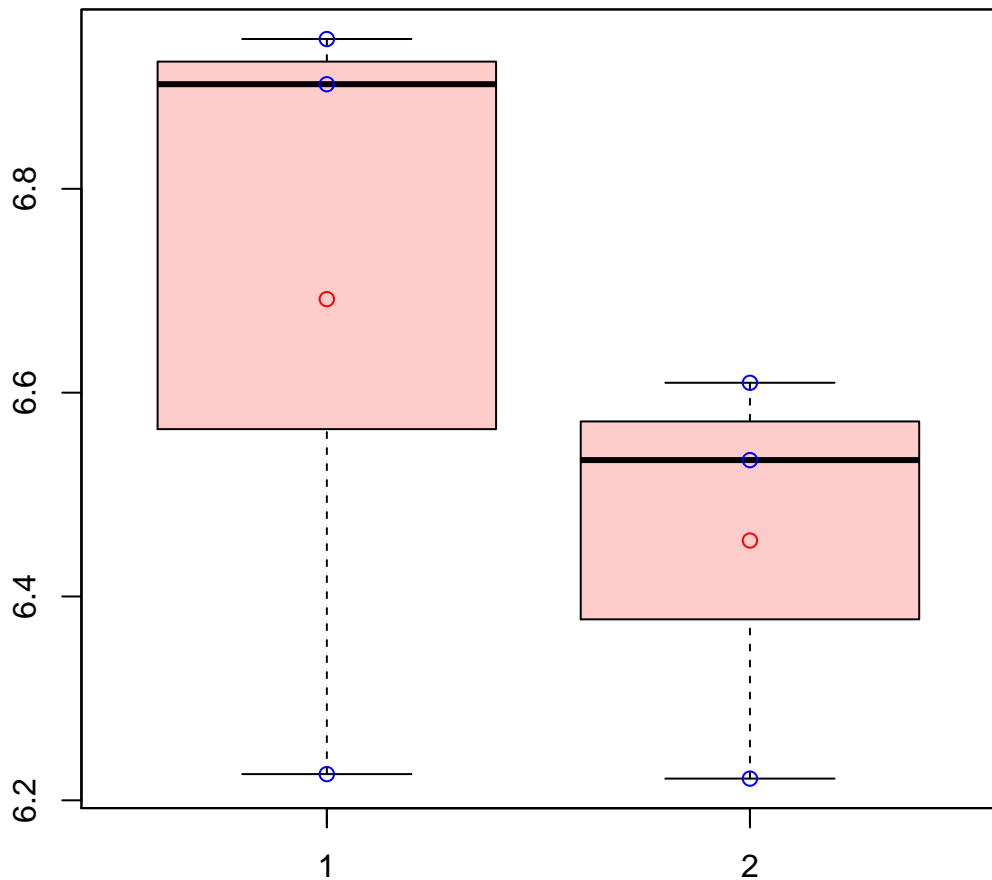

t-Test: p-value = 0.43

# CL7321Contig3|CL7321Contig3

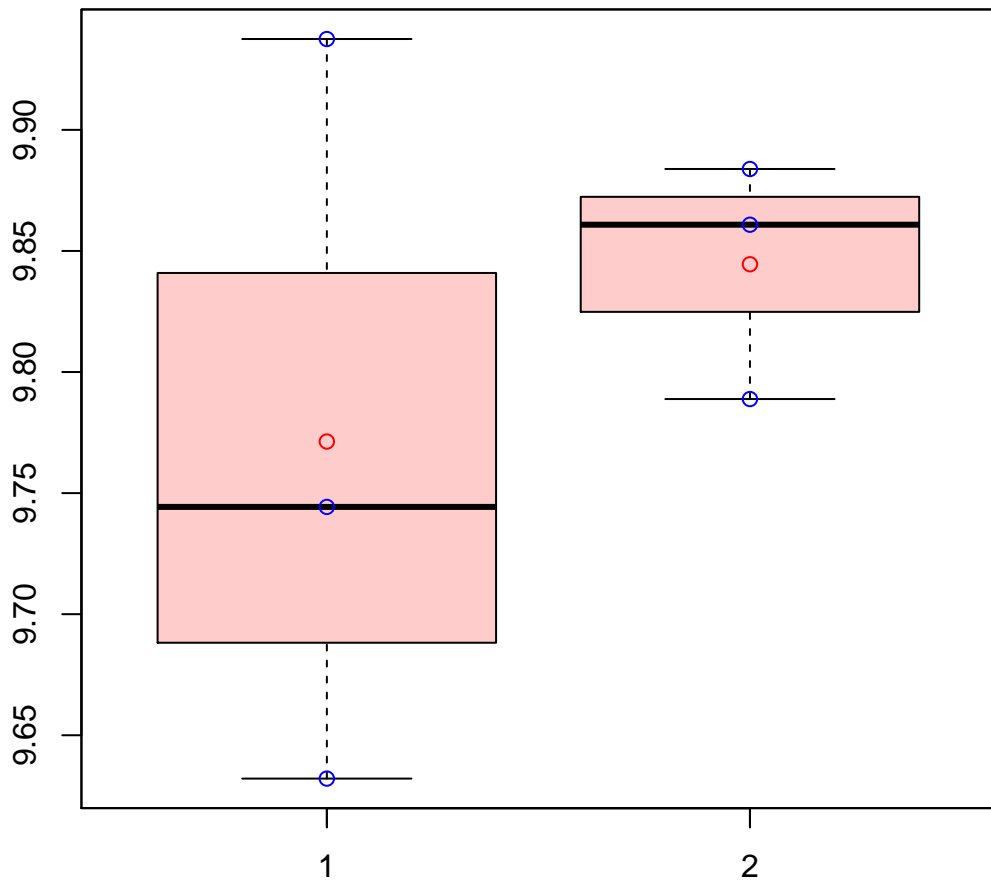

t-Test: p-value = 0.5

# CL7323Contig1|CL7323Contig1

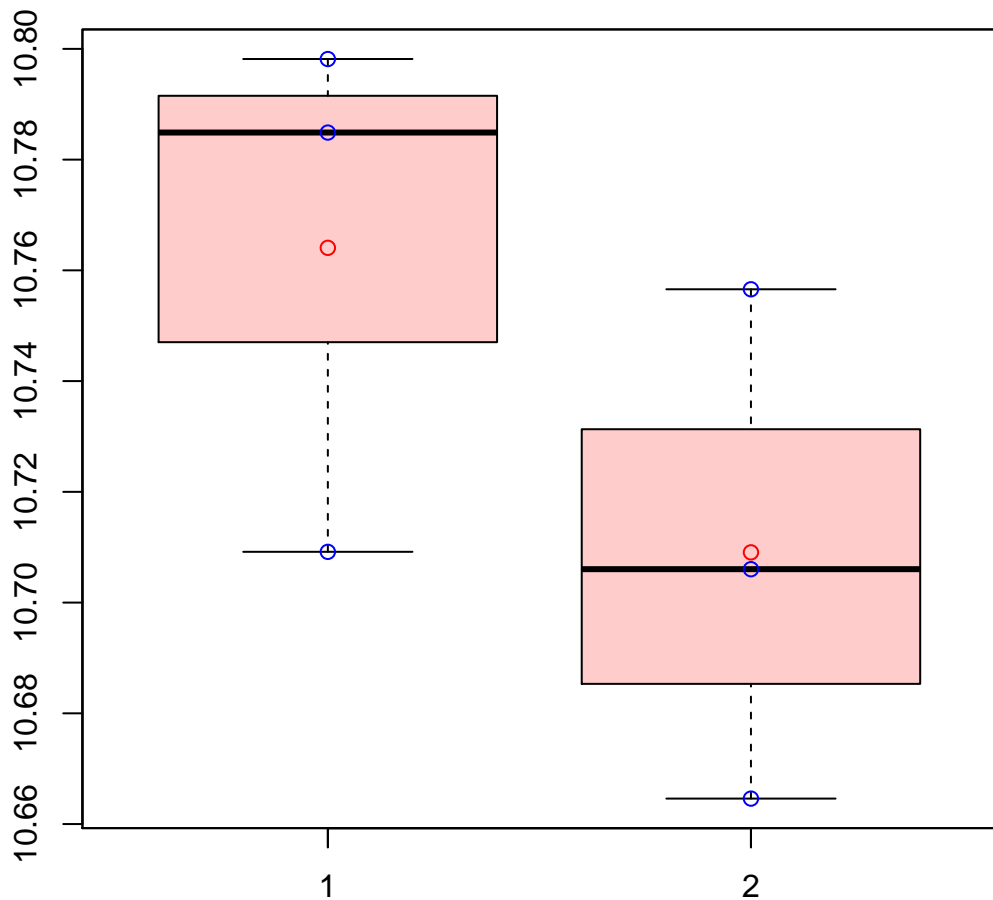

t-Test: p-value = 0.23

# CL732Contig12|CL732Contig12

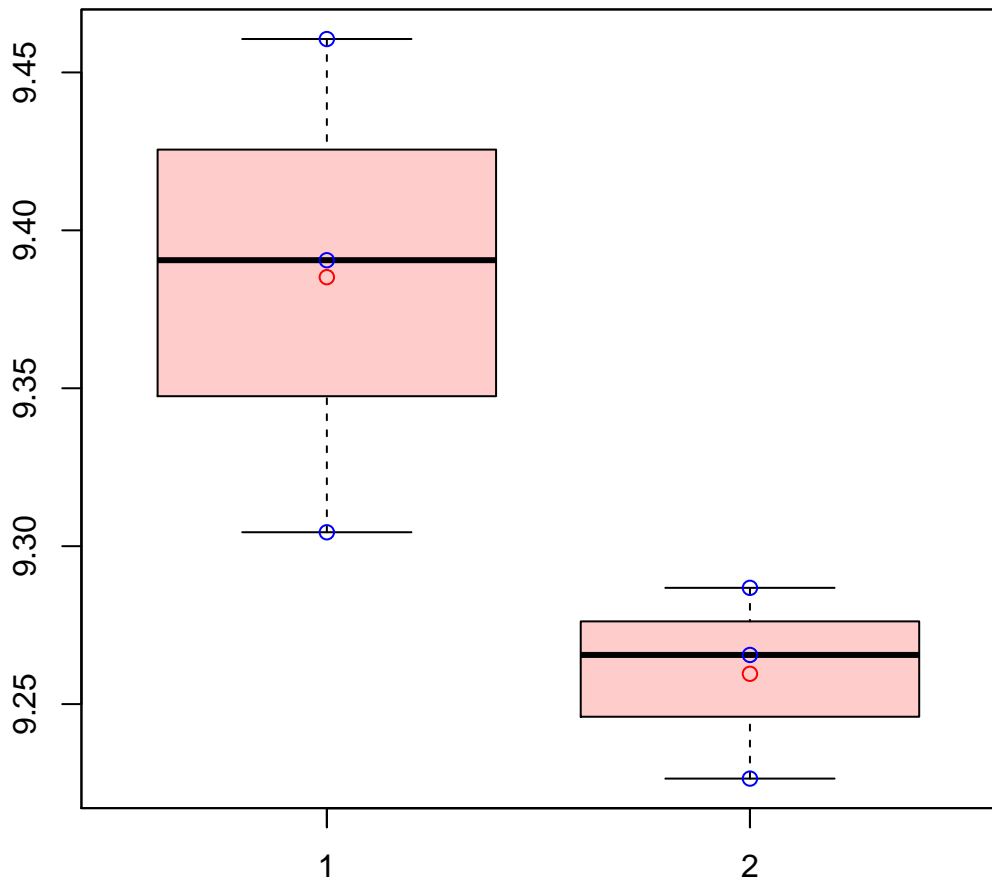

t-Test: p-value = 0.09

# CL7336Contig1|CL7336Contig1

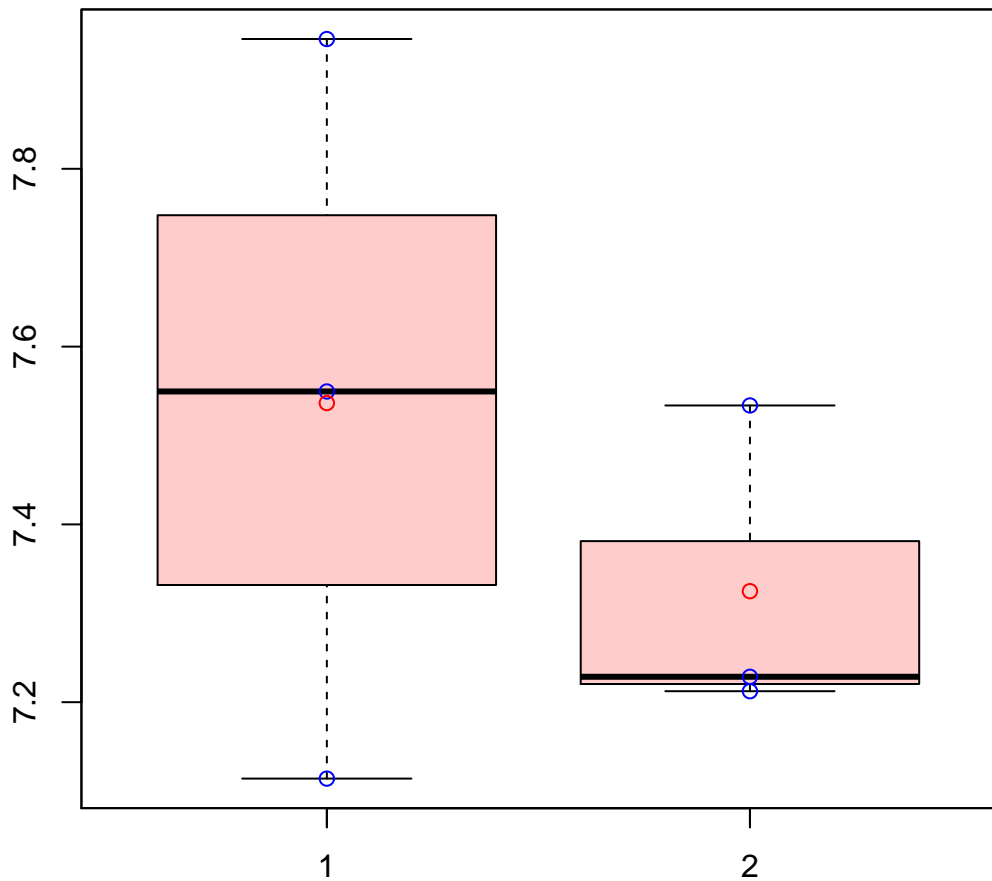

t-Test: p-value = 0.48



# CL7342Contig1|CL7342Contig1

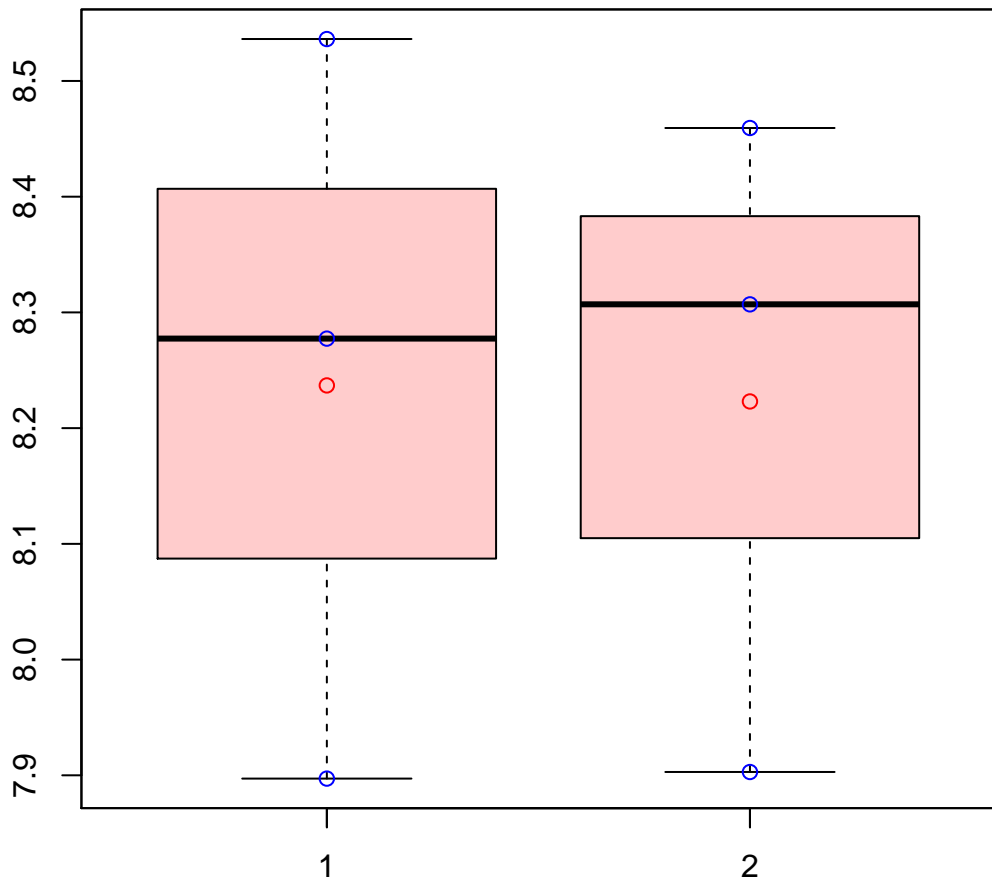

t-Test: p-value = 0.96

# CL7342Contig2|CL7342Contig2



t-Test: p-value = 0.96

# CL7347Contig2|CL7347Contig2

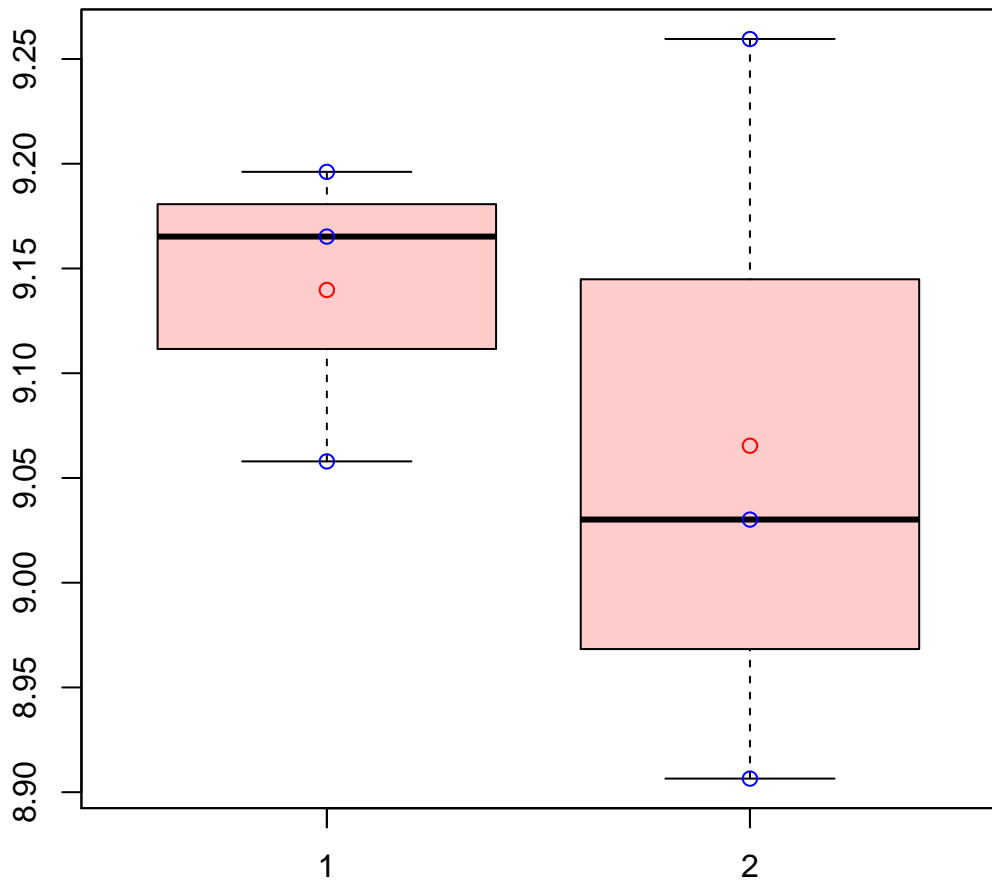

t-Test: p-value = 0.56

# CL7355Contig2|CL7355Contig2

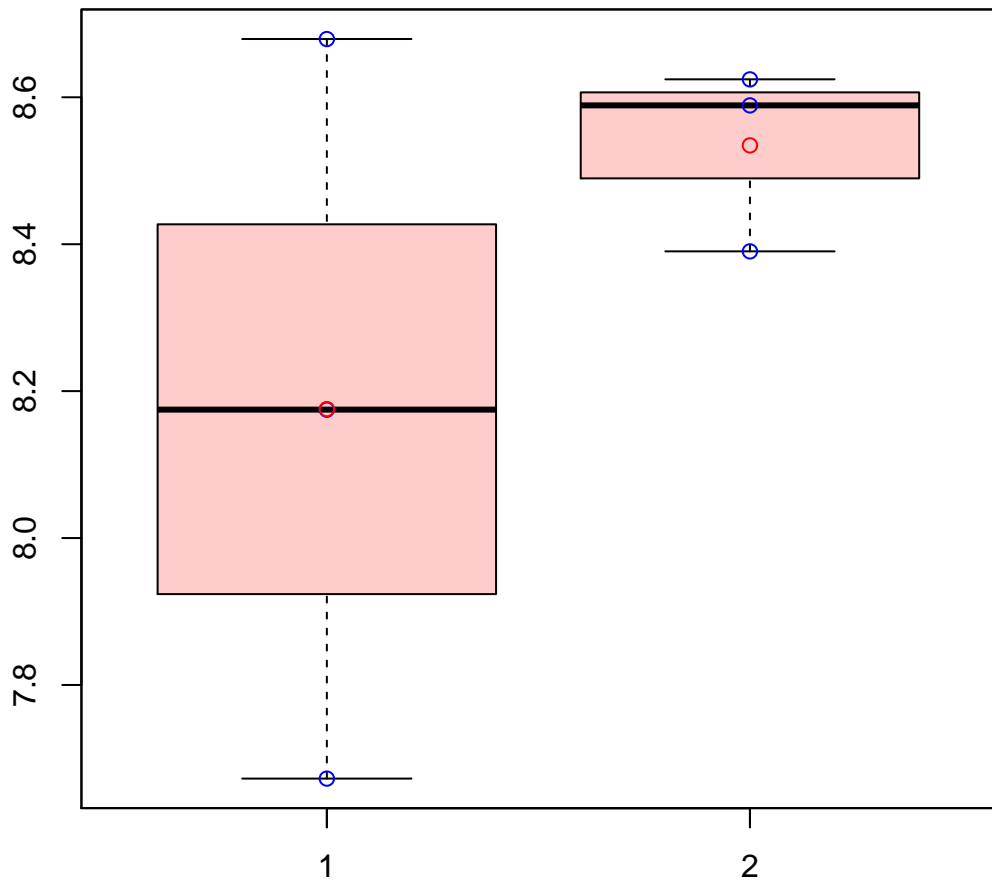

t-Test: p-value = 0.34

# CL7355Contig4|CL7355Contig4

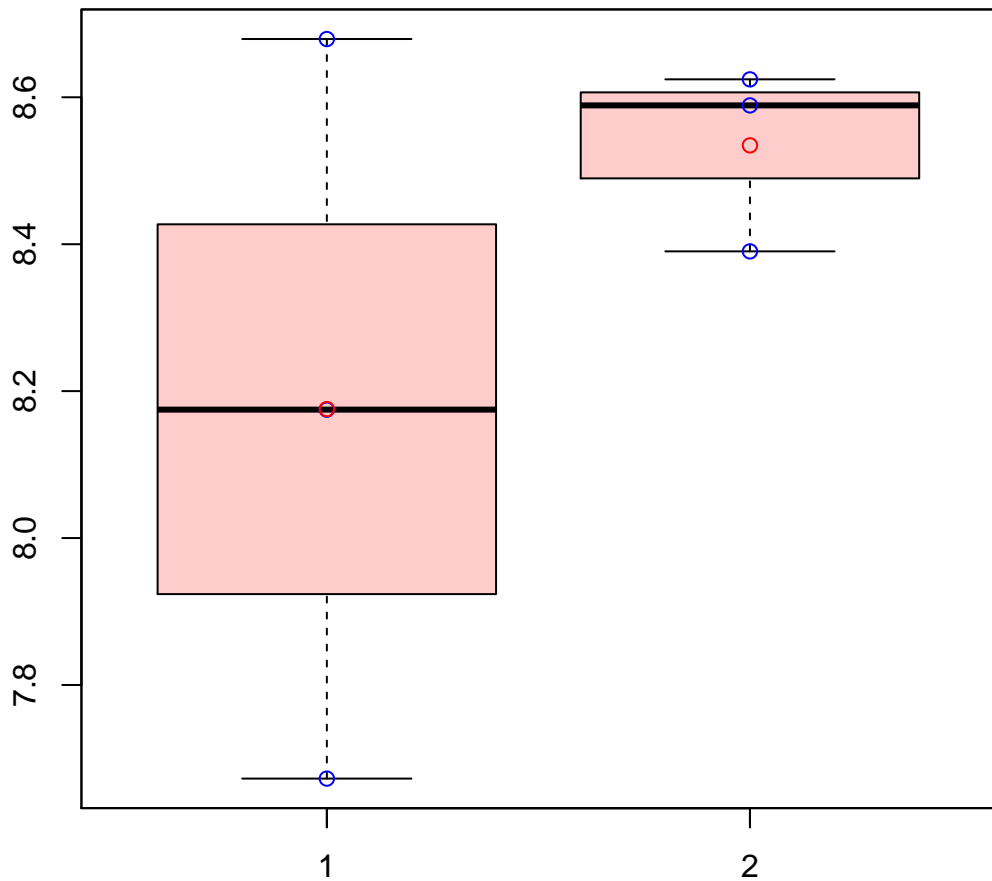

t-Test: p-value = 0.34

# CL7356Contig1|CL7356Contig1

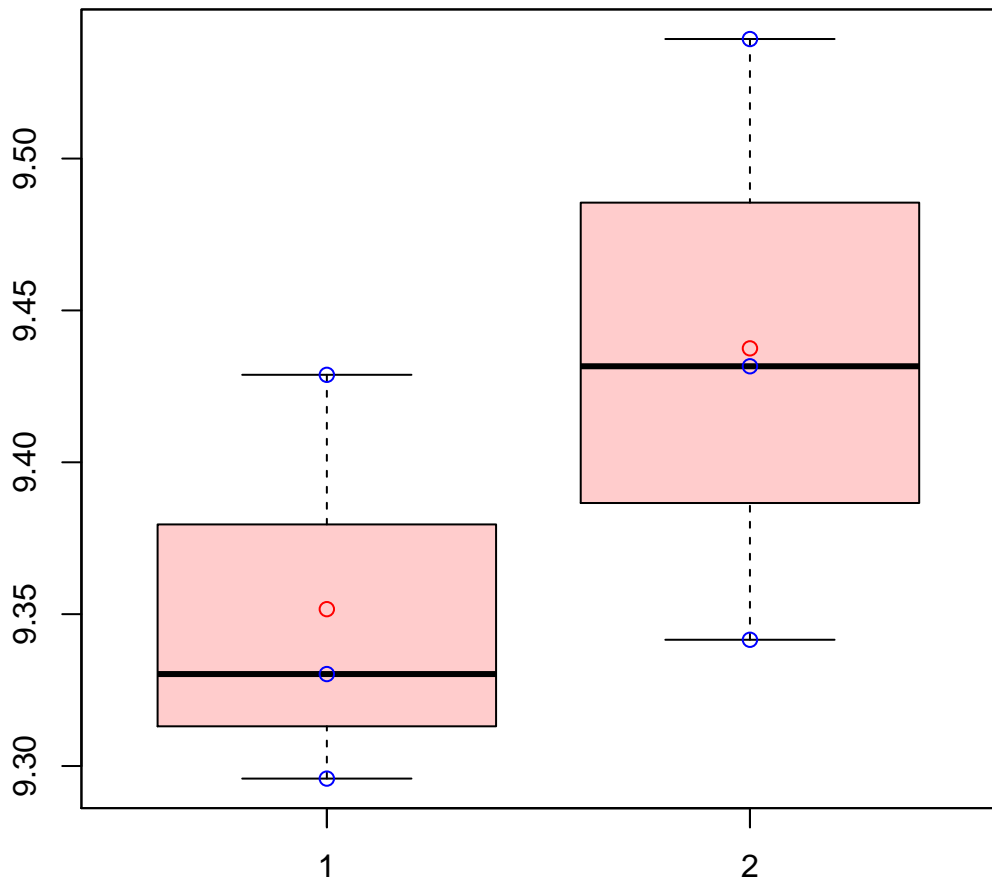

t-Test: p-value = 0.29

# CL735Contig1|CL735Contig1

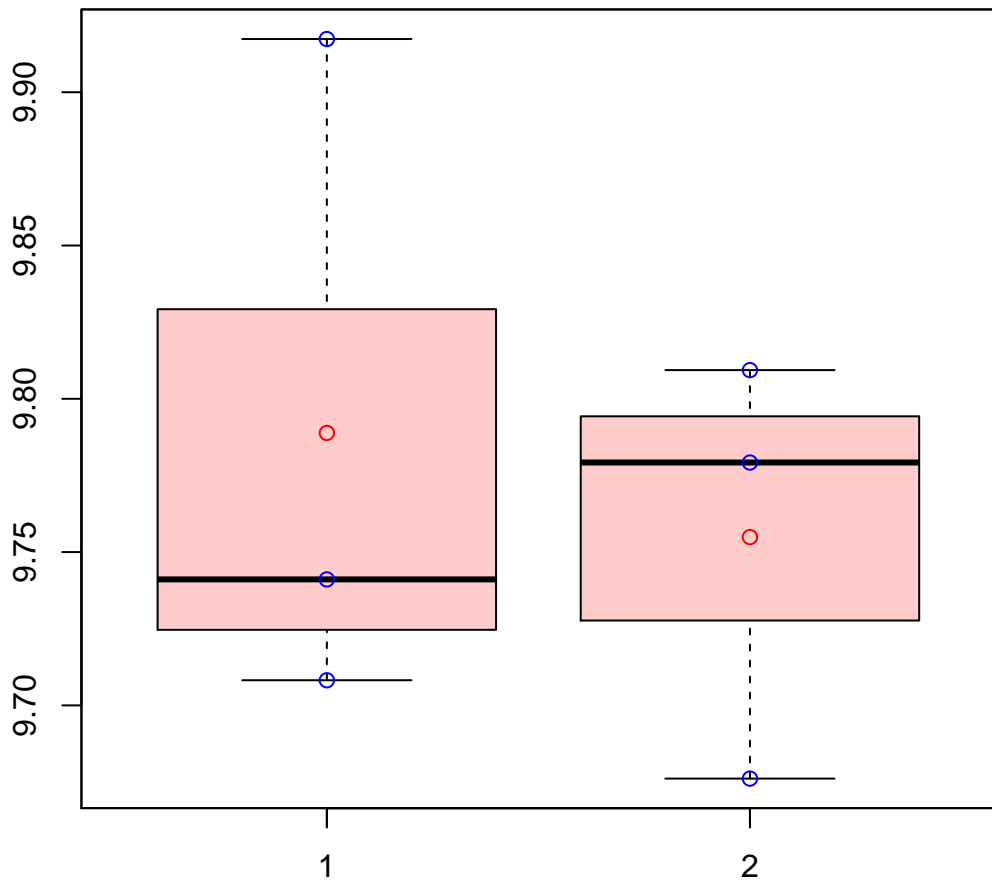

t-Test: p-value = 0.68

# CL735Contig2|CL735Contig2

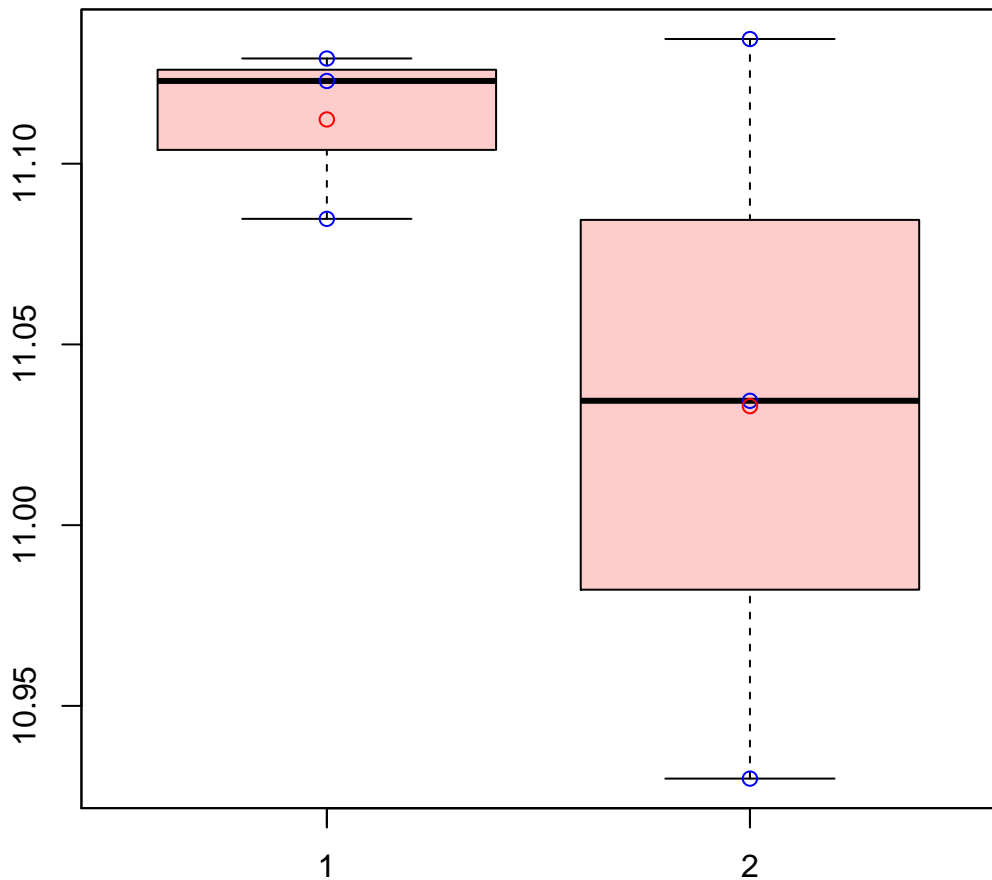

t-Test: p-value = 0.31



# CL735Contig3|CL735Contig3

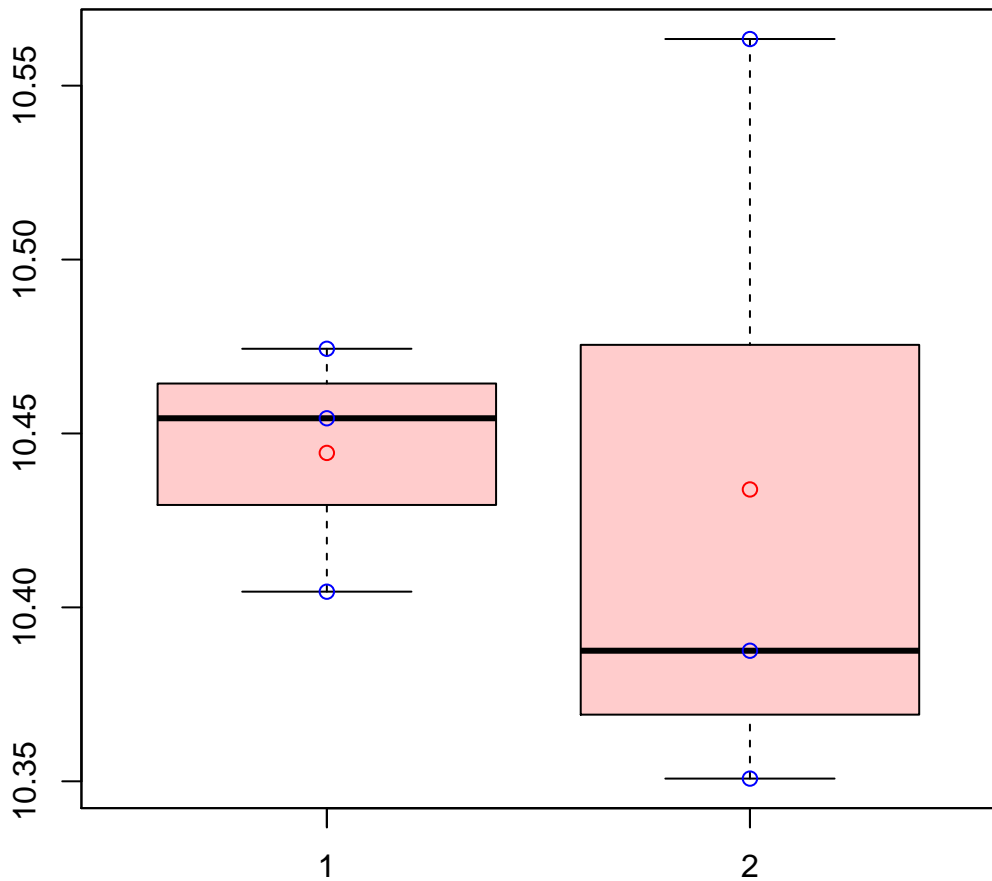

t-Test: p-value = 0.89

# CL735Contig5|CL735Contig5

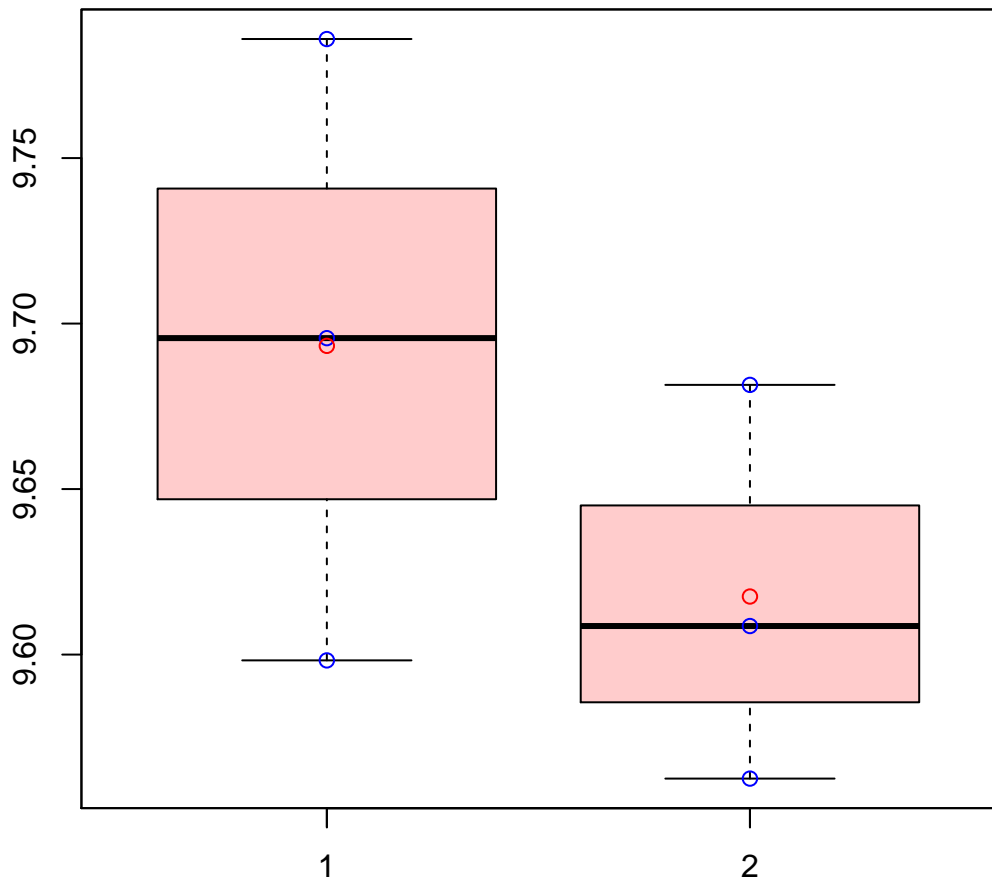

t-Test: p-value = 0.31

# CL7361Contig1|CL7361Contig1

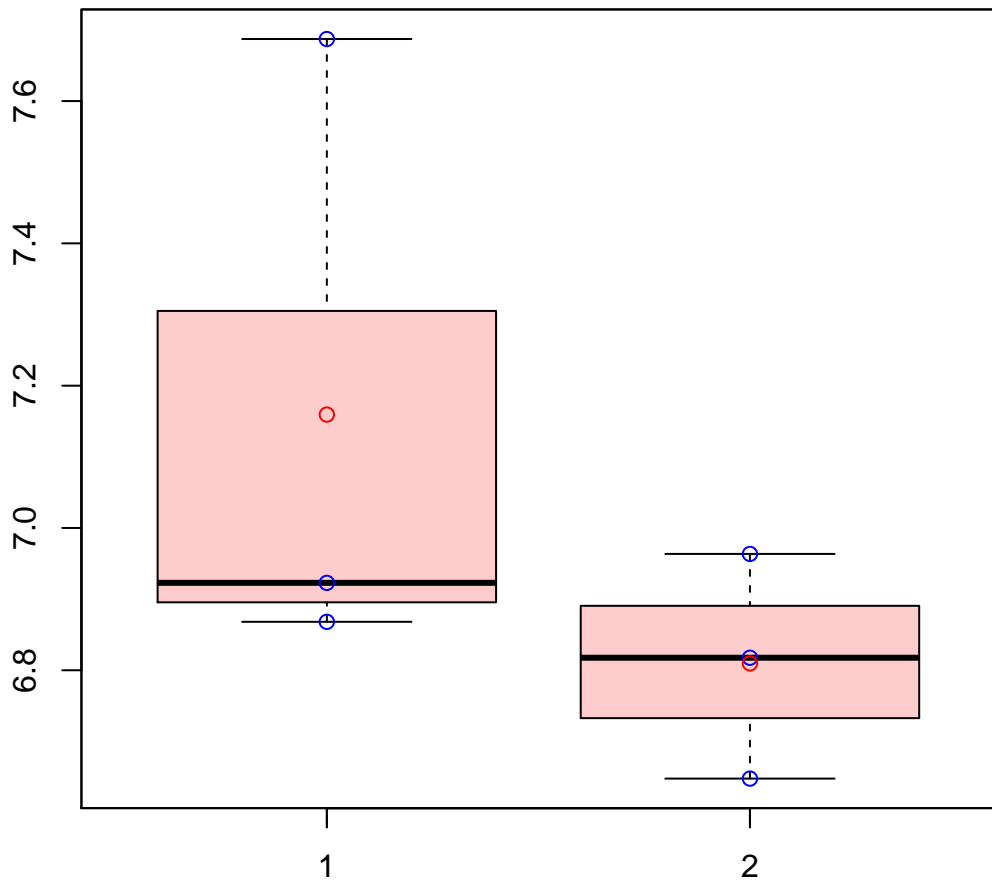

t-Test: p-value = 0.32

# CL7364Contig2|CL7364Contig2

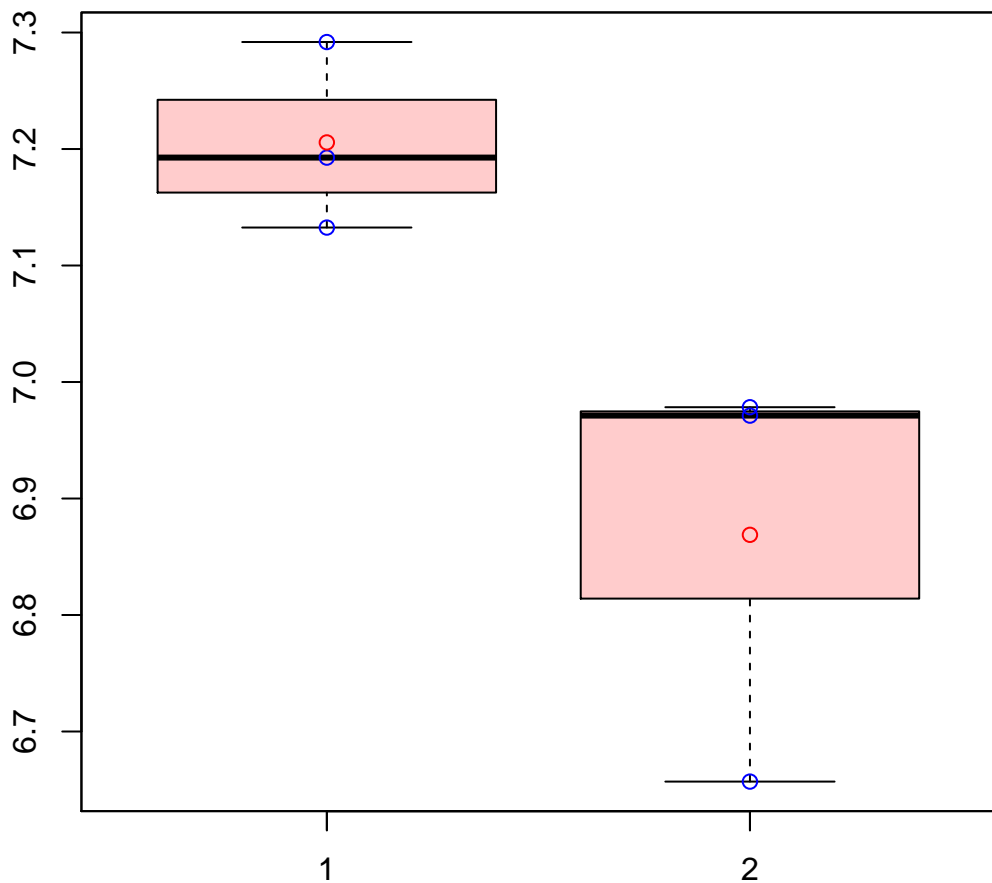

t-Test: p-value = 0.07

# CL736Contig4|CL736Contig4

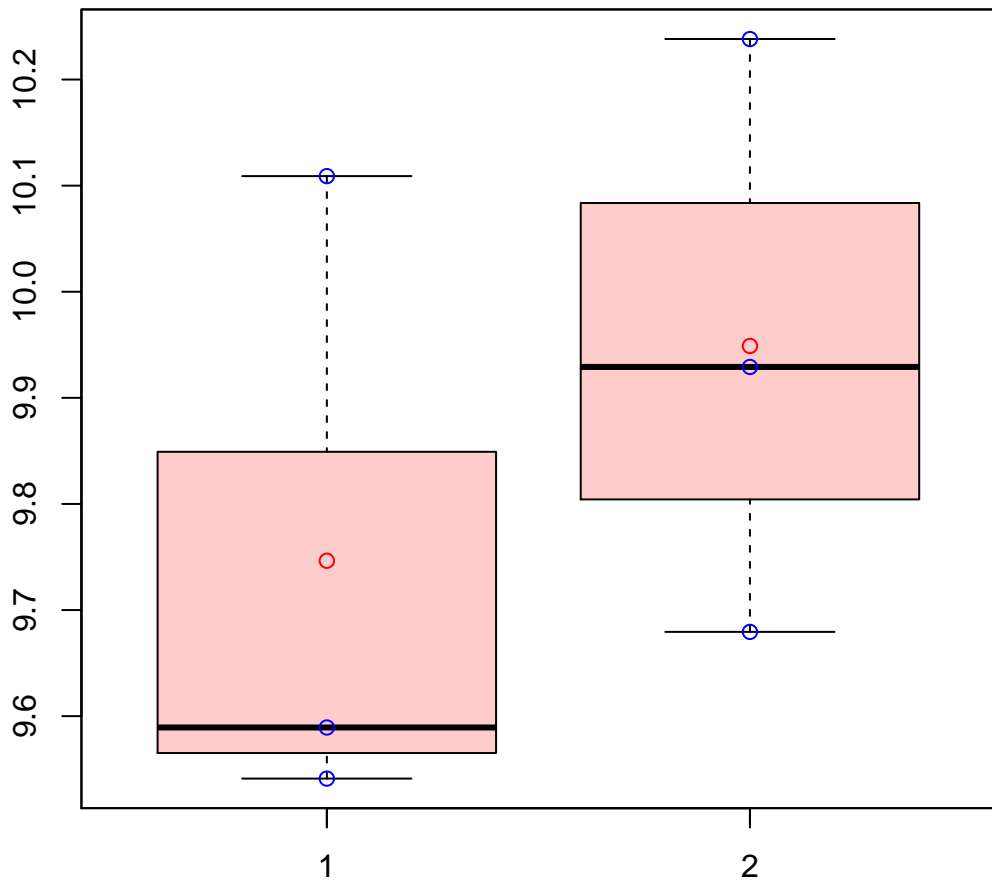

t-Test: p-value = 0.45

# CL7373Contig2|CL7373Contig2

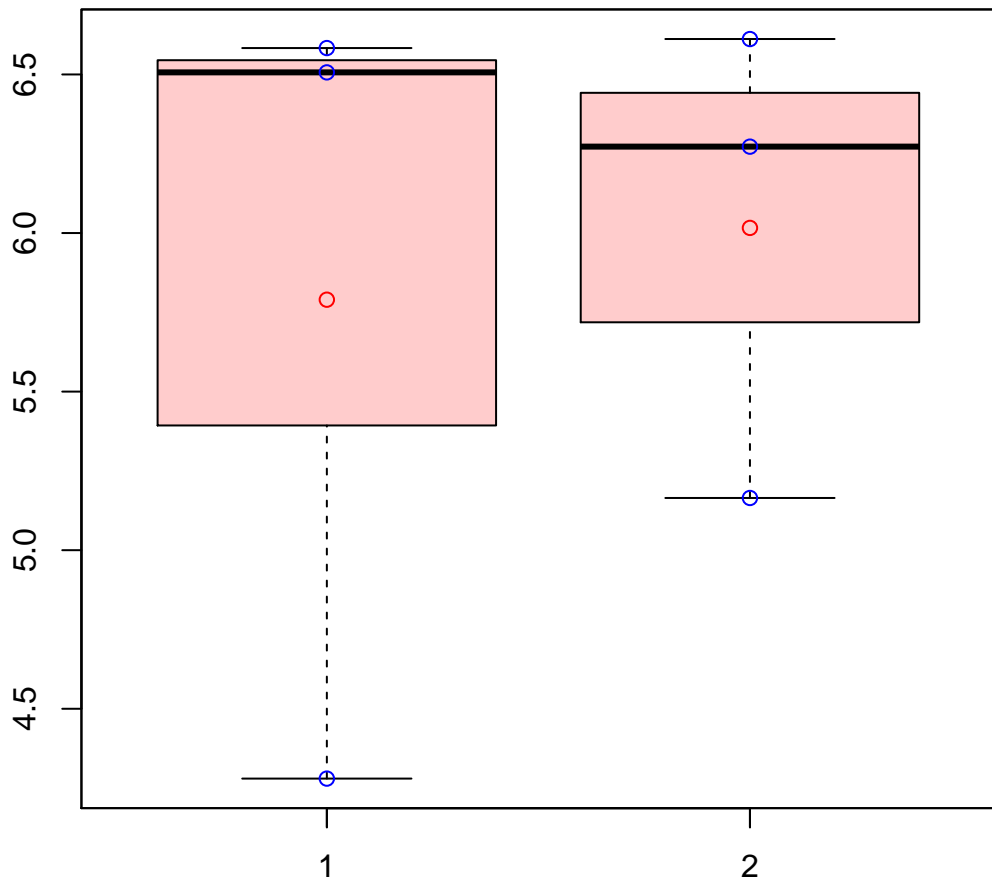

t-Test: p-value = 0.81

# CL7373Contig3|CL7373Contig3



t-Test: p-value = 0.81

# CL737Contig11|CL737Contig11

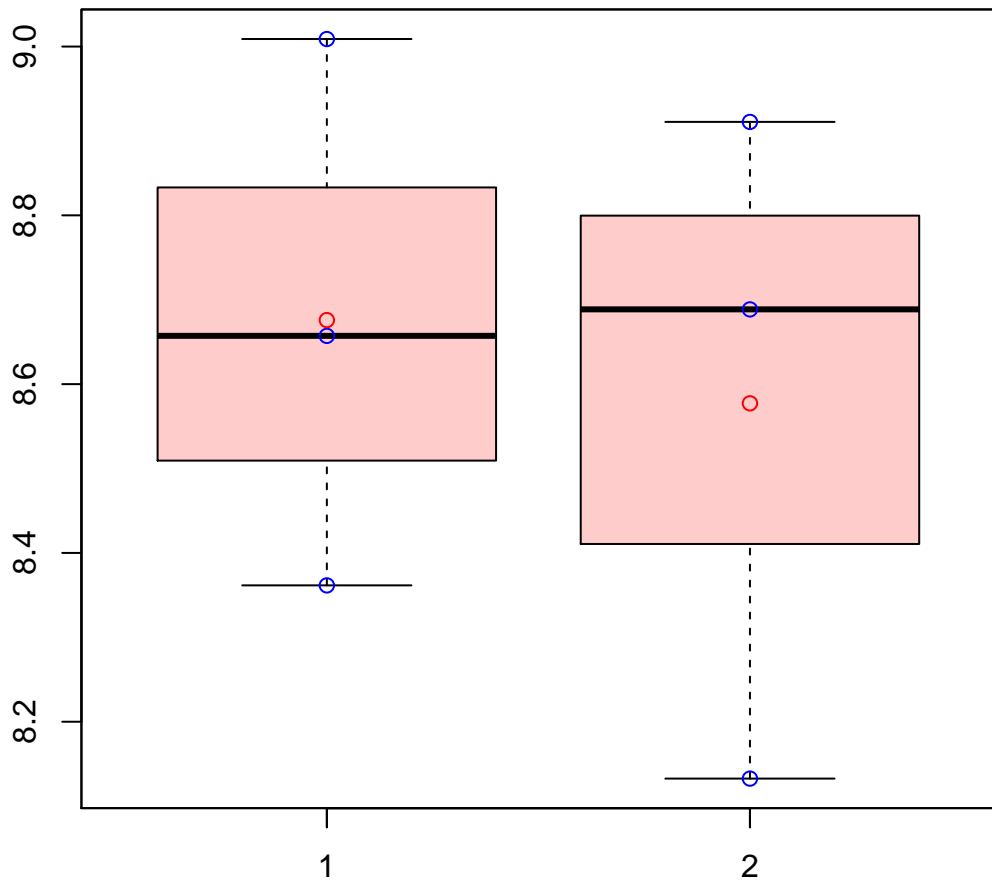

t-Test: p-value = 0.76



# CL737Contig12|CL737Contig12

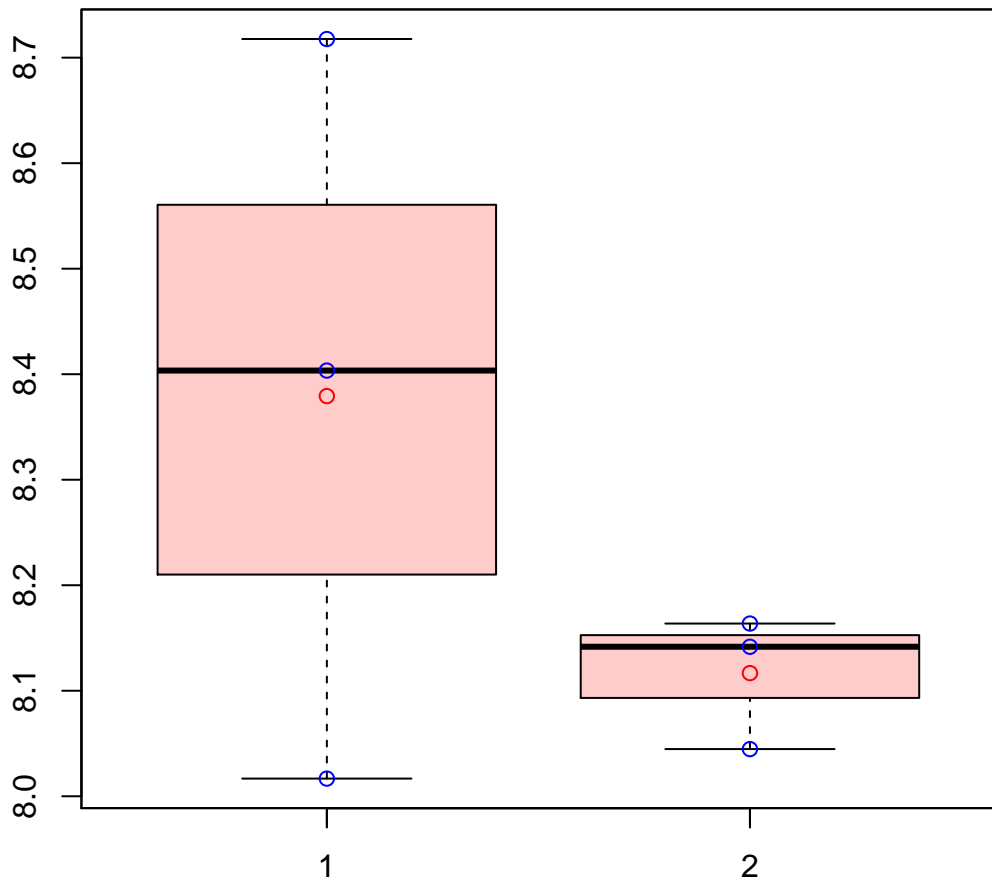

t-Test: p-value = 0.32

# CL737Contig1|CL737Contig1

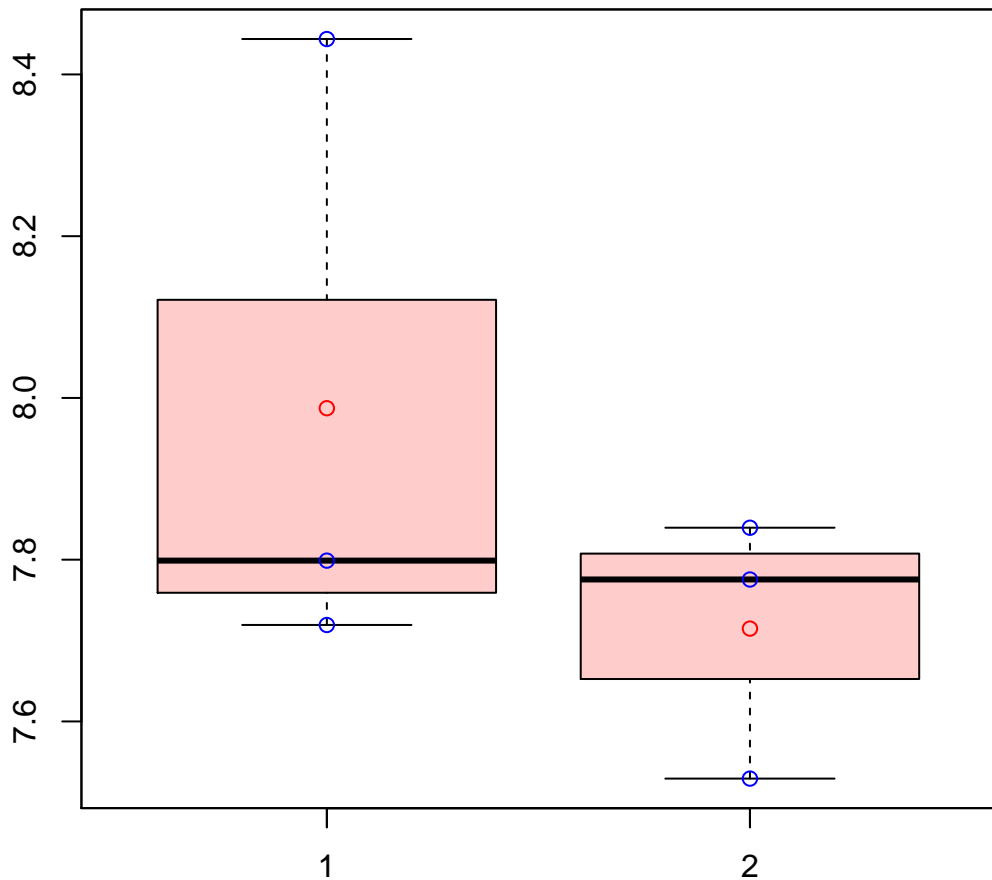

t-Test: p-value = 0.36

# CL737Contig2|CL737Contig2

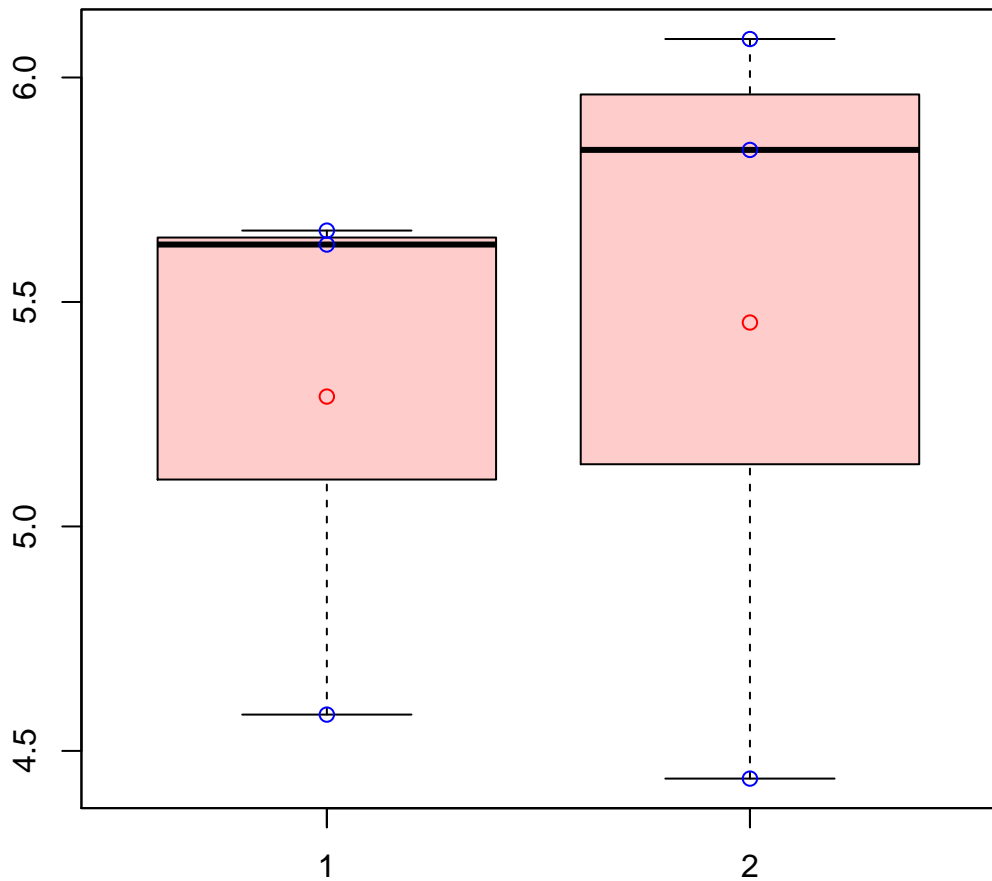

t-Test: p-value = 0.81

# CL737Contig3|CL737Contig3



t-Test: p-value = 0.81

# CL737Contig4|CL737Contig4

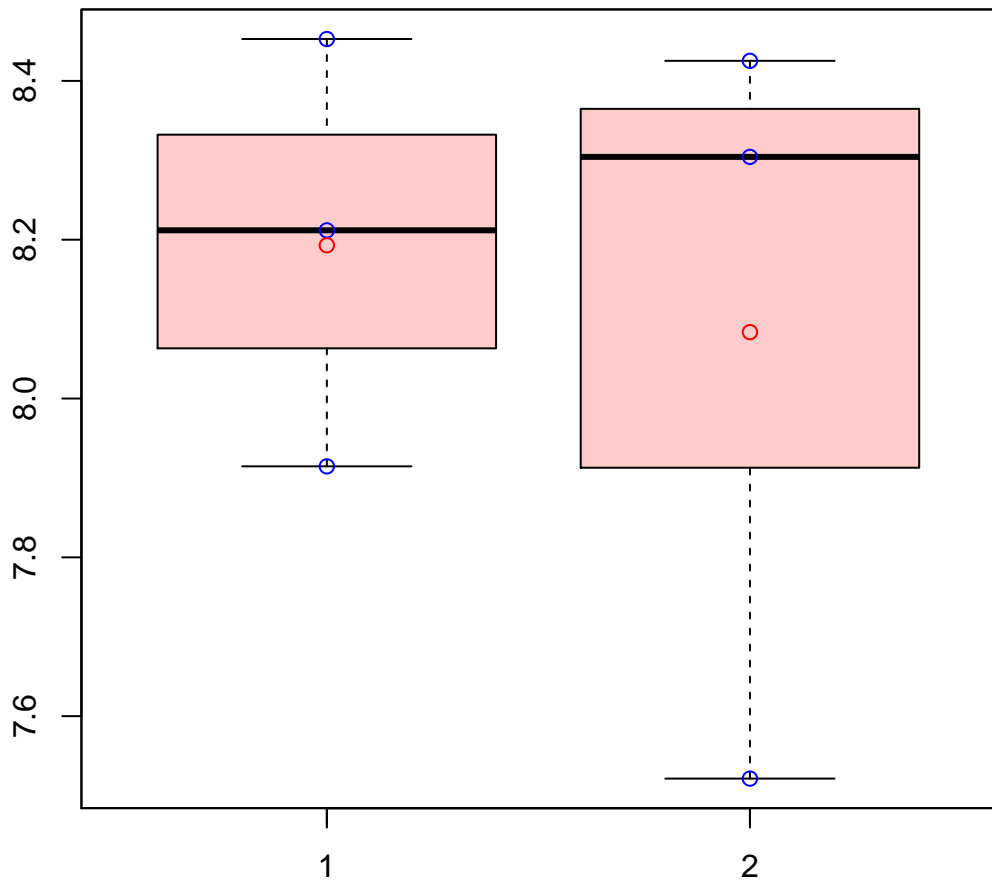

t-Test: p-value = 0.76

# CL737Contig5|CL737Contig5

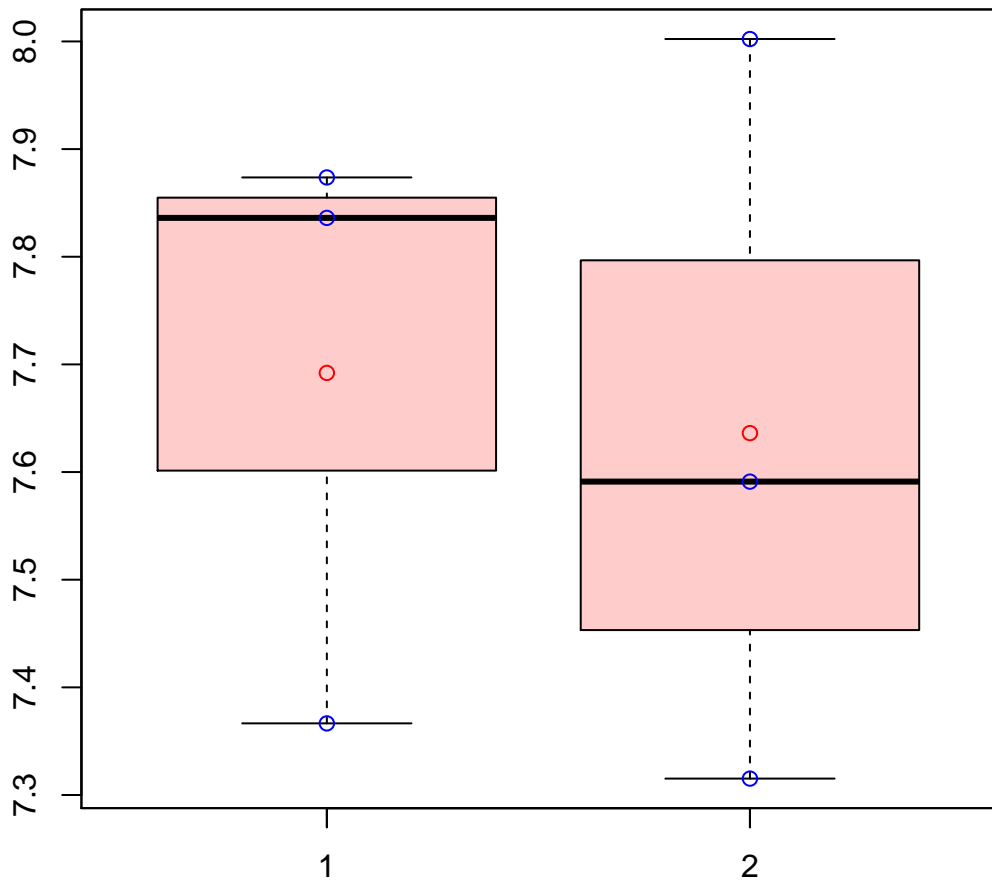

t-Test: p-value = 0.84

# CL737Contig6|CL737Contig6



t-Test: p-value = 0.81

# CL7384Contig1|CL7384Contig1

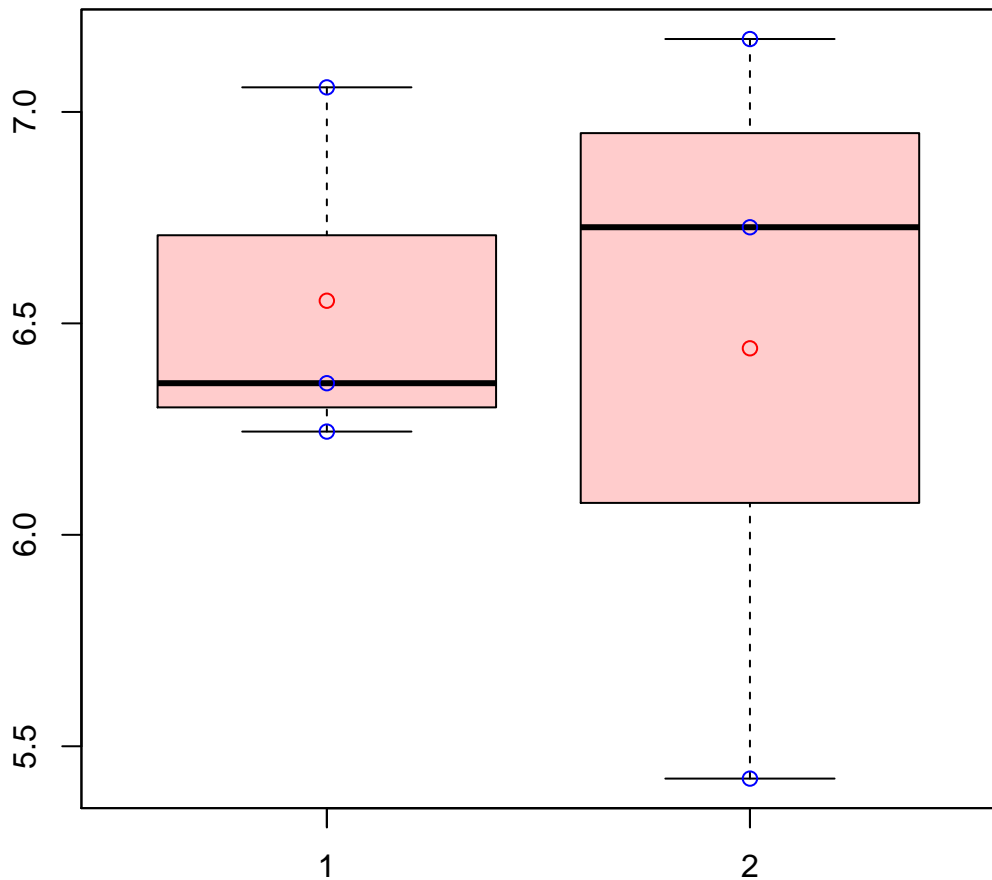

t-Test: p-value = 0.86



# CL7386Contig4|CL7386Contig4

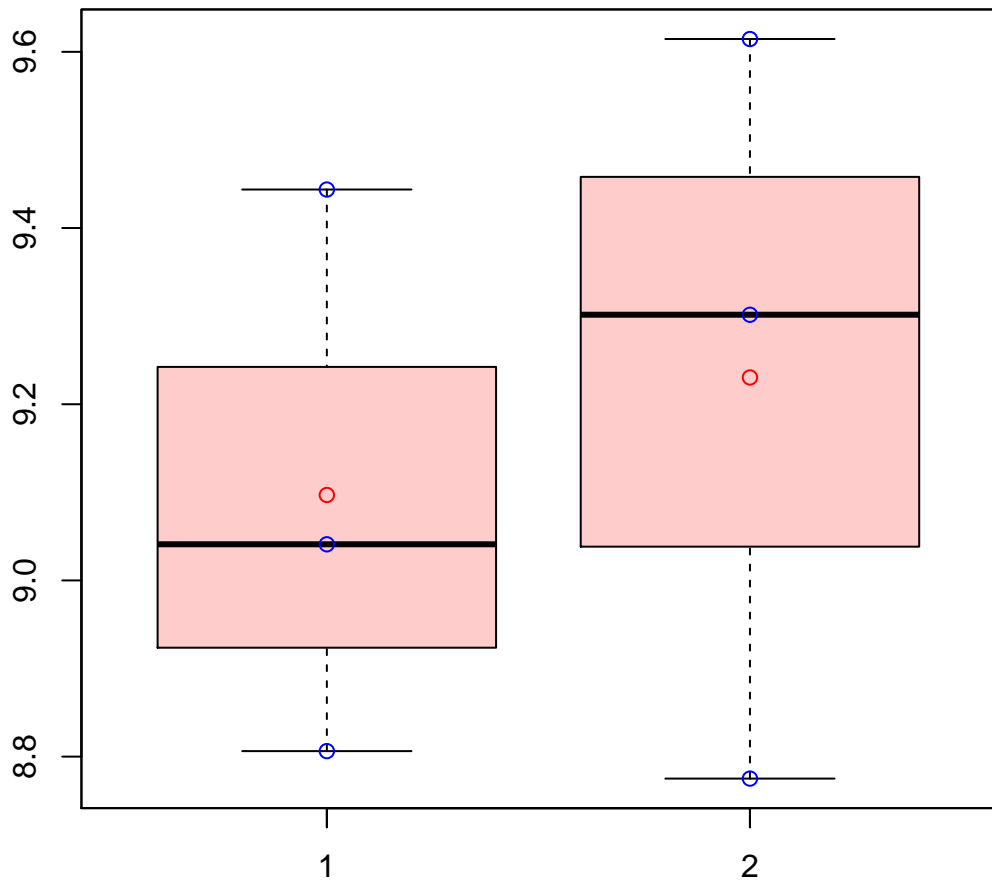

t-Test: p-value = 0.69

# CL738Contig9|CL738Contig9

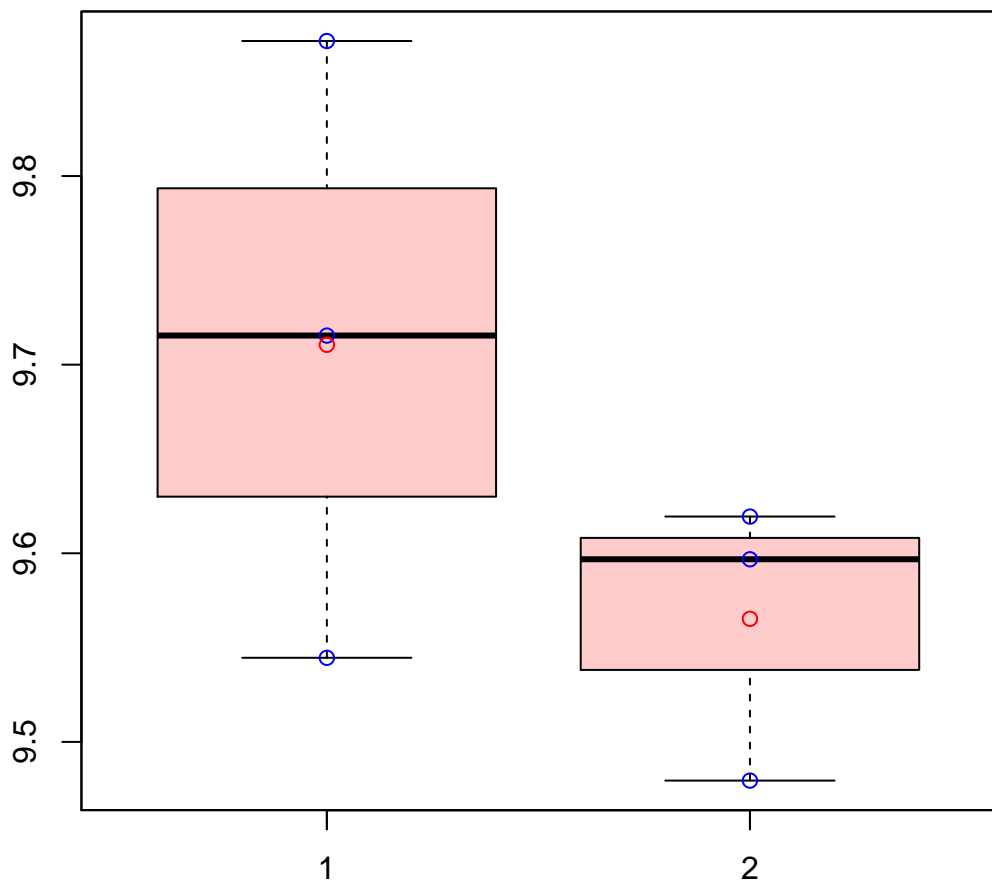

t-Test: p-value = 0.26

# CL7393Contig1|CL7393Contig1

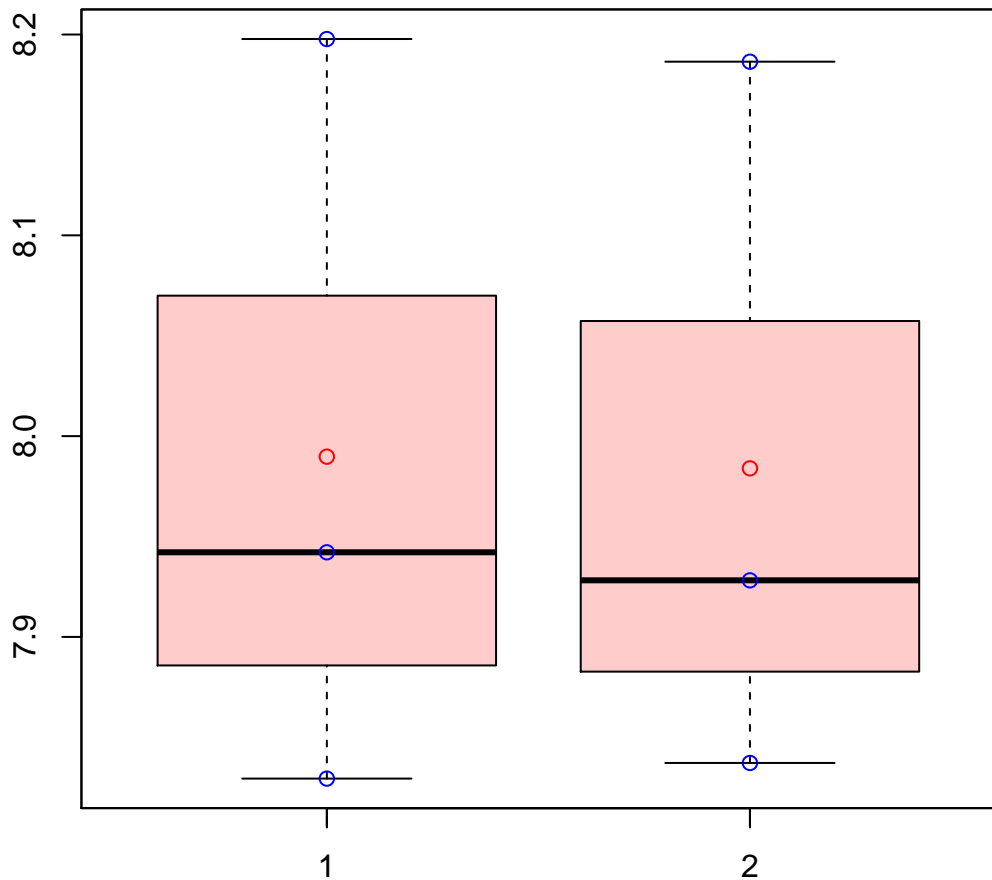

t-Test: p-value = 0.97

# CL7394Contig2|CL7394Contig2

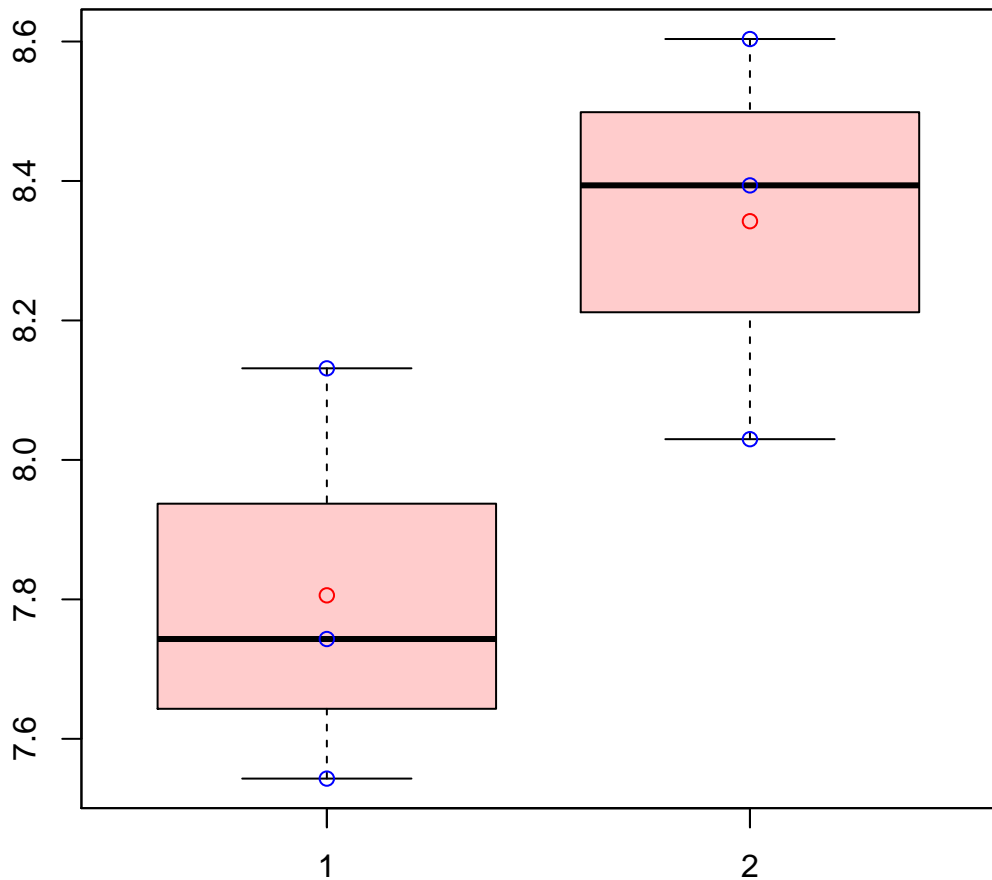

t-Test: p-value = 0.09

# CL7396Contig3|CL7396Contig3

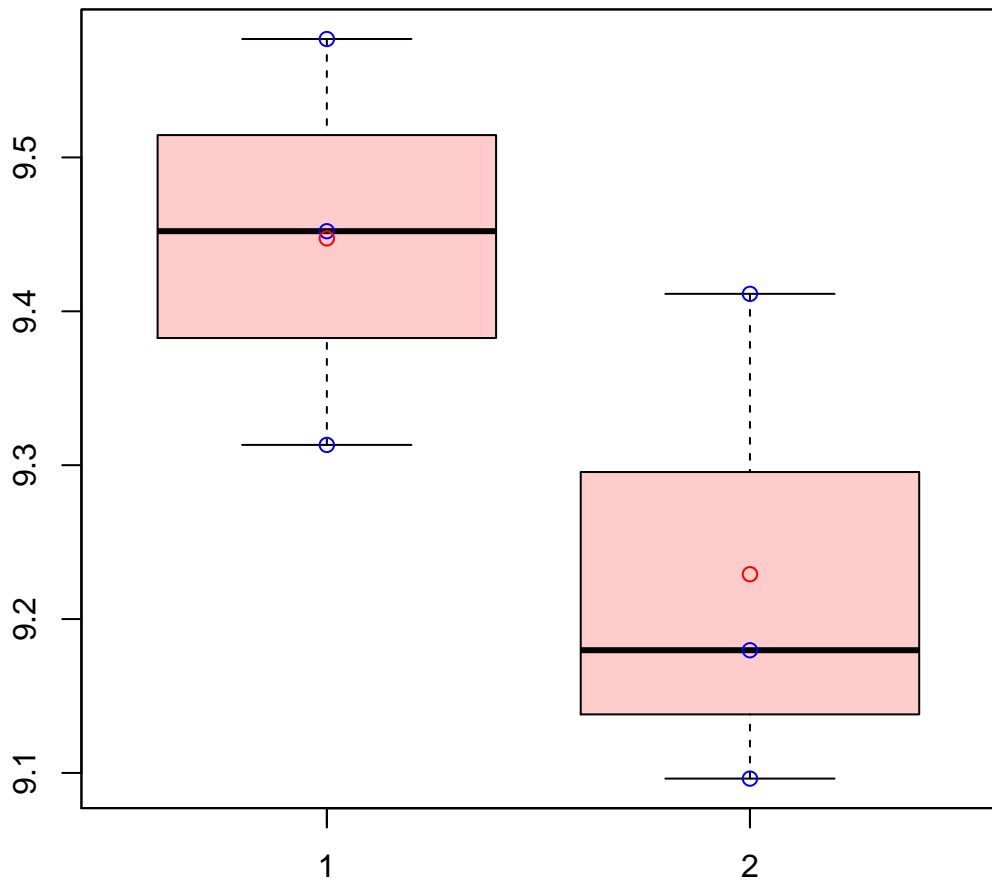

t-Test: p-value = 0.15

# CL73Contig10|CL73Contig10

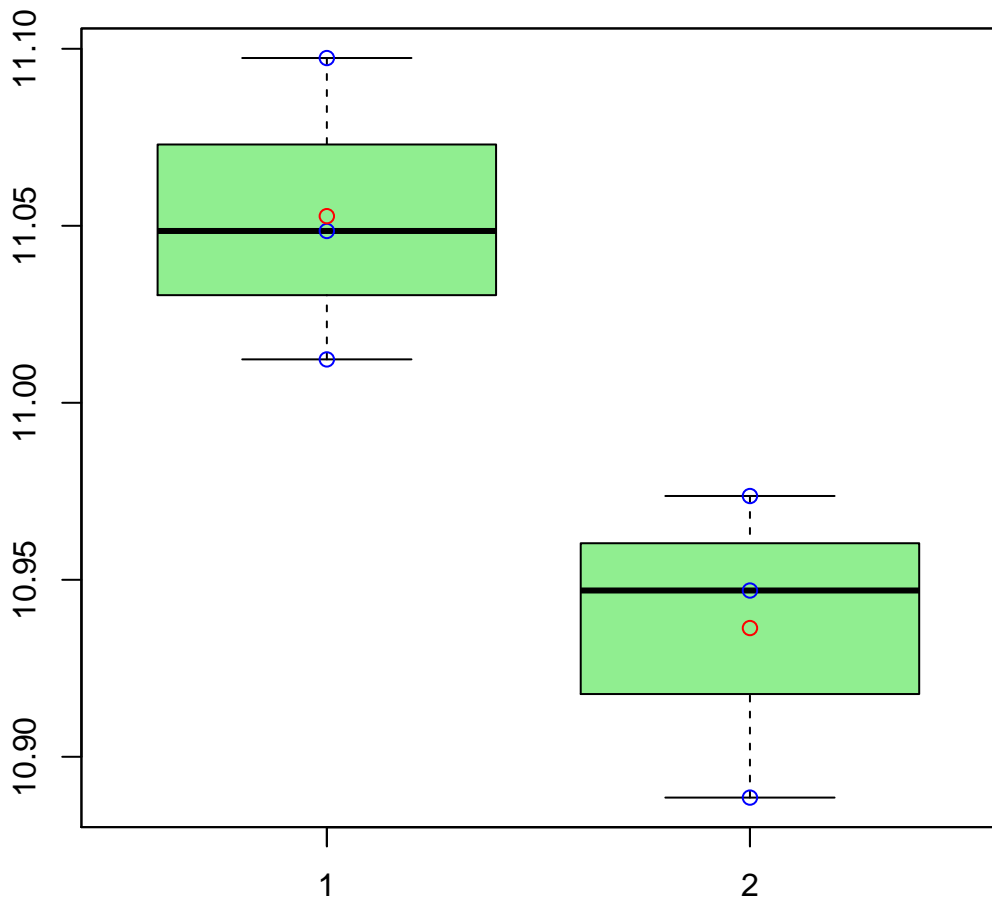

t-Test: p-value = 0.03

# CL73Contig17|CL73Contig17

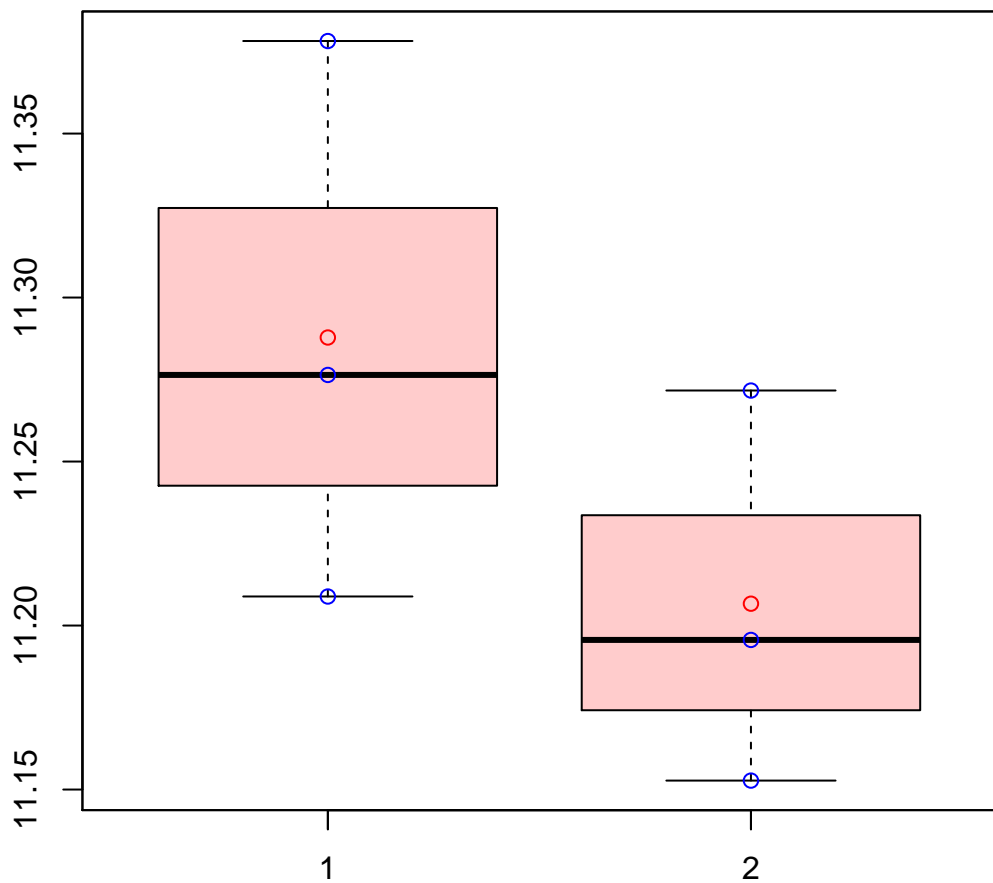

t-Test: p-value = 0.26

# CL73Contig3|CL73Contig3

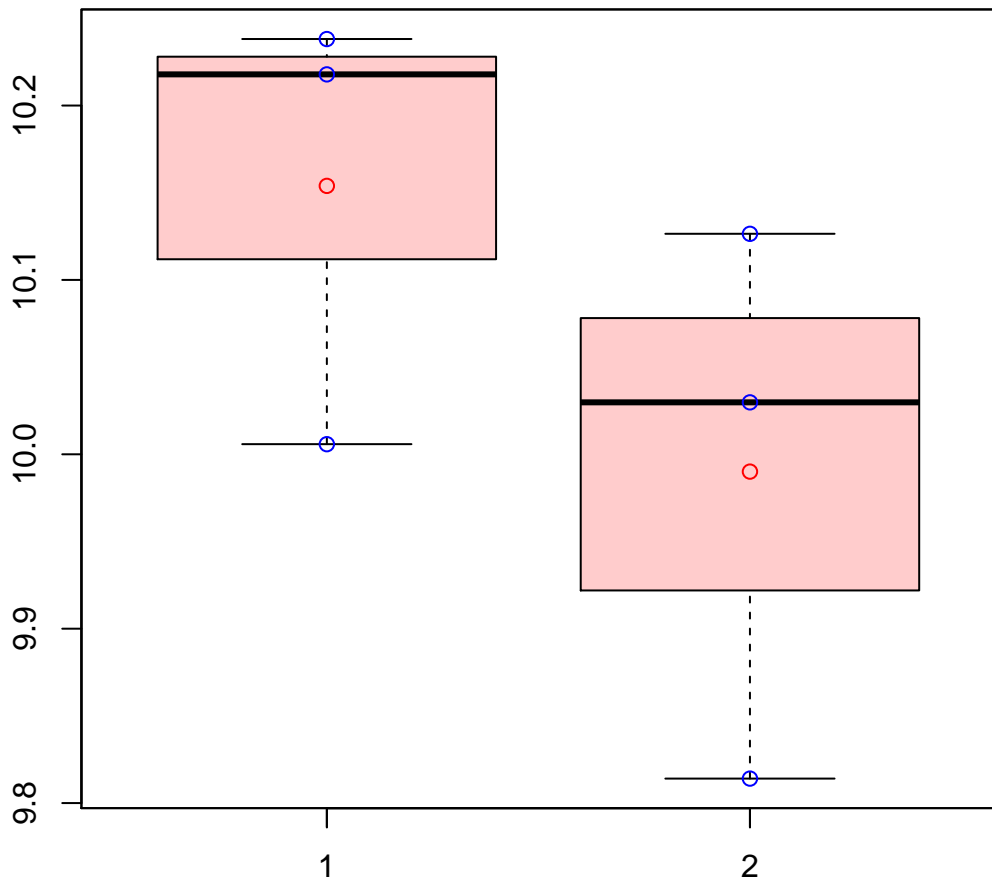

t-Test: p-value = 0.24



# CL7403Contig3|CL7403Contig3



t-Test: p-value = 0.35

# CL7405Contig1|CL7405Contig1

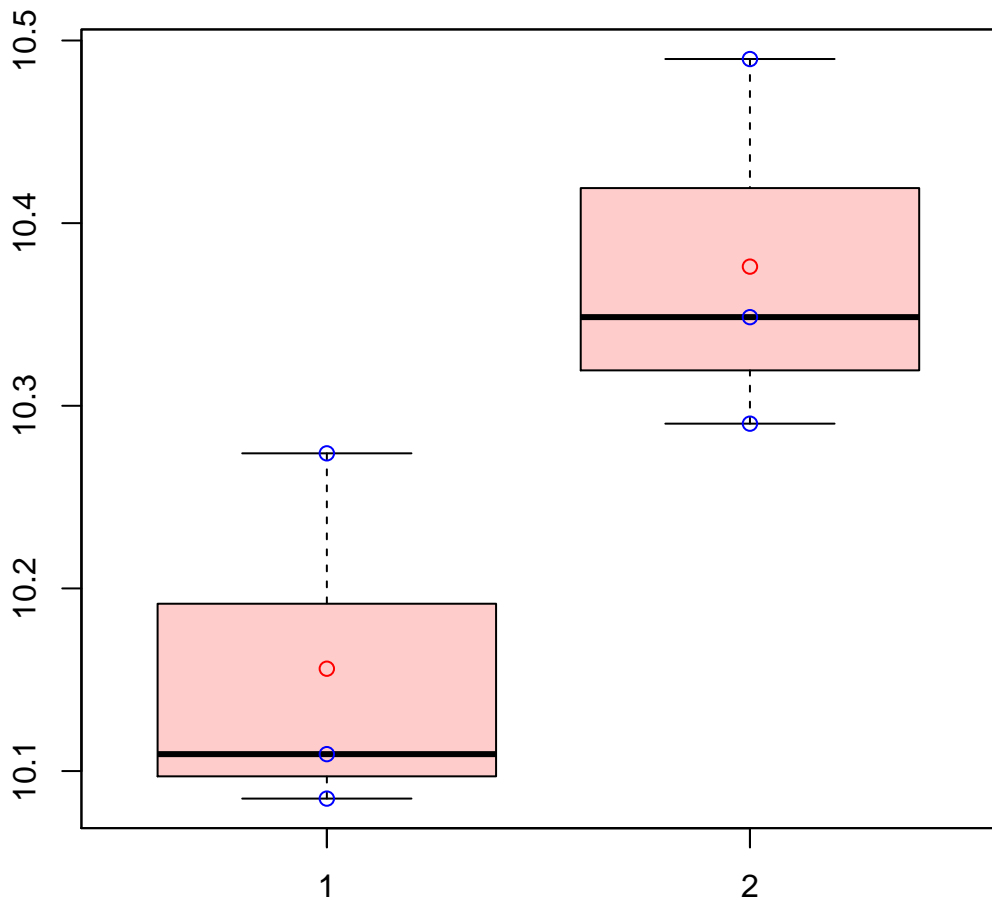

t-Test: p-value = 0.06

# CL7405Contig2|CL7405Contig2

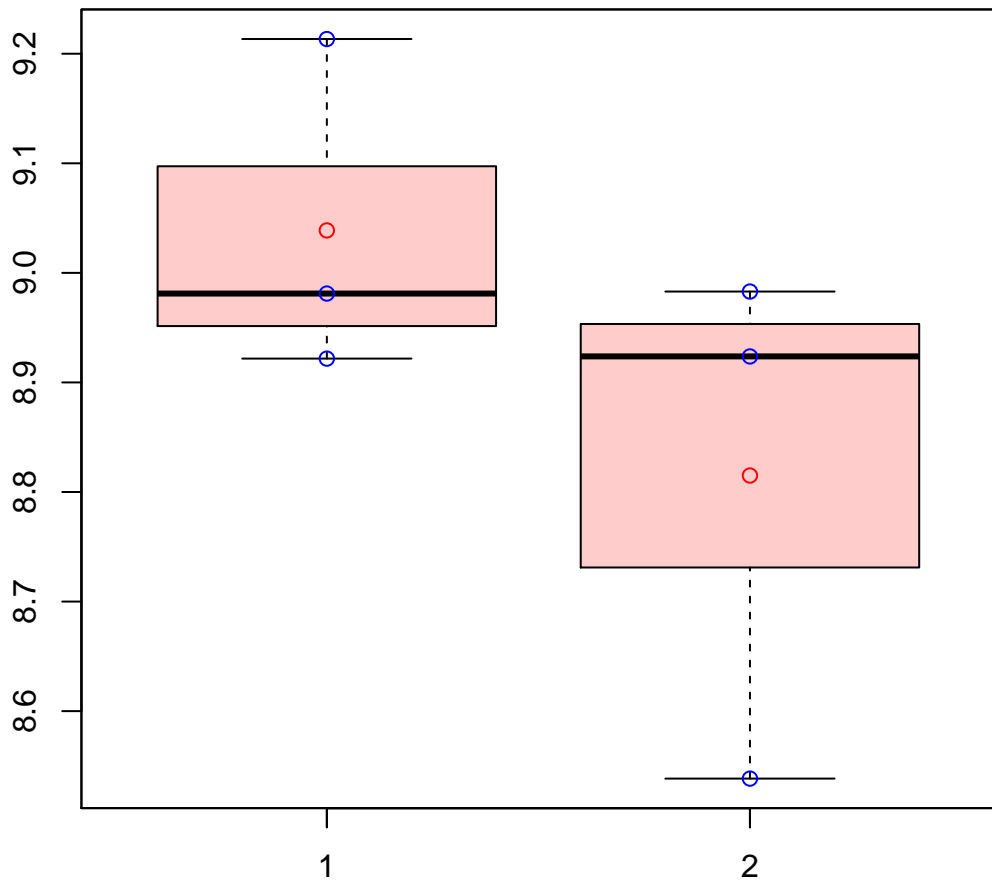

t-Test: p-value = 0.26

# CL7405Contig3|CL7405Contig3

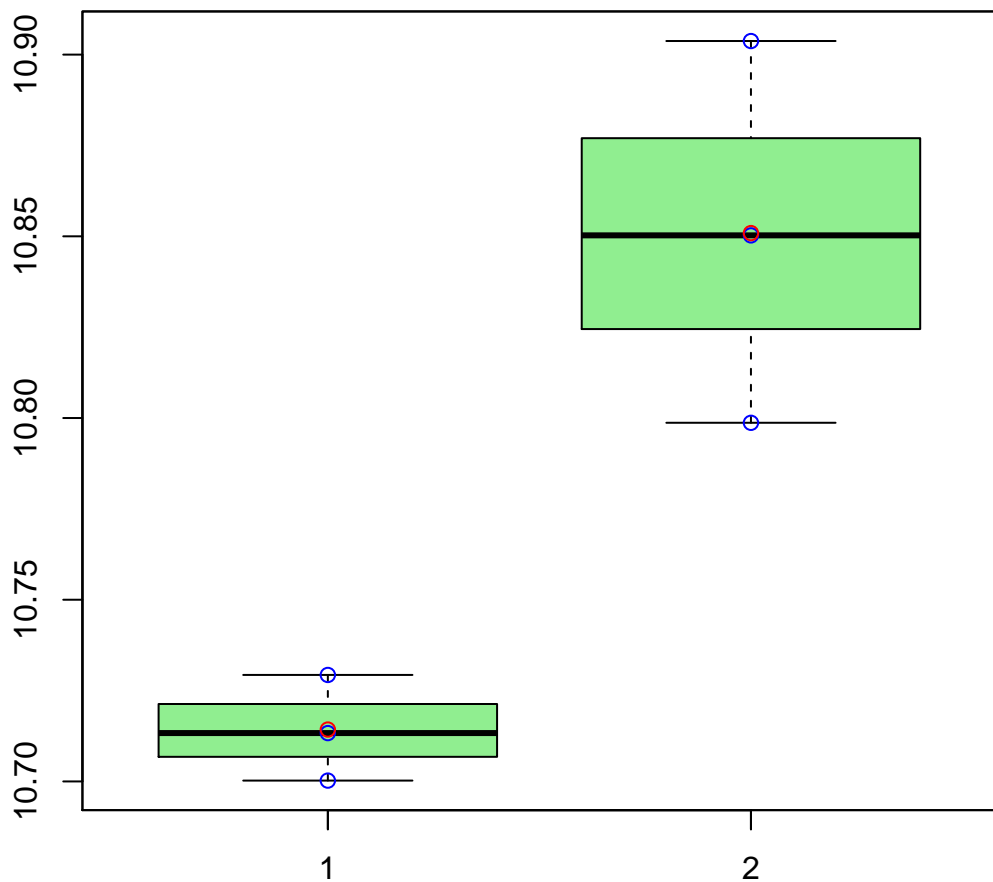

t-Test: p-value = 0.04

# CL7405Contig4|CL7405Contig4

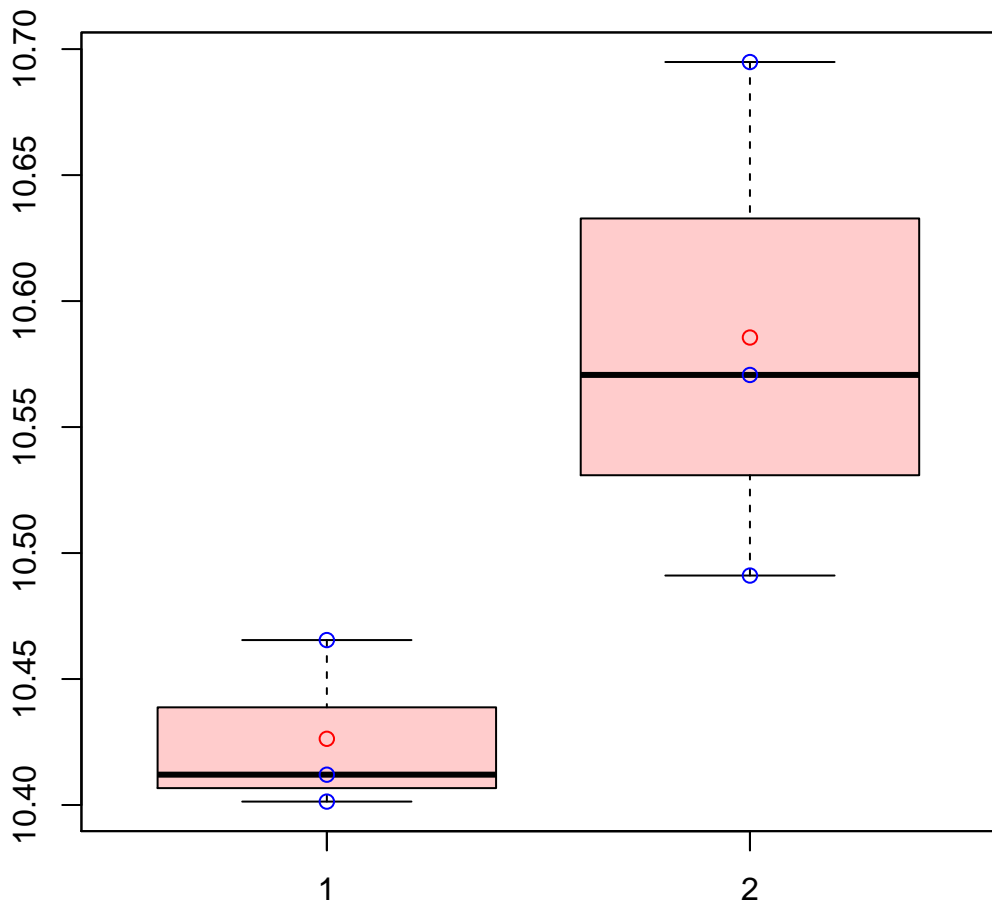

t-Test: p-value = 0.1

# CL7405Contig5|CL7405Contig5

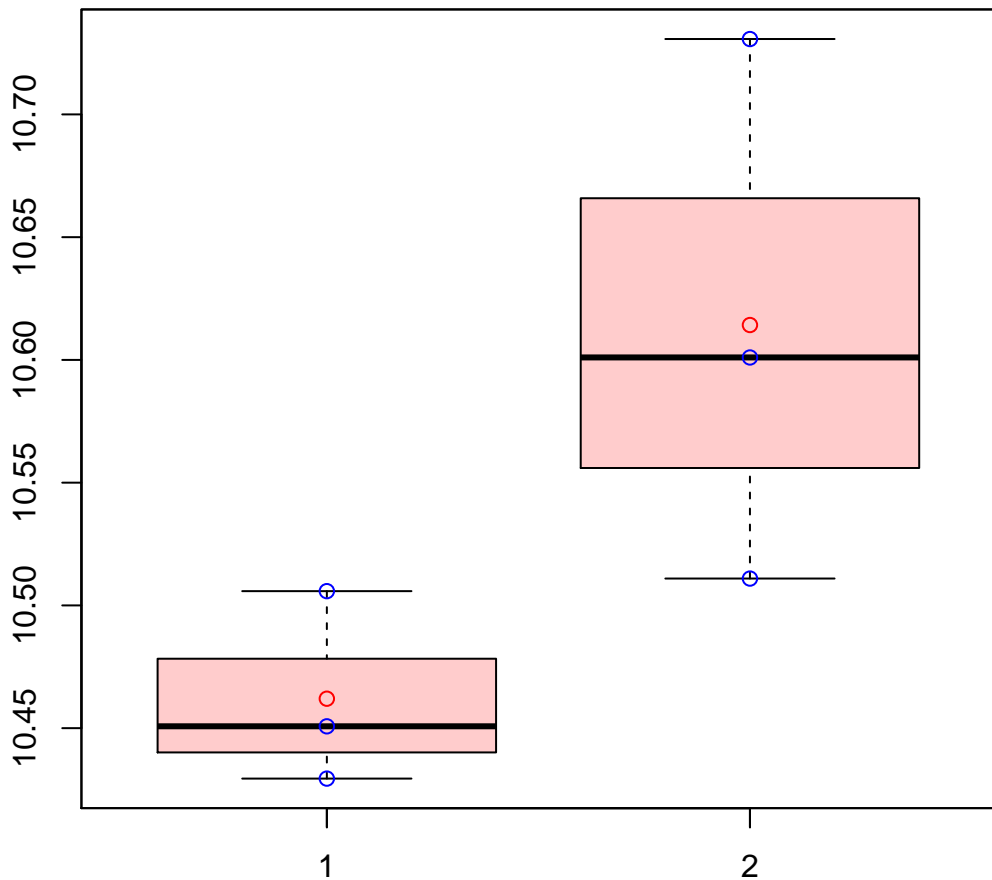

t-Test: p-value = 0.13

# CL7405Contig6|CL7405Contig6



t-Test: p-value = 0.1

# CL7405Contig7|CL7405Contig7

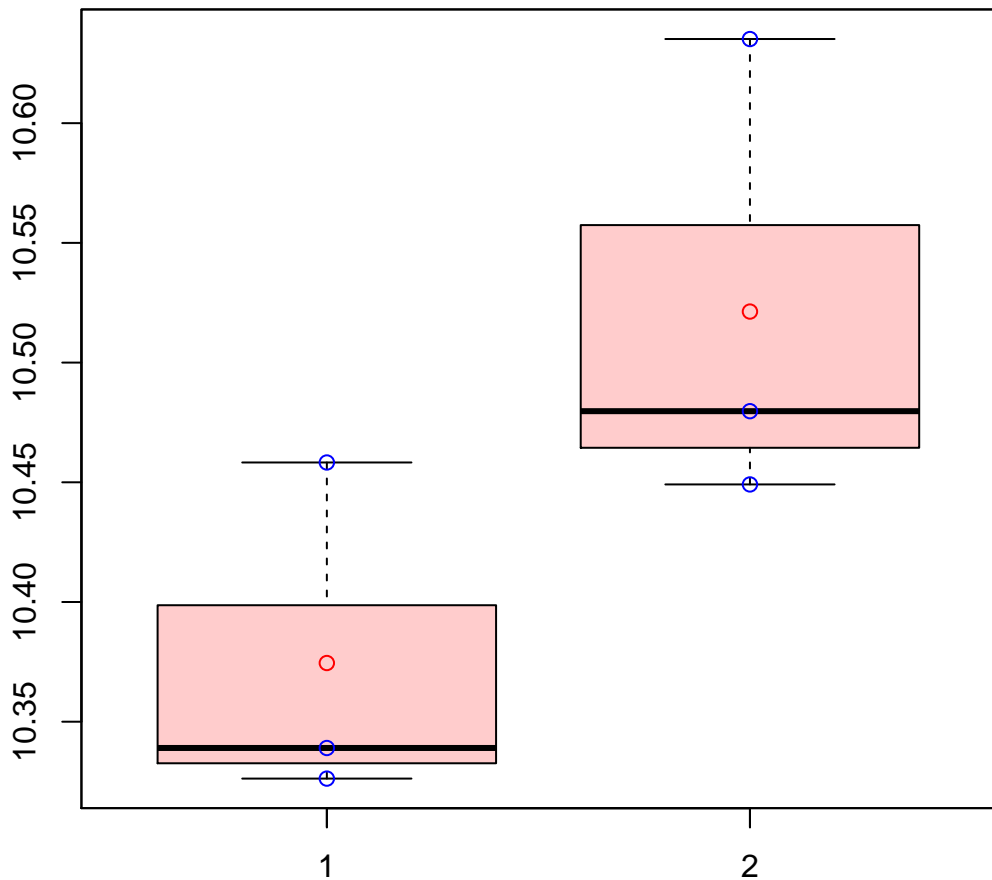

t-Test: p-value = 0.12



# CL7414Contig3|CL7414Contig3

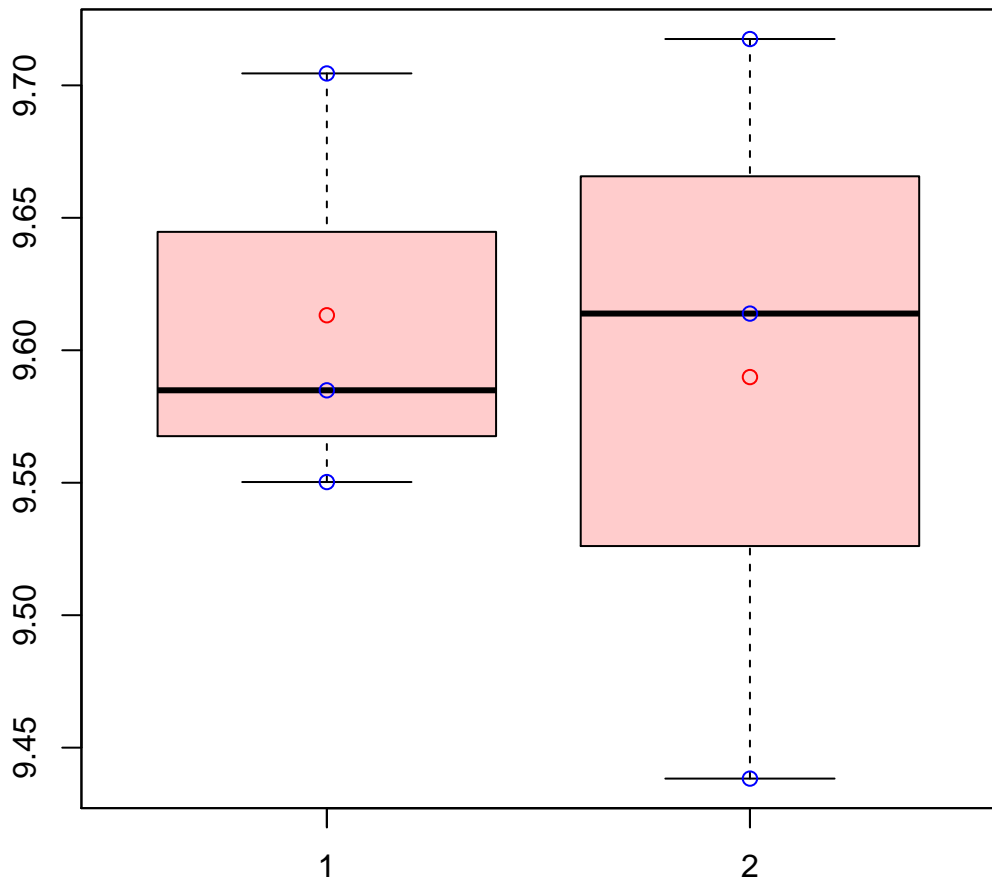

t-Test: p-value = 0.82

# CL7420Contig3|CL7420Contig3

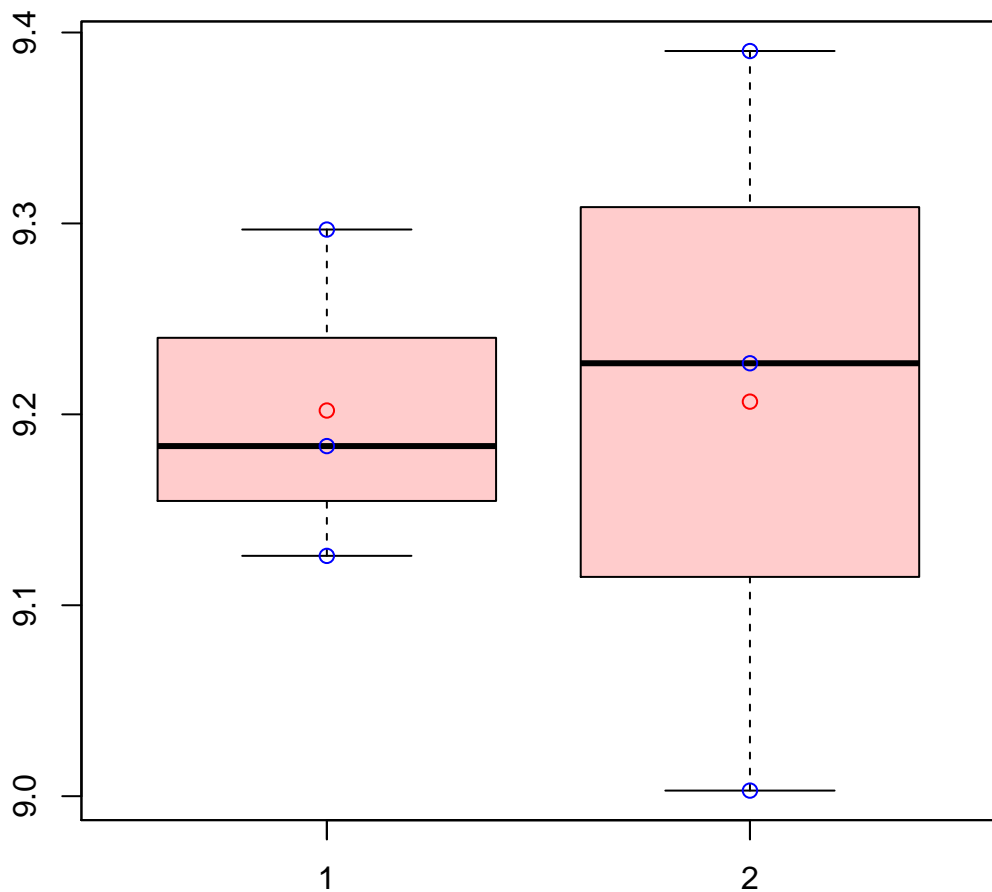

t-Test: p-value = 0.97

# CL7425Contig1|CL7425Contig1

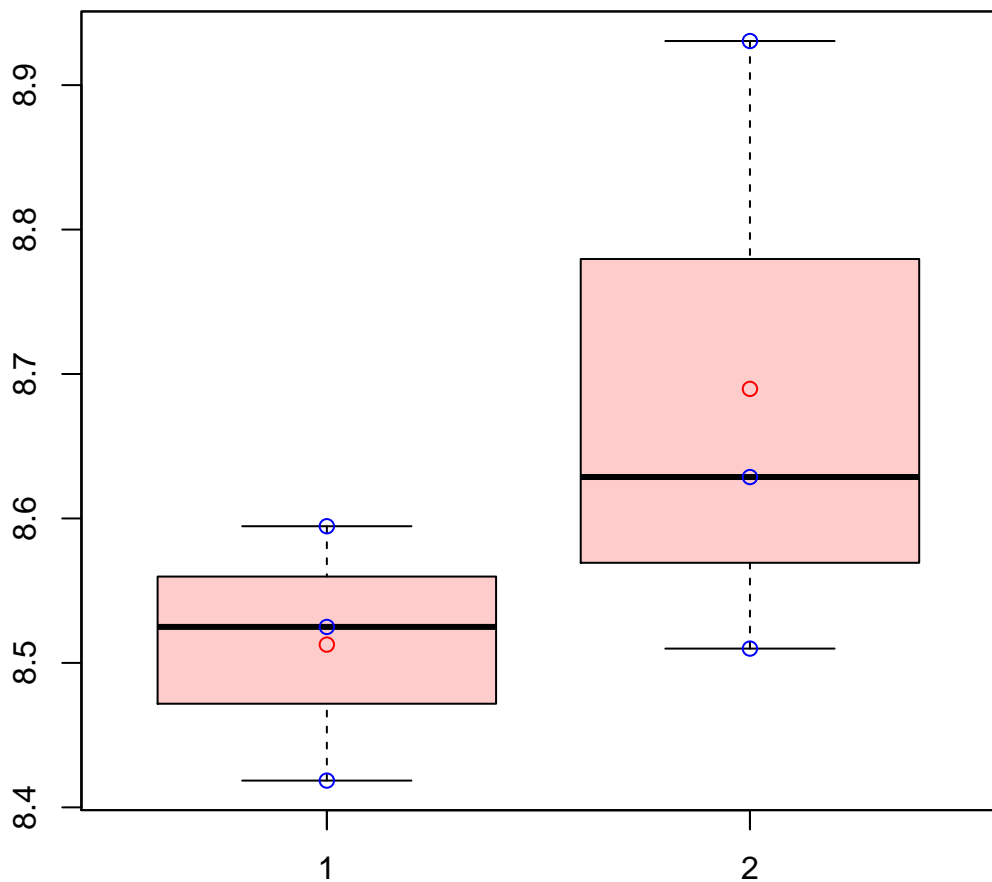

t-Test: p-value = 0.29

# CL7436Contig2|CL7436Contig2

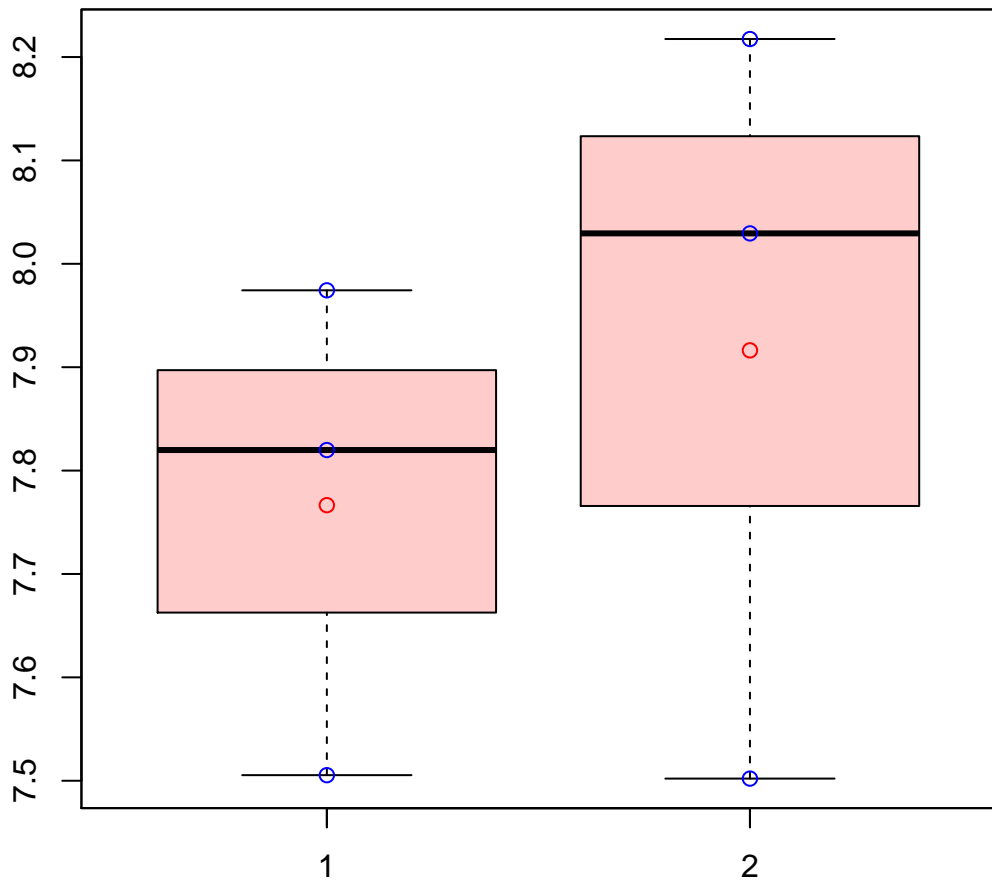

t-Test: p-value = 0.59

# CL7437Contig1|CL7437Contig1

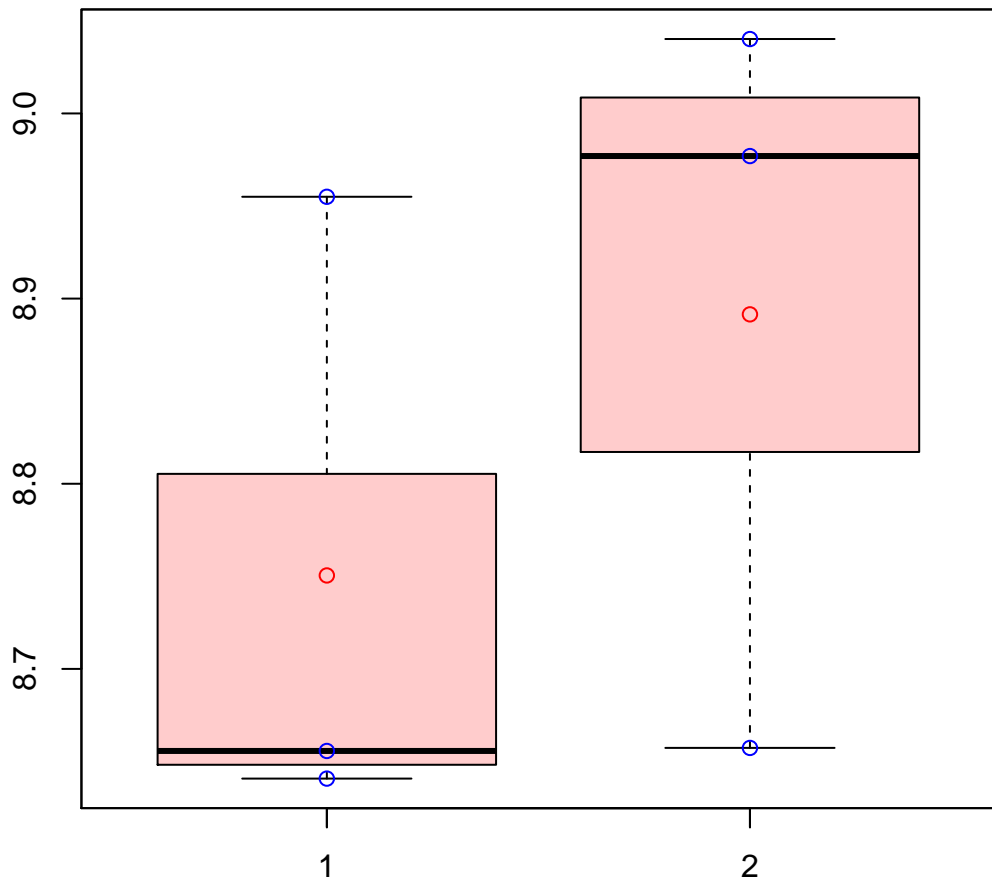

t-Test: p-value = 0.42

# CL743Contig3|CL743Contig3



t-Test: p-value = 1

# CL7445Contig3|CL7445Contig3

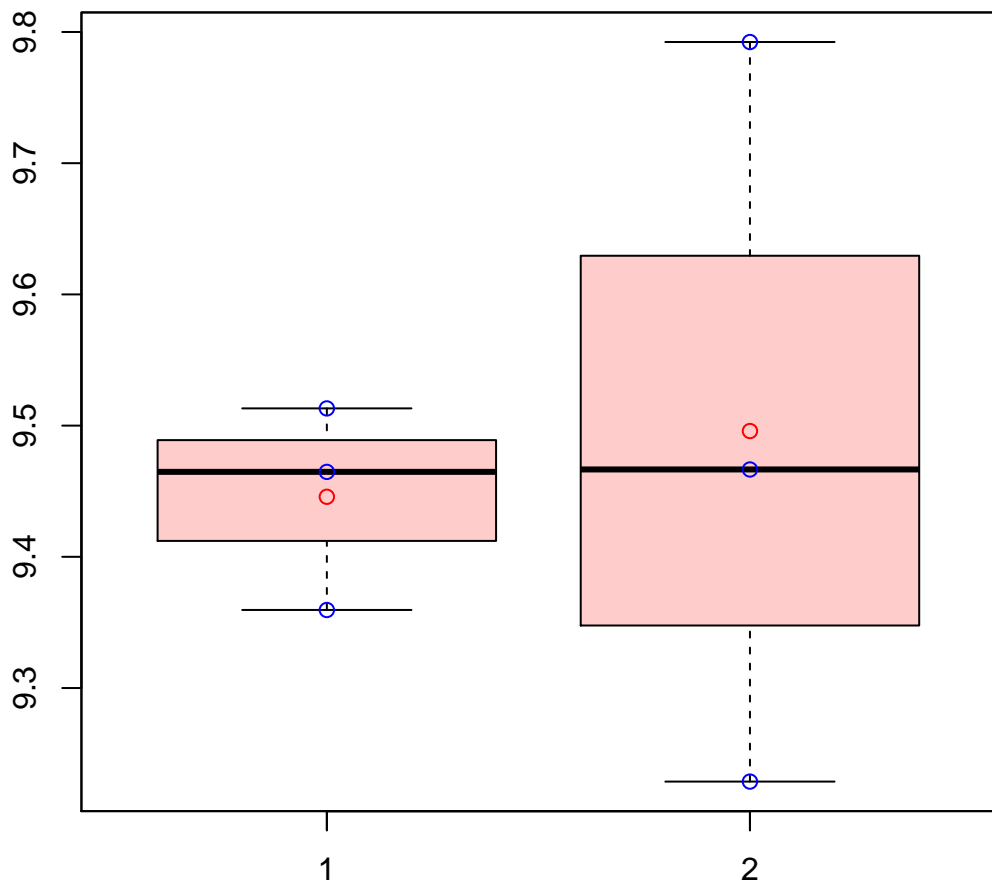

t-Test: p-value = 0.79

# CL744Contig6|CL744Contig6

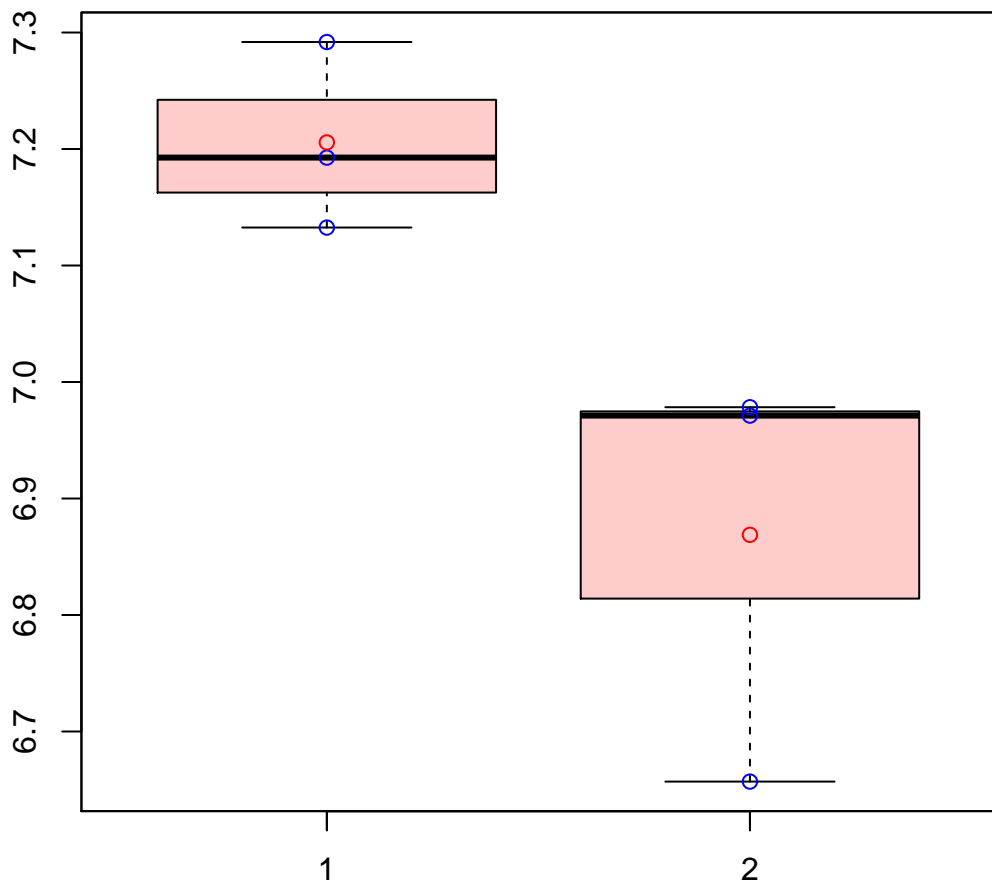

t-Test: p-value = 0.07



# CL7457Contig1|CL7457Contig1

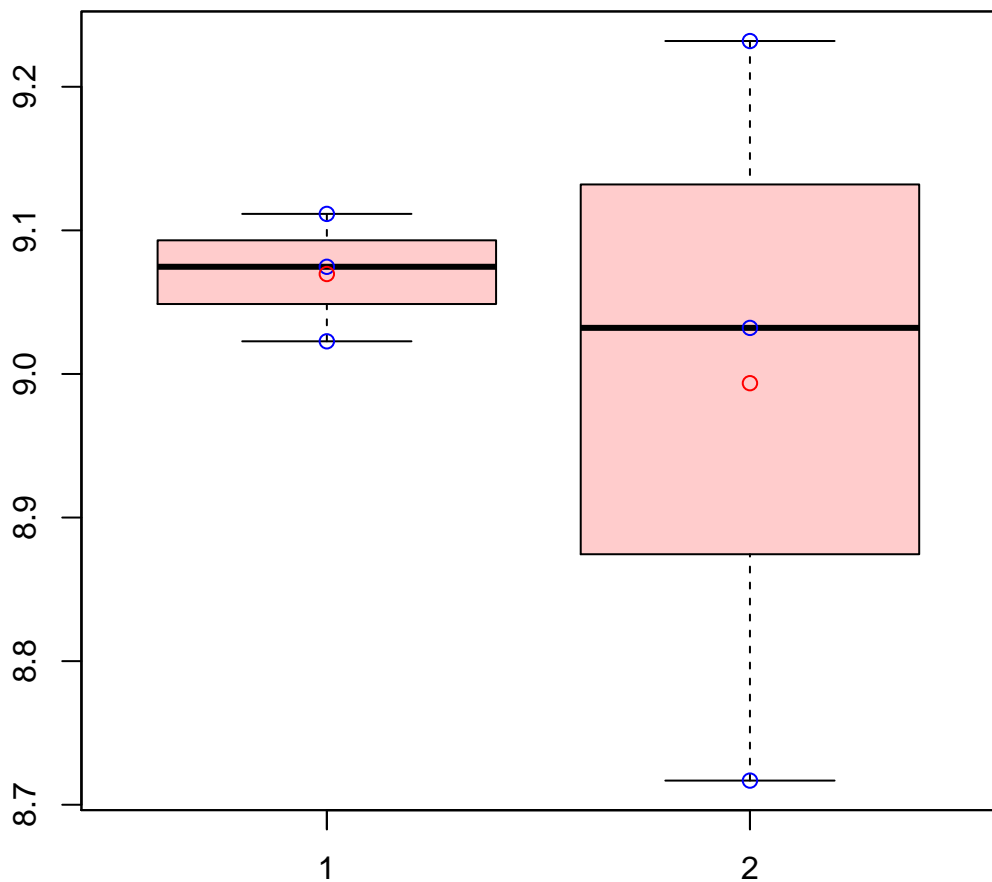

t-Test: p-value = 0.66

# CL7457Contig2|CL7457Contig2



t-Test: p-value = 0.66

# CL7457Contig4|CL7457Contig4



t-Test: p-value = 0.66

# CL746Contig3|CL746Contig3

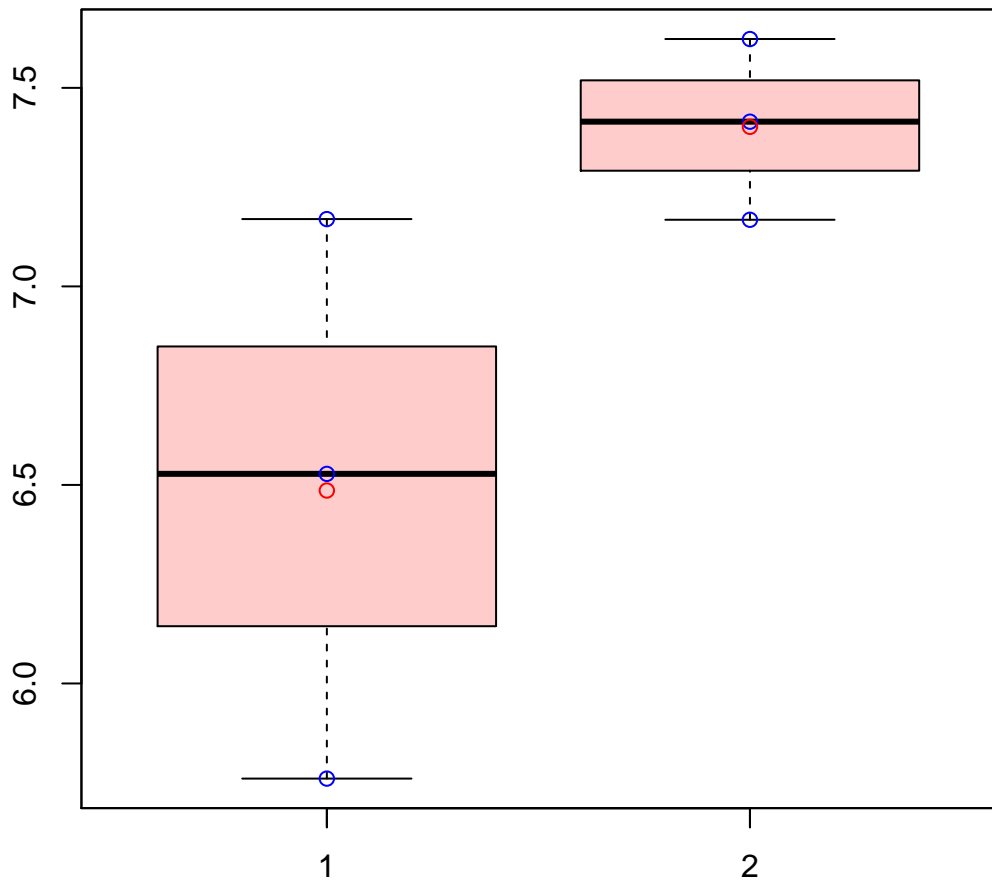

t-Test: p-value = 0.14

# CL7473Contig1|CL7473Contig1

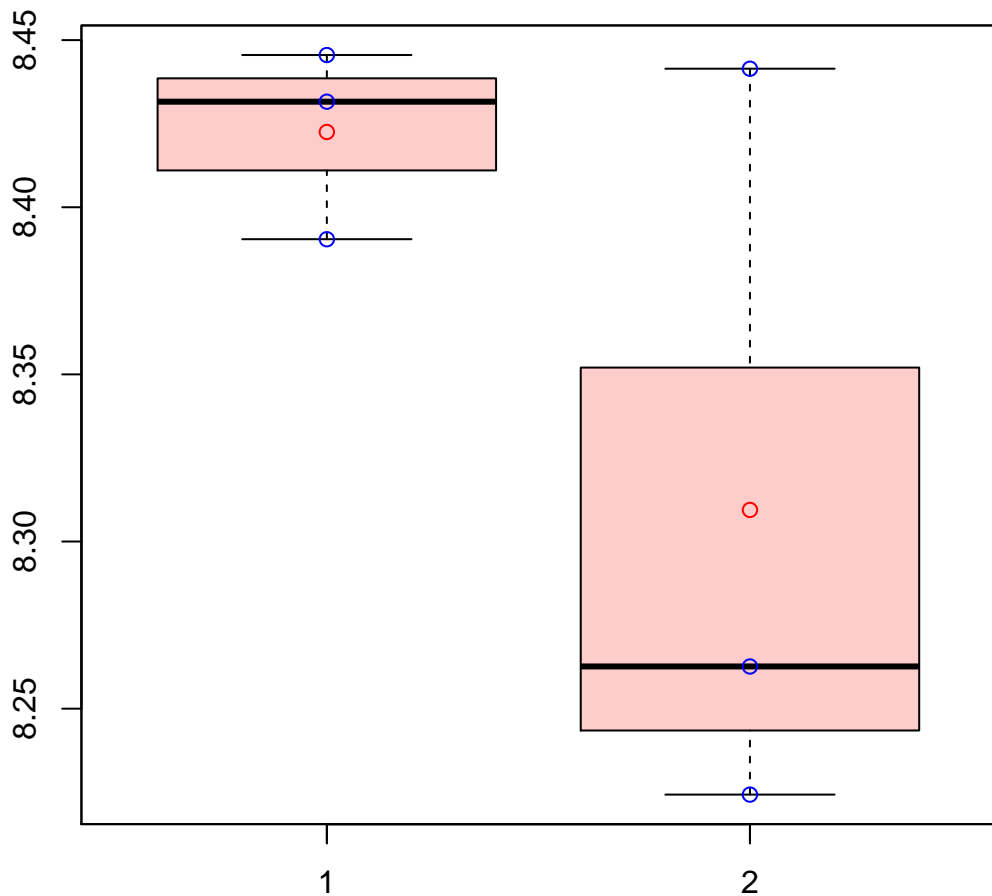

t-Test: p-value = 0.23

# CL7480Contig2|CL7480Contig2

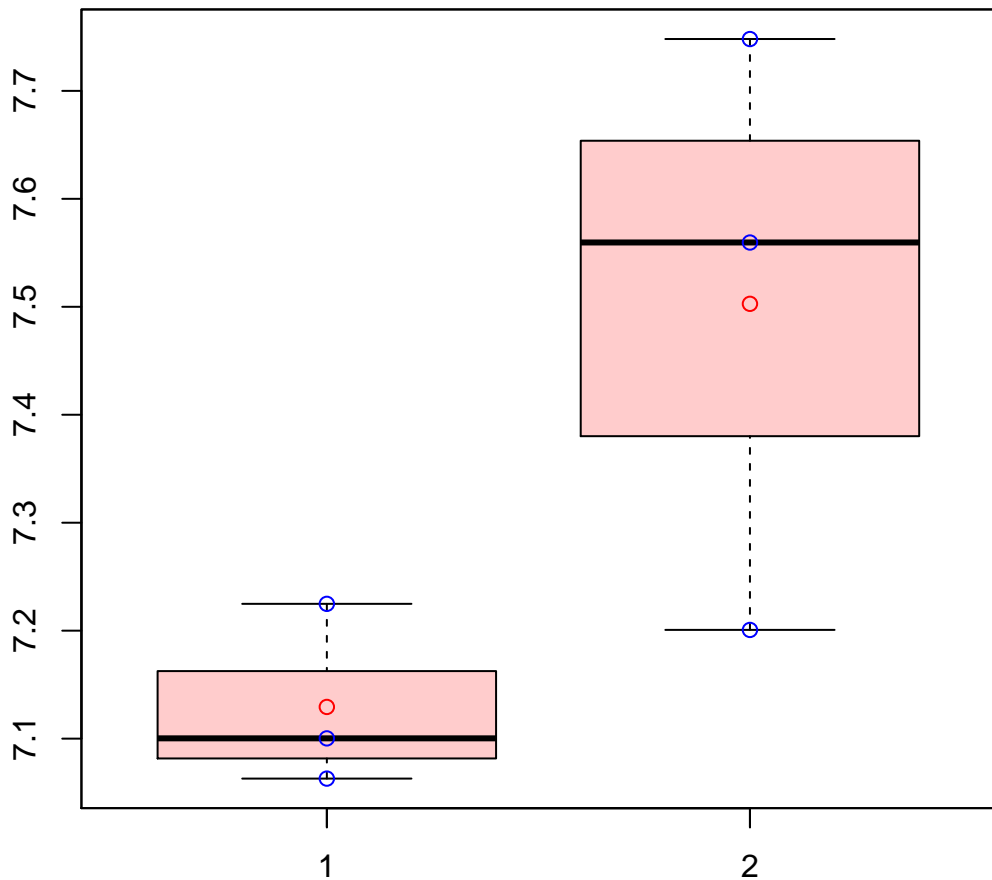

t-Test: p-value = 0.14

# CL7489Contig1|CL7489Contig1

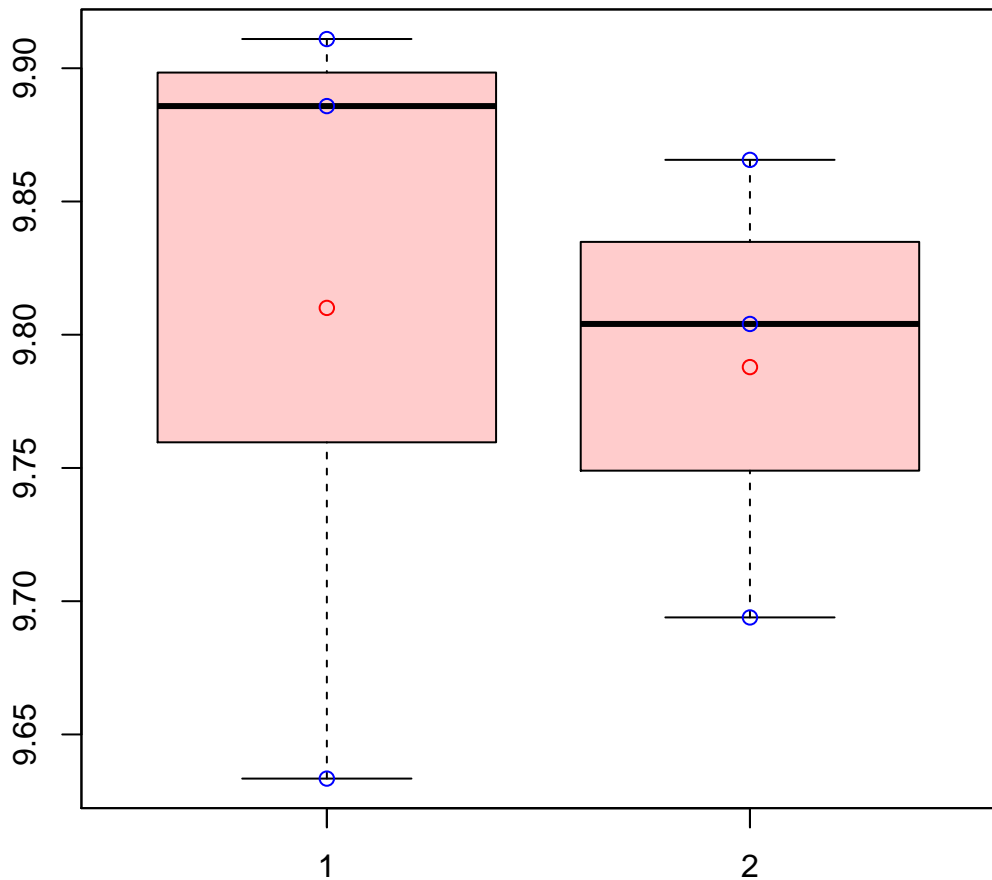

t-Test: p-value = 0.84

# CL74Contig10|CL74Contig10

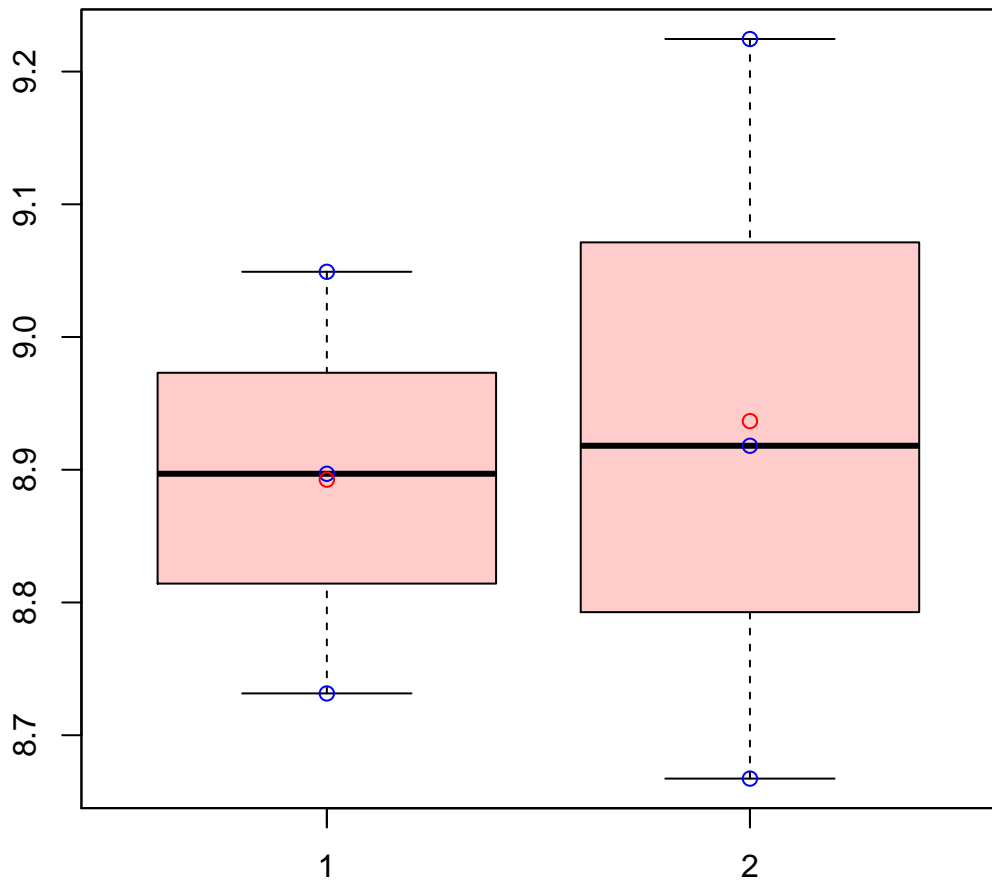

t-Test: p-value = 0.83



# CL74Contig2|CL74Contig2

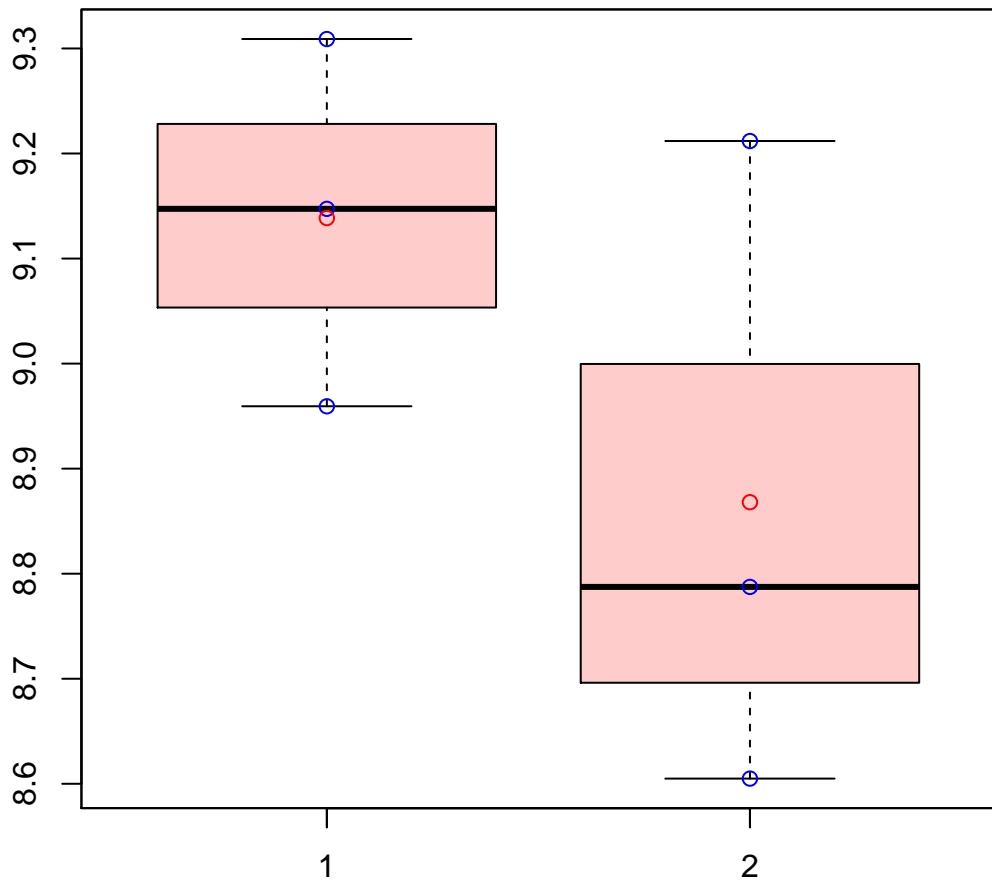

t-Test: p-value = 0.28

# CL74Contig6|CL74Contig6

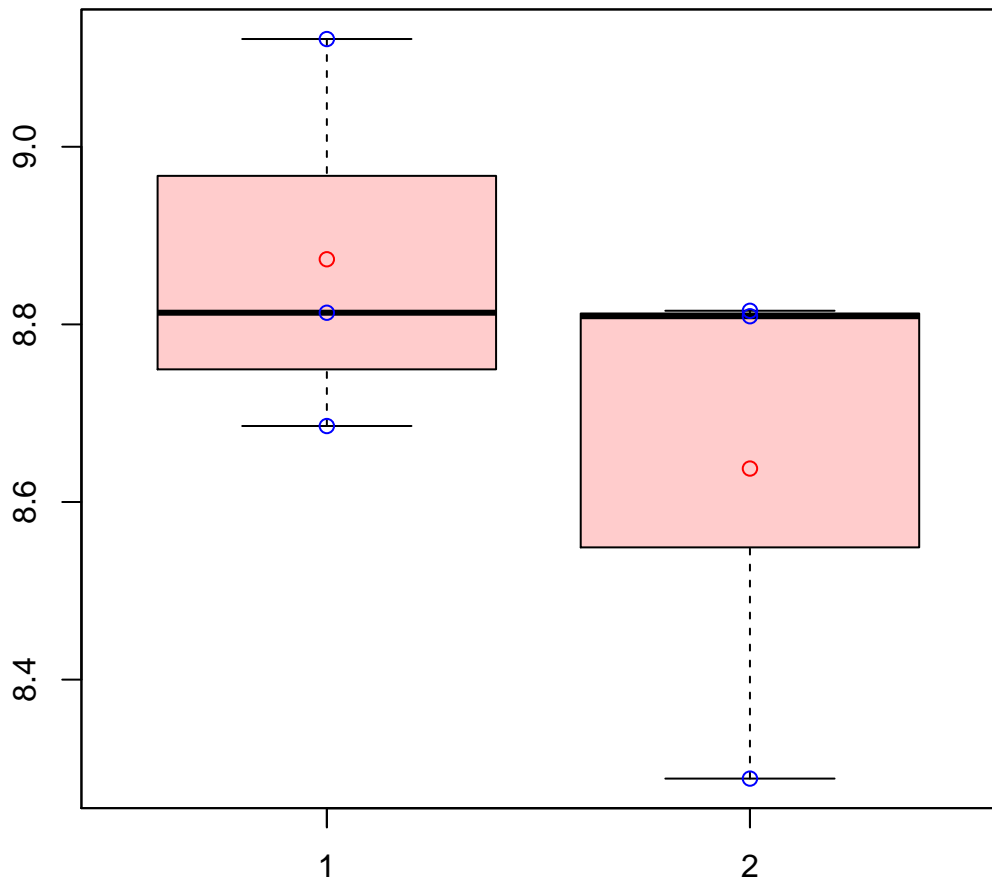

t-Test: p-value = 0.34

# CL74Contig8|CL74Contig8

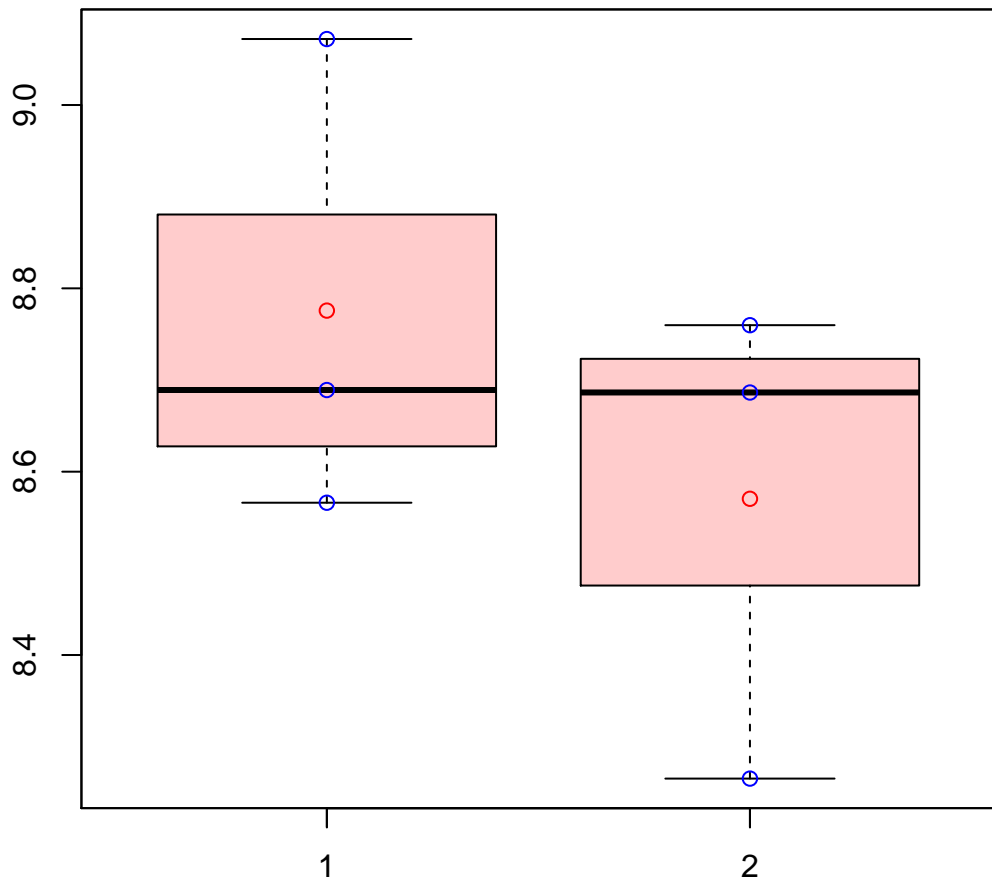

t-Test: p-value = 0.4

# CL7504Contig2|CL7504Contig2



t-Test: p-value = 0.55

# CL750Contig10|CL750Contig10

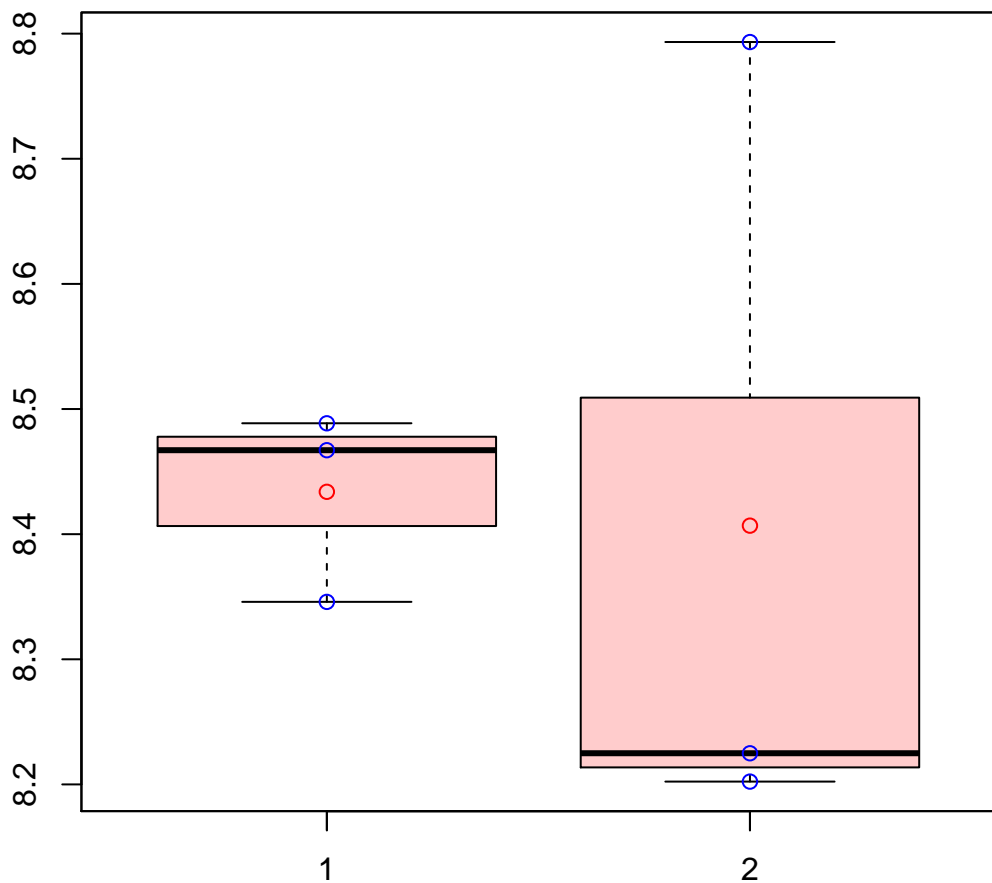

t-Test: p-value = 0.9

# CL750Contig4|CL750Contig4

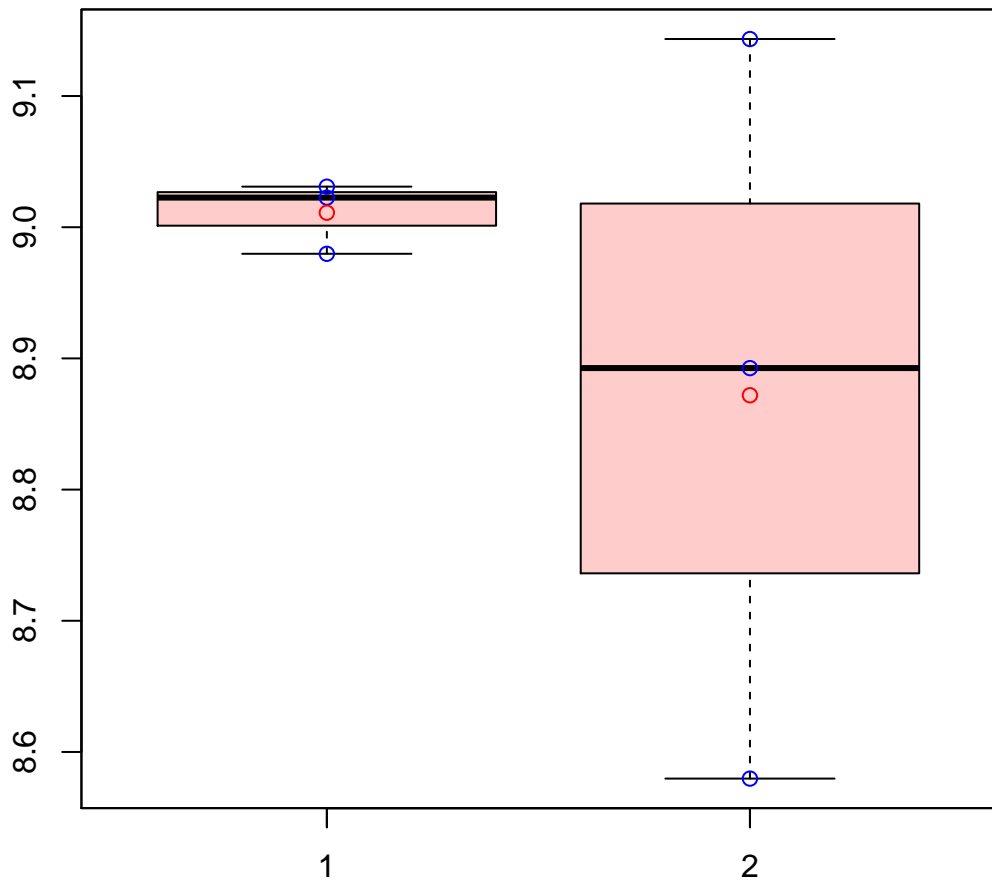

t-Test: p-value = 0.48

# CL750Contig5|CL750Contig5

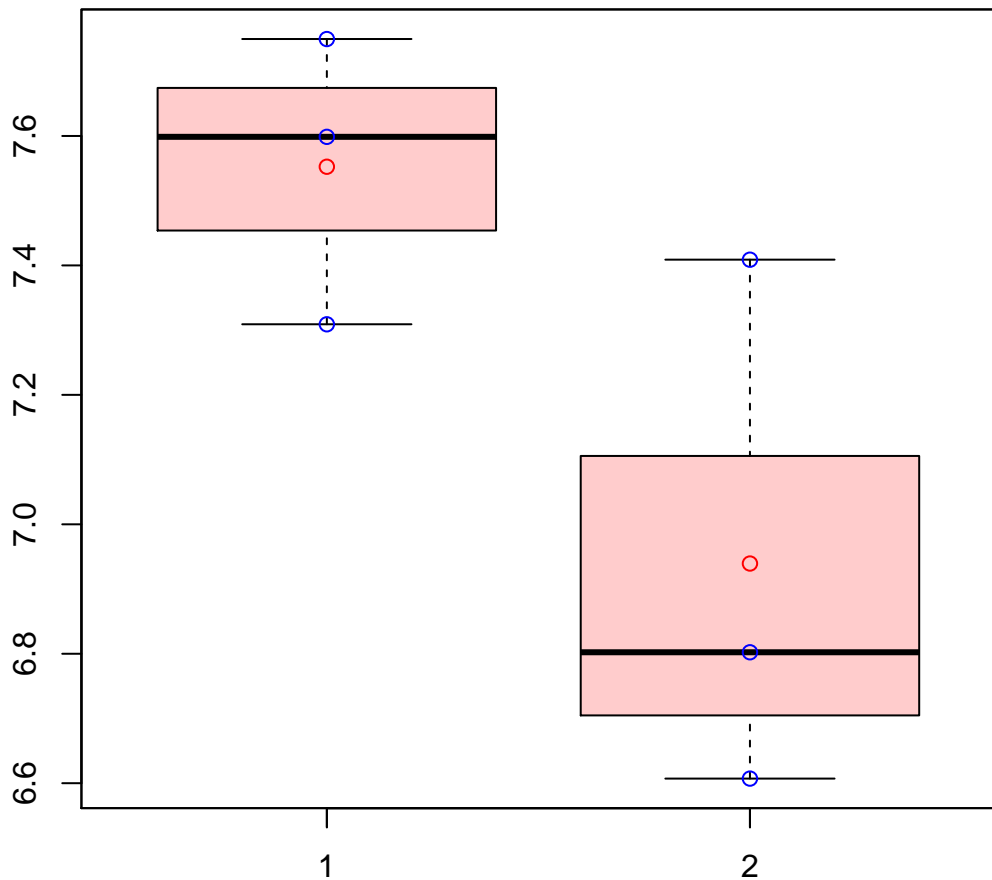

t-Test: p-value = 0.11

# CL750Contig6|CL750Contig6

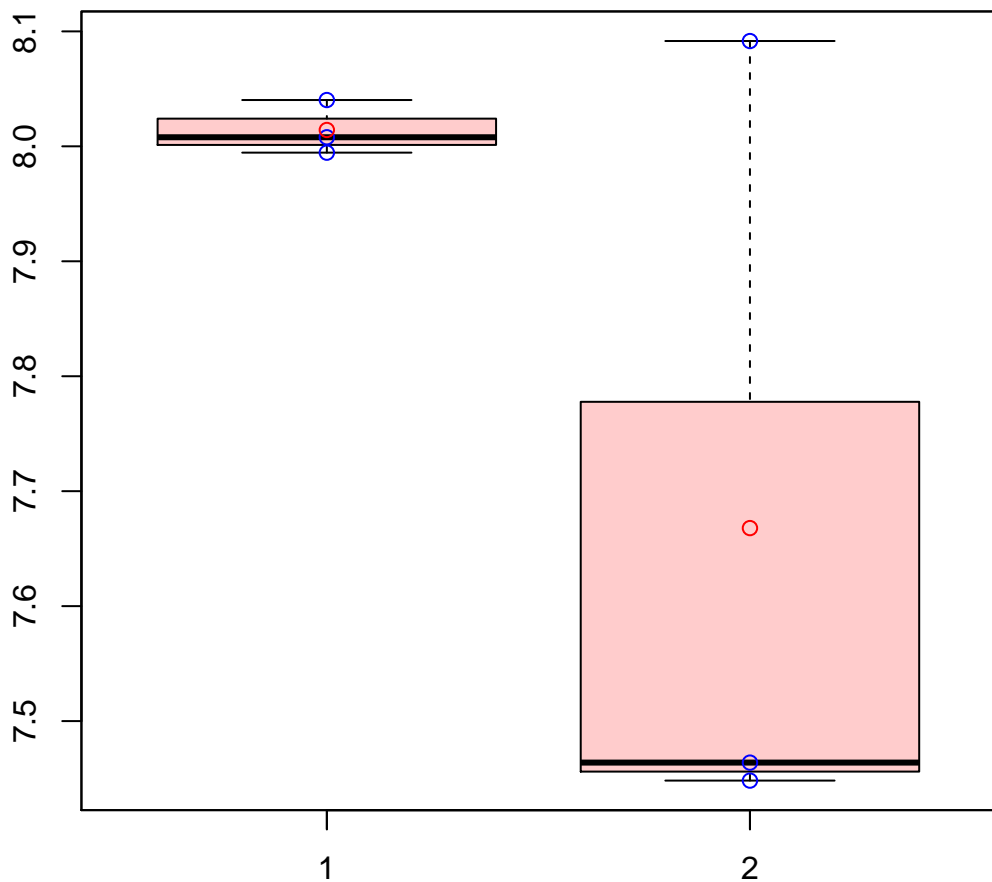

t-Test: p-value = 0.24



# CL7514Contig1|CL7514Contig1

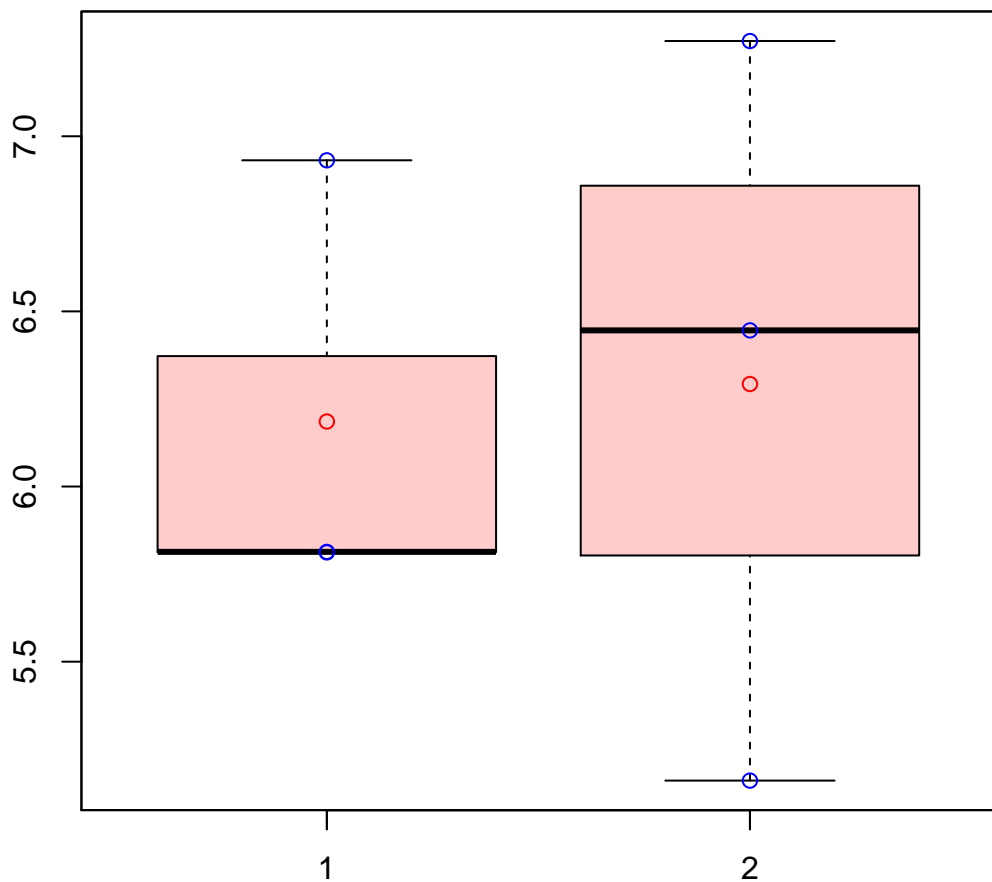

t-Test: p-value = 0.89

# CL7514Contig3|CL7514Contig3

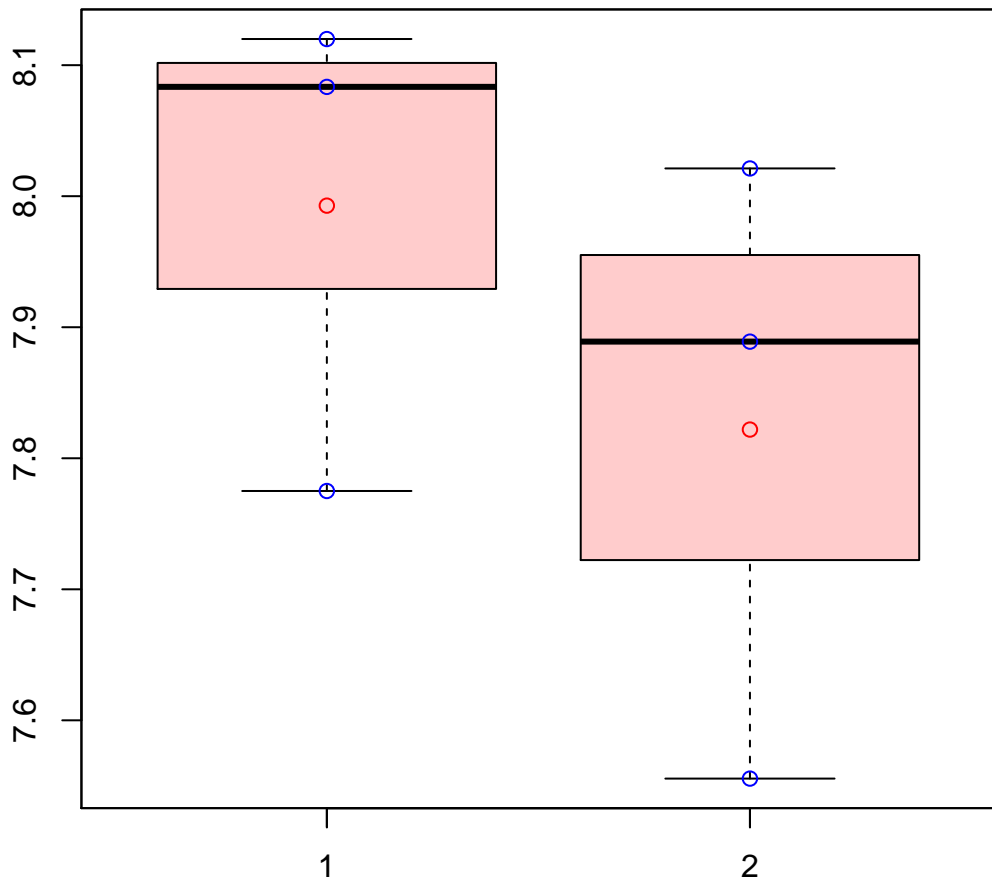

t-Test: p-value = 0.39

# CL7529Contig1|CL7529Contig1

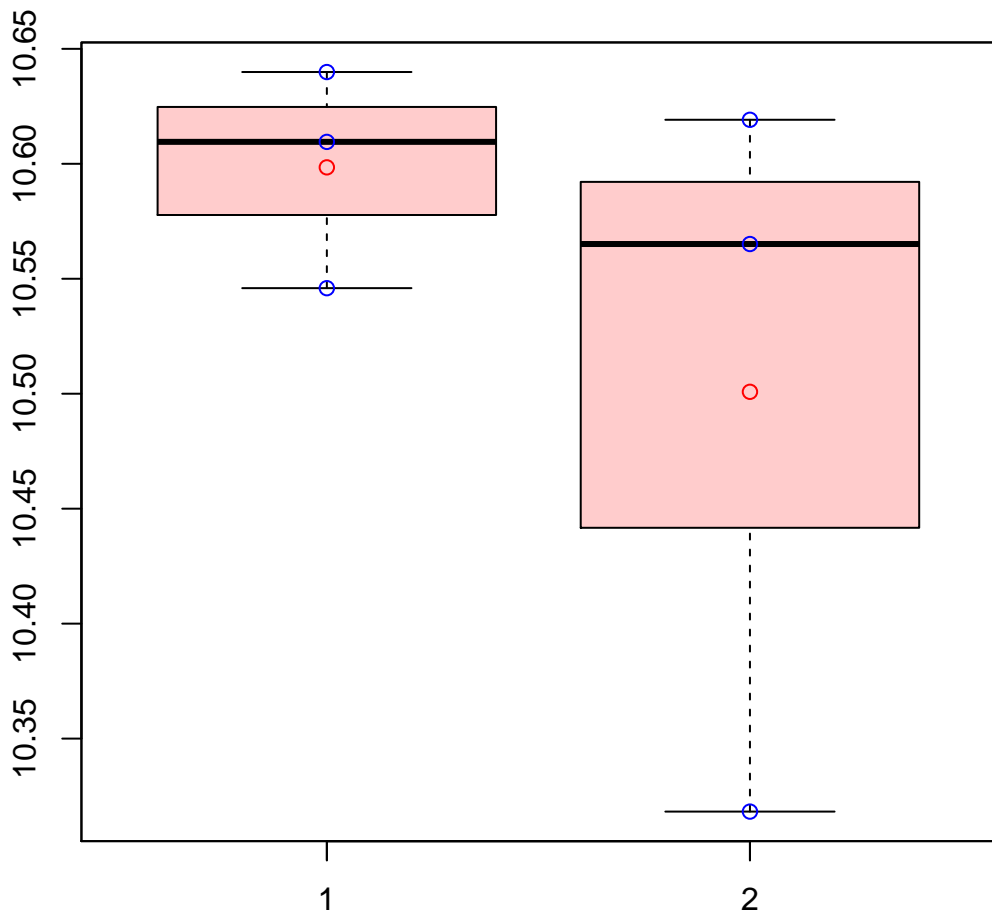

t-Test: p-value = 0.4

# CL7529Contig2|CL7529Contig2



t-Test: p-value = 0.4

# CL7530Contig3|CL7530Contig3

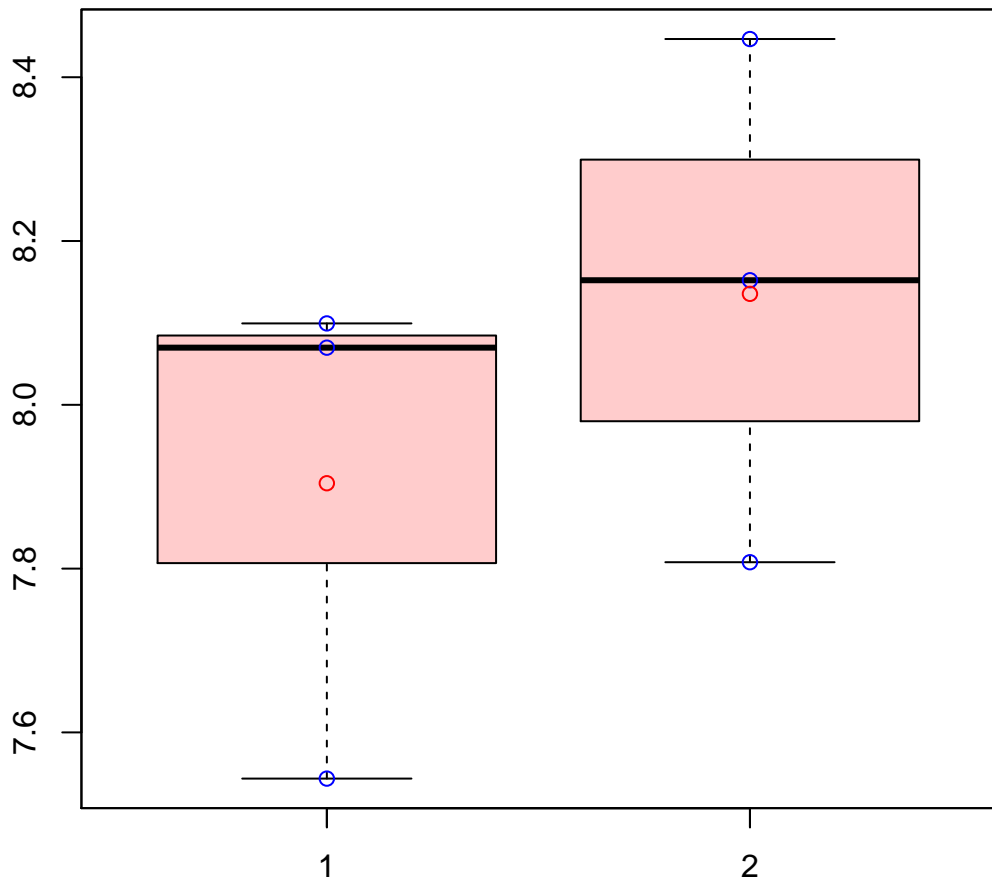

t-Test: p-value = 0.42

# CL7534Contig1|CL7534Contig1

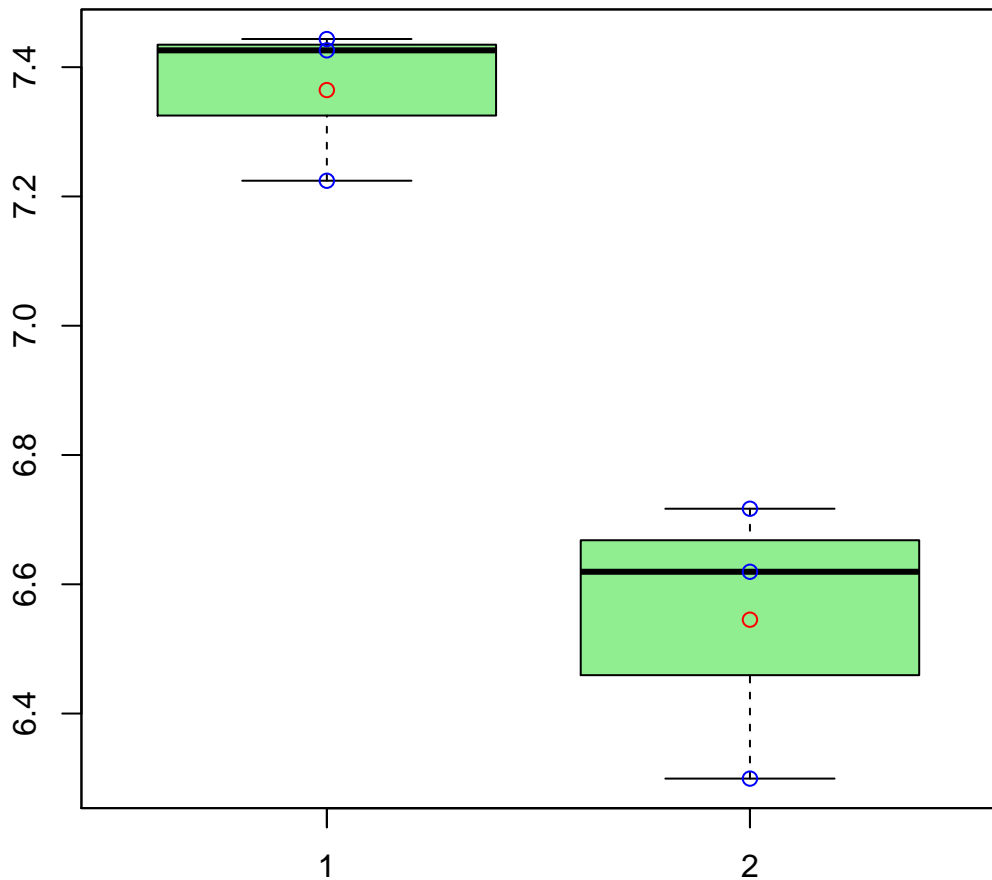

t-Test: p-value = 0.01

# CL7539Contig2|CL7539Contig2

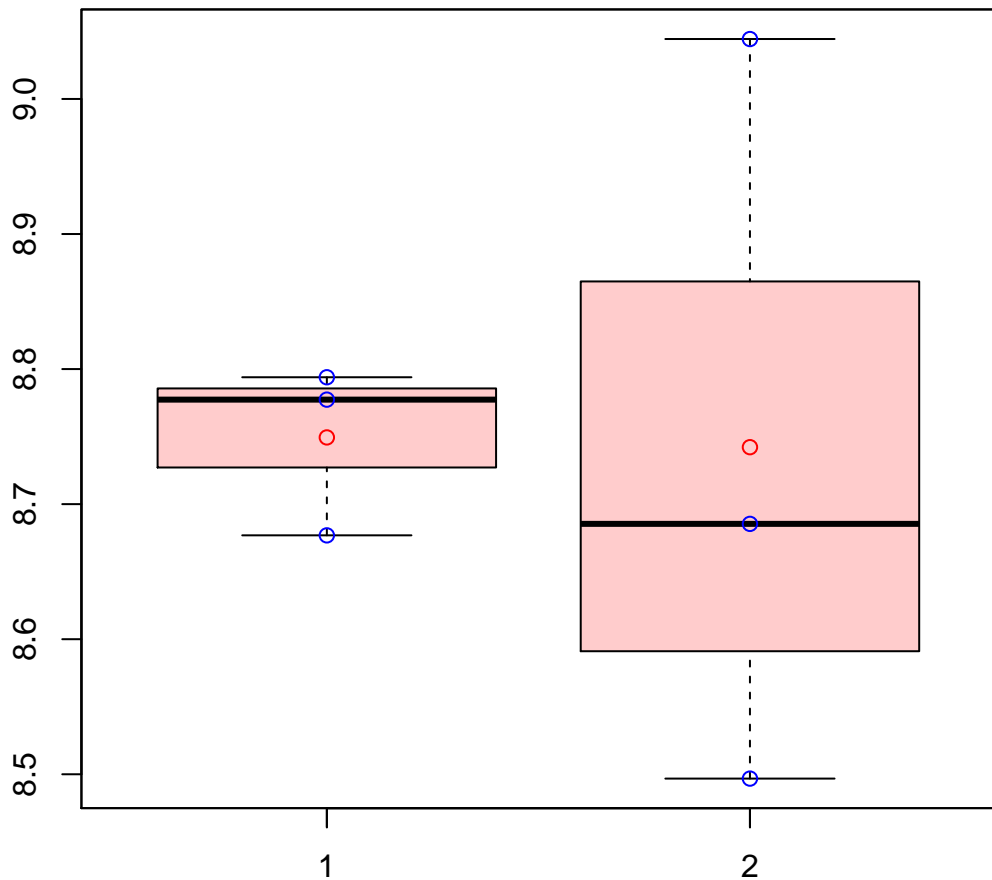

t-Test: p-value = 0.97

# CL7539Contig3|CL7539Contig3

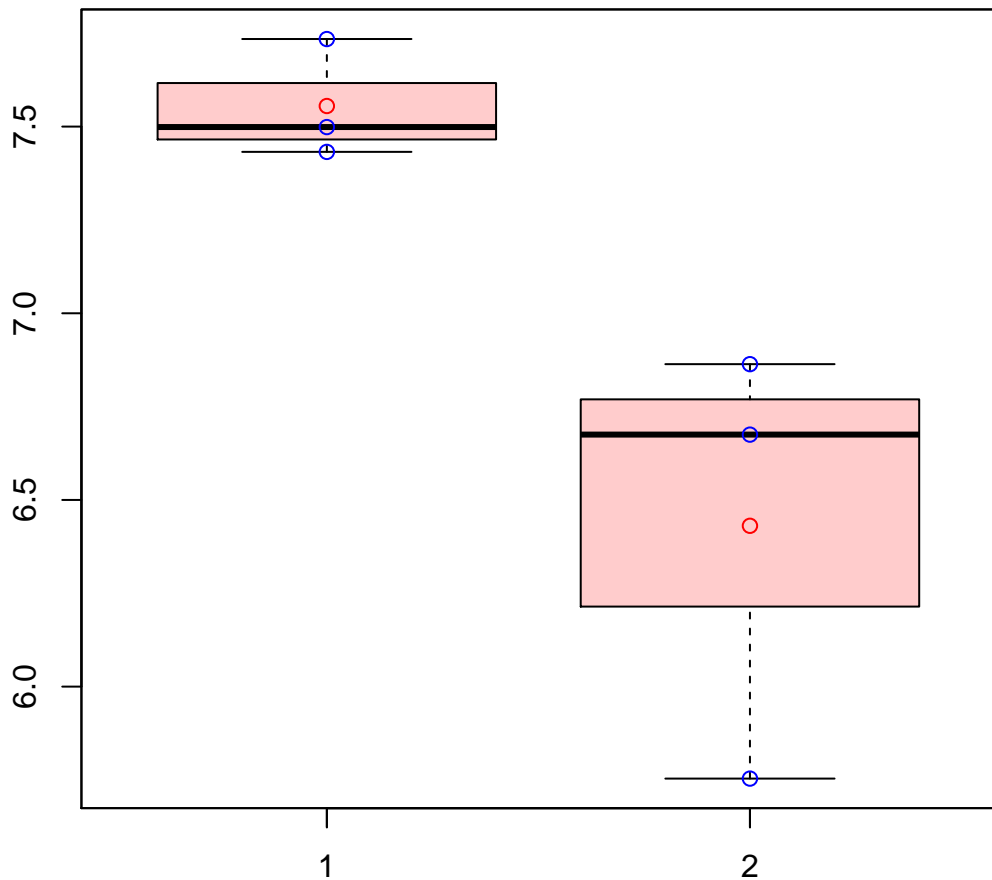

t-Test: p-value = 0.07



# CL753Contig1|CL753Contig1

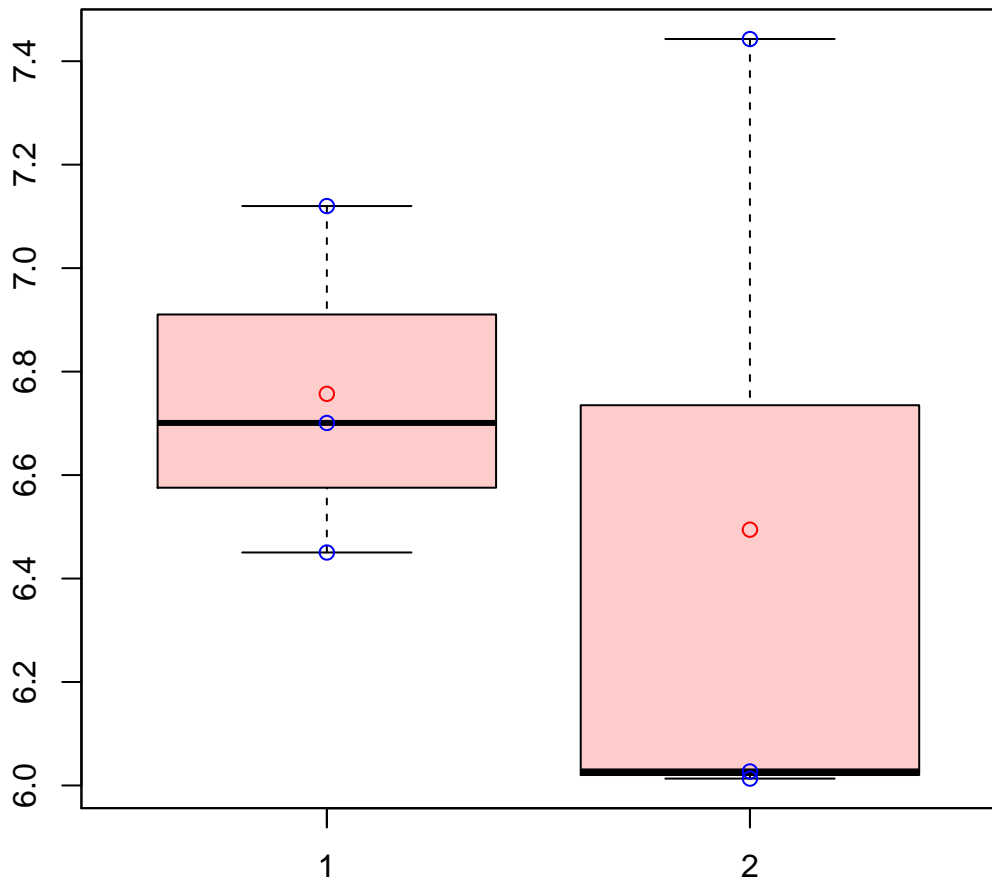

t-Test: p-value = 0.65

# CL7541Contig1|CL7541Contig1

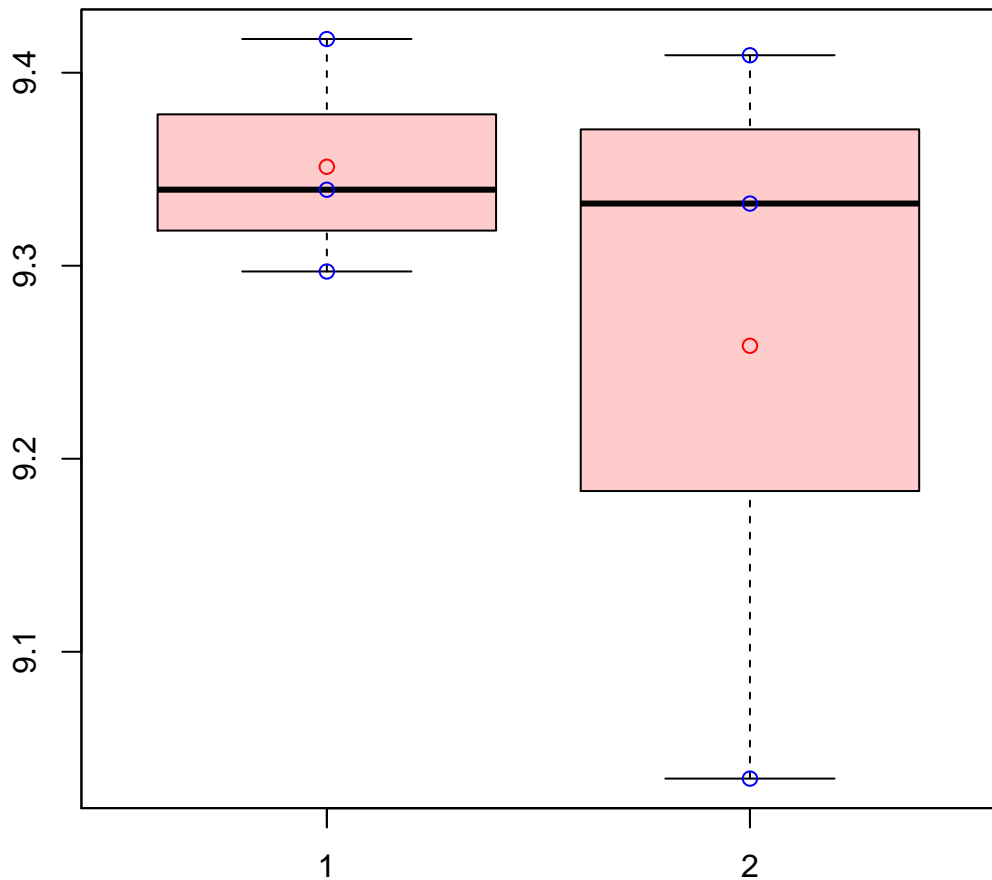

t-Test: p-value = 0.51

# CL7548Contig1|CL7548Contig1

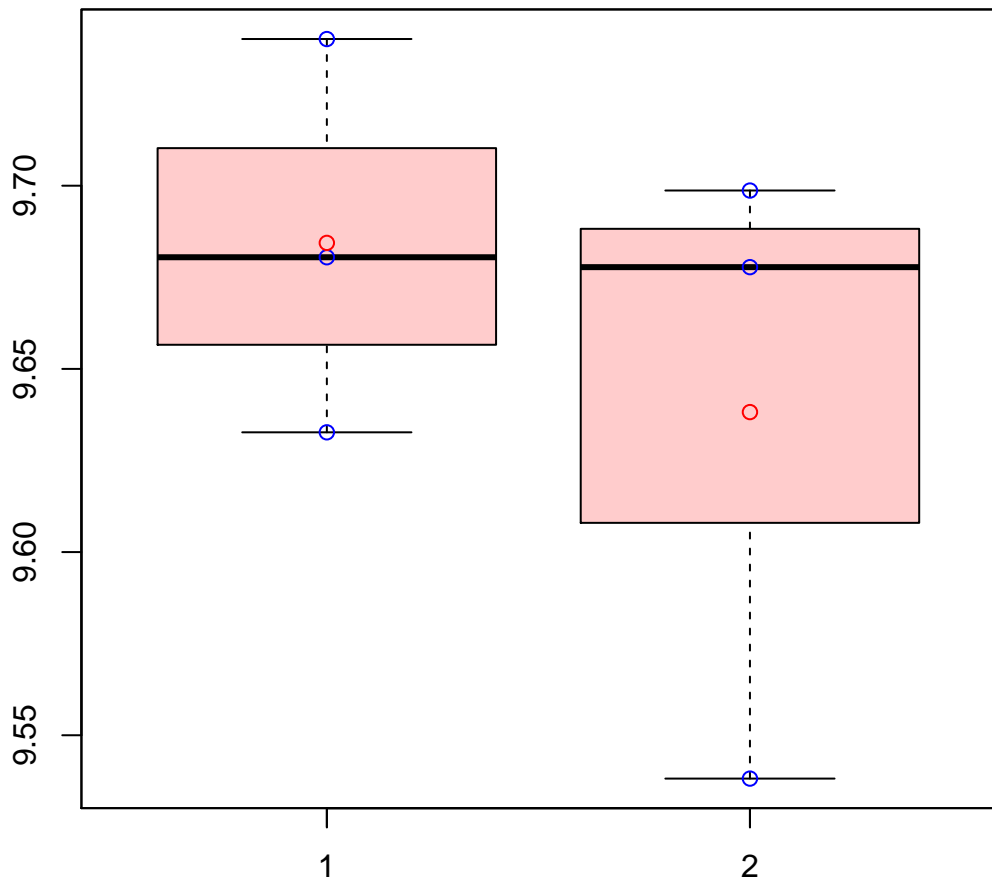

t-Test: p-value = 0.49

# CL7548Contig3|CL7548Contig3

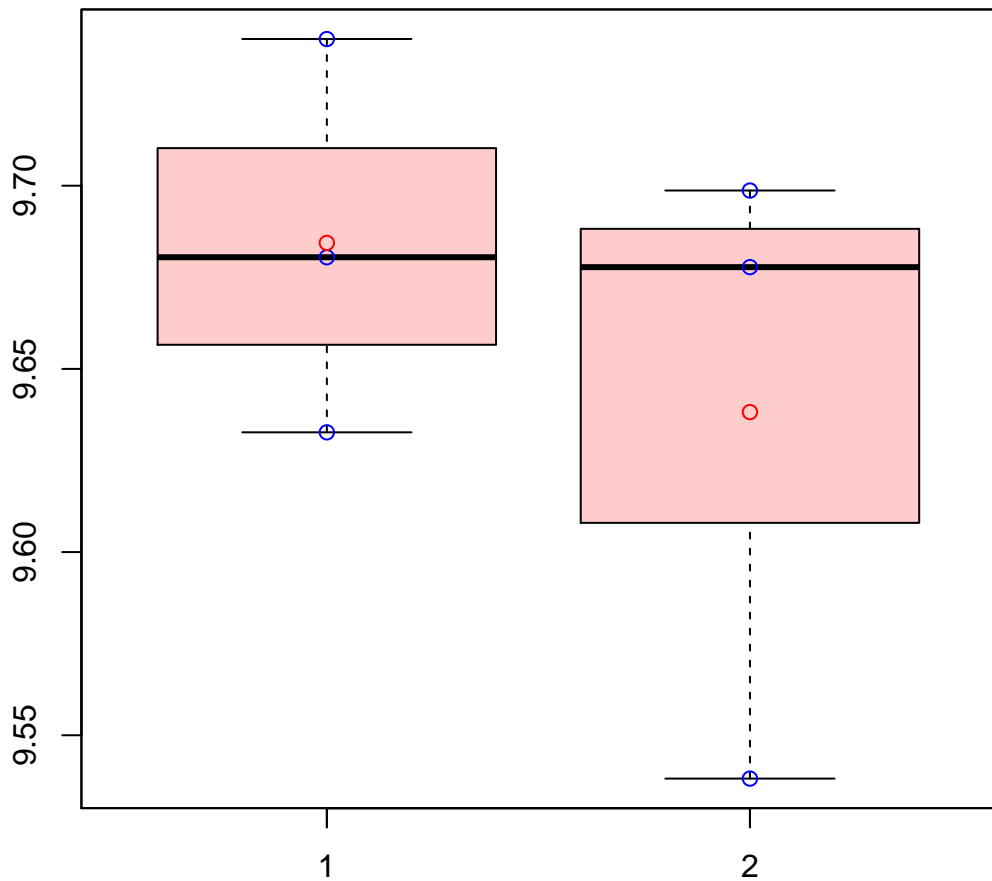

t-Test: p-value = 0.49

# CL7549Contig1|CL7549Contig1

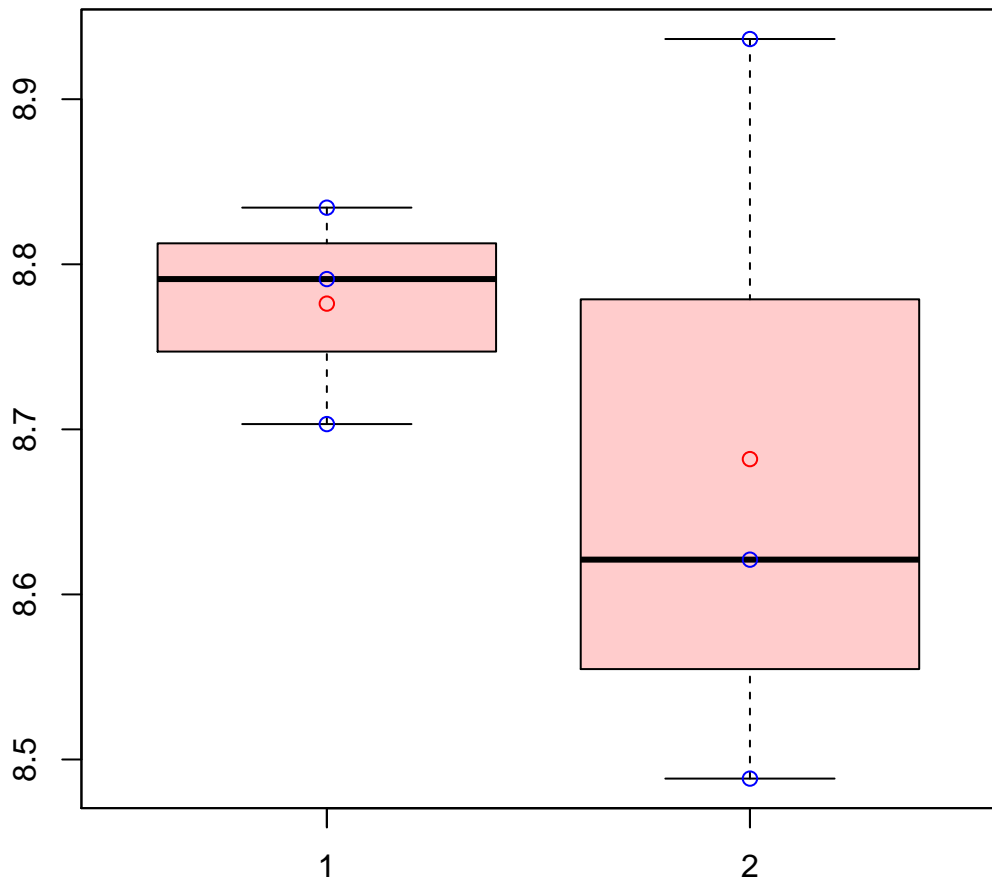

t-Test: p-value = 0.56

# CL7553Contig2|CL7553Contig2

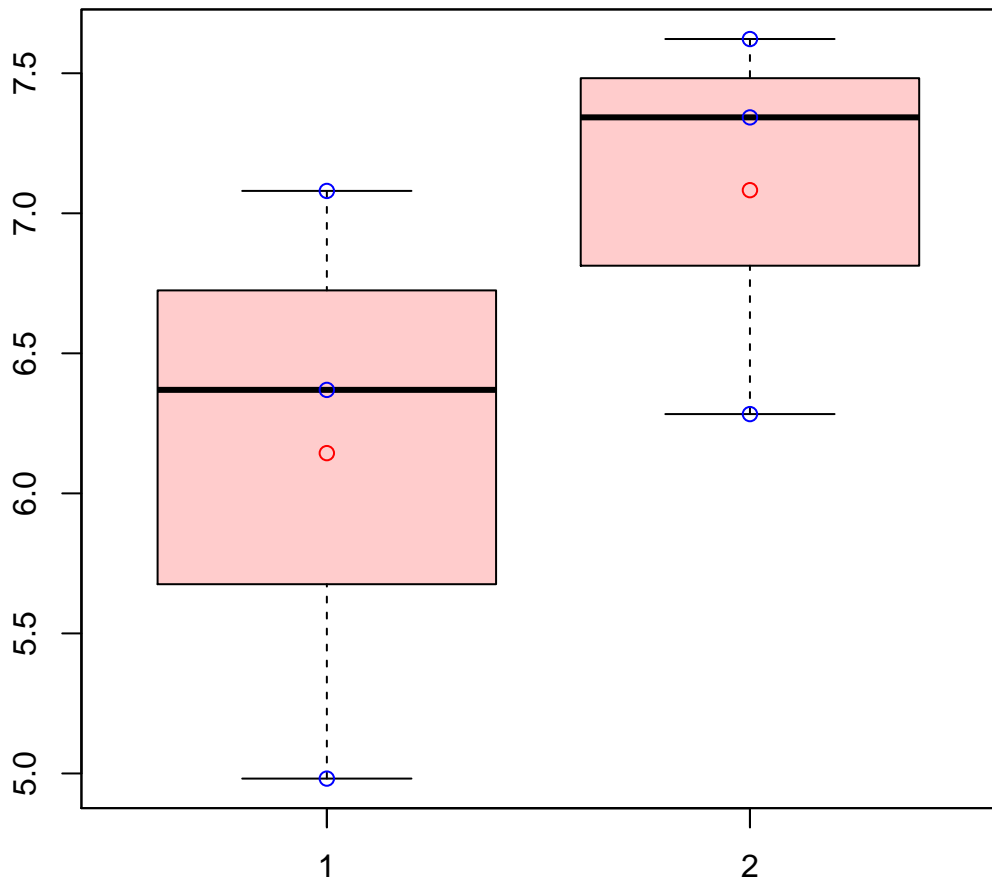

t-Test: p-value = 0.28

# CL7555Contig2|CL7555Contig2

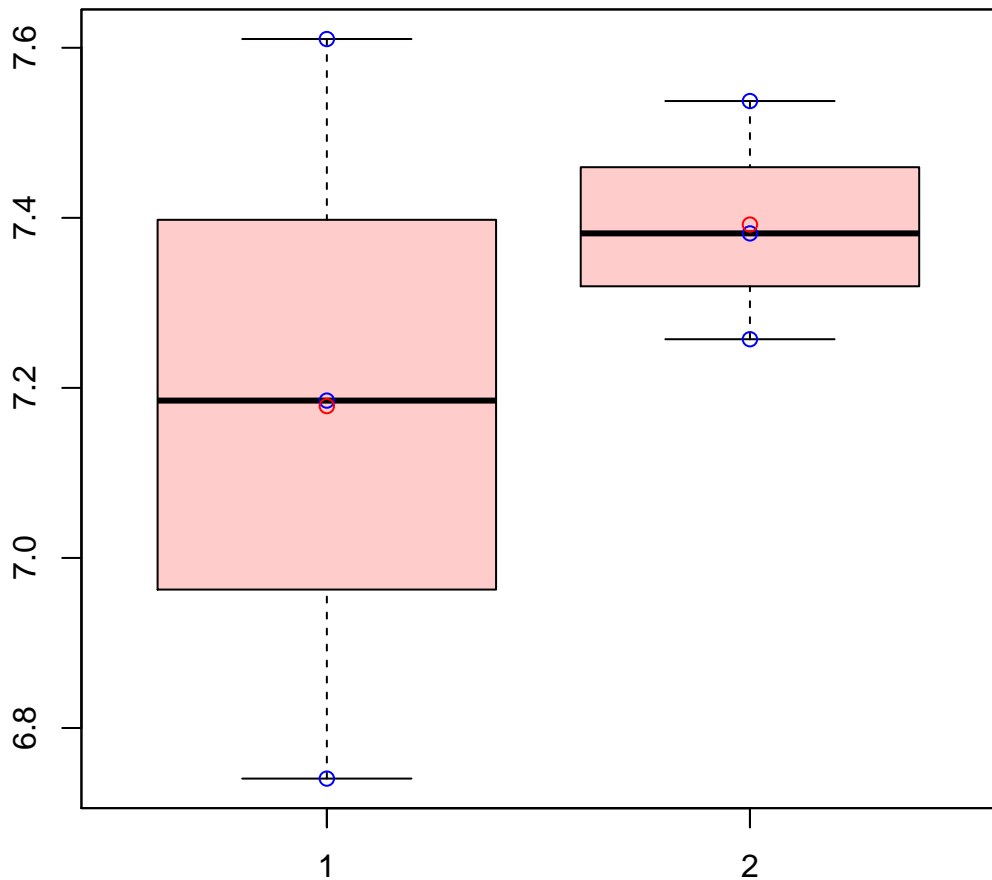

t-Test: p-value = 0.49

# CL7561Contig2|CL7561Contig2

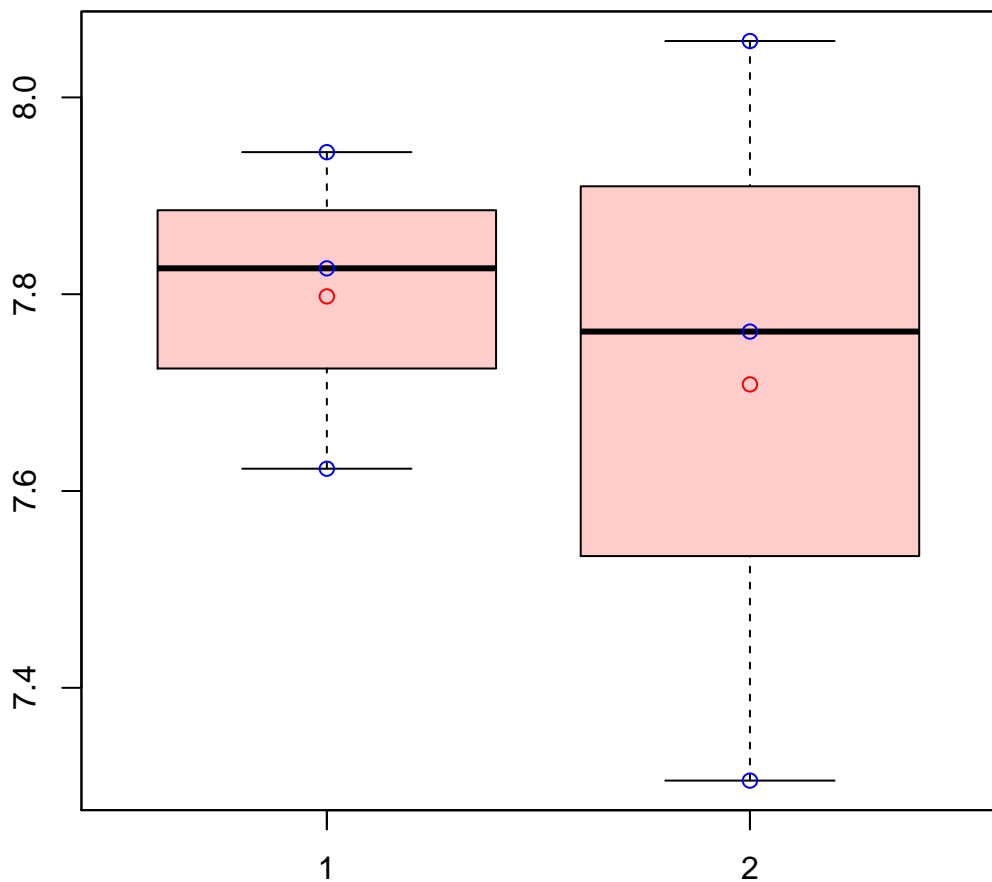

t-Test: p-value = 0.73



# CL7561Contig3|CL7561Contig3



t-Test: p-value = 0.73

# CL7562Contig4|CL7562Contig4

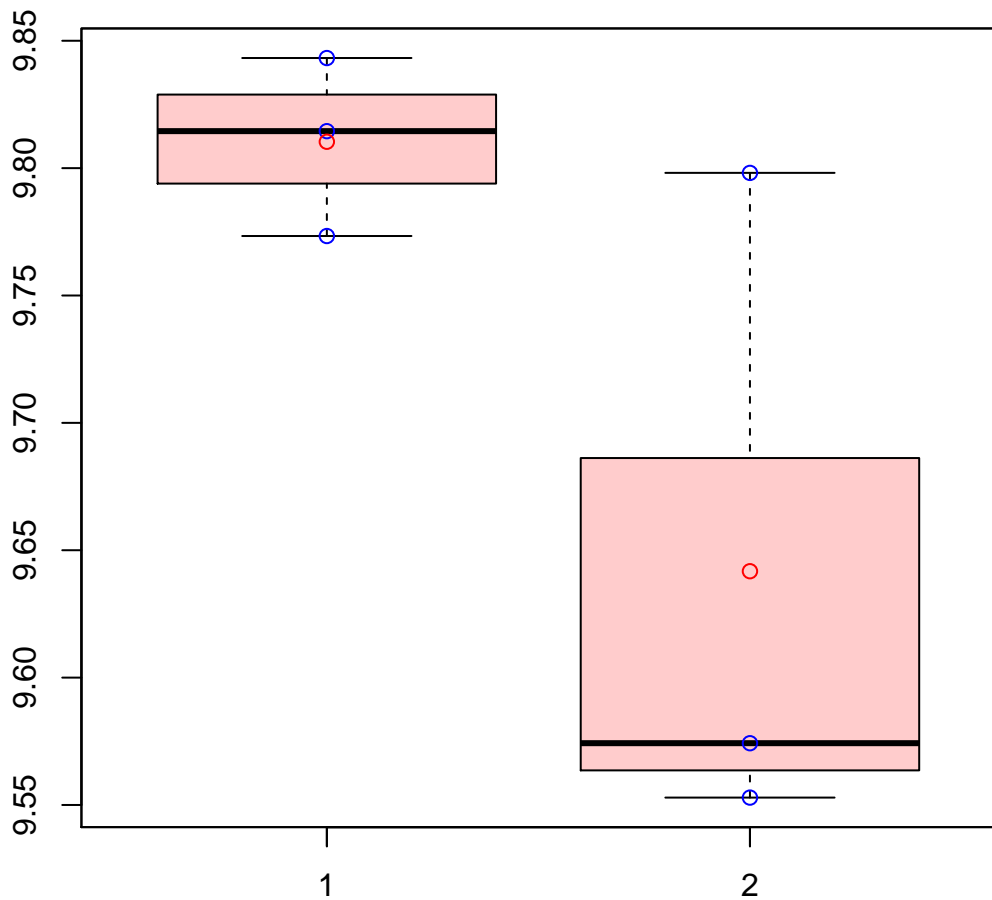

t-Test: p-value = 0.16

# CL7567Contig1|CL7567Contig1



t-Test: p-value = 0.89

# CL7568Contig1|CL7568Contig1

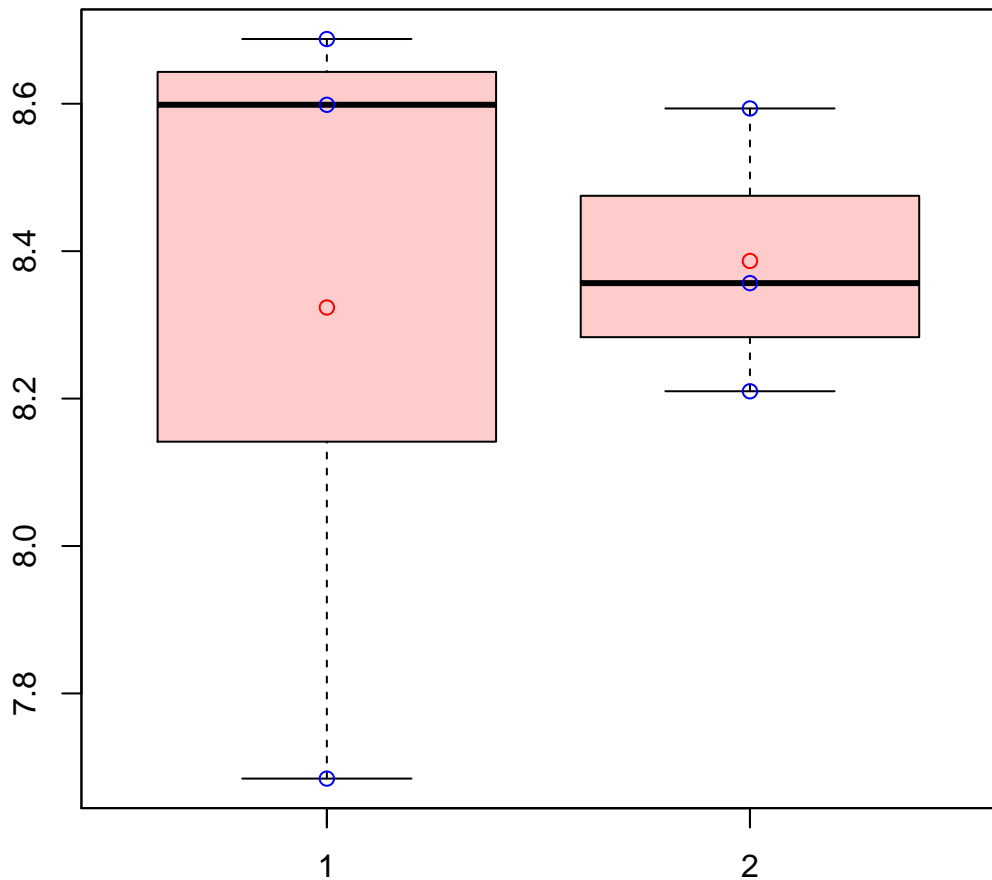

t-Test: p-value = 0.87

# CL7568Contig2|CL7568Contig2



t-Test: p-value = 0.87

# CL756Contig2|CL756Contig2

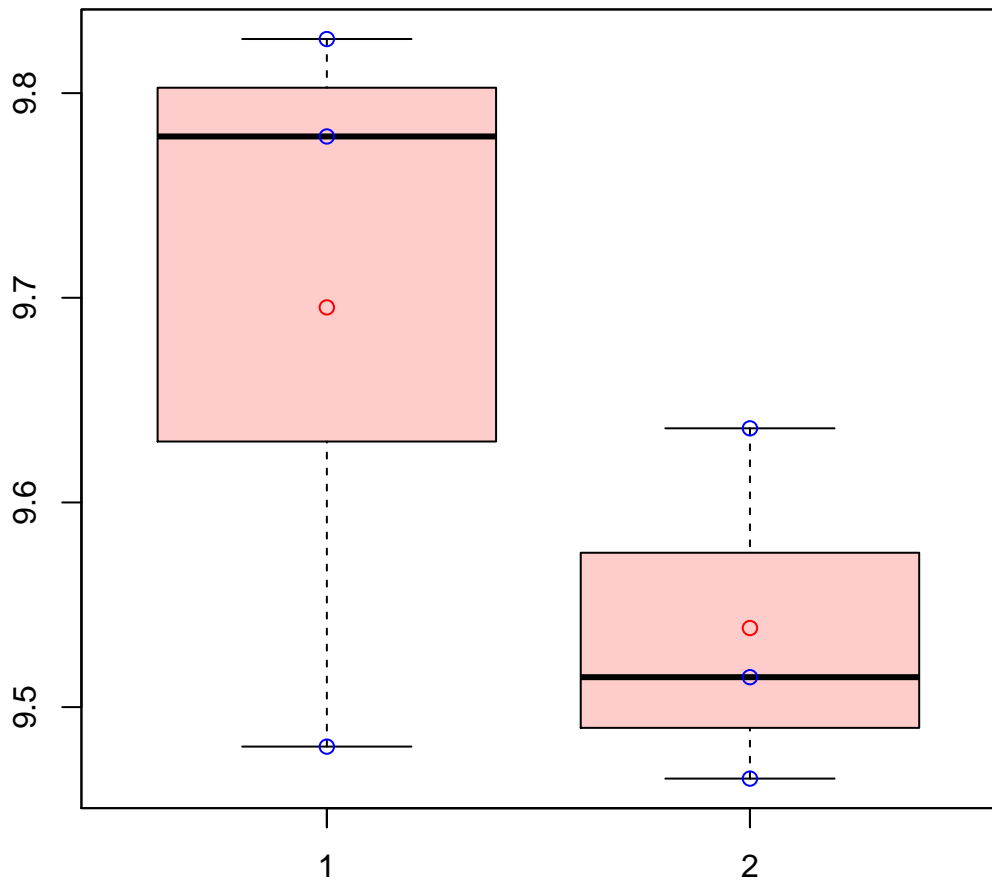

t-Test: p-value = 0.29

# CL756Contig3|CL756Contig3

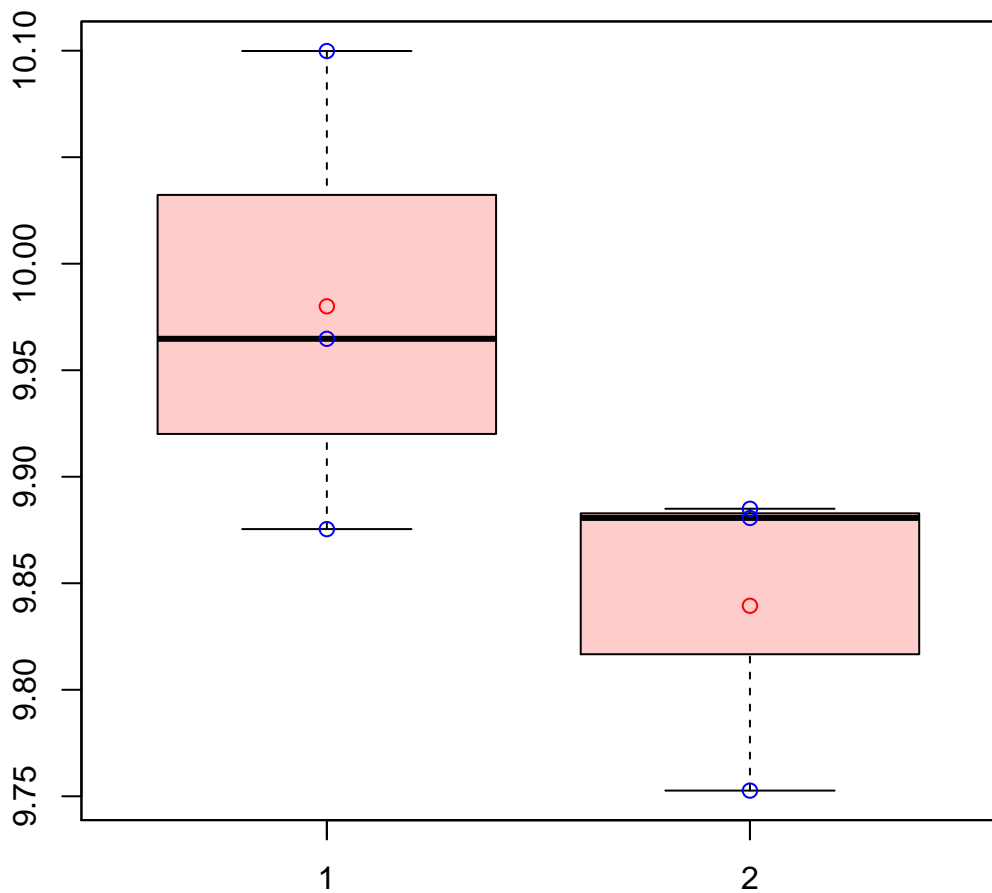

t-Test: p-value = 0.16

# CL756Contig4|CL756Contig4

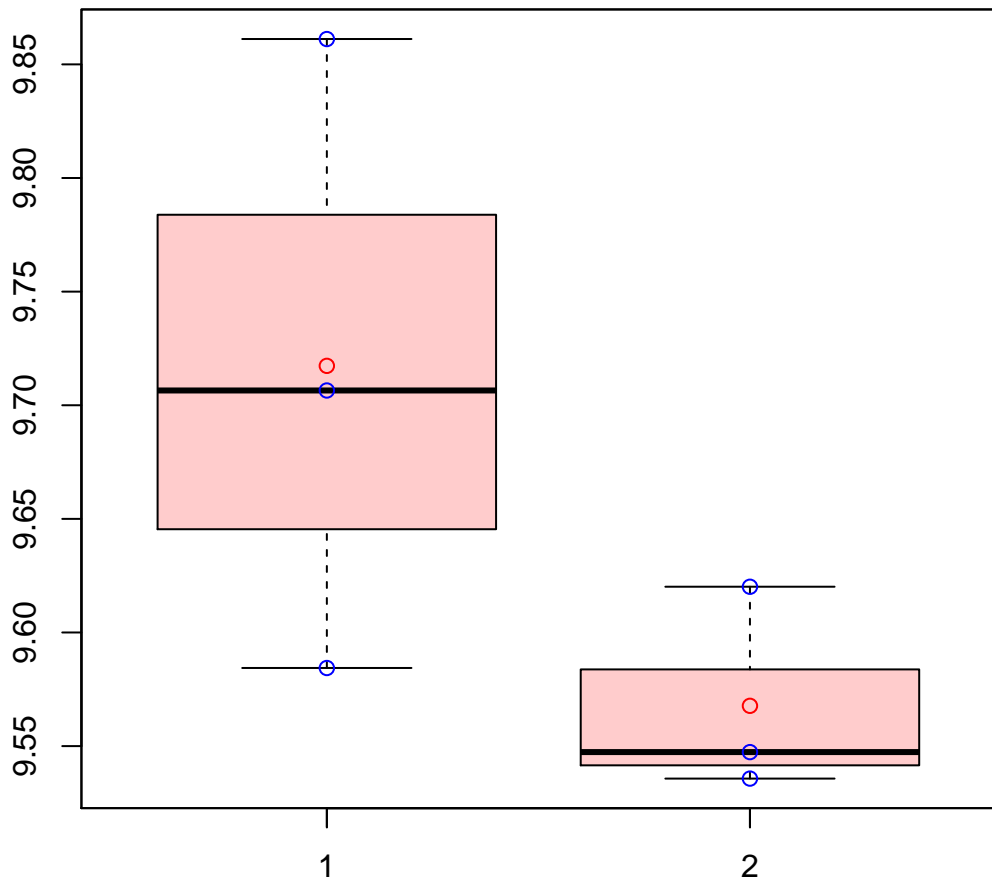

t-Test: p-value = 0.2



# CL7578Contig2|CL7578Contig2



t-Test: p-value = 0.29

# CL7582Contig1|CL7582Contig1

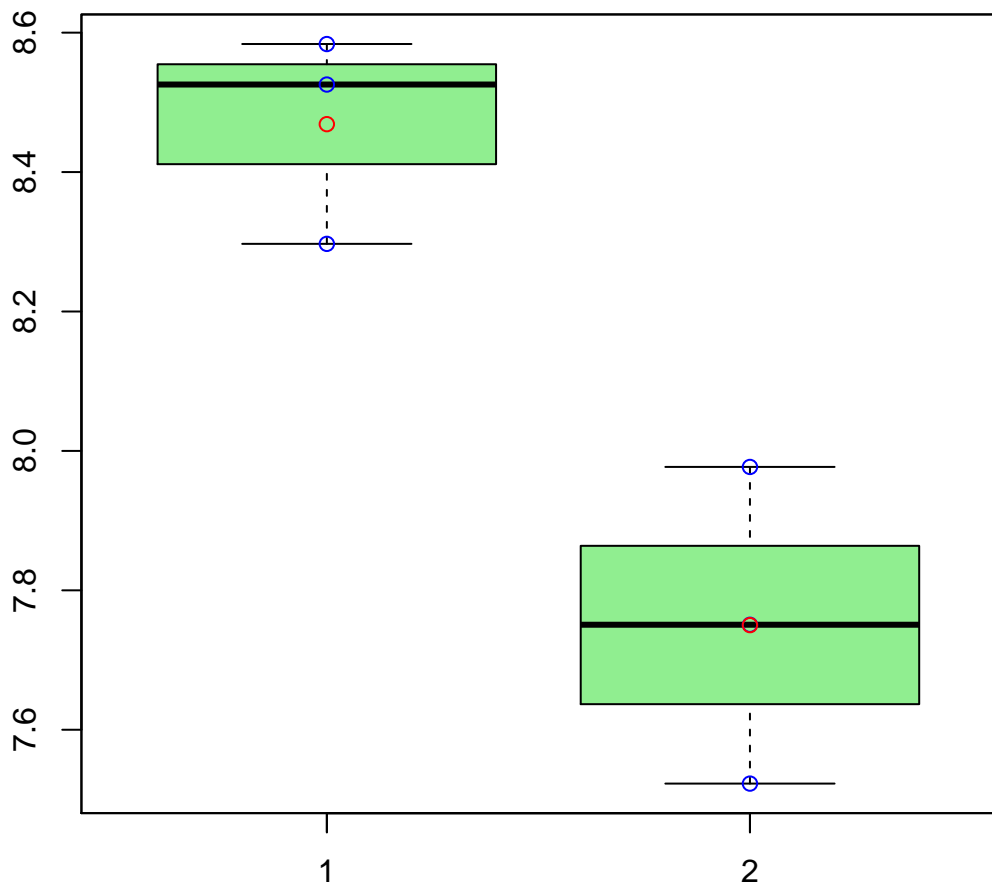

t-Test: p-value = 0.01

# CL7586Contig1|CL7586Contig1

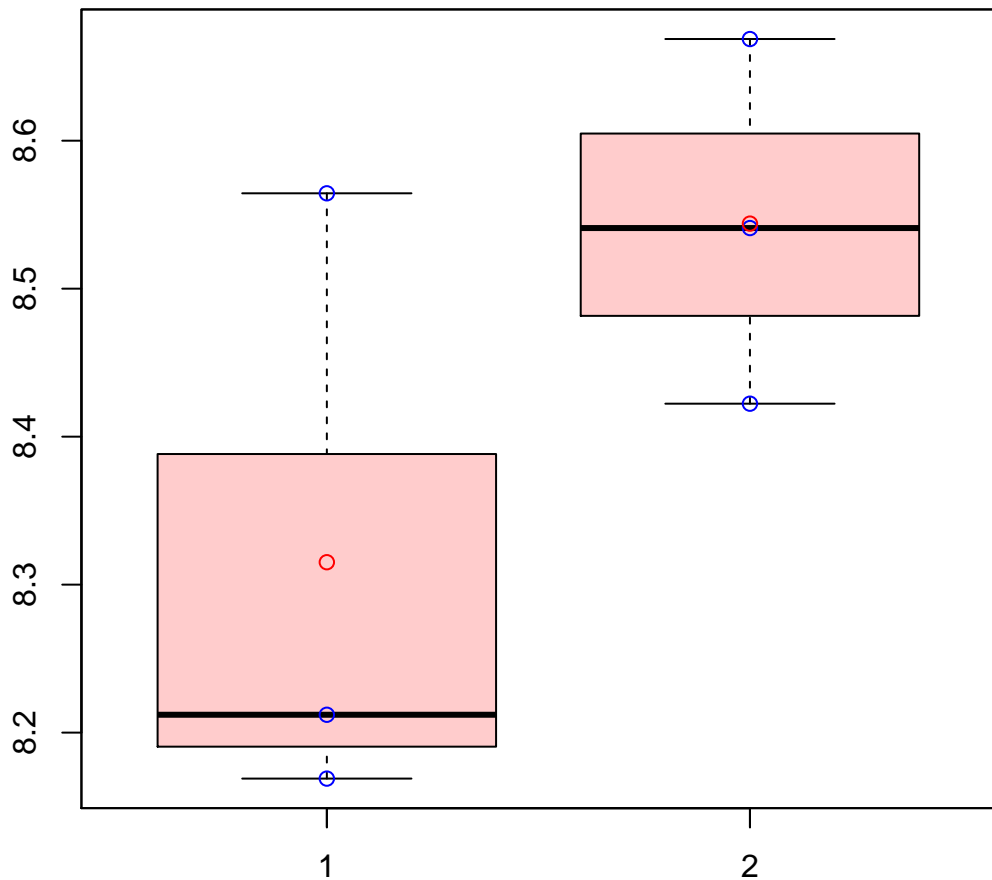

t-Test: p-value = 0.21

# CL758Contig8|CL758Contig8

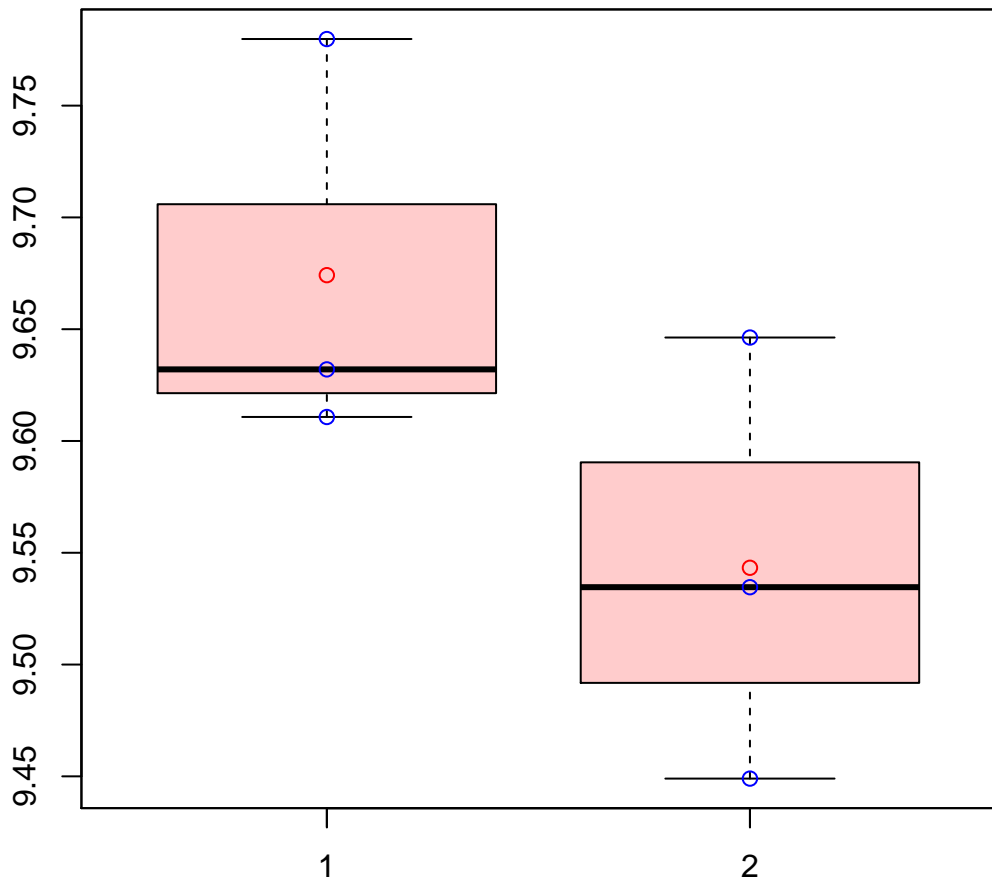

t-Test: p-value = 0.17

# CL7590Contig1|CL7590Contig1

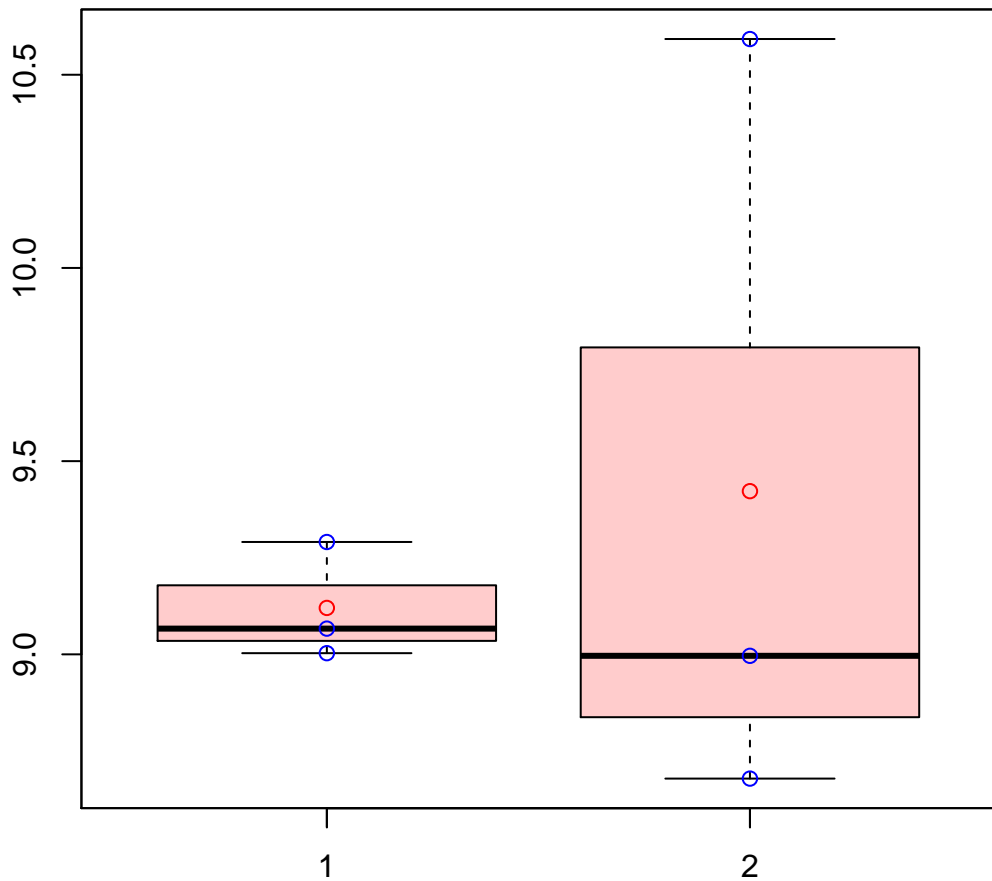

t-Test: p-value = 0.66

# CL7597Contig1|CL7597Contig1

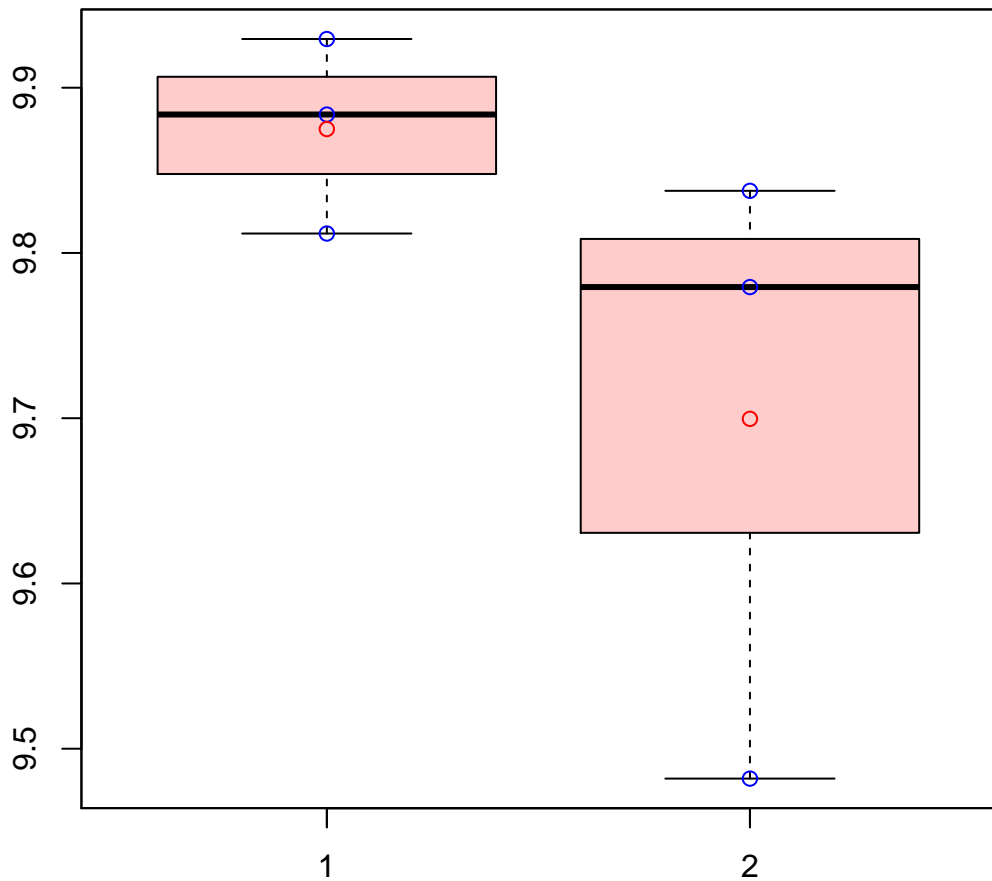

t-Test: p-value = 0.25

# CL75Contig19|CL75Contig19



t-Test: p-value = 0.53

# CL75Contig33|CL75Contig33

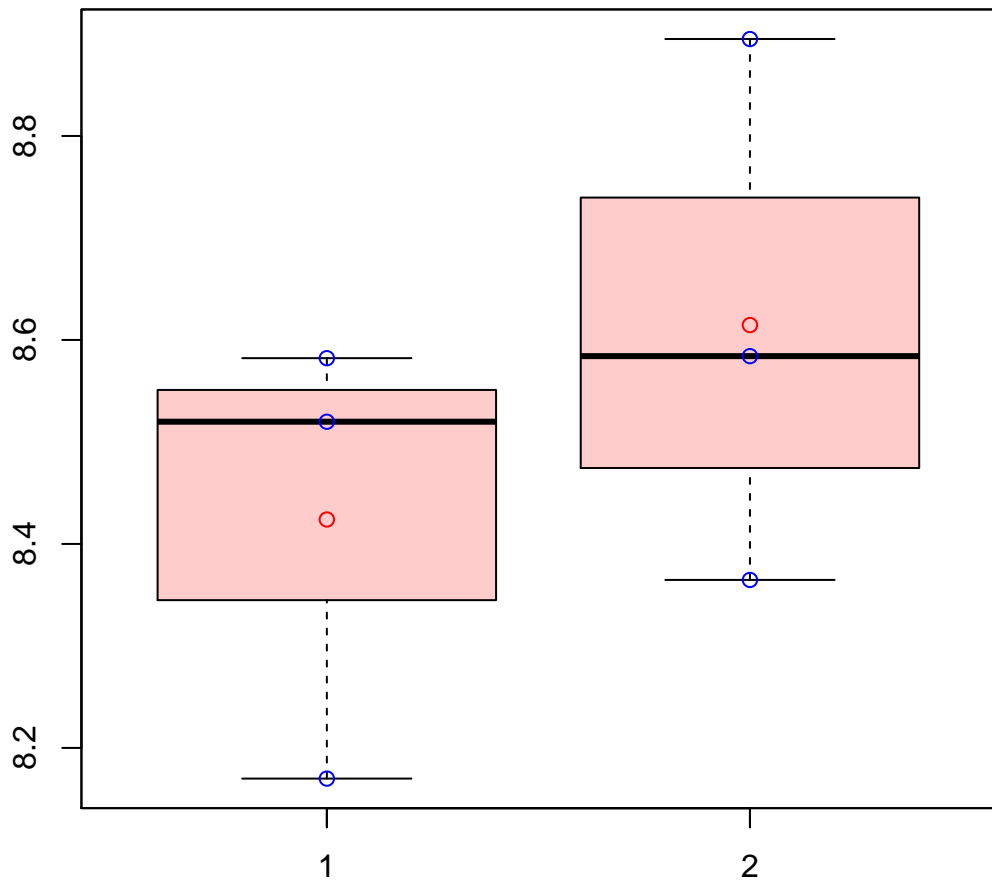

t-Test: p-value = 0.4



# CL7602Contig2|CL7602Contig2

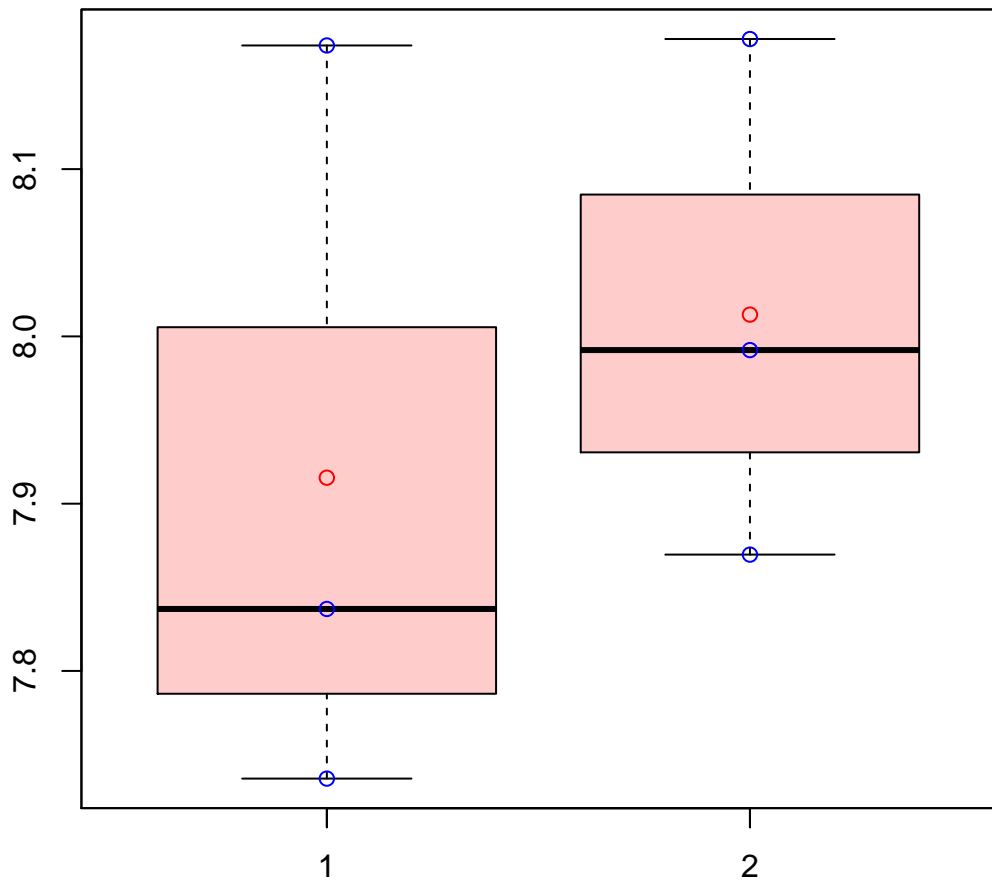

t-Test: p-value = 0.58

# CL7612Contig2|CL7612Contig2



t-Test: p-value = 0.05

# CL7613Contig1|CL7613Contig1

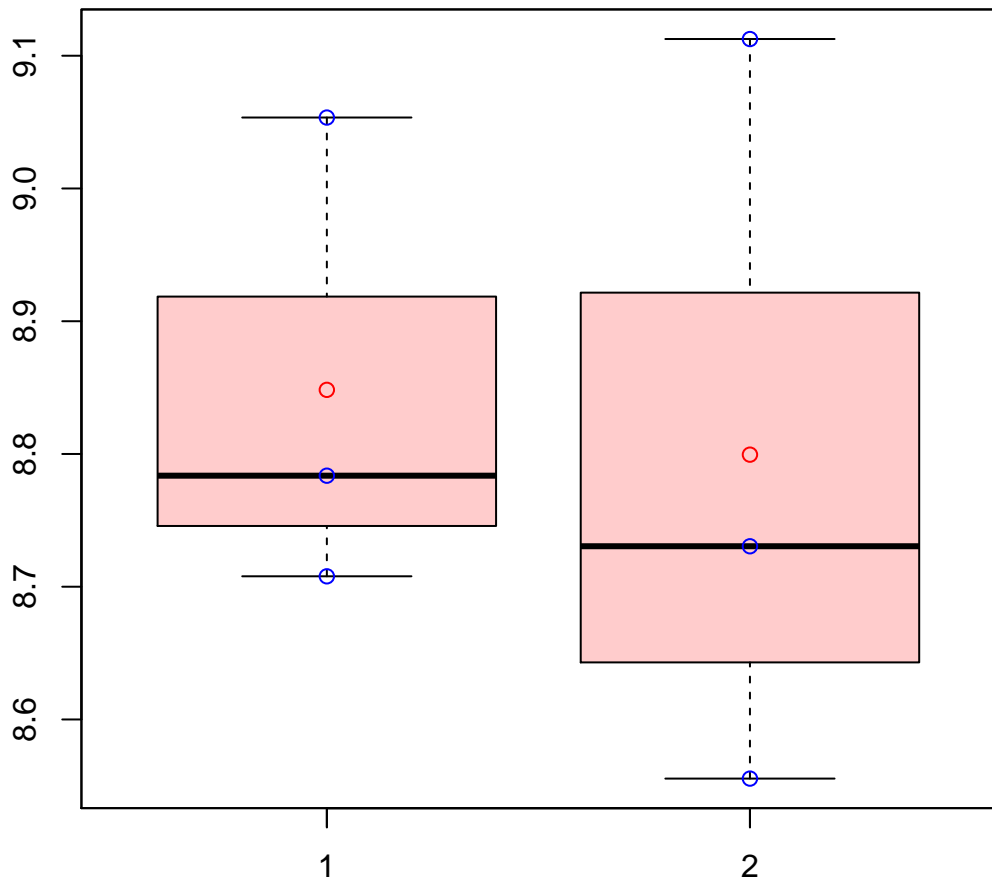

t-Test: p-value = 0.82

# CL762Contig13|CL762Contig13

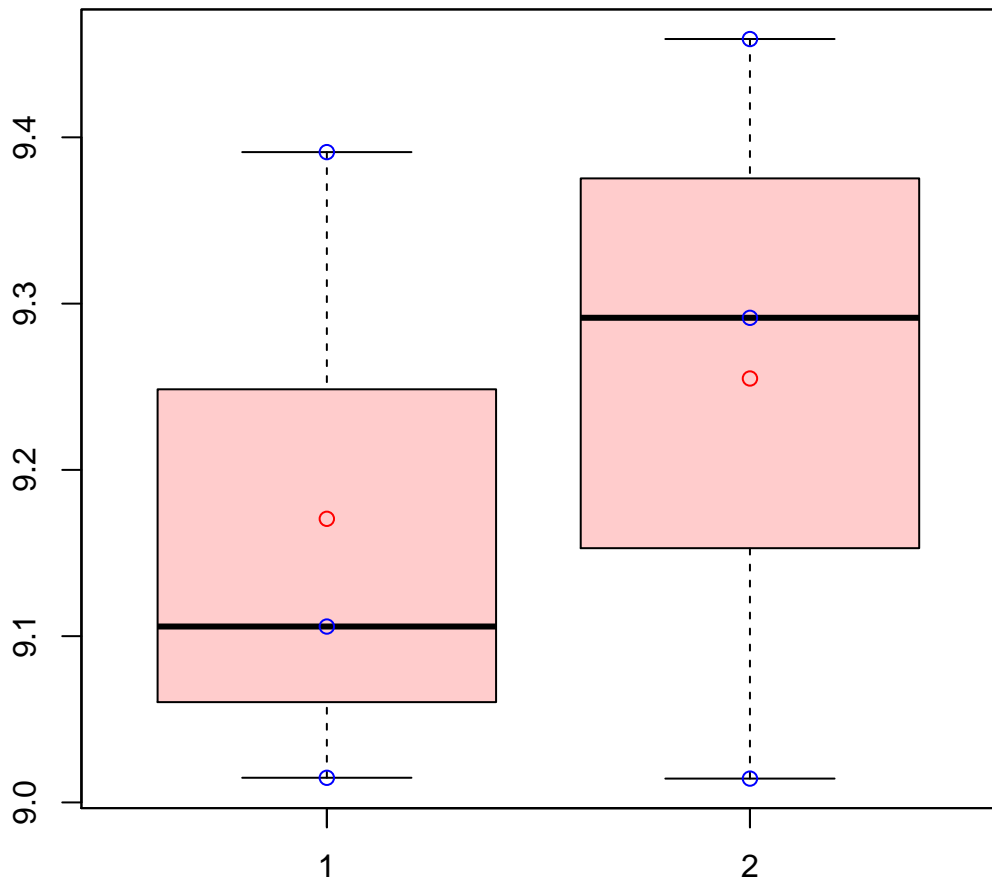

t-Test: p-value = 0.65

# CL7638Contig1|CL7638Contig1

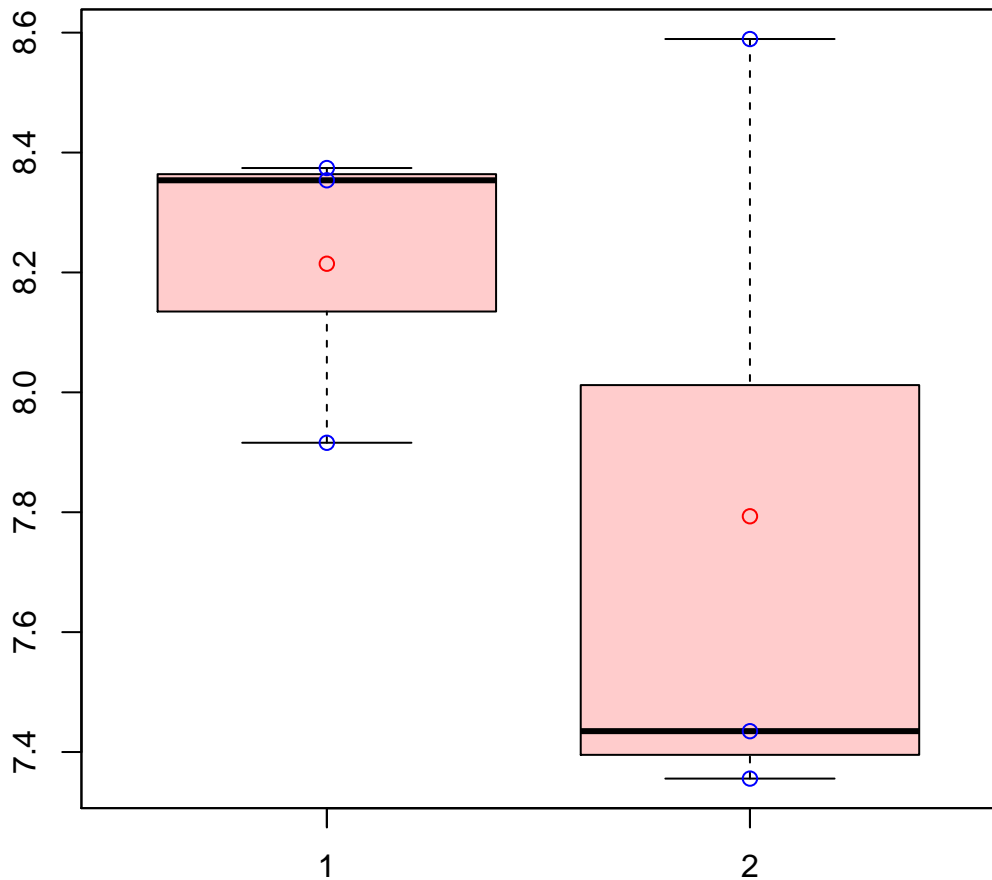

t-Test: p-value = 0.41

# CL7638Contig2|CL7638Contig2

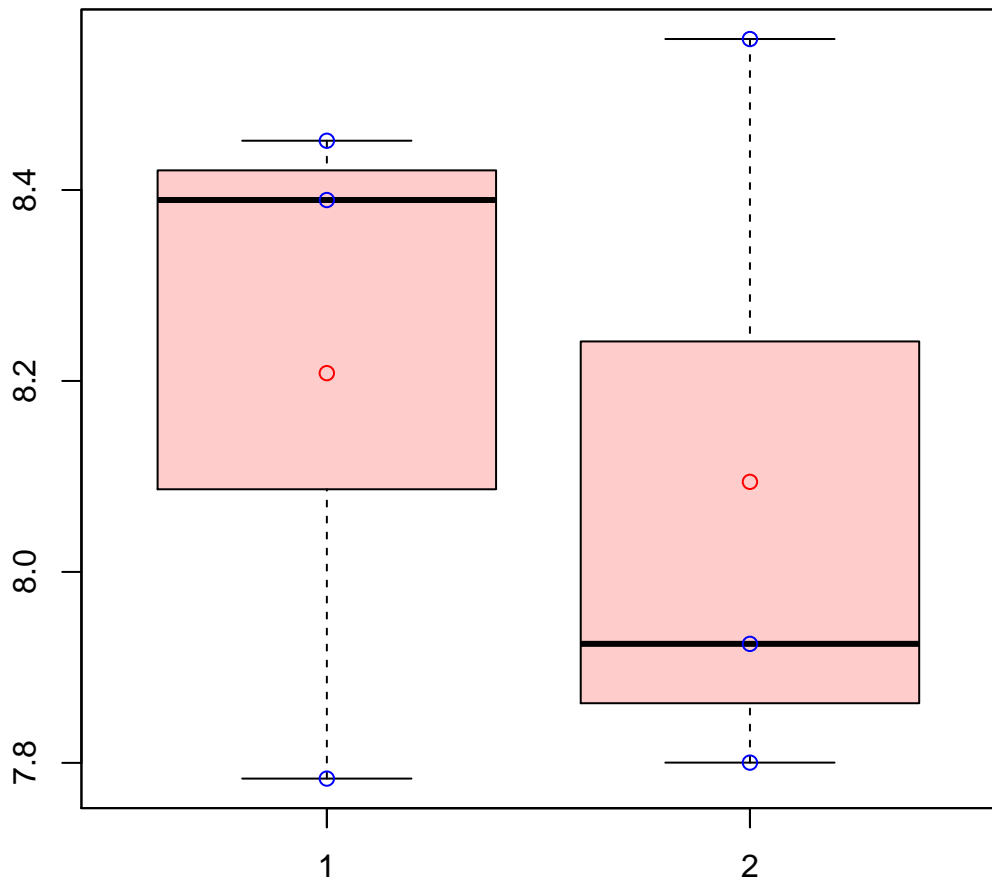

t-Test: p-value = 0.74

# CL763Contig6|CL763Contig6

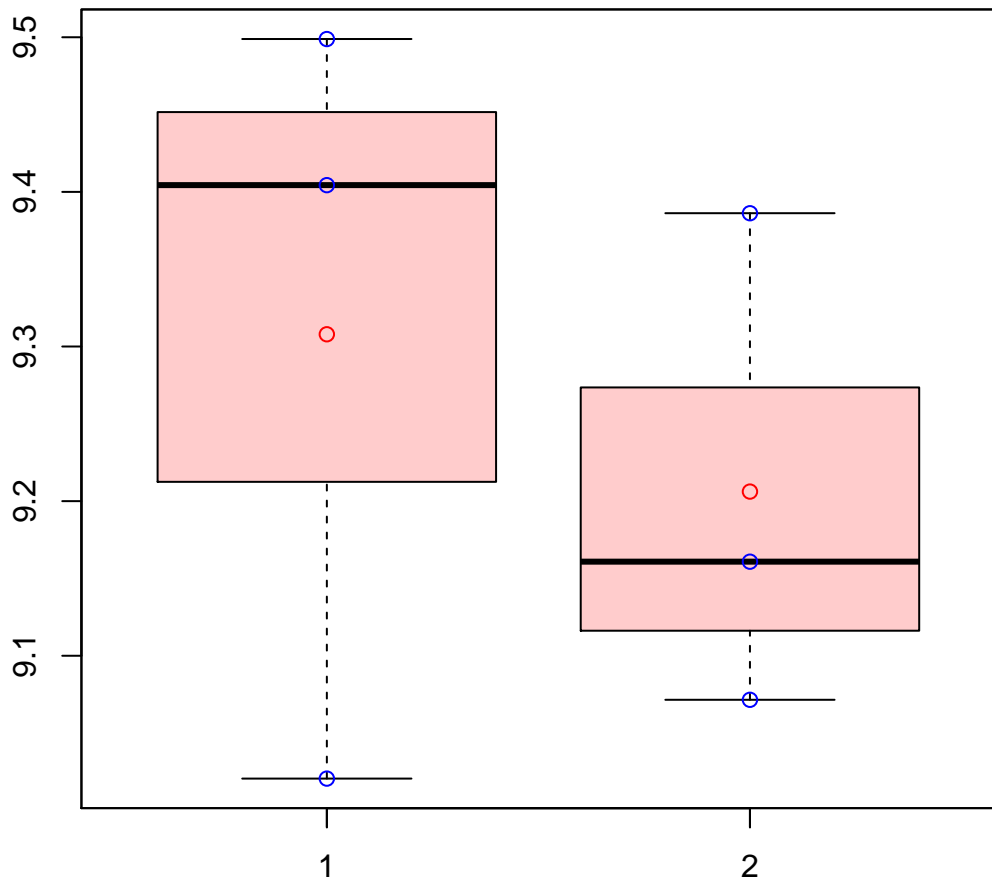

t-Test: p-value = 0.59

# CL7647Contig1|CL7647Contig1

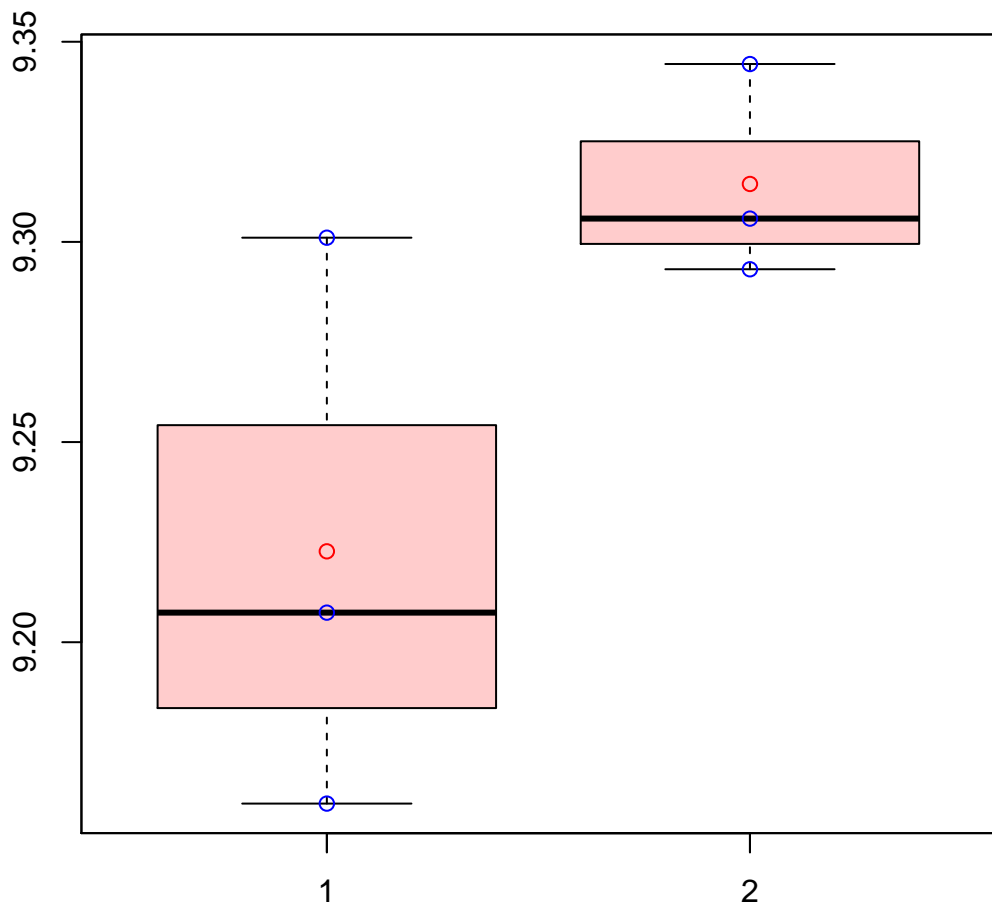

t-Test: p-value = 0.15



# CL7647Contig2|CL7647Contig2

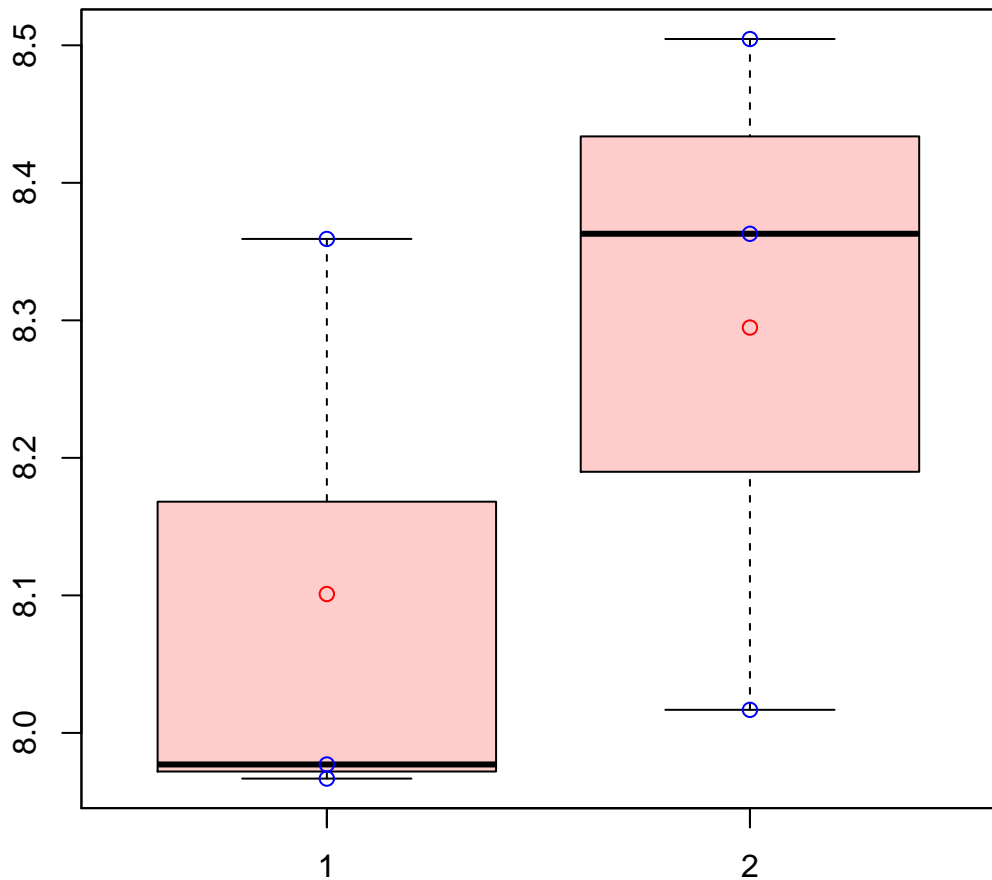

t-Test: p-value = 0.38

# CL7652Contig3|CL7652Contig3



t-Test: p-value = 0.34

# CL765Contig11|CL765Contig11



t-Test: p-value = 0.07

# CL765Contig2|CL765Contig2



t-Test: p-value = 0.07

# CL7661Contig2|CL7661Contig2

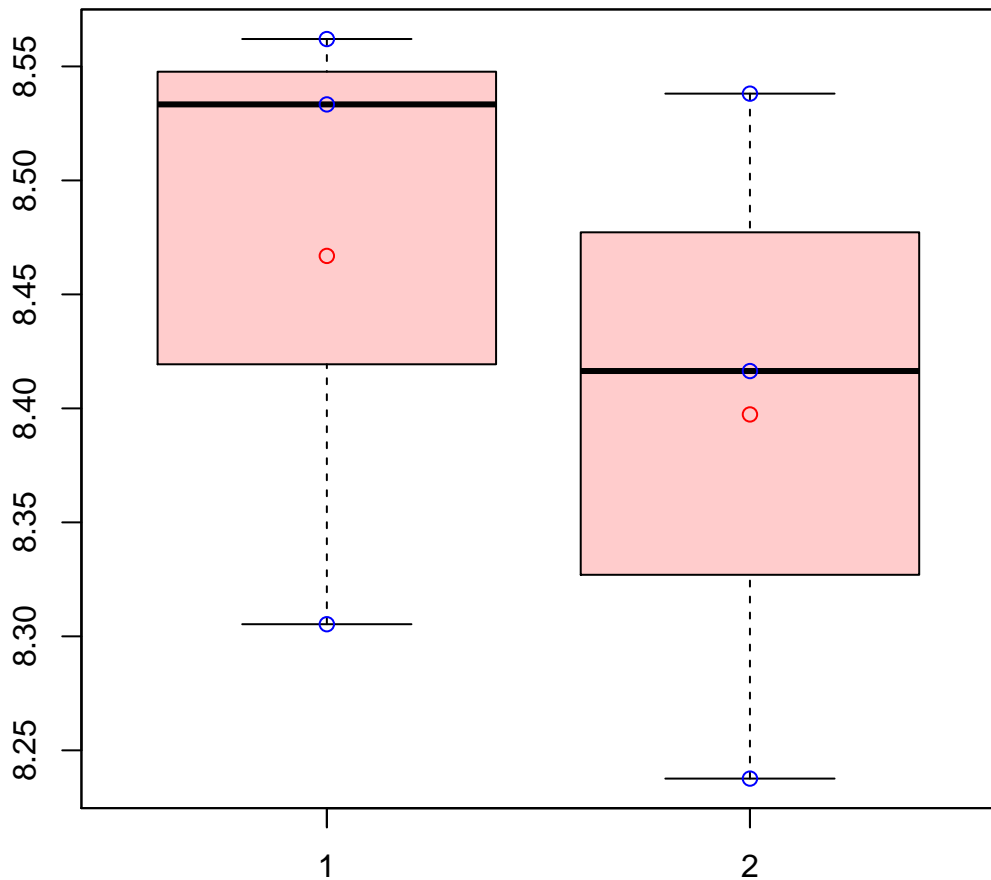

t-Test: p-value = 0.59

# CL7668Contig1|CL7668Contig1

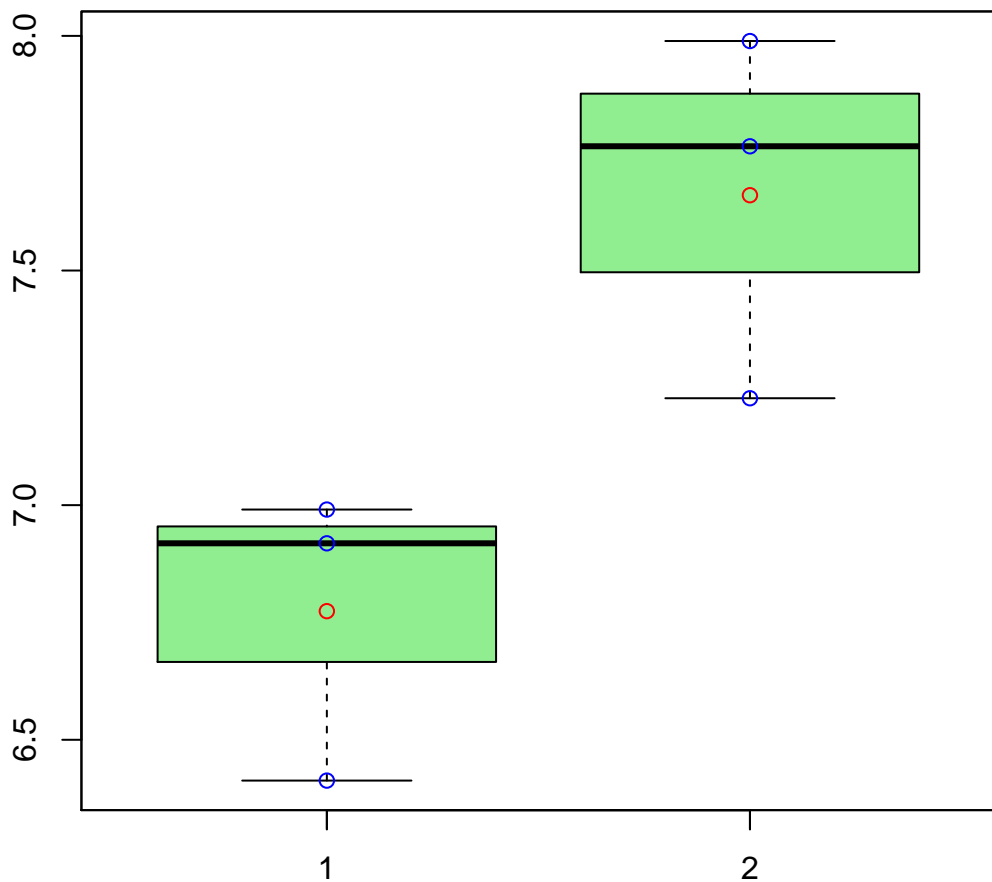

t-Test: p-value = 0.04

# CL7668Contig2|CL7668Contig2

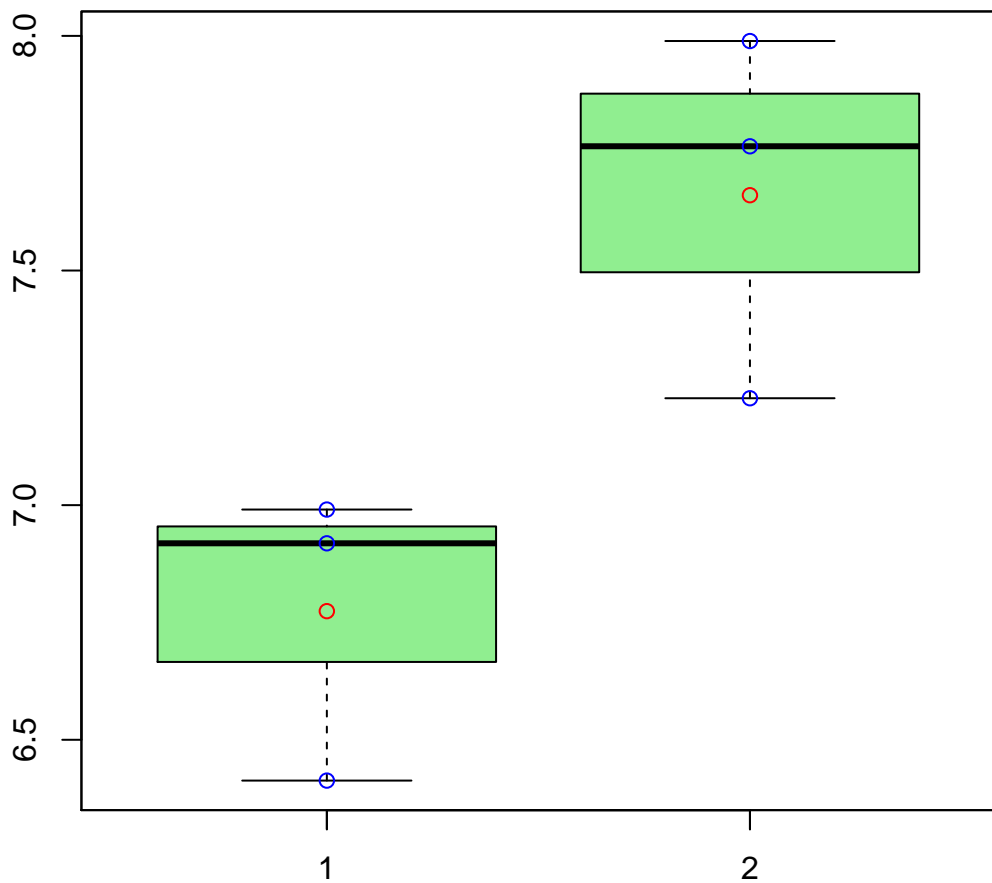

t-Test: p-value = 0.04

# CL7671Contig2|CL7671Contig2

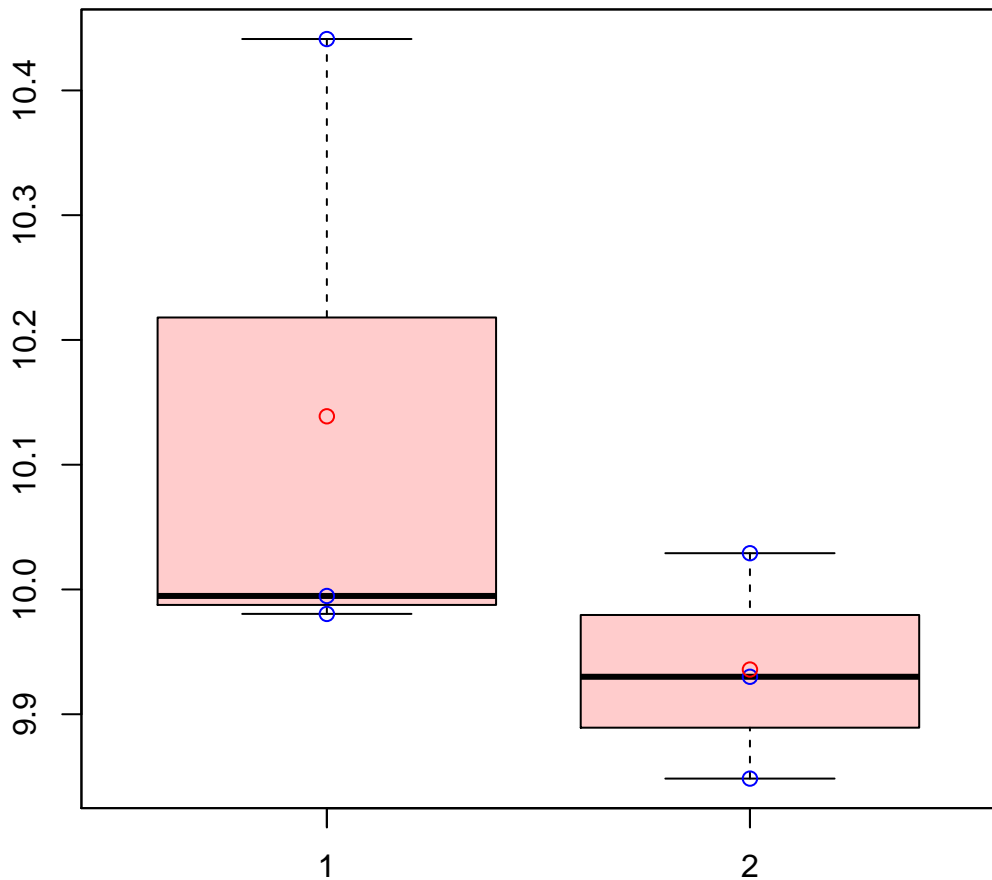

t-Test: p-value = 0.31



# CL7673Contig1|CL7673Contig1

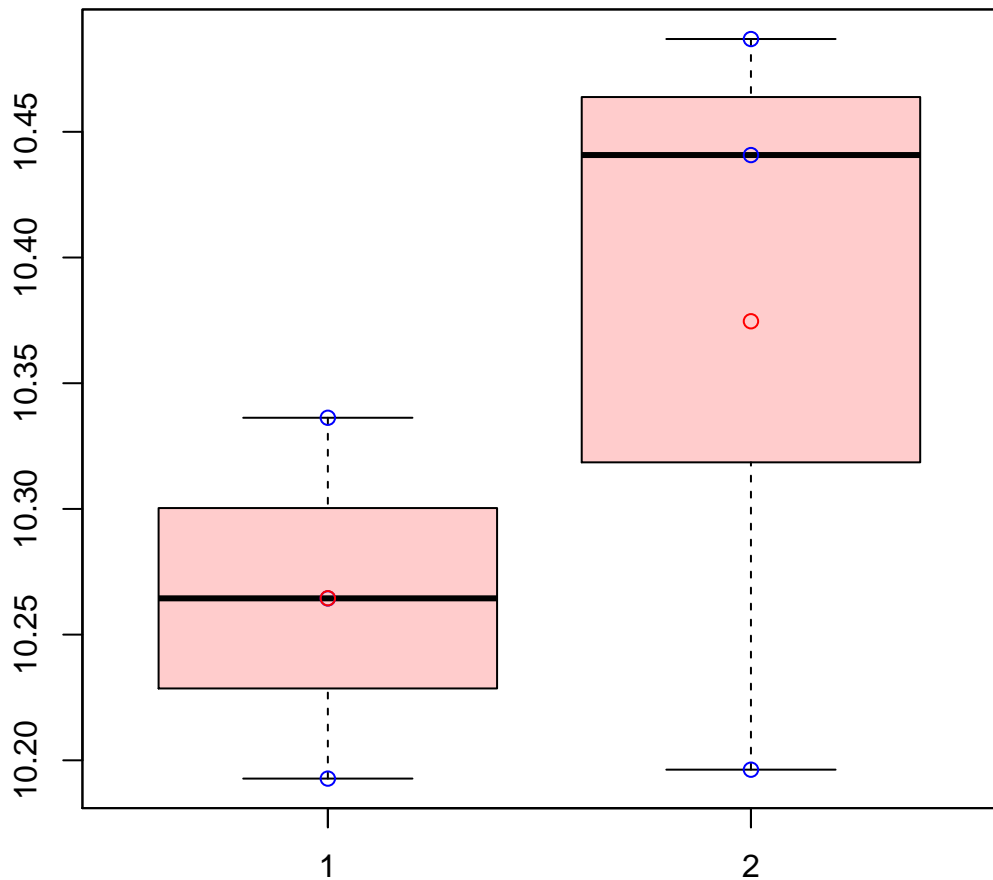

t-Test: p-value = 0.35

# CL7674Contig2|CL7674Contig2

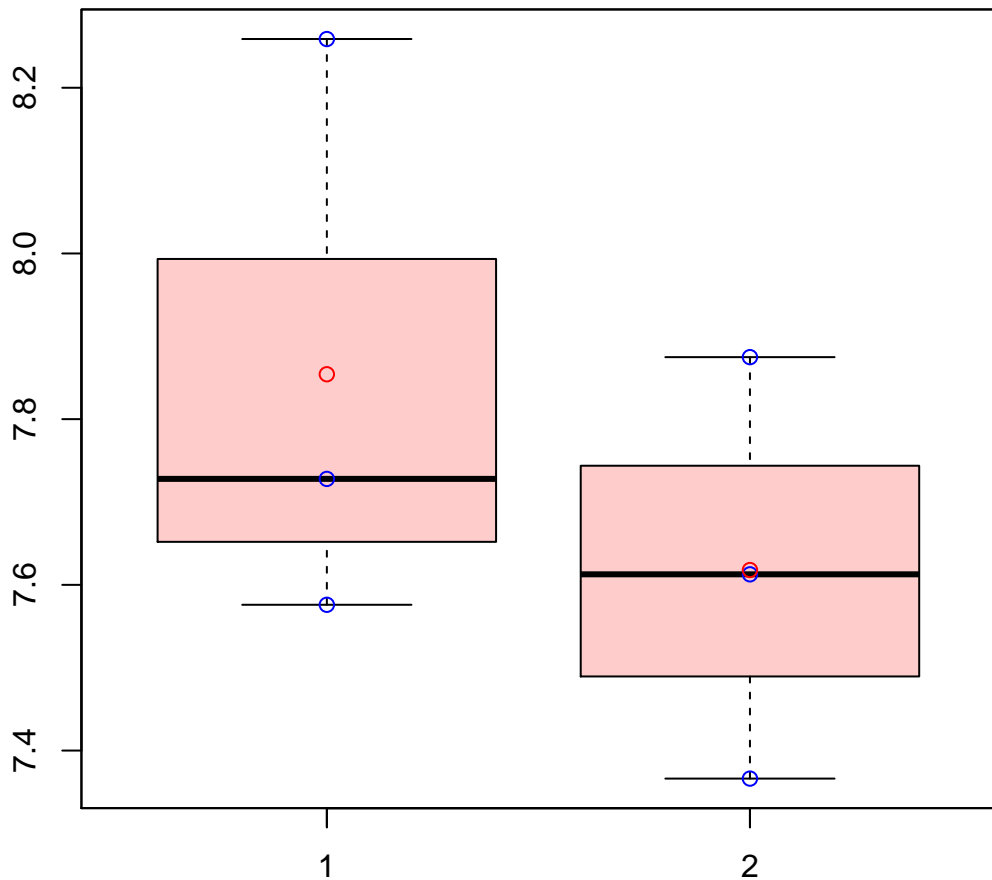

t-Test: p-value = 0.41

# CL767Contig5|CL767Contig5

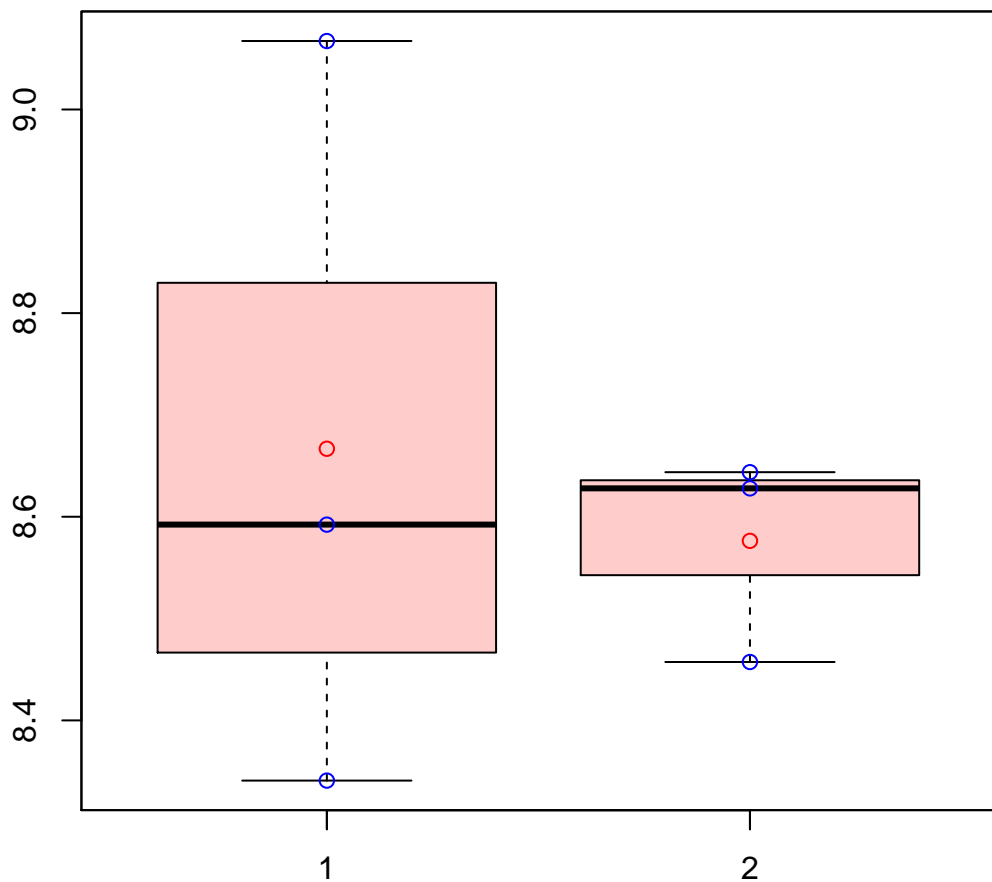

t-Test: p-value = 0.72

# CL7698Contig1|CL7698Contig1

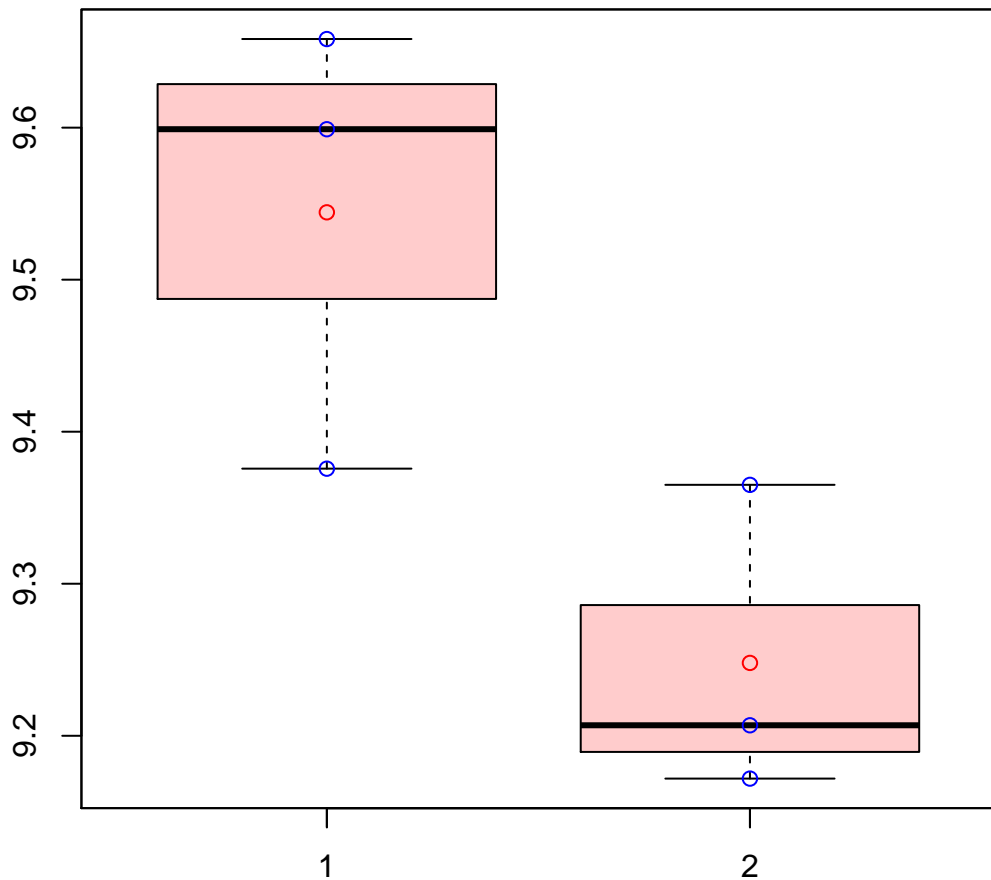

t-Test: p-value = 0.05

# CL7698Contig2|CL7698Contig2

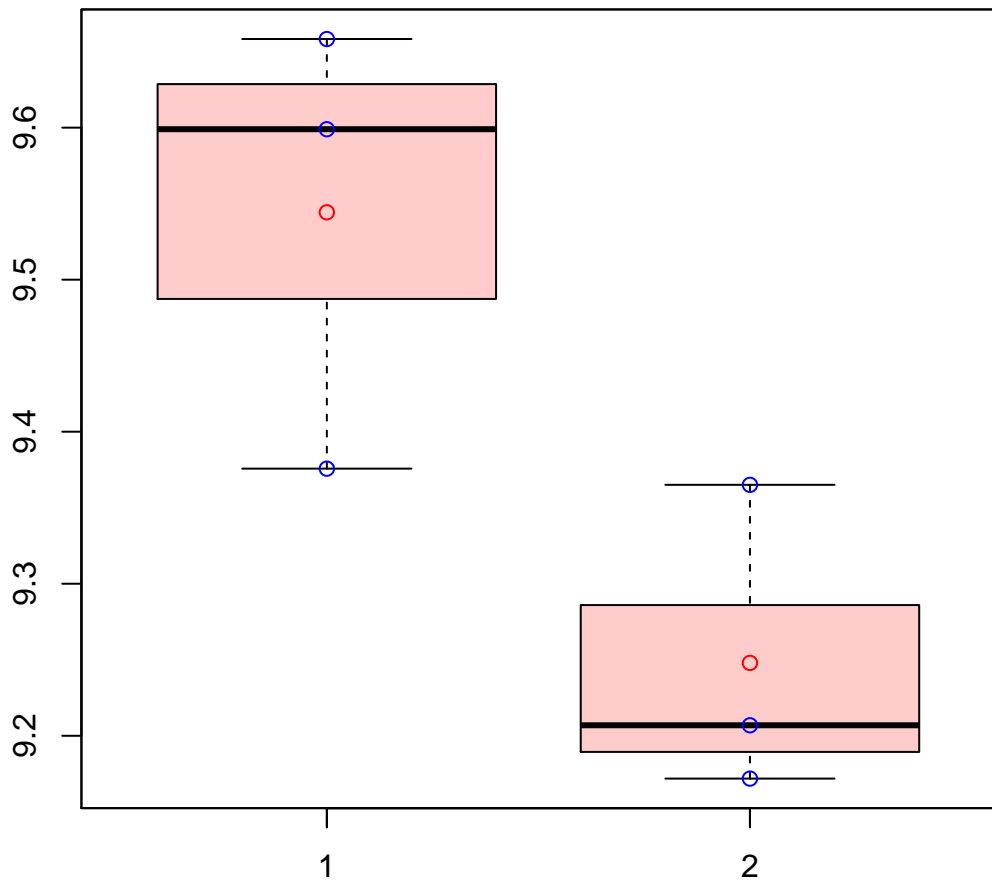

t-Test: p-value = 0.05

# CL769Contig3|CL769Contig3



t-Test: p-value = 0.75

# CL76Contig17|CL76Contig17

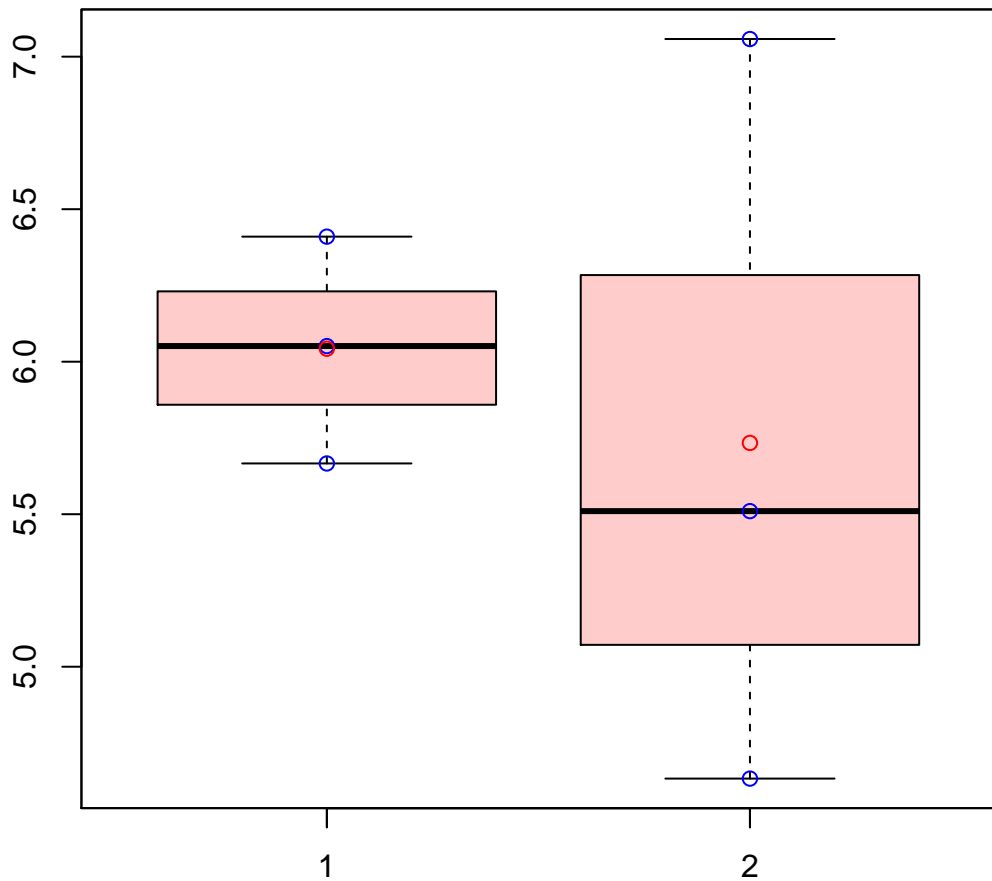

t-Test: p-value = 0.71

# CL7703Contig1|CL7703Contig1

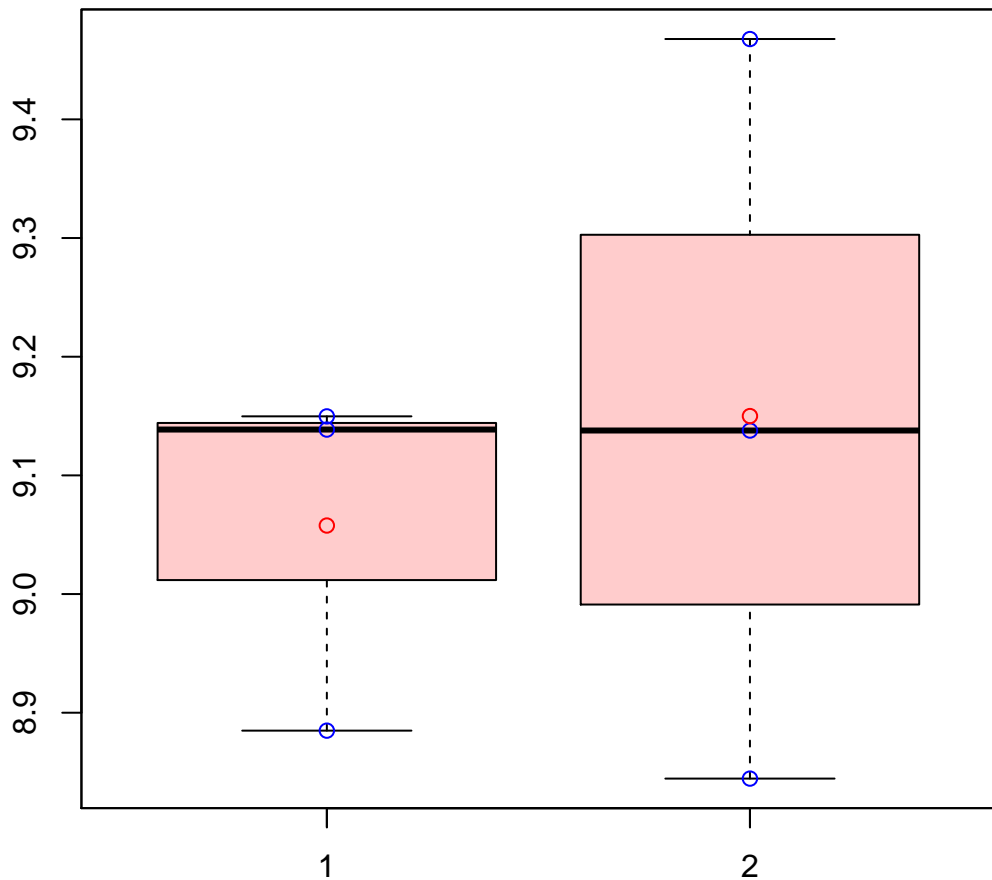

t-Test: p-value = 0.68



# CL7709Contig2|CL7709Contig2



t-Test: p-value = 0.39

# CL770Contig6|CL770Contig6

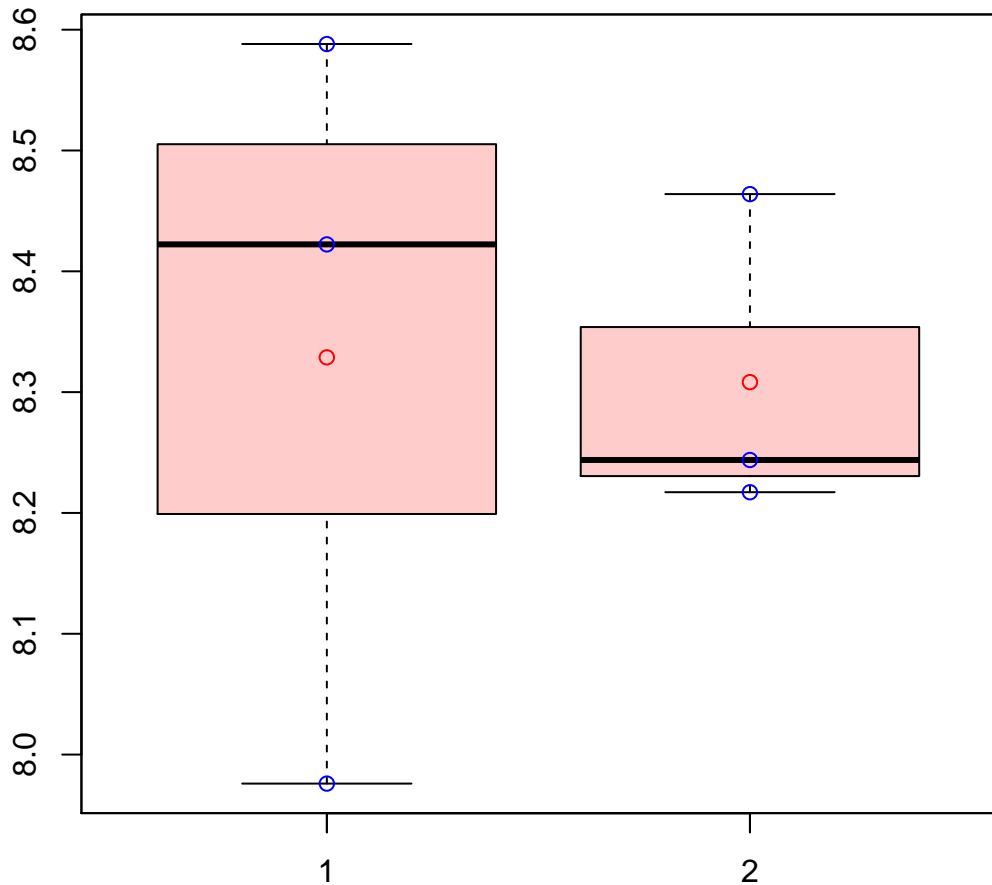

t-Test: p-value = 0.93

# CL7710Contig2|CL7710Contig2

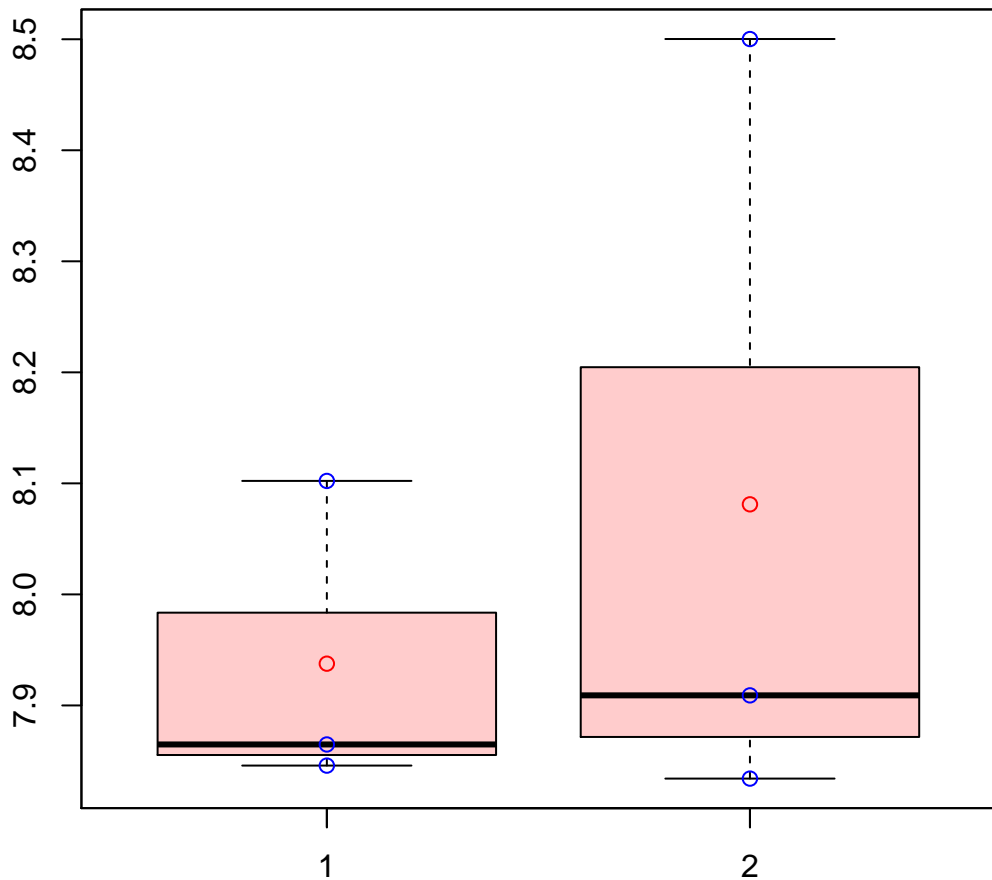

t-Test: p-value = 0.58

# CL7716Contig2|CL7716Contig2

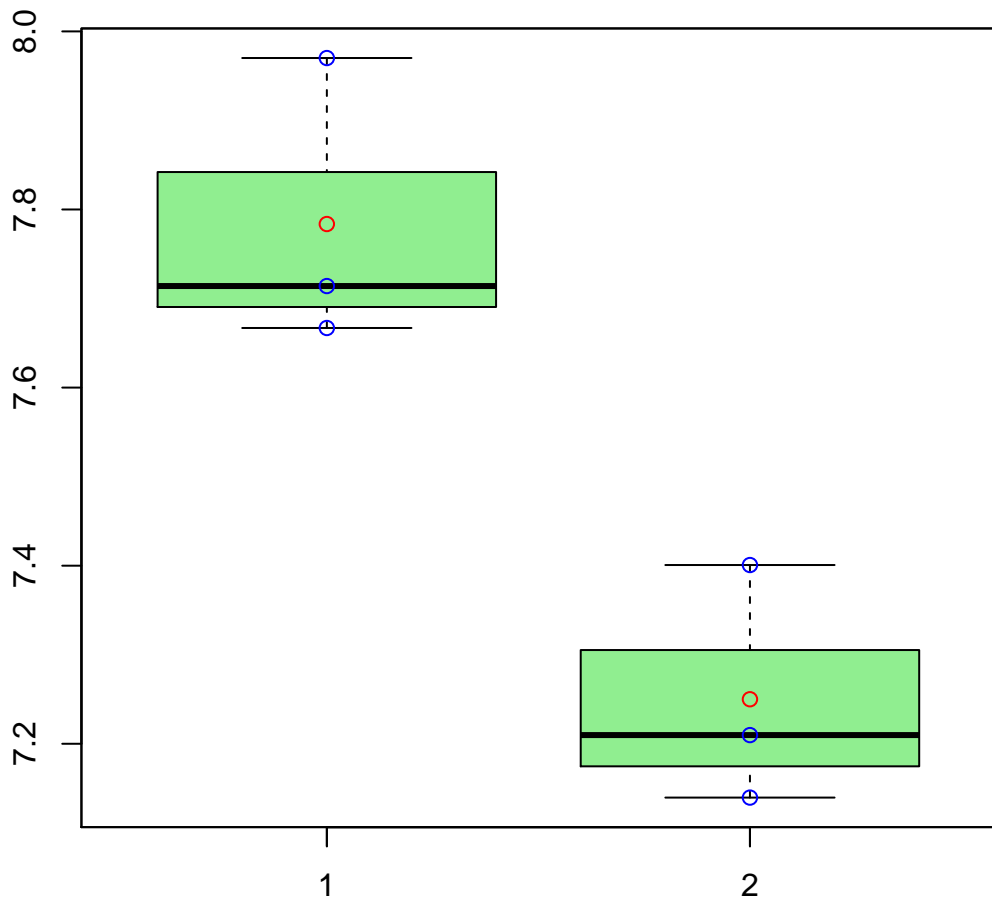

t-Test: p-value = 0.01

# CL7716Contig3|CL7716Contig3



t-Test: p-value = 0.01

# CL7729Contig2|CL7729Contig2

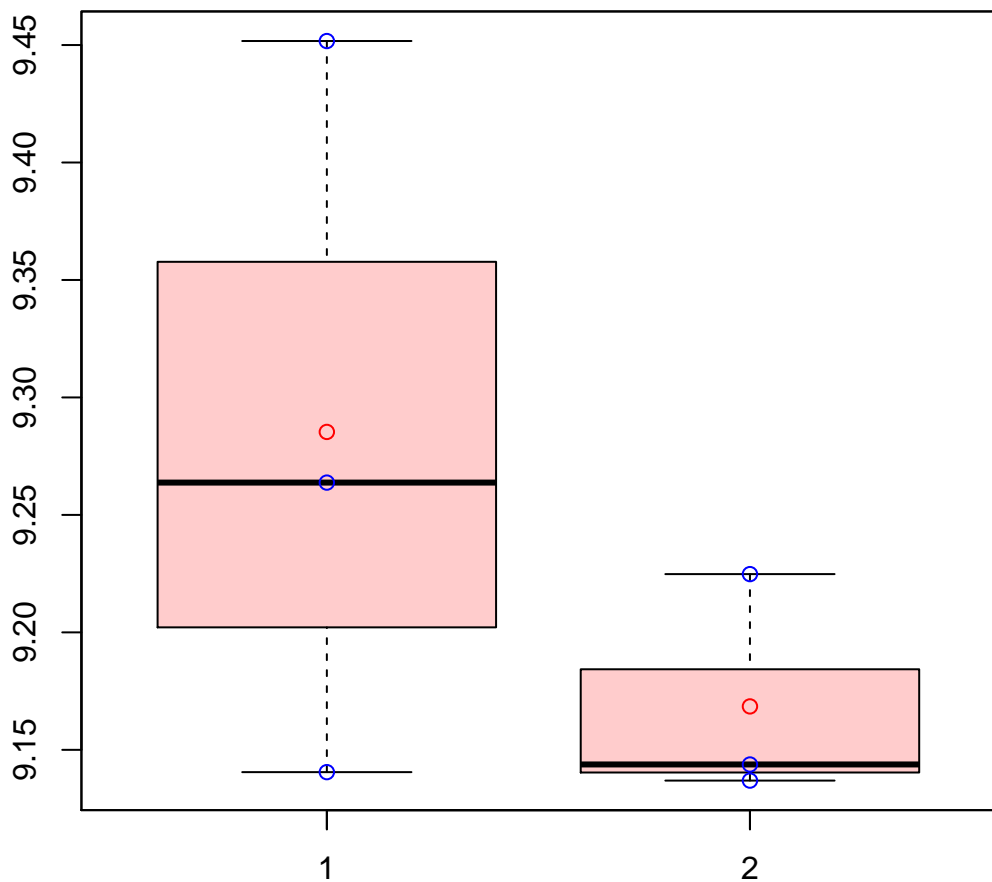

t-Test: p-value = 0.33

# CL772Contig7|CL772Contig7

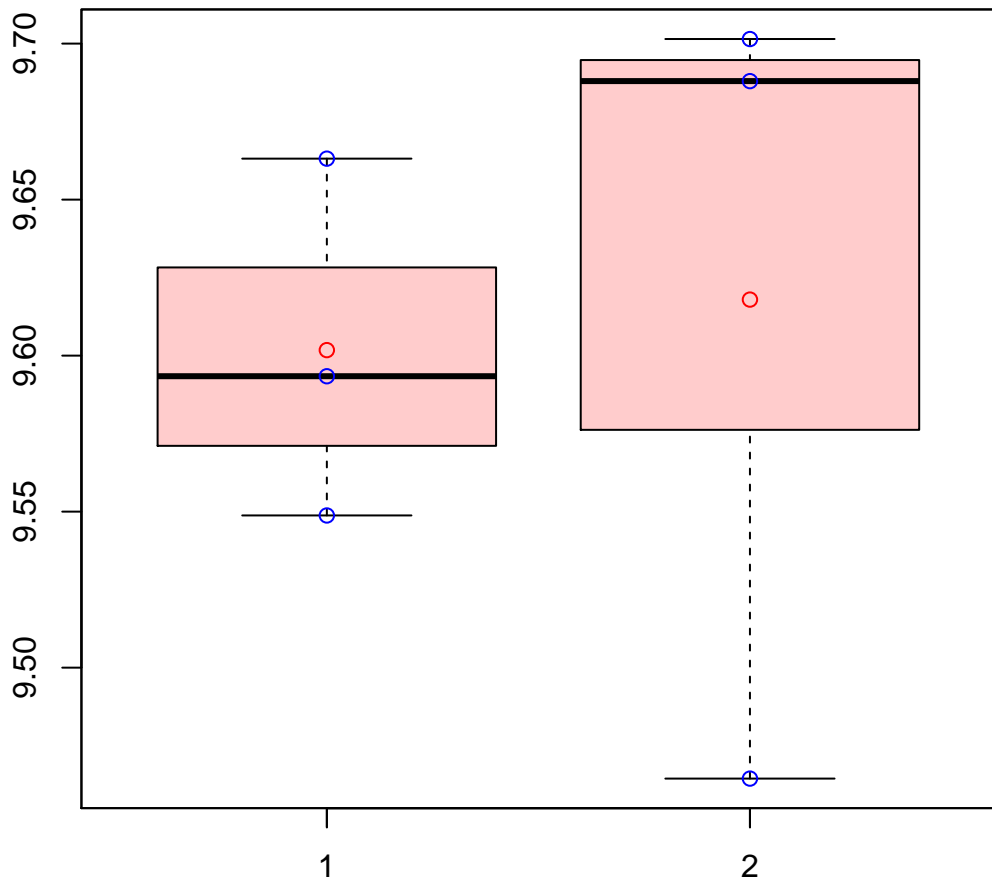

t-Test: p-value = 0.86

# CL7735Contig3|CL7735Contig3

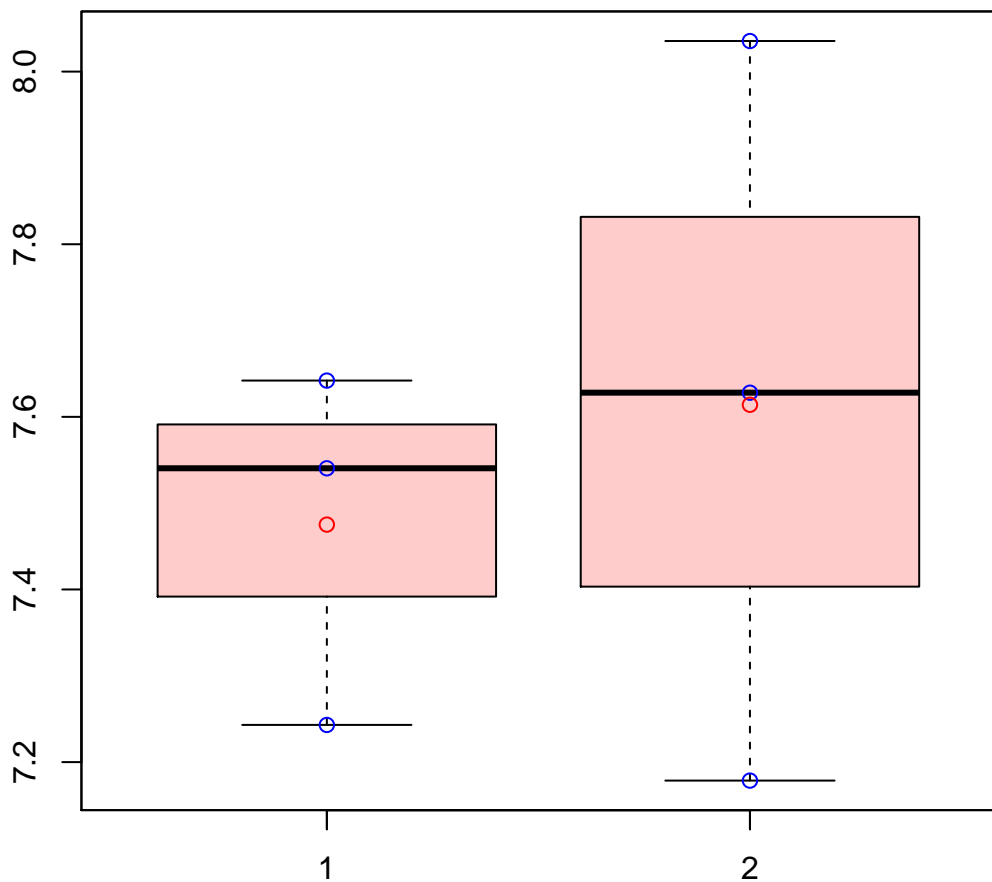

t-Test: p-value = 0.65



# CL7740Contig1|CL7740Contig1



t-Test: p-value = 0.68

# CL7743Contig1|CL7743Contig1

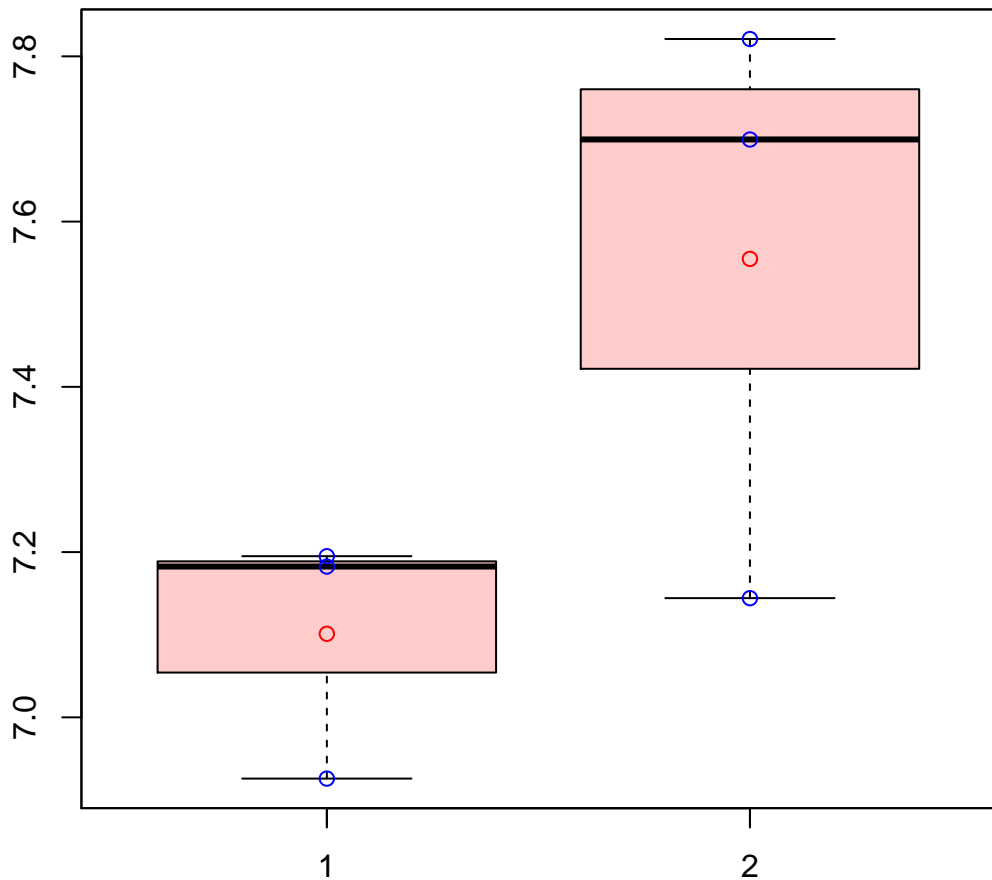

t-Test: p-value = 0.15

# CL7746Contig2|CL7746Contig2

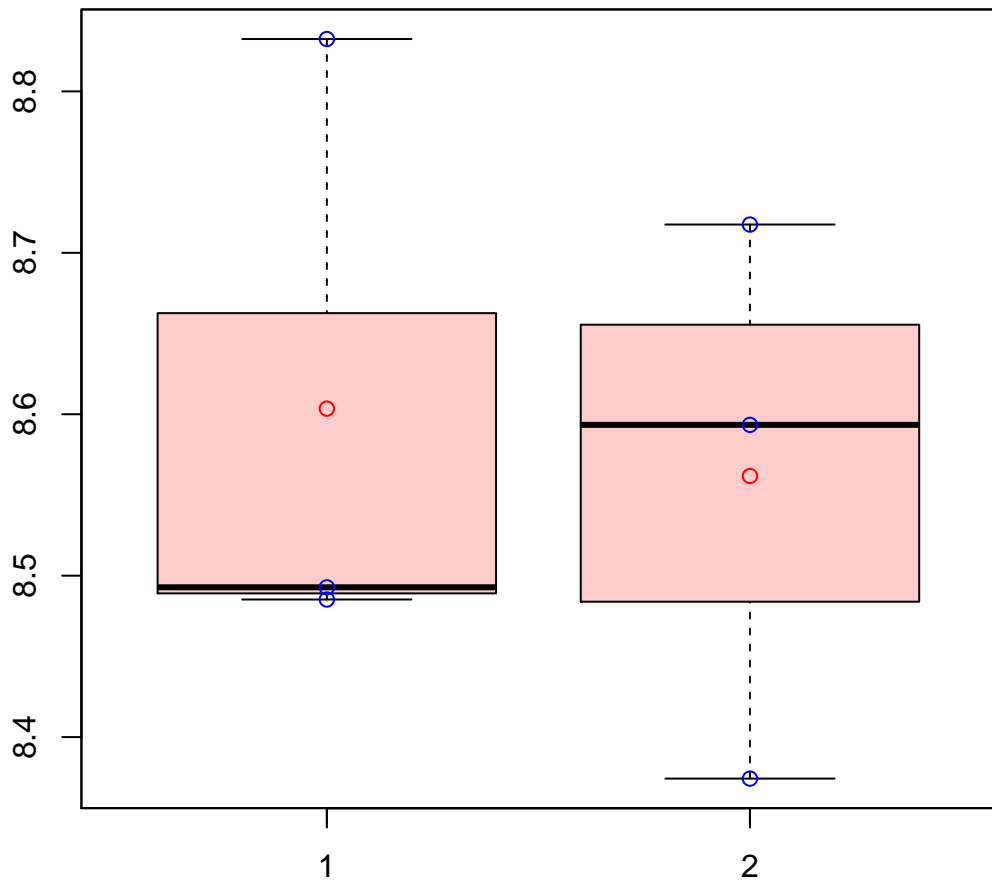

t-Test: p-value = 0.8

# CL7746Contig3|CL7746Contig3

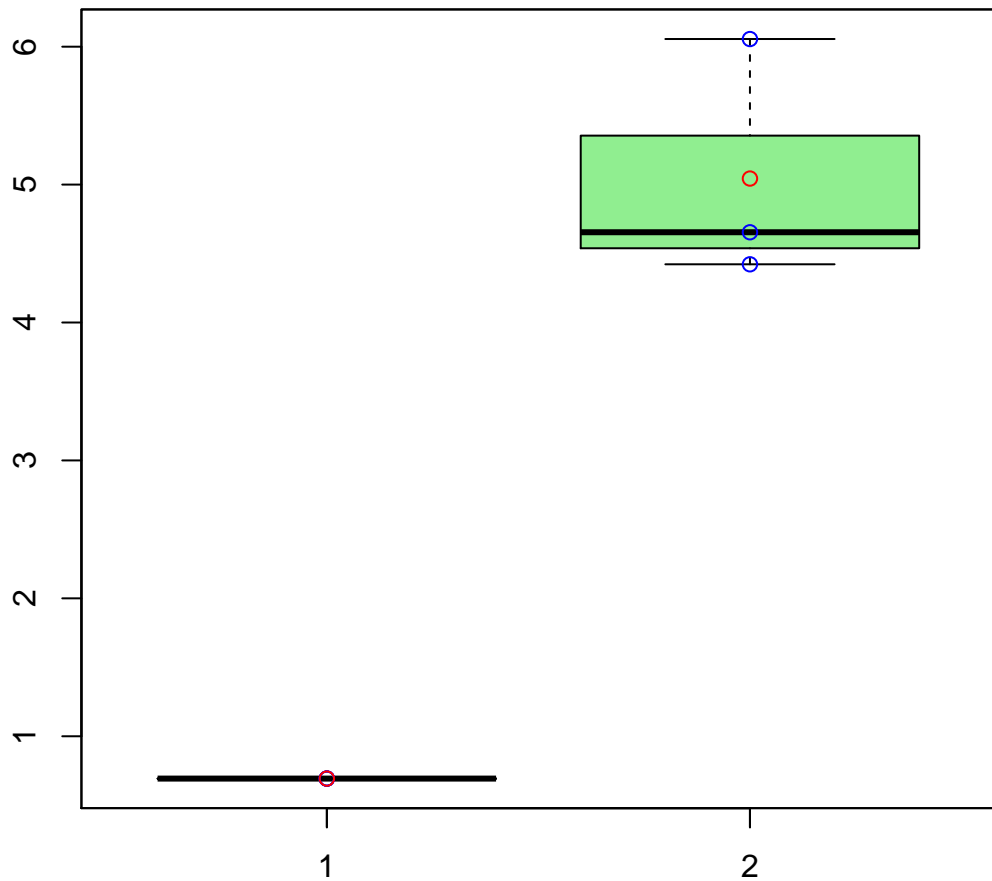

t-Test: p-value = 0.01

# CL7748Contig1|CL7748Contig1

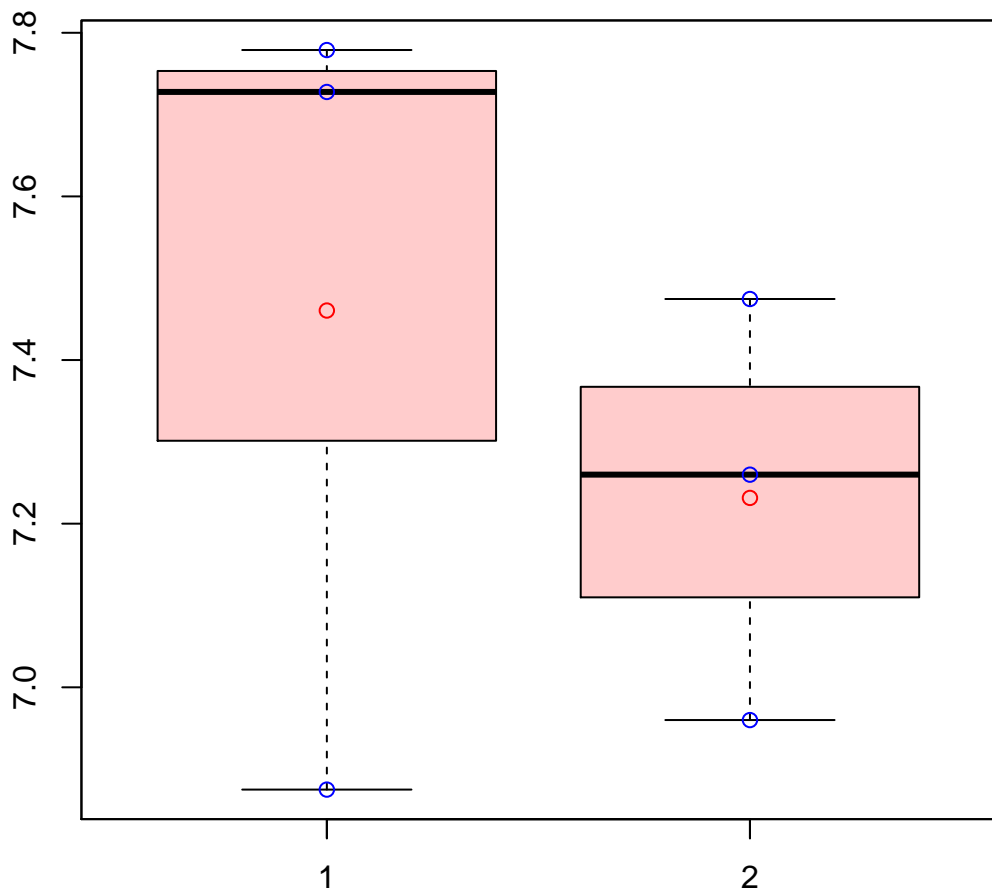

t-Test: p-value = 0.54

# CL7748Contig2|CL7748Contig2

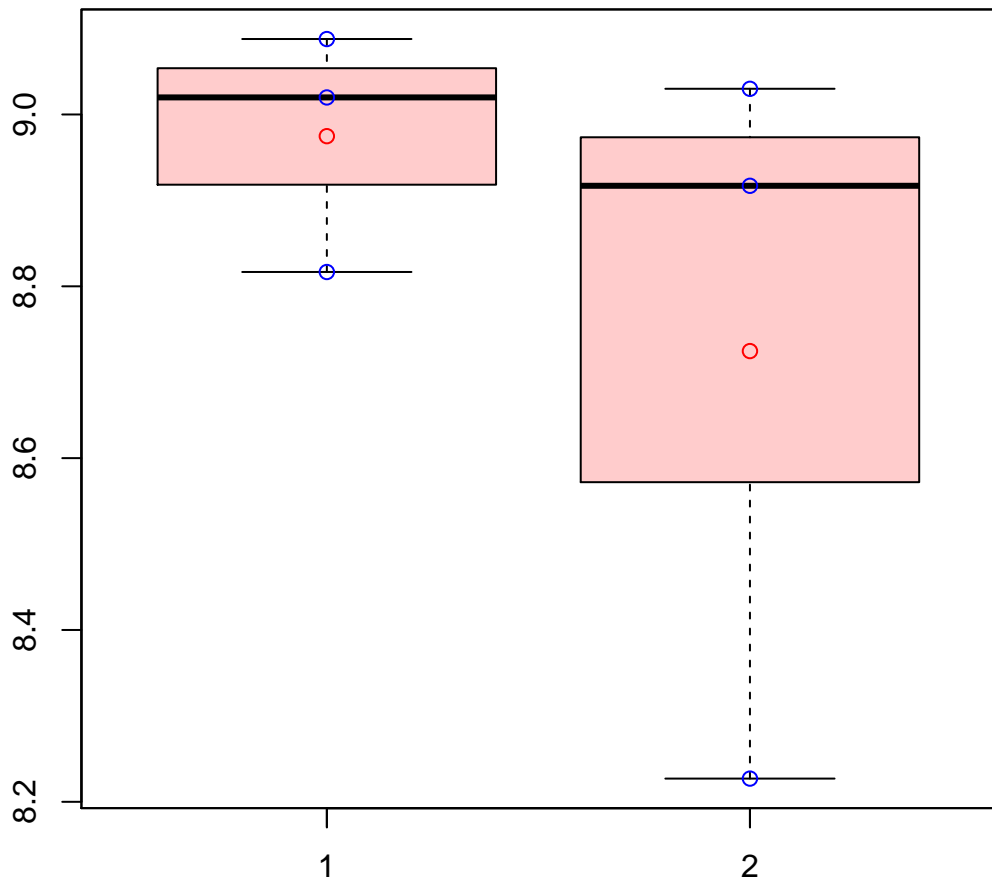

t-Test: p-value = 0.43

# CL7762Contig2|CL7762Contig2

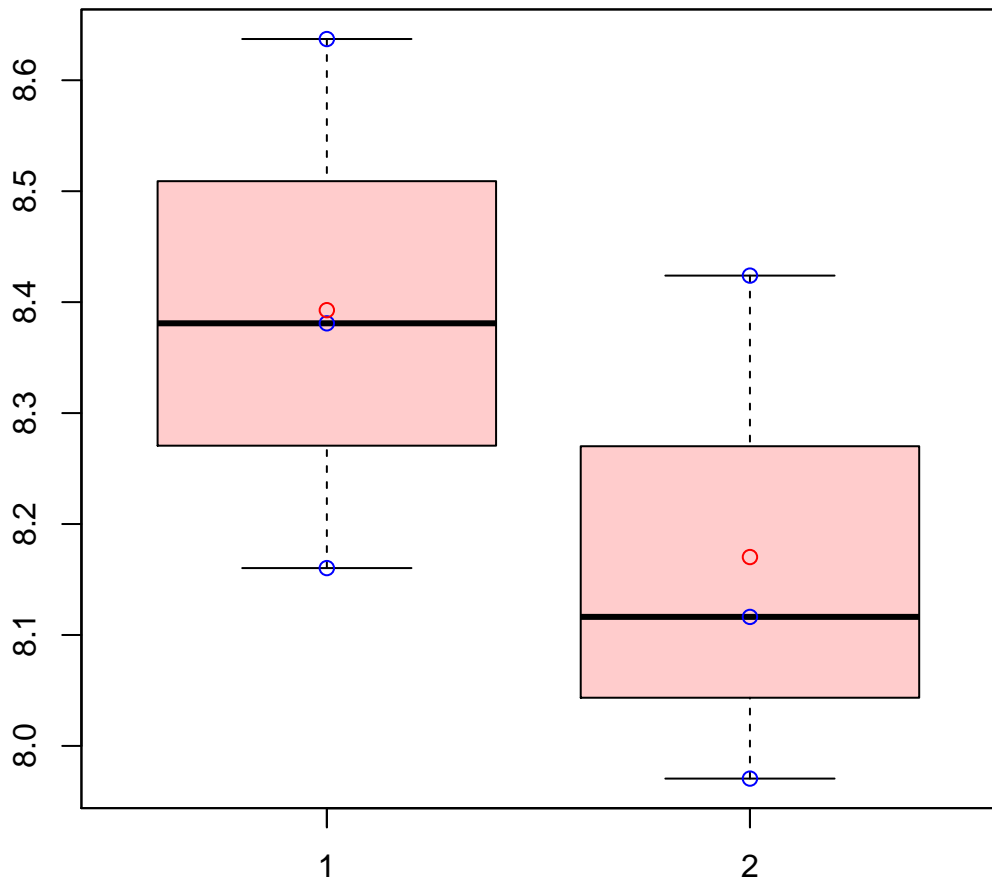

t-Test: p-value = 0.31

# CL7765Contig2|CL7765Contig2

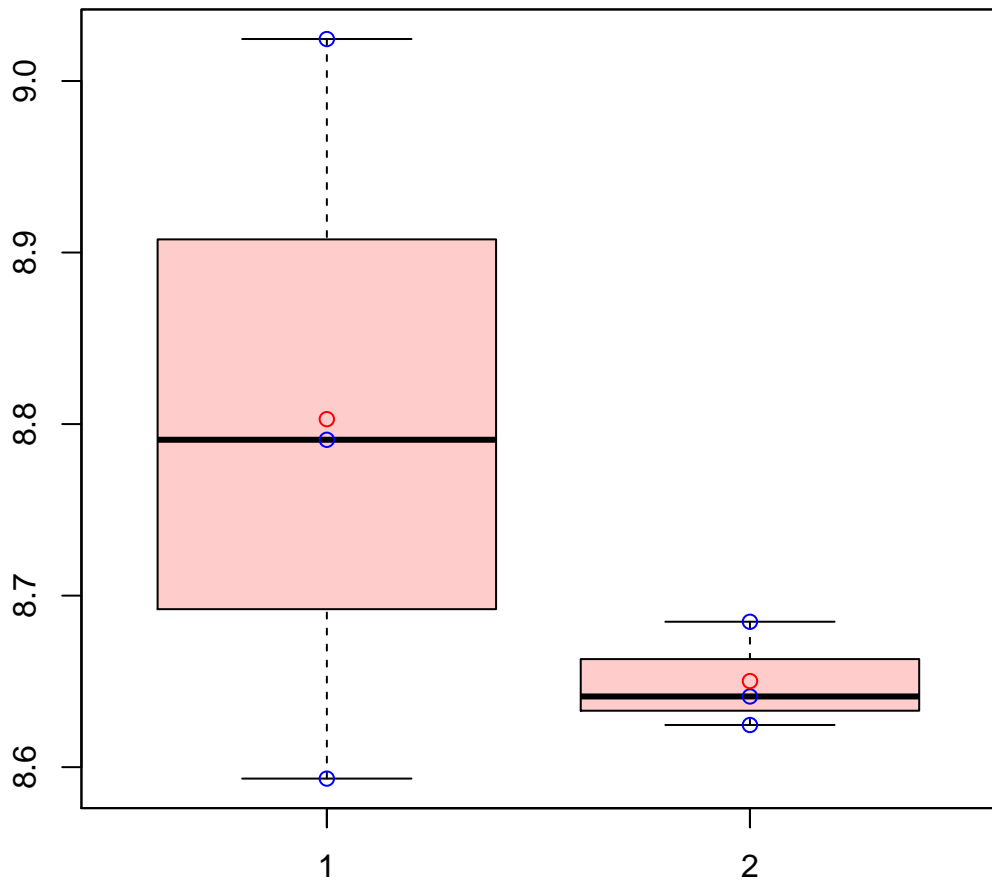

t-Test: p-value = 0.34



# CL776Contig4|CL776Contig4

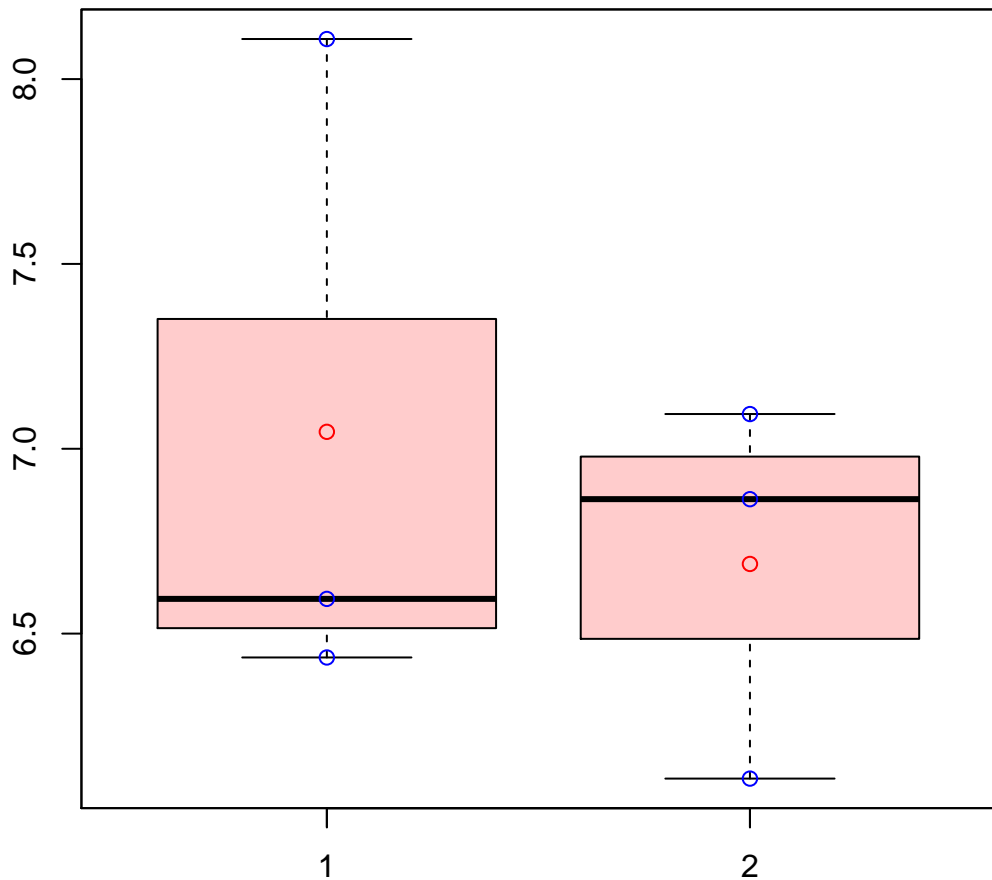

t-Test: p-value = 0.6

# CL7773Contig2|CL7773Contig2

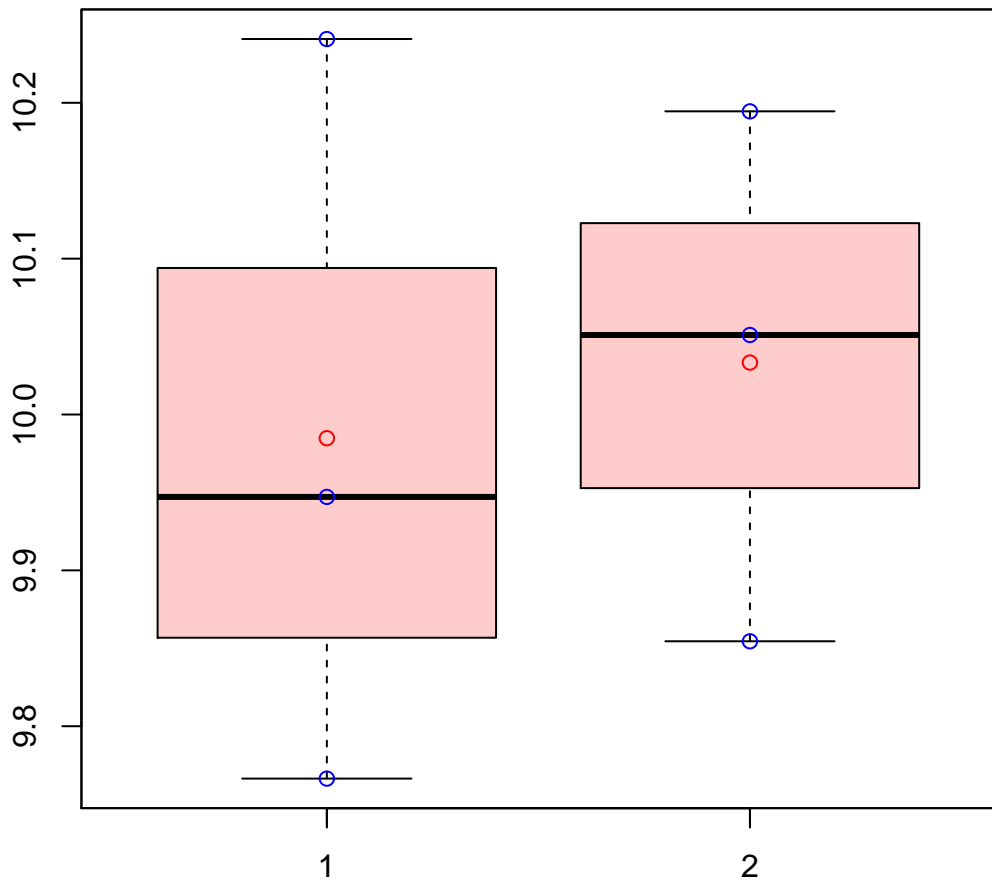

t-Test: p-value = 0.79

# CL777Contig3|CL777Contig3

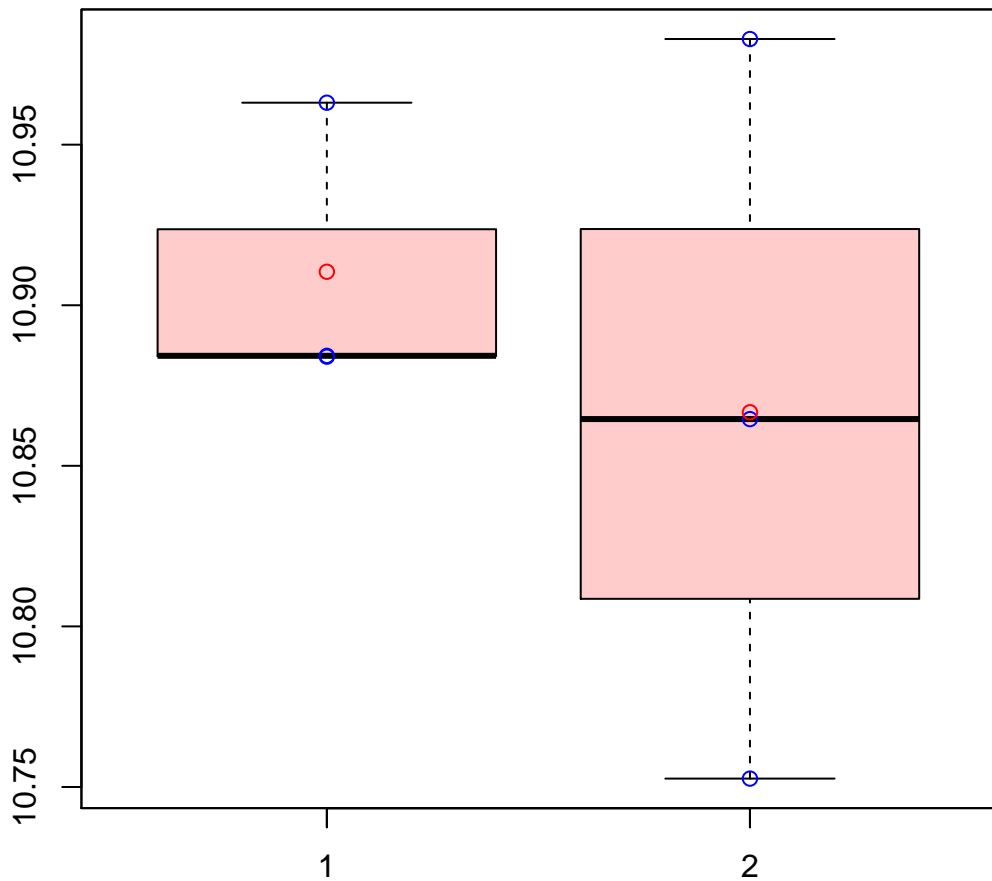

t-Test: p-value = 0.59

# CL777Contig4|CL777Contig4

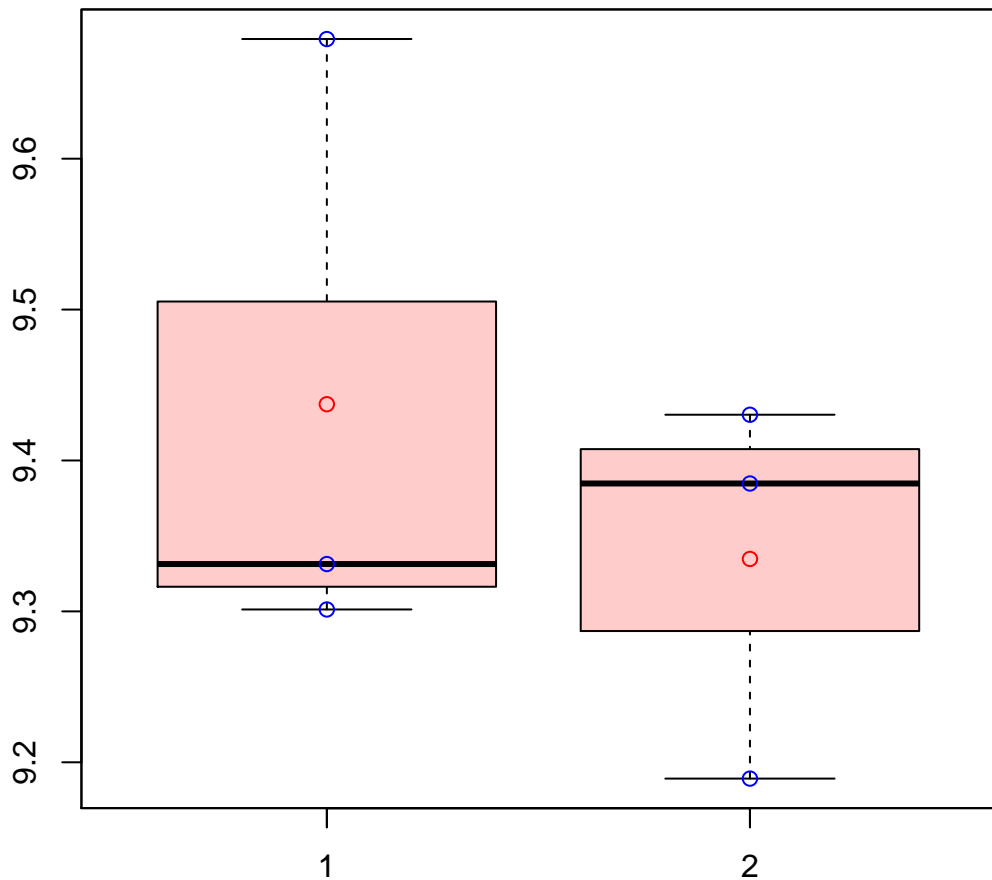

t-Test: p-value = 0.52

# CL7792Contig2|CL7792Contig2

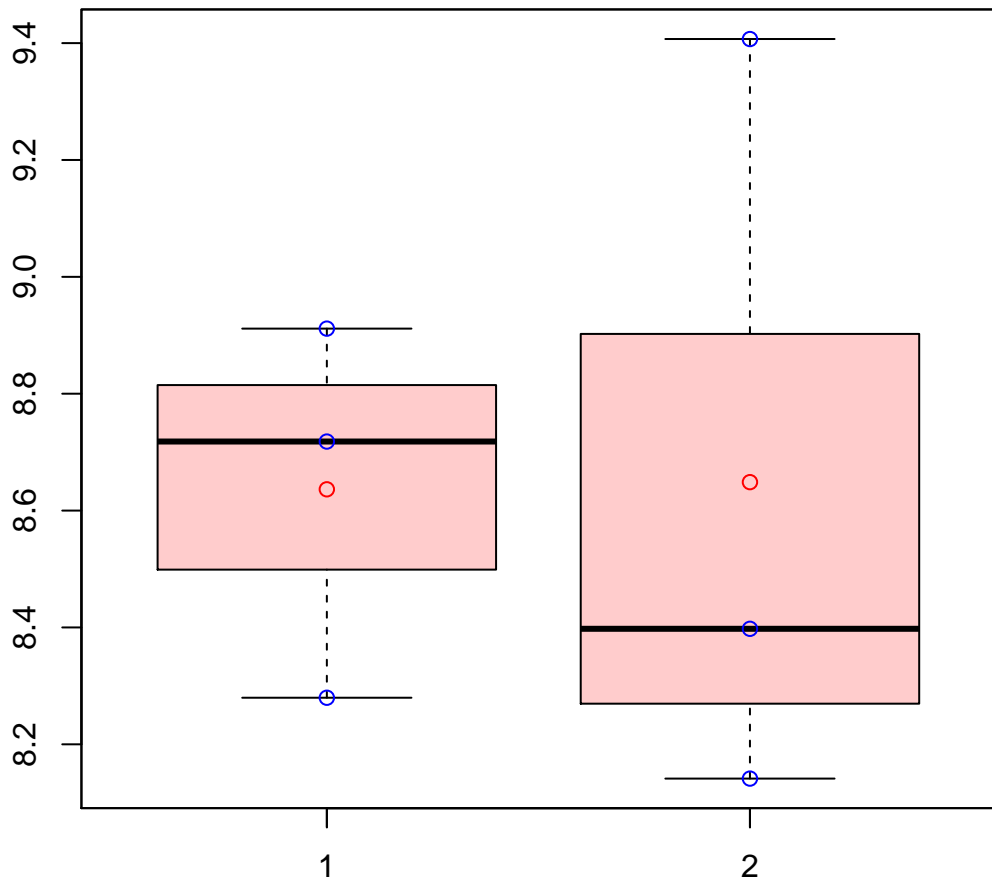

t-Test: p-value = 0.98

# CL7796Contig2|CL7796Contig2

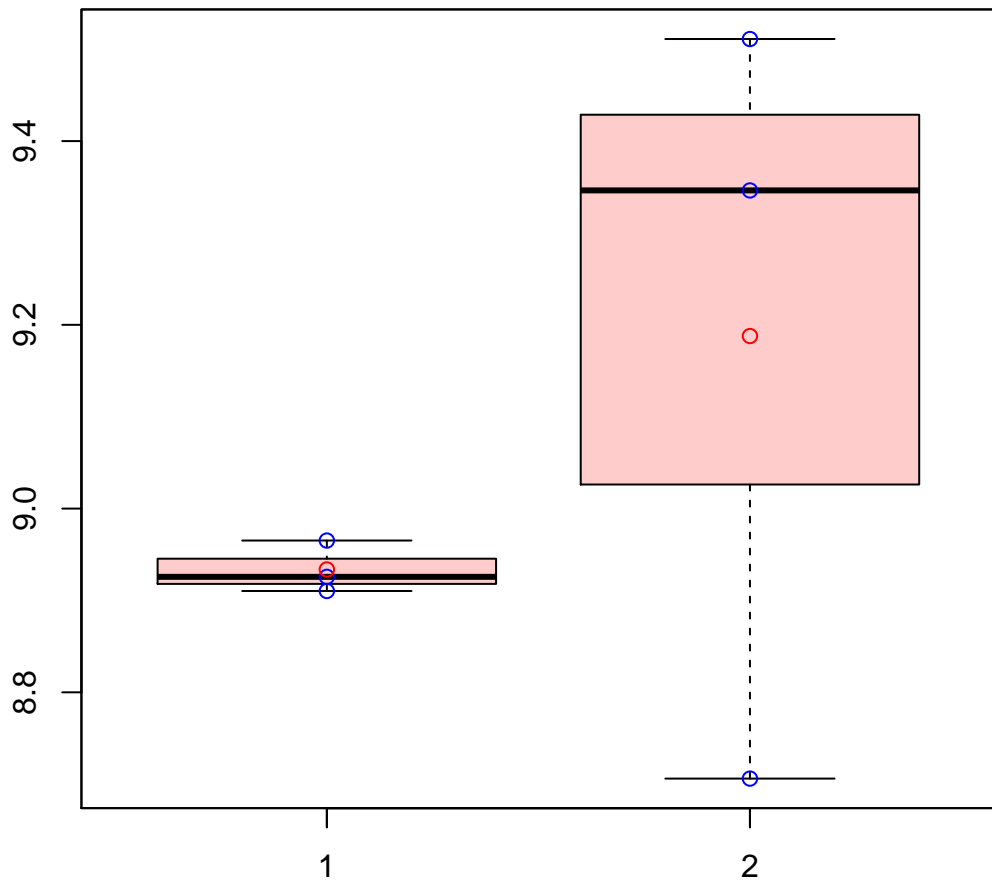

t-Test: p-value = 0.41

# CL77Contig18|CL77Contig18

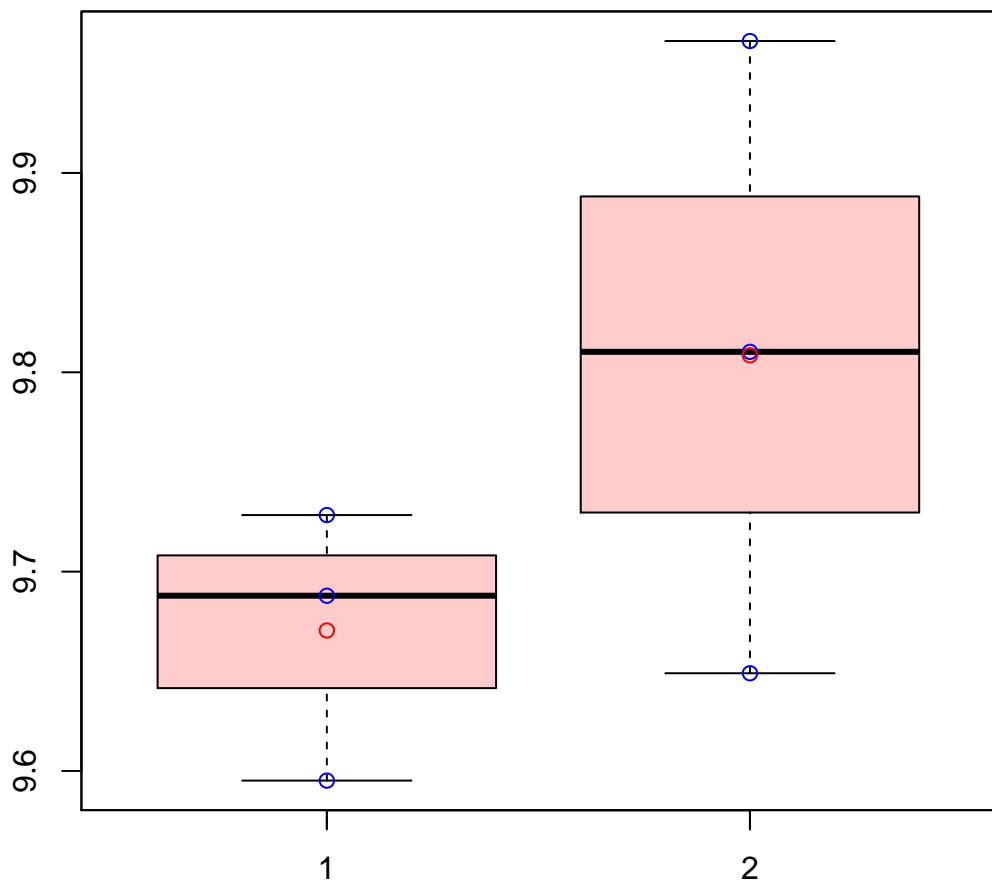

t-Test: p-value = 0.27

# CL77Contig6|CL77Contig6



t-Test: p-value = 0.41



# CL7808Contig3|CL7808Contig3



t-Test: p-value = 0.38

# CL7813Contig4|CL7813Contig4

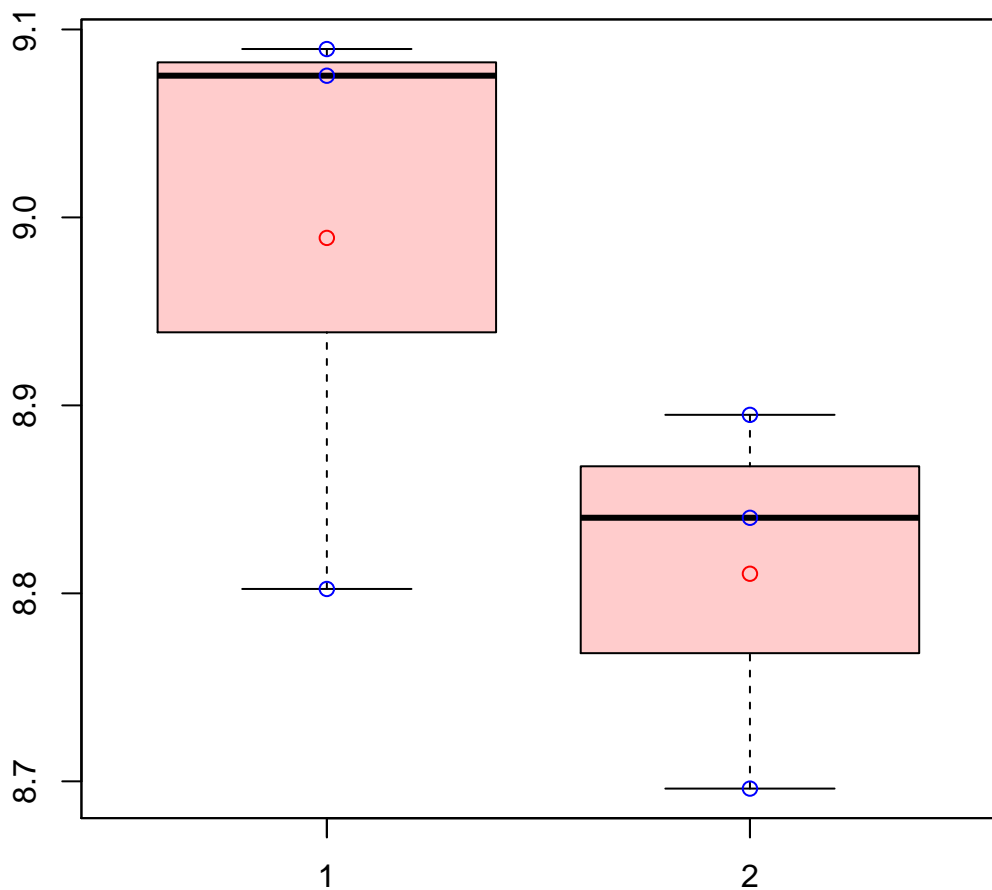

t-Test: p-value = 0.19

# CL7817Contig3|CL7817Contig3

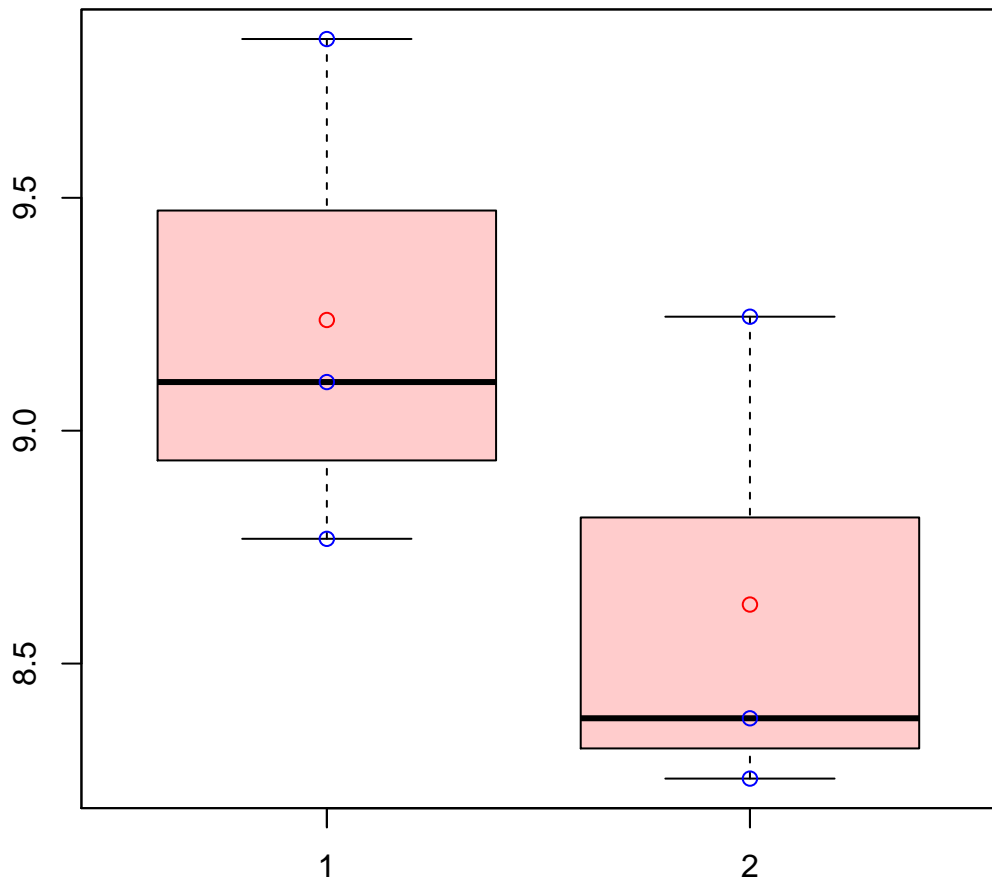

t-Test: p-value = 0.24

# CL7819Contig2|CL7819Contig2

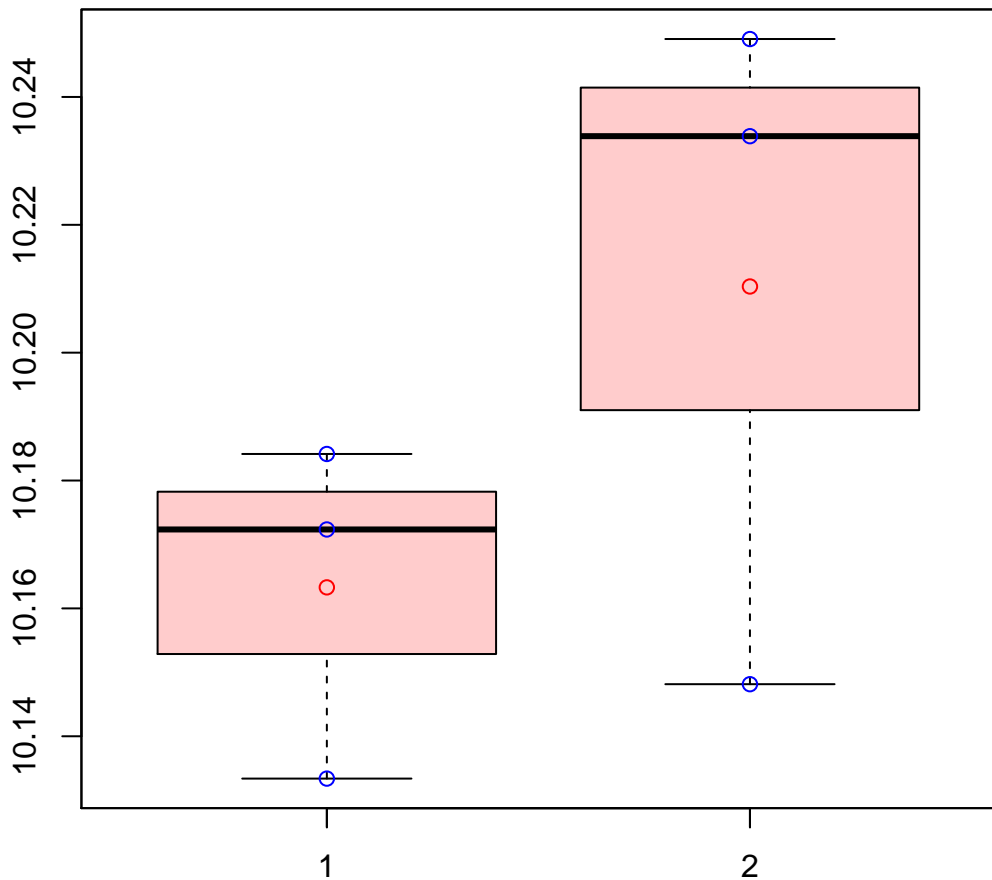

t-Test: p-value = 0.27

# CL781Contig5|CL781Contig5

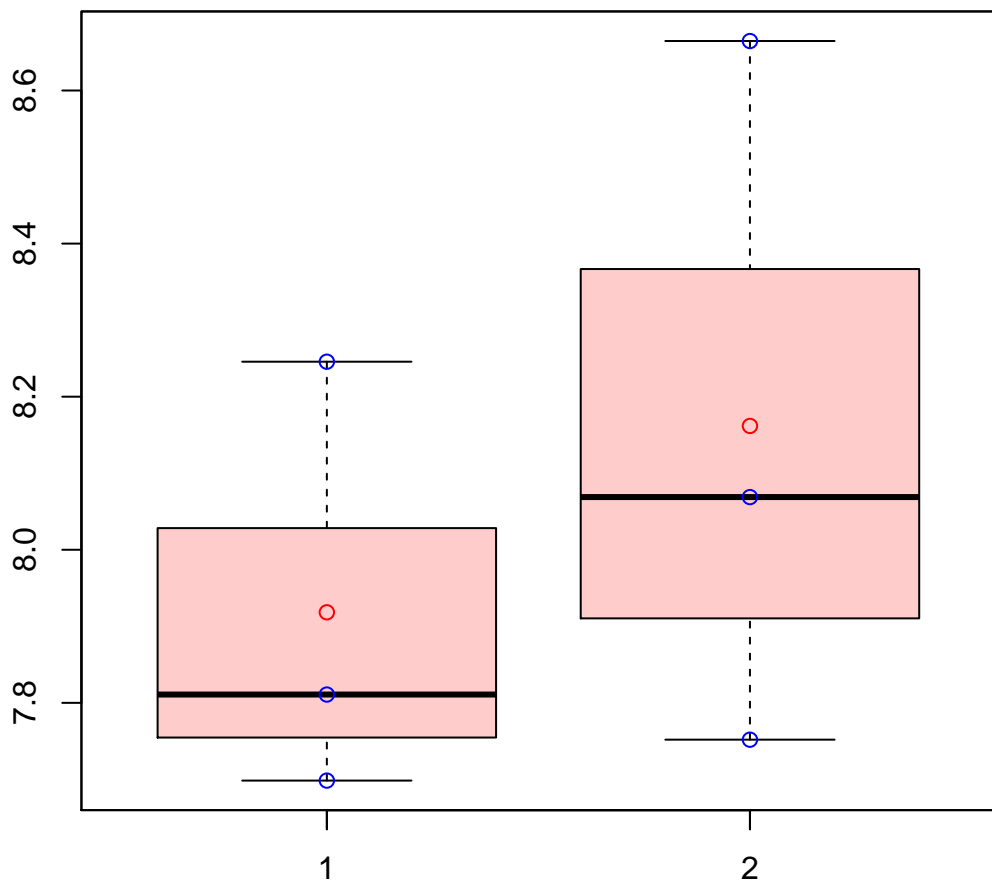

t-Test: p-value = 0.49

# CL781Contig6|CL781Contig6

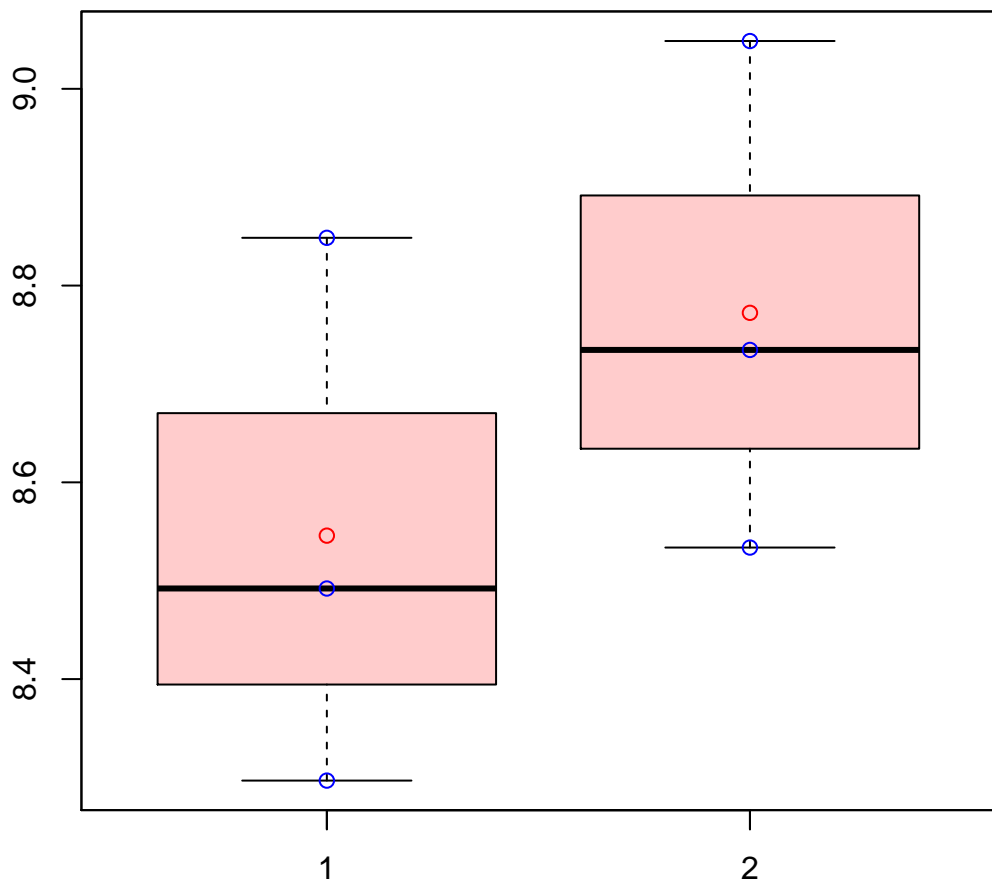

t-Test: p-value = 0.36

# CL7821Contig1|CL7821Contig1

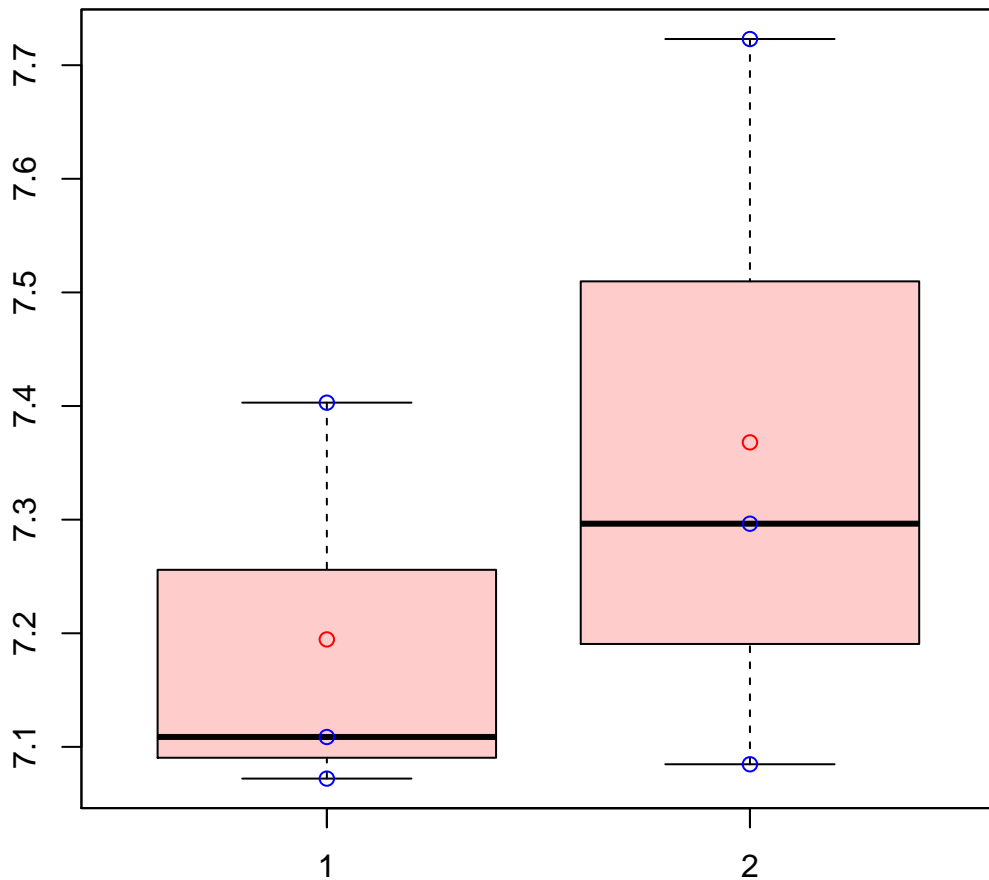

t-Test: p-value = 0.48

# CL7827Contig1|CL7827Contig1

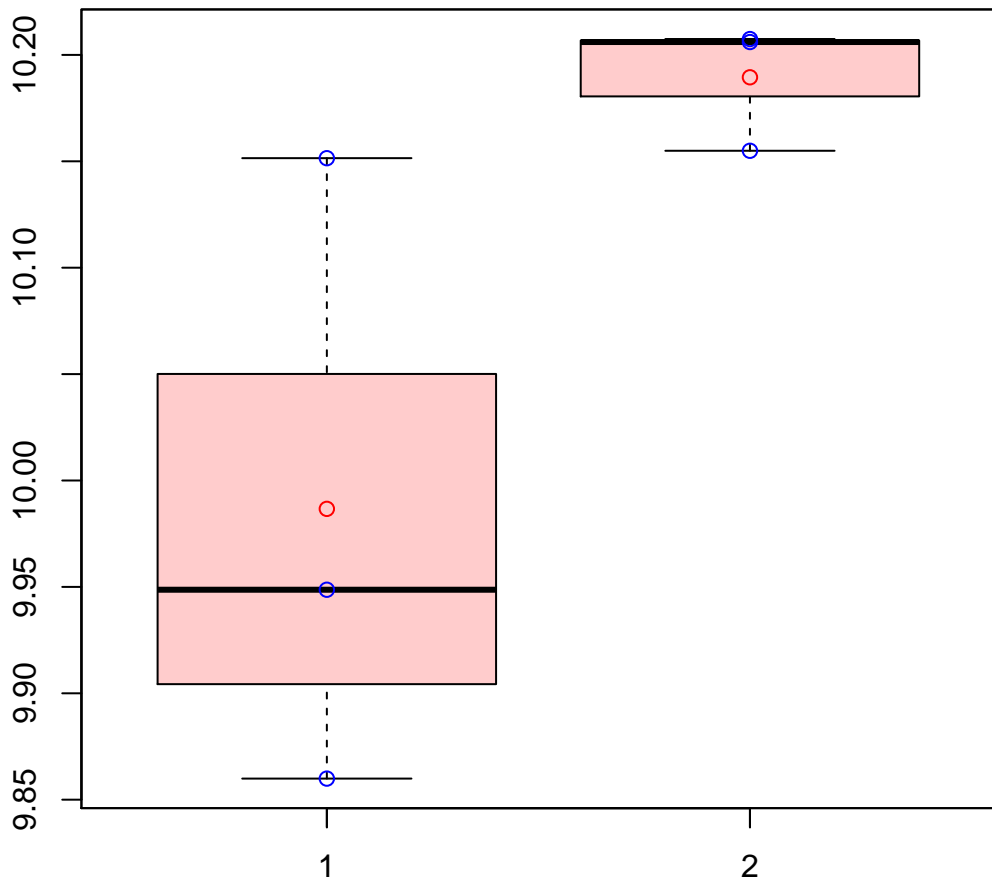

t-Test: p-value = 0.14



# CL782Contig4|CL782Contig4

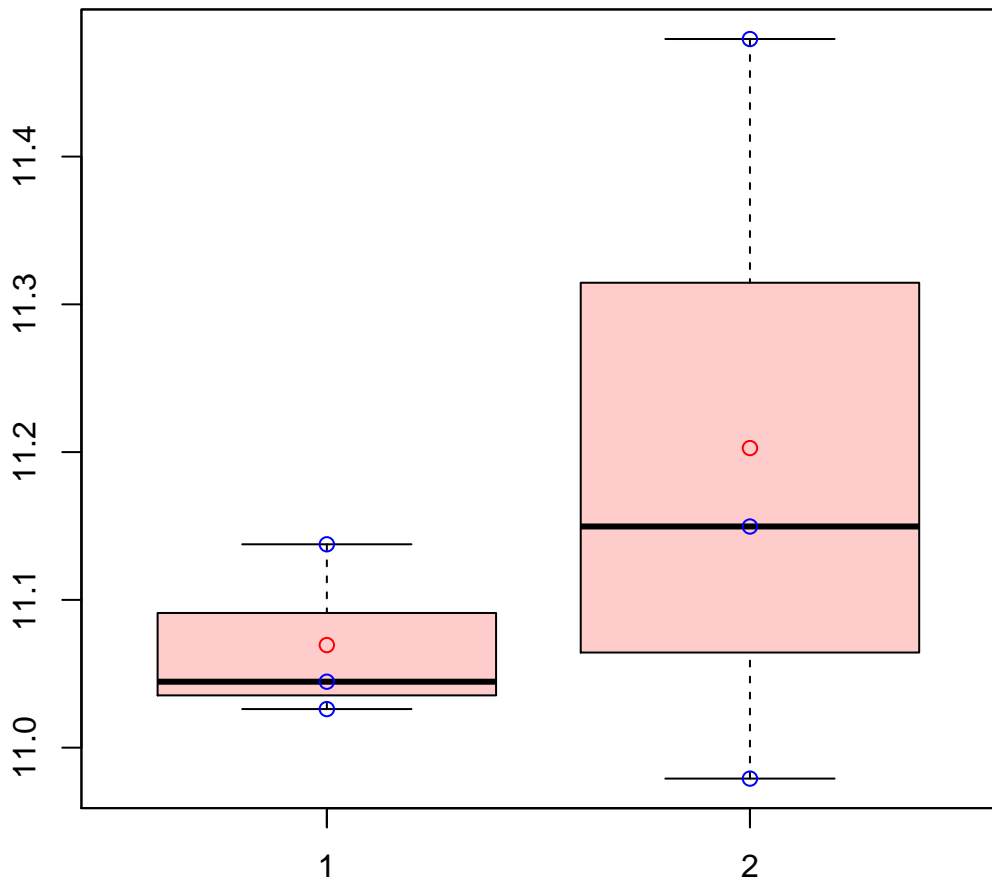

t-Test: p-value = 0.46

# CL782Contig5|CL782Contig5

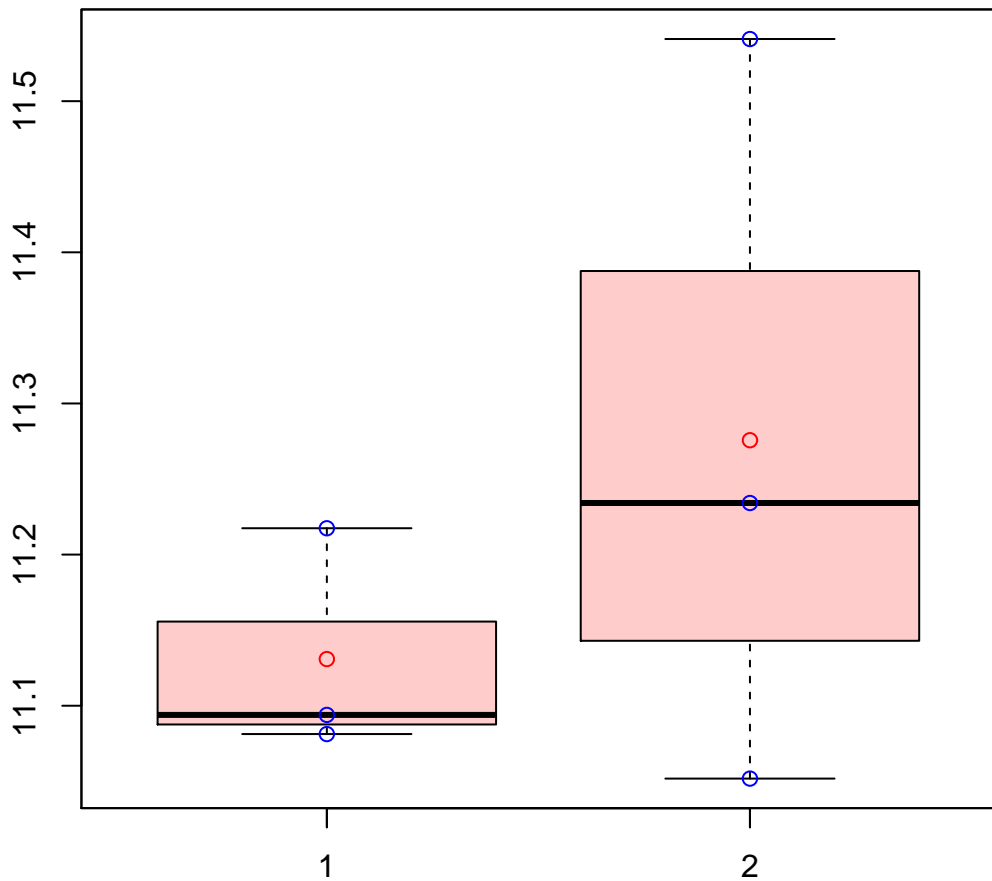

t-Test: p-value = 0.42

# CL782Contig7|CL782Contig7

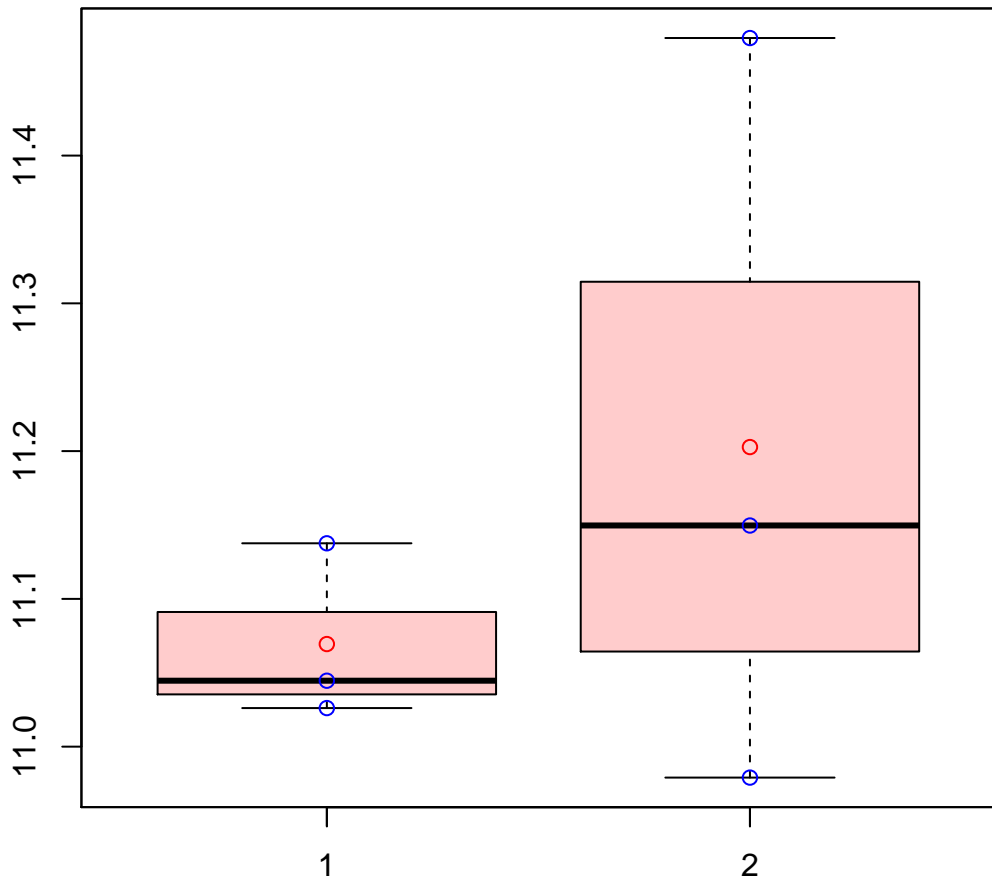

t-Test: p-value = 0.46

# CL782Contig8|CL782Contig8

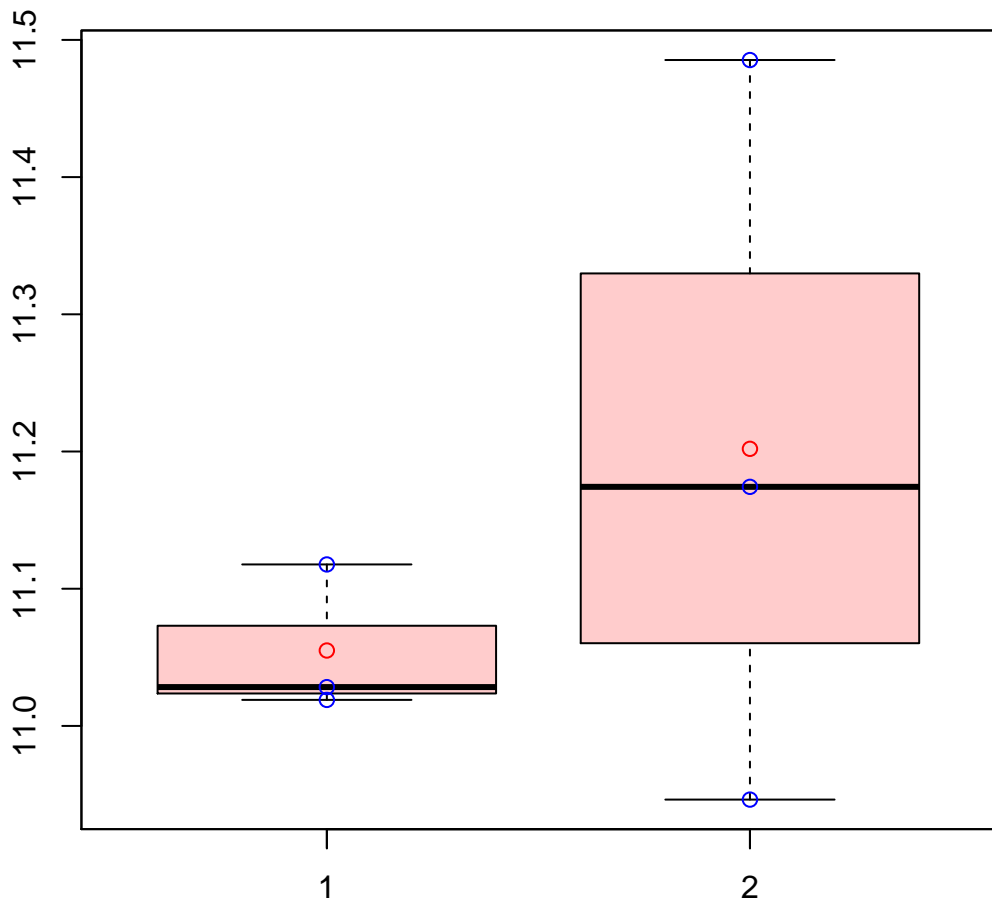

t-Test: p-value = 0.45

# CL7830Contig1|CL7830Contig1

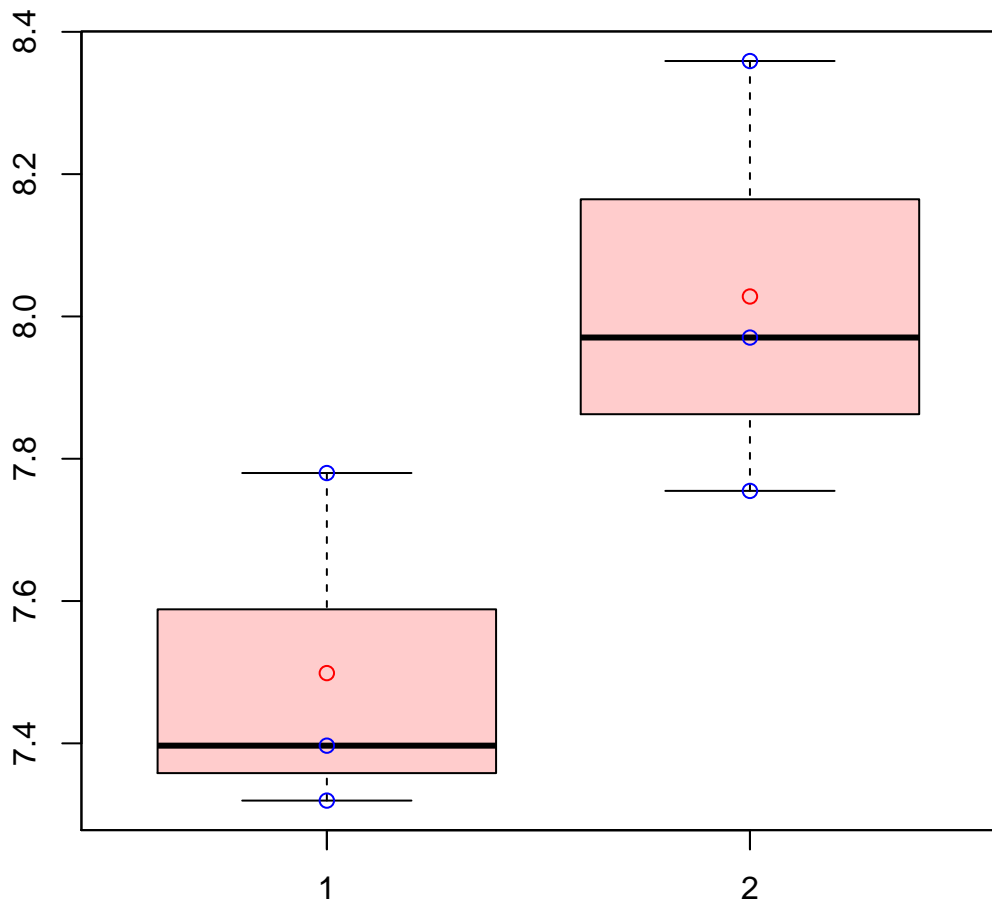

t-Test: p-value = 0.08

# CL7836Contig1|CL7836Contig1

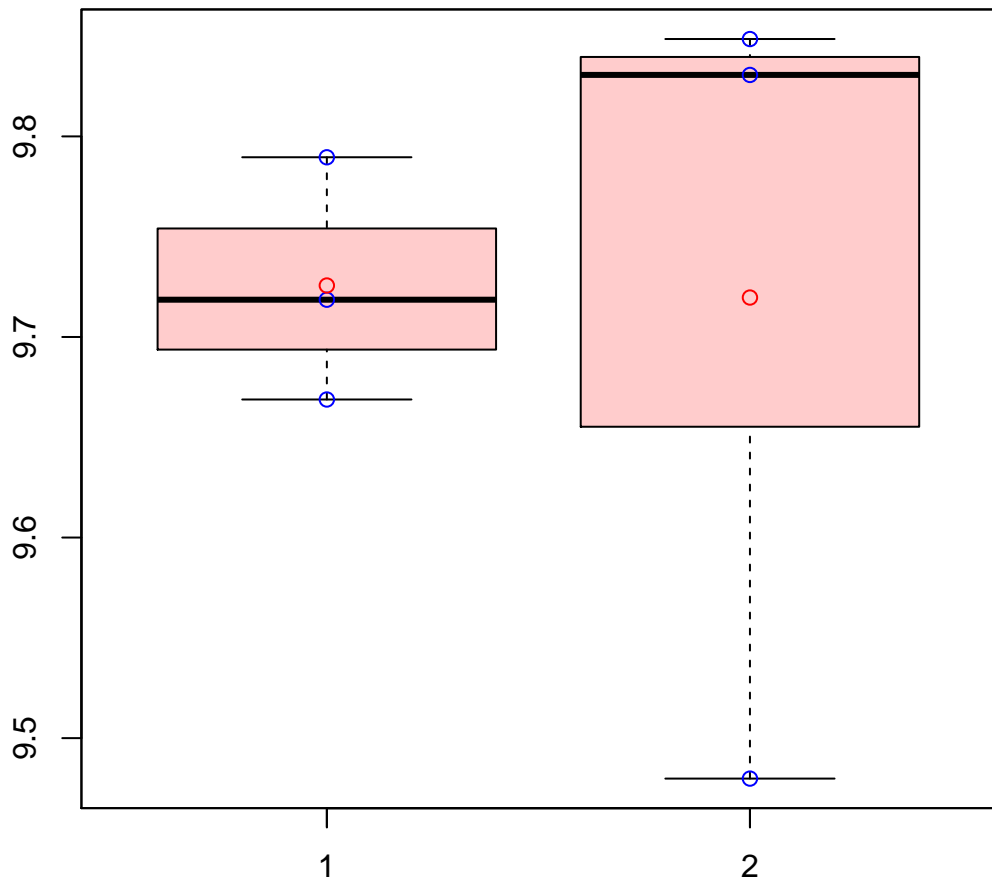

t-Test: p-value = 0.97

# CL7837Contig2|CL7837Contig2

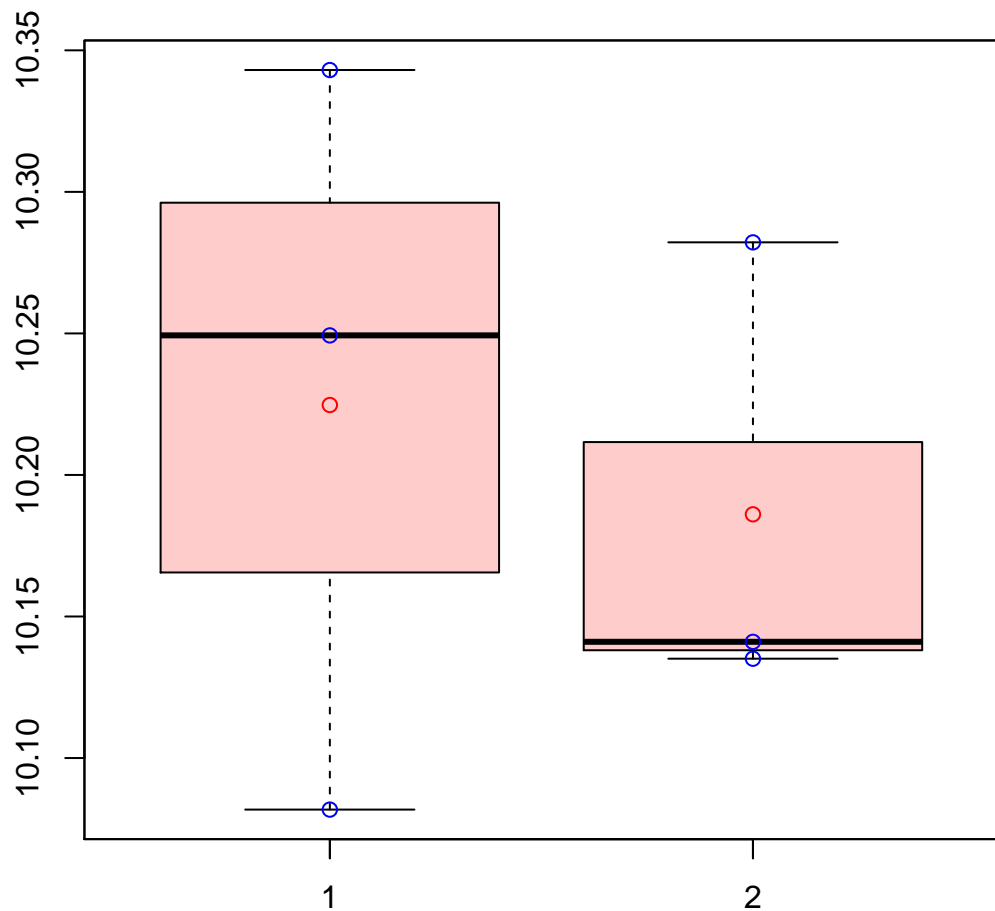

t-Test: p-value = 0.69

# CL7858Contig1|CL7858Contig1

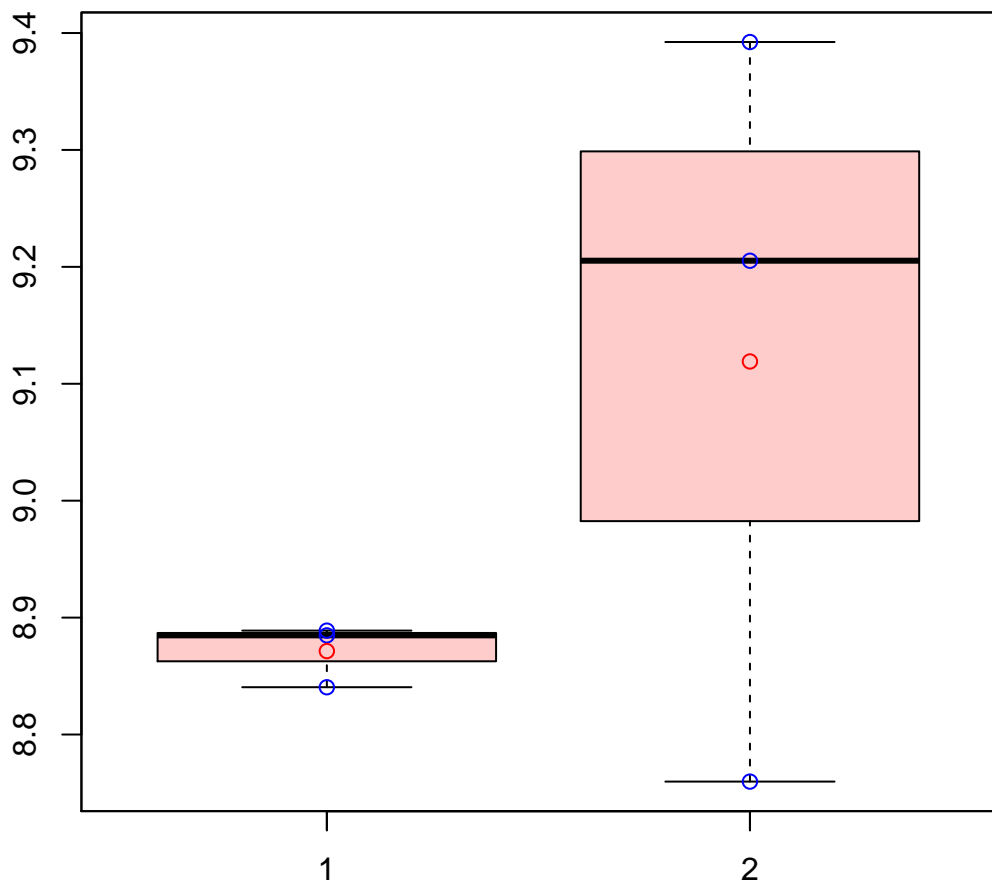

t-Test: p-value = 0.32



# CL785Contig5|CL785Contig5

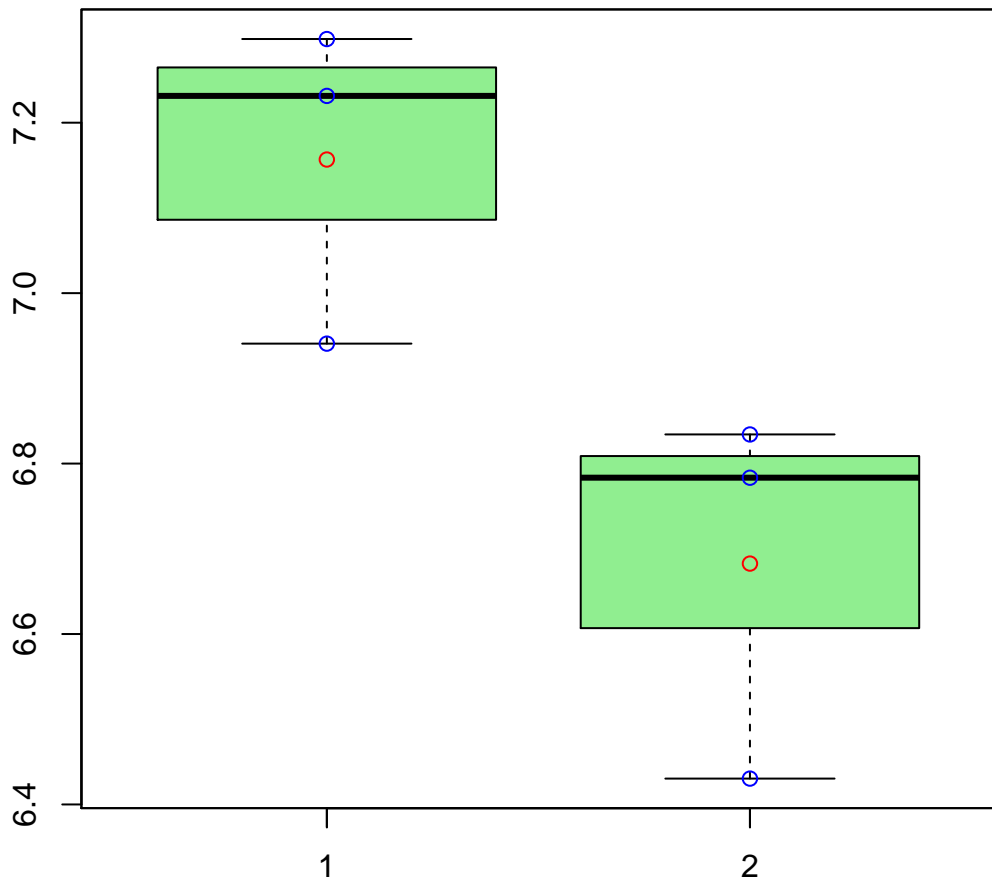

t-Test: p-value = 0.05

# CL785Contig6|CL785Contig6

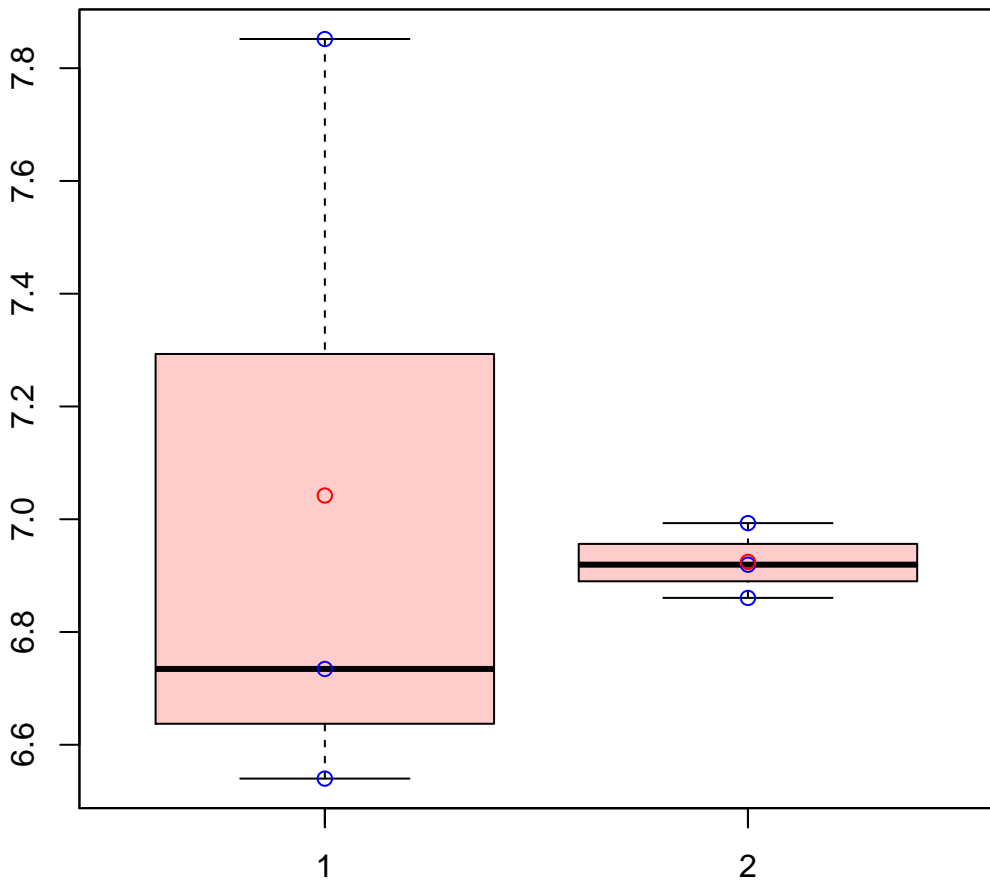

t-Test: p-value = 0.8

# CL7868Contig1|CL7868Contig1

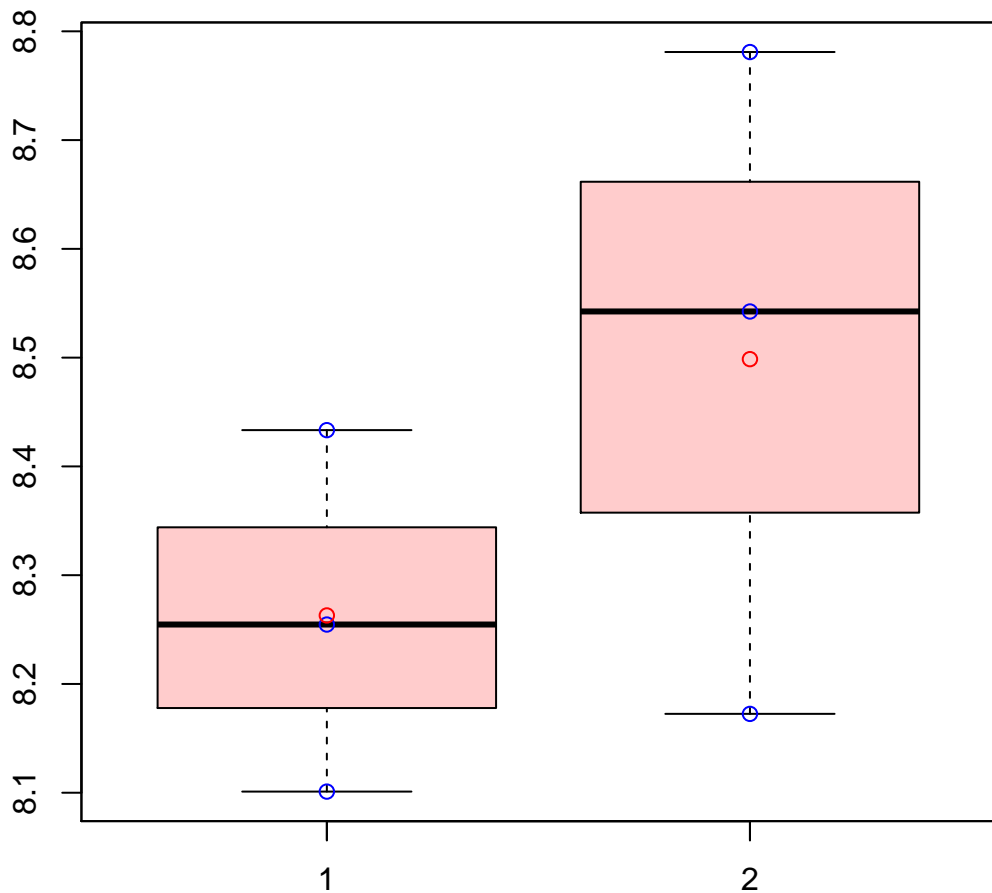

t-Test: p-value = 0.32

# CL7868Contig2|CL7868Contig2

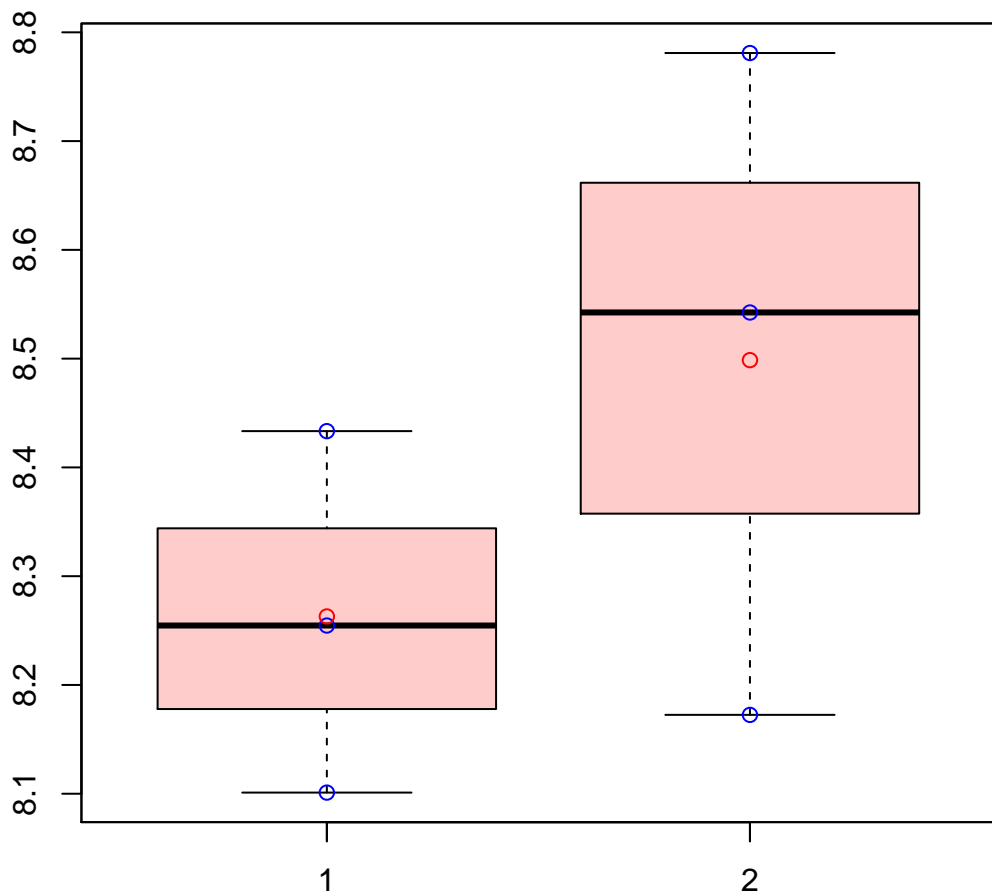

t-Test: p-value = 0.32

# CL7868Contig3|CL7868Contig3



t-Test: p-value = 0.32

# CL786Contig1|CL786Contig1

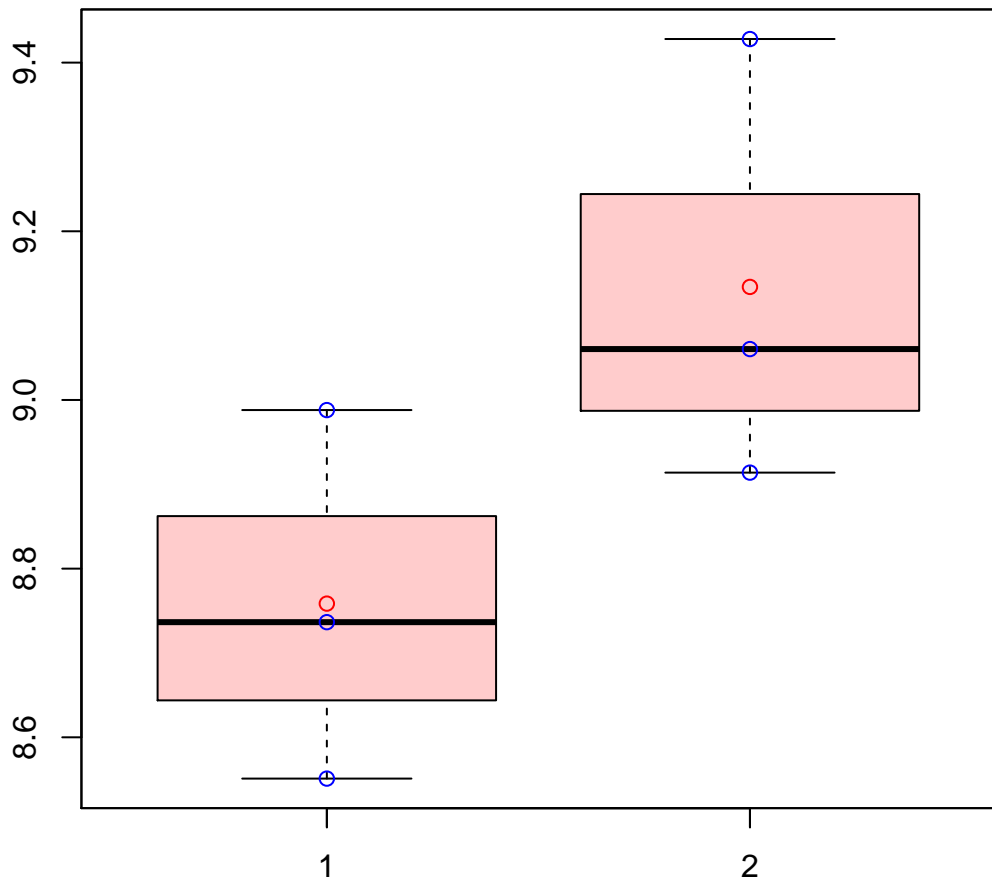

t-Test: p-value = 0.13

# CL786Contig3|CL786Contig3

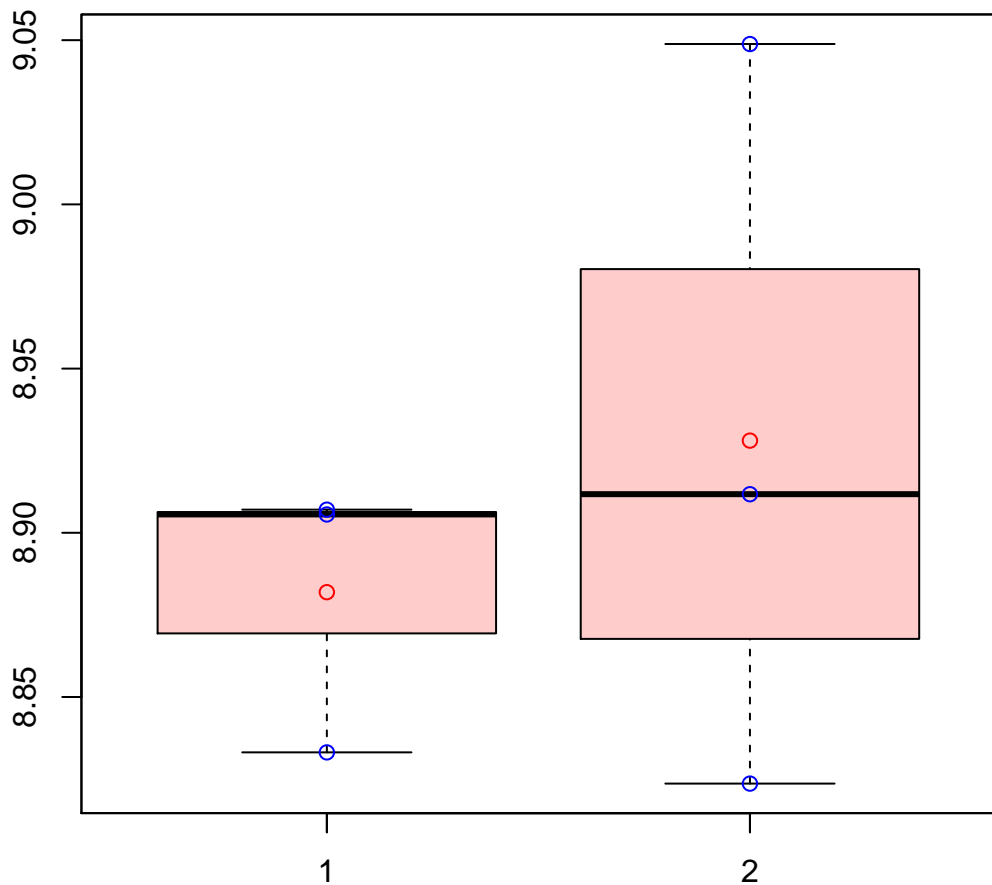

t-Test: p-value = 0.56

# CL786Contig5|CL786Contig5

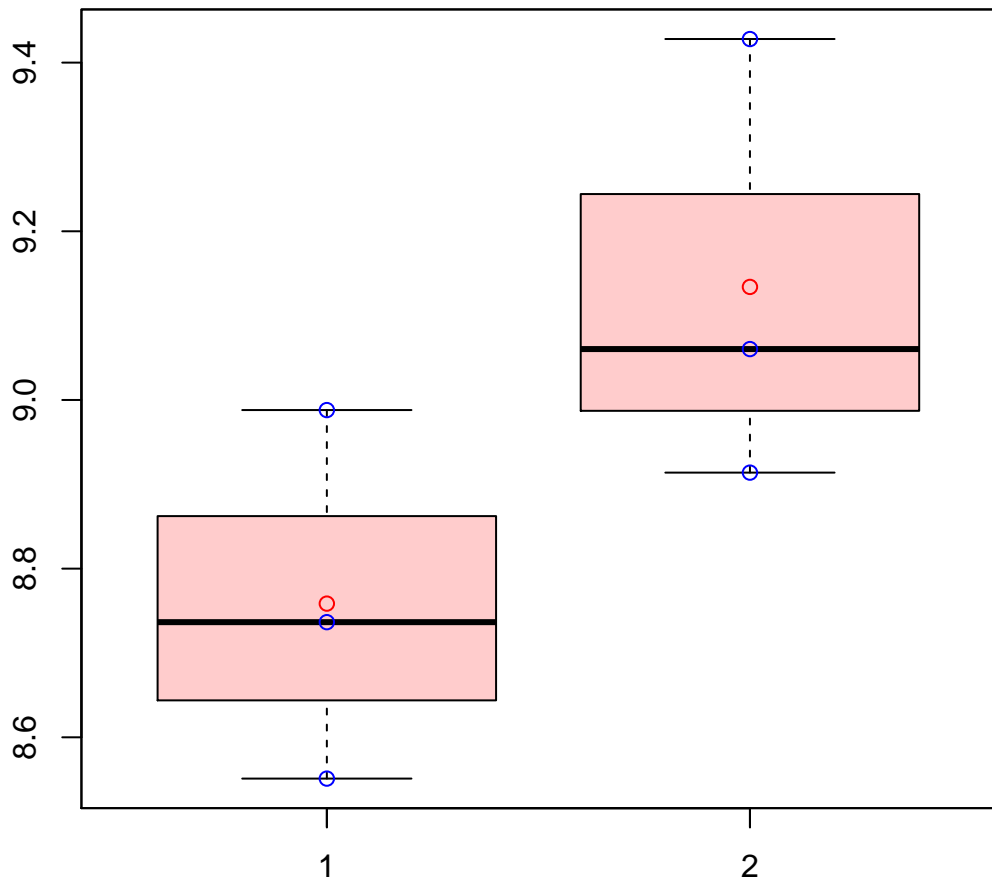

t-Test: p-value = 0.13



# CL7871Contig3|CL7871Contig3

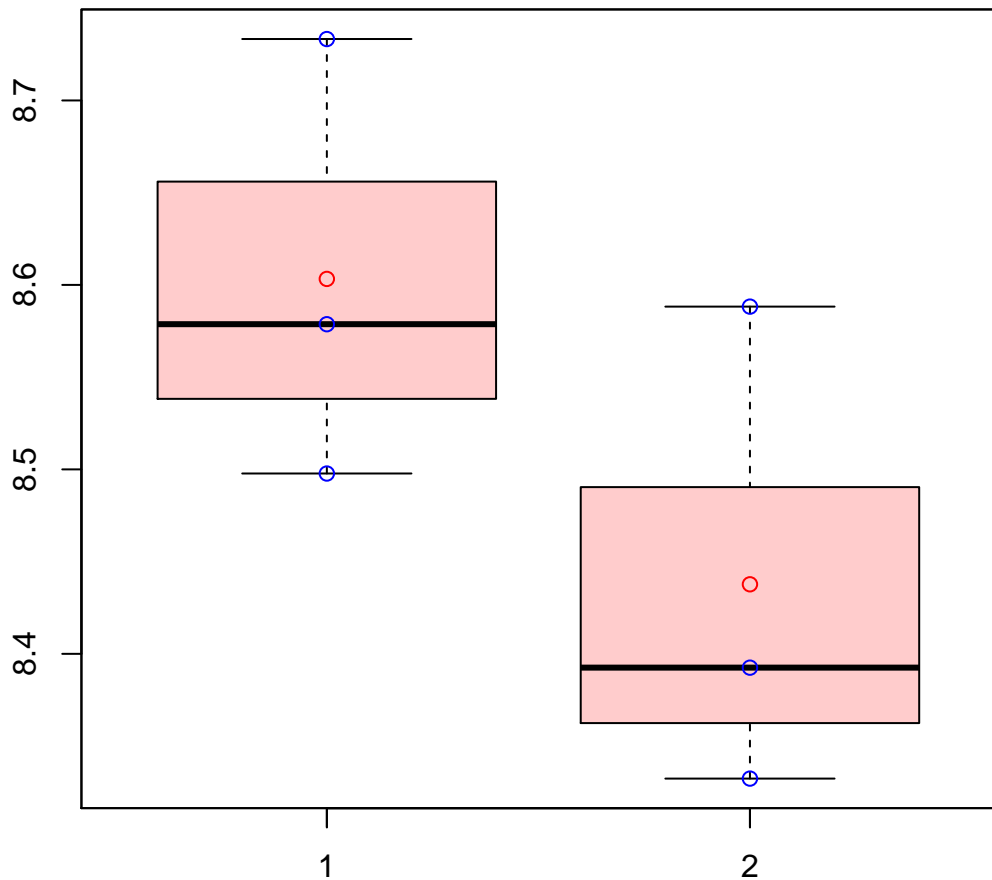

t-Test: p-value = 0.19

# CL7873Contig3|CL7873Contig3



t-Test: p-value = 0.21

# CL7877Contig1|CL7877Contig1

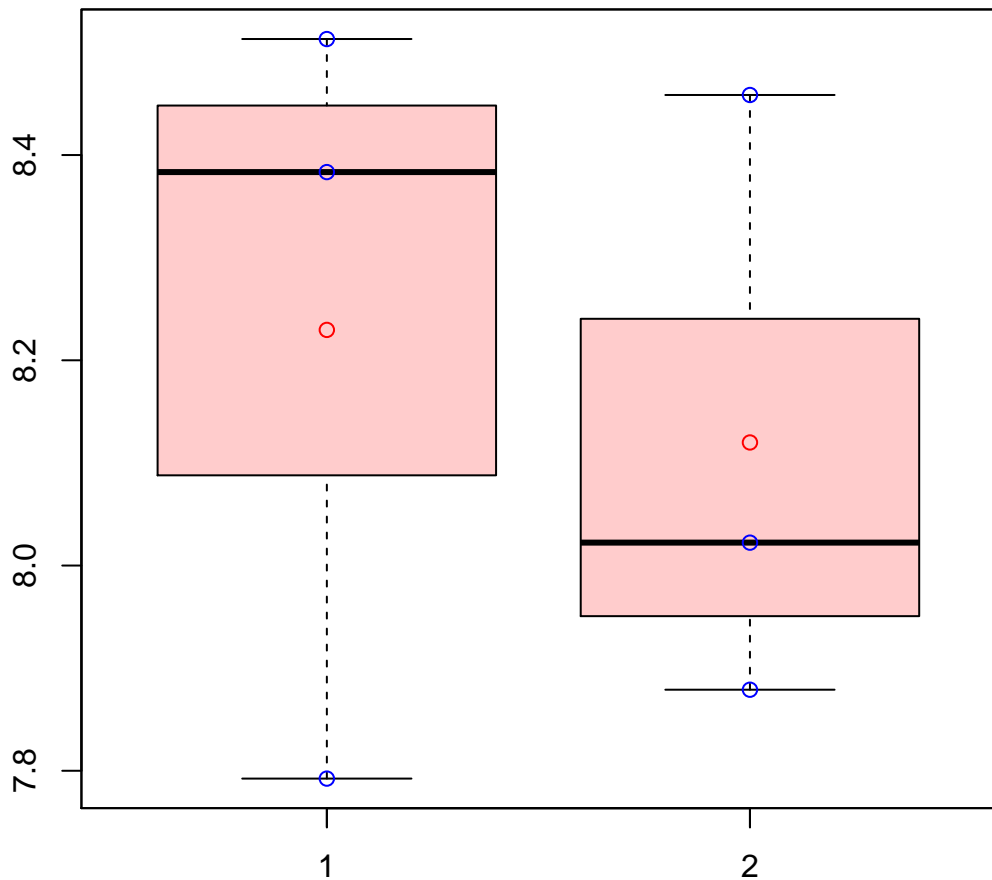

t-Test: p-value = 0.72

# CL7885Contig1|CL7885Contig1



t-Test: p-value = 0.07

# CL788Contig3|CL788Contig3

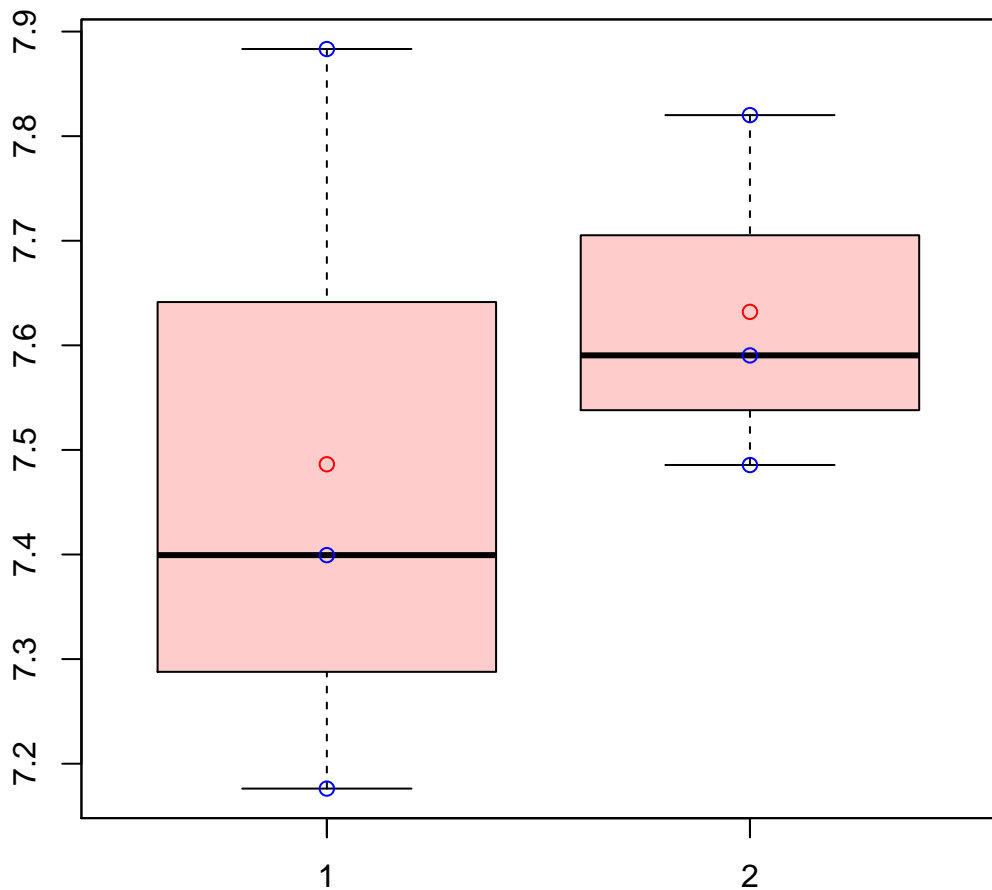

t-Test: p-value = 0.57

# CL7897Contig4|CL7897Contig4



t-Test: p-value = 0.38

# CL7898Contig1|CL7898Contig1

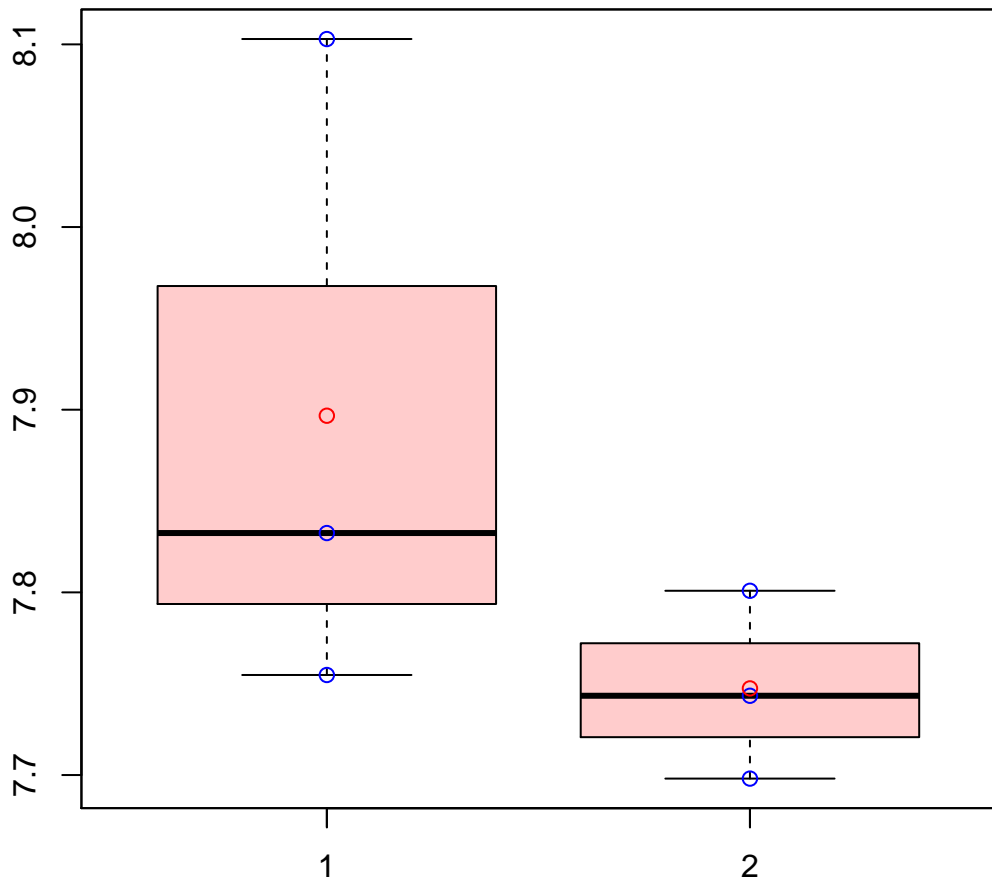

t-Test: p-value = 0.29

# CL7898Contig3|CL7898Contig3



t-Test: p-value = 0.29



# CL78Contig10|CL78Contig10

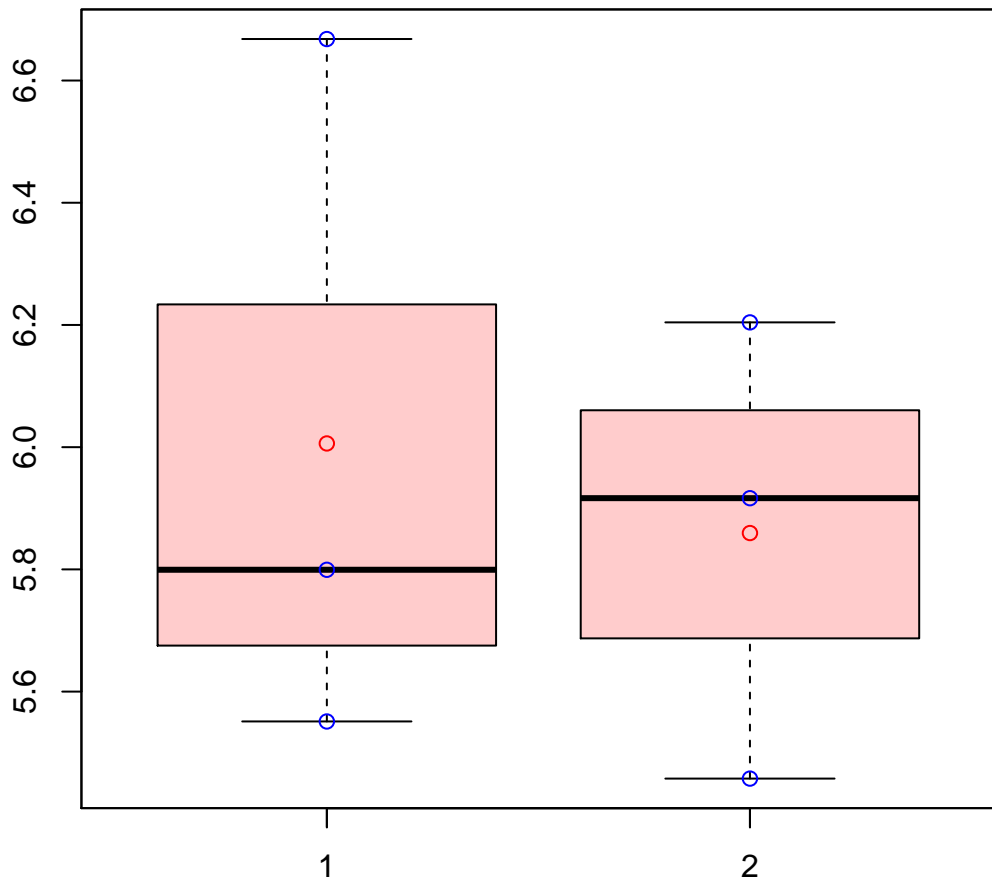

t-Test: p-value = 0.74

# CL78Contig11|CL78Contig11

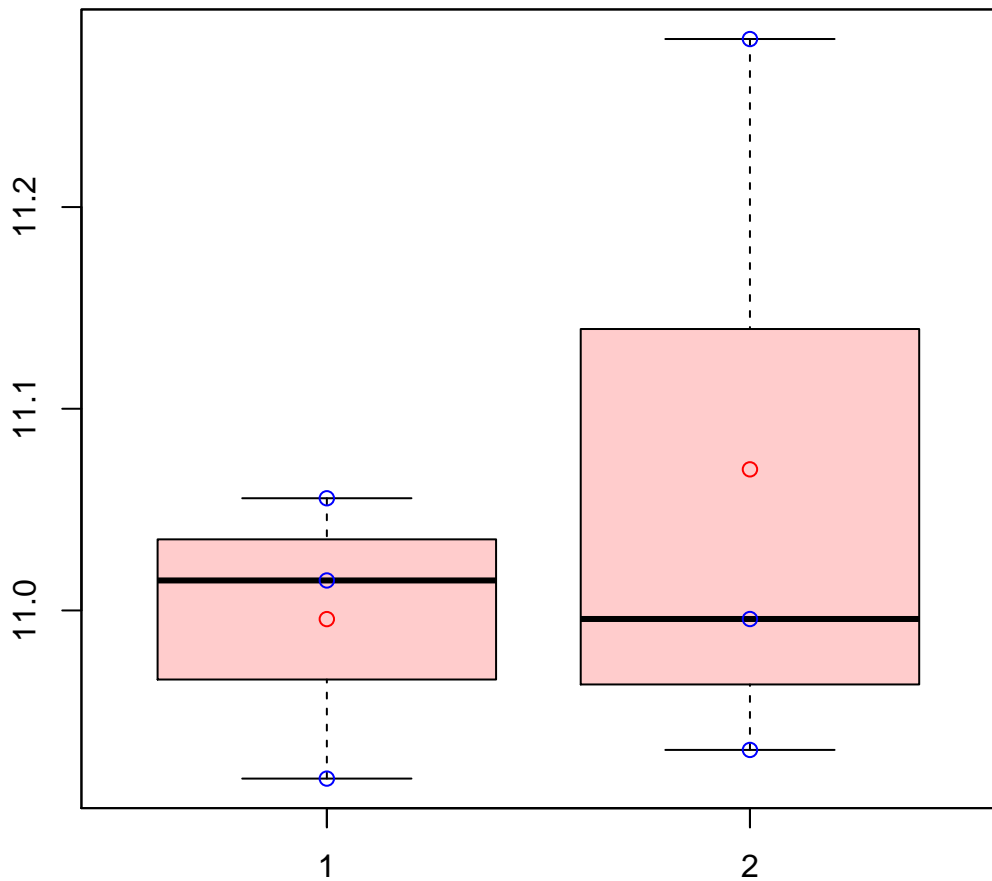

t-Test: p-value = 0.57

# CL78Contig14|CL78Contig14

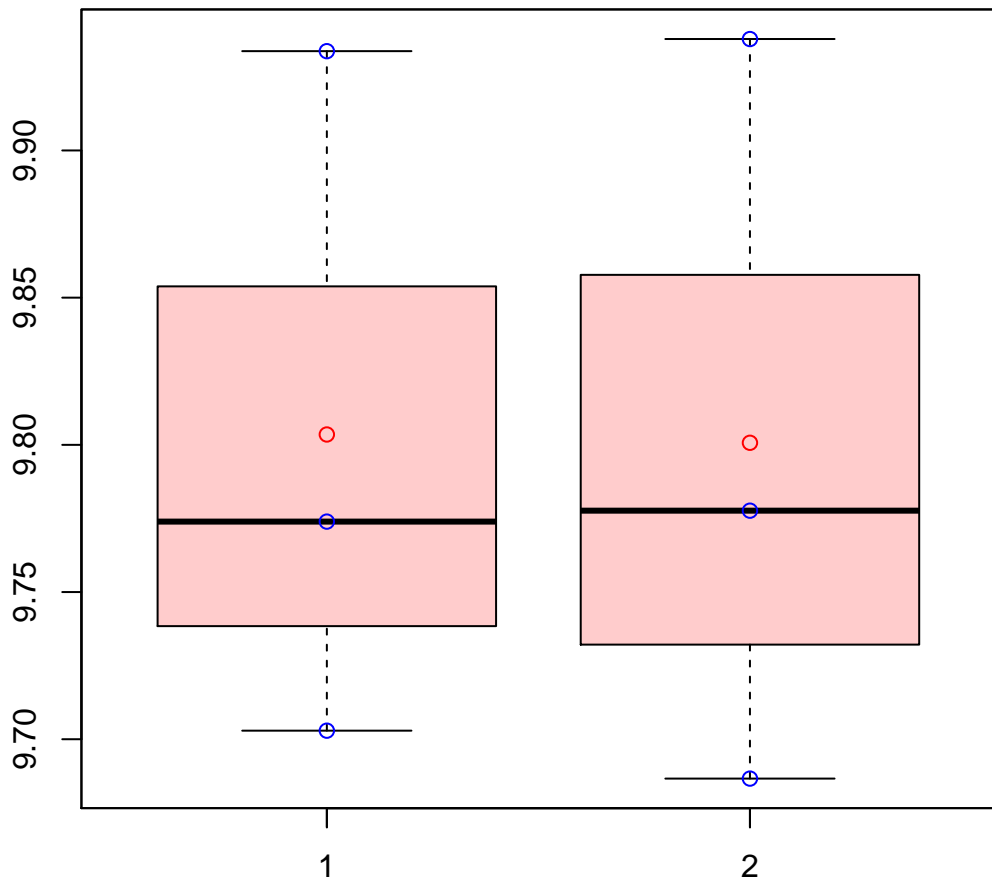

t-Test: p-value = 0.98

# CL78Contig22|CL78Contig22

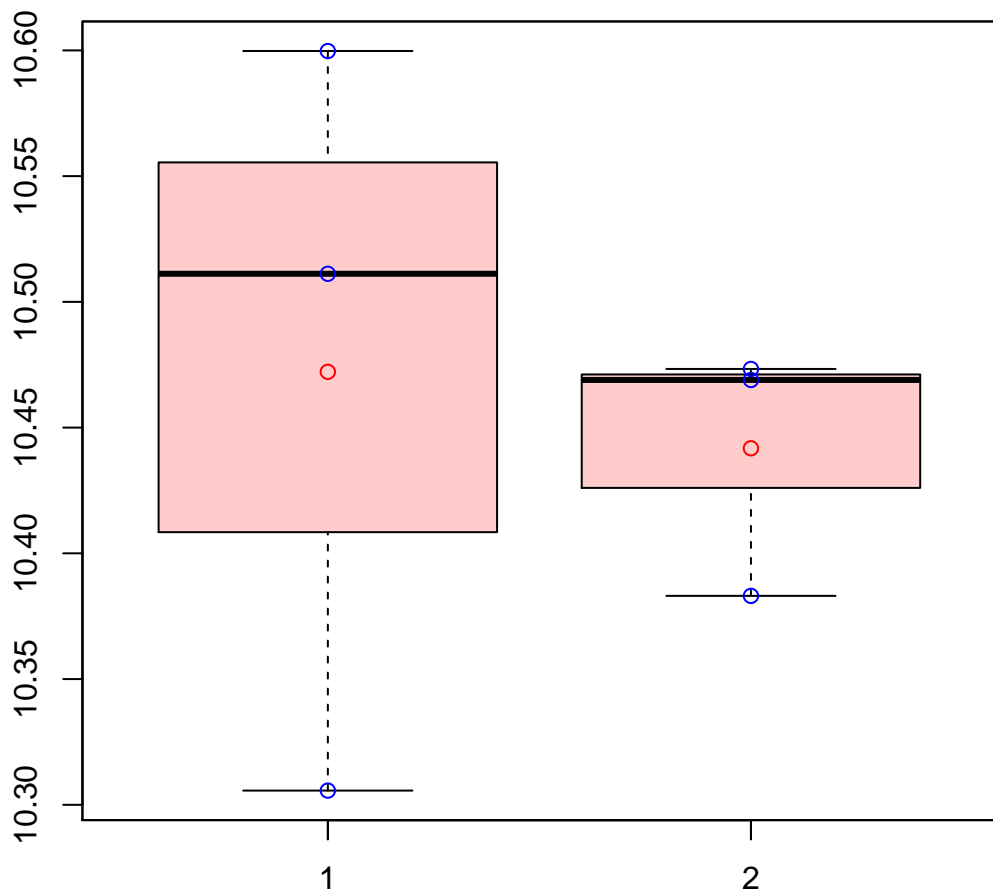

t-Test: p-value = 0.77

# CL78Contig23|CL78Contig23

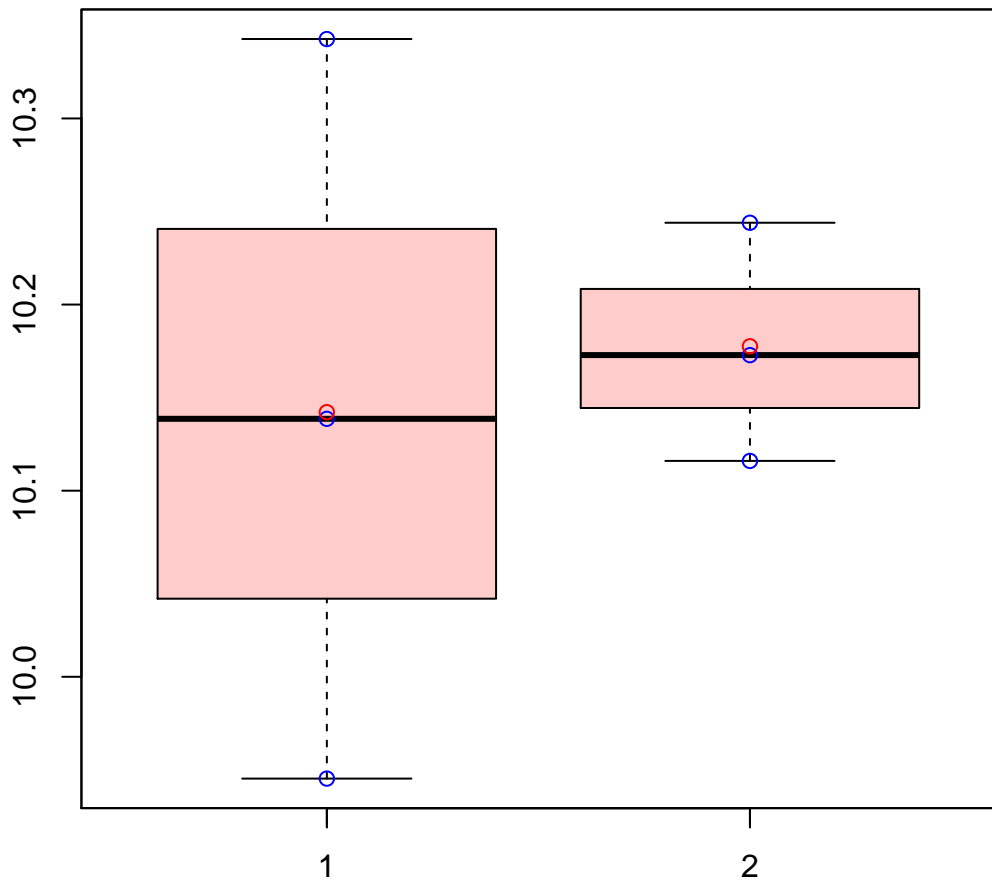

t-Test: p-value = 0.79

# CL78Contig26|CL78Contig26

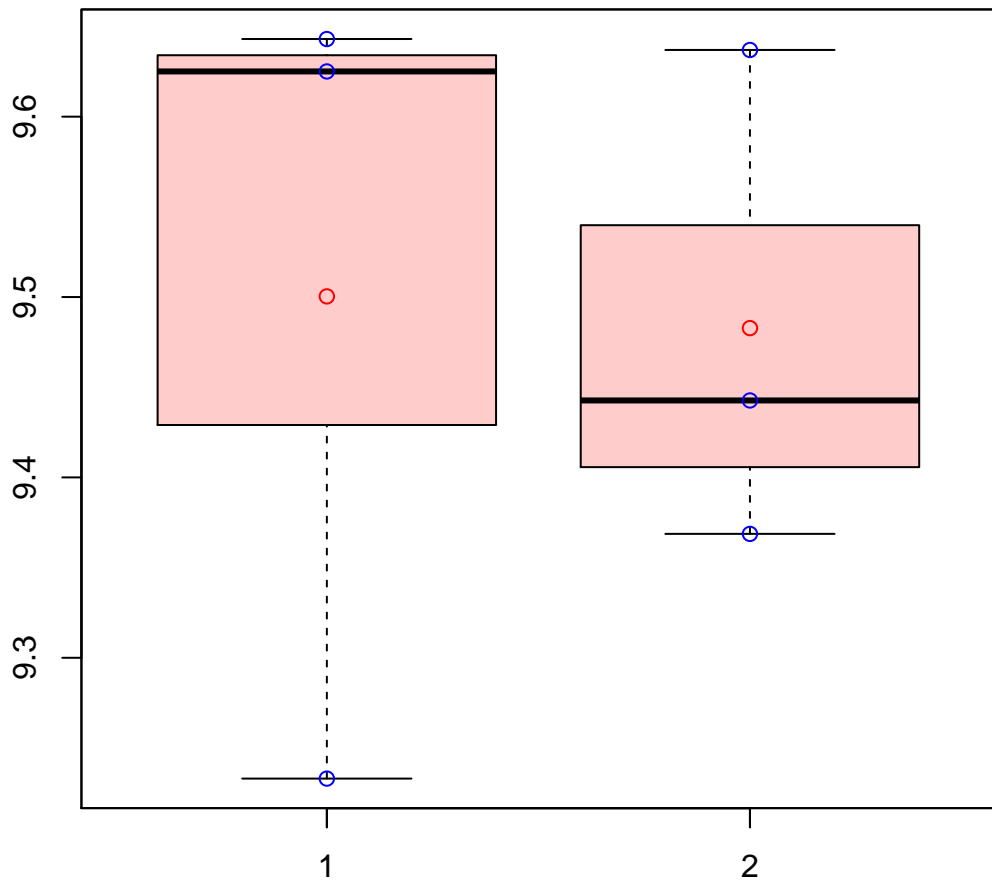

t-Test: p-value = 0.92

# CL78Contig33|CL78Contig33

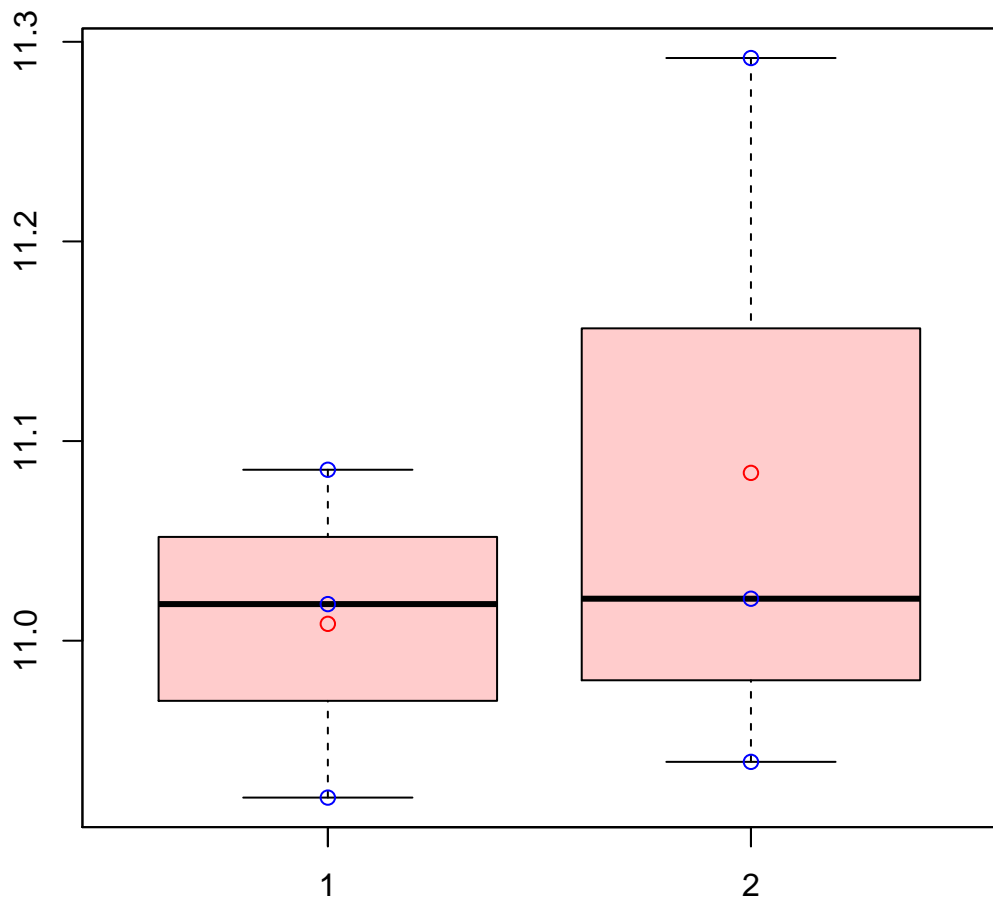

t-Test: p-value = 0.57

# CL78Contig4|CL78Contig4

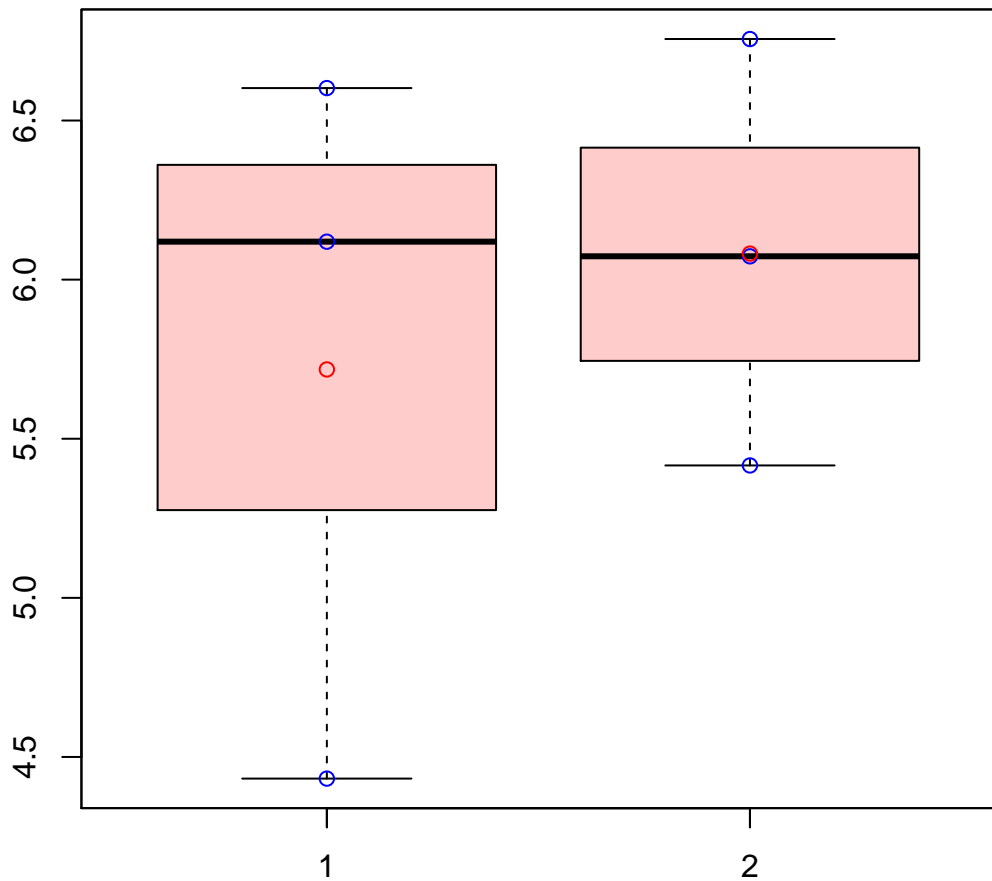

t-Test: p-value = 0.66



# CL78Contig6|CL78Contig6

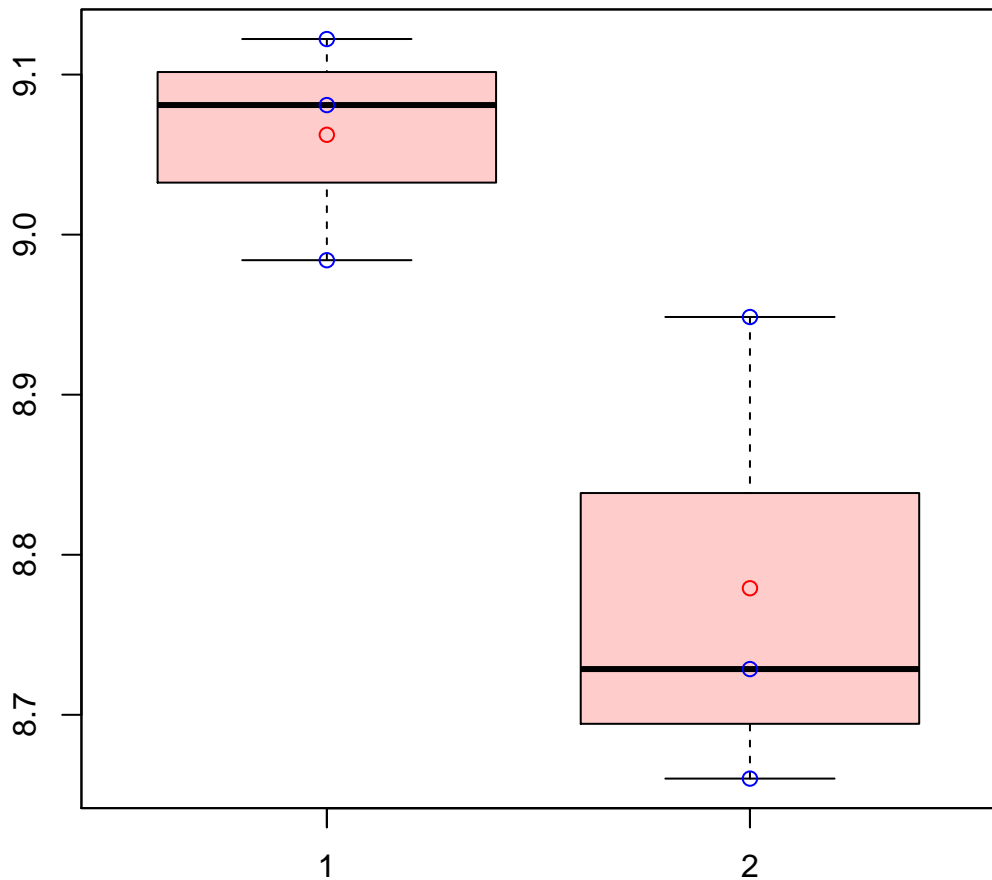

t-Test: p-value = 0.06

# CL78Contig8|CL78Contig8

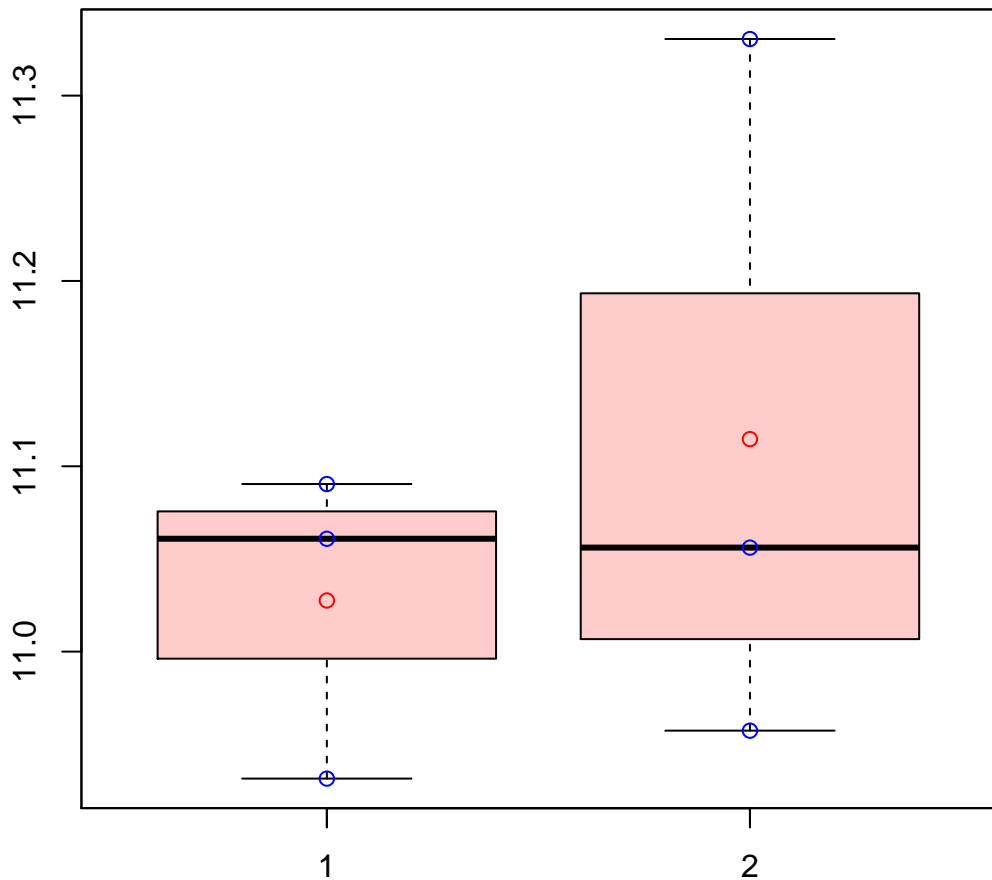

t-Test: p-value = 0.53

# CL78Contig9|CL78Contig9

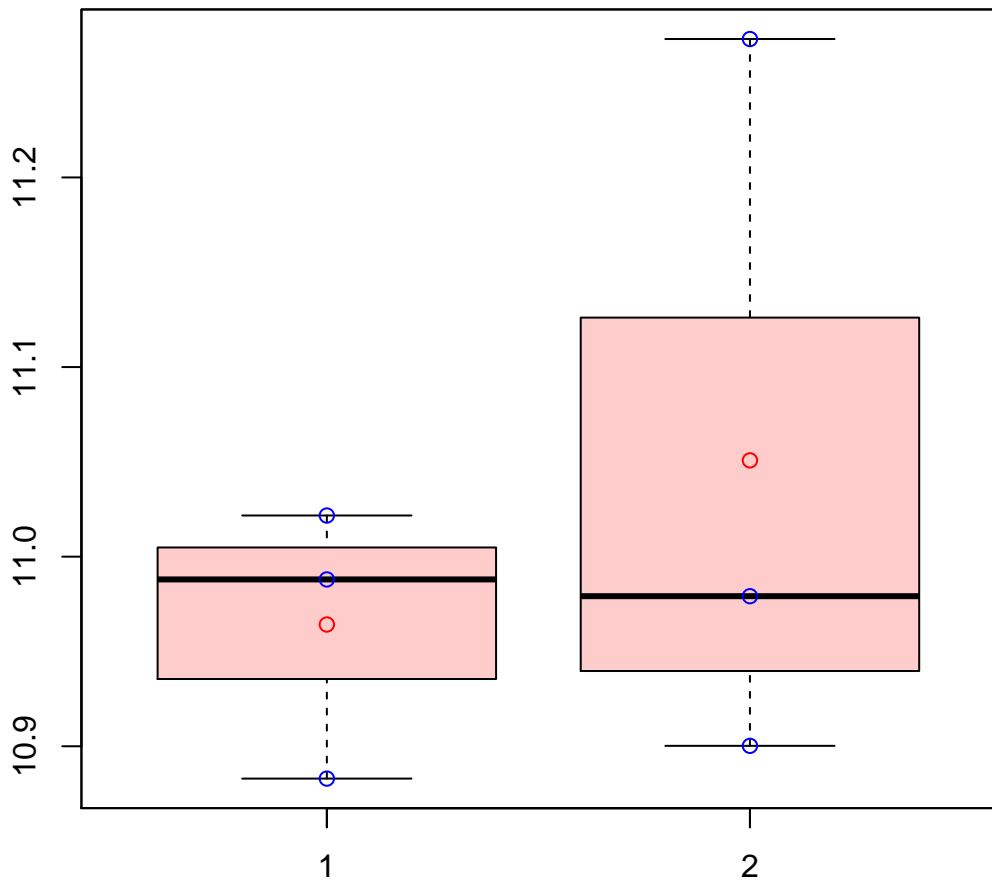

t-Test: p-value = 0.53

# CL7903Contig1|CL7903Contig1

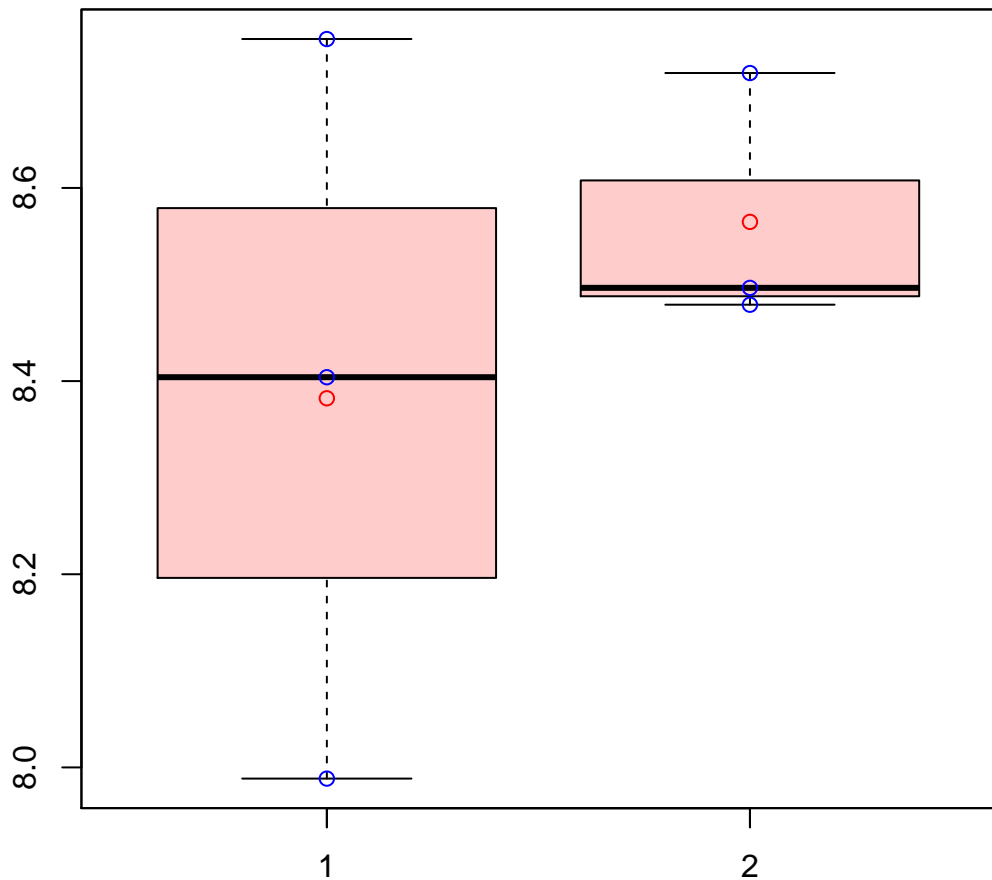

t-Test: p-value = 0.5

# CL7909Contig1|CL7909Contig1

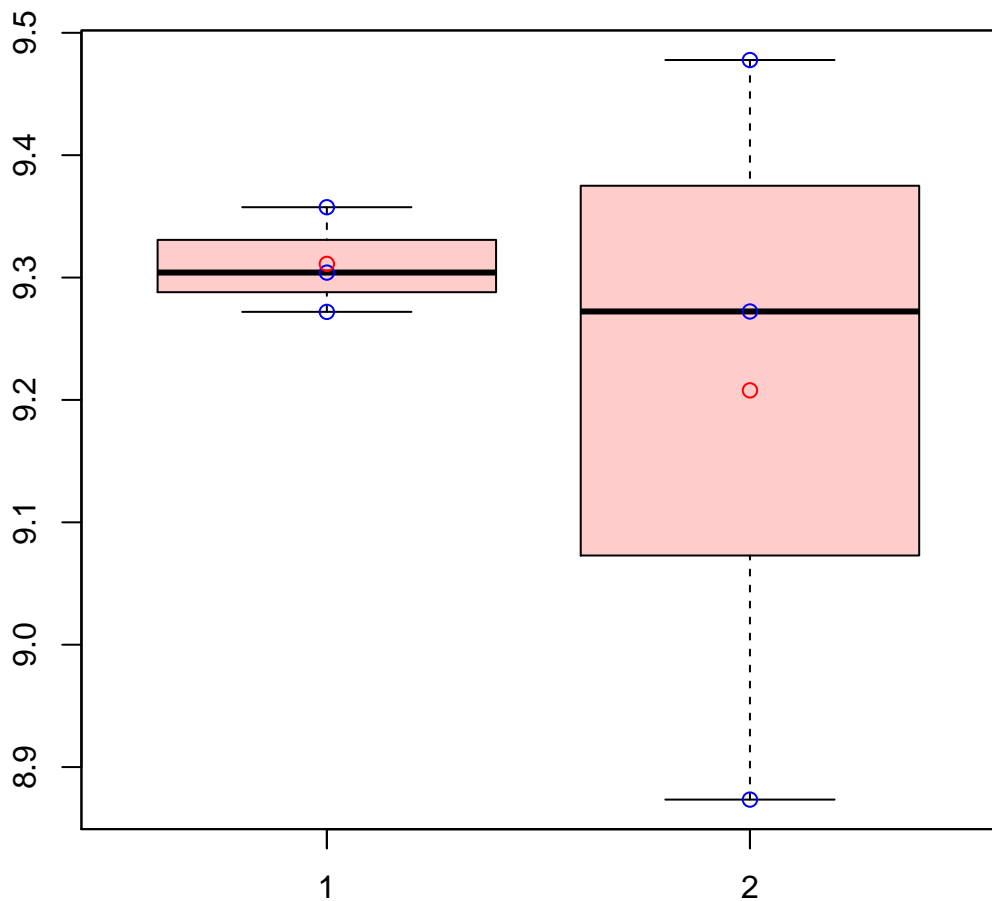

t-Test: p-value = 0.62

# CL7916Contig1|CL7916Contig1

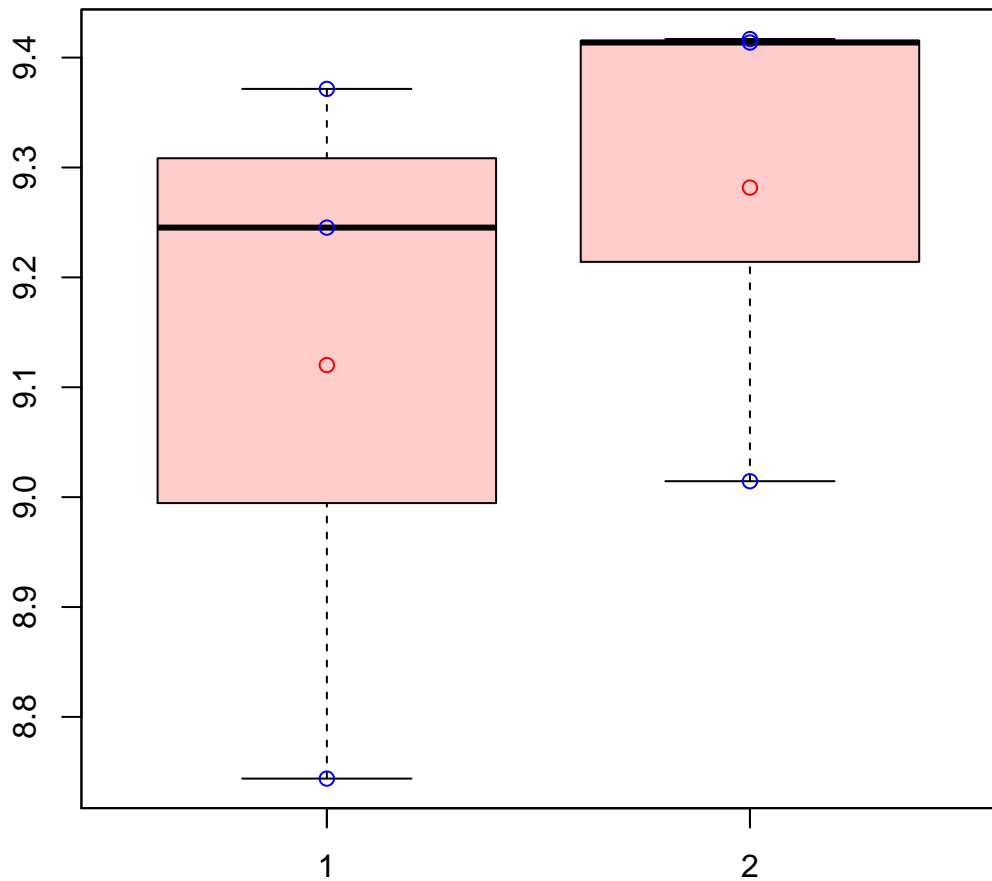

t-Test: p-value = 0.53

# CL7919Contig1|CL7919Contig1

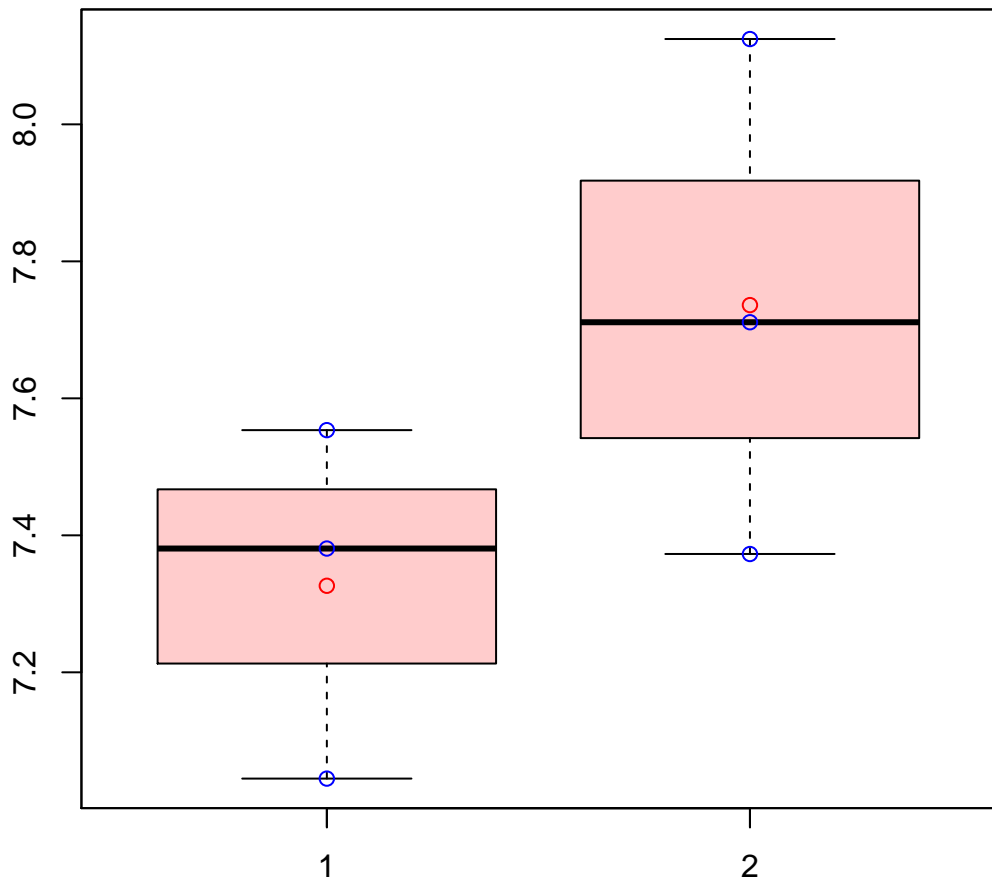

t-Test: p-value = 0.2

# CL791Contig3|CL791Contig3

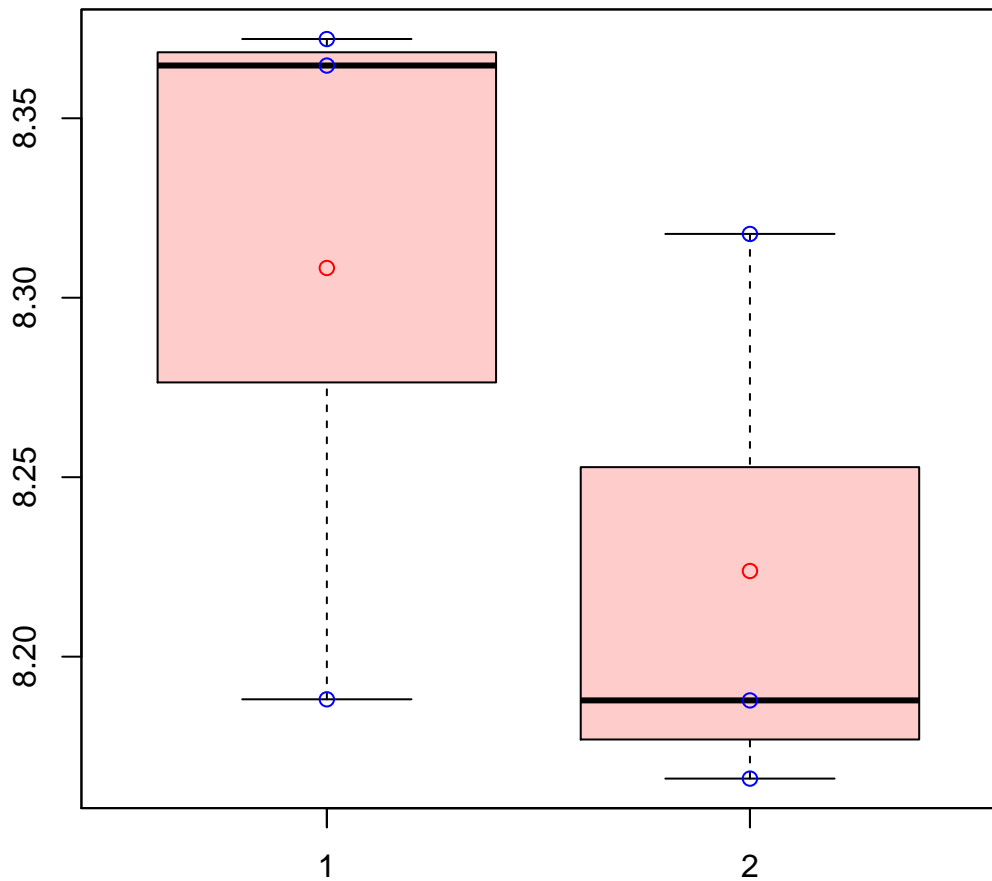

t-Test: p-value = 0.34



# CL791Contig9|CL791Contig9



t-Test: p-value = 0.34

# CL7921Contig1|CL7921Contig1

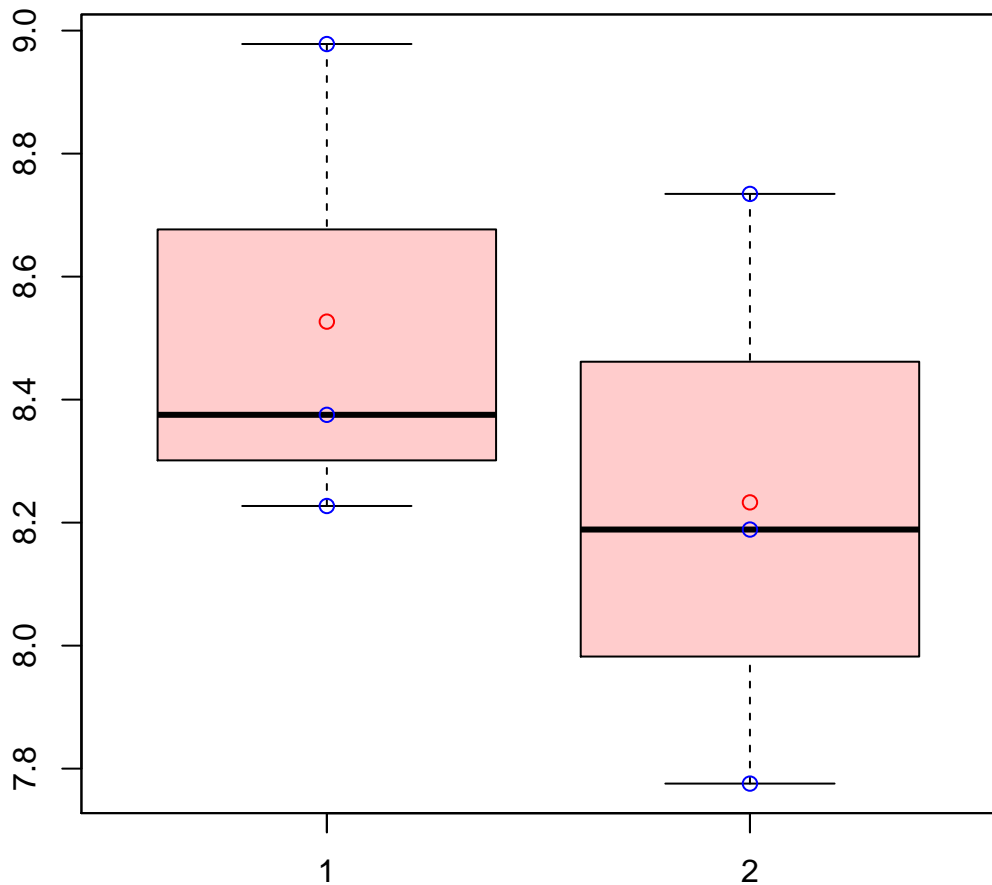

t-Test: p-value = 0.46

# CL7922Contig3|CL7922Contig3

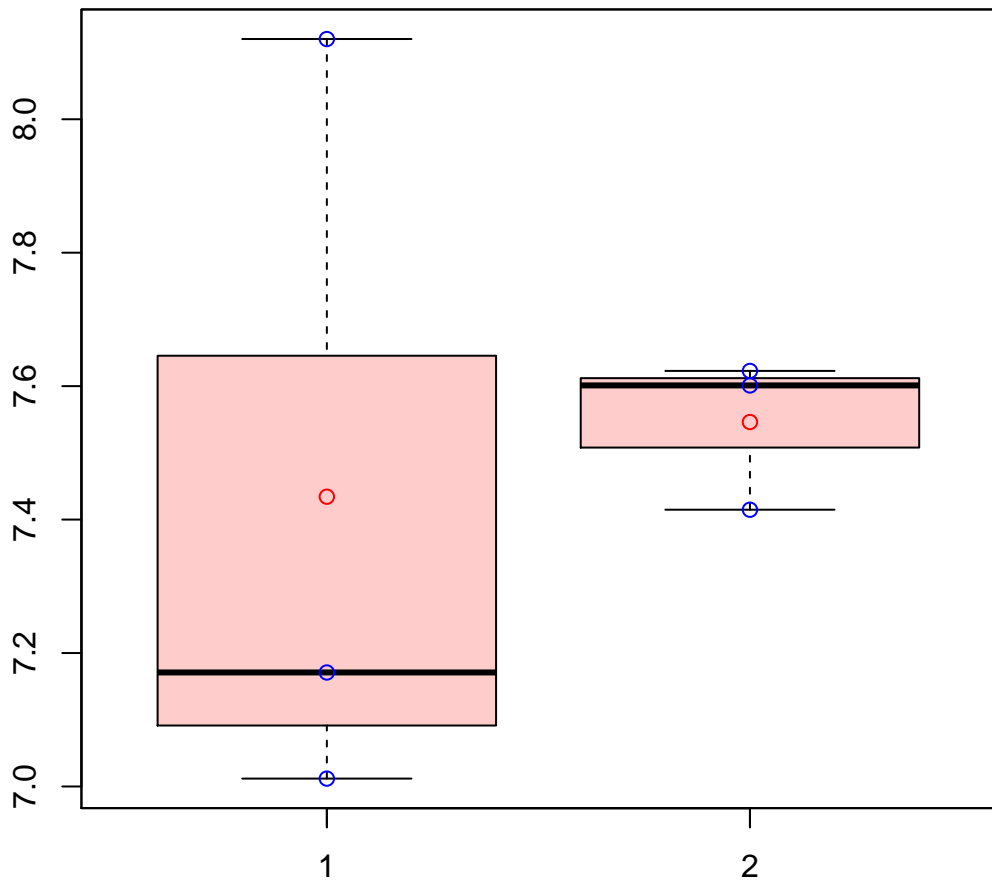

t-Test: p-value = 0.78

# CL7922Contig4|CL7922Contig4

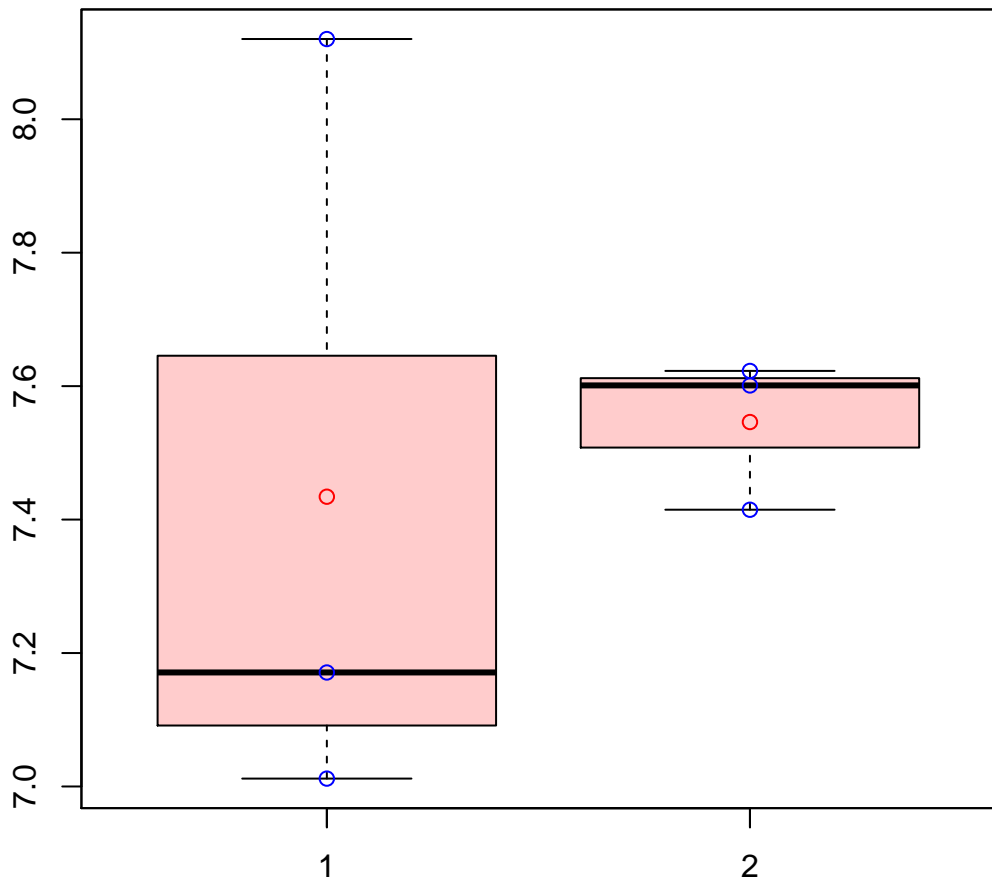

t-Test: p-value = 0.78

# CL7935Contig1|CL7935Contig1

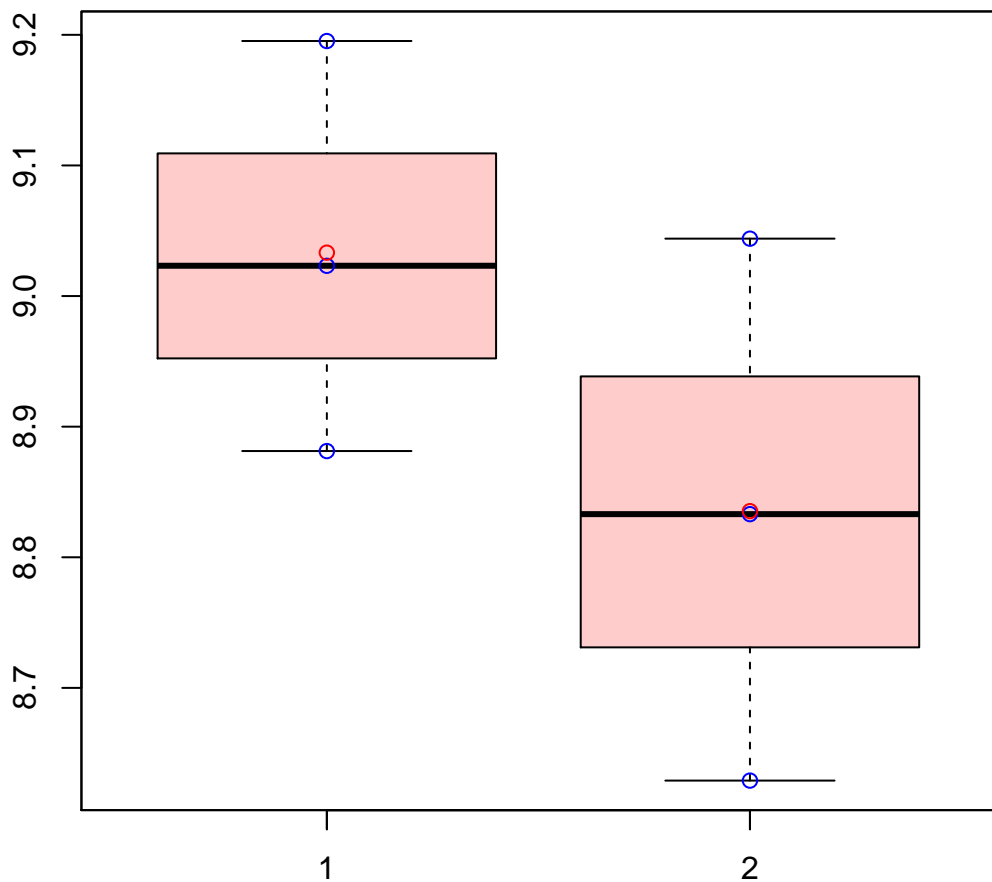

t-Test: p-value = 0.26

# CL7941Contig1|CL7941Contig1

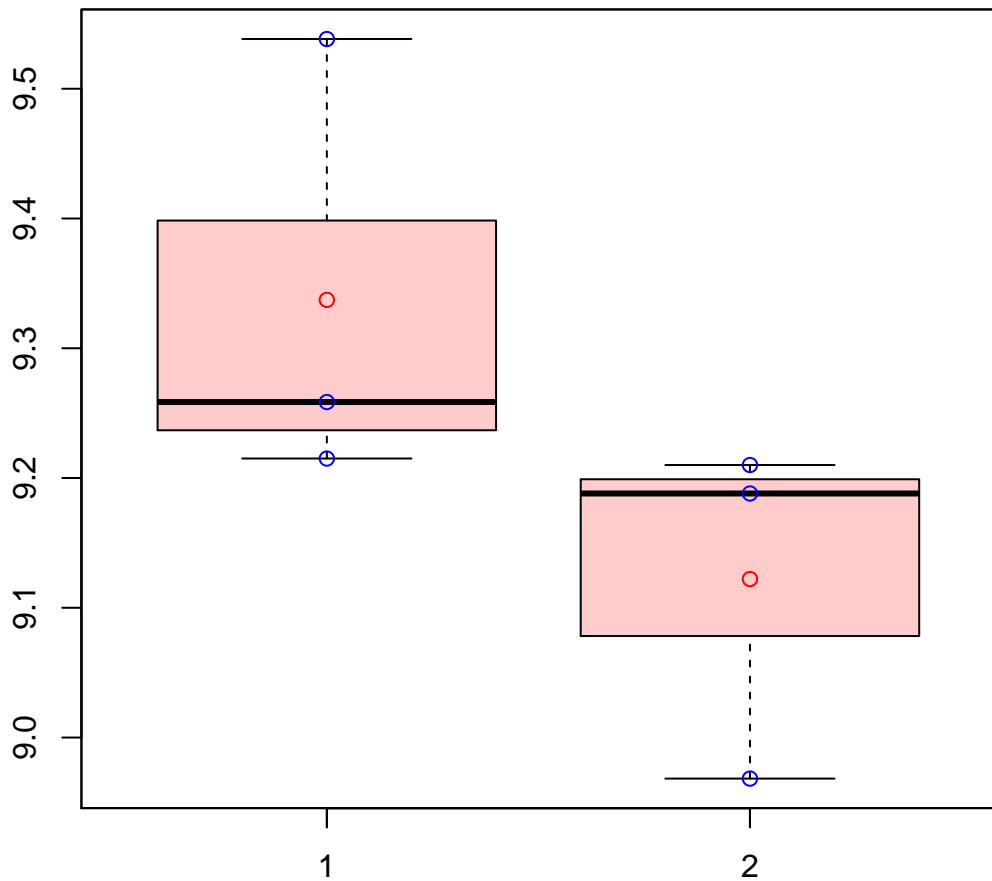

t-Test: p-value = 0.17

# CL7942Contig1|CL7942Contig1

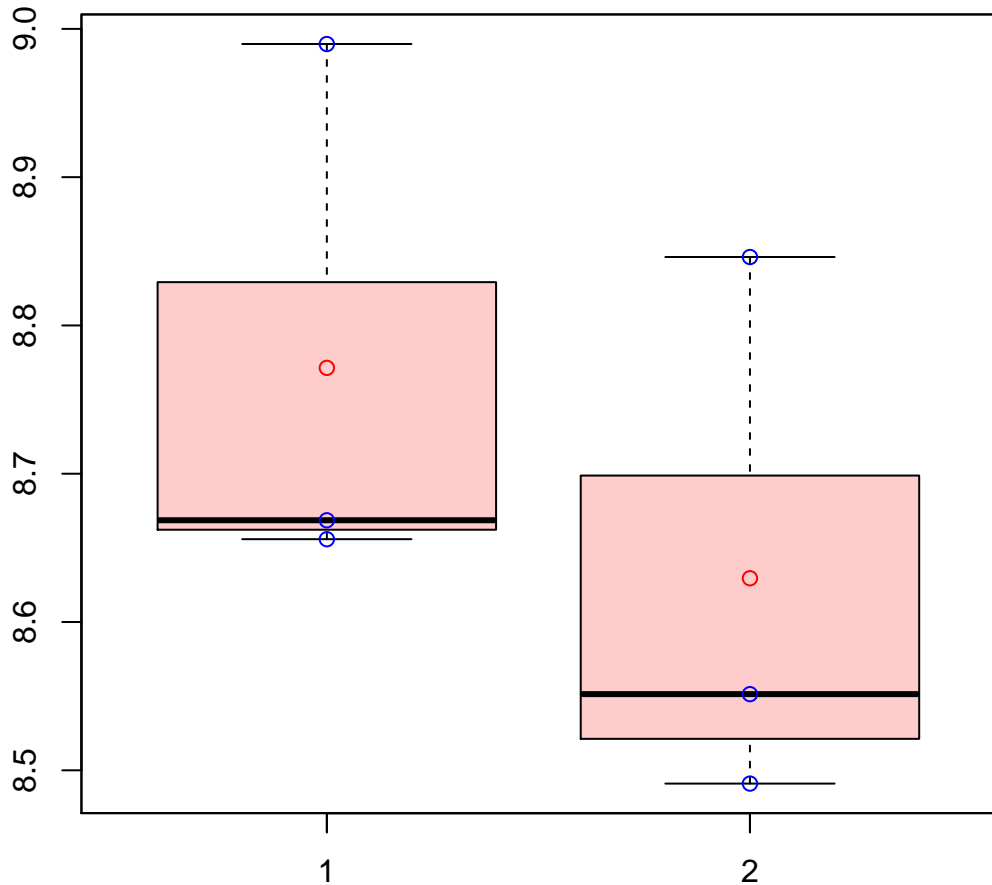

t-Test: p-value = 0.41

# CL794Contig11|CL794Contig11

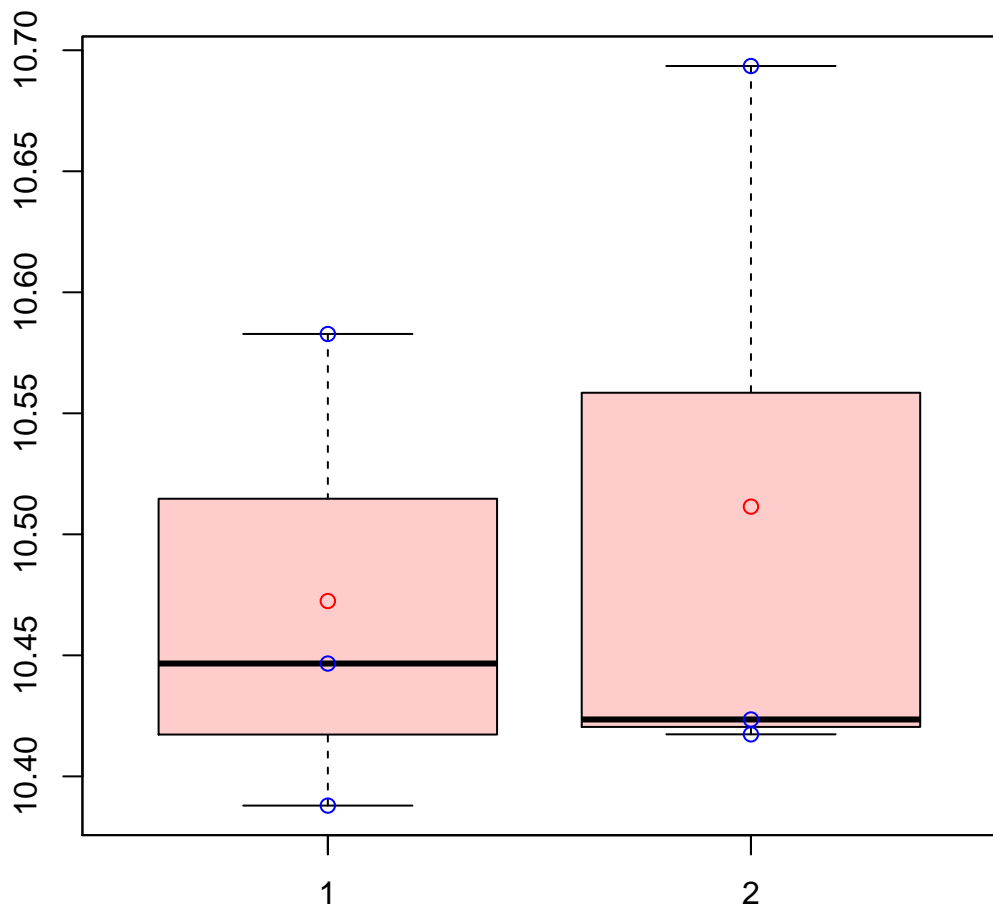

t-Test: p-value = 0.74



# CL794Contig9|CL794Contig9

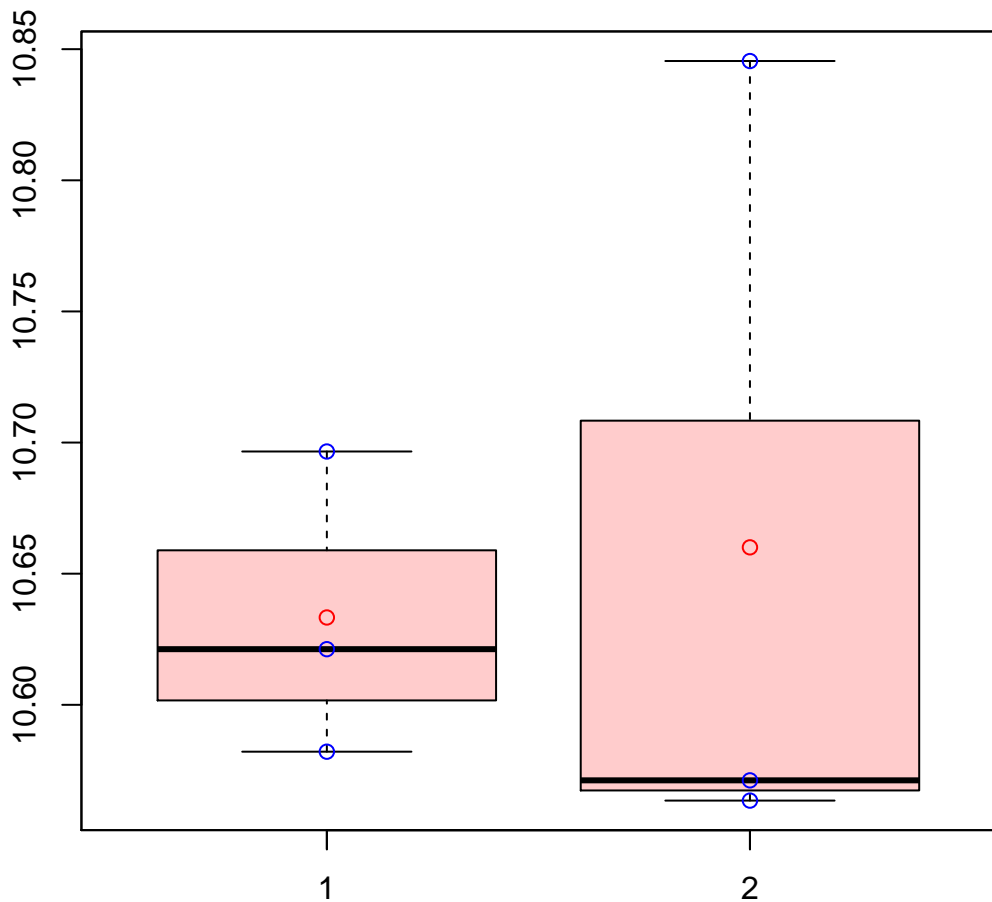

t-Test: p-value = 0.81

# CL7952Contig3|CL7952Contig3

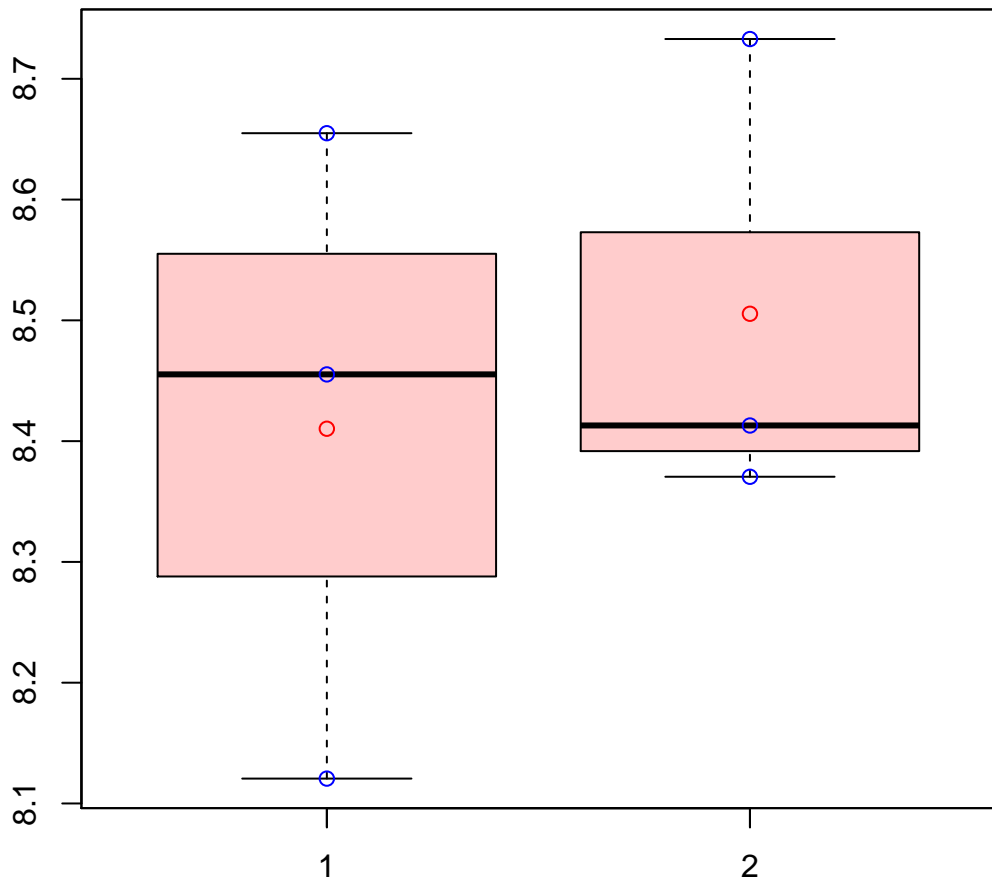

t-Test: p-value = 0.65

# CL7955Contig3|CL7955Contig3



t-Test: p-value = 0.14

# CL7965Contig1|CL7965Contig1

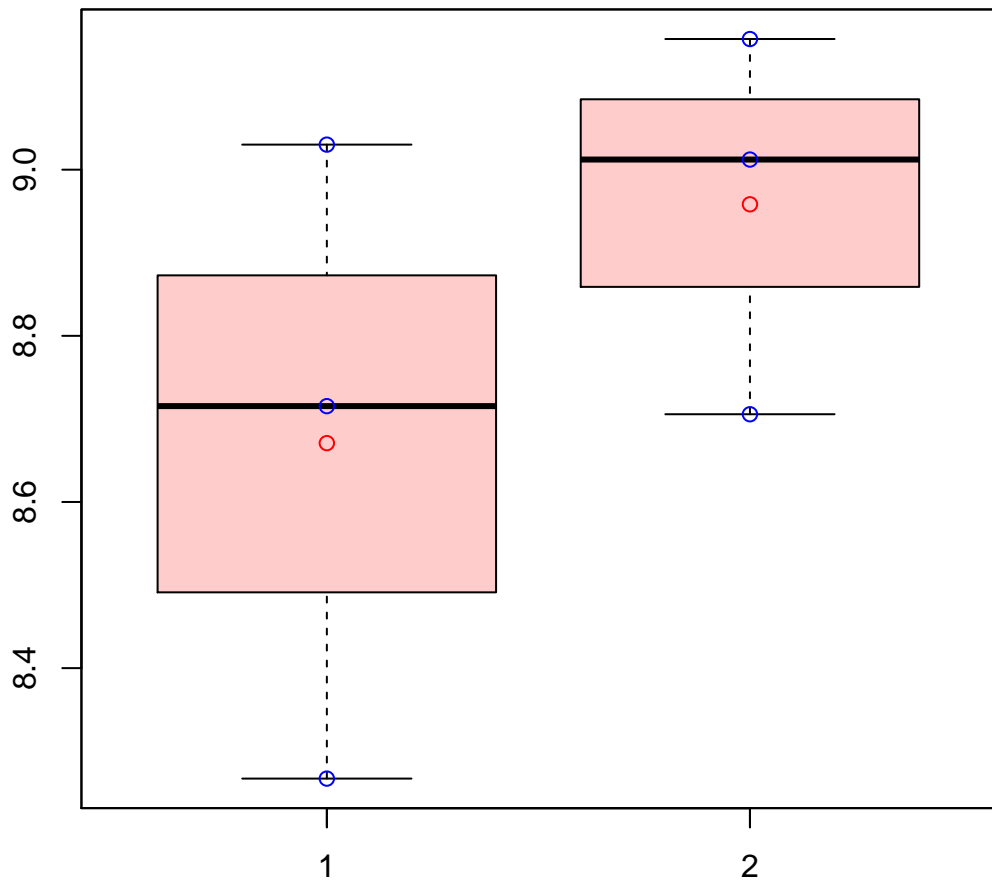

t-Test: p-value = 0.34

# CL7965Contig3|CL7965Contig3

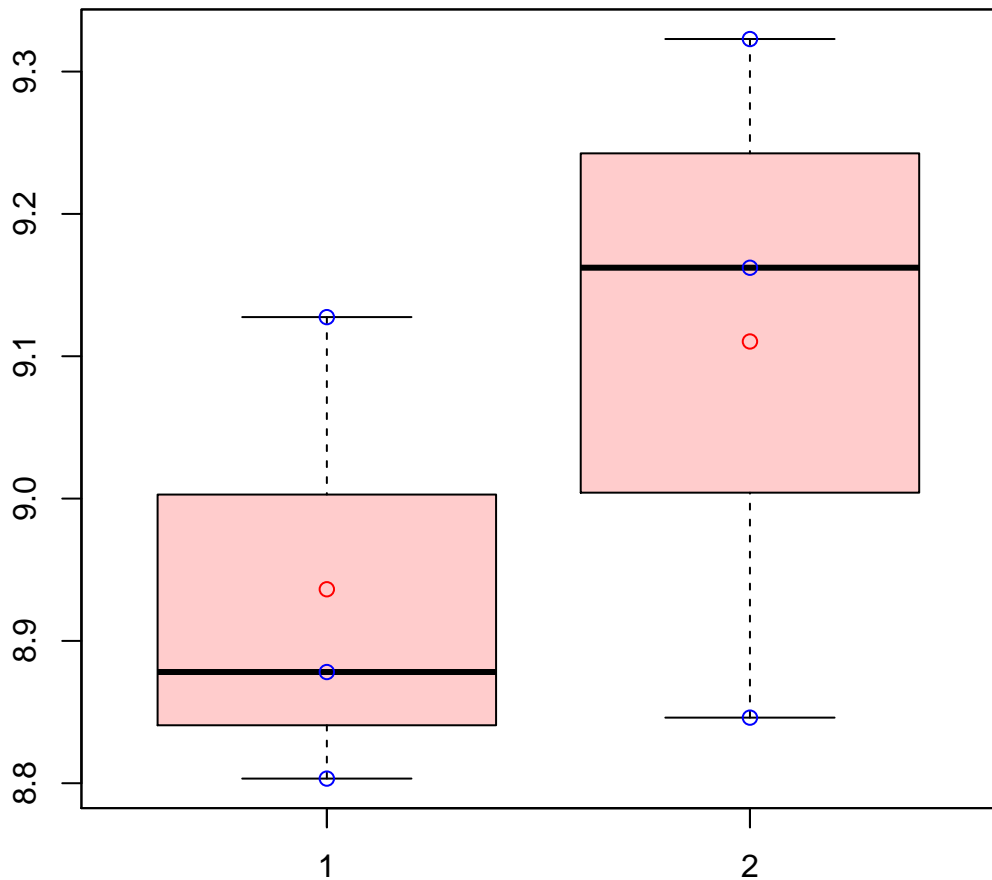

t-Test: p-value = 0.37

# CL7967Contig1|CL7967Contig1



t-Test: p-value = 0.79

# CL796Contig10|CL796Contig10

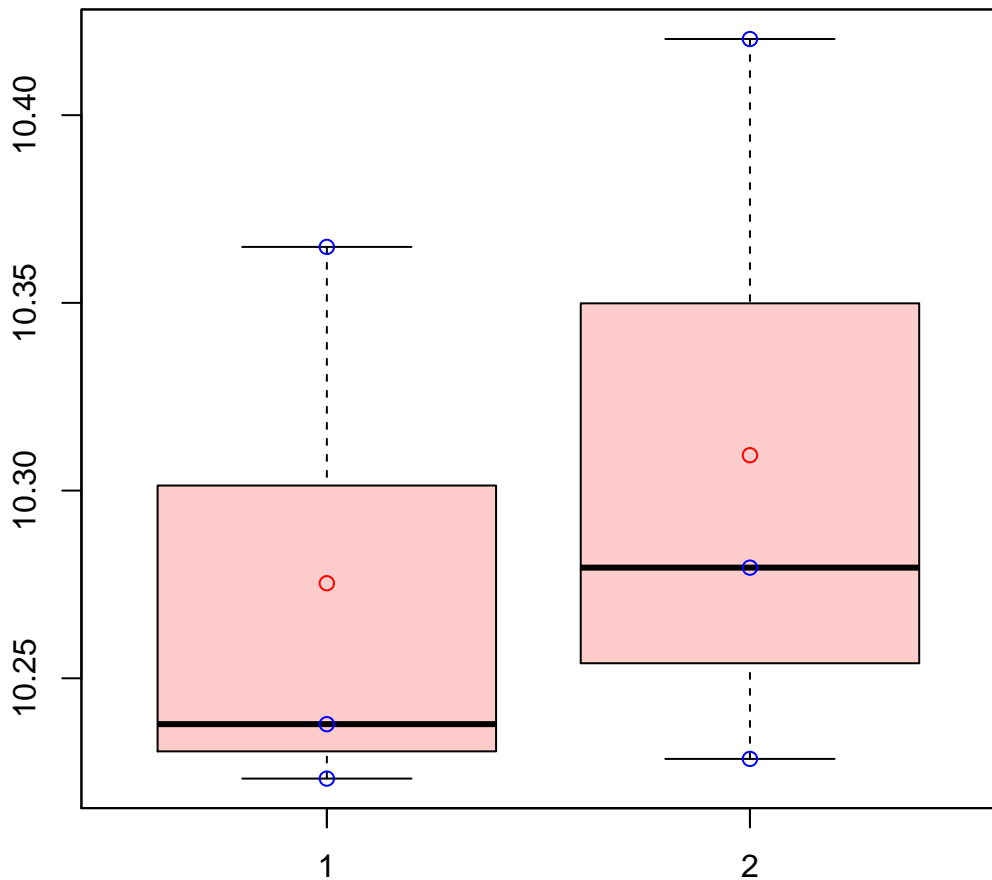

t-Test: p-value = 0.67

# CL796Contig12|CL796Contig12

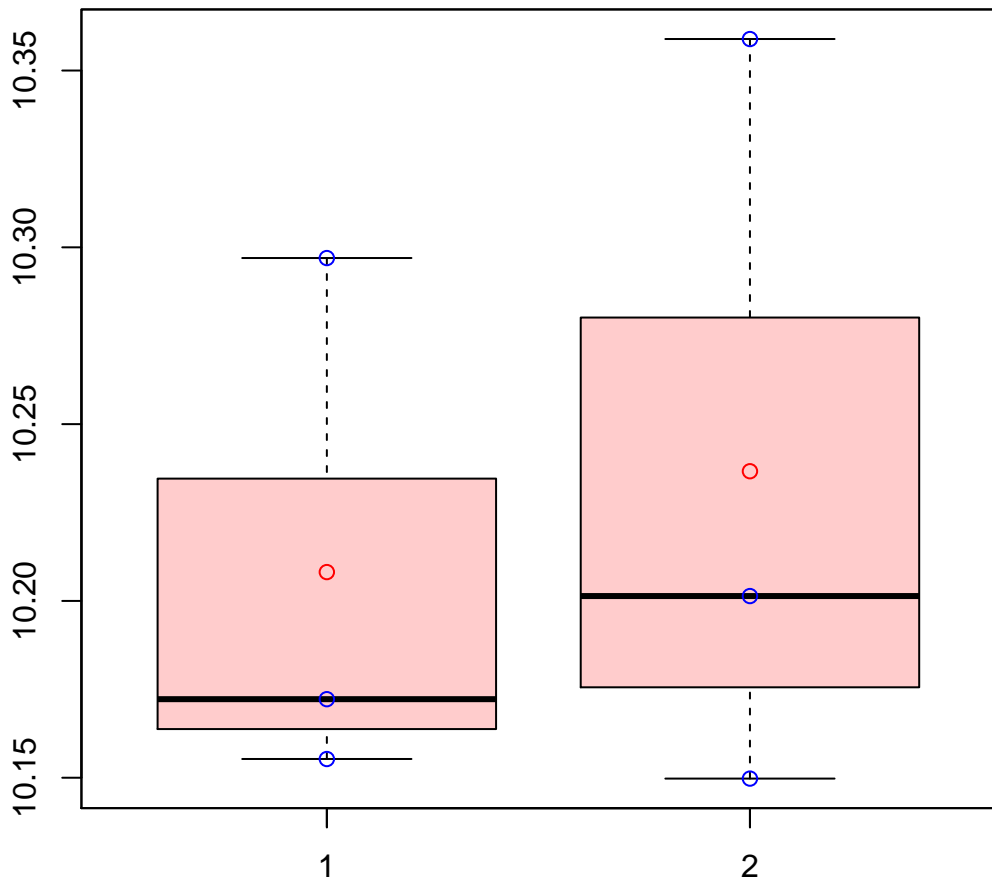

t-Test: p-value = 0.73



# CL796Contig6|CL796Contig6

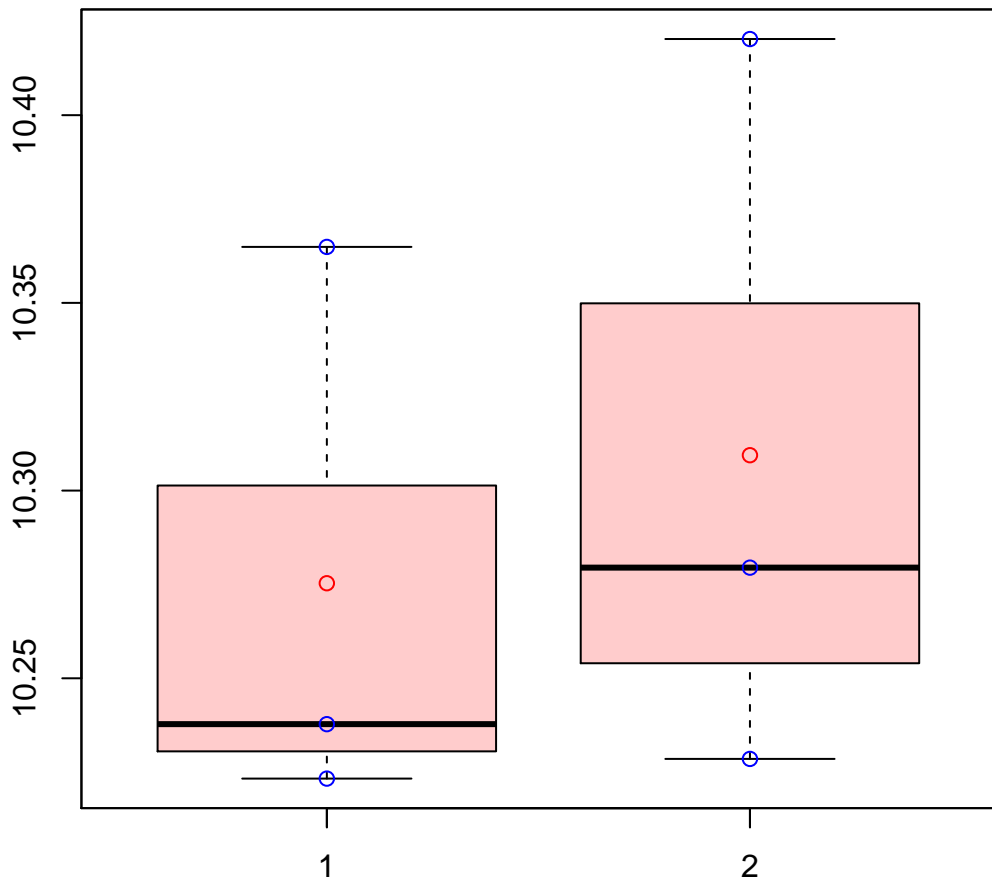

t-Test: p-value = 0.67

# CL7993Contig1|CL7993Contig1



t-Test: p-value = 0.13

# CL7994Contig1|CL7994Contig1

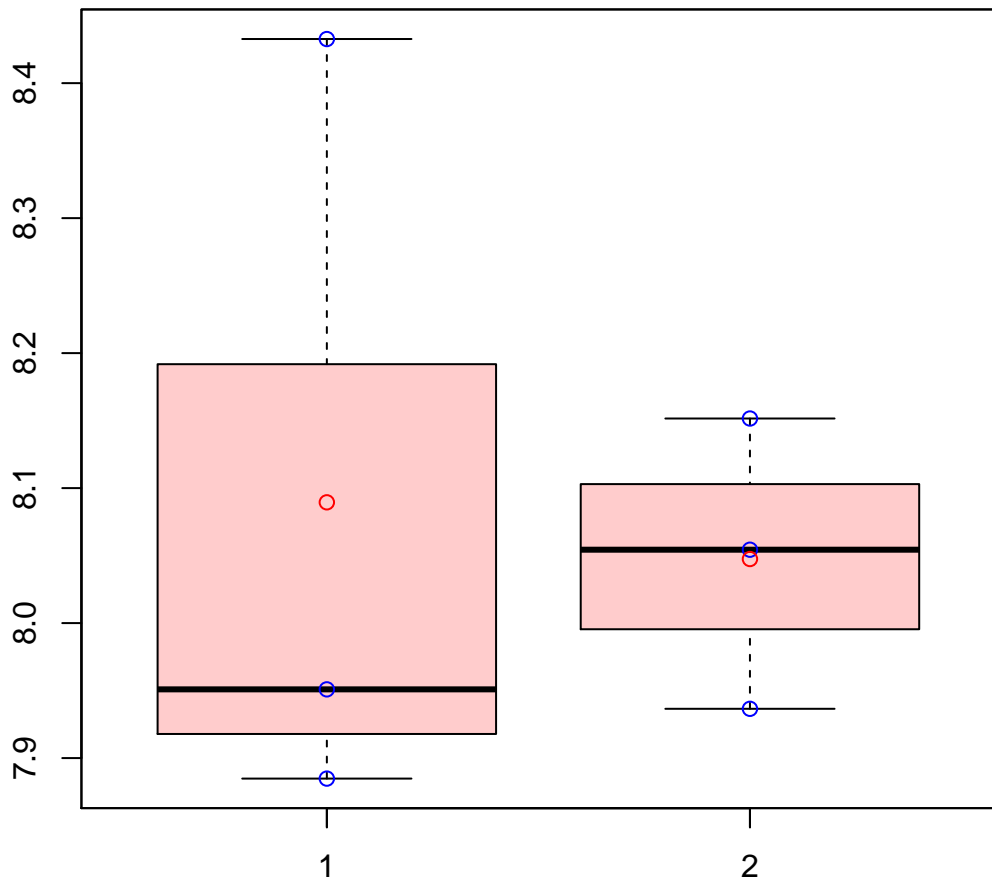

t-Test: p-value = 0.84

# CL7995Contig1|CL7995Contig1

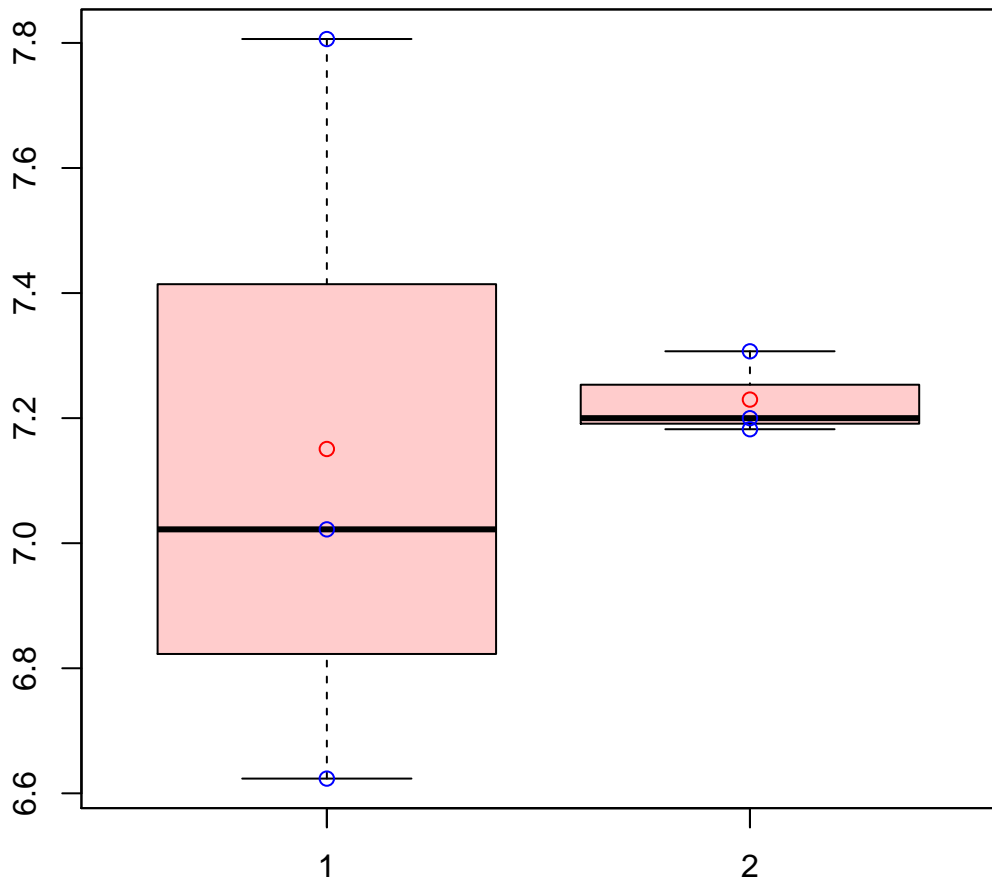

t-Test: p-value = 0.84

# CL7996Contig1|CL7996Contig1

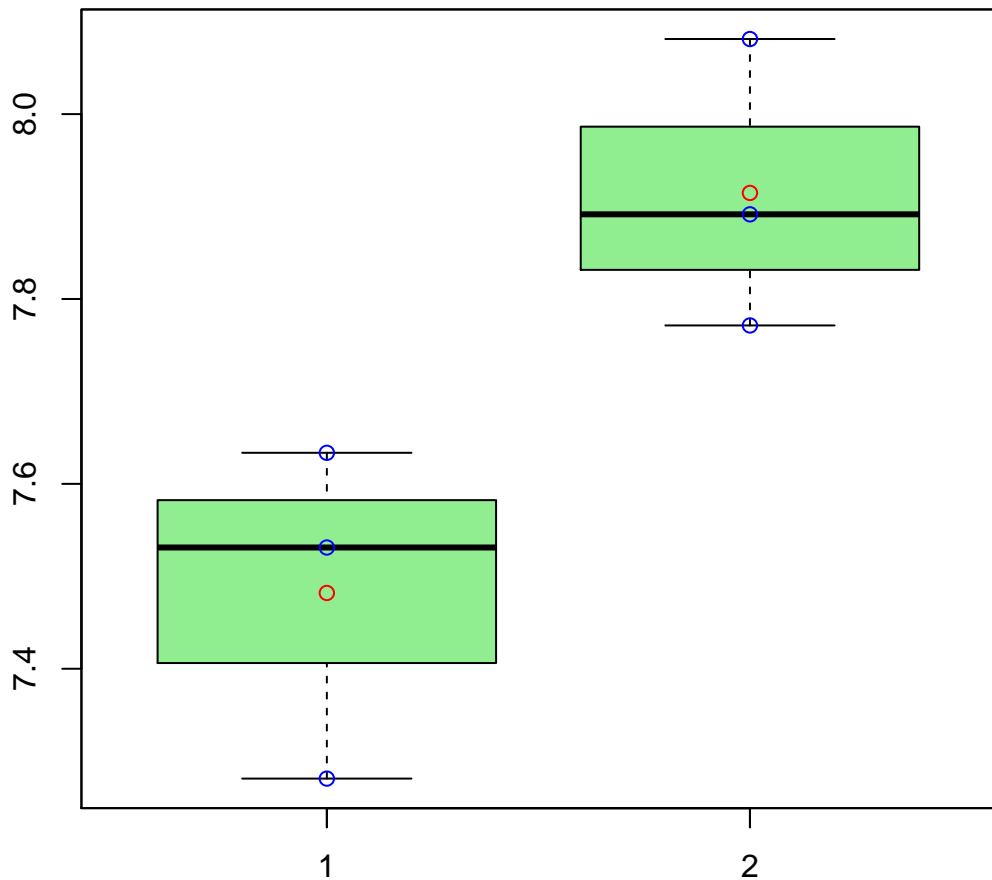

t-Test: p-value = 0.04

# CL7997Contig2|CL7997Contig2

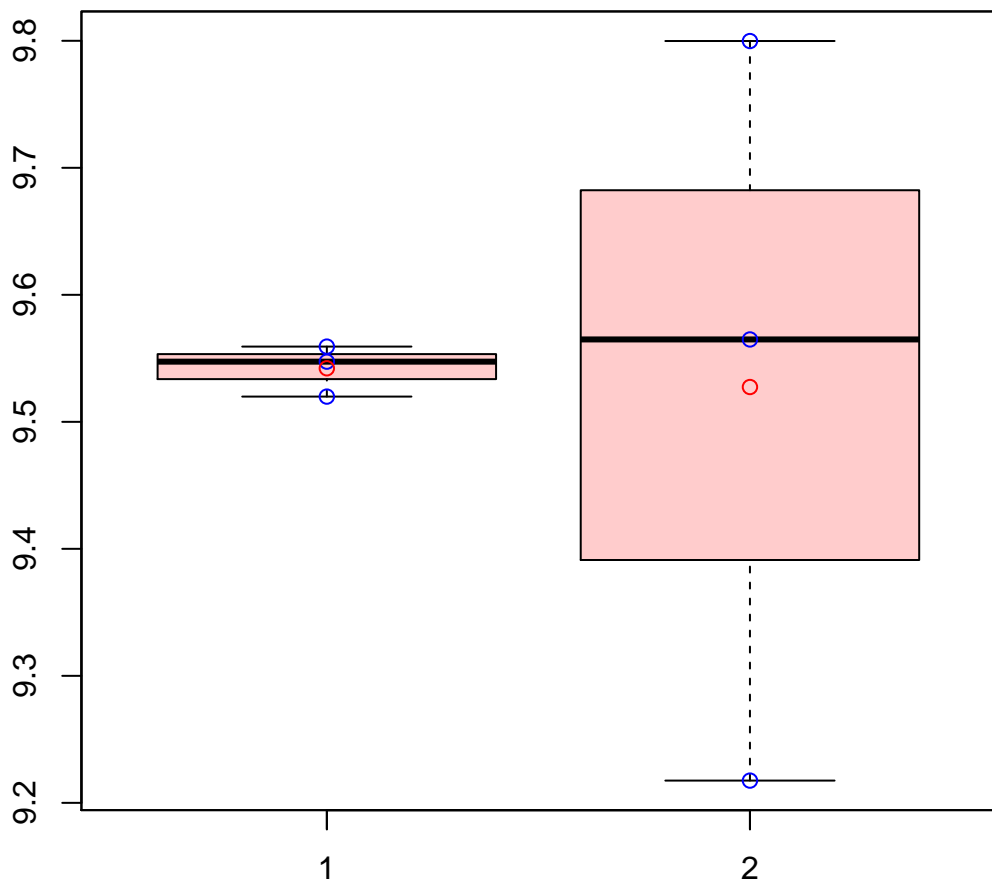

t-Test: p-value = 0.94

# CL799Contig2|CL799Contig2

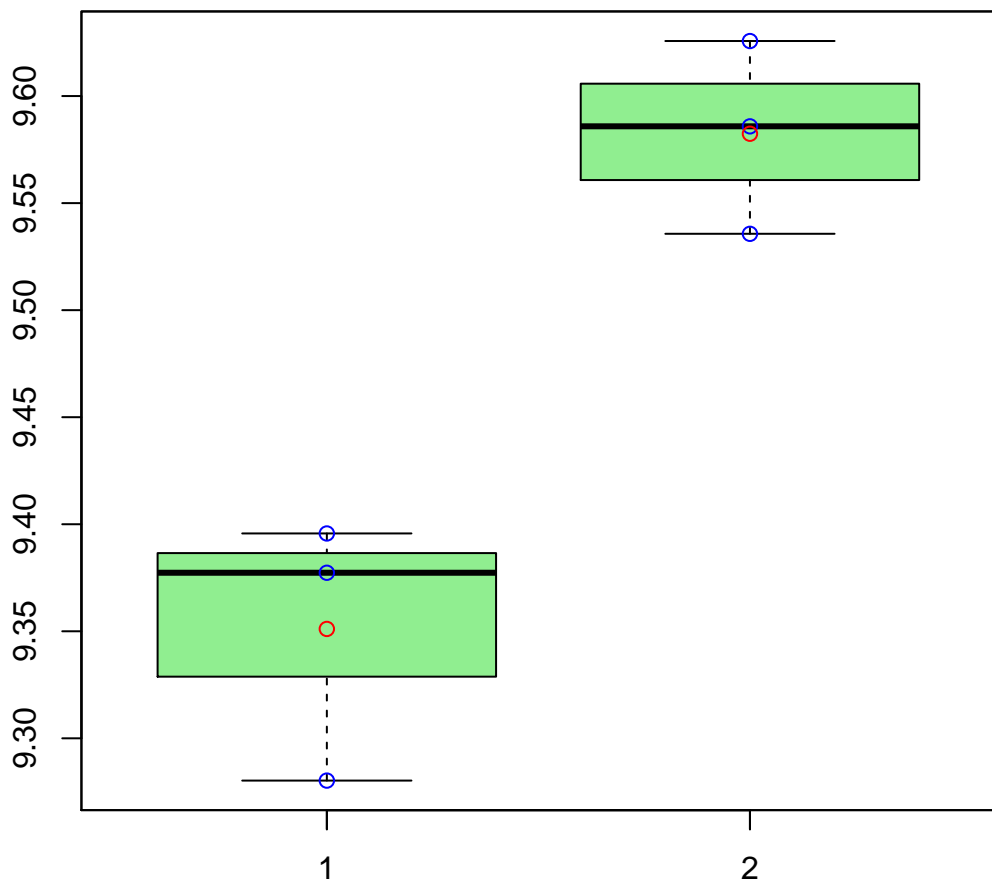

t-Test: p-value = 0.01

# CL79Contig22|CL79Contig22

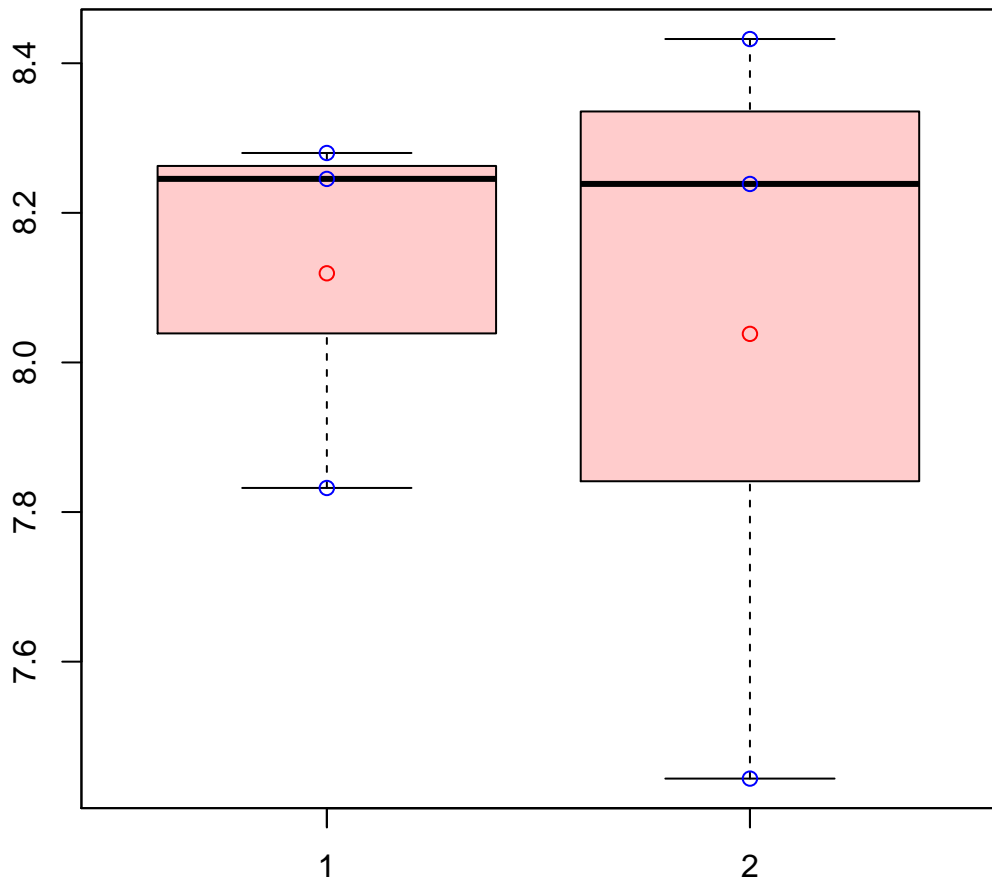

t-Test: p-value = 0.83



# CL7Contig11|CL7Contig11

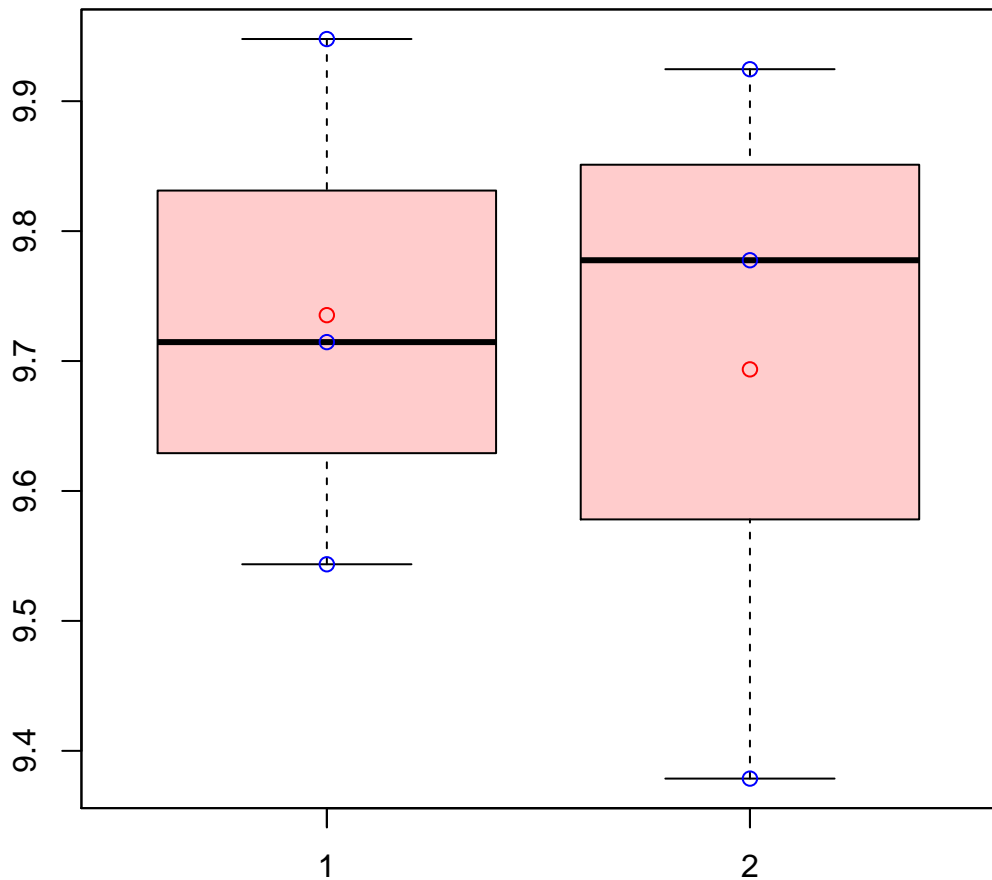

t-Test: p-value = 0.85

# CL7Contig15|CL7Contig15

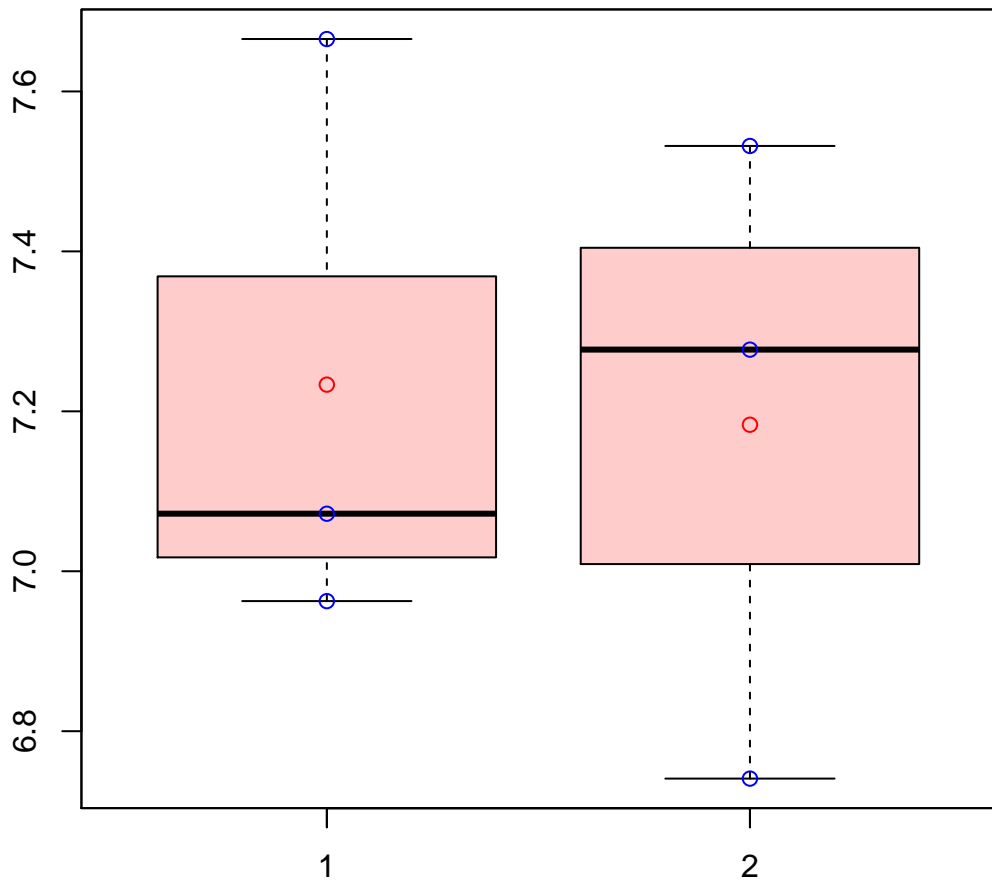

t-Test: p-value = 0.88

# CL7Contig22|CL7Contig22



t-Test: p-value = 0.29

# CL7Contig23|CL7Contig23

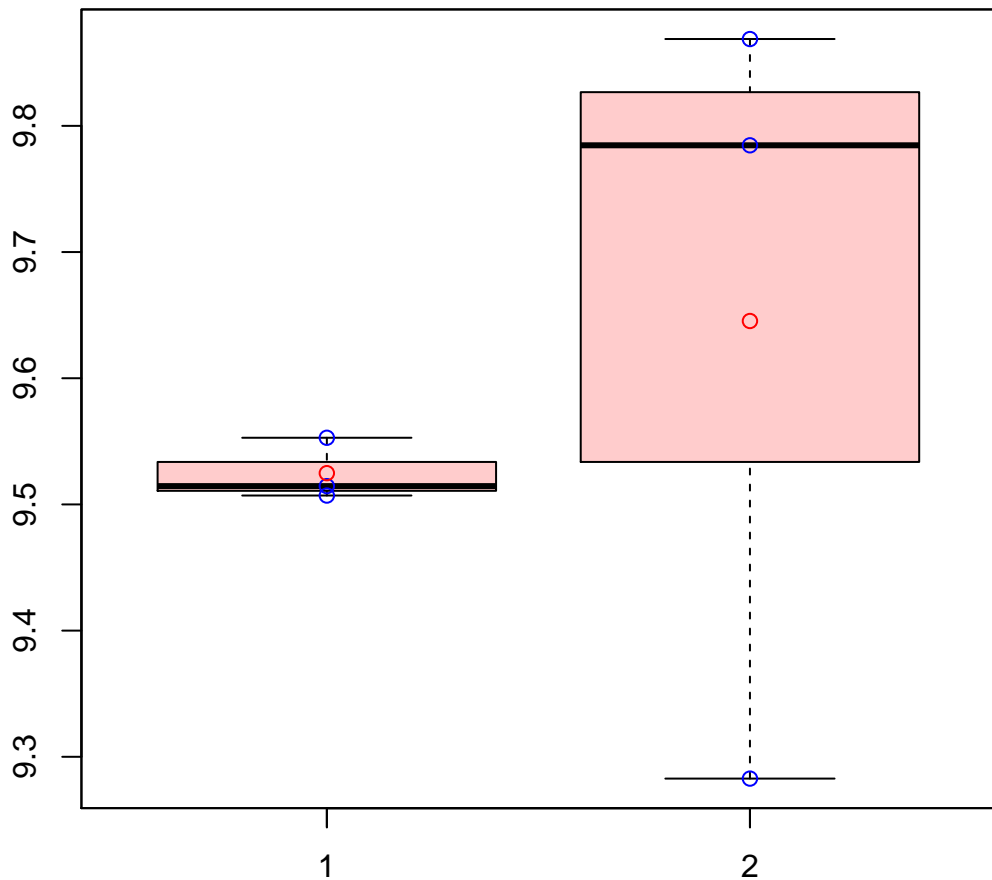

# CL7Contig25|CL7Contig25

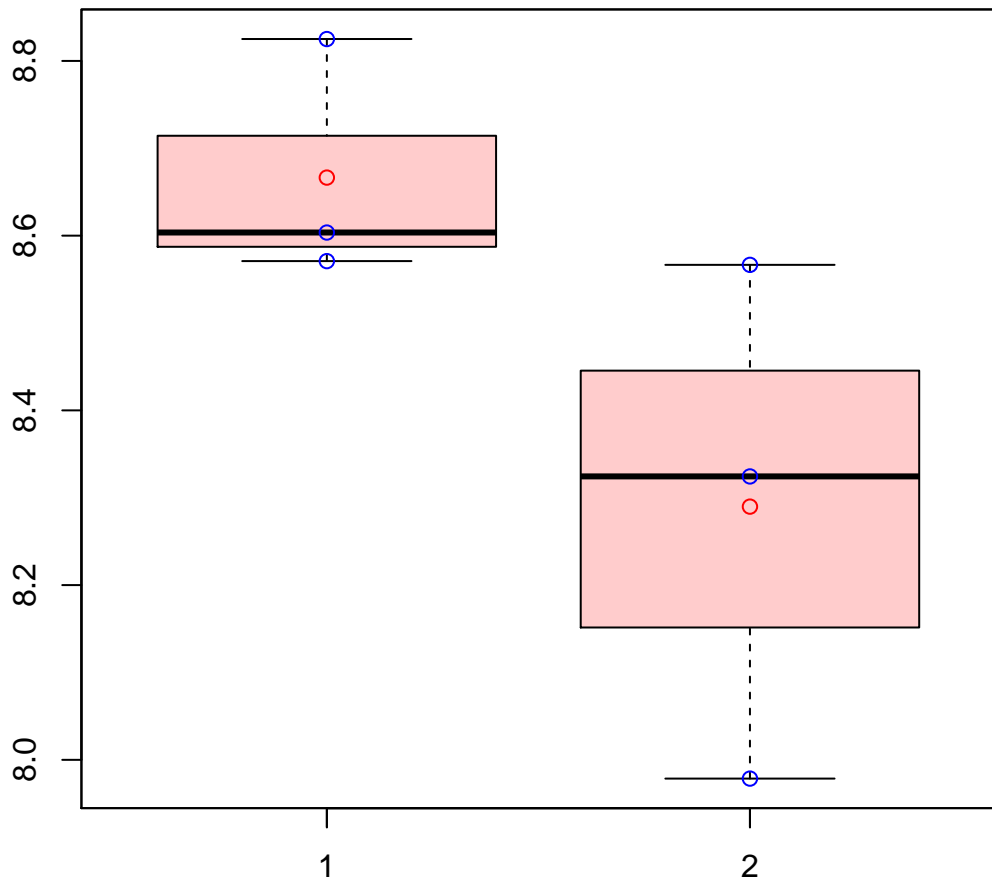

t-Test: p-value = 0.14

# CL7Contig31|CL7Contig31

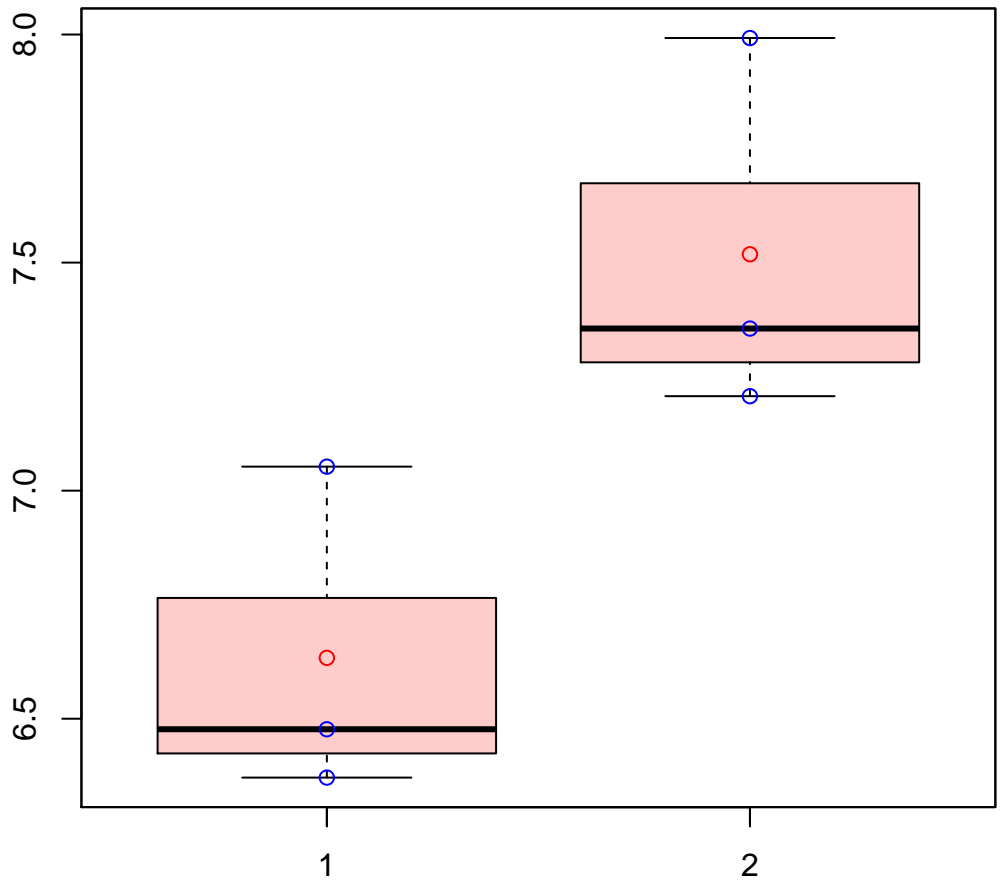

t-Test: p-value = 0.05

# CL7Contig34|CL7Contig34

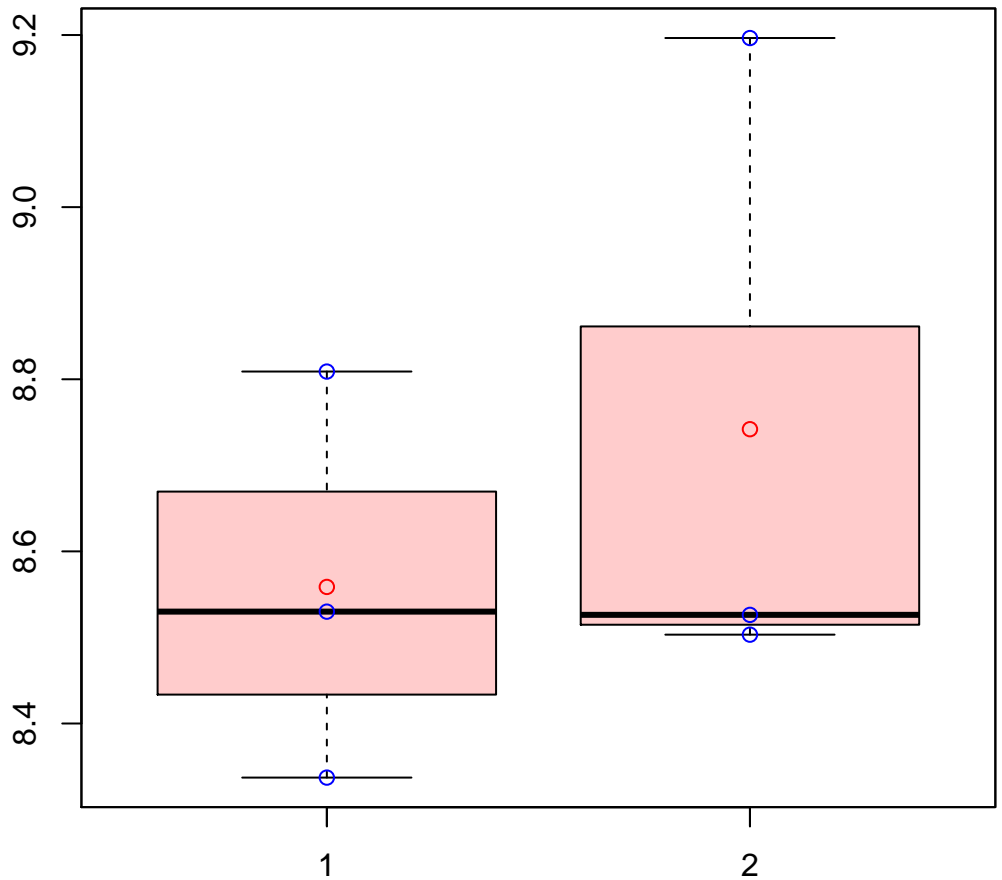

t-Test: p-value = 0.54

# CL7Contig35|CL7Contig35

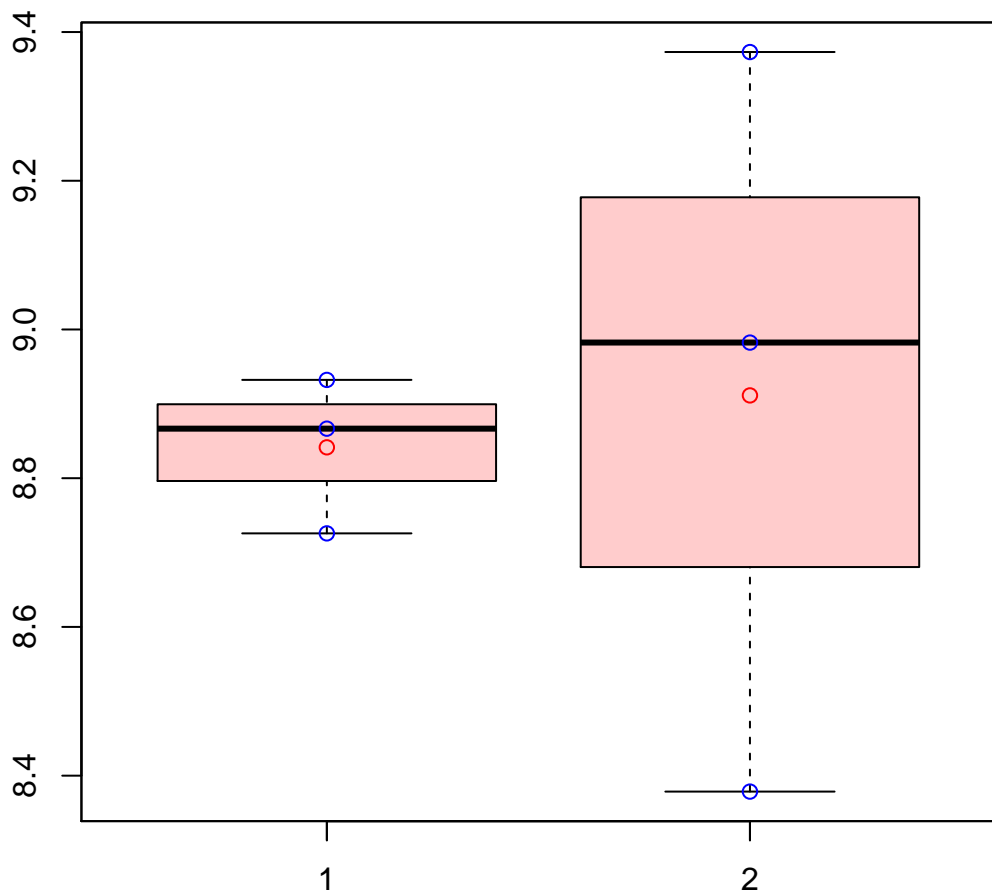

t-Test: p-value = 0.83



# CL7Contig37|CL7Contig37



t-Test: p-value = 0.83

# CL7Contig3|CL7Contig3

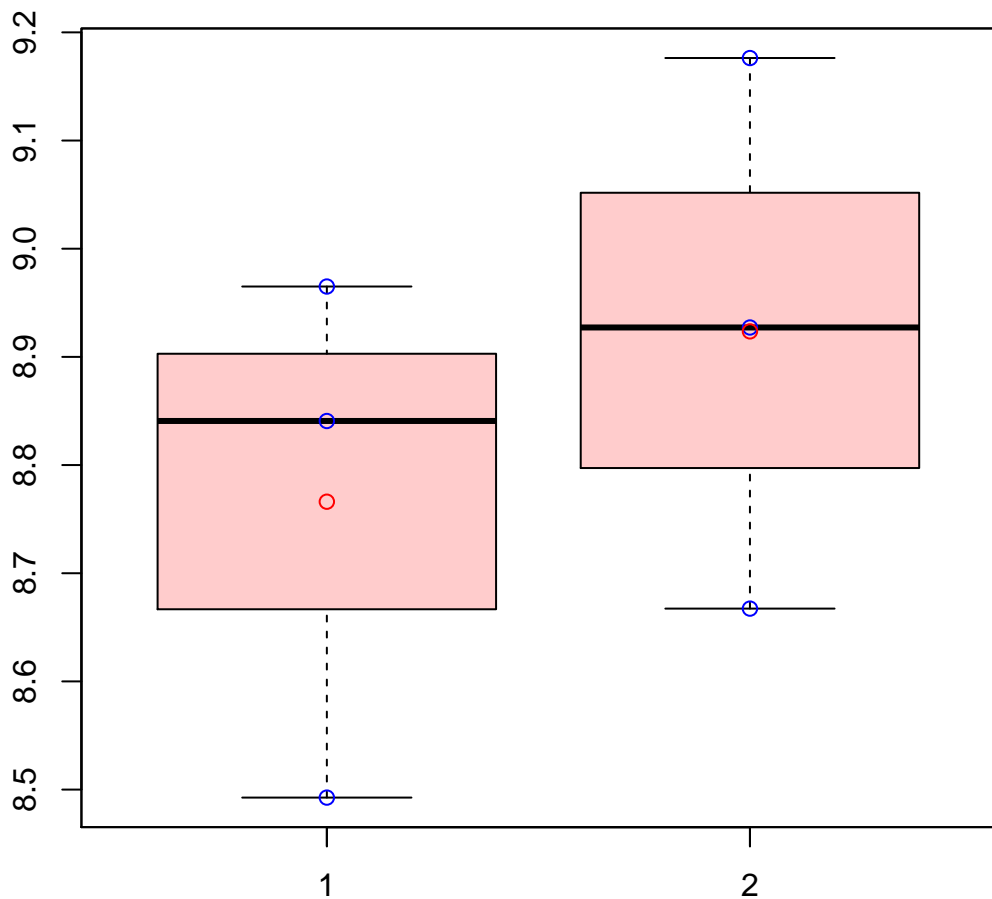

t-Test: p-value = 0.48

# CL7Contig43|CL7Contig43

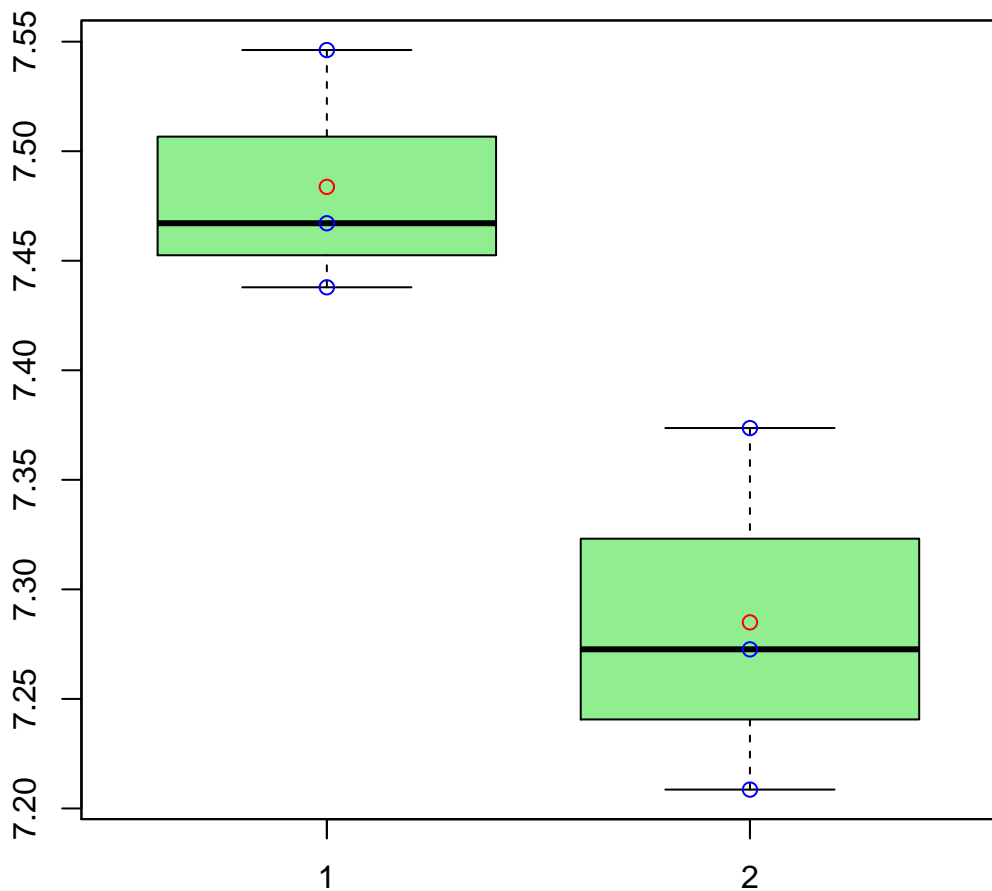

t-Test: p-value = 0.03

# CL7Contig47|CL7Contig47

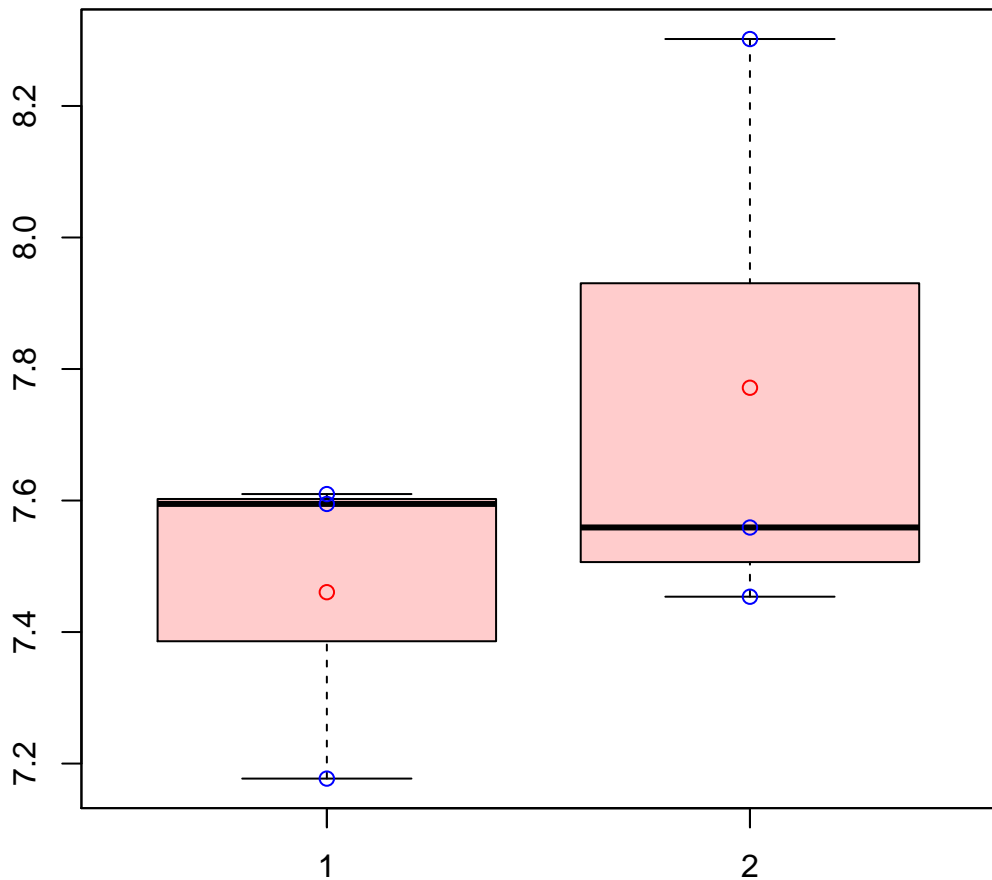

t-Test: p-value = 0.38

# CL7Contig4|CL7Contig4

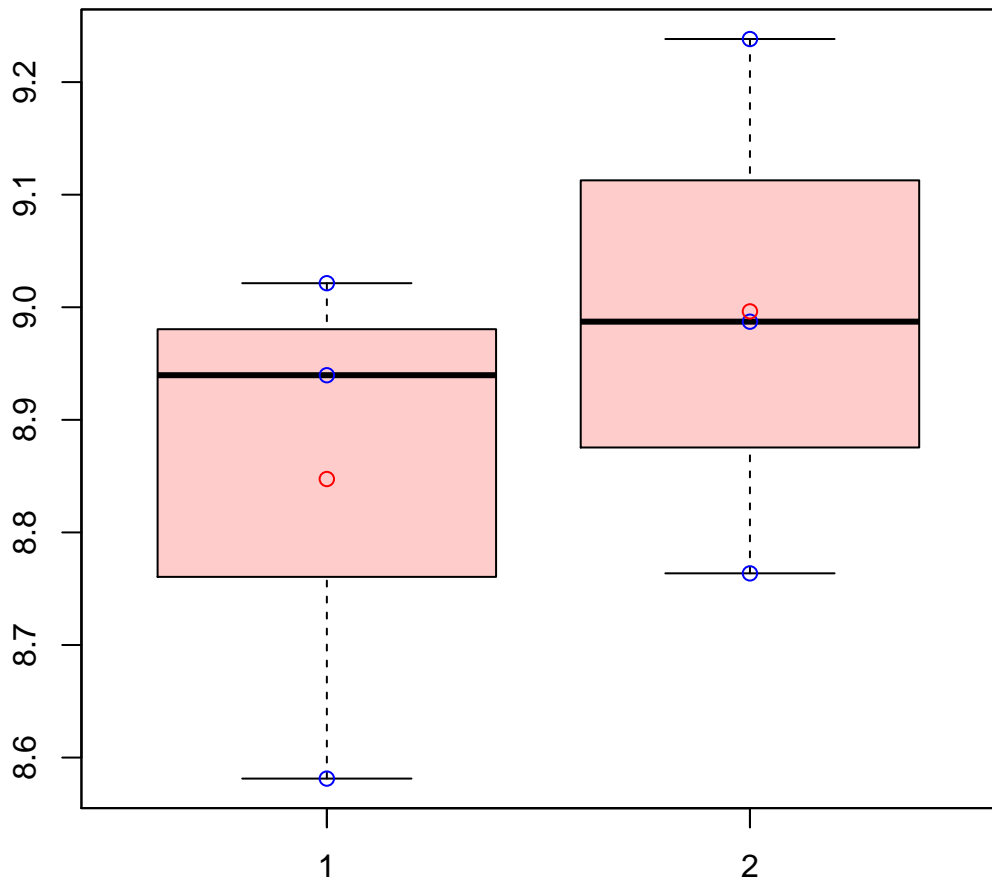

t-Test: p-value = 0.48

# CL7Contig53|CL7Contig53

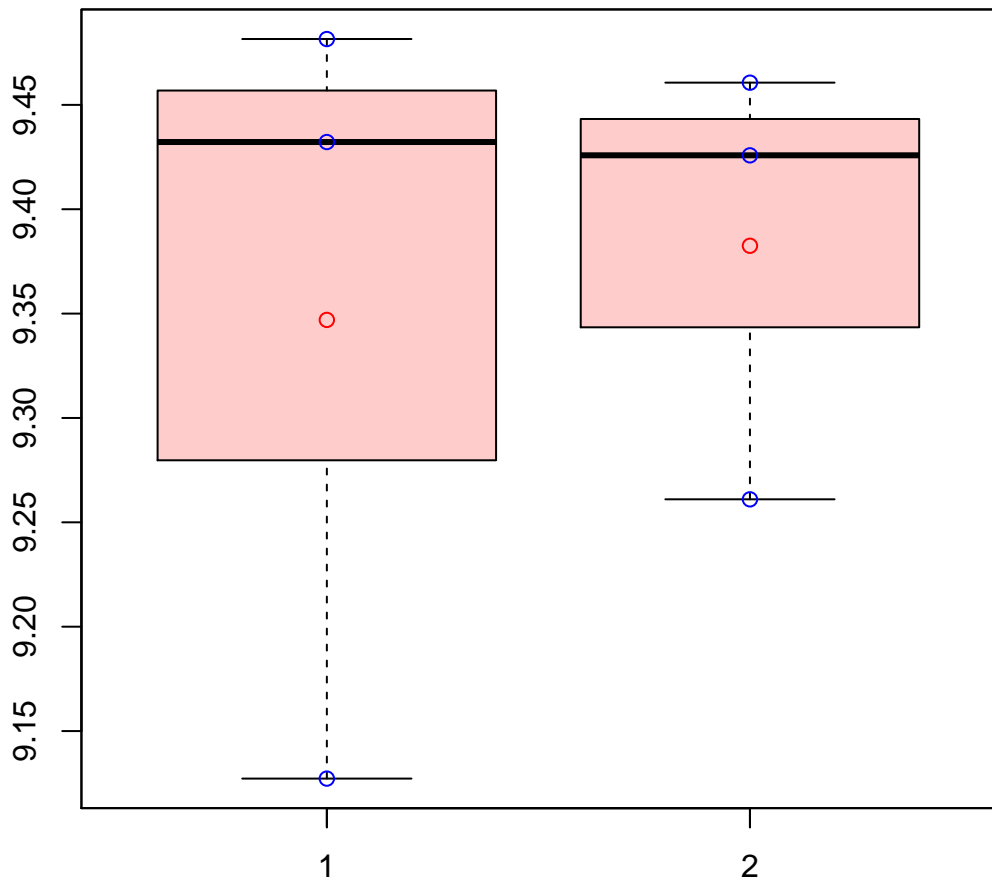

t-Test: p-value = 0.8

# CL7Contig54|CL7Contig54



t-Test: p-value = 0.8

# CL7Contig55|CL7Contig55



t-Test: p-value = 0.8



# CL7Contig56|CL7Contig56



t-Test: p-value = 0.8

# CL7Contig57|CL7Contig57

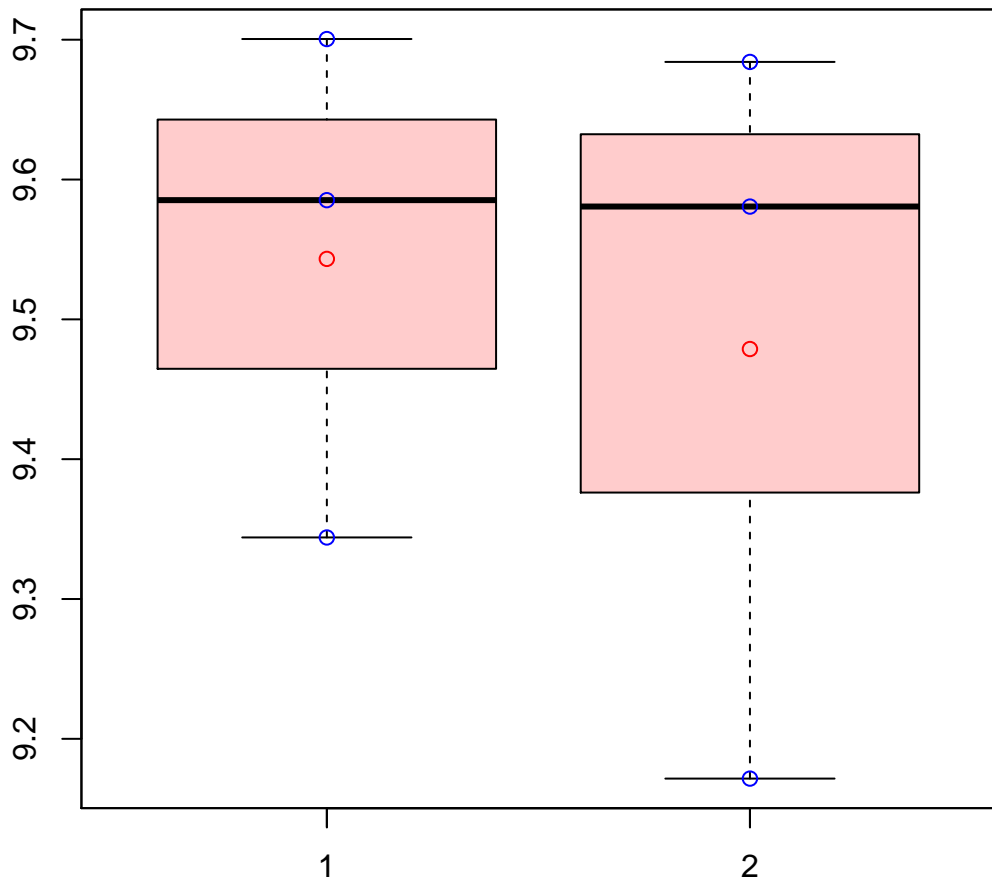

t-Test: p-value = 0.75

# CL7Contig5|CL7Contig5

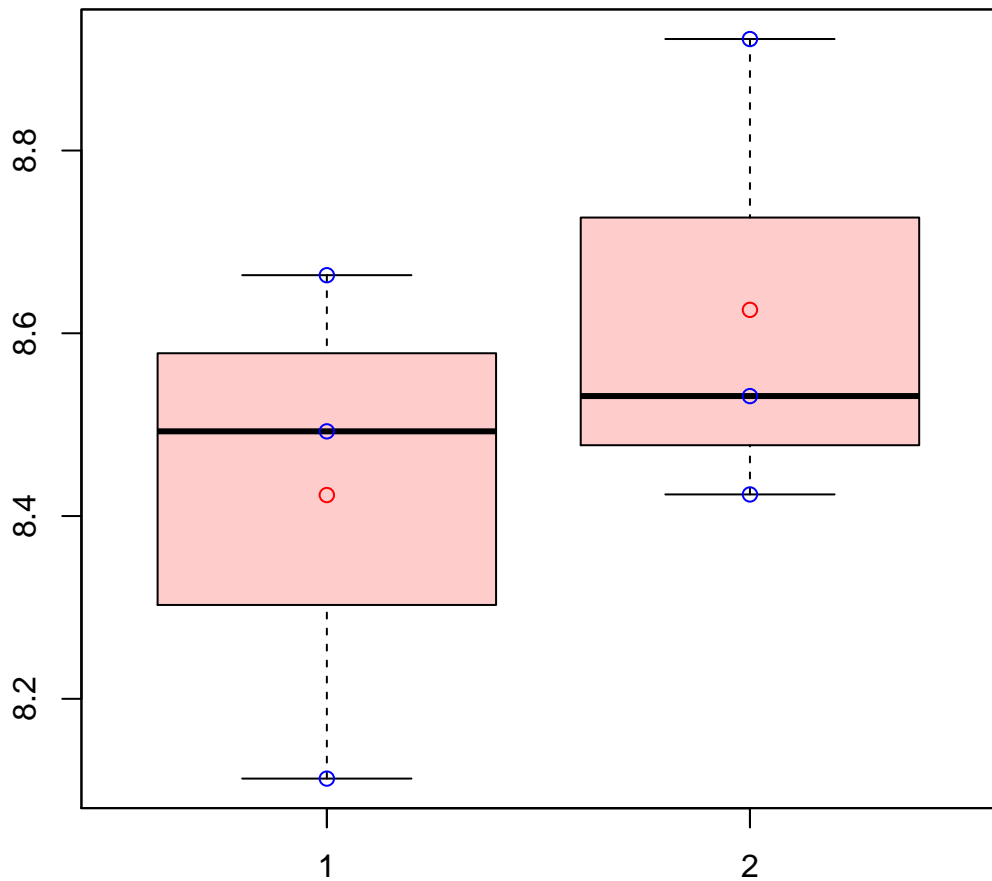

t-Test: p-value = 0.41

# CL7Contig8|CL7Contig8



t-Test: p-value = 0.41

# CL8012Contig2|CL8012Contig2

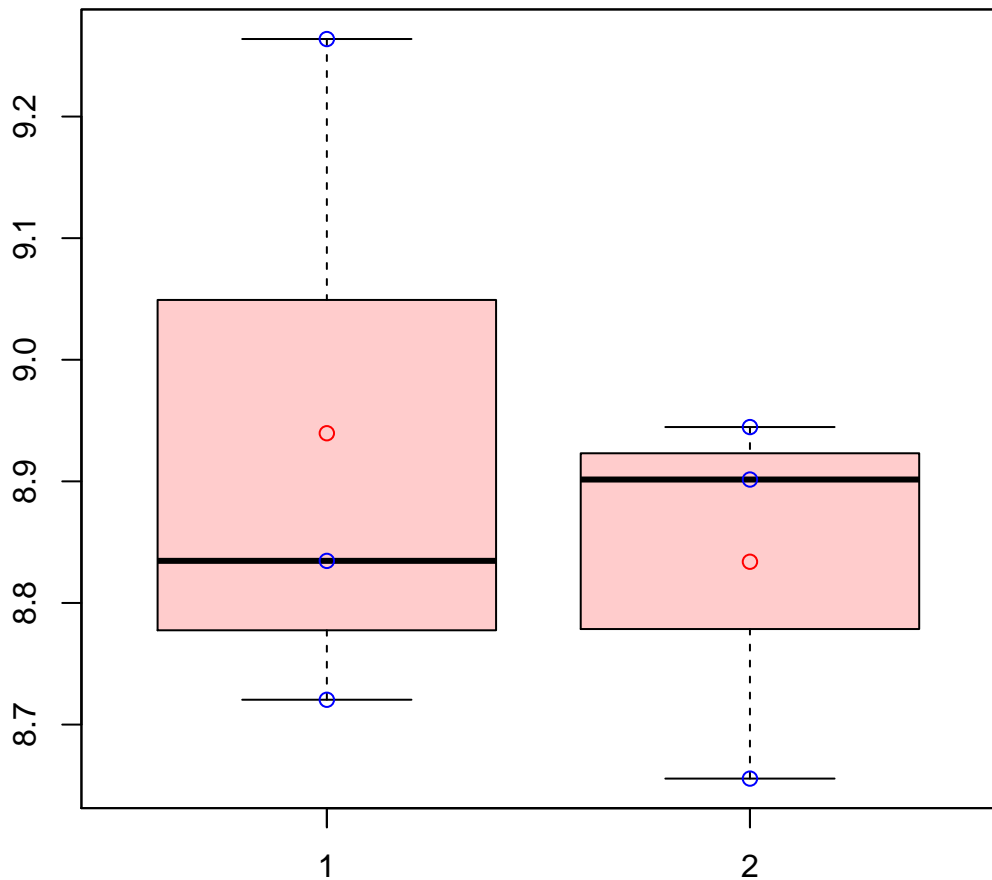

t-Test: p-value = 0.61

# CL8013Contig3|CL8013Contig3

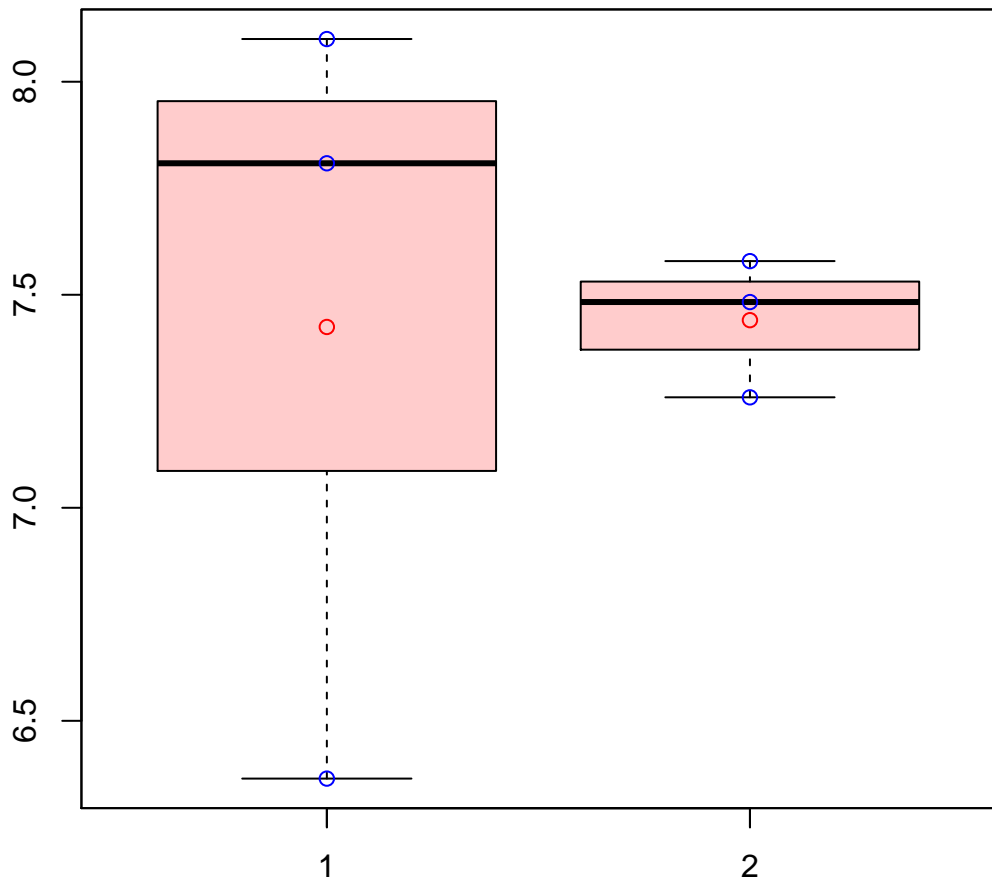

t-Test: p-value = 0.98

# CL801Contig1|CL801Contig1

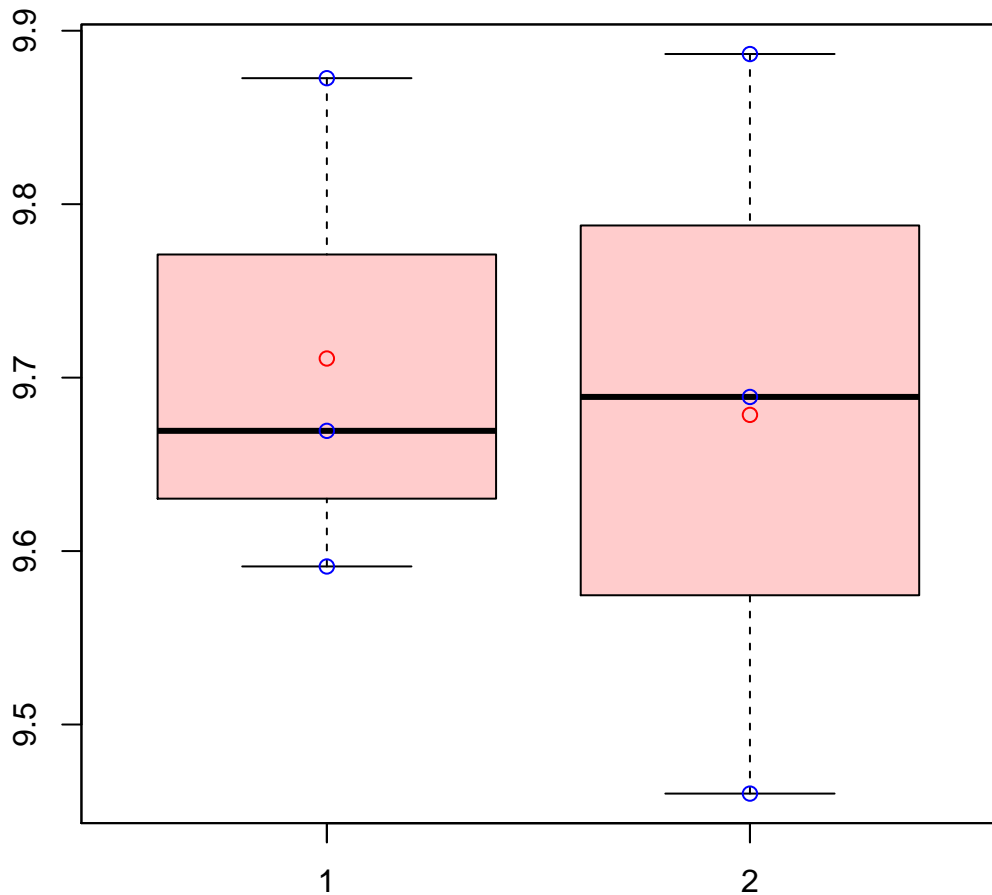

t-Test: p-value = 0.84

# CL801Contig5|CL801Contig5

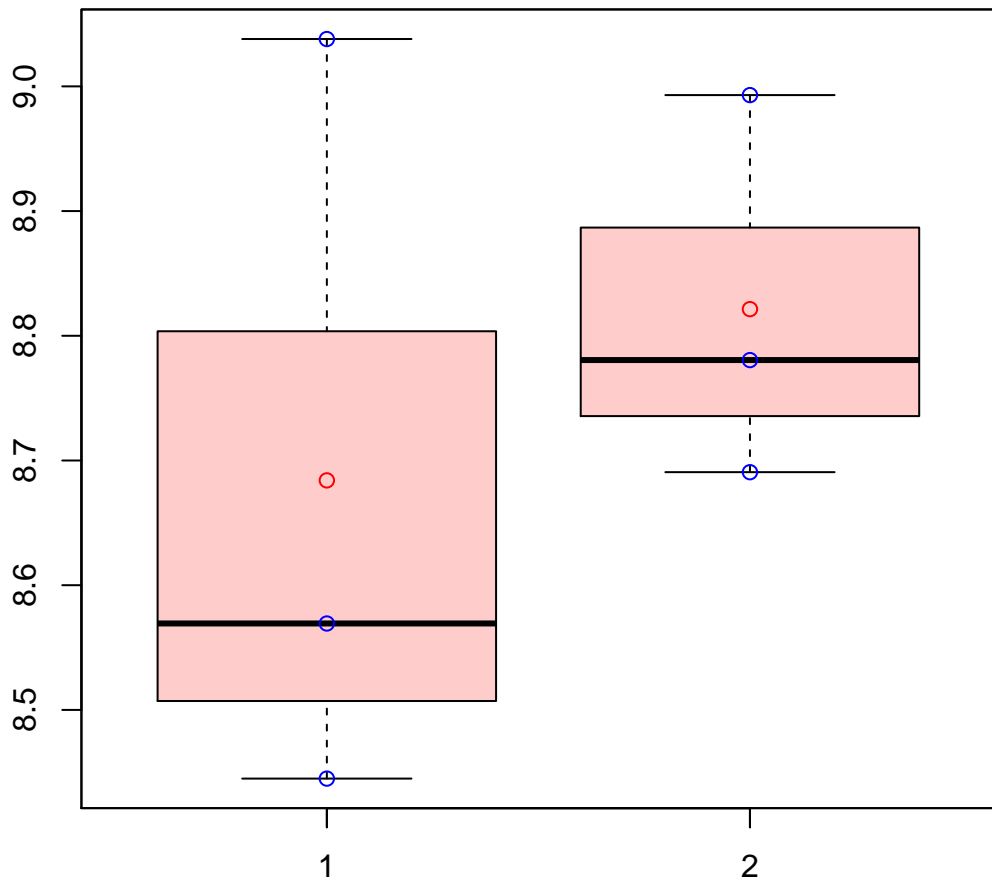

t-Test: p-value = 0.55



# CL8028Contig1|CL8028Contig1

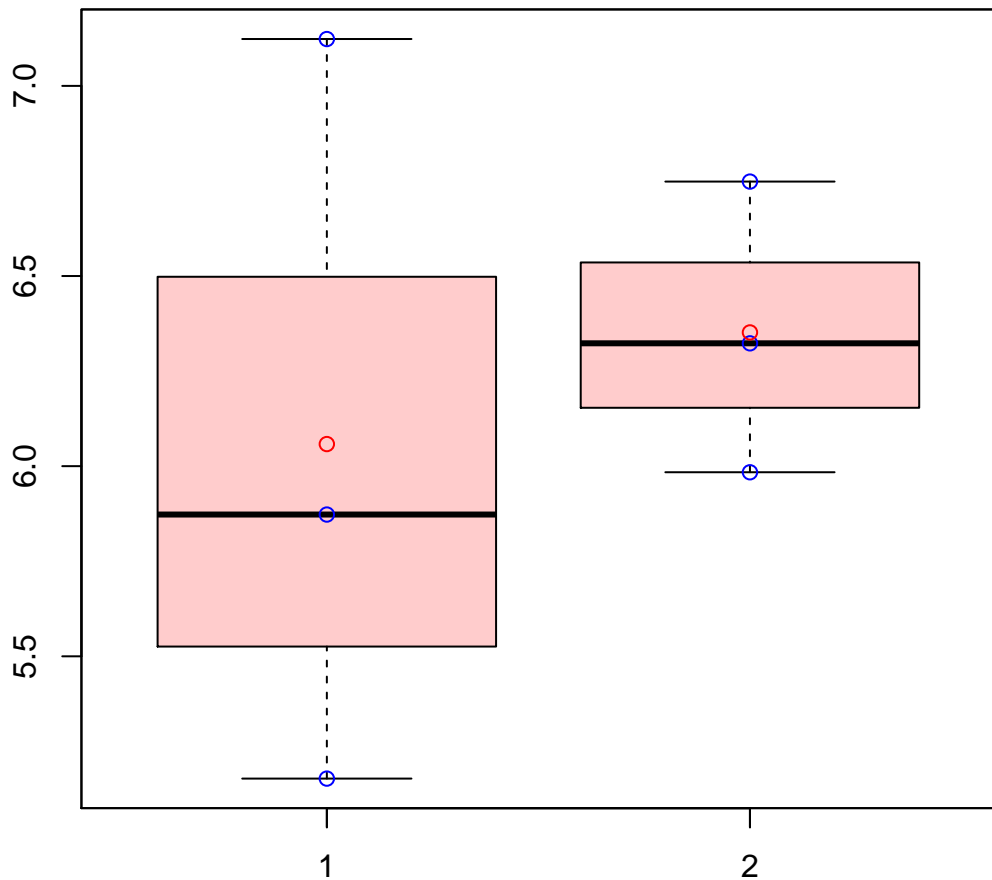

t-Test: p-value = 0.67

# CL802Contig3|CL802Contig3

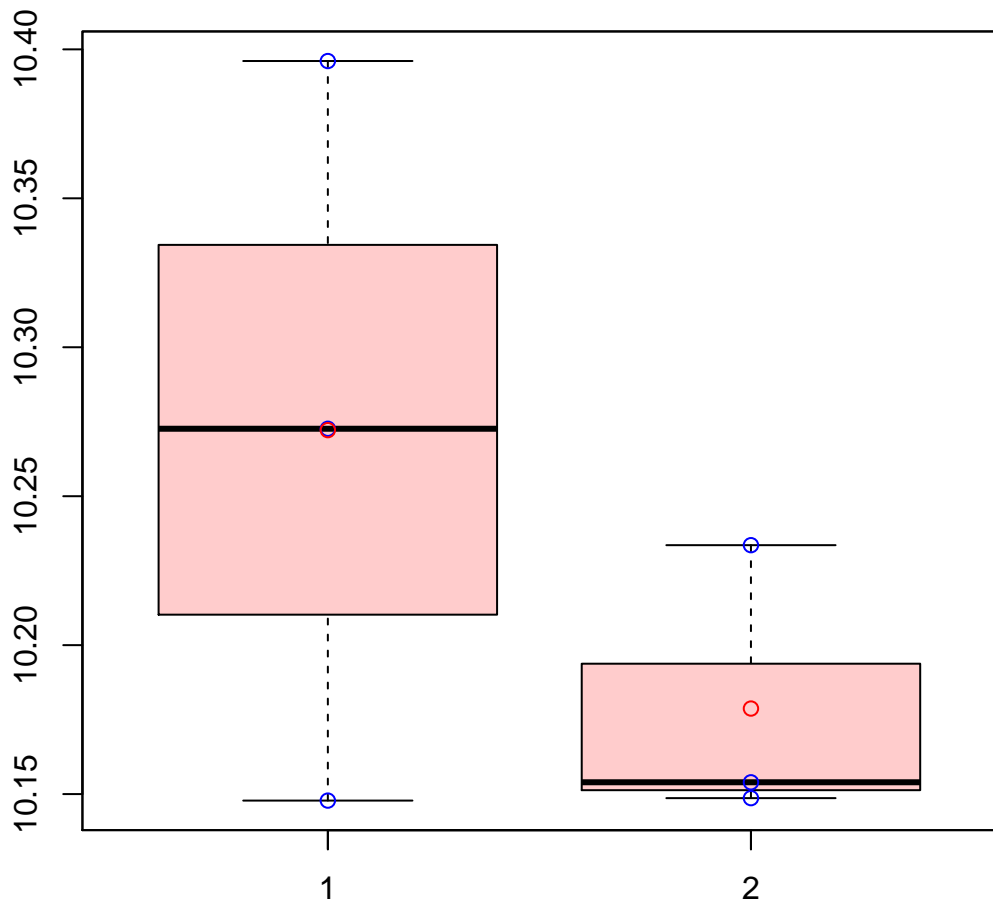

t-Test: p-value = 0.32

# CL803Contig5|CL803Contig5

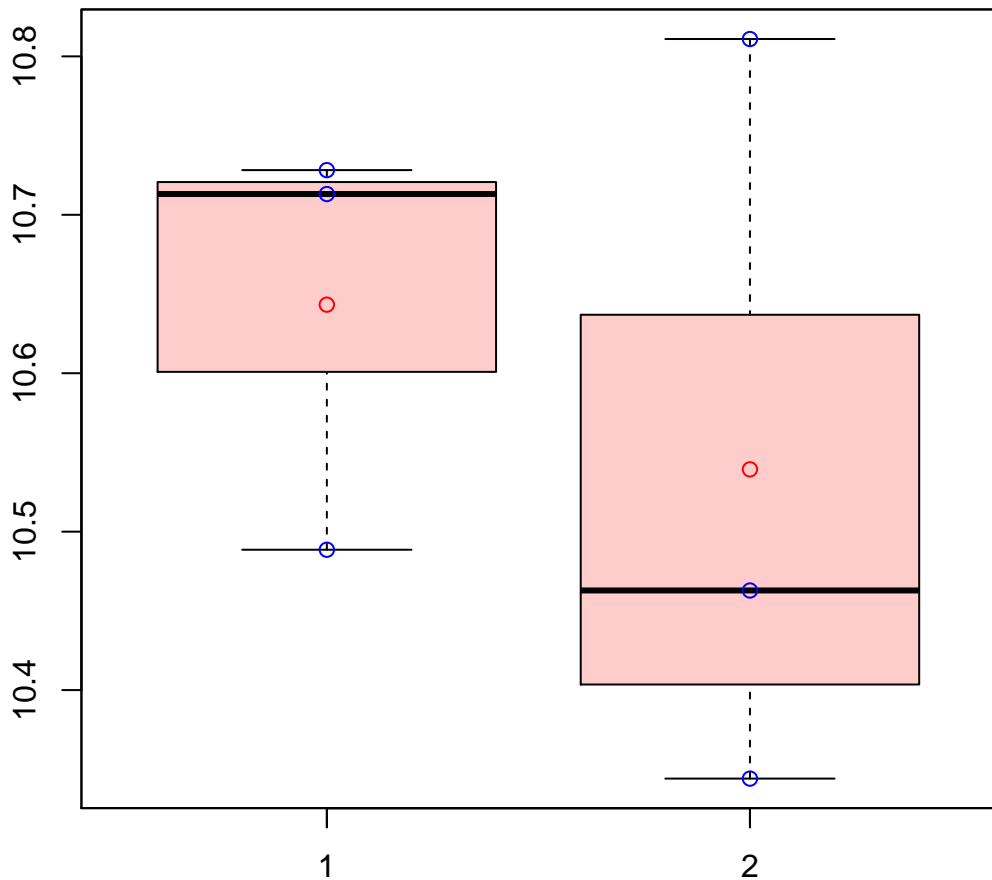

t-Test: p-value = 0.56

# CL8040Contig1|CL8040Contig1

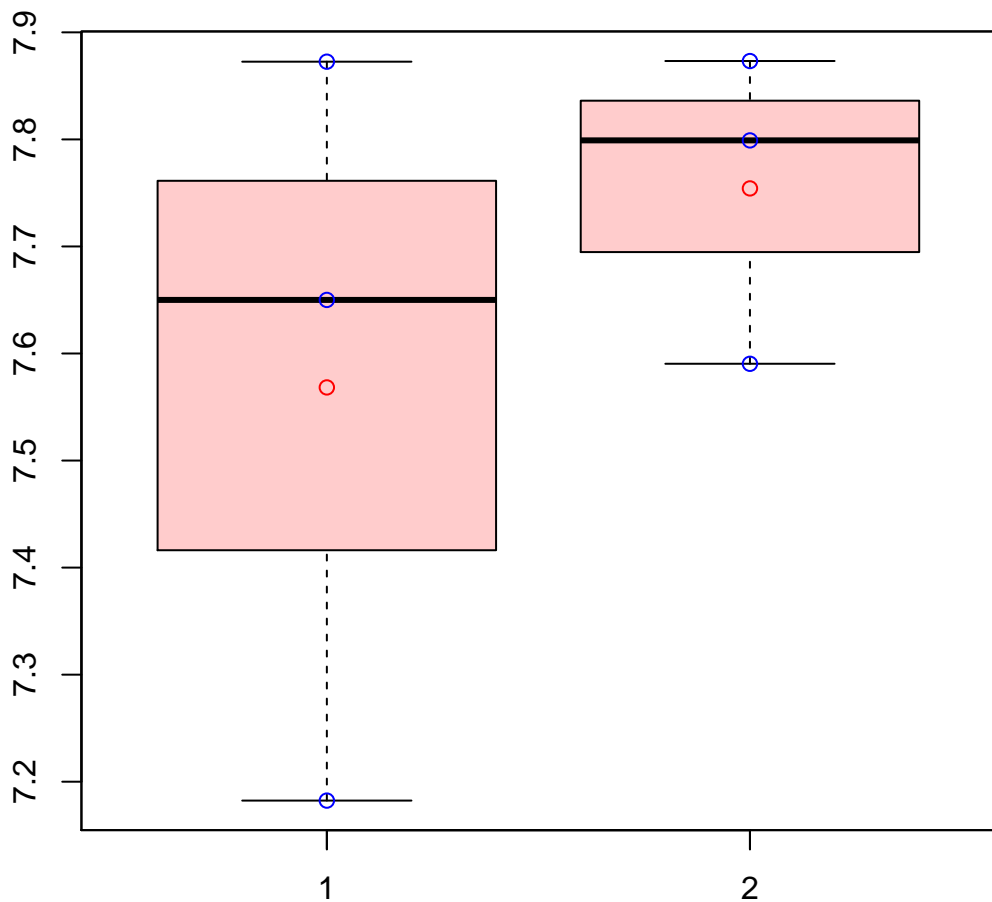

t-Test: p-value = 0.47

# CL8048Contig1|CL8048Contig1

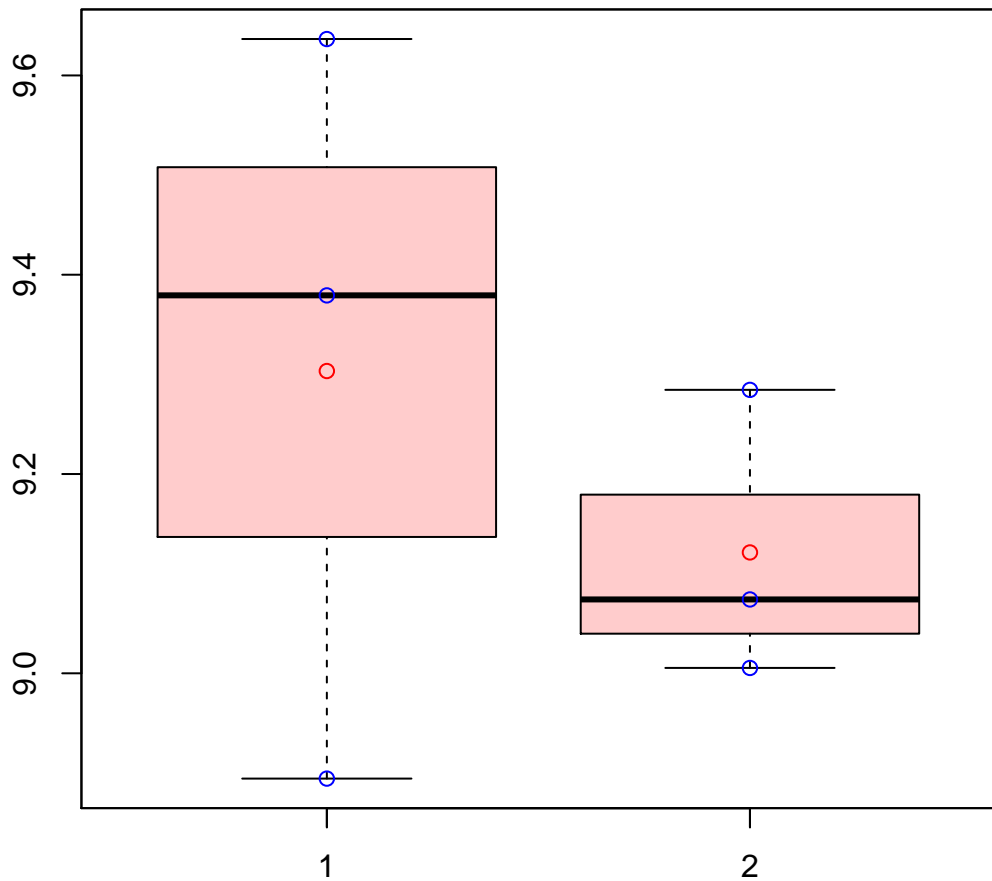

t-Test: p-value = 0.5

# CL804Contig10|CL804Contig10



t-Test: p-value = 0.68

# CL804Contig4|CL804Contig4

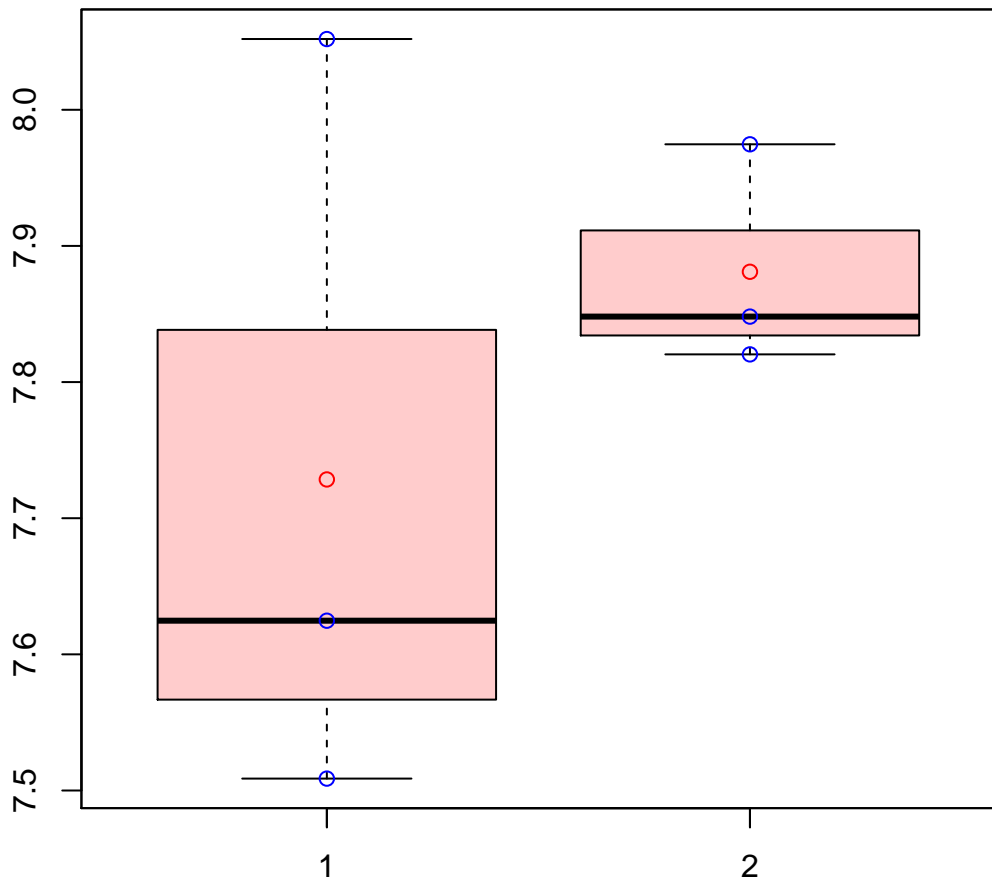

t-Test: p-value = 0.46

# CL8050Contig1|CL8050Contig1

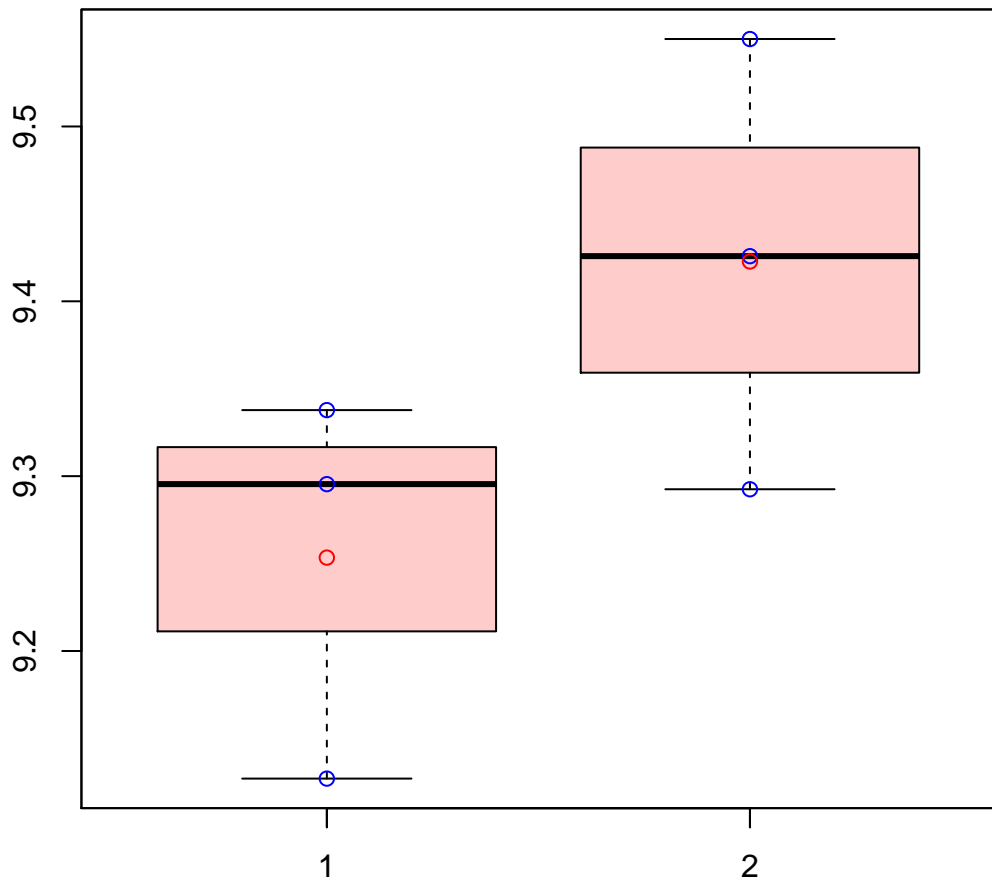

t-Test: p-value = 0.16



# CL8050Contig2|CL8050Contig2

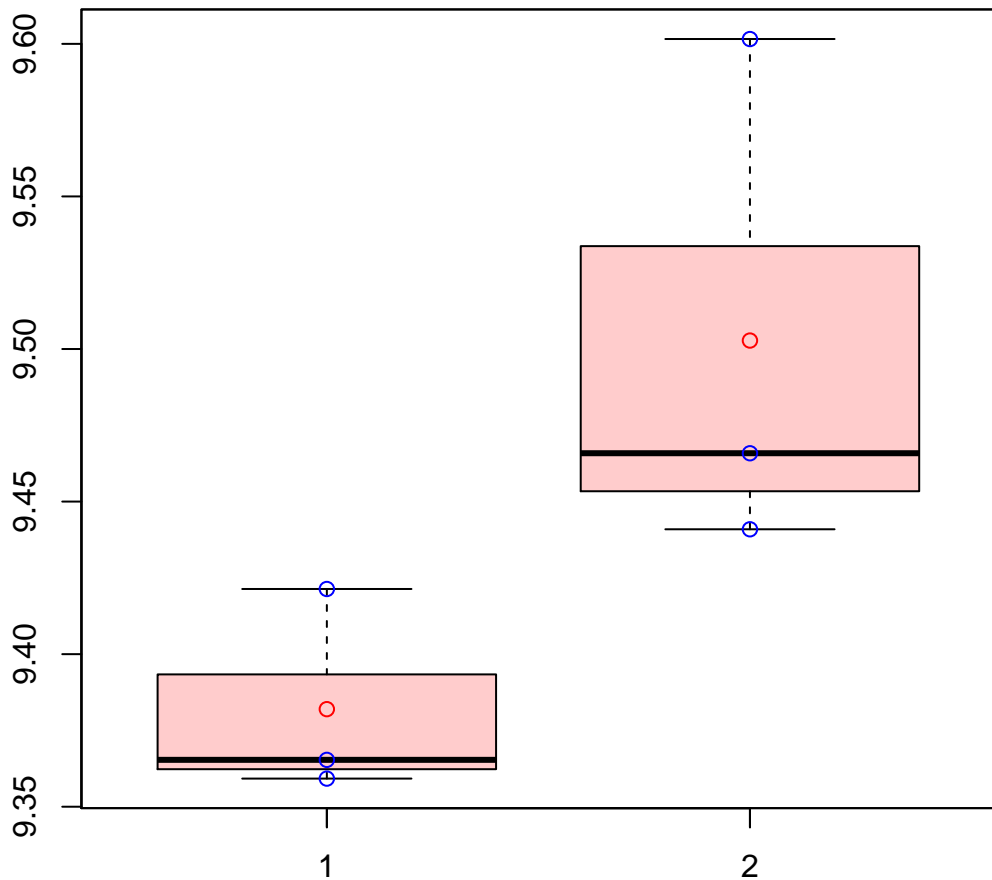

t-Test: p-value = 0.12

# CL8056Contig1|CL8056Contig1



t-Test: p-value = 0.62

# CL8064Contig2|CL8064Contig2

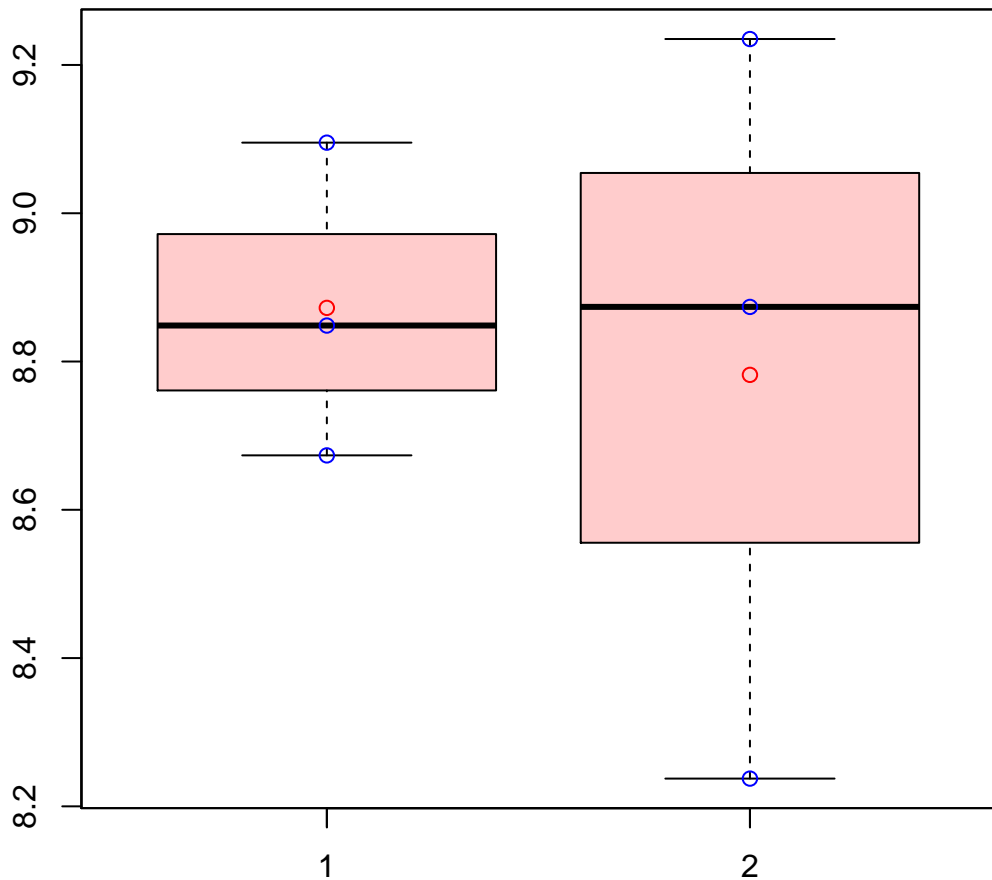

t-Test: p-value = 0.8

# CL8064Contig3|CL8064Contig3

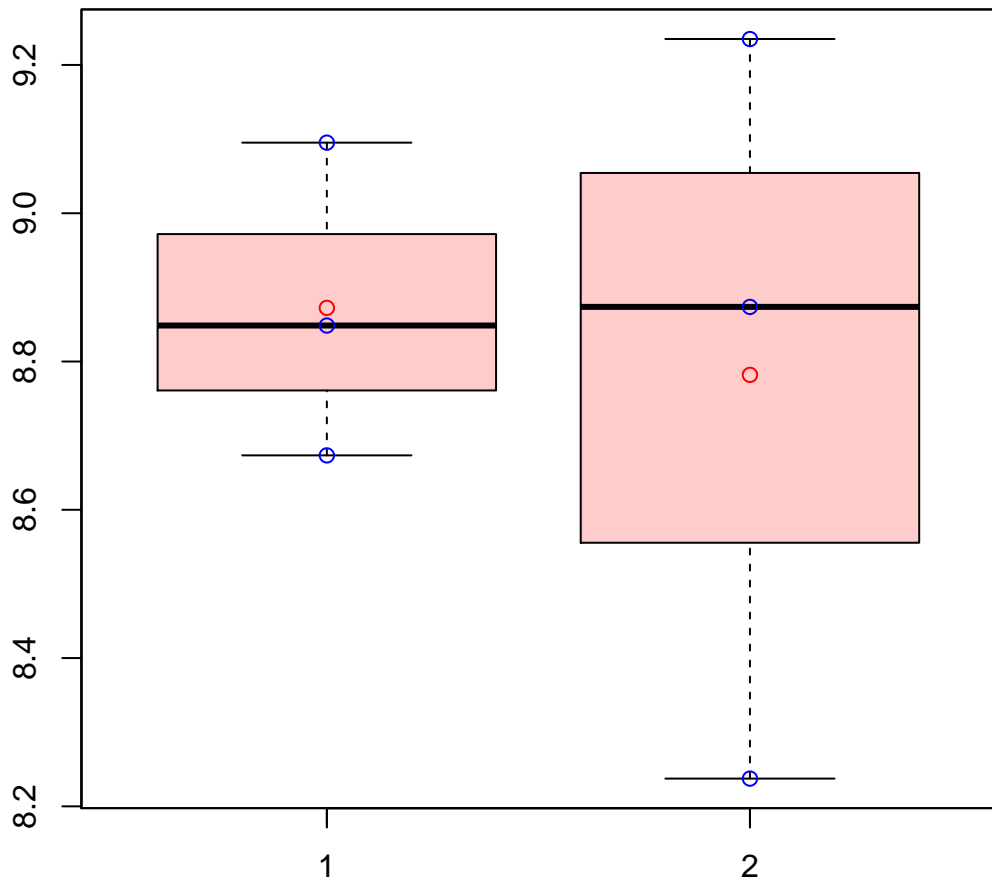

t-Test: p-value = 0.8

# CL806Contig10|CL806Contig10

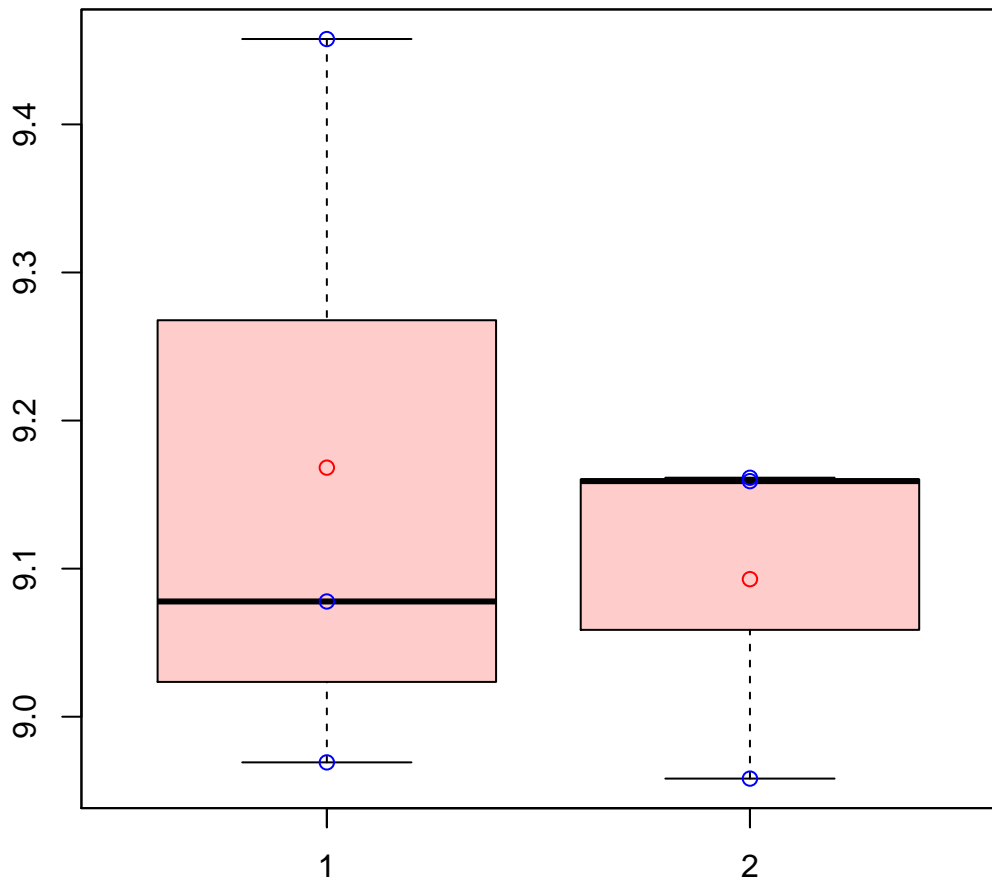

t-Test: p-value = 0.68

# CL806Contig11|CL806Contig11



t-Test: p-value = 0.68

# CL806Contig9|CL806Contig9

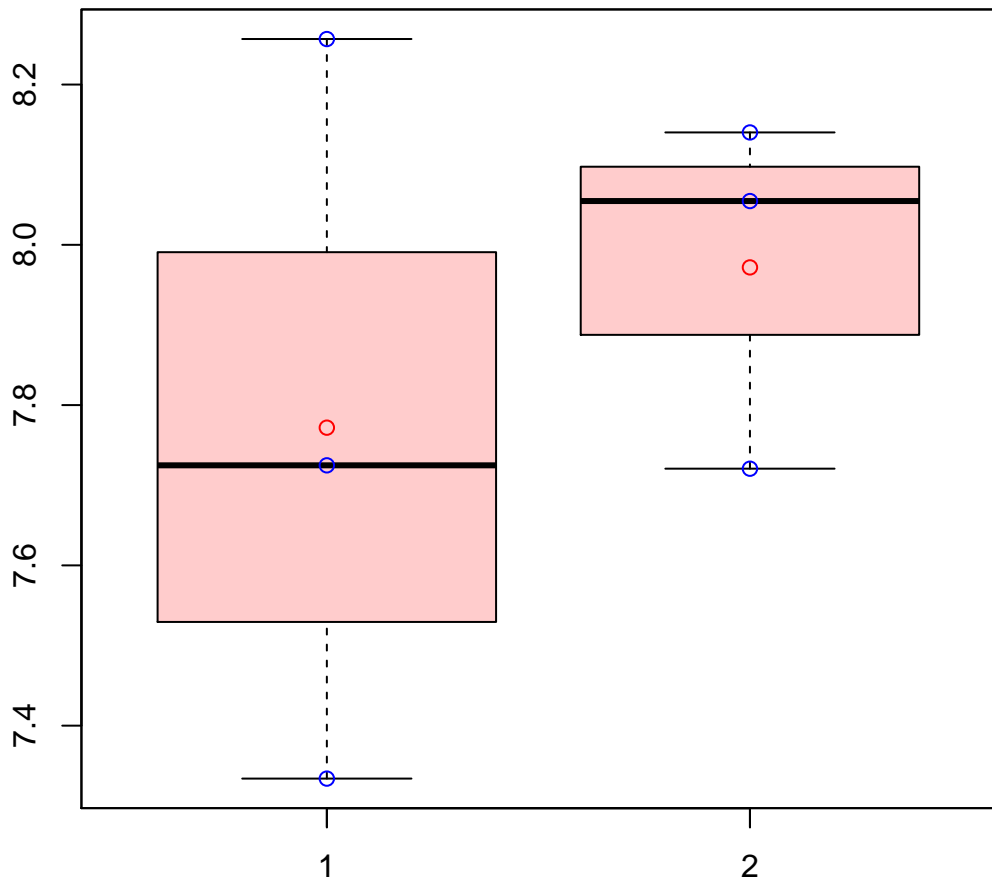

t-Test: p-value = 0.55

# CL8072Contig2|CL8072Contig2

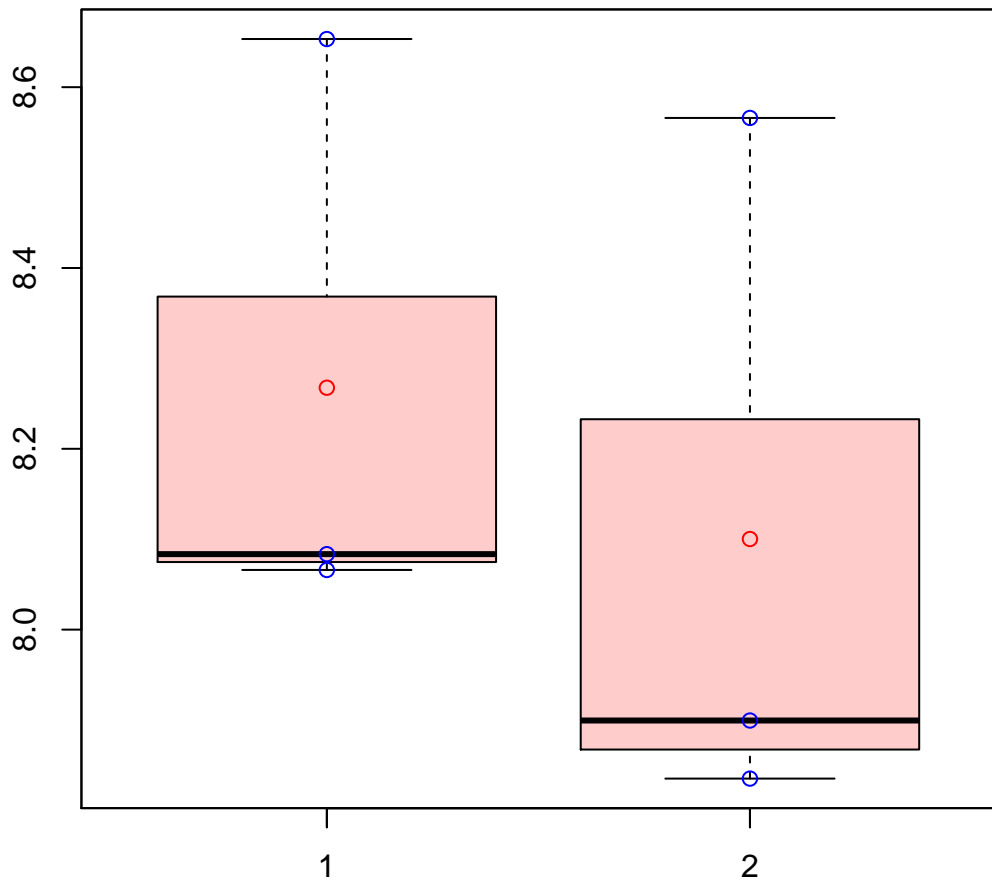

t-Test: p-value = 0.61



# CL8077Contig3|CL8077Contig3

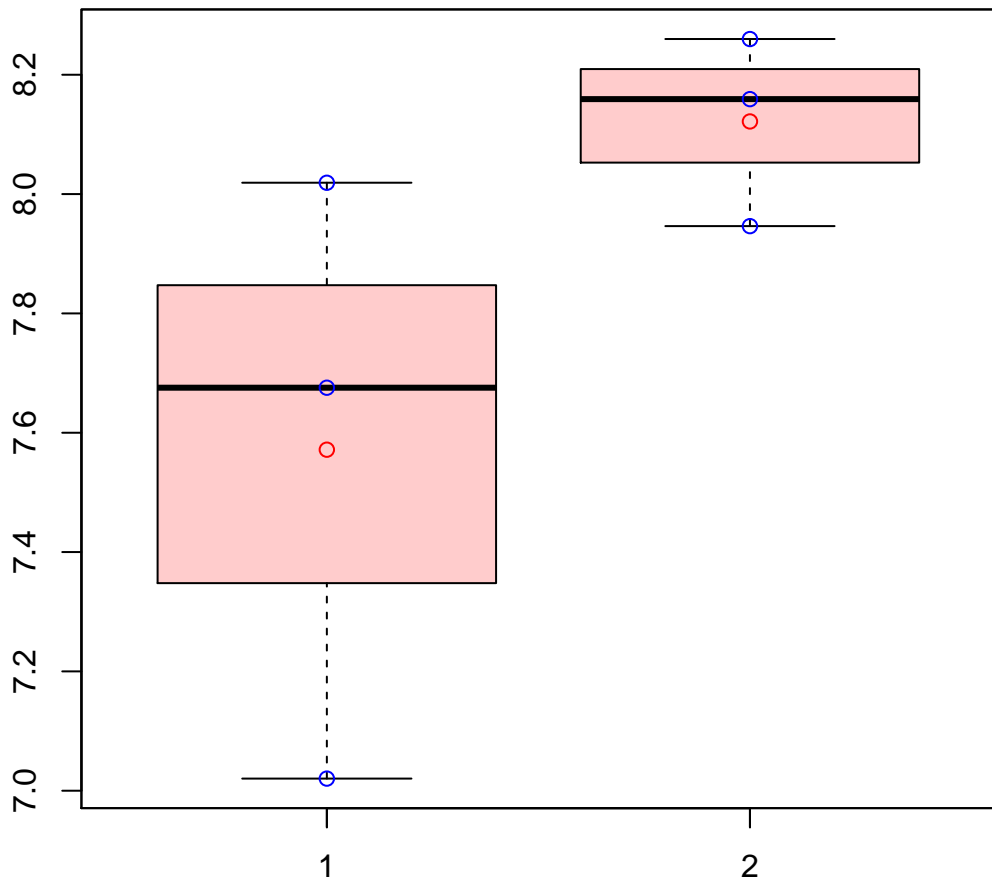

t-Test: p-value = 0.19

# CL8077Contig4|CL8077Contig4

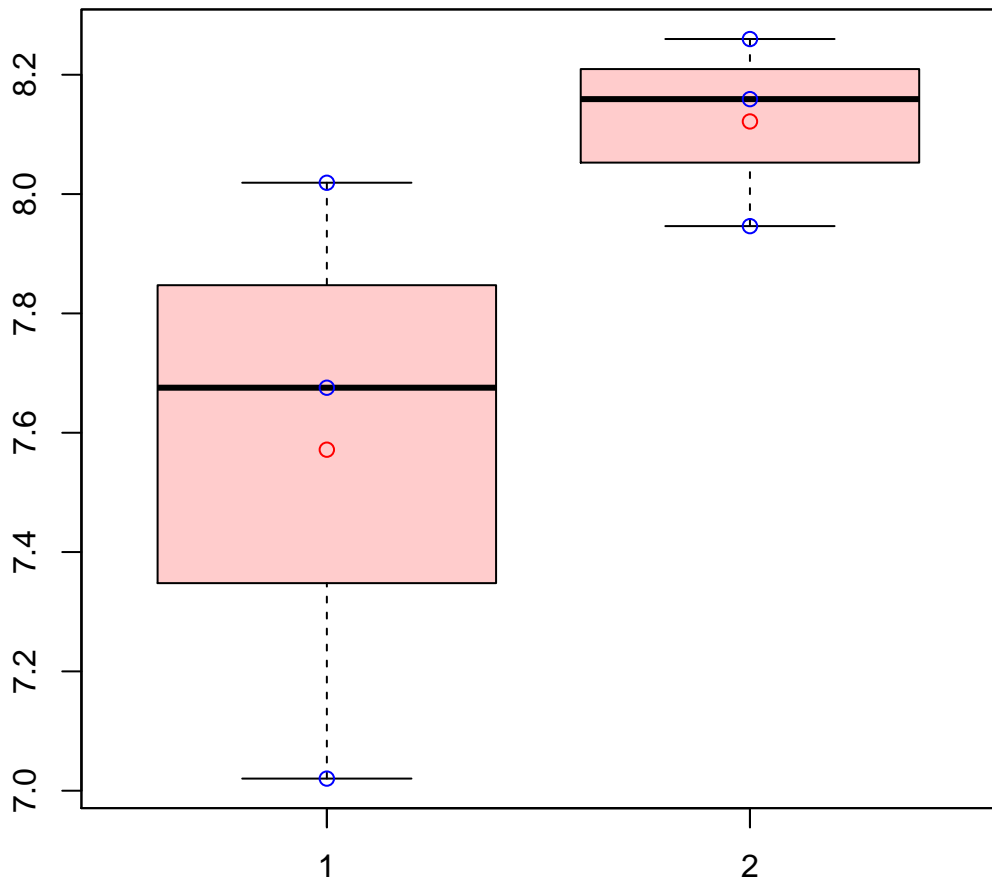

t-Test: p-value = 0.19

# CL808Contig10|CL808Contig10



t-Test: p-value = 0.97

# CL8092Contig5|CL8092Contig5

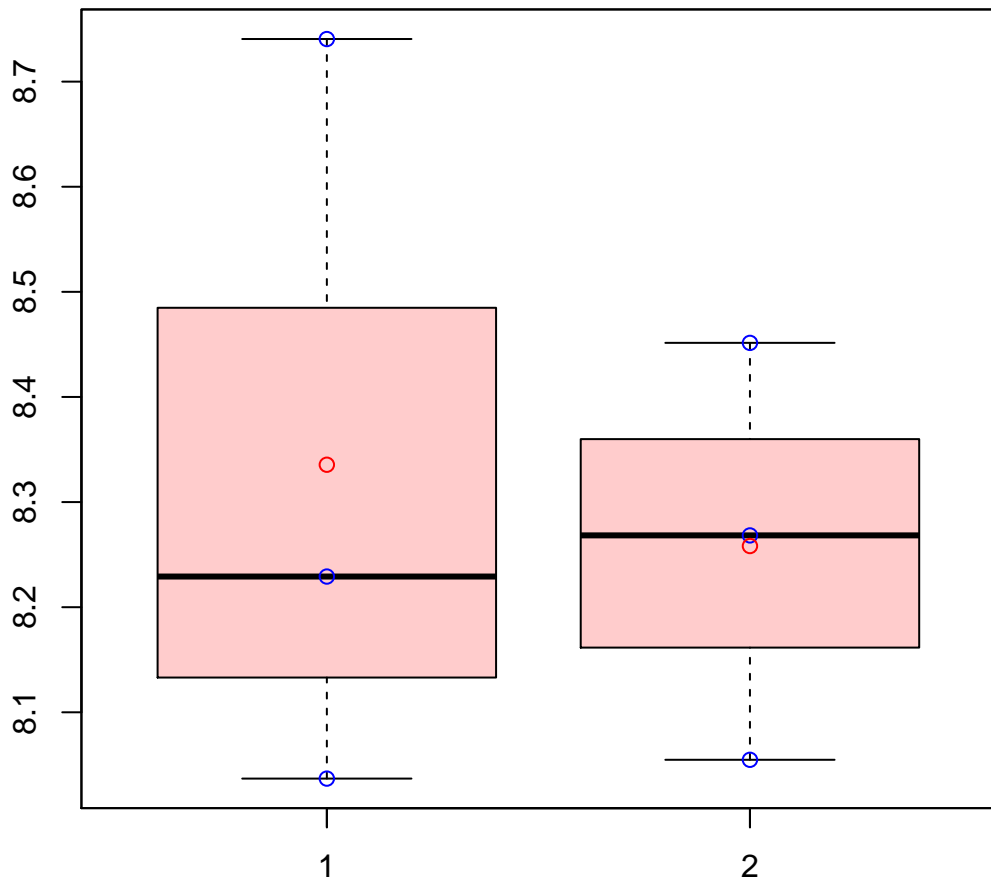

t-Test: p-value = 0.77

# CL8104Contig2|CL8104Contig2

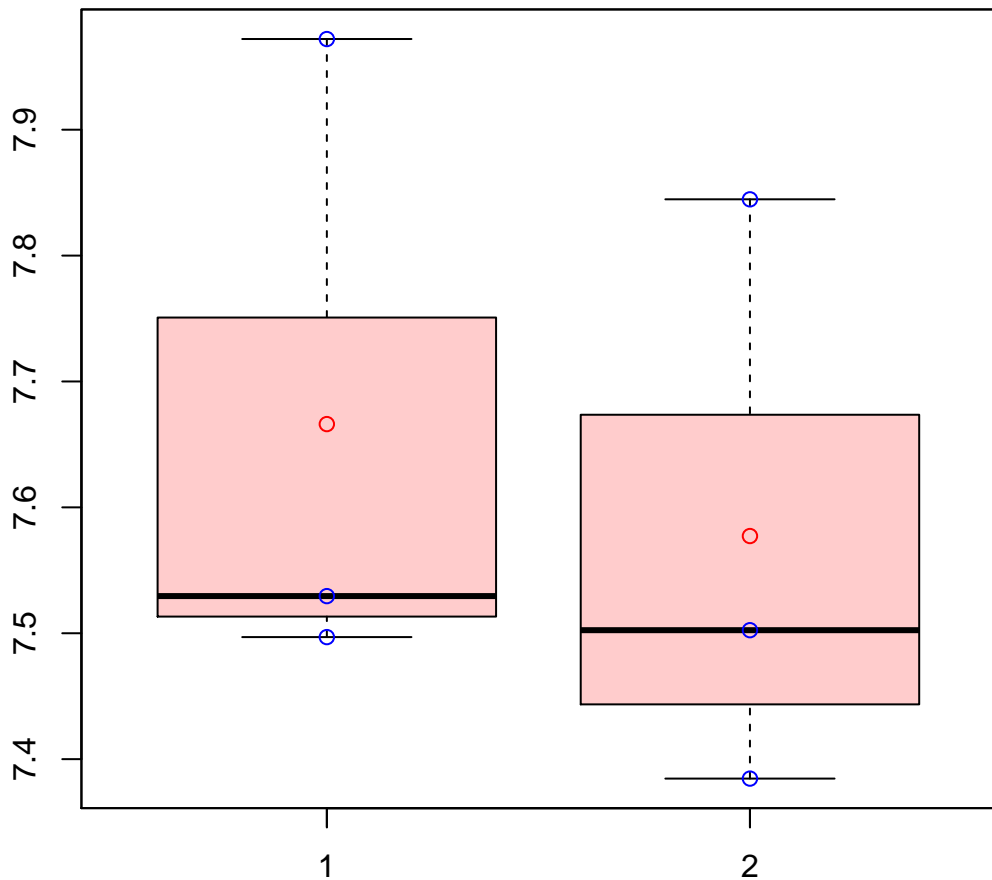

t-Test: p-value = 0.69

# CL811Contig3|CL811Contig3

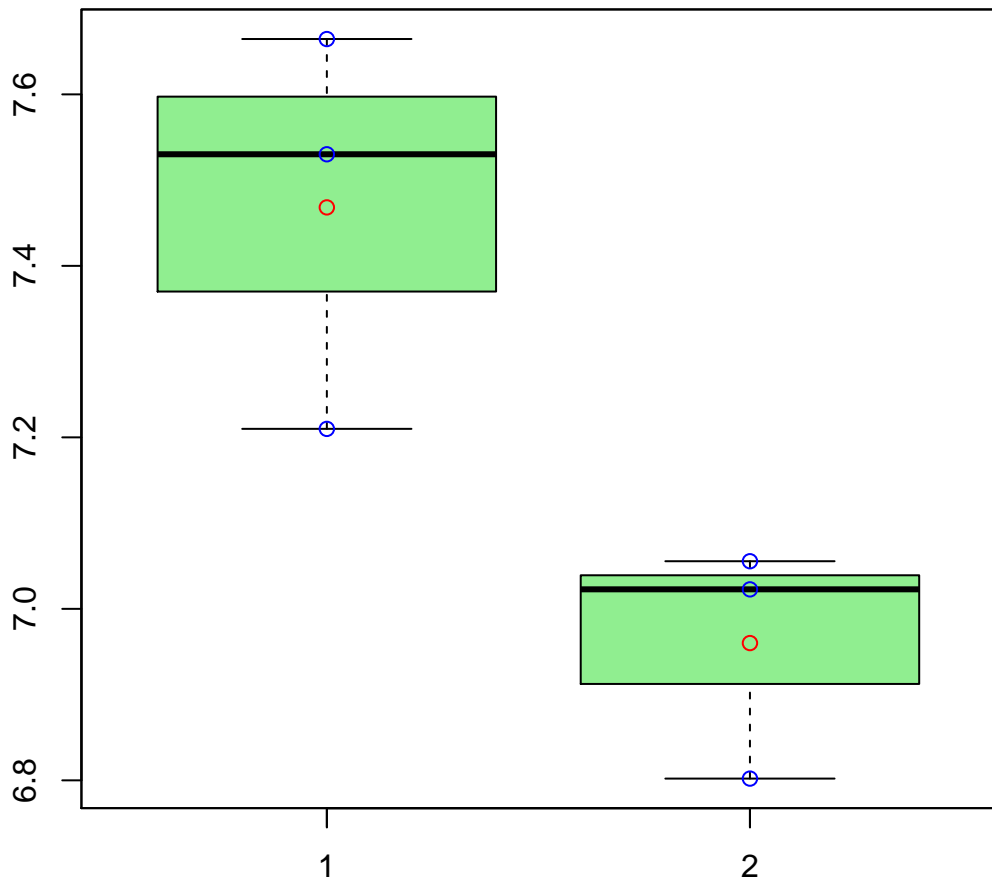

t-Test: p-value = 0.04

# CL8123Contig1|CL8123Contig1

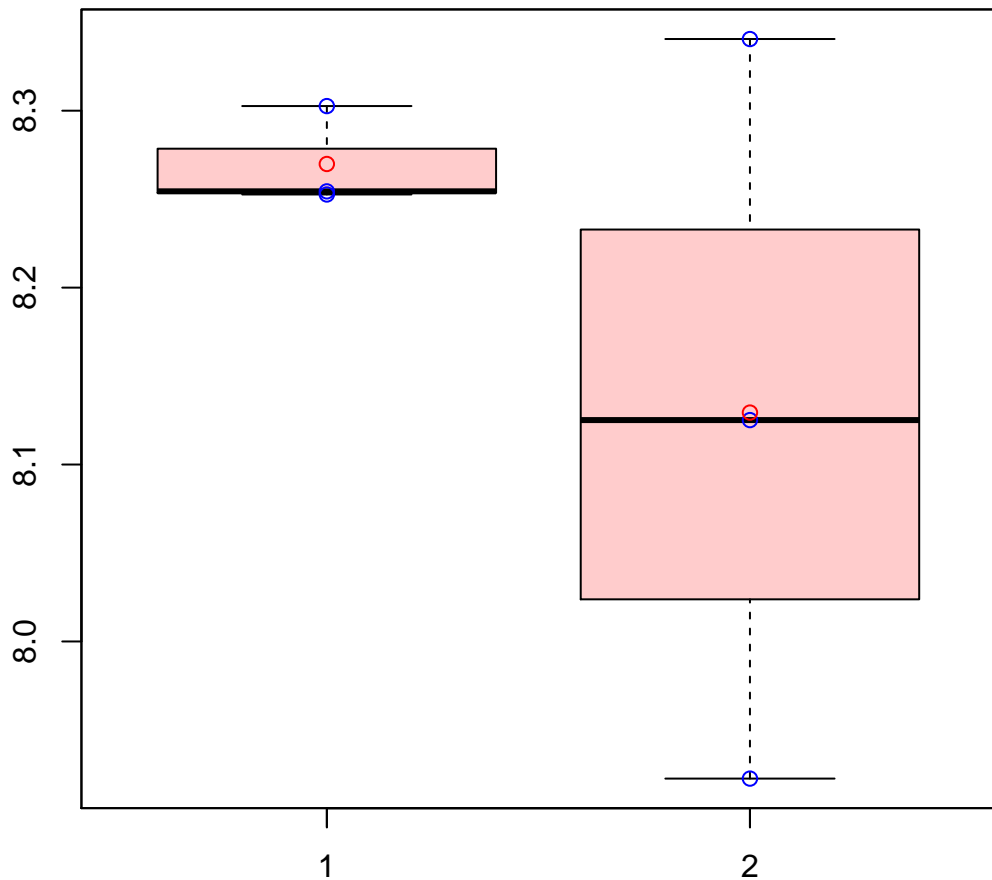

t-Test: p-value = 0.36

# CL8128Contig2|CL8128Contig2

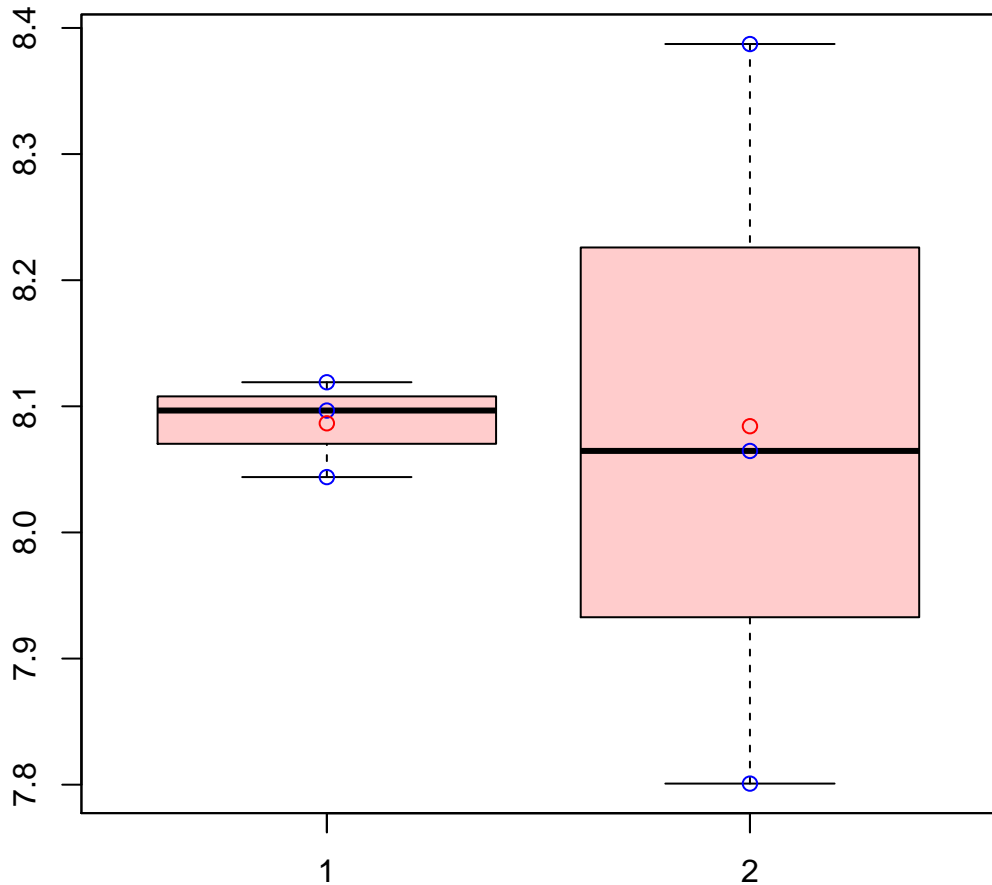

t-Test: p-value = 0.99



# CL8133Contig1|CL8133Contig1

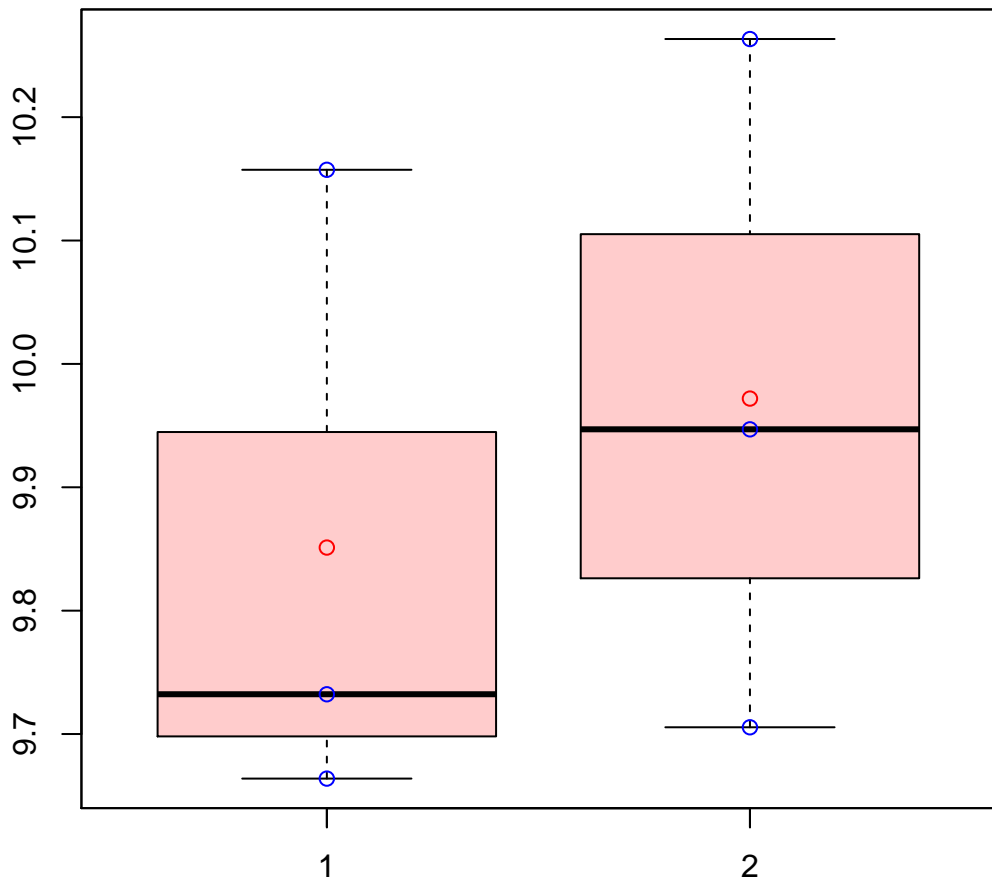

t-Test: p-value = 0.62

# CL8133Contig2|CL8133Contig2

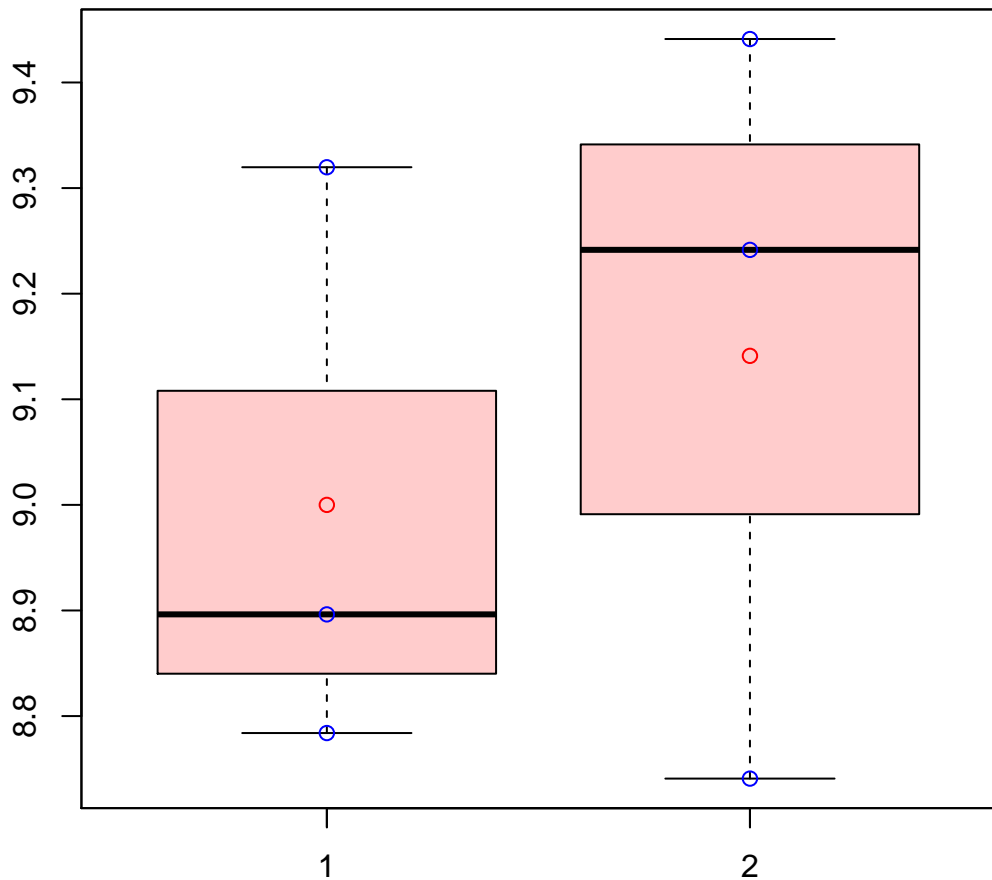

t-Test: p-value = 0.62

# CL8135Contig2|CL8135Contig2

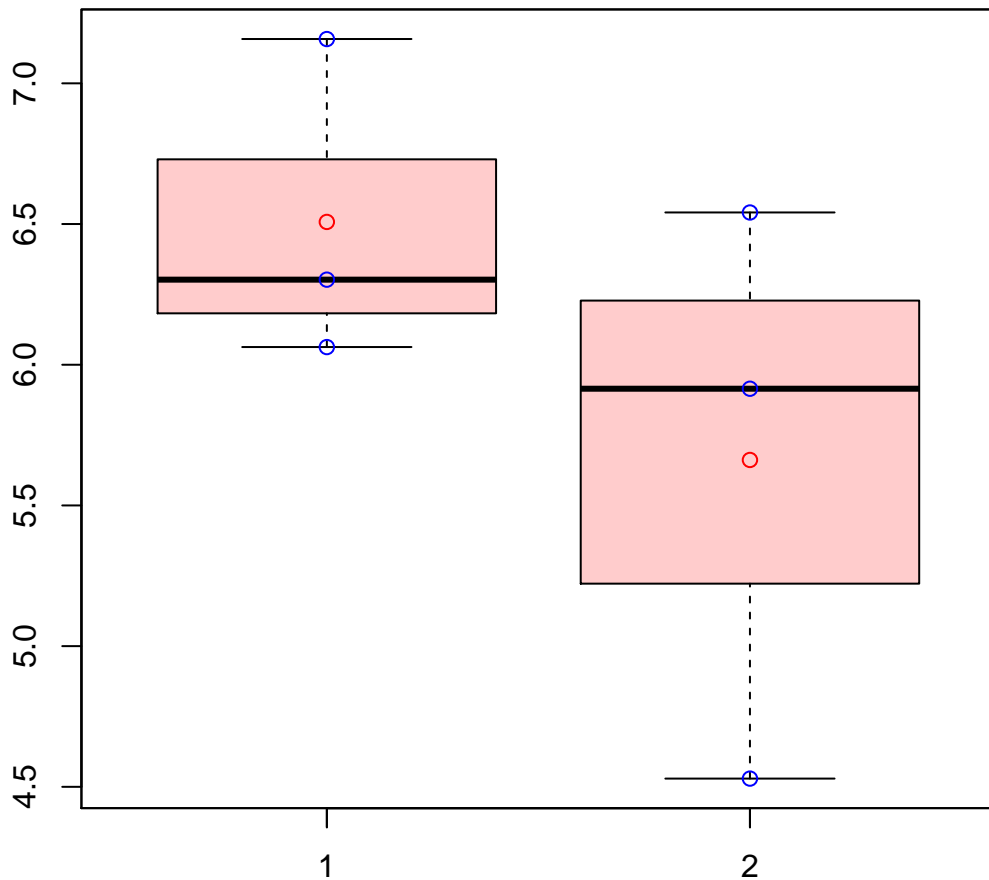

t-Test: p-value = 0.3

# CL813Contig1|CL813Contig1

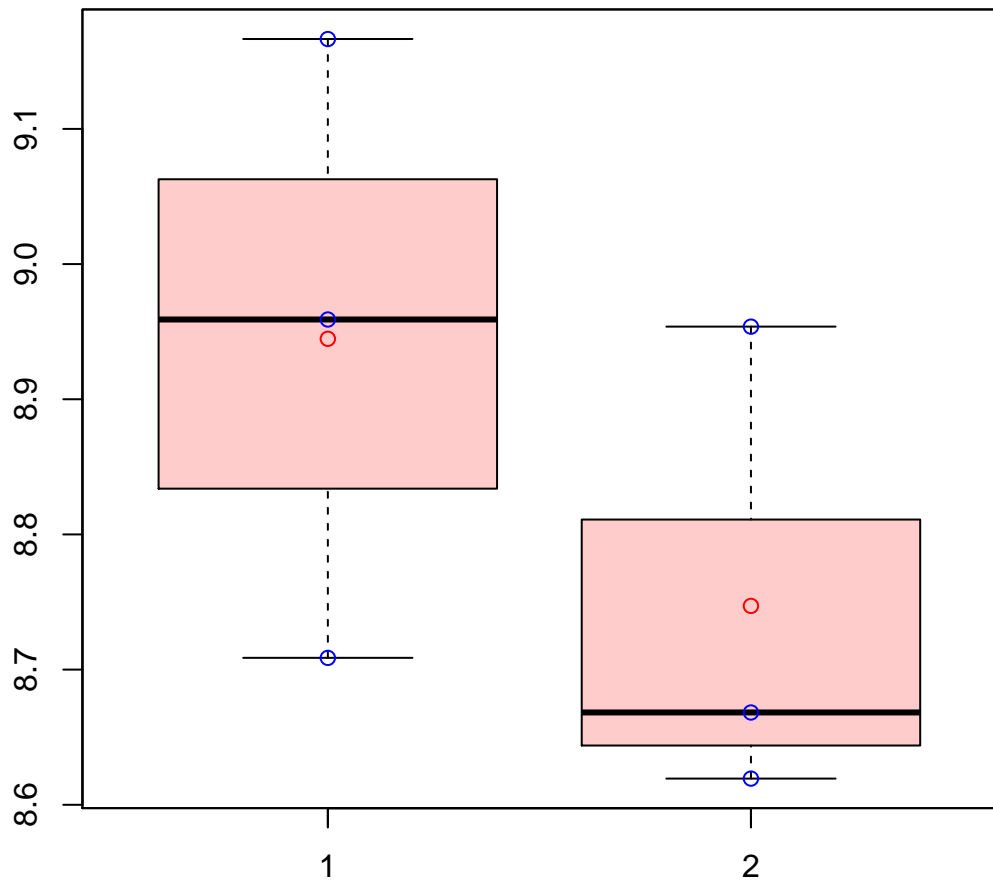

t-Test: p-value = 0.31

# CL8147Contig1|CL8147Contig1

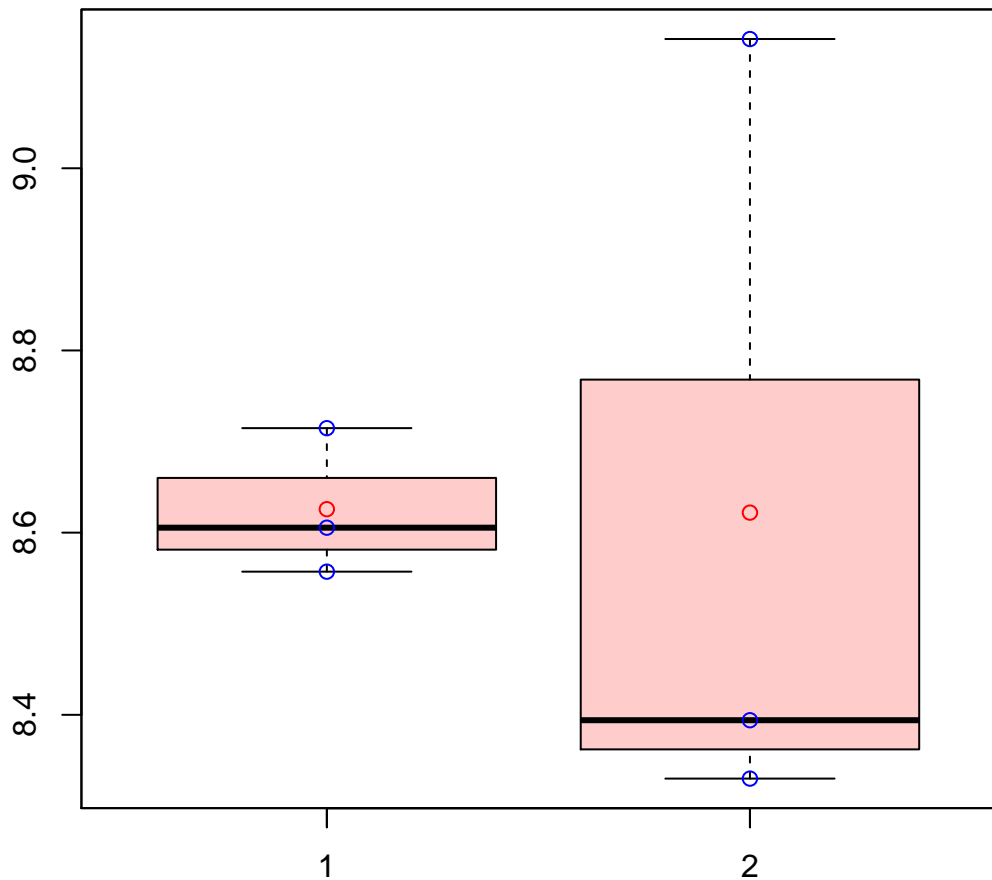

t-Test: p-value = 0.99

# CL8147Contig2|CL8147Contig2

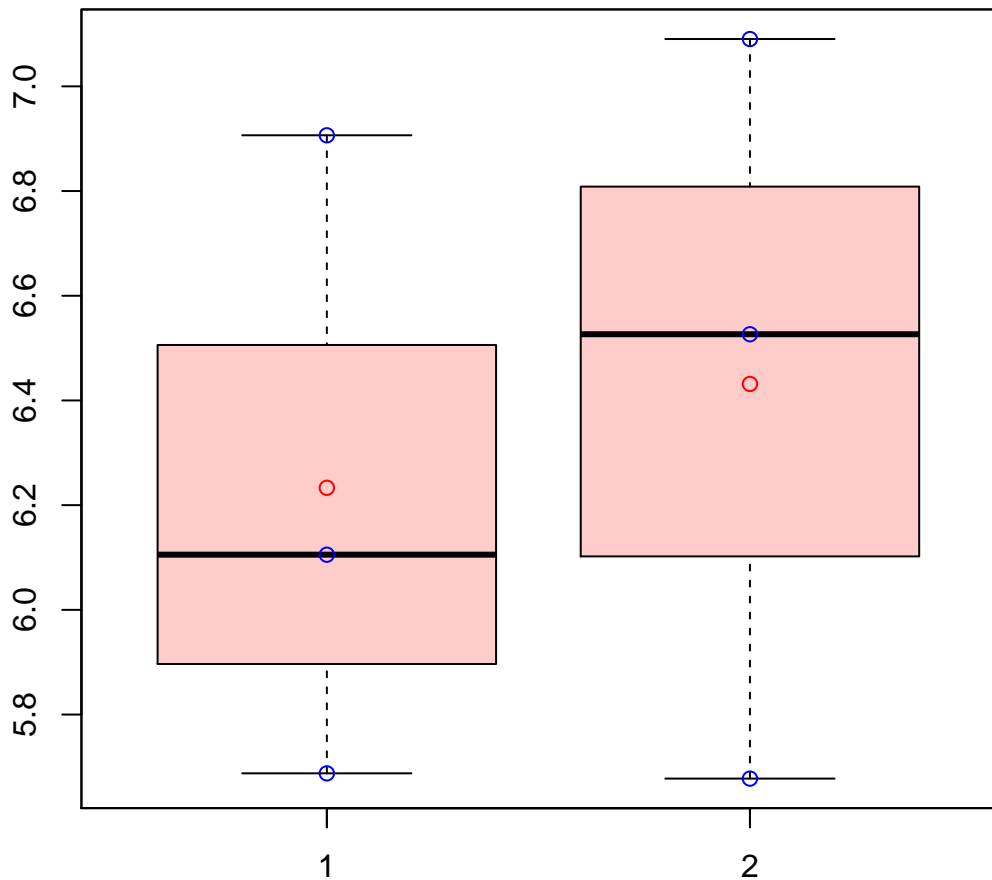

t-Test: p-value = 0.73

# CL8148Contig2|CL8148Contig2

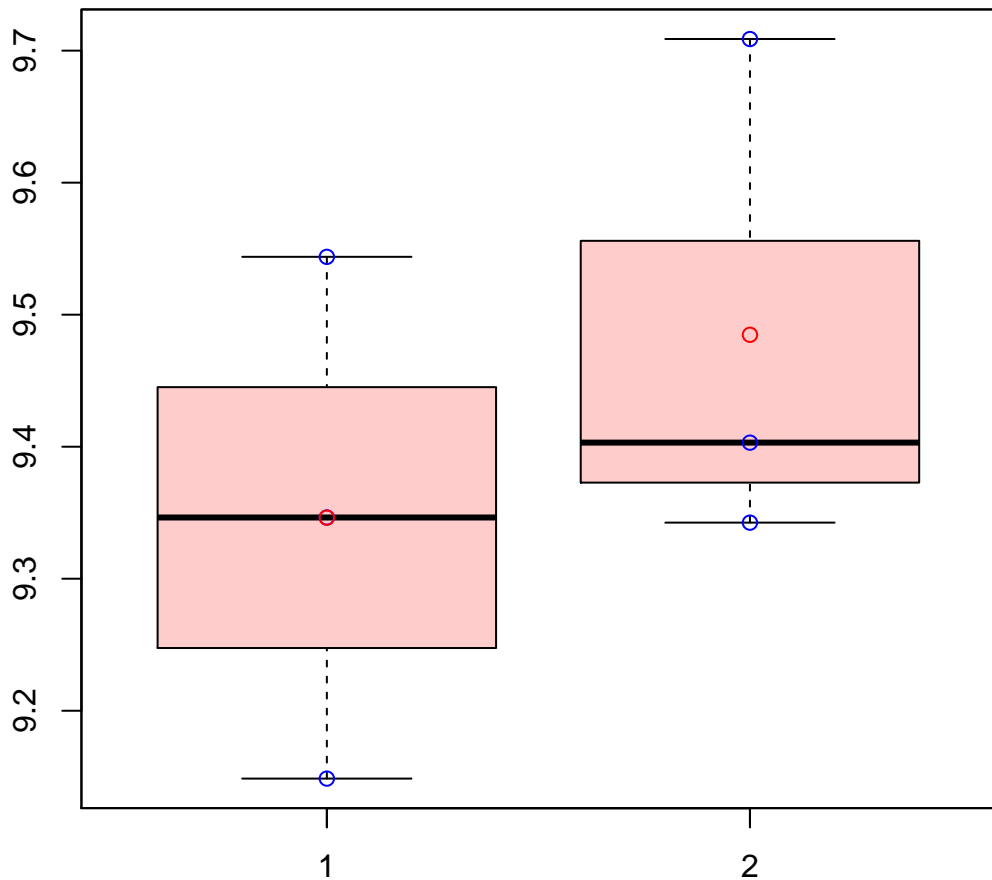

t-Test: p-value = 0.44

# CL814Contig10|CL814Contig10

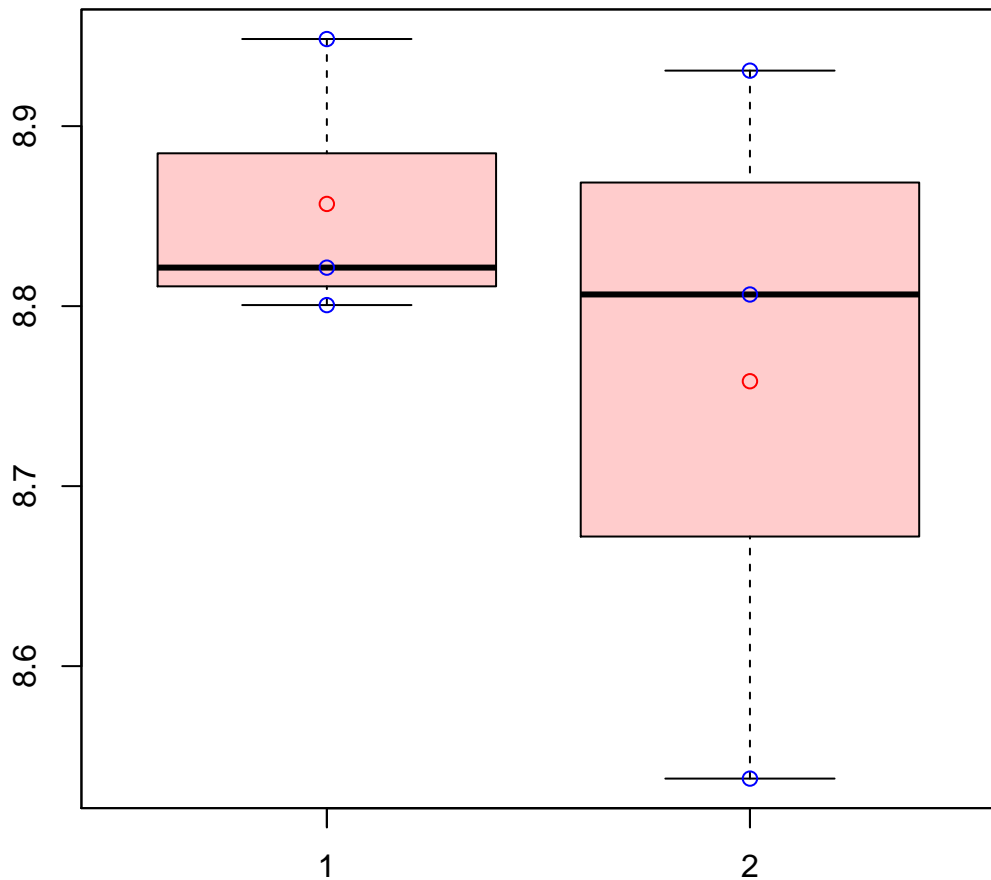

t-Test: p-value = 0.5



# CL8156Contig1|CL8156Contig1

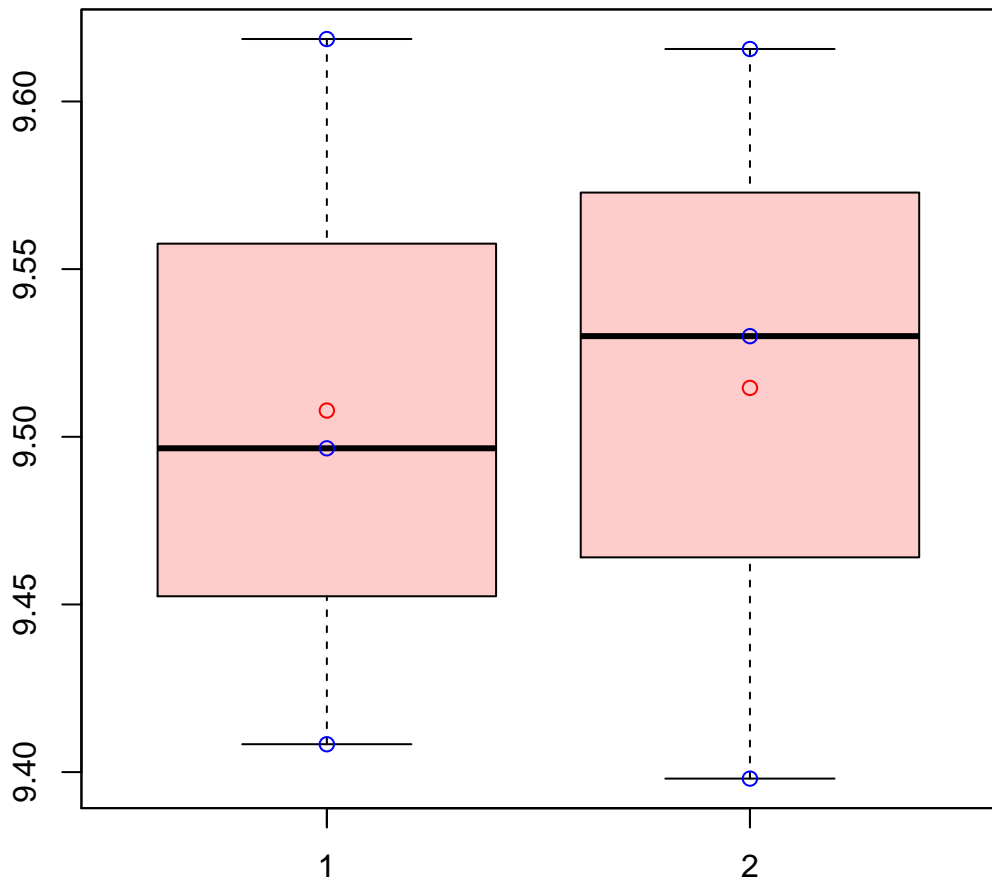

t-Test: p-value = 0.94

# CL8162Contig6|CL8162Contig6

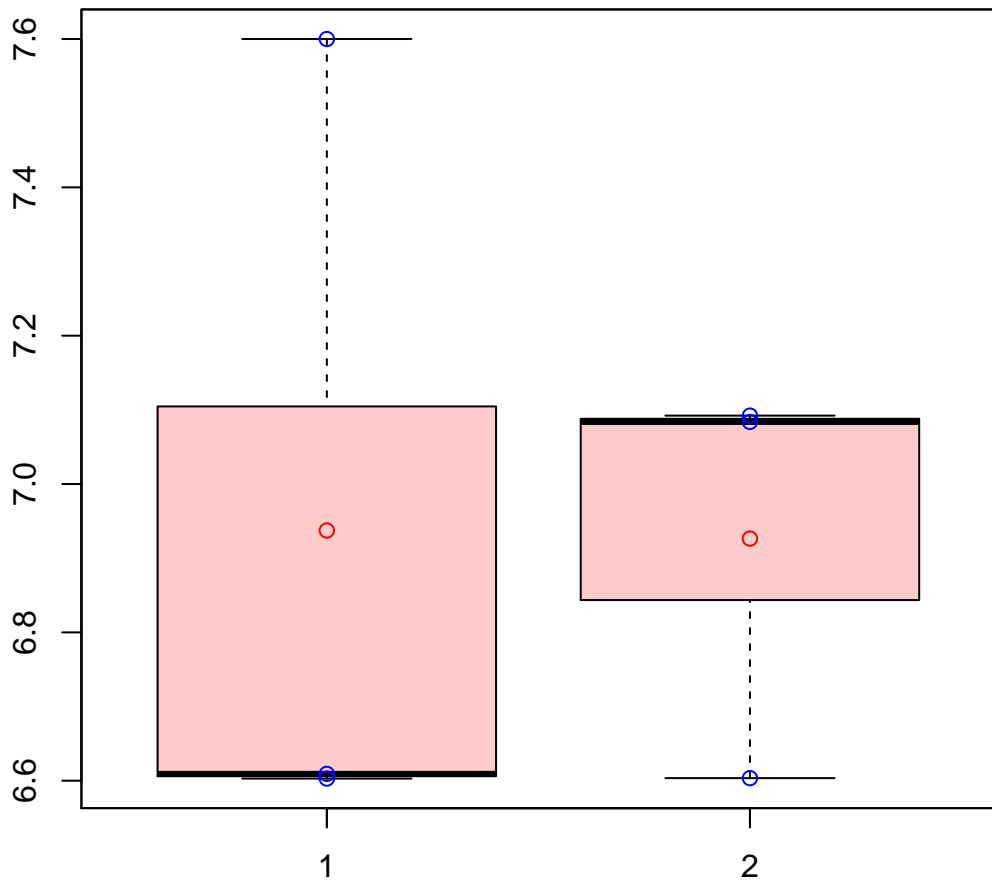

t-Test: p-value = 0.98

# CL8163Contig2|CL8163Contig2

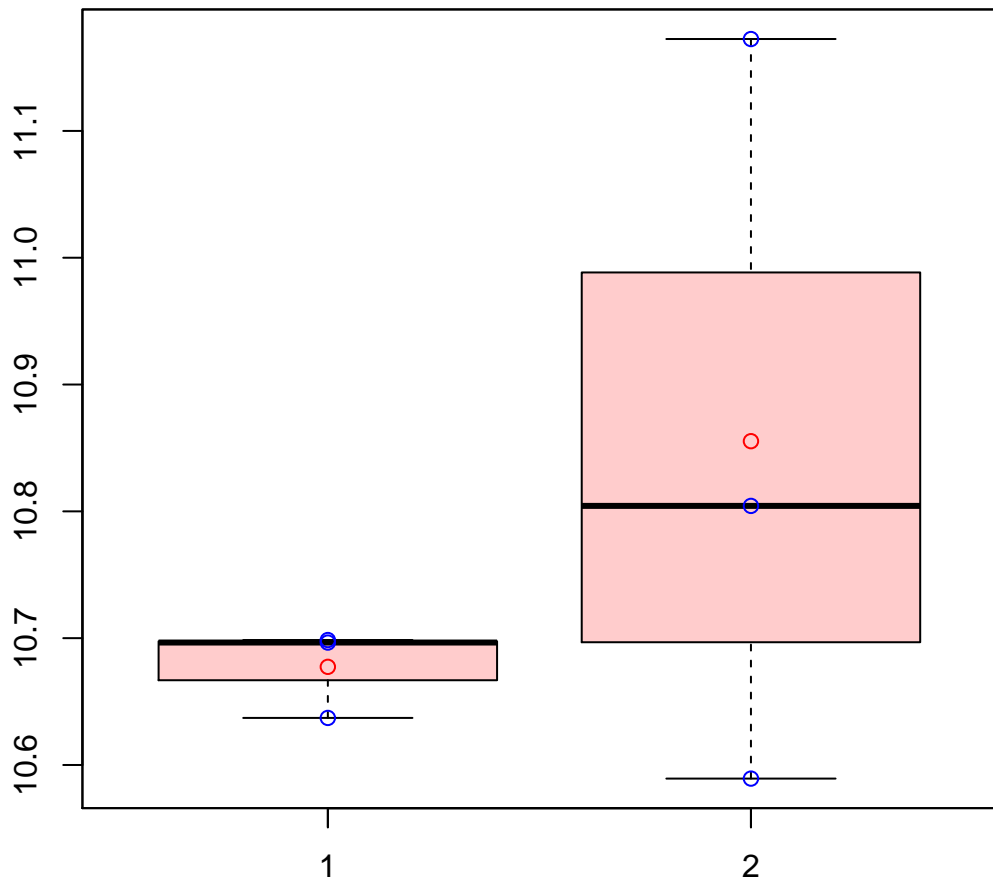

t-Test: p-value = 0.41

# CL8166Contig2|CL8166Contig2

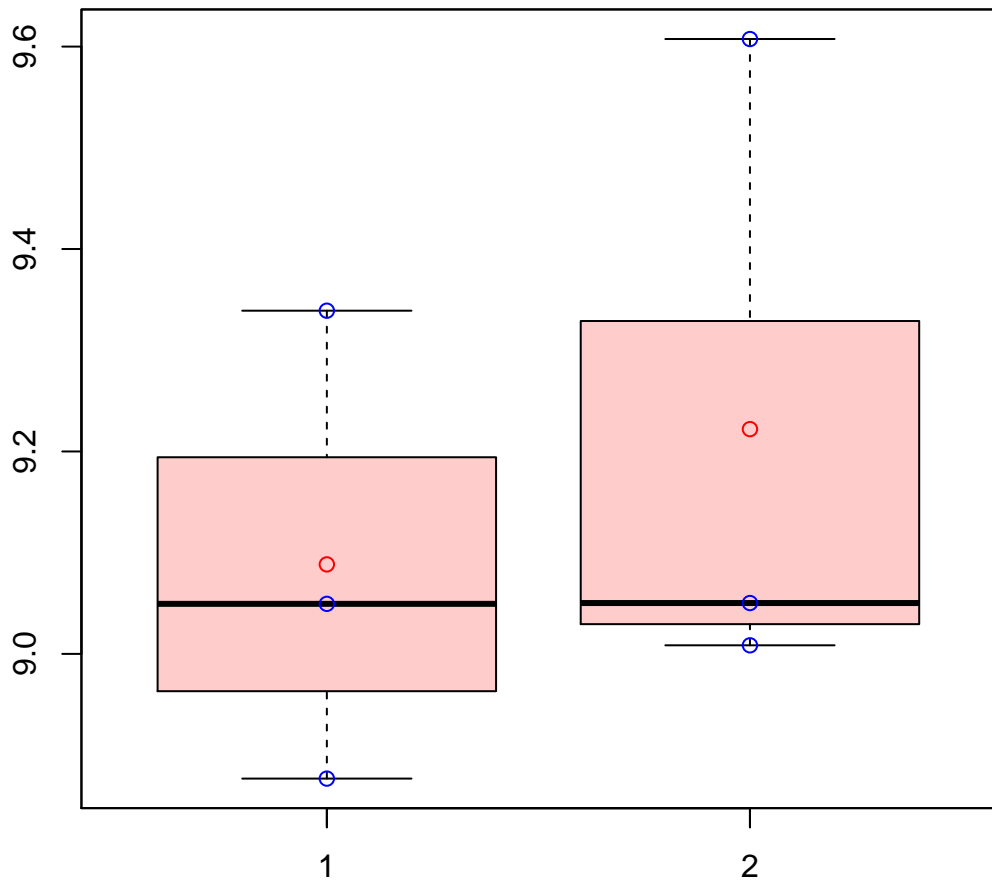

t-Test: p-value = 0.6

# CL8169Contig1|CL8169Contig1

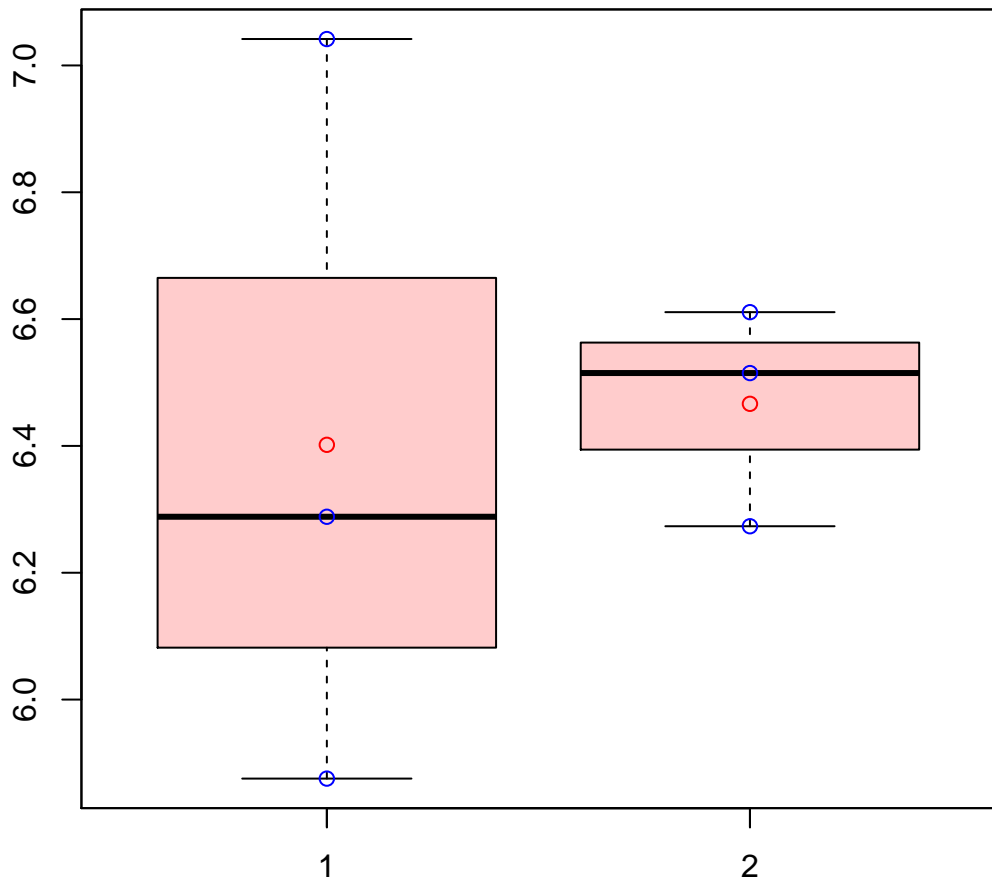

t-Test: p-value = 0.87

# CL816Contig2|CL816Contig2

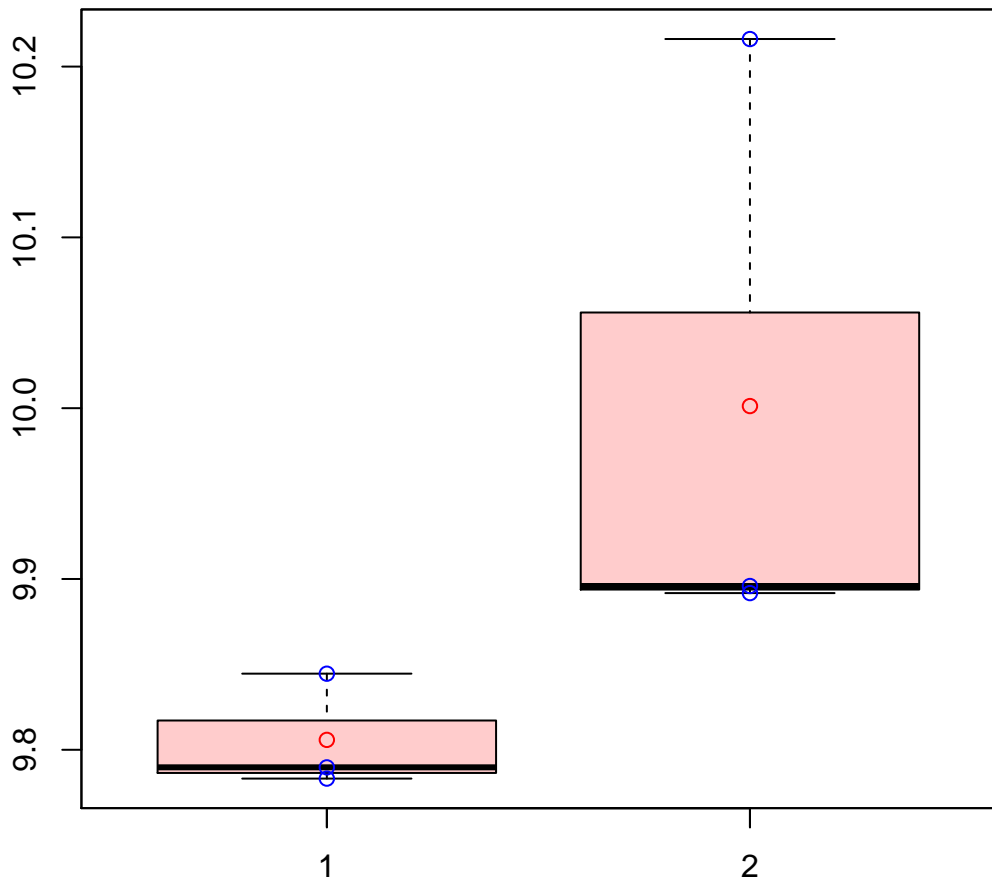

t-Test: p-value = 0.21

# CL818Contig10|CL818Contig10

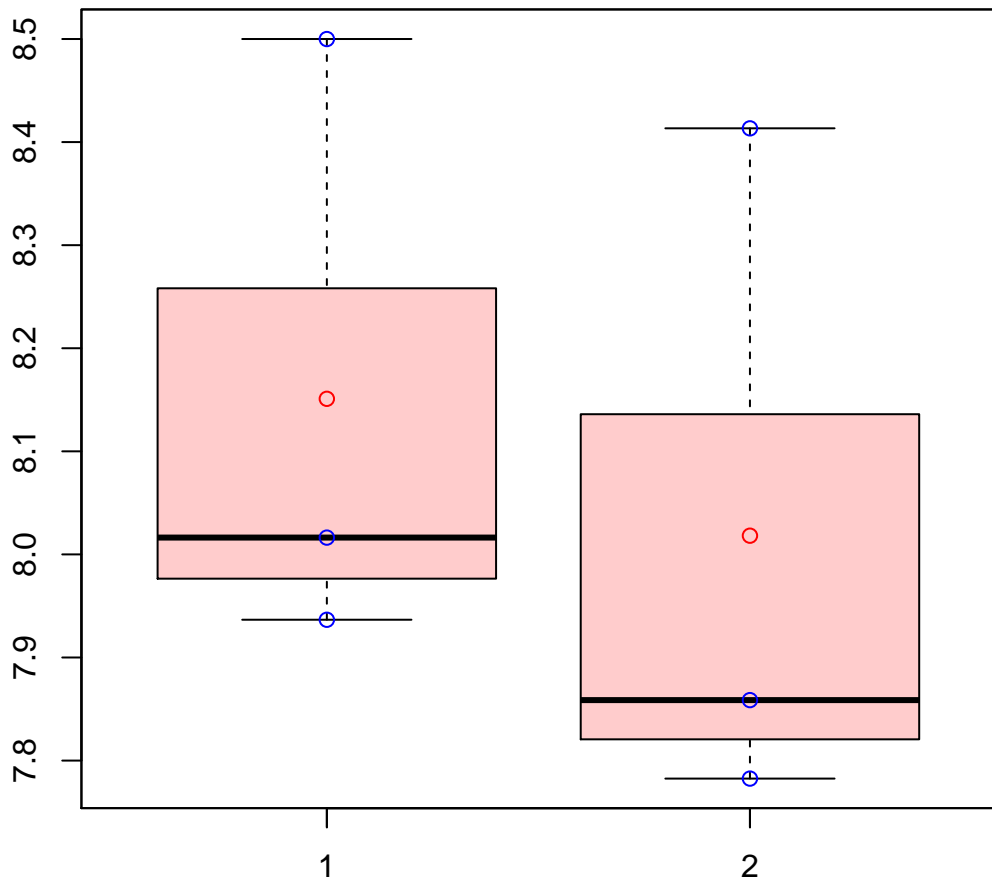

t-Test: p-value = 0.64

# CL818Contig5|CL818Contig5

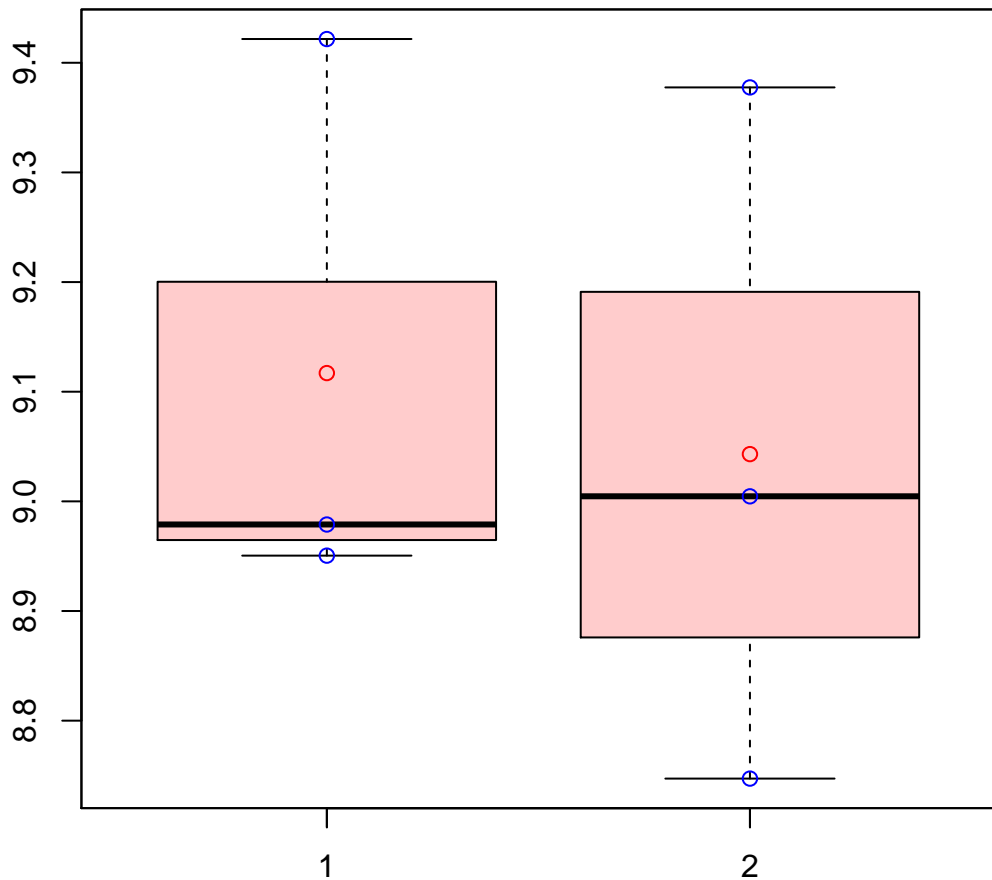

t-Test: p-value = 0.77



# CL818Contig7|CL818Contig7

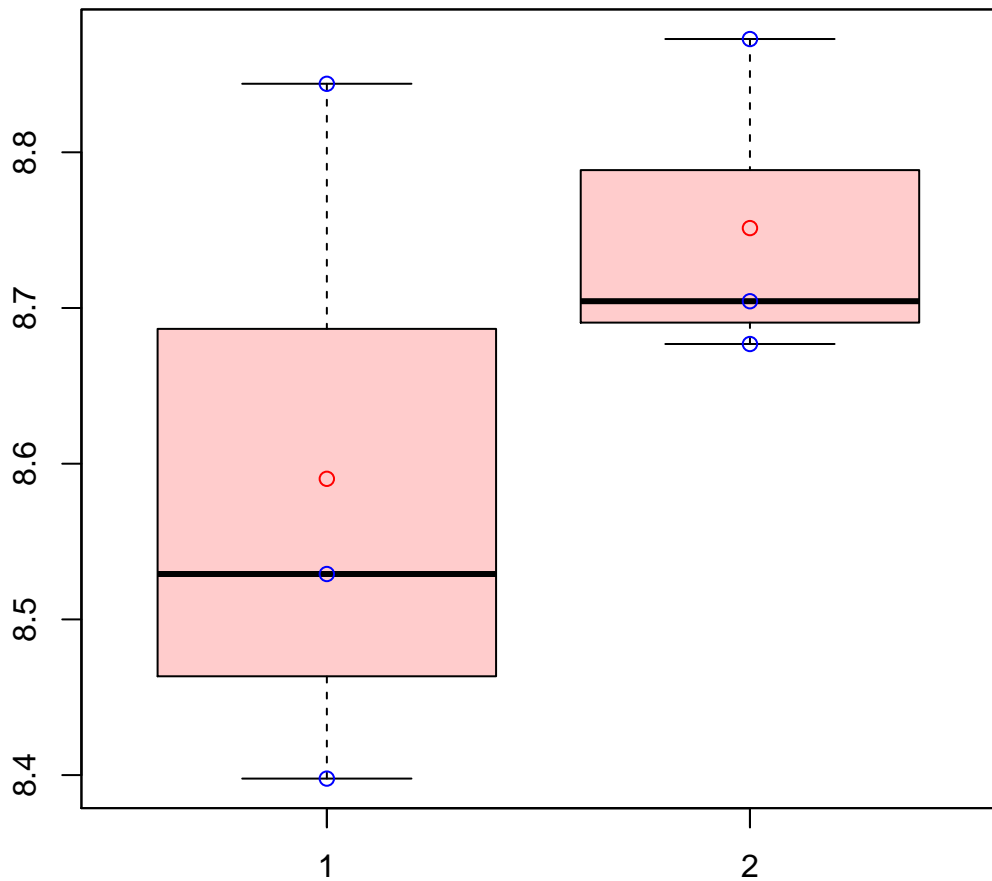

t-Test: p-value = 0.35

# CL819Contig2|CL819Contig2

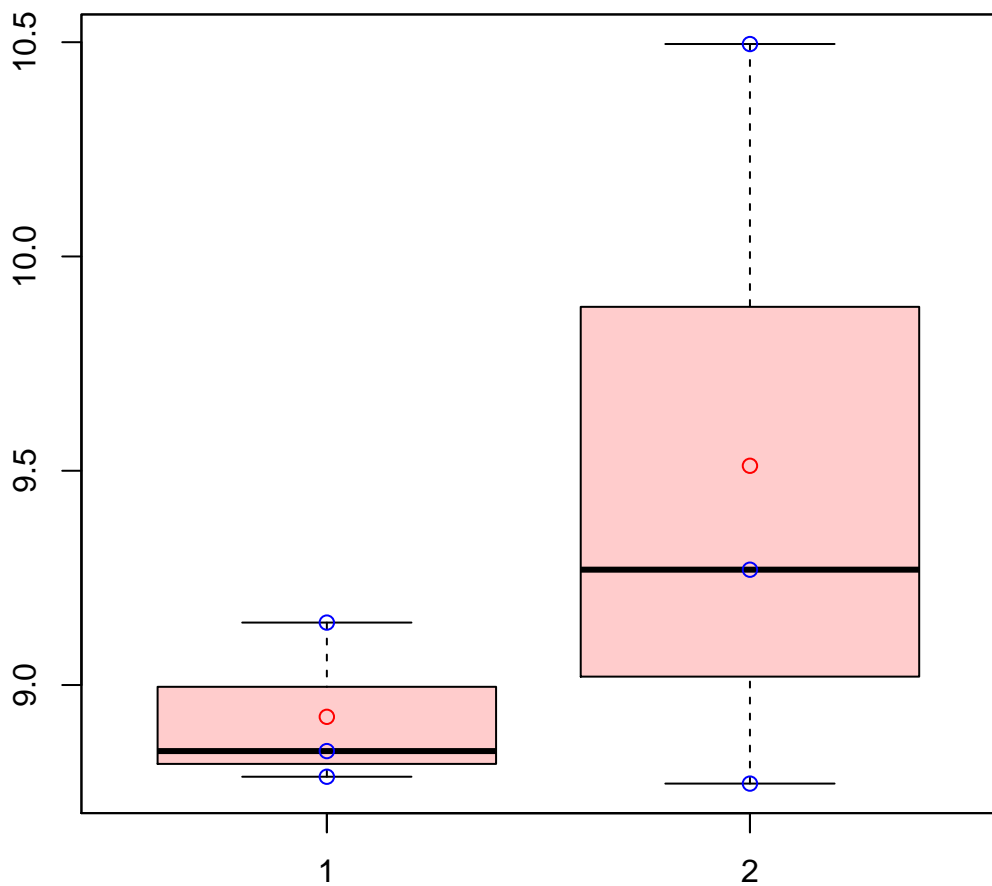

t-Test: p-value = 0.37

# CL81Contig24|CL81Contig24

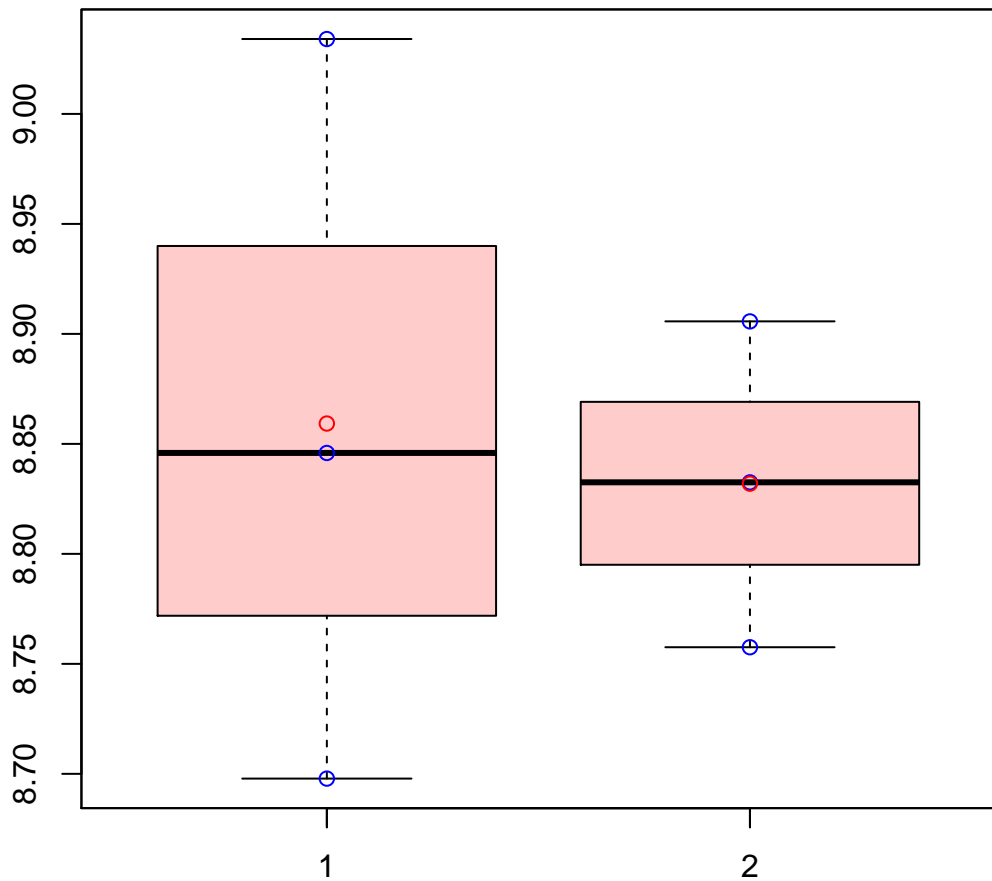

t-Test: p-value = 0.82

# CL8201Contig1|CL8201Contig1

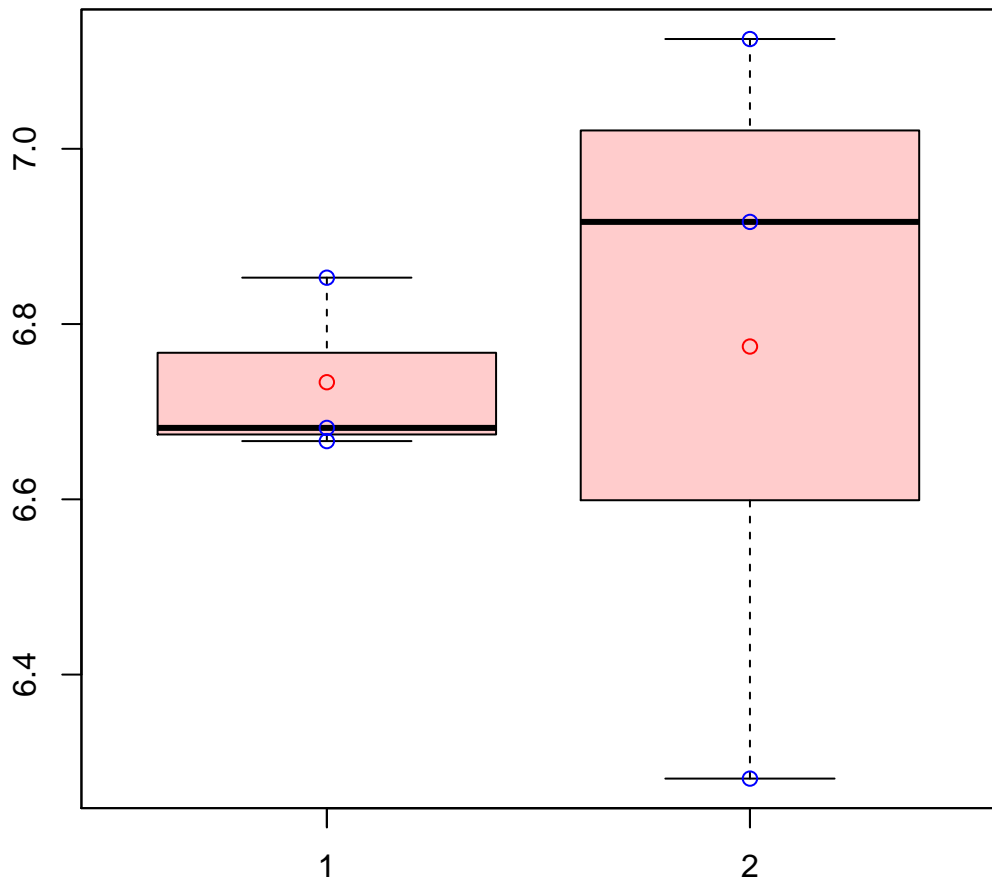

t-Test: p-value = 0.89

# CL8208Contig1|CL8208Contig1

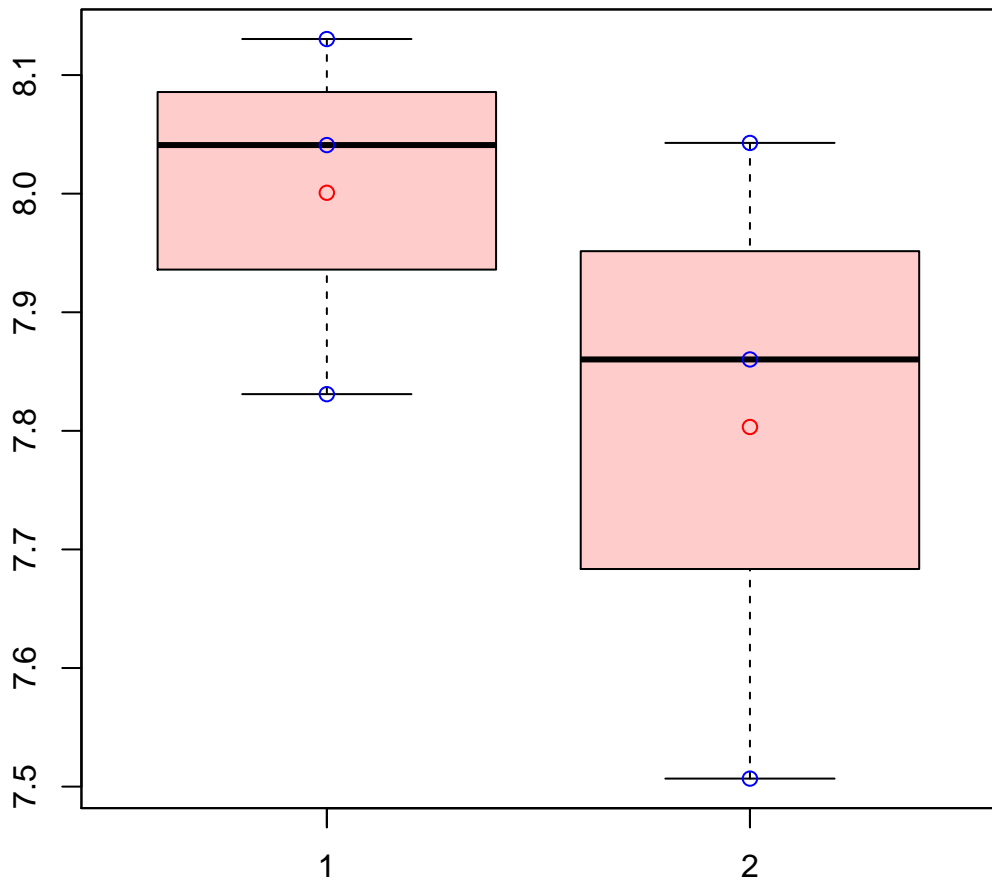

t-Test: p-value = 0.35

# CL8208Contig2|CL8208Contig2

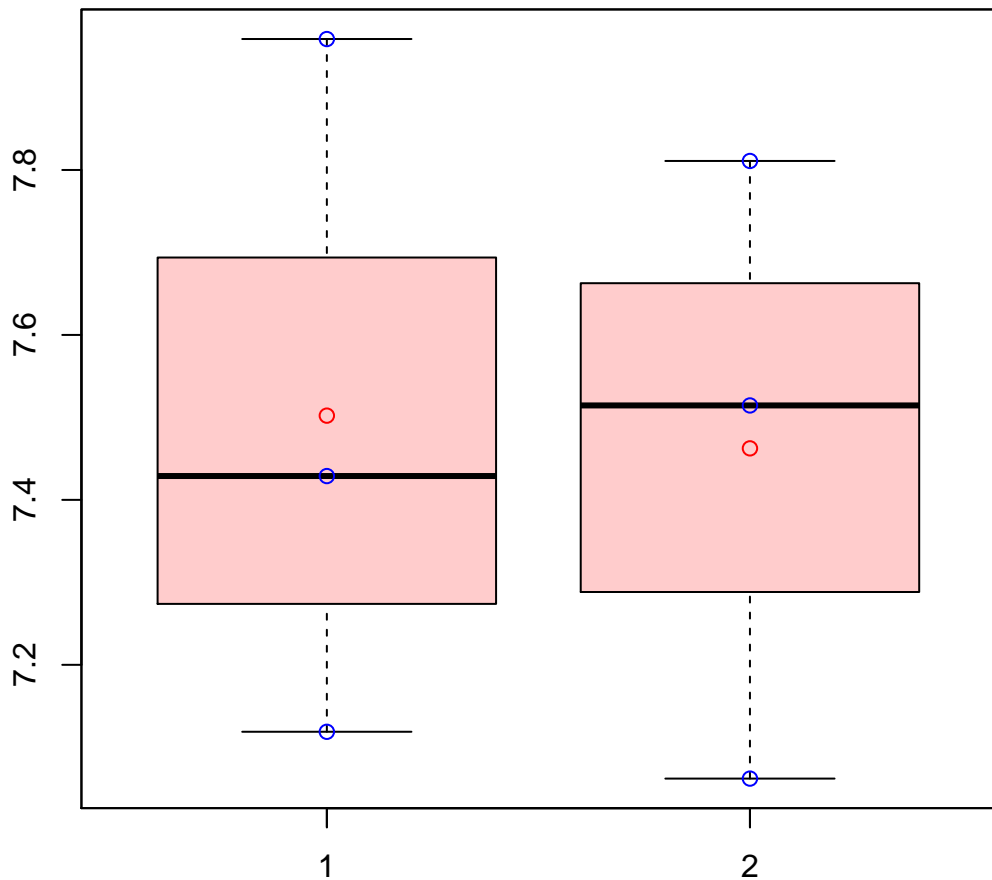

t-Test: p-value = 0.91

# CL8208Contig3|CL8208Contig3

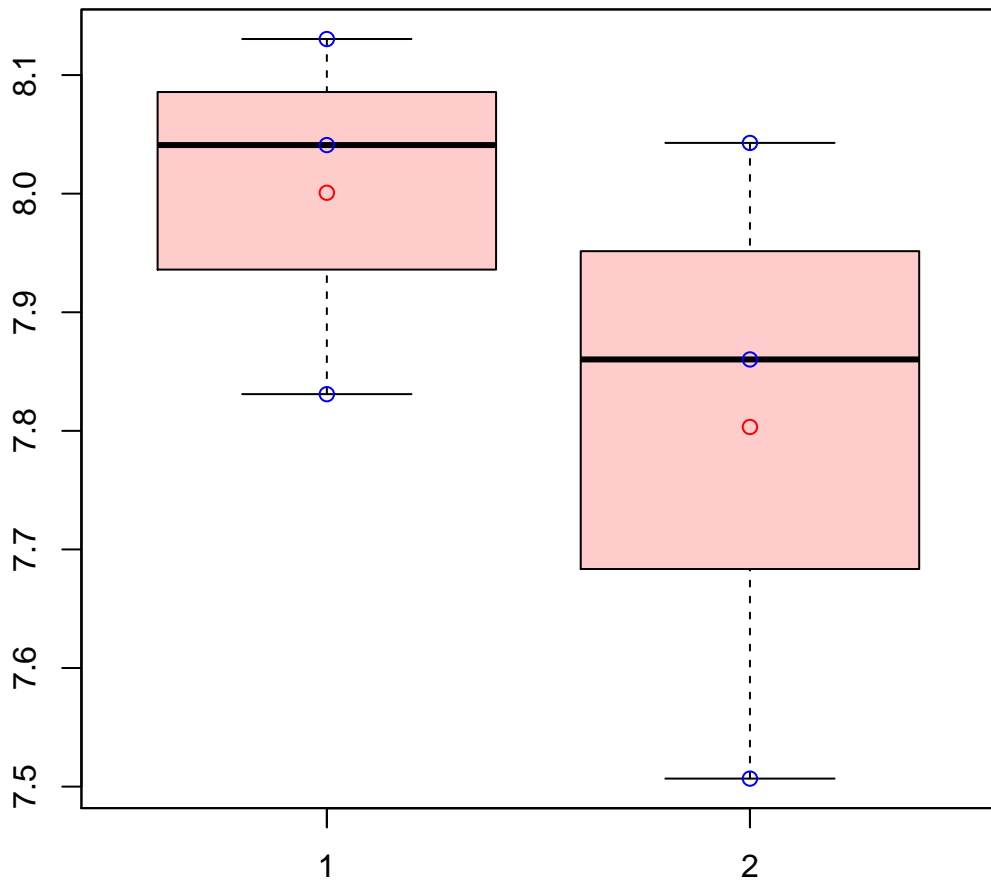

t-Test: p-value = 0.35

# CL820Contig1|CL820Contig1

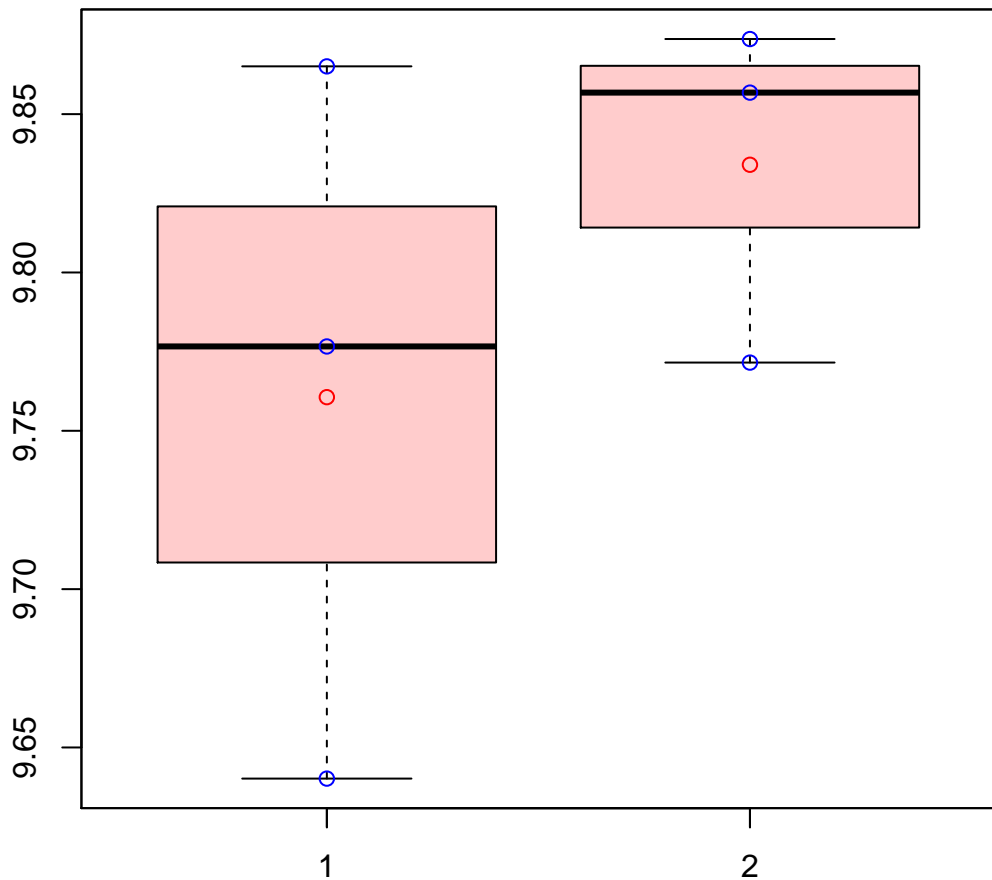

t-Test: p-value = 0.39



# CL820Contig3|CL820Contig3

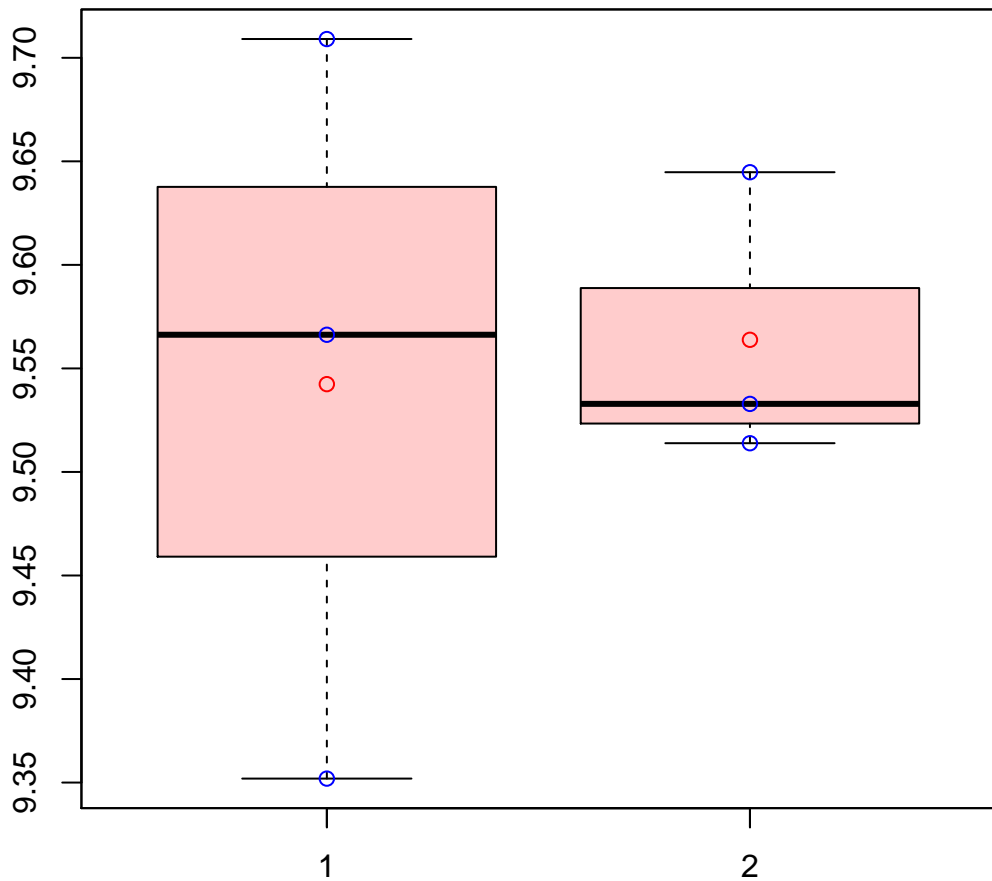

t-Test: p-value = 0.86

# CL820Contig8|CL820Contig8

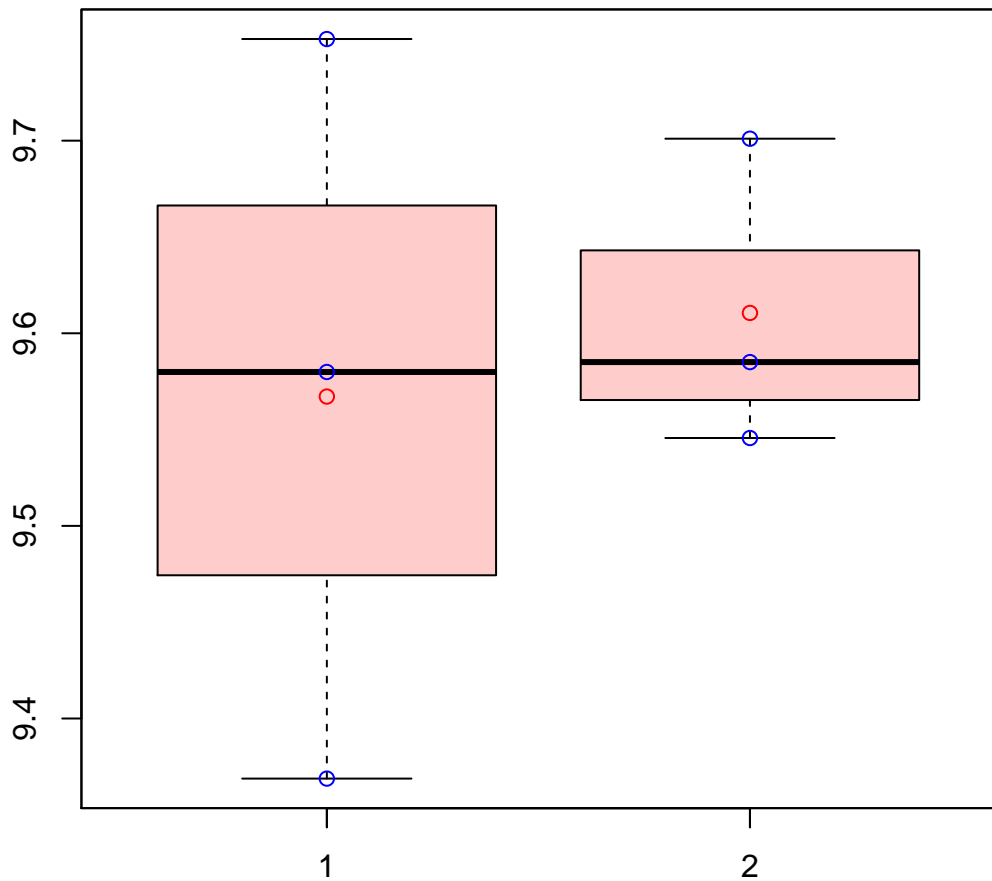

t-Test: p-value = 0.74

# CL820Contig9|CL820Contig9

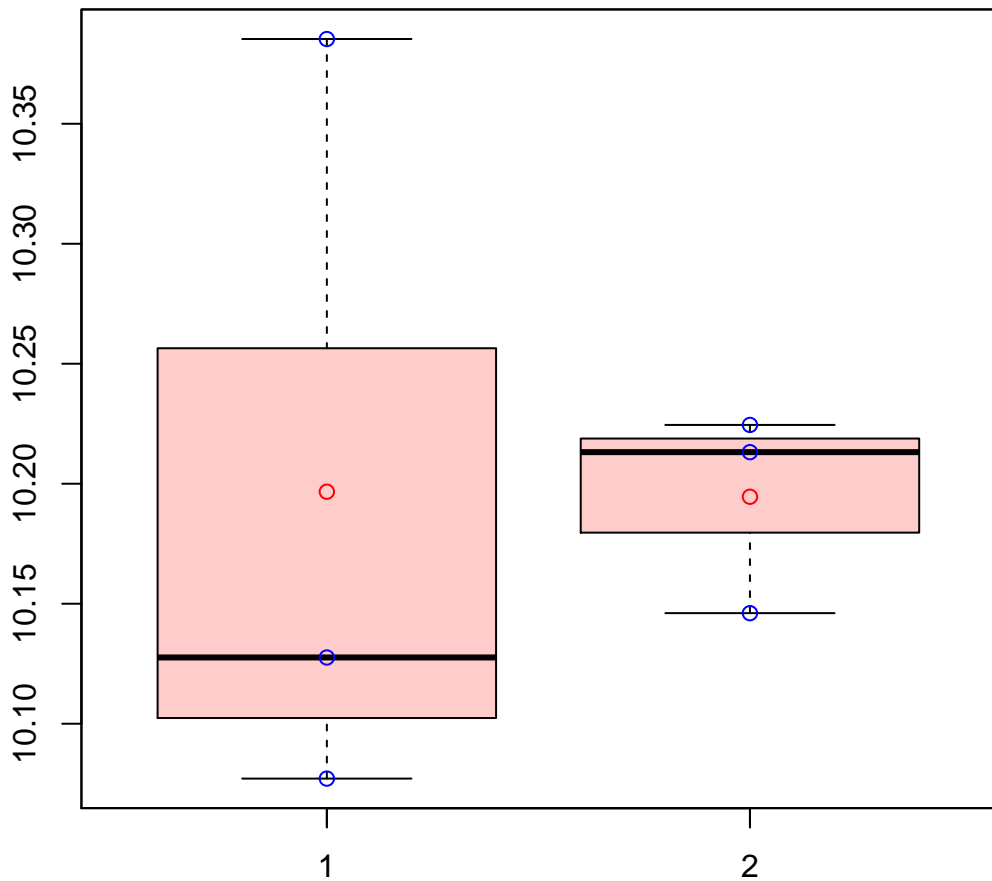

t-Test: p-value = 0.98

# CL8210Contig1|CL8210Contig1

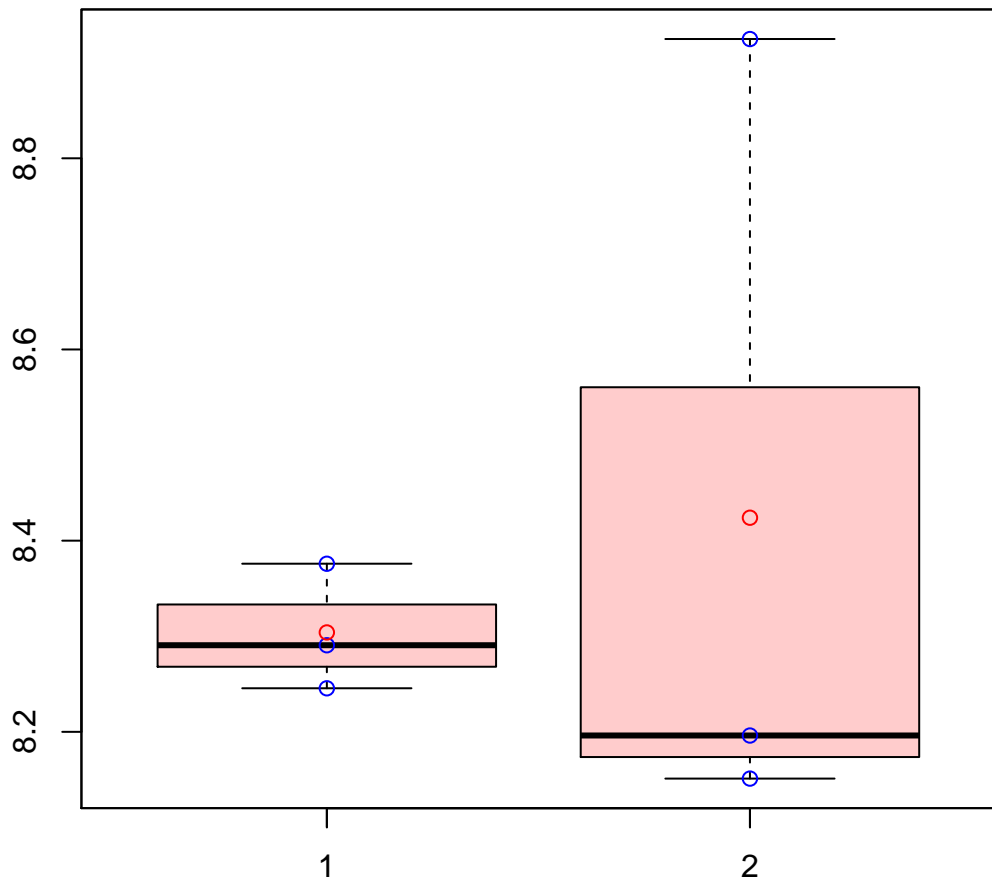

t-Test: p-value = 0.68

# CL8214Contig3|CL8214Contig3

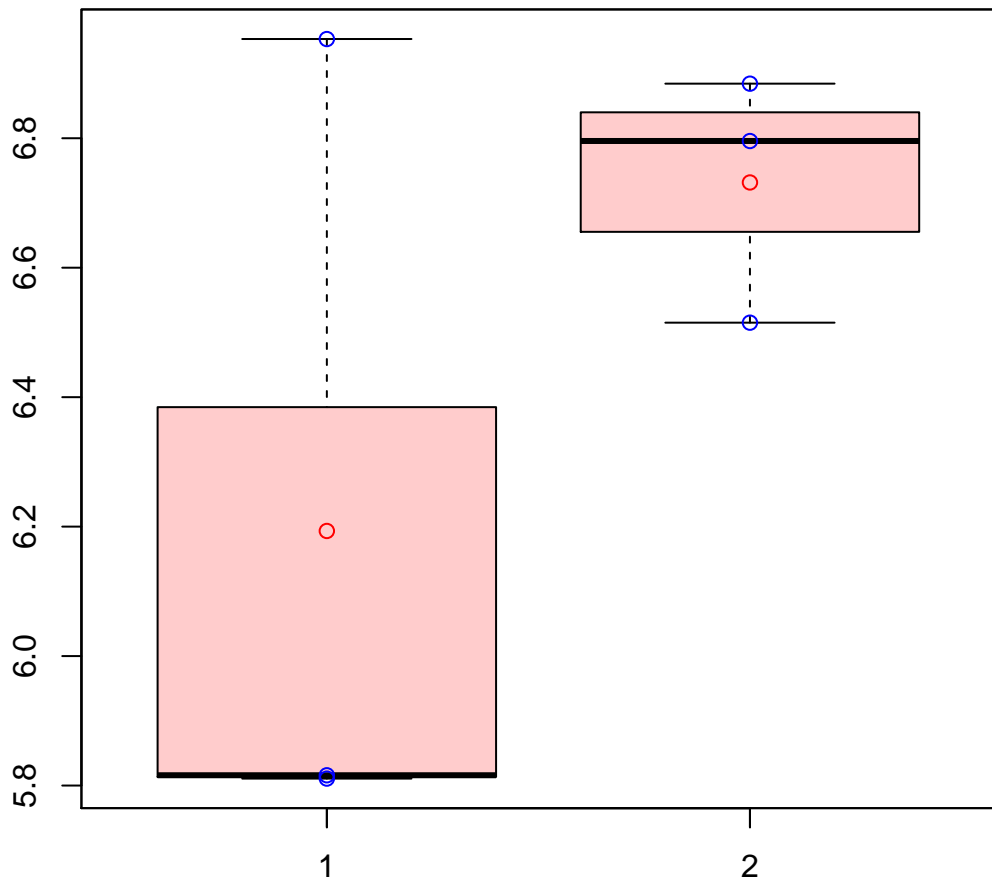

t-Test: p-value = 0.29

# CL821Contig1|CL821Contig1

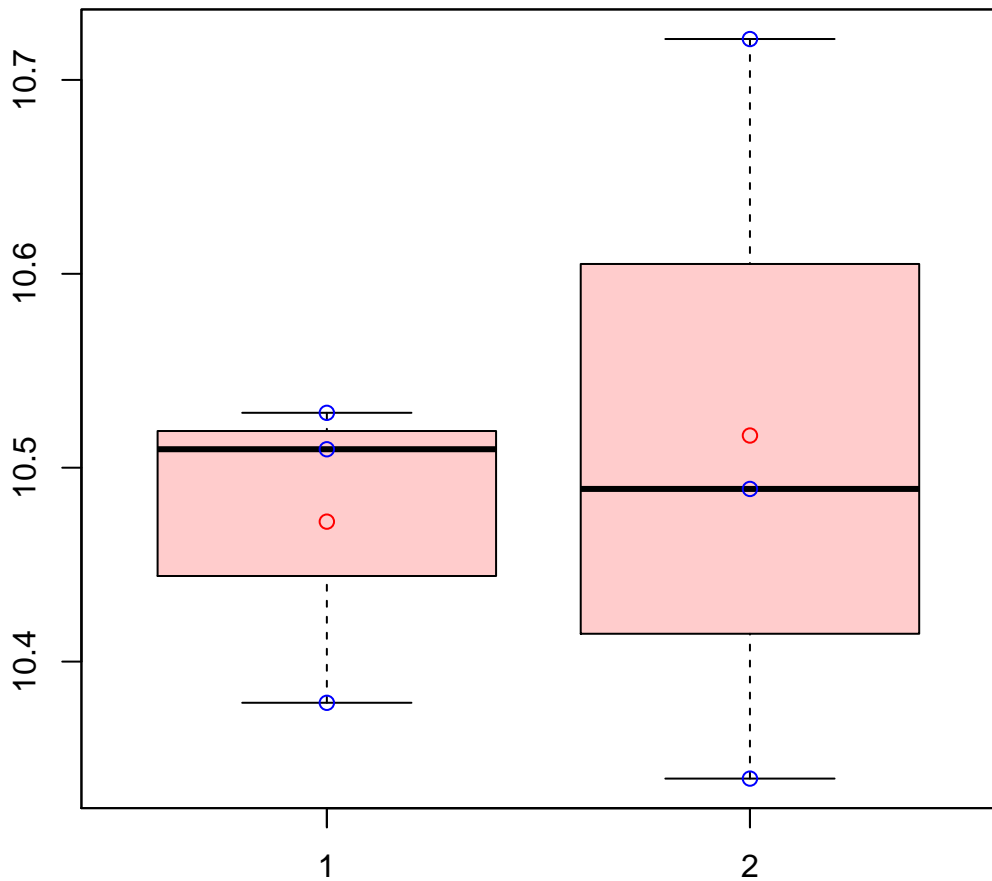

t-Test: p-value = 0.74

# CL821Contig2|CL821Contig2

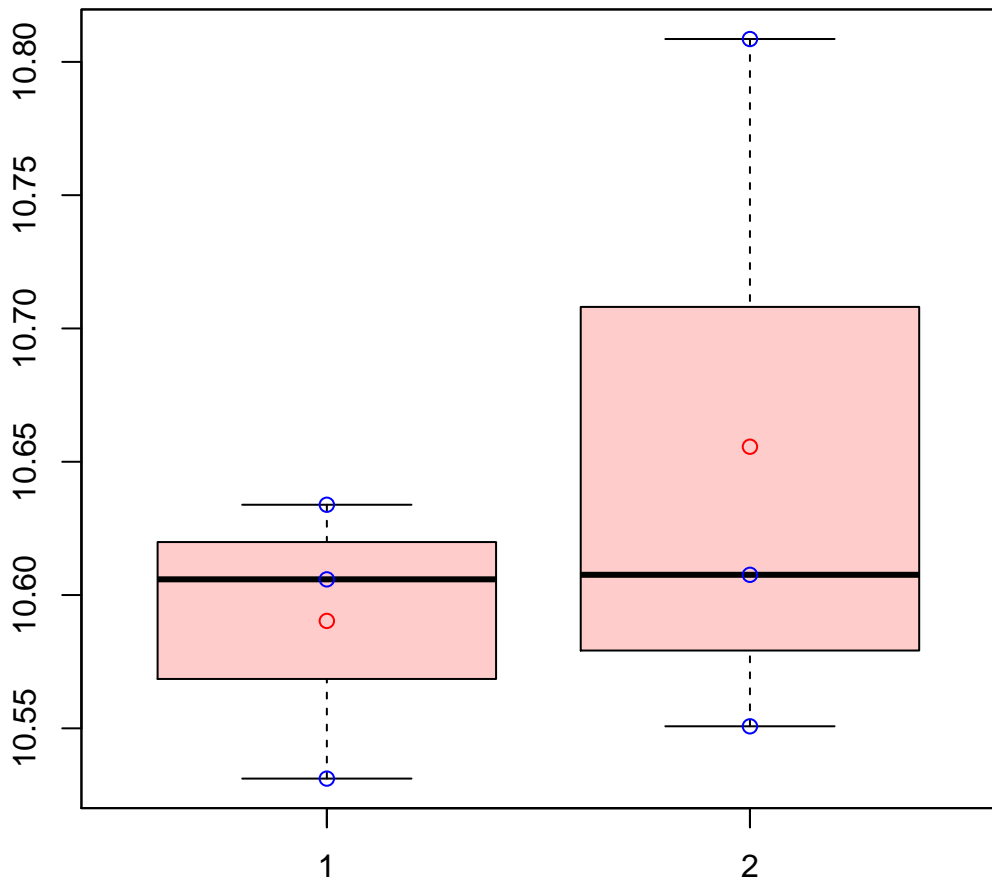

t-Test: p-value = 0.5

# CL821Contig3|CL821Contig3

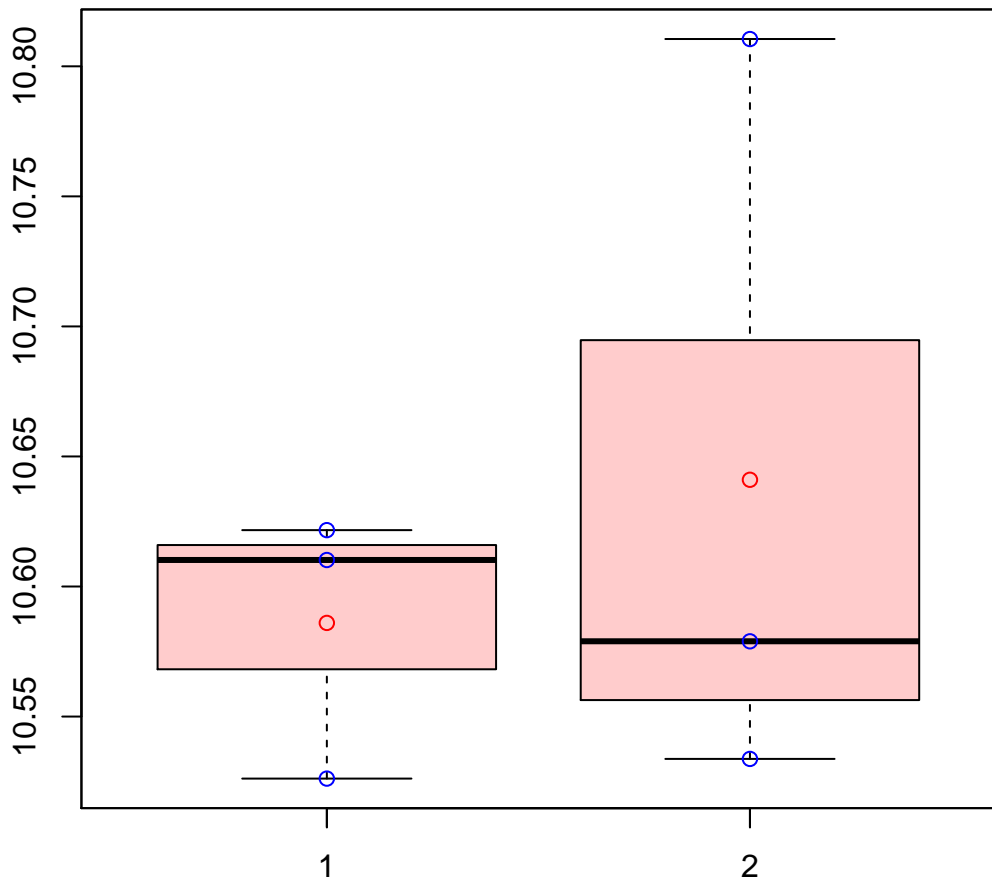

t-Test: p-value = 0.6



# CL821Contig4|CL821Contig4



t-Test: p-value = 0.6

# CL8220Contig2|CL8220Contig2

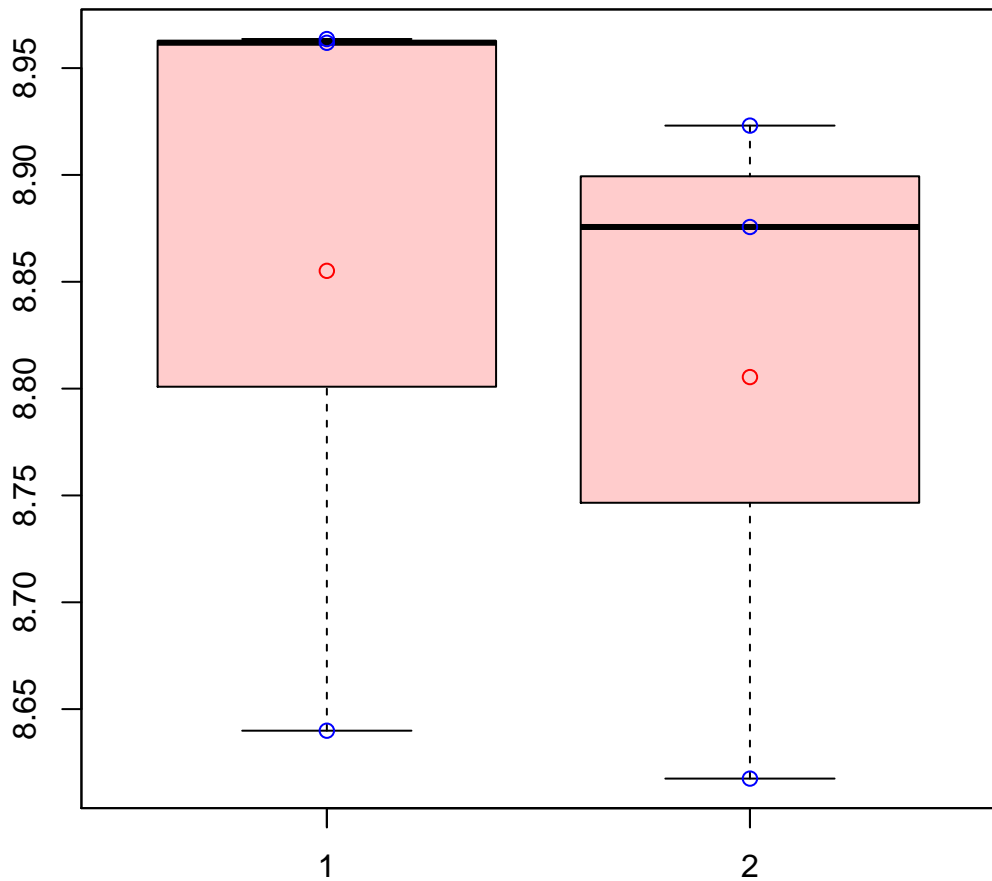

t-Test: p-value = 0.75

# CL8221Contig1|CL8221Contig1

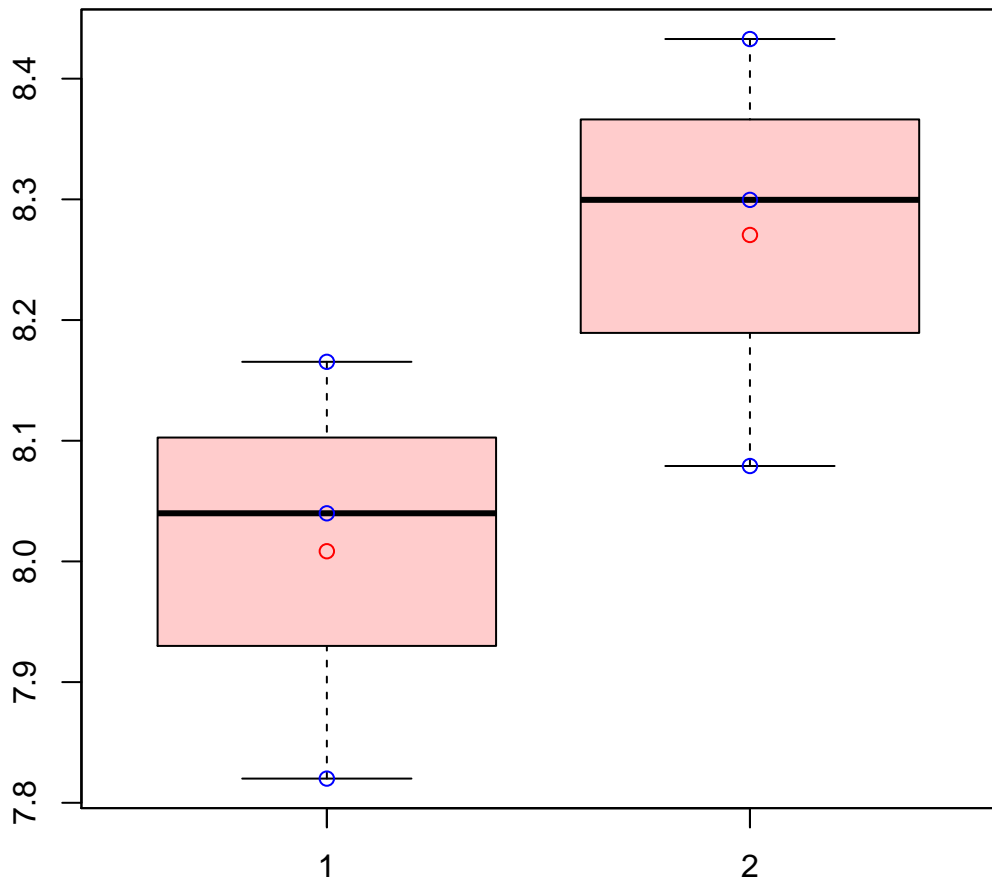

t-Test: p-value = 0.14

# CL8223Contig3|CL8223Contig3

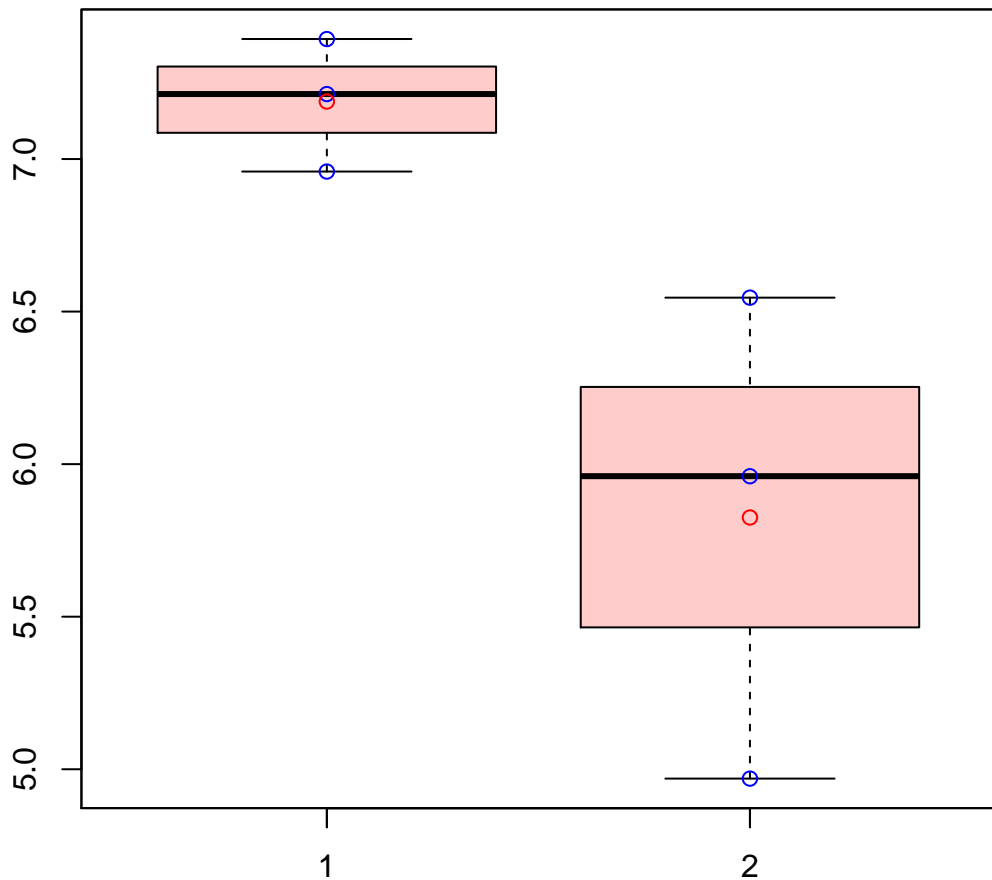

t-Test: p-value = 0.09

# CL8230Contig1|CL8230Contig1

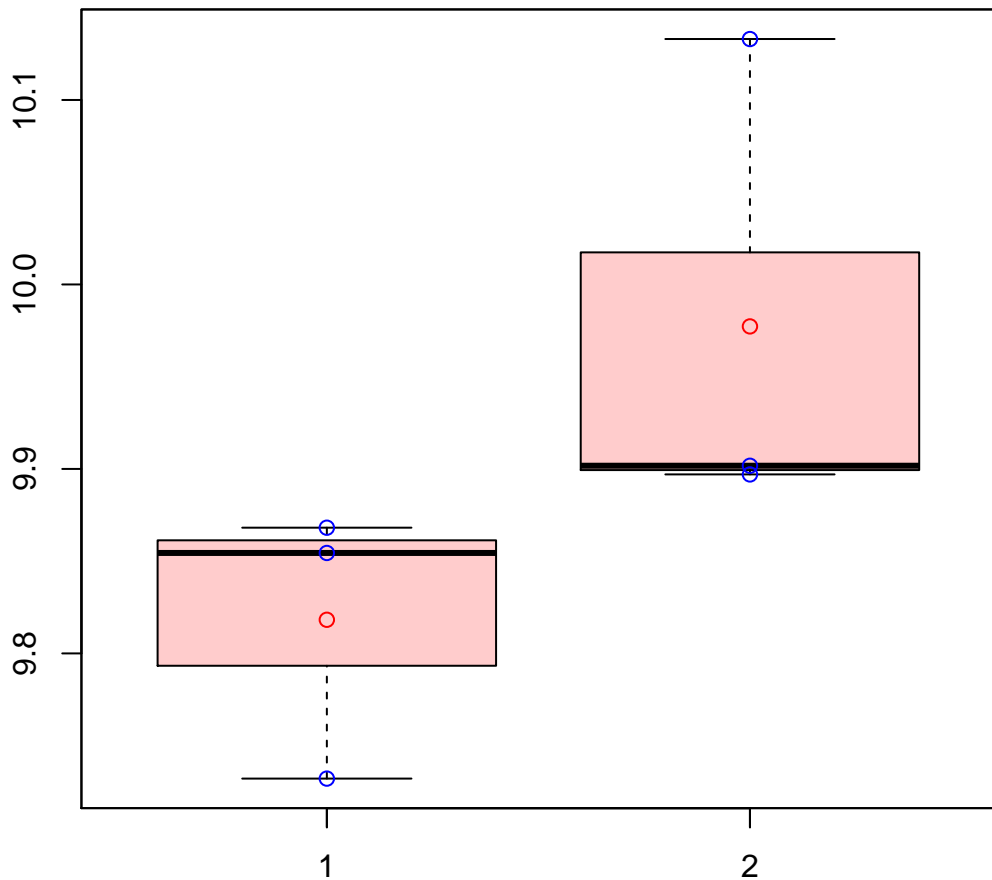

t-Test: p-value = 0.17

# CL8238Contig4|CL8238Contig4

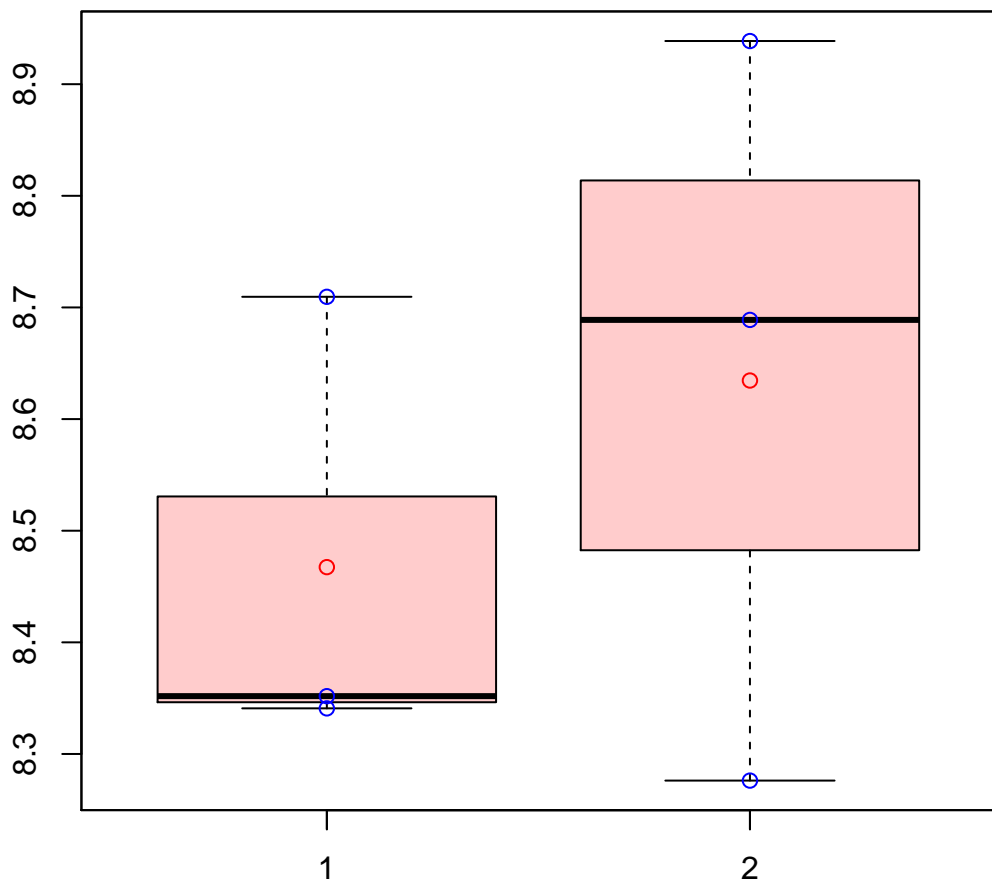

t-Test: p-value = 0.51

# CL8239Contig1|CL8239Contig1

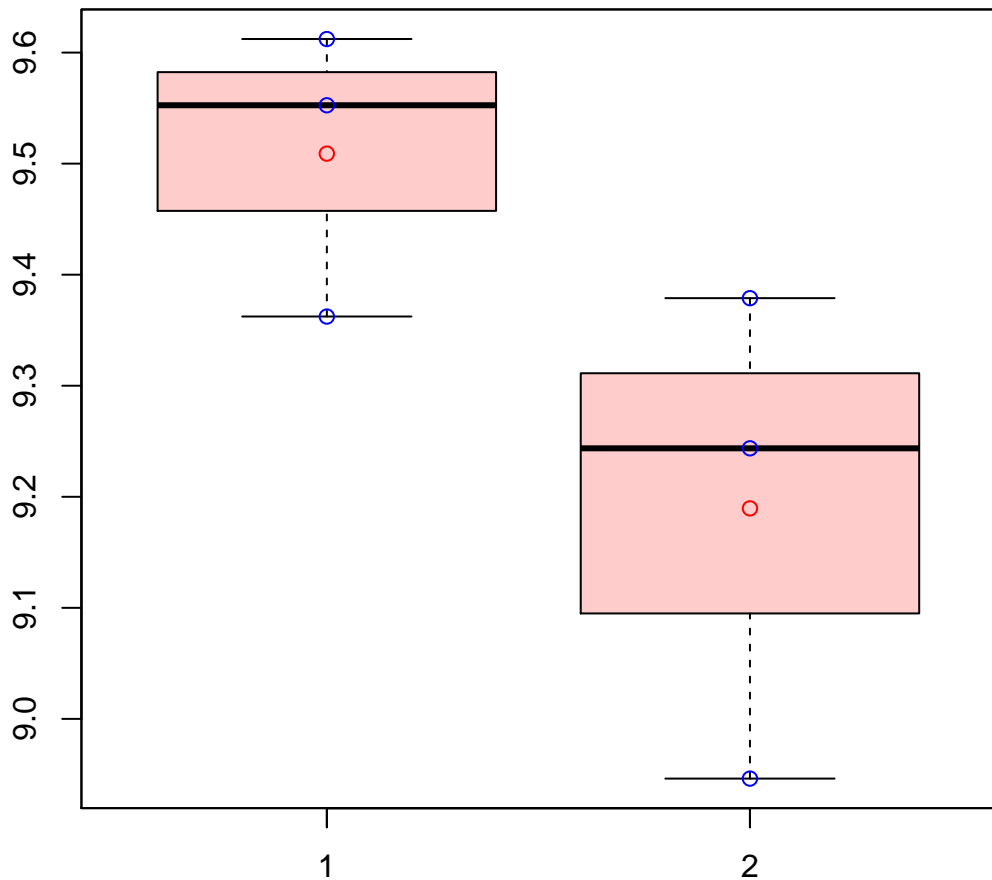

t-Test: p-value = 0.11

# CL8239Contig2|CL8239Contig2

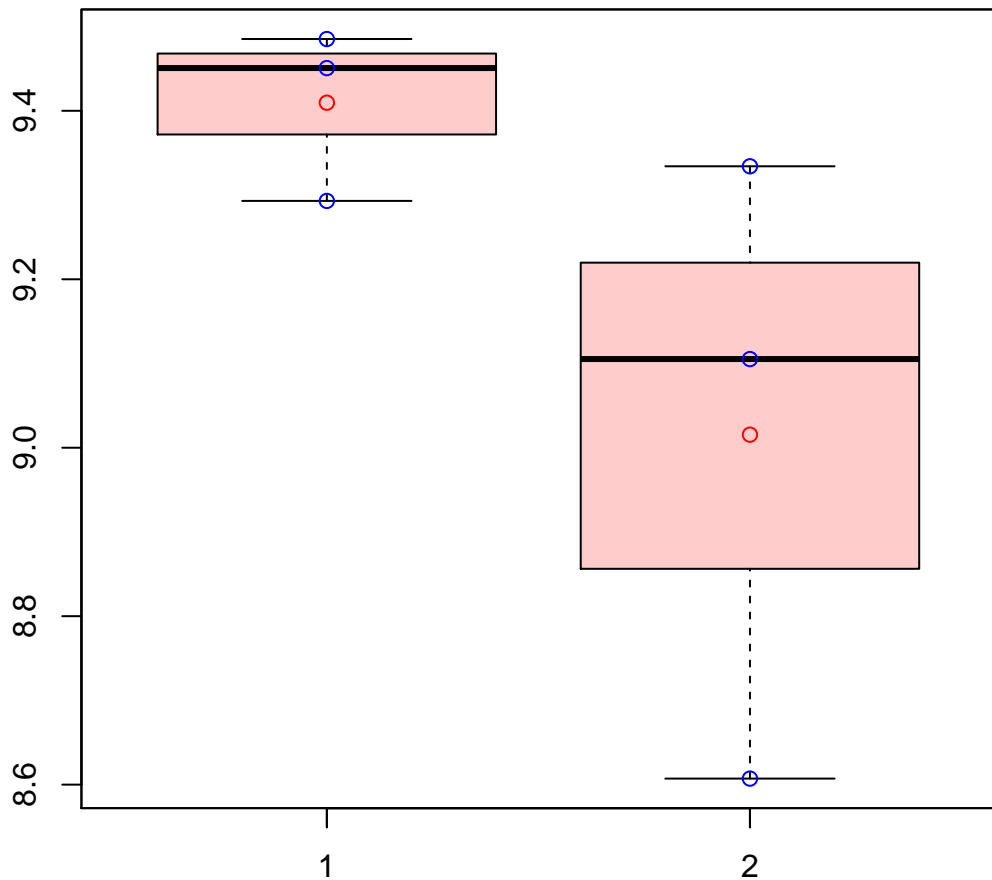

t-Test: p-value = 0.2



# CL8239Contig4|CL8239Contig4

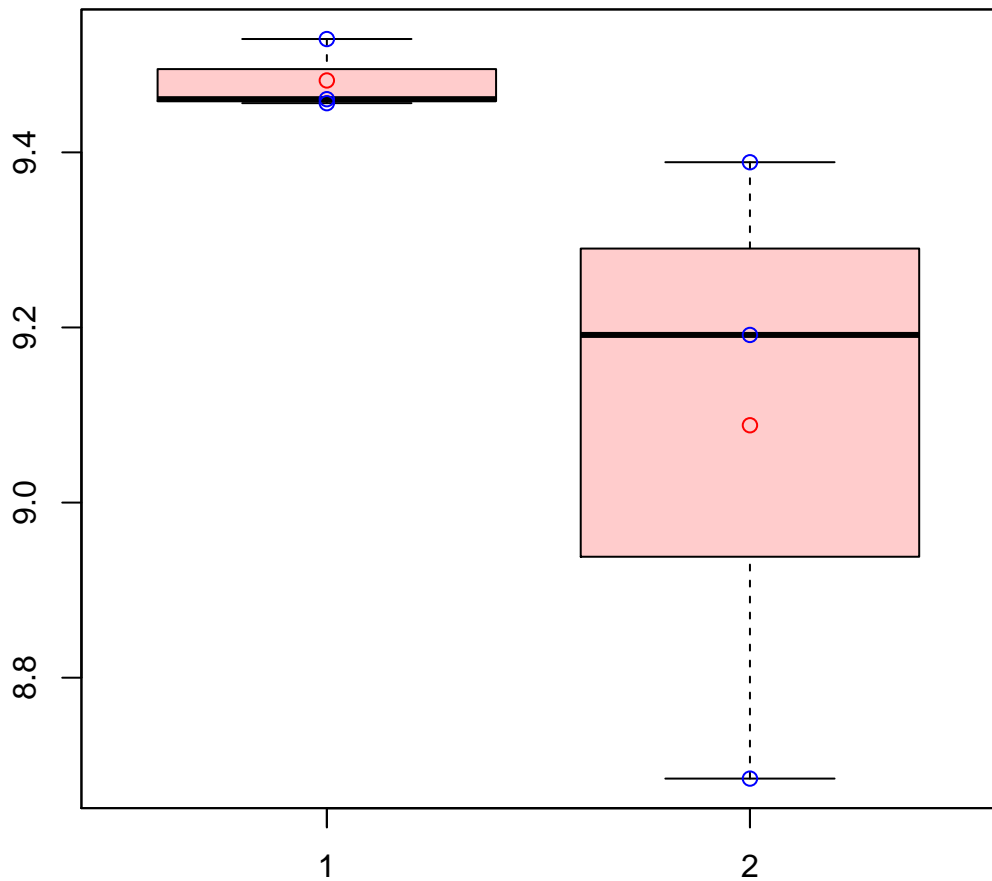

t-Test: p-value = 0.2

# CL8252Contig1|CL8252Contig1

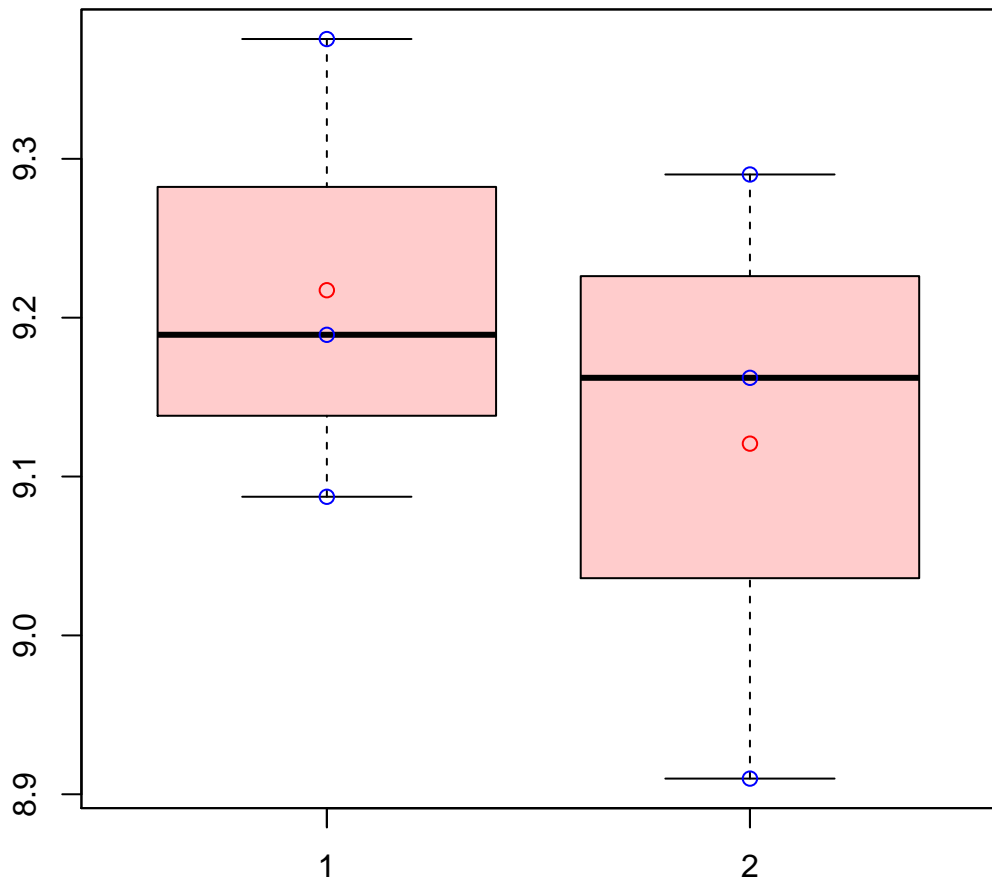

t-Test: p-value = 0.53

# CL8252Contig2|CL8252Contig2

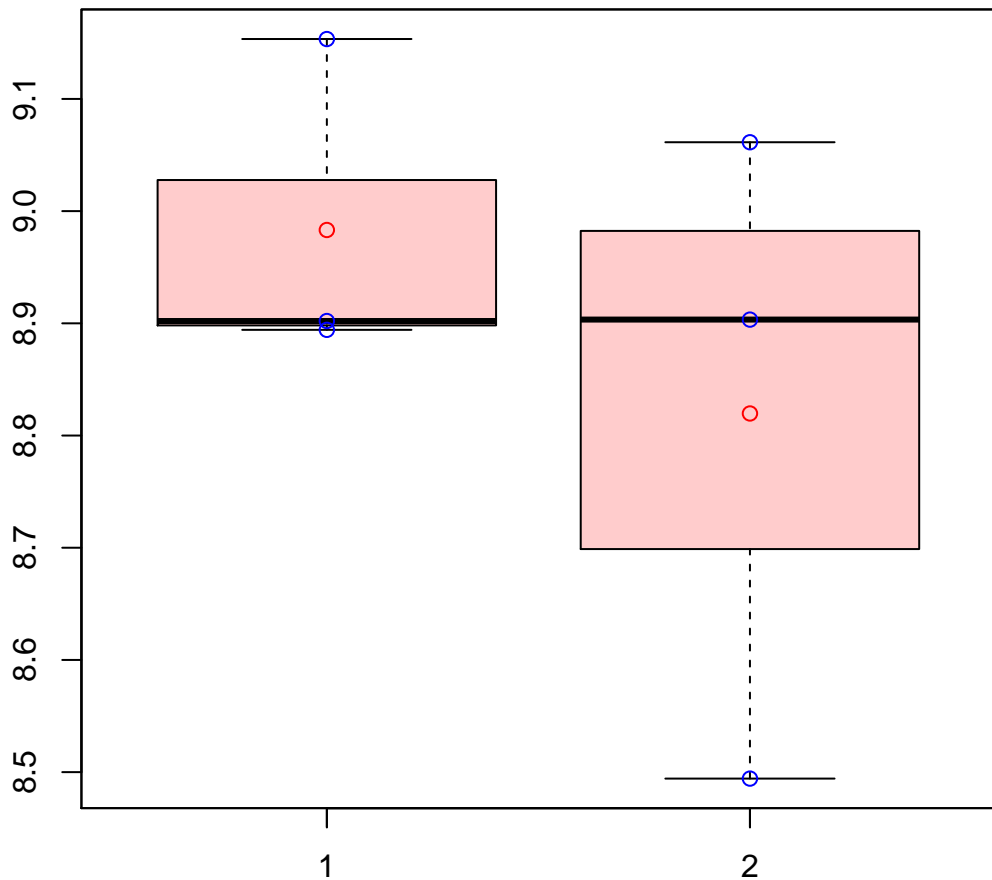

t-Test: p-value = 0.45

# CL8252Contig3|CL8252Contig3



t-Test: p-value = 0.45

# CL826Contig5|CL826Contig5

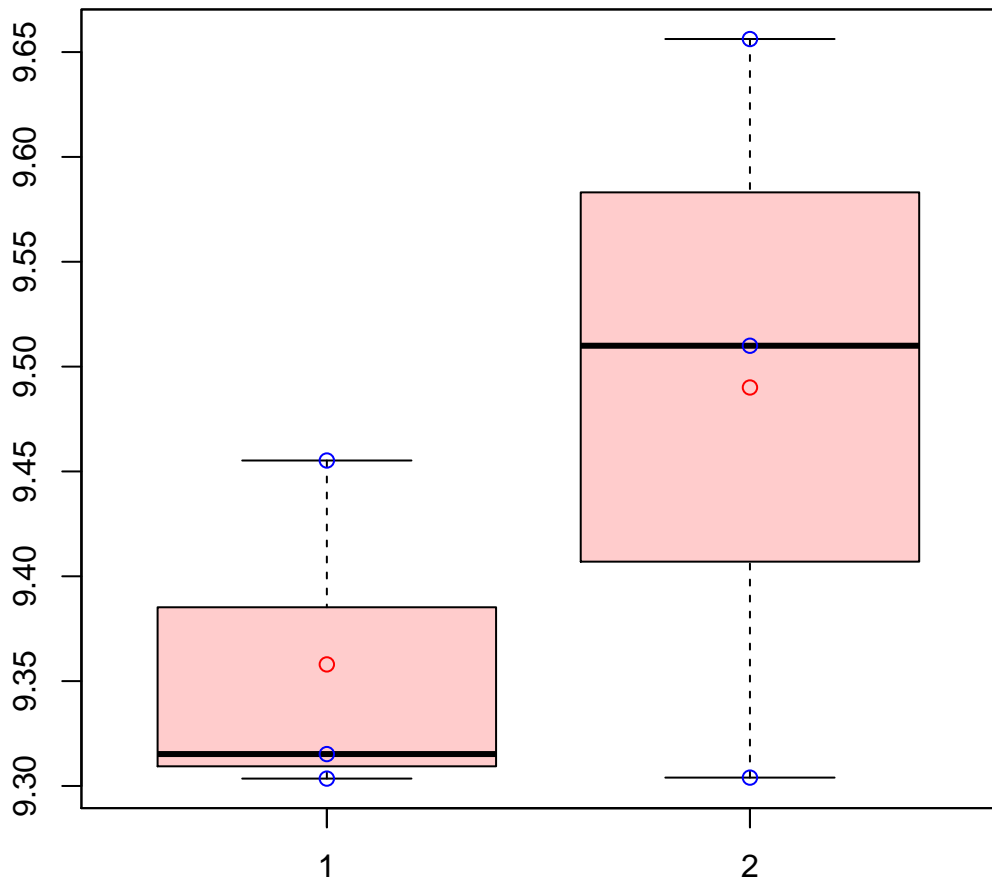

t-Test: p-value = 0.33

# CL8273Contig1|CL8273Contig1

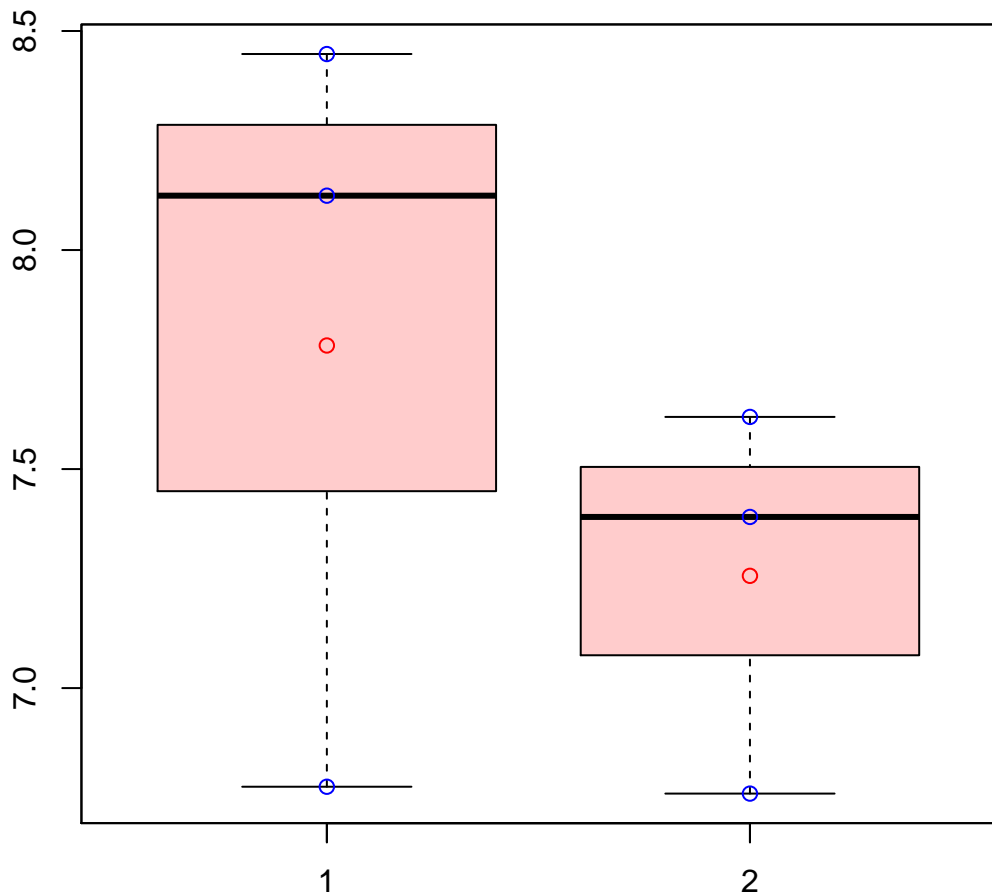

t-Test: p-value = 0.43

# CL8277Contig1|CL8277Contig1

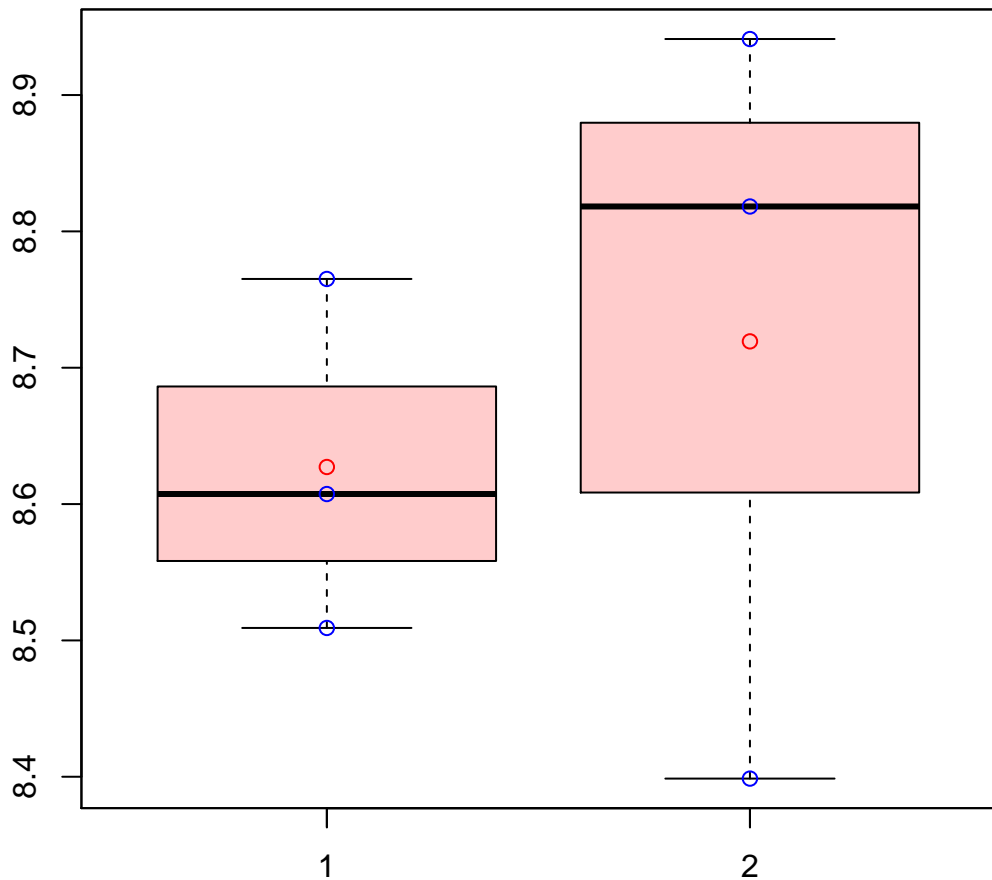

t-Test: p-value = 0.65

# CL8278Contig1|CL8278Contig1

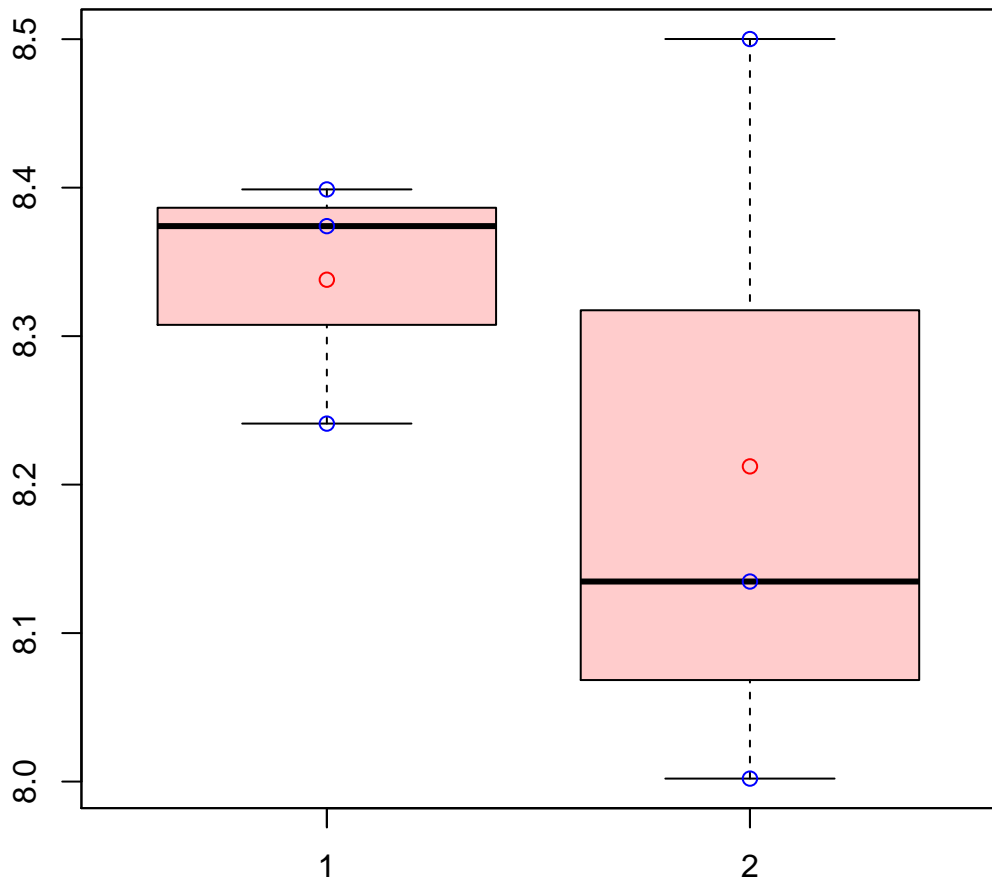

t-Test: p-value = 0.49



# CL8282Contig1|CL8282Contig1

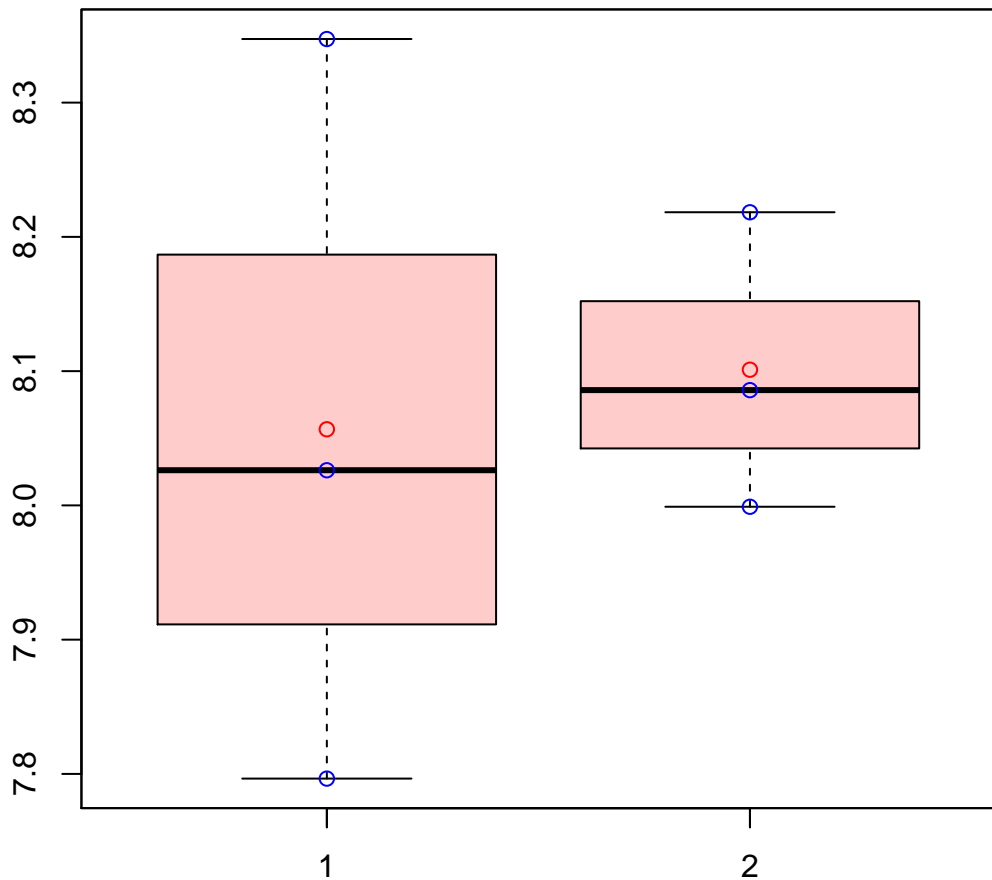

t-Test: p-value = 0.82

# CL828Contig10|CL828Contig10

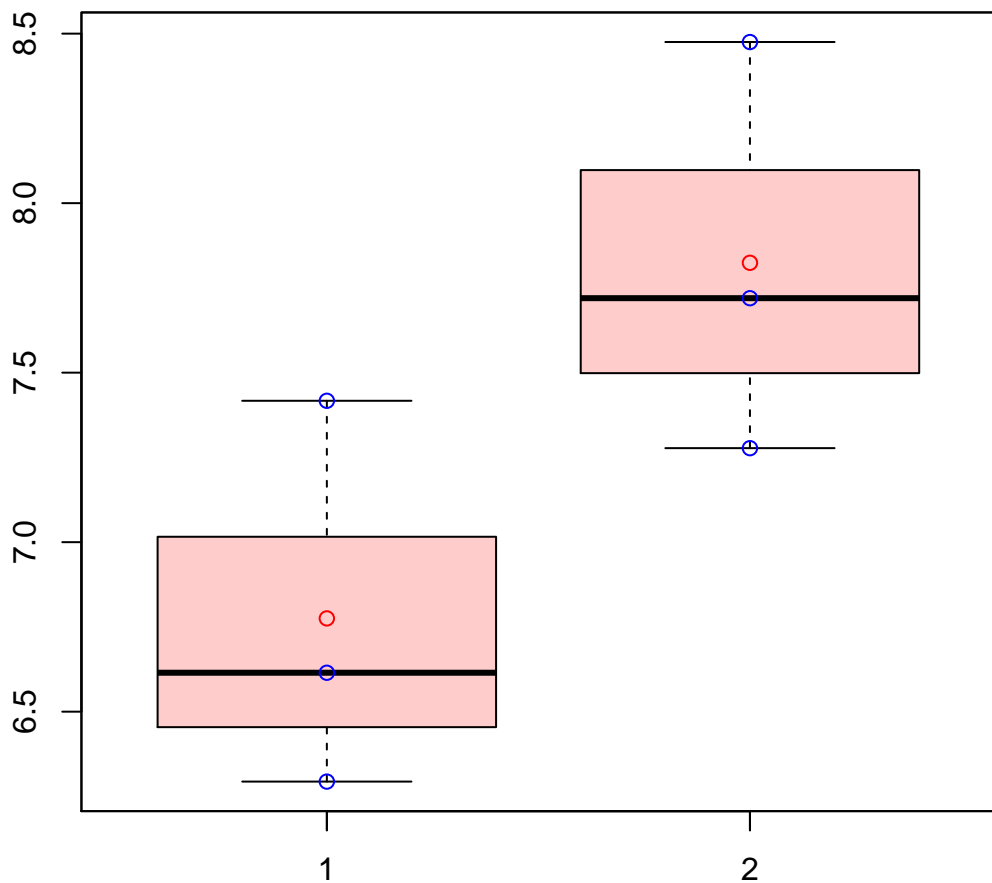

t-Test: p-value = 0.1

# CL828Contig11|CL828Contig11



t-Test: p-value = 0.1

# CL828Contig13|CL828Contig13



t-Test: p-value = 0.1

# CL828Contig14|CL828Contig14



t-Test: p-value = 0.1

# CL828Contig9|CL828Contig9

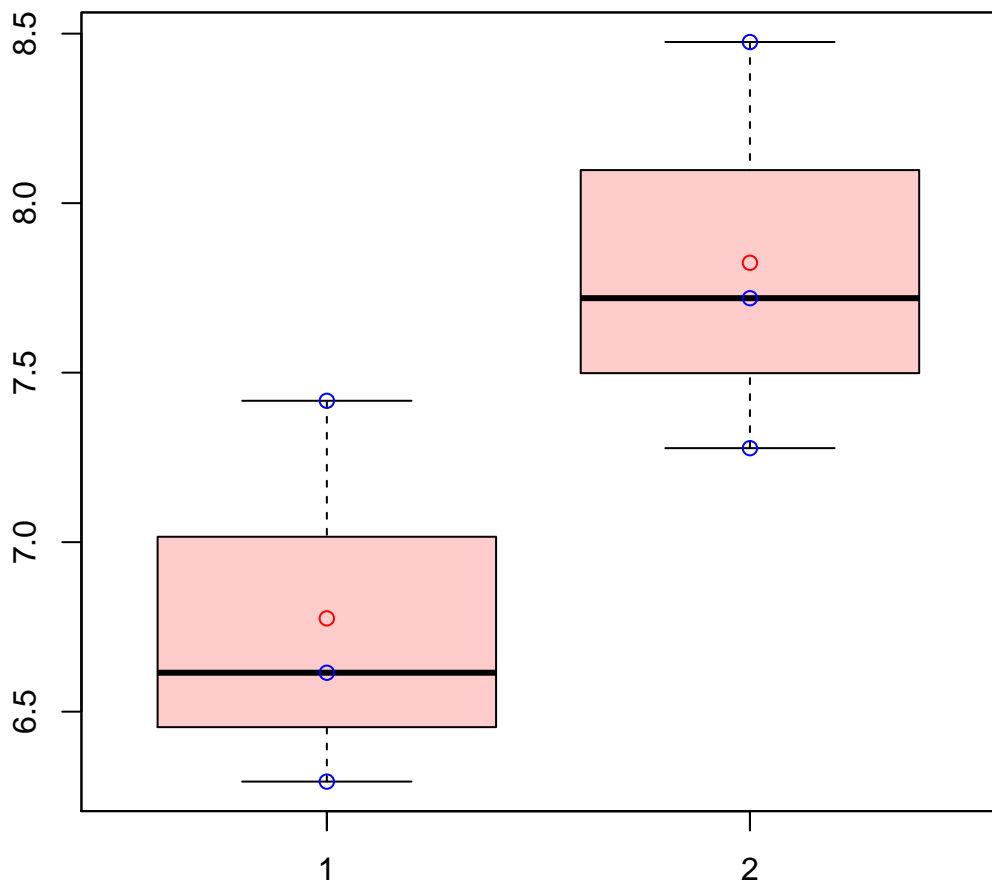

t-Test: p-value = 0.1

# CL8291Contig2|CL8291Contig2

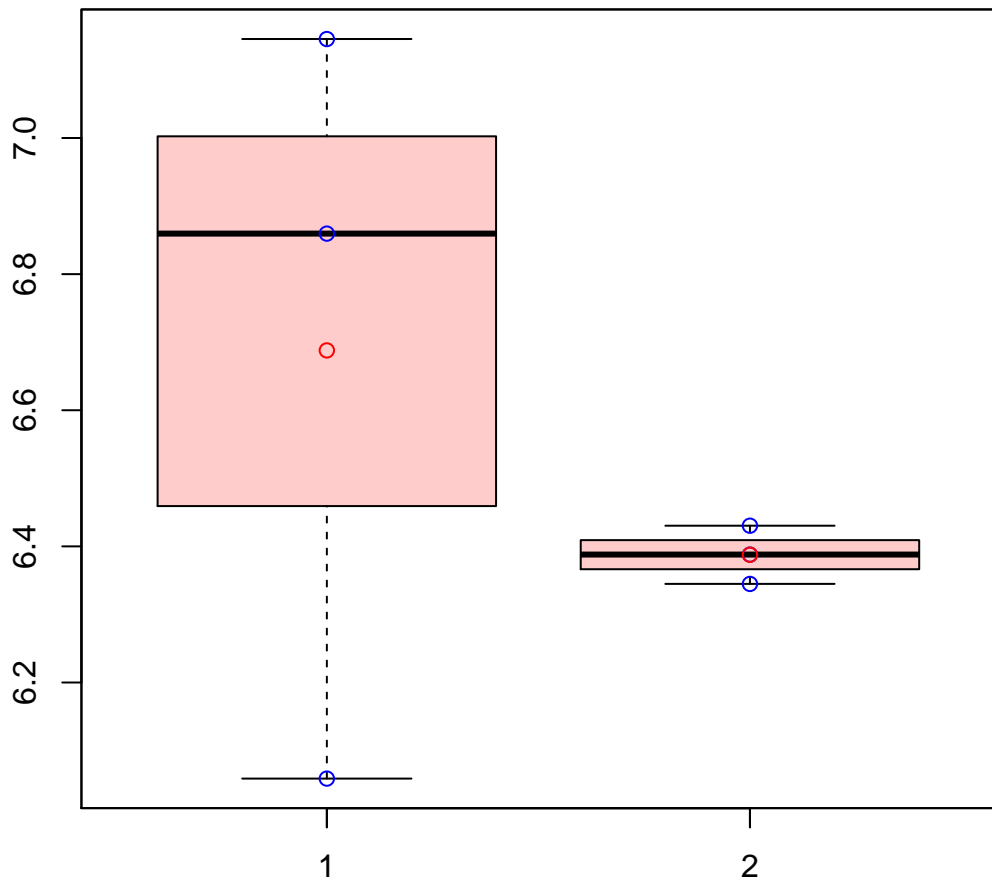

t-Test: p-value = 0.45

## CL829Contig2|CL829Contig2

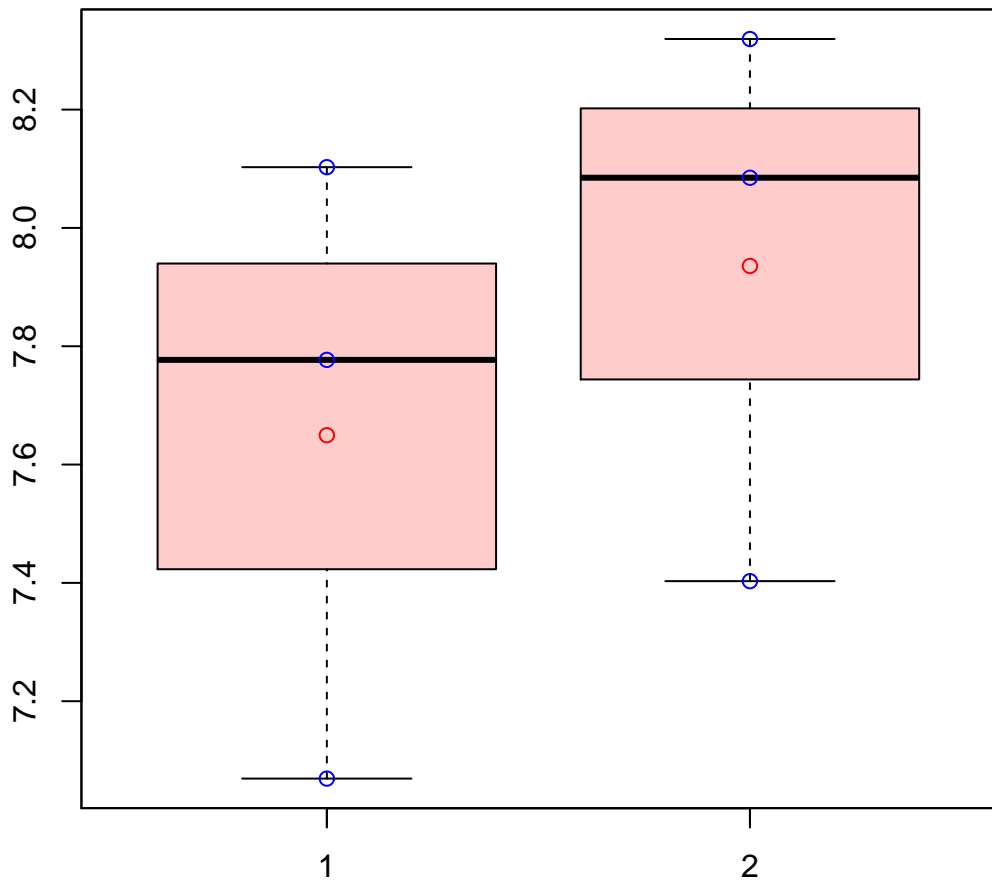

t-Test: p-value = 0.52



# CL82Contig12|CL82Contig12

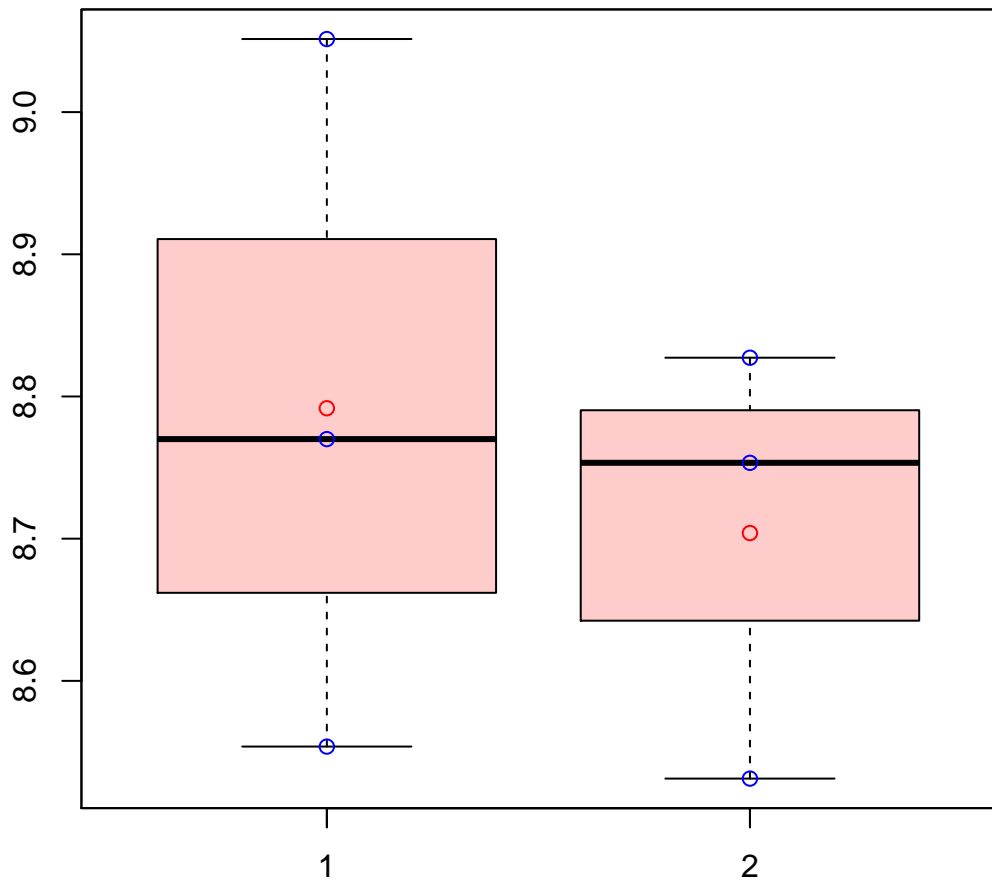

t-Test: p-value = 0.64

# CL82Contig17|CL82Contig17



t-Test: p-value = 0.57

# CL82Contig19|CL82Contig19

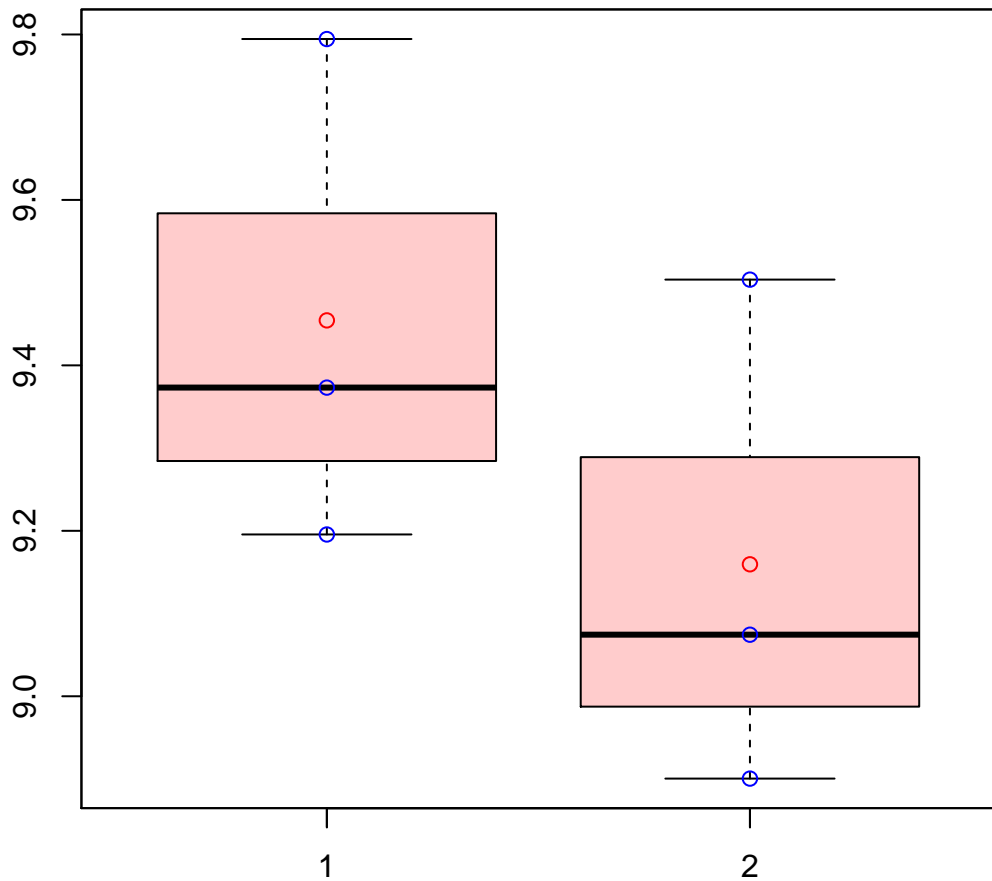

t-Test: p-value = 0.31

# CL82Contig21|CL82Contig21



t-Test: p-value = 0.91

# CL82Contig6|CL82Contig6

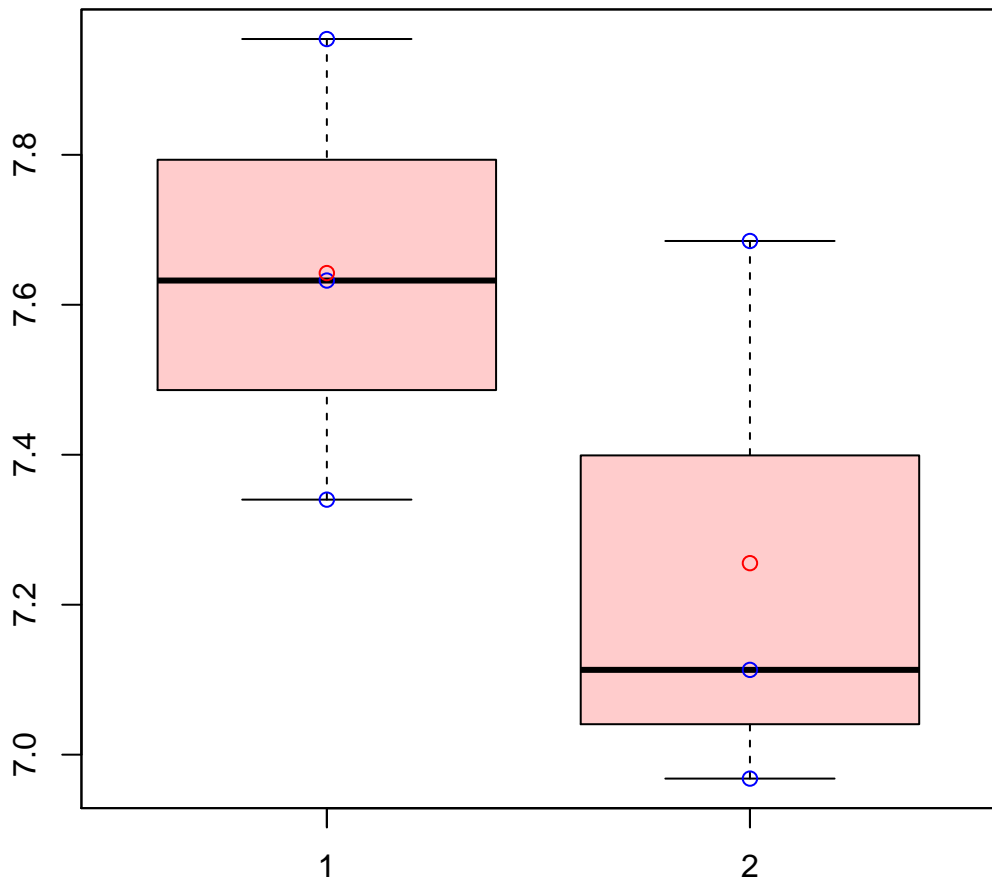

t-Test: p-value = 0.24

# CL82Contig9|CL82Contig9

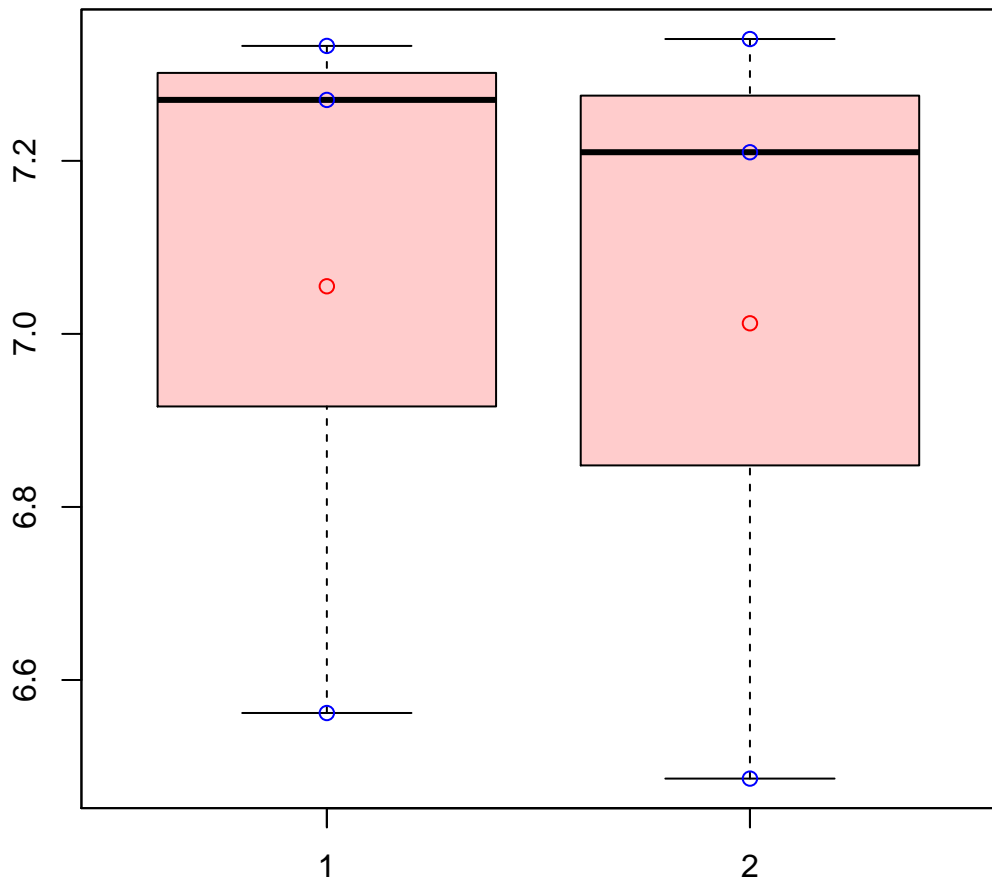

t-Test: p-value = 0.91

# CL8301Contig2|CL8301Contig2

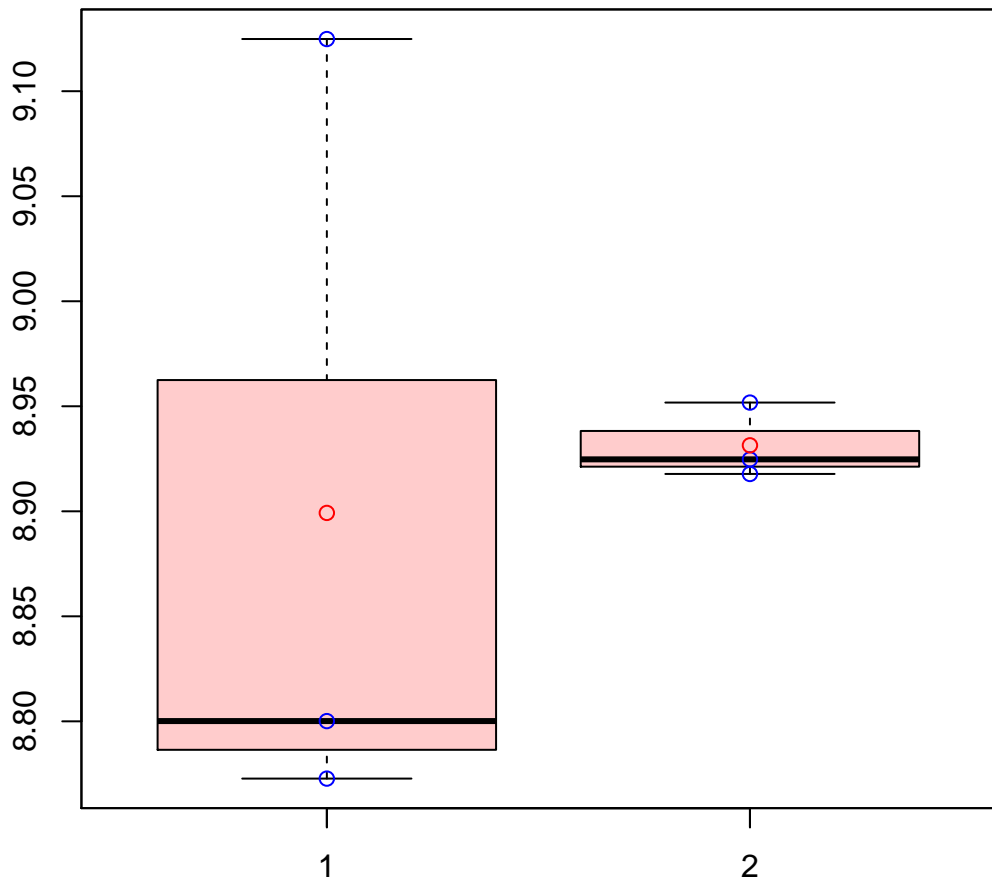

t-Test: p-value = 0.8

# CL8315Contig1|CL8315Contig1

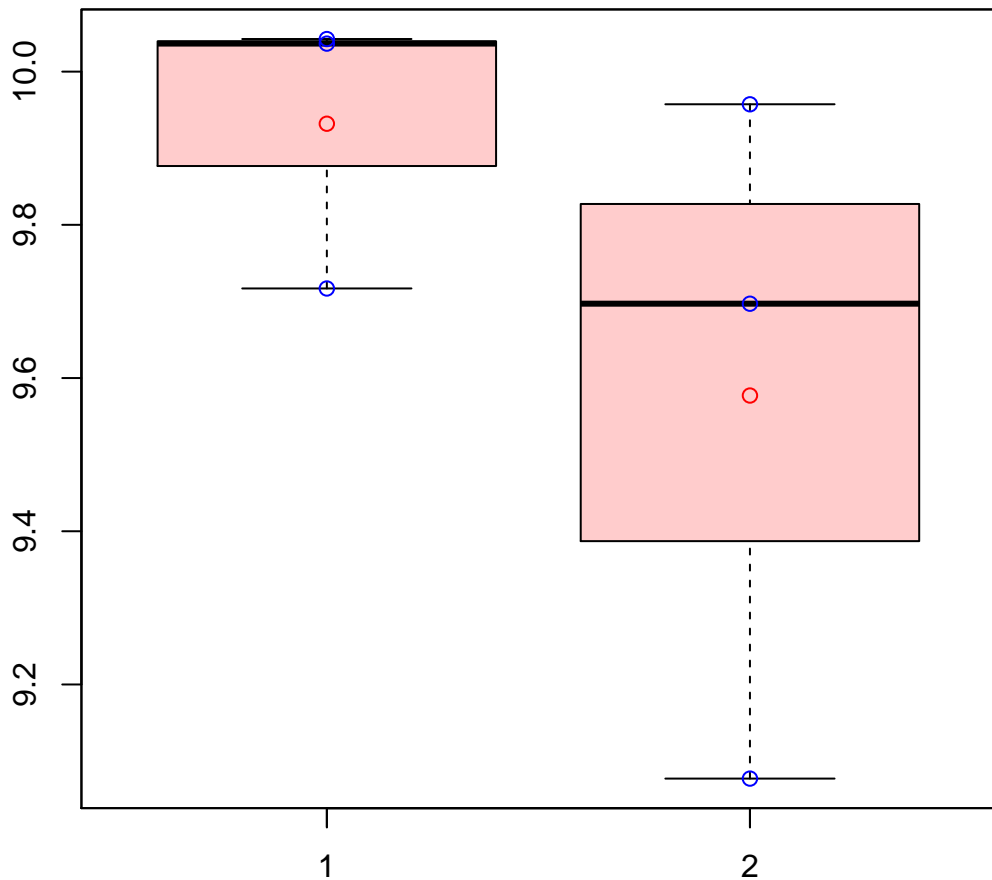

t-Test: p-value = 0.31



# CL8315Contig2|CL8315Contig2



t-Test: p-value = 0.31

# CL833Contig1|CL833Contig1

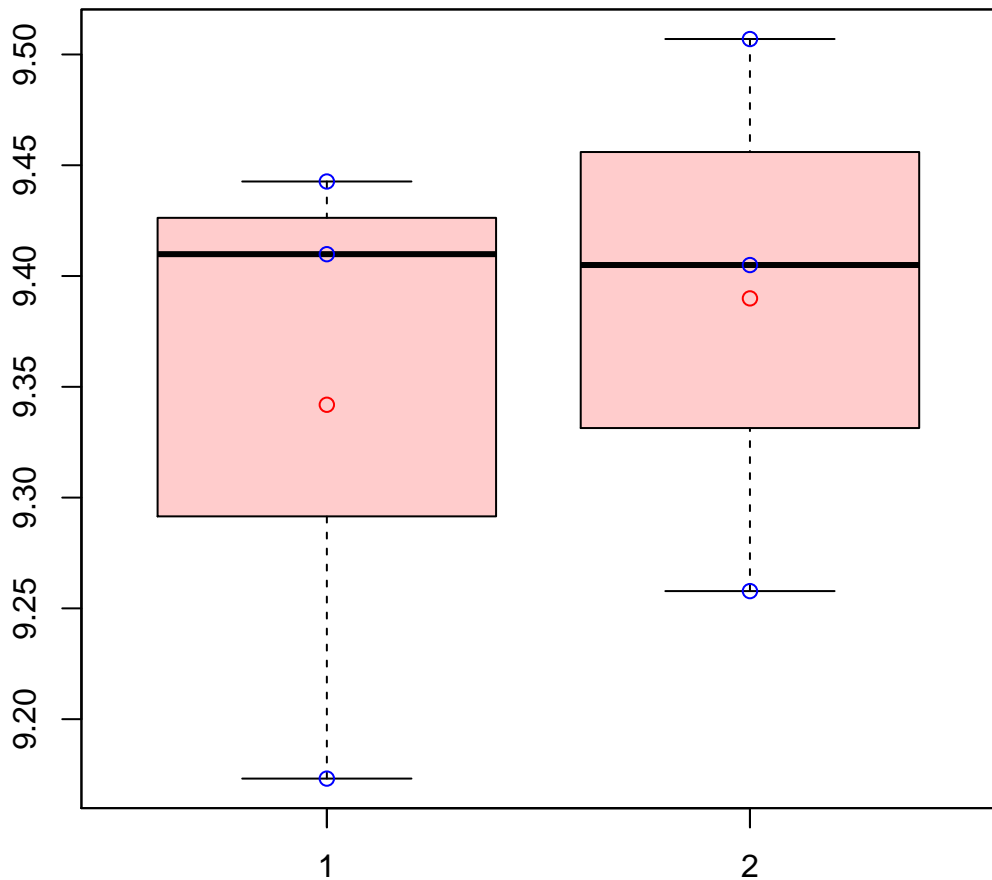

t-Test: p-value = 0.69

# CL8349Contig1|CL8349Contig1

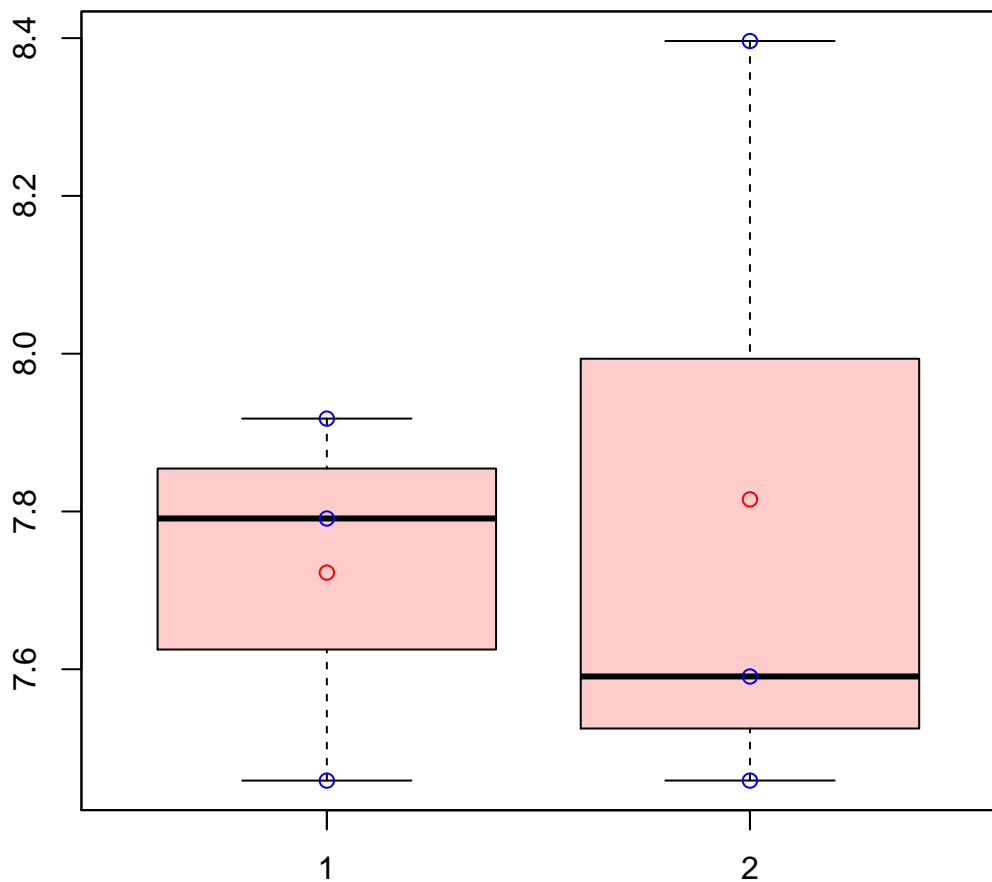

t-Test: p-value = 0.79

# CL8349Contig2|CL8349Contig2

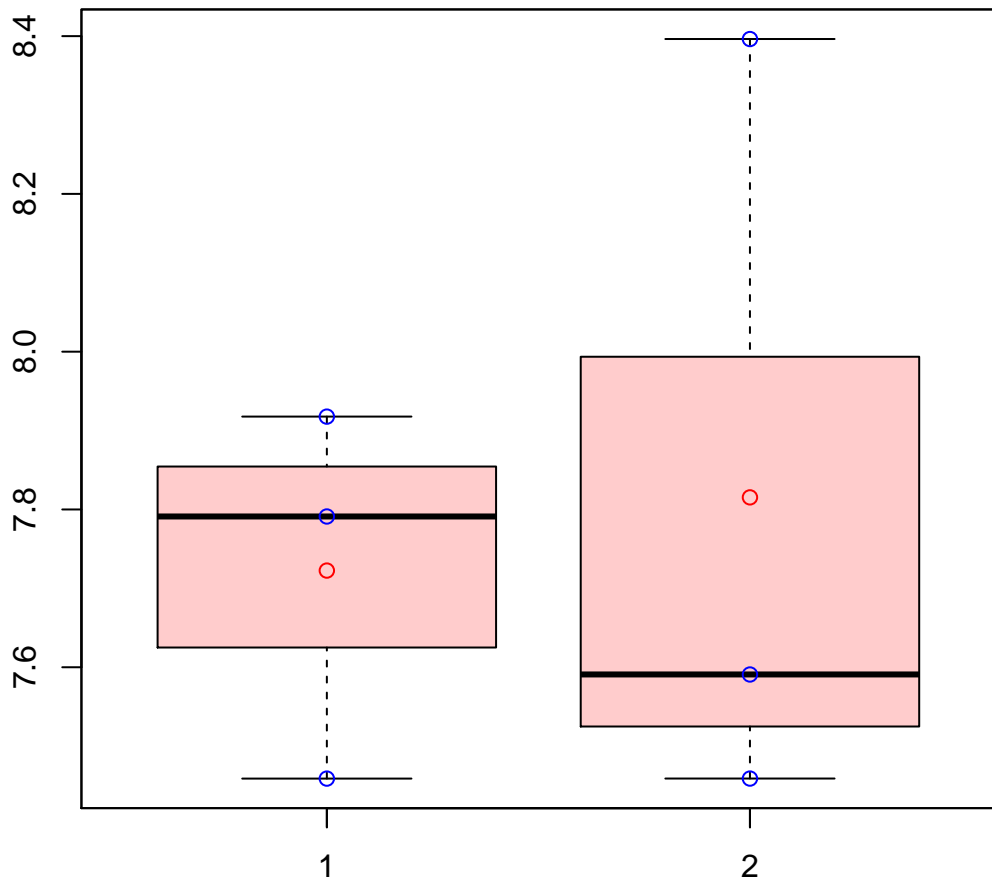

t-Test: p-value = 0.79

# CL8351Contig3|CL8351Contig3

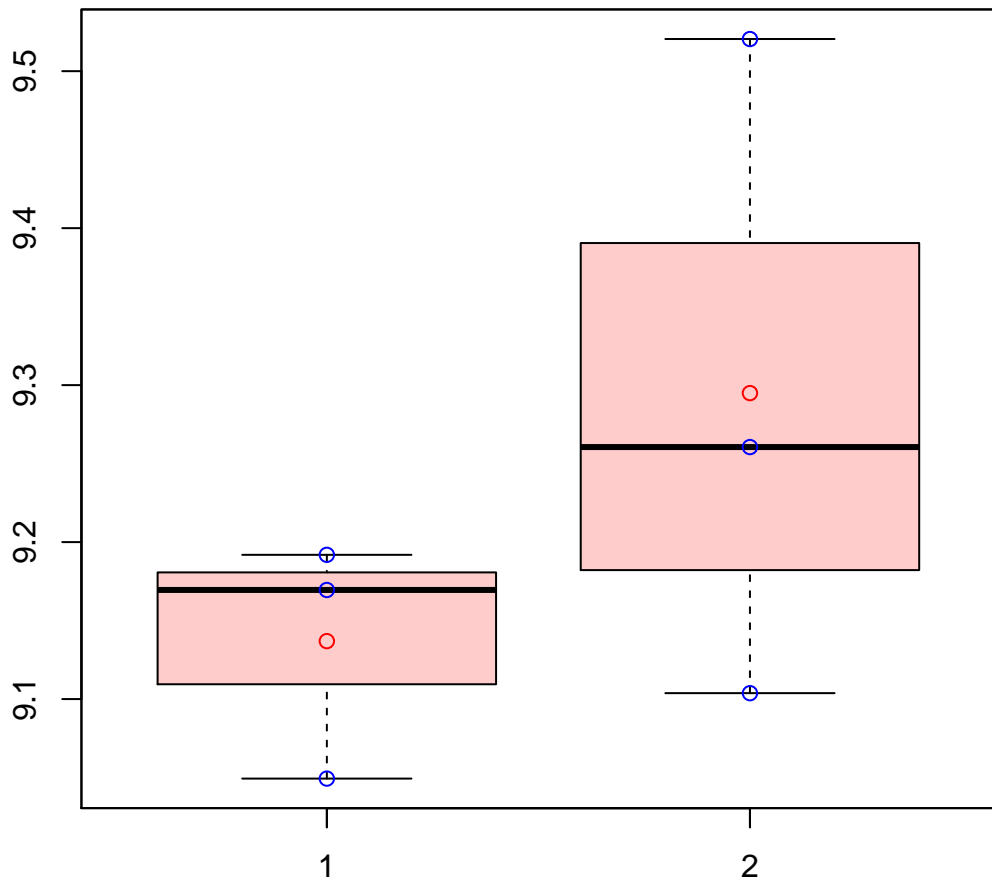

t-Test: p-value = 0.32

# CL8362Contig3|CL8362Contig3

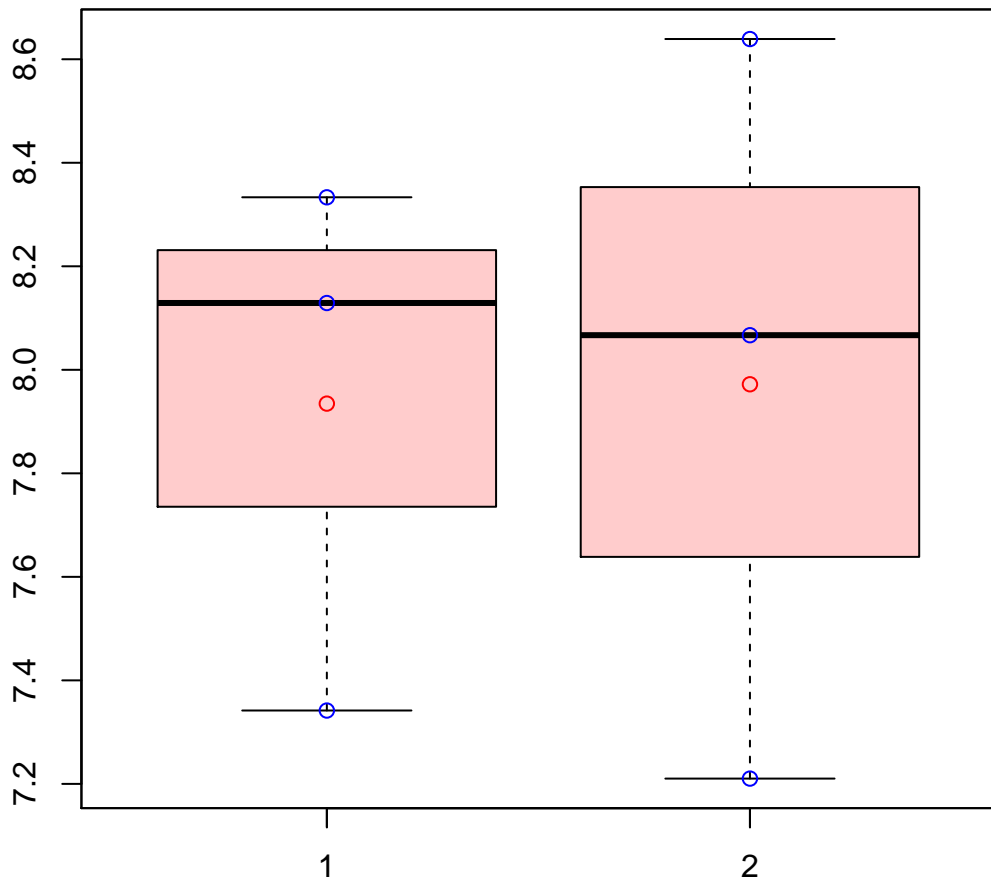

t-Test: p-value = 0.95

# CL836Contig11|CL836Contig11

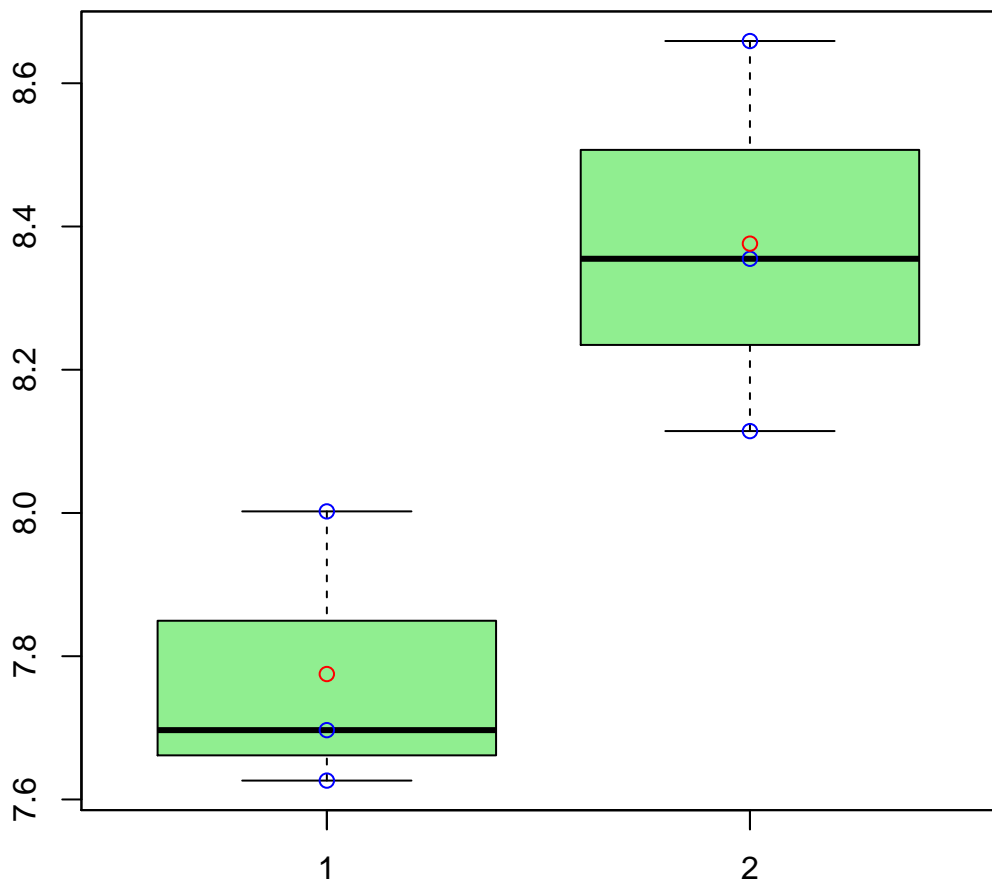

t-Test: p-value = 0.04

# CL8375Contig1|CL8375Contig1

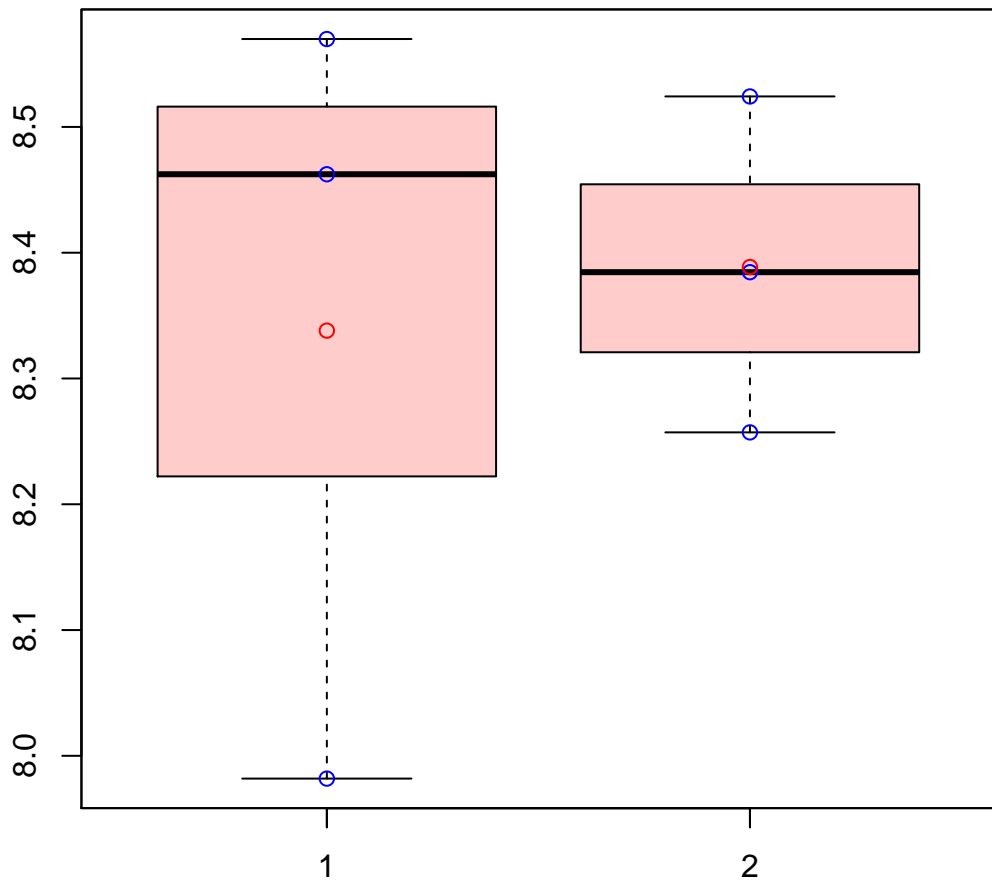

t-Test: p-value = 0.82



# CL837Contig1|CL837Contig1

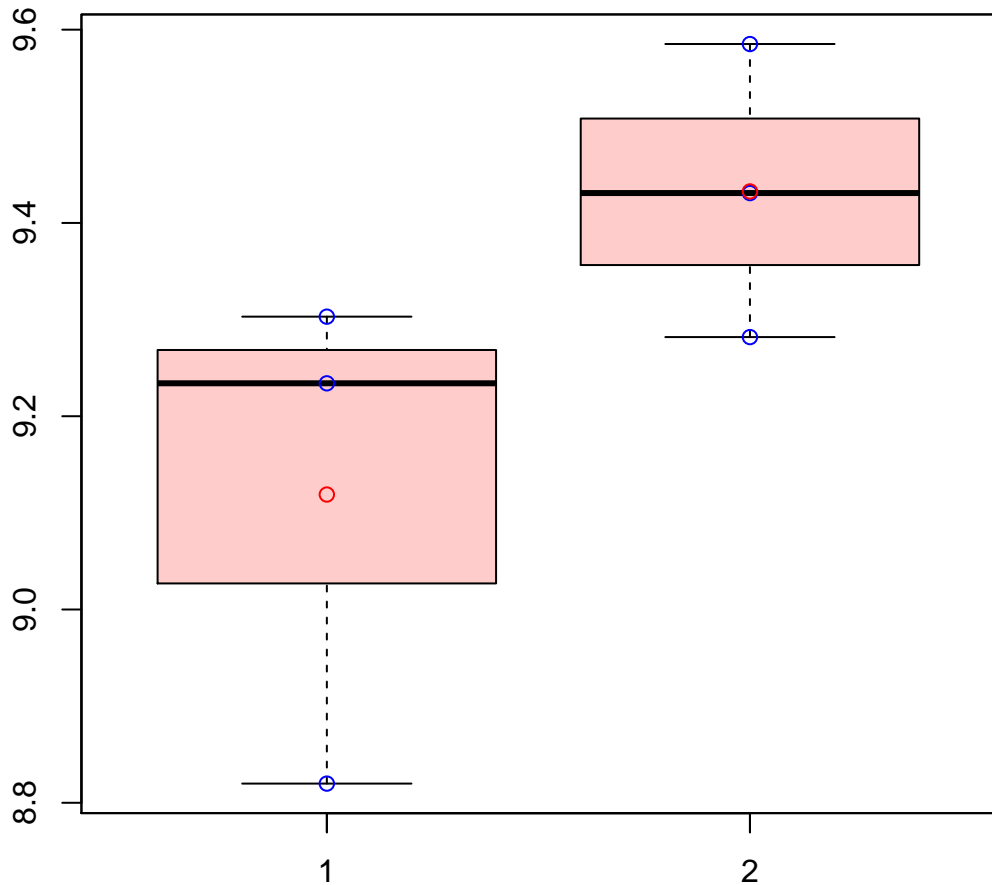

t-Test: p-value = 0.16

# CL837Contig2|CL837Contig2

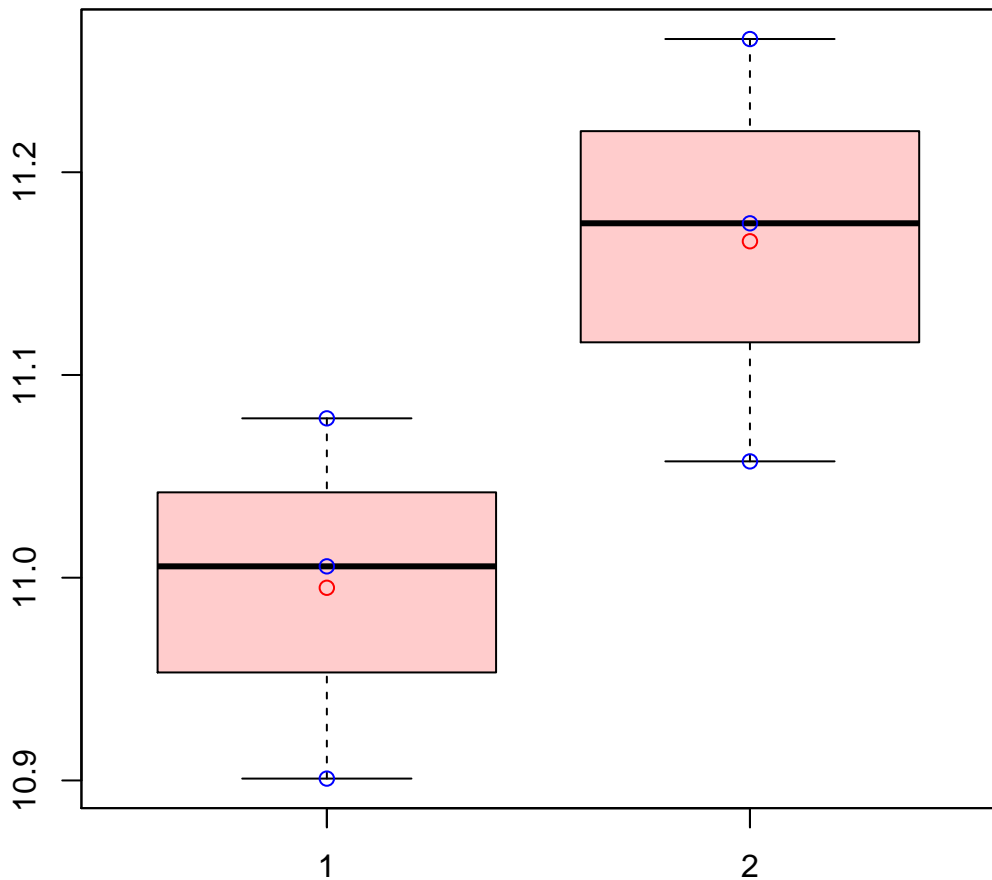

t-Test: p-value = 0.1

# CL837Contig4|CL837Contig4

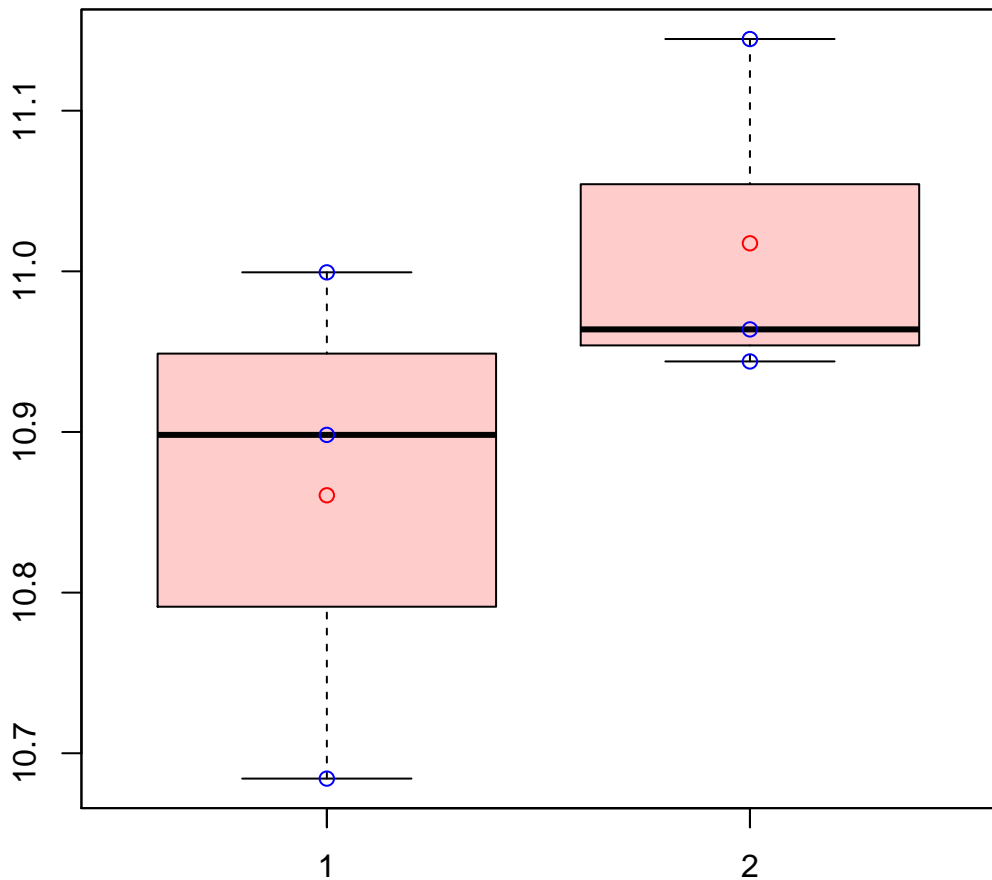

t-Test: p-value = 0.24

# CL837Contig5|CL837Contig5

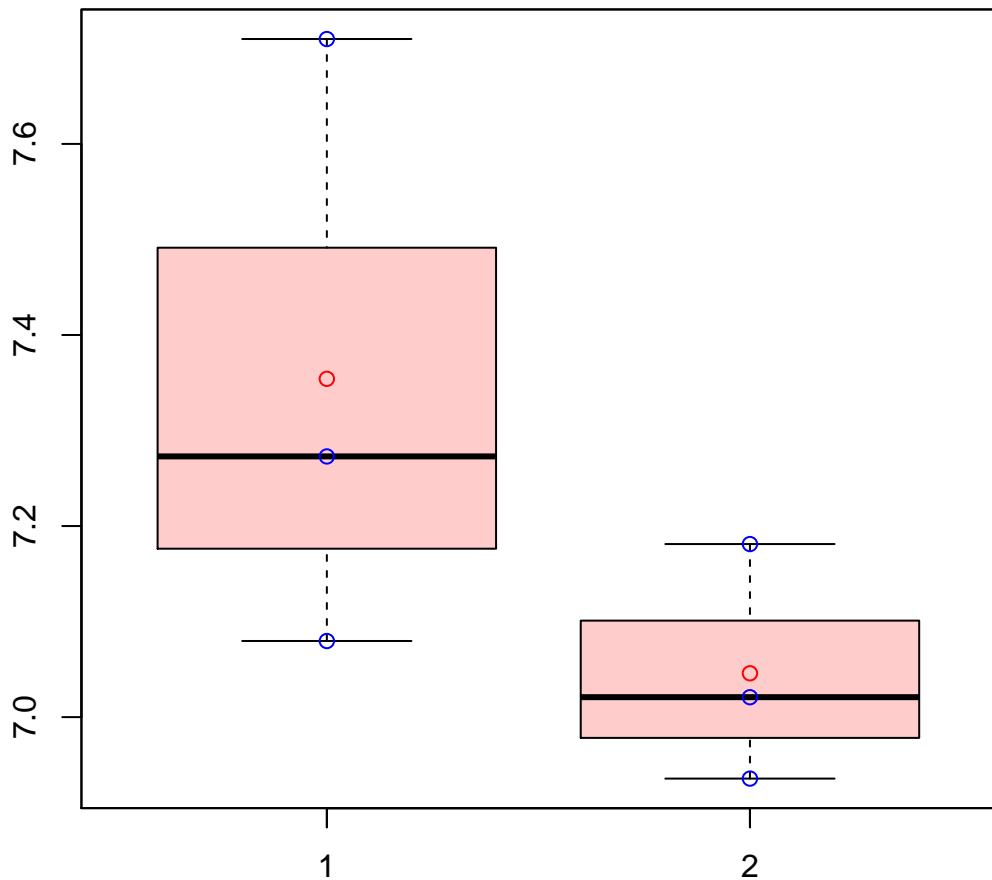

t-Test: p-value = 0.23

# CL837Contig7|CL837Contig7

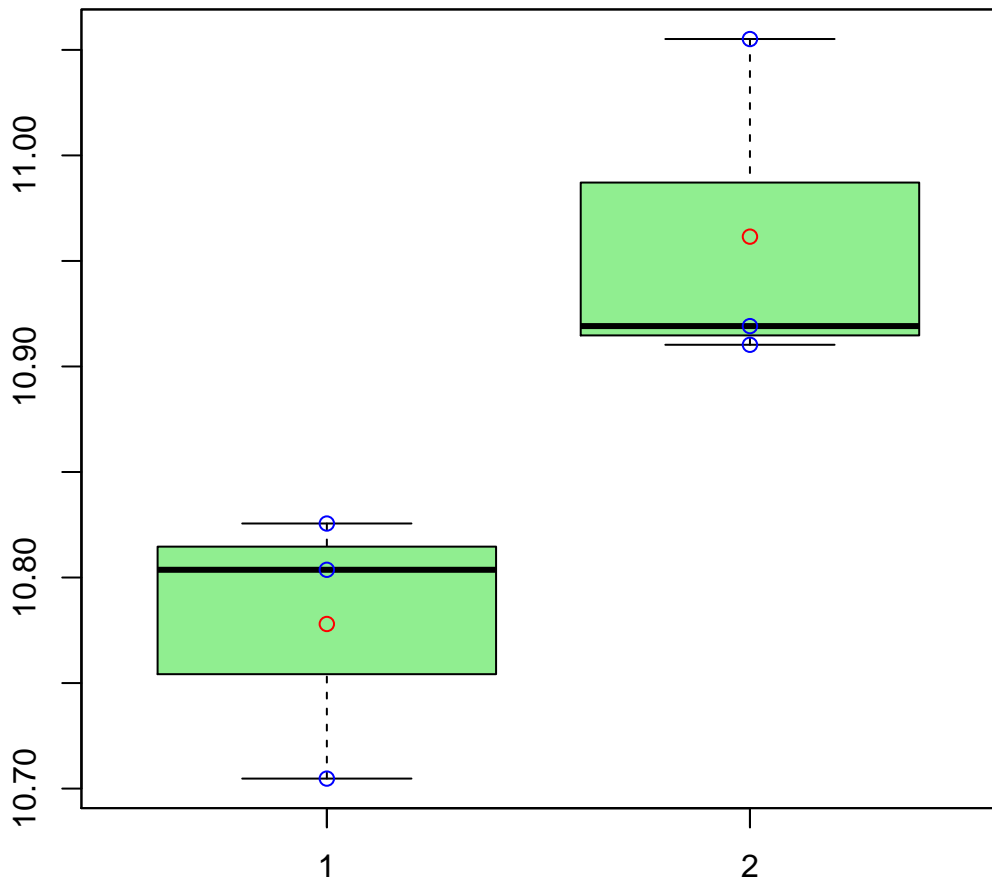

t-Test: p-value = 0.04

# CL8383Contig1|CL8383Contig1

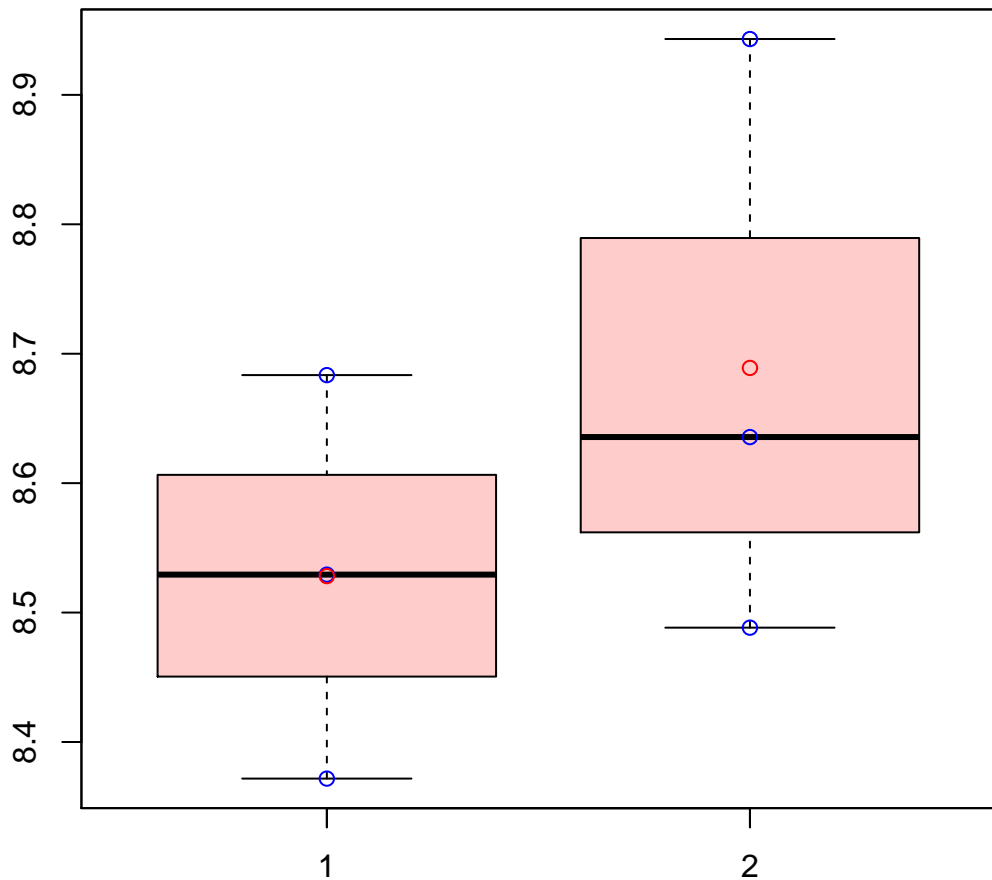

t-Test: p-value = 0.38

# CL8388Contig1|CL8388Contig1

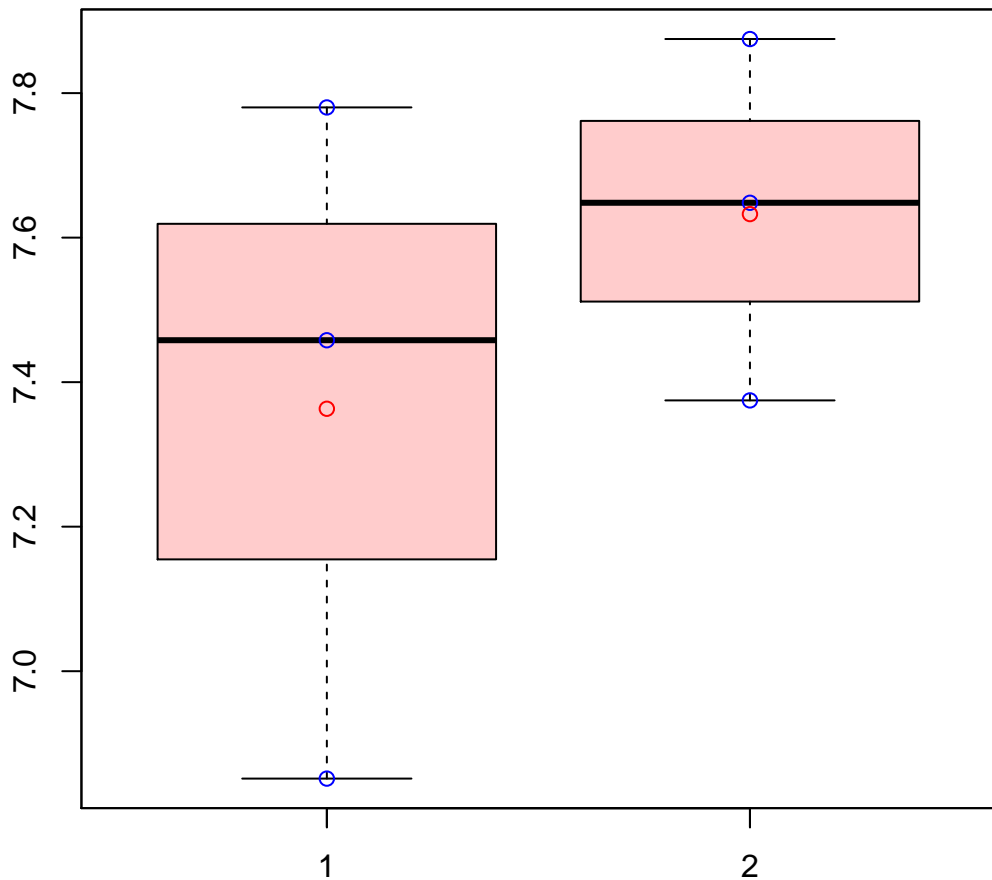

t-Test: p-value = 0.45

# CL8388Contig2|CL8388Contig2



t-Test: p-value = 0.45



# CL8390Contig2|CL8390Contig2

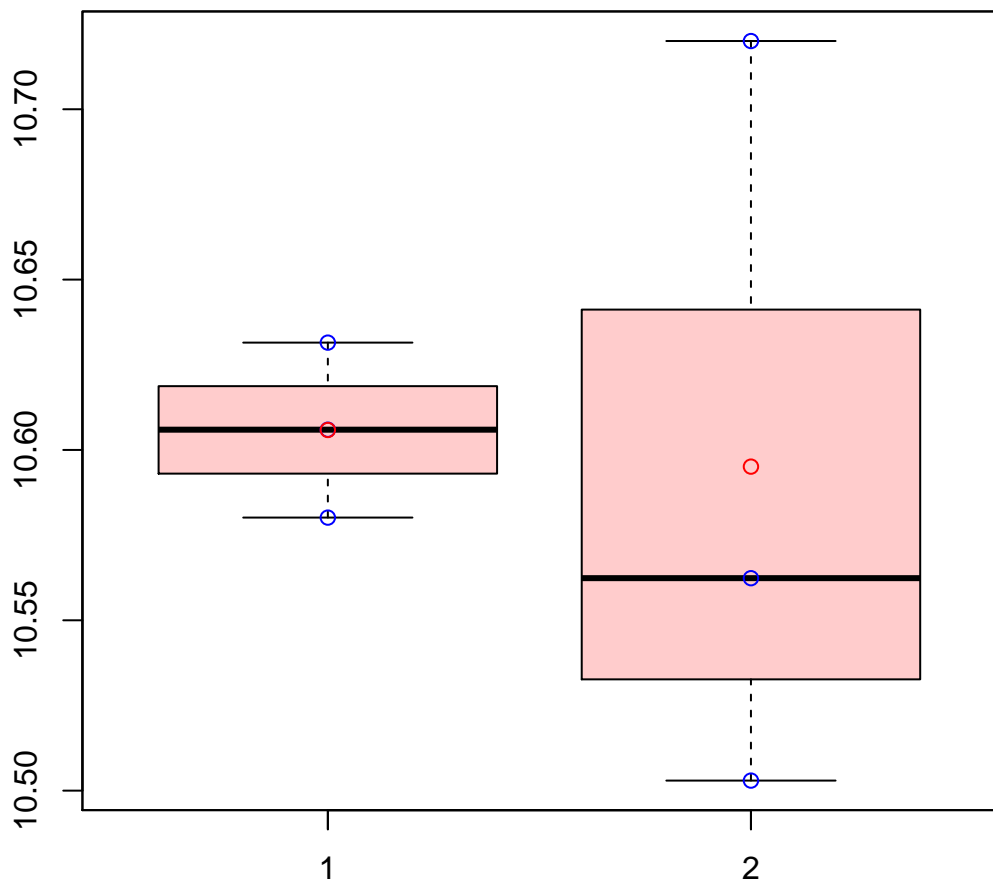

t-Test: p-value = 0.89

# CL8390Contig3|CL8390Contig3

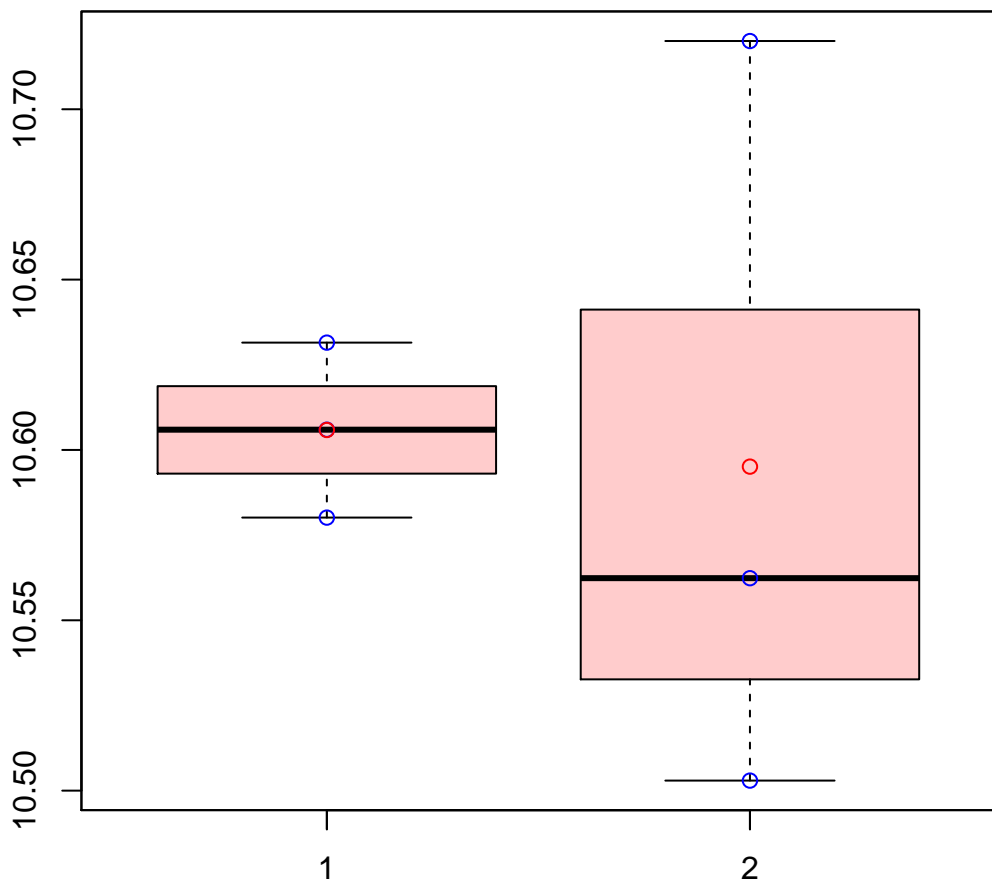

t-Test: p-value = 0.89

# CL83Contig4|CL83Contig4

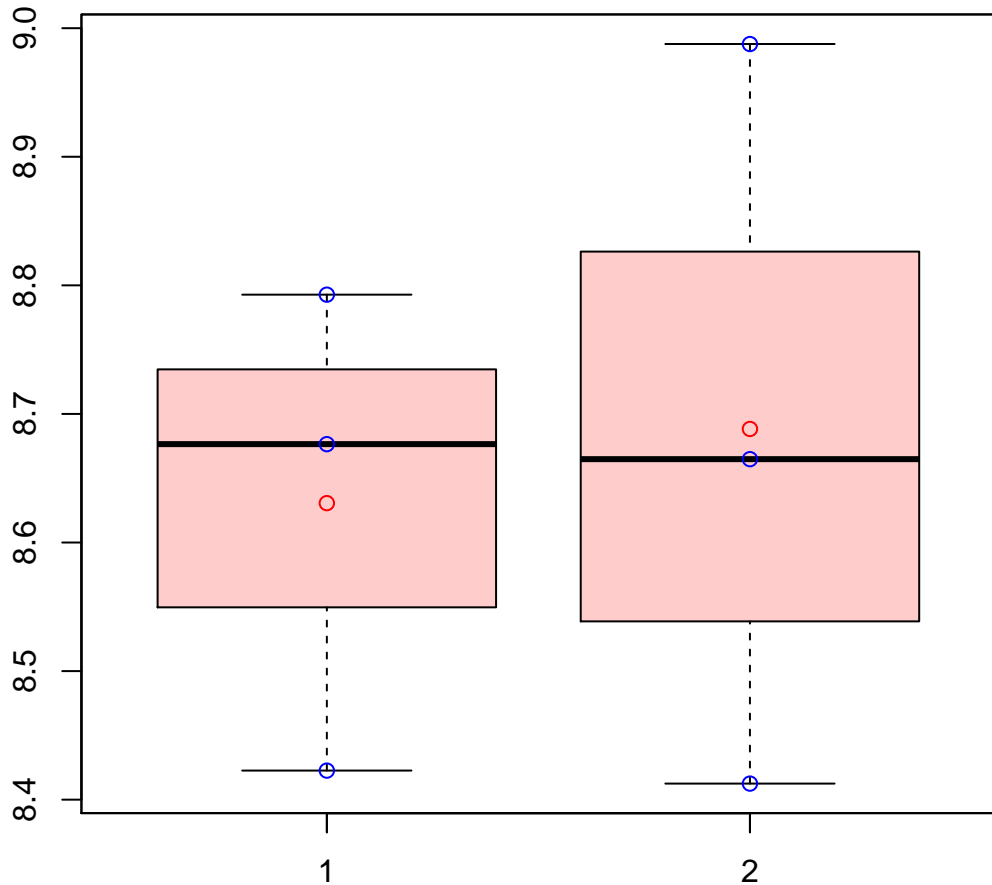

t-Test: p-value = 0.79

# CL840Contig4|CL840Contig4

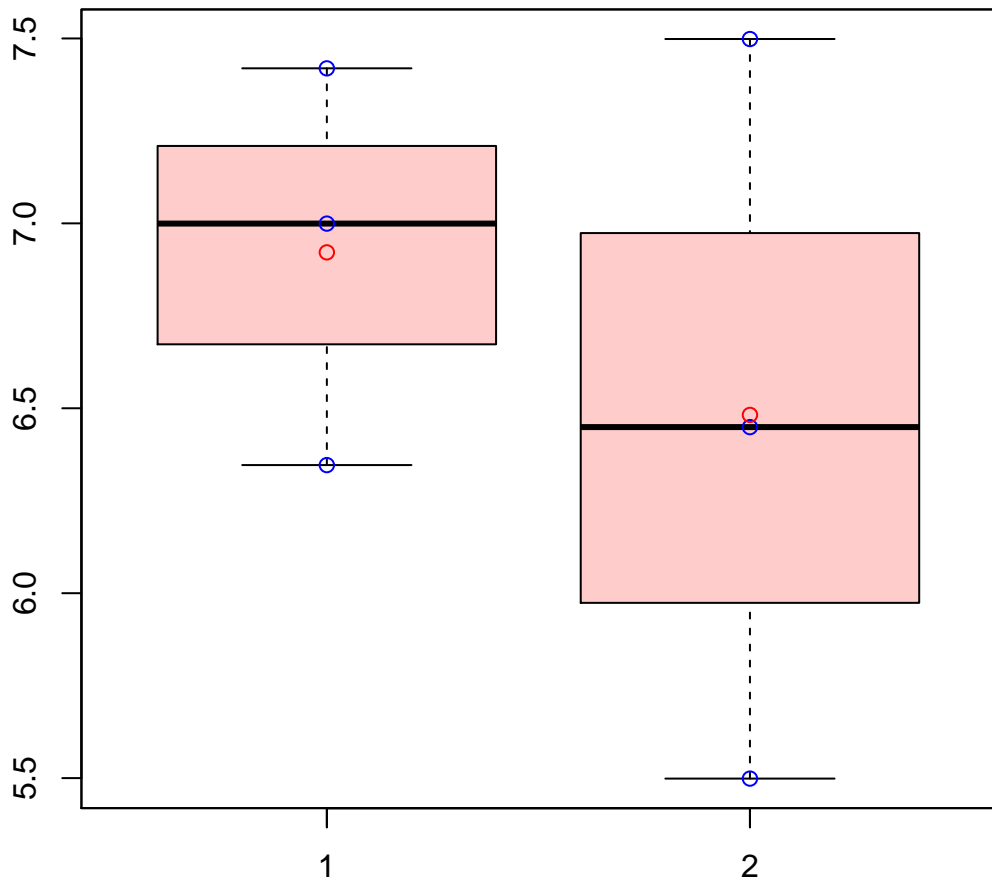

t-Test: p-value = 0.55

# CL840Contig9|CL840Contig9

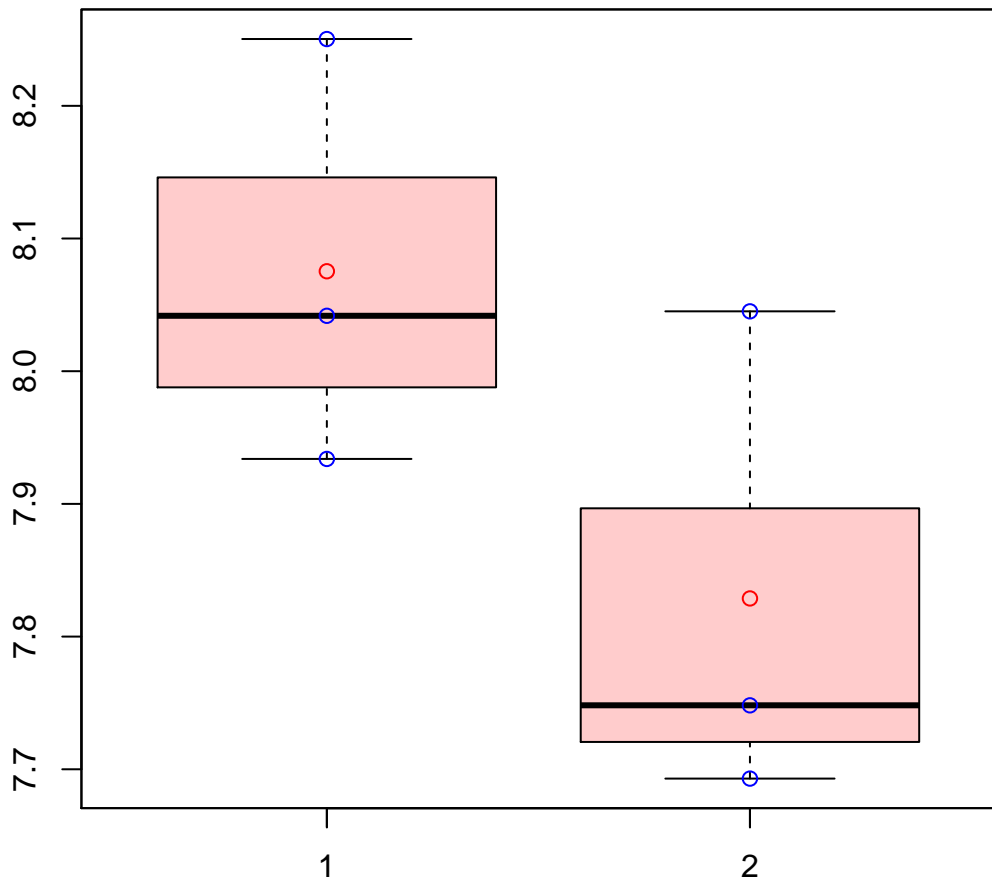

t-Test: p-value = 0.16

# CL8430Contig2|CL8430Contig2

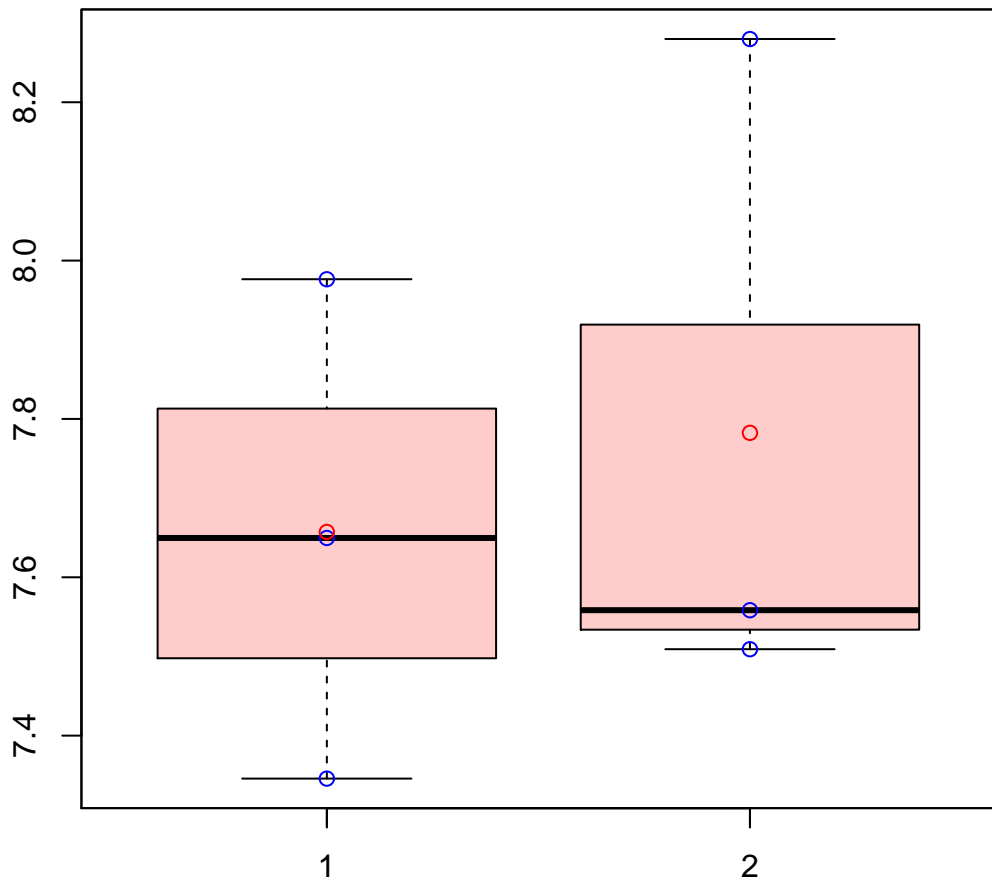

t-Test: p-value = 0.71

# CL8431Contig1|CL8431Contig1



t-Test: p-value = 0.85

# CL8431Contig3|CL8431Contig3

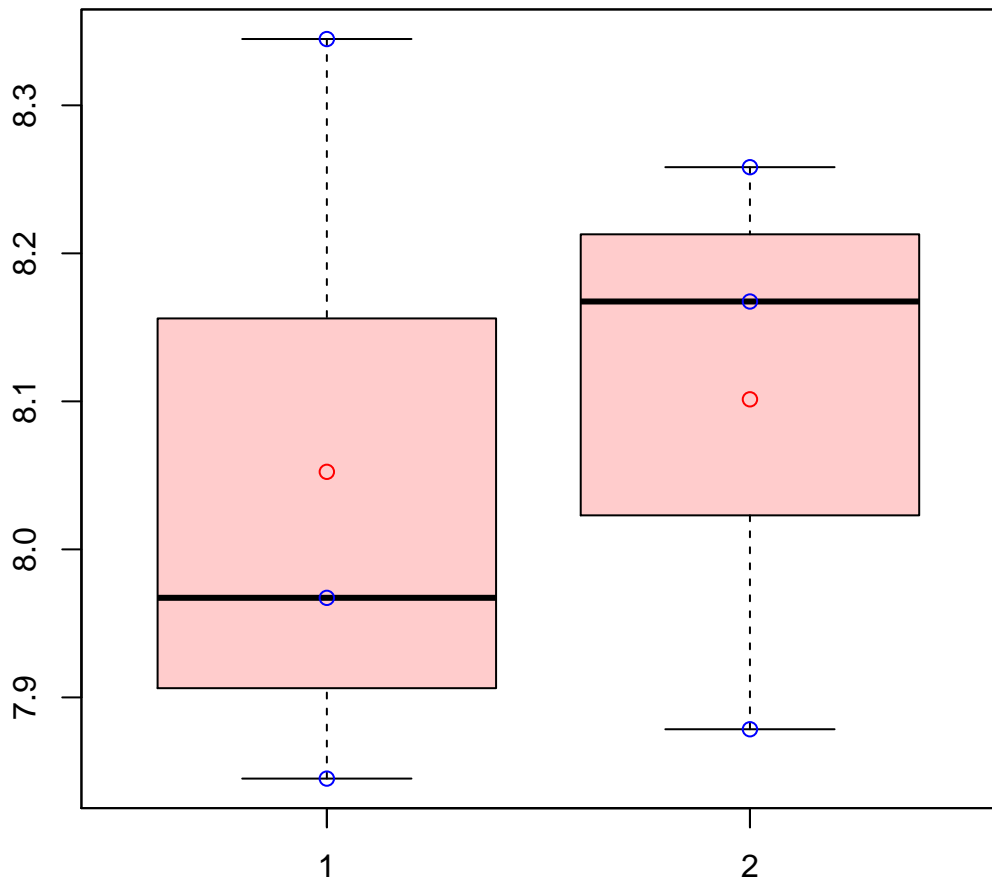

t-Test: p-value = 0.81



# CL8456Contig2|CL8456Contig2

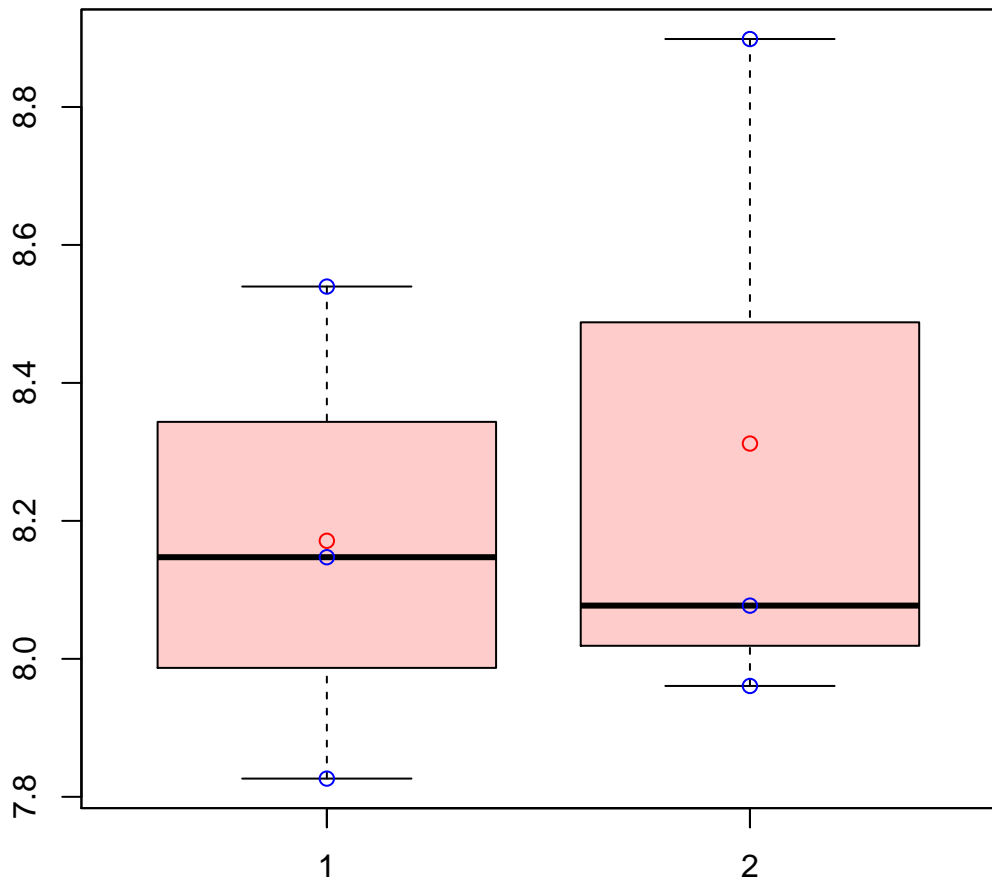

t-Test: p-value = 0.72

# CL846Contig15|CL846Contig15

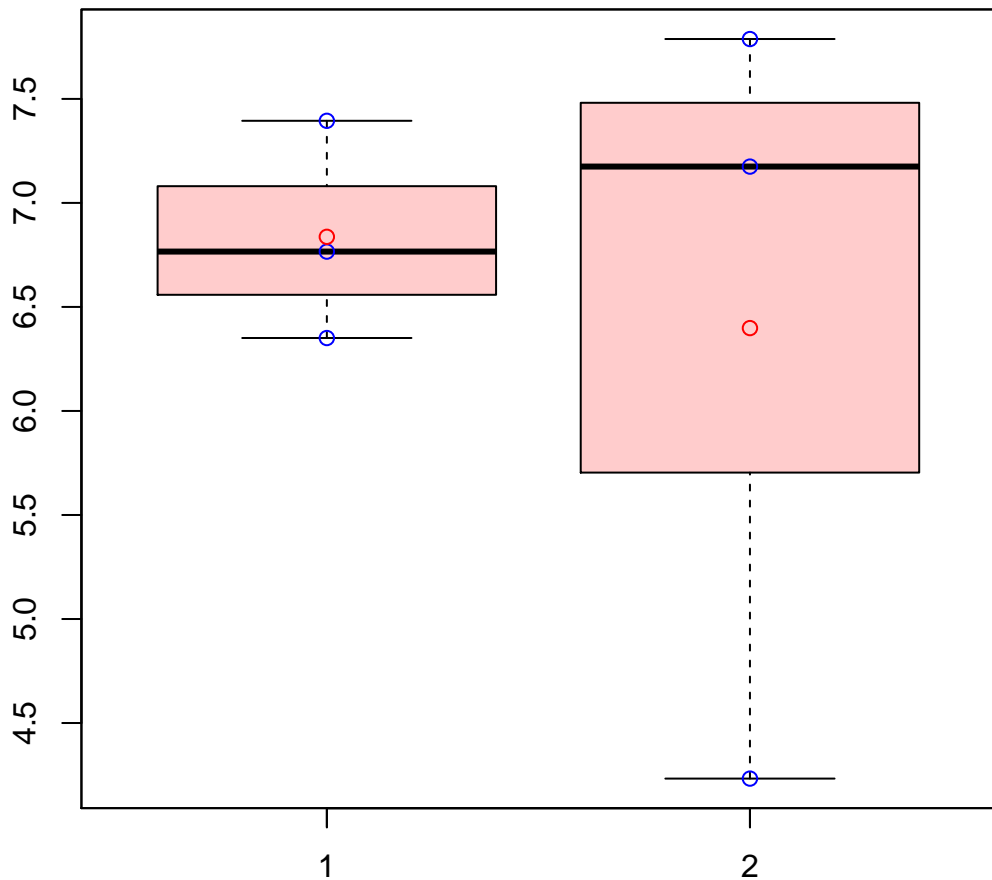

t-Test: p-value = 0.73

# CL8478Contig1|CL8478Contig1

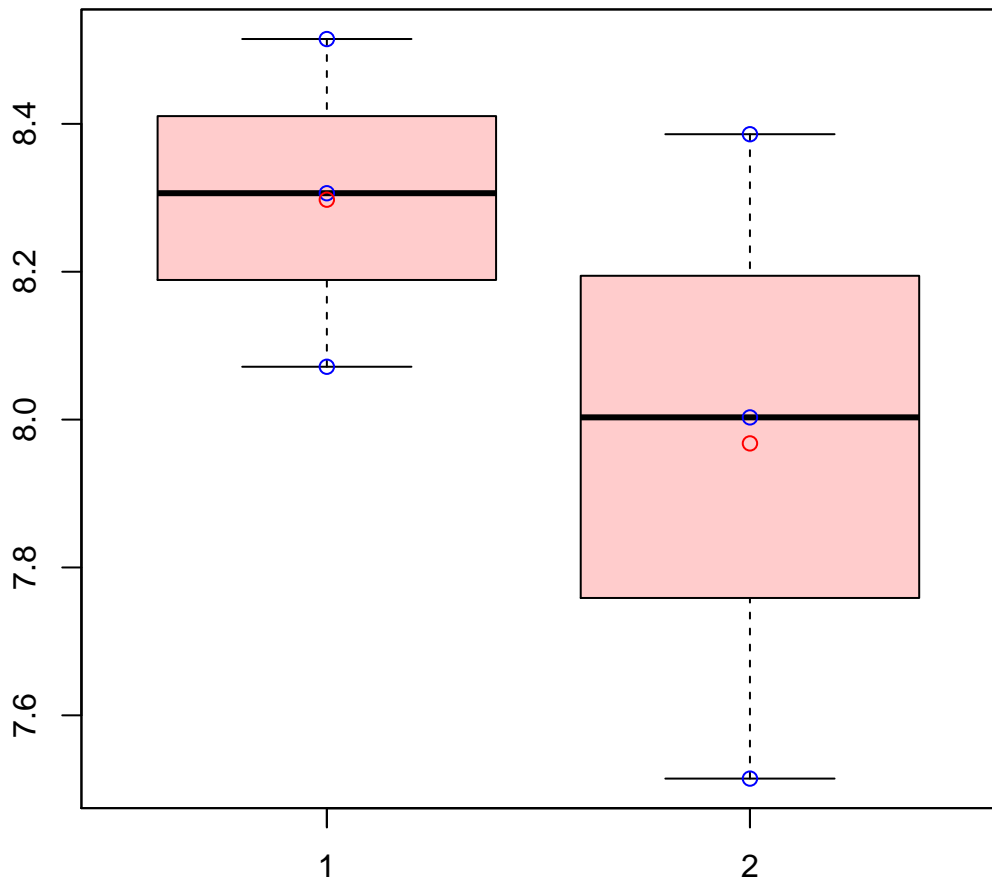

t-Test: p-value = 0.33

# CL8478Contig2|CL8478Contig2



t-Test: p-value = 0.33

# CL847Contig3|CL847Contig3

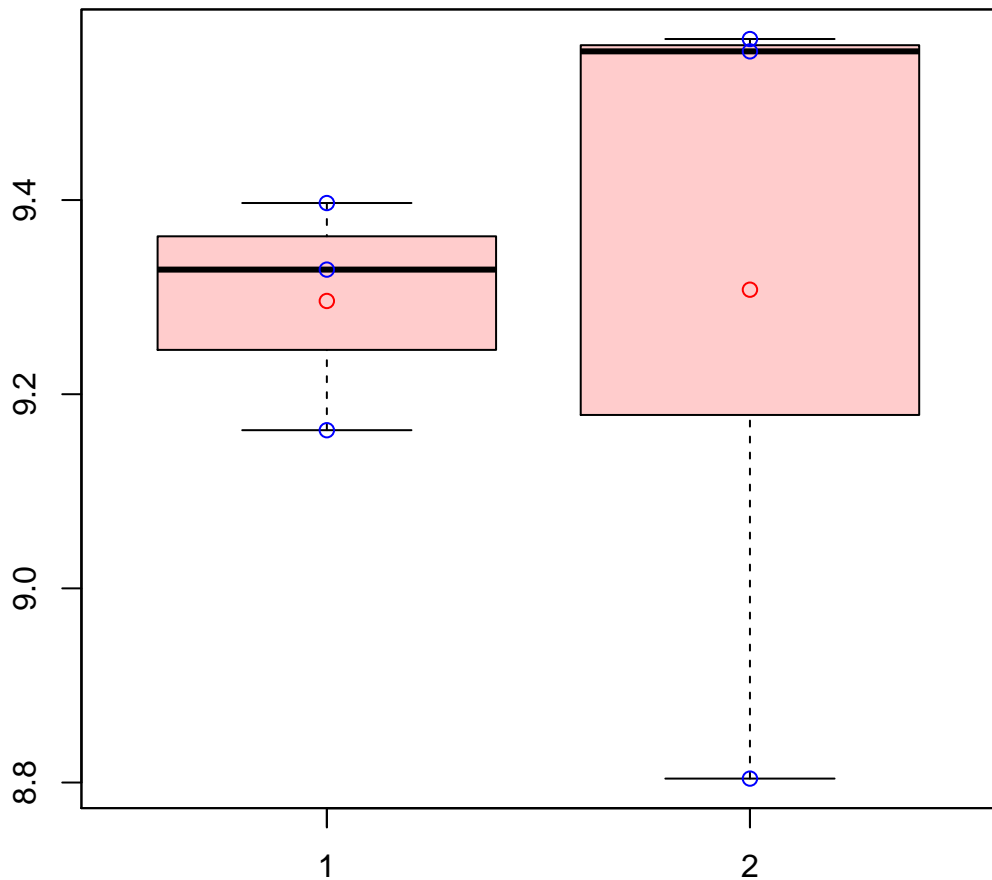

t-Test: p-value = 0.97

# CL847Contig4|CL847Contig4

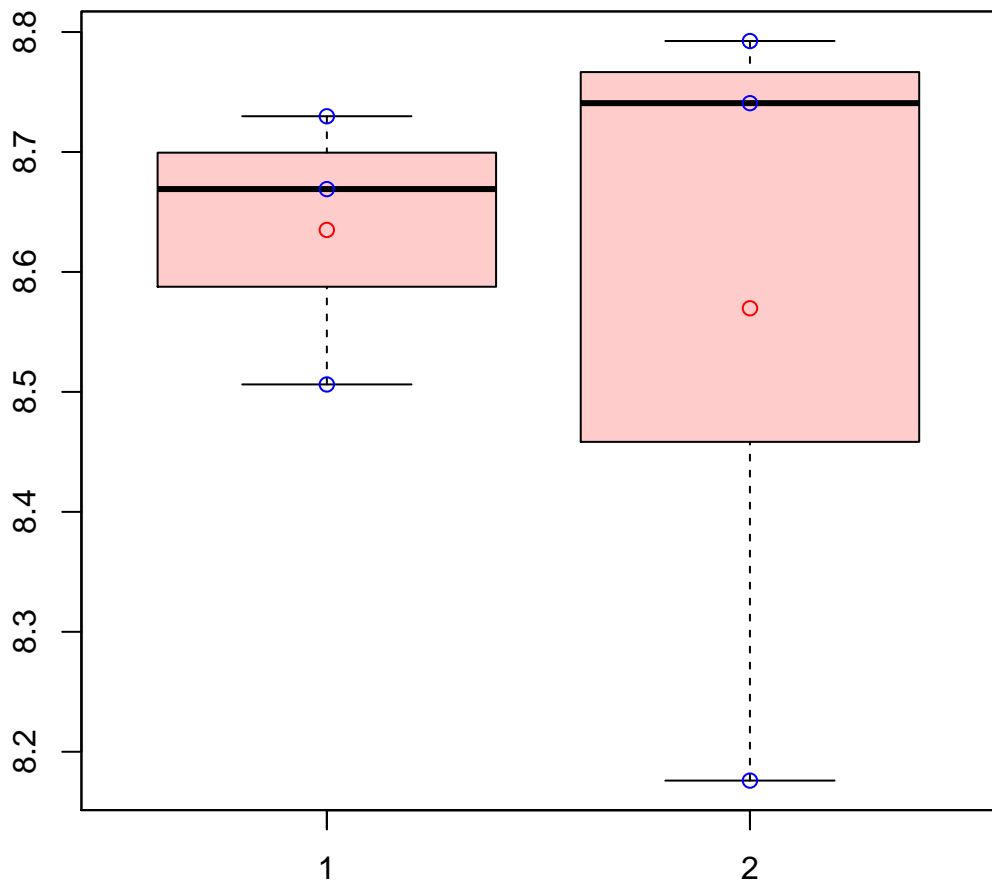

t-Test: p-value = 0.78

# CL8482Contig1|CL8482Contig1

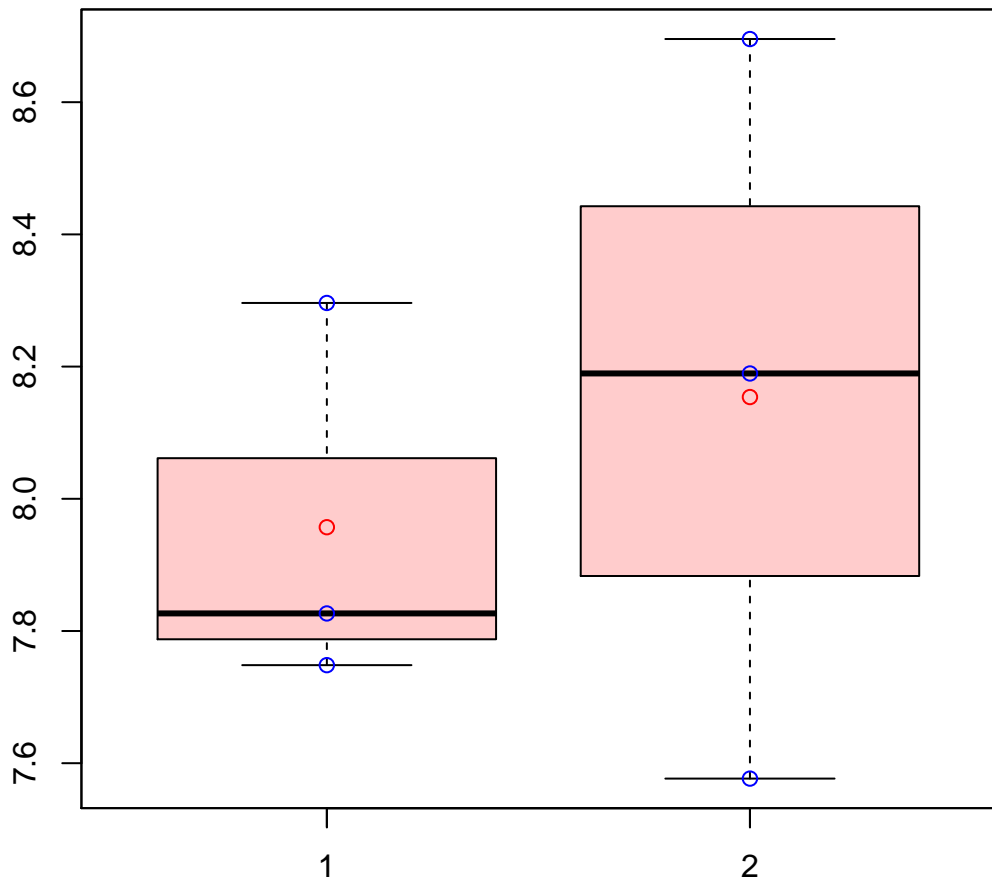

t-Test: p-value = 0.63

# CL8487Contig1|CL8487Contig1

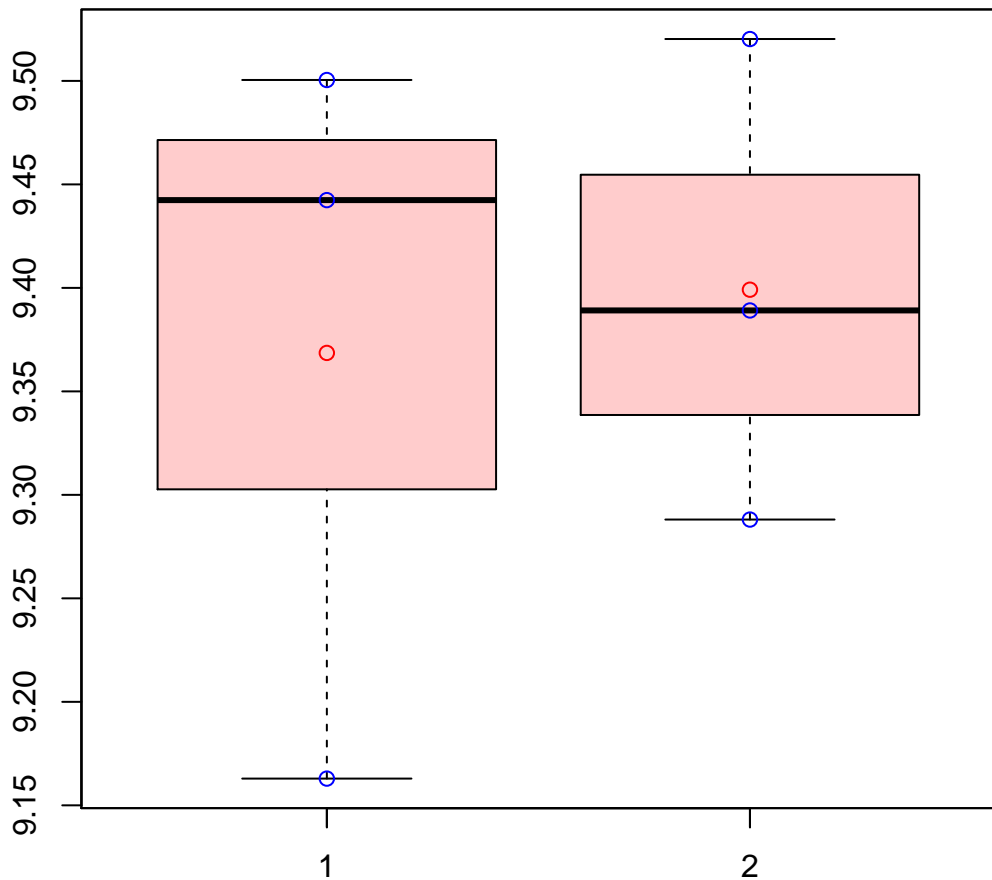

t-Test: p-value = 0.82



# CL849Contig5|CL849Contig5

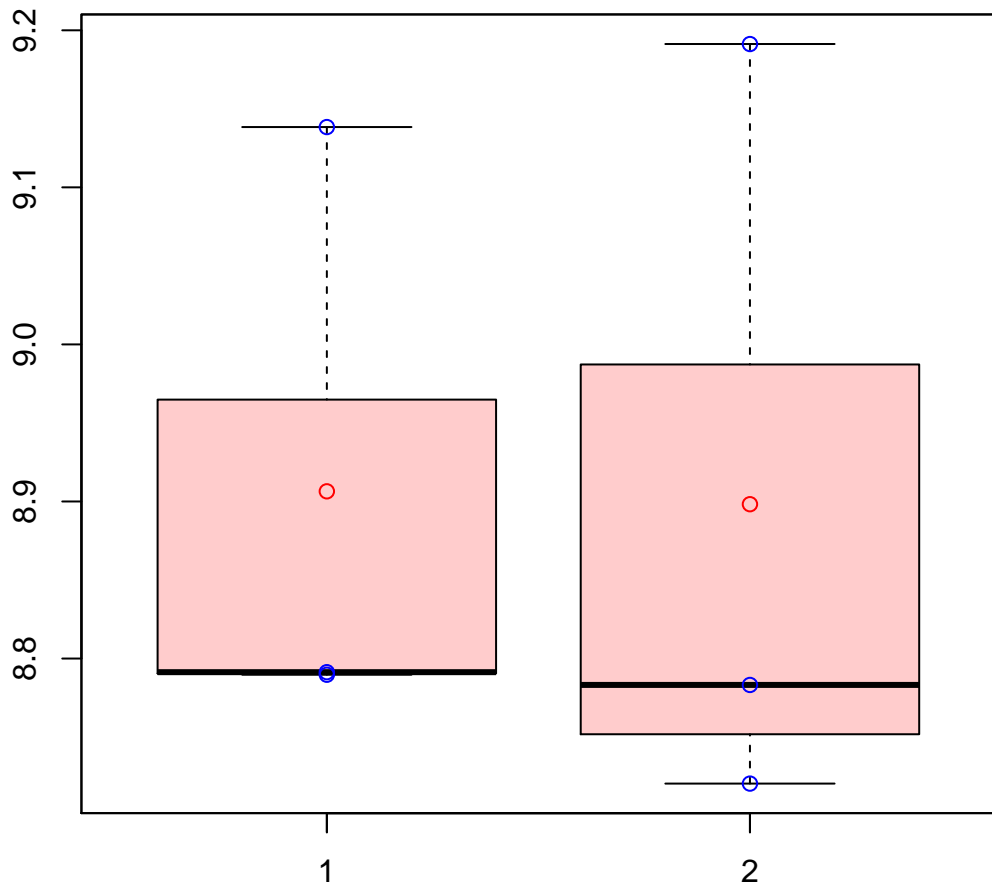

t-Test: p-value = 0.97

# CL84Contig6|CL84Contig6

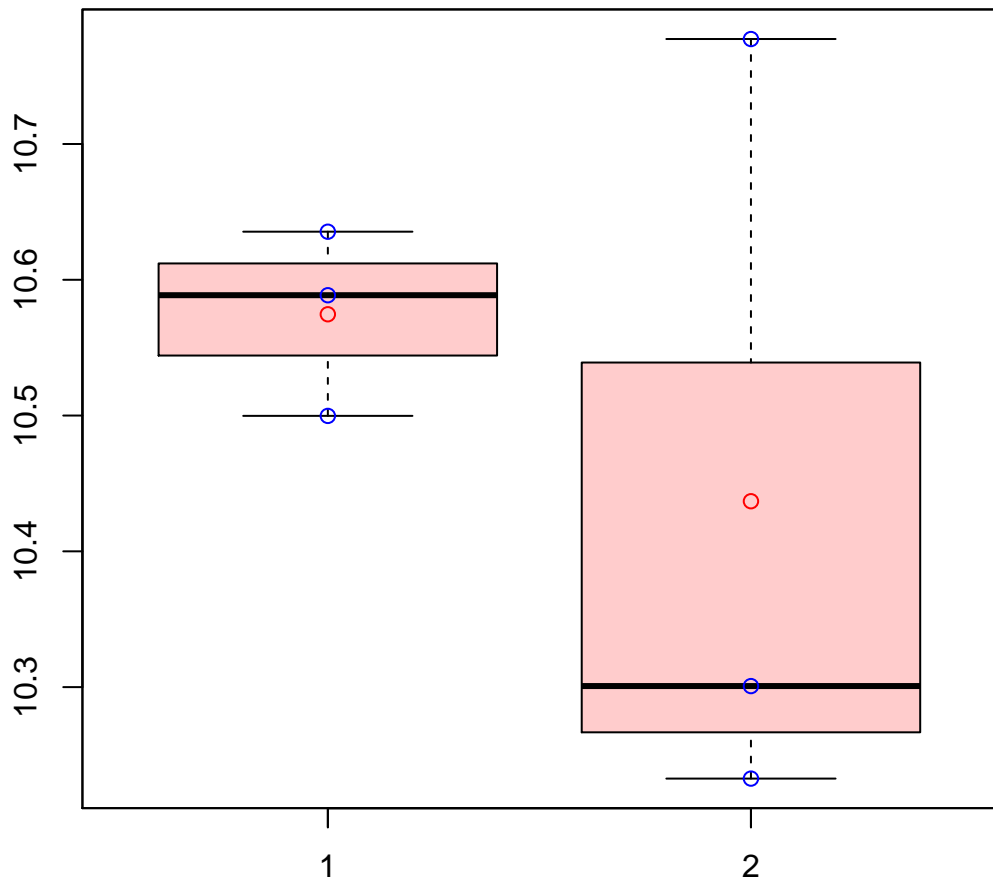

t-Test: p-value = 0.51

# CL8511Contig3|CL8511Contig3

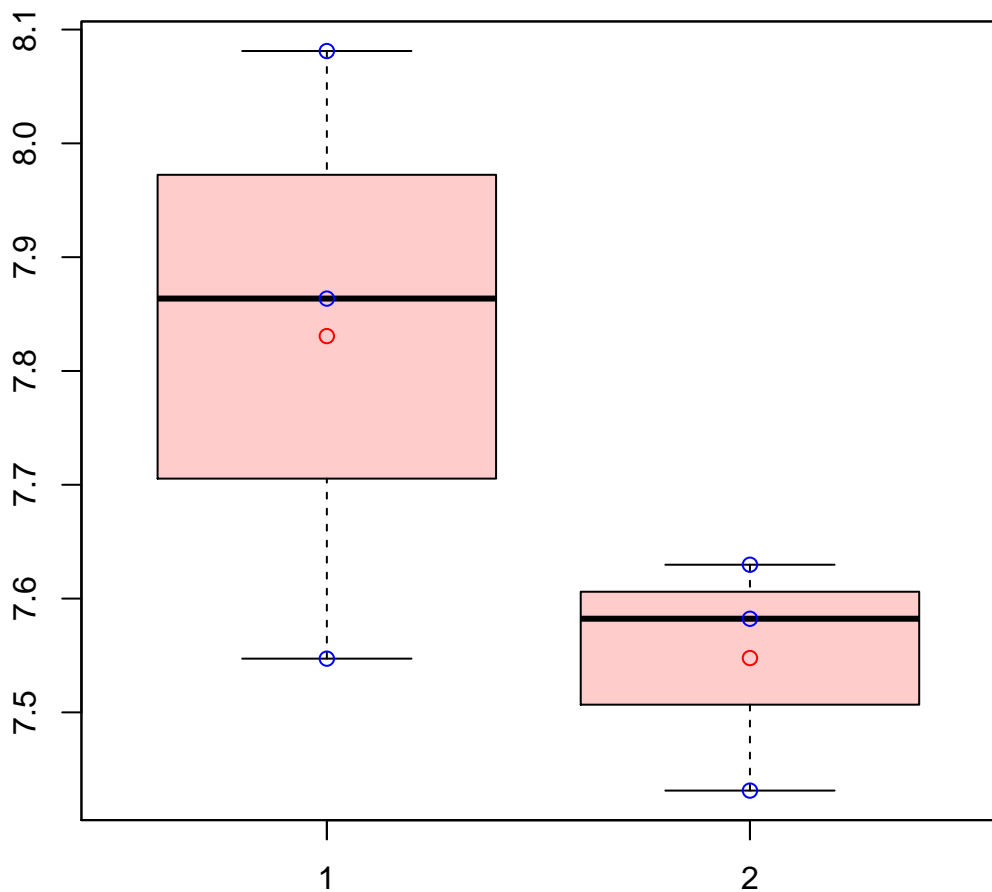

t-Test: p-value = 0.2

# CL8516Contig2|CL8516Contig2

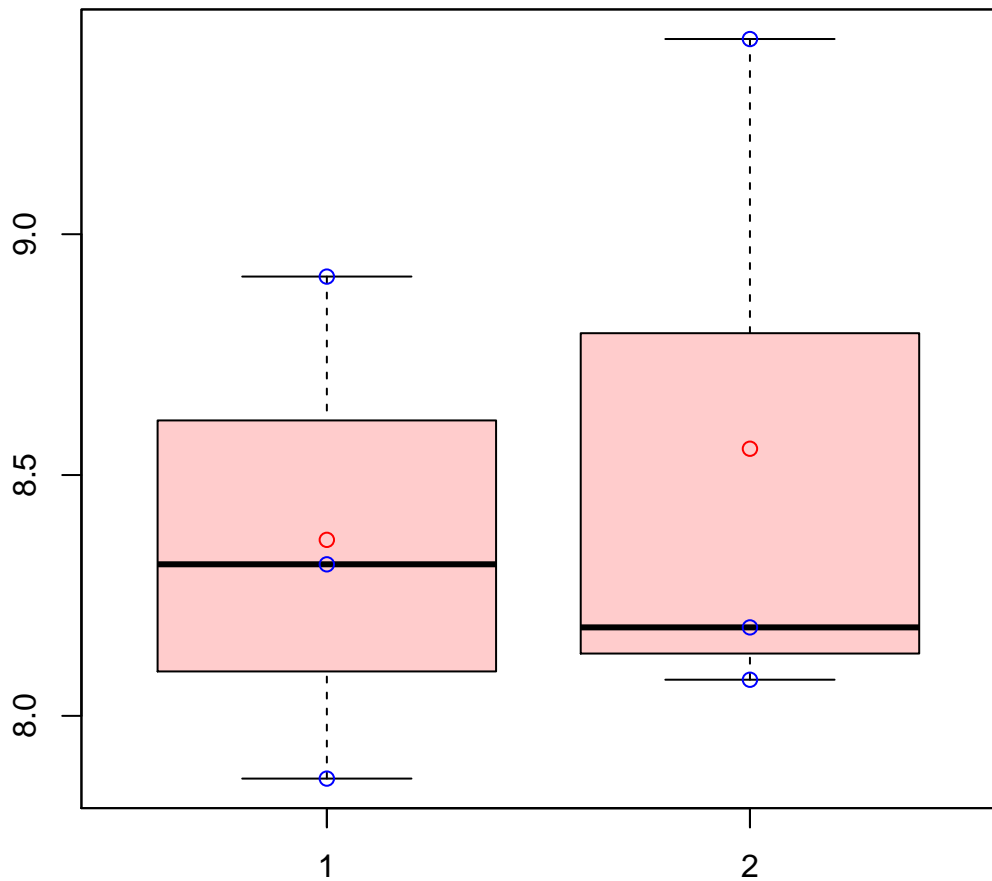

t-Test: p-value = 0.74

# CL8517Contig3|CL8517Contig3

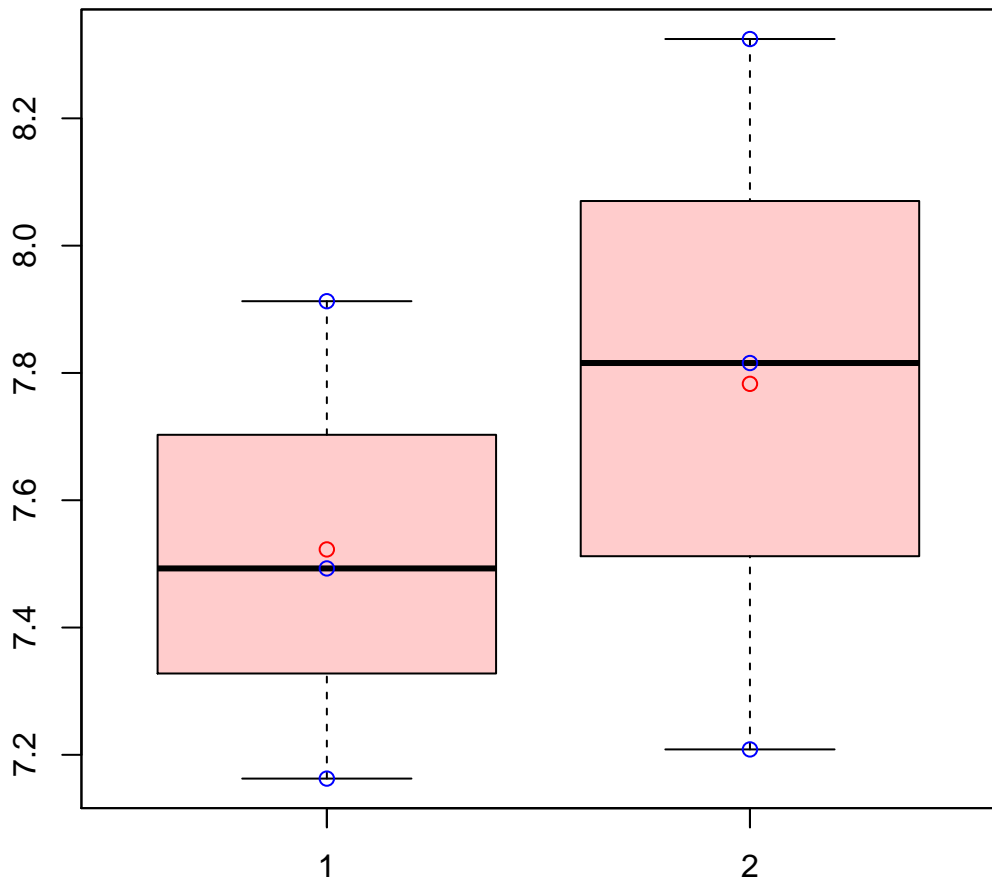

t-Test: p-value = 0.54

# CL8522Contig1|CL8522Contig1

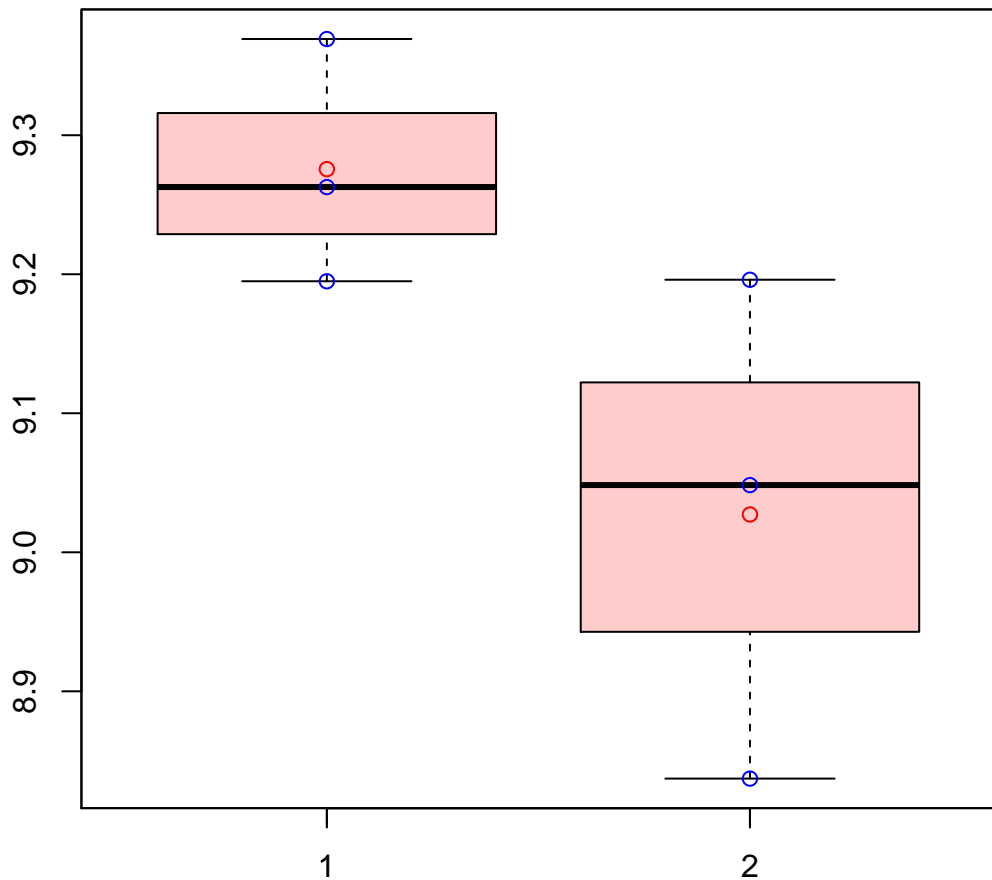

t-Test: p-value = 0.12

# CL8523Contig4|CL8523Contig4

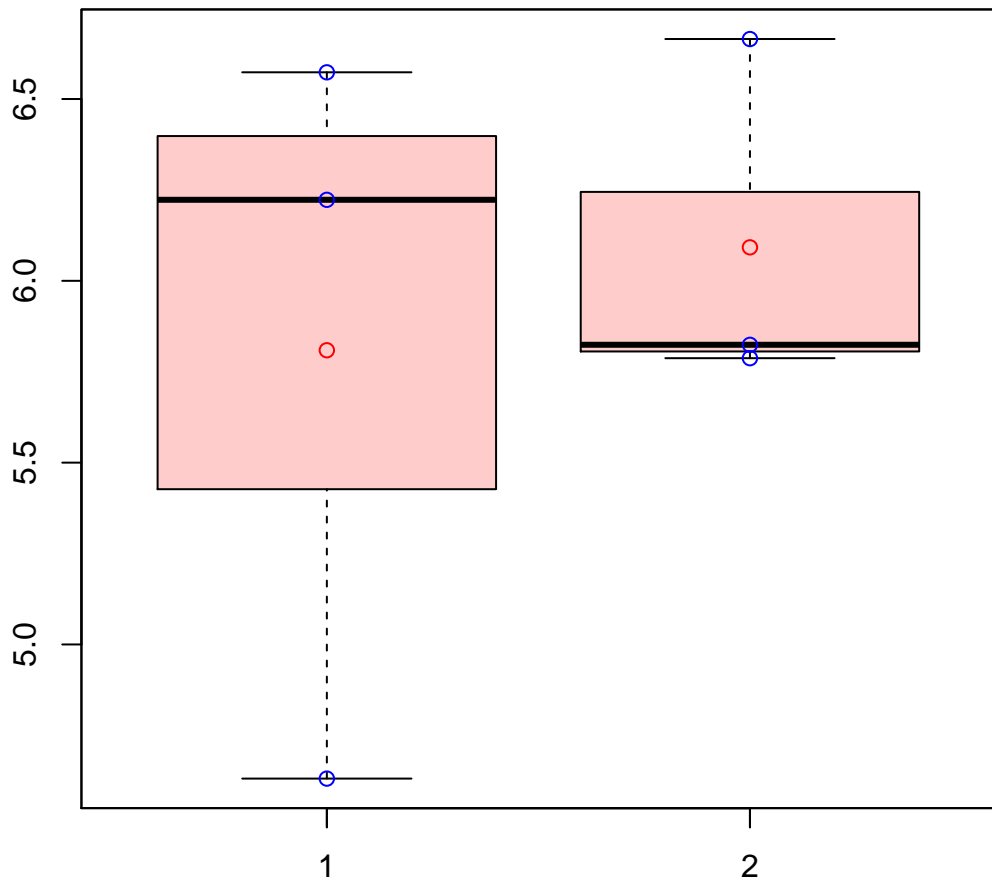

t-Test: p-value = 0.7

# CL852Contig5|CL852Contig5

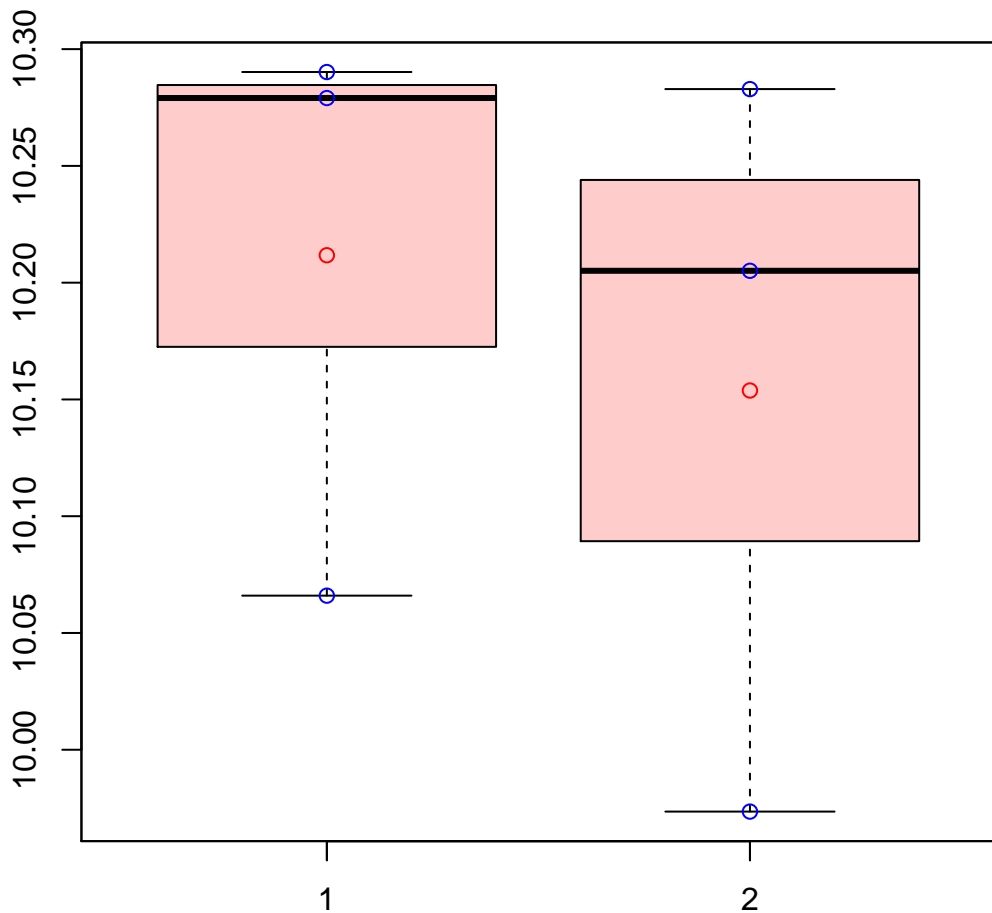

t-Test: p-value = 0.65



# CL853Contig3|CL853Contig3

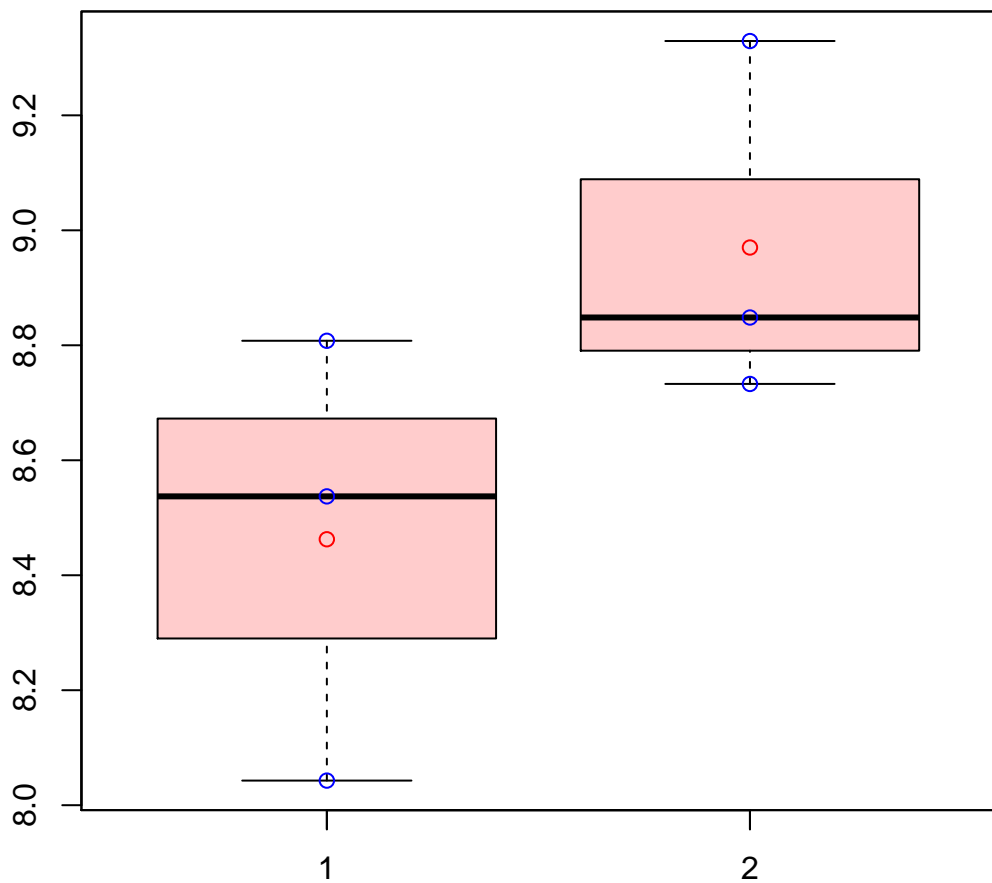

t-Test: p-value = 0.16

# CL854Contig7|CL854Contig7

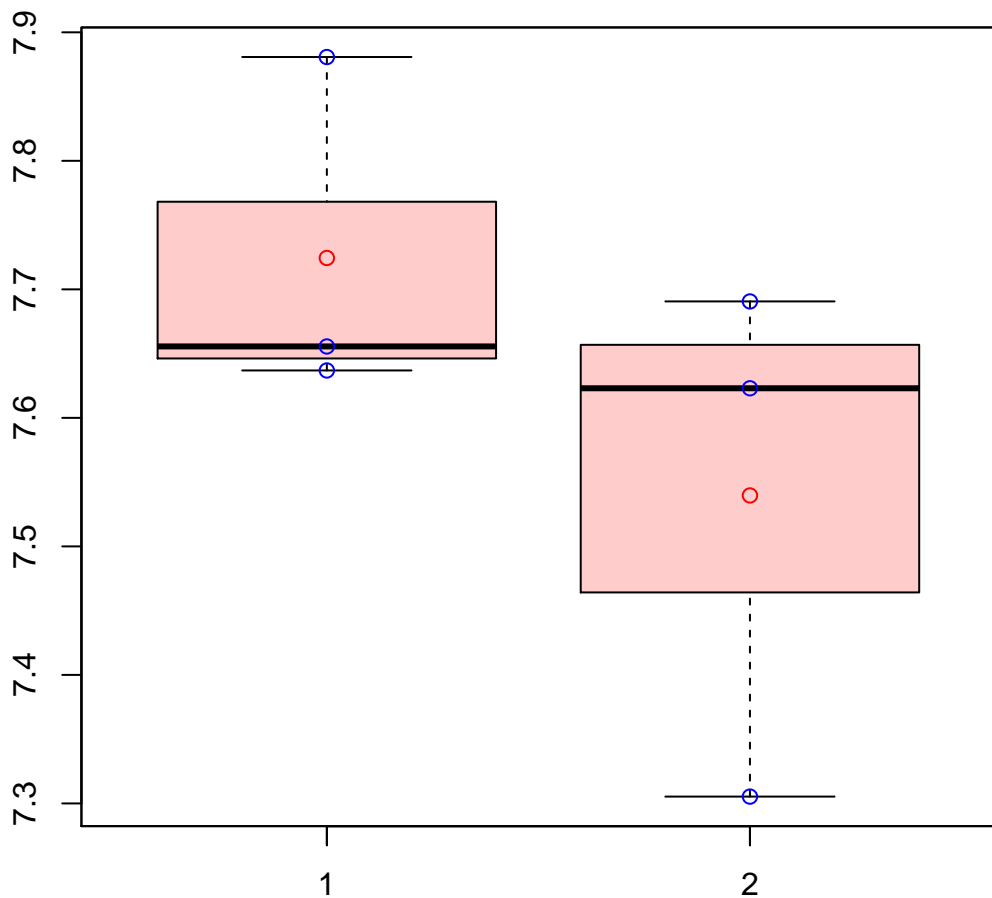

t-Test: p-value = 0.27

# CL8550Contig2|CL8550Contig2

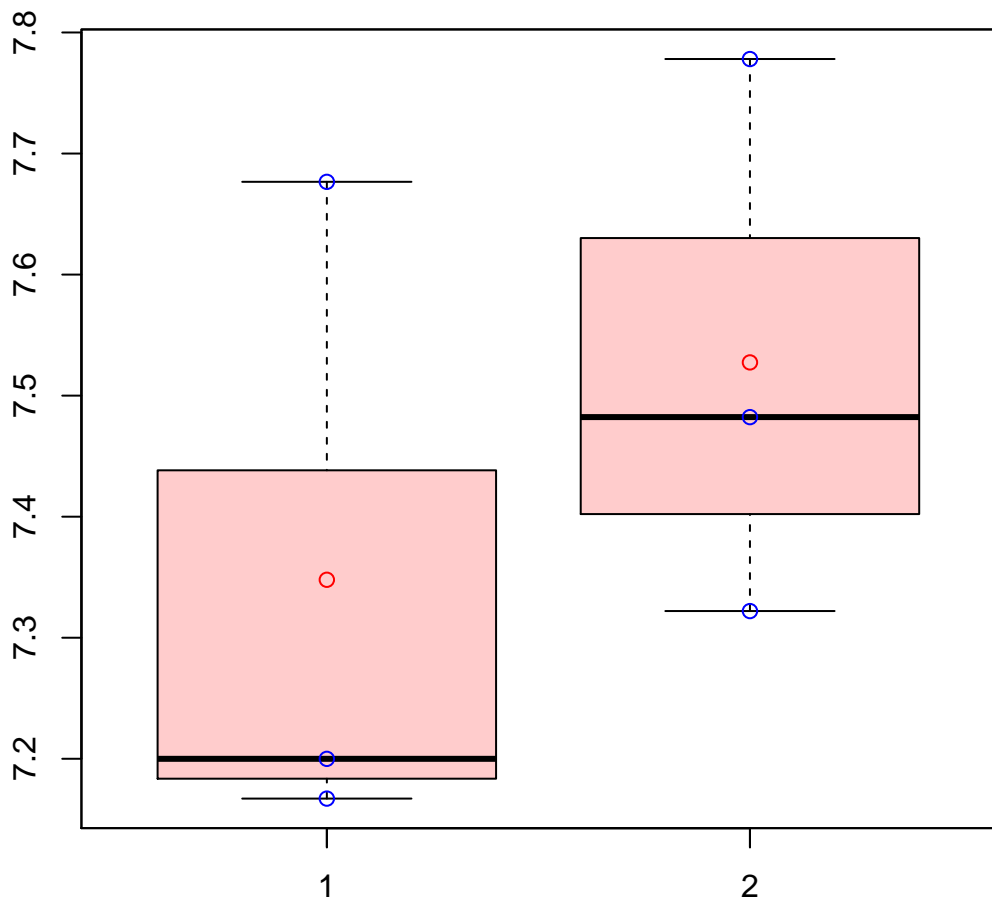

t-Test: p-value = 0.45

# CL856Contig3|CL856Contig3

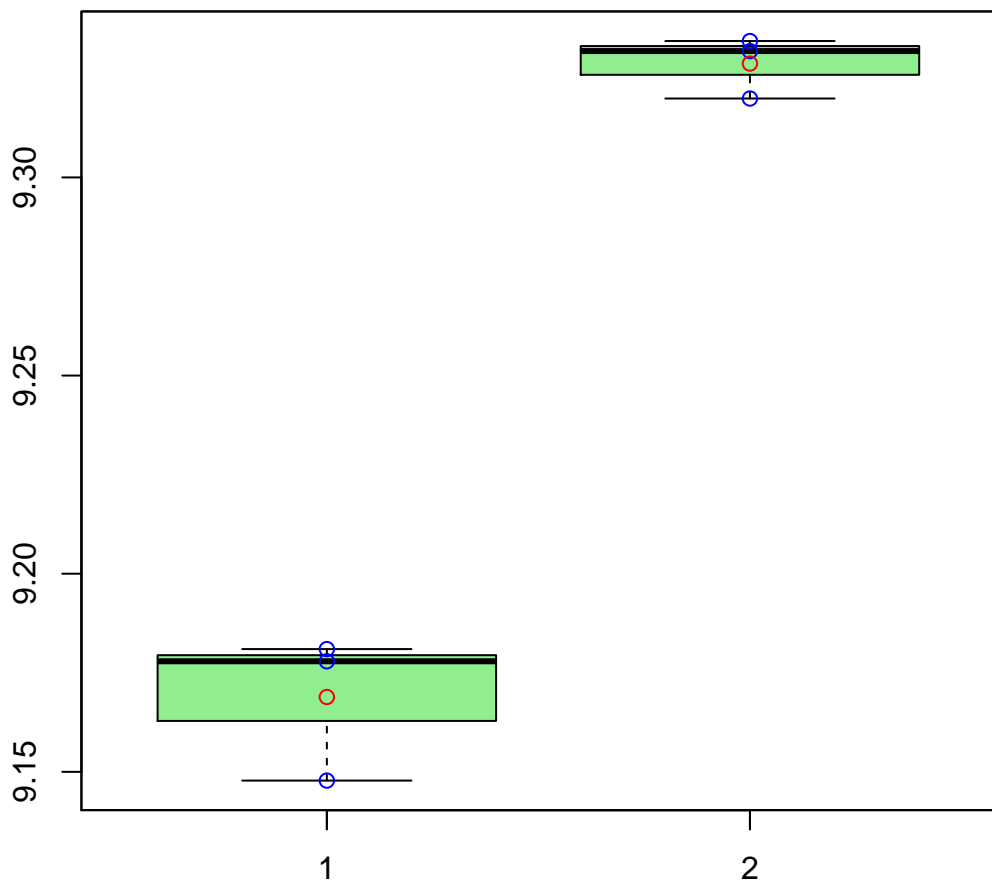

t-Test: p-value = 0

# CL856Contig4|CL856Contig4

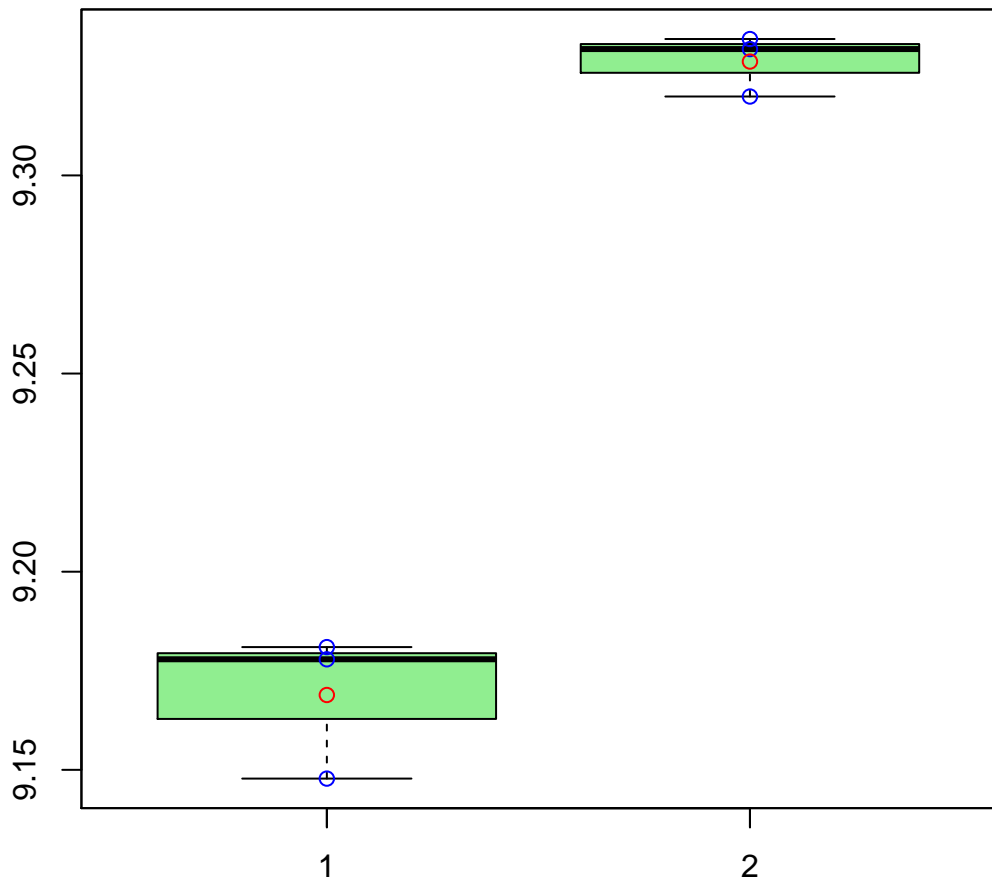

t-Test: p-value = 0

# CL8570Contig1|CL8570Contig1

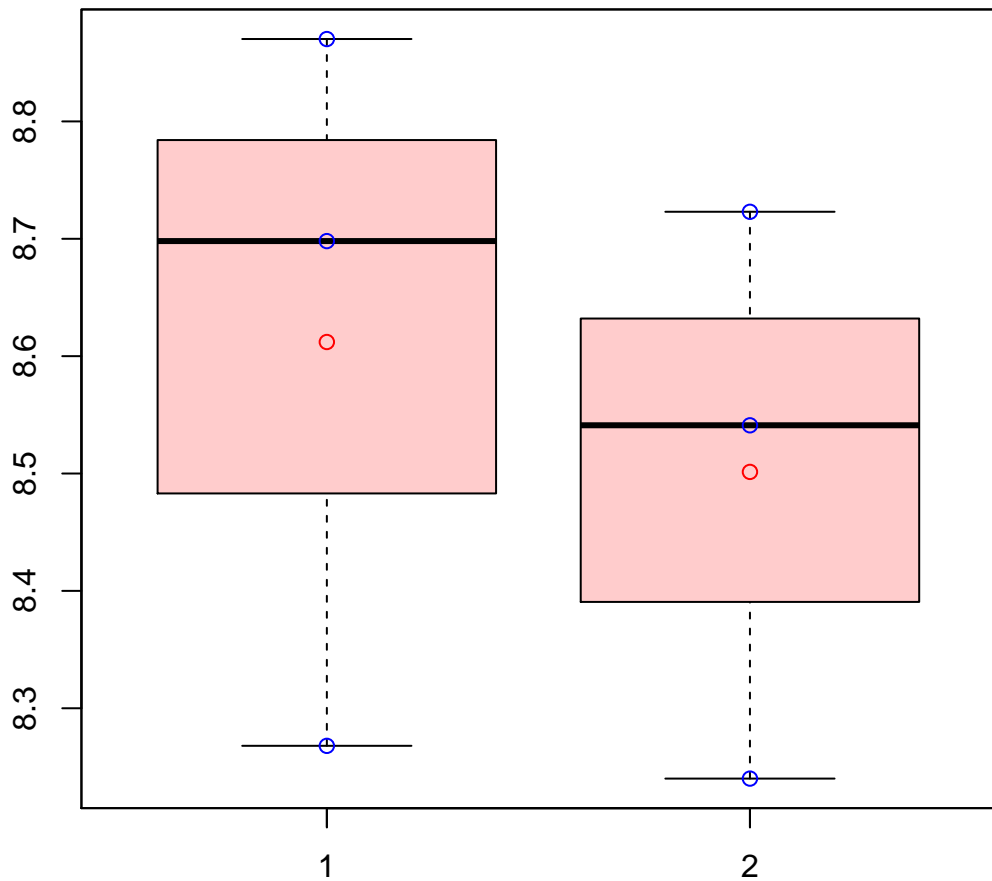

t-Test: p-value = 0.65

# CL8572Contig1|CL8572Contig1

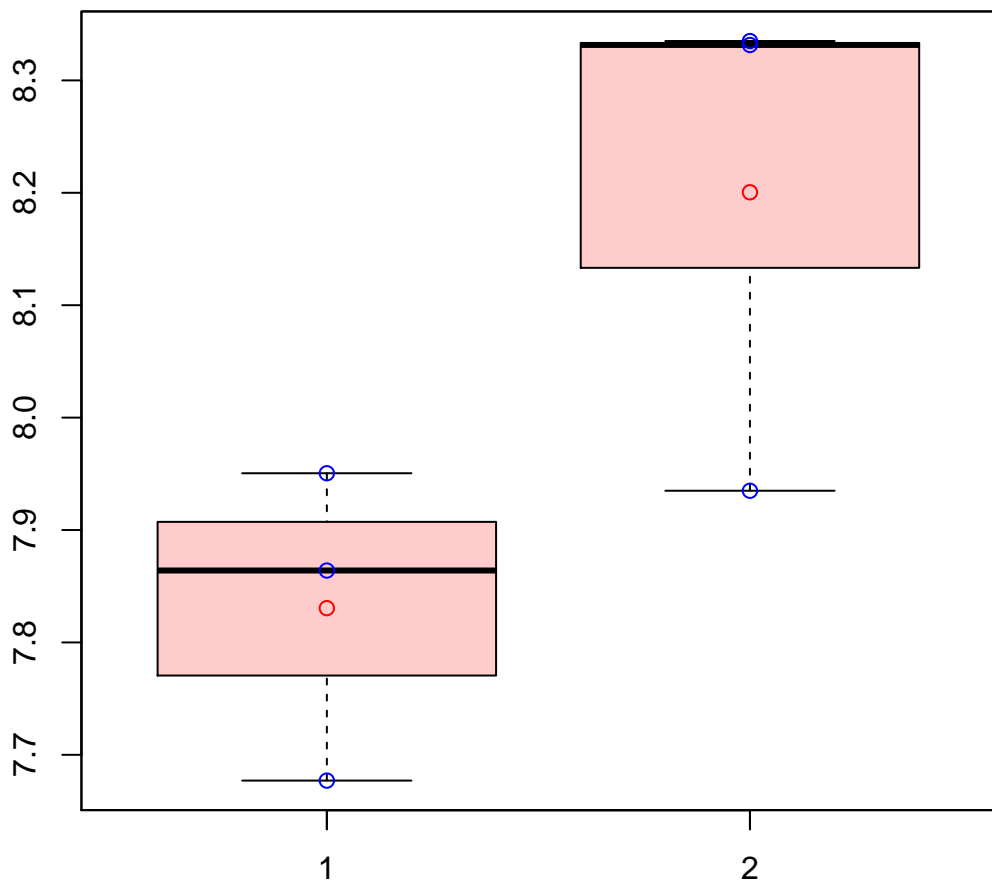

t-Test: p-value = 0.09

# CL857Contig8|CL857Contig8

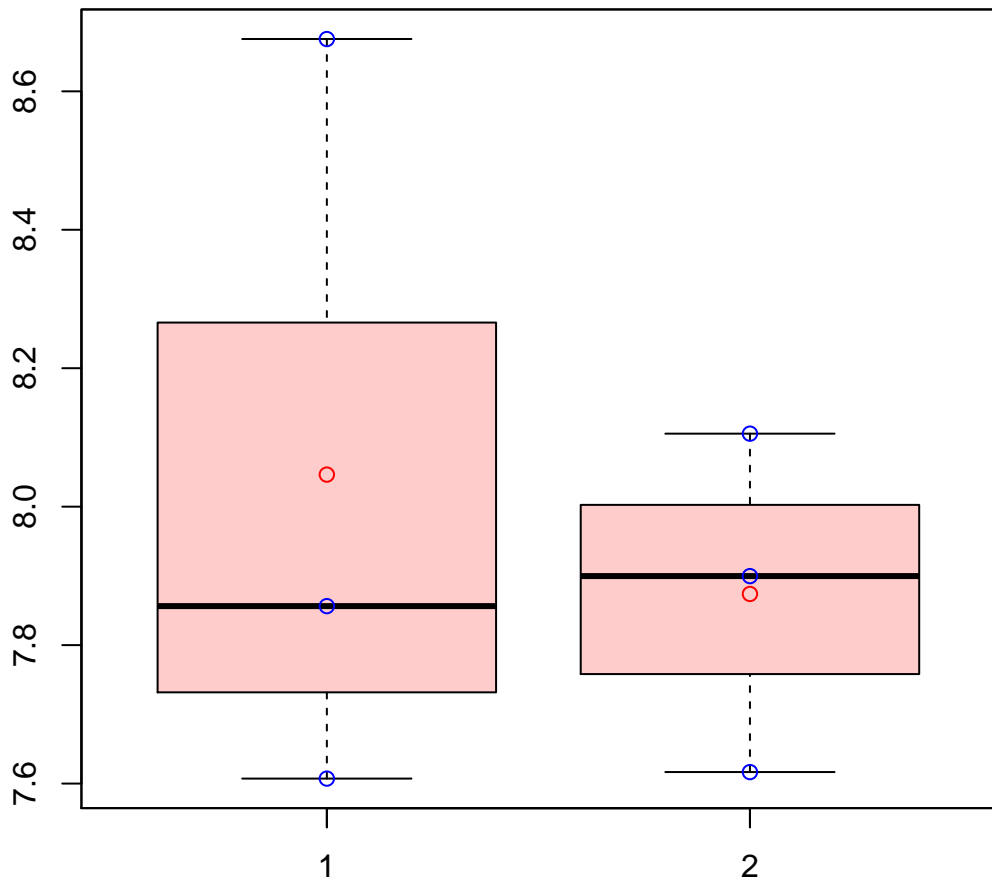

t-Test: p-value = 0.66



# CL8585Contig1|CL8585Contig1

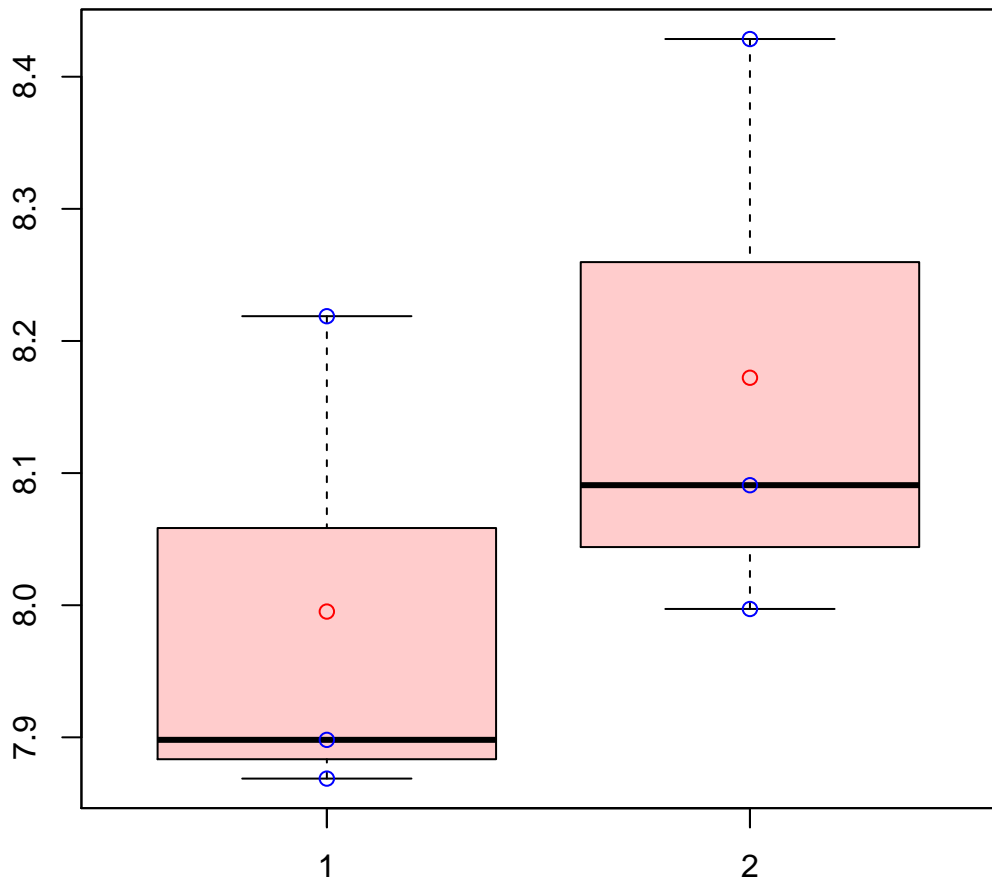

t-Test: p-value = 0.36

# CL8585Contig2|CL8585Contig2



t-Test: p-value = 0.36

# CL8585Contig3|CL8585Contig3

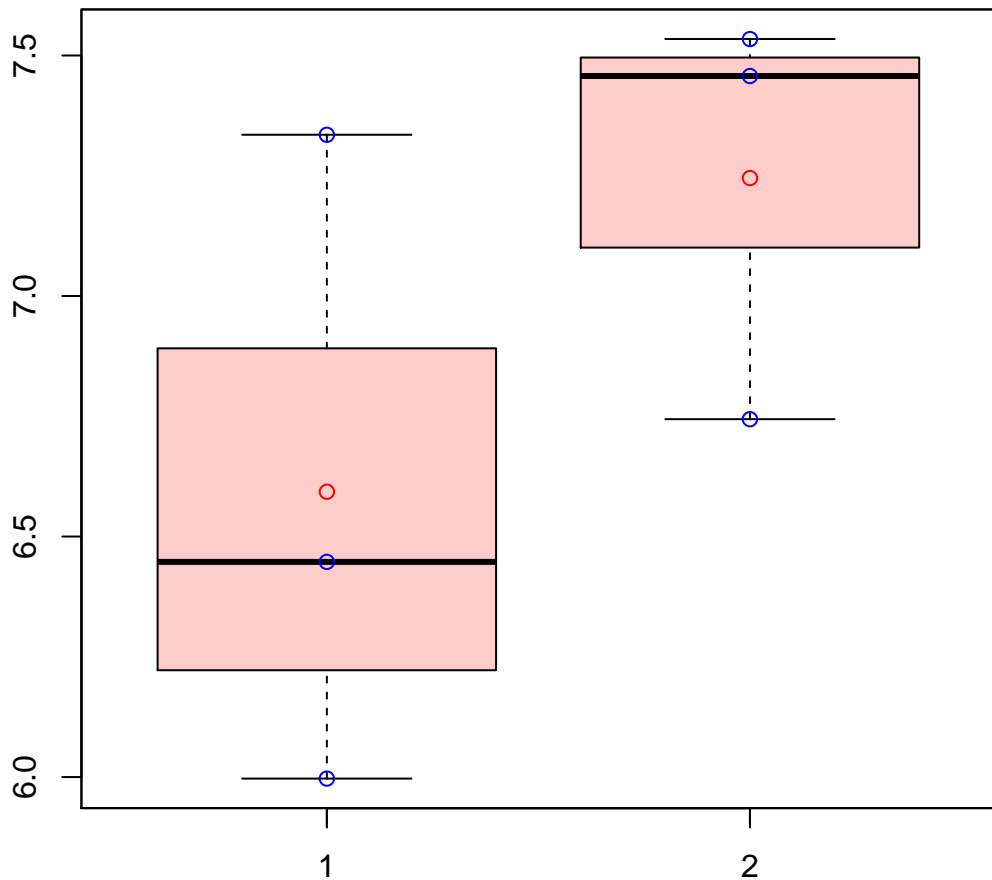

t-Test: p-value = 0.25

# CL858Contig7|CL858Contig7

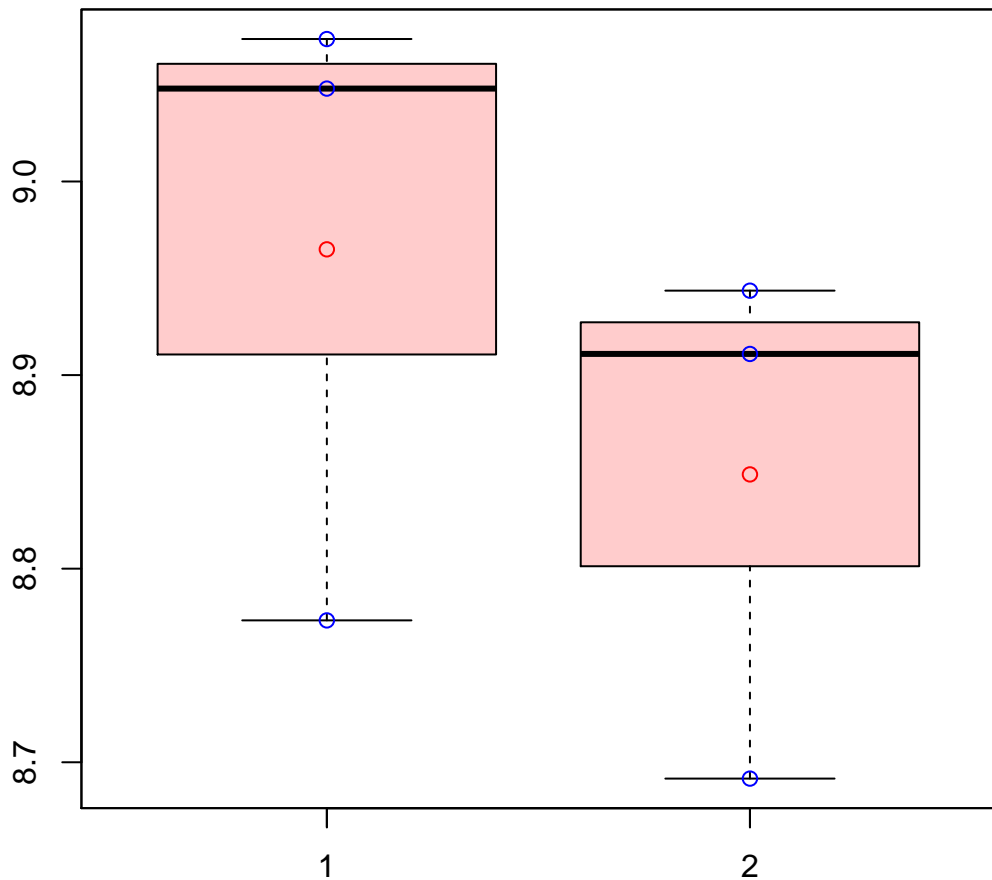

t-Test: p-value = 0.41

# CL8591Contig2|CL8591Contig2



t-Test: p-value = 0.84

# CL8599Contig1|CL8599Contig1

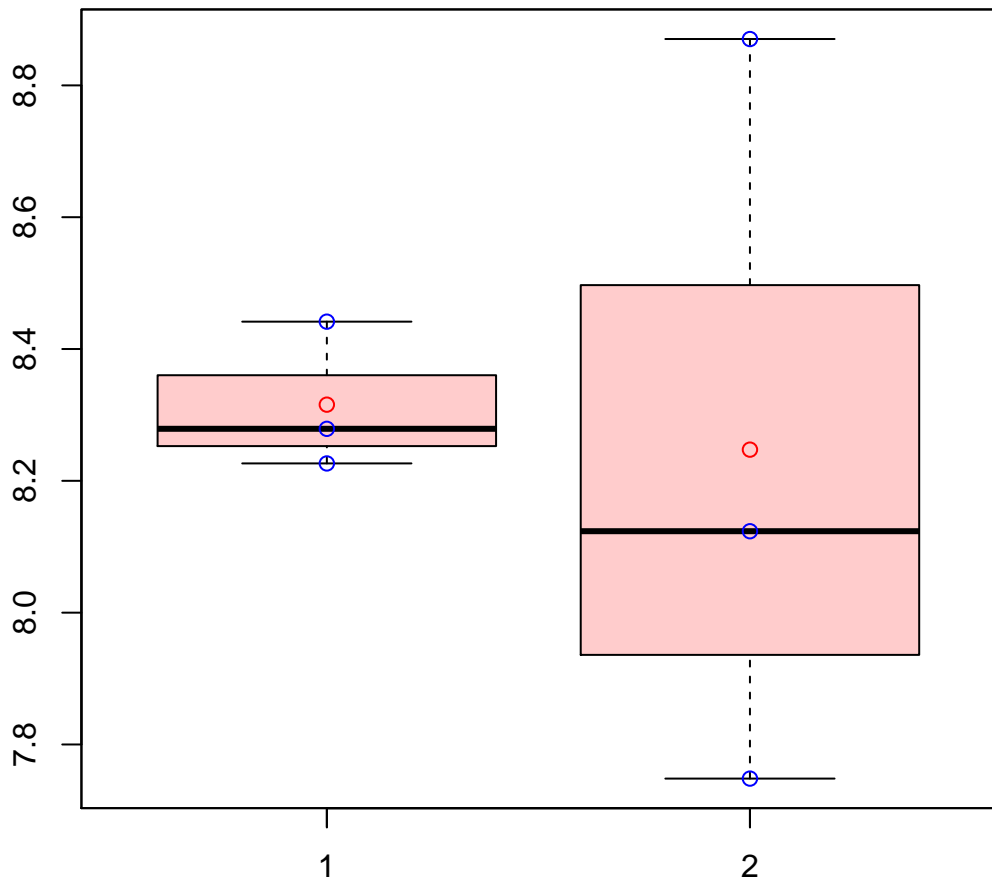

t-Test: p-value = 0.86

# CL859Contig5|CL859Contig5

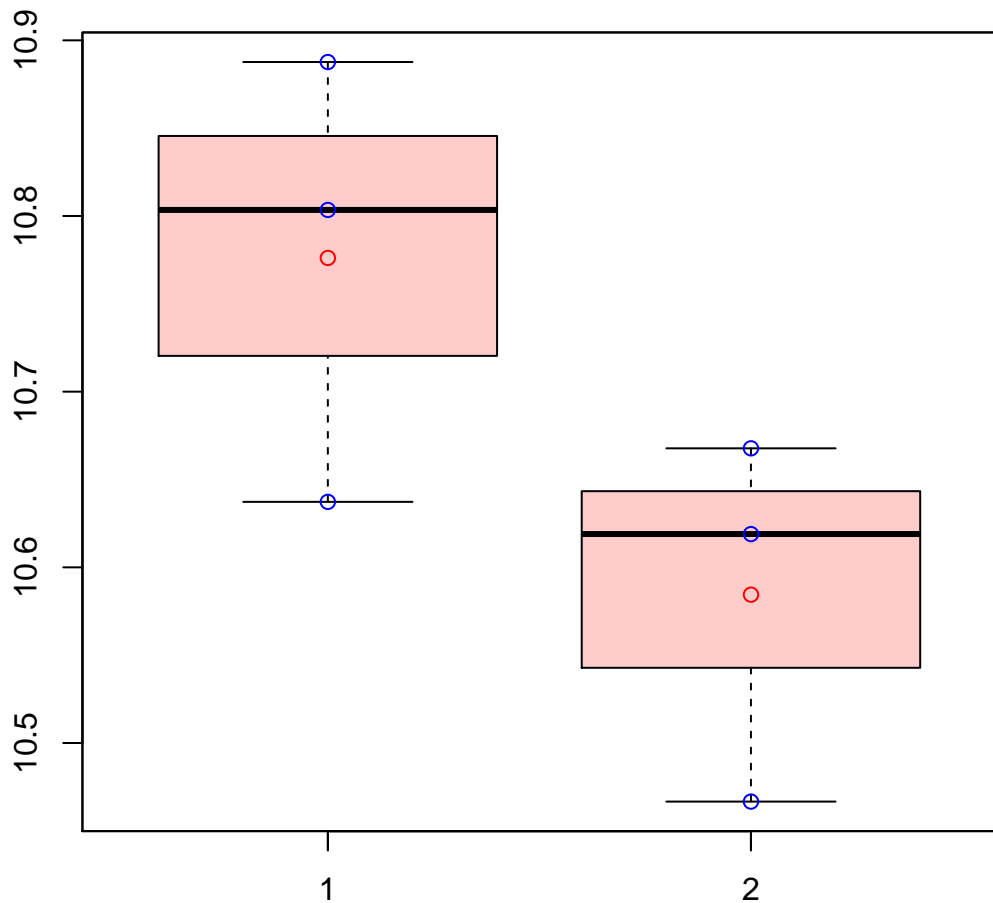

t-Test: p-value = 0.12

# CL859Contig6|CL859Contig6

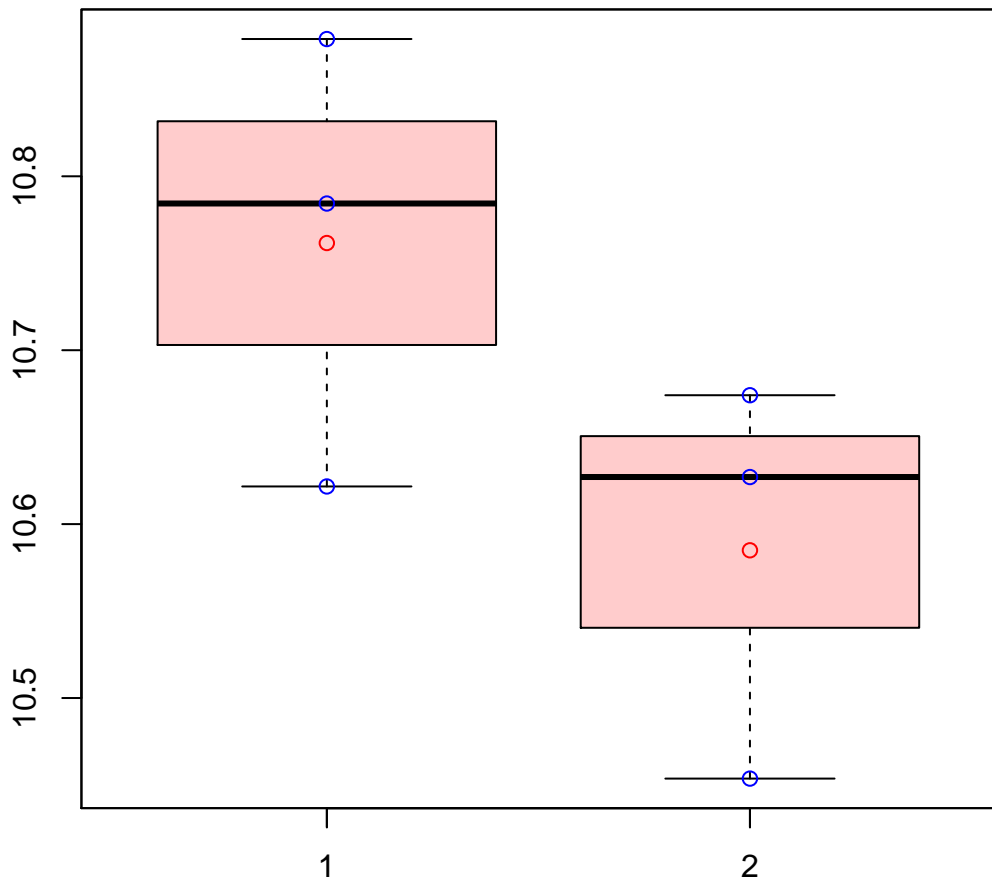

t-Test: p-value = 0.16



# CL859Contig8|CL859Contig8

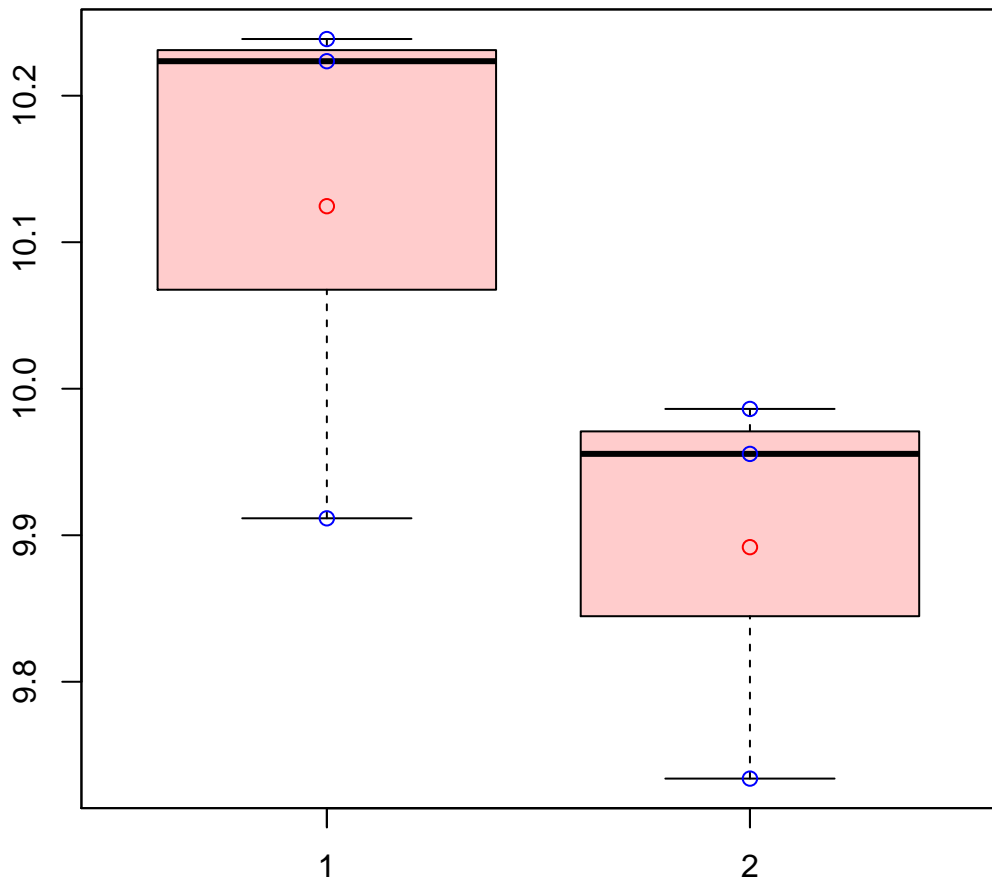

t-Test: p-value = 0.16

# CL859Contig9|CL859Contig9

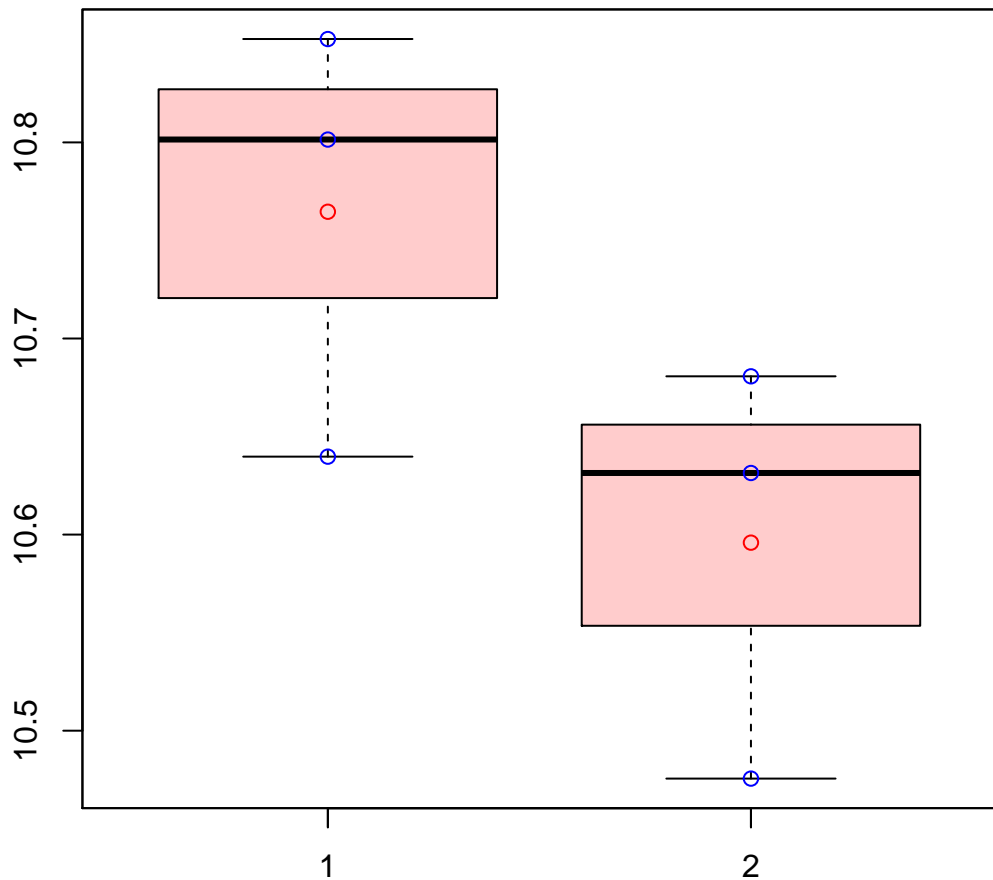

t-Test: p-value = 0.13

# CL85Contig4|CL85Contig4

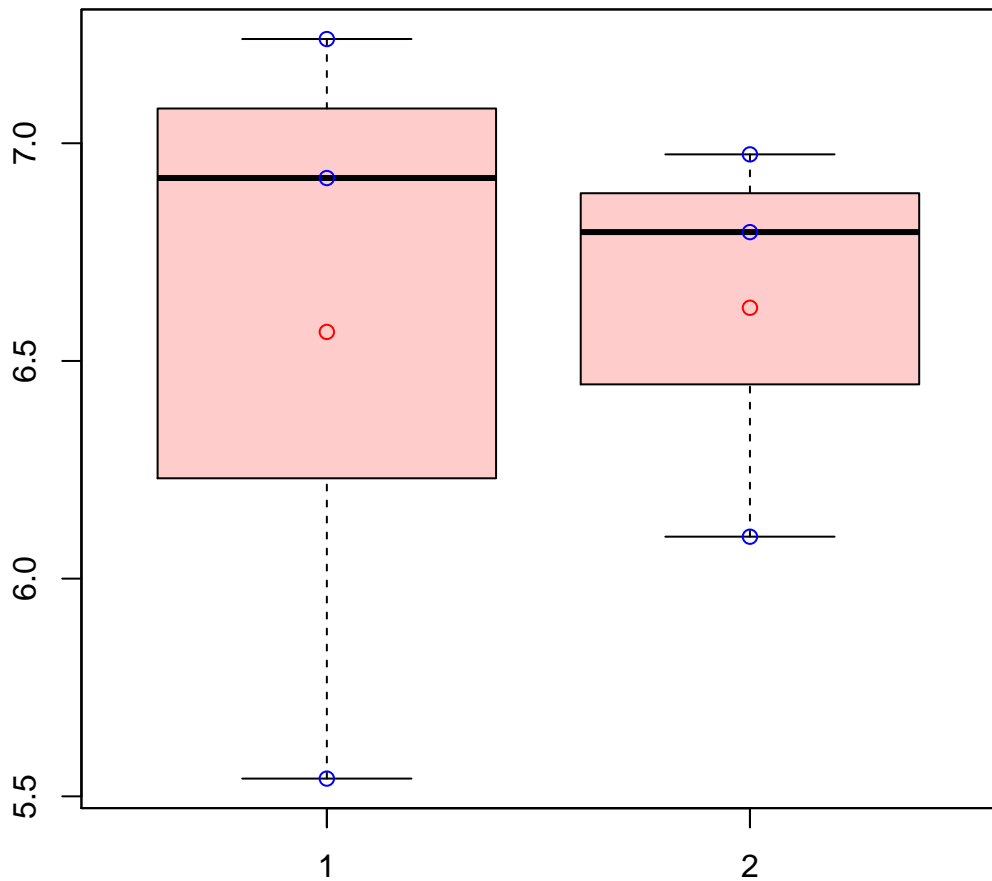

t-Test: p-value = 0.93

# CL85Contig7|CL85Contig7

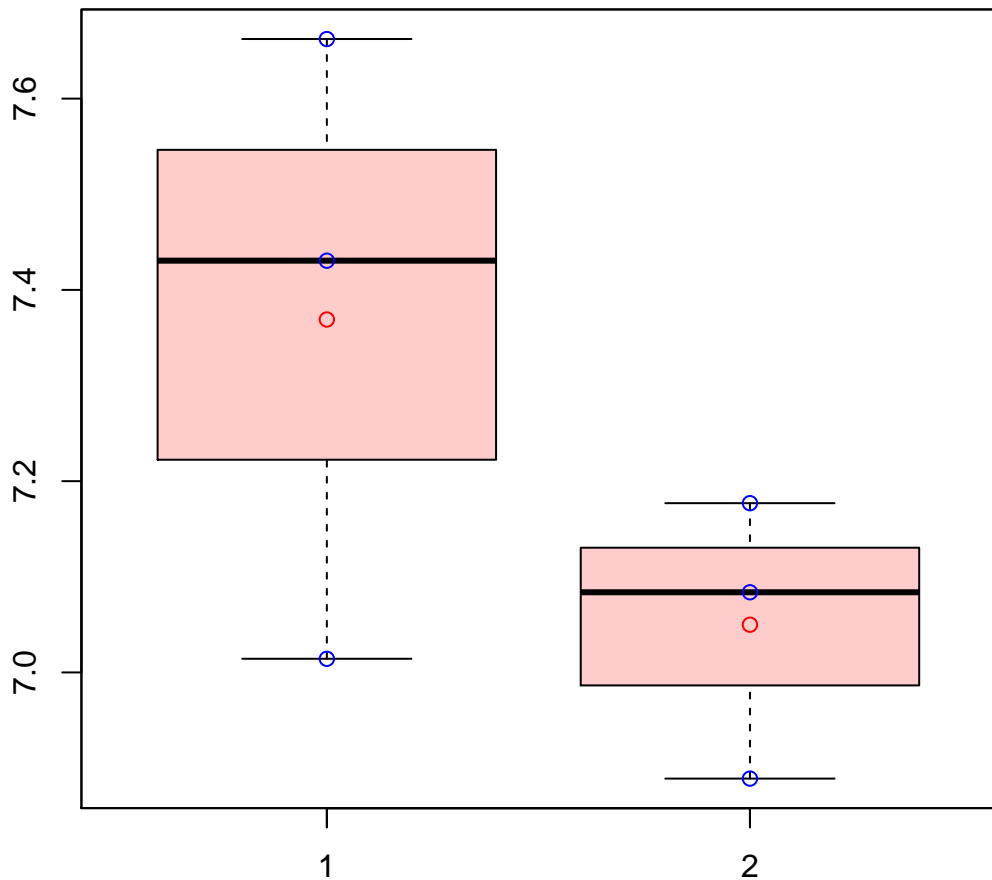

t-Test: p-value = 0.23

# CL860Contig12|CL860Contig12

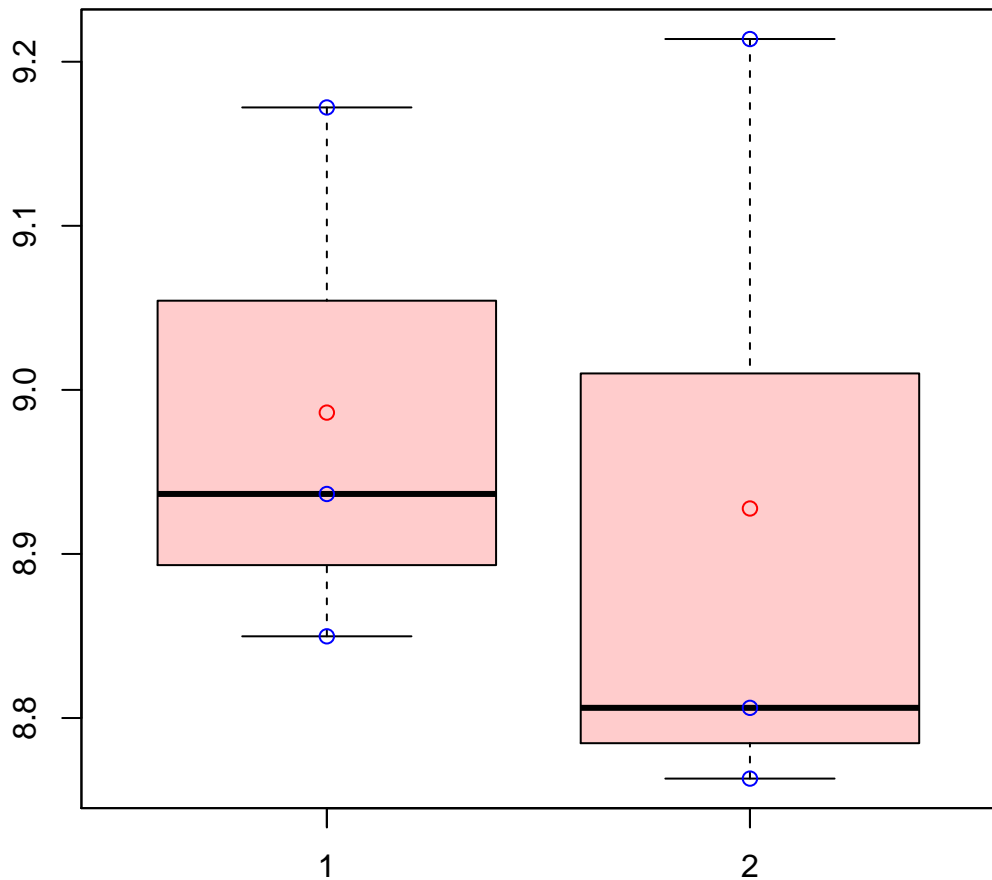

t-Test: p-value = 0.75

# CL860Contig3|CL860Contig3

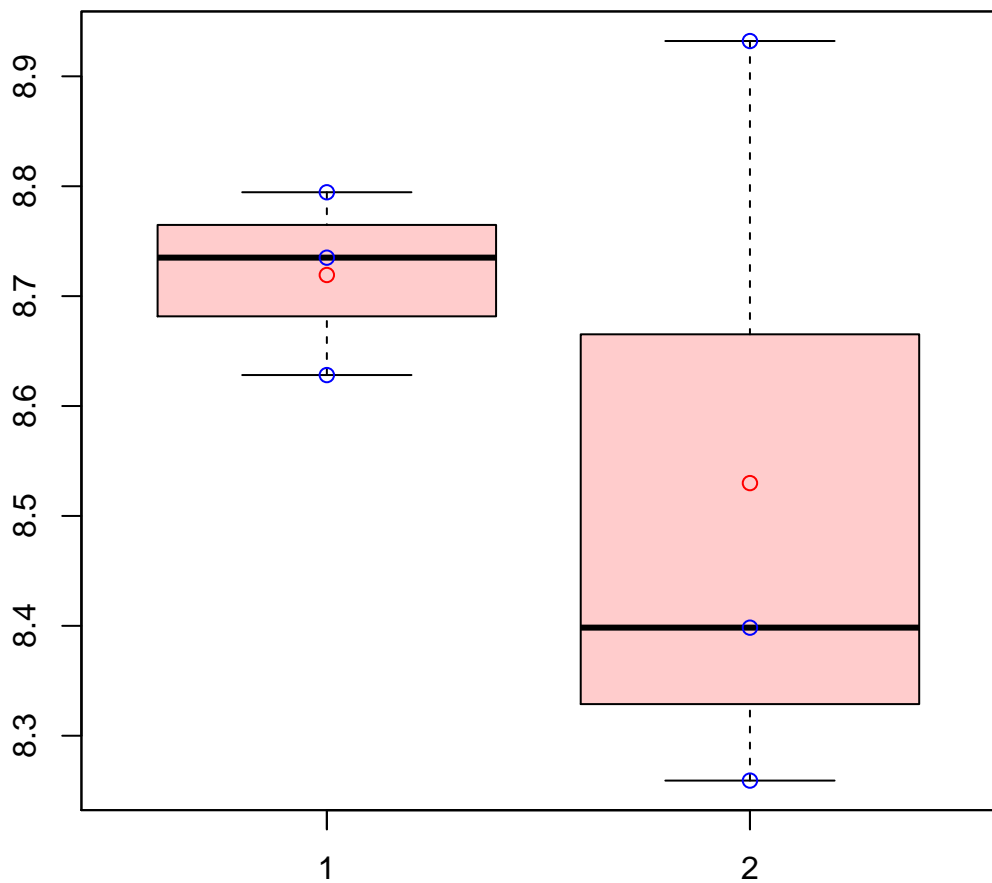

t-Test: p-value = 0.46

# CL860Contig4|CL860Contig4

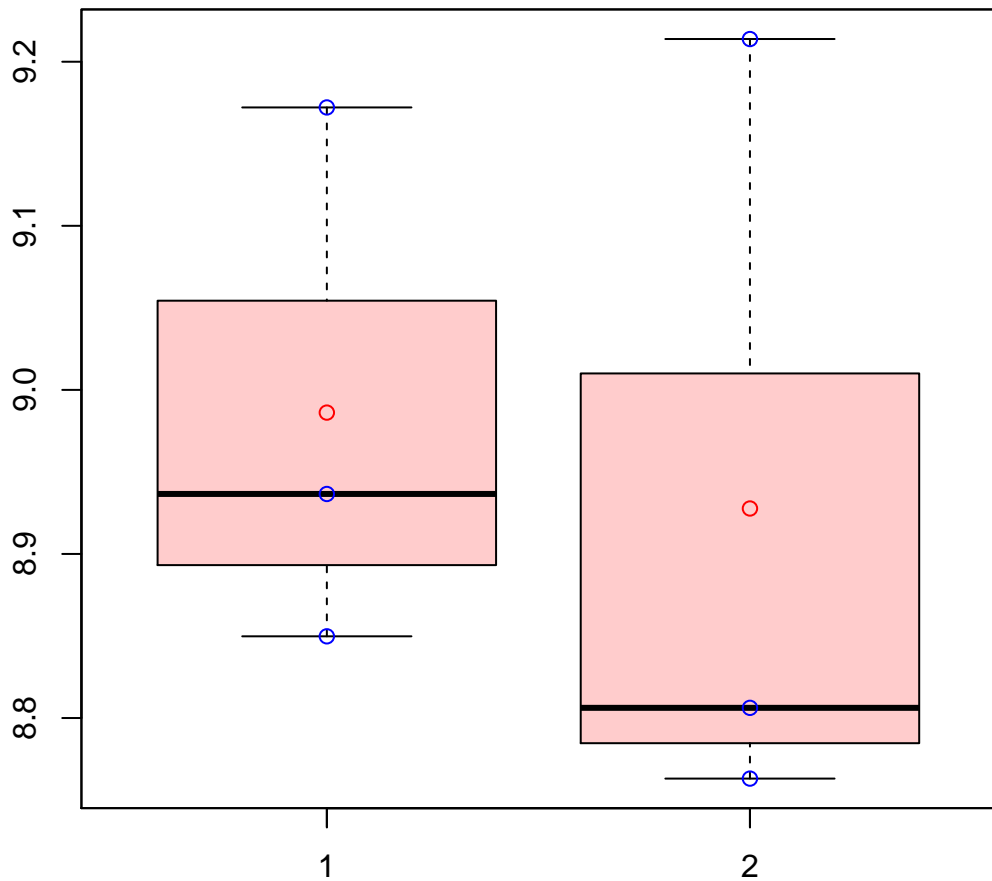

t-Test: p-value = 0.75

# CL8618Contig2|CL8618Contig2

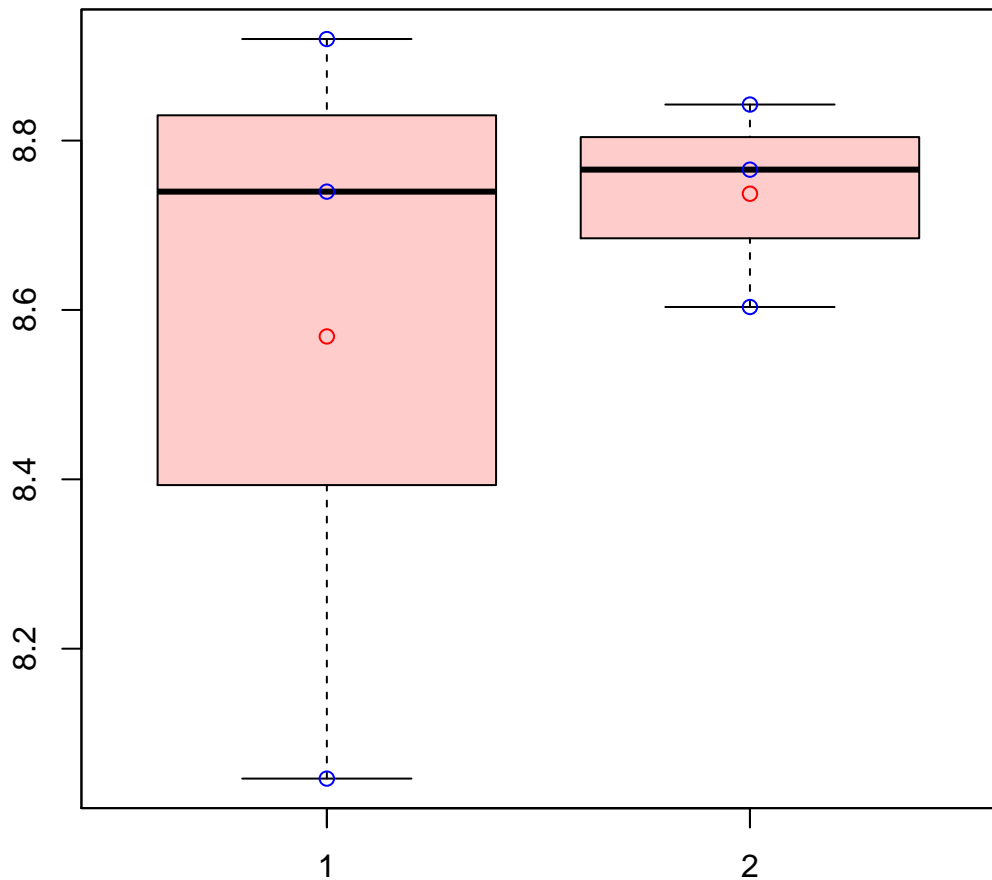

t-Test: p-value = 0.6



# CL8618Contig4|CL8618Contig4



t-Test: p-value = 0.6

# CL861Contig5|CL861Contig5

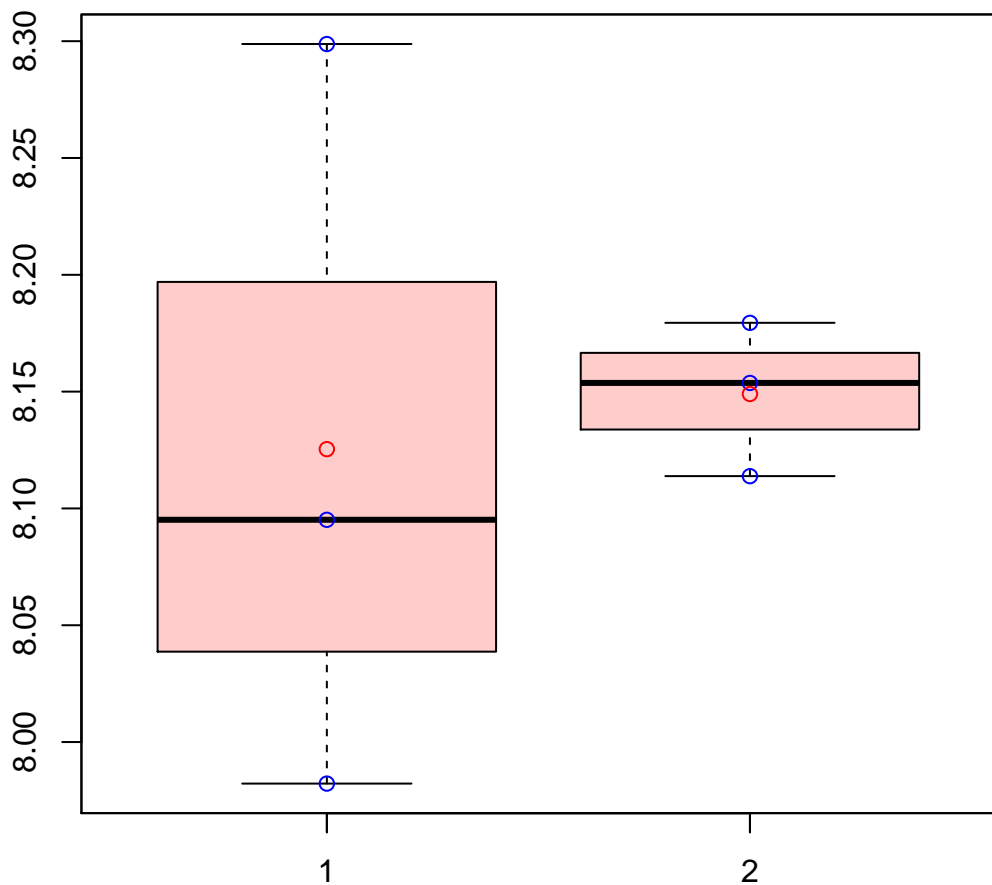

t-Test: p-value = 0.82

# CL861Contig6|CL861Contig6

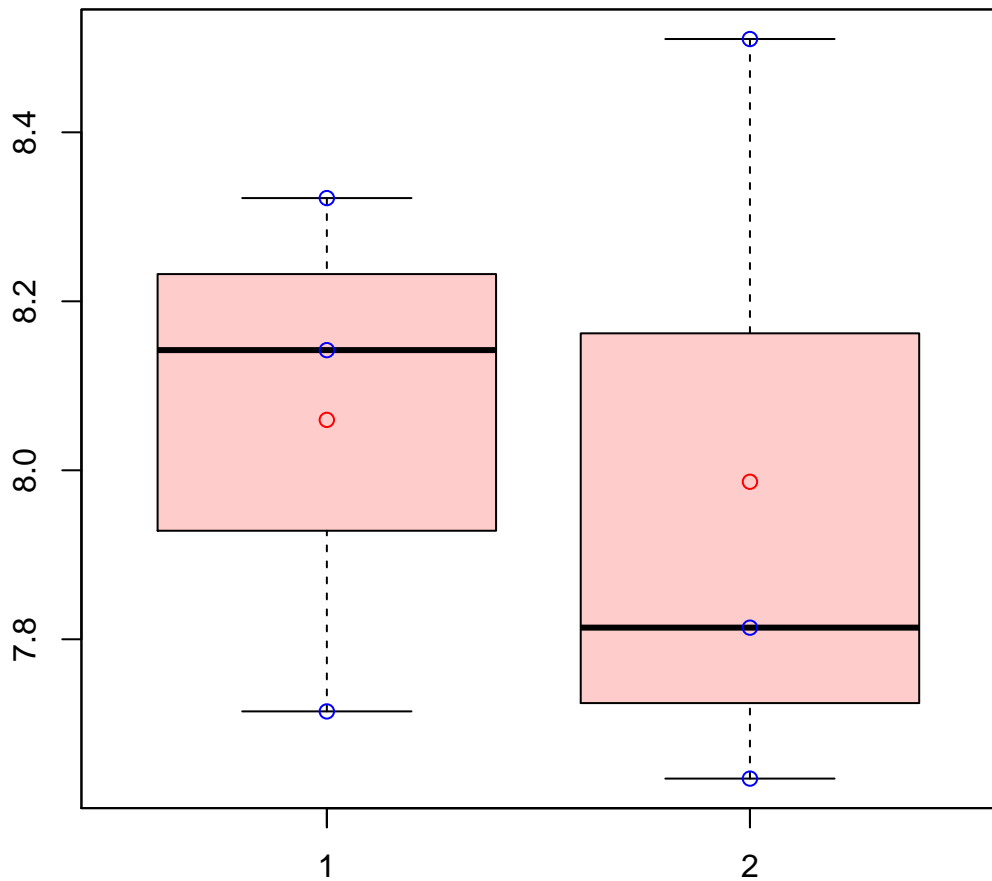

t-Test: p-value = 0.83

# CL8627Contig1|CL8627Contig1

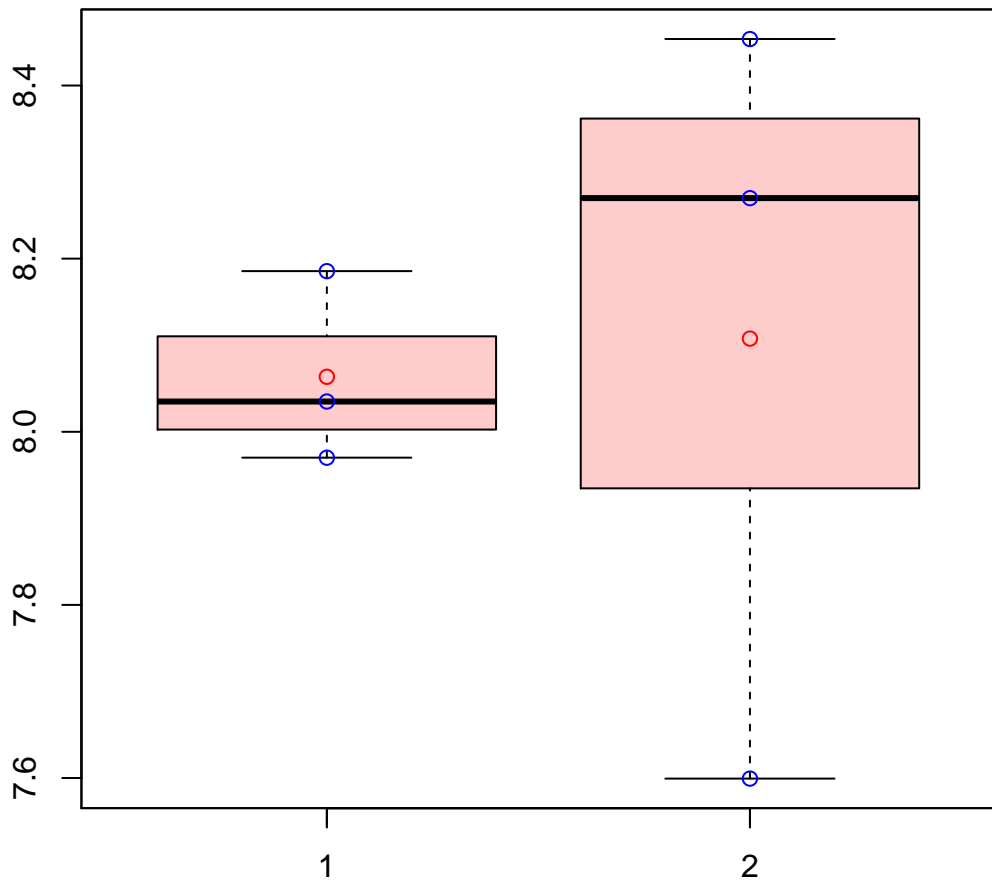

t-Test: p-value = 0.88

# CL863Contig2|CL863Contig2

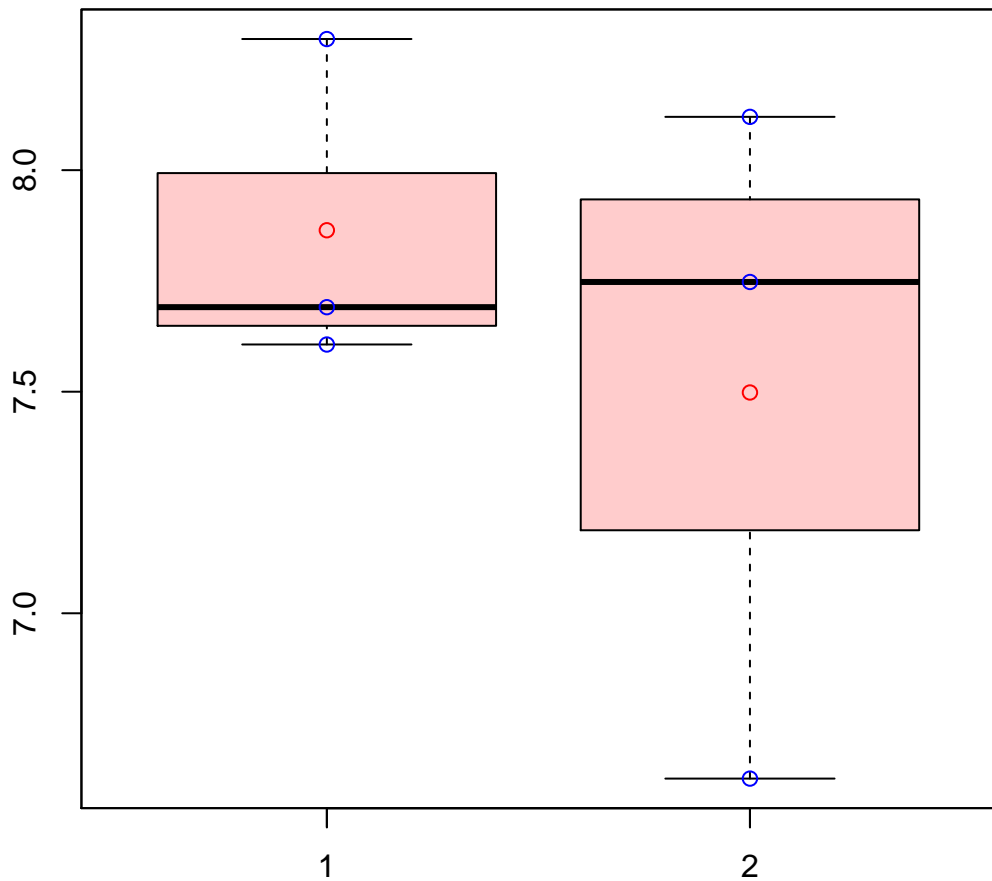

t-Test: p-value = 0.52

# CL863Contig3|CL863Contig3

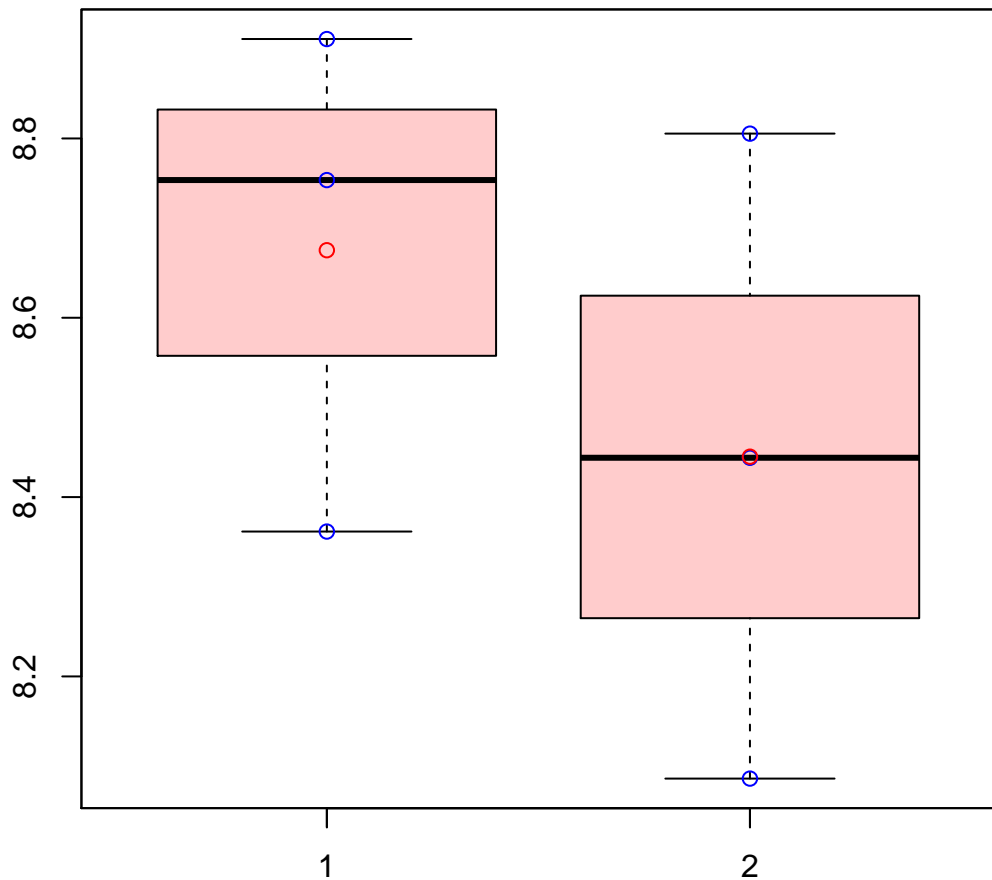

t-Test: p-value = 0.44

# CL863Contig4|CL863Contig4

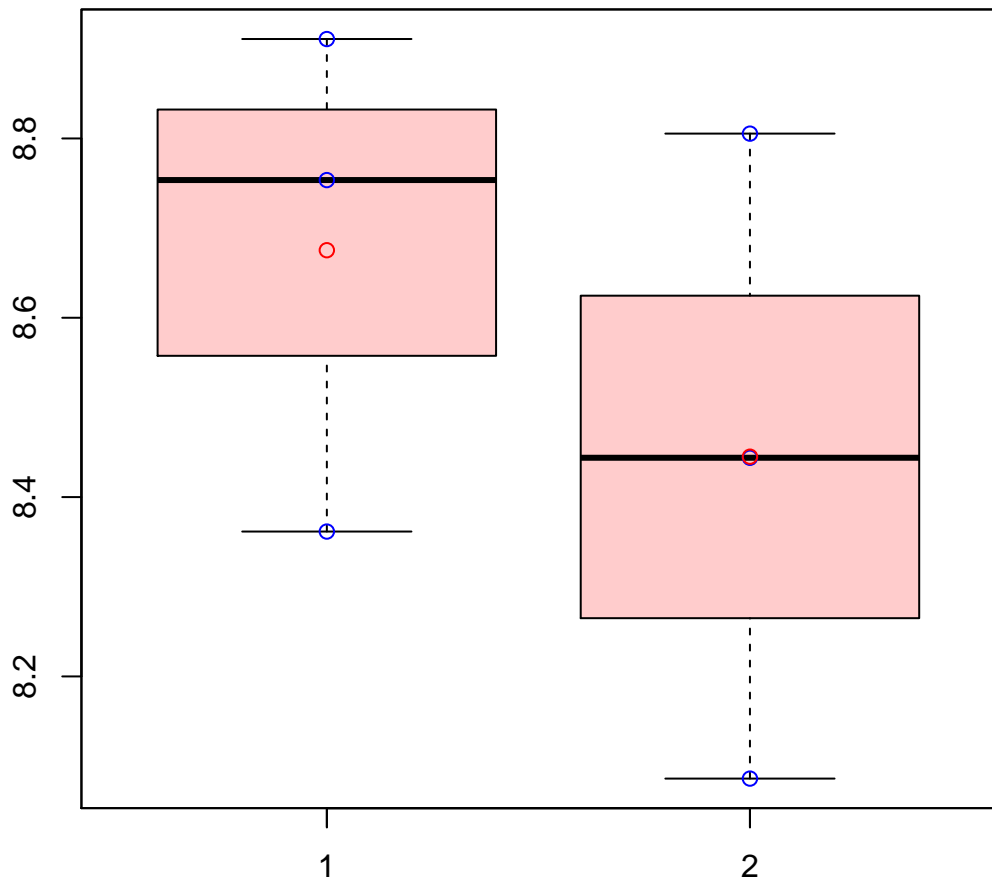

t-Test: p-value = 0.44

# CL8653Contig2|CL8653Contig2

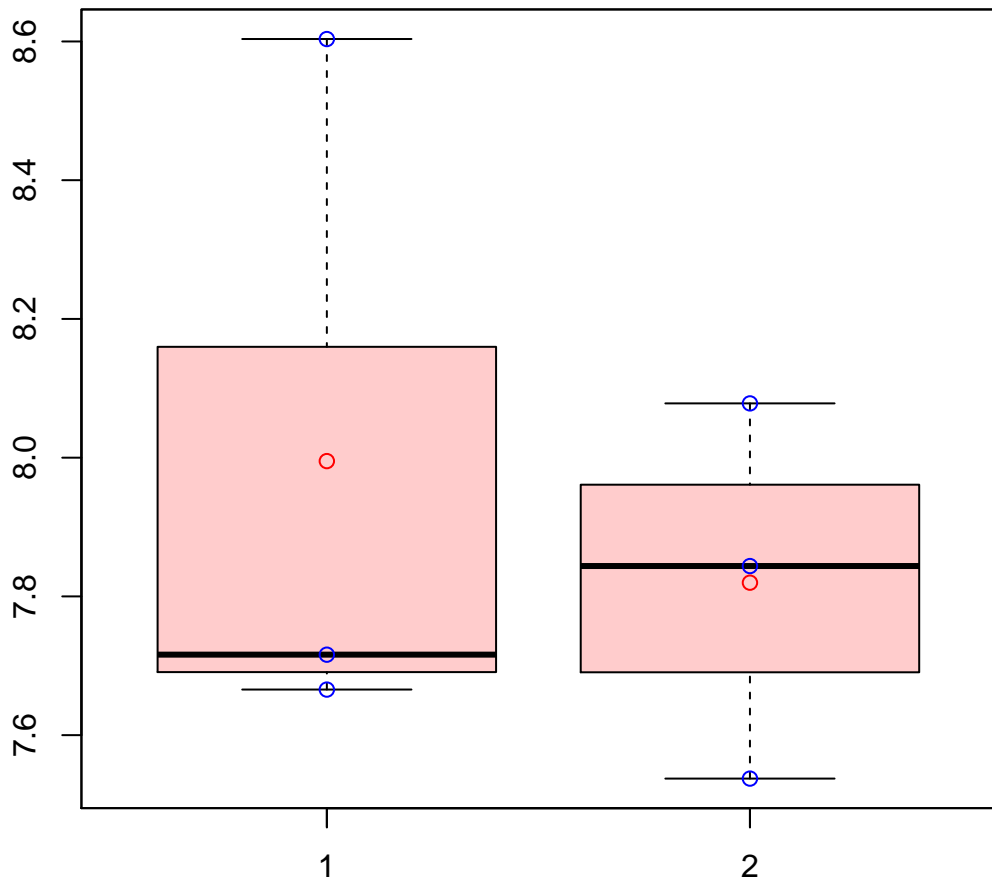

t-Test: p-value = 0.64



# CL8662Contig2|CL8662Contig2

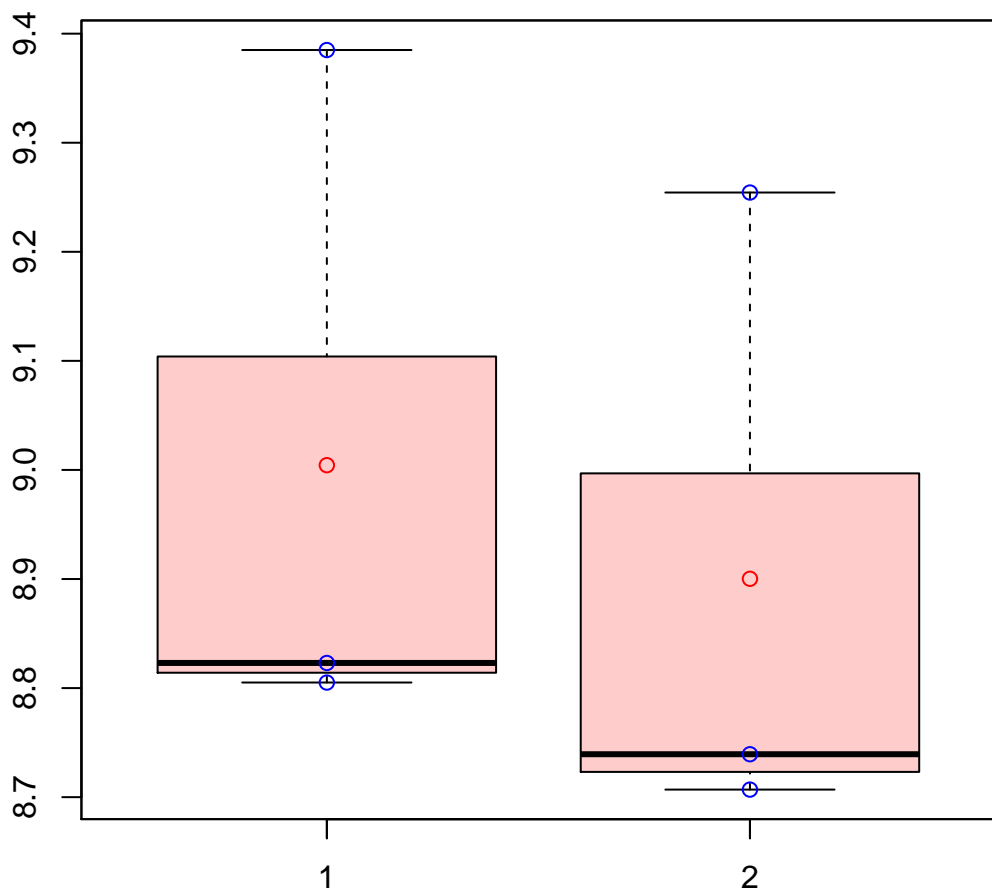

t-Test: p-value = 0.71

# CL8663Contig1|CL8663Contig1

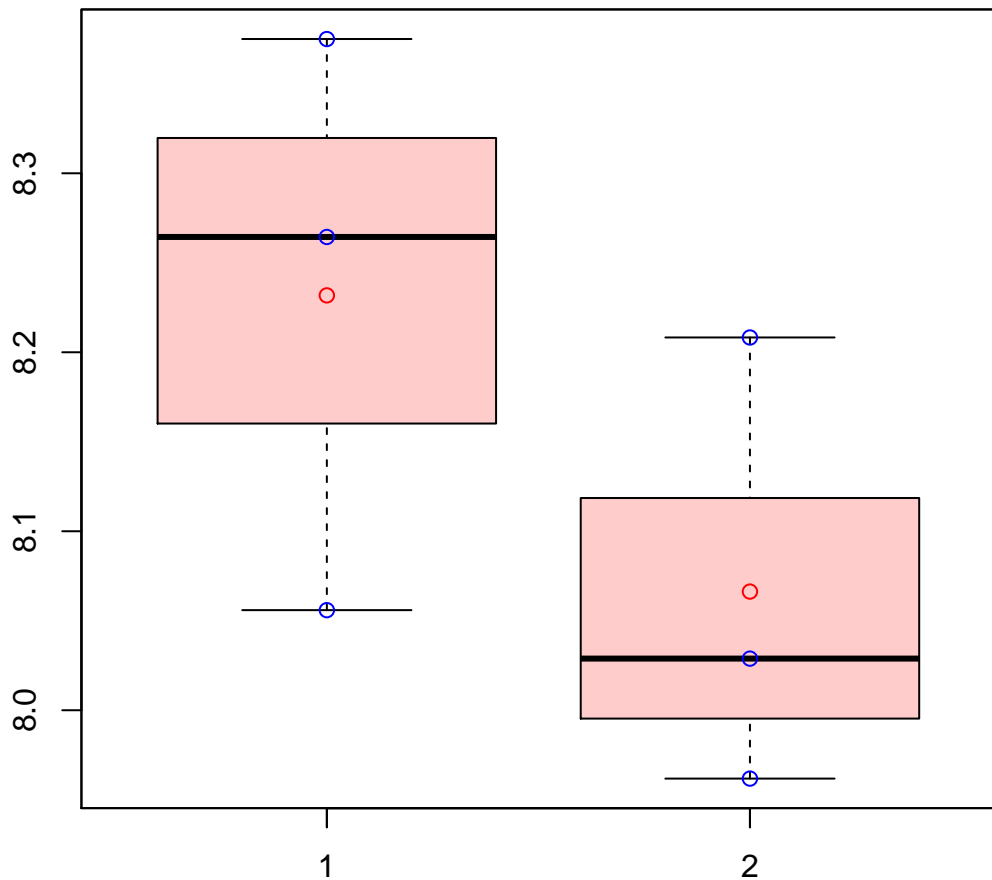

t-Test: p-value = 0.24

# CL8664Contig1|CL8664Contig1

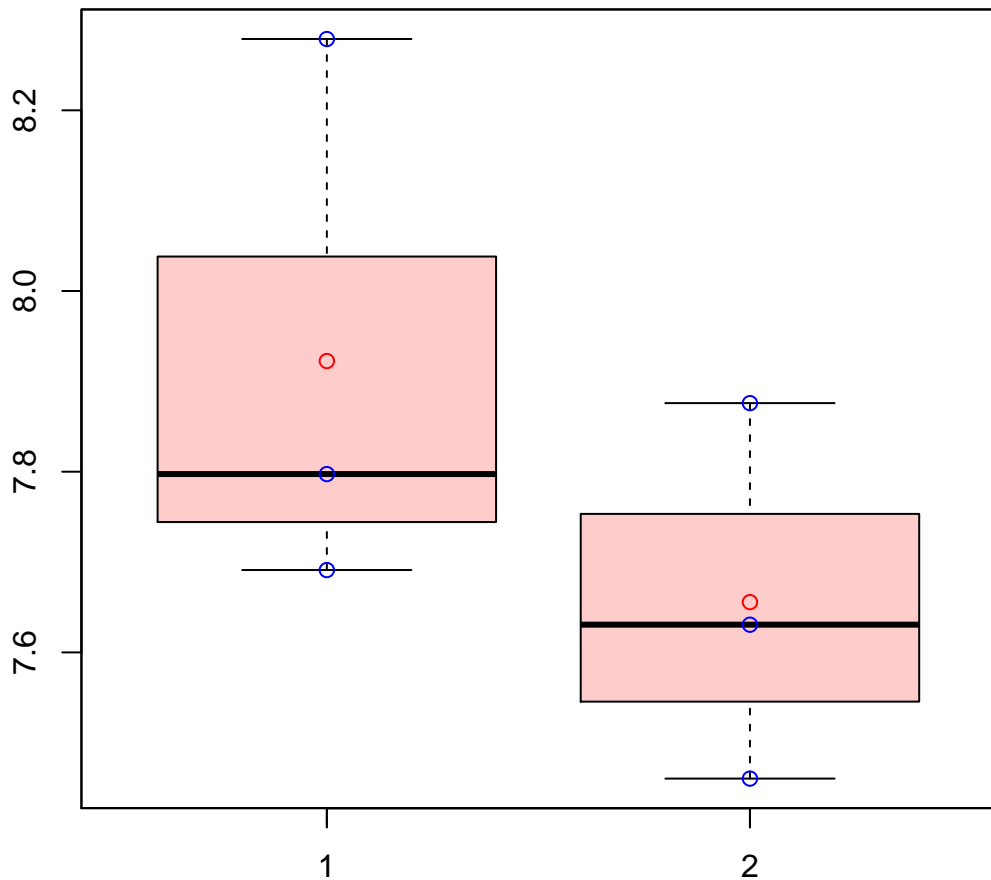

t-Test: p-value = 0.3

# CL8670Contig4|CL8670Contig4

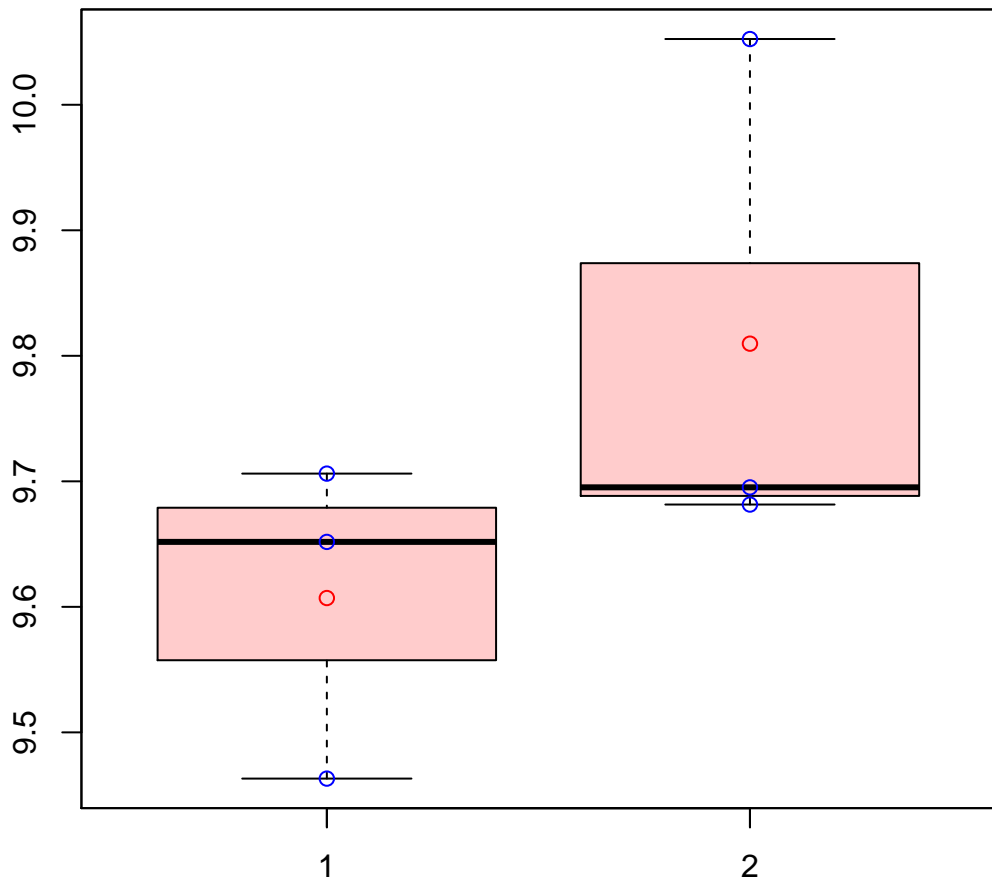

t-Test: p-value = 0.24

# CL8679Contig2|CL8679Contig2

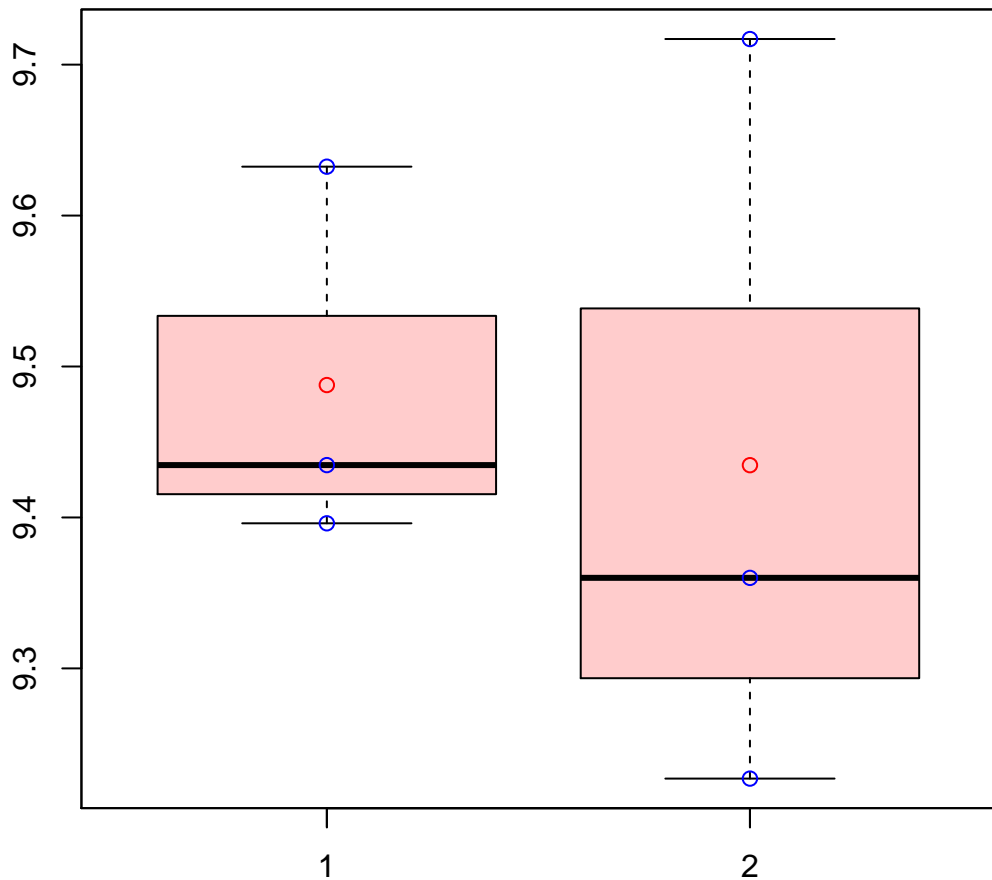

t-Test: p-value = 0.77

# CL867Contig2|CL867Contig2

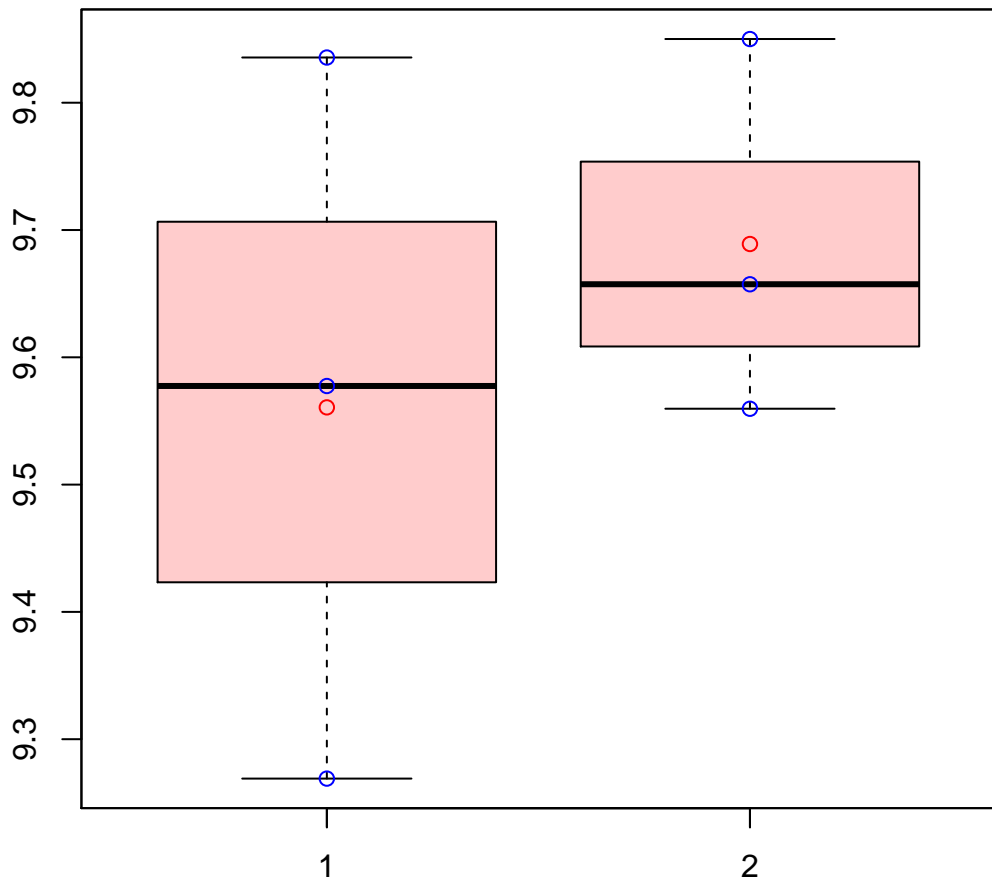

t-Test: p-value = 0.54

# CL8690Contig2|CL8690Contig2

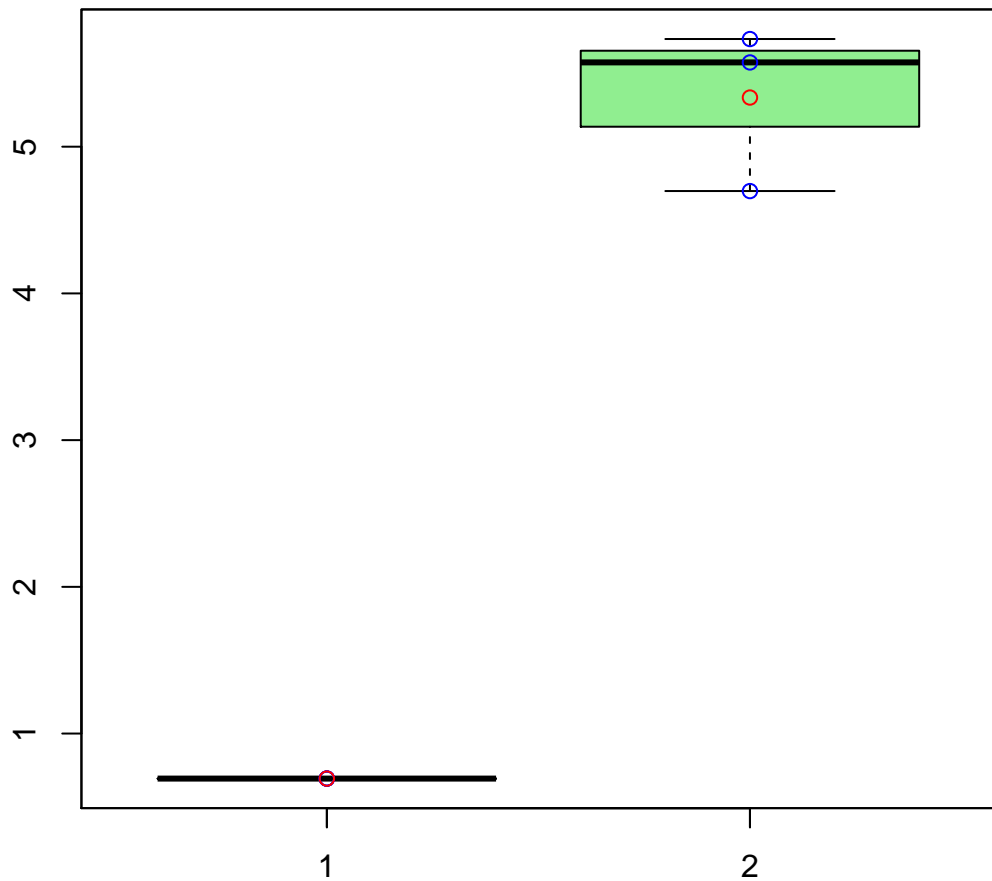

t-Test: p-value = 0

# CL8690Contig3|CL8690Contig3

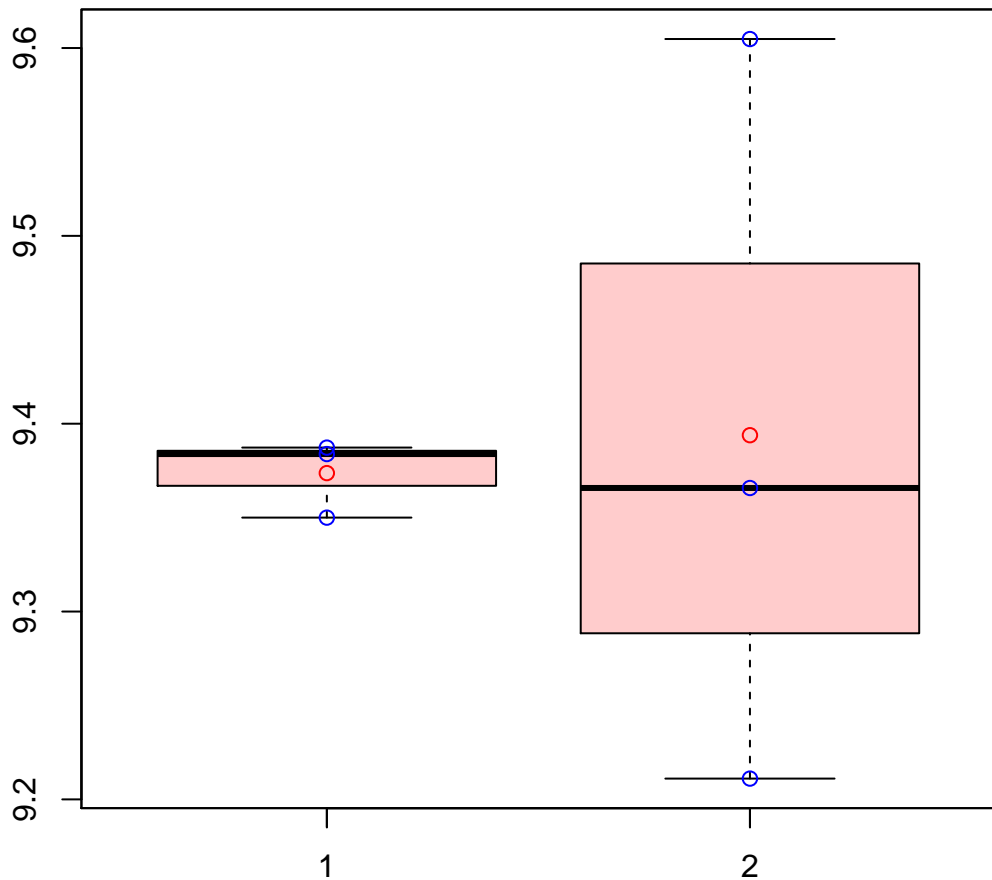

t-Test: p-value = 0.88



# CL8698Contig1|CL8698Contig1

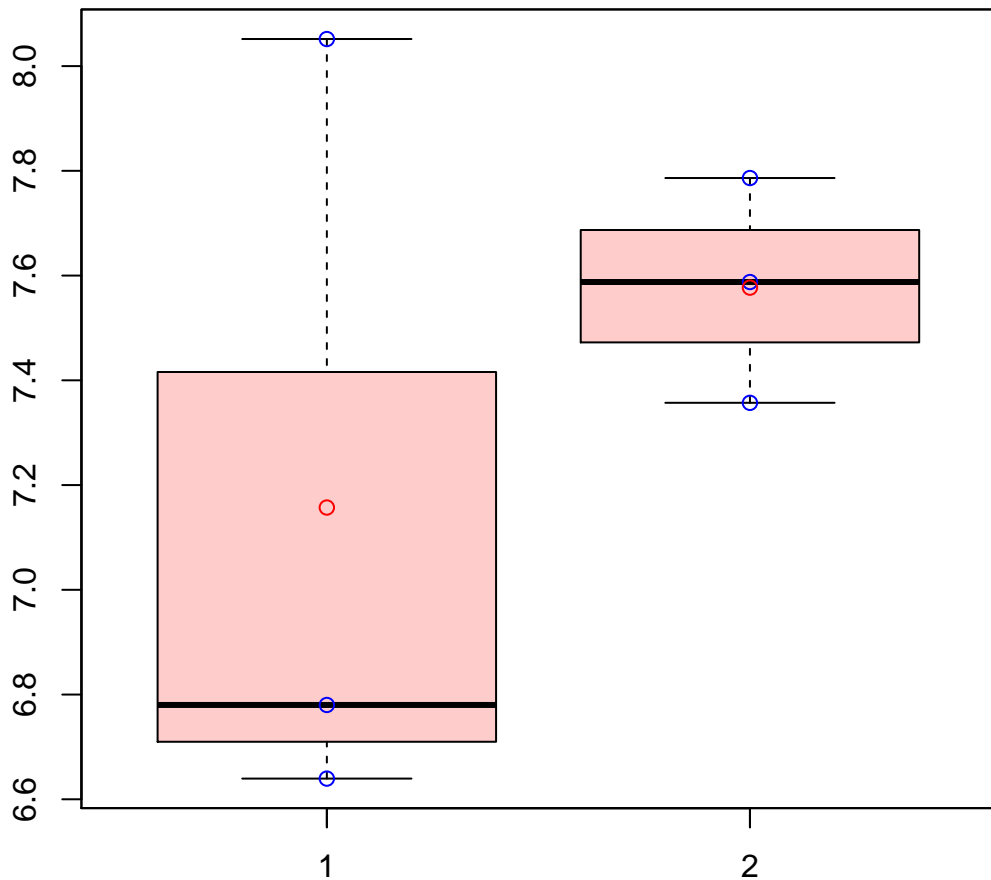

t-Test: p-value = 0.45

# CL86Contig11|CL86Contig11

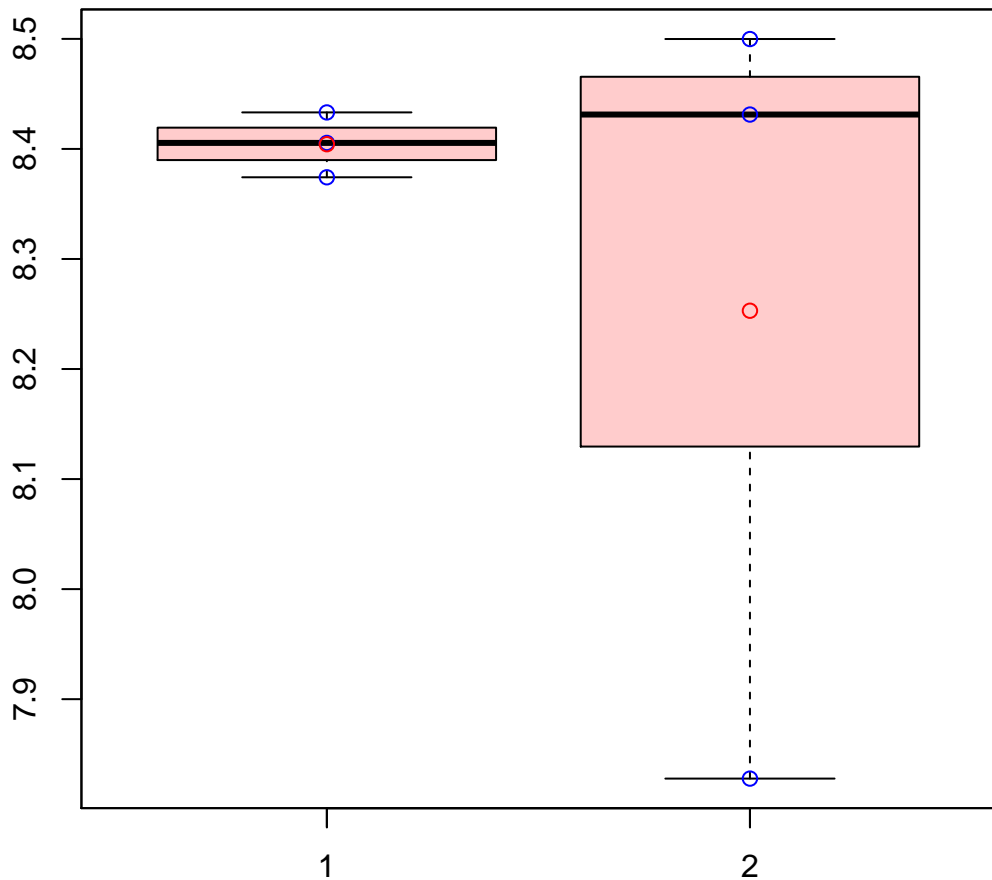

t-Test: p-value = 0.55

# CL86Contig4|CL86Contig4

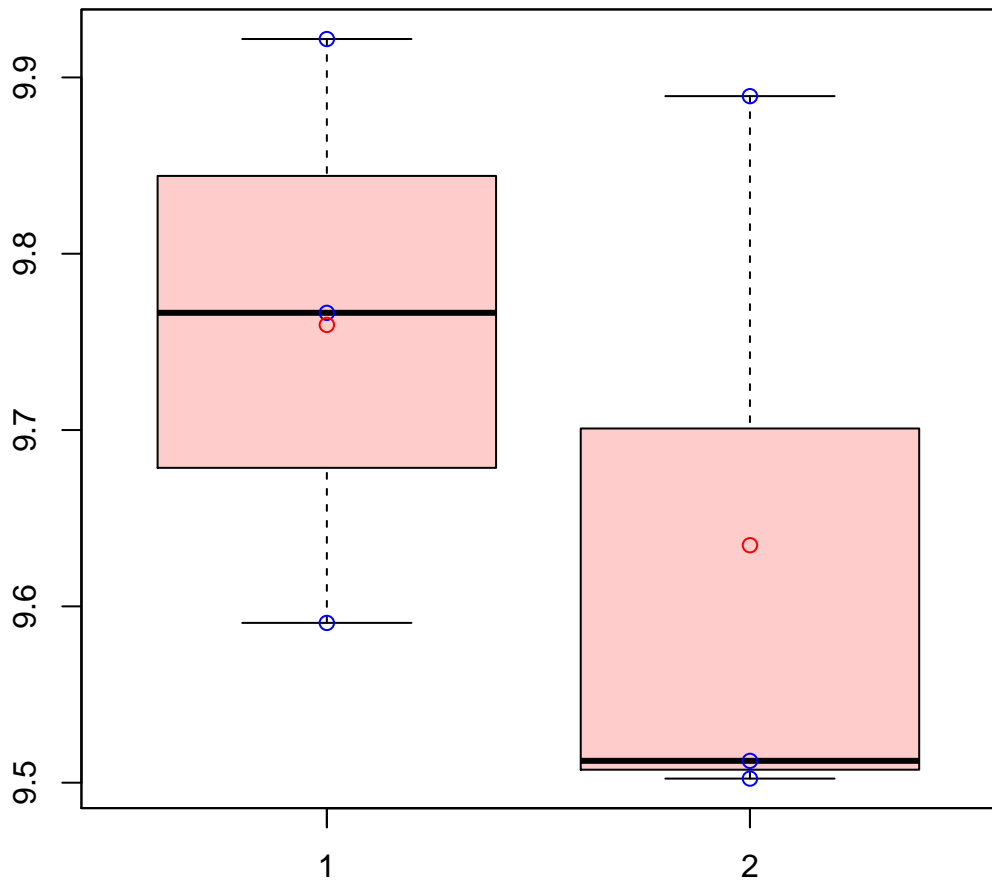

t-Test: p-value = 0.48

# CL871Contig5|CL871Contig5

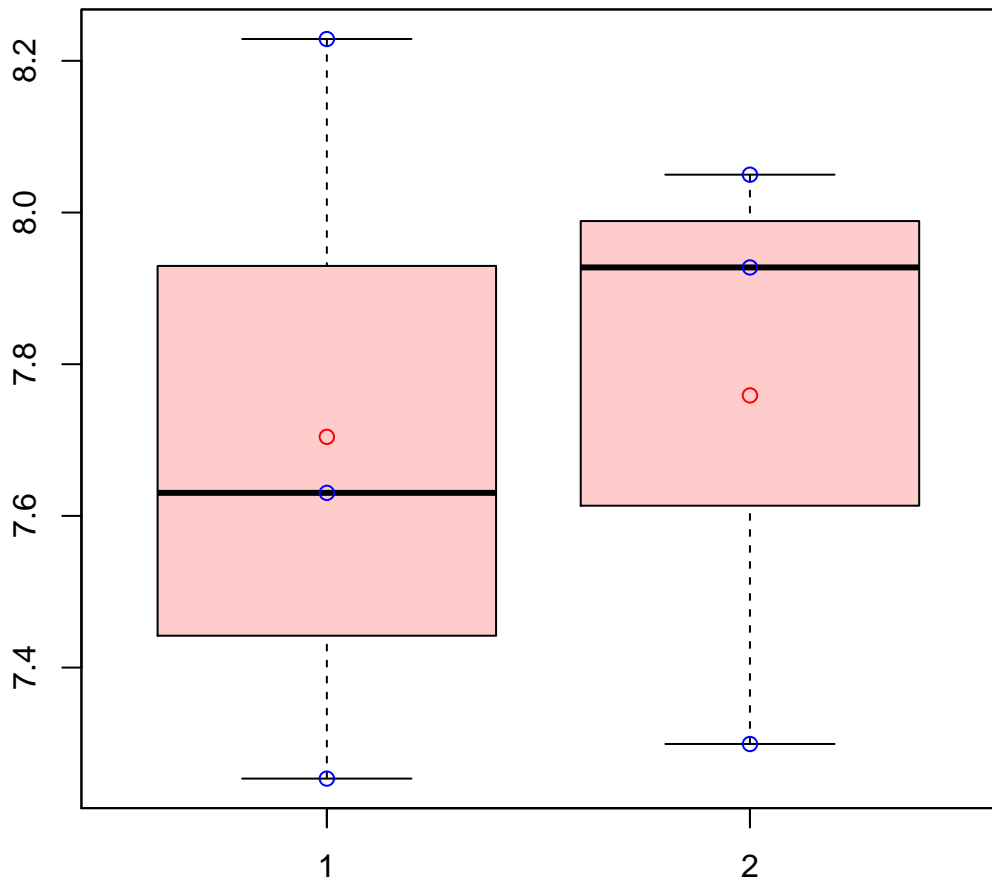

t-Test: p-value = 0.89

# CL871Contig8|CL871Contig8

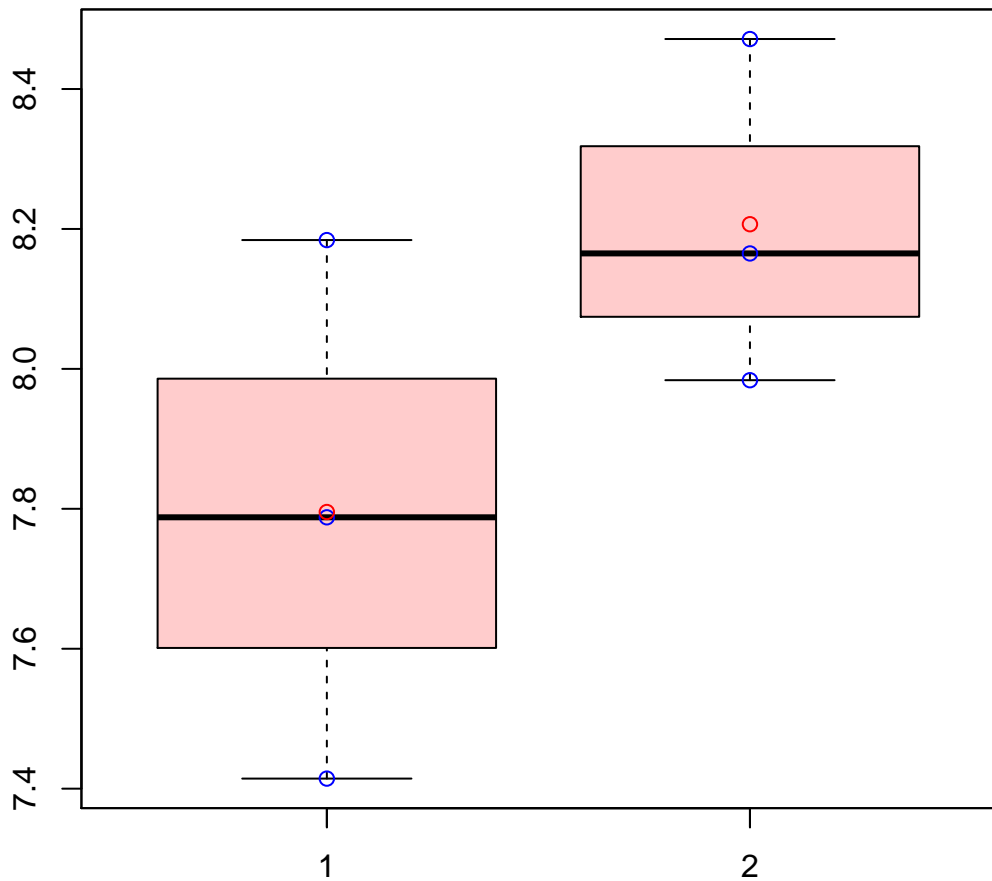

t-Test: p-value = 0.21

# CL8722Contig1|CL8722Contig1

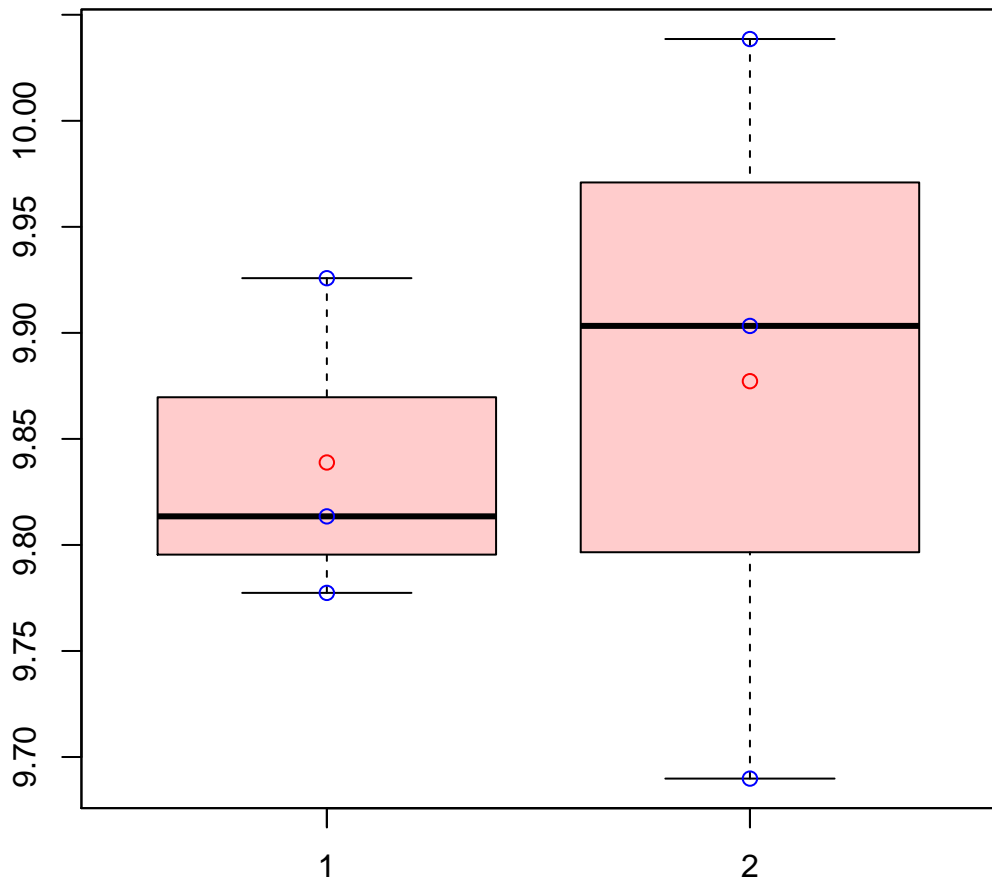

t-Test: p-value = 0.75

# CL8722Contig2|CL8722Contig2

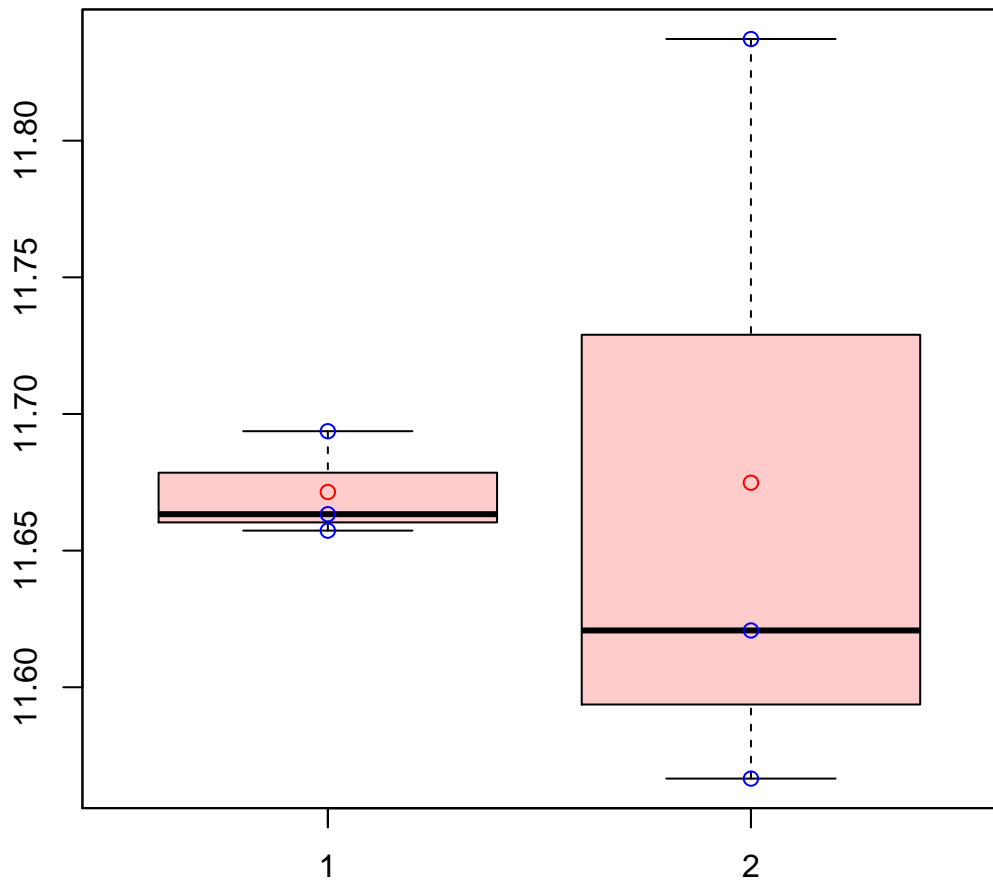

t-Test: p-value = 0.97

# CL8722Contig4|CL8722Contig4

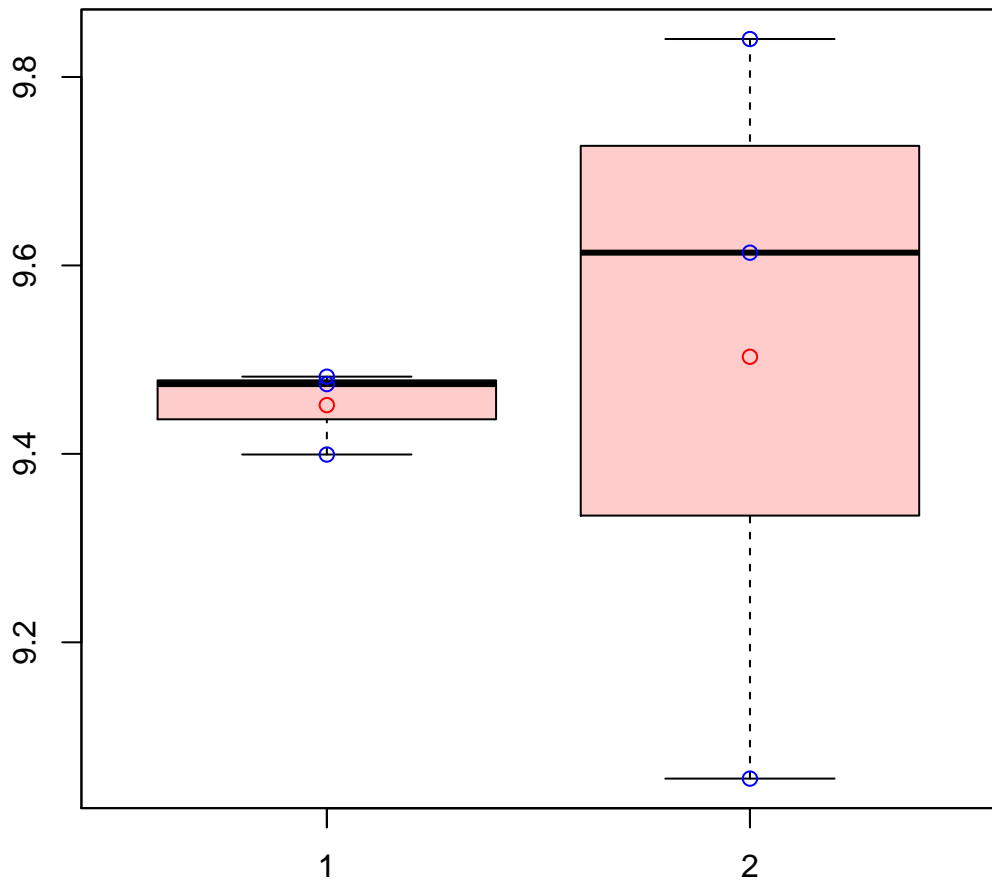

t-Test: p-value = 0.85



# CL8722Contig5|CL8722Contig5

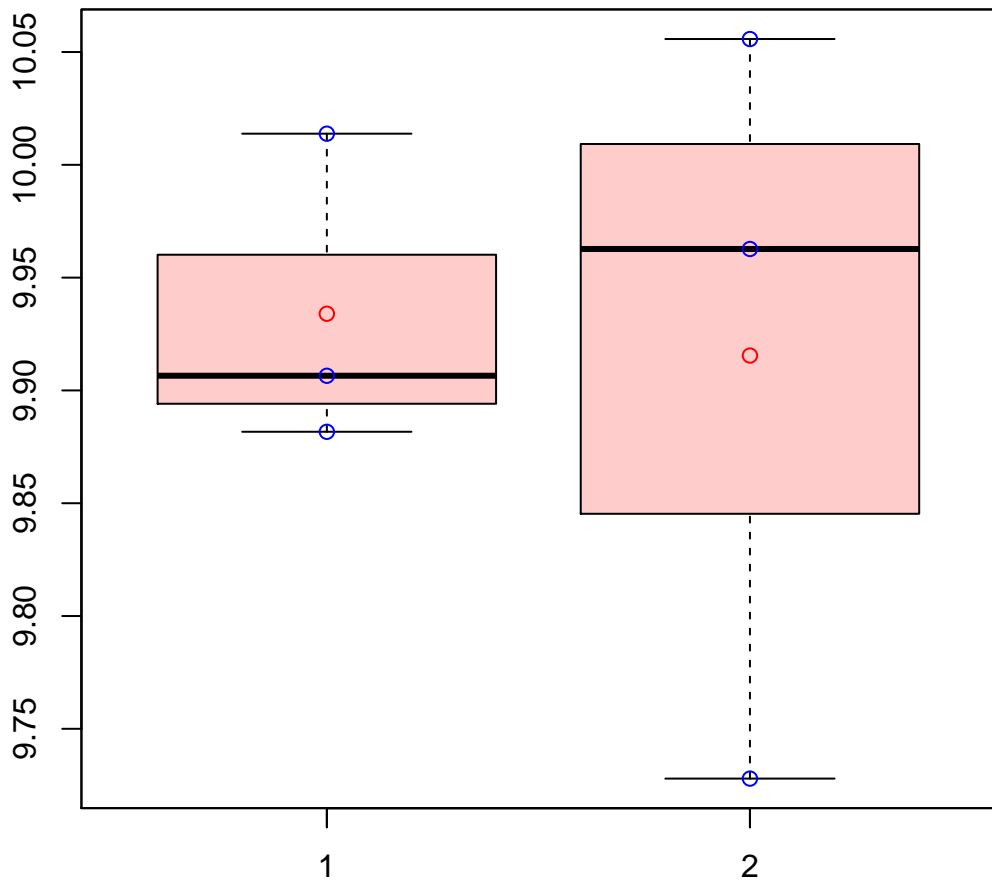

t-Test: p-value = 0.87

# CL8723Contig1|CL8723Contig1

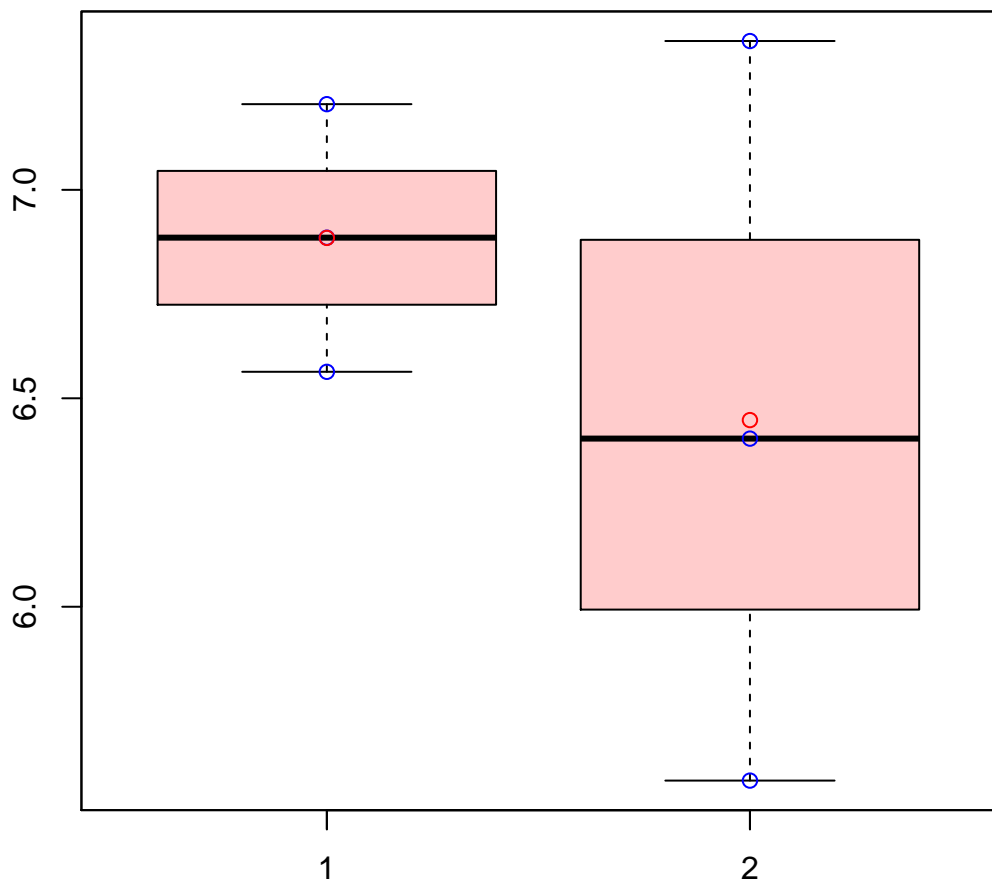

t-Test: p-value = 0.49

# CL8723Contig2|CL8723Contig2

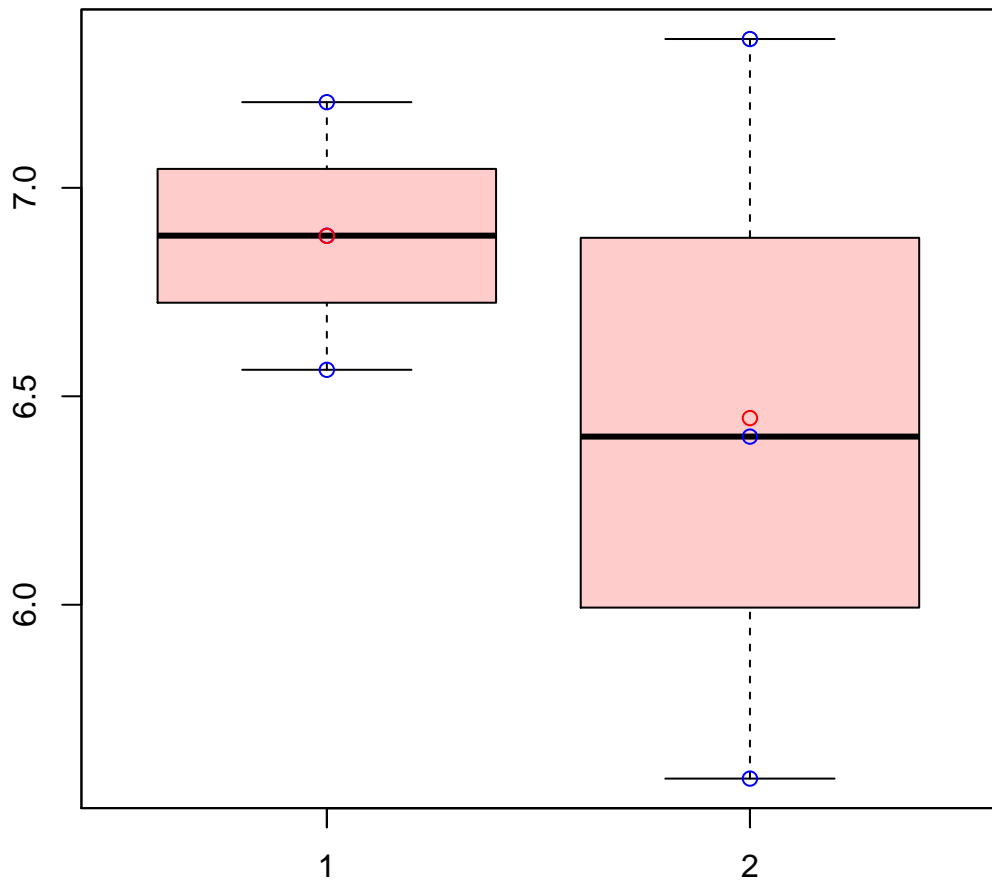

t-Test: p-value = 0.49

# CL8723Contig4|CL8723Contig4



t-Test: p-value = 0.49

# CL8723Contig5|CL8723Contig5



t-Test: p-value = 0.49

# CL8734Contig3|CL8734Contig3

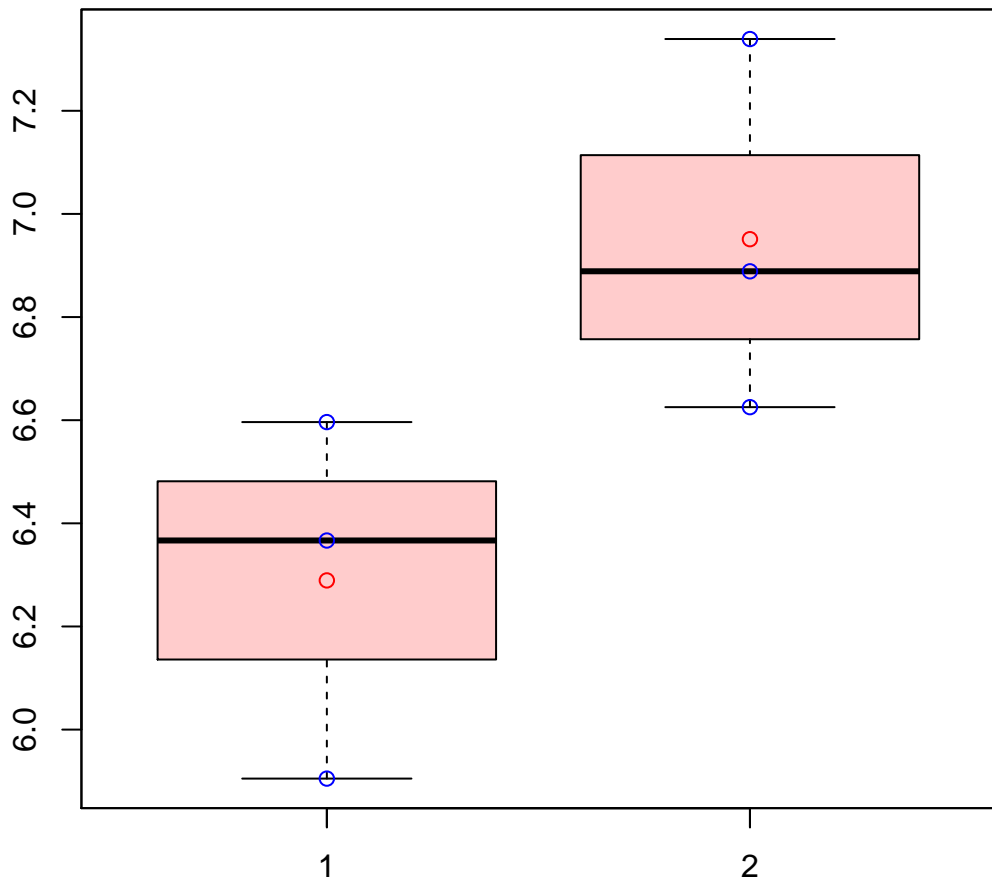

t-Test: p-value = 0.09

# CL873Contig3|CL873Contig3

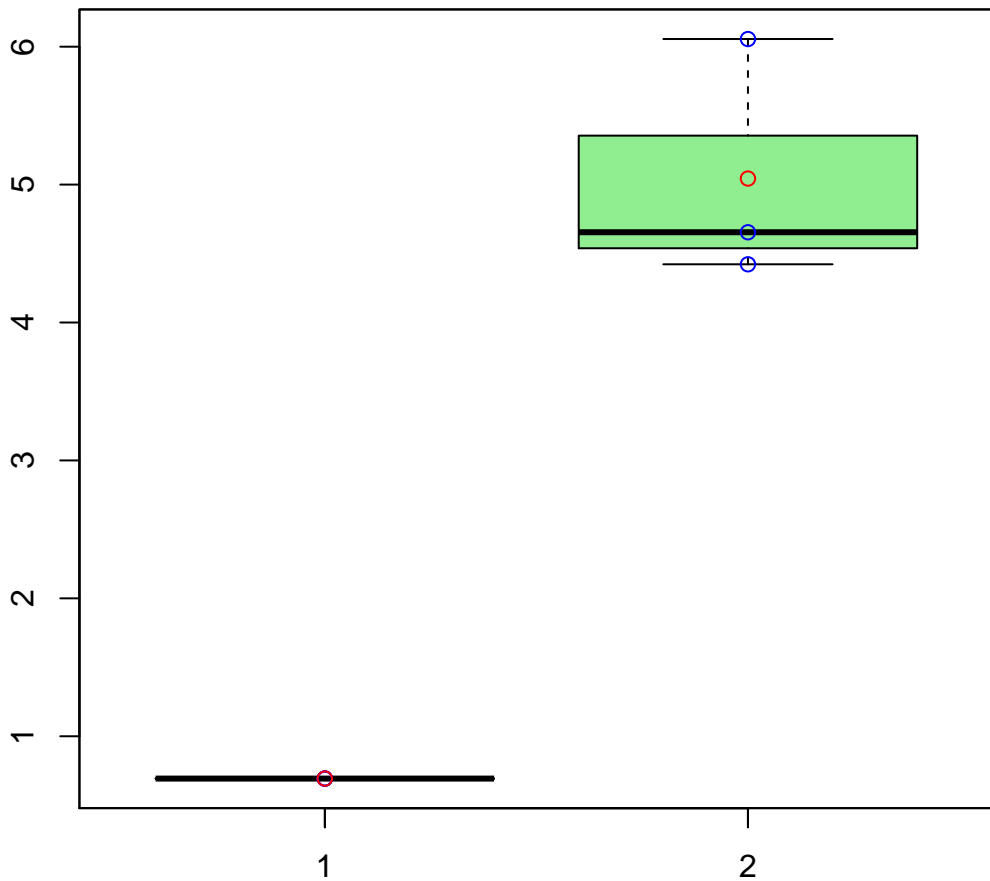

t-Test: p-value = 0.01

# CL873Contig4|CL873Contig4

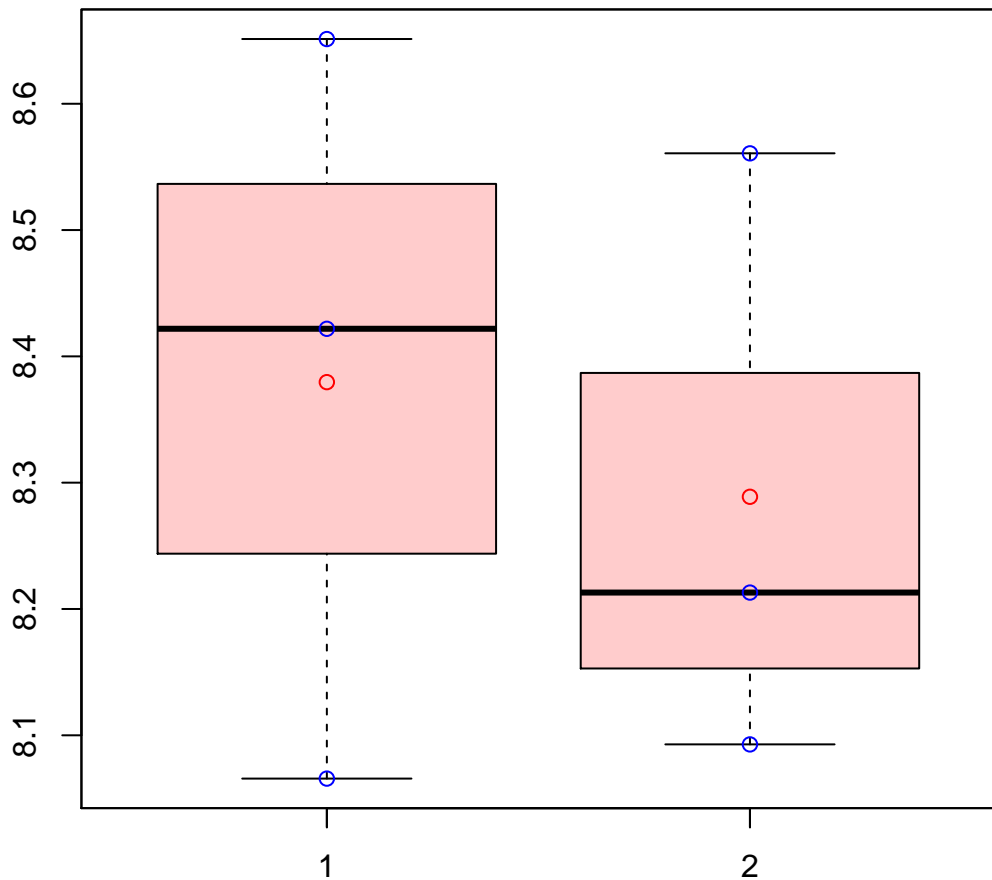

t-Test: p-value = 0.7



# CL8741Contig2|CL8741Contig2

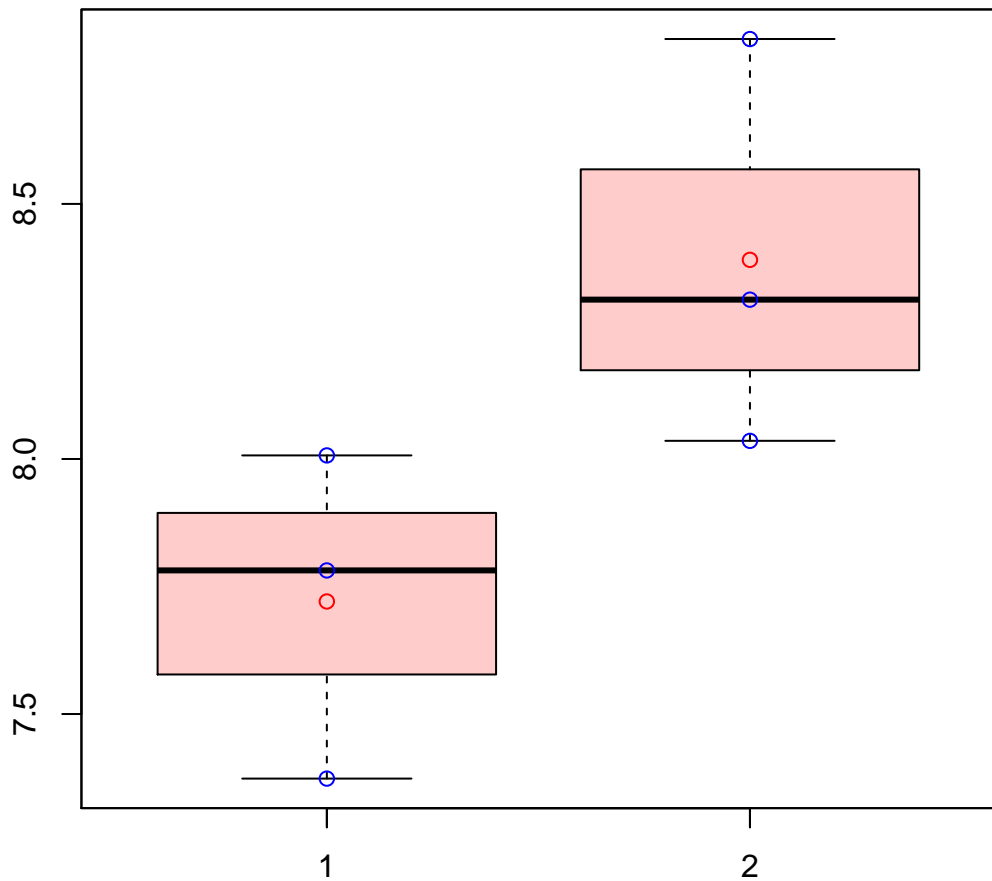

t-Test: p-value = 0.09

# CL8746Contig2|CL8746Contig2

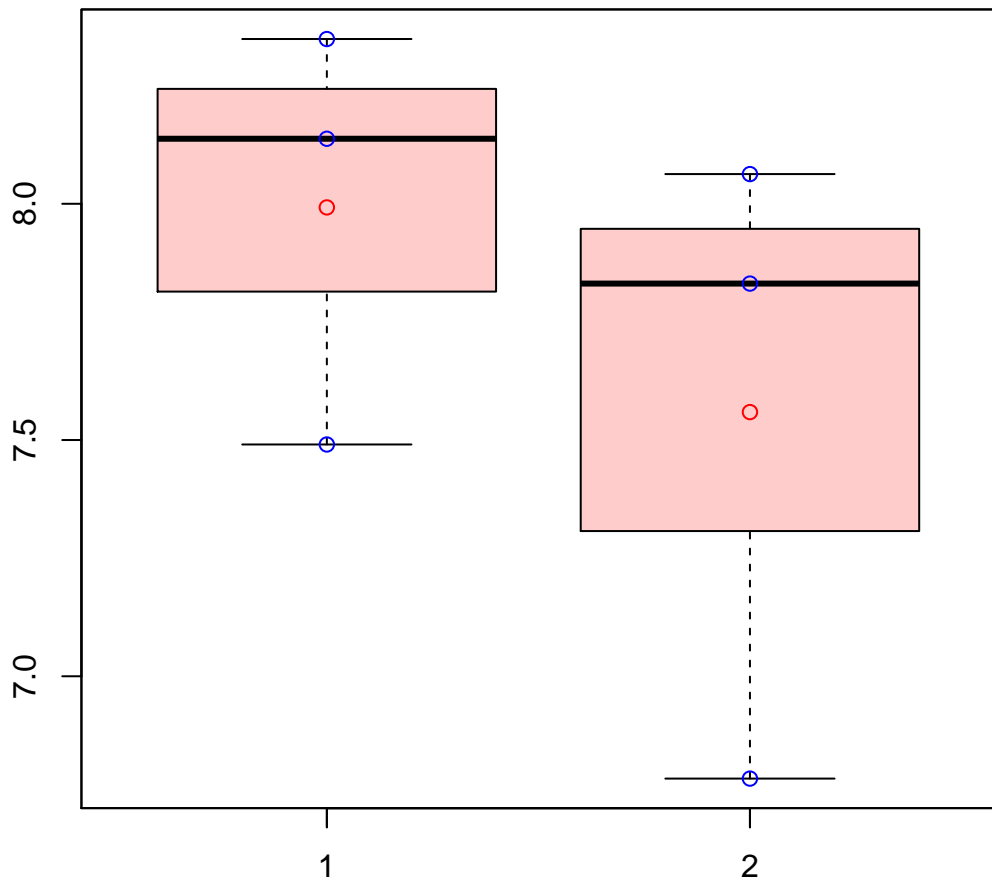

t-Test: p-value = 0.42

# CL8753Contig1|CL8753Contig1

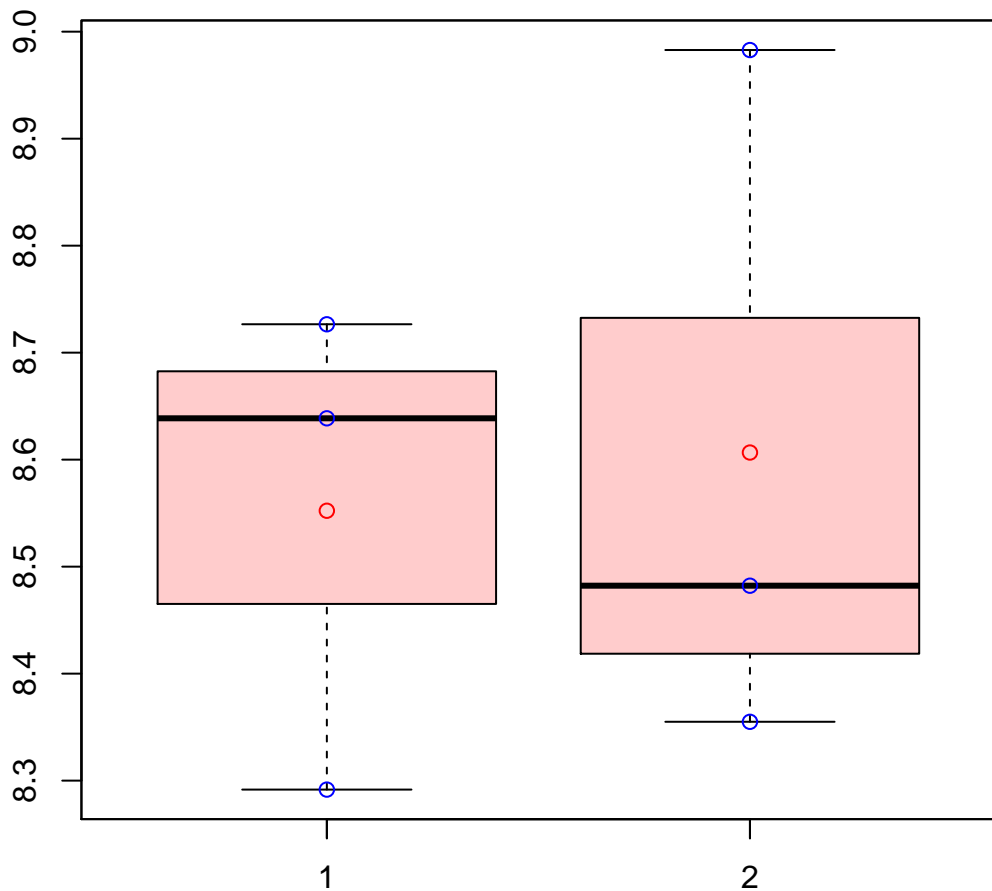

t-Test: p-value = 0.83

# CL8759Contig1|CL8759Contig1

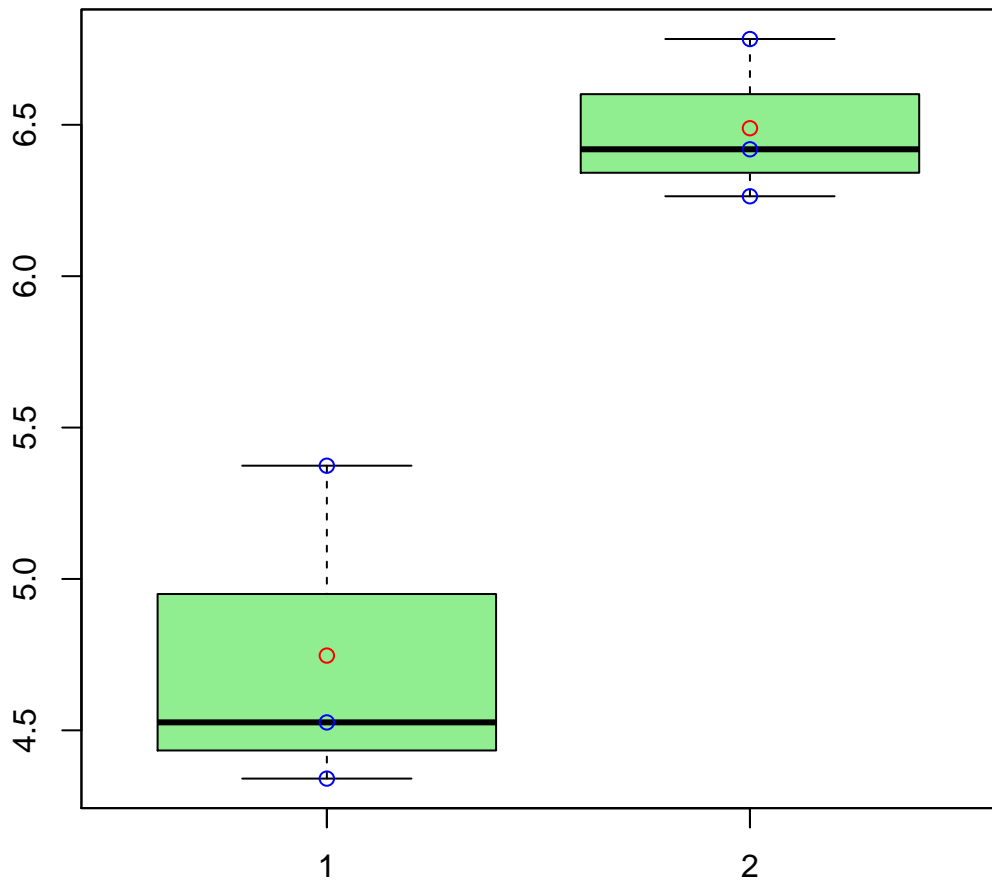

t-Test: p-value = 0.02

# CL8759Contig2|CL8759Contig2



t-Test: p-value = 0.02

# CL8764Contig1|CL8764Contig1

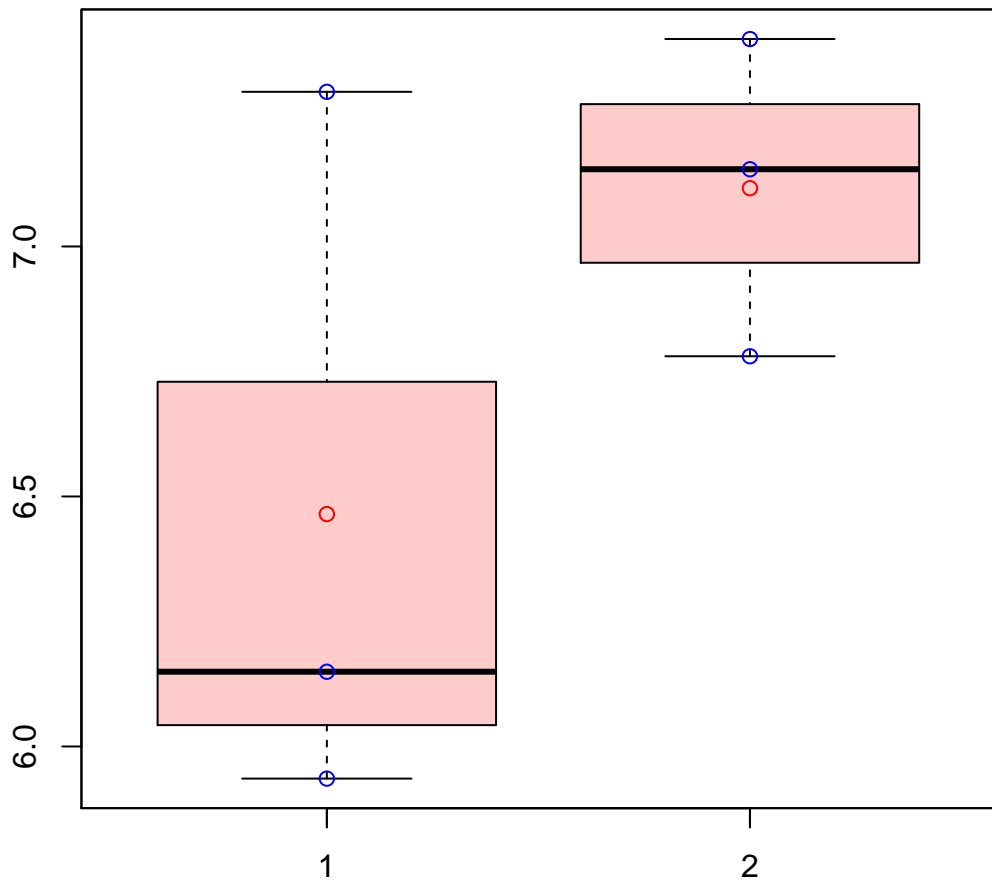

t-Test: p-value = 0.26

# CL876Contig4|CL876Contig4

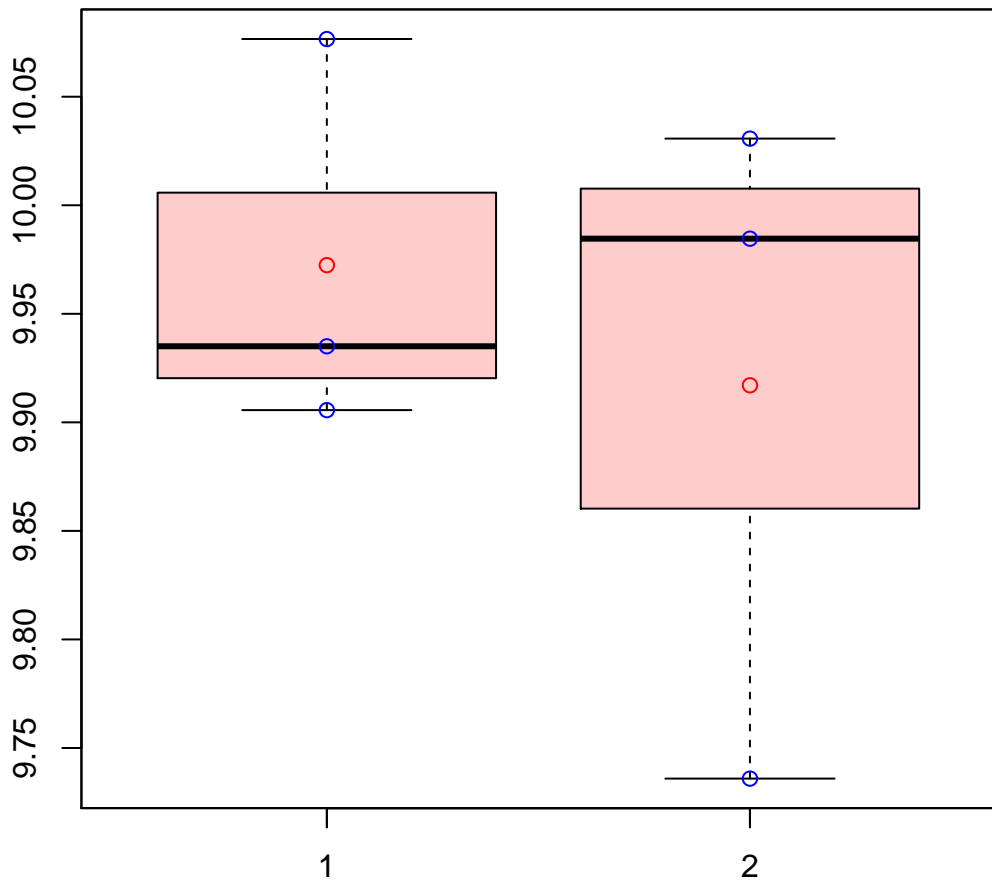

t-Test: p-value = 0.63

# CL8772Contig1|CL8772Contig1



t-Test: p-value = 0.86



# CL8773Contig1|CL8773Contig1

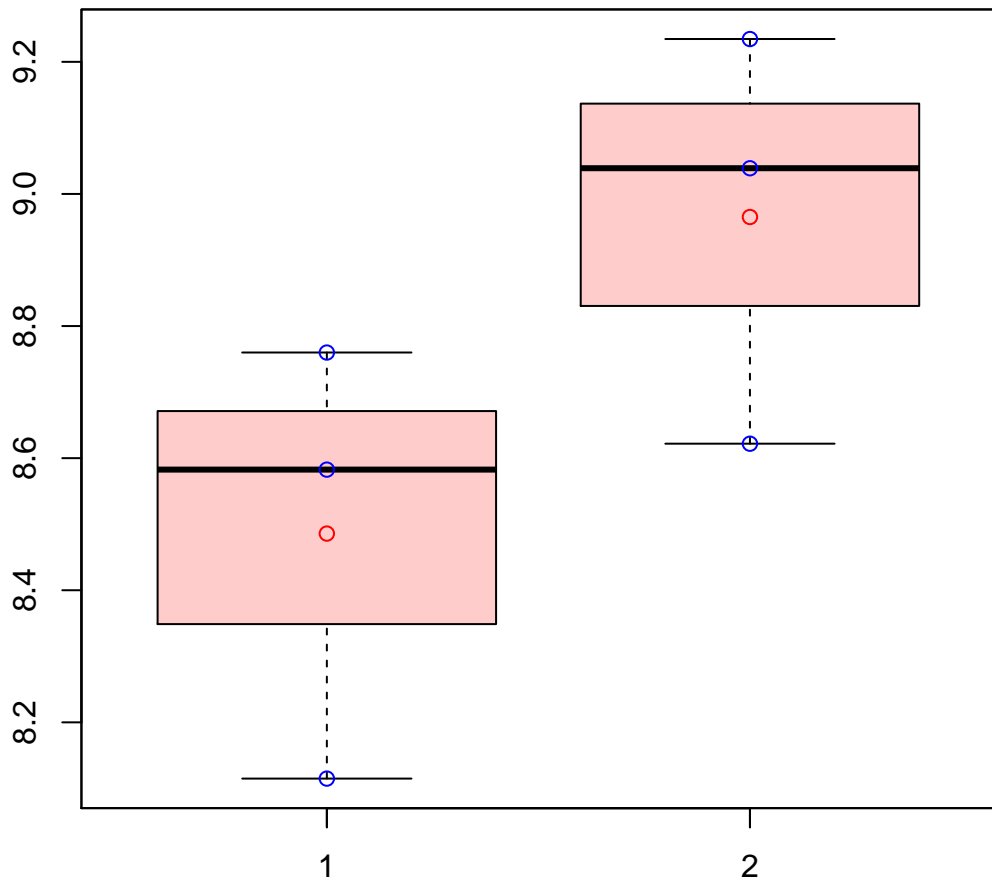

t-Test: p-value = 0.14

# CL8780Contig2|CL8780Contig2



t-Test: p-value = 0.71

# CL8796Contig2|CL8796Contig2

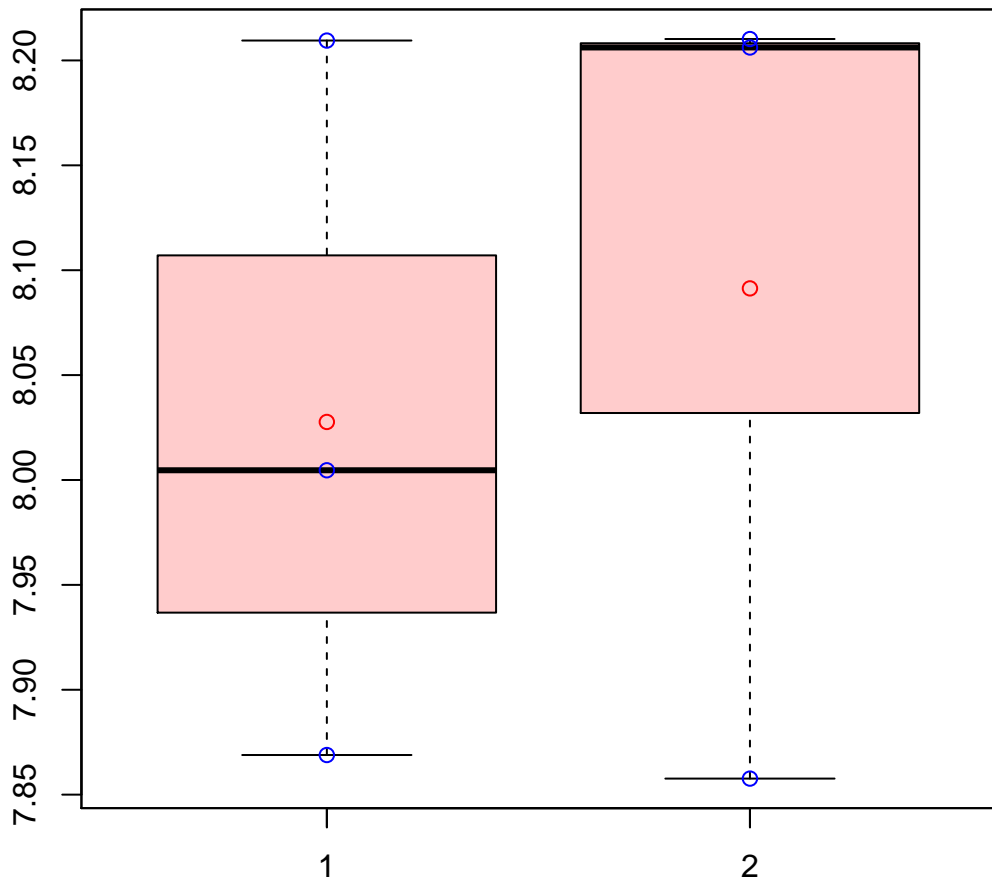

t-Test: p-value = 0.7

# CL879Contig11|CL879Contig11

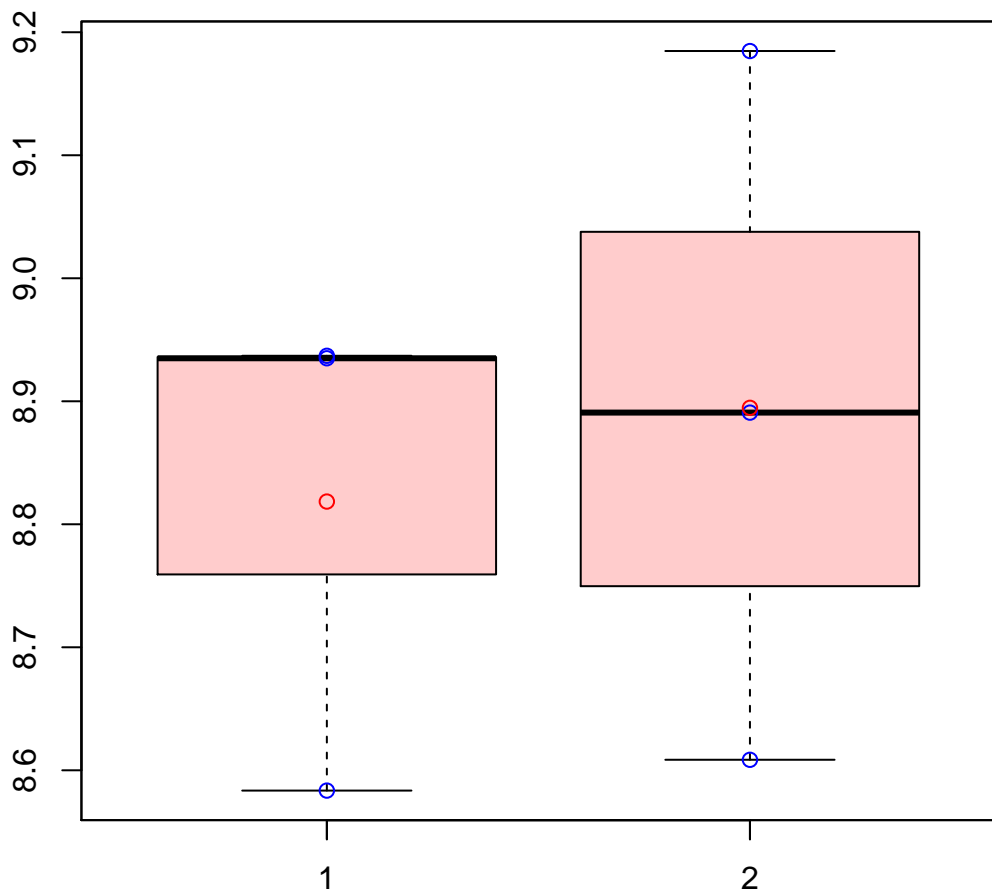

t-Test: p-value = 0.73

# CL87Contig11|CL87Contig11

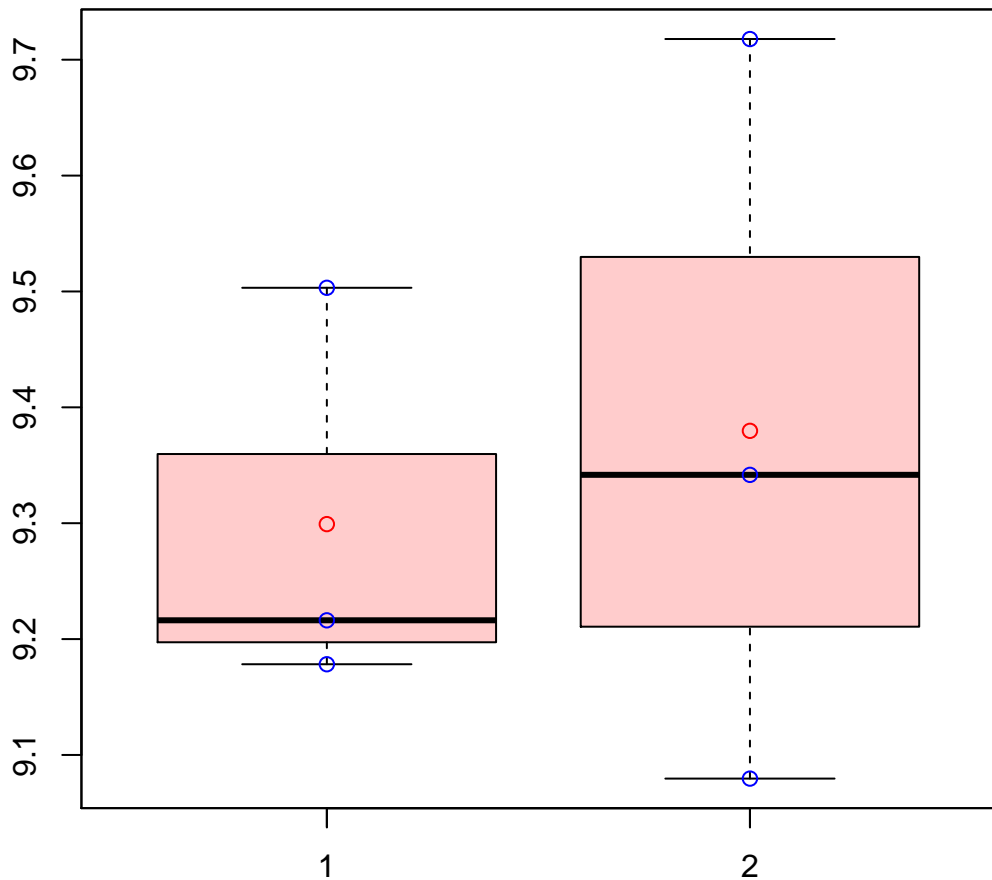

t-Test: p-value = 0.73

# CL87Contig19|CL87Contig19

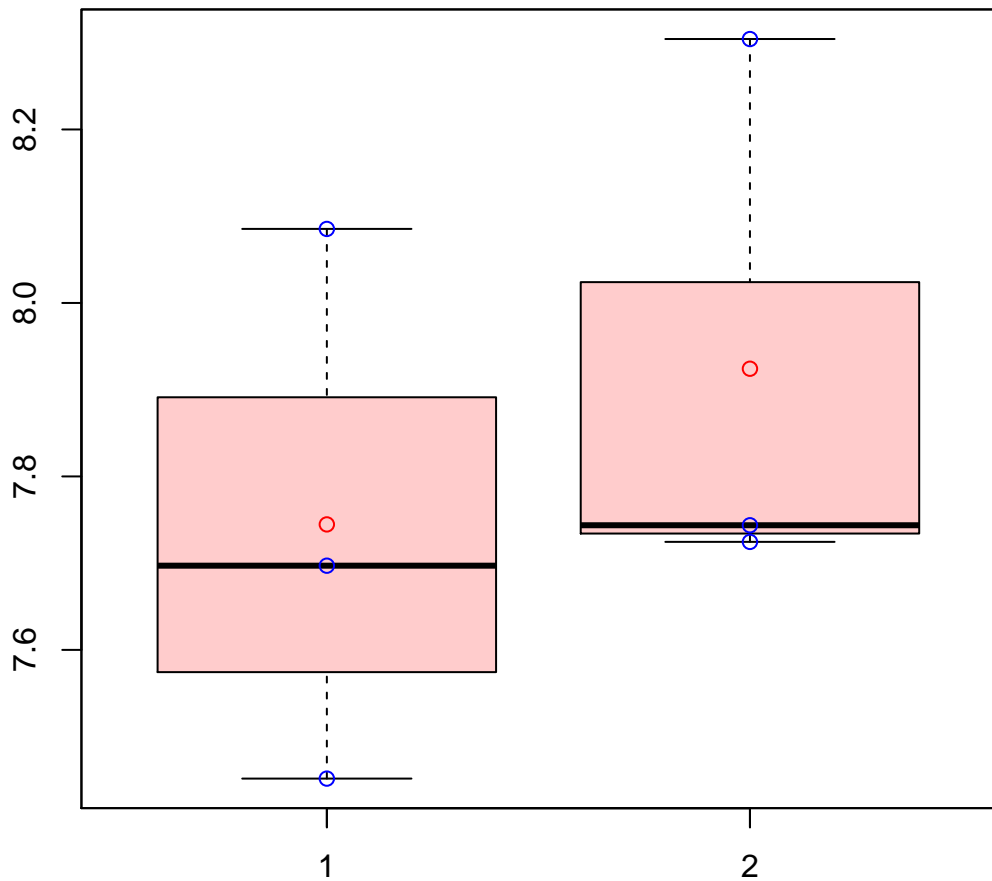

t-Test: p-value = 0.54

# CL87Contig20|CL87Contig20

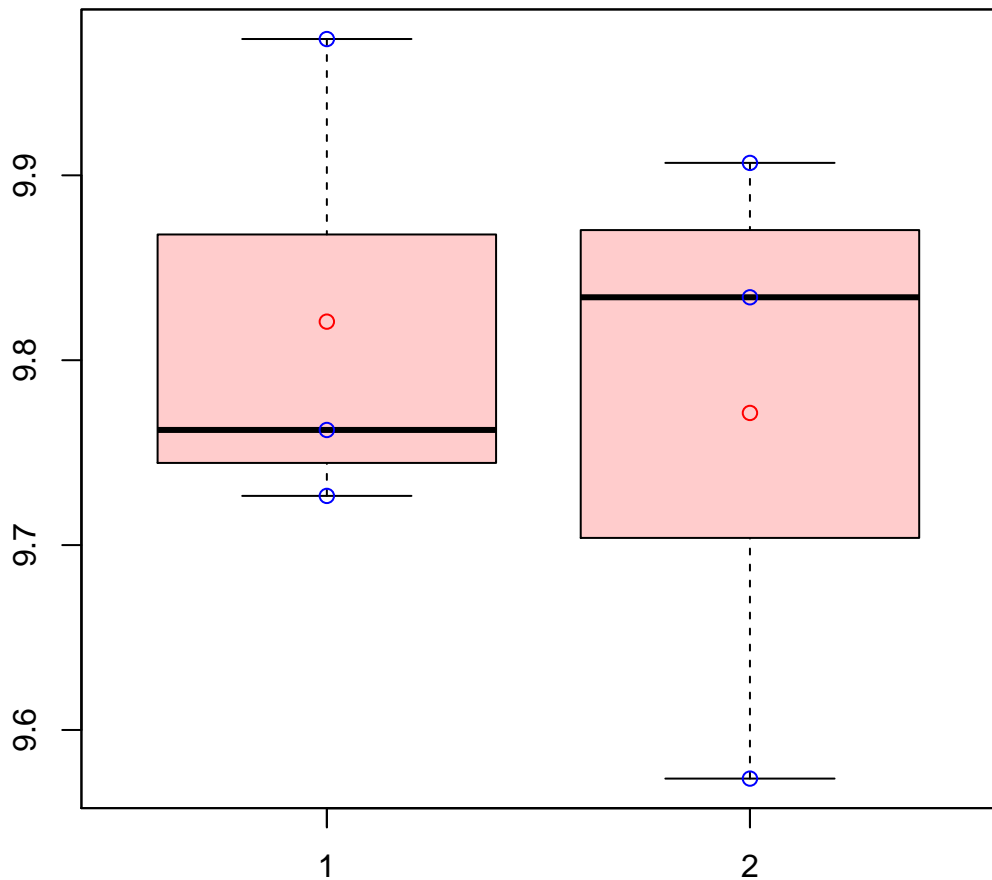

t-Test: p-value = 0.72

# CL87Contig23|CL87Contig23

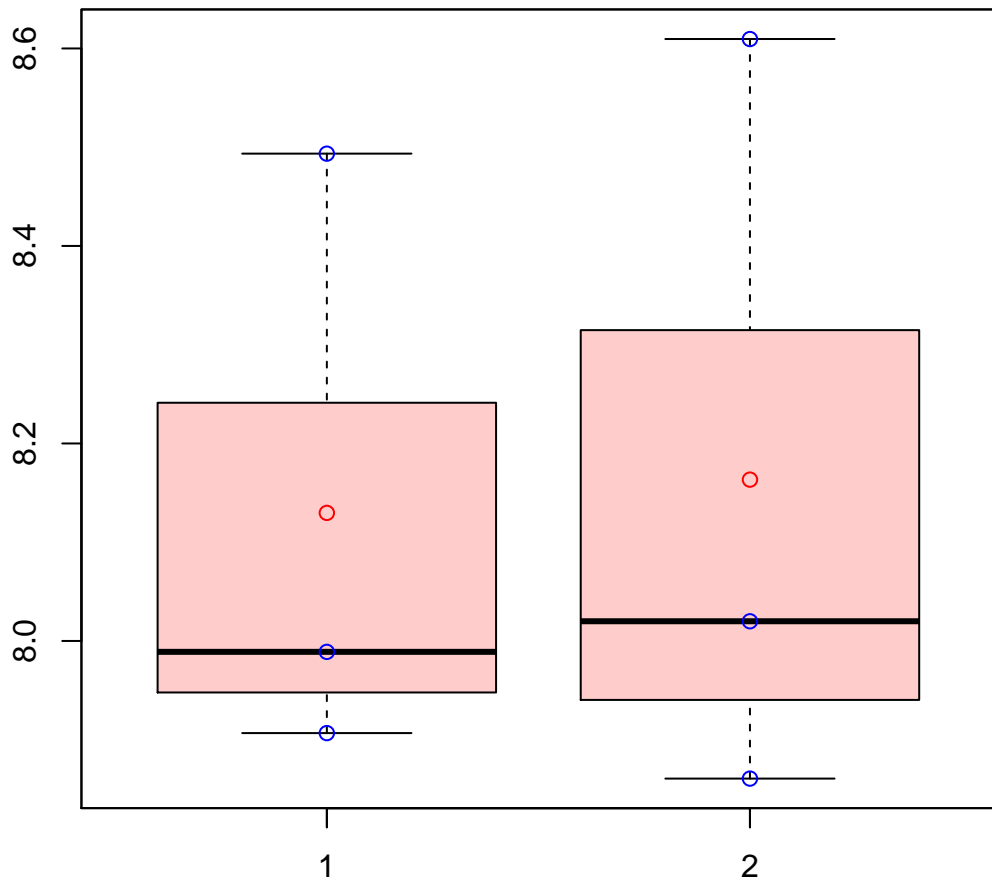

t-Test: p-value = 0.91



# CL87Contig25|CL87Contig25

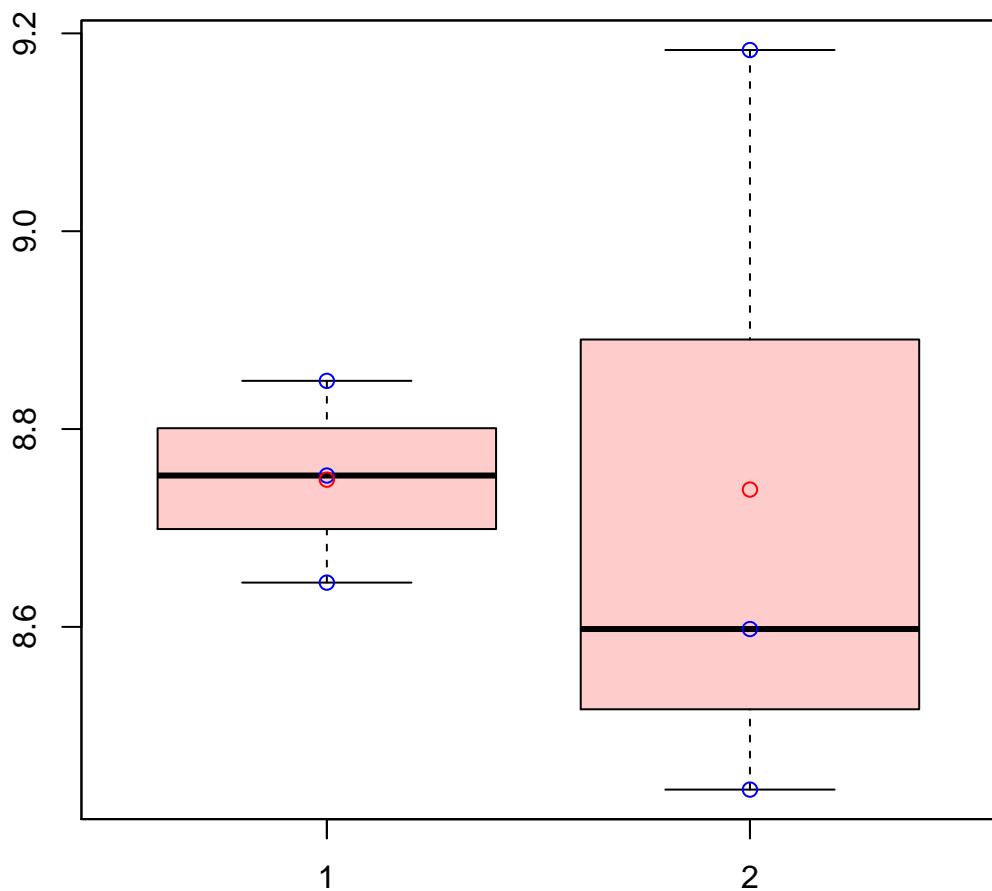

t-Test: p-value = 0.97

# CL87Contig26|CL87Contig26



t-Test: p-value = 0.91

# CL87Contig28|CL87Contig28



t-Test: p-value = 0.91

# CL87Contig29|CL87Contig29



t-Test: p-value = 0.91

# CL87Contig32|CL87Contig32

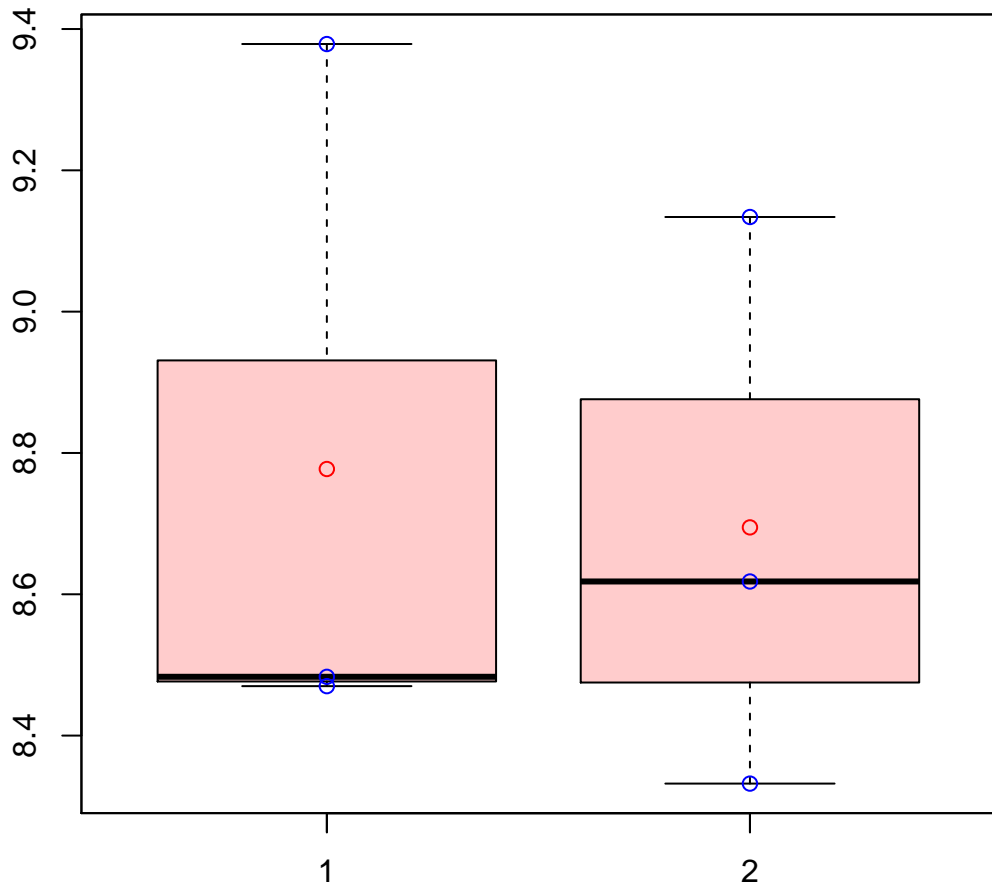

t-Test: p-value = 0.84

# CL87Contig4|CL87Contig4

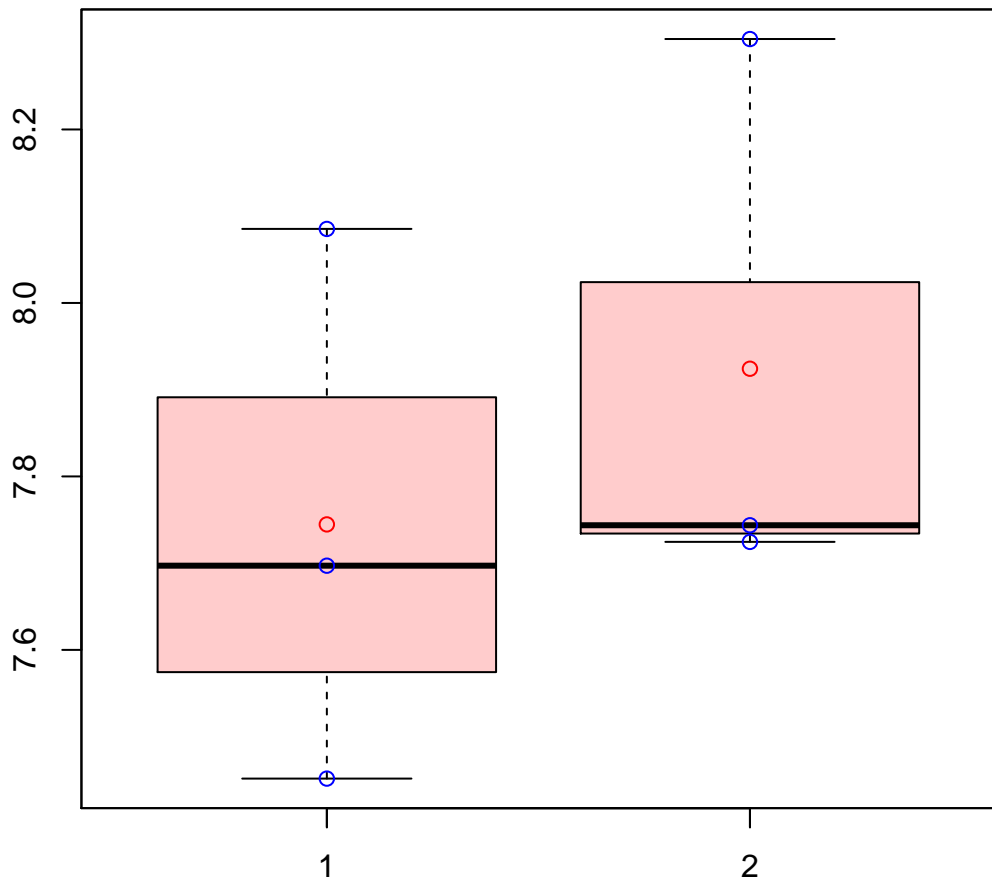

t-Test: p-value = 0.54

# CL87Contig5|CL87Contig5

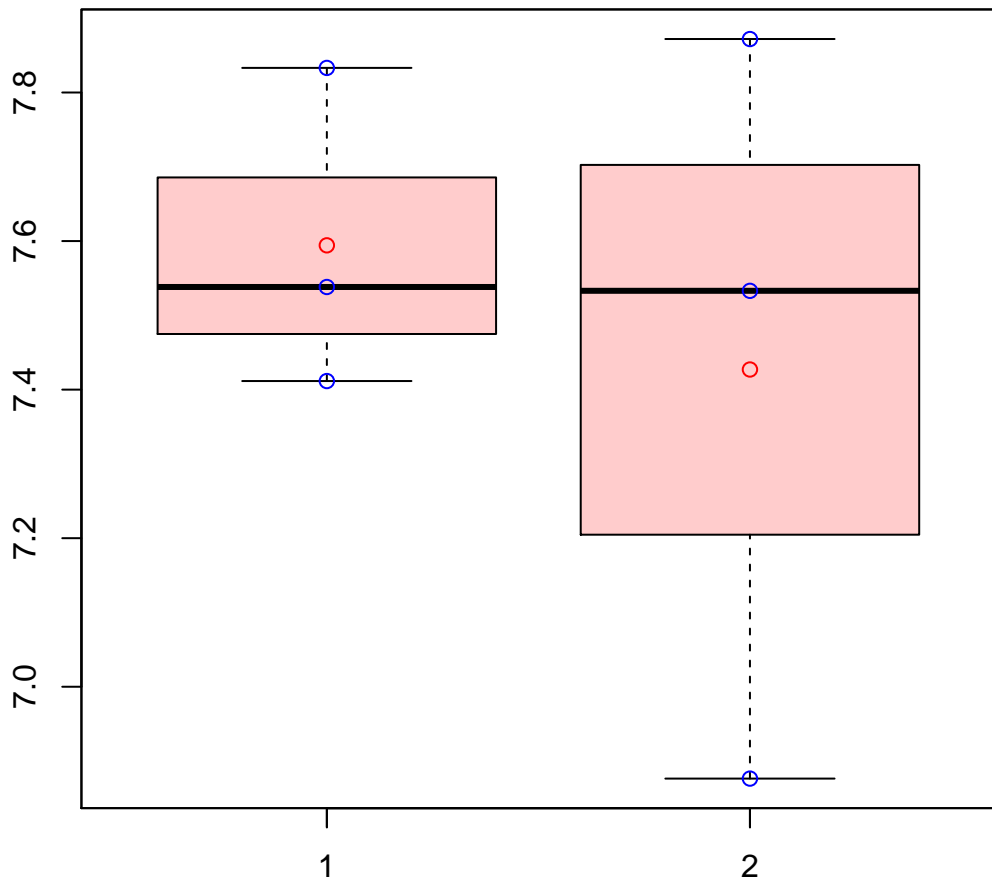

t-Test: p-value = 0.64

# CL87Contig7|CL87Contig7

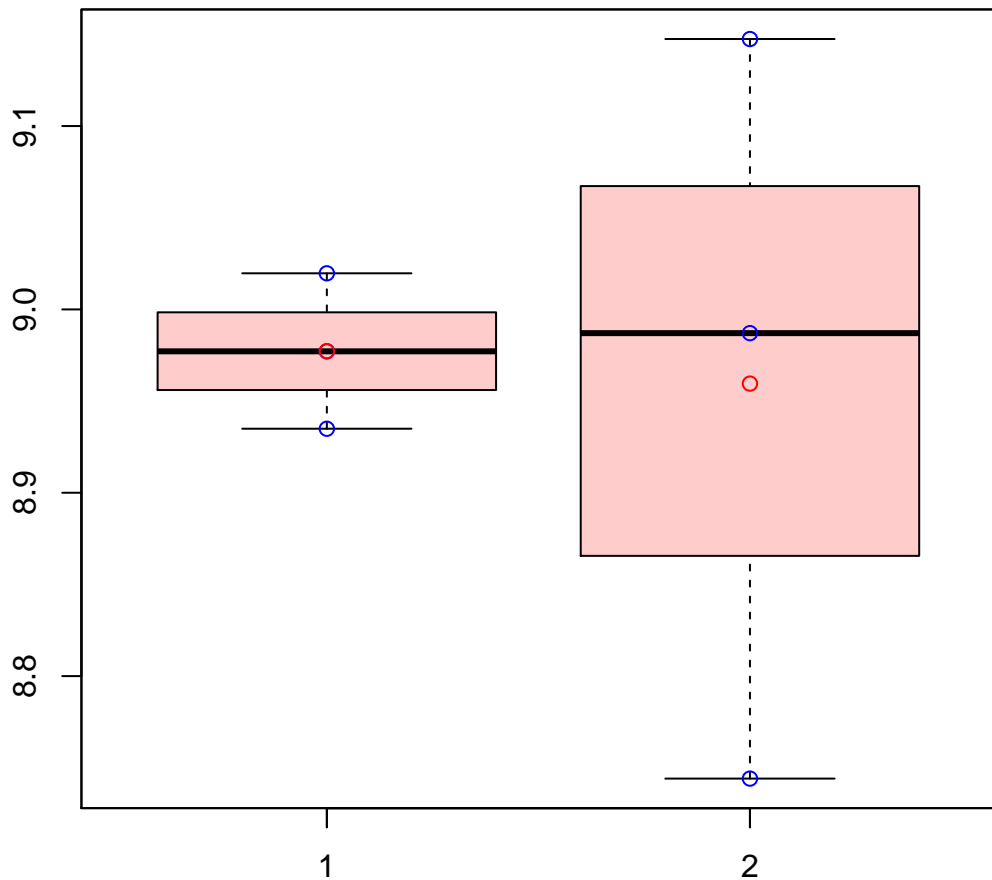

t-Test: p-value = 0.9



# CL8802Contig1|CL8802Contig1

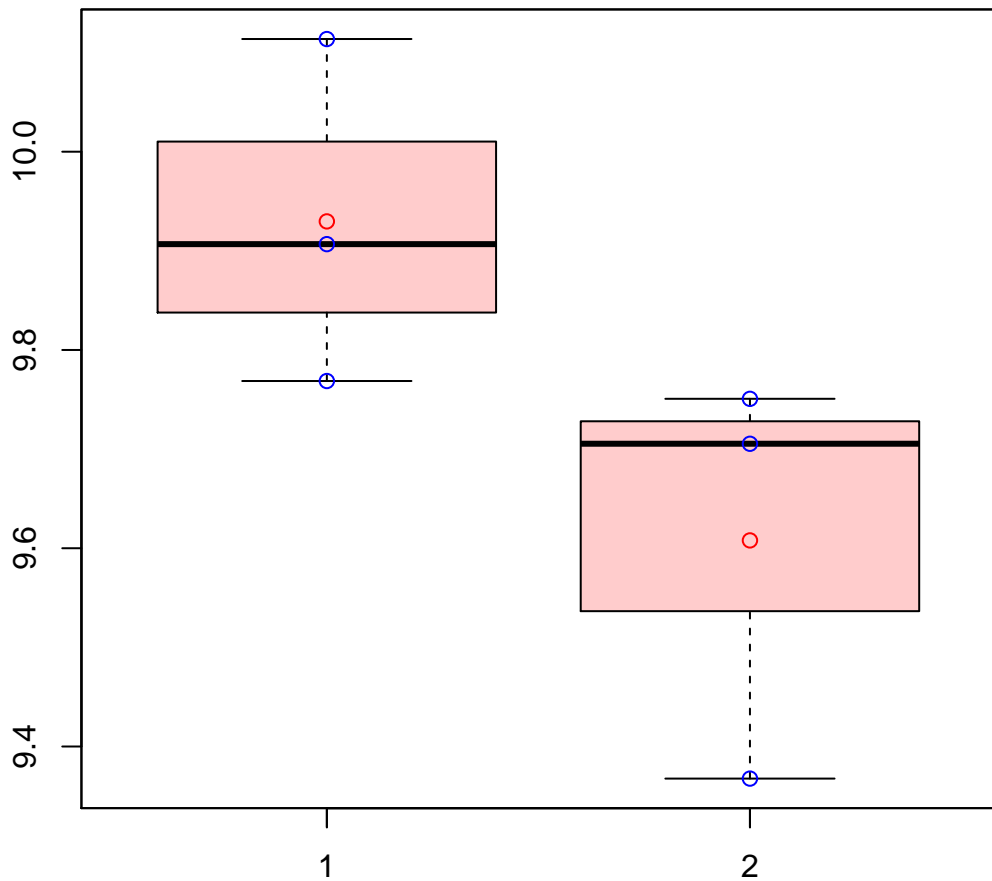

t-Test: p-value = 0.11

# CL8802Contig2|CL8802Contig2

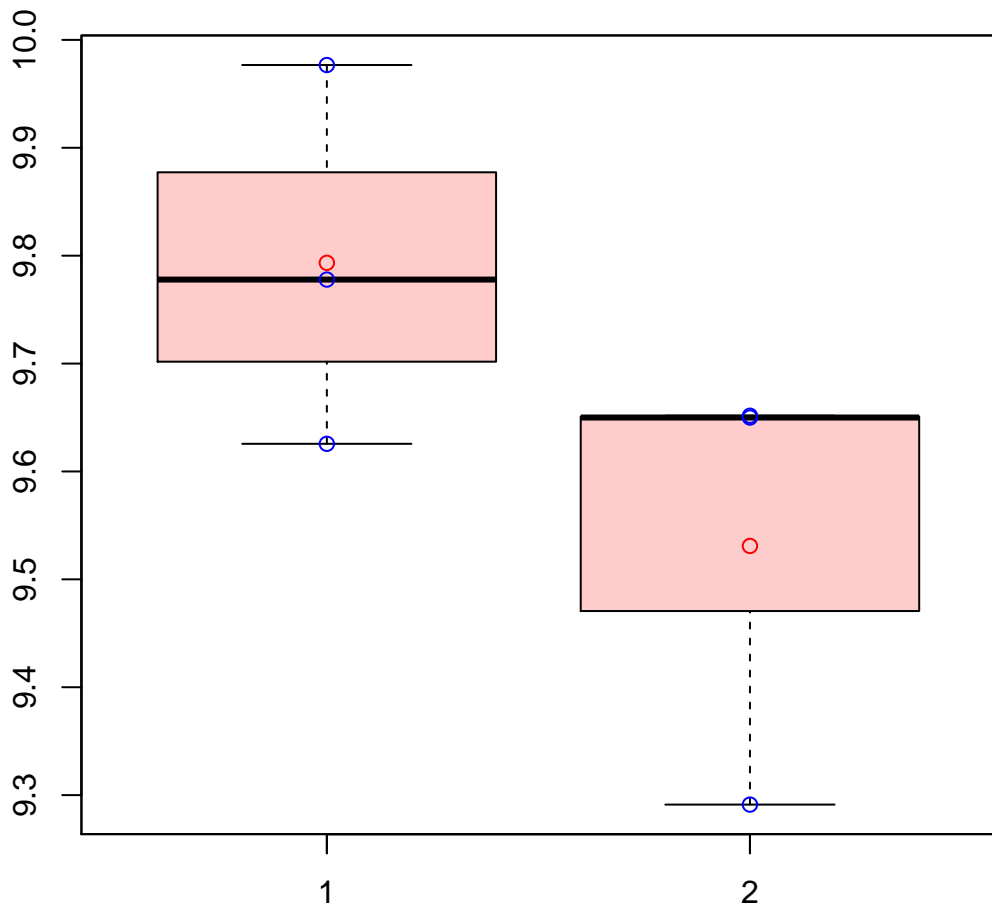

t-Test: p-value = 0.17

# CL8802Contig4|CL8802Contig4

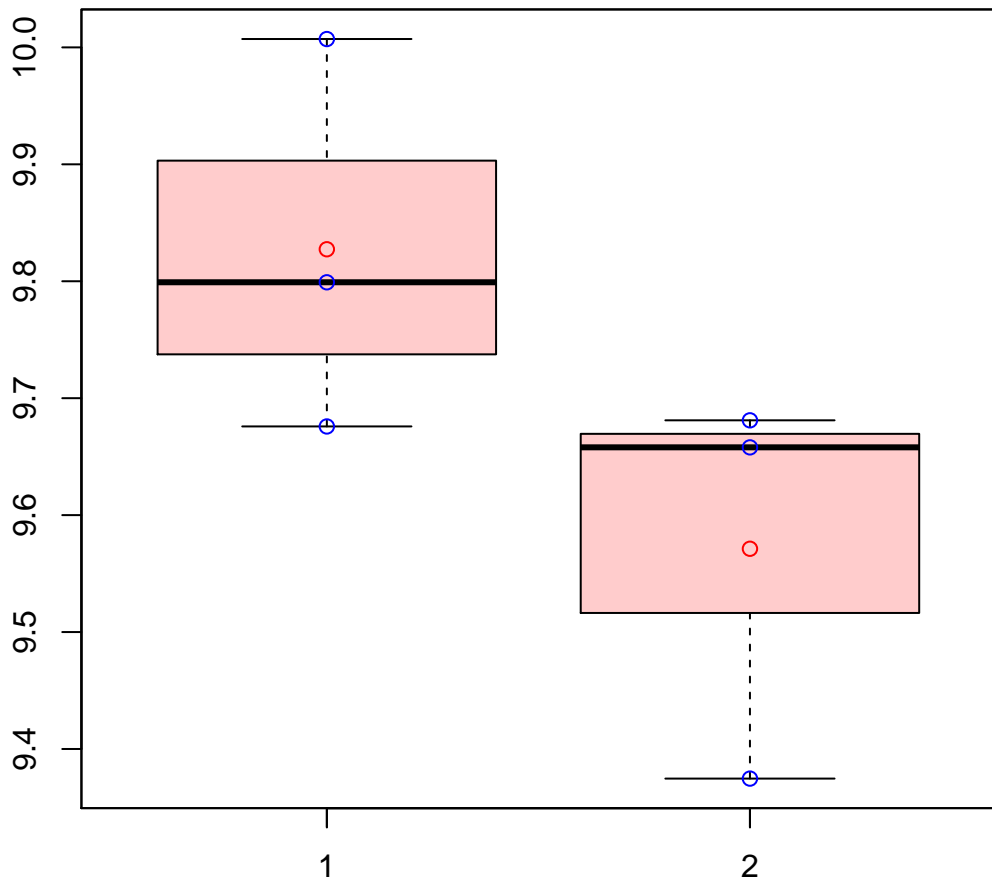

t-Test: p-value = 0.14

# CL8805Contig2|CL8805Contig2

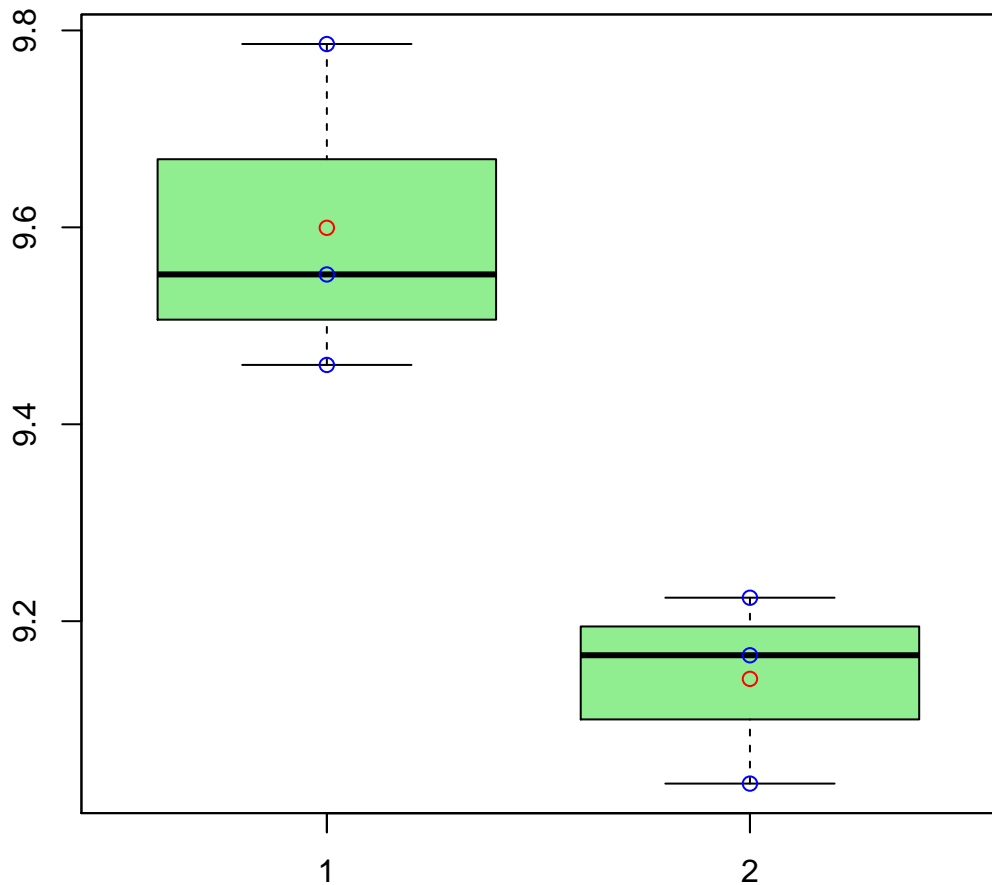

t-Test: p-value = 0.02

# CL880Contig1|CL880Contig1

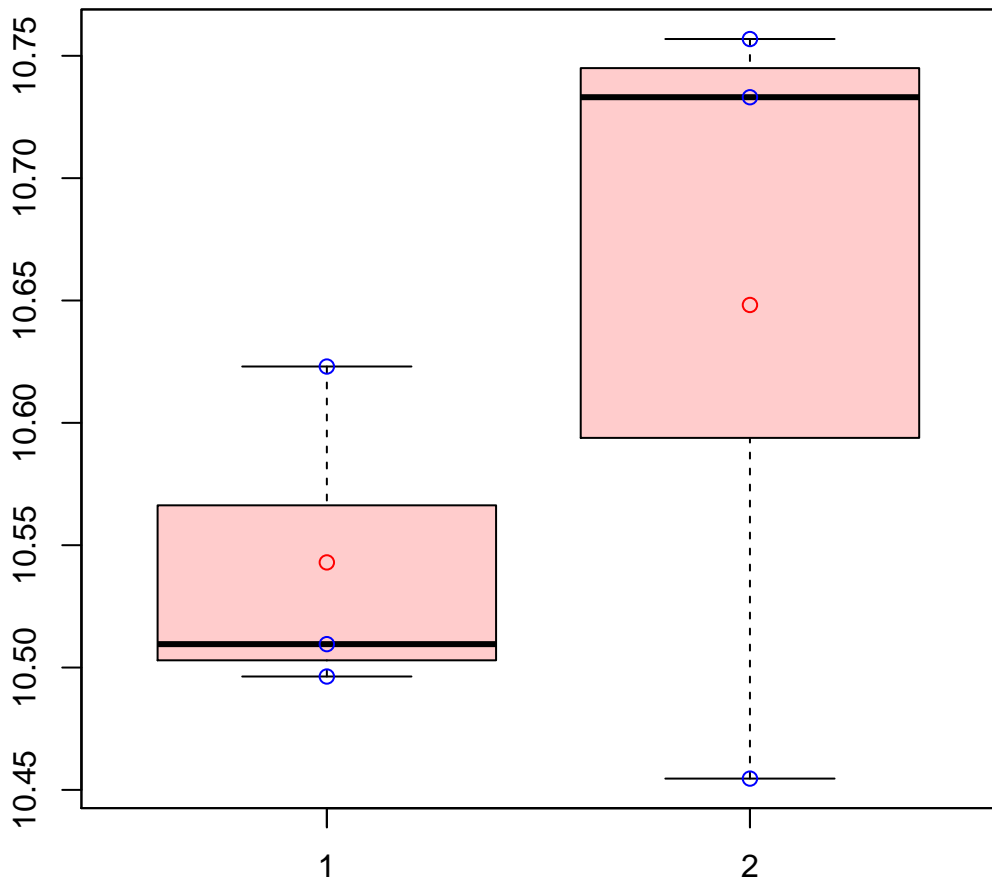

t-Test: p-value = 0.4

# CL8819Contig1|CL8819Contig1

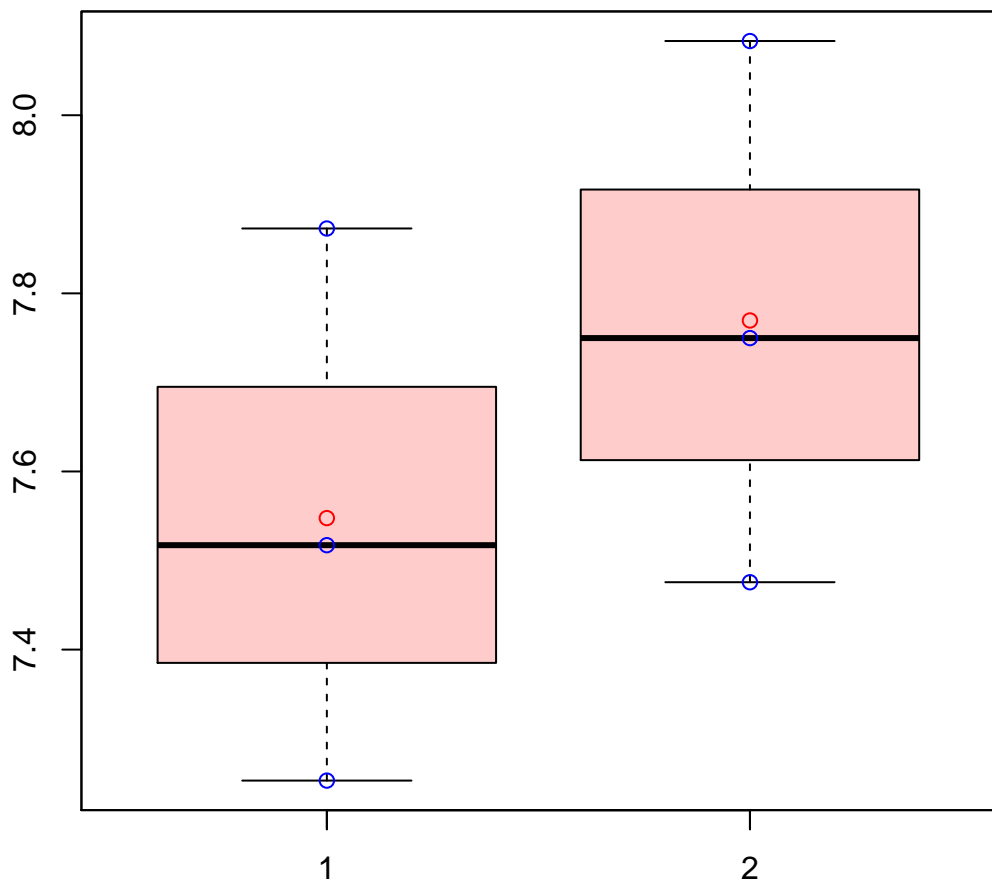

t-Test: p-value = 0.43

# CL8826Contig1|CL8826Contig1

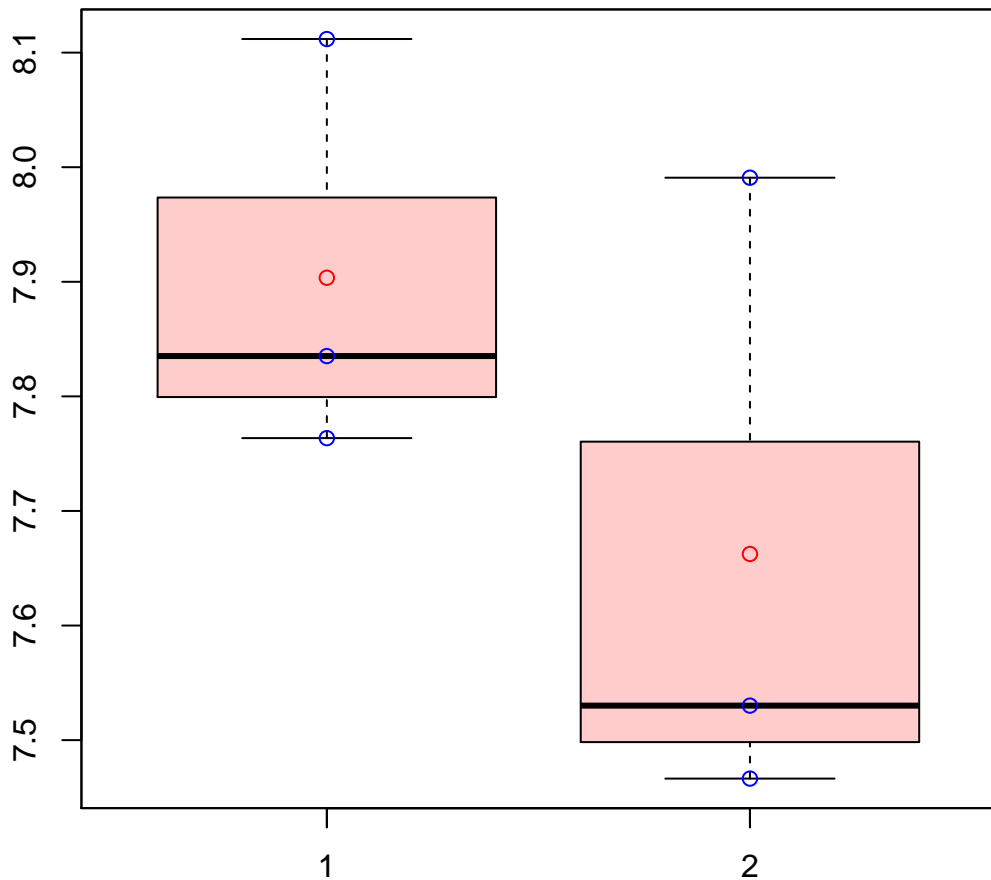

t-Test: p-value = 0.3

# CL8832Contig2|CL8832Contig2

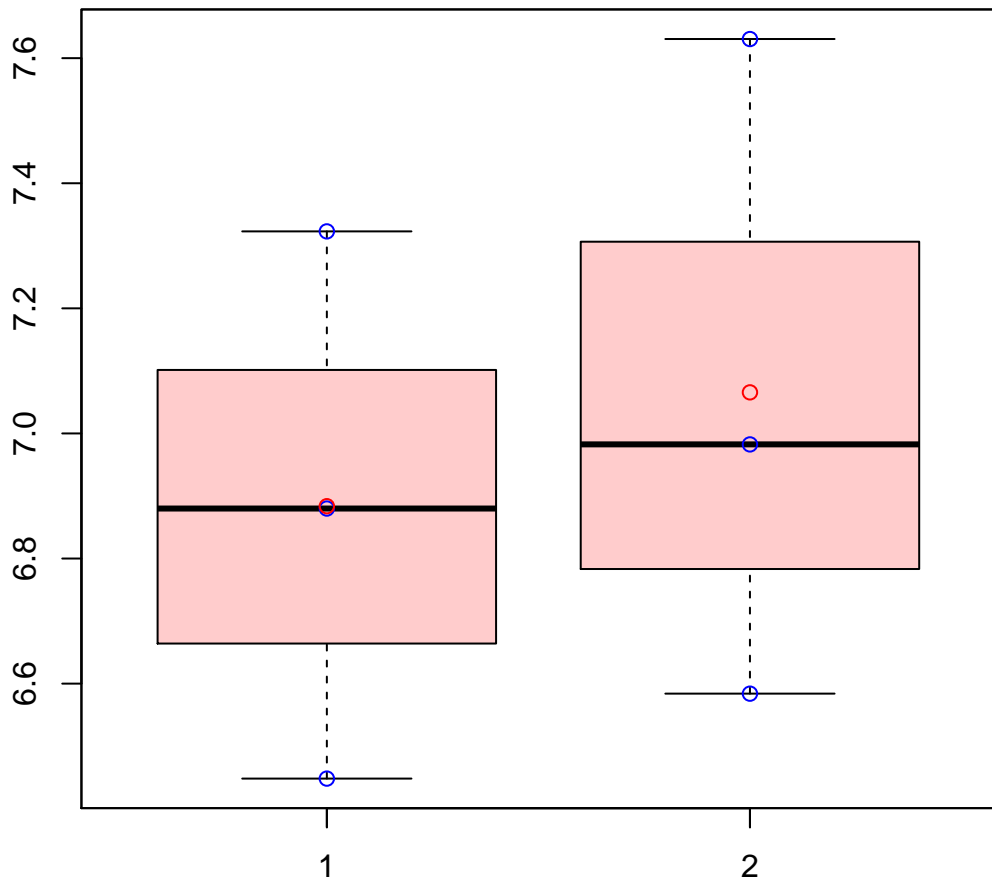

t-Test: p-value = 0.67



# CL883Contig2|CL883Contig2

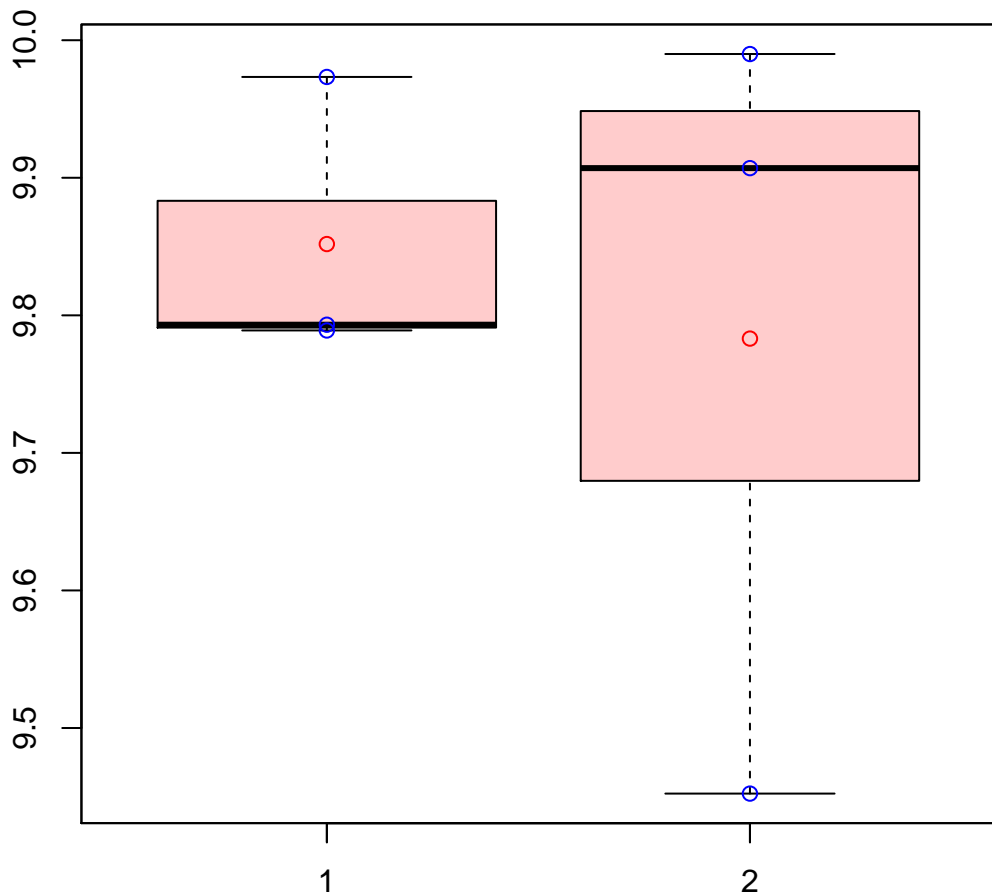

t-Test: p-value = 0.73

# CL883Contig9|CL883Contig9

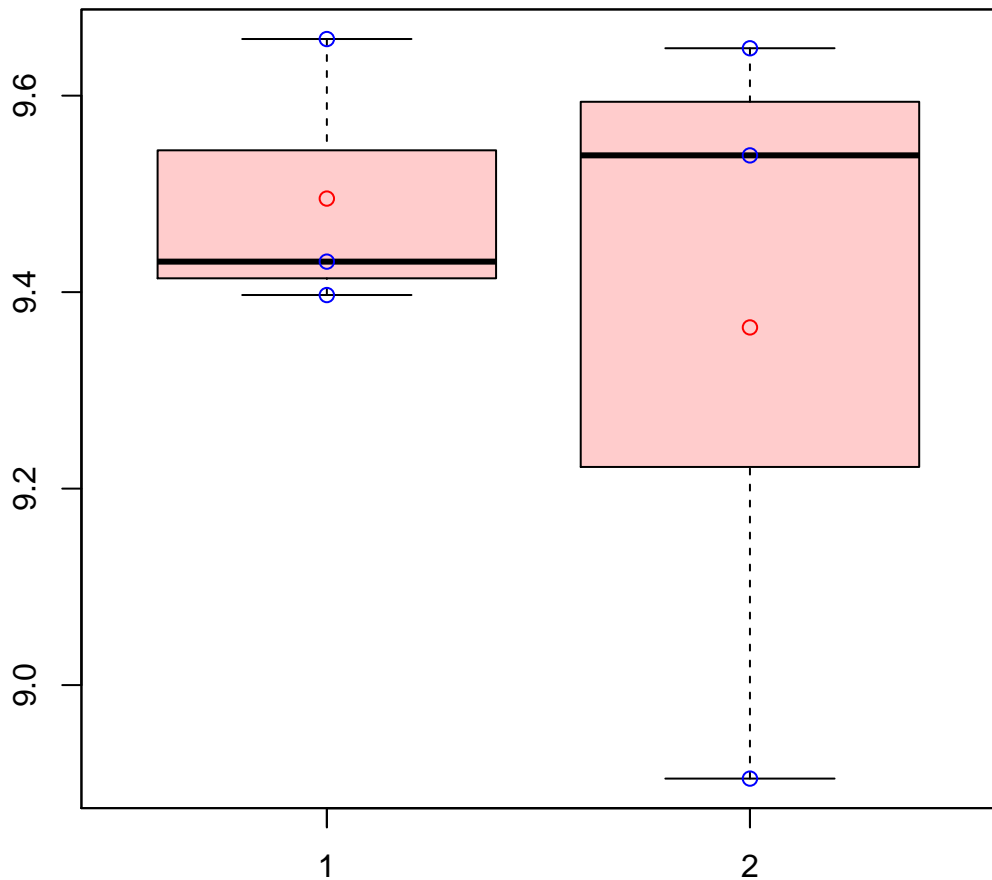

t-Test: p-value = 0.64

# CL8849Contig1|CL8849Contig1

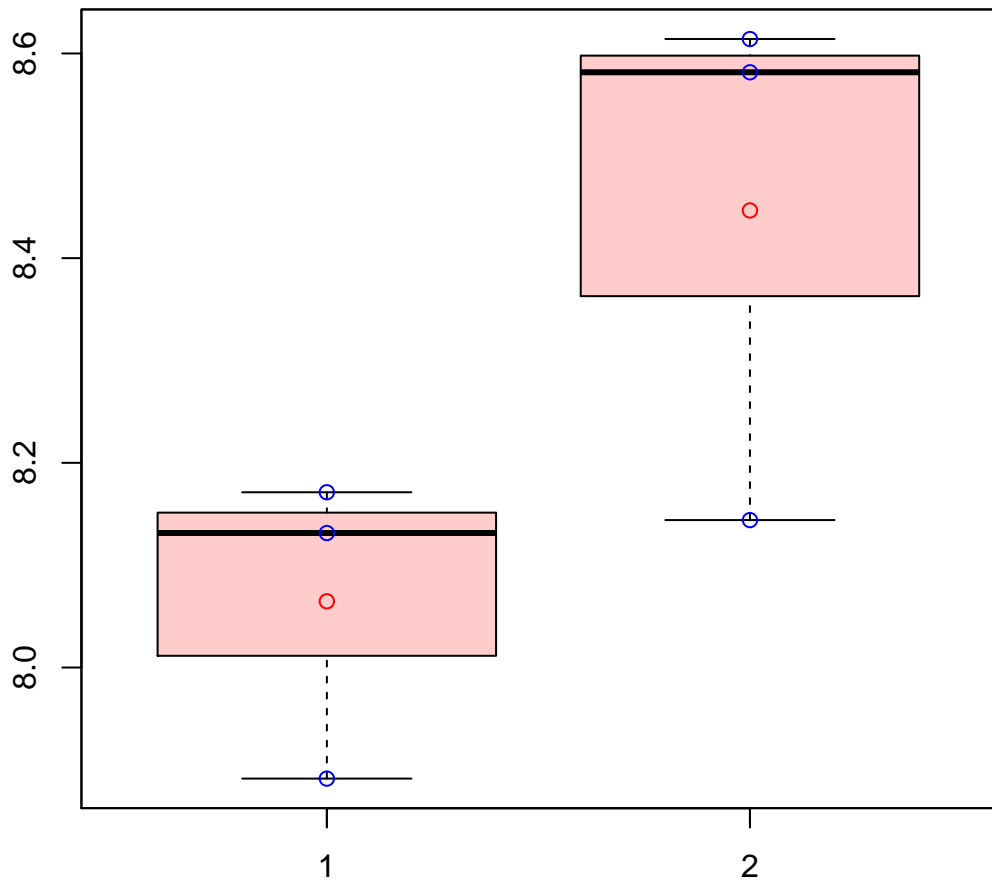

t-Test: p-value = 0.11

# CL8849Contig2|CL8849Contig2



t-Test: p-value = 0.13

# CL884Contig2|CL884Contig2

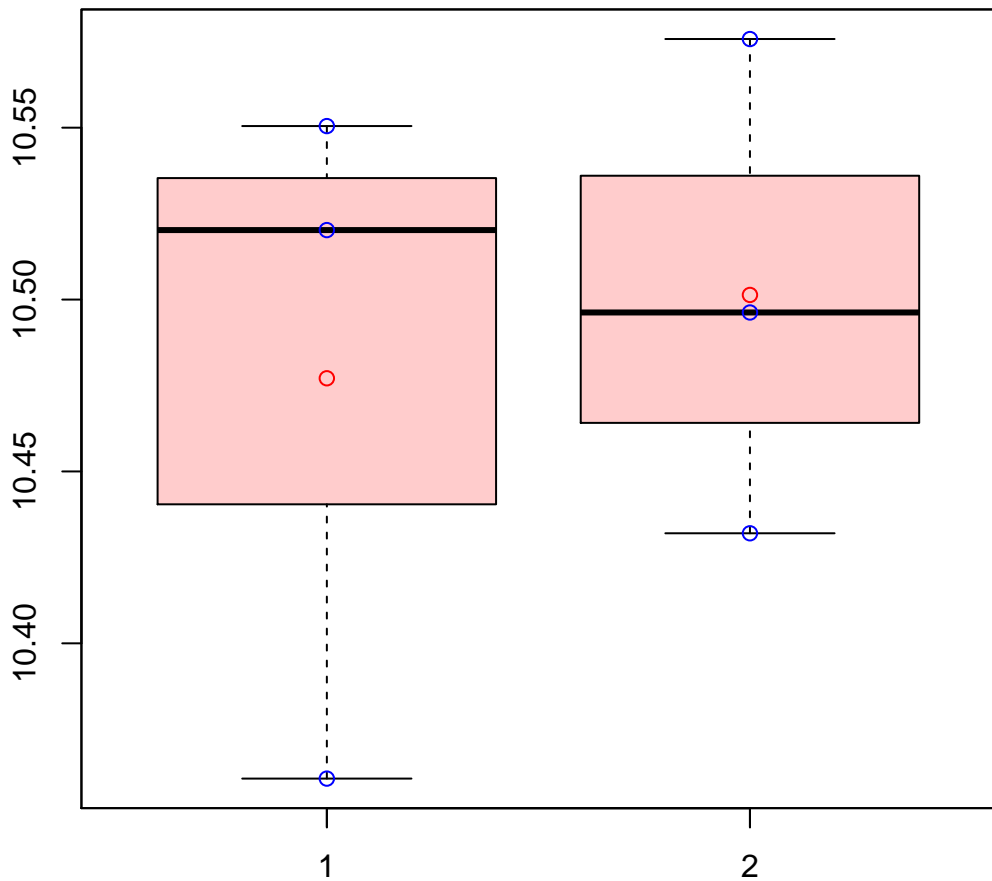

t-Test: p-value = 0.76

# CL884Contig3|CL884Contig3

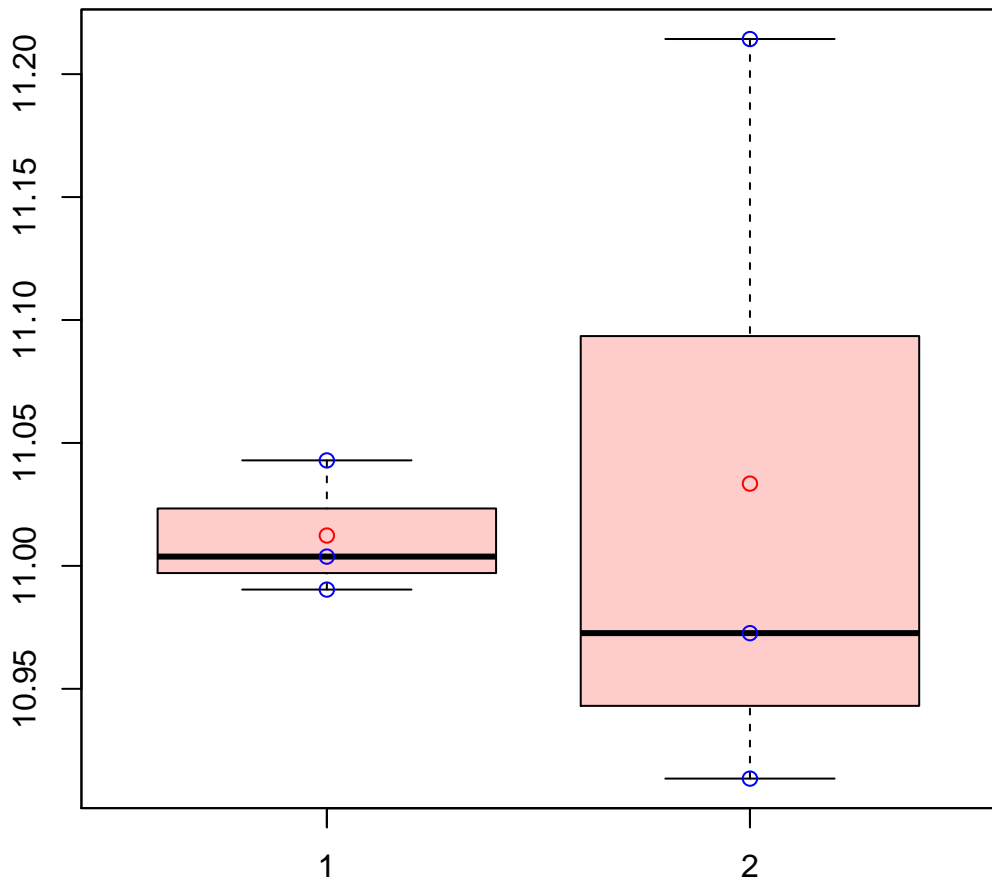

t-Test: p-value = 0.84

# CL884Contig4|CL884Contig4

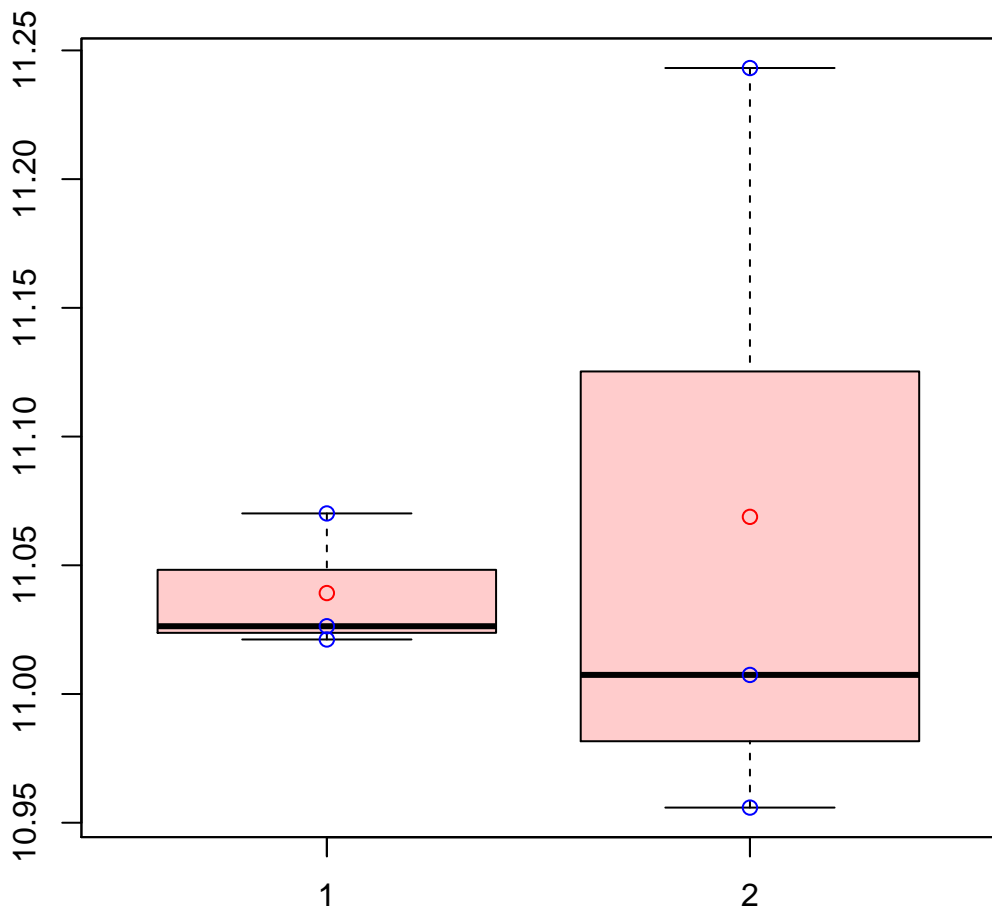

t-Test: p-value = 0.77

# CL884Contig5|CL884Contig5

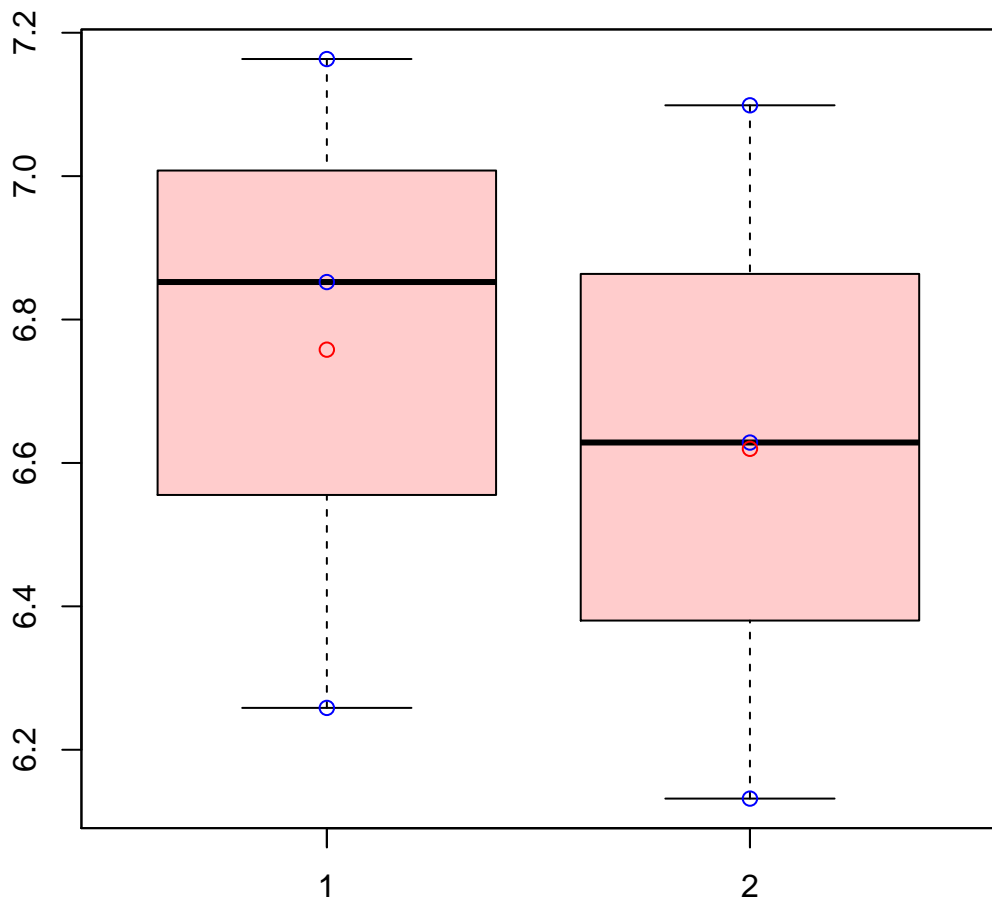

t-Test: p-value = 0.74



# CL884Contig7|CL884Contig7

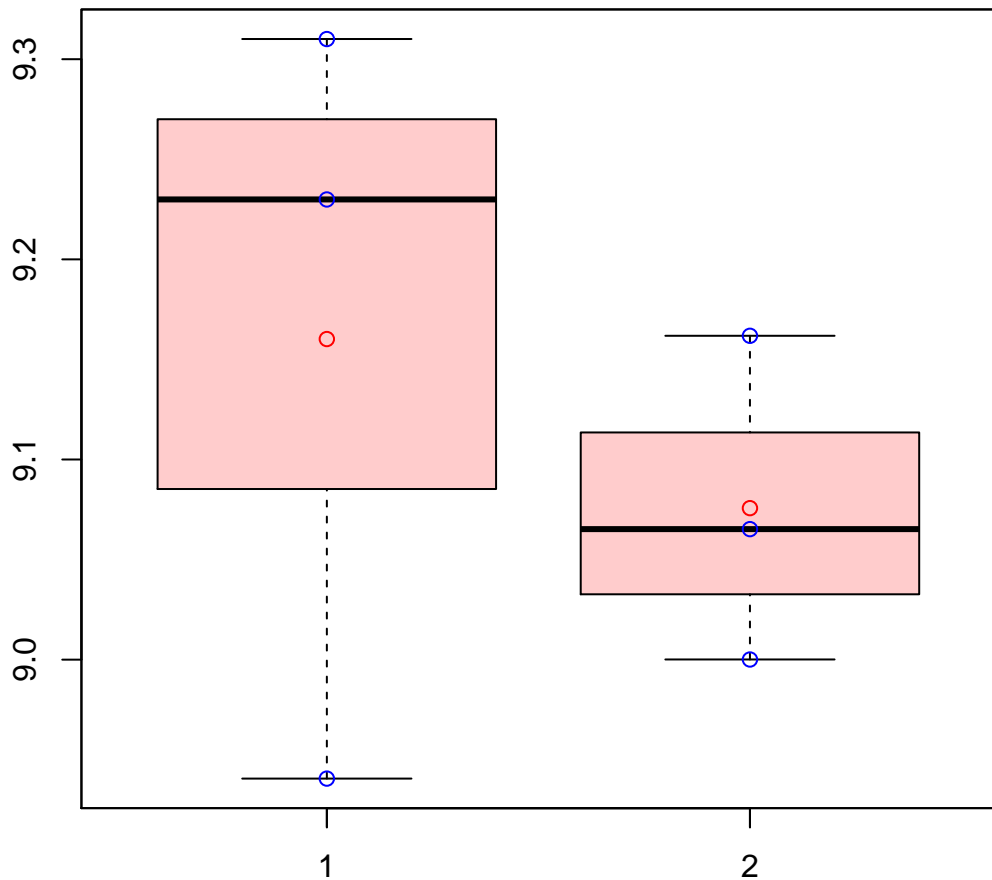

t-Test: p-value = 0.54

# CL8858Contig2|CL8858Contig2

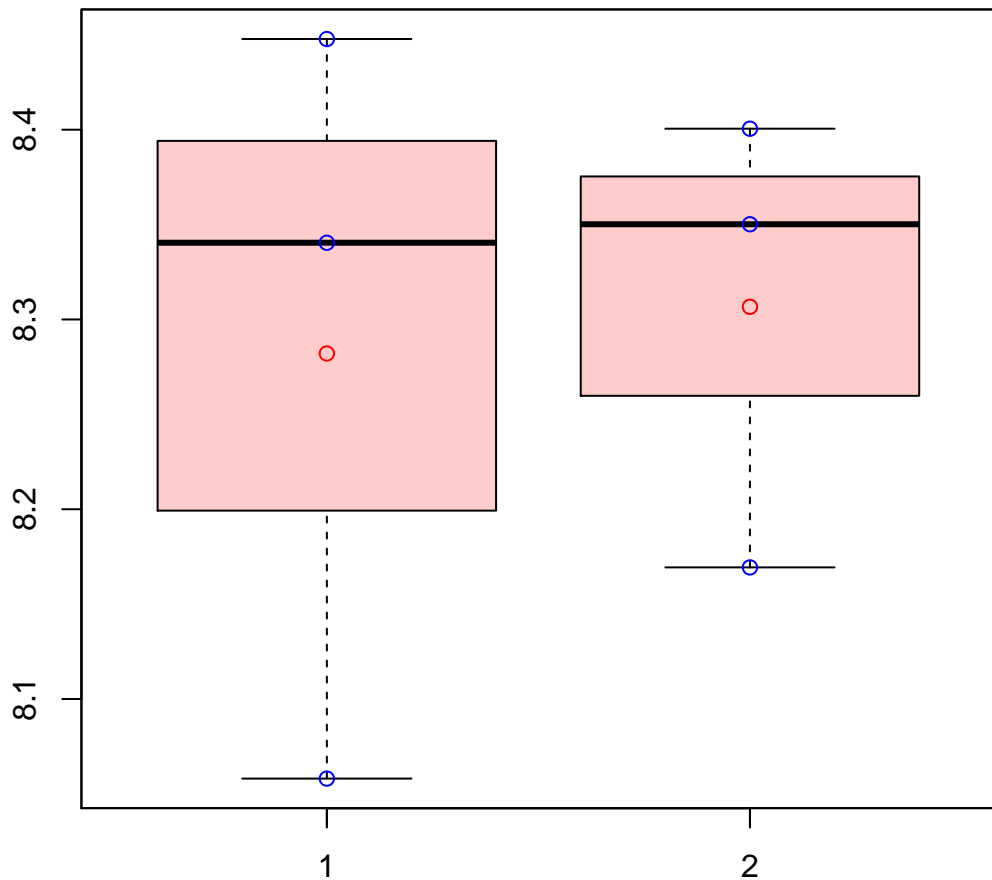

t-Test: p-value = 0.87

# CL885Contig1|CL885Contig1

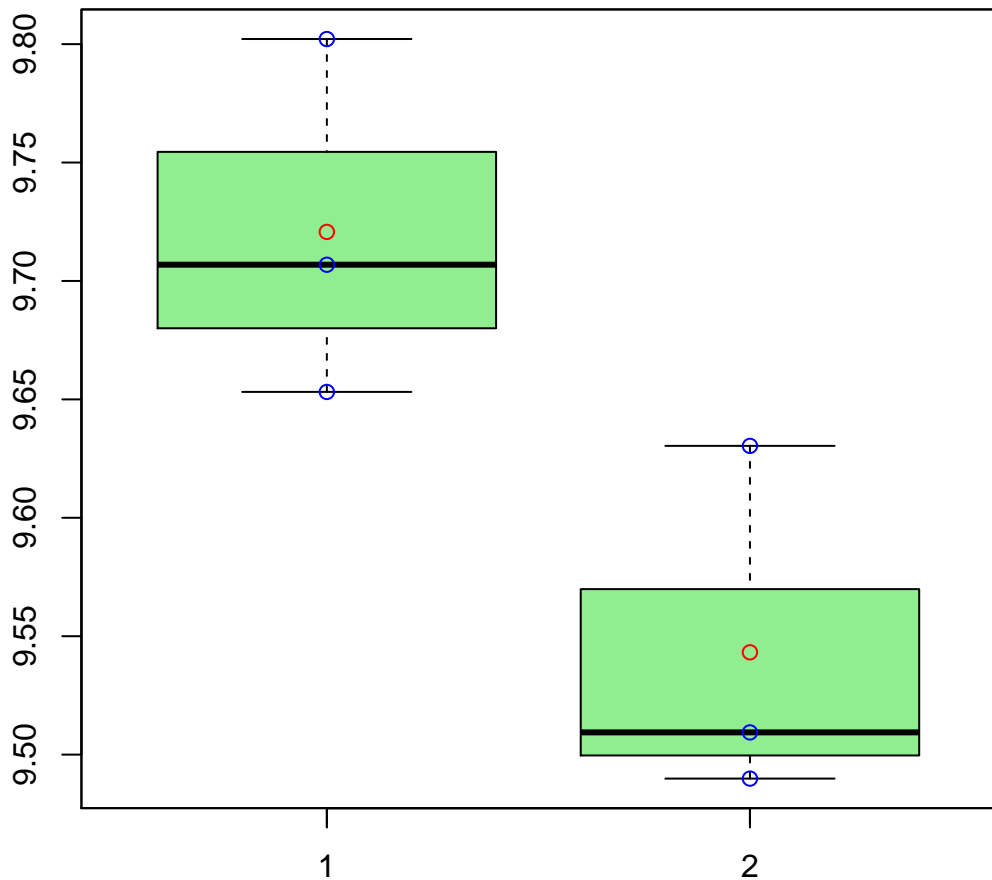

t-Test: p-value = 0.05

# CL885Contig3|CL885Contig3

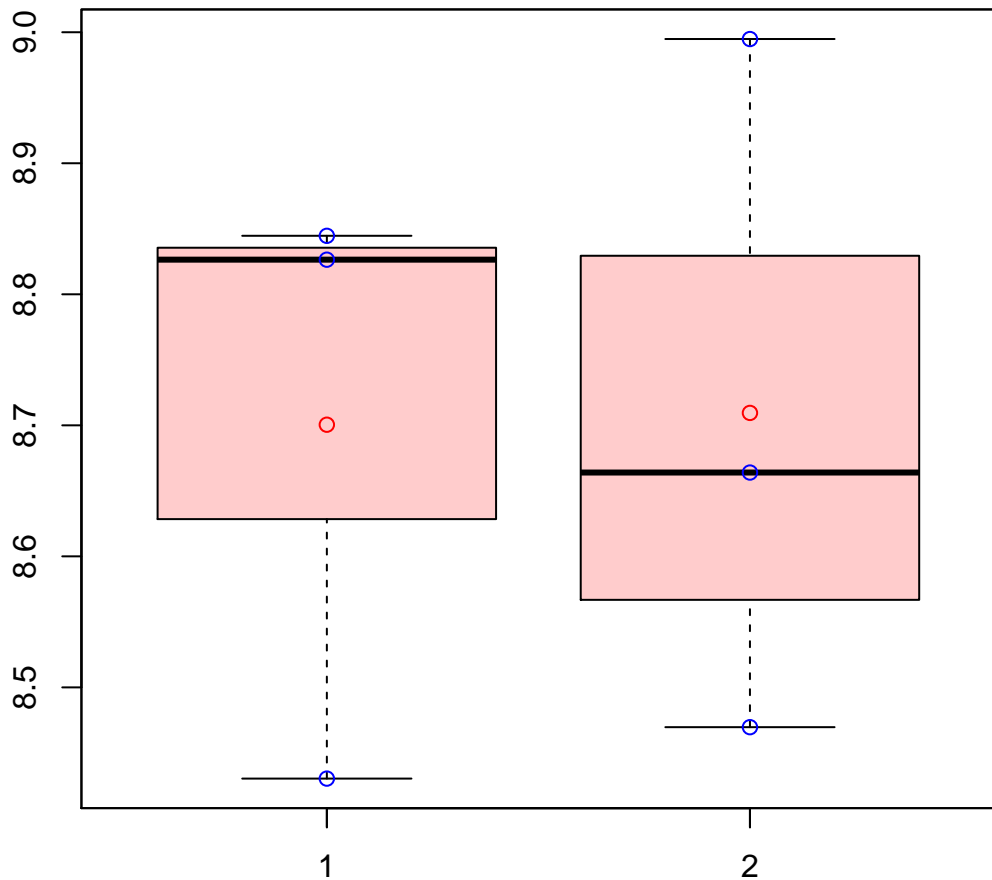

t-Test: p-value = 0.97

# CL885Contig4|CL885Contig4

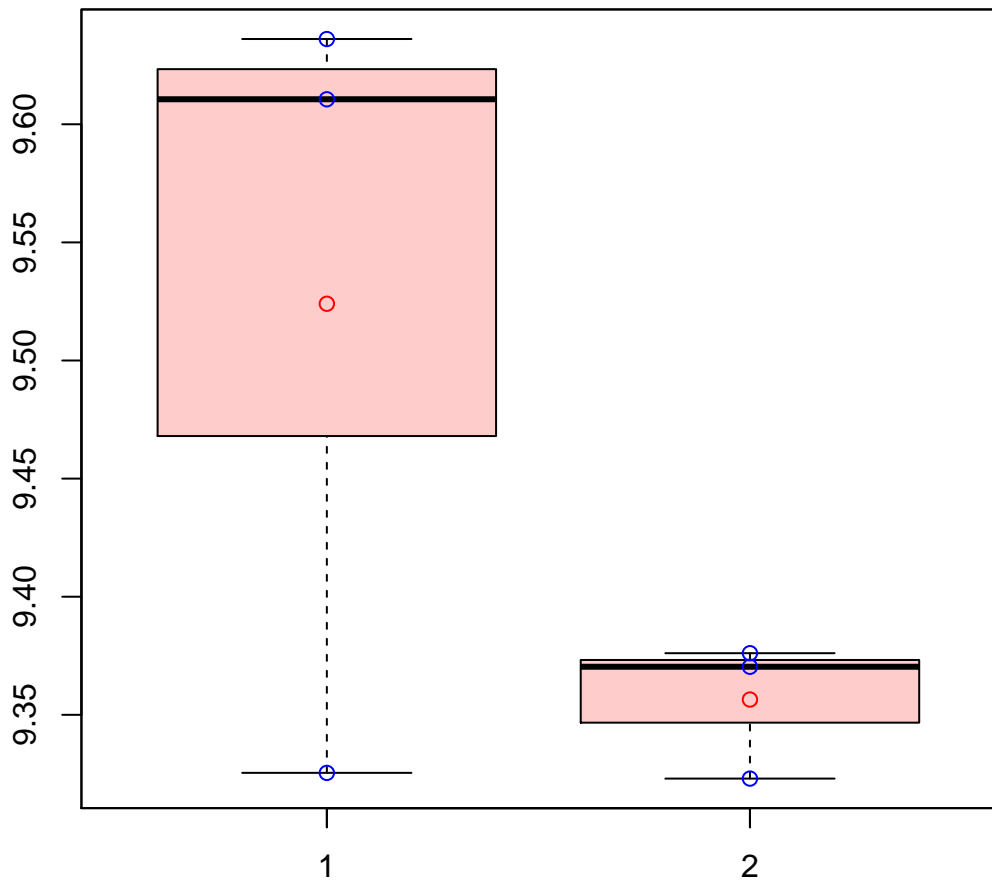

t-Test: p-value = 0.23

# CL8861Contig2|CL8861Contig2

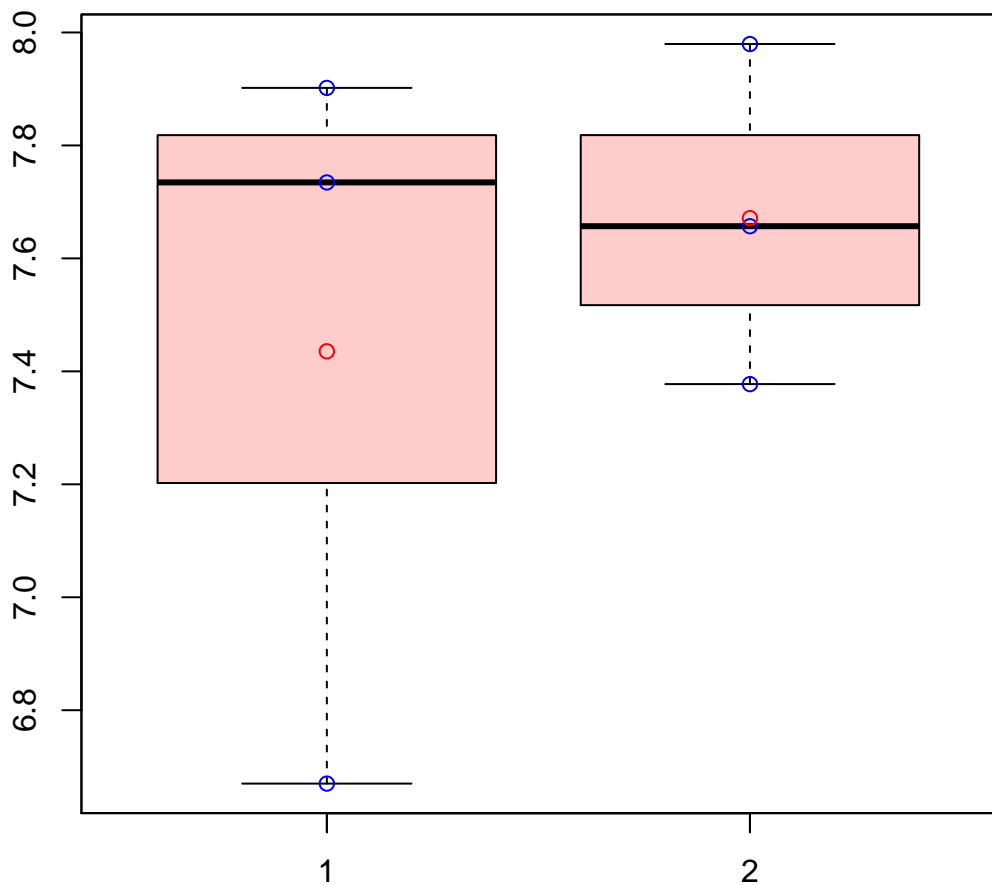

t-Test: p-value = 0.62

# CL8862Contig2|CL8862Contig2

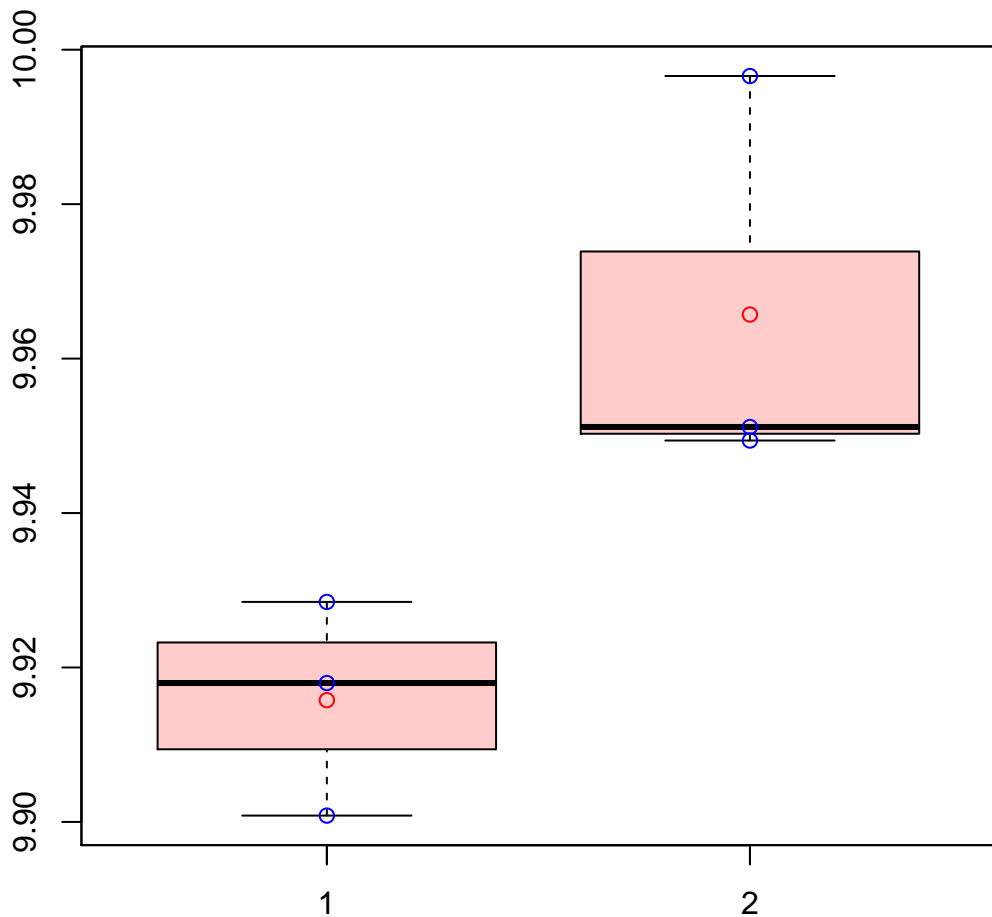

t-Test: p-value = 0.06

# CL8864Contig3|CL8864Contig3

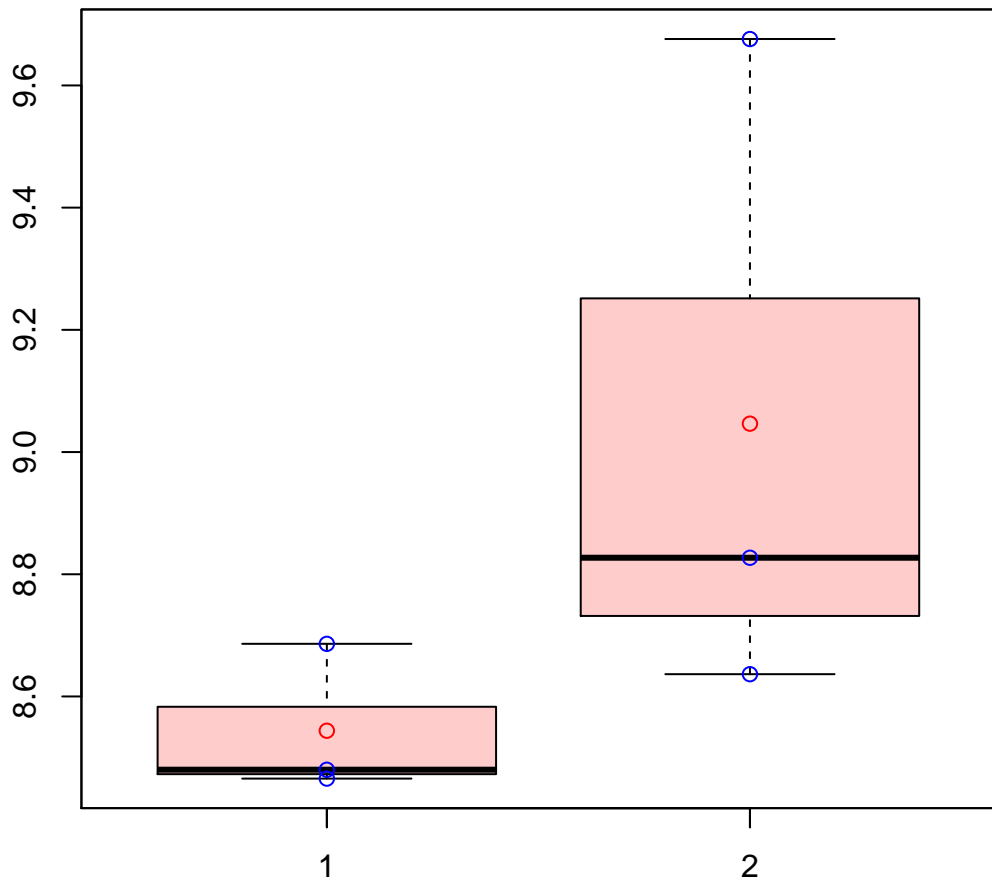

t-Test: p-value = 0.25



# CL886Contig5|CL886Contig5

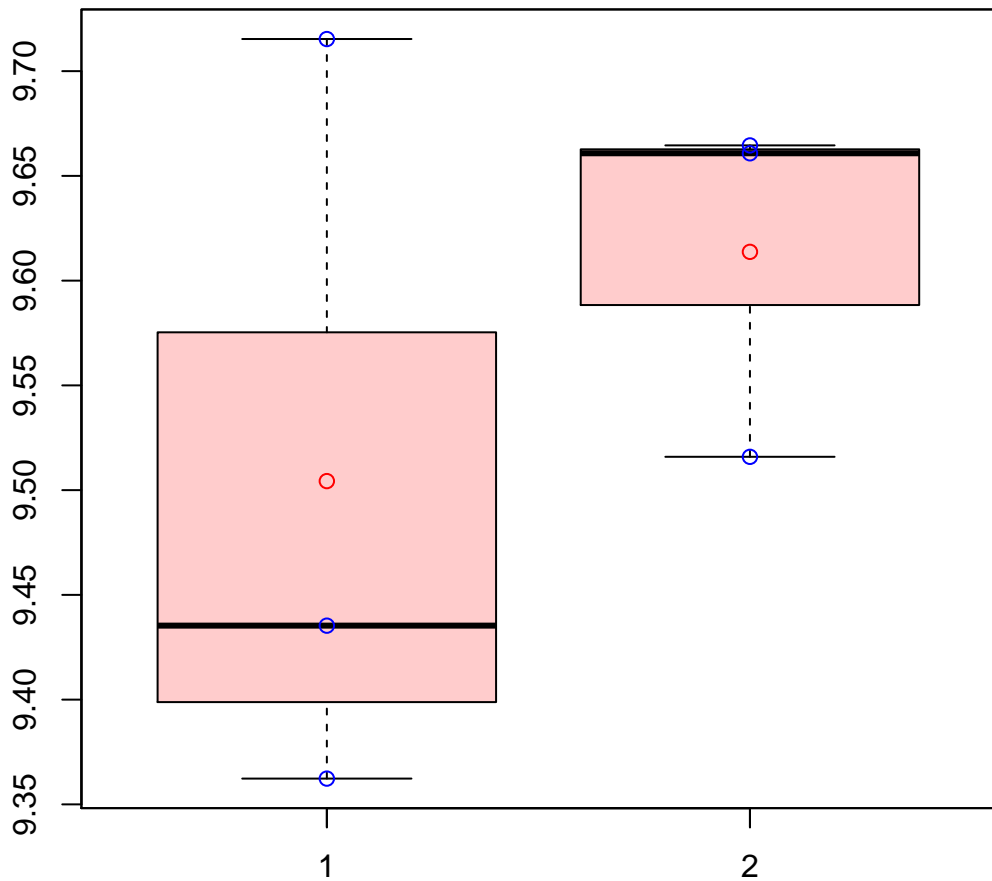

t-Test: p-value = 0.43

# CL8872Contig2|CL8872Contig2



t-Test: p-value = 0.73

# CL8909Contig1|CL8909Contig1

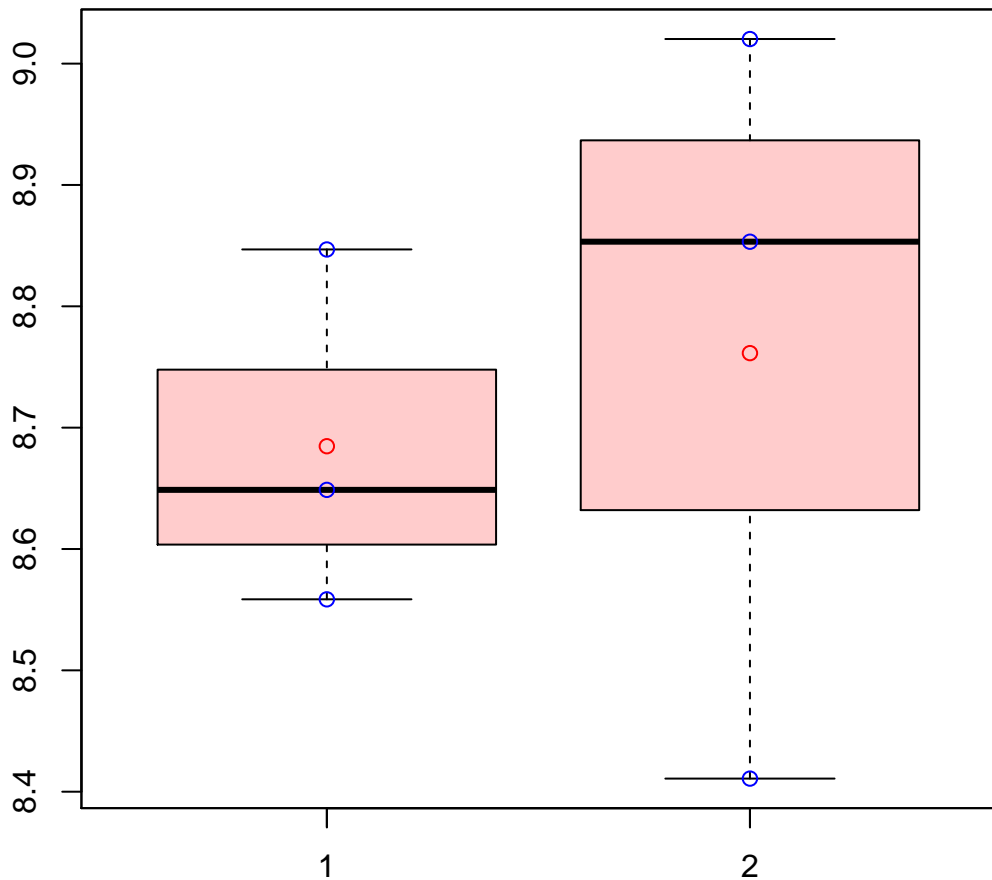

t-Test: p-value = 0.73

# CL8909Contig2|CL8909Contig2



t-Test: p-value = 0.73

# CL890Contig6|CL890Contig6

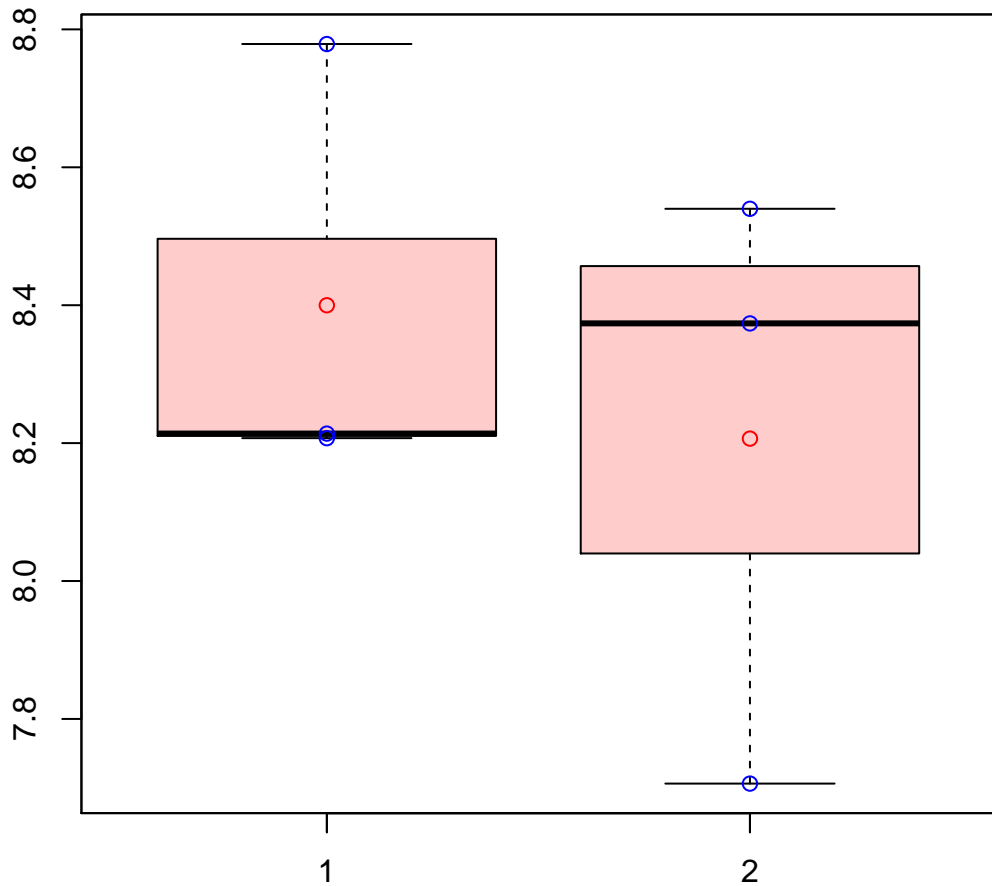

t-Test: p-value = 0.58

# CL8917Contig2|CL8917Contig2

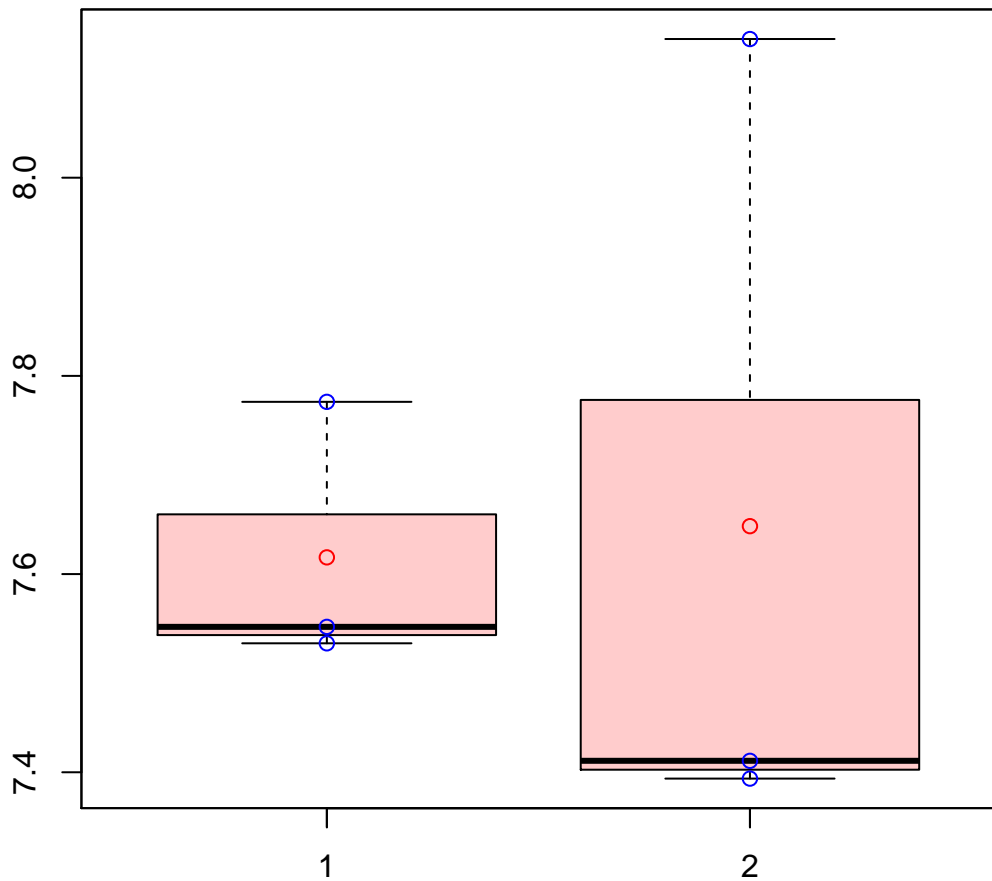

t-Test: p-value = 0.91

# CL891Contig6|CL891Contig6

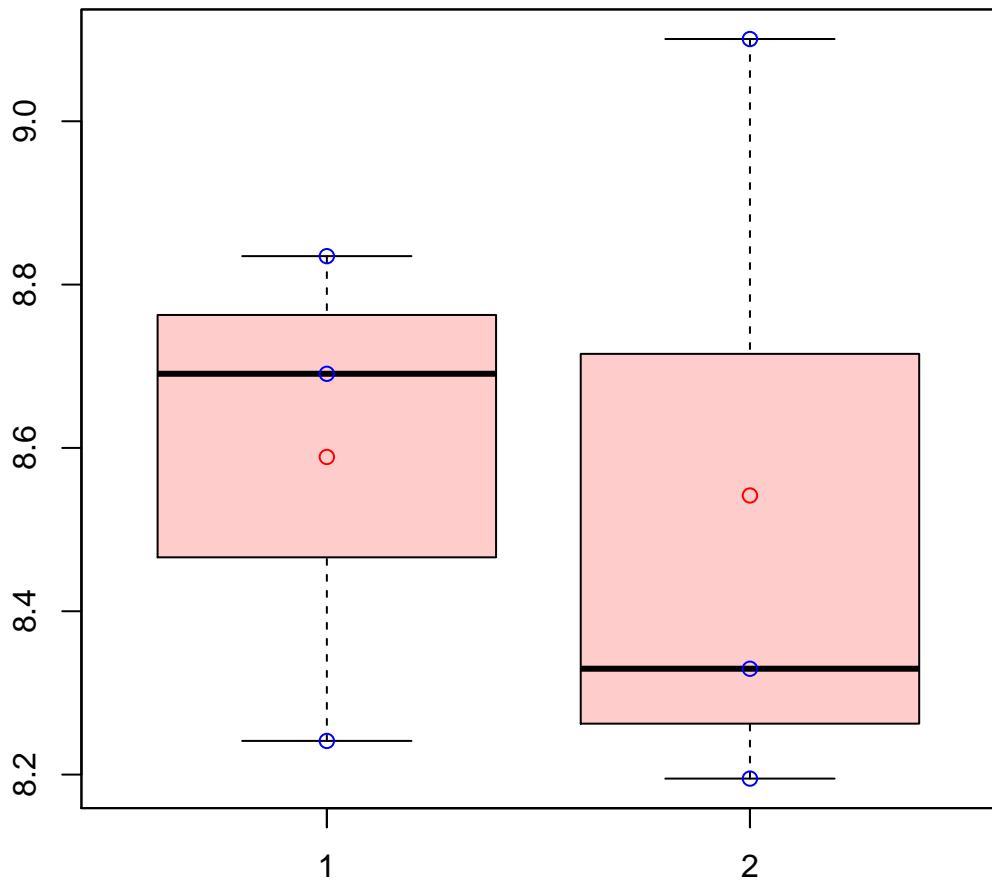

t-Test: p-value = 0.9

# CL8924Contig1|CL8924Contig1

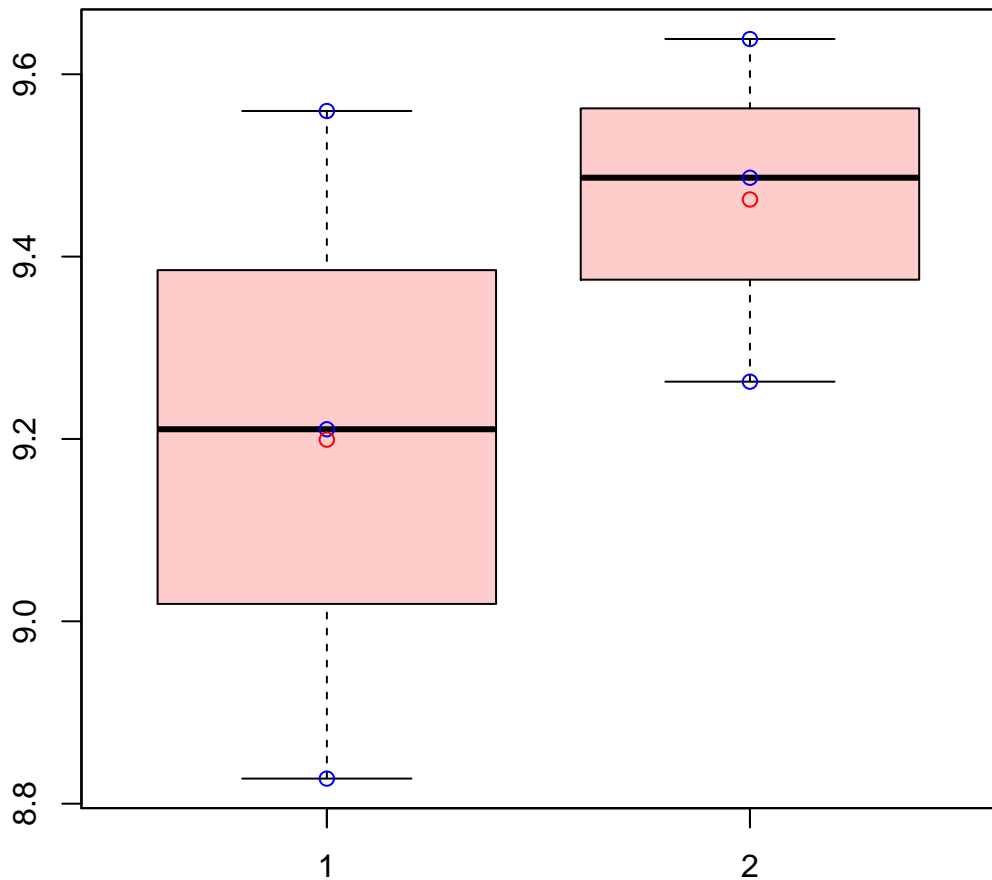

t-Test: p-value = 0.35



# CL8924Contig2|CL8924Contig2



t-Test: p-value = 0.35

# CL8924Contig3|CL8924Contig3



t-Test: p-value = 0.35

# CL8924Contig4|CL8924Contig4



t-Test: p-value = 0.35

# CL8924Contig5|CL8924Contig5



t-Test: p-value = 0.35

# CL8929Contig1|CL8929Contig1

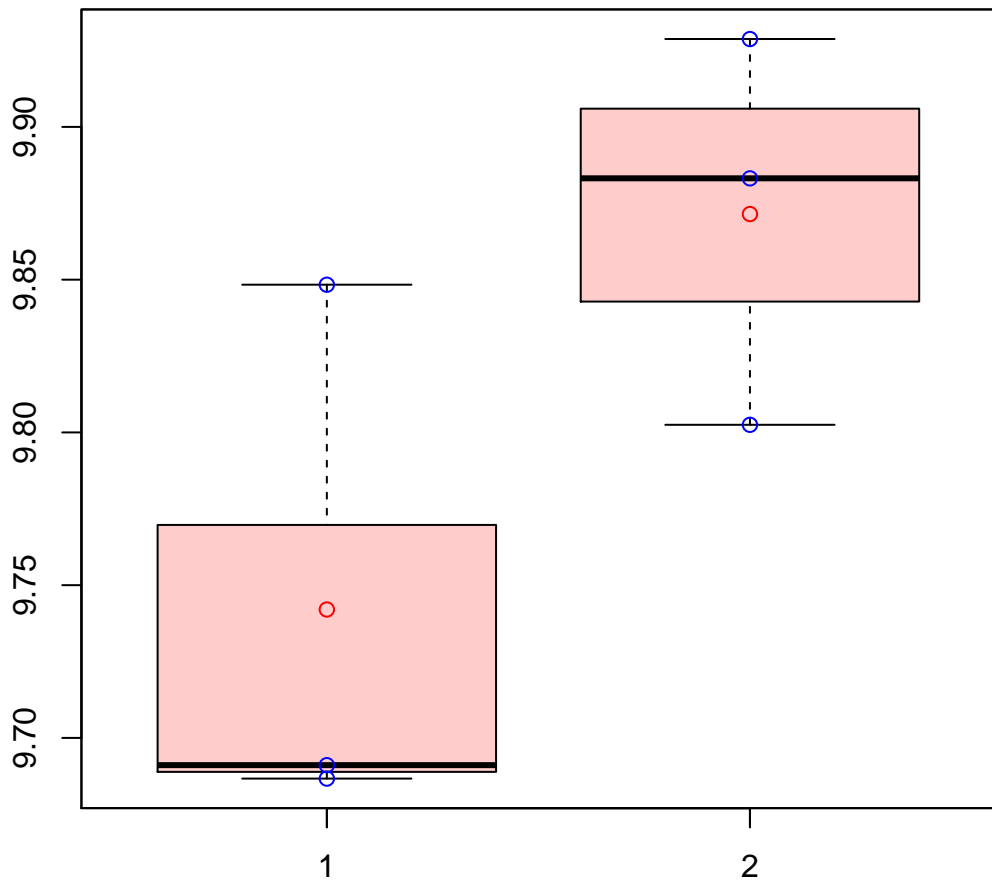

t-Test: p-value = 0.12

# CL8948Contig1|CL8948Contig1

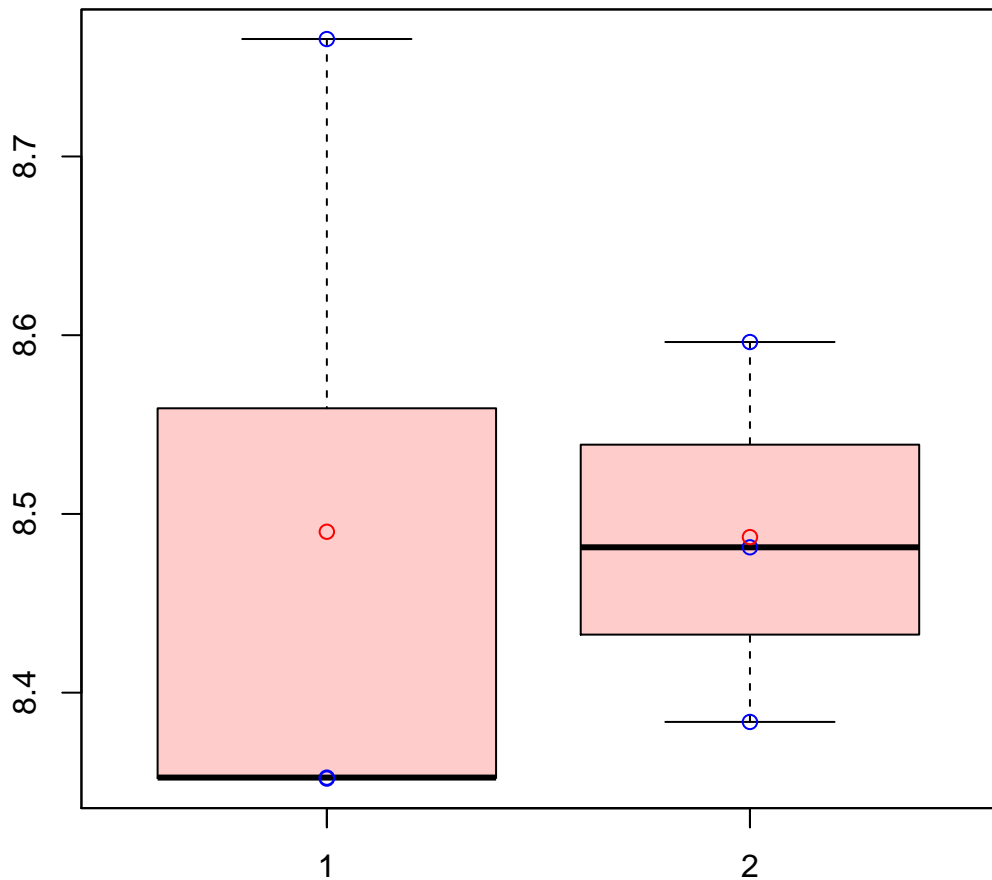

t-Test: p-value = 0.99

# CL894Contig4|CL894Contig4

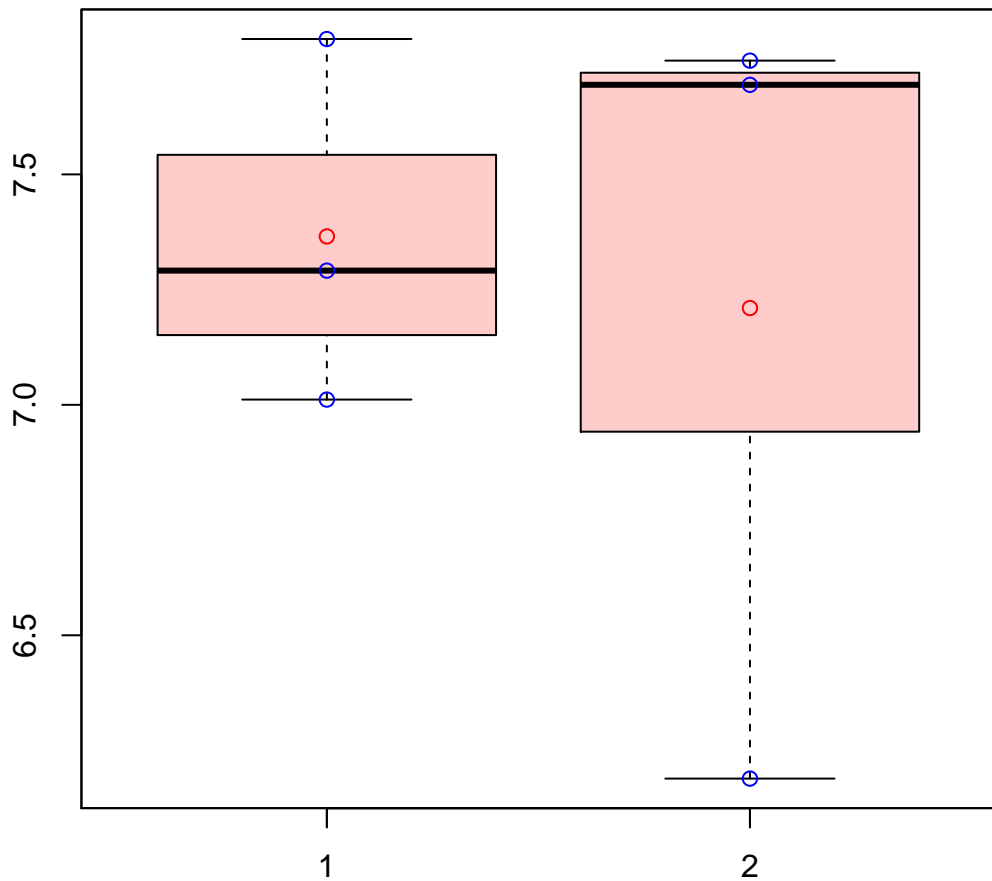

t-Test: p-value = 0.8

# CL8953Contig2|CL8953Contig2

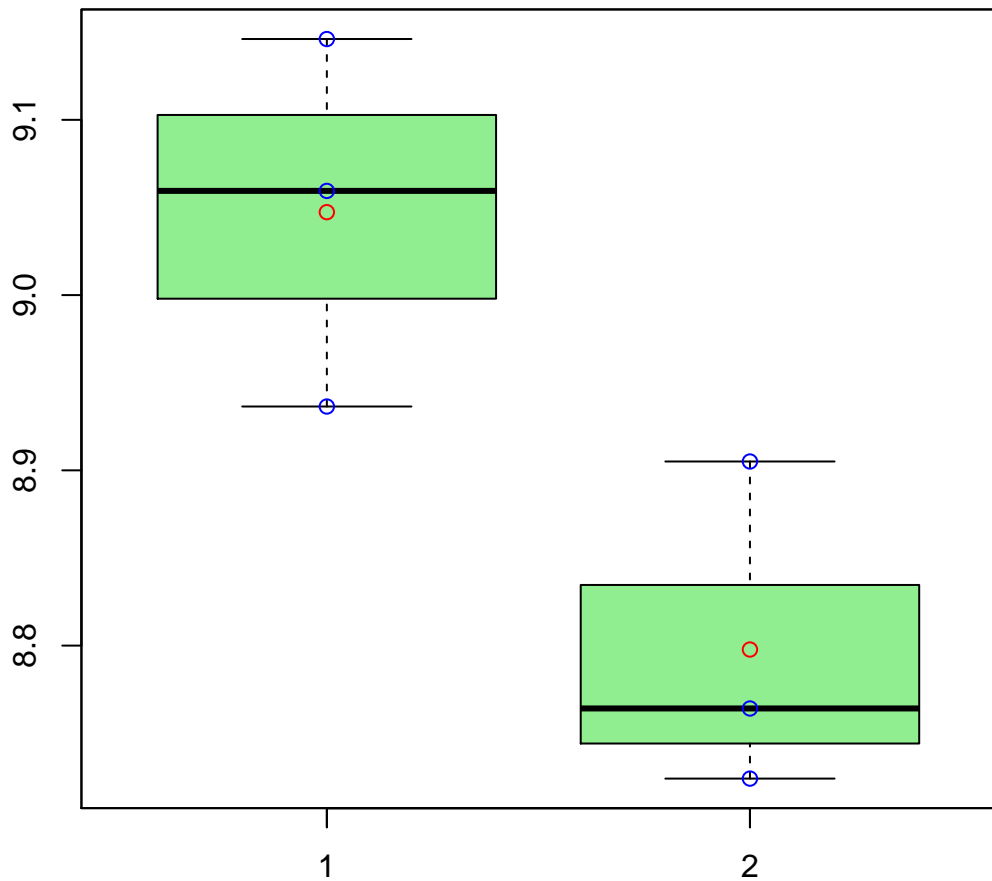

t-Test: p-value = 0.04



# CL895Contig4|CL895Contig4

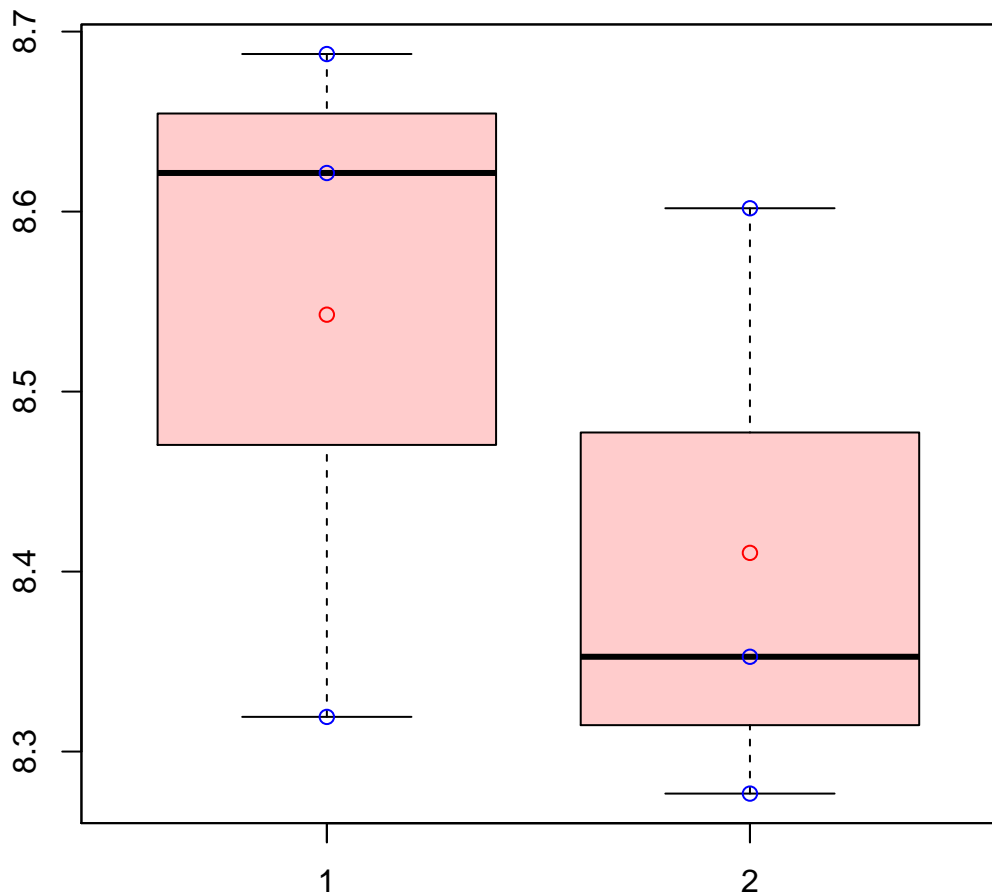

t-Test: p-value = 0.43

# CL8967Contig6|CL8967Contig6

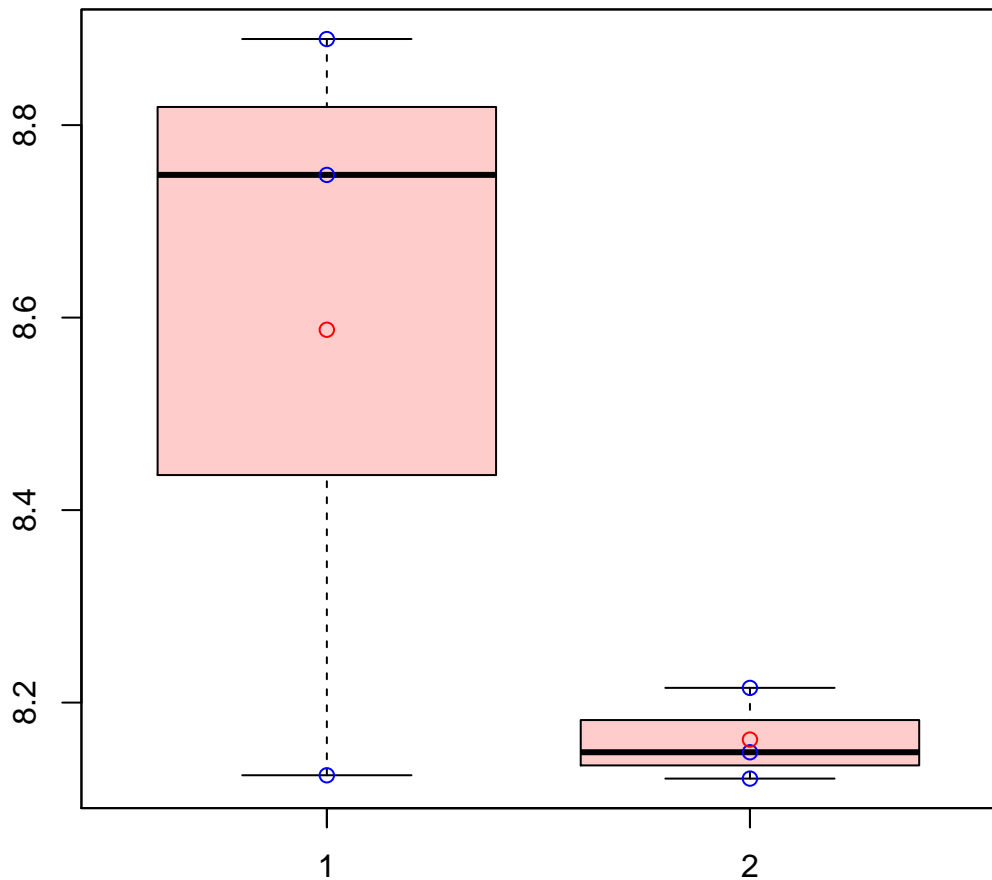

t-Test: p-value = 0.21

# CL8980Contig2|CL8980Contig2



t-Test: p-value = 0.58

# CL8983Contig3|CL8983Contig3

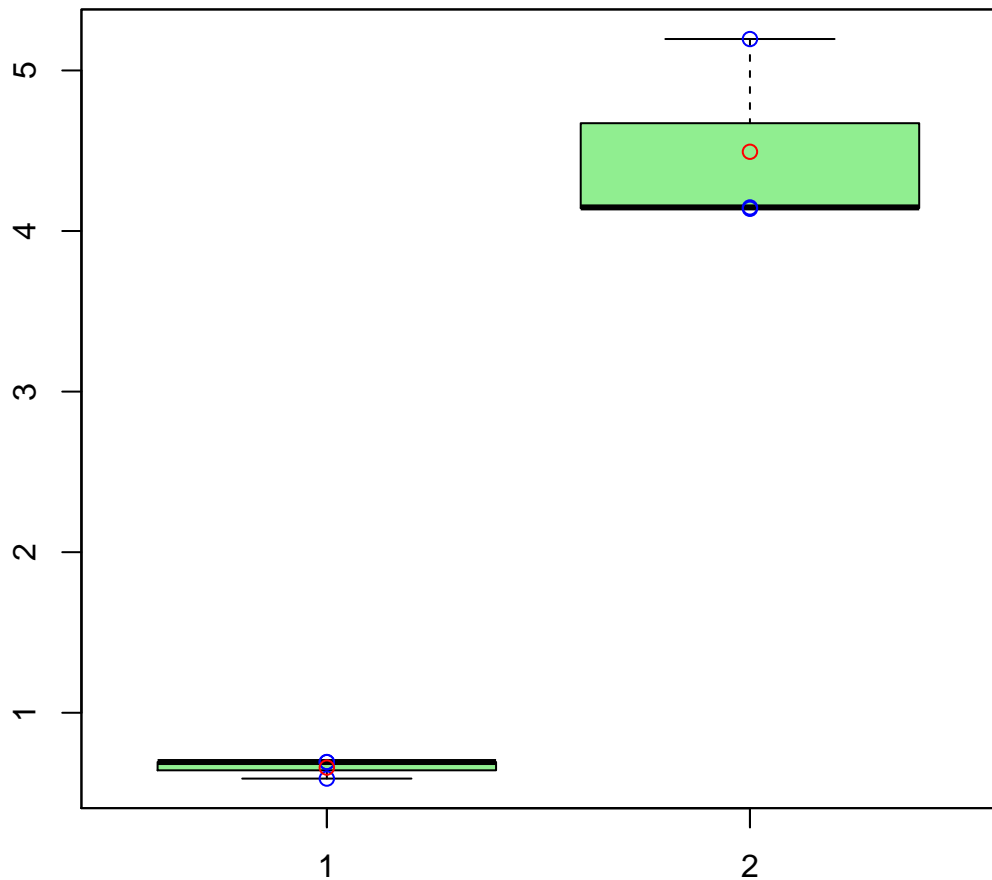

t-Test: p-value = 0.01

# CL8989Contig1|CL8989Contig1

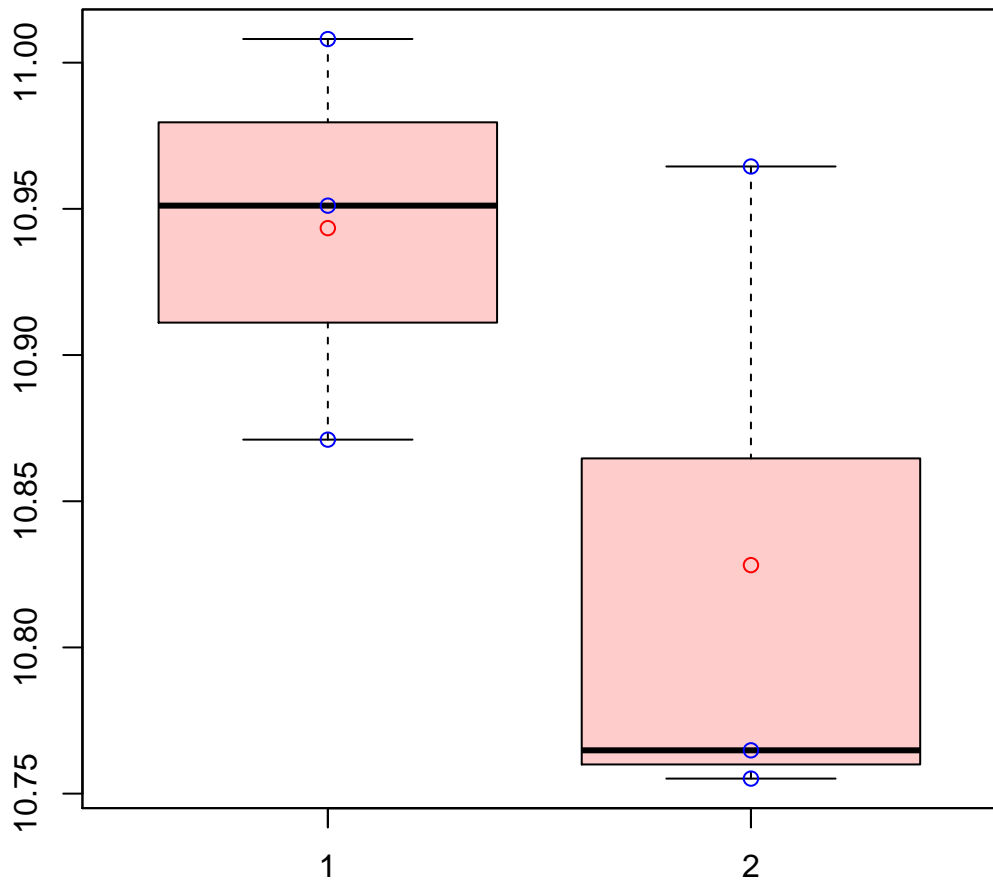

t-Test: p-value = 0.23

# CL8989Contig3|CL8989Contig3

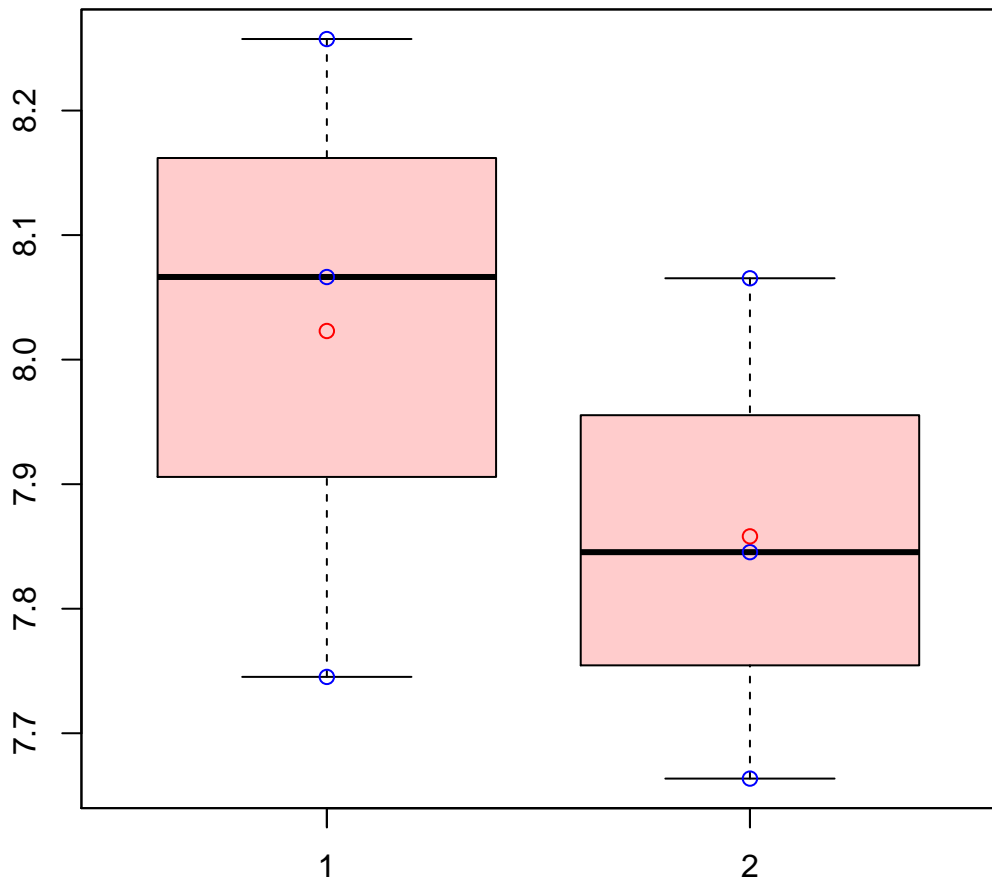

t-Test: p-value = 0.44

# CL8989Contig4|CL8989Contig4

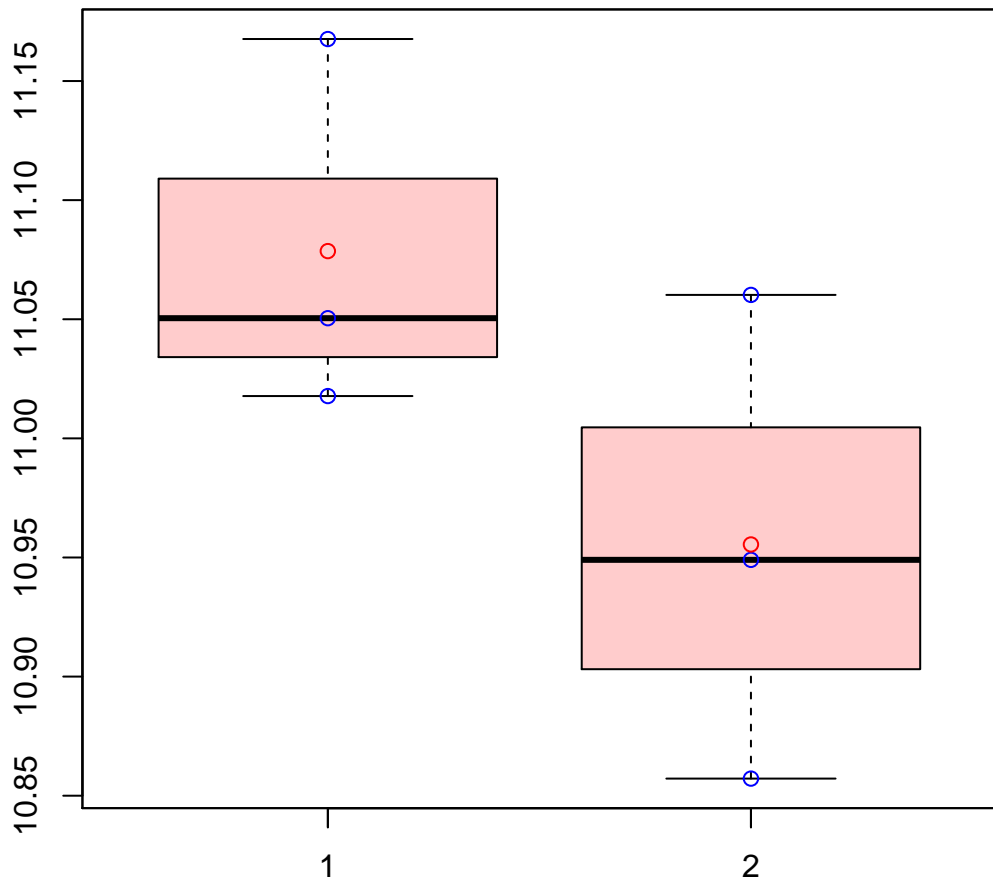

t-Test: p-value = 0.18

# CL898Contig1|CL898Contig1

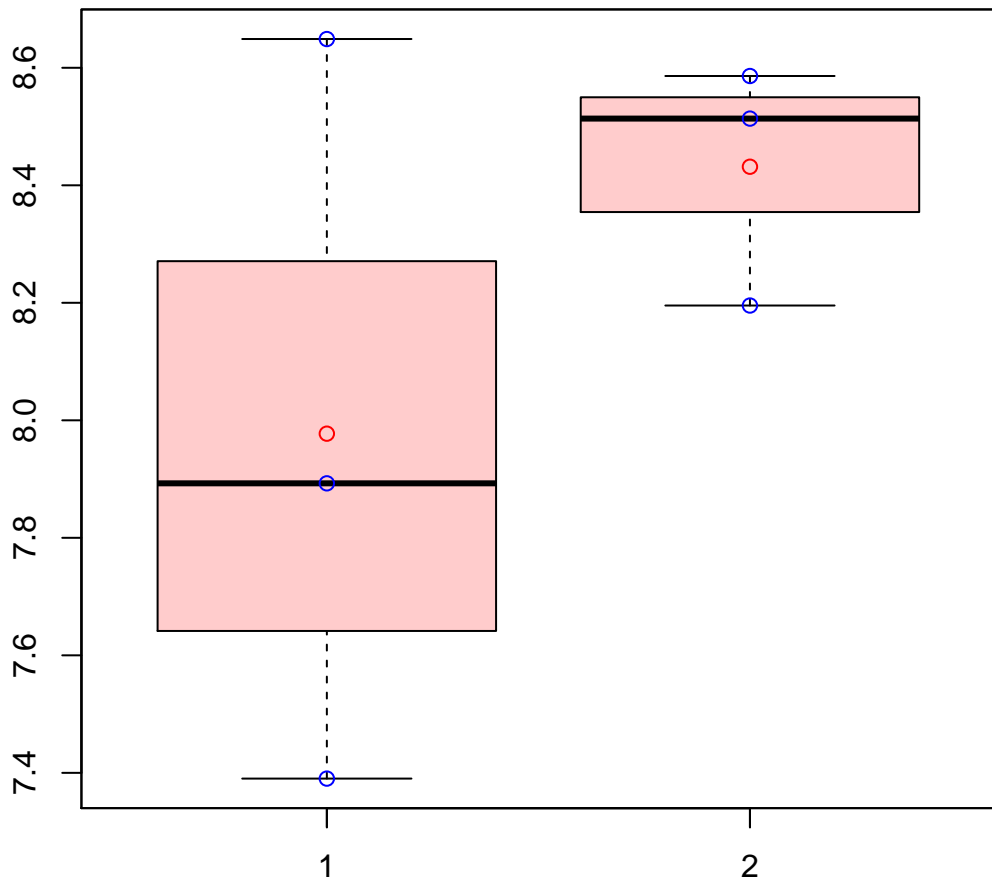

t-Test: p-value = 0.34



# CL898Contig7|CL898Contig7

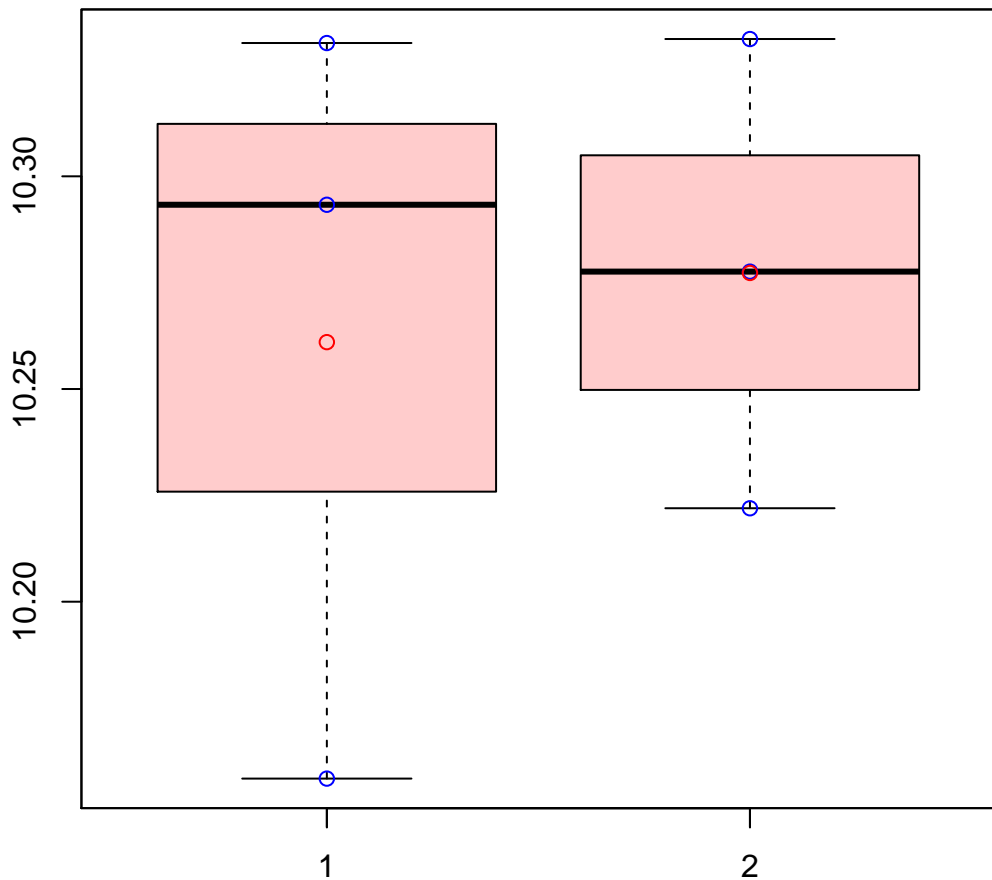

t-Test: p-value = 0.81

# CL8996Contig2|CL8996Contig2

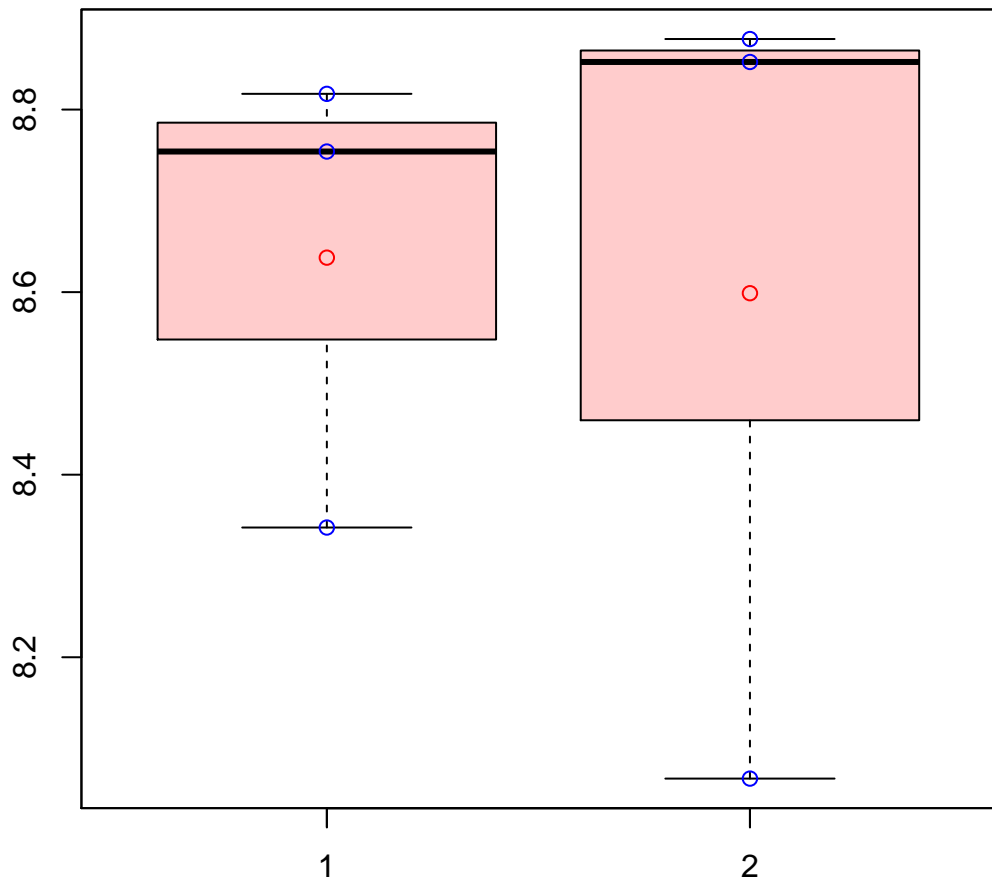

t-Test: p-value = 0.91

# CL899Contig1|CL899Contig1

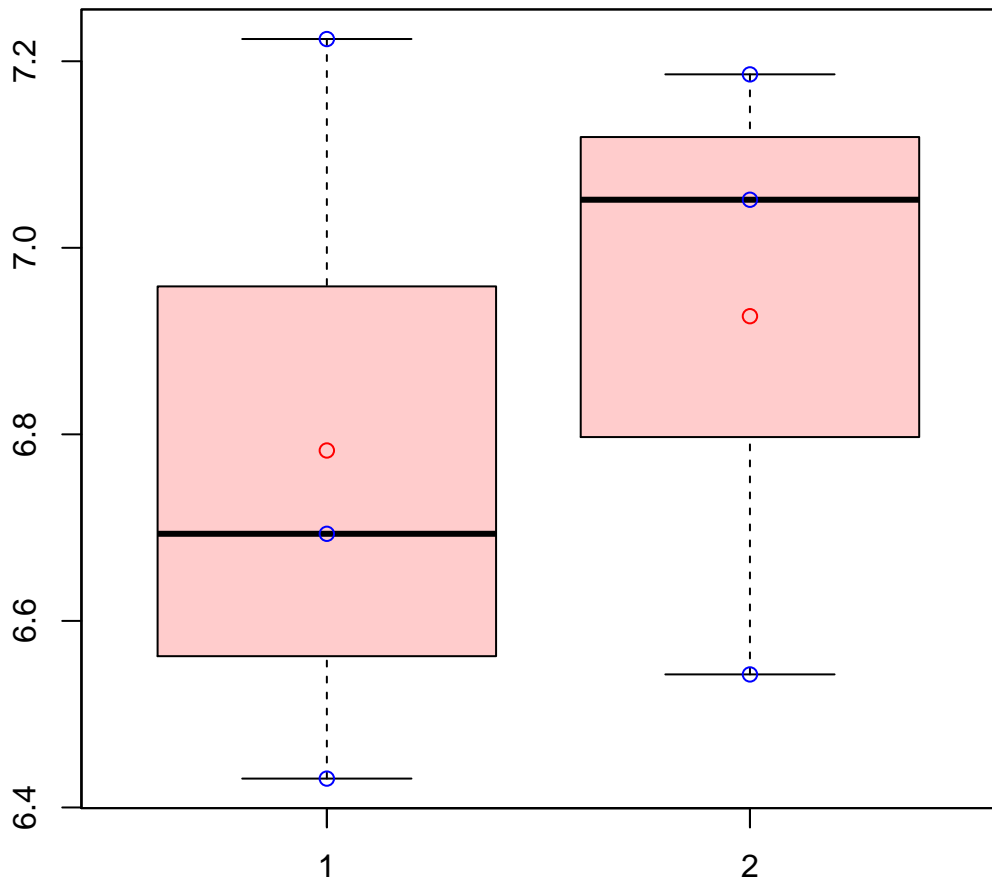

t-Test: p-value = 0.66

# CL899Contig2|CL899Contig2



t-Test: p-value = 0.43

# CL899Contig3|CL899Contig3

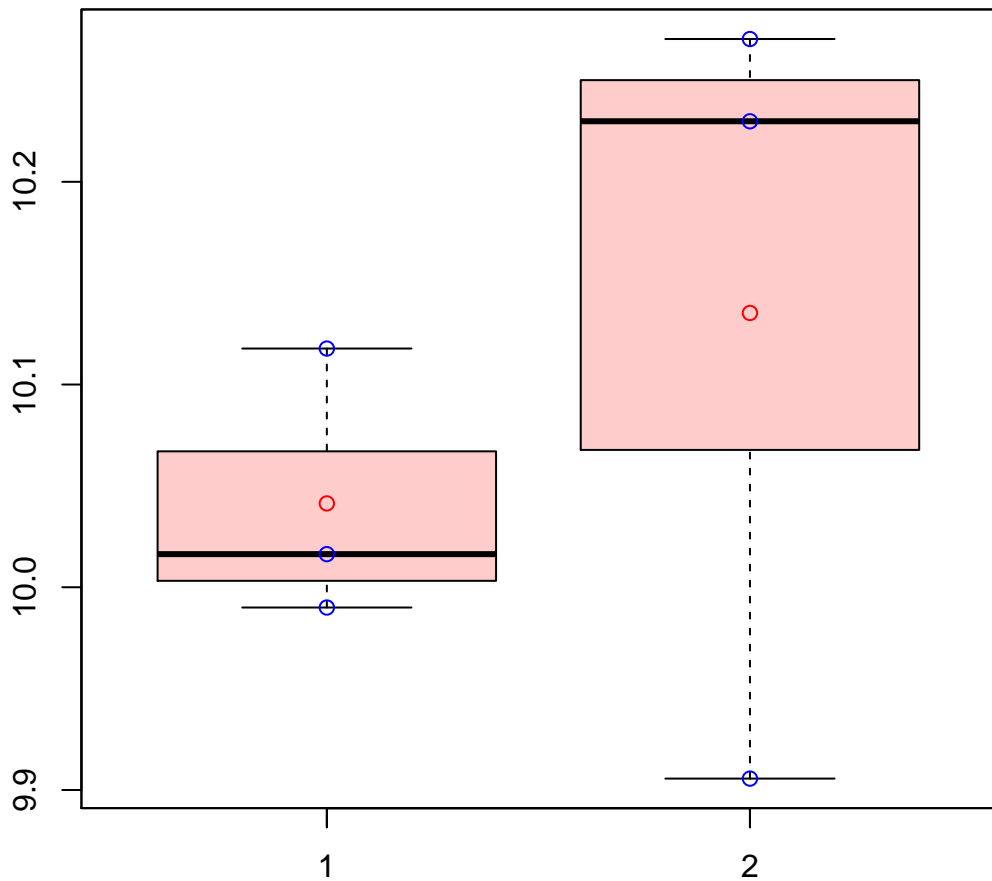

t-Test: p-value = 0.51

# CL899Contig4|CL899Contig4

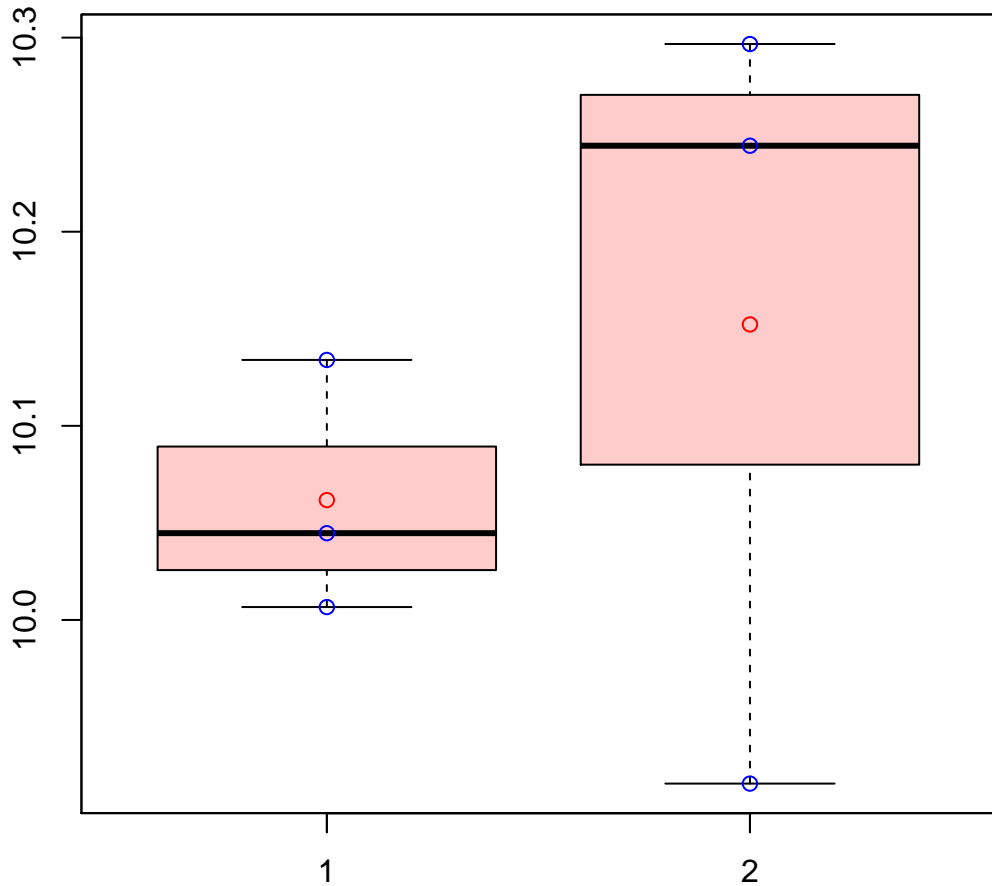

t-Test: p-value = 0.53

# CL89Contig18|CL89Contig18

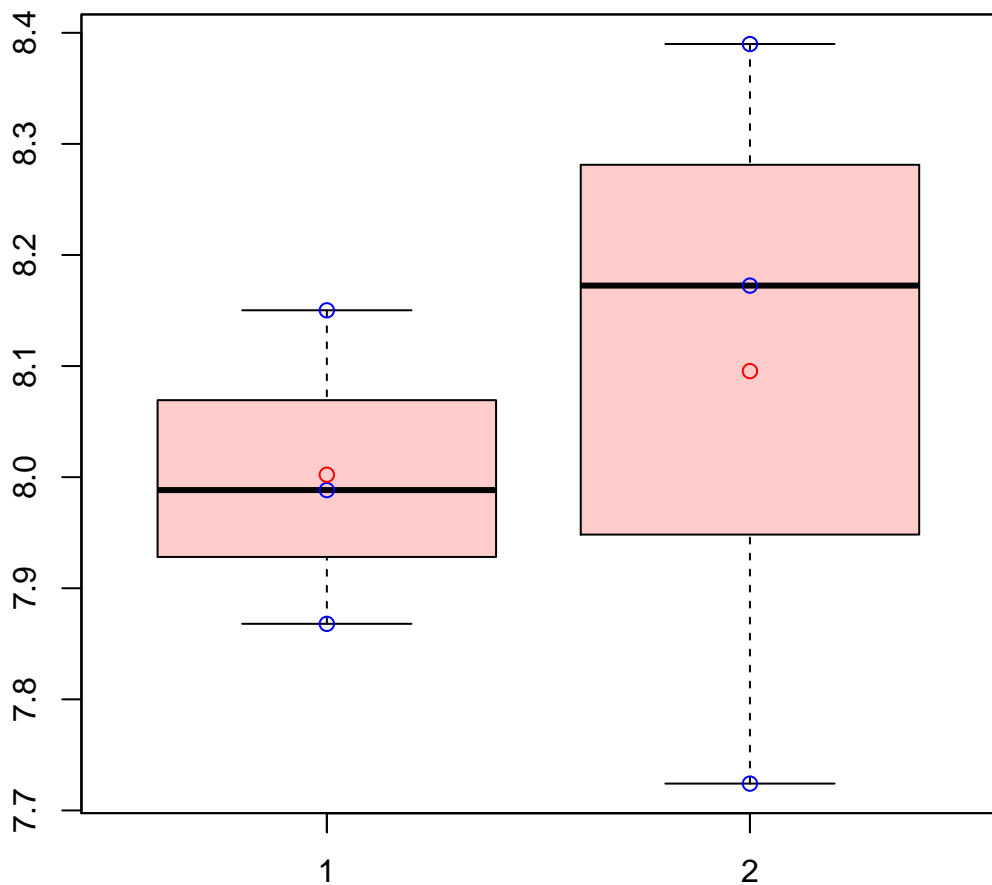

t-Test: p-value = 0.69

# CL89Contig5|CL89Contig5

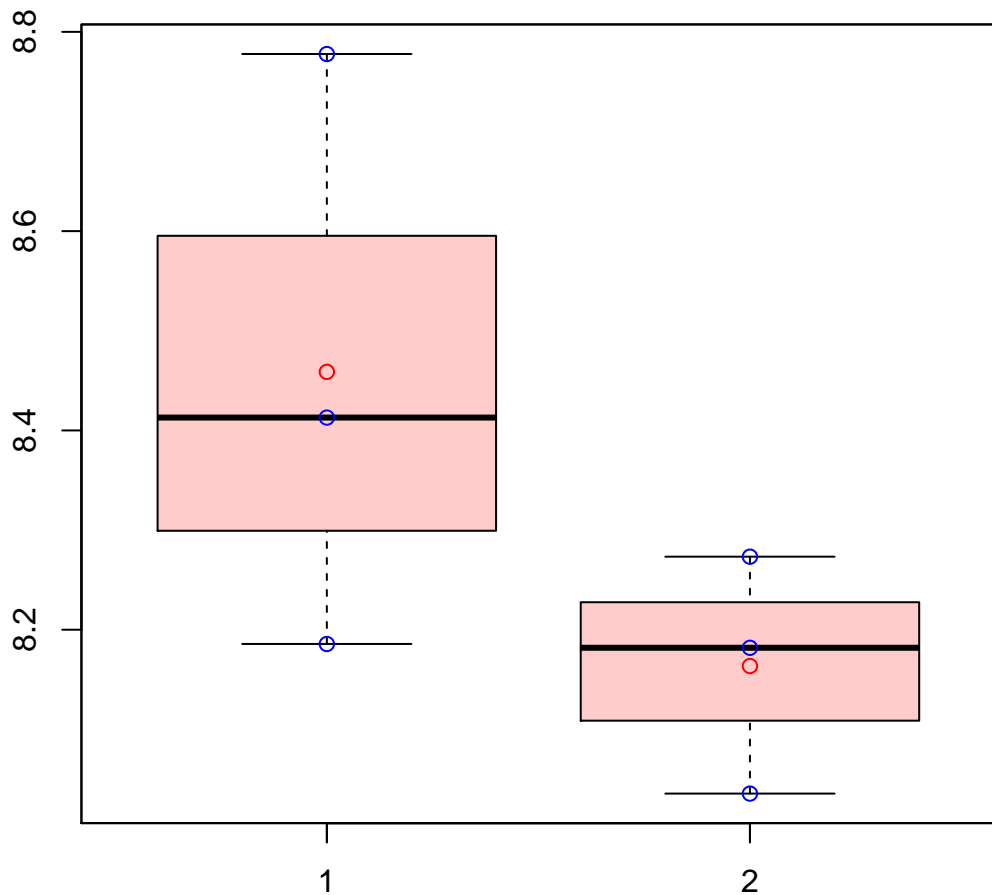

t-Test: p-value = 0.22



# CL9002Contig5|CL9002Contig5

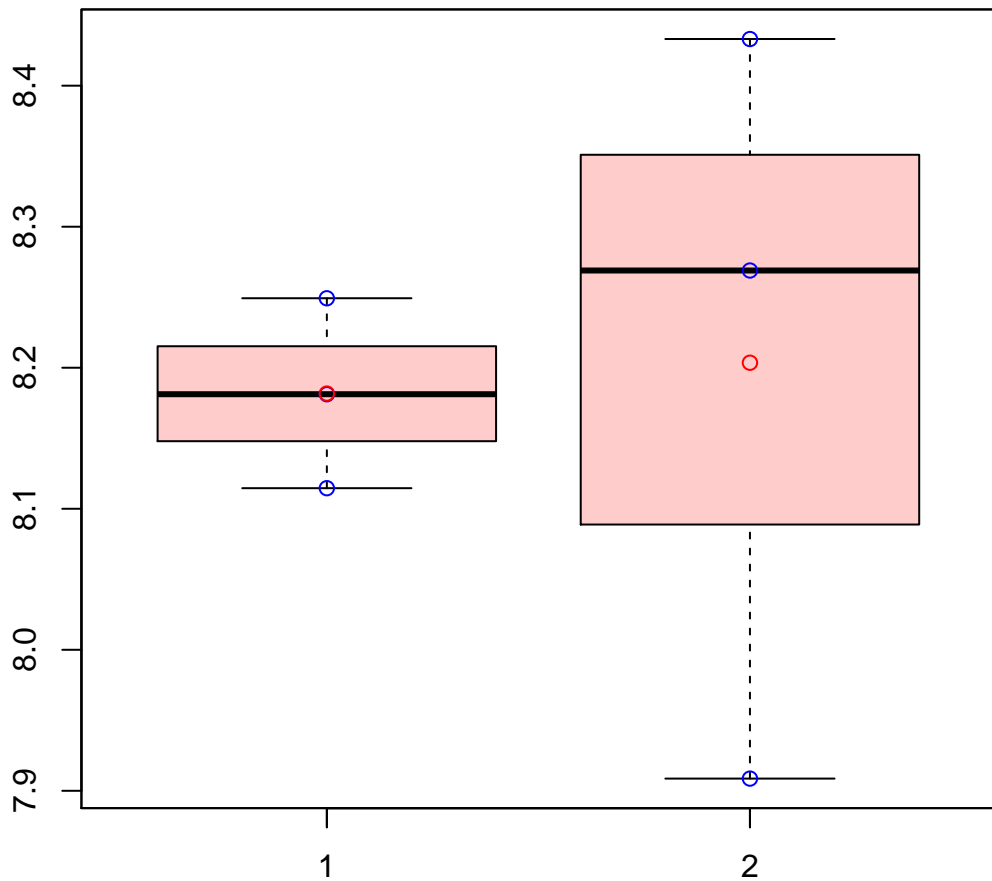

t-Test: p-value = 0.9

# CL9006Contig1|CL9006Contig1

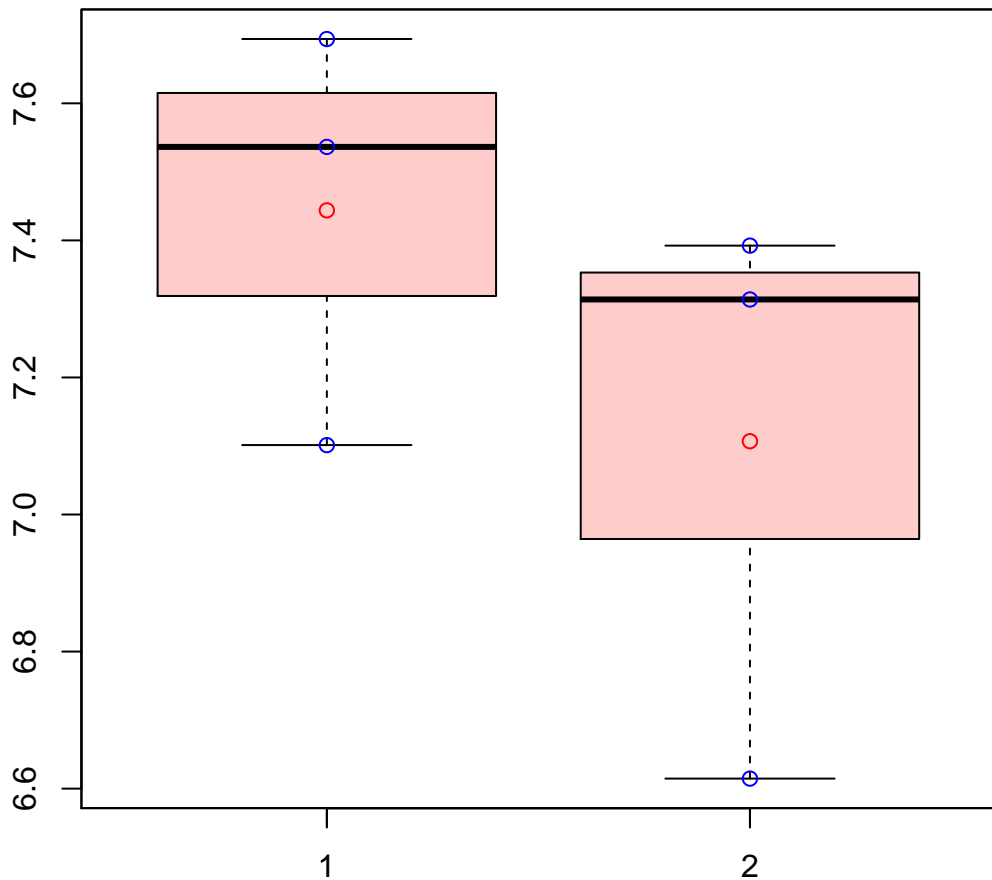

t-Test: p-value = 0.34

# CL9018Contig1|CL9018Contig1



t-Test: p-value = 0.54

# CL9027Contig1|CL9027Contig1

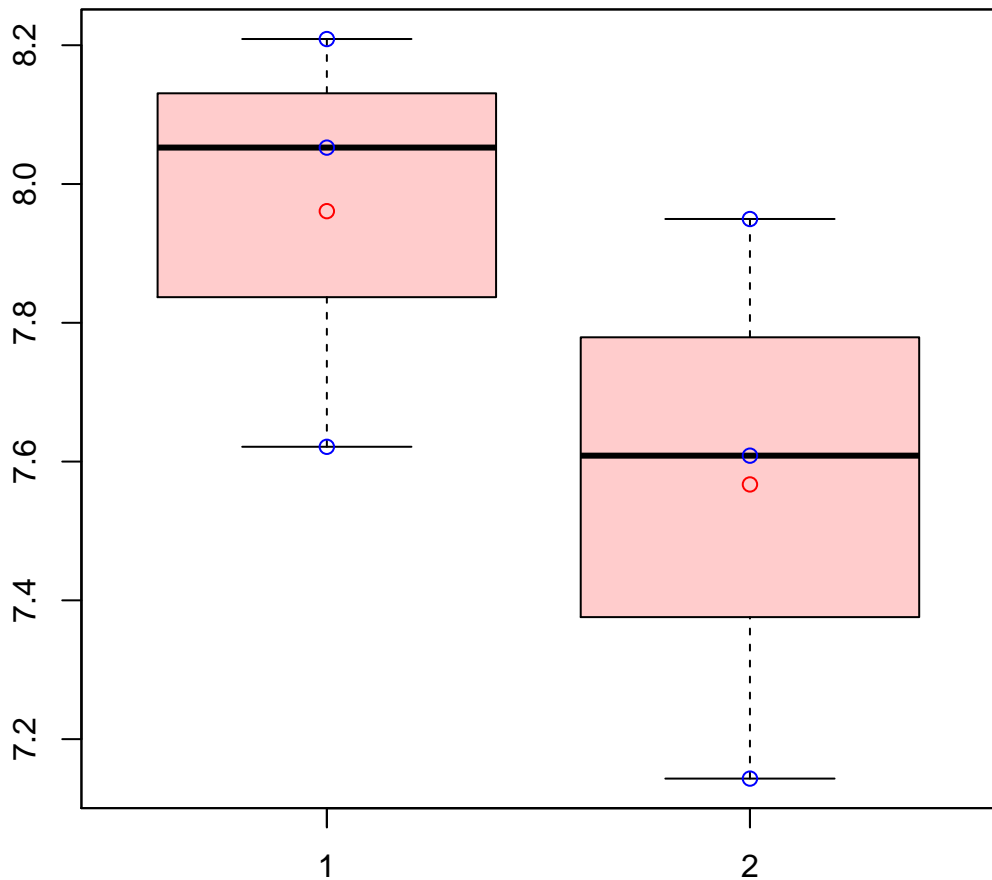

t-Test: p-value = 0.25

# CL903Contig10|CL903Contig10

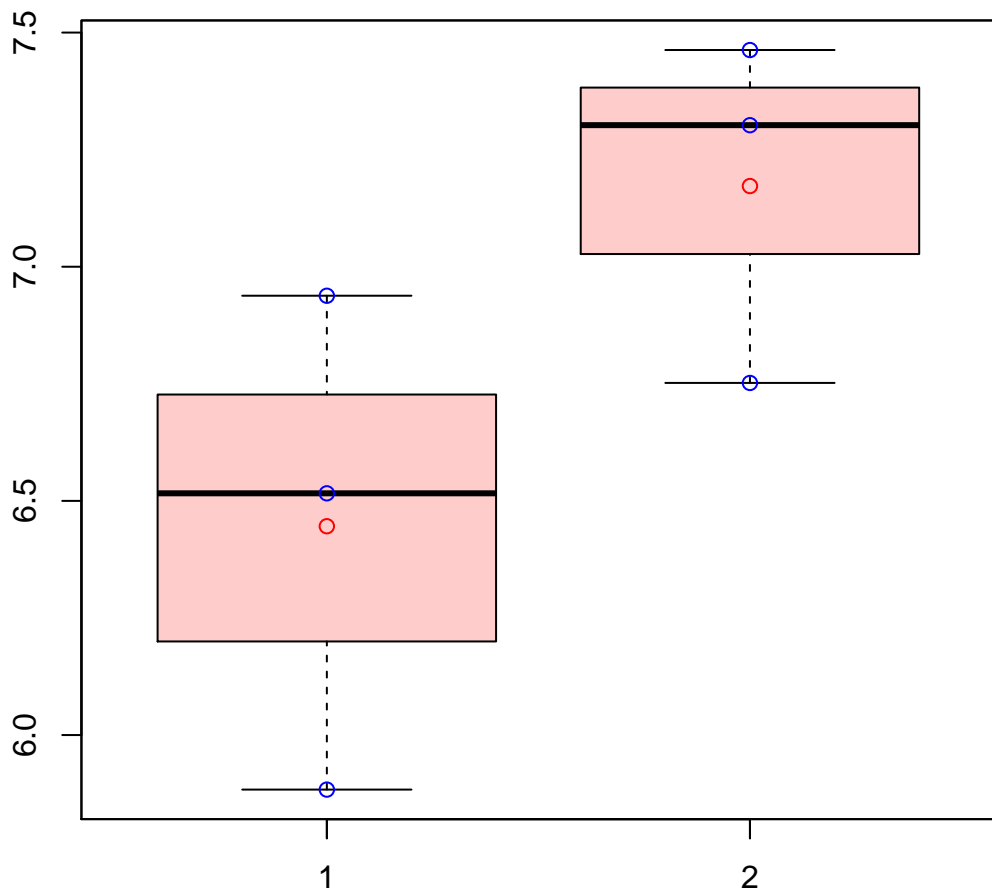

t-Test: p-value = 0.13

# CL903Contig5|CL903Contig5

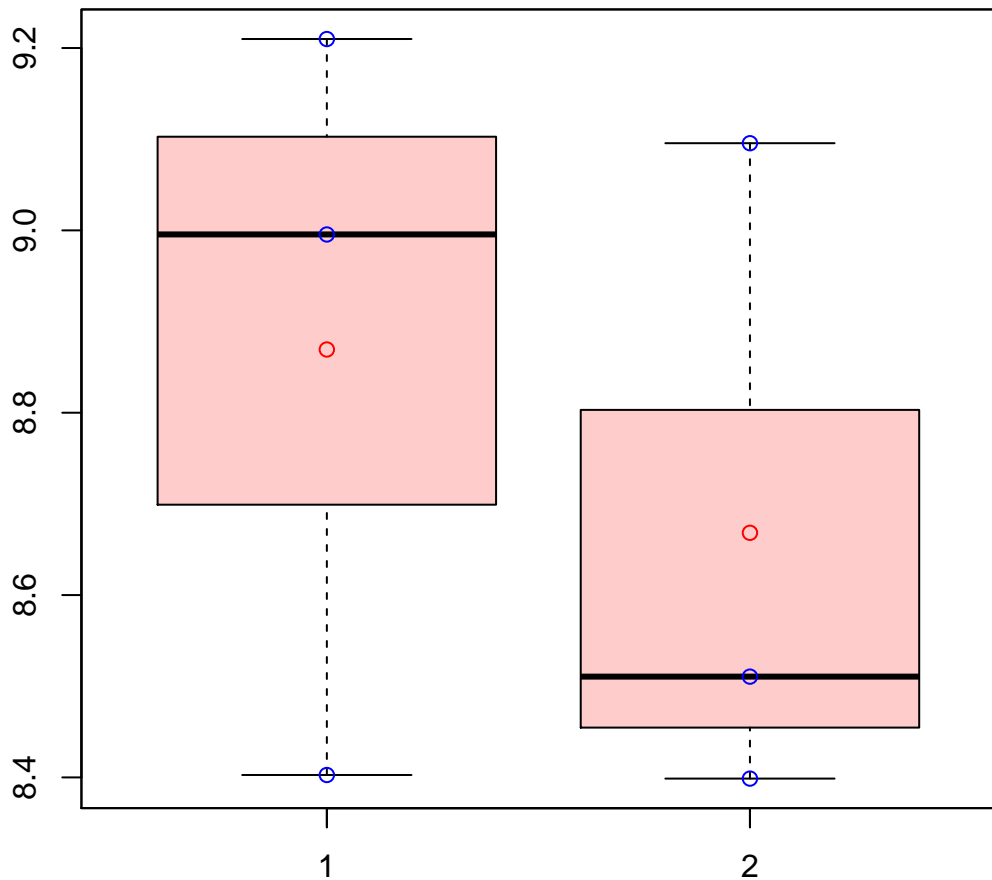

t-Test: p-value = 0.57

# CL903Contig9|CL903Contig9

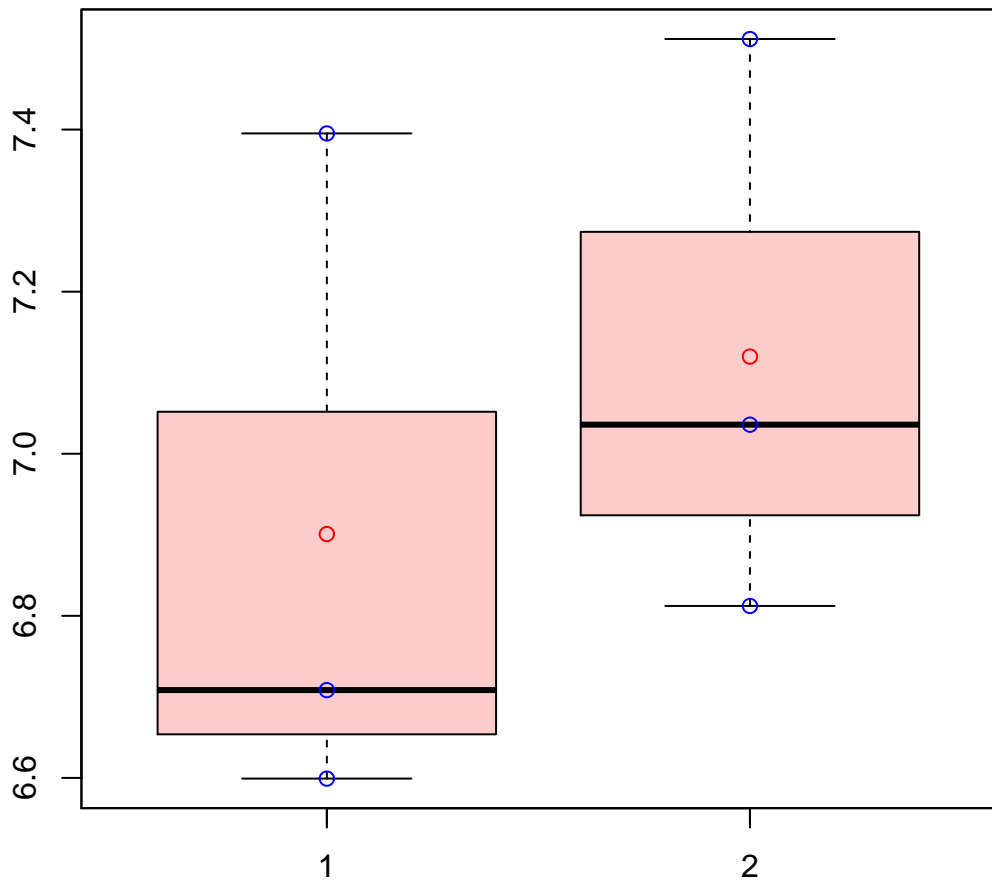

t-Test: p-value = 0.54

# CL9053Contig1|CL9053Contig1

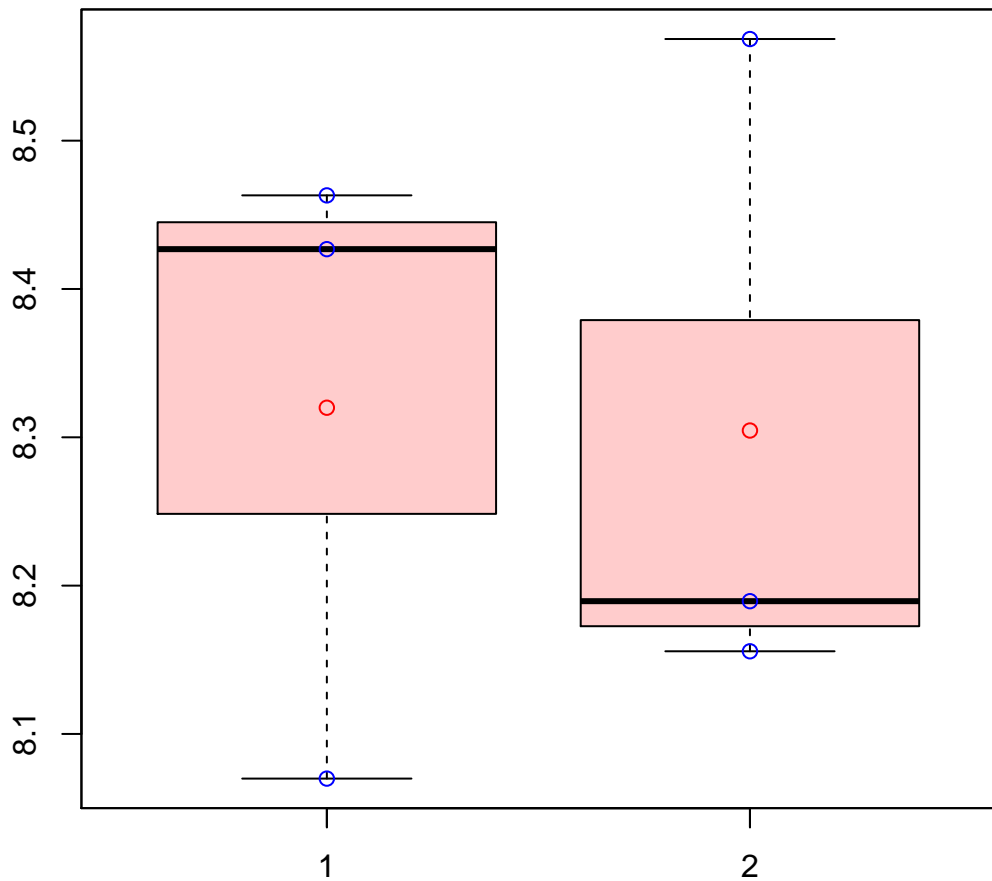

t-Test: p-value = 0.94



# CL9053Contig2|CL9053Contig2

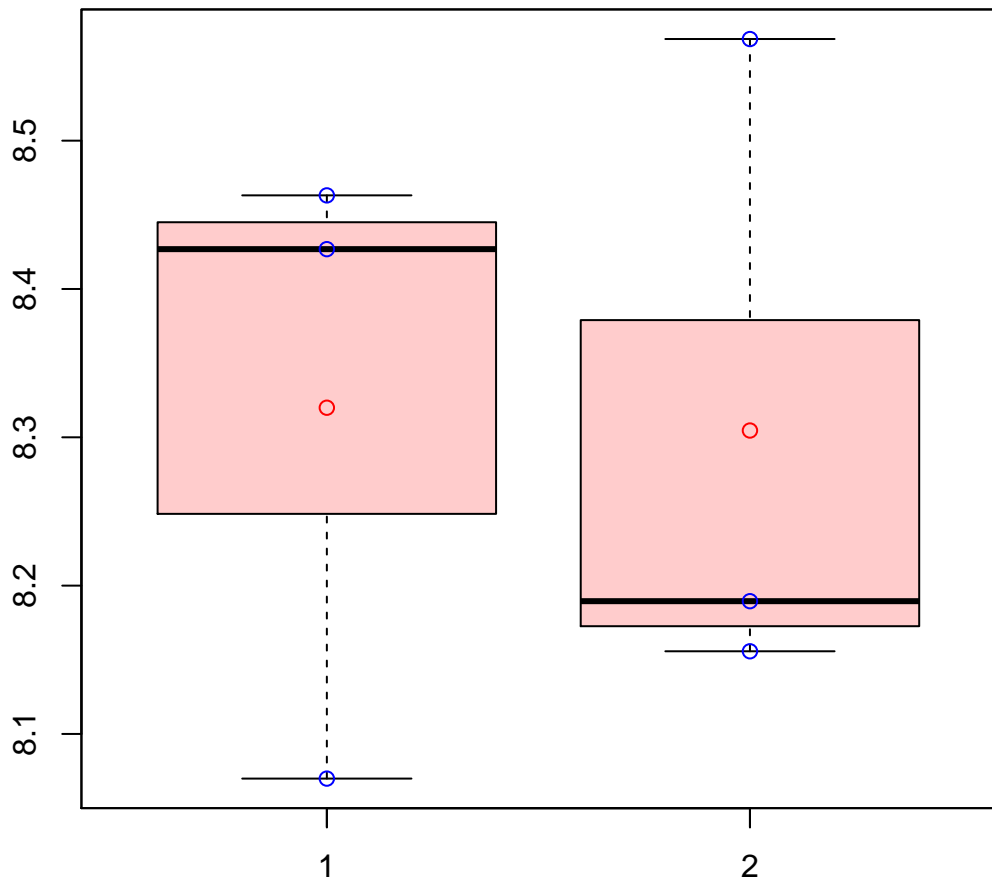

t-Test: p-value = 0.94

# CL905Contig1|CL905Contig1

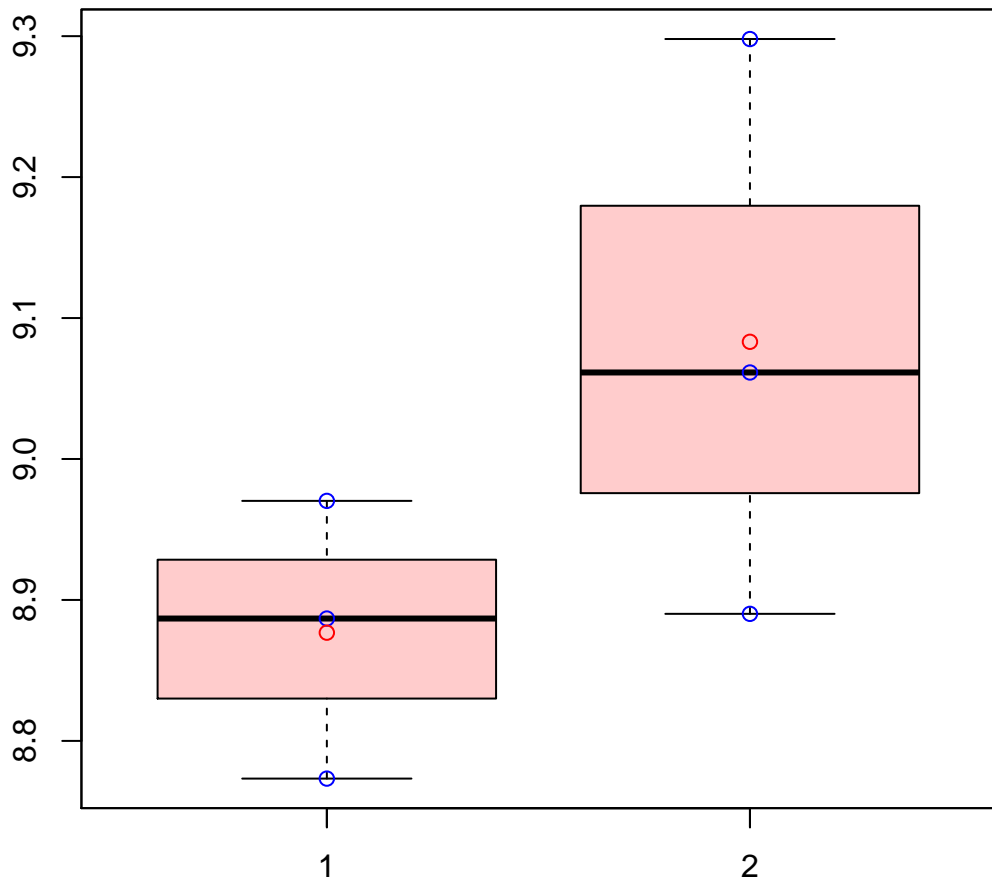

t-Test: p-value = 0.22

# CL905Contig3|CL905Contig3

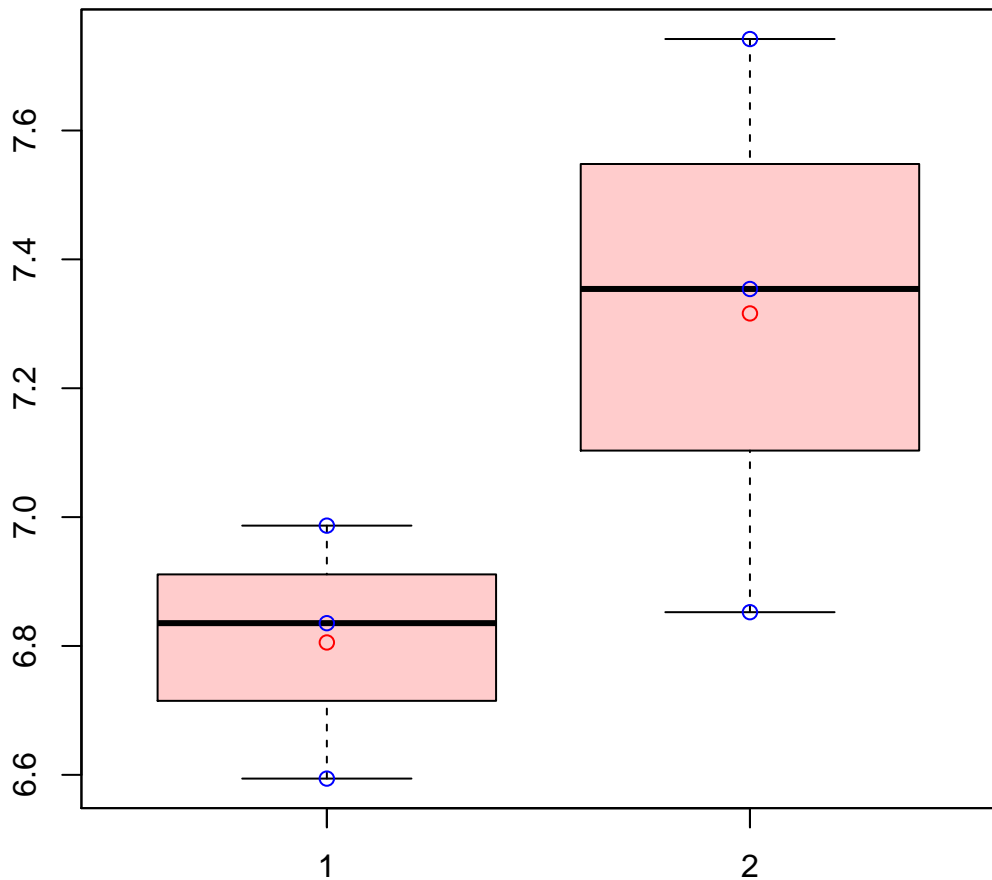

t-Test: p-value = 0.18

# CL9068Contig2|CL9068Contig2

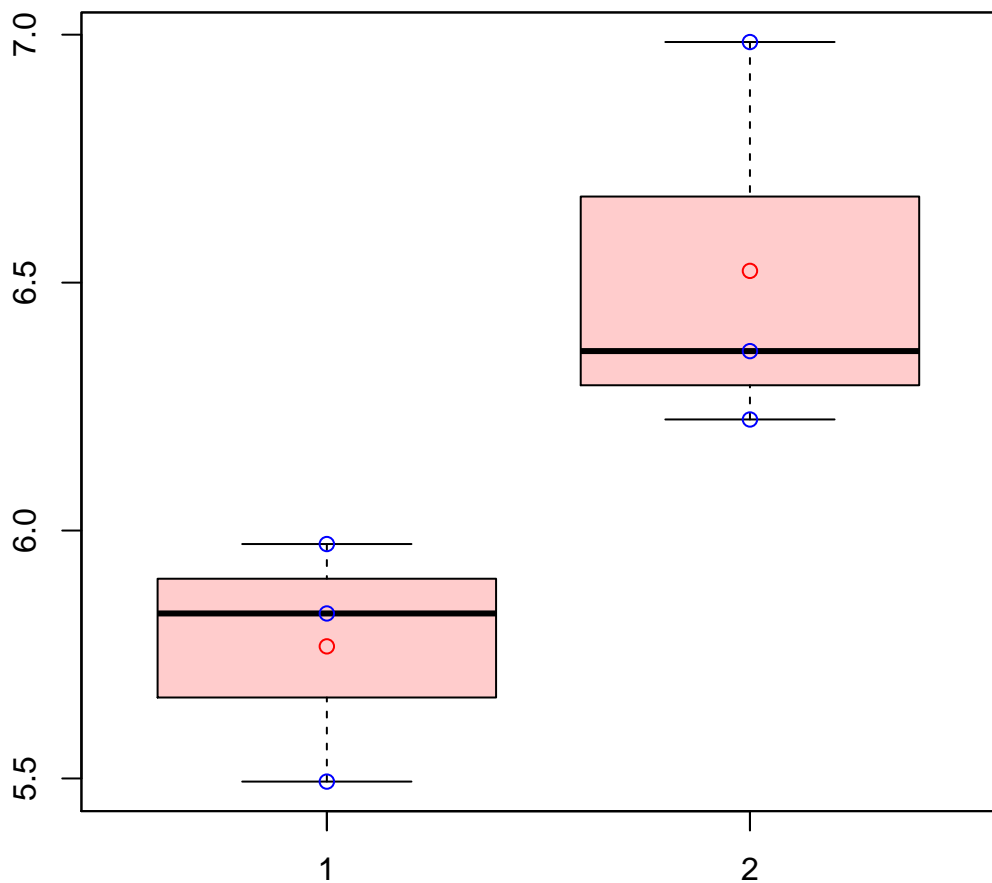

t-Test: p-value = 0.06

# CL9071Contig1|CL9071Contig1

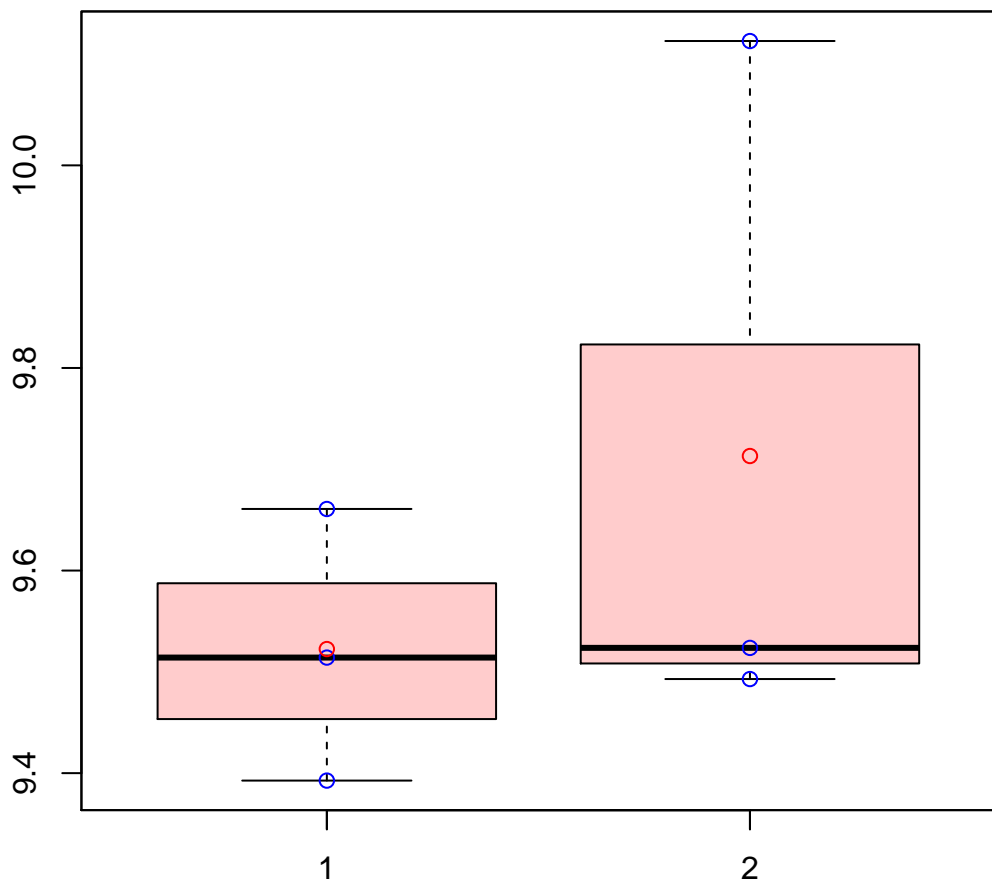

t-Test: p-value = 0.46

# CL908Contig1|CL908Contig1

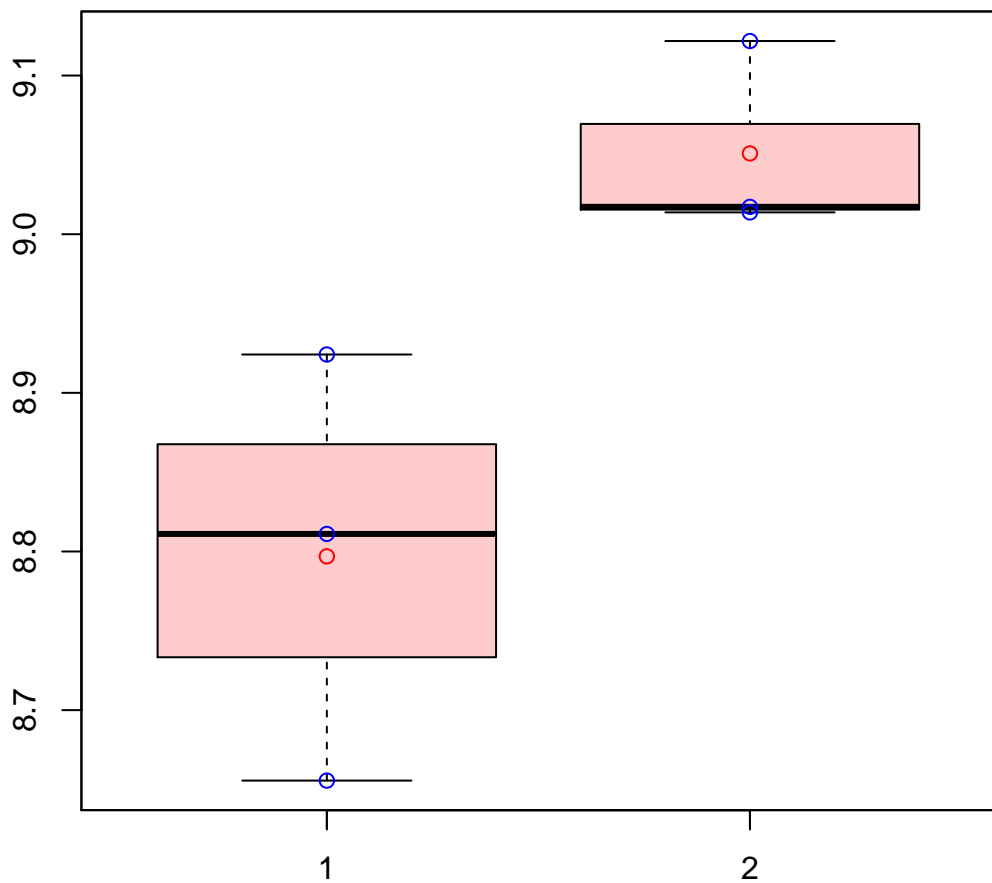

t-Test: p-value = 0.06

# CL908Contig2|CL908Contig2

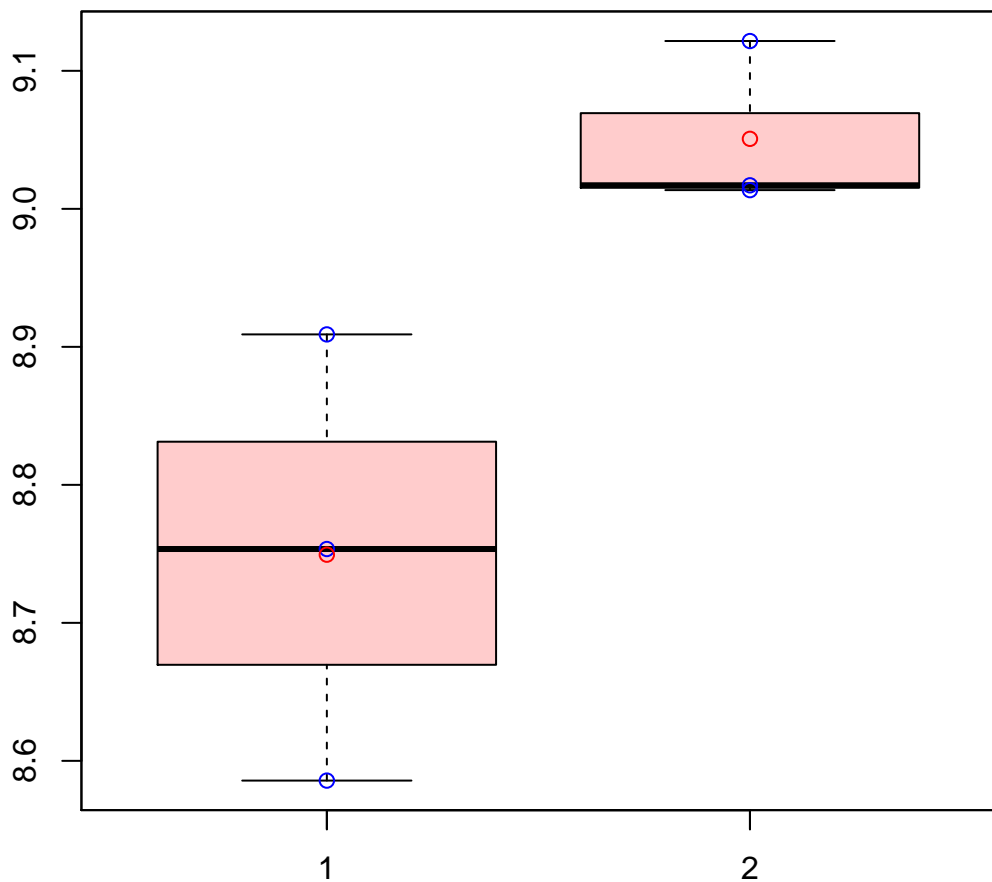

t-Test: p-value = 0.07

# CL908Contig3|CL908Contig3

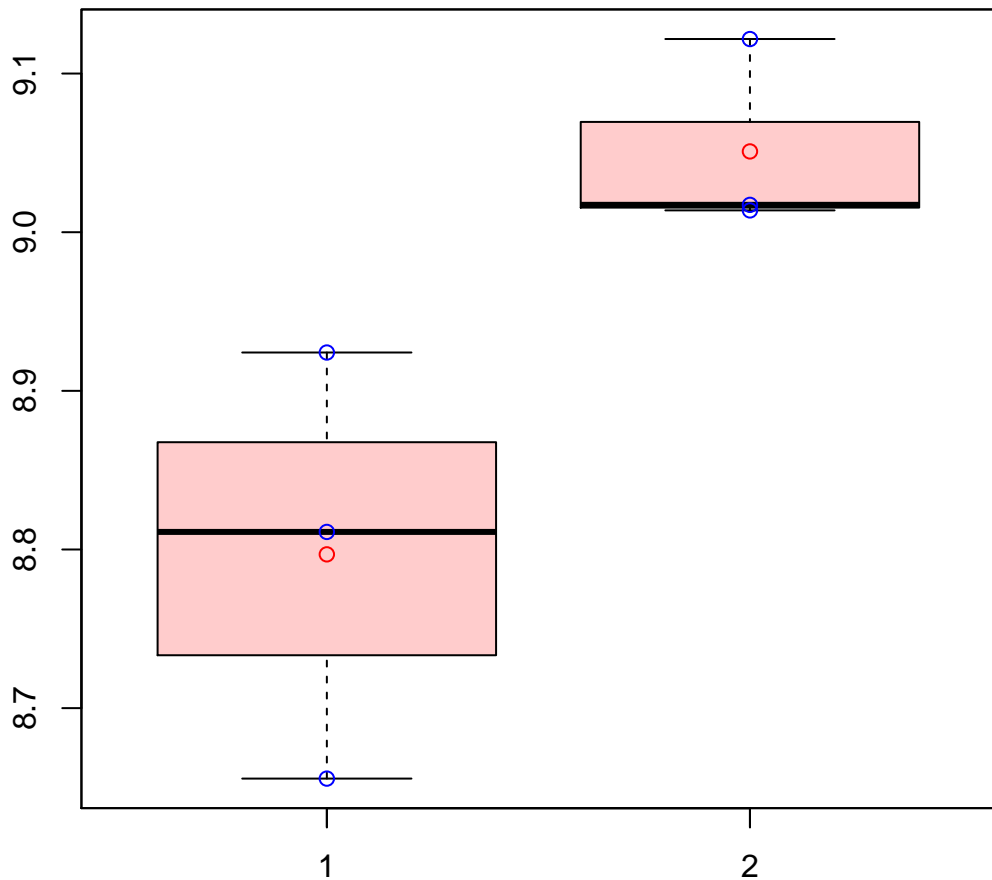

t-Test: p-value = 0.06



# CL909Contig10|CL909Contig10

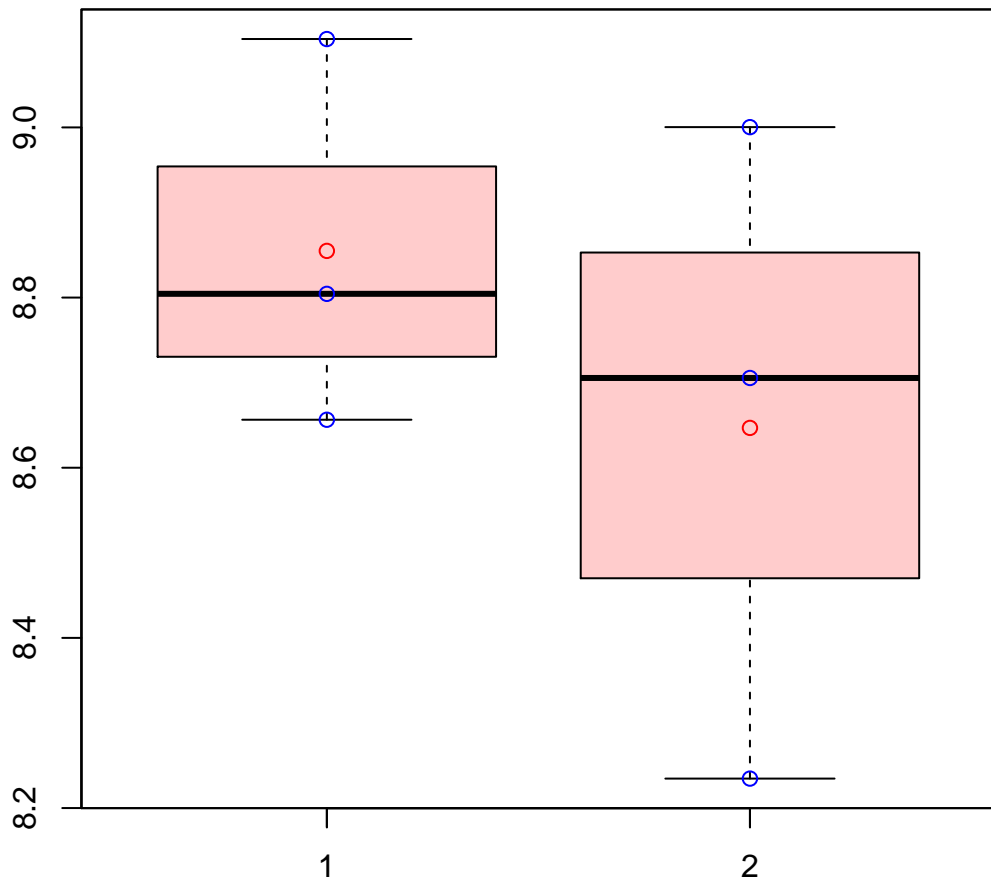

t-Test: p-value = 0.48

# CL909Contig14|CL909Contig14

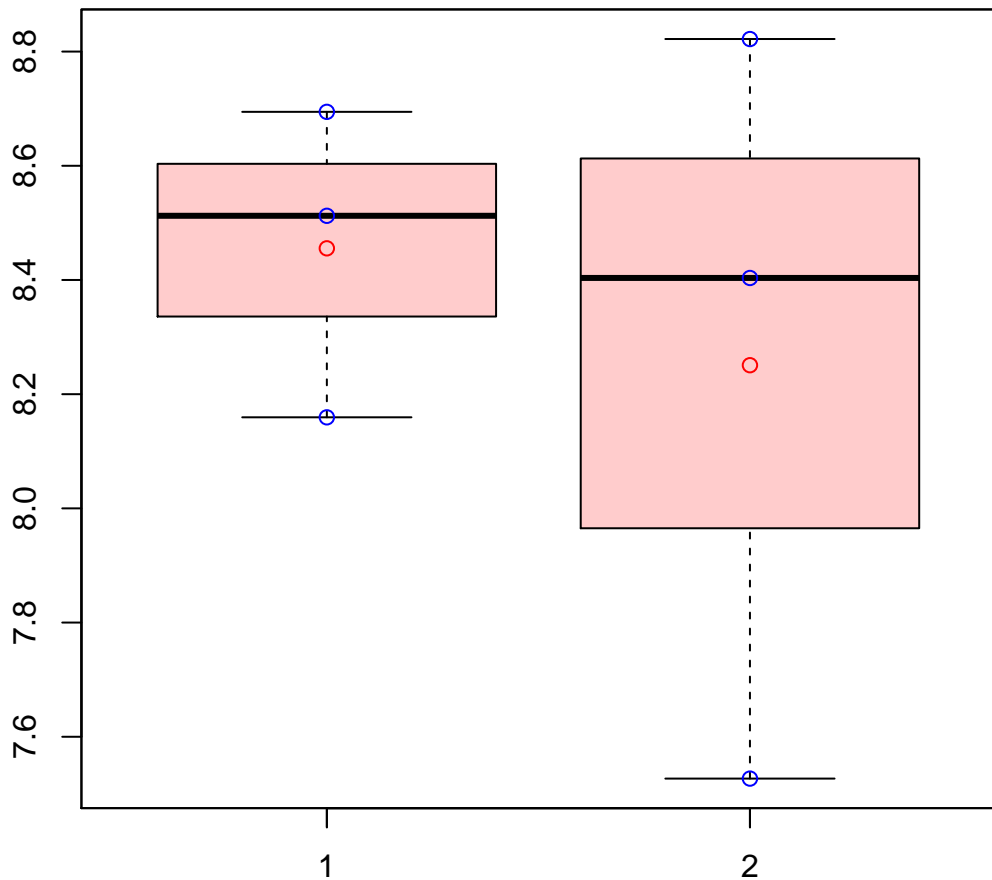

t-Test: p-value = 0.66

# CL909Contig1|CL909Contig1

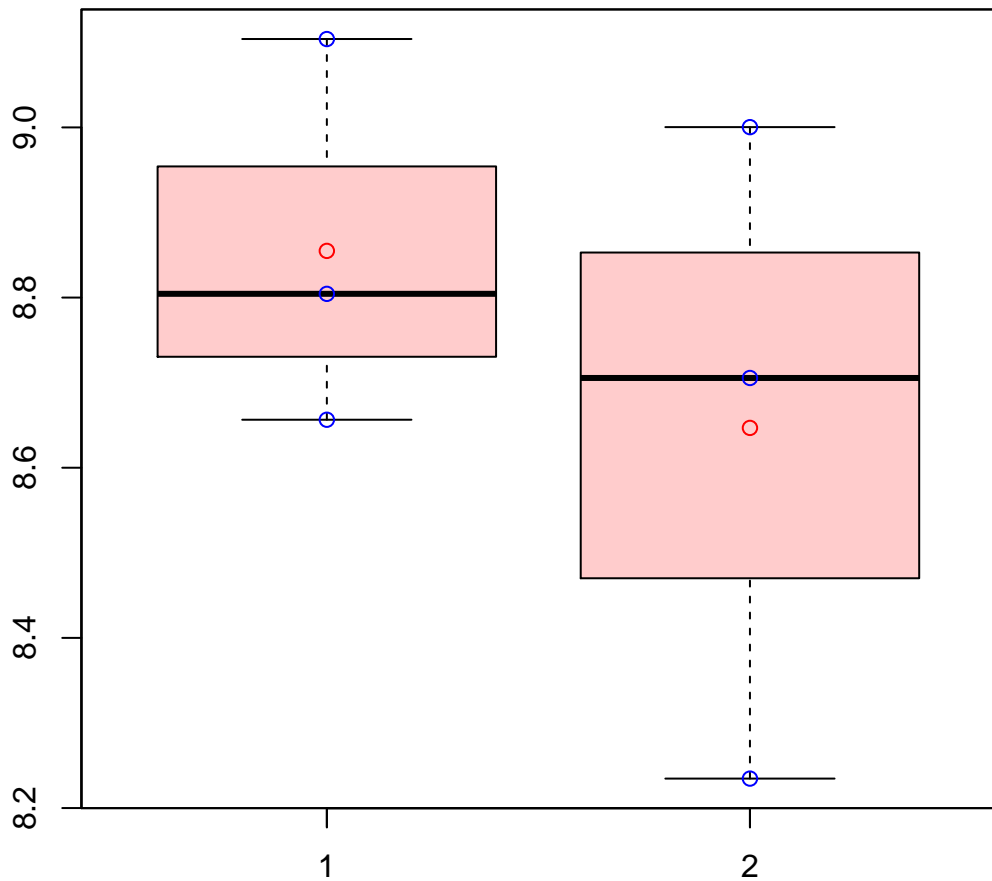

t-Test: p-value = 0.48

# CL909Contig5|CL909Contig5

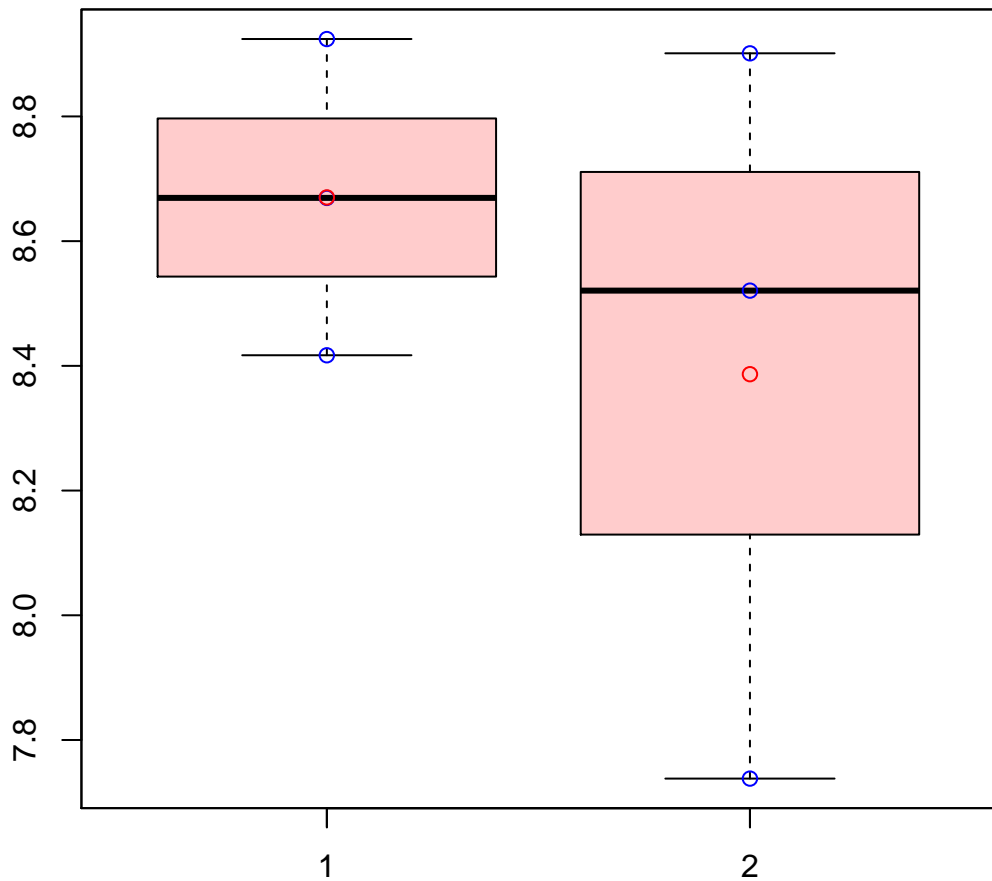

t-Test: p-value = 0.51

# CL909Contig6|CL909Contig6



t-Test: p-value = 0.66

# CL909Contig7|CL909Contig7

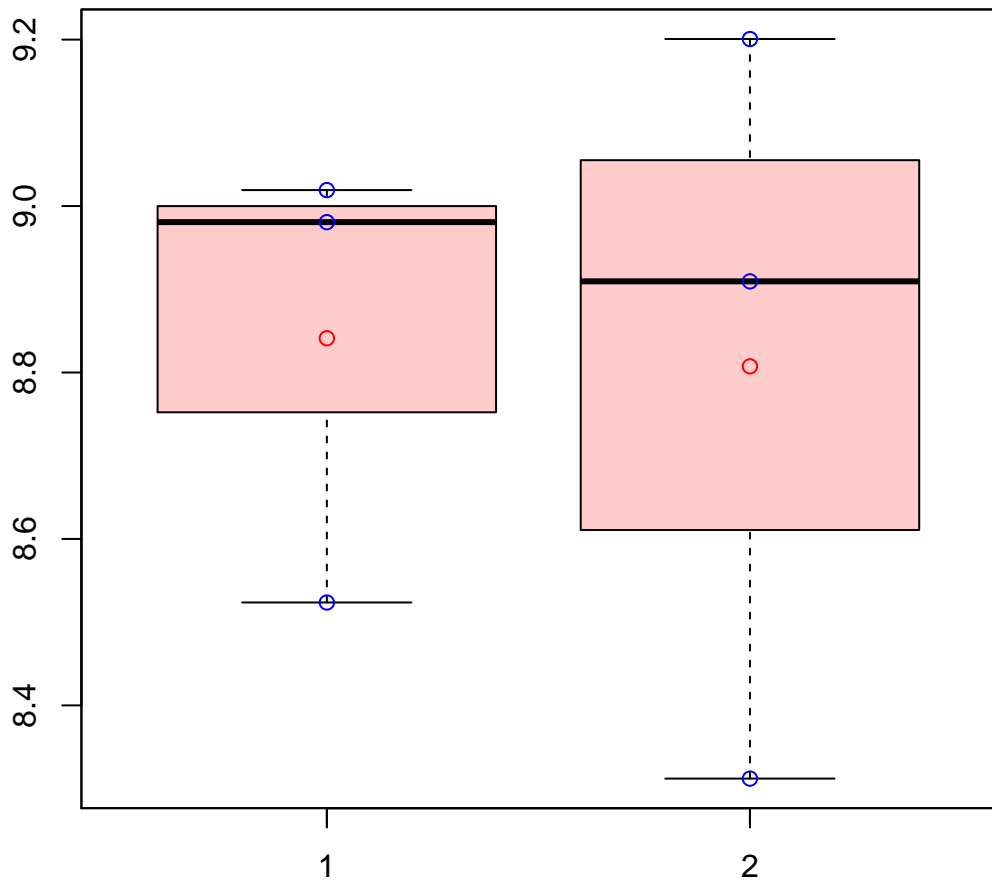

t-Test: p-value = 0.92

# CL909Contig8|CL909Contig8



t-Test: p-value = 0.66

# CL909Contig9|CL909Contig9

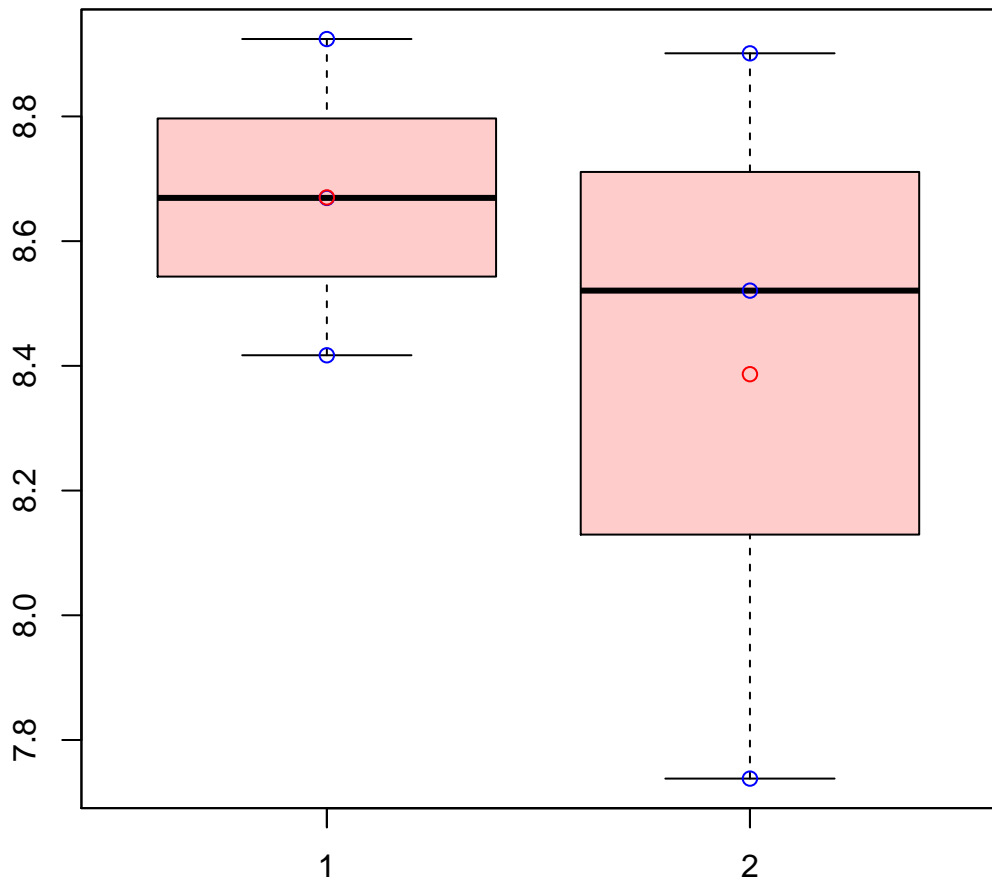

t-Test: p-value = 0.51



# CL90Contig16|CL90Contig16

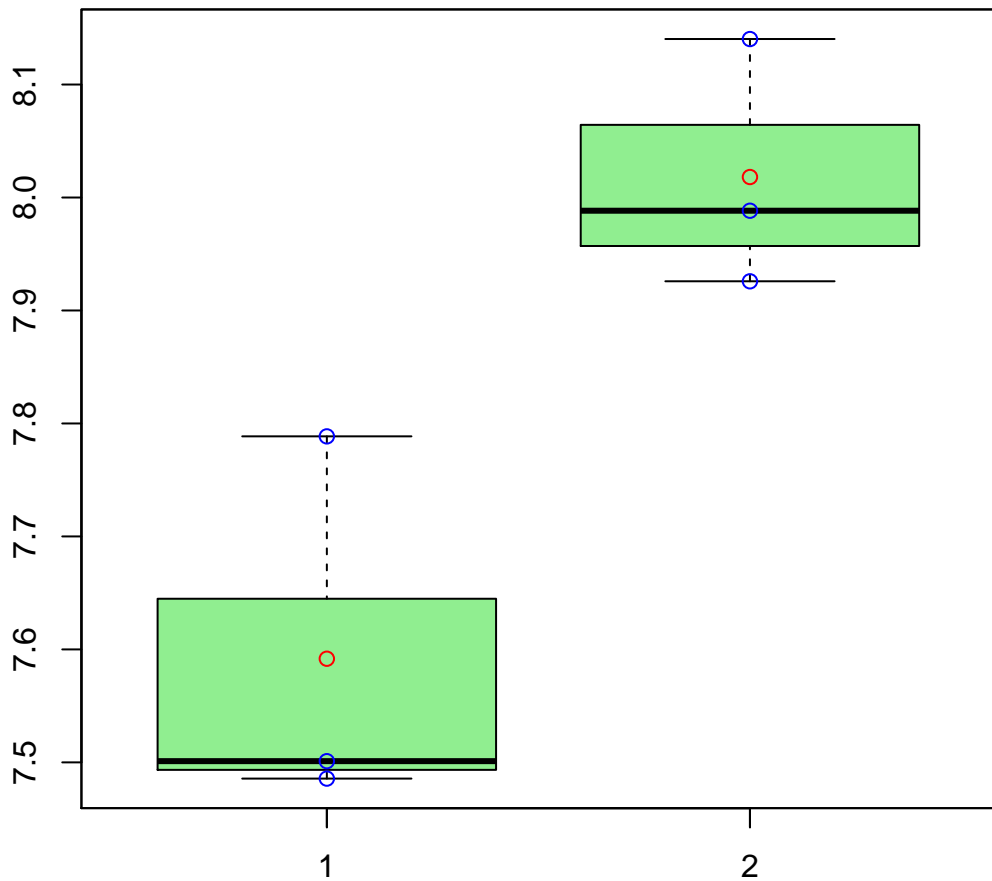

t-Test: p-value = 0.03

# CL90Contig17|CL90Contig17

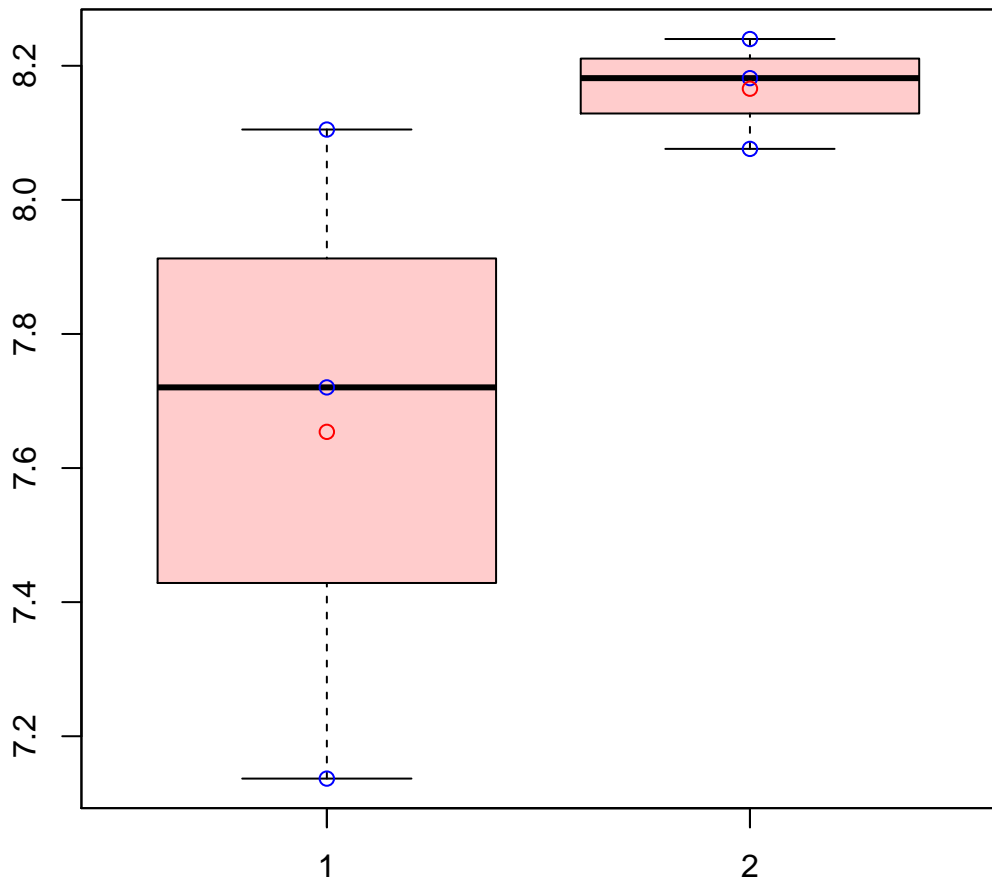

t-Test: p-value = 0.21

# CL90Contig9|CL90Contig9

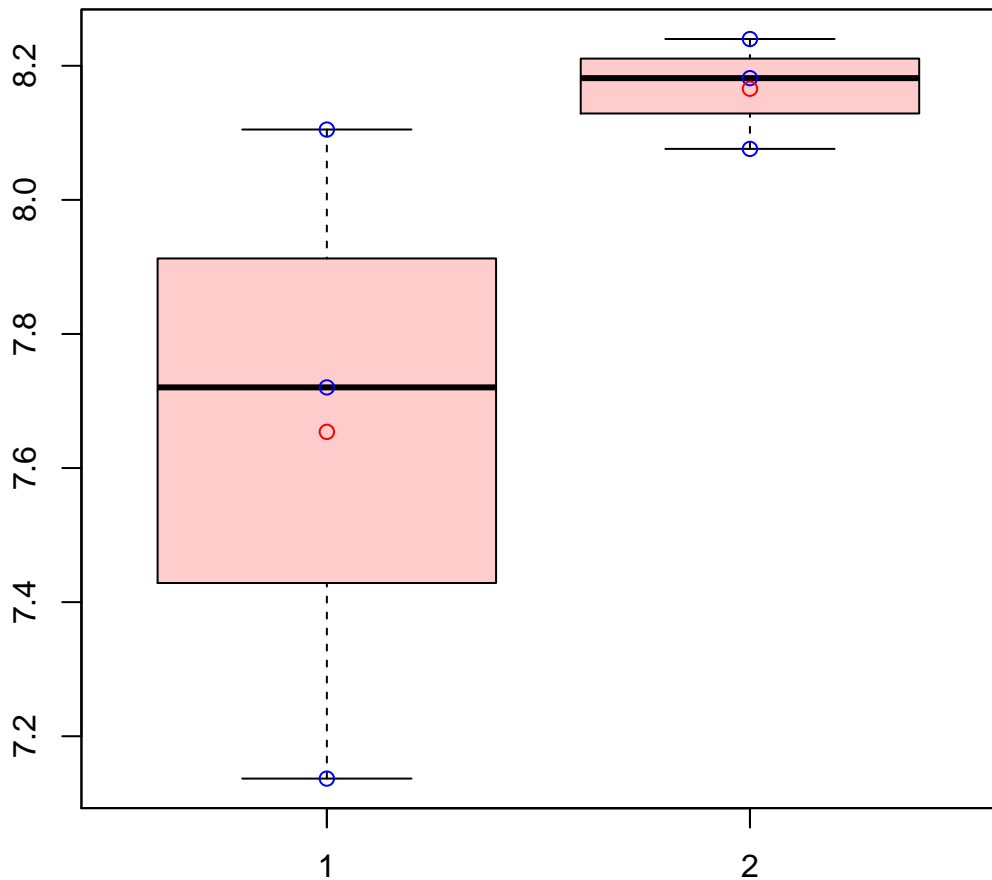

t-Test: p-value = 0.21

# CL9103Contig2|CL9103Contig2

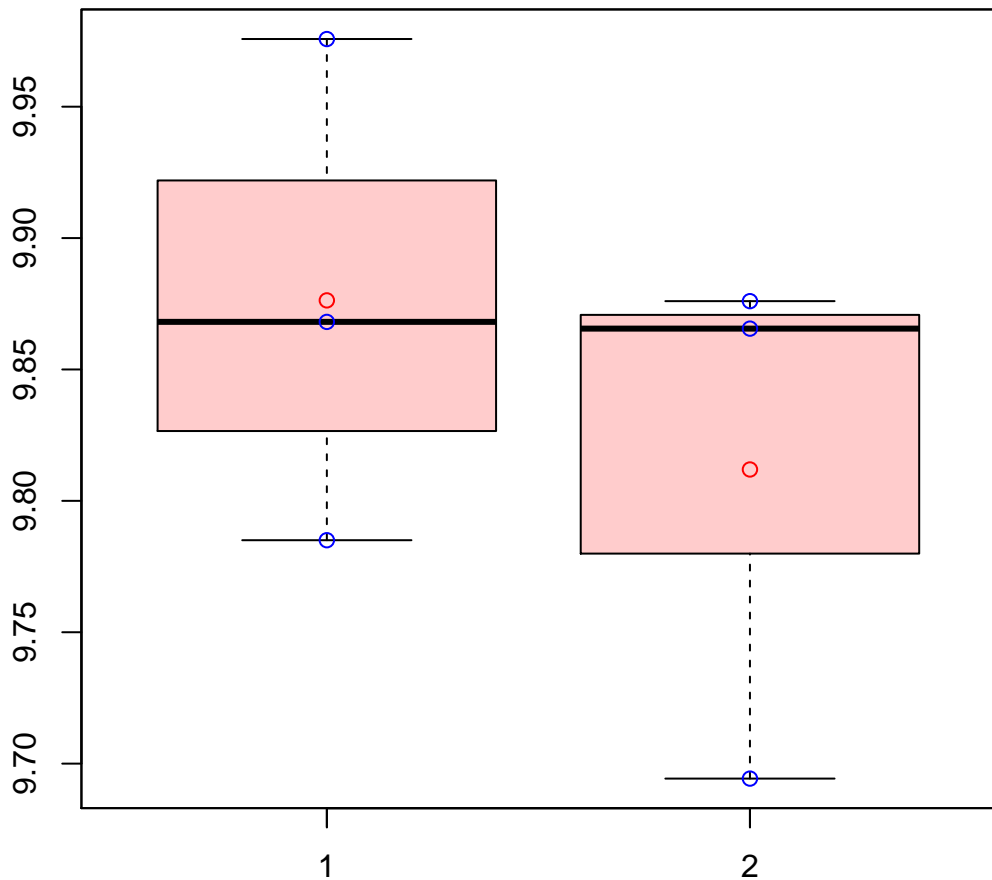

t-Test: p-value = 0.47

# CL9116Contig1|CL9116Contig1

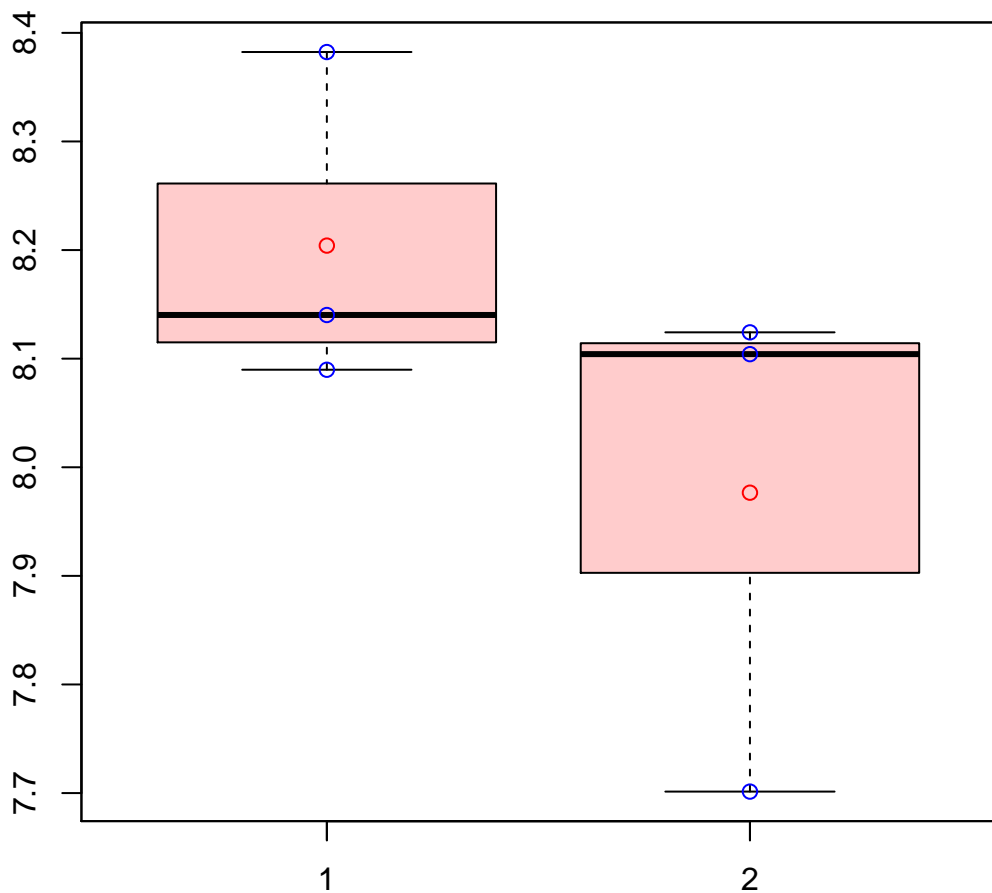

t-Test: p-value = 0.25

# CL911Contig4|CL911Contig4

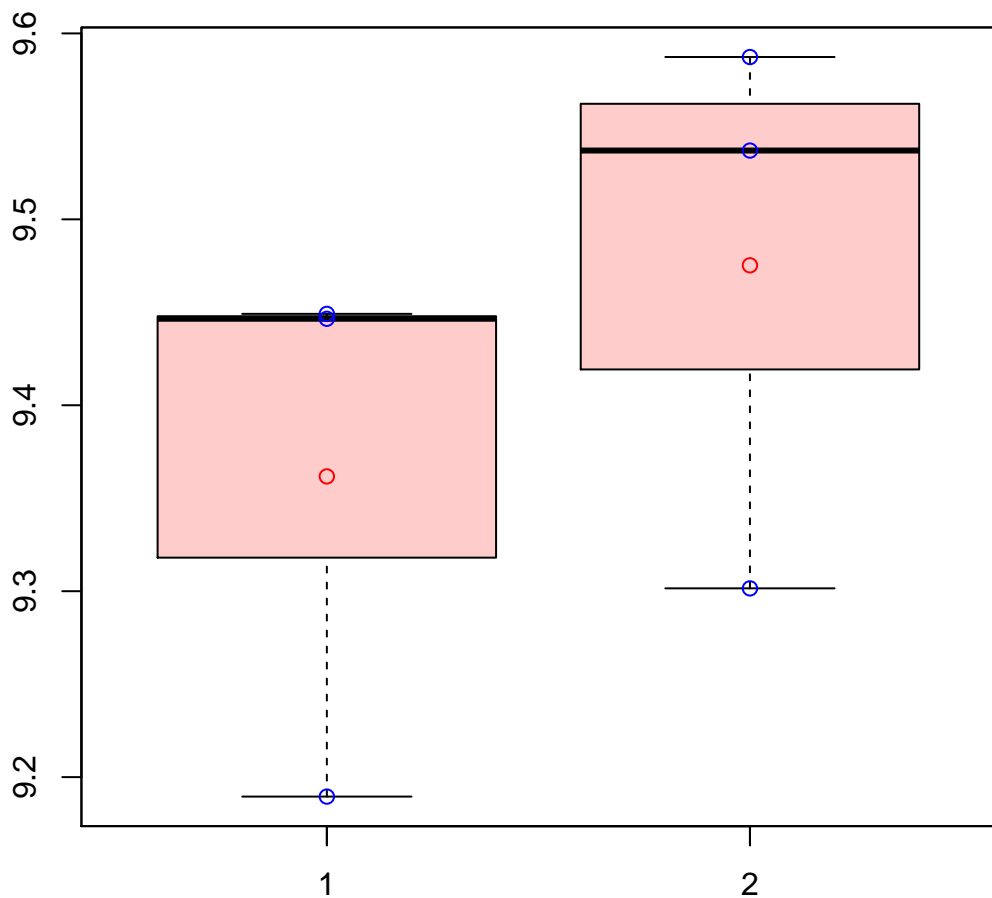

t-Test: p-value = 0.41

# CL9120Contig4|CL9120Contig4

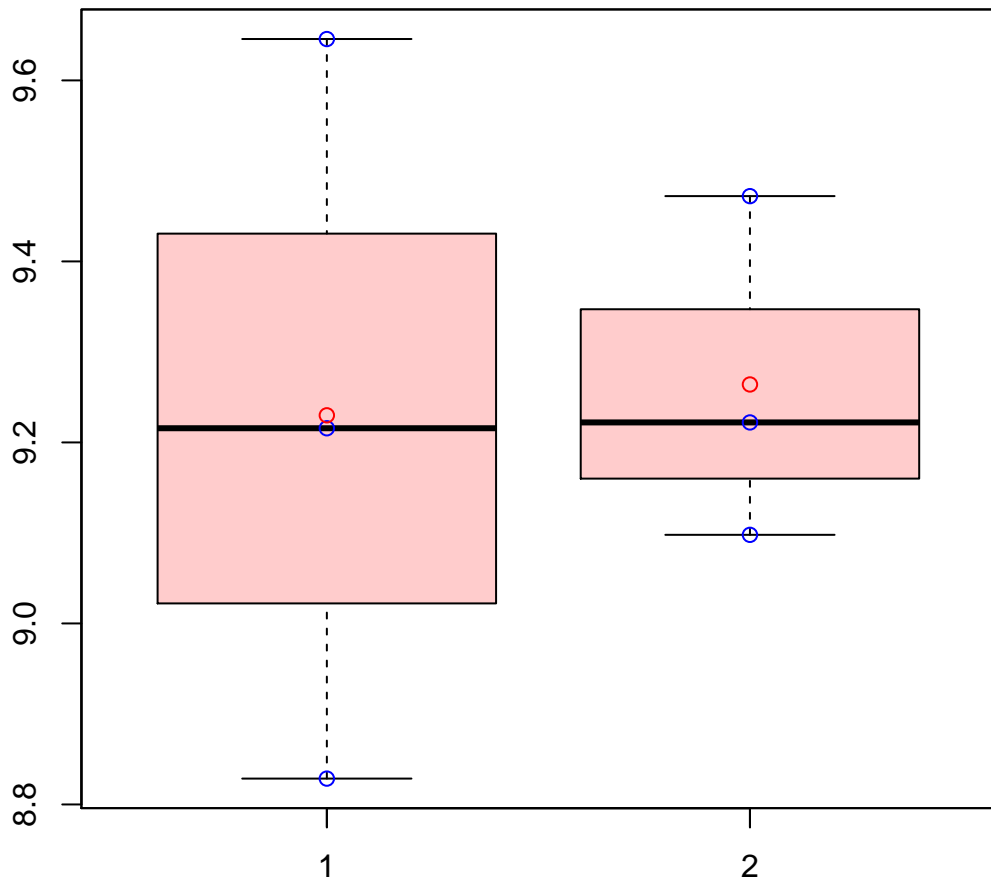

t-Test: p-value = 0.9

# CL9120Contig5|CL9120Contig5

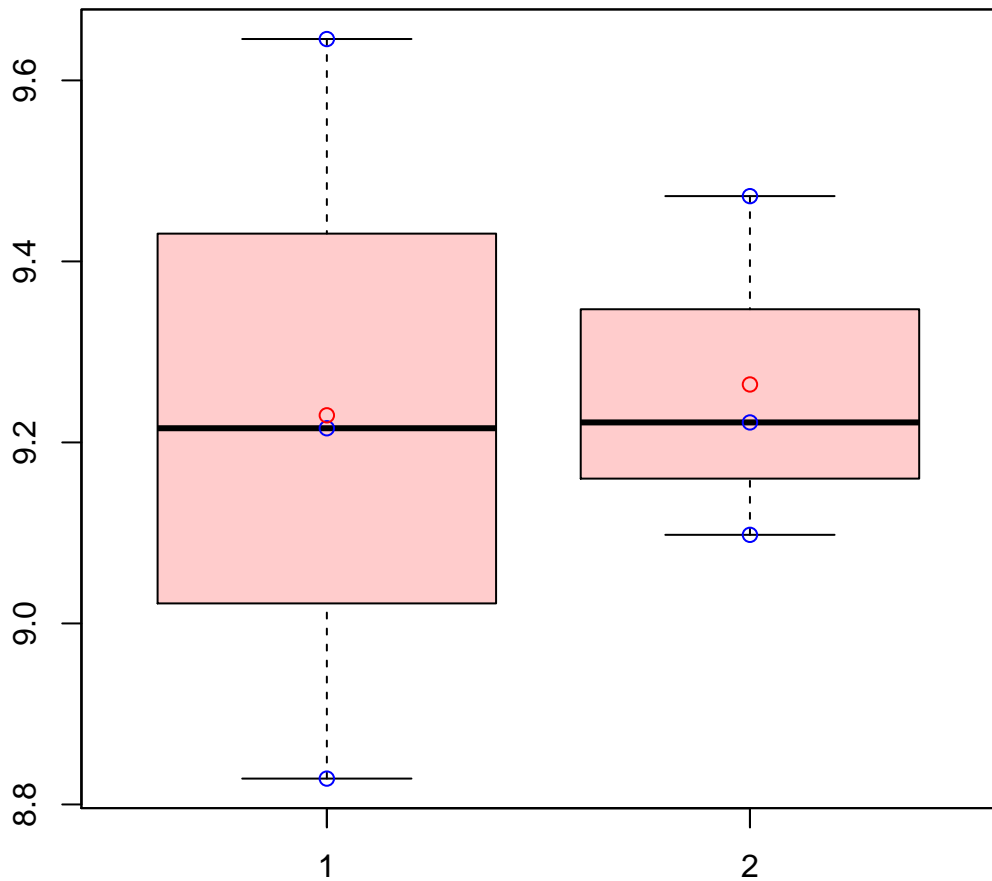

t-Test: p-value = 0.9



# CL9129Contig2|CL9129Contig2

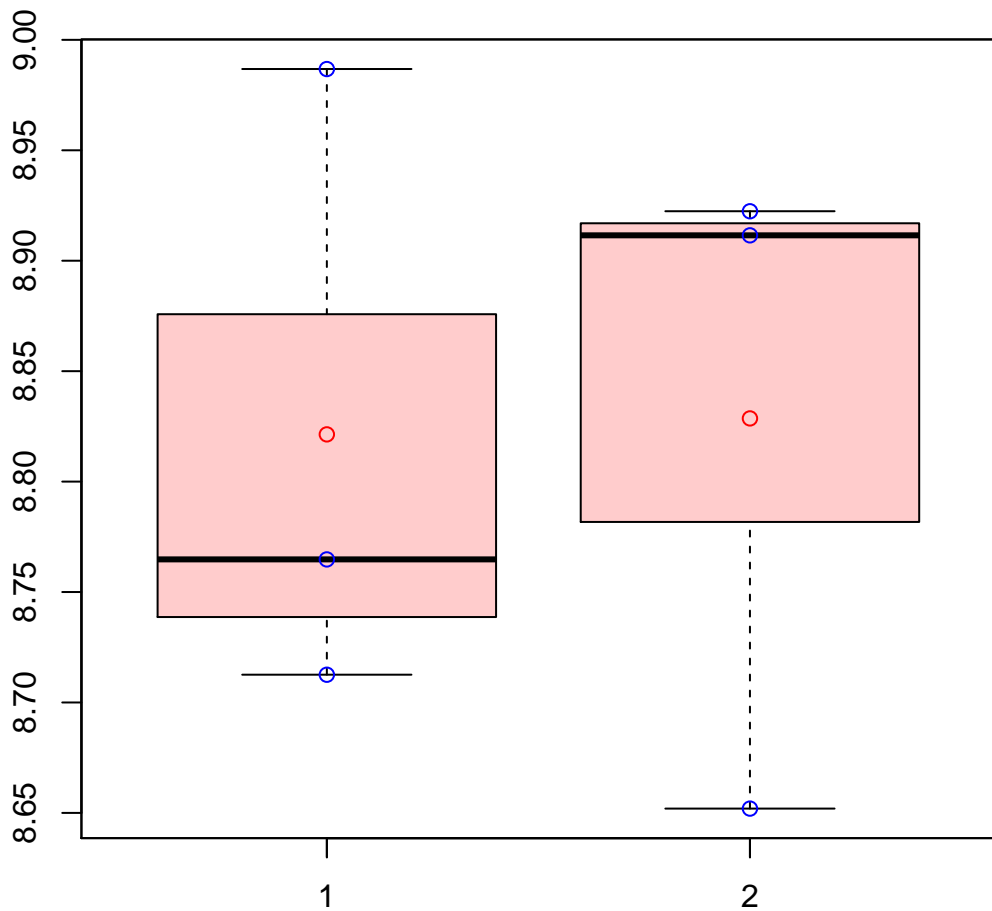

t-Test: p-value = 0.96

# CL9132Contig1|CL9132Contig1

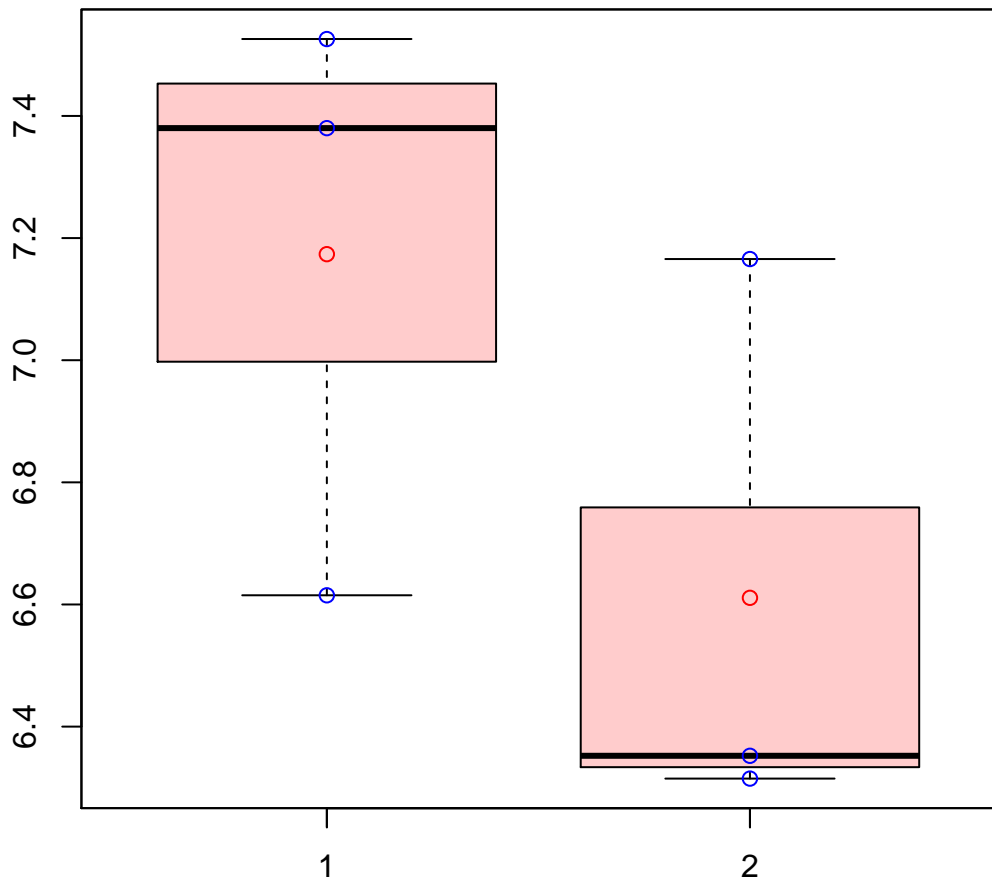

t-Test: p-value = 0.23

# CL913Contig1|CL913Contig1

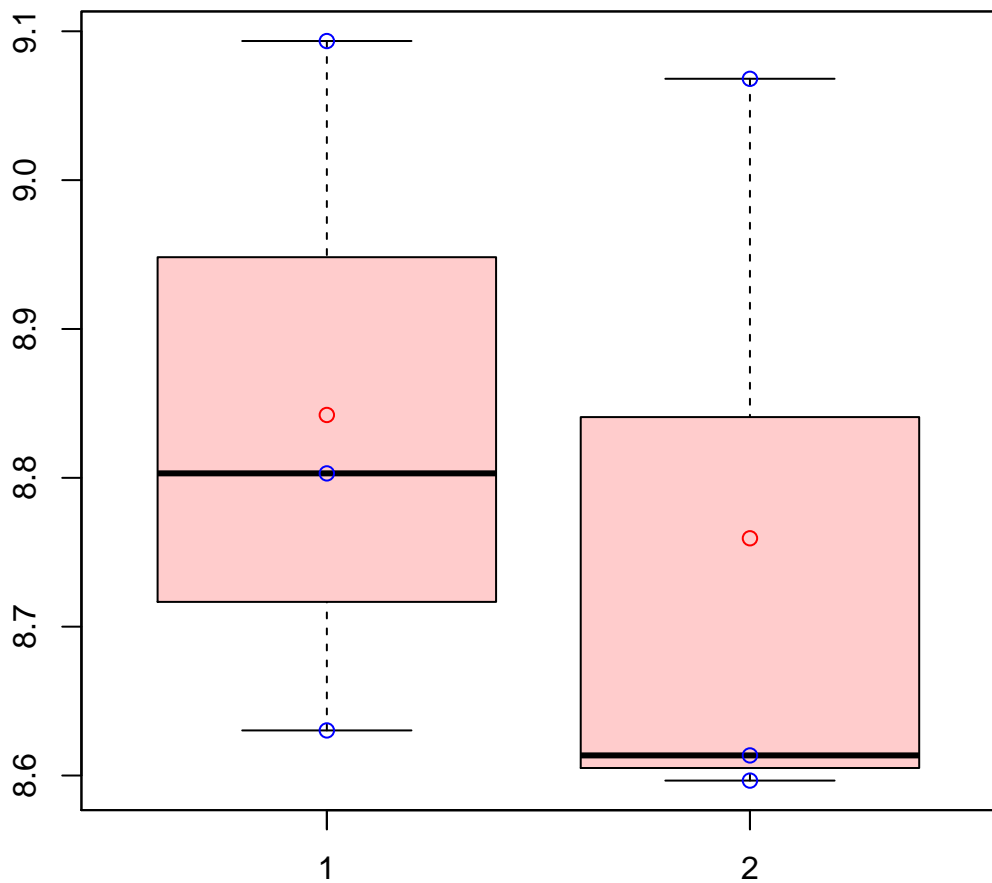

t-Test: p-value = 0.71

# CL9144Contig1|CL9144Contig1

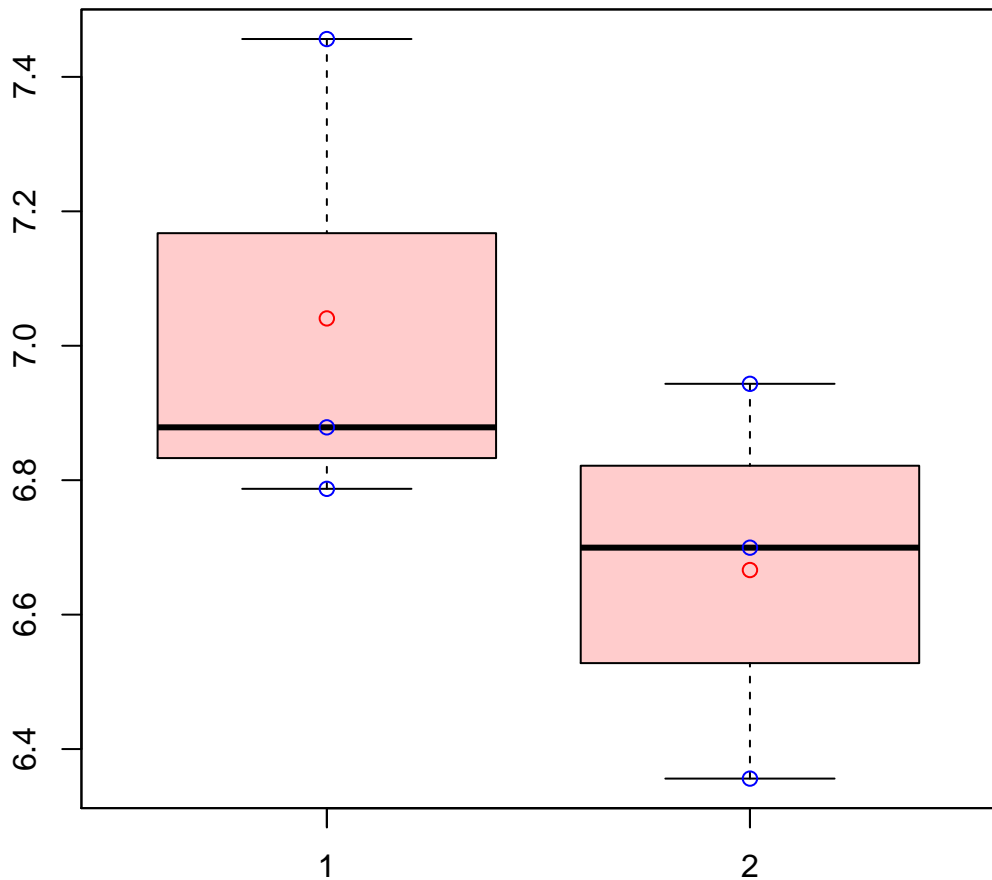

t-Test: p-value = 0.24

# CL914Contig2|CL914Contig2

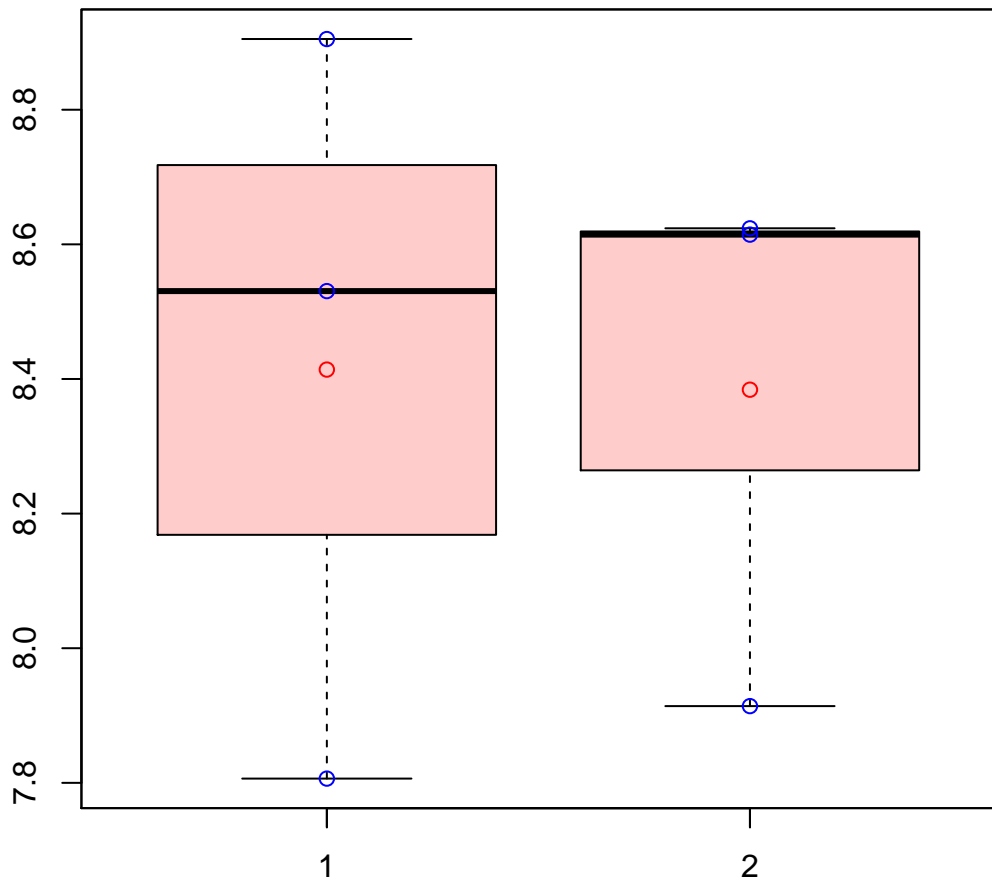

t-Test: p-value = 0.94

# CL9159Contig1|CL9159Contig1

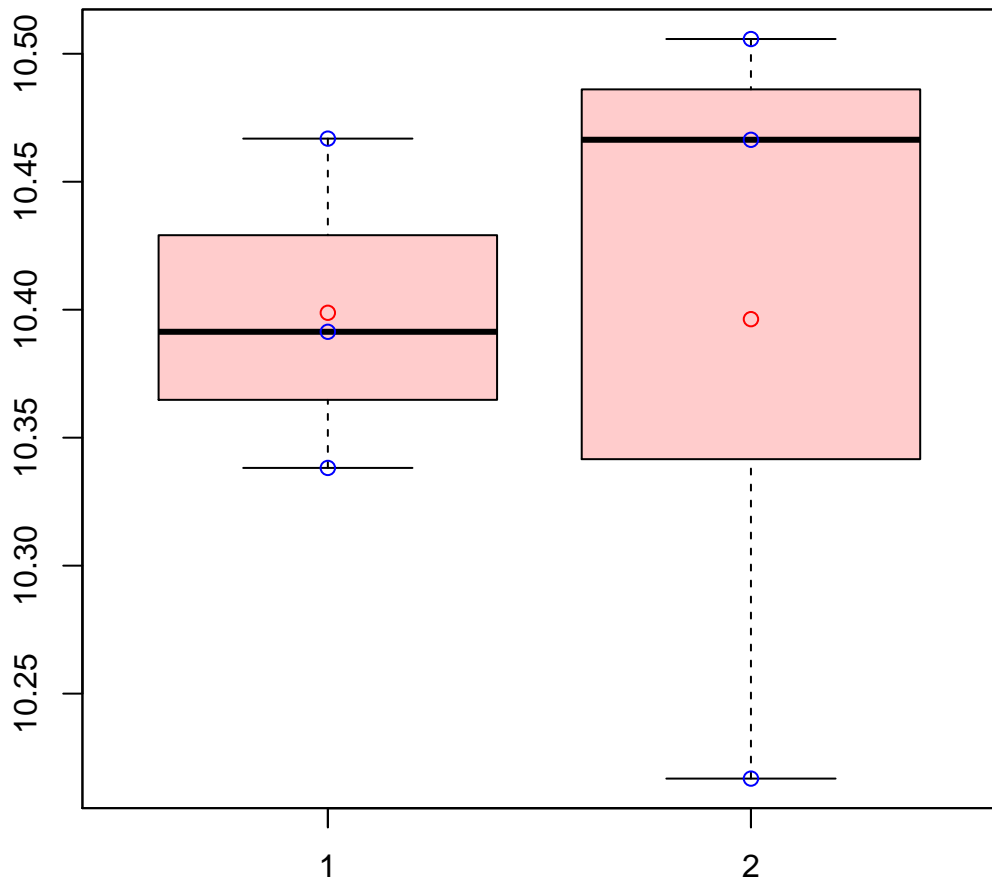

t-Test: p-value = 0.98

# CL9159Contig2|CL9159Contig2

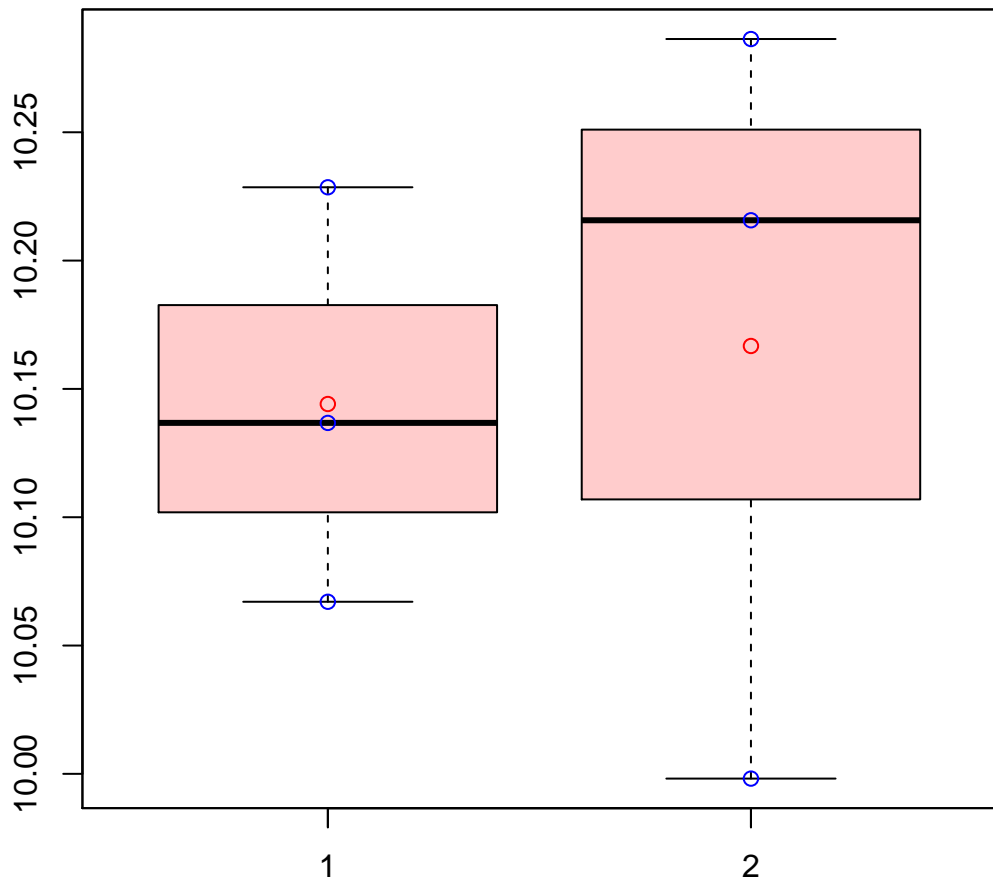

t-Test: p-value = 0.83

# CL9159Contig3|CL9159Contig3



t-Test: p-value = 0.83



# CL915Contig4|CL915Contig4

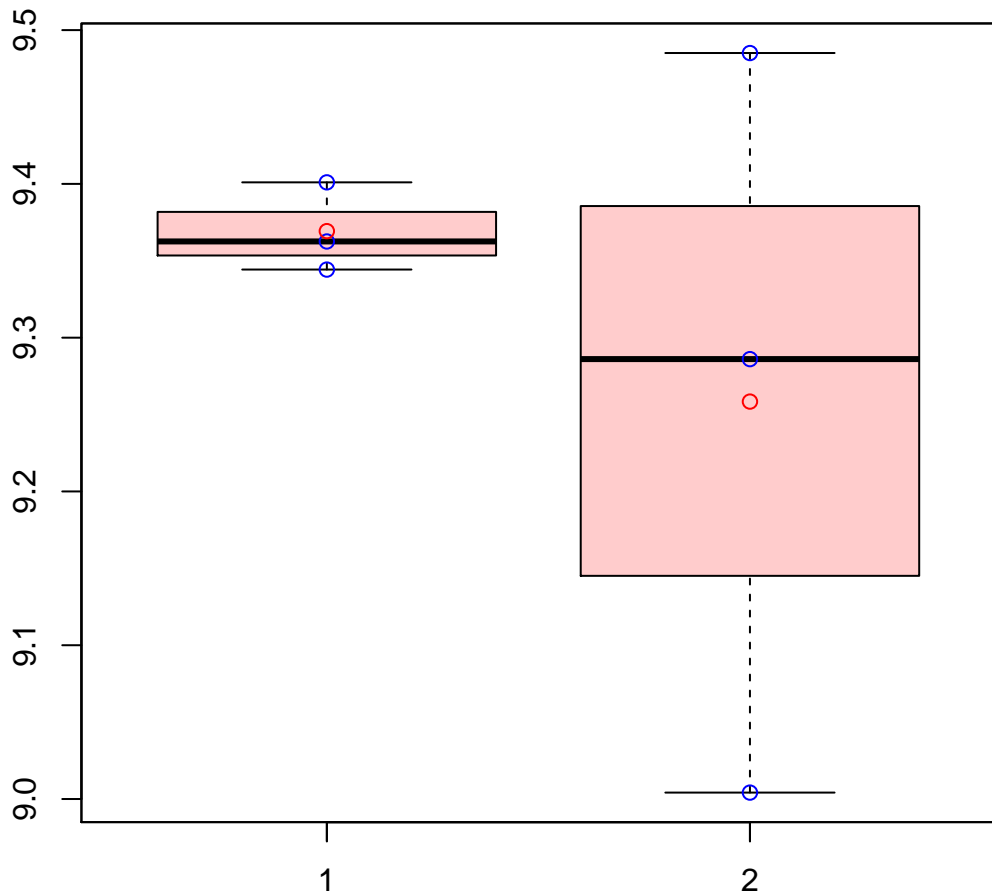

t-Test: p-value = 0.51

# CL9163Contig1|CL9163Contig1

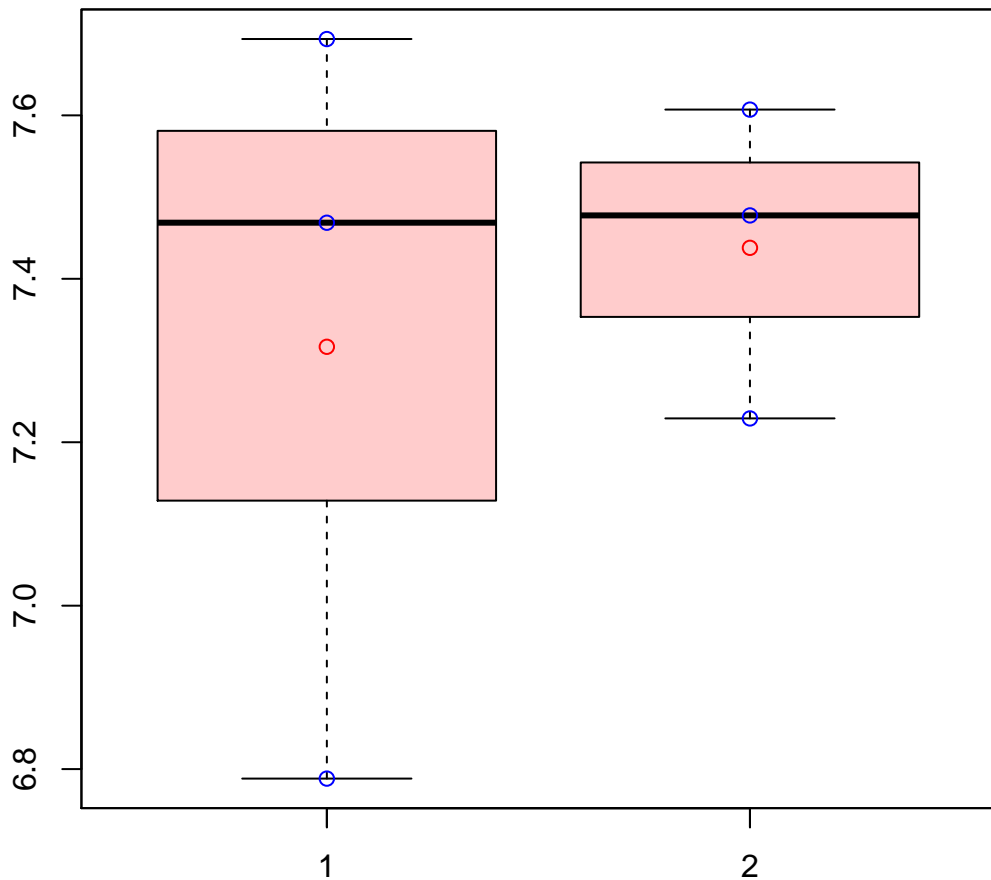

t-Test: p-value = 0.71

# CL9165Contig1|CL9165Contig1

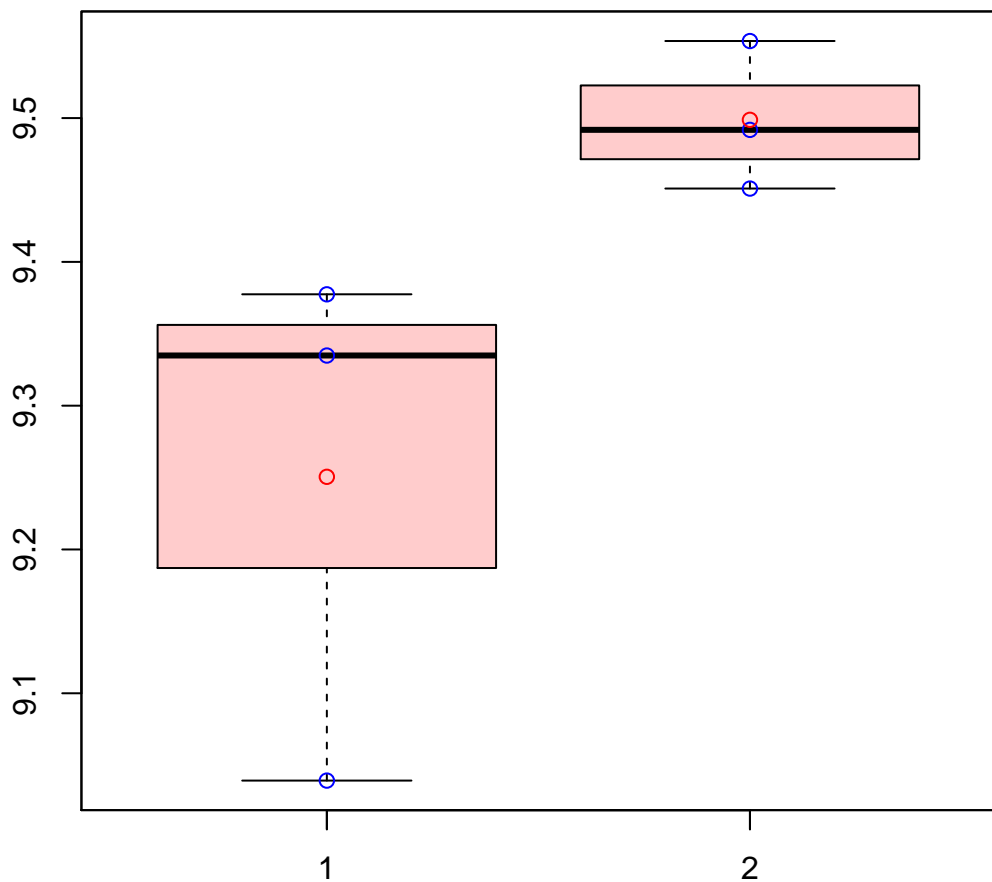

t-Test: p-value = 0.14

# CL9199Contig1|CL9199Contig1

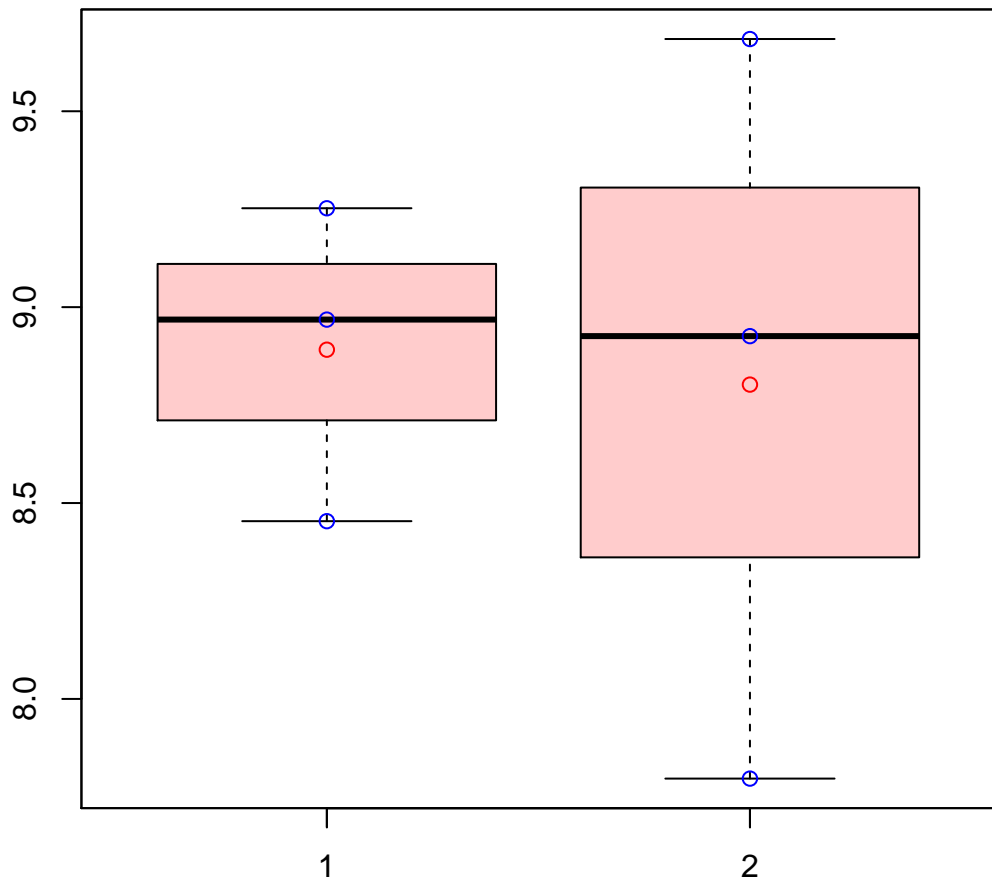

t-Test: p-value = 0.89

# CL91Contig11|CL91Contig11

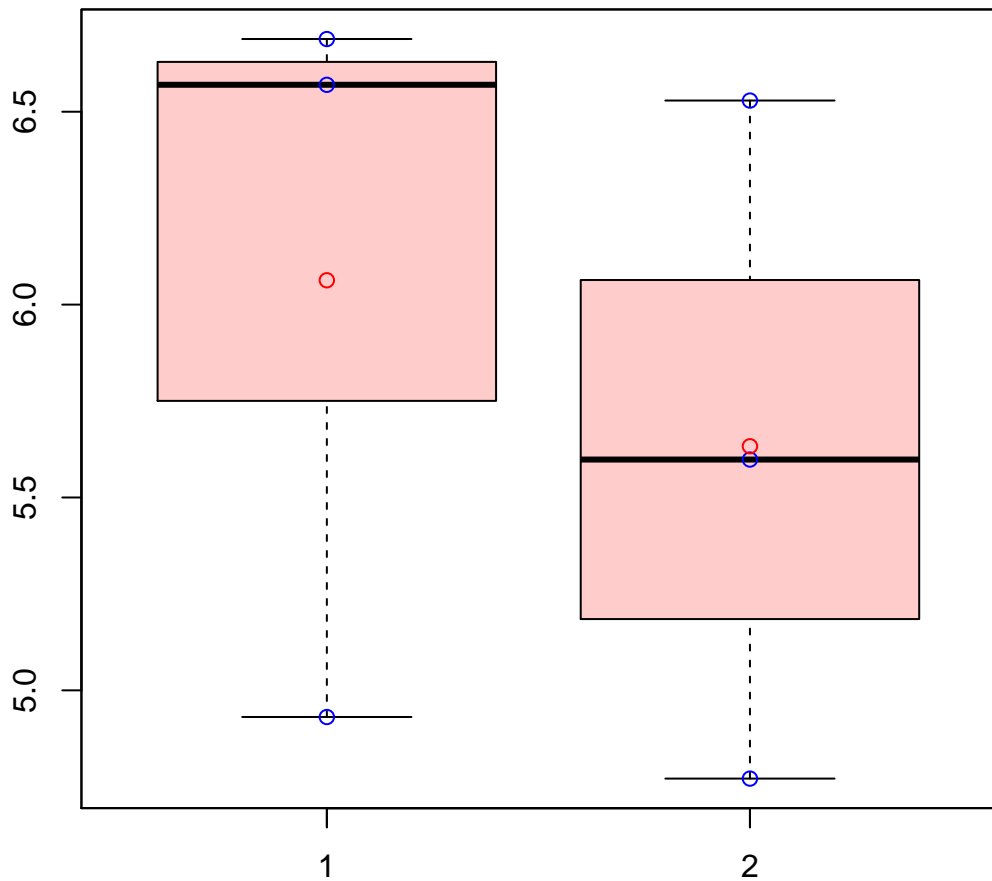

t-Test: p-value = 0.6

# CL9207Contig1|CL9207Contig1

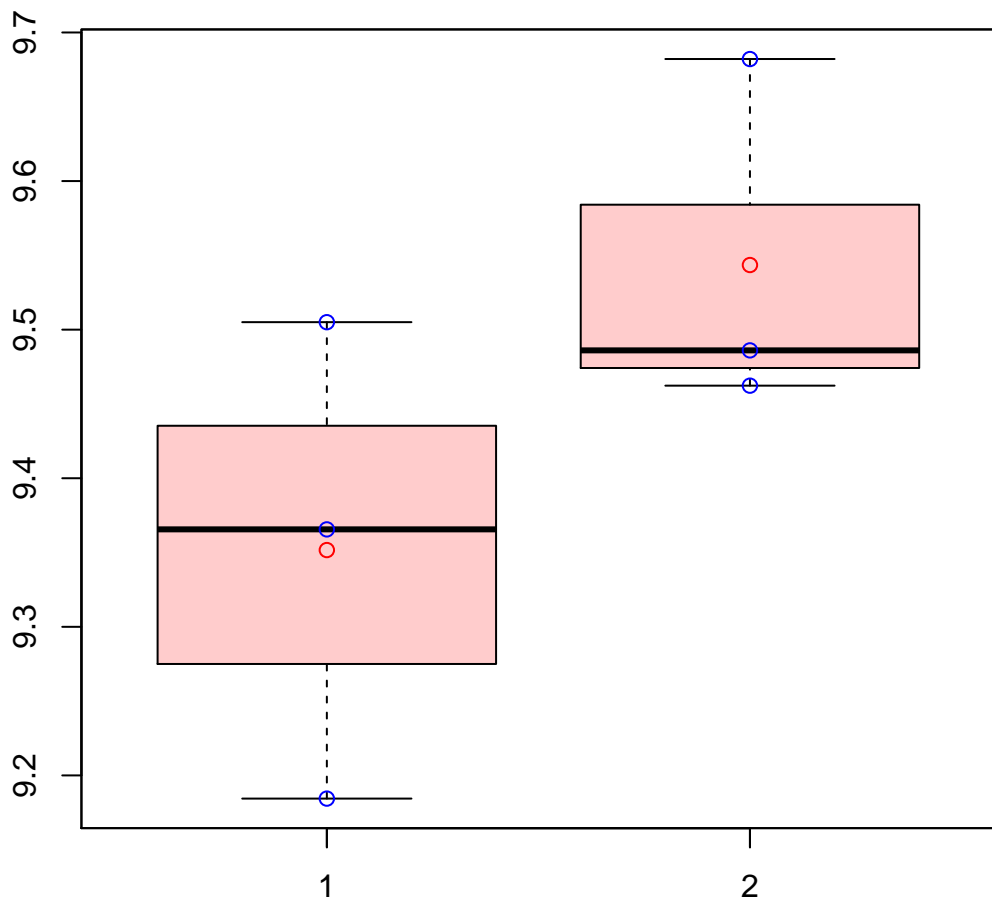

t-Test: p-value = 0.18

# CL9209Contig1|CL9209Contig1

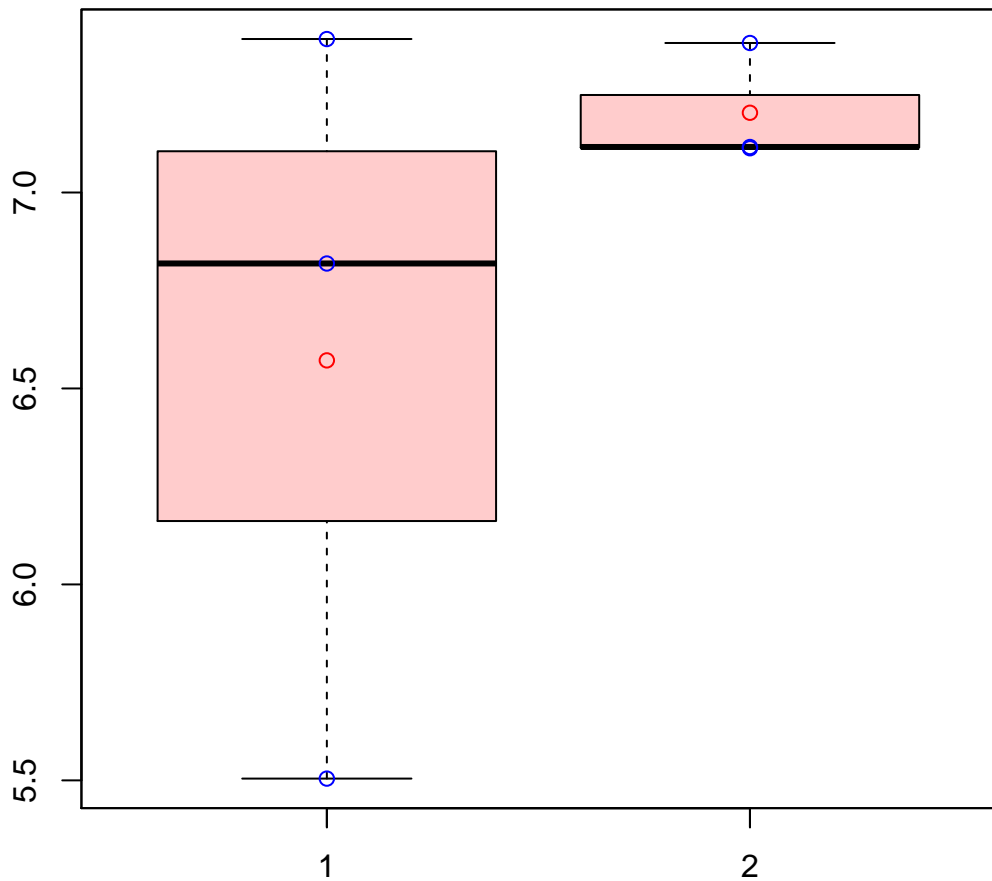

t-Test: p-value = 0.38

# CL9210Contig3|CL9210Contig3

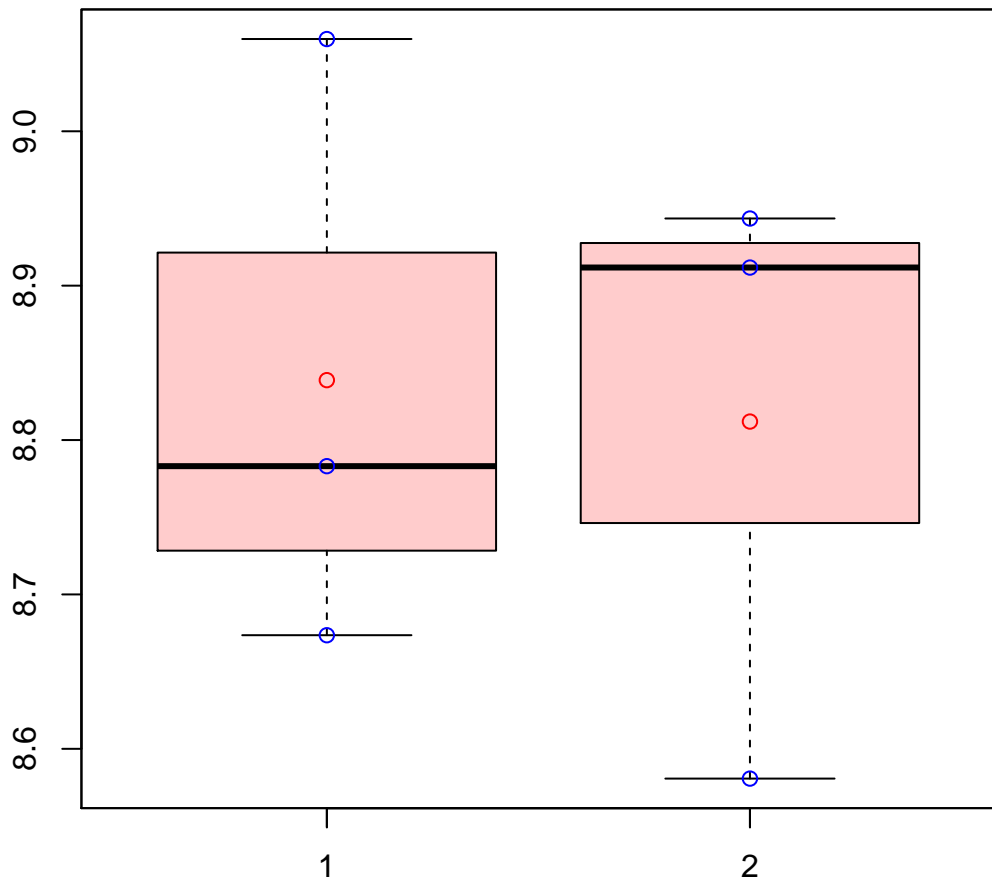

t-Test: p-value = 0.88



# CL9217Contig2|CL9217Contig2

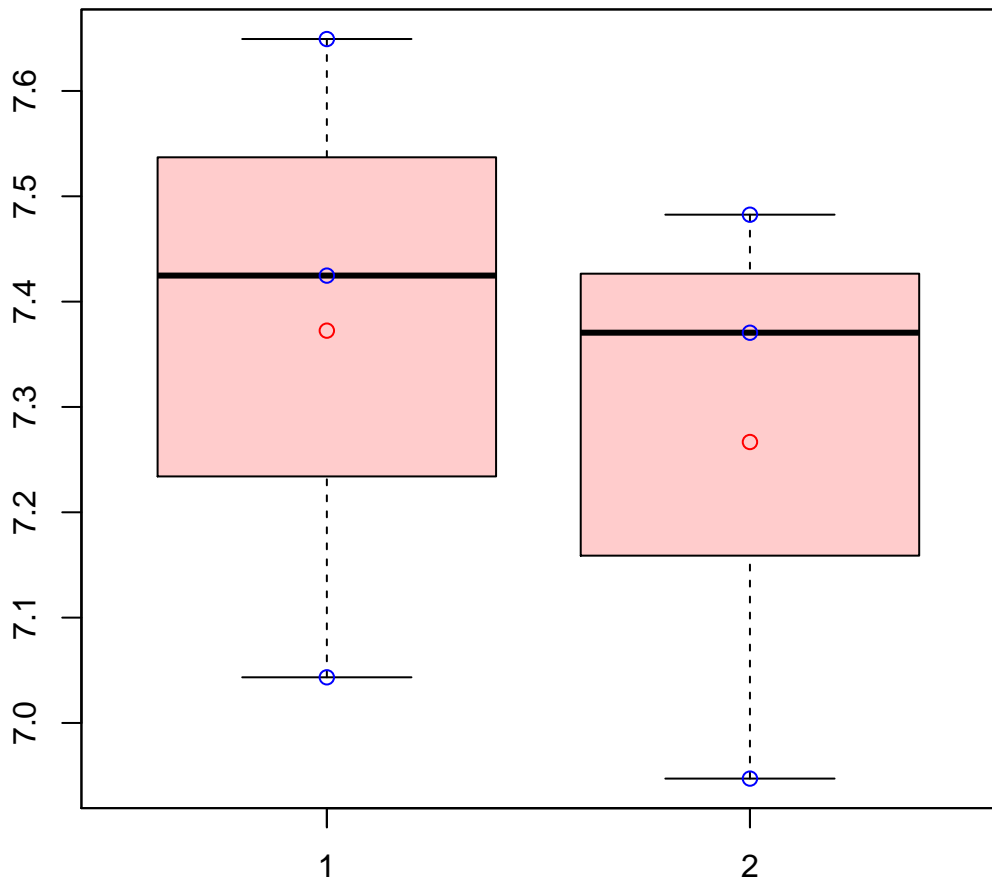

t-Test: p-value = 0.68

# CL9218Contig1|CL9218Contig1

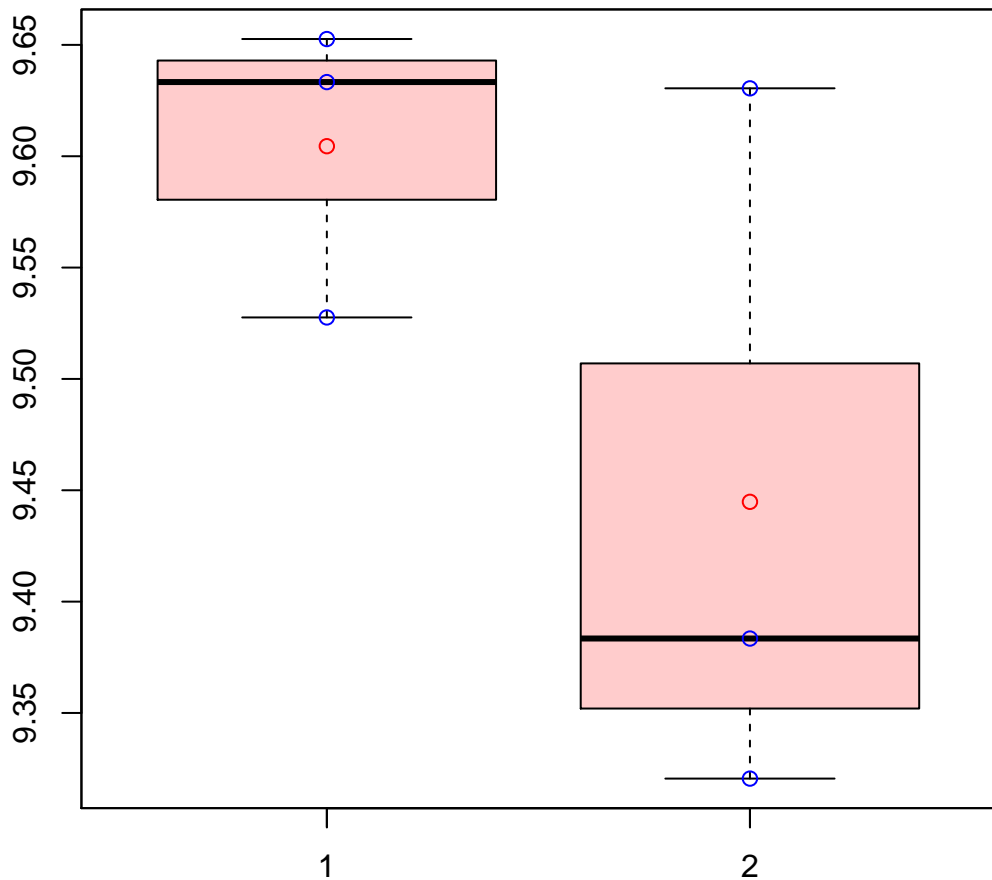

t-Test: p-value = 0.23

# CL9224Contig1|CL9224Contig1



t-Test: p-value = 0.44

# CL9224Contig3|CL9224Contig3

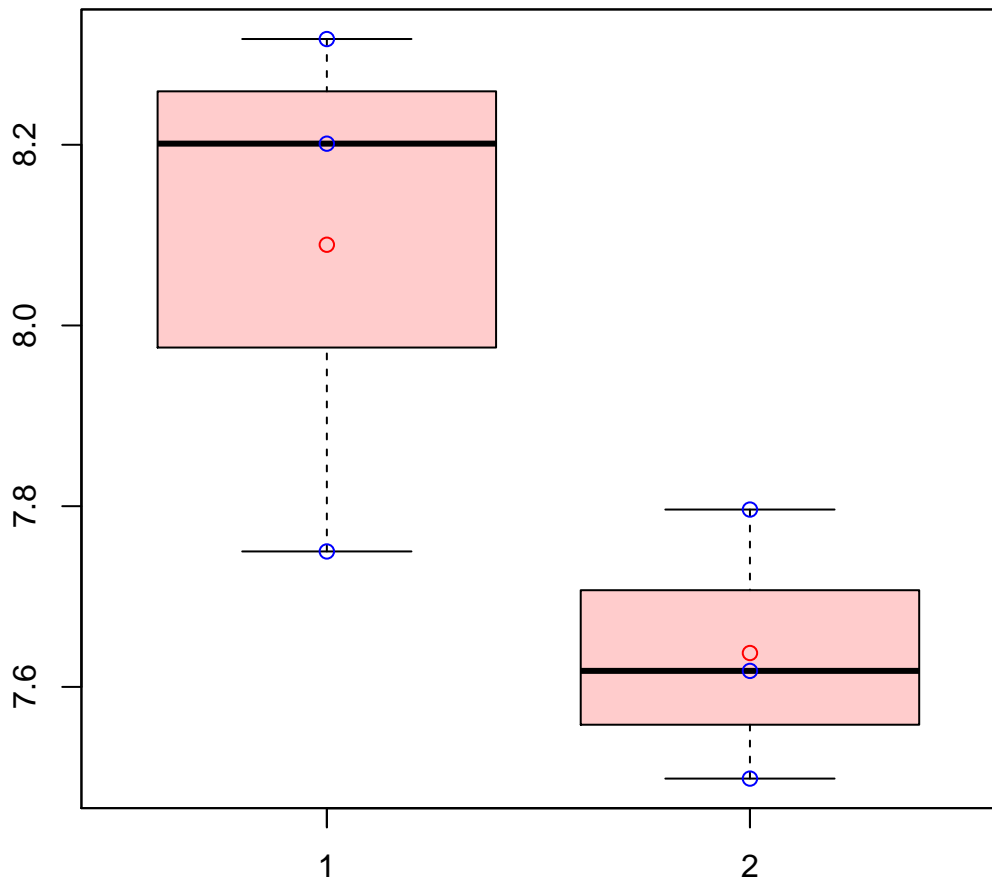

t-Test: p-value = 0.1

# CL922Contig1|CL922Contig1

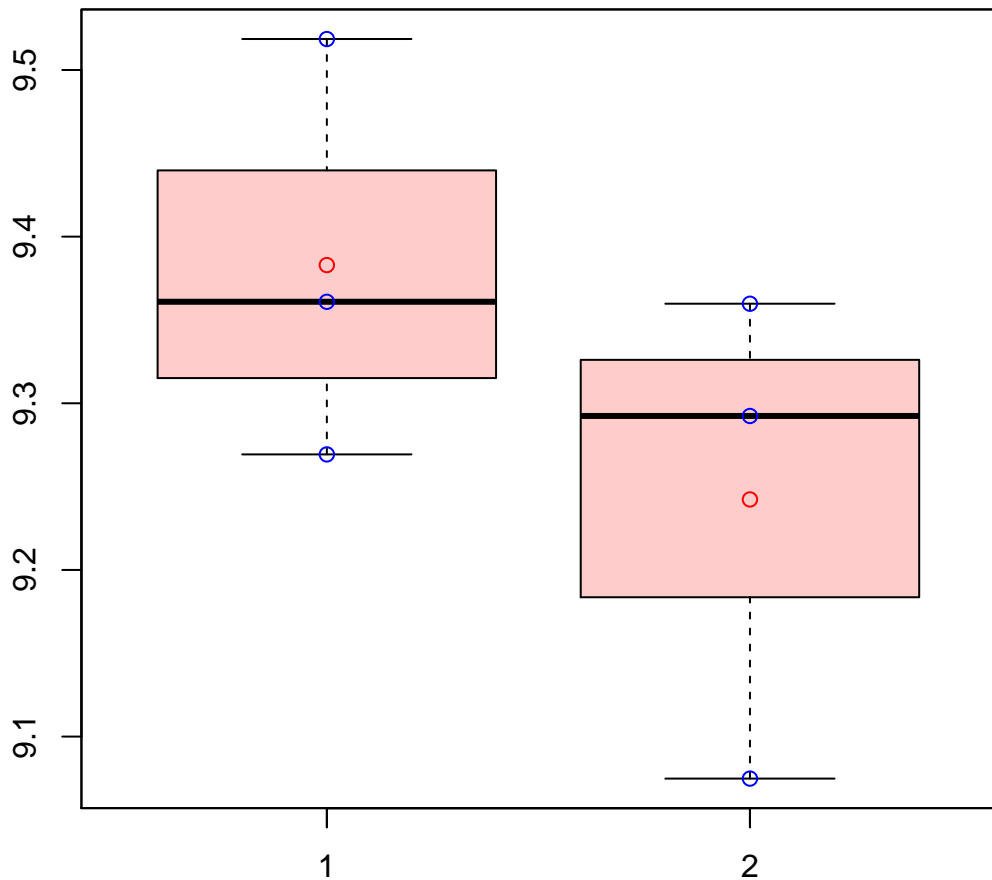

t-Test: p-value = 0.28

# CL9239Contig1|CL9239Contig1

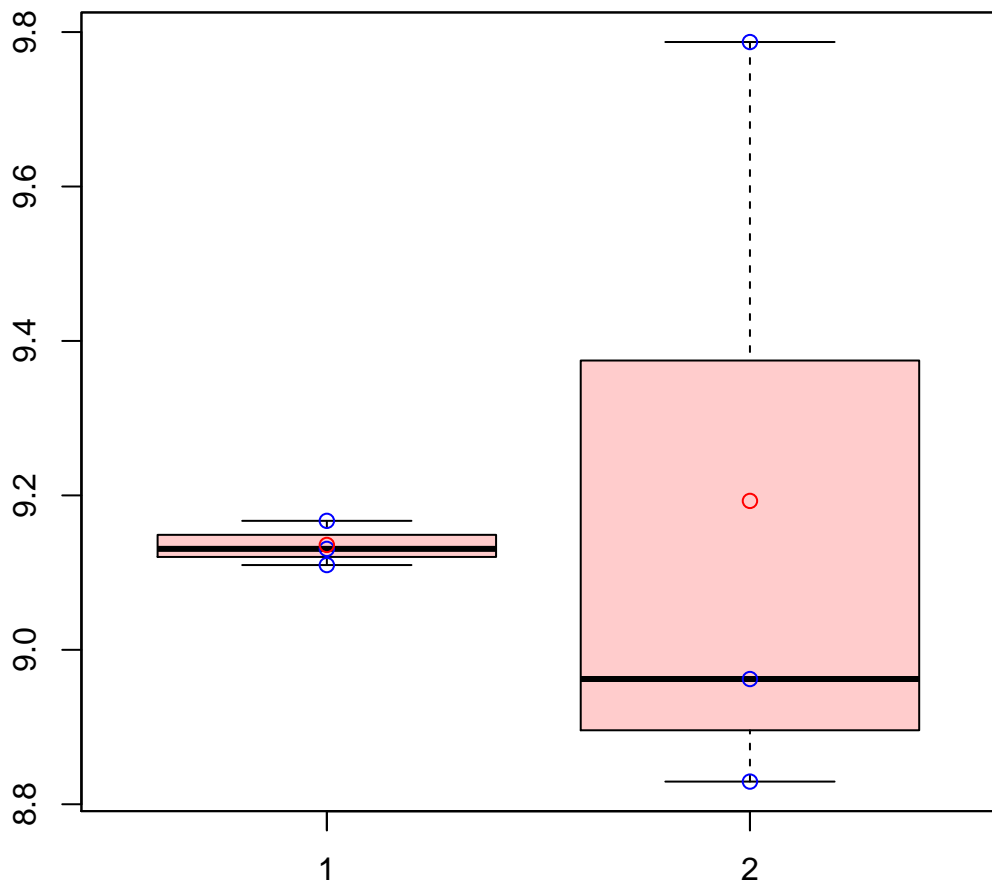

t-Test: p-value = 0.87

# CL9242Contig1|CL9242Contig1

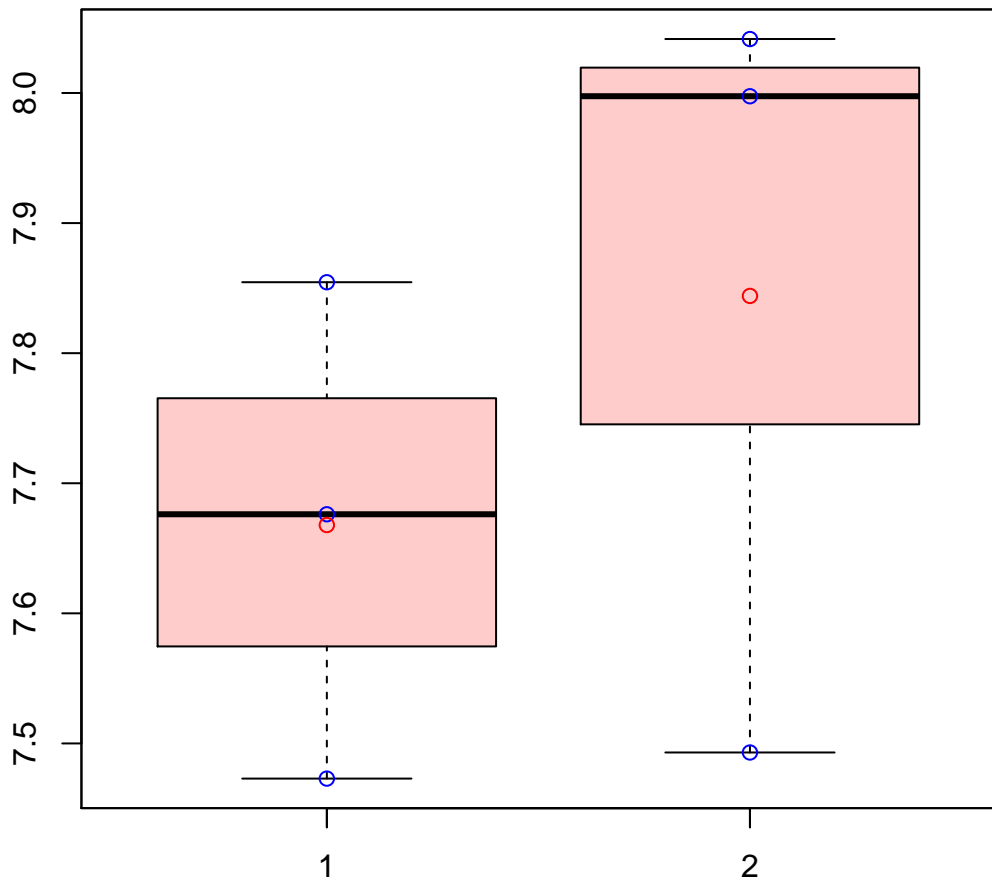

t-Test: p-value = 0.45

# CL9242Contig3|CL9242Contig3

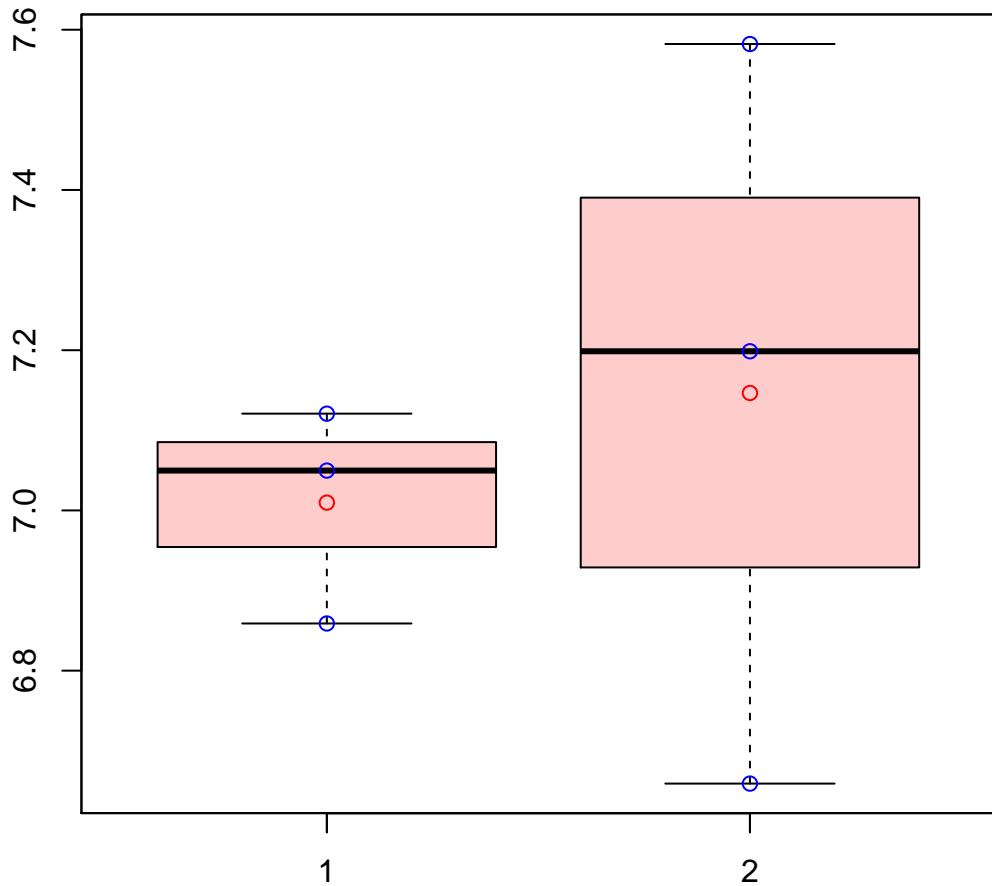

t-Test: p-value = 0.67



# CL9243Contig3|CL9243Contig3



t-Test: p-value = 0.86

# CL924Contig7|CL924Contig7

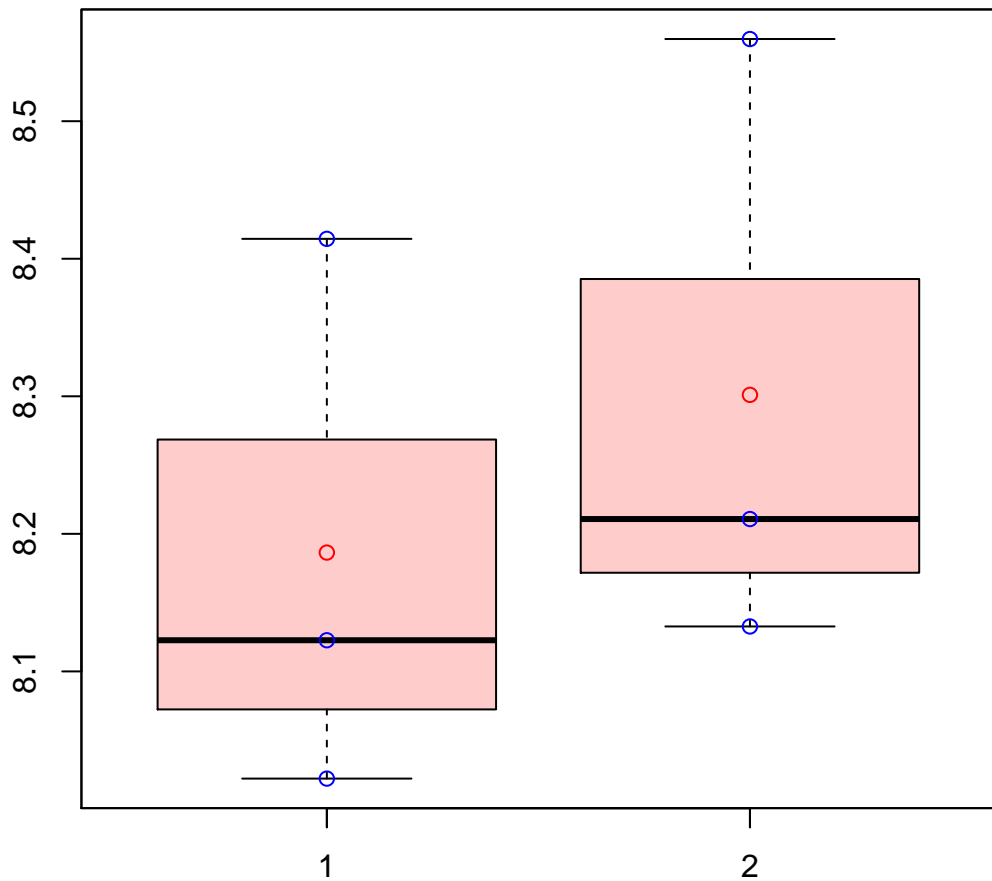

t-Test: p-value = 0.55

# CL9253Contig2|CL9253Contig2



t-Test: p-value = 0.45

# CL9259Contig2|CL9259Contig2

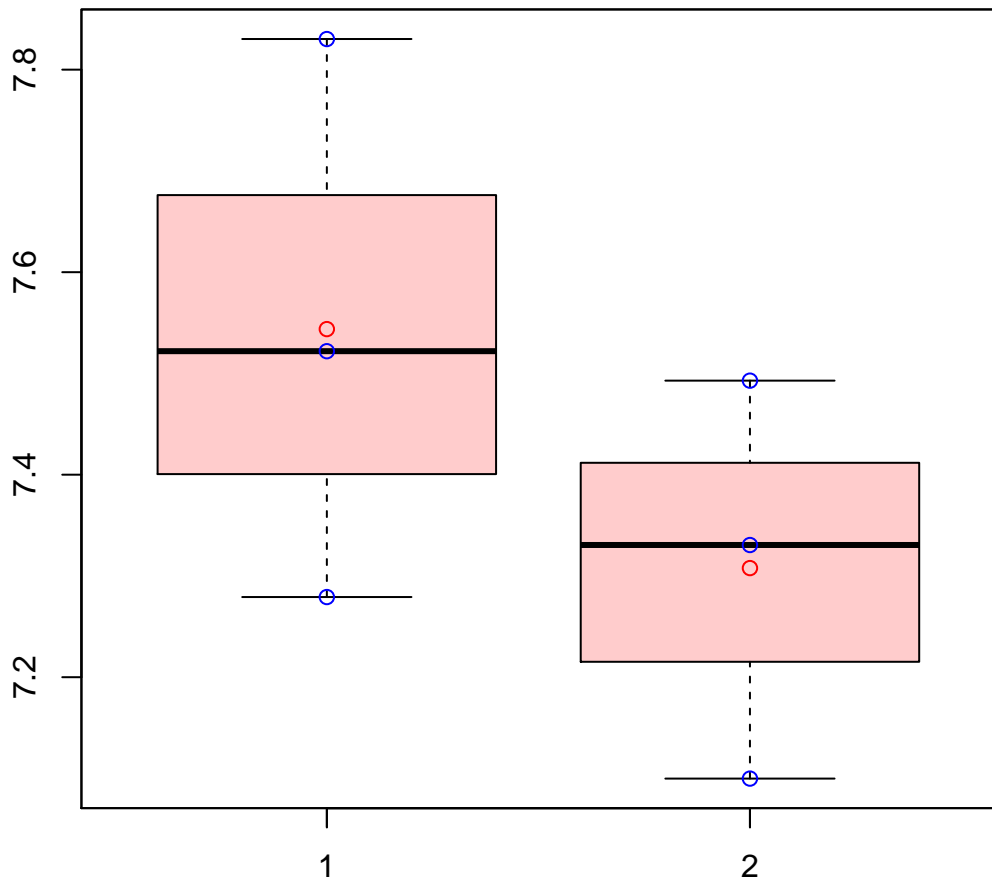

t-Test: p-value = 0.3

# CL9262Contig2|CL9262Contig2



t-Test: p-value = 0.6

# CL926Contig6|CL926Contig6

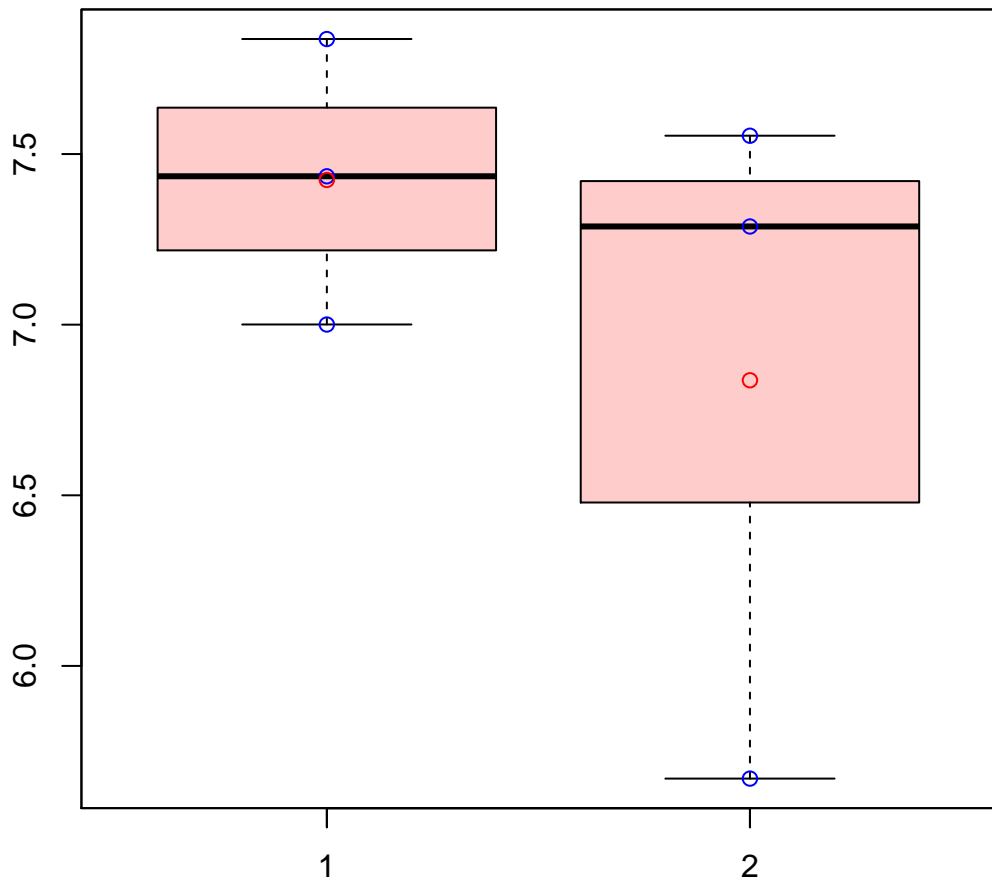

t-Test: p-value = 0.43

# CL9274Contig1|CL9274Contig1

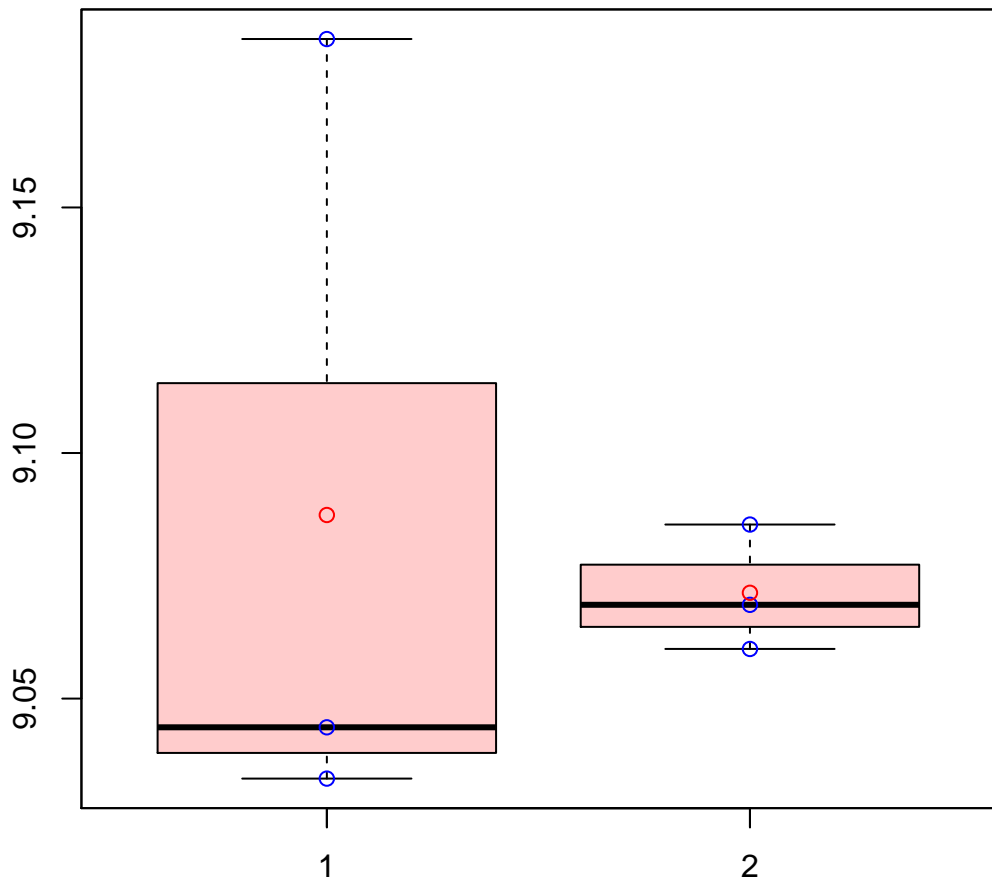

t-Test: p-value = 0.78

# CL9274Contig2|CL9274Contig2

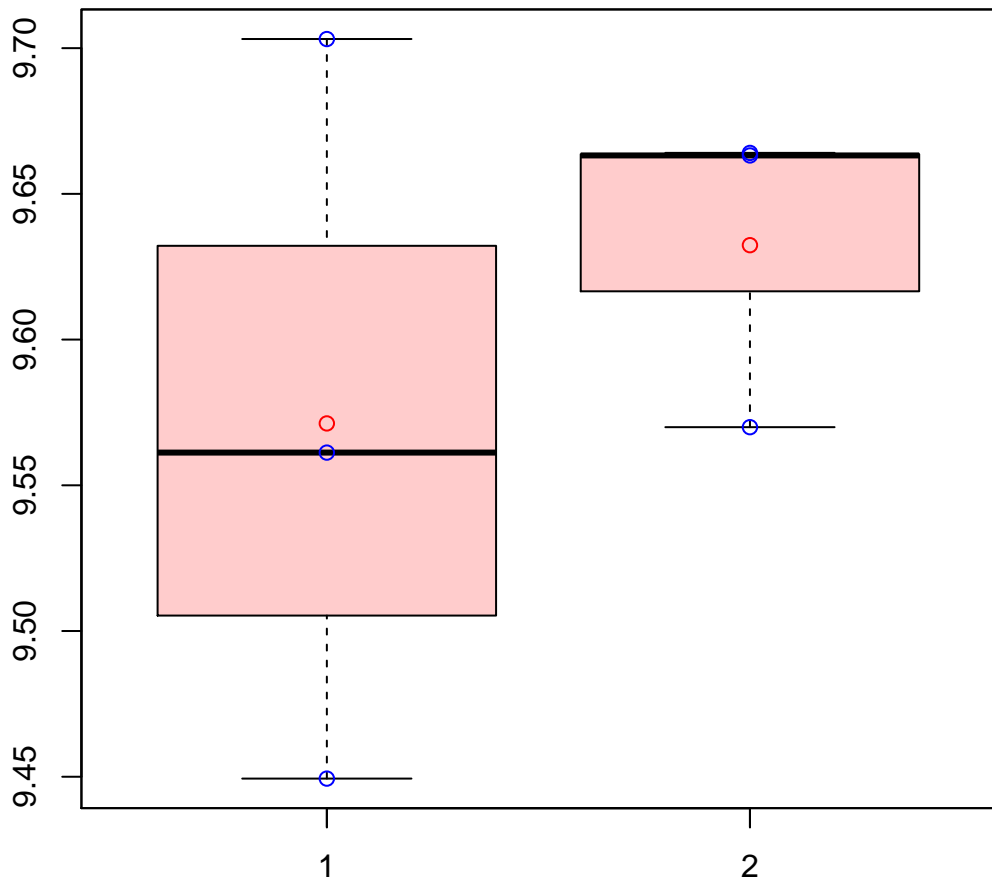

t-Test: p-value = 0.5



# CL9278Contig2|CL9278Contig2

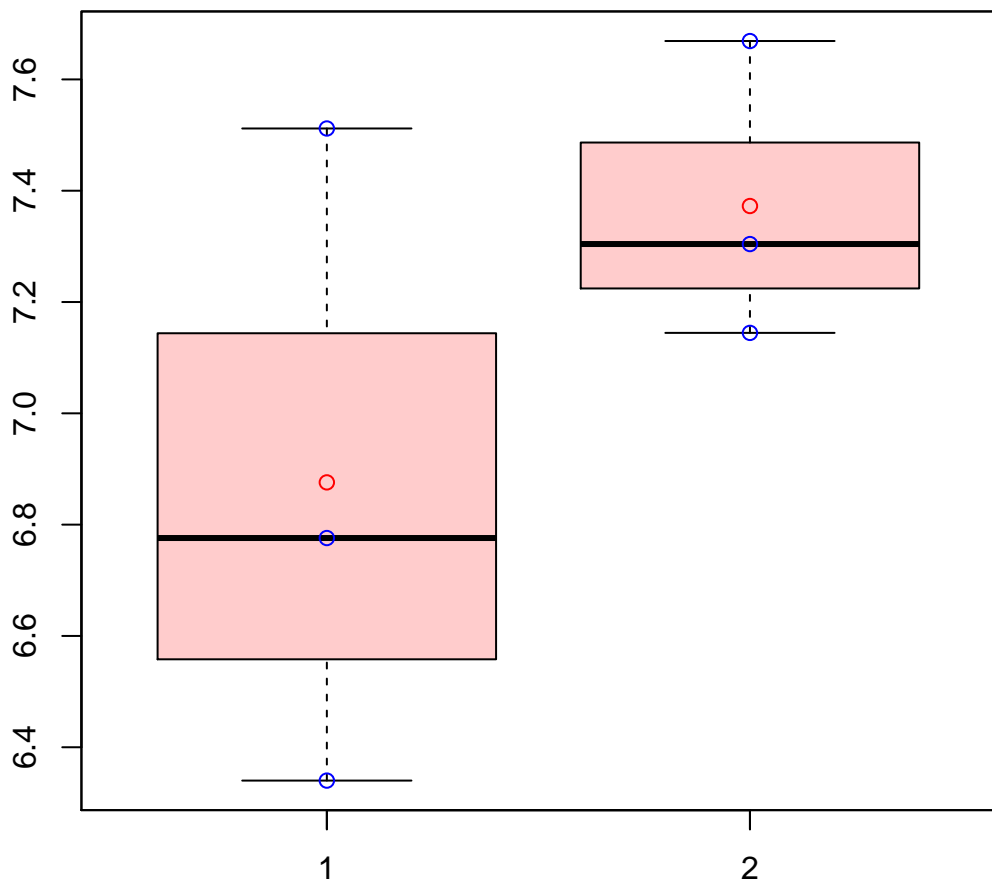

t-Test: p-value = 0.28

# CL9281Contig2|CL9281Contig2

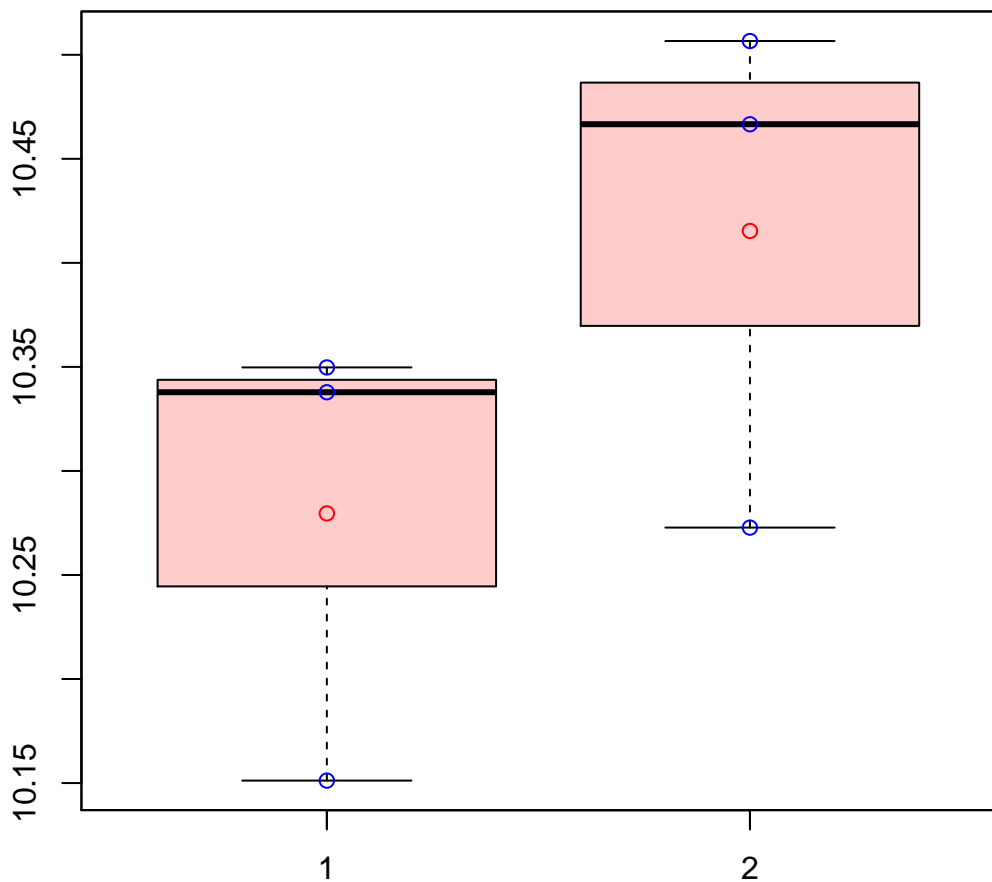

t-Test: p-value = 0.23

# CL9282Contig1|CL9282Contig1

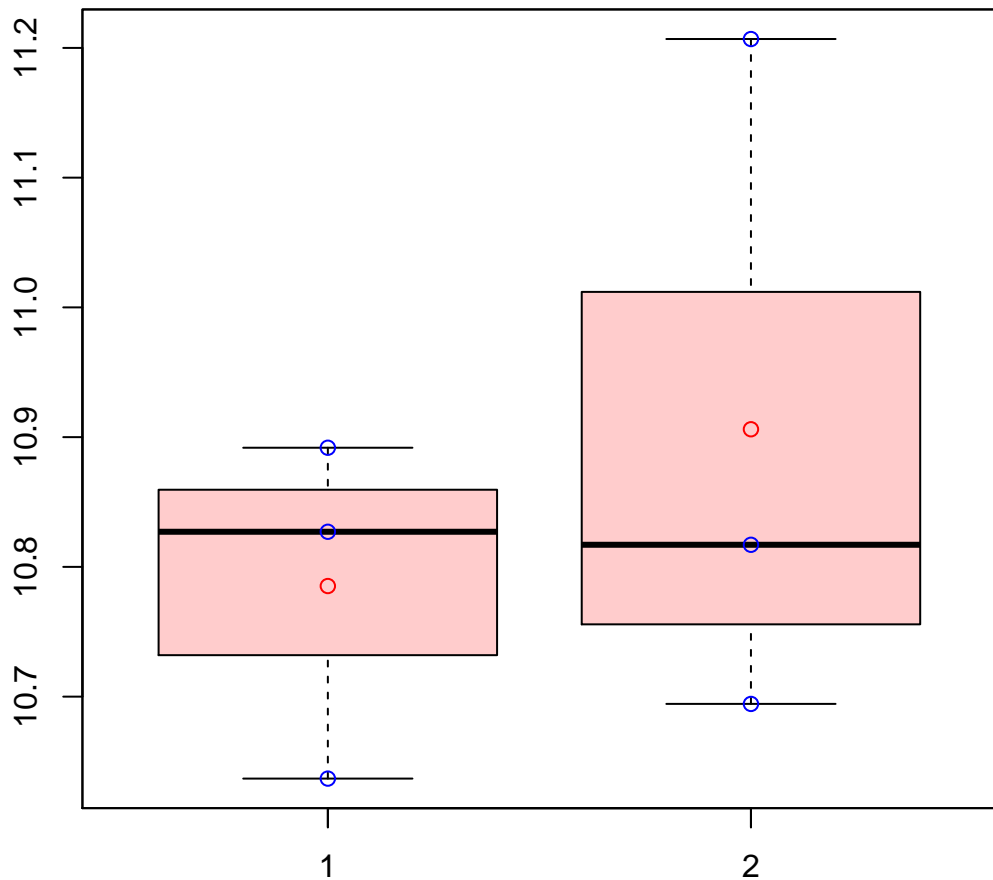

t-Test: p-value = 0.53

# CL929Contig4|CL929Contig4

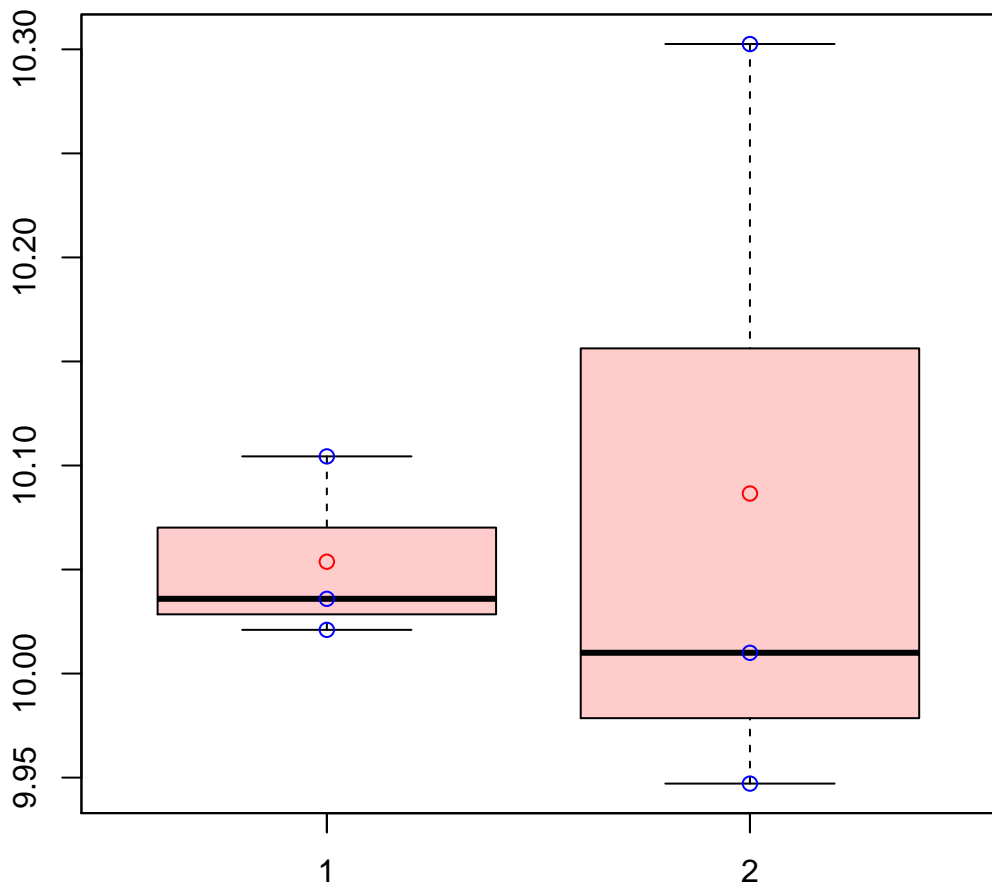

t-Test: p-value = 0.8

# CL929Contig6|CL929Contig6

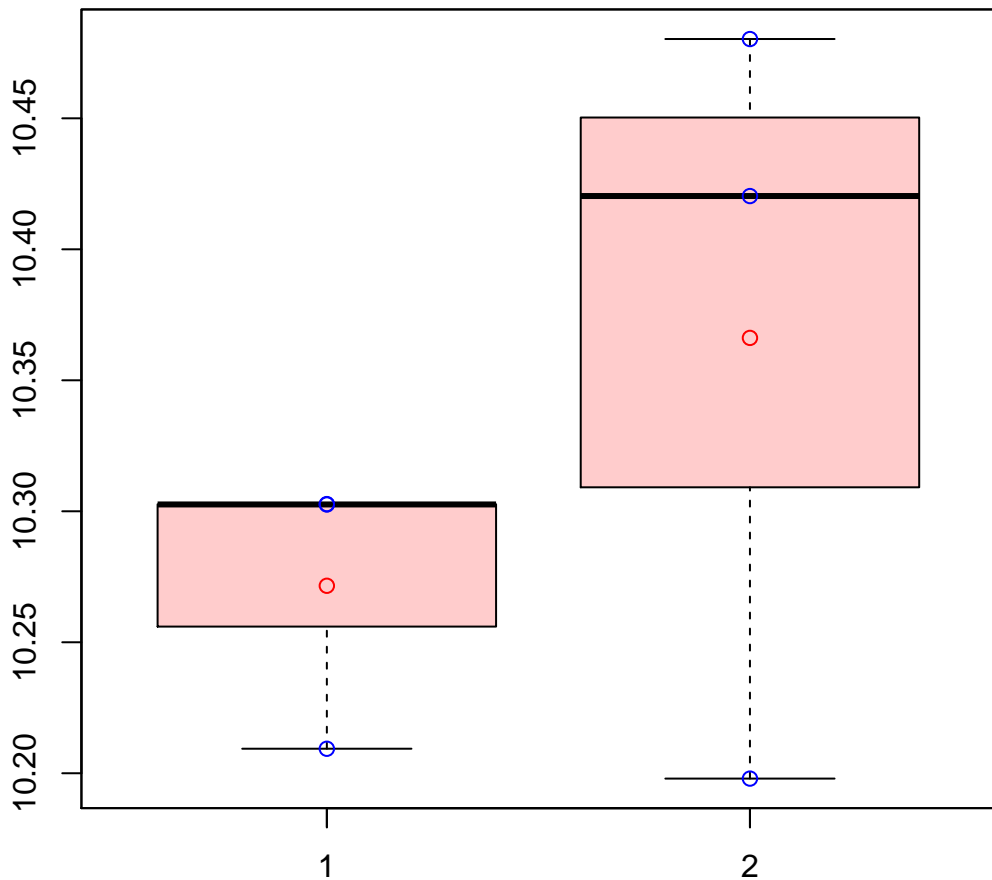

t-Test: p-value = 0.39

# CL92Contig10|CL92Contig10

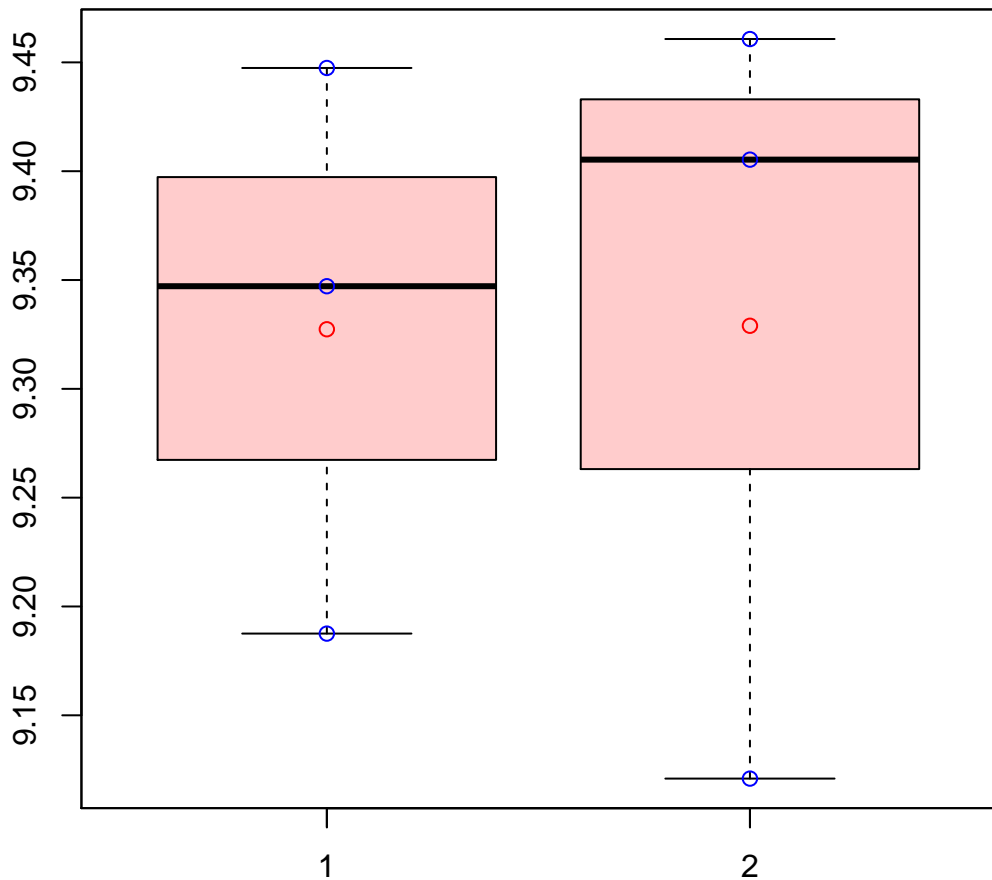

t-Test: p-value = 0.99

# CL9306Contig1|CL9306Contig1

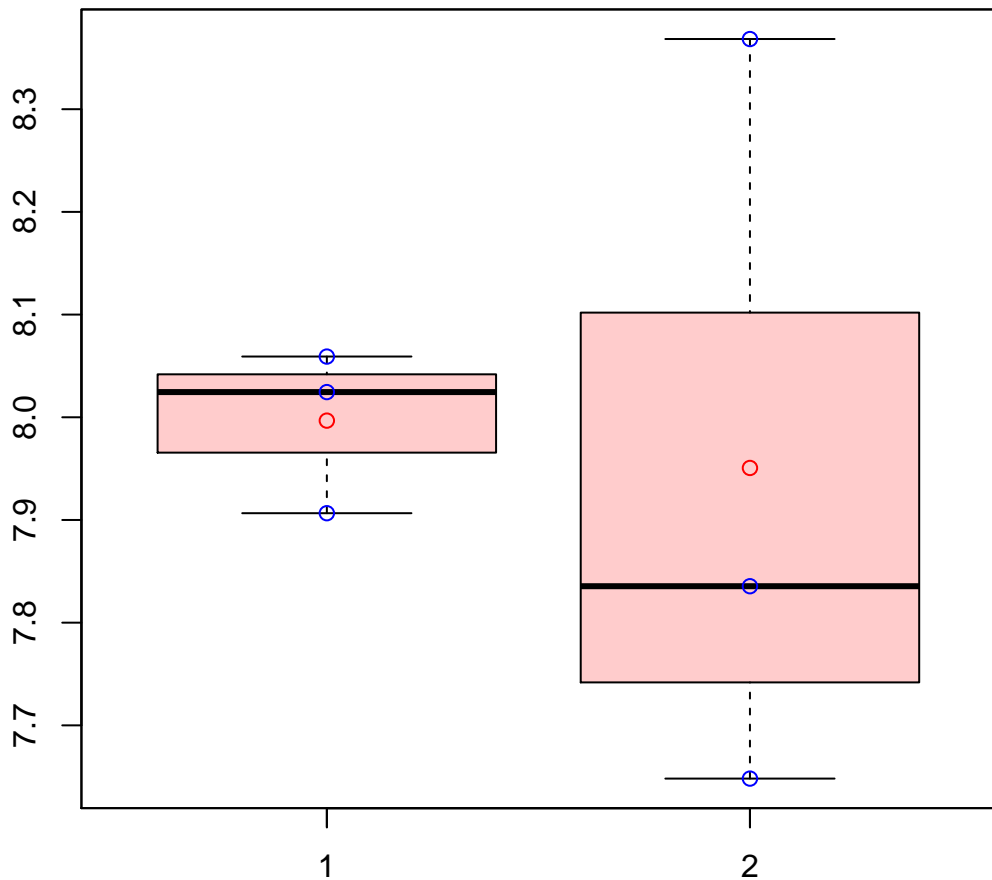

t-Test: p-value = 0.85

# CL9306Contig2|CL9306Contig2

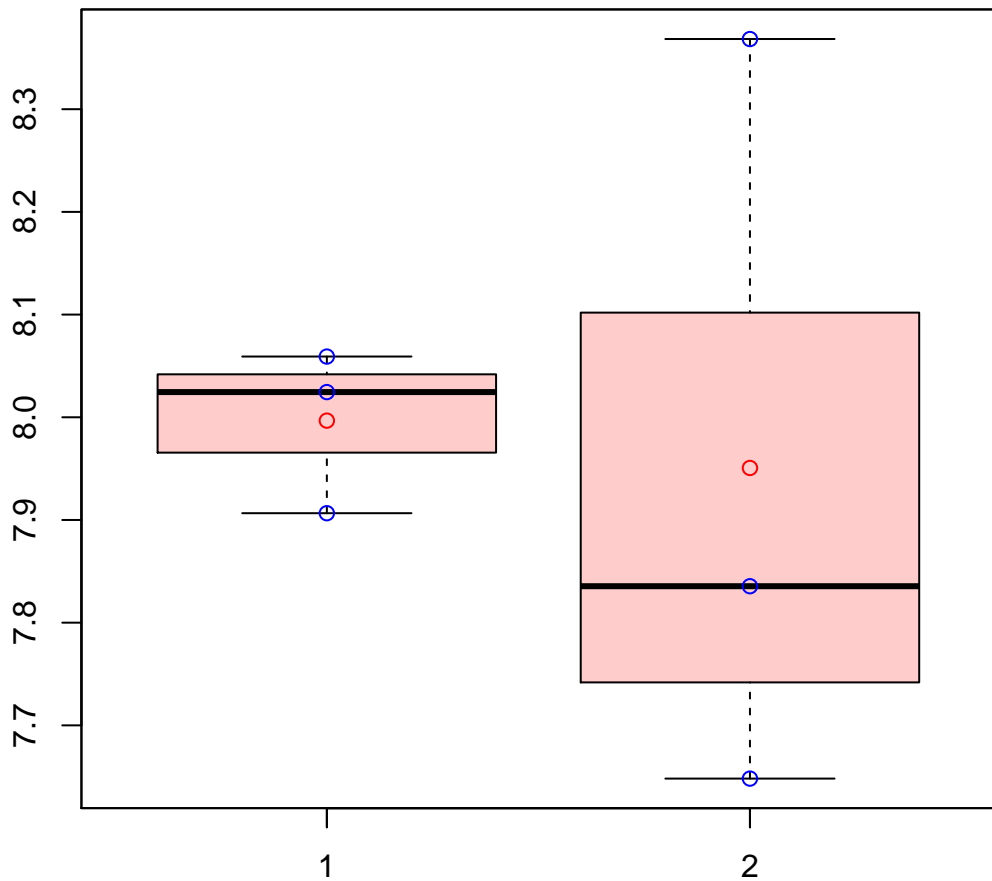

t-Test: p-value = 0.85



# CL9307Contig1|CL9307Contig1

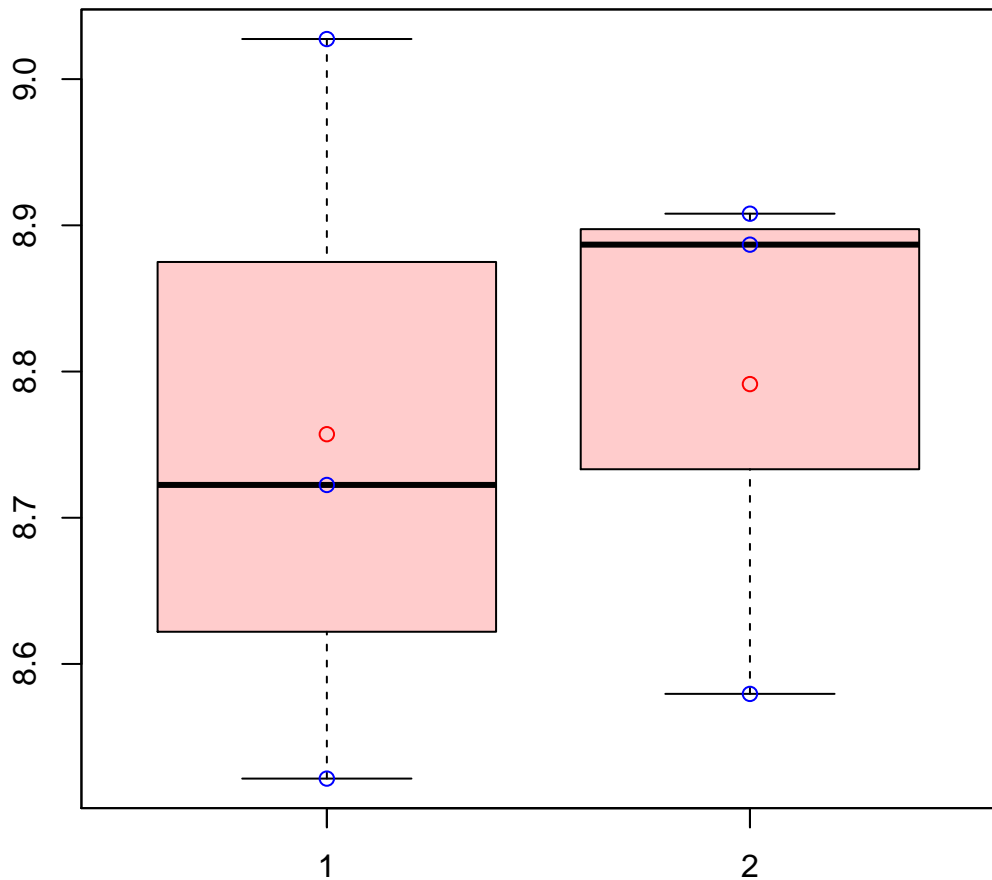

t-Test: p-value = 0.86

# CL9307Contig2|CL9307Contig2

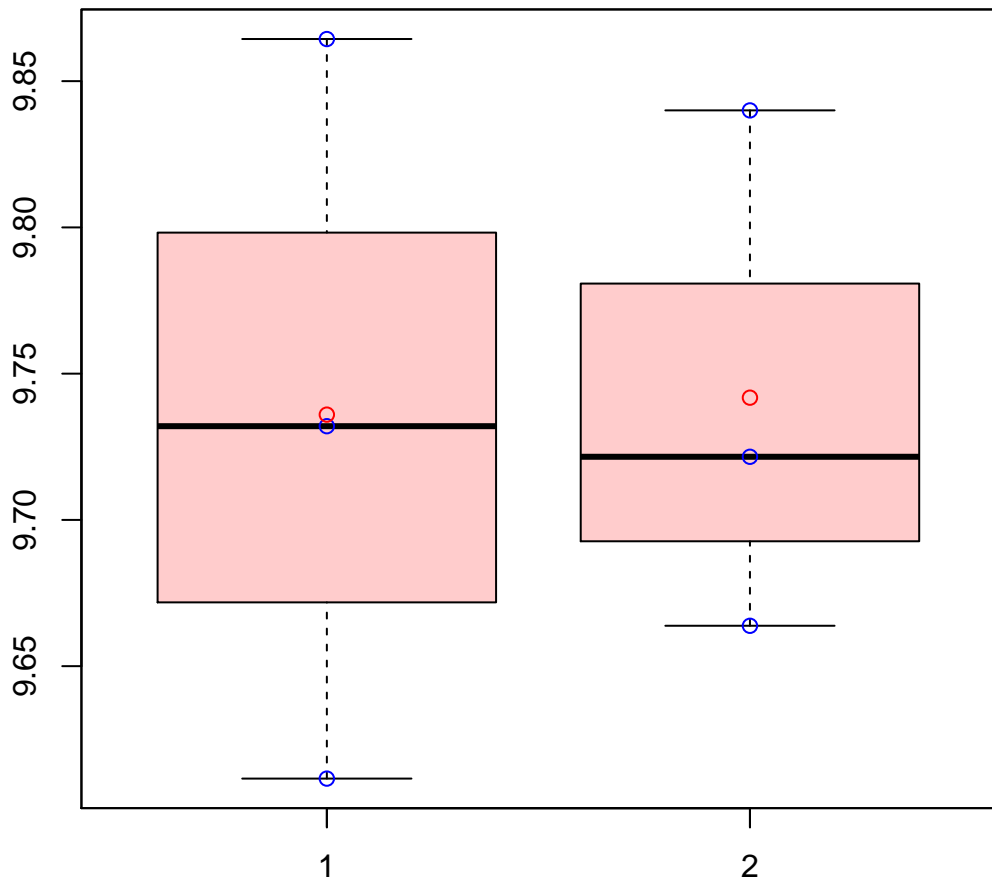

t-Test: p-value = 0.95

# CL931Contig6|CL931Contig6

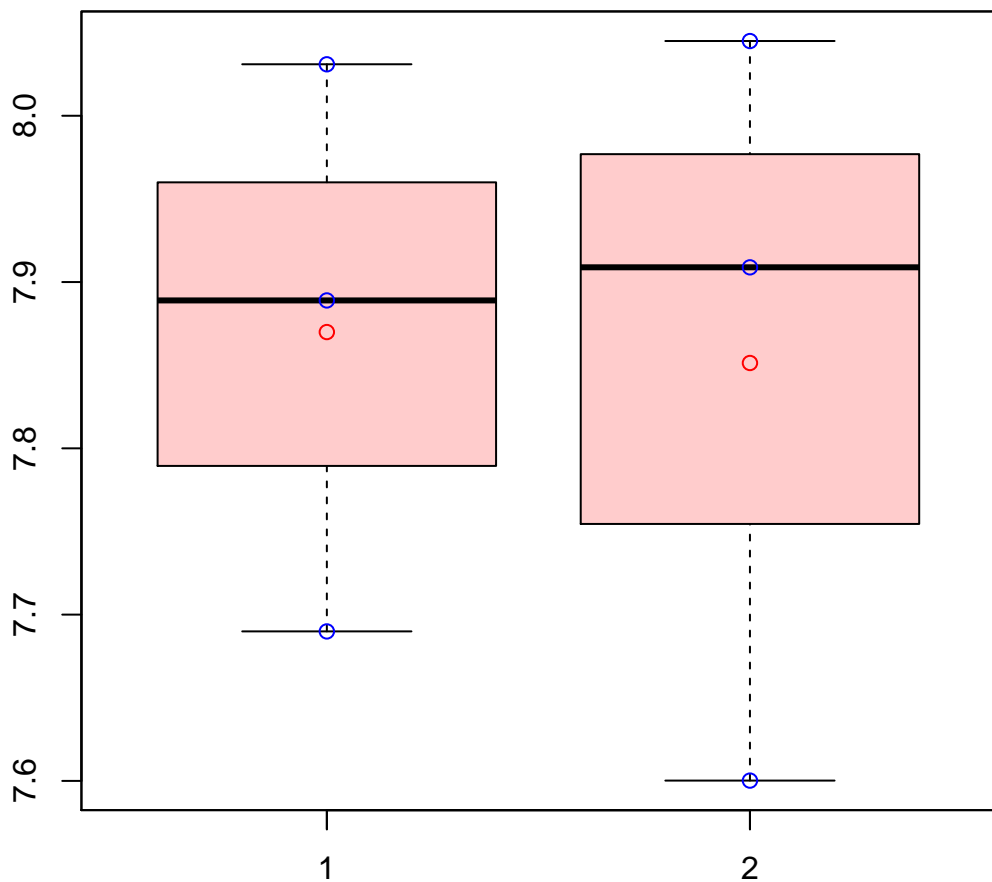

t-Test: p-value = 0.92

# CL9323Contig2|CL9323Contig2

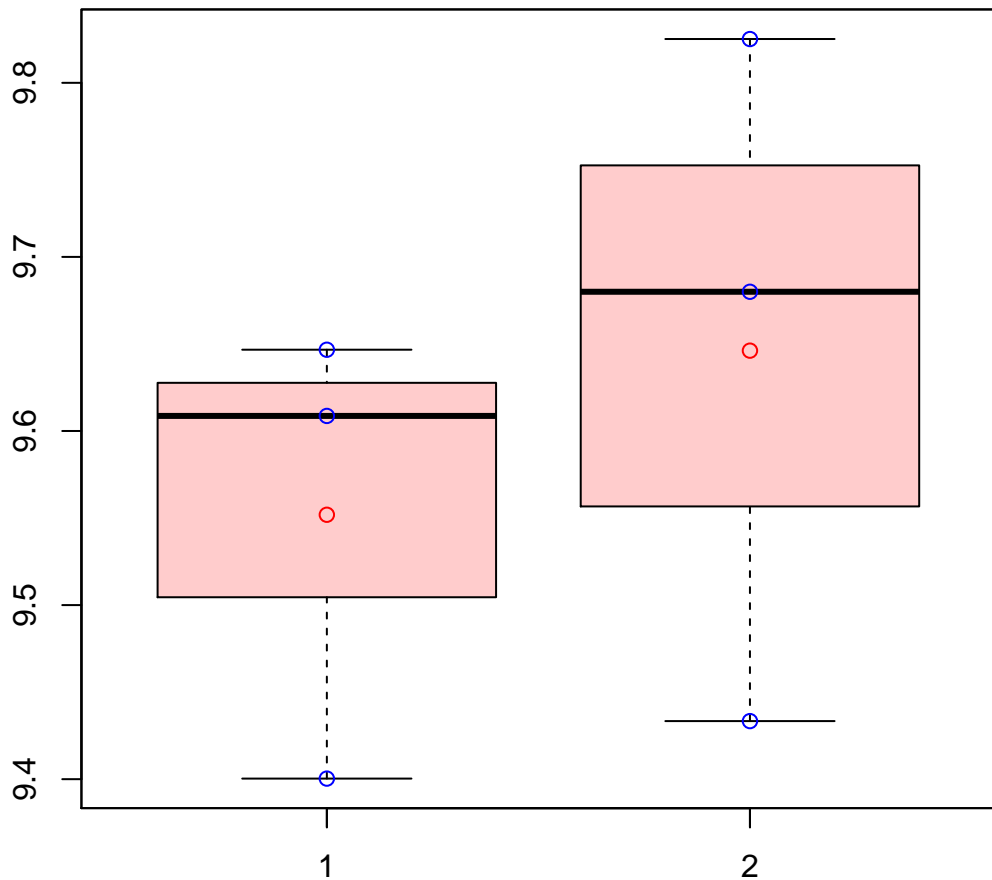

t-Test: p-value = 0.54

# CL9327Contig2|CL9327Contig2

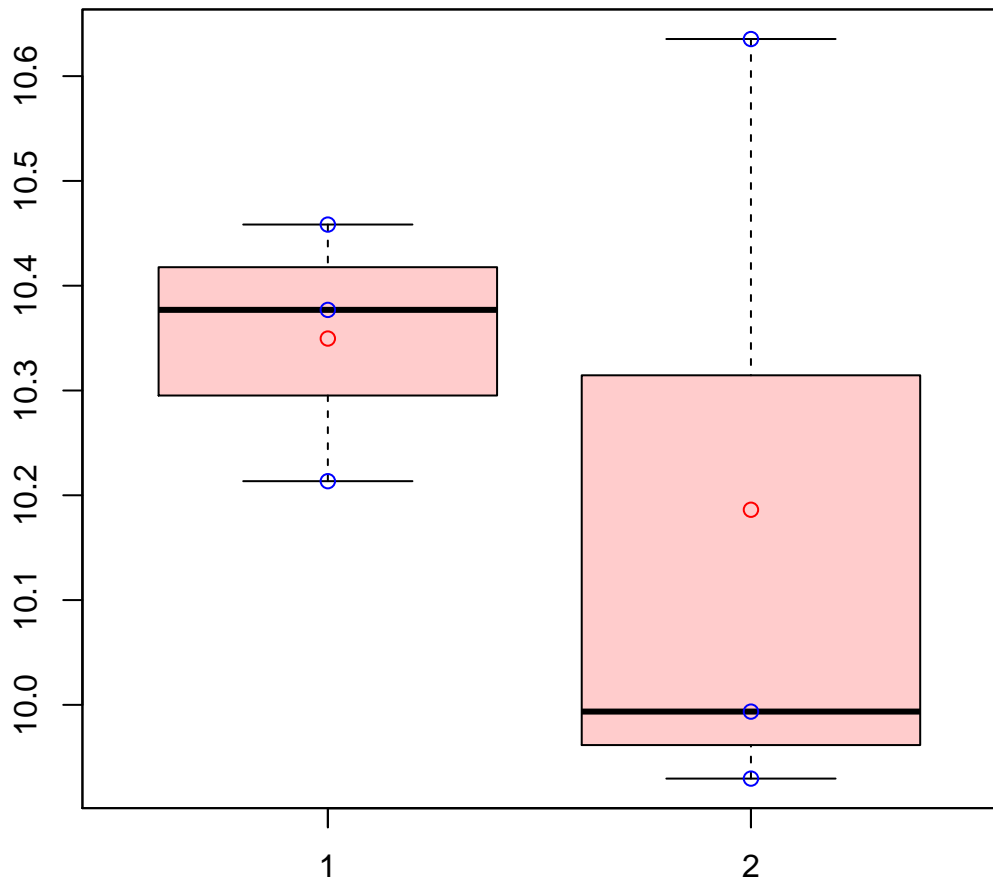

t-Test: p-value = 0.55

# CL9331Contig1|CL9331Contig1

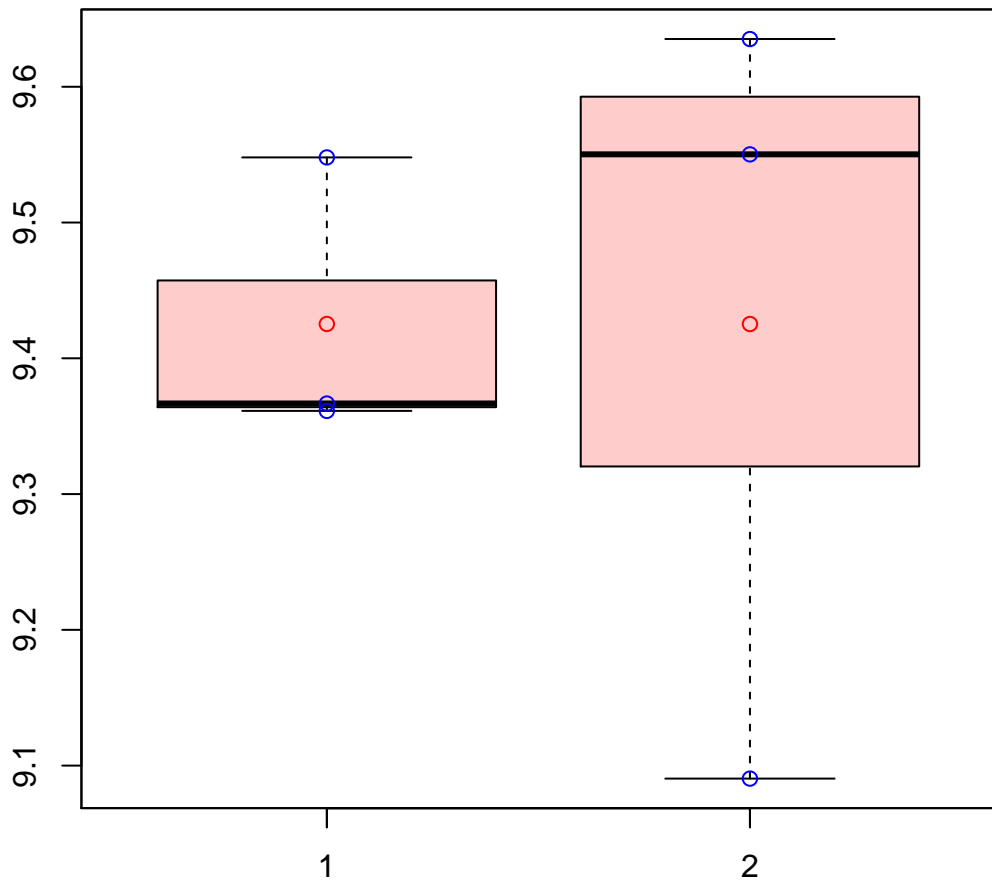

t-Test: p-value = 1

# CL9333Contig2|CL9333Contig2



t-Test: p-value = 0.26

# CL9337Contig1|CL9337Contig1

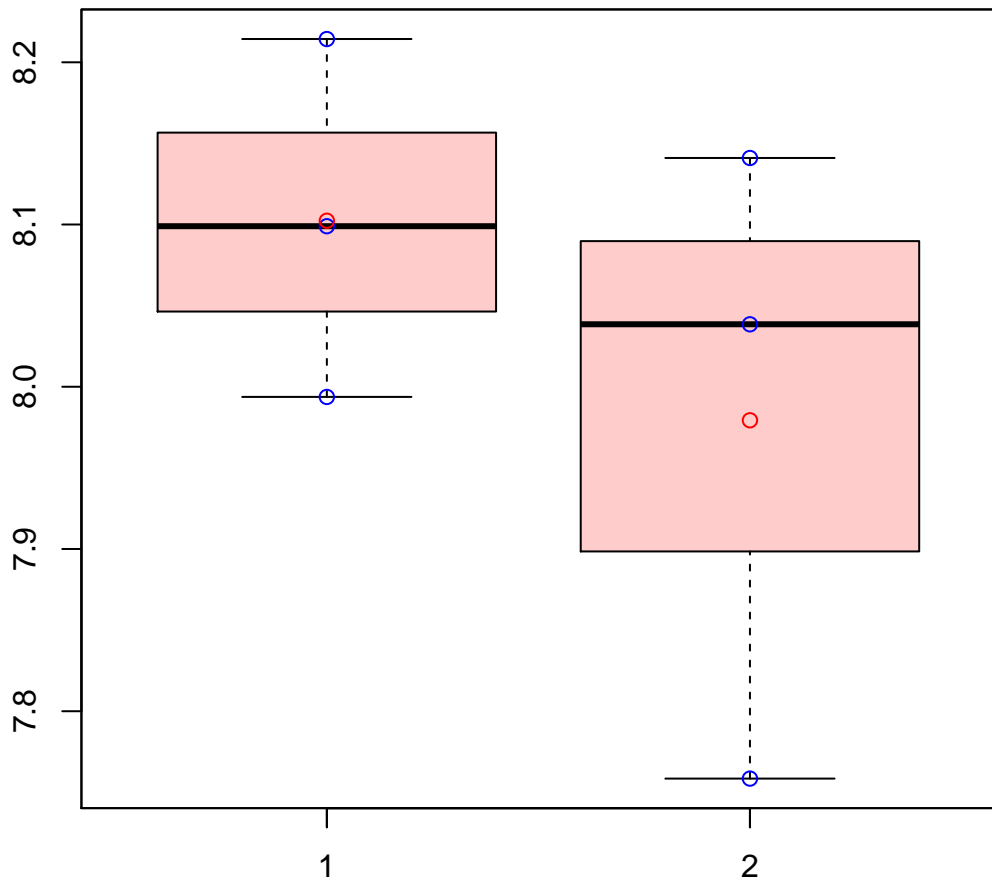

t-Test: p-value = 0.41



# CL9341Contig2|CL9341Contig2

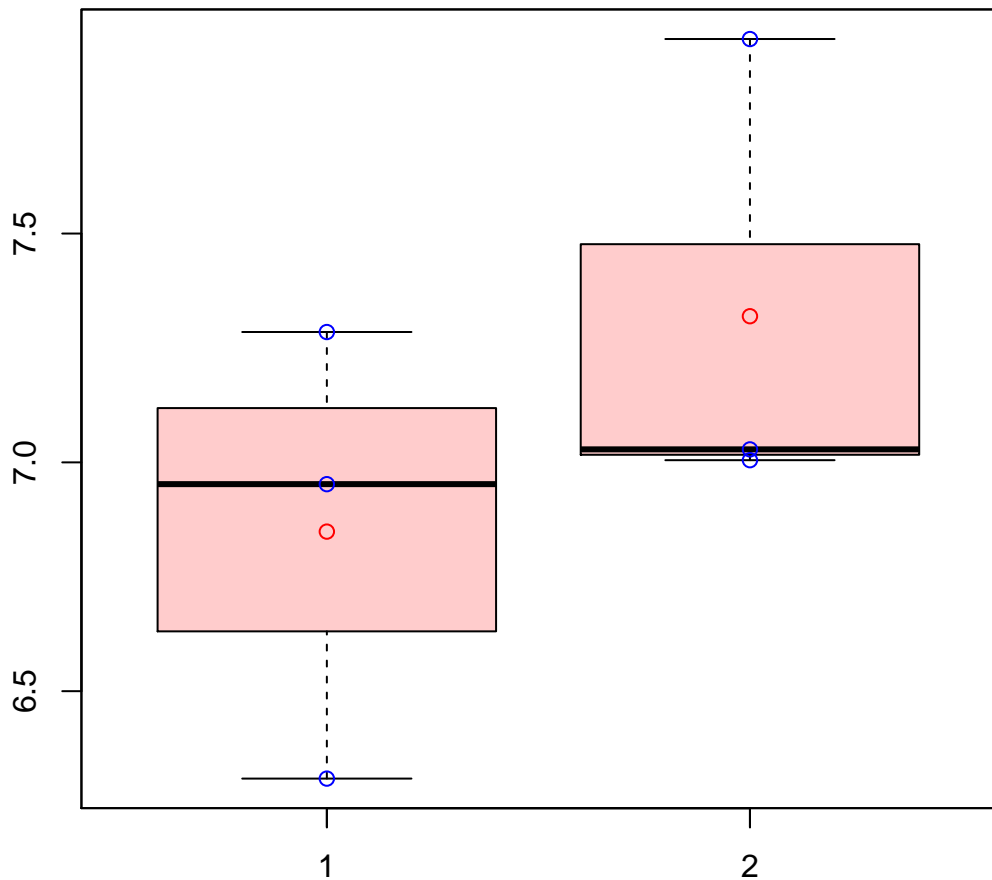

t-Test: p-value = 0.32

# CL9348Contig1|CL9348Contig1

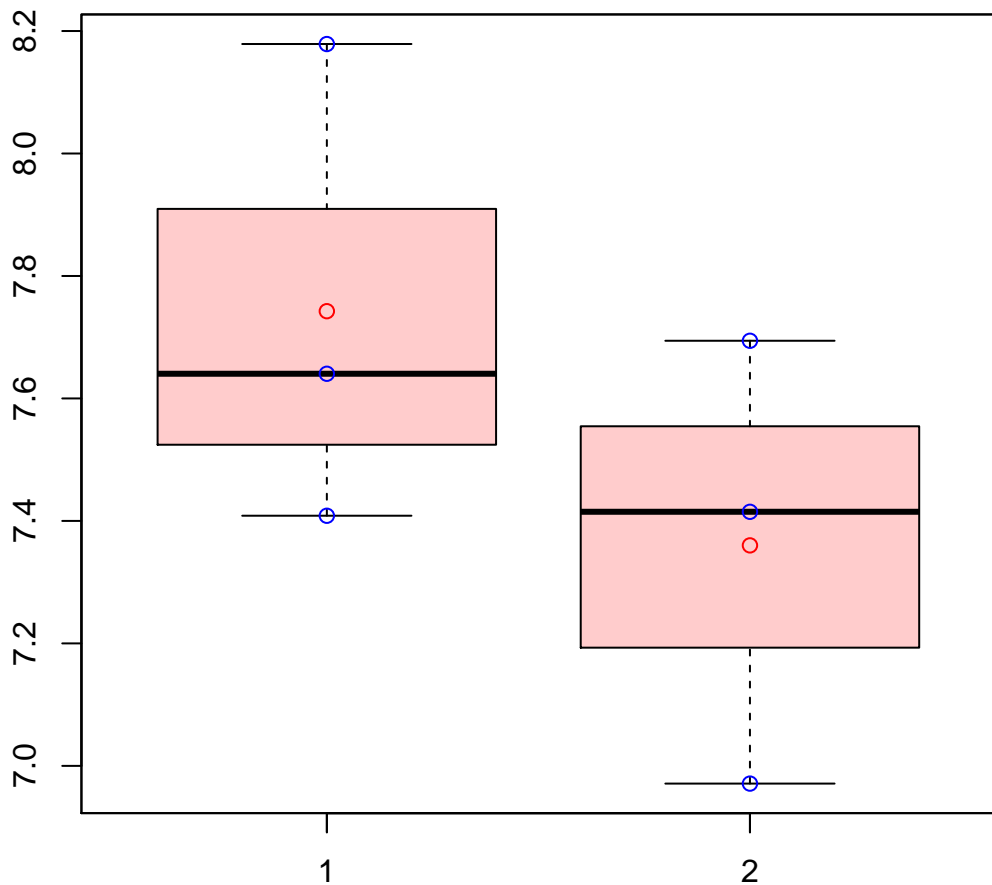

t-Test: p-value = 0.29

# CL9348Contig2|CL9348Contig2

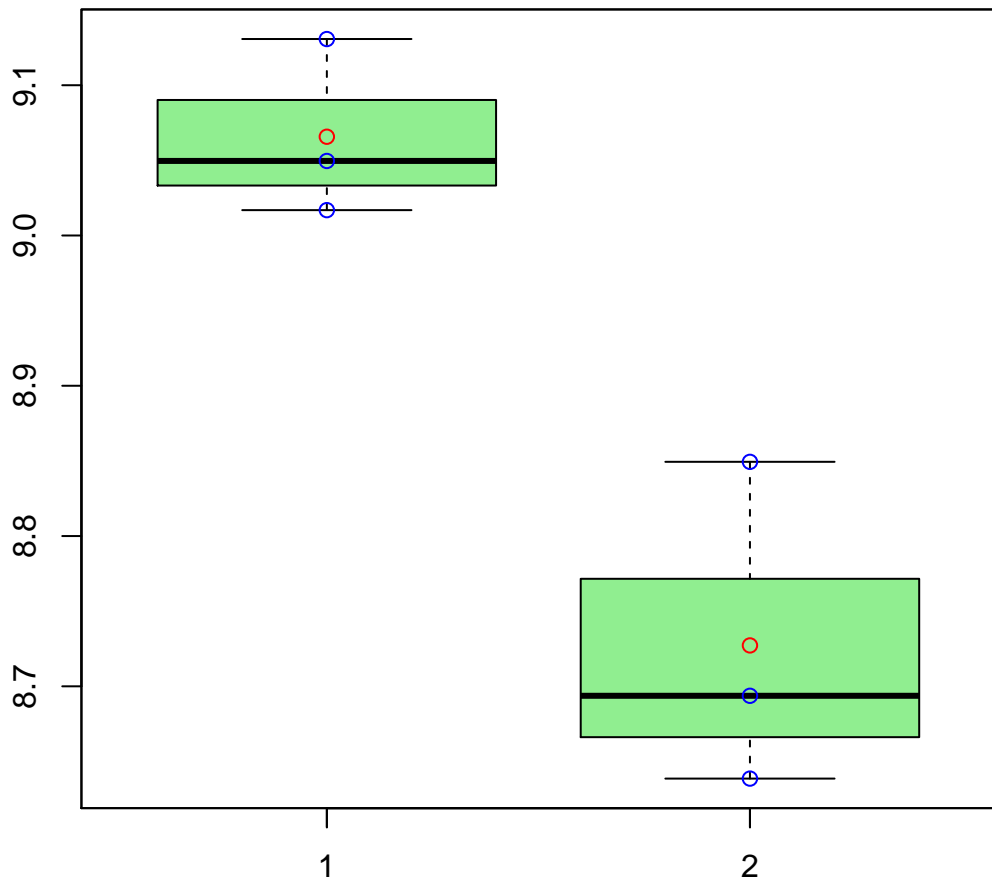

t-Test: p-value = 0.02

# CL9361Contig1|CL9361Contig1

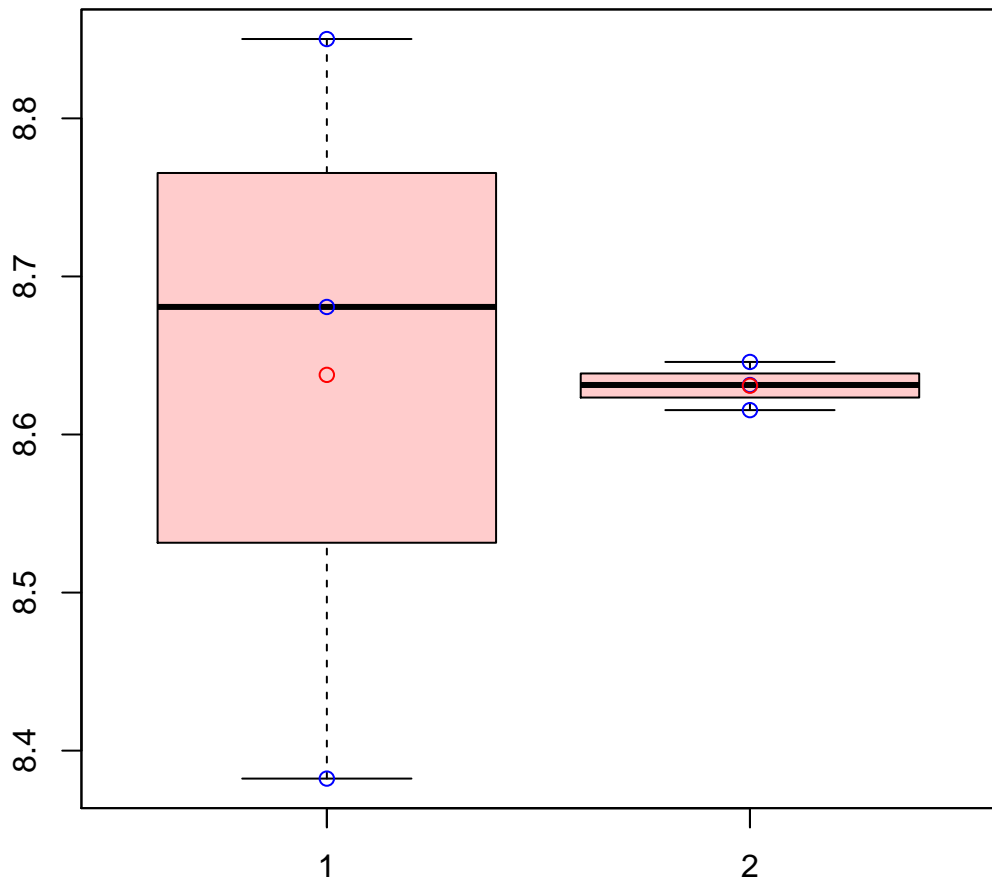

t-Test: p-value = 0.96

# CL9364Contig1|CL9364Contig1

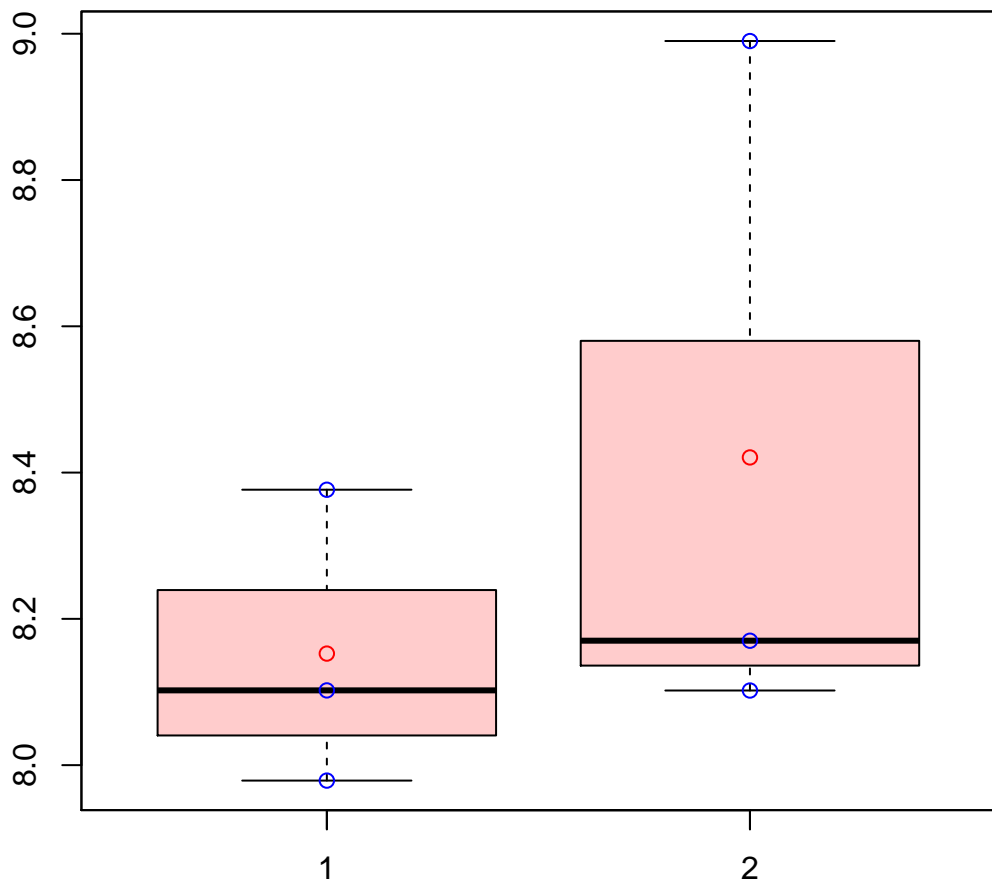

t-Test: p-value = 0.46

# CL9364Contig2|CL9364Contig2



t-Test: p-value = 0.46

# CL9372Contig1|CL9372Contig1

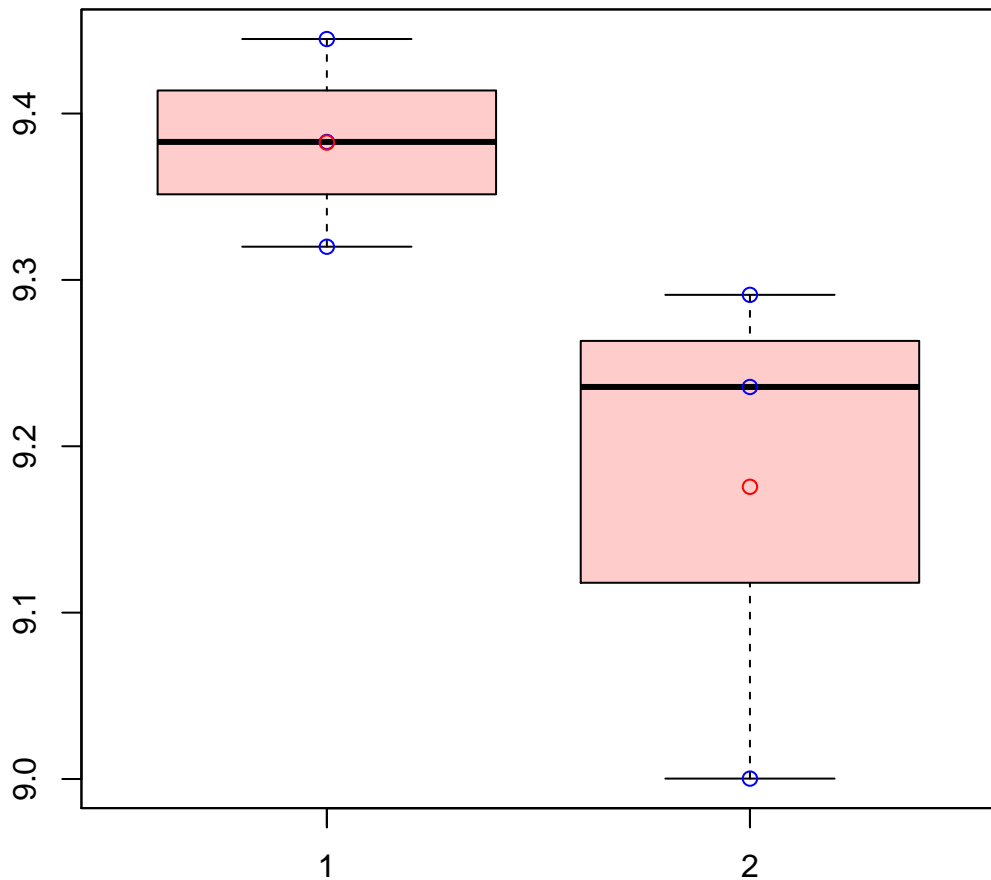

t-Test: p-value = 0.13

# CL9372Contig2|CL9372Contig2

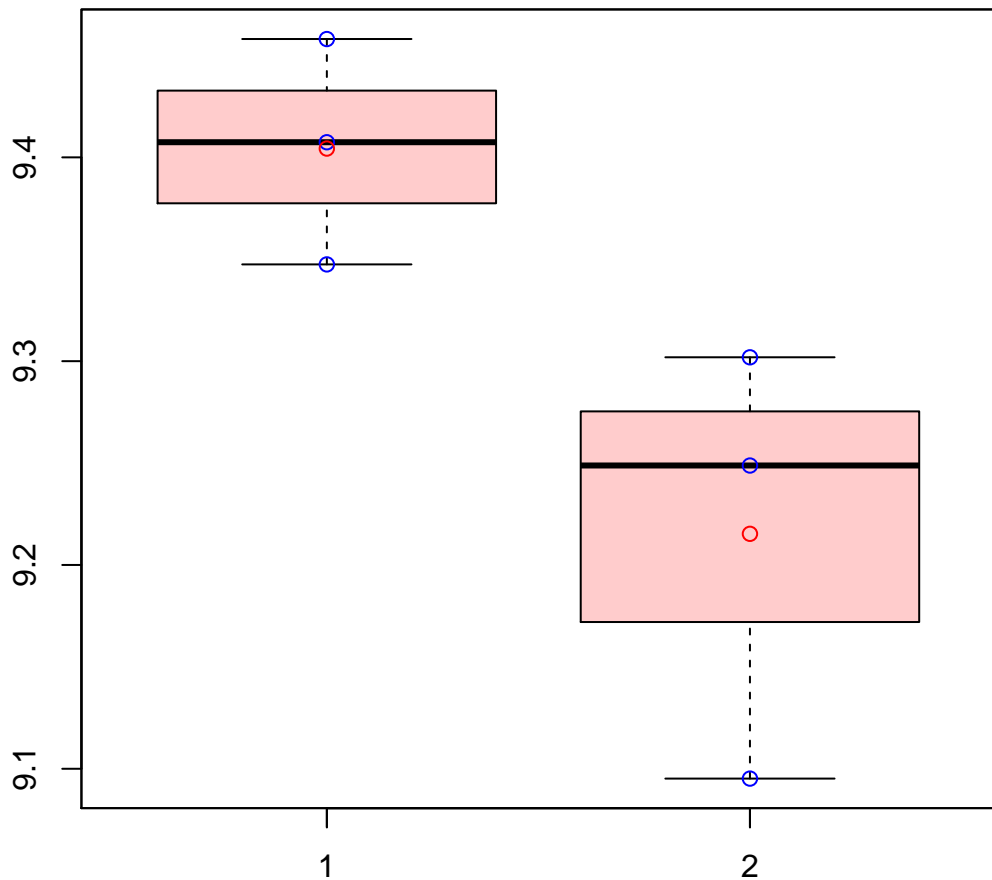

t-Test: p-value = 0.07



# CL9375Contig2|CL9375Contig2

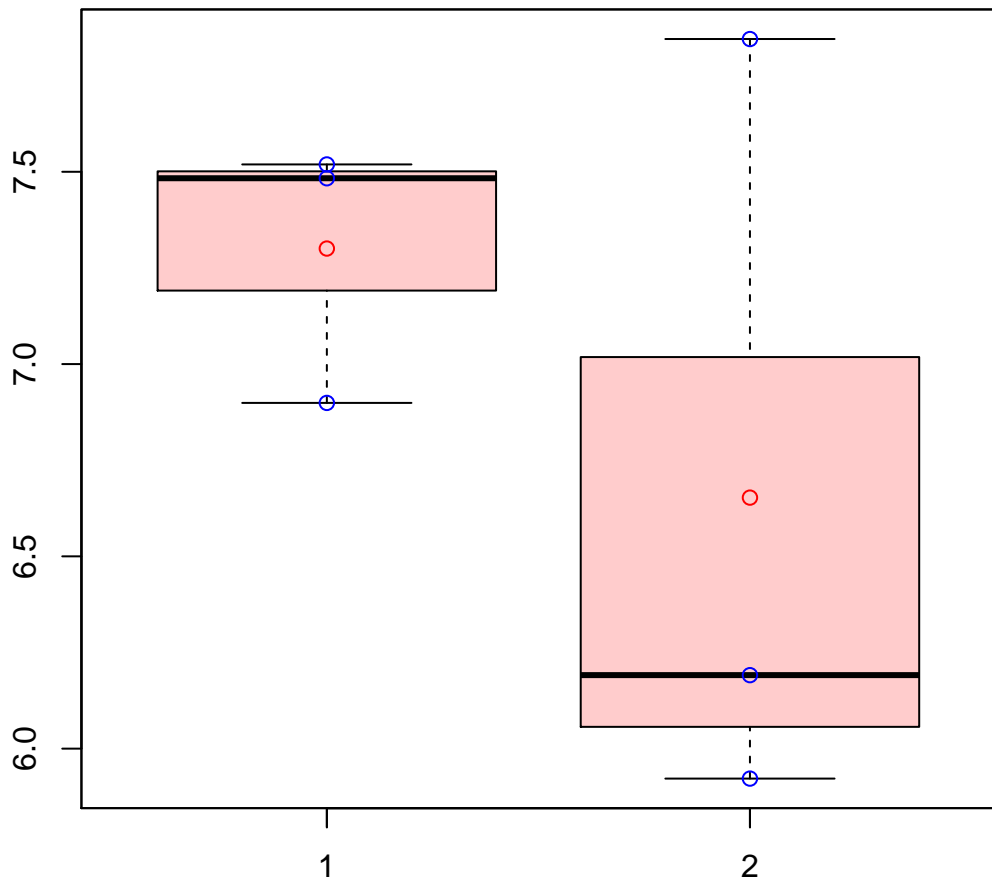

t-Test: p-value = 0.4

# CL9396Contig1|CL9396Contig1

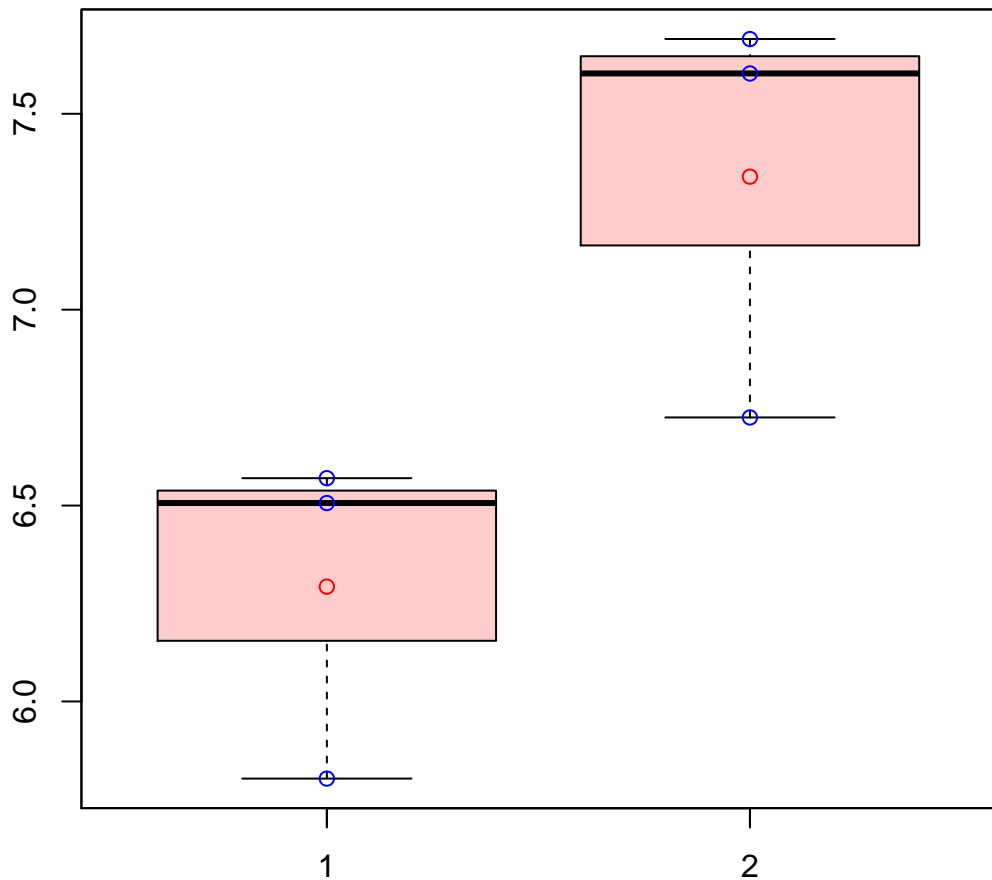

t-Test: p-value = 0.06

# CL939Contig1|CL939Contig1

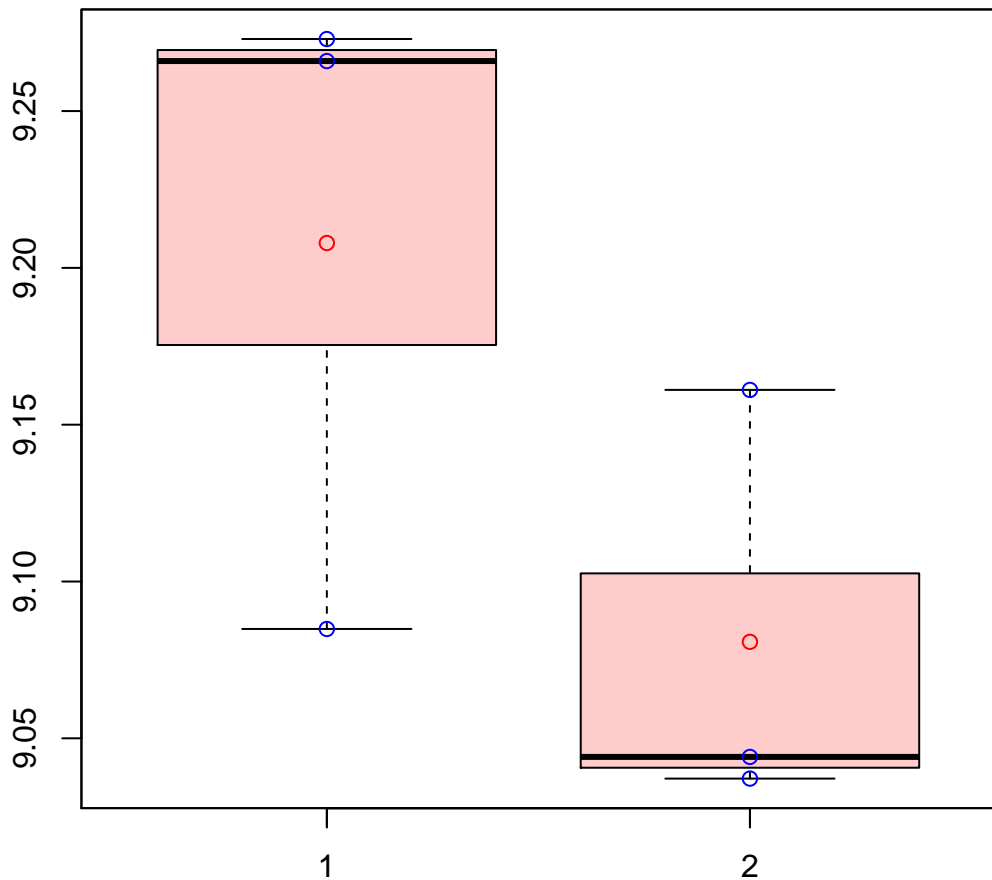

t-Test: p-value = 0.17

# CL939Contig6|CL939Contig6

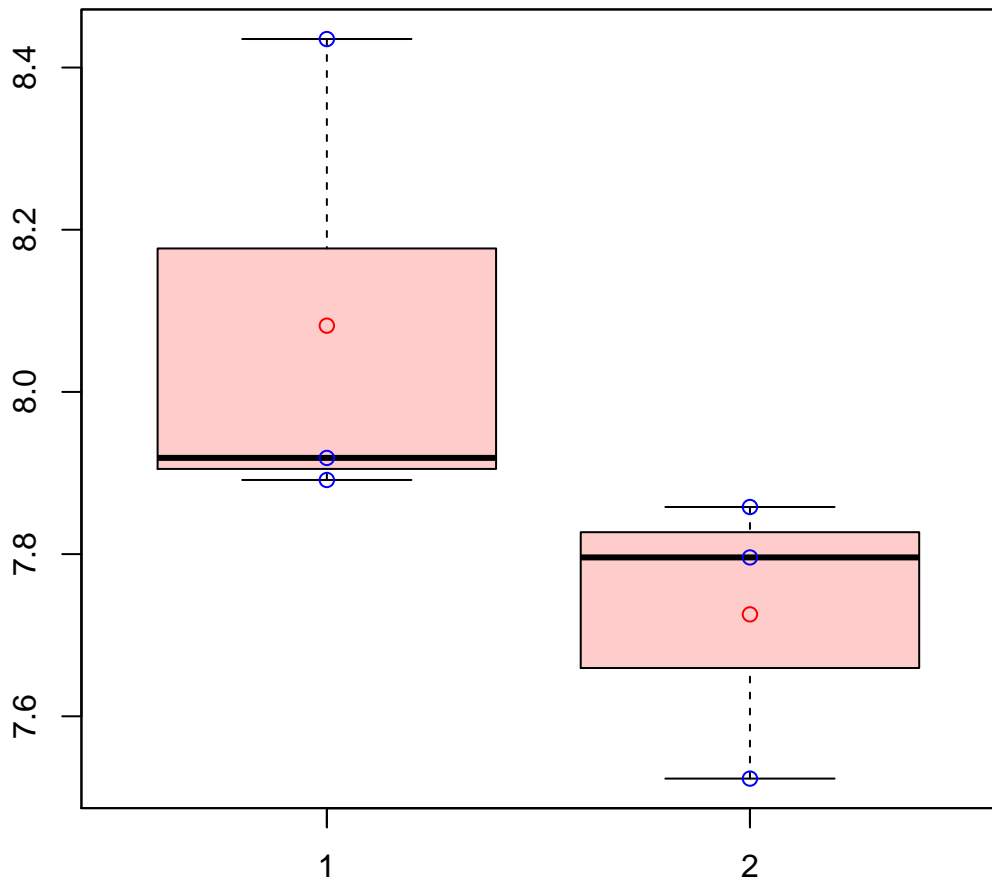

t-Test: p-value = 0.17

# CL93Contig11|CL93Contig11

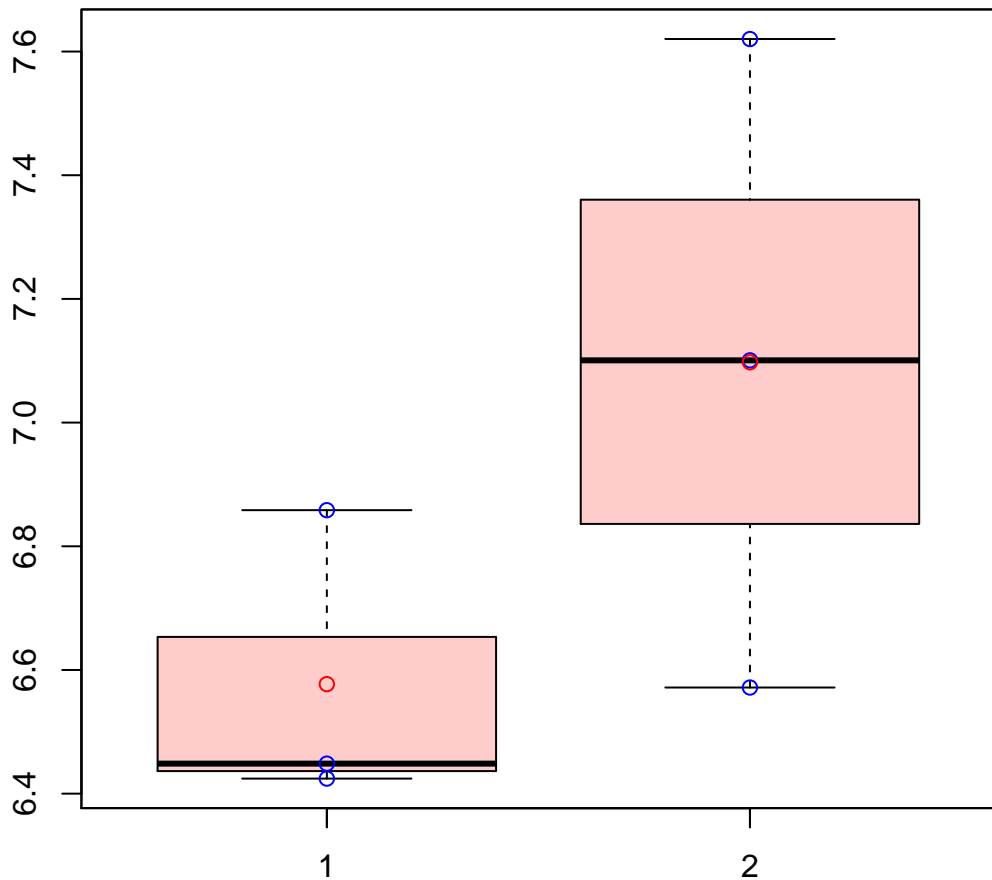

t-Test: p-value = 0.22

# CL9403Contig2|CL9403Contig2

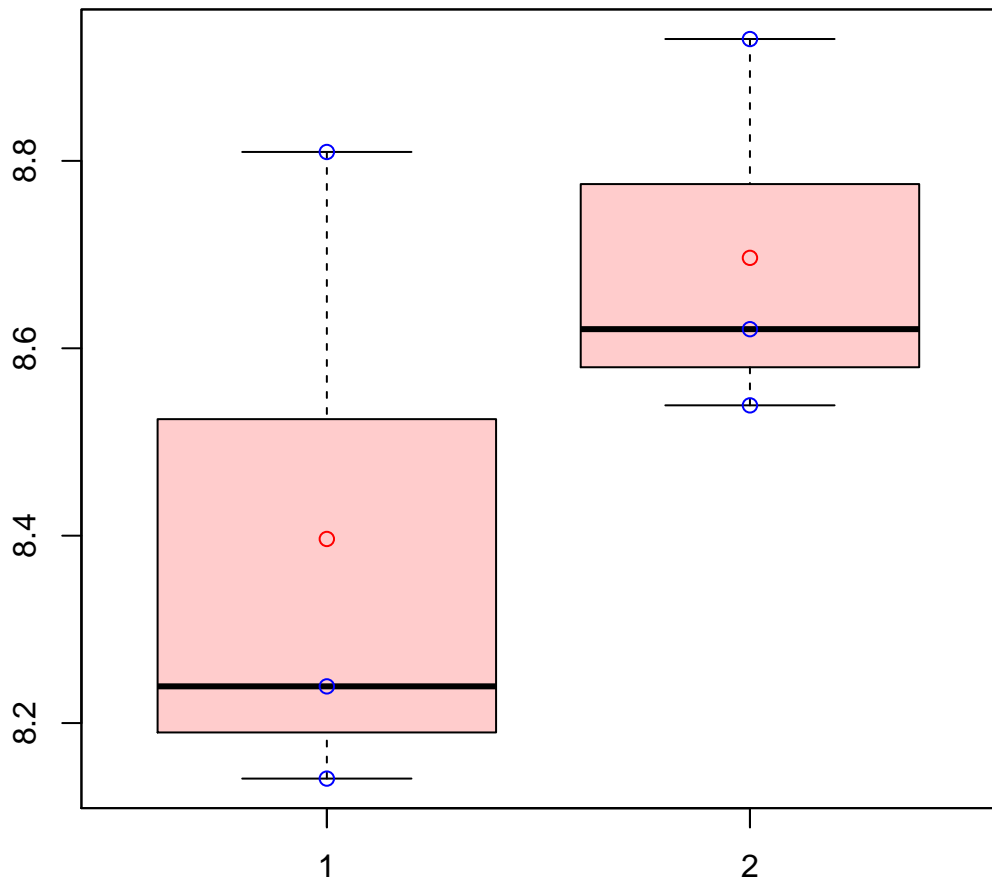

t-Test: p-value = 0.3

# CL9417Contig1|CL9417Contig1

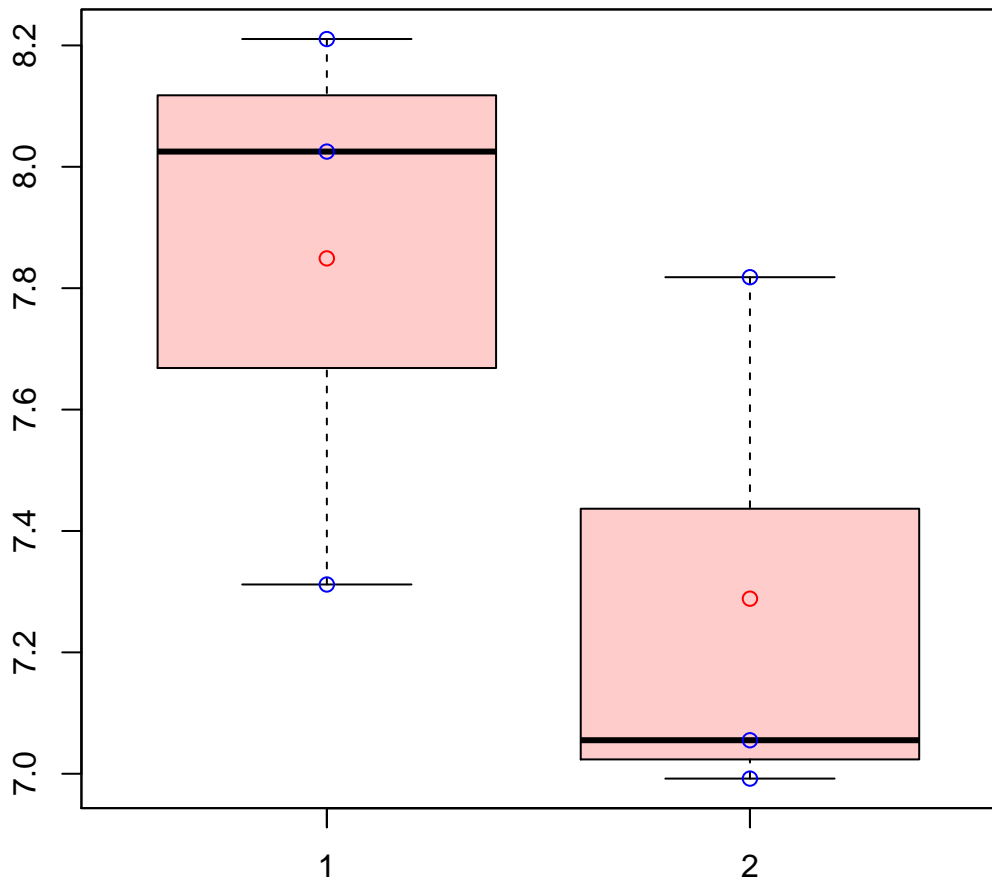

t-Test: p-value = 0.22

# CL941Contig1|CL941Contig1

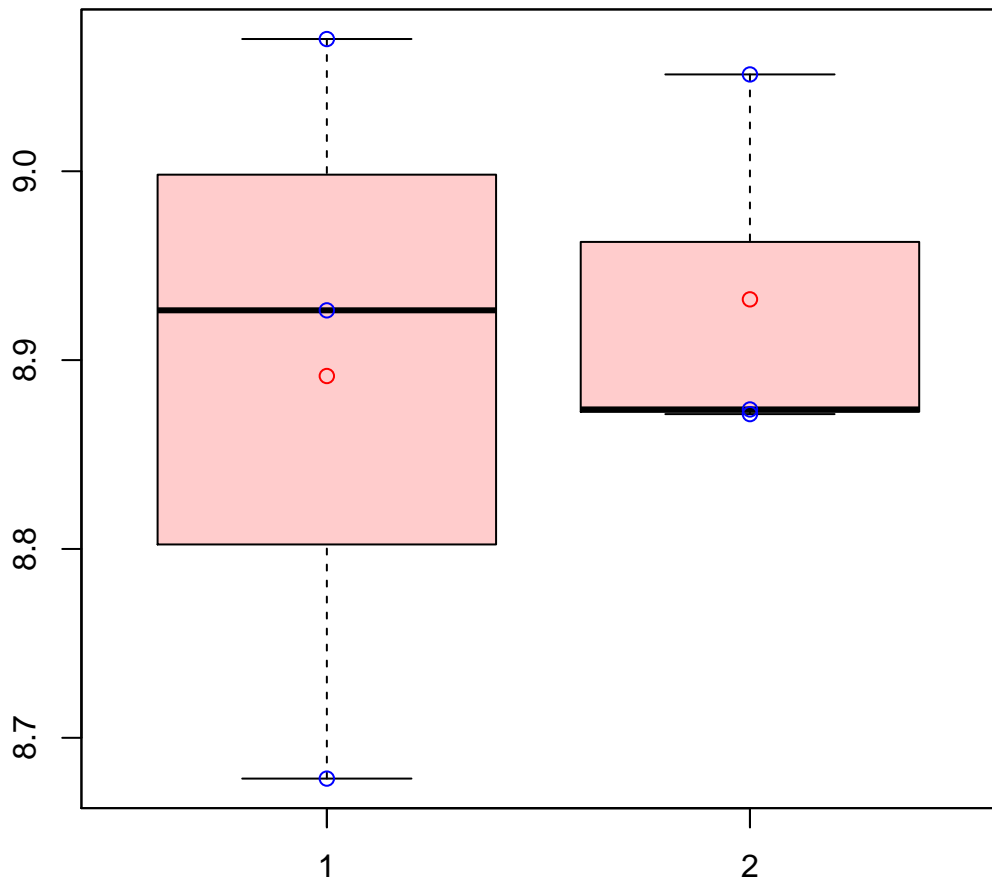

t-Test: p-value = 0.77



# CL941Contig2|CL941Contig2

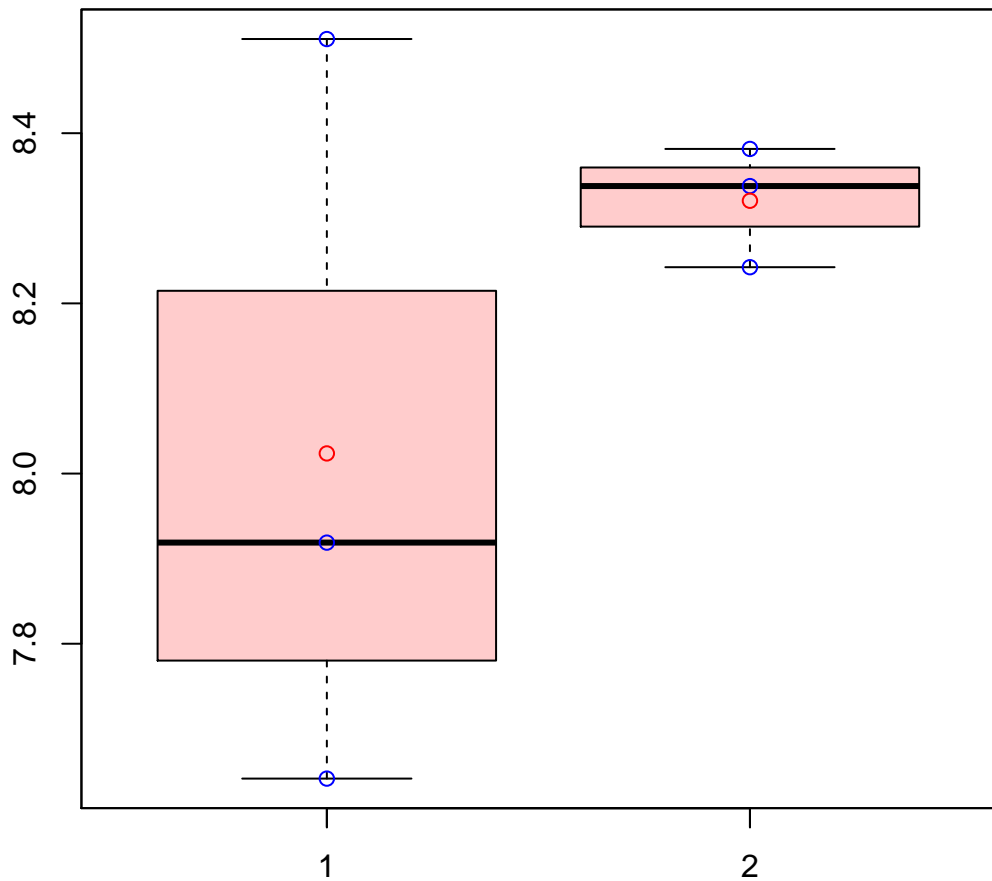

t-Test: p-value = 0.37

# CL941Contig4|CL941Contig4



t-Test: p-value = 0.37

# CL941Contig7|CL941Contig7

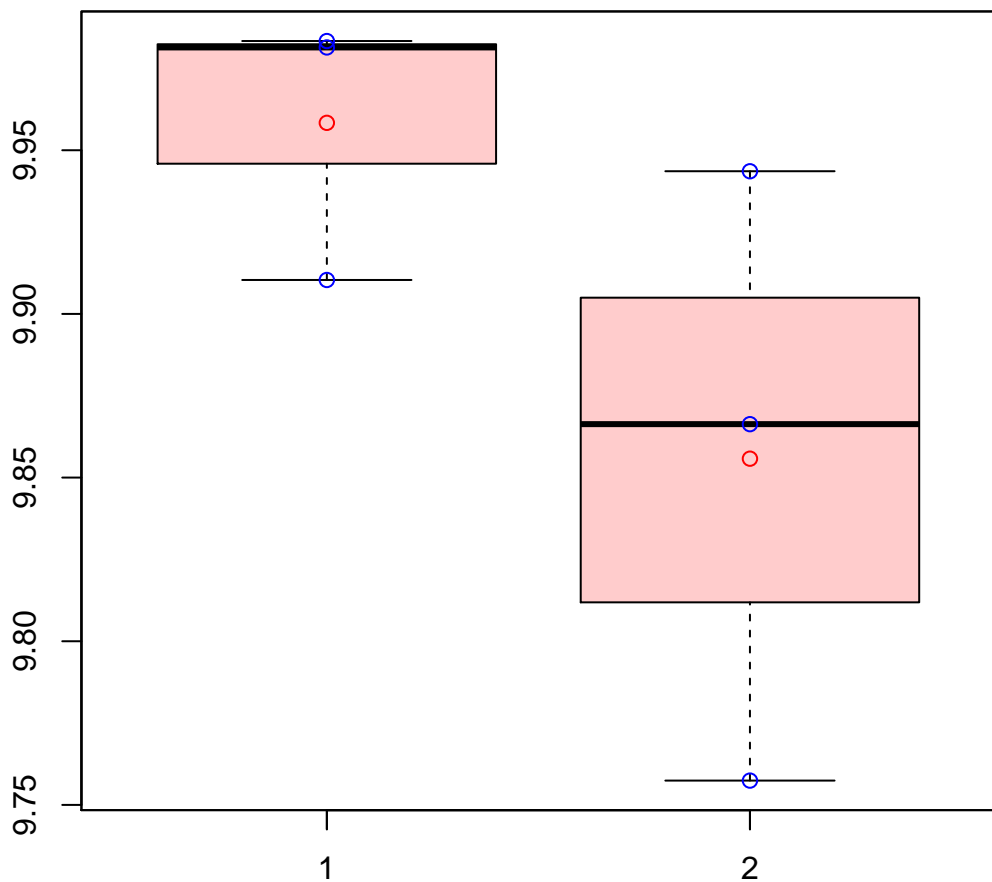

t-Test: p-value = 0.19

# CL9427Contig2|CL9427Contig2

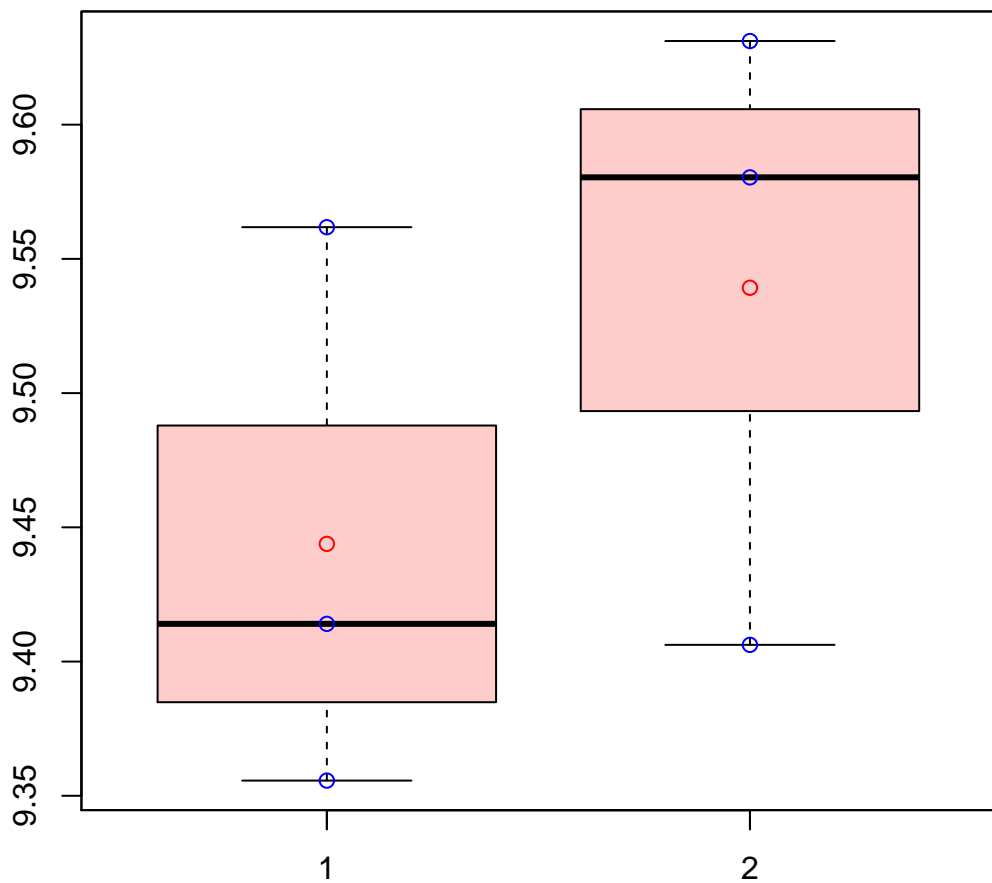

t-Test: p-value = 0.36

# CL942Contig1|CL942Contig1

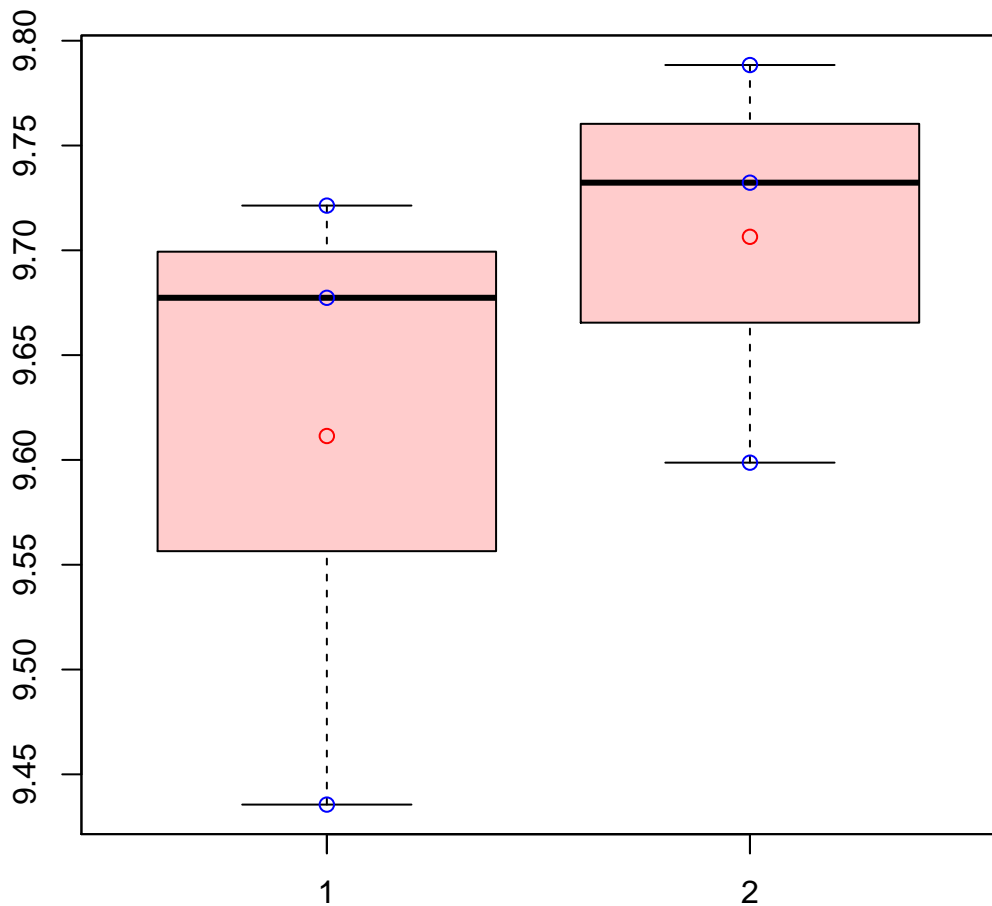

t-Test: p-value = 0.43

# CL942Contig2|CL942Contig2

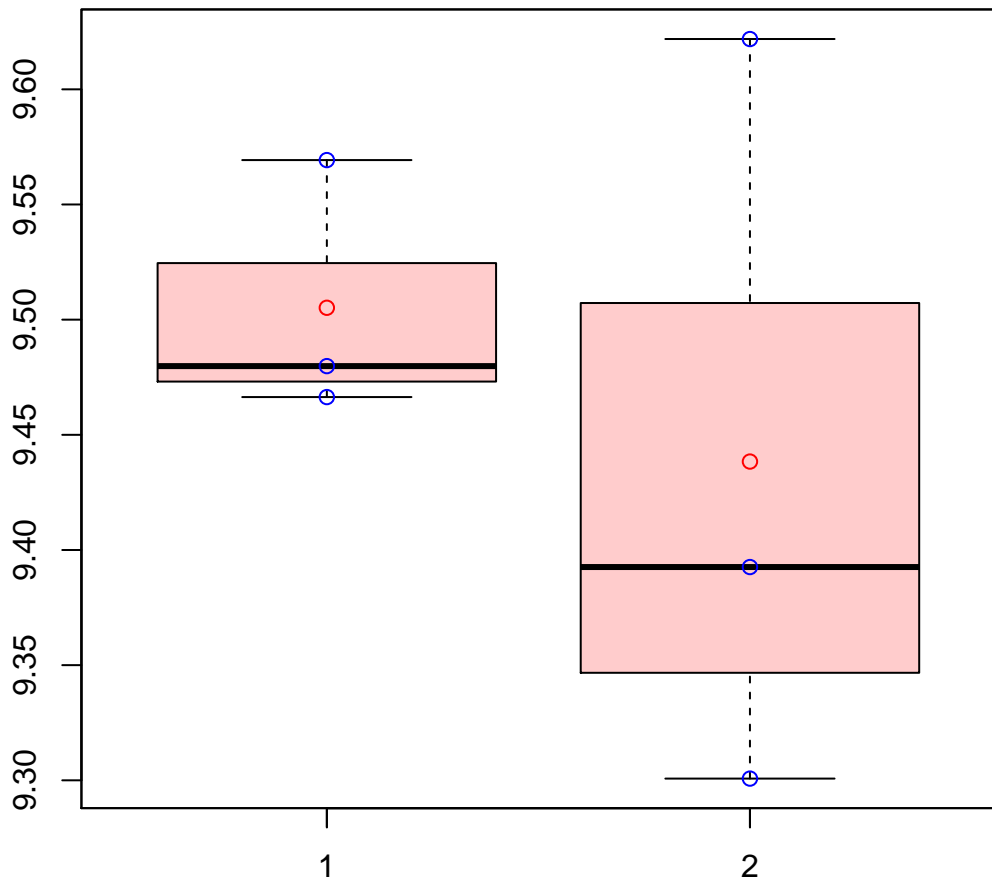

t-Test: p-value = 0.56

# CL942Contig3|CL942Contig3

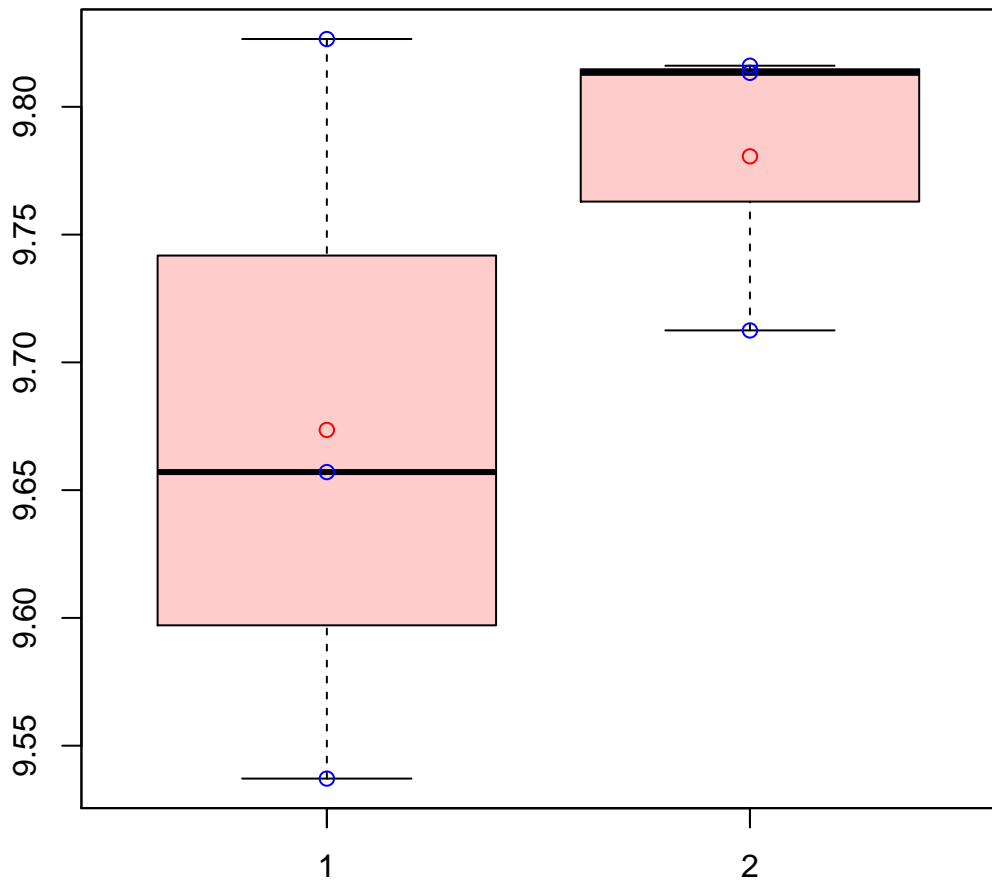

t-Test: p-value = 0.33

# CL942Contig4|CL942Contig4

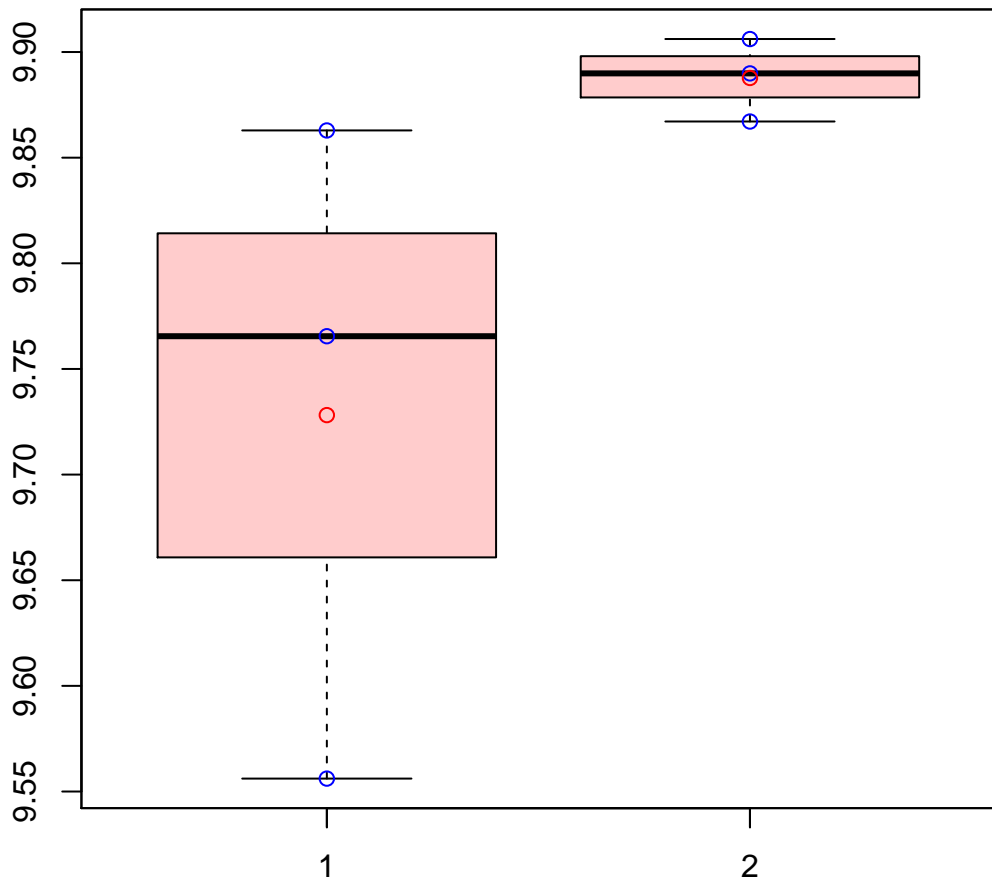

t-Test: p-value = 0.22



# CL9430Contig1|CL9430Contig1



t-Test: p-value = 0.39

# CL9430Contig2|CL9430Contig2



t-Test: p-value = 0.39

# CL9430Contig3|CL9430Contig3

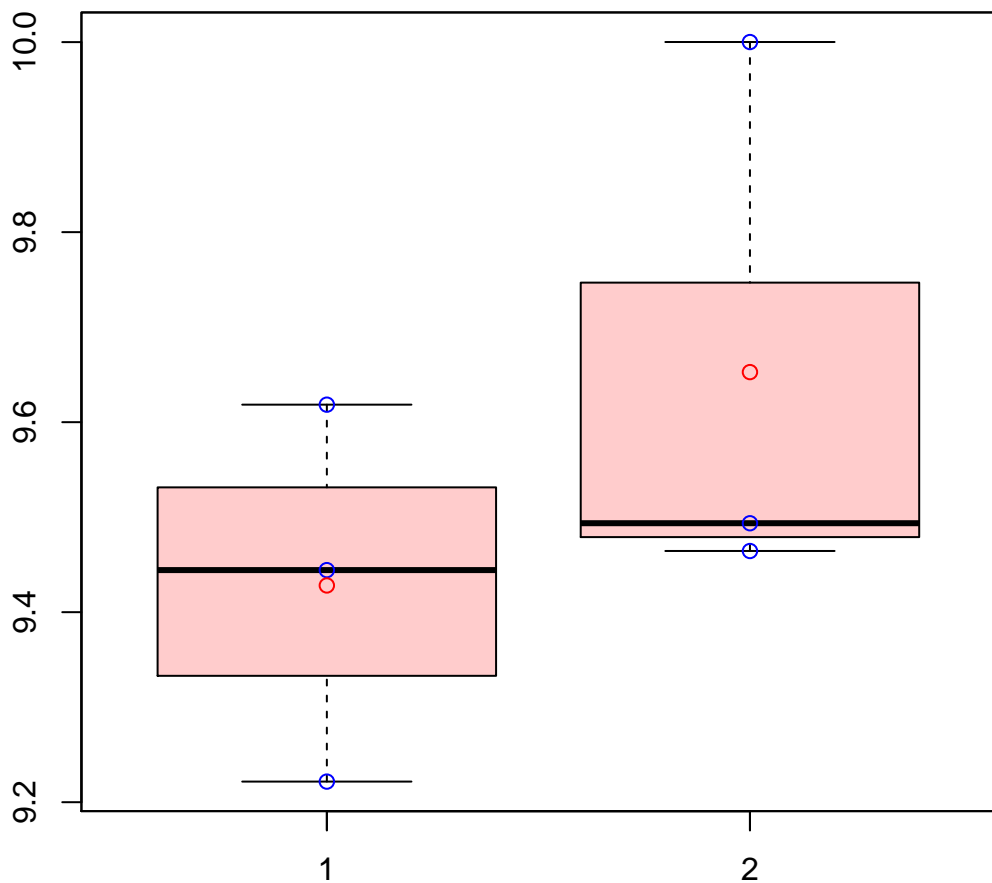

t-Test: p-value = 0.35

# CL943Contig2|CL943Contig2

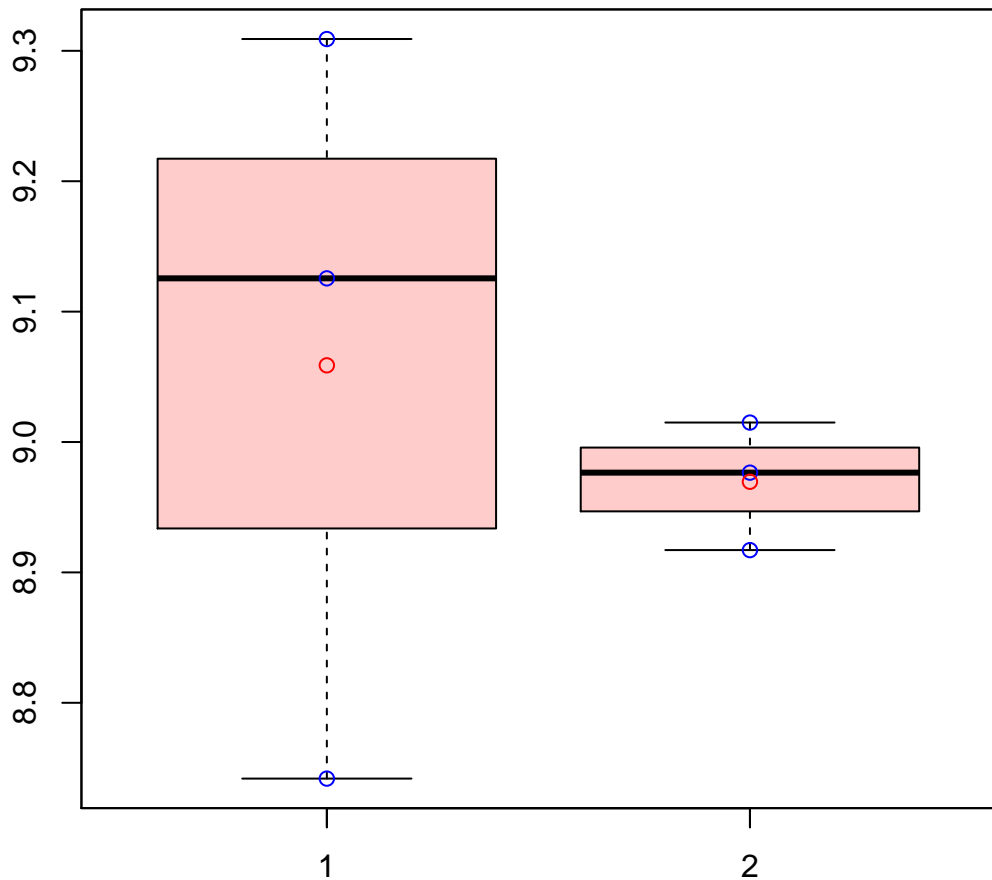

t-Test: p-value = 0.65

# CL943Contig4|CL943Contig4

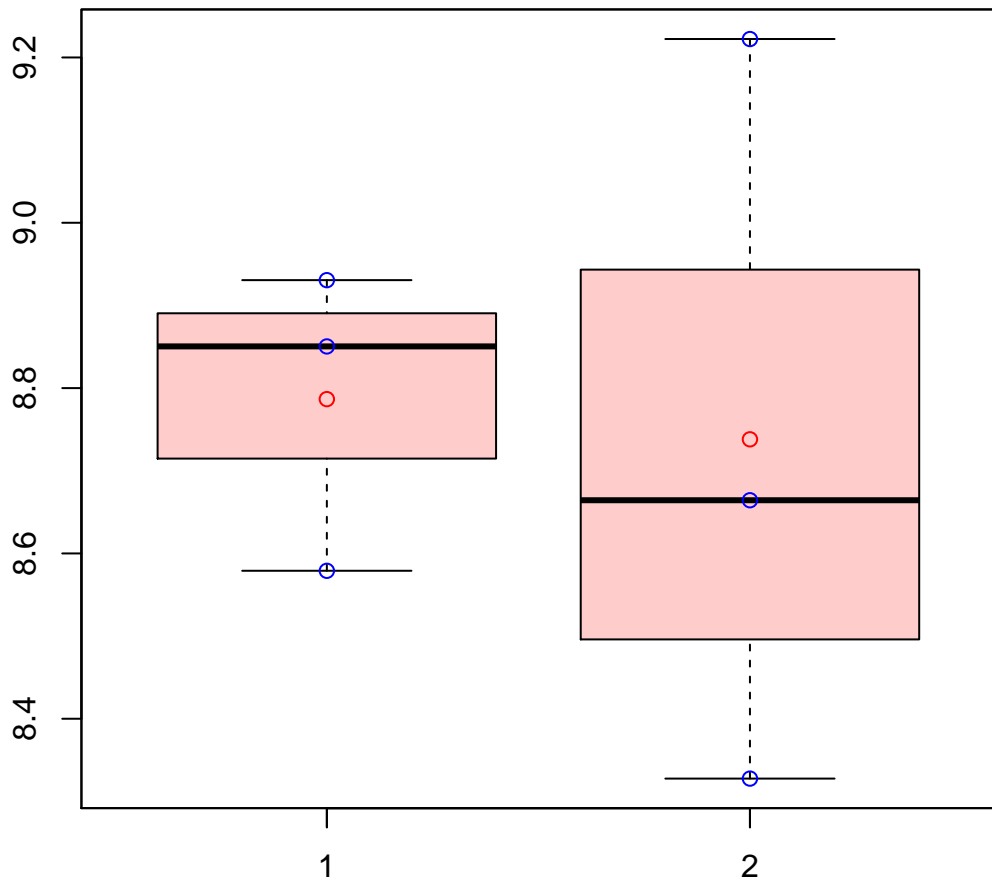

t-Test: p-value = 0.88

# CL9459Contig2|CL9459Contig2

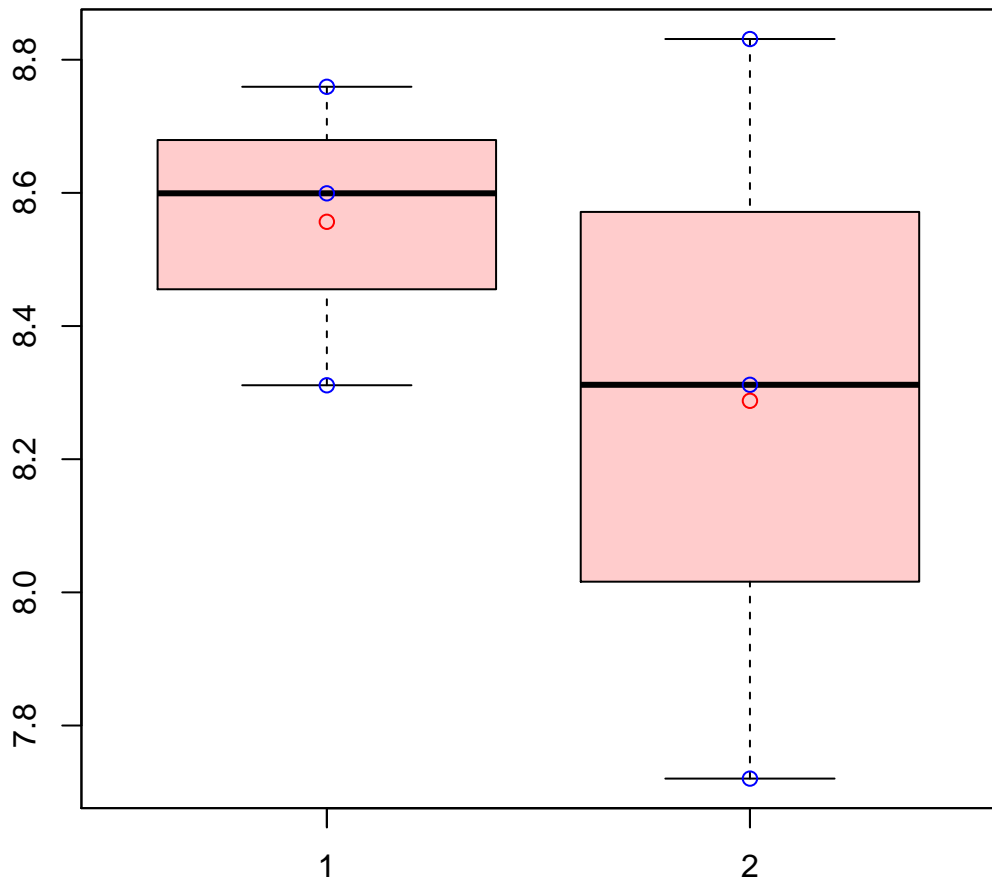

t-Test: p-value = 0.5

# CL9463Contig2|CL9463Contig2



t-Test: p-value = 0.34

# CL9471Contig1|CL9471Contig1

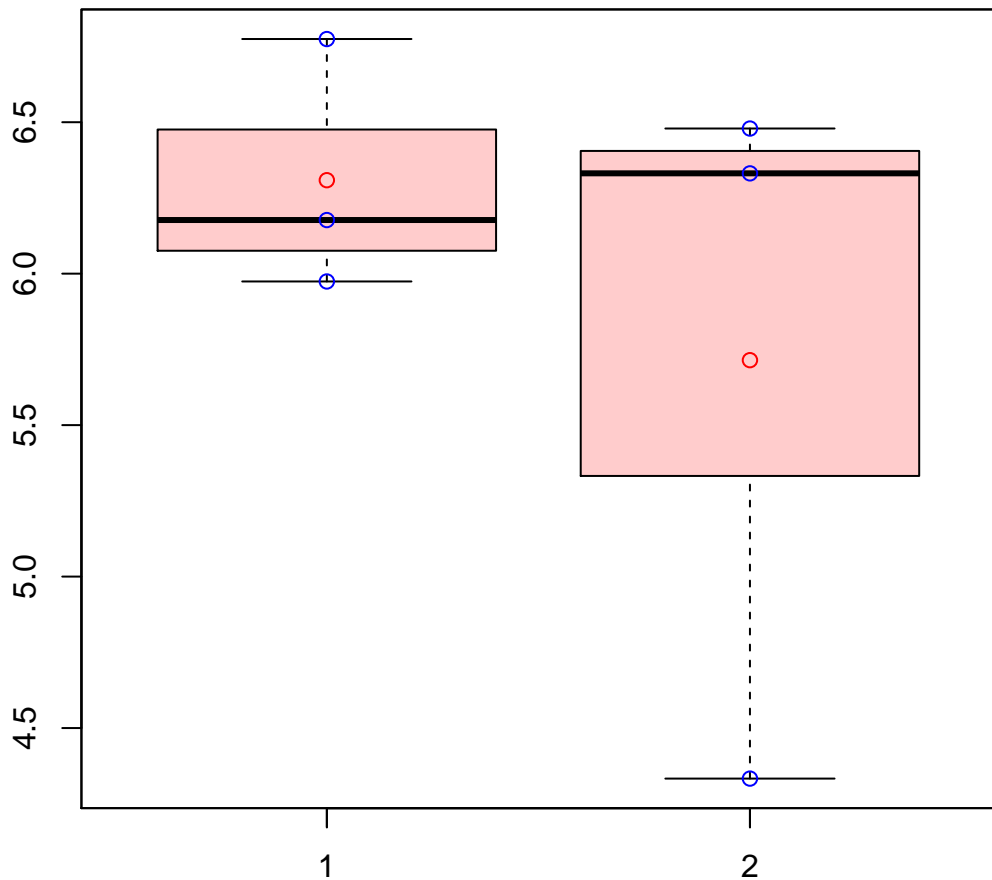

t-Test: p-value = 0.49



# CL948Contig4|CL948Contig4

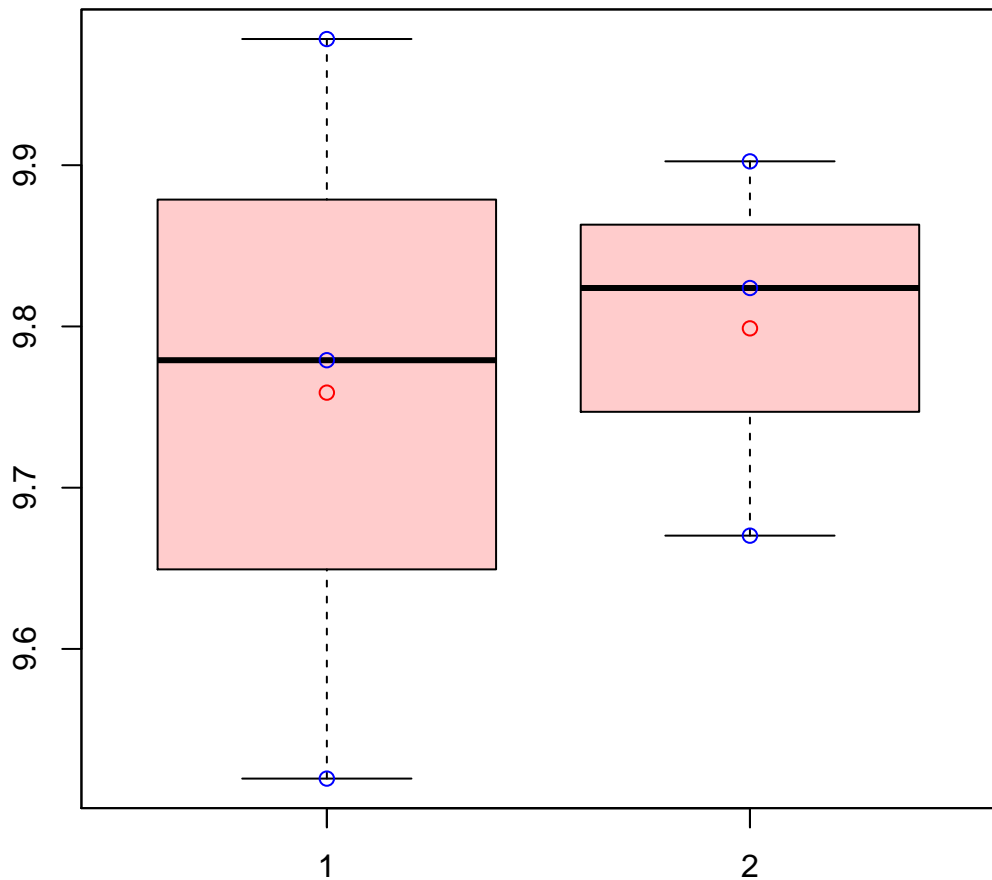

t-Test: p-value = 0.81

# CL948Contig7|CL948Contig7

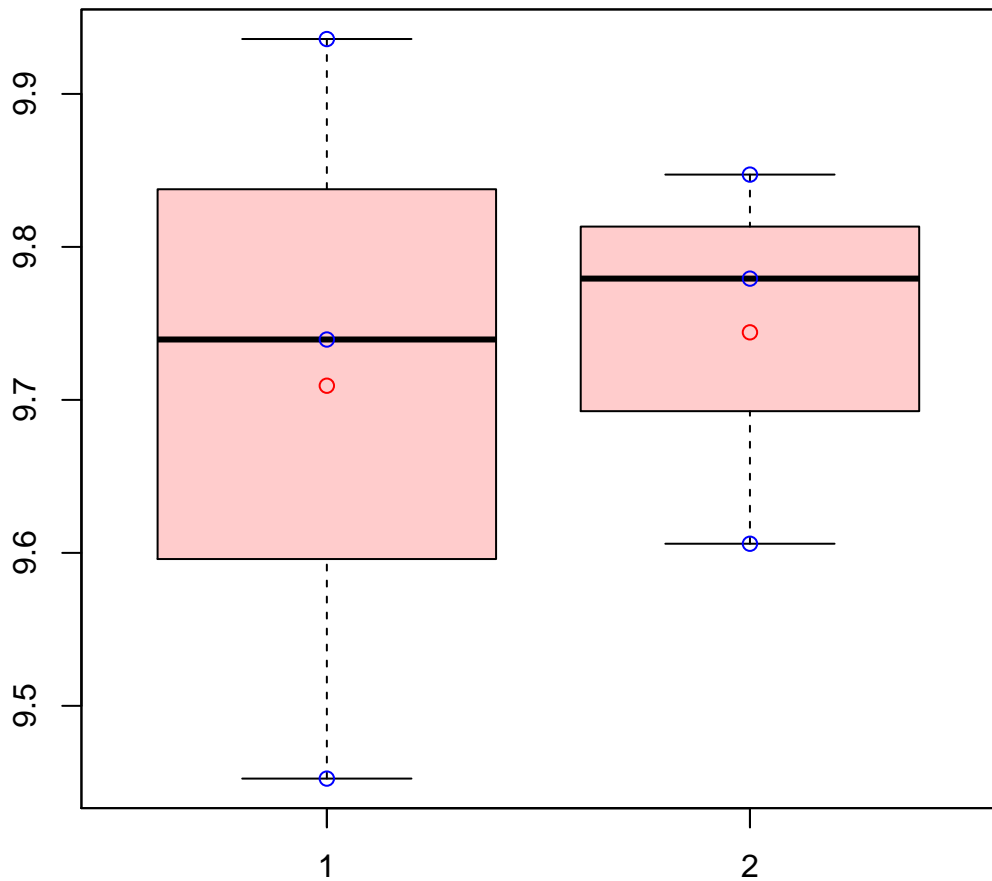

t-Test: p-value = 0.84

# CL94Contig19|CL94Contig19

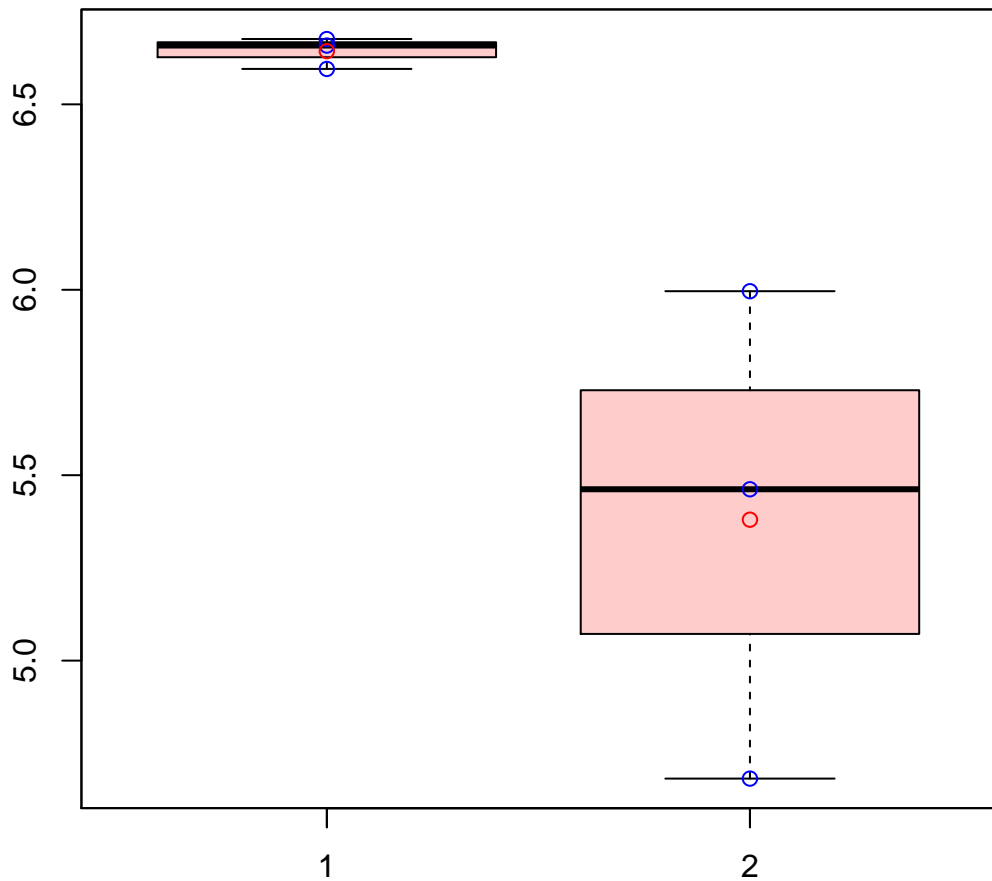

t-Test: p-value = 0.08

# CL94Contig27|CL94Contig27

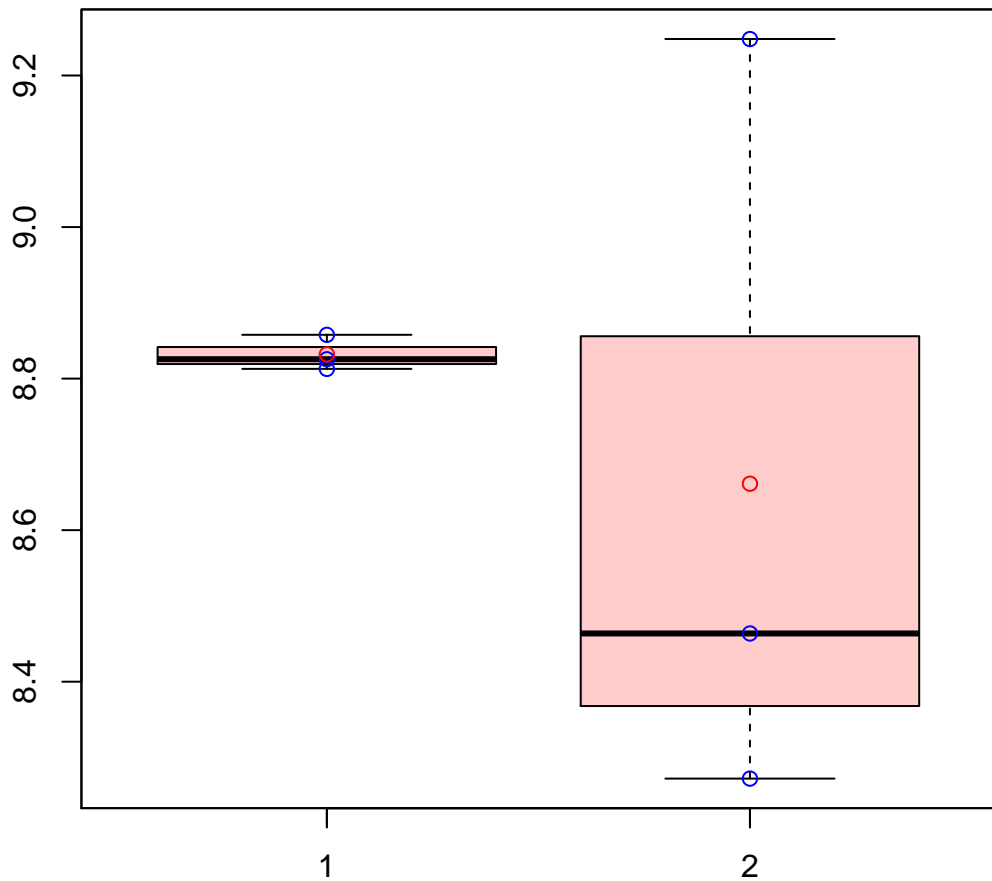

t-Test: p-value = 0.63

# CL94Contig5|CL94Contig5

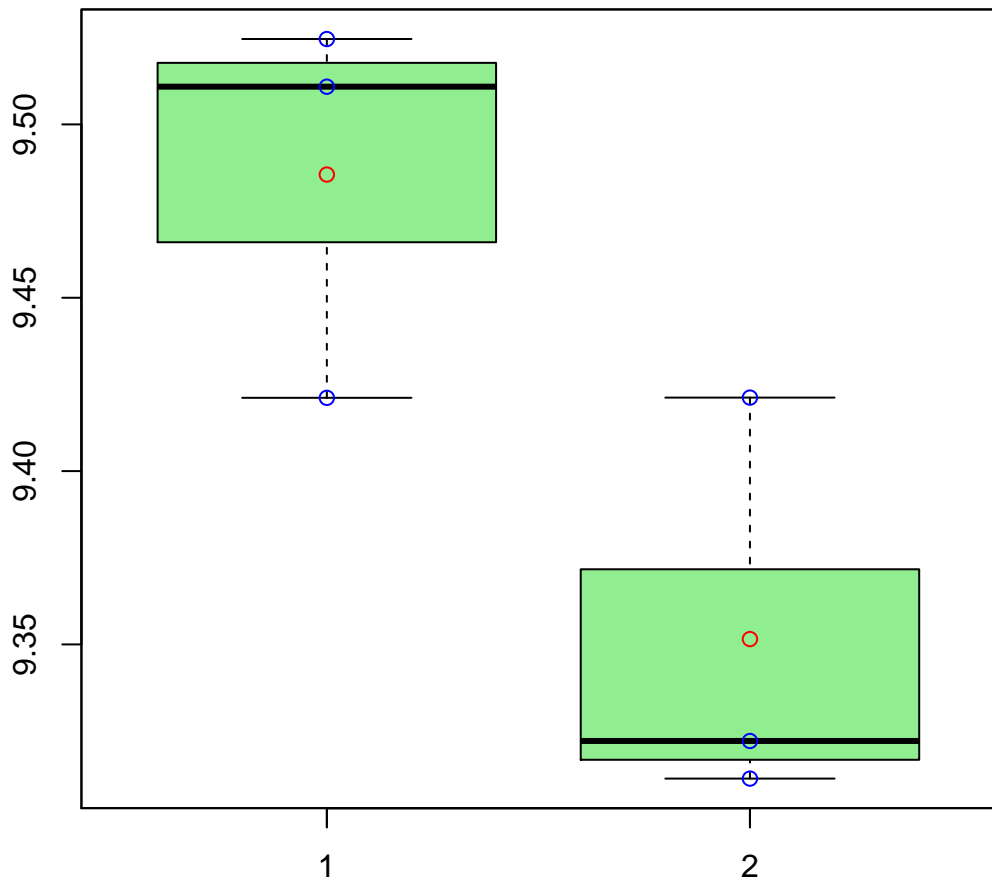

t-Test: p-value = 0.05

# CL94Contig6|CL94Contig6

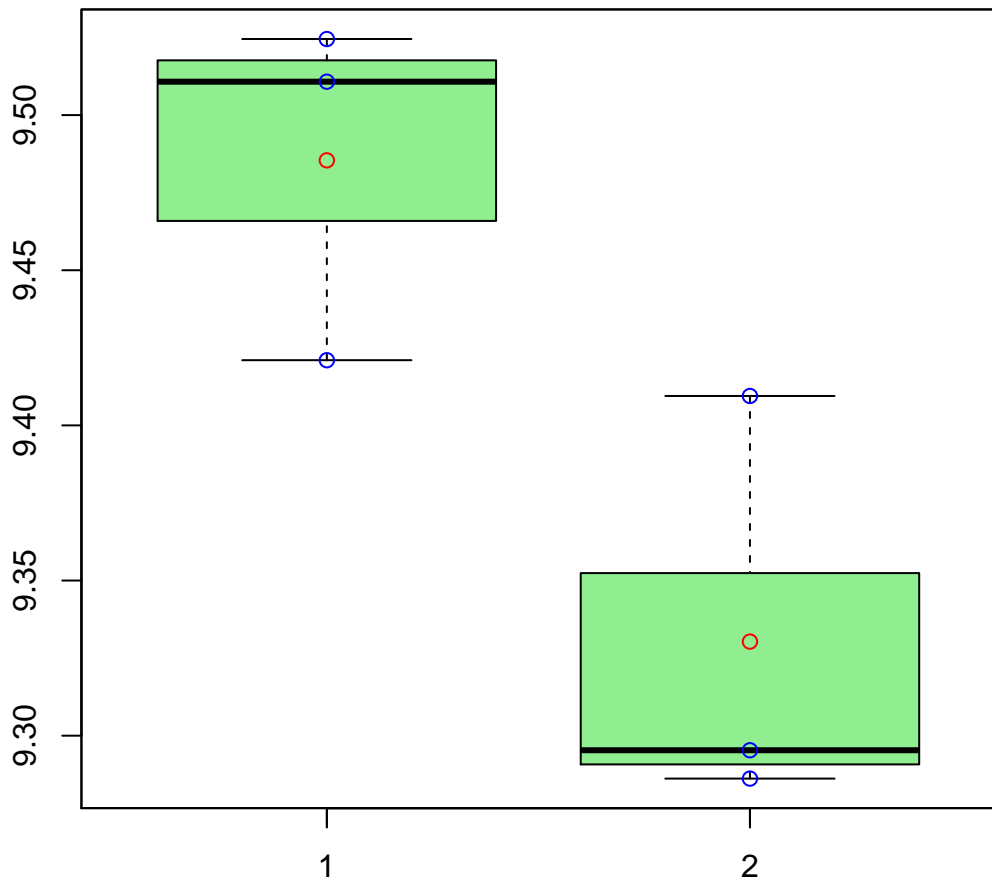

t-Test: p-value = 0.04

# CL94Contig7|CL94Contig7



t-Test: p-value = 0.48

# CL9506Contig1|CL9506Contig1



t-Test: p-value = 0.41



# CL950Contig3|CL950Contig3

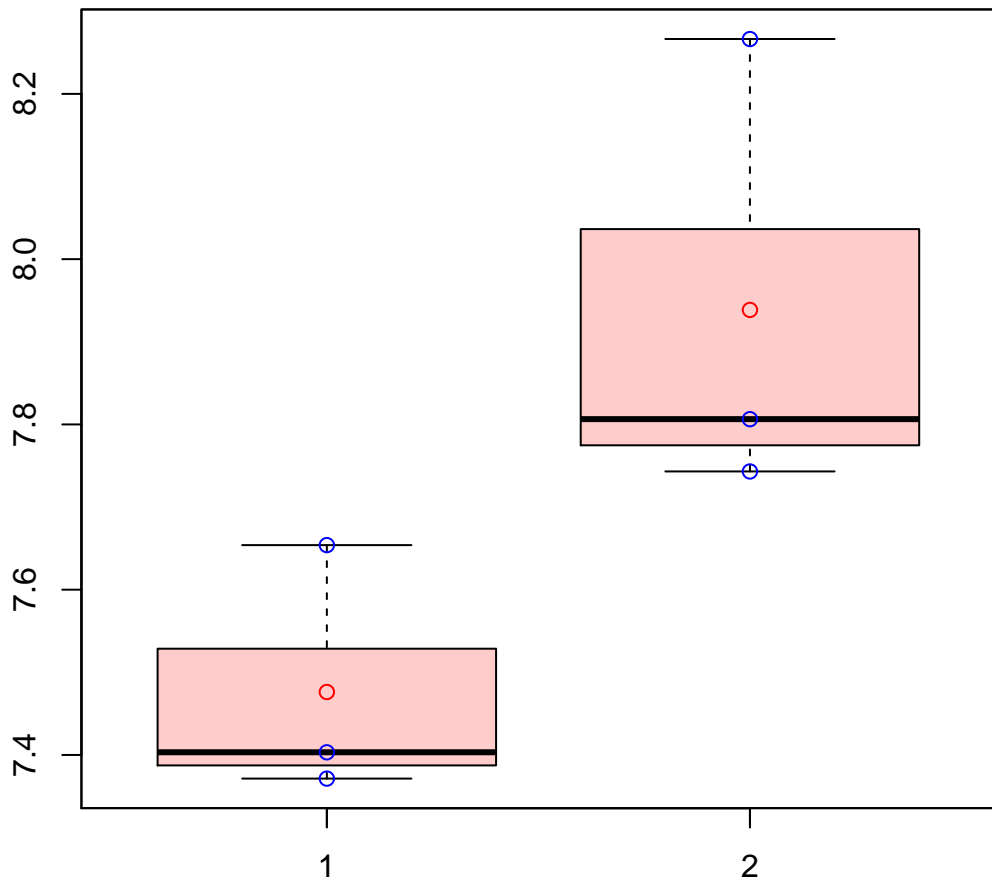

t-Test: p-value = 0.09

## CL9518Contig2|CL9518Contig2

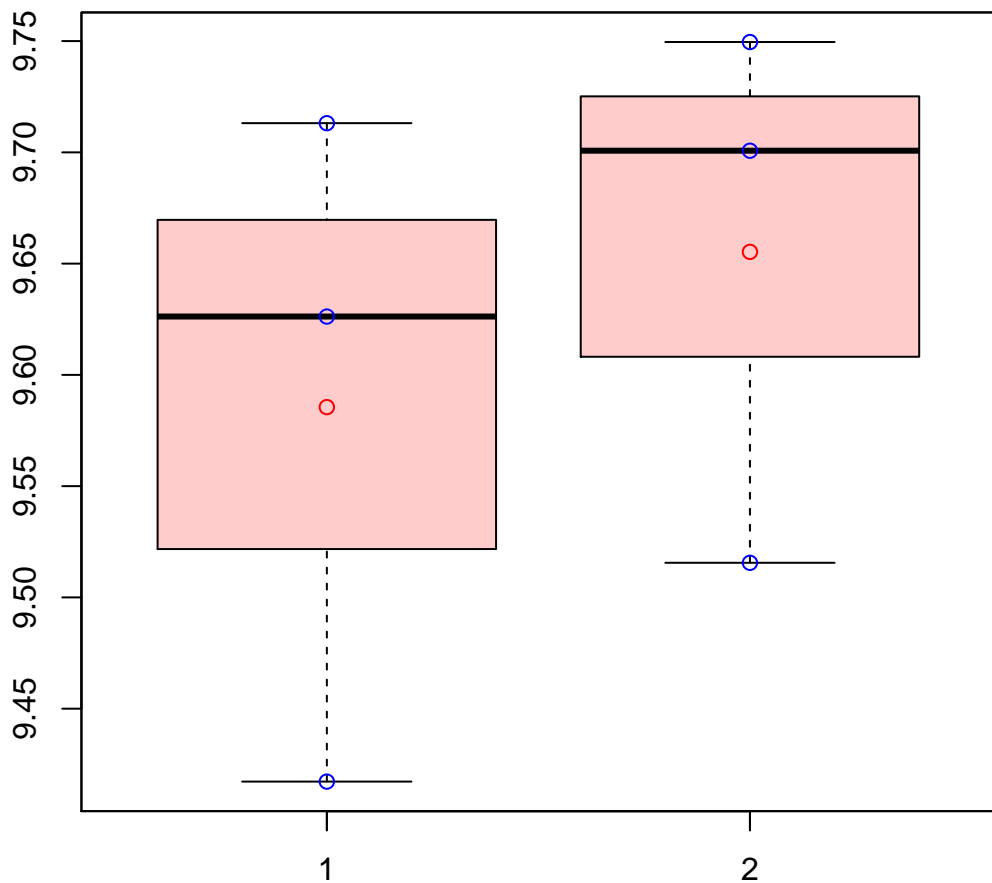

t-Test: p-value = 0.57

# CL9532Contig2|CL9532Contig2

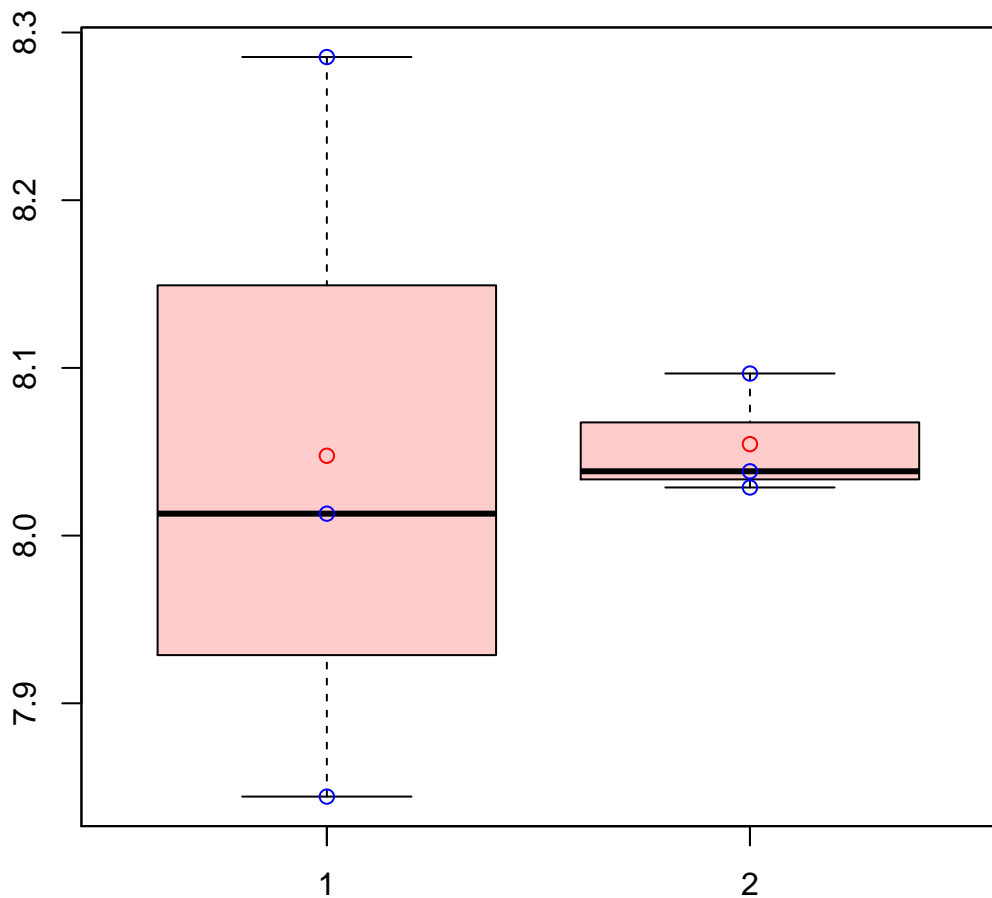

t-Test: p-value = 0.96

# CL953Contig5|CL953Contig5

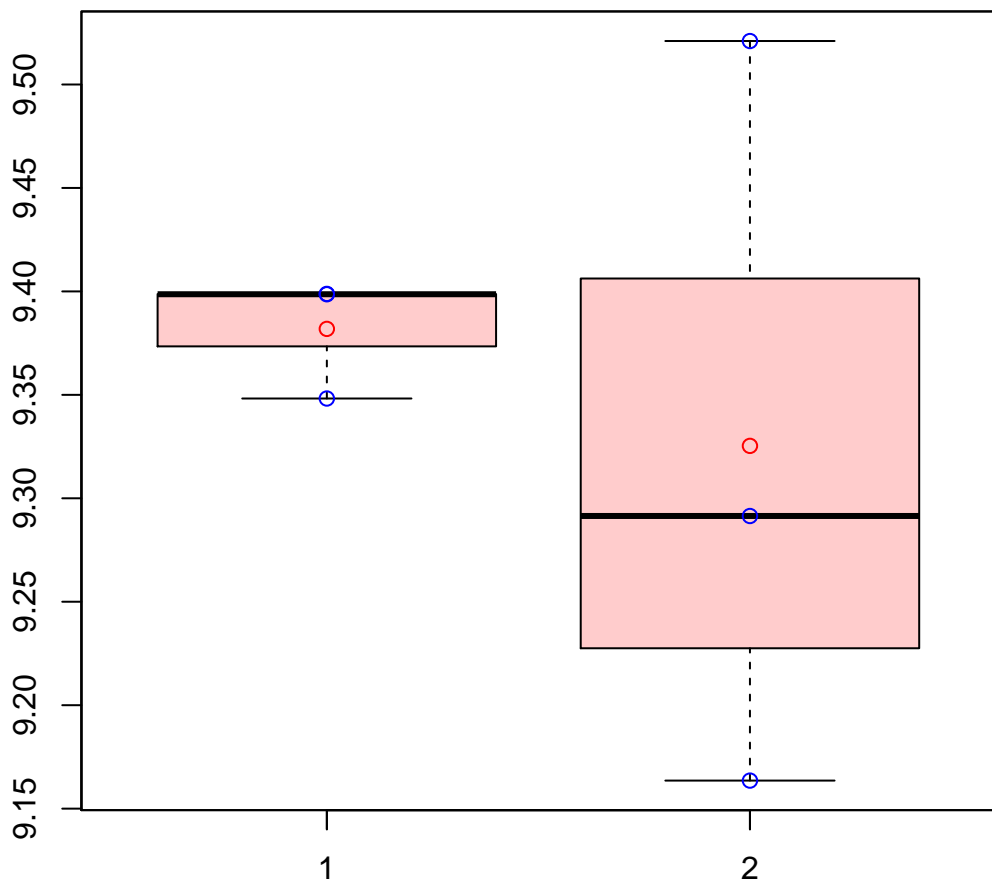

t-Test: p-value = 0.64

# CL953Contig6|CL953Contig6

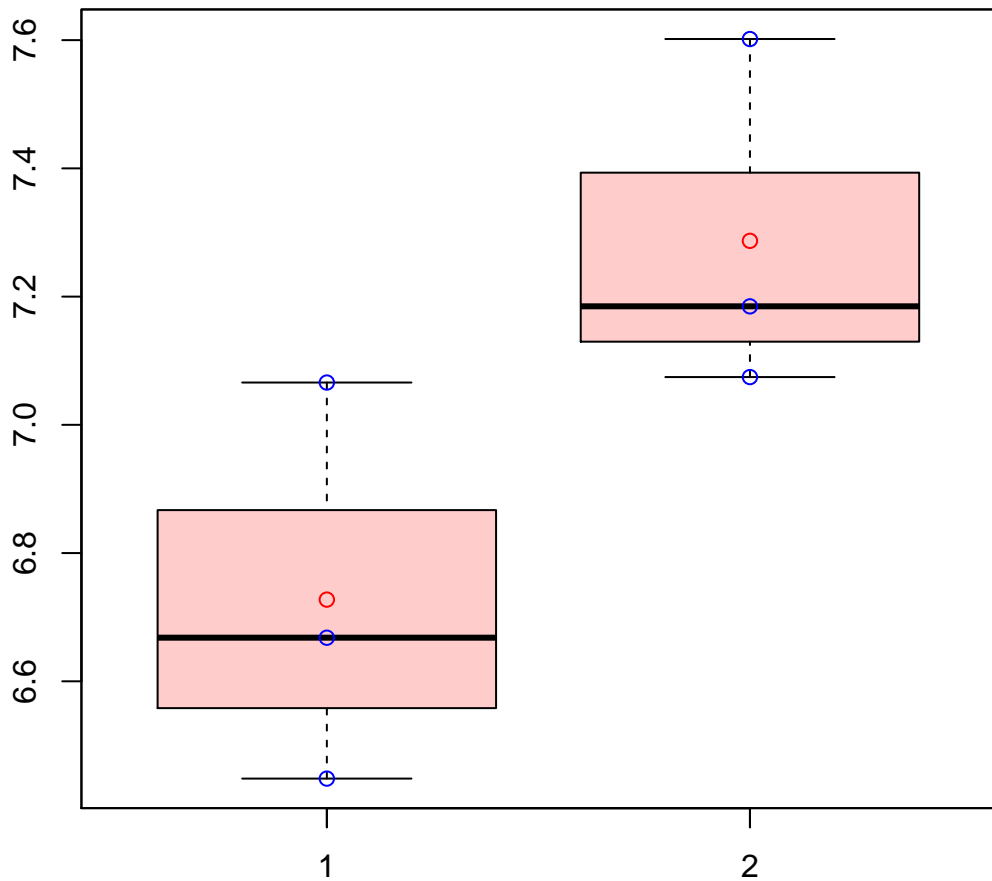

t-Test: p-value = 0.08

# CL9545Contig2|CL9545Contig2

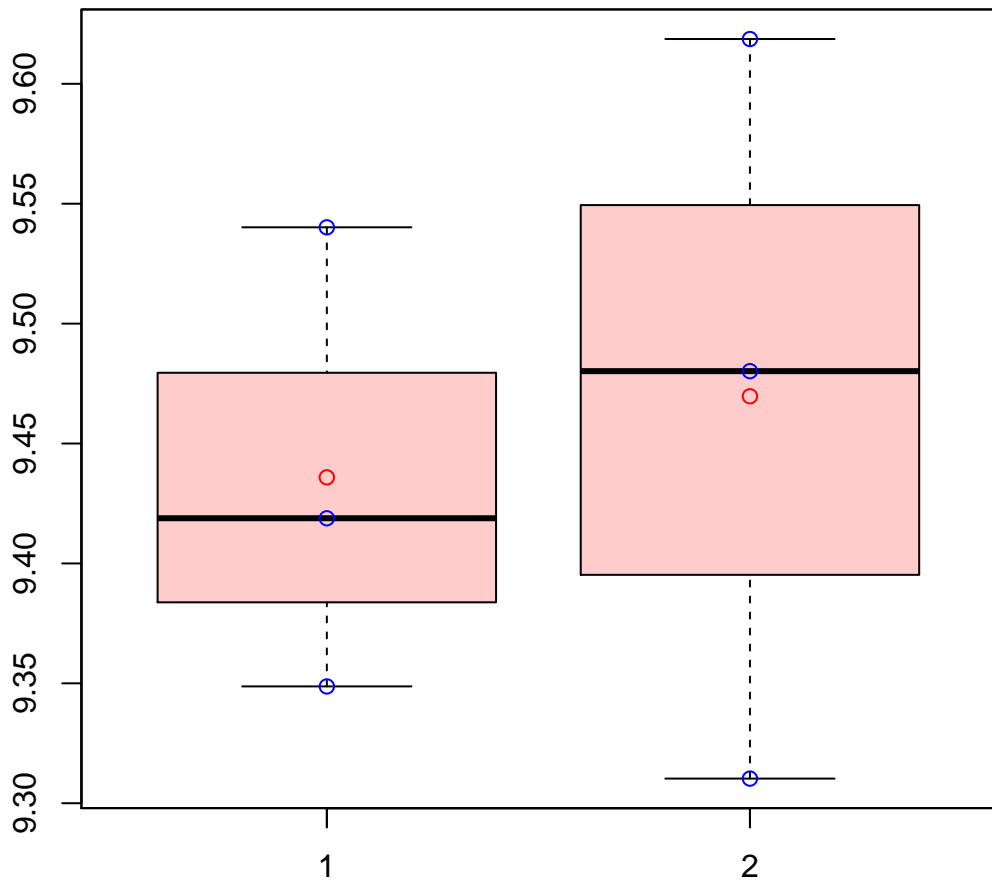

t-Test: p-value = 0.77

# CL954Contig2|CL954Contig2

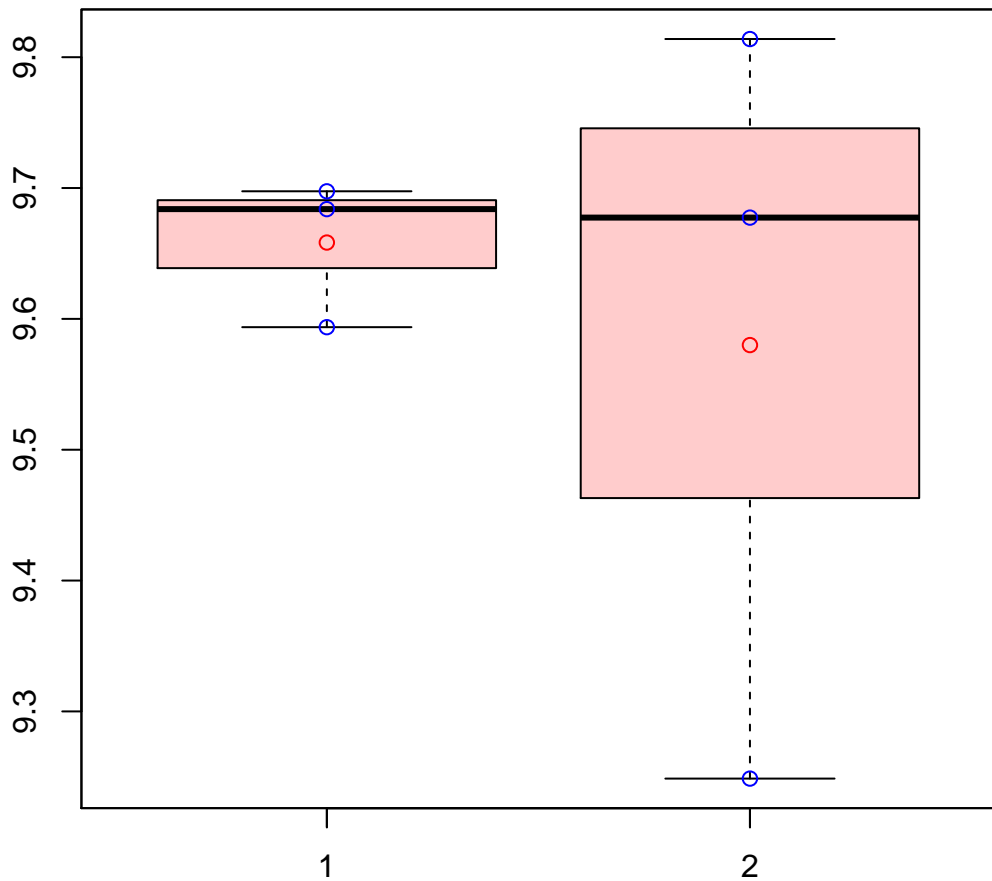

t-Test: p-value = 0.69

# CL954Contig4|CL954Contig4

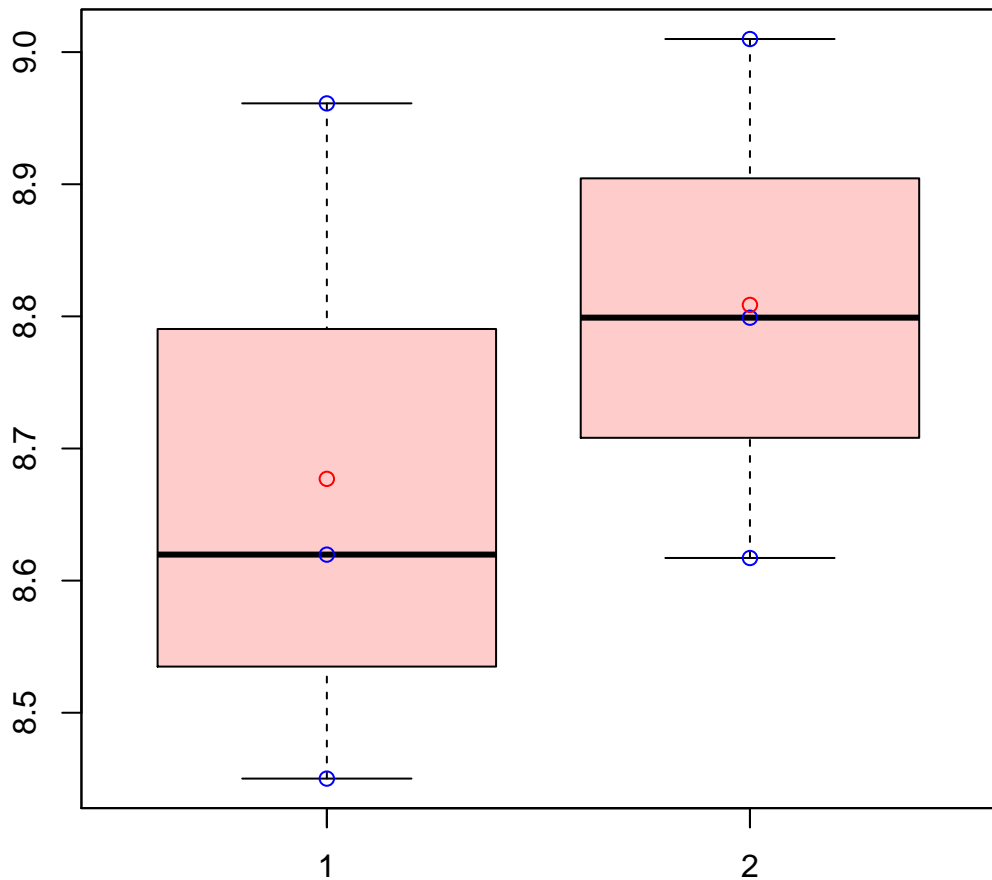

t-Test: p-value = 0.53



# CL954Contig5|CL954Contig5

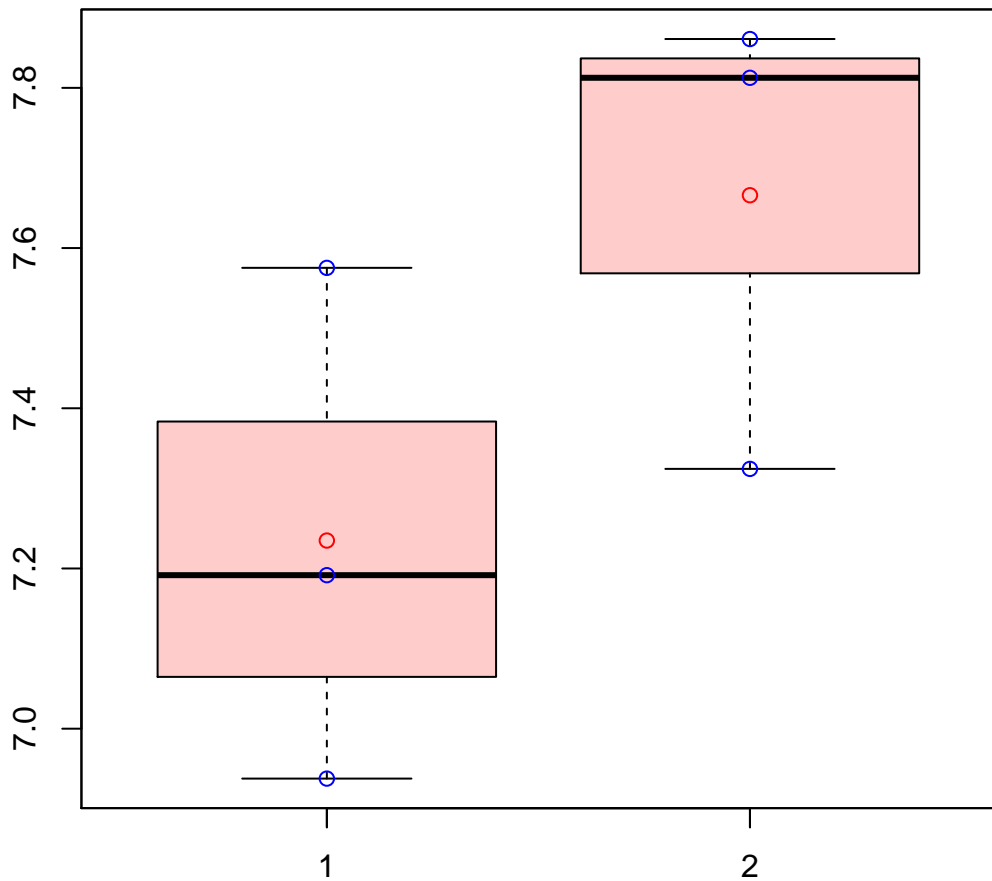

t-Test: p-value = 0.16

# CL9581Contig1|CL9581Contig1

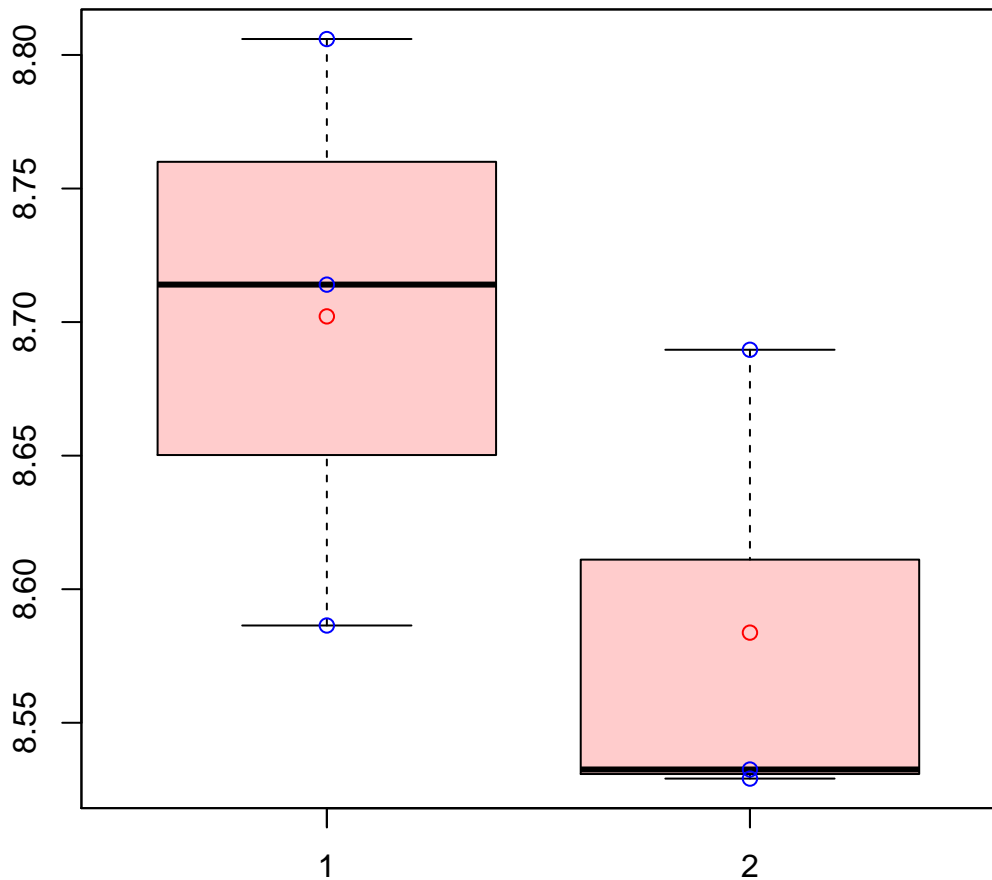

t-Test: p-value = 0.23

# CL958Contig1|CL958Contig1

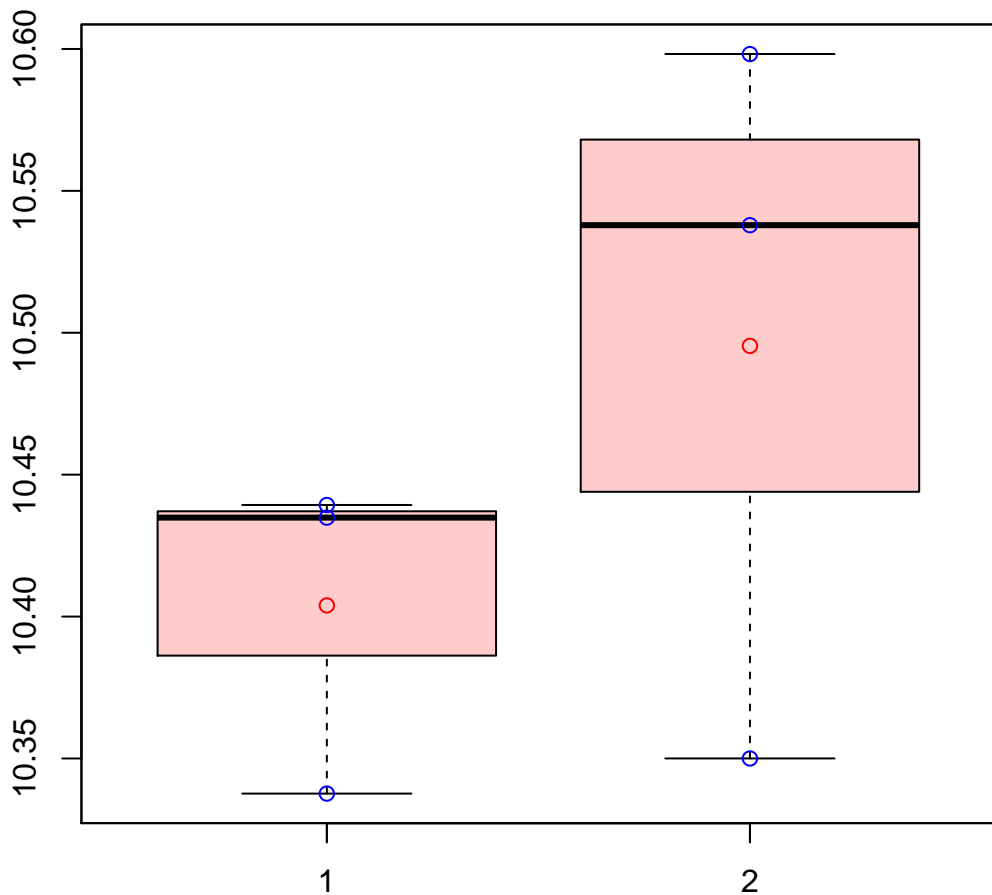

t-Test: p-value = 0.35

# CL958Contig5|CL958Contig5

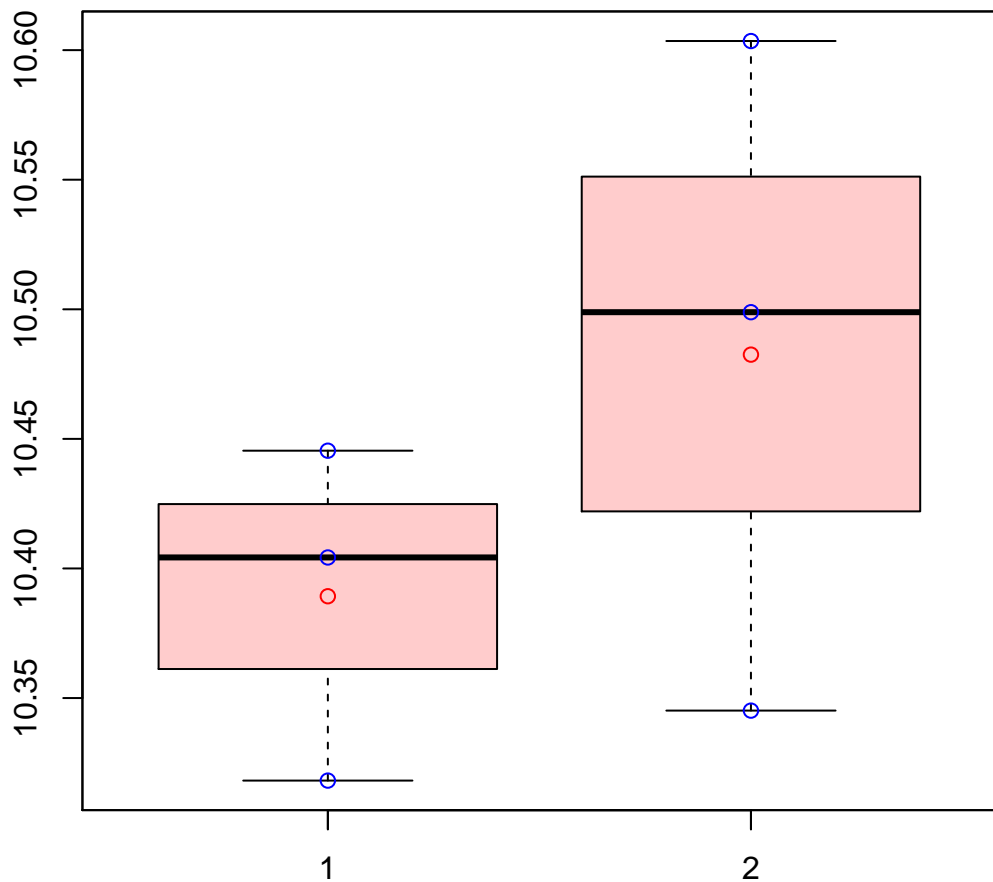

t-Test: p-value = 0.35

# CL959Contig12|CL959Contig12

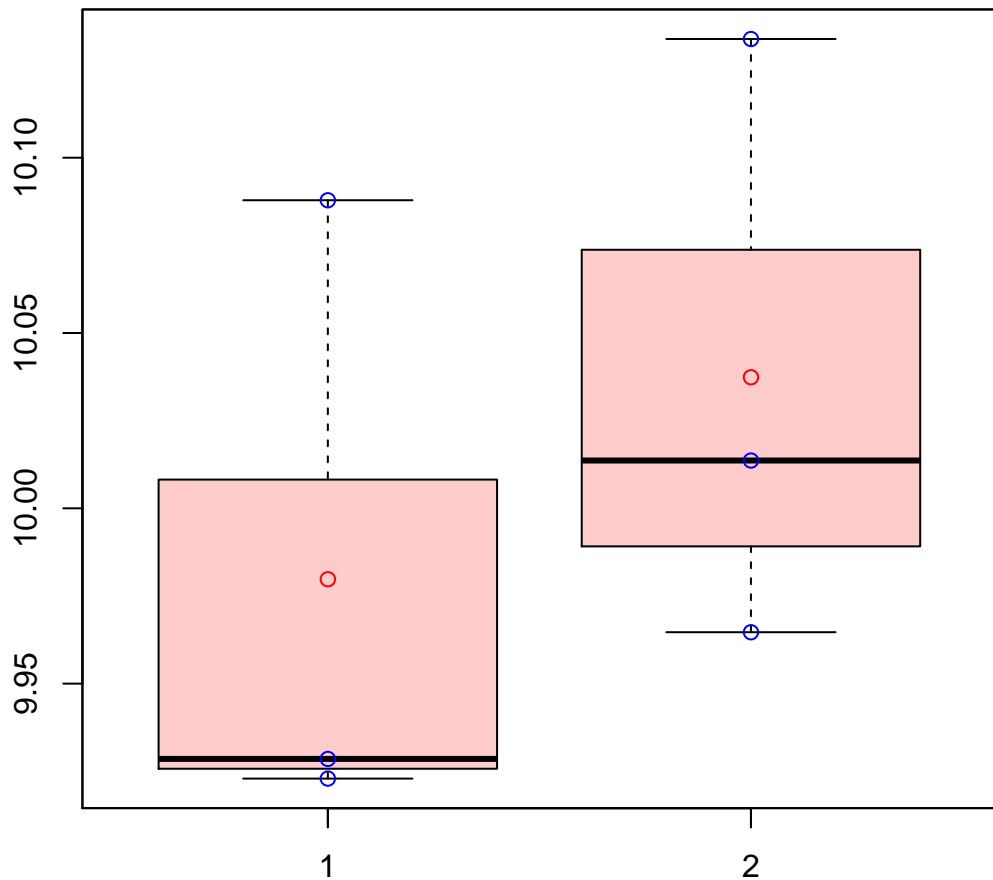

t-Test: p-value = 0.48

# CL95Contig1|CL95Contig1

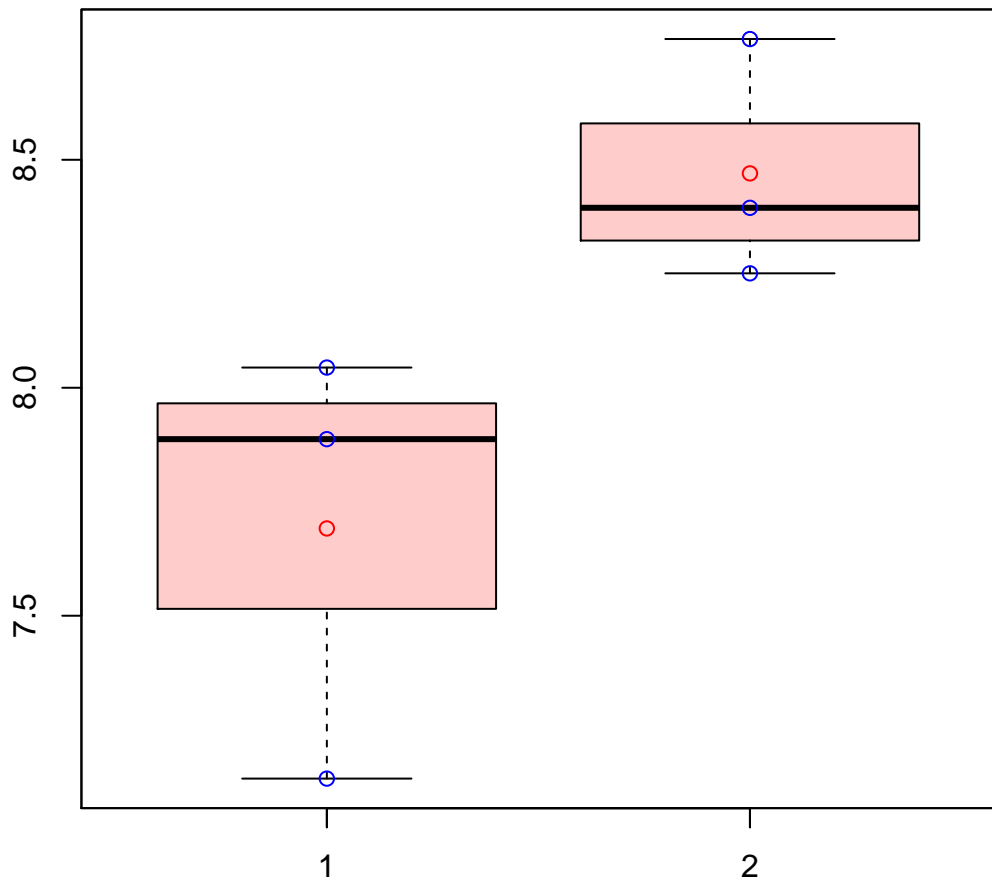

t-Test: p-value = 0.09

# CL95Contig4|CL95Contig4

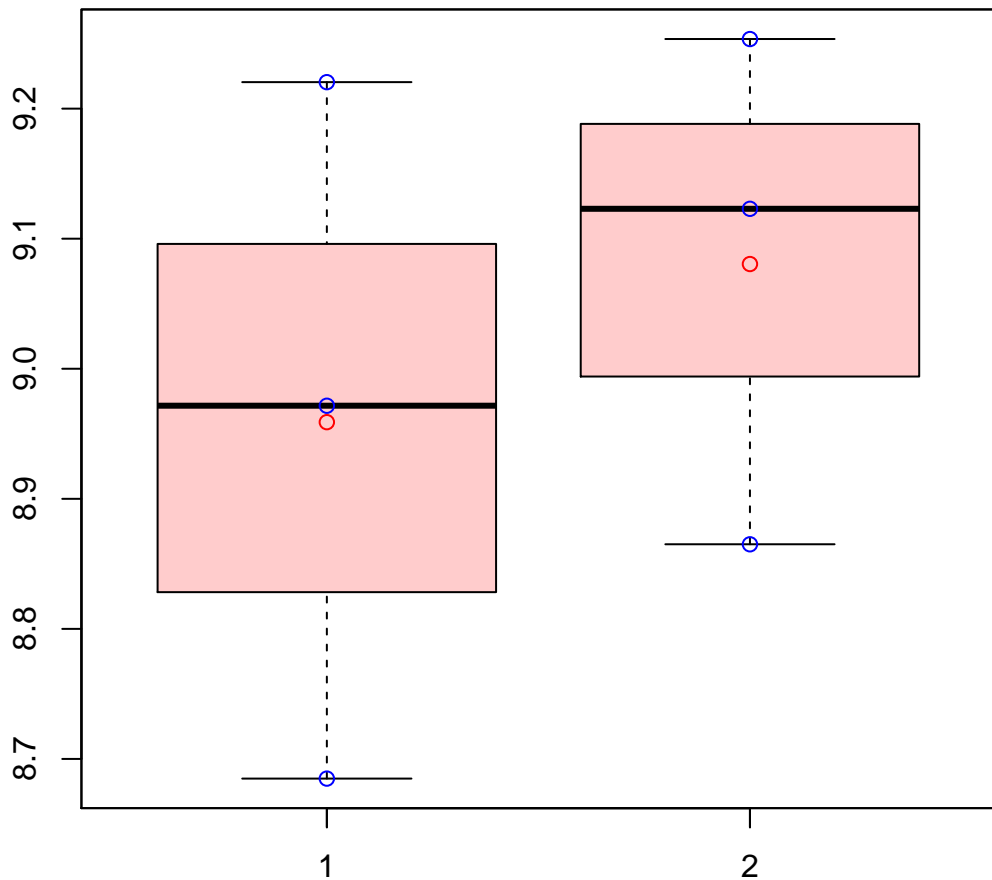

t-Test: p-value = 0.56

# CL961Contig3|CL961Contig3

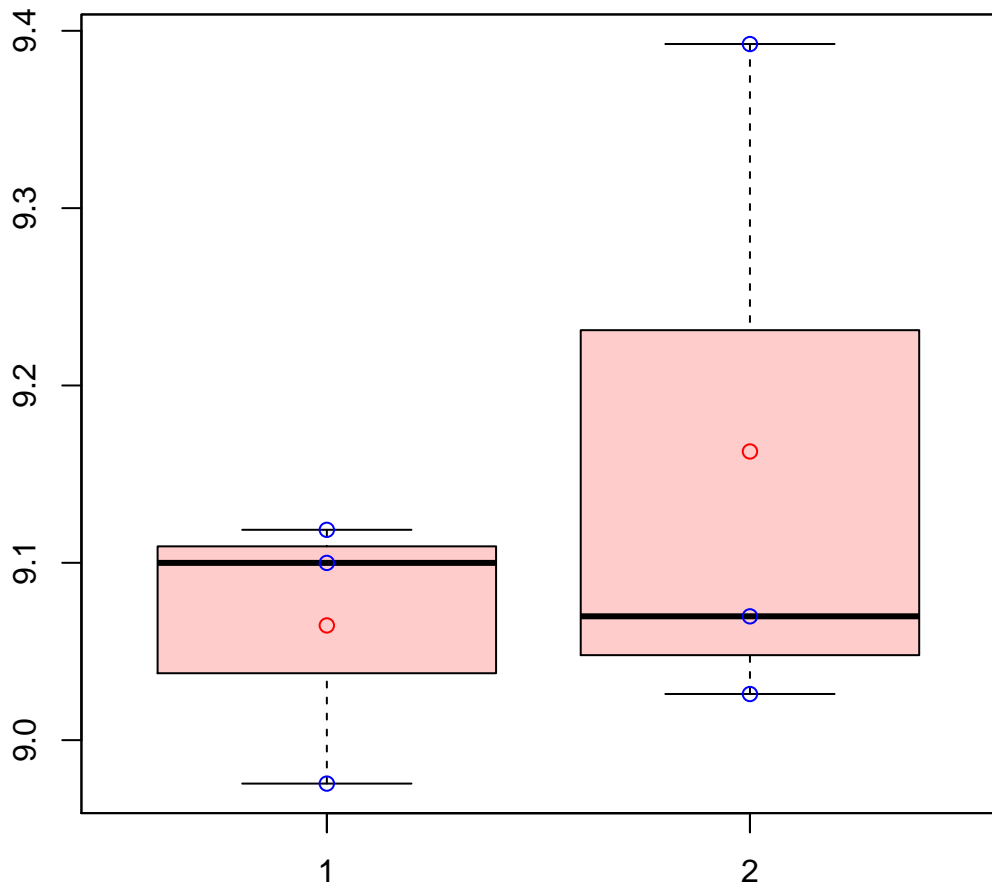

t-Test: p-value = 0.49



# CL9633Contig1|CL9633Contig1



t-Test: p-value = 0.4

# CL9654Contig3|CL9654Contig3

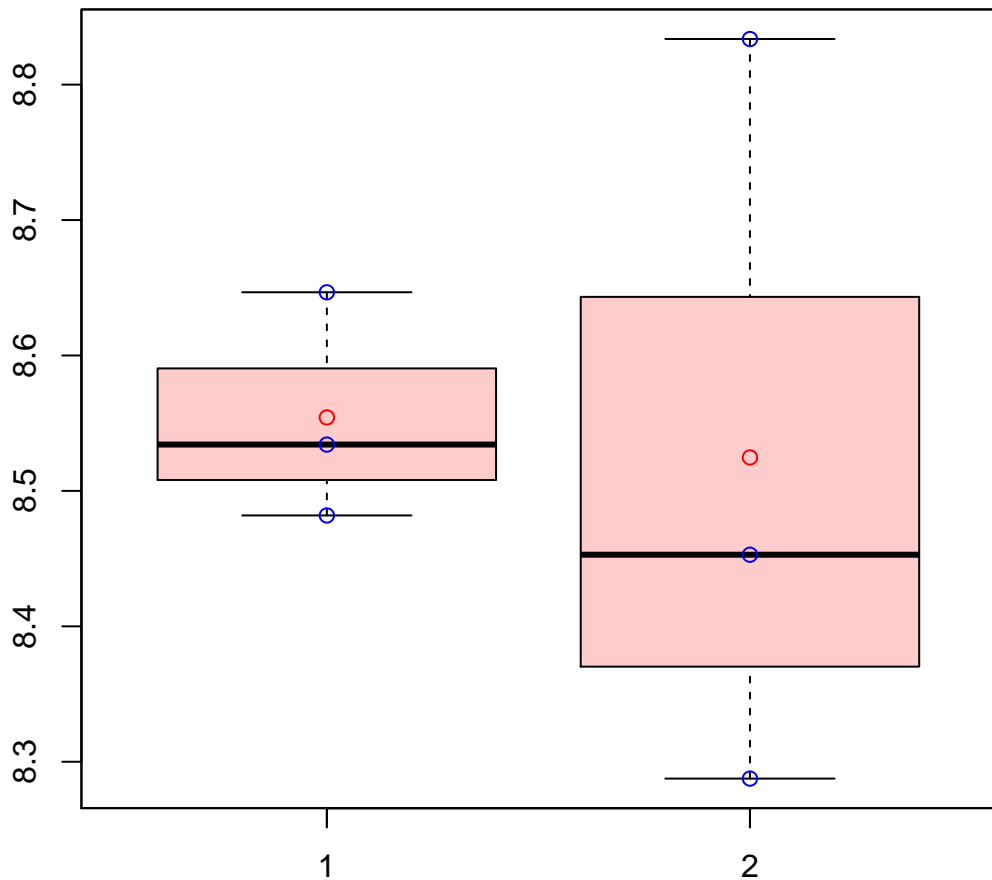

t-Test: p-value = 0.87

# CL9662Contig1|CL9662Contig1

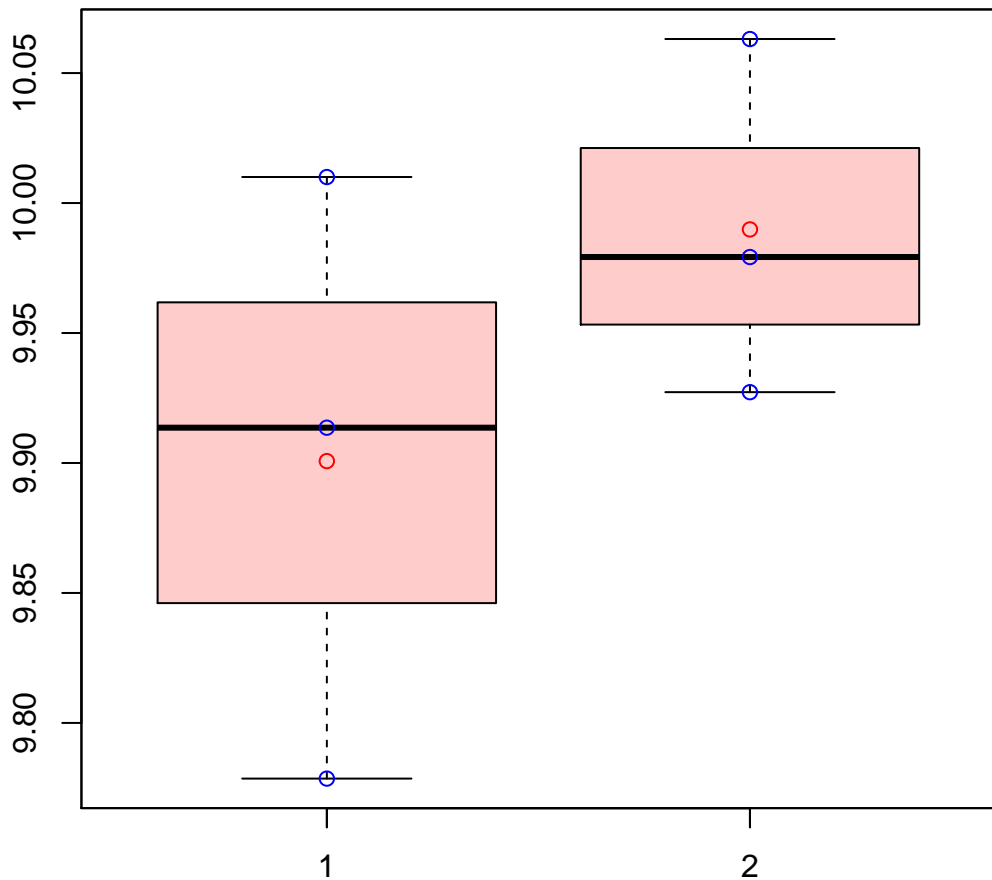

t-Test: p-value = 0.33

# CL9662Contig3|CL9662Contig3

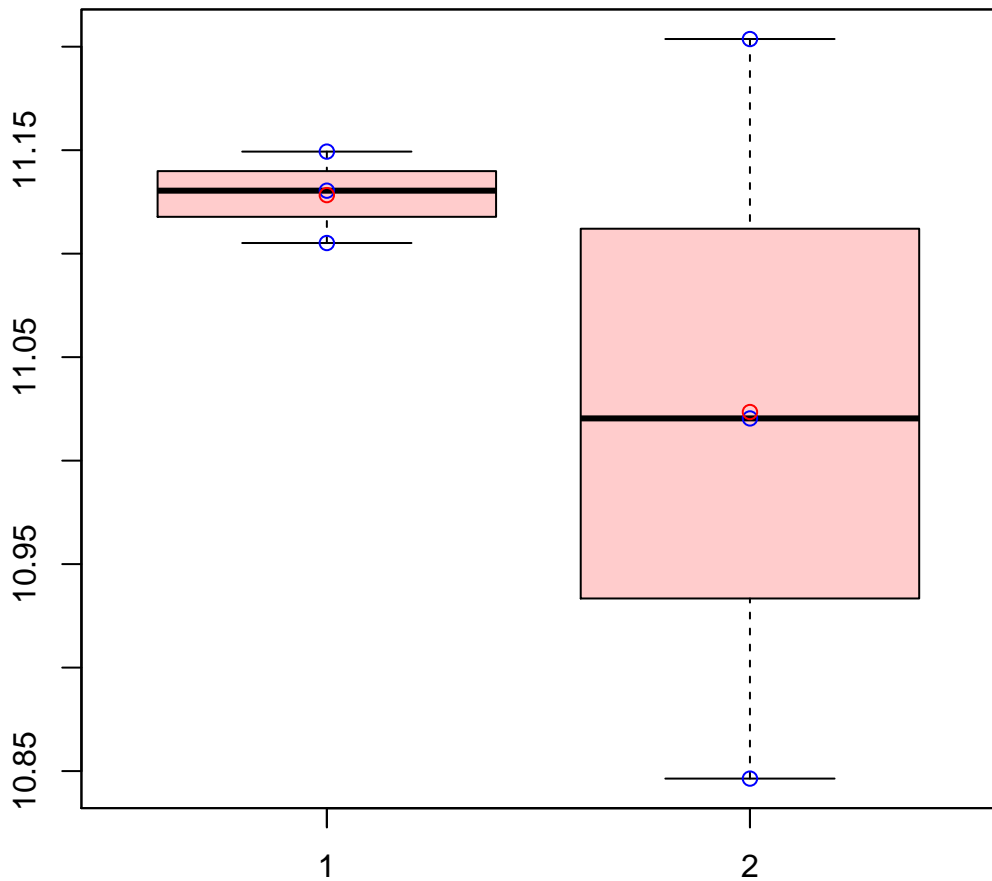

t-Test: p-value = 0.42

# CL9662Contig4|CL9662Contig4

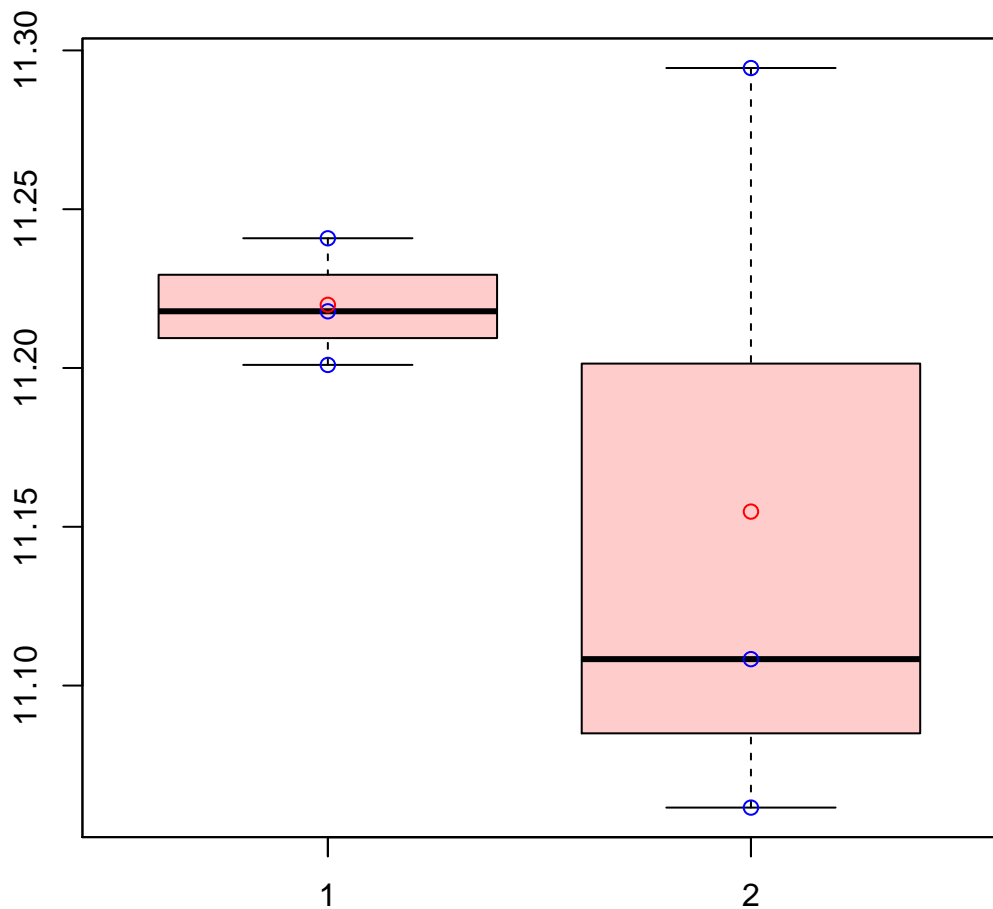

t-Test: p-value = 0.46

# CL9662Contig5|CL9662Contig5

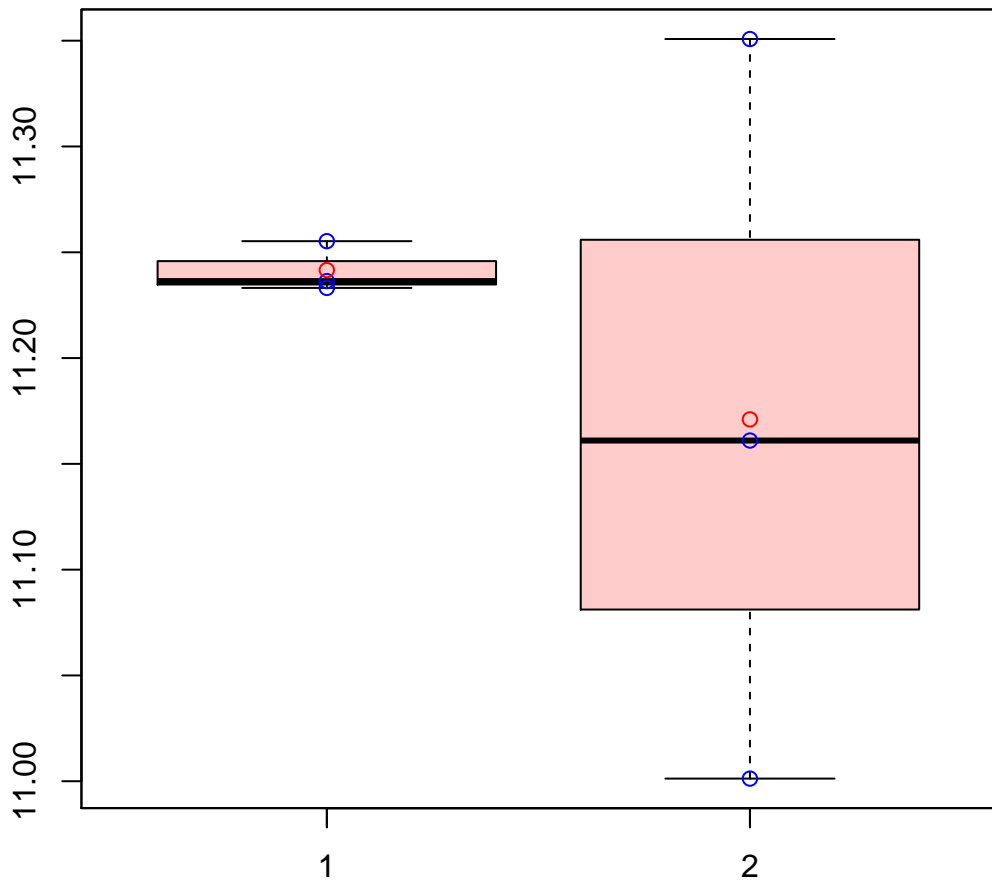

t-Test: p-value = 0.56

# CL9672Contig2|CL9672Contig2

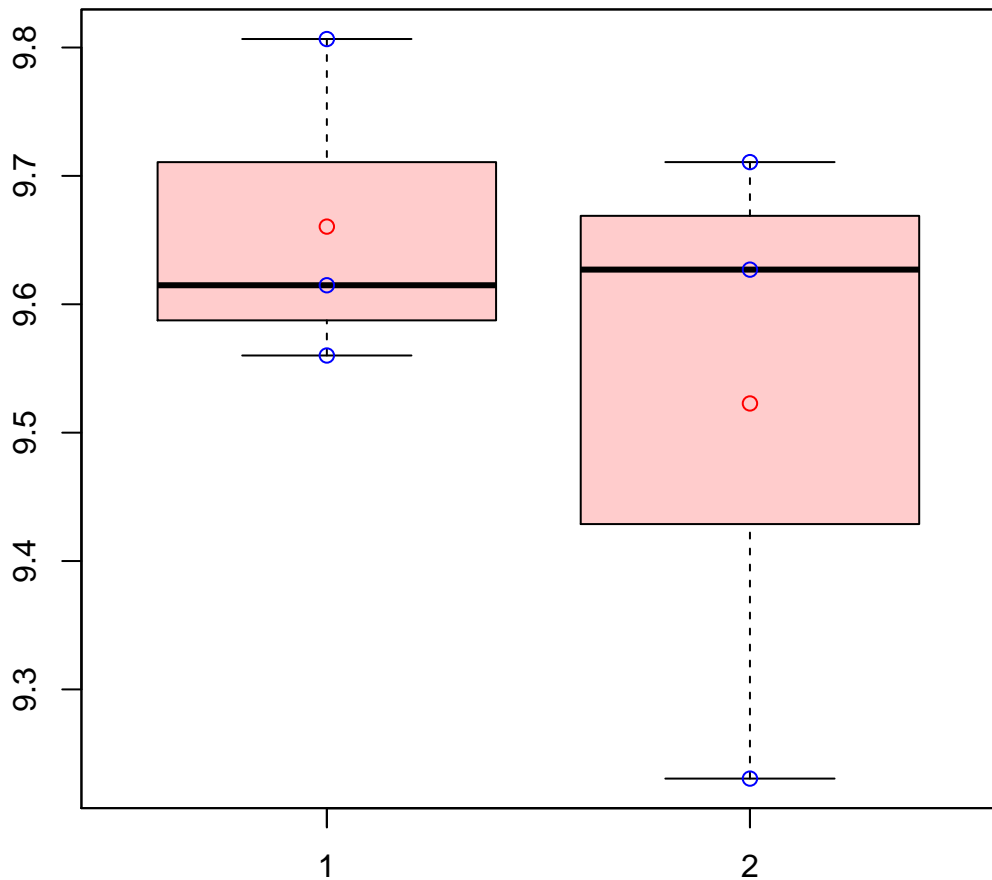

t-Test: p-value = 0.47

# CL9672Contig3|CL9672Contig3

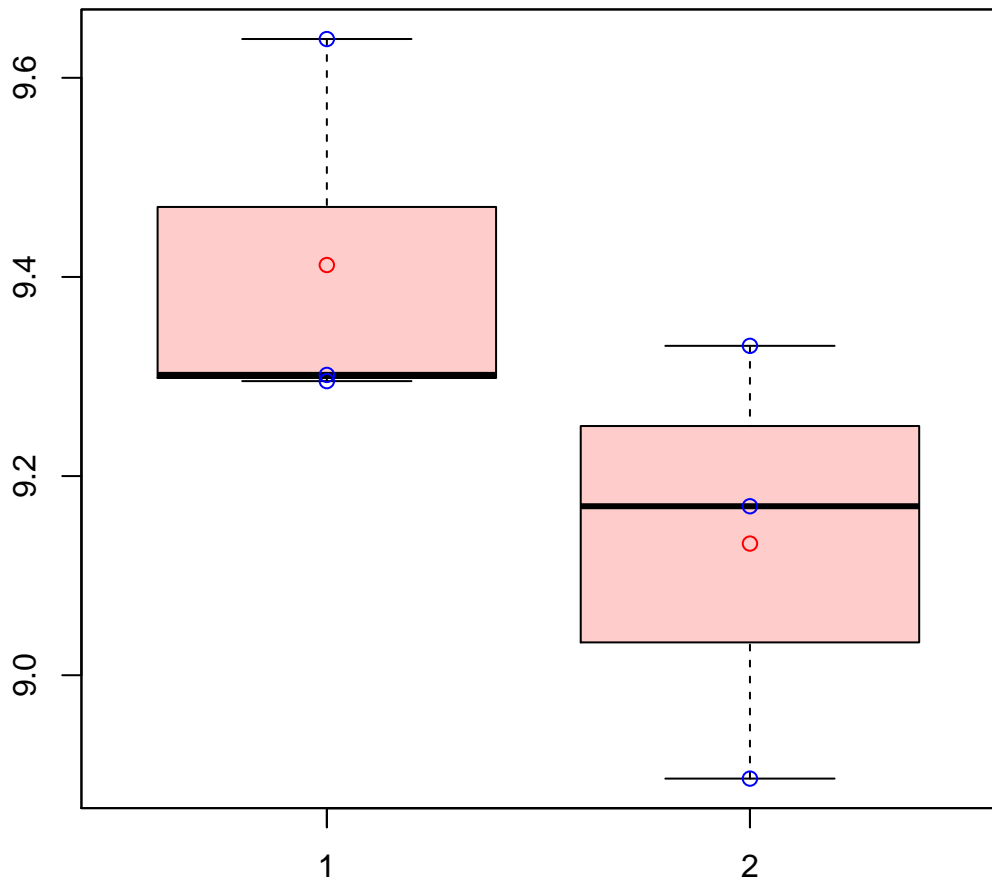

t-Test: p-value = 0.18



# CL9686Contig1|CL9686Contig1

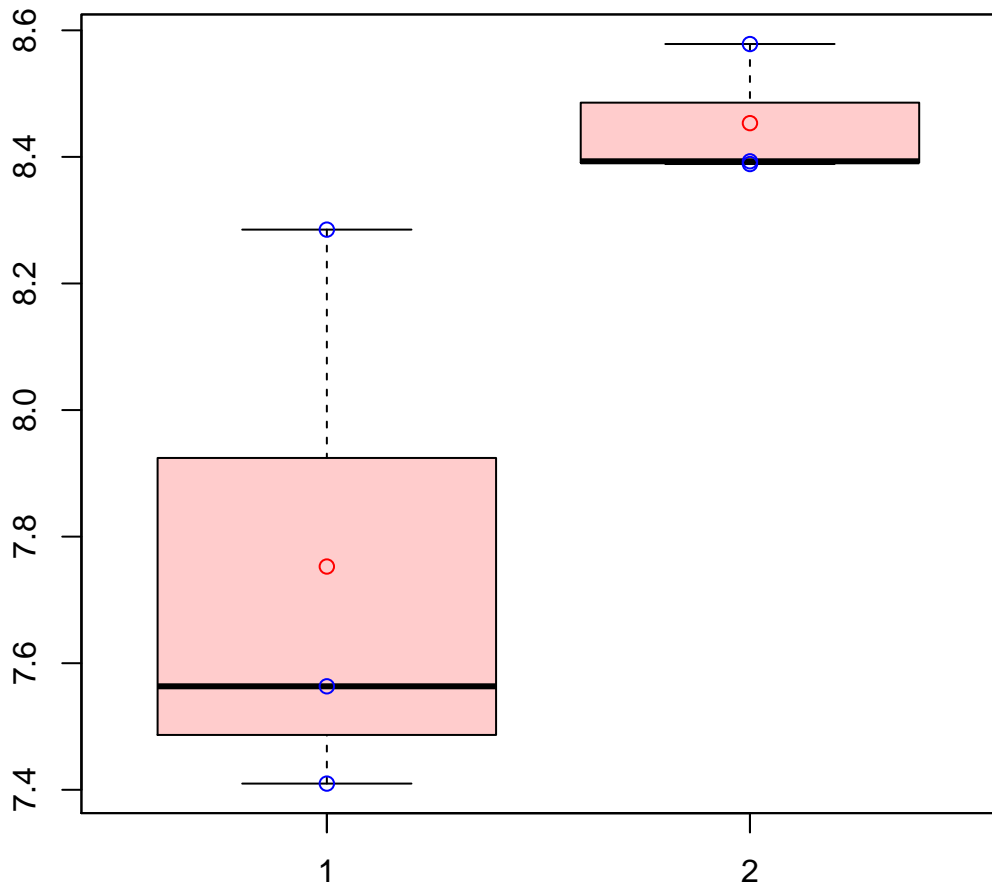

t-Test: p-value = 0.12

# CL9686Contig2|CL9686Contig2

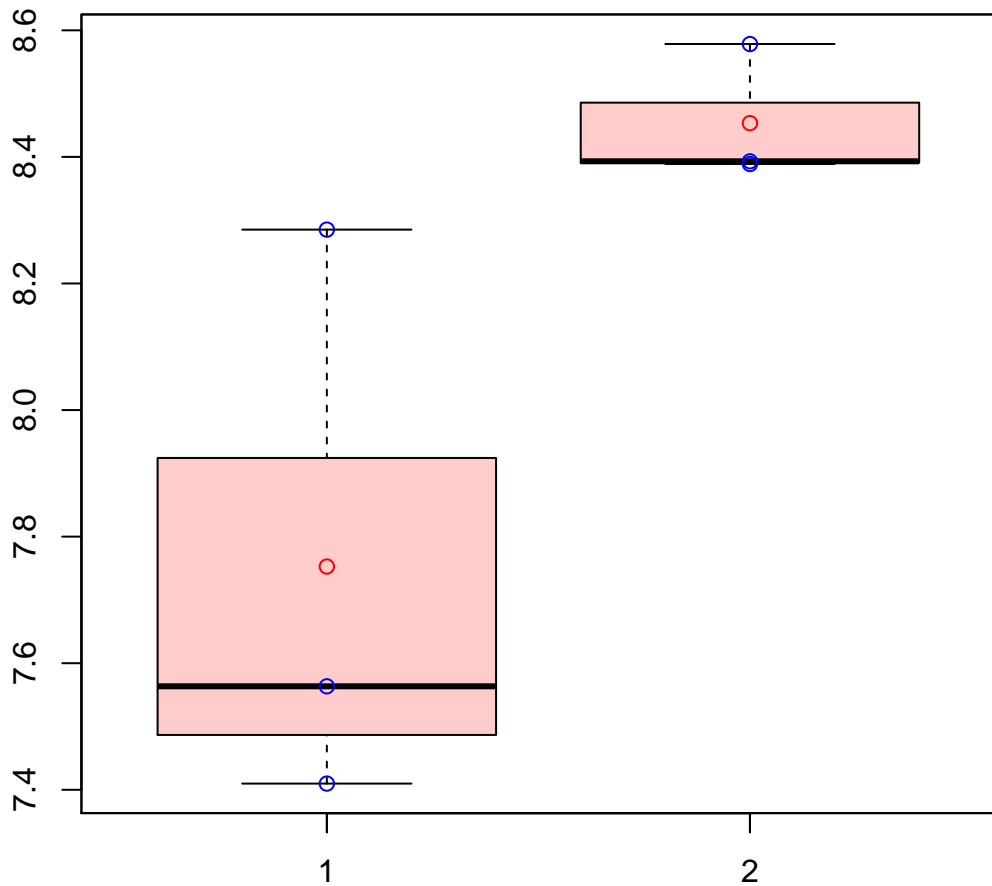

t-Test: p-value = 0.12

# CL968Contig12|CL968Contig12

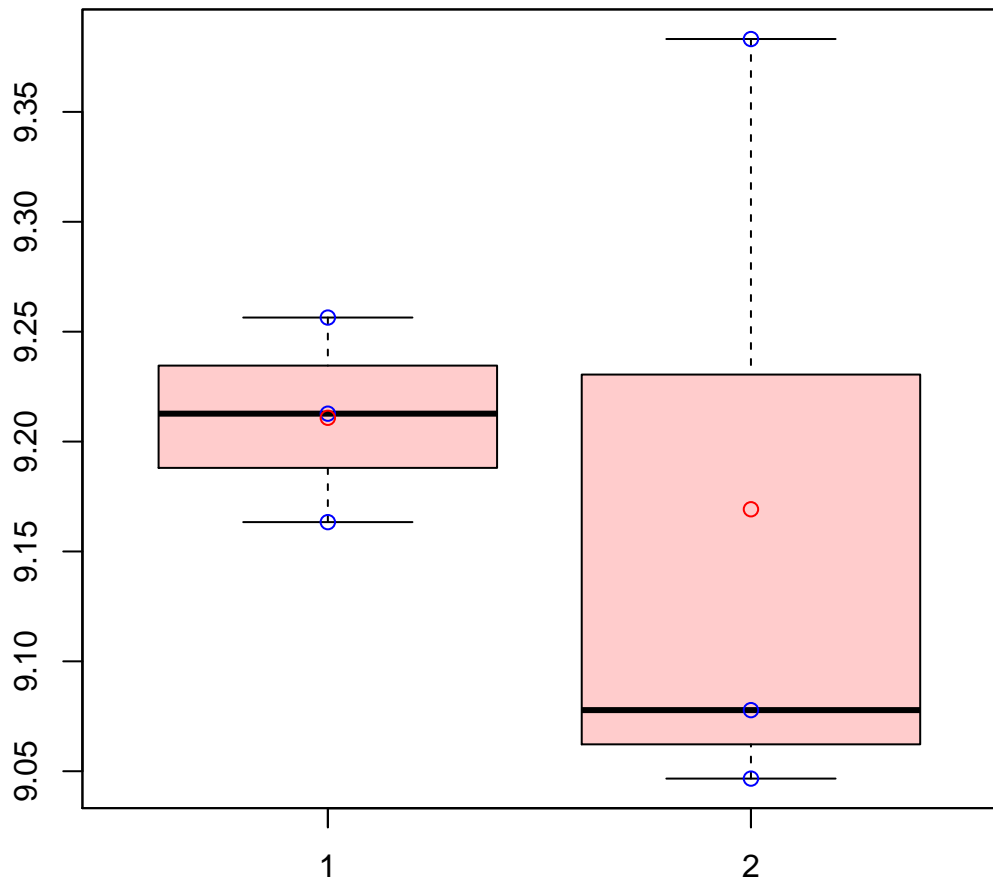

t-Test: p-value = 0.74

# CL9692Contig1|CL9692Contig1

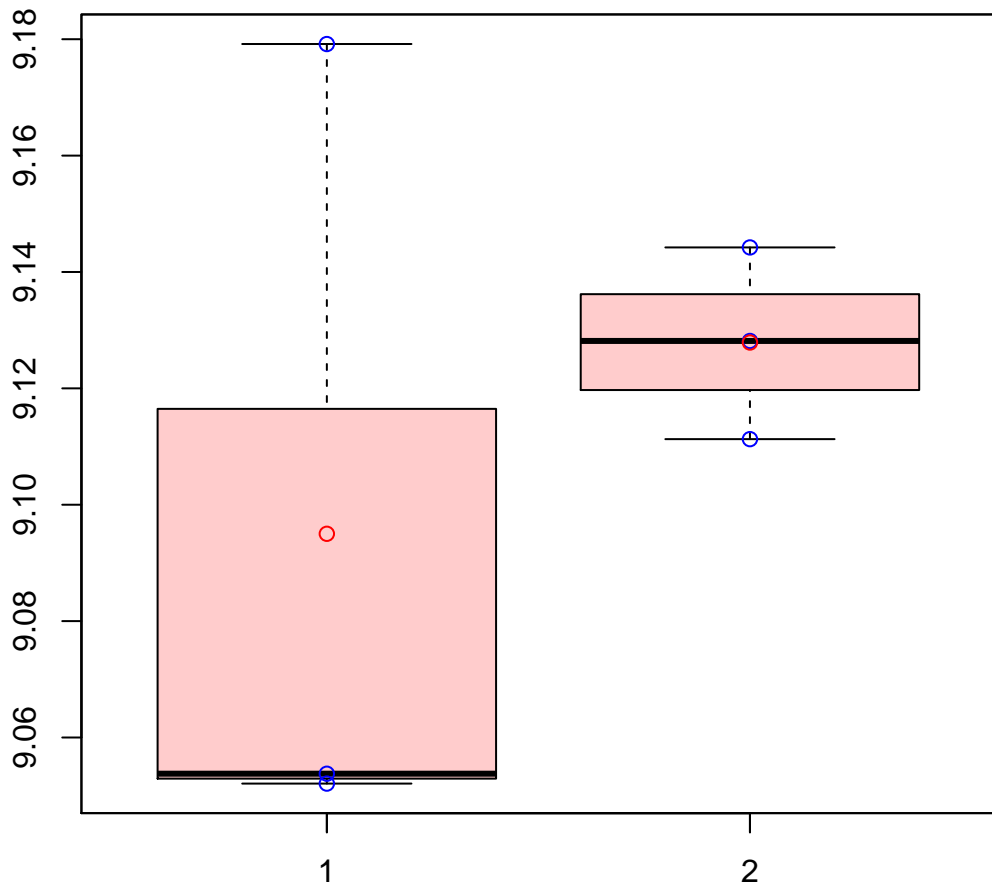

t-Test: p-value = 0.52

# CL969Contig1|CL969Contig1

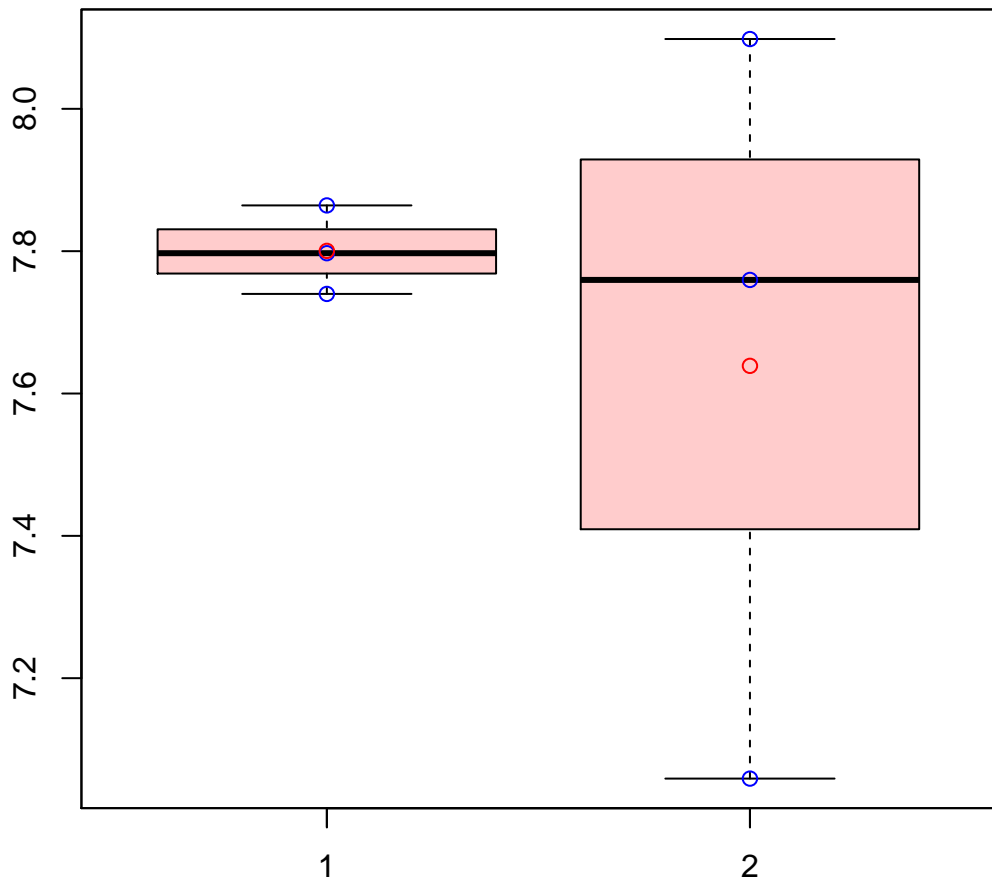

t-Test: p-value = 0.65

# CL969Contig2|CL969Contig2

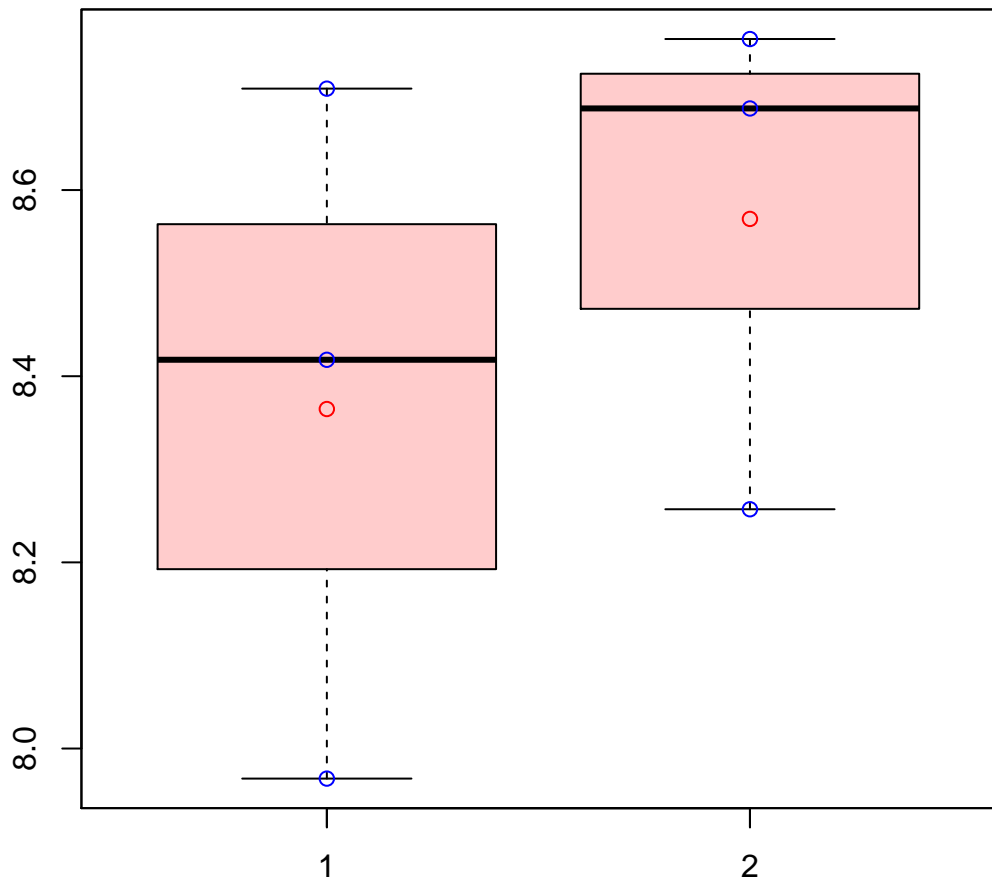

t-Test: p-value = 0.49

# CL969Contig4|CL969Contig4

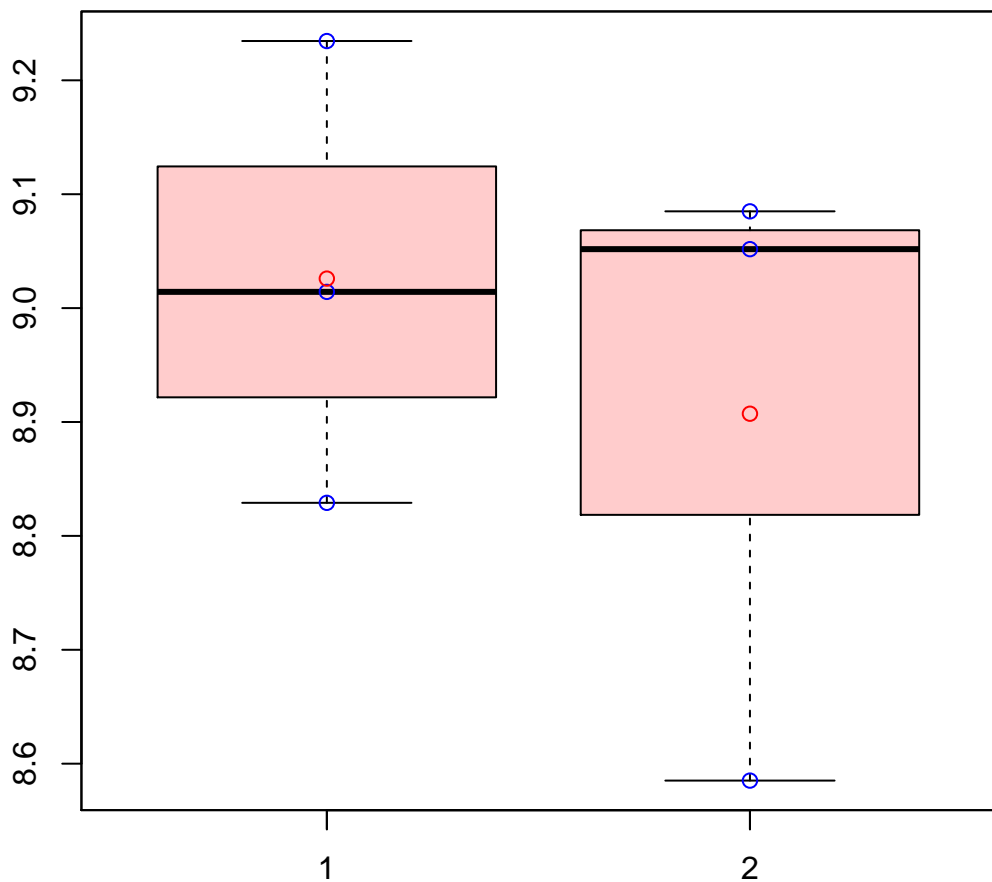

t-Test: p-value = 0.59

# CL96Contig3|CL96Contig3

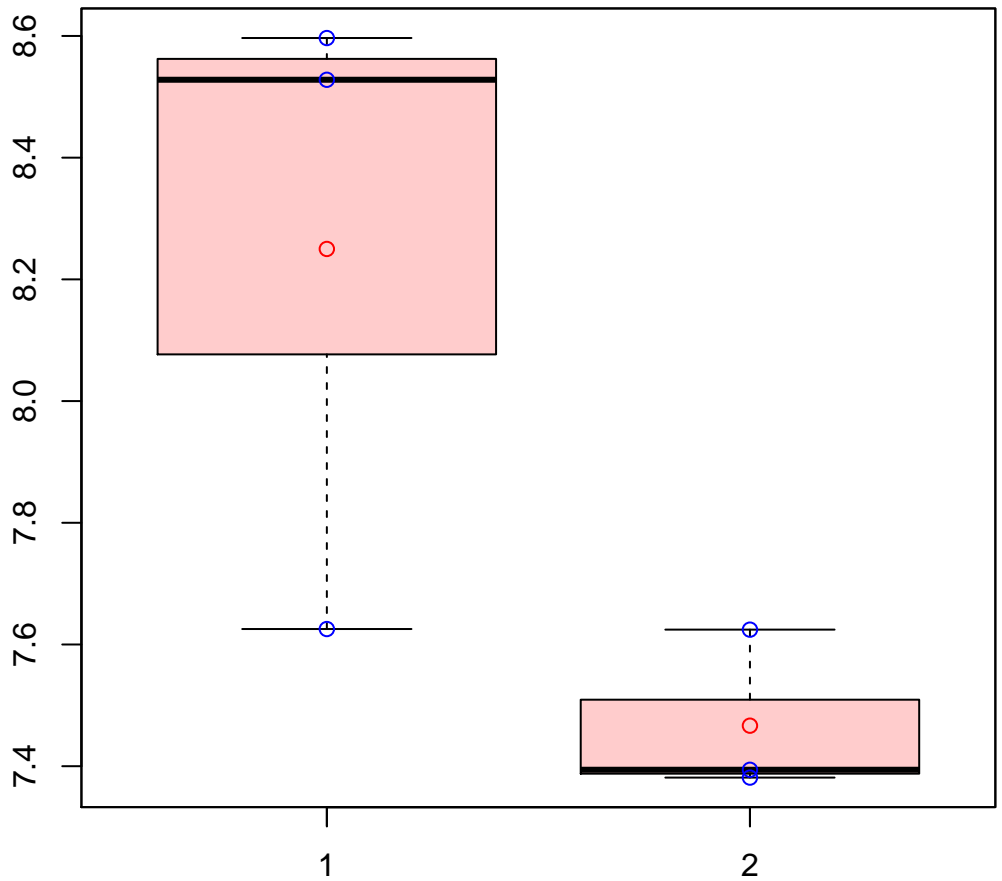

t-Test: p-value = 0.12



# CL9702Contig1|CL9702Contig1



t-Test: p-value = 1

# CL9711Contig2|CL9711Contig2

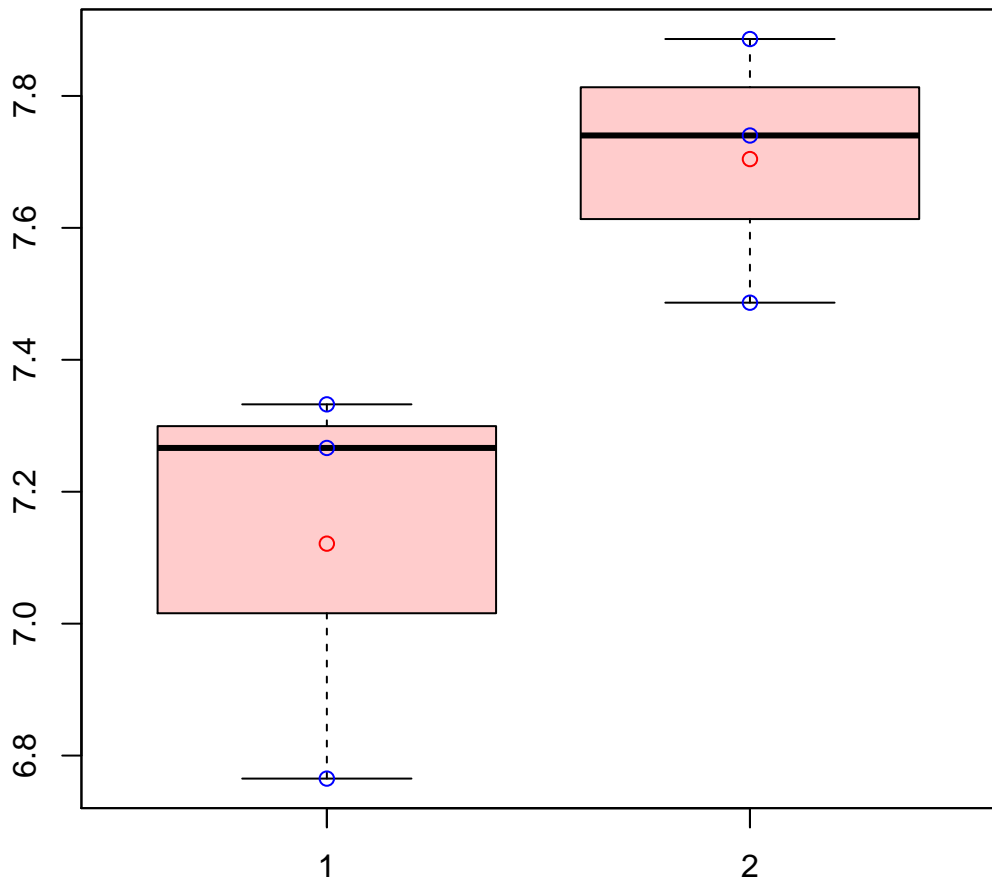

t-Test: p-value = 0.06

# CL9721Contig1|CL9721Contig1

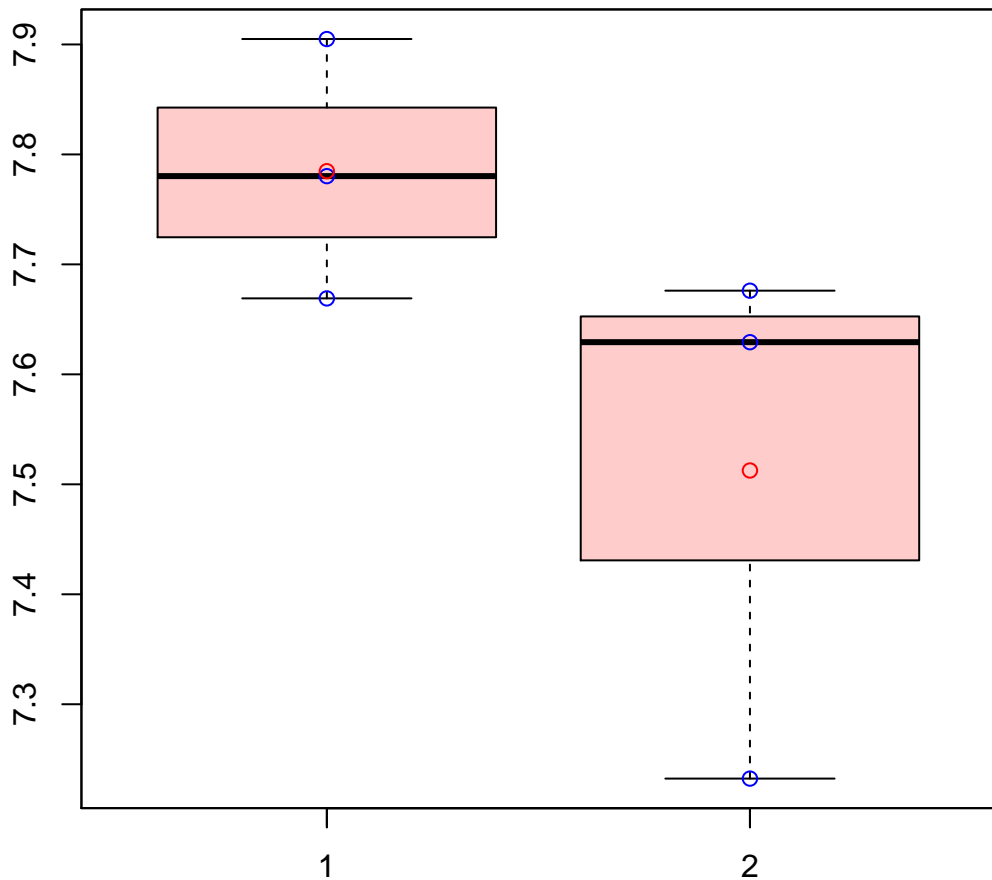

t-Test: p-value = 0.18

# CL973Contig2|CL973Contig2

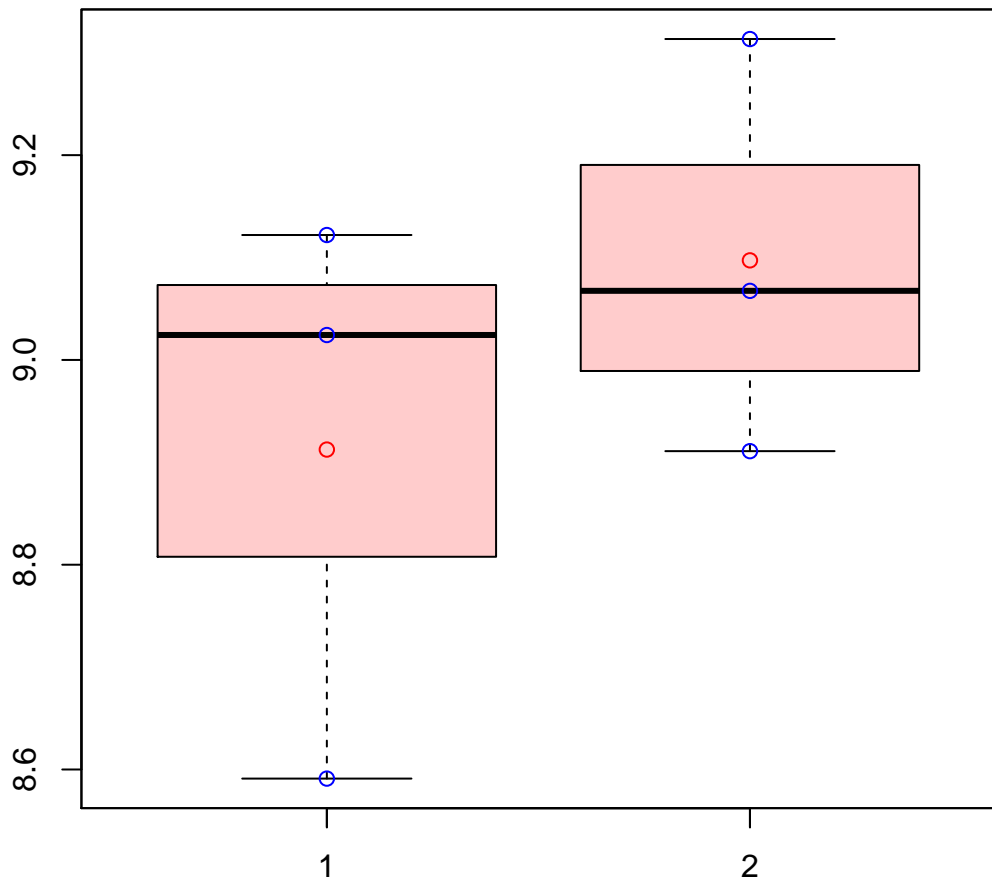

t-Test: p-value = 0.41

# CL973Contig4|CL973Contig4

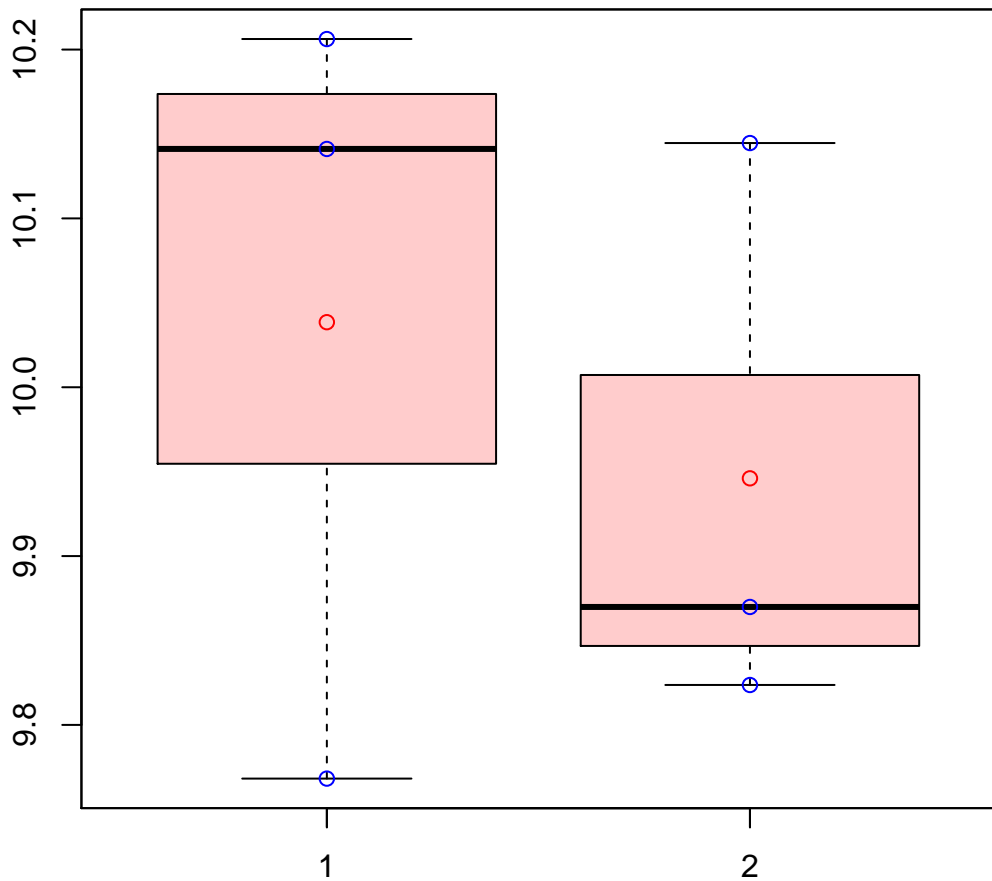

t-Test: p-value = 0.62

# CL9752Contig1|CL9752Contig1

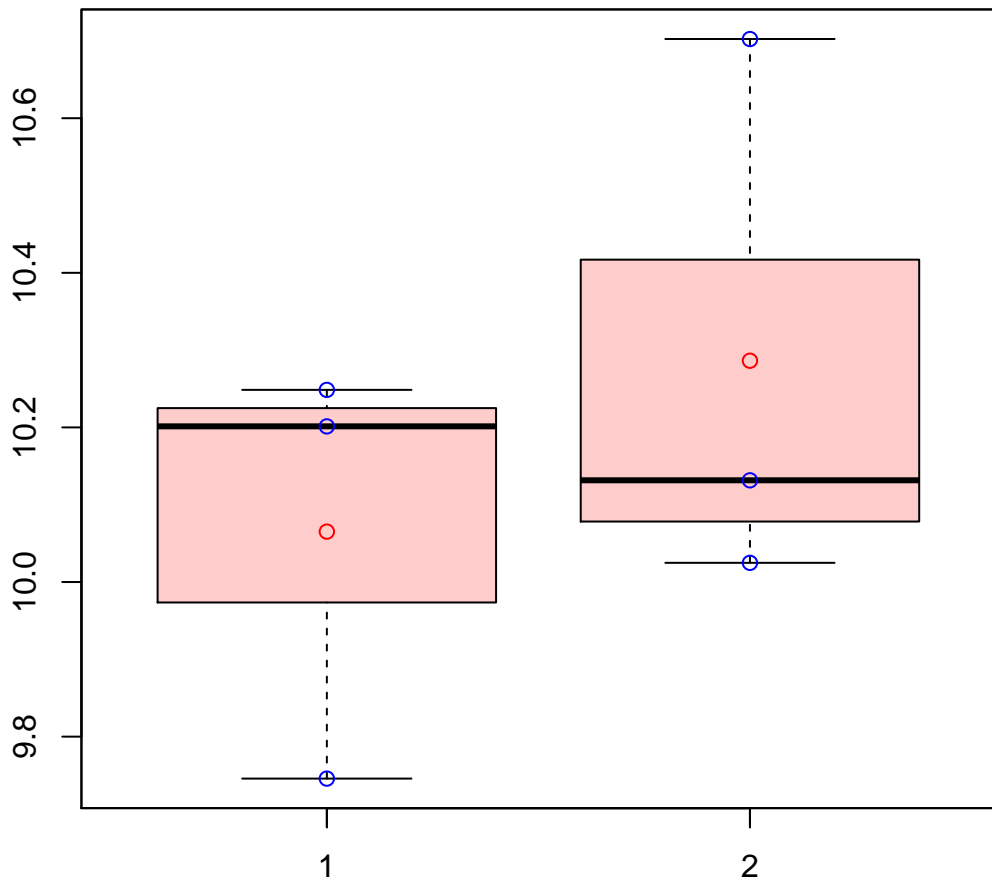

t-Test: p-value = 0.45

# CL9758Contig3|CL9758Contig3

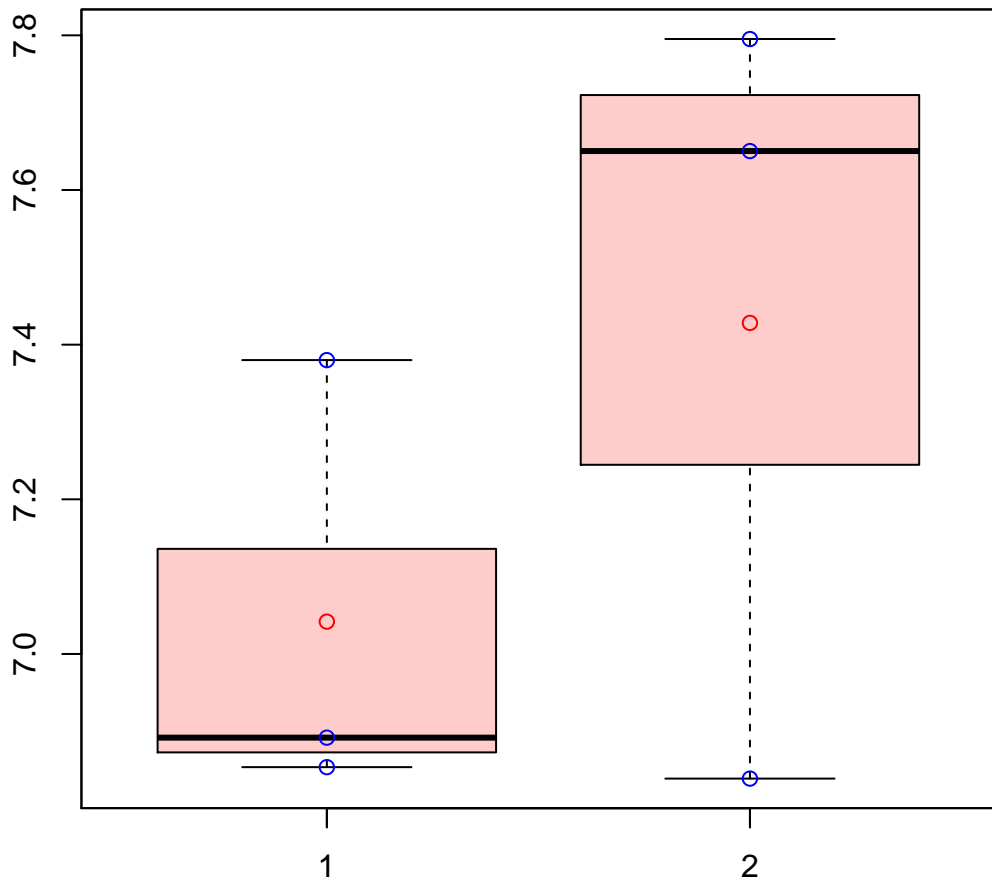

t-Test: p-value = 0.34

# CL975Contig4|CL975Contig4

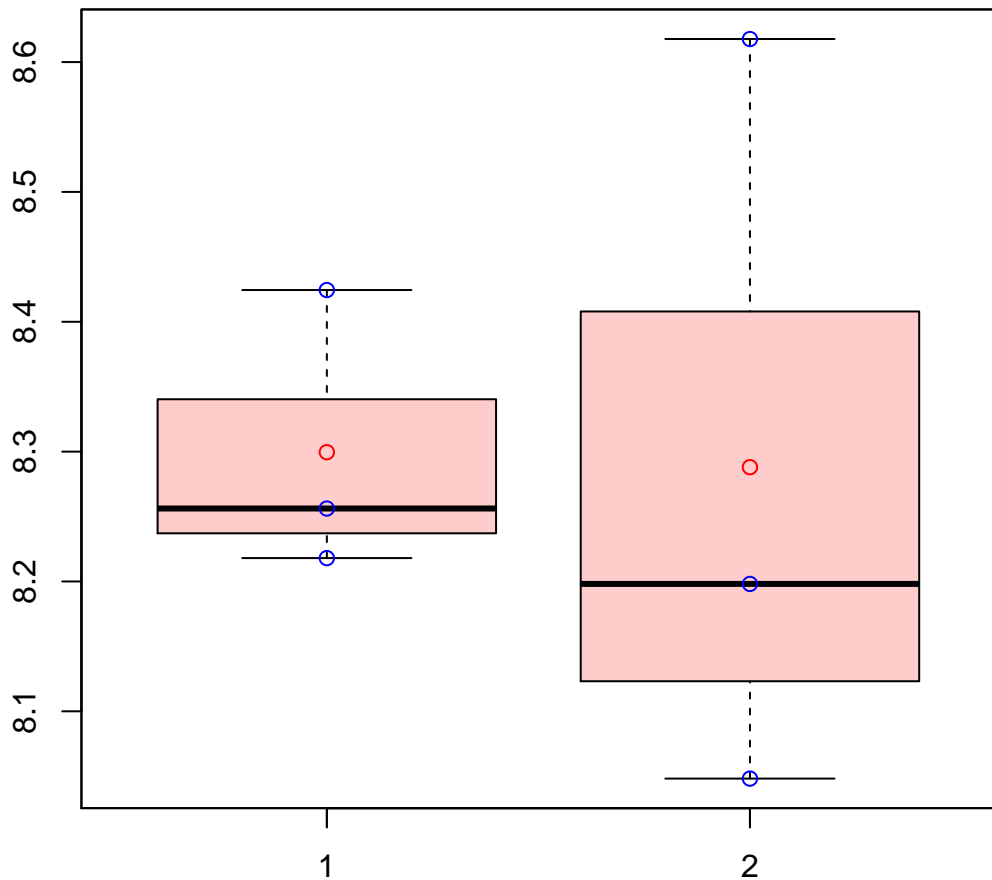

t-Test: p-value = 0.95



# CL975Contig5|CL975Contig5

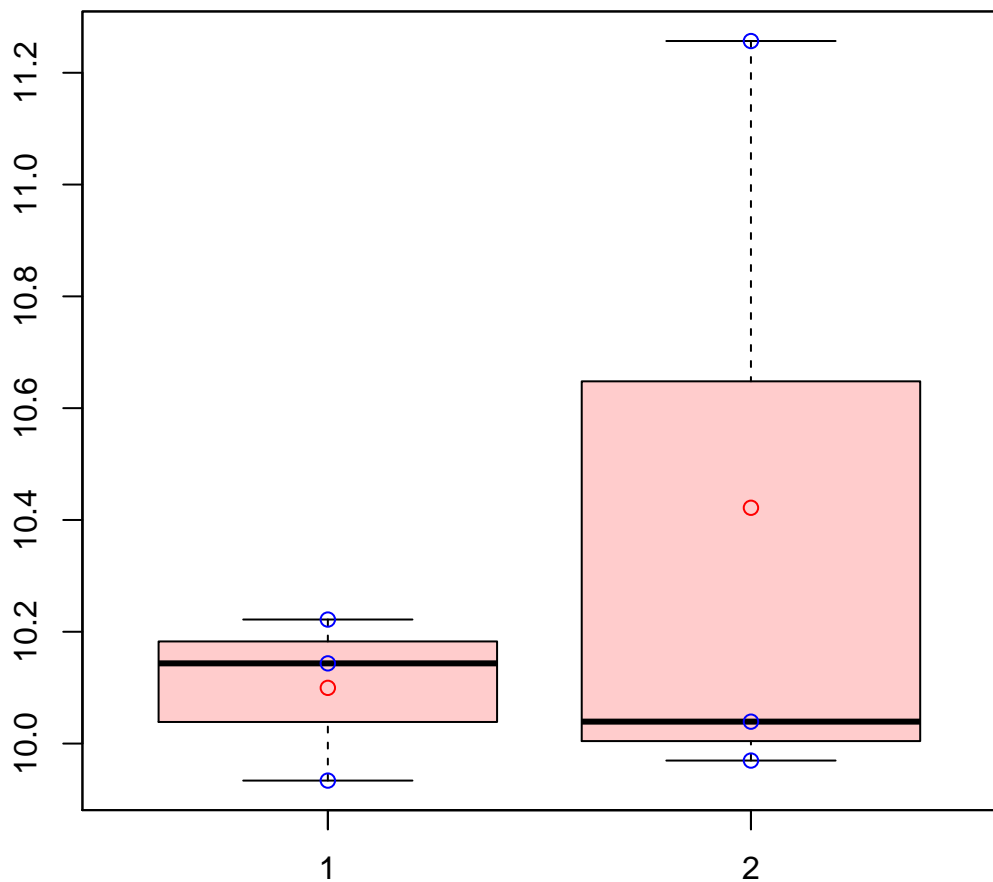

t-Test: p-value = 0.52

# CL975Contig6|CL975Contig6

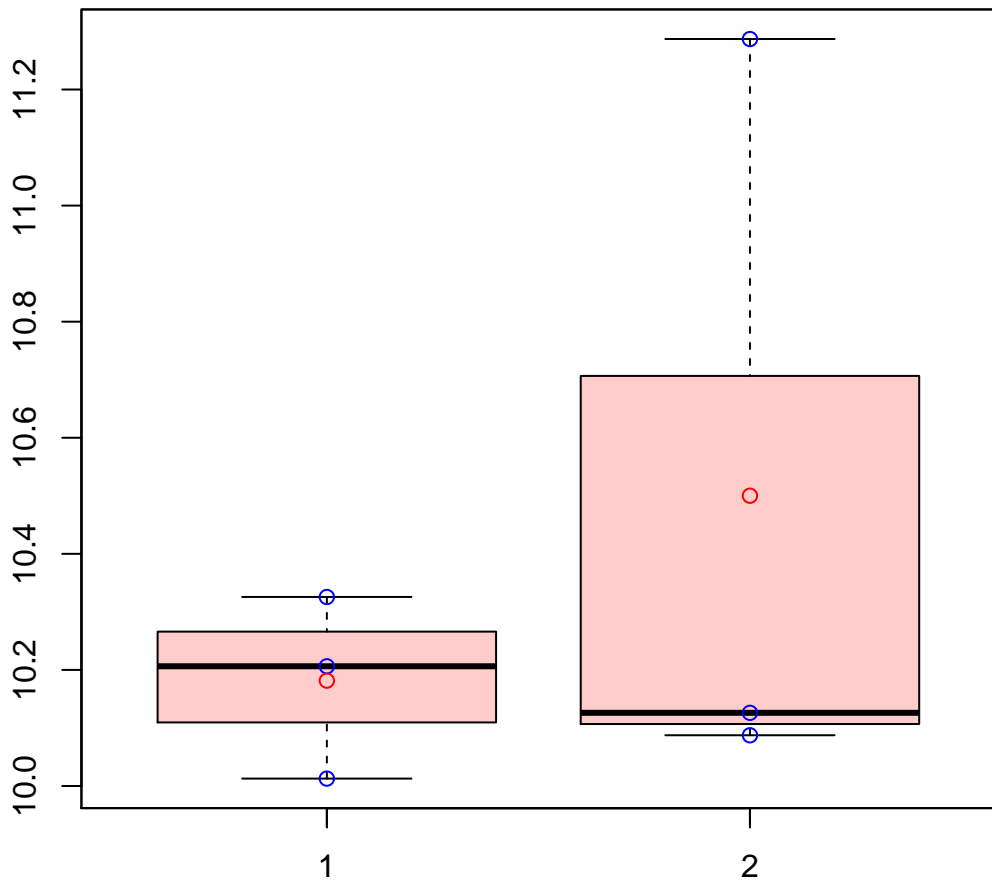

t-Test: p-value = 0.51

## CL9763Contig2|CL9763Contig2

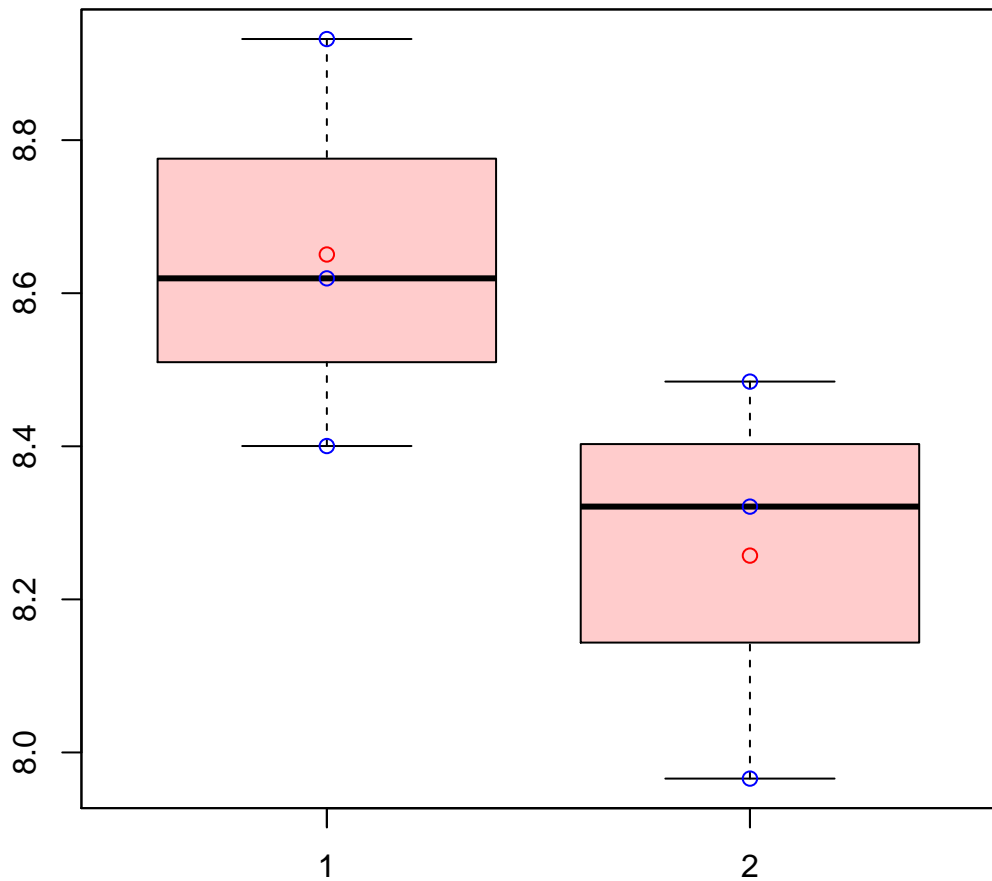

t-Test: p-value = 0.14

# CL976Contig2|CL976Contig2



t-Test: p-value = 1

# CL9774Contig2|CL9774Contig2

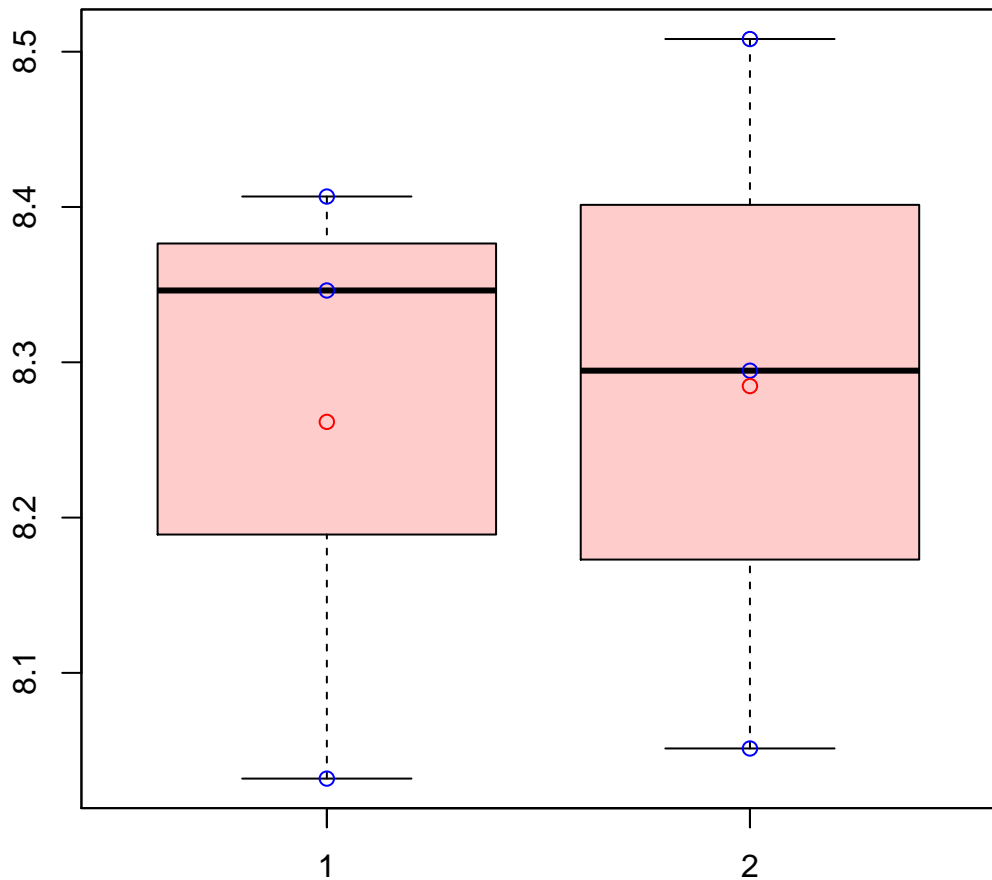

t-Test: p-value = 0.9

# CL977Contig1|CL977Contig1



t-Test: p-value = 0.03

# CL977Contig4|CL977Contig4

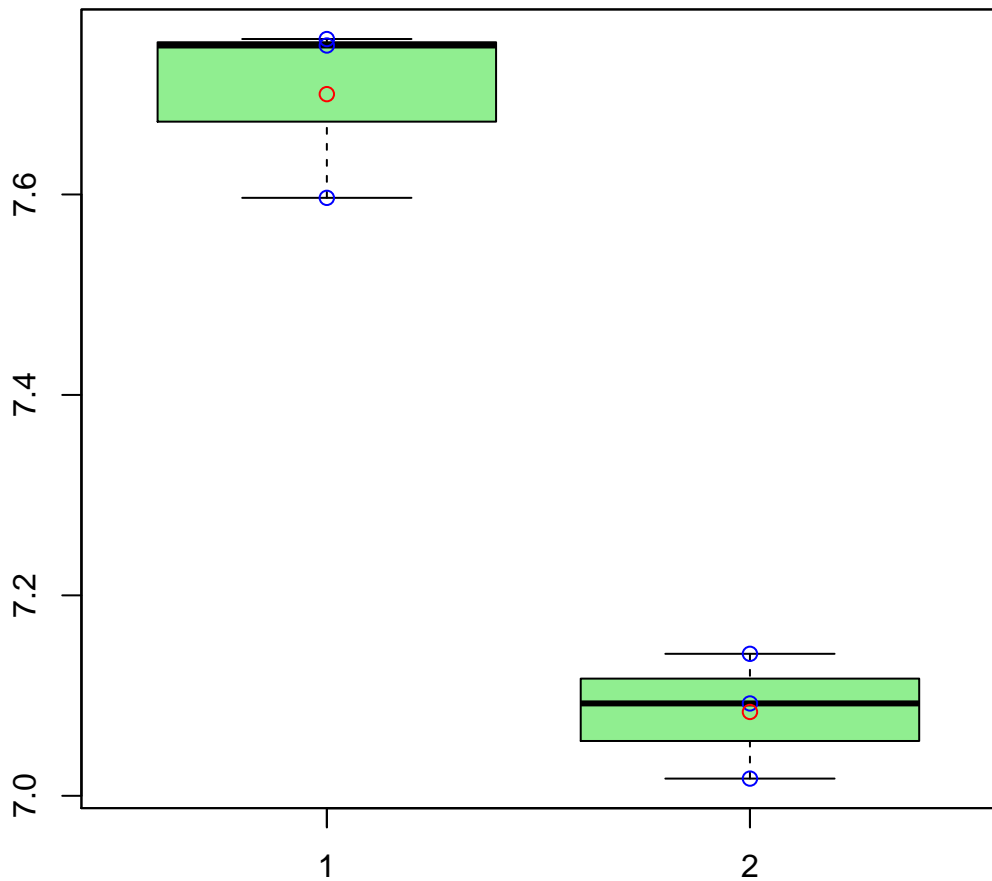

t-Test: p-value = 0

# CL9781Contig2|CL9781Contig2

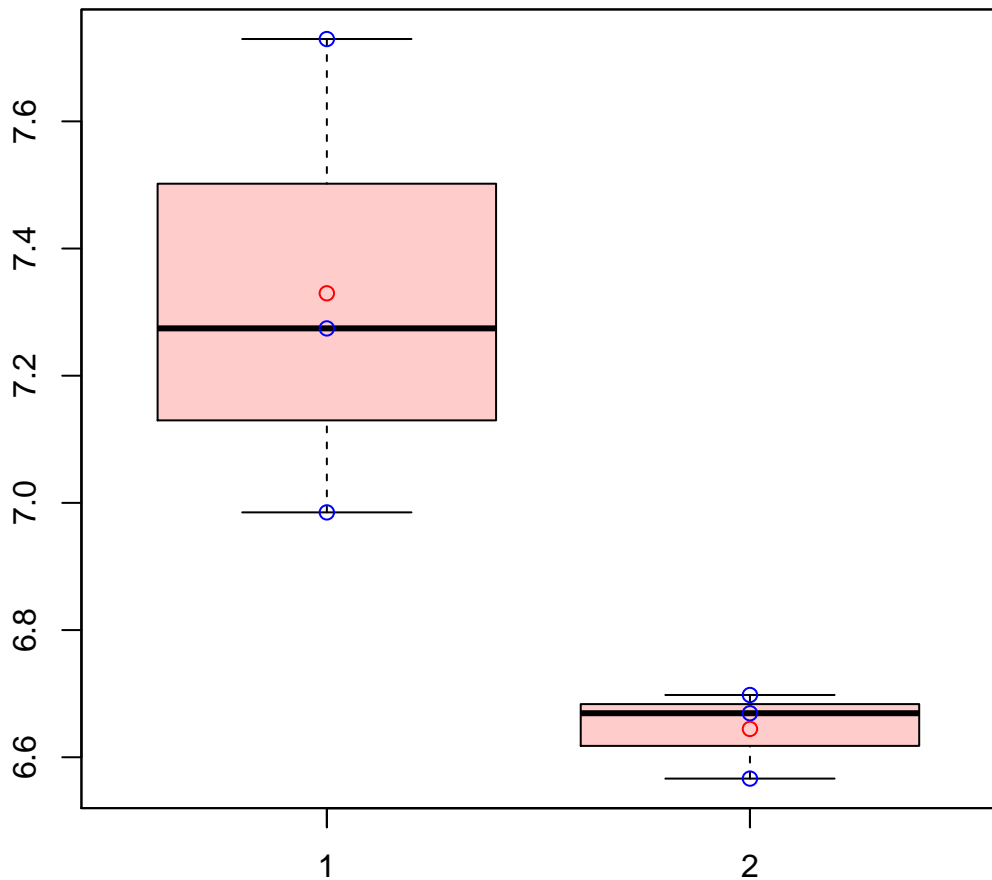

t-Test: p-value = 0.08



# CL9785Contig1|CL9785Contig1

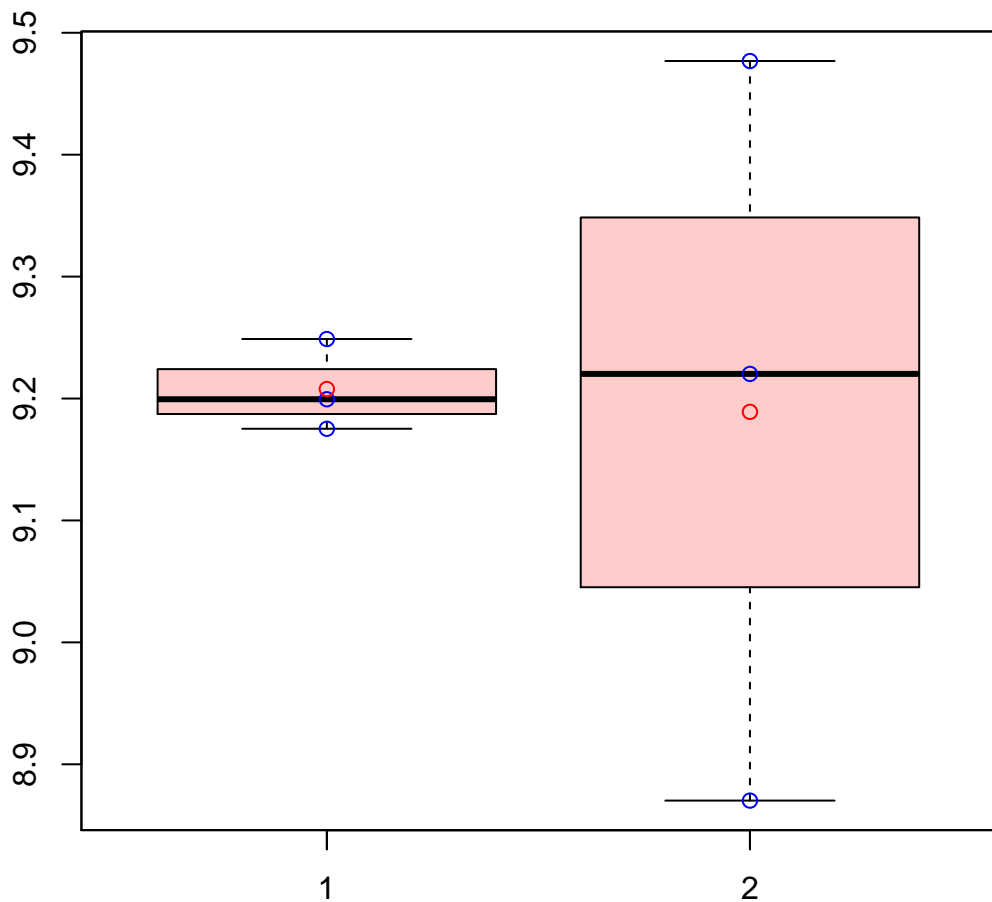

t-Test: p-value = 0.93

# CL978Contig1|CL978Contig1

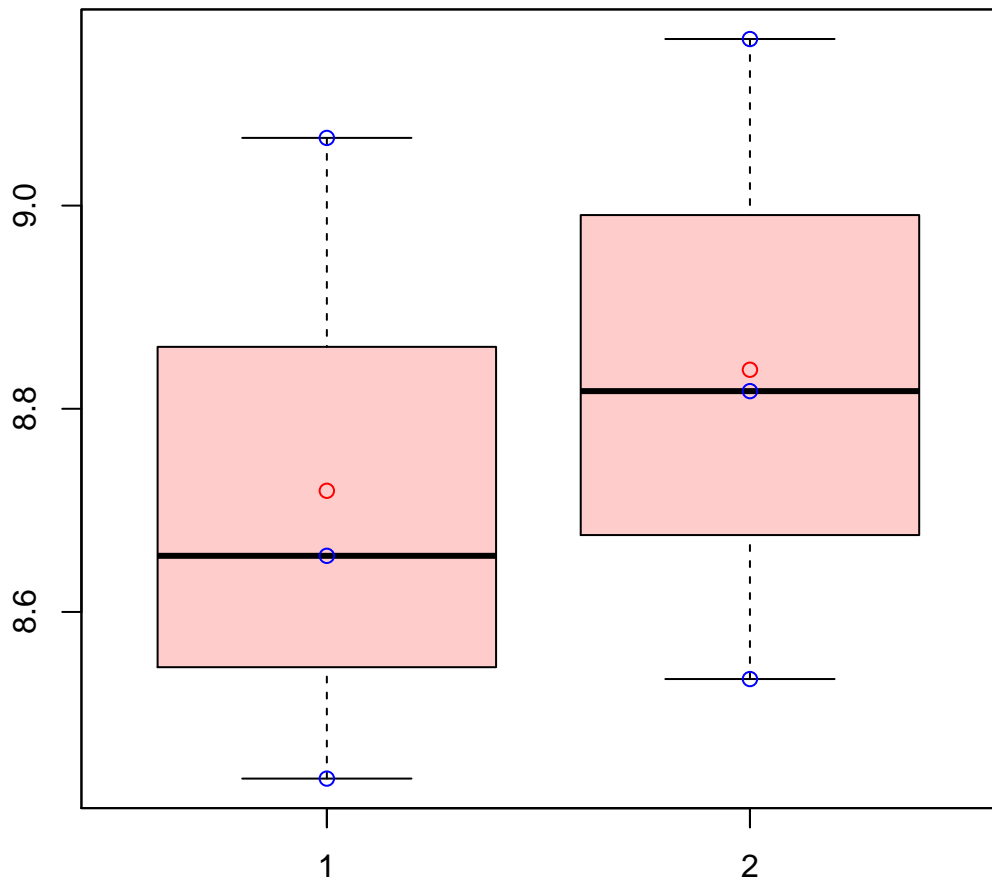

t-Test: p-value = 0.67

# CL9792Contig1|CL9792Contig1

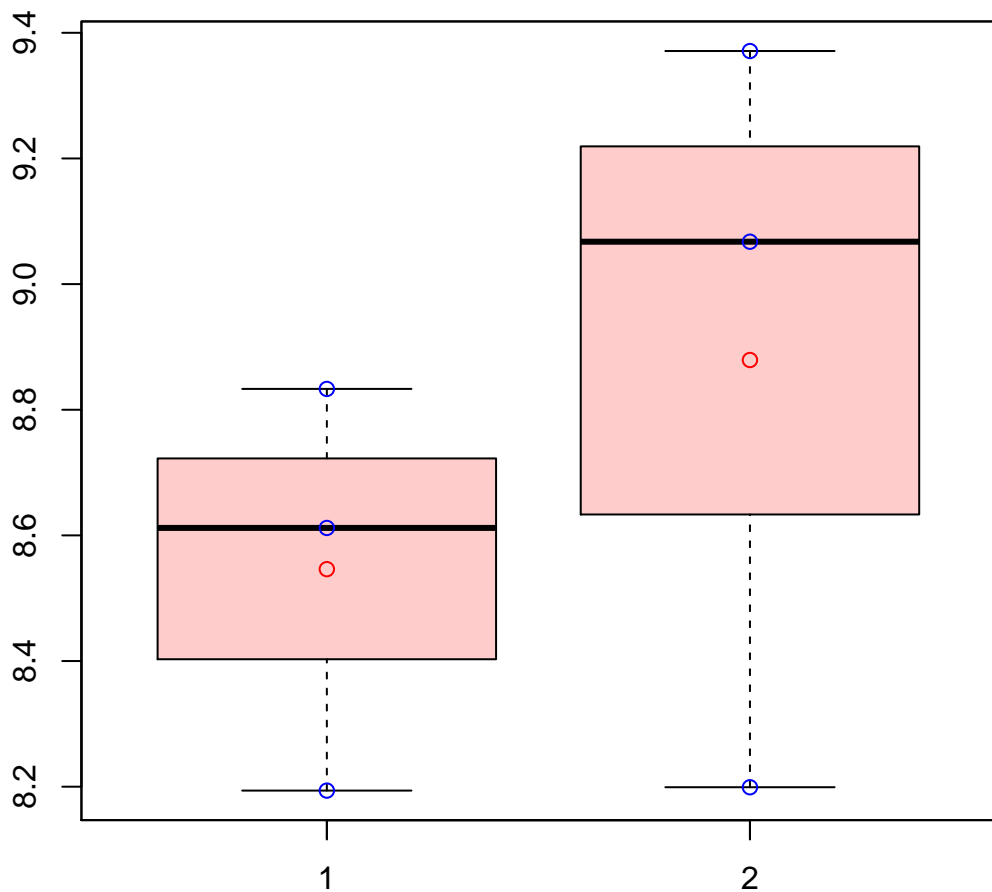

t-Test: p-value = 0.46

# CL9792Contig2|CL9792Contig2



t-Test: p-value = 0.46

# CL9792Contig4|CL9792Contig4



t-Test: p-value = 0.46

# CL980Contig6|CL980Contig6

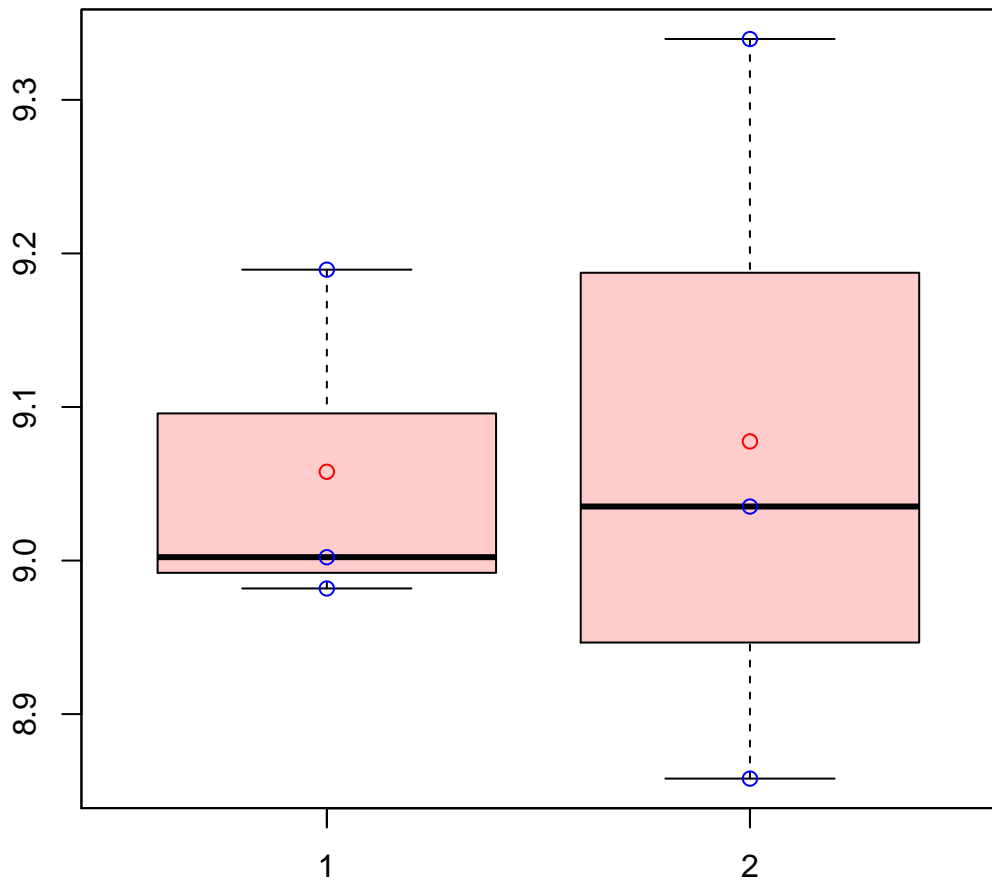

t-Test: p-value = 0.91

# CL981Contig2|CL981Contig2

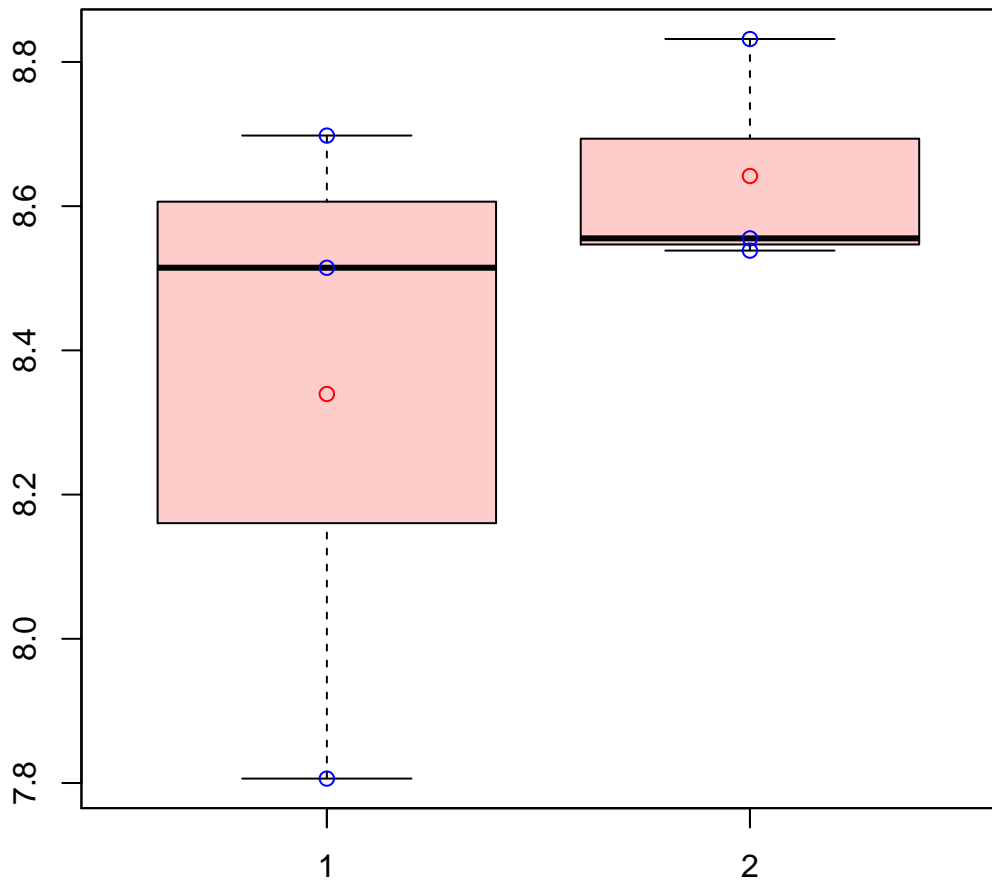

t-Test: p-value = 0.39

# CL981Contig6|CL981Contig6



t-Test: p-value = 0.39



# CL9824Contig1|CL9824Contig1

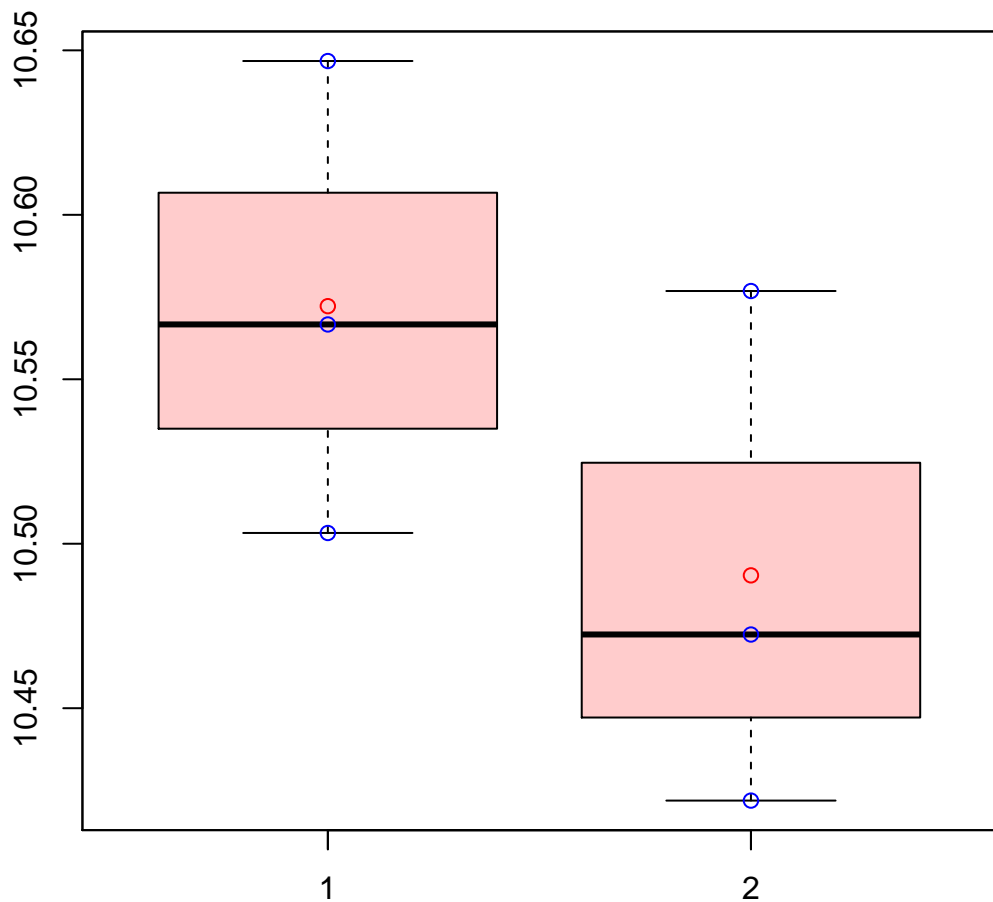

t-Test: p-value = 0.26

# CL9824Contig3|CL9824Contig3

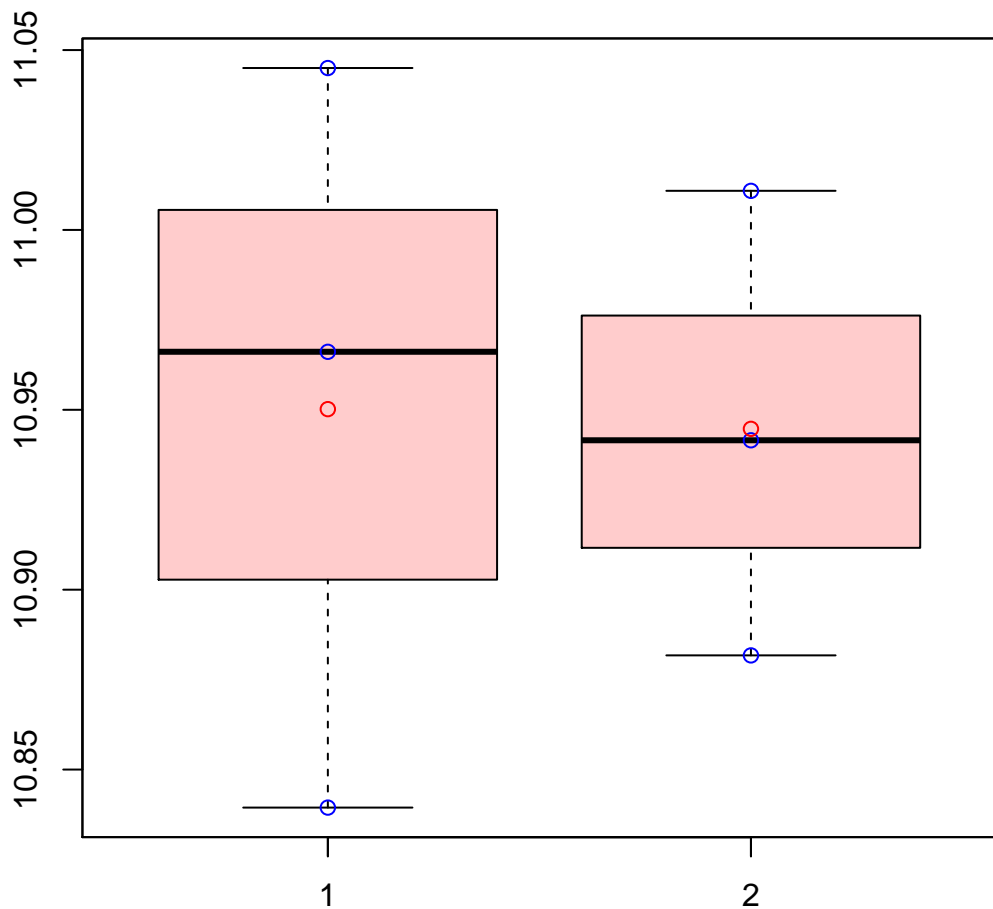

t-Test: p-value = 0.94

# CL9849Contig1|CL9849Contig1

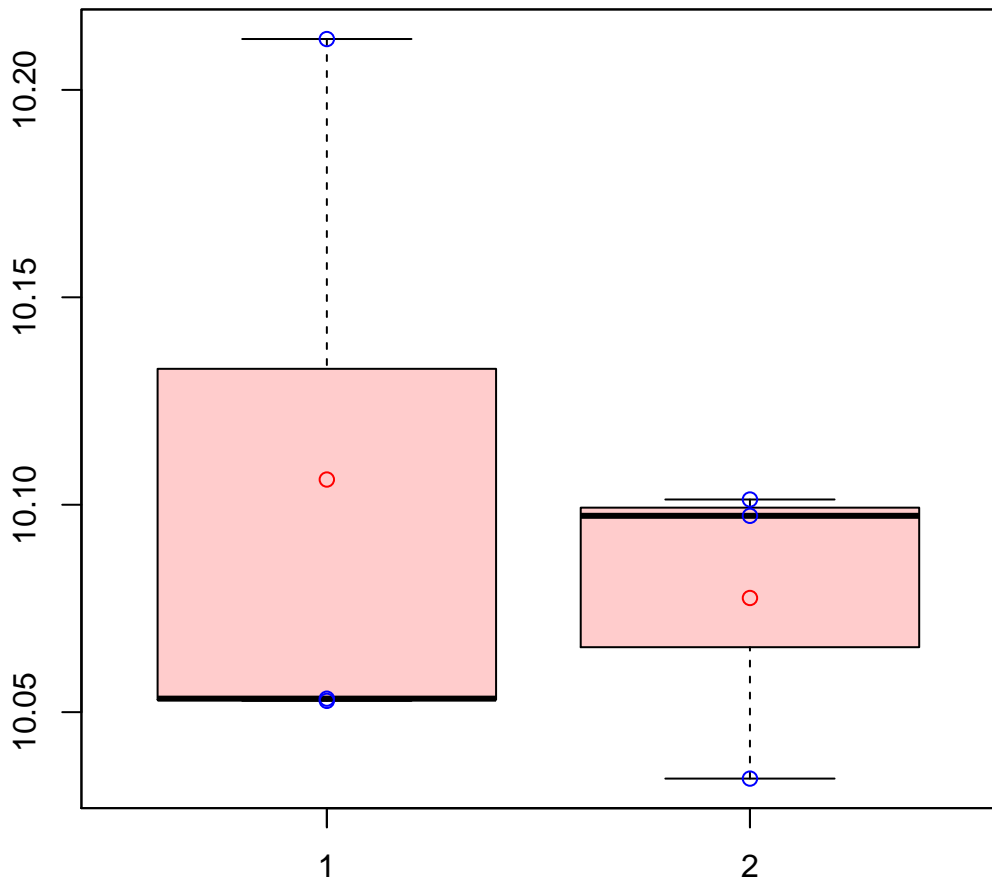

t-Test: p-value = 0.66

# CL9849Contig3|CL9849Contig3



t-Test: p-value = 0.66

# CL9862Contig1|CL9862Contig1



t-Test: p-value = 0.29

# CL9862Contig2|CL9862Contig2



t-Test: p-value = 0.29

# CL9863Contig2|CL9863Contig2



t-Test: p-value = 0.18

# CL9878Contig2|CL9878Contig2

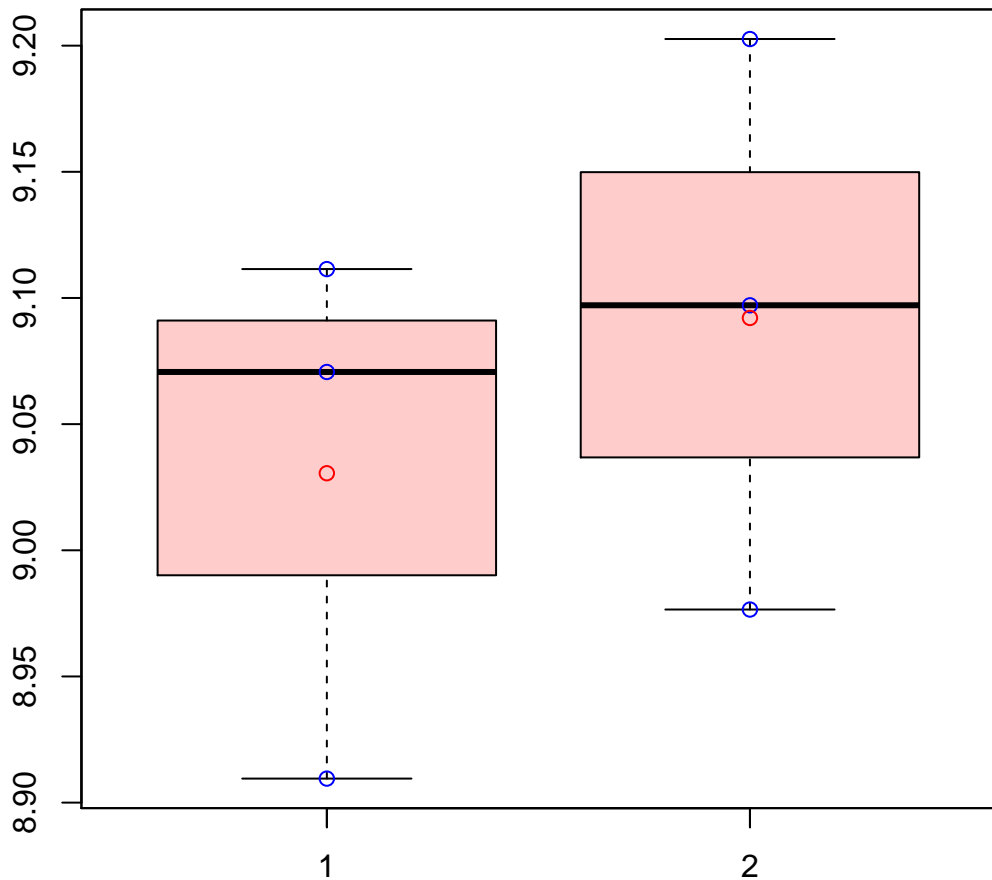

t-Test: p-value = 0.53



# CL9881Contig2|CL9881Contig2

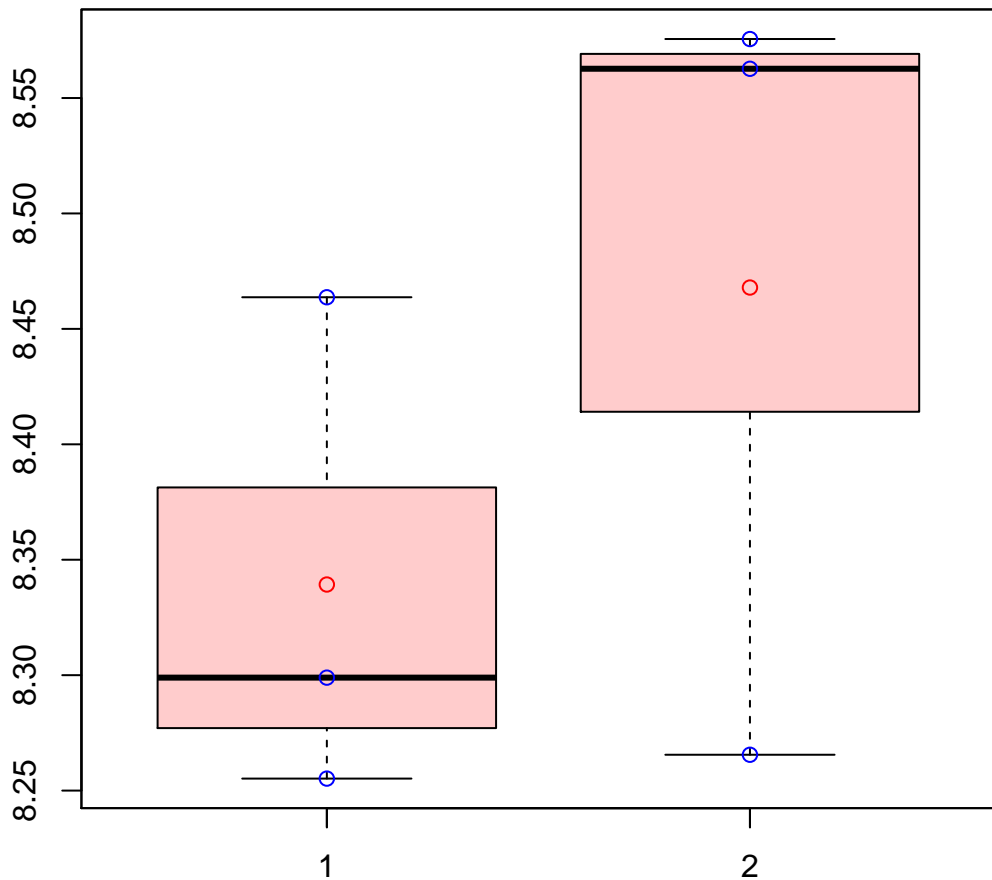

t-Test: p-value = 0.35

# CL9891Contig1|CL9891Contig1

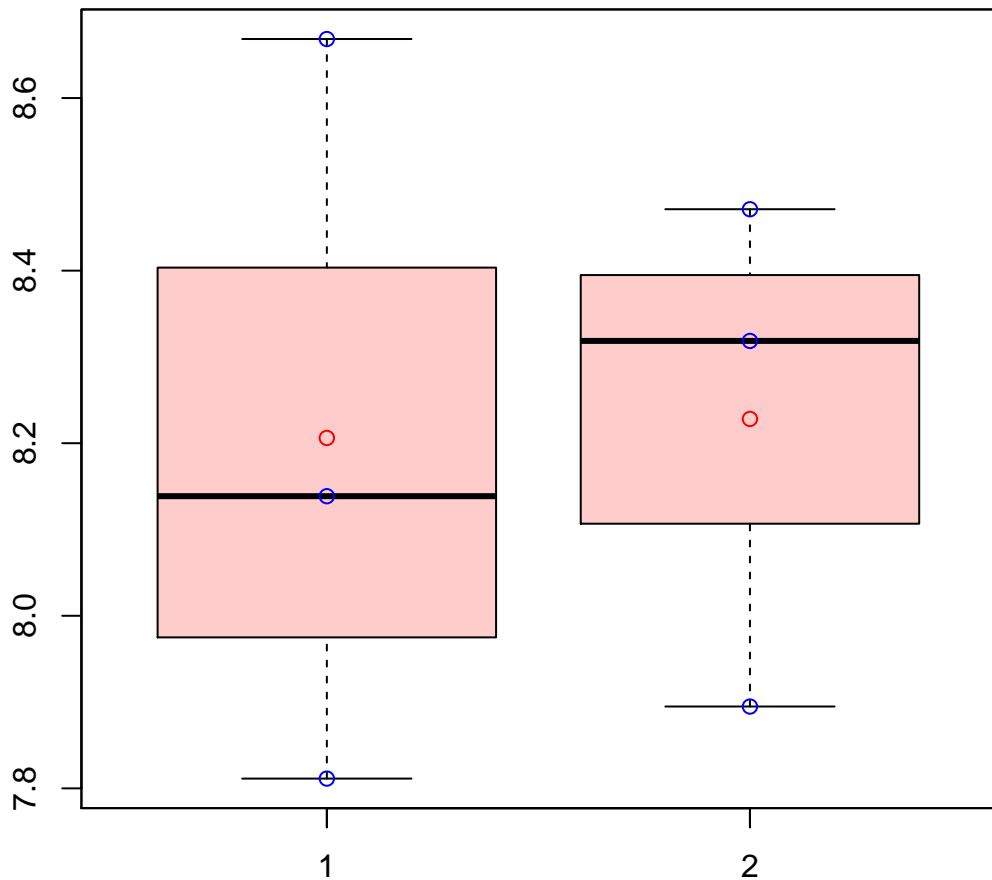

t-Test: p-value = 0.95

# CL9898Contig3|CL9898Contig3

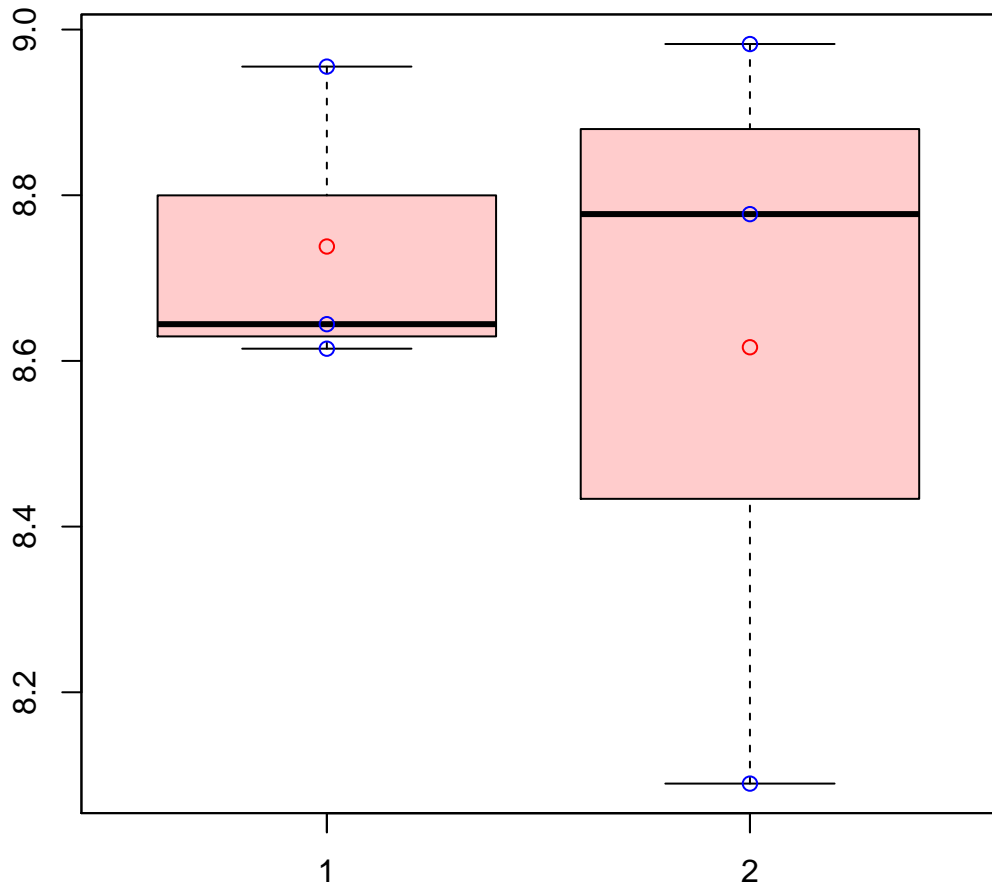

t-Test: p-value = 0.71

# CL9907Contig1|CL9907Contig1



t-Test: p-value = 0.87

# CL990Contig4|CL990Contig4

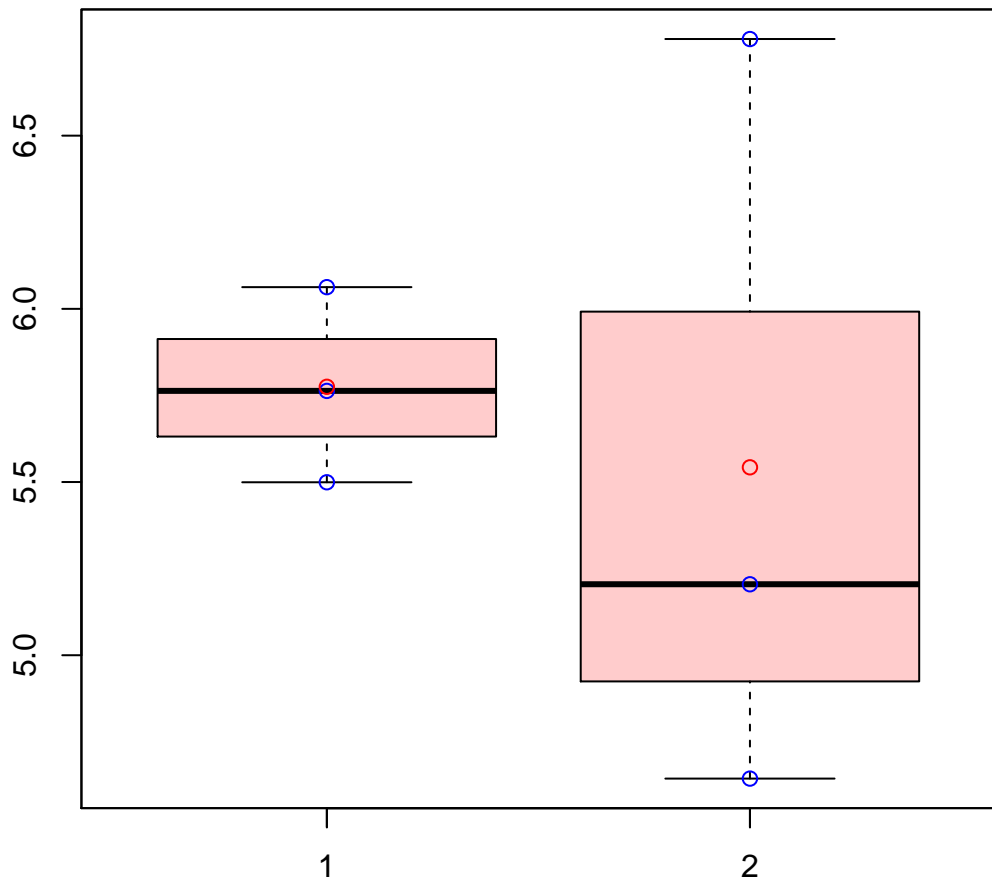

t-Test: p-value = 0.75

# CL990Contig6|CL990Contig6

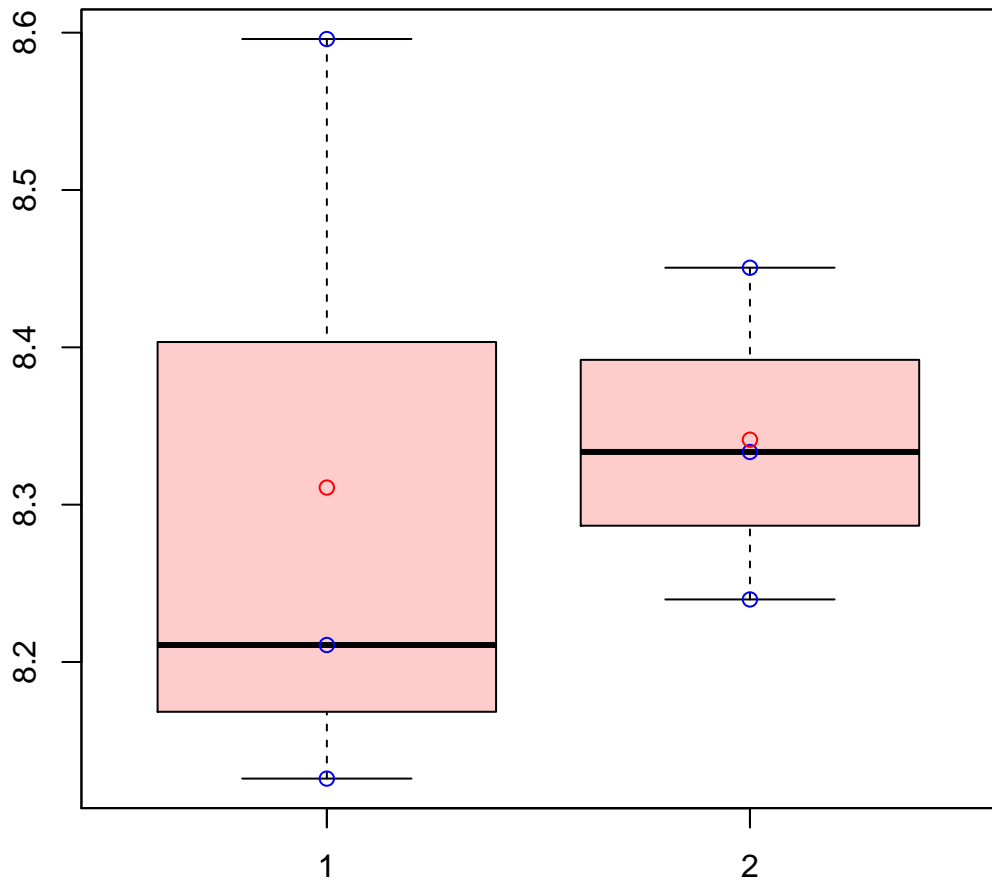

t-Test: p-value = 0.86

# CL9910Contig1|CL9910Contig1

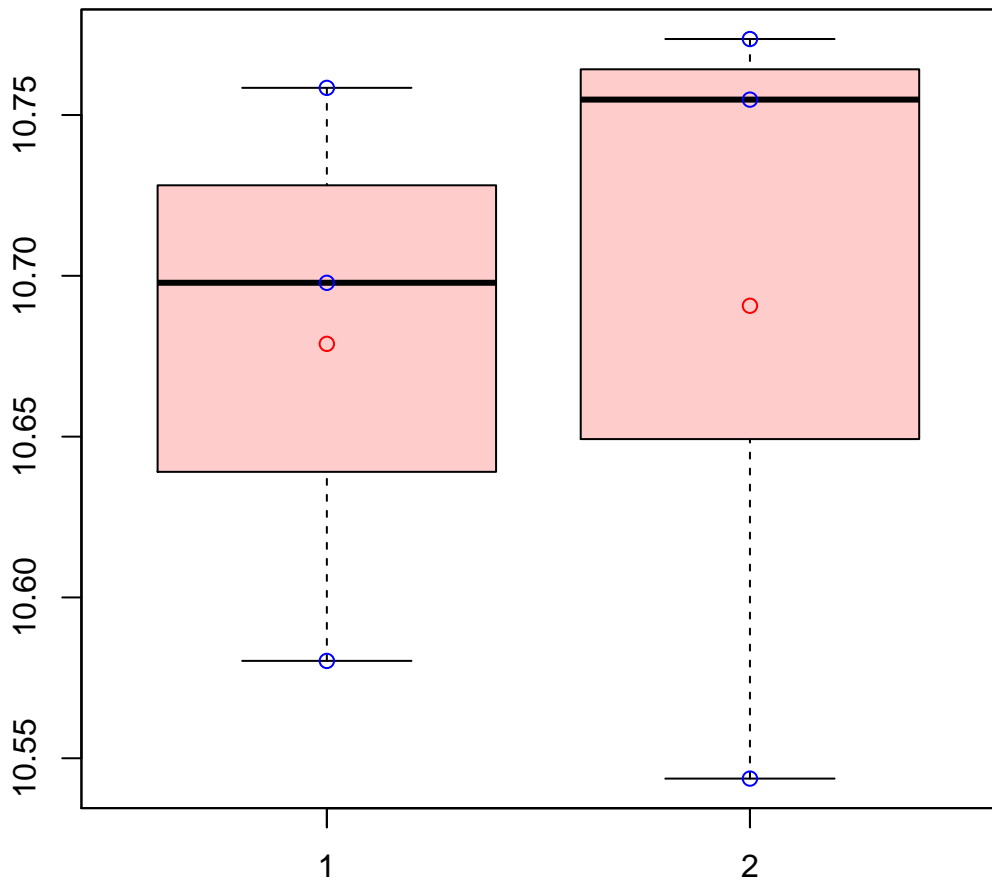

t-Test: p-value = 0.9

# CL992Contig2|CL992Contig2

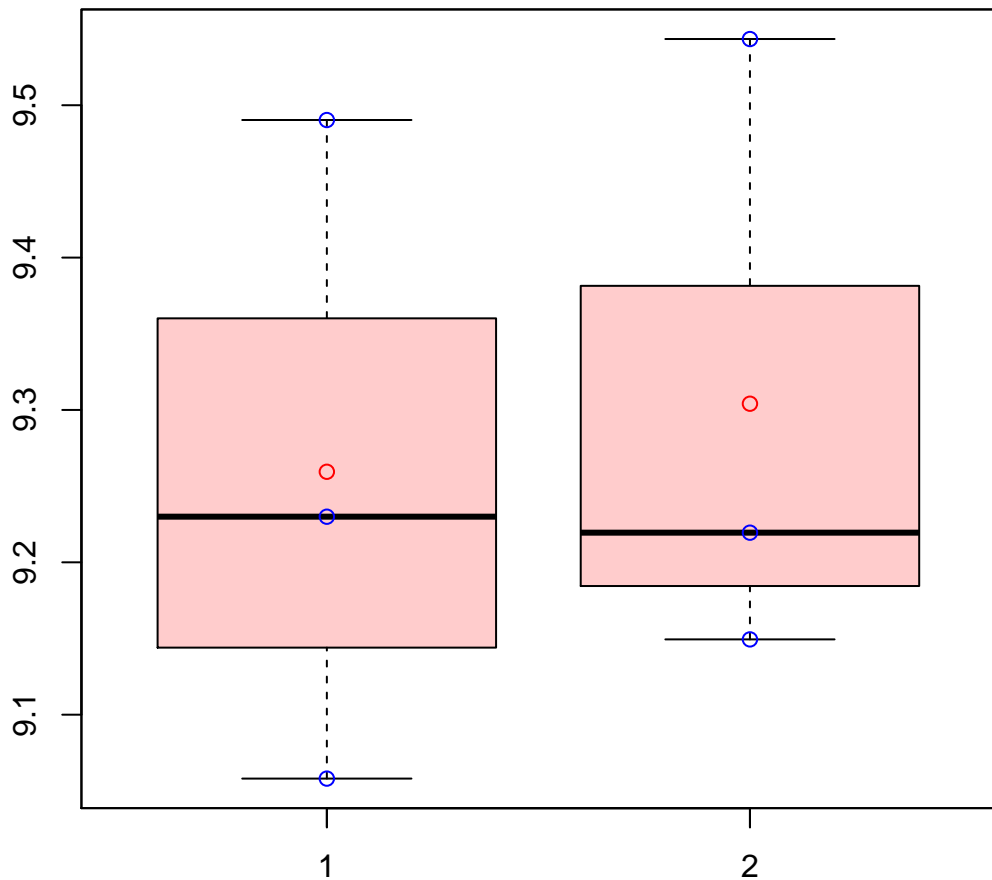

t-Test: p-value = 0.81



# CL993Contig6|CL993Contig6

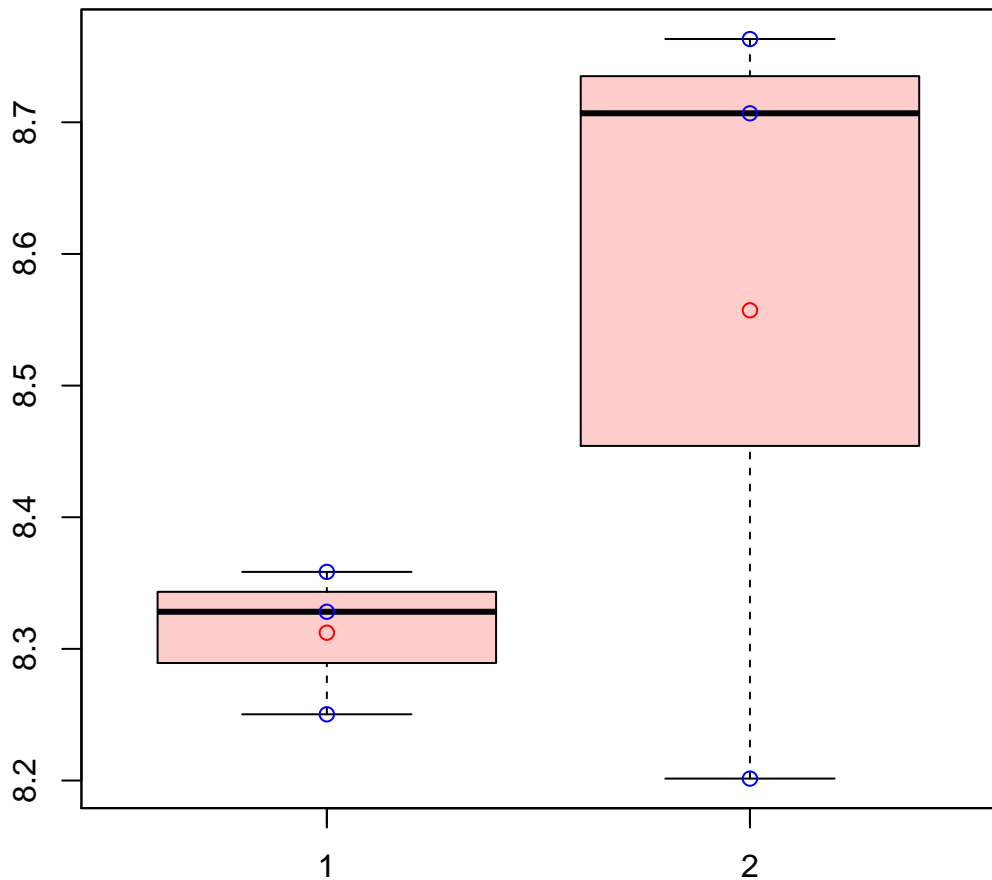

t-Test: p-value = 0.3

# CL993Contig9|CL993Contig9

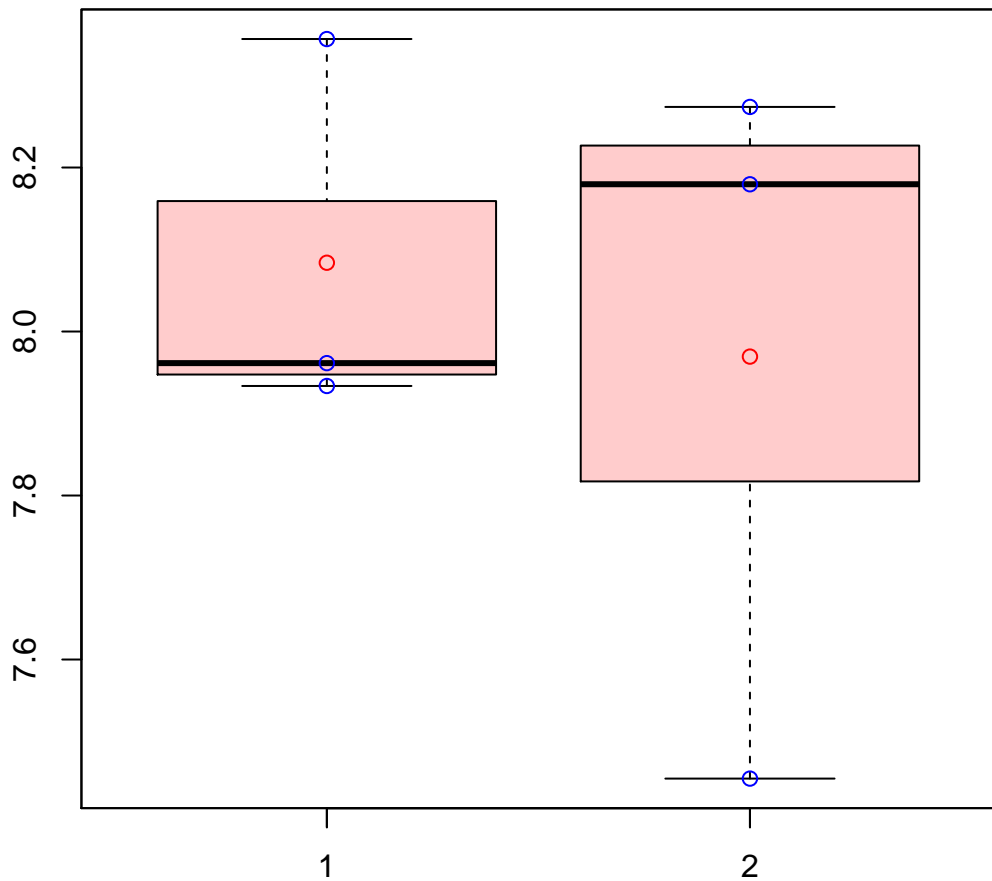

t-Test: p-value = 0.72

# CL9949Contig1|CL9949Contig1



t-Test: p-value = 0.07

# CL9960Contig2|CL9960Contig2

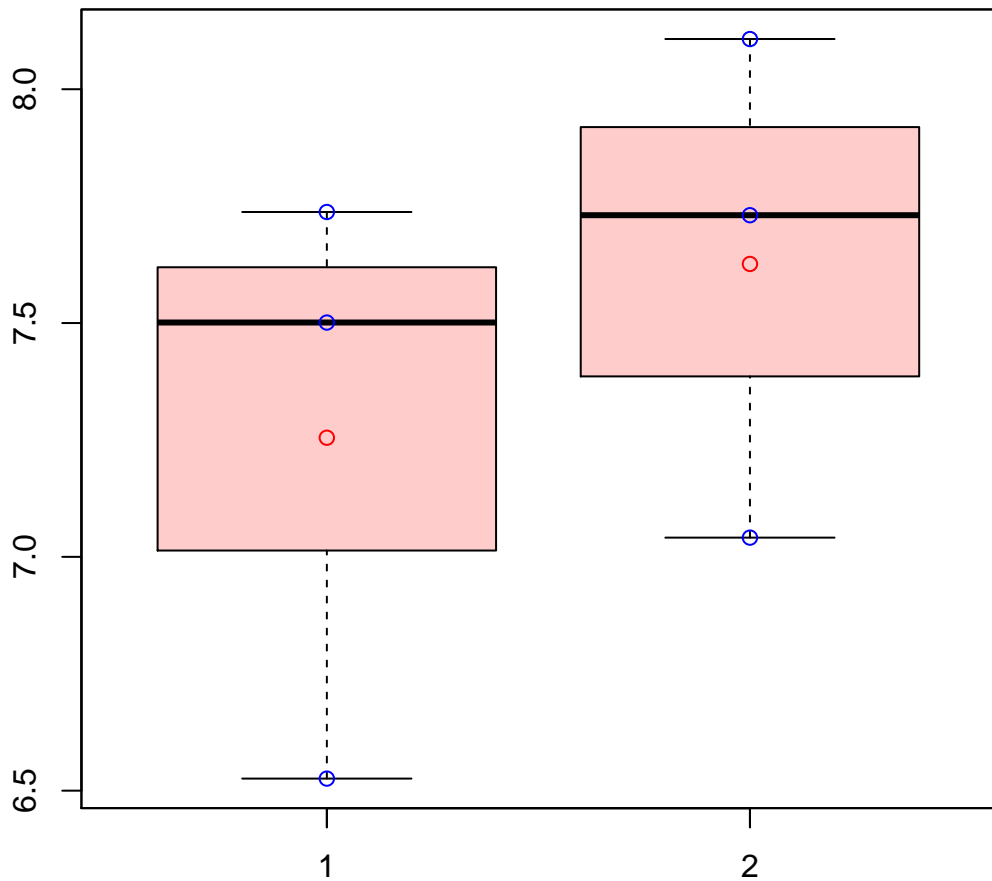

t-Test: p-value = 0.49

# CL9963Contig1|CL9963Contig1

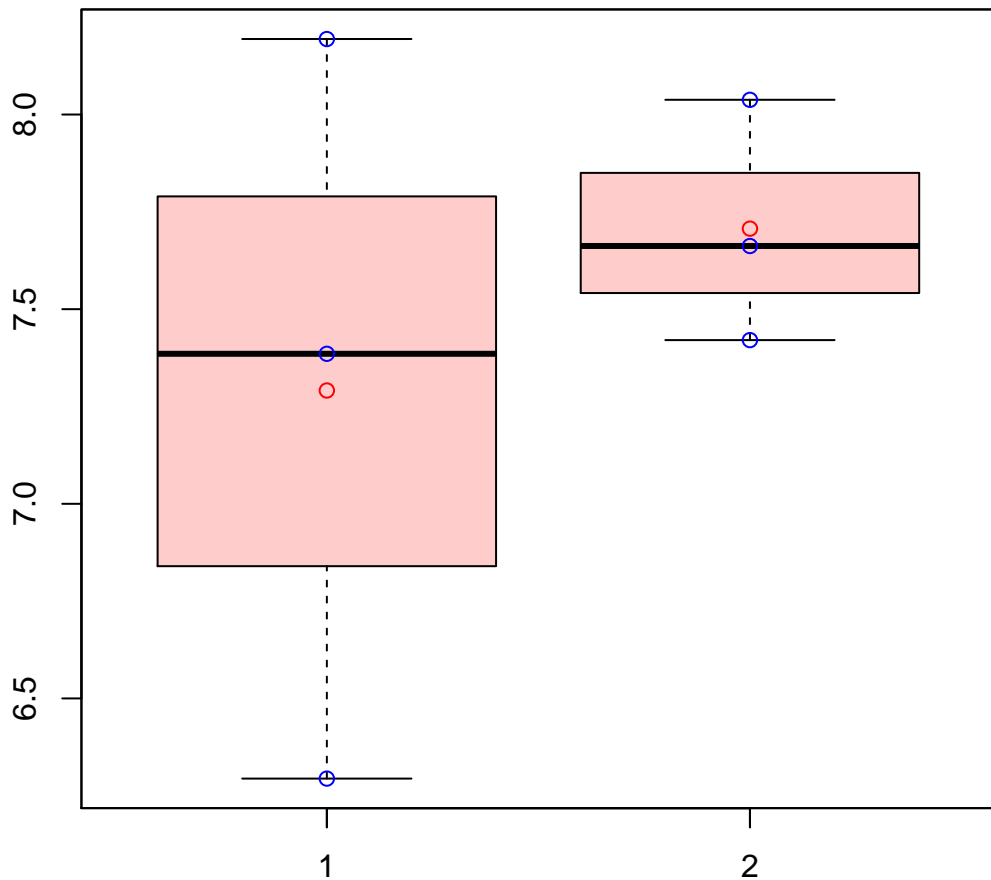

t-Test: p-value = 0.54

# CL9973Contig2|CL9973Contig2

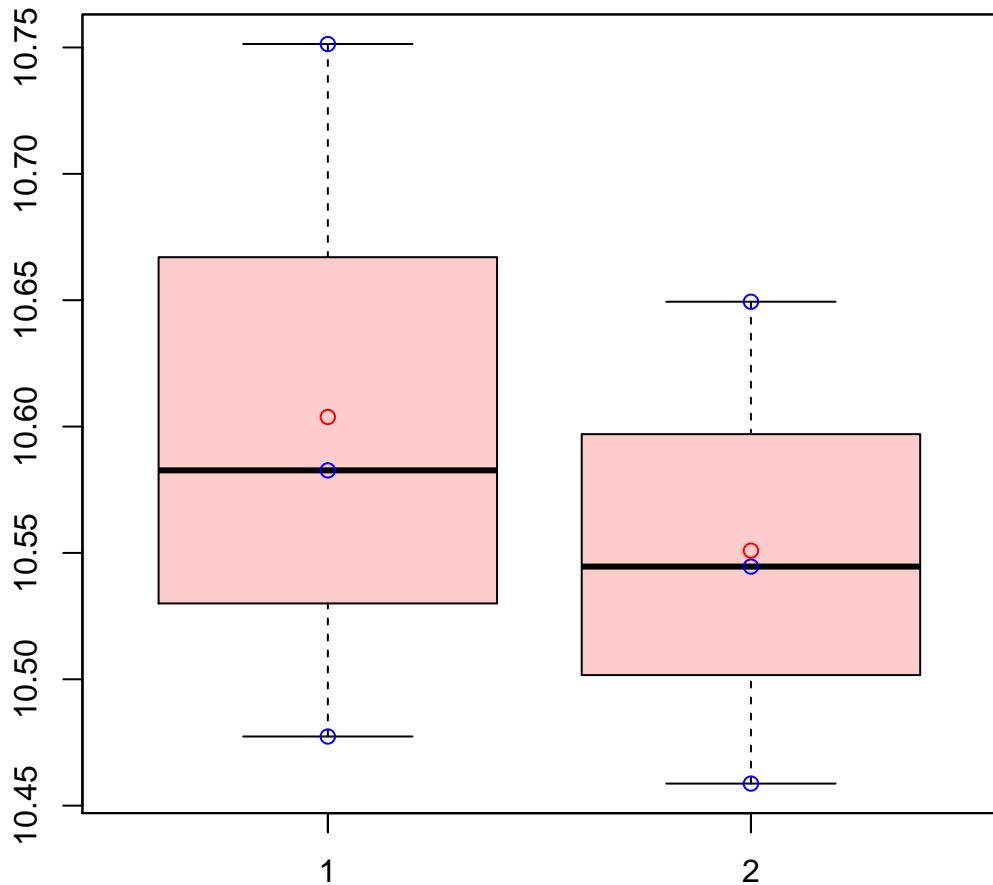

t-Test: p-value = 0.62

# CL9974Contig1|CL9974Contig1

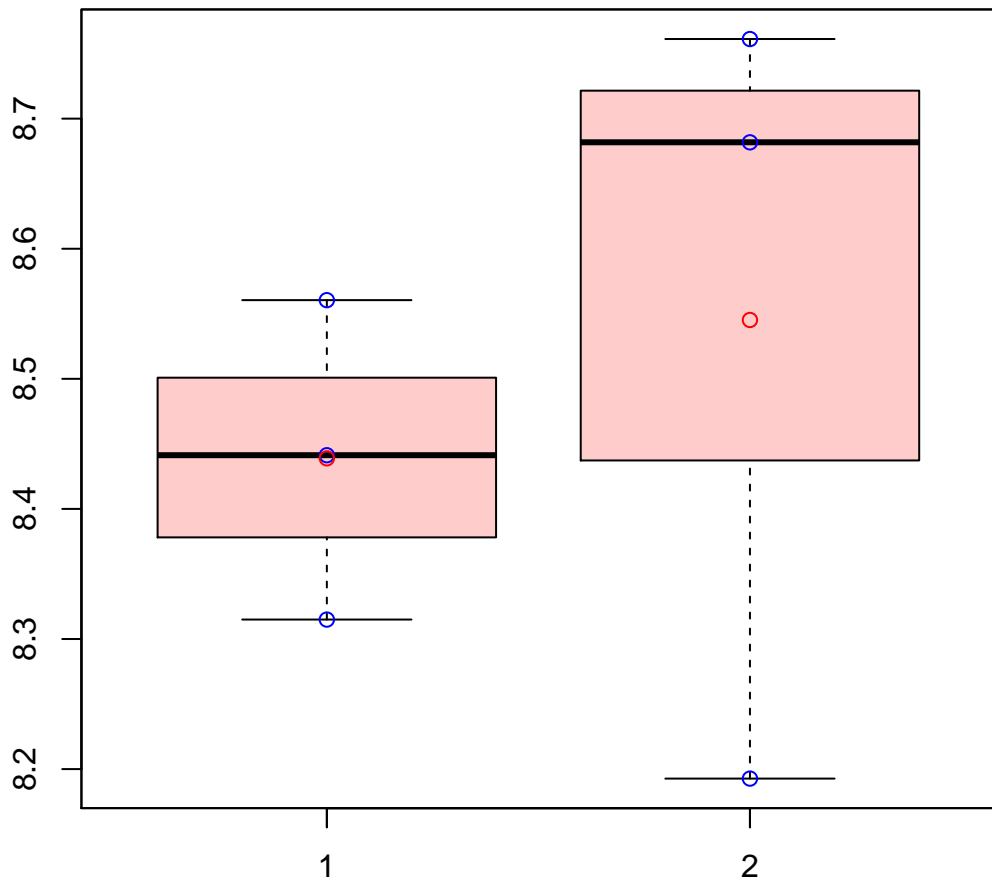

t-Test: p-value = 0.62

# CL997Contig4|CL997Contig4

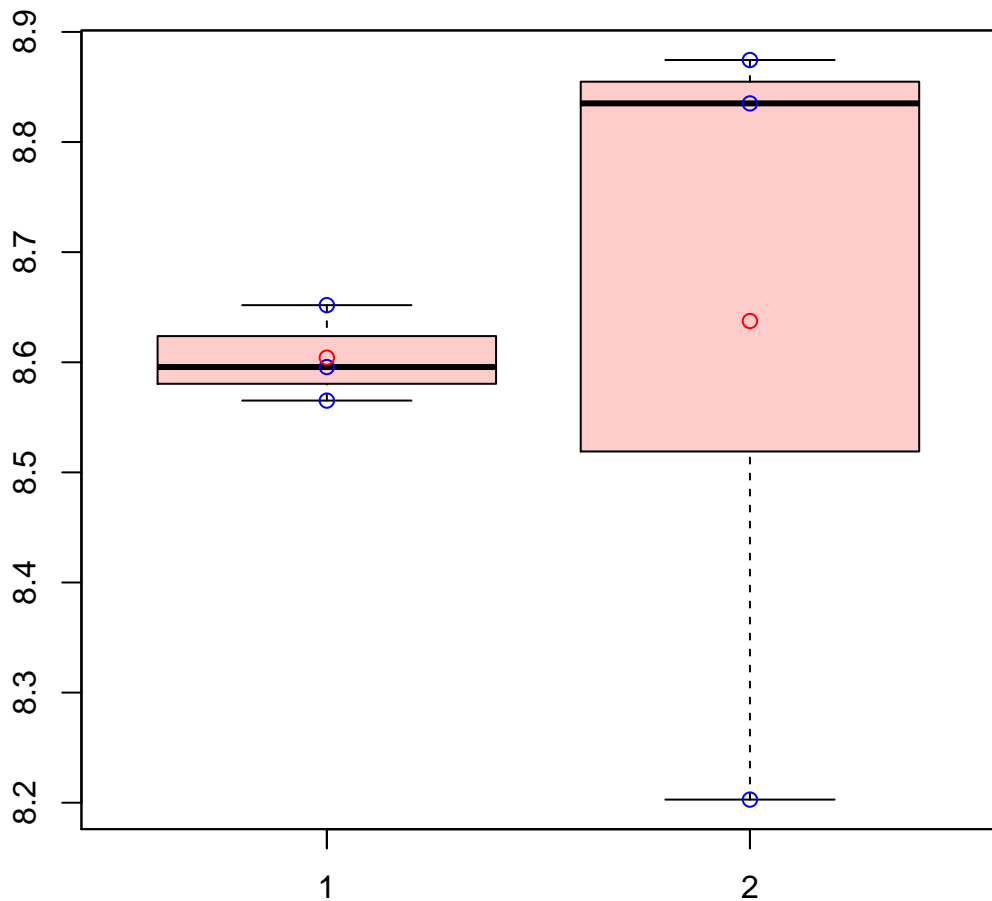

t-Test: p-value = 0.89



# CL997Contig5|CL997Contig5

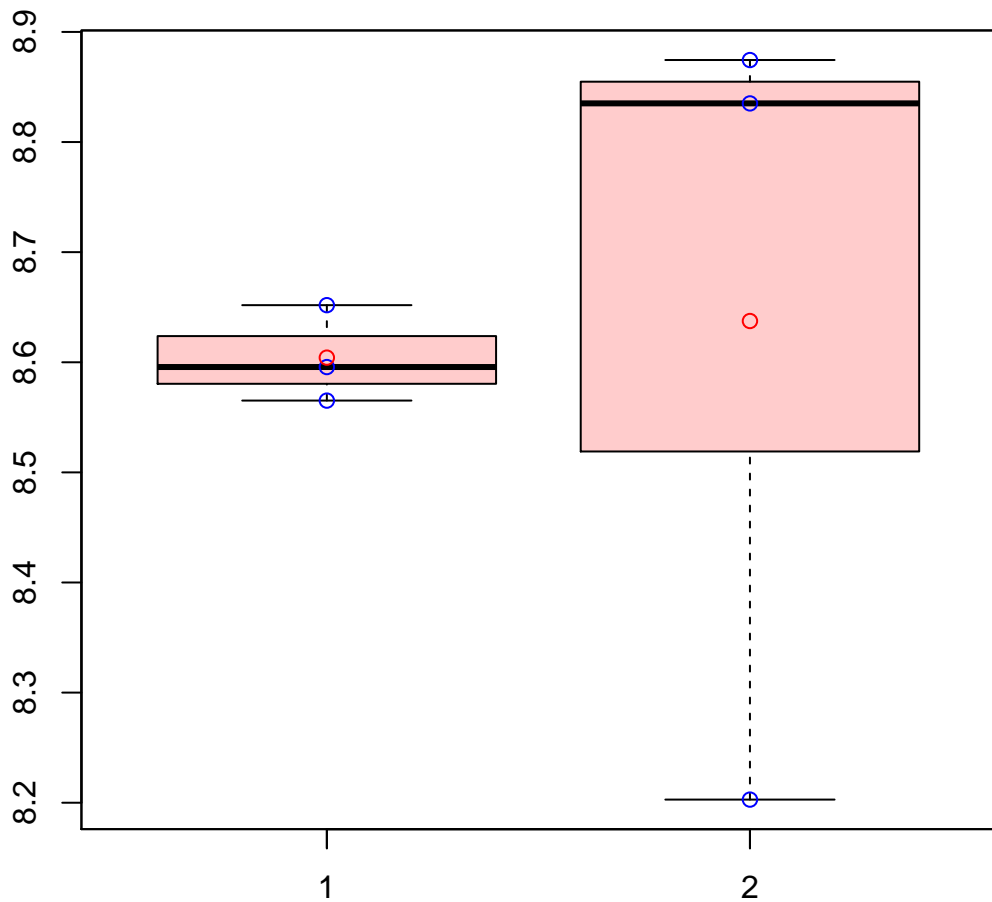

t-Test: p-value = 0.89

# CL998Contig2|CL998Contig2

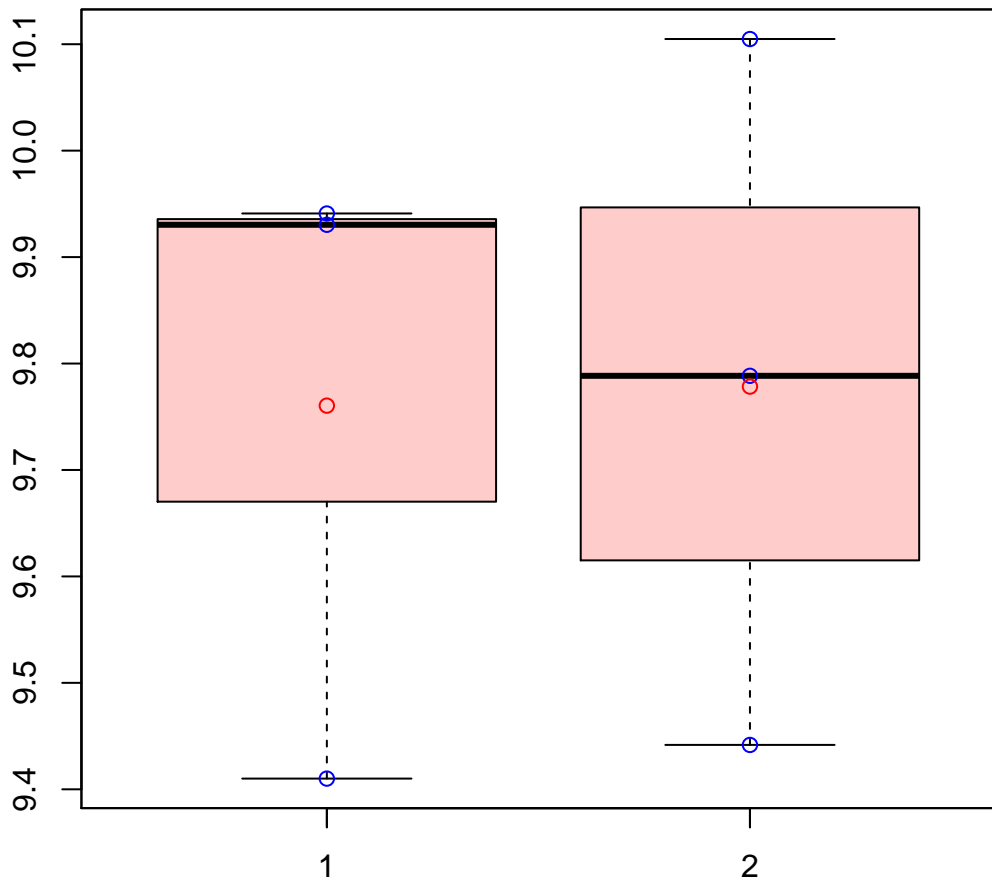

t-Test: p-value = 0.95

# CL998Contig7|CL998Contig7

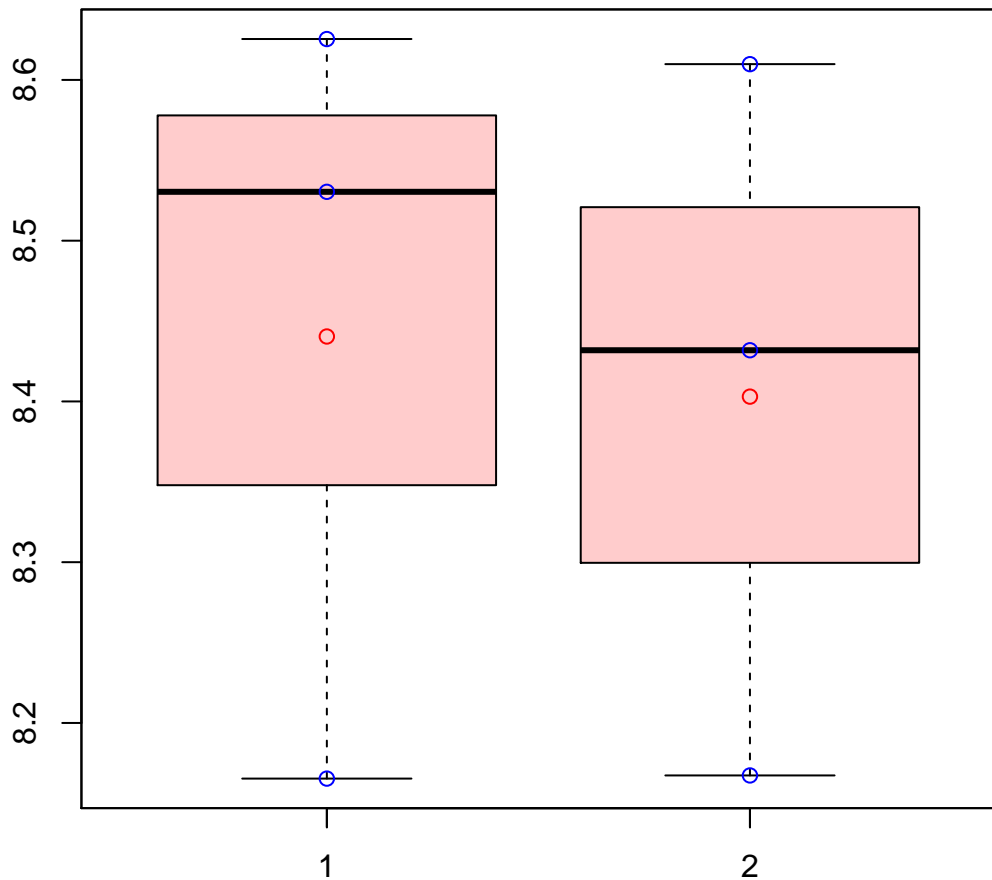

t-Test: p-value = 0.85

# CL999Contig10|CL999Contig10

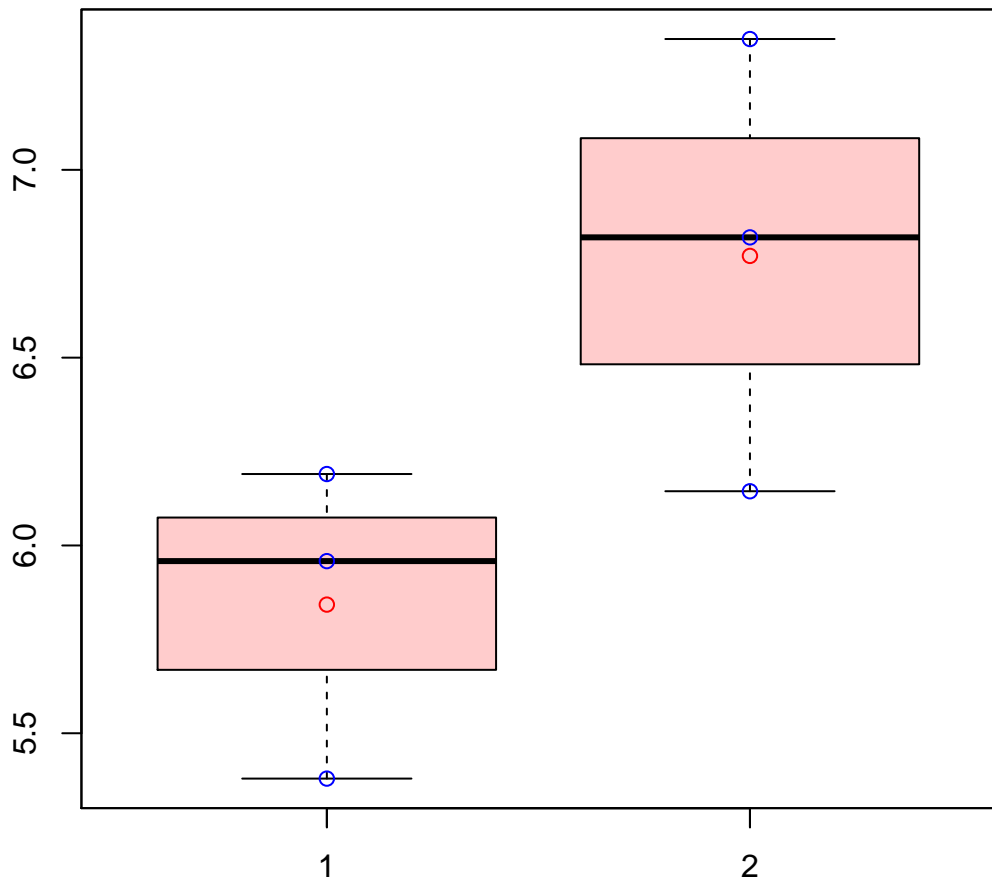

t-Test: p-value = 0.1

# CL999Contig15|CL999Contig15



t-Test: p-value = 0.1

# CL999Contig7|CL999Contig7



t-Test: p-value = 0.1

# CL999Contig9|CL999Contig9

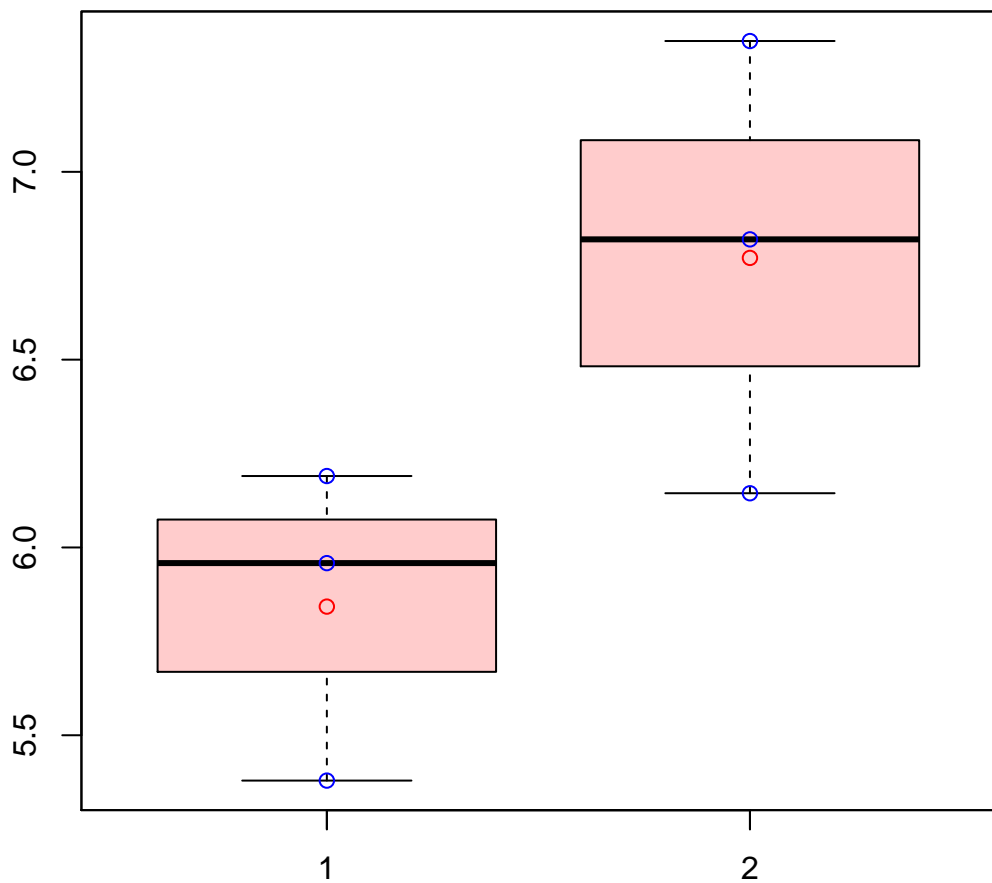

t-Test: p-value = 0.1

# CL99Contig10|CL99Contig10

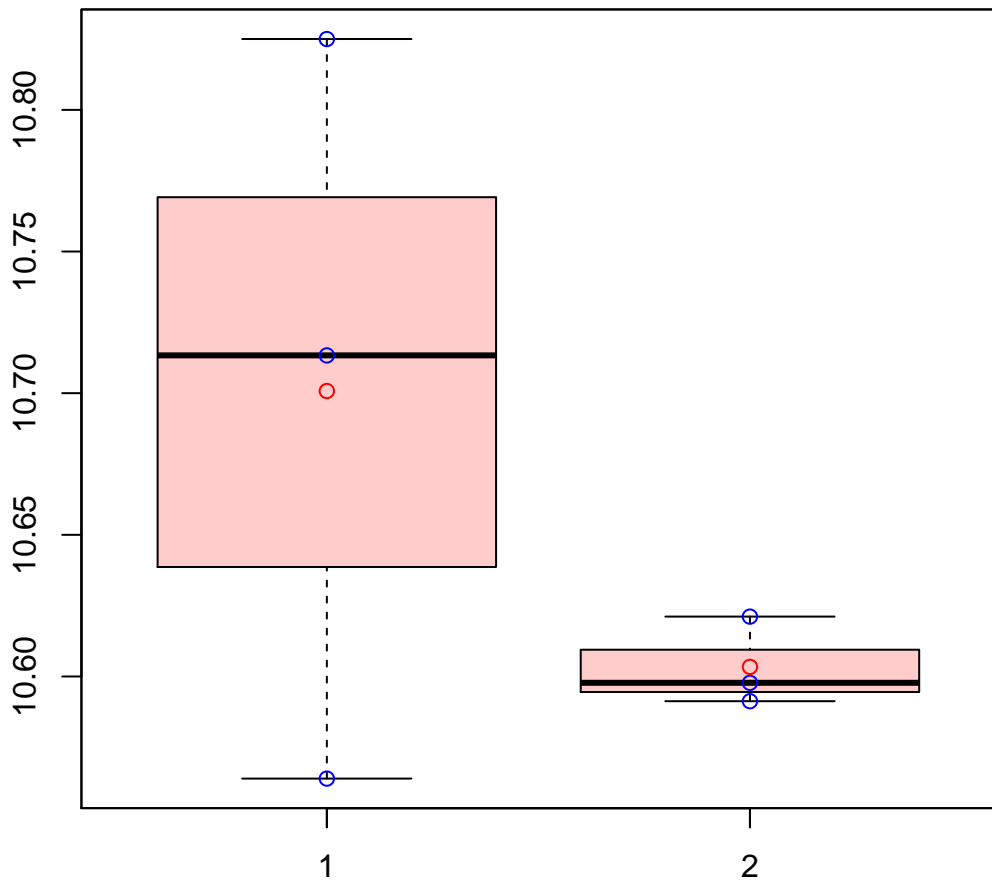

t-Test: p-value = 0.33



# CL99Contig11|CL99Contig11

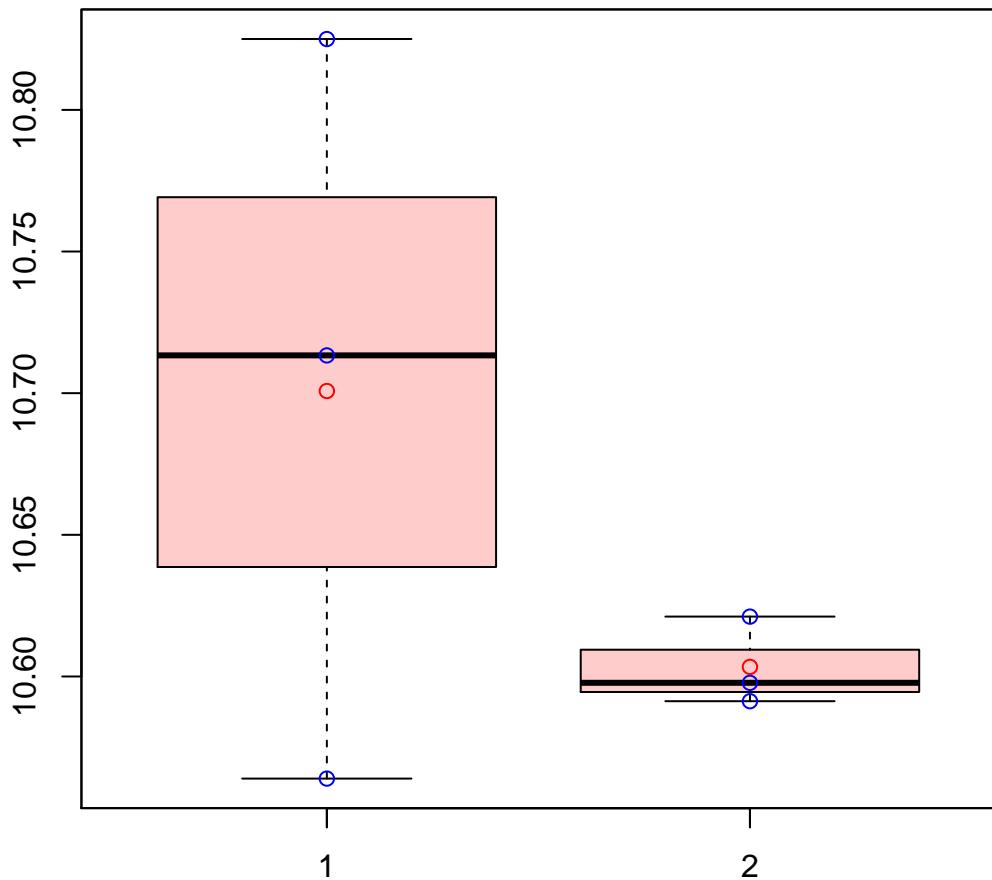

t-Test: p-value = 0.33

# CL99Contig13|CL99Contig13

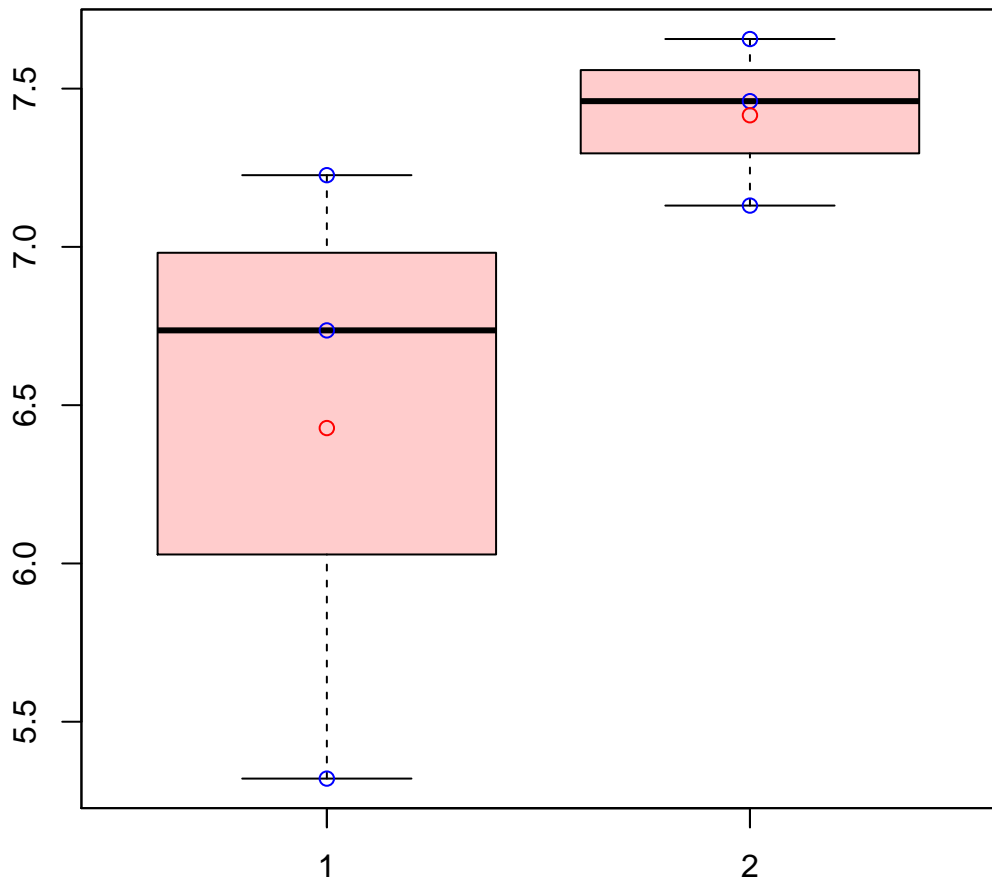

t-Test: p-value = 0.22

# CL99Contig17|CL99Contig17

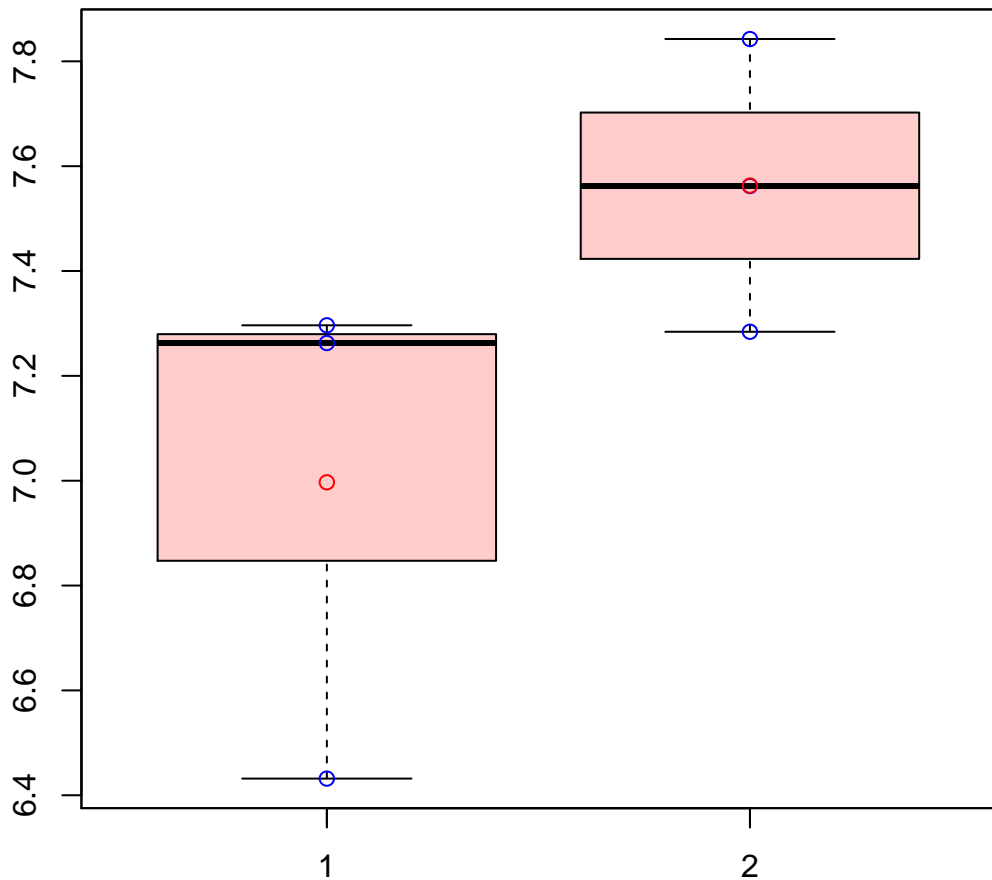

t-Test: p-value = 0.18

# CL99Contig18|CL99Contig18

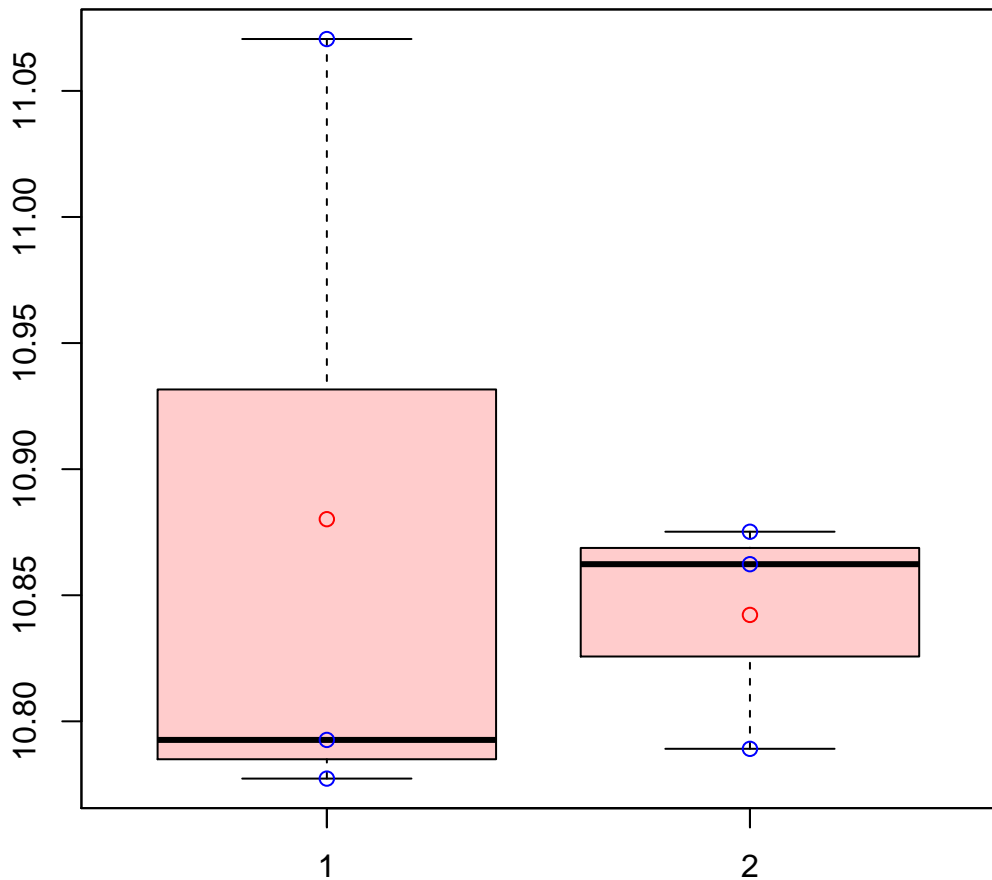

t-Test: p-value = 0.73

# CL99Contig19|CL99Contig19

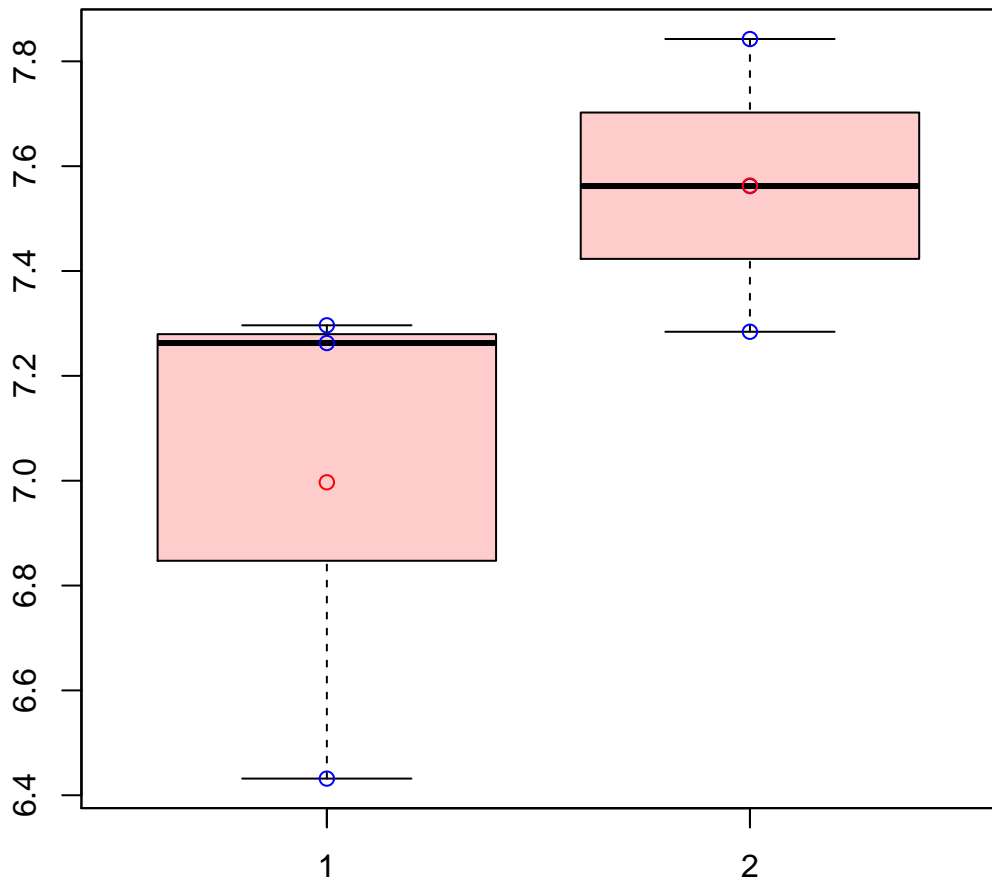

t-Test: p-value = 0.18

# CL99Contig20|CL99Contig20



t-Test: p-value = 0.18

# CL99Contig22|CL99Contig22



t-Test: p-value = 0.18

# CL99Contig26|CL99Contig26

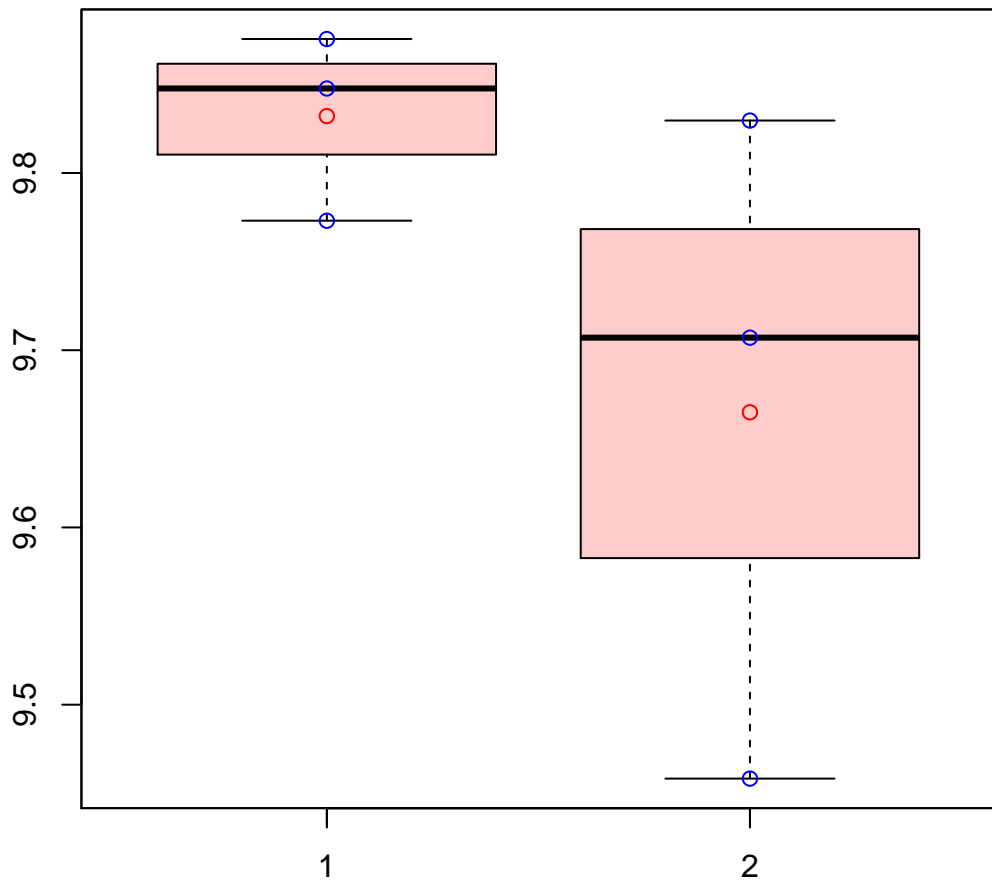

t-Test: p-value = 0.26



# CL99Contig28|CL99Contig28

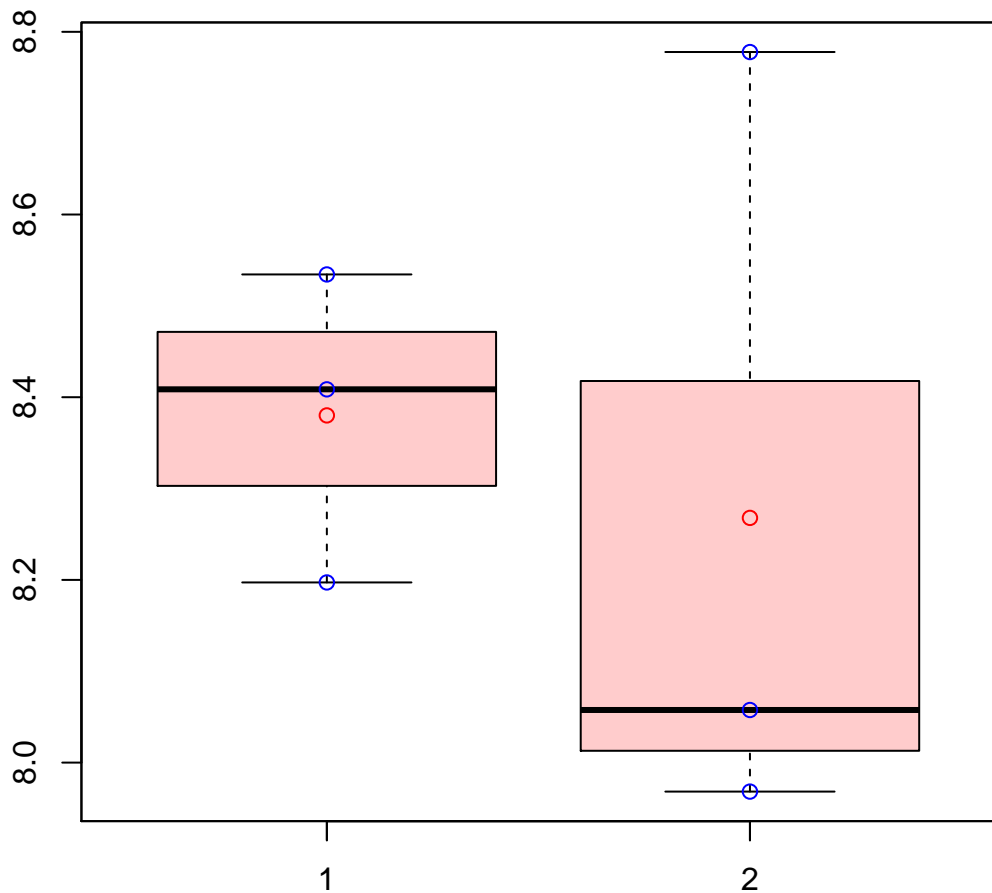

t-Test: p-value = 0.71

# CL99Contig30|CL99Contig30

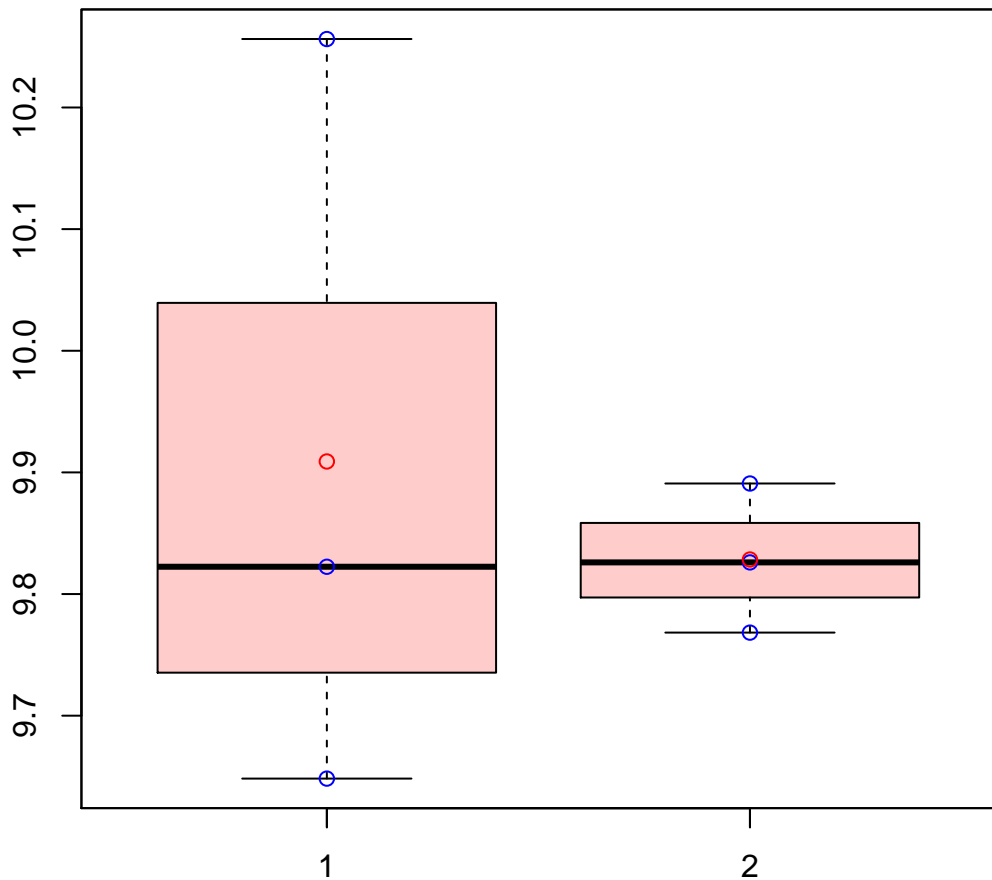

t-Test: p-value = 0.7

# CL99Contig6|CL99Contig6

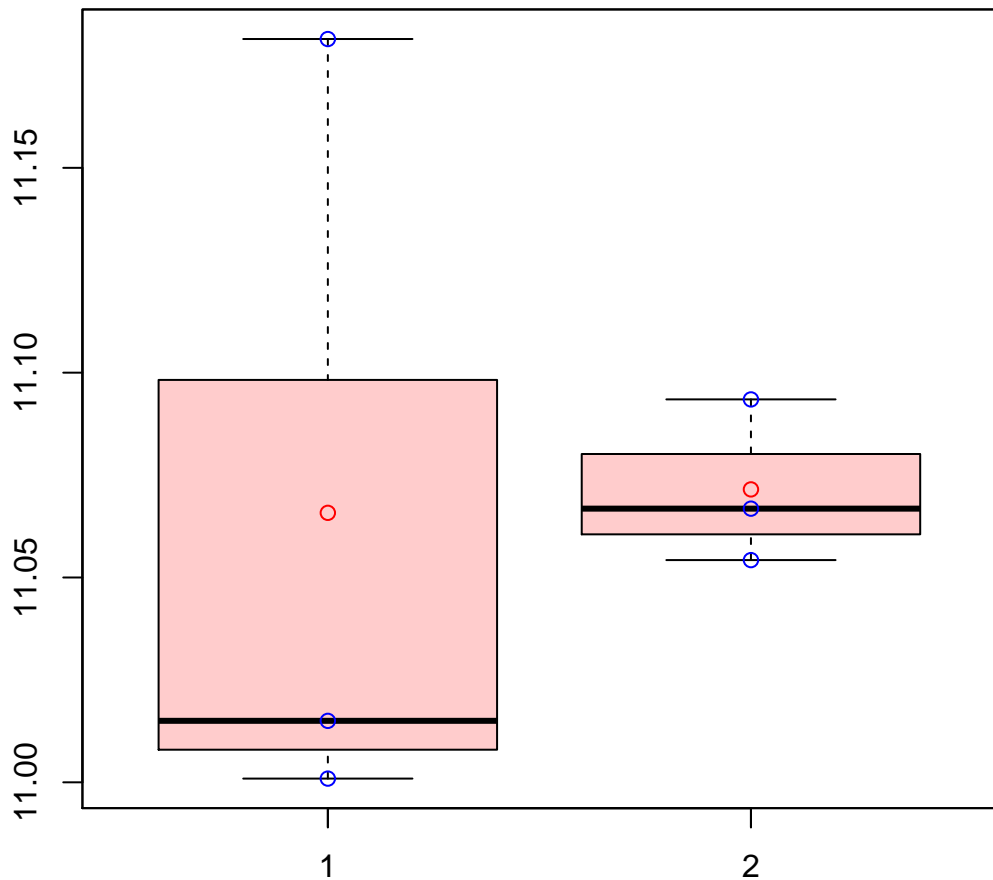

t-Test: p-value = 0.93

# CL9Contig20|CL9Contig20

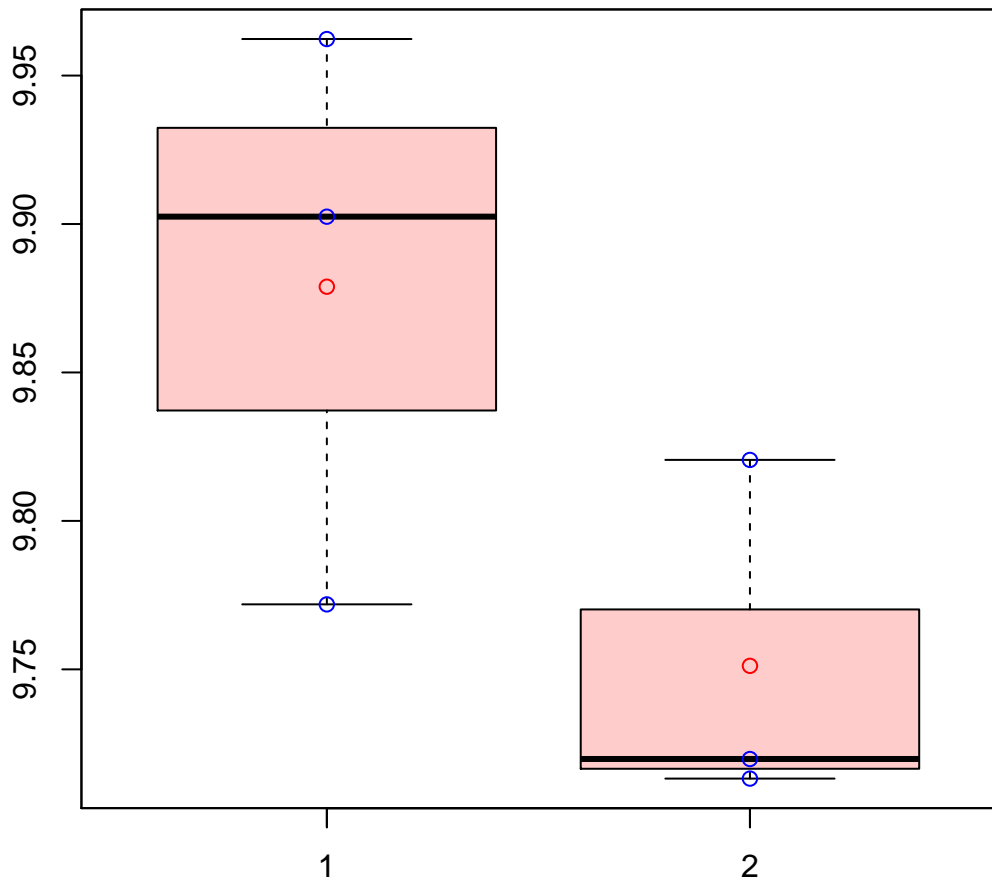

t-Test: p-value = 0.14

# CL9Contig35|CL9Contig35

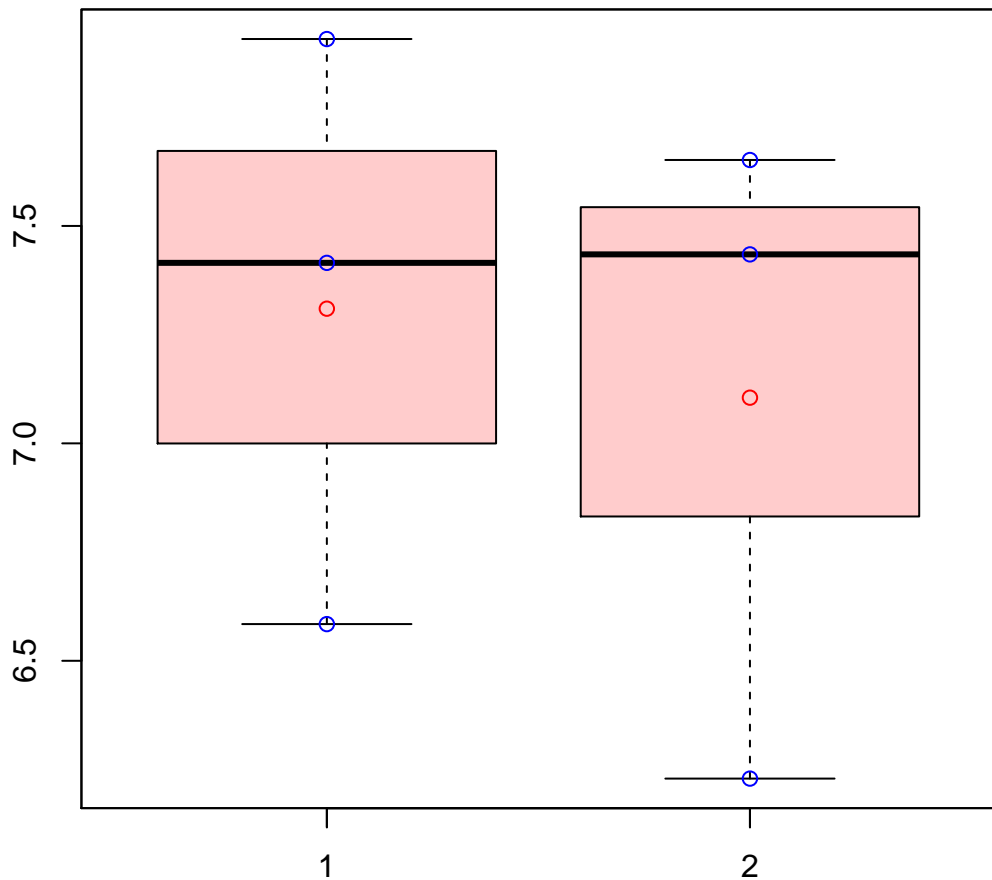

t-Test: p-value = 0.75

# CL9Contig4|CL9Contig4



t-Test: p-value = 0.35

# CL9Contig5|CL9Contig5



t-Test: p-value = 0.9

# CL9Contig72|CL9Contig72

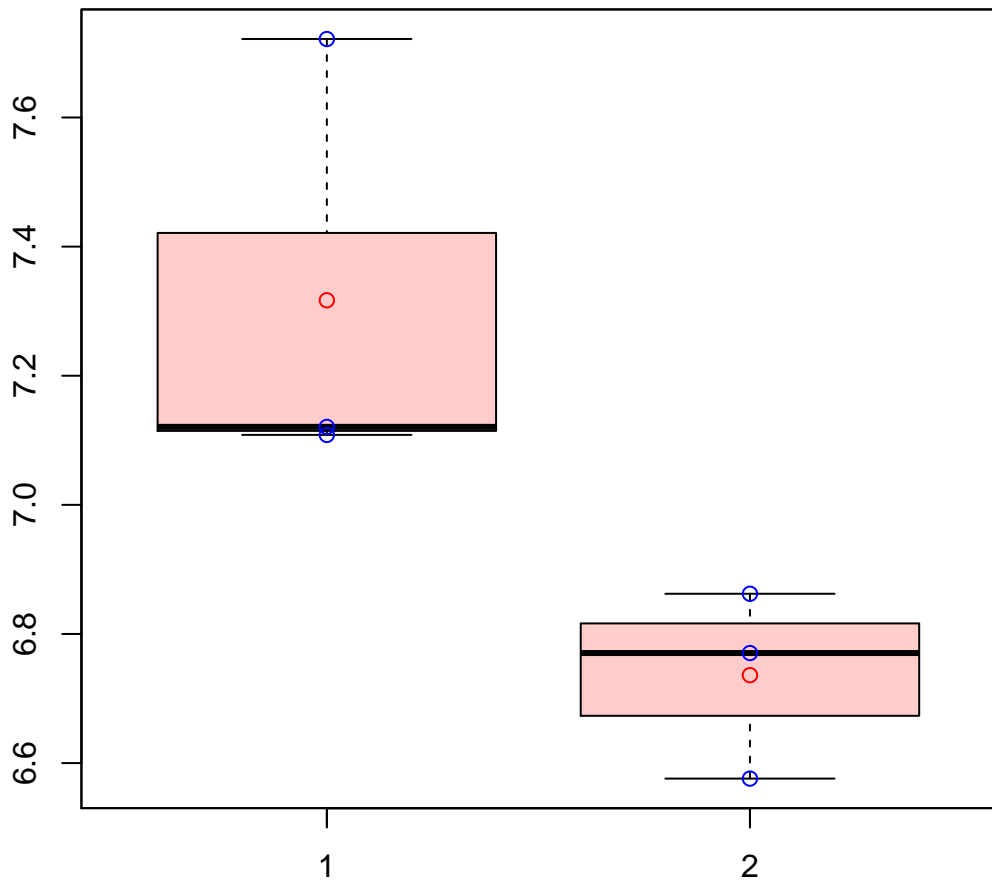

t-Test: p-value = 0.09



# CLPP8\_ERATE|CLPP8\_ERATE

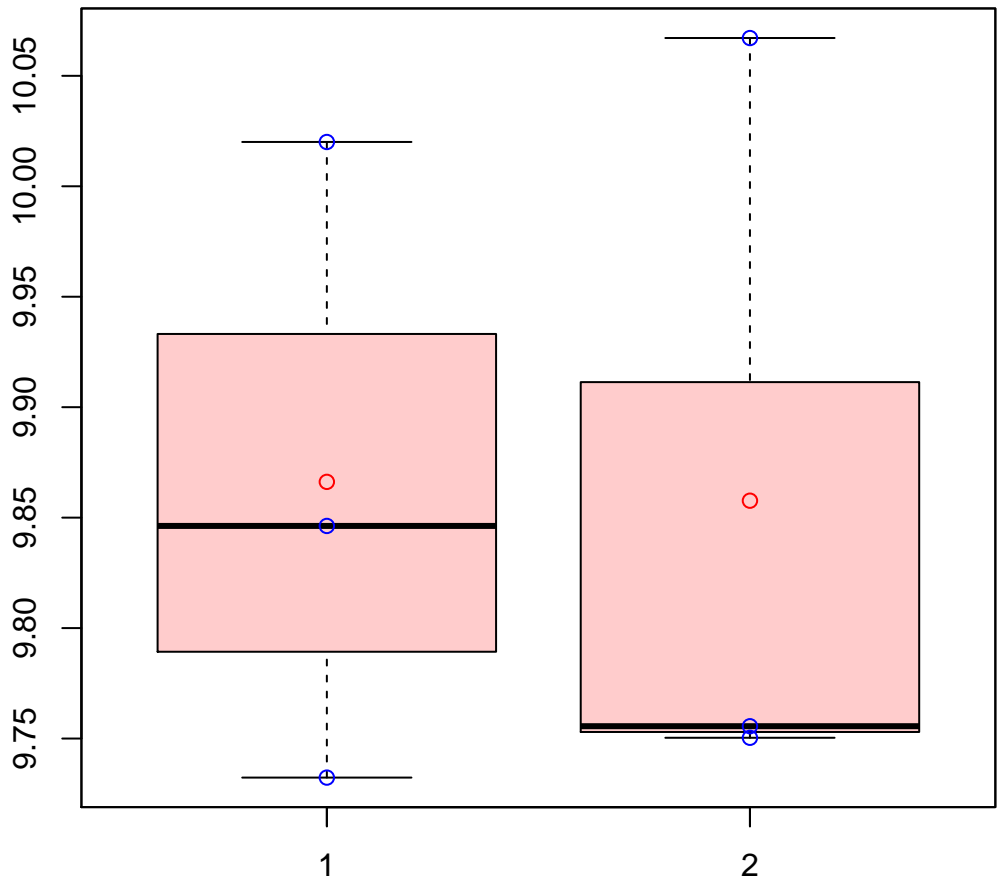

t-Test: p-value = 0.95

comp10971\_c0\_seq1|comp10971\_c0\_seq1

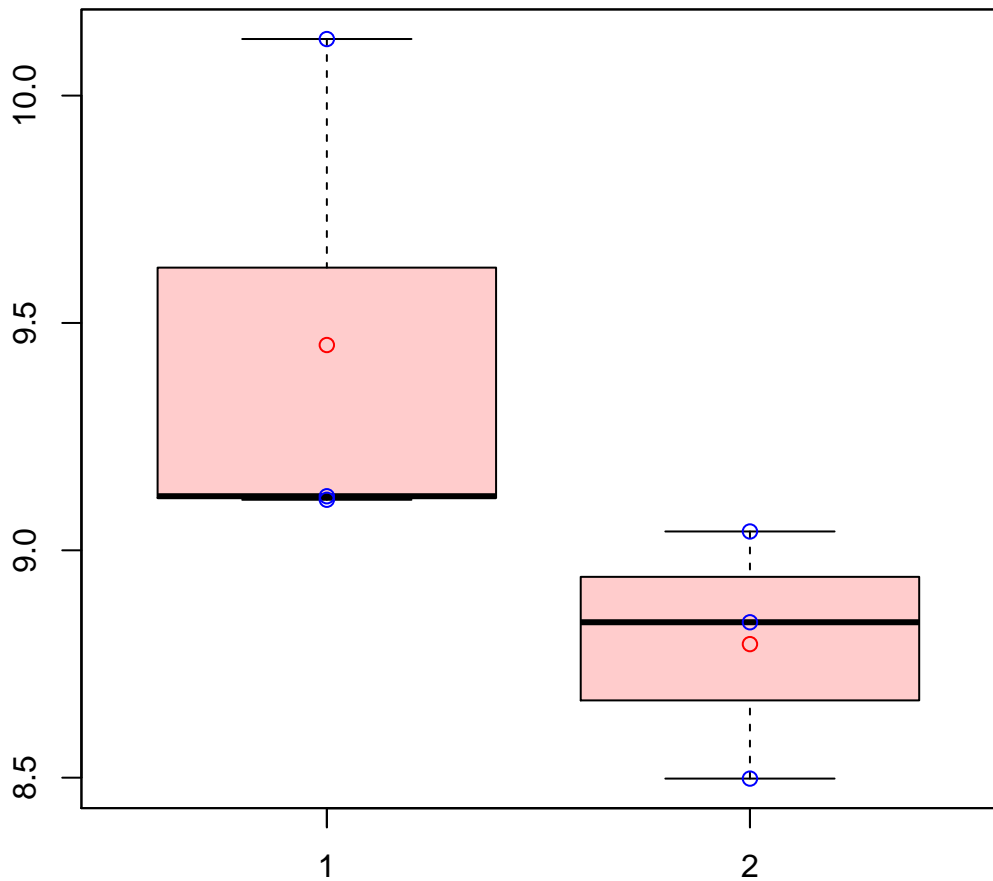

t-Test: p-value = 0.18

comp1100\_c0\_seq1|comp1100\_c0\_seq1



t-Test: p-value = 0.31

# comp11559\_c0\_seq6|comp11559\_c0\_seq6

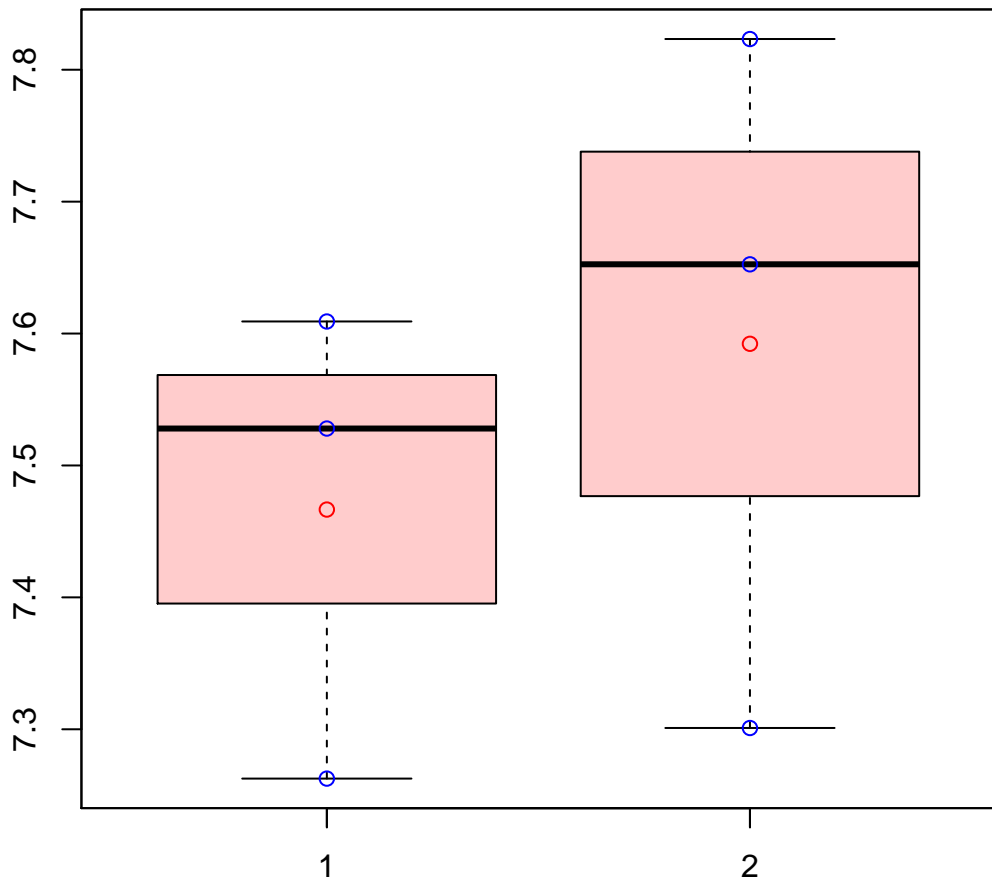

t-Test: p-value = 0.54

# comp11619\_c0\_seq2|comp11619\_c0\_seq2



t-Test: p-value = 0.16

# comp117\_c4\_seq8|comp117\_c4\_seq8



t-Test: p-value = 0.64

comp1287\_c0\_seq1|comp1287\_c0\_seq1

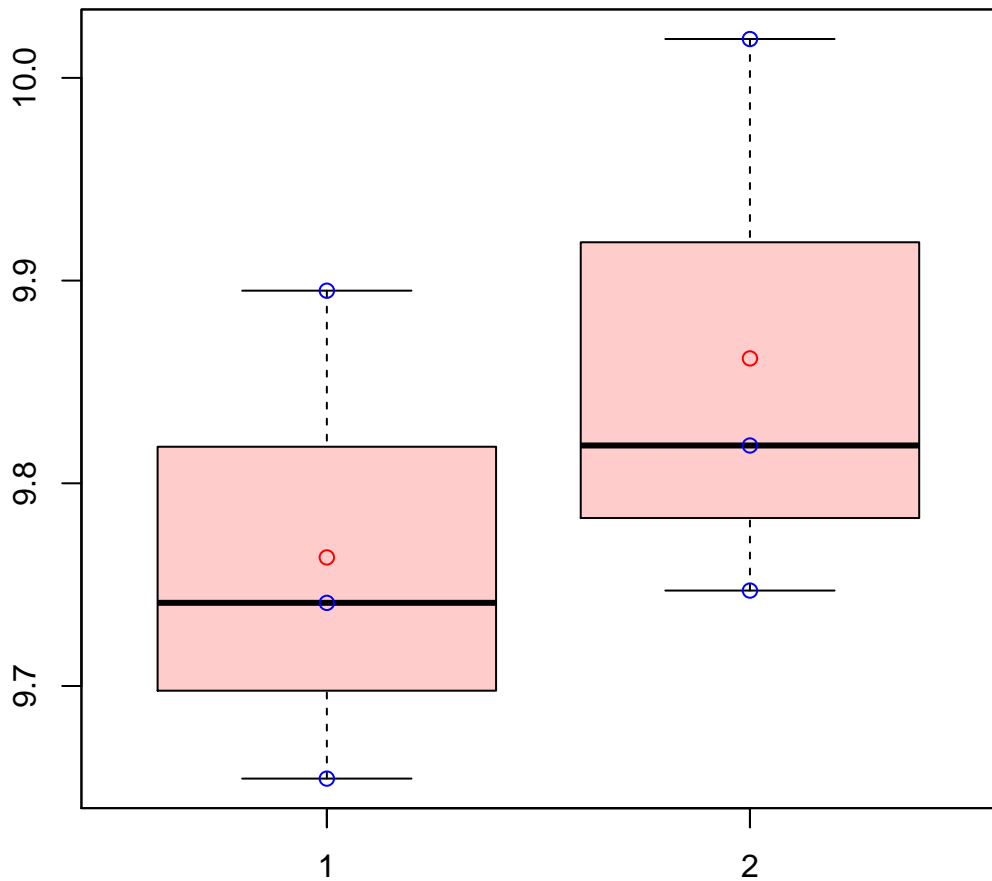

t-Test: p-value = 0.41

**comp1325\_c0\_seq38|comp1325\_c0\_seq38**

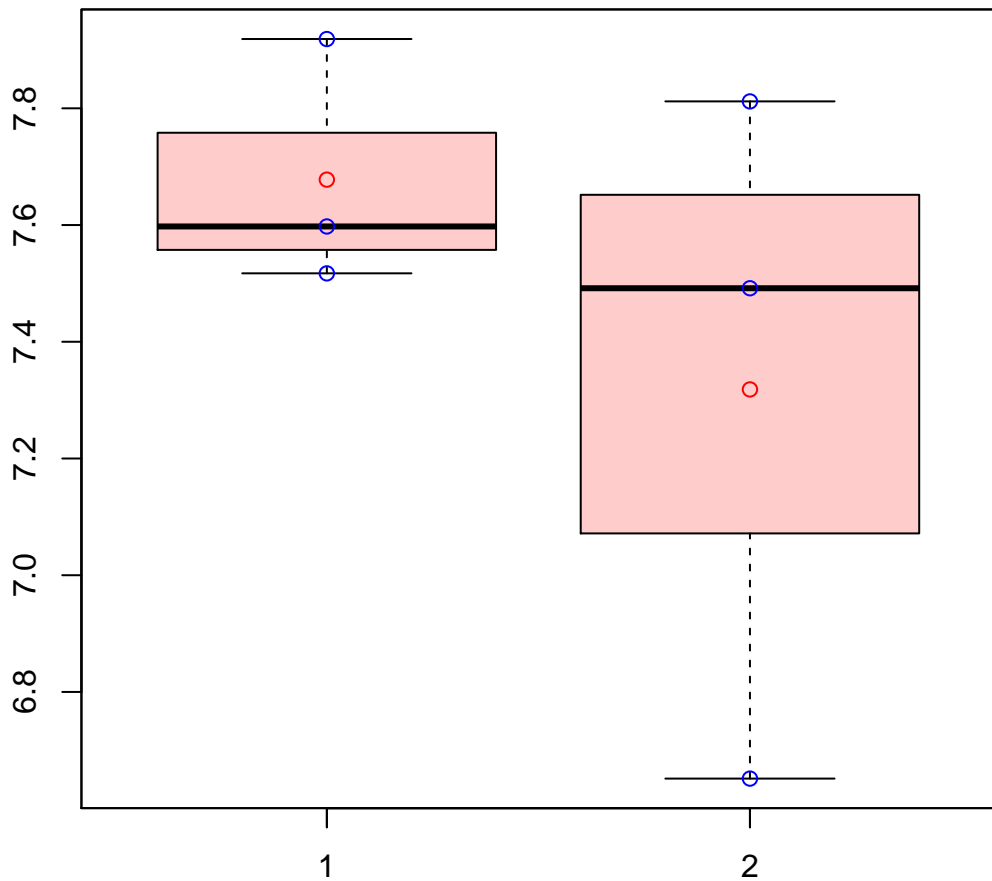

t-Test: p-value = 0.41



# comp1386\_c0\_seq1|comp1386\_c0\_seq1



t-Test: p-value = 0.05

comp13984\_c0\_seq1|comp13984\_c0\_seq1

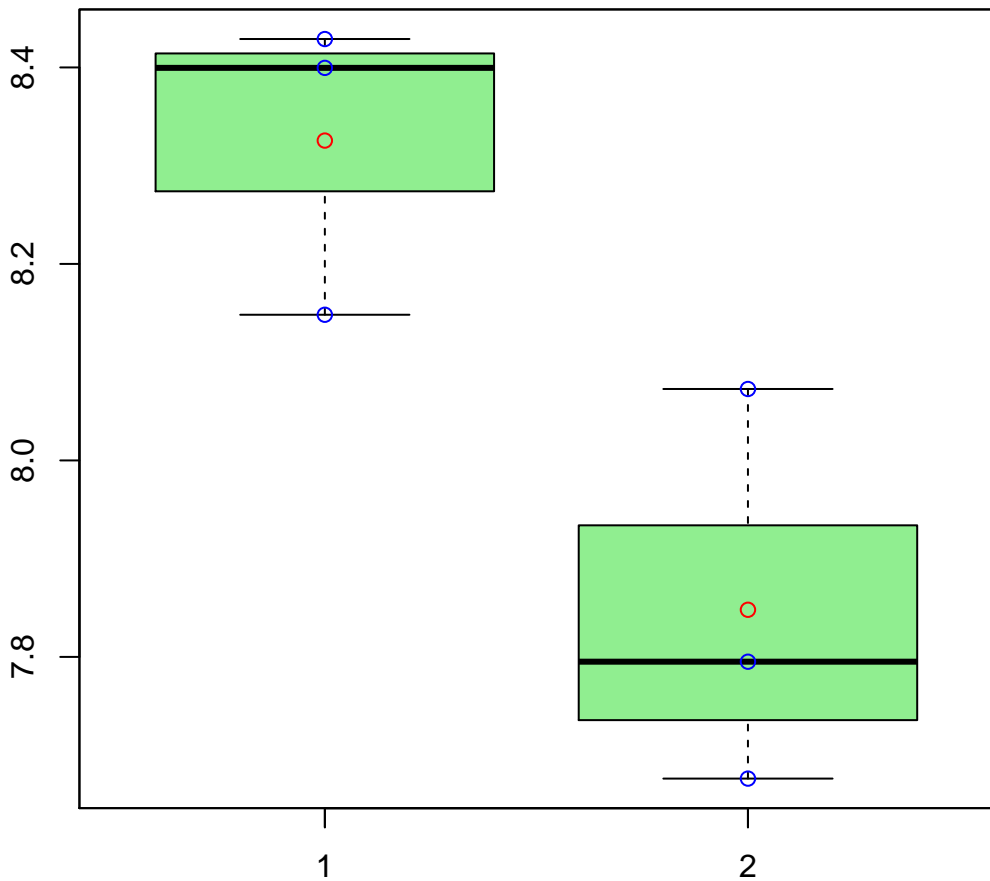

t-Test: p-value = 0.04

# comp13984\_c0\_seq2|comp13984\_c0\_seq2

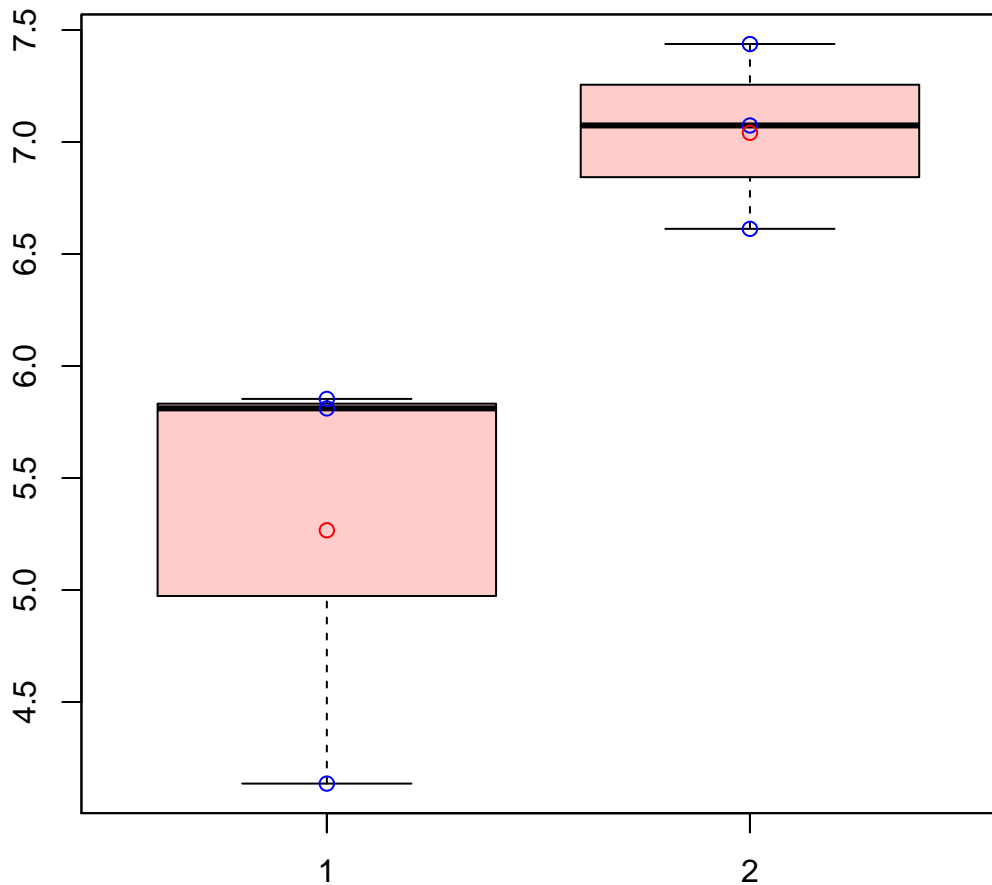

t-Test: p-value = 0.07

# comp13984\_c0\_seq3|comp13984\_c0\_seq3

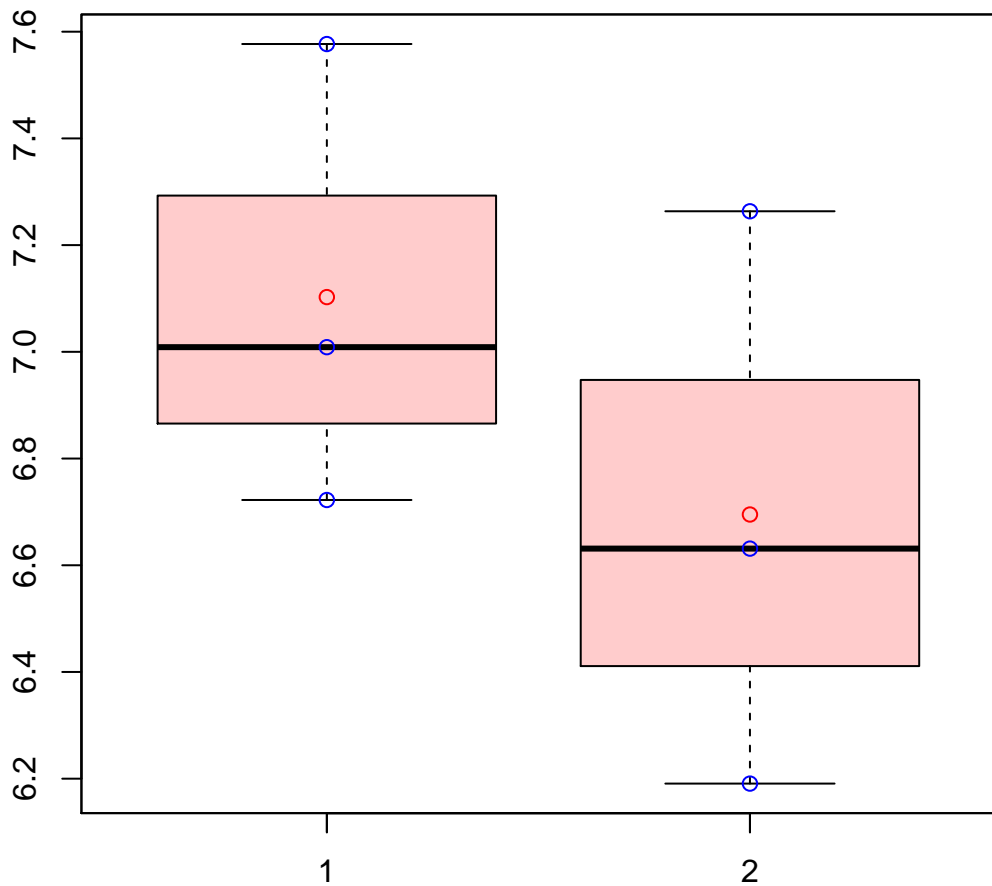

t-Test: p-value = 0.37

comp15916\_c0\_seq1|comp15916\_c0\_seq1

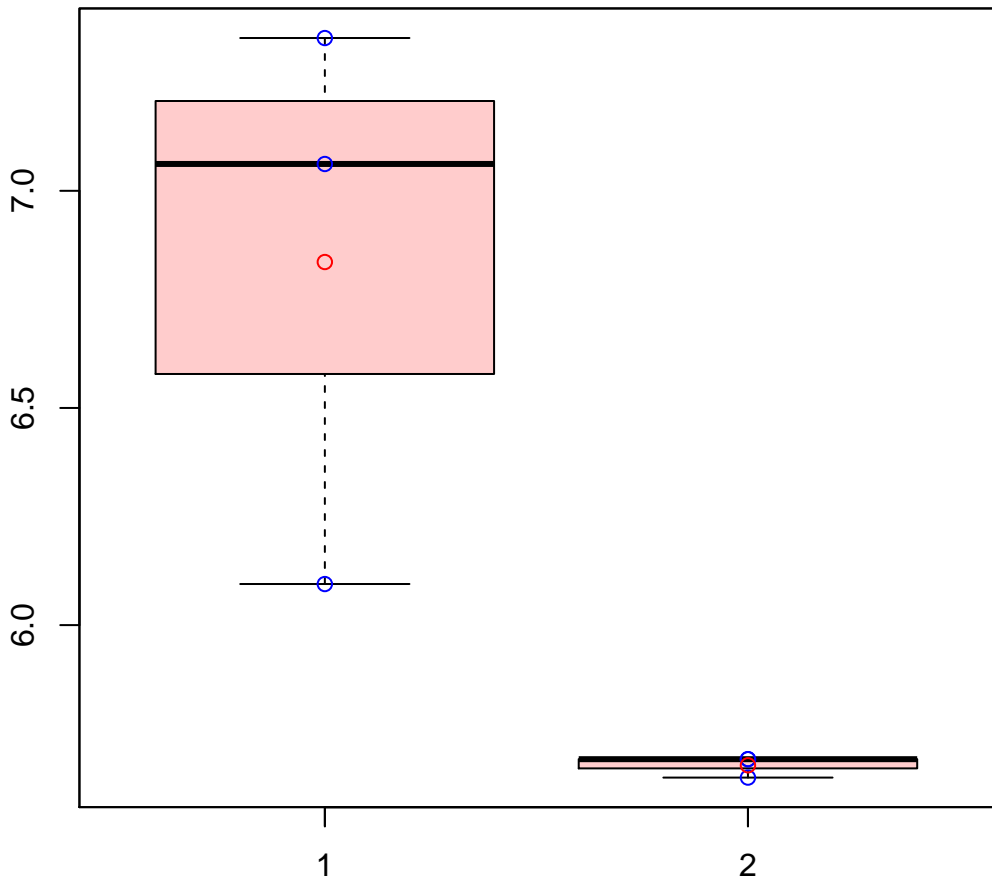

t-Test: p-value = 0.09

**comp16494\_c0\_seq4|comp16494\_c0\_seq4**



t-Test: p-value = 0.32

# comp16511\_c0\_seq6|comp16511\_c0\_seq6

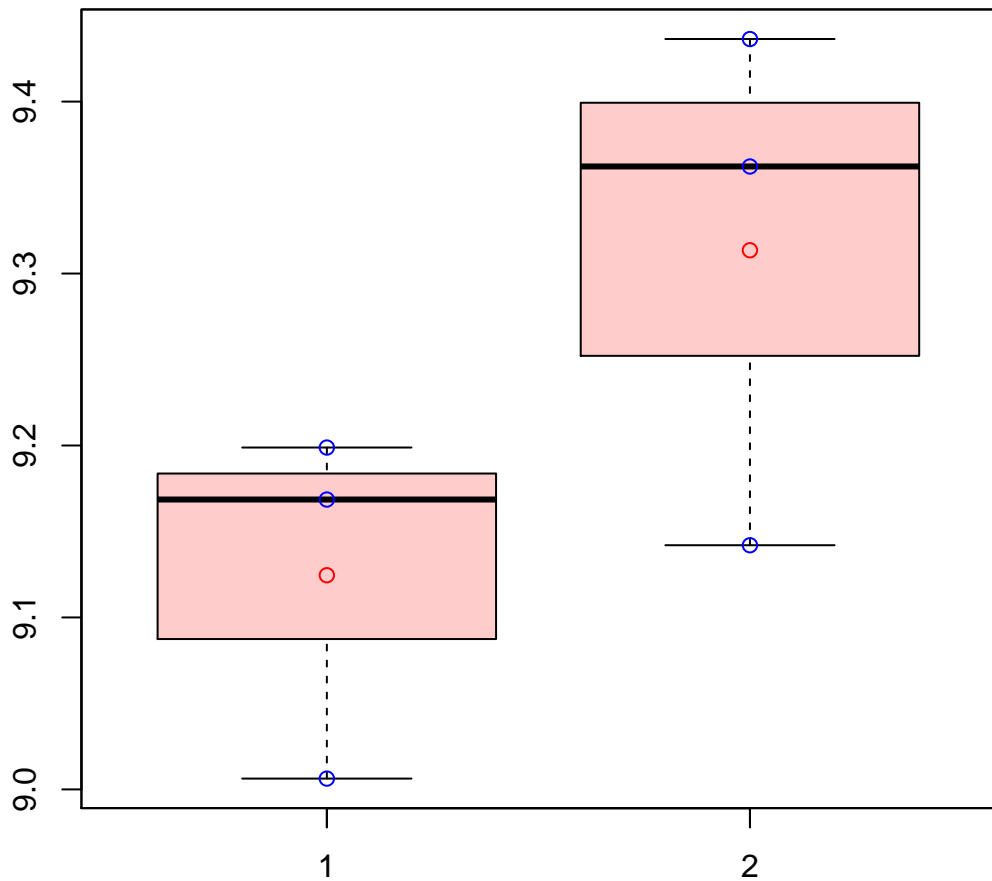

t-Test: p-value = 0.16

comp20692\_c0\_seq1|comp20692\_c0\_seq1

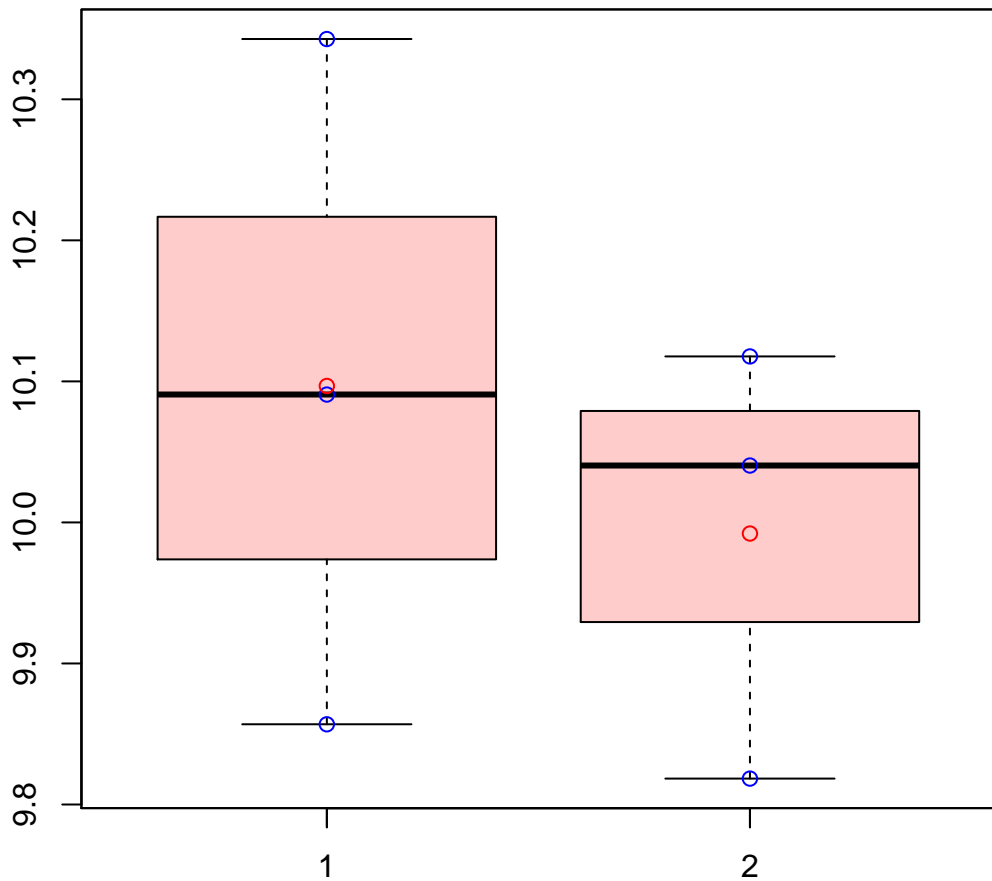

t-Test: p-value = 0.57



# comp21315\_c0\_seq2|comp21315\_c0\_seq2

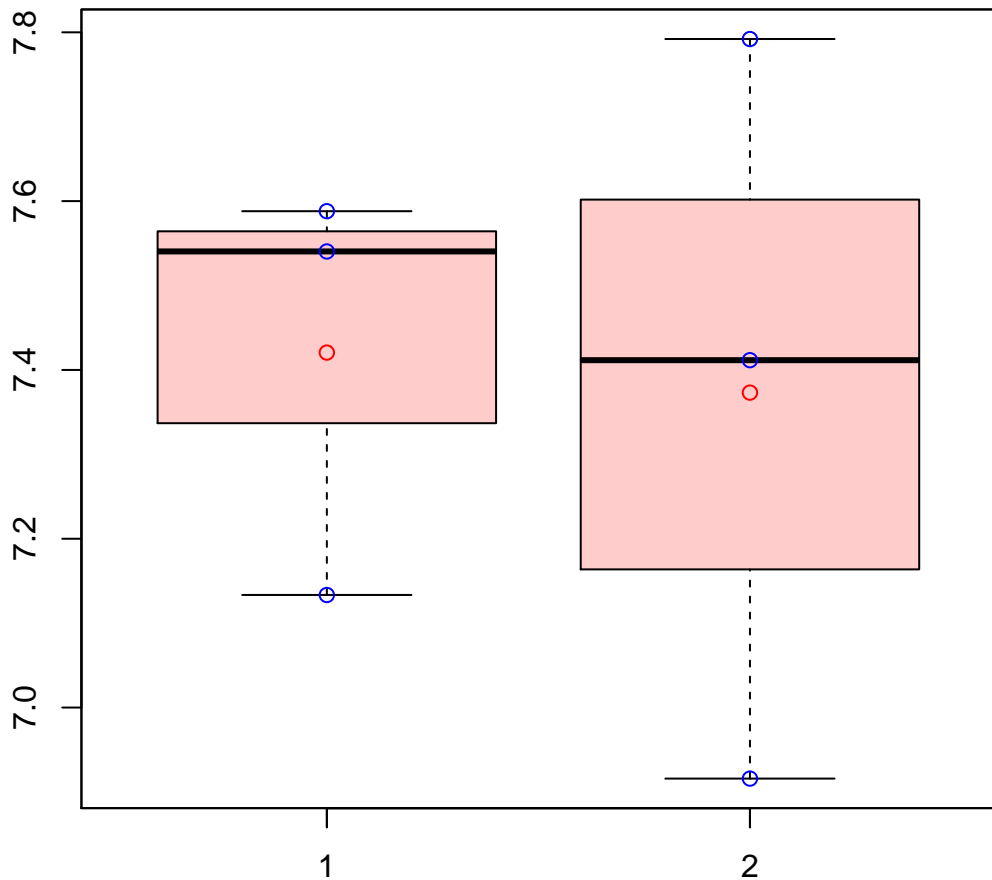

t-Test: p-value = 0.88

# comp21949\_c0\_seq4|comp21949\_c0\_seq4

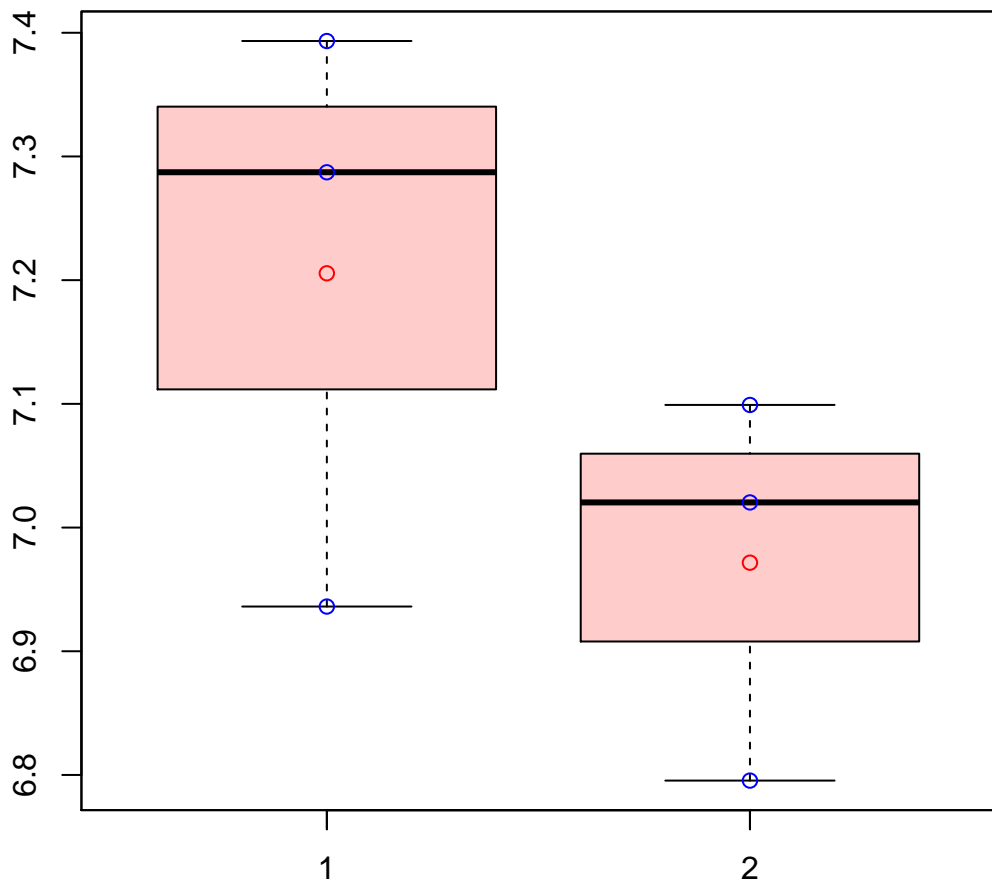

t-Test: p-value = 0.24

# comp2297\_c0\_seq6|comp2297\_c0\_seq6



t-Test: p-value = 0.86

comp2297\_c0\_seq7|comp2297\_c0\_seq7



t-Test: p-value = 0.85

comp2297\_c0\_seq8|comp2297\_c0\_seq8



t-Test: p-value = 0.86

# comp239\_c0\_seq13|comp239\_c0\_seq13

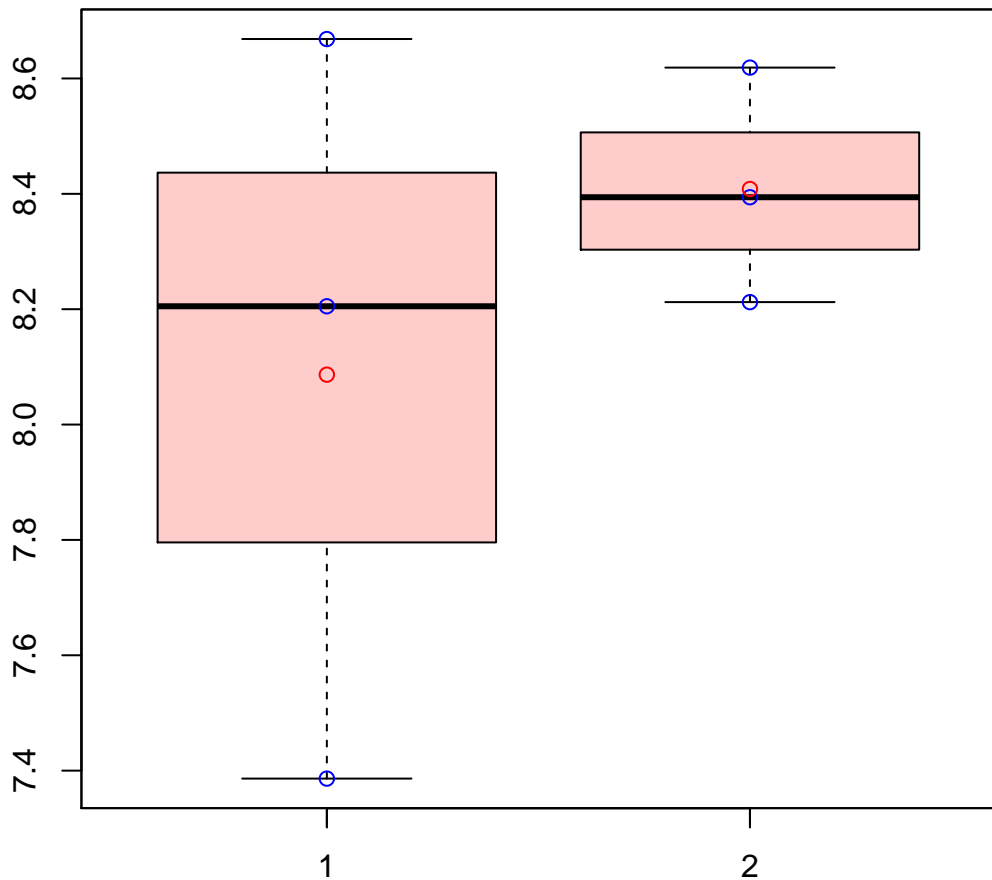

t-Test: p-value = 0.49

comp2740\_c0\_seq1|comp2740\_c0\_seq1

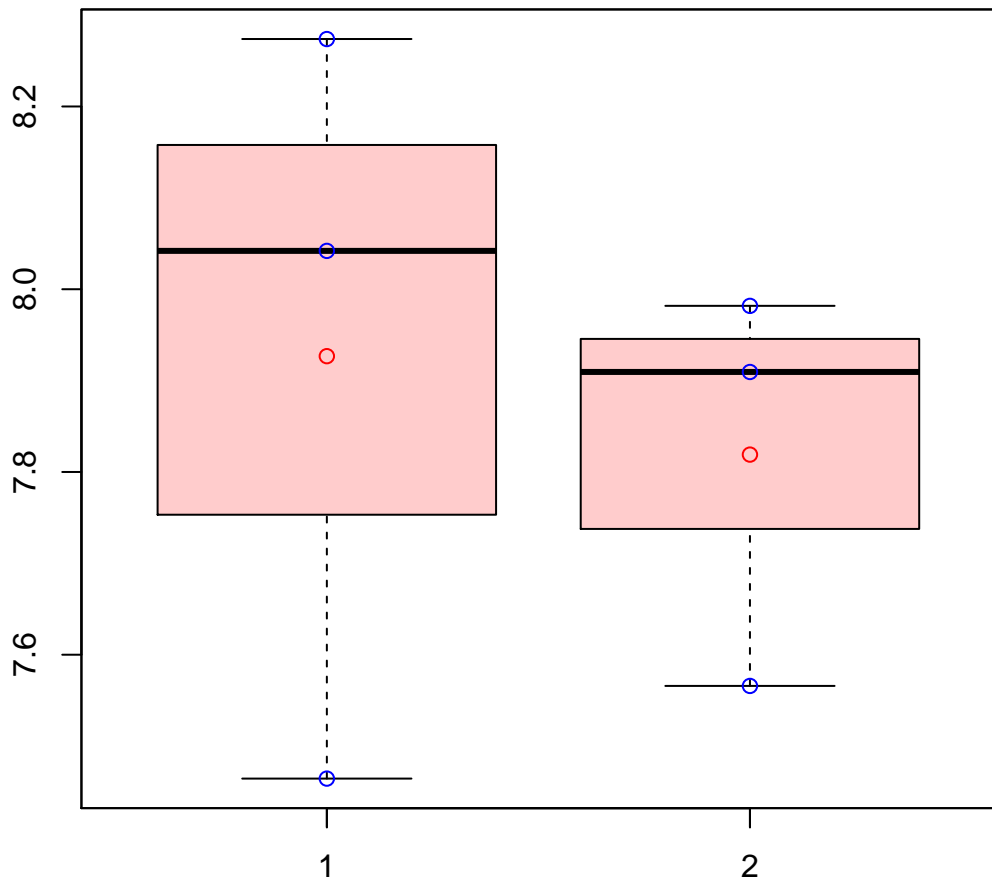

t-Test: p-value = 0.72

# comp2813\_c0\_seq5|comp2813\_c0\_seq5



t-Test: p-value = 0.14



comp29334\_c0\_seq8|comp29334\_c0\_seq8



t-Test: p-value = 0.76

# comp294\_c0\_seq1|comp294\_c0\_seq1



t-Test: p-value = 0.02

# comp310\_c1\_seq3|comp310\_c1\_seq3

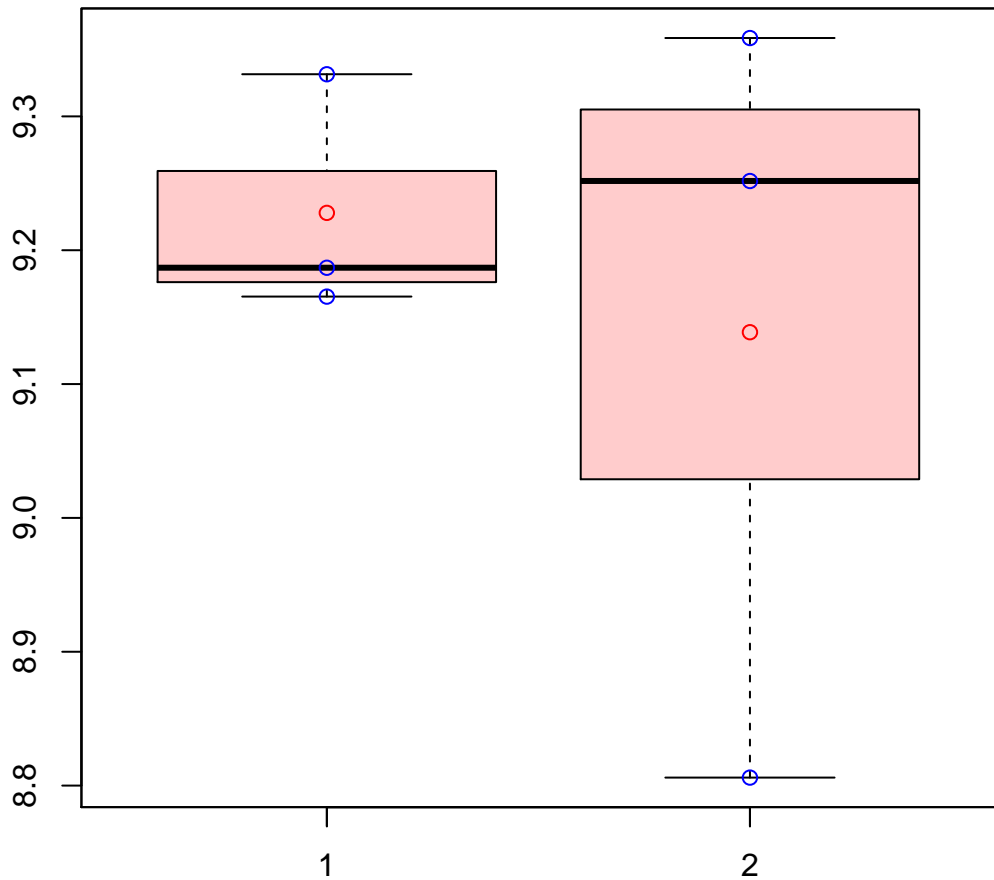

t-Test: p-value = 0.66

# comp3282\_c0\_seq1|comp3282\_c0\_seq1

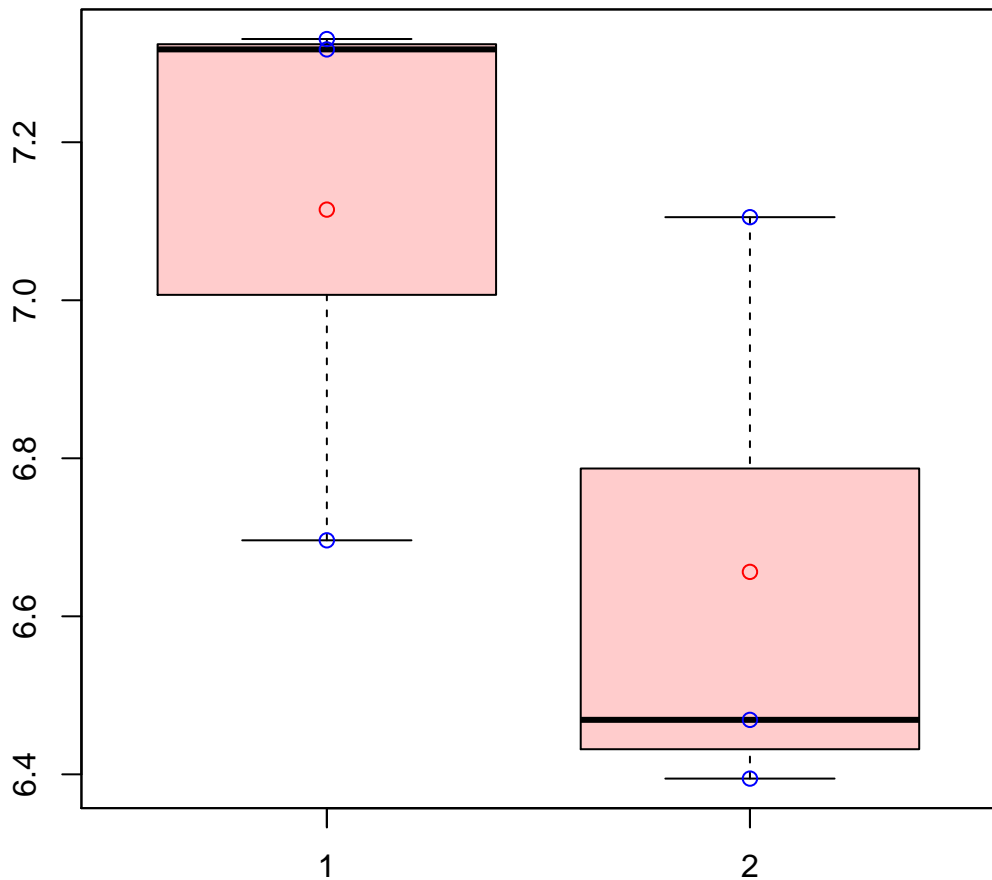

t-Test: p-value = 0.21

comp33\_c2\_seq17|comp33\_c2\_seq17



t-Test: p-value = 0.71

# comp34052\_c0\_seq4|comp34052\_c0\_seq4



t-Test: p-value = 0.76

# comp350\_c1\_seq13|comp350\_c1\_seq13

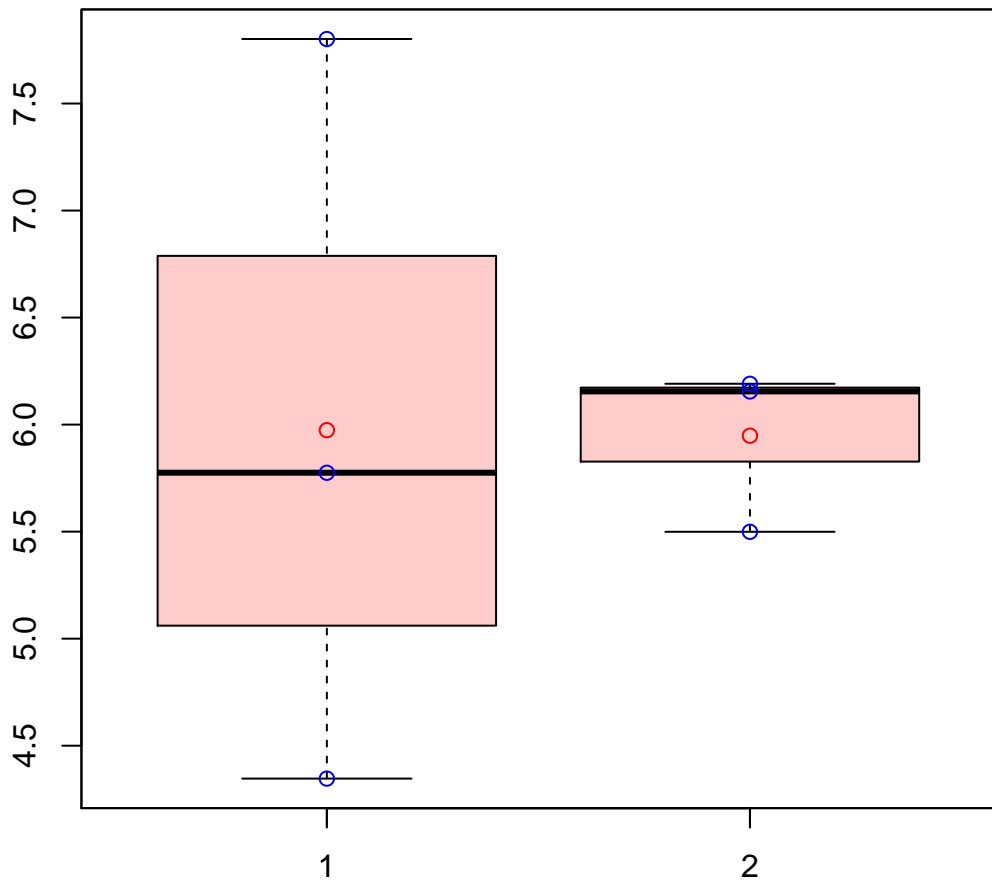

t-Test: p-value = 0.98

# comp355\_c0\_seq3|comp355\_c0\_seq3

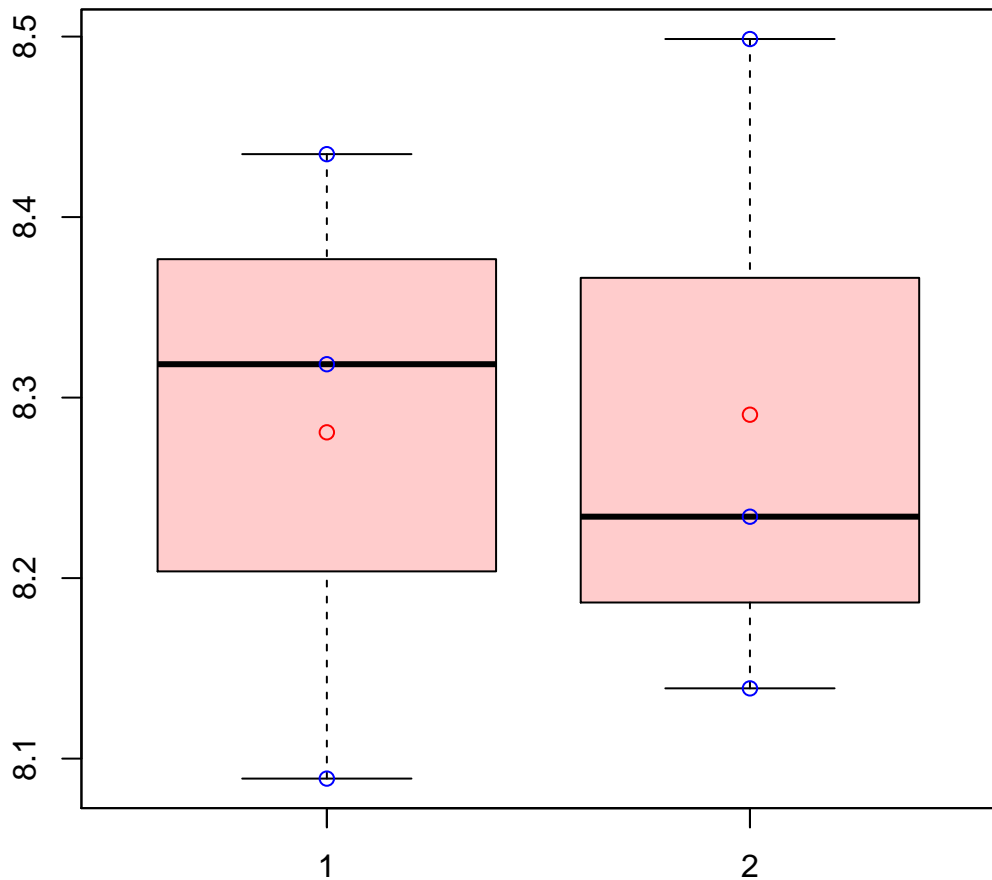

t-Test: p-value = 0.95



# comp36065\_c0\_seq1|comp36065\_c0\_seq1

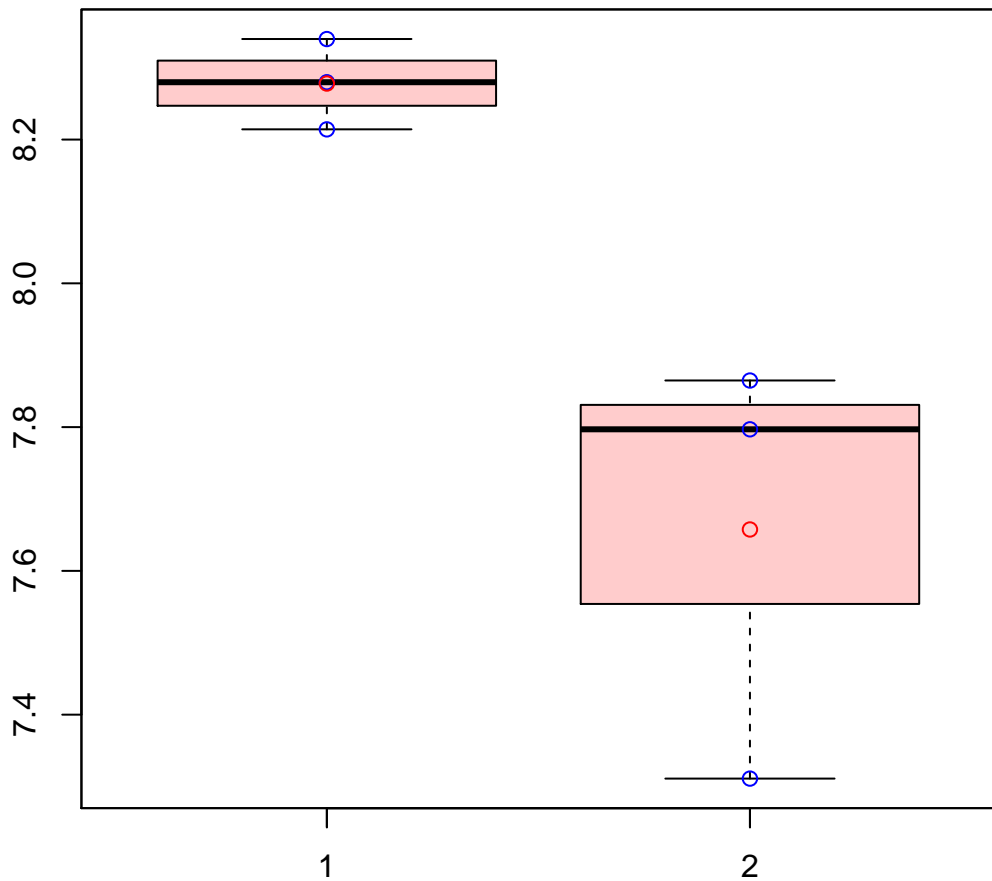

t-Test: p-value = 0.07

# comp3757\_c0\_seq1|comp3757\_c0\_seq1

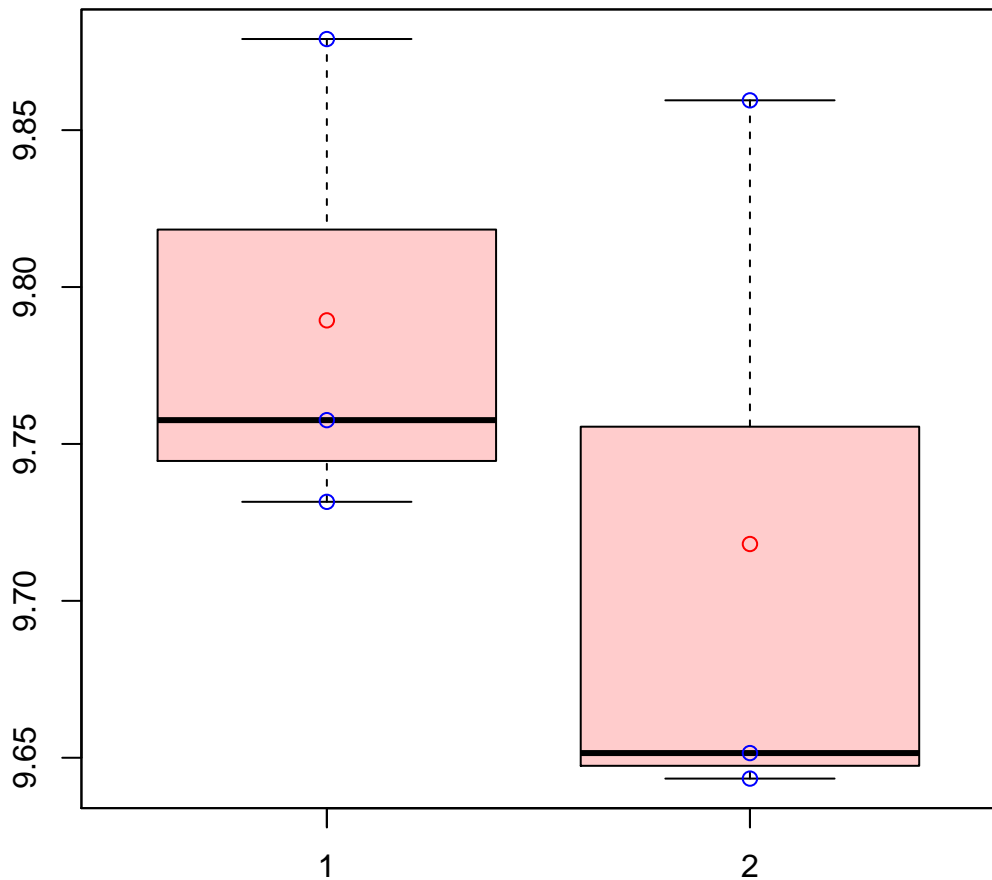

t-Test: p-value = 0.45

# comp42\_c0\_seq1|comp42\_c0\_seq1

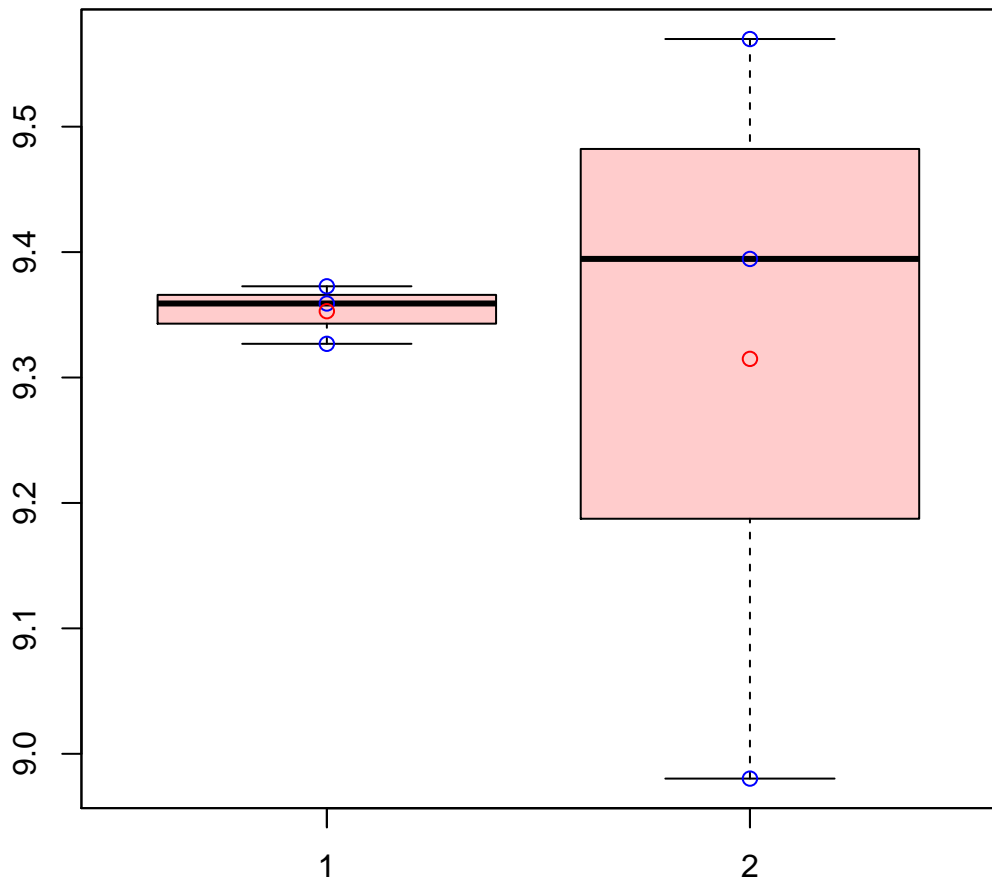

t-Test: p-value = 0.85

comp52472\_c0\_seq1|comp52472\_c0\_seq1

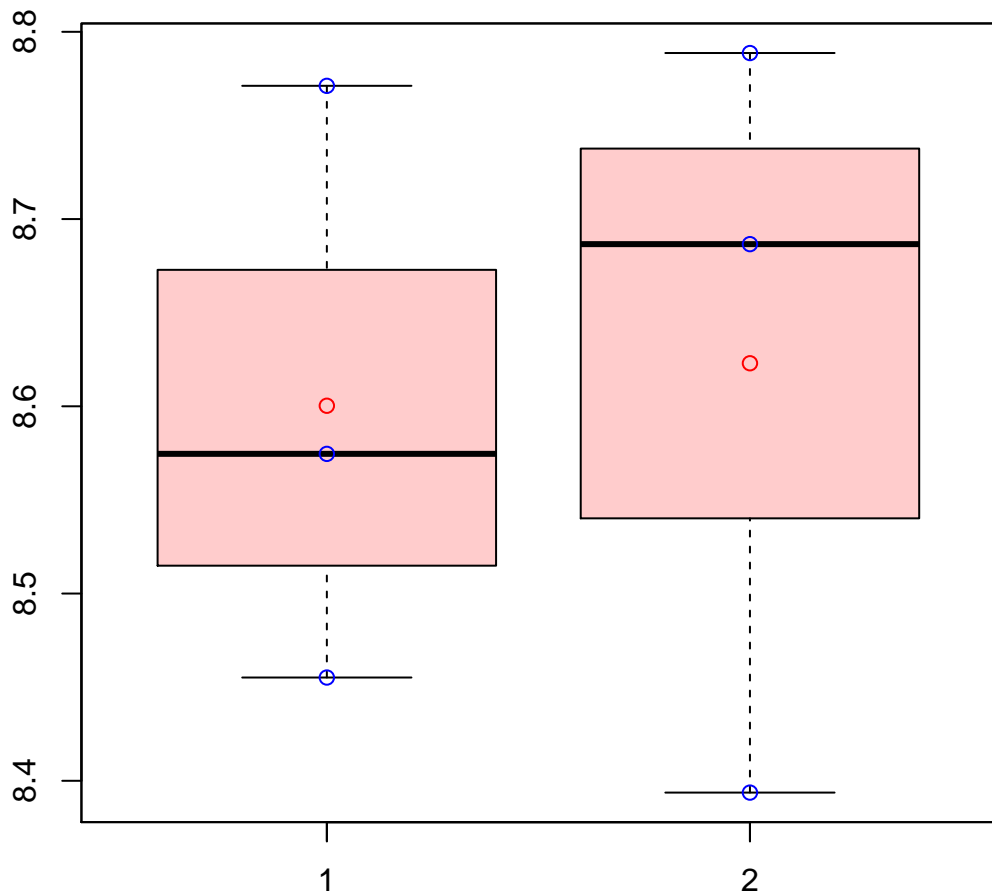

t-Test: p-value = 0.89

comp5643\_c0\_seq23|comp5643\_c0\_seq23

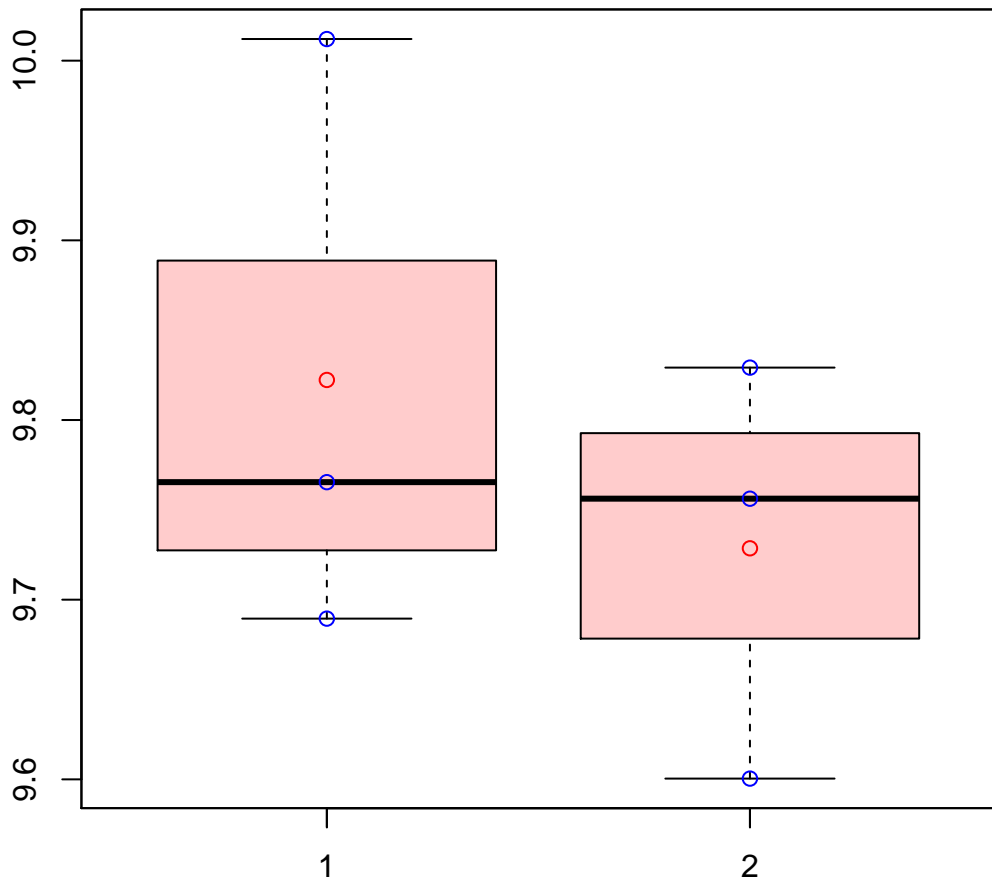

t-Test: p-value = 0.48

comp5643\_c0\_seq46|comp5643\_c0\_seq46

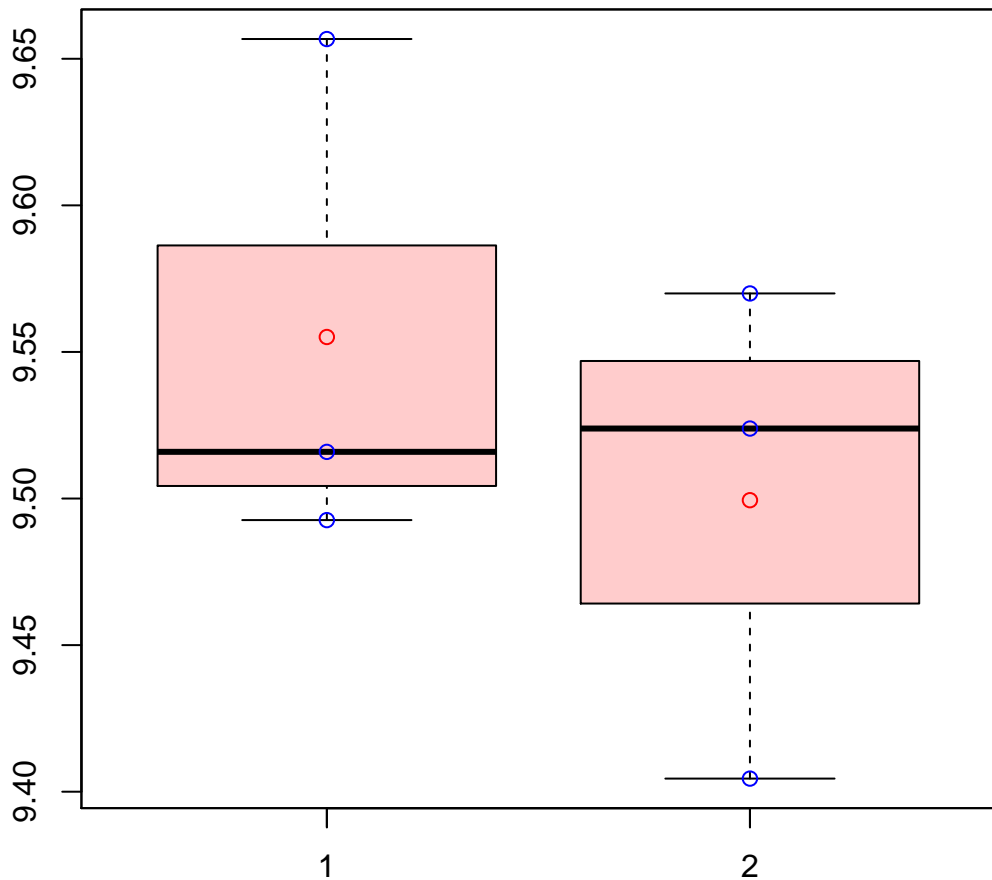

t-Test: p-value = 0.48

**comp5643\_c0\_seq64|comp5643\_c0\_seq64**



t-Test: p-value = 0.48

# comp60156\_c0\_seq1|comp60156\_c0\_seq1

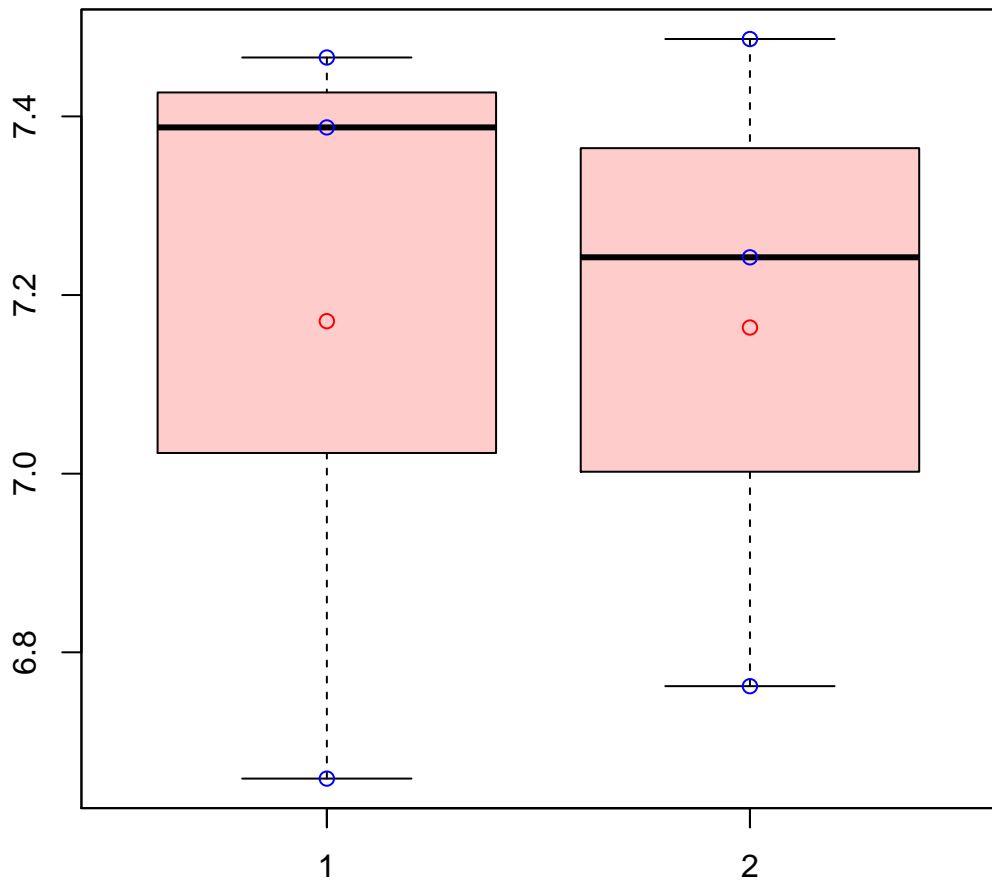

t-Test: p-value = 0.98



# comp6085\_c0\_seq16|comp6085\_c0\_seq16

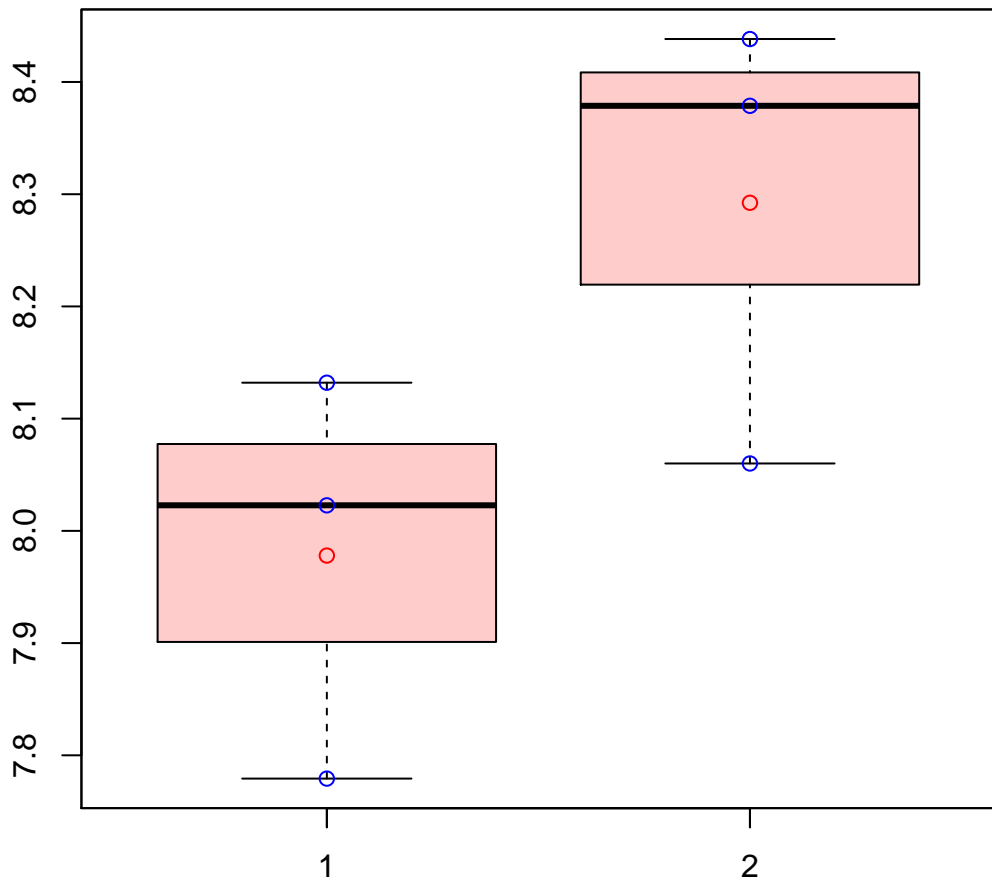

t-Test: p-value = 0.12

comp62429\_c0\_seq1|comp62429\_c0\_seq1

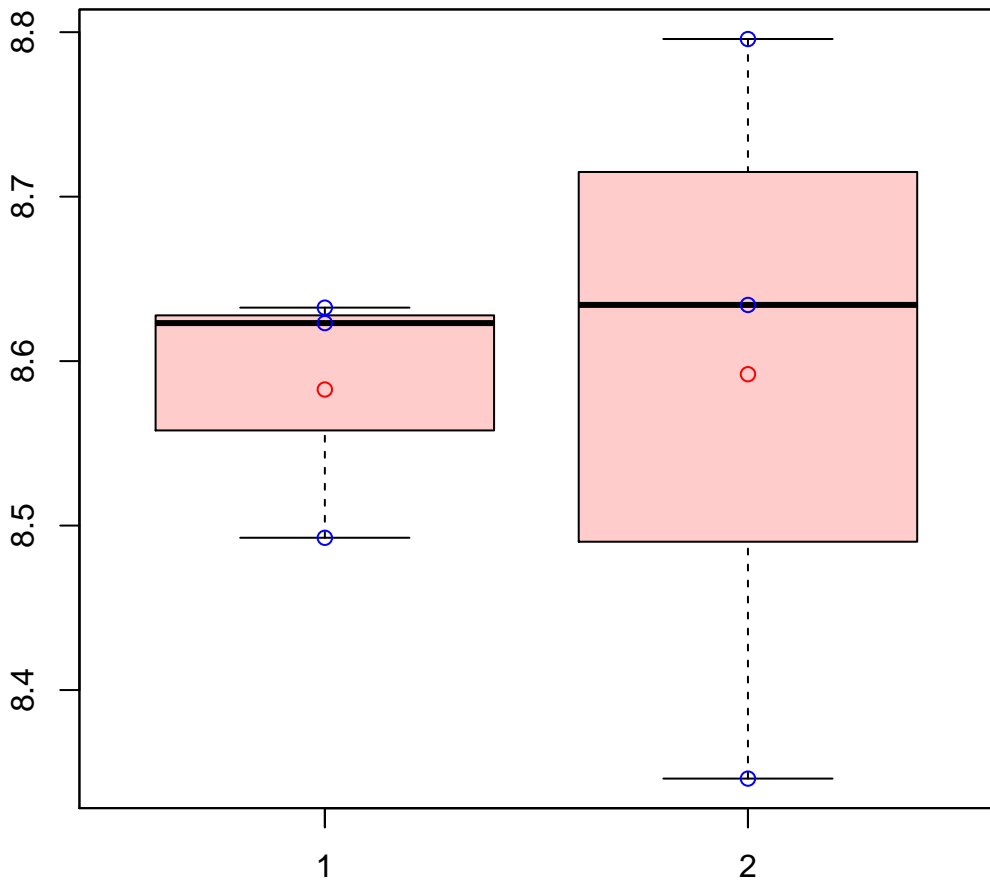

t-Test: p-value = 0.95

# comp655\_c0\_seq3|comp655\_c0\_seq3

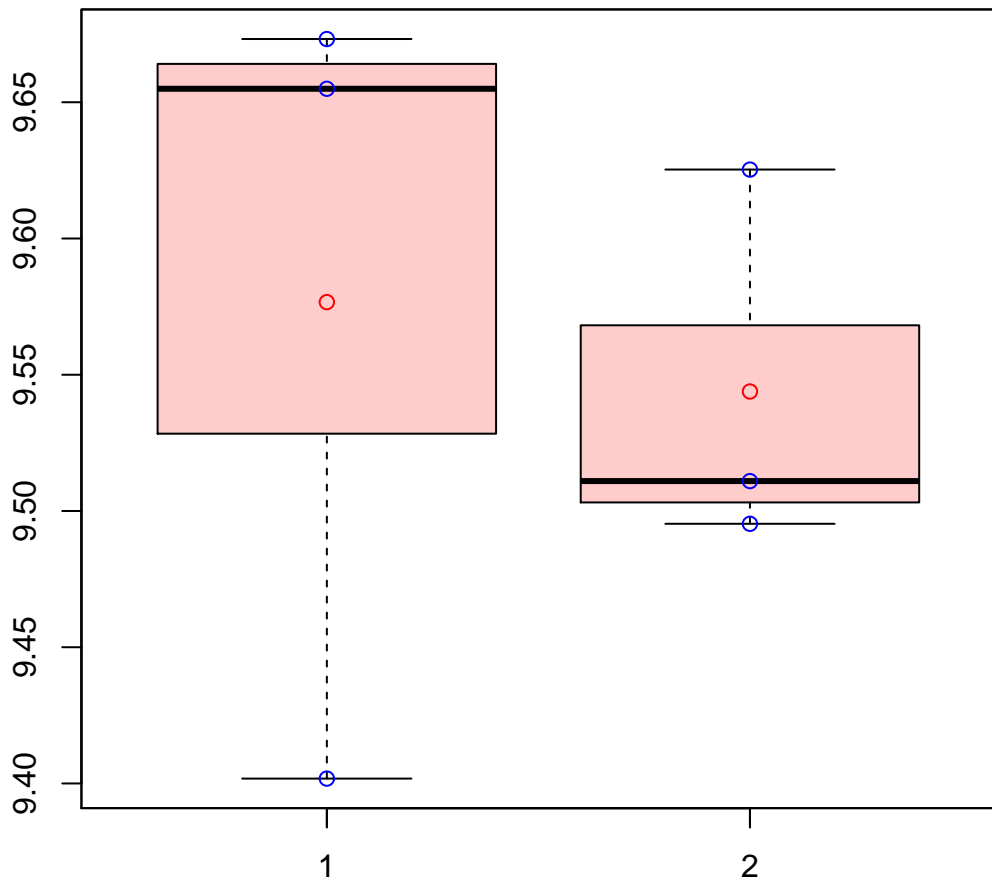

t-Test: p-value = 0.76

comp6926\_c1\_seq5|comp6926\_c1\_seq5

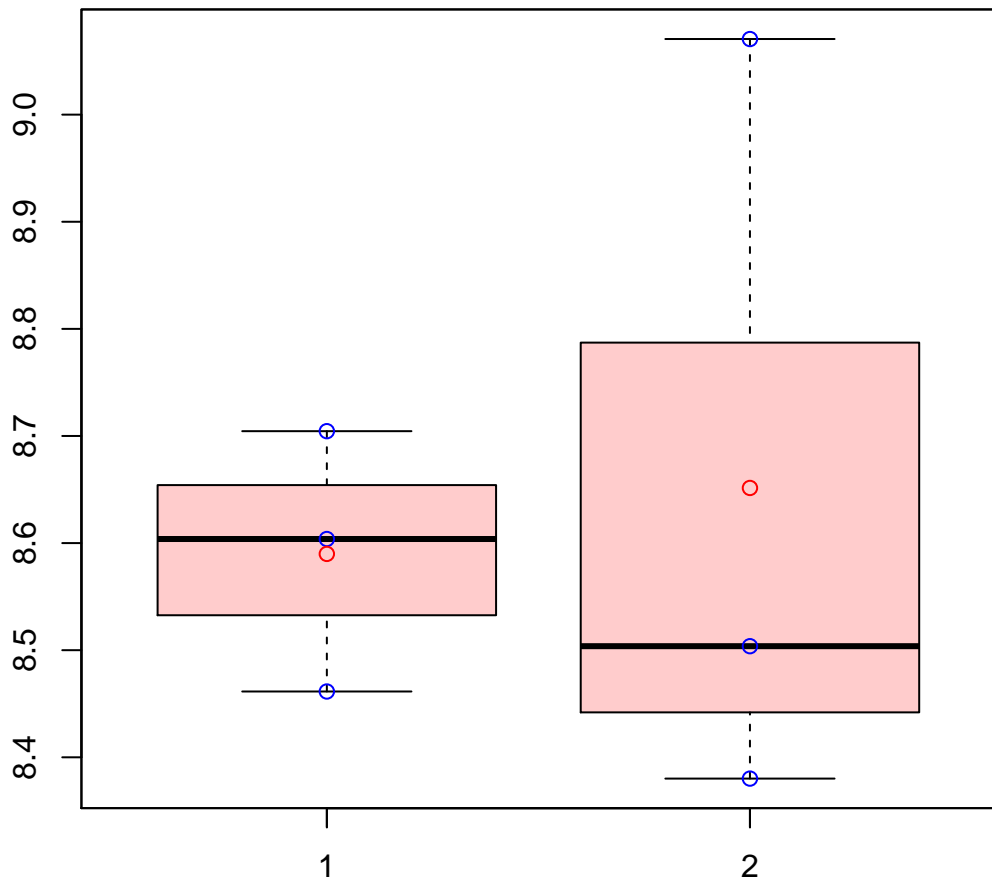

t-Test: p-value = 0.8

# comp7117\_c0\_seq2|comp7117\_c0\_seq2

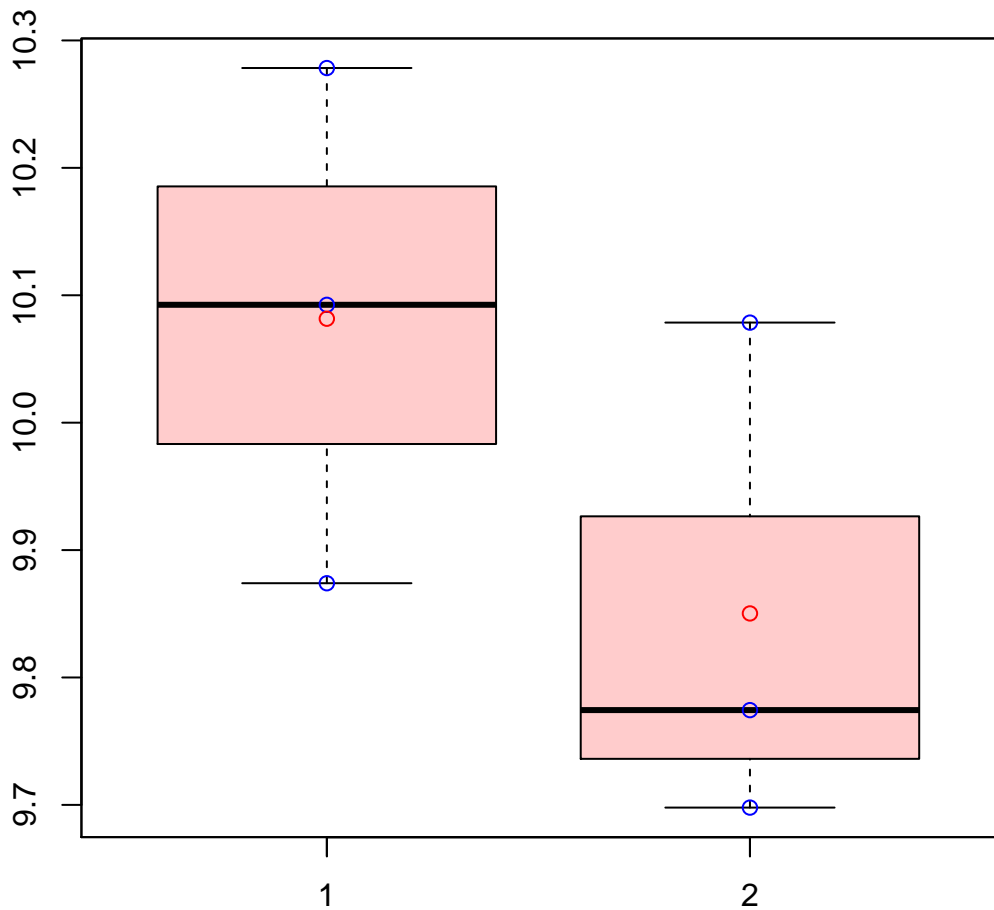

t-Test: p-value = 0.23

# comp7117\_c0\_seq4|comp7117\_c0\_seq4

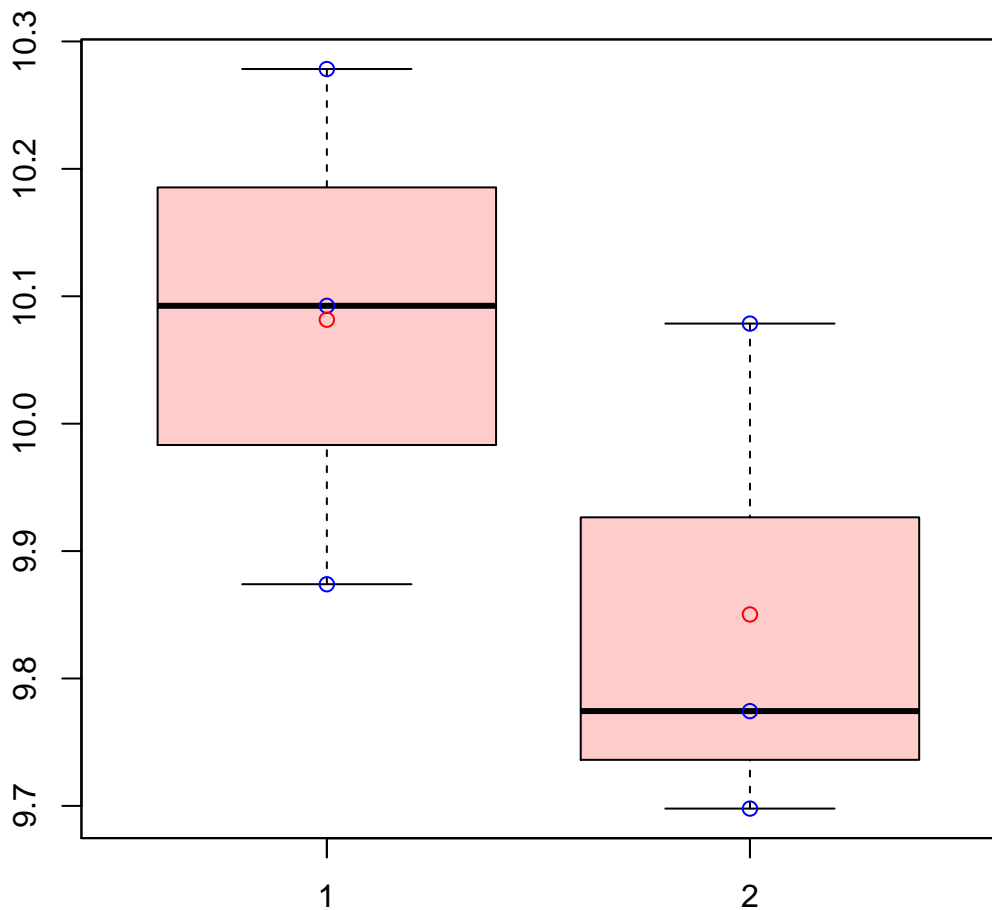

t-Test: p-value = 0.23

# comp7683\_c0\_seq3|comp7683\_c0\_seq3

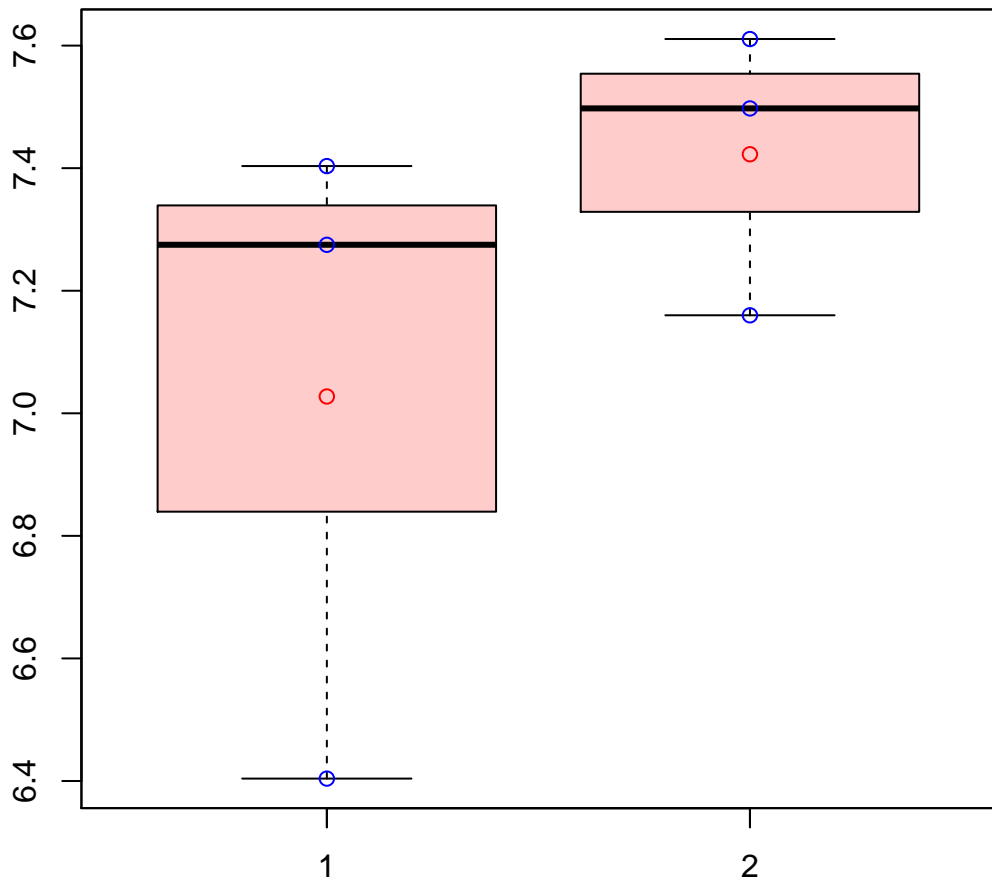

t-Test: p-value = 0.34

# comp8394\_c0\_seq2|comp8394\_c0\_seq2

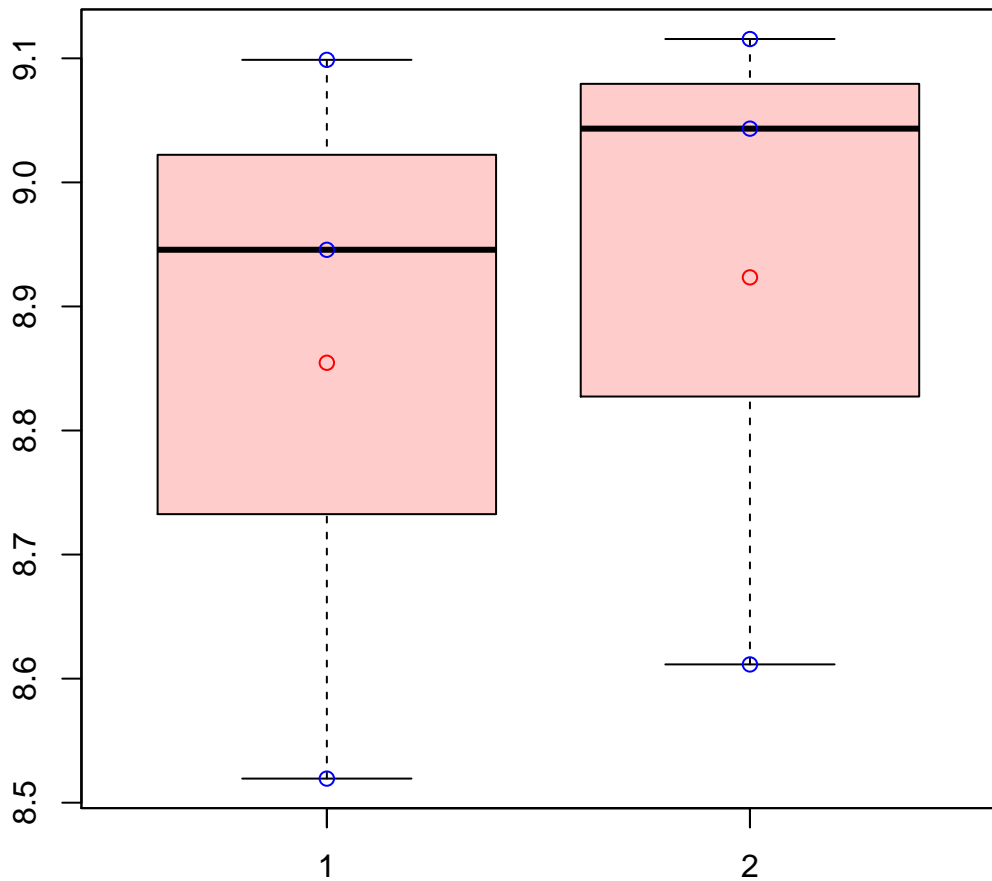

t-Test: p-value = 0.78



# comp894\_c0\_seq3|comp894\_c0\_seq3

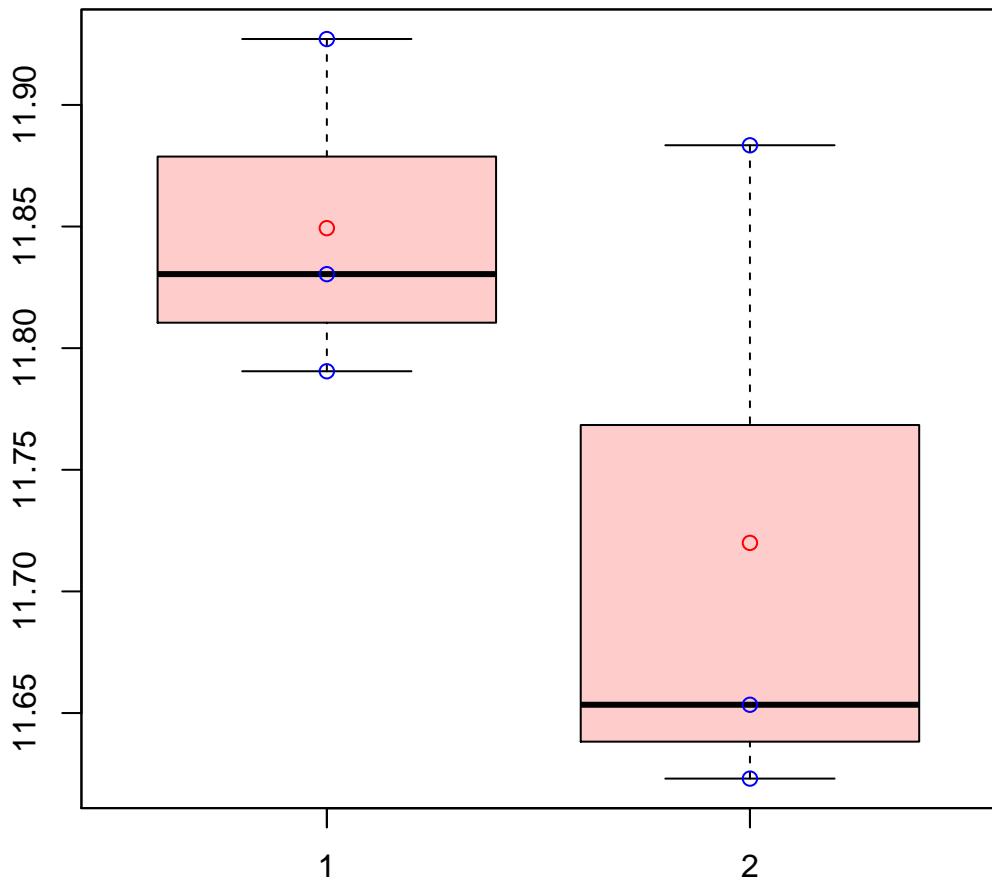

t-Test: p-value = 0.26

comp9211\_c0\_seq1|comp9211\_c0\_seq1

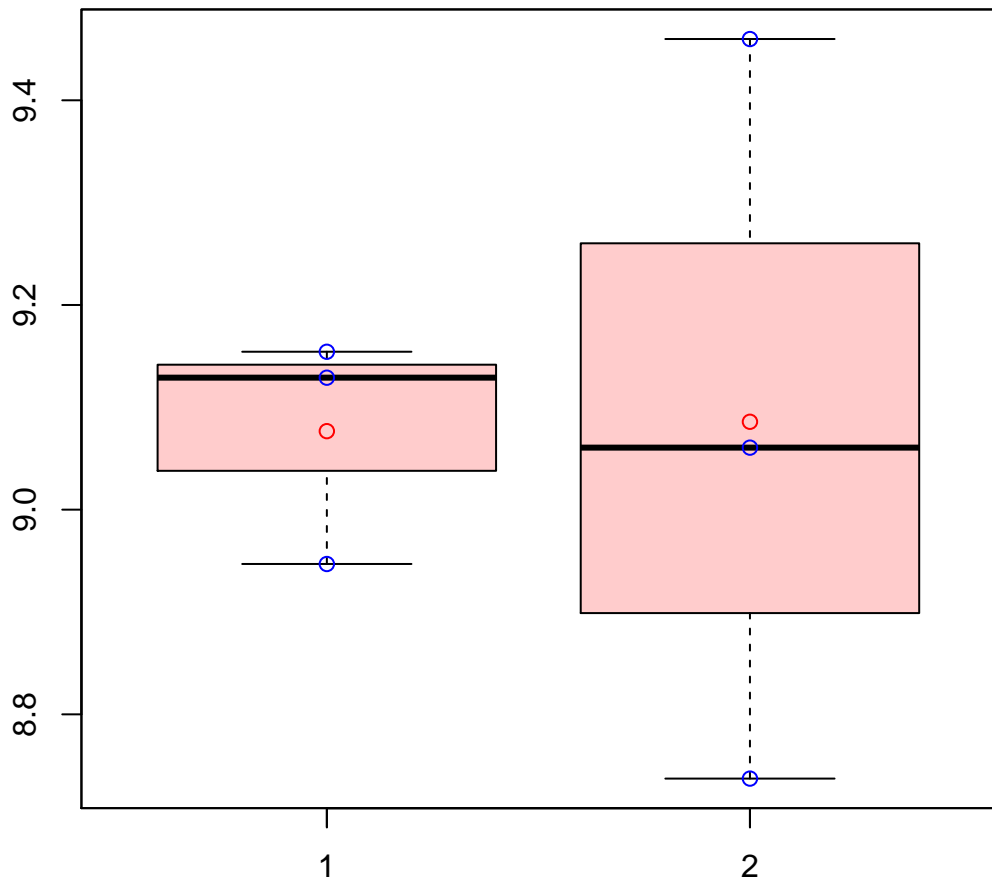

t-Test: p-value = 0.97

# CYNS14\_ERATE|CYNS14\_ERATE

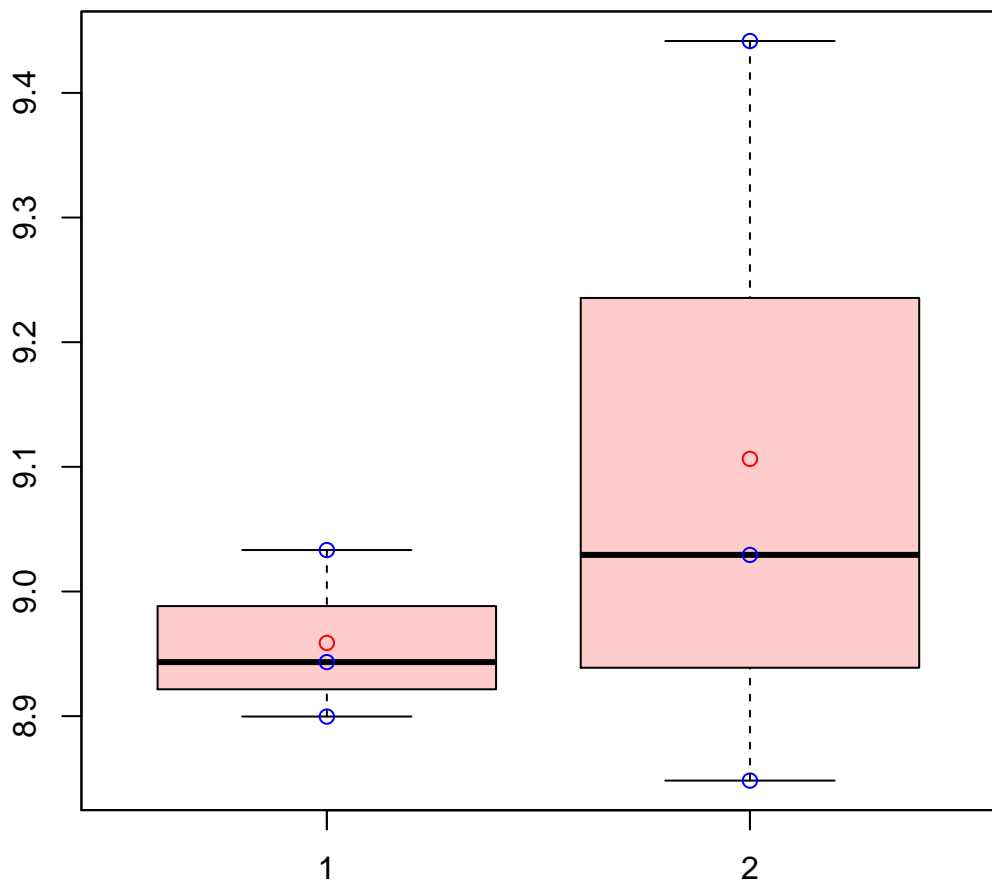

t-Test: p-value = 0.49

# CYNS15\_ERATE|CYNS15\_ERATE

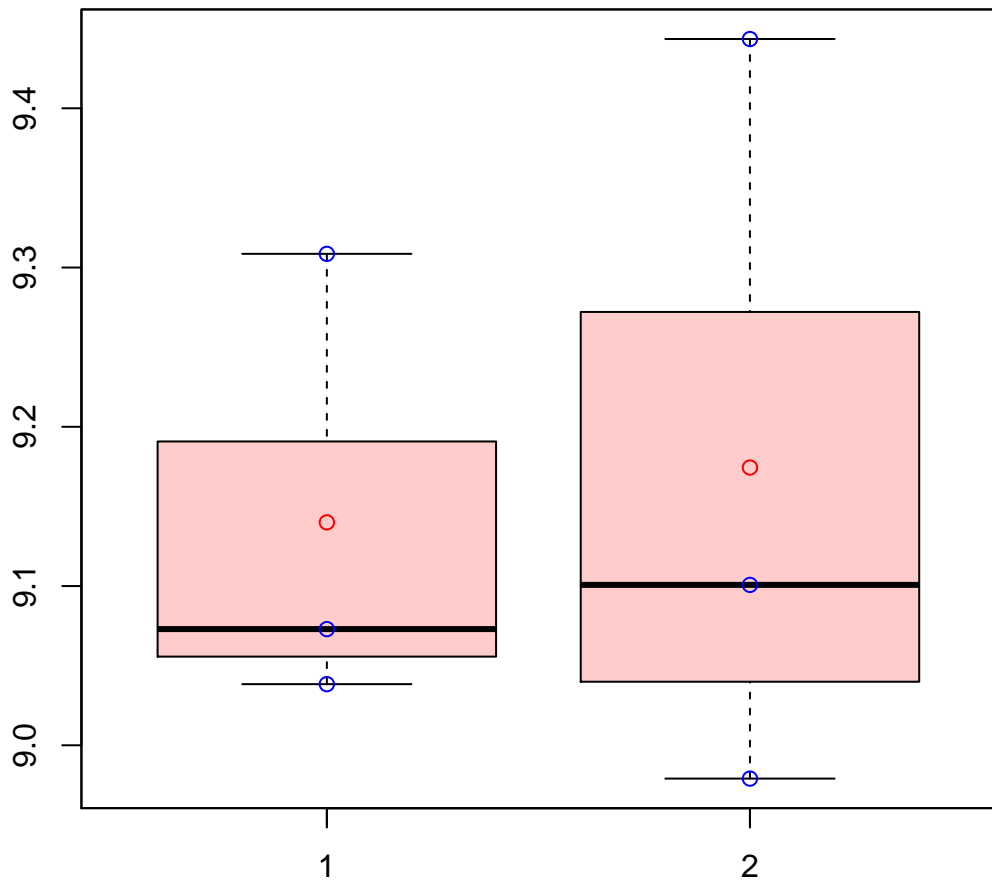

t-Test: p-value = 0.84

# DAPAT1\_ERATE|DAPAT1\_ERATE

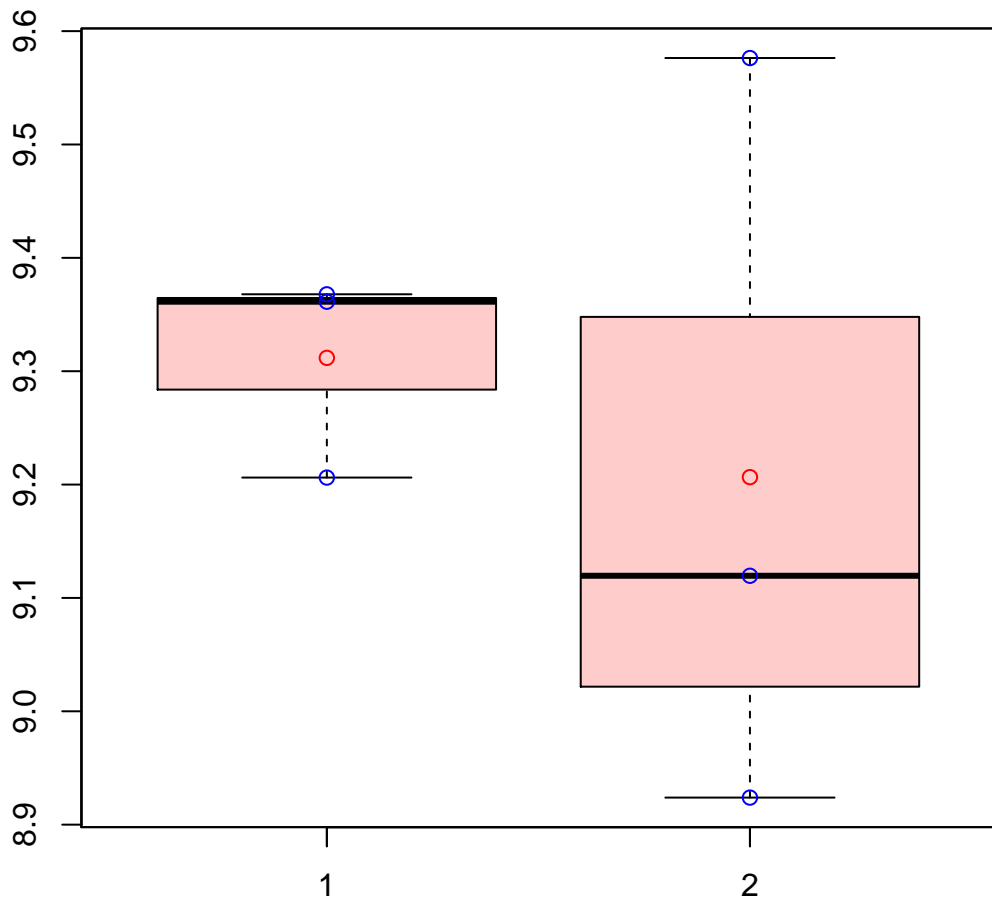

t-Test: p-value = 0.65

# DHAS1\_ERATE|DHAS1\_ERATE

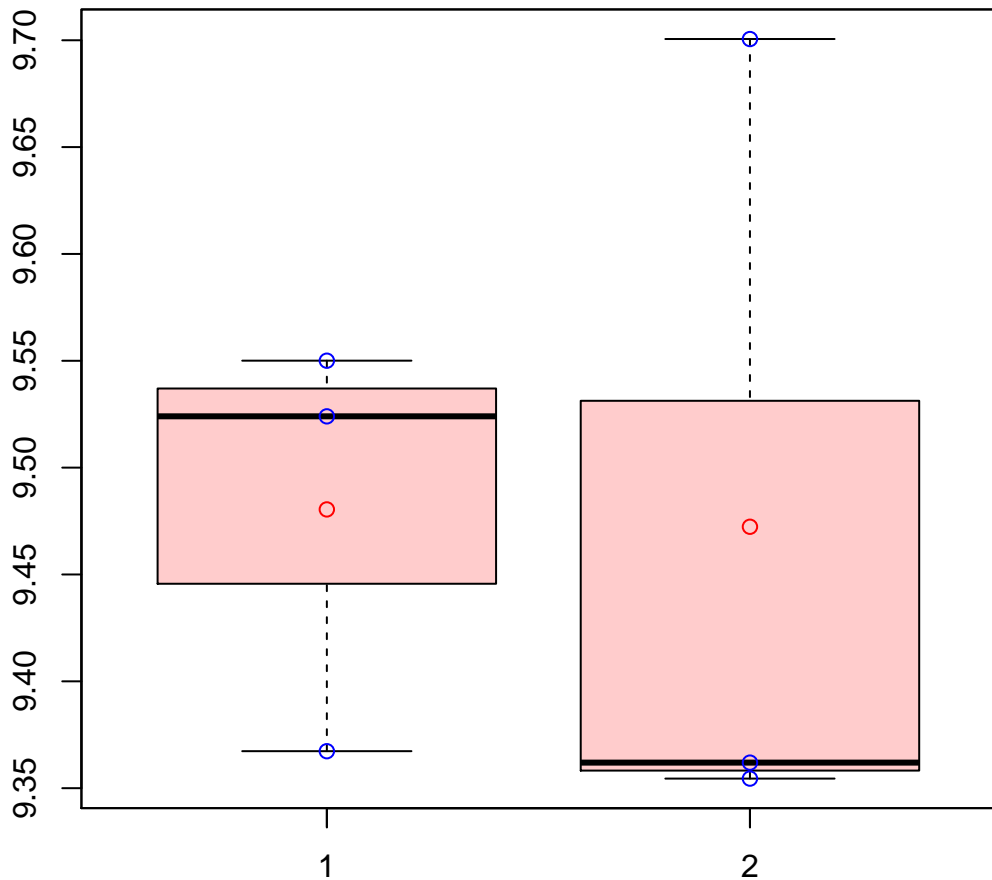

t-Test: p-value = 0.95

# DNAJ10\_ERATE|DNAJ10\_ERATE

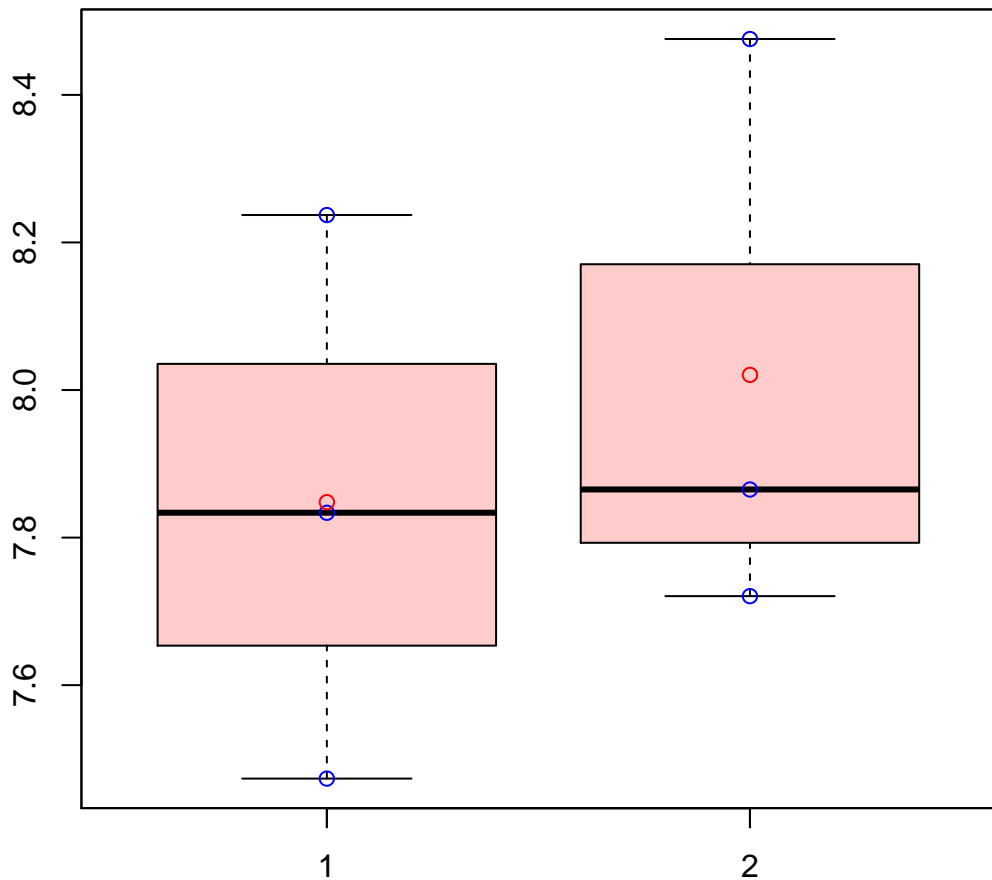

t-Test: p-value = 0.62

# DNAJ11\_ERATE|DNAJ11\_ERATE



t-Test: p-value = 0.62



# DNAJ13\_ERATE|DNAJ13\_ERATE

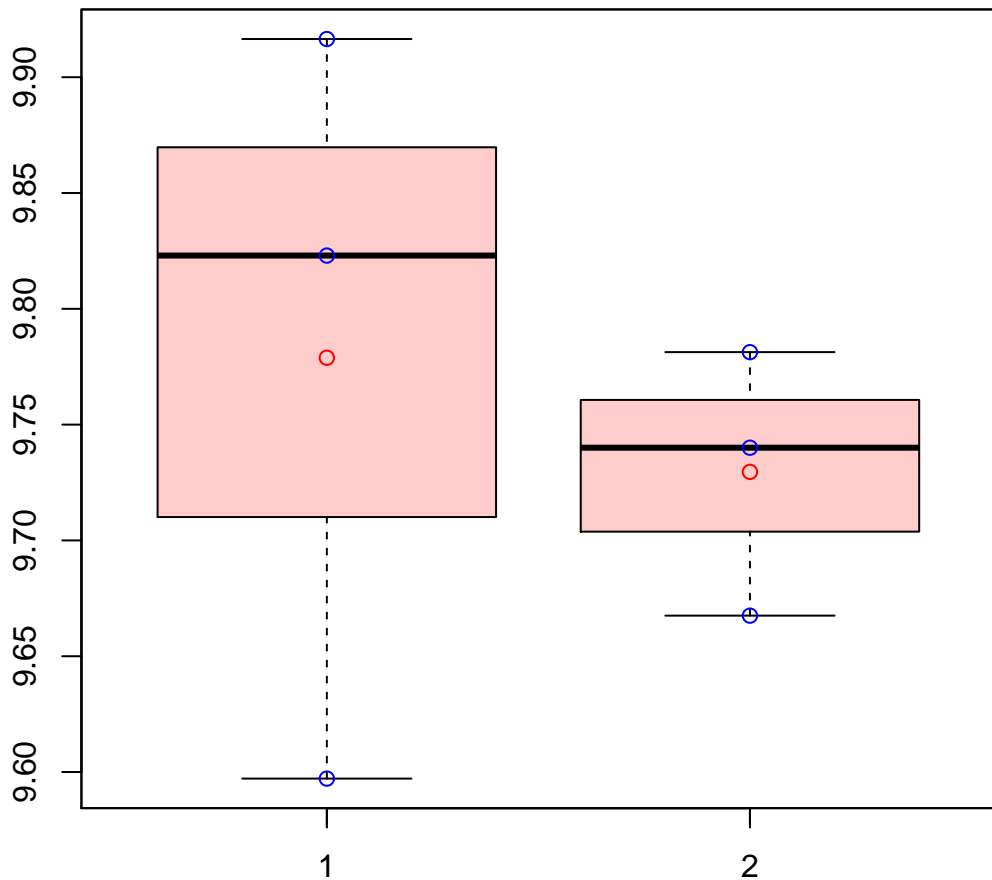

t-Test: p-value = 0.66

# DNAJ3\_ERATE|DNAJ3\_ERATE

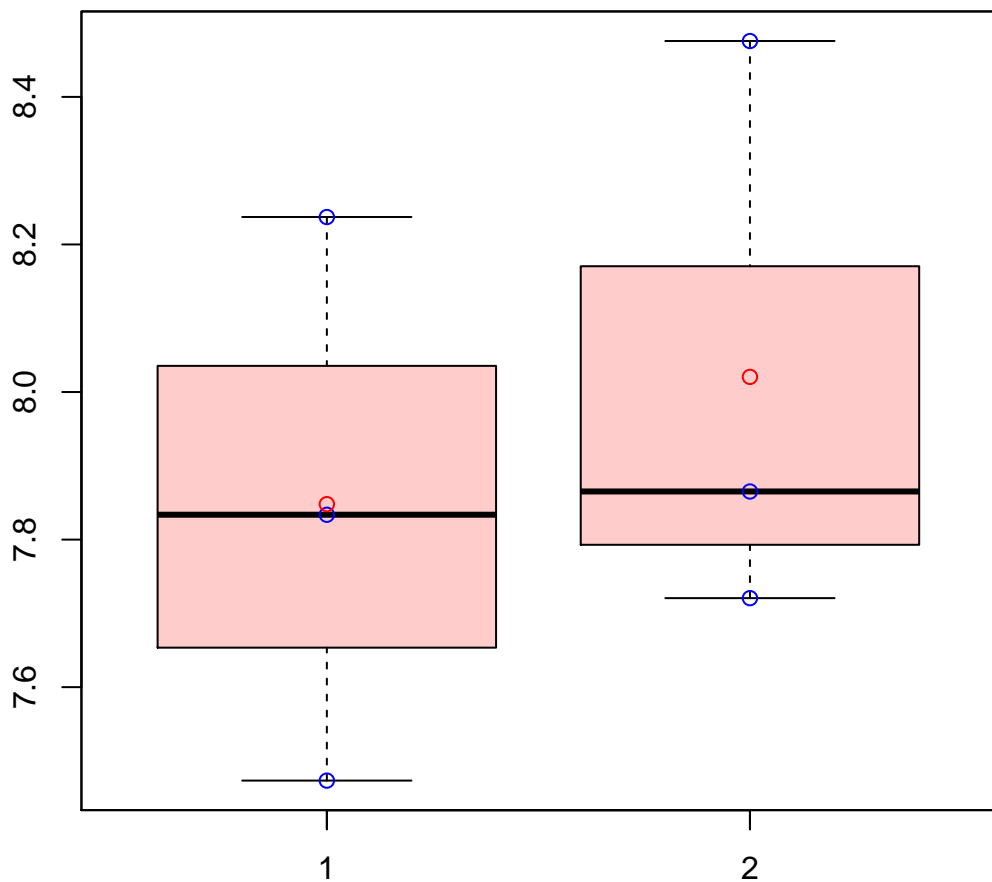

t-Test: p-value = 0.62

# DNAJ7\_ERATE|DNAJ7\_ERATE



t-Test: p-value = 0.62

# DNAK11\_ERATE|DNAK11\_ERATE

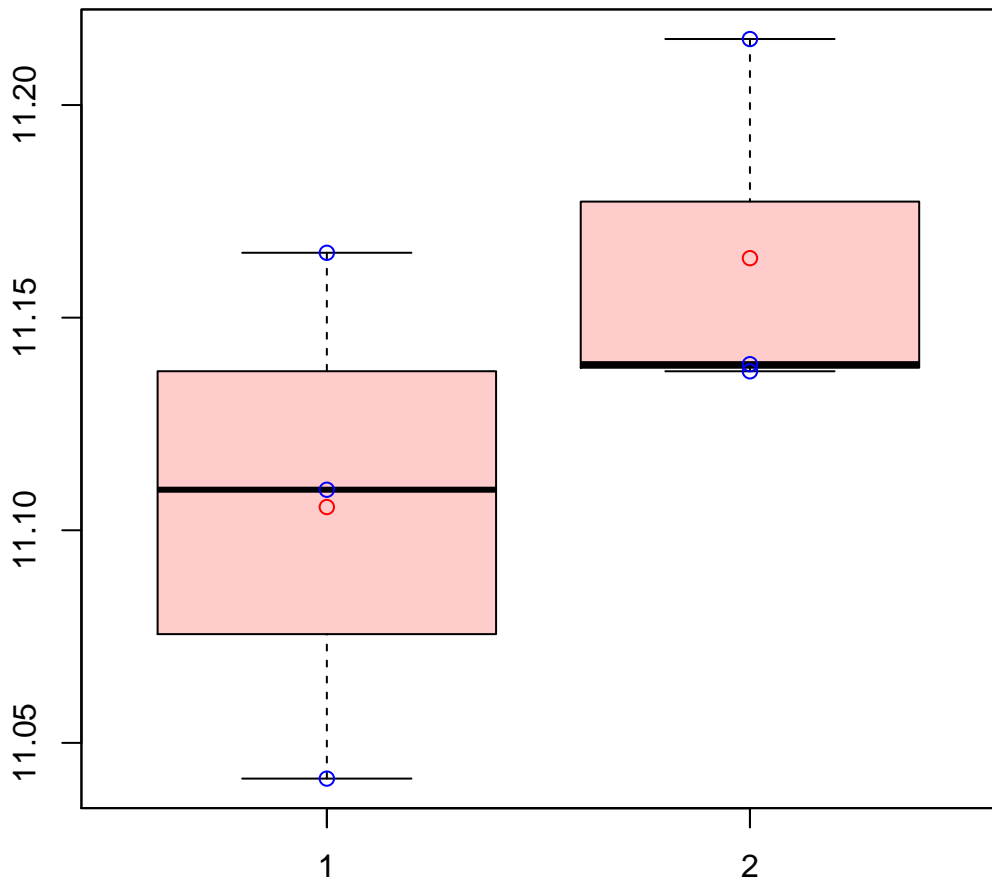

t-Test: p-value = 0.26

# DNAK1\_ERATE|DNAK1\_ERATE

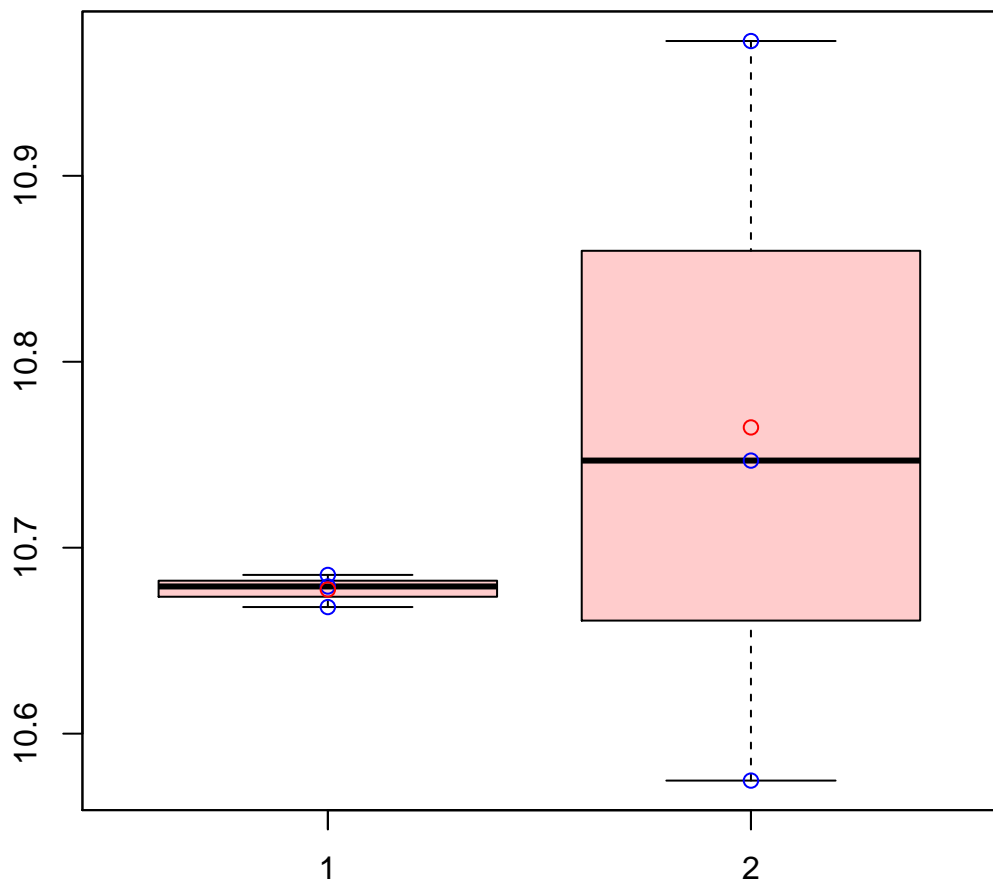

t-Test: p-value = 0.53

# DNAK24\_ERATE|DNAK24\_ERATE

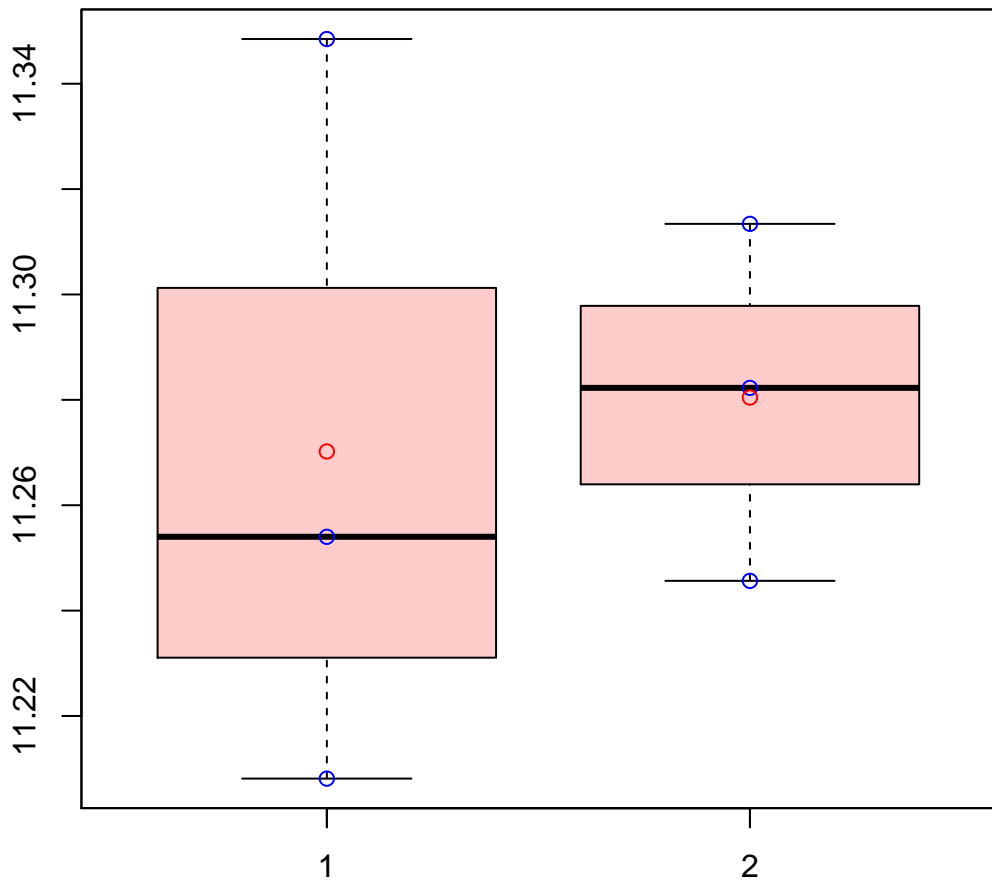

t-Test: p-value = 0.84

# DNAK3\_ERATE|DNAK3\_ERATE

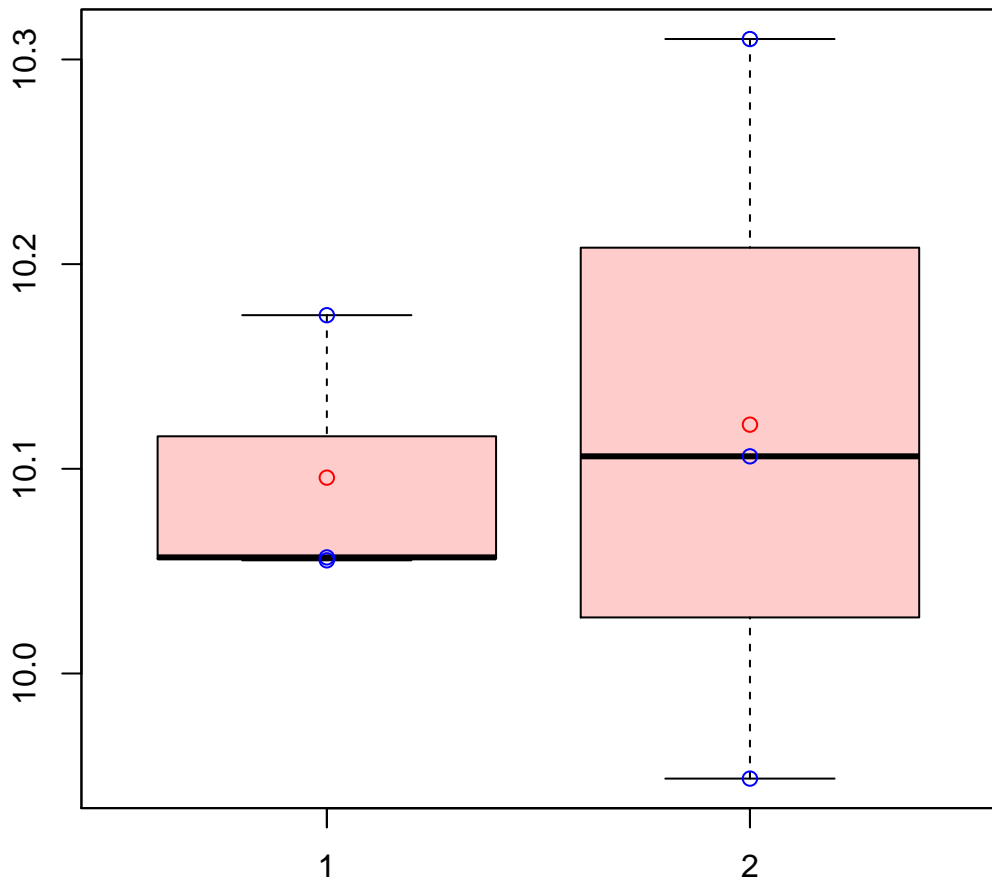

t-Test: p-value = 0.83

# DNAK4\_ERATE|DNAK4\_ERATE



t-Test: p-value = 0.26



# ENO2\_ERATE|ENO2\_ERATE

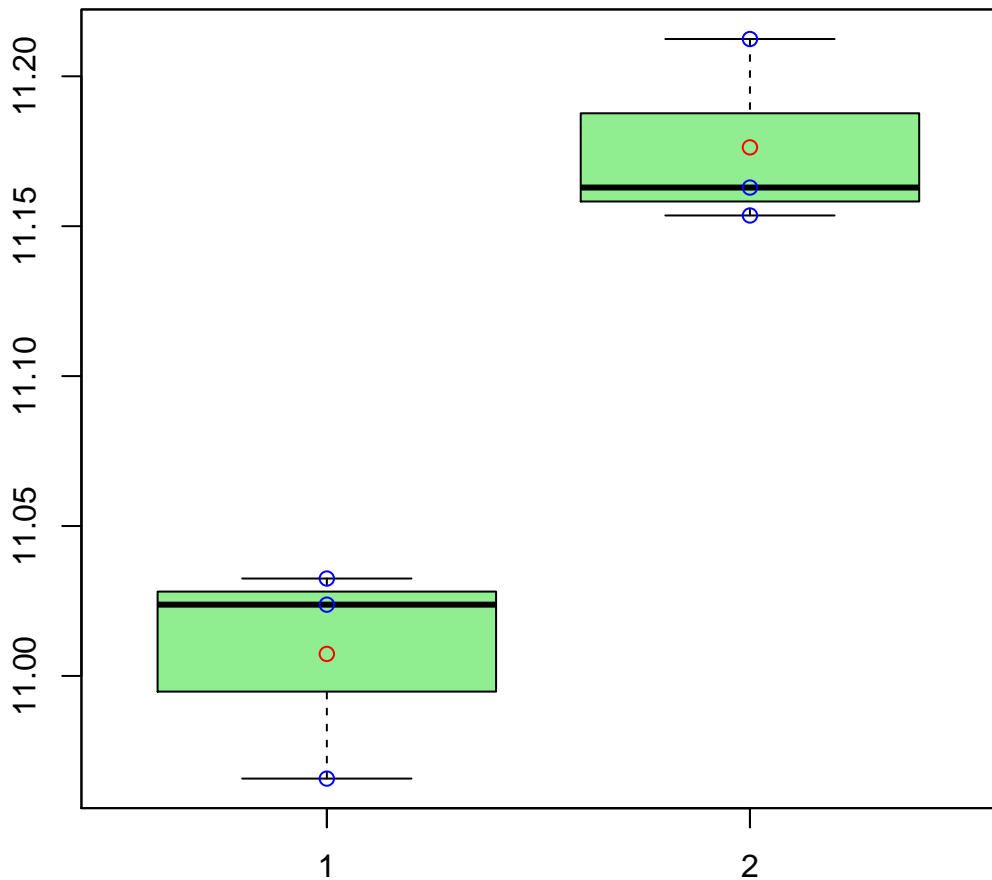

t-Test: p-value = 0

# ENO3\_ERATE|ENO3\_ERATE

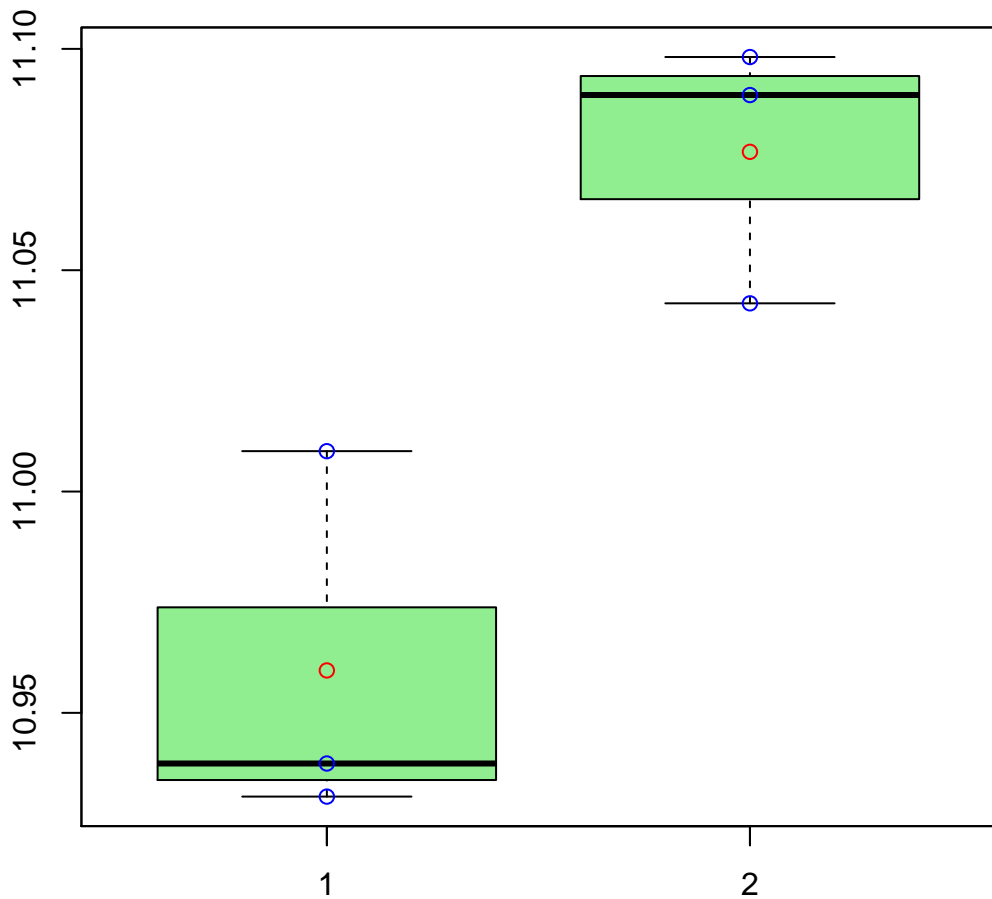

t-Test: p-value = 0.02

# F16PA13\_ERATE|F16PA13\_ERATE

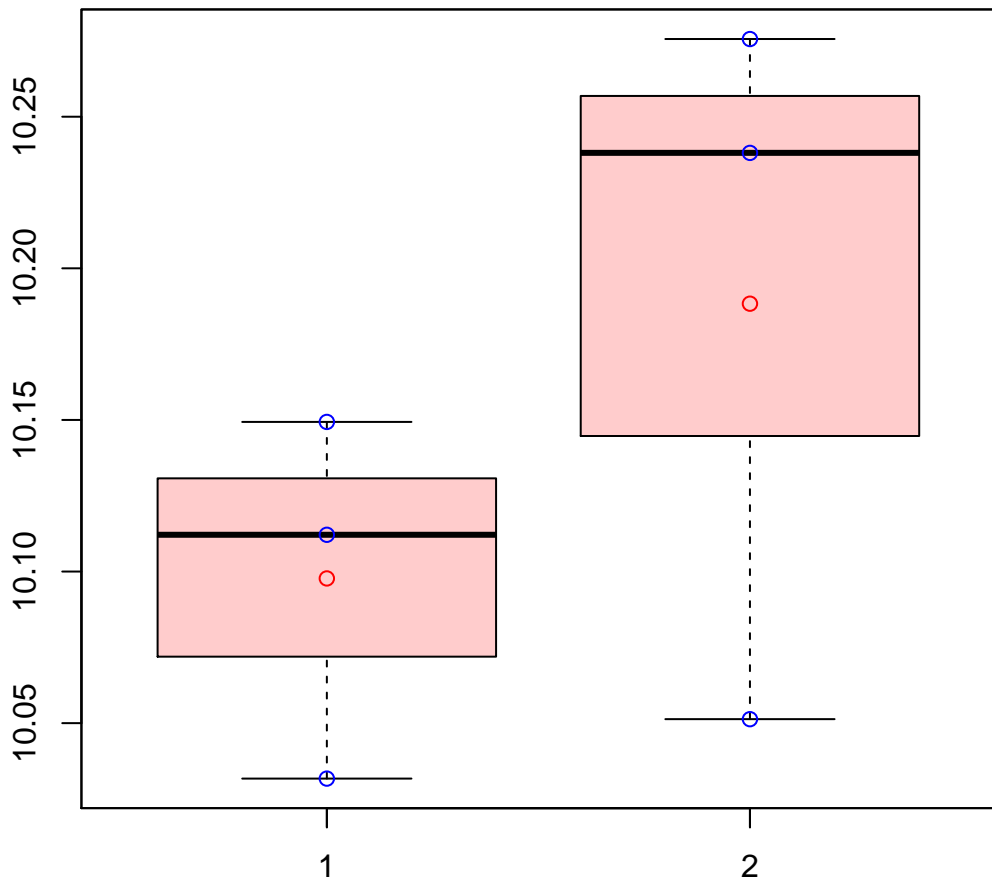

t-Test: p-value = 0.33

# F16PA15\_ERATE|F16PA15\_ERATE

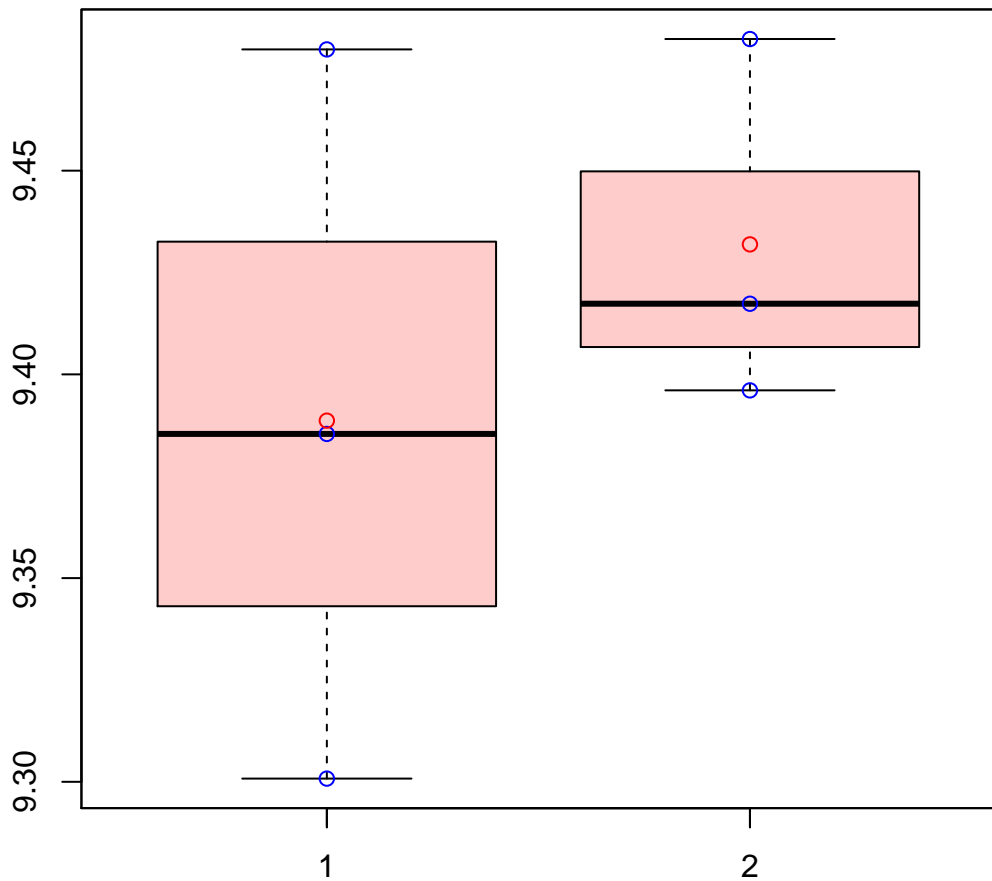

t-Test: p-value = 0.51

# F16PA7\_ERATE|F16PA7\_ERATE

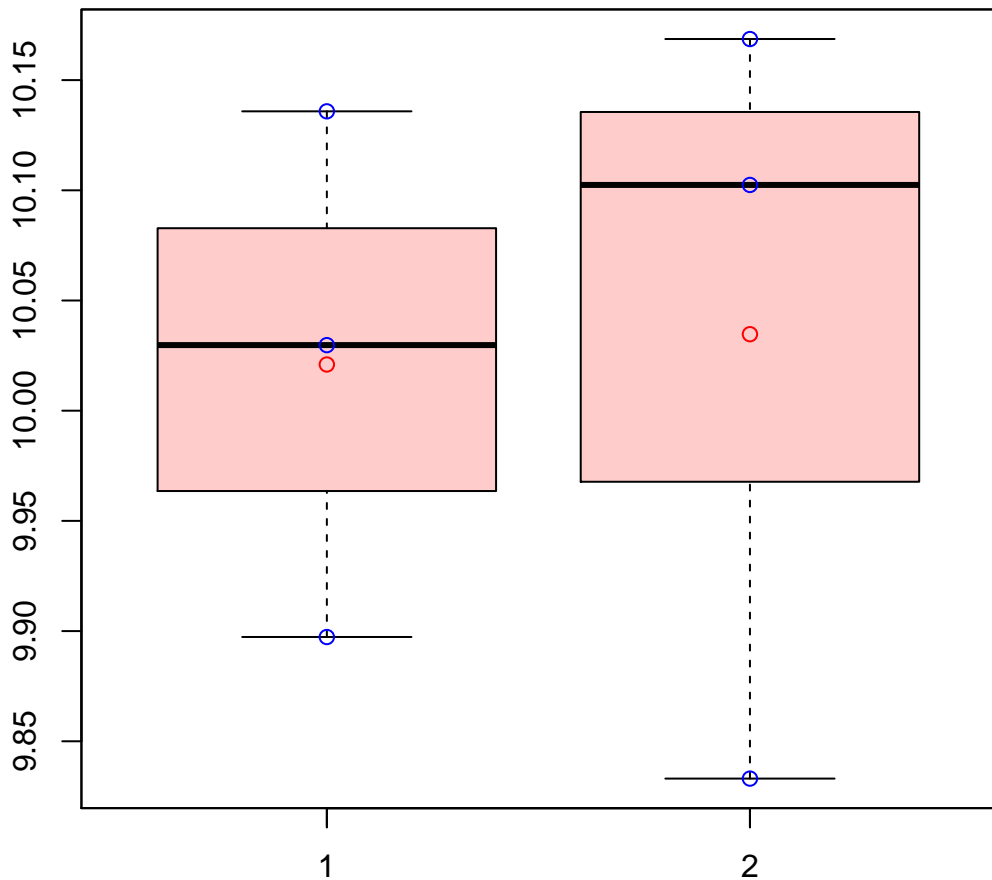

t-Test: p-value = 0.92

# FTSH11\_ERATE|FTSH11\_ERATE

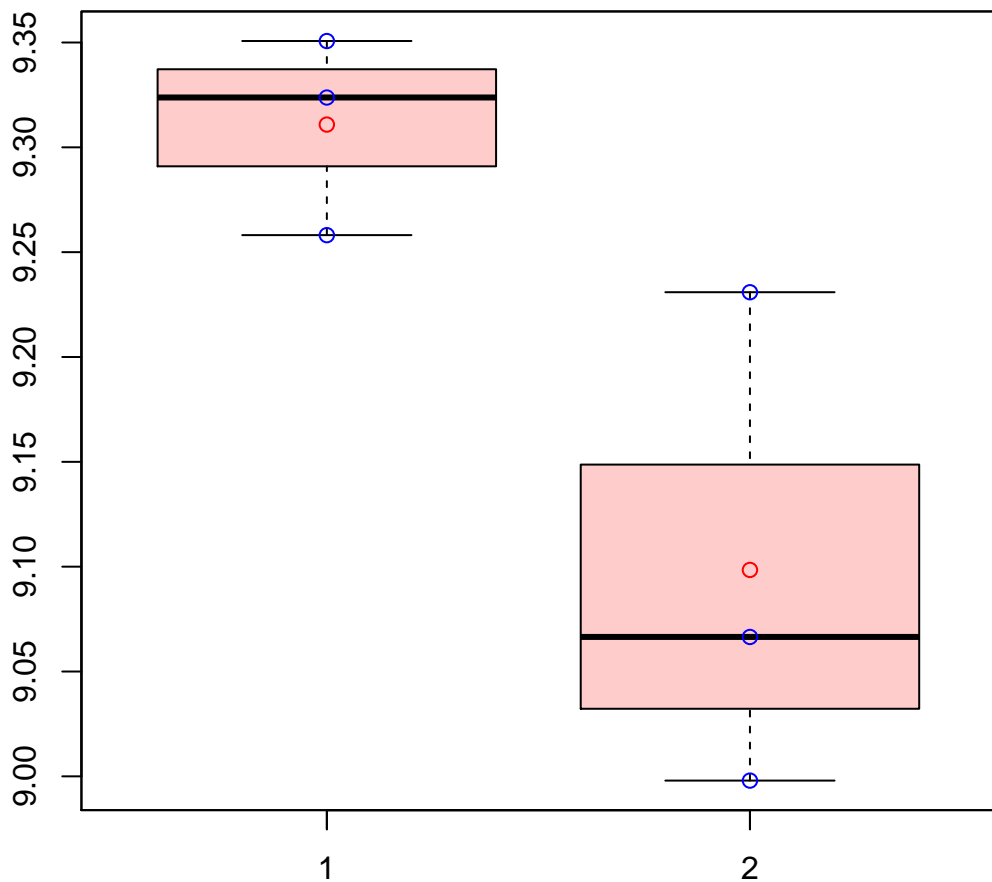

t-Test: p-value = 0.08

# FTSH14\_ERATE|FTSH14\_ERATE

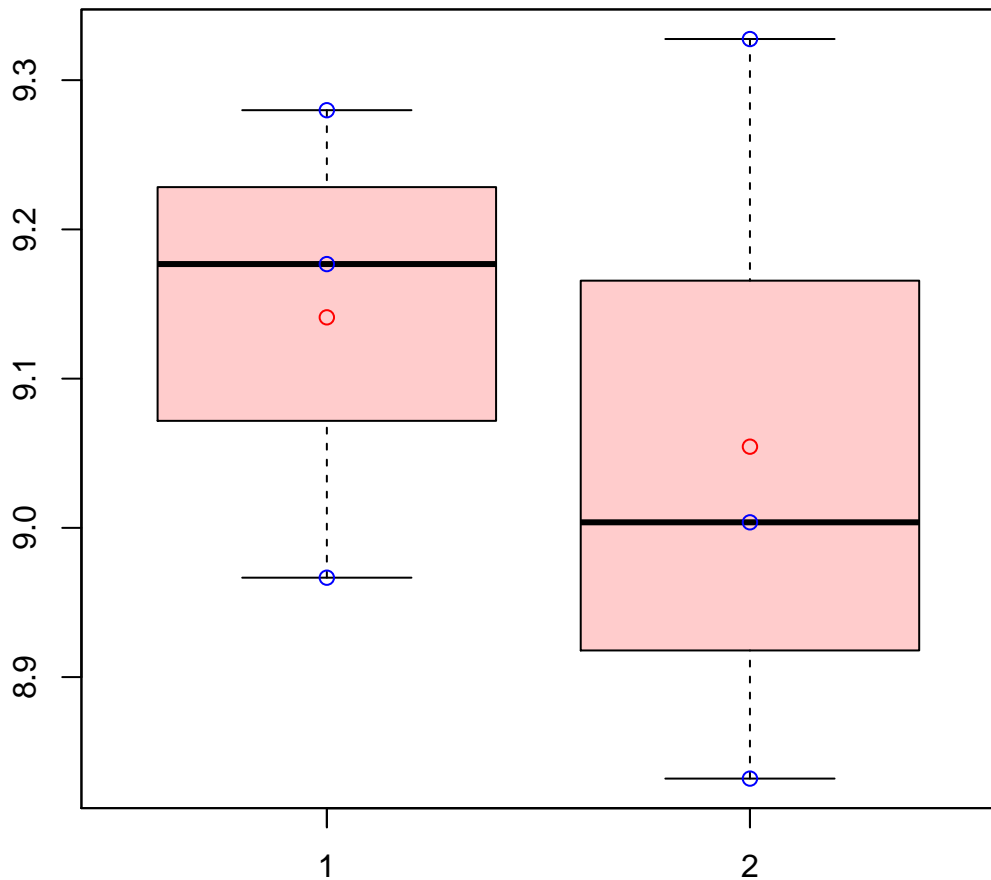

t-Test: p-value = 0.65

# FTSH15\_ERATE|FTSH15\_ERATE

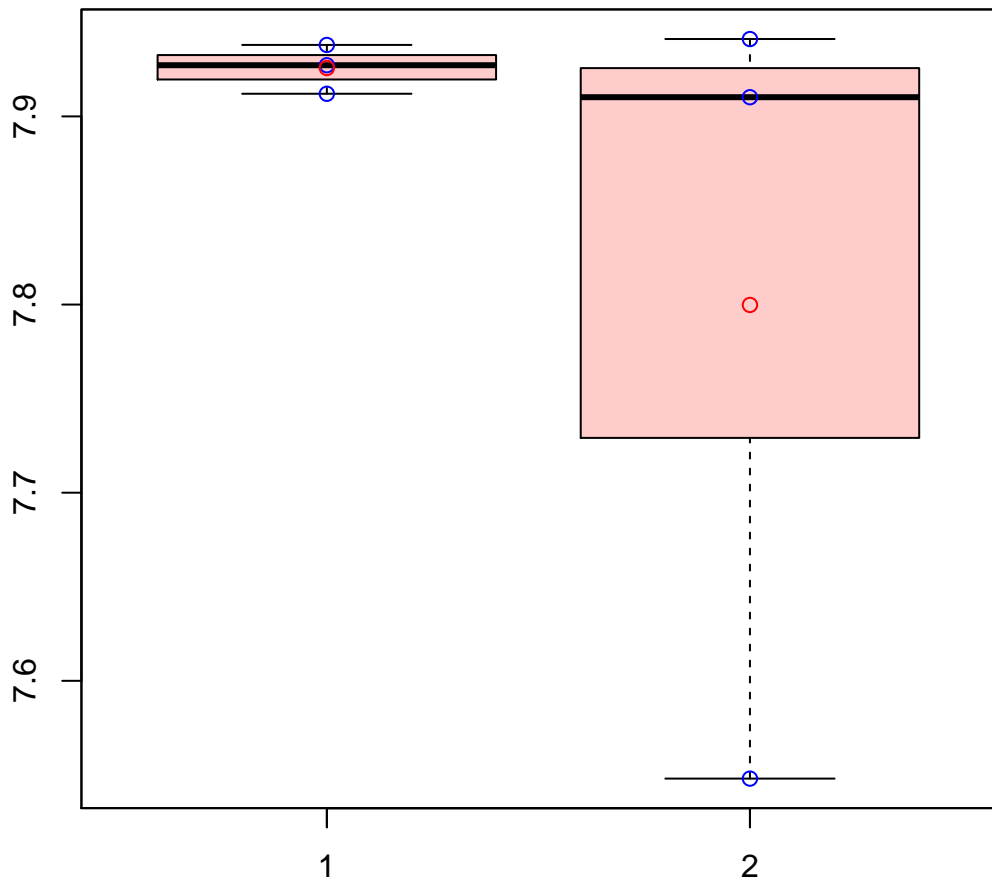

t-Test: p-value = 0.42



# FTSH16\_ERATE|FTSH16\_ERATE

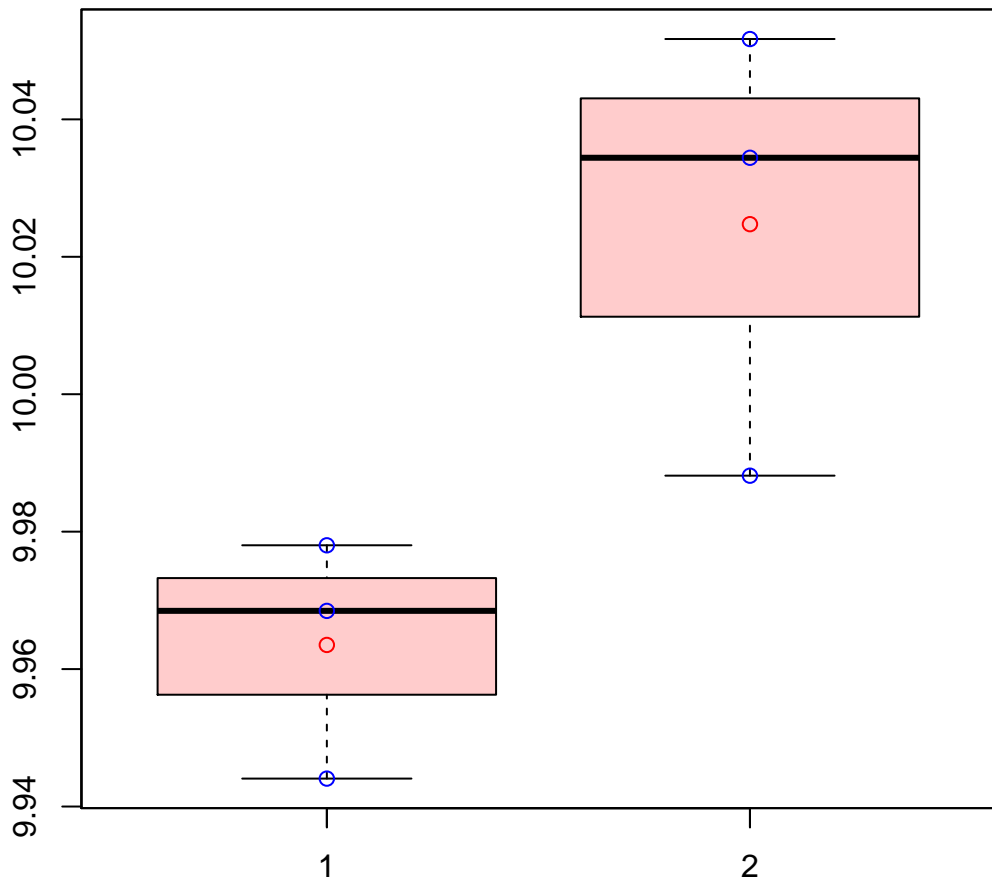

t-Test: p-value = 0.06

# FTSH3\_ERATE|FTSH3\_ERATE

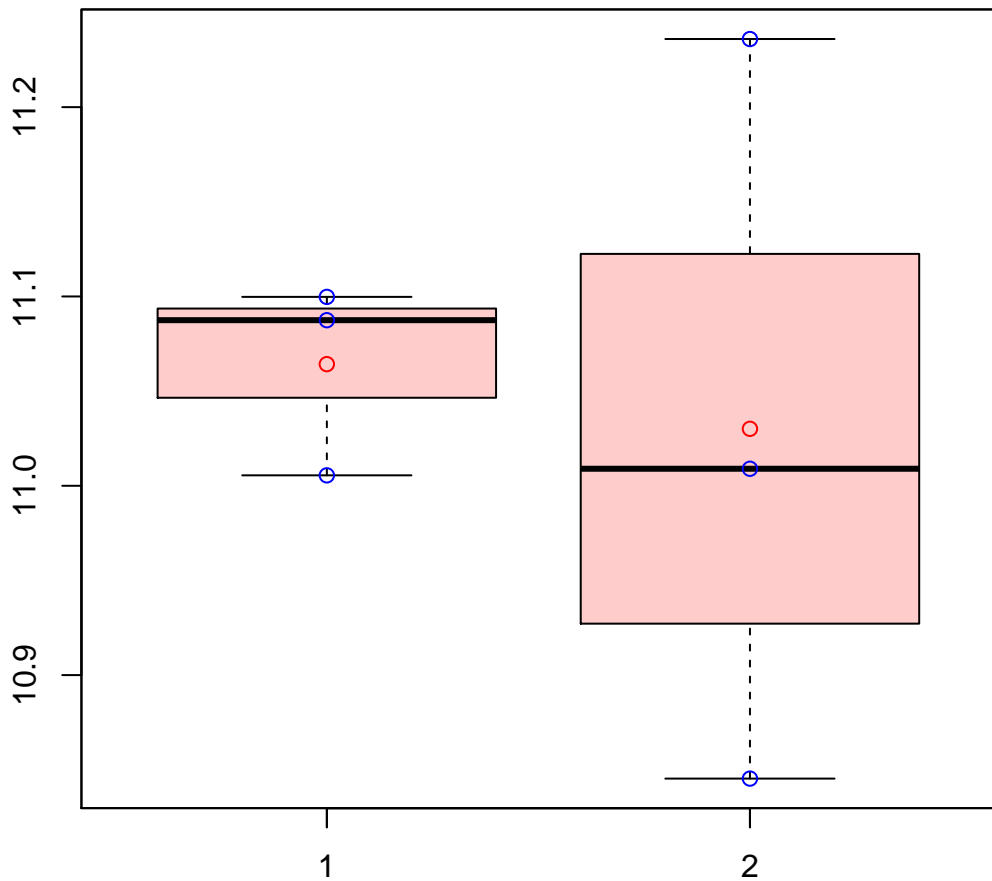

t-Test: p-value = 0.8

# FTSH4\_ERATE|FTSH4\_ERATE

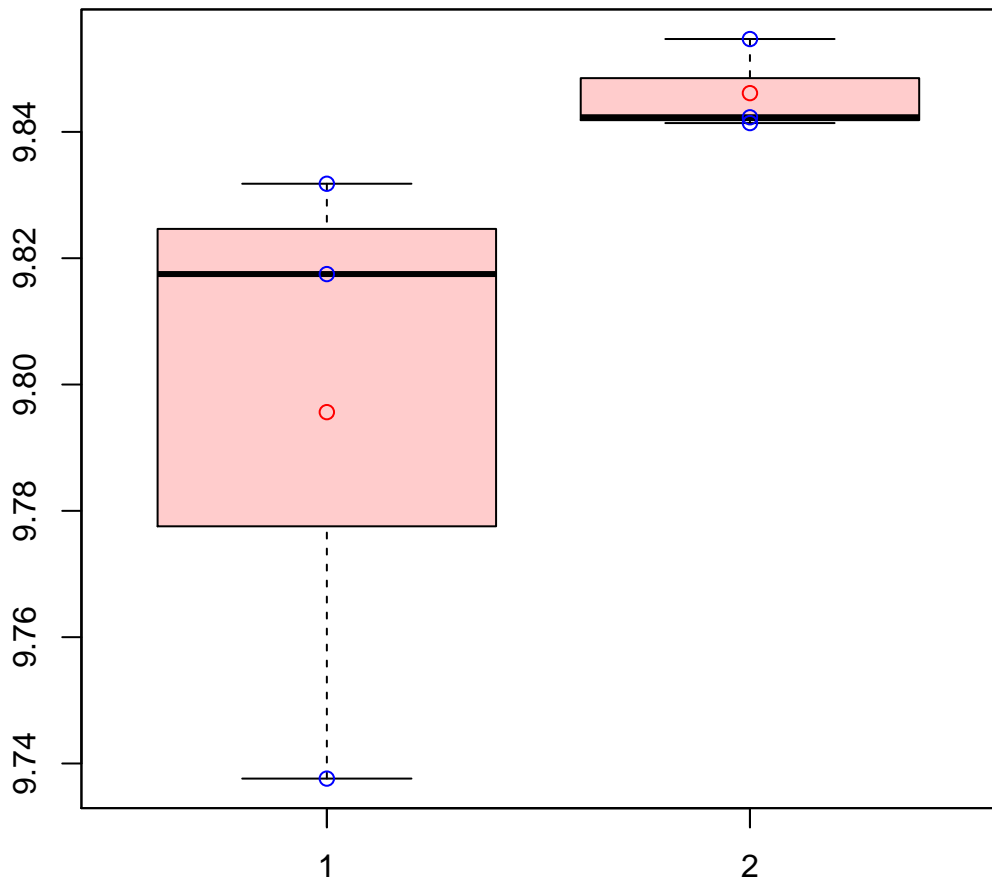

t-Test: p-value = 0.23

# FTSH6\_ERATE|FTSH6\_ERATE

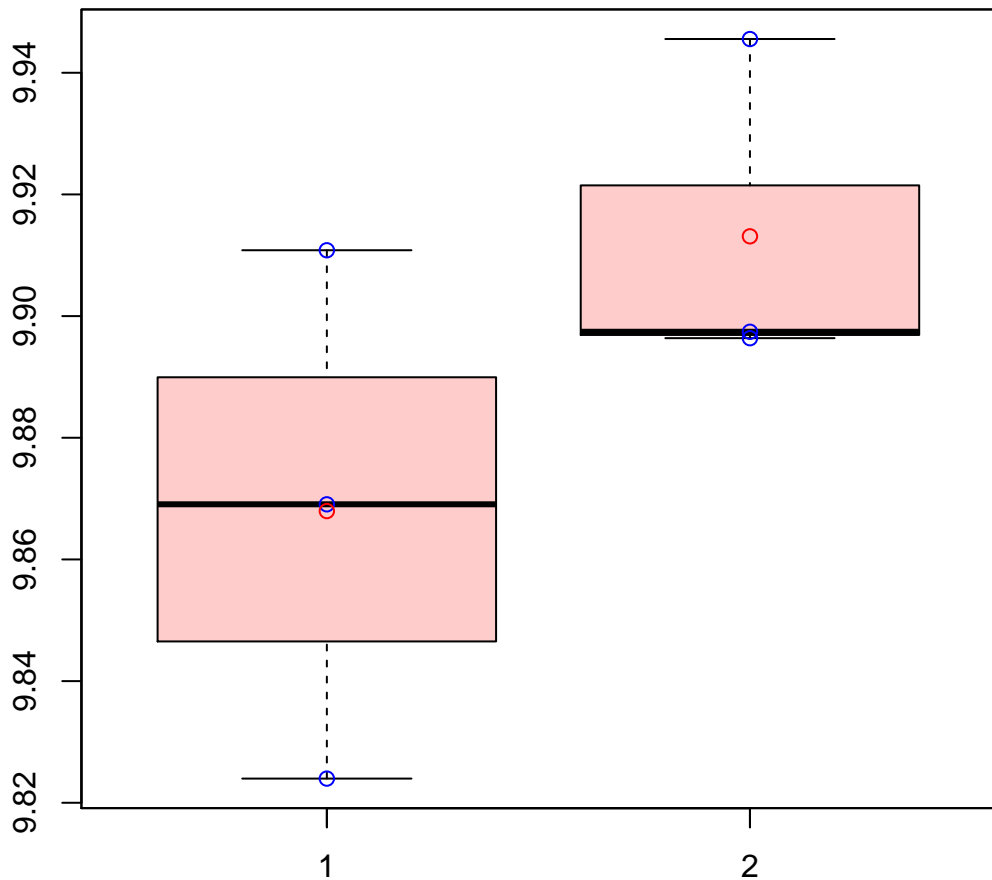

t-Test: p-value = 0.22

# FTSH7\_ERATE|FTSH7\_ERATE

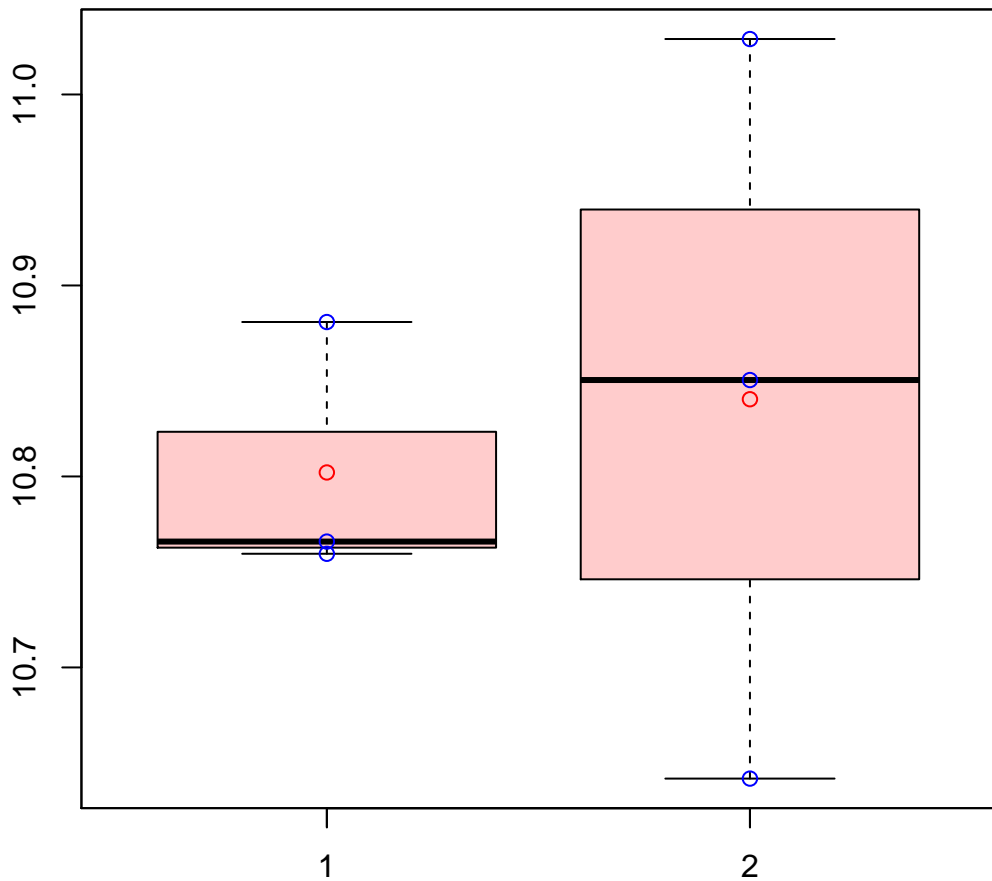

t-Test: p-value = 0.77

# FTSH9\_ERATE|FTSH9\_ERATE

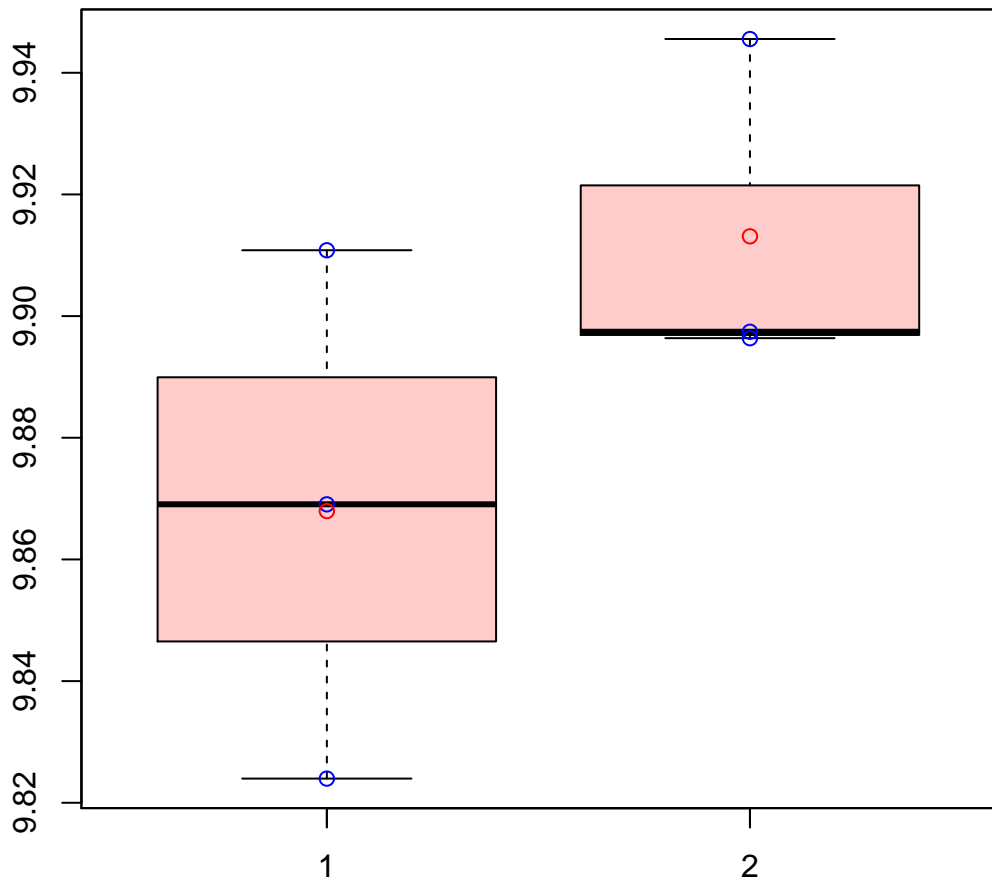

t-Test: p-value = 0.22

# FTSH\_ERATE|FTSH\_ERATE

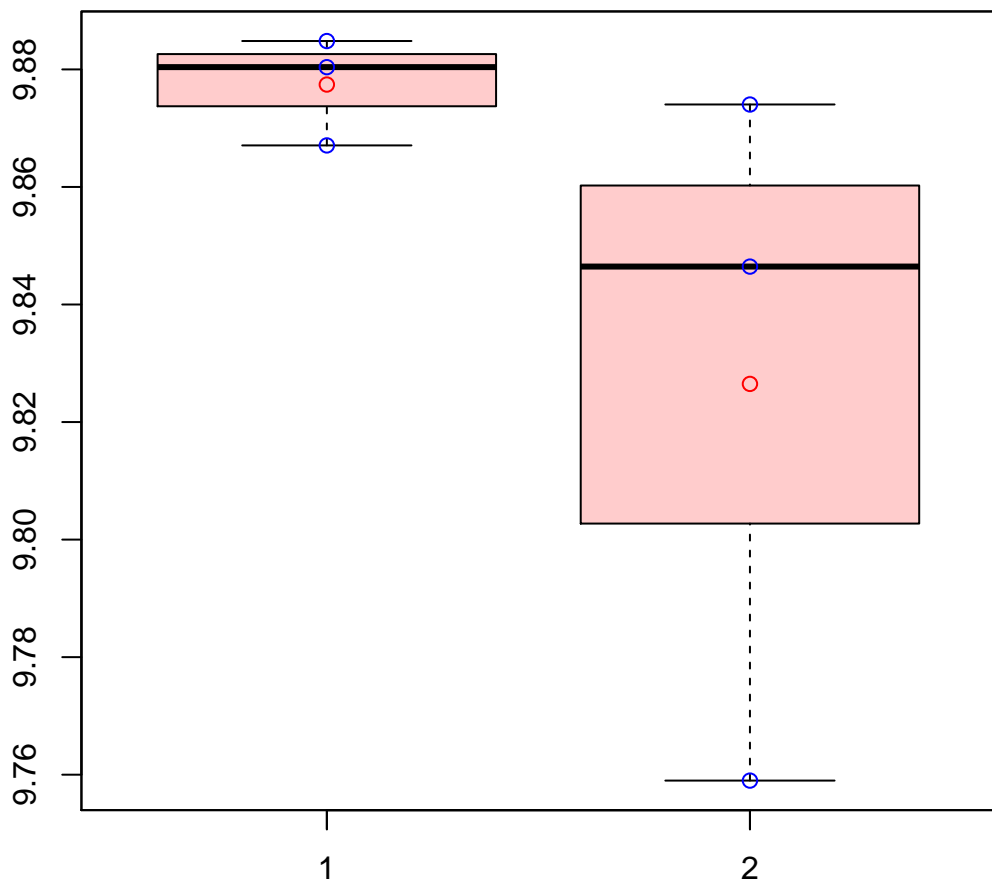

t-Test: p-value = 0.28

# G6PI3\_ERATE|G6PI3\_ERATE

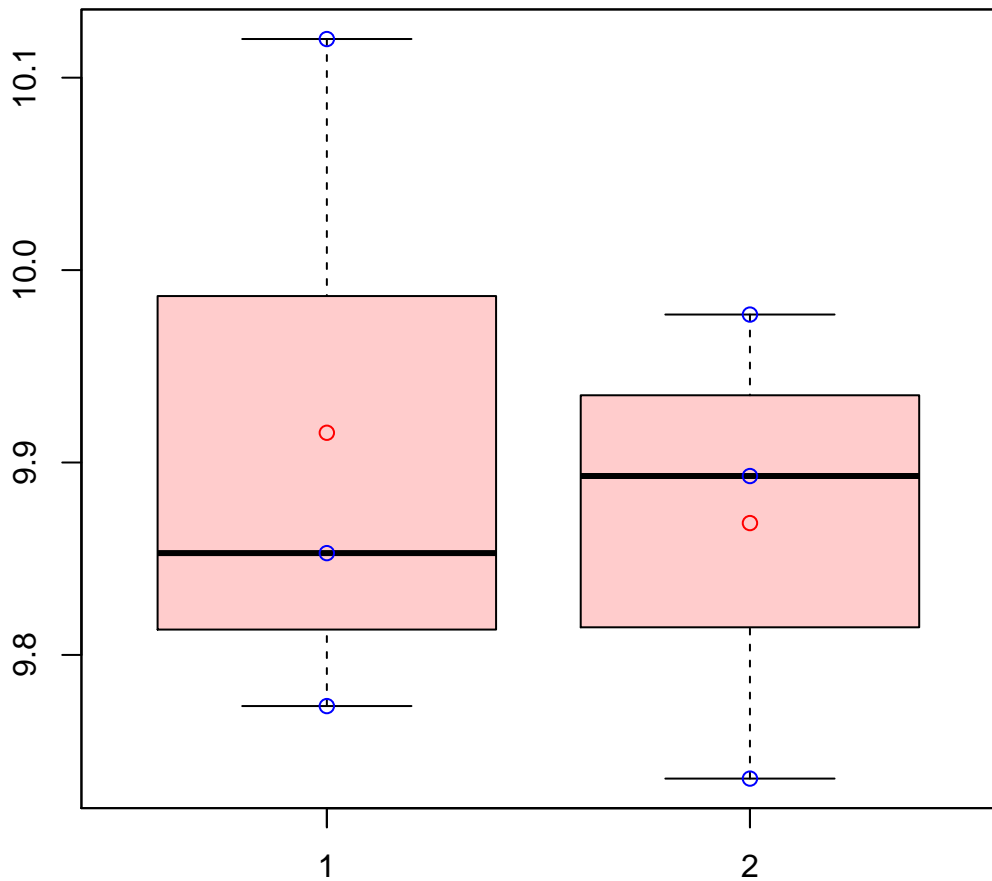

t-Test: p-value = 0.73



# G6PI\_ERATE|G6PI\_ERATE

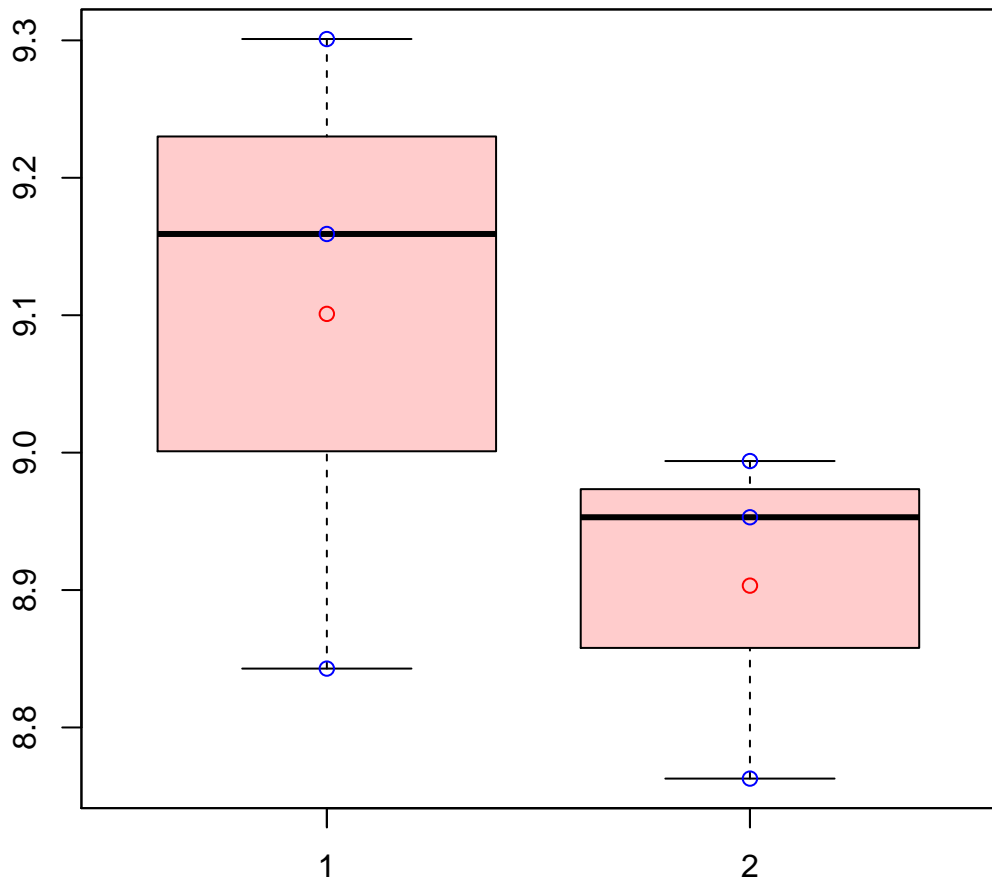

t-Test: p-value = 0.29

# GCSP1\_ERATE|GCSP1\_ERATE

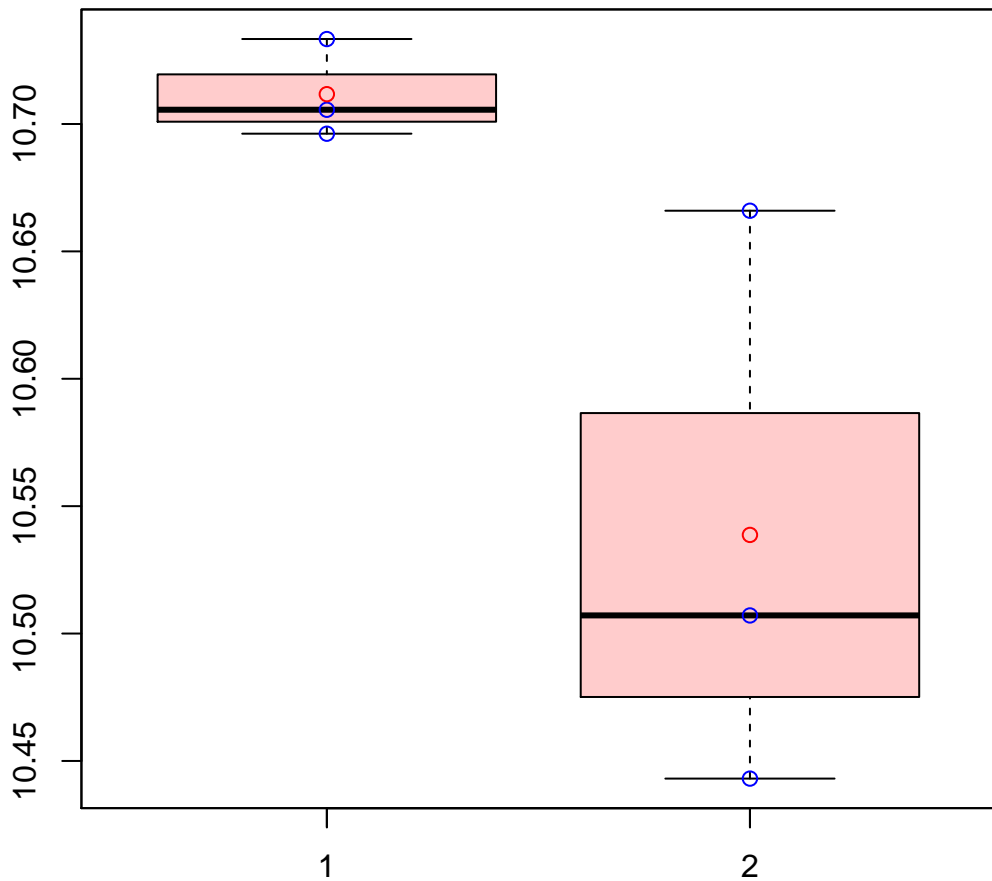

t-Test: p-value = 0.12

# GLYA1\_ERATE|GLYA1\_ERATE

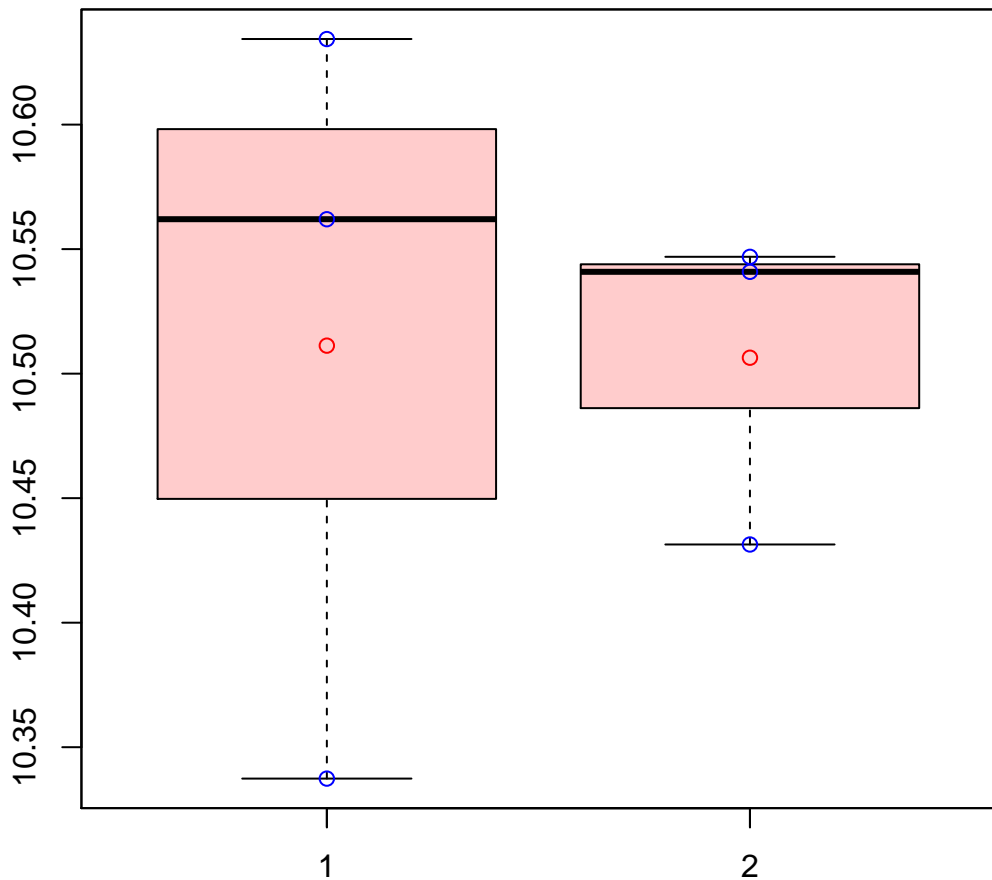

t-Test: p-value = 0.96

# GLYA2\_ERATE|GLYA2\_ERATE

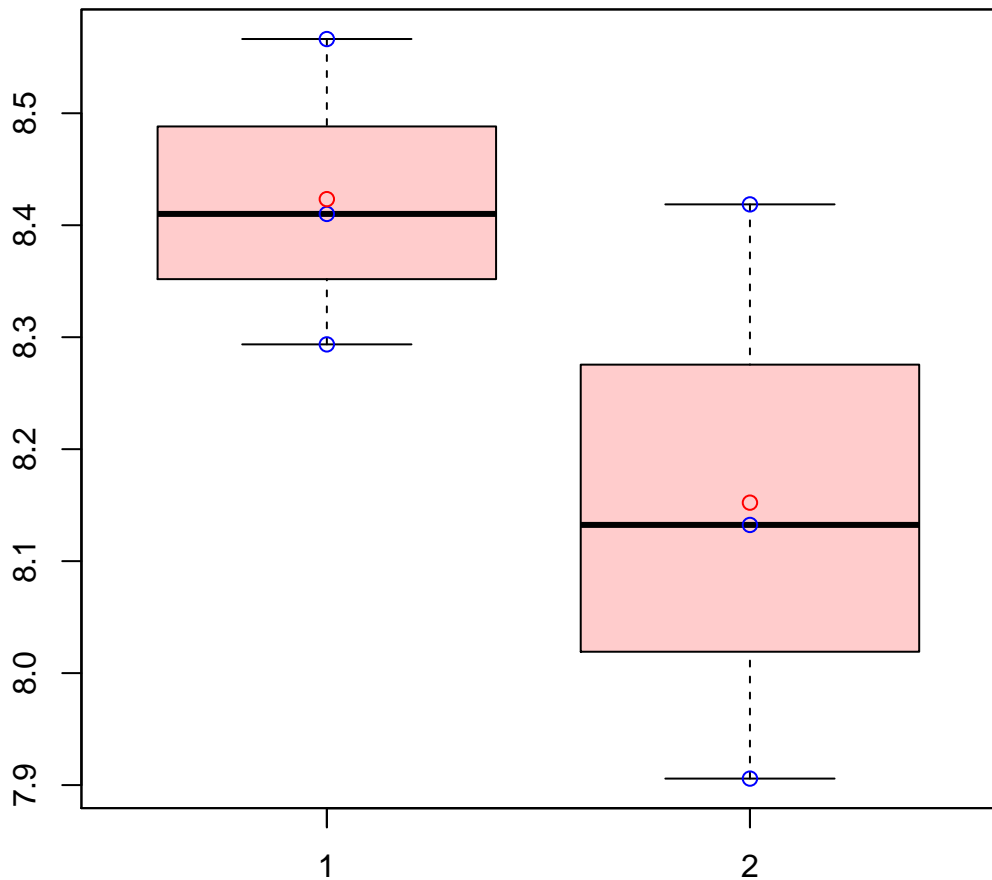

t-Test: p-value = 0.2

# GLYA3\_ERATE|GLYA3\_ERATE

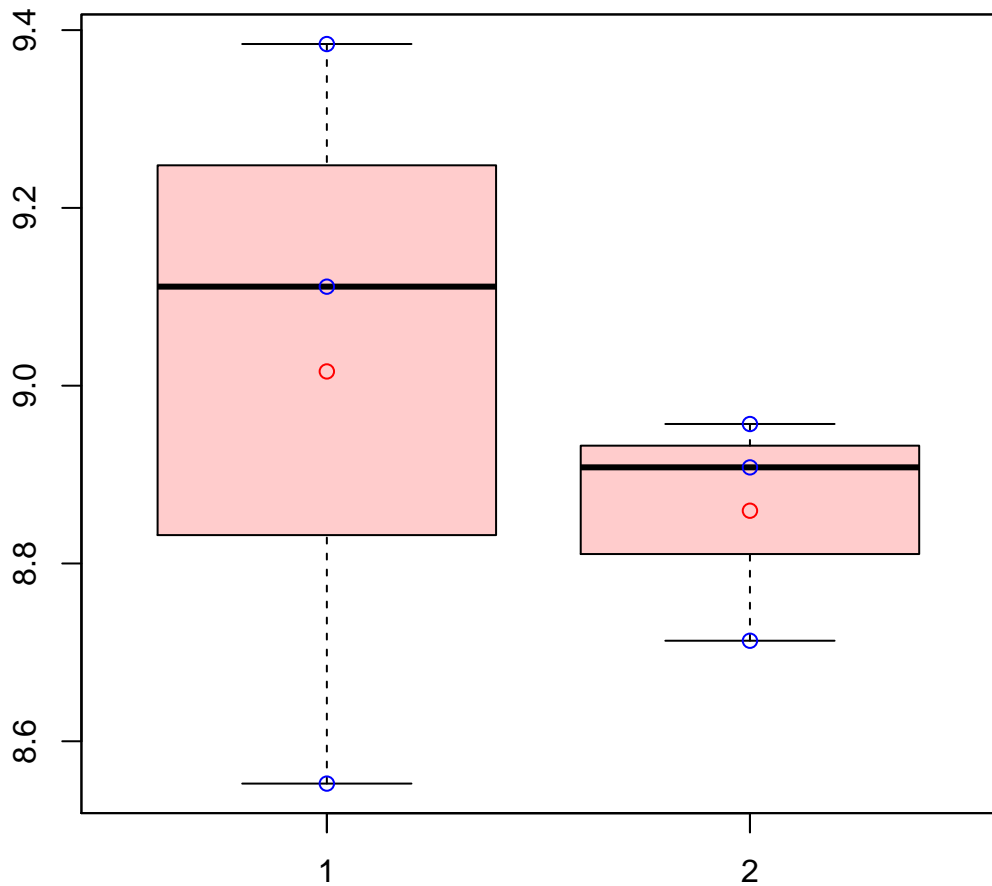

t-Test: p-value = 0.59

# HEM31\_ERATE|HEM31\_ERATE

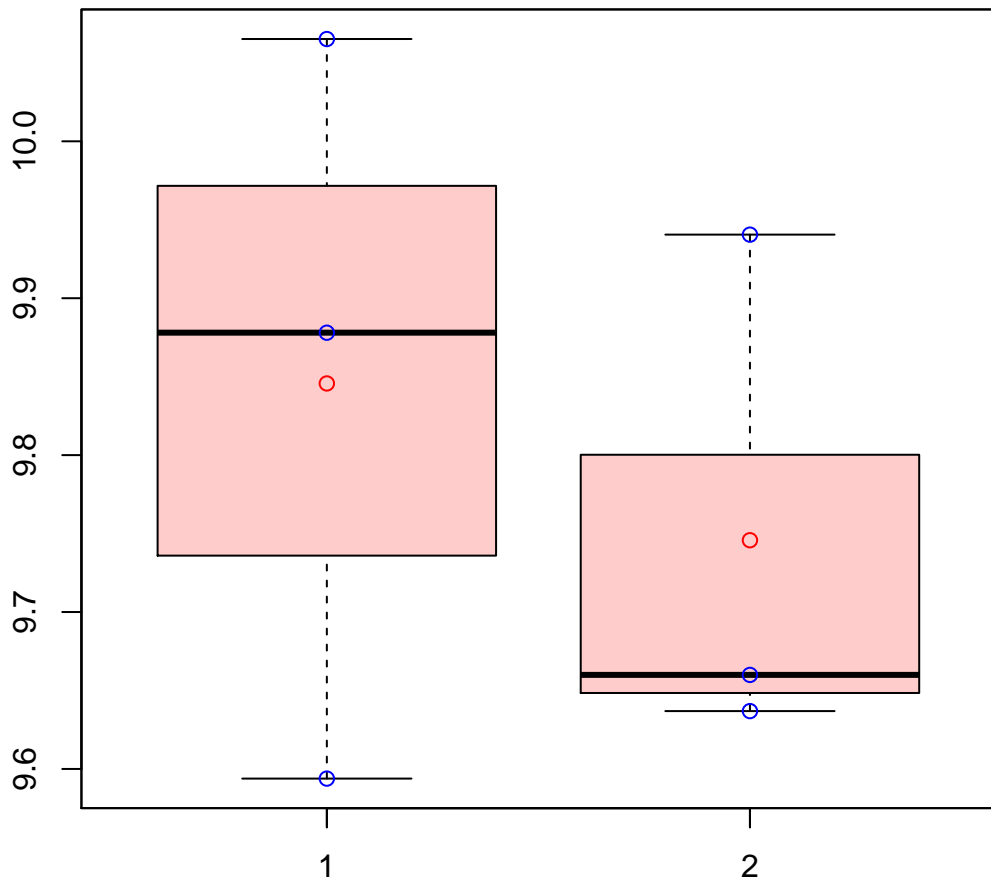

t-Test: p-value = 0.59

# HPPA1\_ERATE|HPPA1\_ERATE

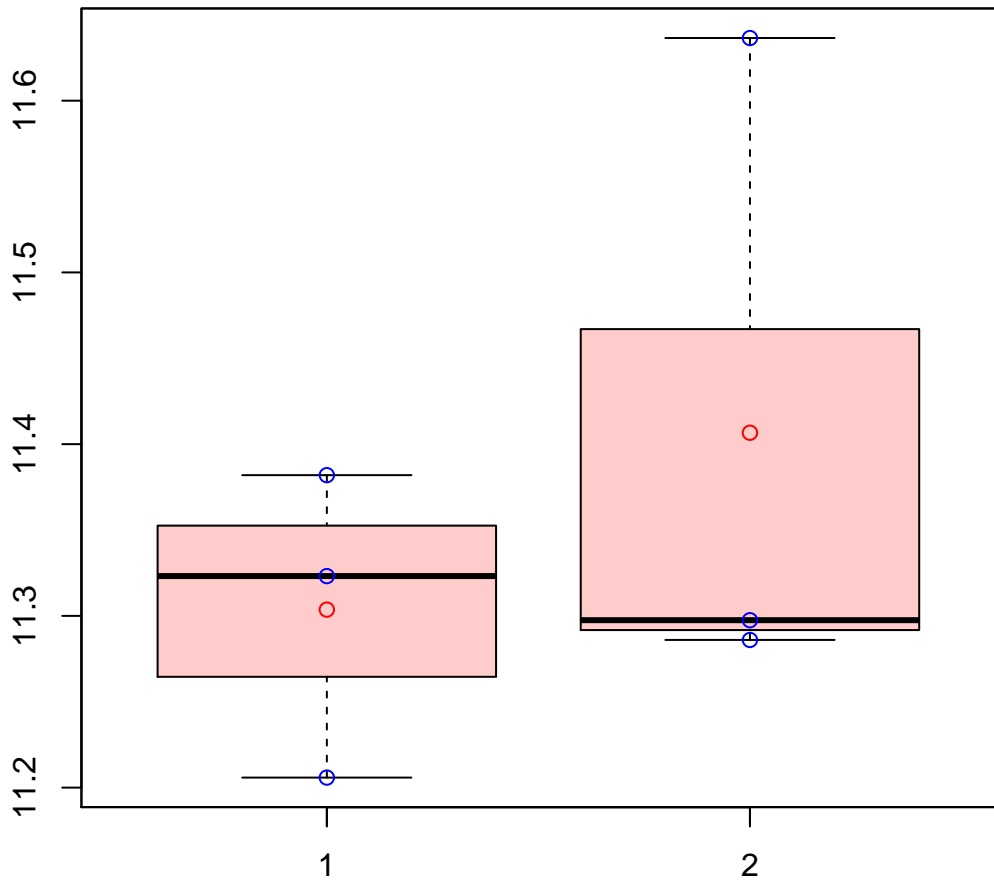

t-Test: p-value = 0.48

# HPPA2\_ERATE|HPPA2\_ERATE

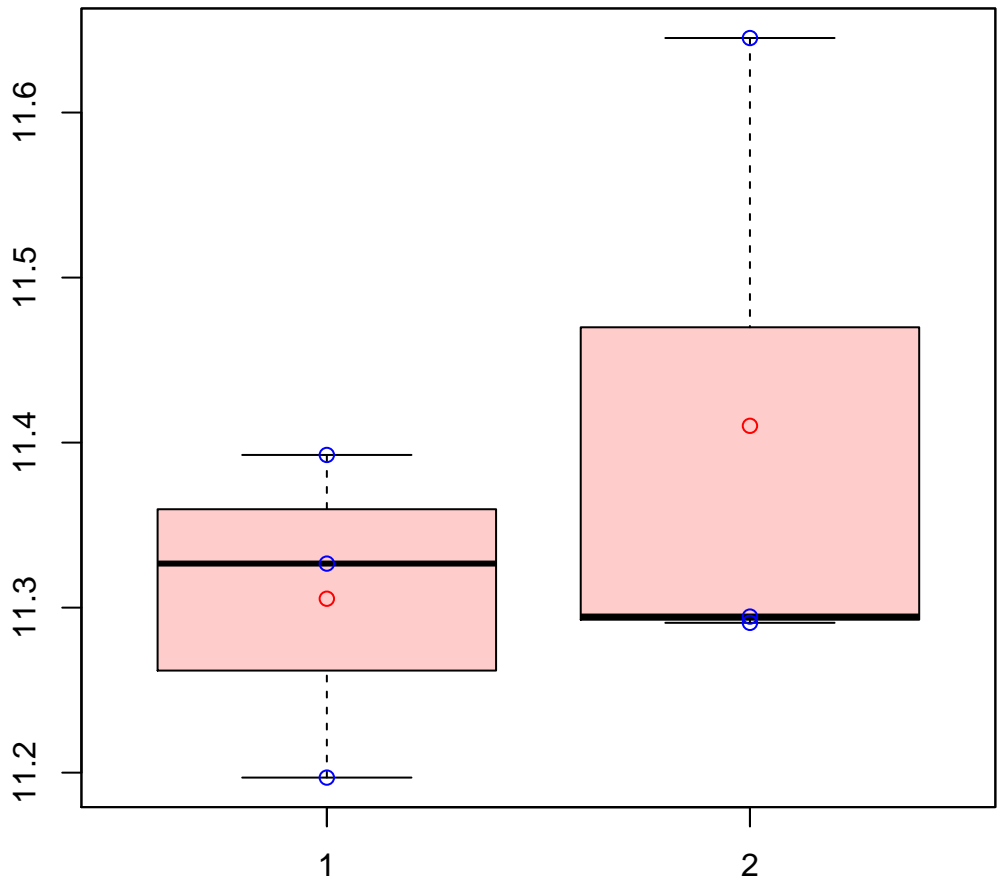

t-Test: p-value = 0.48



# HPPA4\_ERATE|HPPA4\_ERATE

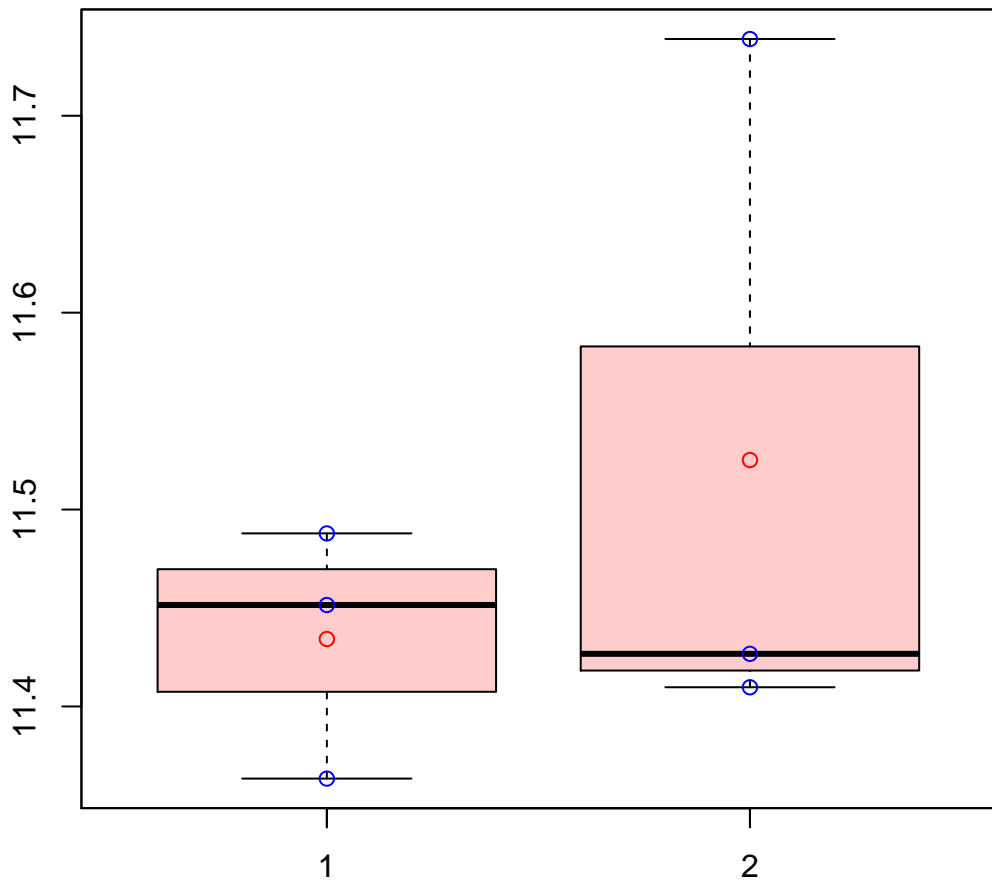

t-Test: p-value = 0.49

# HPPA7\_ERATE|HPPA7\_ERATE

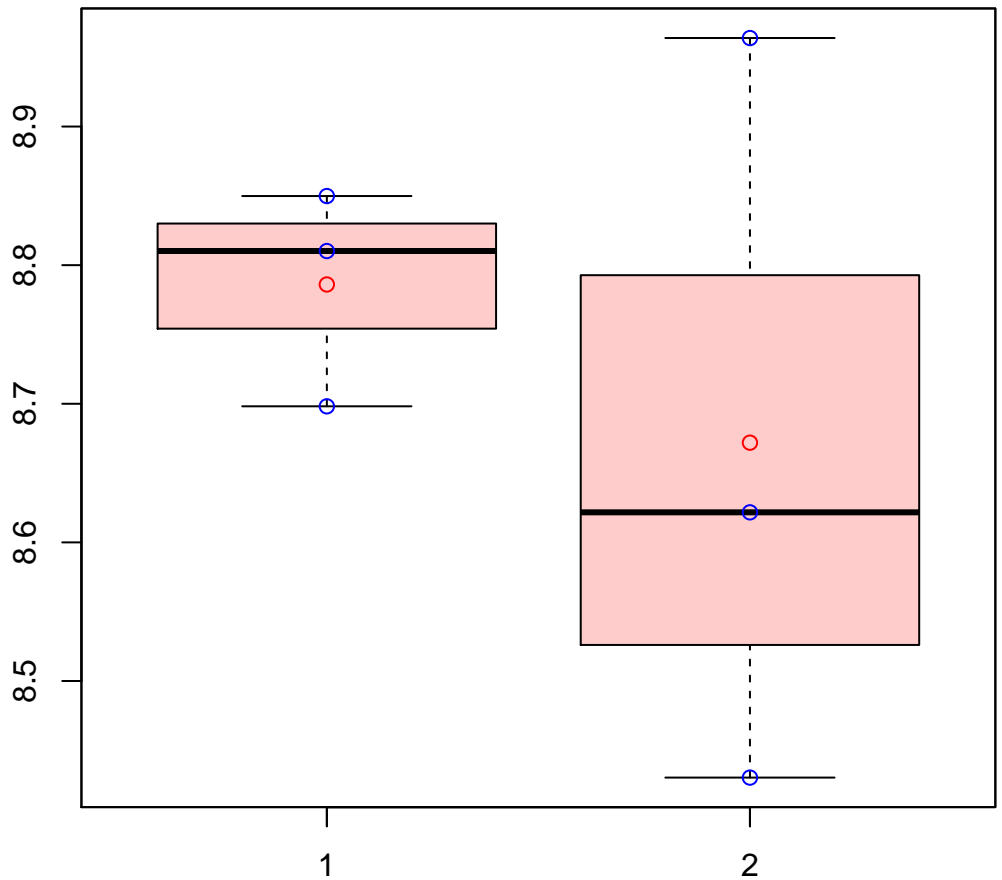

t-Test: p-value = 0.55

# HTPG11\_ERATE|HTPG11\_ERATE

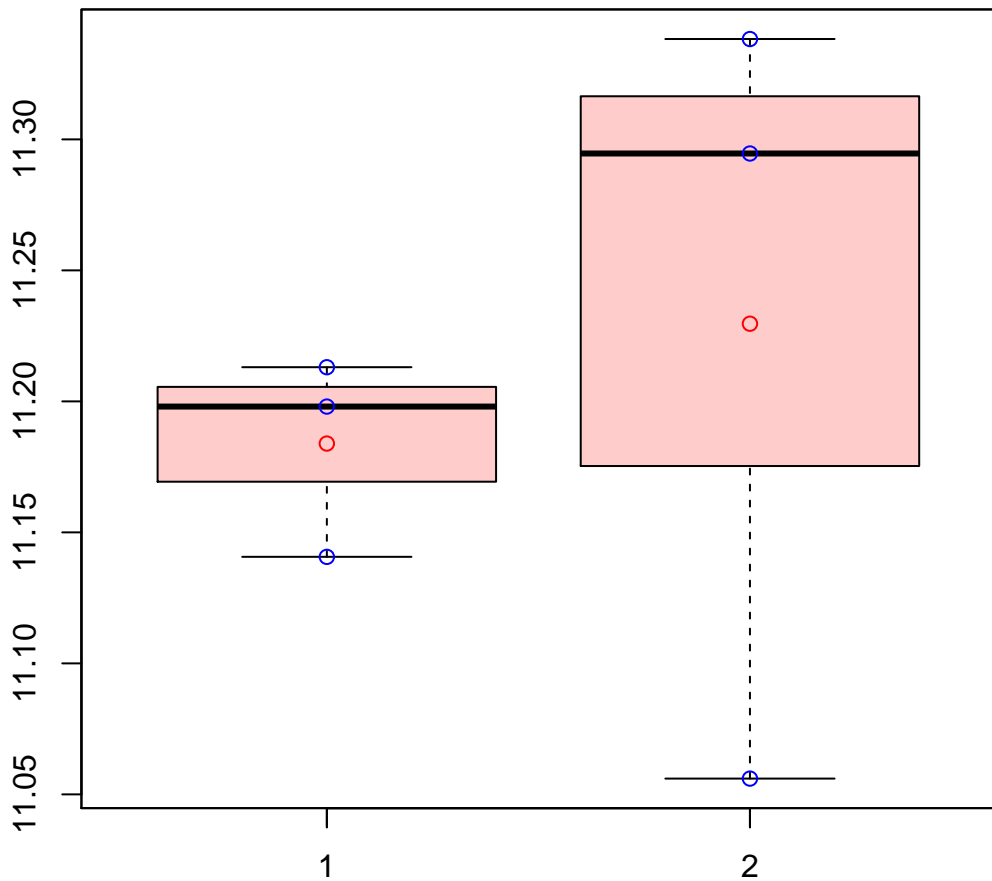

t-Test: p-value = 0.66

# HTPG13\_ERATE|HTPG13\_ERATE

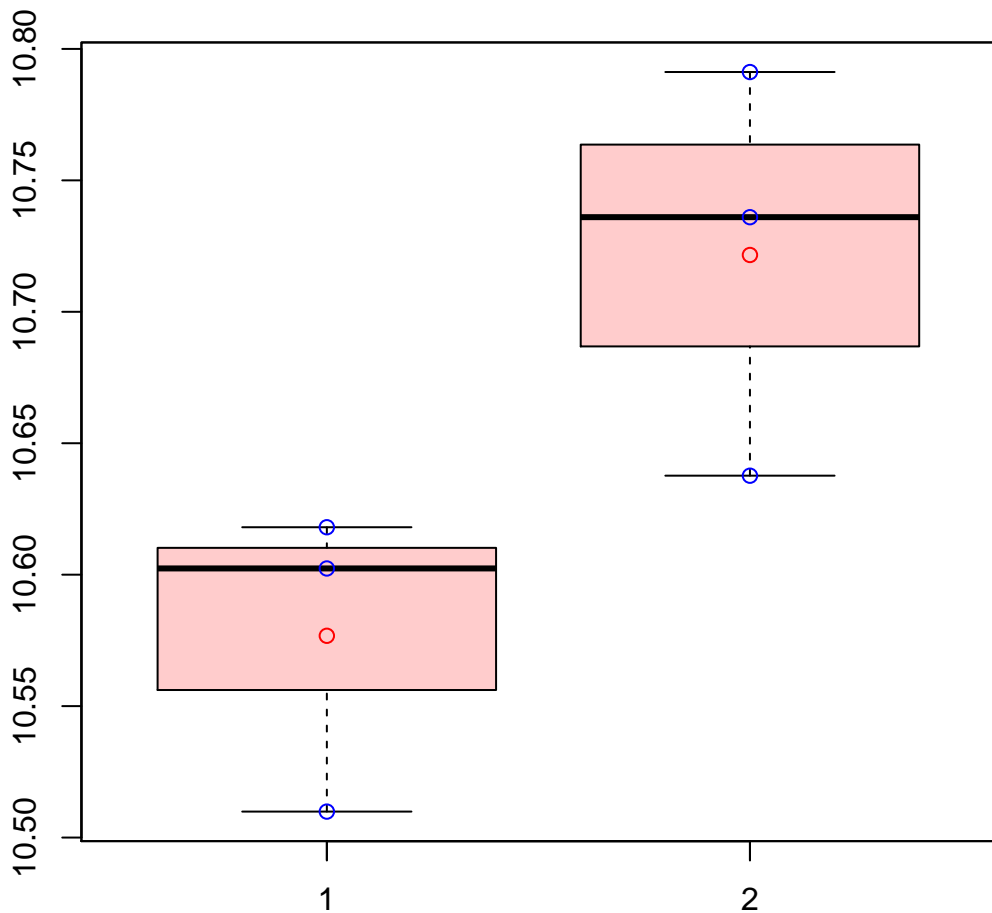

t-Test: p-value = 0.07

# HTPG3\_ERATE|HTPG3\_ERATE

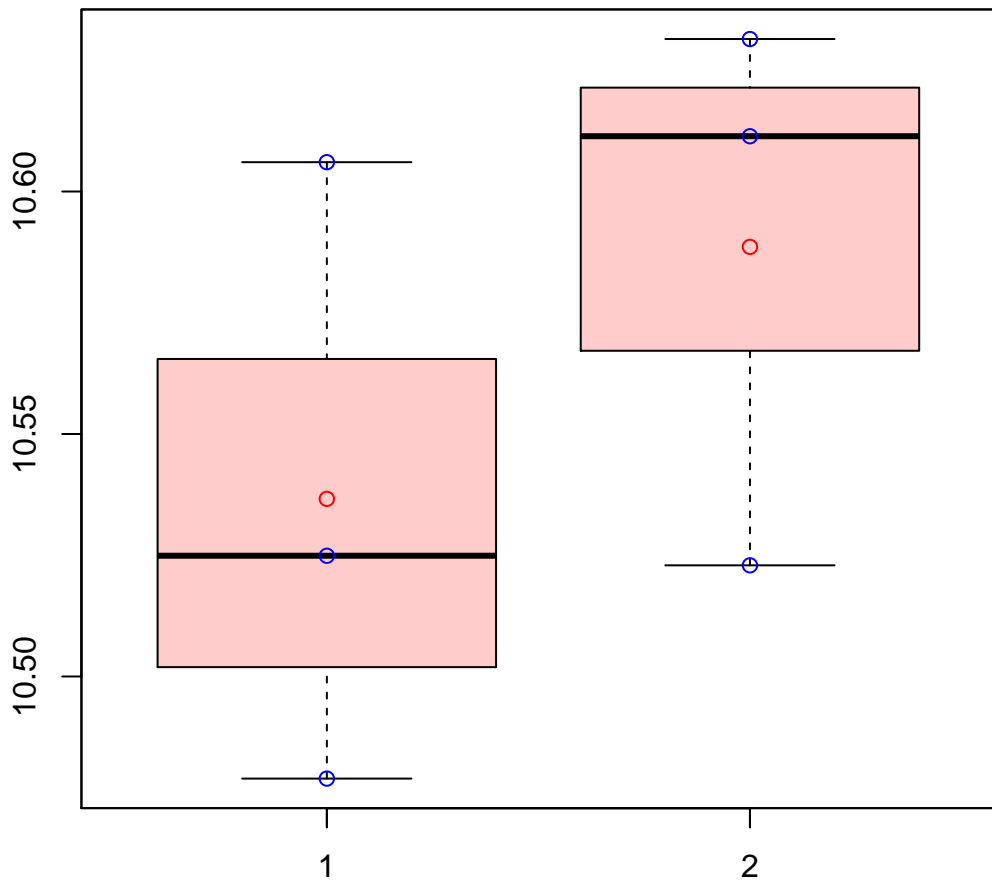

t-Test: p-value = 0.36

# HTPG4\_ERATE|HTPG4\_ERATE

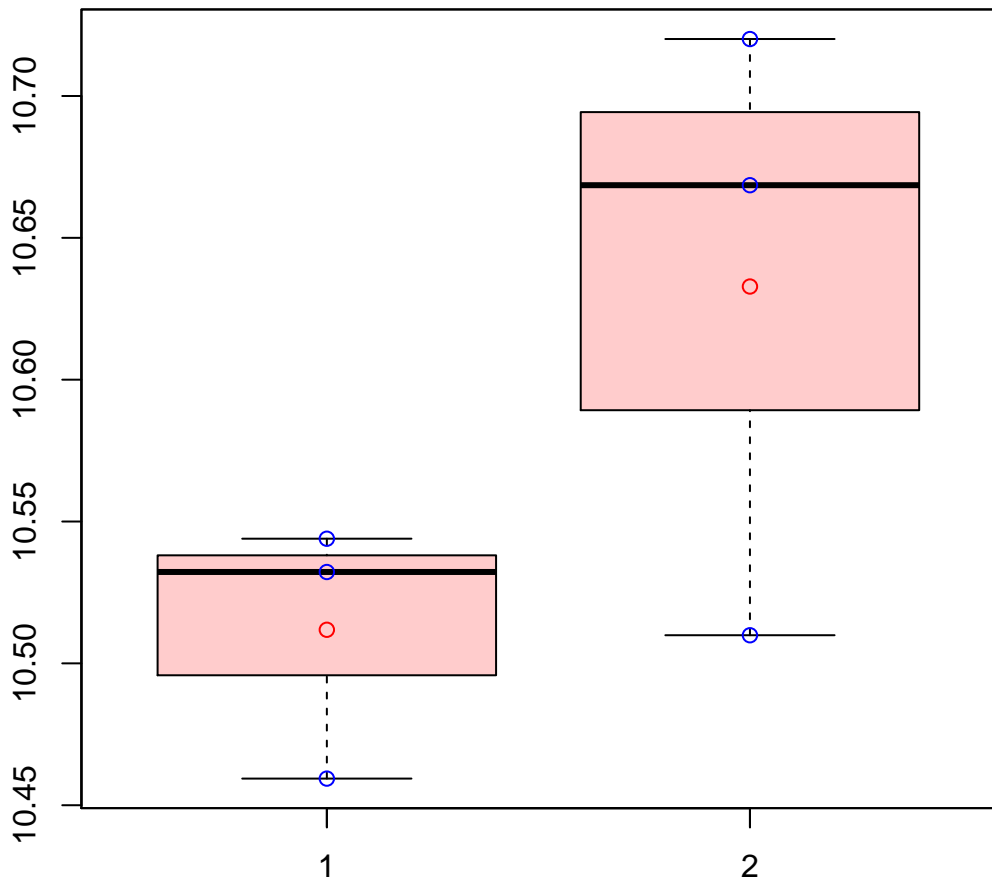

t-Test: p-value = 0.19

# HTPG5\_ERATE|HTPG5\_ERATE

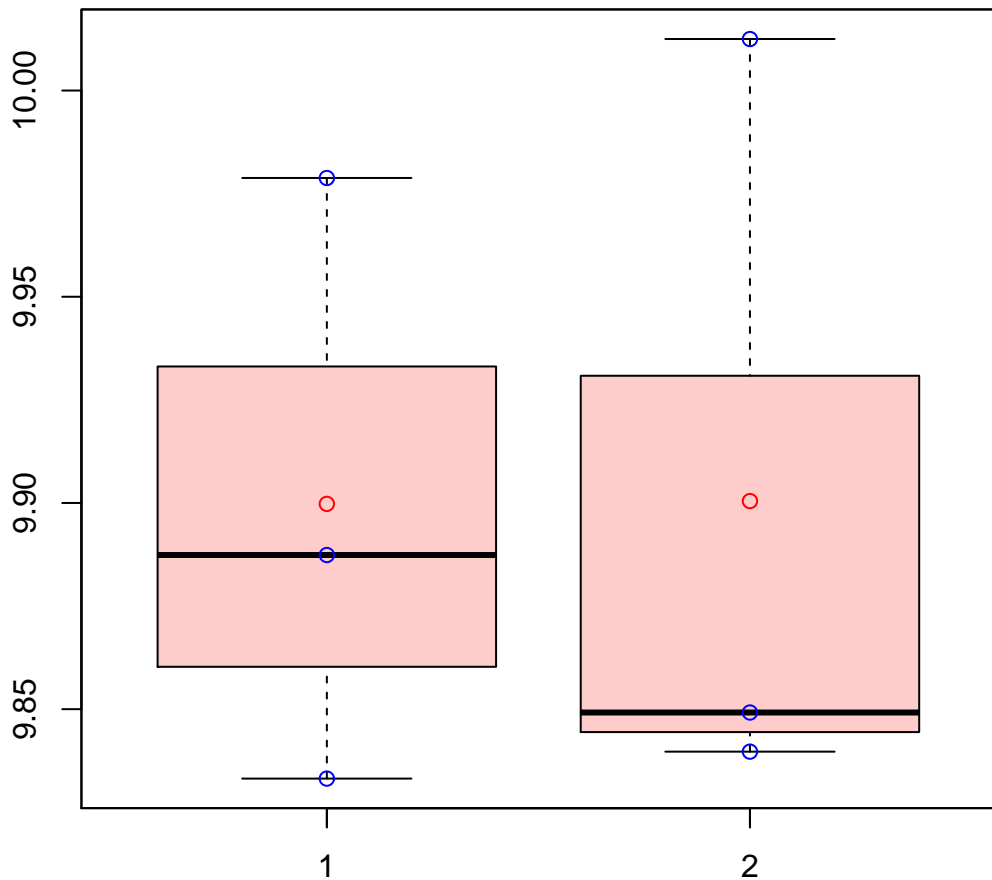

t-Test: p-value = 0.99

# HTPG8\_ERATE|HTPG8\_ERATE

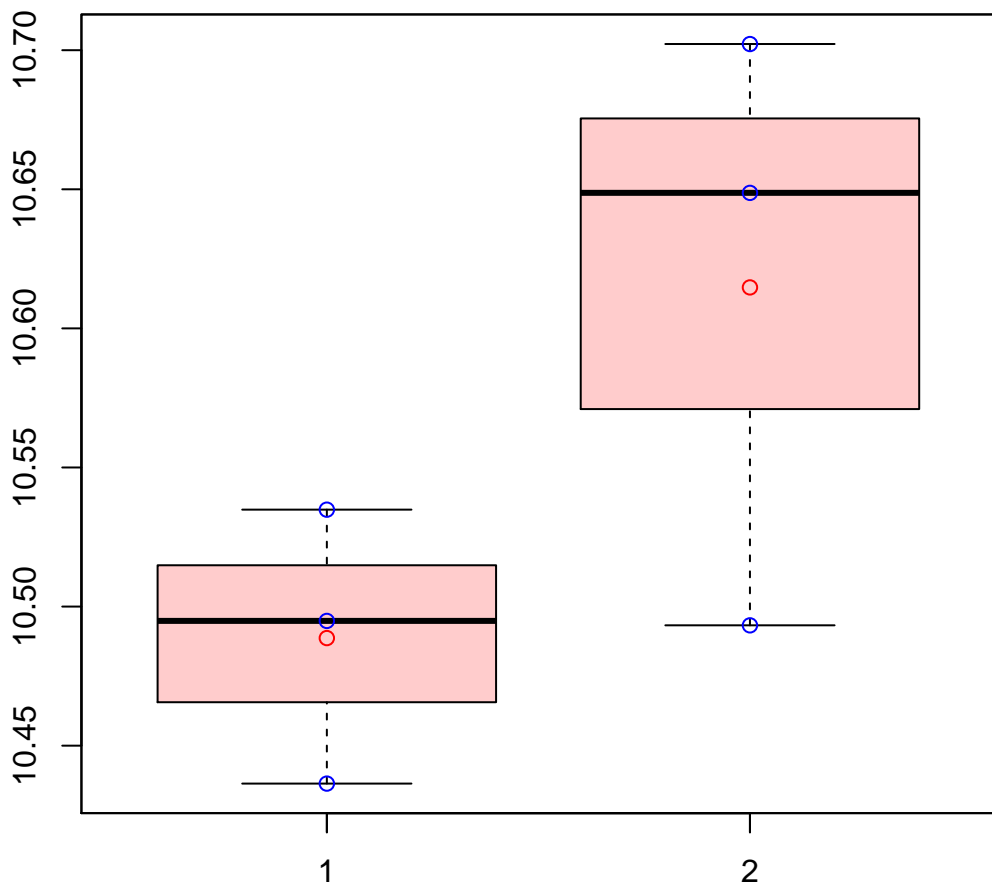

t-Test: p-value = 0.17



# HTPG9\_ERATE|HTPG9\_ERATE

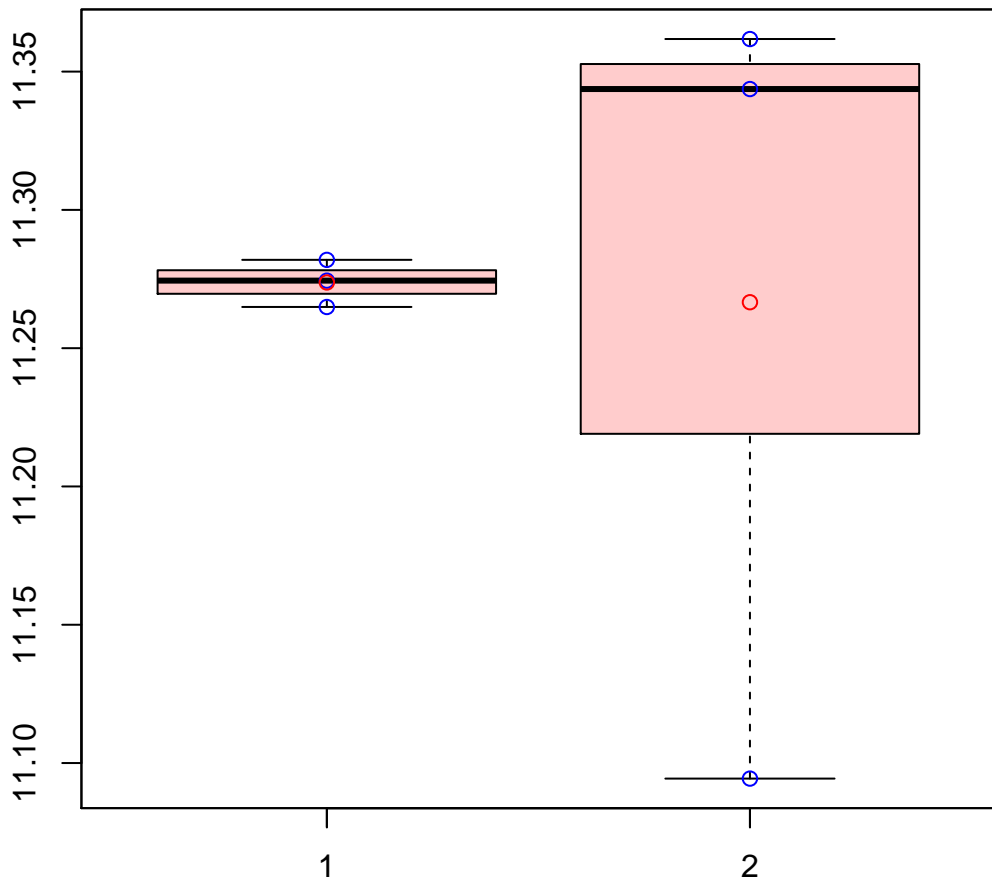

t-Test: p-value = 0.94

isotig00531|isotig00531

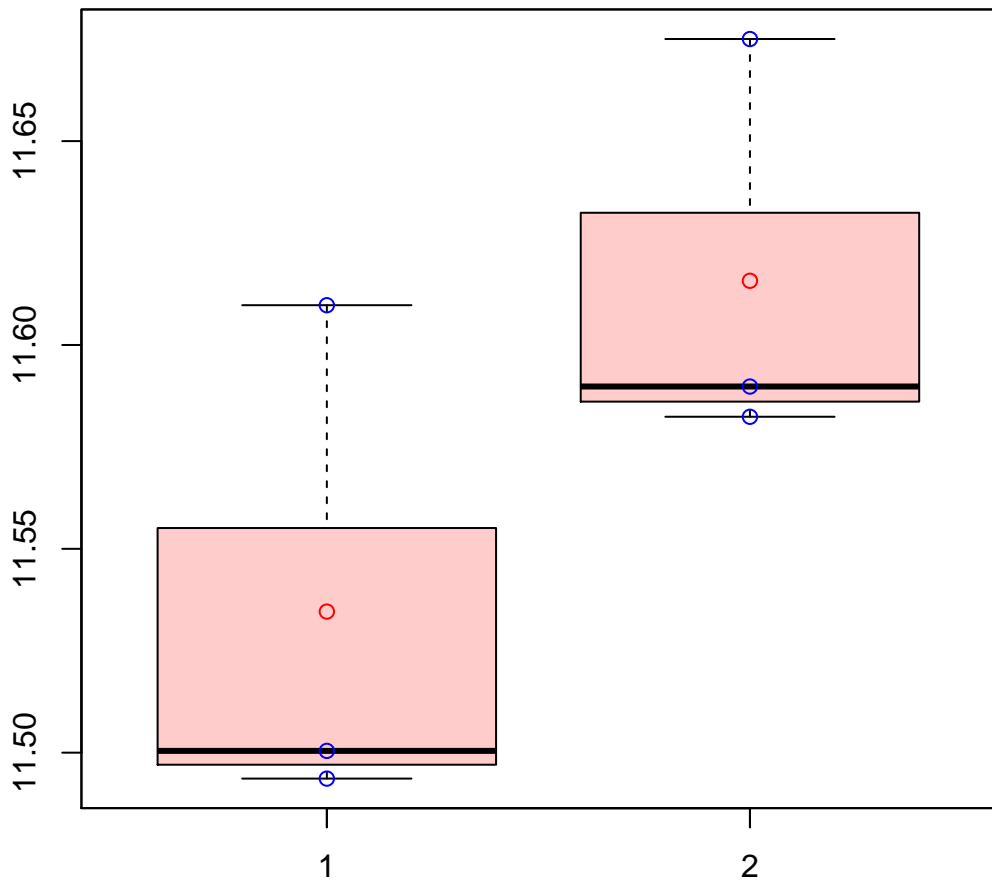

t-Test: p-value = 0.17

# isotig00688|isotig00688

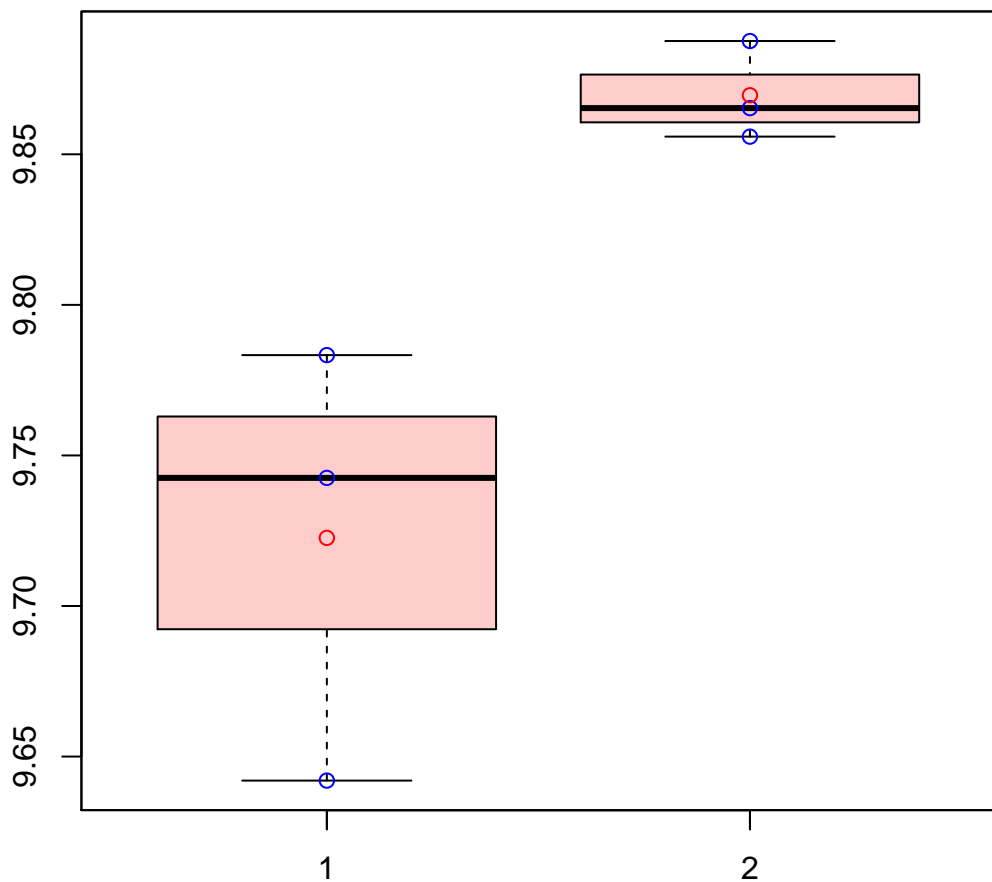

t-Test: p-value = 0.07

isotig00697|isotig00697

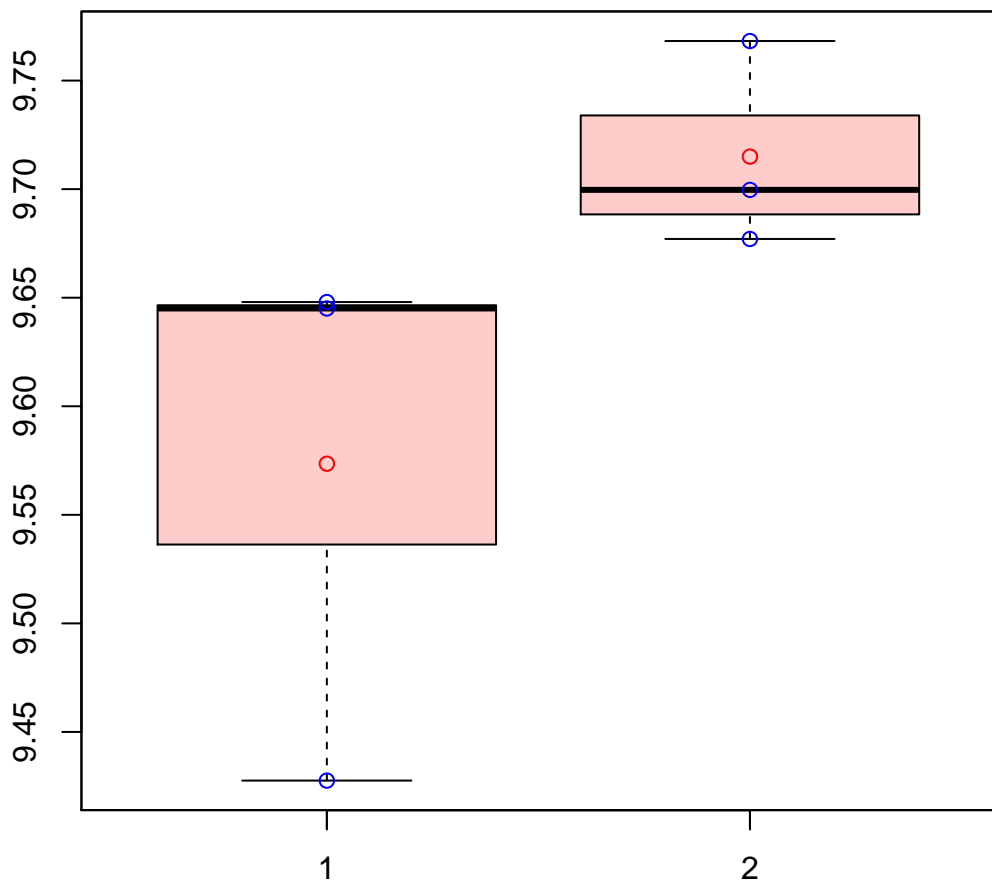

t-Test: p-value = 0.18

# isotig00702|isotig00702

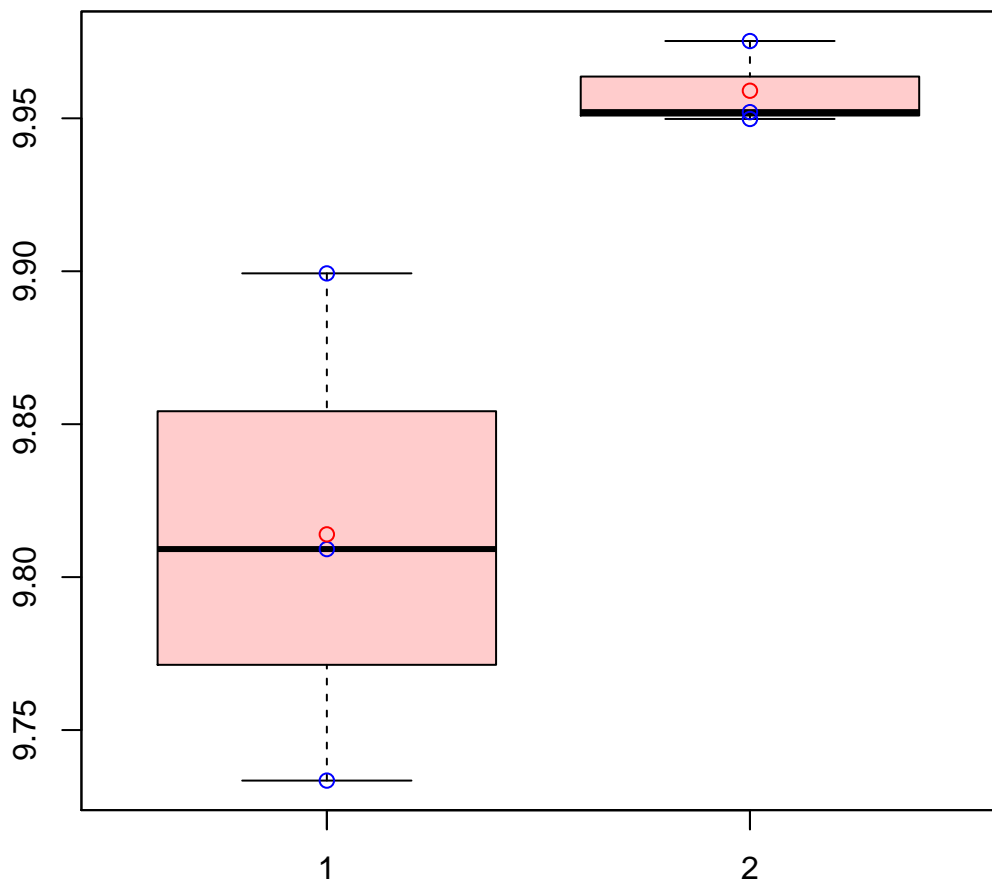

t-Test: p-value = 0.09

# isotig00708|isotig00708



t-Test: p-value = 0.07

# isotig00781|isotig00781



t-Test: p-value = 0.76

# isotig01127|isotig01127

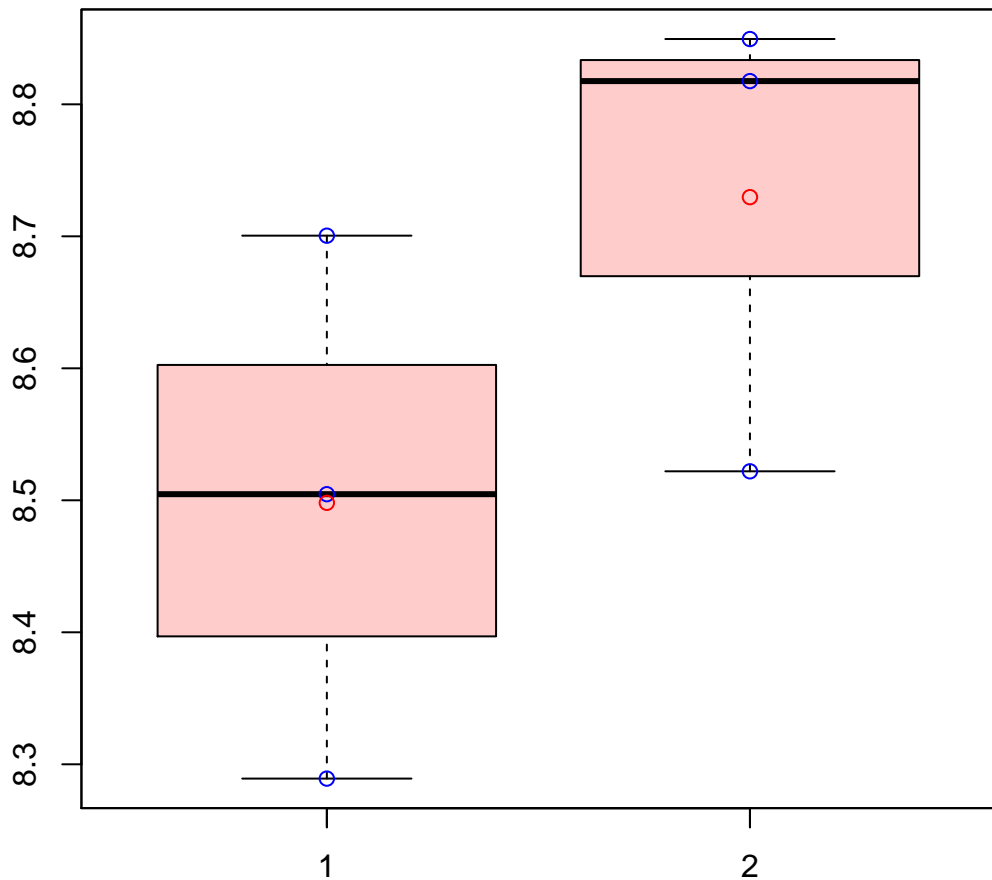

t-Test: p-value = 0.22



isotig01136|isotig01136

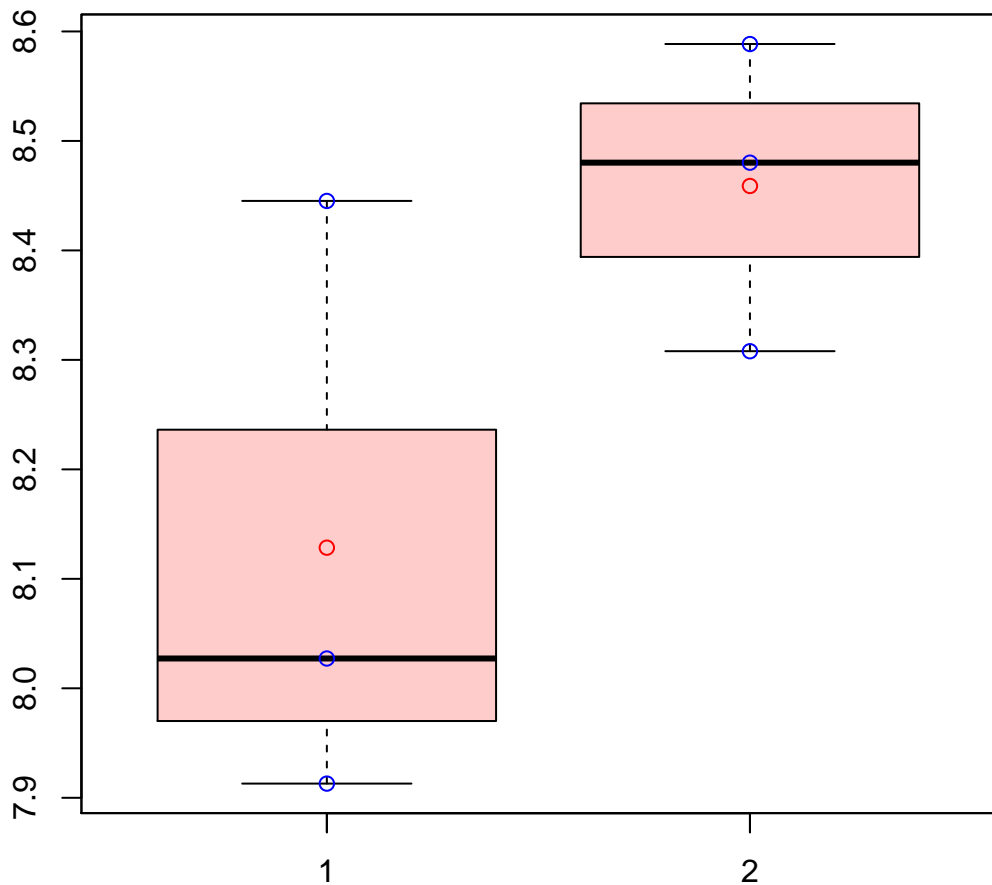

t-Test: p-value = 0.17

# isotig01227|isotig01227

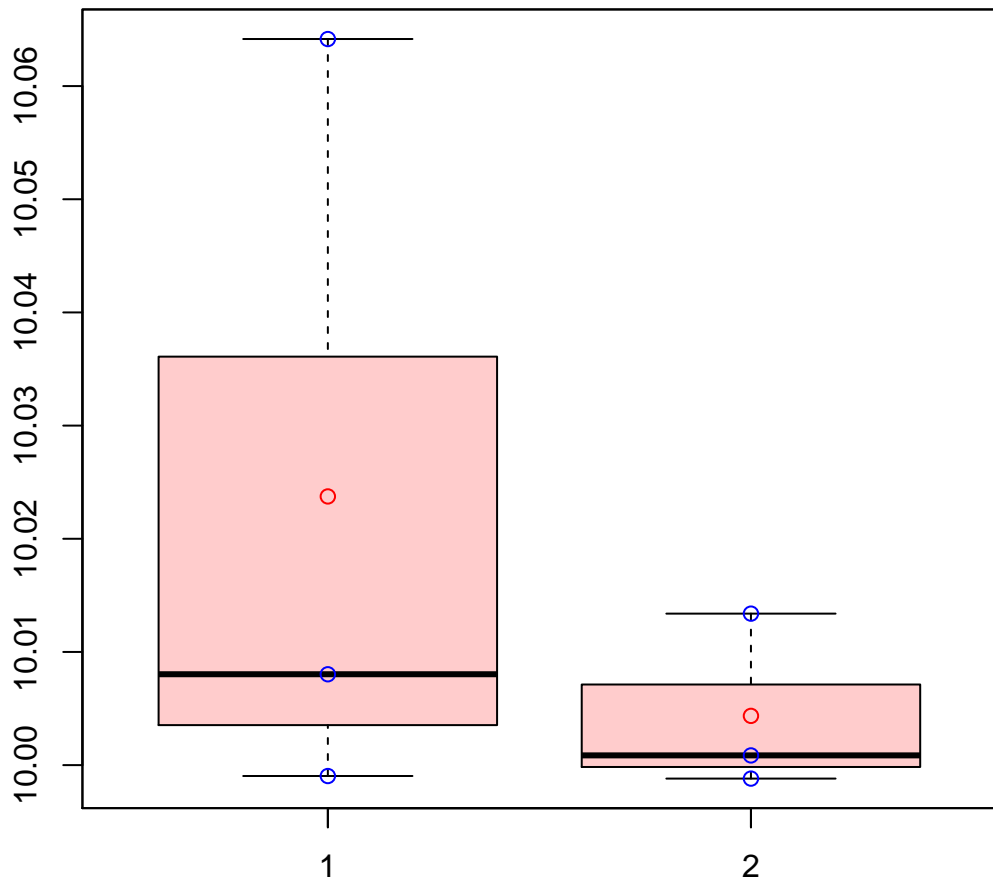

t-Test: p-value = 0.44

# isotig01667|isotig01667

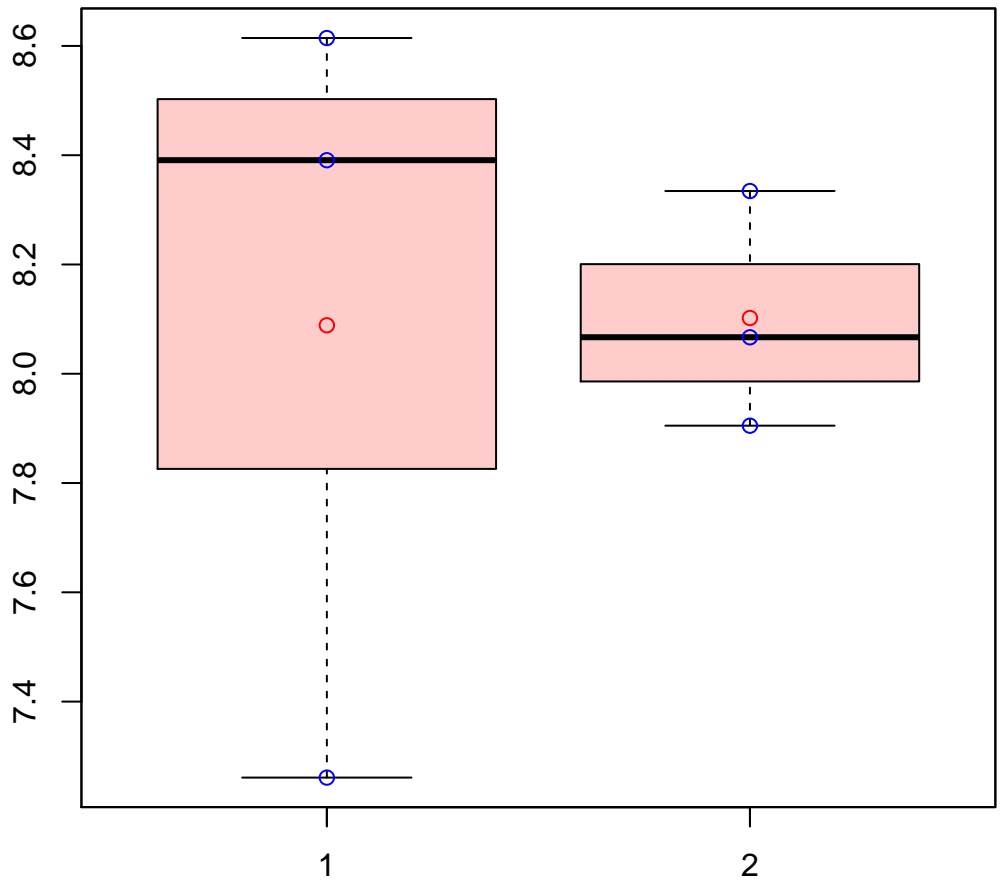

t-Test: p-value = 0.98

# isotig01759|isotig01759

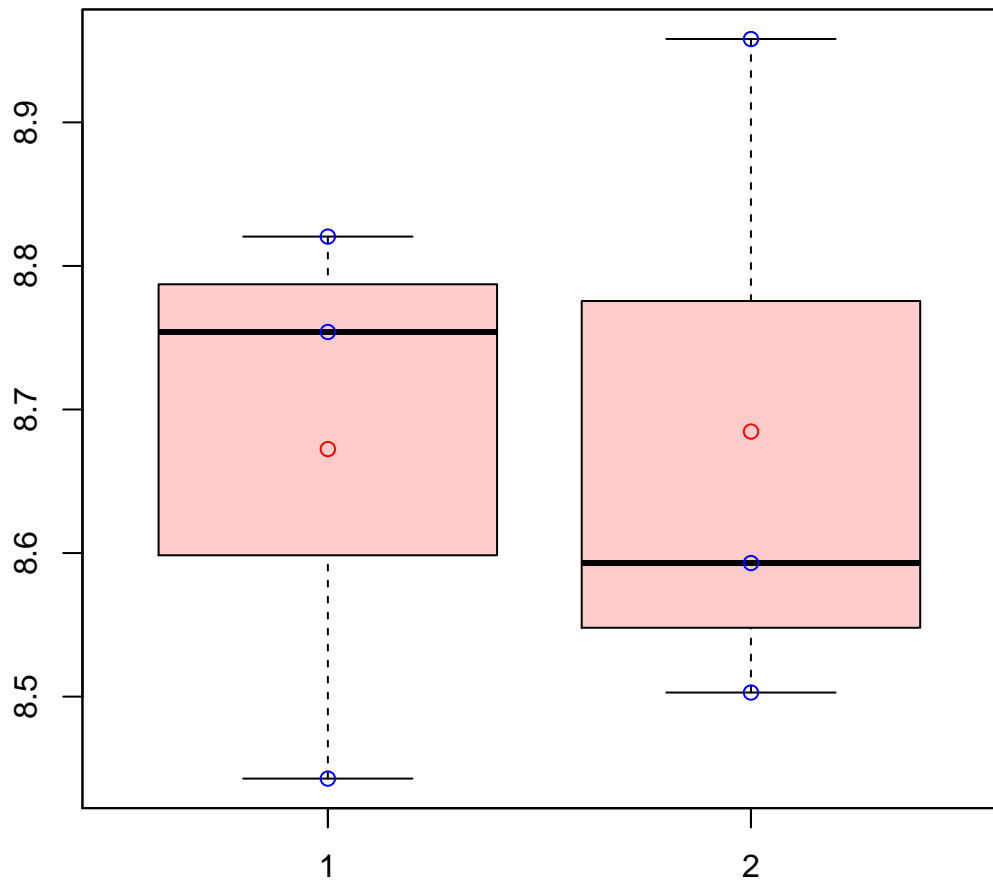

t-Test: p-value = 0.95

# isotig02126|isotig02126

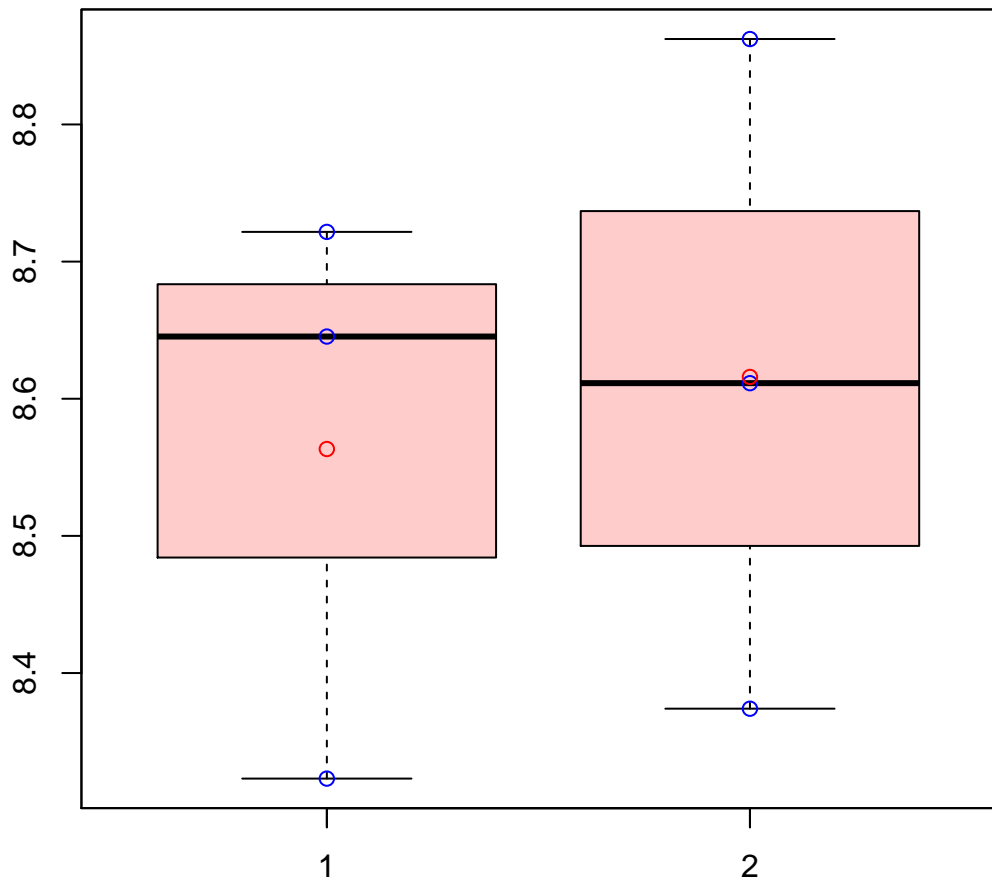

t-Test: p-value = 0.79

# isotig02308|isotig02308



t-Test: p-value = 0.01

# isotig02453|isotig02453

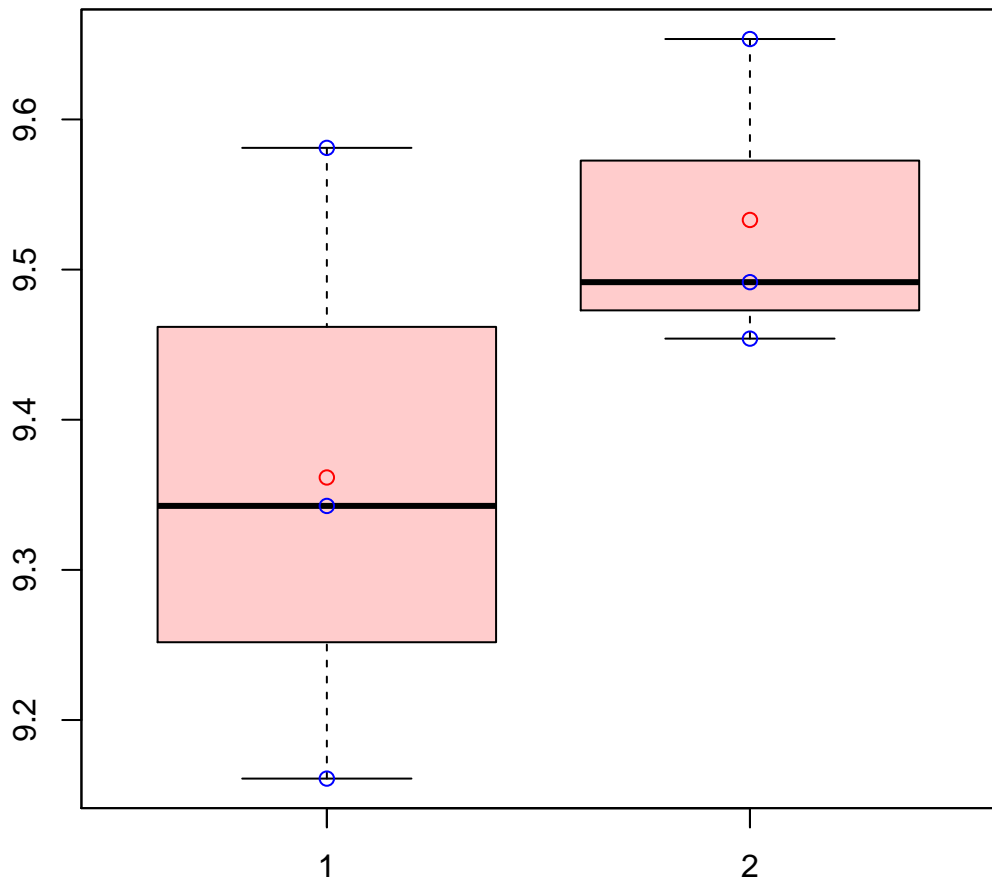

t-Test: p-value = 0.3

# isotig02481|isotig02481

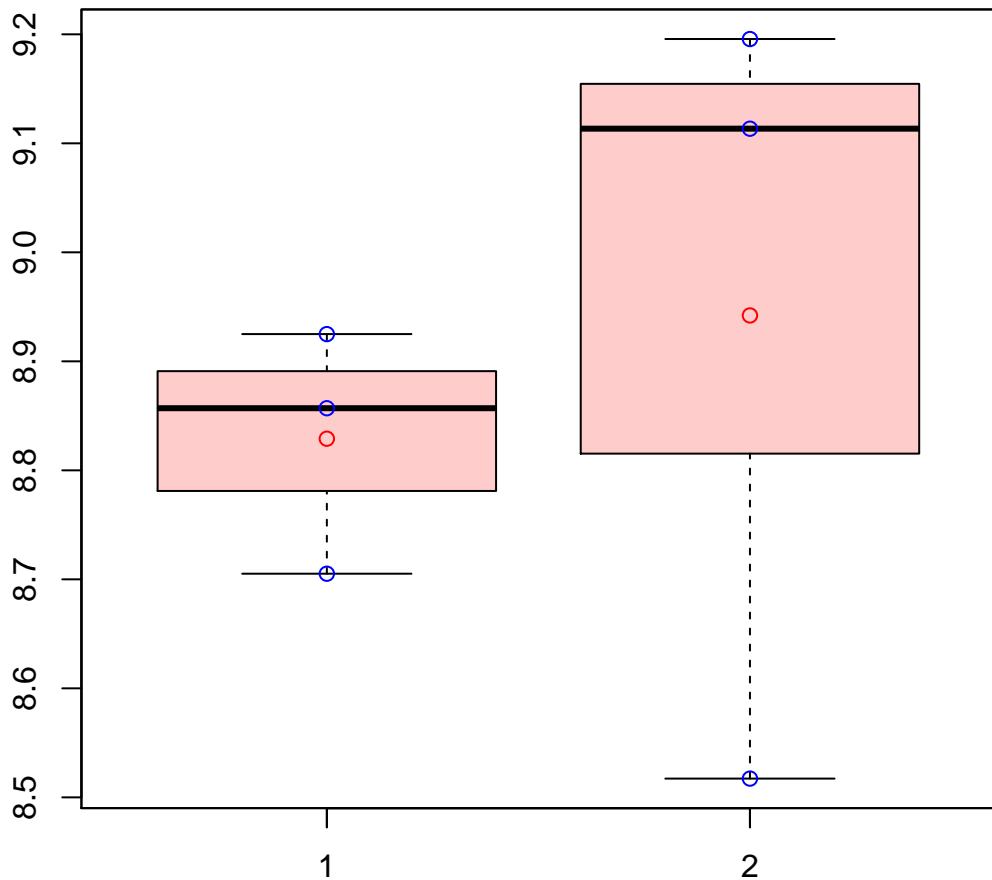

t-Test: p-value = 0.66



# isotig02742|isotig02742



t-Test: p-value = 0.52

# isotig02787|isotig02787

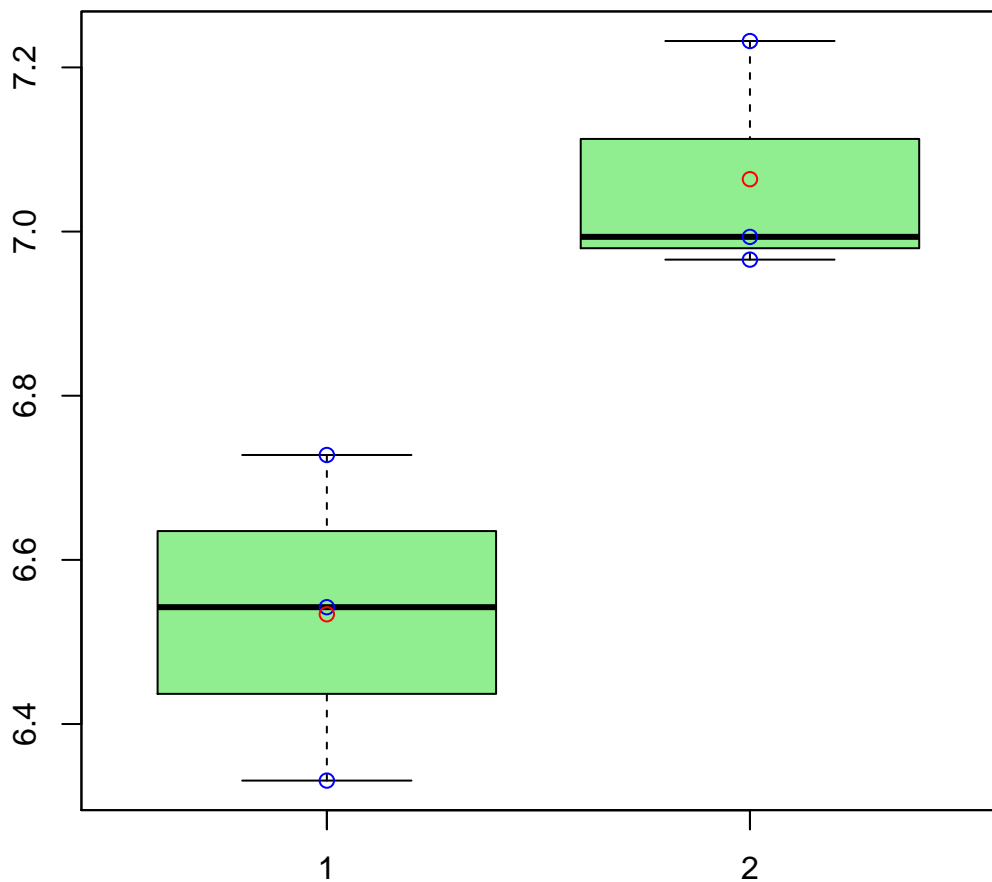

t-Test: p-value = 0.02

# isotig02917|isotig02917

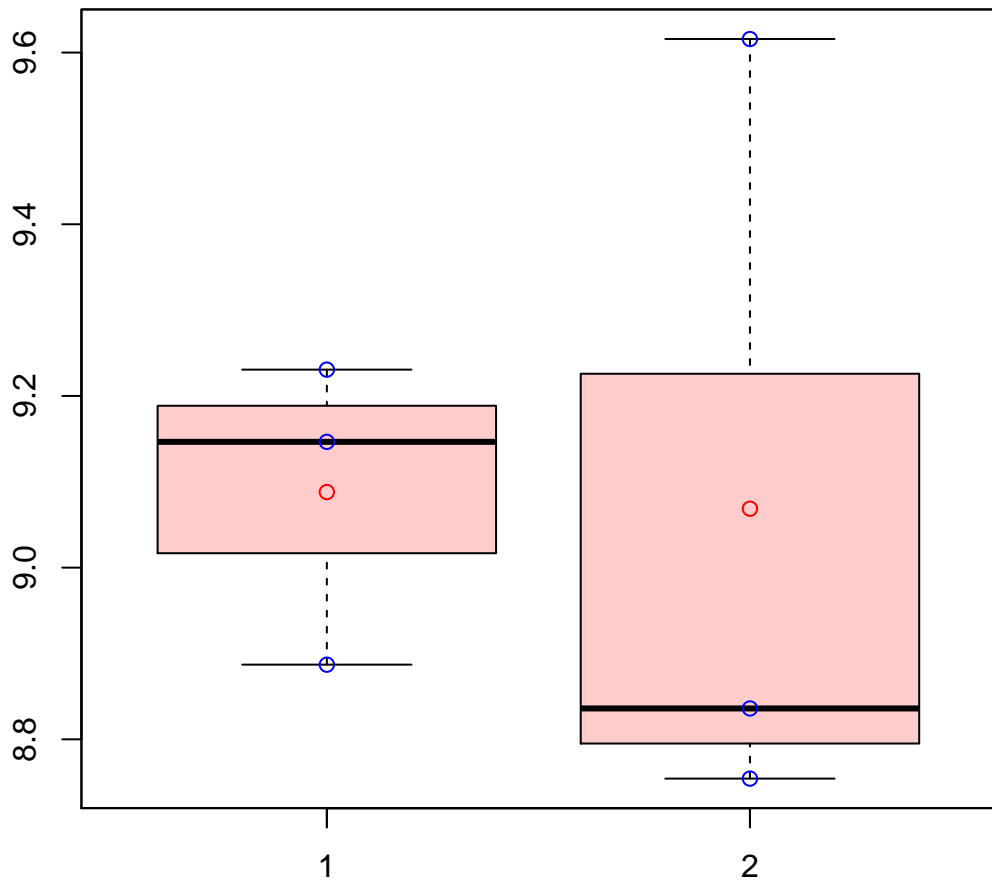

t-Test: p-value = 0.95

# isotig02919|isotig02919

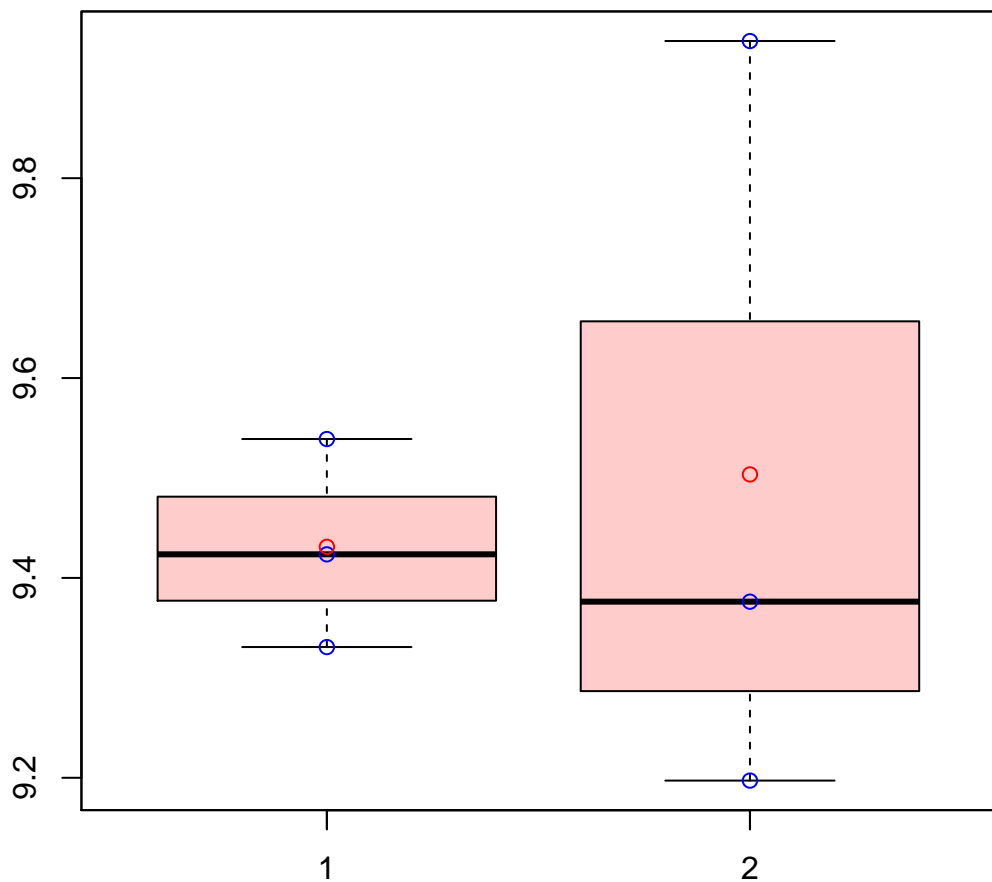

t-Test: p-value = 0.78

# isotig03618|isotig03618



t-Test: p-value = 0.26

# isotig03751|isotig03751

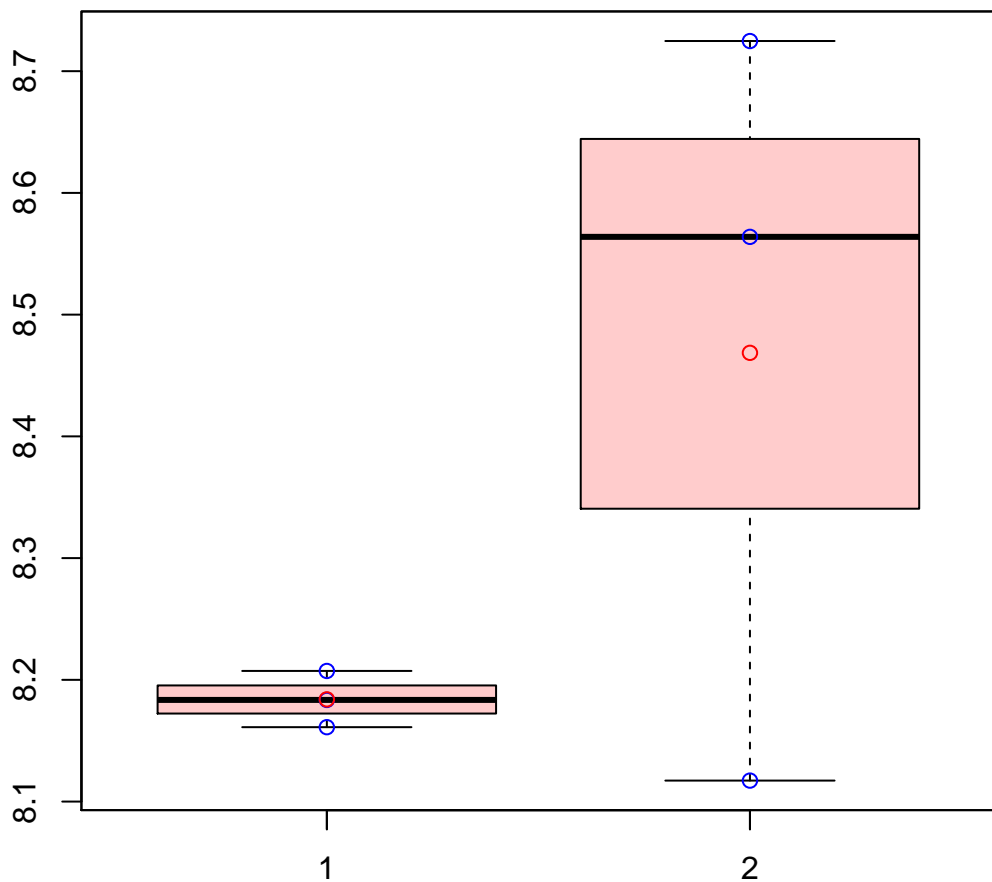

# isotig03753|isotig03753

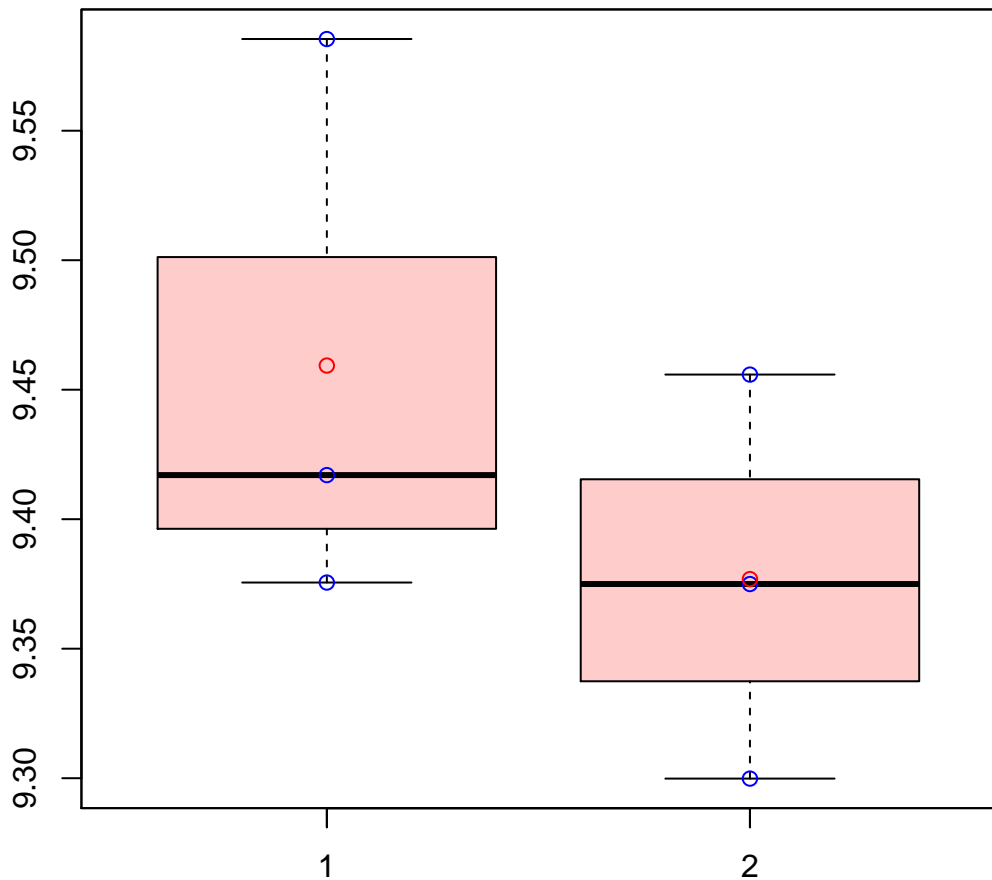

t-Test: p-value = 0.36

# isotig03755|isotig03755

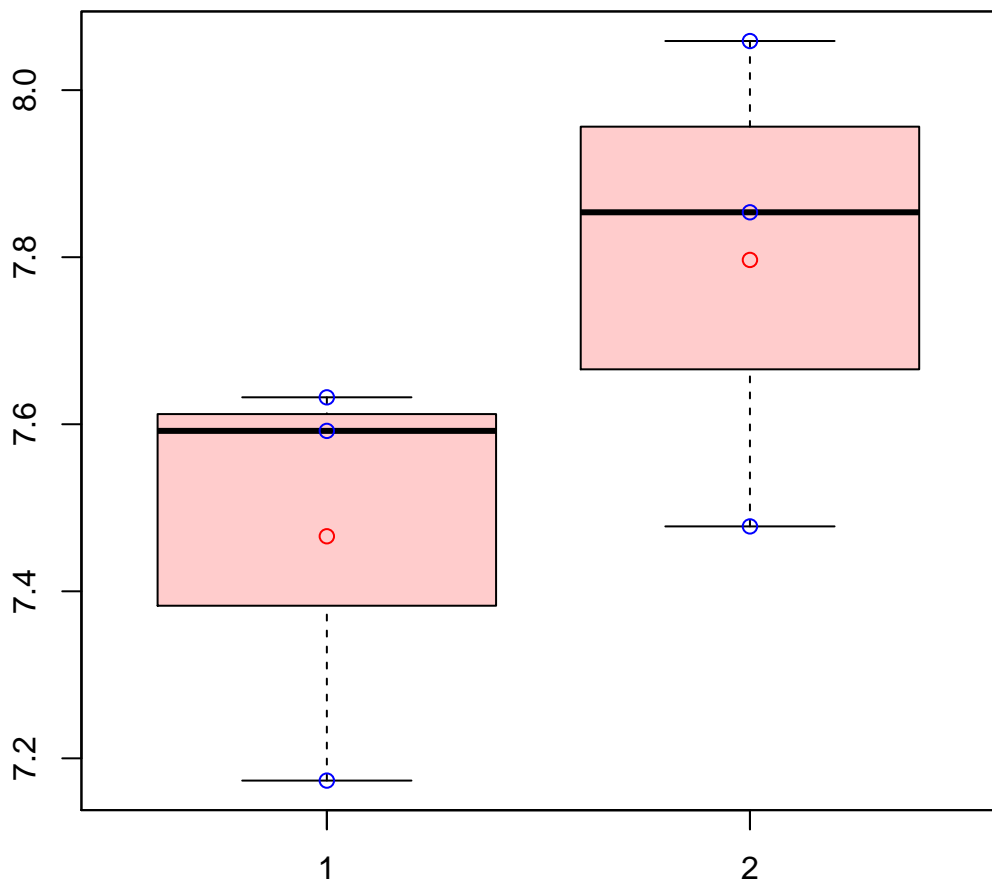

t-Test: p-value = 0.22



# isotig03756|isotig03756

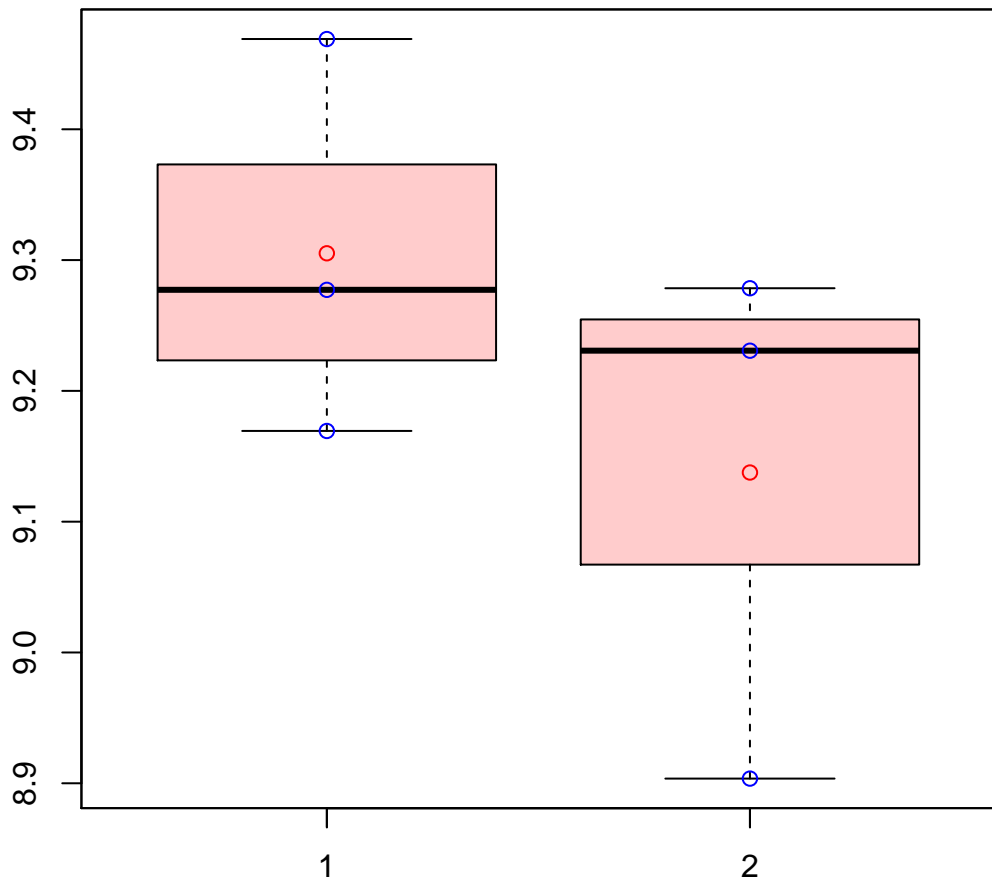

t-Test: p-value = 0.32

# isotig03774|isotig03774

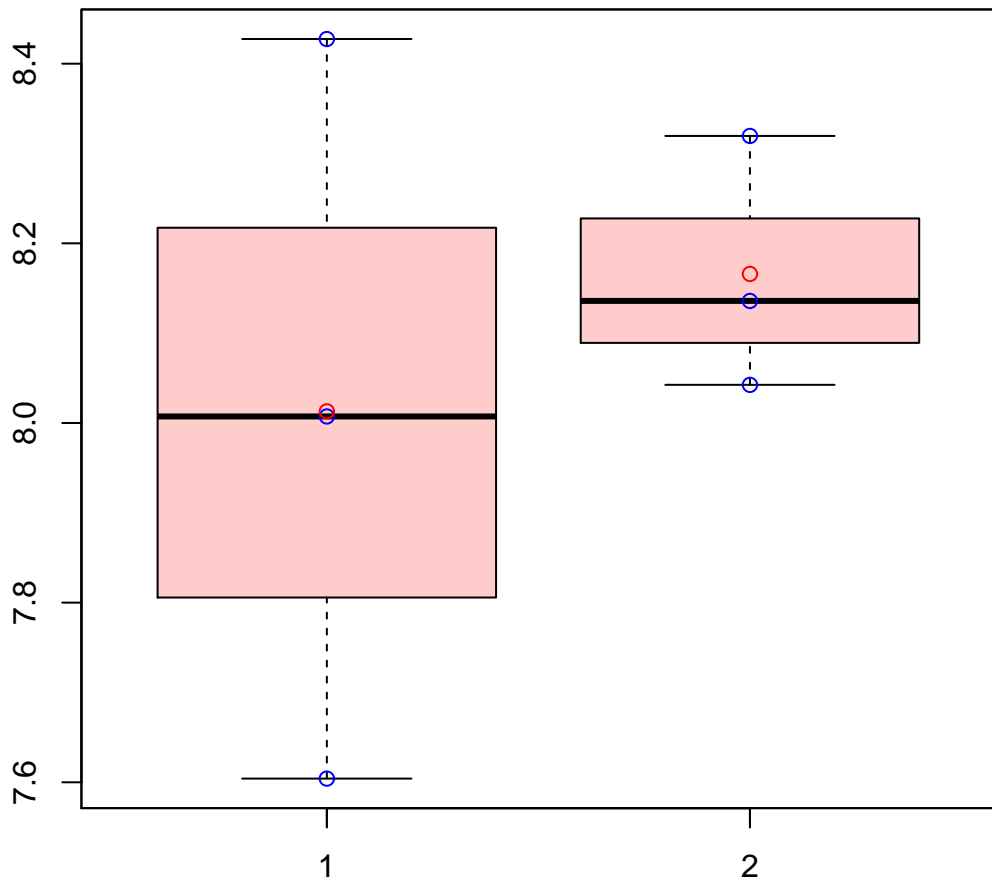

t-Test: p-value = 0.59

# isotig03902|isotig03902

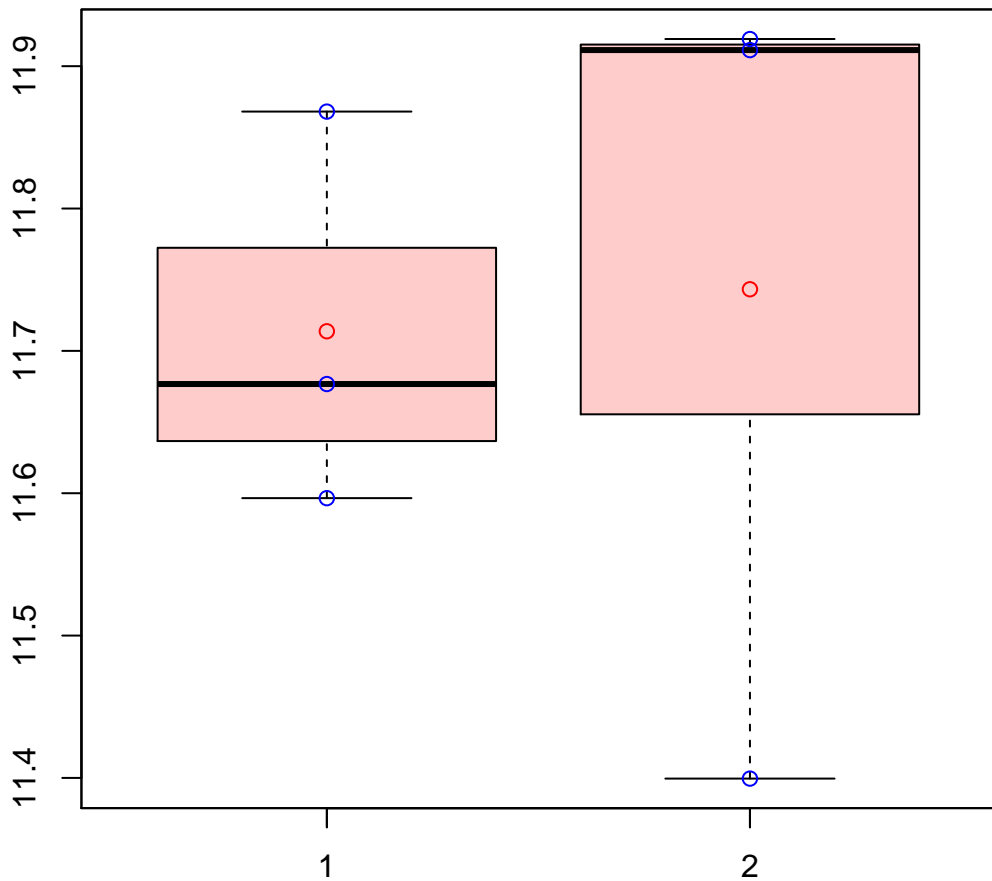

t-Test: p-value = 0.89

# isotig03908|isotig03908

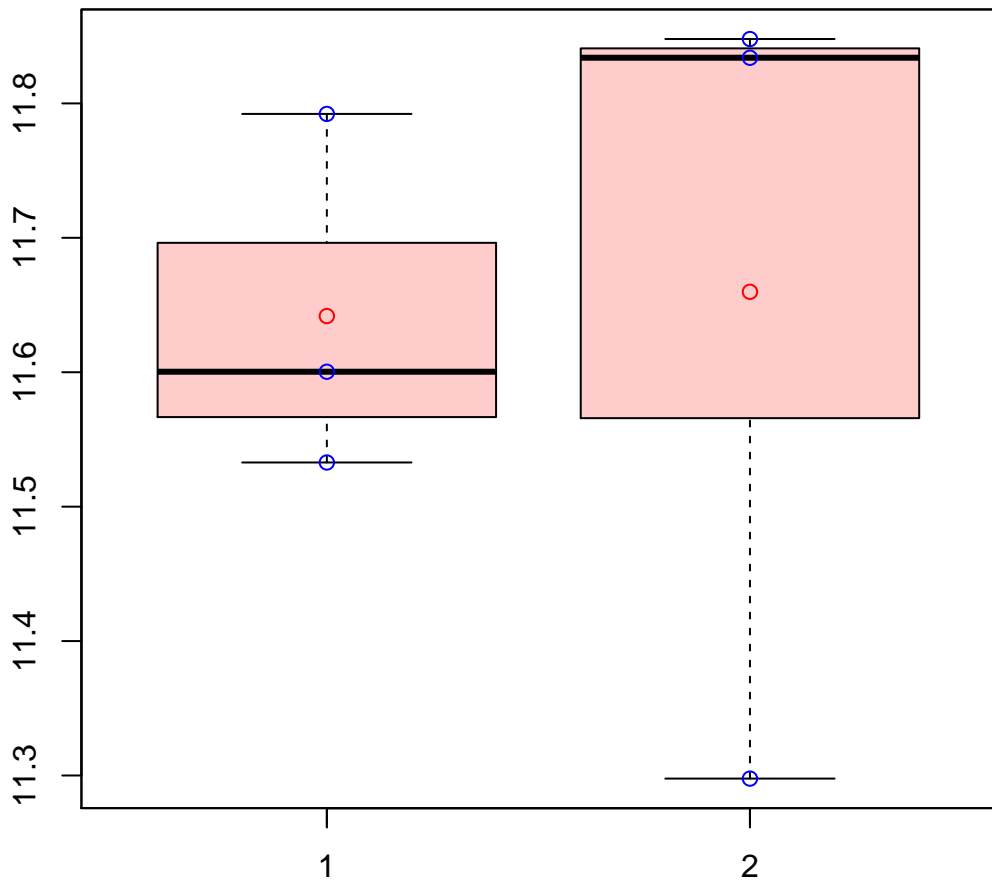

t-Test: p-value = 0.93

# isotig04017|isotig04017



t-Test: p-value = 0.62

# isotig04020|isotig04020

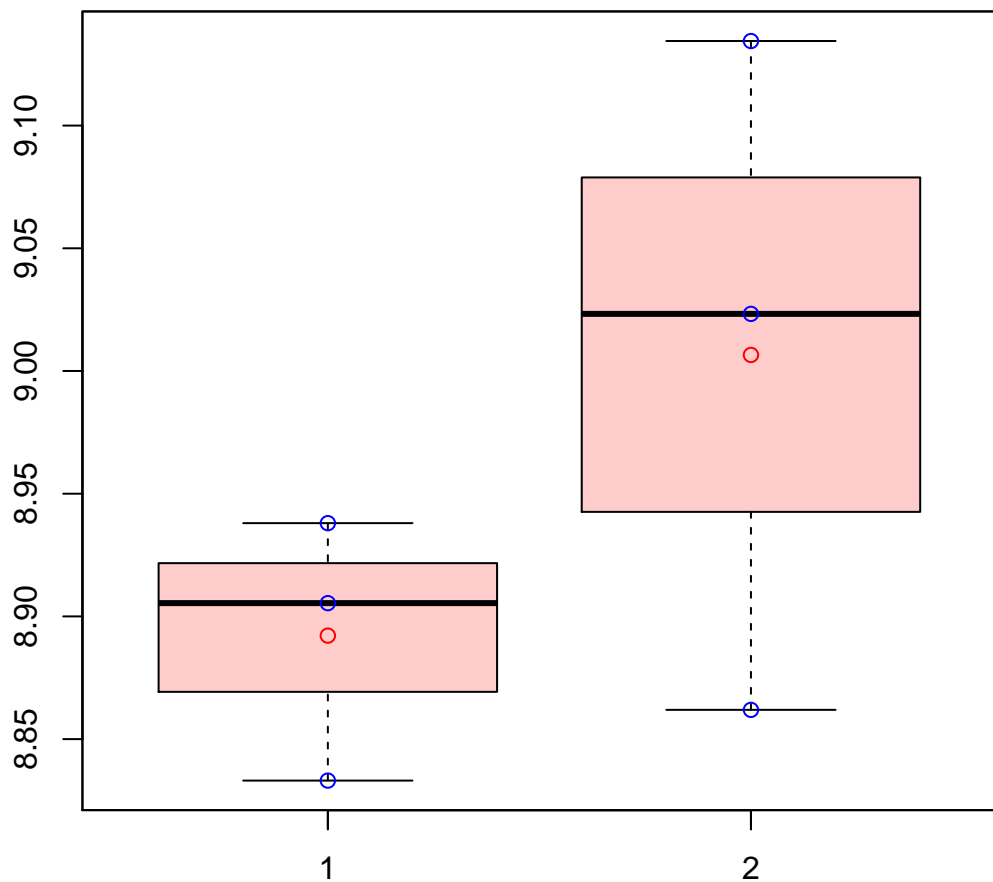

t-Test: p-value = 0.28

# isotig04026|isotig04026

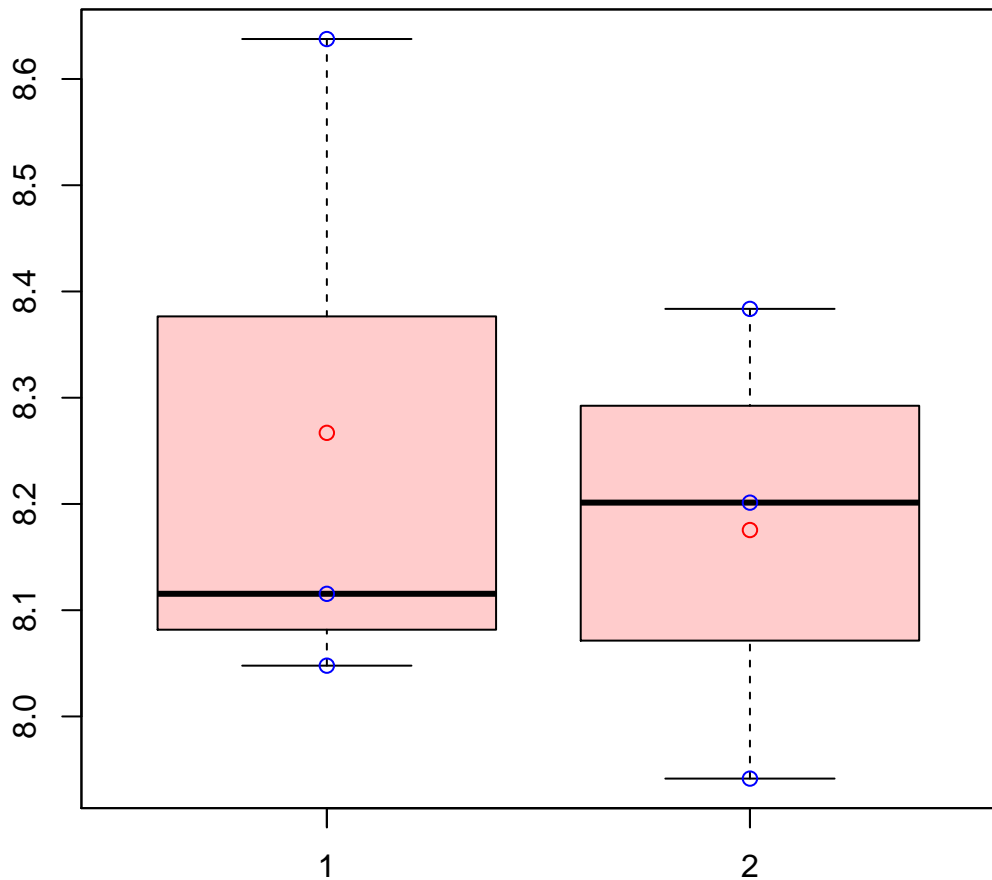

t-Test: p-value = 0.71

# isotig04028|isotig04028



t-Test: p-value = 0.71



# isotig04032|isotig04032

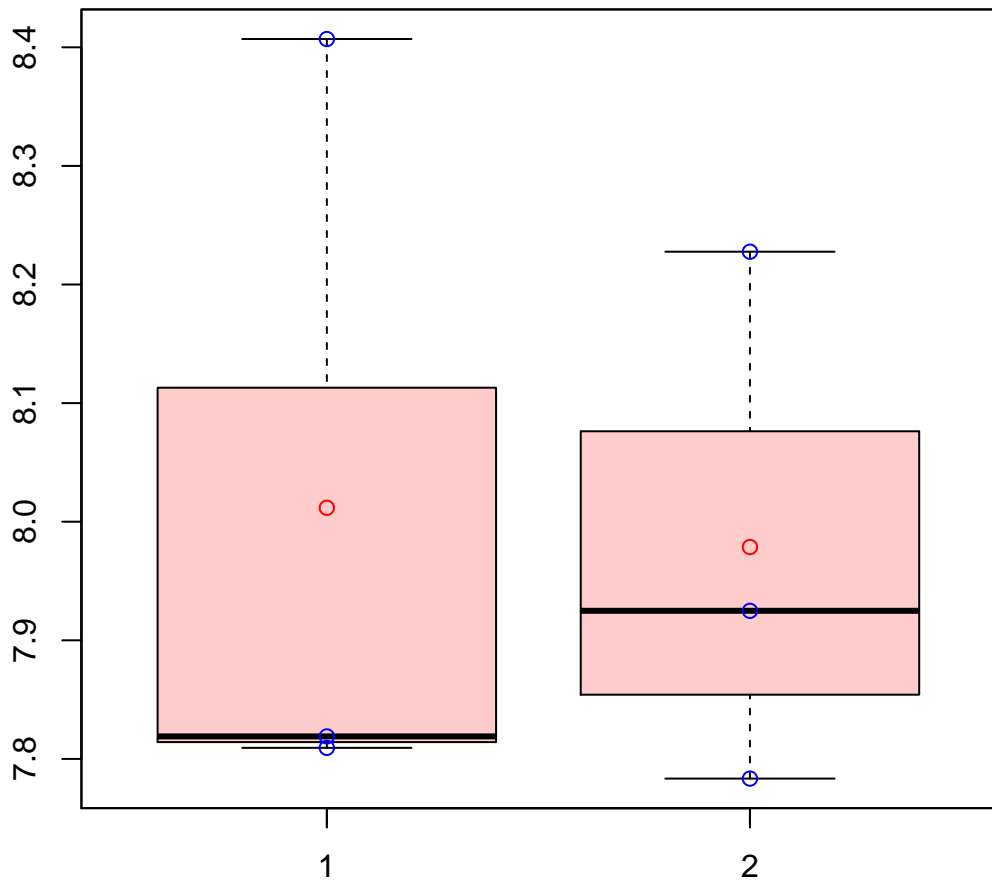

t-Test: p-value = 0.9

# isotig04086|isotig04086



t-Test: p-value = 0.44

isotig04087|isotig04087



t-Test: p-value = 0.44

# isotig04406|isotig04406

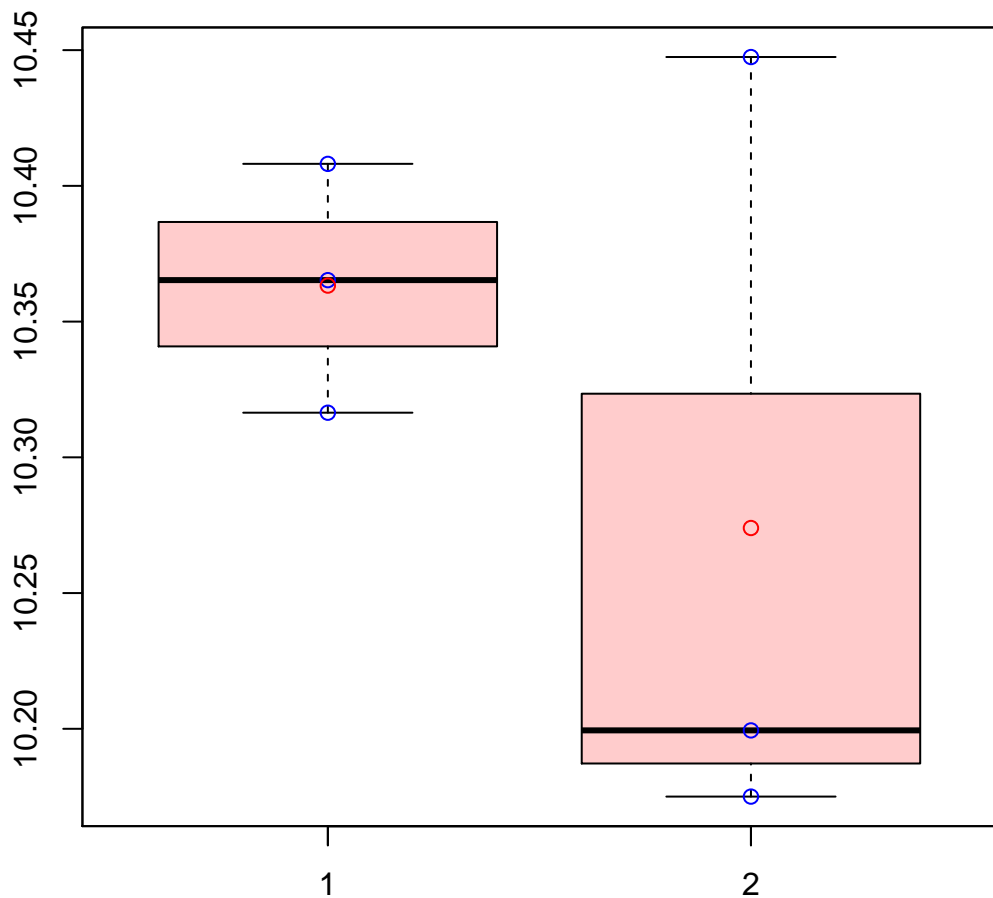

t-Test: p-value = 0.42

# isotig04407|isotig04407

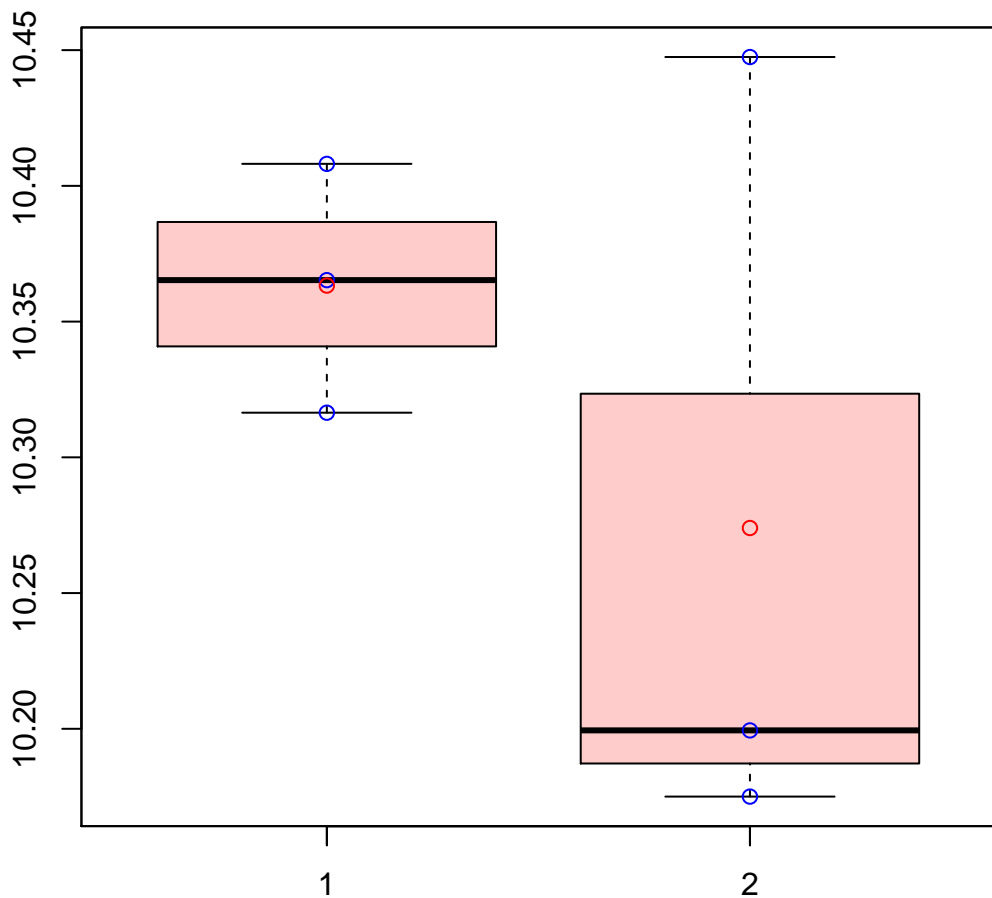

t-Test: p-value = 0.42

# isotig04461|isotig04461



t-Test: p-value = 0.93

# isotig04693|isotig04693

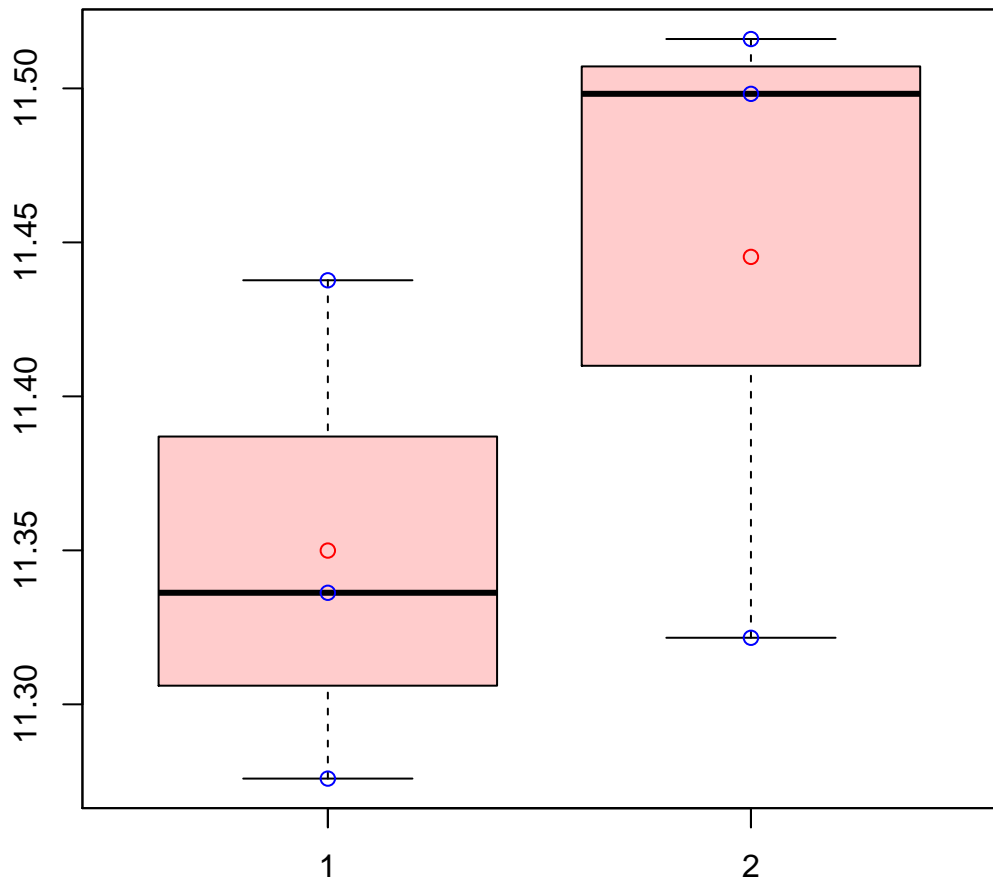

t-Test: p-value = 0.29

# isotig04775|isotig04775

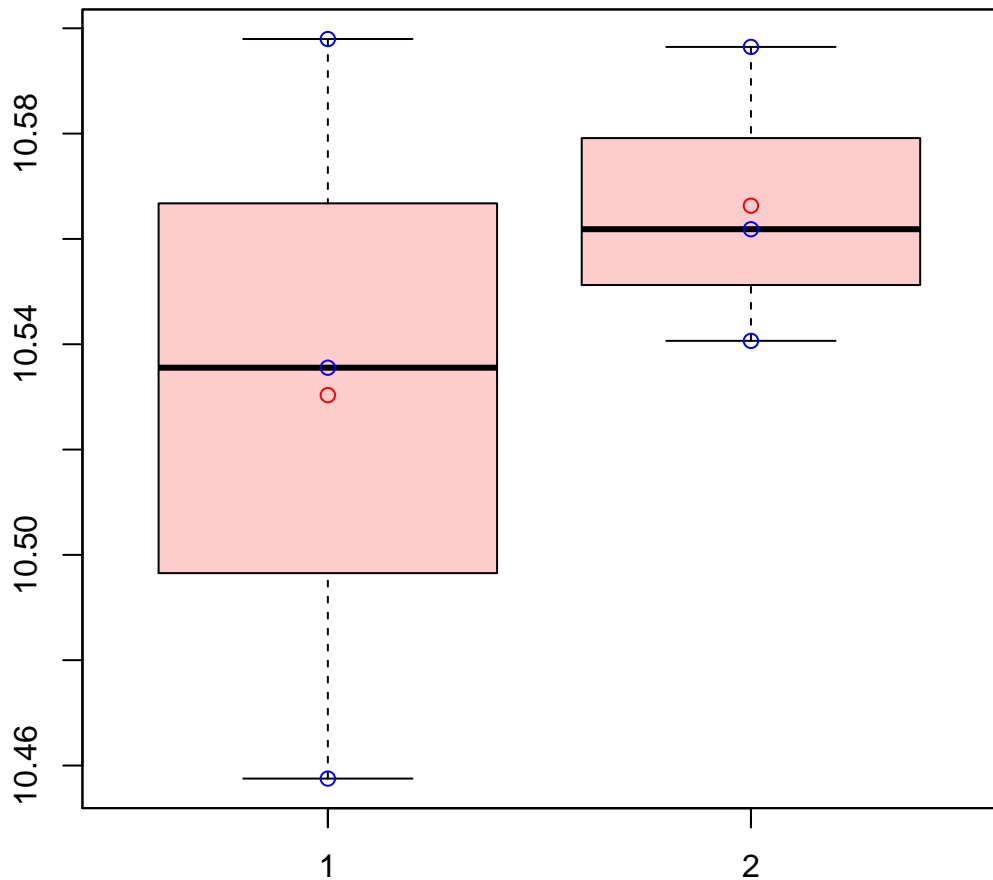

t-Test: p-value = 0.48



# isotig04972|isotig04972

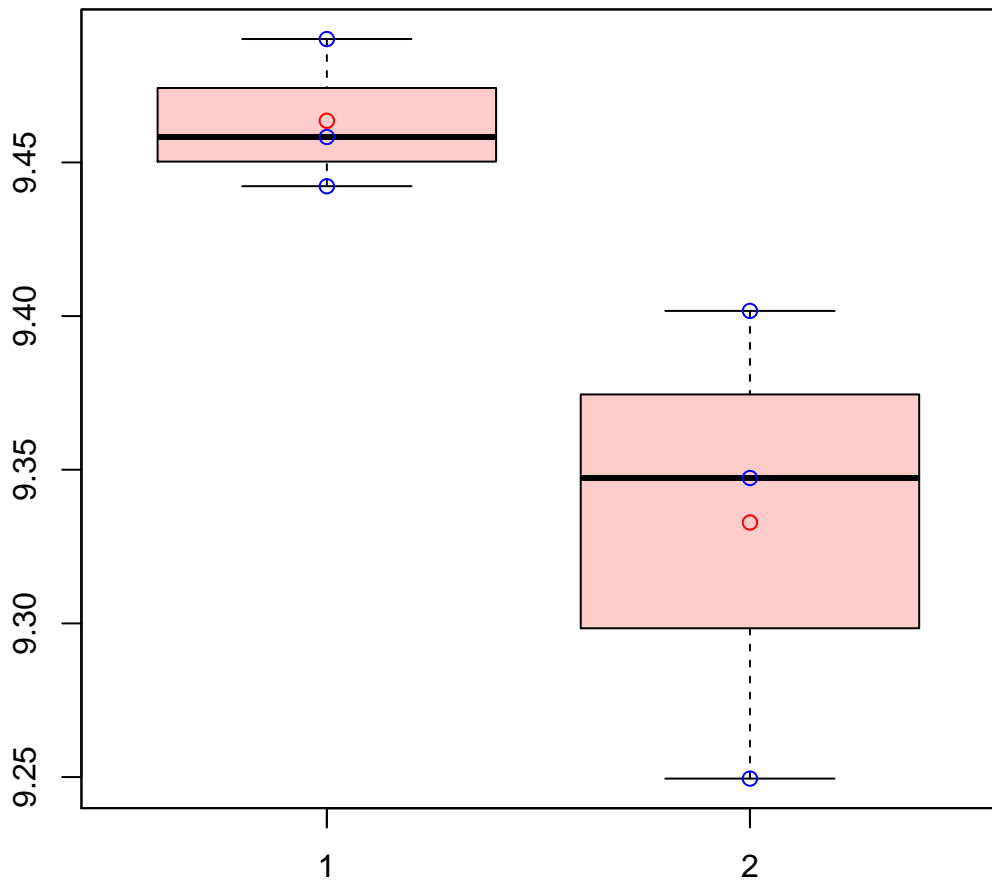

t-Test: p-value = 0.09

# isotig04974|isotig04974

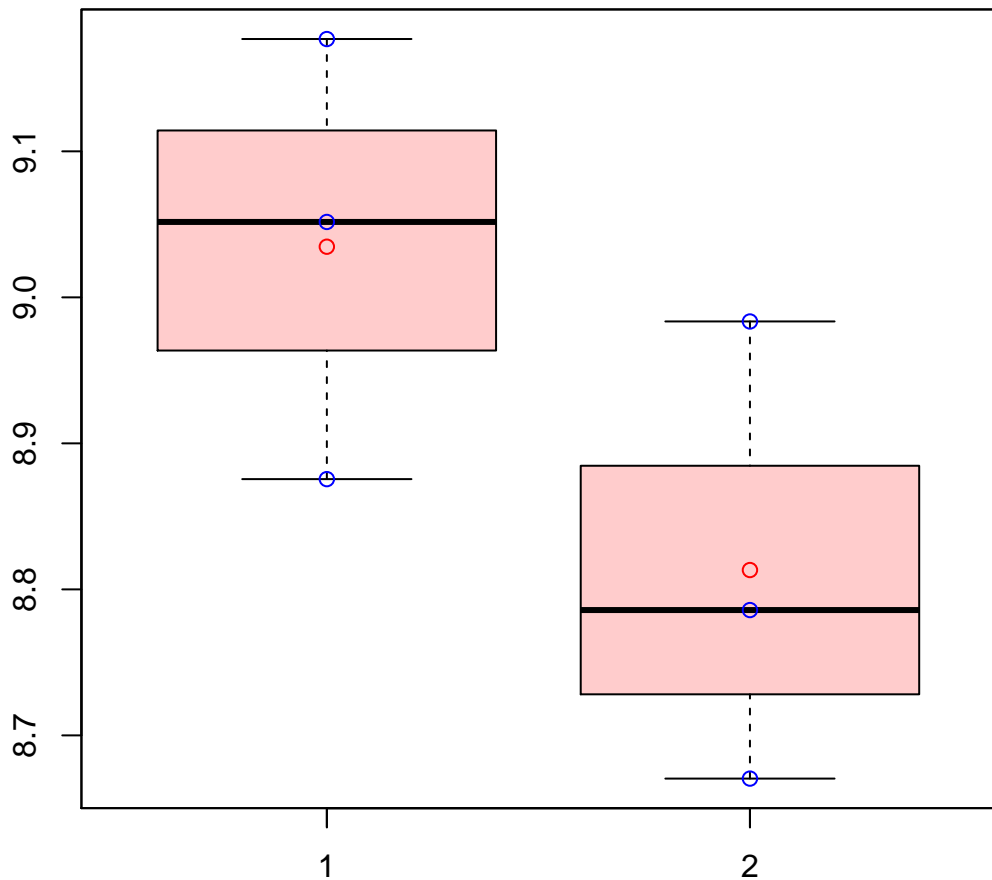

t-Test: p-value = 0.16

# isotig04976|isotig04976

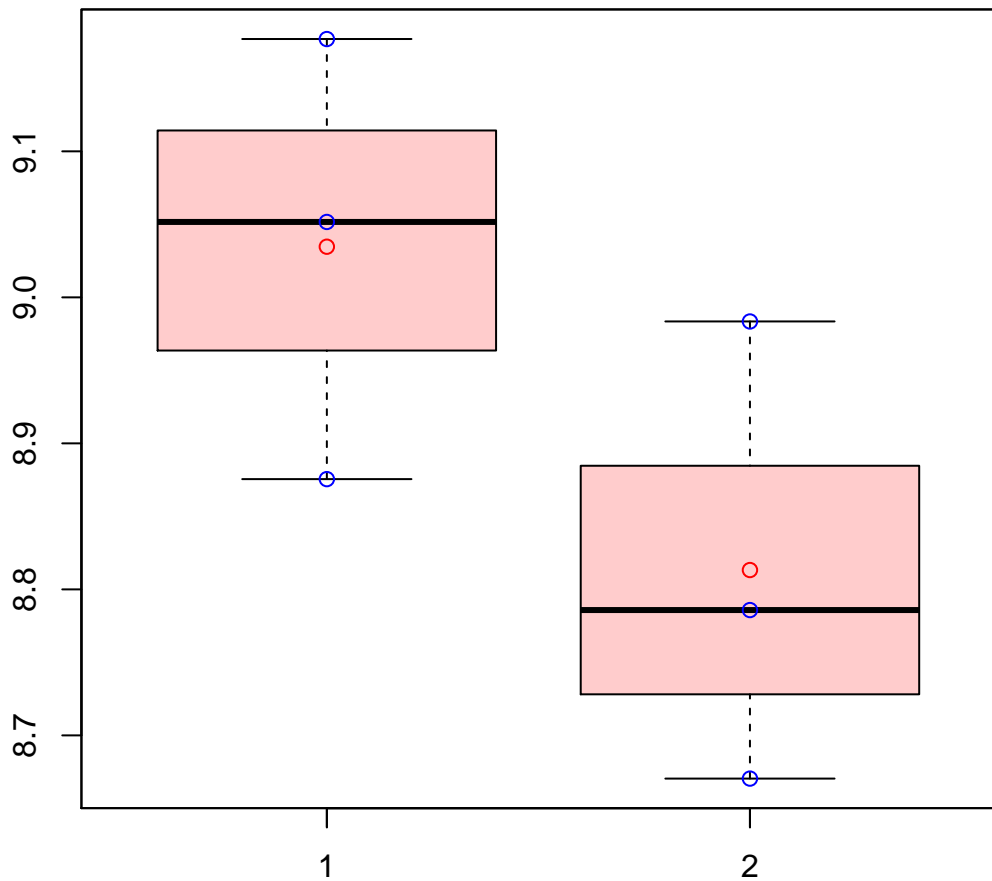

t-Test: p-value = 0.16

# isotig05526|isotig05526

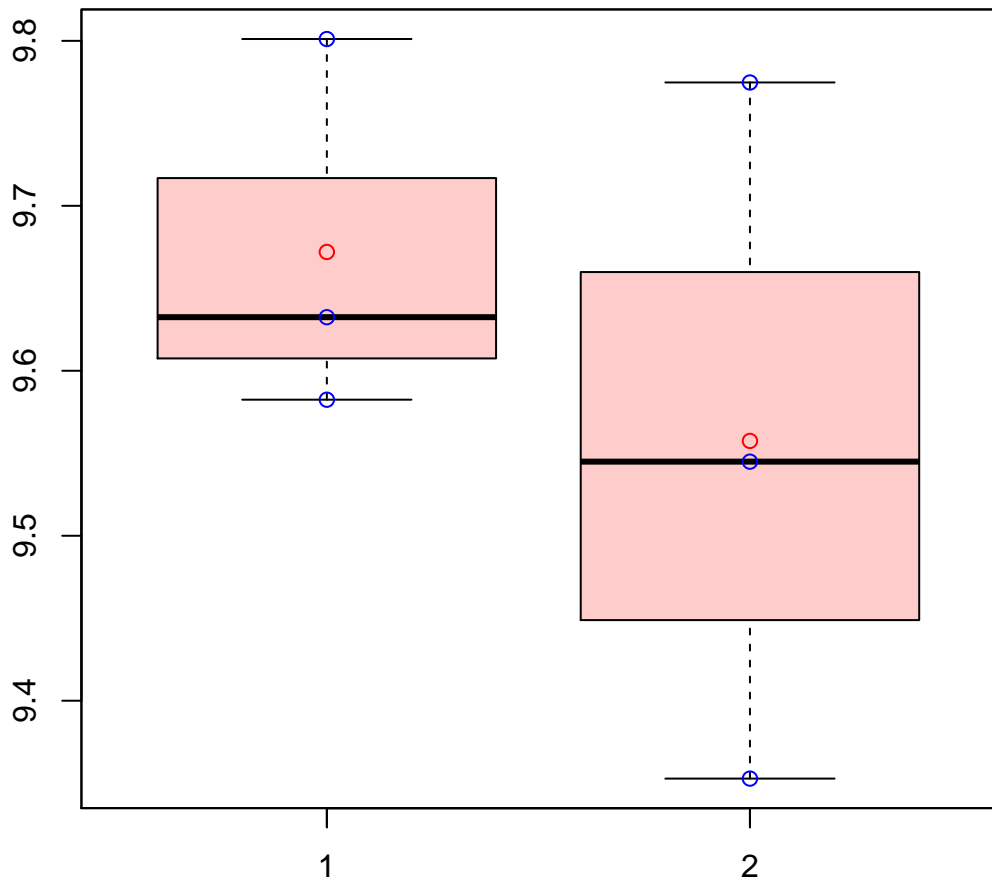

t-Test: p-value = 0.47

# isotig05819|isotig05819

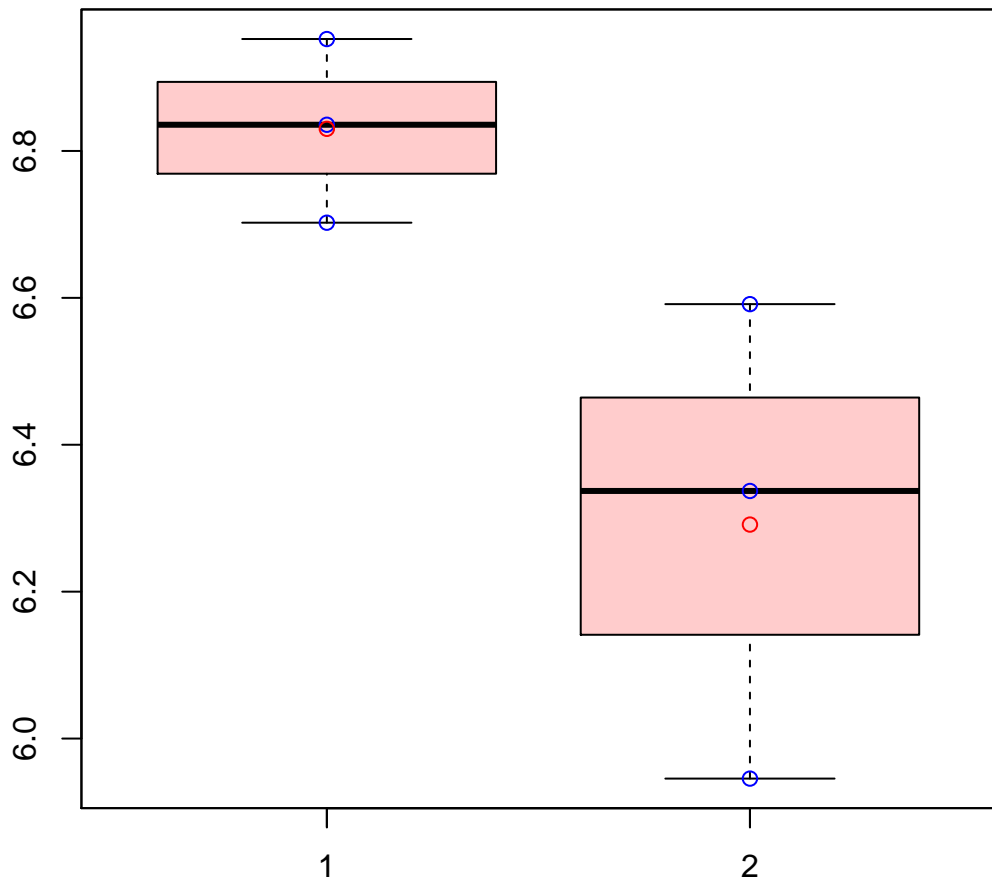

t-Test: p-value = 0.09

# isotig05936|isotig05936

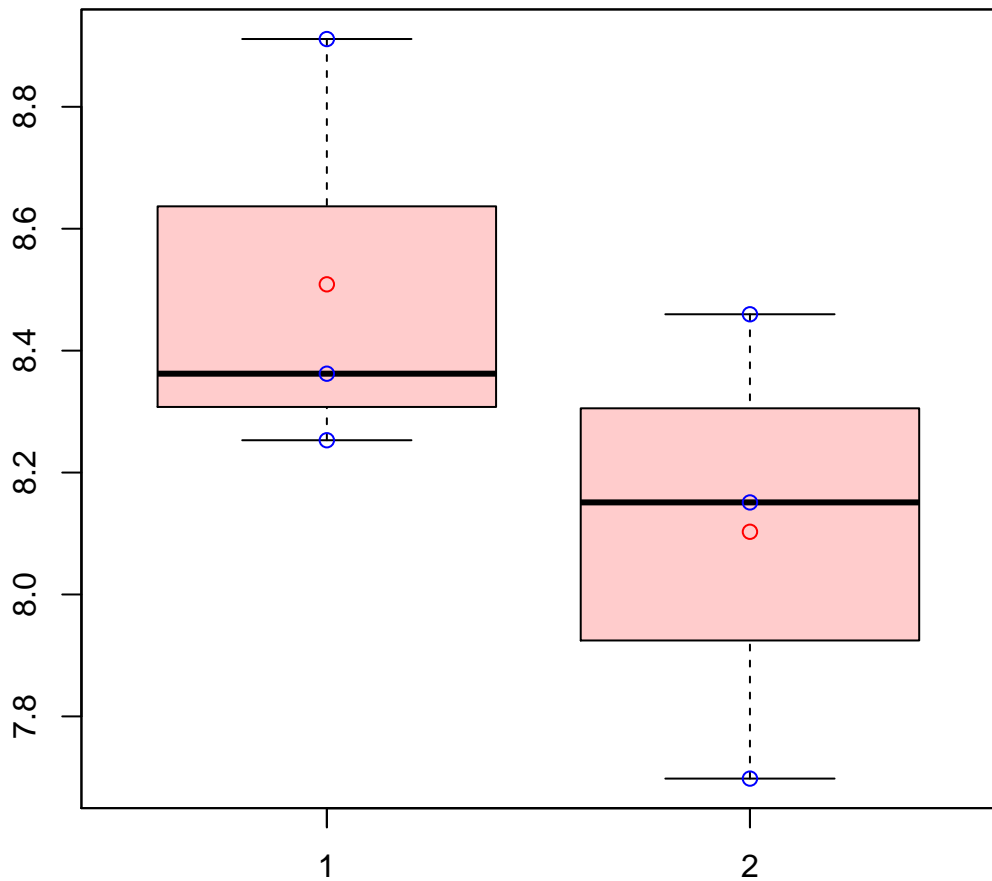

t-Test: p-value = 0.25

# isotig05988|isotig05988



t-Test: p-value = 0.8

# isotig05990|isotig05990



t-Test: p-value = 0.8



# isotig05991|isotig05991



t-Test: p-value = 0.8

# isotig06219|isotig06219

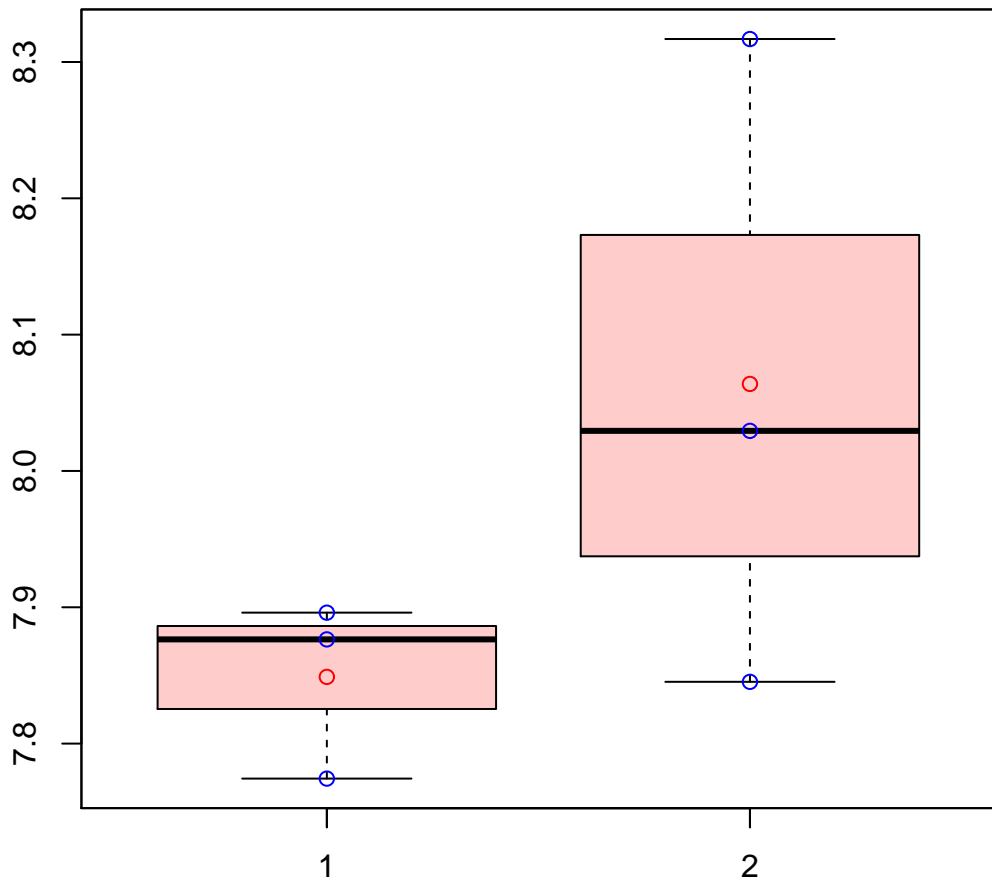

t-Test: p-value = 0.25

# isotig06277|isotig06277

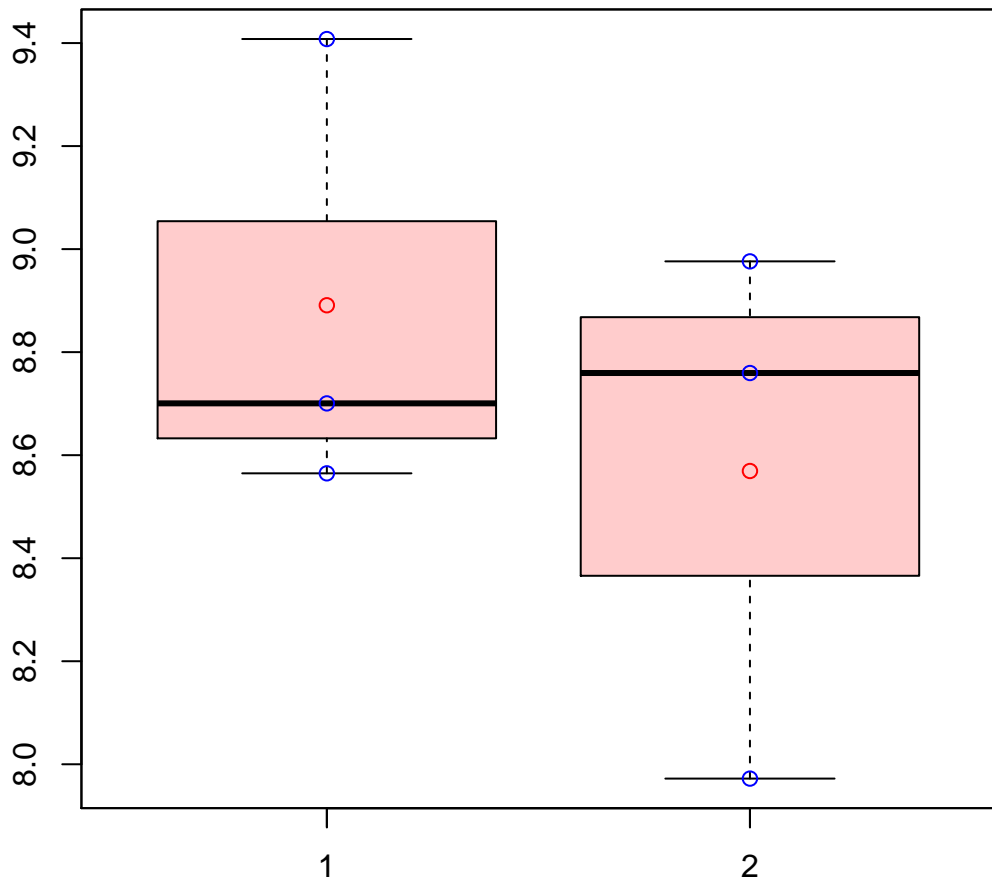

t-Test: p-value = 0.47

isotig06422|isotig06422

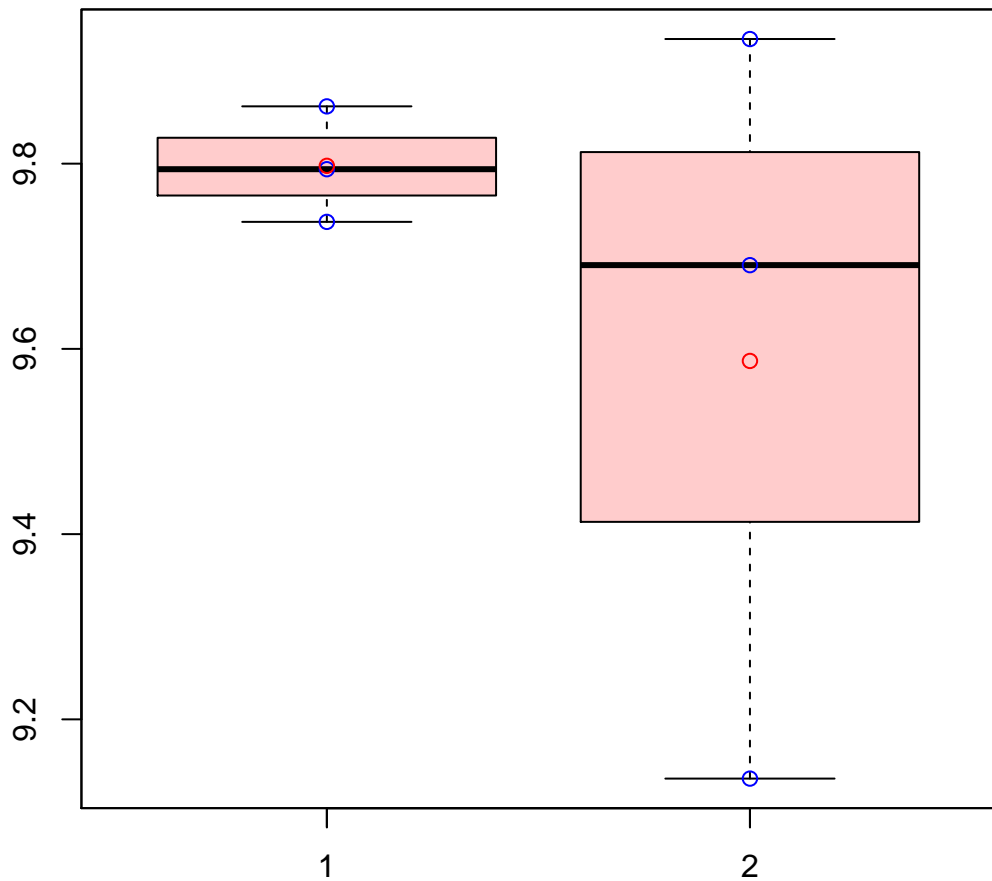

t-Test: p-value = 0.47

# isotig06423|isotig06423



t-Test: p-value = 0.47

# isotig06657|isotig06657

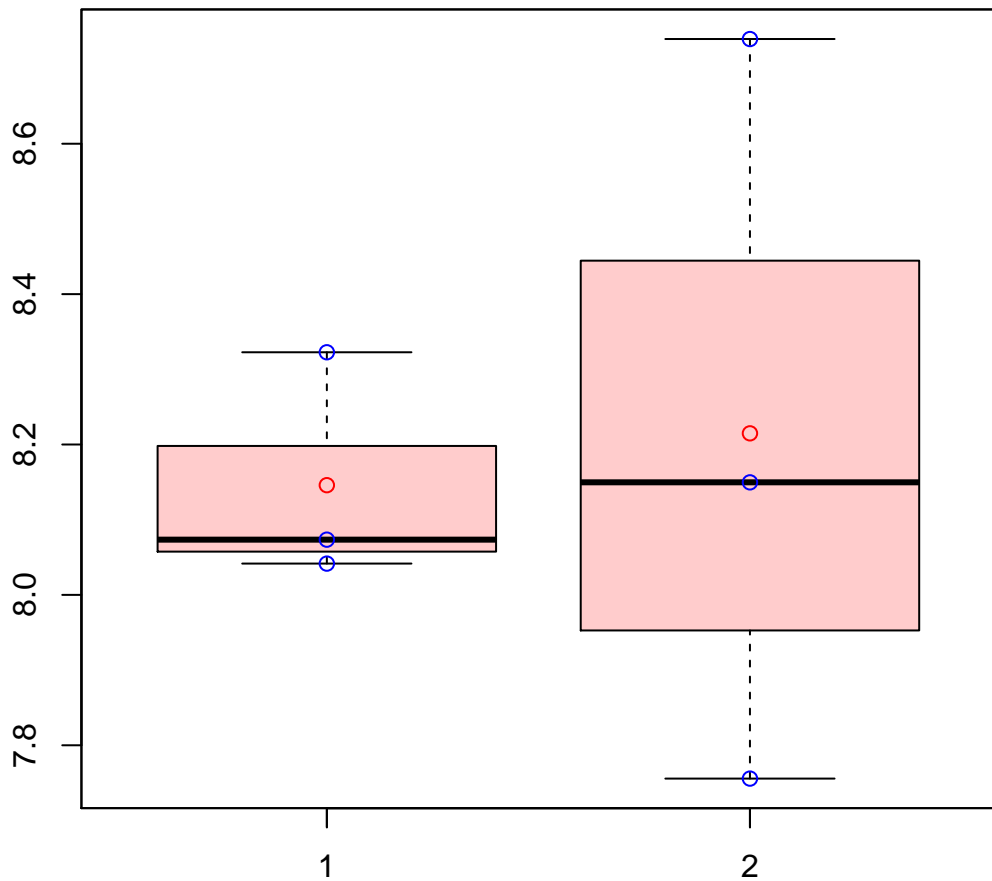

t-Test: p-value = 0.84

# isotig06906|isotig06906

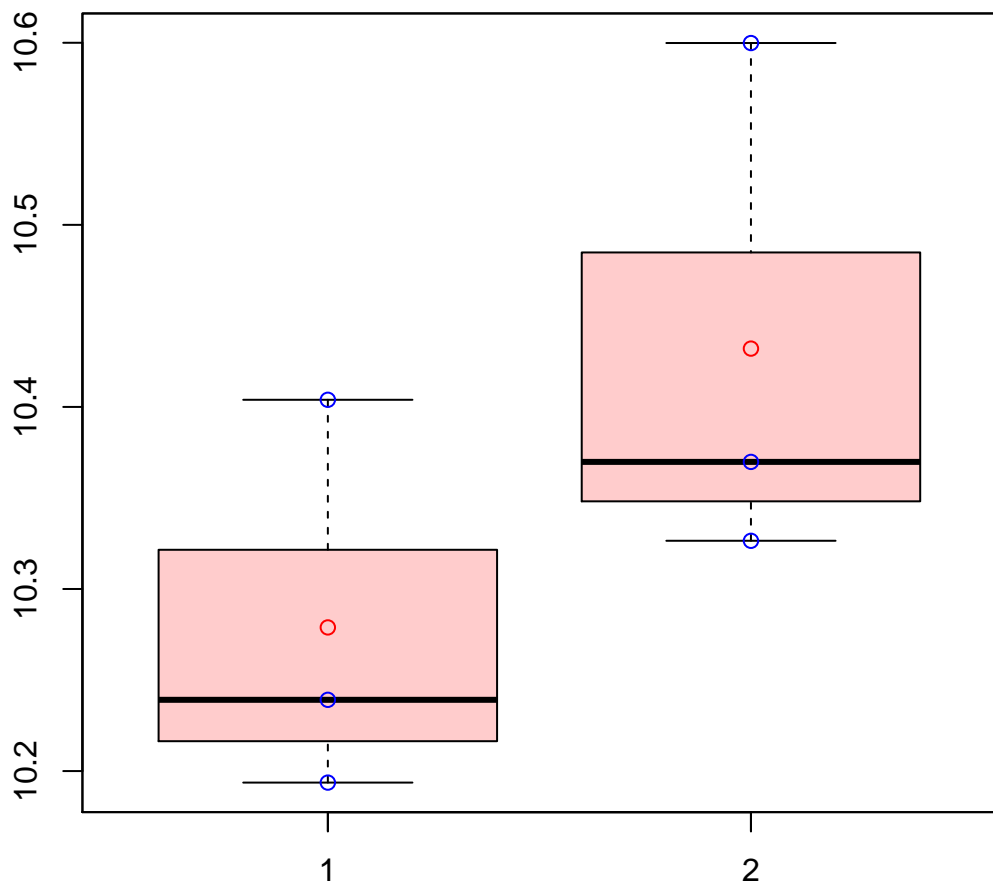

t-Test: p-value = 0.23

# isotig07055|isotig07055

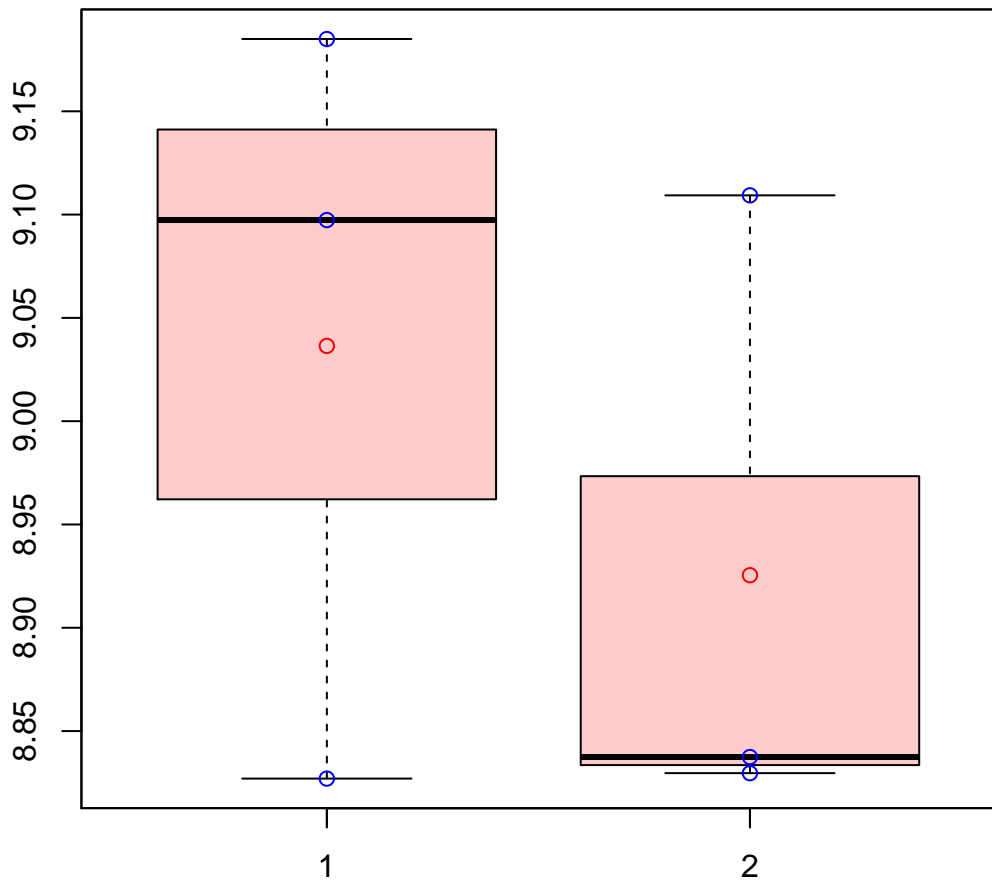

t-Test: p-value = 0.48



# isotig07058|isotig07058

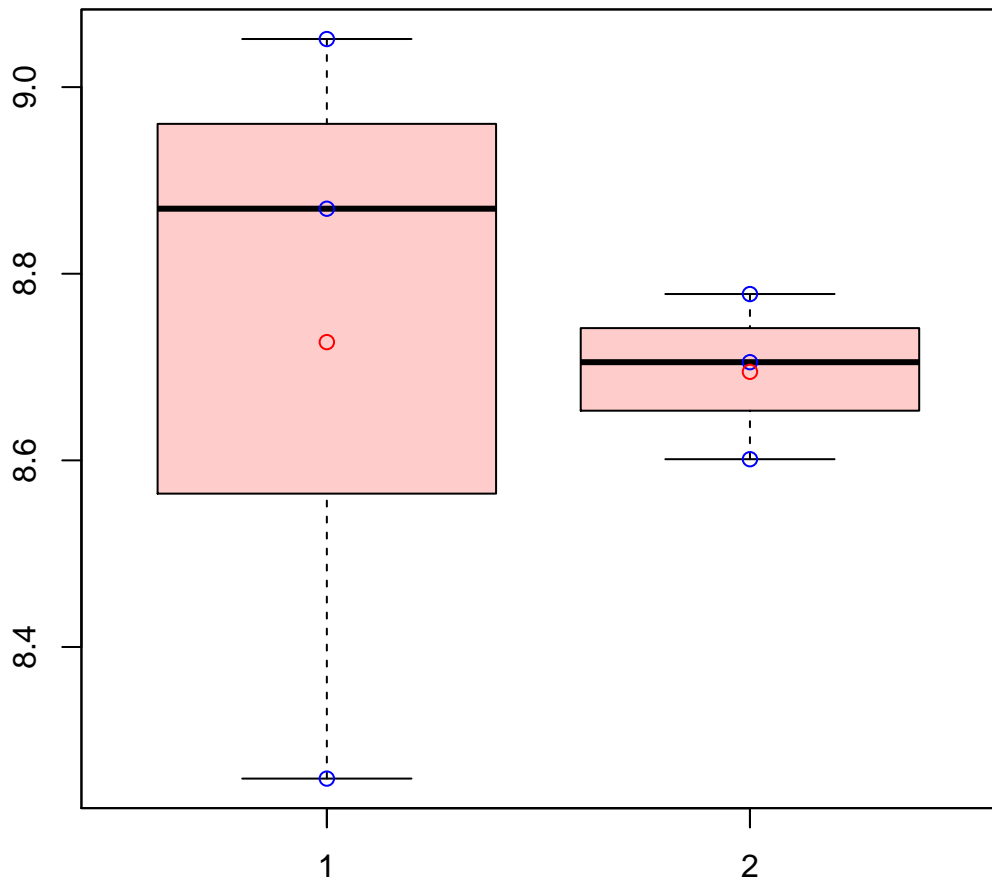

t-Test: p-value = 0.91

# isotig07096|isotig07096

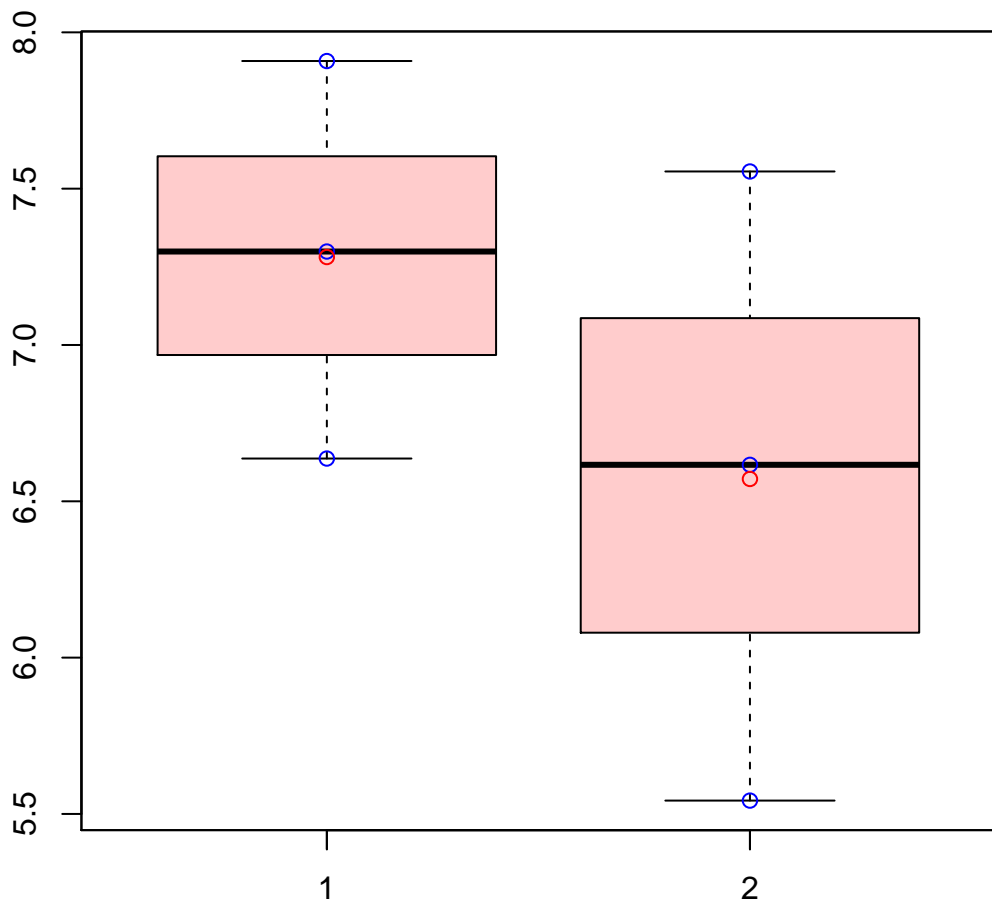

t-Test: p-value = 0.37

isotig07274|isotig07274

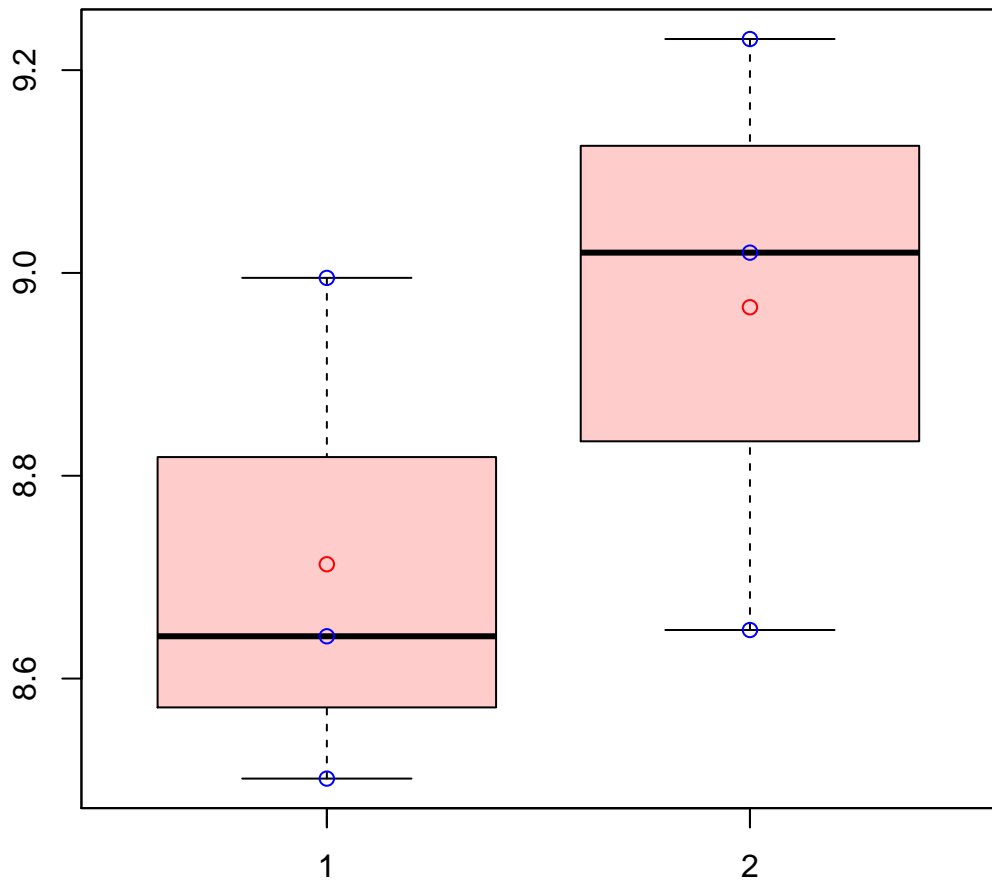

t-Test: p-value = 0.32

# isotig07688|isotig07688

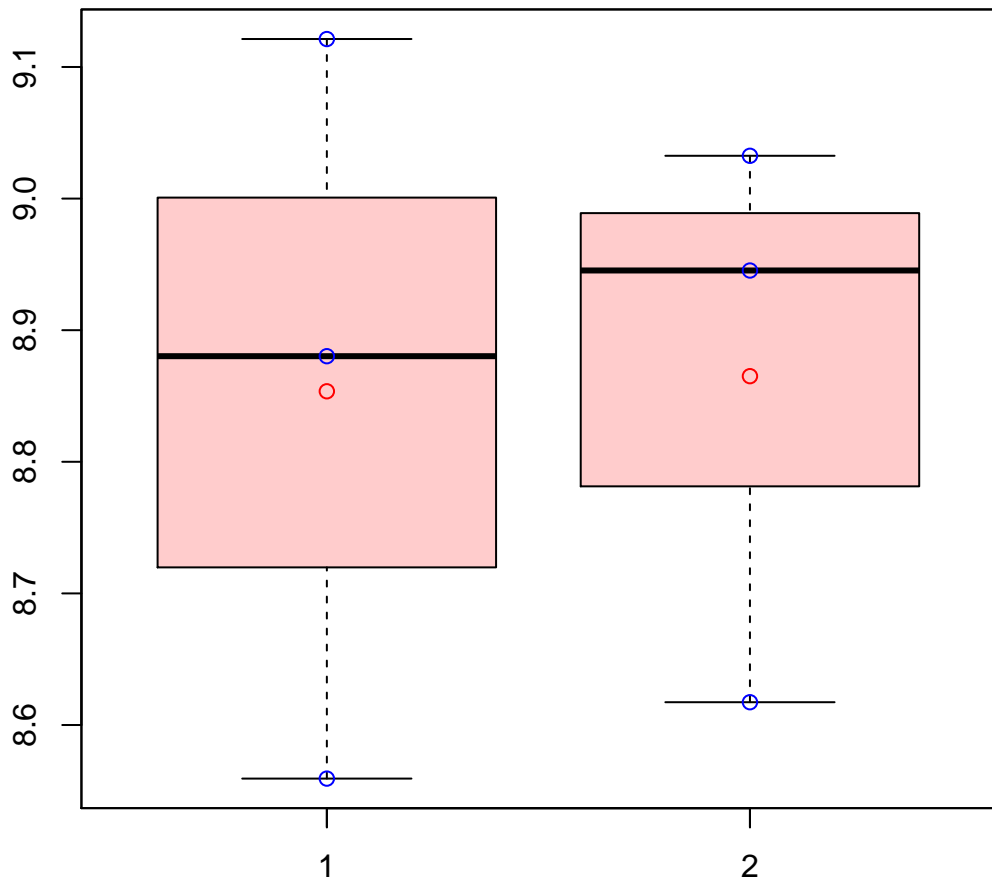

t-Test: p-value = 0.96

# isotig07782|isotig07782

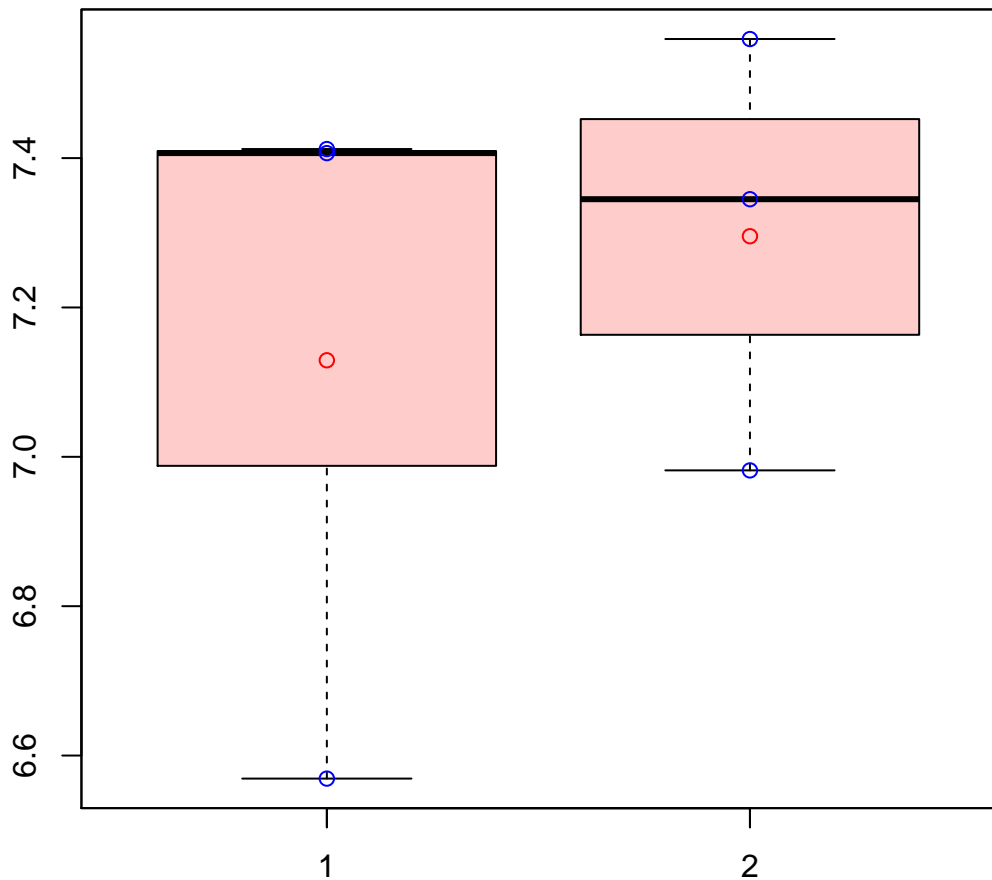

t-Test: p-value = 0.64

# isotig07921|isotig07921

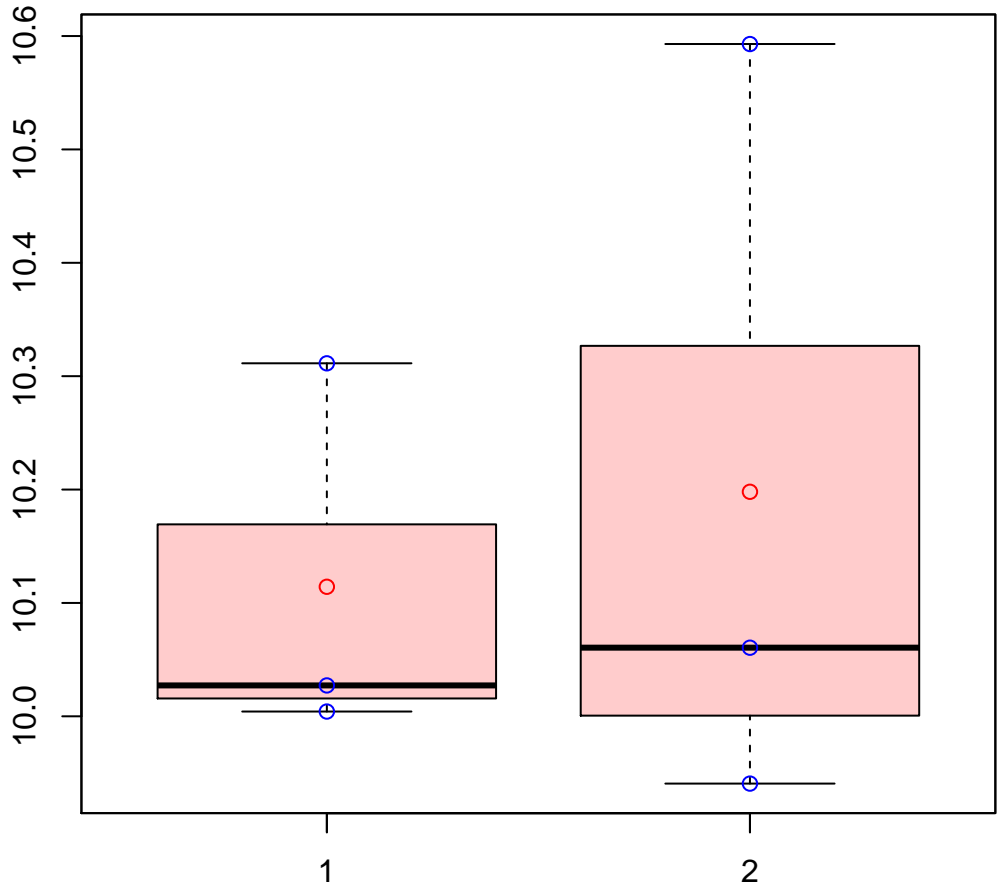

t-Test: p-value = 0.73

# isotig07964|isotig07964

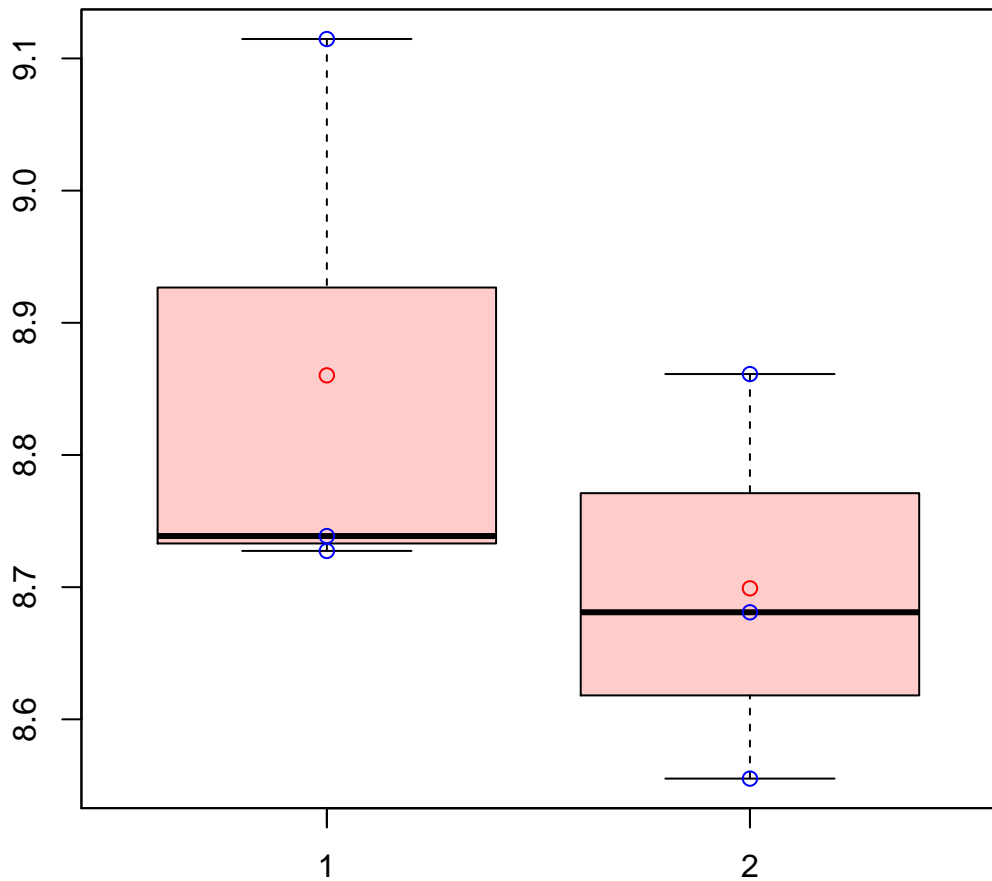

t-Test: p-value = 0.36

# isotig08018|isotig08018

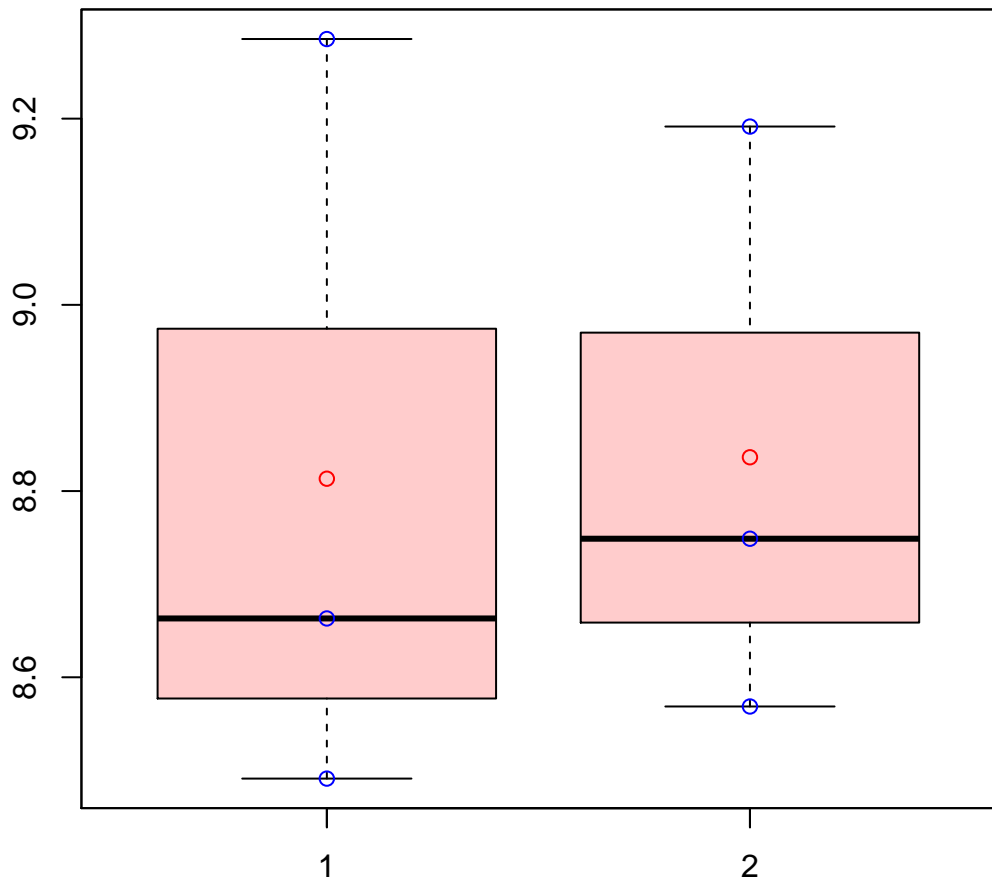

t-Test: p-value = 0.94



# isotig08027|isotig08027

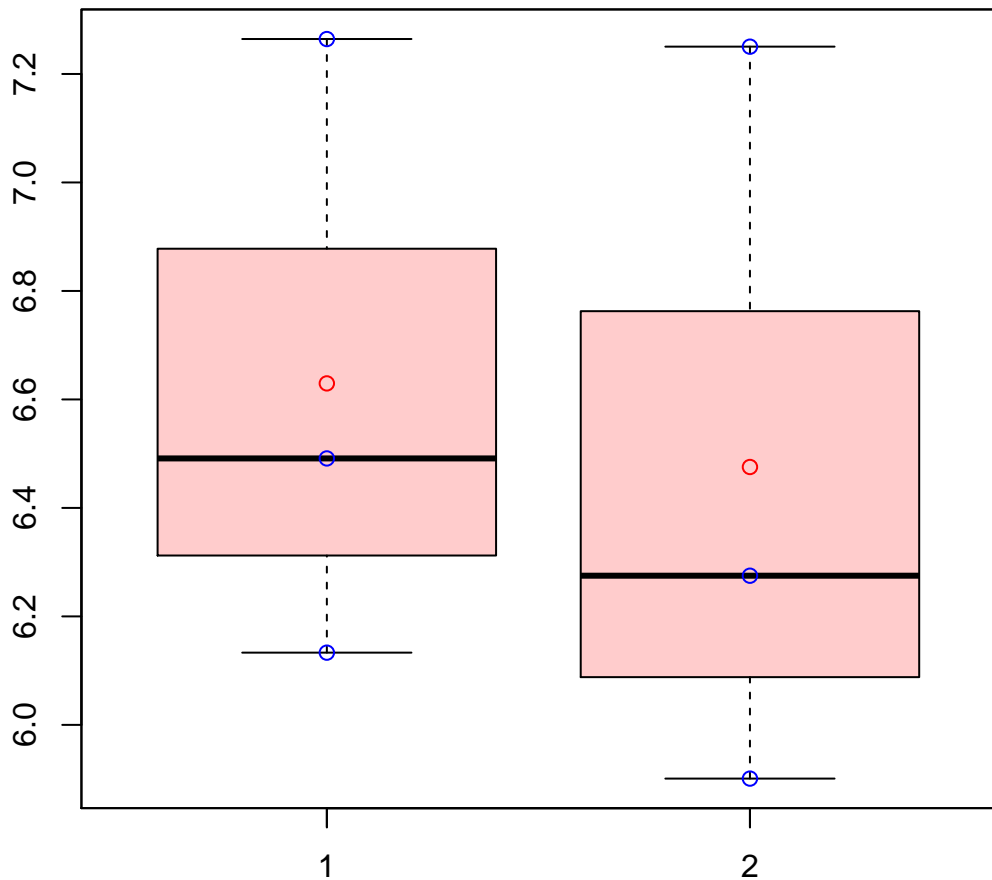

t-Test: p-value = 0.78

# isotig08284|isotig08284

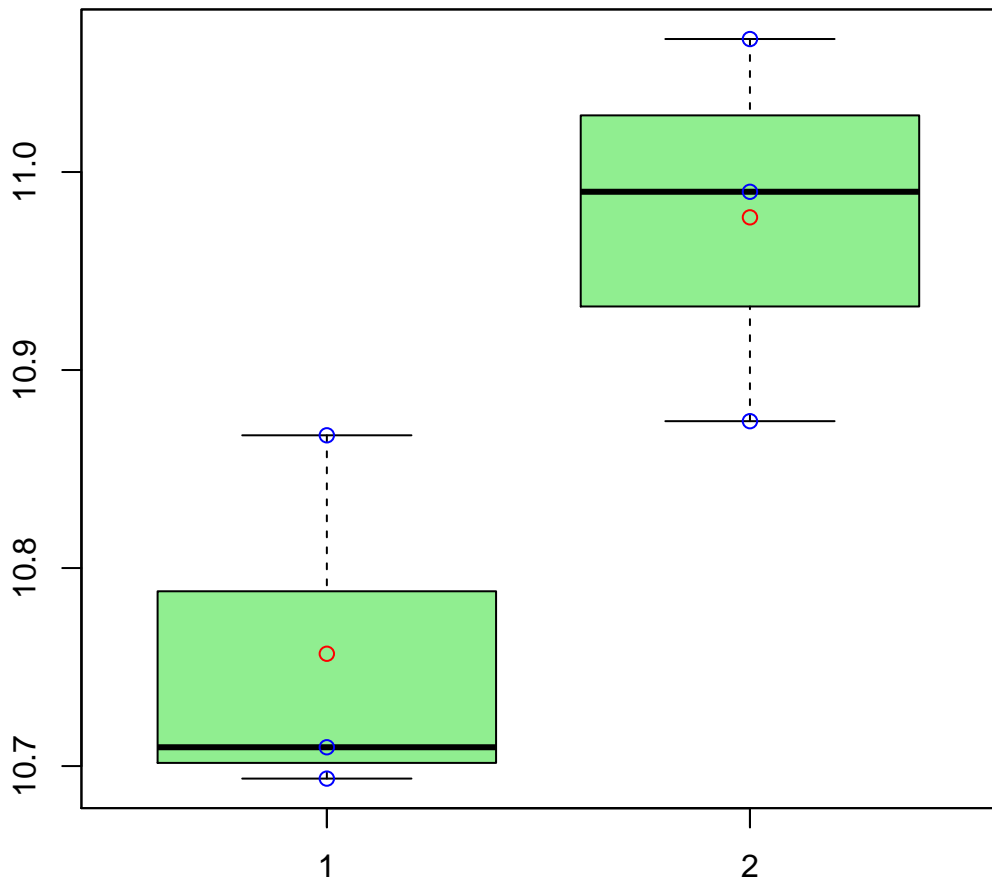

t-Test: p-value = 0.05

# isotig09392|isotig09392

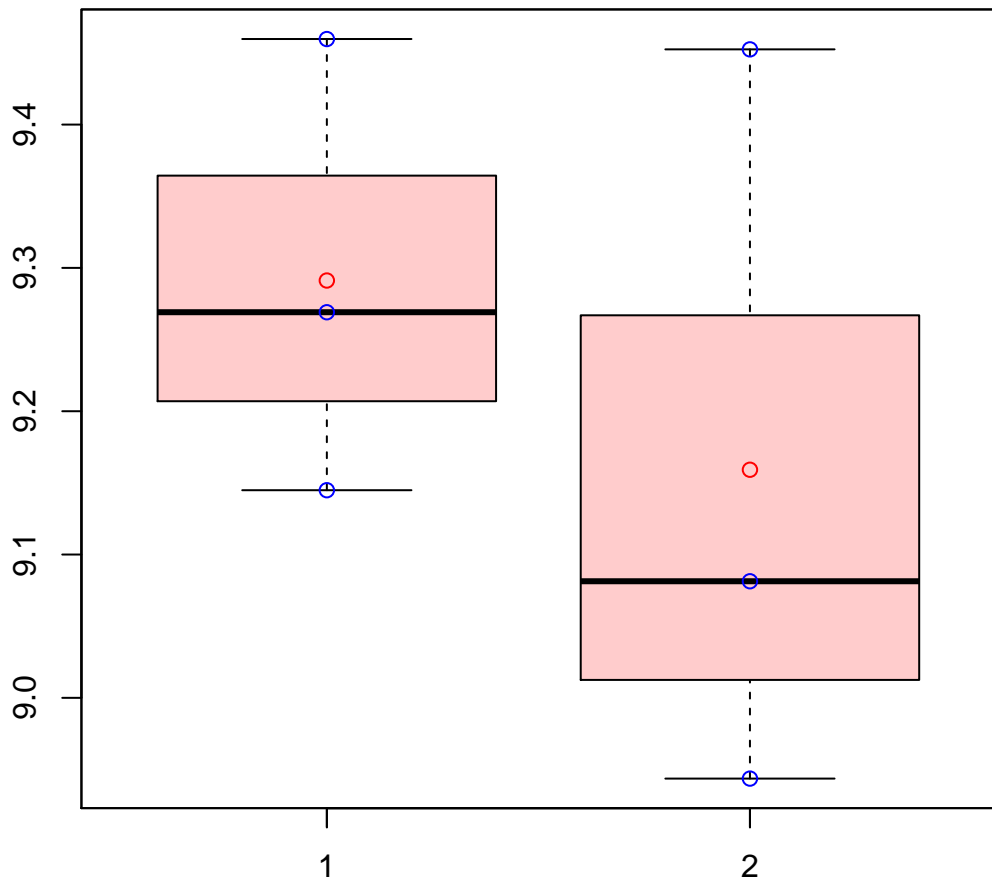

t-Test: p-value = 0.51

# isotig09880|isotig09880

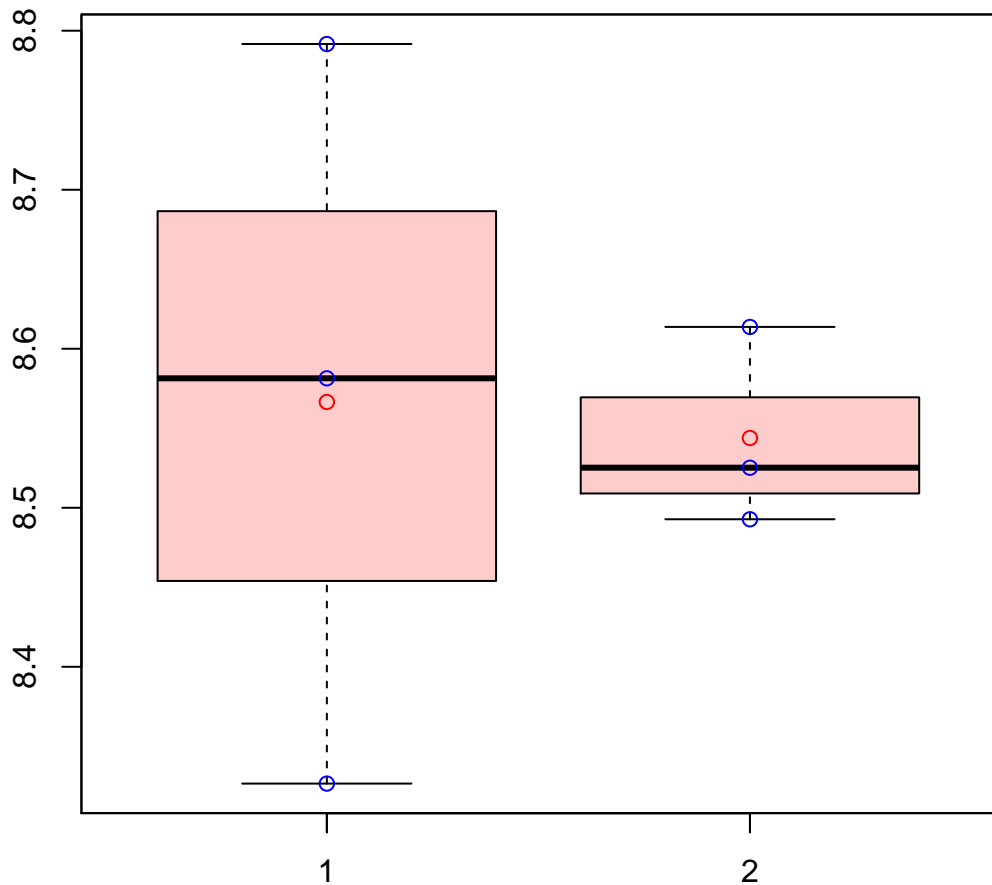

t-Test: p-value = 0.88

# isotig09905|isotig09905

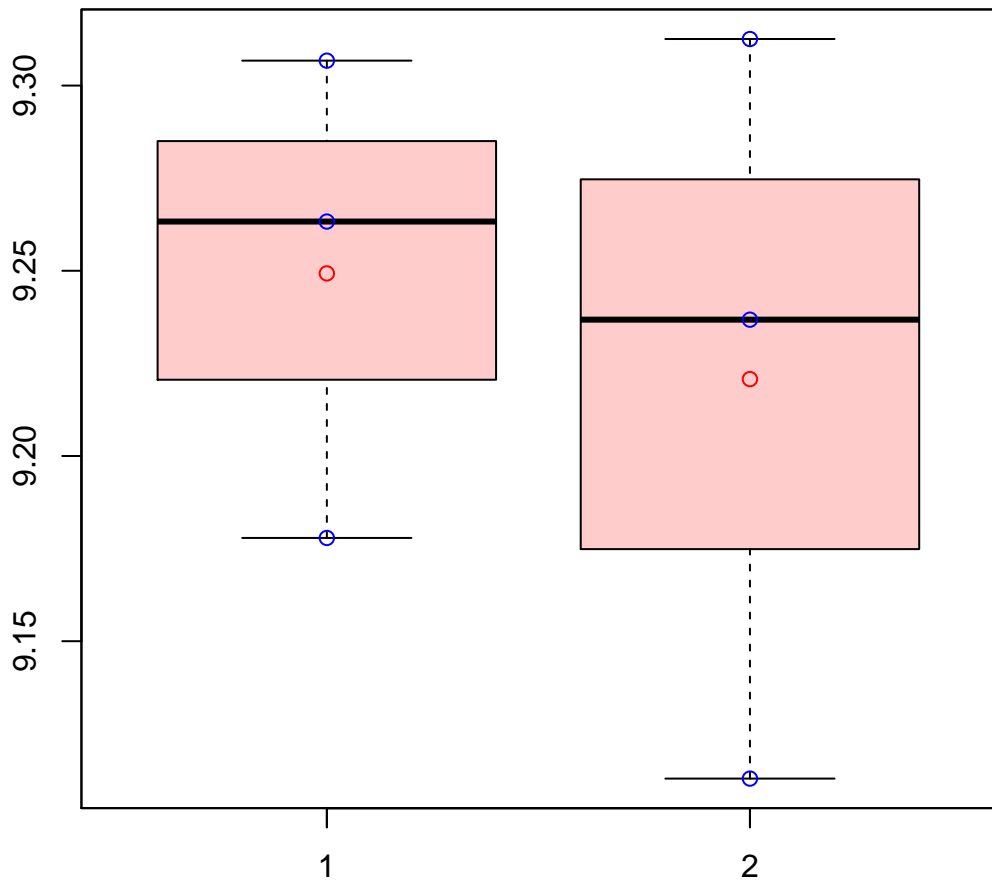

t-Test: p-value = 0.71

# isotig10340|isotig10340

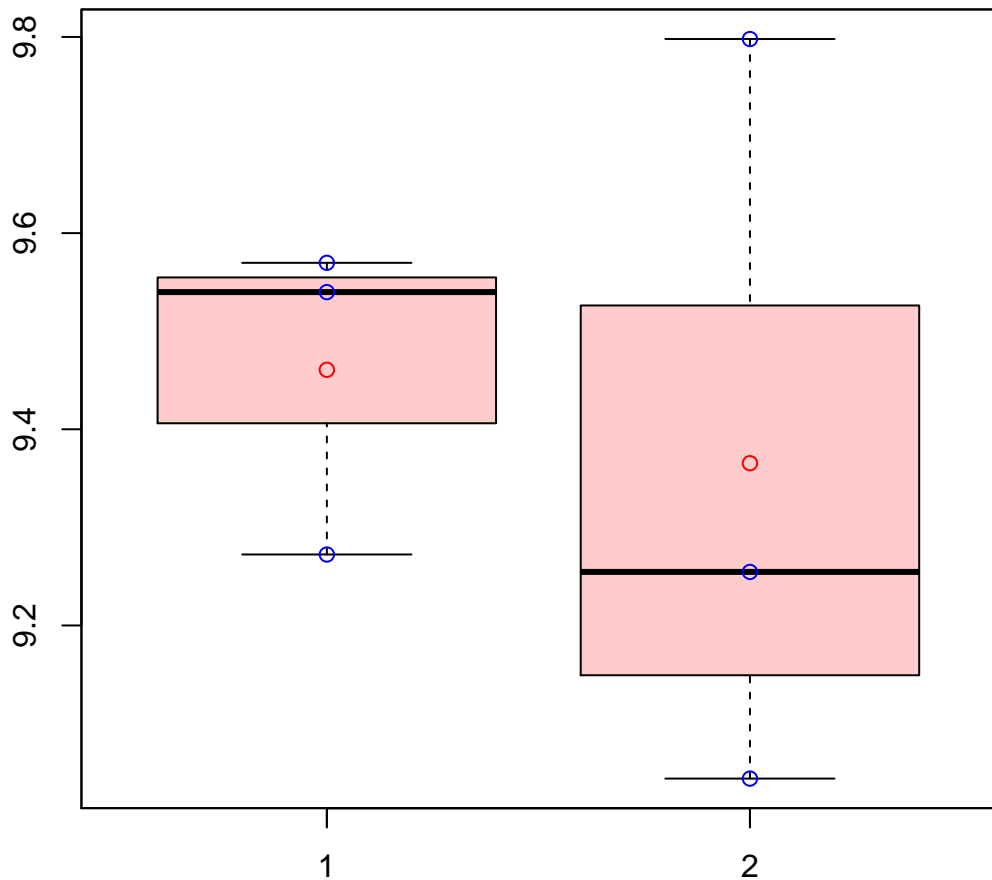

t-Test: p-value = 0.72

# isotig10634|isotig10634

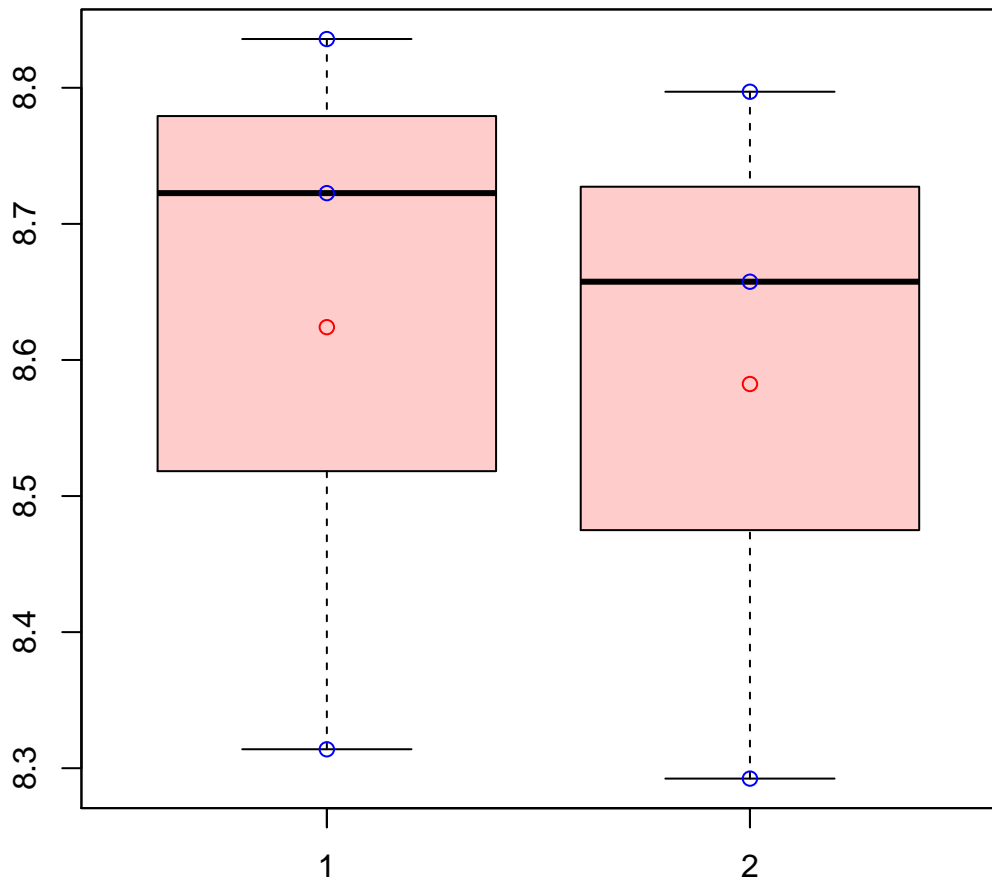

t-Test: p-value = 0.86

# isotig10649|isotig10649



t-Test: p-value = 0.01



isotig11046|isotig11046

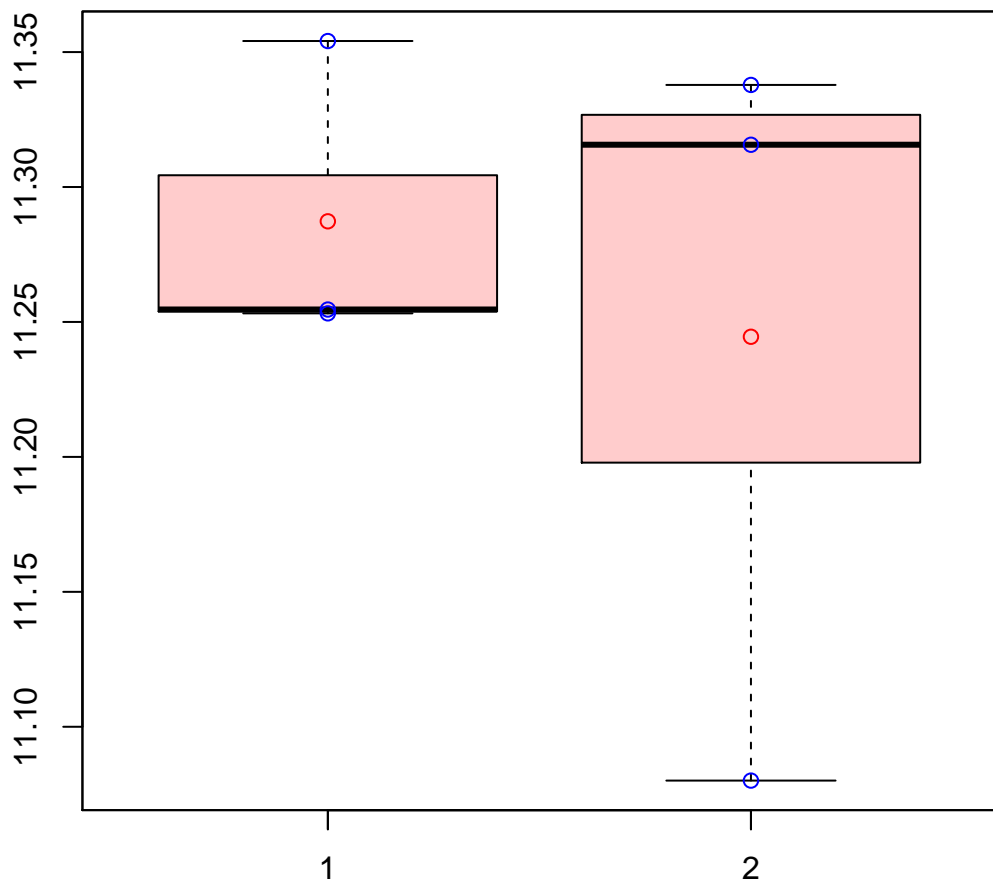

t-Test: p-value = 0.67

# isotig11217|isotig11217



t-Test: p-value = 0.78

# isotig11290|isotig11290

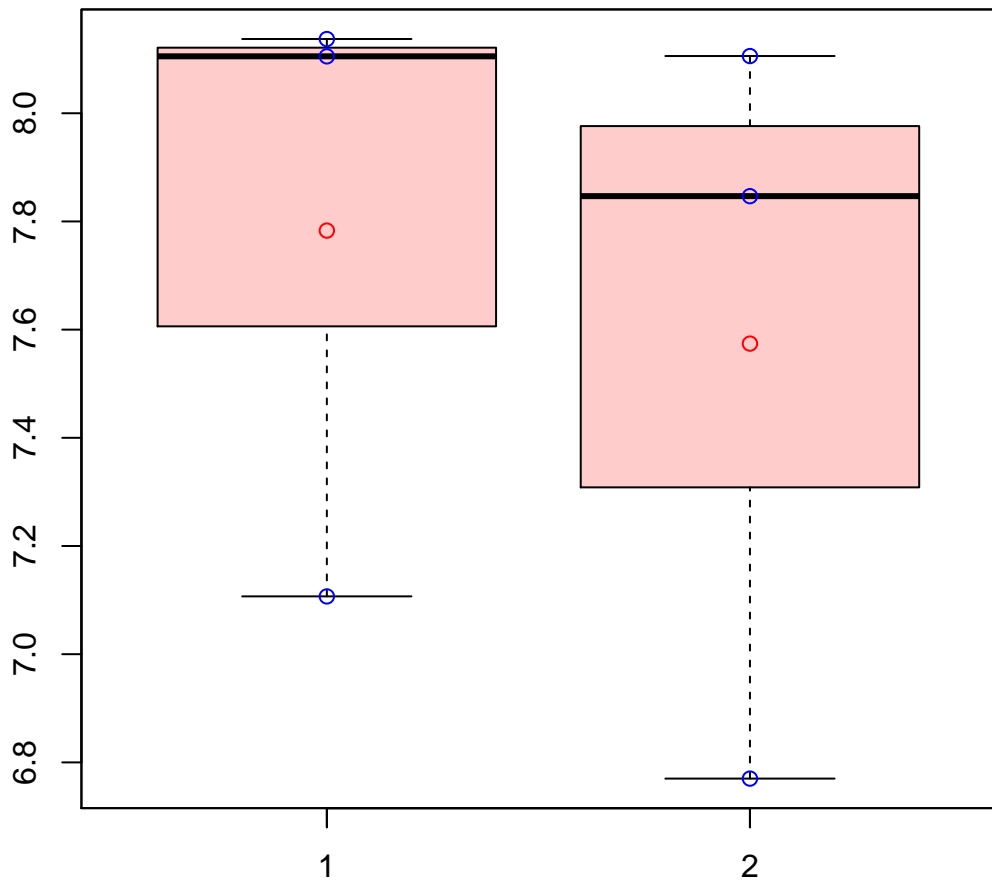

t-Test: p-value = 0.71

# isotig13959|isotig13959

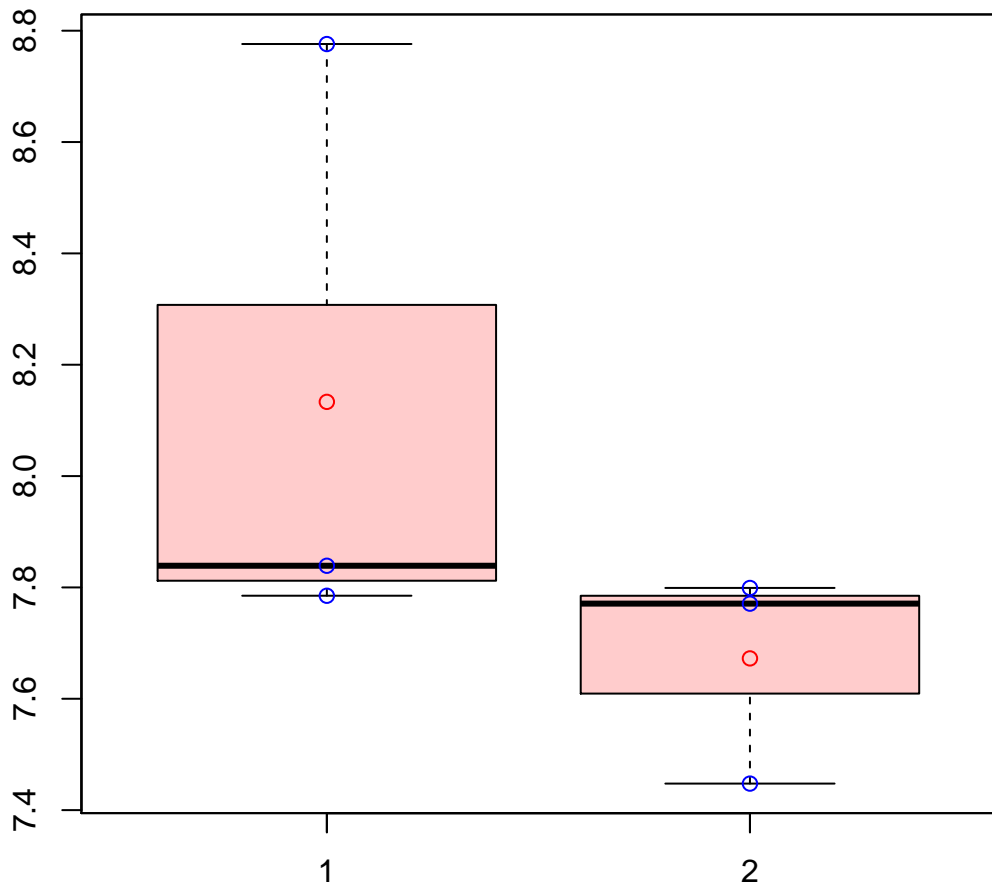

t-Test: p-value = 0.29

# isotig14384|isotig14384

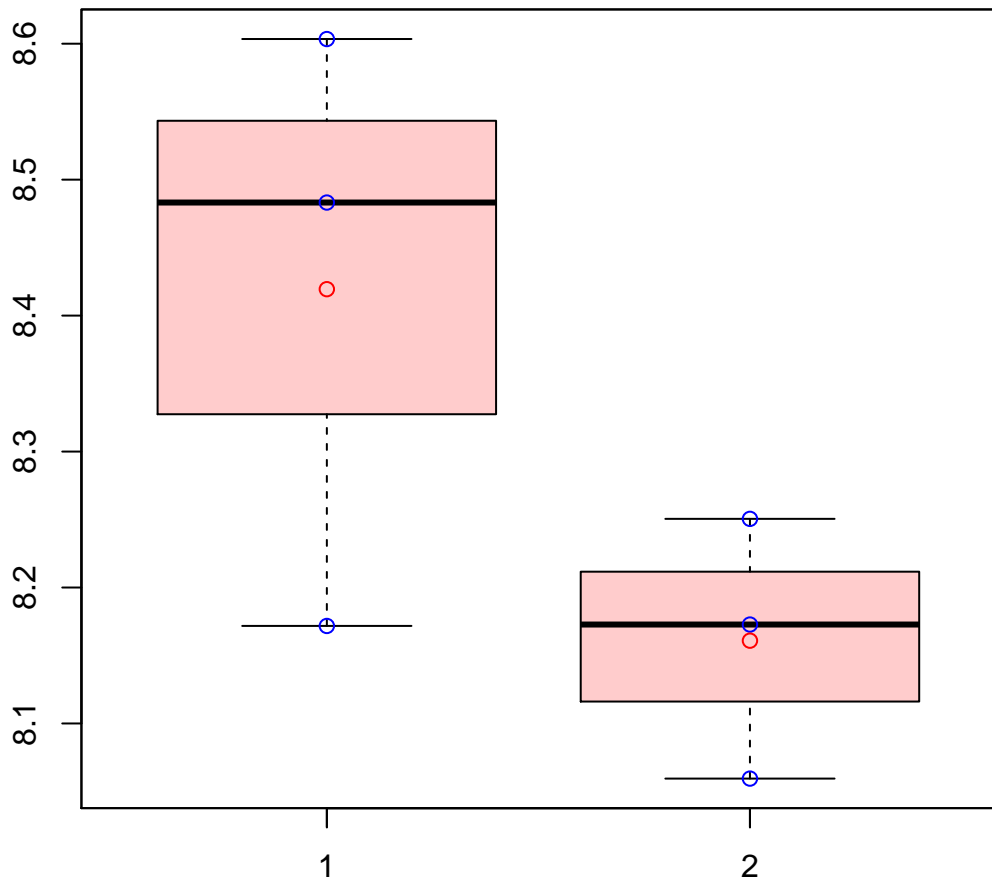

t-Test: p-value = 0.17

# isotig15227|isotig15227

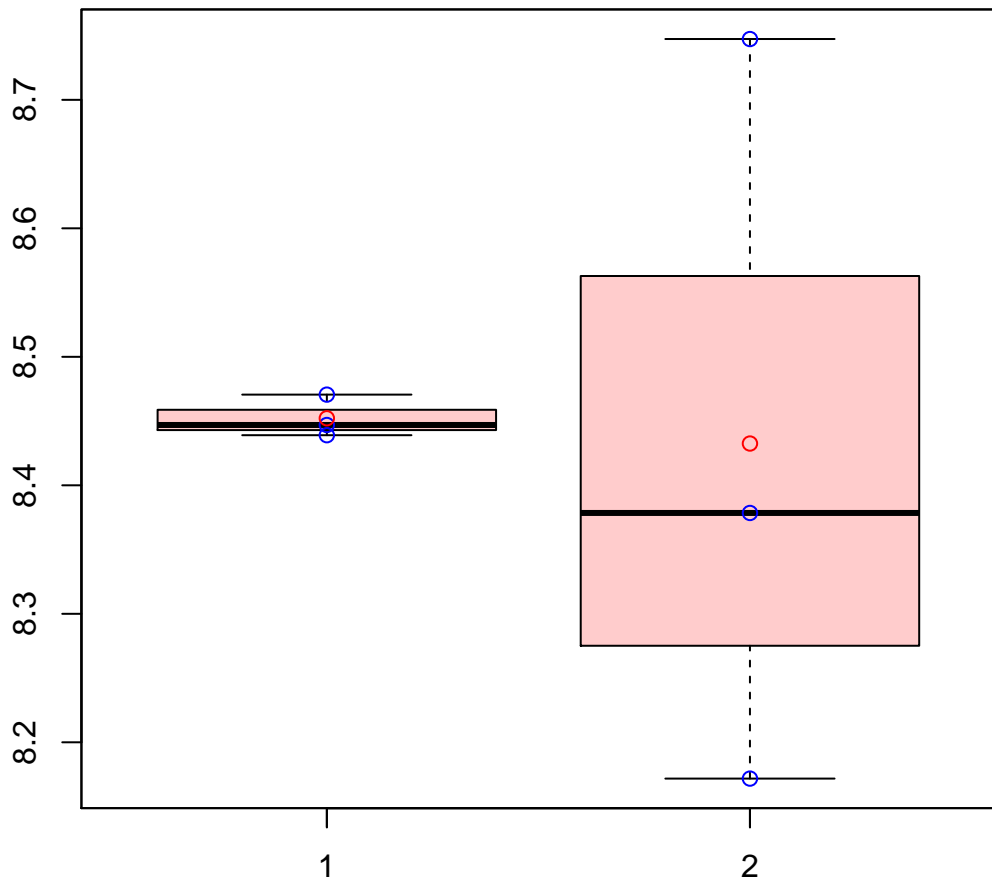

t-Test: p-value = 0.92

# isotig16381|isotig16381

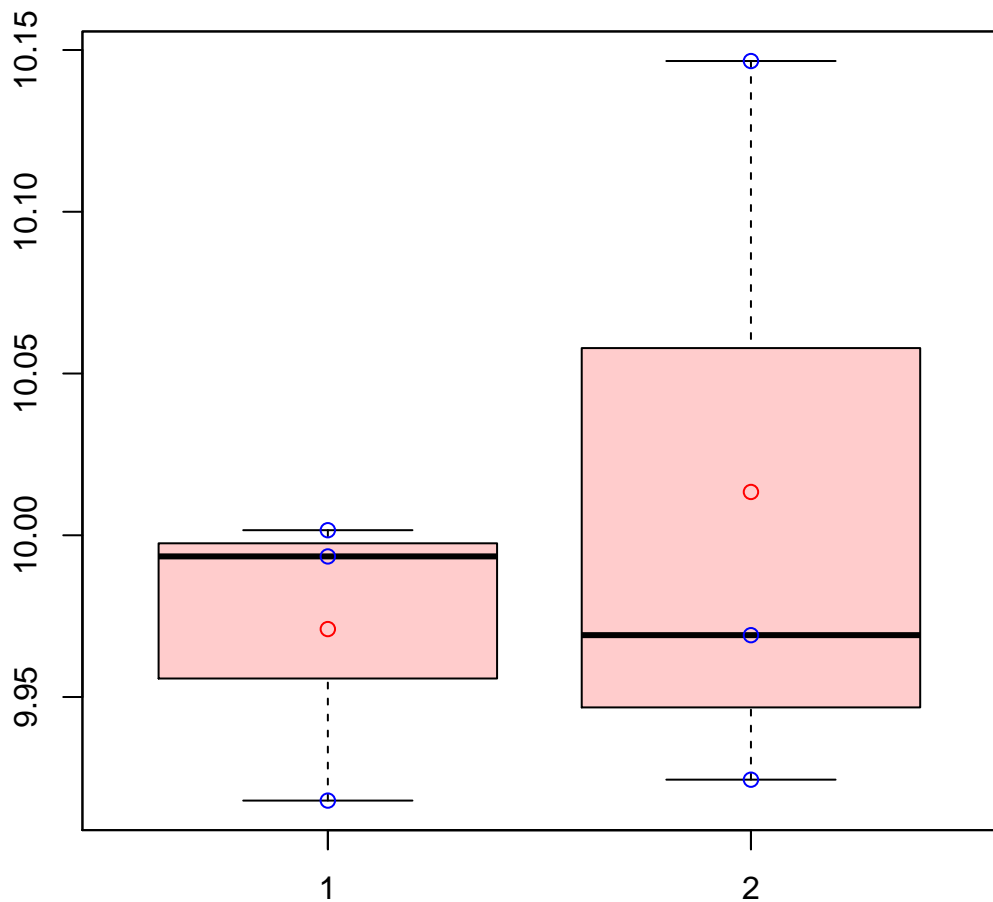

t-Test: p-value = 0.61

# isotig16578|isotig16578

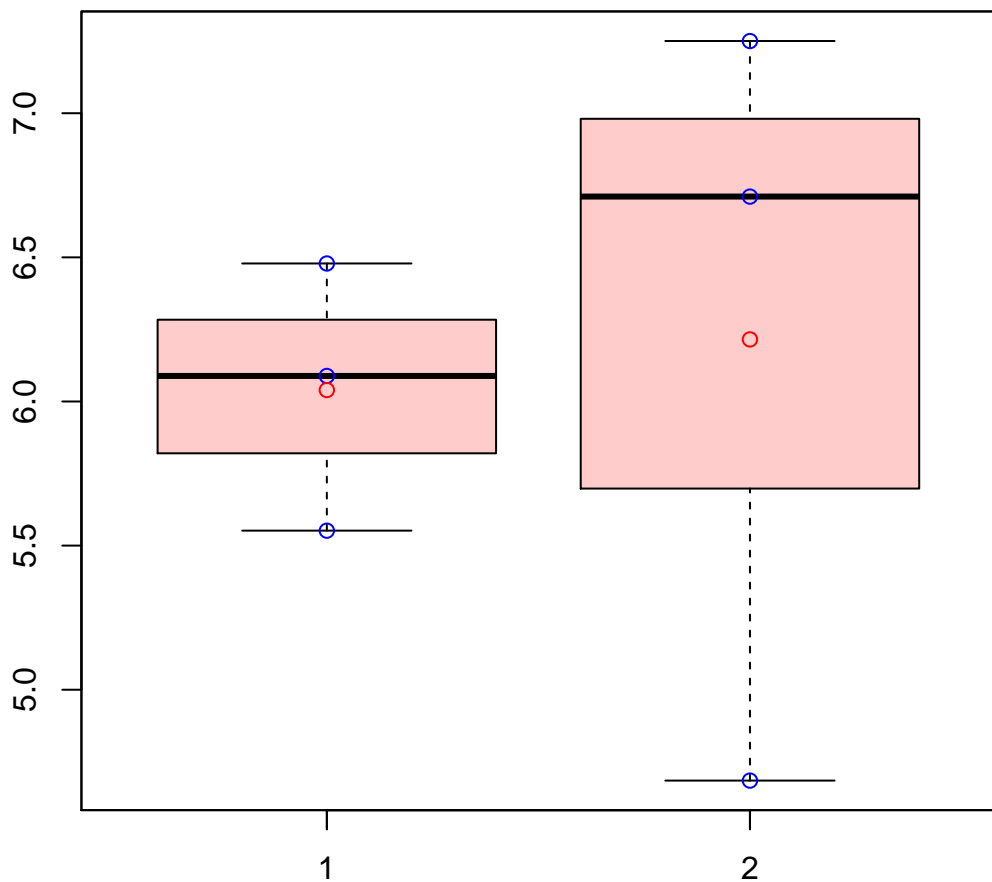

t-Test: p-value = 0.85



# isotig17049|isotig17049

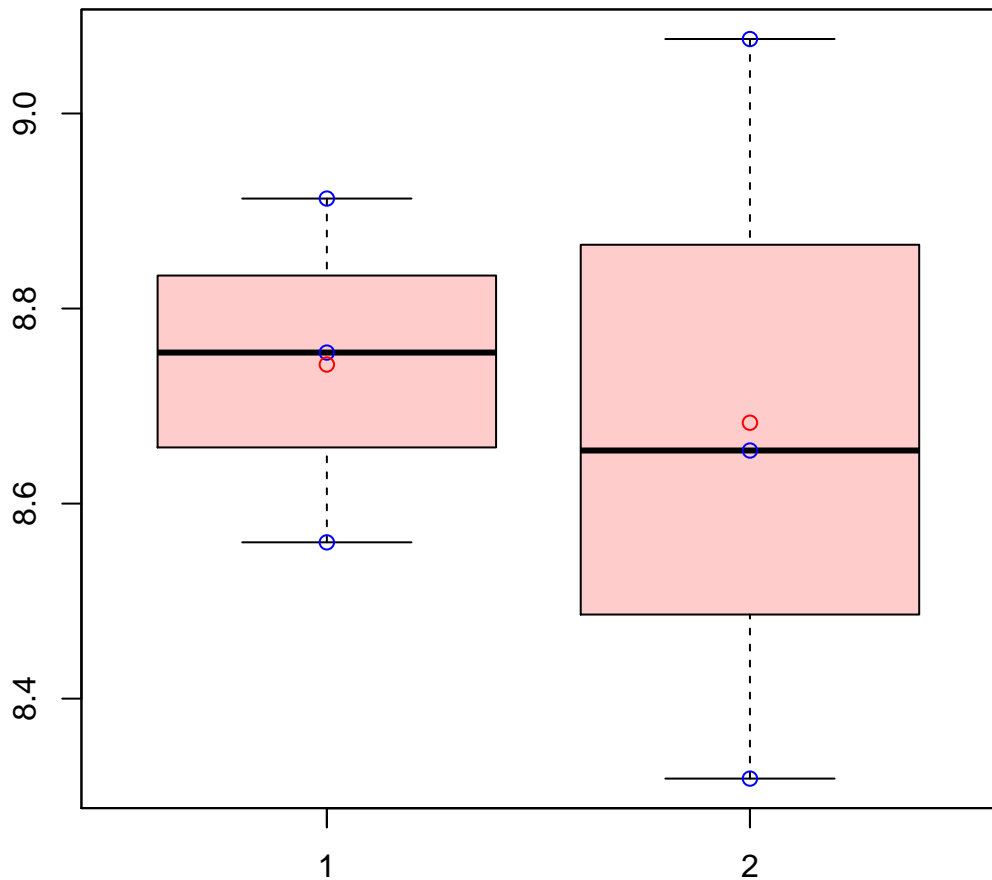

t-Test: p-value = 0.82

# isotig18887|isotig18887

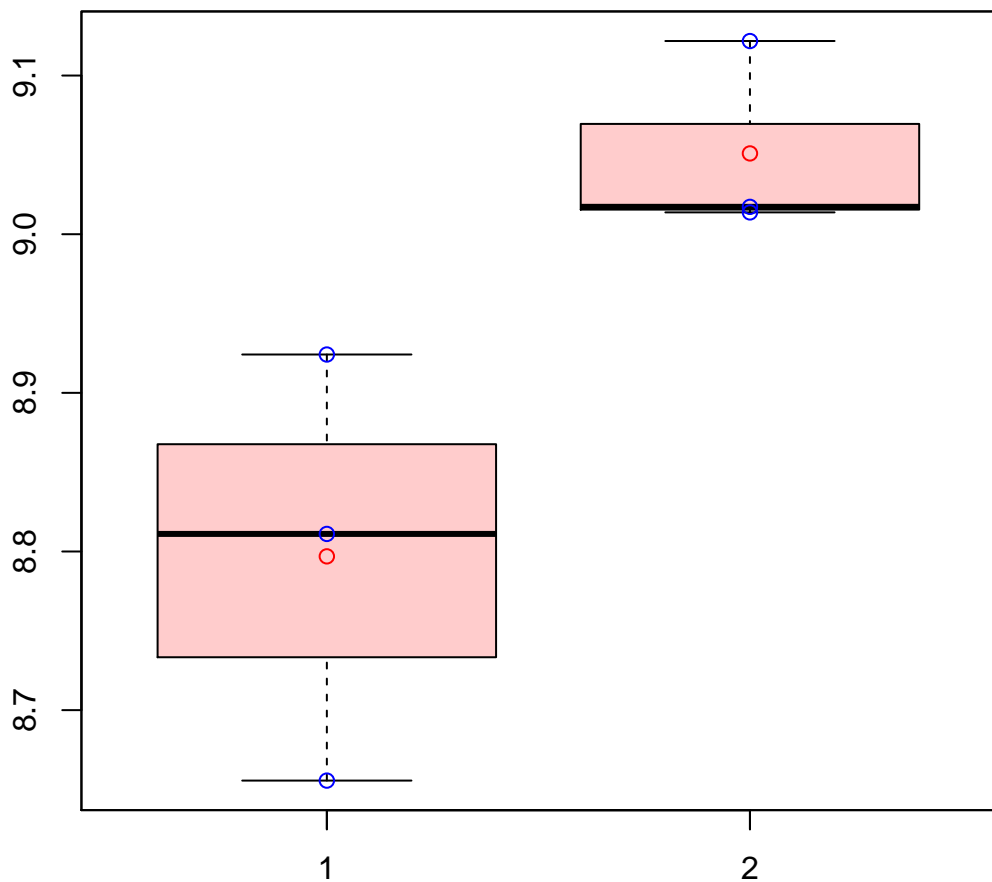

t-Test: p-value = 0.06

# isotig18981|isotig18981

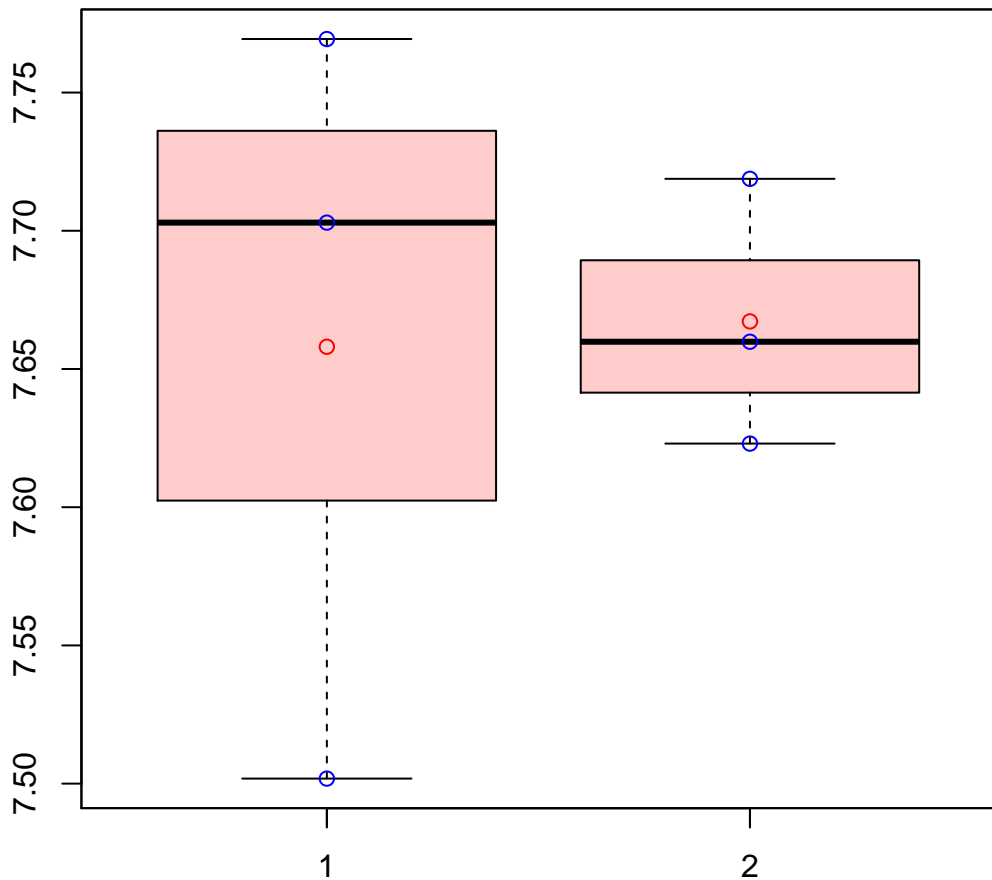

t-Test: p-value = 0.92

# isotig20461|isotig20461

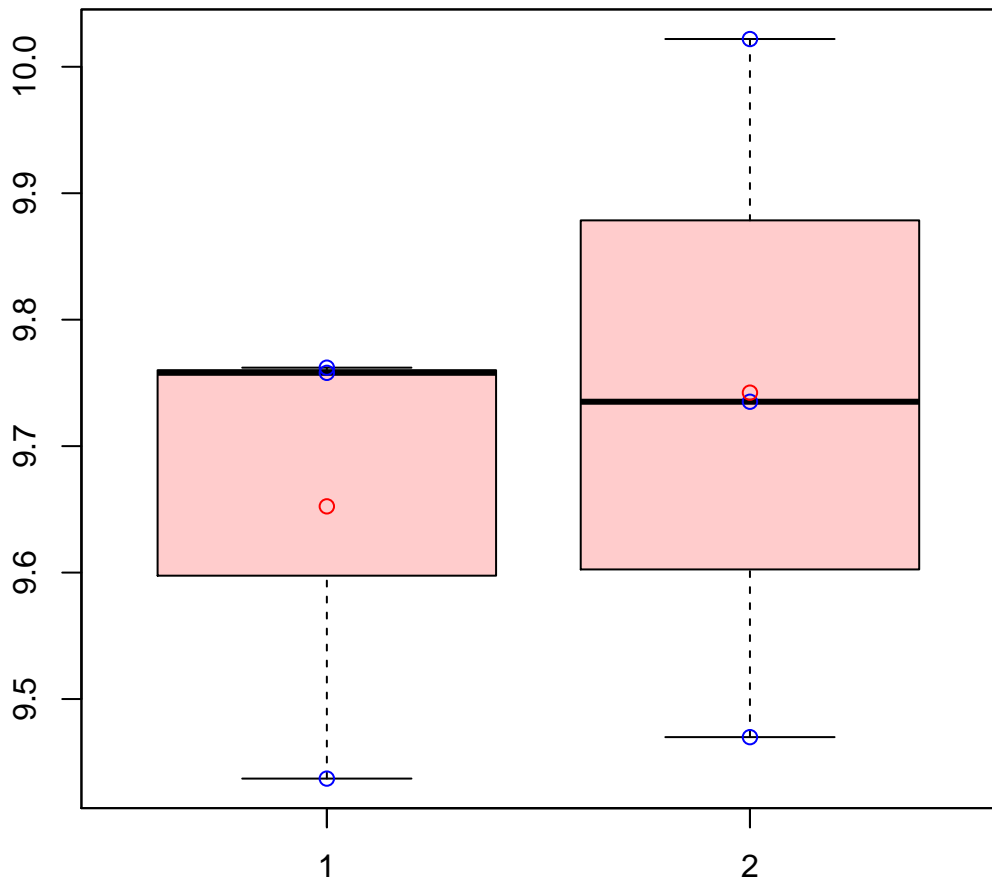

t-Test: p-value = 0.67

# isotig20609|isotig20609

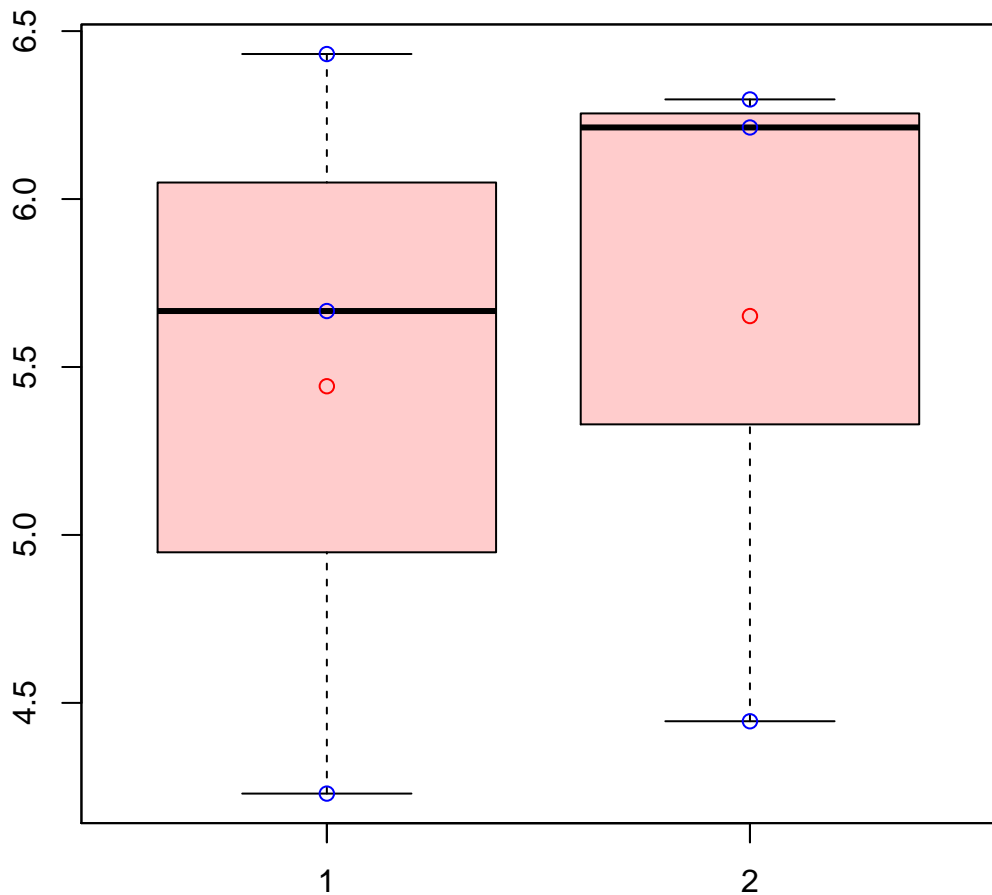

t-Test: p-value = 0.82

# isotig20927|isotig20927

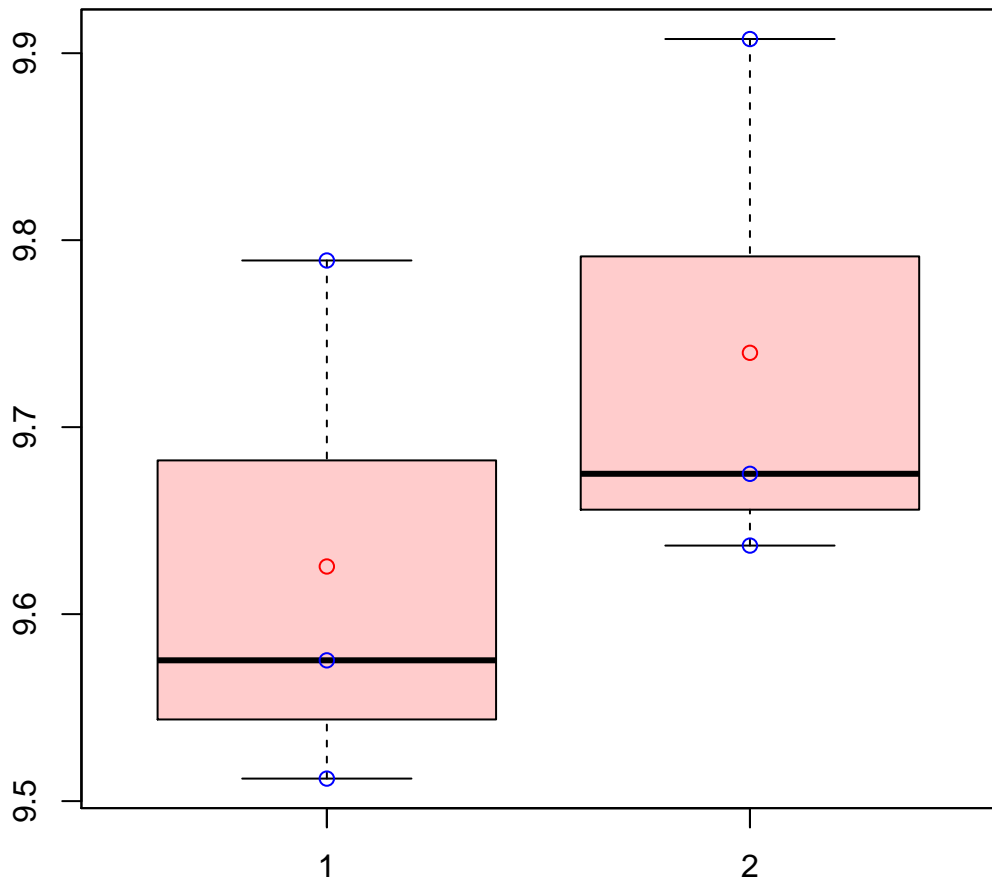

t-Test: p-value = 0.39

# isotig21147|isotig21147

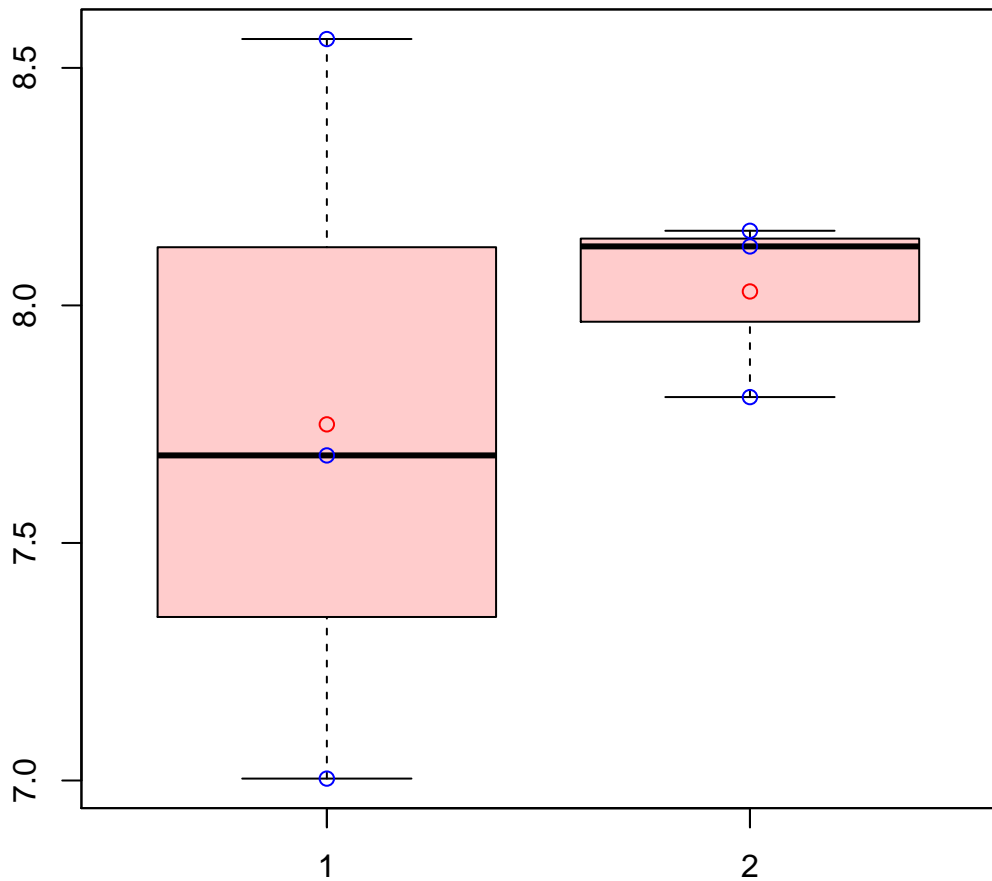

t-Test: p-value = 0.6

# isotig21337|isotig21337

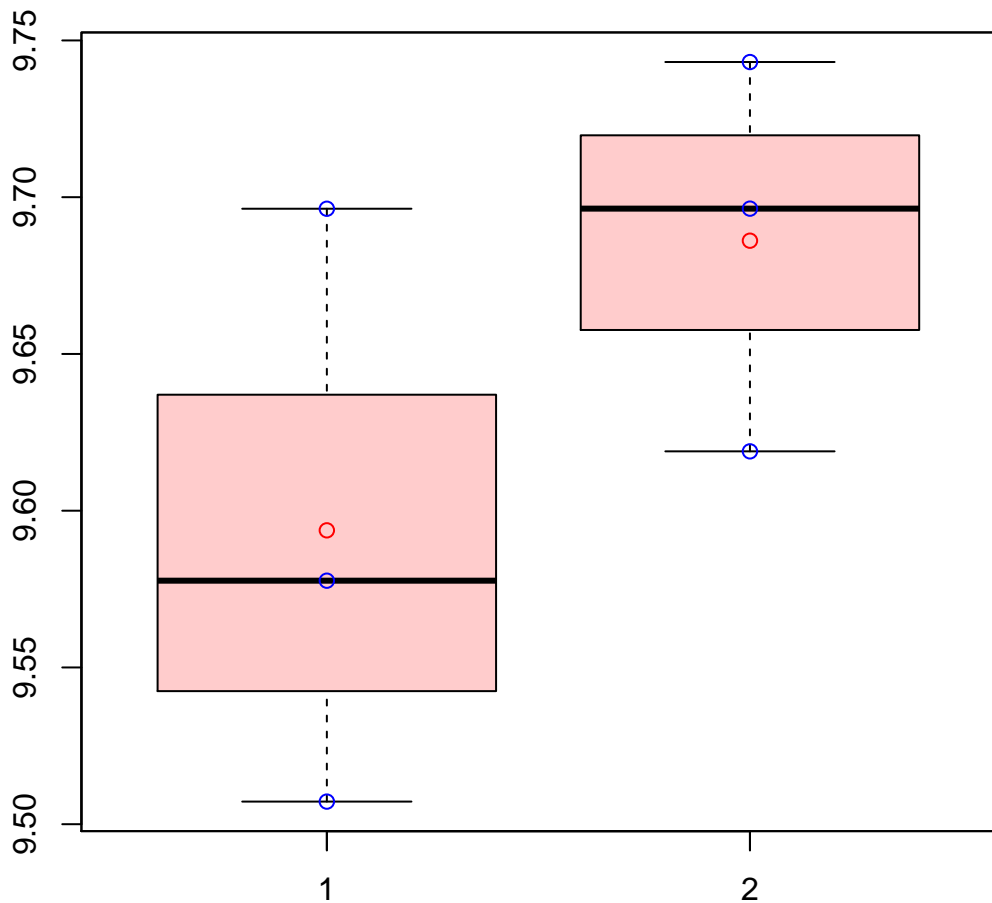

t-Test: p-value = 0.24



# isotig21390|isotig21390

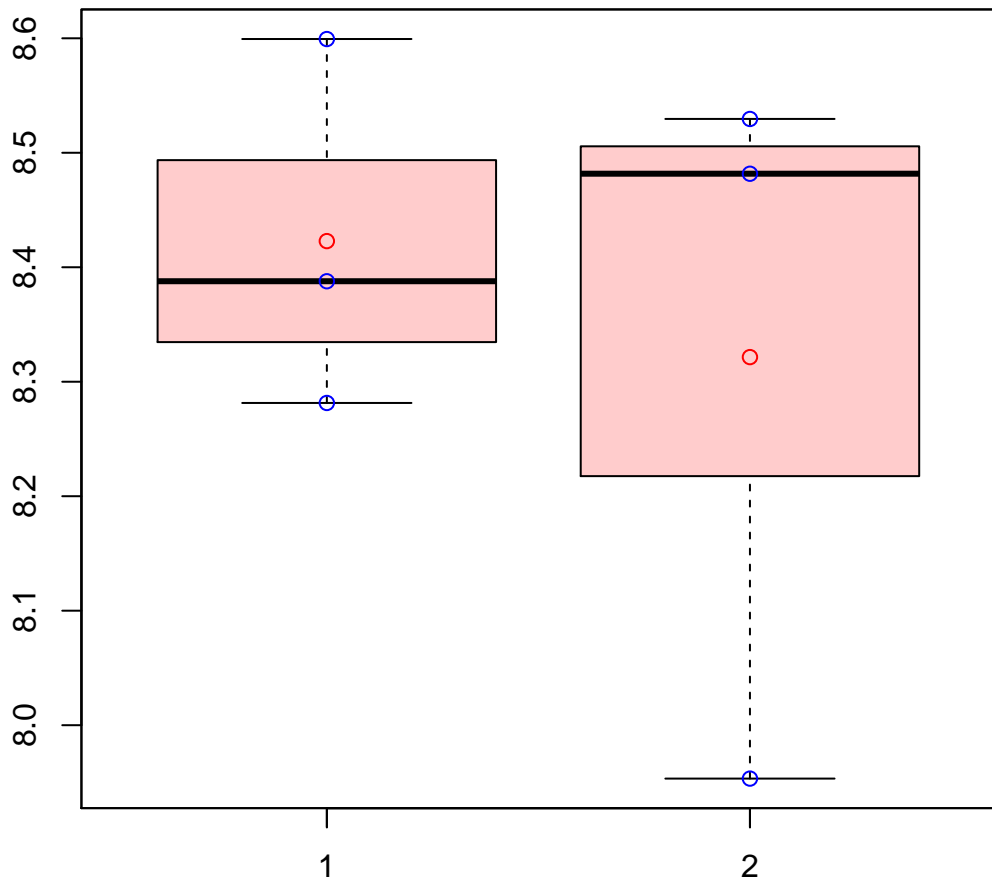

t-Test: p-value = 0.66

# isotig22806|isotig22806

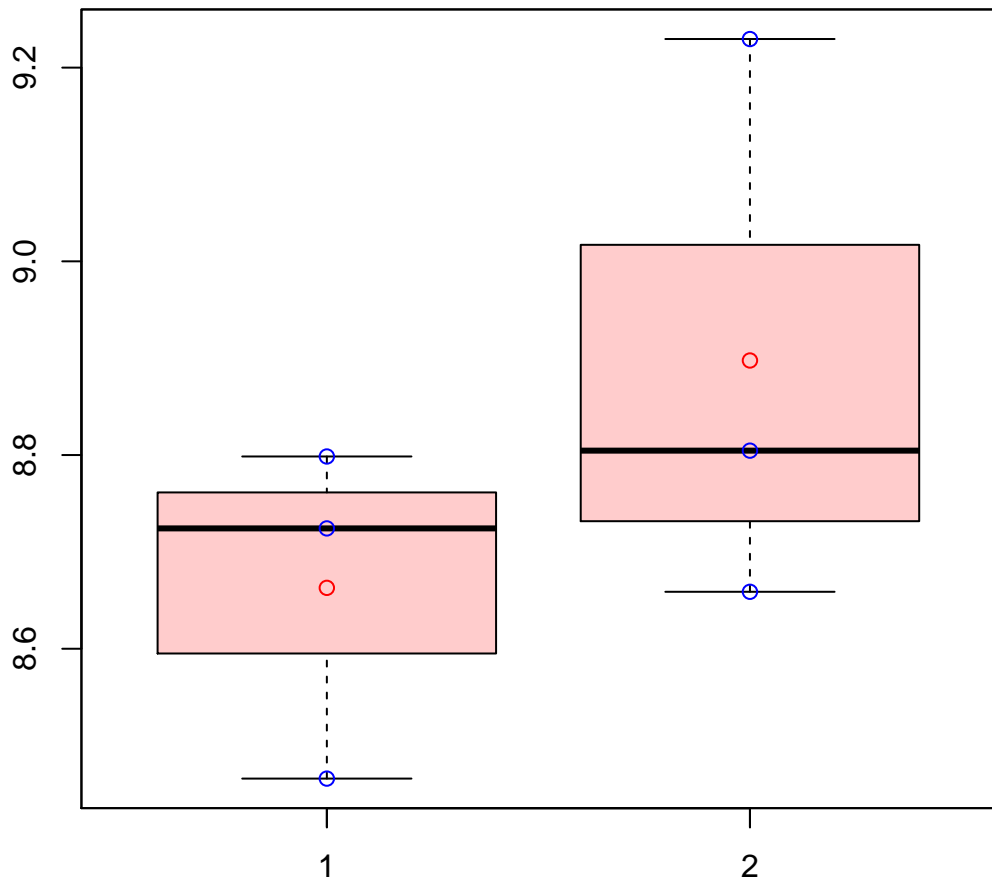

t-Test: p-value = 0.32

# isotig23406|isotig23406

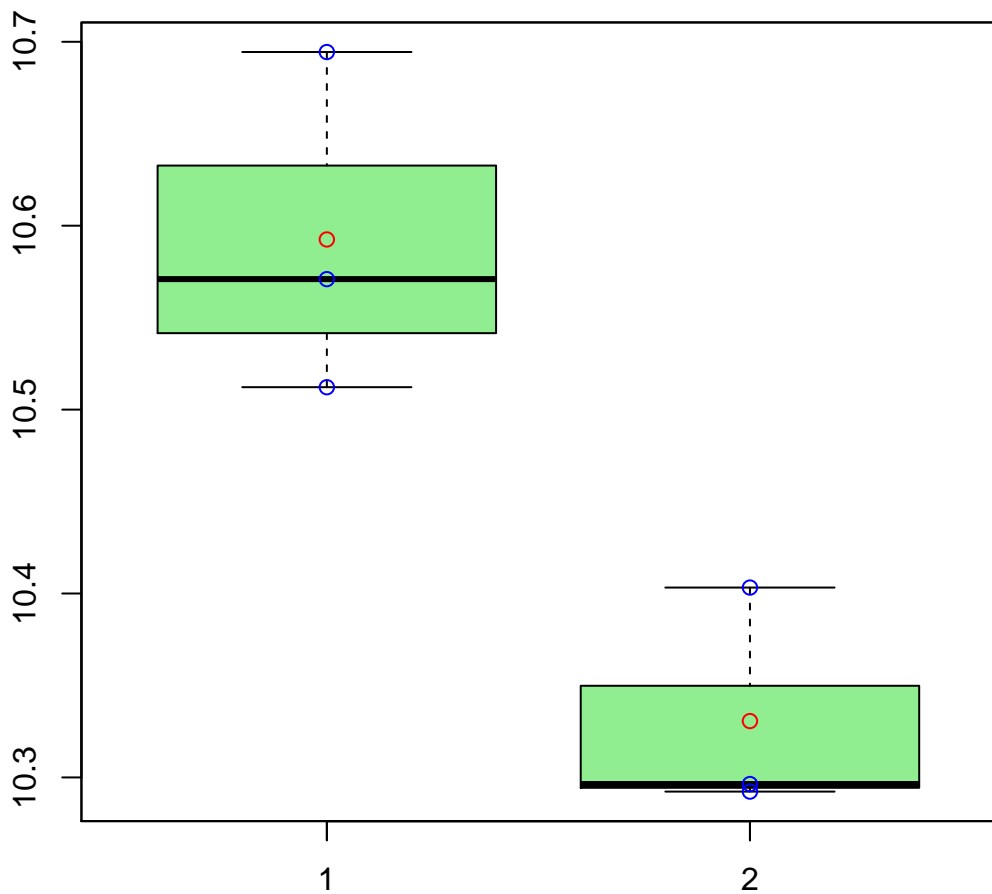

t-Test: p-value = 0.02

# isotig24262|isotig24262

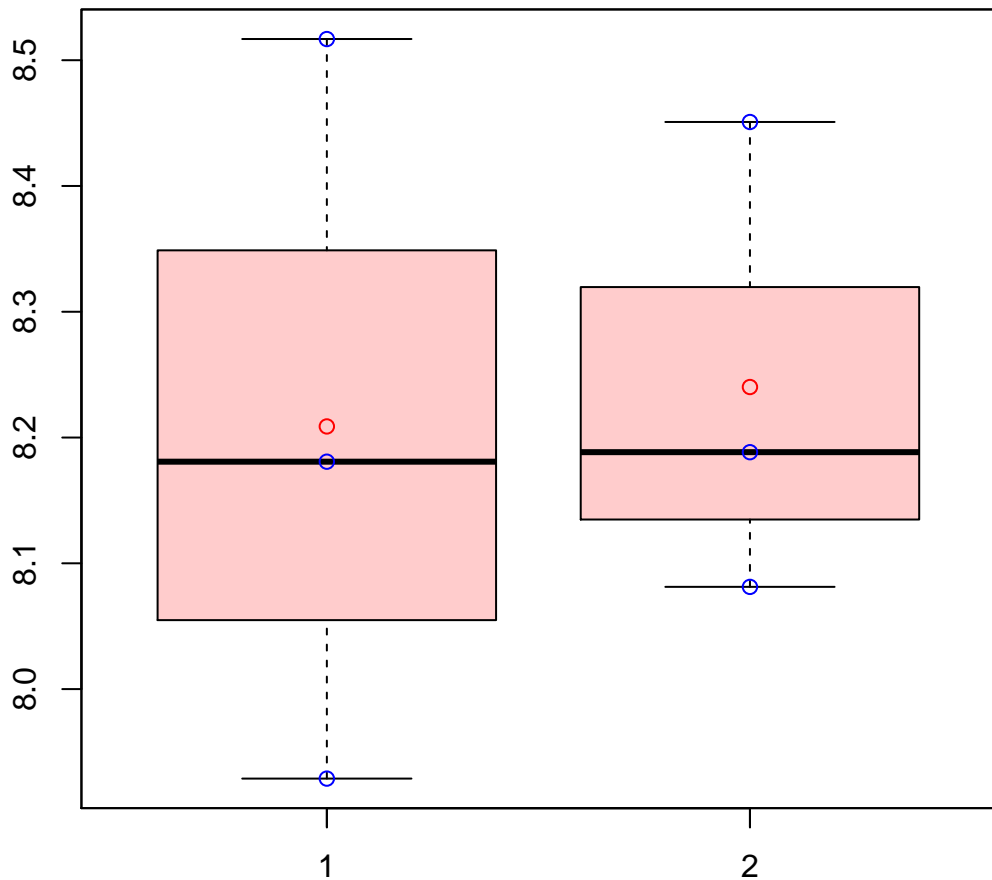

t-Test: p-value = 0.89

isotig29795|isotig29795



t-Test: p-value = 0.65

# isotig32319|isotig32319

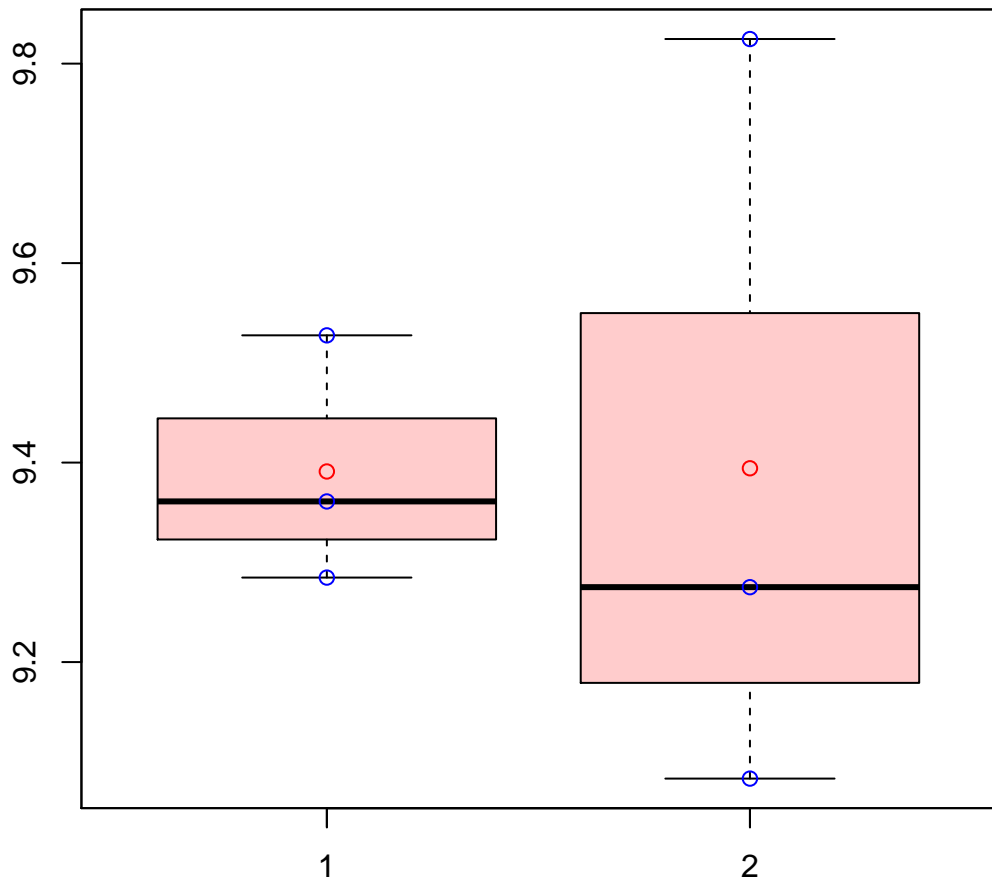

t-Test: p-value = 0.99

# isotig34100|isotig34100

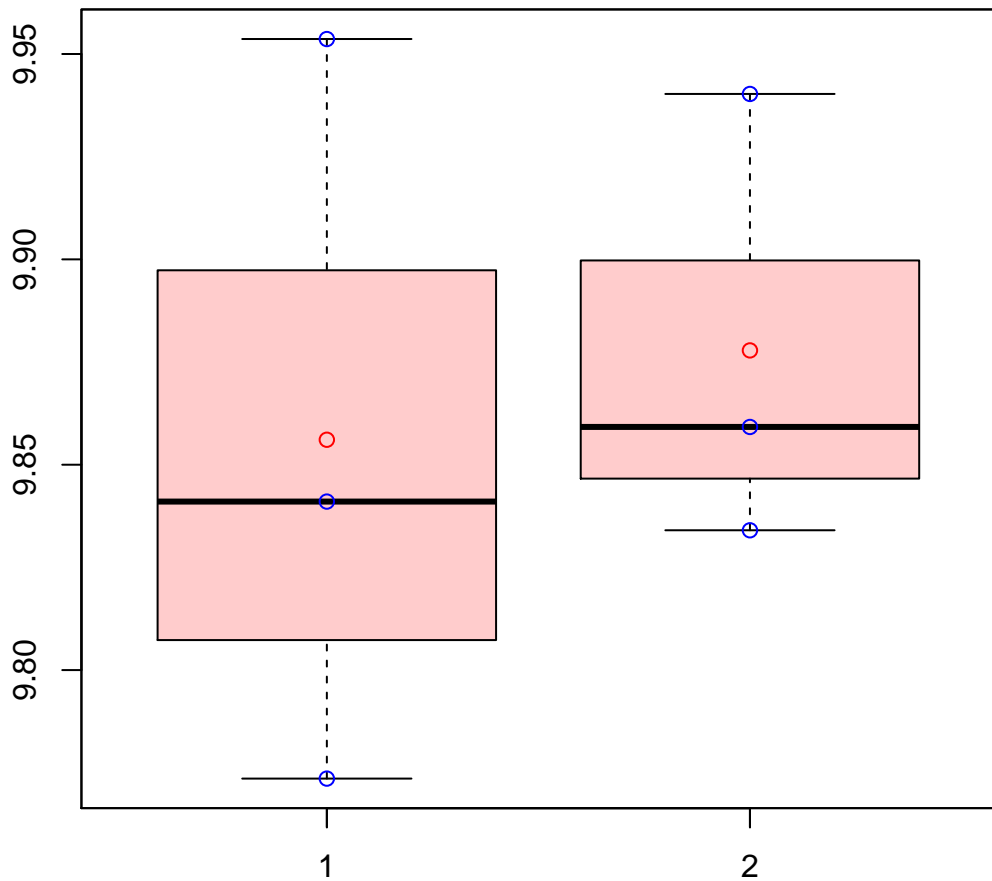

t-Test: p-value = 0.75

# ISPG1\_ERATE|ISPG1\_ERATE

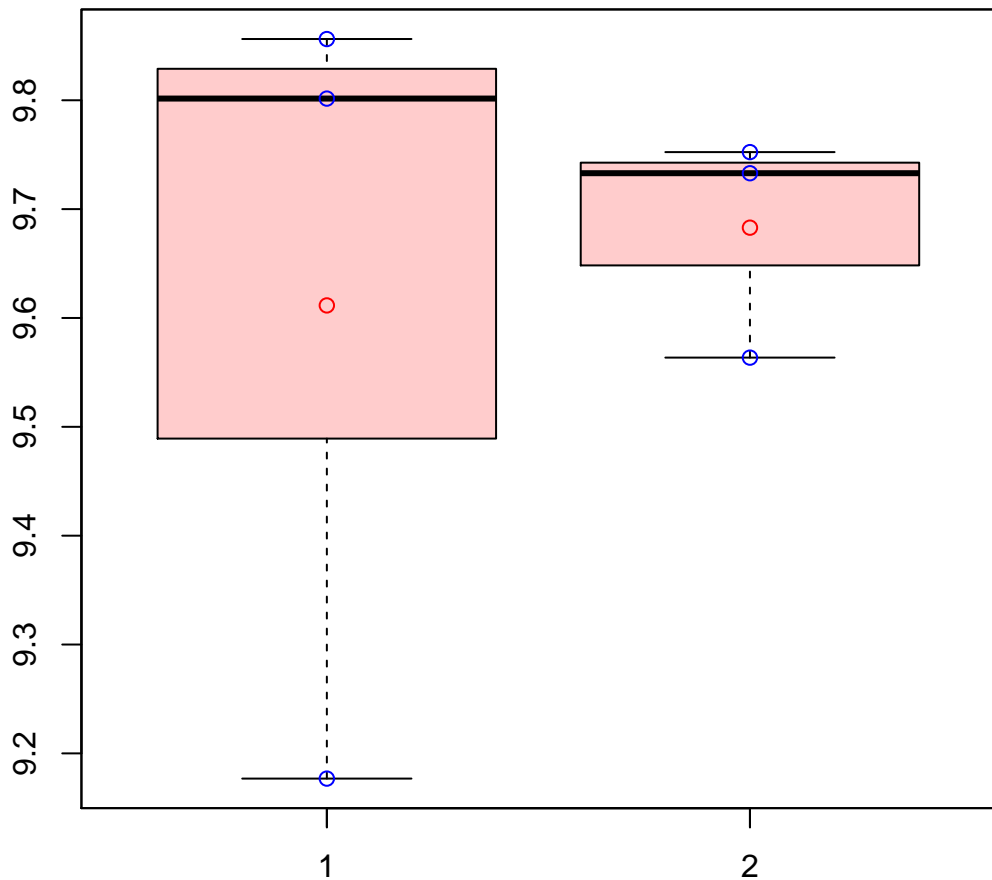

t-Test: p-value = 0.78



# ISPG3\_ERATE|ISPG3\_ERATE

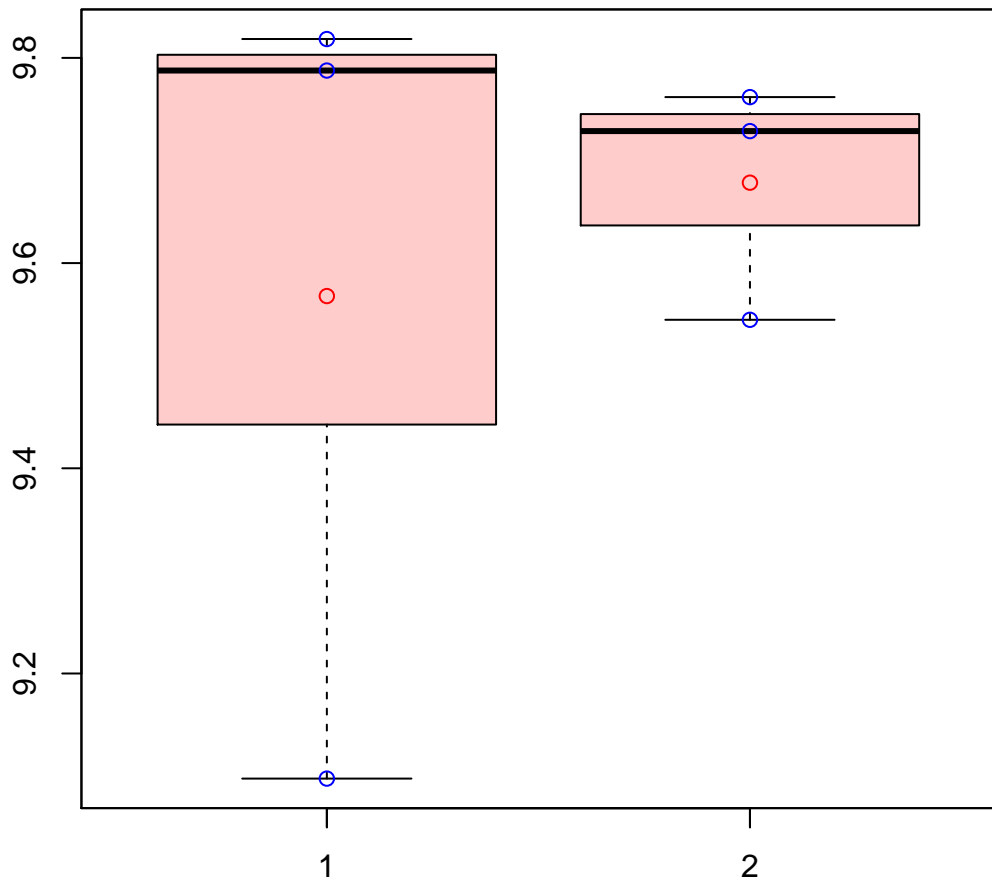

t-Test: p-value = 0.69

# KAD10\_ERATE|KAD10\_ERATE

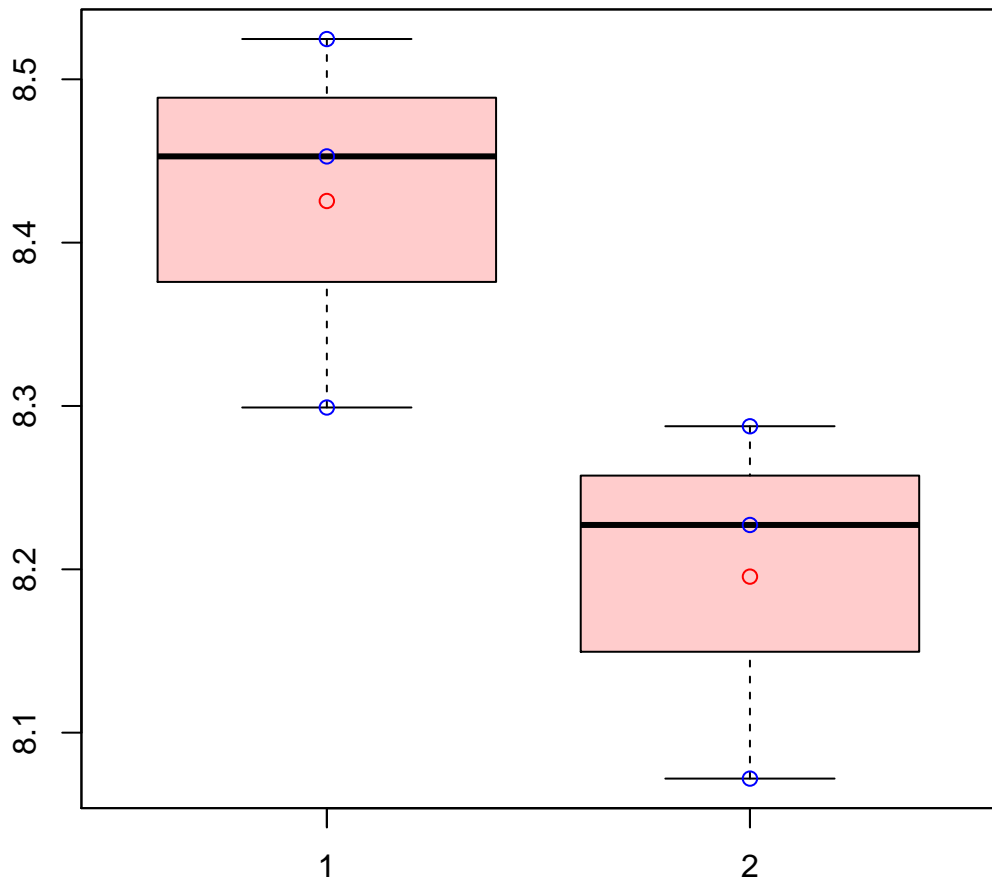

t-Test: p-value = 0.07

# KAD2\_ERATE|KAD2\_ERATE



t-Test: p-value = 0.07

# KAD5\_ERATE|KAD5\_ERATE

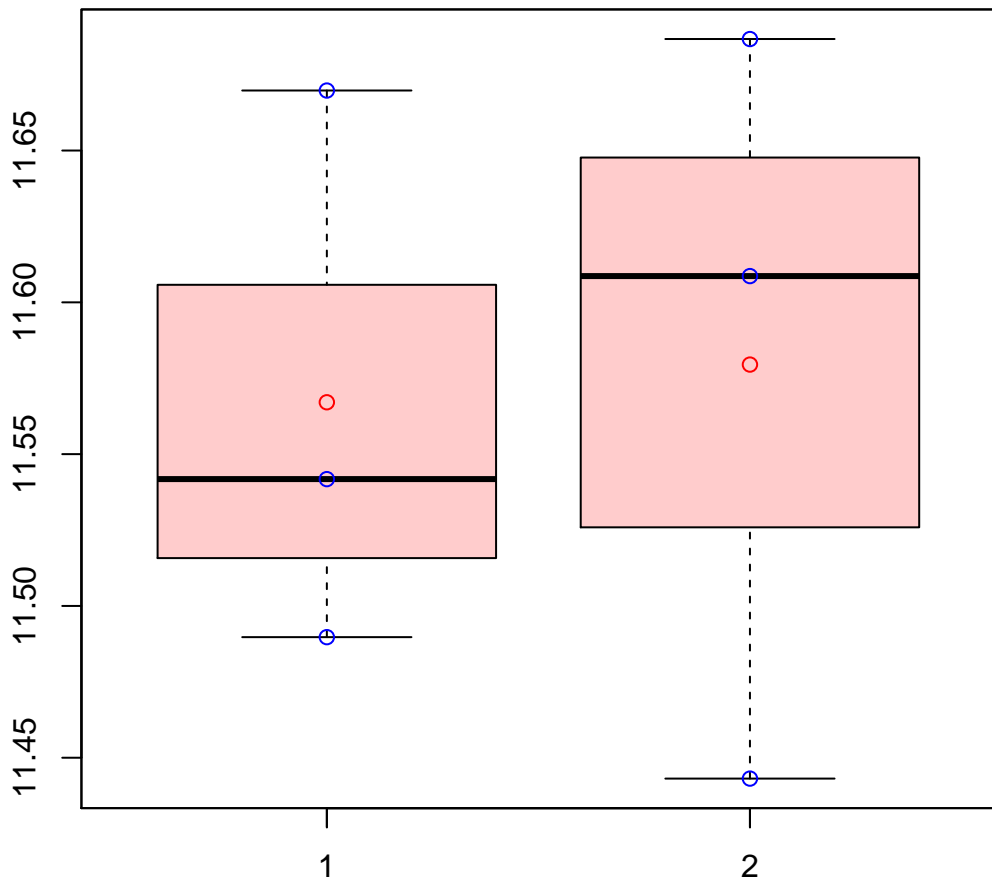

t-Test: p-value = 0.9

# LEPA4\_ERATE|LEPA4\_ERATE

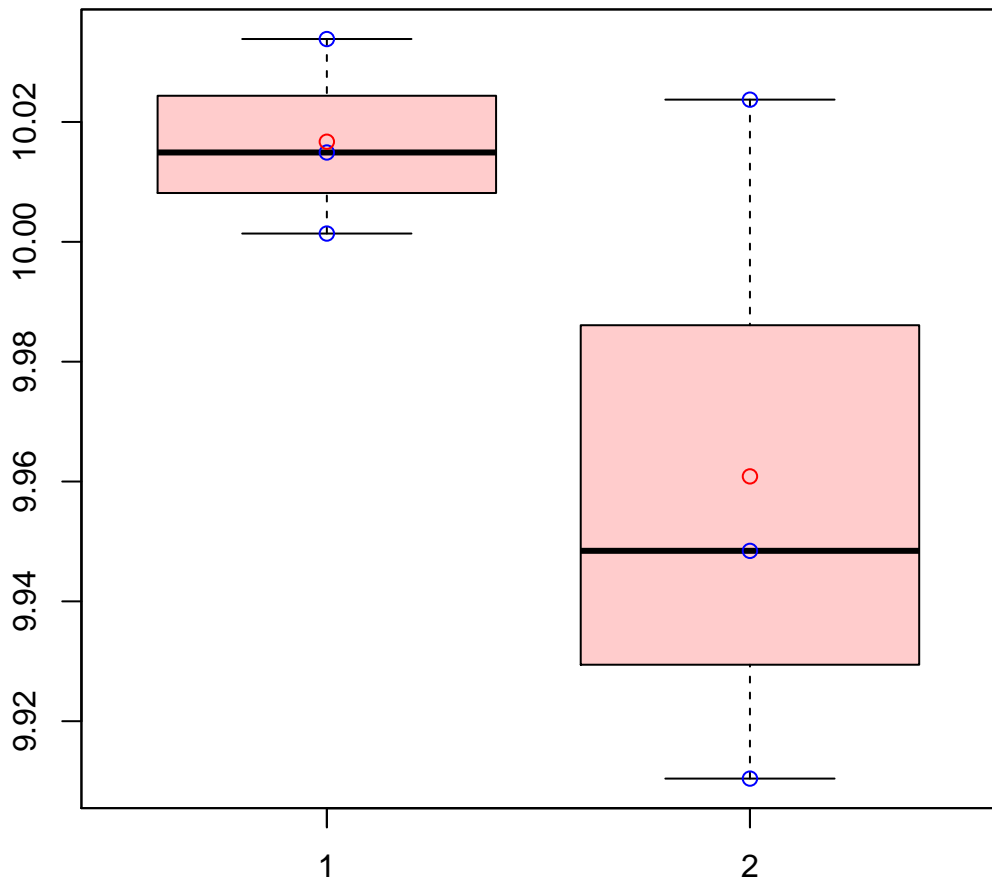

t-Test: p-value = 0.23

# LEU31\_ERATE|LEU31\_ERATE

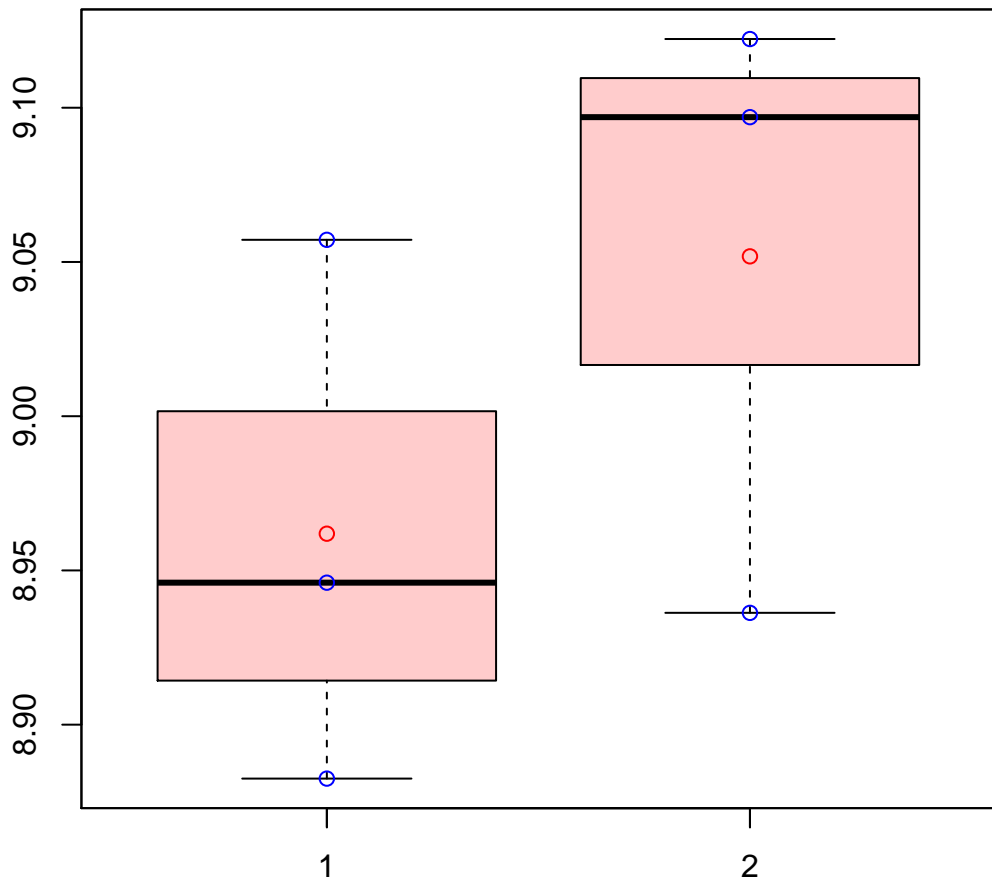

t-Test: p-value = 0.31

# LEU34\_ERATE|LEU34\_ERATE

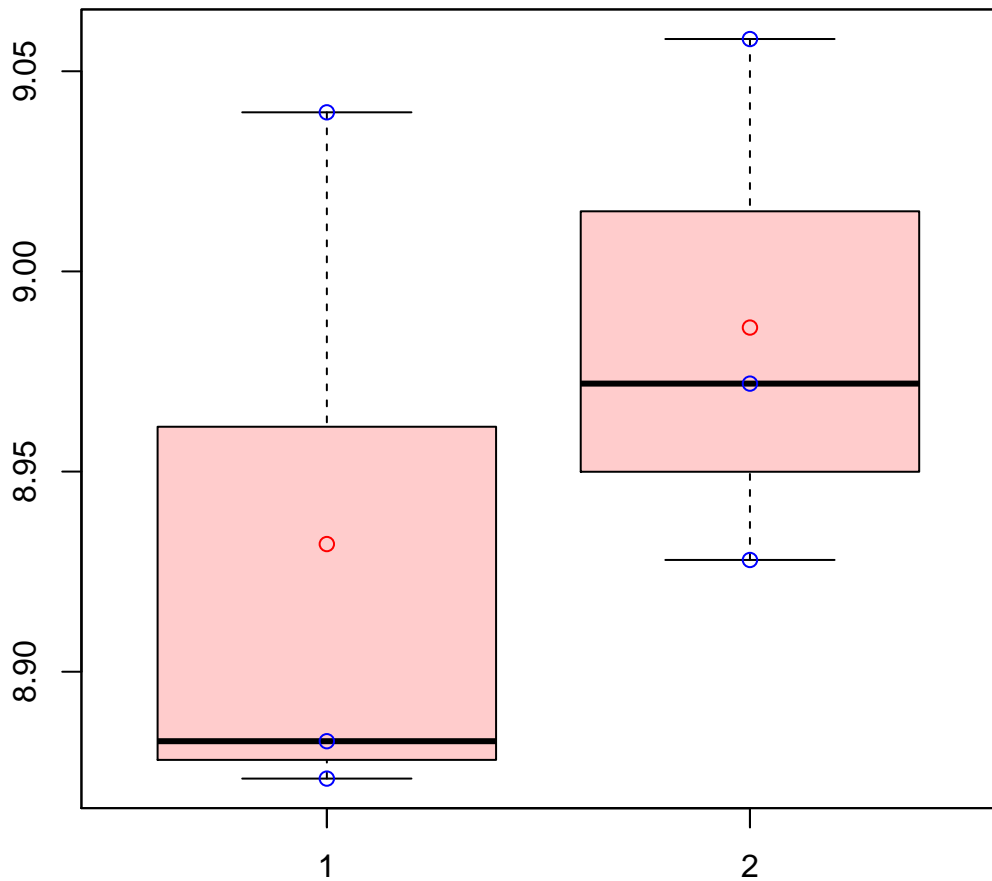

t-Test: p-value = 0.46

# Locus\_1005\_8\_11|Locus\_1005\_8\_11



t-Test: p-value = 0.26



# Locus\_10367\_3\_4|Locus\_10367\_3\_4

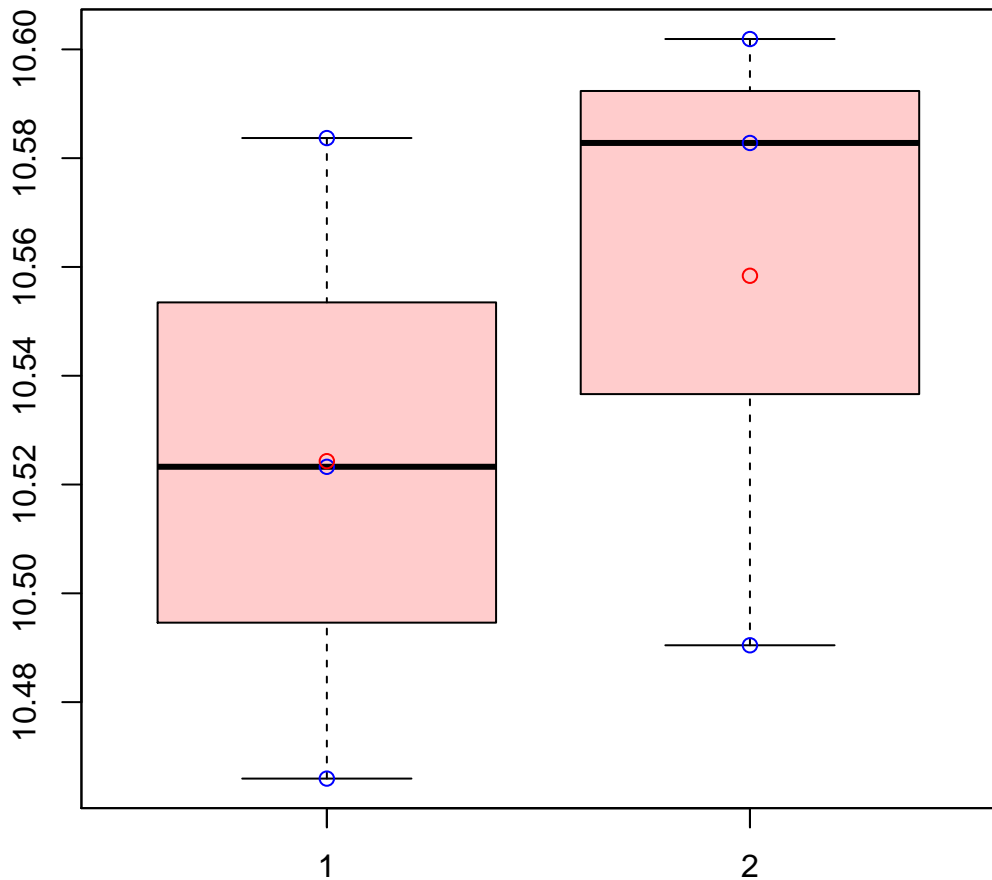

t-Test: p-value = 0.52

# Locus\_1063\_2\_5|Locus\_1063\_2\_5

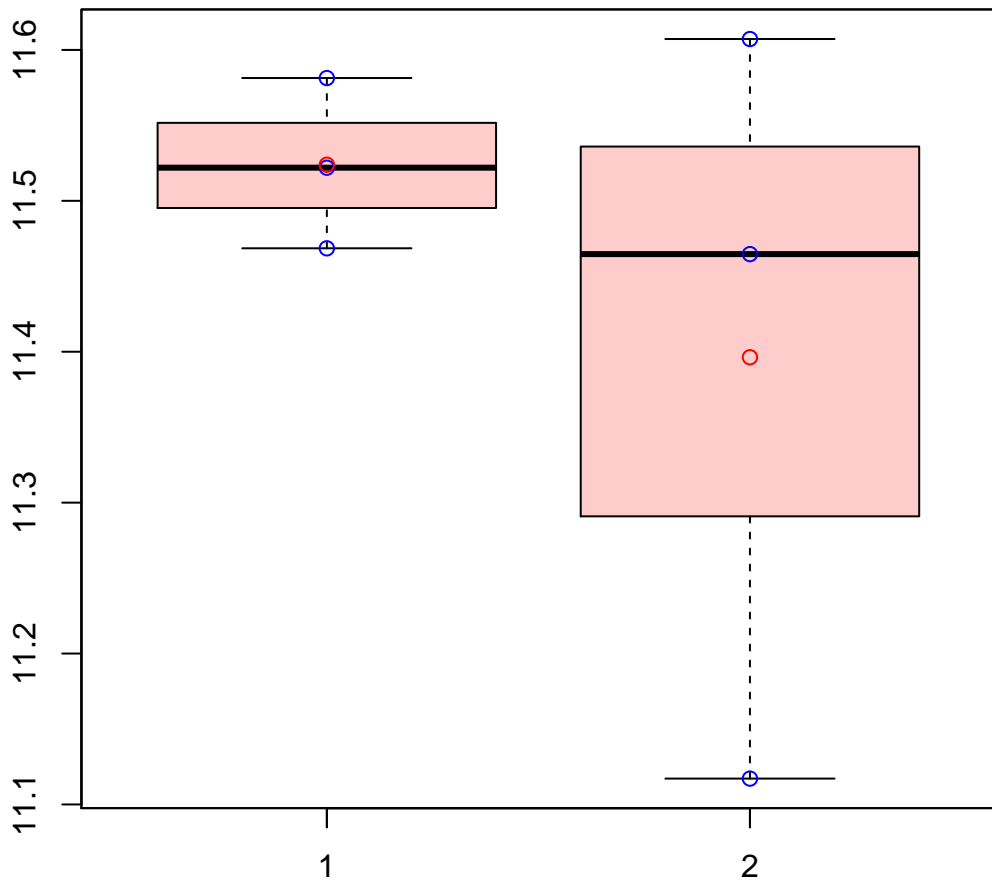

t-Test: p-value = 0.48

# Locus\_10667\_4\_5|Locus\_10667\_4\_5

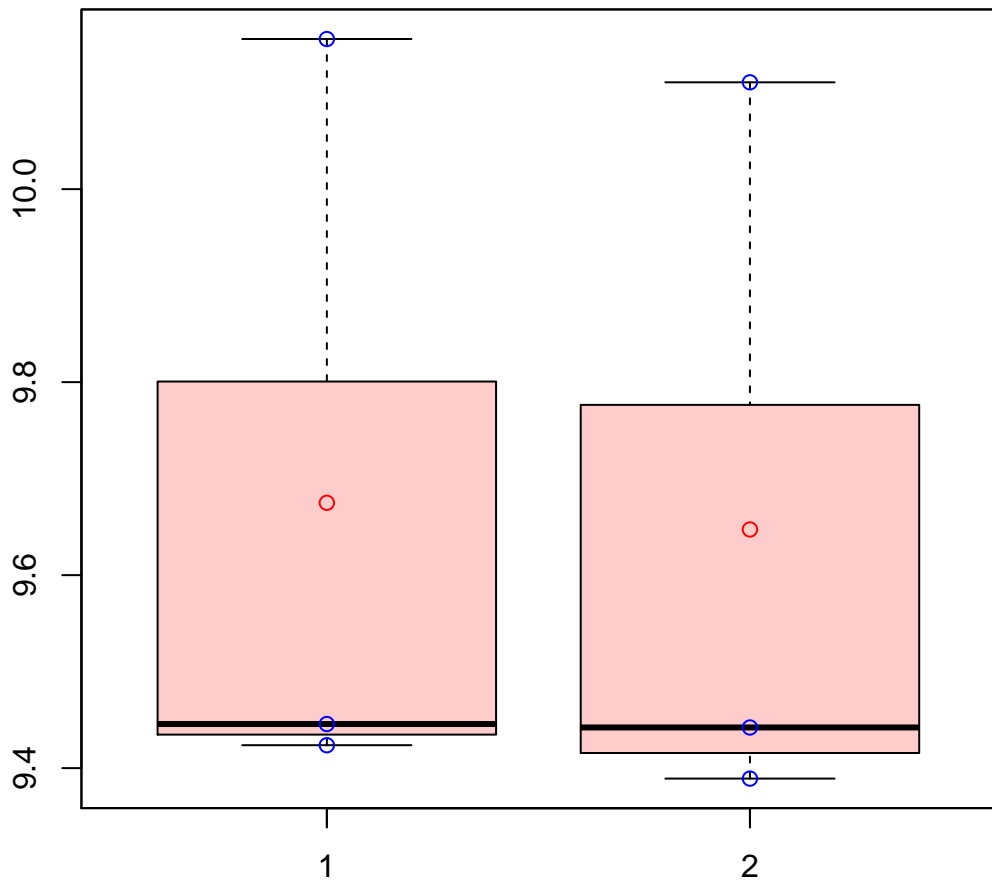

t-Test: p-value = 0.94

# Locus\_107\_1\_4|Locus\_107\_1\_4

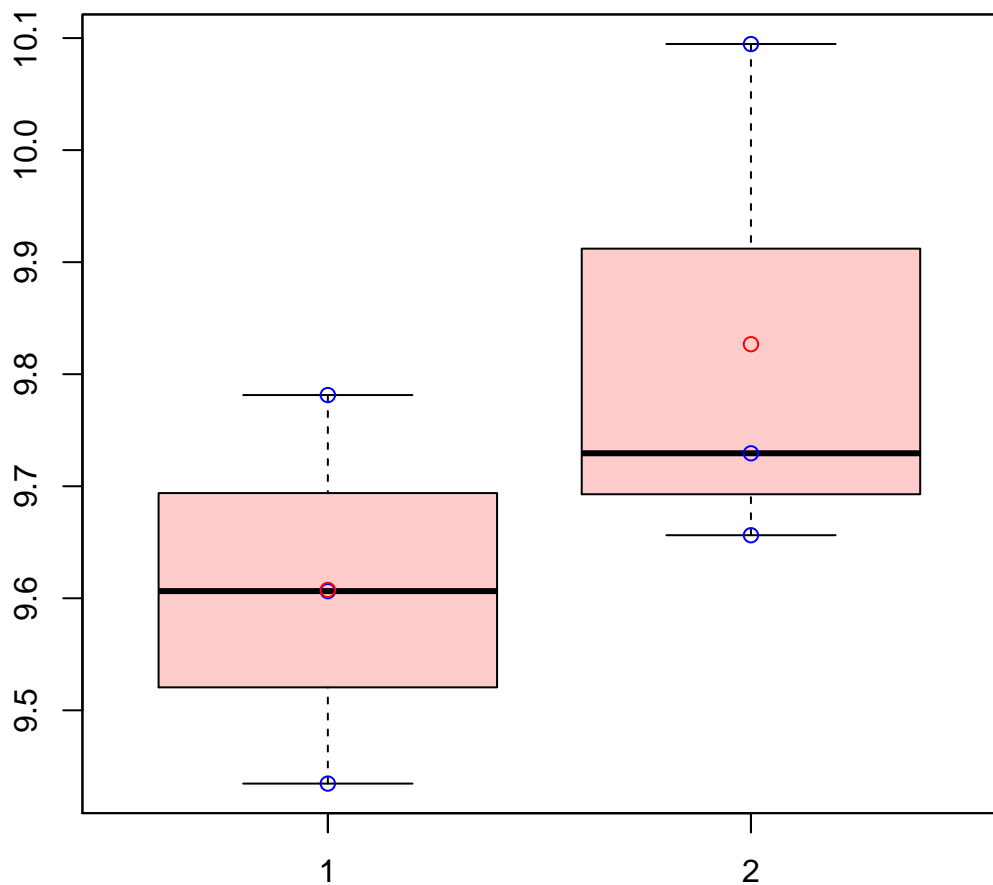

t-Test: p-value = 0.27

# Locus\_1086\_11\_13|Locus\_1086\_11\_13

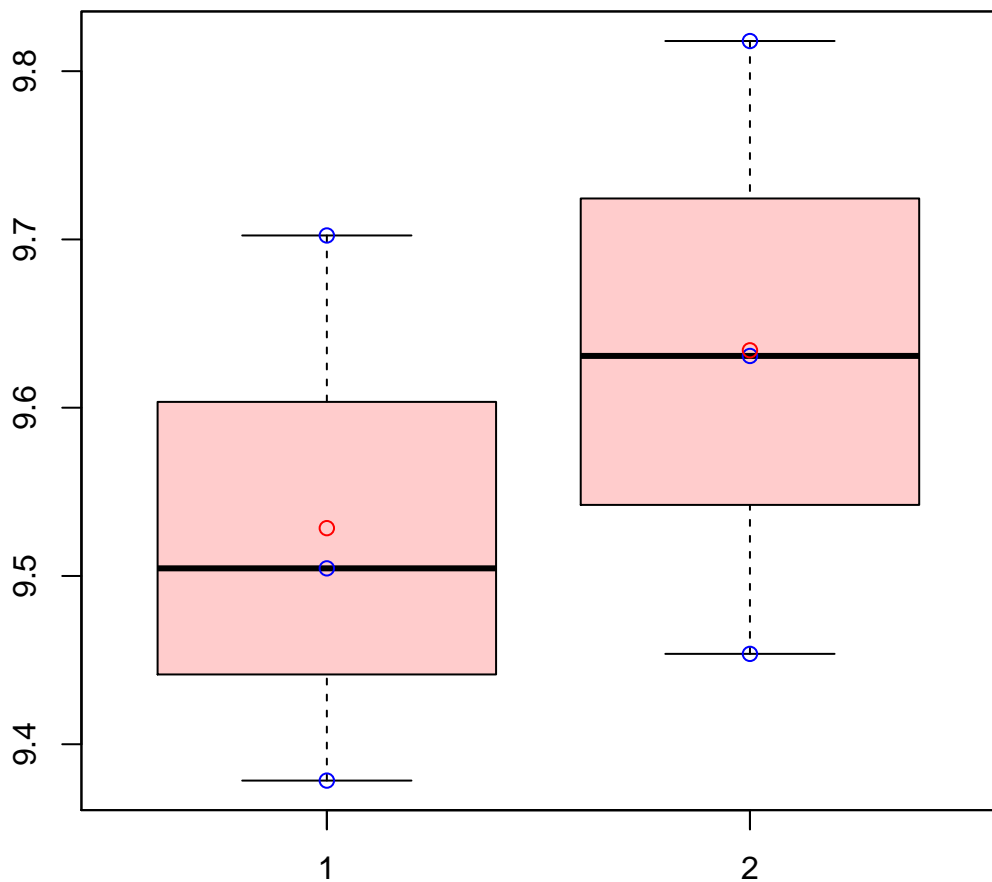

t-Test: p-value = 0.5

# Locus\_11108\_5\_6|Locus\_11108\_5\_6

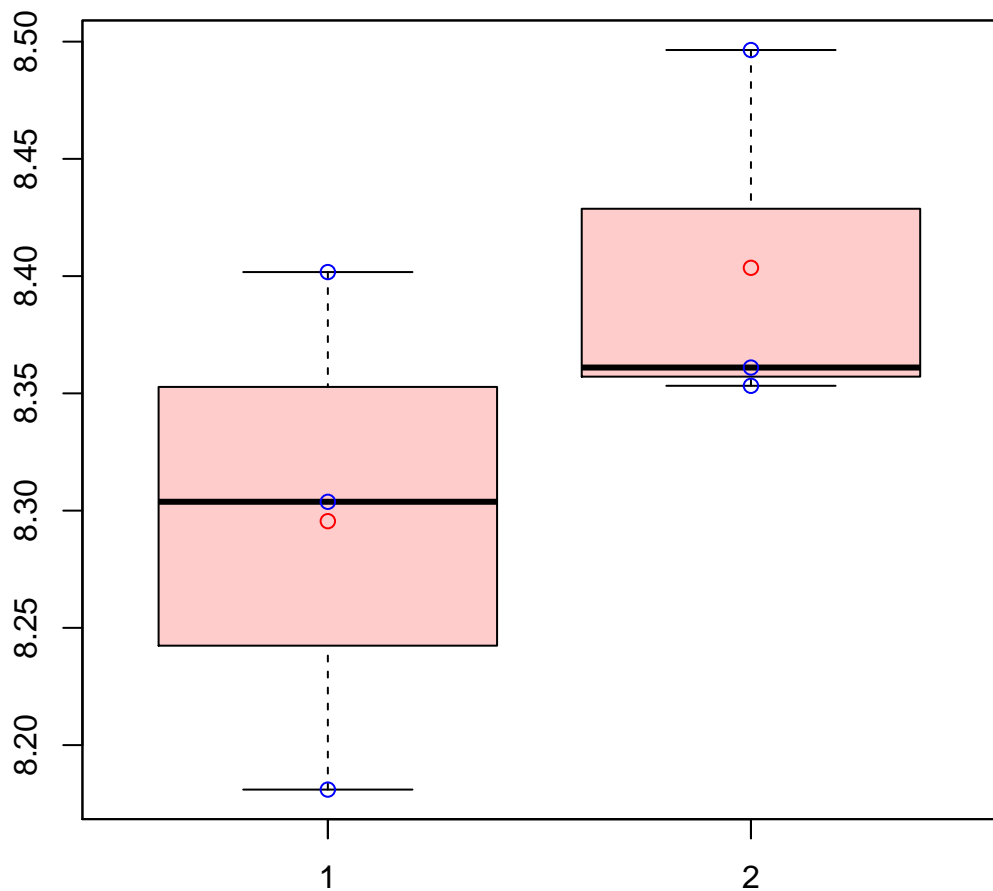

t-Test: p-value = 0.25

# Locus\_1113\_2\_2|Locus\_1113\_2\_2

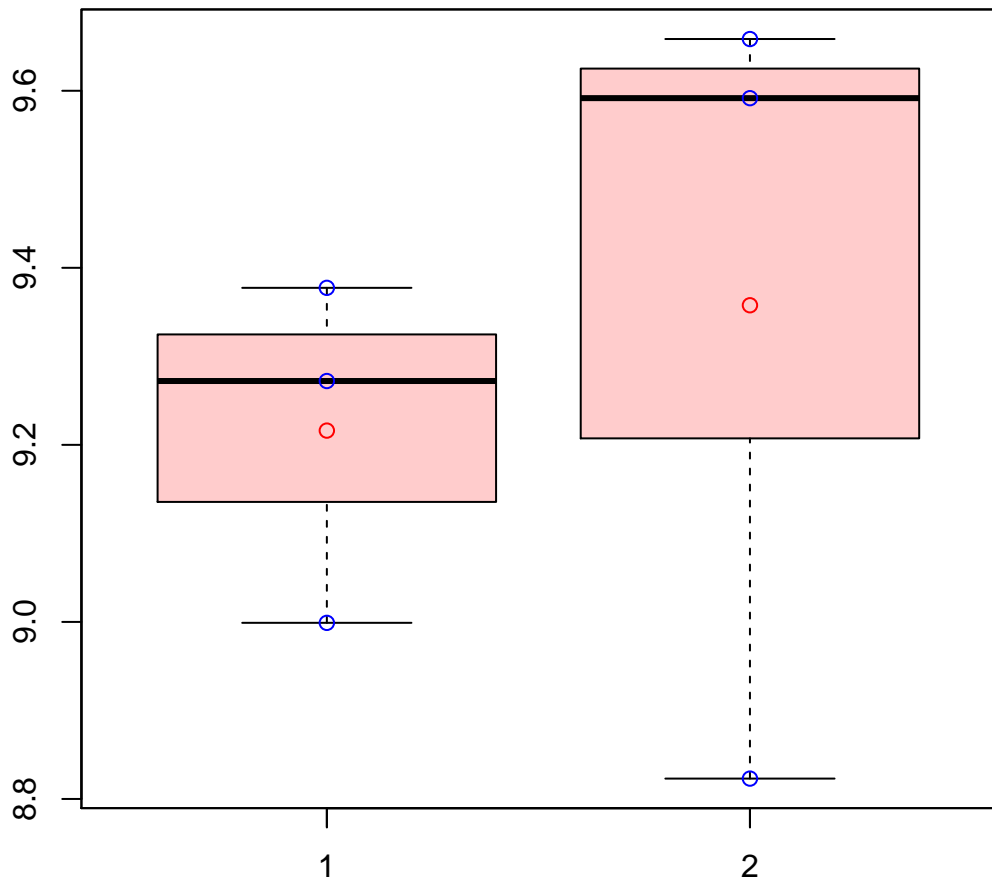

t-Test: p-value = 0.66

# Locus\_1138\_1\_3|Locus\_1138\_1\_3

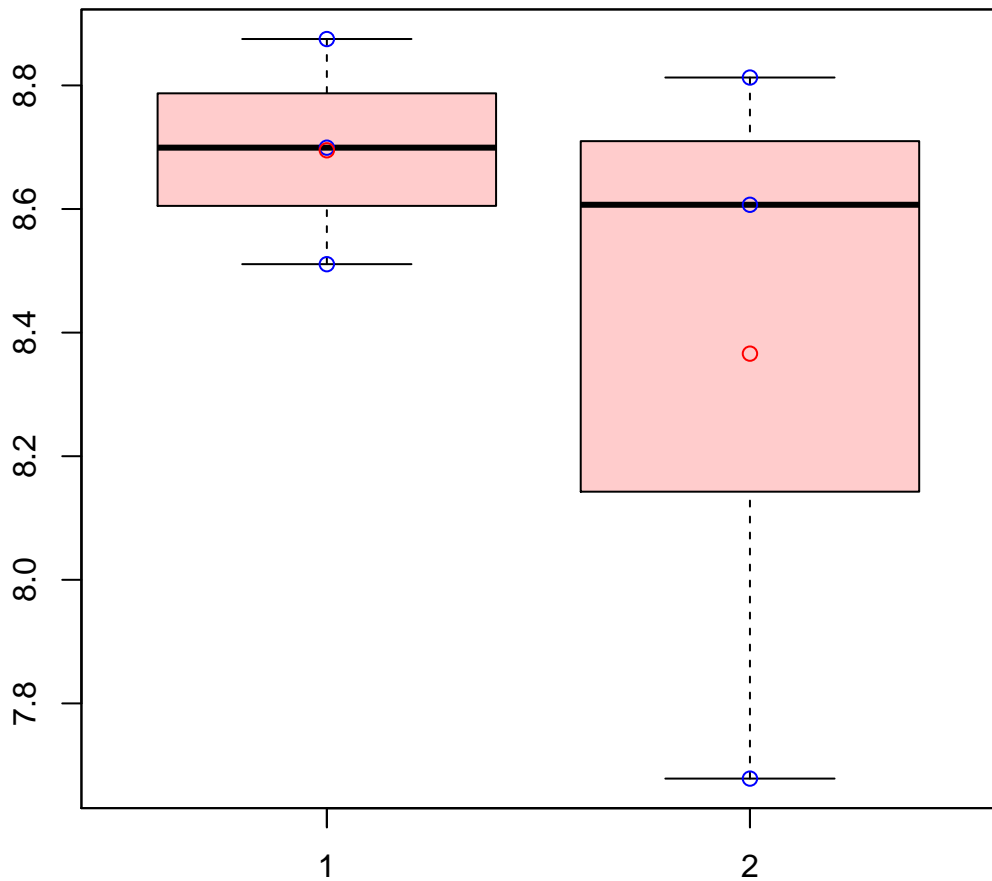

t-Test: p-value = 0.45



# Locus\_1139\_2\_3|Locus\_1139\_2\_3

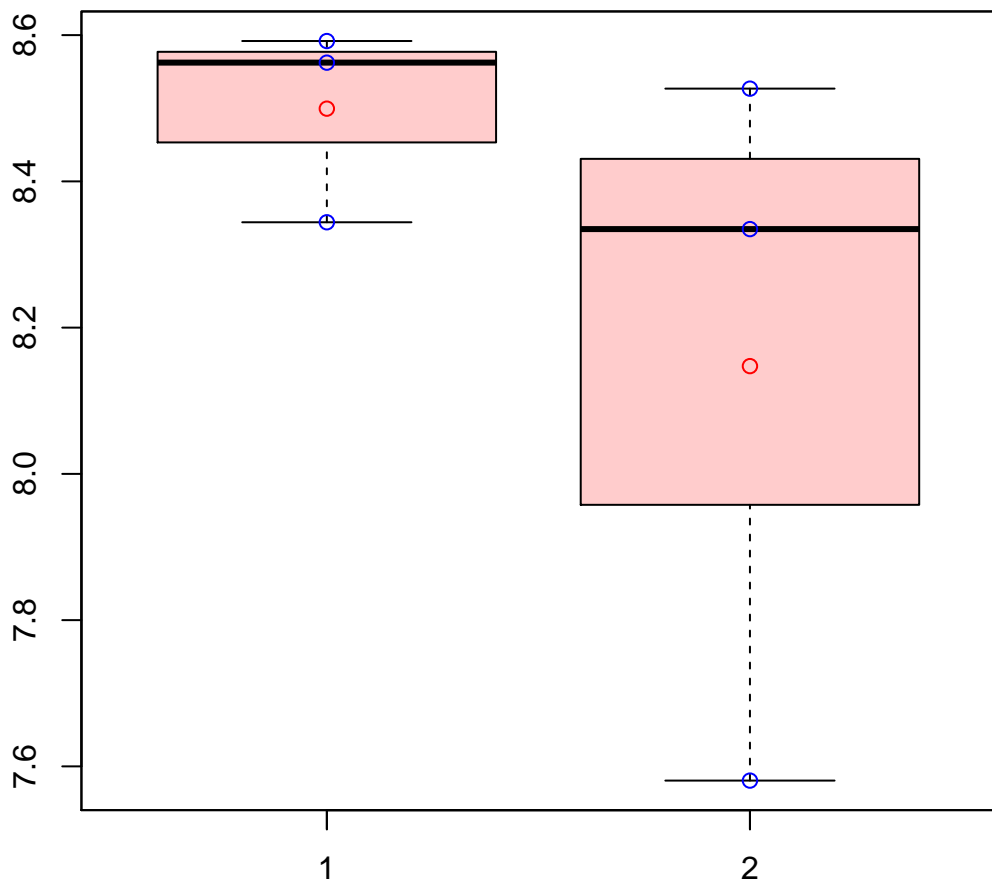

t-Test: p-value = 0.35

# Locus\_11550\_3\_7|Locus\_11550\_3\_7

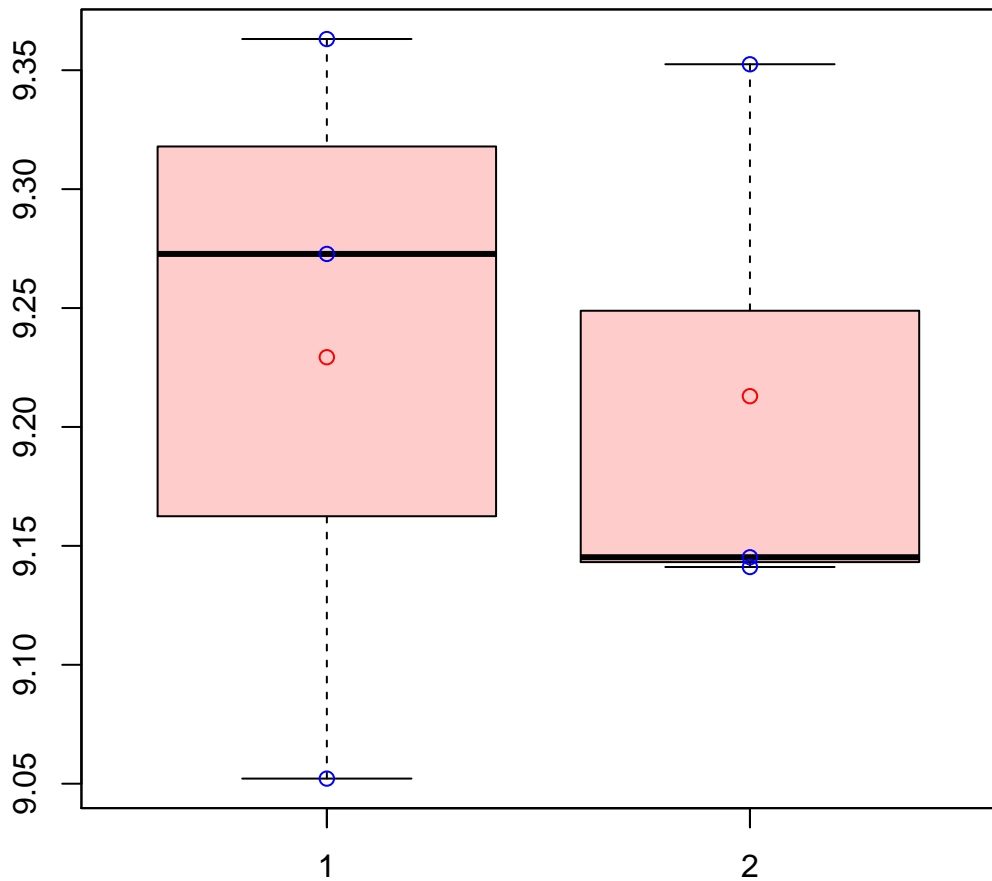

t-Test: p-value = 0.89

# Locus\_1180\_4\_10|Locus\_1180\_4\_10

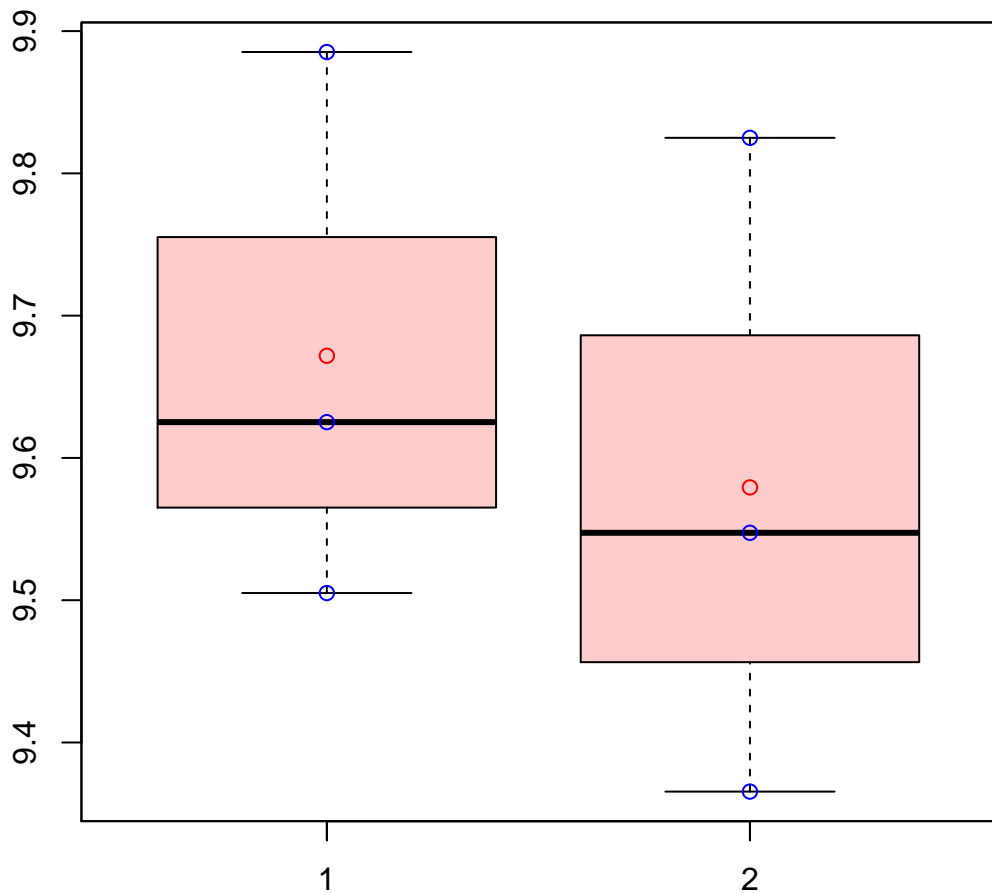

t-Test: p-value = 0.62

# Locus\_11848\_5\_6|Locus\_11848\_5\_6

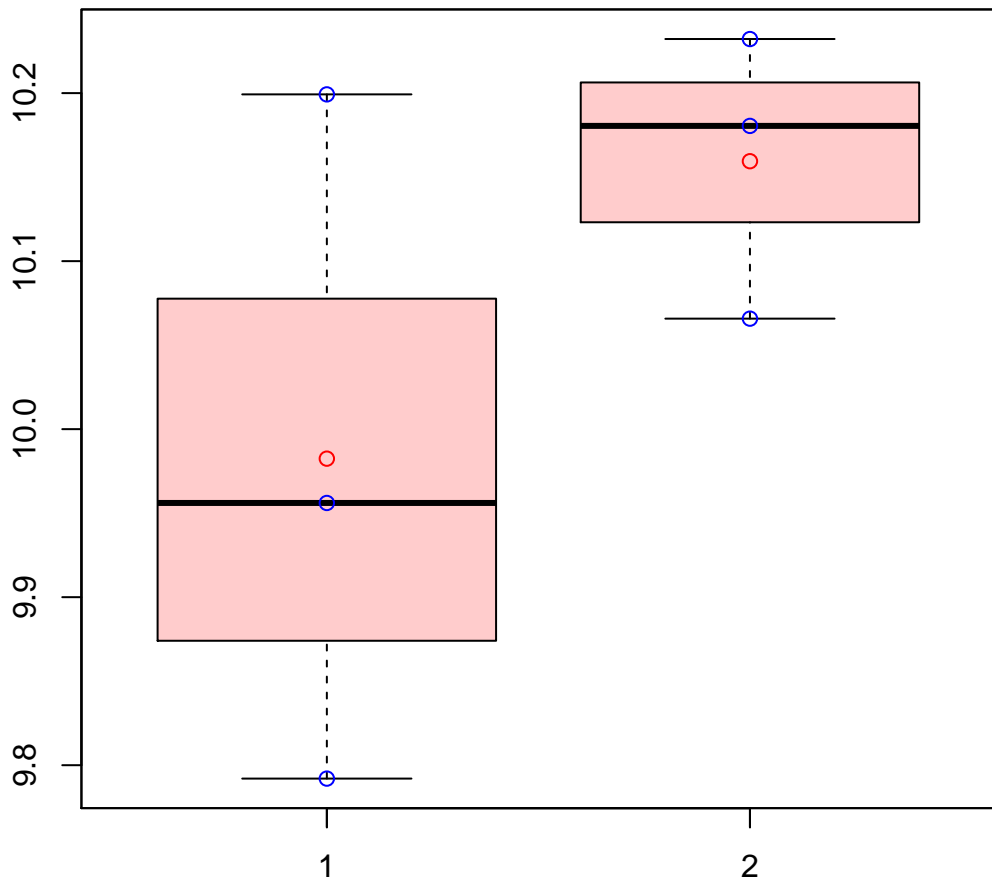

t-Test: p-value = 0.27

# Locus\_12209\_4\_6|Locus\_12209\_4\_6

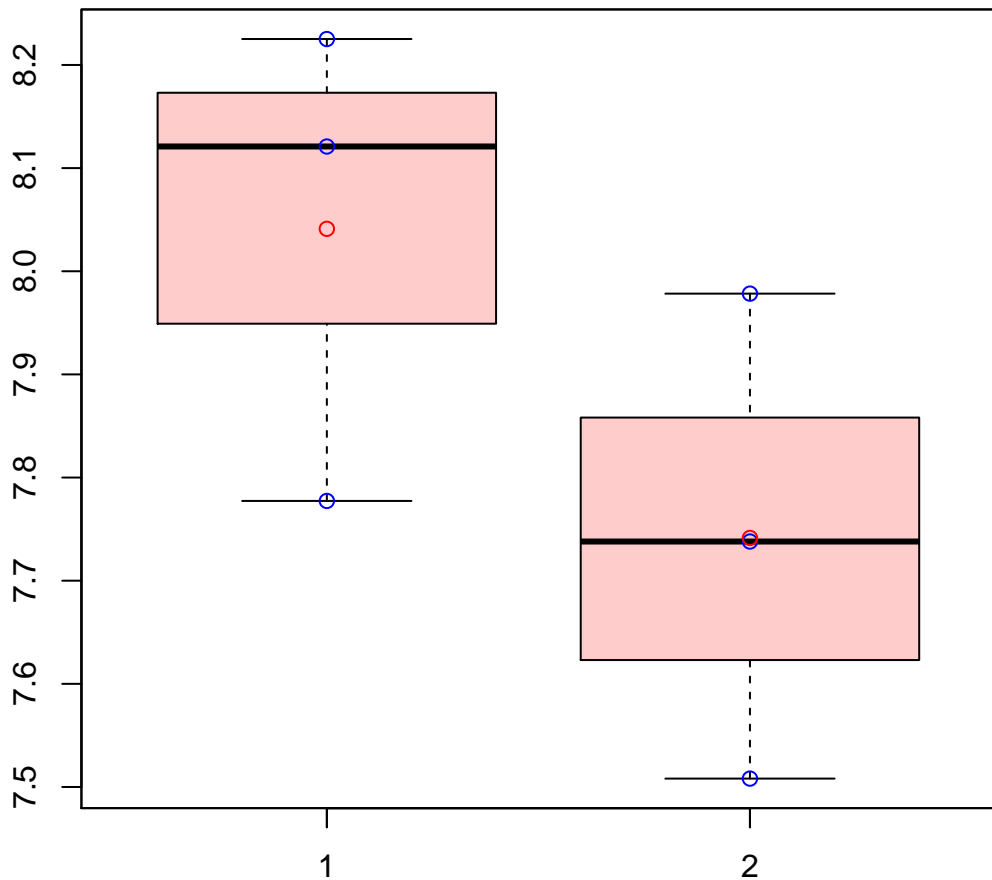

t-Test: p-value = 0.19

# Locus\_1225\_11\_12|Locus\_1225\_11\_12

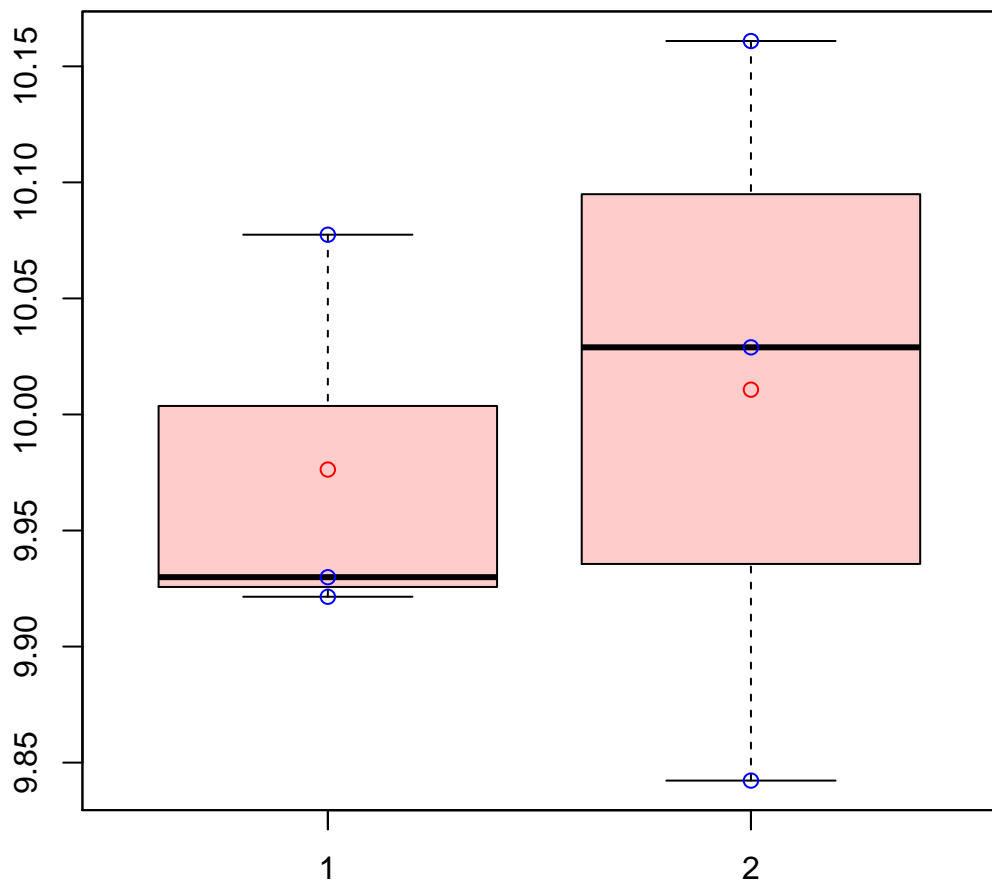

t-Test: p-value = 0.76

# Locus\_1228\_1\_10|Locus\_1228\_1\_10

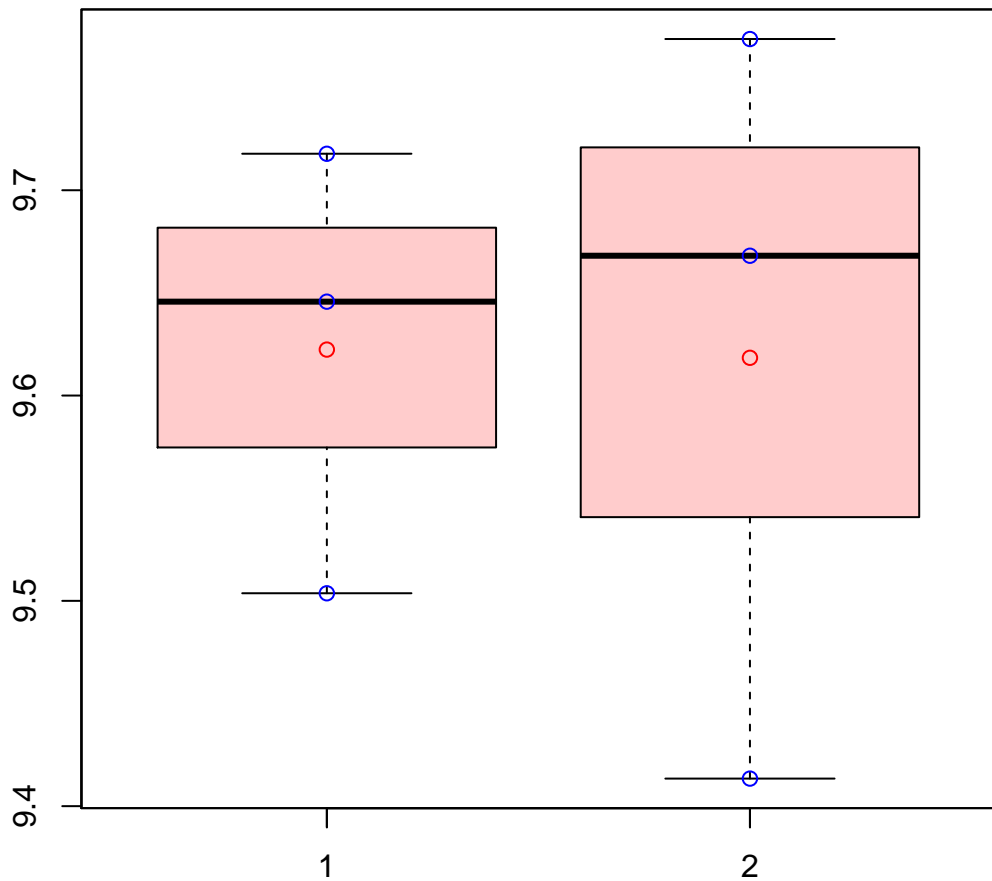

t-Test: p-value = 0.98

# Locus\_12434\_1\_4|Locus\_12434\_1\_4

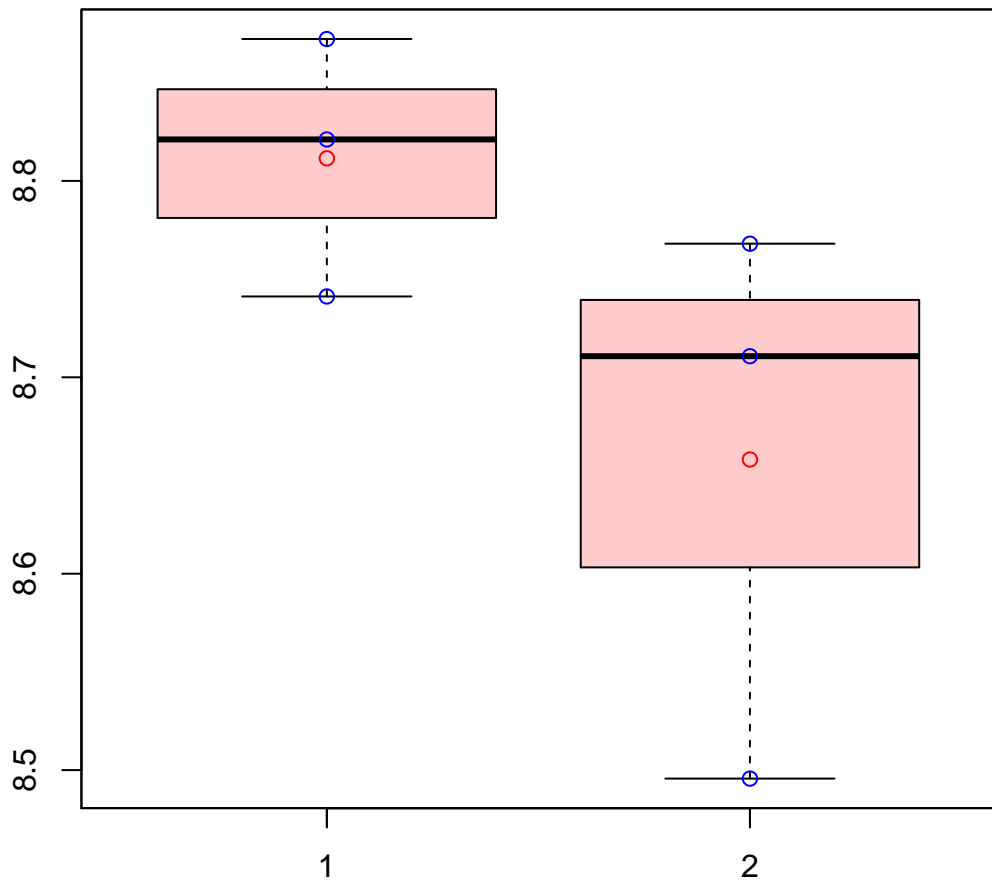

t-Test: p-value = 0.2



# Locus\_1\_26\_31|Locus\_1\_26\_31

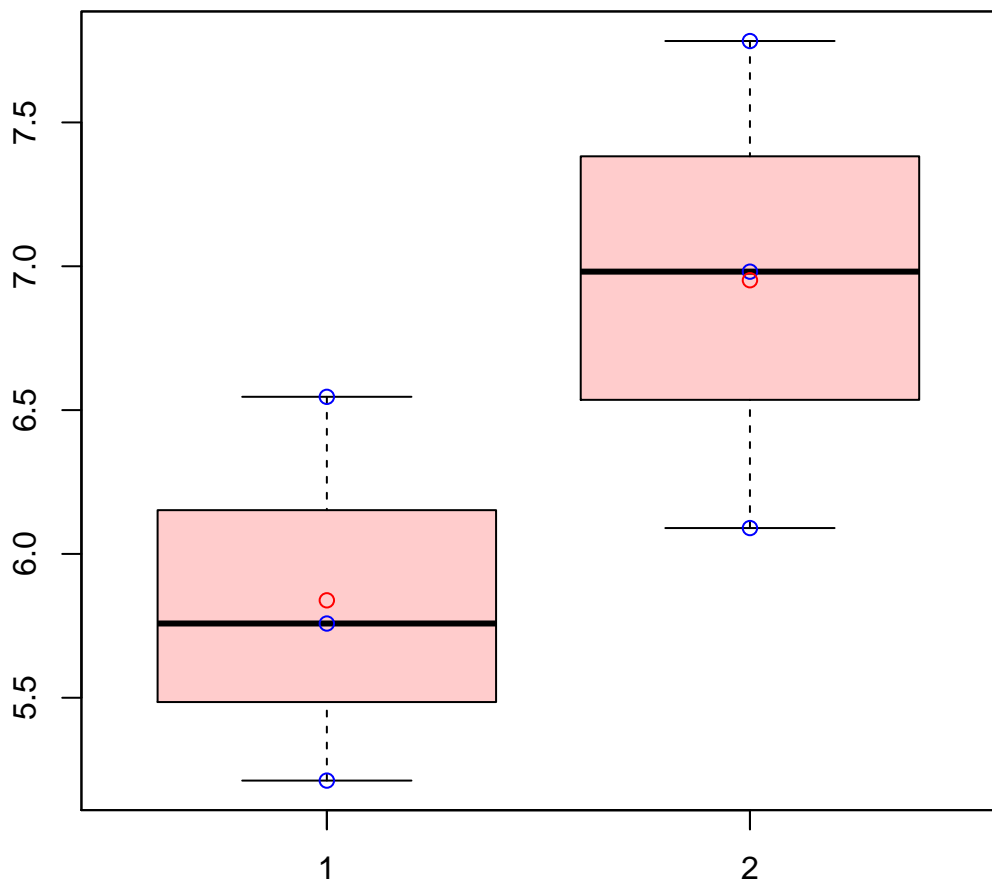

t-Test: p-value = 0.15

# Locus\_12706\_2\_3|Locus\_12706\_2\_3

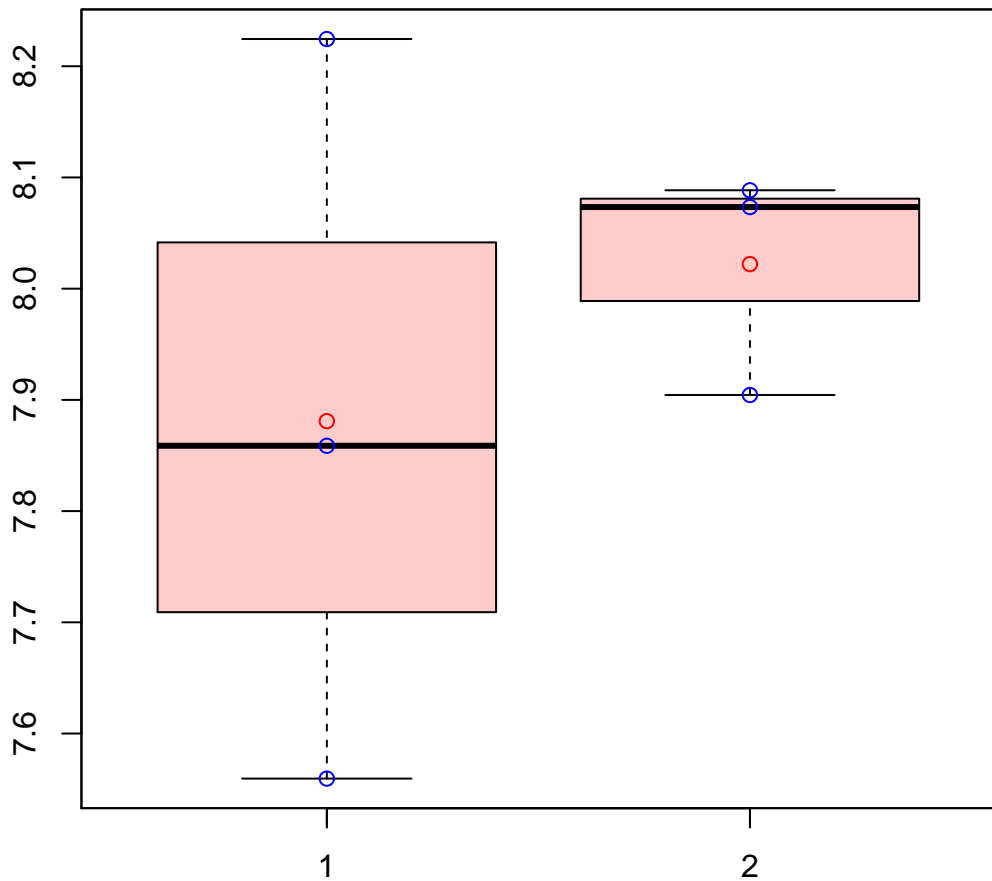

t-Test: p-value = 0.55

# Locus\_1\_27\_31|Locus\_1\_27\_31

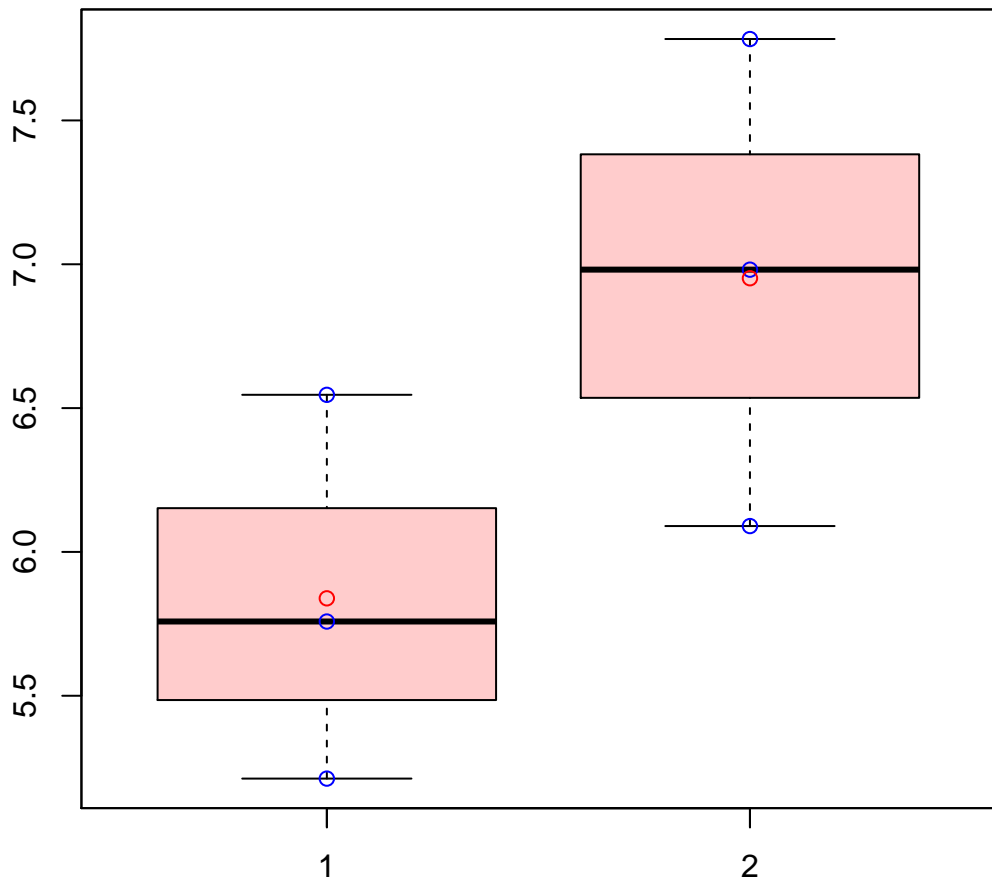

t-Test: p-value = 0.15

# Locus\_13156\_11\_12|Locus\_13156\_11\_12

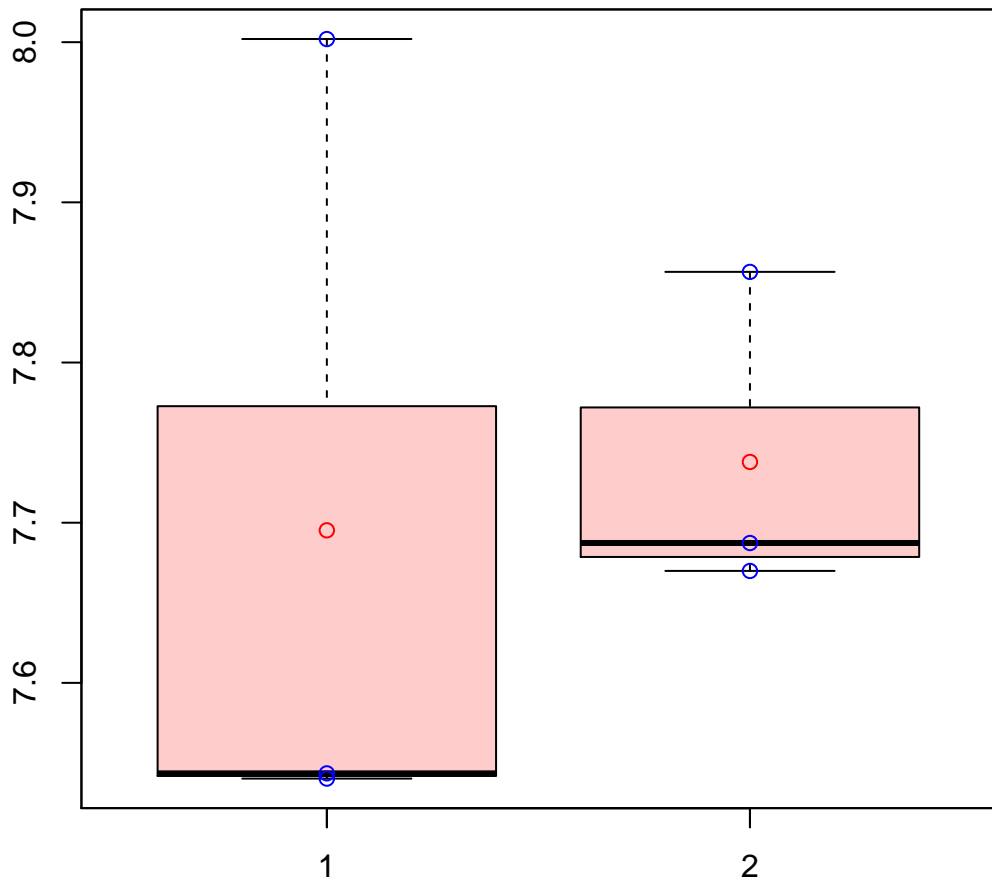

# Locus\_132\_1\_5|Locus\_132\_1\_5

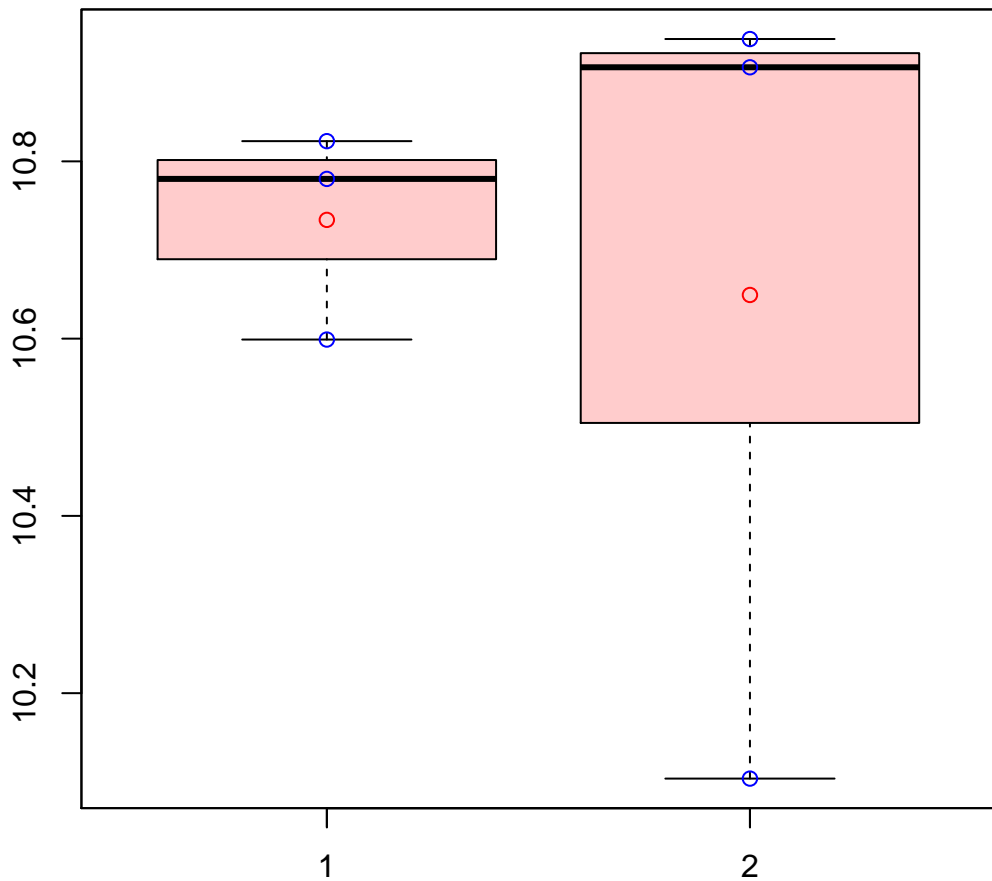

t-Test: p-value = 0.79

# Locus\_13789\_3\_7|Locus\_13789\_3\_7



t-Test: p-value = 0.24

# Locus\_14282\_2\_4|Locus\_14282\_2\_4

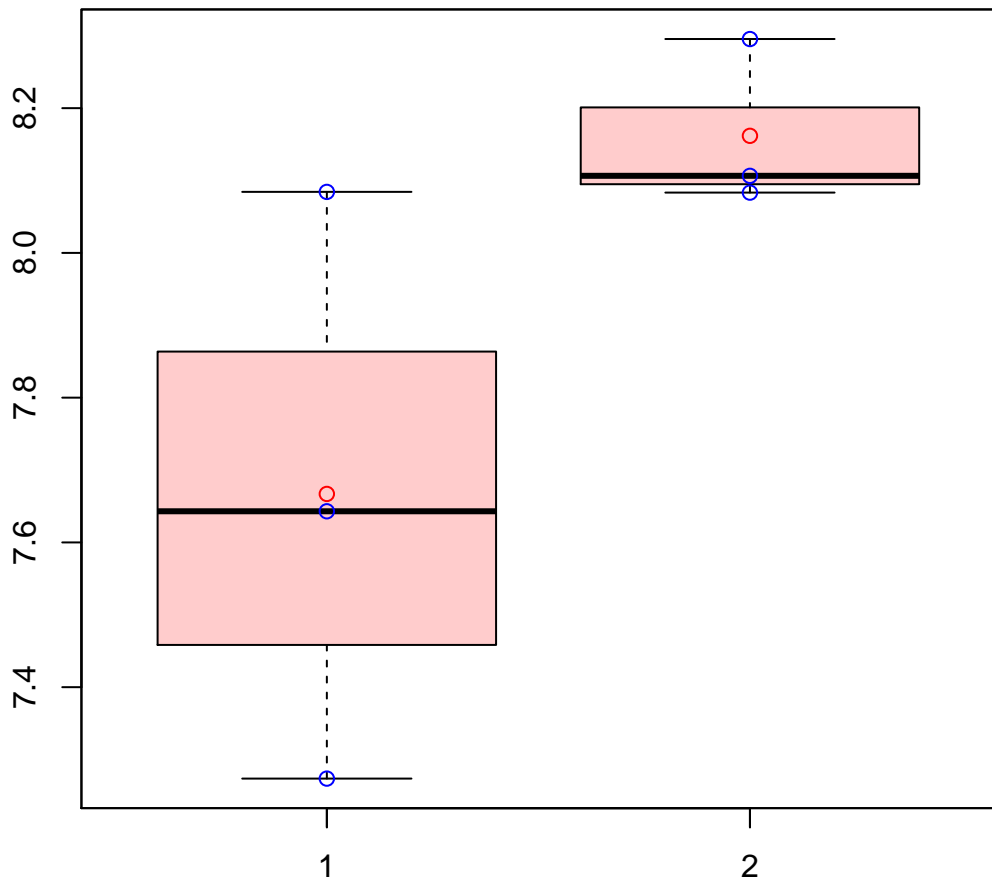

t-Test: p-value = 0.16

# Locus\_14293\_2\_3|Locus\_14293\_2\_3

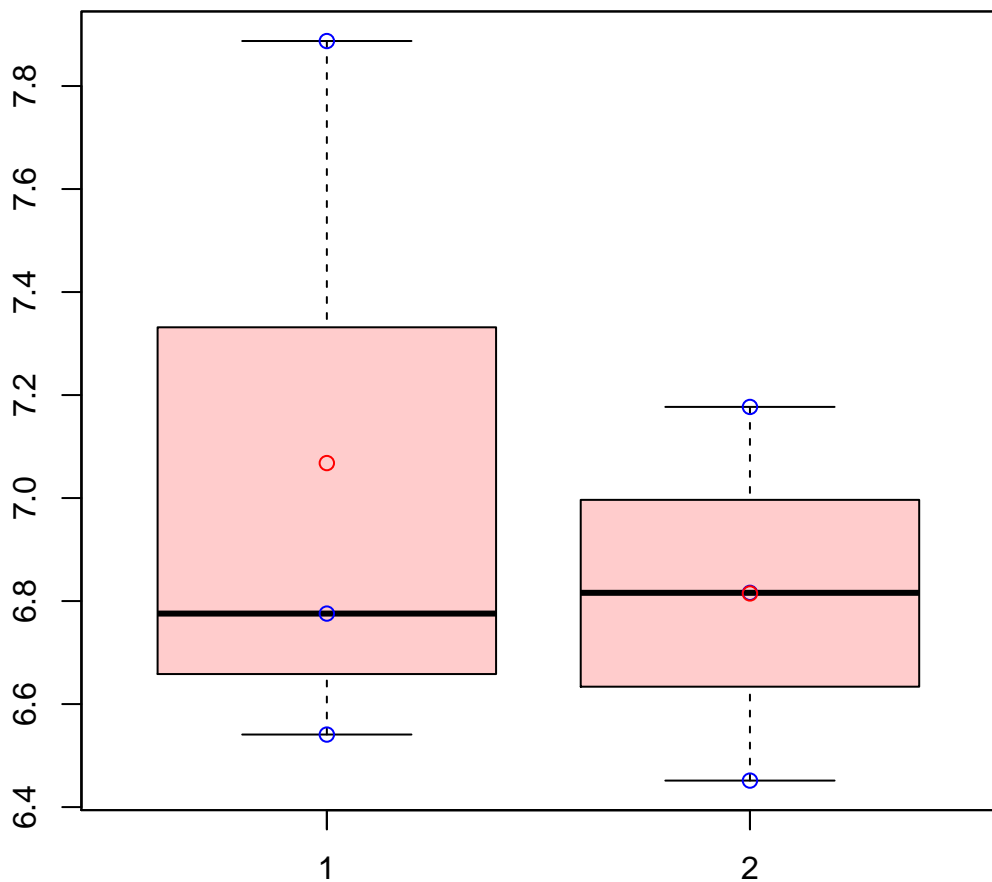

t-Test: p-value = 0.62



# Locus\_1430\_4\_6|Locus\_1430\_4\_6

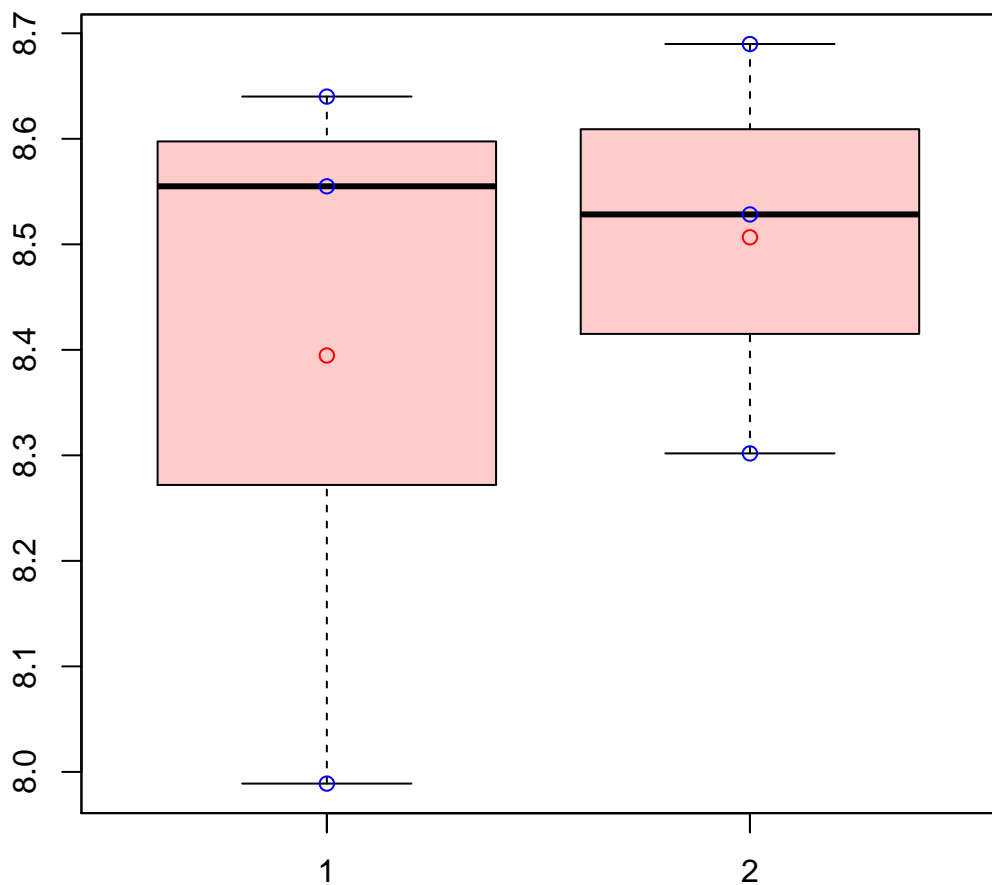

t-Test: p-value = 0.66

# Locus\_1430\_5\_6|Locus\_1430\_5\_6

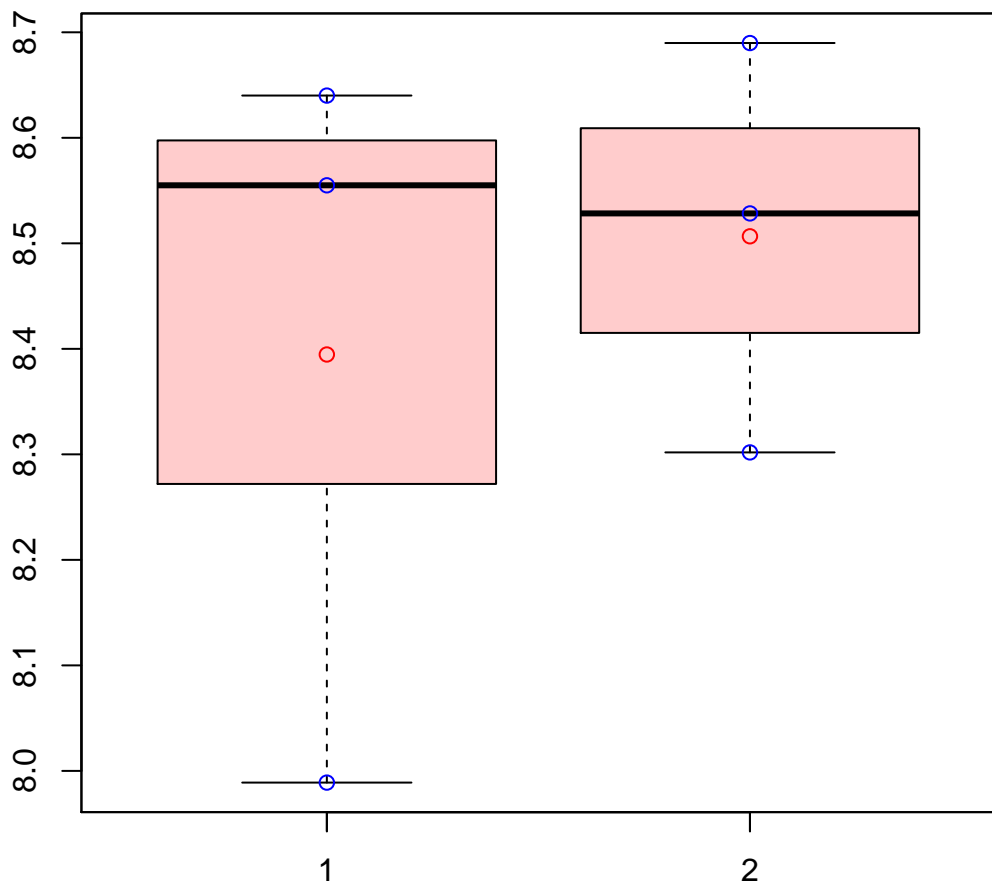

t-Test: p-value = 0.66

# Locus\_1431\_4\_5|Locus\_1431\_4\_5



t-Test: p-value = 0.24

# Locus\_1444\_3\_4|Locus\_1444\_3\_4



t-Test: p-value = 0.24

# Locus\_1501\_6\_6|Locus\_1501\_6\_6

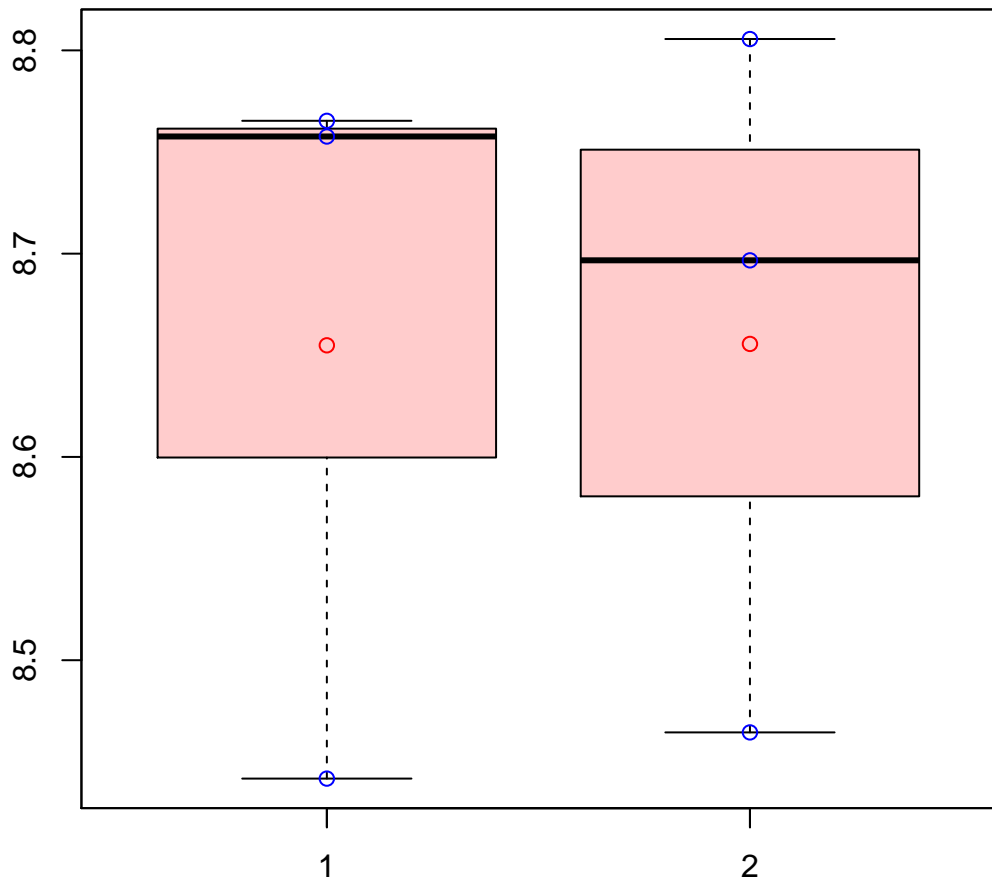

t-Test: p-value = 1

# Locus\_153\_4\_6|Locus\_153\_4\_6

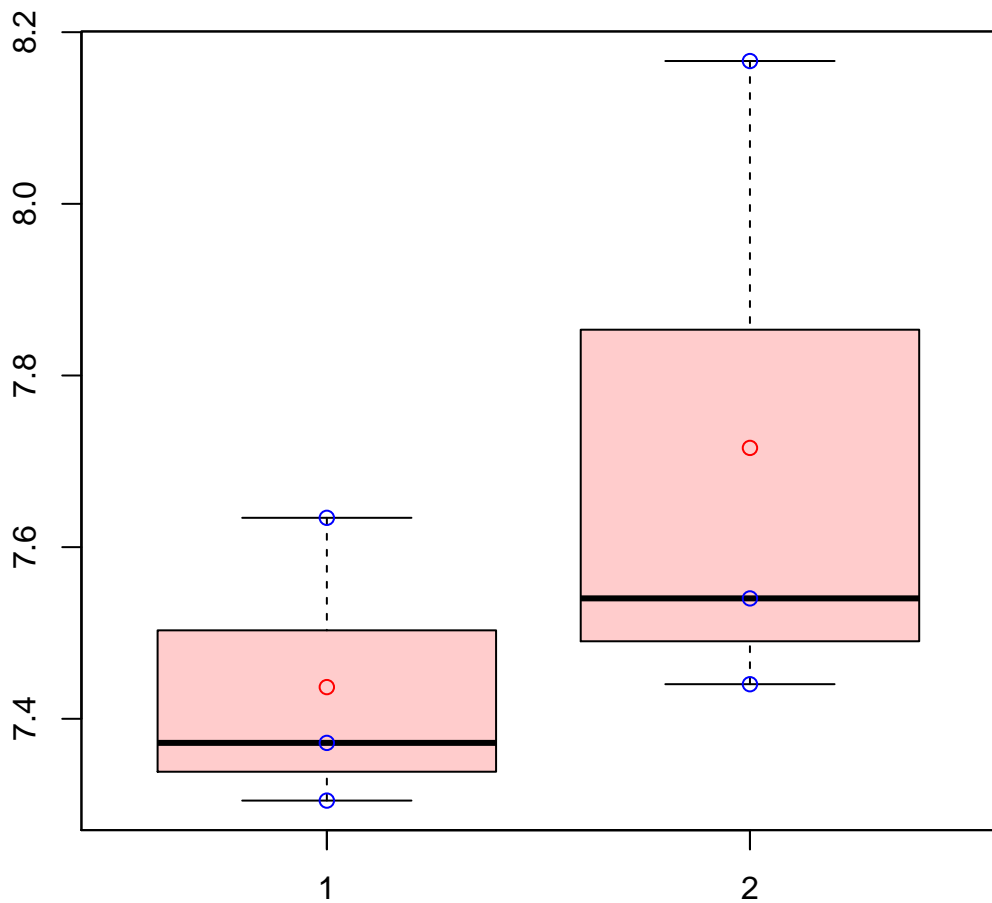

t-Test: p-value = 0.35

# Locus\_15480\_1\_7|Locus\_15480\_1\_7

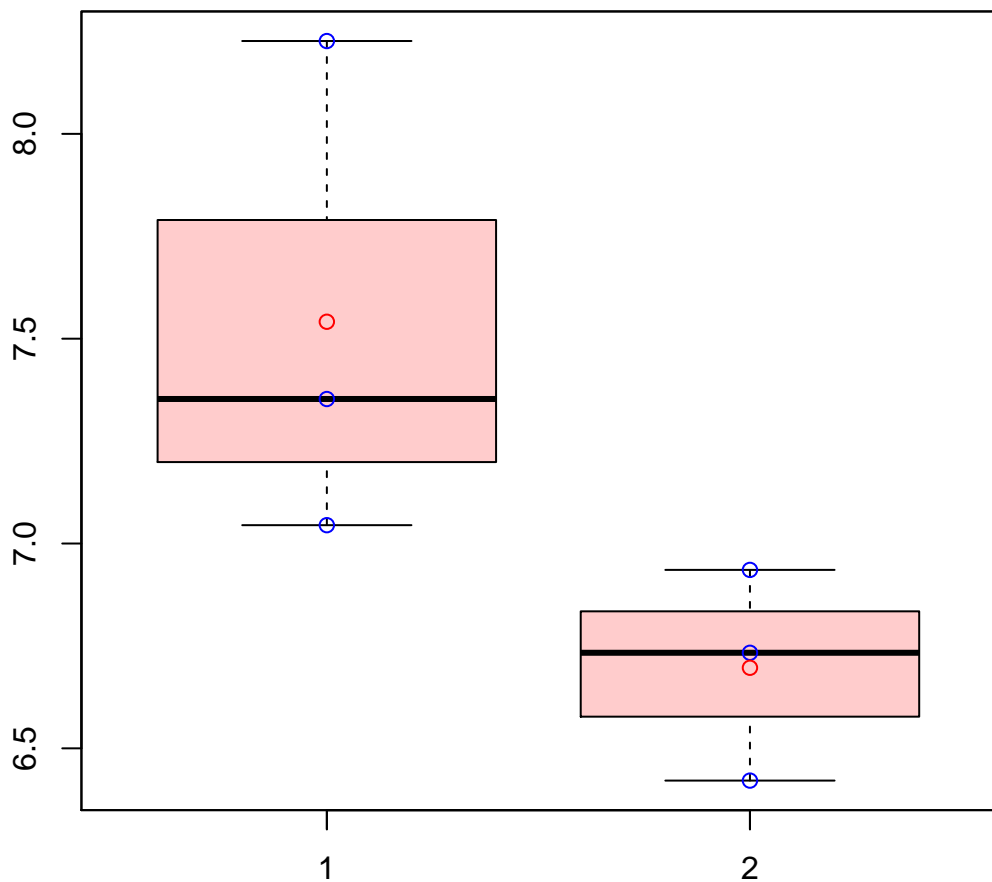

t-Test: p-value = 0.13

# Locus\_15723\_4\_6|Locus\_15723\_4\_6

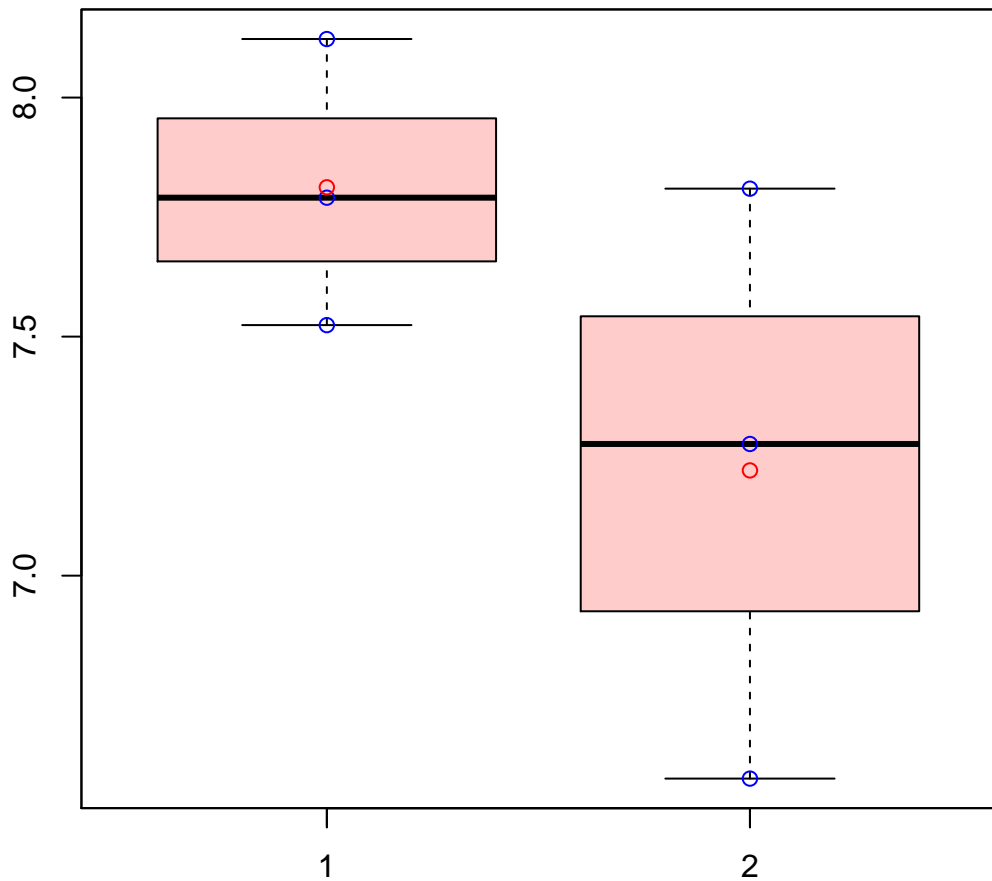

t-Test: p-value = 0.24



# Locus\_1584\_9\_10|Locus\_1584\_9\_10

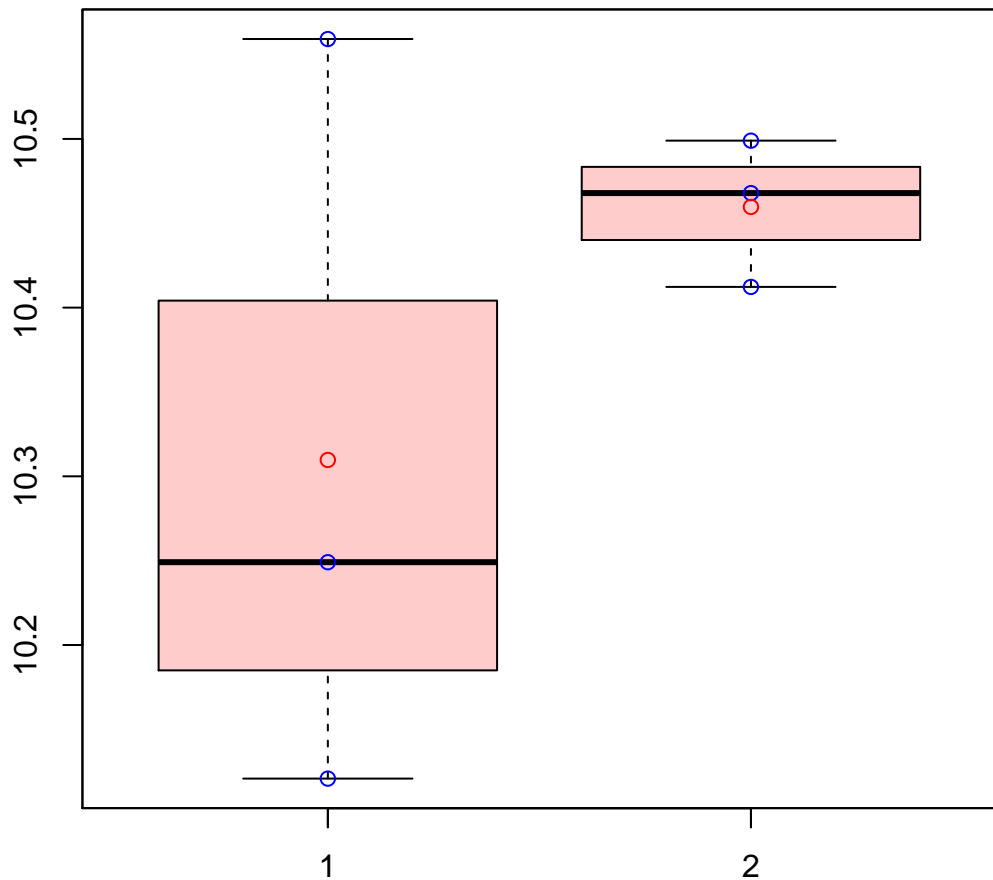

t-Test: p-value = 0.37

# Locus\_1605\_2\_5|Locus\_1605\_2\_5



t-Test: p-value = 0.51

# Locus\_1651\_3\_5|Locus\_1651\_3\_5

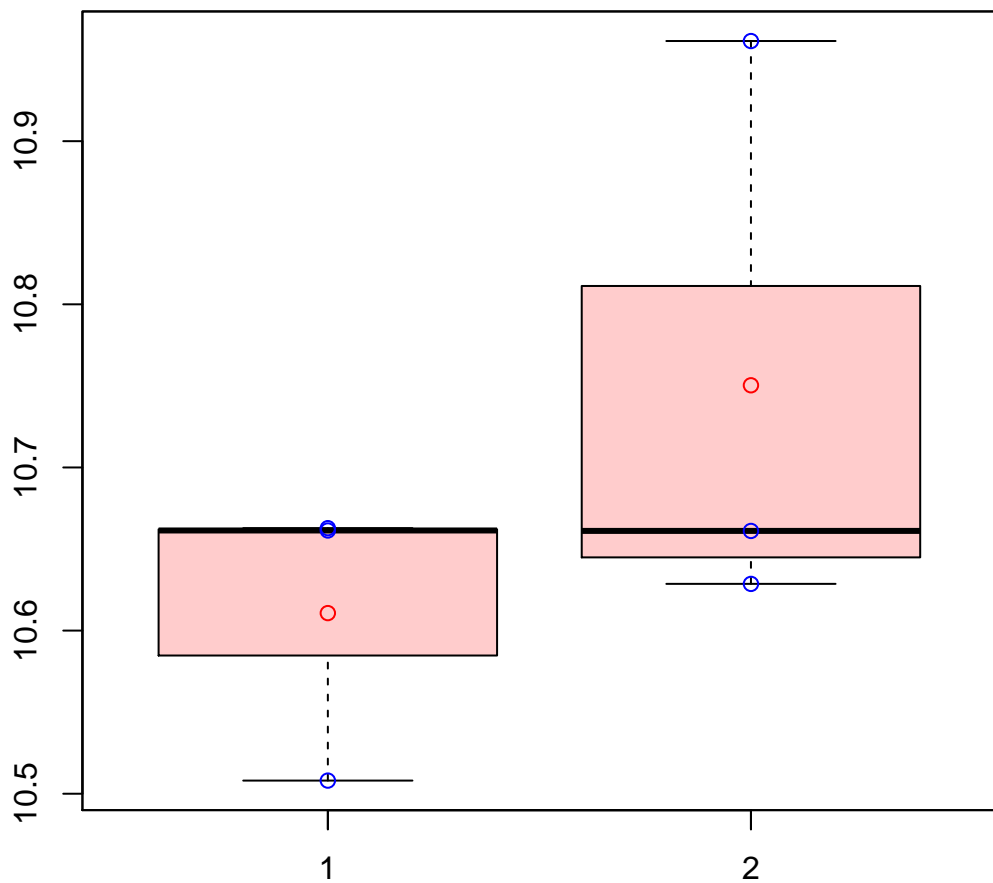

t-Test: p-value = 0.32

# Locus\_1783\_2\_10|Locus\_1783\_2\_10

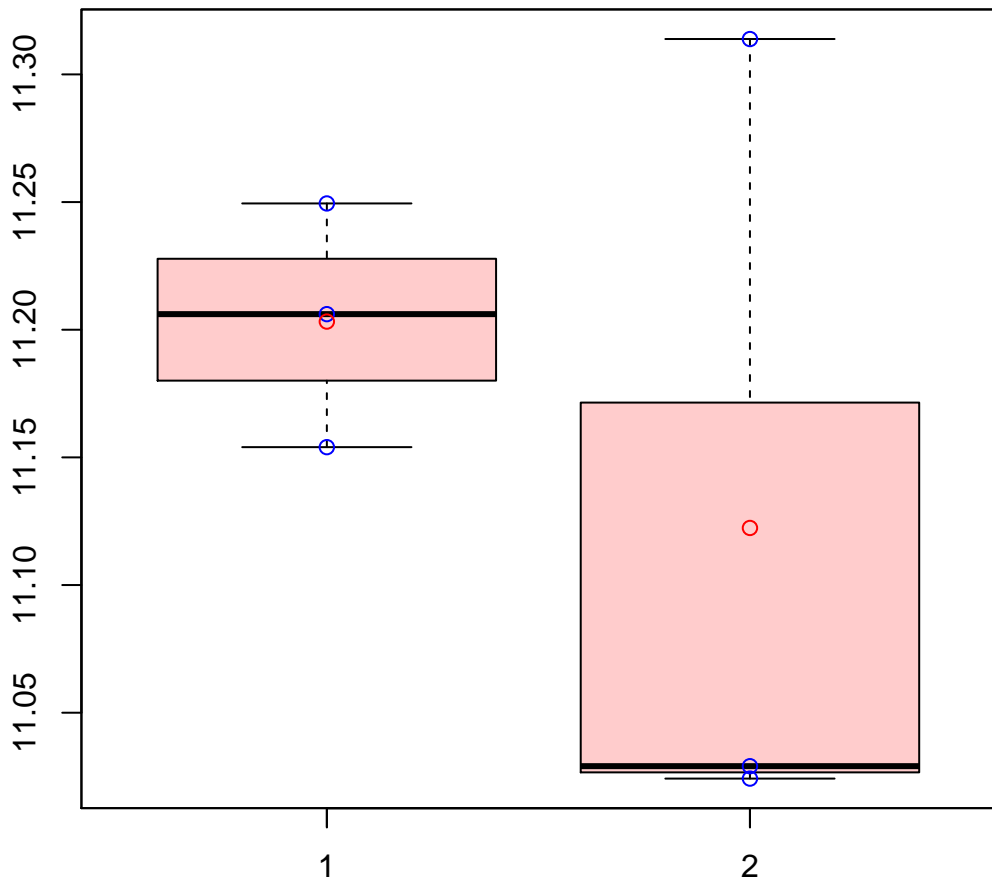

t-Test: p-value = 0.49

# Locus\_1811\_4\_10|Locus\_1811\_4\_10

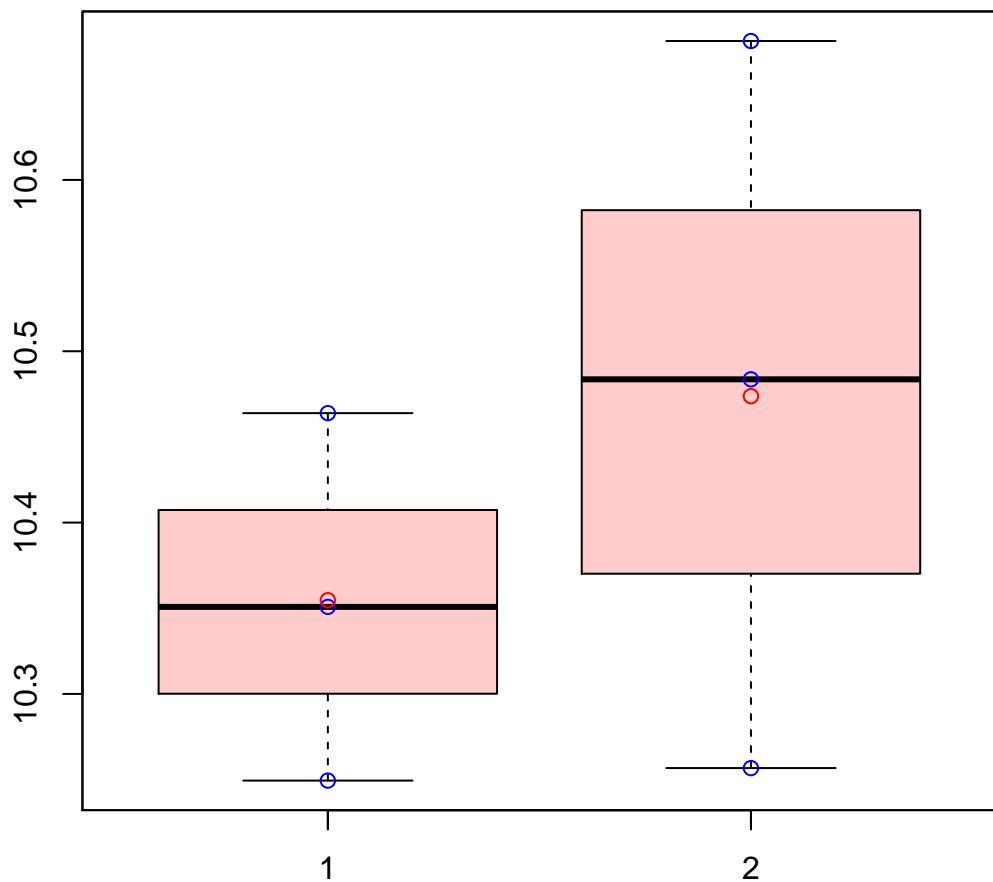

t-Test: p-value = 0.45

# Locus\_1811\_7\_10|Locus\_1811\_7\_10

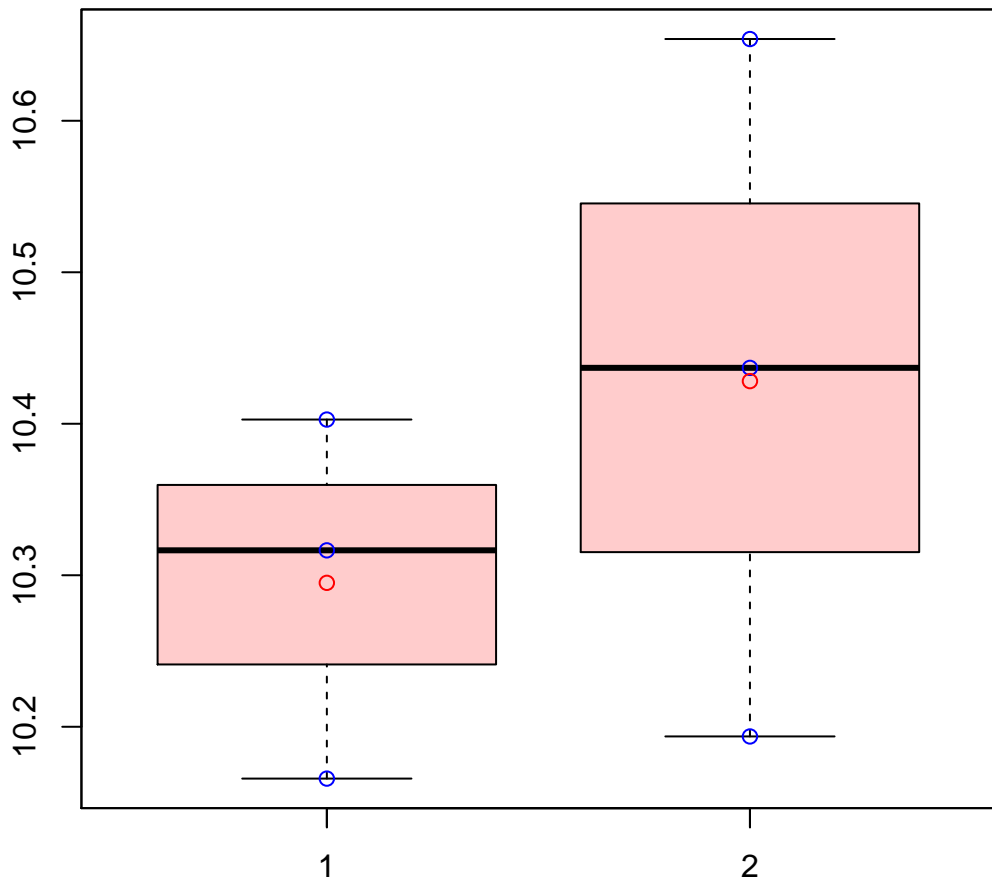

t-Test: p-value = 0.44

# Locus\_1821\_5\_10|Locus\_1821\_5\_10

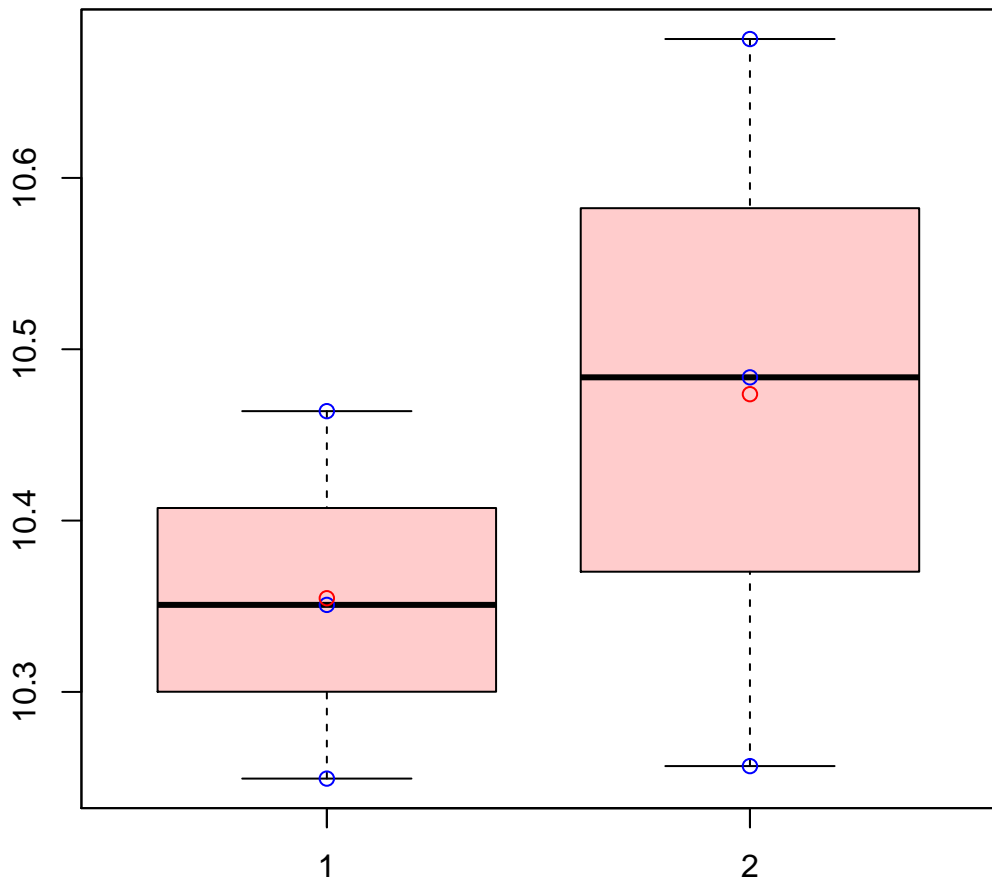

t-Test: p-value = 0.45

# Locus\_1821\_7\_10|Locus\_1821\_7\_10



t-Test: p-value = 0.44



# Locus\_1824\_1\_8|Locus\_1824\_1\_8

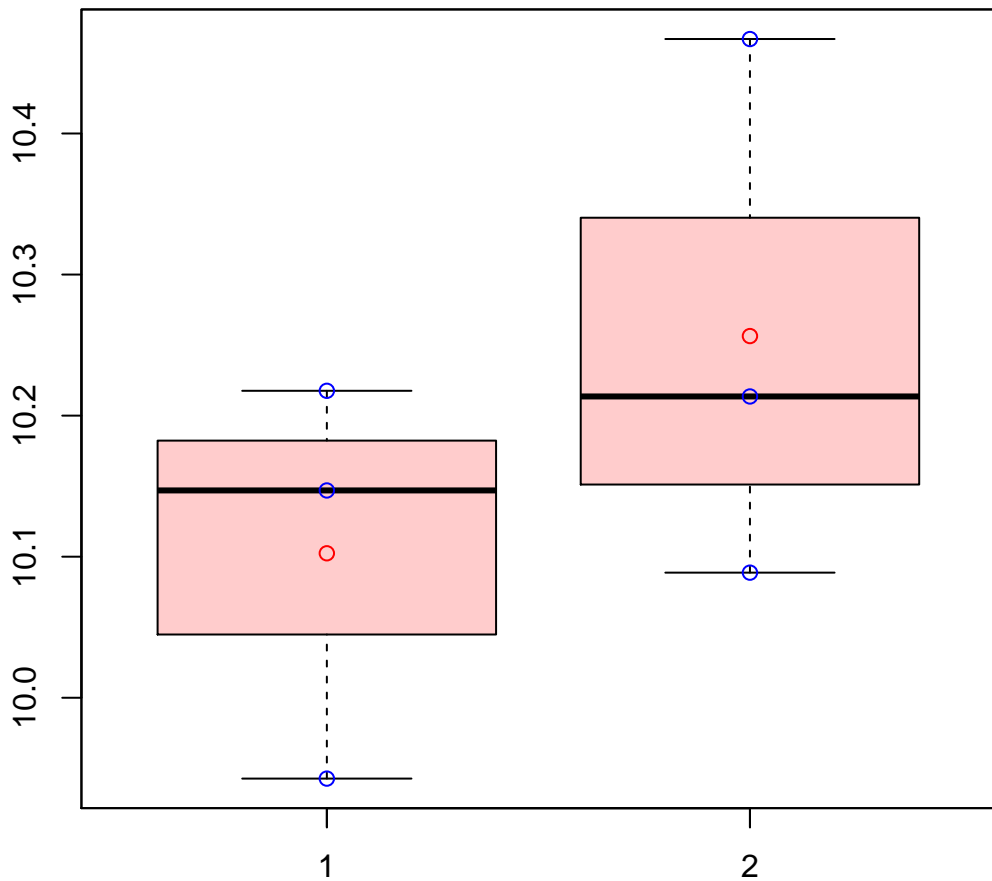

t-Test: p-value = 0.33

# Locus\_1824\_5\_8|Locus\_1824\_5\_8

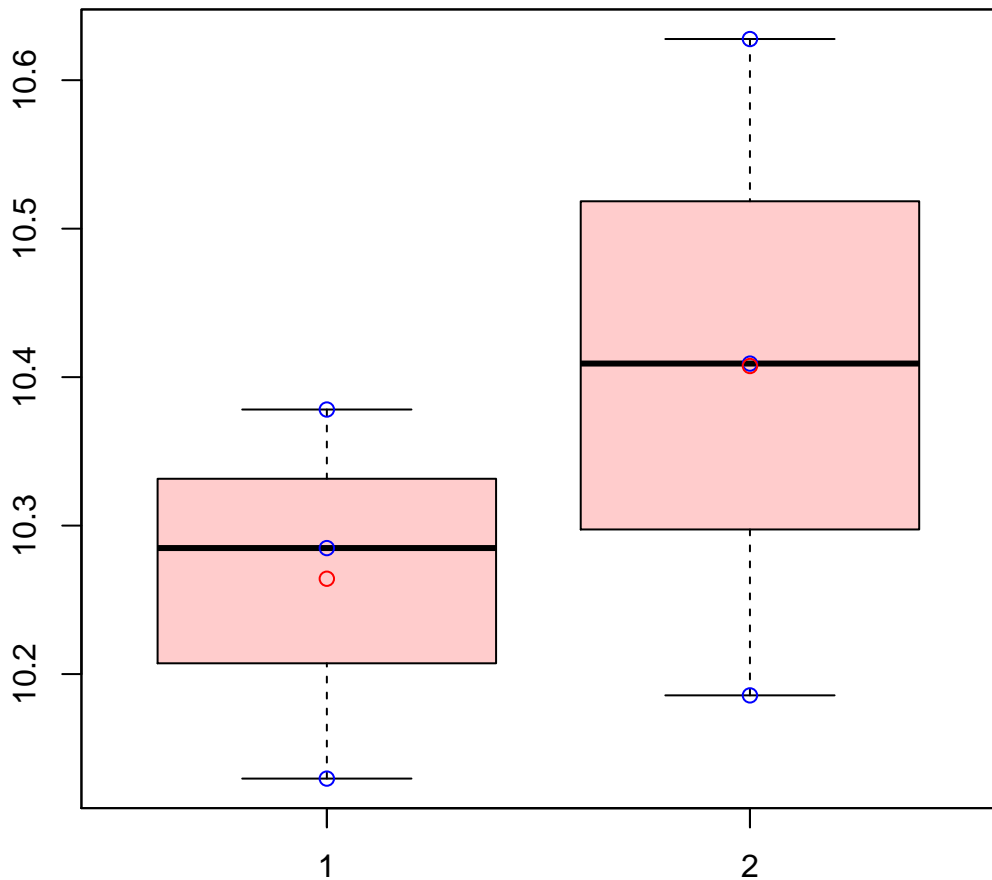

t-Test: p-value = 0.4

# Locus\_18328\_6\_7|Locus\_18328\_6\_7

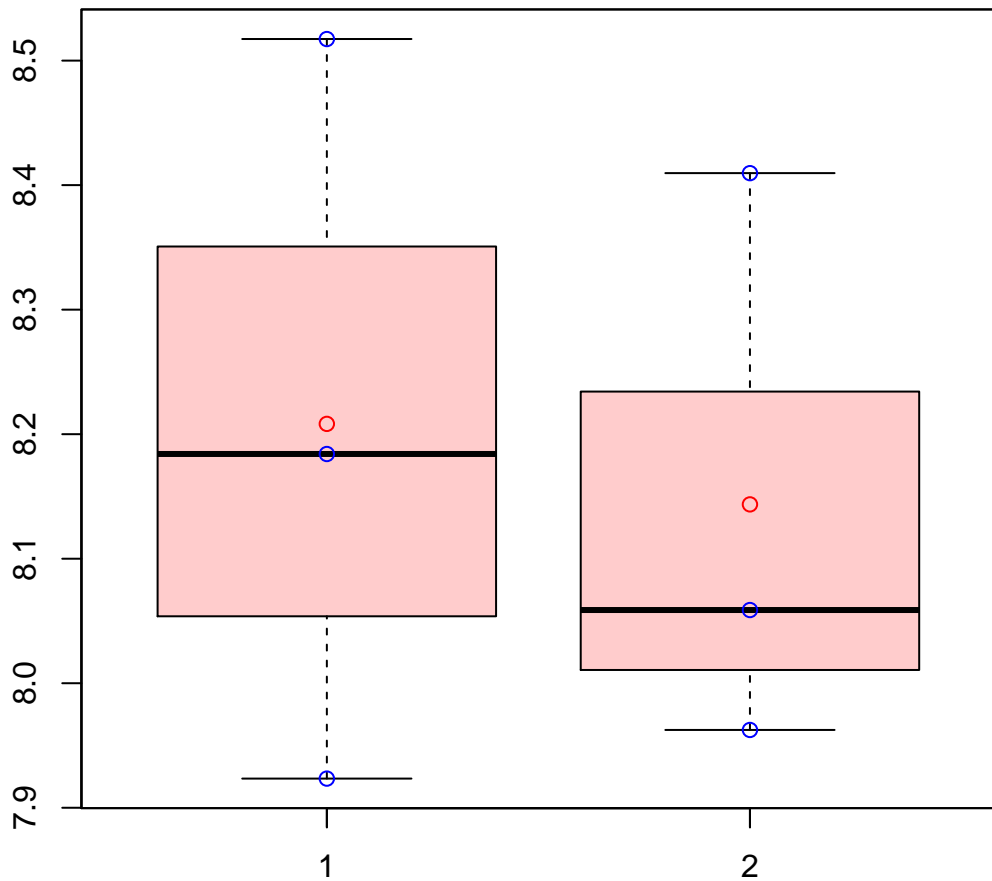

t-Test: p-value = 0.78

# Locus\_1908\_2\_7|Locus\_1908\_2\_7



t-Test: p-value = 0.55

# Locus\_192\_1\_6|Locus\_192\_1\_6

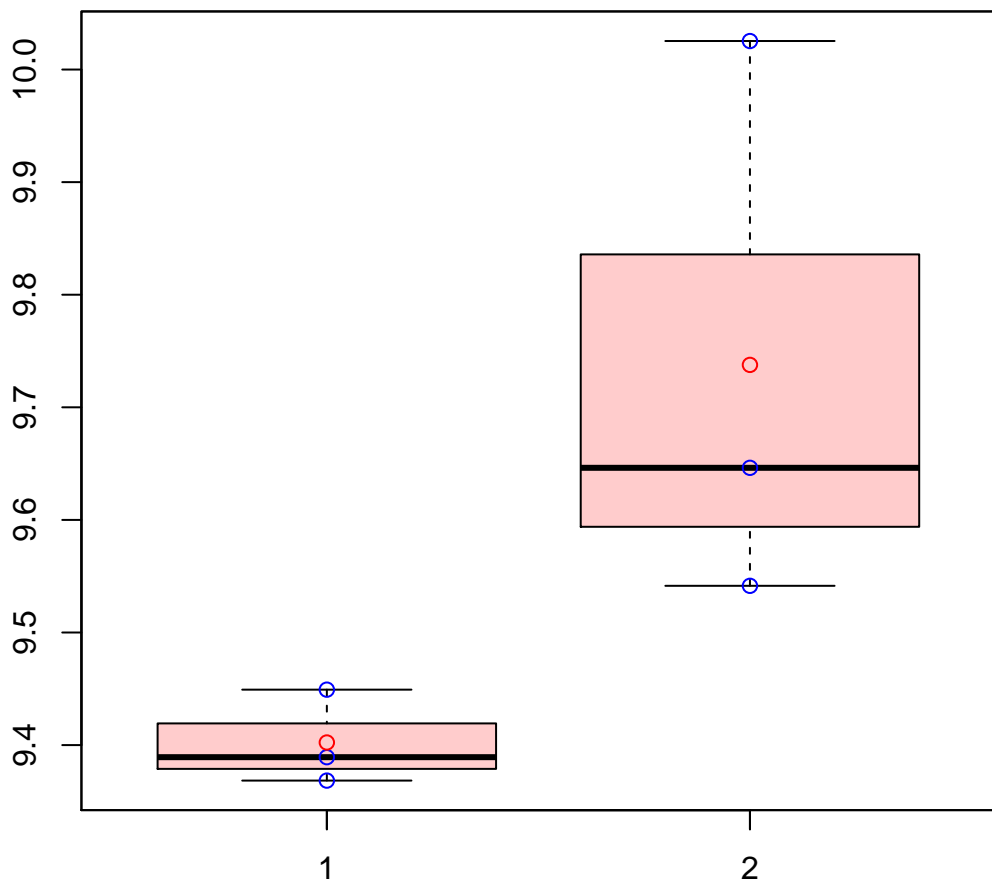

t-Test: p-value = 0.15

# Locus\_1972\_7\_10|Locus\_1972\_7\_10

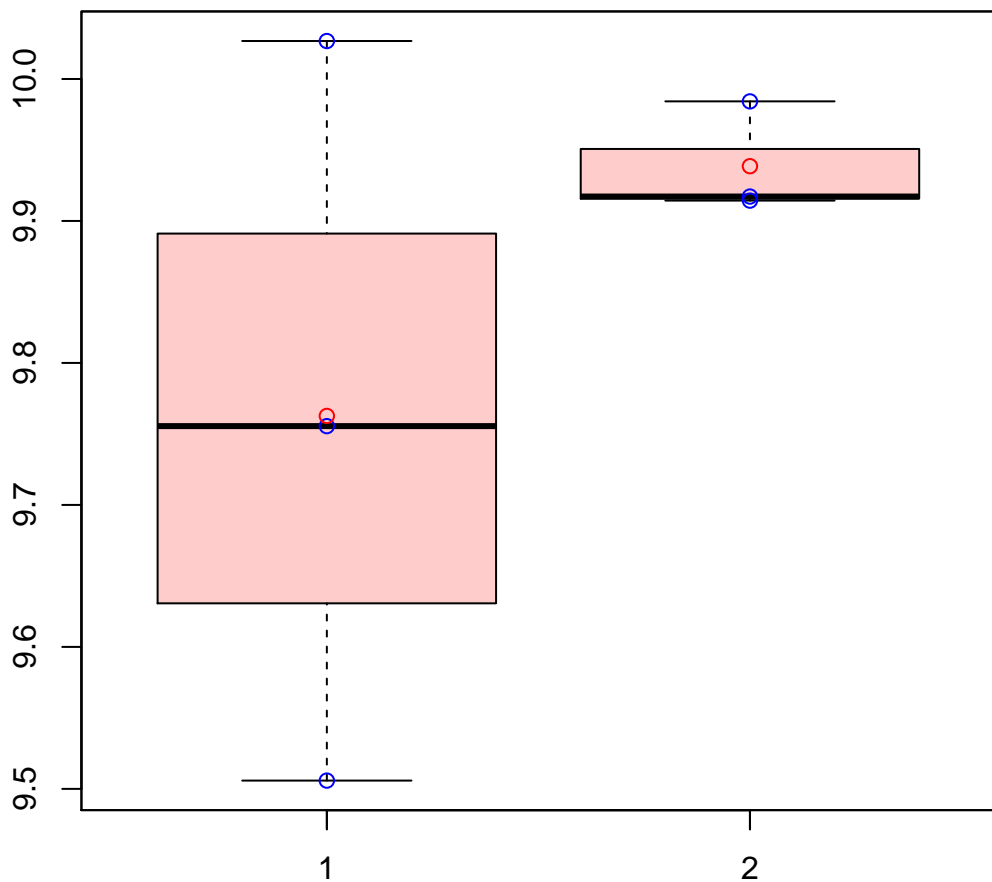

t-Test: p-value = 0.36

# Locus\_1987\_1\_5|Locus\_1987\_1\_5



t-Test: p-value = 0.56

# Locus\_1987\_2\_9|Locus\_1987\_2\_9

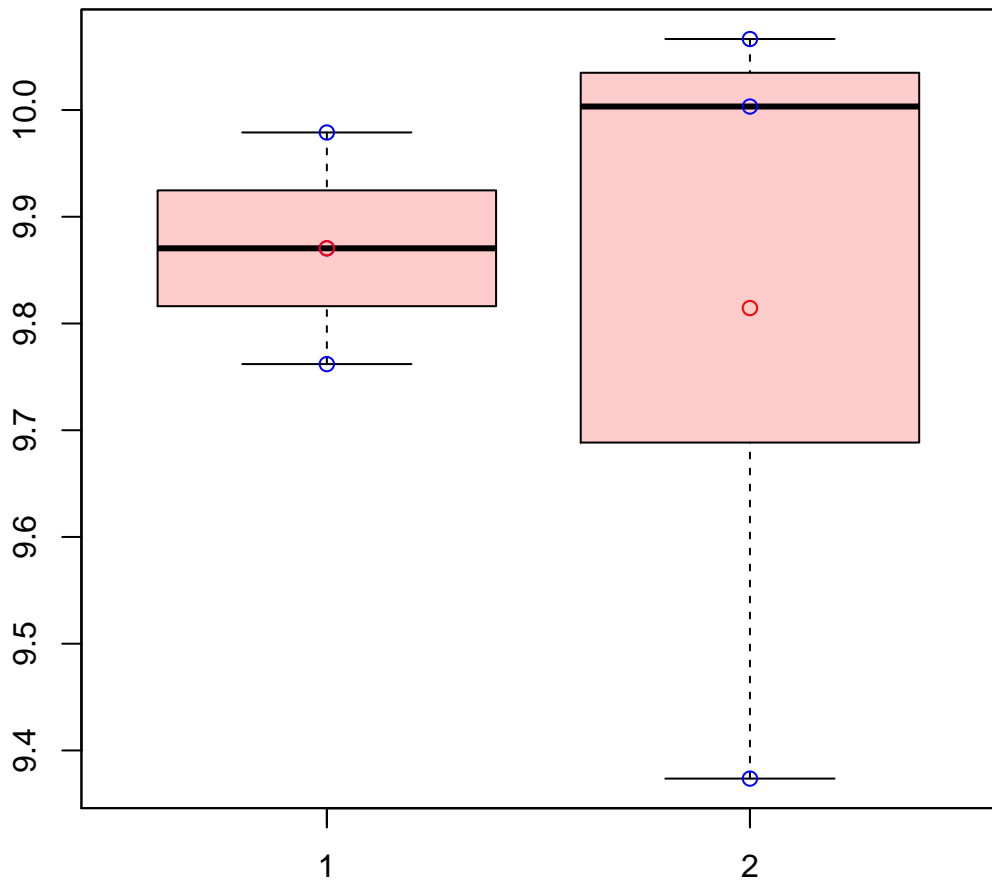

t-Test: p-value = 0.83



# Locus\_2004\_9\_11|Locus\_2004\_9\_11

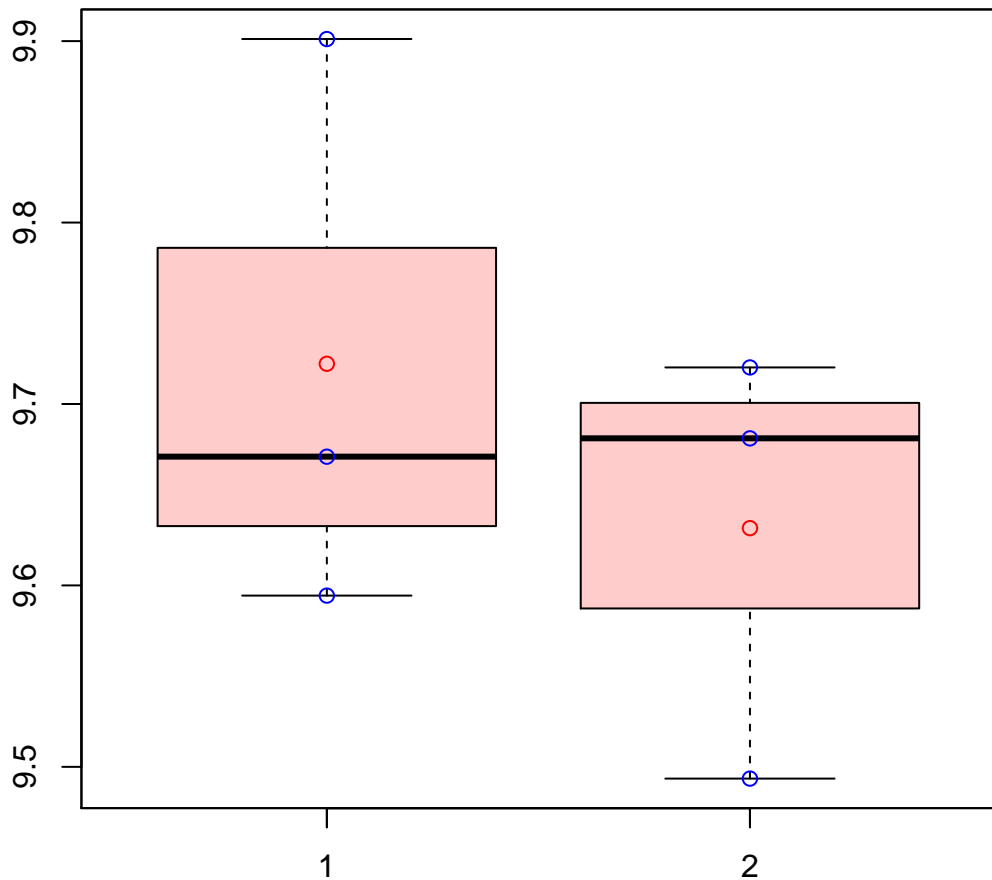

t-Test: p-value = 0.48

# Locus\_2016\_8\_9|Locus\_2016\_8\_9



t-Test: p-value = 0.47

# Locus\_206\_1\_3|Locus\_206\_1\_3

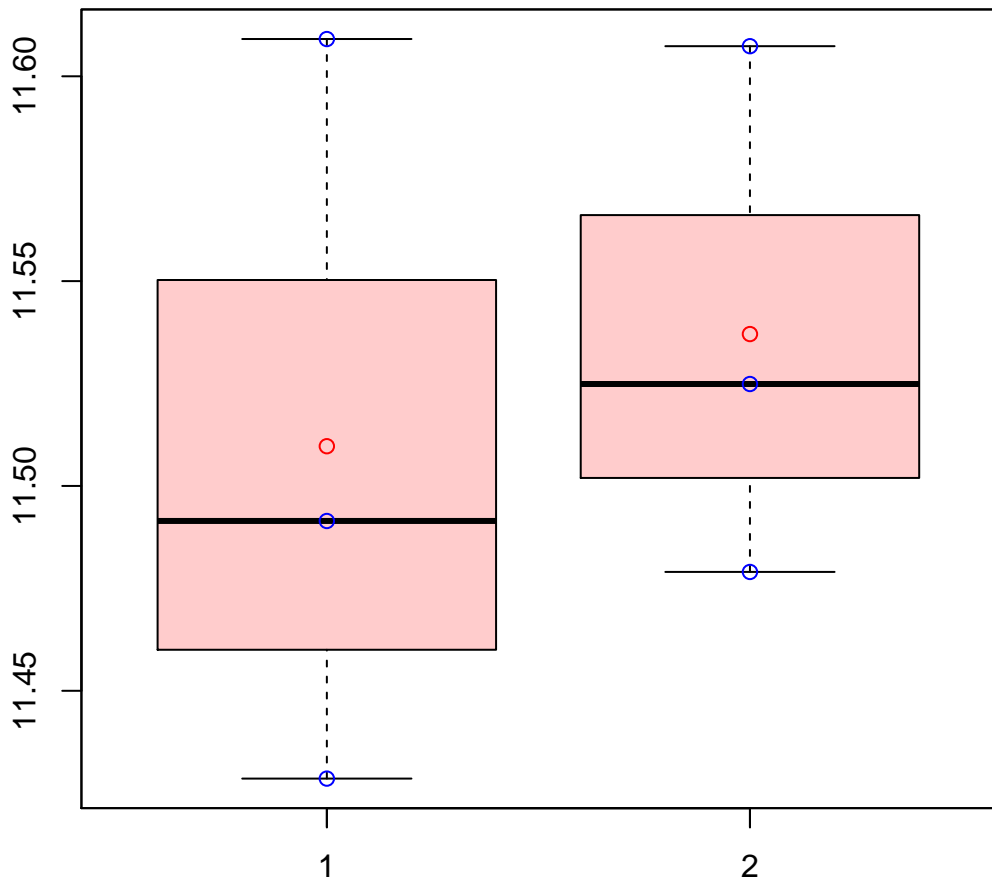

t-Test: p-value = 0.7

# Locus\_2081\_1\_9|Locus\_2081\_1\_9

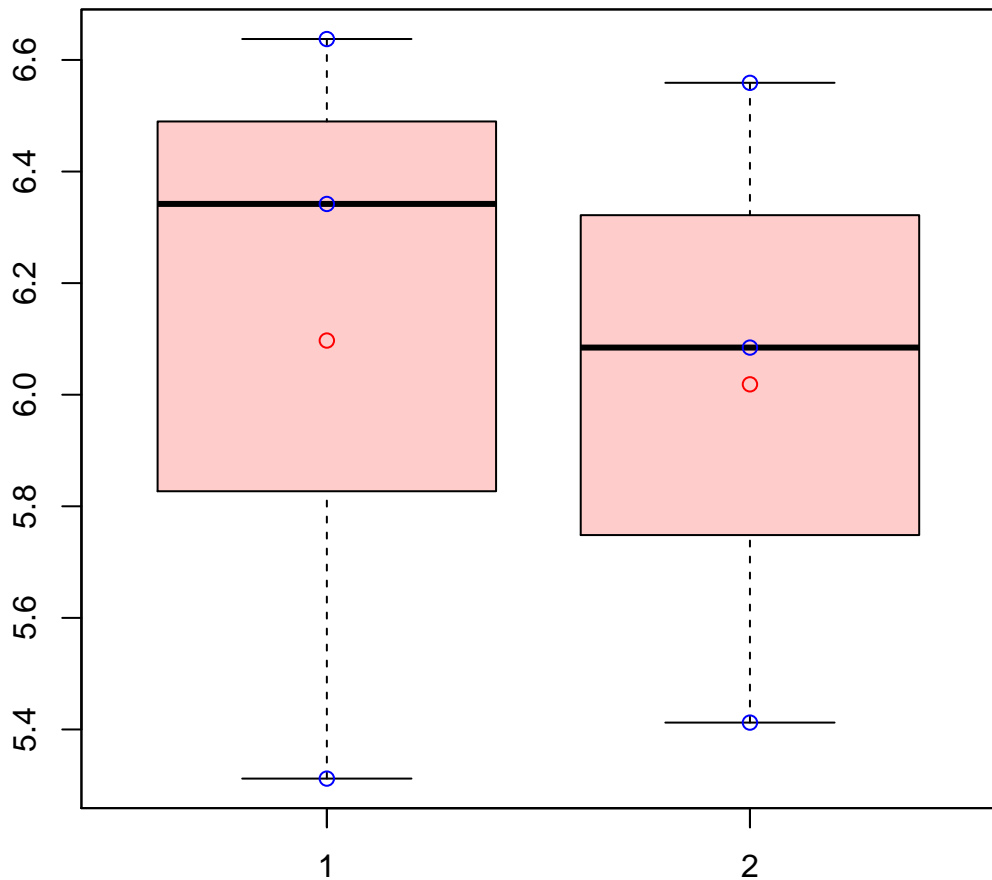

t-Test: p-value = 0.89

# Locus\_211\_9\_10|Locus\_211\_9\_10

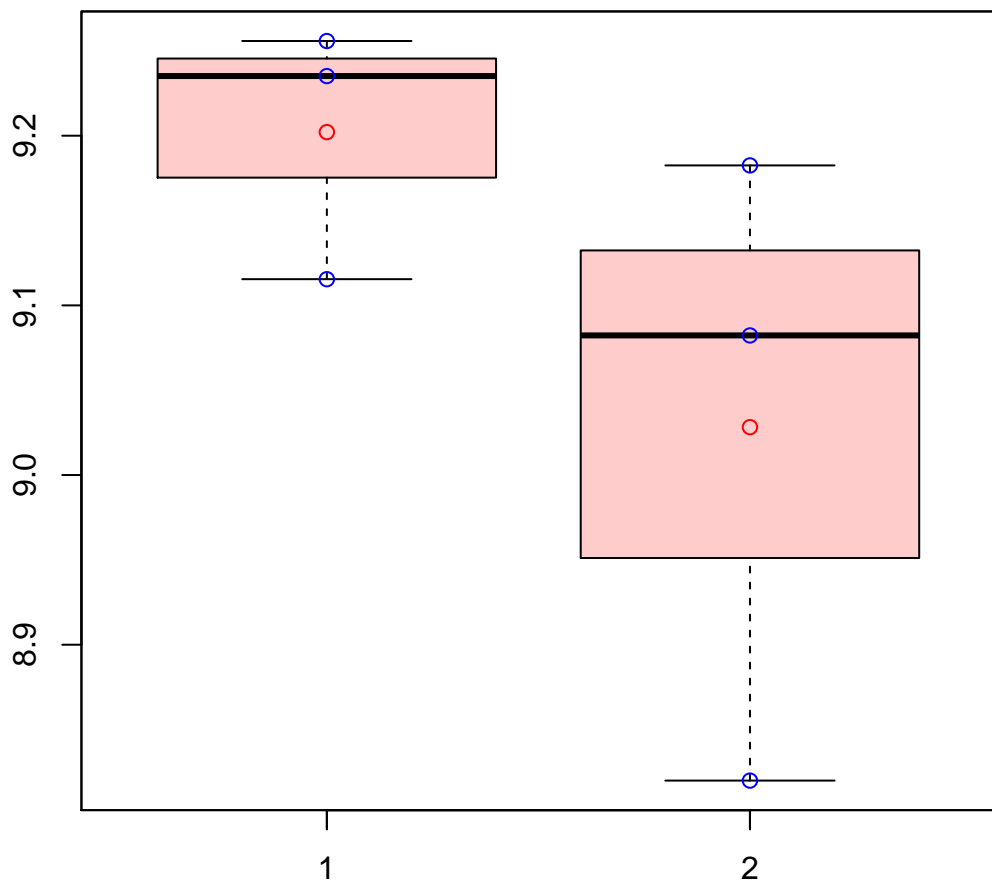

t-Test: p-value = 0.24

# Locus\_213\_1\_4|Locus\_213\_1\_4

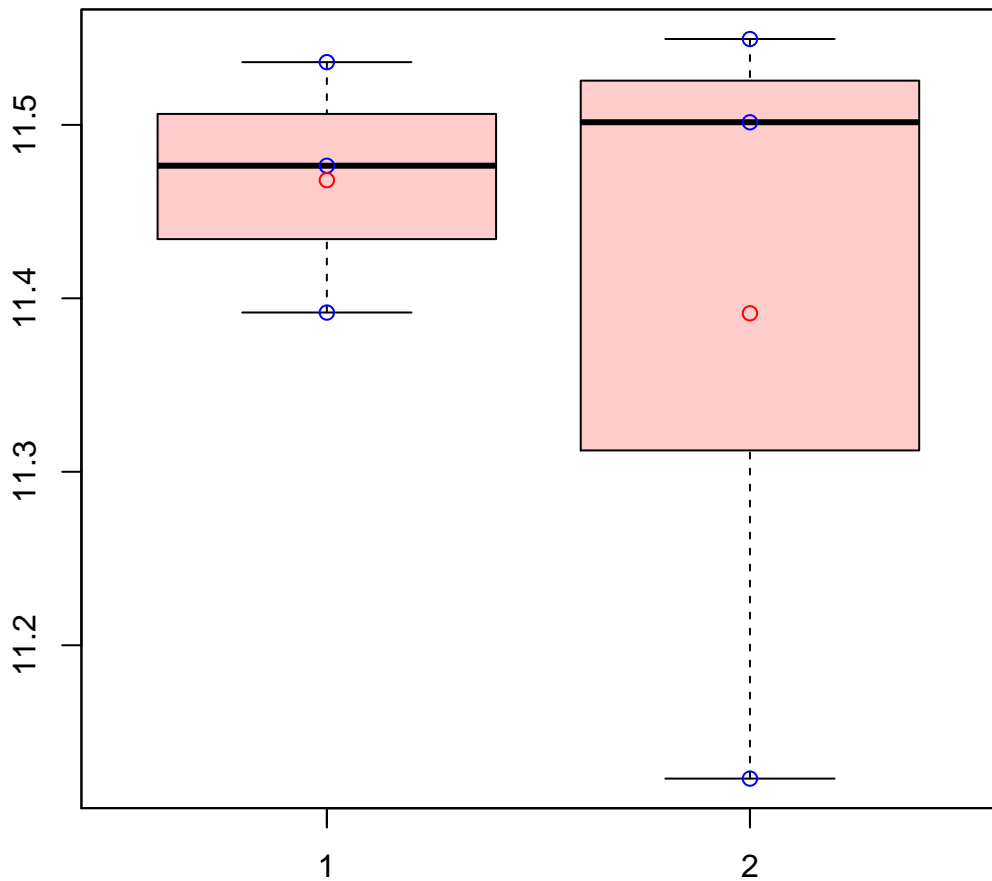

t-Test: p-value = 0.63

# Locus\_217\_3\_7|Locus\_217\_3\_7

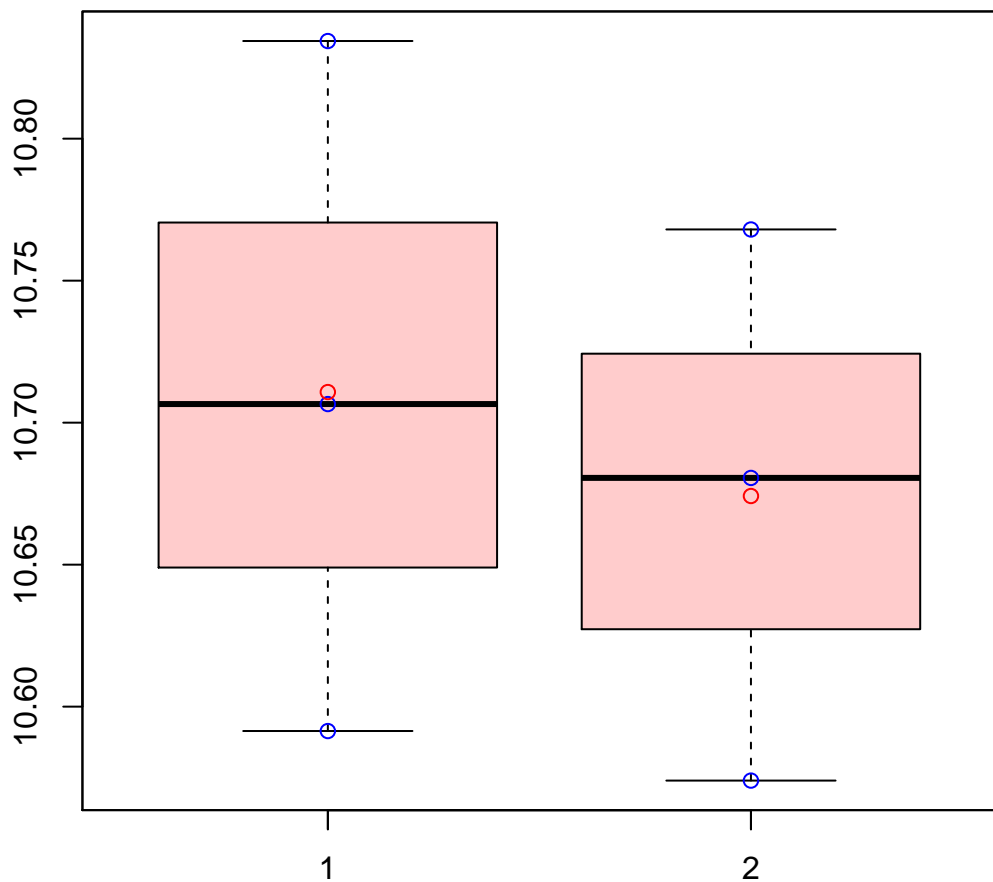

t-Test: p-value = 0.71

# Locus\_2174\_5\_9|Locus\_2174\_5\_9

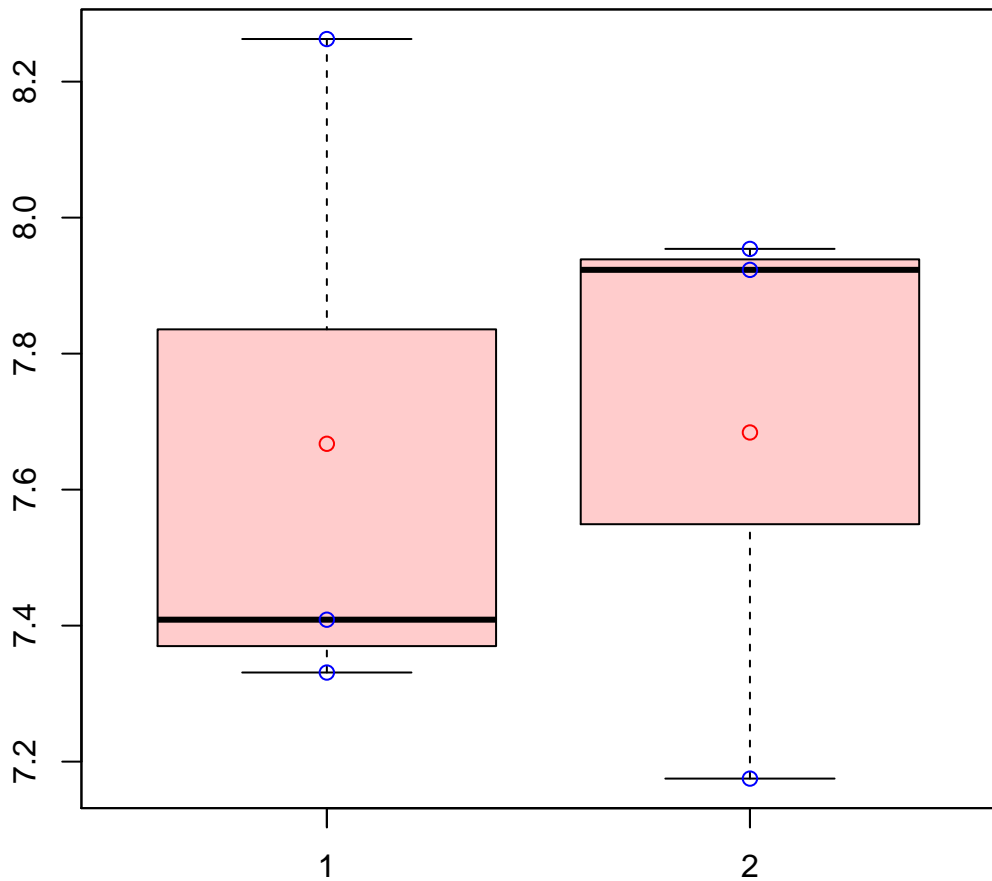

t-Test: p-value = 0.97



# Locus\_221\_6\_8|Locus\_221\_6\_8



t-Test: p-value = 0.66

# Locus\_222\_5\_11|Locus\_222\_5\_11

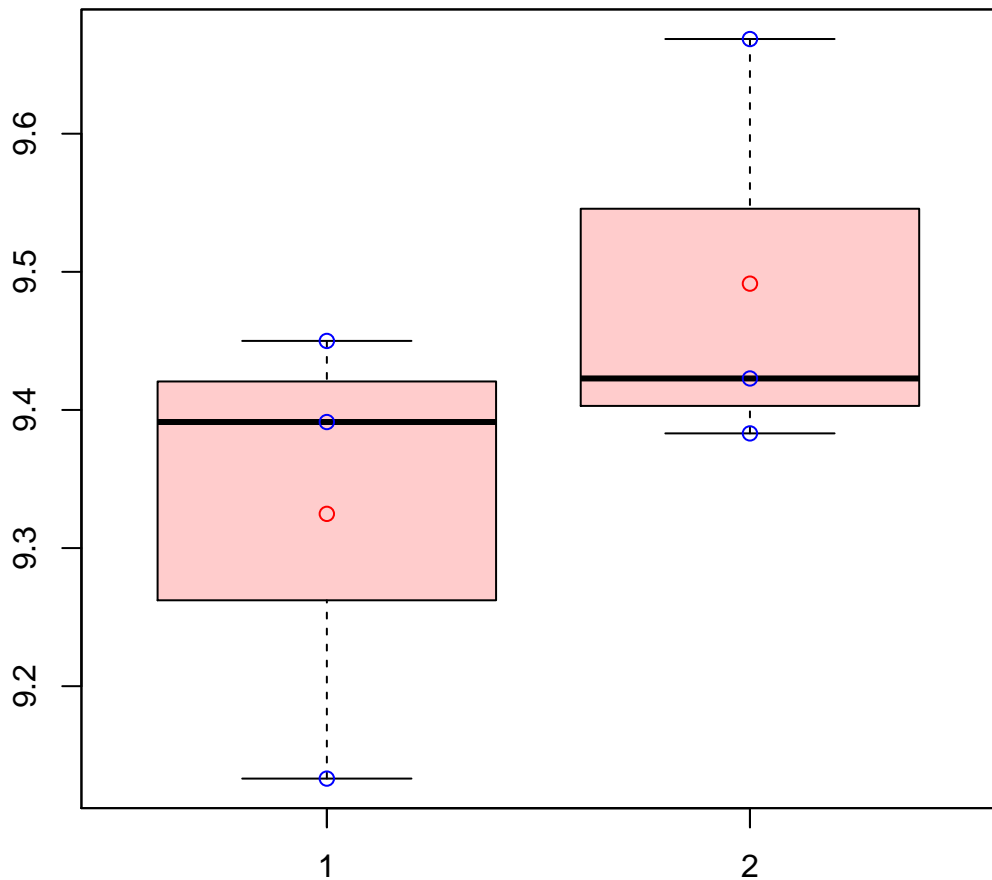

t-Test: p-value = 0.28

# Locus\_226\_6\_6|Locus\_226\_6\_6

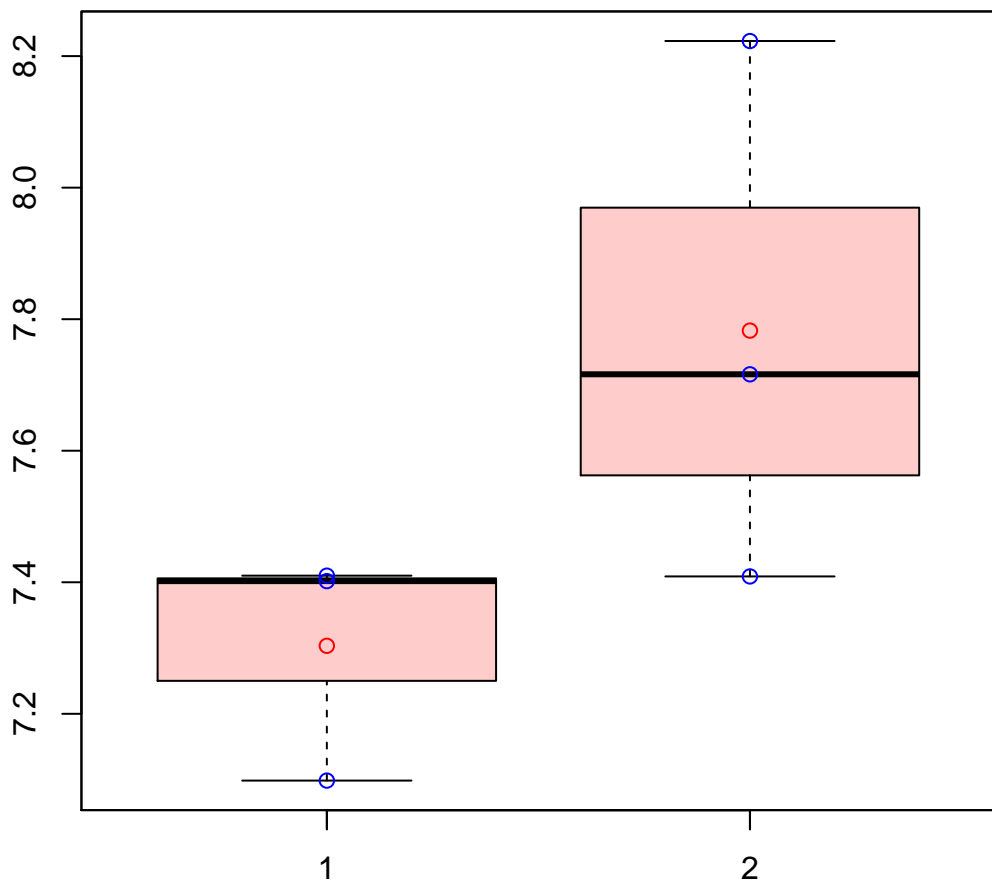

t-Test: p-value = 0.17

# Locus\_2281\_2\_10|Locus\_2281\_2\_10



t-Test: p-value = 0.13

# Locus\_2281\_6\_10|Locus\_2281\_6\_10



t-Test: p-value = 0.13

# Locus\_2281\_8\_10|Locus\_2281\_8\_10

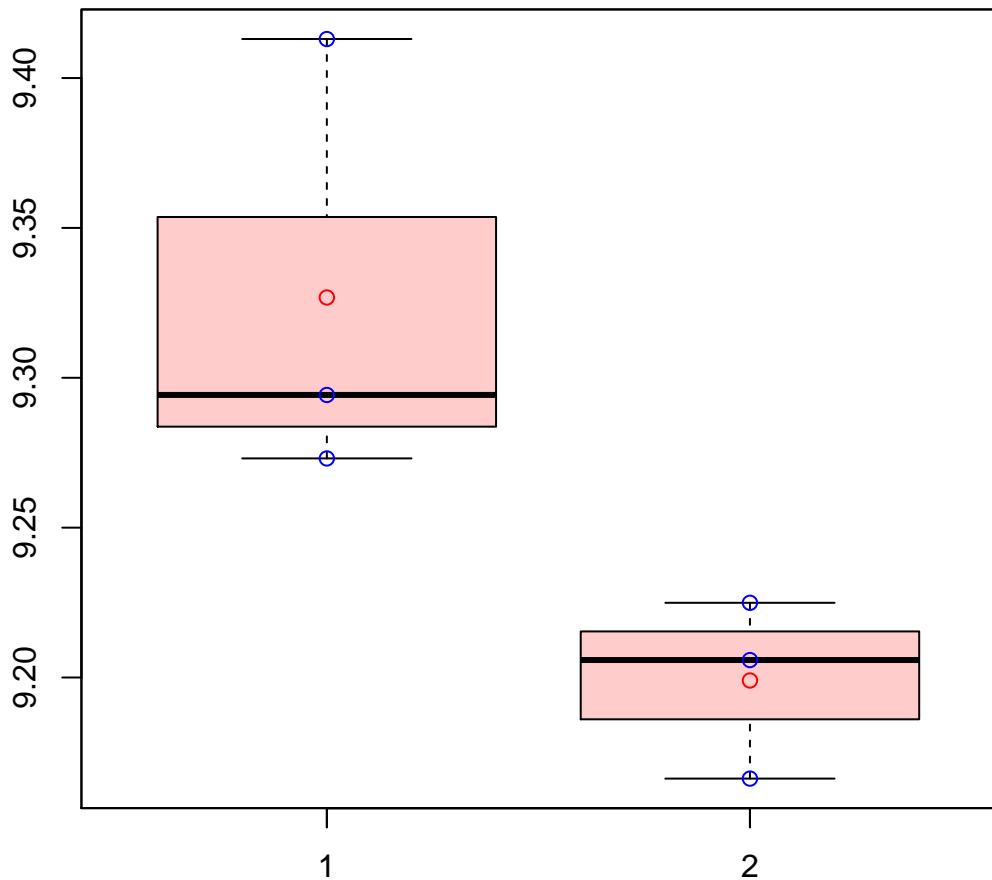

t-Test: p-value = 0.08

# Locus\_2288\_7\_9|Locus\_2288\_7\_9

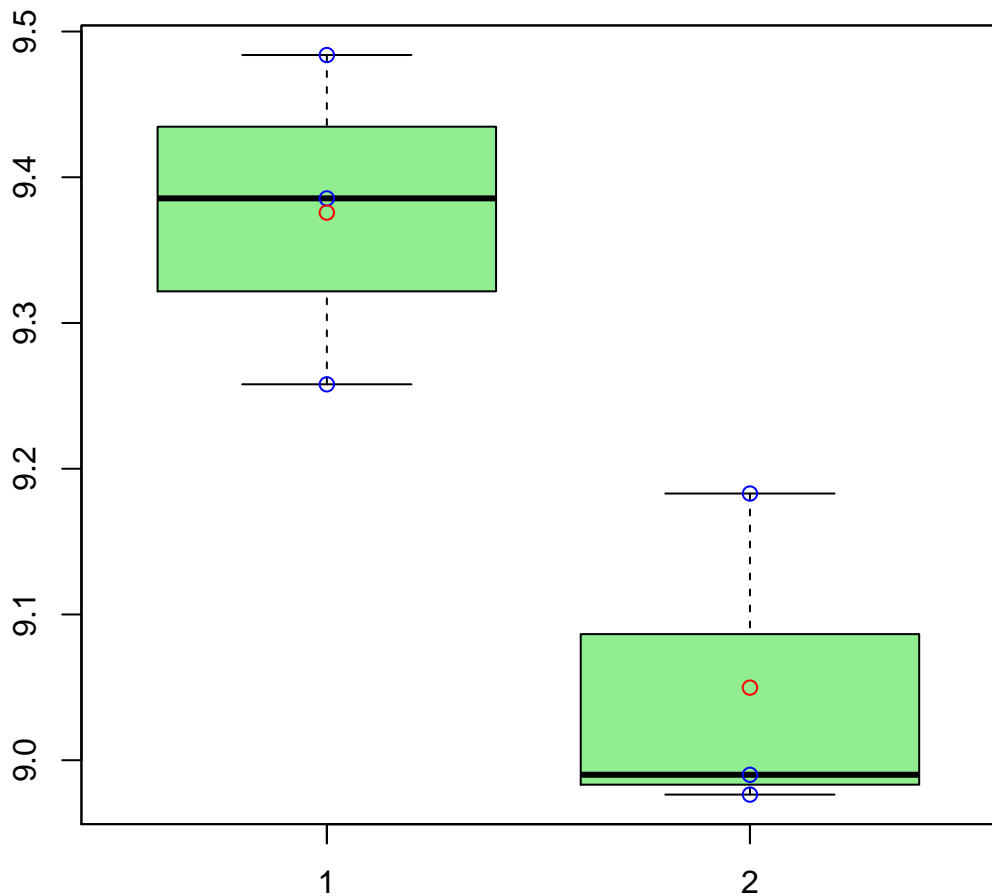

t-Test: p-value = 0.03

# Locus\_2294\_3\_12|Locus\_2294\_3\_12



t-Test: p-value = 0.44



# Locus\_230\_1\_1|Locus\_230\_1\_1

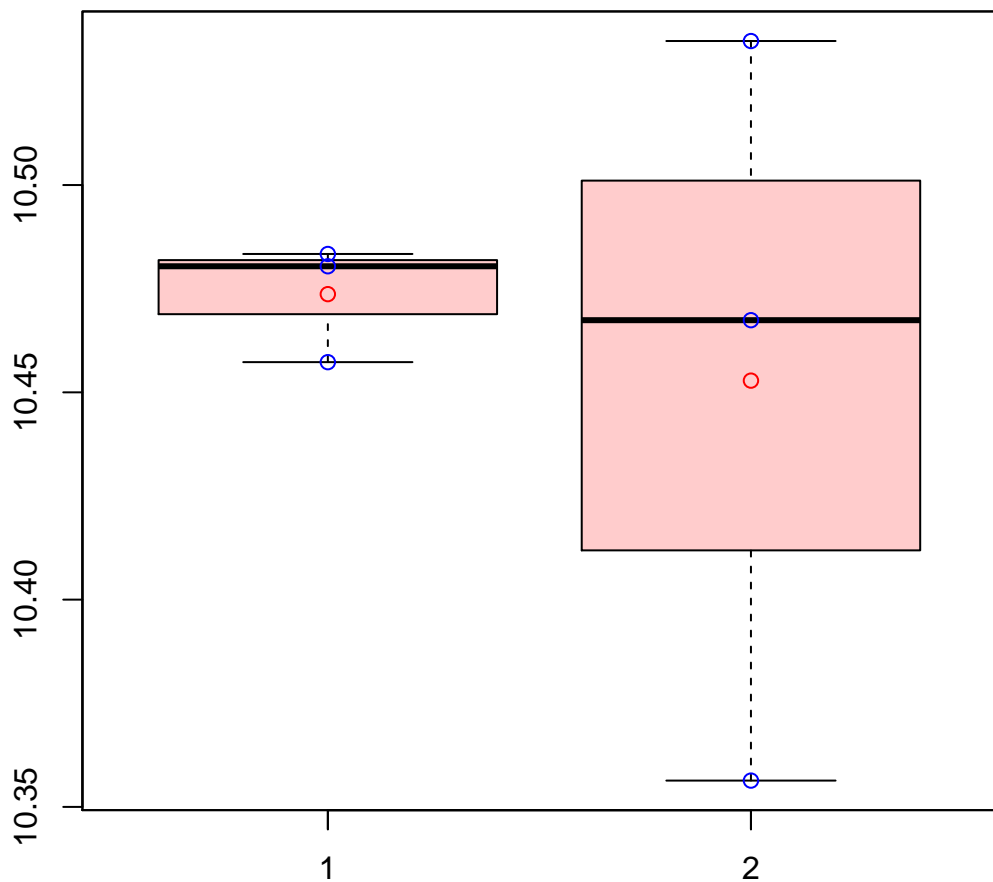

t-Test: p-value = 0.73

# Locus\_234\_6\_13|Locus\_234\_6\_13

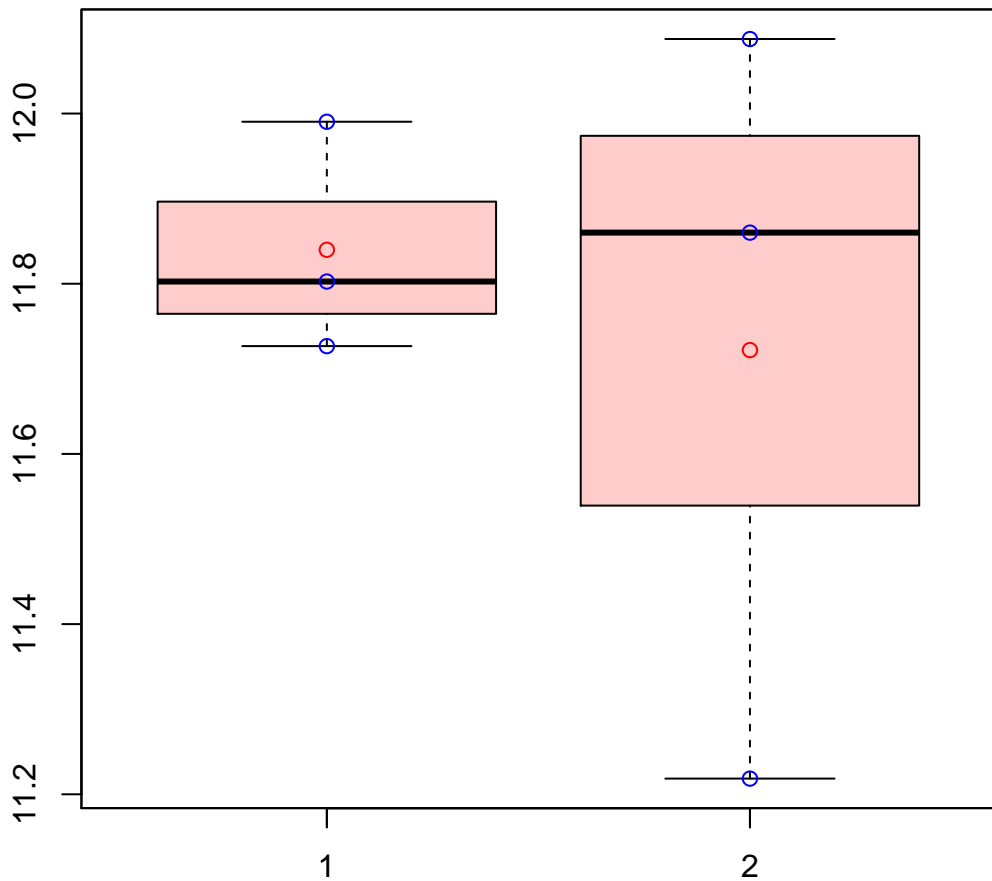

t-Test: p-value = 0.7

# Locus\_236\_4\_5|Locus\_236\_4\_5

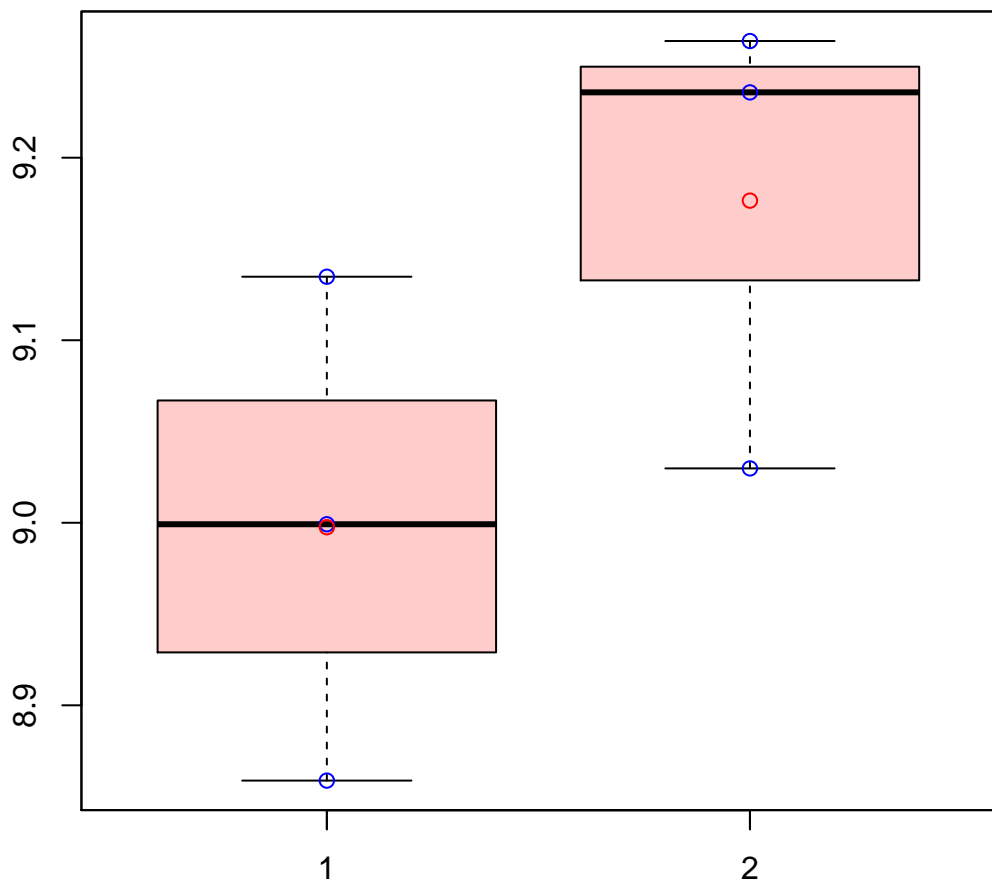

t-Test: p-value = 0.18

# Locus\_2388\_3\_9|Locus\_2388\_3\_9

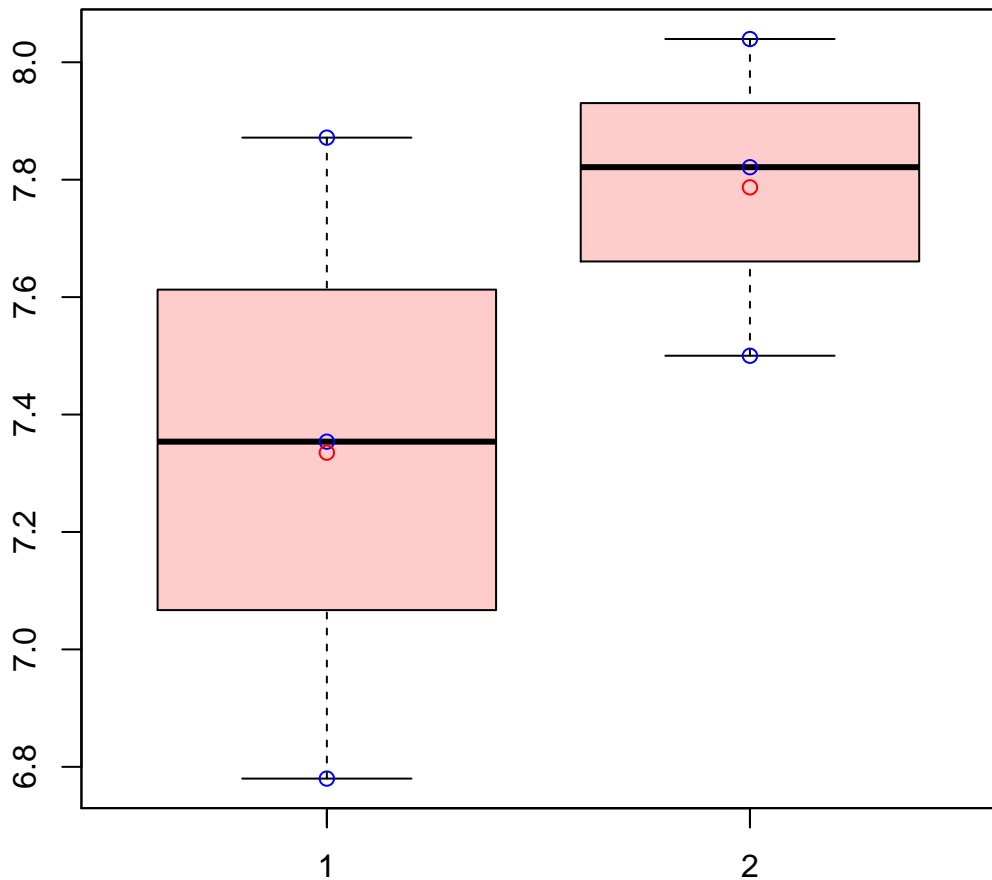

t-Test: p-value = 0.29

# Locus\_246\_4\_5|Locus\_246\_4\_5

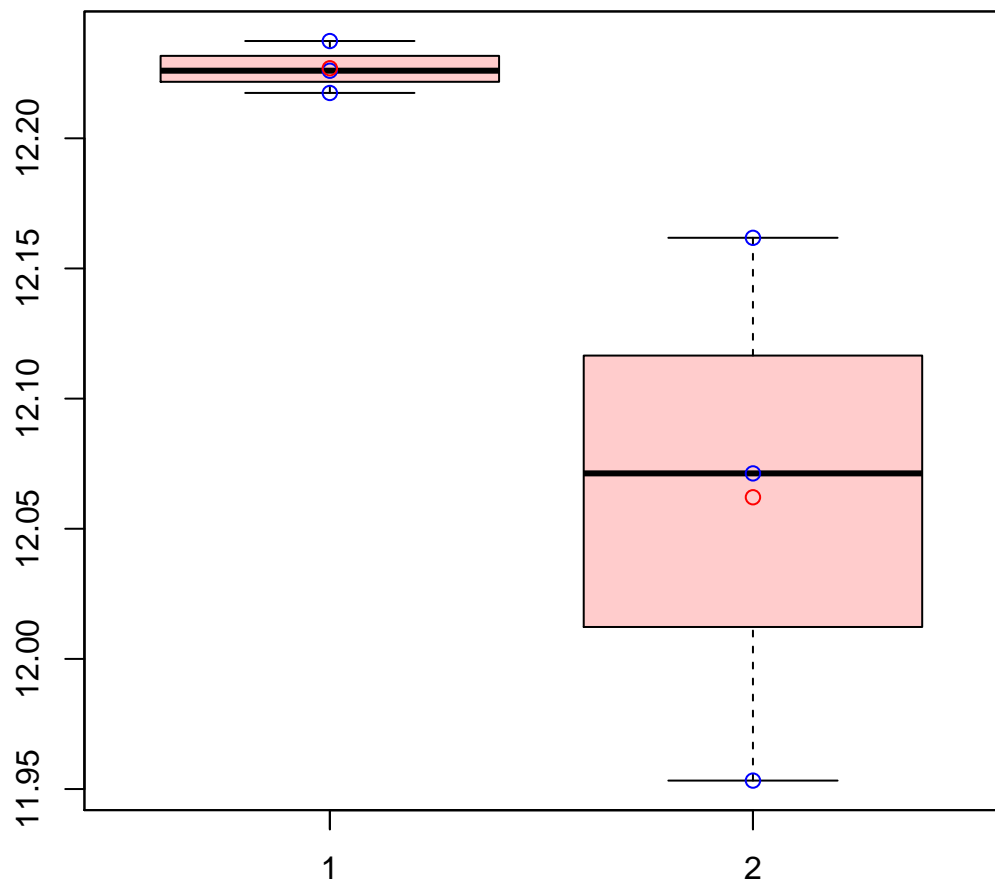

t-Test: p-value = 0.11

# Locus\_248\_3\_3|Locus\_248\_3\_3

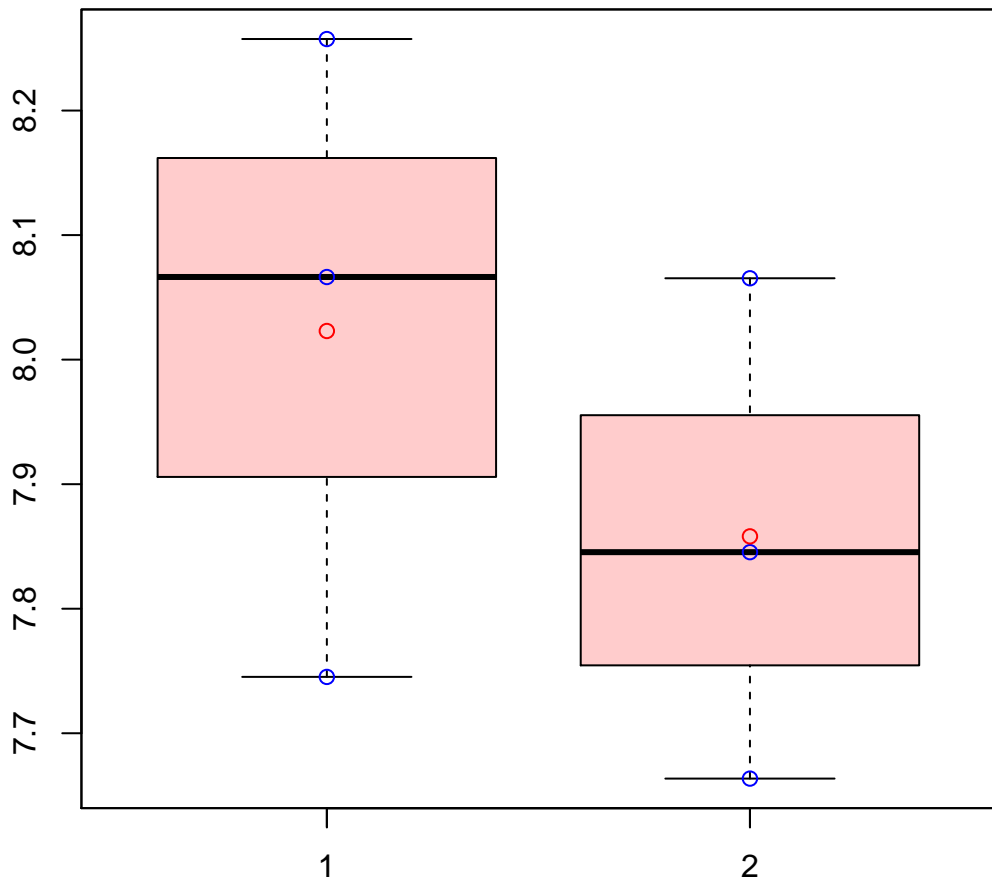

t-Test: p-value = 0.44

# Locus\_25544\_1\_5|Locus\_25544\_1\_5

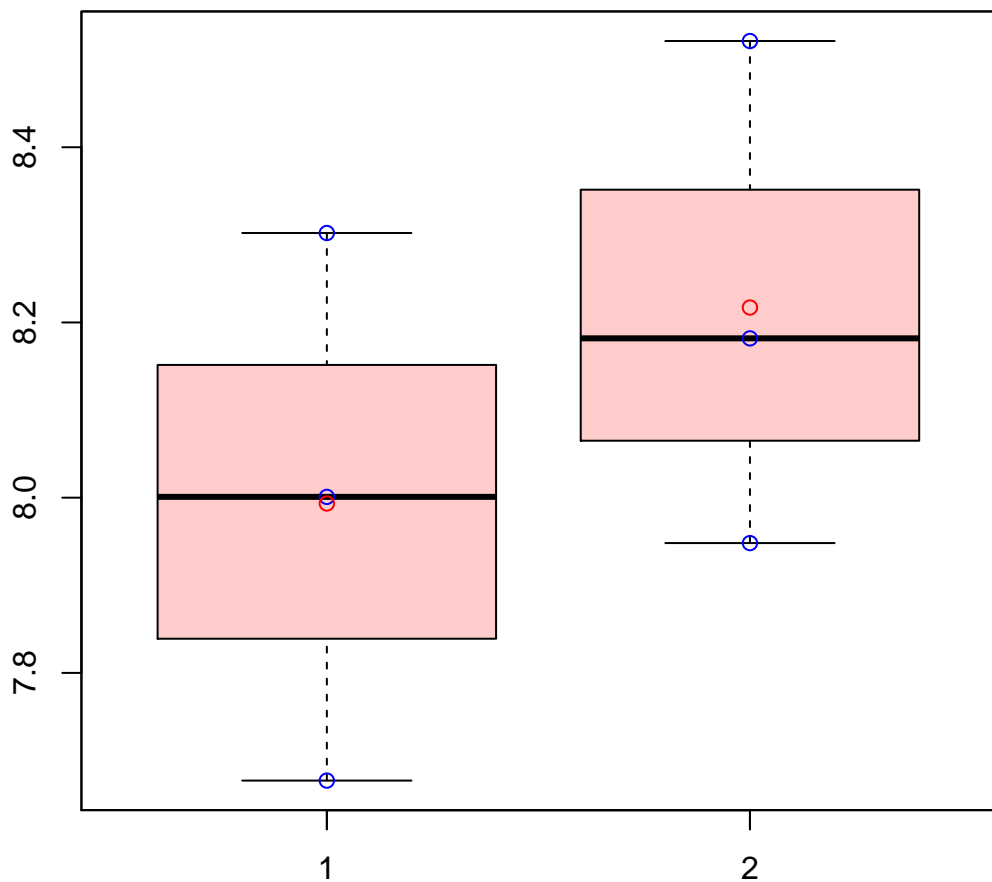

t-Test: p-value = 0.41

# Locus\_2602\_2\_9|Locus\_2602\_2\_9

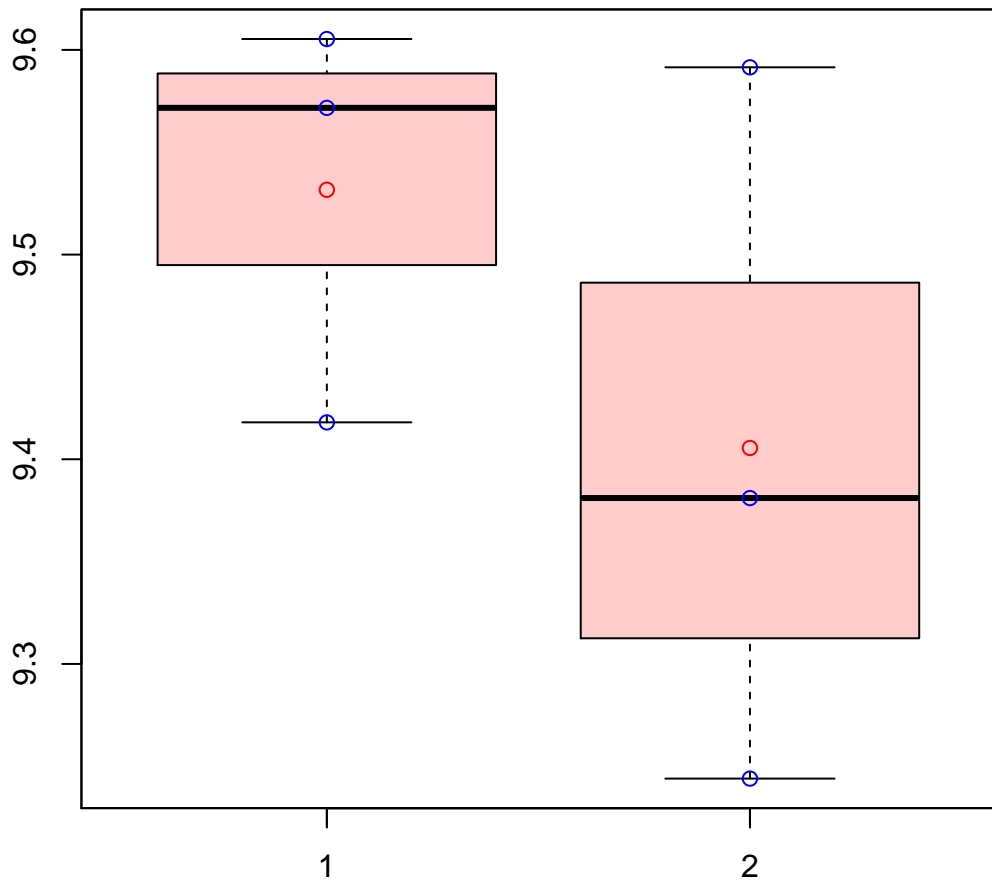

t-Test: p-value = 0.35



# Locus\_26\_1\_7|Locus\_26\_1\_7

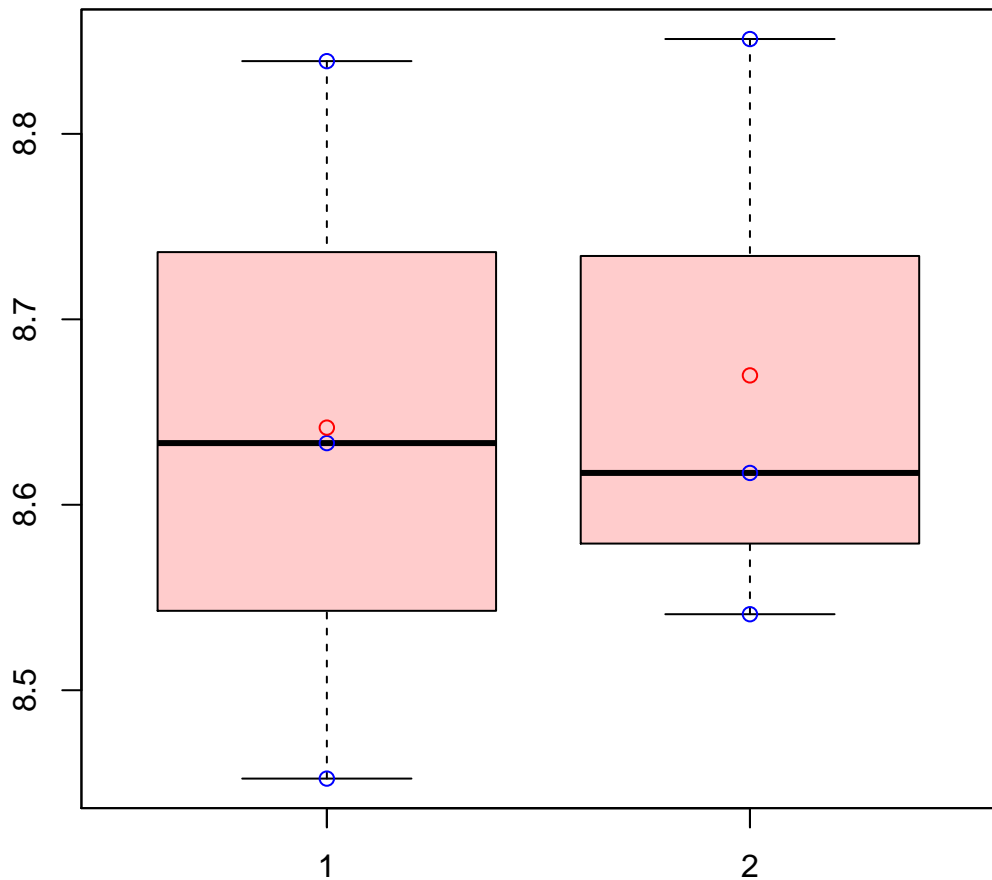

t-Test: p-value = 0.86

# Locus\_262\_5\_11|Locus\_262\_5\_11



t-Test: p-value = 0.81

# Locus\_2764\_4\_8|Locus\_2764\_4\_8

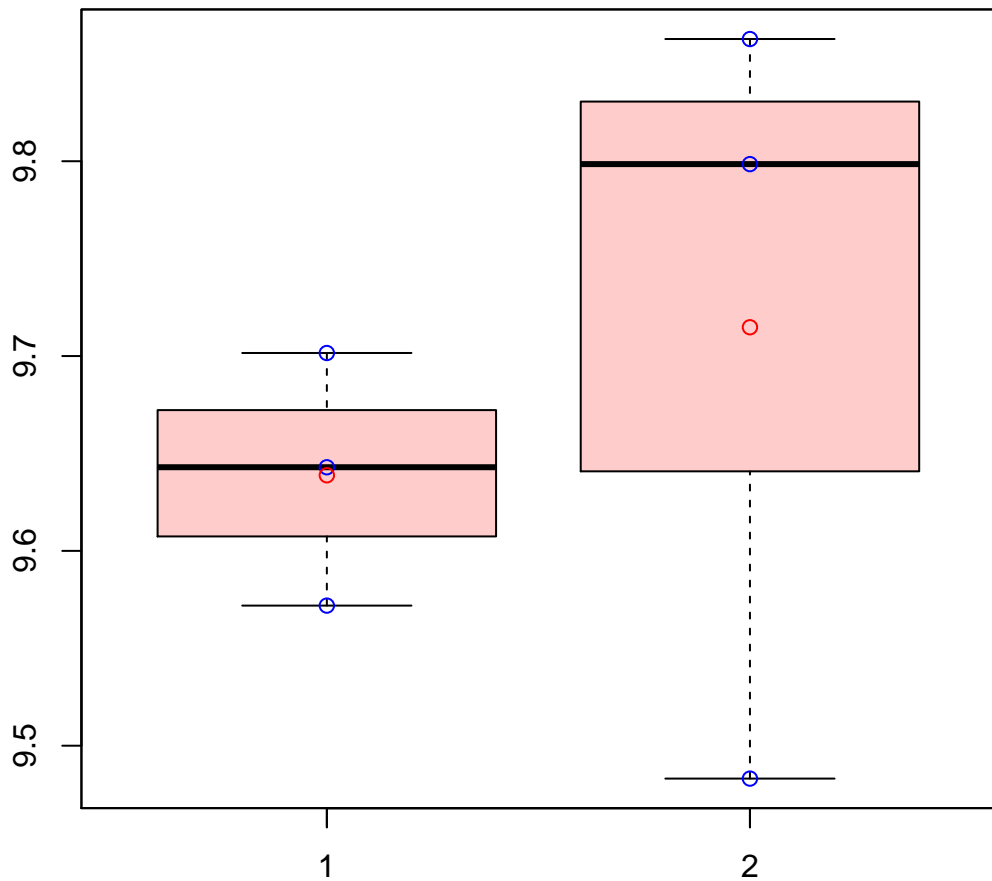

t-Test: p-value = 0.59

# Locus\_2939\_8\_10|Locus\_2939\_8\_10

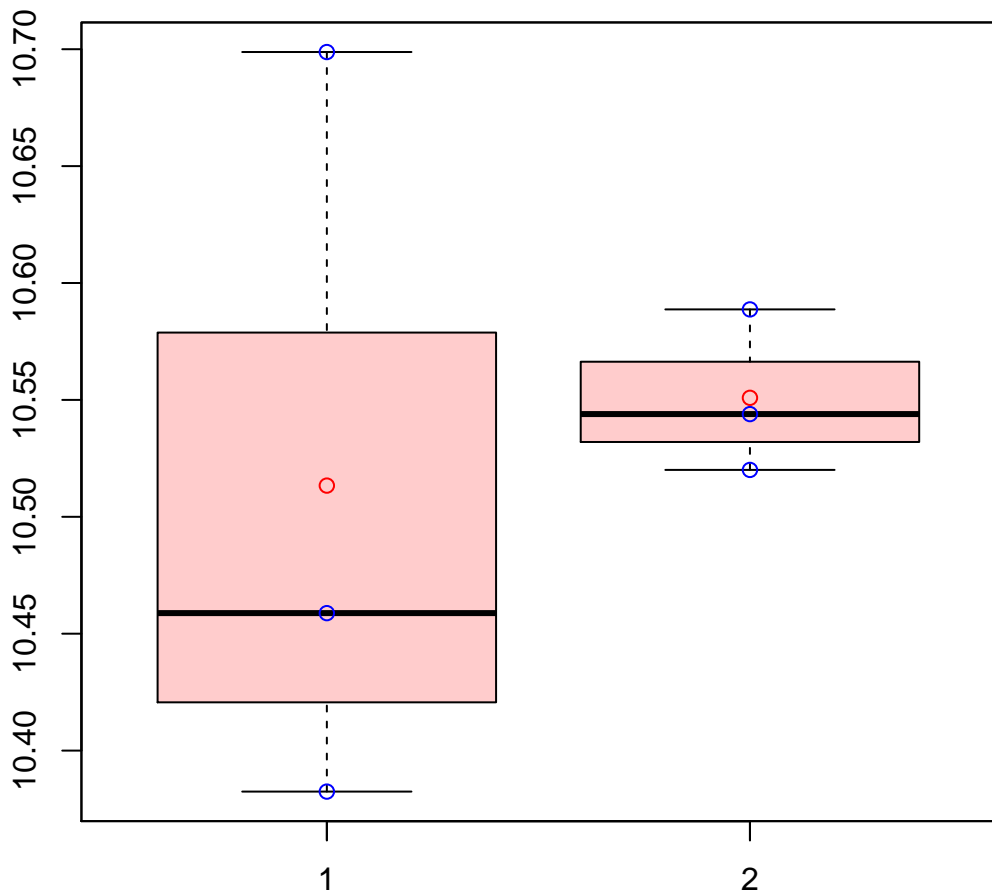

t-Test: p-value = 0.73

# Locus\_2951\_2\_9|Locus\_2951\_2\_9



t-Test: p-value = 0.91

# Locus\_2951\_8\_9|Locus\_2951\_8\_9



t-Test: p-value = 0.56

# Locus\_2954\_2\_10|Locus\_2954\_2\_10



t-Test: p-value = 0.33

# Locus\_2954\_3\_10|Locus\_2954\_3\_10

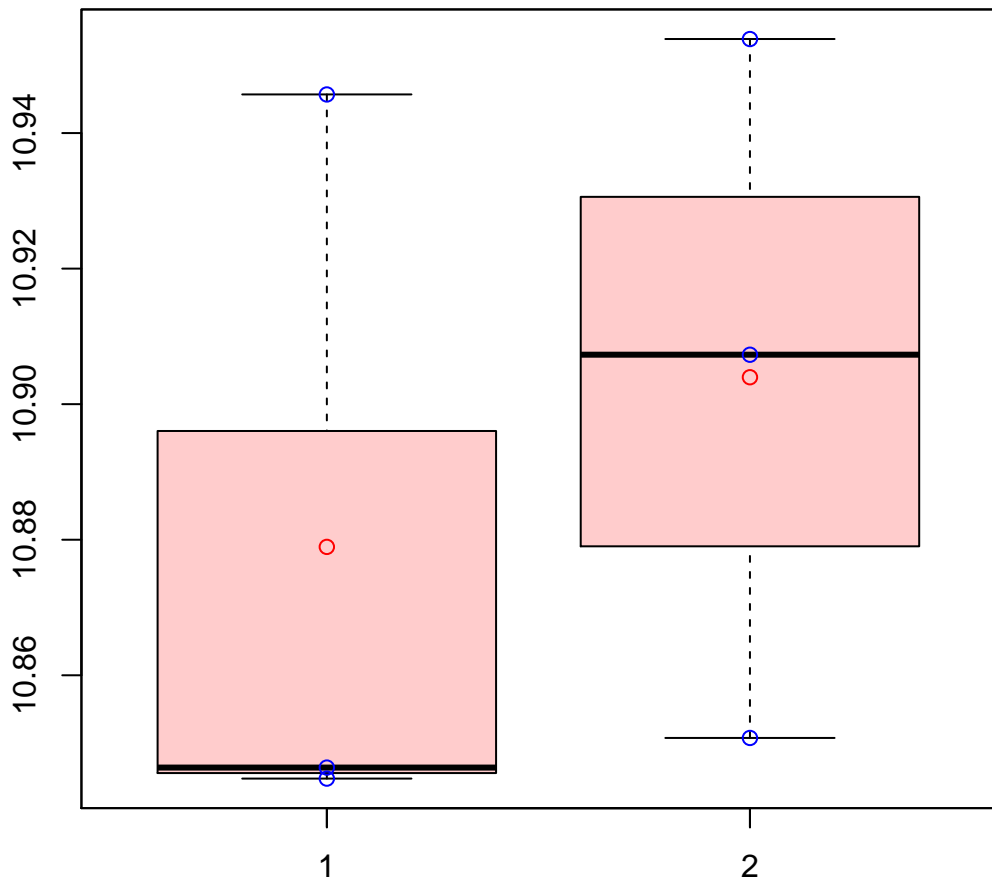

t-Test: p-value = 0.61



# Locus\_2965\_1\_3|Locus\_2965\_1\_3



t-Test: p-value = 0.56

# Locus\_2972\_3\_7|Locus\_2972\_3\_7

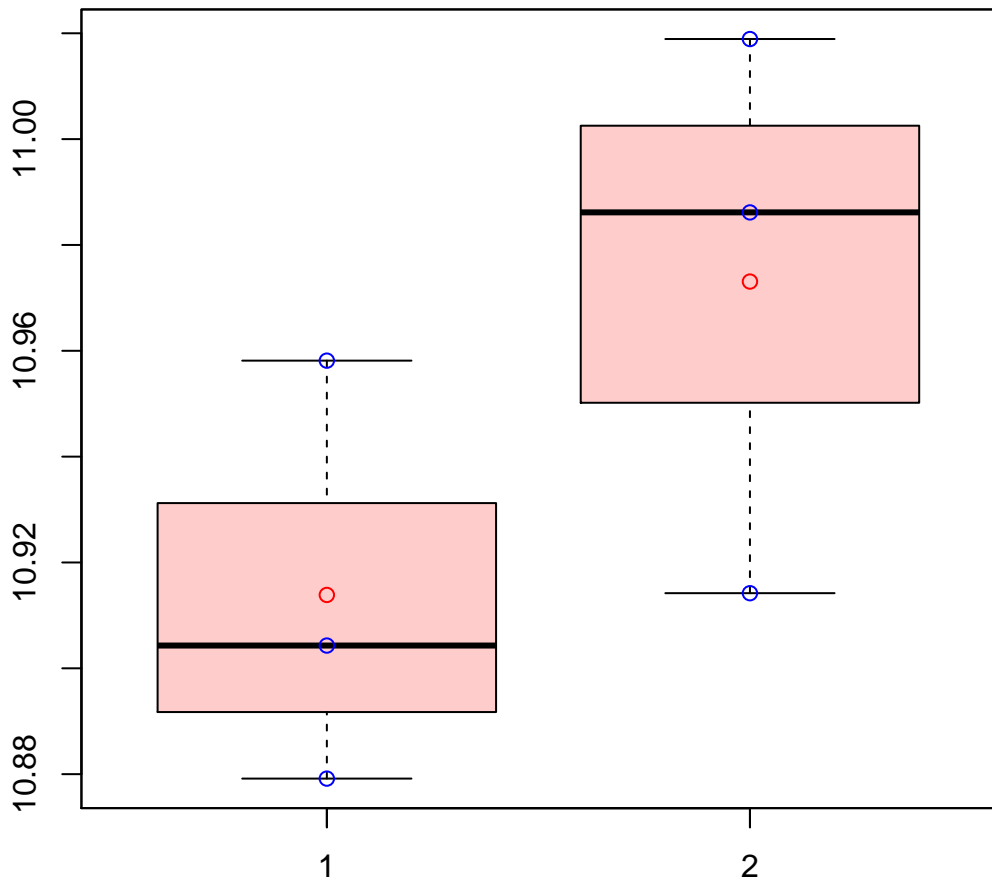

t-Test: p-value = 0.21

# Locus\_2984\_2\_9|Locus\_2984\_2\_9

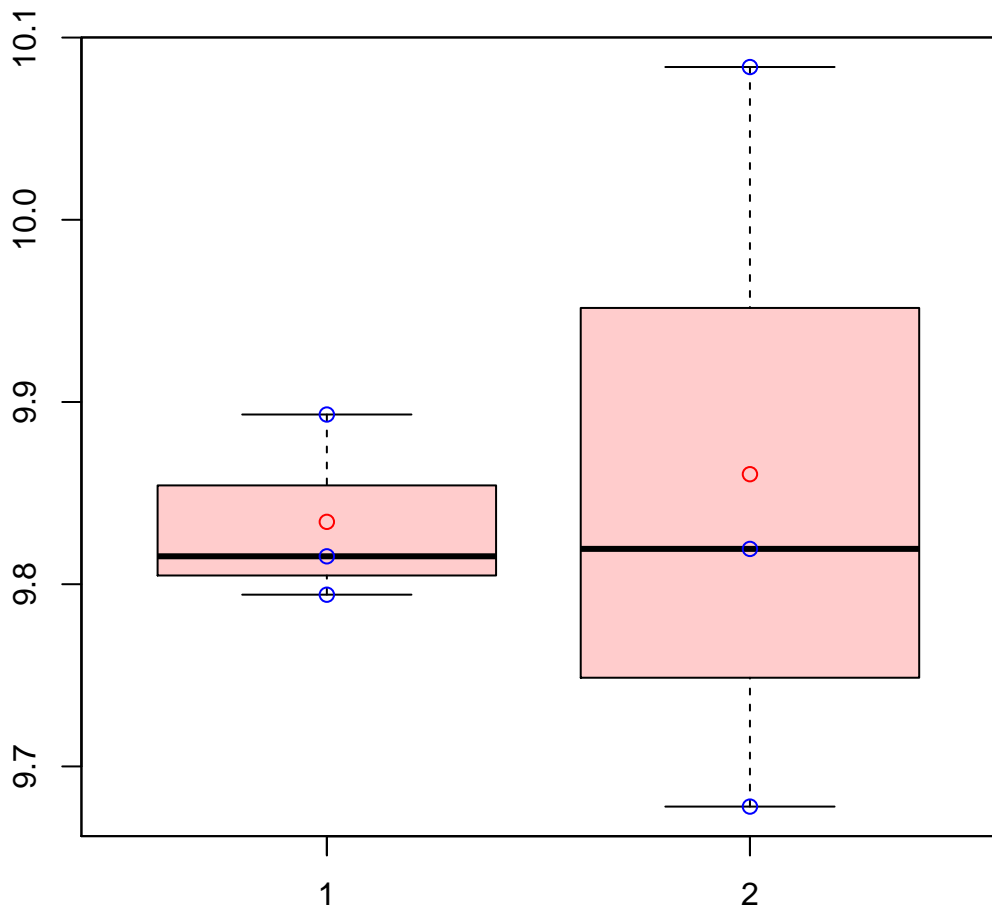

t-Test: p-value = 0.85

# Locus\_30109\_4\_6|Locus\_30109\_4\_6

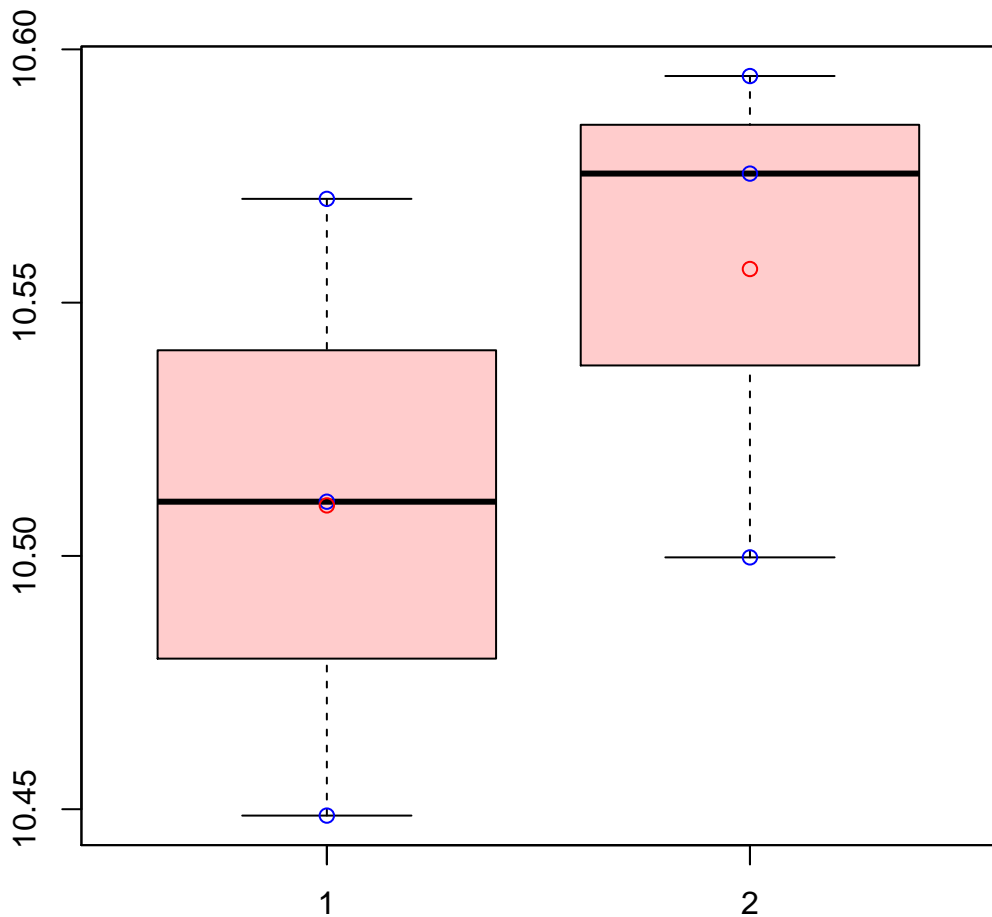

t-Test: p-value = 0.37

# Locus\_303\_2\_4|Locus\_303\_2\_4

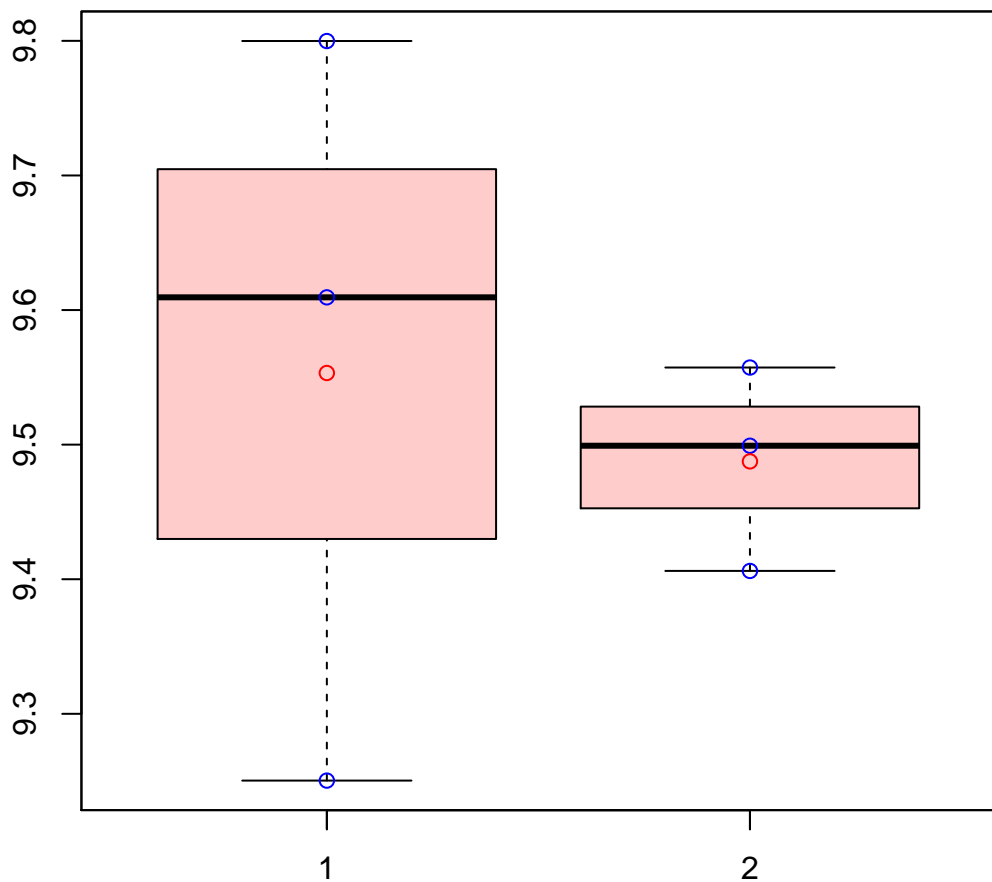

t-Test: p-value = 0.73

# Locus\_31755\_3\_5|Locus\_31755\_3\_5

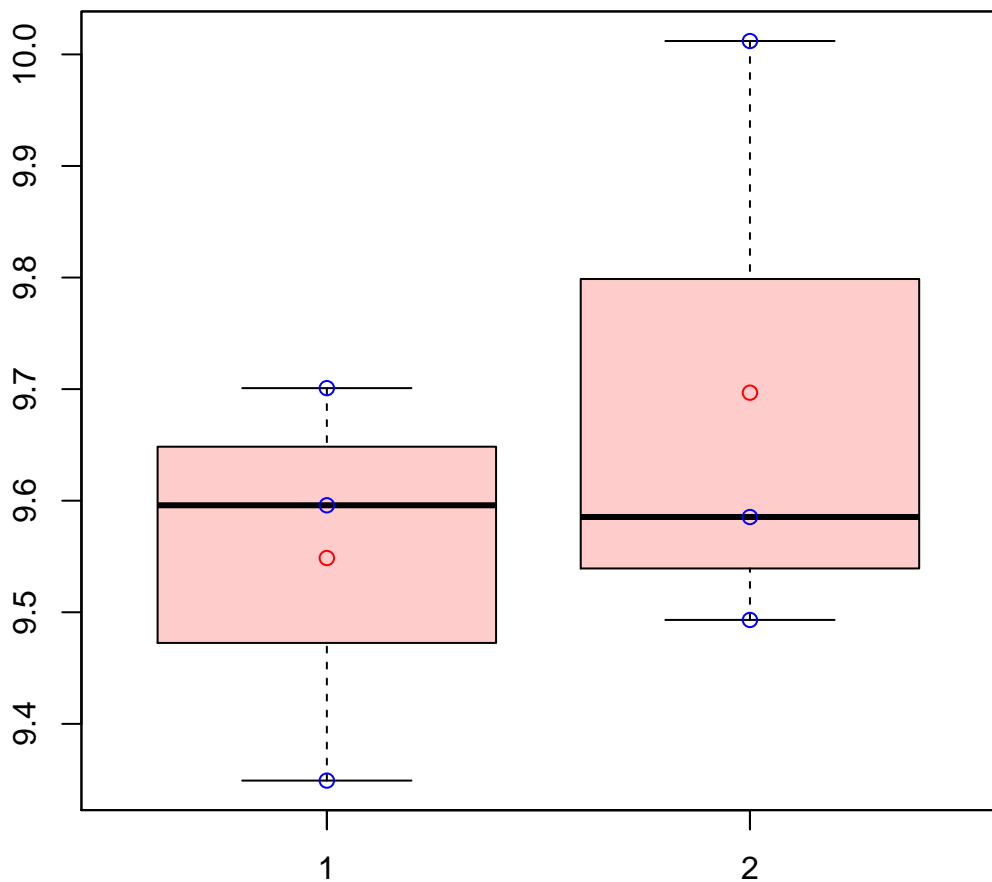

t-Test: p-value = 0.49

# Locus\_3253\_1\_9|Locus\_3253\_1\_9

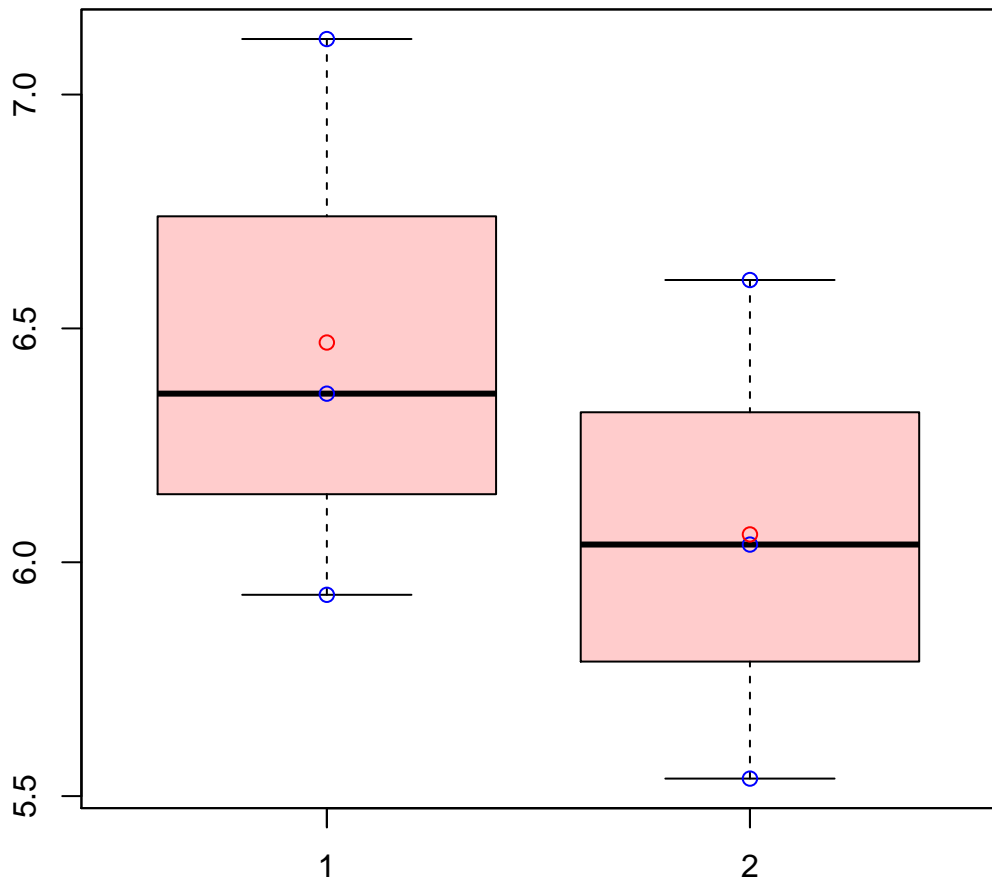

t-Test: p-value = 0.43

# Locus\_3302\_1\_8|Locus\_3302\_1\_8



t-Test: p-value = 0.32



# Locus\_3417\_4\_6|Locus\_3417\_4\_6

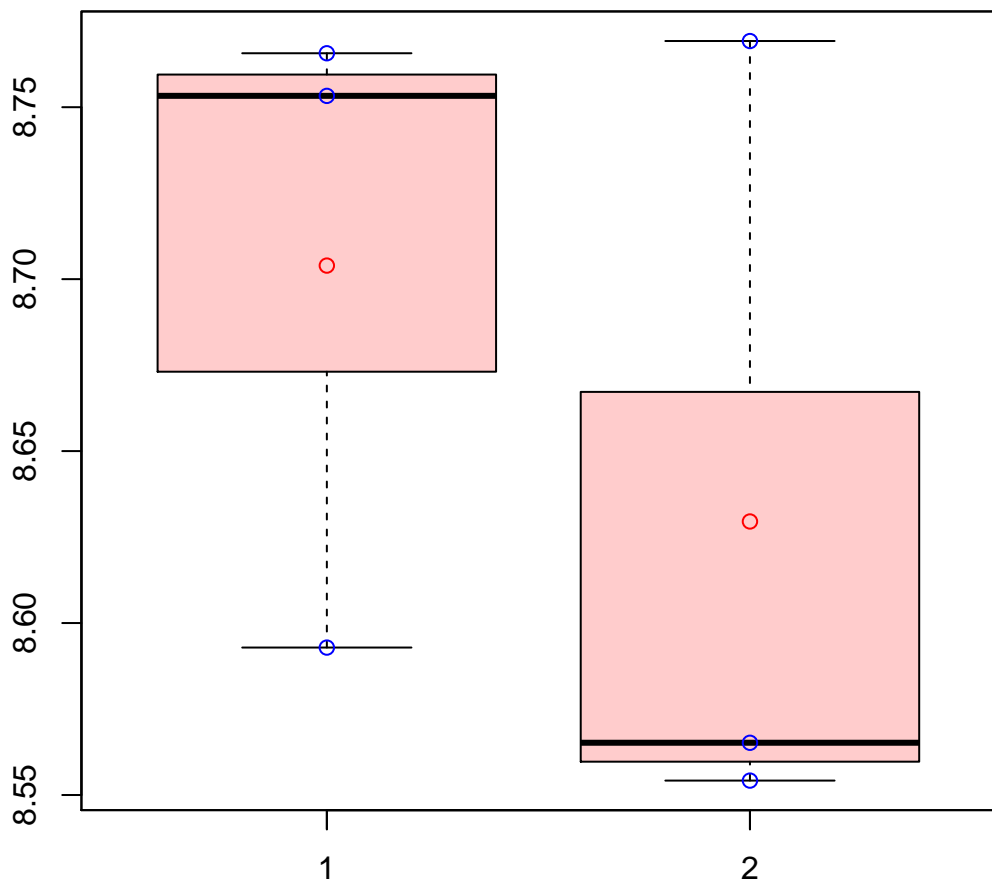

t-Test: p-value = 0.45

# Locus\_3417\_5\_6|Locus\_3417\_5\_6

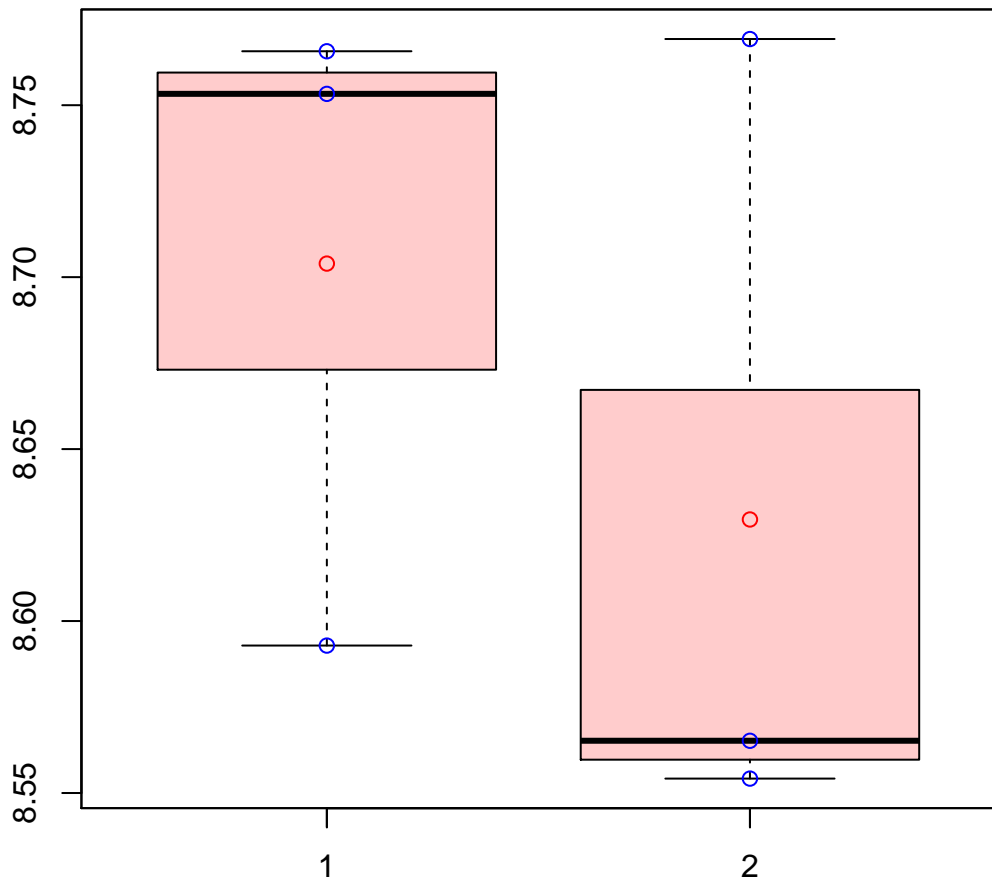

t-Test: p-value = 0.45

# Locus\_3532\_1\_8|Locus\_3532\_1\_8

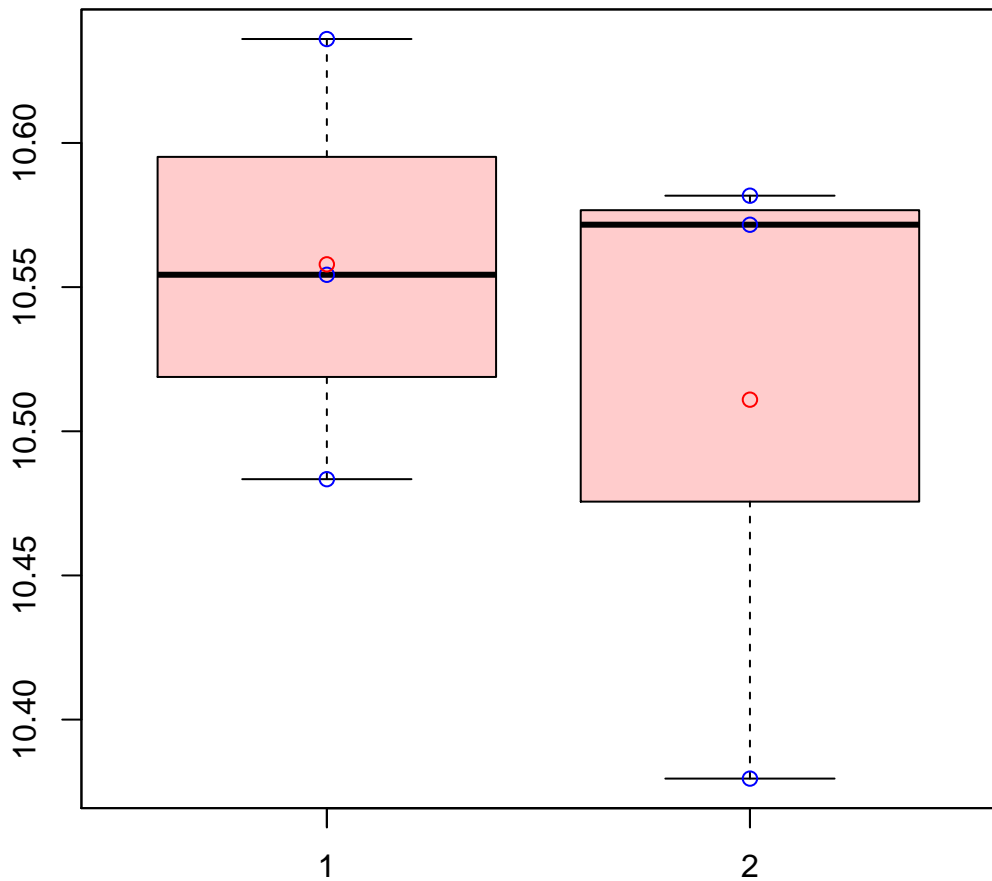

t-Test: p-value = 0.59

# Locus\_3598\_3\_12|Locus\_3598\_3\_12

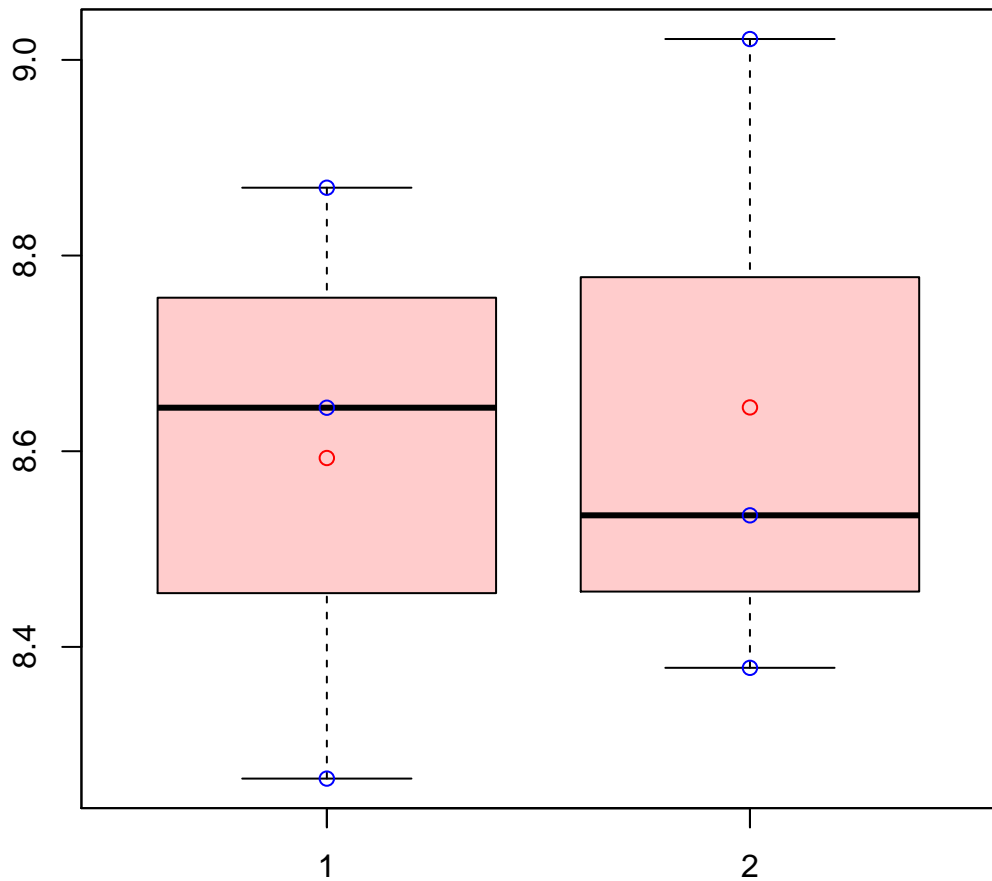

t-Test: p-value = 0.85

# Locus\_3637\_9\_10|Locus\_3637\_9\_10



t-Test: p-value = 0.51

# Locus\_3660\_6\_8|Locus\_3660\_6\_8



t-Test: p-value = 0.55

# Locus\_372\_4\_10|Locus\_372\_4\_10

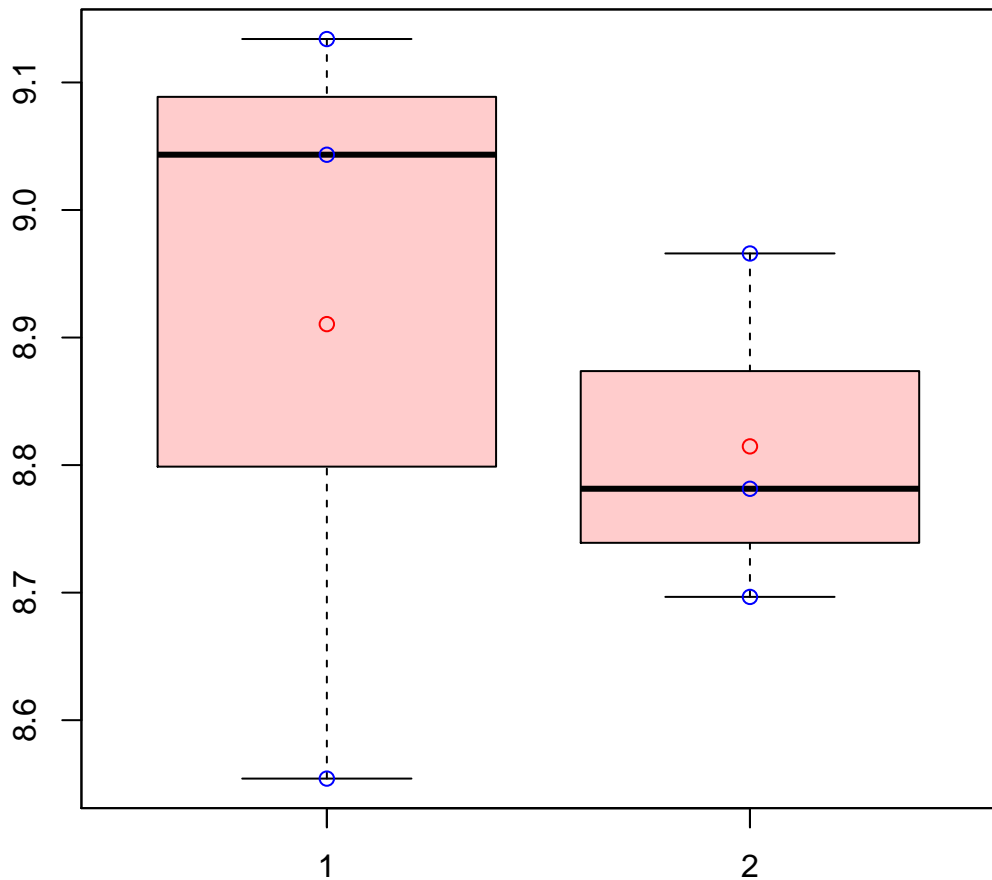

t-Test: p-value = 0.66

# Locus\_376\_5\_13|Locus\_376\_5\_13



t-Test: p-value = 0.36



# Locus\_376\_8\_13|Locus\_376\_8\_13

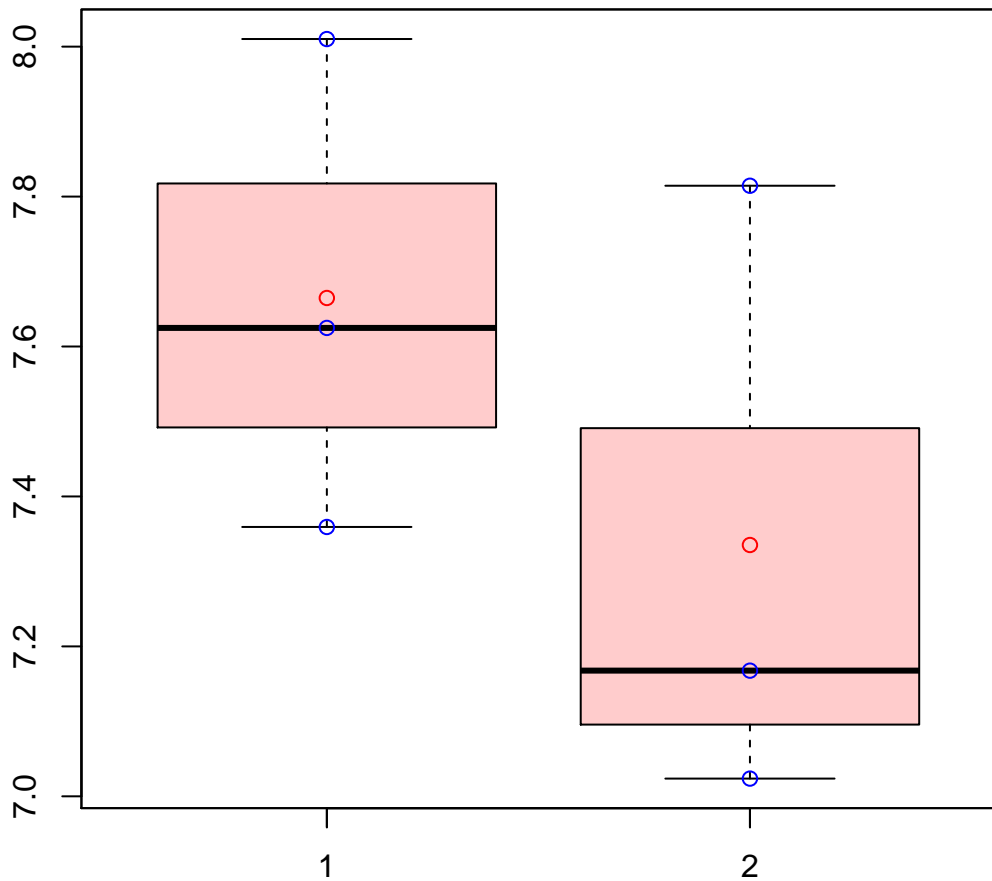

t-Test: p-value = 0.35

# Locus\_376\_9\_13|Locus\_376\_9\_13



t-Test: p-value = 0.36

# Locus\_3778\_1\_5|Locus\_3778\_1\_5

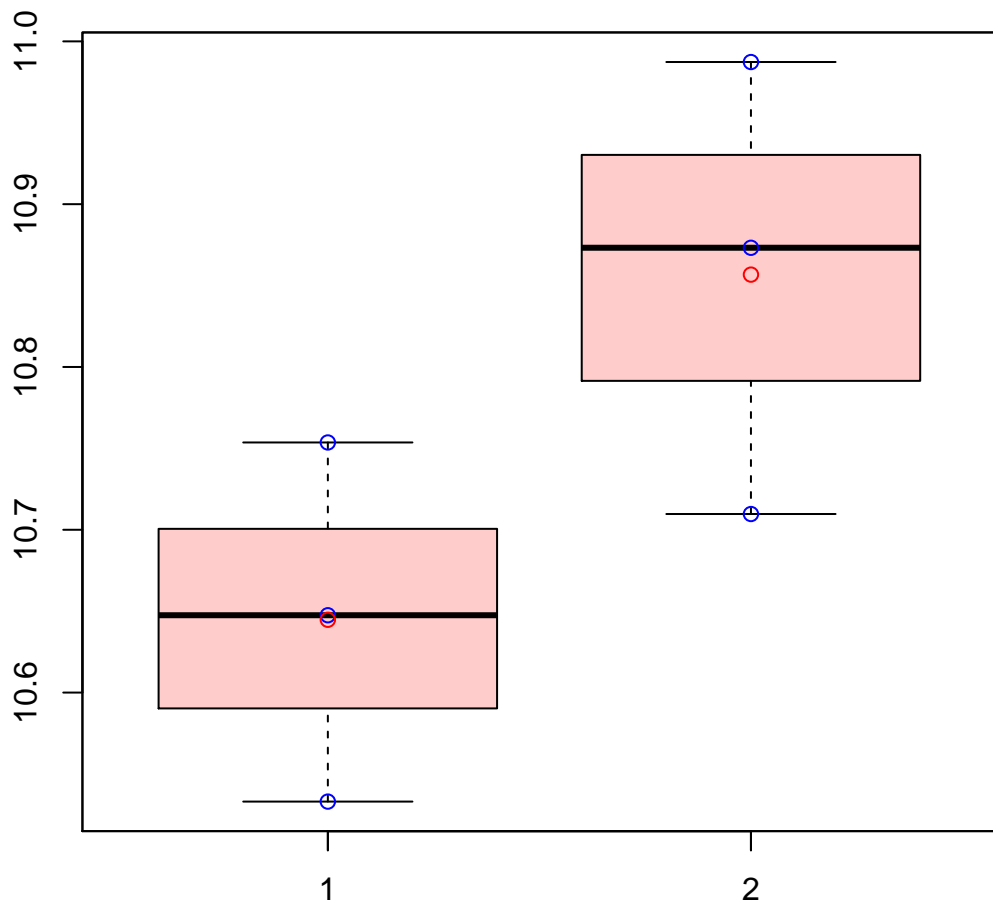

t-Test: p-value = 0.11

# Locus\_389\_3\_9|Locus\_389\_3\_9

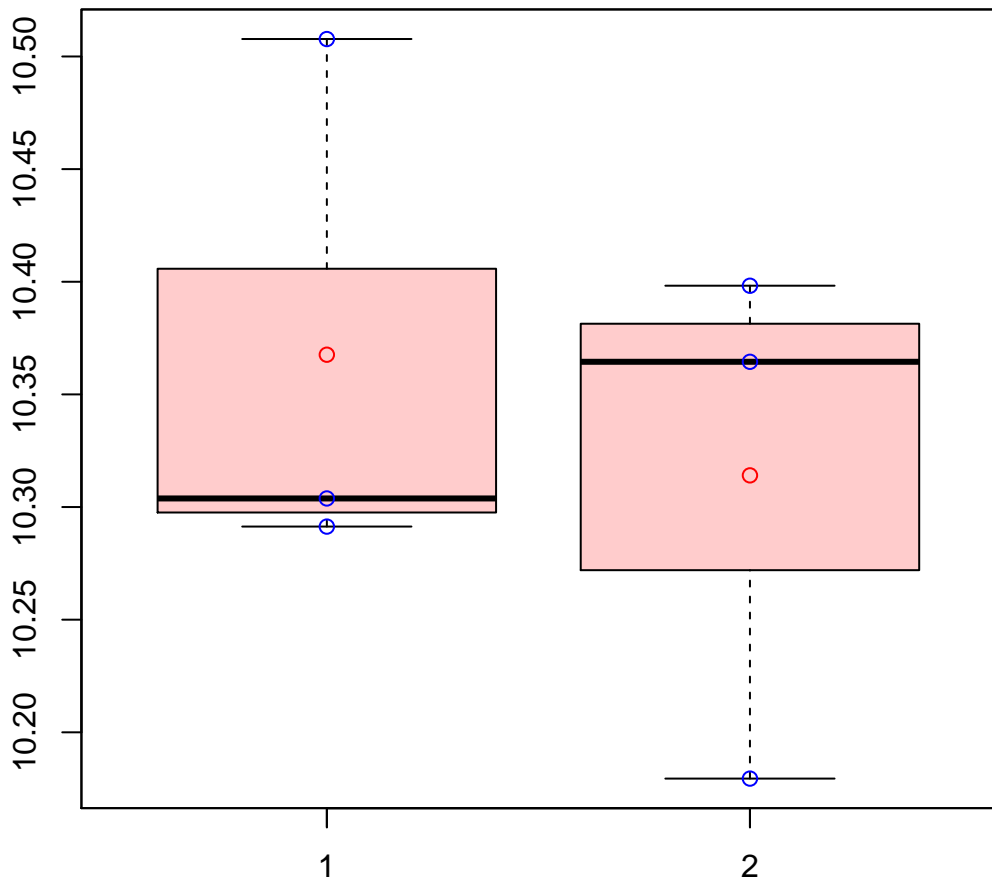

t-Test: p-value = 0.61

# Locus\_391\_4\_12|Locus\_391\_4\_12

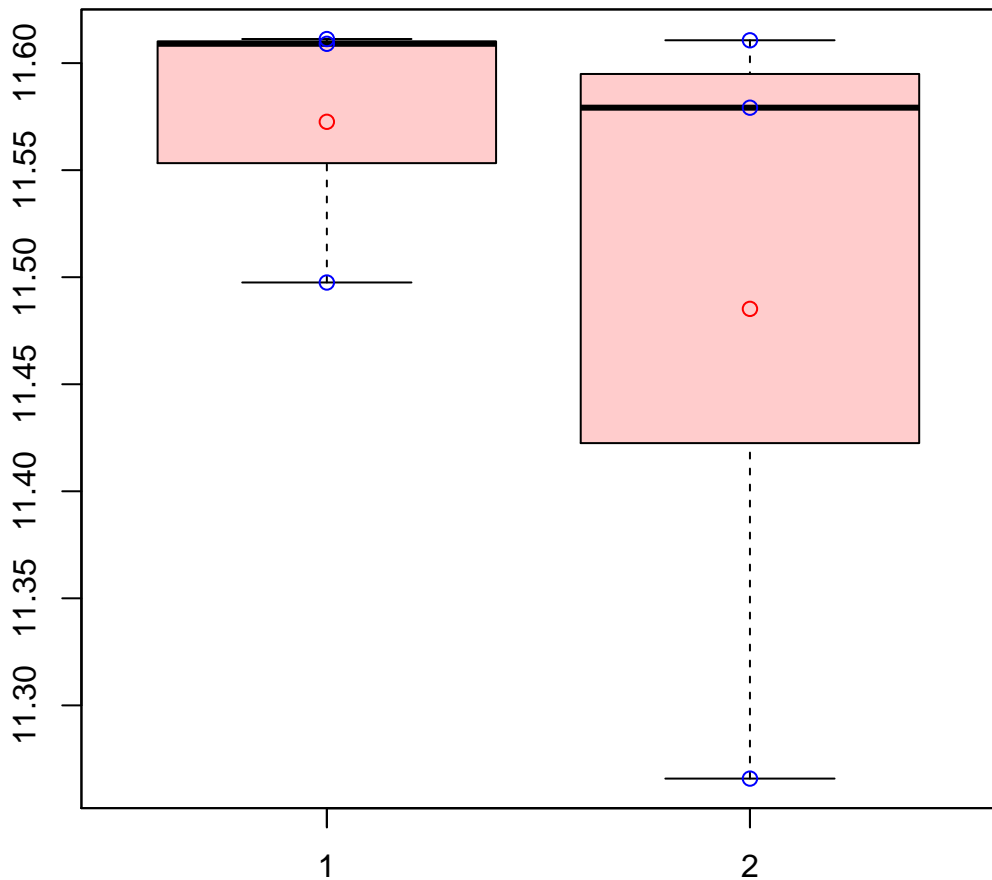

t-Test: p-value = 0.52

# Locus\_391\_5\_12|Locus\_391\_5\_12

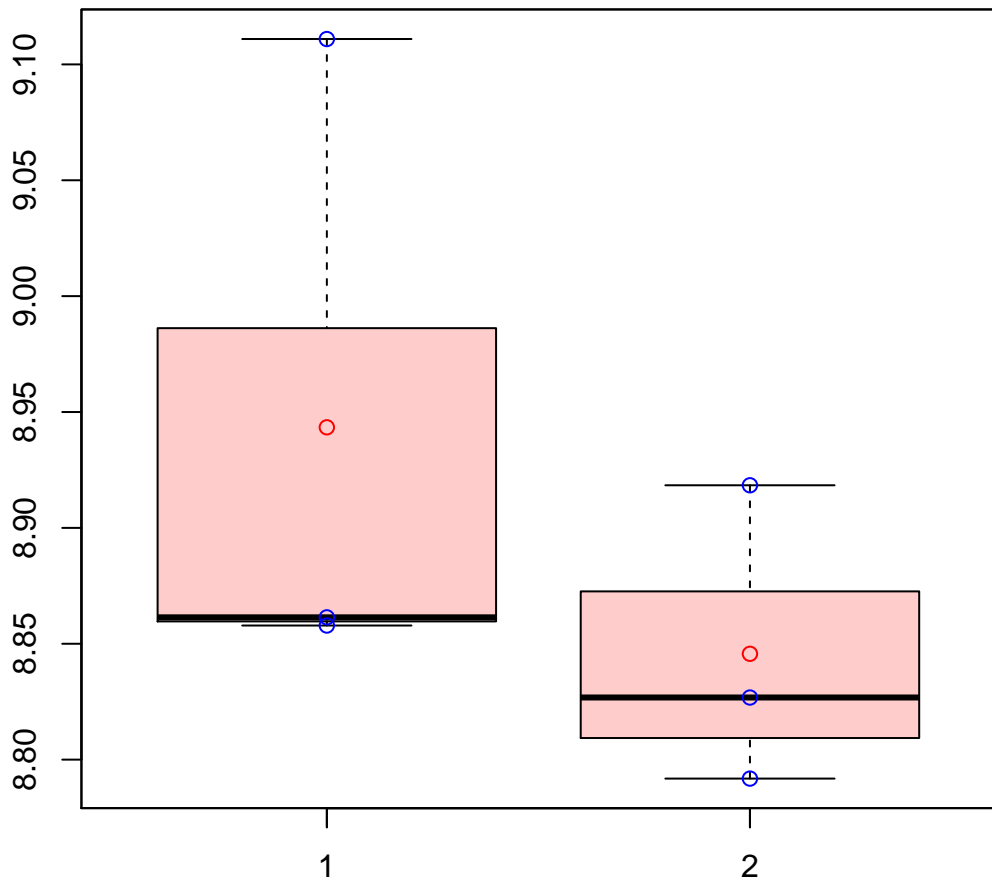

t-Test: p-value = 0.37

# Locus\_393\_4\_9|Locus\_393\_4\_9

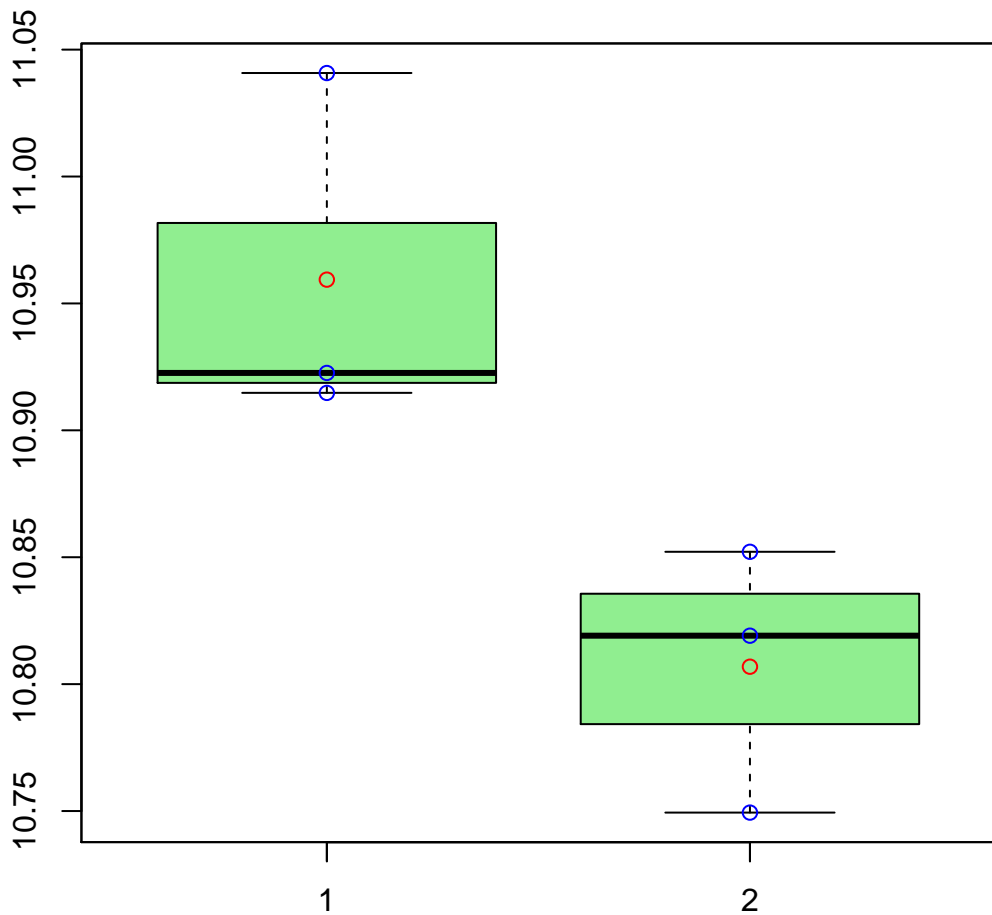

t-Test: p-value = 0.04

# Locus\_400\_10\_17|Locus\_400\_10\_17

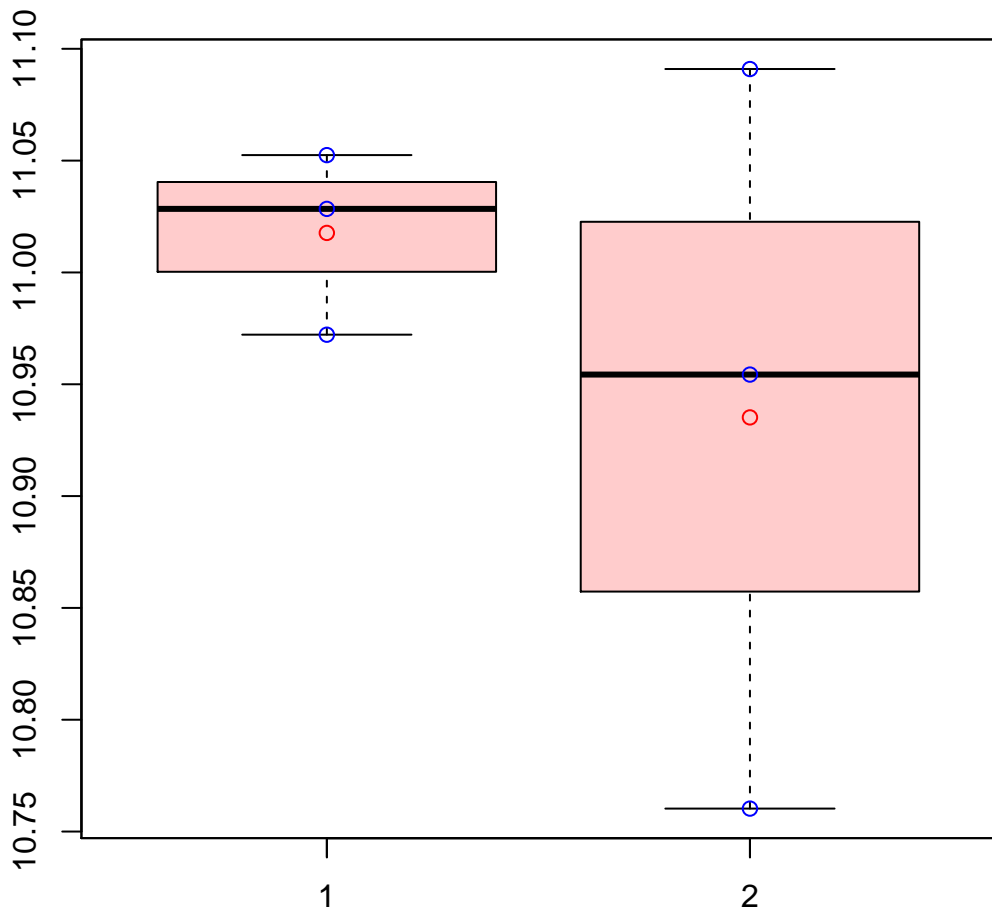

t-Test: p-value = 0.48



# Locus\_400\_11\_17|Locus\_400\_11\_17

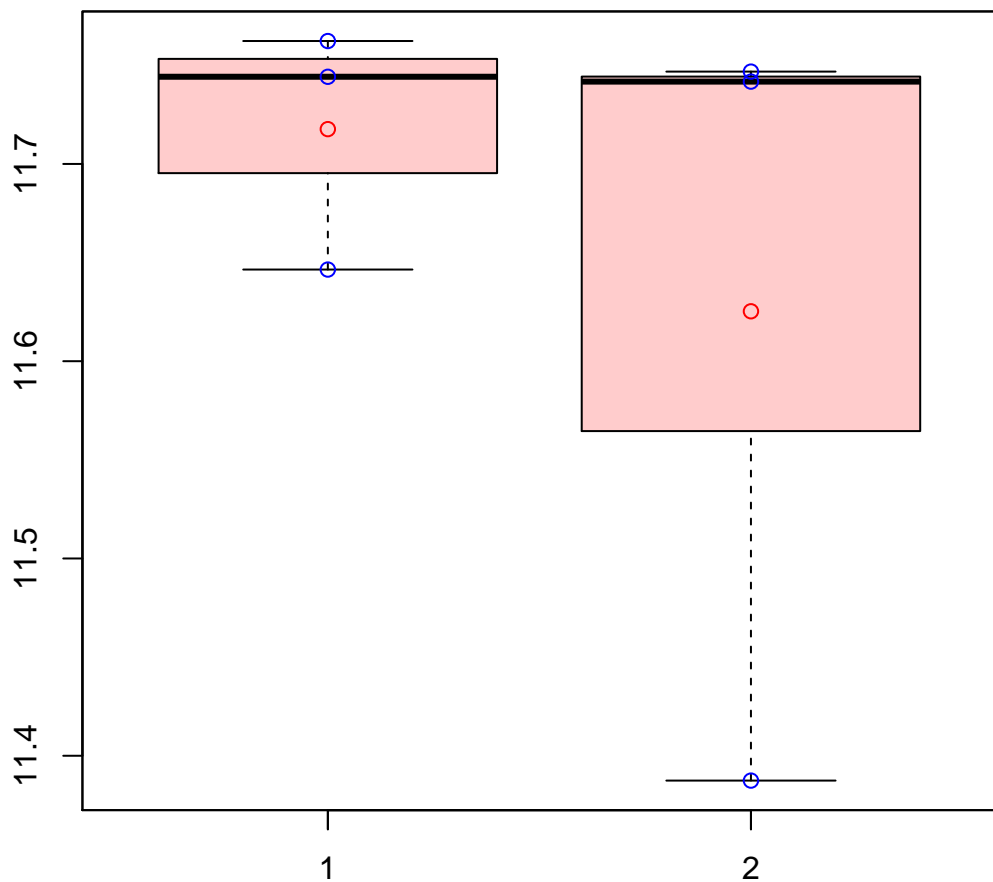

t-Test: p-value = 0.52

# Locus\_400\_13\_17|Locus\_400\_13\_17

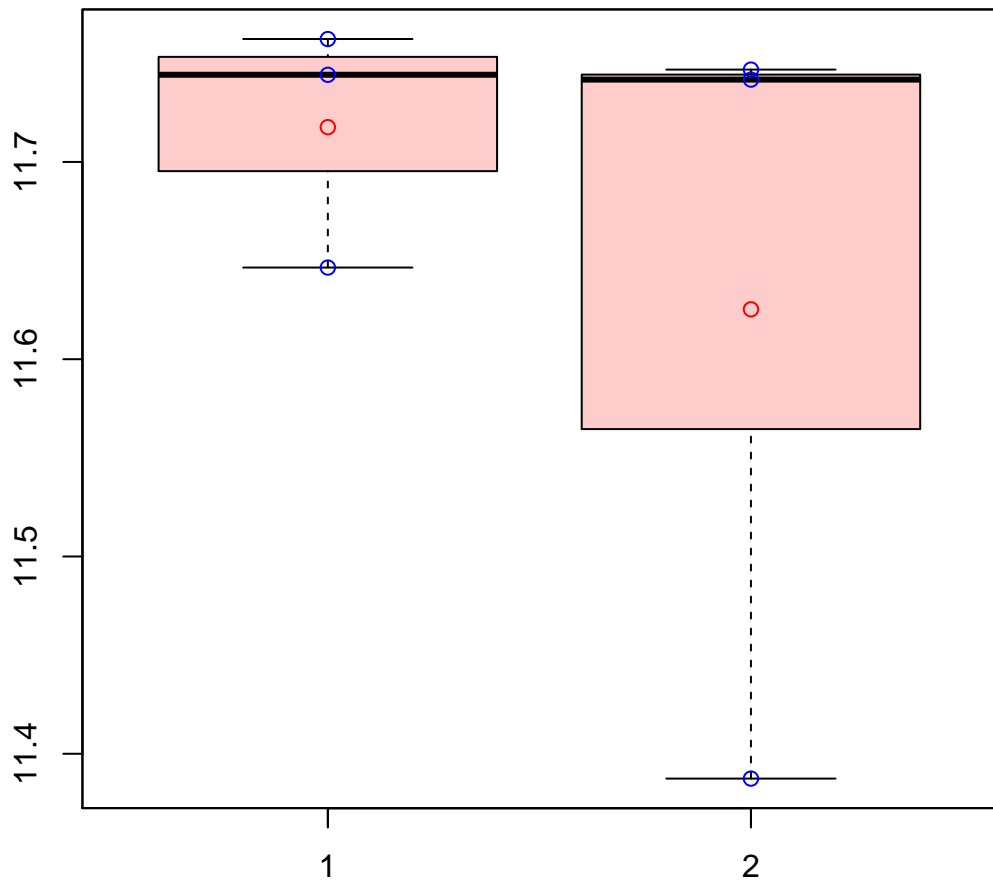

t-Test: p-value = 0.52

# Locus\_400\_9\_17|Locus\_400\_9\_17

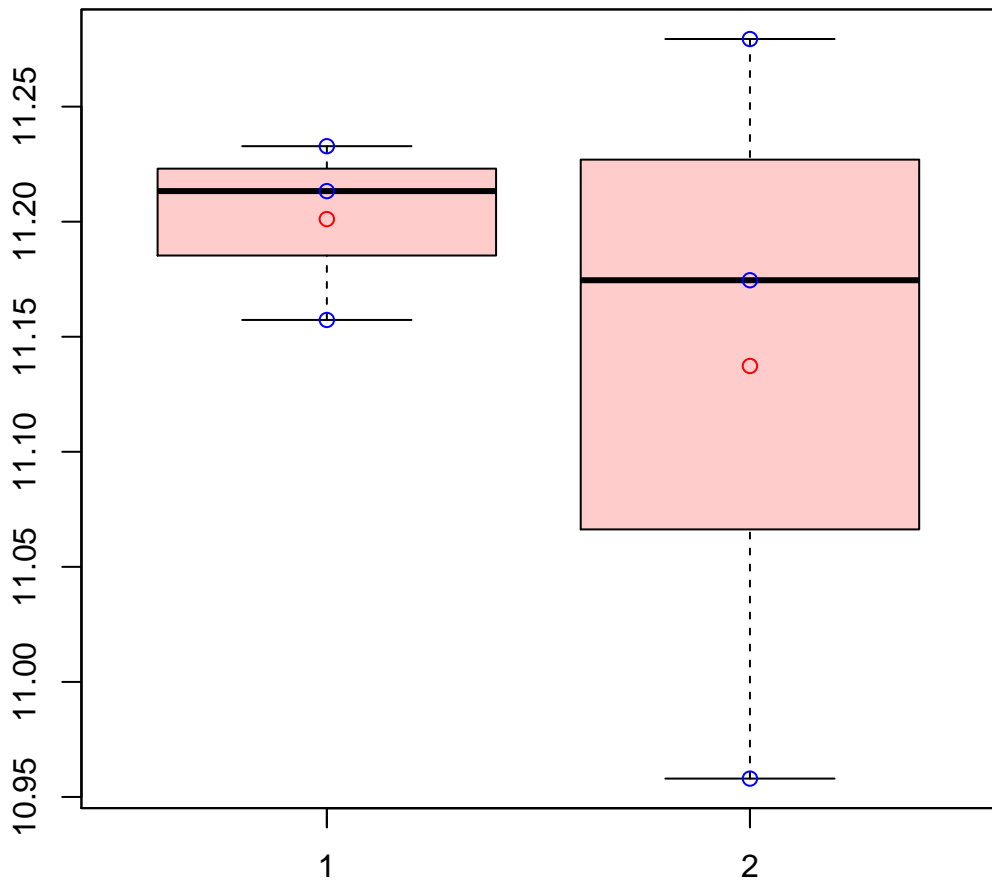

t-Test: p-value = 0.57

# Locus\_4035\_1\_7|Locus\_4035\_1\_7

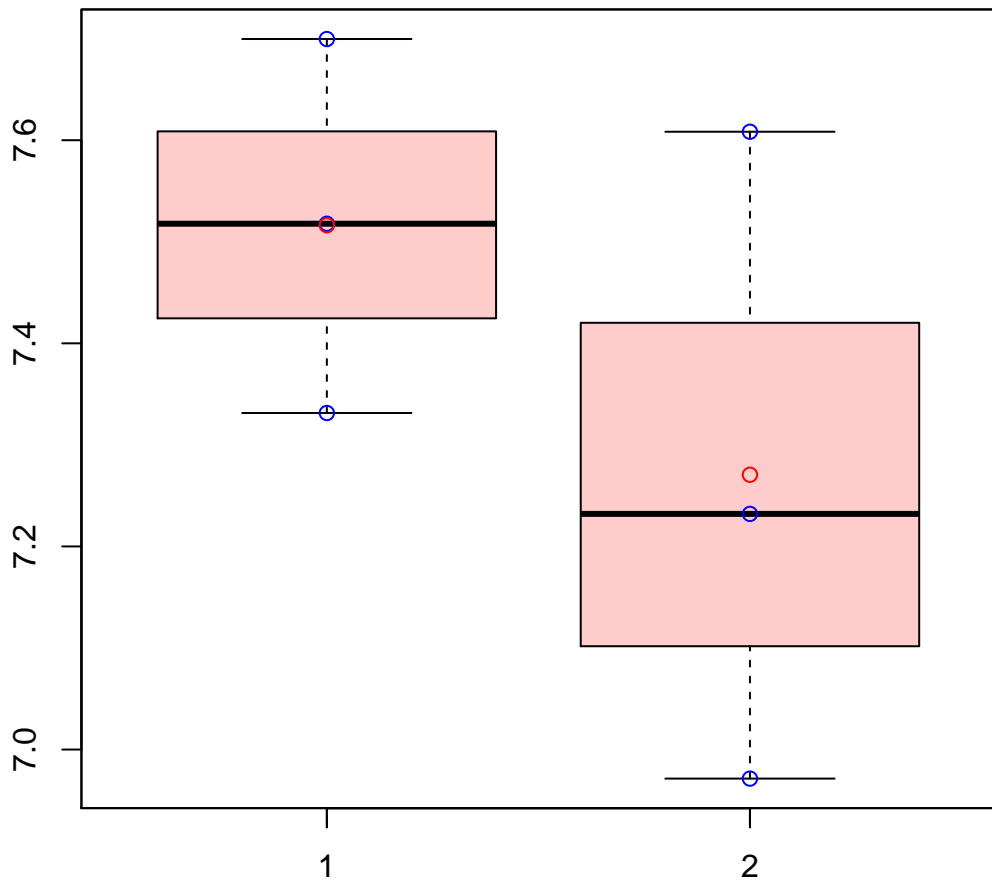

t-Test: p-value = 0.33

# Locus\_40\_5\_6|Locus\_40\_5\_6

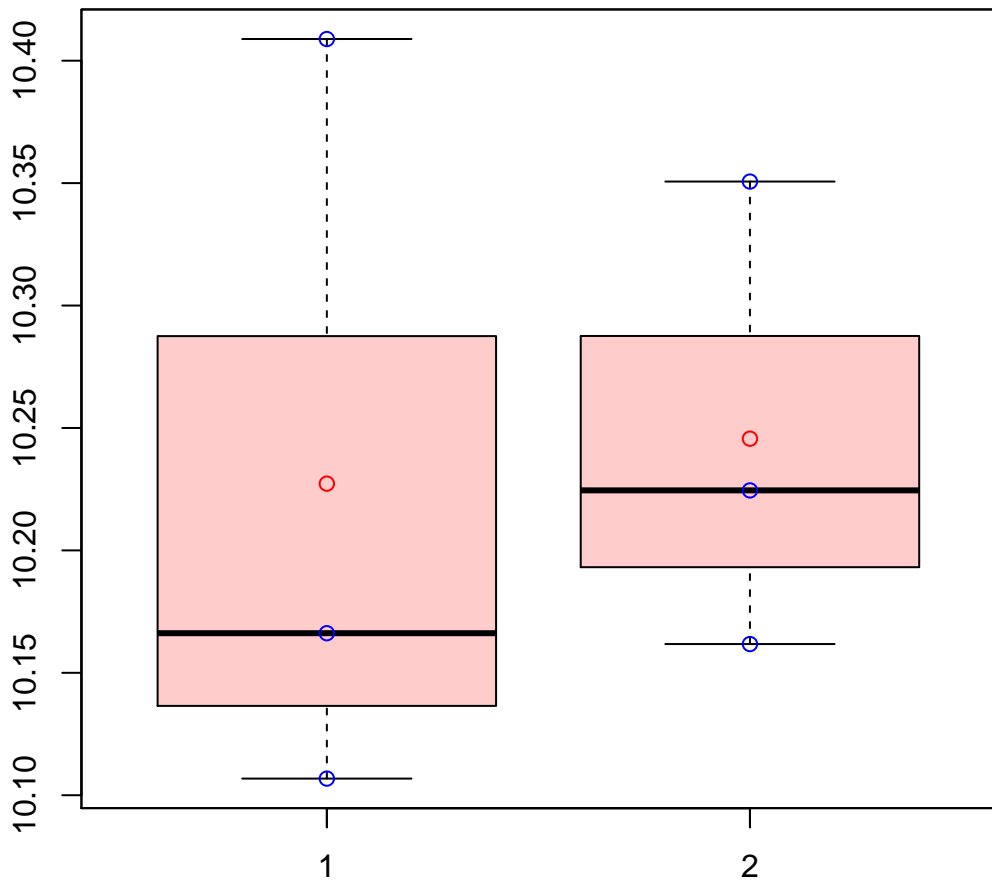

t-Test: p-value = 0.87

# Locus\_4065\_6\_12|Locus\_4065\_6\_12



t-Test: p-value = 0.36

# Locus\_4112\_2\_3|Locus\_4112\_2\_3

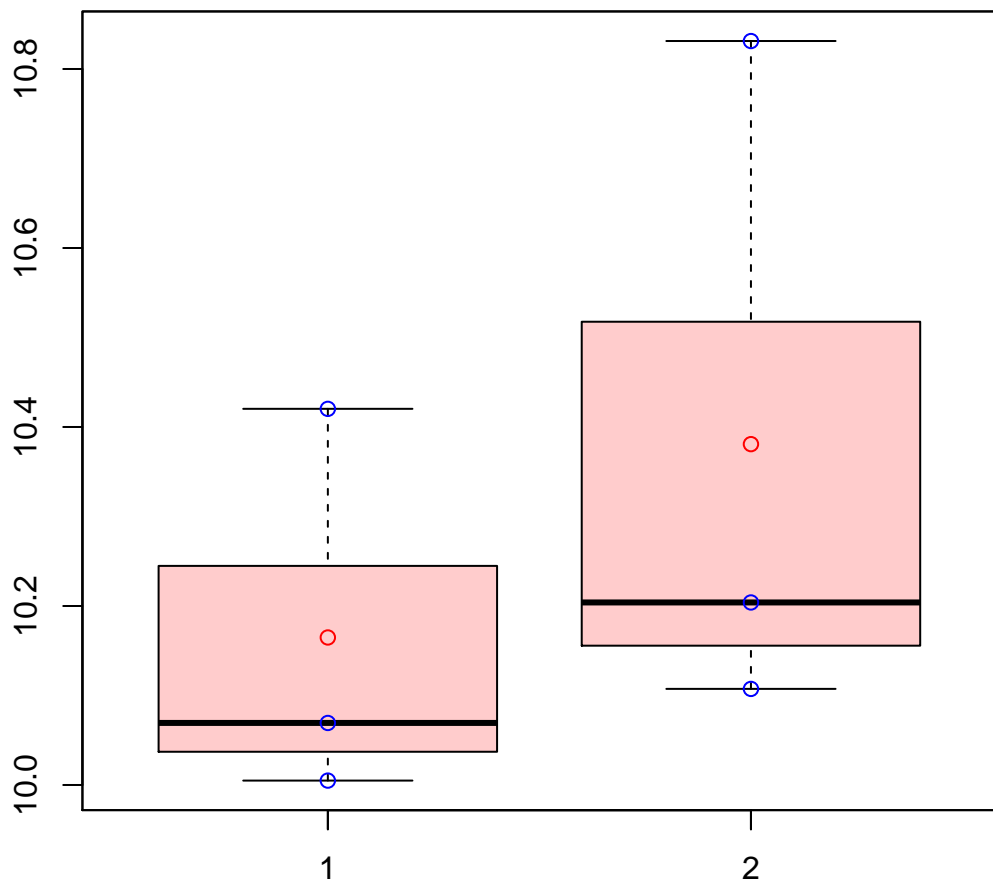

t-Test: p-value = 0.47

# Locus\_4177\_4\_5|Locus\_4177\_4\_5

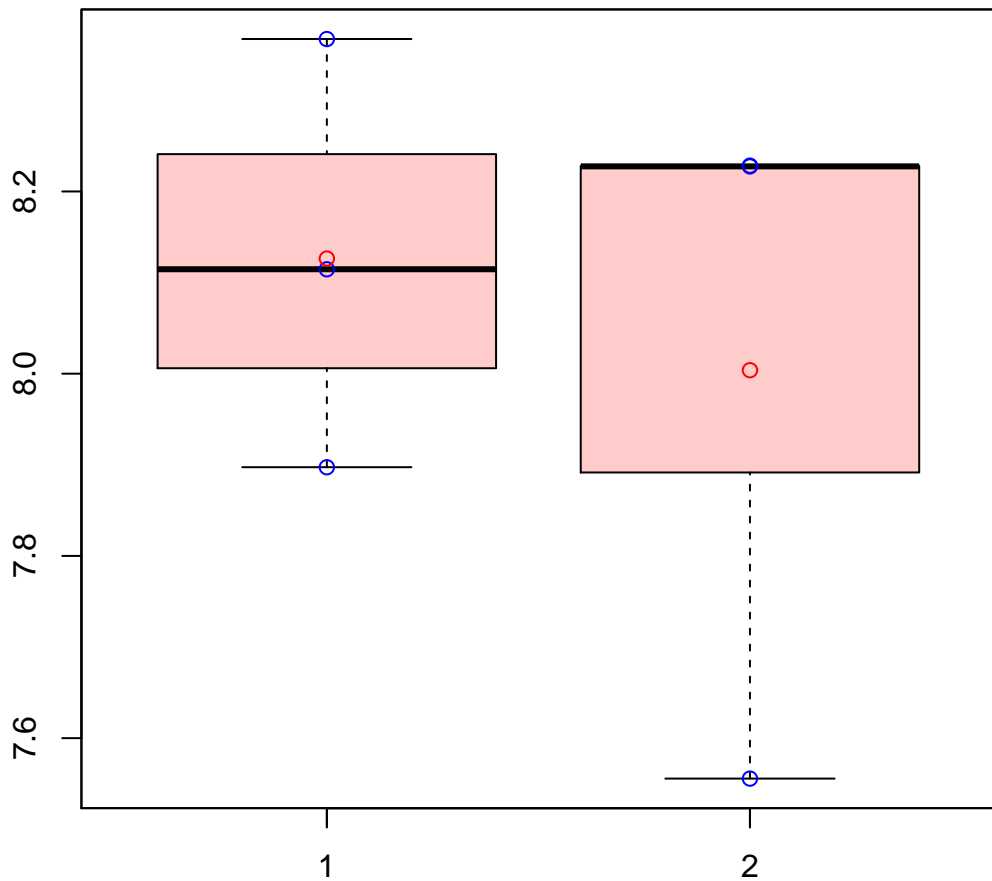

t-Test: p-value = 0.67



# Locus\_4256\_5\_6|Locus\_4256\_5\_6

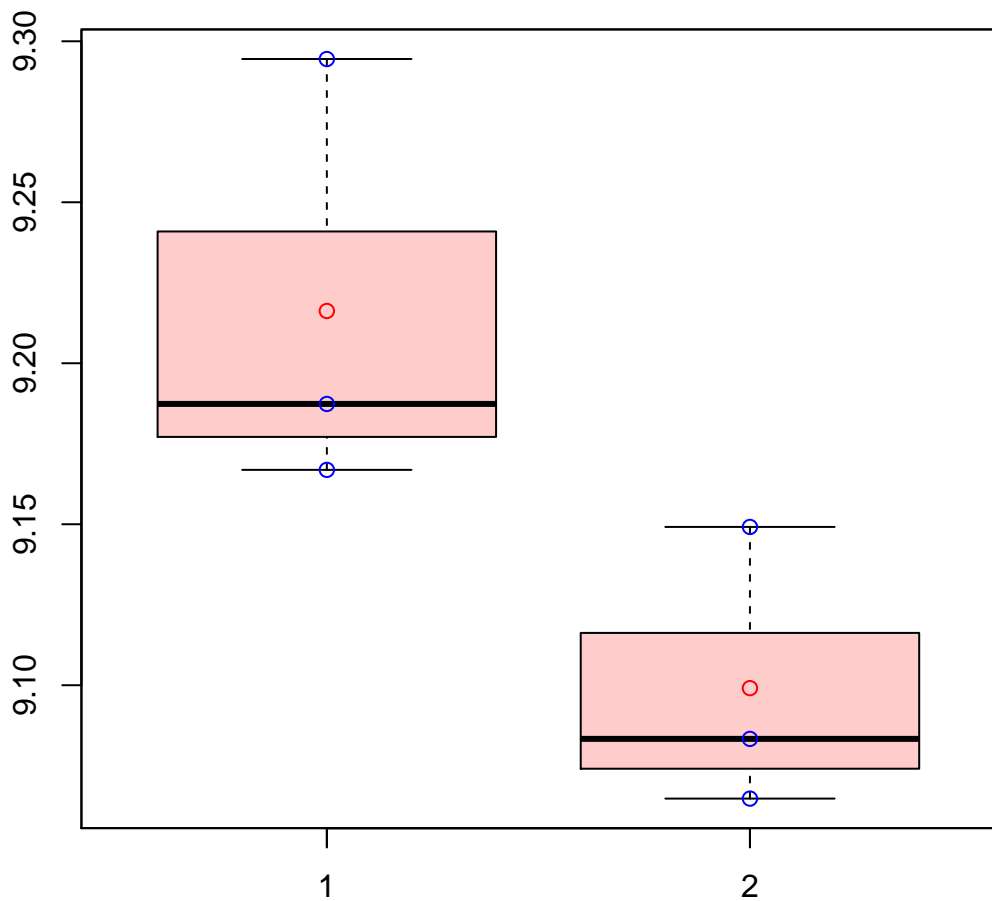

t-Test: p-value = 0.08

# Locus\_427\_1\_4|Locus\_427\_1\_4

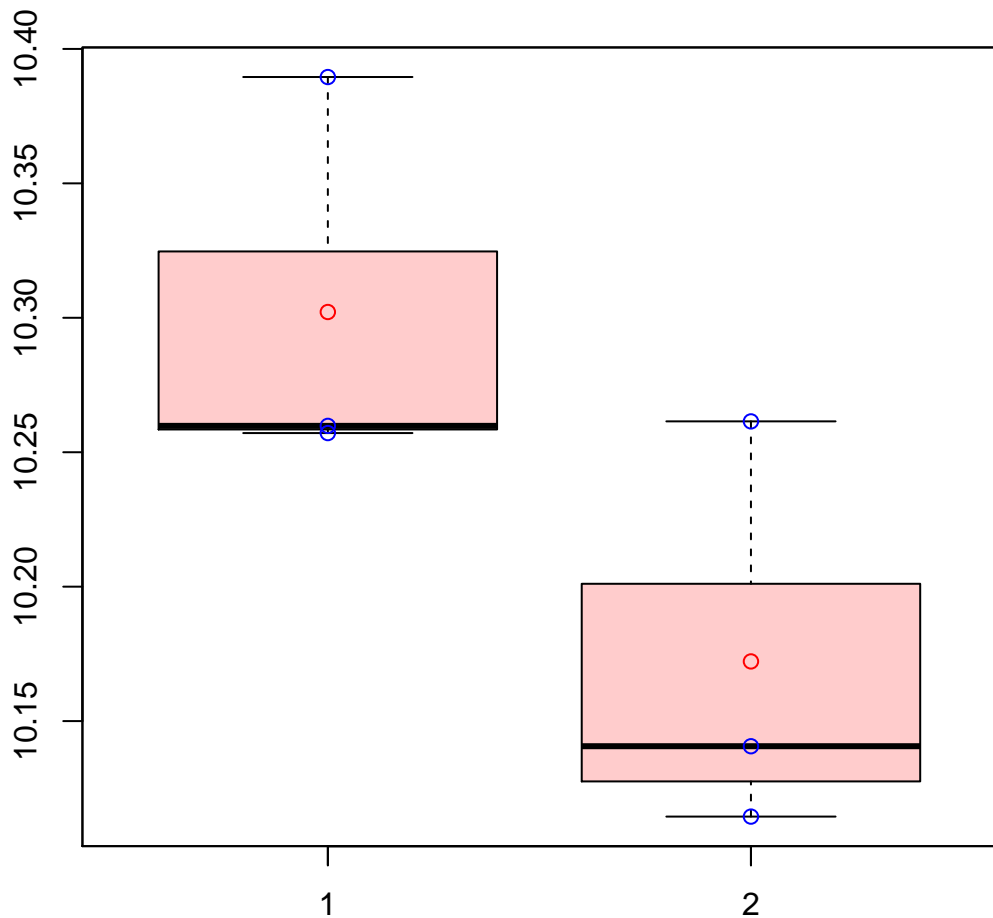

t-Test: p-value = 0.11

# Locus\_432\_1\_8|Locus\_432\_1\_8

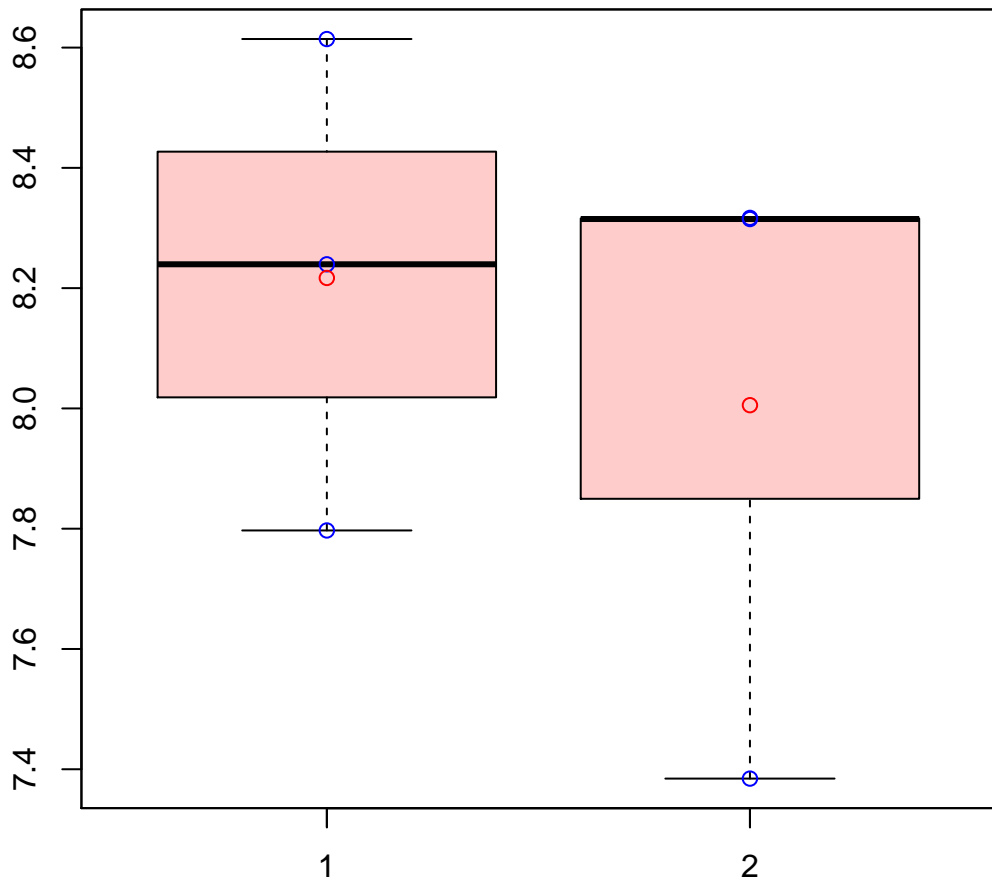

t-Test: p-value = 0.62

# Locus\_4333\_6\_8|Locus\_4333\_6\_8

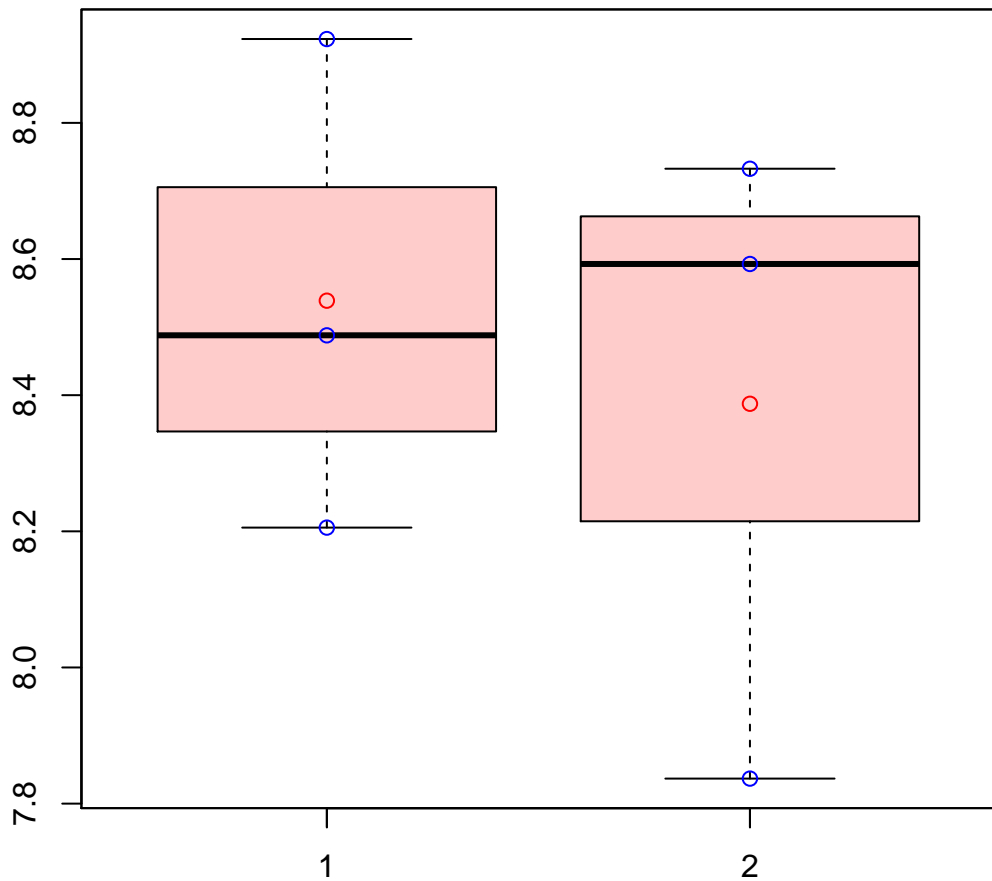

t-Test: p-value = 0.69

# Locus\_436\_2\_9|Locus\_436\_2\_9

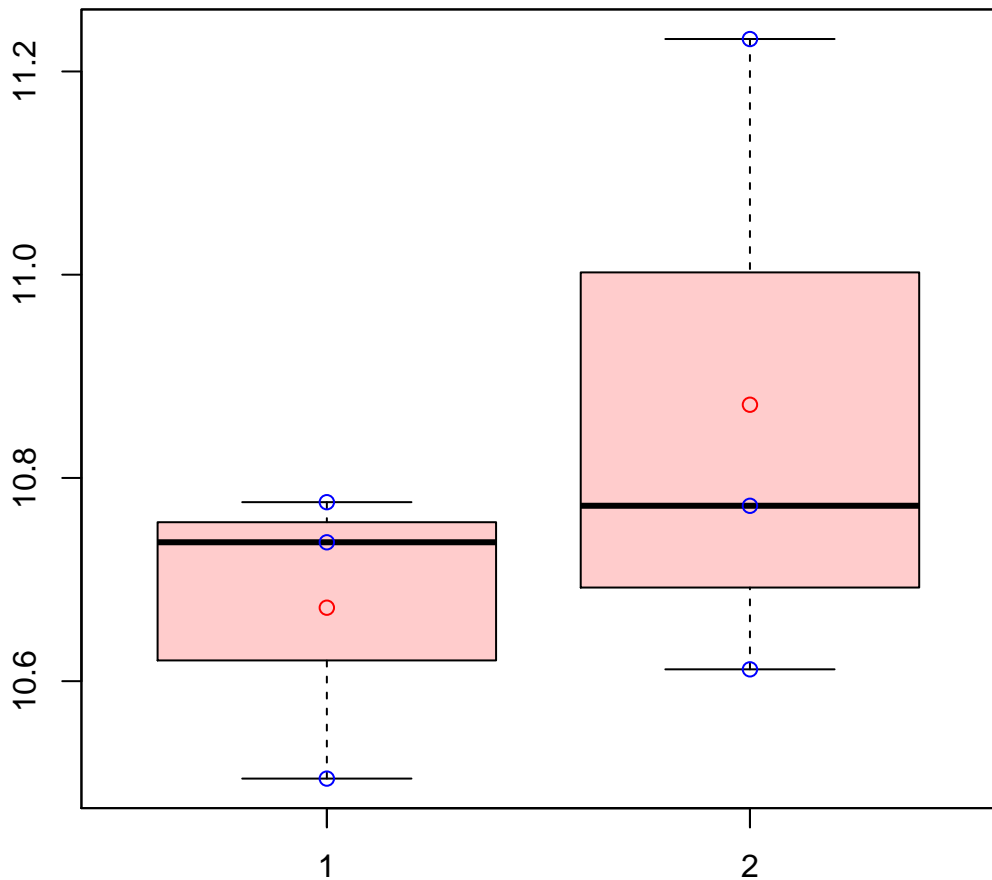

t-Test: p-value = 0.4

# Locus\_44\_1\_9|Locus\_44\_1\_9

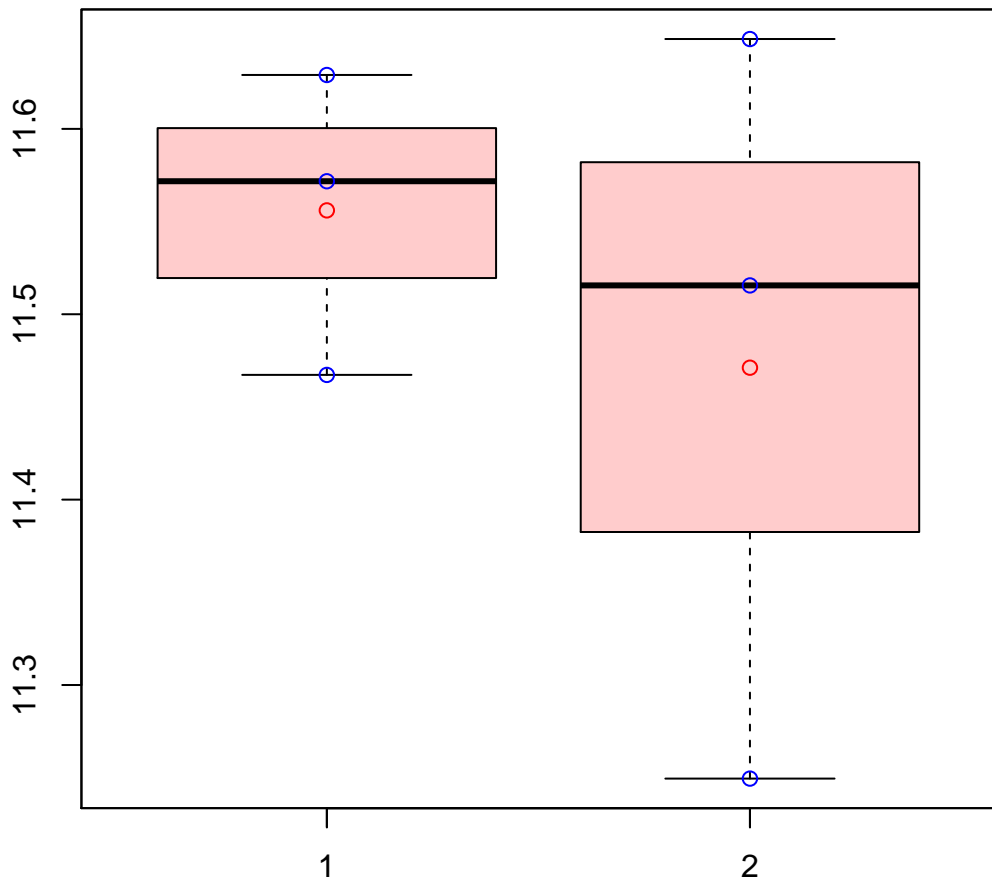

t-Test: p-value = 0.56

# Locus\_44\_3\_12|Locus\_44\_3\_12

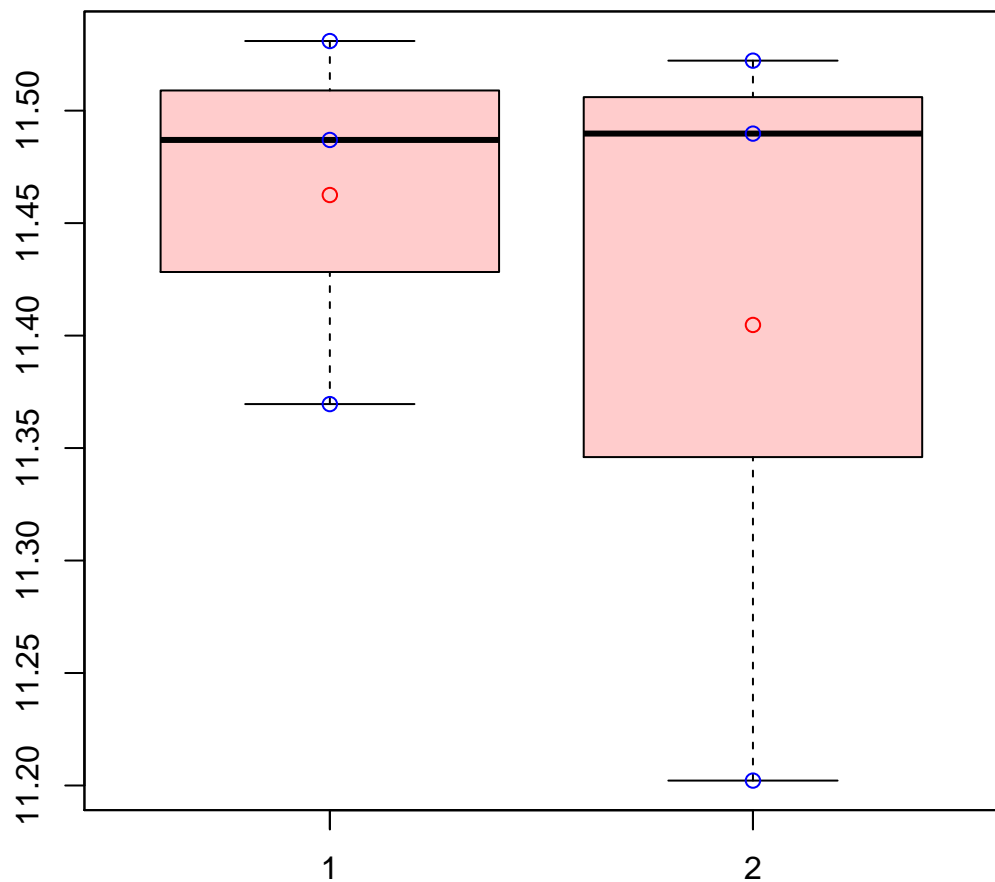

t-Test: p-value = 0.64

# Locus\_44\_6\_12|Locus\_44\_6\_12

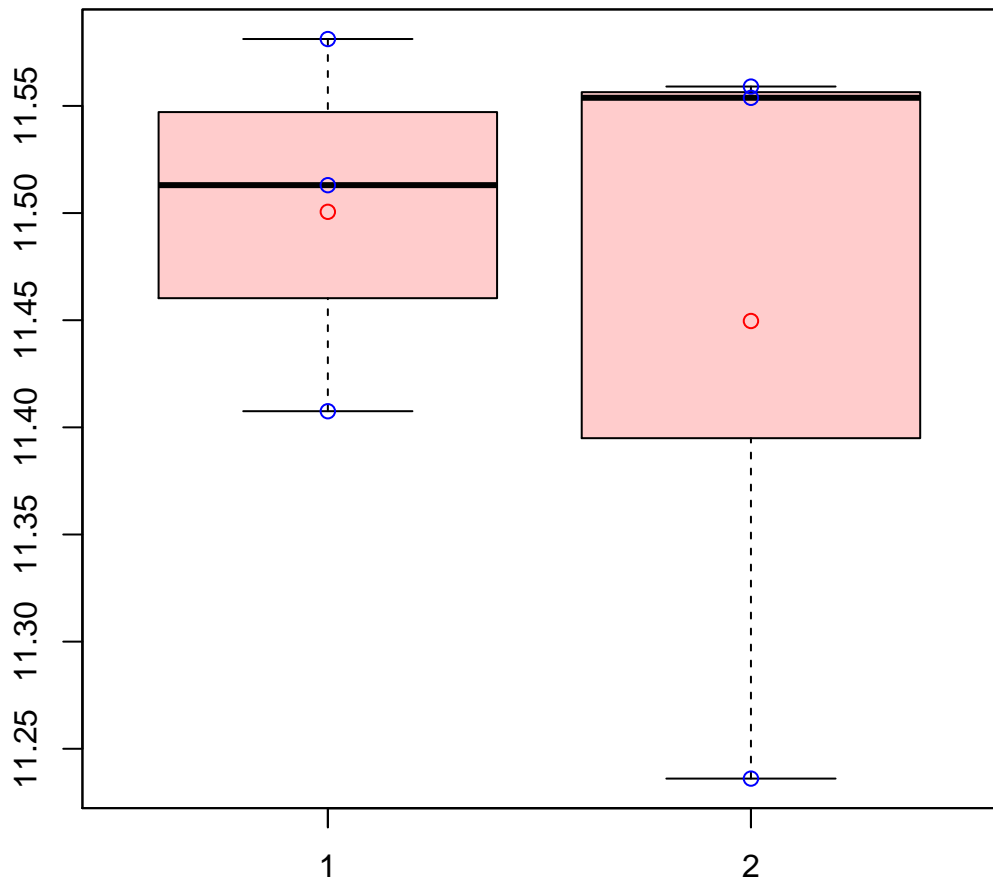

t-Test: p-value = 0.7



# Locus\_44\_7\_9|Locus\_44\_7\_9

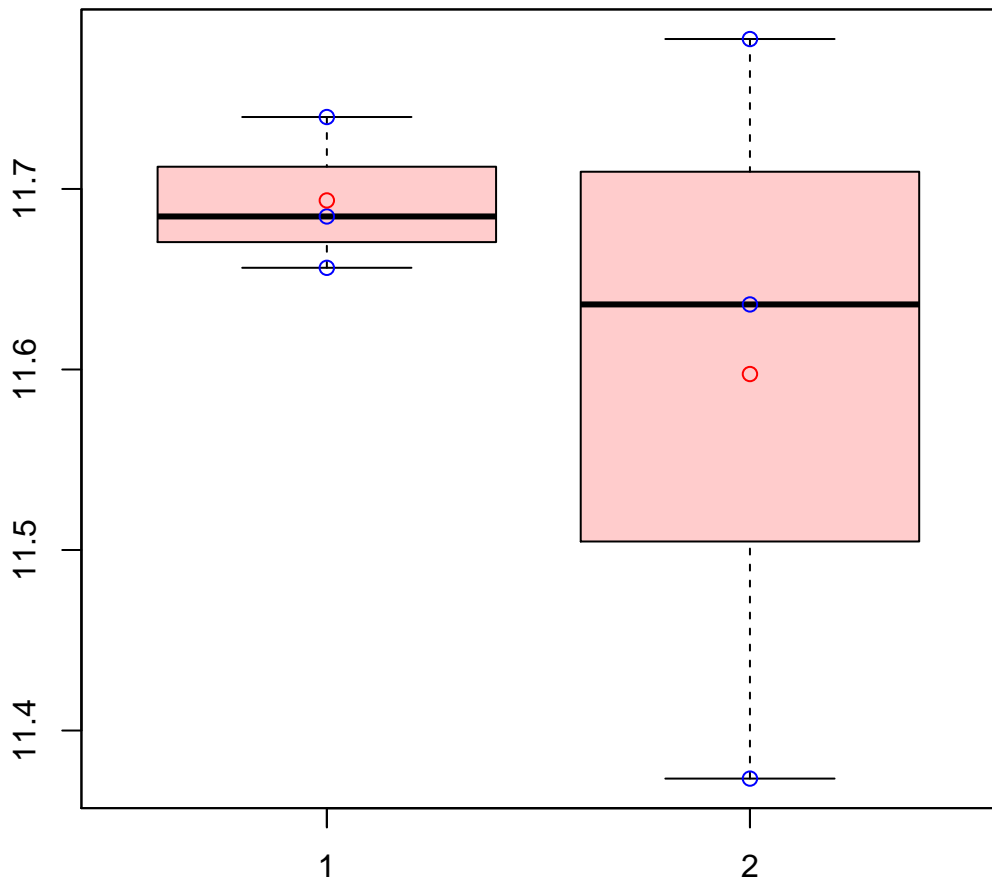

t-Test: p-value = 0.51

# Locus\_44\_9\_9|Locus\_44\_9\_9

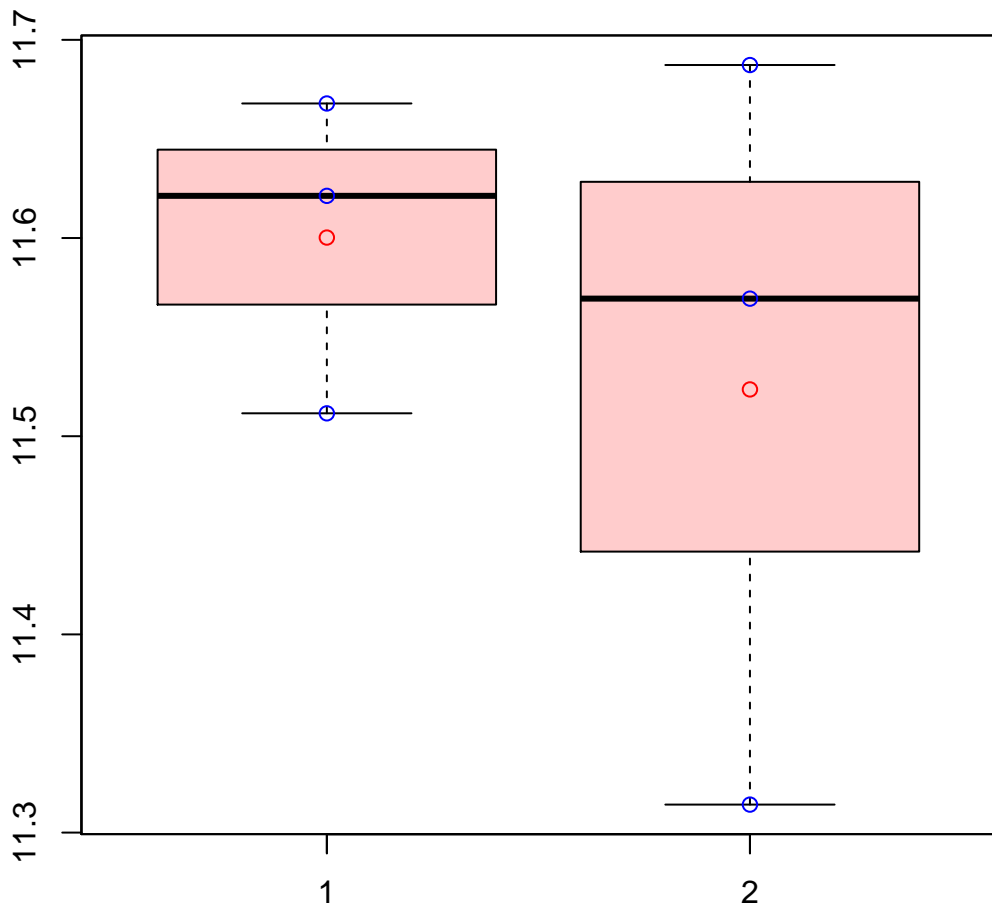

t-Test: p-value = 0.57

# Locus\_4532\_4\_11|Locus\_4532\_4\_11

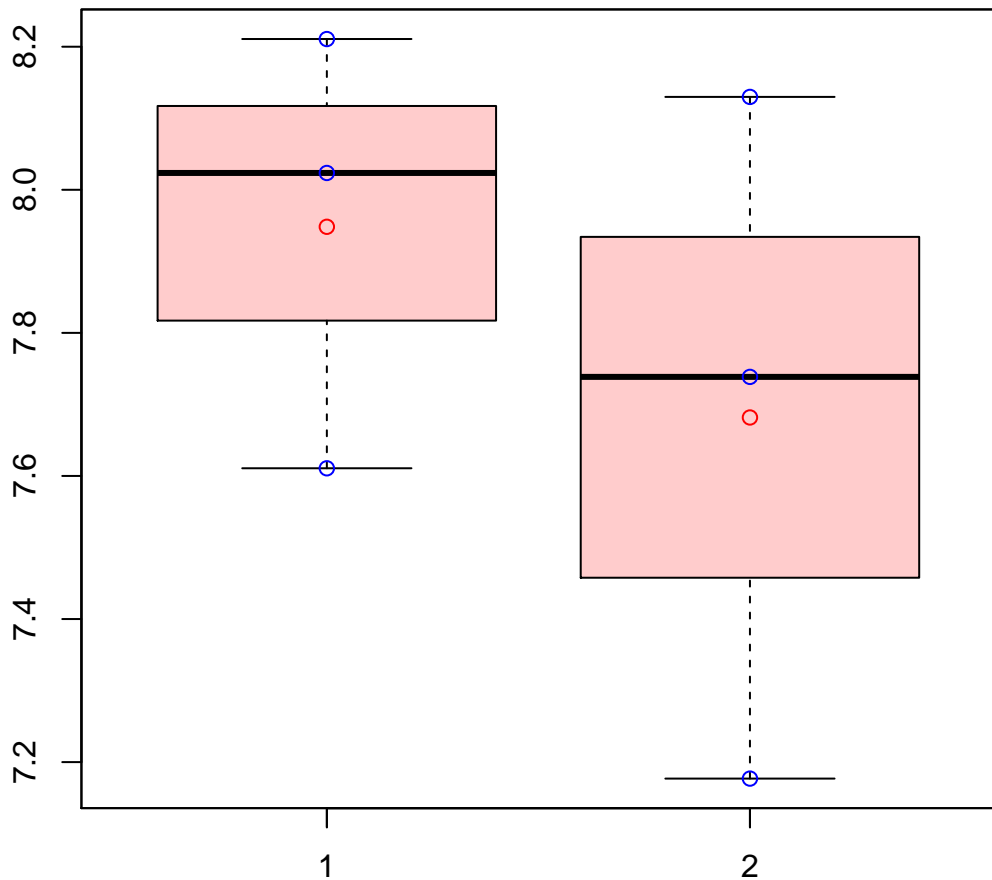

t-Test: p-value = 0.47

# Locus\_454\_4\_9|Locus\_454\_4\_9

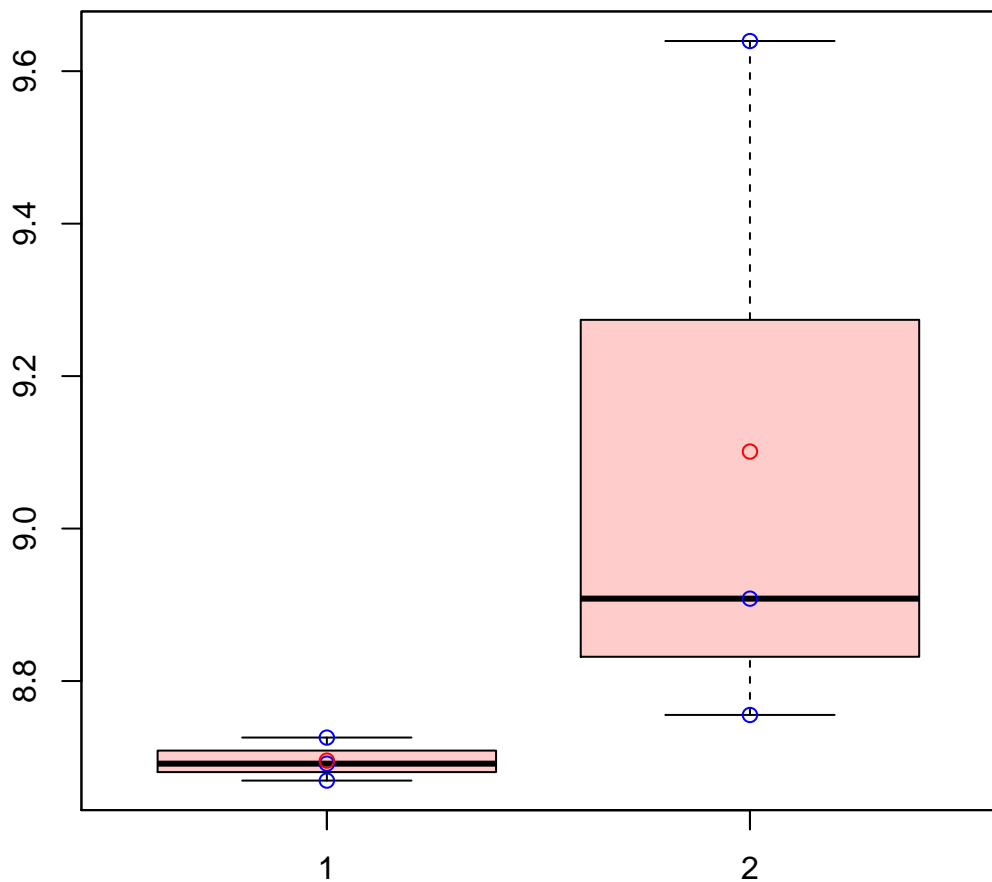

t-Test: p-value = 0.28

# Locus\_4547\_2\_11|Locus\_4547\_2\_11

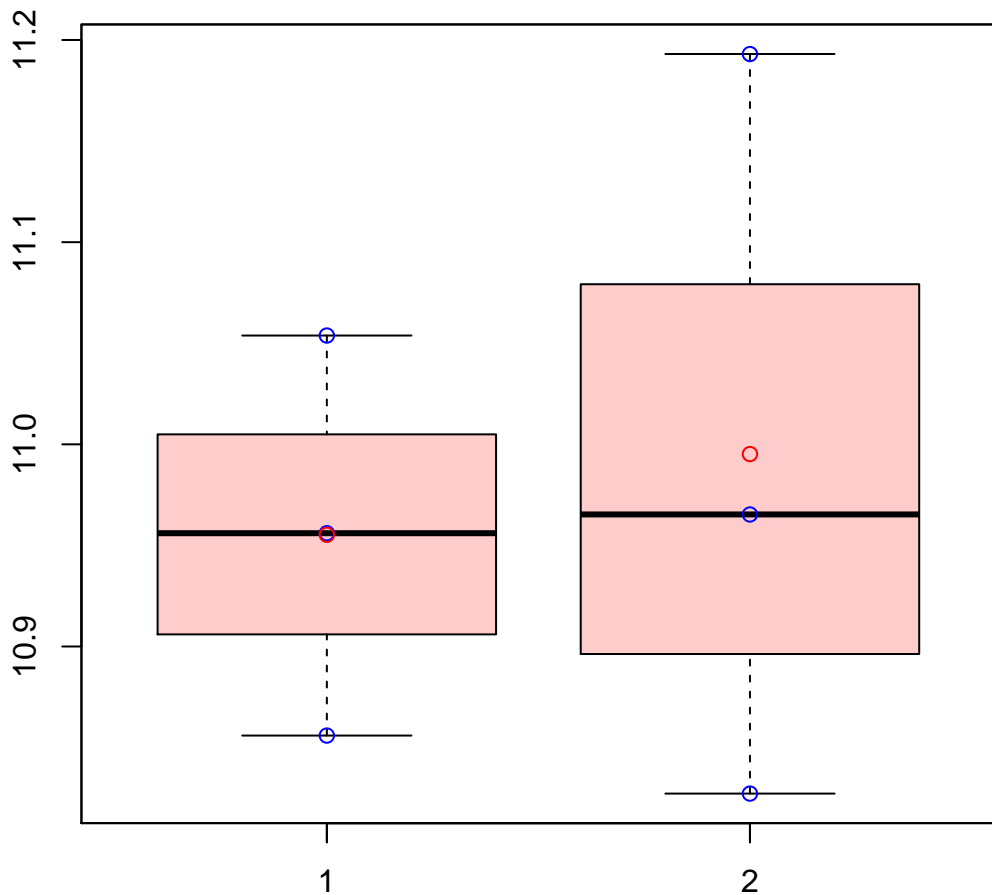

t-Test: p-value = 0.76

# Locus\_4558\_1\_9|Locus\_4558\_1\_9

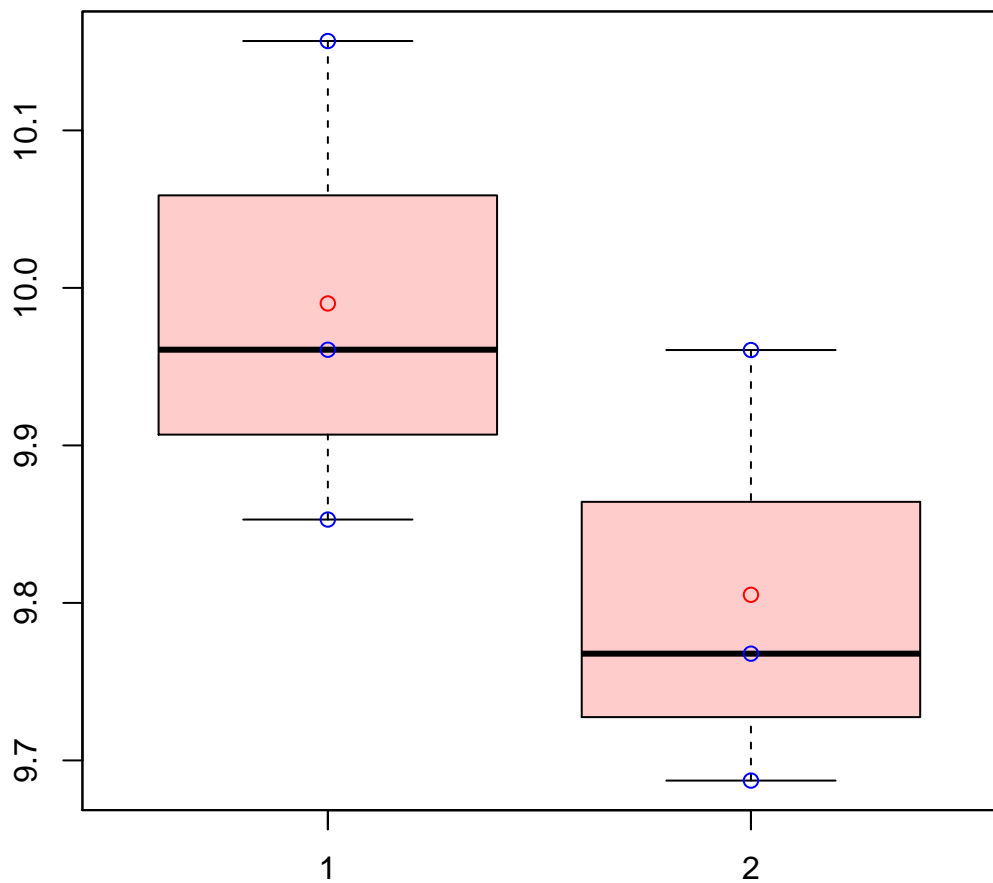

t-Test: p-value = 0.2

# Locus\_46\_2\_9|Locus\_46\_2\_9

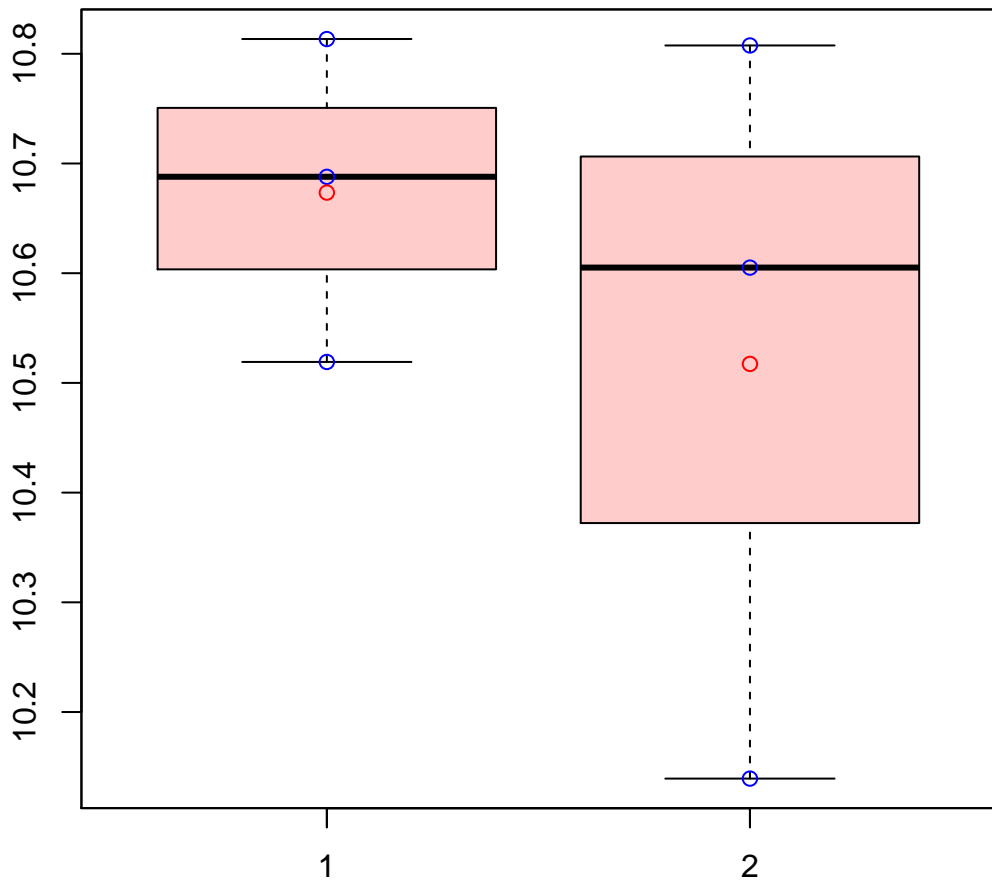

t-Test: p-value = 0.53

# Locus\_4637\_1\_10|Locus\_4637\_1\_10

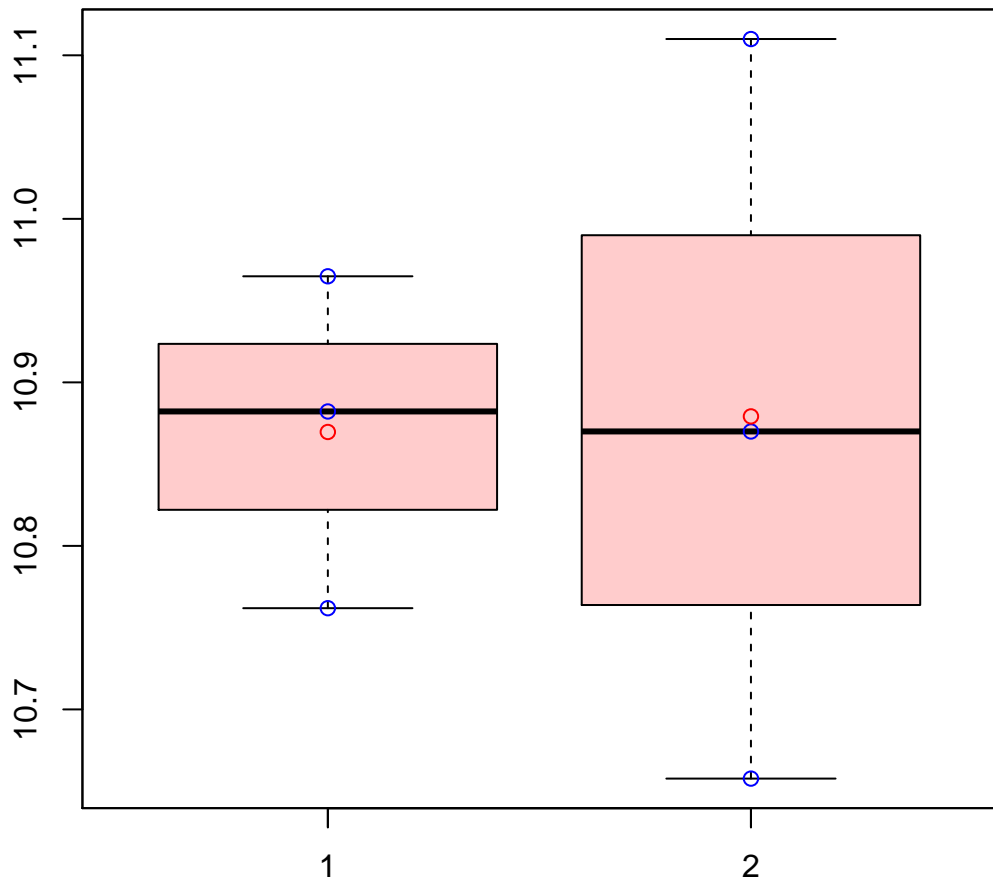

t-Test: p-value = 0.95



# Locus\_471\_2\_7|Locus\_471\_2\_7

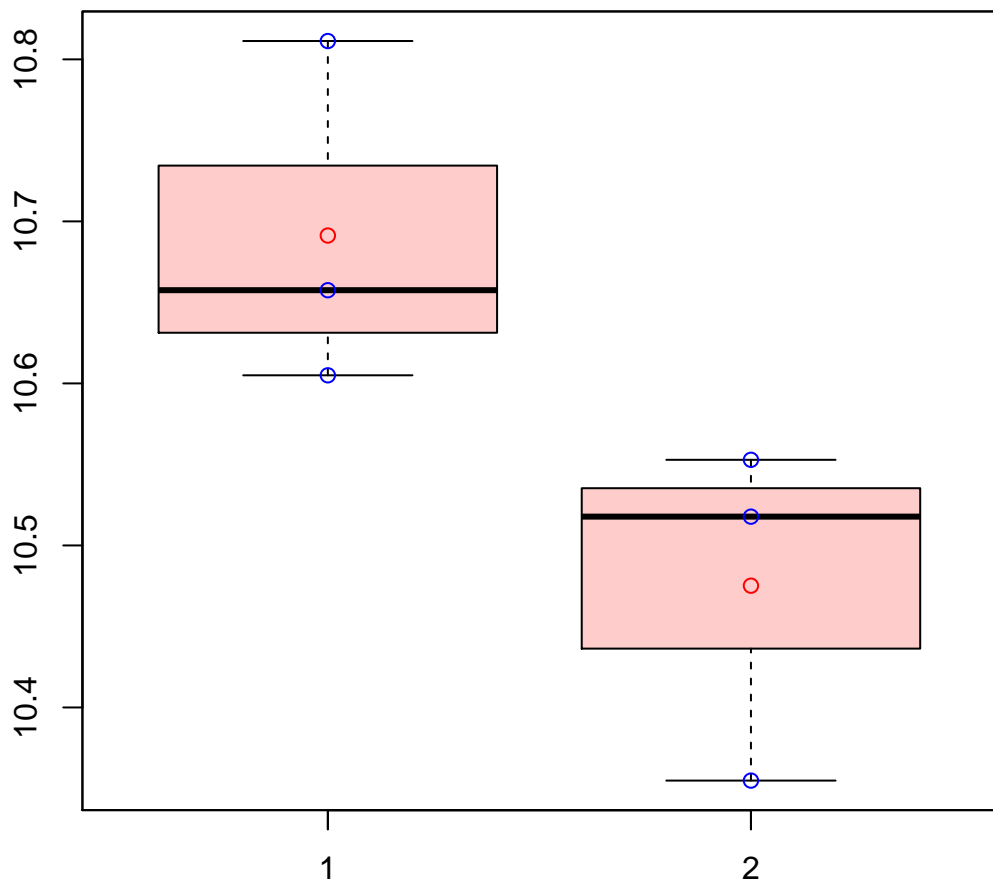

t-Test: p-value = 0.07

# Locus\_4939\_4\_10|Locus\_4939\_4\_10

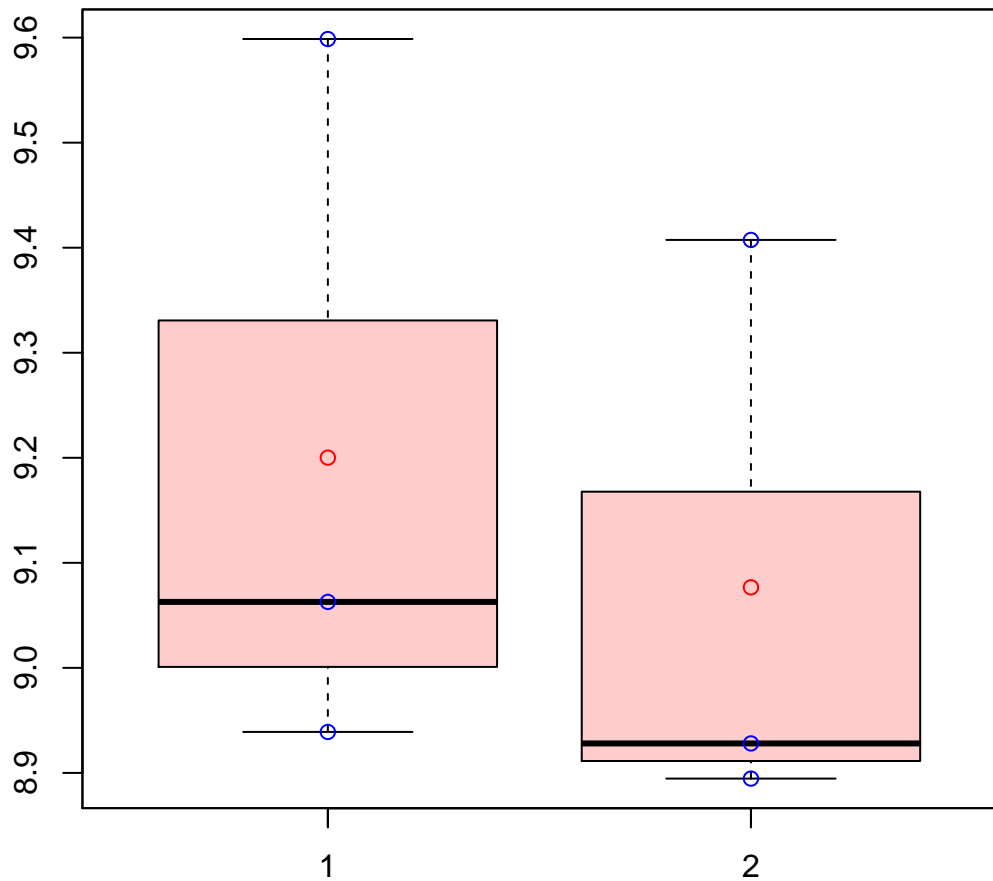

t-Test: p-value = 0.66

# Locus\_4972\_1\_4|Locus\_4972\_1\_4

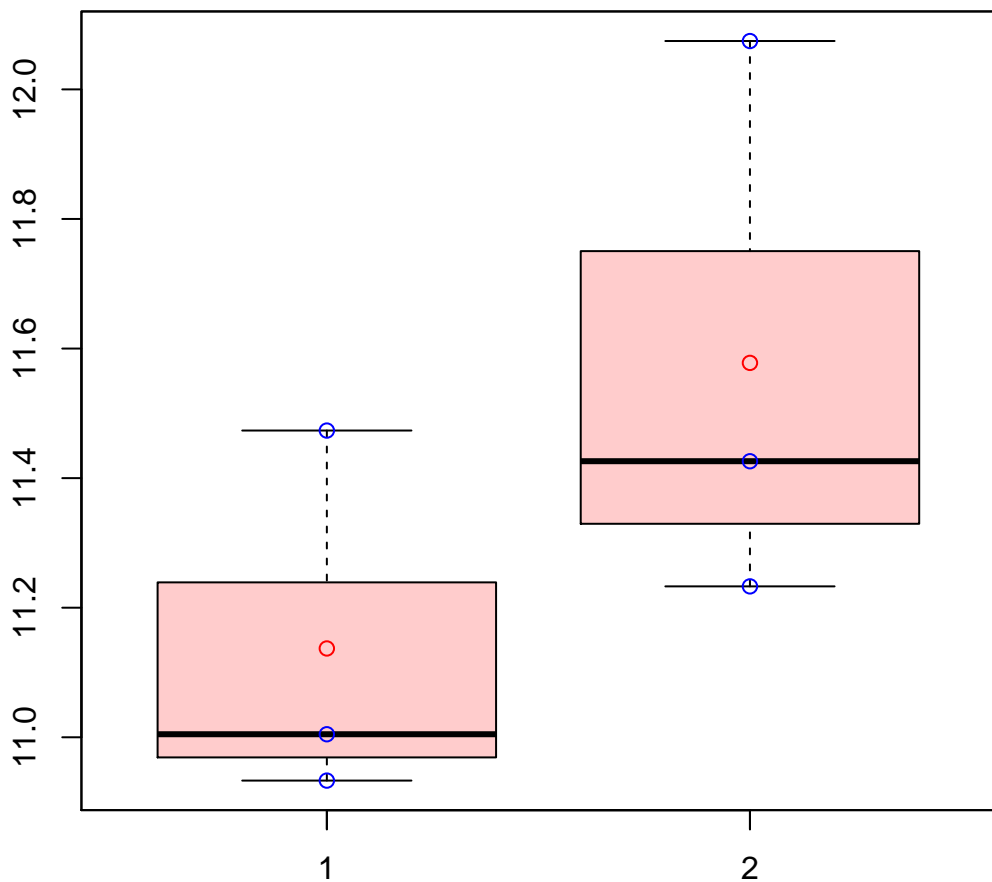

t-Test: p-value = 0.23

# Locus\_4972\_3\_4|Locus\_4972\_3\_4



t-Test: p-value = 0.24

# Locus\_49\_75\_82|Locus\_49\_75\_82

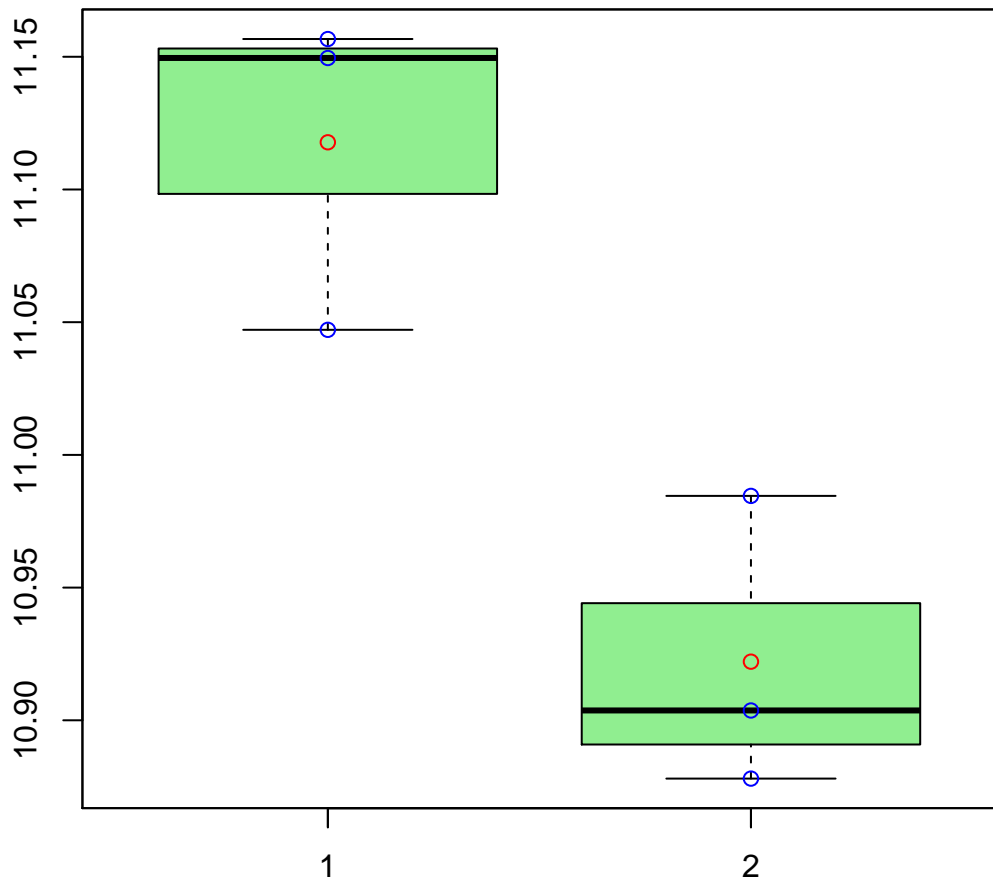

t-Test: p-value = 0.02

# Locus\_49\_76\_82|Locus\_49\_76\_82

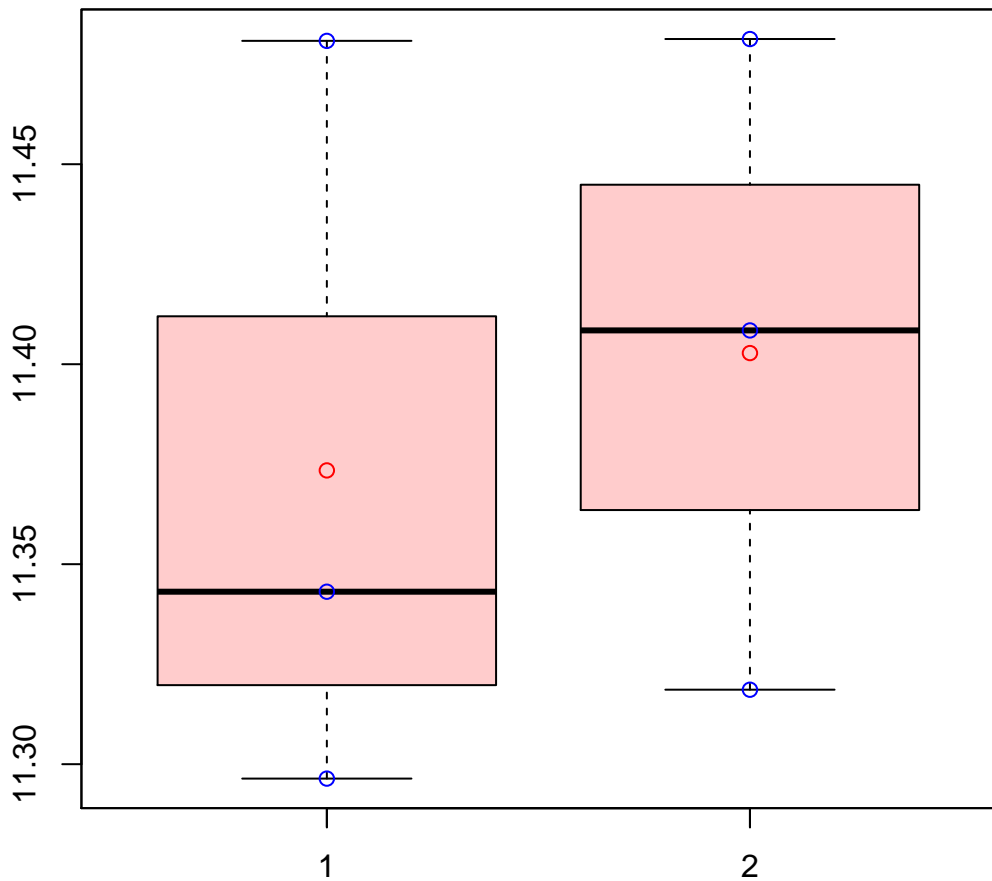

t-Test: p-value = 0.71

# Locus\_49\_80\_82|Locus\_49\_80\_82

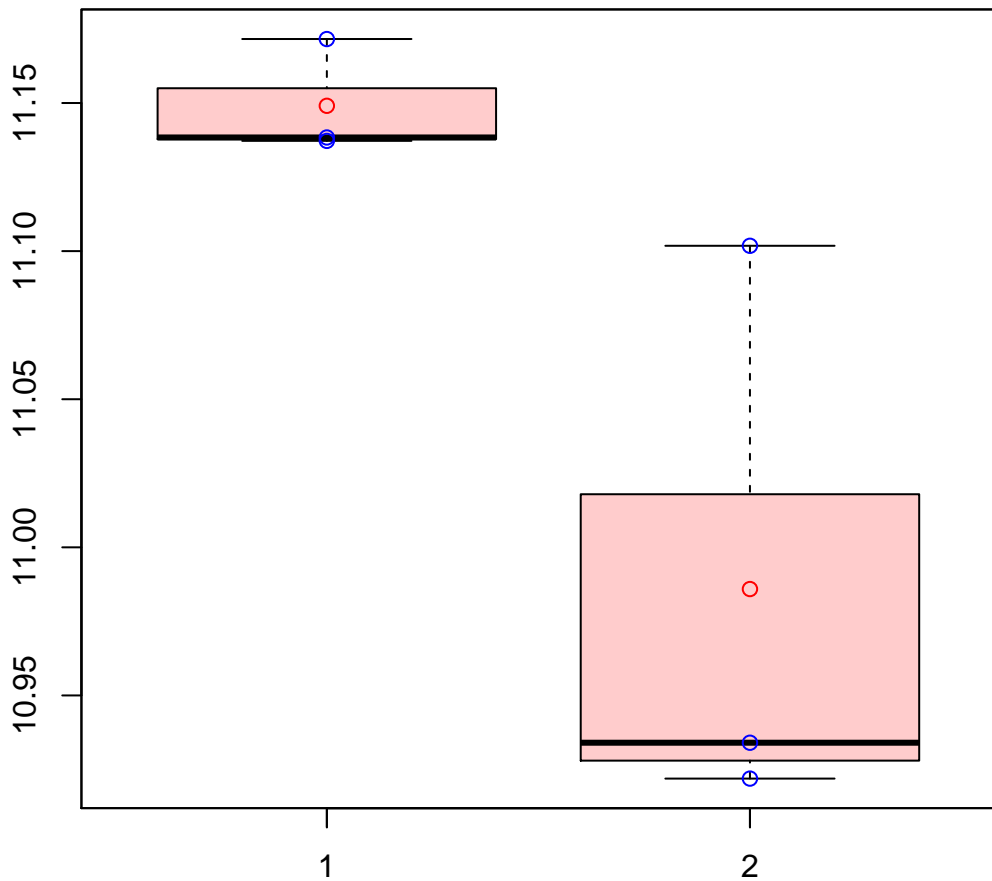

t-Test: p-value = 0.1

# Locus\_49\_81\_82|Locus\_49\_81\_82

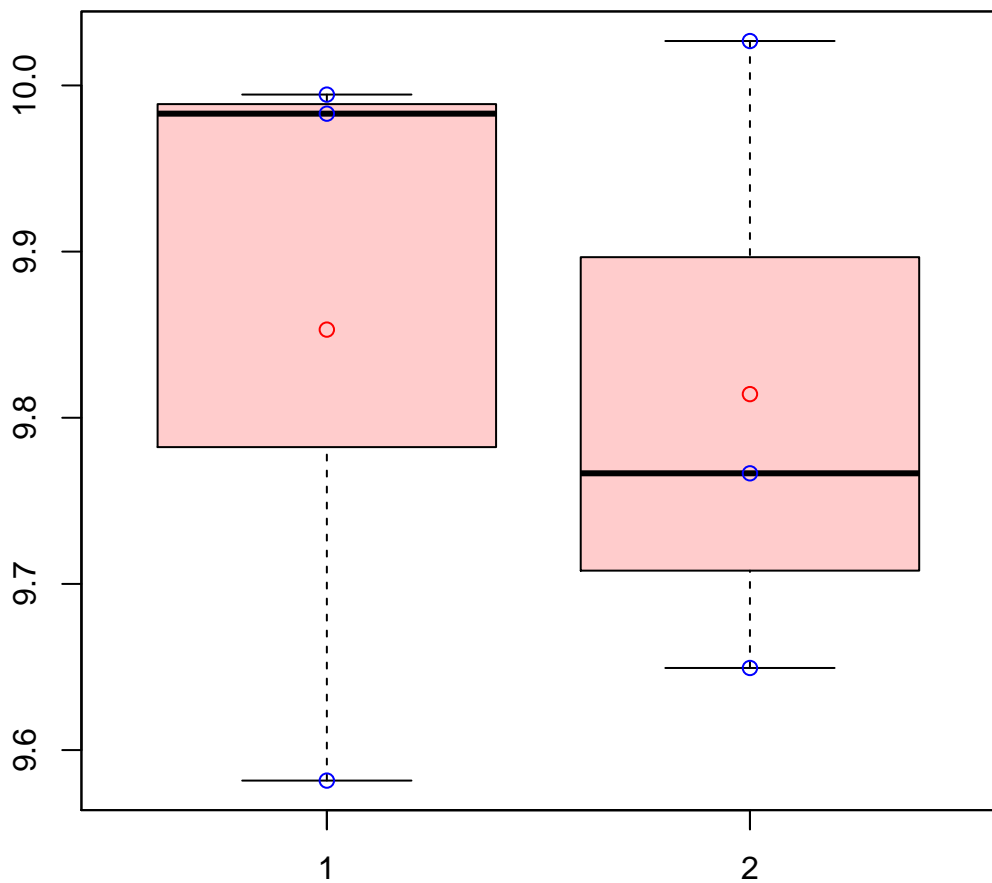

t-Test: p-value = 0.84



# Locus\_5081\_2\_10|Locus\_5081\_2\_10

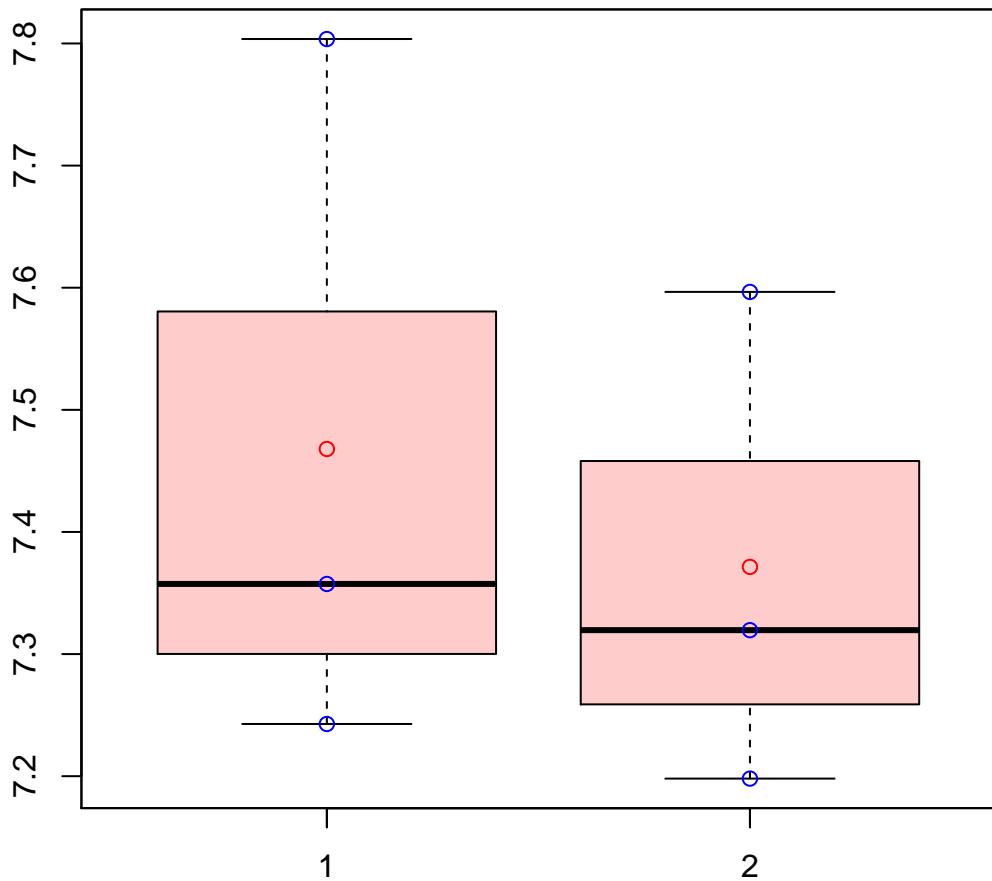

t-Test: p-value = 0.67

# Locus\_5111\_2\_8|Locus\_5111\_2\_8

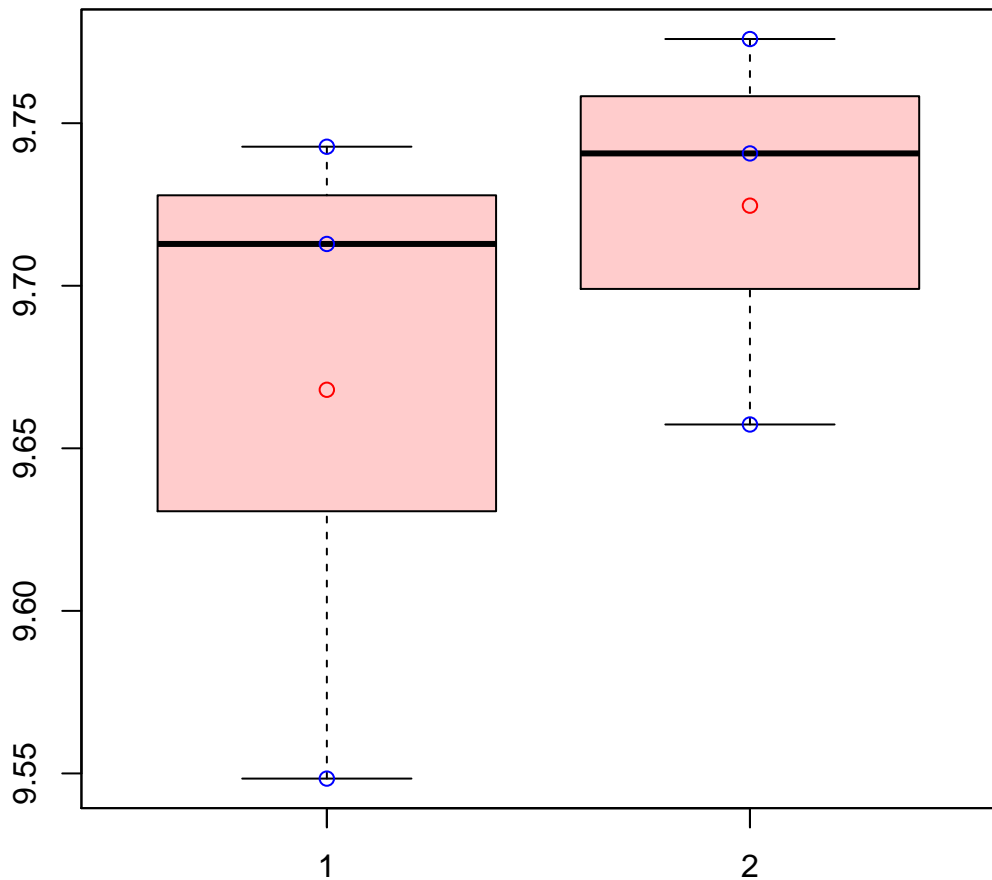

t-Test: p-value = 0.47

# Locus\_51662\_1\_1|Locus\_51662\_1\_1

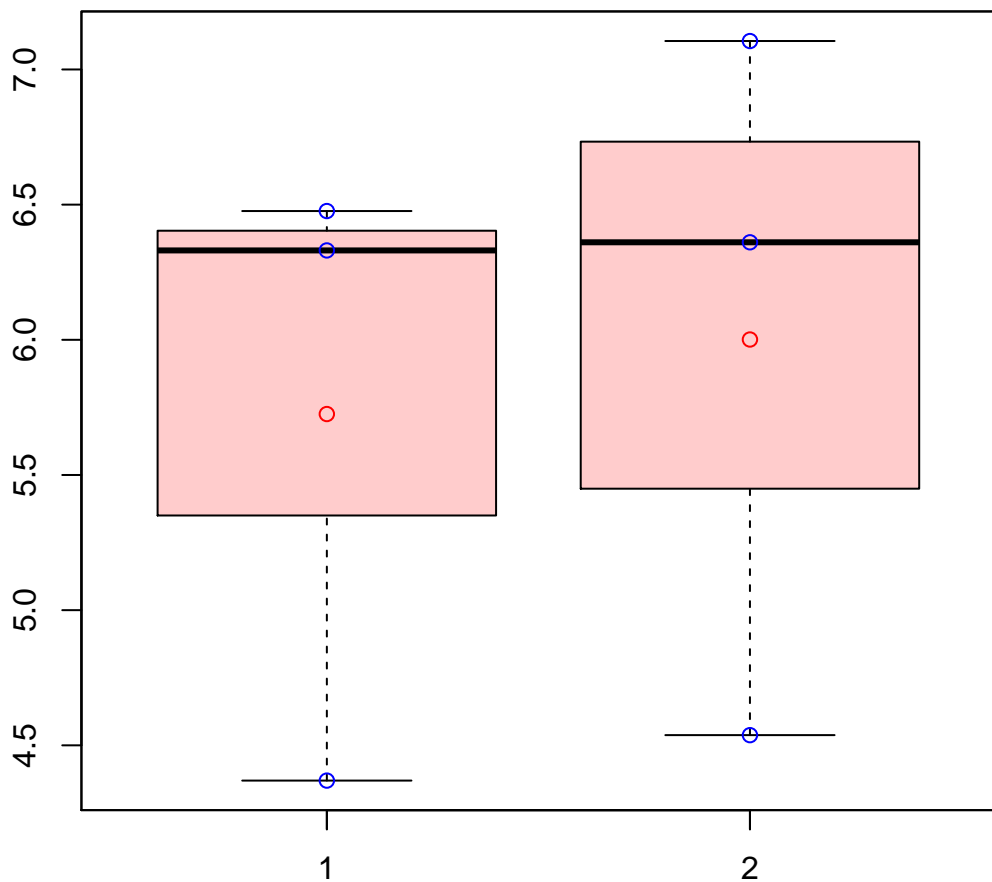

t-Test: p-value = 0.8

# Locus\_5256\_3\_3|Locus\_5256\_3\_3



t-Test: p-value = 0.88

# Locus\_542\_5\_10|Locus\_542\_5\_10



t-Test: p-value = 0.35

# Locus\_542\_8\_10|Locus\_542\_8\_10



t-Test: p-value = 0.36

# Locus\_543\_17\_19|Locus\_543\_17\_19

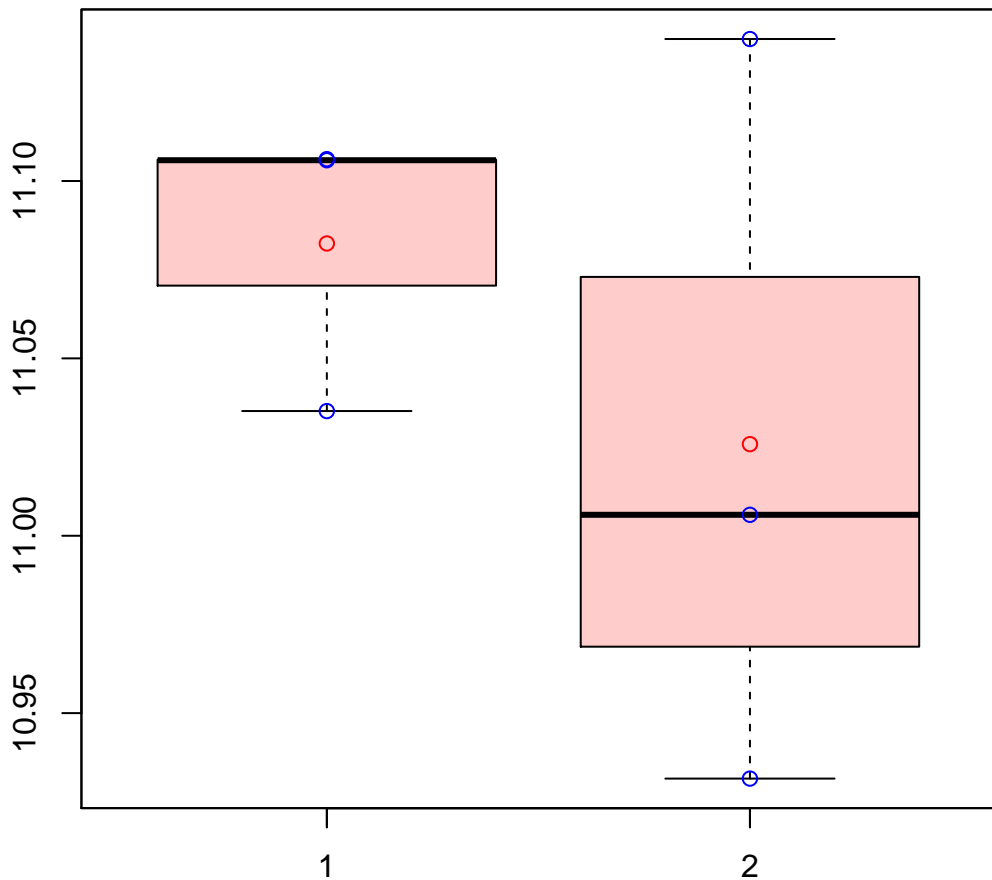

t-Test: p-value = 0.46

# Locus\_5765\_3\_5|Locus\_5765\_3\_5

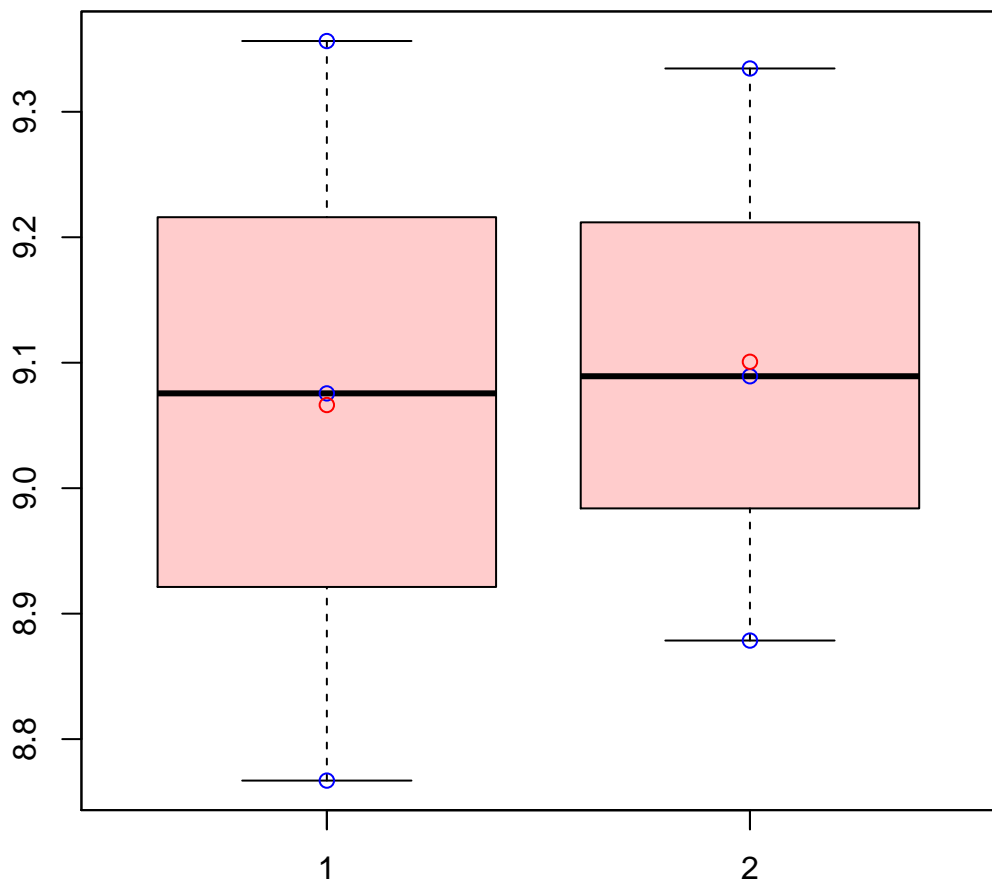

t-Test: p-value = 0.88



# Locus\_5770\_2\_2|Locus\_5770\_2\_2

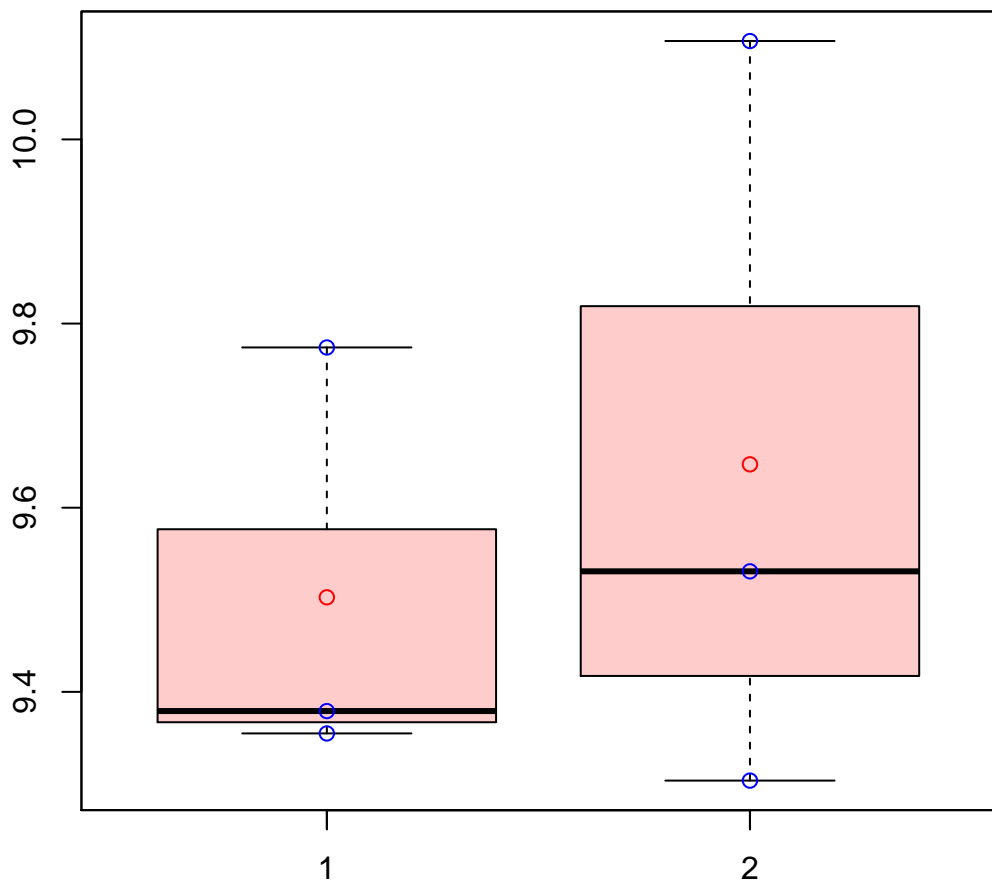

t-Test: p-value = 0.63

# Locus\_579\_2\_6|Locus\_579\_2\_6

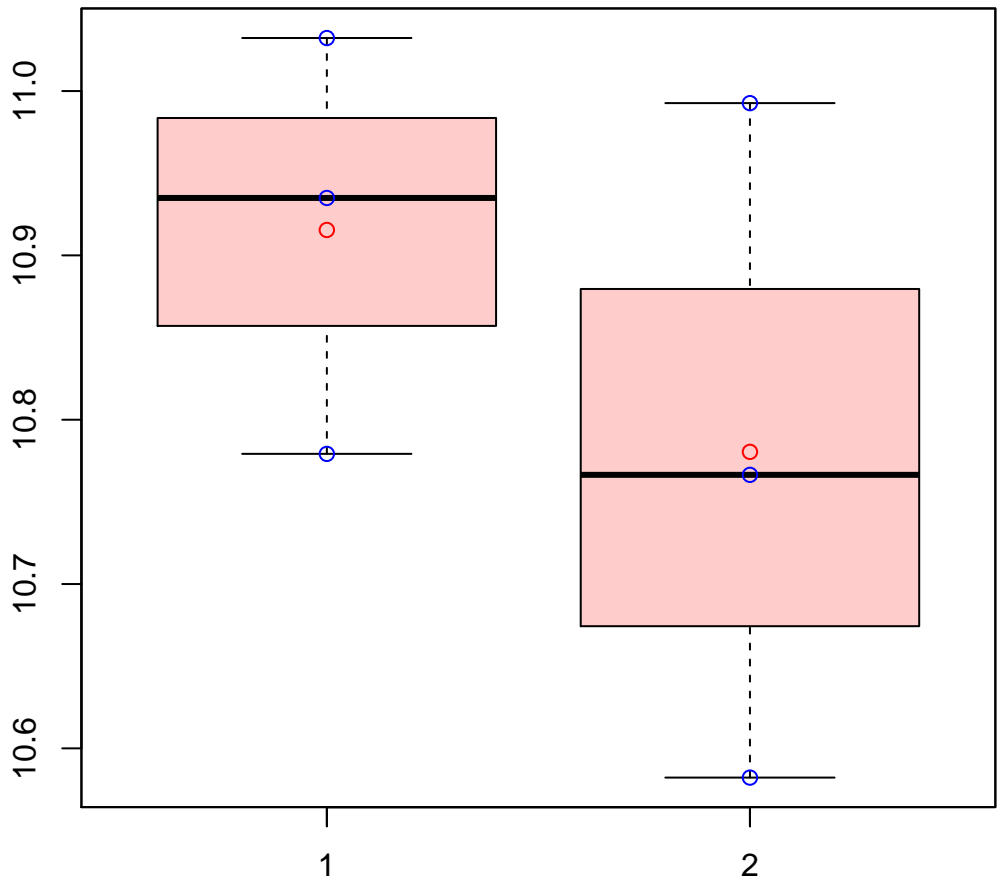

t-Test: p-value = 0.4

# Locus\_5835\_2\_9|Locus\_5835\_2\_9



t-Test: p-value = 0.34

# Locus\_5905\_3\_3|Locus\_5905\_3\_3

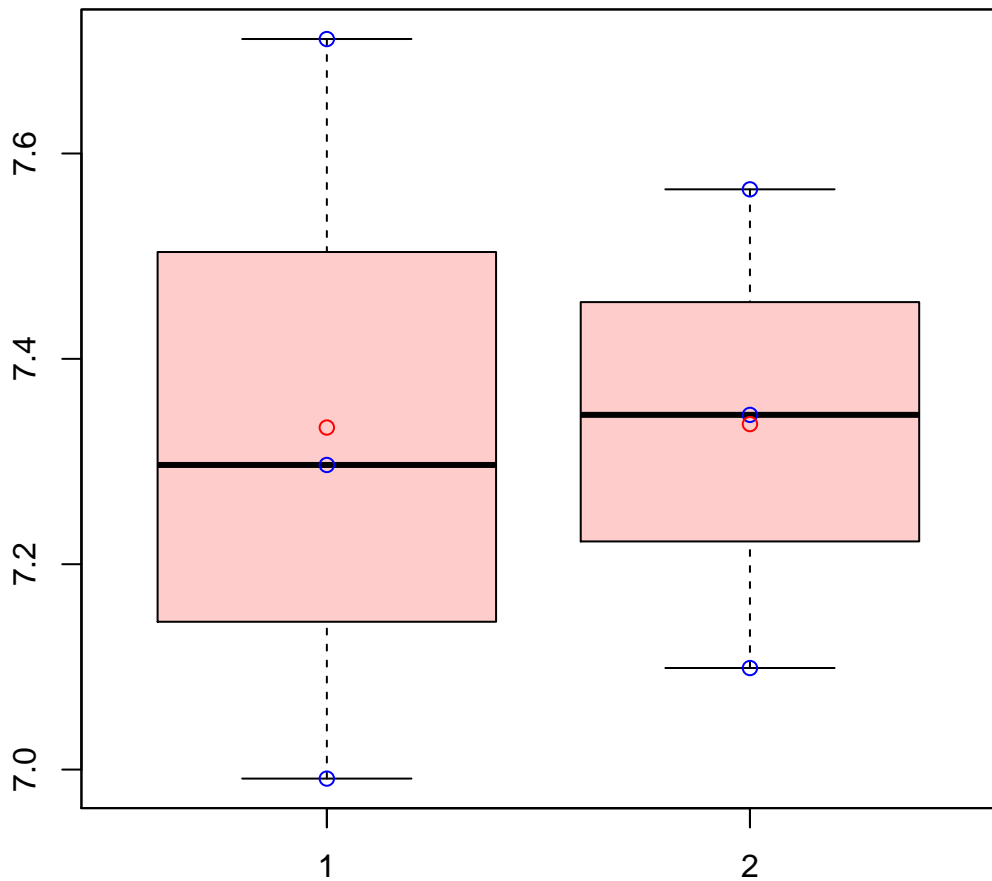

t-Test: p-value = 0.99

# Locus\_6091\_1\_8|Locus\_6091\_1\_8

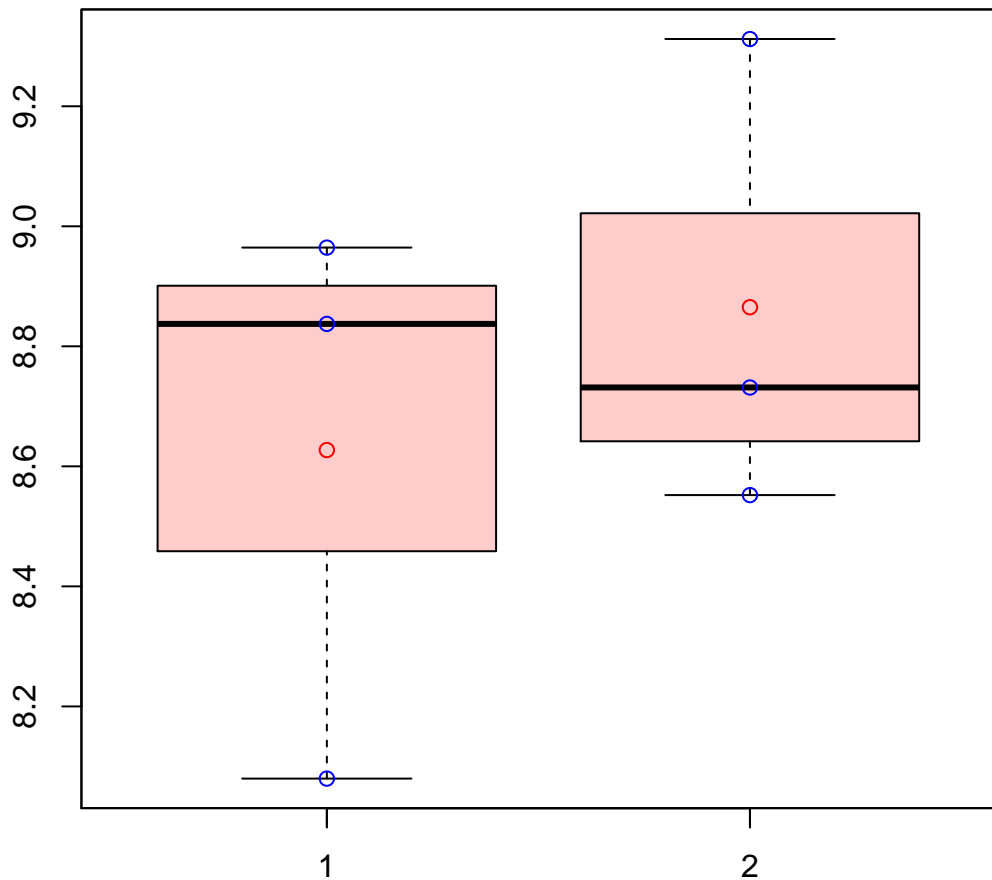

t-Test: p-value = 0.54

# Locus\_6091\_2\_8|Locus\_6091\_2\_8

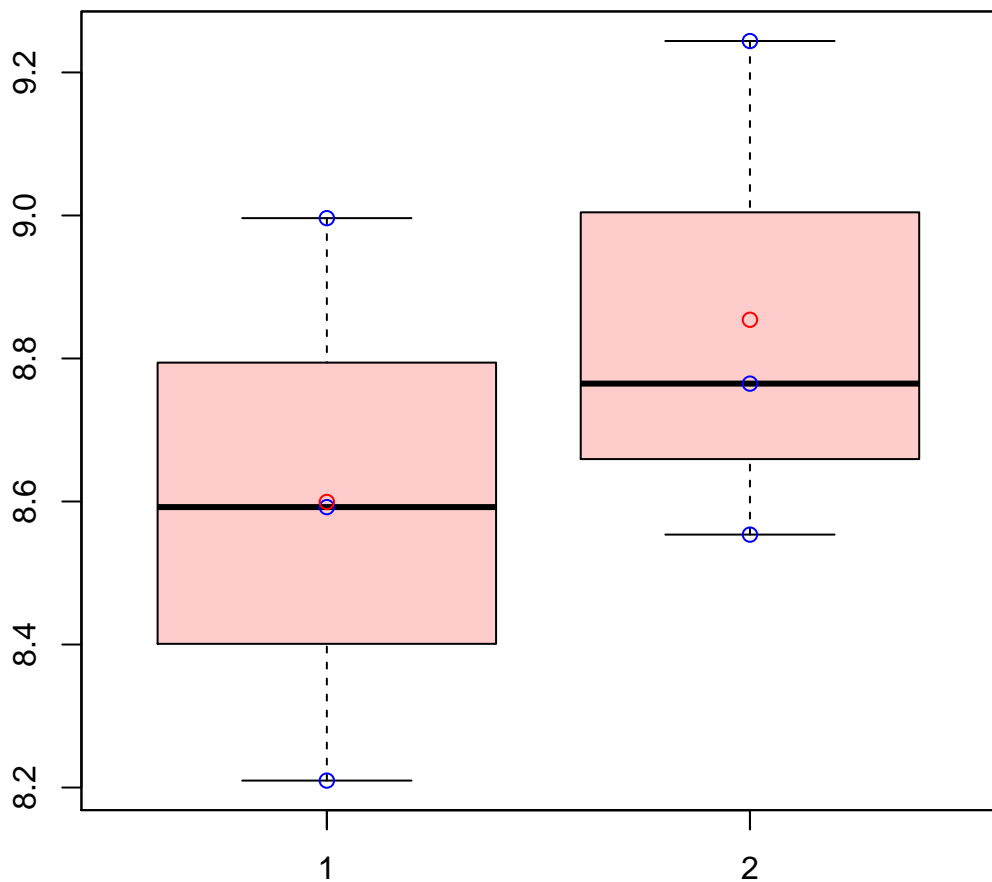

t-Test: p-value = 0.45

# Locus\_6130\_5\_8|Locus\_6130\_5\_8

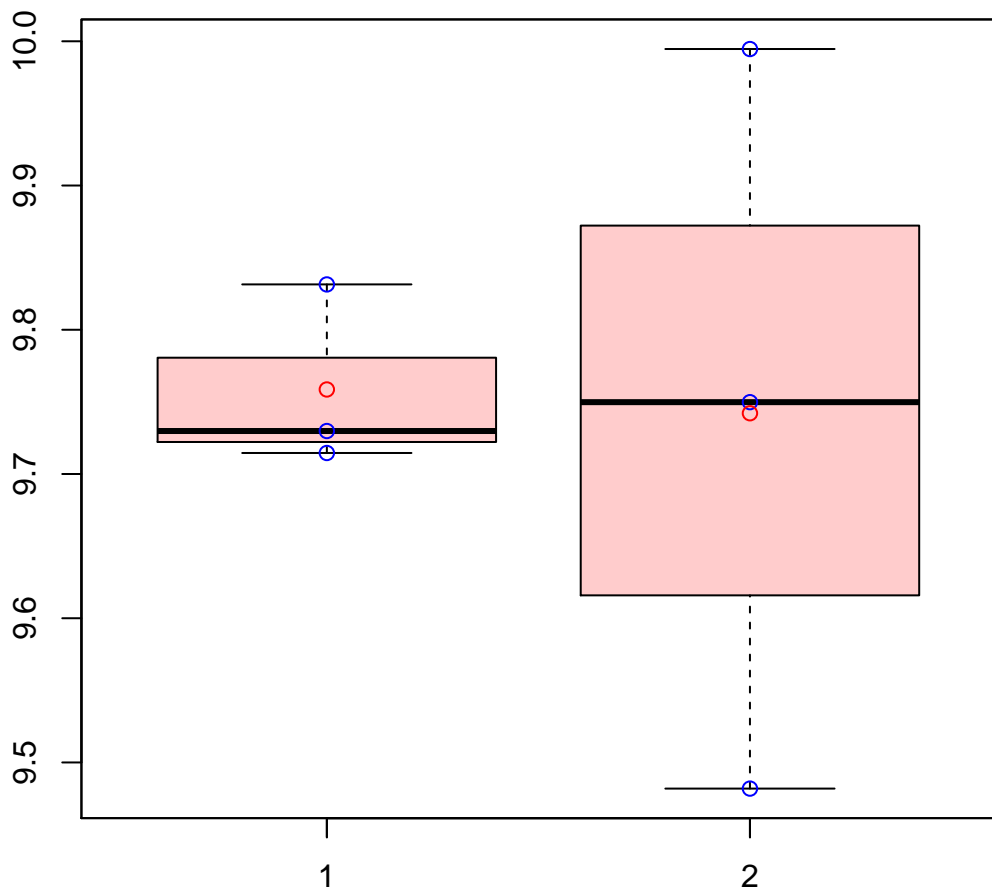

t-Test: p-value = 0.92

# Locus\_61\_5\_6|Locus\_61\_5\_6

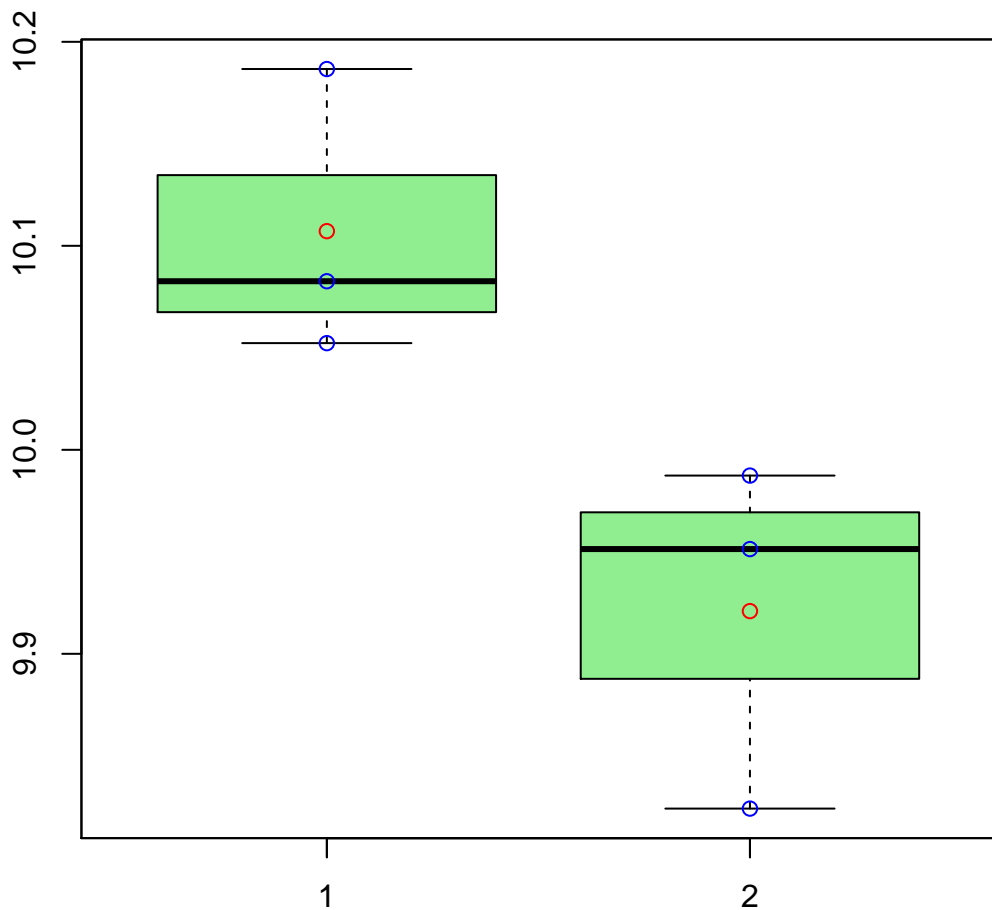

t-Test: p-value = 0.05



# Locus\_618\_5\_6|Locus\_618\_5\_6

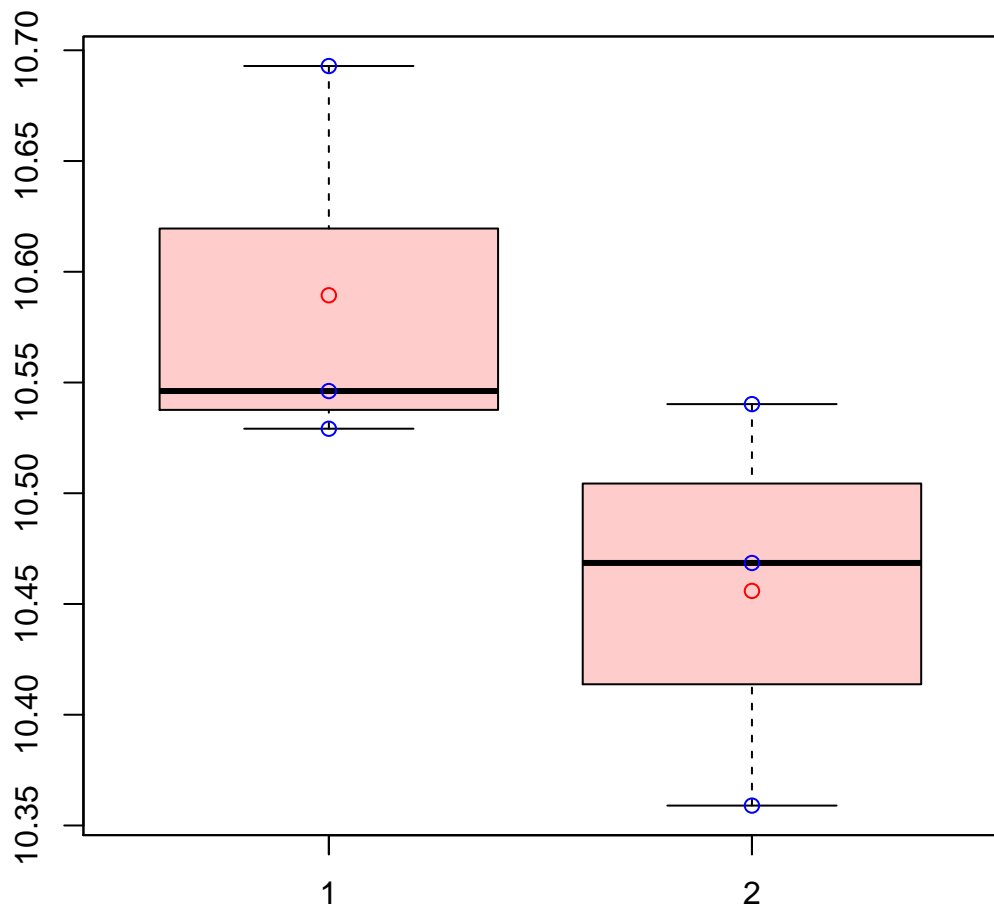

t-Test: p-value = 0.15

# Locus\_619\_2\_8|Locus\_619\_2\_8

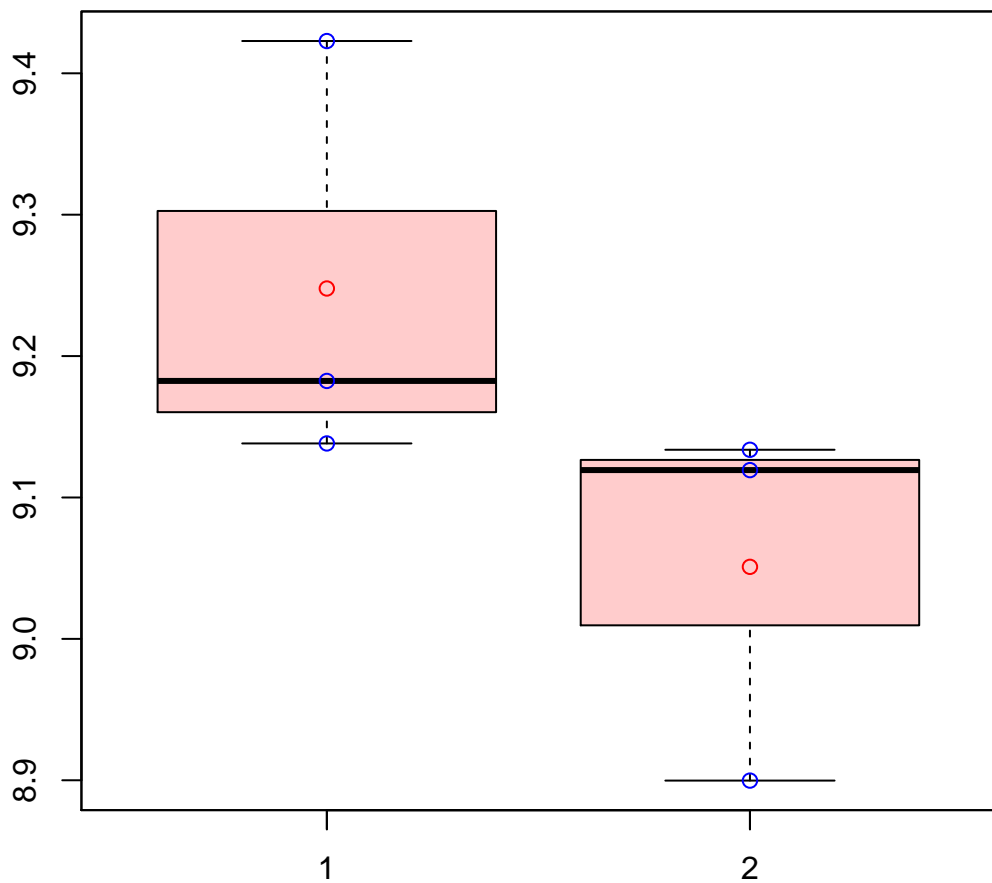

t-Test: p-value = 0.17

# Locus\_62\_2\_10|Locus\_62\_2\_10

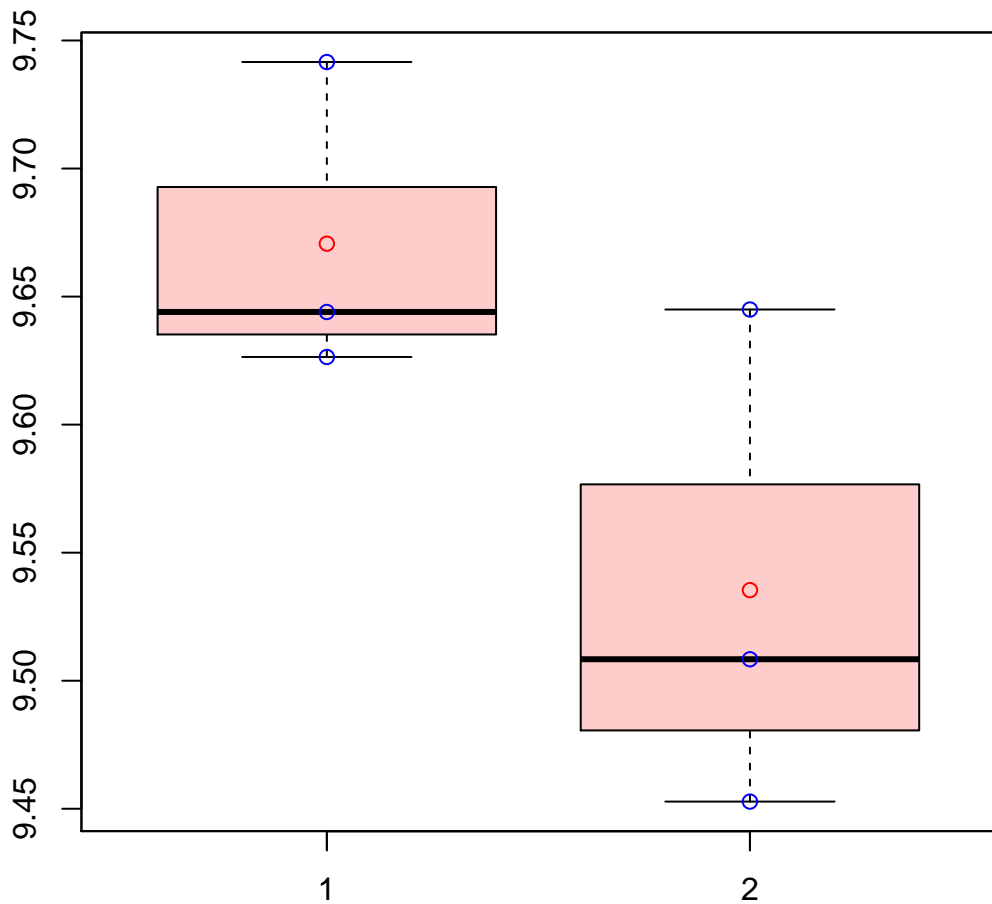

t-Test: p-value = 0.13

# Locus\_62\_8\_10|Locus\_62\_8\_10

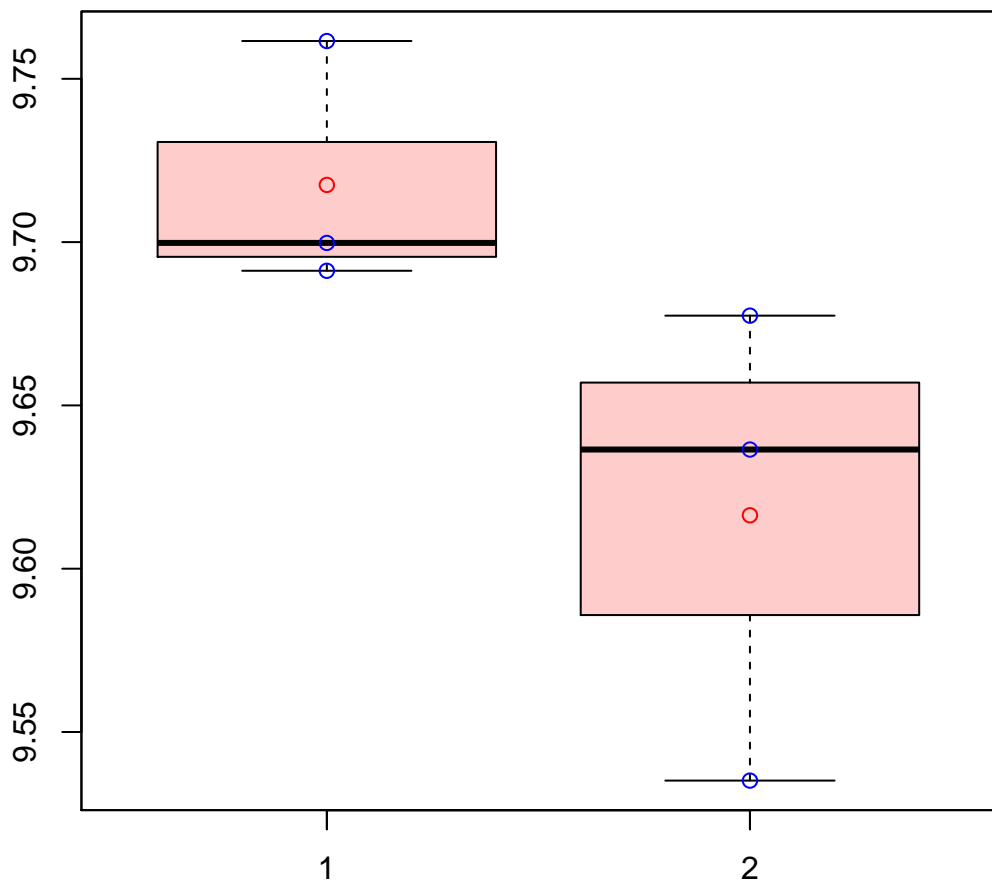

t-Test: p-value = 0.12

# Locus\_6350\_1\_4|Locus\_6350\_1\_4

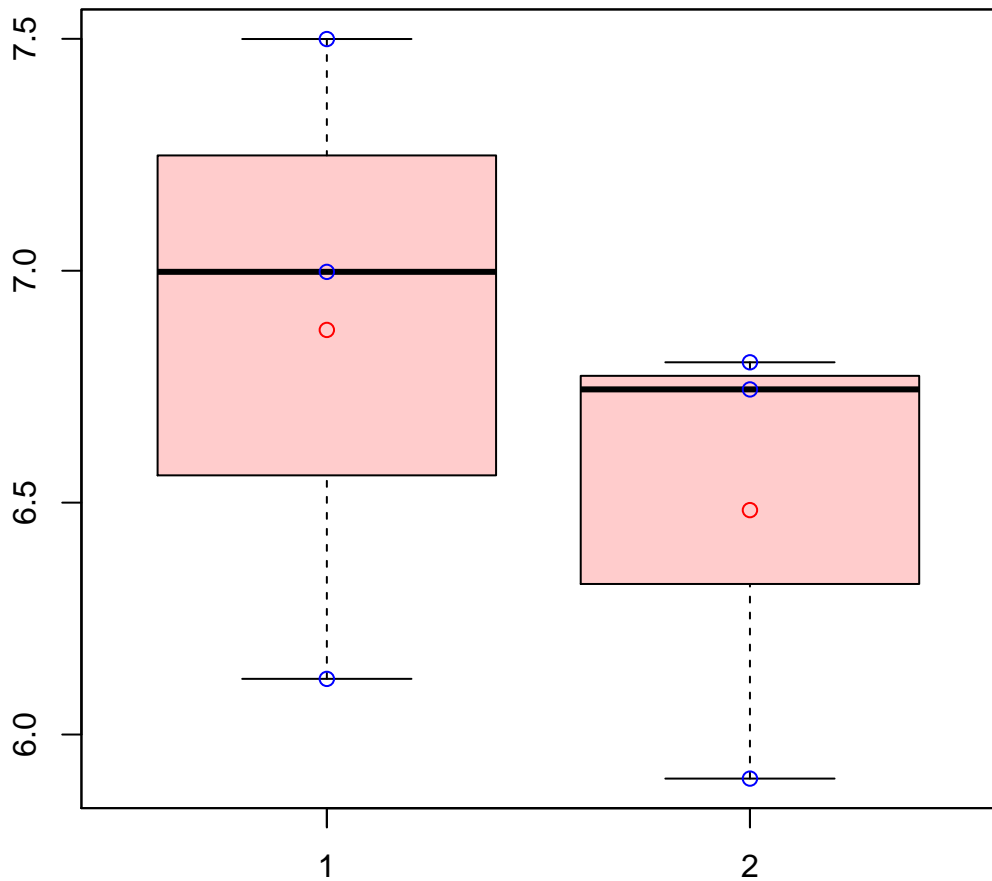

t-Test: p-value = 0.48

# Locus\_63728\_1\_1|Locus\_63728\_1\_1

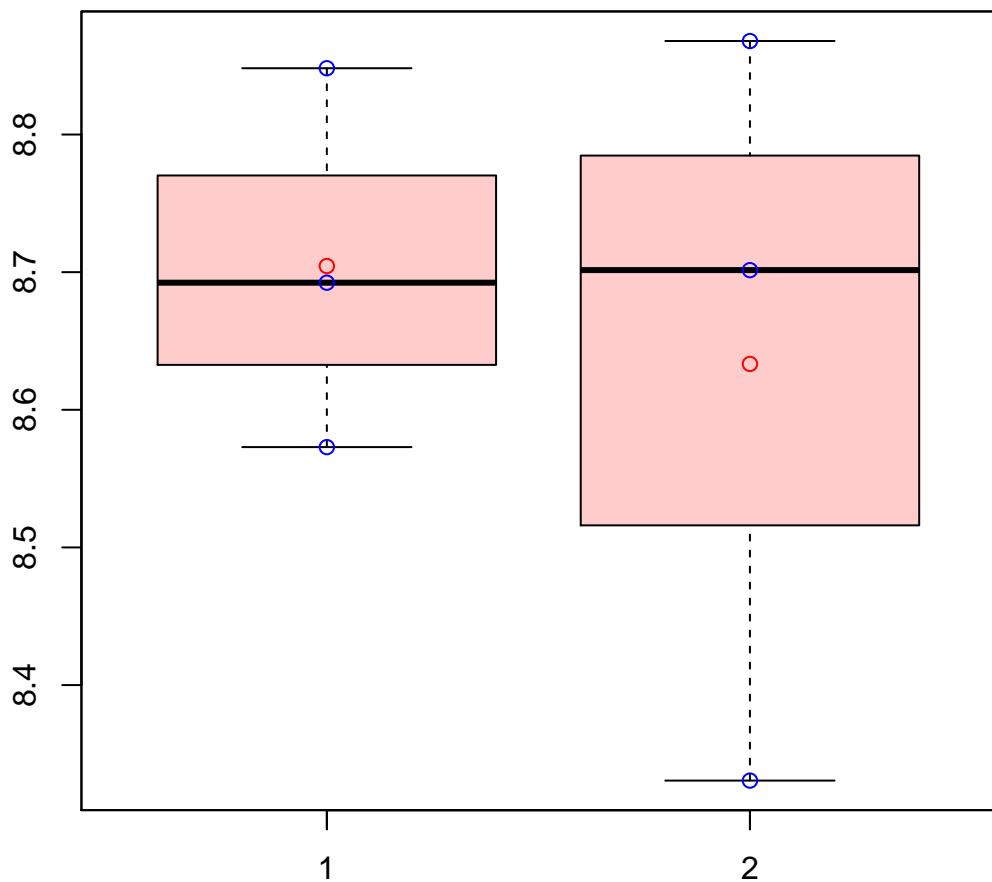

t-Test: p-value = 0.72

# Locus\_640\_3\_5|Locus\_640\_3\_5

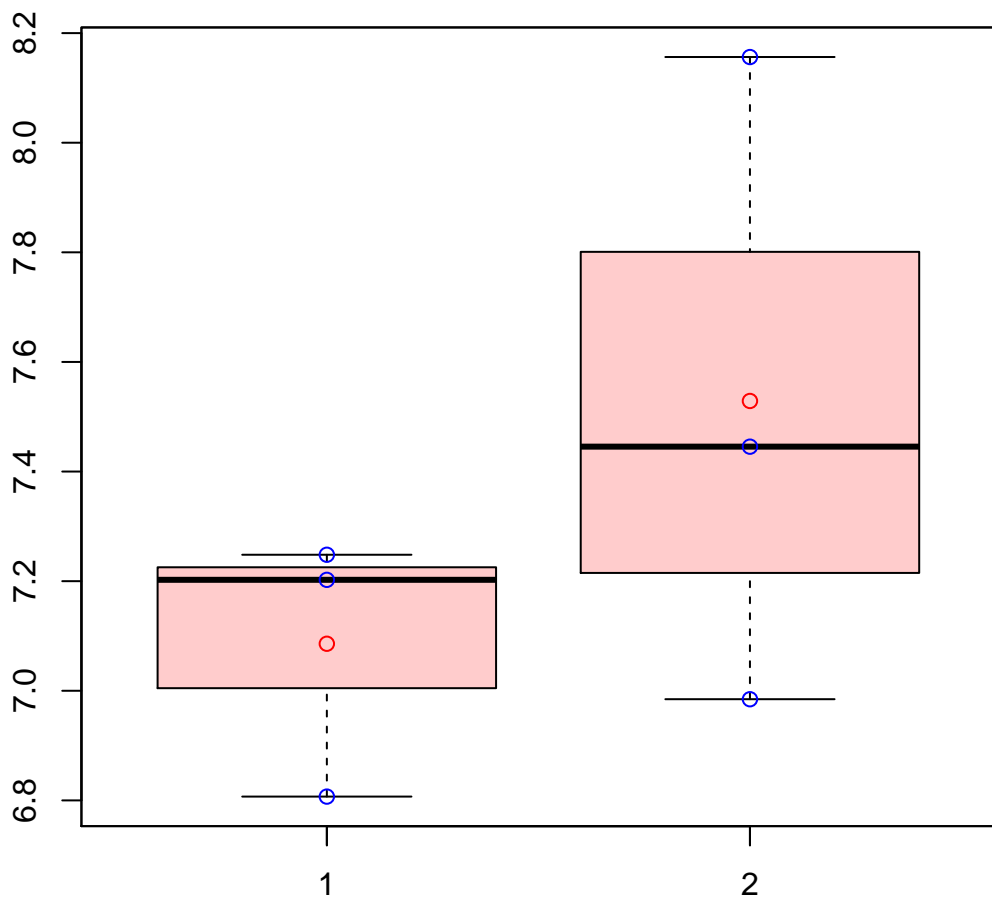

t-Test: p-value = 0.33

# Locus\_6504\_2\_6|Locus\_6504\_2\_6

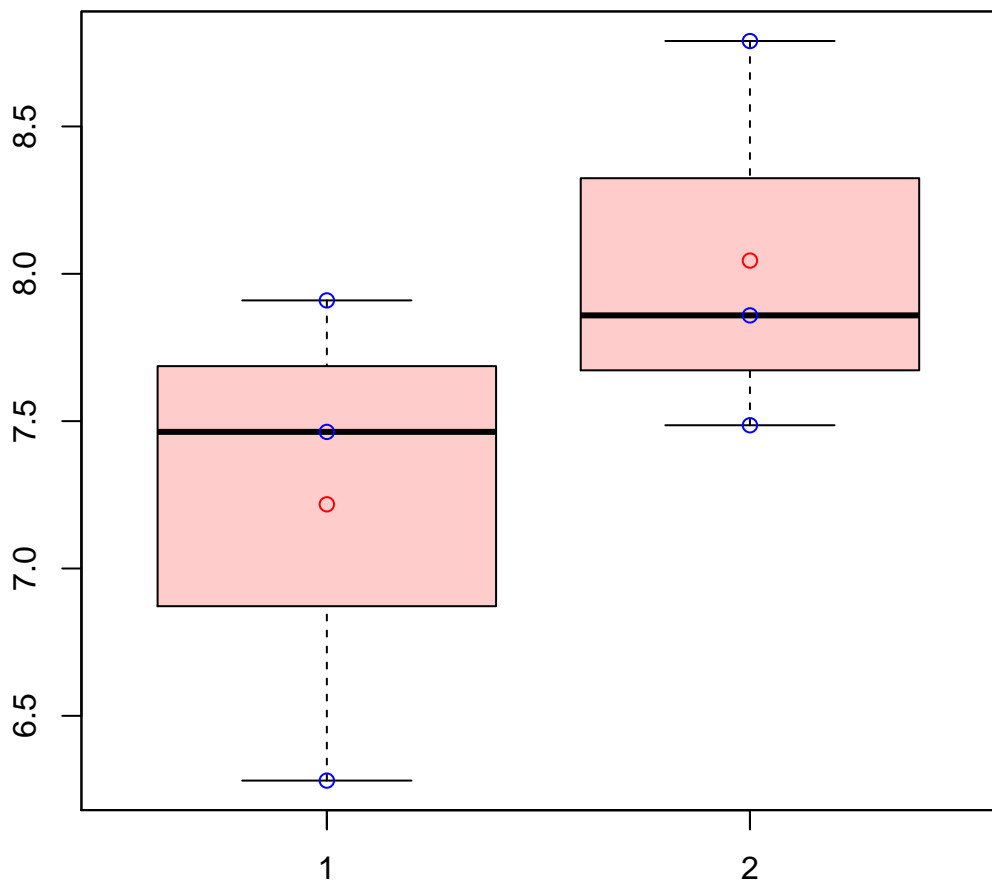

t-Test: p-value = 0.26



# Locus\_65369\_1\_3|Locus\_65369\_1\_3

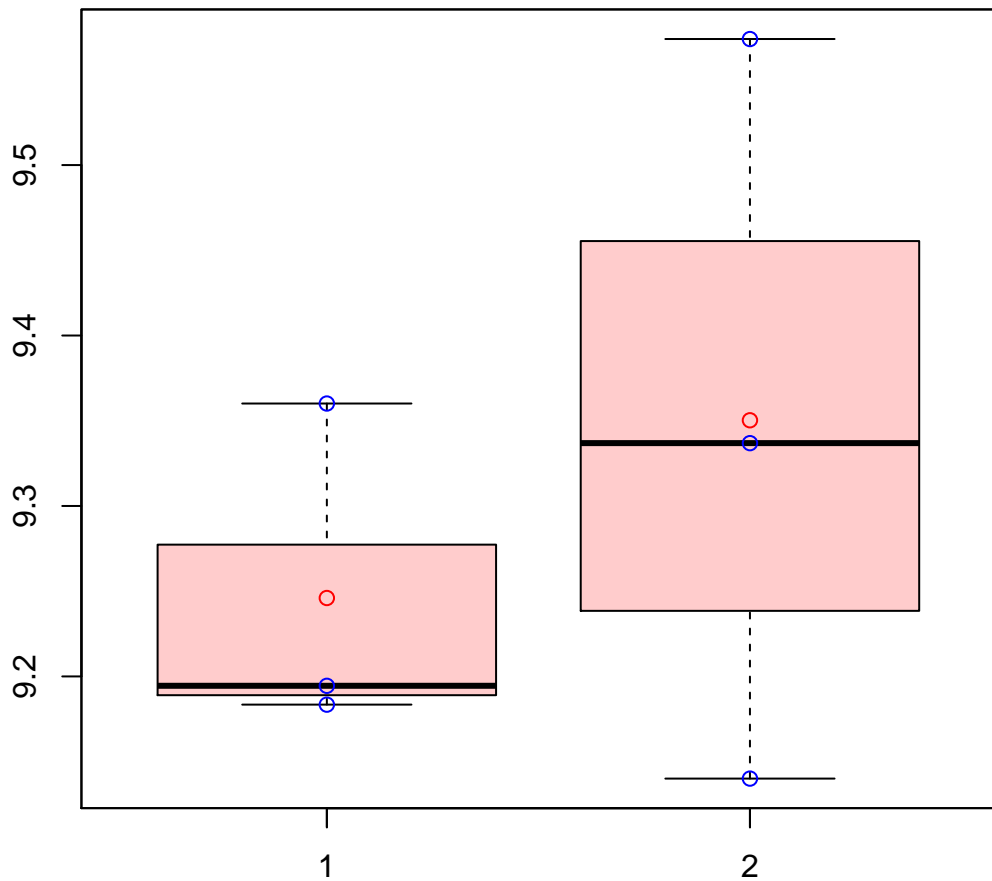

t-Test: p-value = 0.51

# Locus\_6550\_4\_8|Locus\_6550\_4\_8

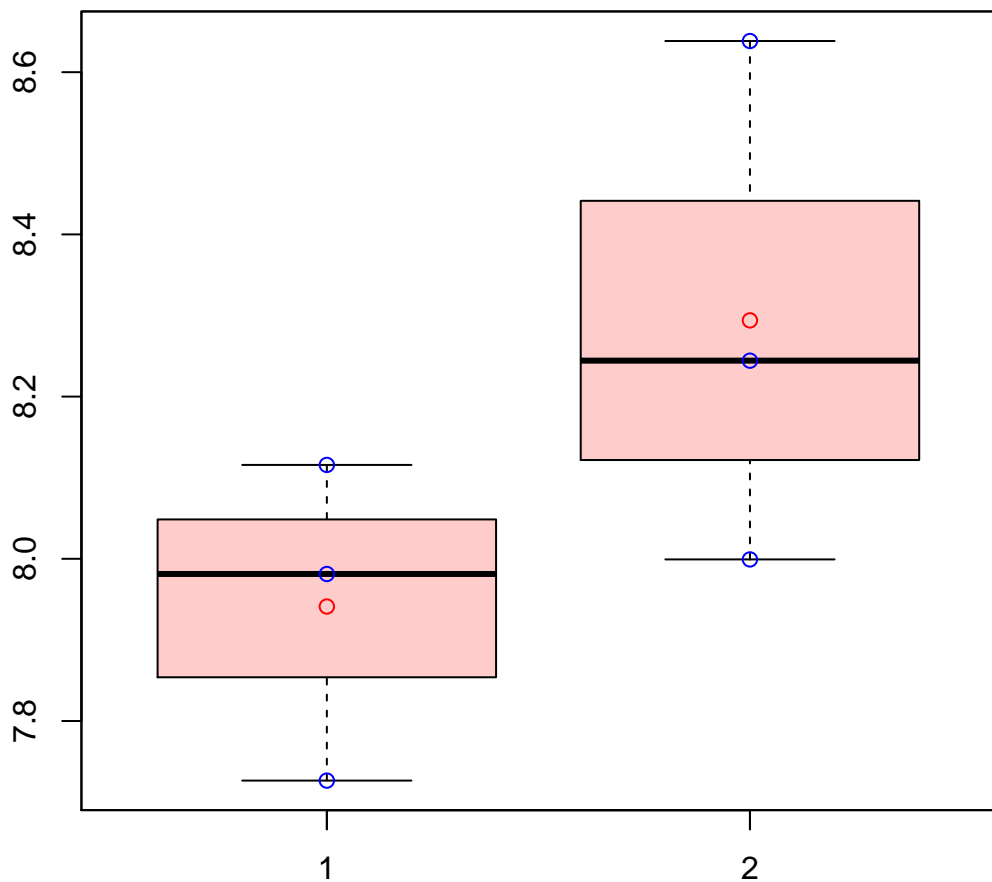

t-Test: p-value = 0.2

# Locus\_65\_7\_13|Locus\_65\_7\_13

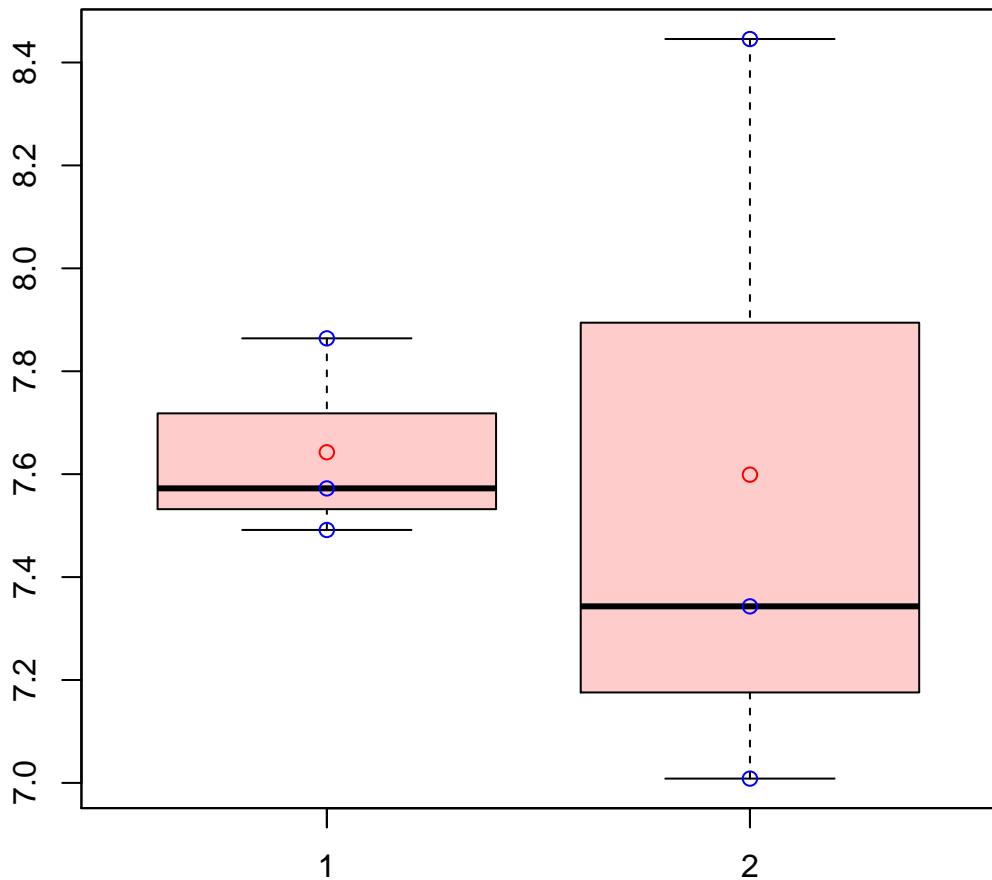

t-Test: p-value = 0.93

# Locus\_6732\_3\_10|Locus\_6732\_3\_10

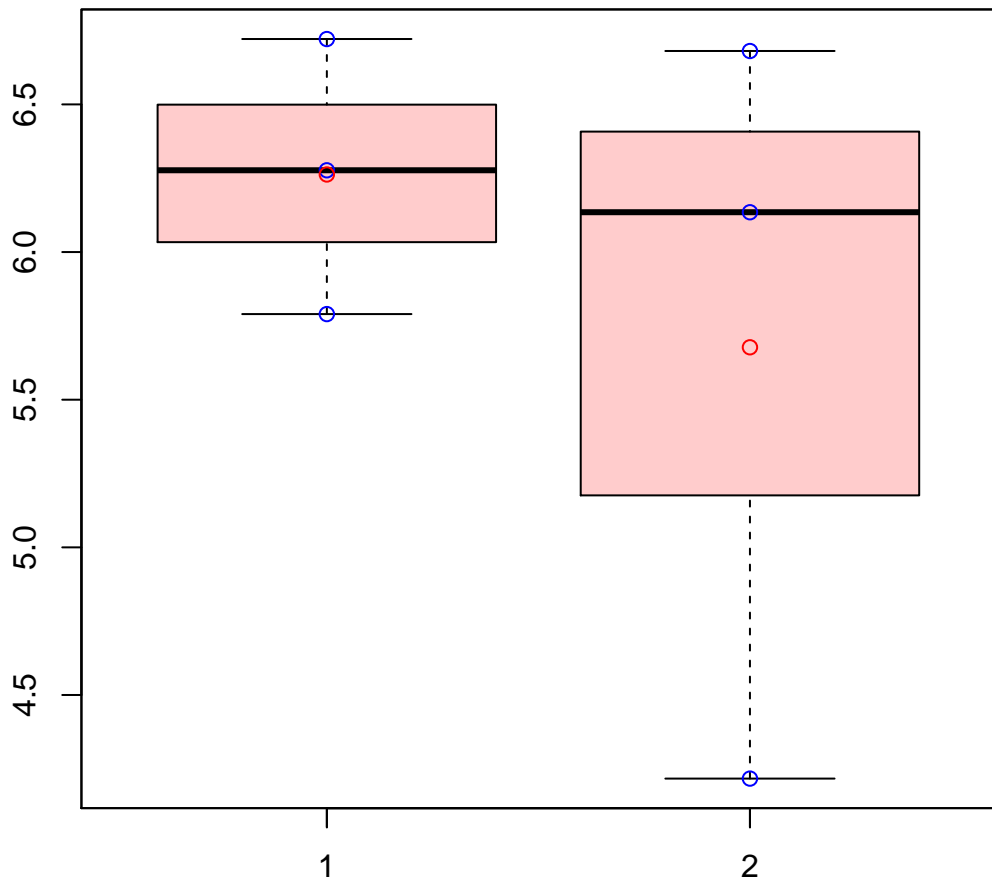

t-Test: p-value = 0.52

# Locus\_67368\_3\_4|Locus\_67368\_3\_4



t-Test: p-value = 0.98

# Locus\_684\_4\_12|Locus\_684\_4\_12

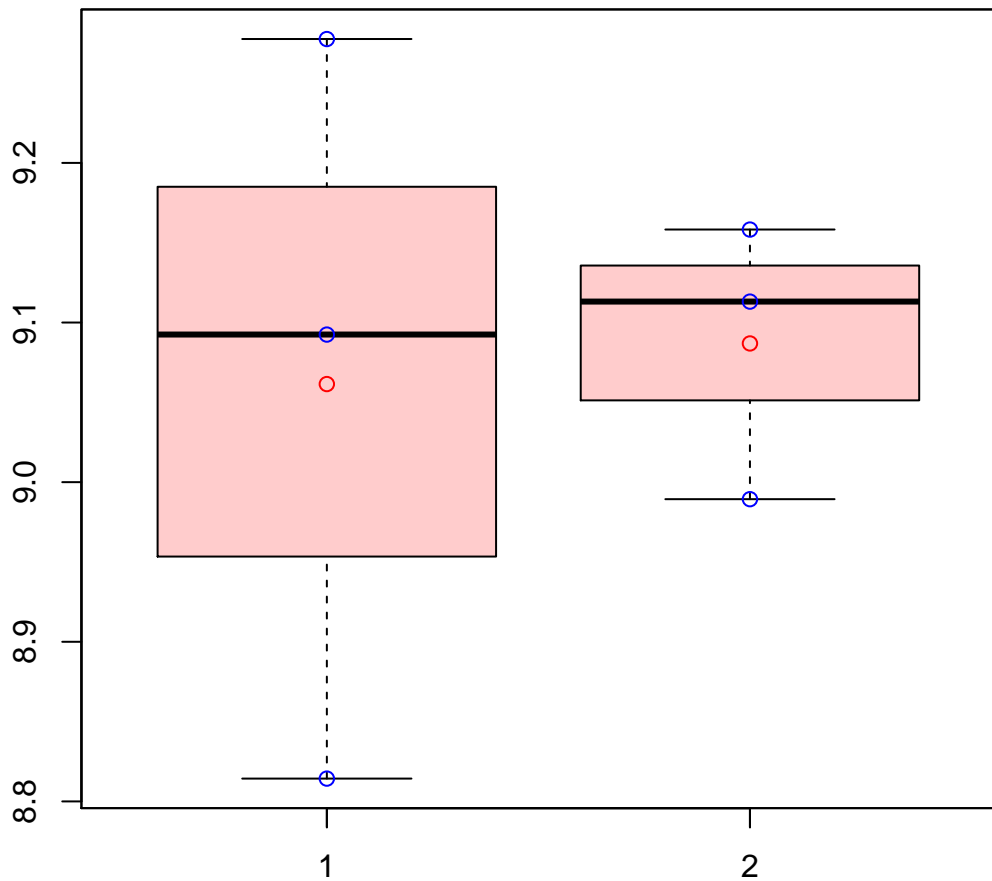

t-Test: p-value = 0.87

# Locus\_684\_8\_12|Locus\_684\_8\_12



t-Test: p-value = 0.87

# Locus\_685\_1\_10|Locus\_685\_1\_10

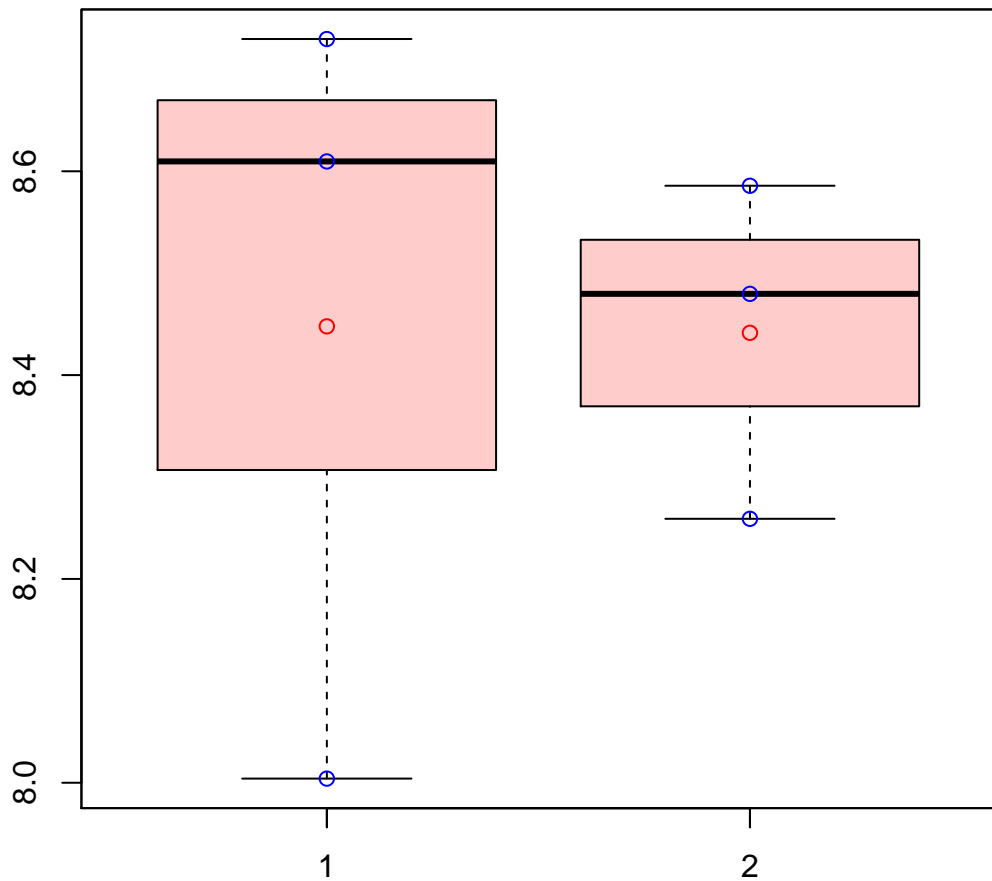

t-Test: p-value = 0.98



# Locus\_696\_10\_11|Locus\_696\_10\_11

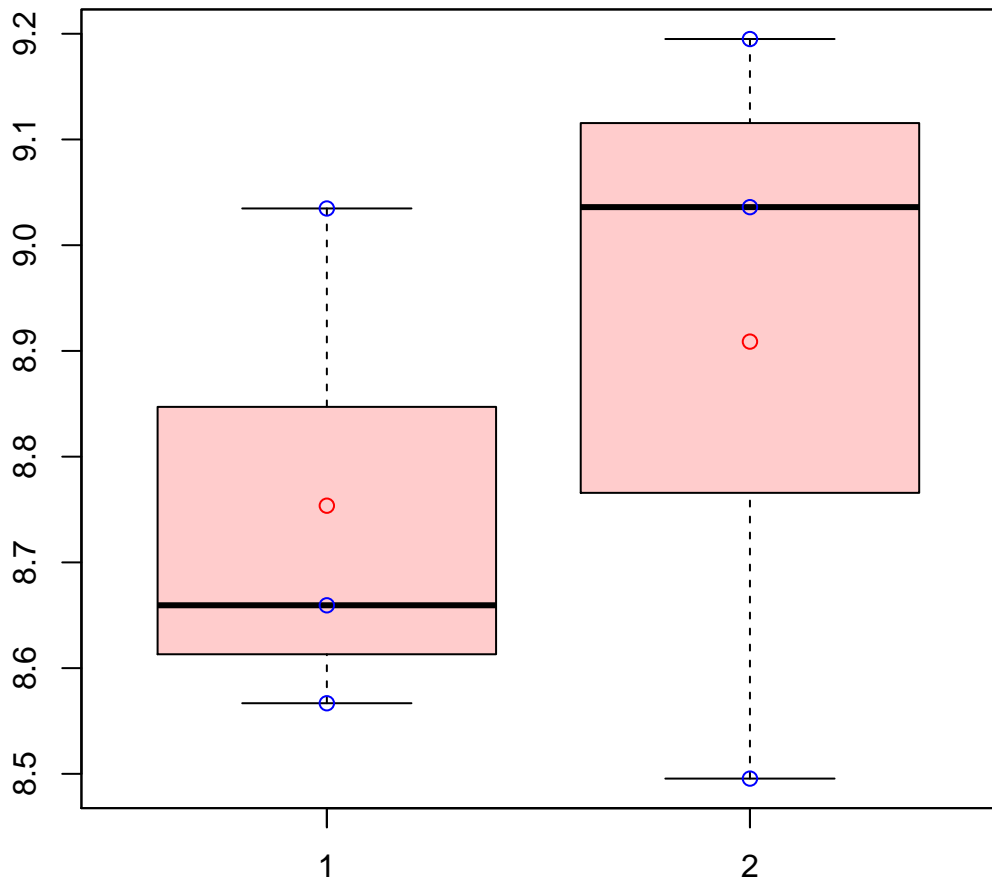

t-Test: p-value = 0.58

# Locus\_6977\_3\_3|Locus\_6977\_3\_3

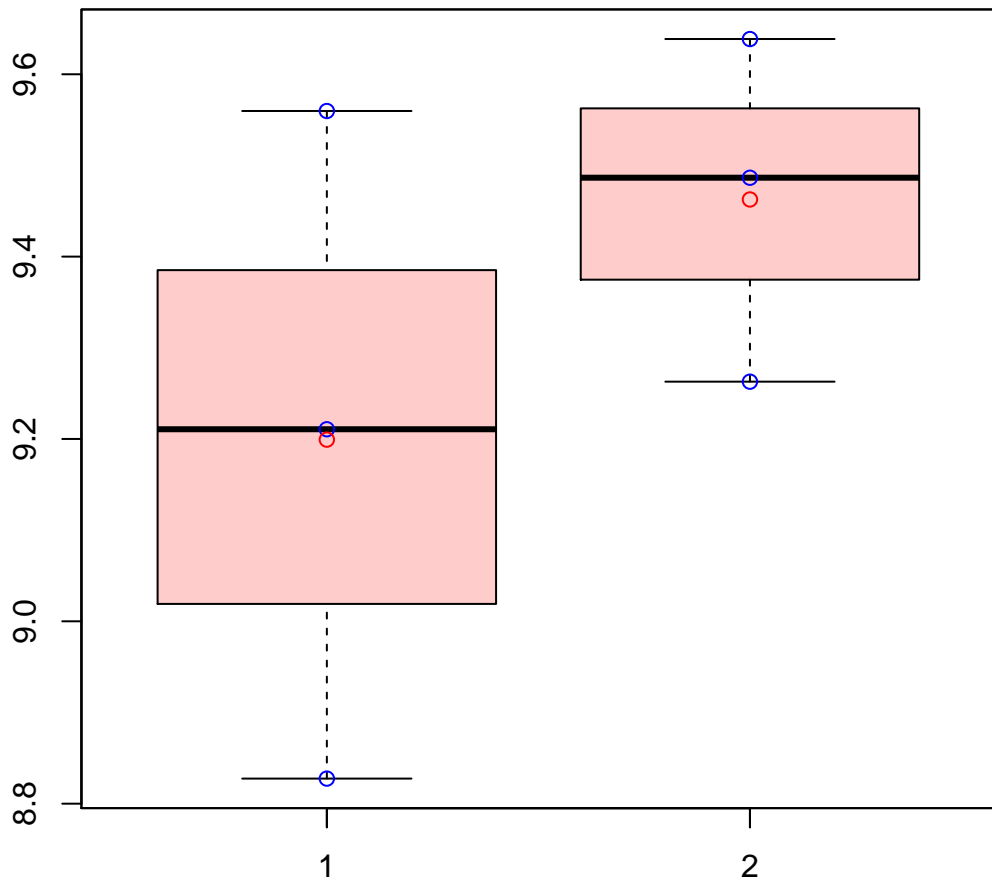

t-Test: p-value = 0.35

# Locus\_6980\_3\_5|Locus\_6980\_3\_5

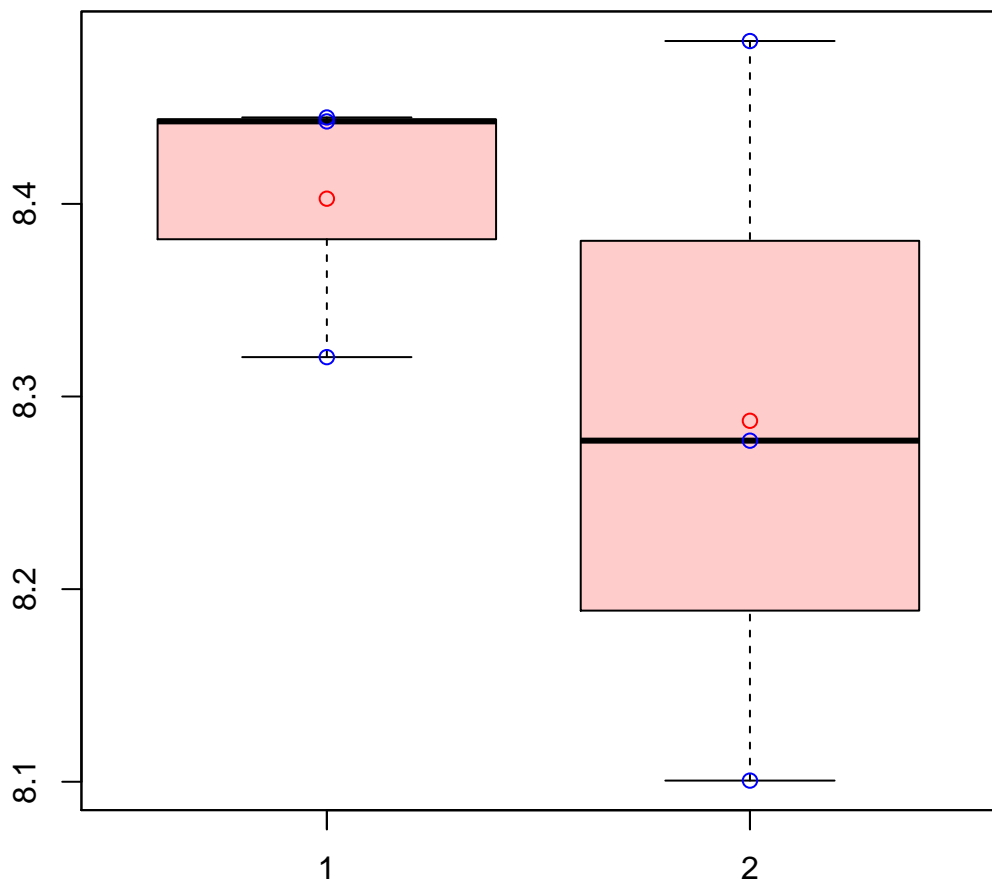

t-Test: p-value = 0.41

# Locus\_699\_8\_13|Locus\_699\_8\_13

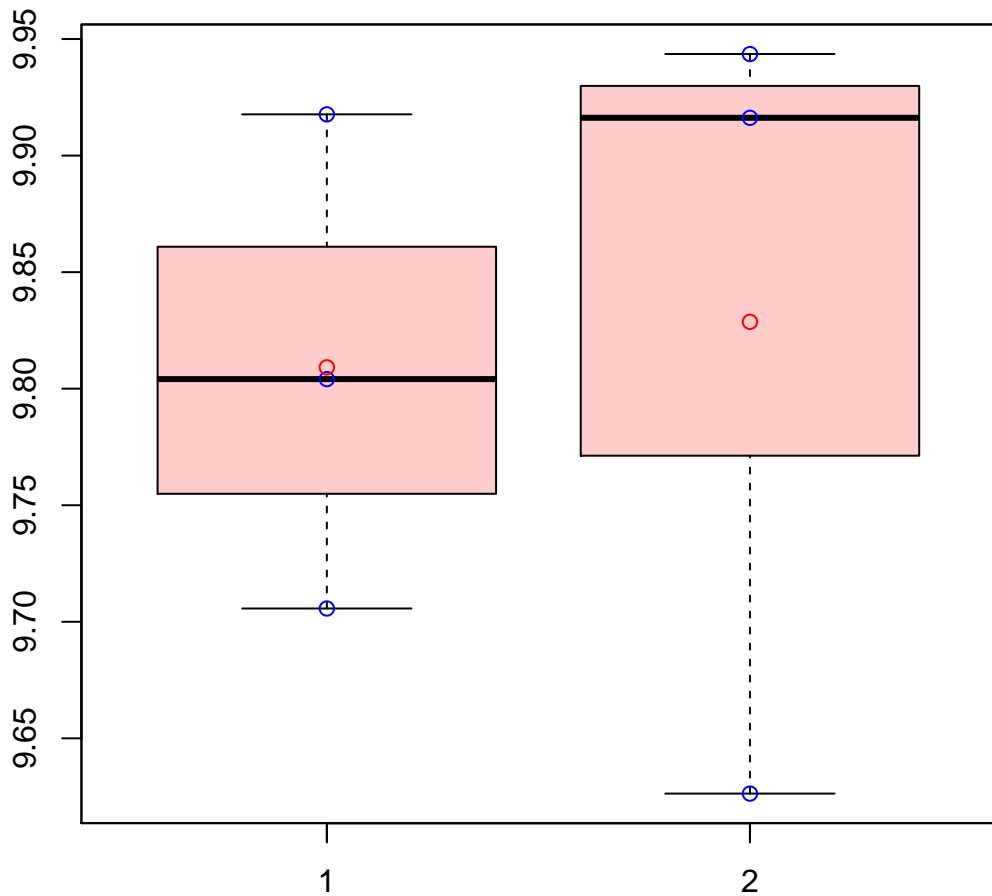

t-Test: p-value = 0.88

# Locus\_7074\_7\_8|Locus\_7074\_7\_8

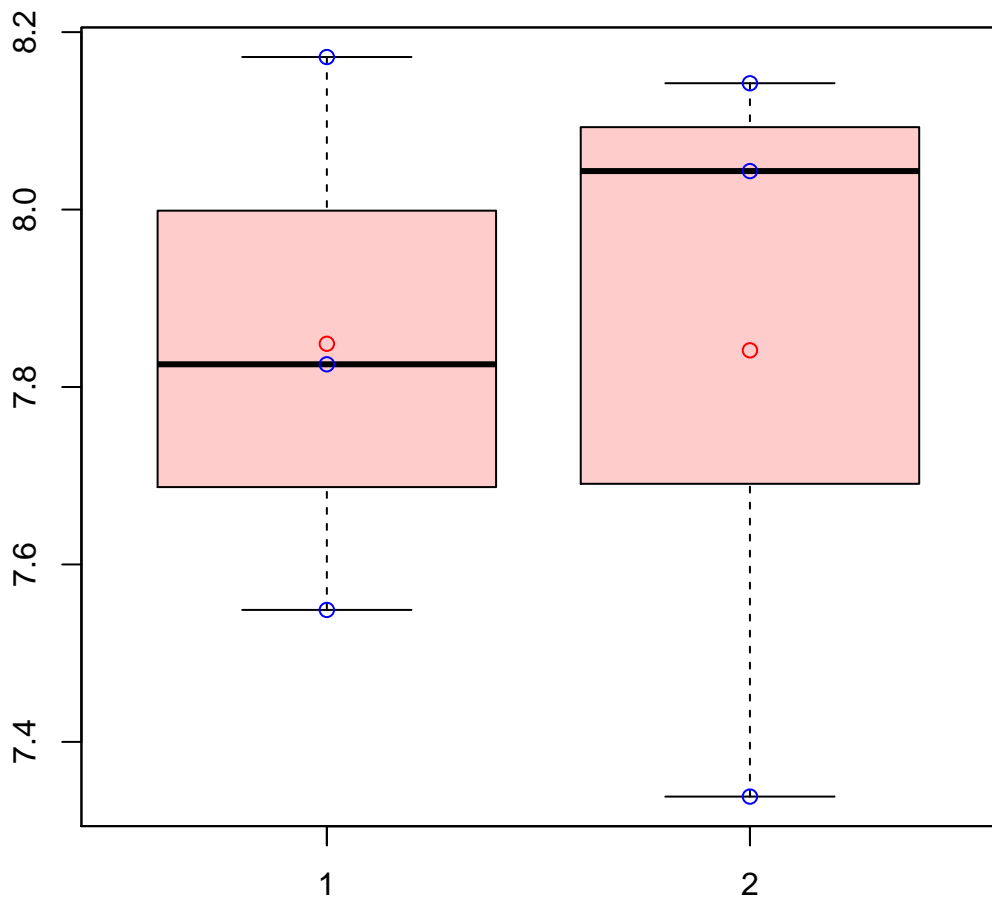

t-Test: p-value = 0.98

# Locus\_7184\_13\_13|Locus\_7184\_13\_13

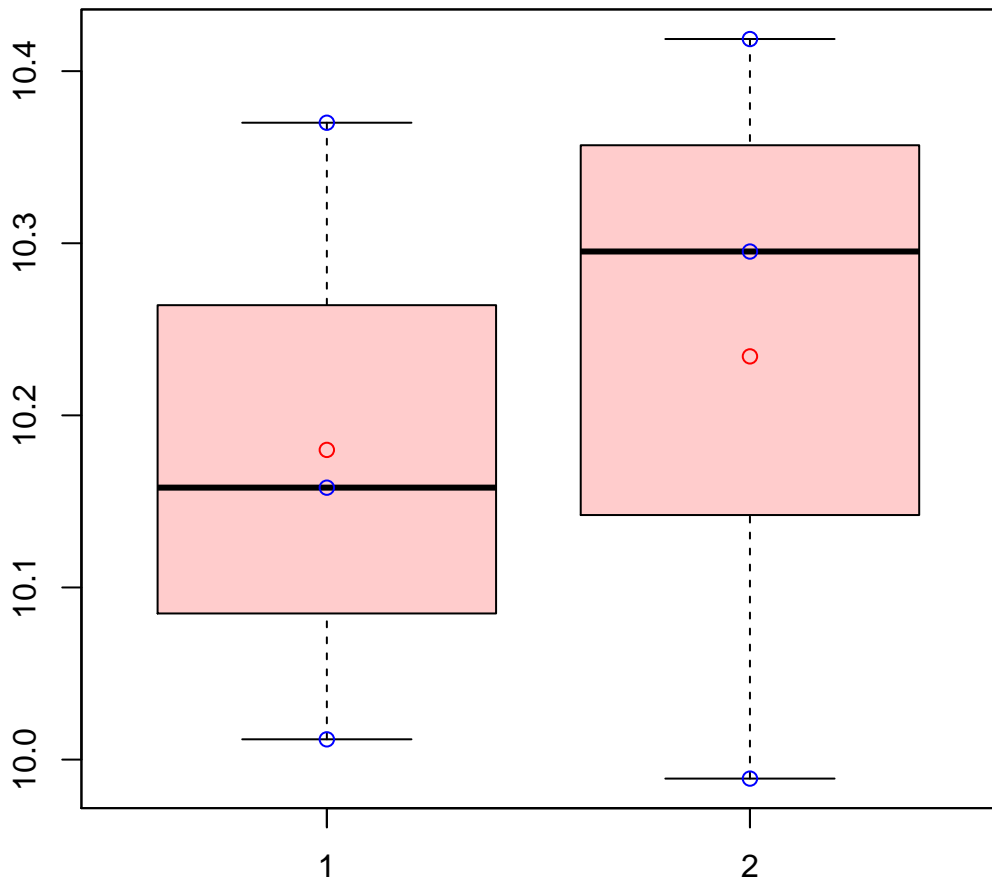

t-Test: p-value = 0.76

# Locus\_7184\_5\_13|Locus\_7184\_5\_13



t-Test: p-value = 0.76

# Locus\_7184\_9\_13|Locus\_7184\_9\_13



t-Test: p-value = 0.76



# Locus\_7356\_1\_2|Locus\_7356\_1\_2

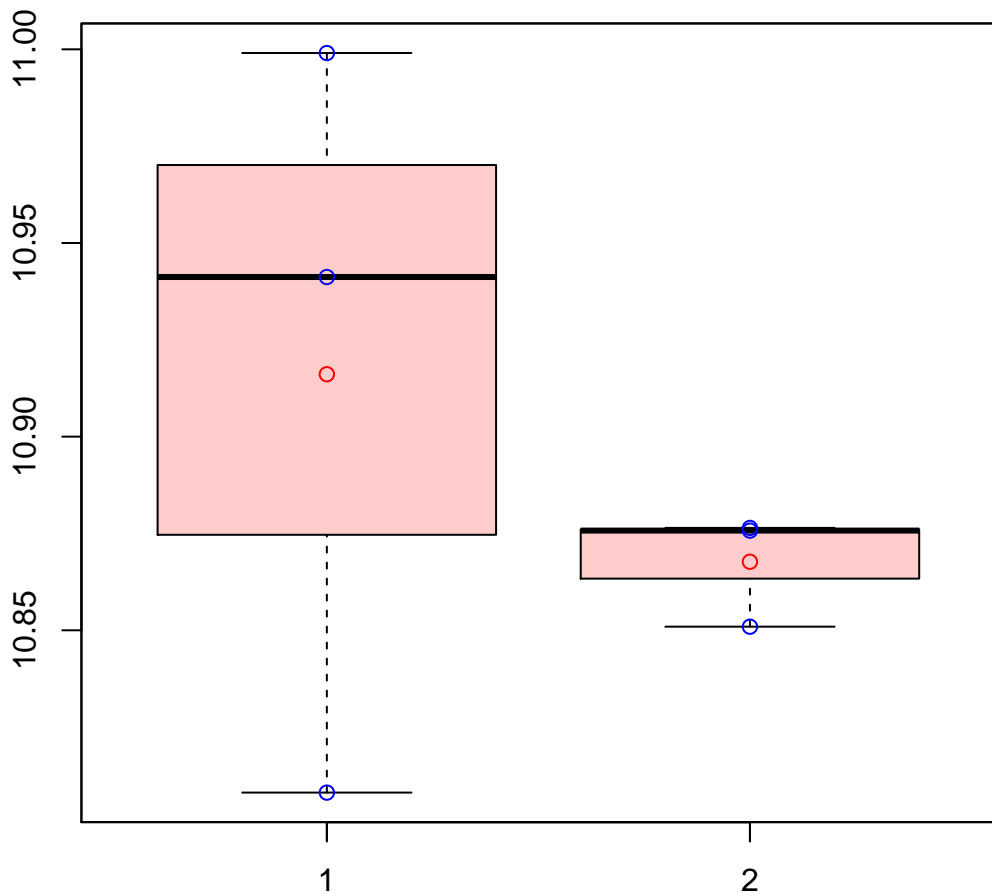

t-Test: p-value = 0.48

# Locus\_740\_1\_7|Locus\_740\_1\_7

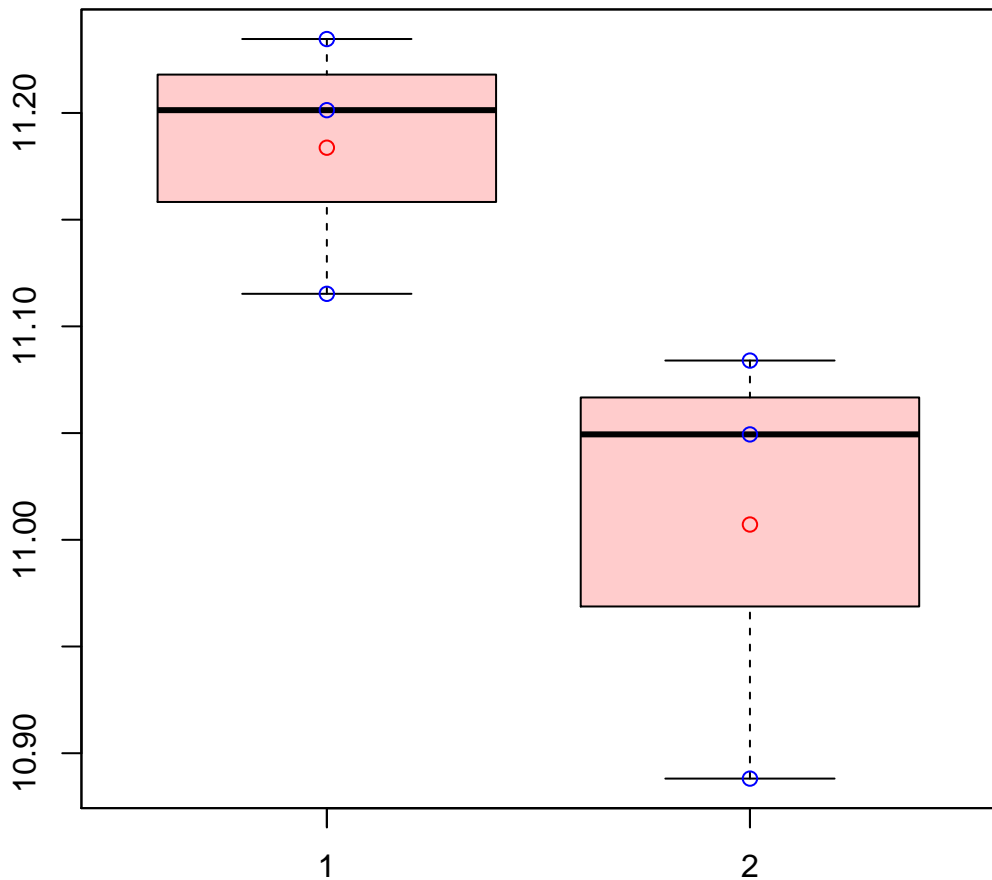

t-Test: p-value = 0.08

# Locus\_740\_6\_7|Locus\_740\_6\_7

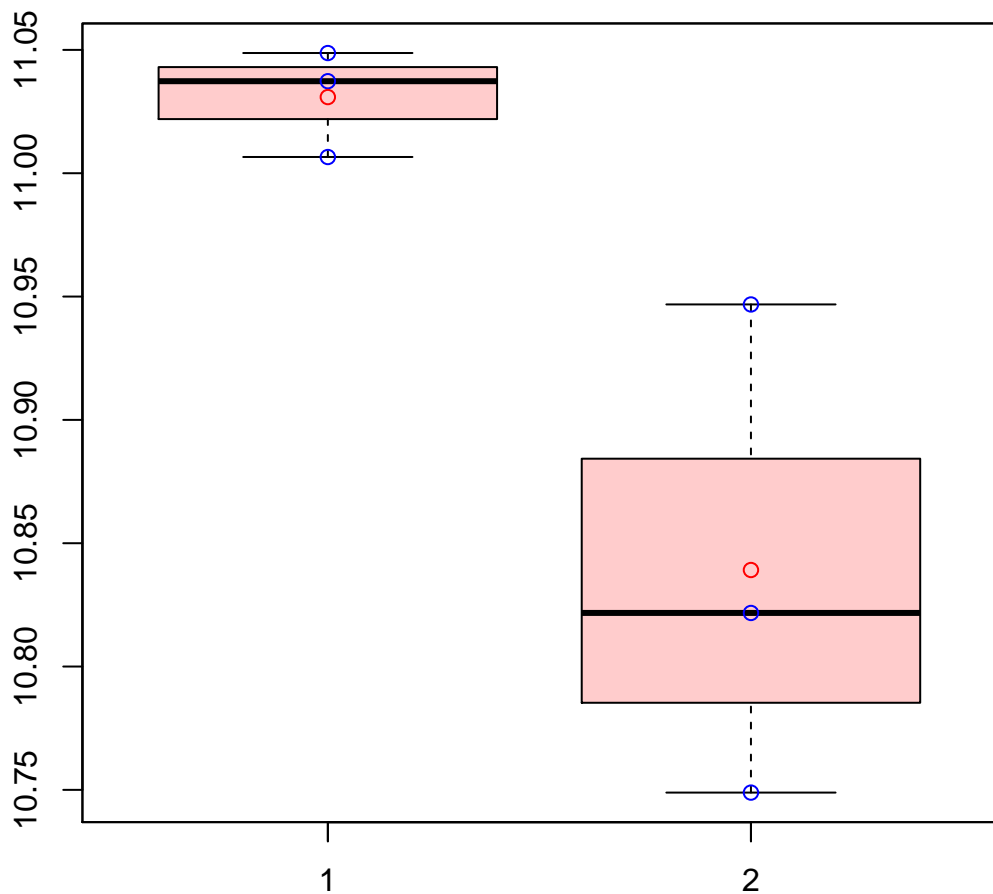

t-Test: p-value = 0.07

# Locus\_748\_6\_7|Locus\_748\_6\_7

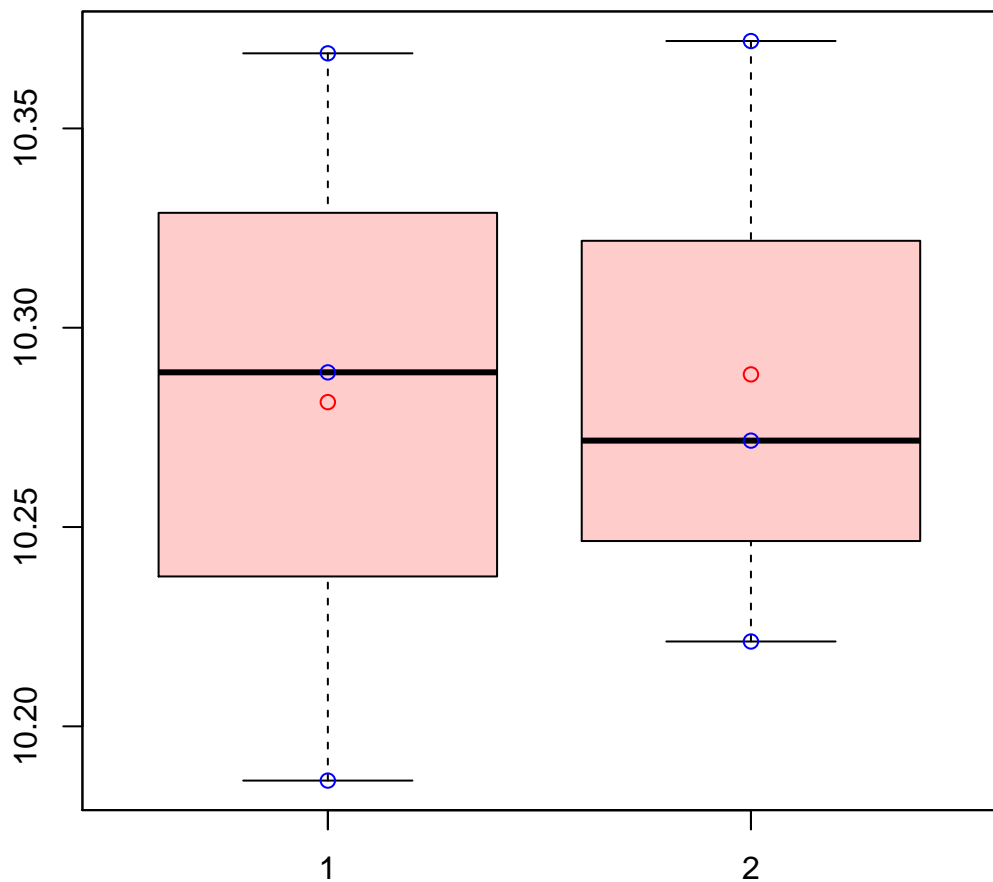

t-Test: p-value = 0.92

# Locus\_77125\_1\_1|Locus\_77125\_1\_1



t-Test: p-value = 0.26

# Locus\_774\_1\_9|Locus\_774\_1\_9

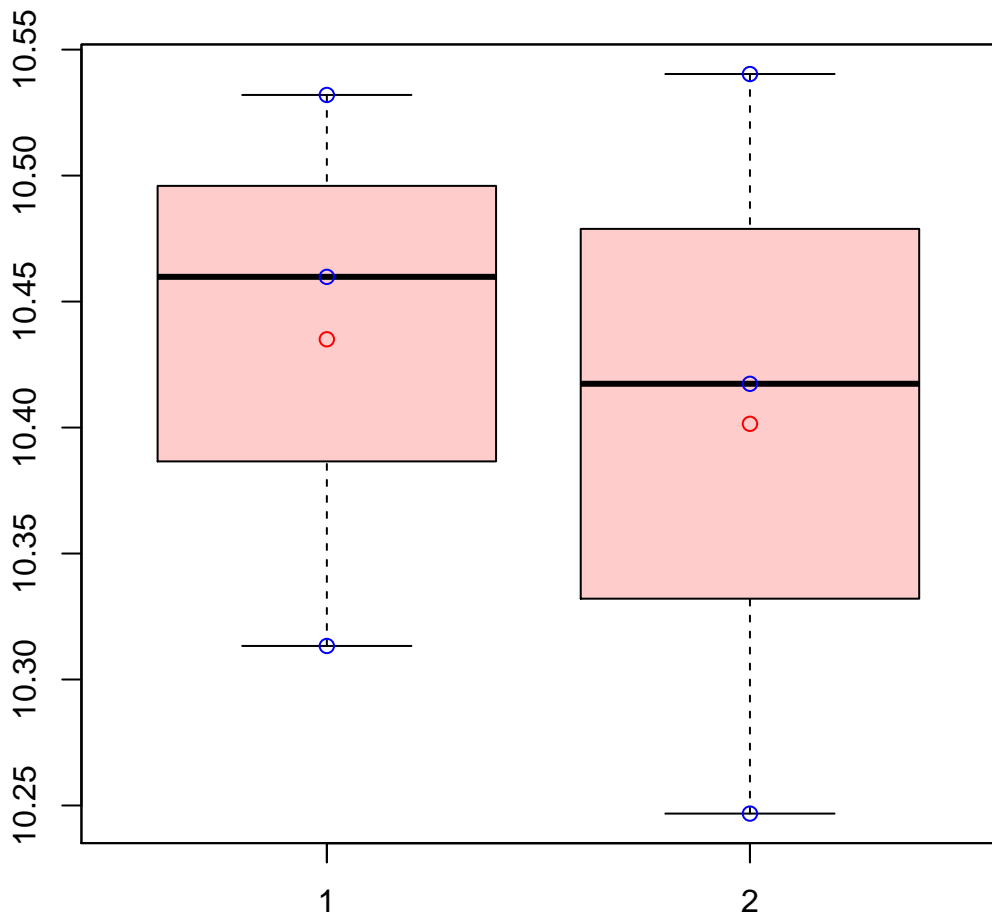

t-Test: p-value = 0.77

# Locus\_78\_1\_2|Locus\_78\_1\_2

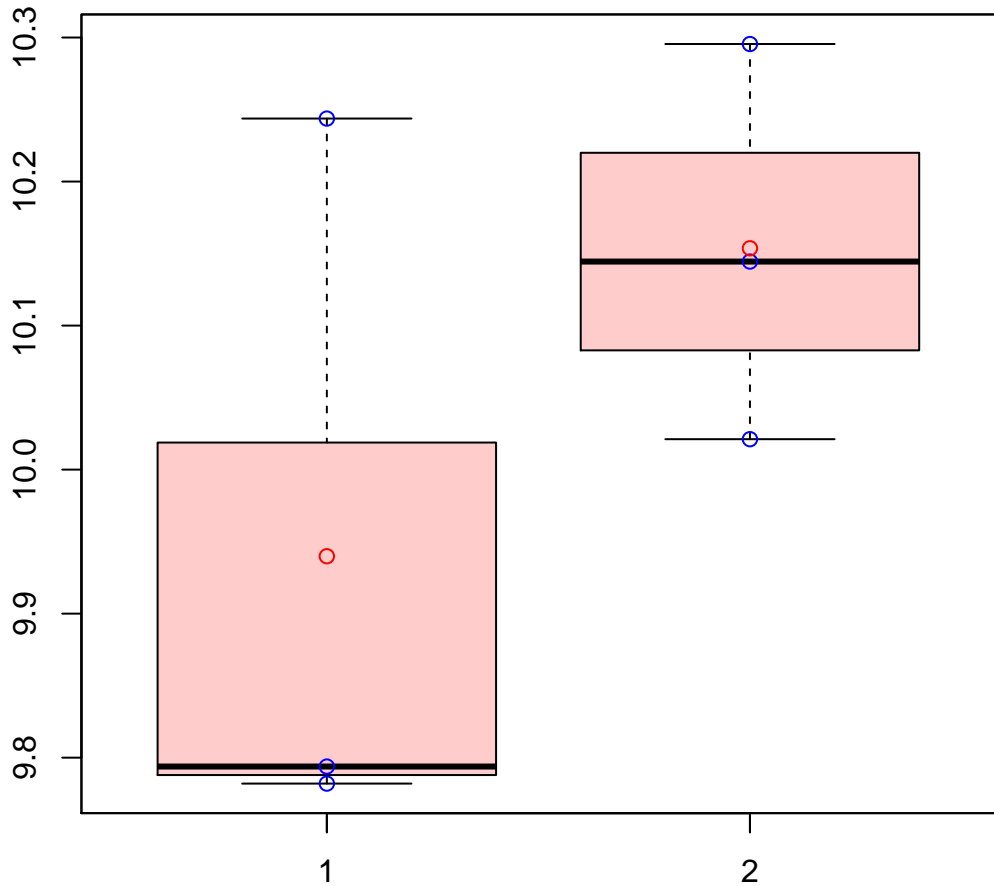

t-Test: p-value = 0.3

# Locus\_78\_1\_5|Locus\_78\_1\_5

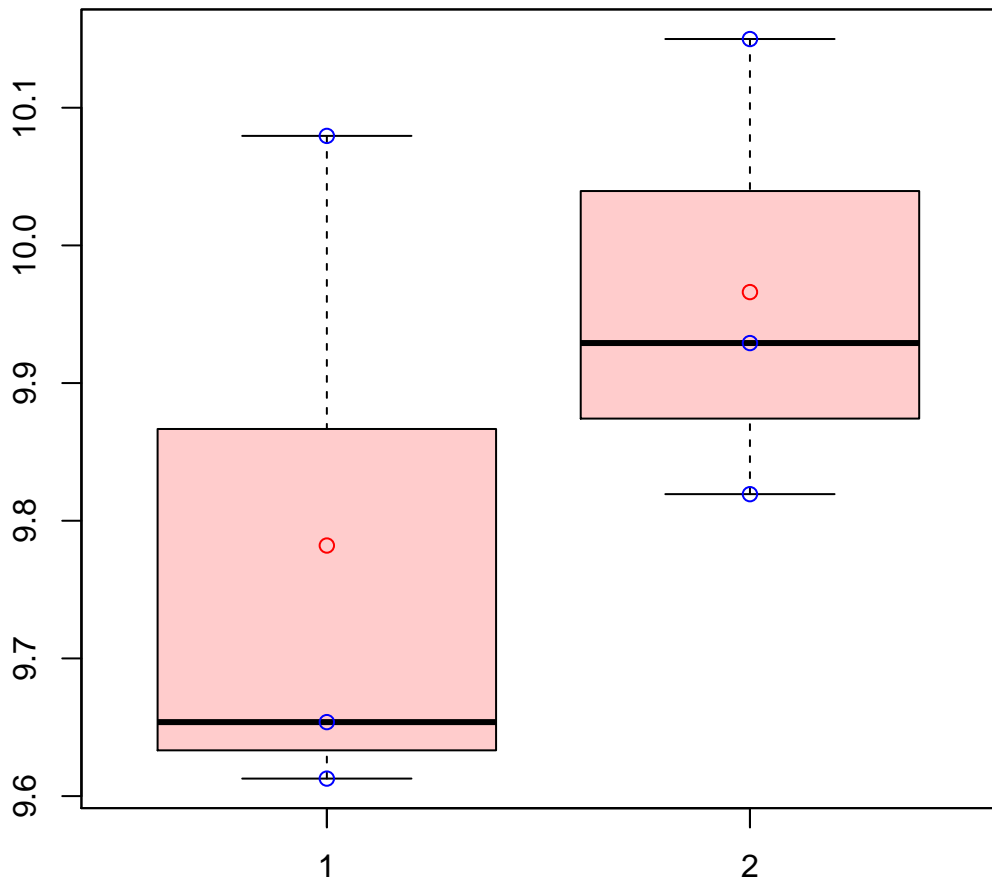

t-Test: p-value = 0.37



# Locus\_7869\_3\_11|Locus\_7869\_3\_11

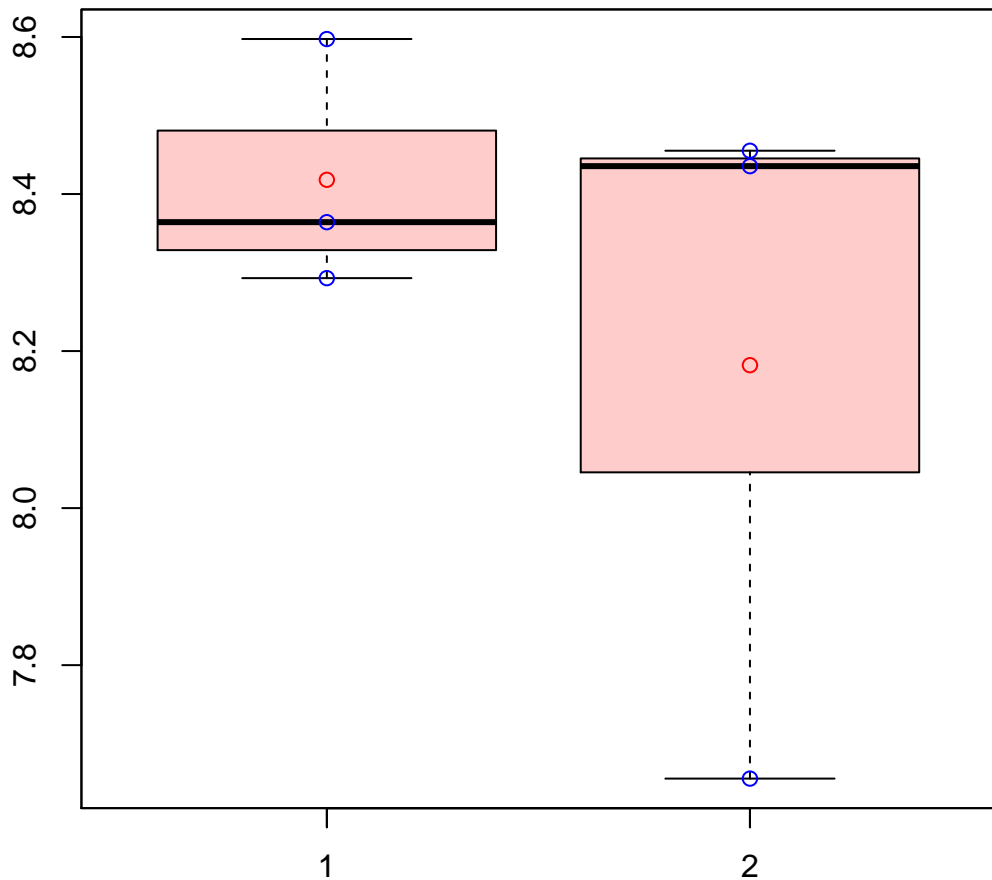

t-Test: p-value = 0.47

# Locus\_787\_2\_11|Locus\_787\_2\_11

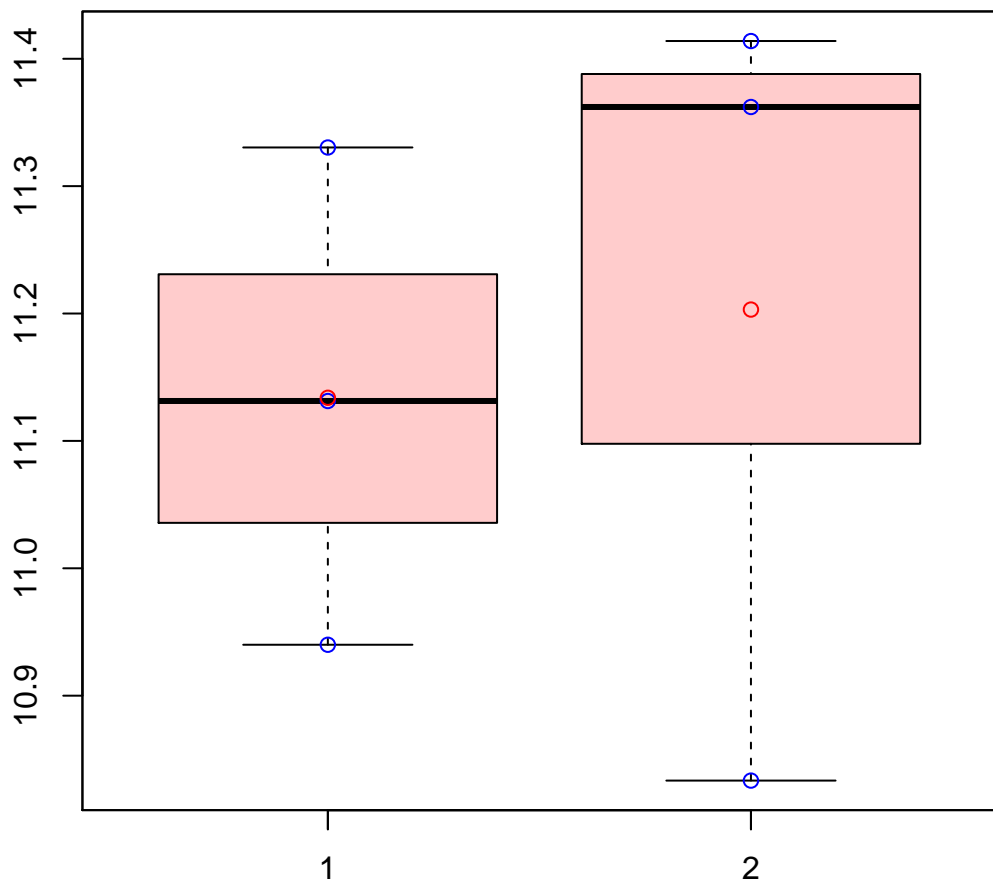

t-Test: p-value = 0.77

# Locus\_787\_3\_11|Locus\_787\_3\_11

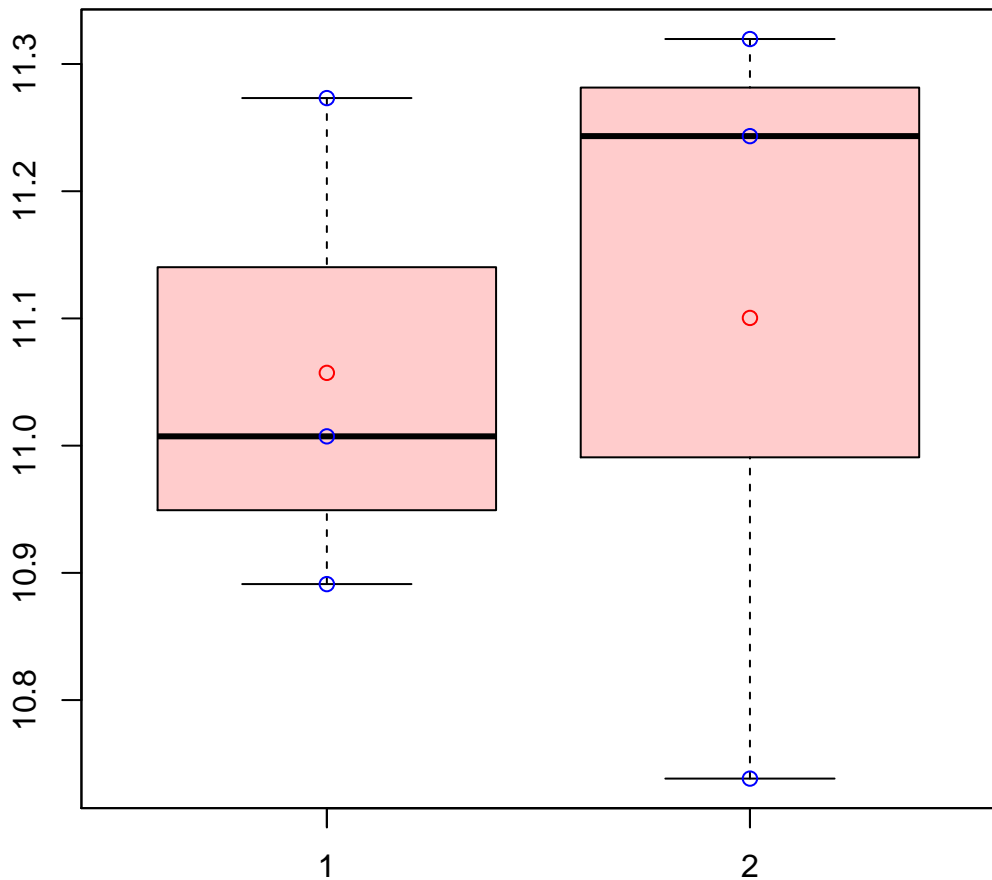

t-Test: p-value = 0.85

# Locus\_790\_1\_8|Locus\_790\_1\_8

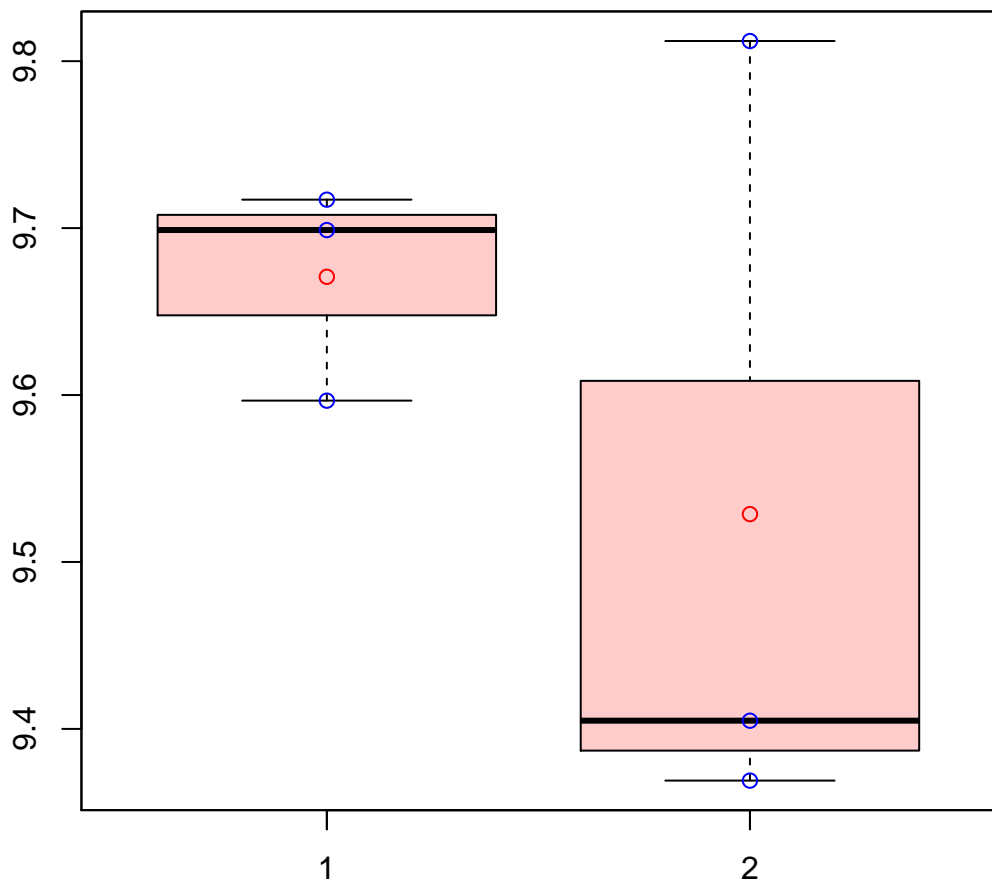

t-Test: p-value = 0.42

# Locus\_792\_1\_2|Locus\_792\_1\_2

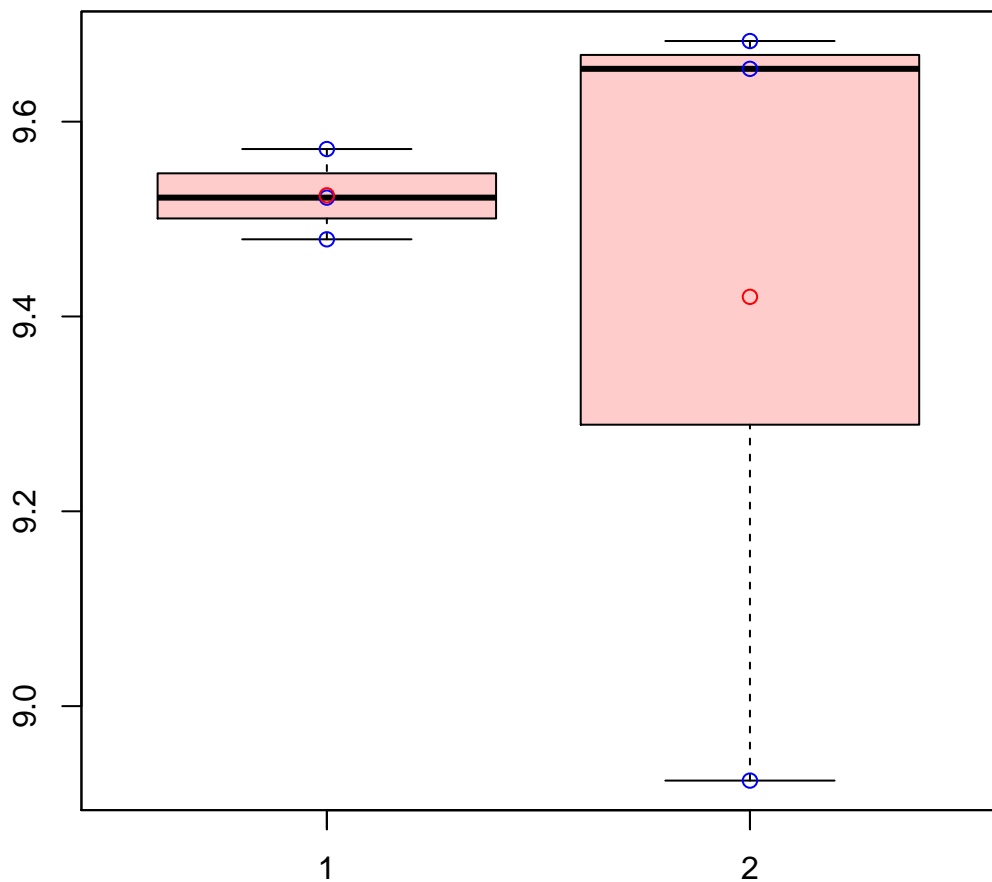

t-Test: p-value = 0.72

# Locus\_8175\_4\_5|Locus\_8175\_4\_5

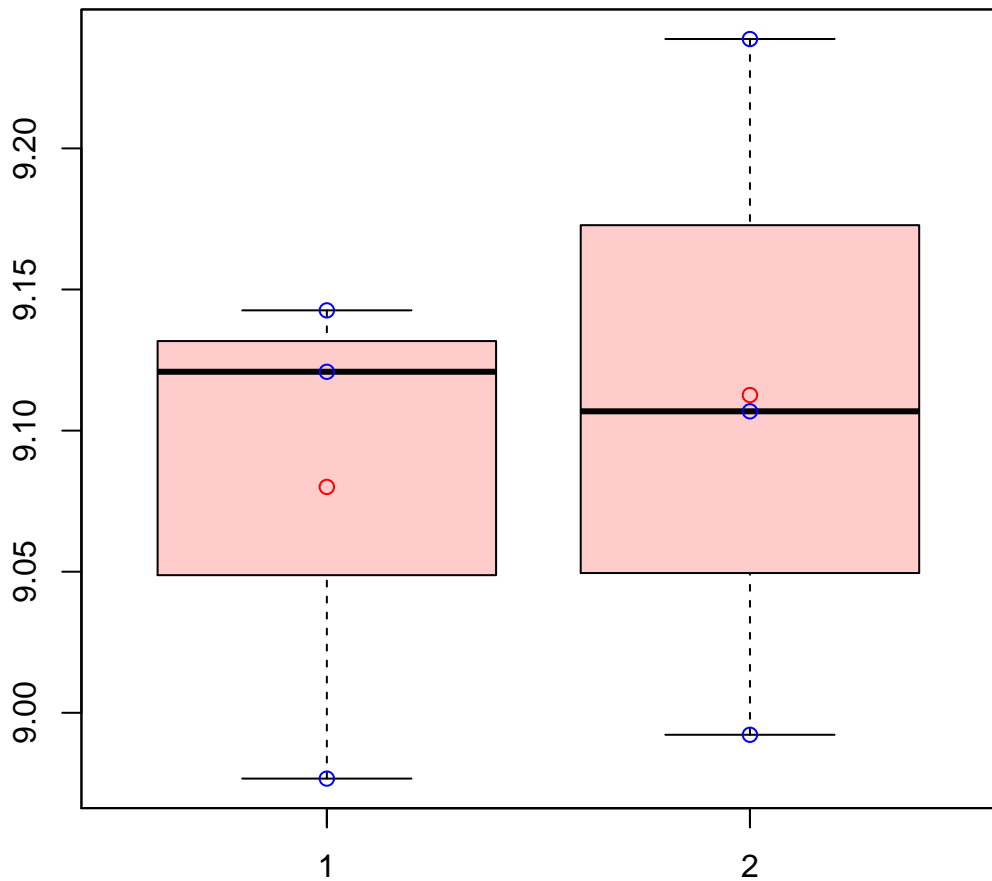

t-Test: p-value = 0.73

# Locus\_82\_1\_4|Locus\_82\_1\_4

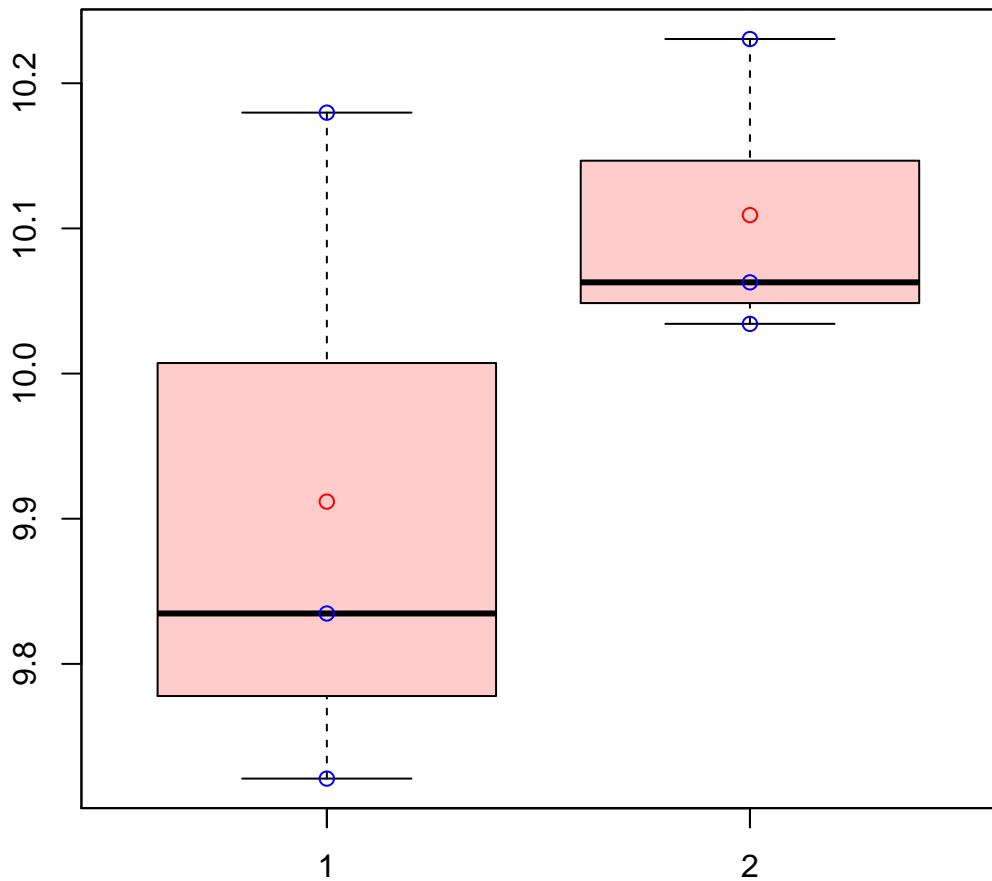

t-Test: p-value = 0.29

# Locus\_82\_4\_4|Locus\_82\_4\_4

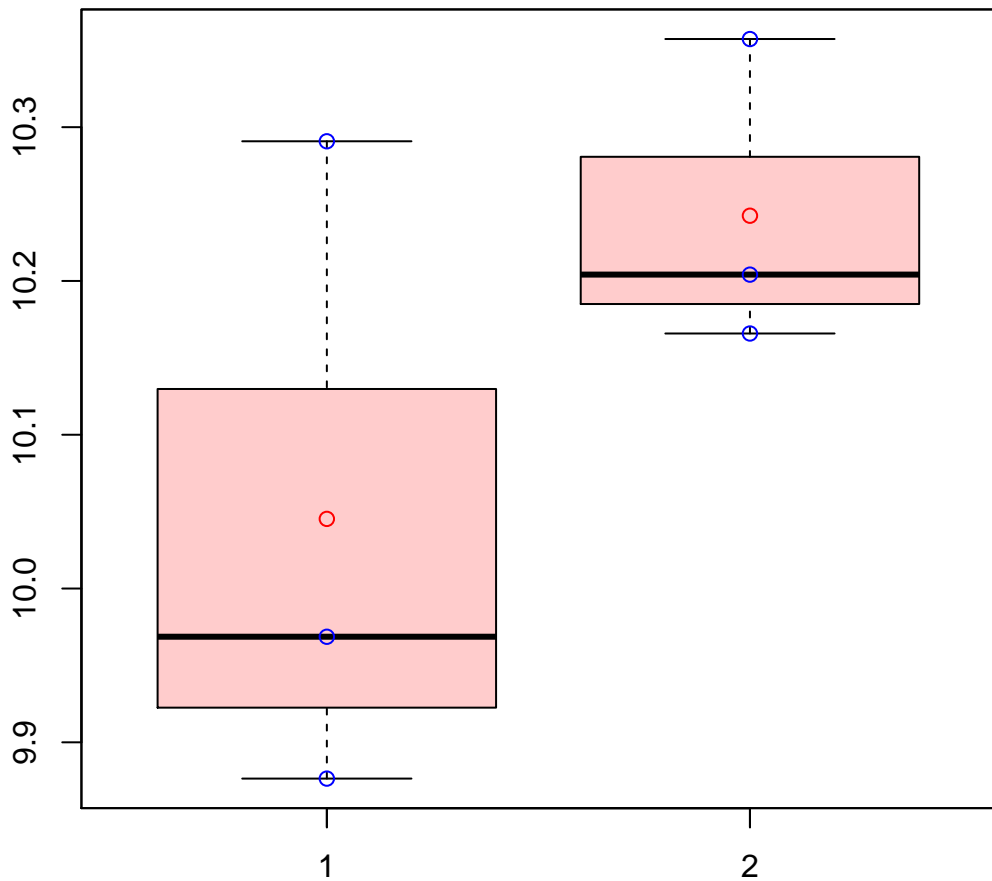

t-Test: p-value = 0.26



# Locus\_828\_1\_1|Locus\_828\_1\_1

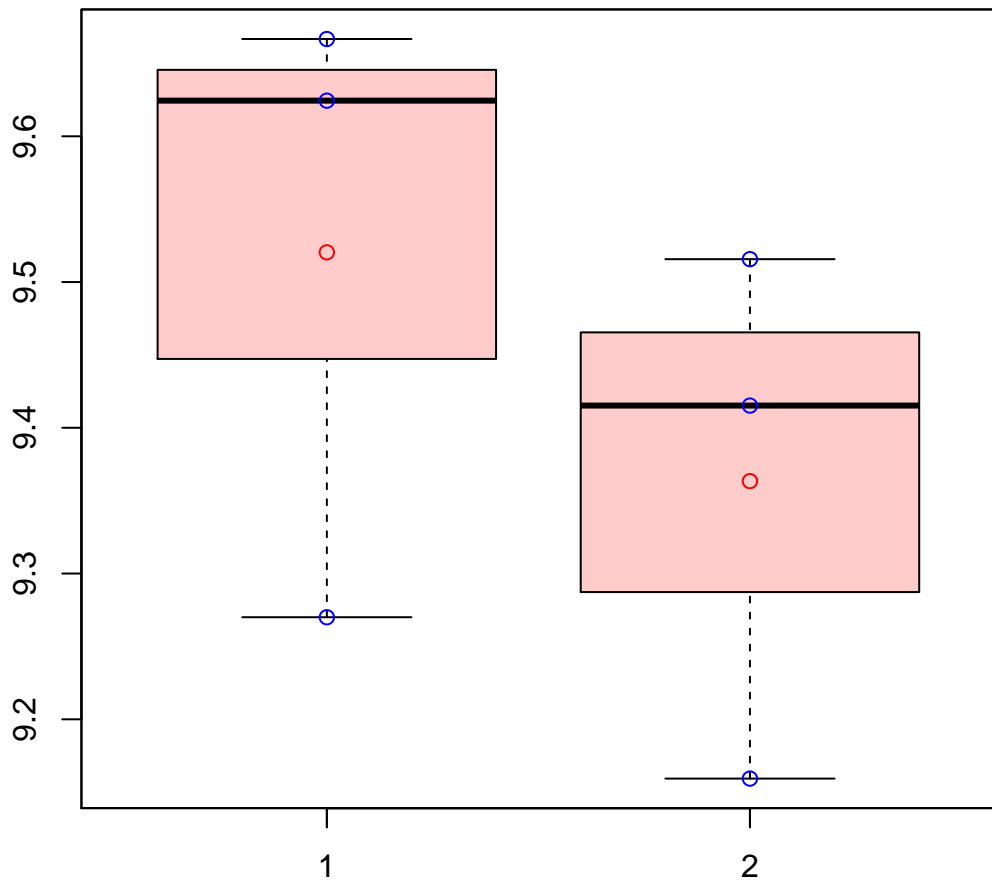

t-Test: p-value = 0.4

# Locus\_83\_4\_5|Locus\_83\_4\_5

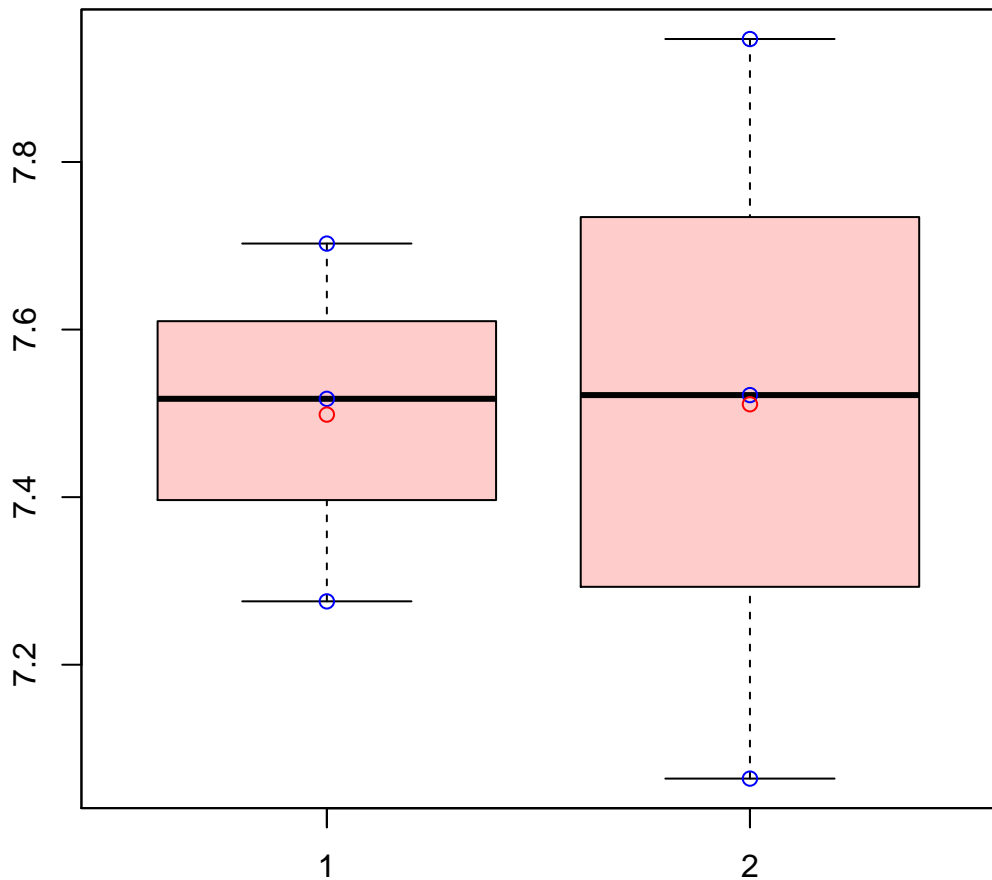

t-Test: p-value = 0.97

# Locus\_8526\_3\_8|Locus\_8526\_3\_8



t-Test: p-value = 0.97

# Locus\_8528\_2\_5|Locus\_8528\_2\_5

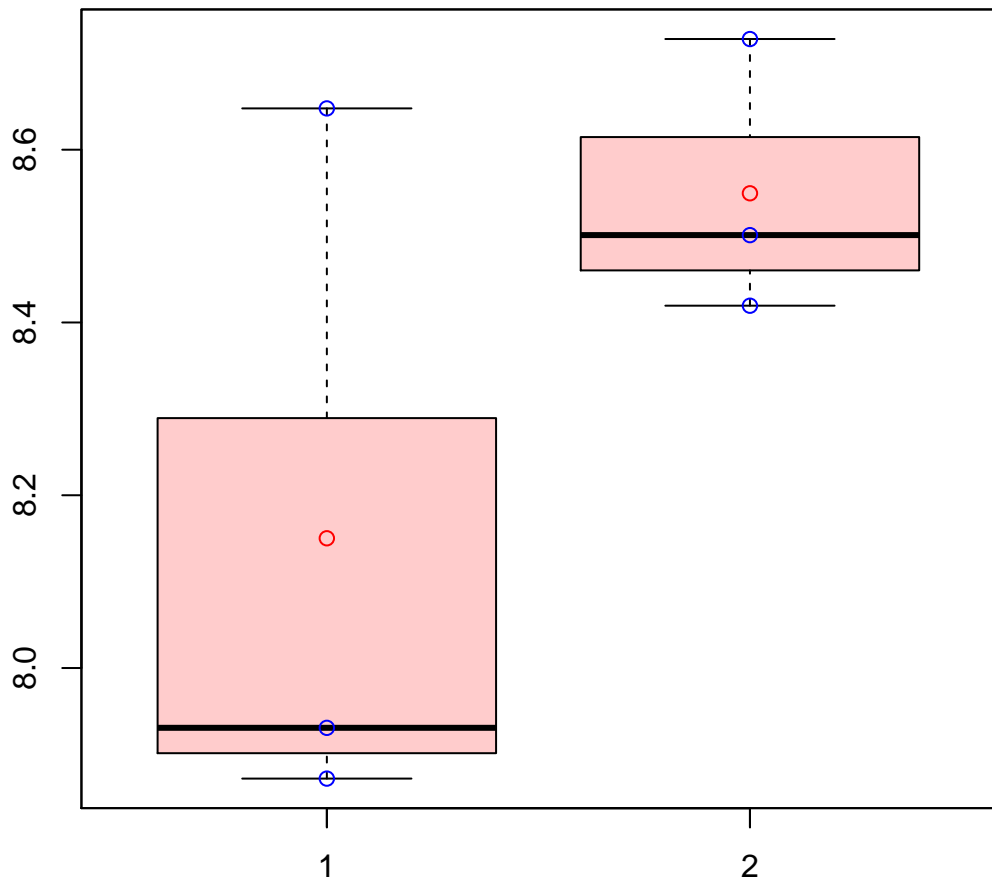

t-Test: p-value = 0.25

# Locus\_853\_2\_4|Locus\_853\_2\_4

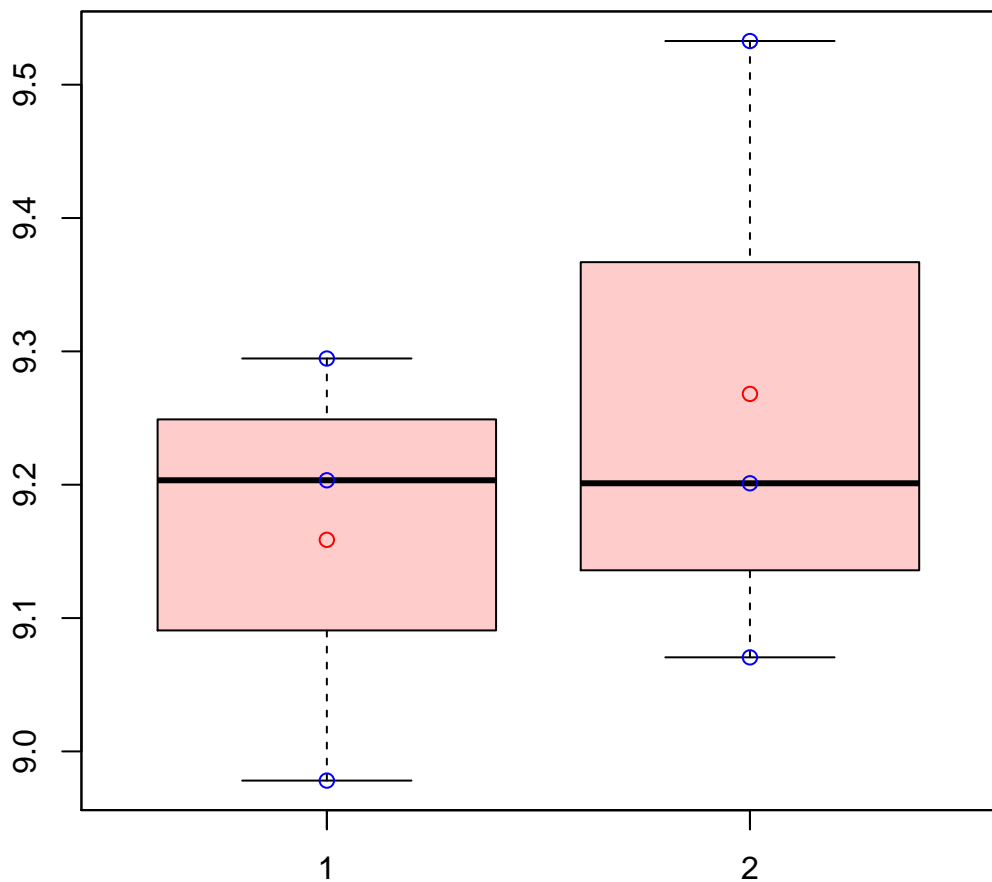

t-Test: p-value = 0.55

# Locus\_876\_6\_11|Locus\_876\_6\_11



t-Test: p-value = 0.98

# Locus\_9116\_1\_2|Locus\_9116\_1\_2

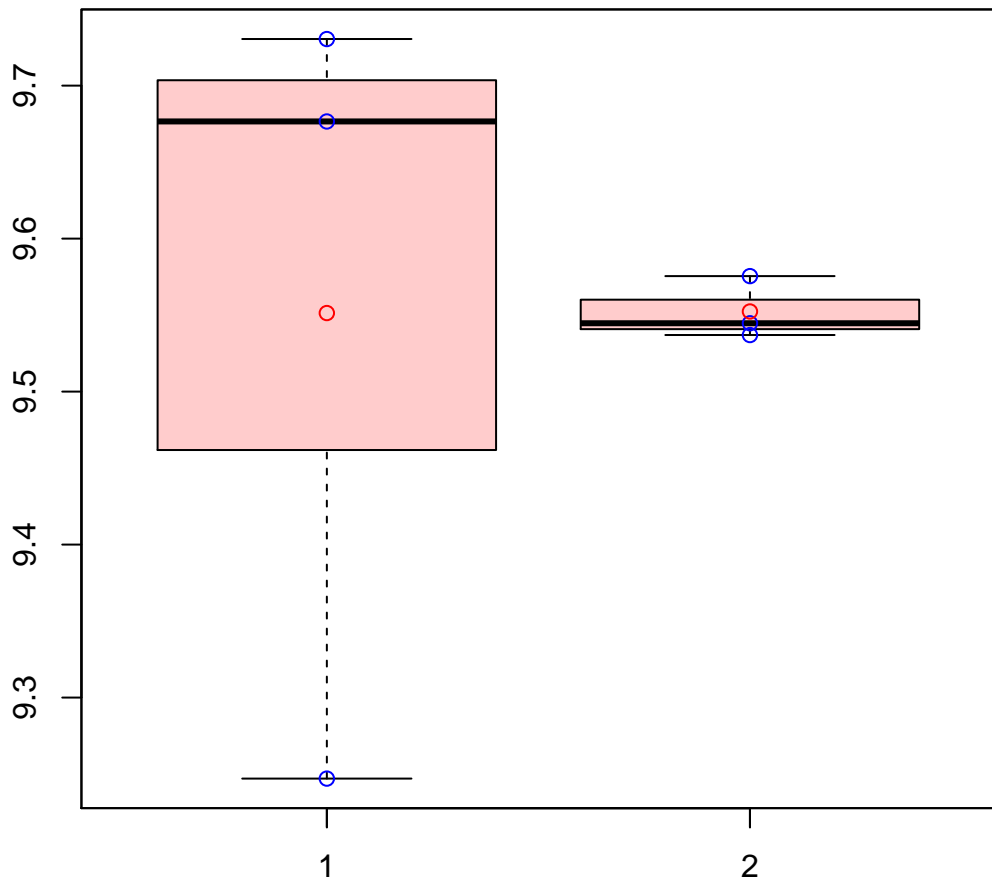

t-Test: p-value = 1

# Locus\_9242\_7\_10|Locus\_9242\_7\_10



t-Test: p-value = 0.49



# Locus\_927\_3\_10|Locus\_927\_3\_10

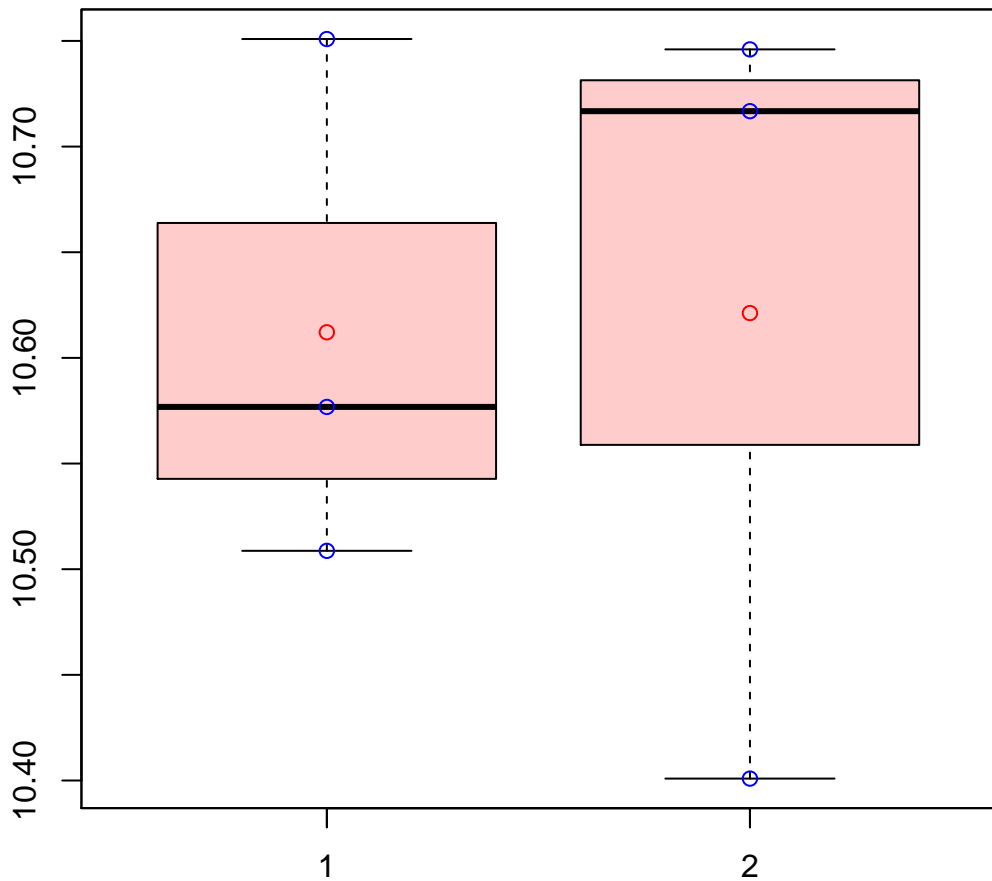

t-Test: p-value = 0.95

# Locus\_94\_2\_6|Locus\_94\_2\_6

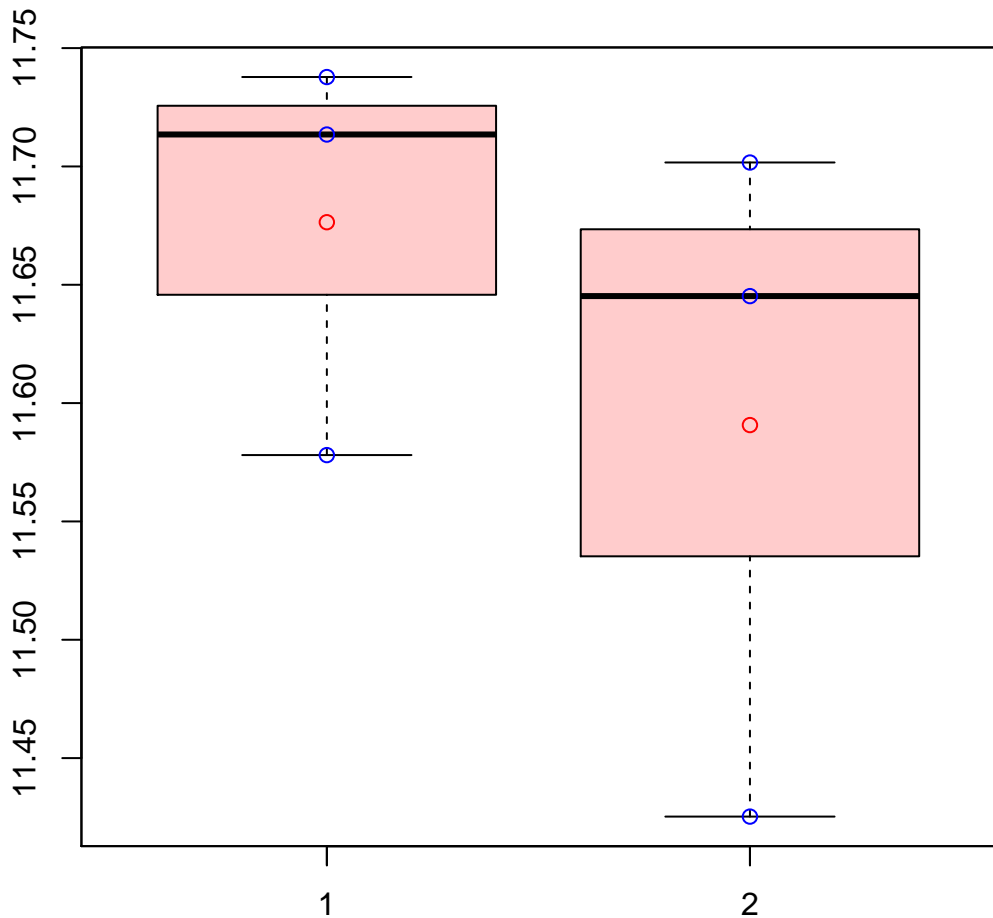

t-Test: p-value = 0.44

# Locus\_954\_4\_4|Locus\_954\_4\_4



t-Test: p-value = 0.02

# Locus\_9552\_1\_7|Locus\_9552\_1\_7

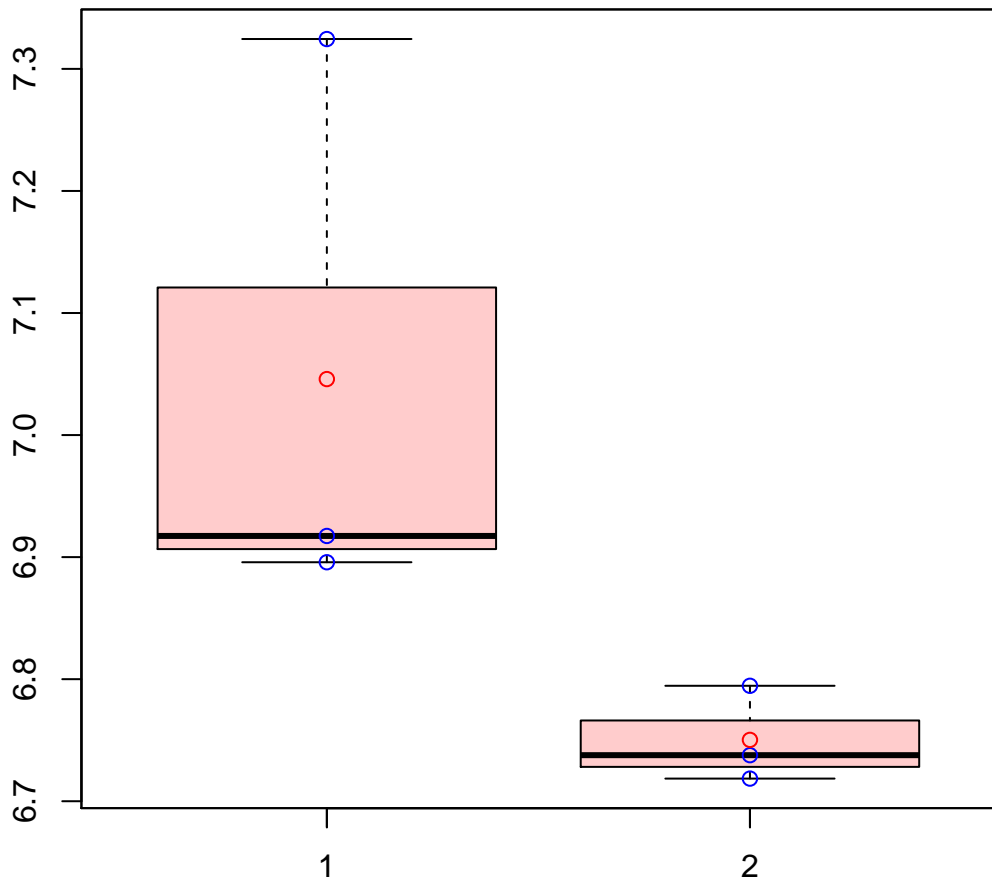

t-Test: p-value = 0.17

# Locus\_9570\_5\_6|Locus\_9570\_5\_6

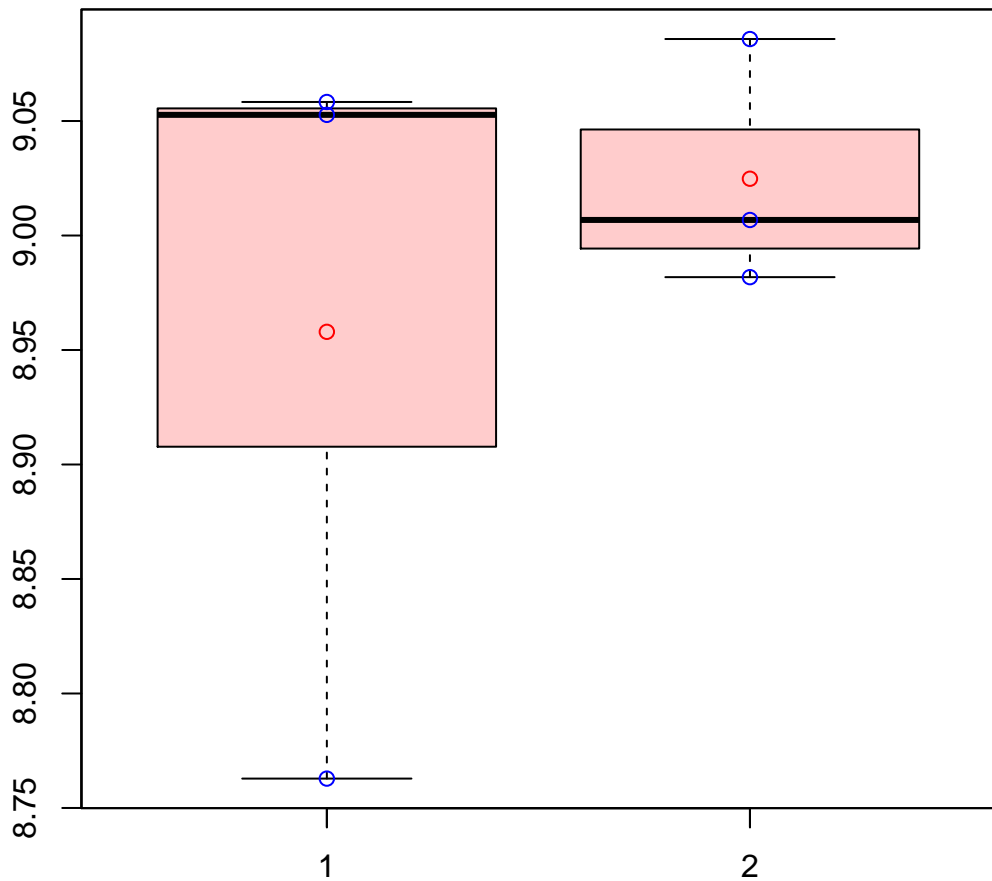

t-Test: p-value = 0.57

# Locus\_9776\_3\_4|Locus\_9776\_3\_4



t-Test: p-value = 0.24

# Locus\_9946\_2\_6|Locus\_9946\_2\_6

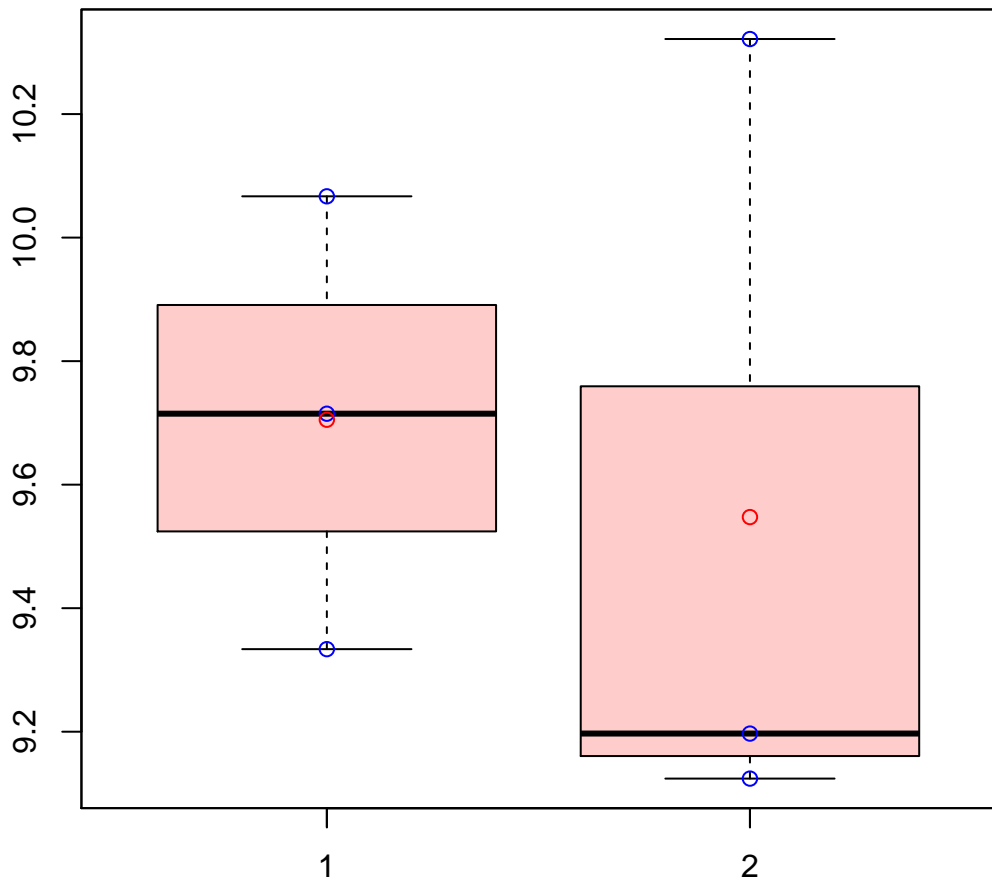

t-Test: p-value = 0.74

# METE3\_ERATE|METE3\_ERATE

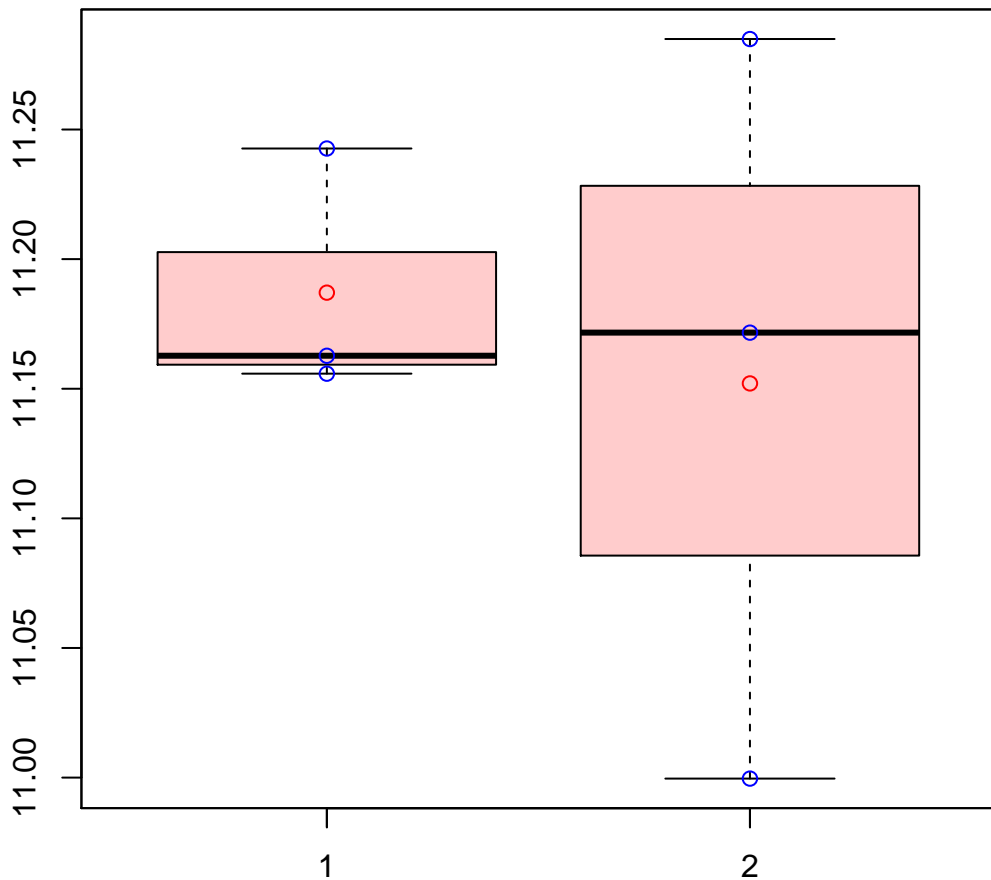

t-Test: p-value = 0.72



# METE4\_ERATE|METE4\_ERATE

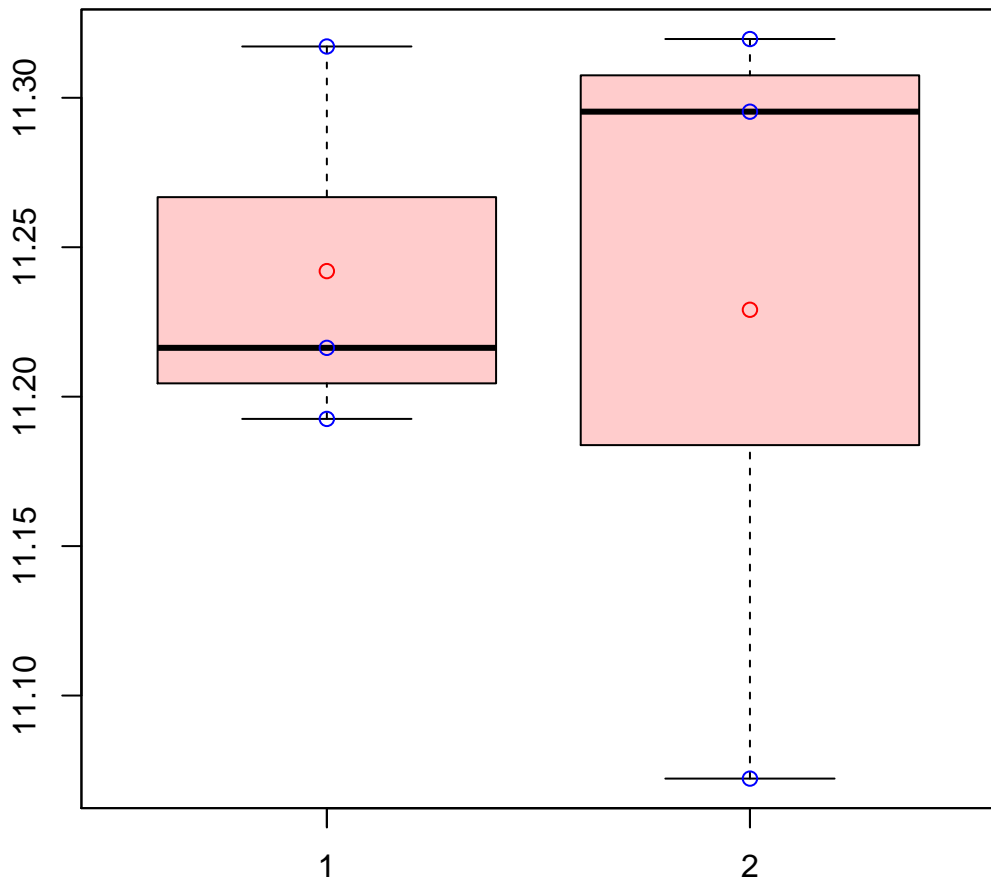

t-Test: p-value = 0.89

# METE9\_ERATE|METE9\_ERATE

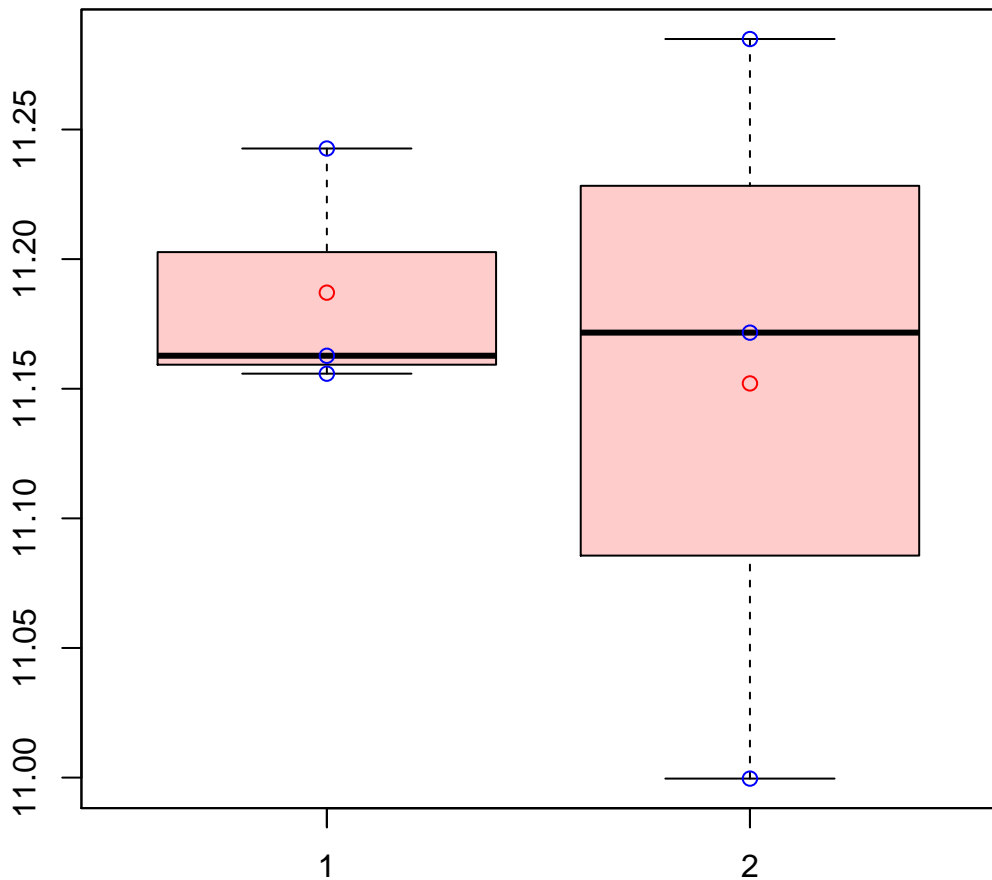

t-Test: p-value = 0.72

# METK4\_ERATE|METK4\_ERATE

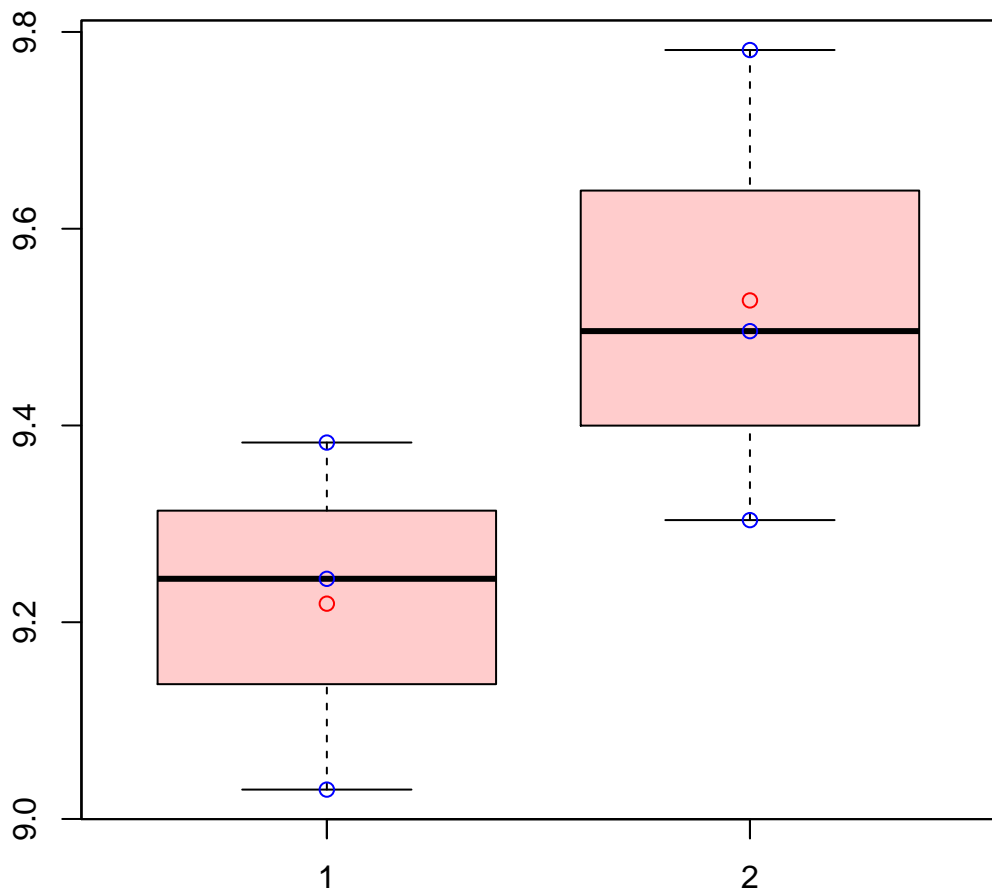

t-Test: p-value = 0.15

# METK5\_ERATE|METK5\_ERATE

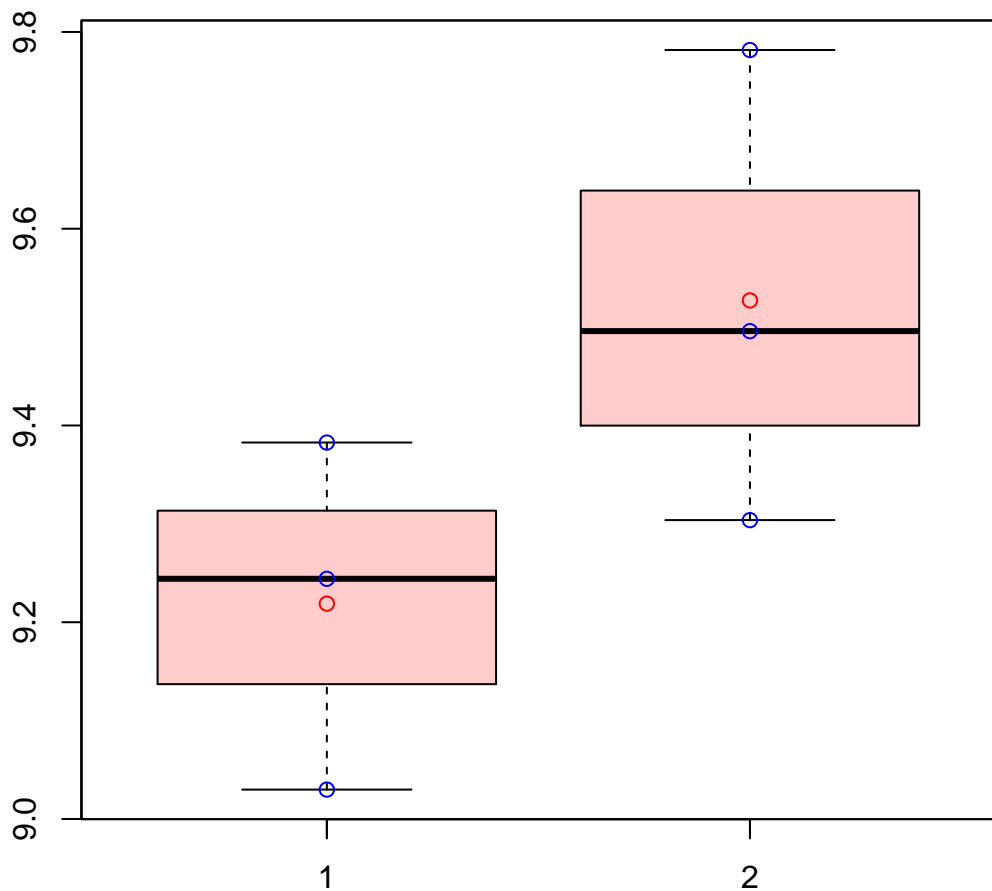

t-Test: p-value = 0.15

# NDK2\_ERATE|NDK2\_ERATE

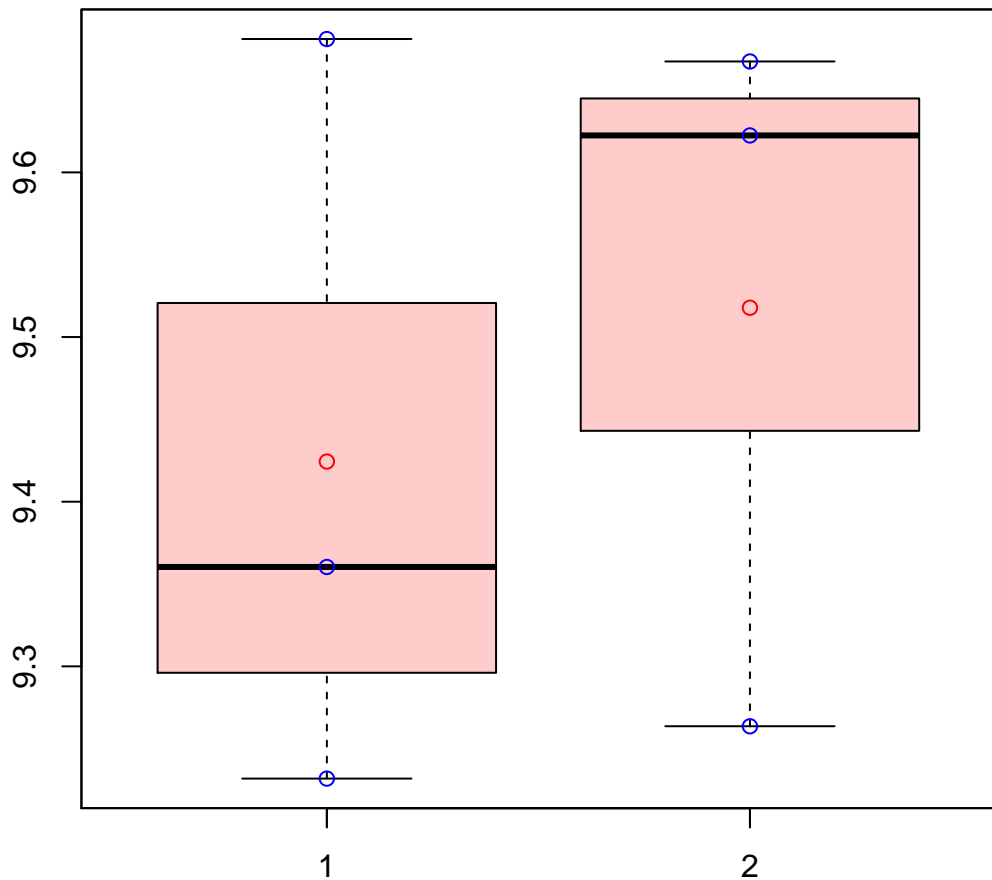

t-Test: p-value = 0.64

# NDK3\_ERATE|NDK3\_ERATE

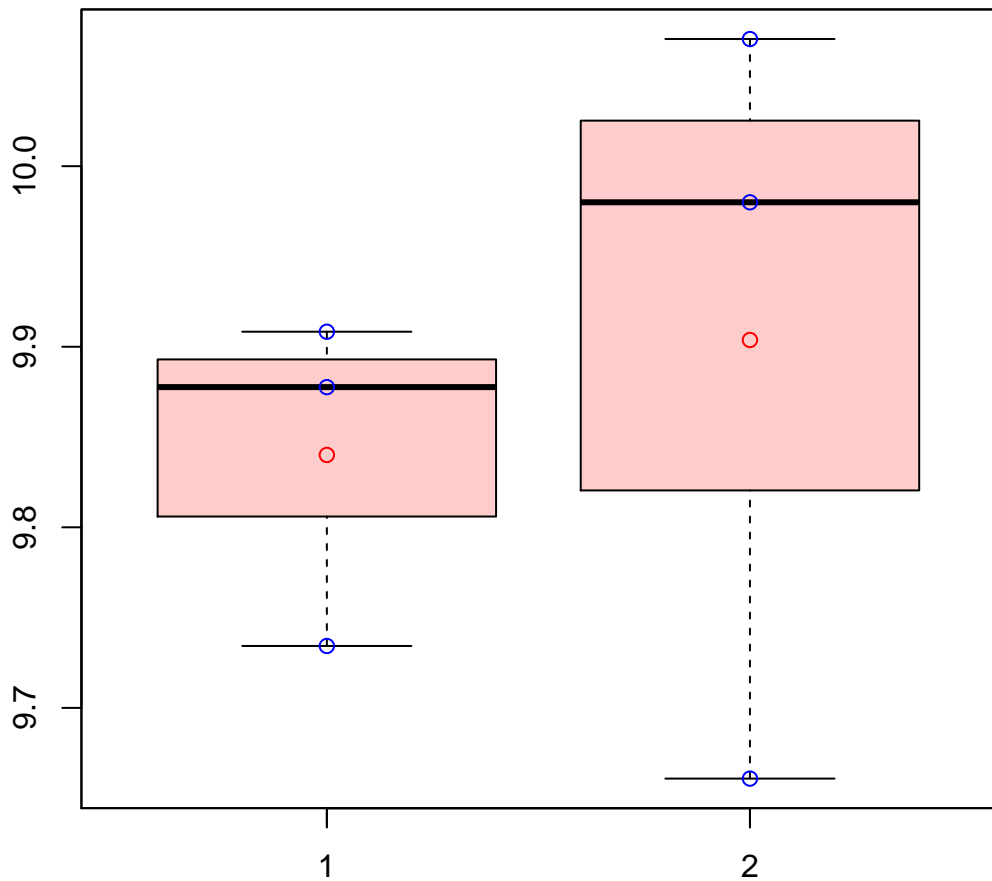

t-Test: p-value = 0.67

# NDK4\_ERATE|NDK4\_ERATE



t-Test: p-value = 0.67

# PDXS6\_ERATE|PDXS6\_ERATE

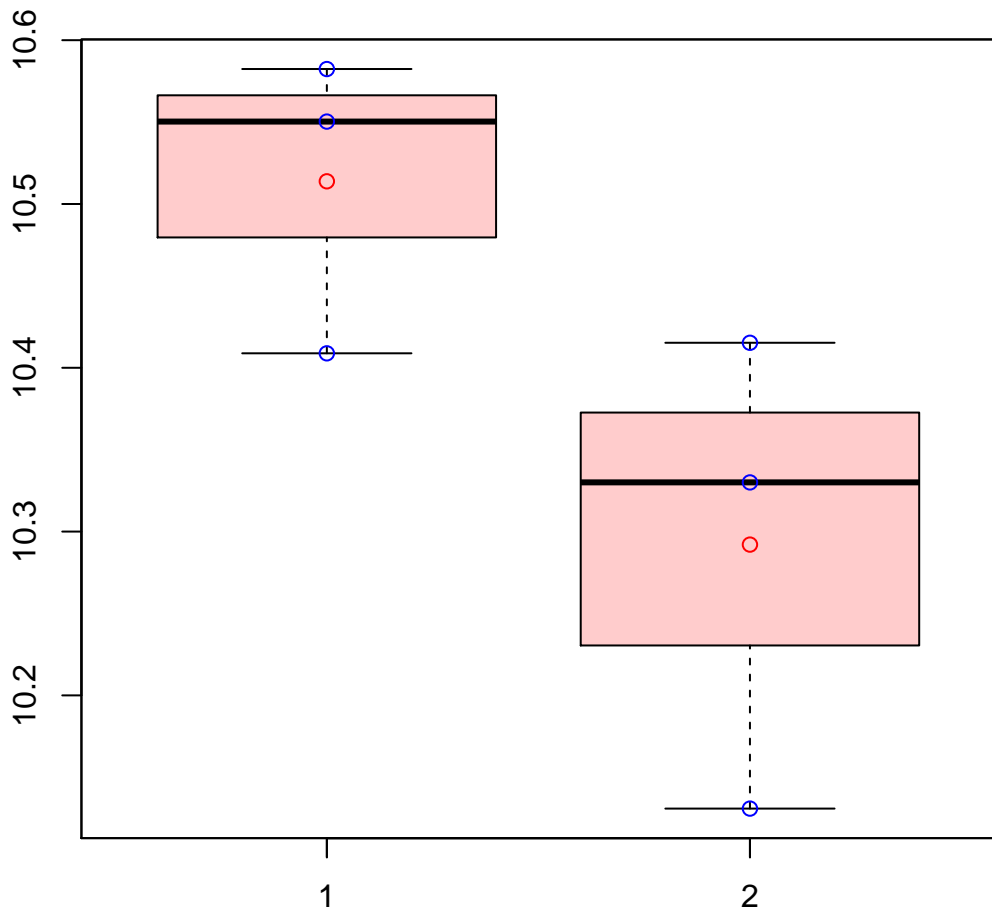

t-Test: p-value = 0.1



# PGK5\_ERATE|PGK5\_ERATE

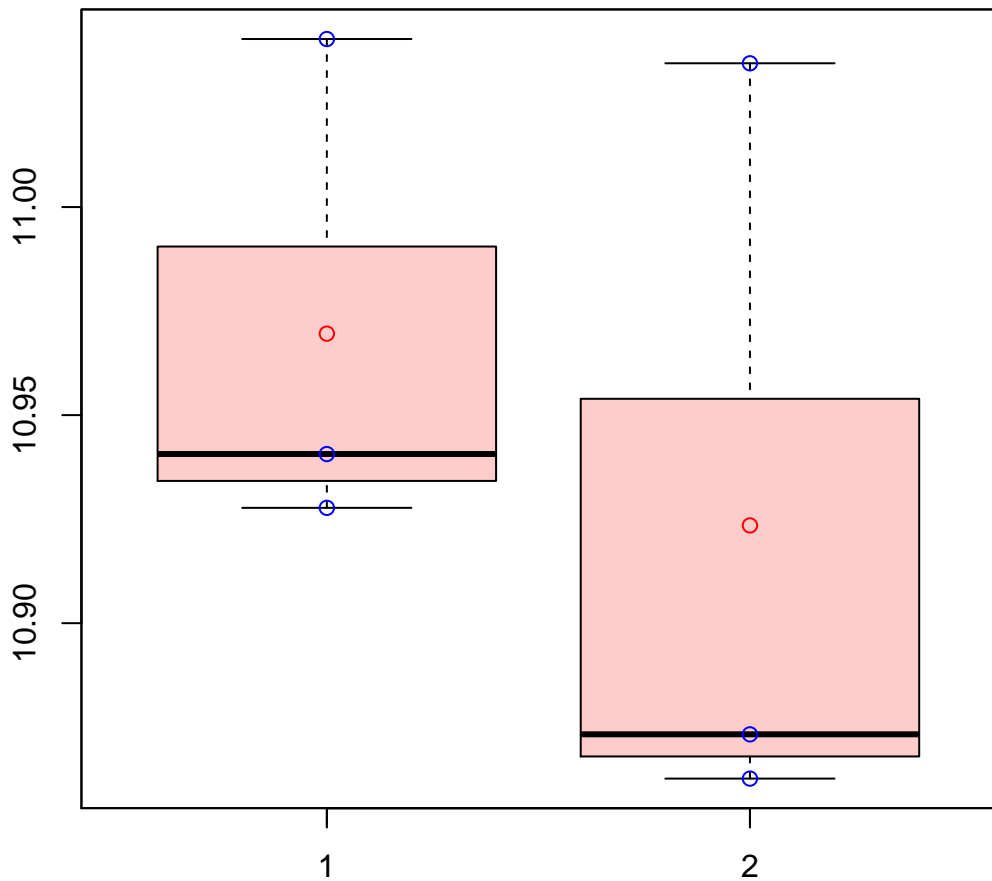

t-Test: p-value = 0.53

# PSB287\_ERATE|PSB287\_ERATE

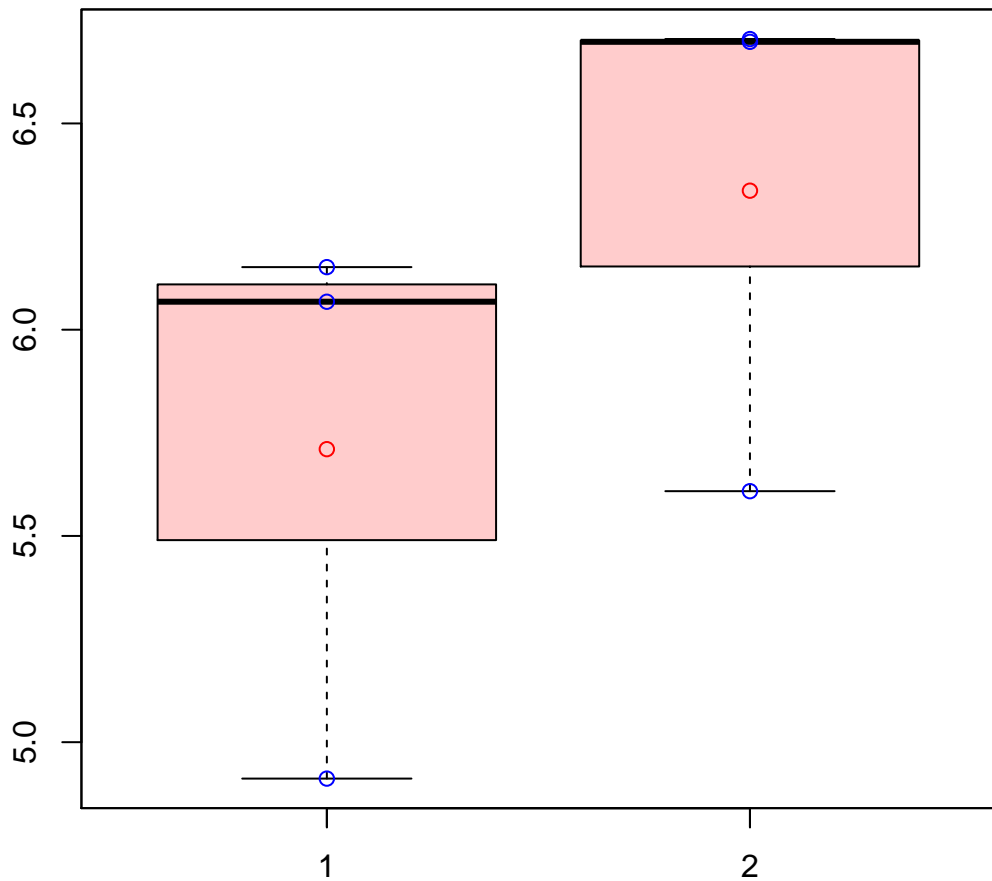

t-Test: p-value = 0.31

# PSBA5\_ERATE|PSBA5\_ERATE

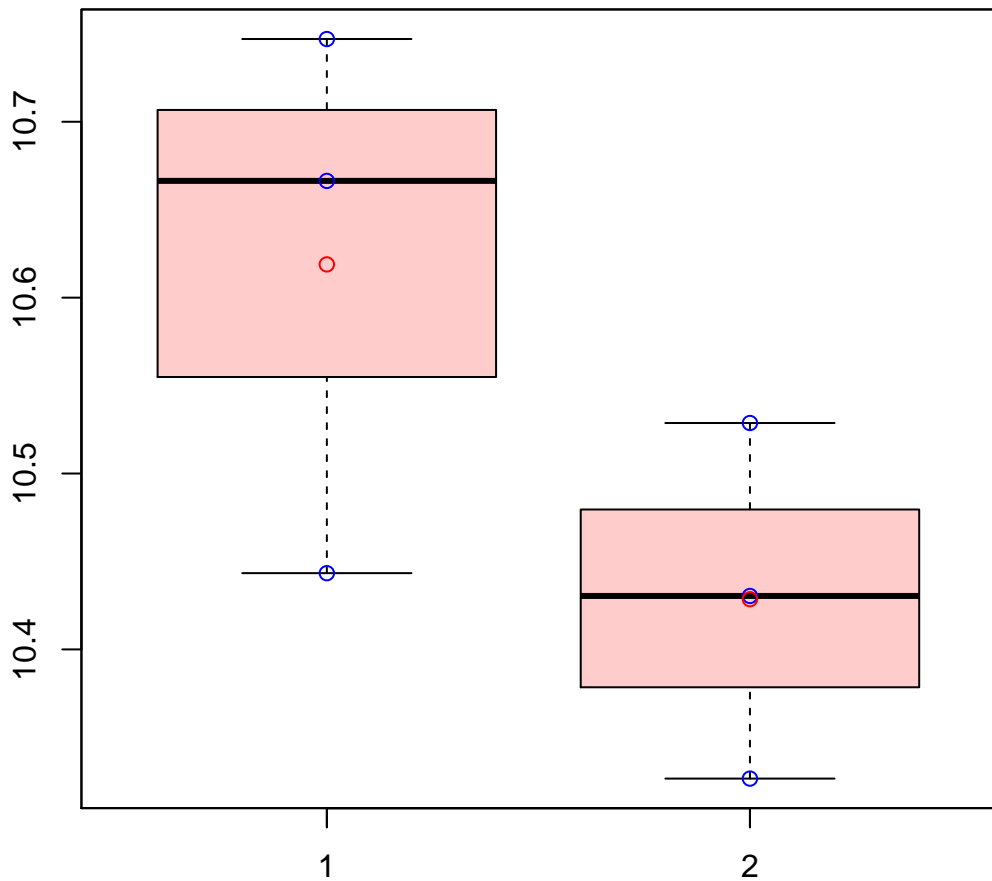

t-Test: p-value = 0.16

# PYRE13\_ERATE|PYRE13\_ERATE

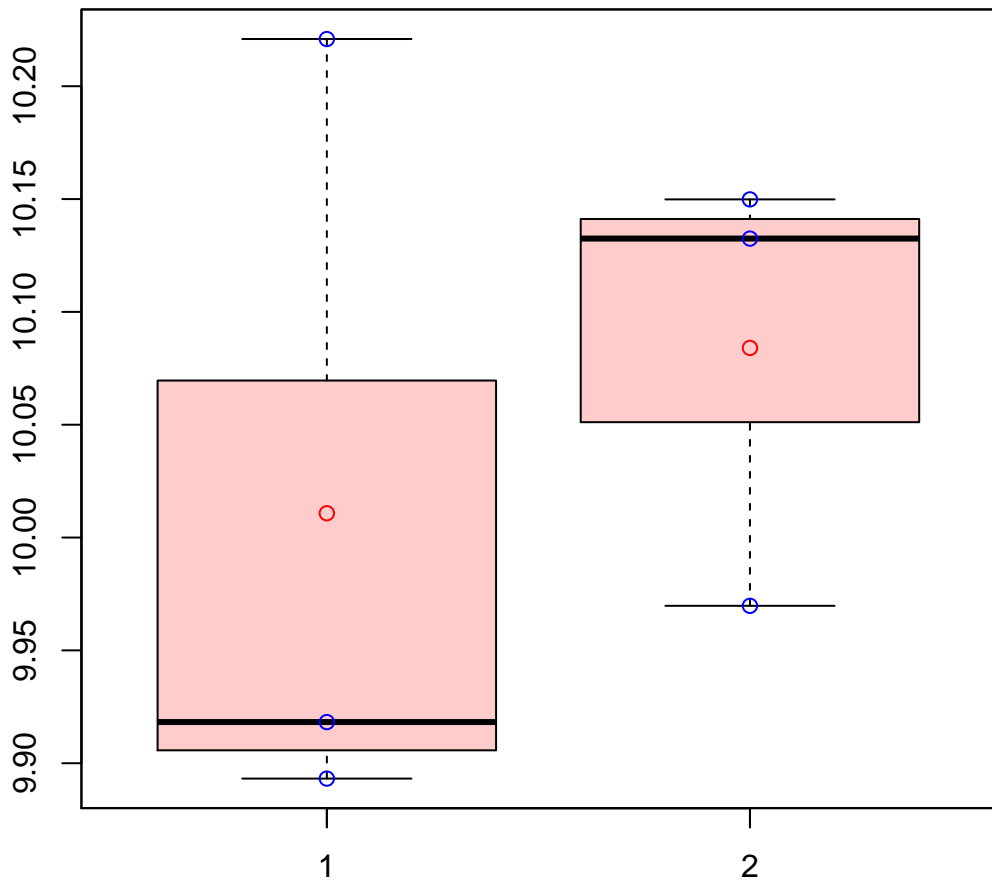

t-Test: p-value = 0.58

# PYRE7\_ERATE|PYRE7\_ERATE



t-Test: p-value = 0.58

# RBL3\_ERATE|RBL3\_ERATE

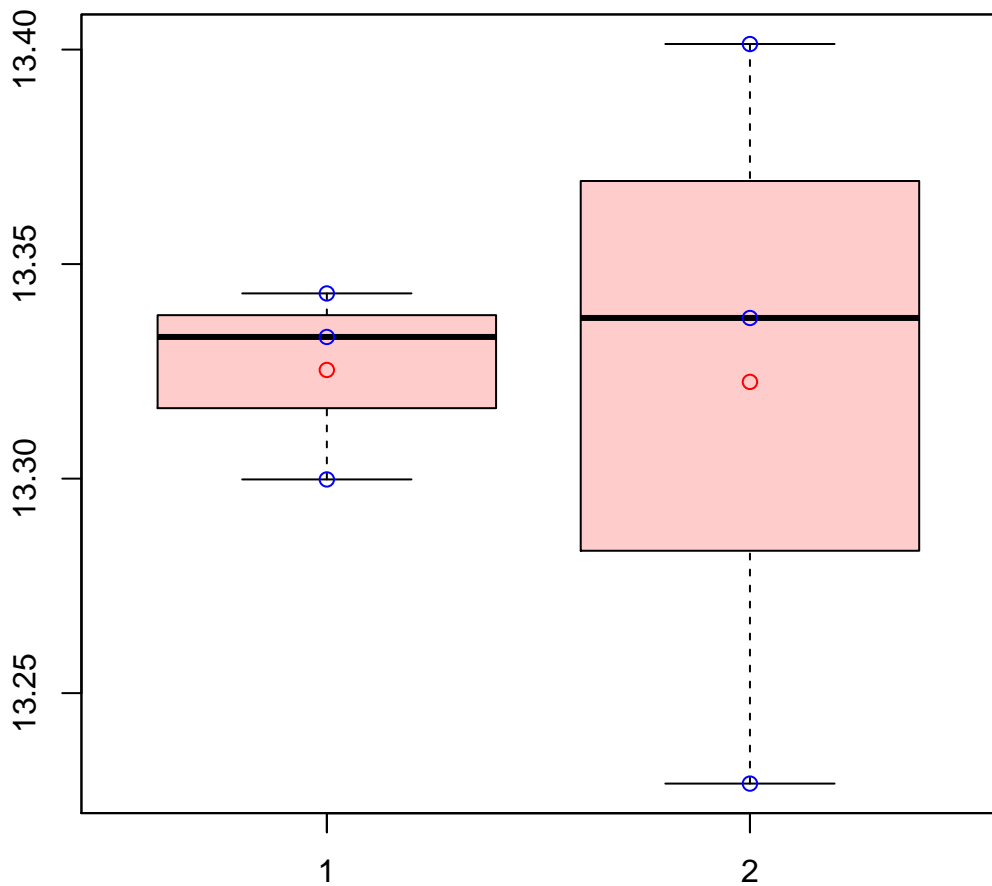

t-Test: p-value = 0.96

# RPIA10\_ERATE|RPIA10\_ERATE

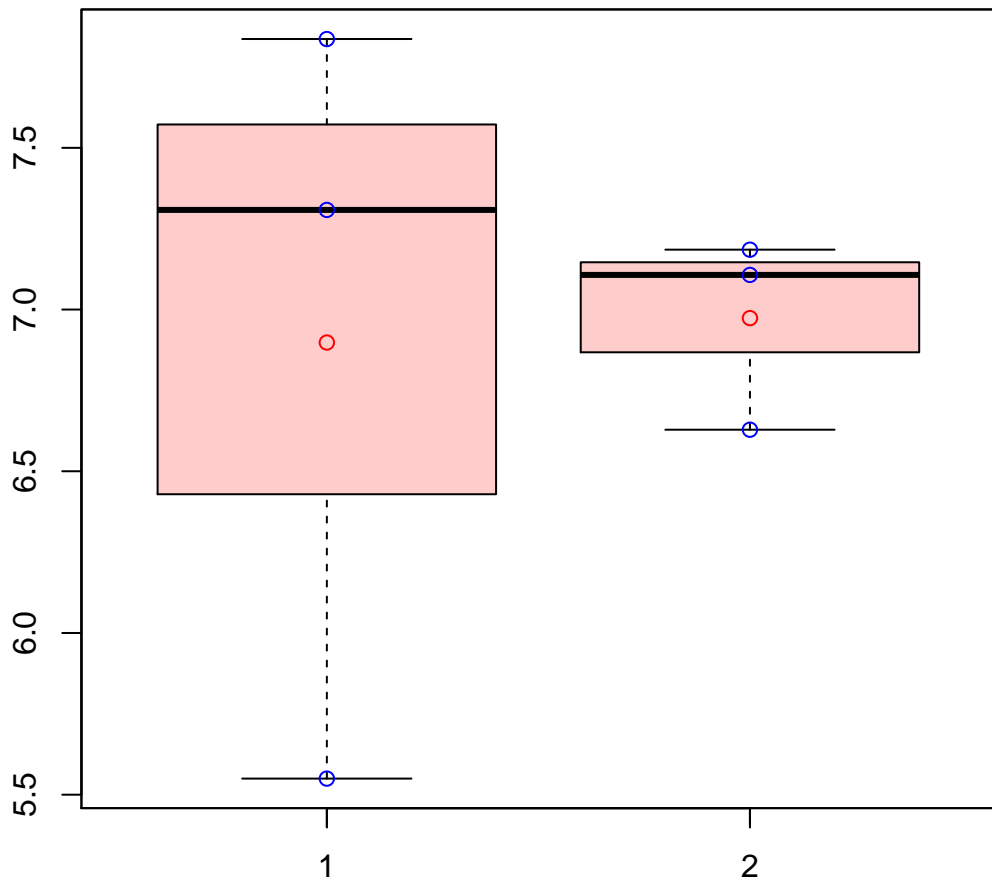

t-Test: p-value = 0.92

# RPIA2\_ERATE|RPIA2\_ERATE

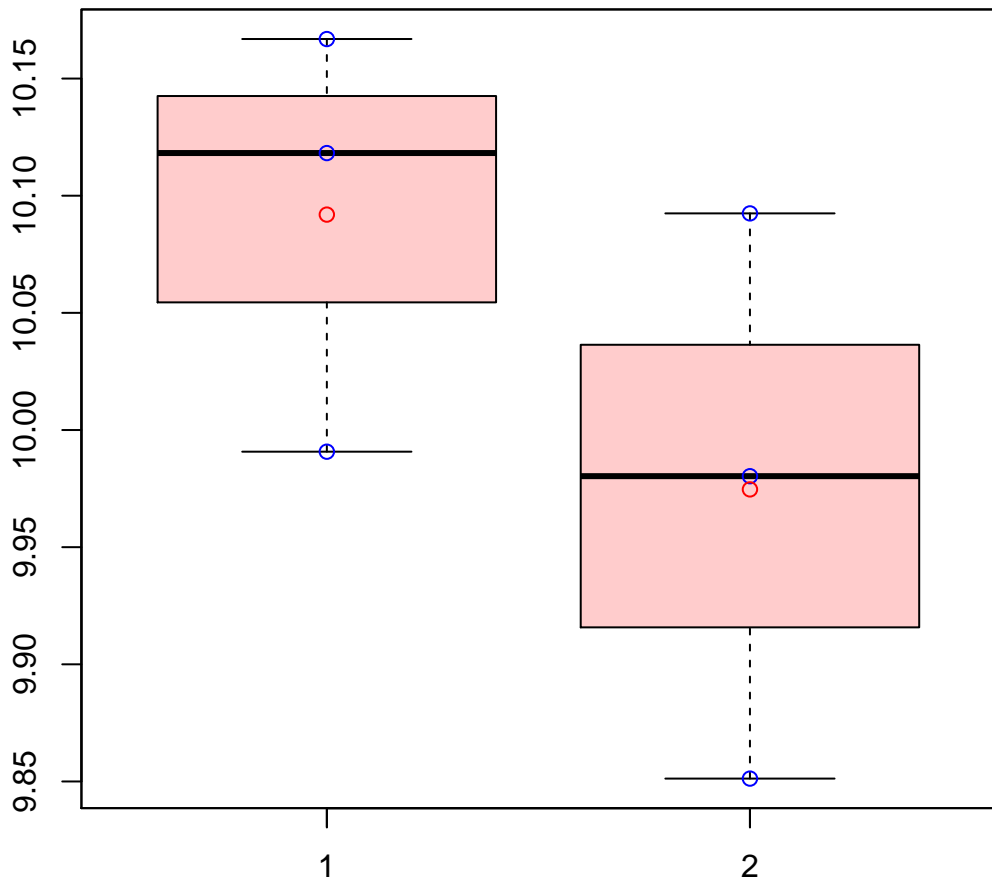

t-Test: p-value = 0.26



# RPIA5\_ERATE|RPIA5\_ERATE

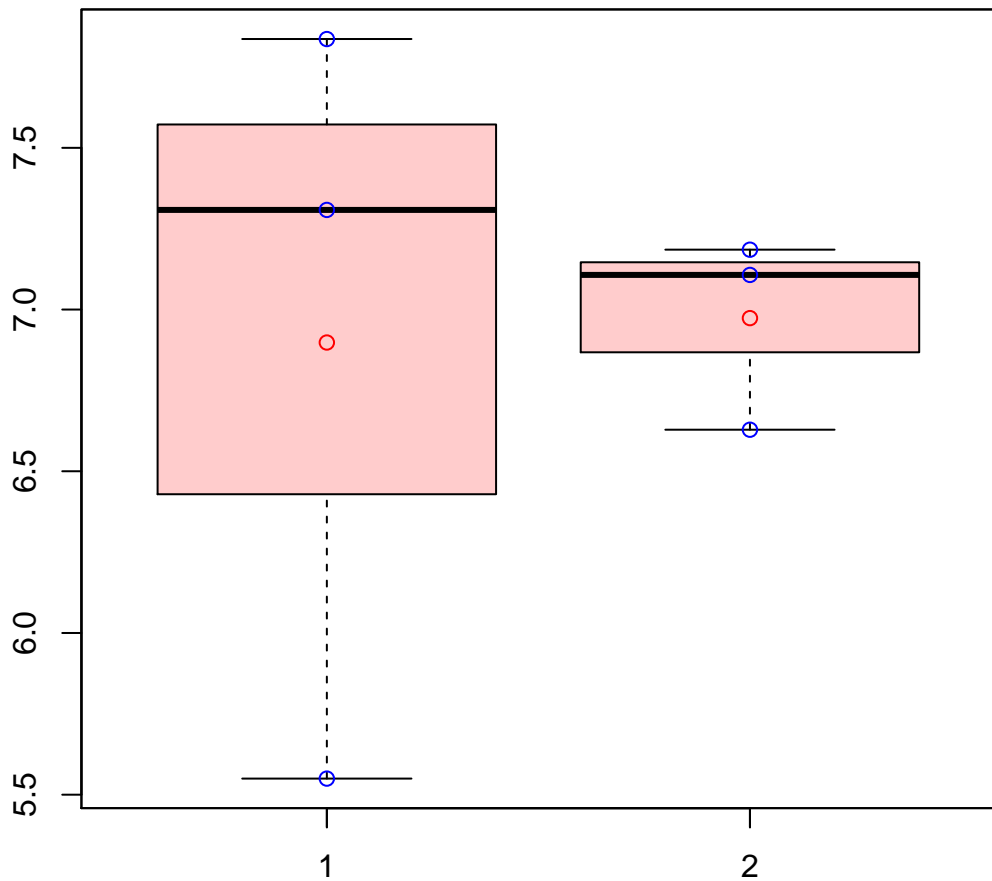

t-Test: p-value = 0.92

# RS17E6\_ERATE|RS17E6\_ERATE

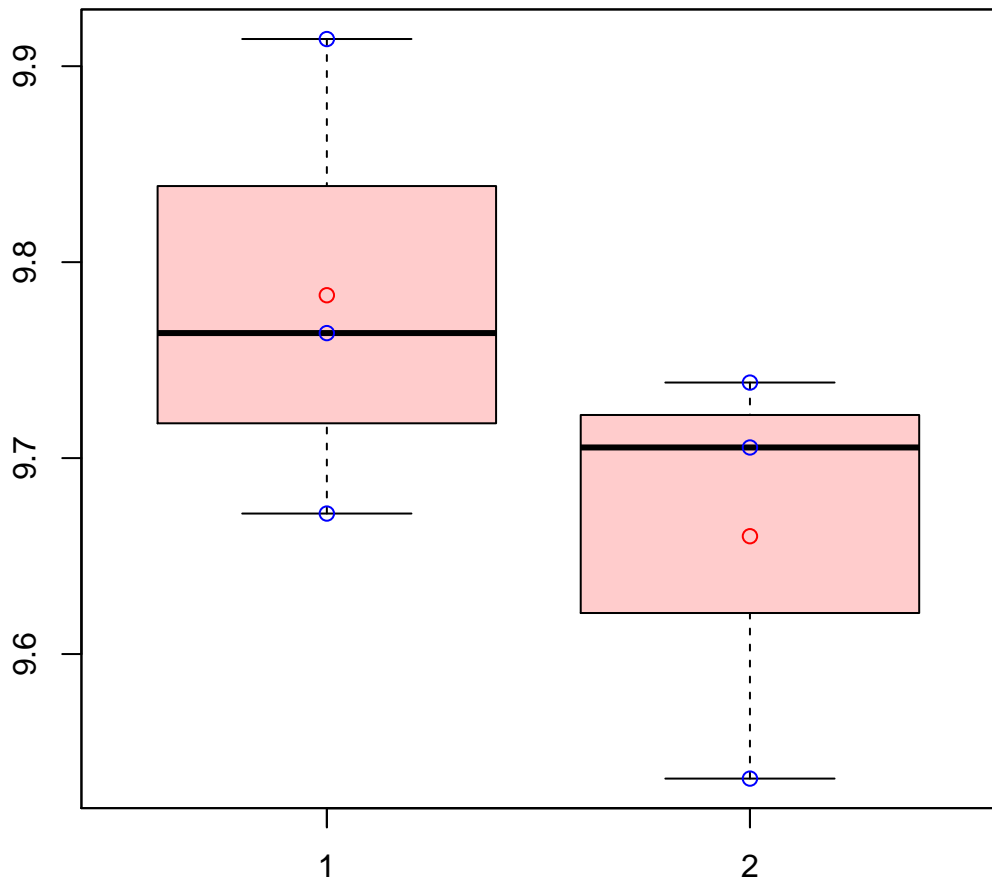

t-Test: p-value = 0.26

# RSMG8\_ERATE|RSMG8\_ERATE

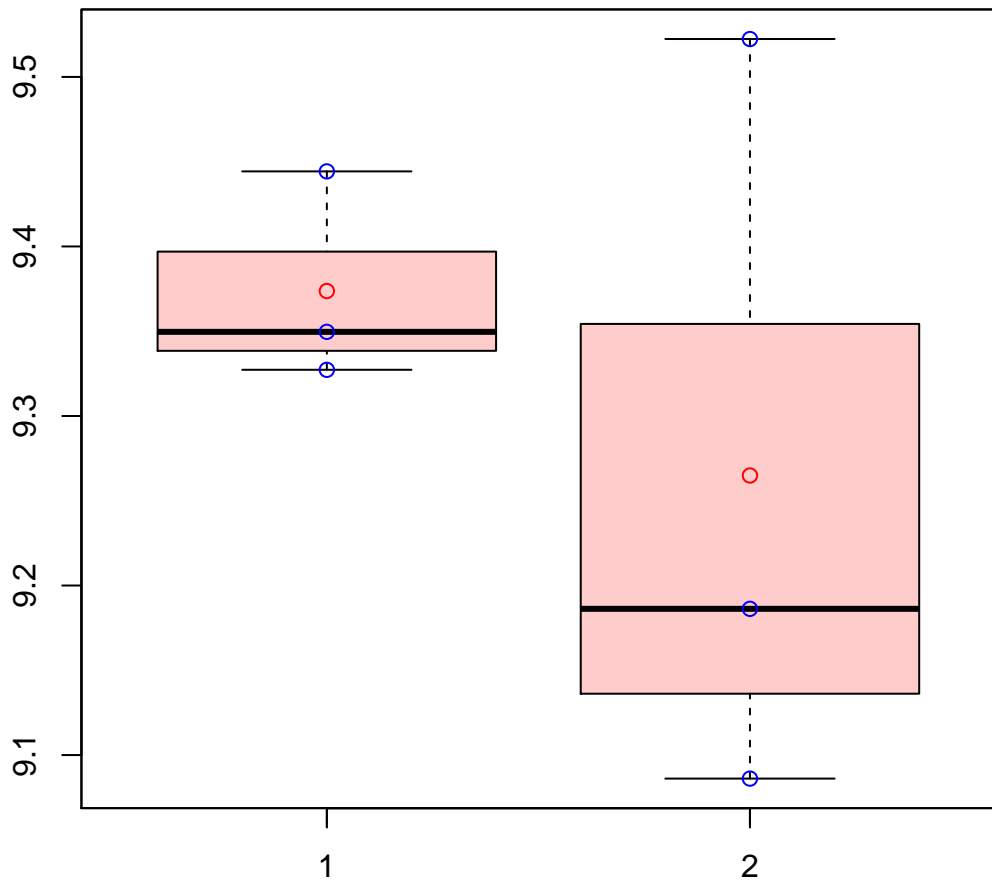

t-Test: p-value = 0.5

# SECA9\_ERATE|SECA9\_ERATE

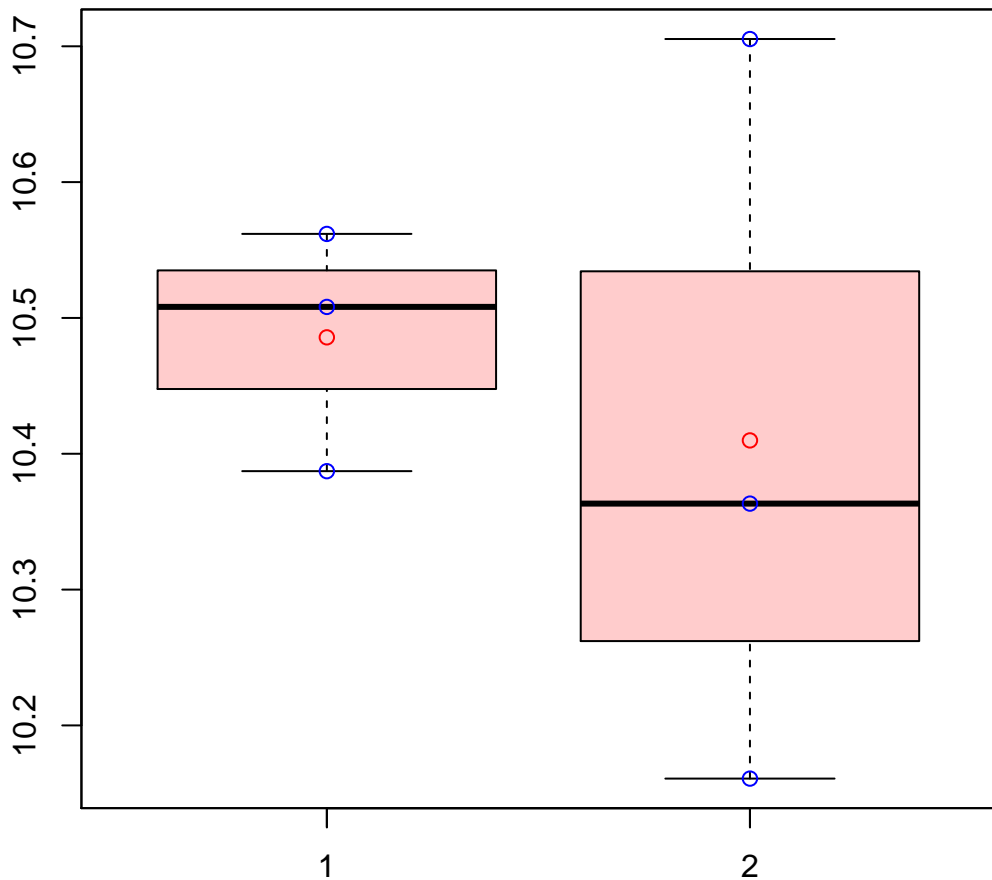

t-Test: p-value = 0.69

# SECY7\_ERATE|SECY7\_ERATE

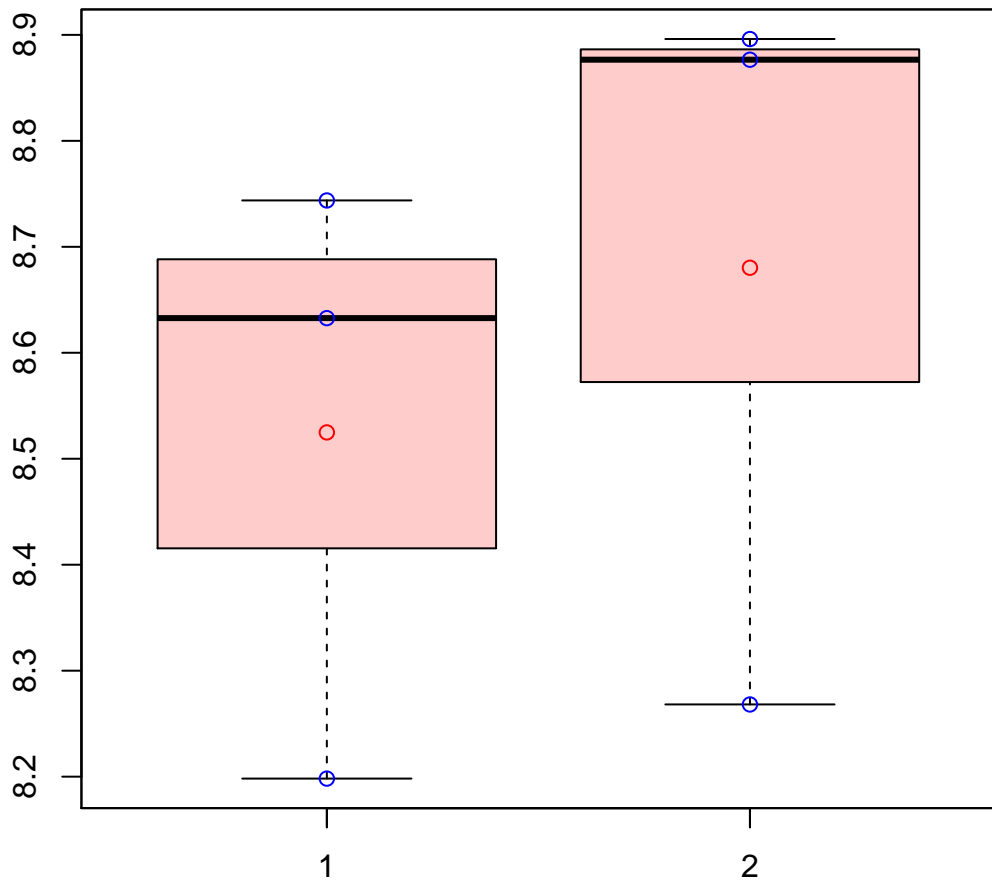

t-Test: p-value = 0.59

# SERC2\_ERATE|SERC2\_ERATE

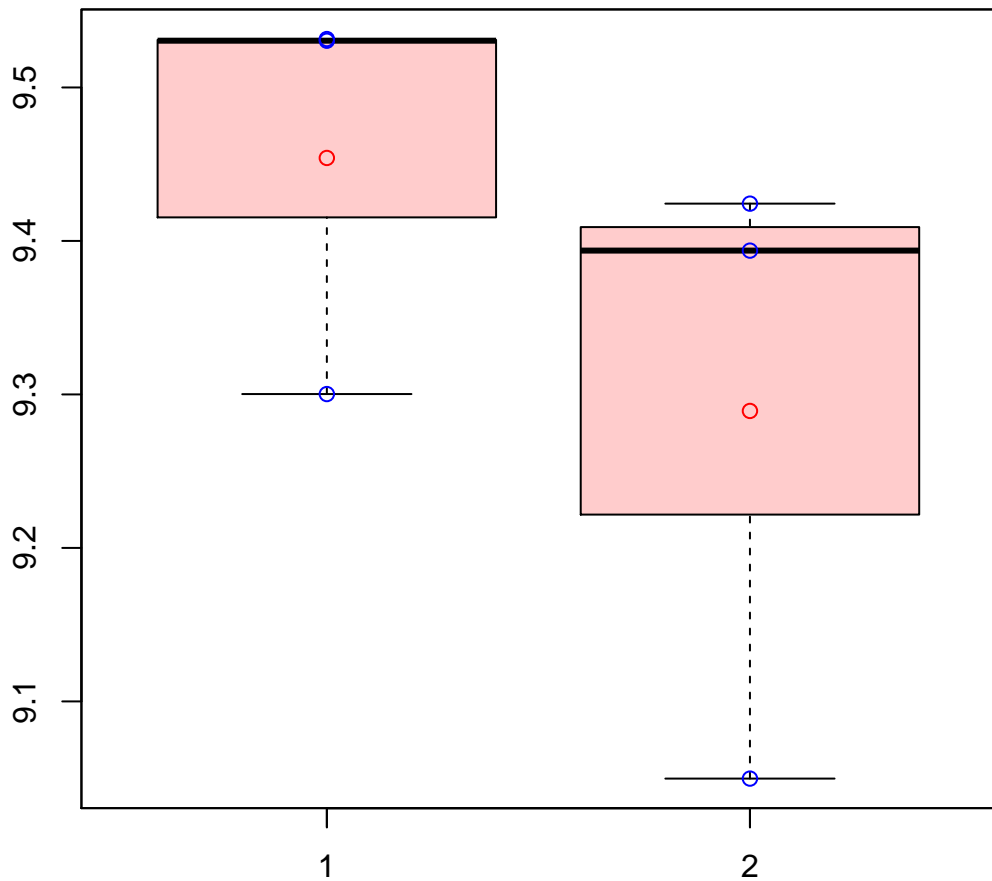

t-Test: p-value = 0.32

# SERC6\_ERATE|SERC6\_ERATE

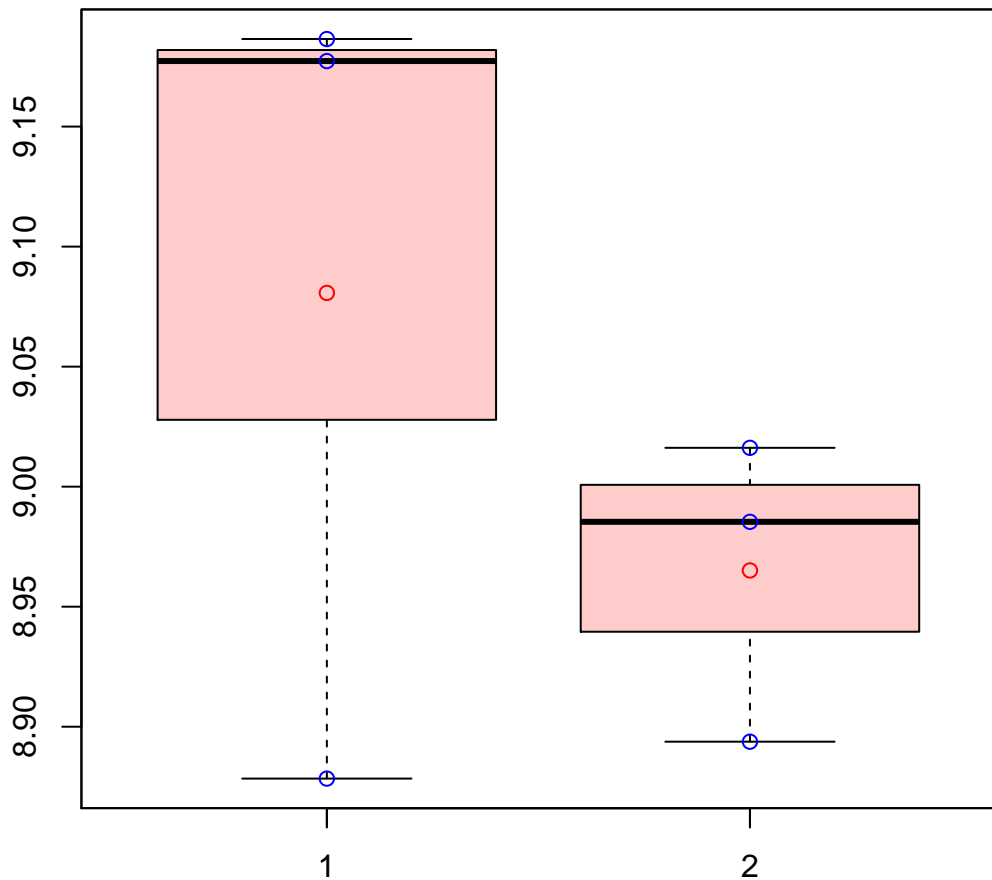

t-Test: p-value = 0.37

# SPEE4\_ERATE|SPEE4\_ERATE

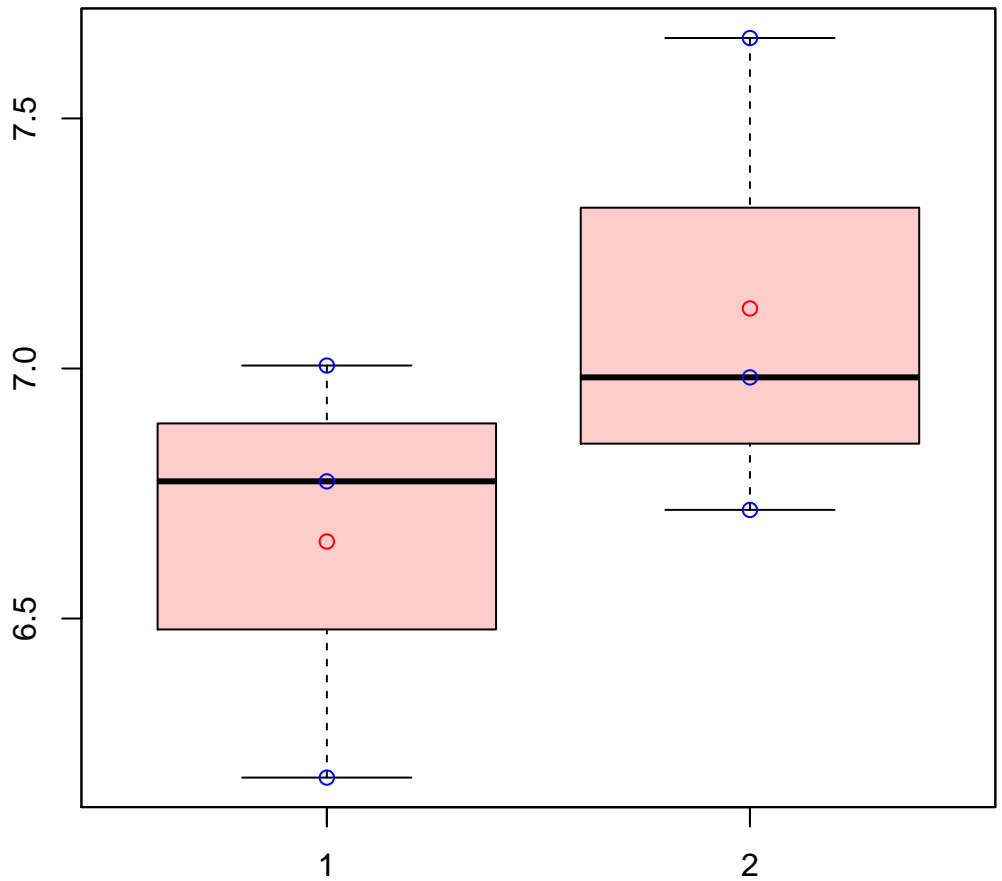

t-Test: p-value = 0.28



# SYI3\_ERATE|SYI3\_ERATE

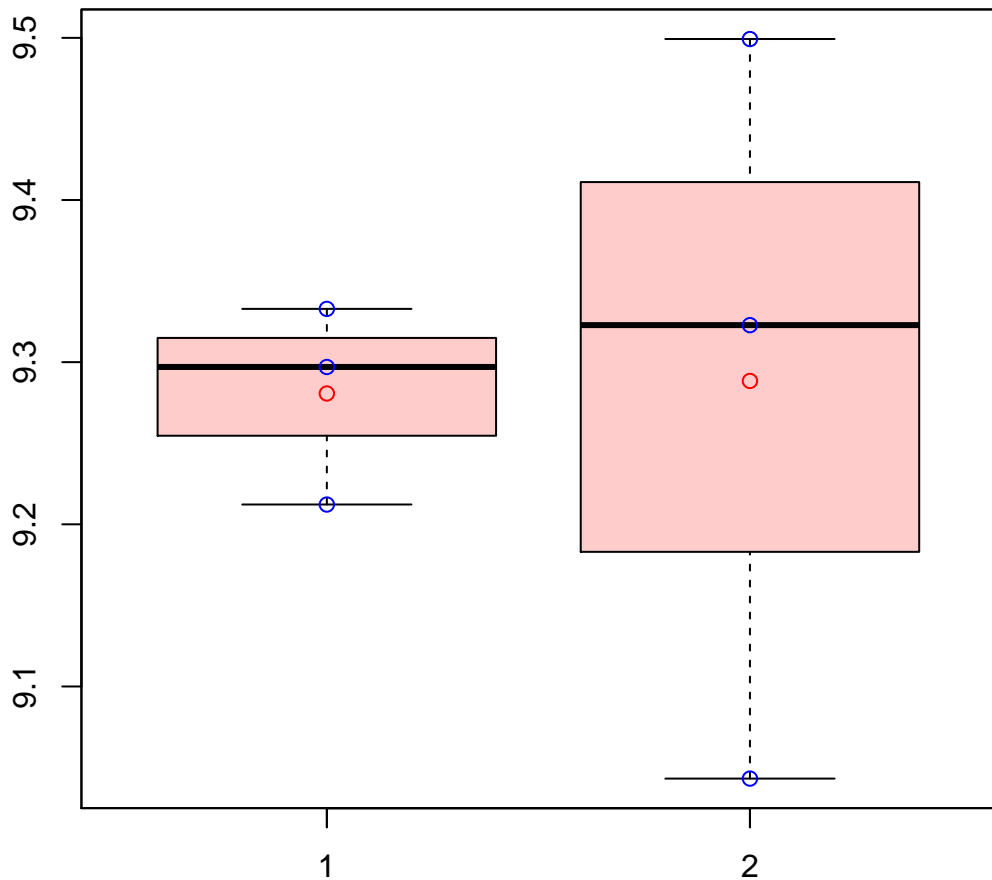

t-Test: p-value = 0.96

# SYK5\_ERATE|SYK5\_ERATE

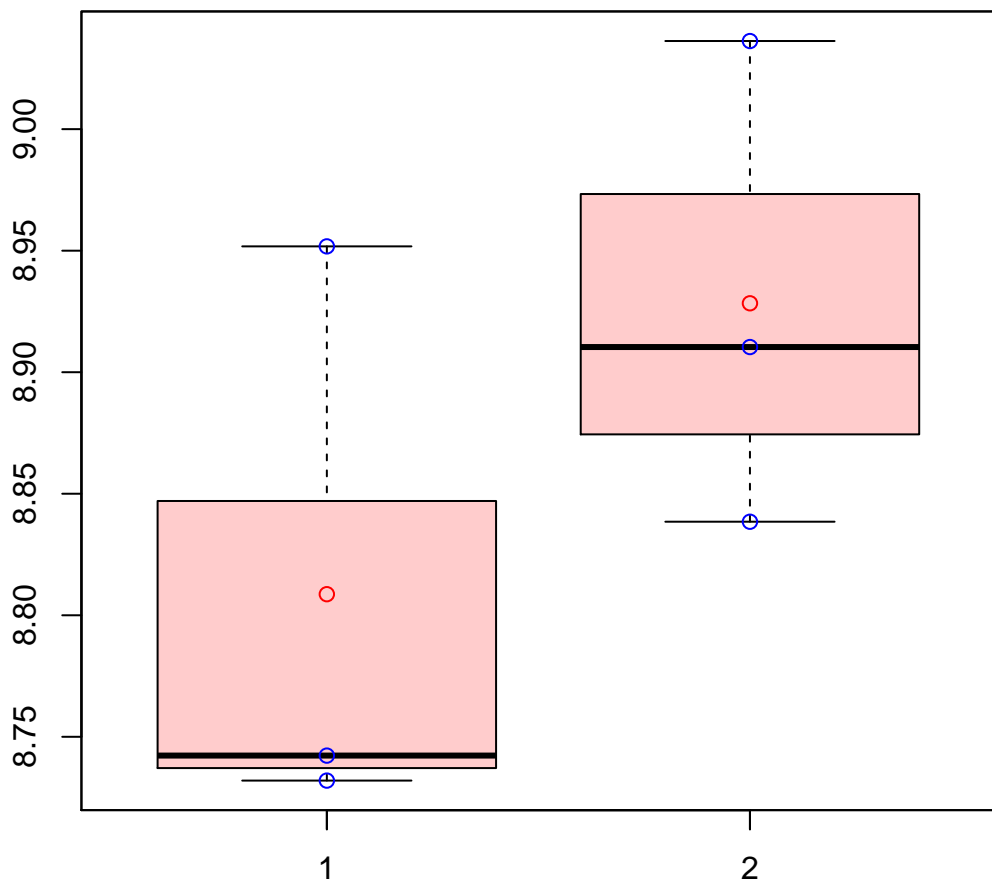

t-Test: p-value = 0.27

# SYN1\_ERATE|SYN1\_ERATE

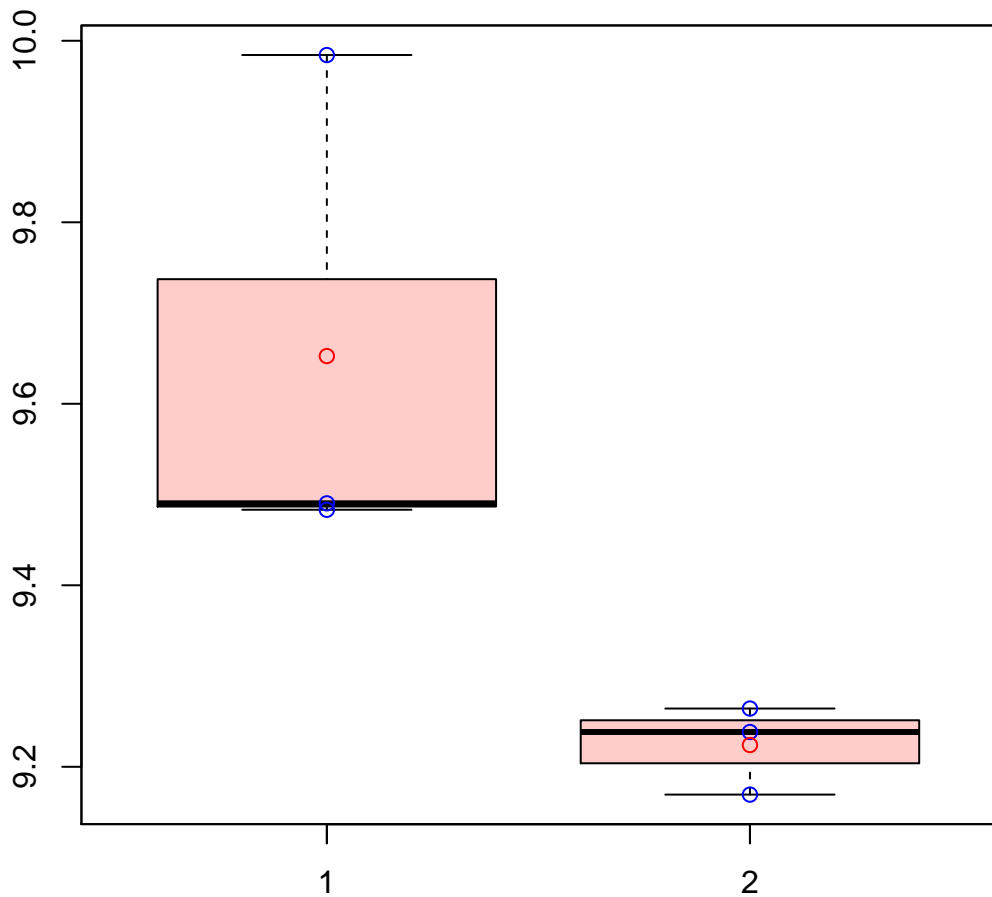

t-Test: p-value = 0.12

# SYN3\_ERATE|SYN3\_ERATE

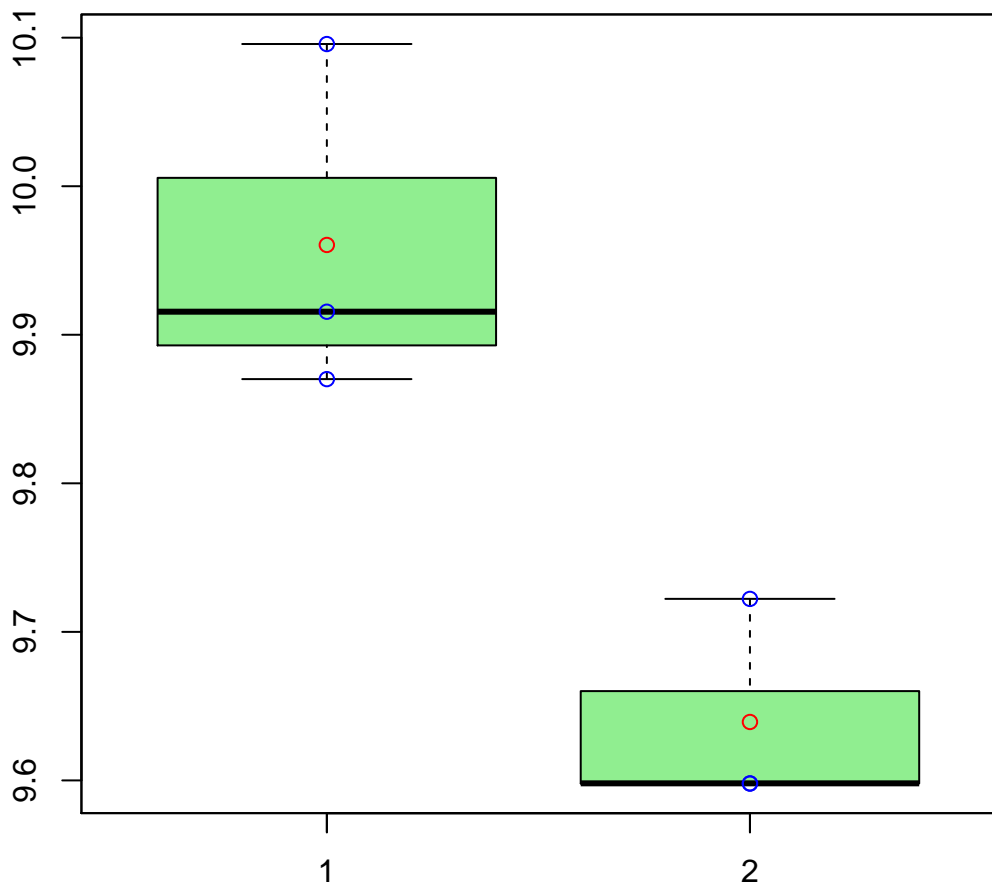

t-Test: p-value = 0.02

# SYN8\_ERATE|SYN8\_ERATE

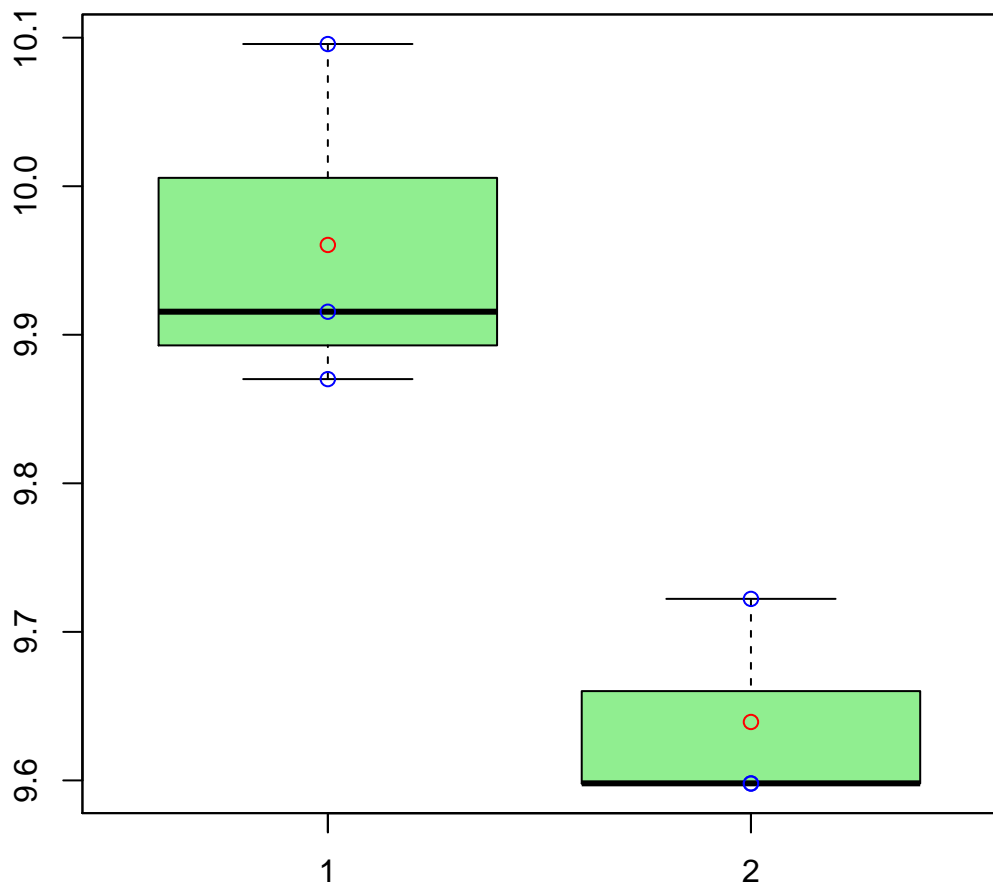

t-Test: p-value = 0.02

# SYP2\_ERATE|SYP2\_ERATE

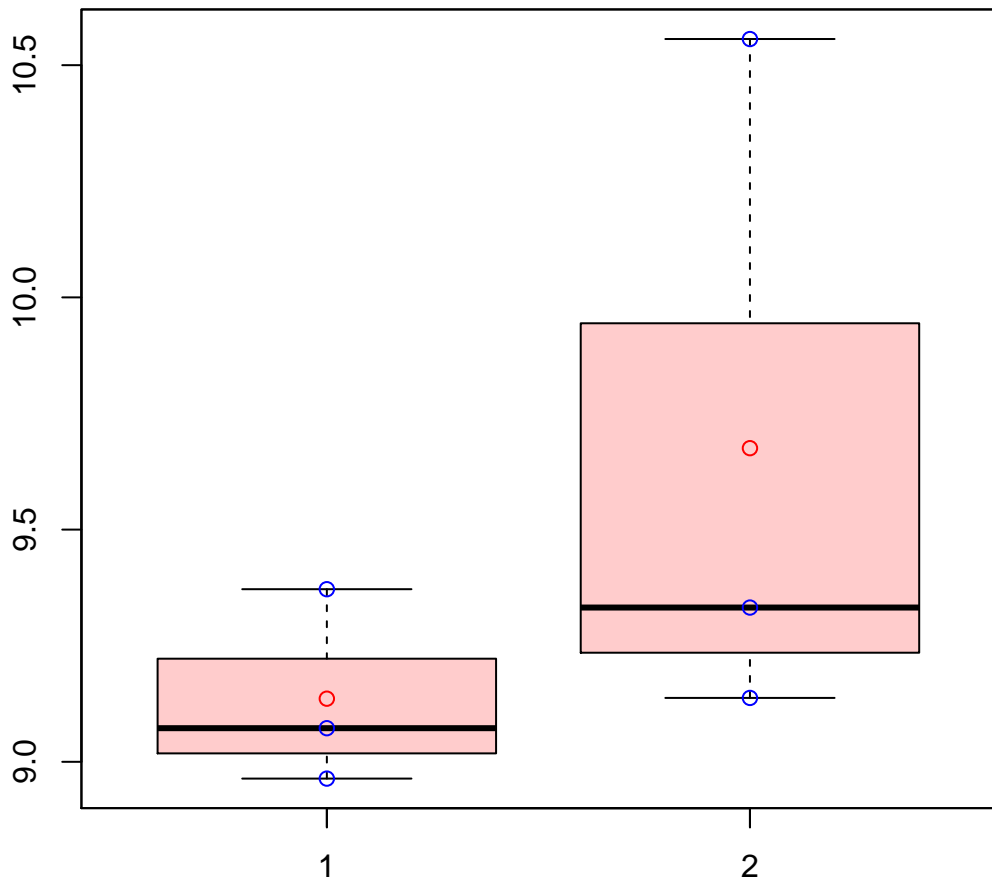

t-Test: p-value = 0.35

# SYP5\_ERATE|SYP5\_ERATE

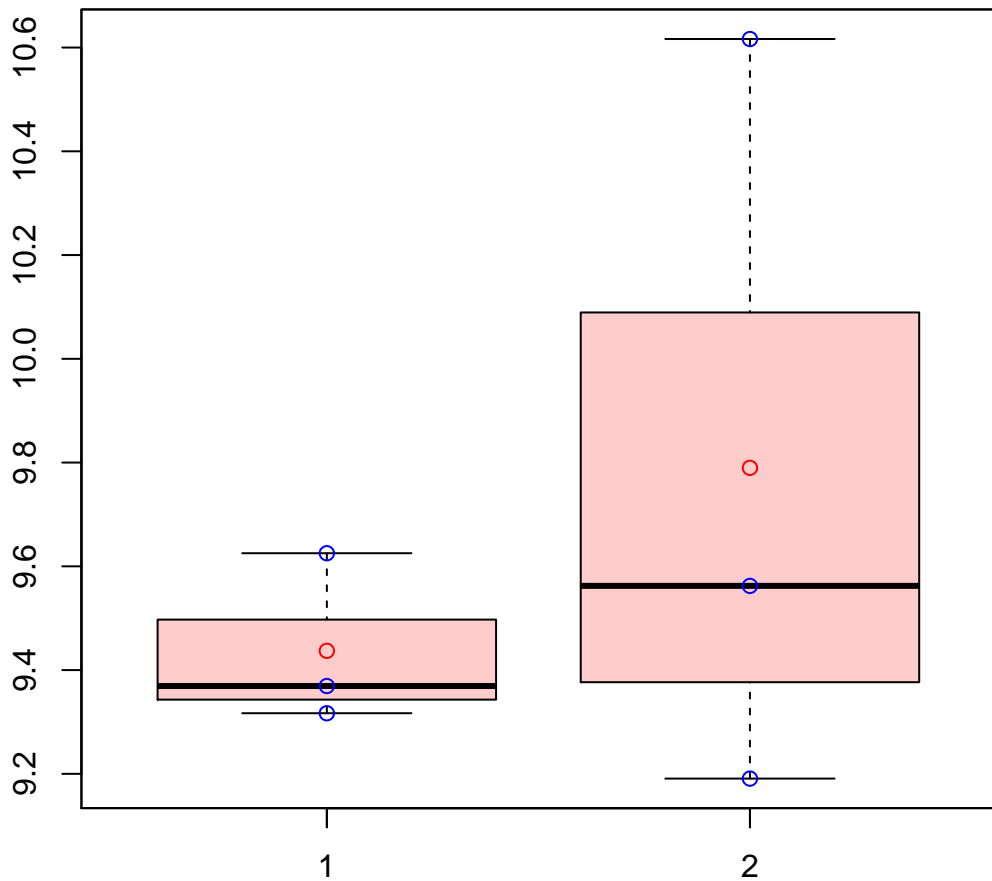

t-Test: p-value = 0.5

# TAL9\_ERATE|TAL9\_ERATE

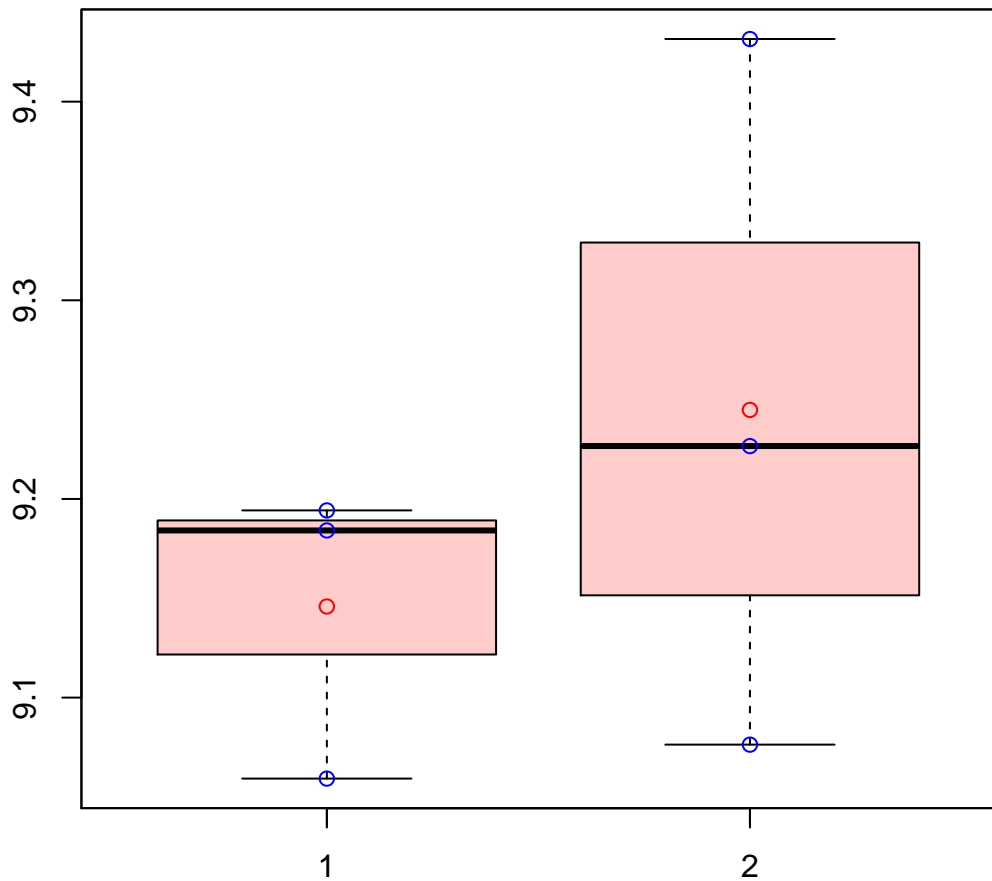

t-Test: p-value = 0.45



# THF13\_ERATE|THF13\_ERATE

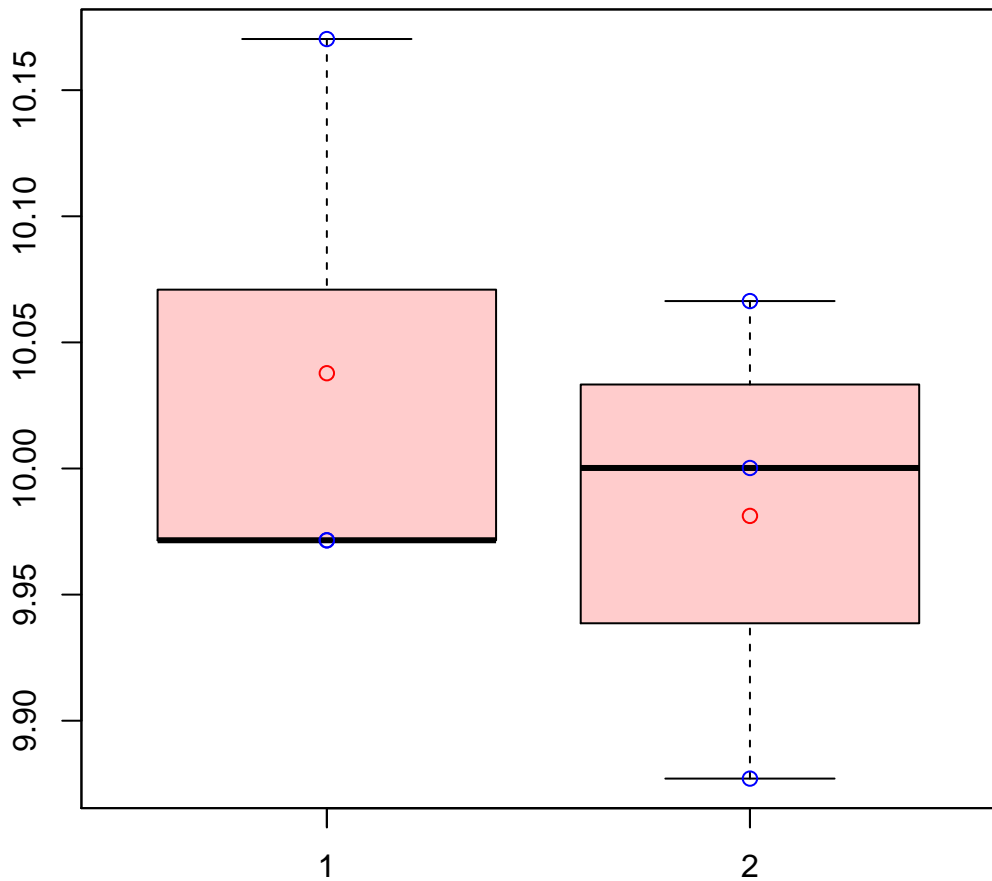

t-Test: p-value = 0.55

# UPPS7\_ERATE|UPPS7\_ERATE

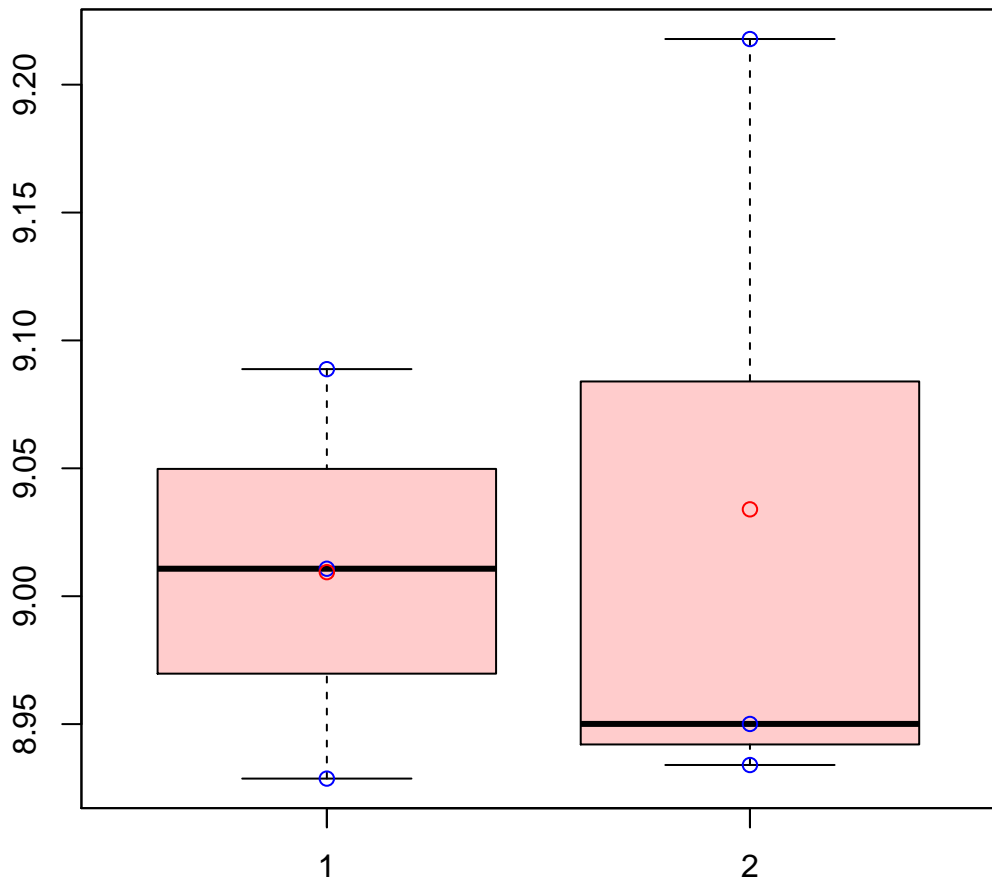

t-Test: p-value = 0.83

# VATA12\_ERATE|VATA12\_ERATE

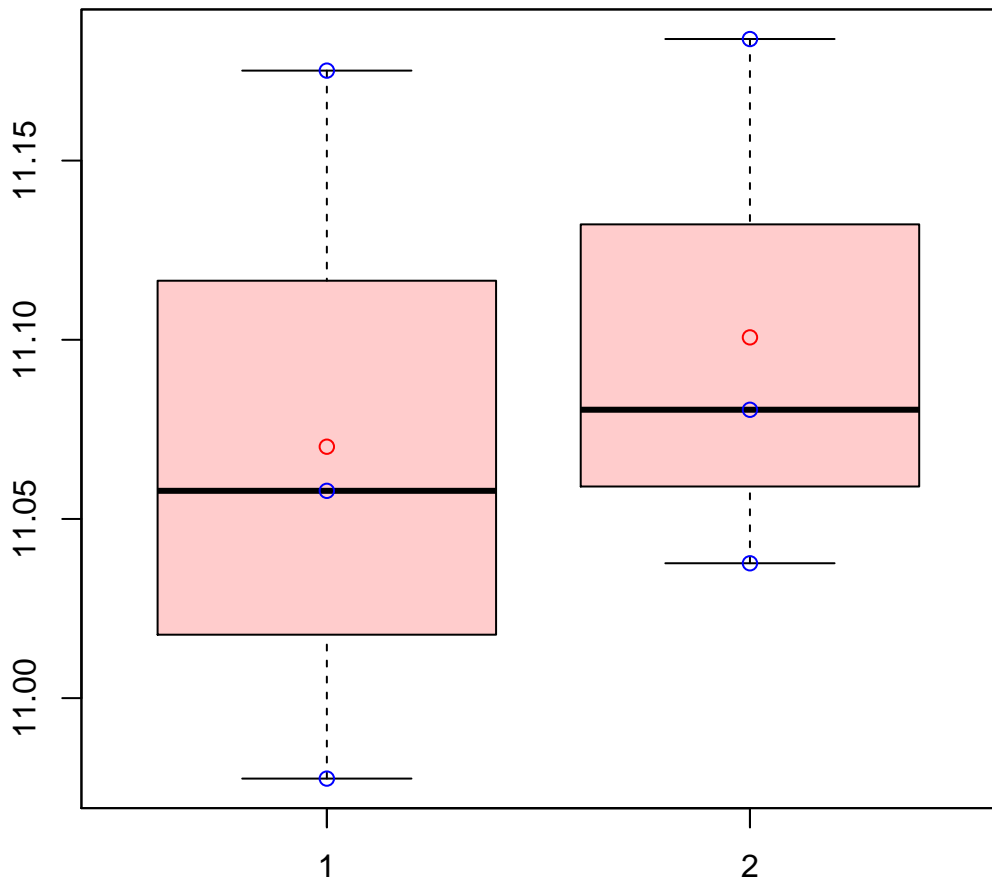

t-Test: p-value = 0.69

# VATA23\_ERATE|VATA23\_ERATE



t-Test: p-value = 0.69

# VATA8\_ERATE|VATA8\_ERATE

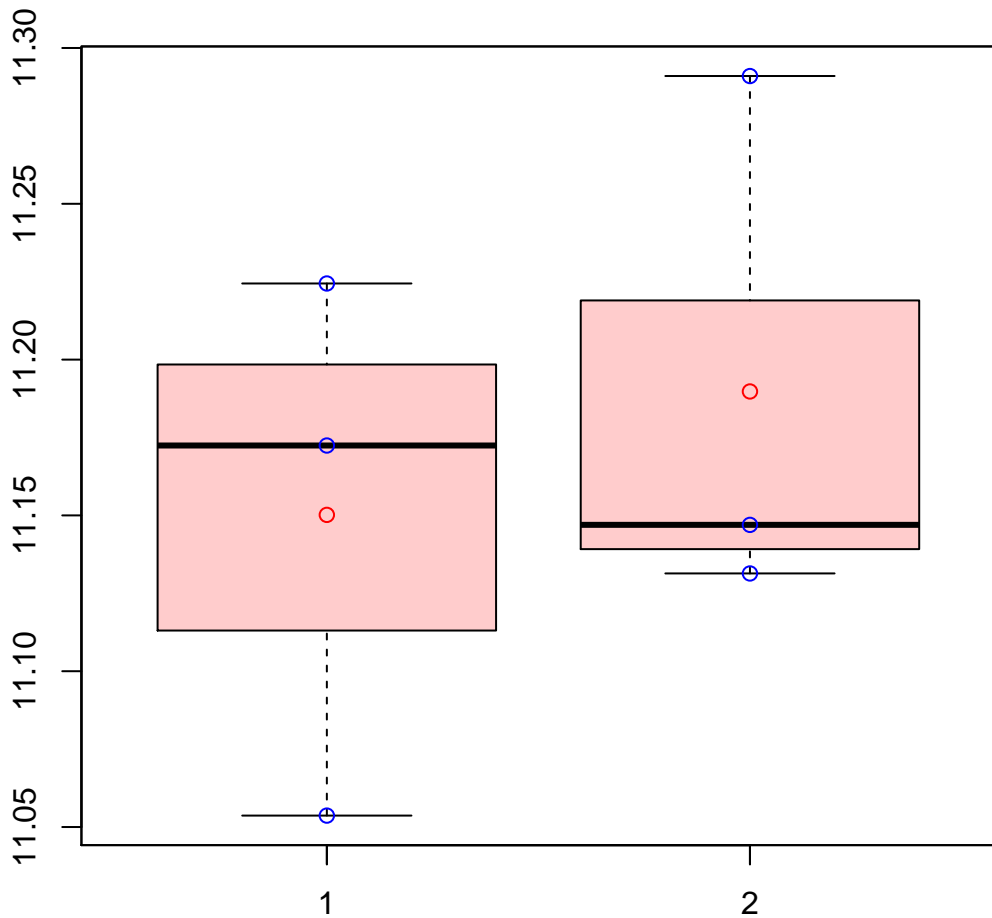

t-Test: p-value = 0.61

# VATB2\_ERATE|VATB2\_ERATE

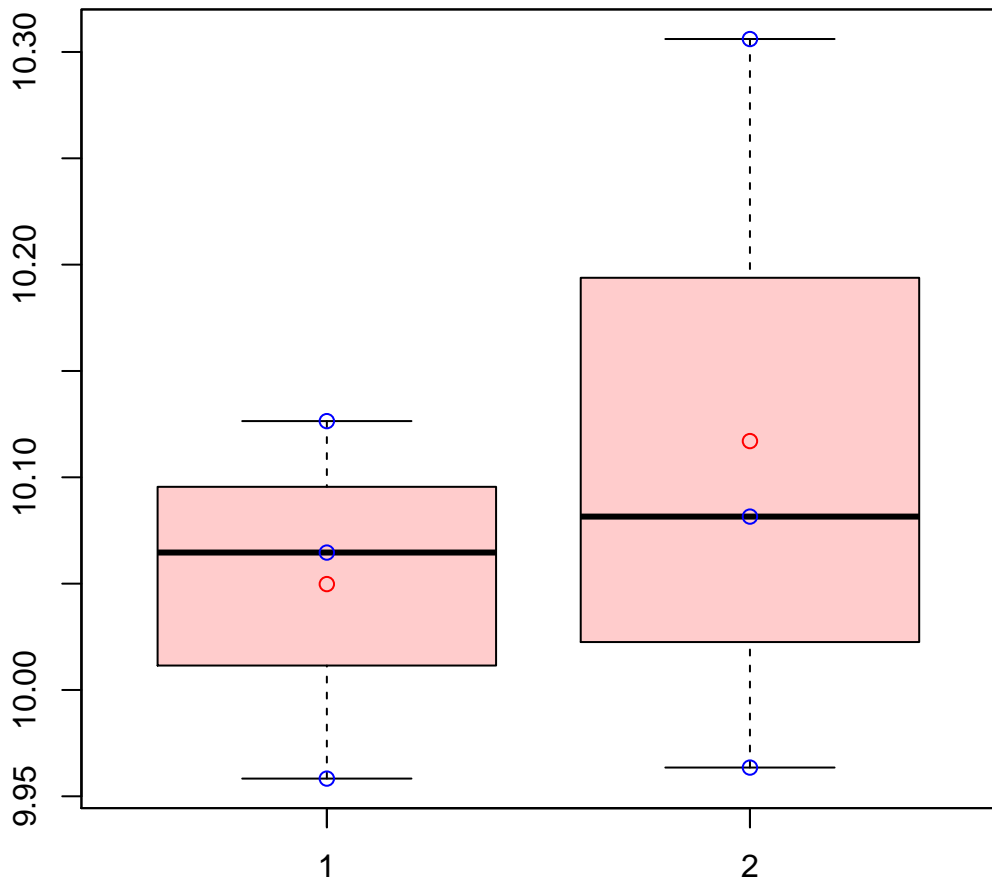

t-Test: p-value = 0.59

# VATE8\_ERATE|VATE8\_ERATE

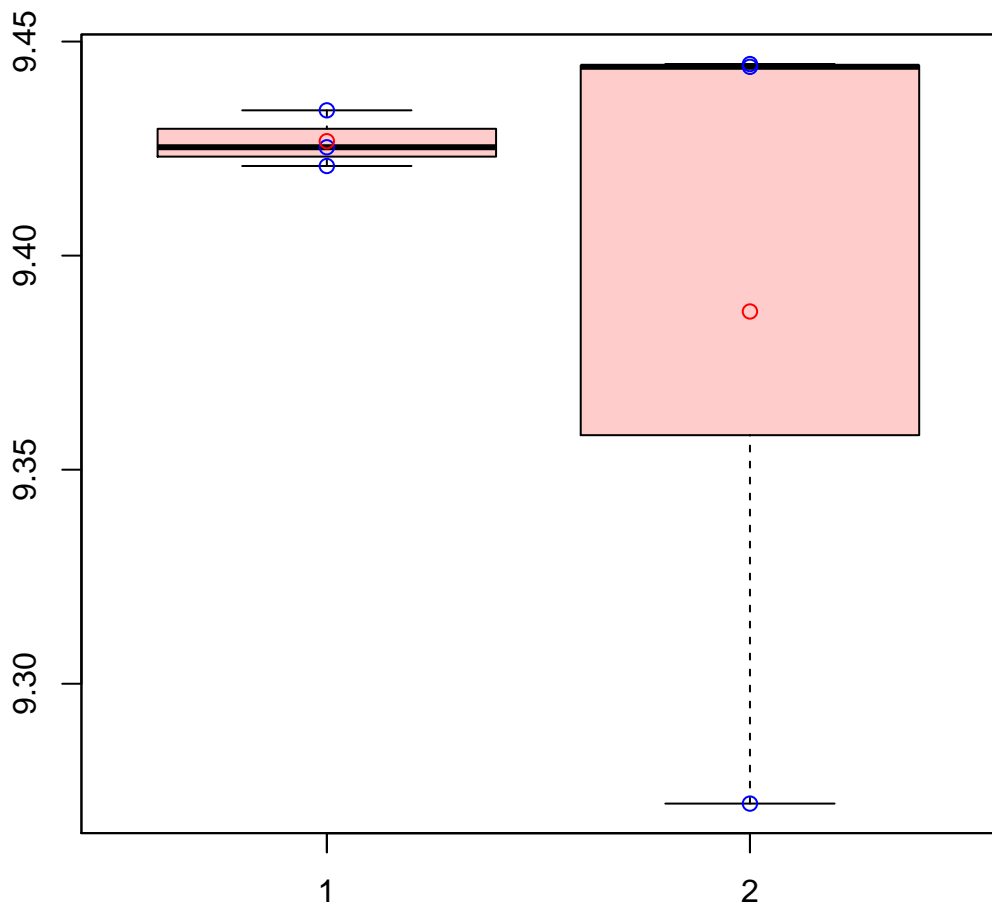

t-Test: p-value = 0.56
