# Supplementary material for: A Proteomic Approach to Investigate the Drought Response in the Orphan Crop Eragrostis tef
Source: MDPI journal article supplement (doi:10.3390/proteomes5040032), 2017-11-15
Supplement: s1 [file s1]

# A0EVI4|A0EVI4\_MAIZE

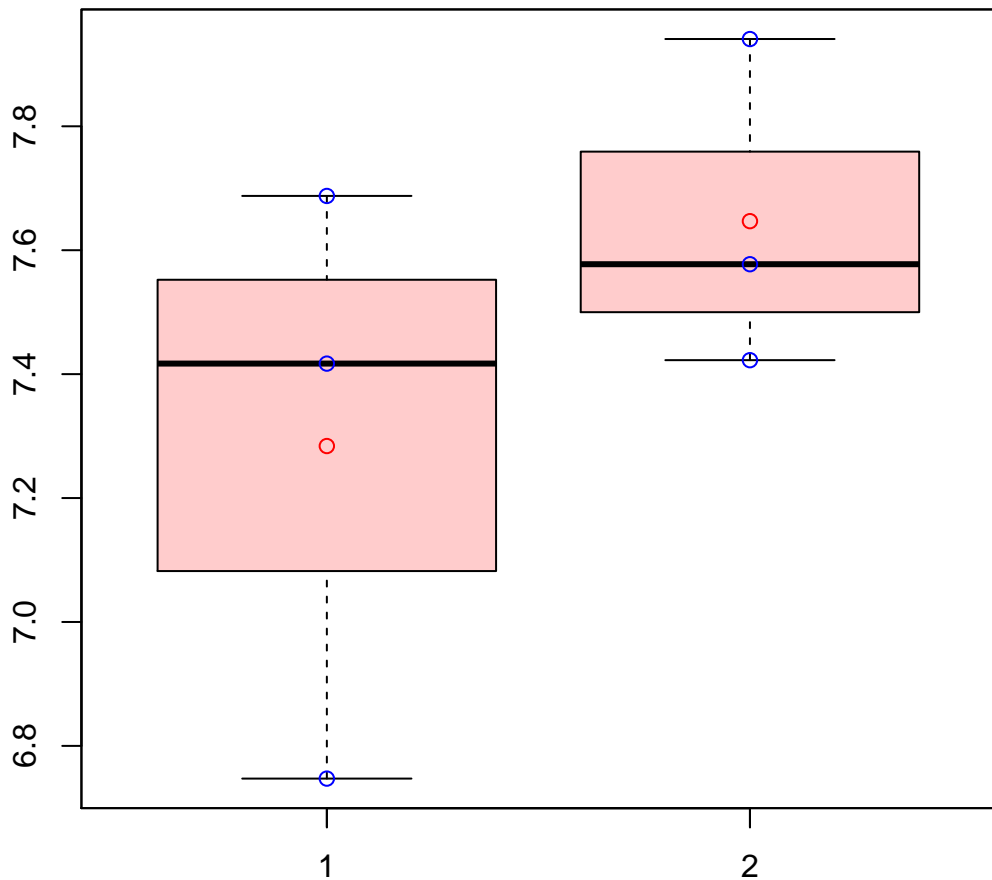

t-Test: p-value = 0.34

# A0FHB5|A0FHB5\_LYCAU

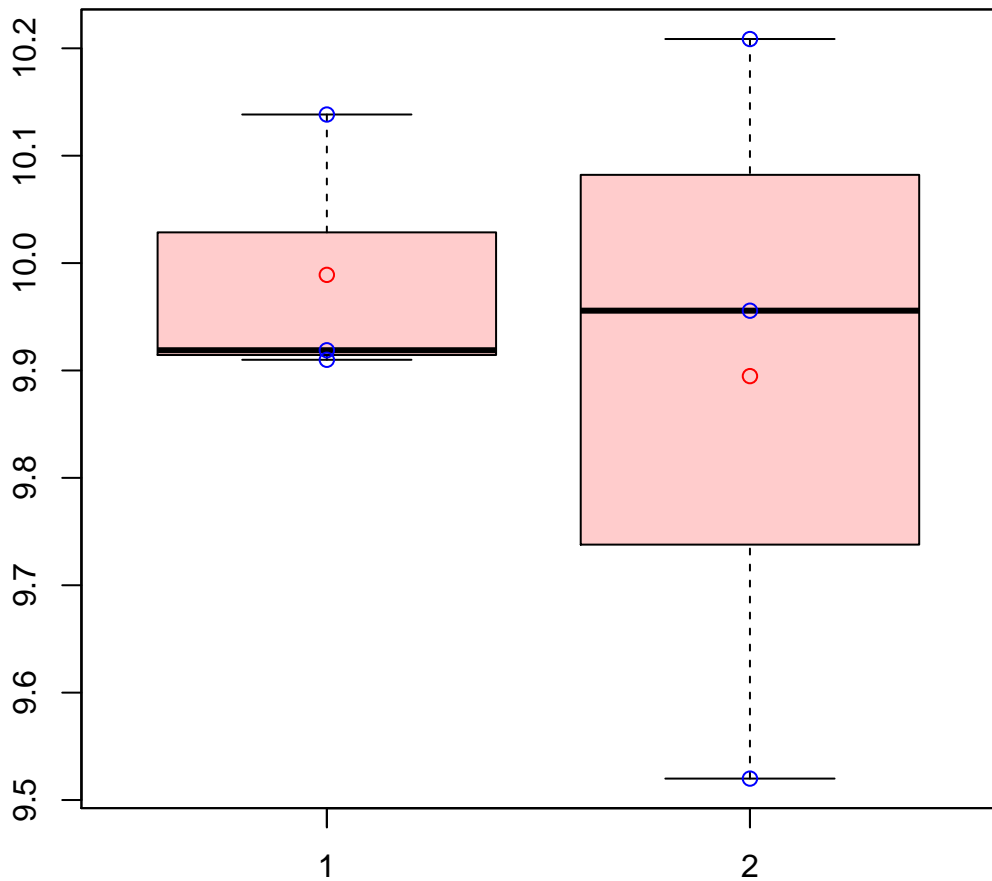

t-Test: p-value = 0.69

# A1DS02|A1DS02\_9POAL

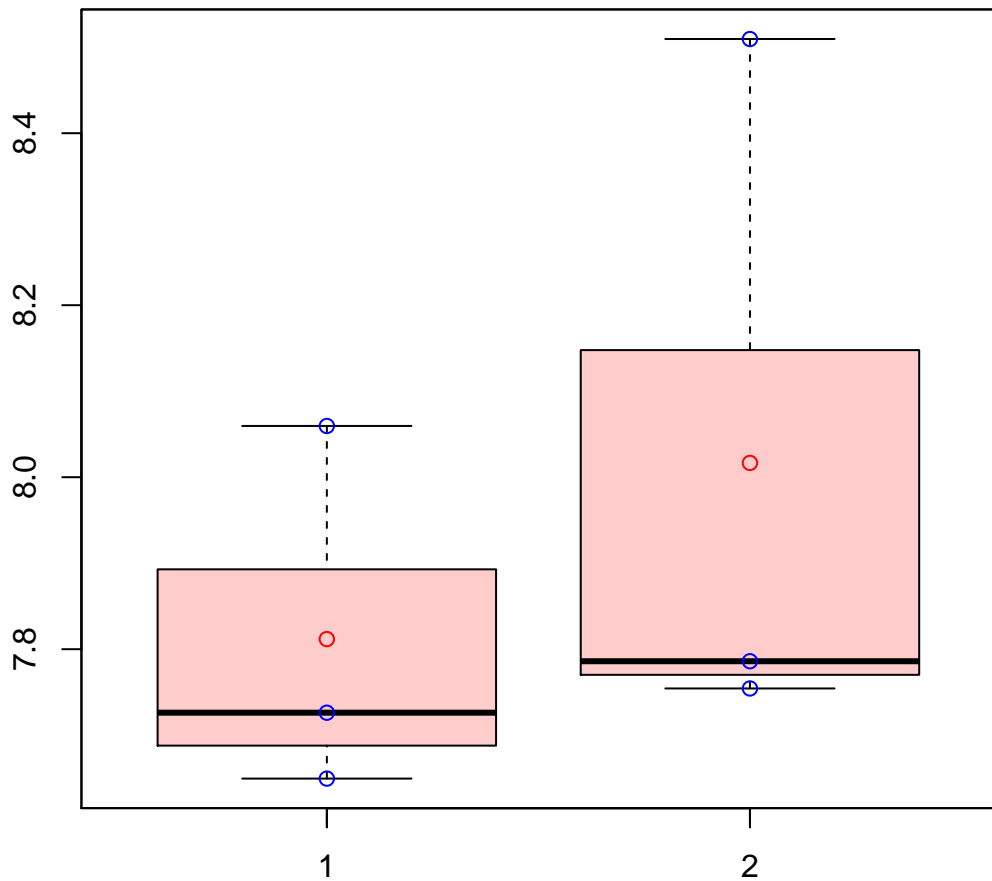

t-Test: p-value = 0.51

# A1KXJ7|A1KXJ7\_ELAGV

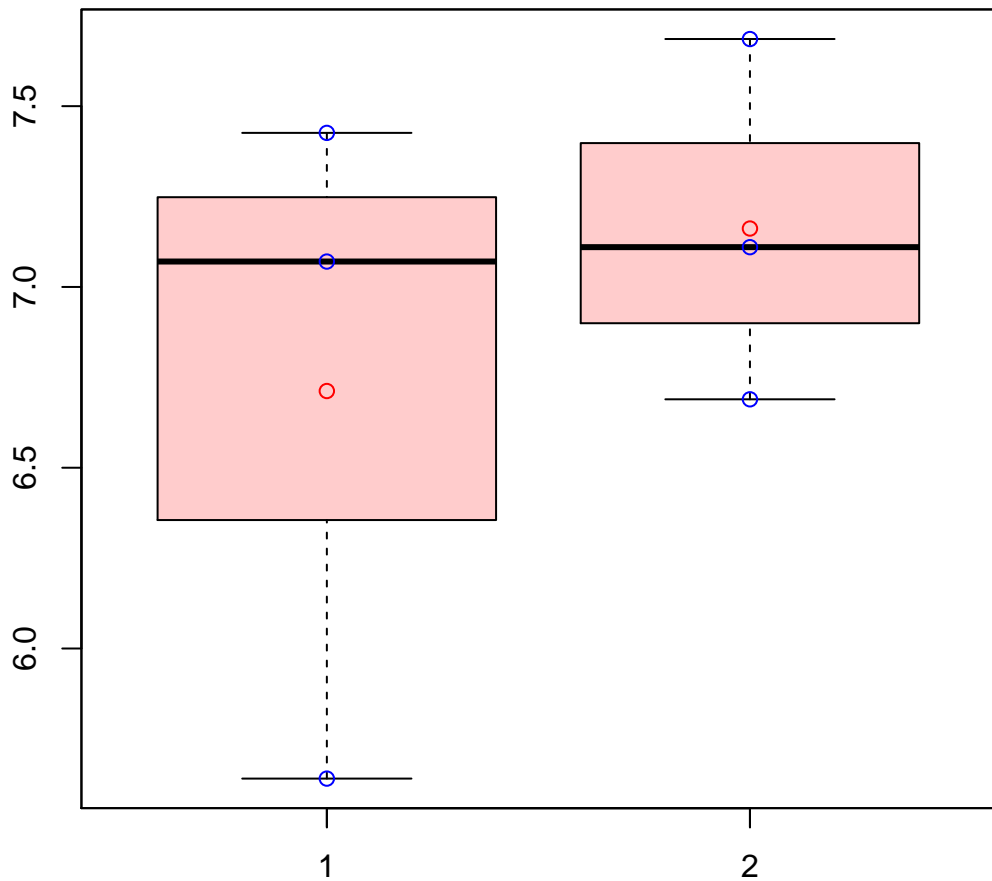

t-Test: p-value = 0.52

# A1X810|A1X810\_HORVD

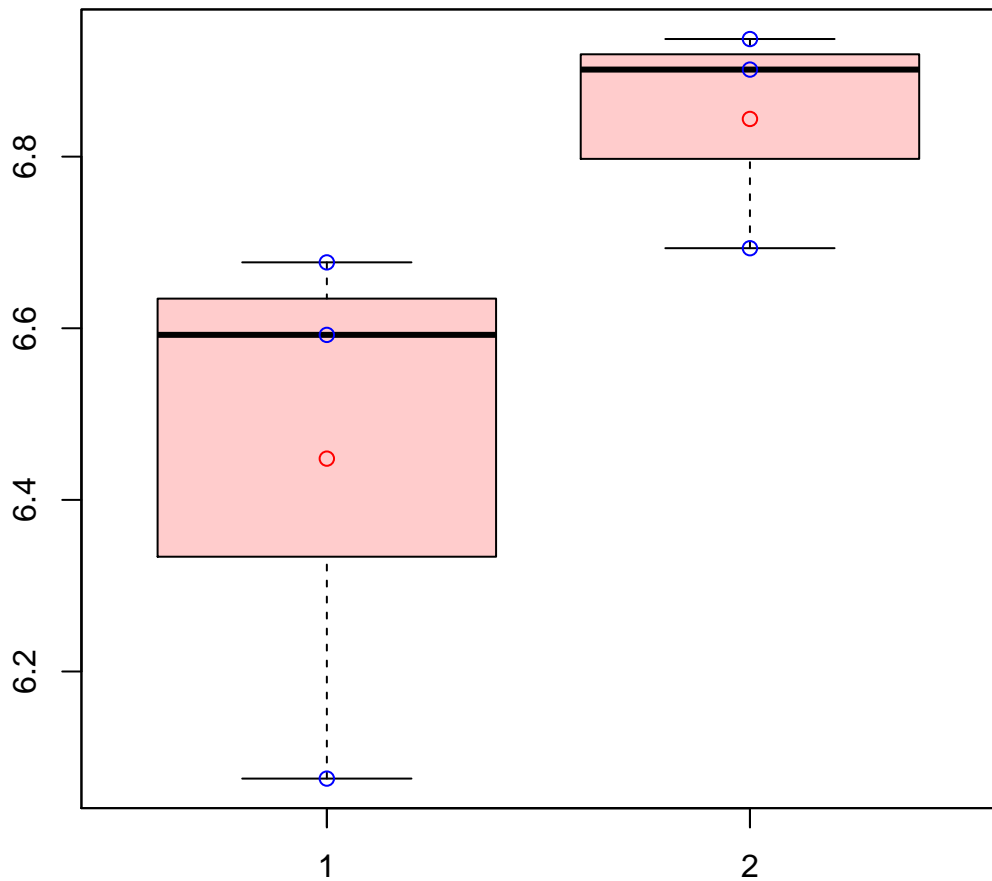

t-Test: p-value = 0.16

# A1XC19|A1XC19\_WHEAT

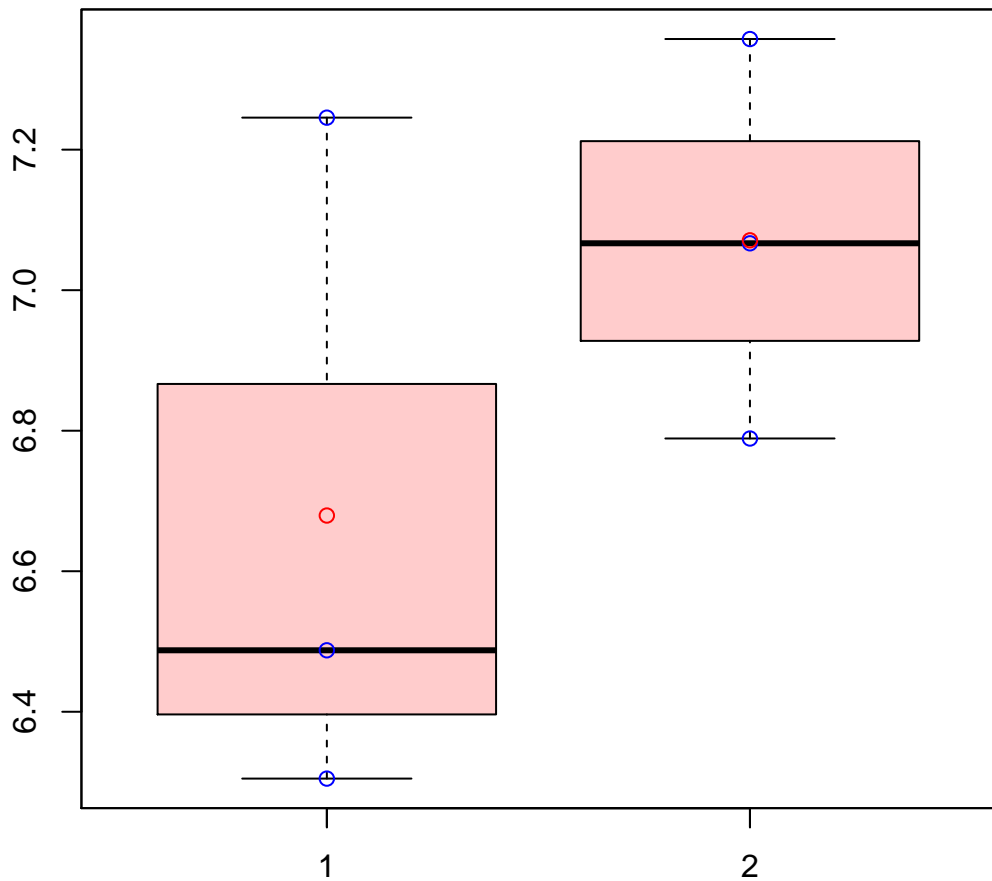

t-Test: p-value = 0.32

# A1XJ34|A1XJ34\_BEARE

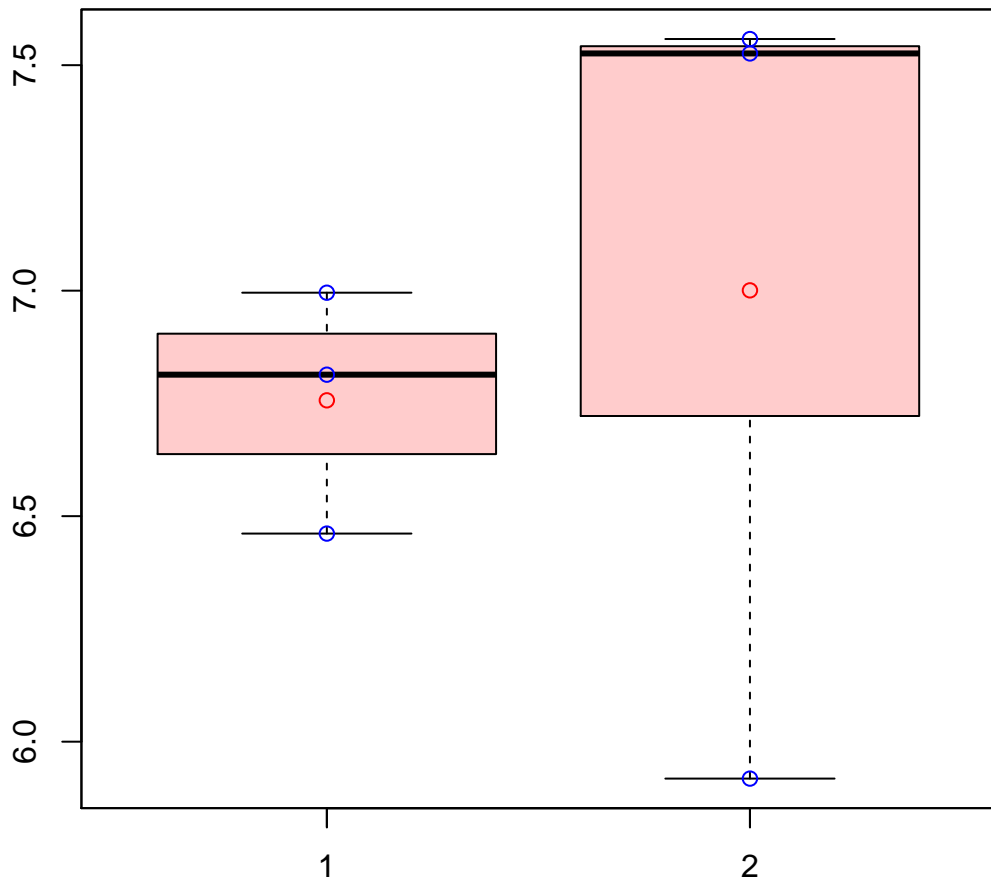

t-Test: p-value = 0.7

# A1XKB3|A1XKB3\_9ARAE

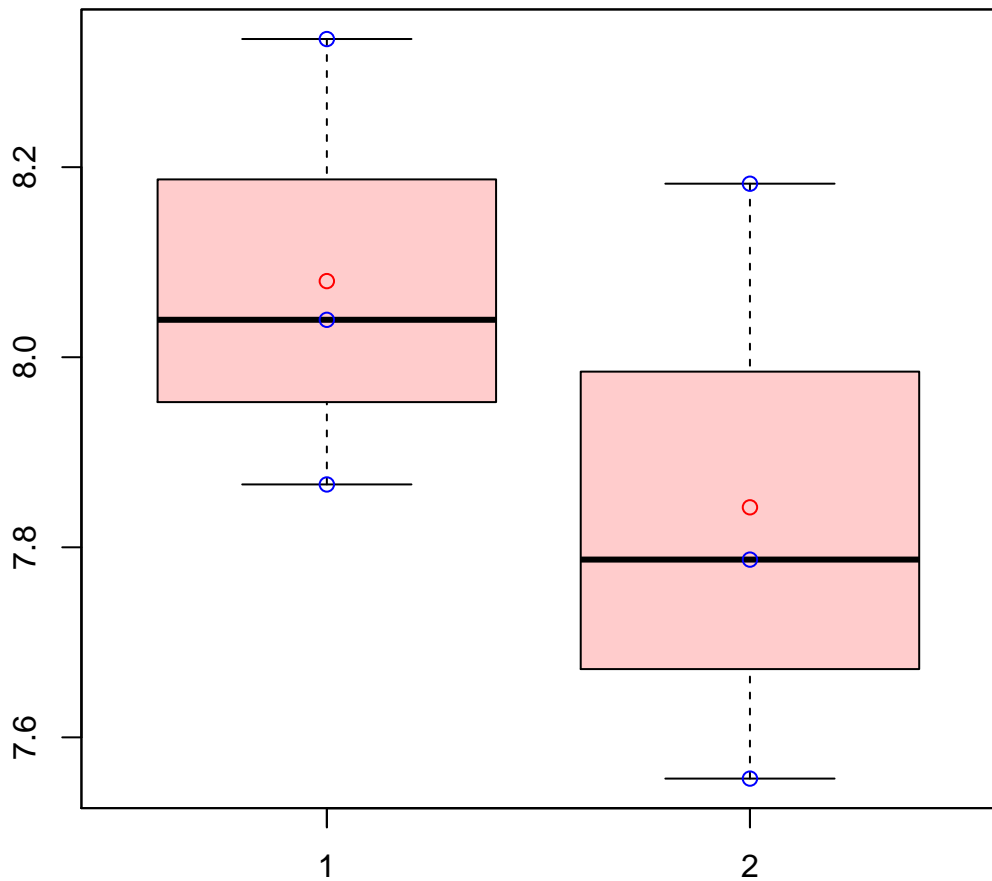

t-Test: p-value = 0.36



# A1Y9I7|A1Y9I7\_MAIZE

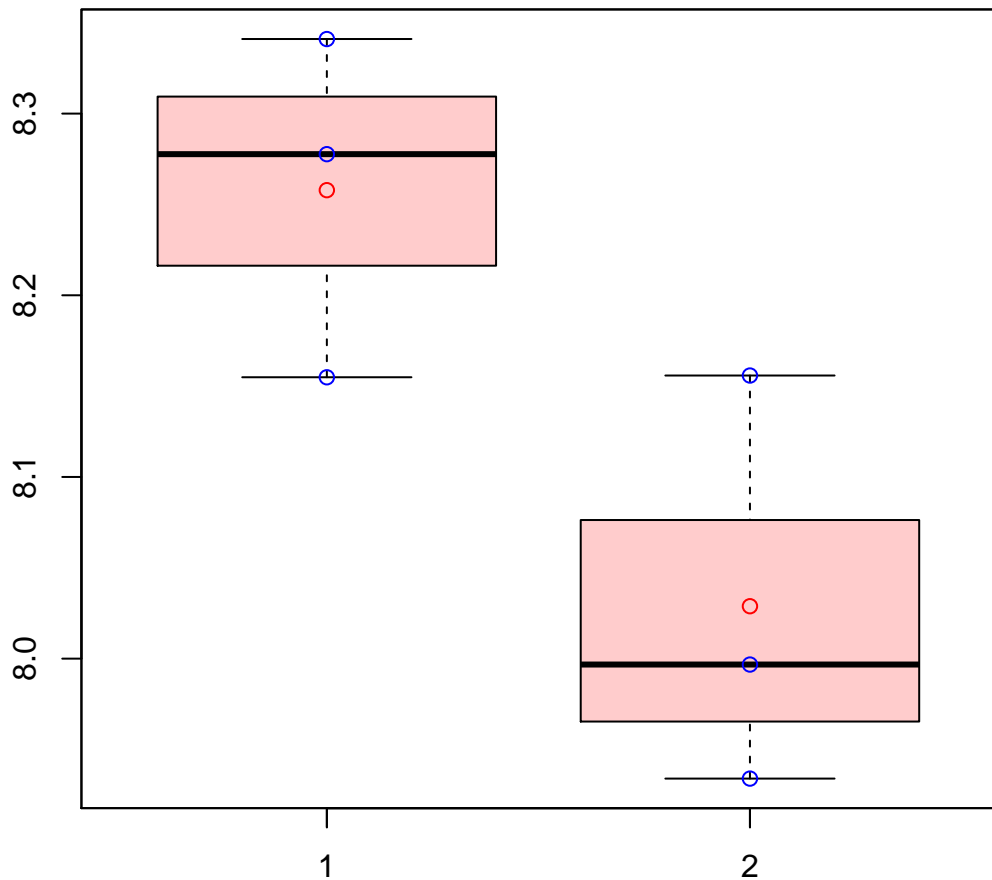

t-Test: p-value = 0.06

# A1YR13|A1YR13\_ORYSA

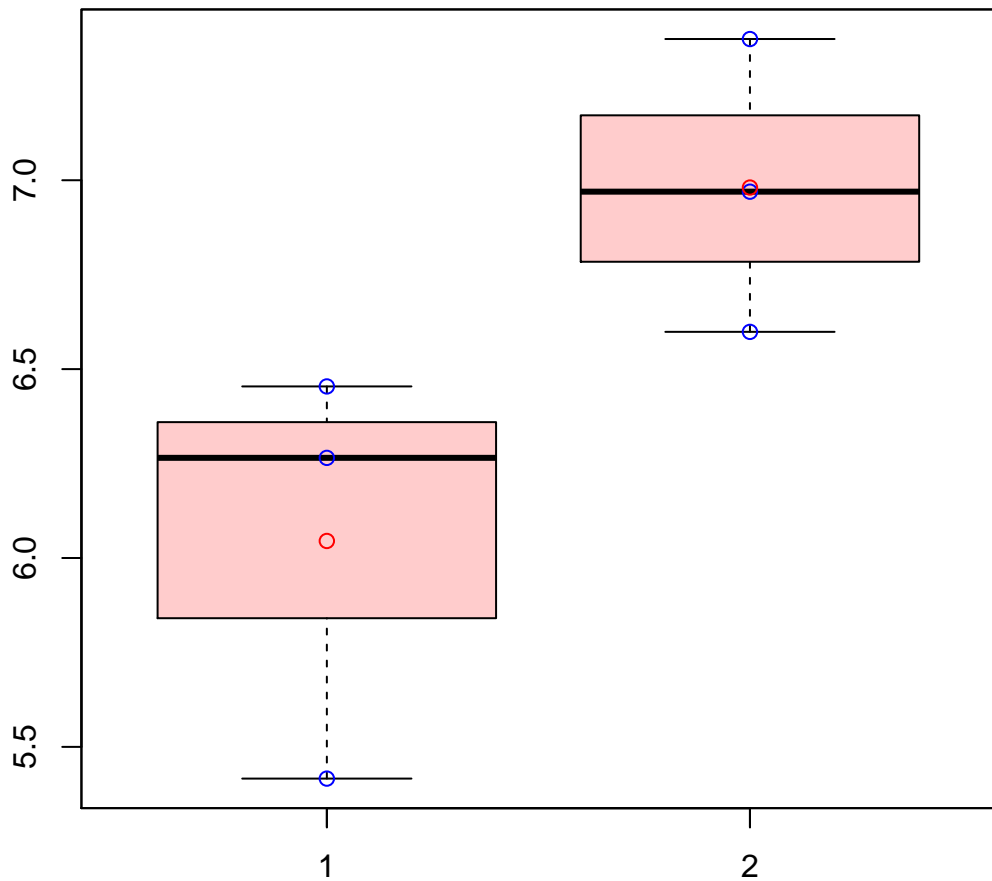

t-Test: p-value = 0.08

# A2WKG1|A2WKG1\_ORYSI

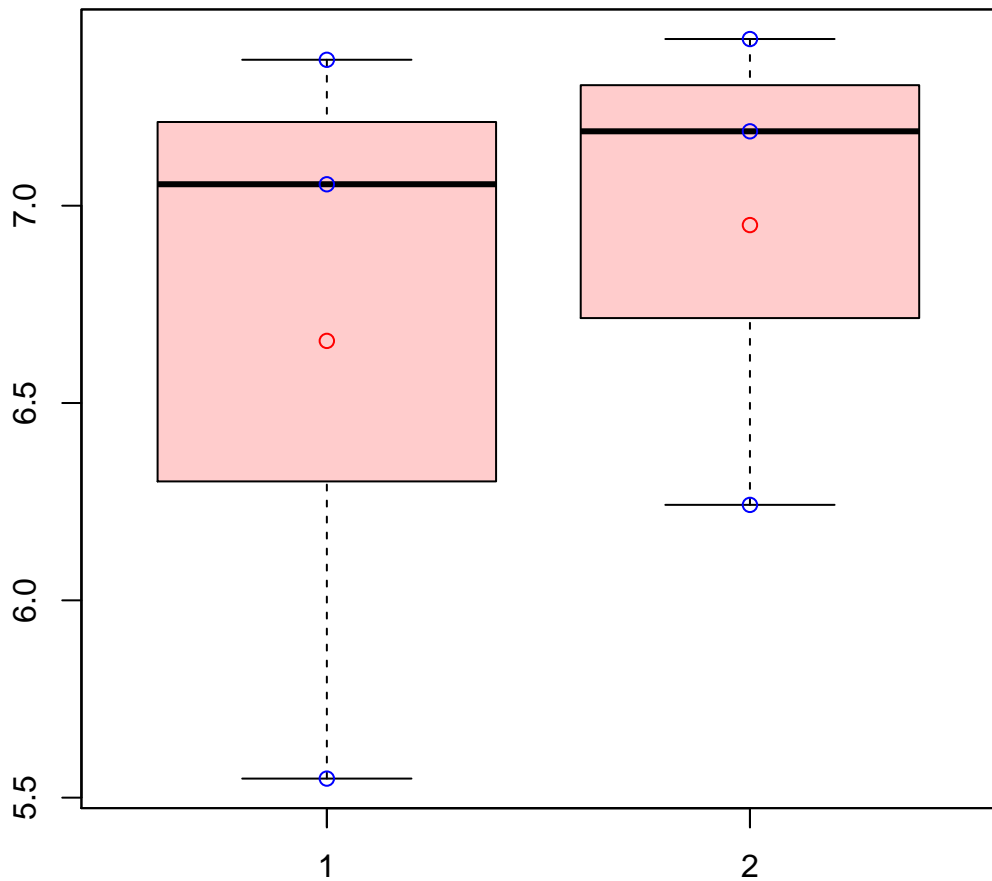

t-Test: p-value = 0.69

# A2WLB3|A2WLB3\_ORYSI

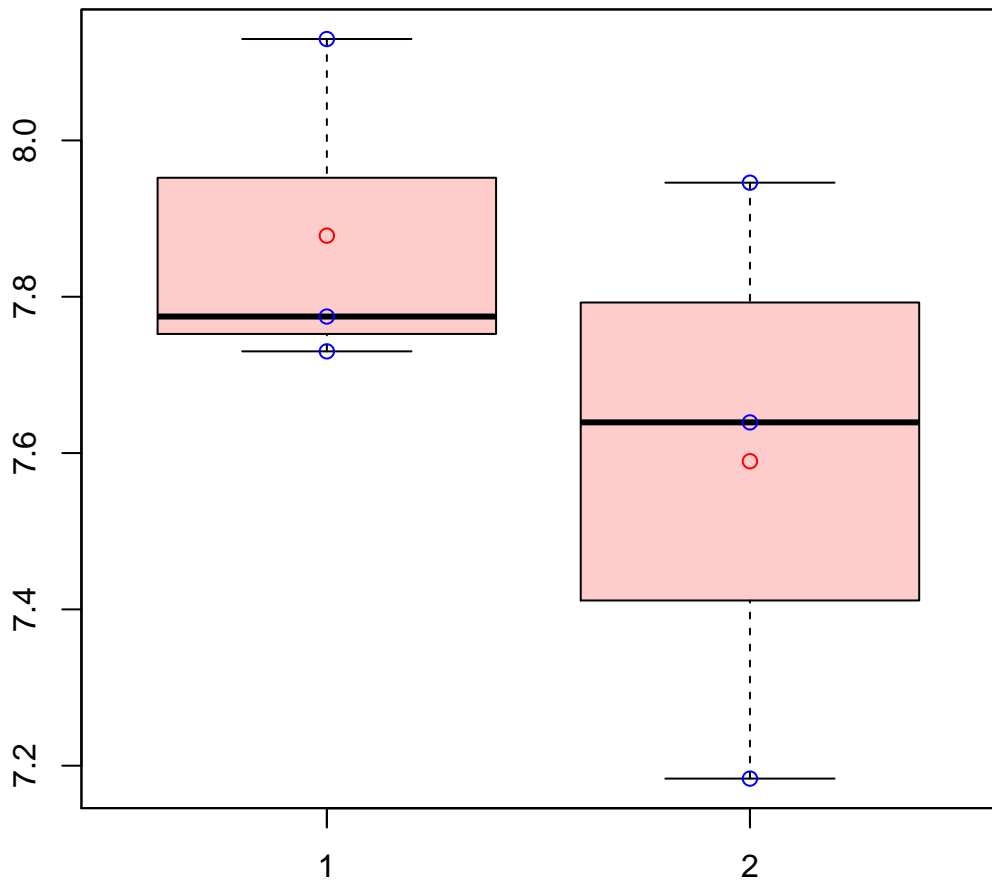

t-Test: p-value = 0.34

# A2WN64|A2WN64\_ORYSI

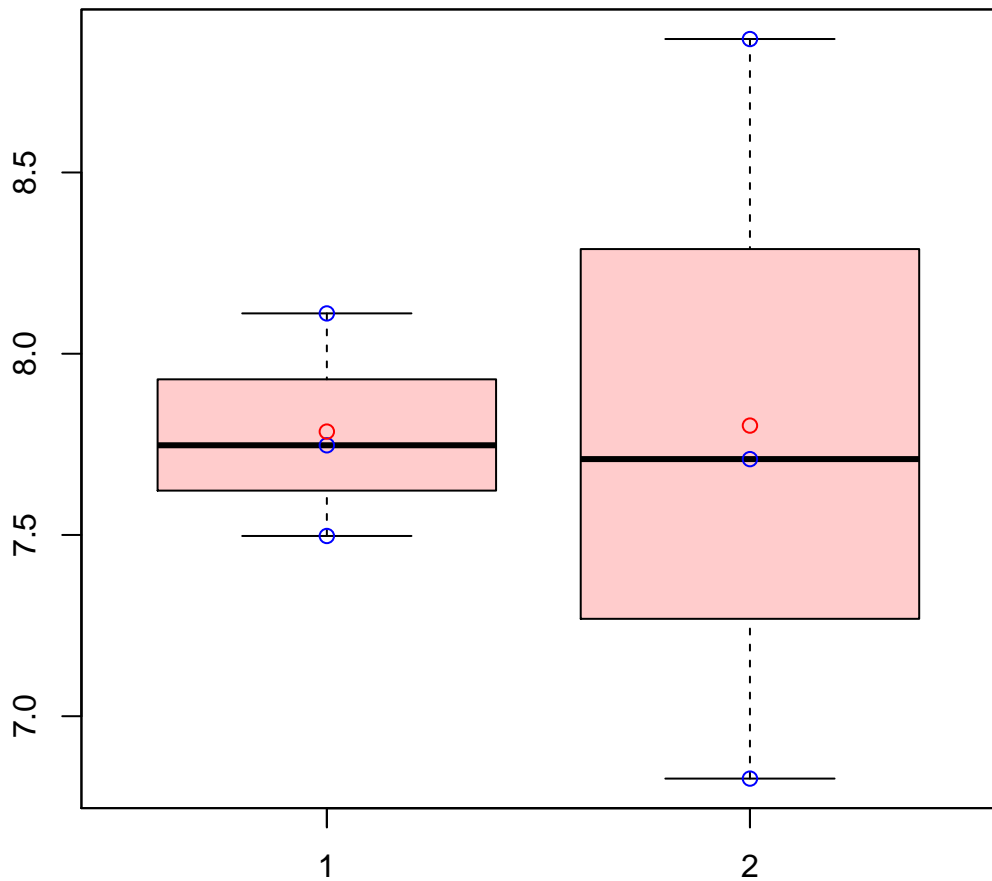

t-Test: p-value = 0.98

## A2WP76|A2WP76\_ORYSI

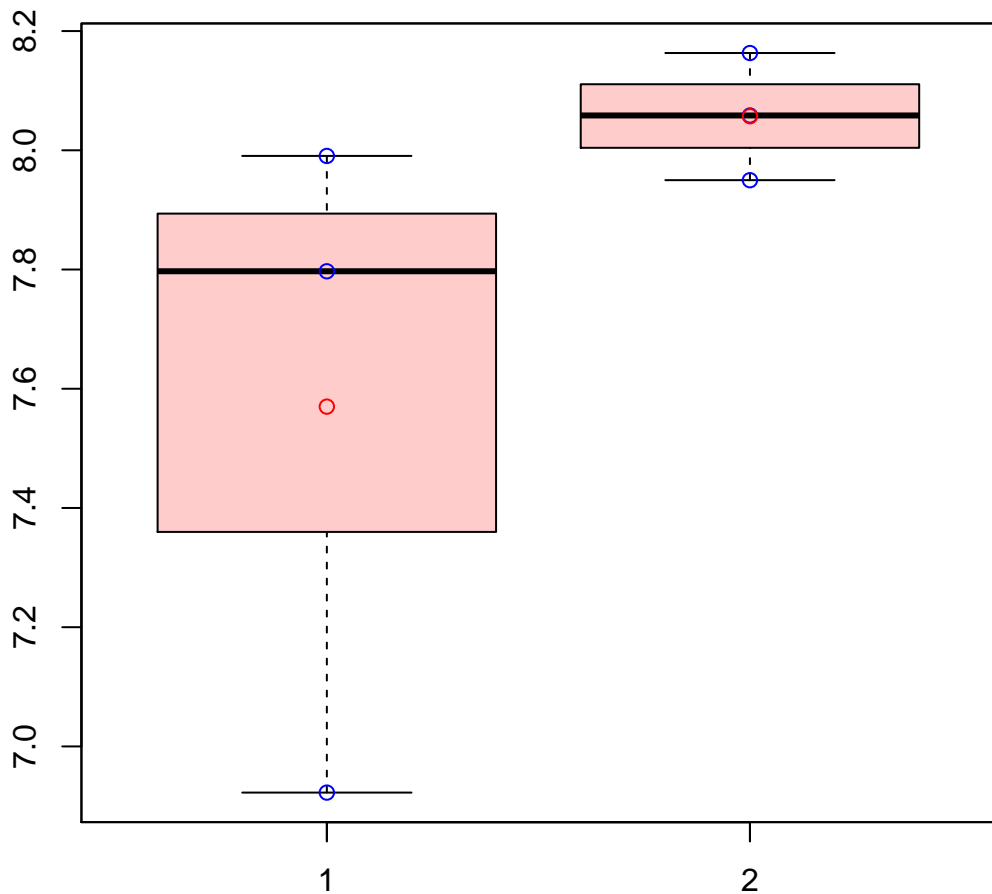

t-Test: p-value = 0.27

# A2WQJ0|A2WQJ0\_ORYSI

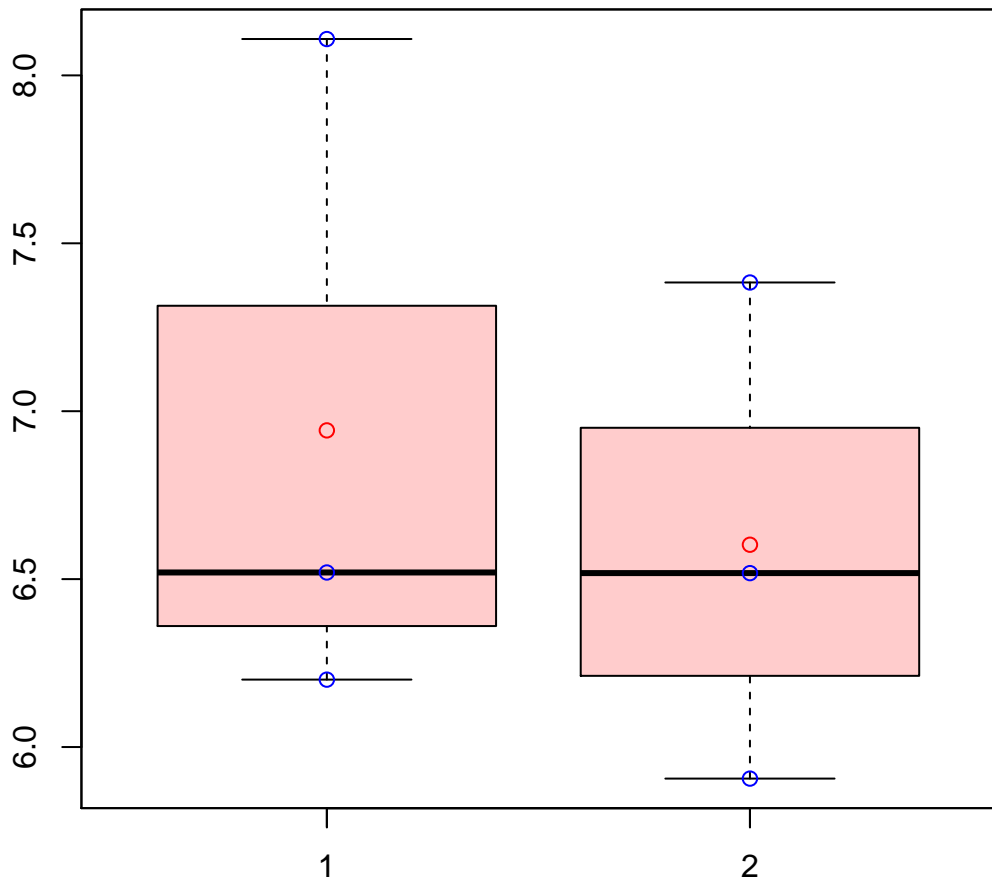

t-Test: p-value = 0.67

# A2WSI8|A2WSI8\_ORYSI

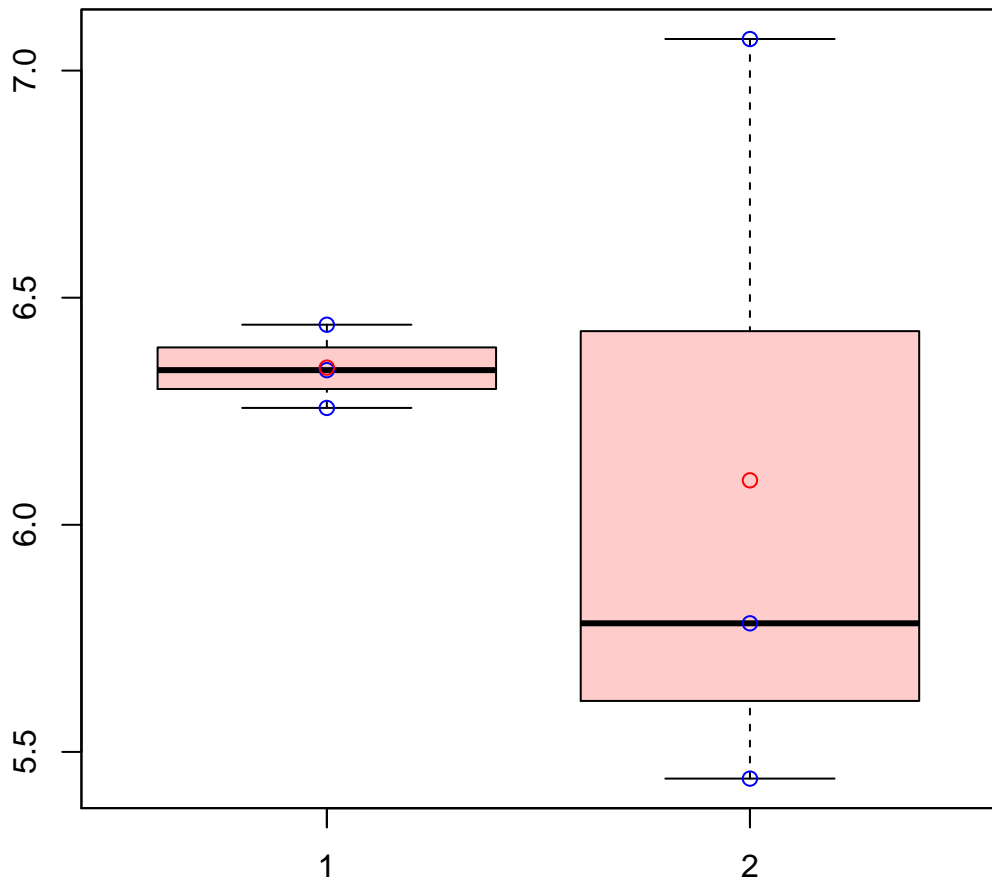

t-Test: p-value = 0.67



## A2WUJ2|A2WUJ2\_ORYSI

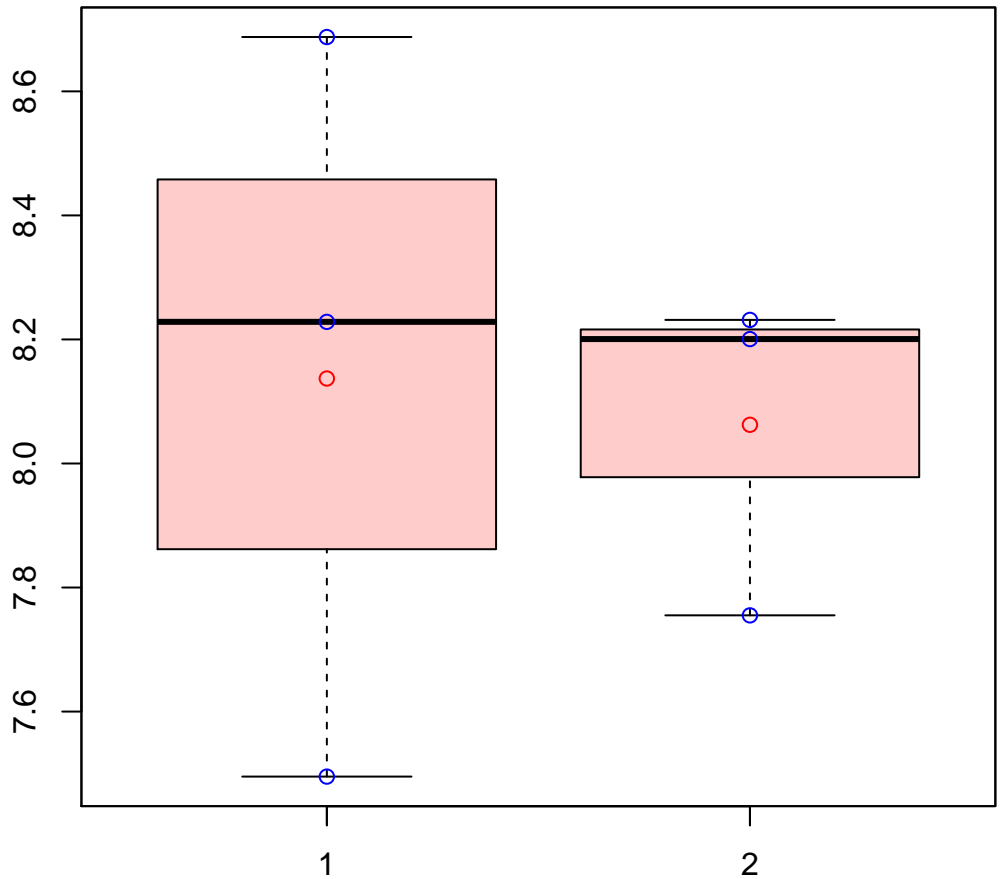

t-Test: p-value = 0.86

## A2WUL5|A2WUL5\_ORYSI

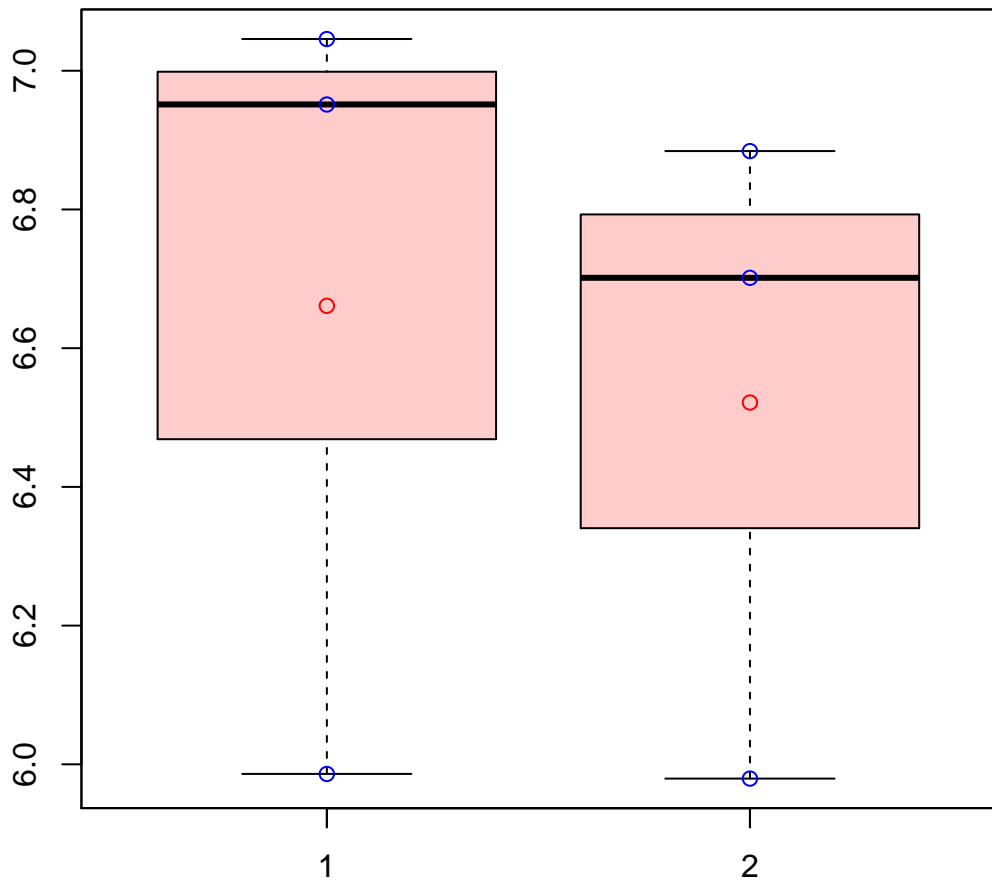

t-Test: p-value = 0.77

# A2WWW5|A2WWW5\_ORYSI

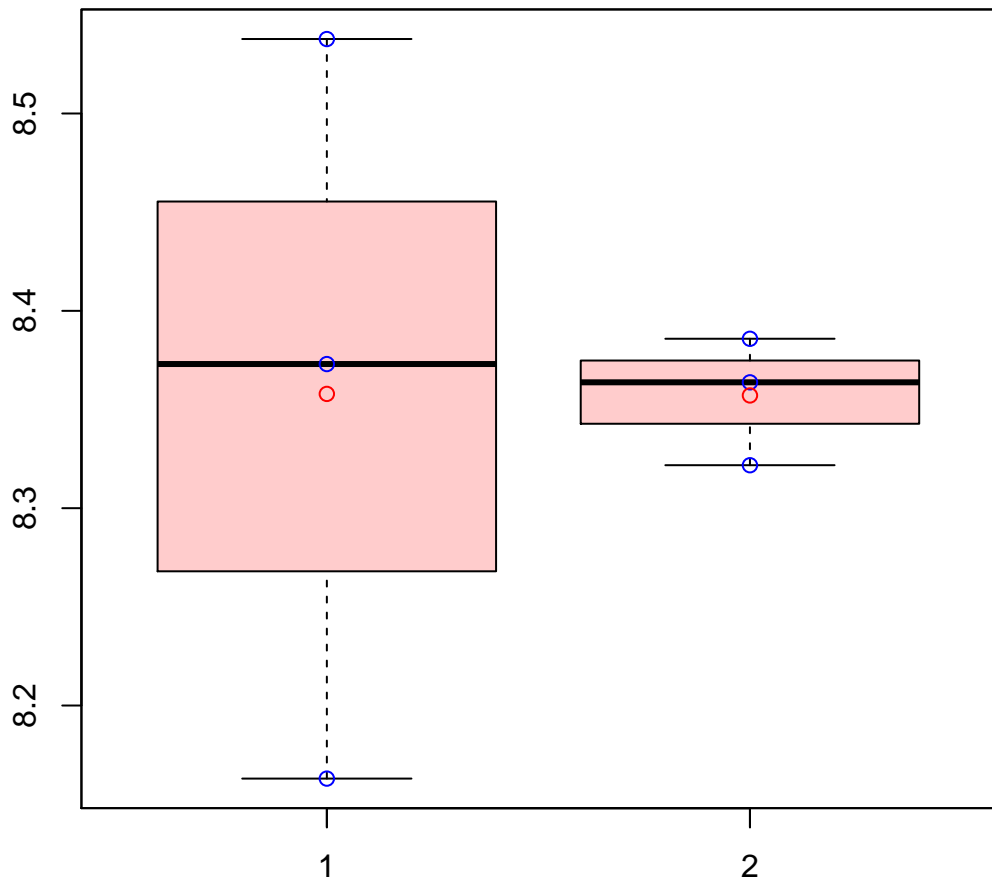

t-Test: p-value = 0.99

# A2WXS7|A2WXS7\_ORYSI

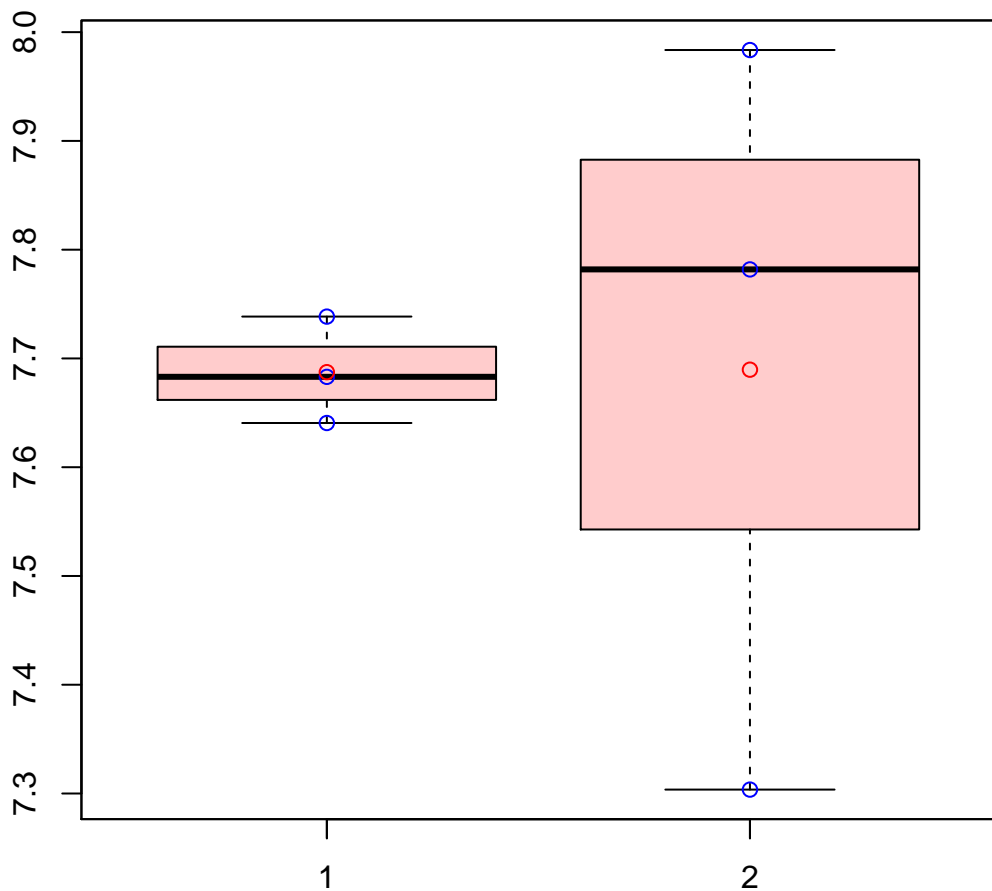

t-Test: p-value = 0.99

# A2WXX7|A2WXX7\_ORYSI

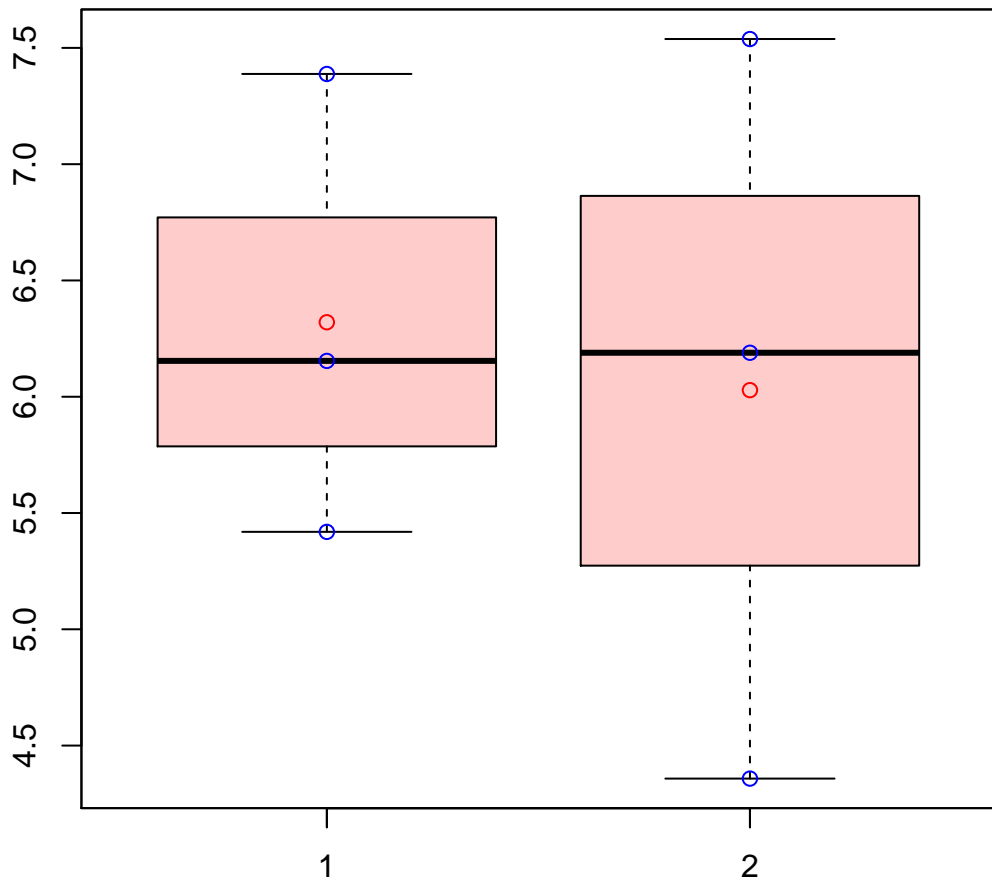

t-Test: p-value = 0.8

# A2WZV1|A2WZV1\_ORYSI

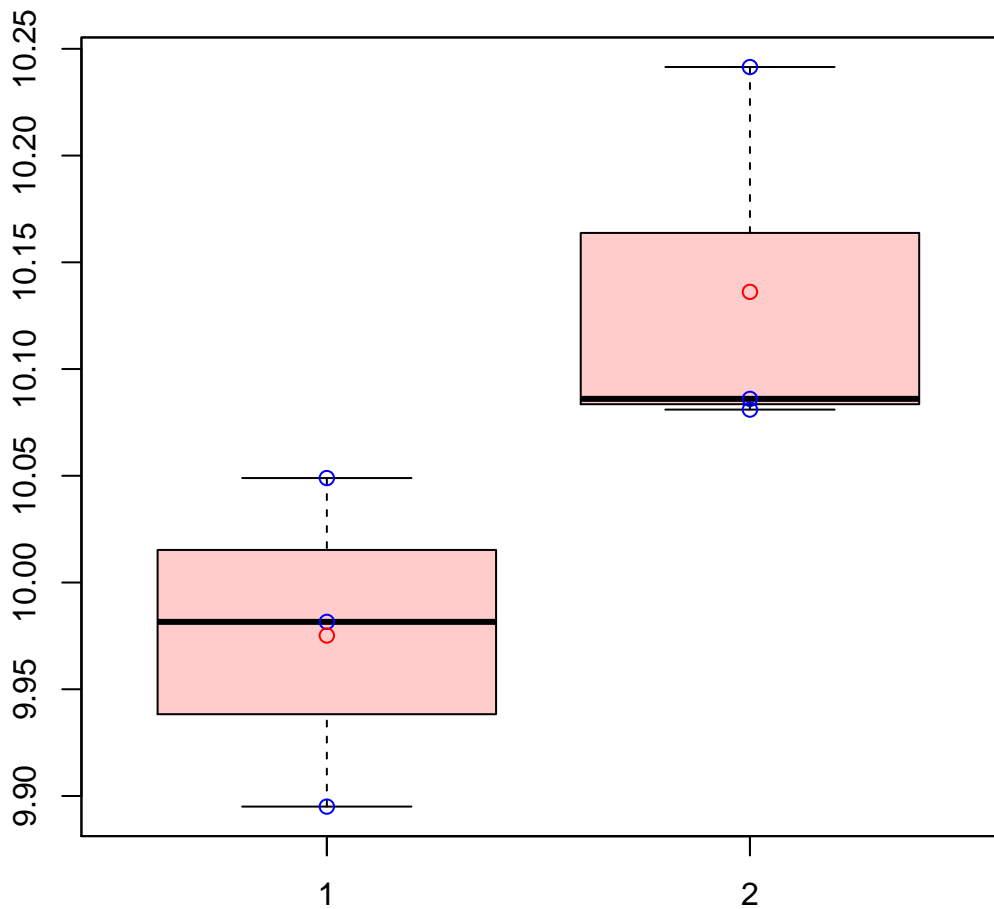

t-Test: p-value = 0.08

# A2X0J1|A2X0J1\_ORYSI

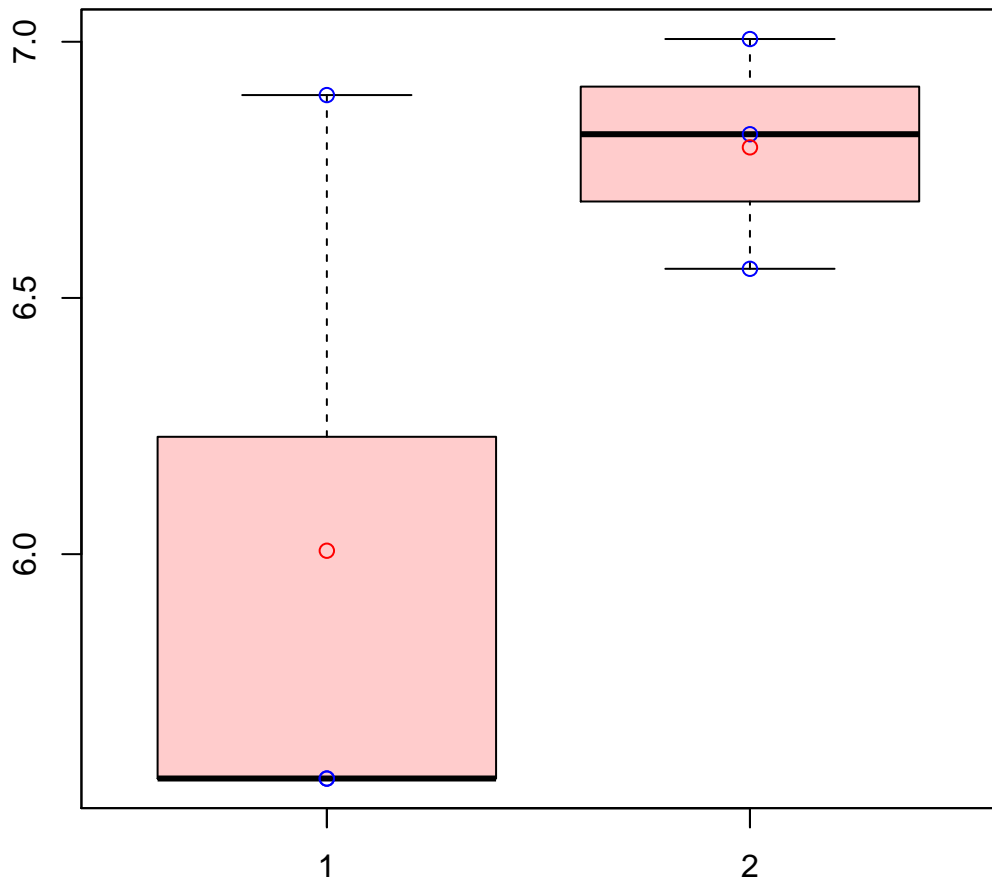

t-Test: p-value = 0.21

# A2X1X4|A2X1X4\_ORYSI

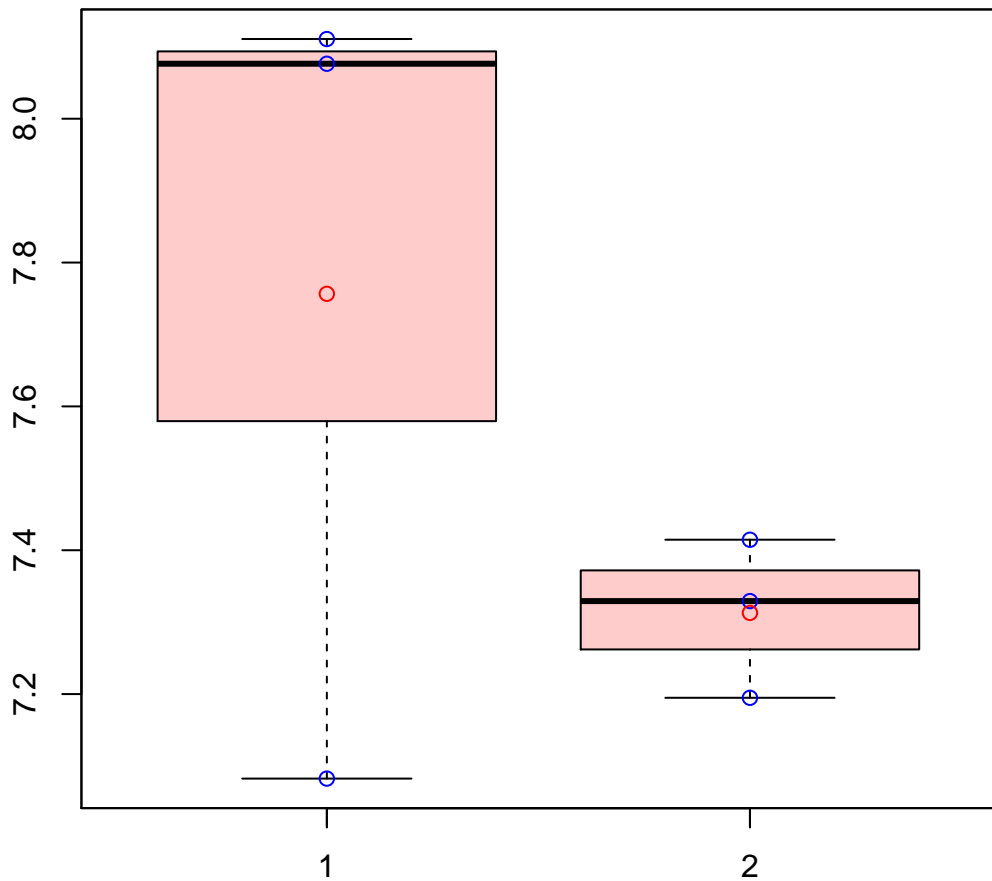

t-Test: p-value = 0.32



# A2X2W4|A2X2W4\_ORYSI

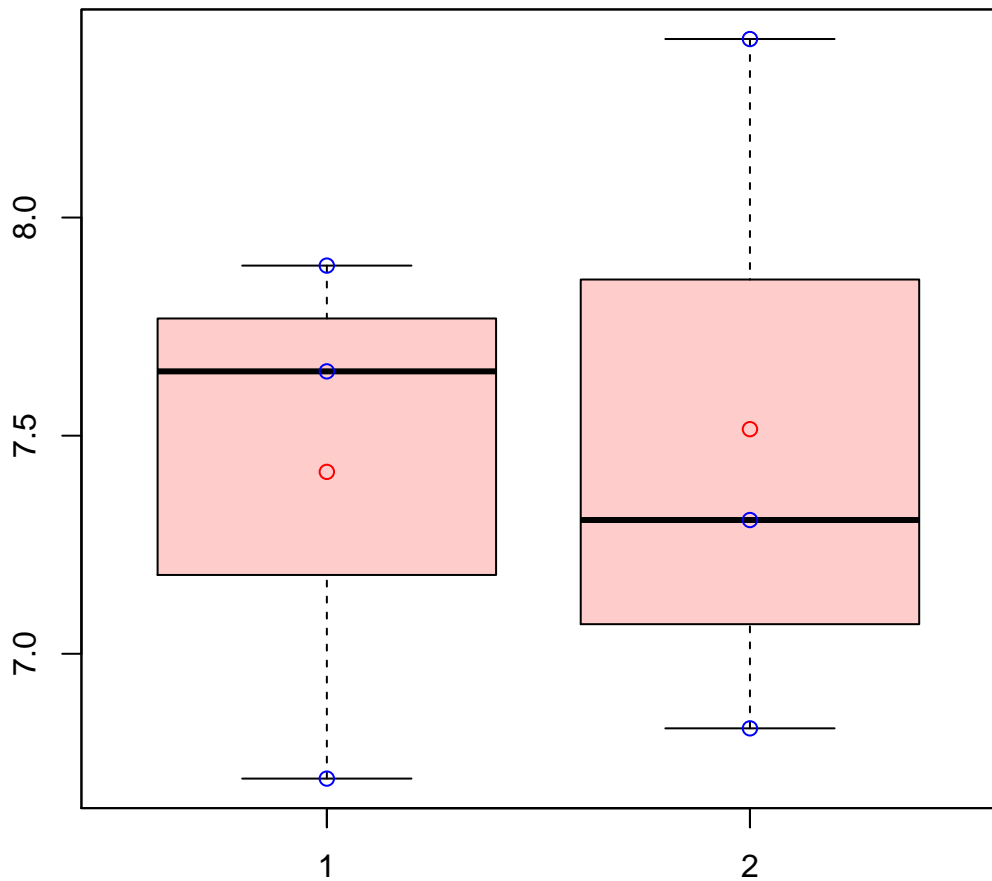

t-Test: p-value = 0.88

# A2X2W9|A2X2W9\_ORYSI

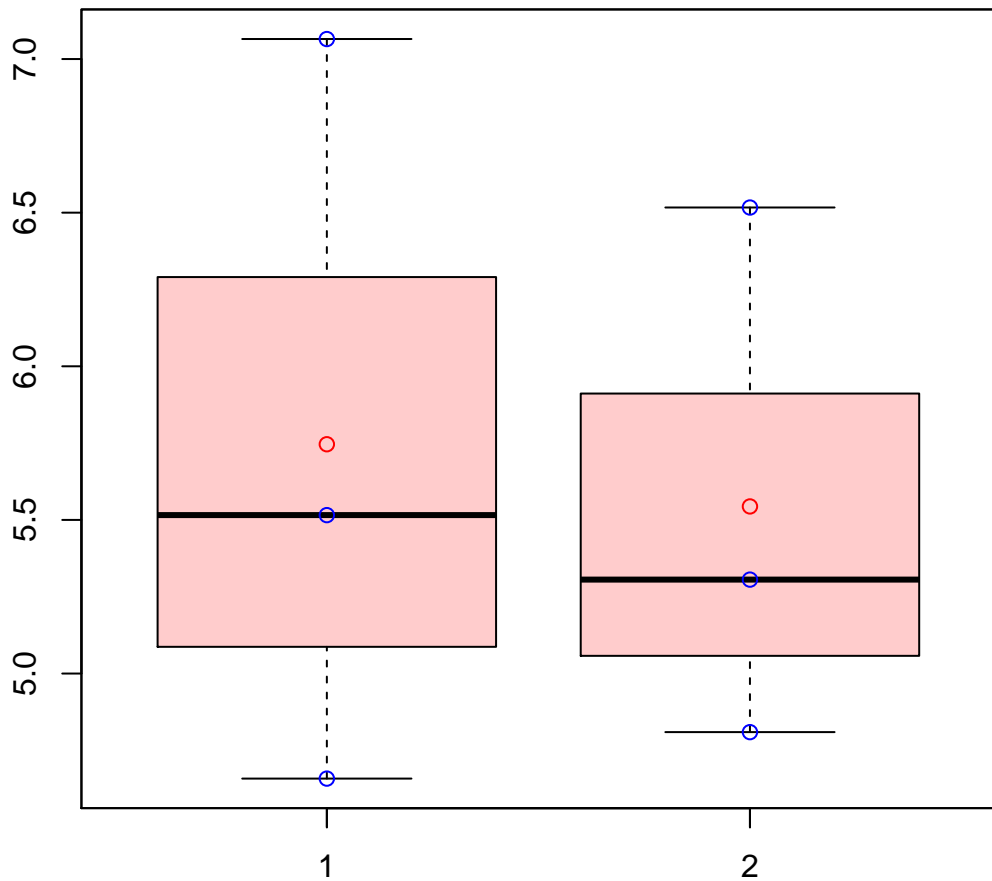

t-Test: p-value = 0.83

# A2X358|A2X358\_ORYSI

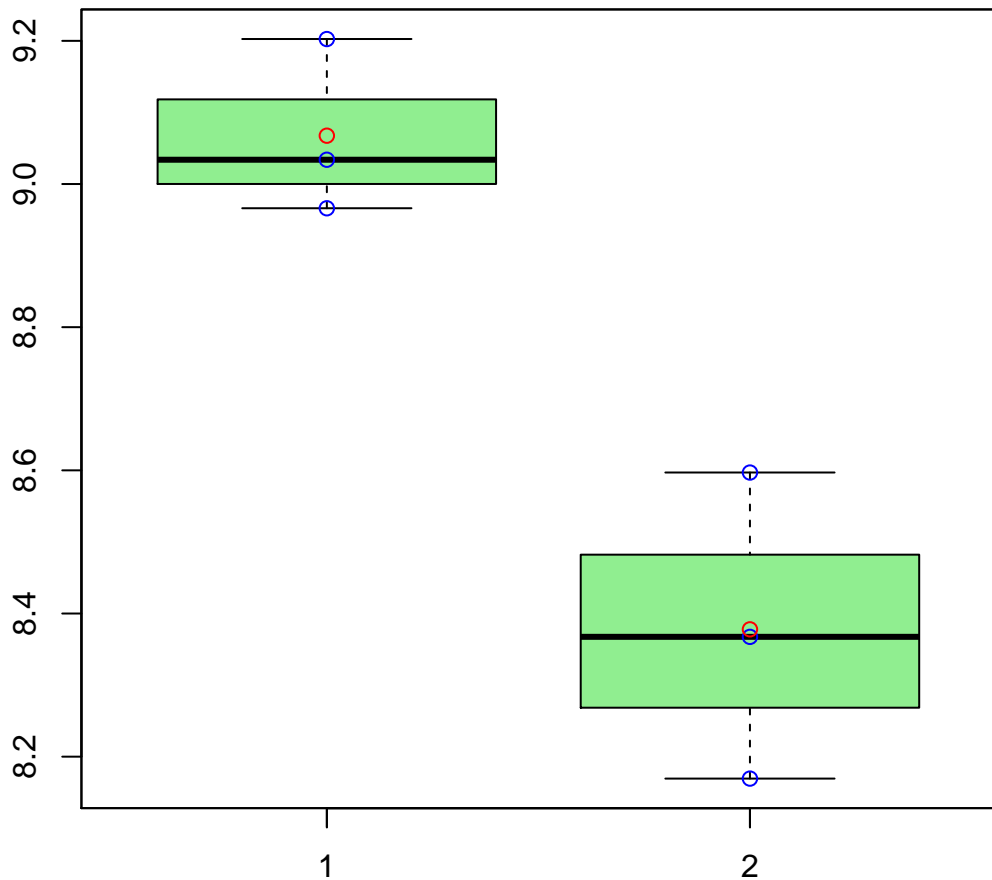

t-Test: p-value = 0.01

# A2X3K4|A2X3K4\_ORYSI

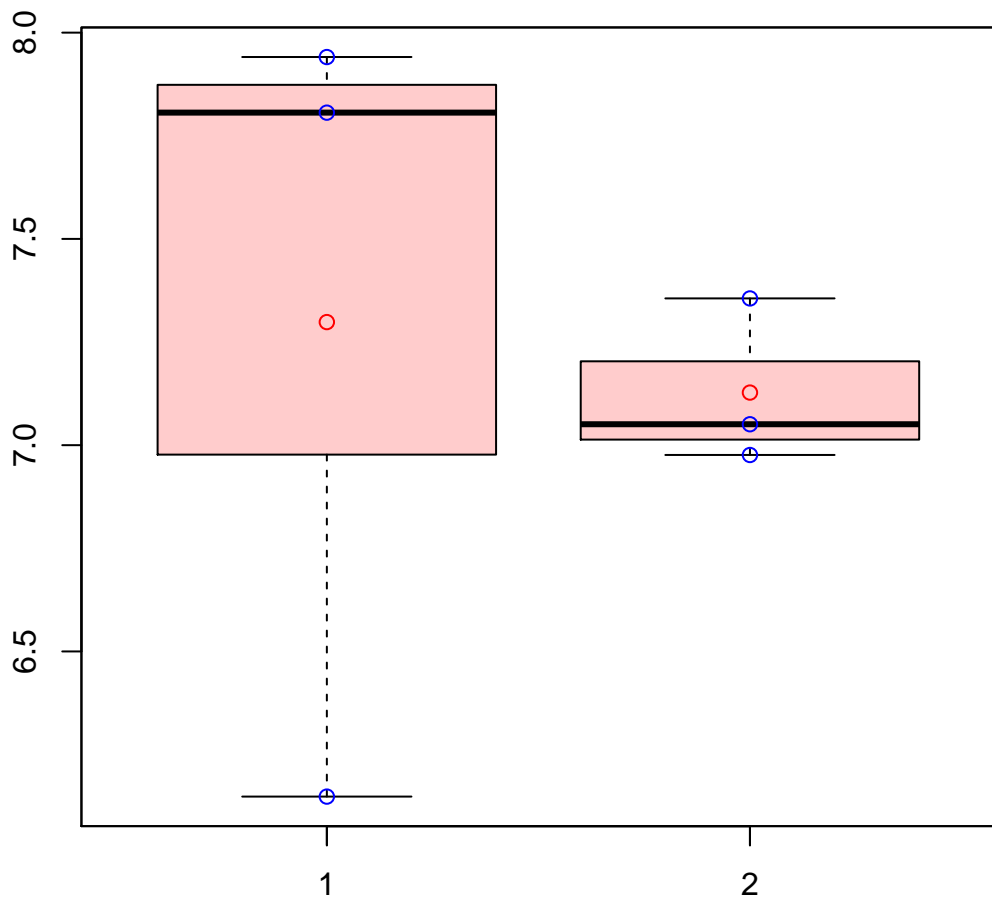

t-Test: p-value = 0.8

# A2X4P4|A2X4P4\_ORYSI

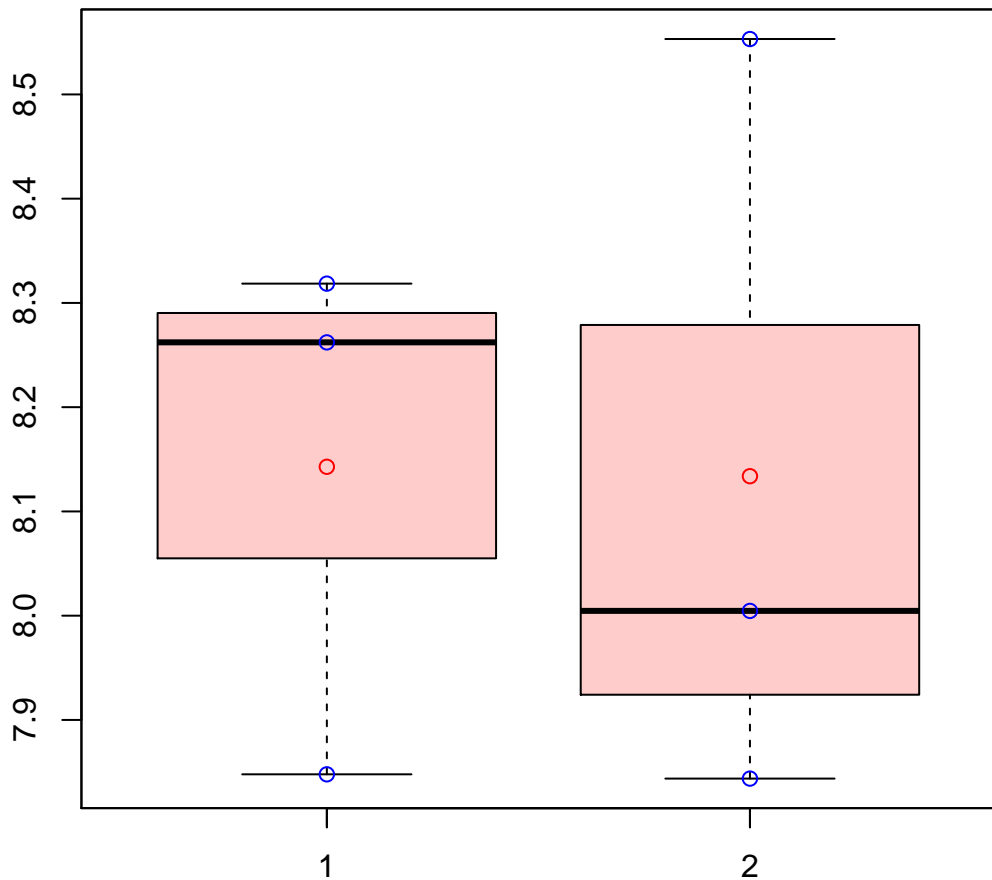

t-Test: p-value = 0.97

# A2X6L9|A2X6L9\_ORYSI

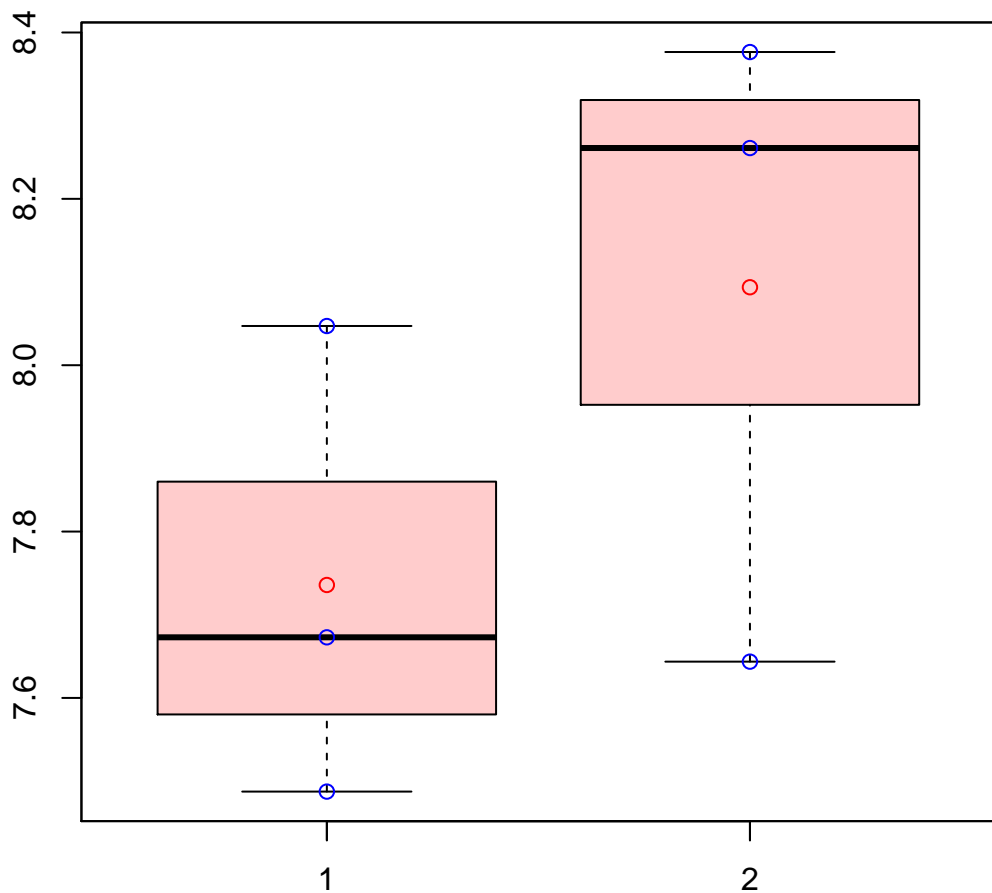

t-Test: p-value = 0.28

# A2X6W1|A2X6W1\_ORYSI

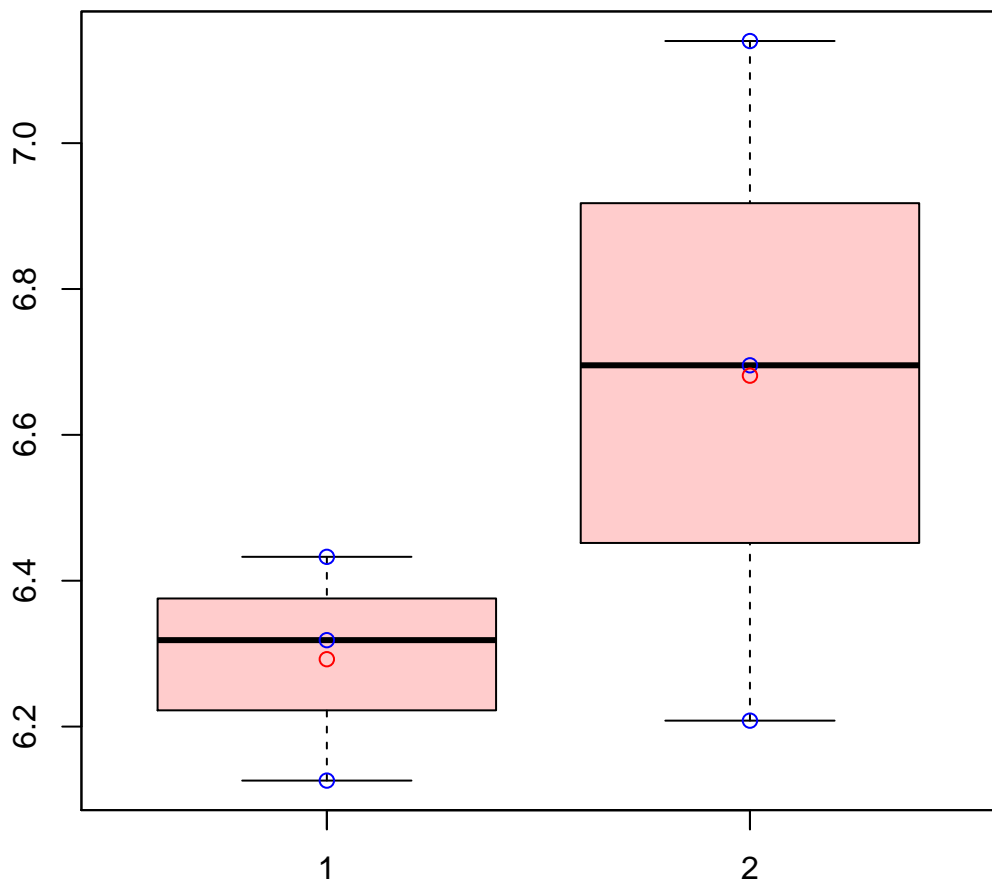

t-Test: p-value = 0.28

# A2X7E9|A2X7E9\_ORYSI

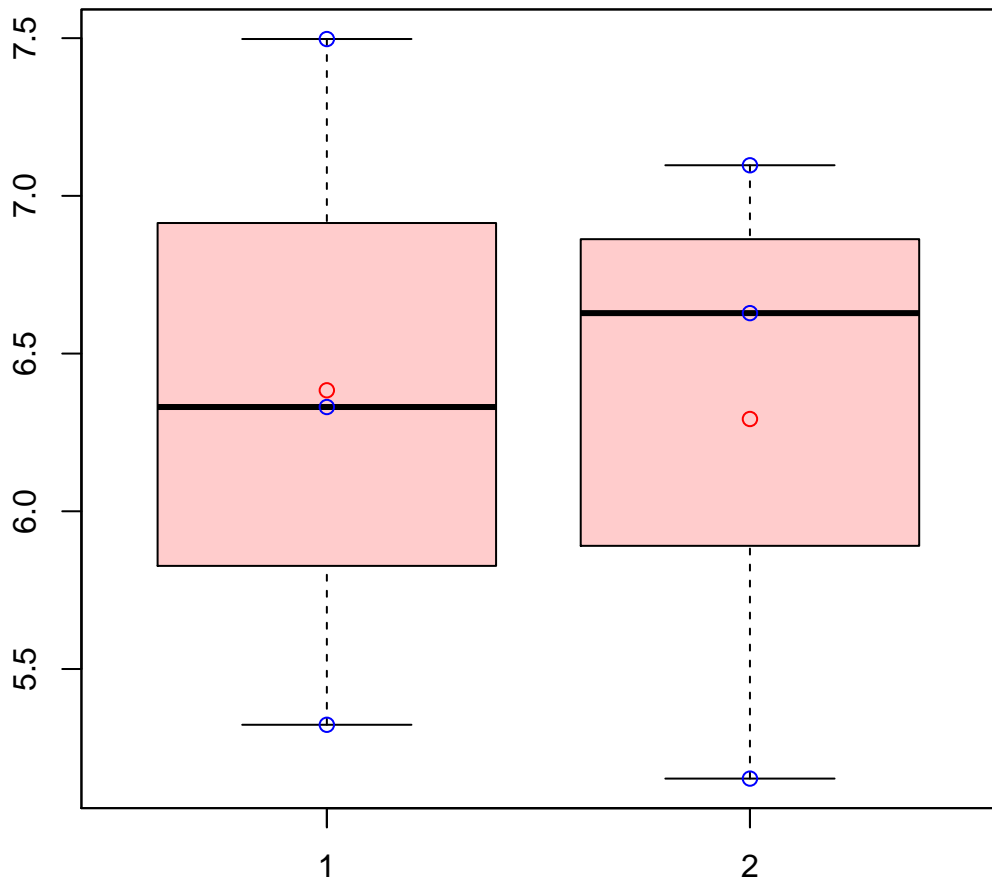

t-Test: p-value = 0.92



# A2X7U3|A2X7U3\_ORYSI

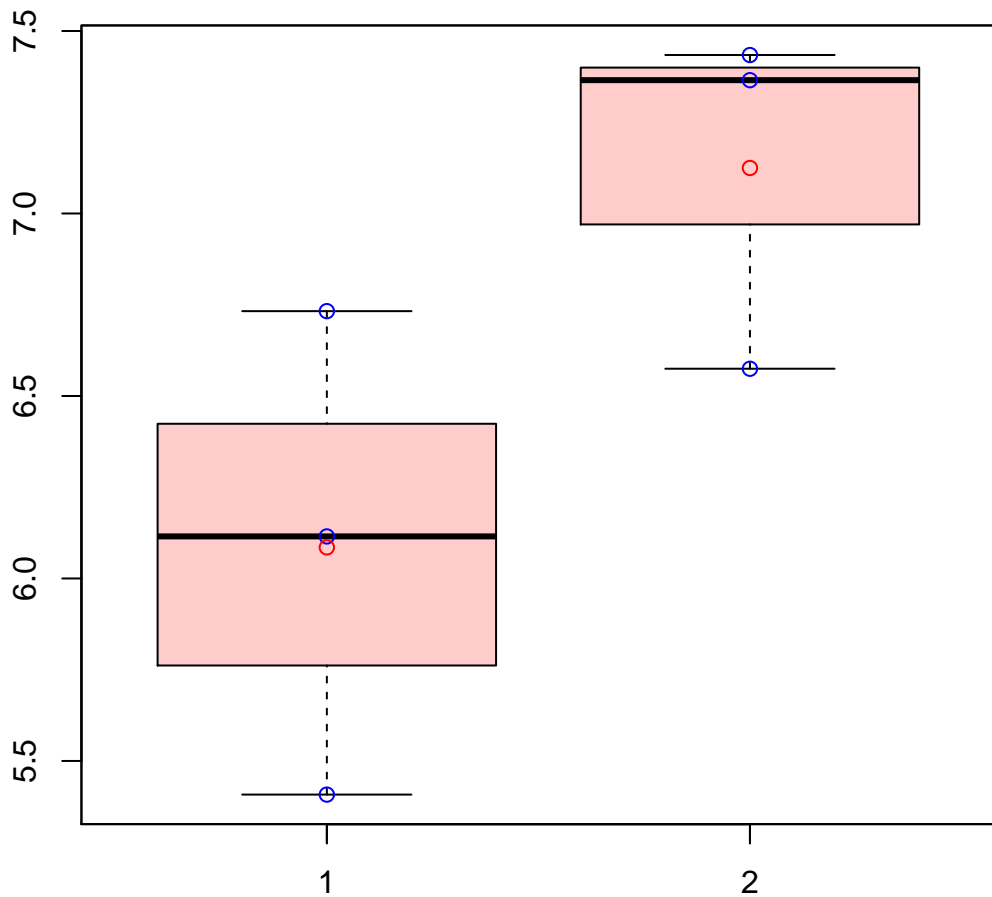

t-Test: p-value = 0.1

# A2X8M1|A2X8M1\_ORYSI

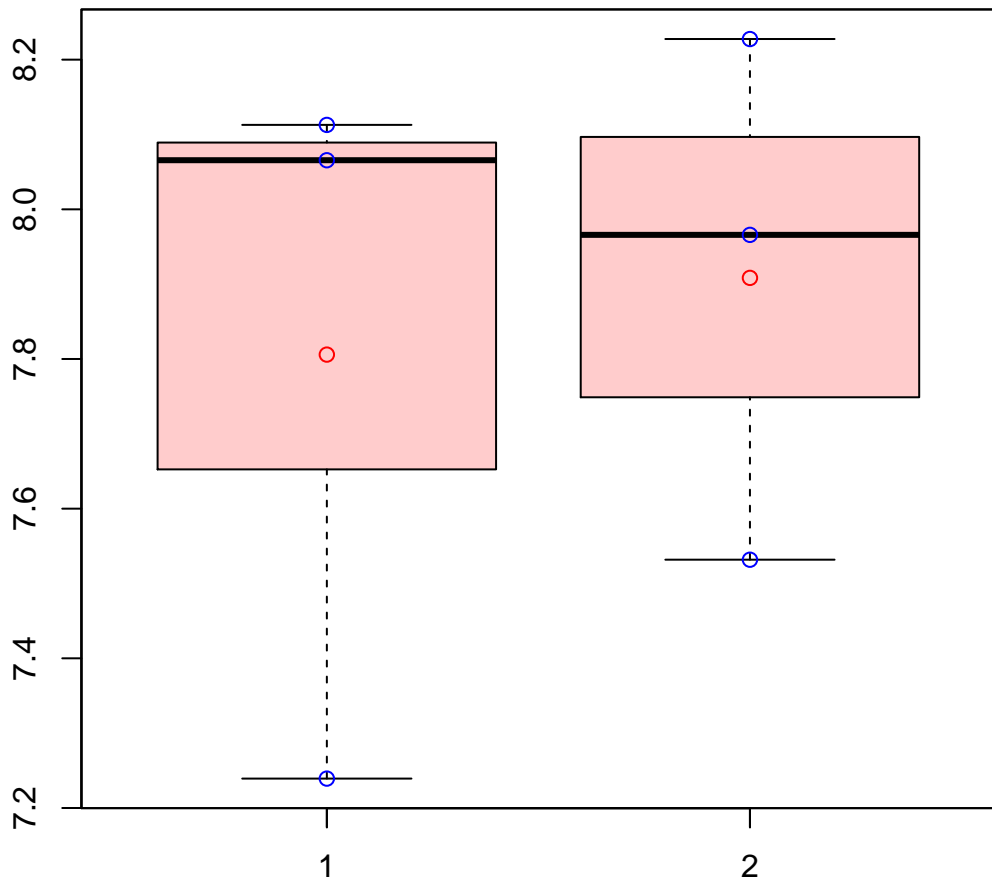

t-Test: p-value = 0.78

# A2X9D0|A2X9D0\_ORYSI

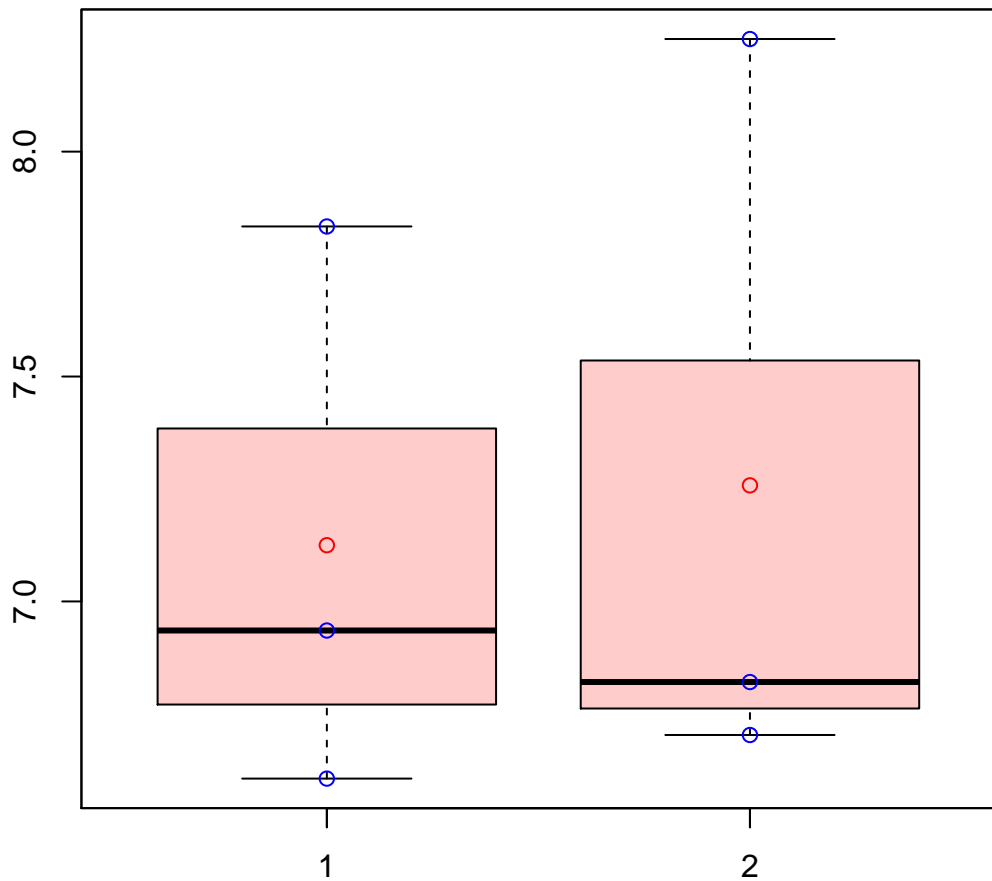

t-Test: p-value = 0.84

# A2XAH0|A2XAH0\_ORYSI

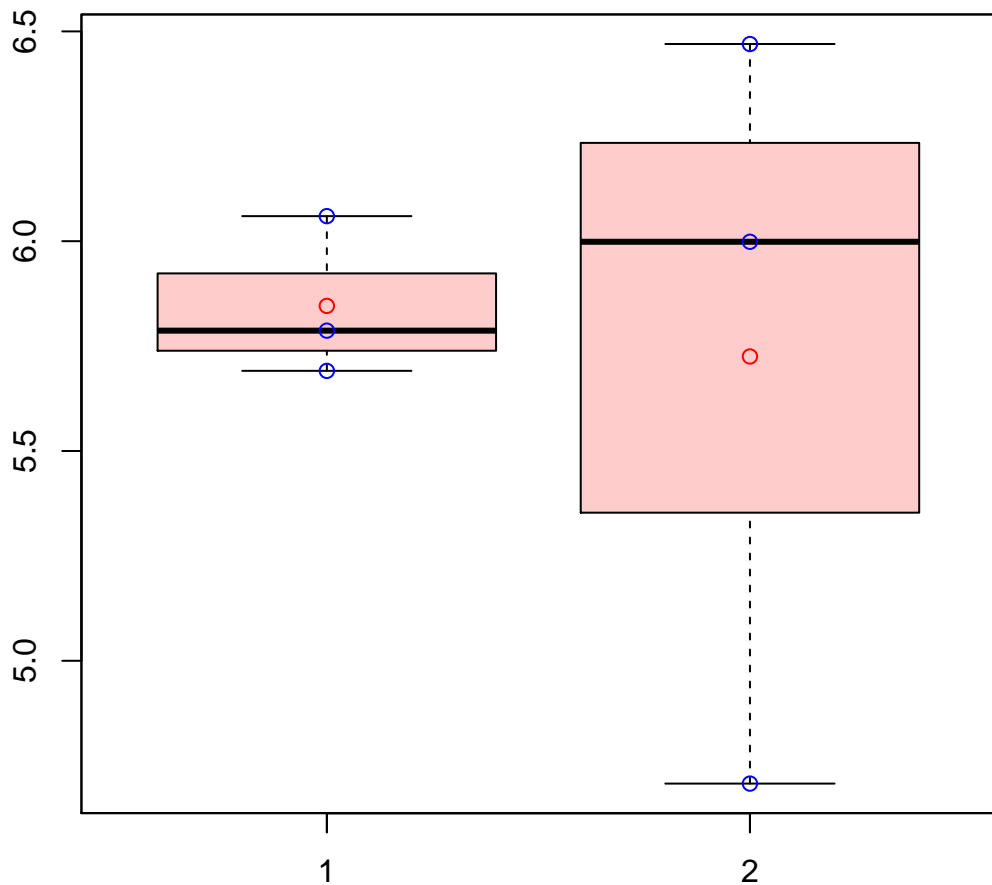

t-Test: p-value = 0.84

## A2XAK0|A2XAK0\_ORYSI

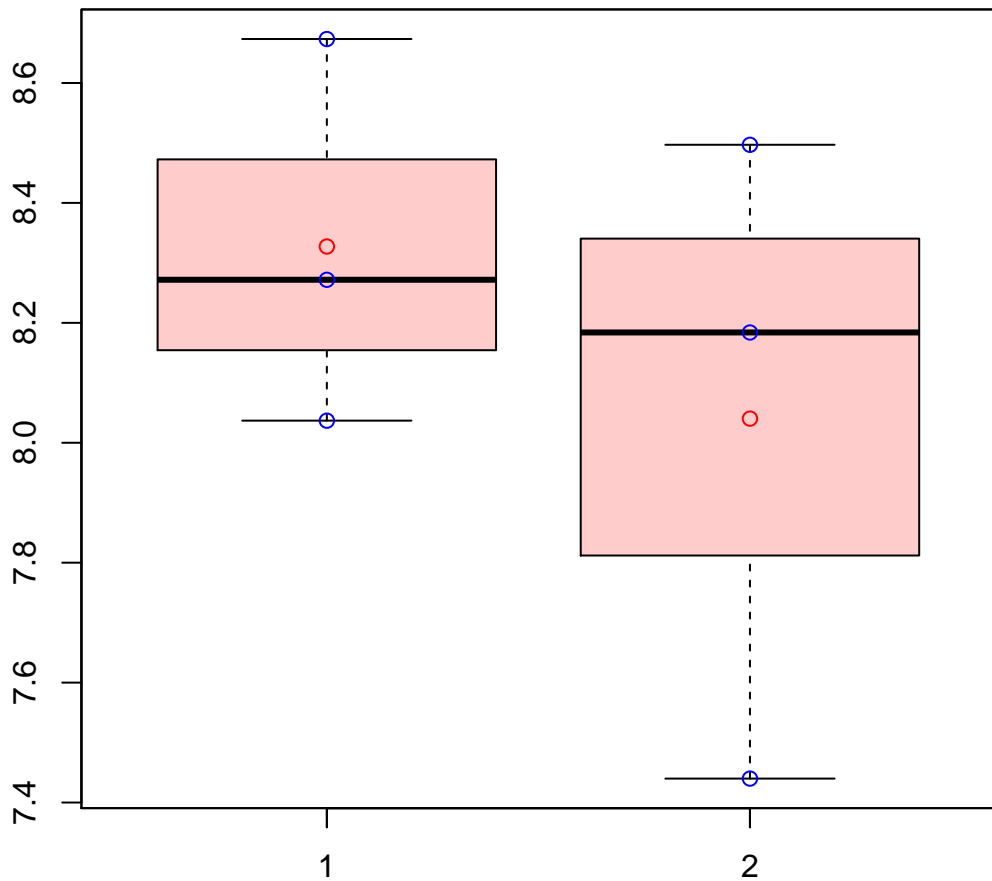

t-Test: p-value = 0.48

# A2XBC6|A2XBC6\_ORYSI

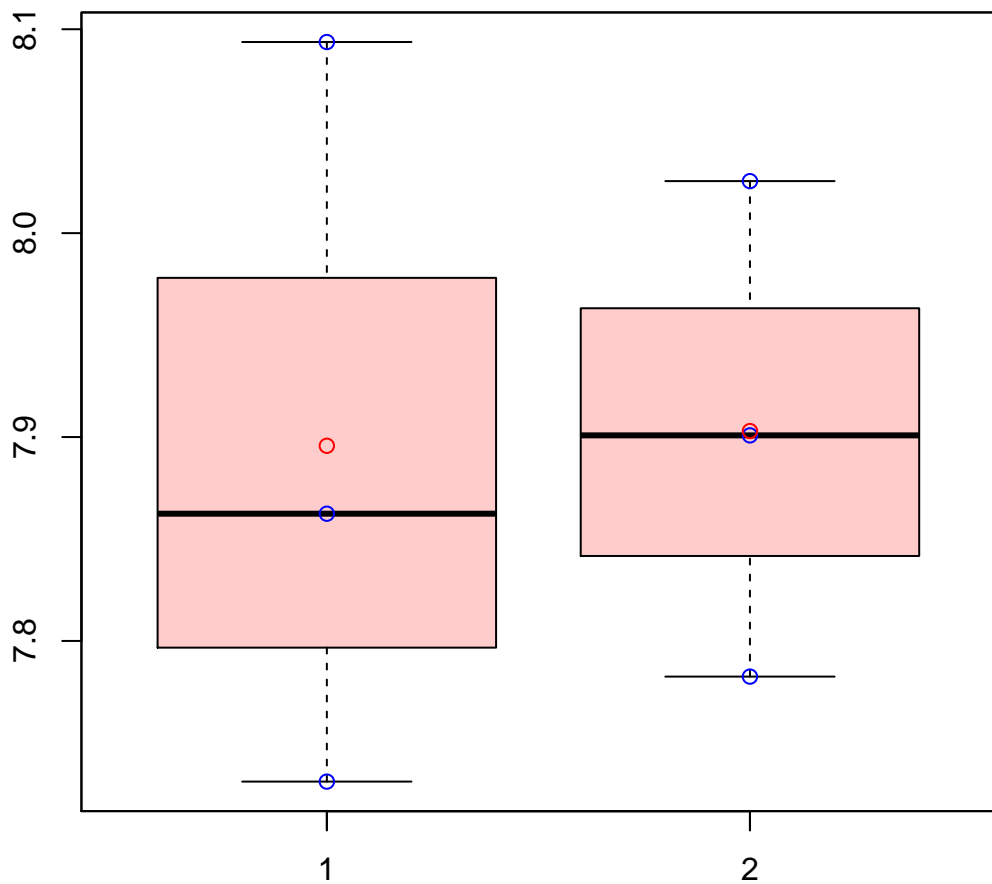

t-Test: p-value = 0.96

# A2XDB1|A2XDB1\_ORYSI

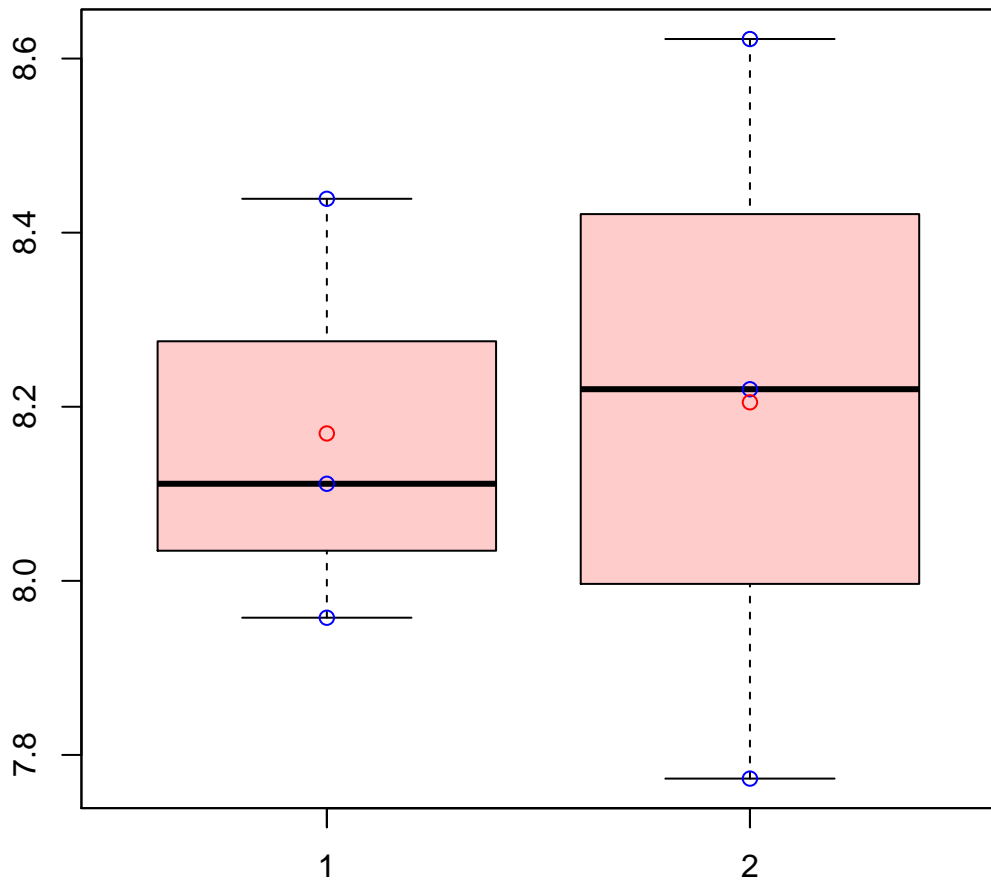

t-Test: p-value = 0.91

# A2XE00|A2XE00\_ORYSI

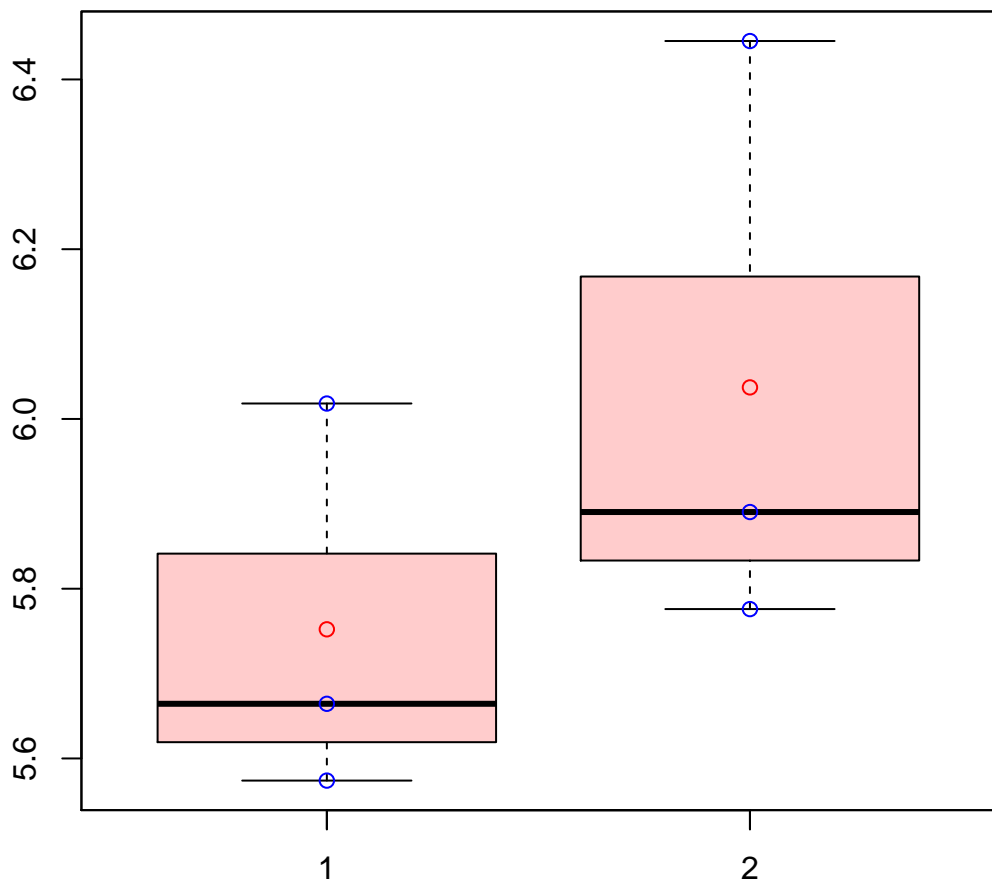

t-Test: p-value = 0.32



# A2XEB3|A2XEB3\_ORYSI

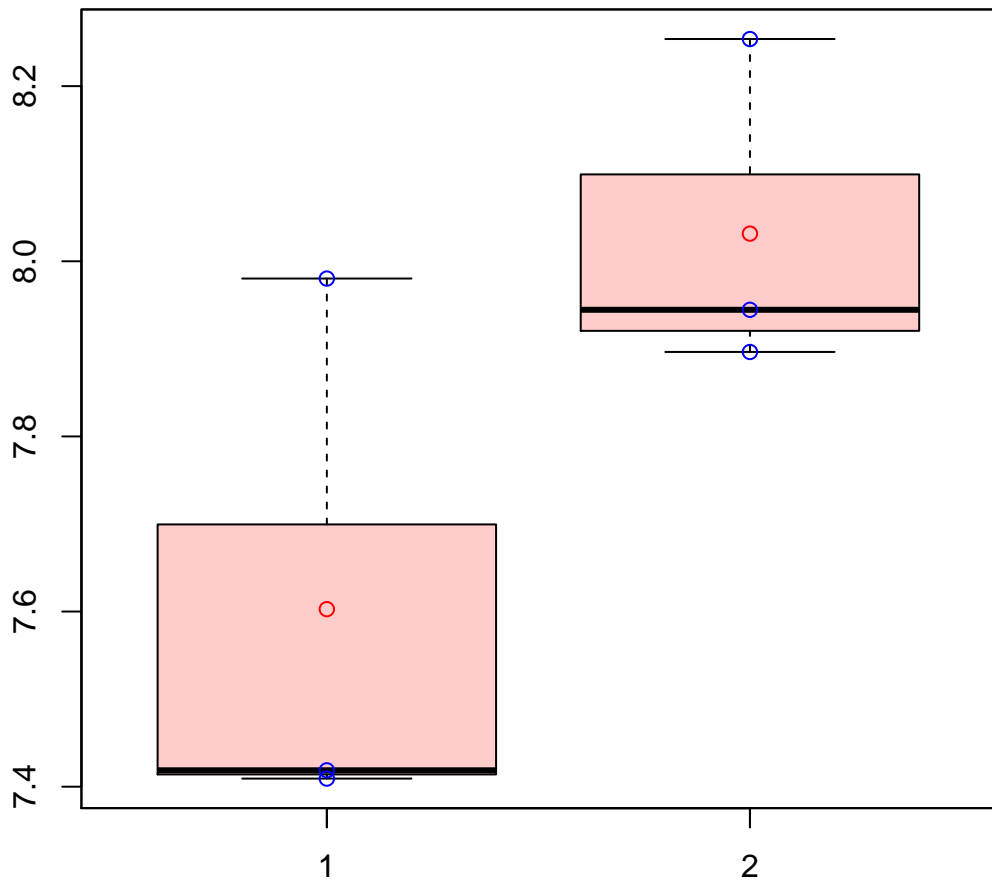

t-Test: p-value = 0.14

# A2XED7|A2XED7\_ORYSI

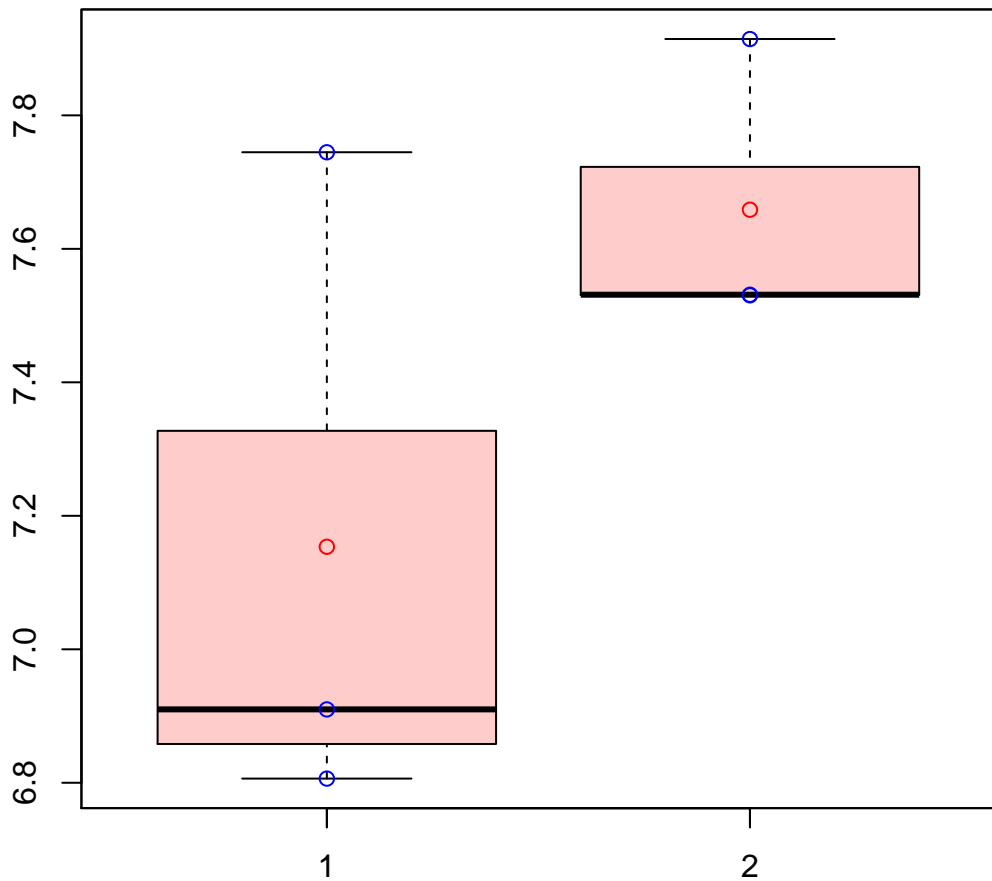

t-Test: p-value = 0.23

## A2XGB9|A2XGB9\_ORYSI

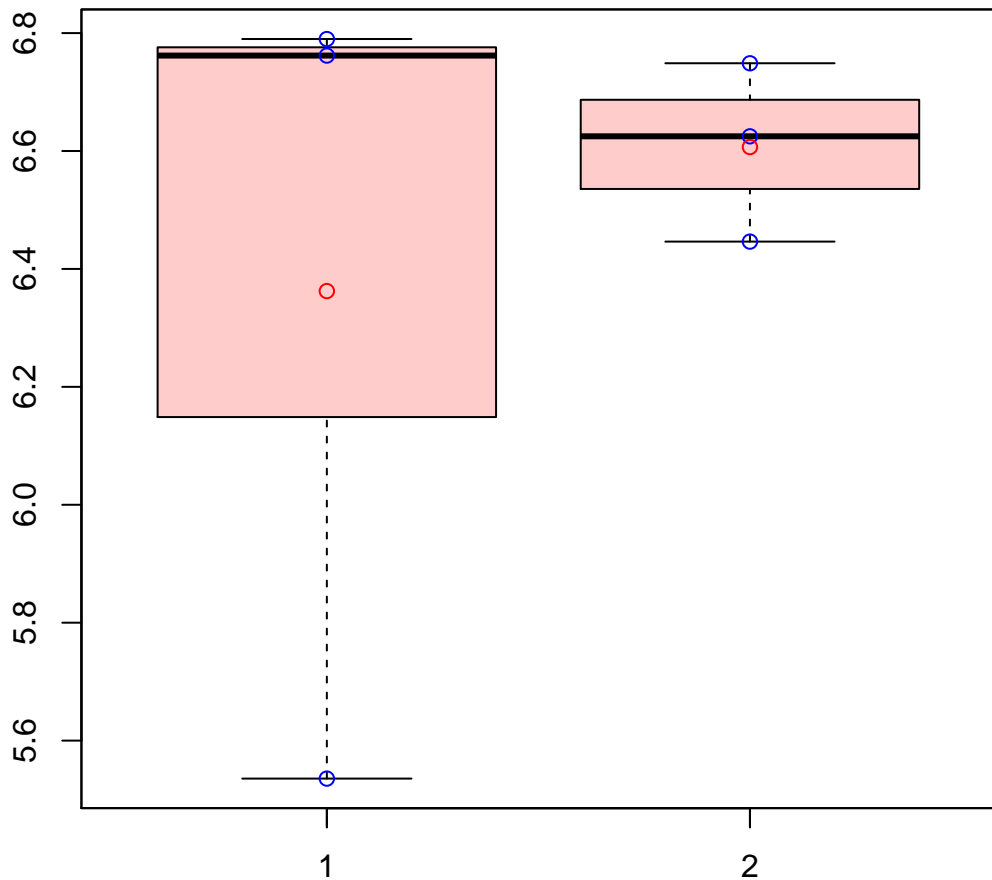

t-Test: p-value = 0.62

## A2XHR5|A2XHR5\_ORYSI

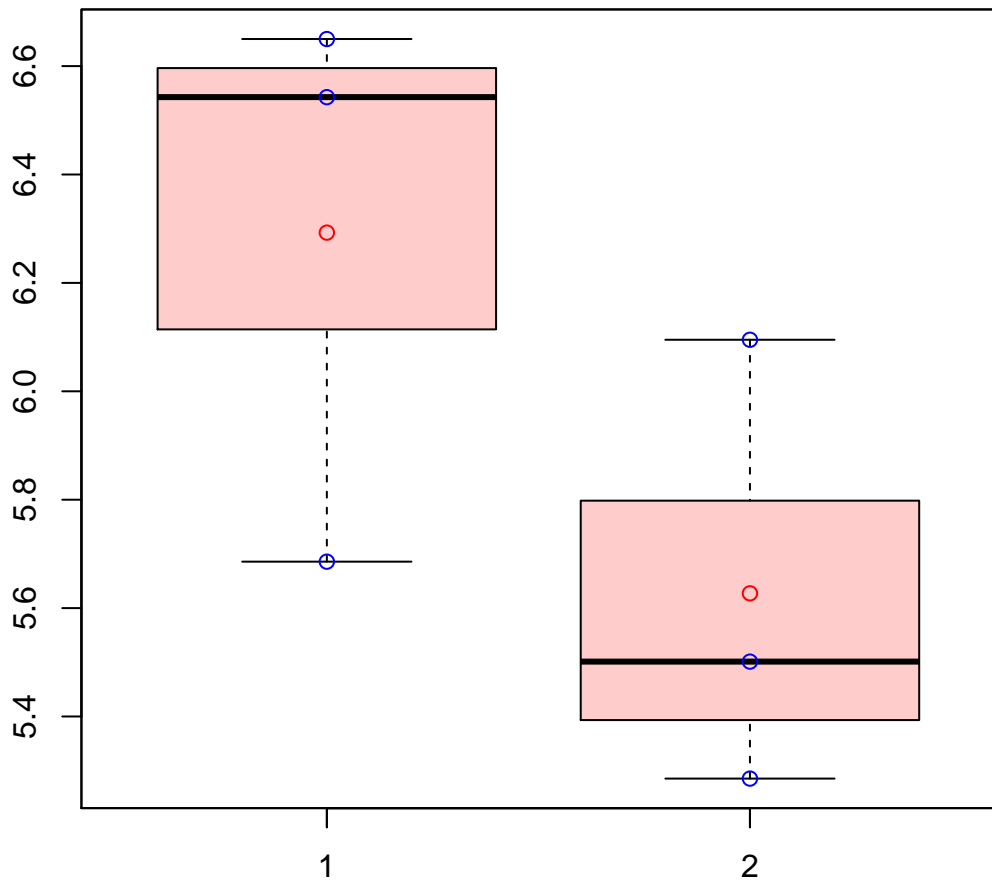

t-Test: p-value = 0.17

# A2XJY0|A2XJY0\_ORYSI

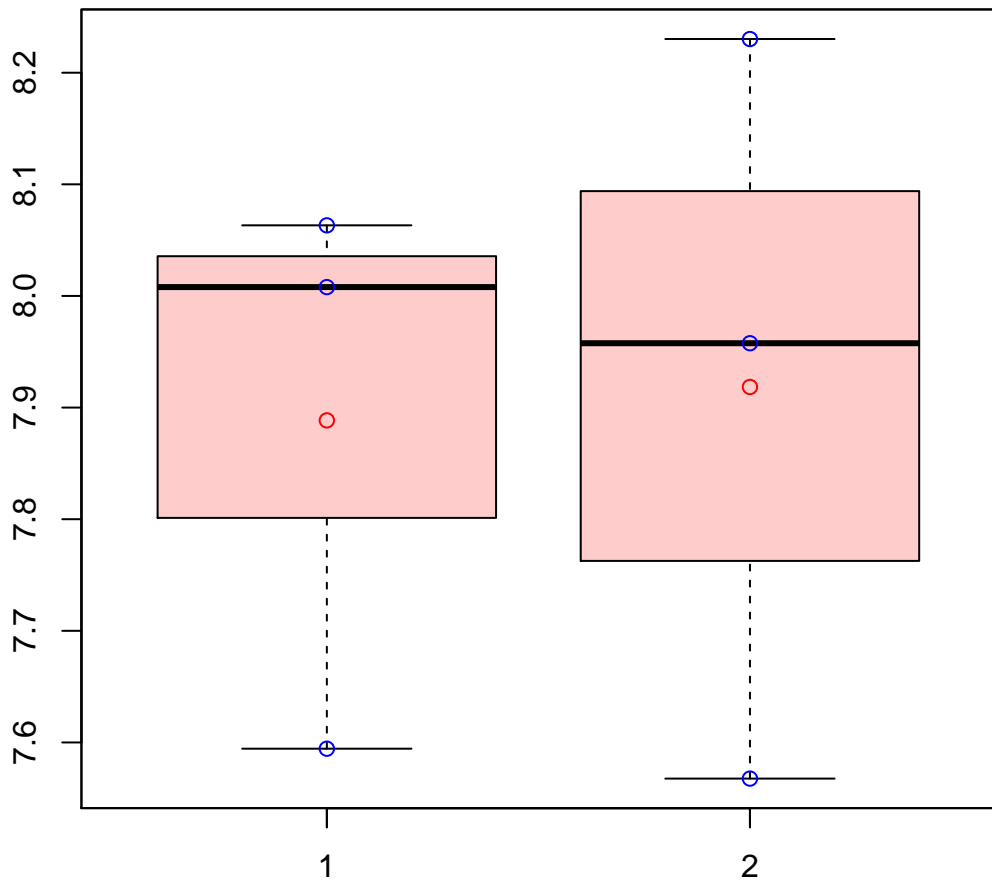

t-Test: p-value = 0.91

## A2XL87|A2XL87\_ORYSI

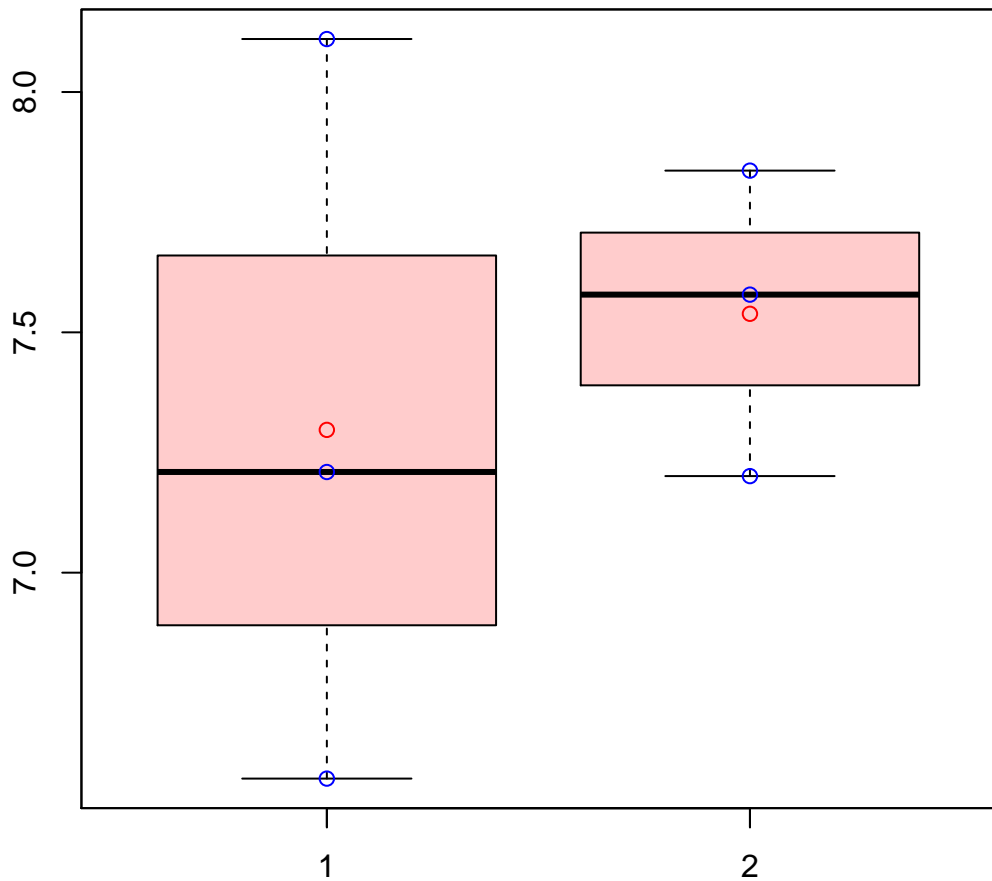

t-Test: p-value = 0.66

## A2XM21|A2XM21\_ORYSI

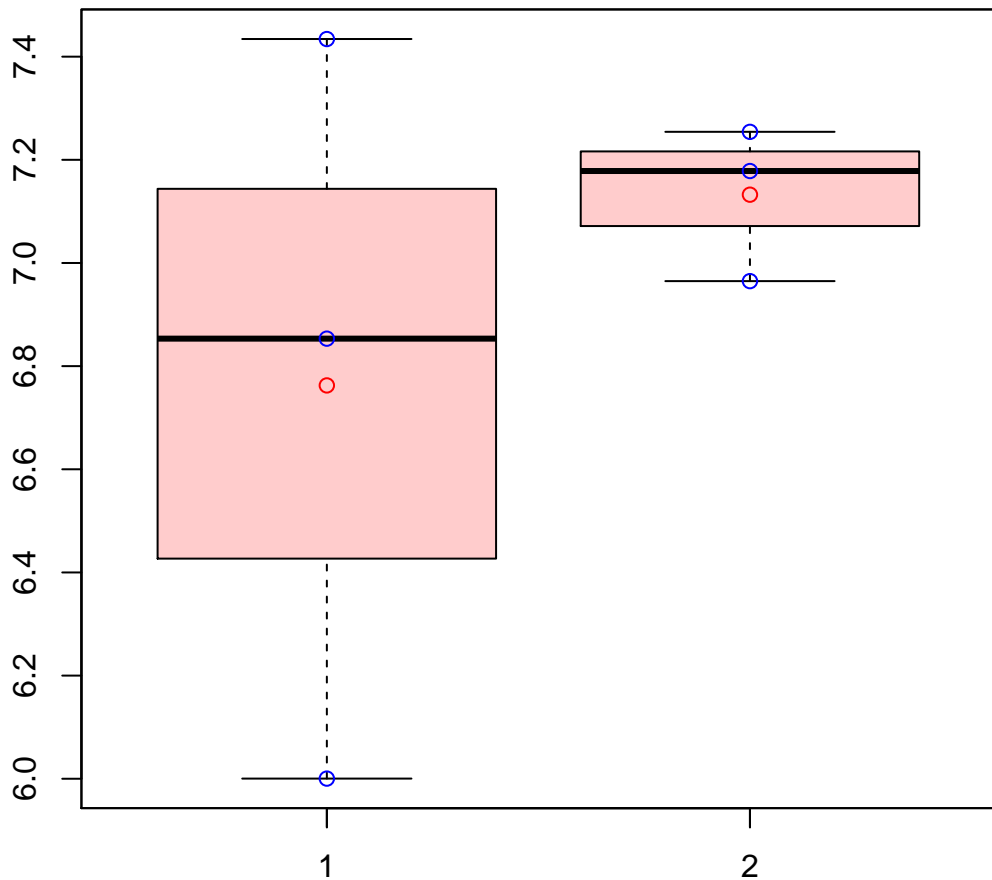

t-Test: p-value = 0.47

# A2XM47|A2XM47\_ORYSI

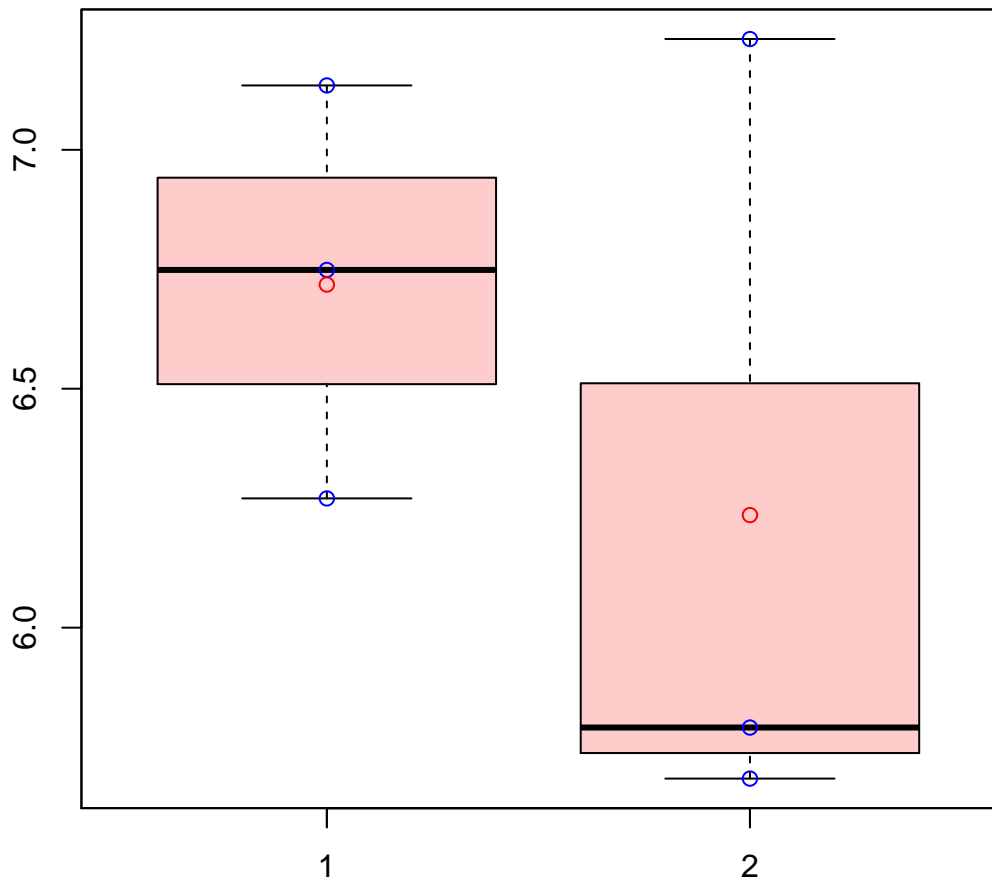

t-Test: p-value = 0.45



# A2XMH6|A2XMH6\_ORYSI

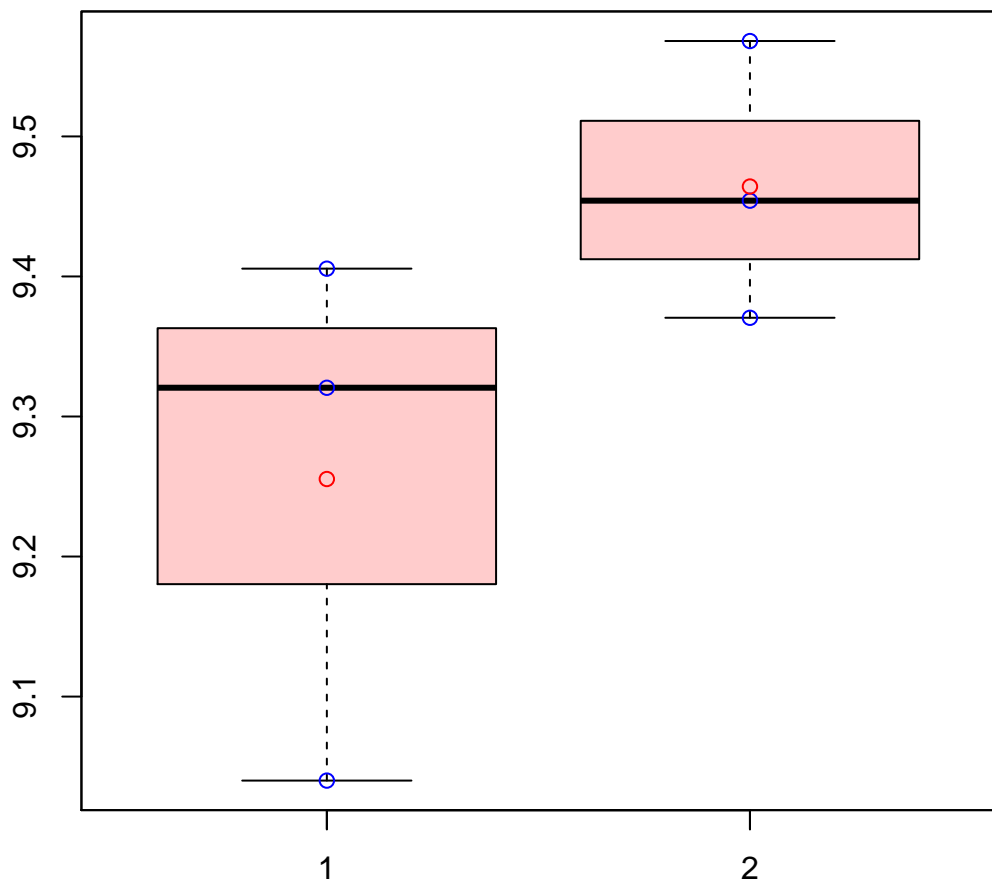

t-Test: p-value = 0.19

# A2XMI9|A2XMI9\_ORYSI

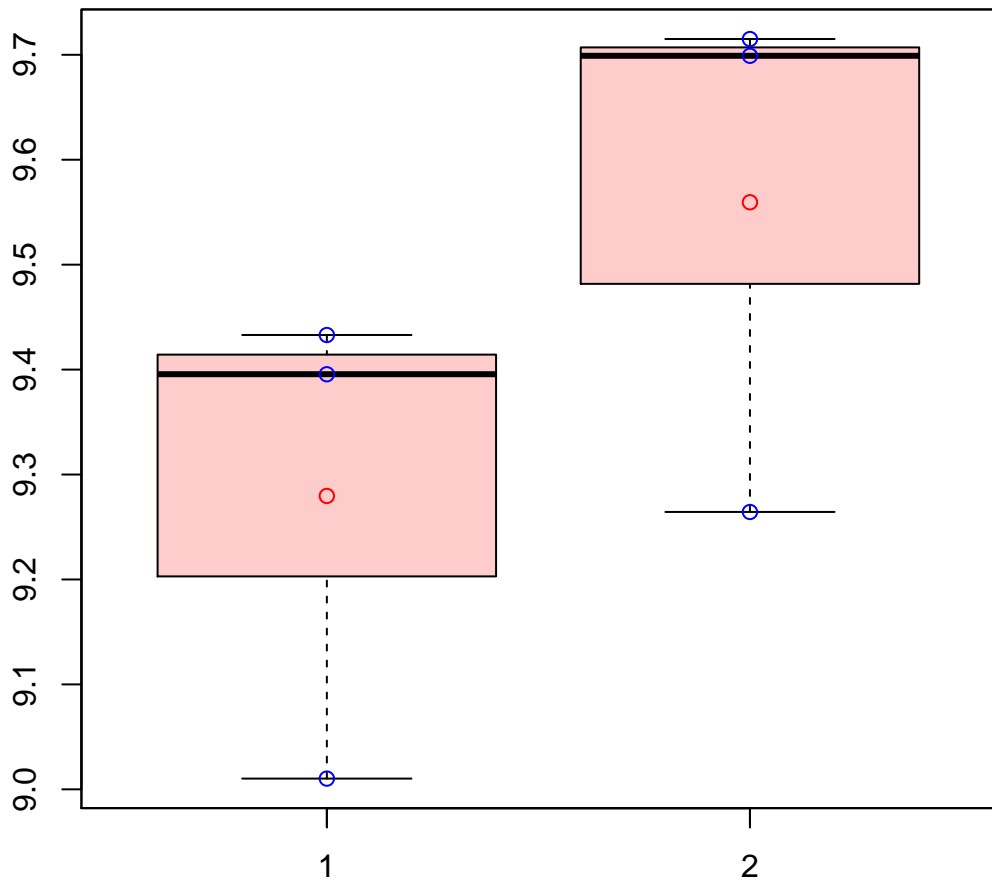

t-Test: p-value = 0.24

# A2XMW9|A2XMW9\_ORYSI

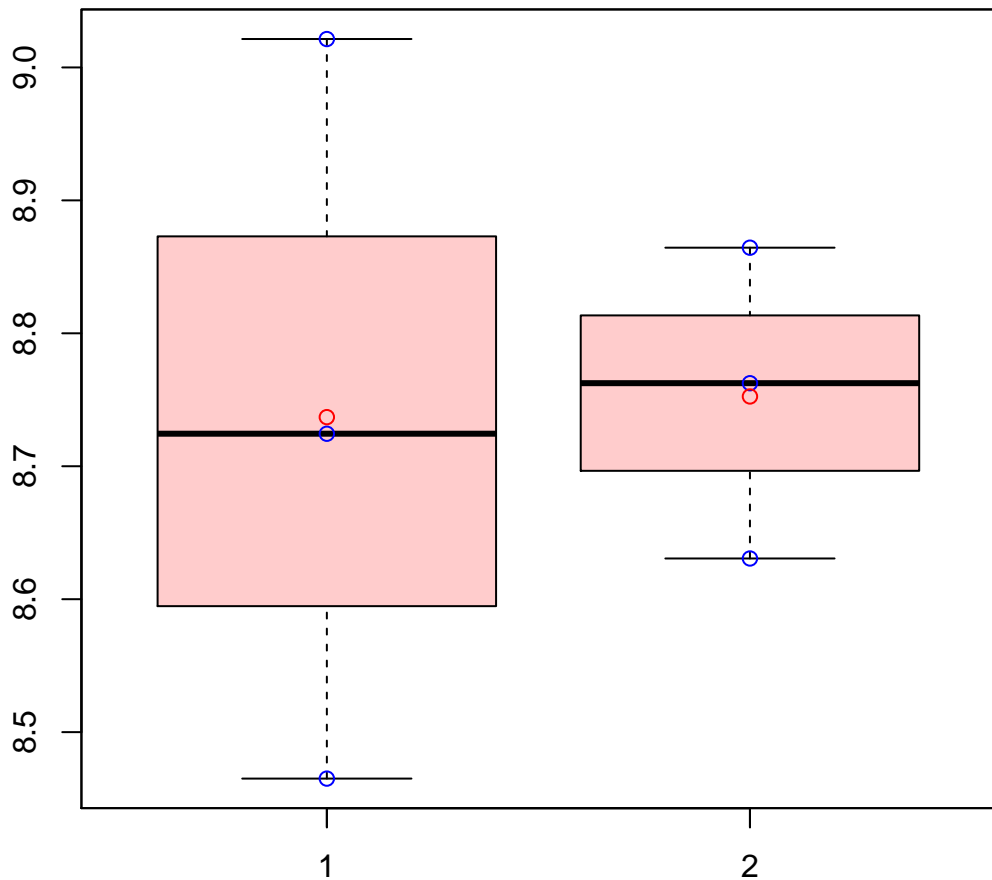

t-Test: p-value = 0.94

# A2XNU7|A2XNU7\_ORYSI

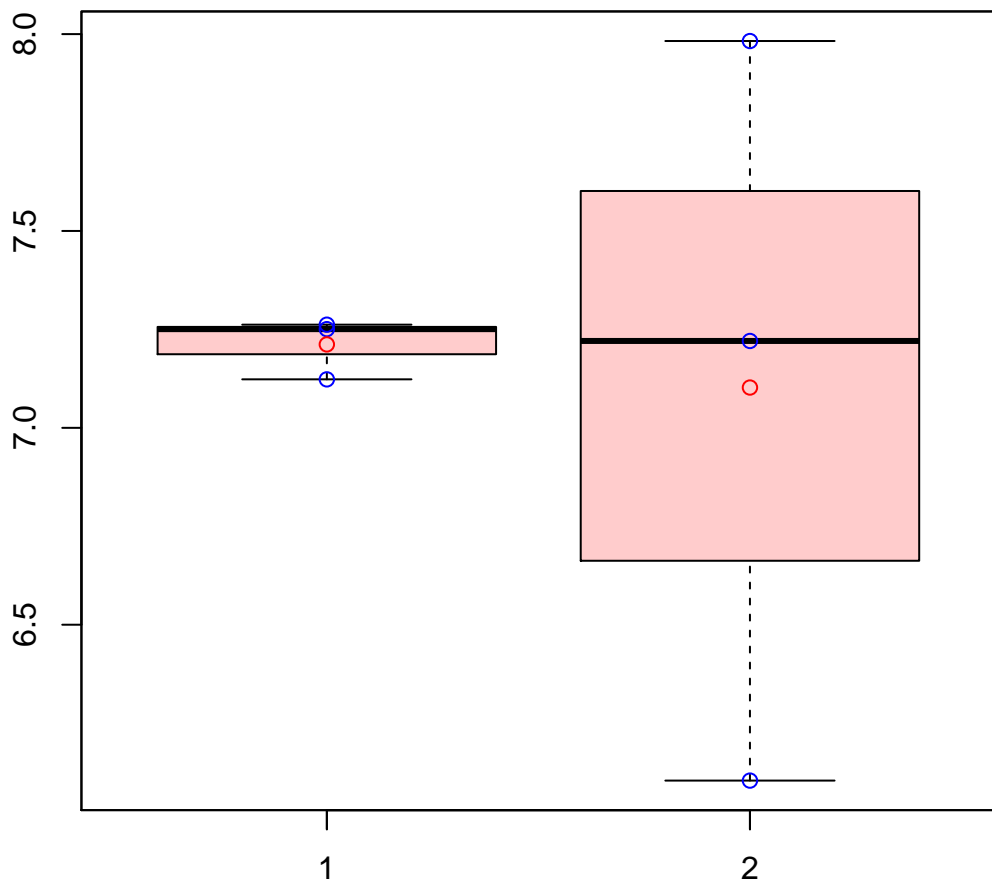

t-Test: p-value = 0.86

# A2XQI8|A2XQI8\_ORYSI

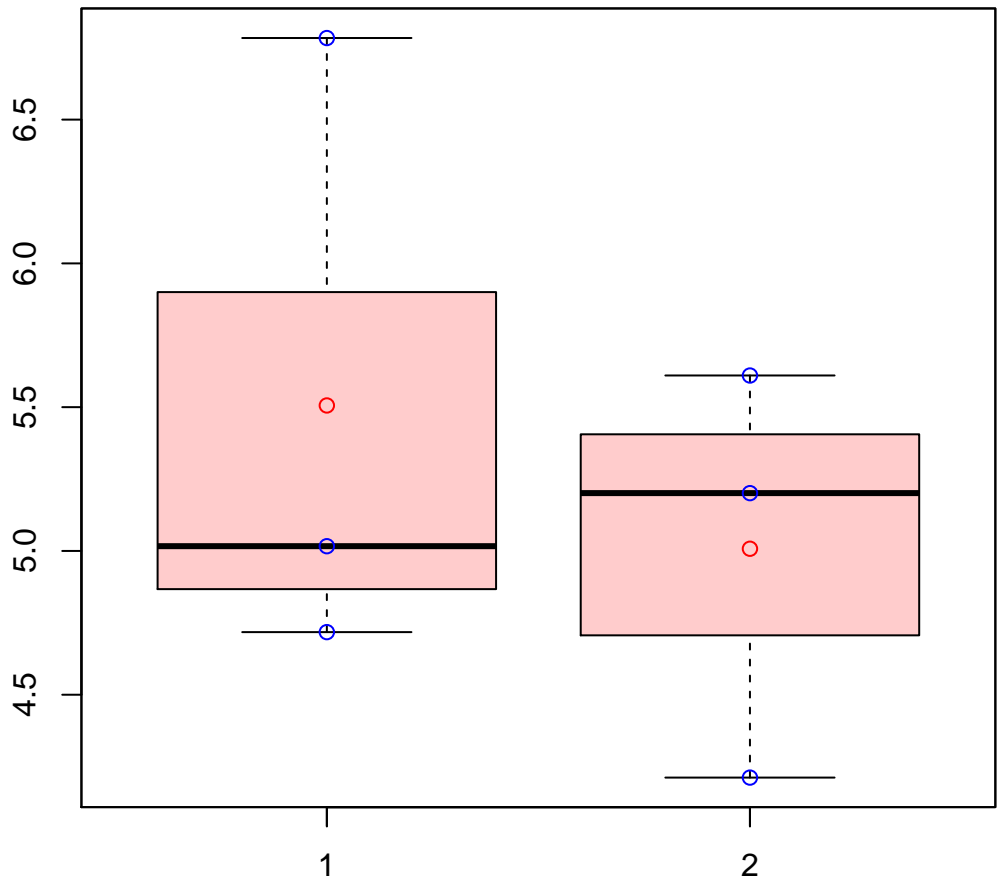

t-Test: p-value = 0.56

# A2XR63|A2XR63\_ORYSI

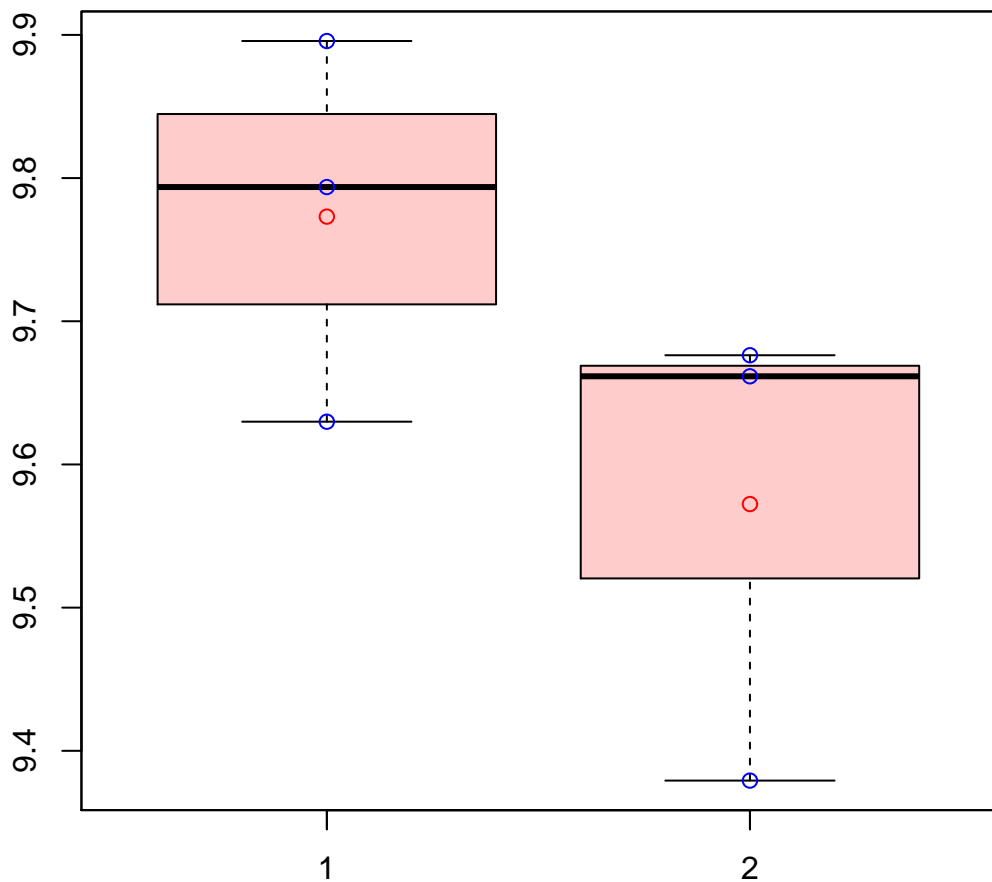

t-Test: p-value = 0.18

# A2XSG1|A2XSG1\_ORYSI

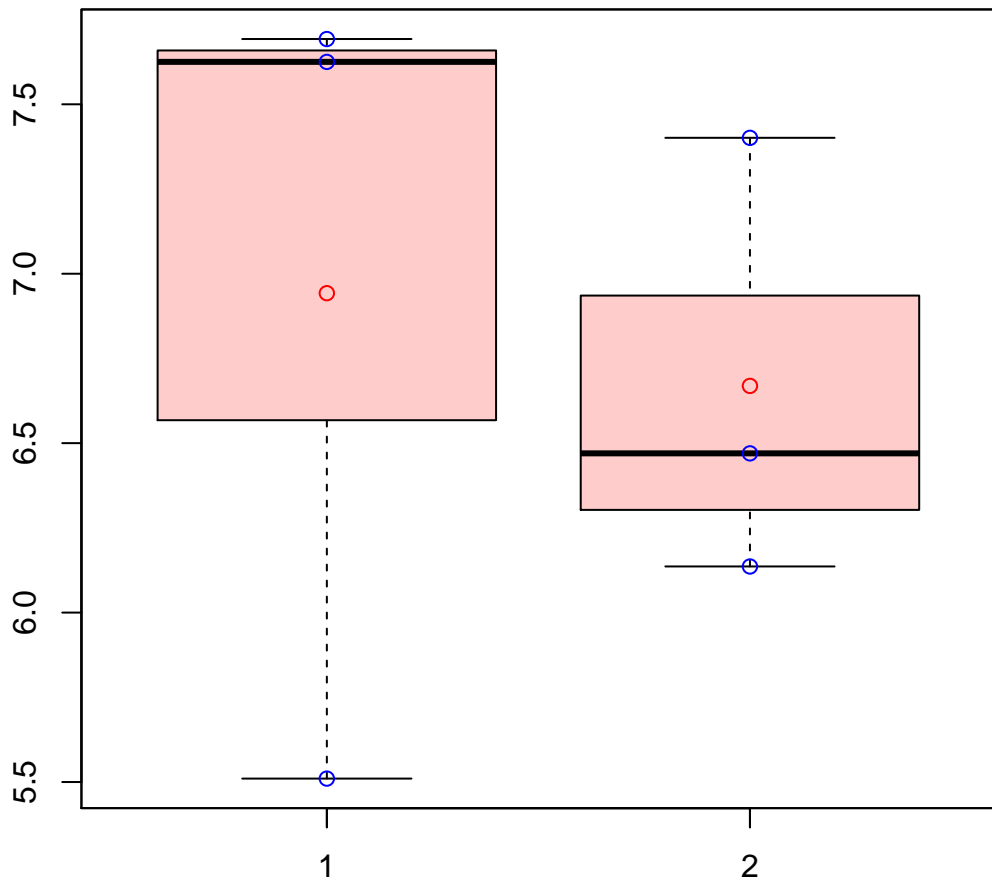

t-Test: p-value = 0.76

# A2XU83|A2XU83\_ORYSI

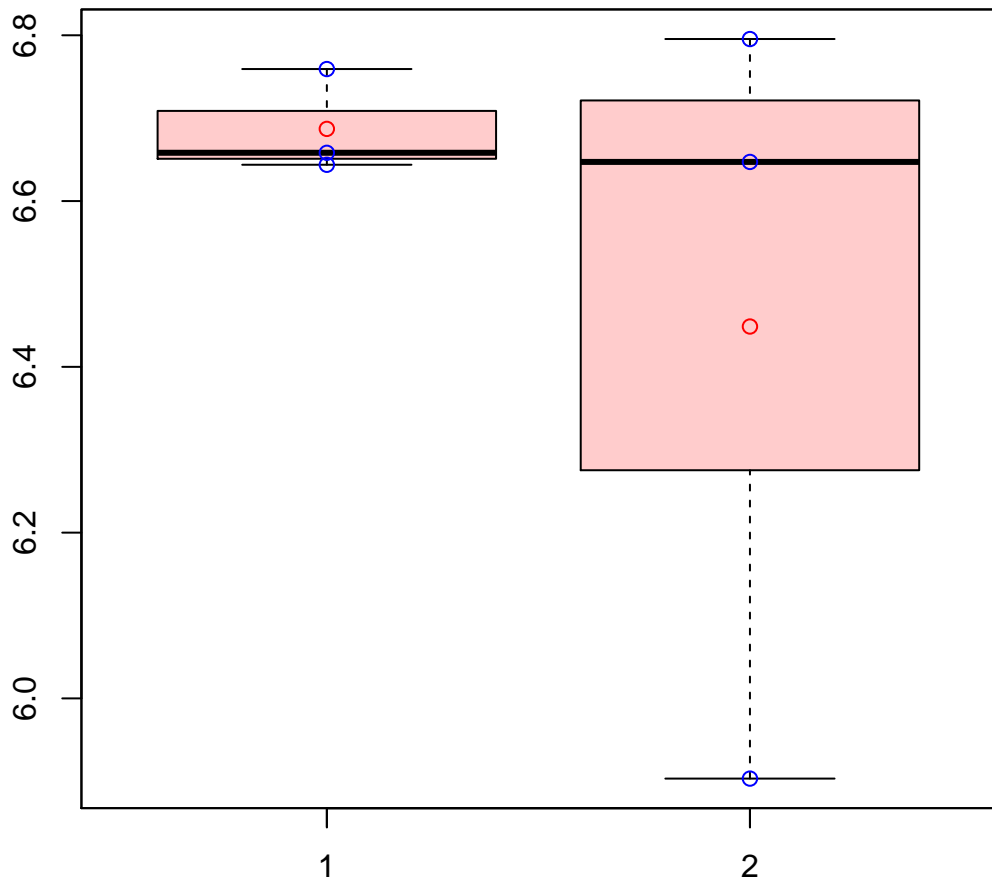

t-Test: p-value = 0.48



# A2XUH5|A2XUH5\_ORYSI

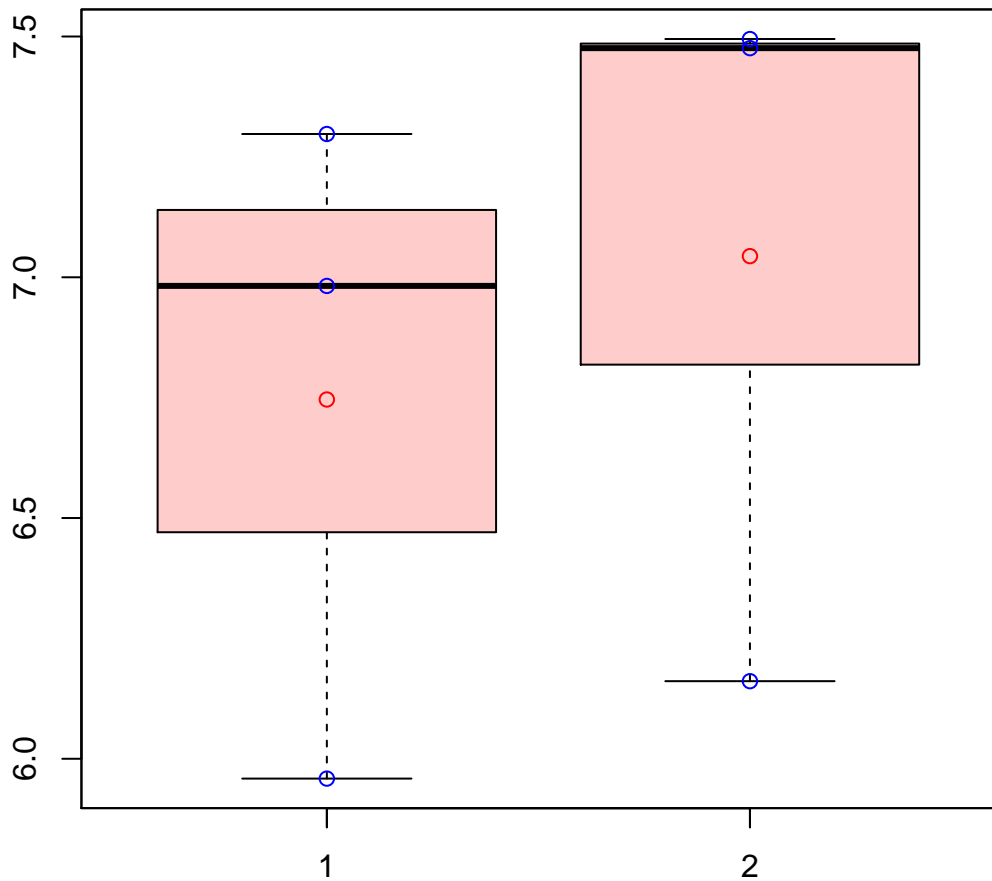

t-Test: p-value = 0.65

# A2XVI1|A2XVI1\_ORYSI

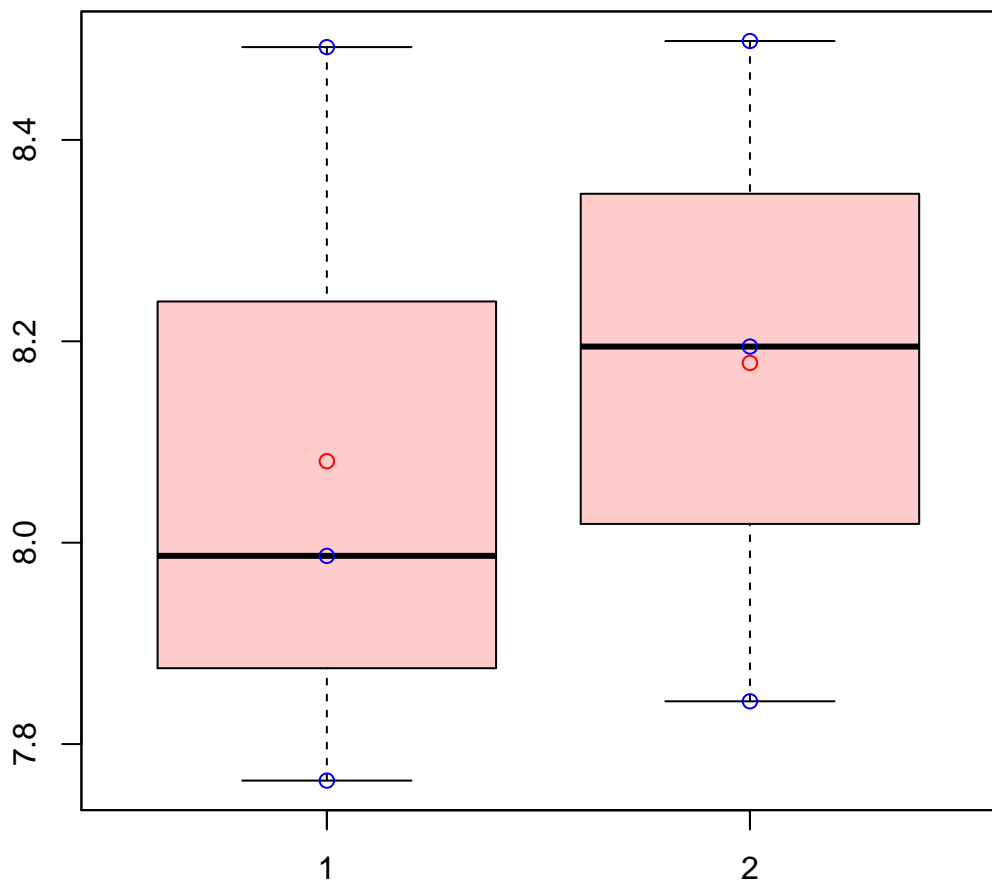

t-Test: p-value = 0.75

# A2XVK3|A2XVK3\_ORYSI

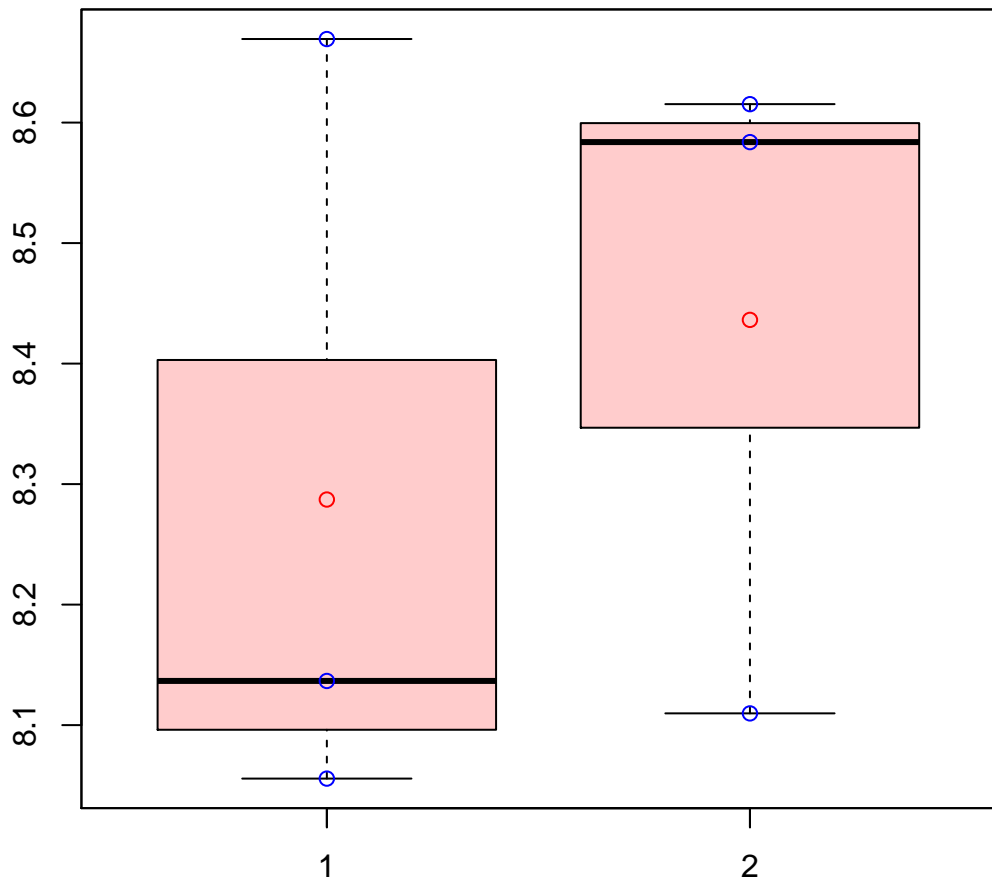

t-Test: p-value = 0.59

# A2XVV0|A2XVV0\_ORYSI

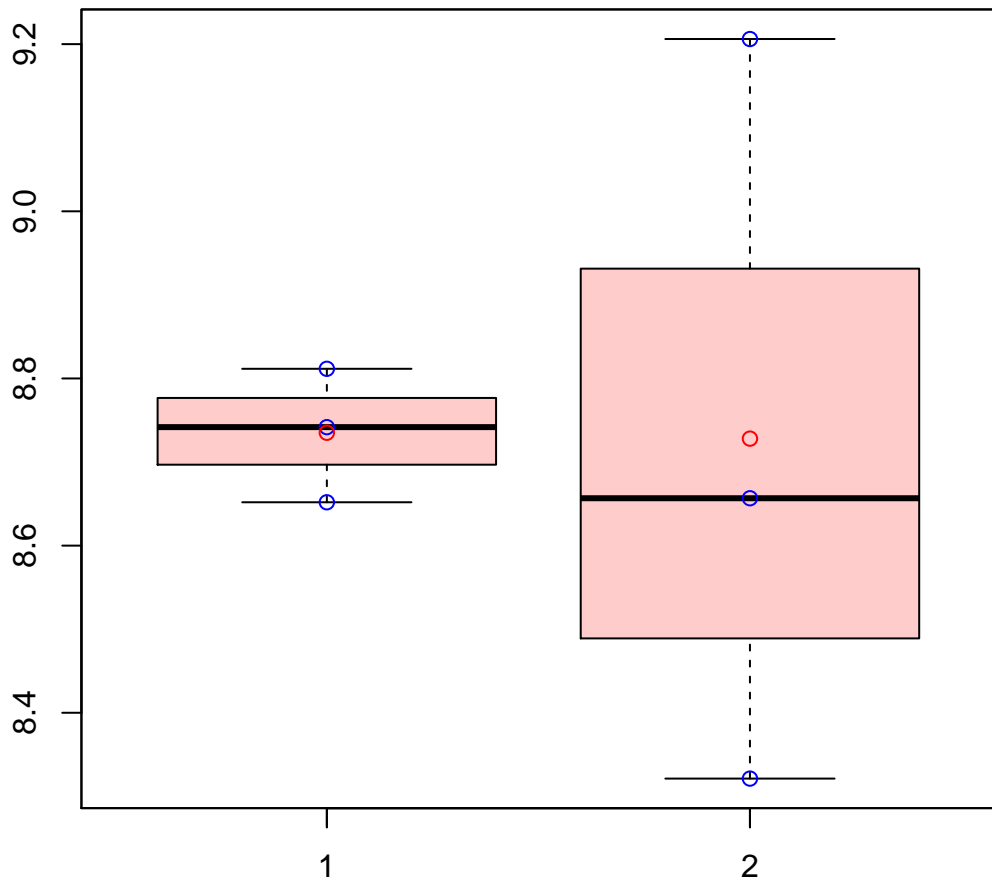

t-Test: p-value = 0.98

# A2Y092|A2Y092\_ORYSI

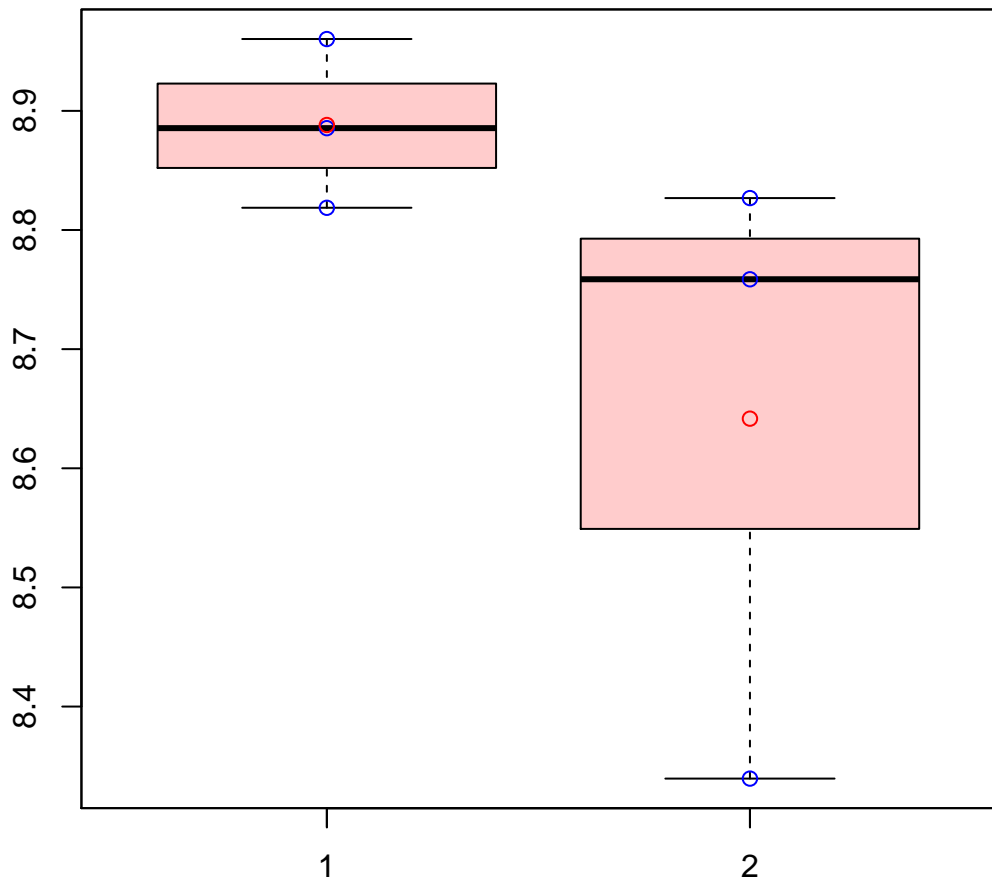

t-Test: p-value = 0.24

# A2Y0K6|A2Y0K6\_ORYSI

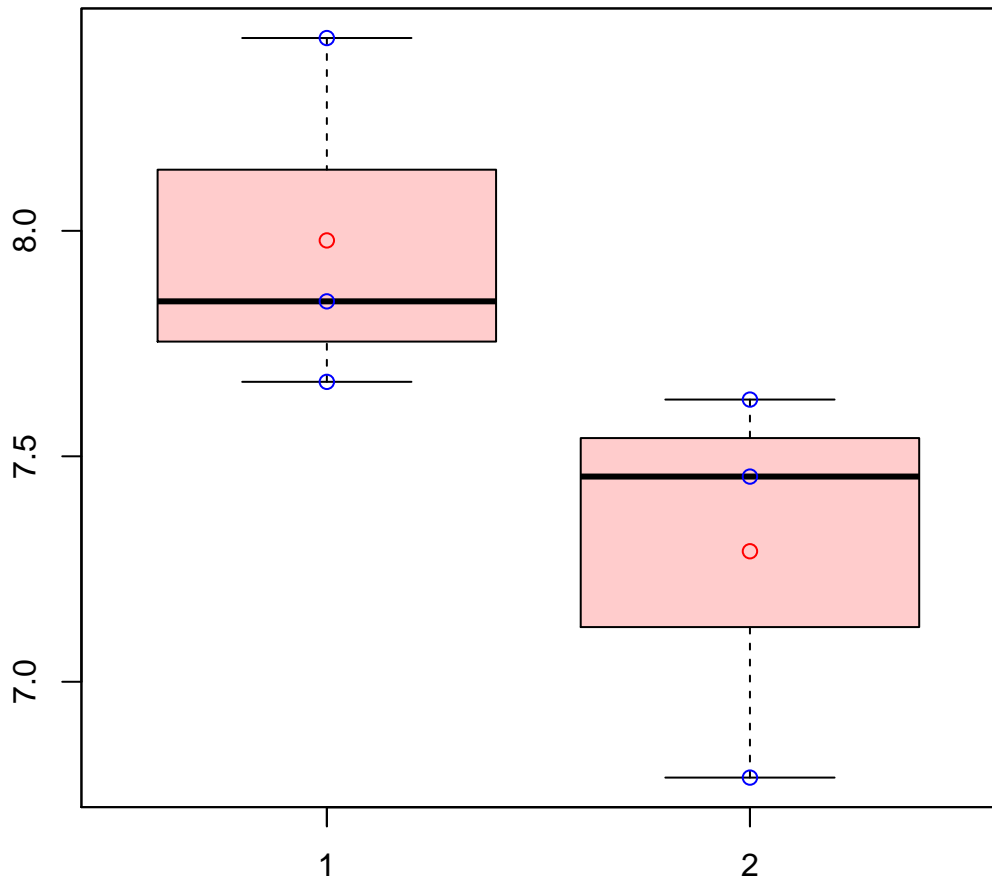

t-Test: p-value = 0.12

# A2Y2Y4|A2Y2Y4\_ORYSI

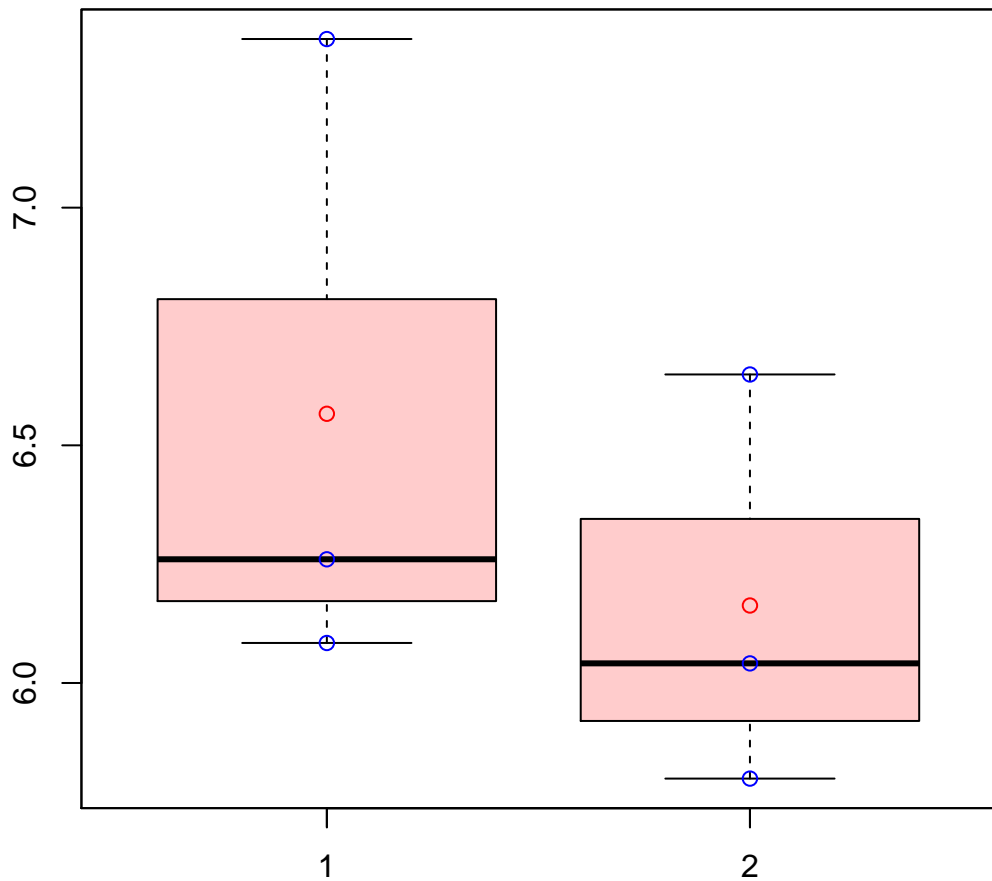

t-Test: p-value = 0.45

# A2Y3V8|A2Y3V8\_ORYSI

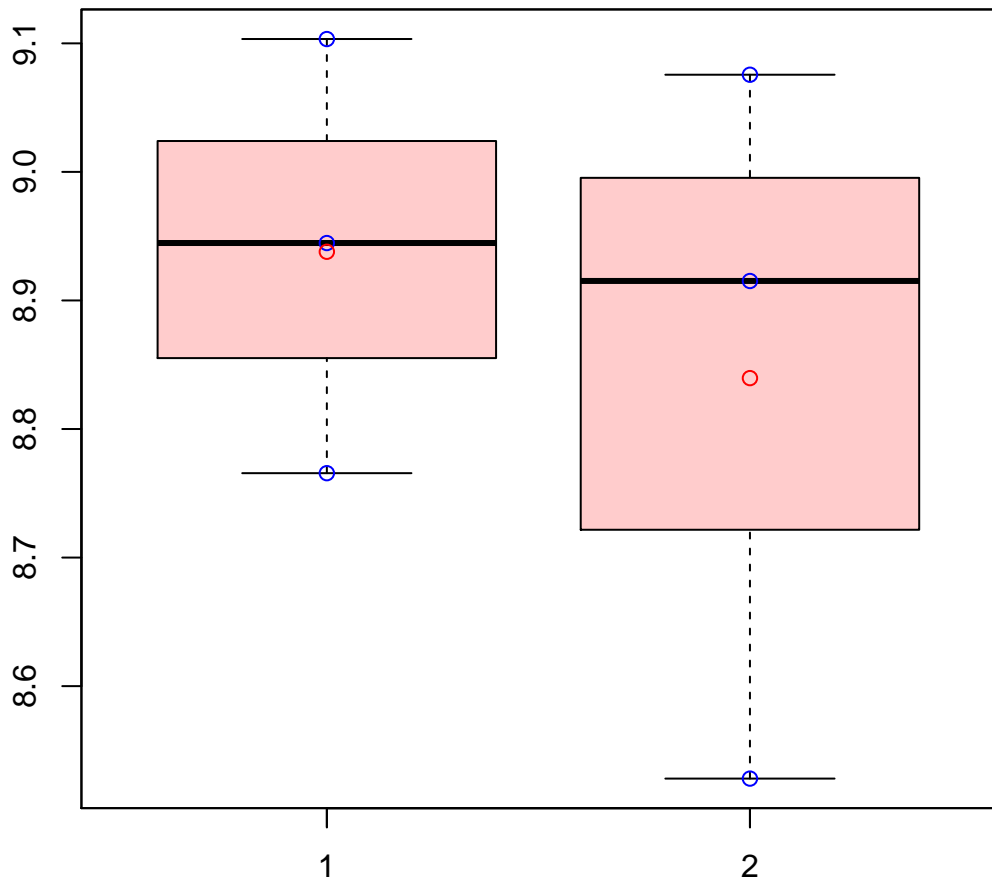

t-Test: p-value = 0.64



# A2Y6W7|A2Y6W7\_ORYSI

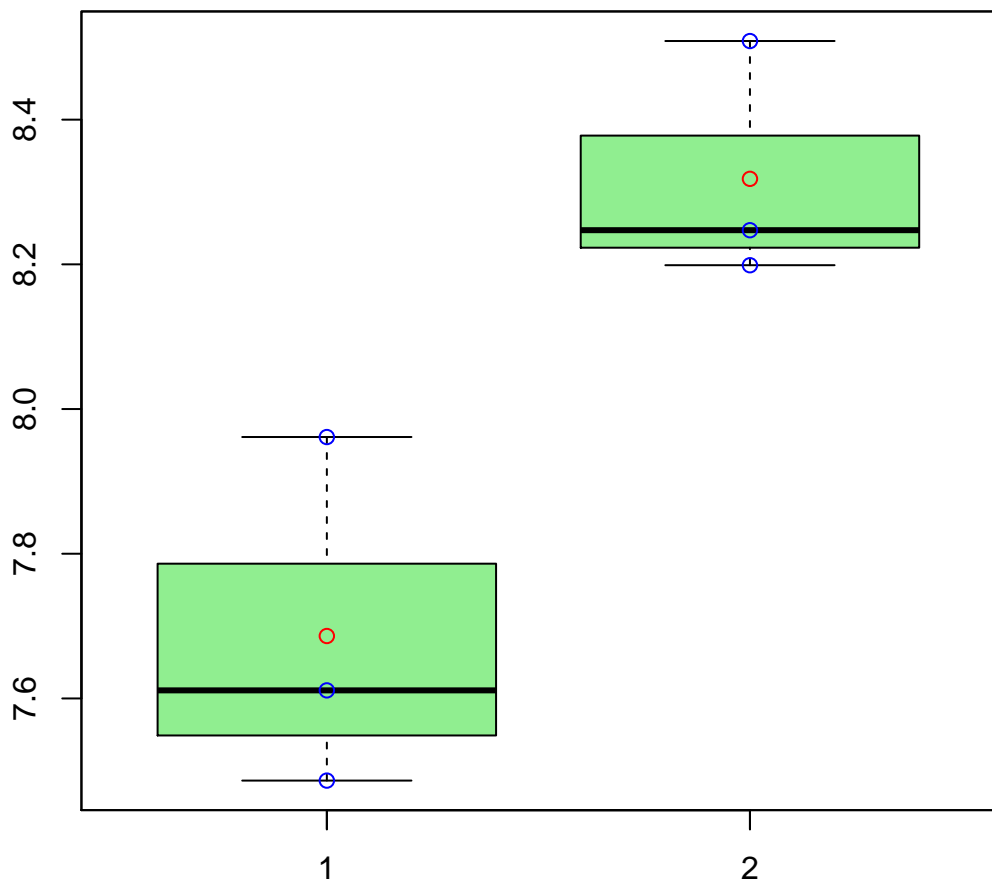

t-Test: p-value = 0.03

# A2Y7R0|A2Y7R0\_ORYSI

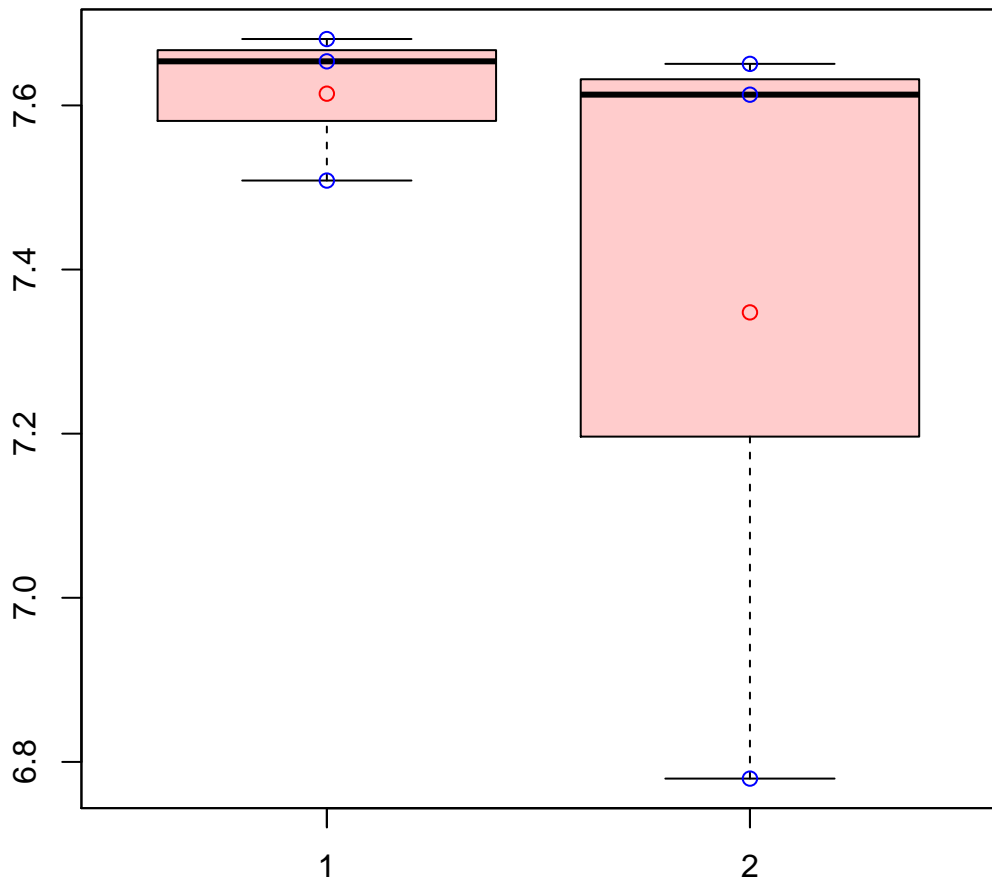

t-Test: p-value = 0.45

# A2Y7T7|A2Y7T7\_ORYSI

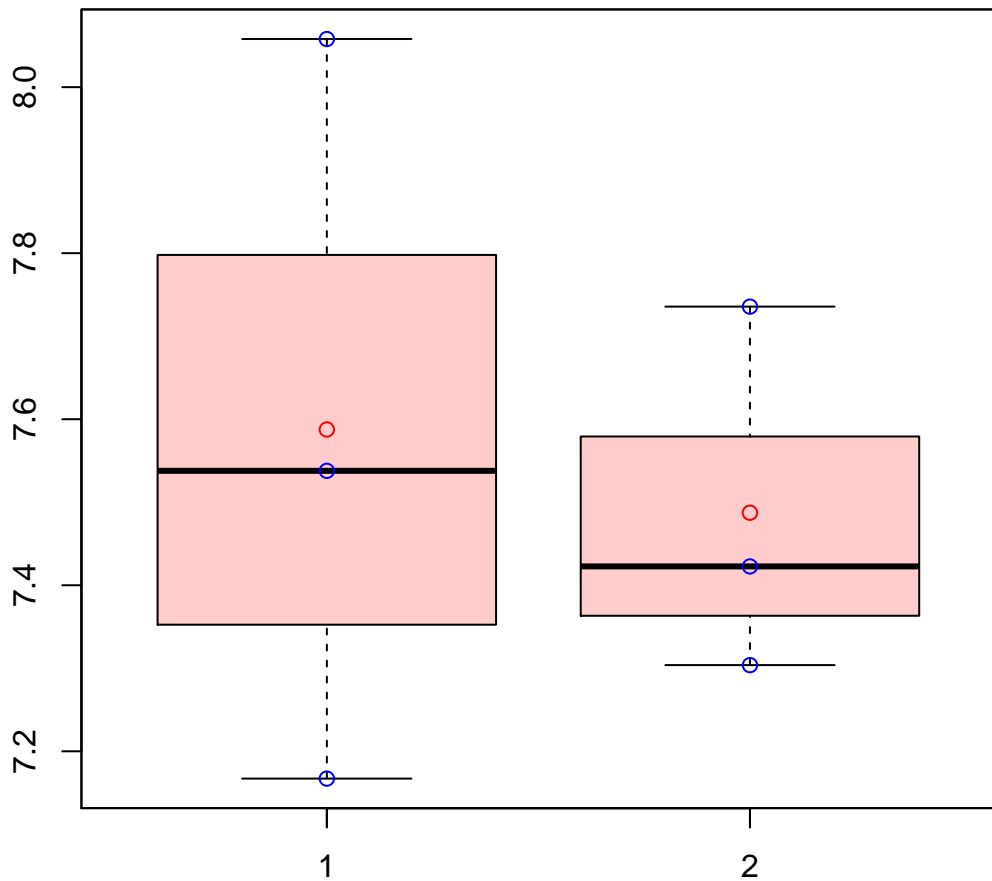

t-Test: p-value = 0.75

# A2YBG0|A2YBG0\_ORYSI

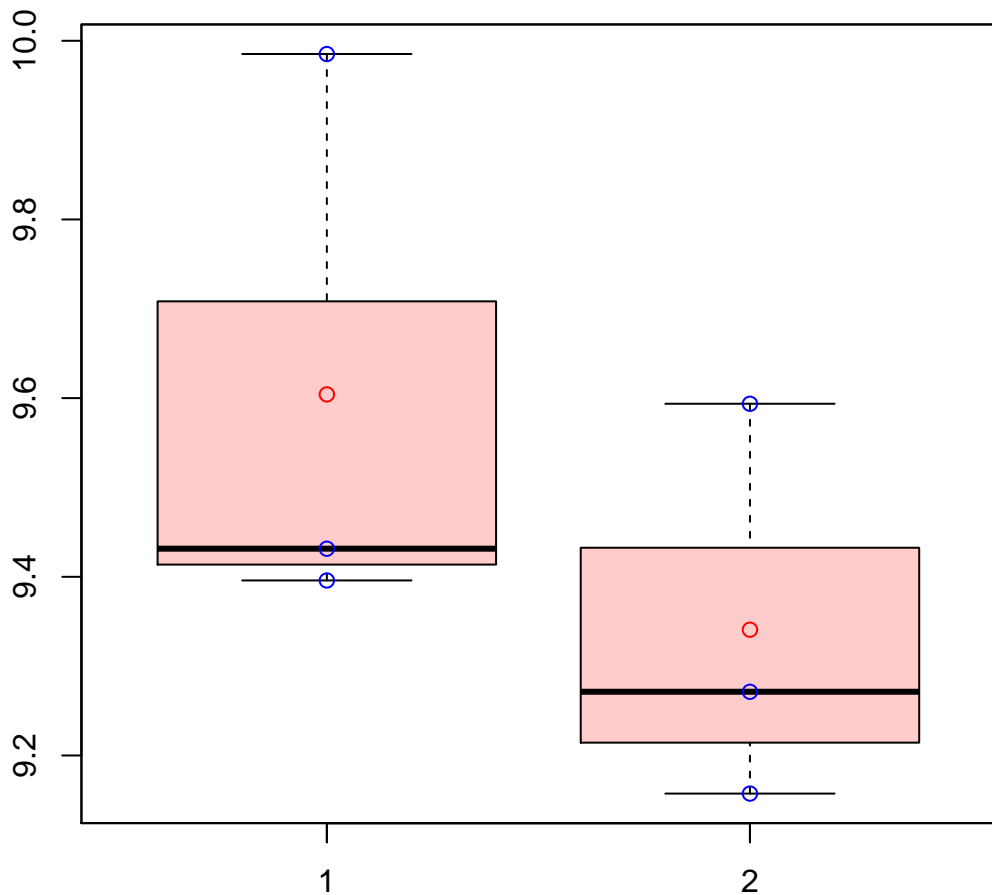

t-Test: p-value = 0.33

# A2YCW1|A2YCW1\_ORYSI

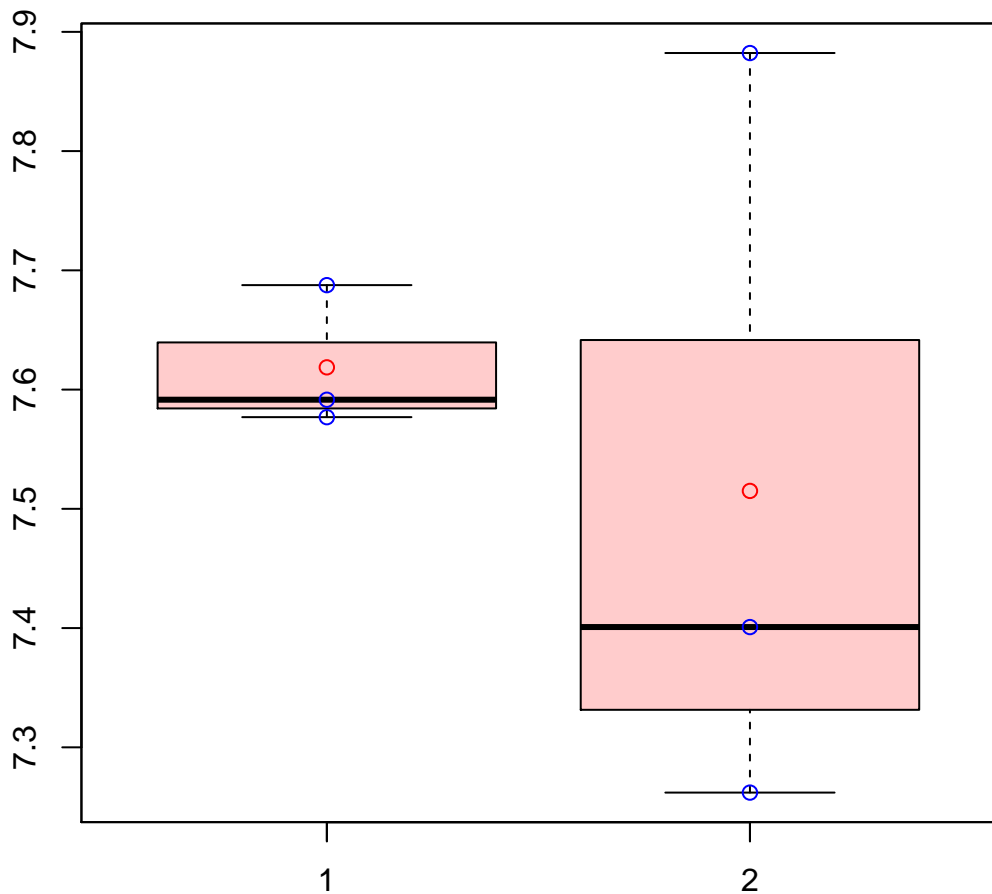

t-Test: p-value = 0.64

# A2YI21|A2YI21\_ORYSI

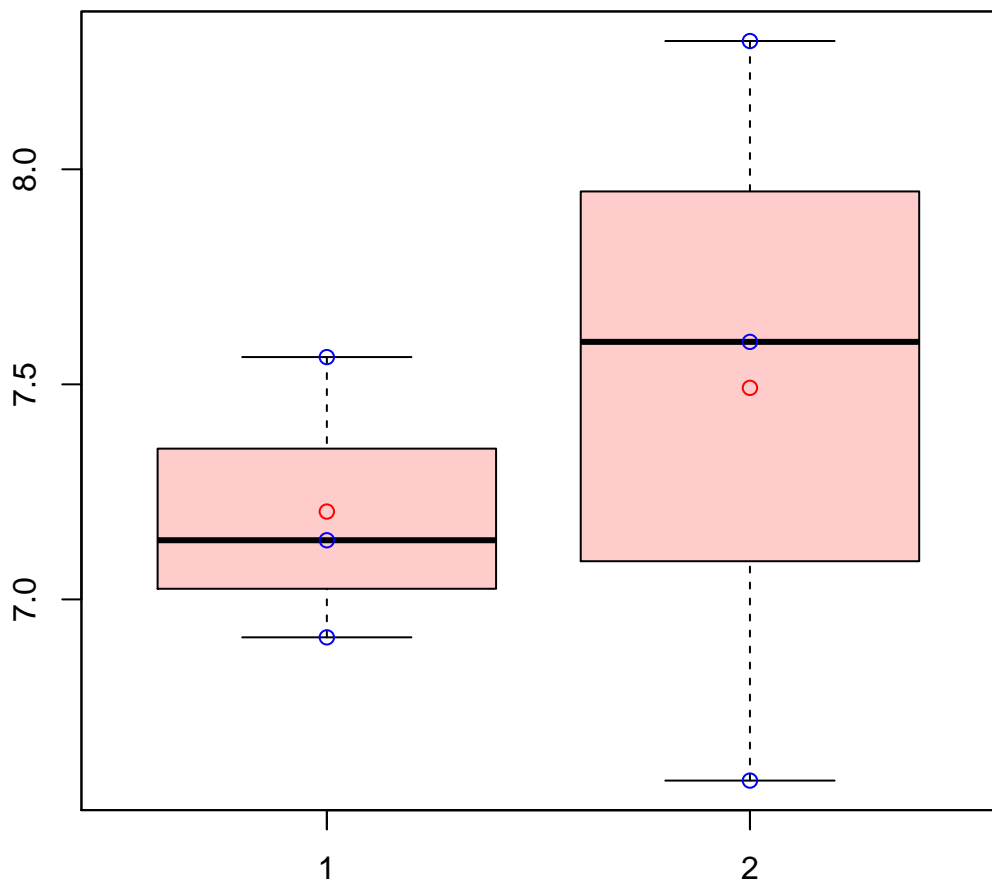

t-Test: p-value = 0.63

# A2YJ49|A2YJ49\_ORYSI

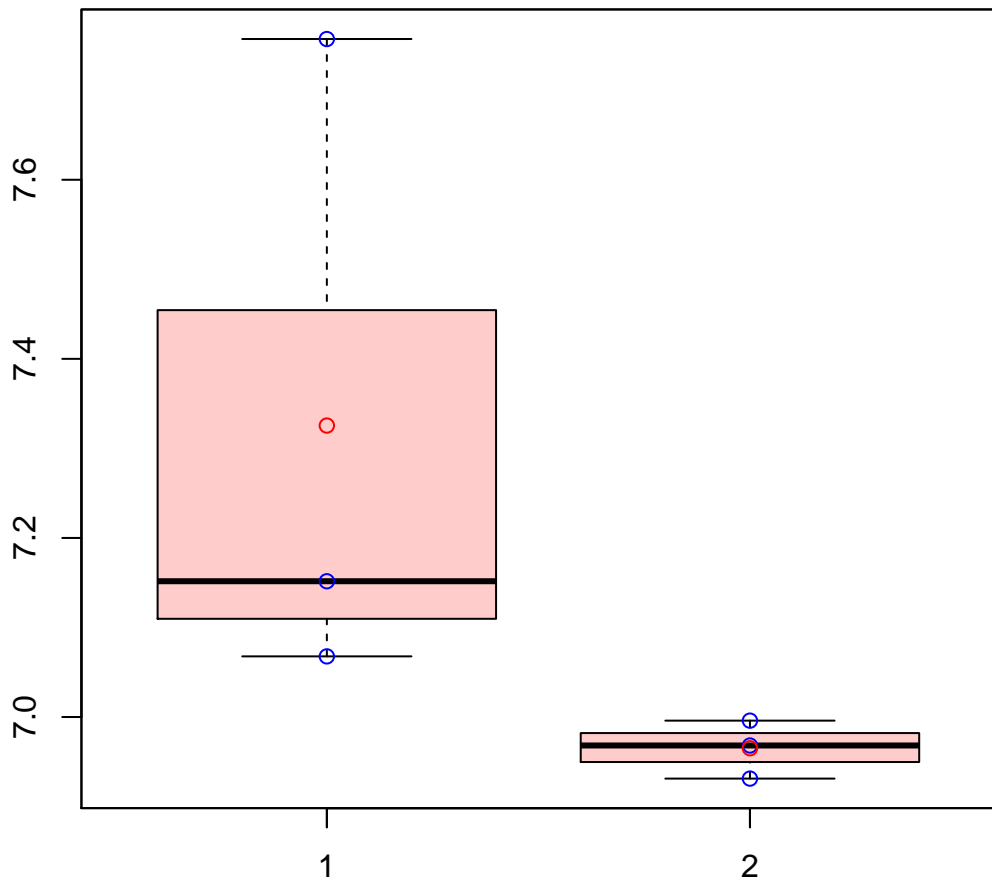

t-Test: p-value = 0.24

# A2YKJ8|A2YKJ8\_ORYSI

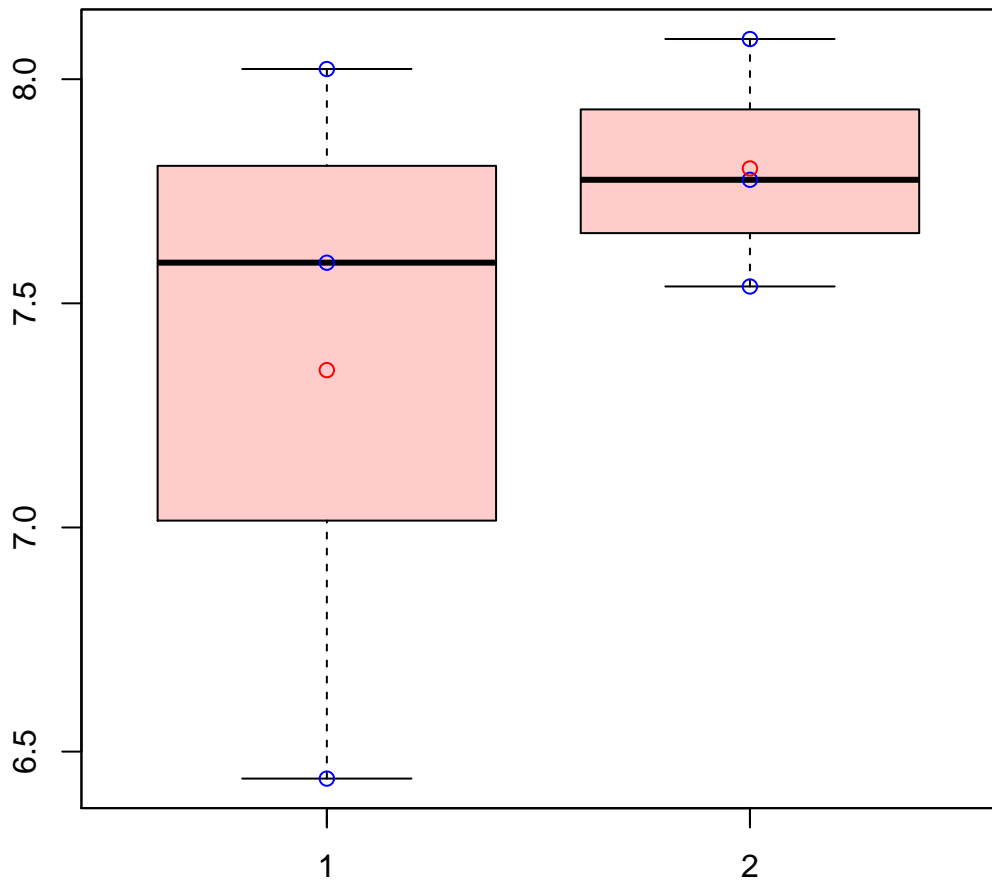

t-Test: p-value = 0.45



## A2YLE6|A2YLE6\_ORYSI

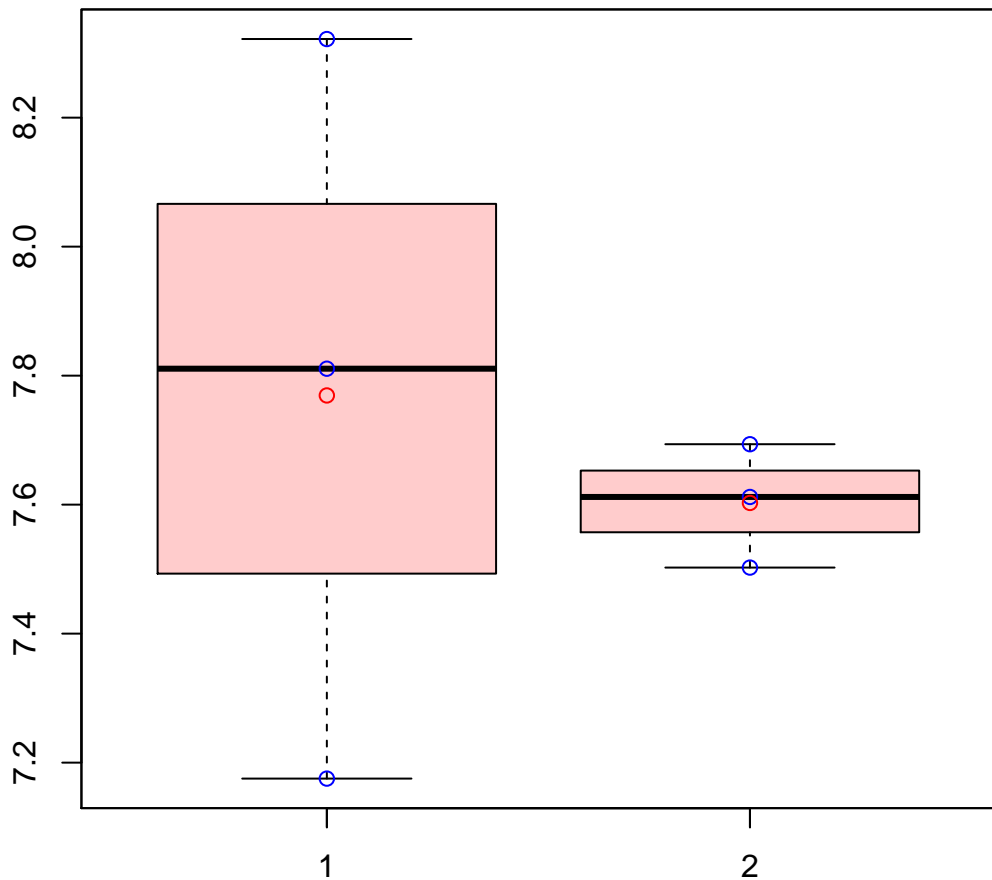

t-Test: p-value = 0.67

## A2YML2|A2YML2\_ORYSI

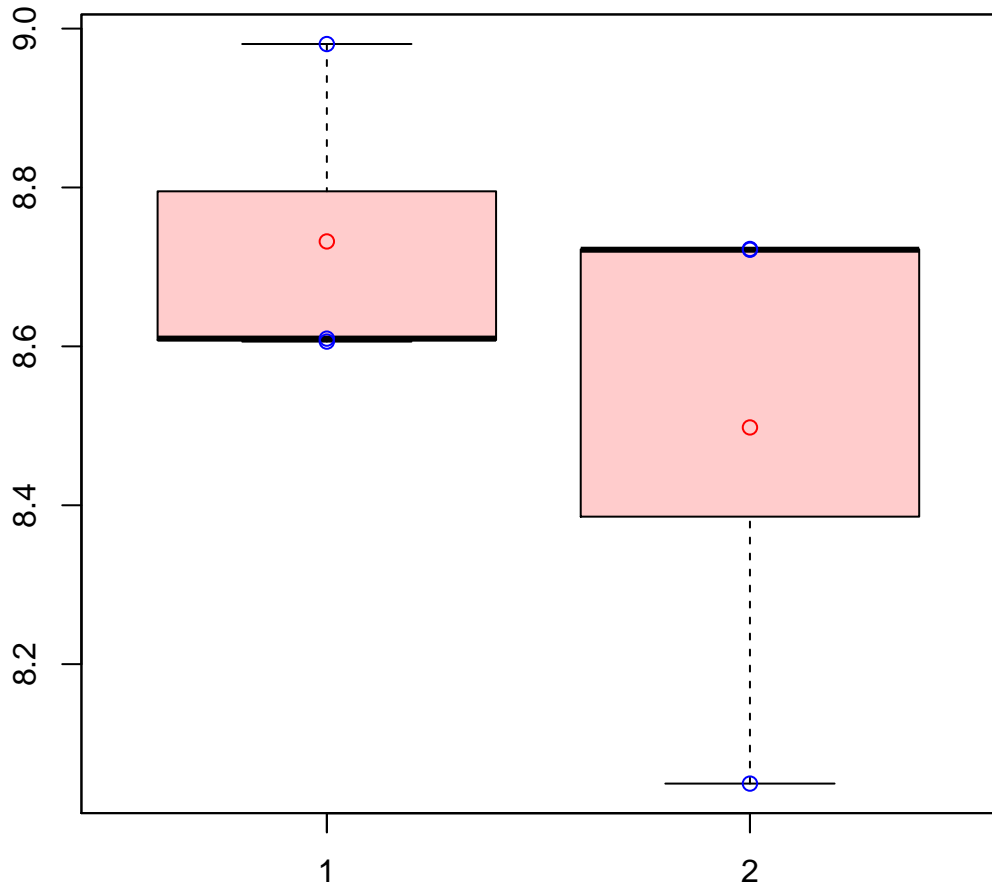

t-Test: p-value = 0.43

# A2YNQ0|A2YNQ0\_ORYSI

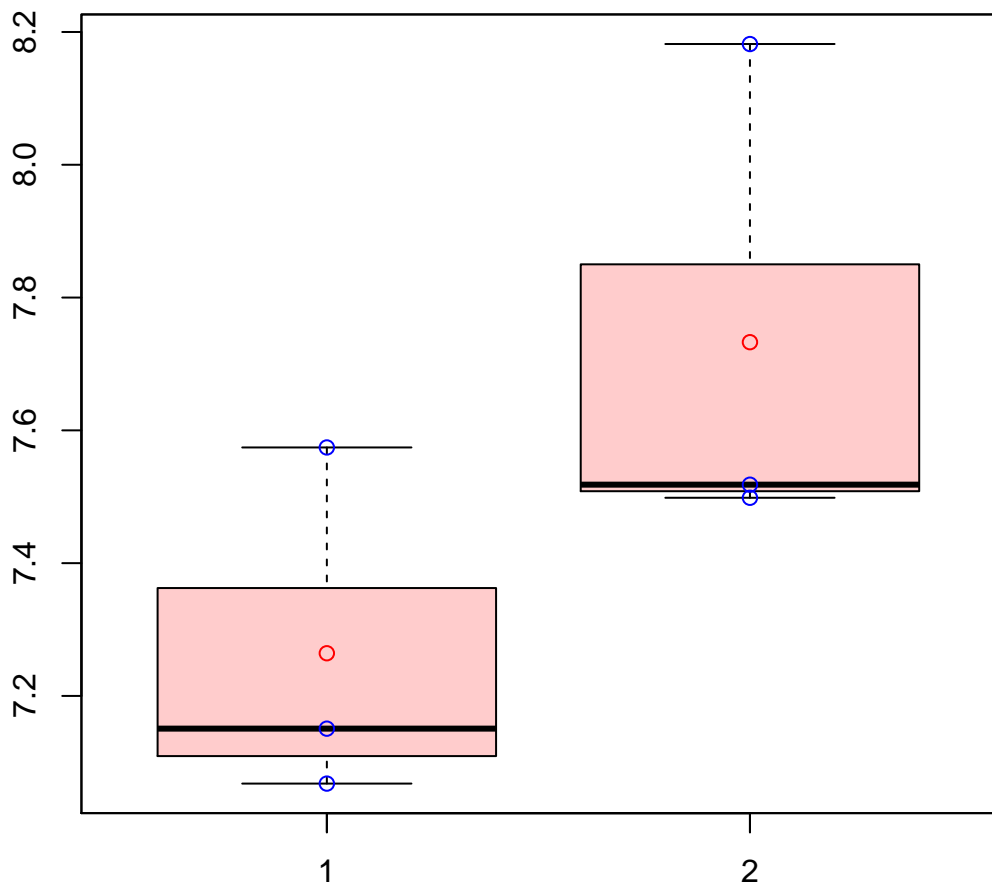

t-Test: p-value = 0.17

# A2YNU0|A2YNU0\_ORYSI

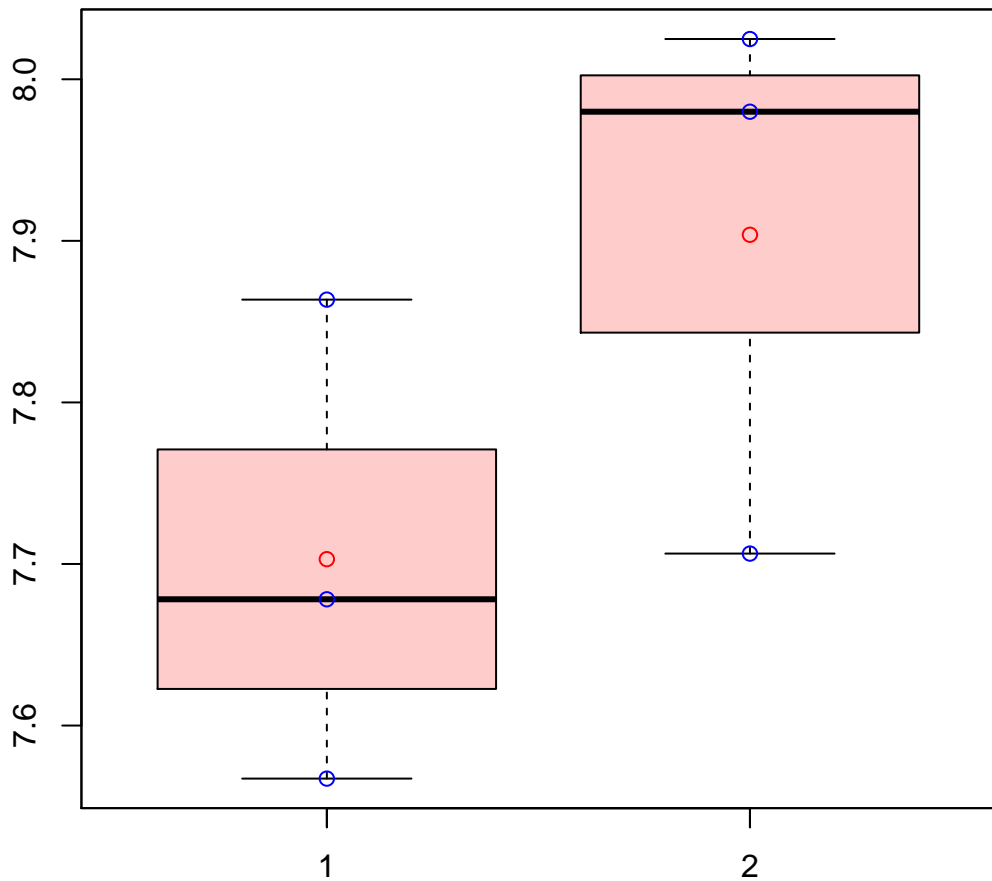

t-Test: p-value = 0.2

# A2YSN9|A2YSN9\_ORYSI

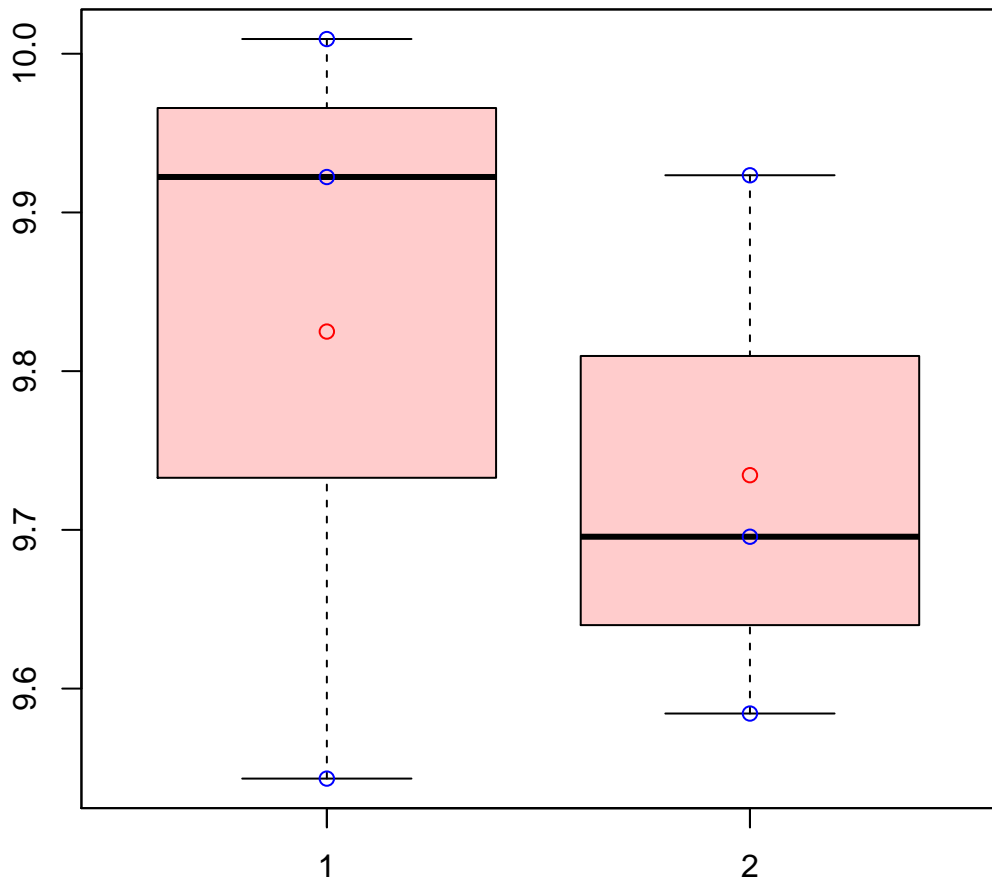

t-Test: p-value = 0.63

# A2YSS8|A2YSS8\_ORYSI

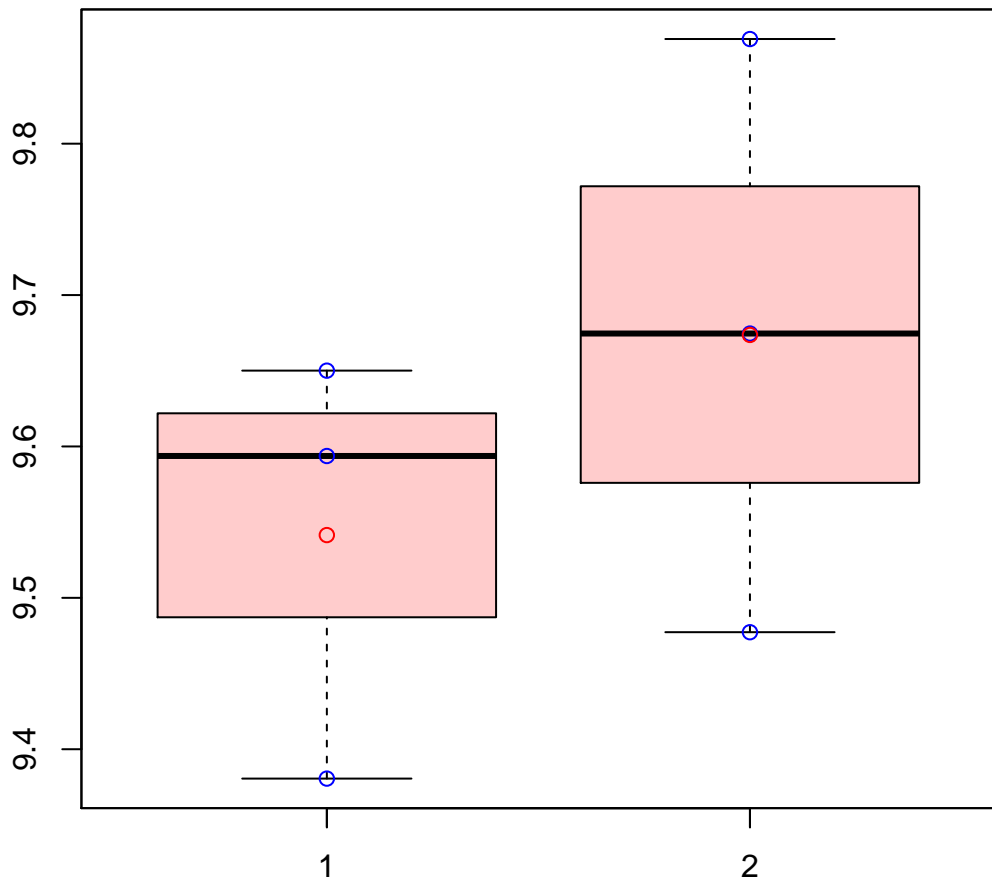

t-Test: p-value = 0.4

## A2YUJ1|A2YUJ1\_ORYSI

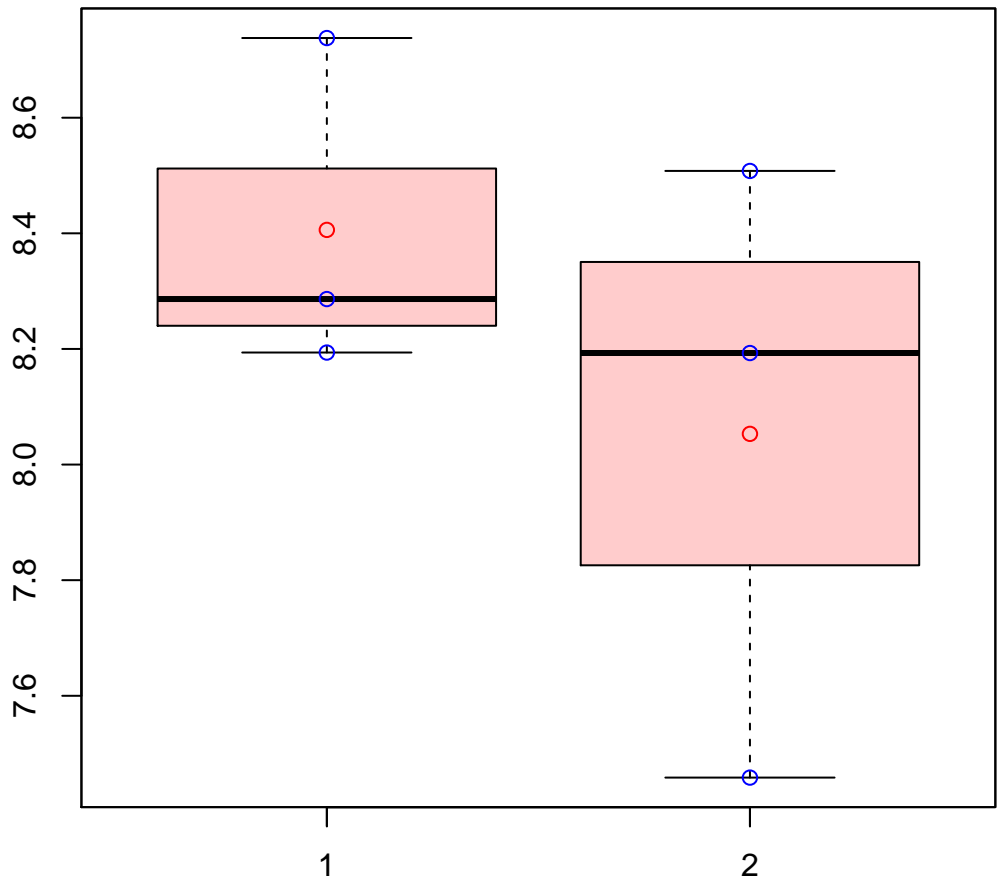

t-Test: p-value = 0.39

# A2YUJ2|A2YUJ2\_ORYSI

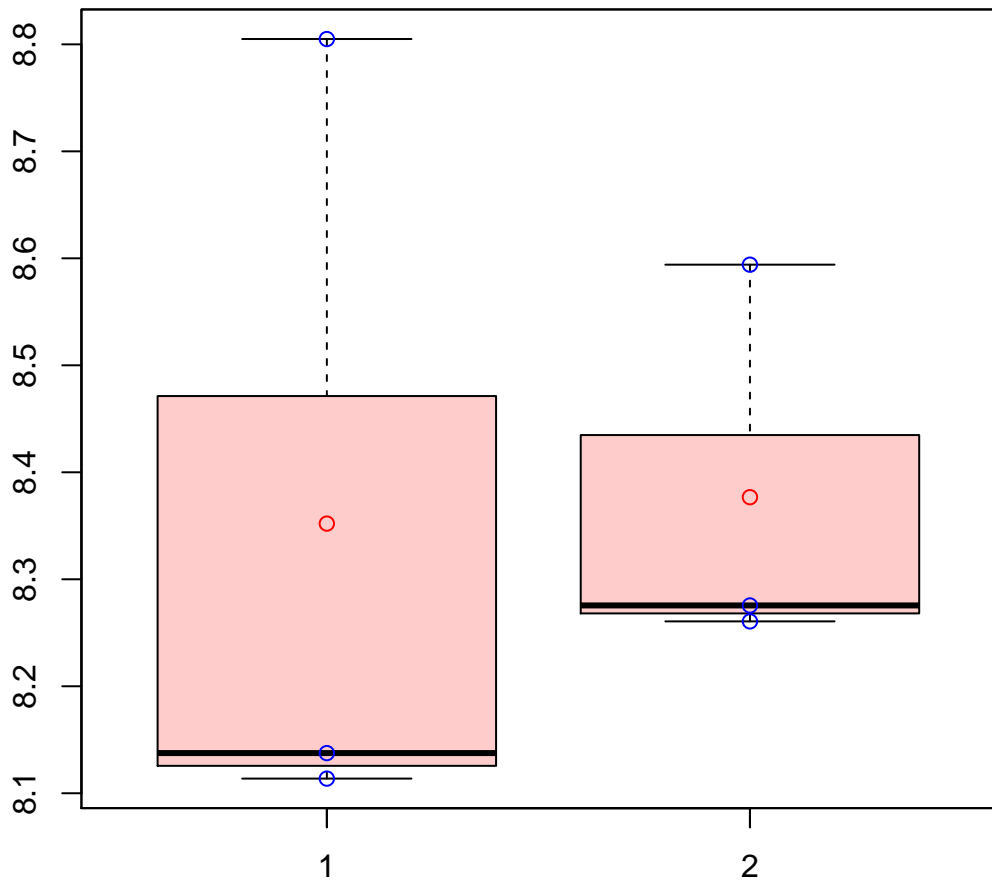

t-Test: p-value = 0.93



# A2YUJ4|A2YUJ4\_ORYSI

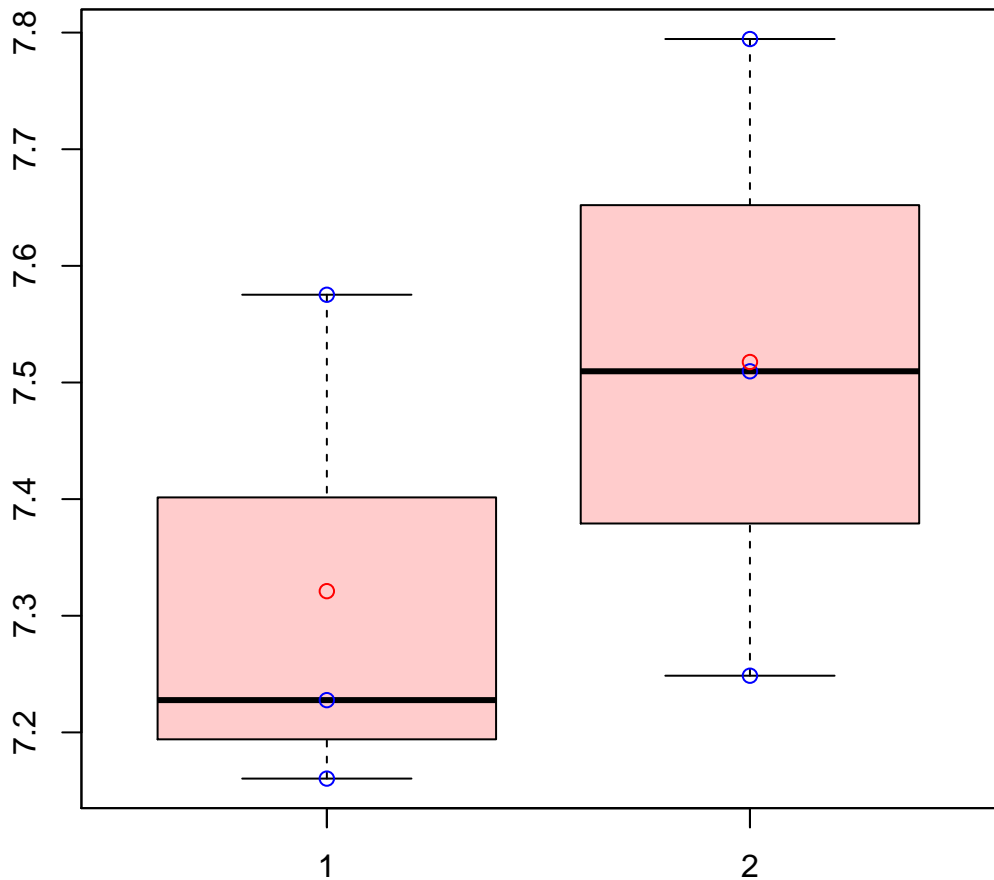

t-Test: p-value = 0.39

# A2YUU5|A2YUU5\_ORYSI

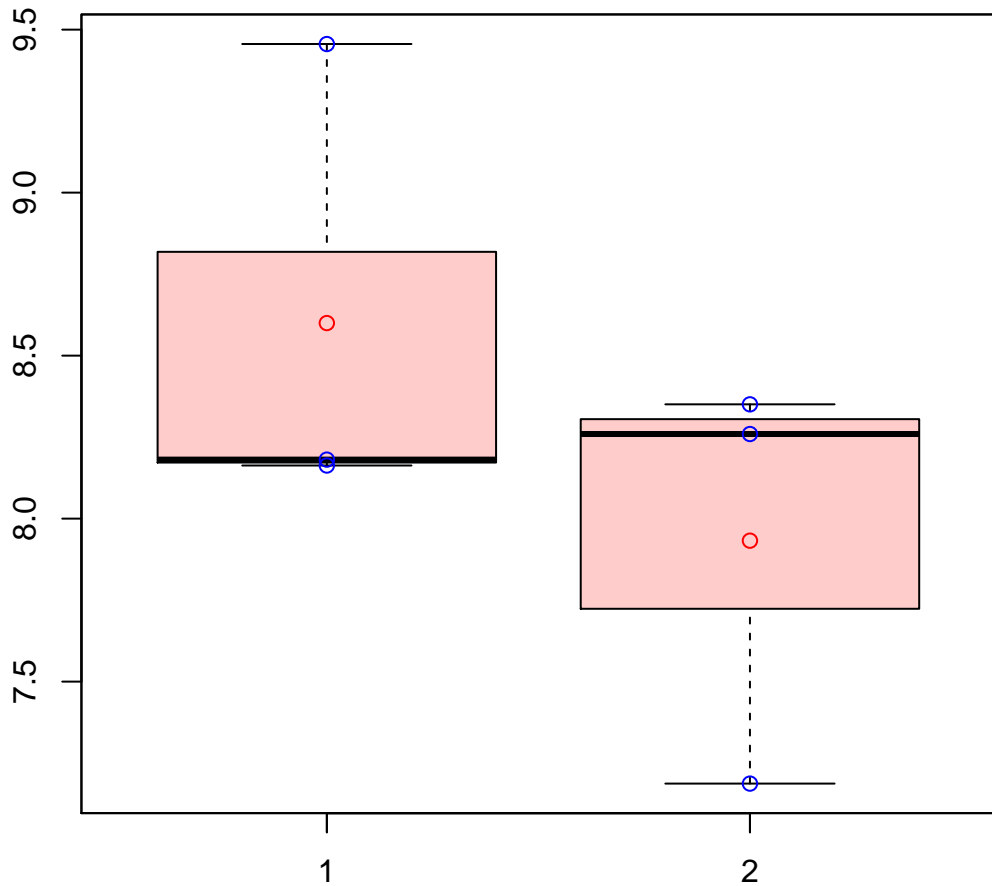

t-Test: p-value = 0.31

# A2YV93|A2YV93\_ORYSI

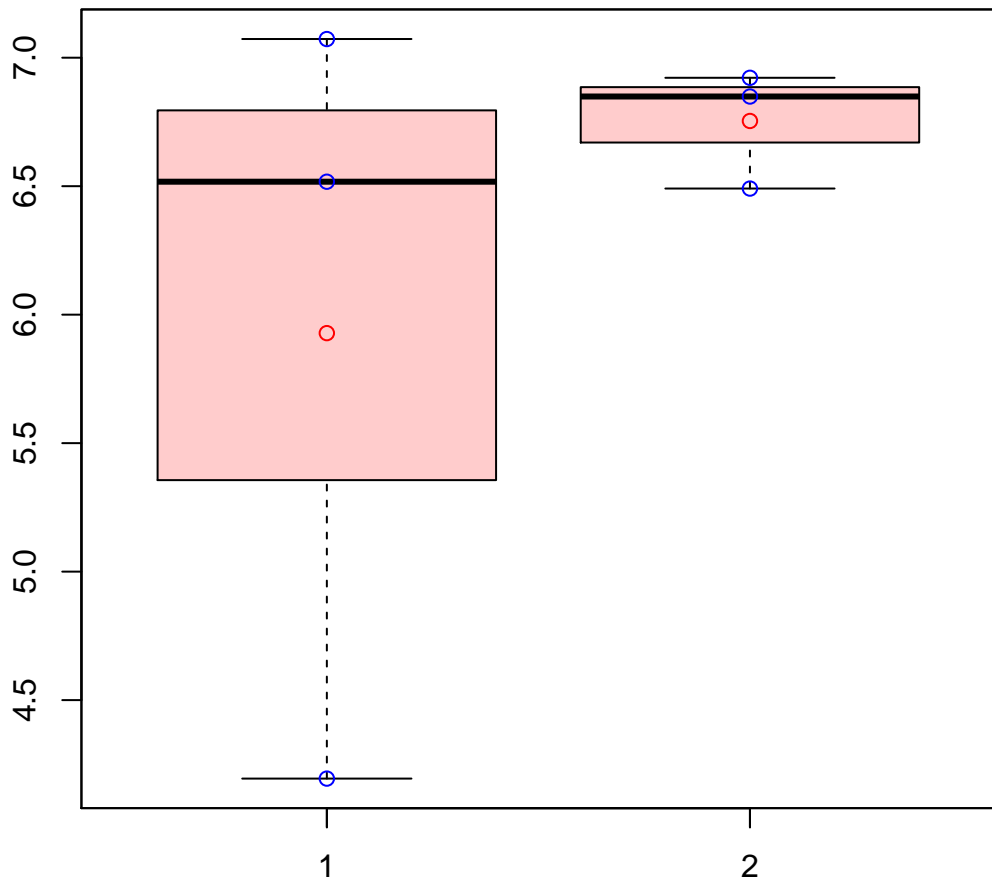

t-Test: p-value = 0.45

# A2YVN3|A2YVN3\_ORYSI

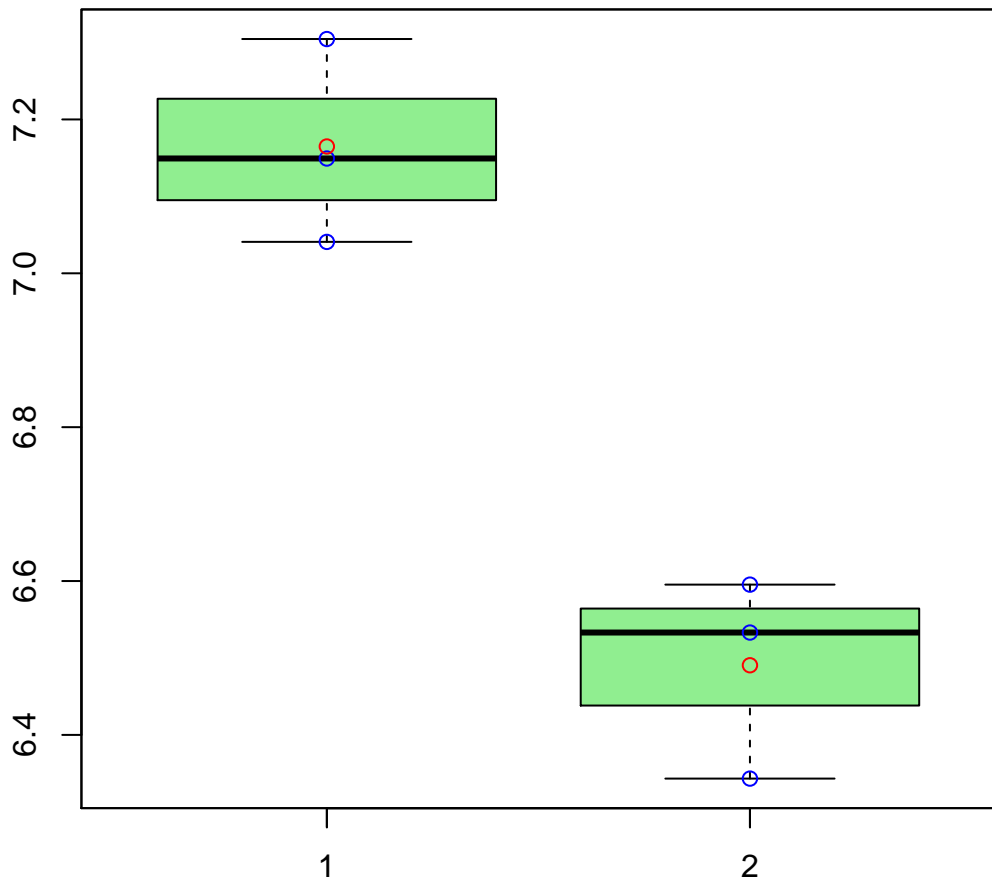

t-Test: p-value = 0

# A2YXU4|A2YXU4\_ORYSI

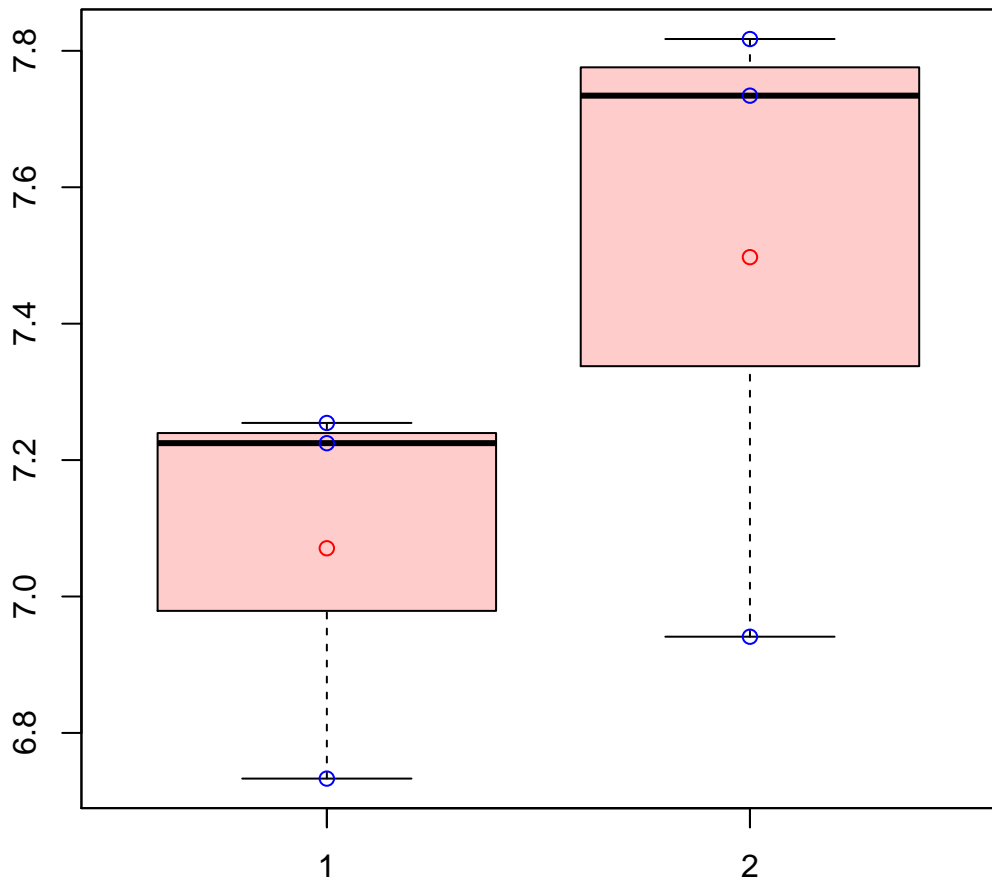

t-Test: p-value = 0.27

# A2YY54|A2YY54\_ORYSI

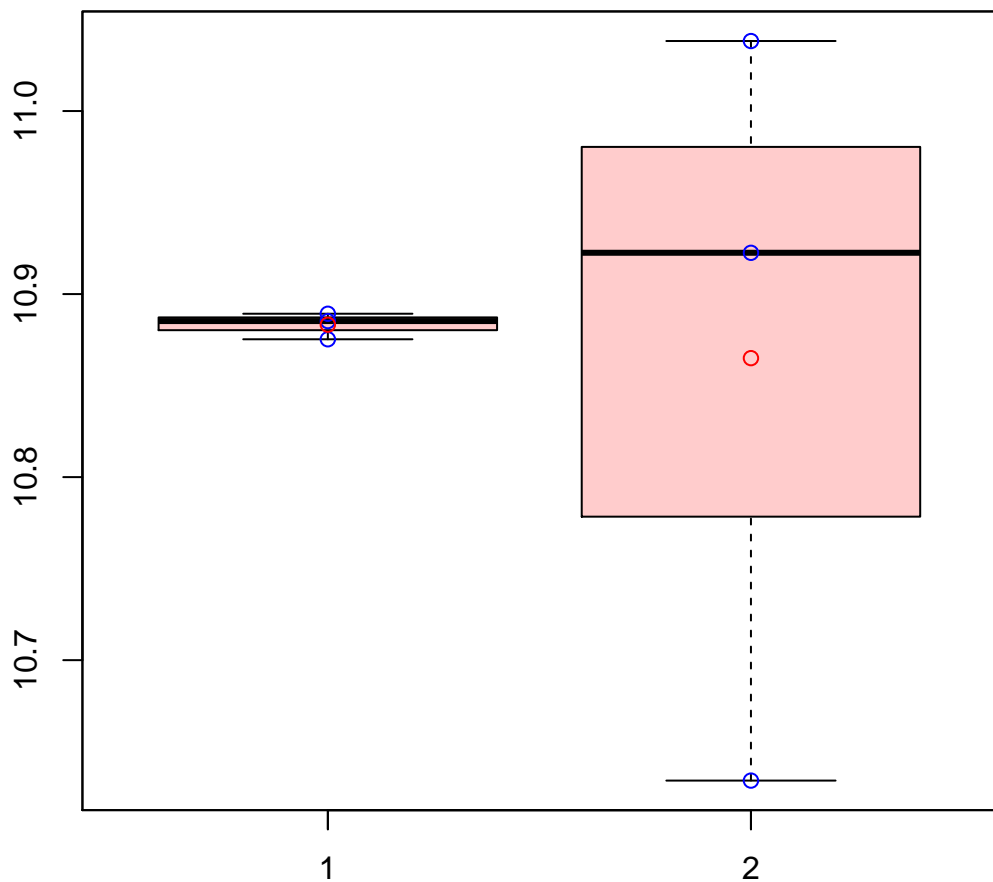

t-Test: p-value = 0.89

## A2YZM2|A2YZM2\_ORYSI

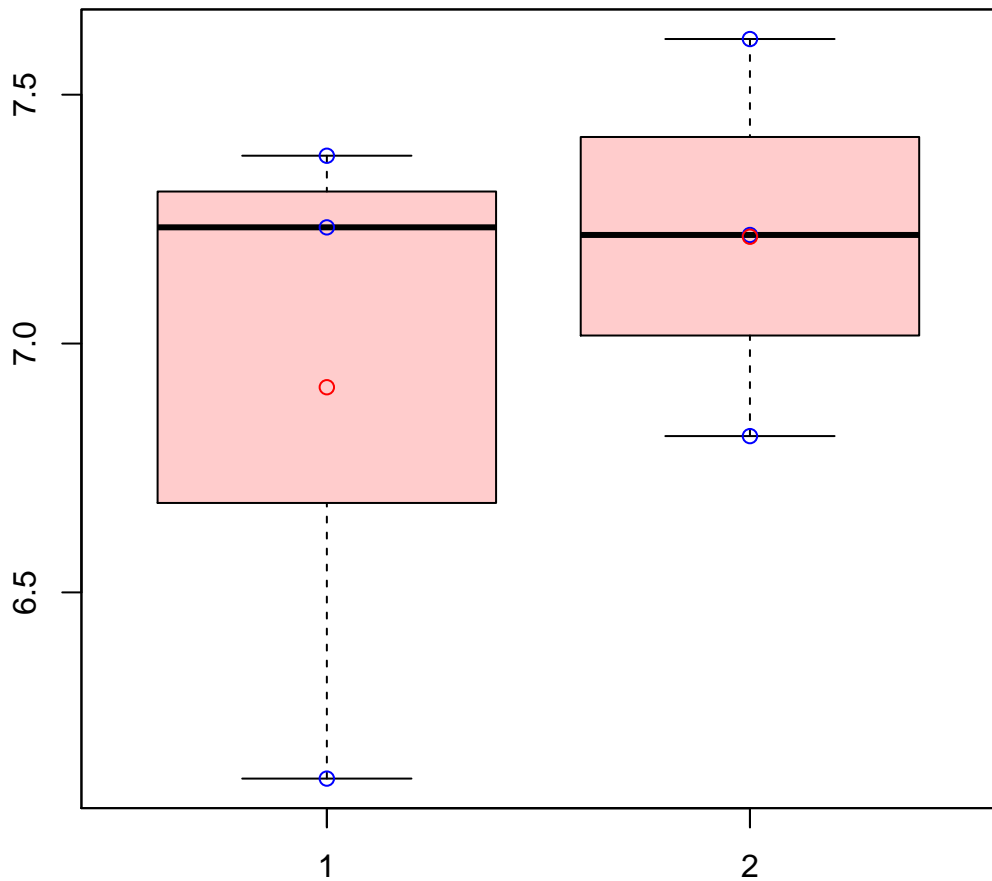

t-Test: p-value = 0.55

# A2YZX0|A2YZX0\_ORYSI

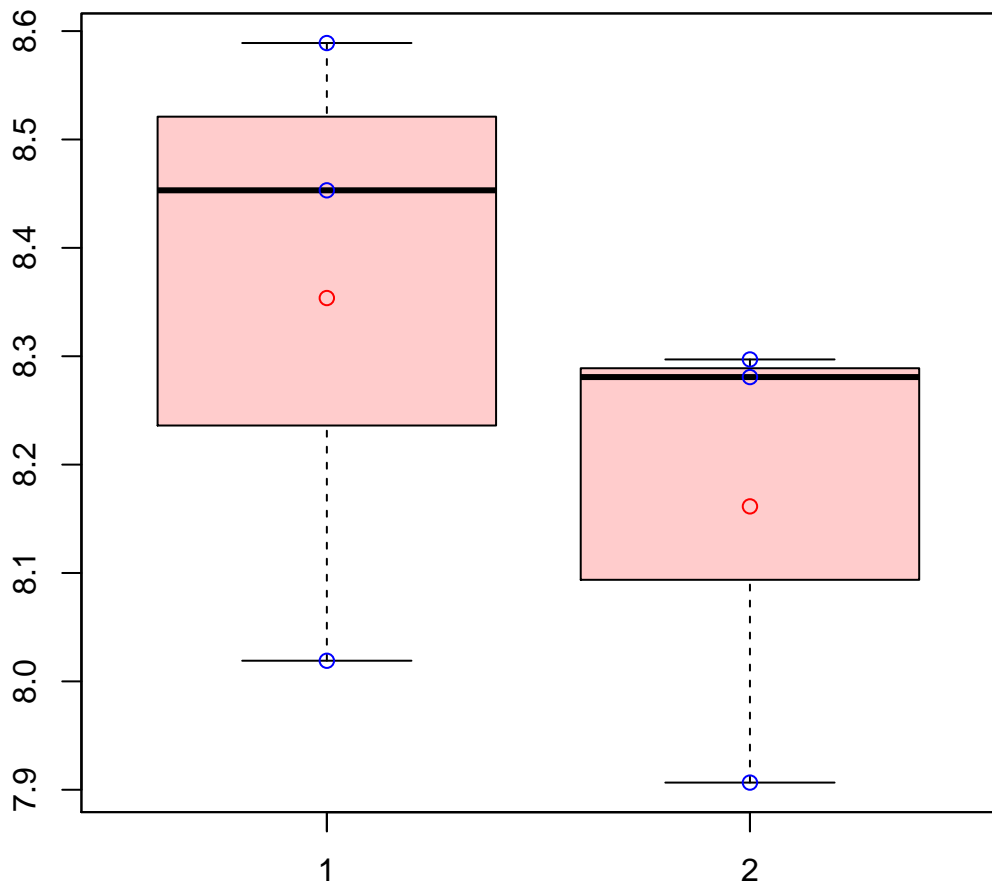

t-Test: p-value = 0.42



# A2Z043|A2Z043\_ORYSI

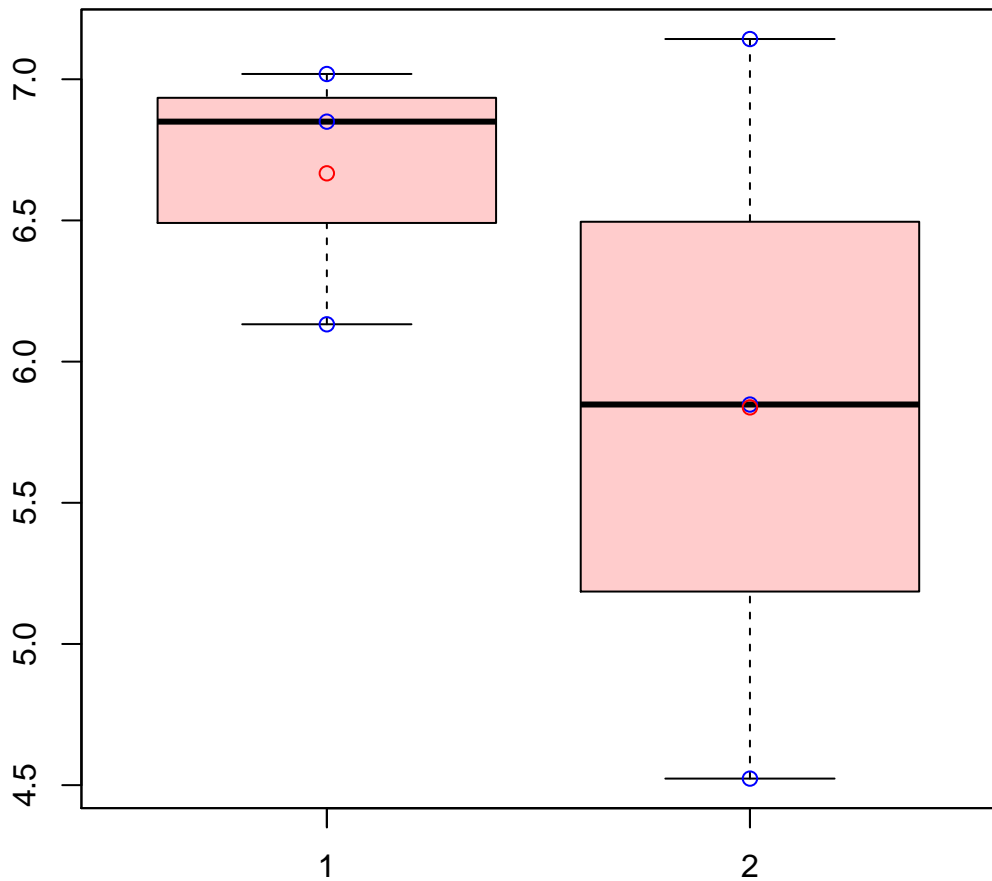

t-Test: p-value = 0.39

# A2Z0H1|A2Z0H1\_ORYSI

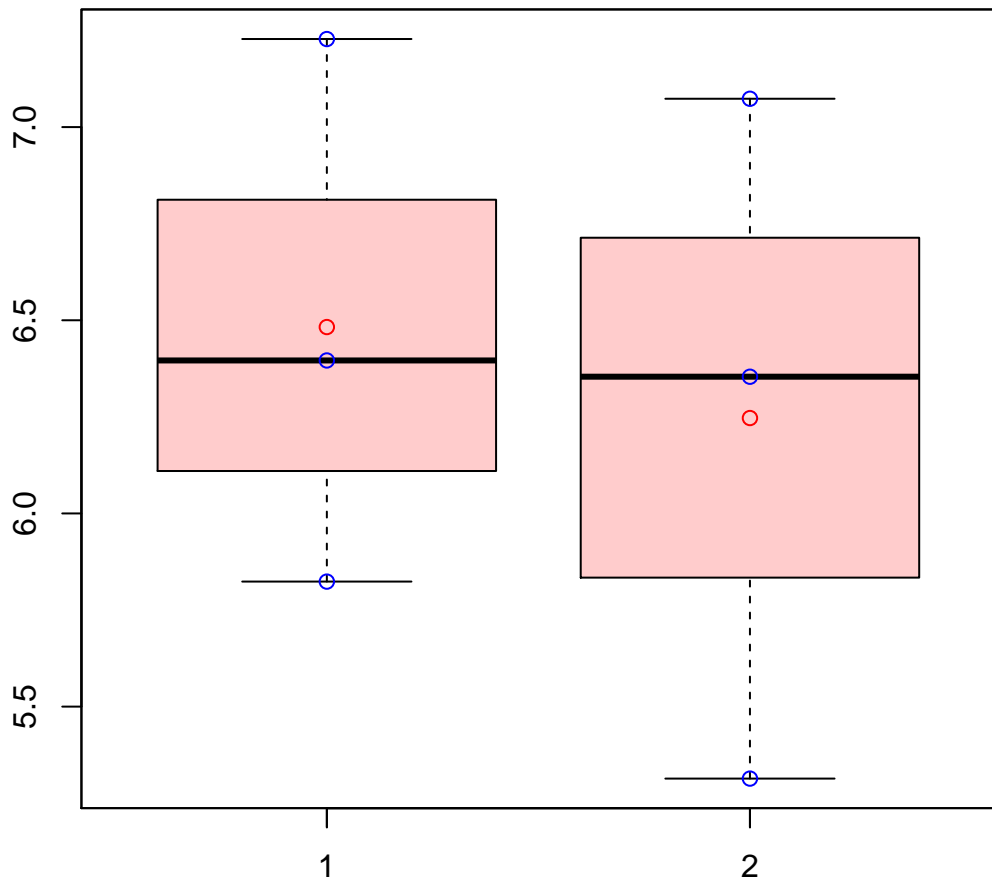

t-Test: p-value = 0.74

# A2Z2B1|A2Z2B1\_ORYSI

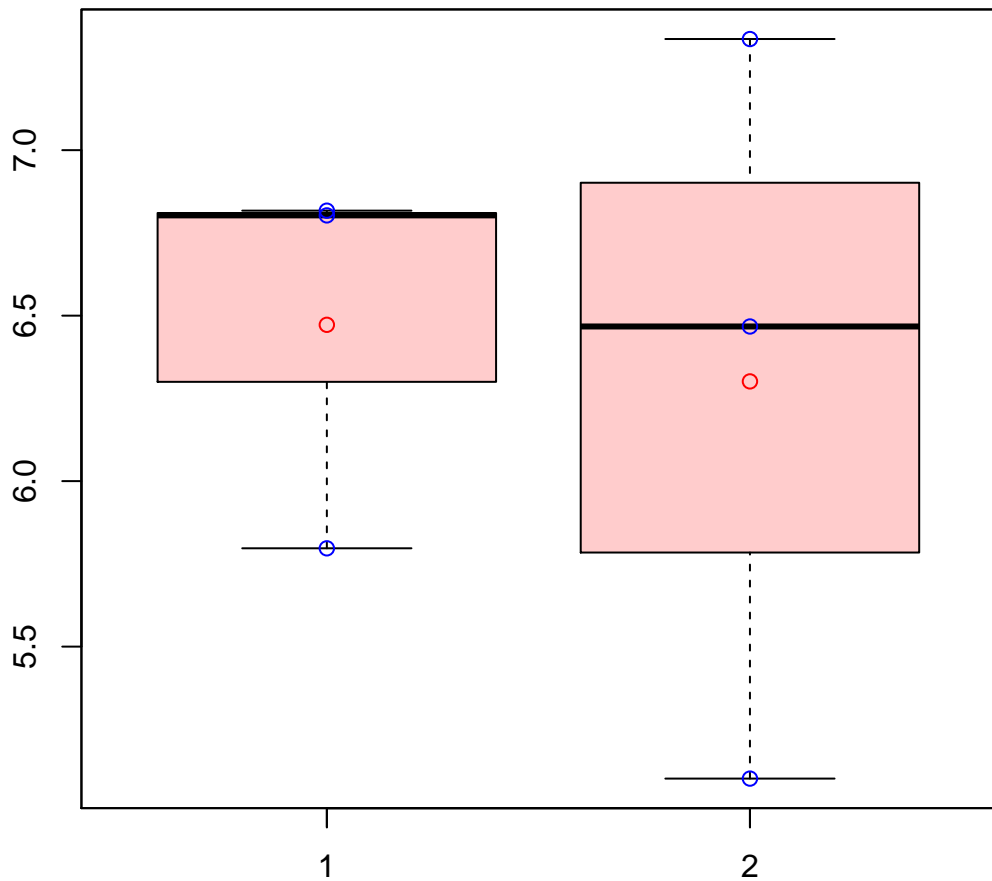

t-Test: p-value = 0.83

# A2Z844|A2Z844\_ORYSI

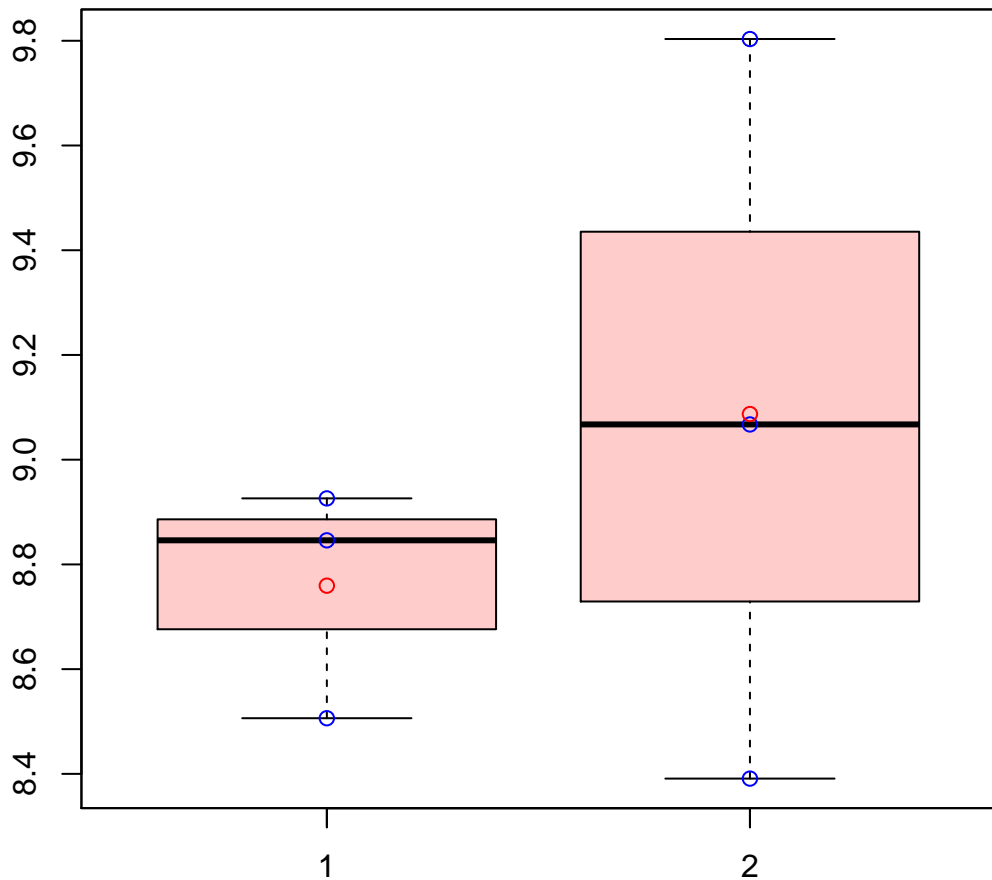

t-Test: p-value = 0.51

# A2Z893|A2Z893\_ORYSI

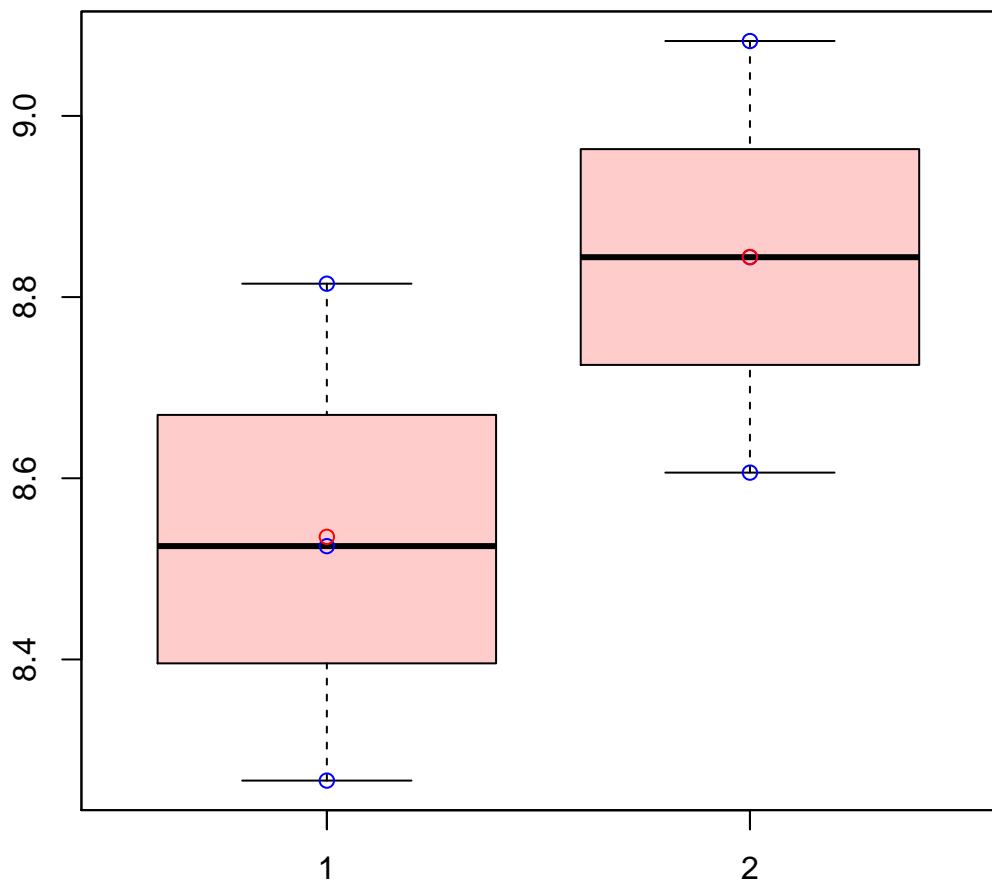

t-Test: p-value = 0.22

## A2Z8K1|A2Z8K1\_ORYSI

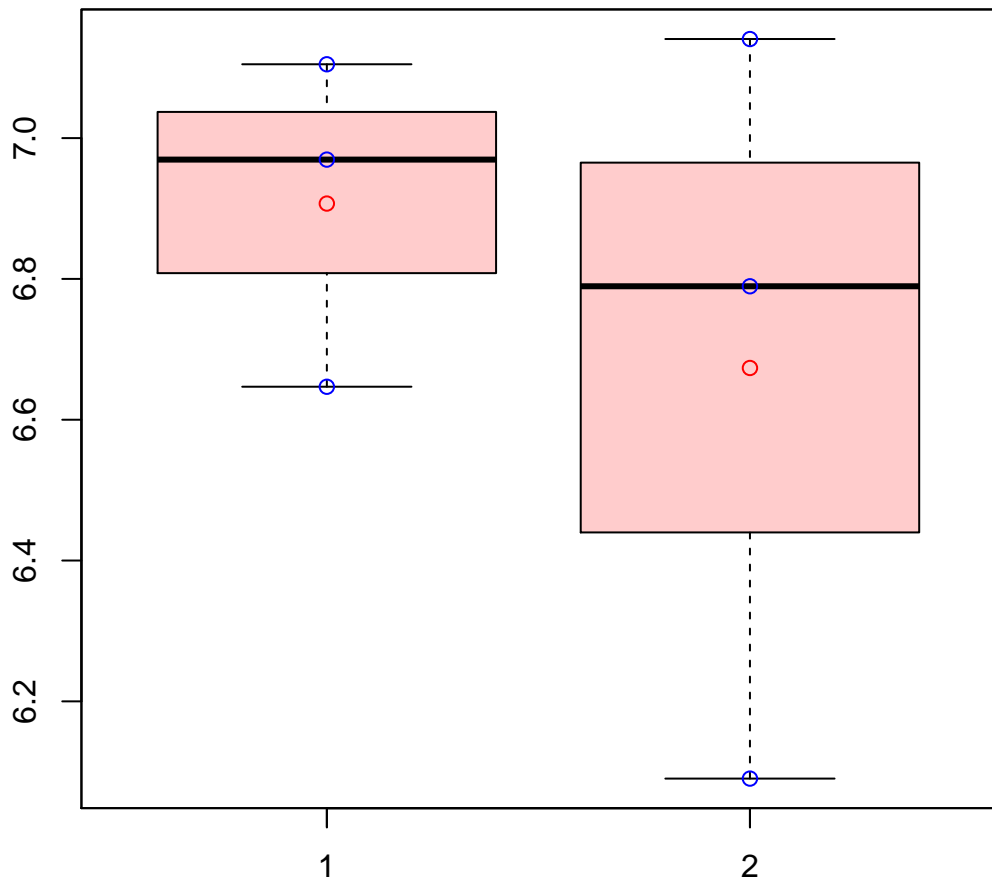

t-Test: p-value = 0.54

# A2Z8Y6|A2Z8Y6\_ORYSI

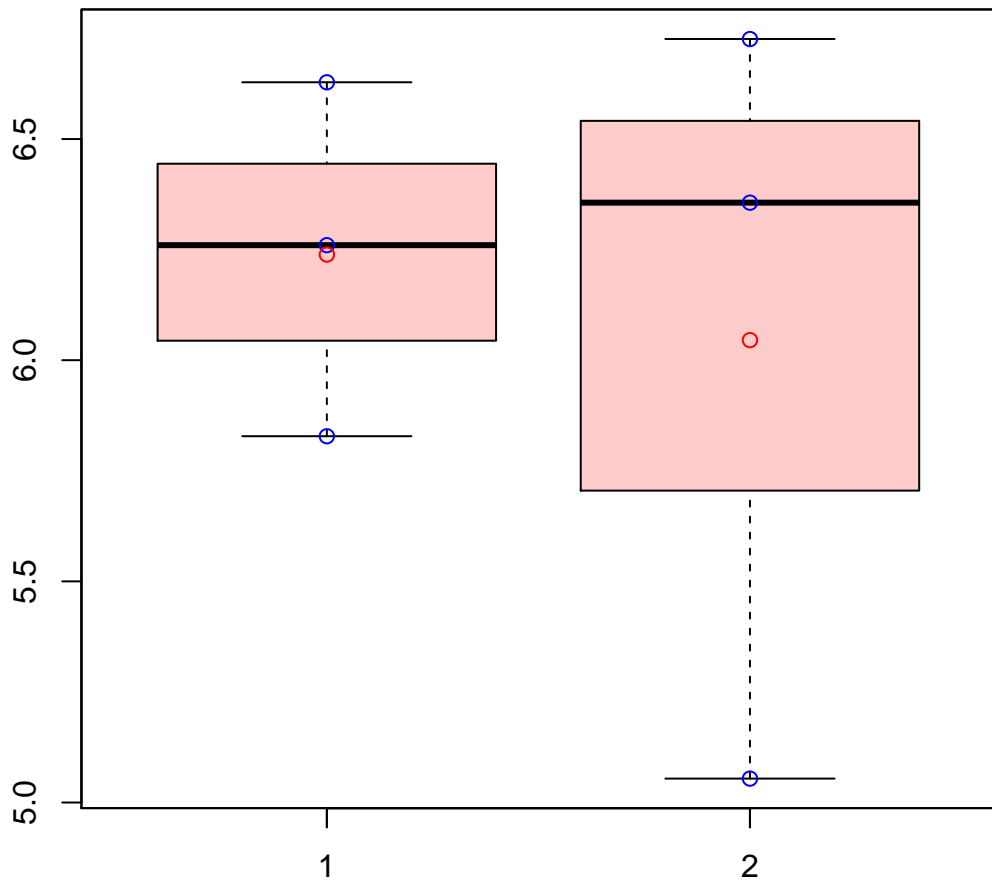

t-Test: p-value = 0.75

# A2Z977|A2Z977\_ORYSI

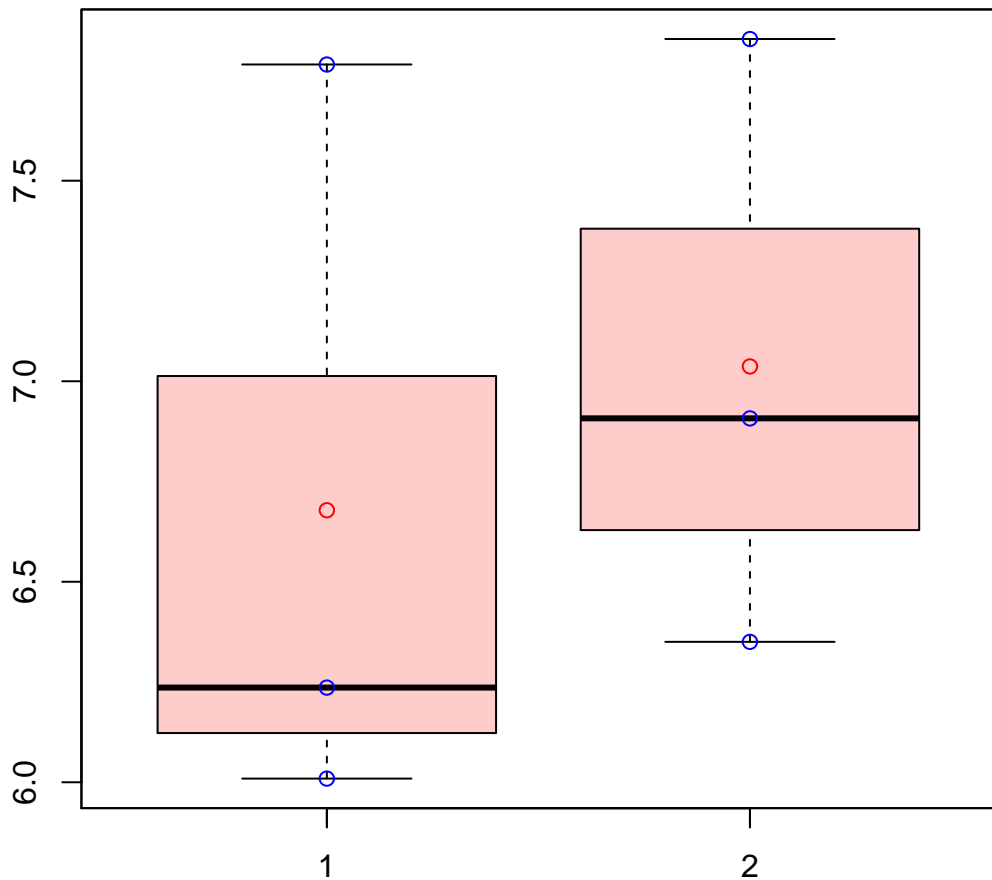

t-Test: p-value = 0.64



# A2ZBM0|A2ZBM0\_ORYSI

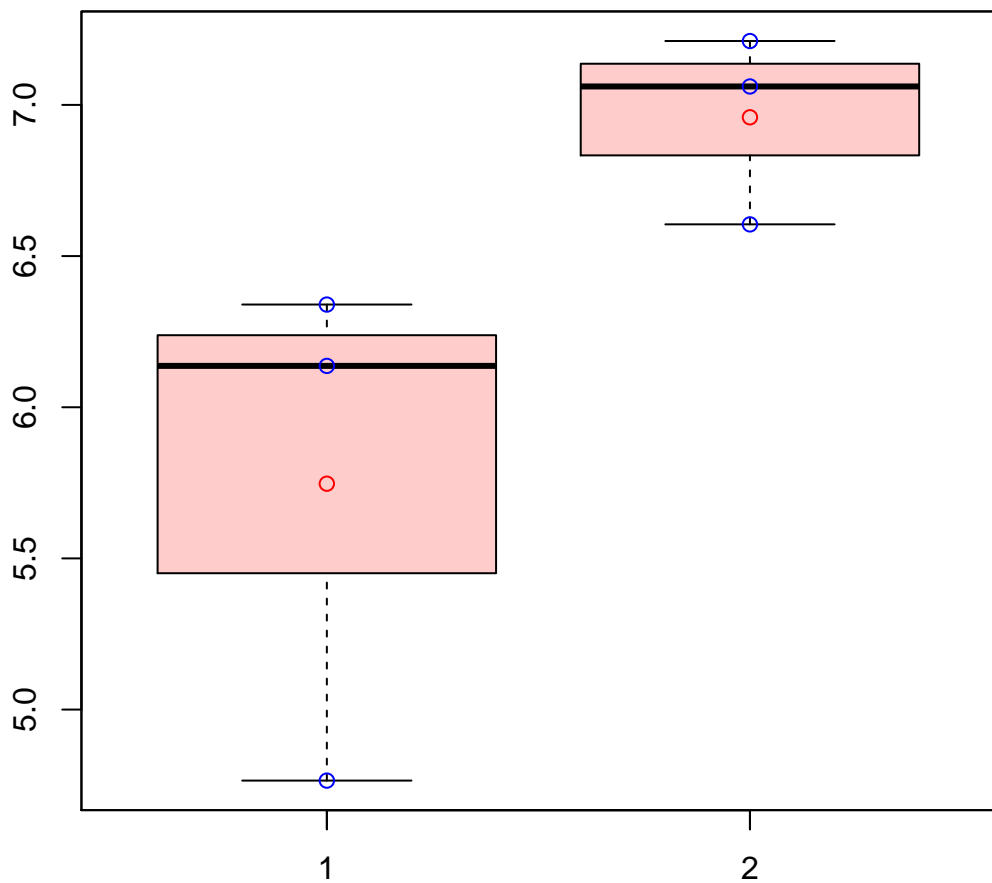

t-Test: p-value = 0.12

# A2ZCH2|A2ZCH2\_ORYSI

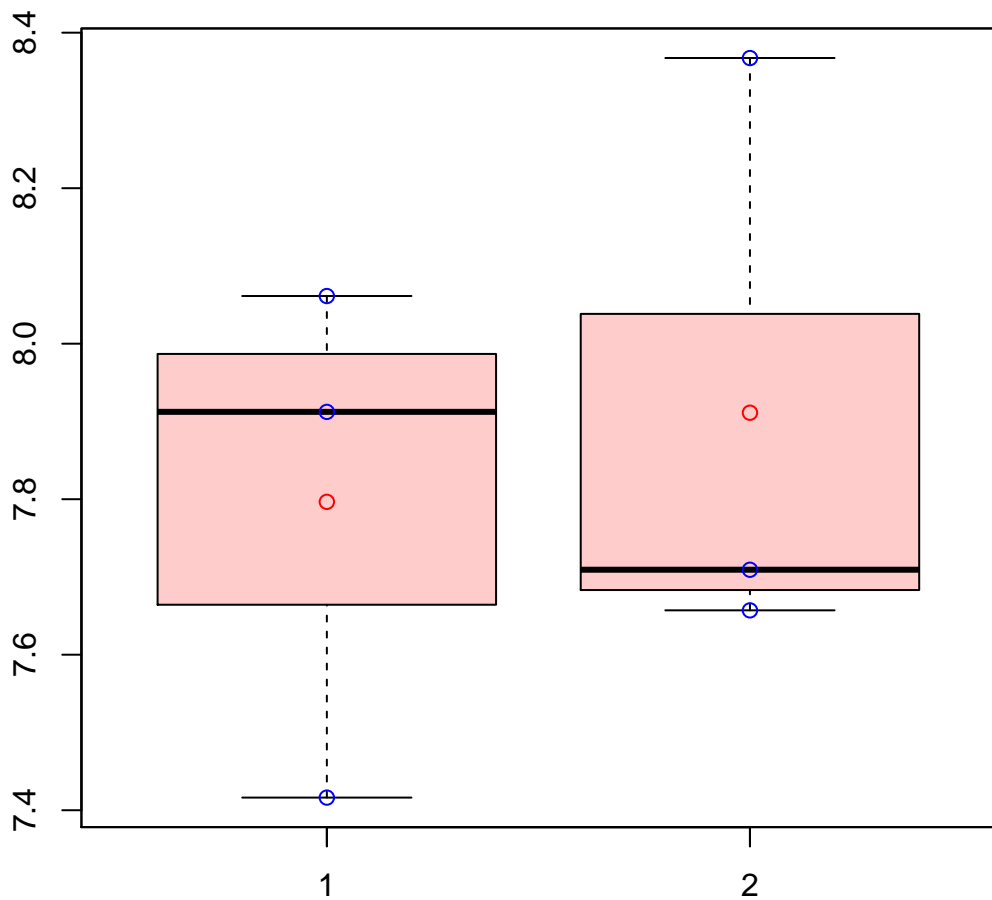

t-Test: p-value = 0.72

## A2ZEB5|A2ZEB5\_ORYSI

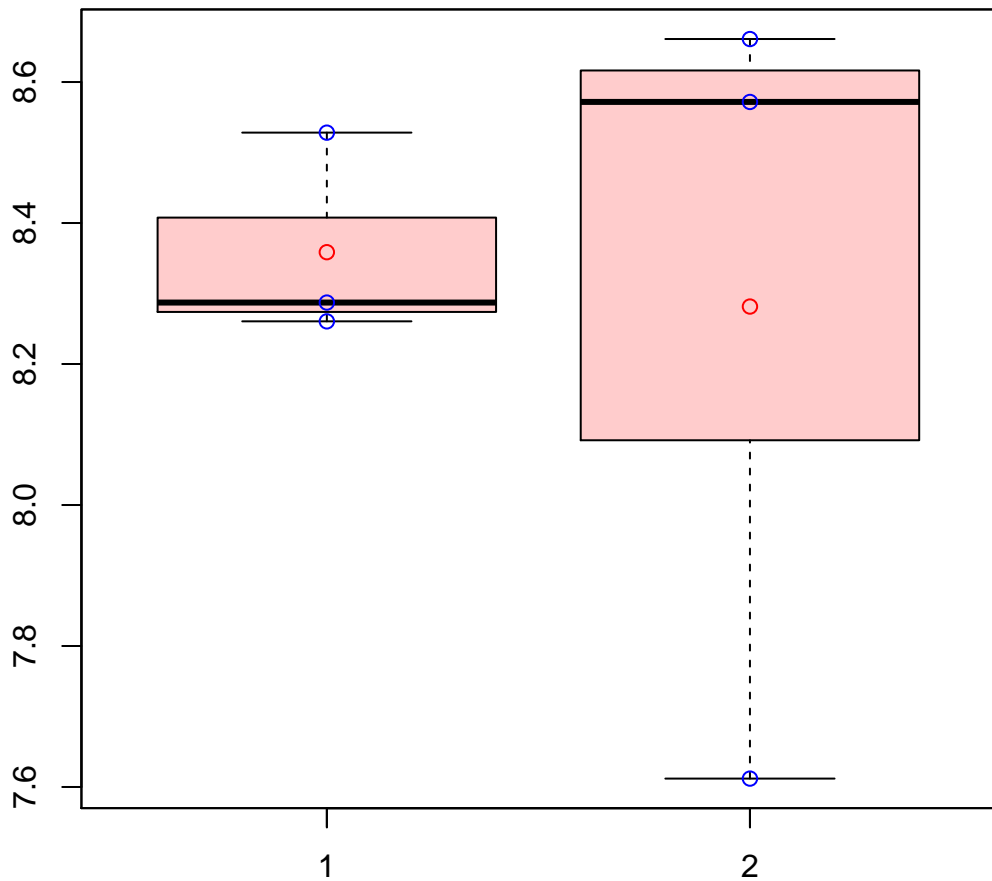

t-Test: p-value = 0.84

# A2ZK43|A2ZK43\_ORYSI

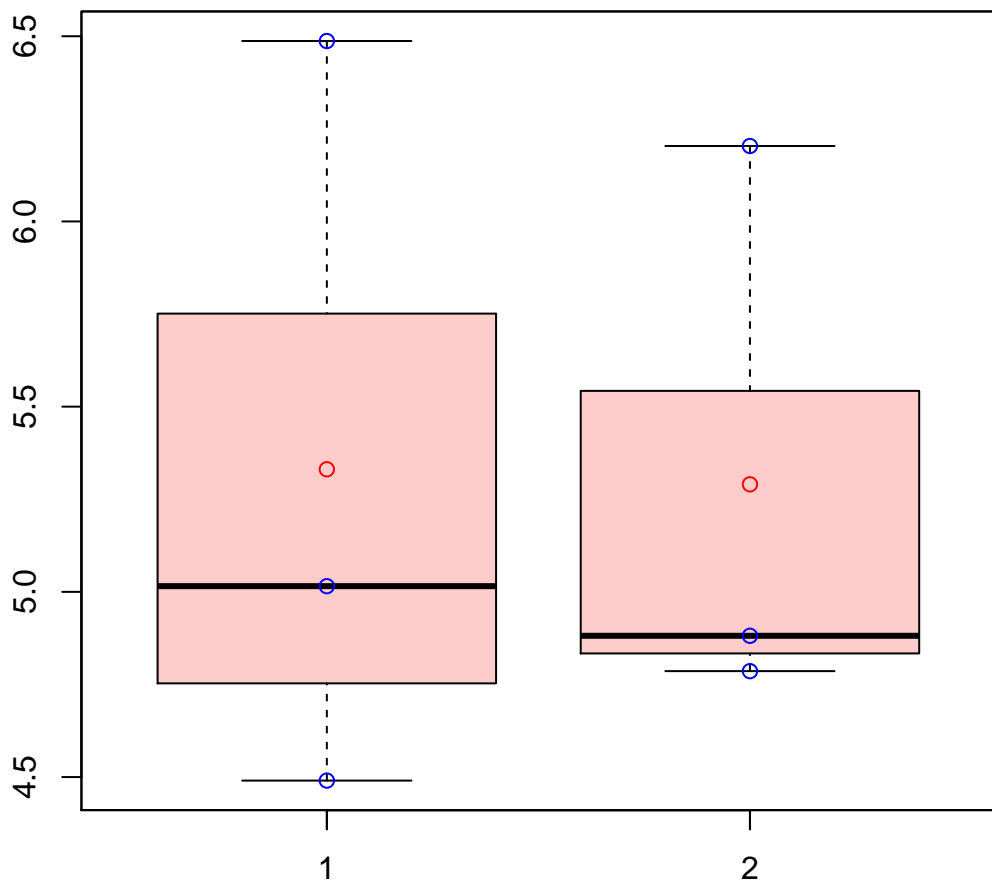

t-Test: p-value = 0.96

# A2ZLM3|A2ZLM3\_ORYSI

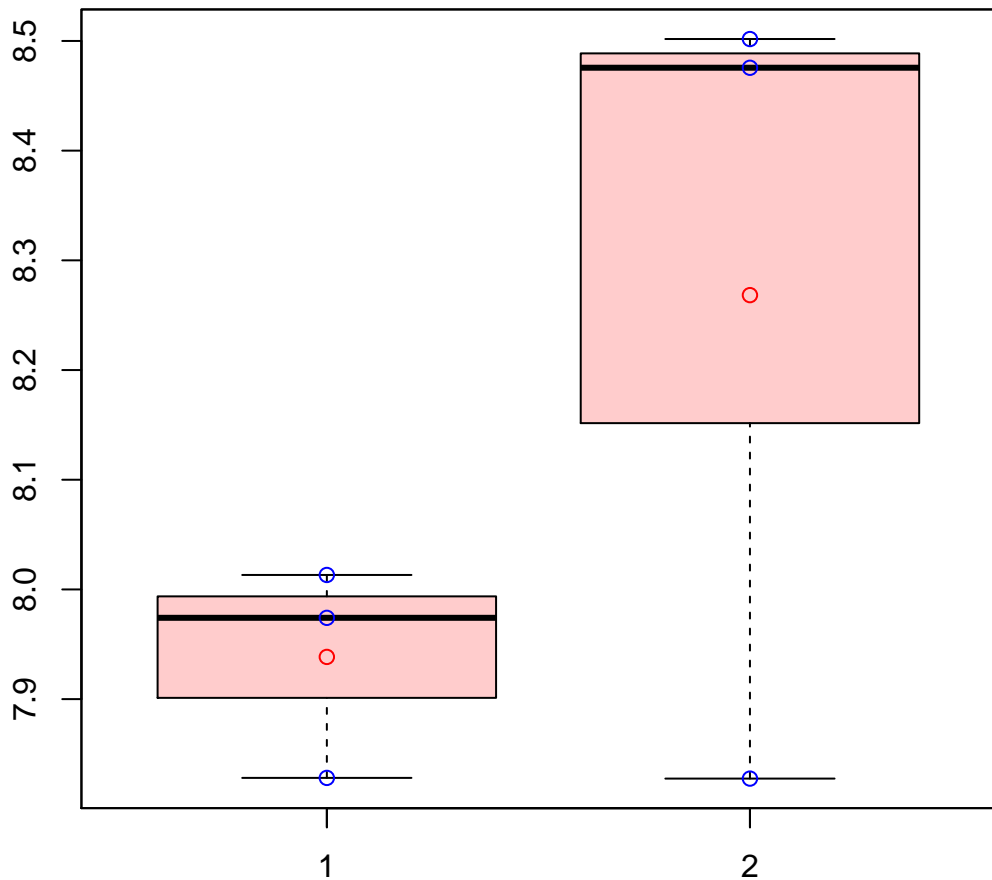

t-Test: p-value = 0.27

# A2ZQV4|A2ZQV4\_ORYSJ

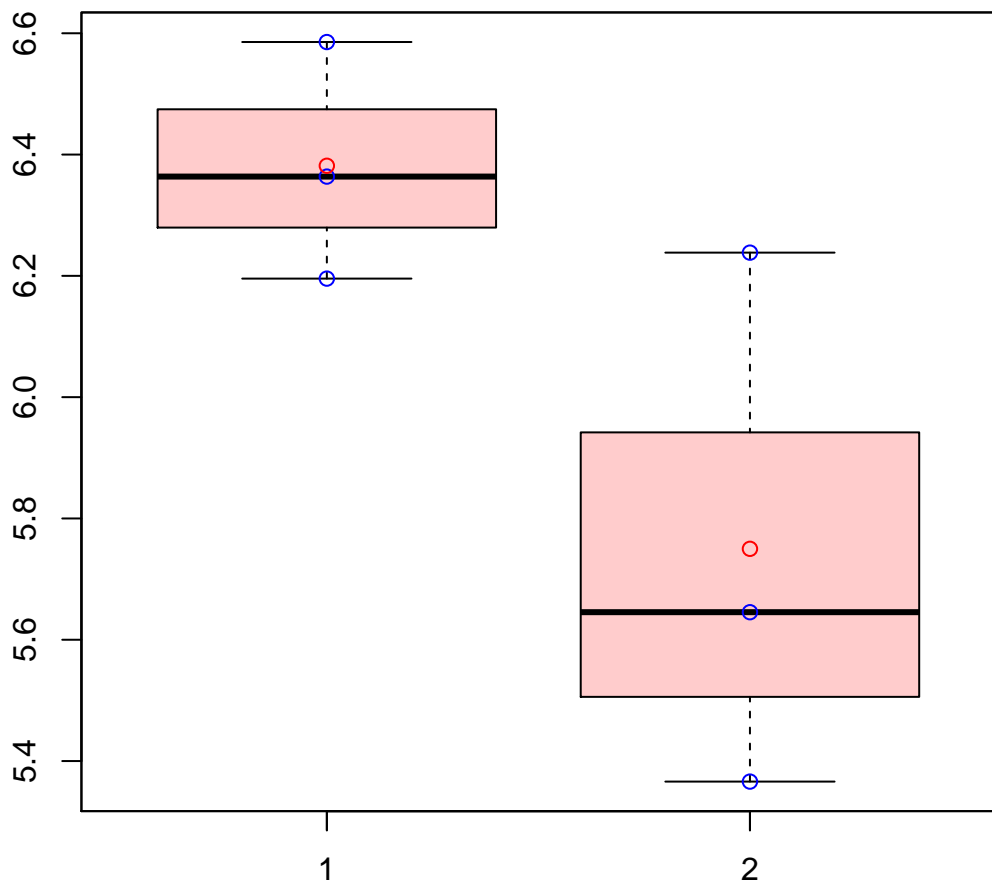

t-Test: p-value = 0.12

# A2ZRK6|A2ZRK6\_ORYSJ

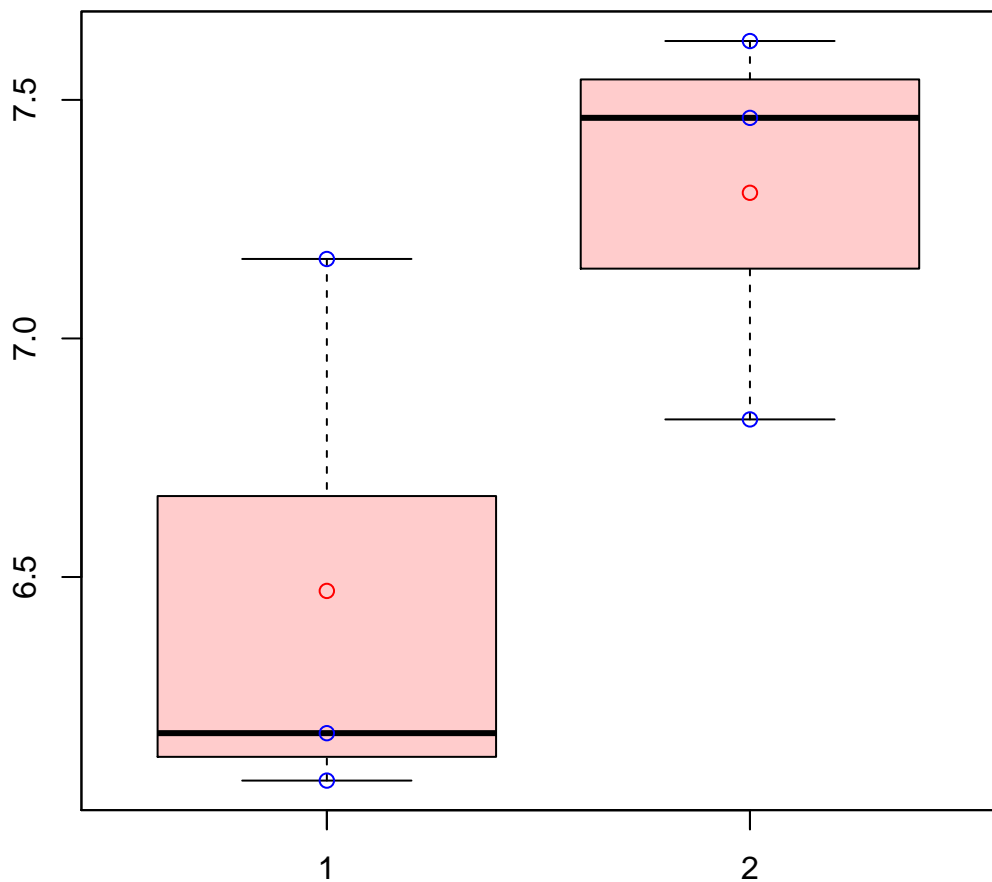

t-Test: p-value = 0.13

# A2ZRW5|A2ZRW5\_ORYSJ

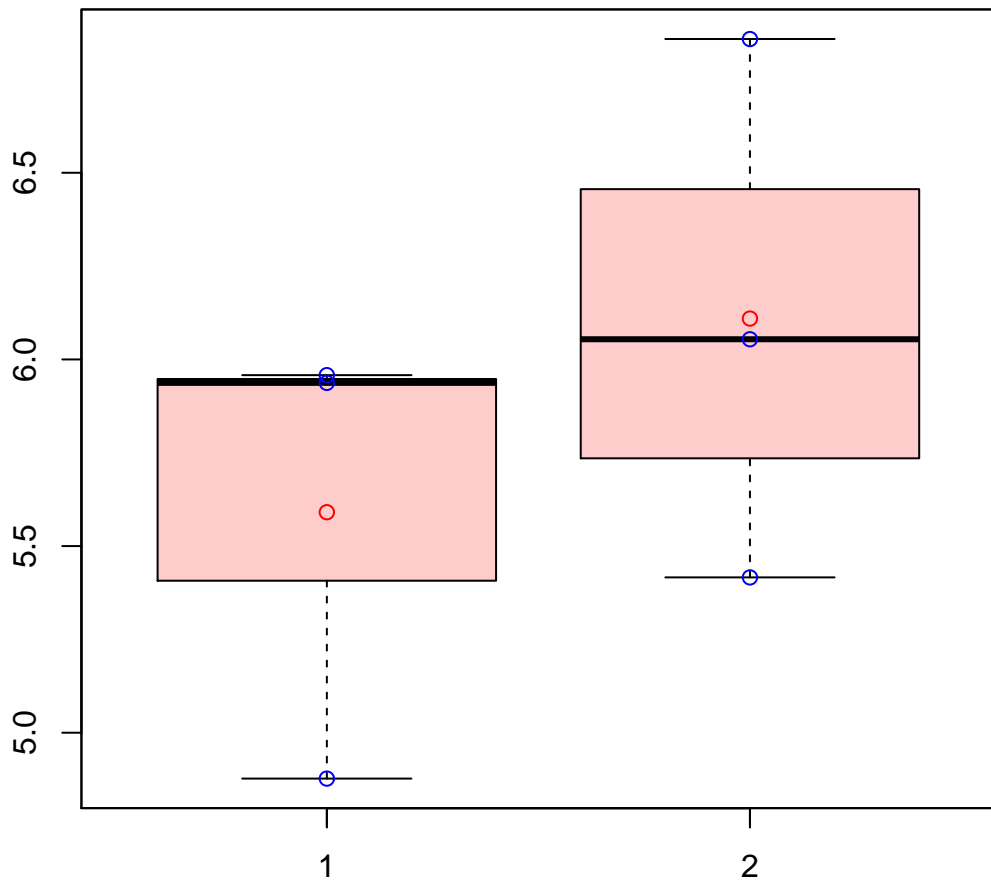

t-Test: p-value = 0.4



# A2ZSP0|A2ZSP0\_ORYSJ

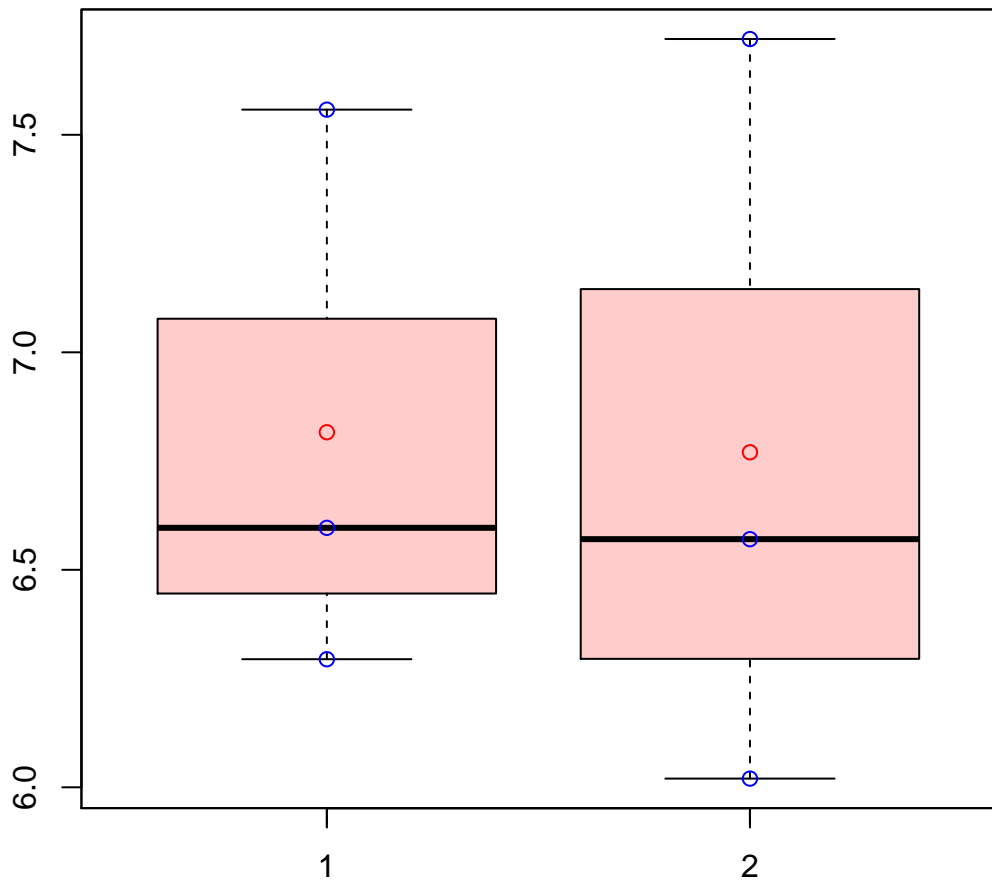

t-Test: p-value = 0.95

# A2ZU69|A2ZU69\_ORYSJ

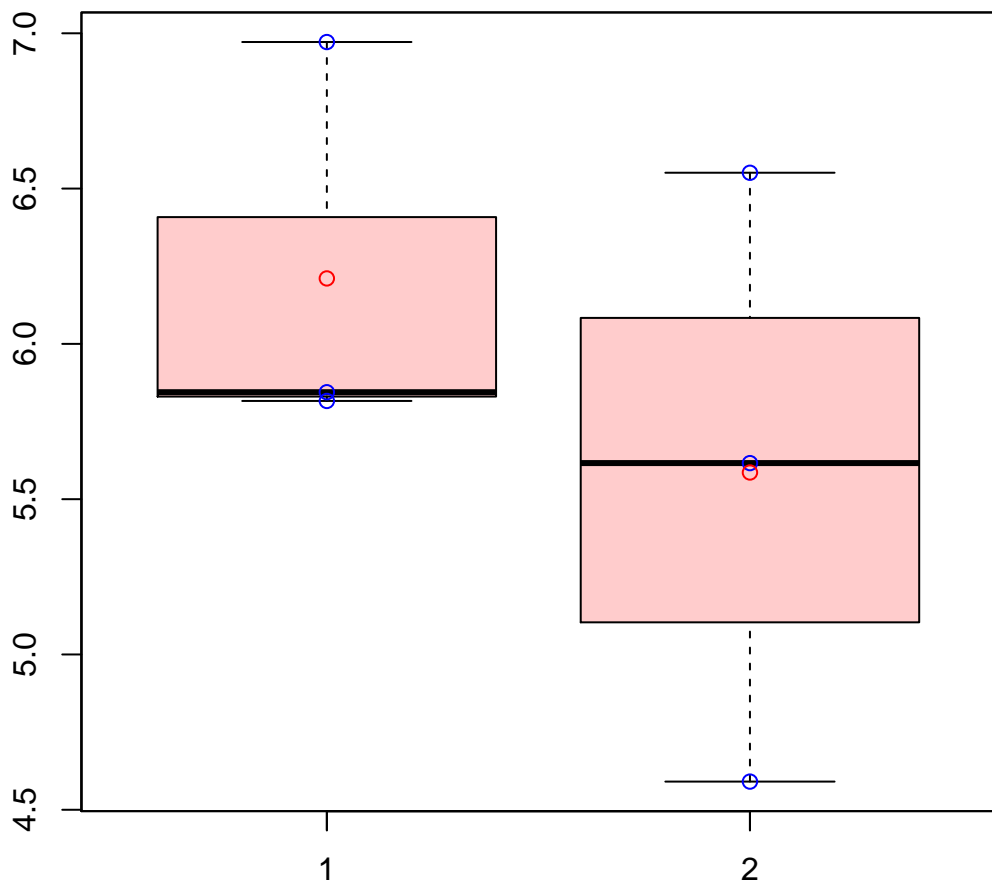

t-Test: p-value = 0.42

# A2ZX46|A2ZX46\_ORYSJ

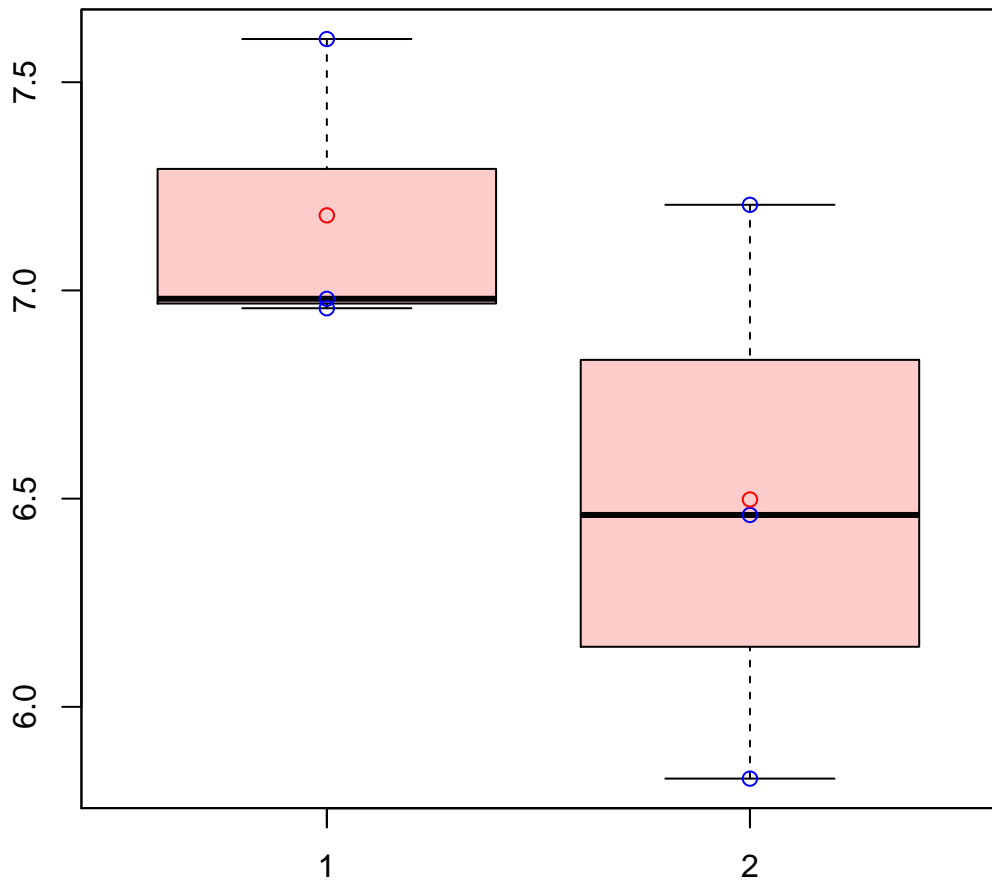

t-Test: p-value = 0.23

## A2ZXP6|A2ZXP6\_ORYSJ

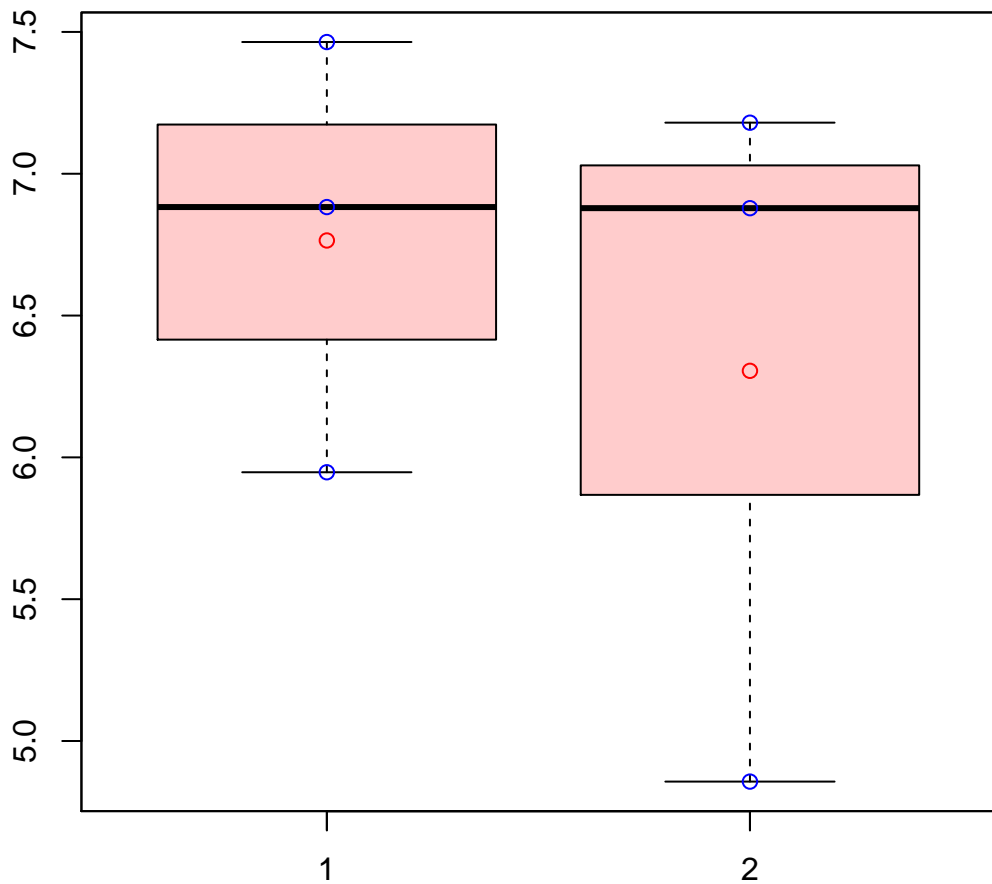

t-Test: p-value = 0.62

# A3A032|A3A032\_ORYSJ

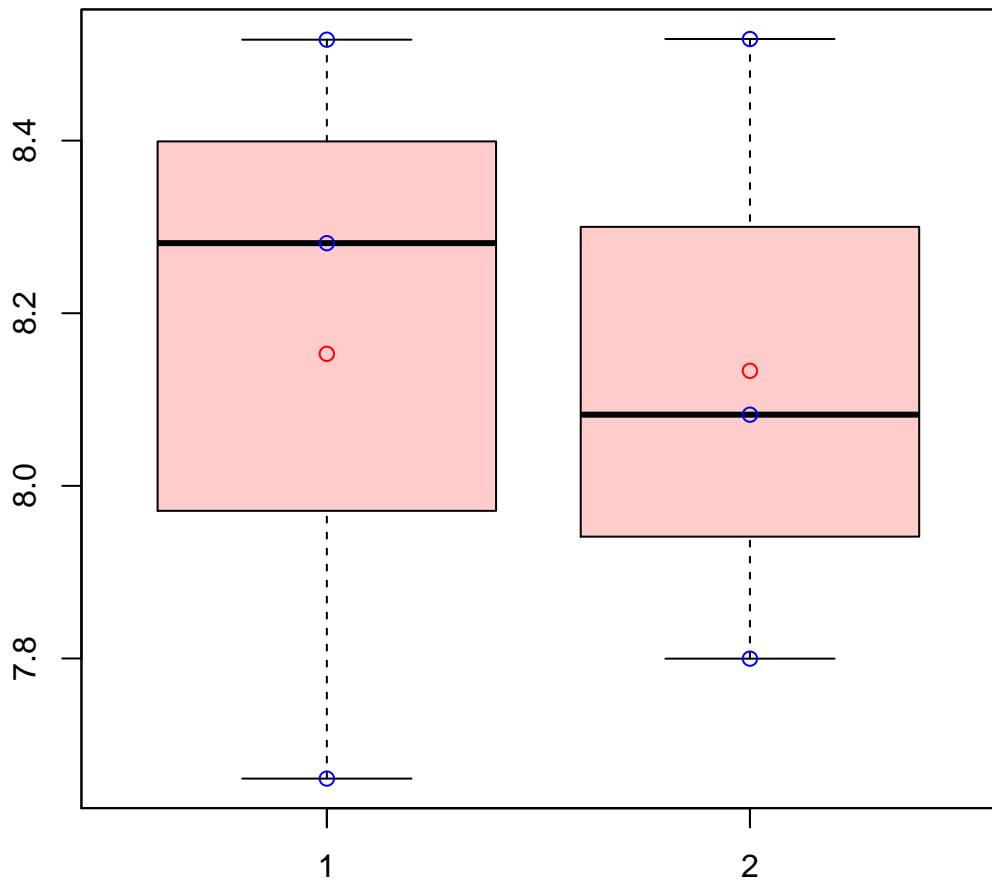

t-Test: p-value = 0.96

# A3A1H5|A3A1H5\_ORYSJ

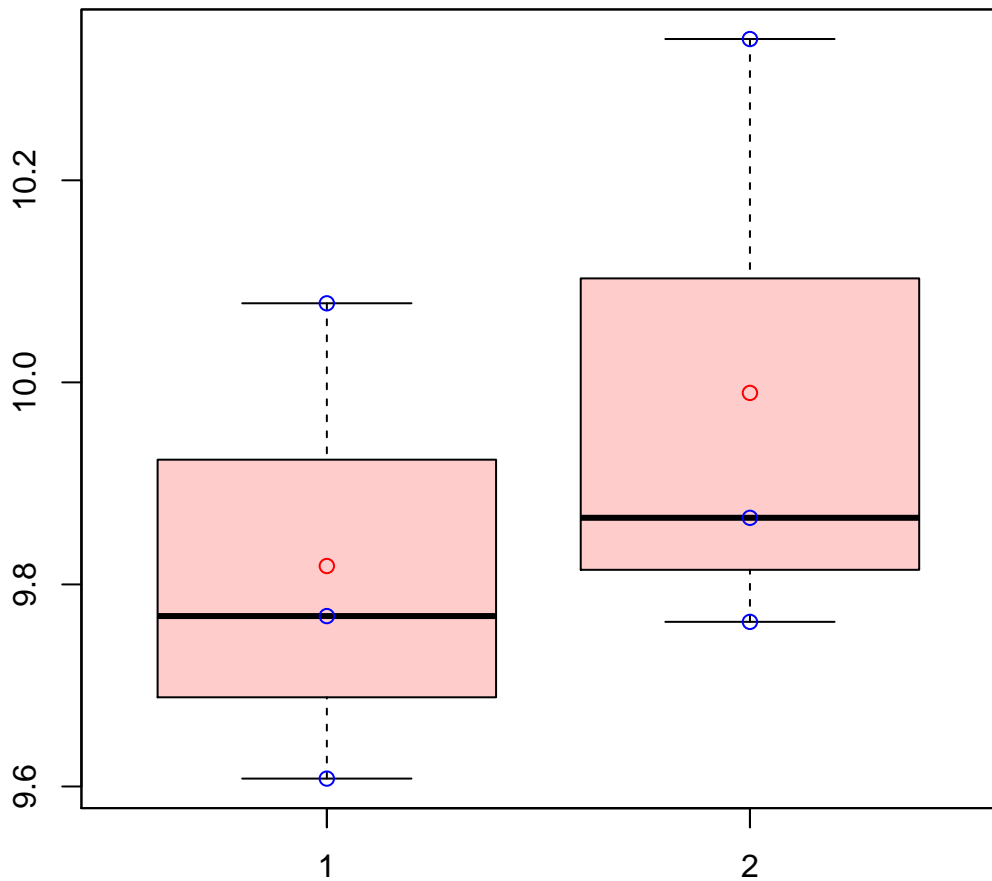

t-Test: p-value = 0.49

# A3A1V0|A3A1V0\_ORYSJ

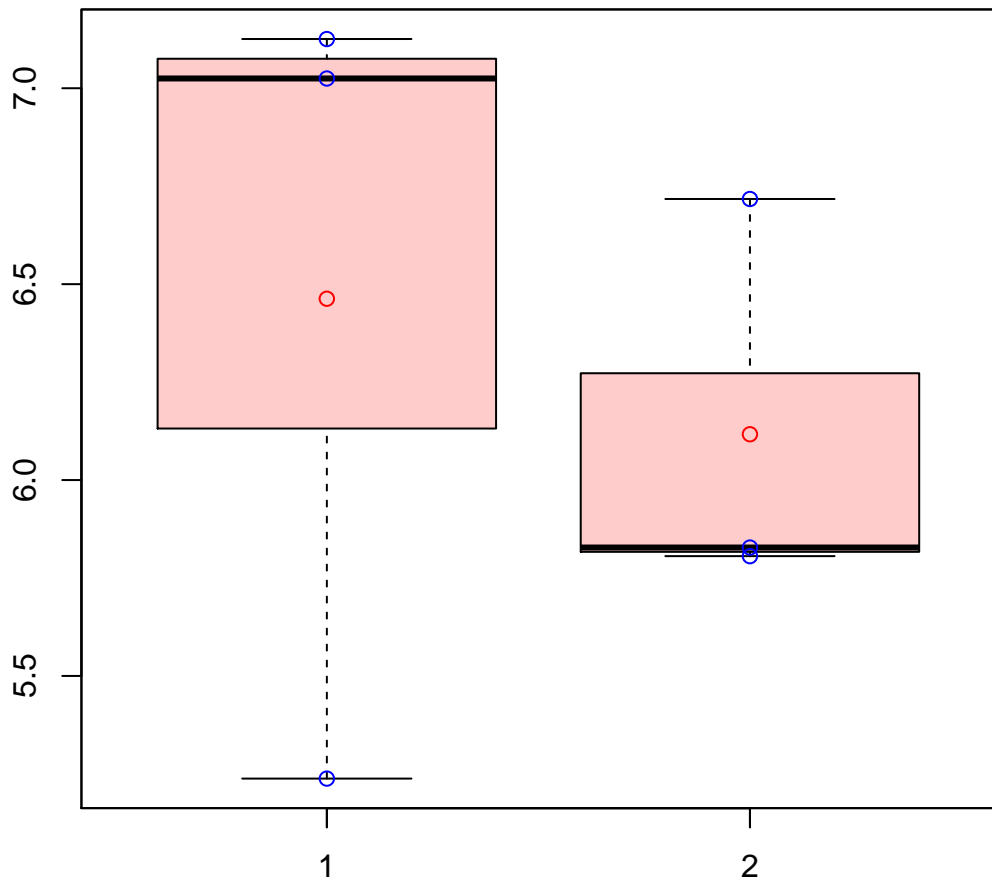

t-Test: p-value = 0.65

# A3A7Y3|A3A7Y3\_ORYSJ

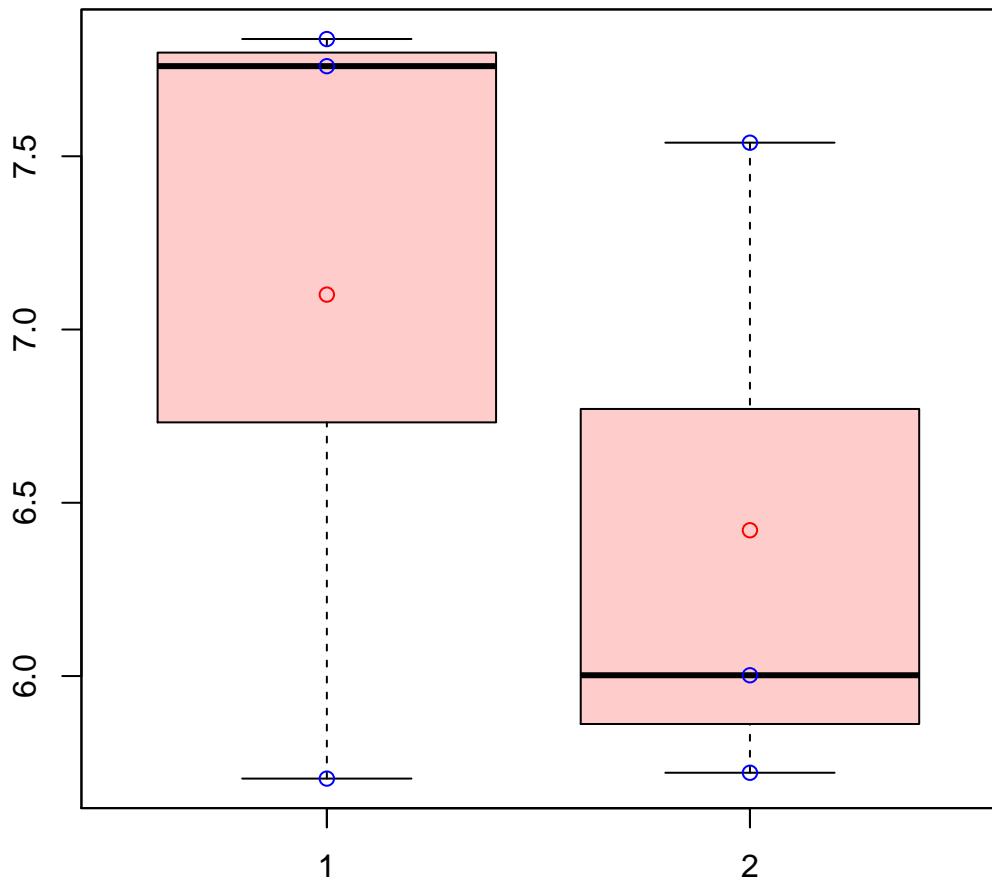

t-Test: p-value = 0.49



# A3AEJ1|A3AEJ1\_ORYSJ

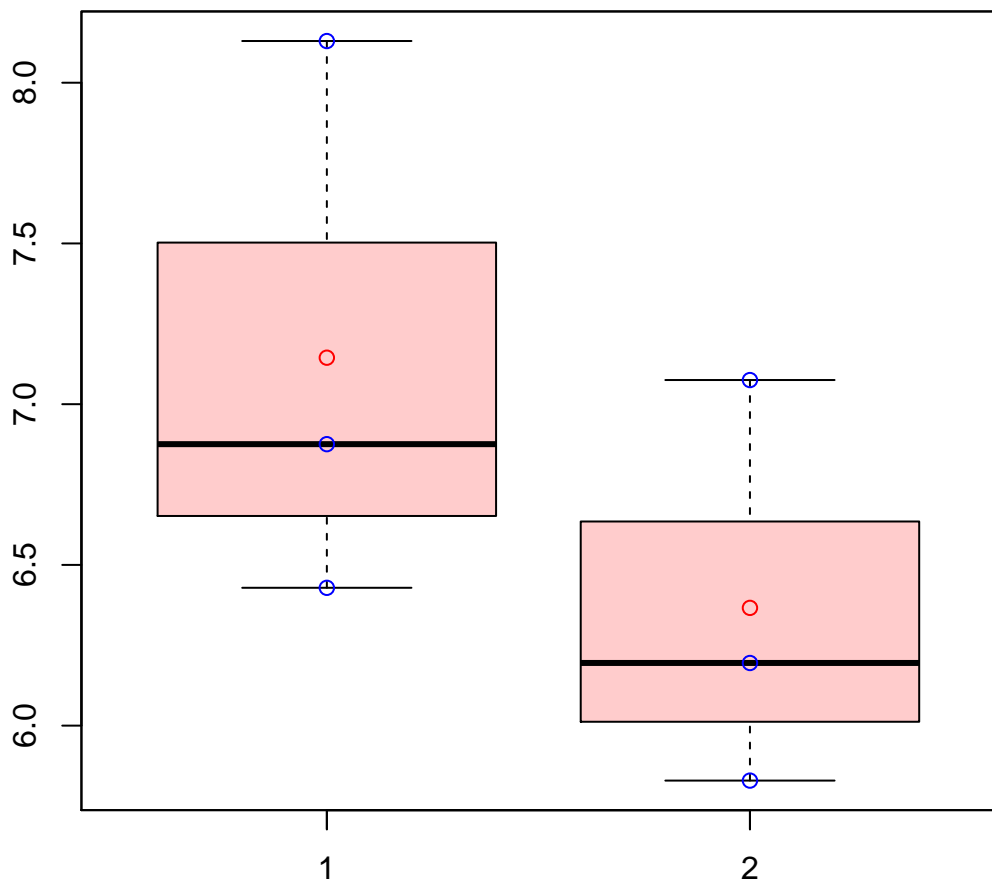

t-Test: p-value = 0.29

# A3AFD1|A3AFD1\_ORYSJ

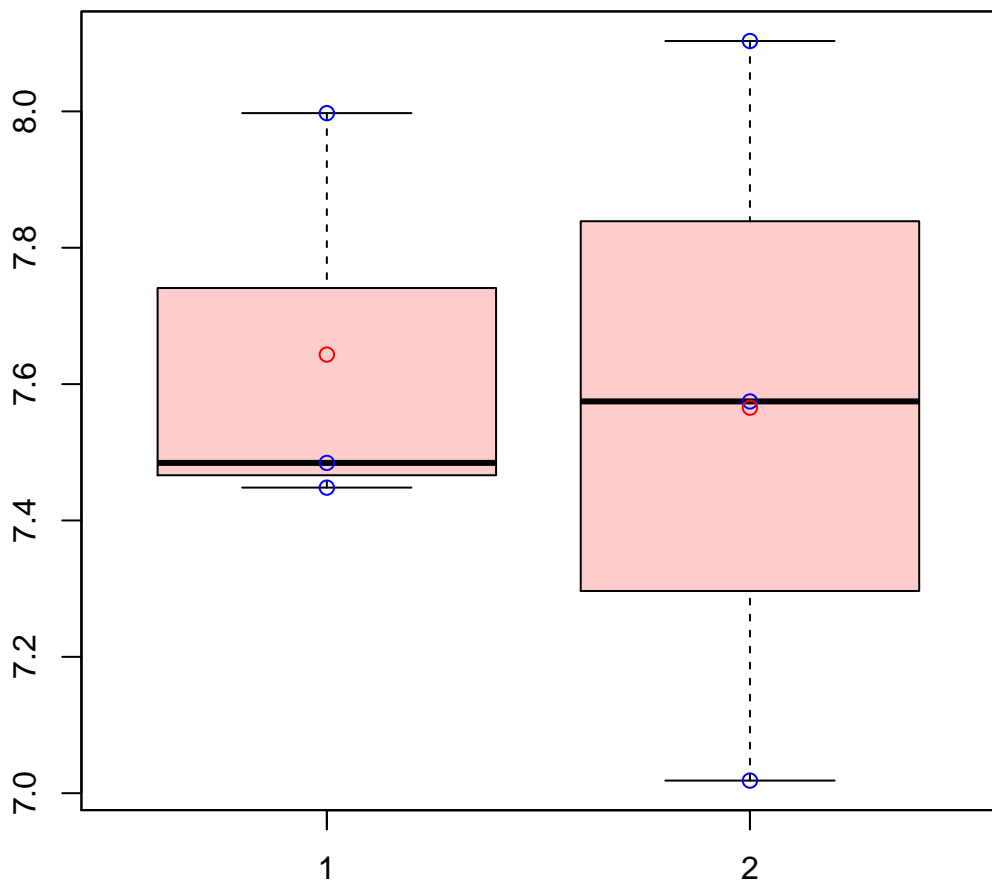

t-Test: p-value = 0.84

# A3AJN1|A3AJN1\_ORYSJ

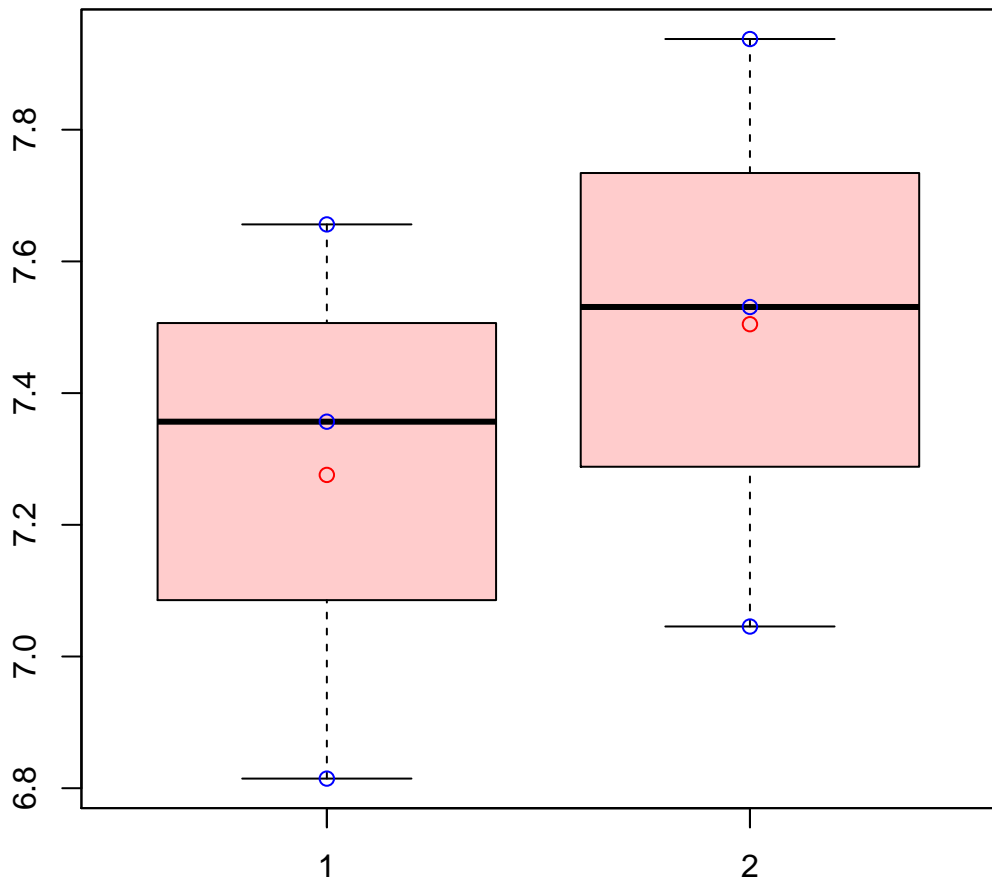

t-Test: p-value = 0.56

# A3AKE9|A3AKE9\_ORYSJ

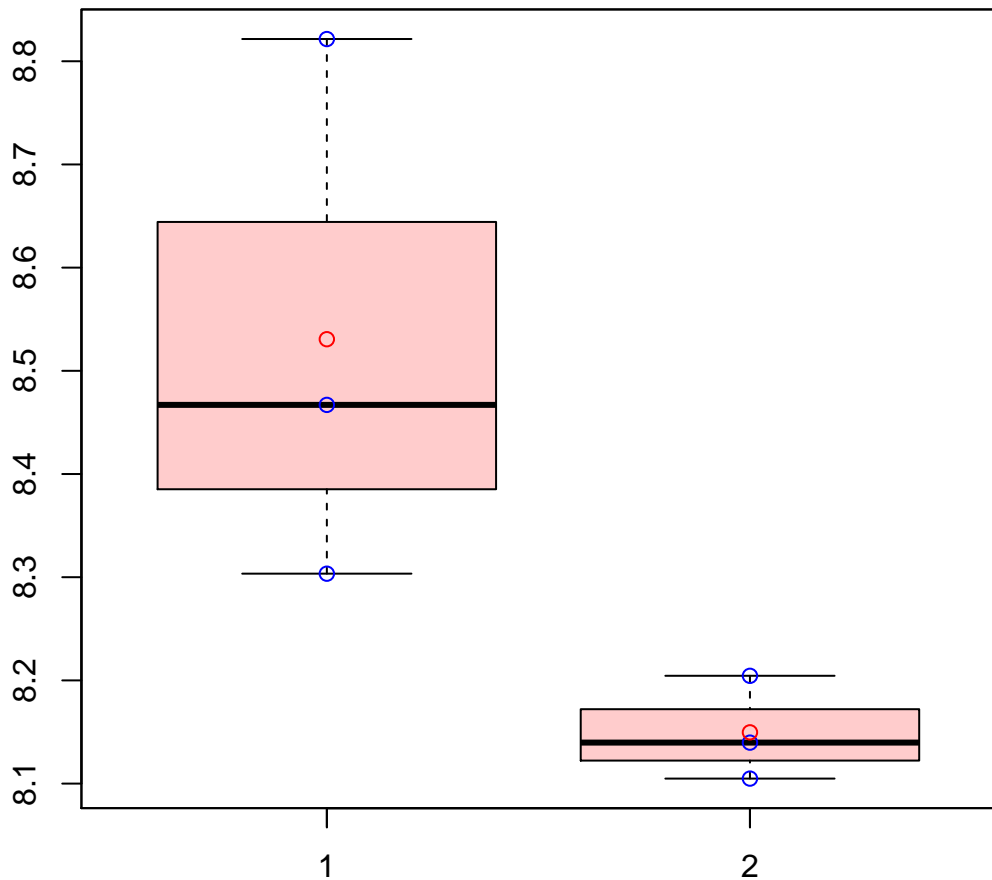

t-Test: p-value = 0.13

# A3ALE5|A3ALE5\_ORYSJ

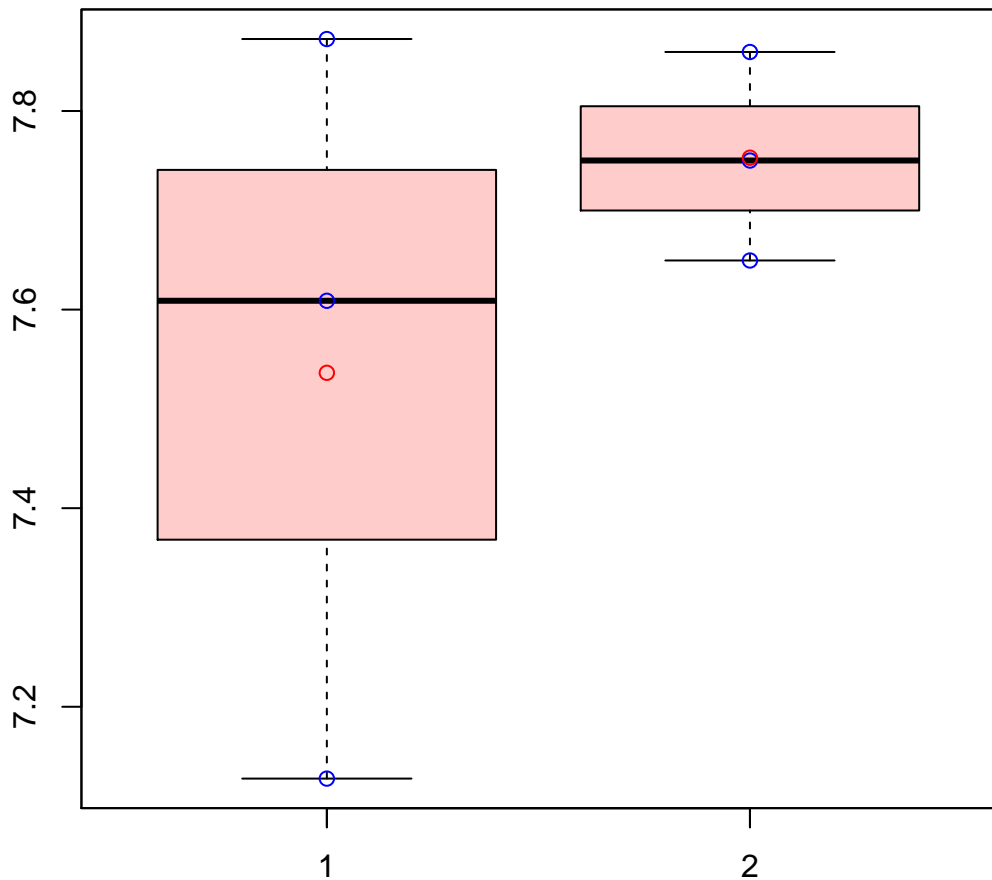

t-Test: p-value = 0.43

# A3AXK2|A3AXK2\_ORYSJ

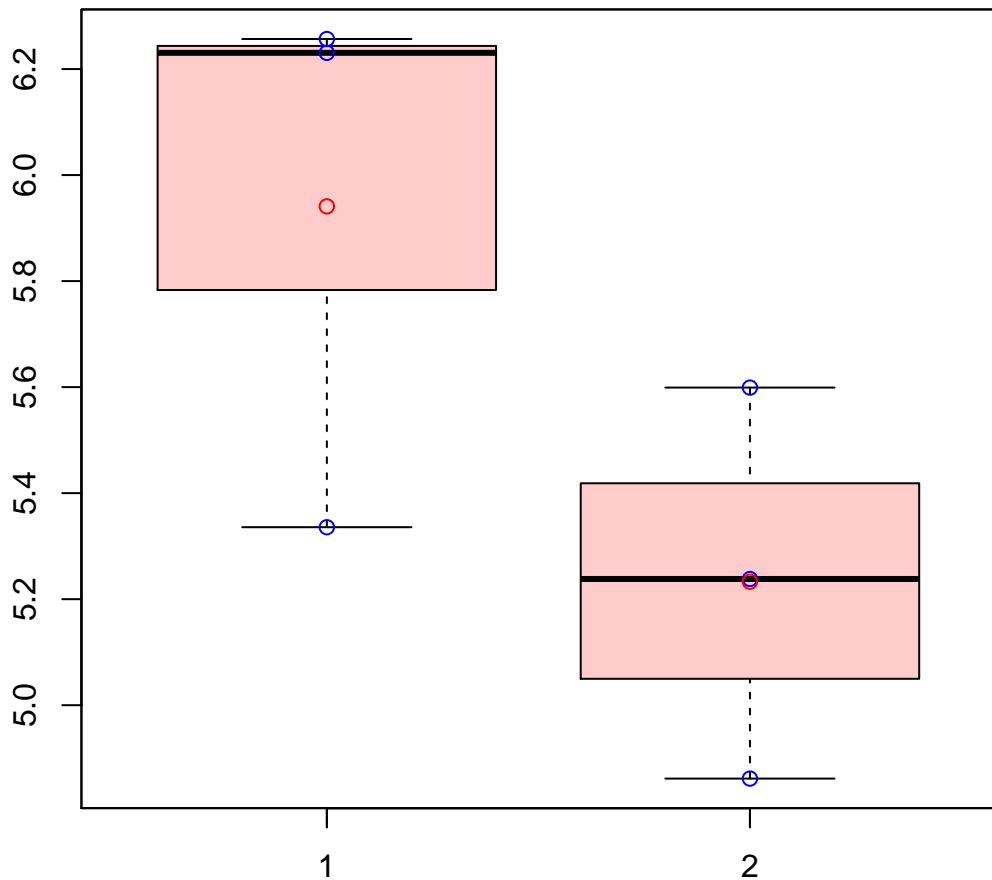

t-Test: p-value = 0.14

# A3BE72|A3BE72\_ORYSJ

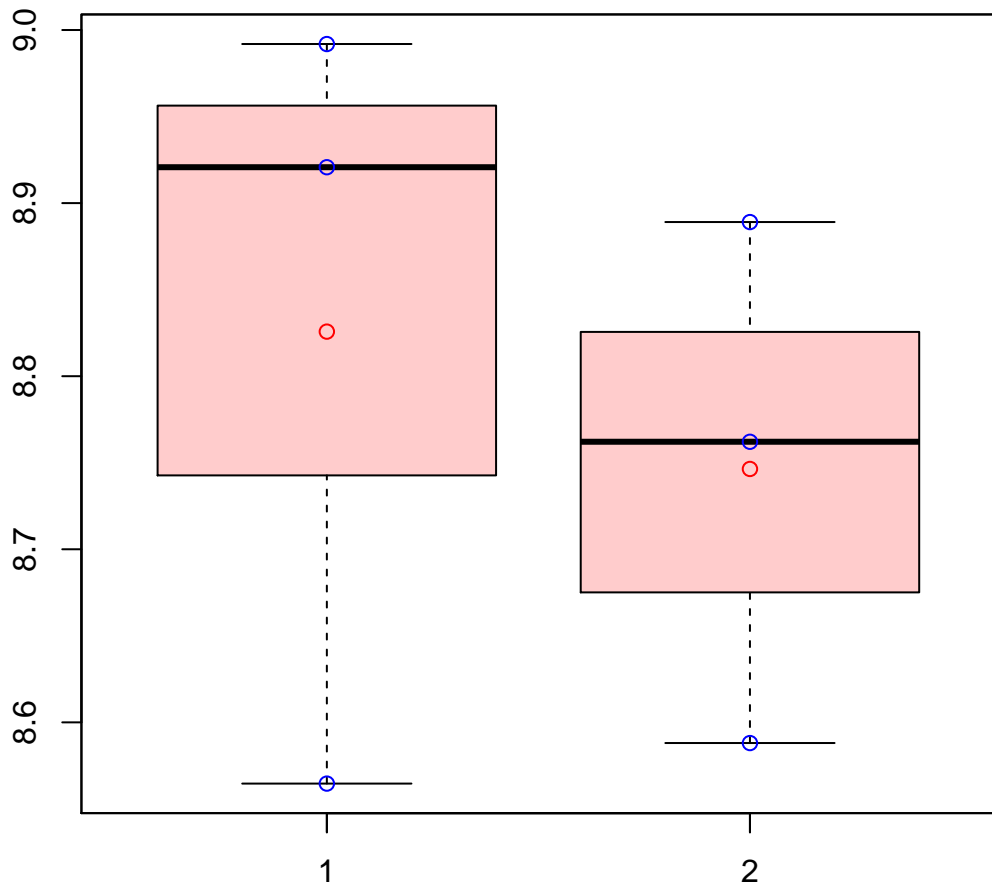

t-Test: p-value = 0.65

# A3BMJ5|A3BMJ5\_ORYSJ

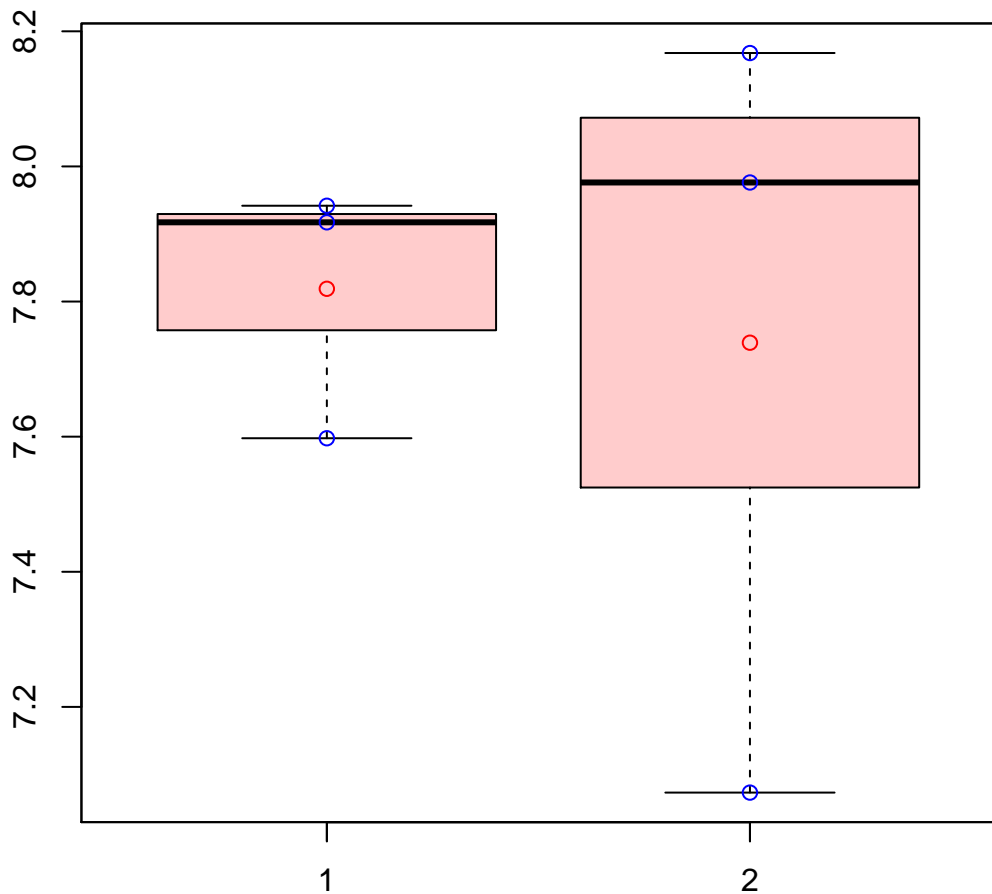

t-Test: p-value = 0.84



# A3BMS4|A3BMS4\_ORYSJ

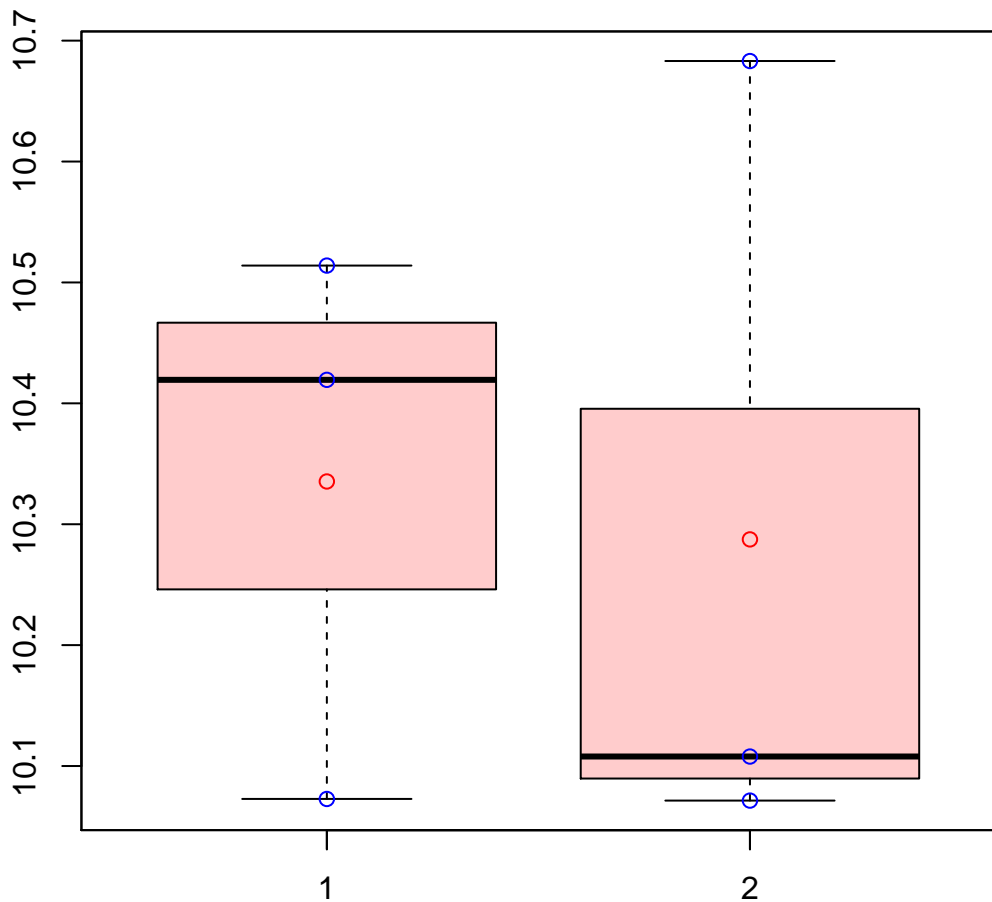

t-Test: p-value = 0.85

# A3BMY0|A3BMY0\_ORYSJ

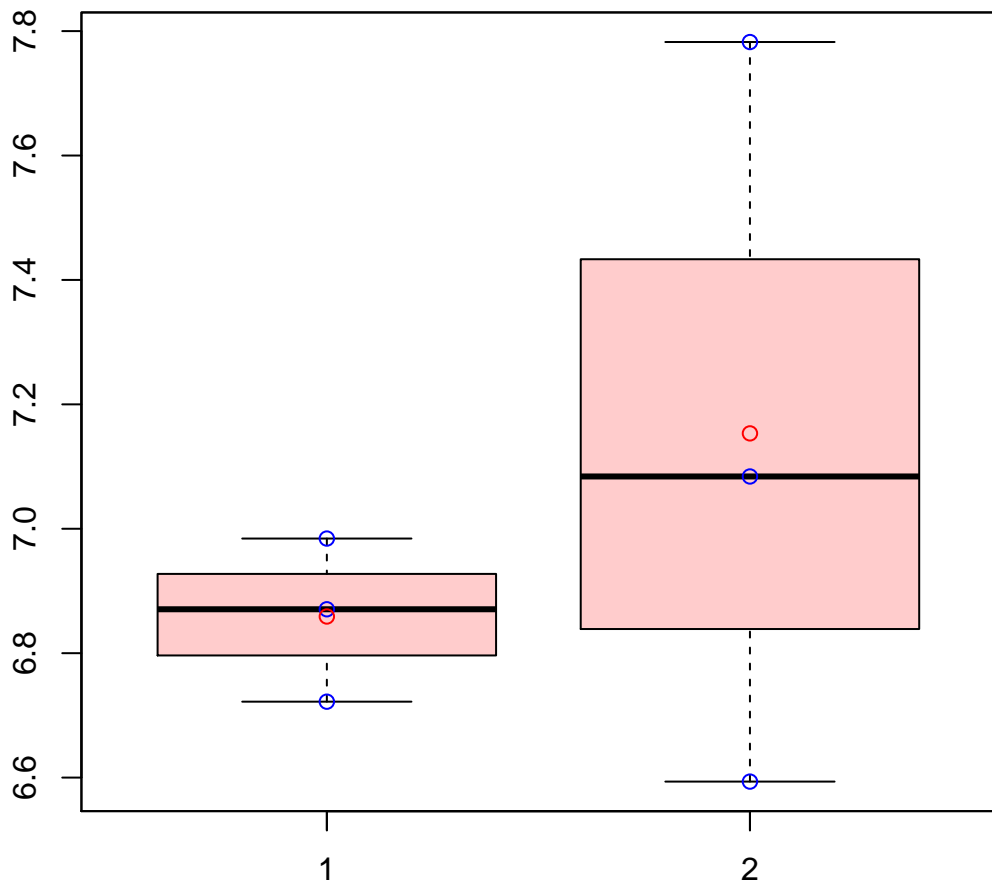

t-Test: p-value = 0.49

# A3BS75|A3BS75\_ORYSJ

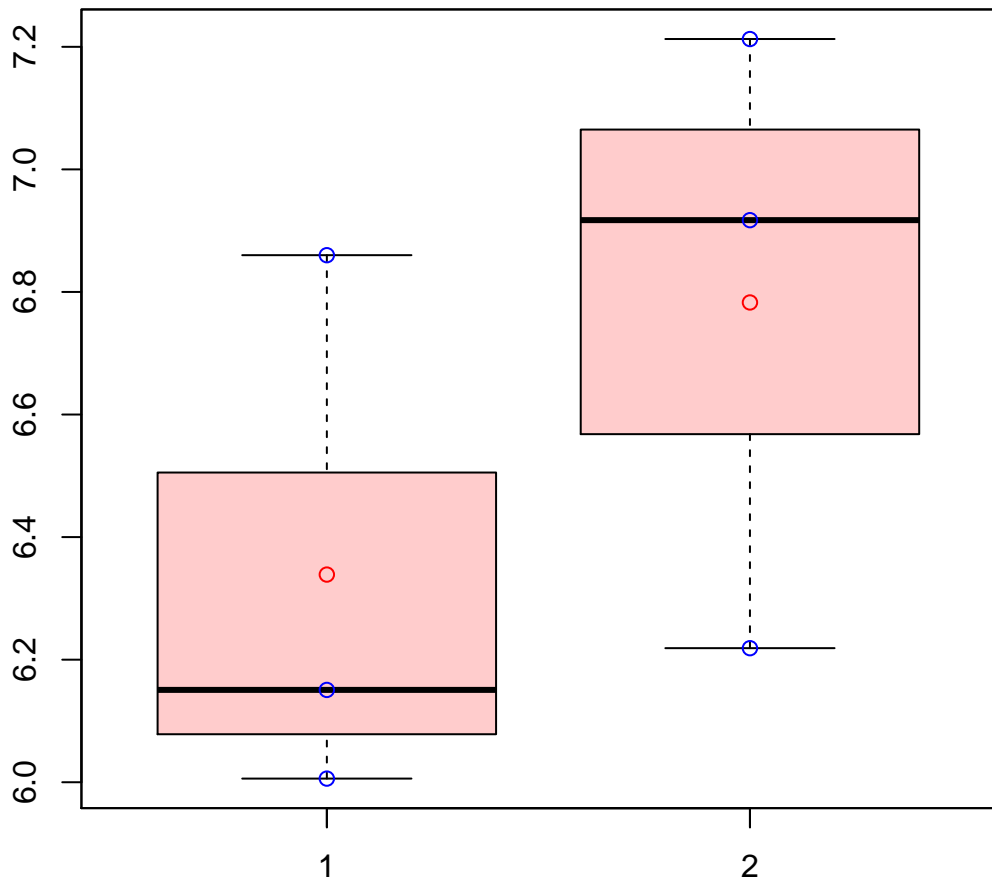

t-Test: p-value = 0.33

# A3BU91|A3BU91\_ORYSJ

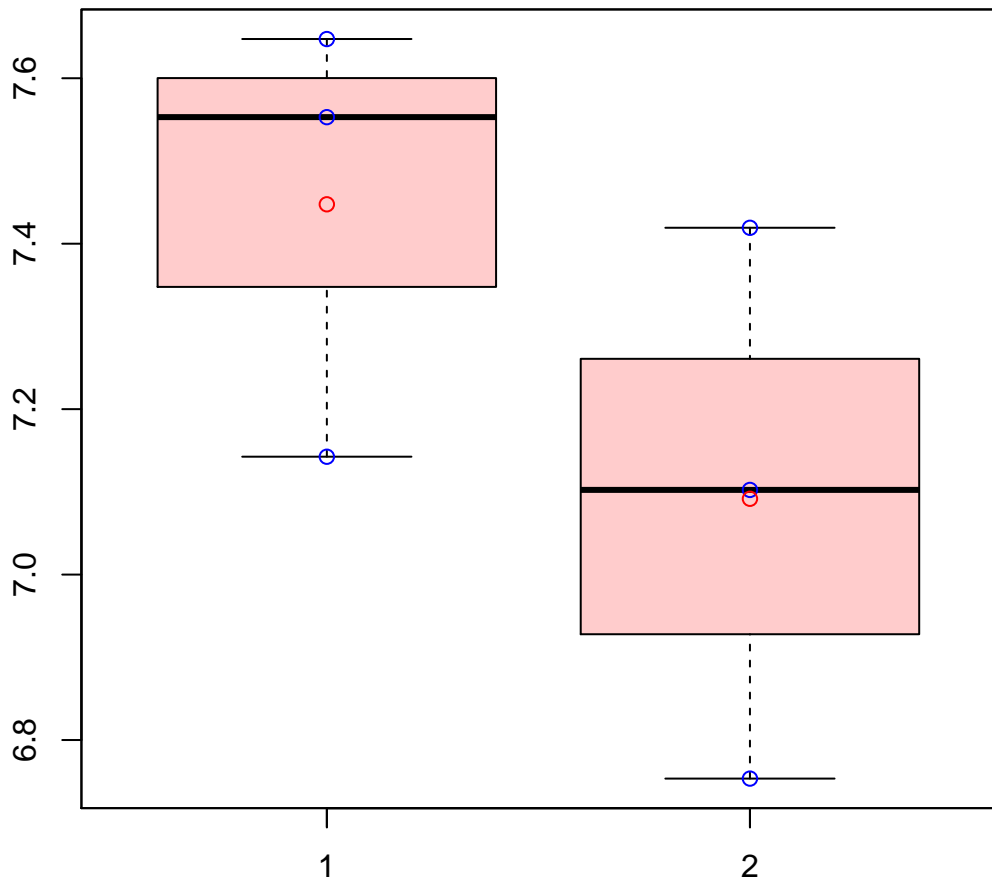

t-Test: p-value = 0.23

# A3BUT5|A3BUT5\_ORYSJ

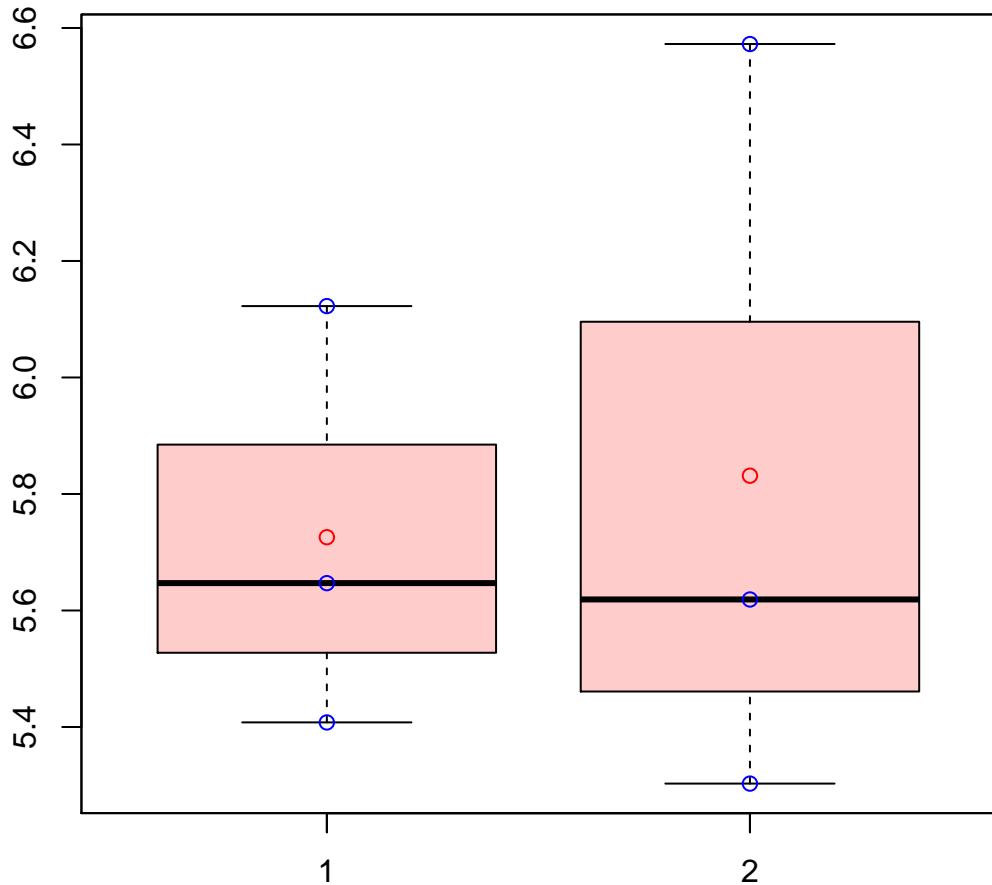

t-Test: p-value = 0.82

# A3BVS6|A3BVS6\_ORYSJ

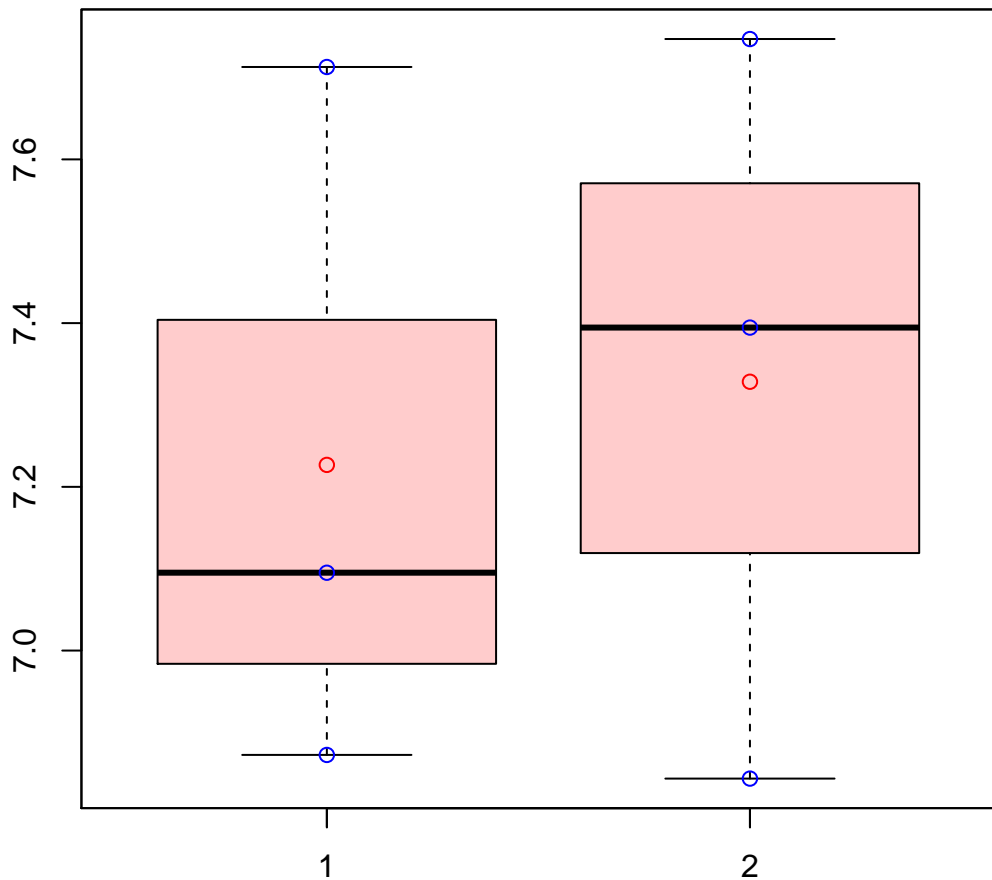

t-Test: p-value = 0.79

# A3BY14|A3BY14\_ORYSJ

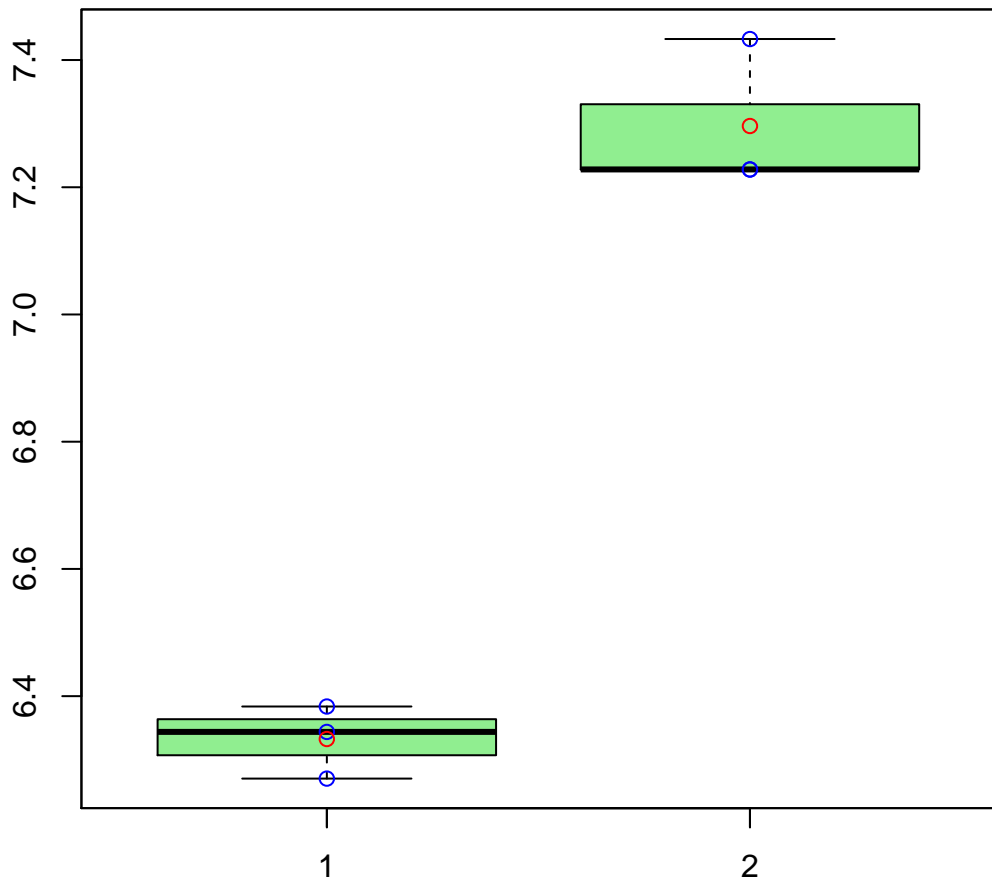

t-Test: p-value = 0

# A3C0N6|A3C0N6\_ORYSJ

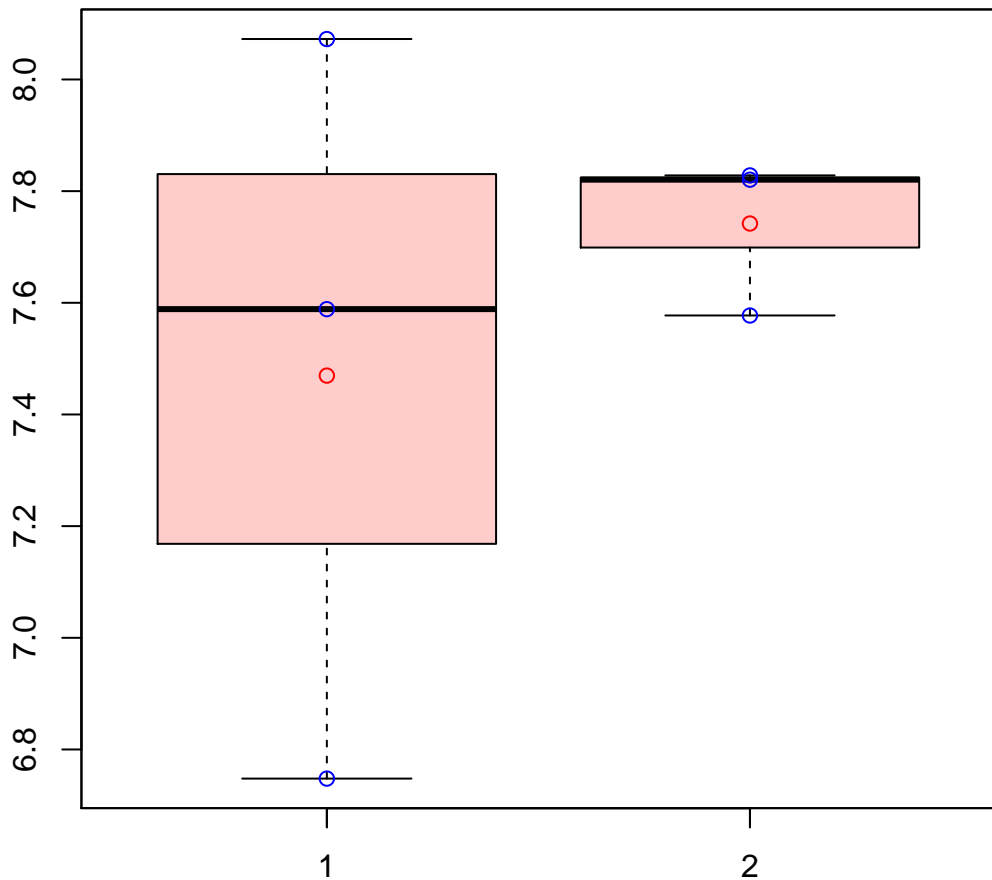

t-Test: p-value = 0.56



# A3C5W3|A3C5W3\_ORYSJ

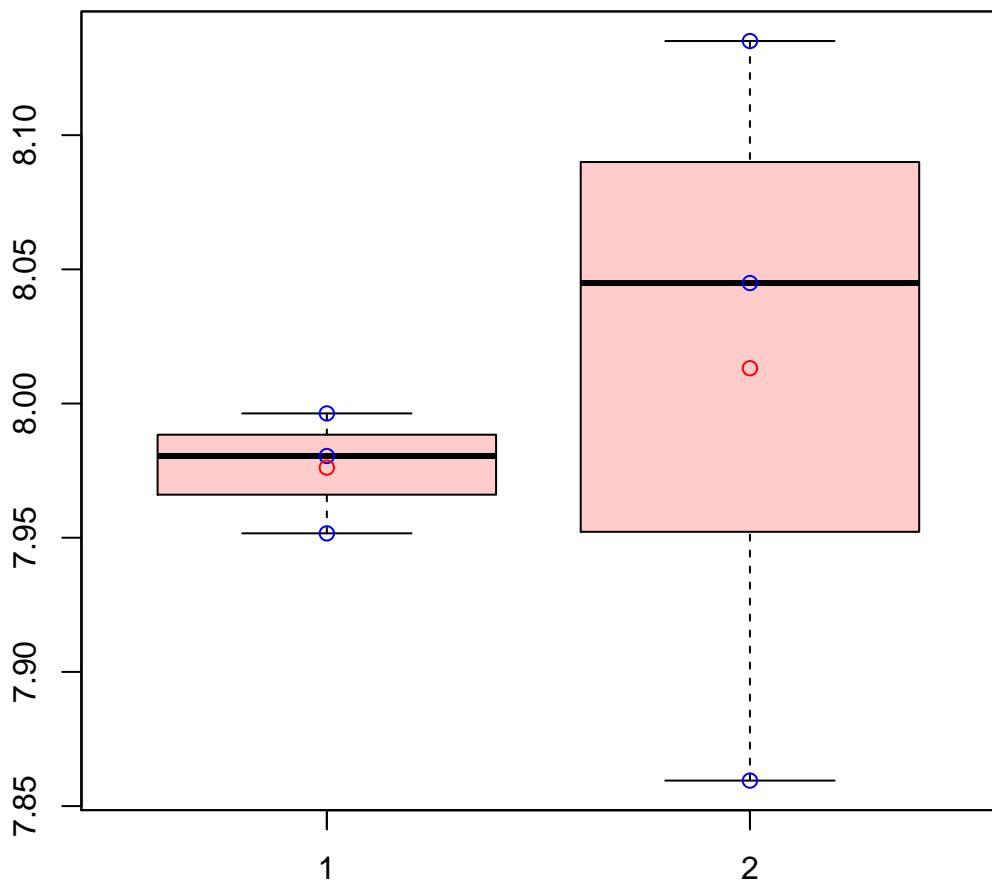

t-Test: p-value = 0.69

# A3C766|A3C766\_ORYSJ

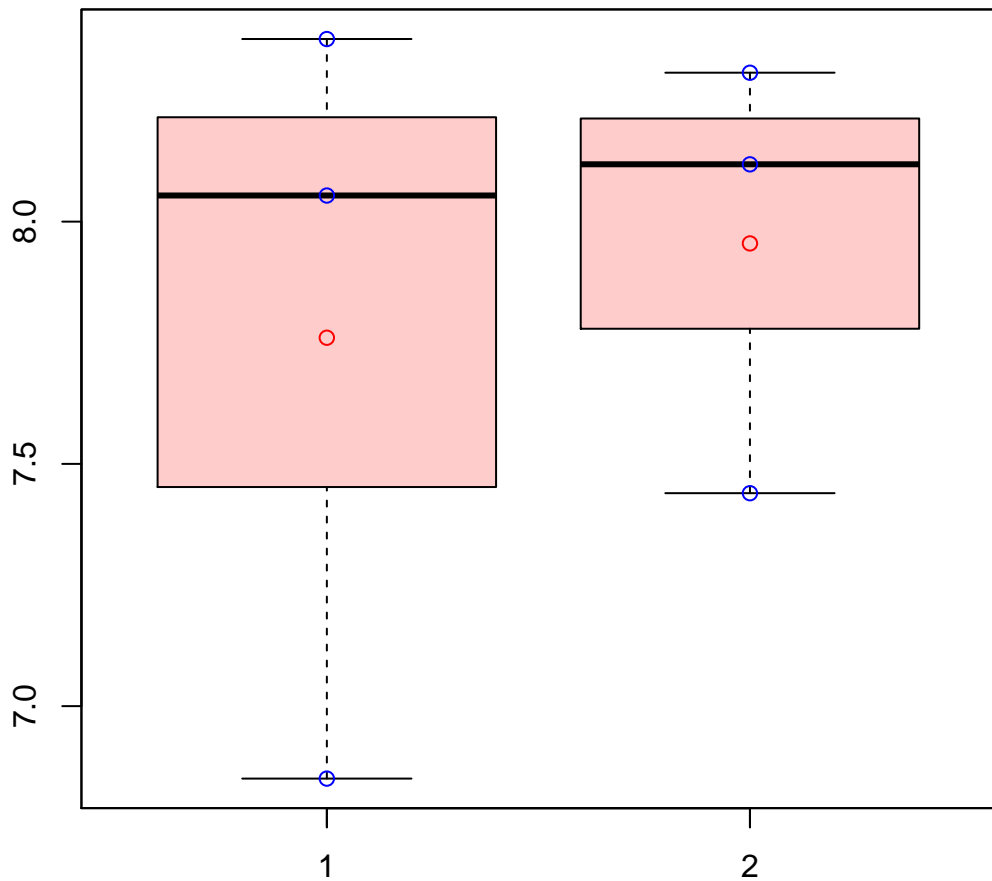

t-Test: p-value = 0.74

# A3C7K0|A3C7K0\_ORYSJ

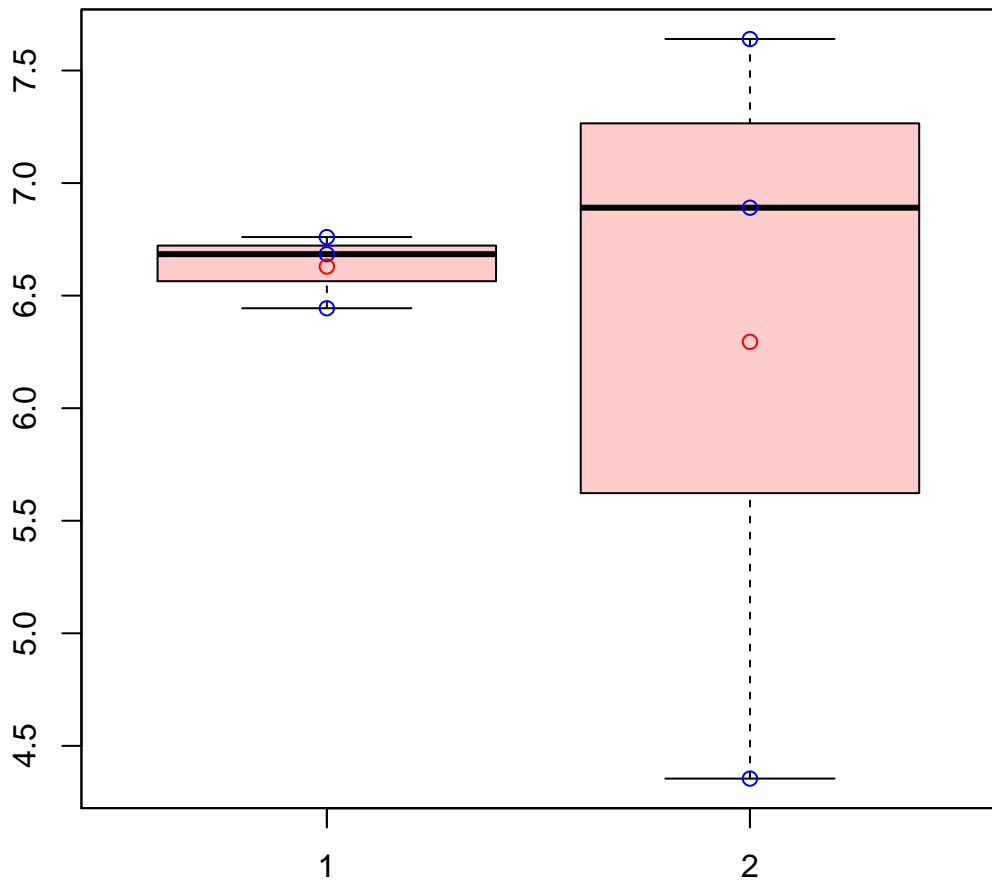

t-Test: p-value = 0.77

# A3C9K3|A3C9K3\_ORYSJ

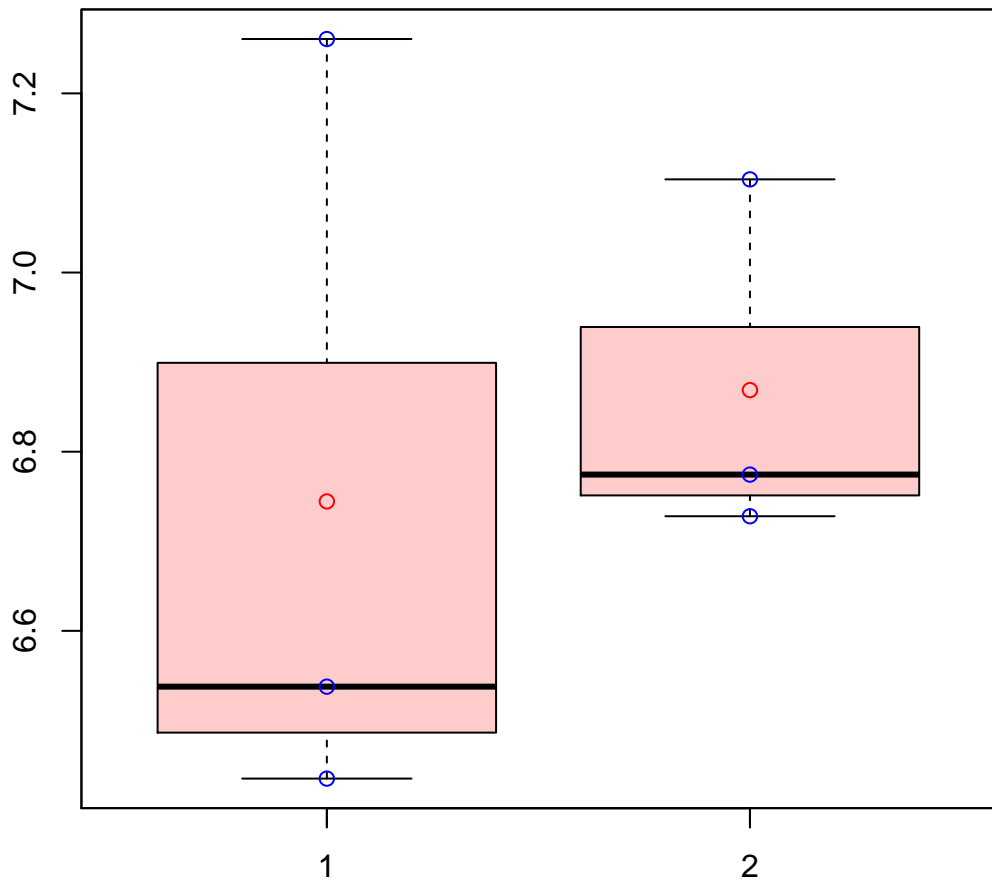

t-Test: p-value = 0.69

# A3CA11|A3CA11\_ORYSJ

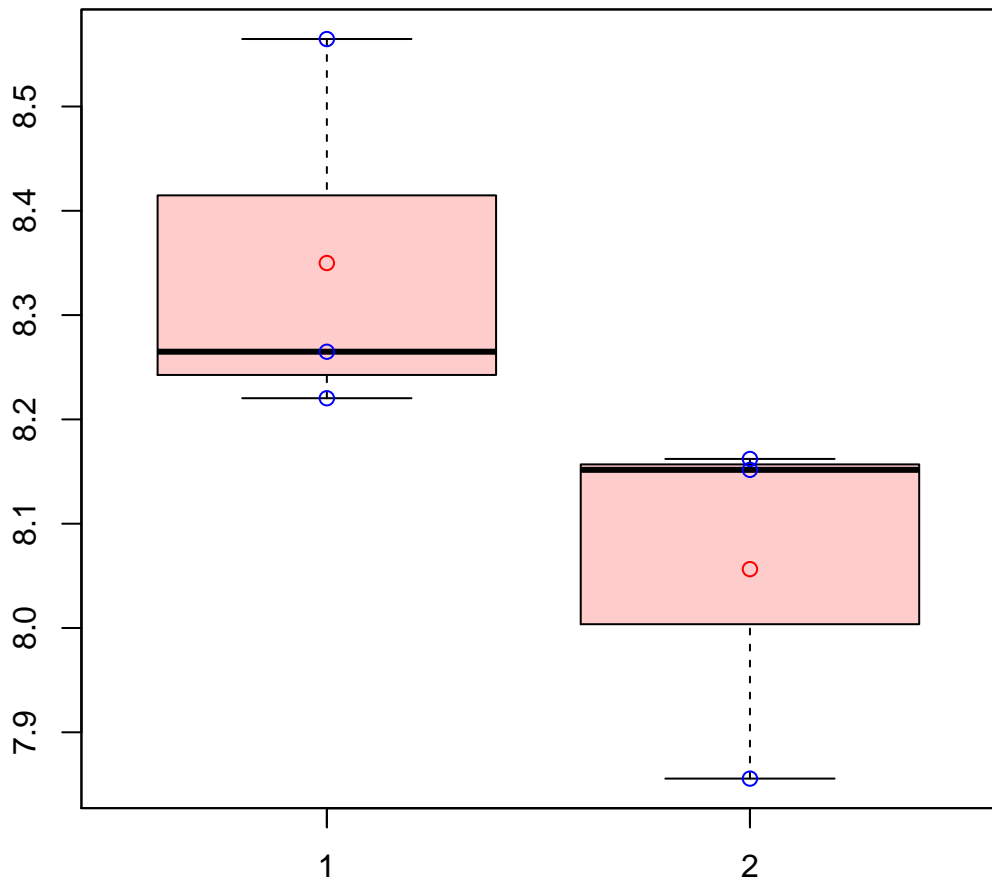

t-Test: p-value = 0.12

# A3CE41|A3CE41\_ORYSJ

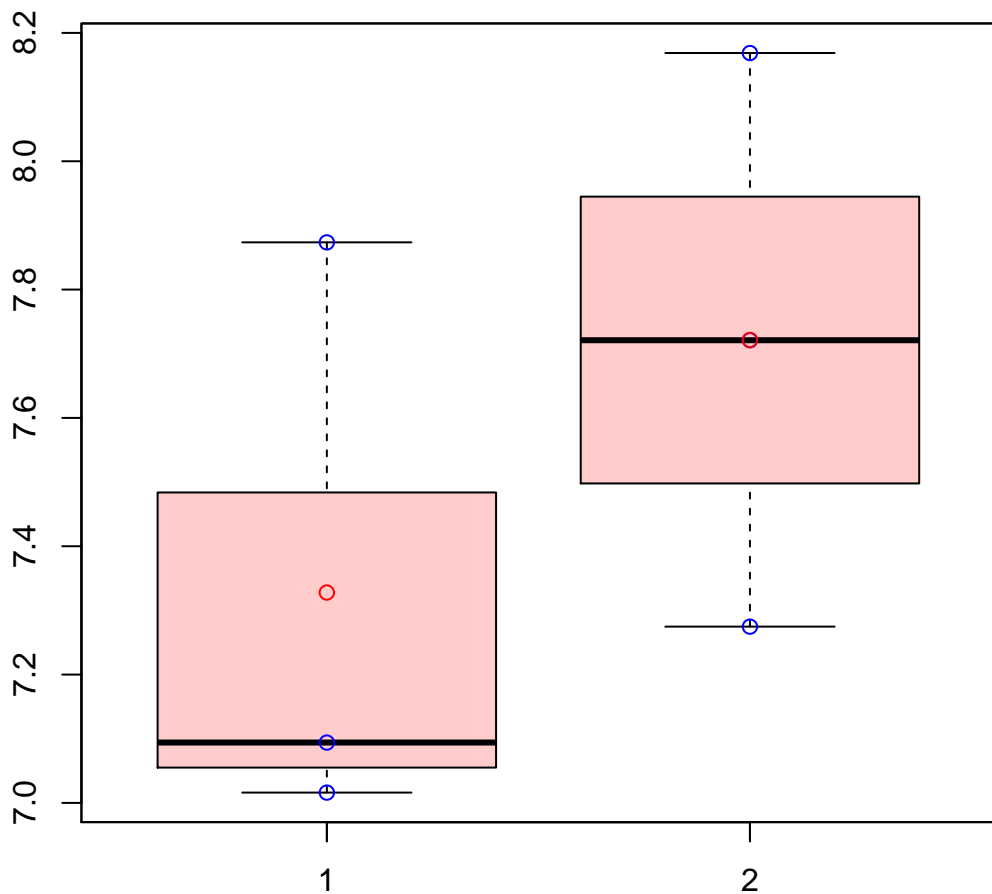

t-Test: p-value = 0.35

# A3CFP8|A3CFP8\_ORYSJ

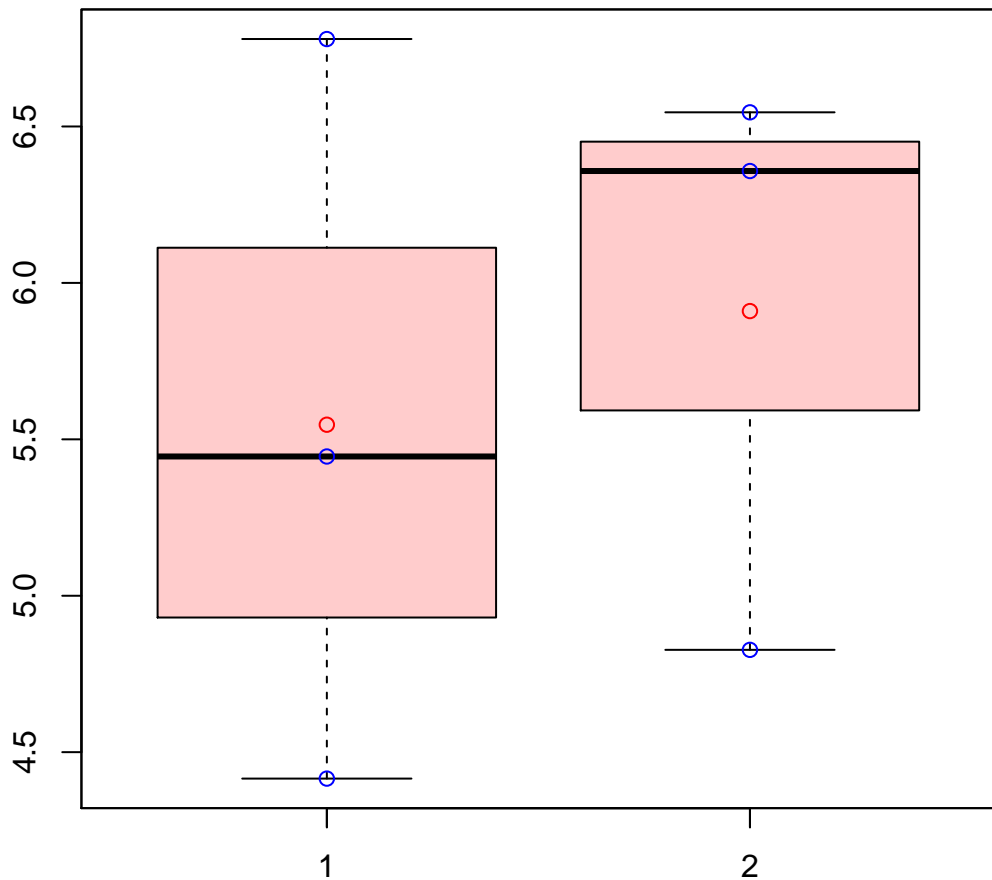

t-Test: p-value = 0.7

# A3CG62|A3CG62\_ORYSJ

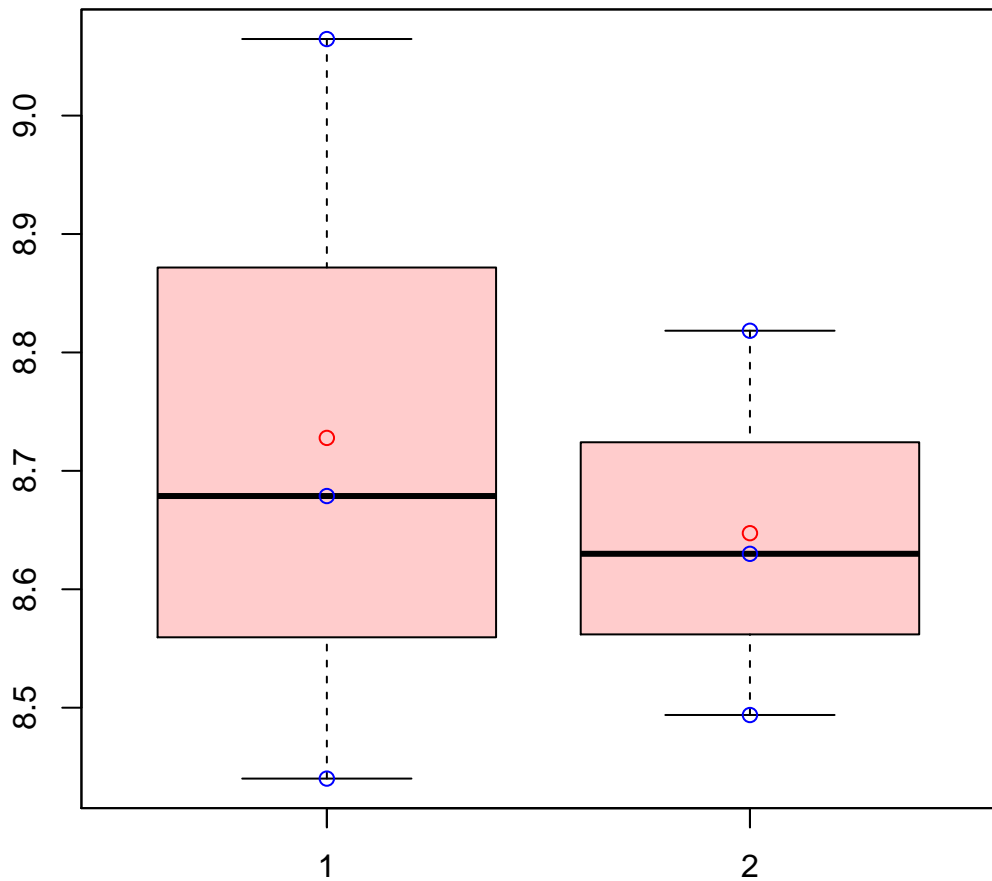

t-Test: p-value = 0.72



# A3CJU4|A3CJU4\_ORYSJ

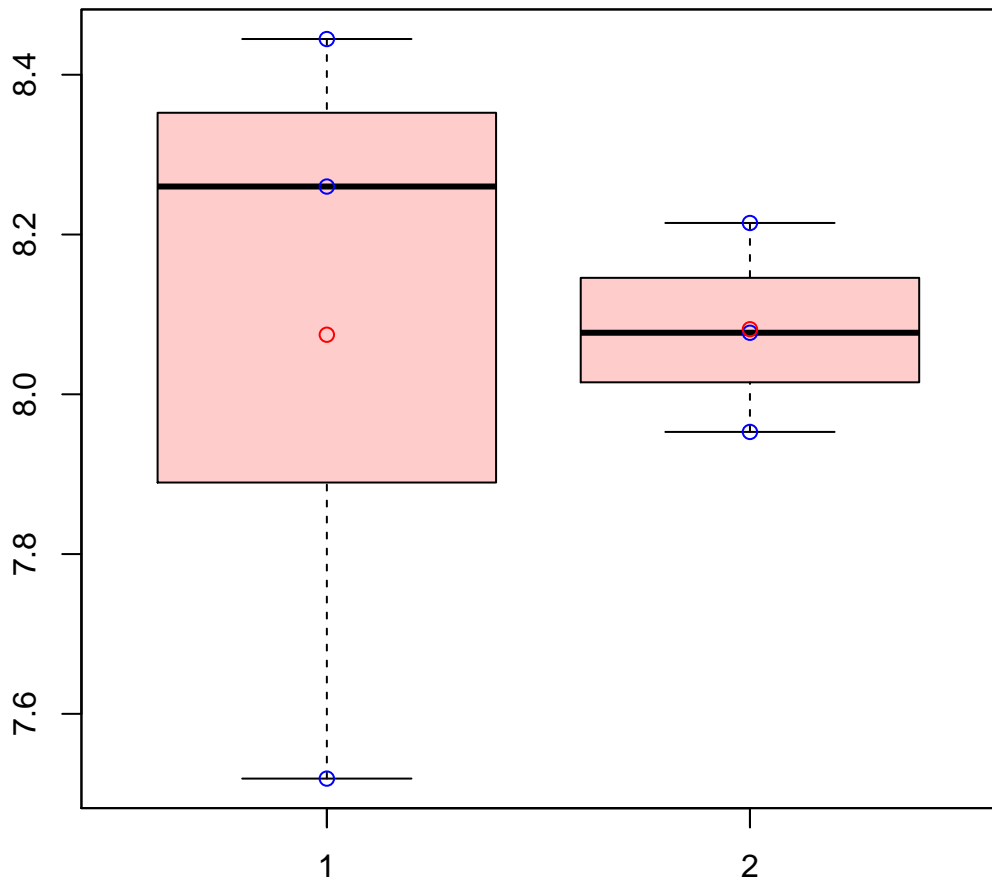

t-Test: p-value = 0.98

# A3RG90|A3RG90\_LILLO

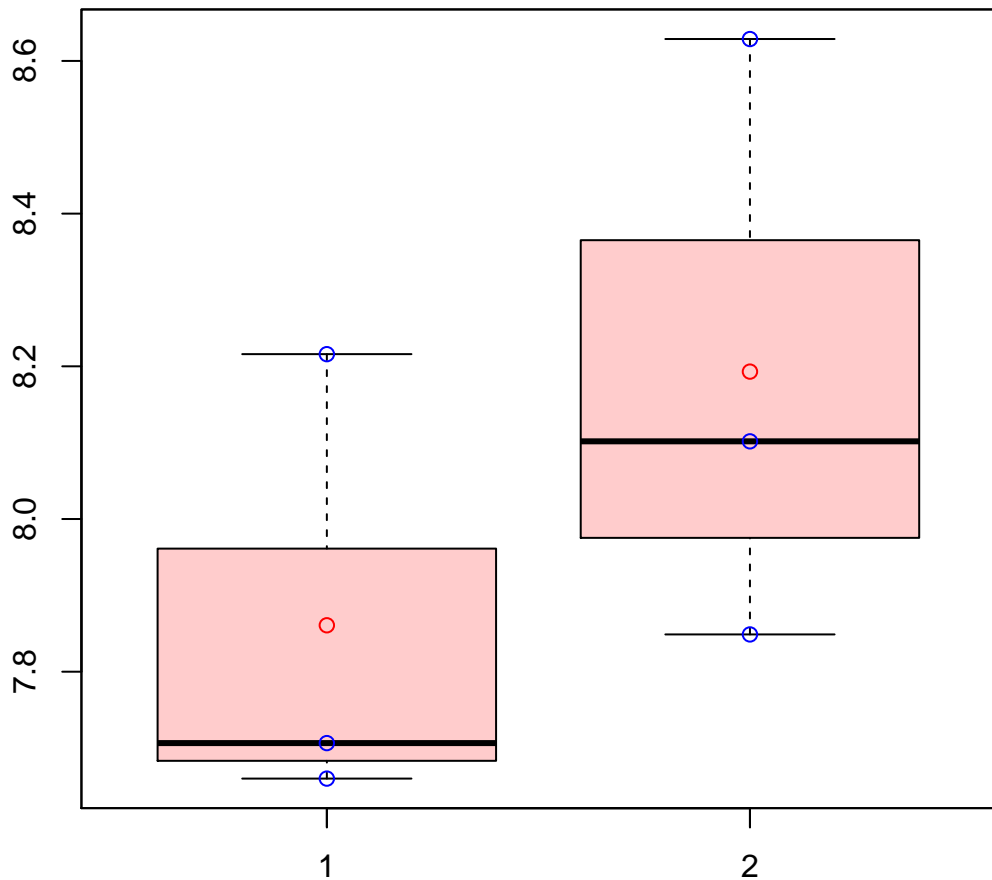

t-Test: p-value = 0.32

# A4GKM7|A4GKM7\_9POAL

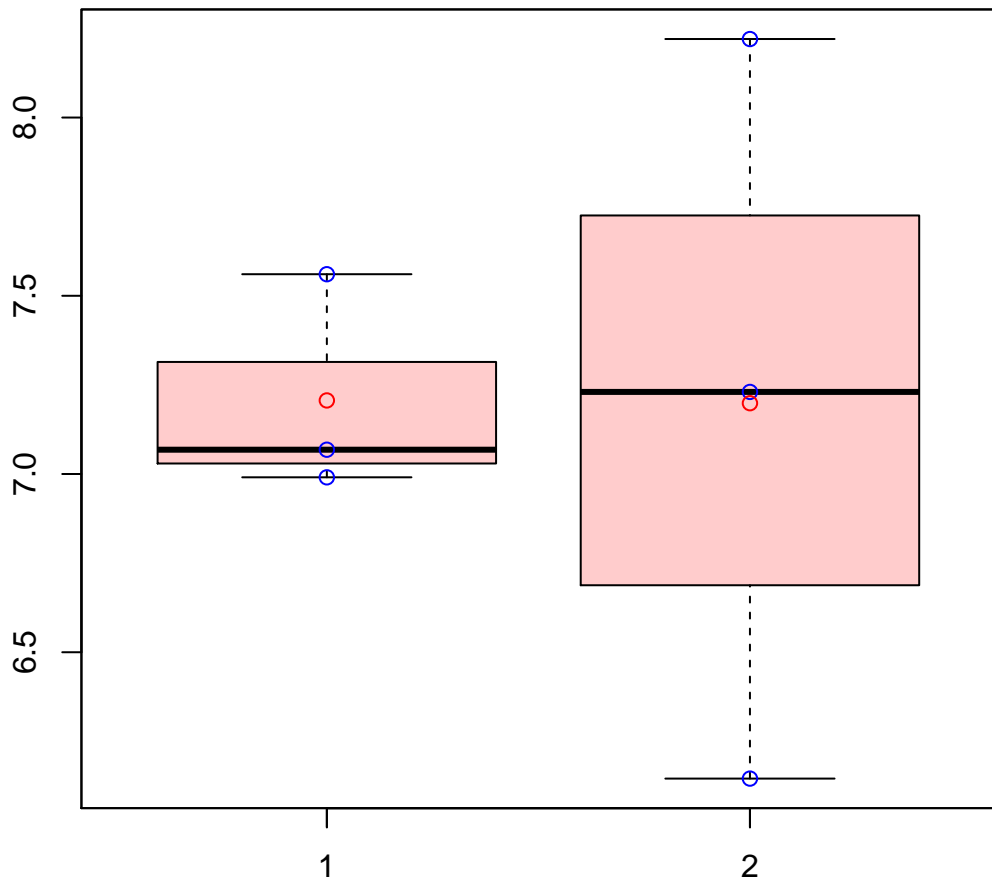

t-Test: p-value = 0.99

# A4ZYQ0|A4ZYQ0\_PENAM

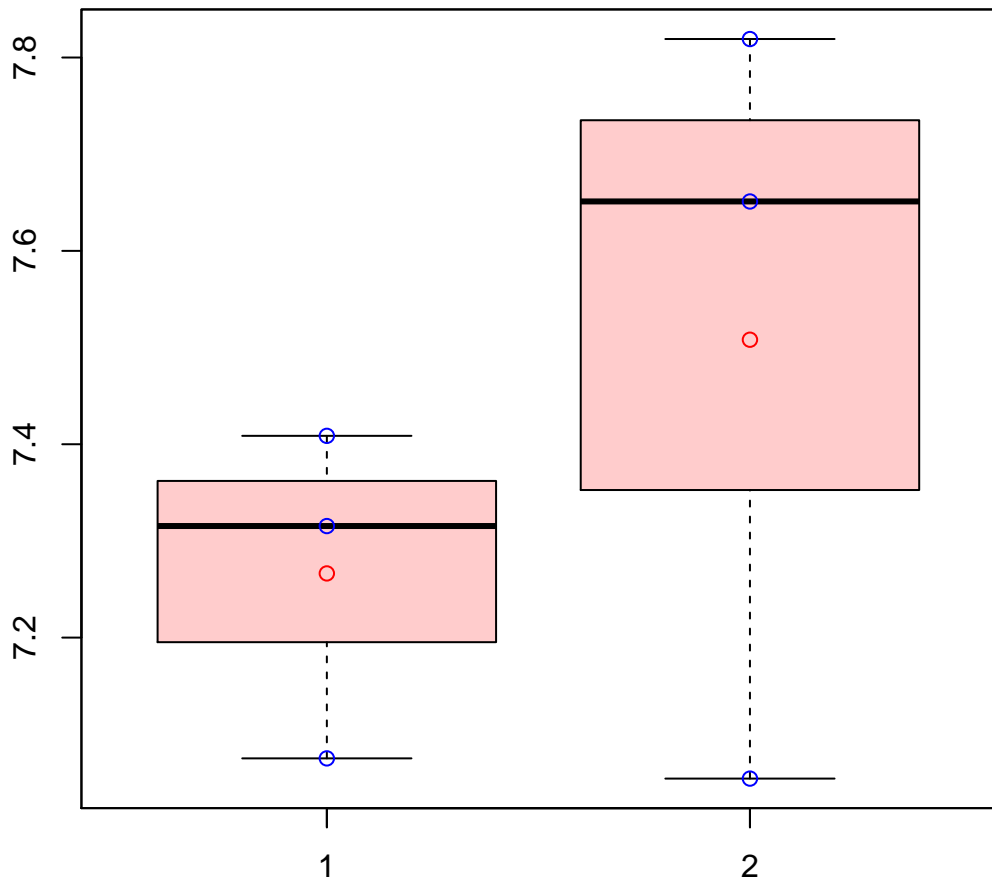

t-Test: p-value = 0.42

# A5A5E7|A5A5E7\_MAIZE

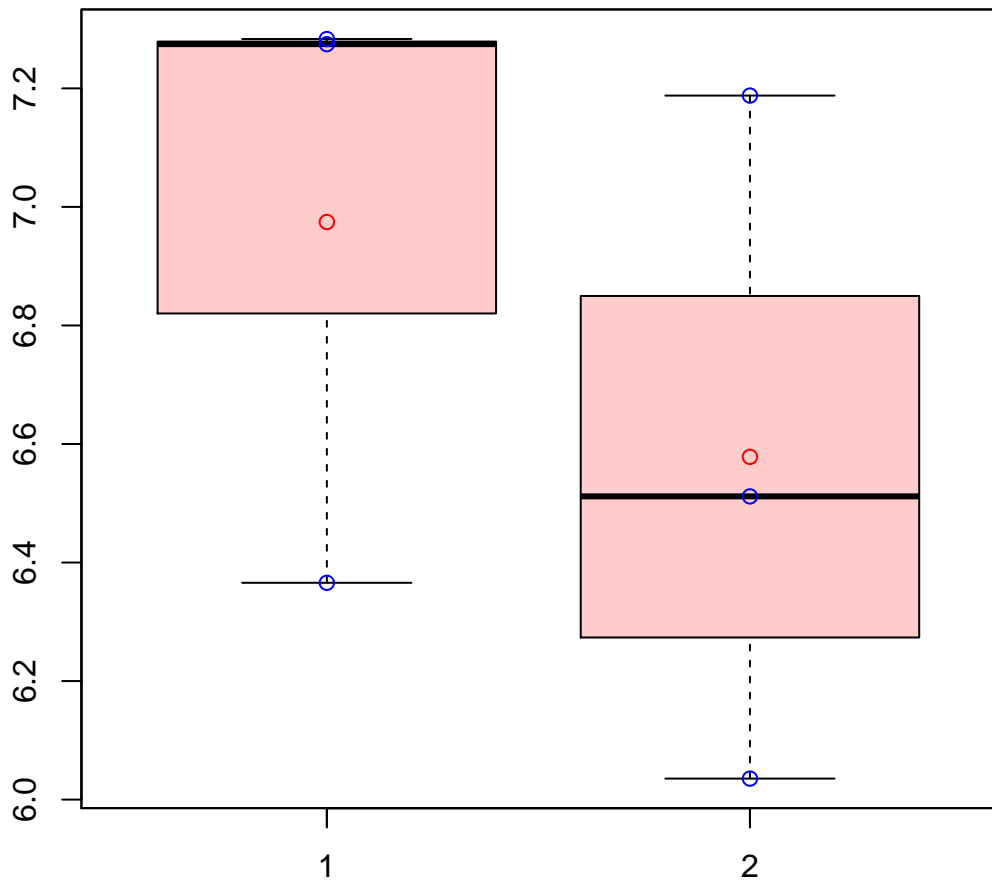

t-Test: p-value = 0.43

# A5GZ73|A5GZ73\_MAIZE

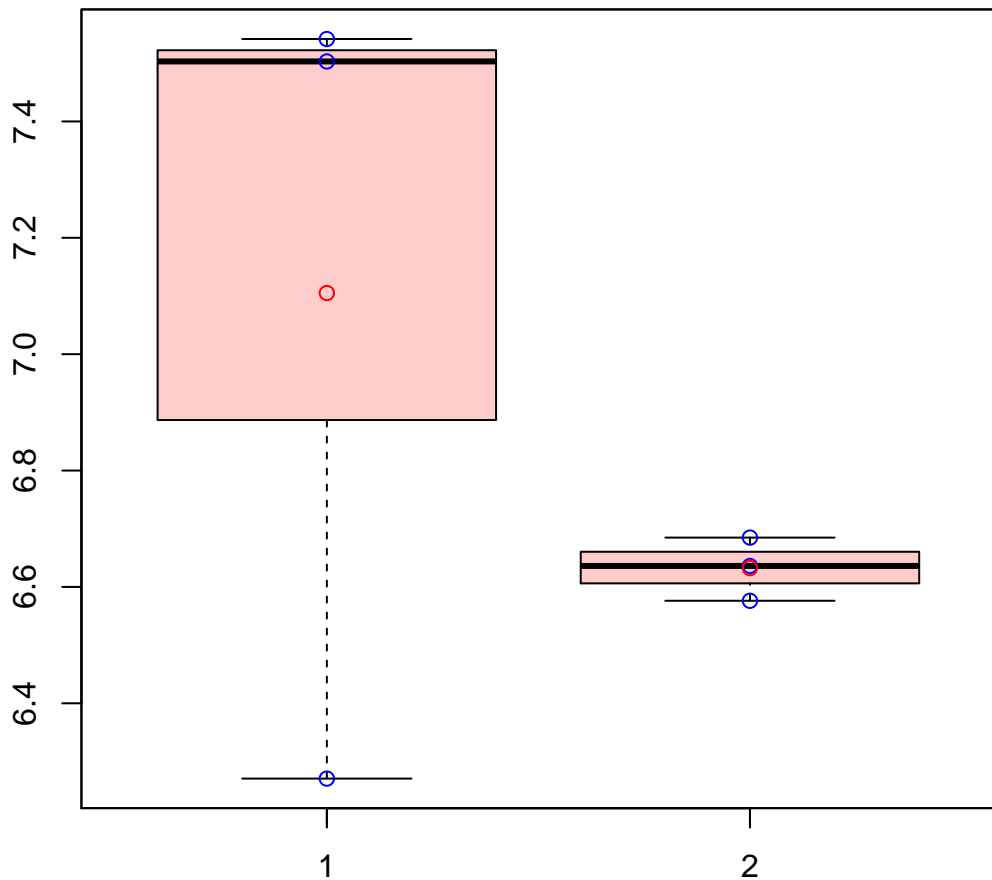

t-Test: p-value = 0.37

# A5HSI1|A5HSI1\_BAMOL

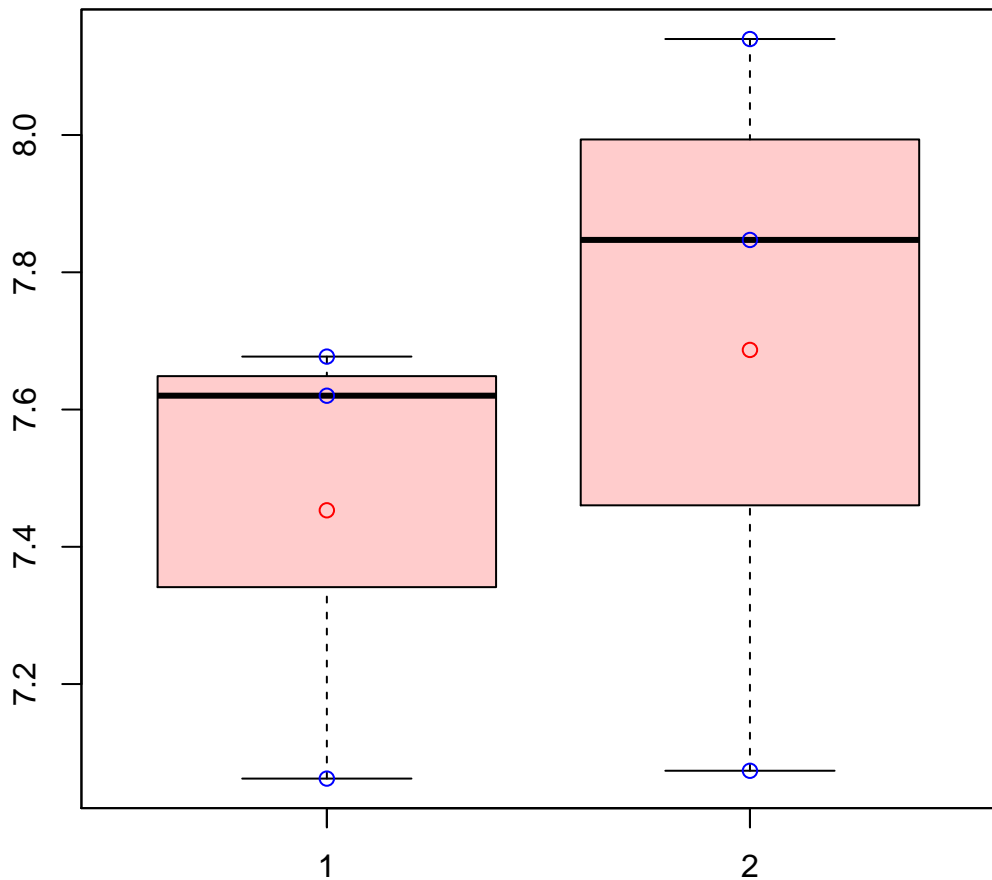

t-Test: p-value = 0.57

# A5Y429|A5Y429\_SORBI

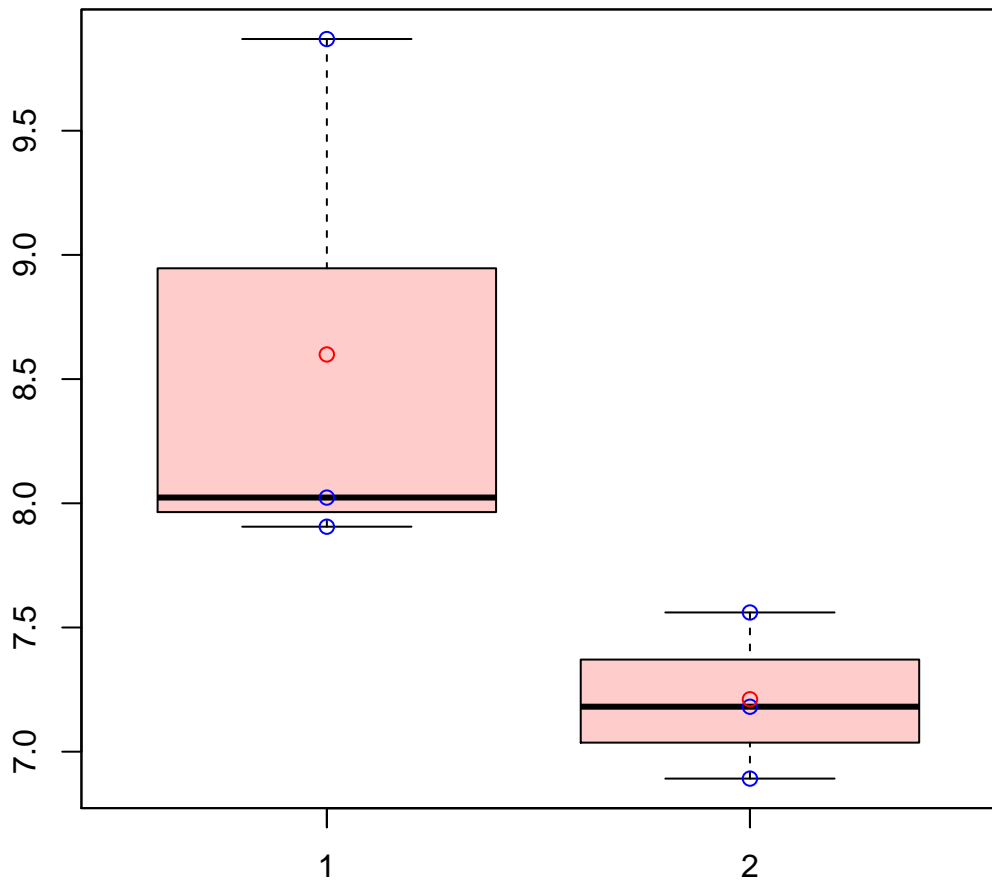

t-Test: p-value = 0.15



# A6MZM7|A6MZM7\_ORYSI

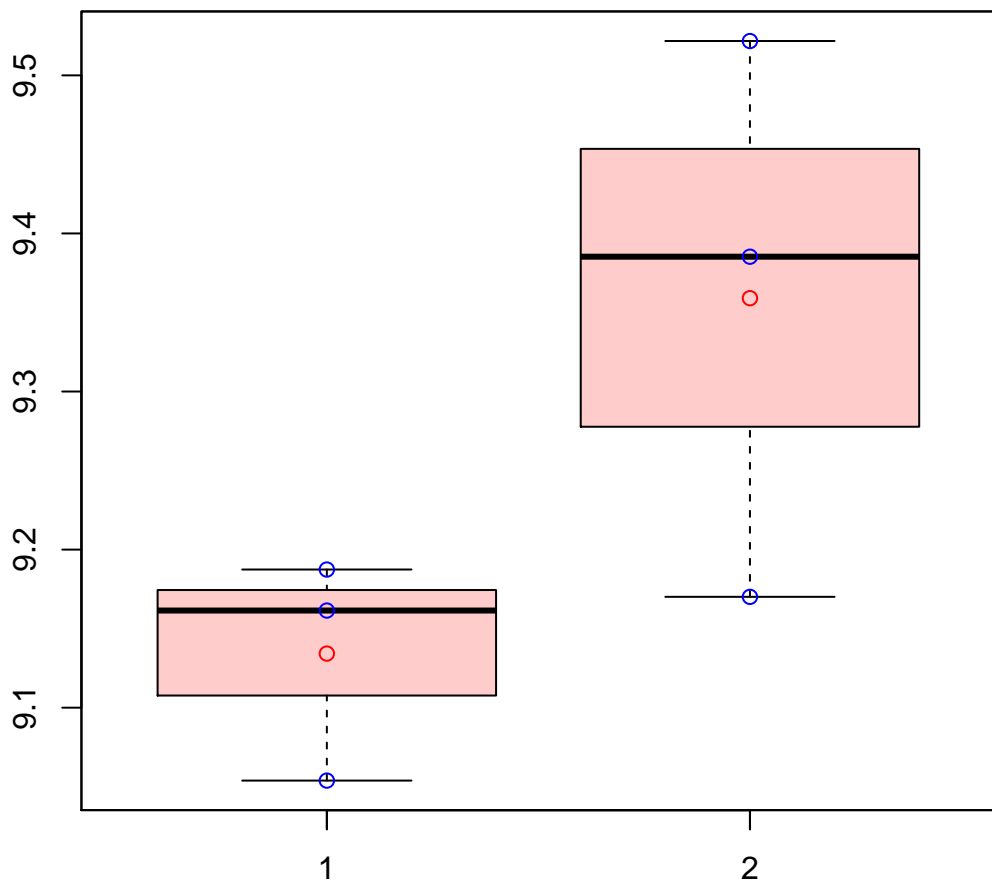

t-Test: p-value = 0.15

# A6N038|A6N038\_ORYSI

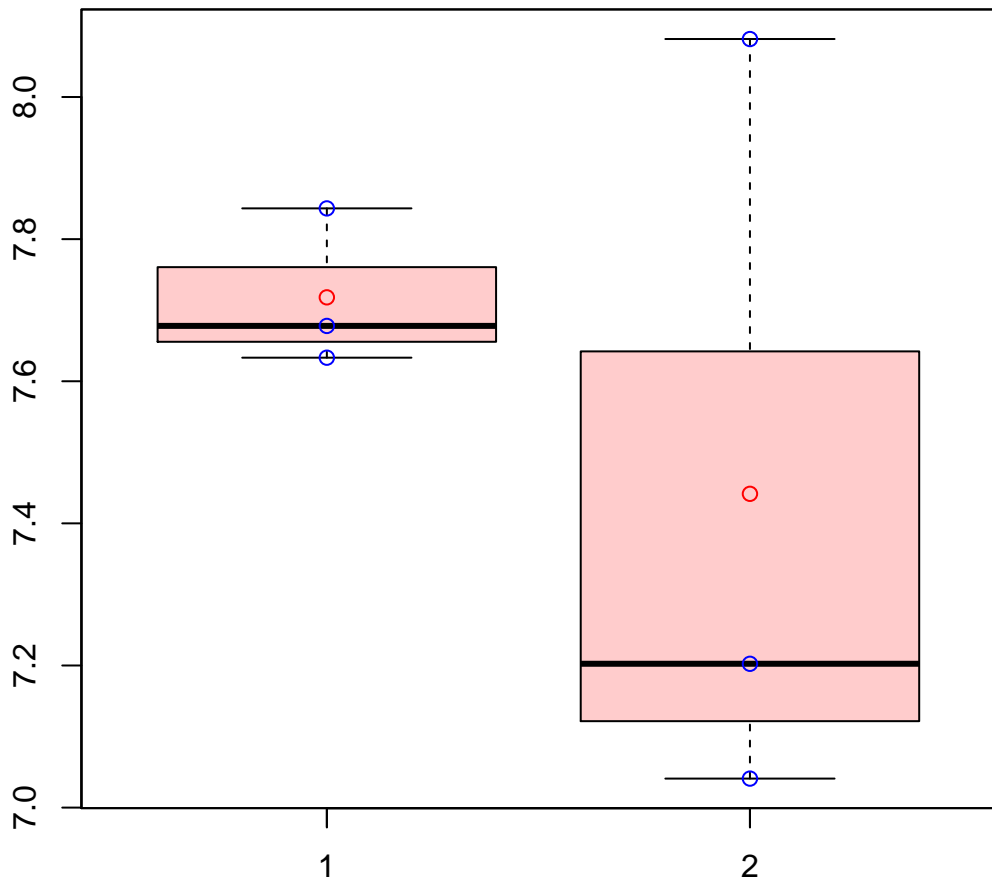

t-Test: p-value = 0.48

# A6N0D0|A6N0D0\_ORYSI

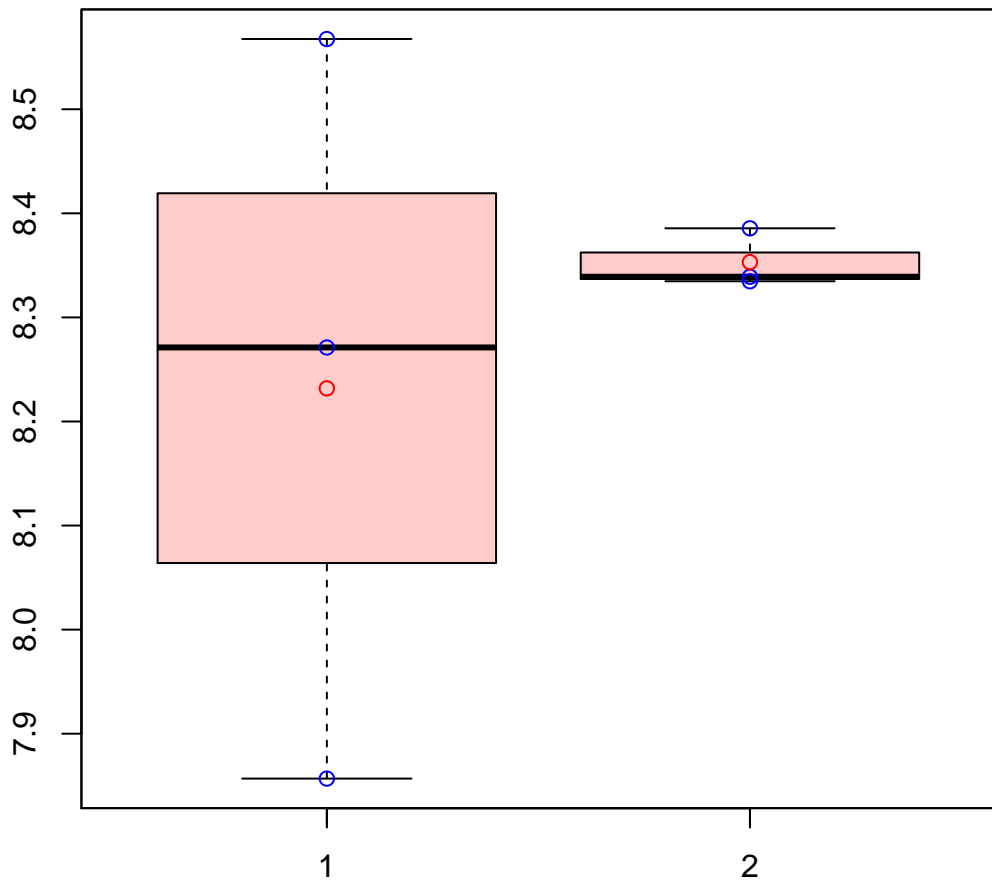

t-Test: p-value = 0.62

# A6N0D3|A6N0D3\_ORYSI

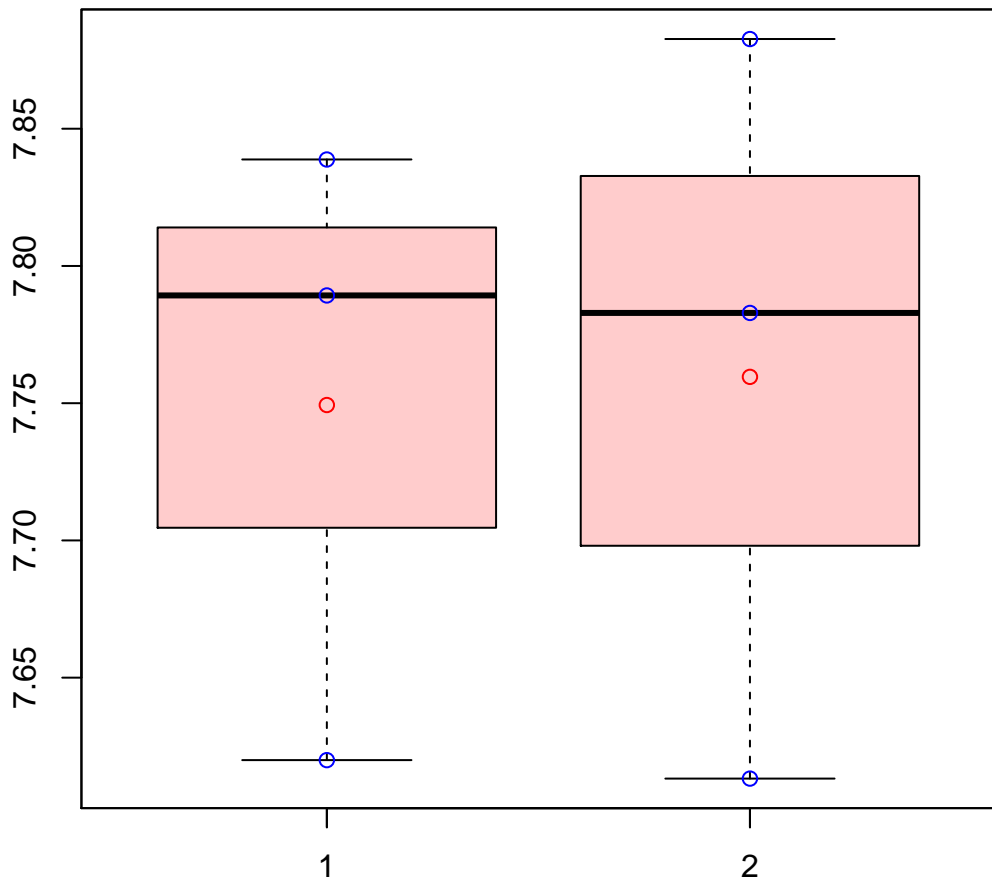

t-Test: p-value = 0.93

# A6N1B1|A6N1B1\_ORYSI

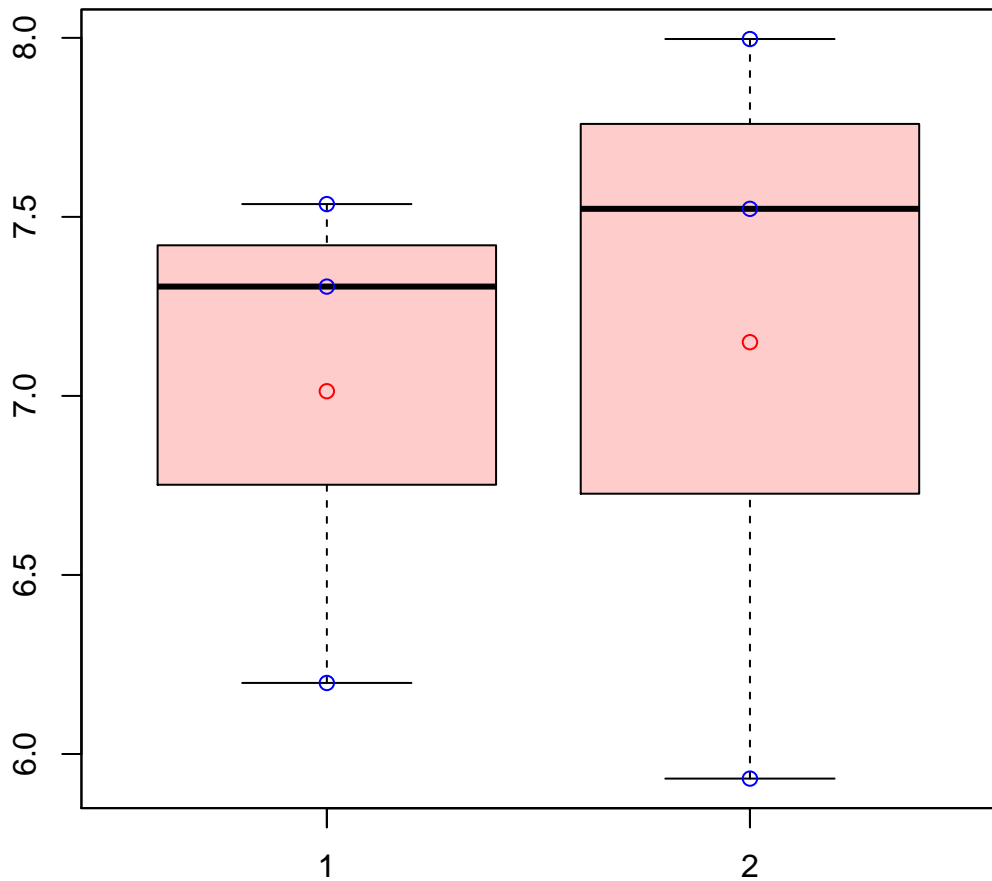

t-Test: p-value = 0.87

# A6YDU4|A6YDU4\_LOLTE

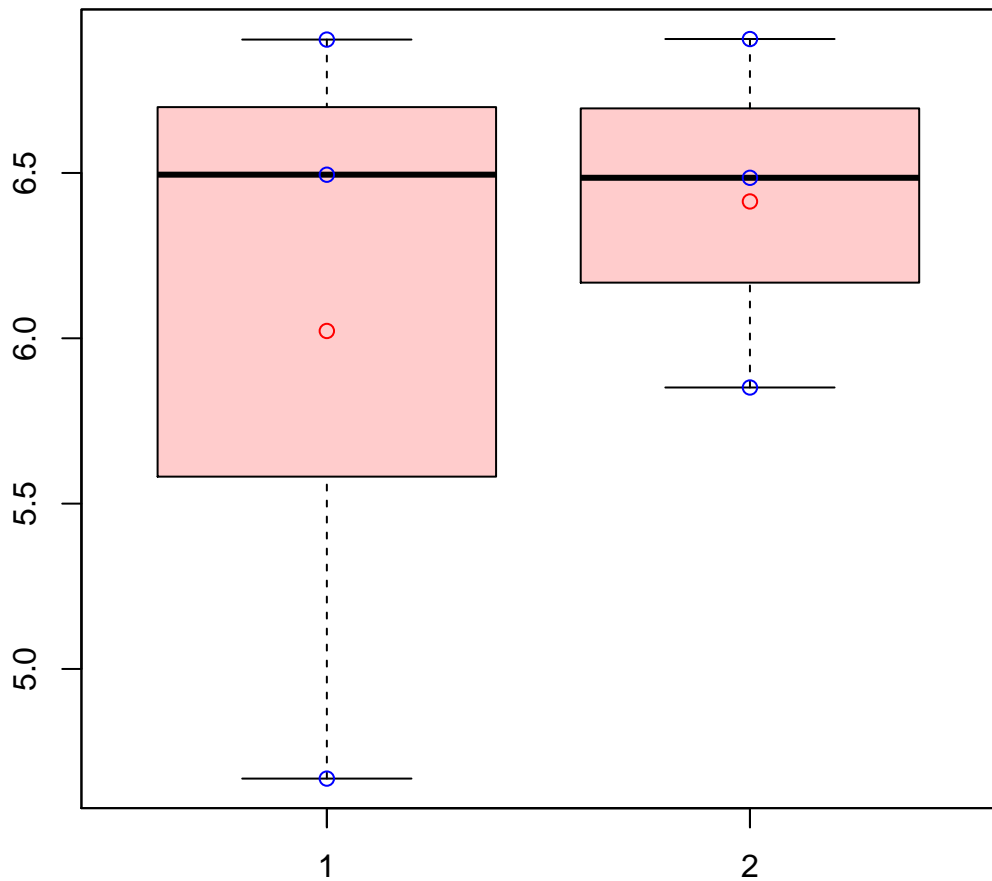

t-Test: p-value = 0.64

# A7DX17|A7DX17\_9POAL

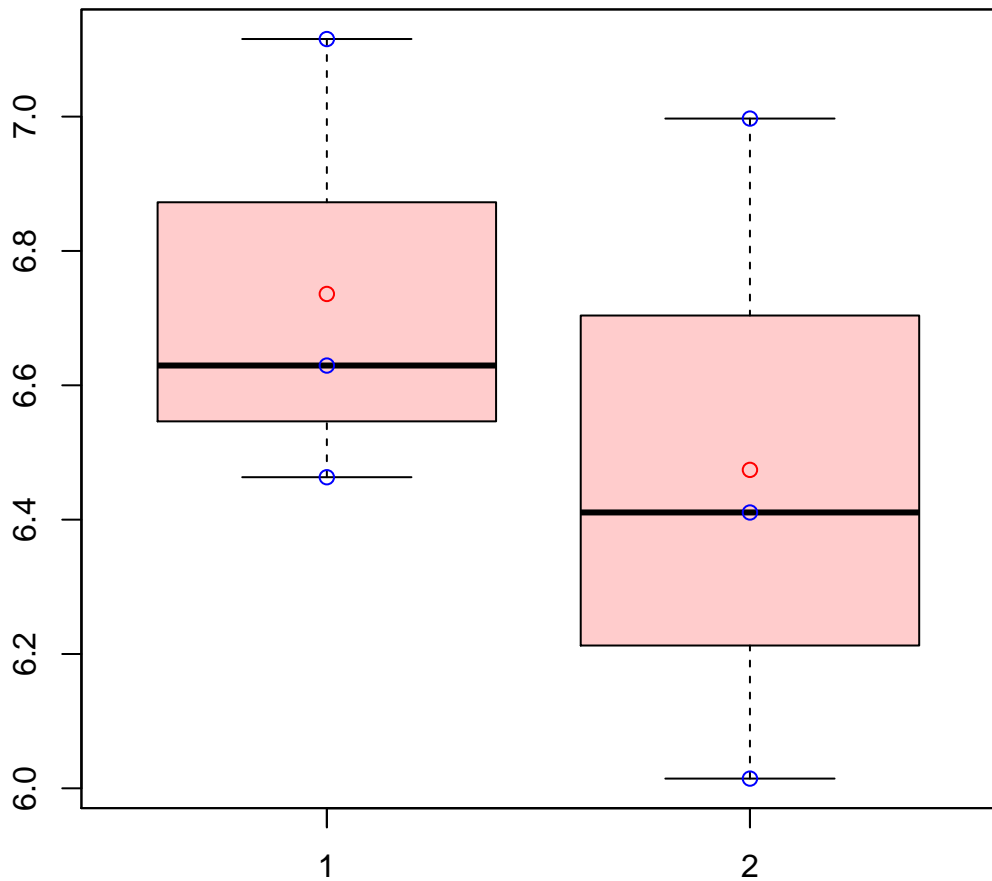

t-Test: p-value = 0.5

# A7DX18|A7DX18\_9POAL

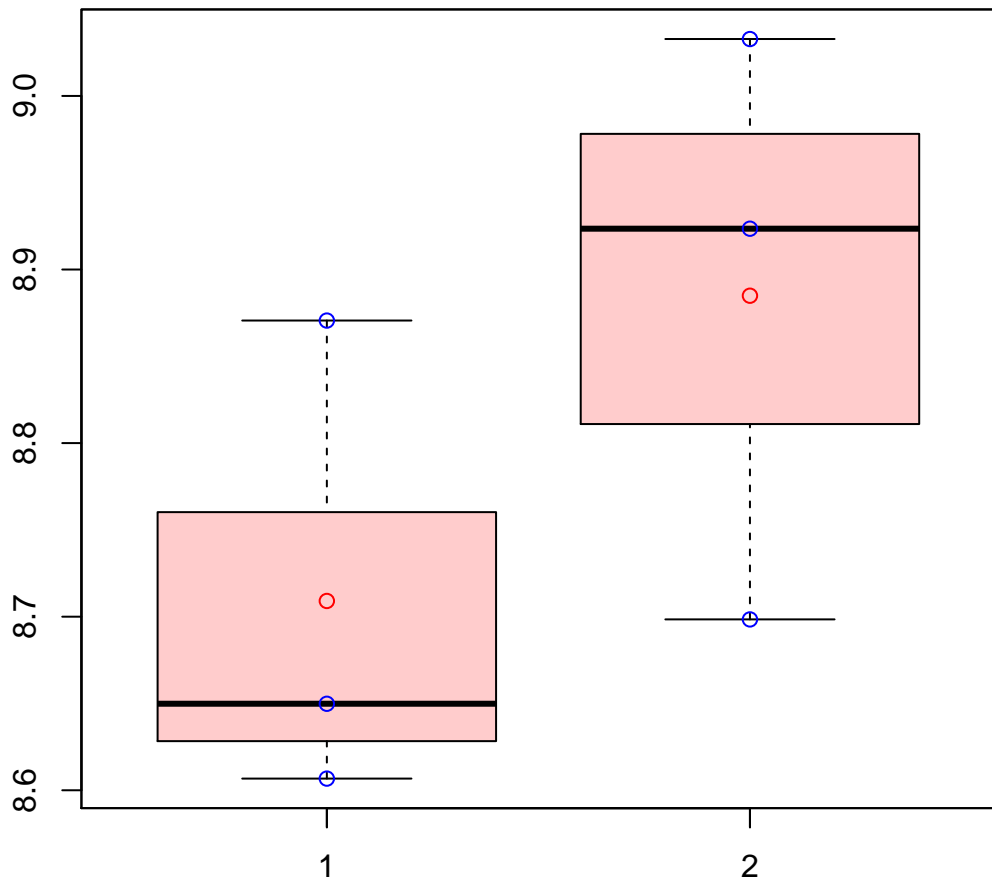

t-Test: p-value = 0.24



# A7DX19|A7DX19\_PHRAU

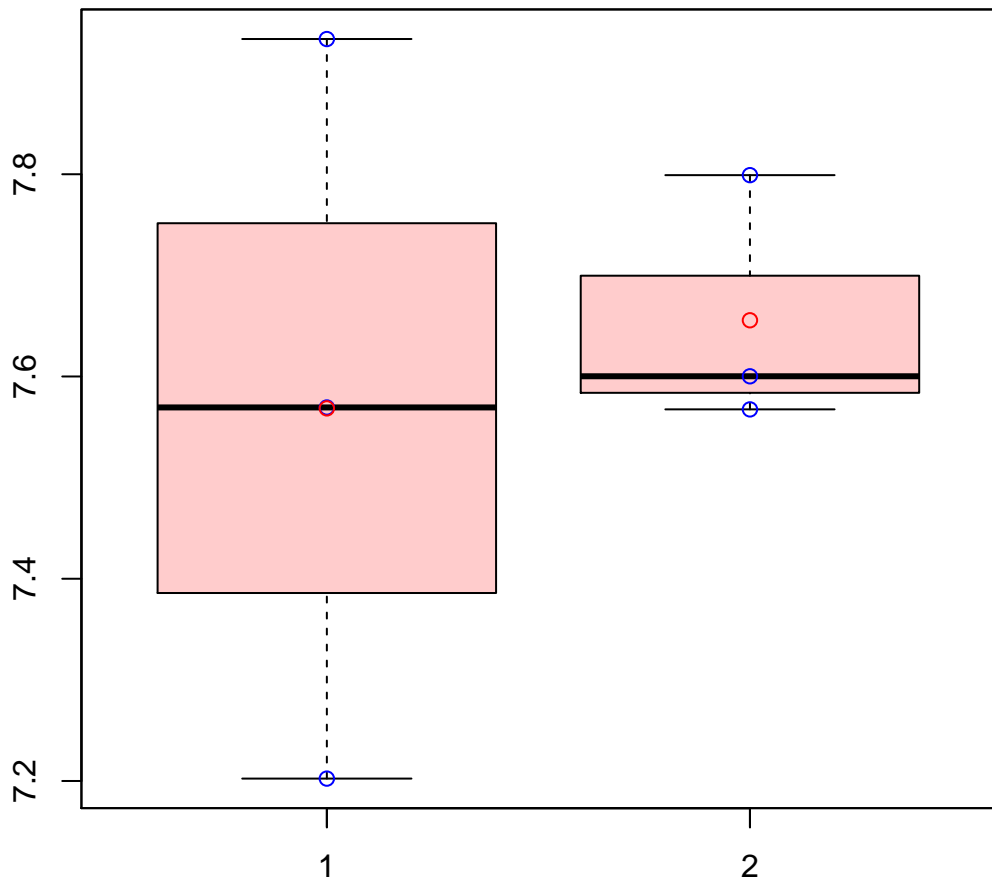

t-Test: p-value = 0.73

# A7DX42|A7DX42\_9POAL

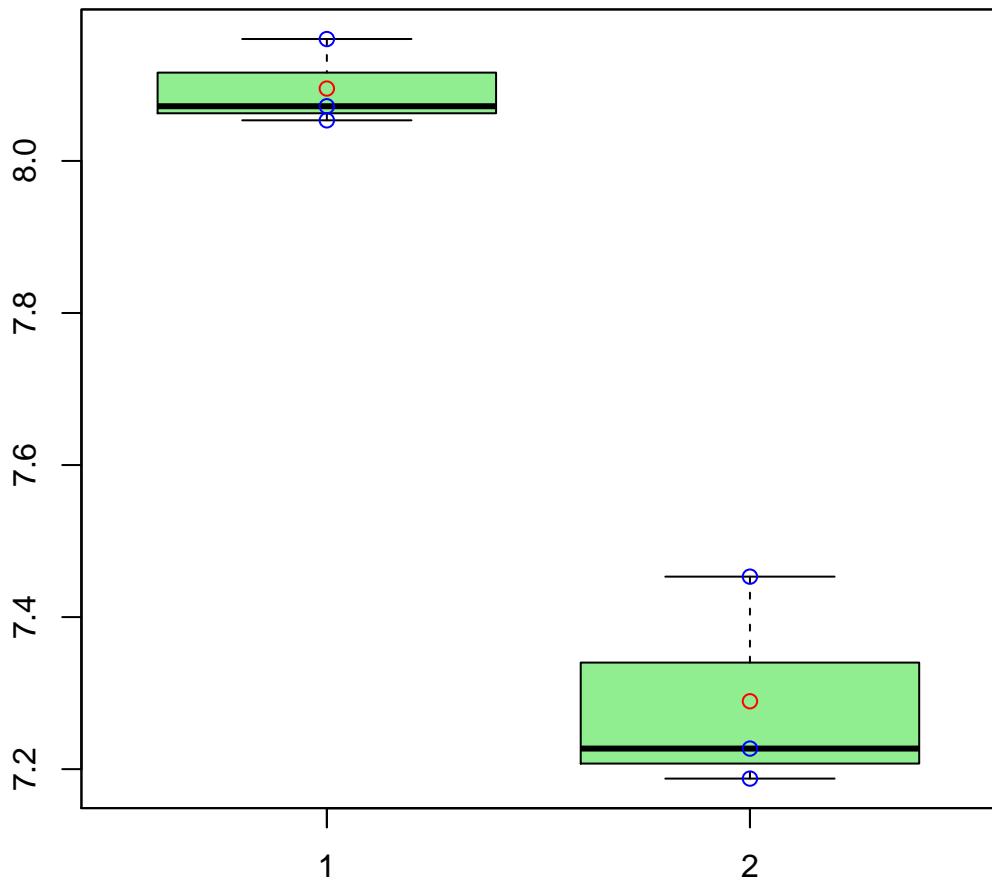

t-Test: p-value = 0

# A7DX54|A7DX54\_9POAL

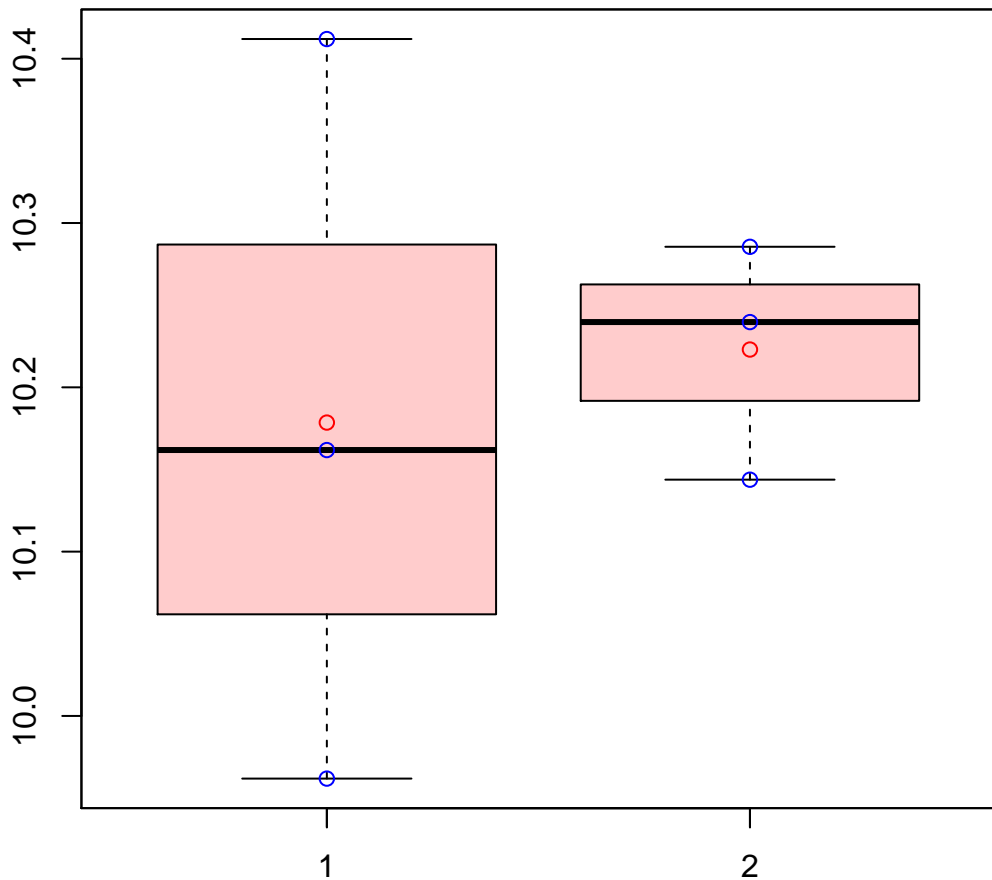

t-Test: p-value = 0.77

# A7DX61|A7DX61\_9POAL

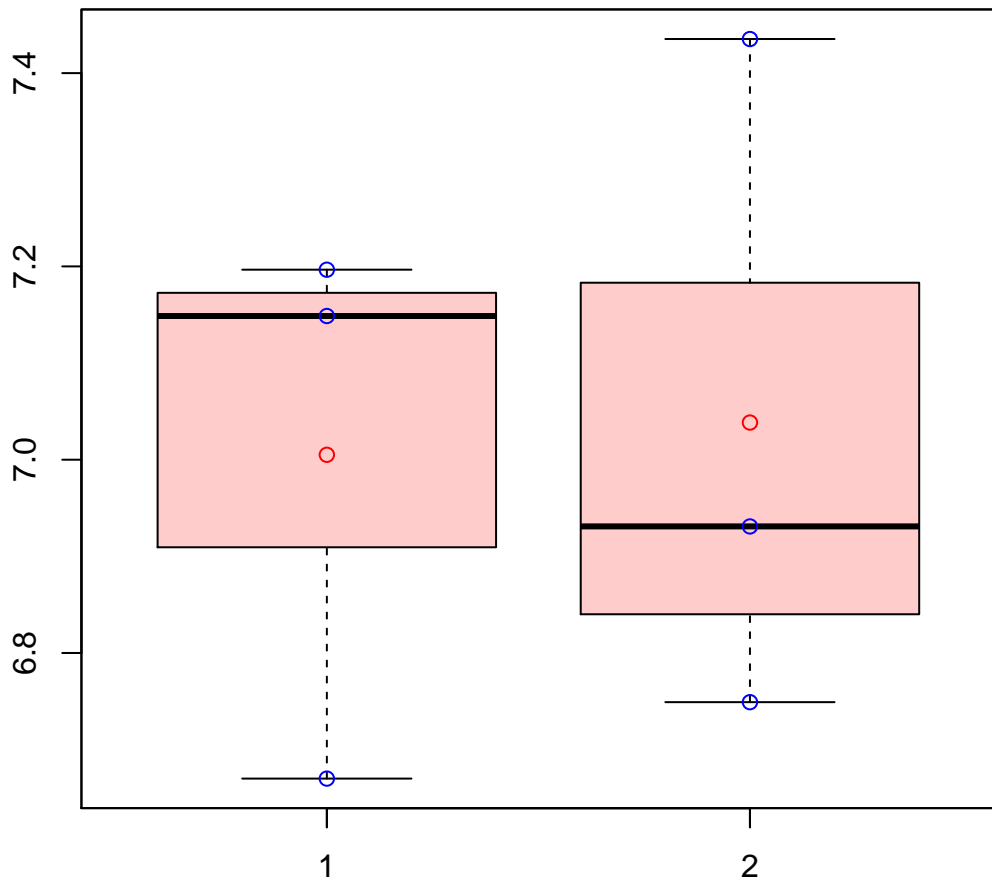

t-Test: p-value = 0.91

# A7DX63|A7DX63\_IMPCY

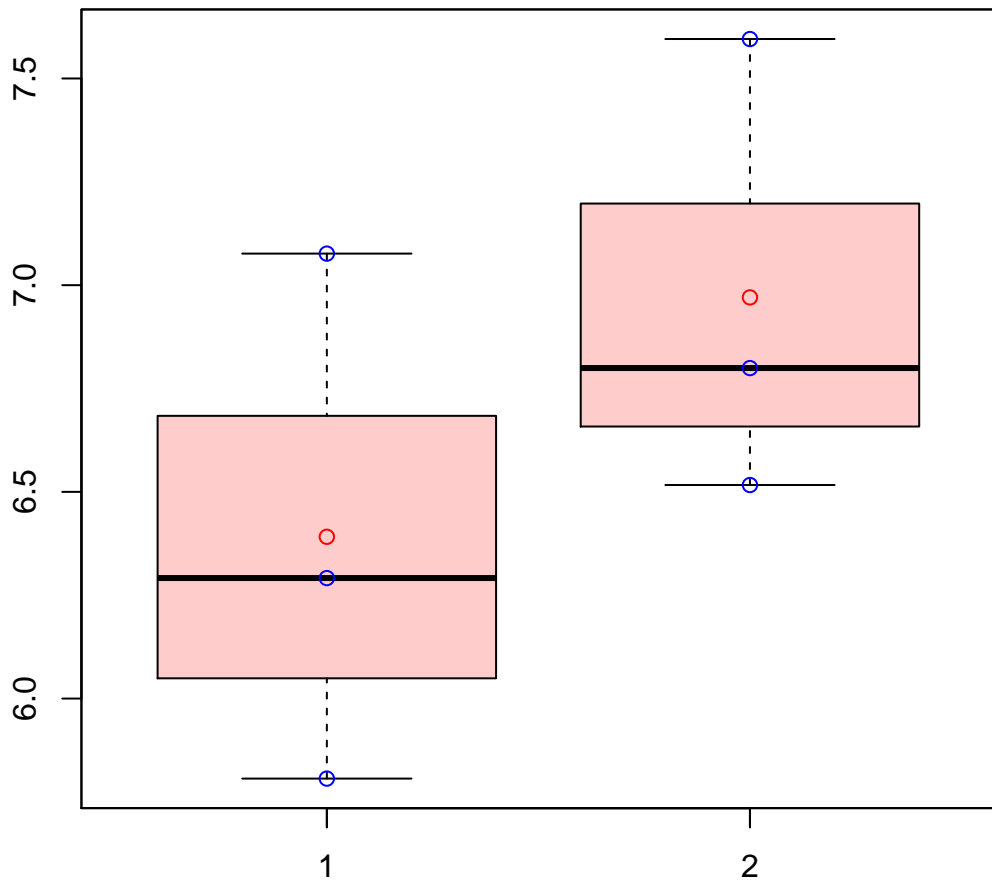

t-Test: p-value = 0.3

# A7DX69|A7DX69\_MELUN

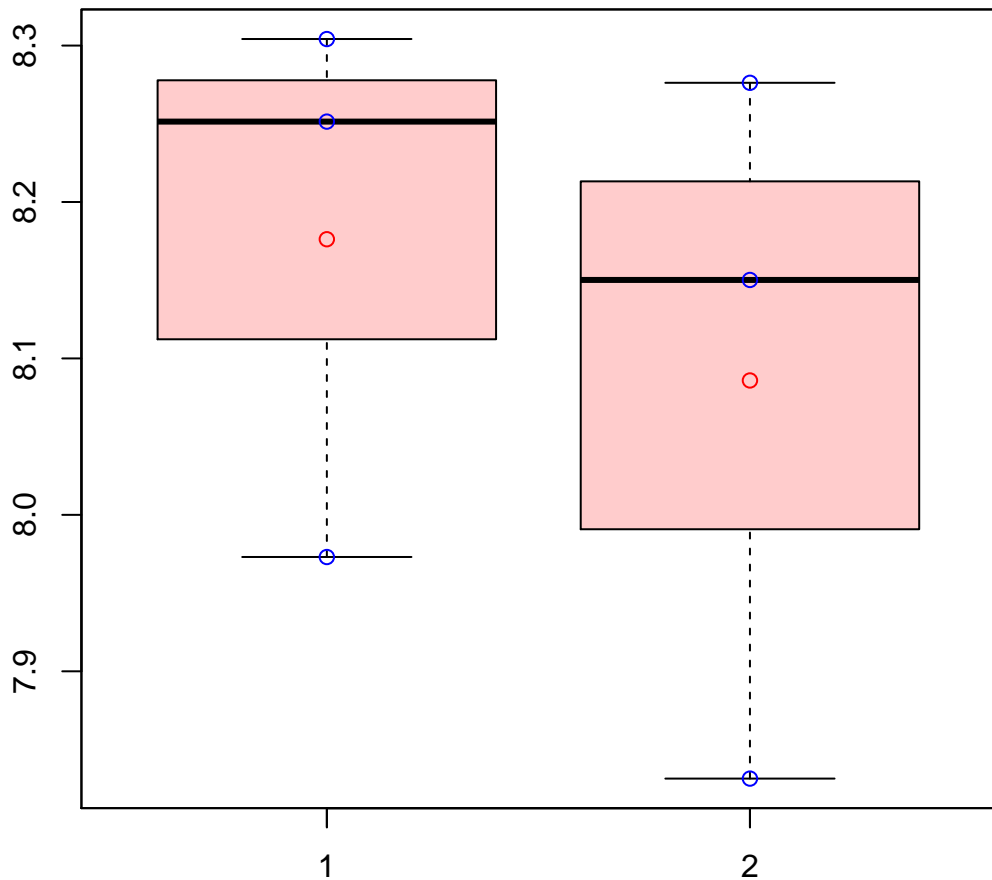

t-Test: p-value = 0.62

# A7DX76|A7DX76\_9POAL

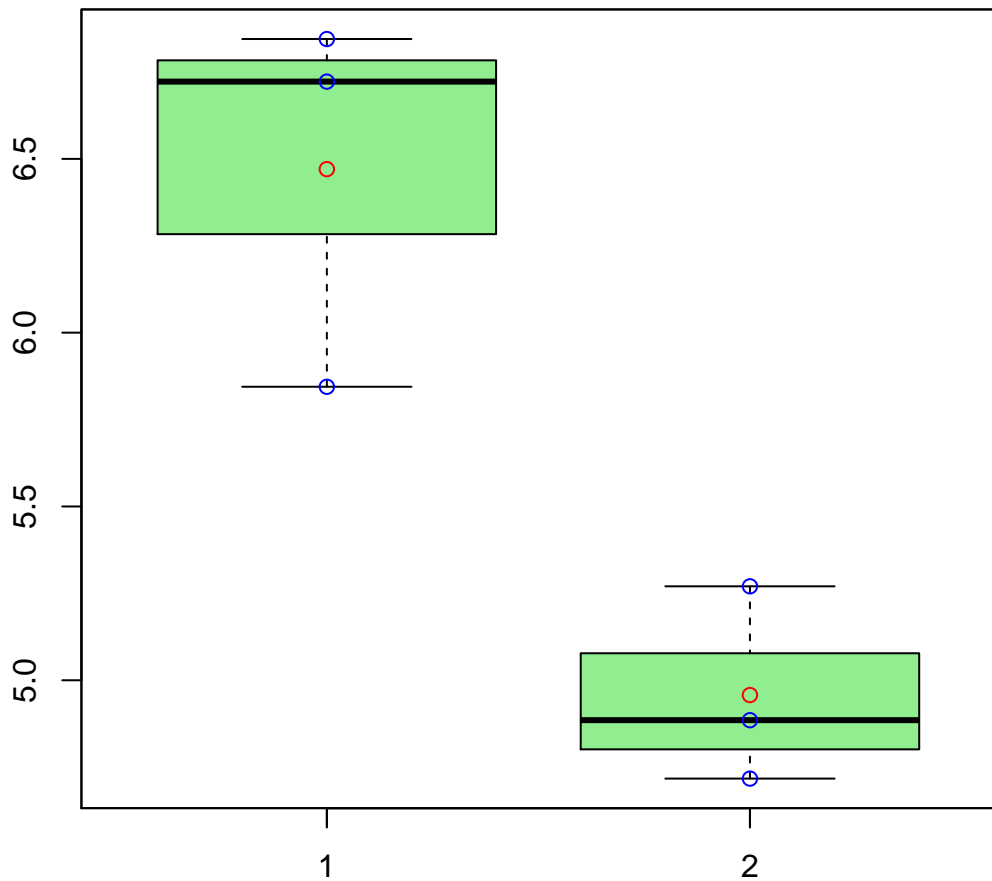

t-Test: p-value = 0.02

# A7DX81|A7DX81\_9POAL

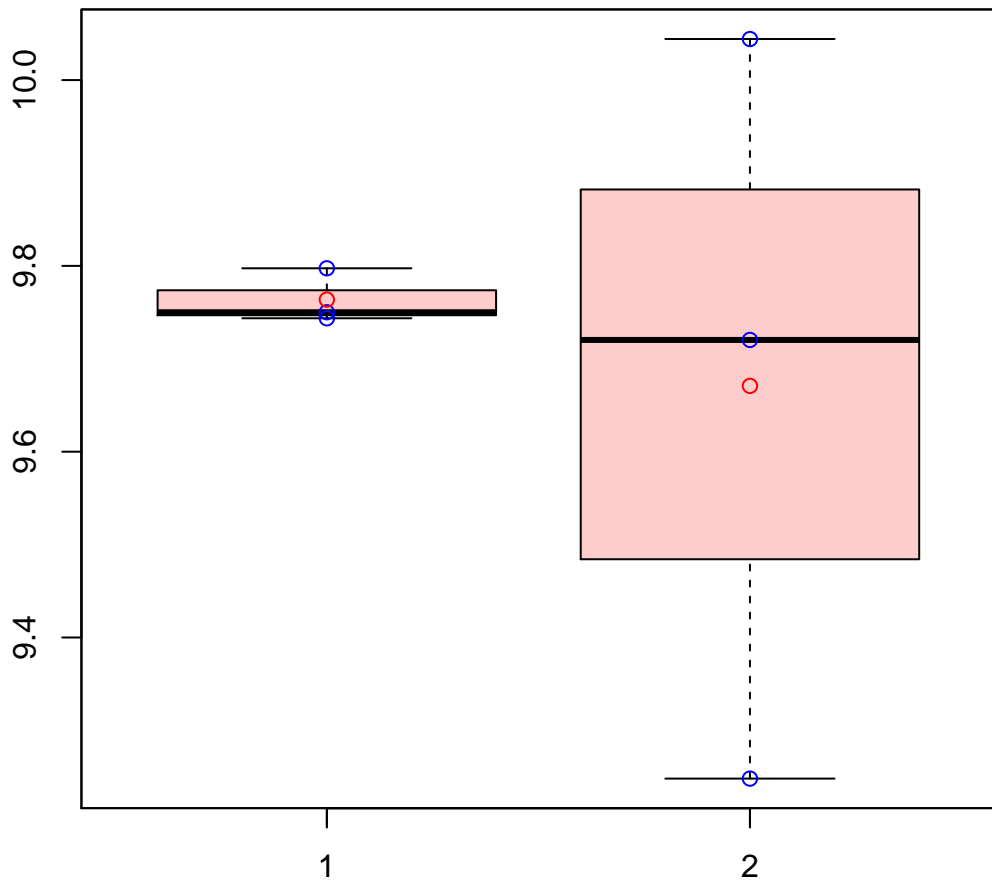

t-Test: p-value = 0.73



# A7DX85|A7DX85\_9POAL

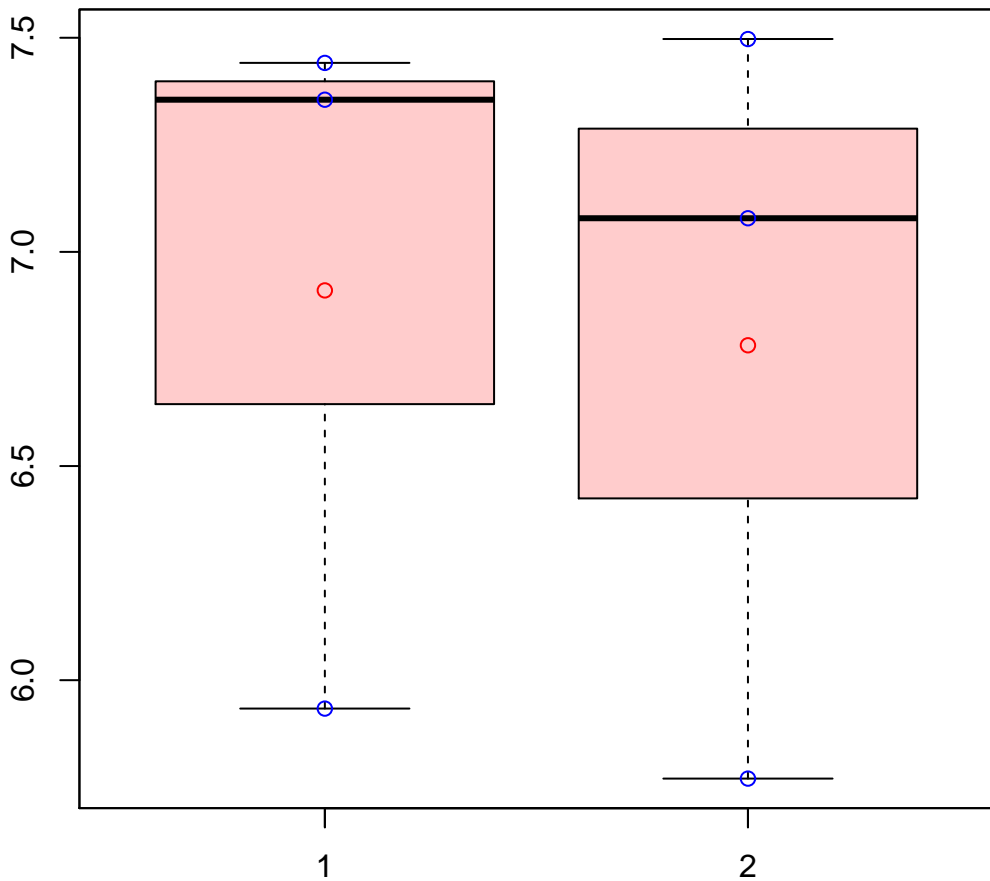

t-Test: p-value = 0.87

# A7DX94|A7DX94\_9POAL

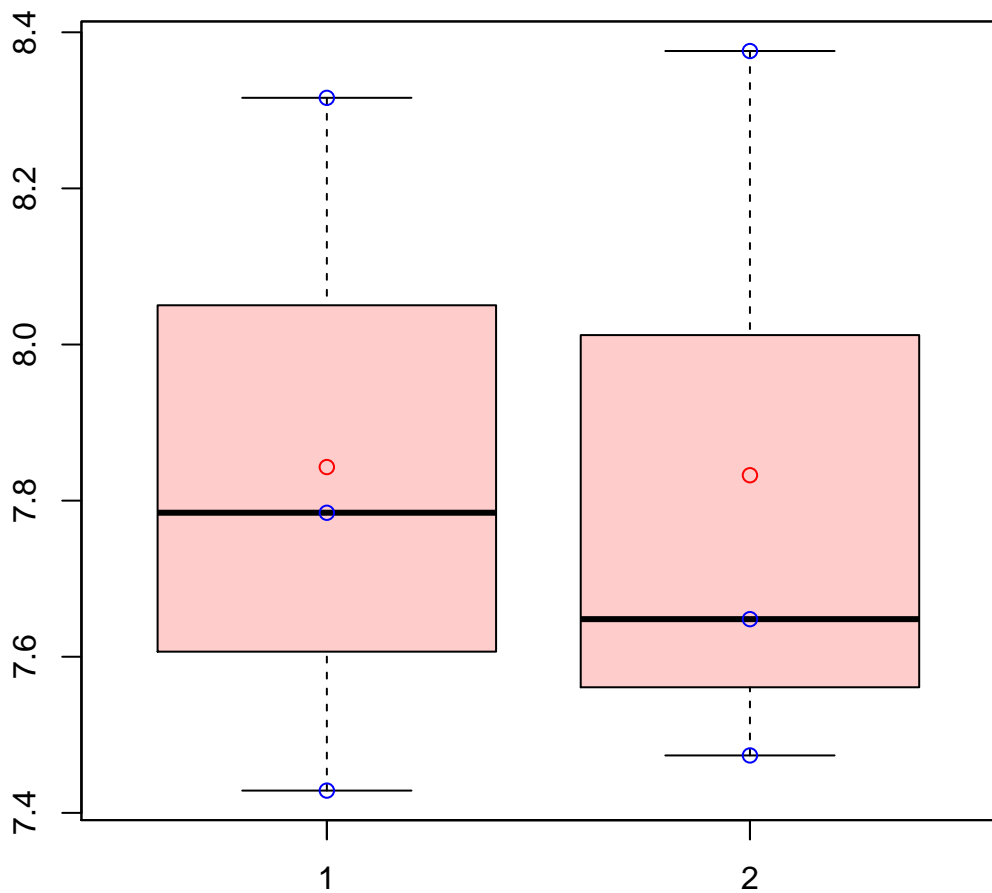

t-Test: p-value = 0.98

# A7DXA8|A7DXA8\_9POAL

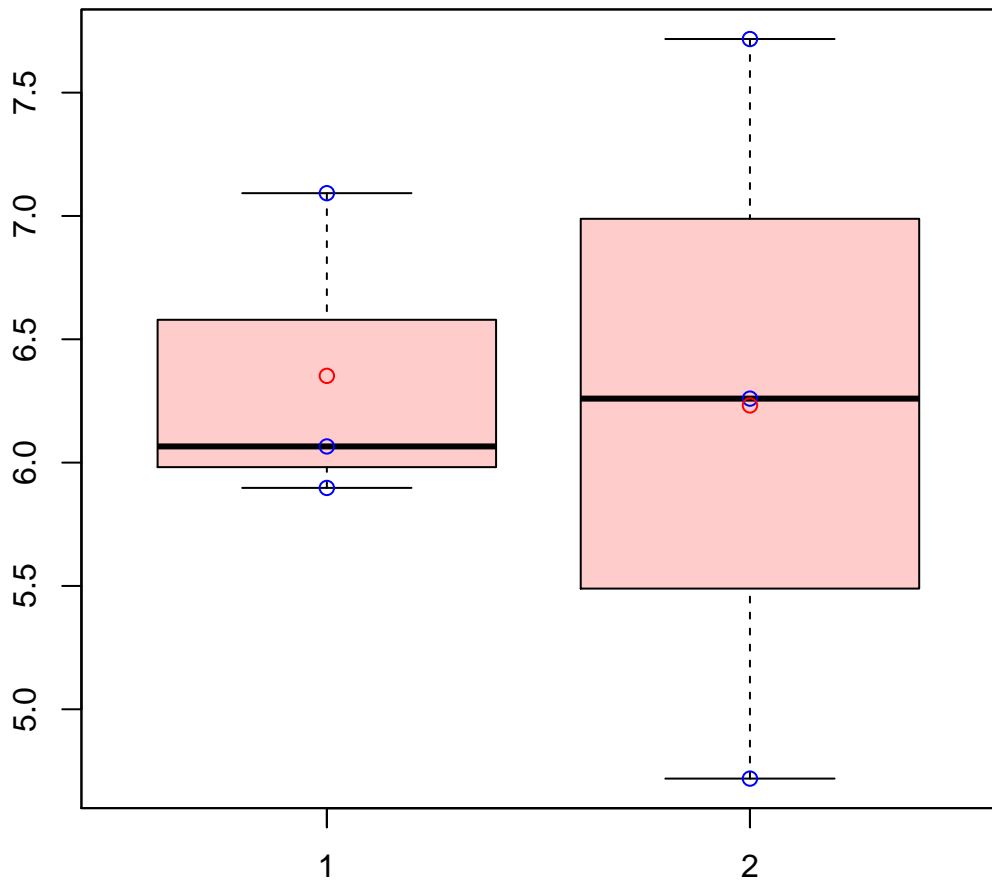

t-Test: p-value = 0.91

# A7DXB0|A7DXB0\_9POAL

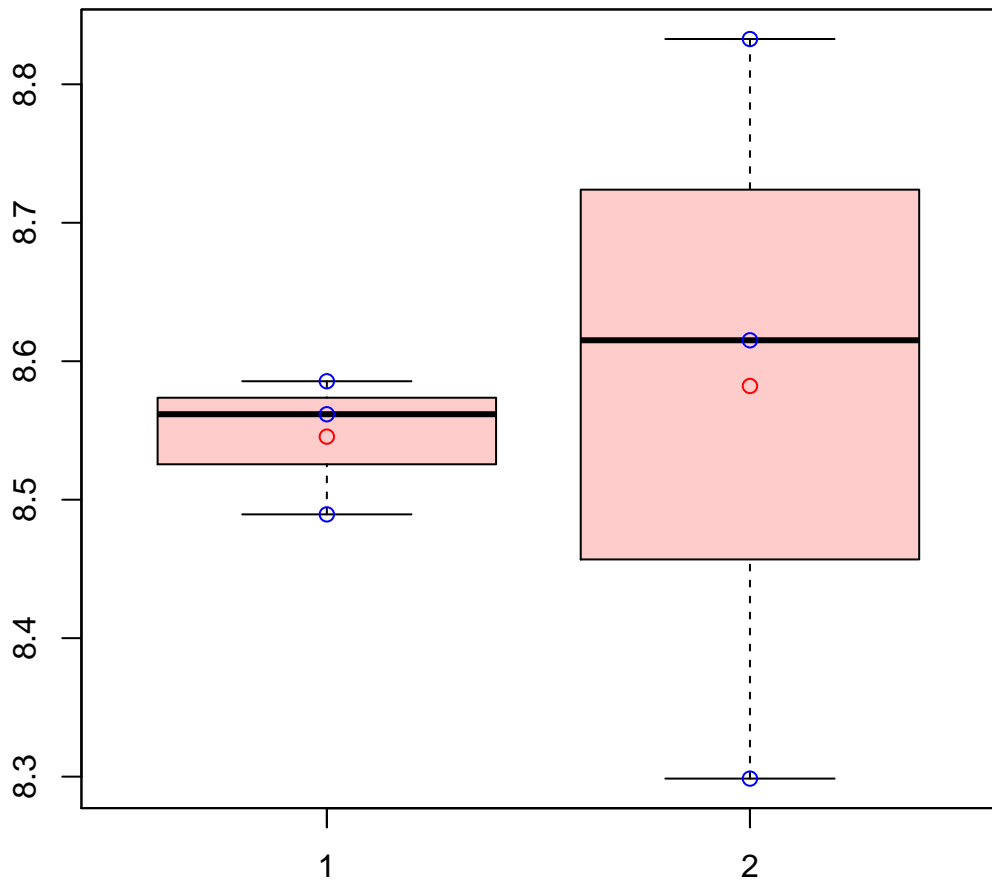

t-Test: p-value = 0.84

# A7DXB2|A7DXB2\_9POAL

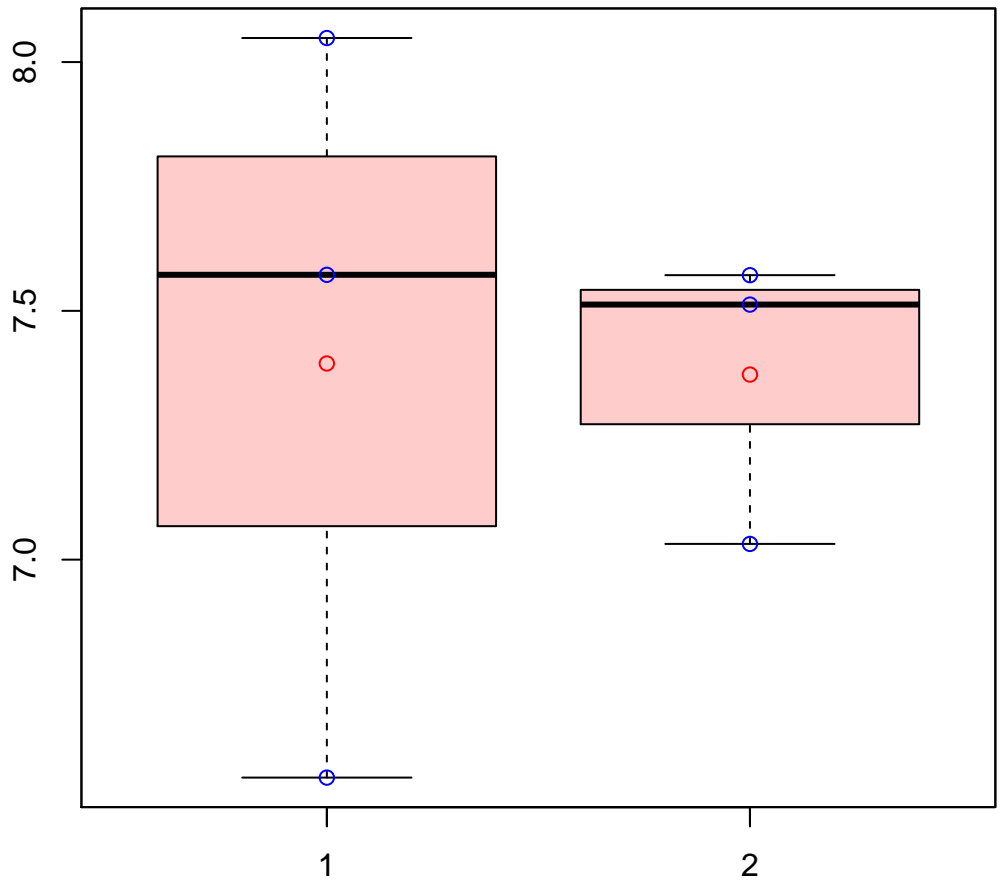

t-Test: p-value = 0.97

# A7DXC3|A7DXC3\_9POAL

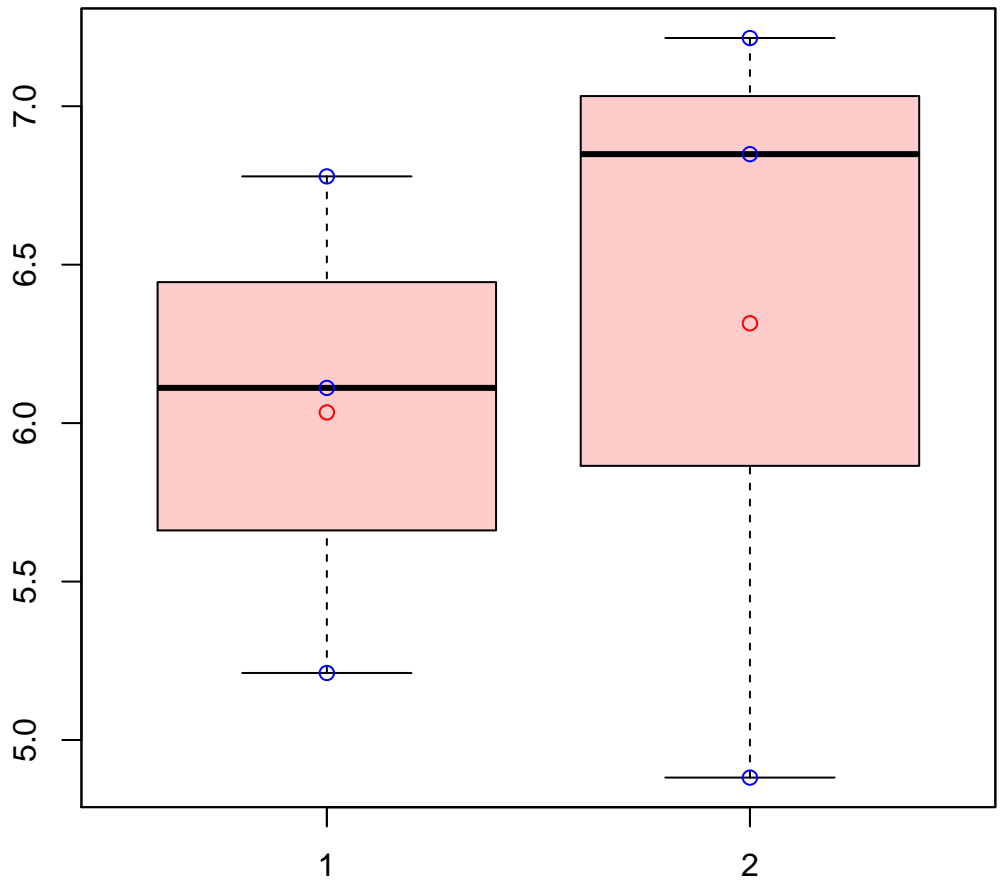

t-Test: p-value = 0.76

# A7DXC7|A7DXC7\_9POAL

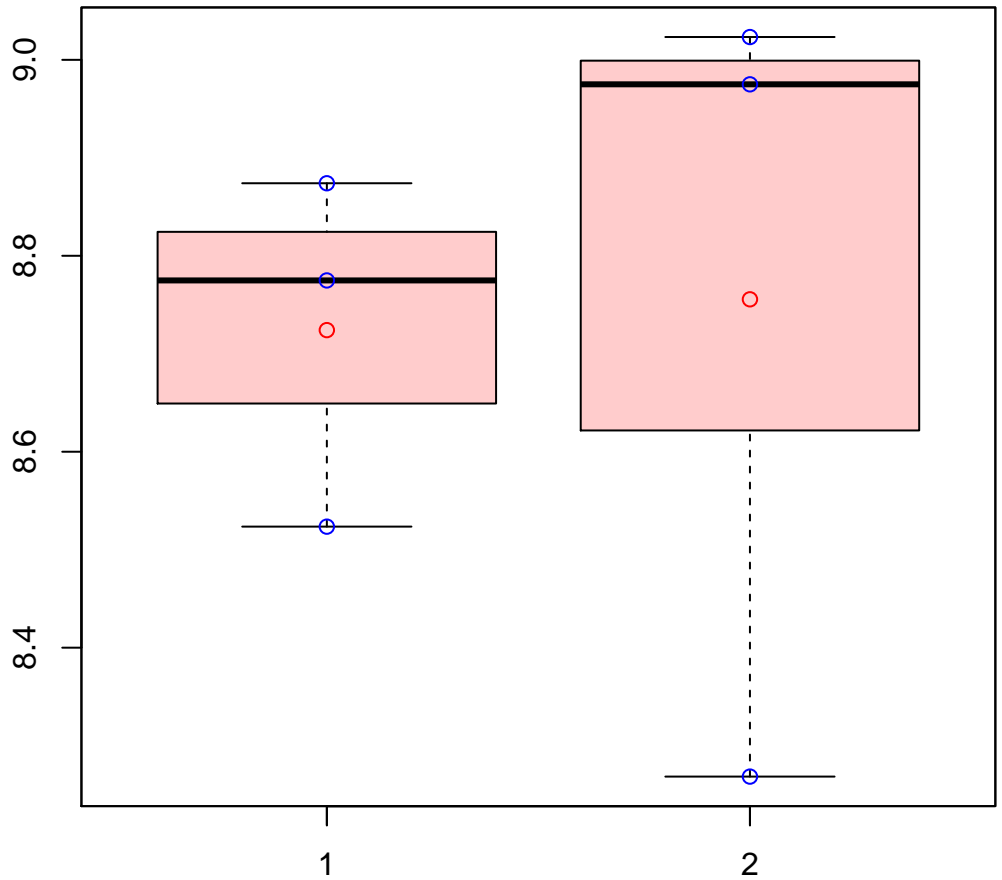

t-Test: p-value = 0.91

# A7DXD2|A7DXD2\_9POAL

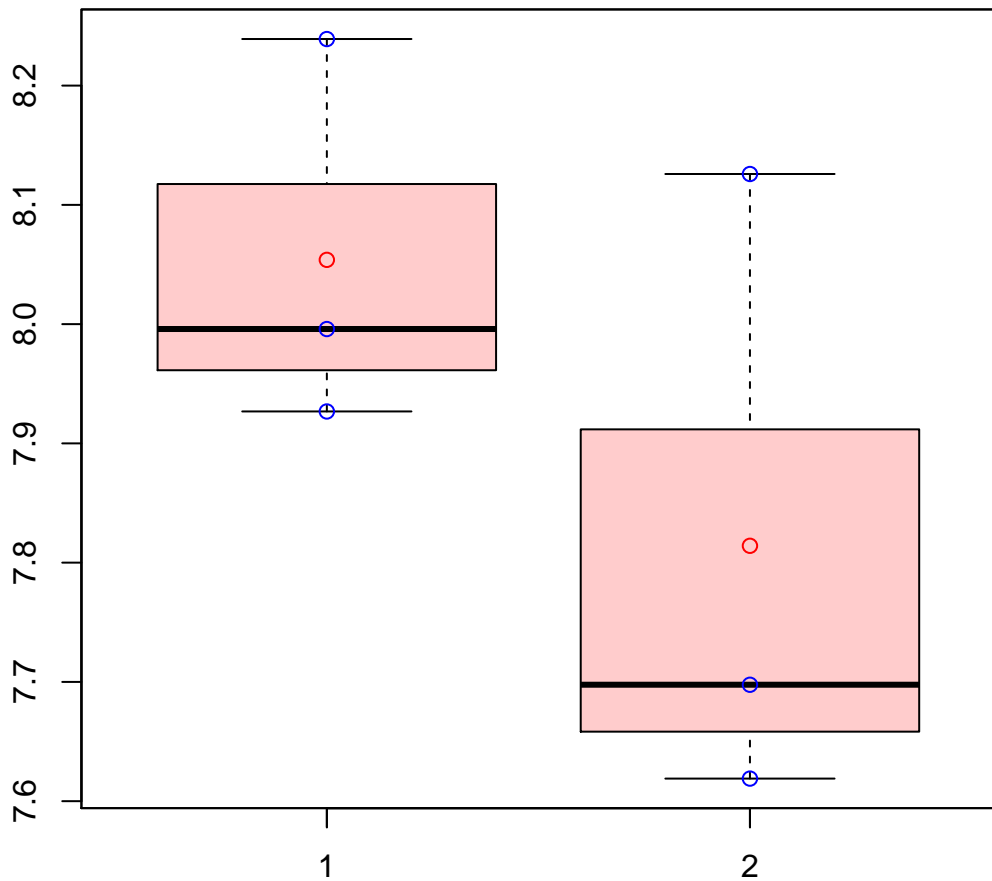

t-Test: p-value = 0.28



# A7DXD5|A7DXD5\_9POAL

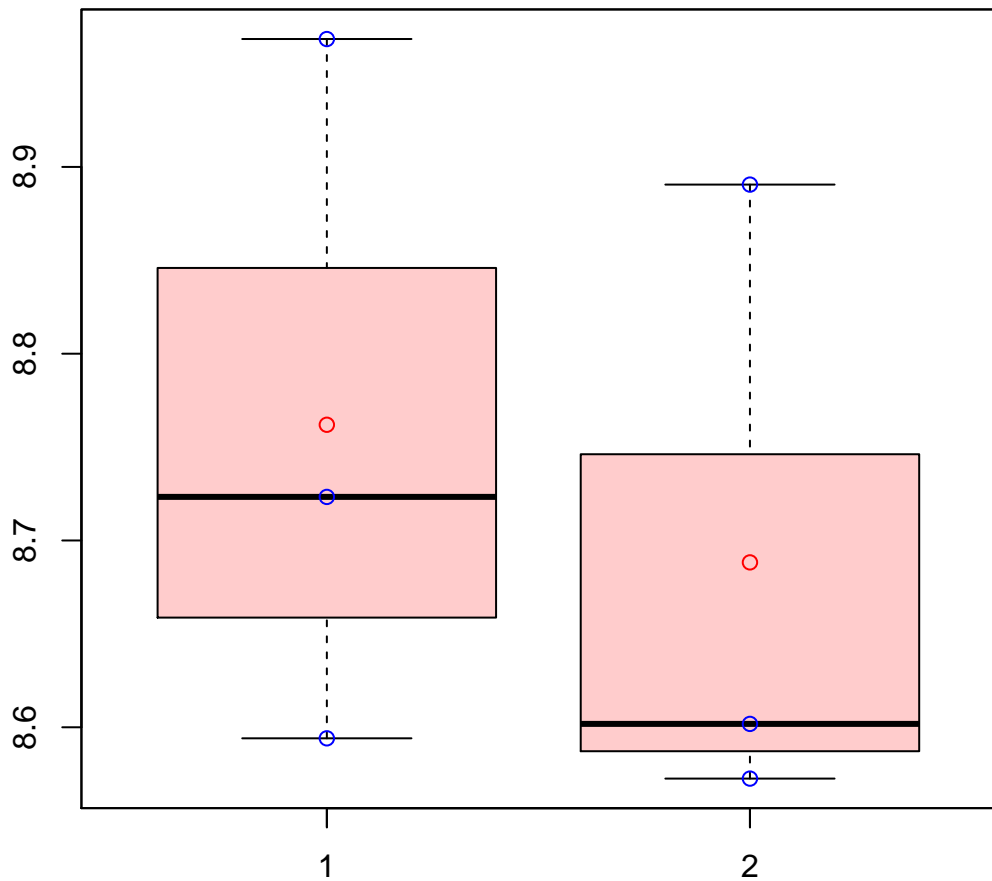

t-Test: p-value = 0.65

# A7DXD6|A7DXD6\_9POAL

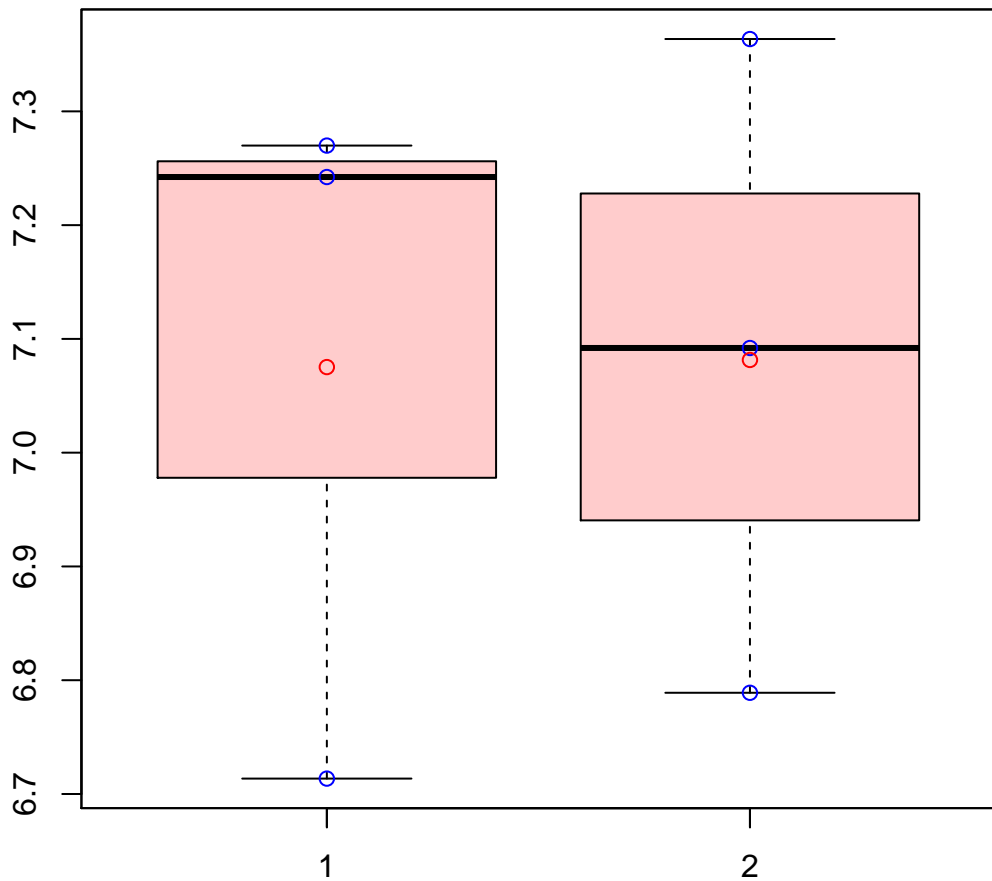

t-Test: p-value = 0.98

# A7DXD9|A7DXD9\_TRARA

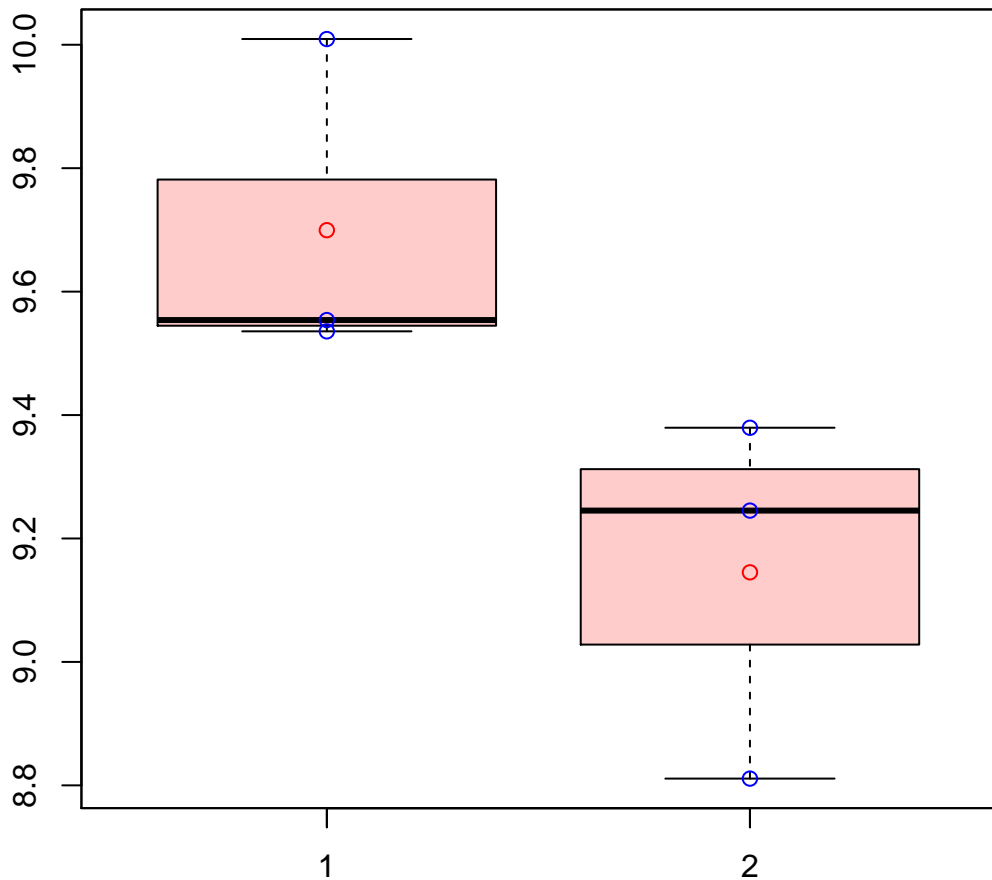

t-Test: p-value = 0.08

# A7DXE4|A7DXE4\_9POAL

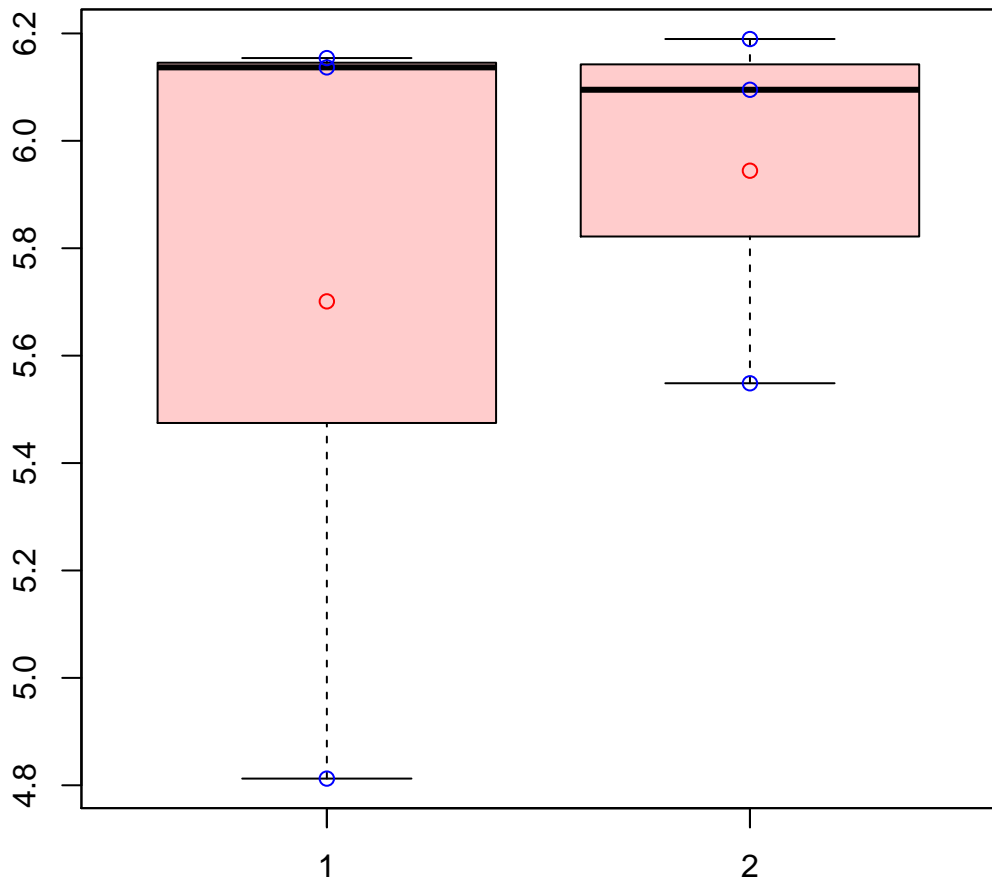

t-Test: p-value = 0.65

# A7J1F3|A7J1F3\_9LILI

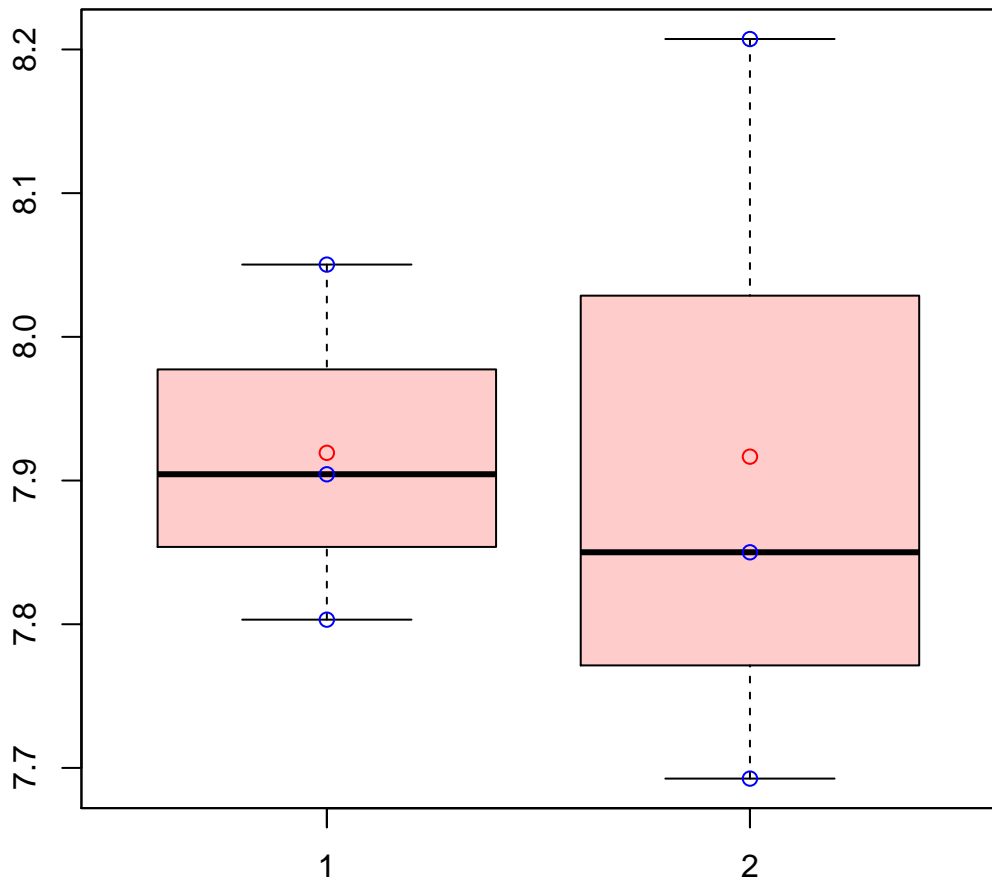

t-Test: p-value = 0.99

# A7J1F6|A7J1F6\_9LILI

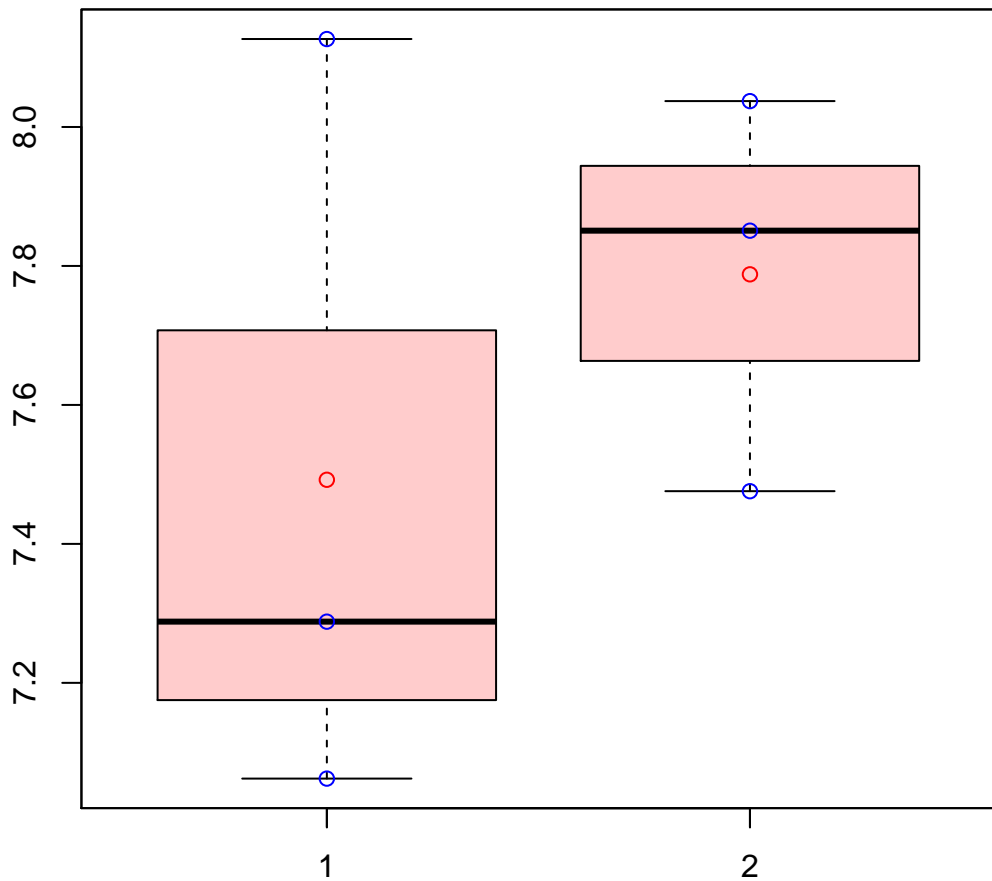

t-Test: p-value = 0.48

# A8ASG2|A8ASG2\_ALOAR

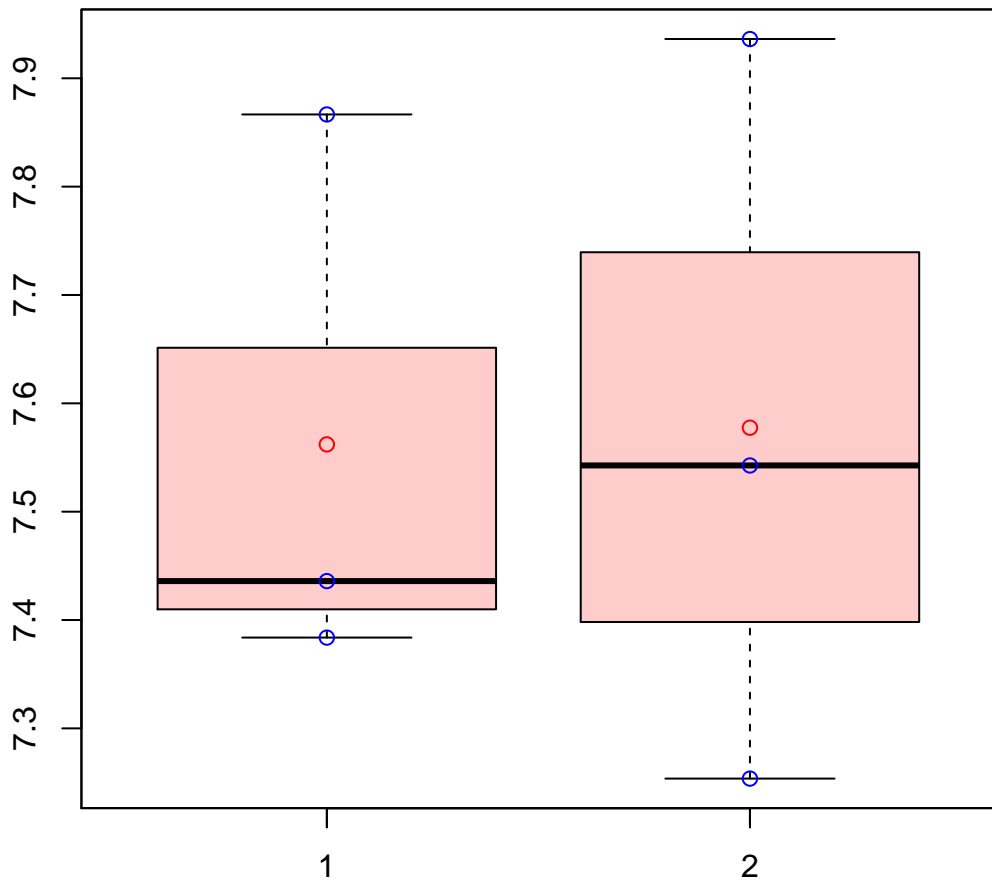

t-Test: p-value = 0.95

# A8QJP9|A8QJP9\_BAMOL

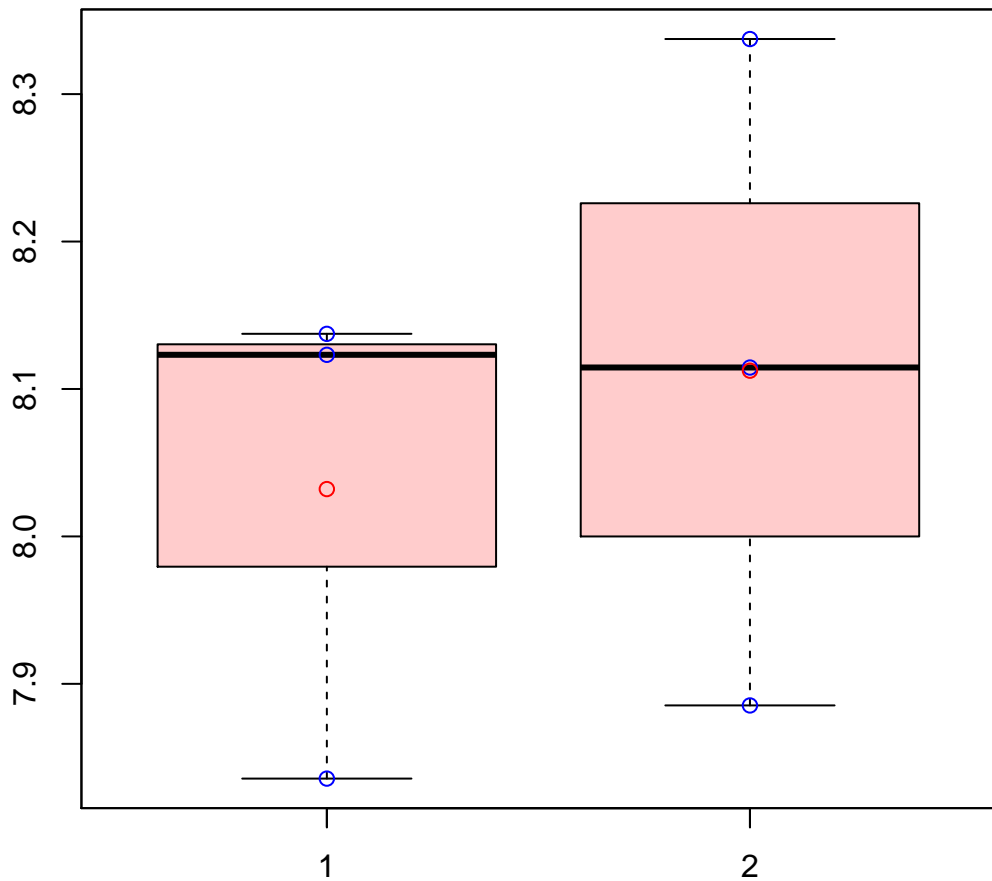

t-Test: p-value = 0.65



# A8W482|A8W482\_ORYSI

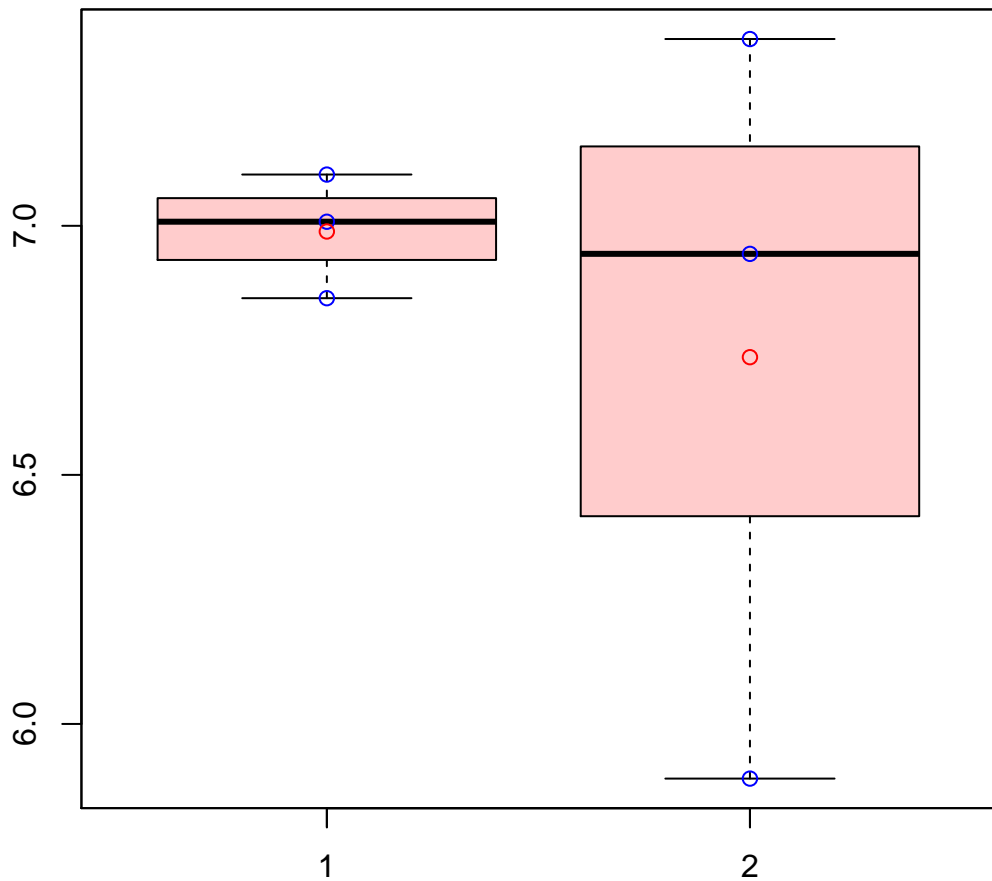

t-Test: p-value = 0.63

# A9L9X2|A9L9X2\_LOLRI

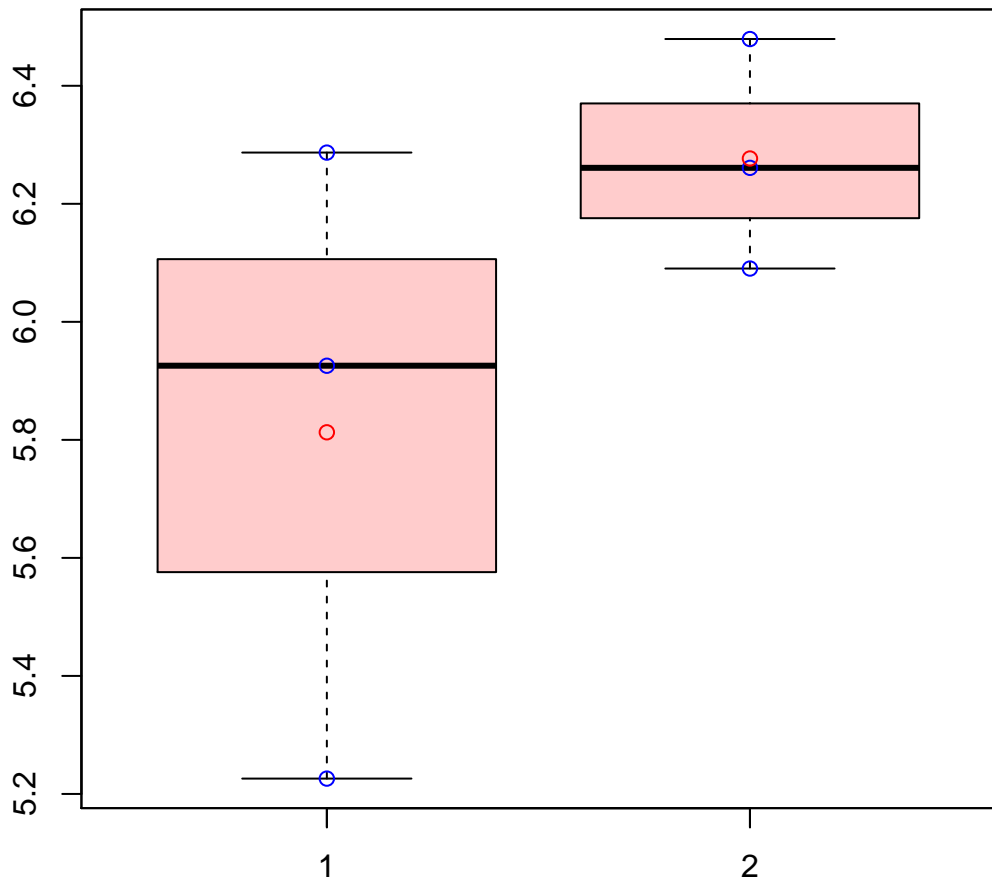

t-Test: p-value = 0.27

# A9NJ56|A9NJ56\_HORVD

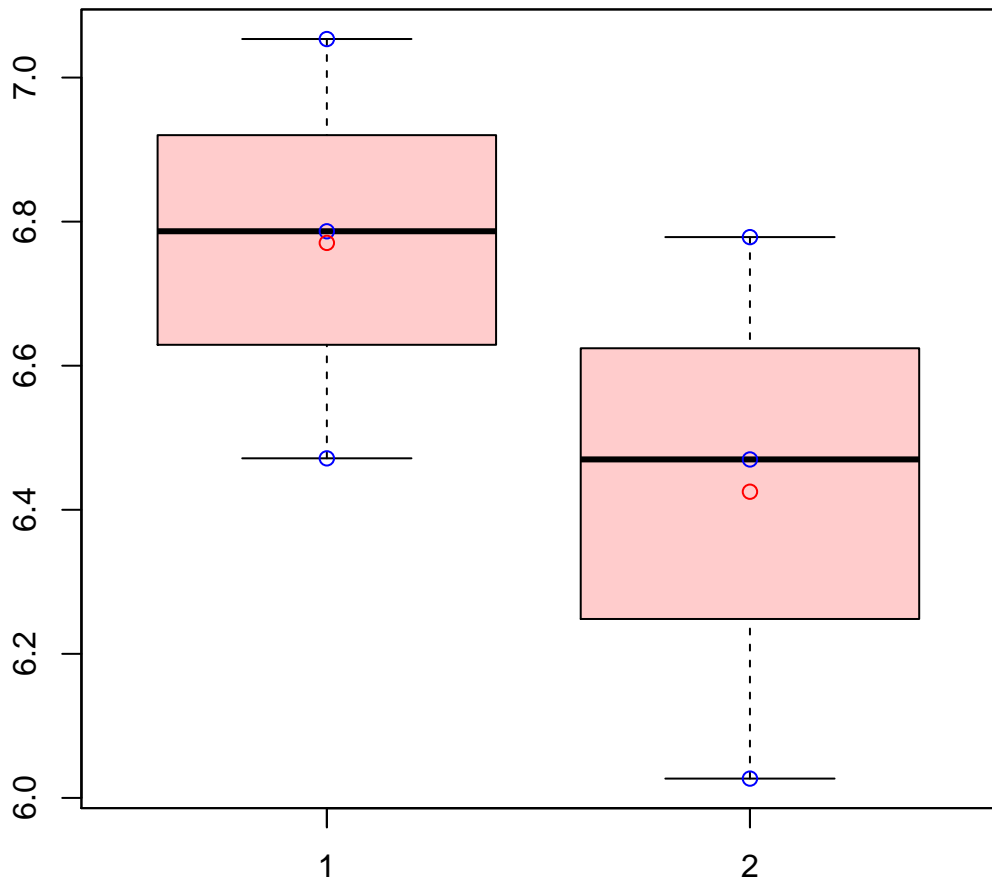

t-Test: p-value = 0.28

# A9YCD3|A9YCD3\_9ASPA

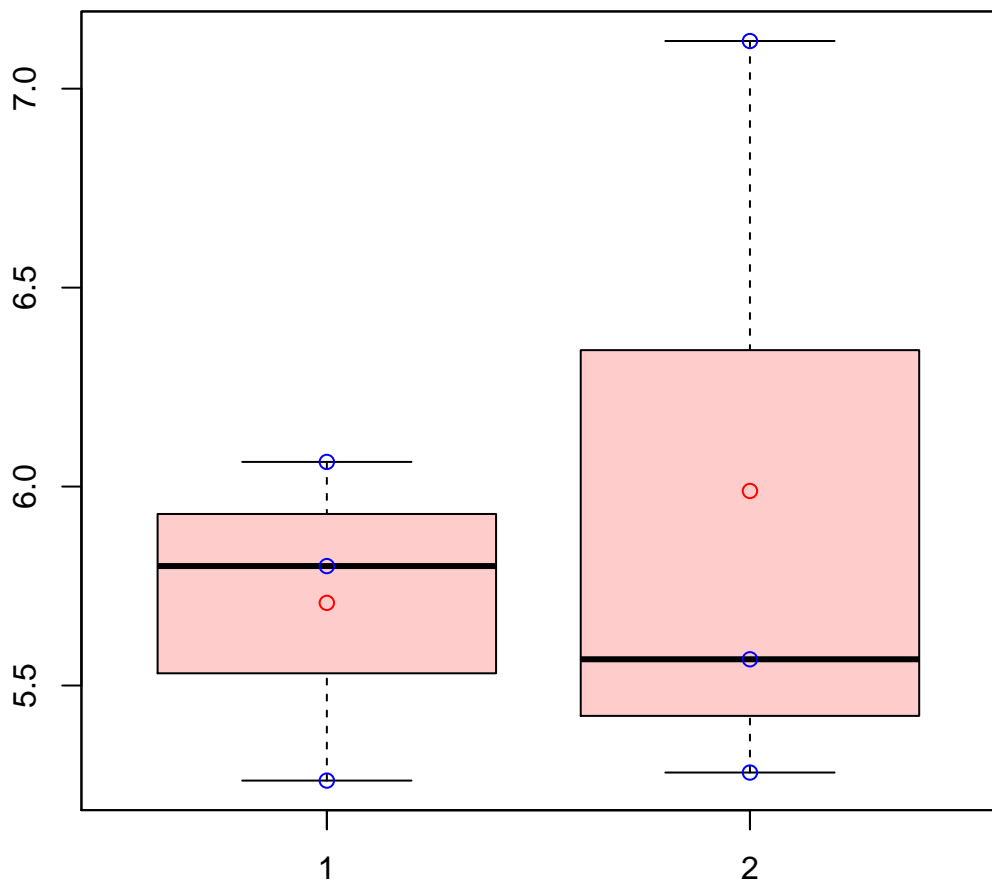

t-Test: p-value = 0.68

# B0B770|B0B770\_9POAL

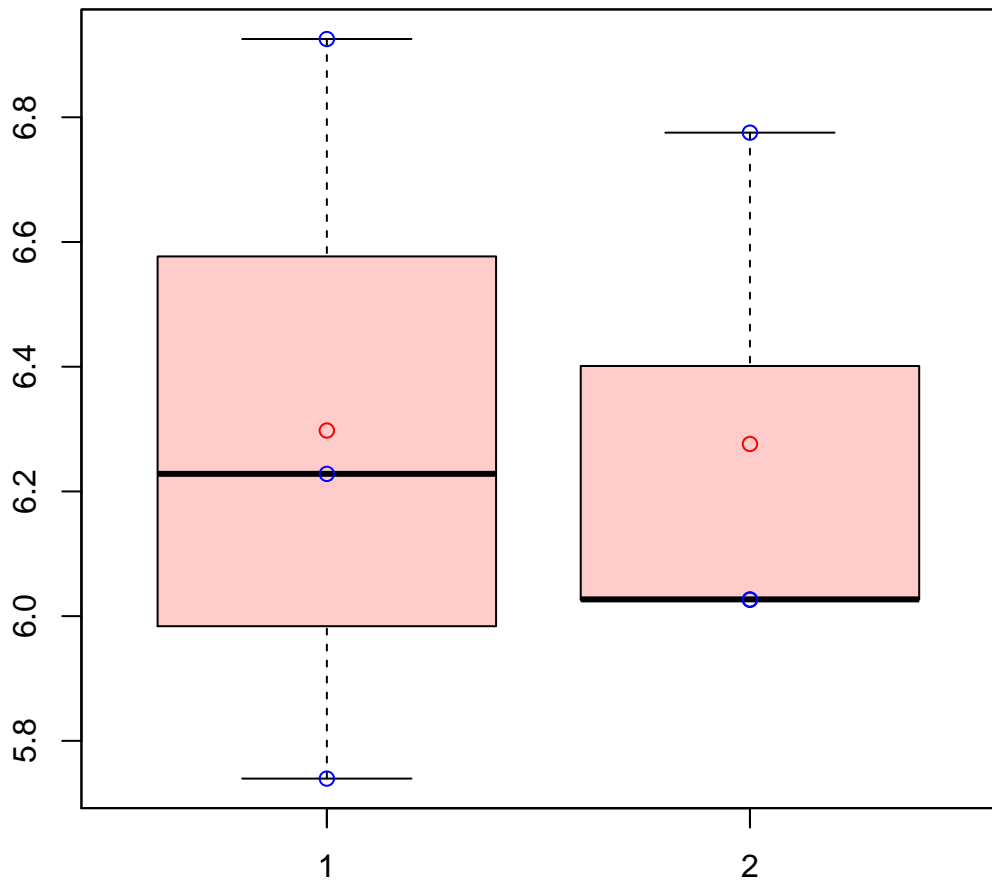

t-Test: p-value = 0.96

# B0FFQ2|B0FFQ2\_BRADI

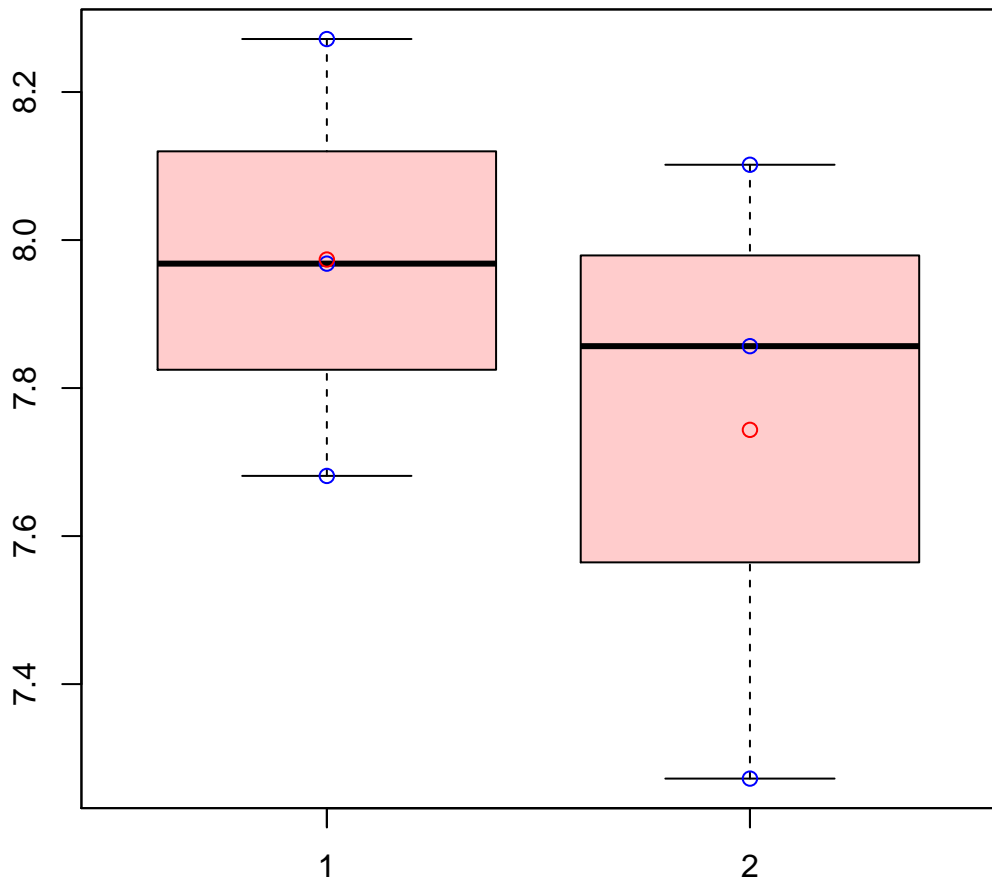

t-Test: p-value = 0.49

# B0YIB2|B0YIB2\_9POAL

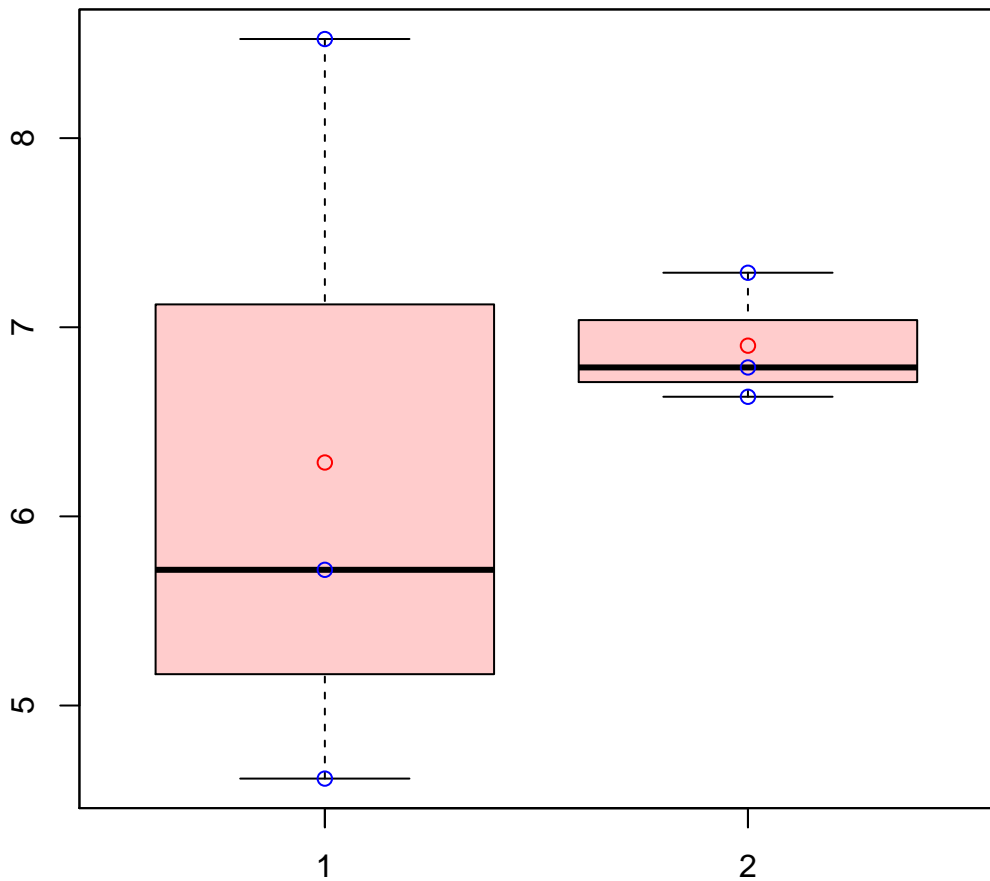

t-Test: p-value = 0.65

# B1P2H4|B1P2H4\_MAIZE

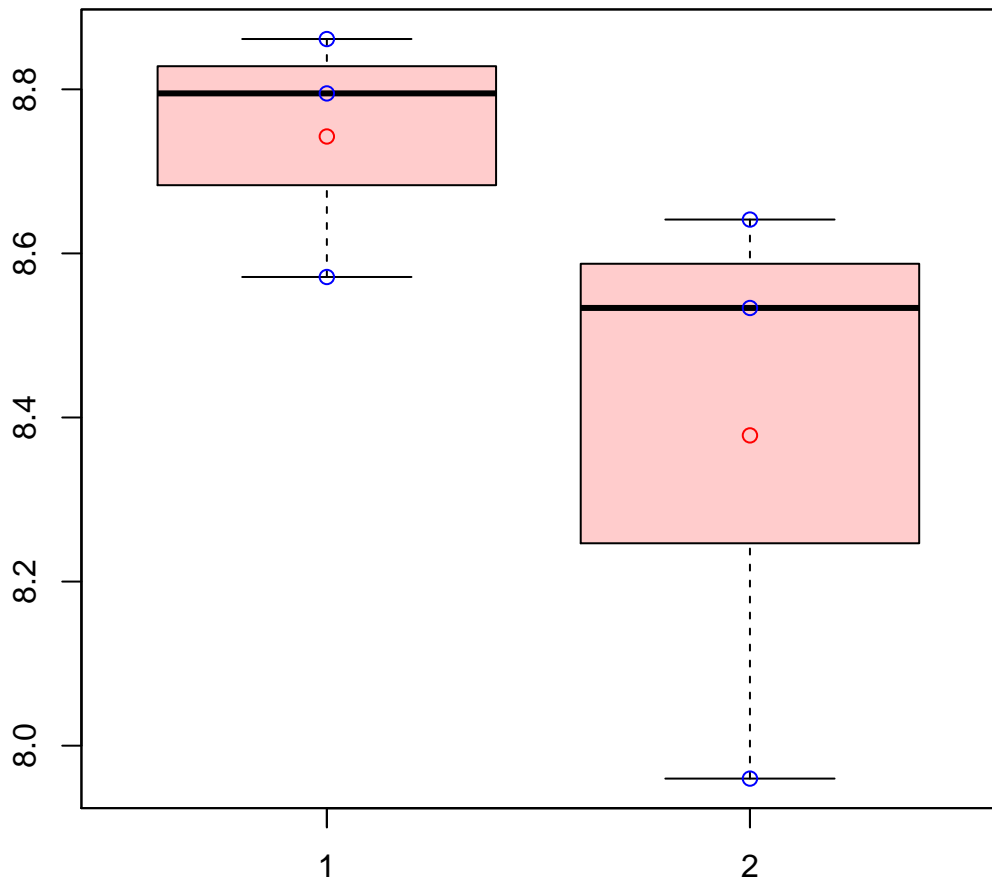

t-Test: p-value = 0.22



## B2CBC0|B2CBC0\_POAPR

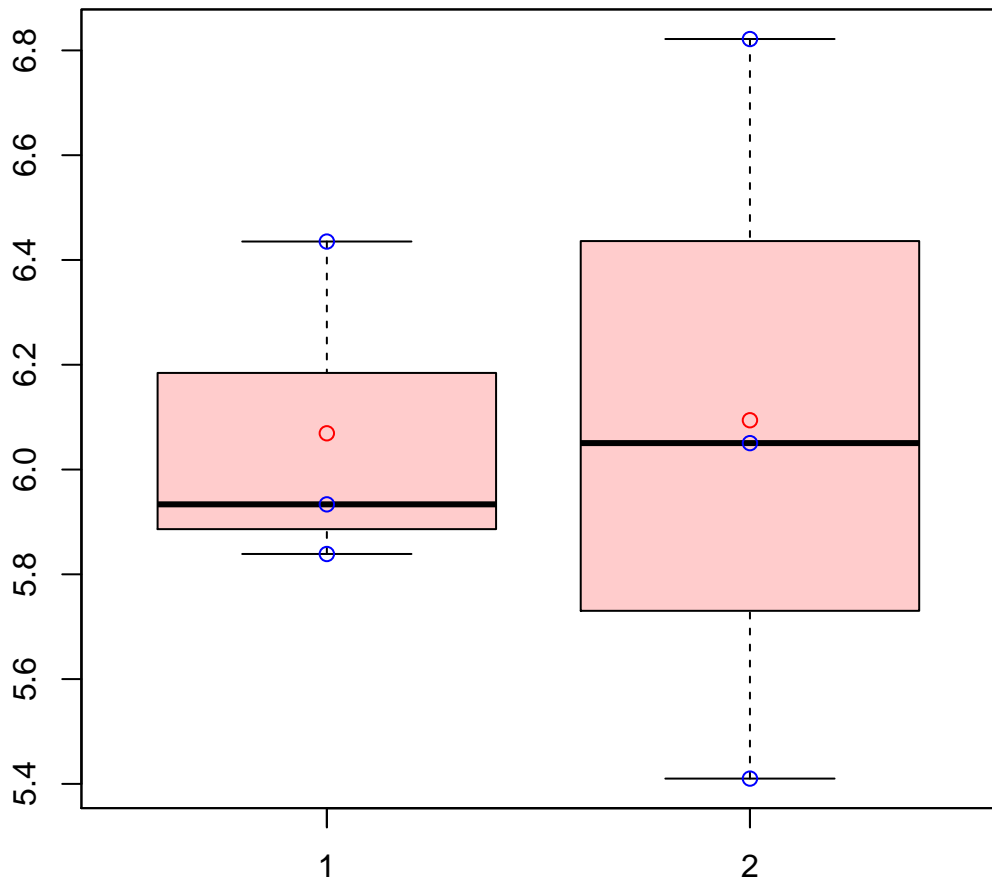

t-Test: p-value = 0.96

# B2LHT7|B2LHT7\_9POAL

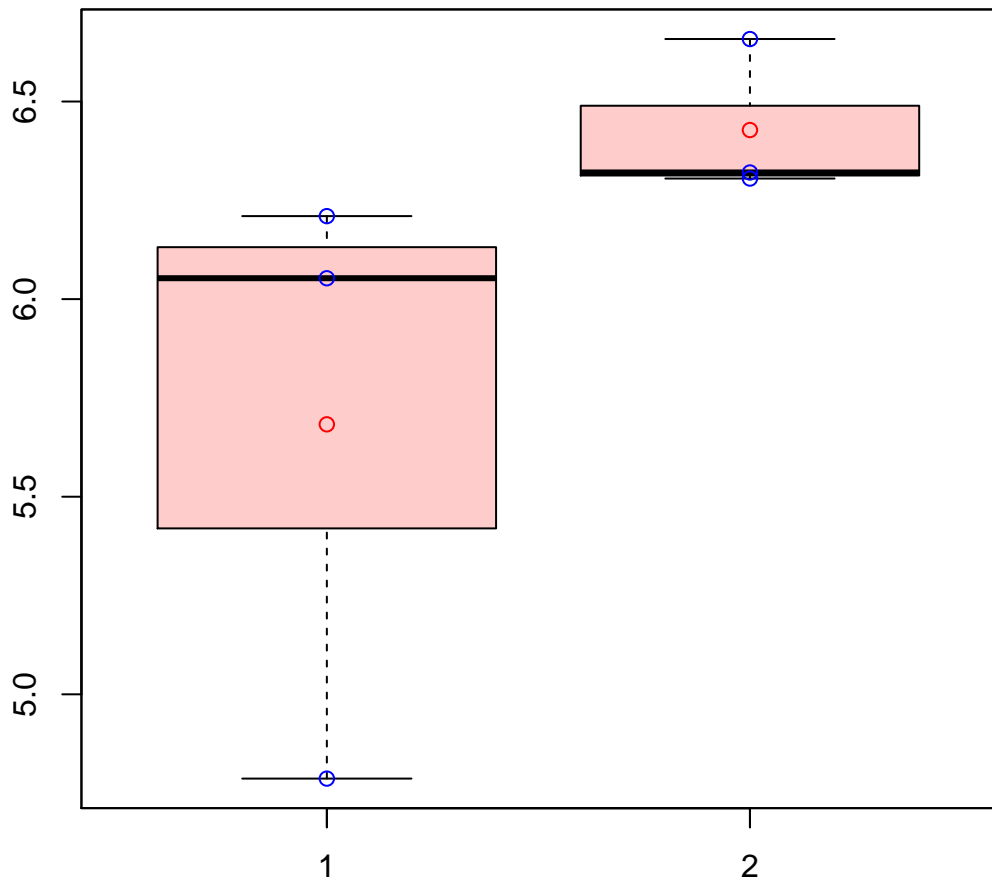

t-Test: p-value = 0.24

# B2ZGL0|B2ZGL0\_TRIDB

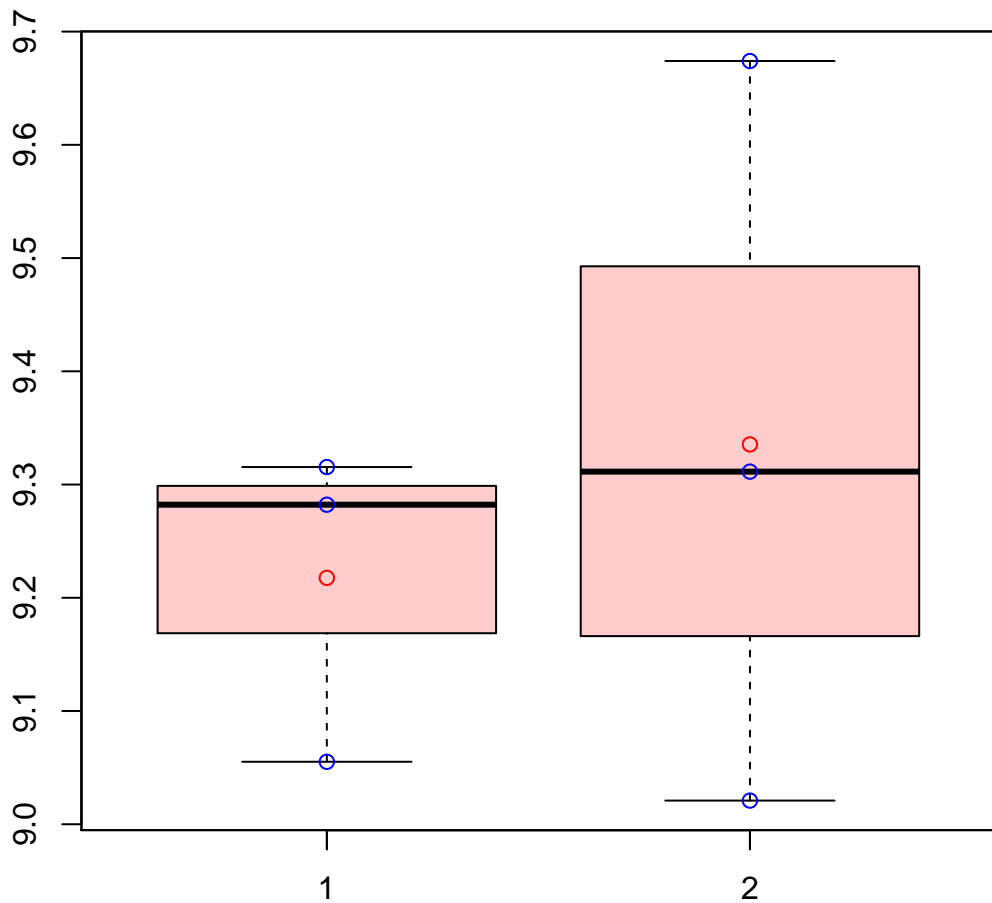

t-Test: p-value = 0.61

# B3FTS3|B3FTS3\_9LILI

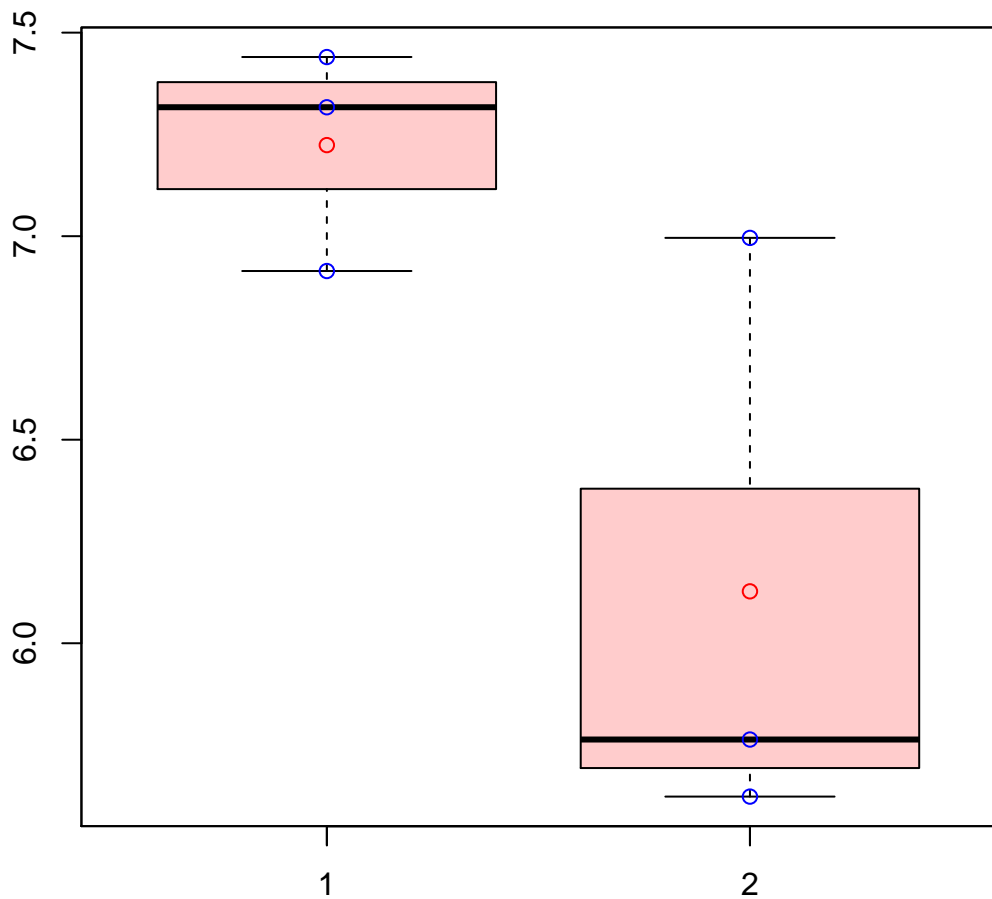

t-Test: p-value = 0.12

# B3SH73|B3SH73\_9POAL

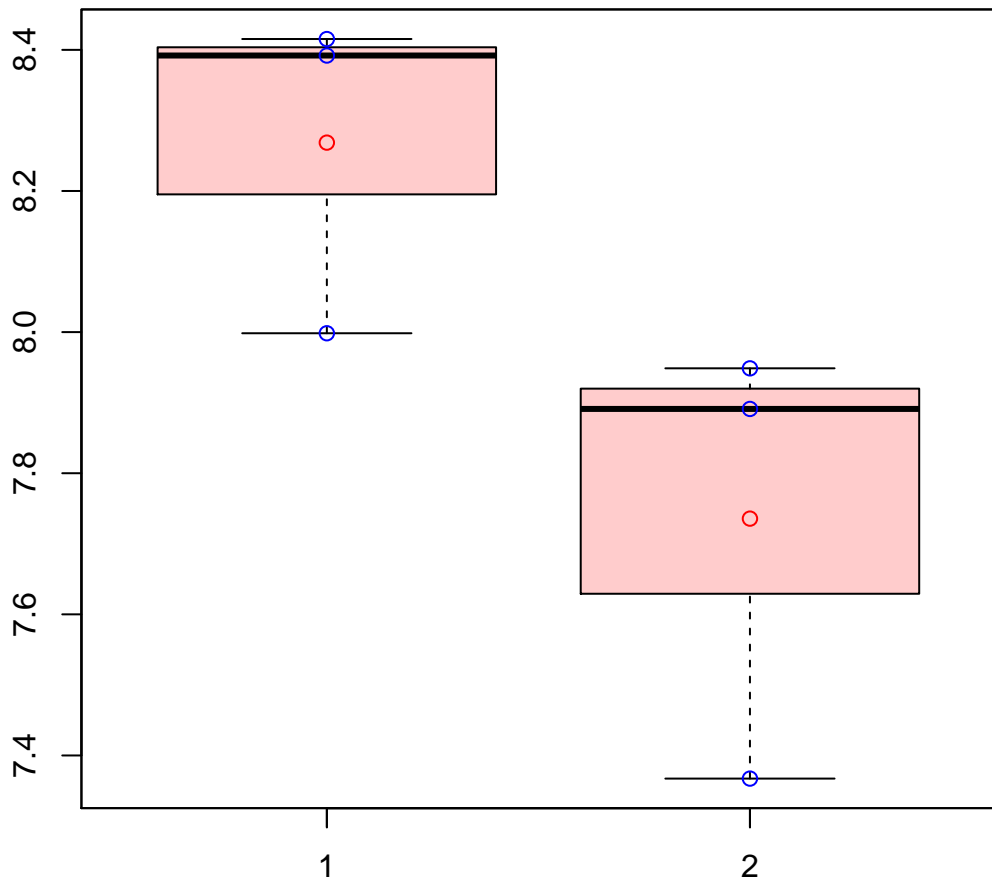

t-Test: p-value = 0.09

# B3SHC6|B3SHC6\_9POAL

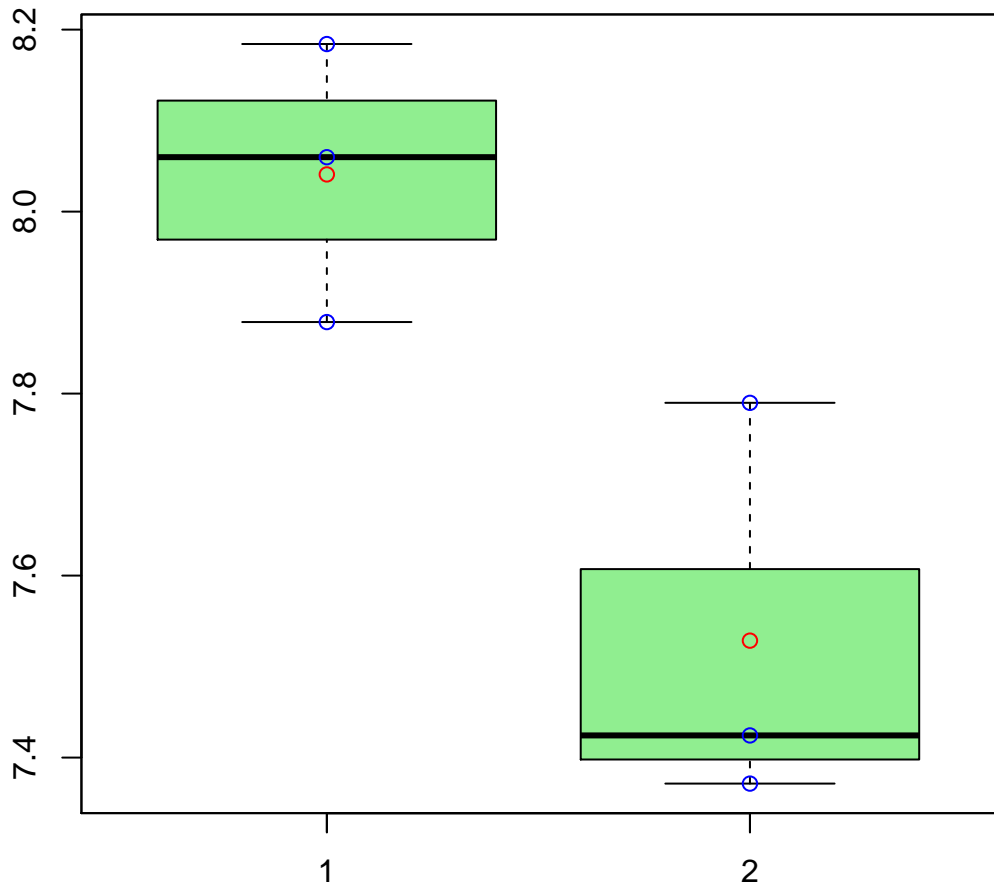

t-Test: p-value = 0.04

# B3SHD1|B3SHD1\_9POAL

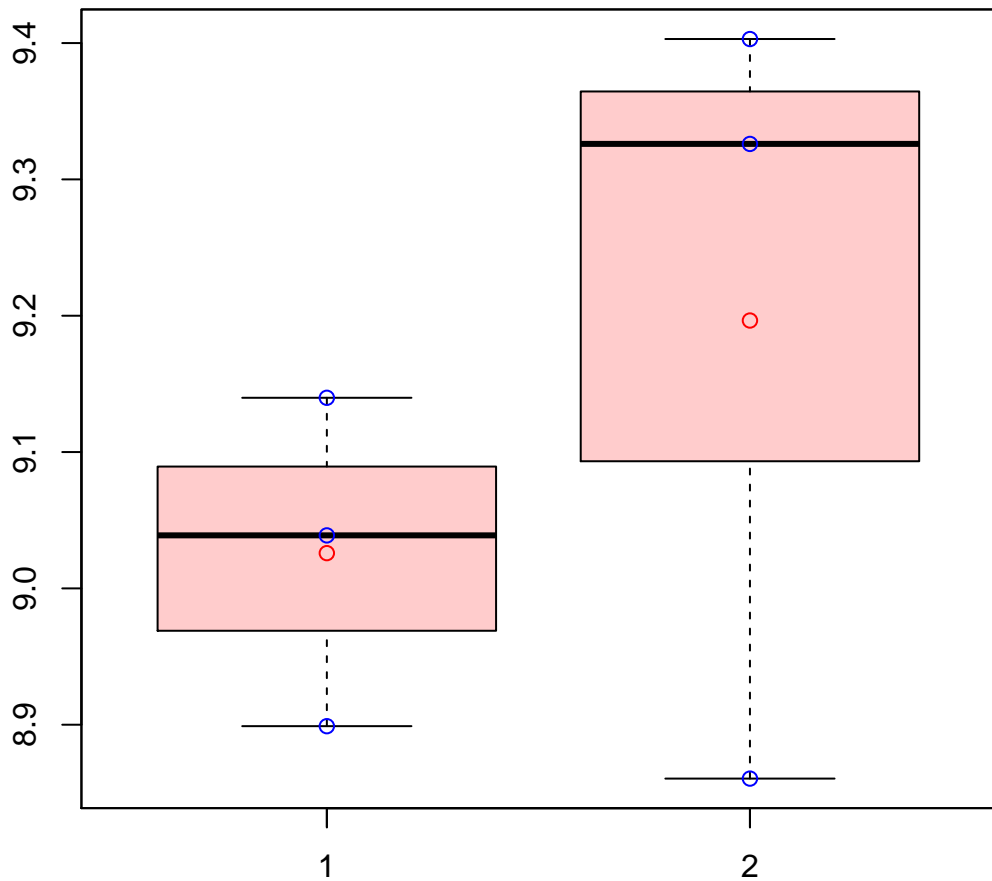

t-Test: p-value = 0.43

# B3SHF5|B3SHF5\_9POAL

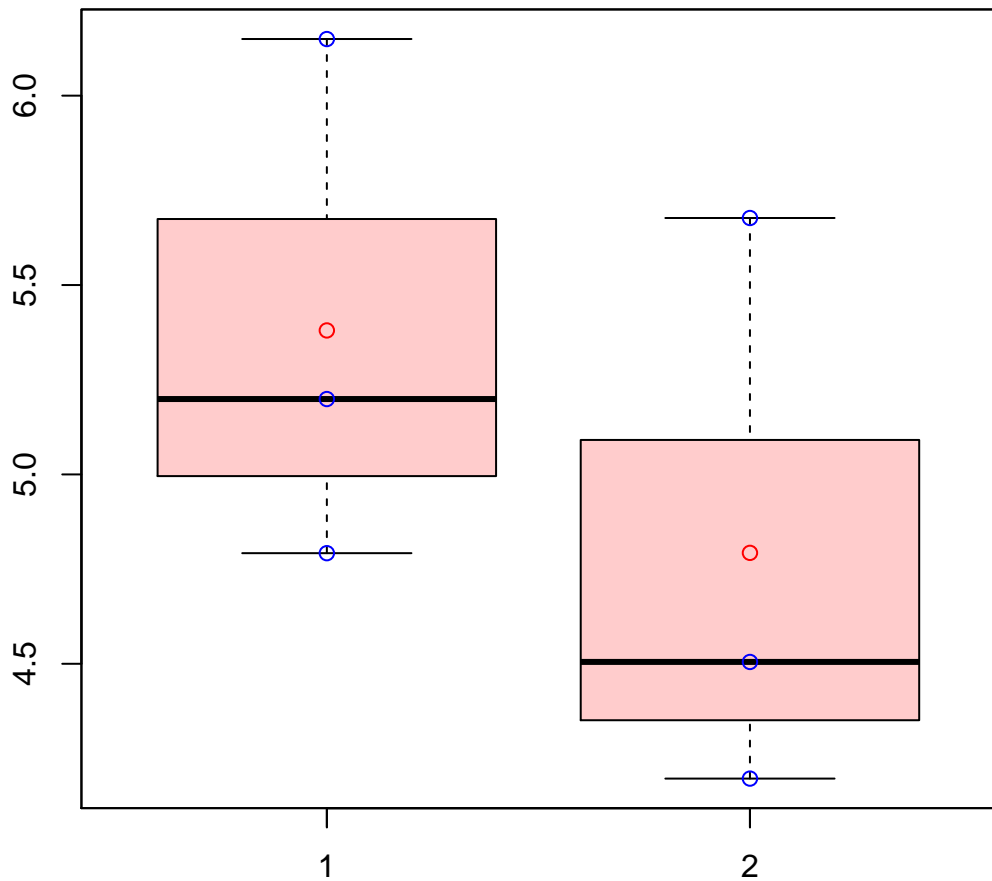

t-Test: p-value = 0.39



# B3TM10|B3TM10\_ELAGV

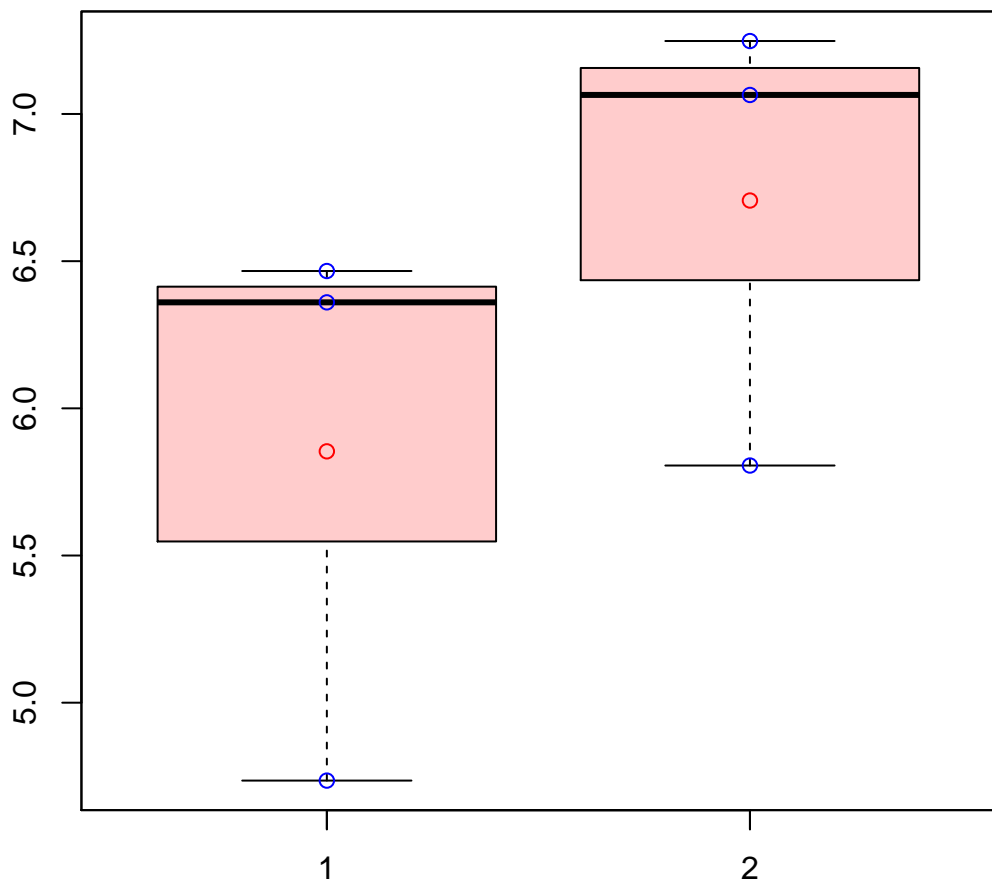

t-Test: p-value = 0.31

# B3TM23|B3TM23\_ELAGV

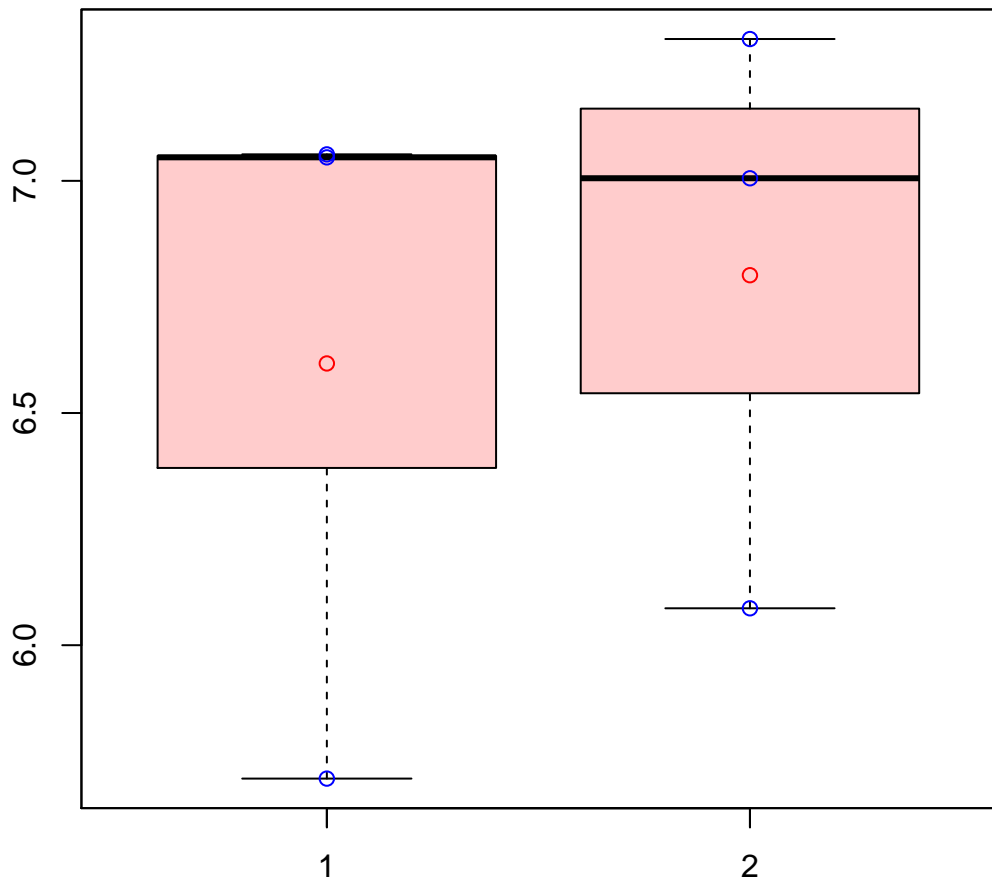

t-Test: p-value = 0.76

# B3TN48|B3TN48\_BRADI

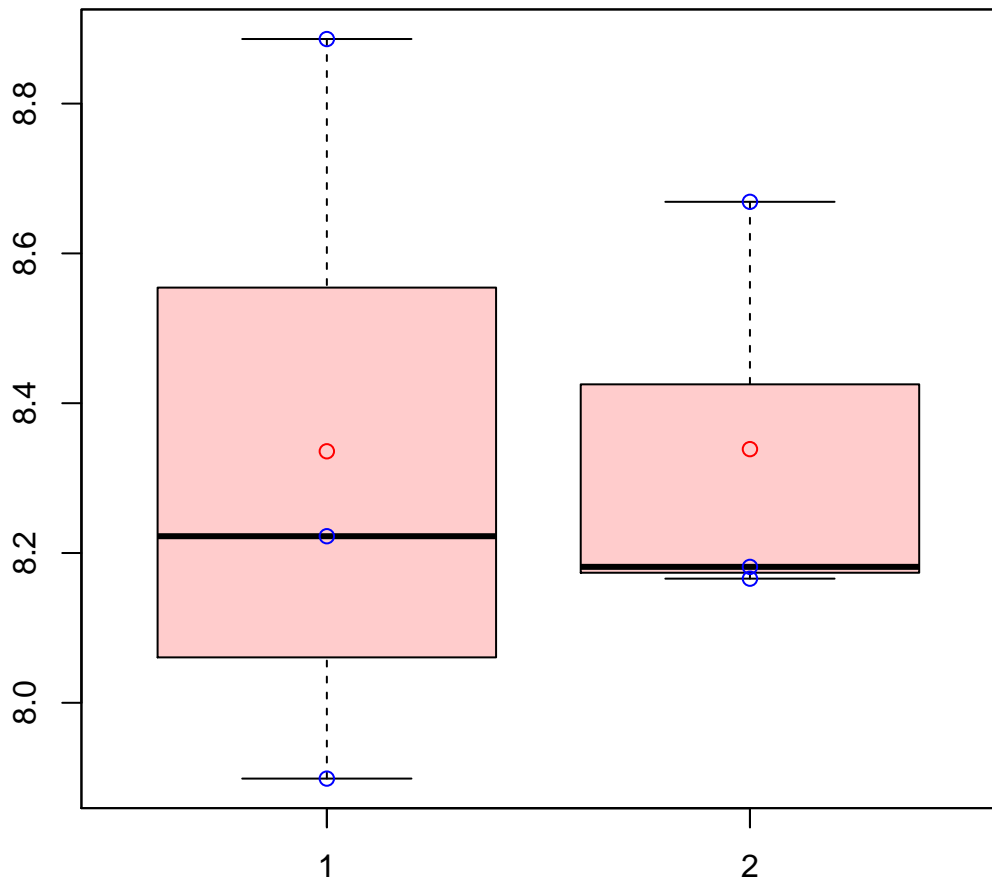

t-Test: p-value = 0.99

# B3TNA0|B3TNA0\_BRADI

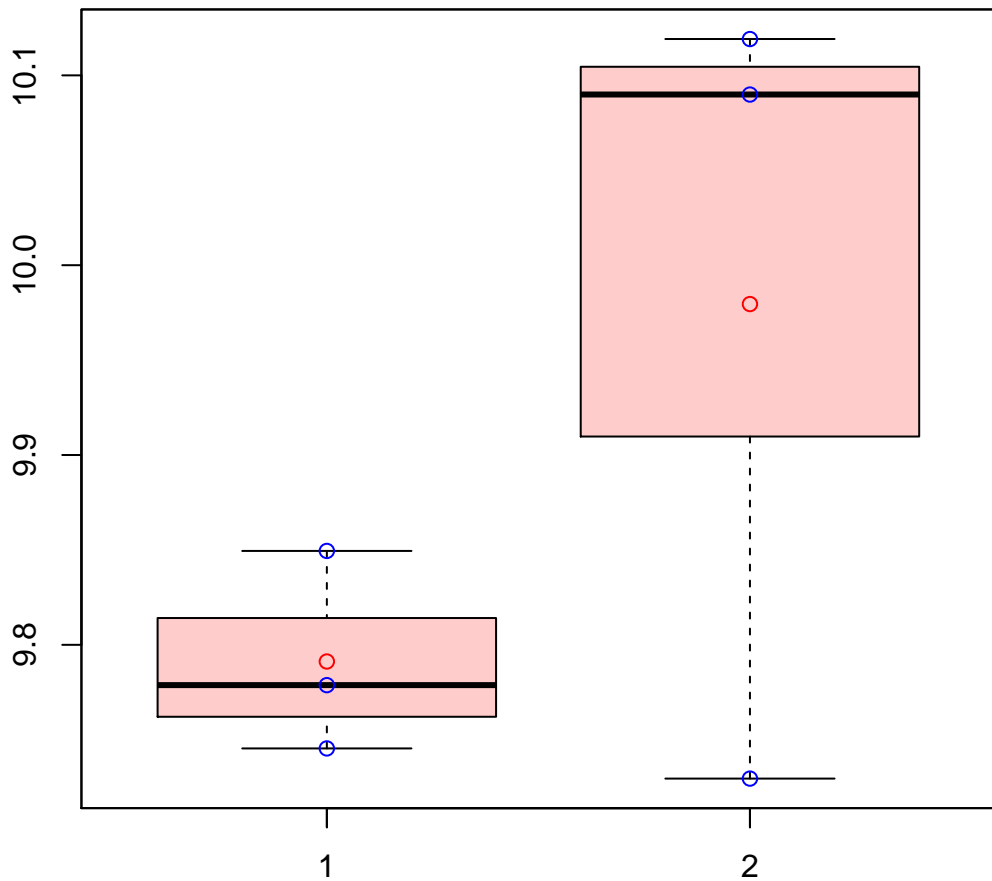

t-Test: p-value = 0.27

# B3TNA4|B3TNA4\_BRADI

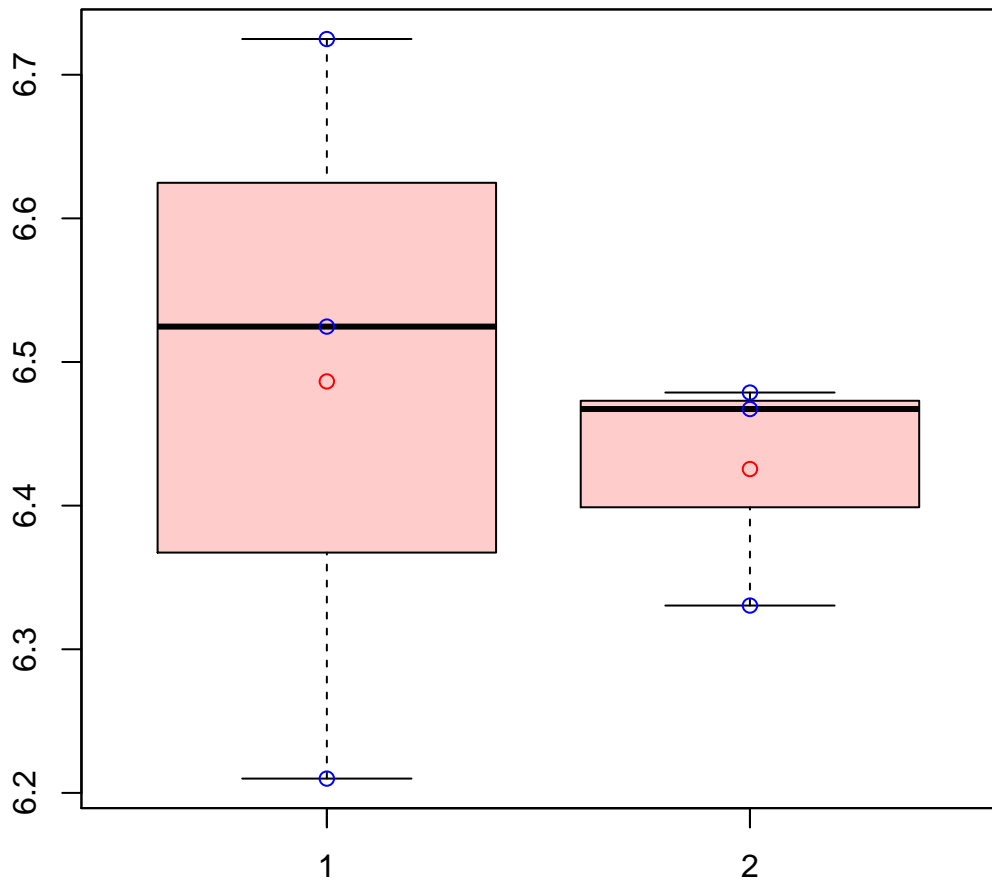

t-Test: p-value = 0.73

# B3VTC0|B3VTC0\_SORBI

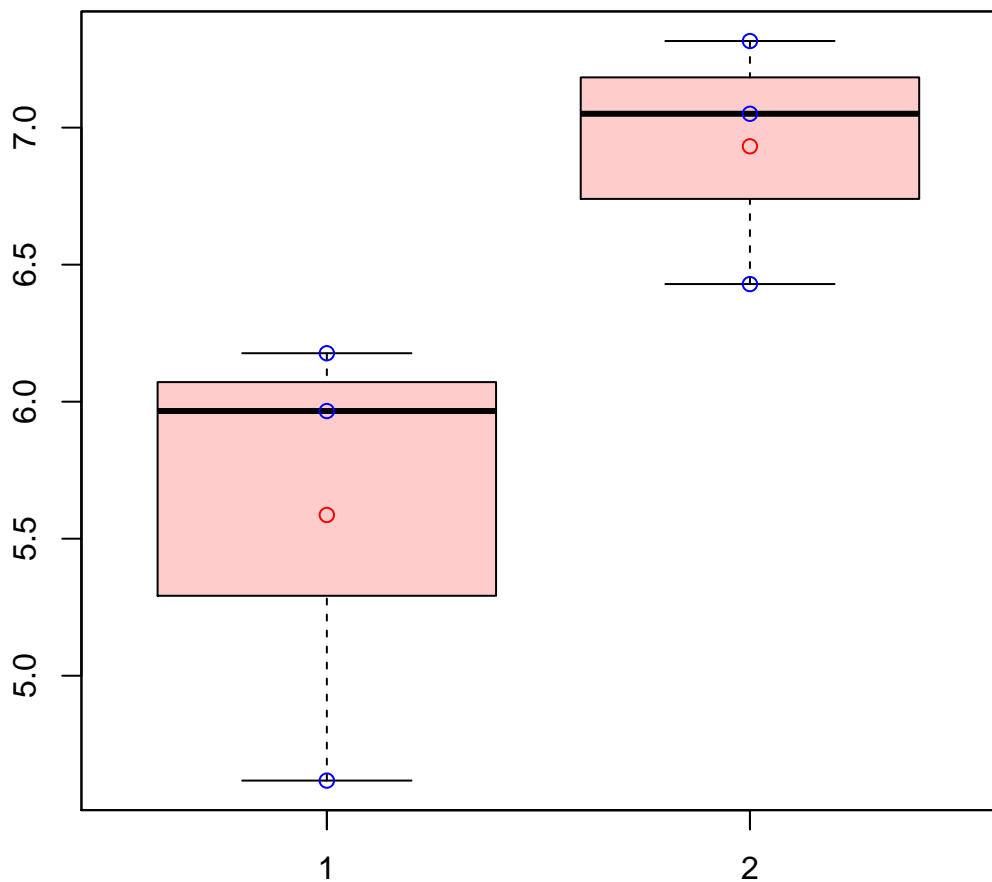

t-Test: p-value = 0.09

# B4F7T8|B4F7T8\_MAIZE

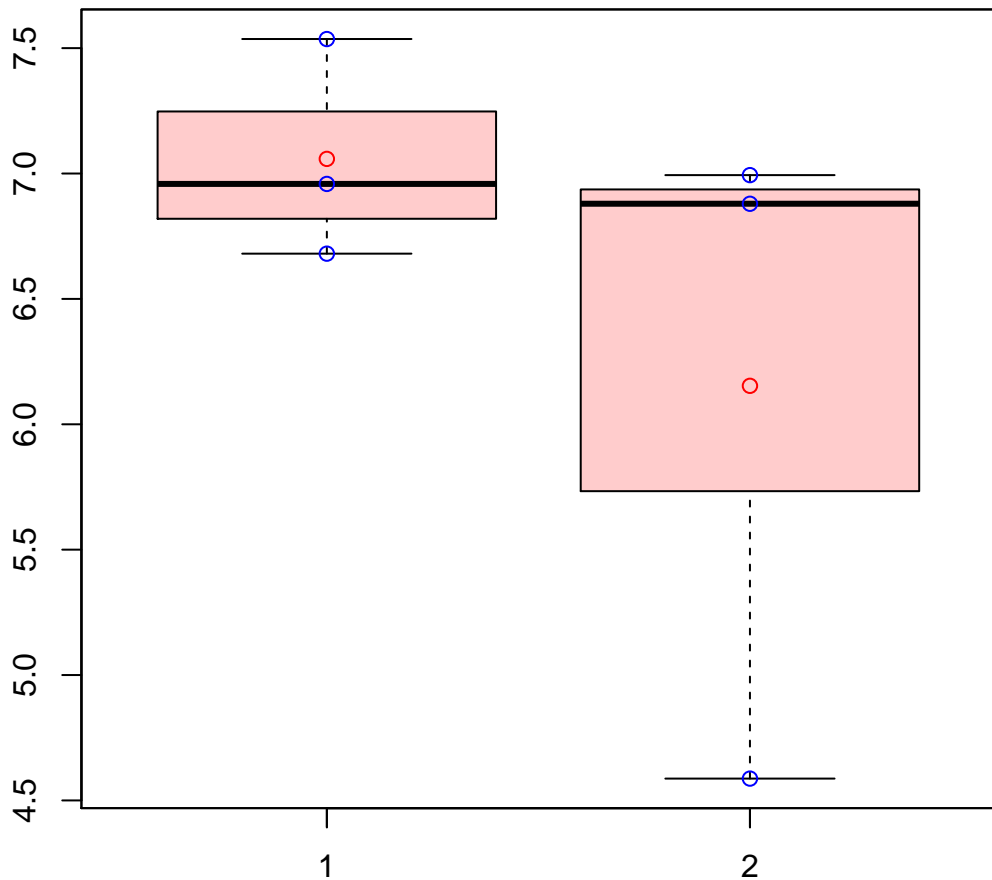

t-Test: p-value = 0.37

# B4F837|B4F837\_MAIZE

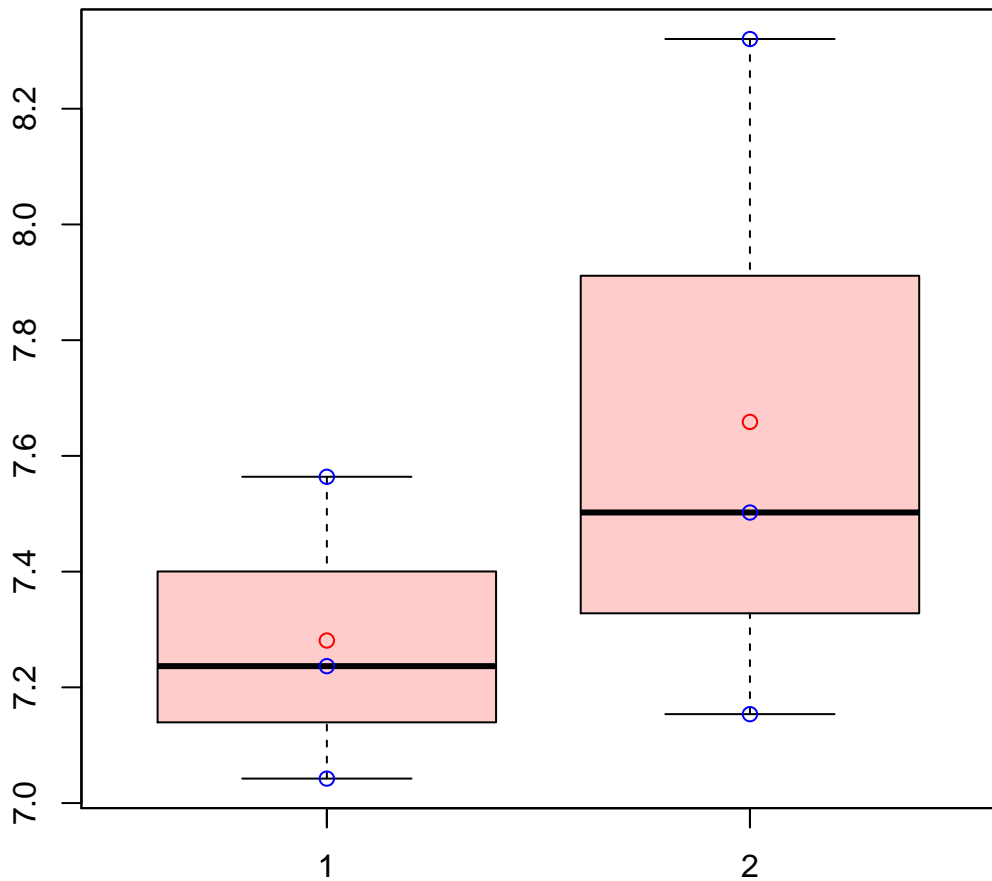

t-Test: p-value = 0.4



# B4F8L0|B4F8L0\_MAIZE

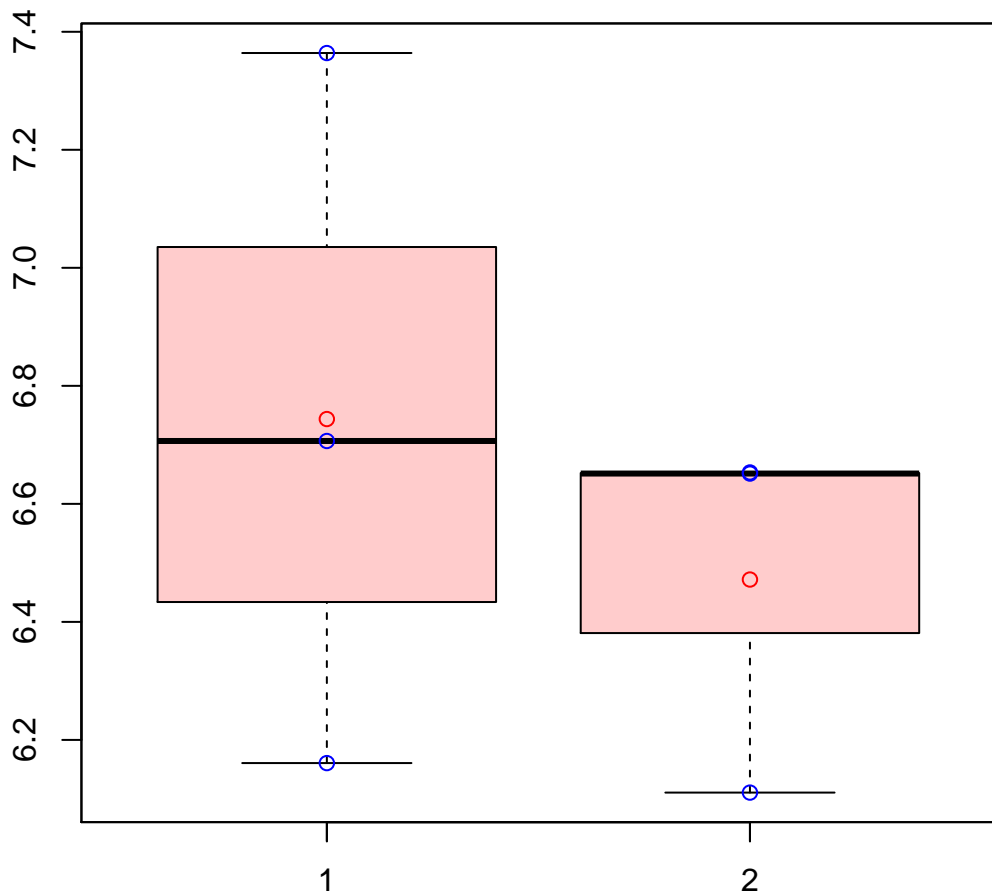

t-Test: p-value = 0.54

# B4F8N3|B4F8N3\_MAIZE

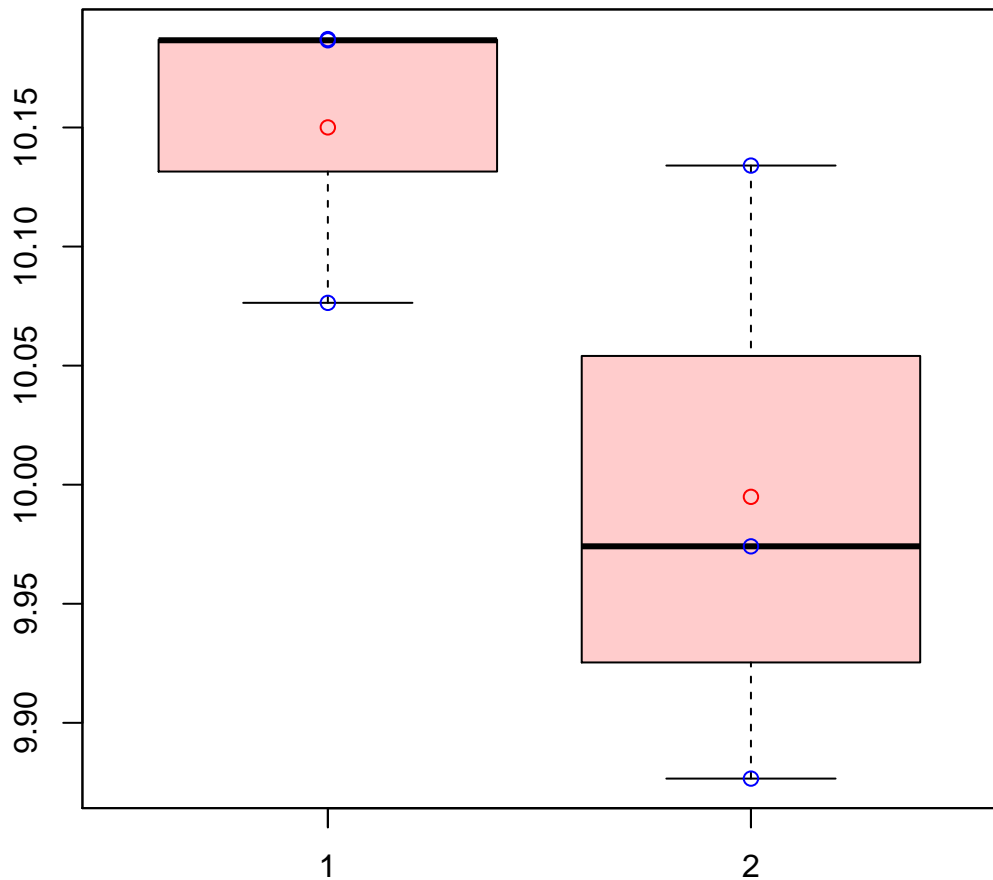

t-Test: p-value = 0.16

# B4F8Q3|B4F8Q3\_MAIZE

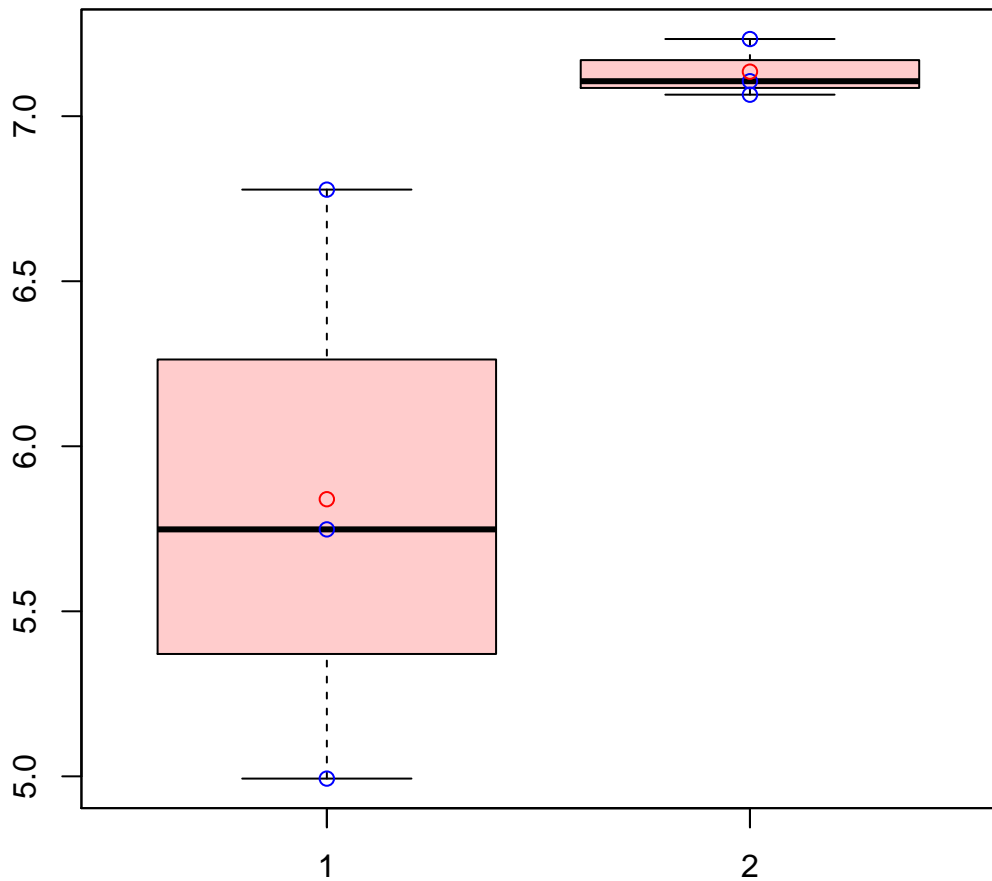

t-Test: p-value = 0.13

# B4F8W6|B4F8W6\_MAIZE

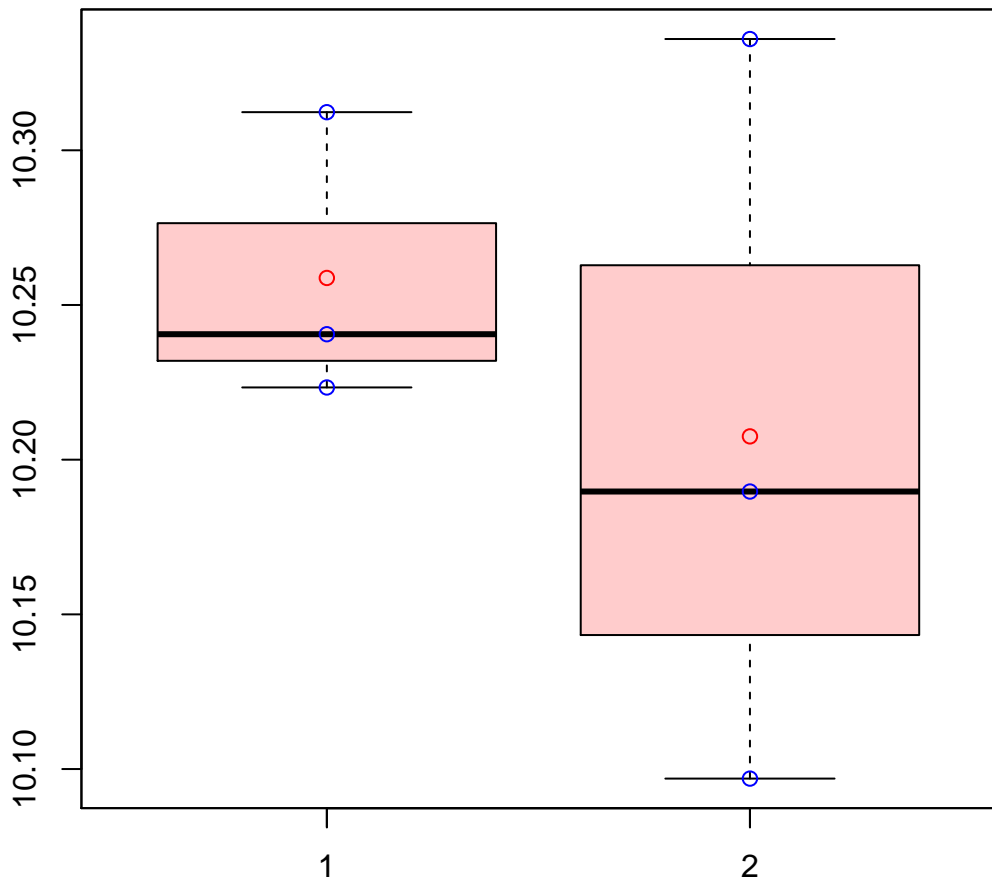

t-Test: p-value = 0.55

# B4F9E2|B4F9E2\_MAIZE

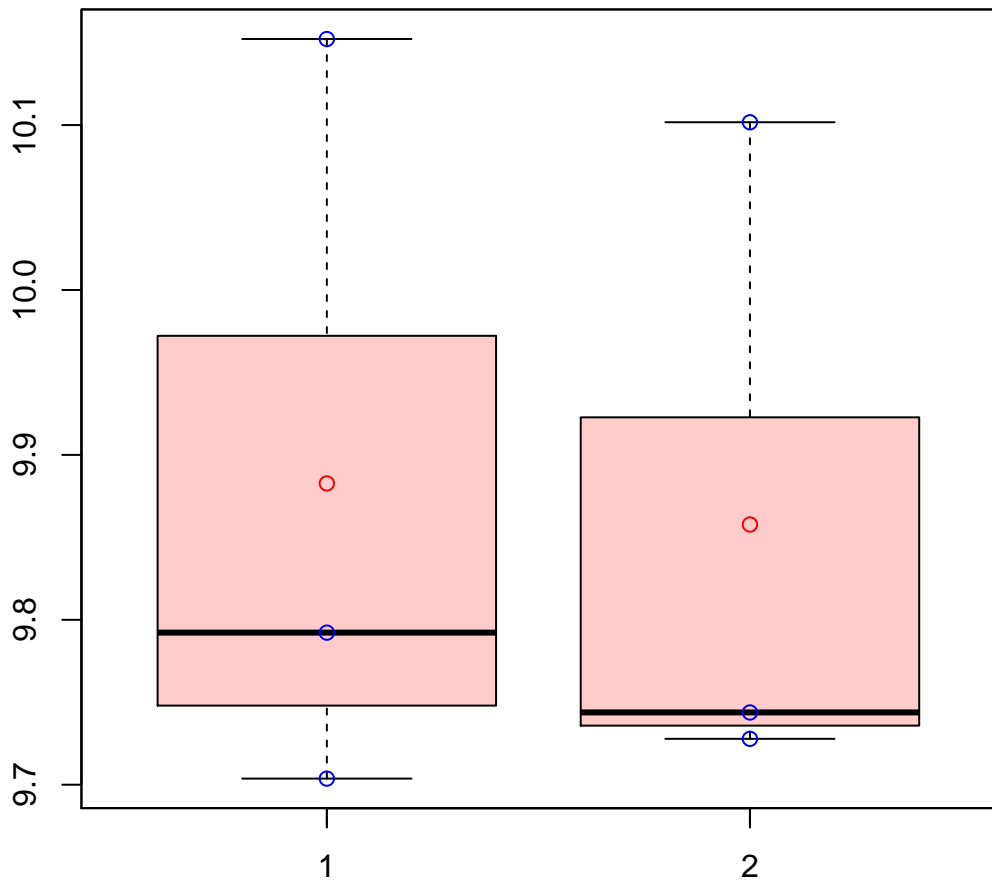

t-Test: p-value = 0.9

# B4F9G8|B4F9G8\_MAIZE

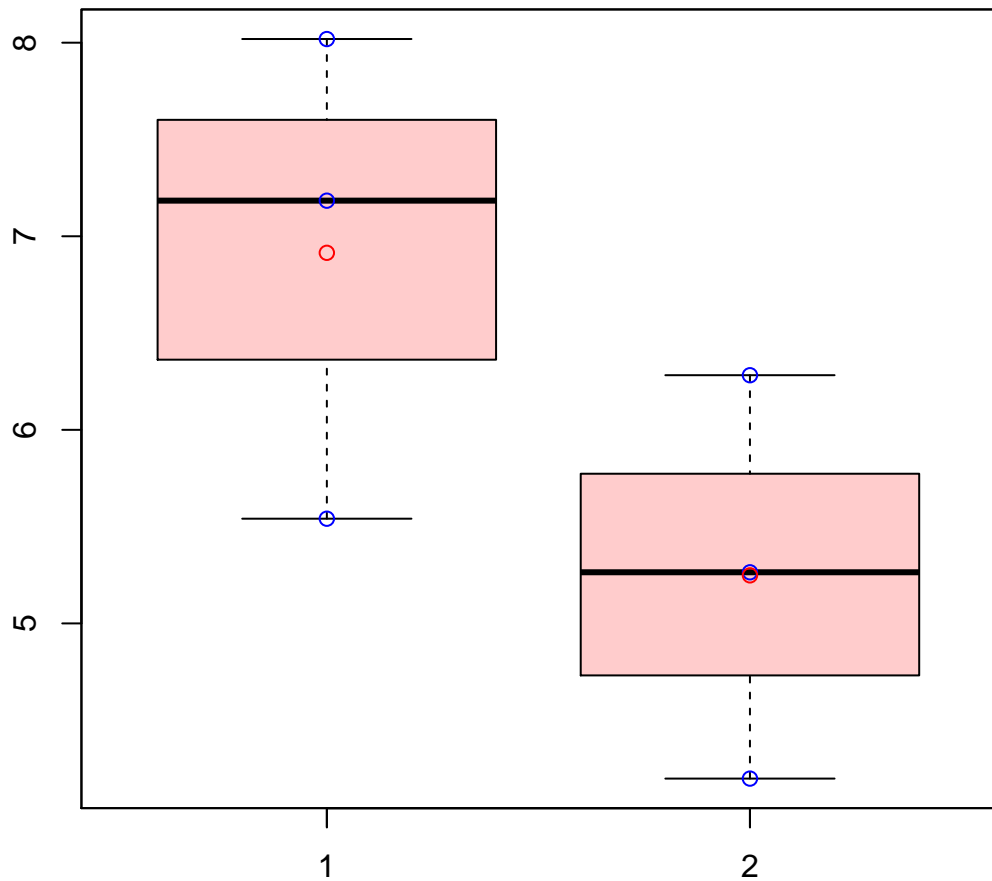

t-Test: p-value = 0.15

# B4F9P7|B4F9P7\_MAIZE

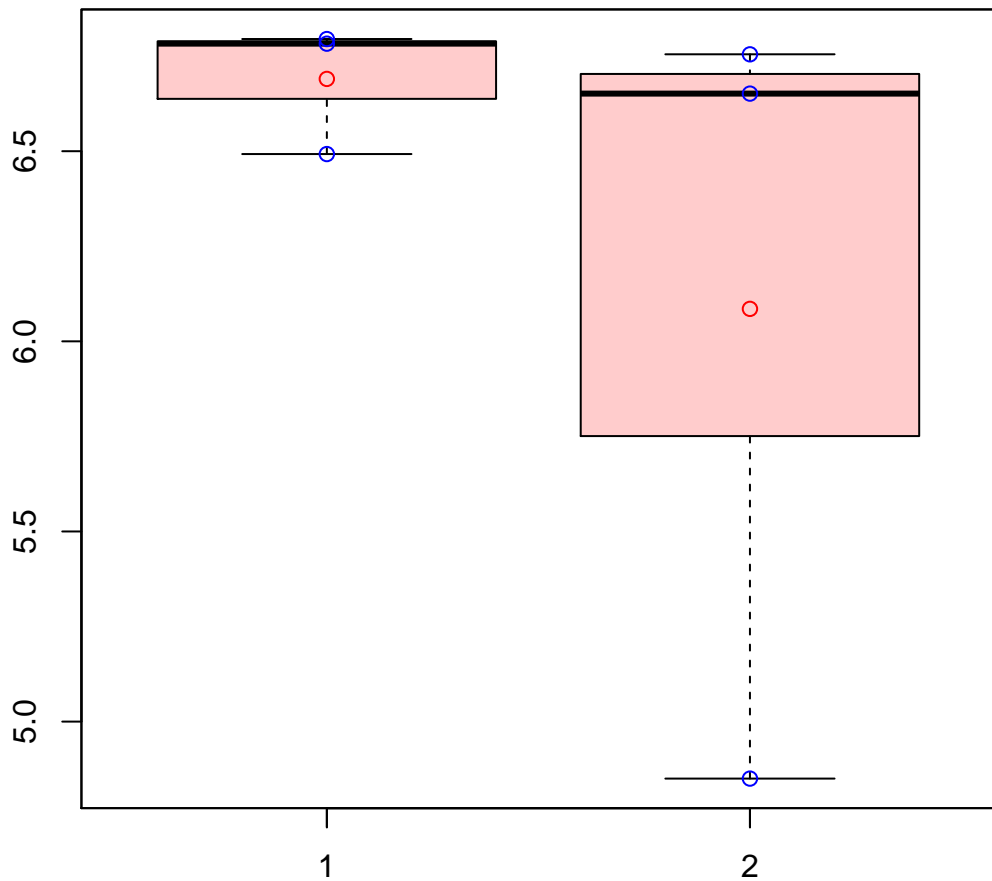

t-Test: p-value = 0.43

# B4F9R9|B4F9R9\_MAIZE

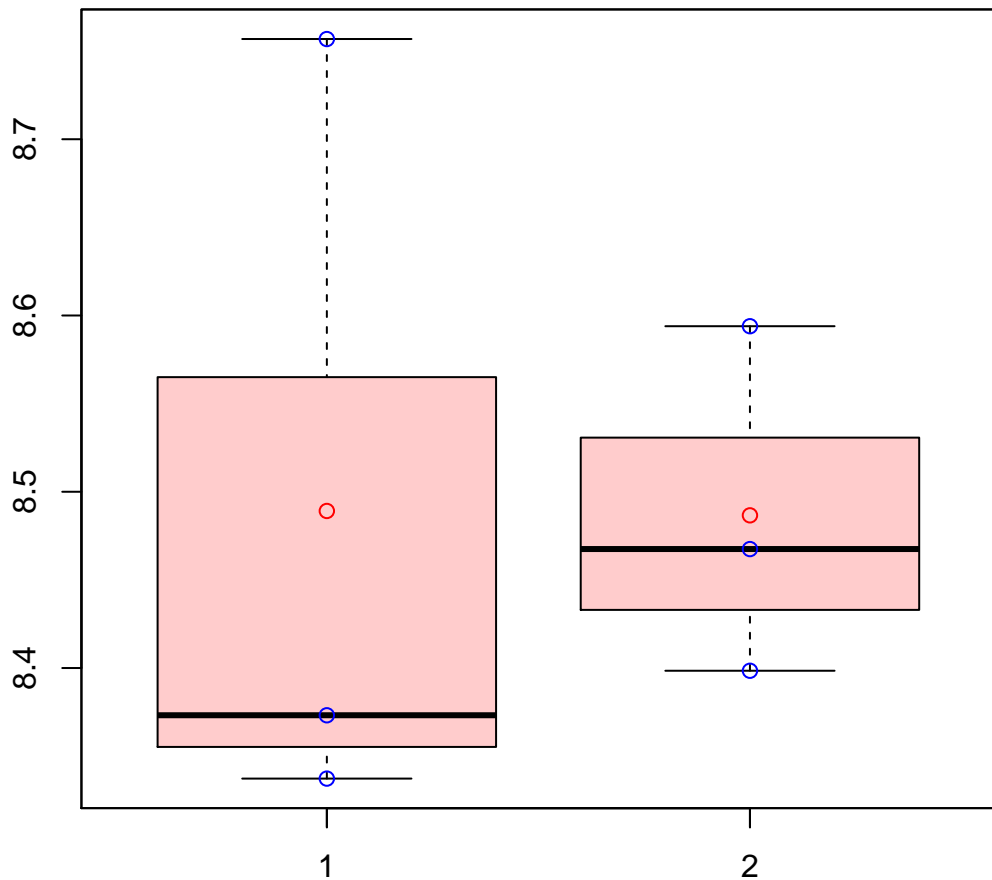

t-Test: p-value = 0.99



# B4FAE5|B4FAE5\_MAIZE

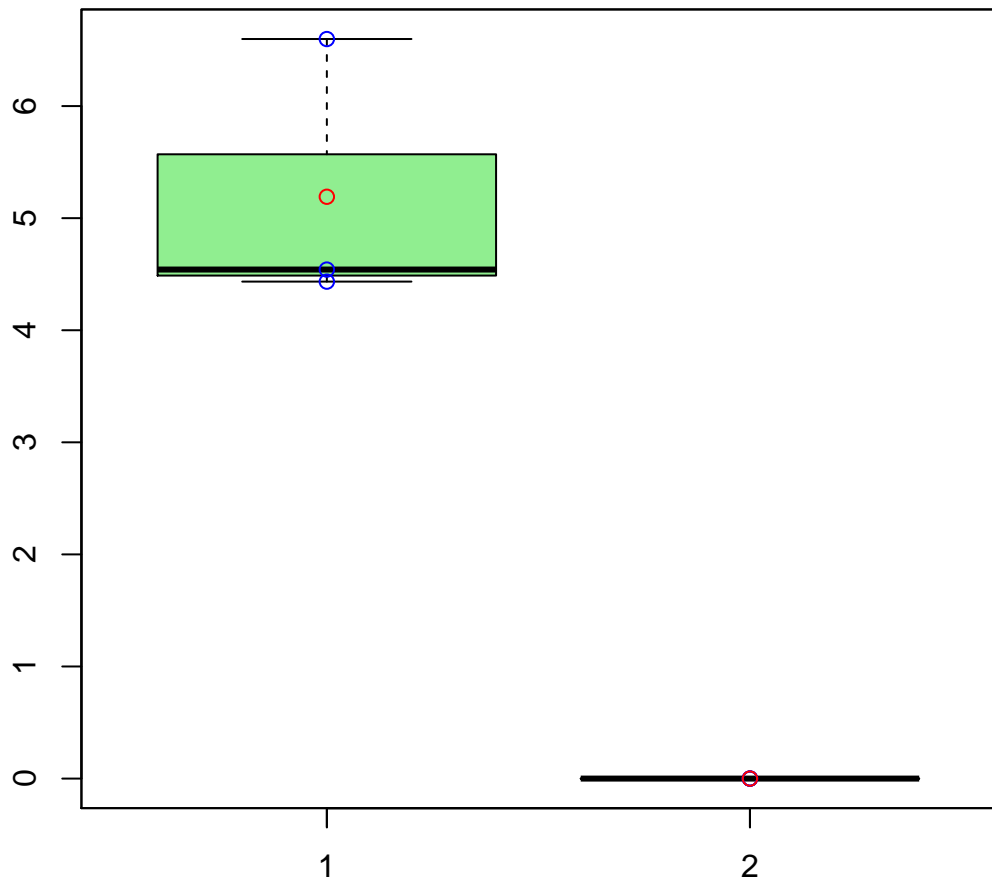

t-Test: p-value = 0.02

# B4FAF5|B4FAF5\_MAIZE

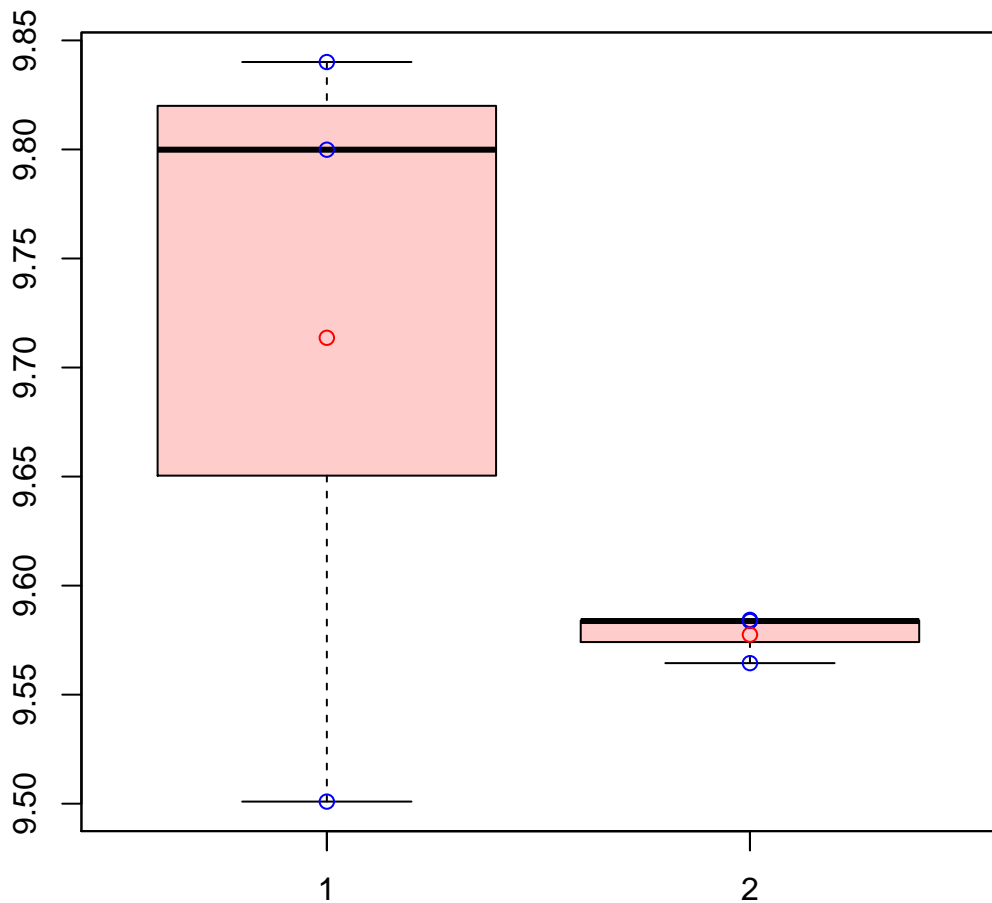

t-Test: p-value = 0.33

# B4FB66|B4FB66\_MAIZE

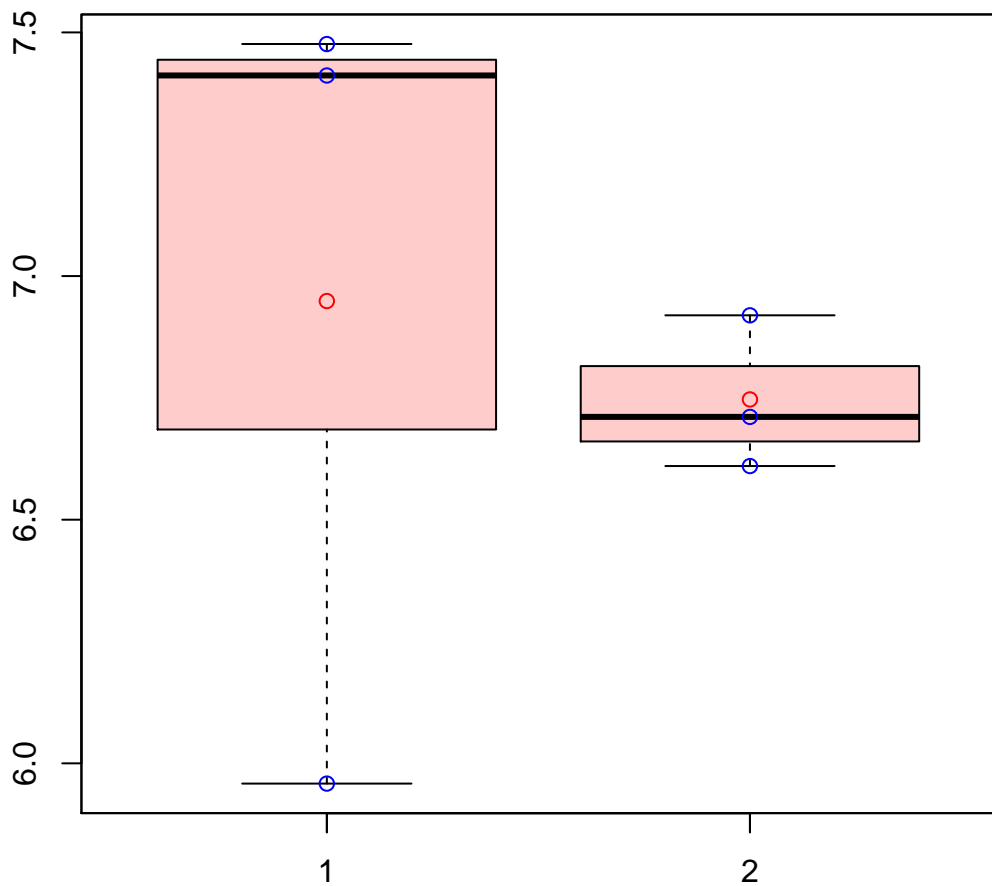

t-Test: p-value = 0.73

# B4FBH0|B4FBH0\_MAIZE

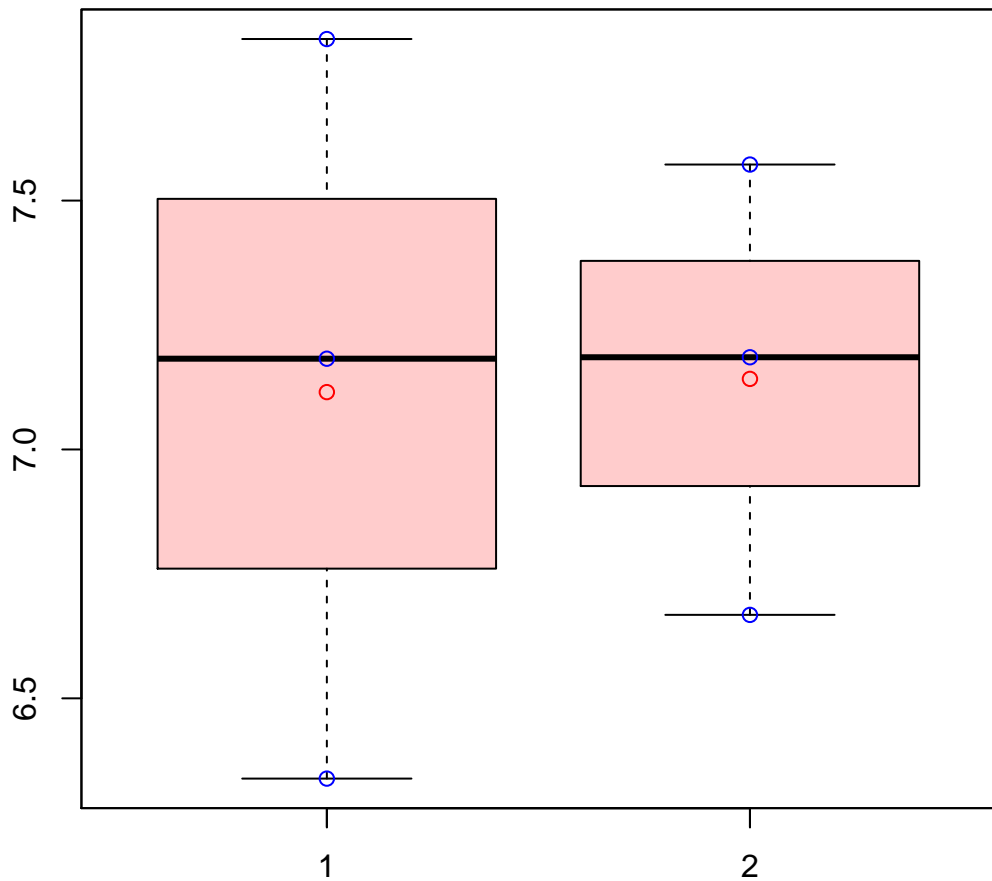

t-Test: p-value = 0.96

# B4FD90|B4FD90\_MAIZE

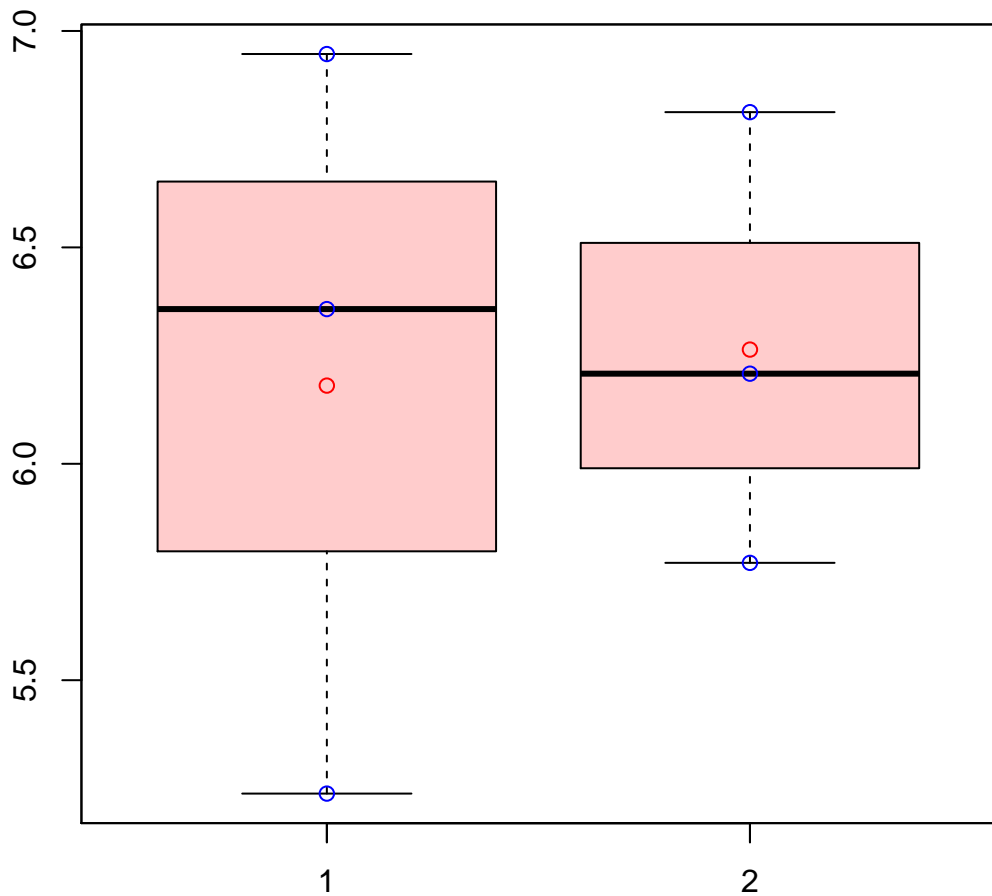

t-Test: p-value = 0.9

# B4FDM1|B4FDM1\_MAIZE

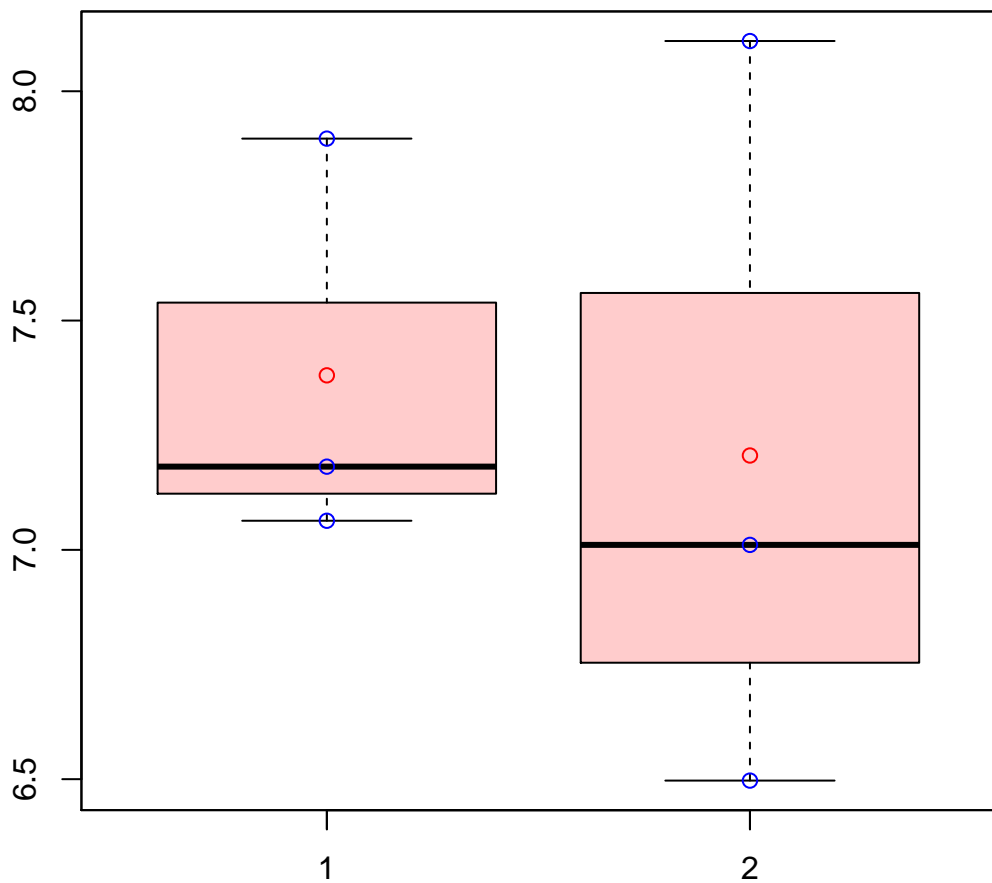

t-Test: p-value = 0.77

# B4FEA2|B4FEA2\_MAIZE

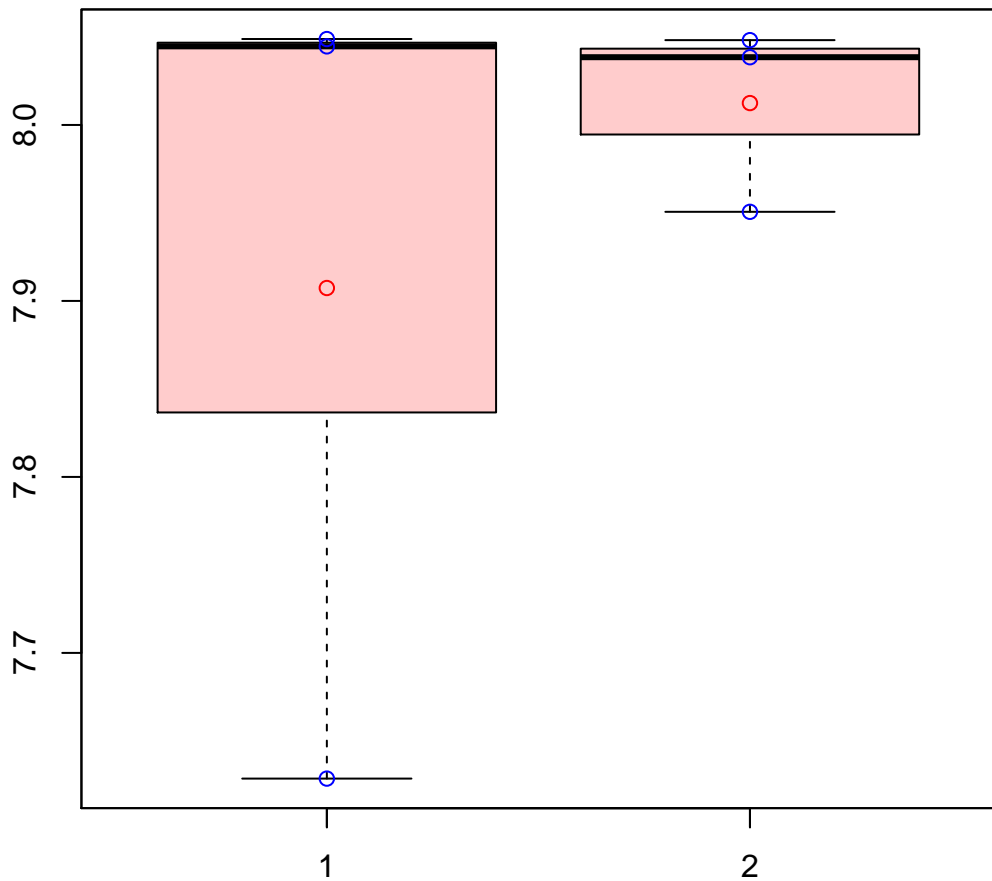

t-Test: p-value = 0.53

# B4FHH2|B4FHH2\_MAIZE

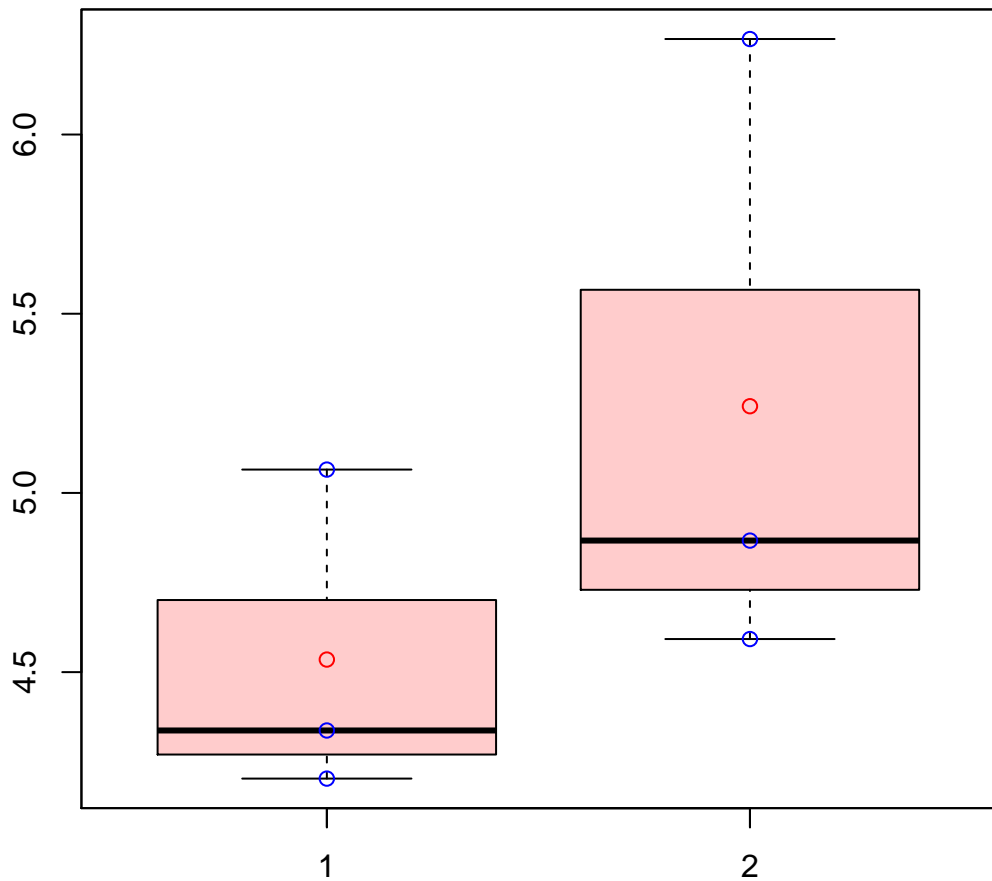

t-Test: p-value = 0.31



# B4FHX3|B4FHX3\_MAIZE

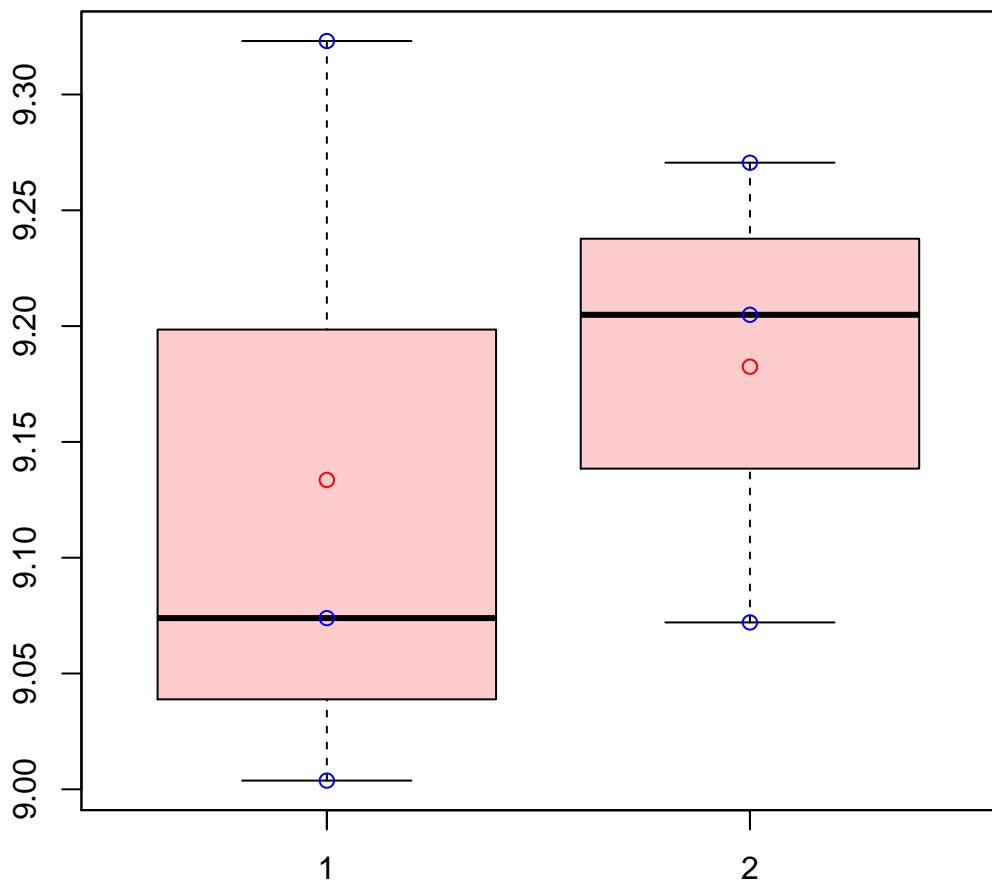

t-Test: p-value = 0.69

# B4FIE9|B4FIE9\_MAIZE

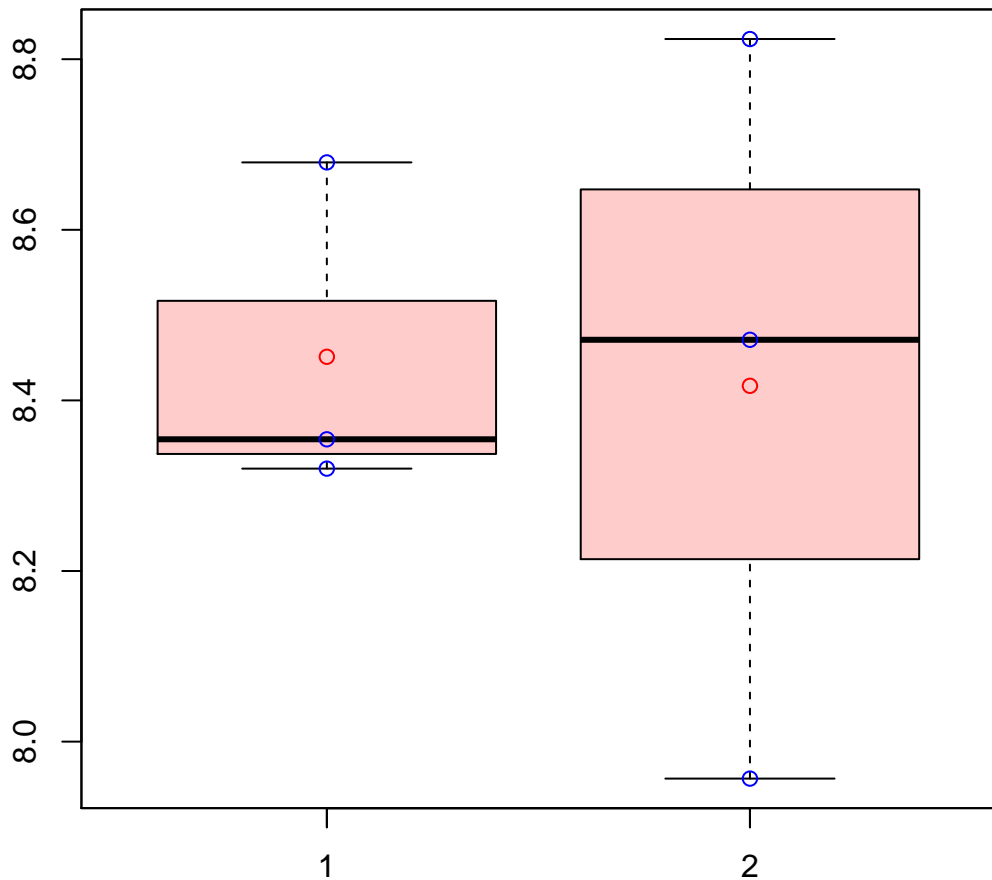

t-Test: p-value = 0.91

# B4FIL5|B4FIL5\_MAIZE

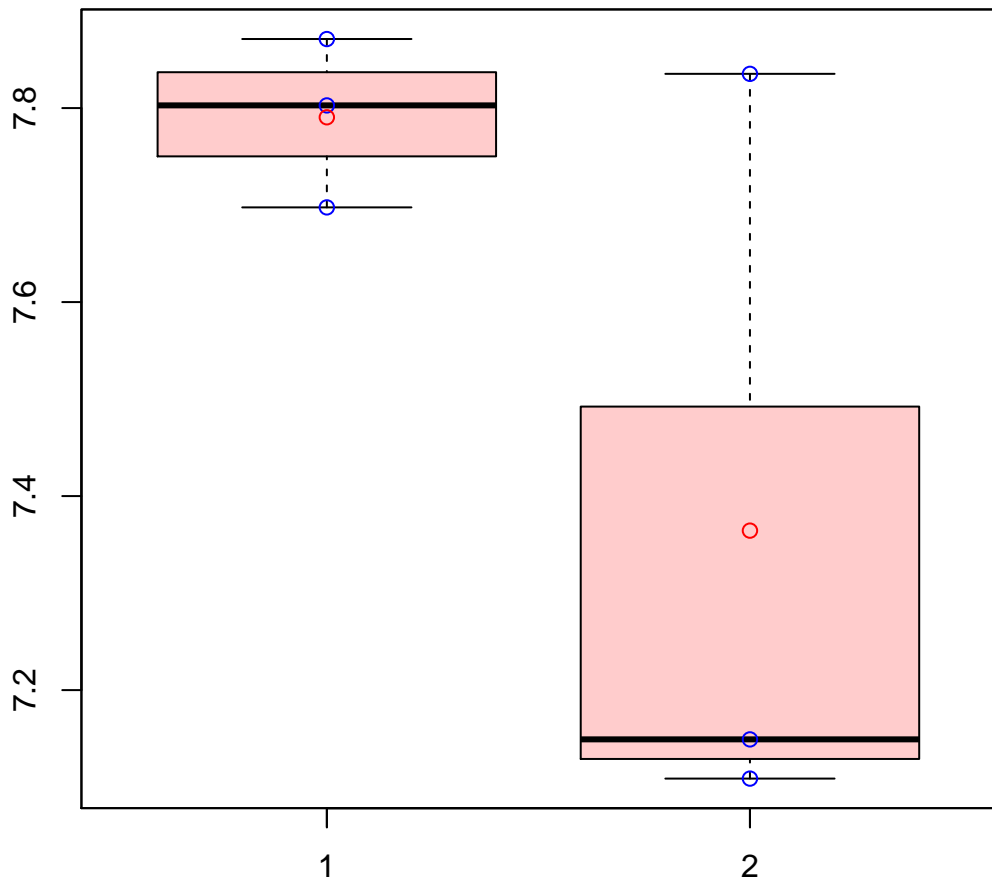

t-Test: p-value = 0.21

# B4FIY7|B4FIY7\_MAIZE

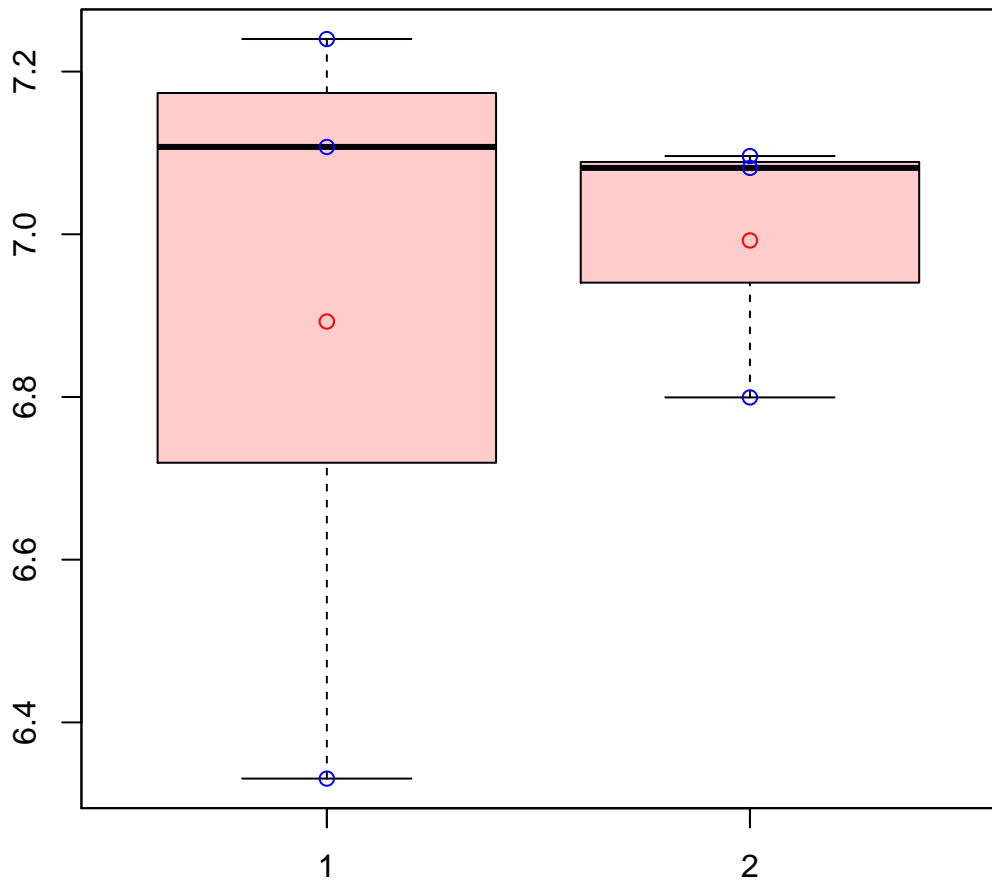

t-Test: p-value = 0.77

# B4FJF0|B4FJF0\_MAIZE

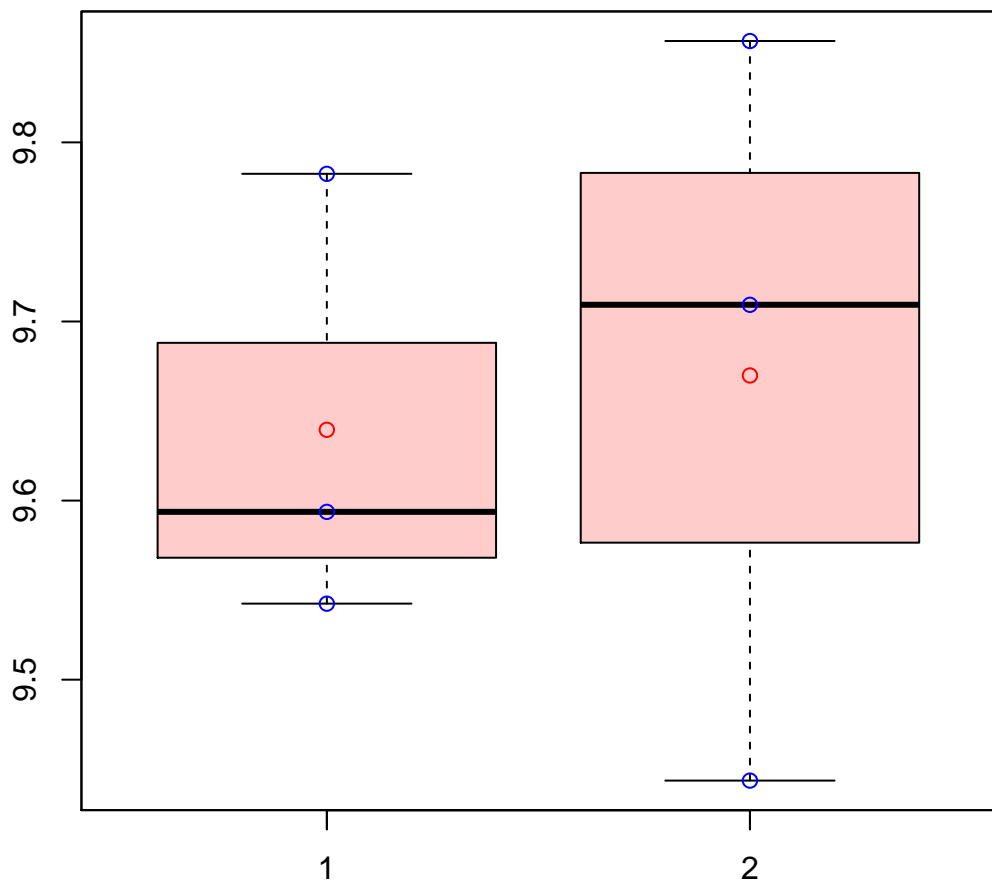

t-Test: p-value = 0.84

# B4FK03|B4FK03\_MAIZE

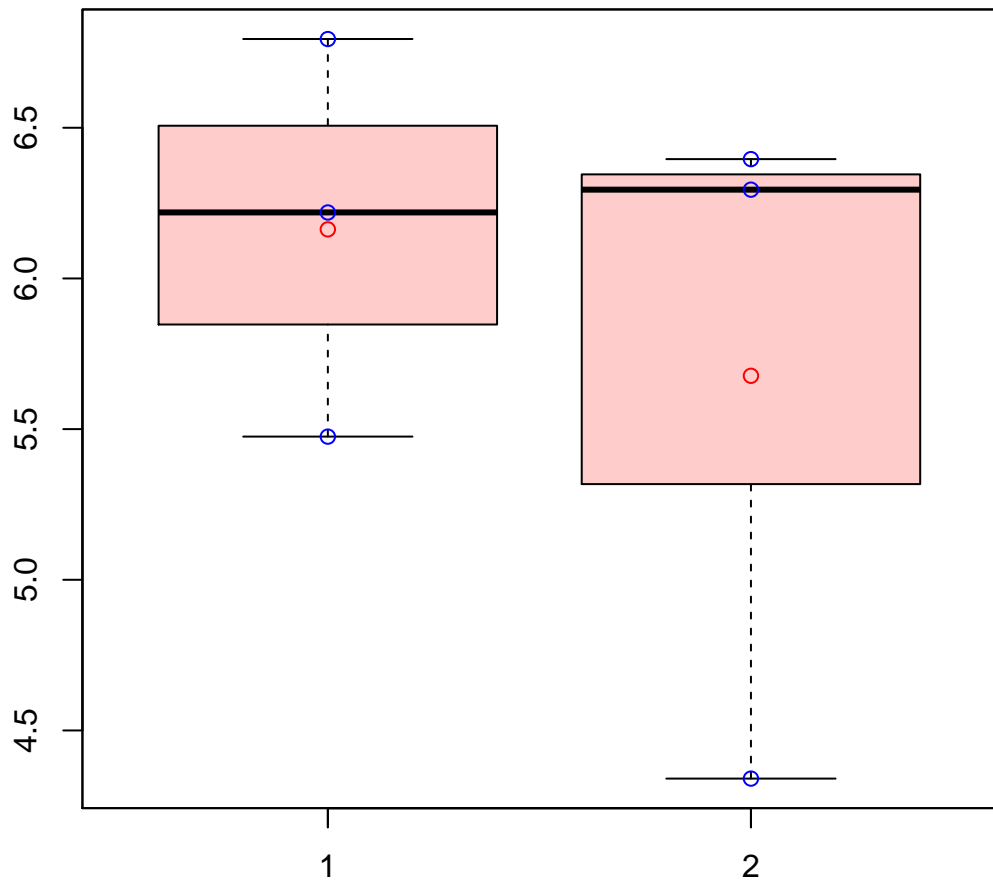

t-Test: p-value = 0.57

# B4FKV6|B4FKV6\_MAIZE

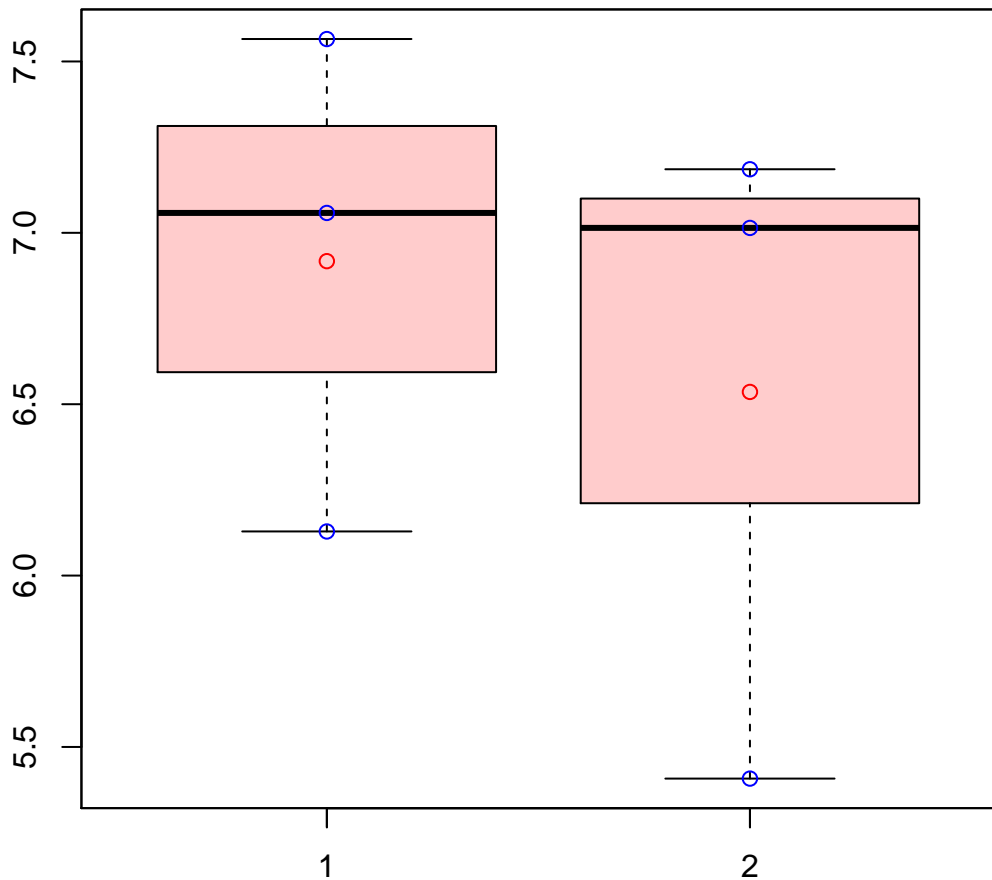

t-Test: p-value = 0.62

# B4FLB2|B4FLB2\_MAIZE

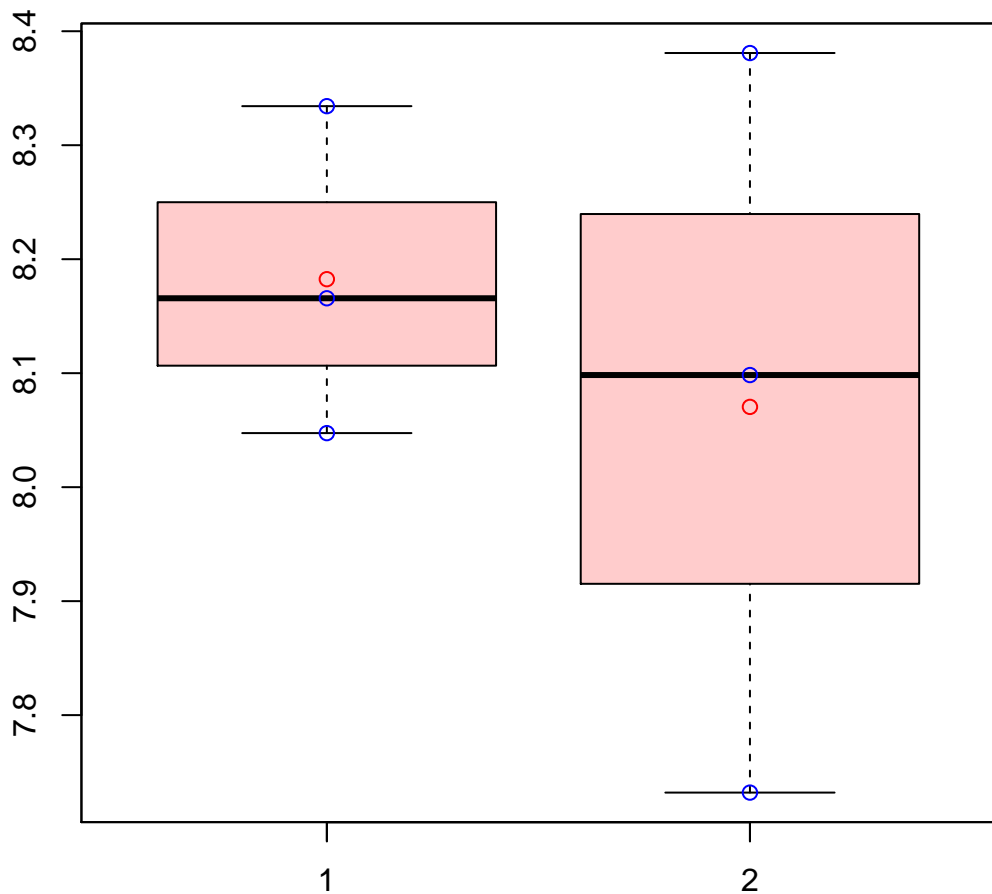

t-Test: p-value = 0.63



# B4FM07|B4FM07\_MAIZE

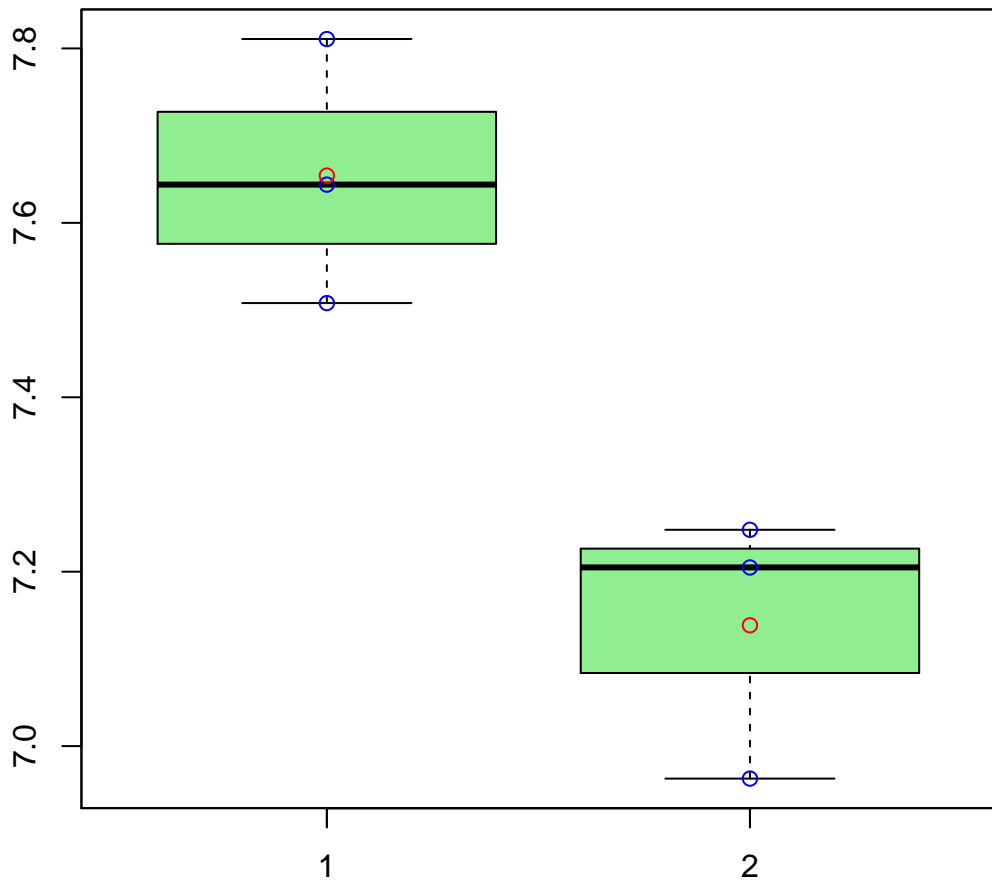

t-Test: p-value = 0.01

# B4FMS7|B4FMS7\_MAIZE

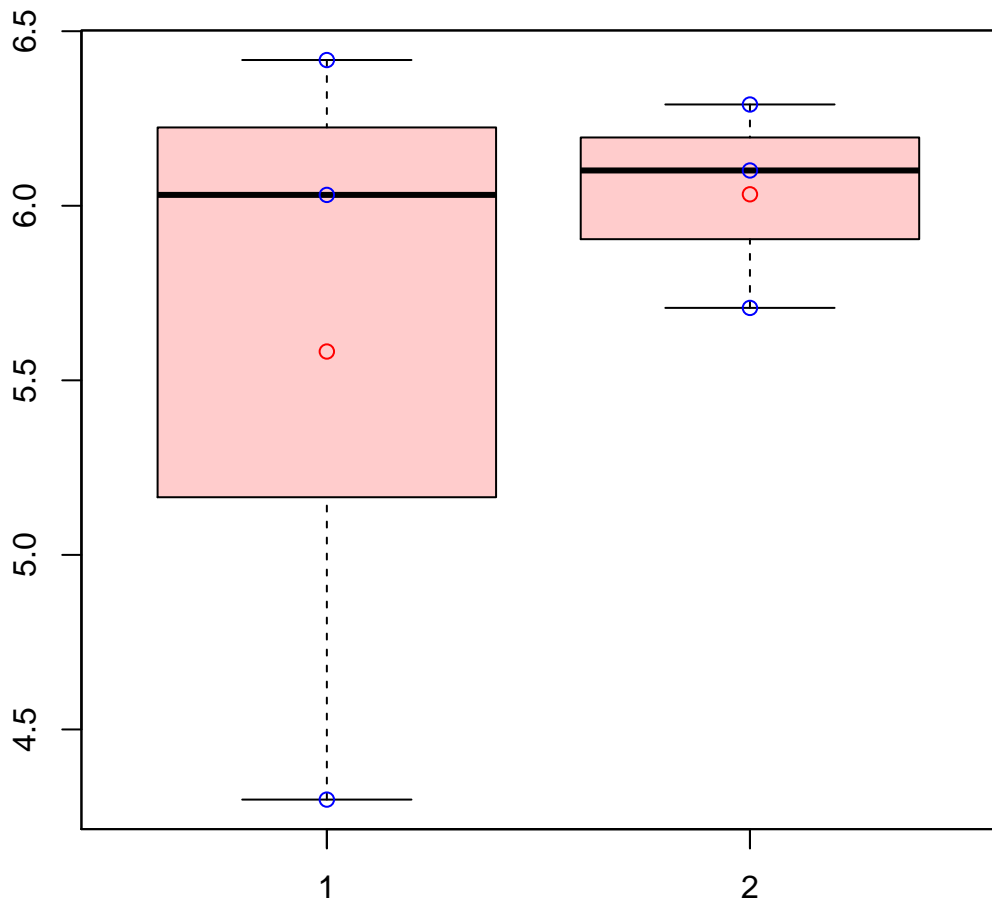

t-Test: p-value = 0.57

# B4FN63|B4FN63\_MAIZE

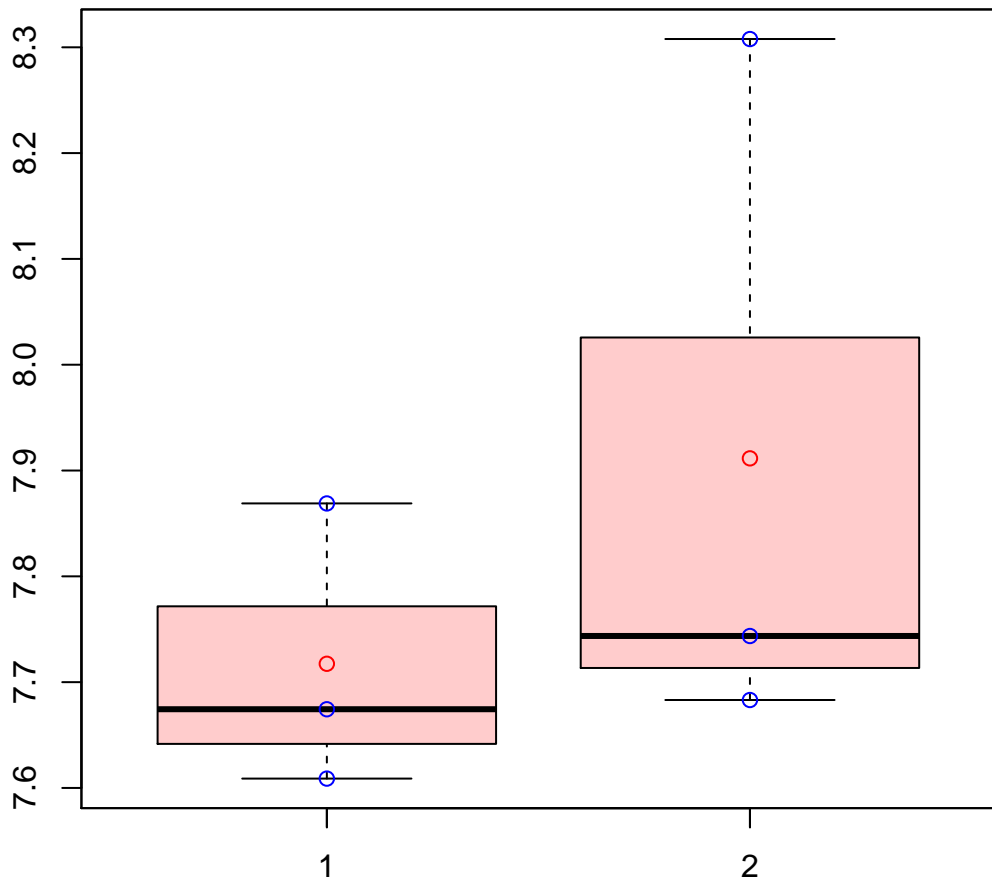

t-Test: p-value = 0.44

# B4FN73|B4FN73\_MAIZE

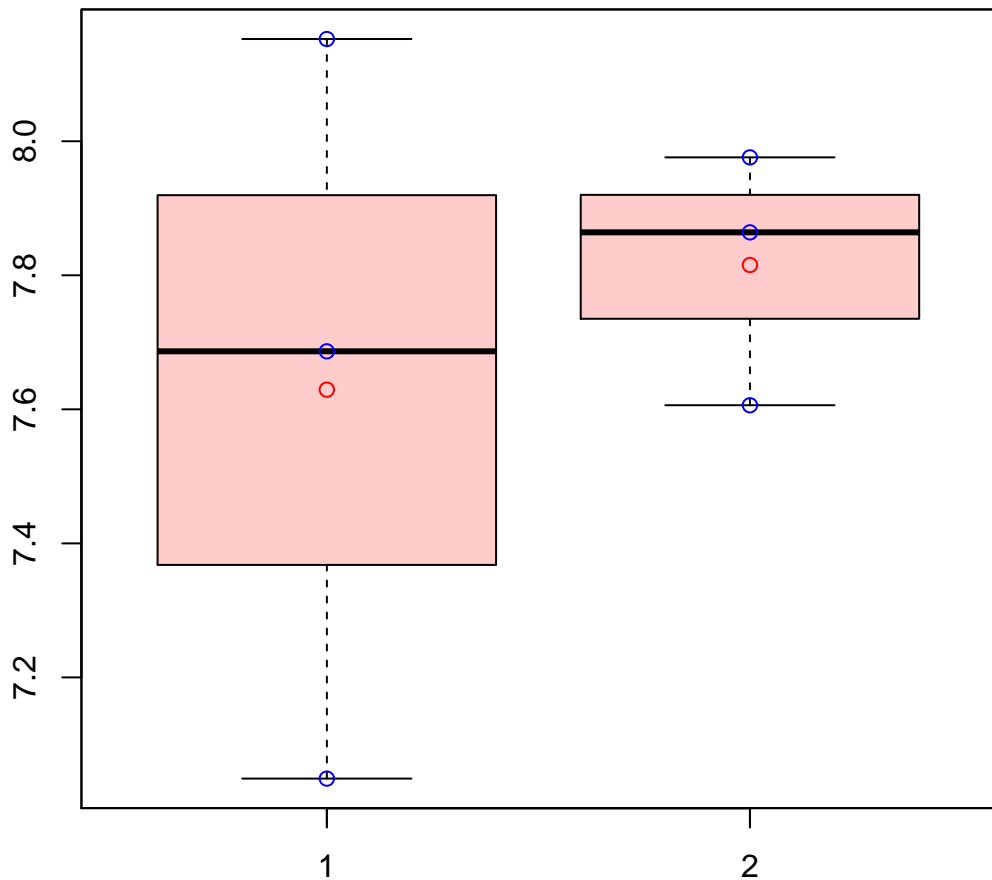

t-Test: p-value = 0.63

# B4FPE4|B4FPE4\_MAIZE

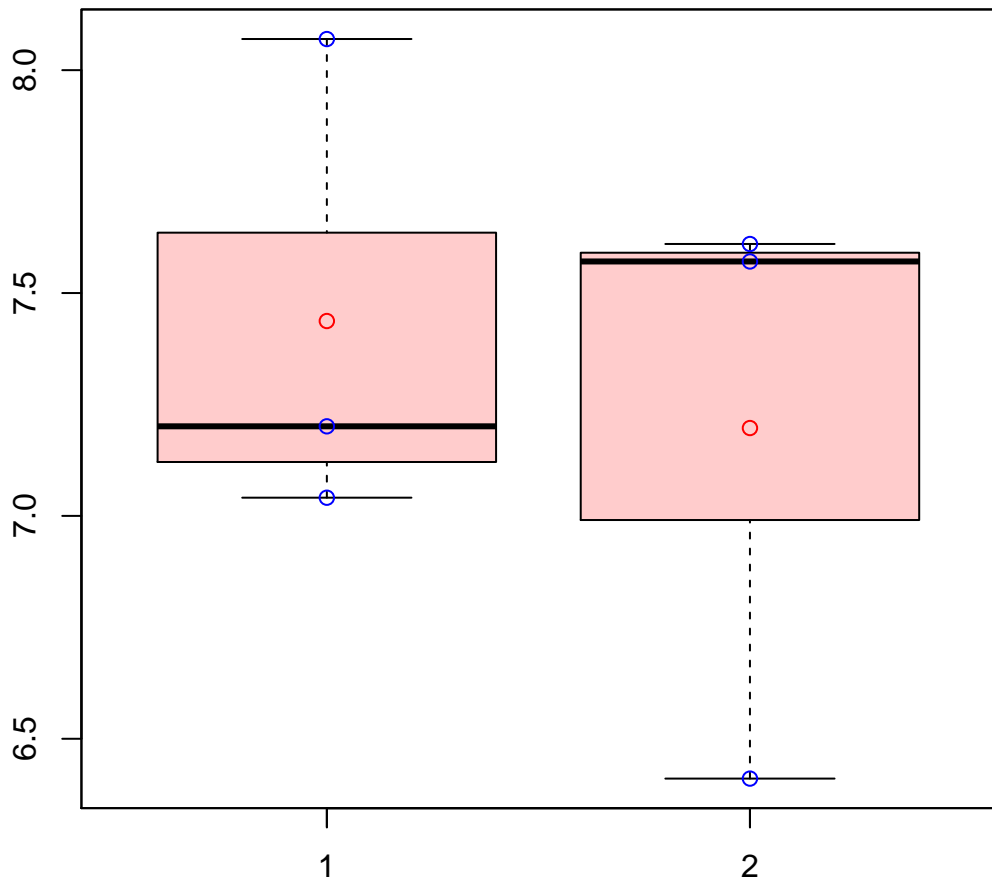

t-Test: p-value = 0.66

# B4FPW3|B4FPW3\_MAIZE

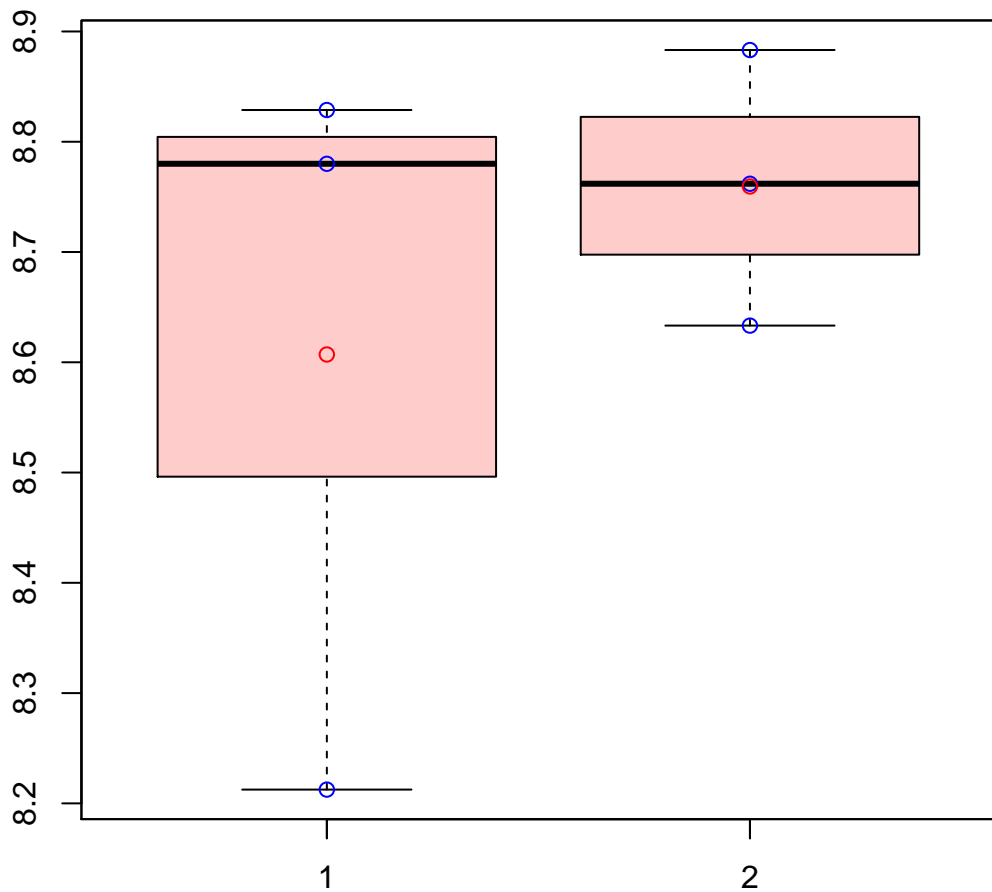

t-Test: p-value = 0.53

# B4FQ59|B4FQ59\_MAIZE

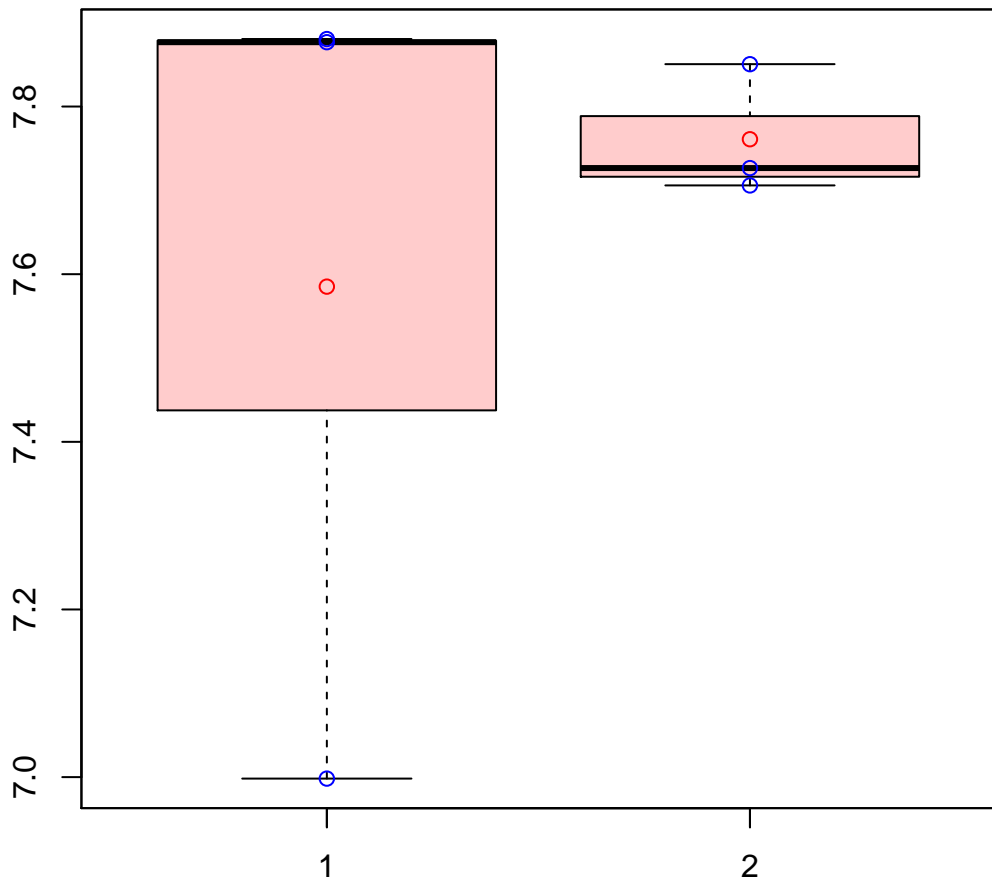

t-Test: p-value = 0.61

# B4FQ81|B4FQ81\_MAIZE

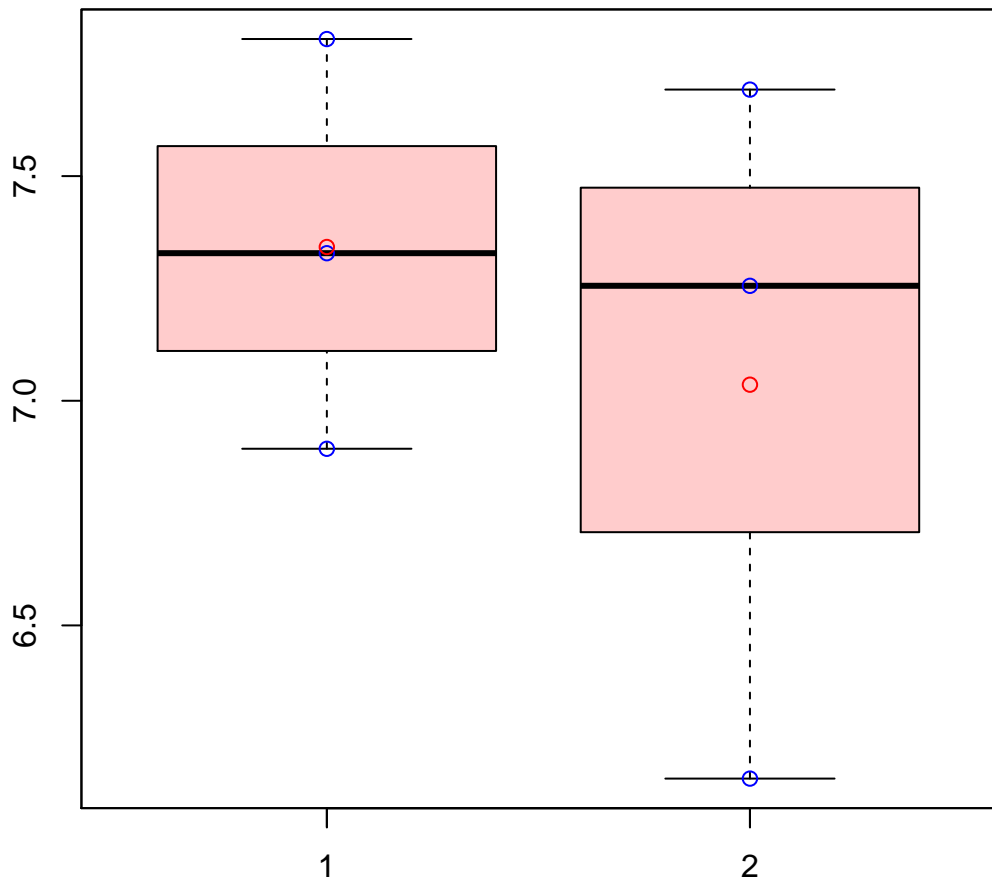

t-Test: p-value = 0.6



# B4FQ90|B4FQ90\_MAIZE

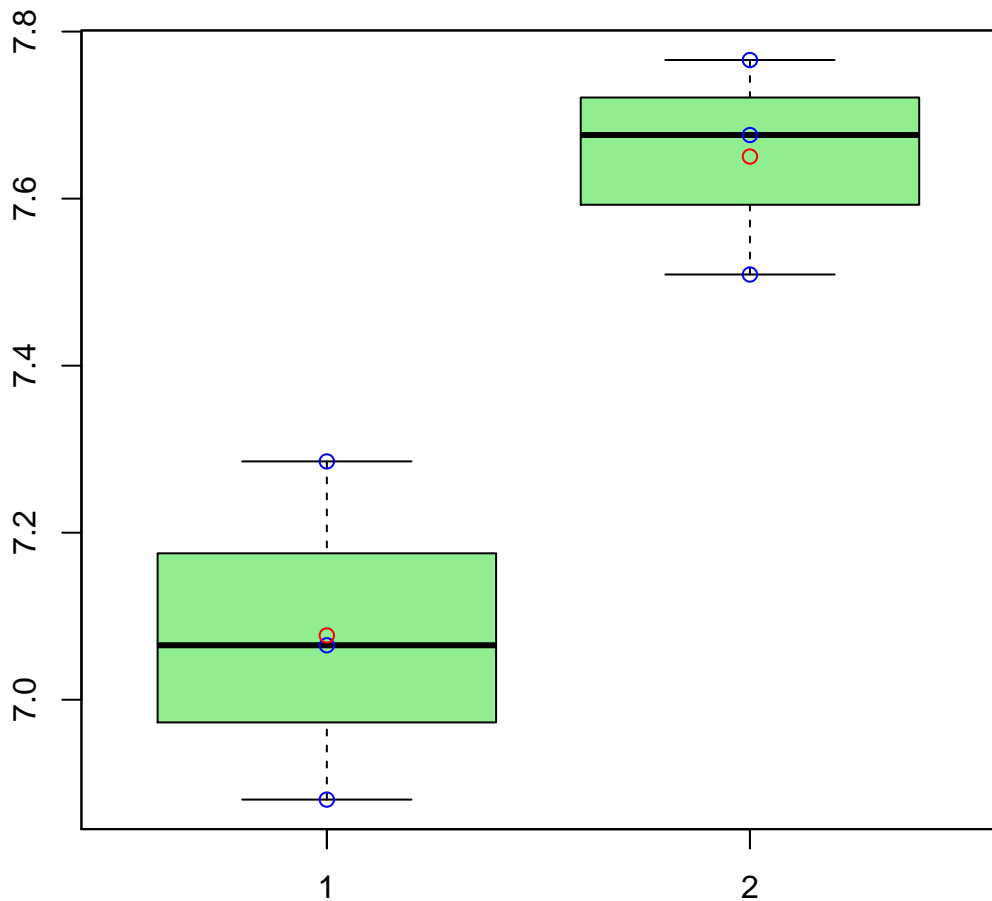

t-Test: p-value = 0.02

# B4FQI8|B4FQI8\_MAIZE

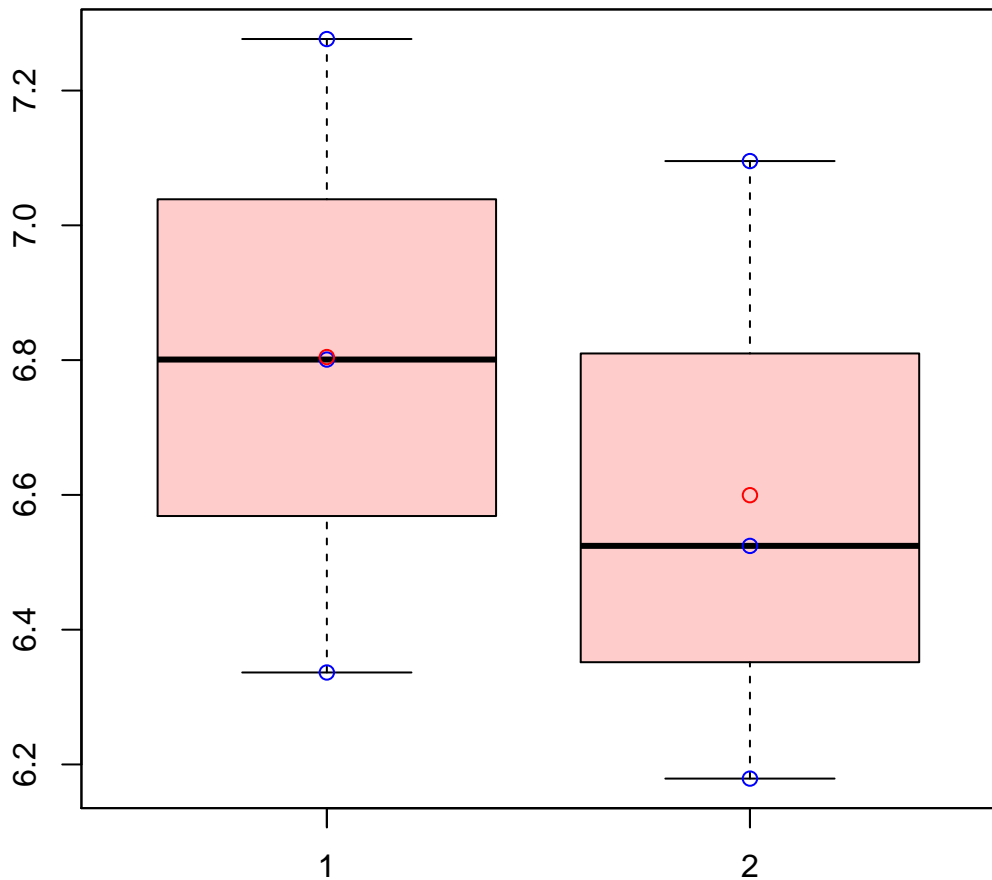

t-Test: p-value = 0.62

# B4FQT6|B4FQT6\_MAIZE

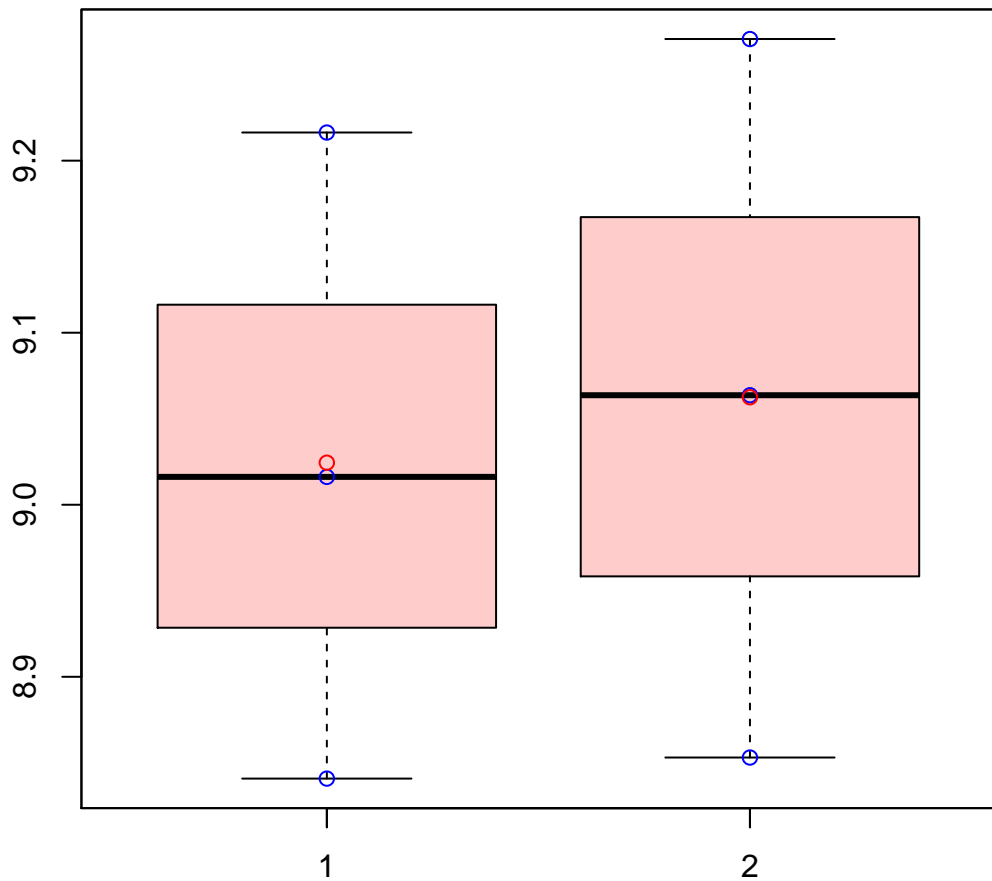

t-Test: p-value = 0.83

# B4FQX1|B4FQX1\_MAIZE

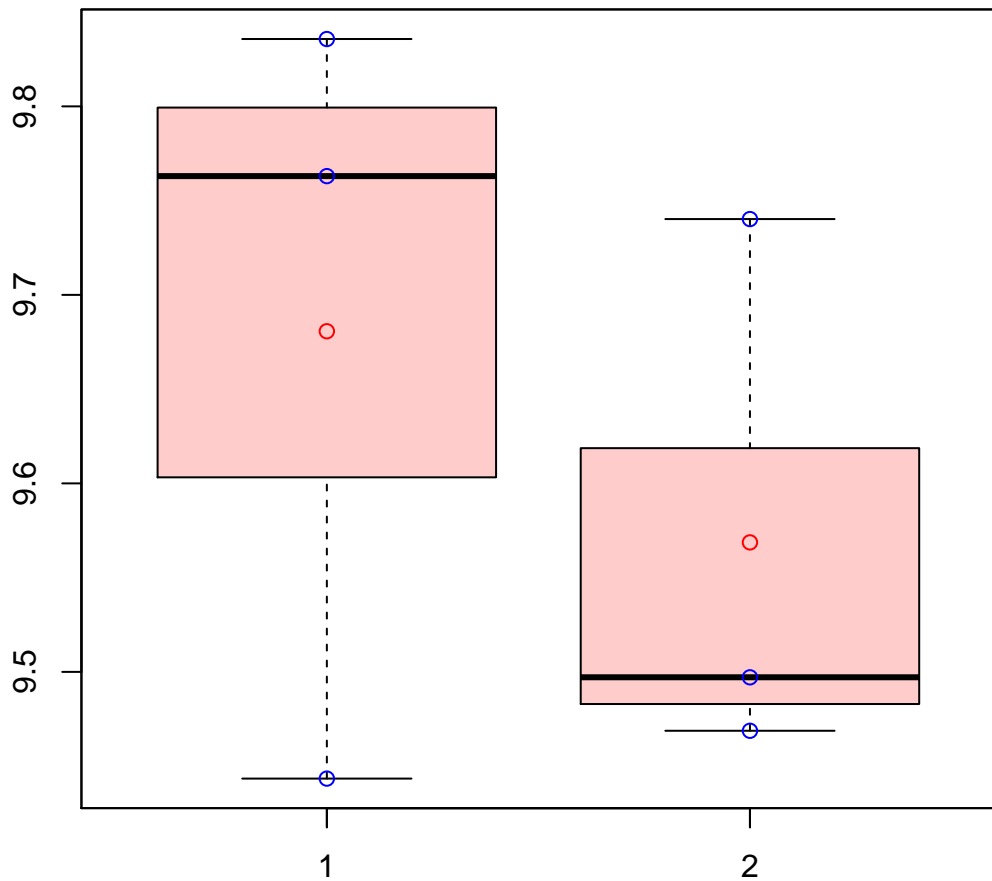

t-Test: p-value = 0.5

# B4FR27|B4FR27\_MAIZE

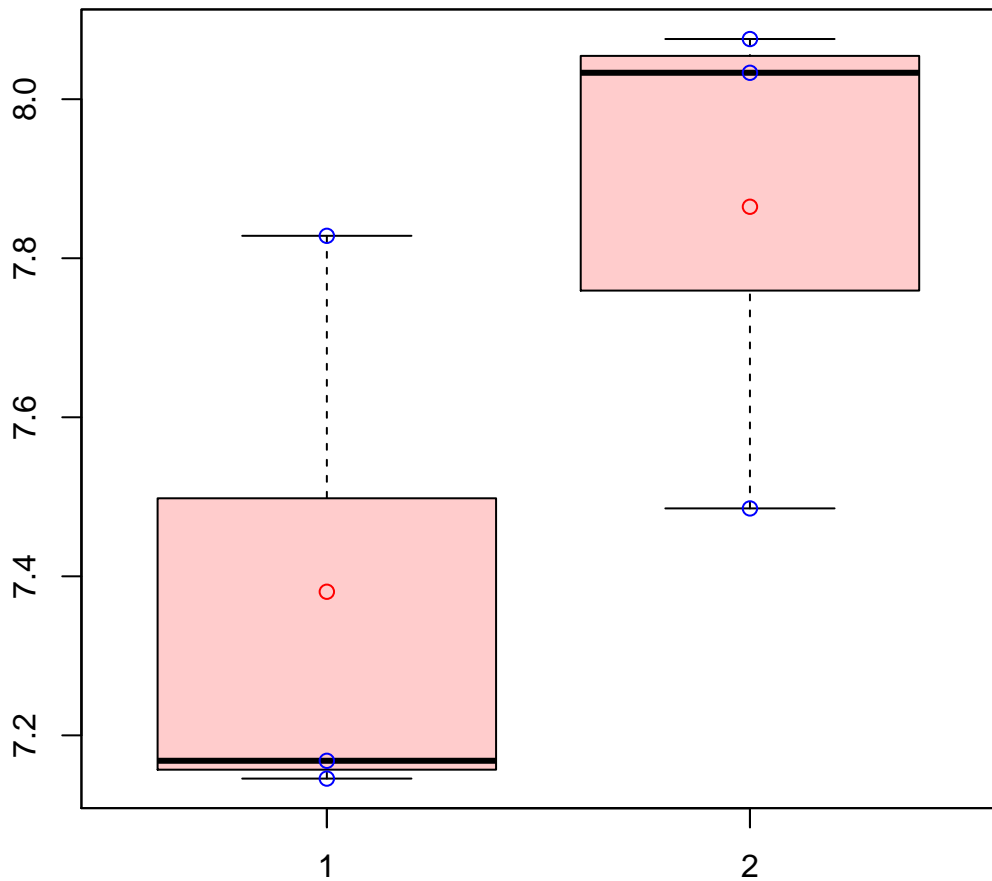

t-Test: p-value = 0.18

# B4FR61|B4FR61\_MAIZE

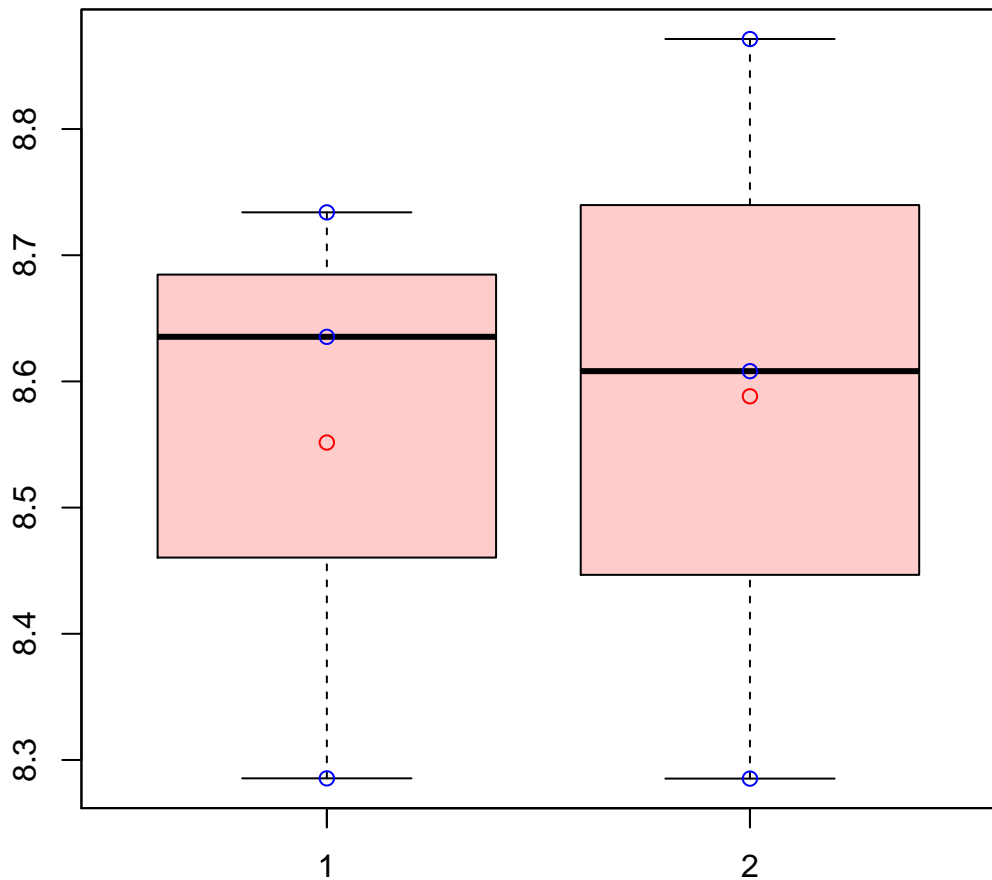

t-Test: p-value = 0.87

# B4FRE2|B4FRE2\_MAIZE

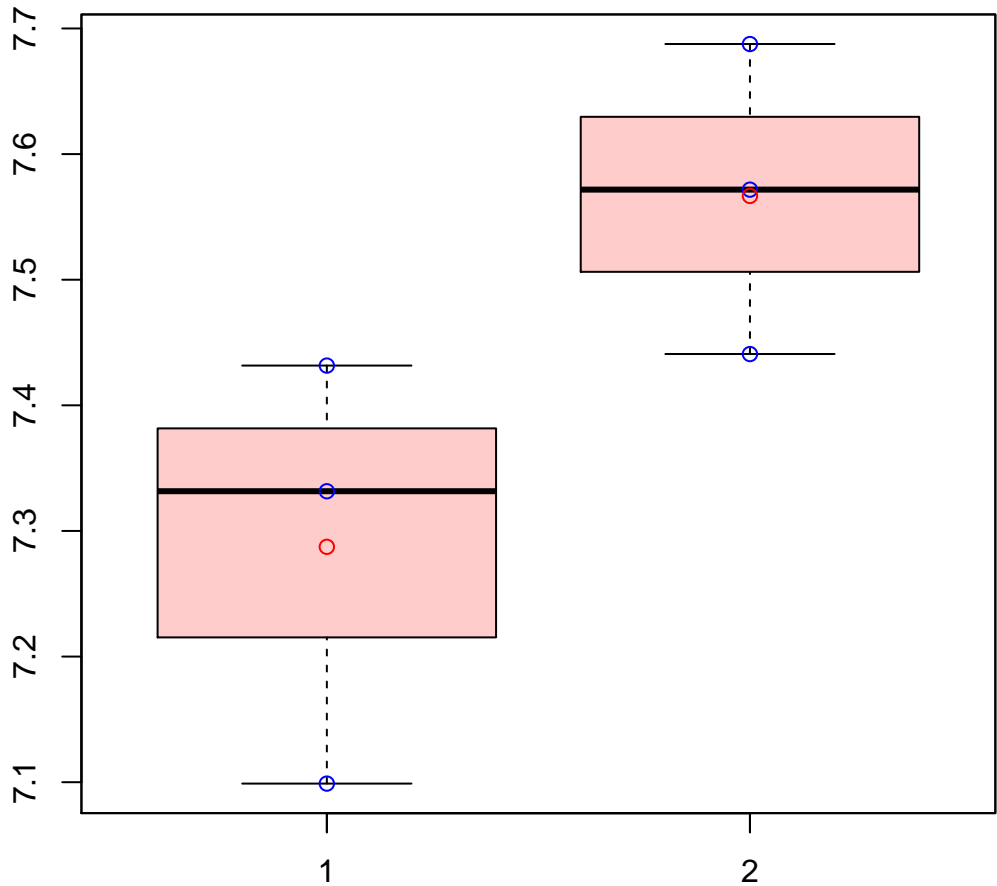

t-Test: p-value = 0.09

# B4FRP8|B4FRP8\_MAIZE

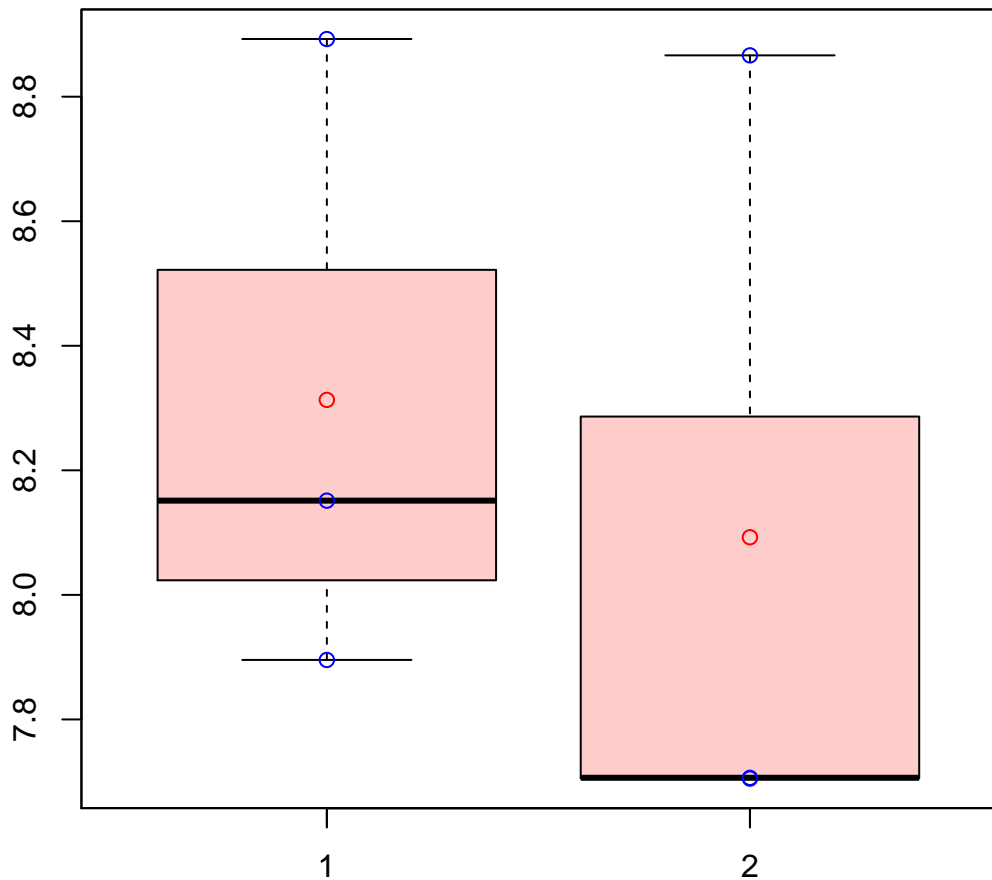

t-Test: p-value = 0.68



# B4FRV4|B4FRV4\_MAIZE

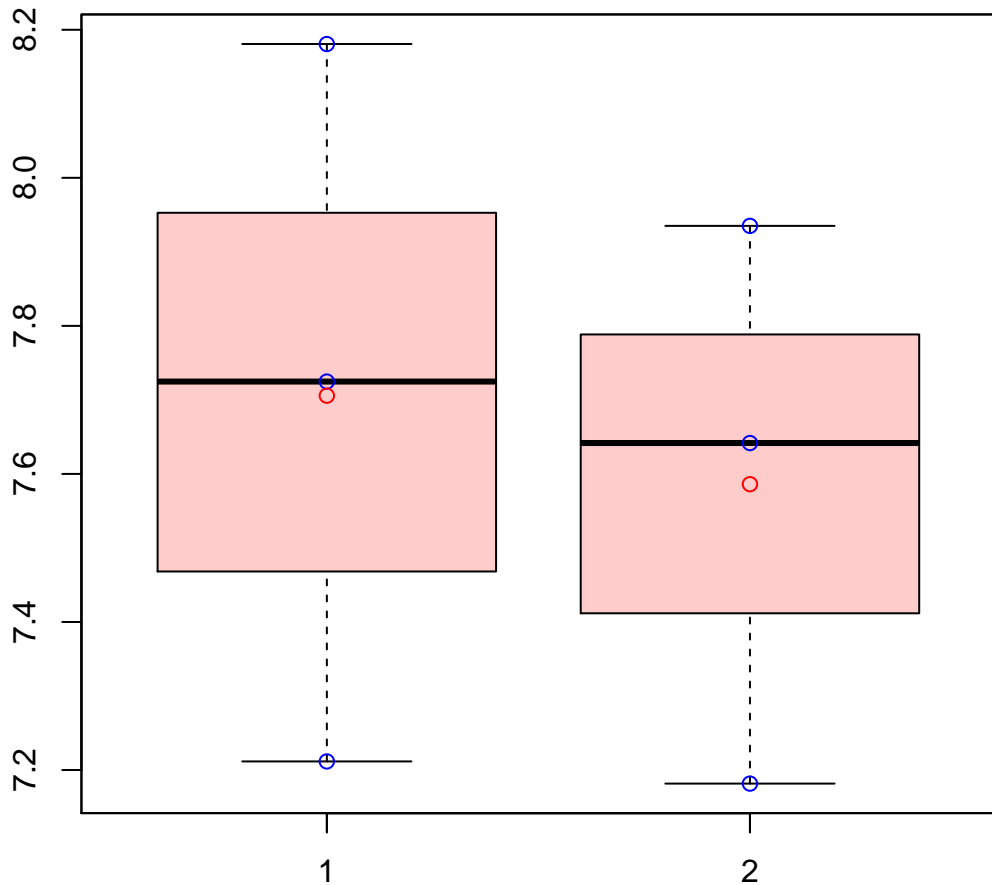

t-Test: p-value = 0.75

# B4FRX4|B4FRX4\_MAIZE

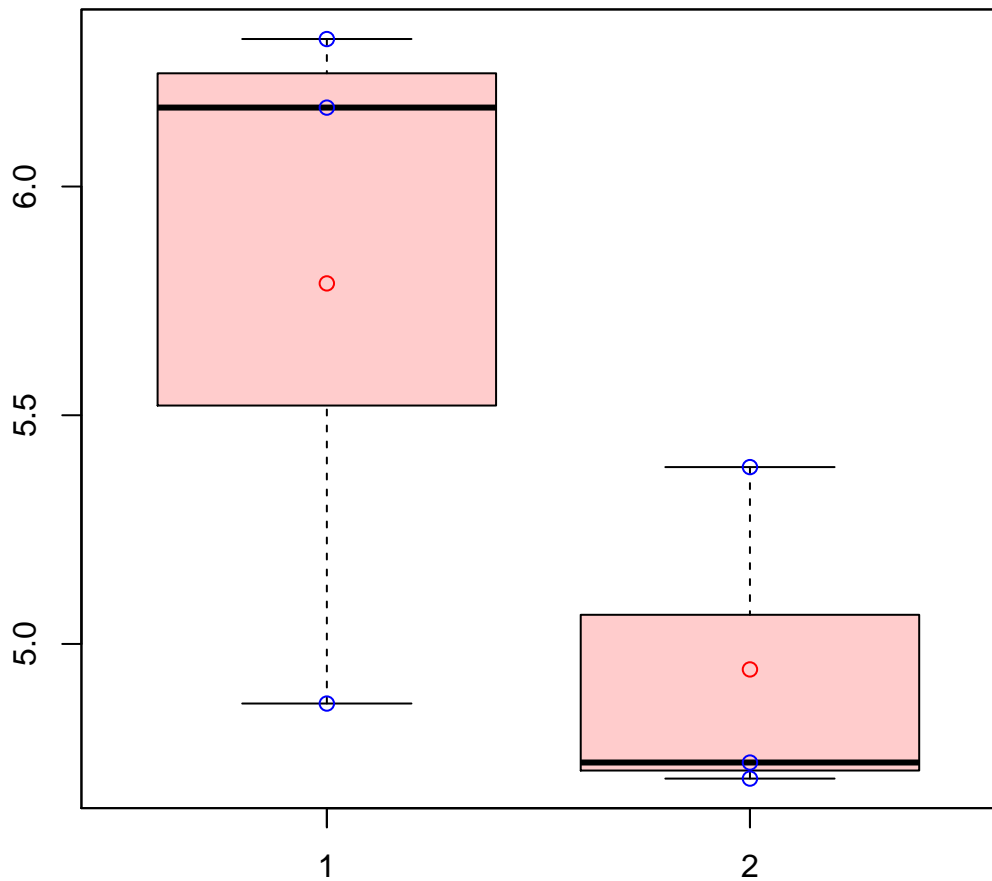

t-Test: p-value = 0.2

# B4FRZ2|B4FRZ2\_MAIZE

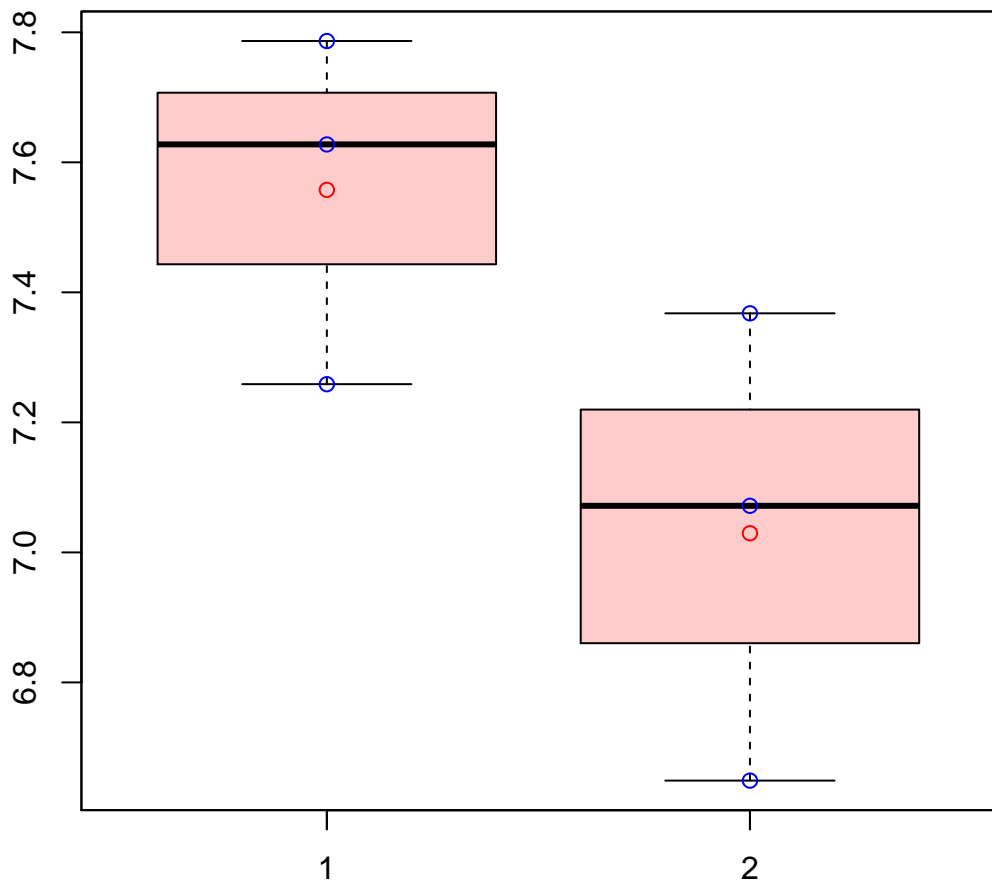

t-Test: p-value = 0.12

# B4FSA7|B4FSA7\_MAIZE

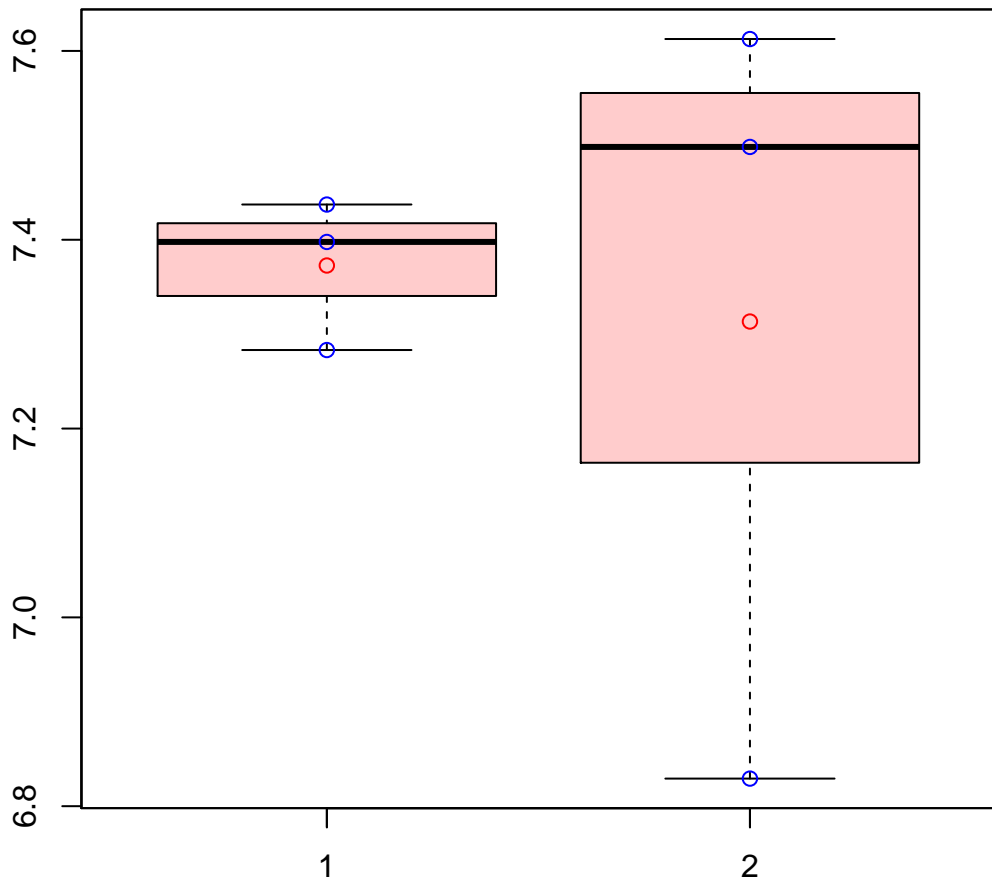

t-Test: p-value = 0.83

# B4FSE2|B4FSE2\_MAIZE

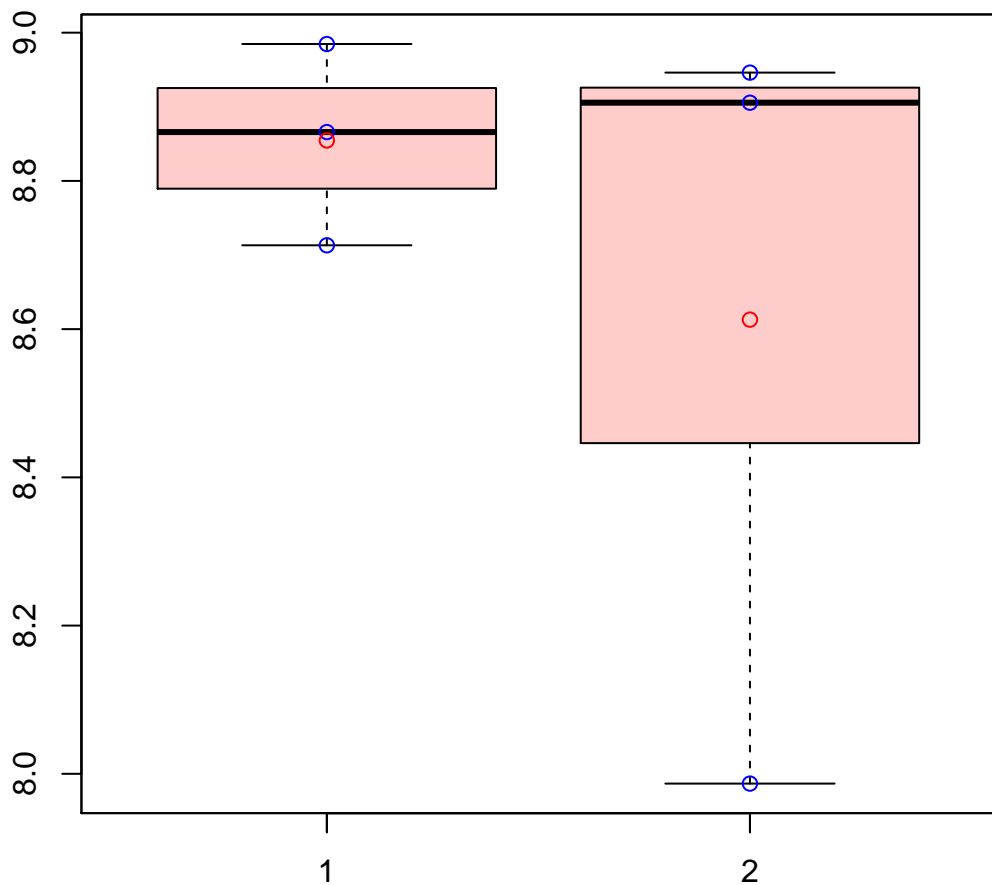

t-Test: p-value = 0.52

# B4FSM5|B4FSM5\_MAIZE

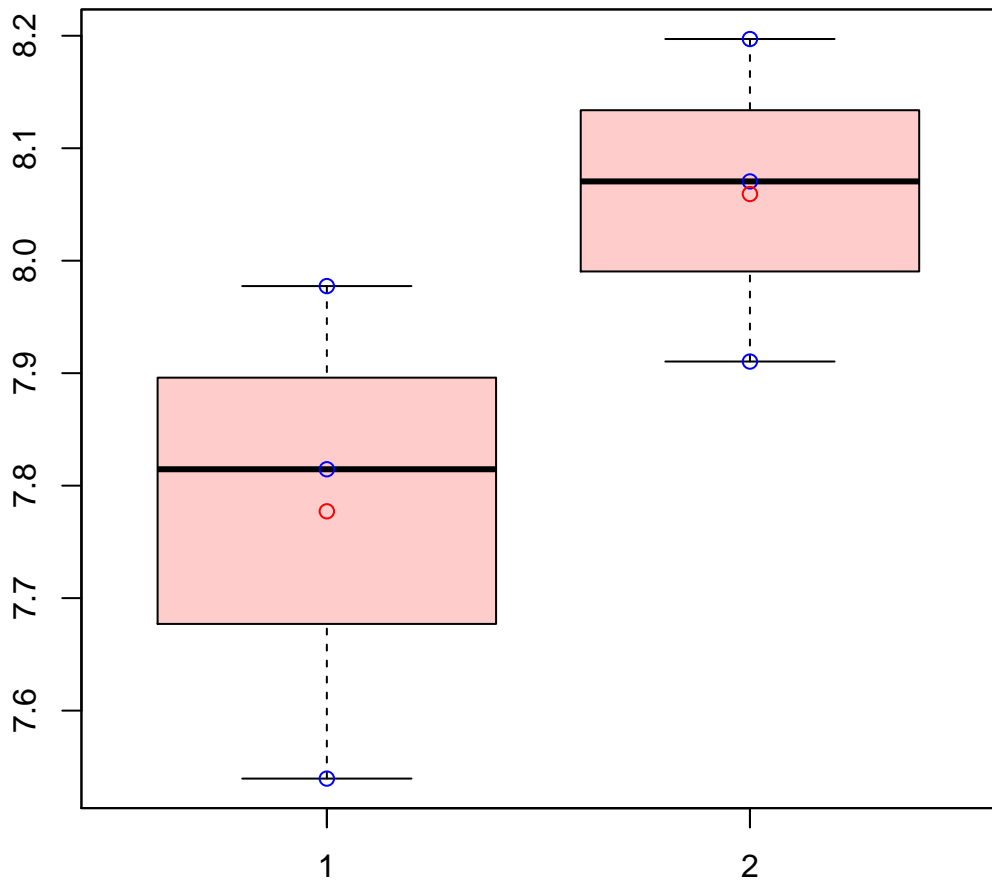

t-Test: p-value = 0.15

# B4FSZ7|B4FSZ7\_MAIZE

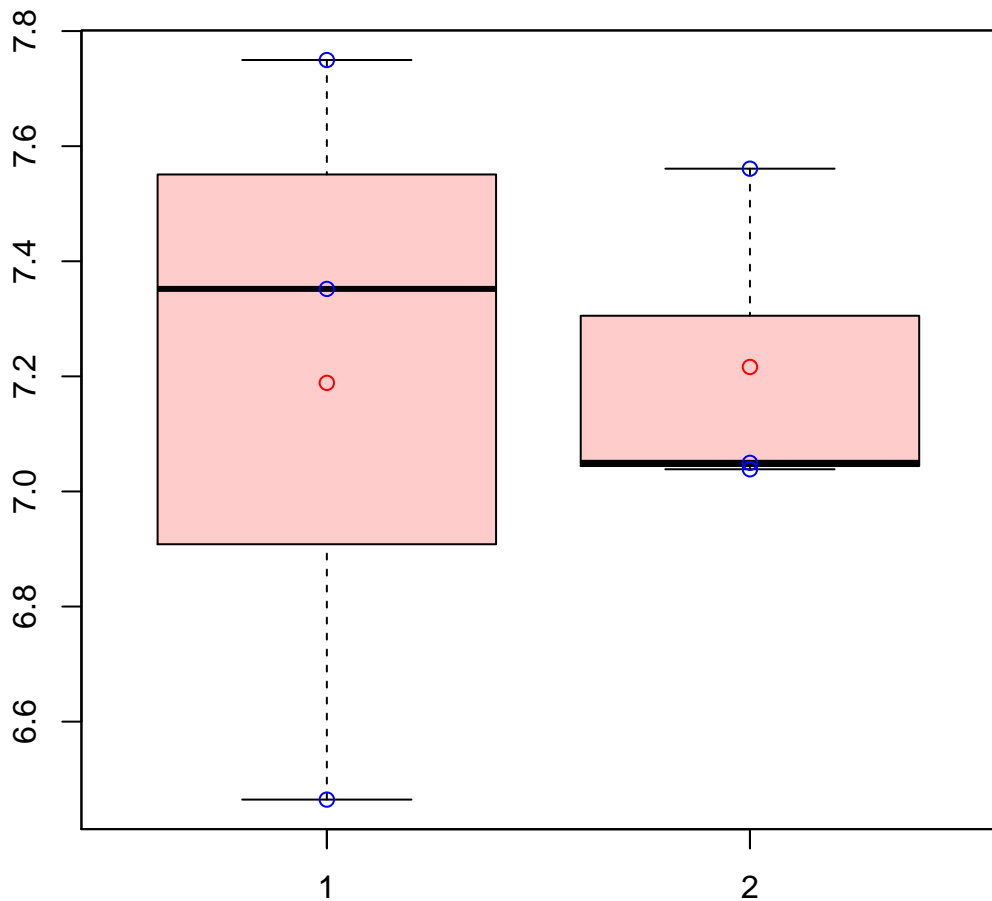

t-Test: p-value = 0.95

# B4FT19|B4FT19\_MAIZE

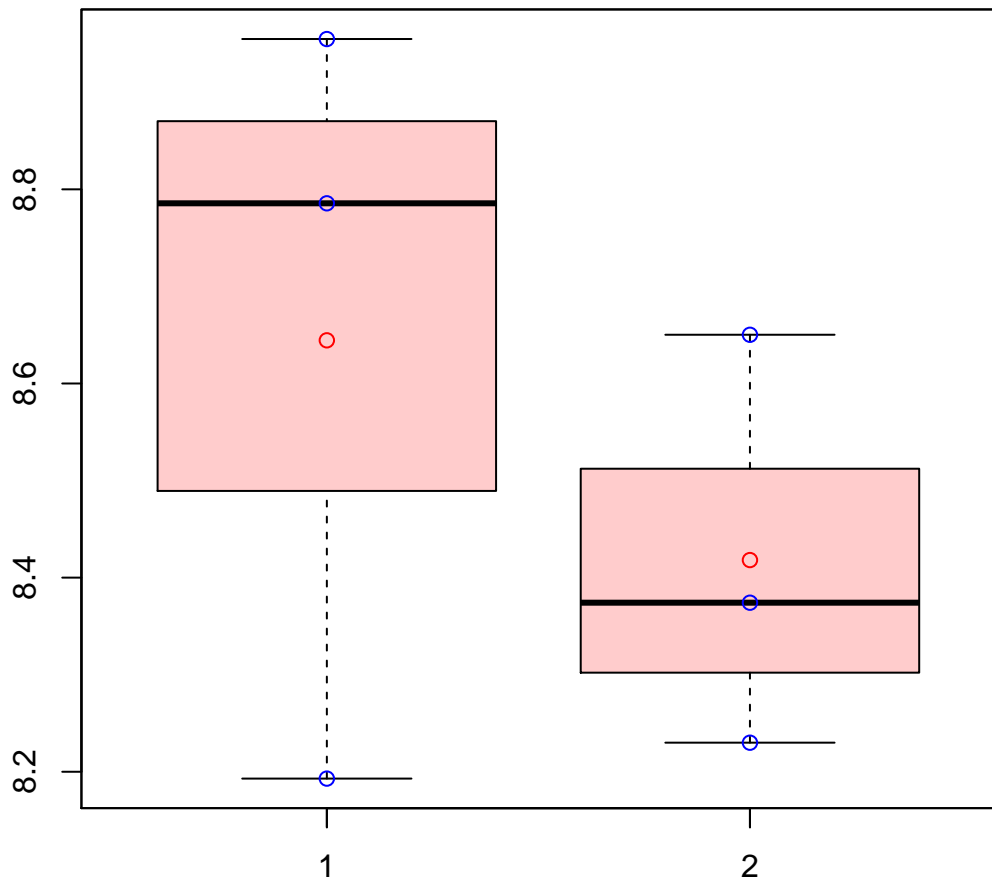

t-Test: p-value = 0.45



# B4FTA0|B4FTA0\_MAIZE

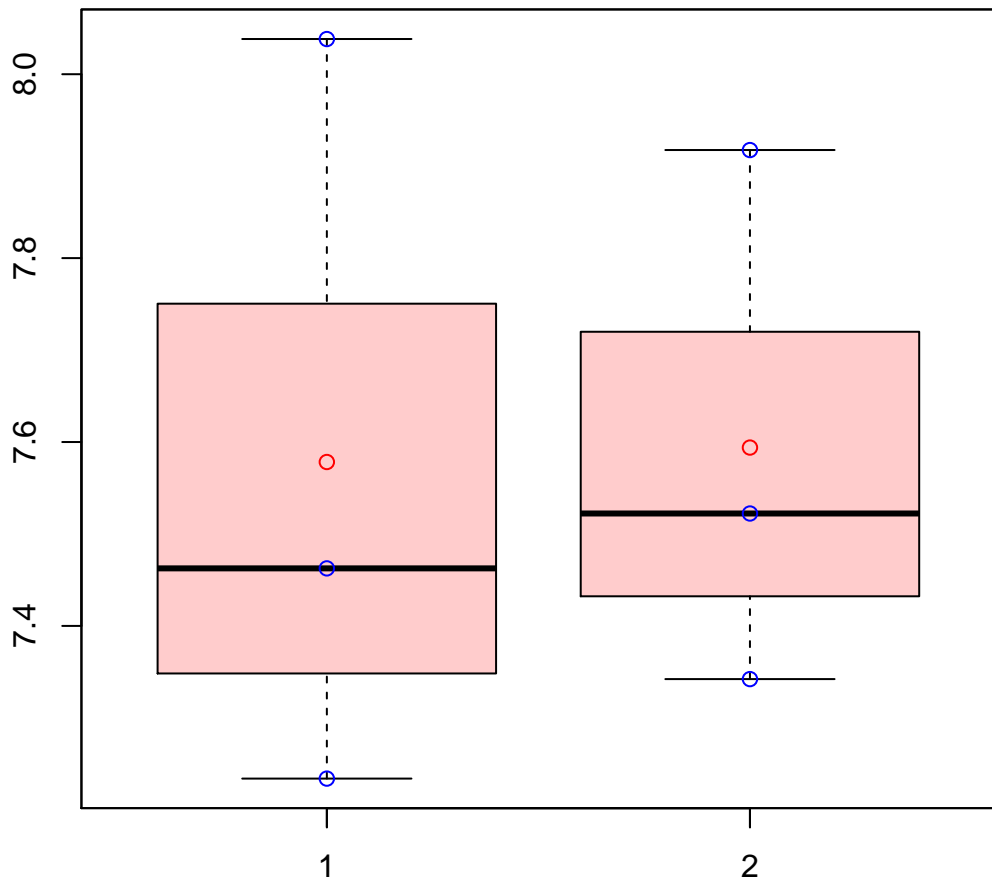

t-Test: p-value = 0.96

# B4FTJ0|B4FTJ0\_MAIZE

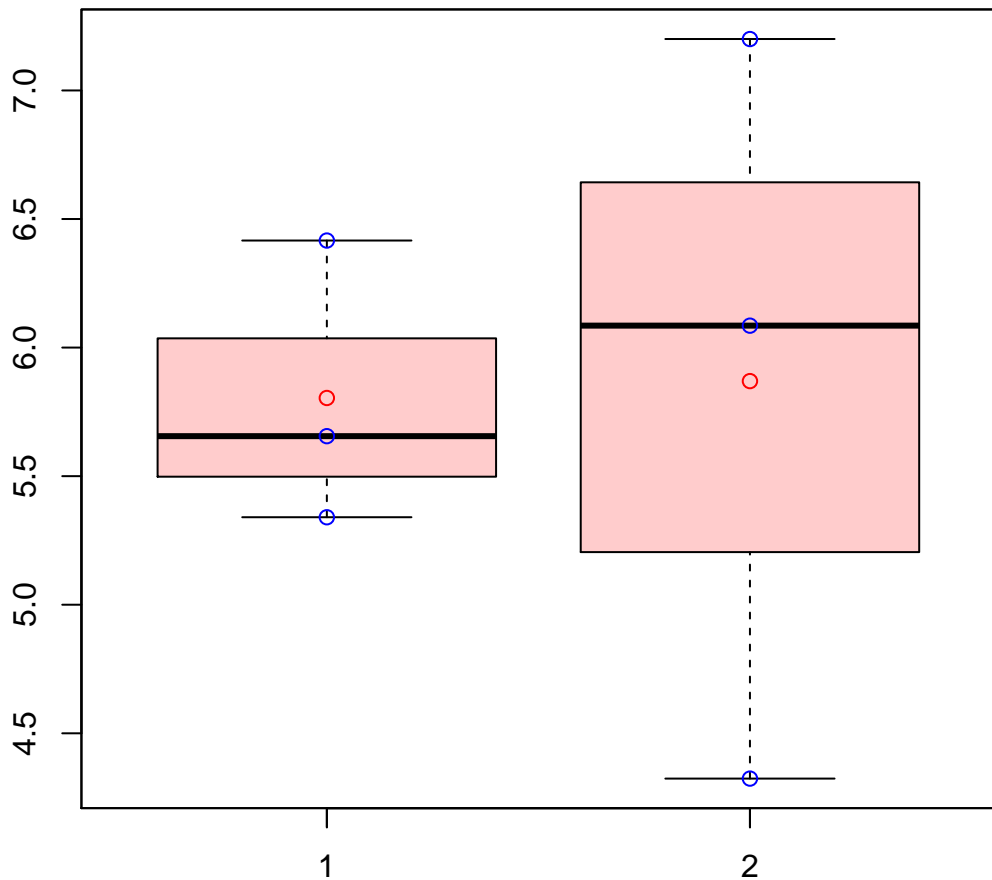

t-Test: p-value = 0.95

# B4FUD7|B4FUD7\_MAIZE

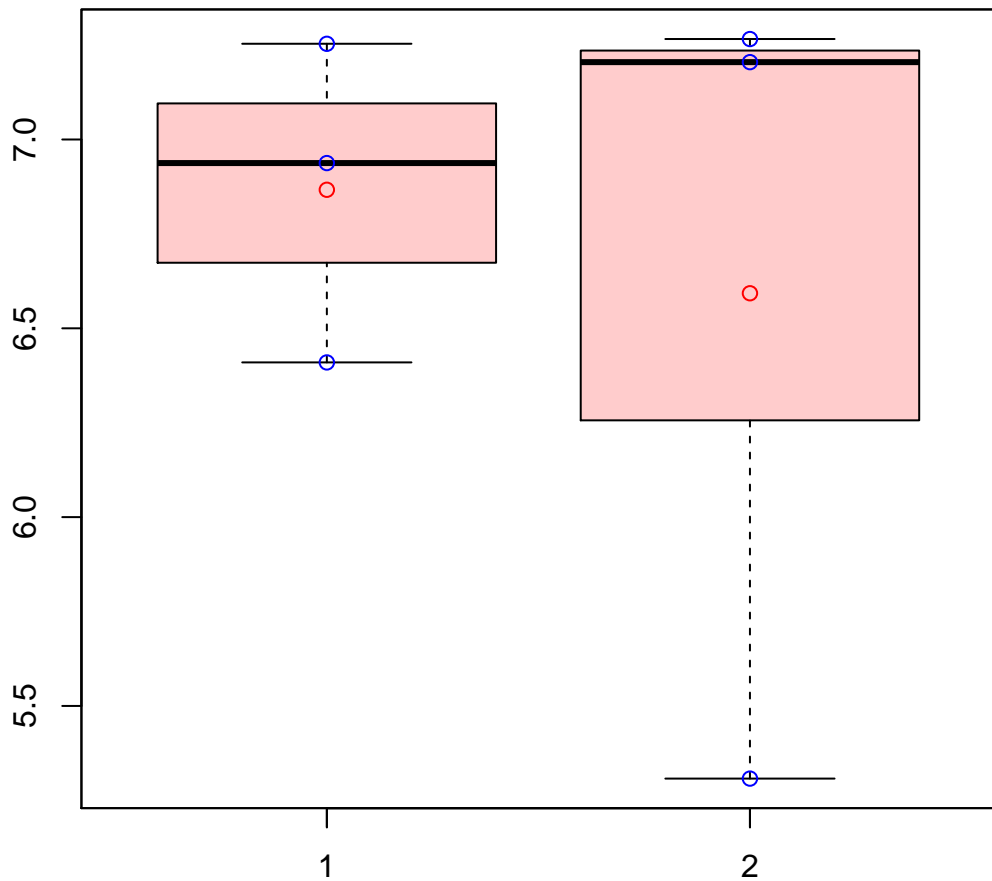

t-Test: p-value = 0.72

# B4FUH2|B4FUH2\_MAIZE

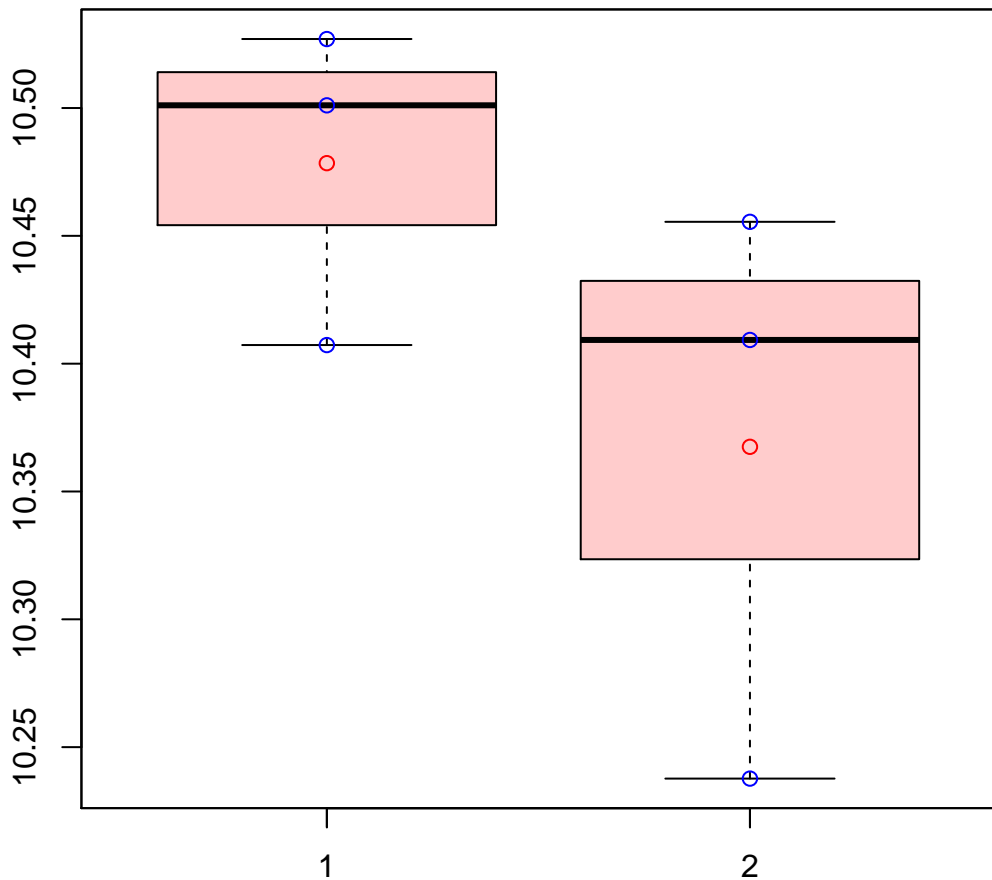

t-Test: p-value = 0.24

# B4FVD5|B4FVD5\_MAIZE

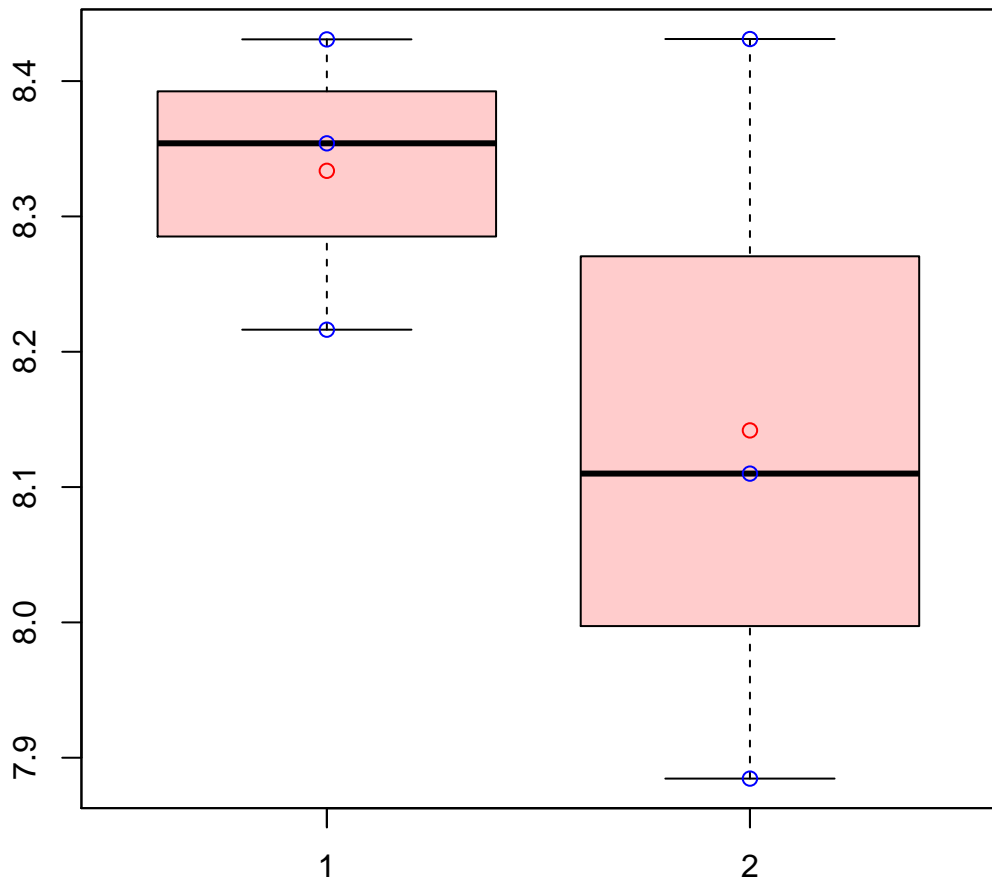

t-Test: p-value = 0.35

# B4FVN3|B4FVN3\_MAIZE

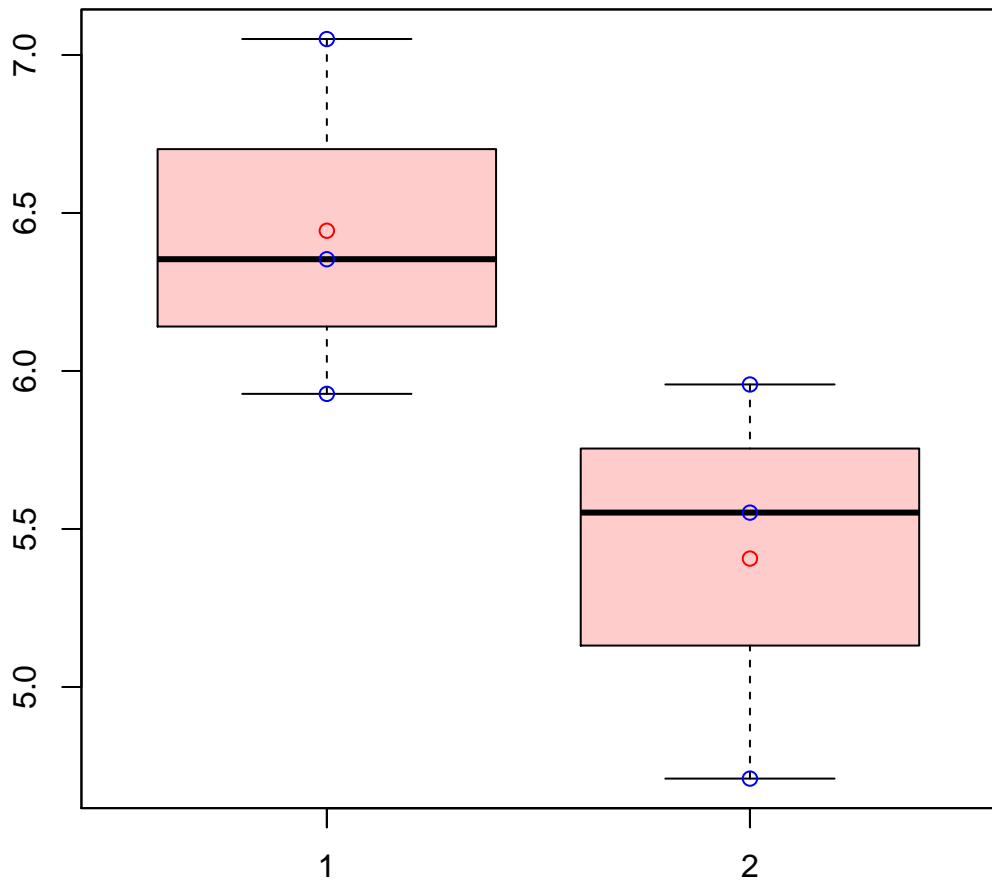

t-Test: p-value = 0.1

# B4FW57|B4FW57\_MAIZE

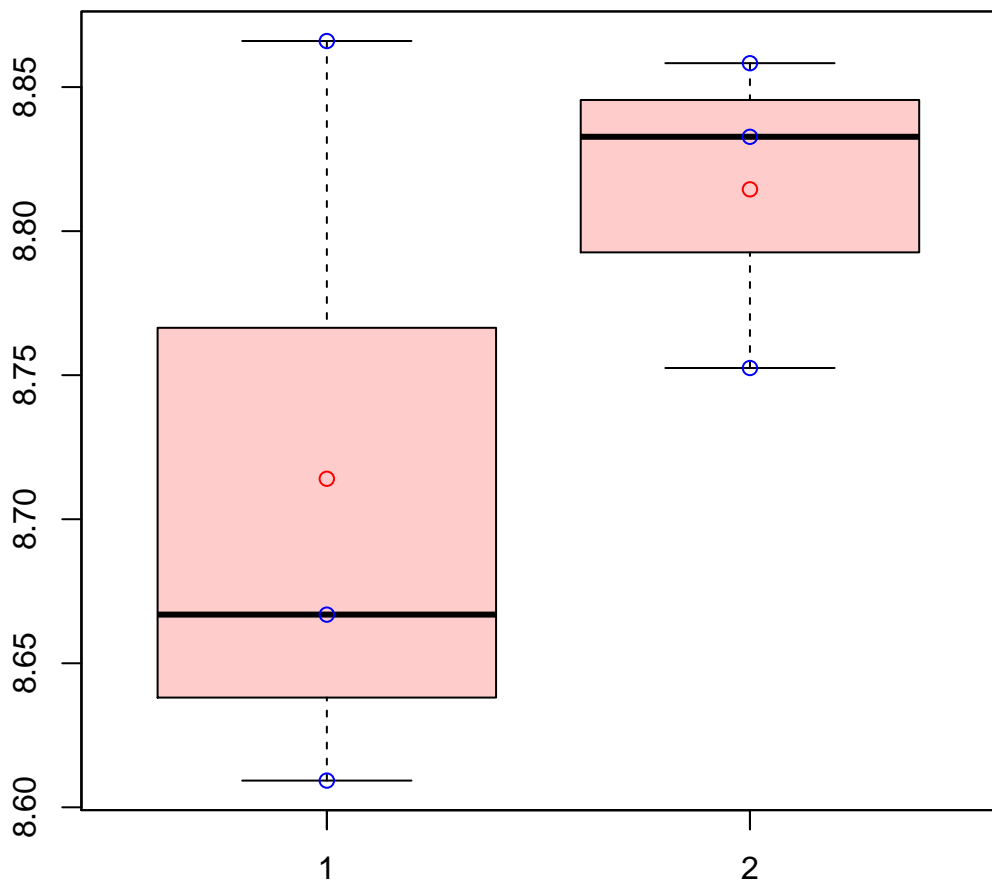

t-Test: p-value = 0.33

# B4FW75|B4FW75\_MAIZE

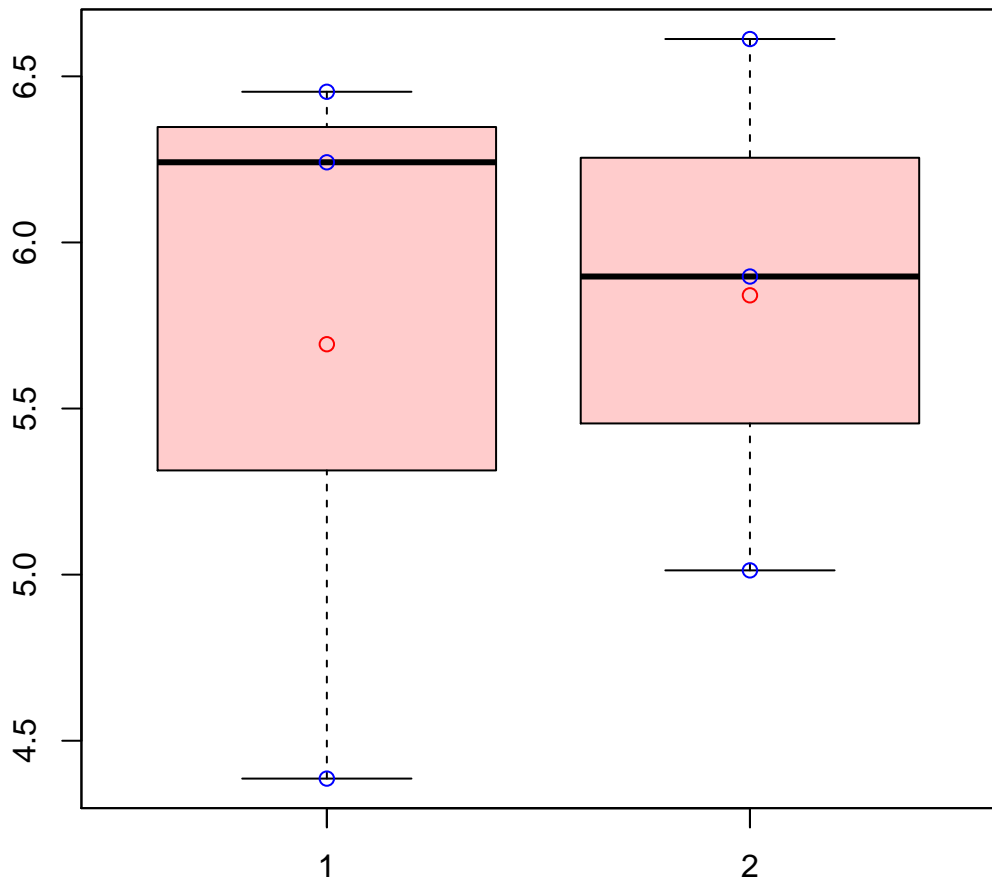

t-Test: p-value = 0.86



# B4FWG2|B4FWG2\_MAIZE

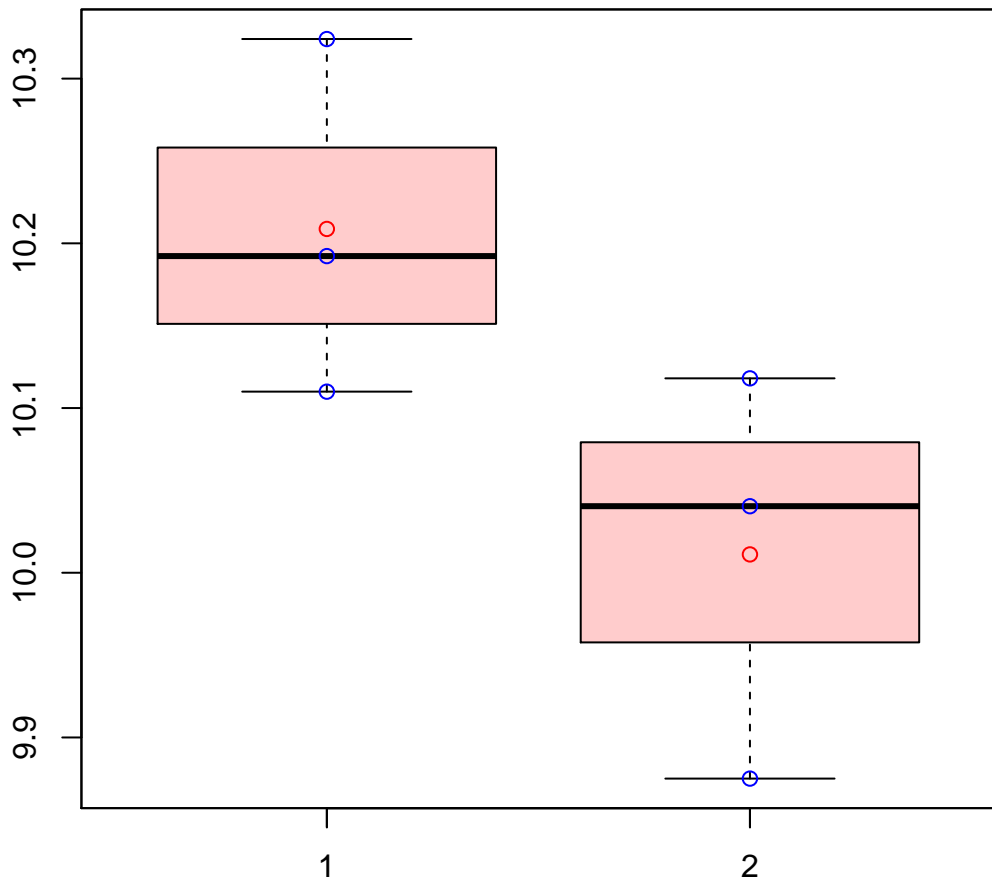

t-Test: p-value = 0.11

# B4FWJ8|B4FWJ8\_MAIZE

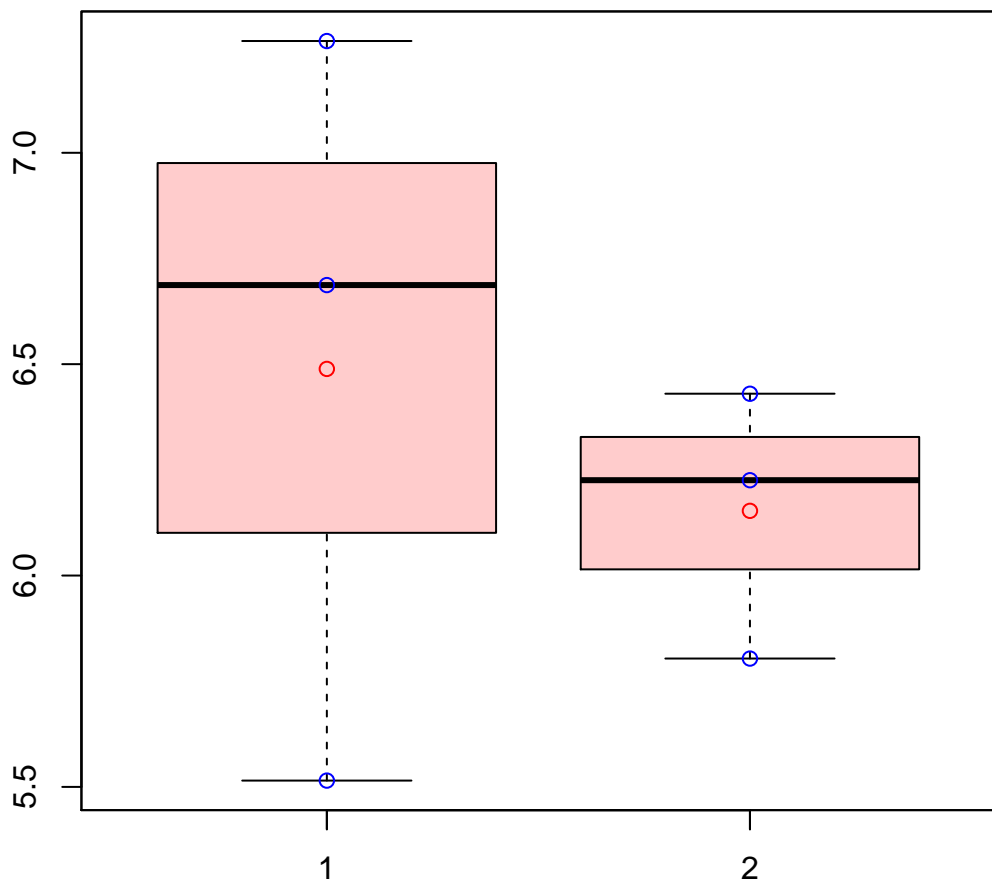

t-Test: p-value = 0.59

# B4FWP0|B4FWP0\_MAIZE

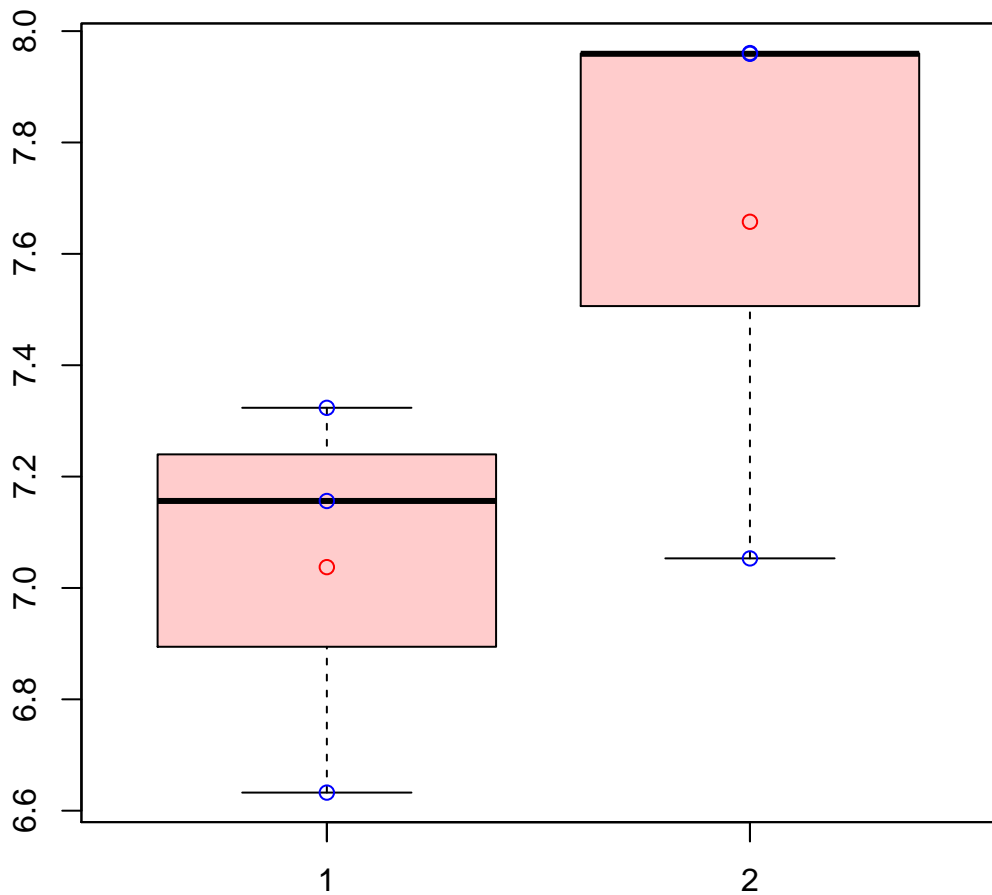

t-Test: p-value = 0.18

# B4FXB0|B4FXB0\_MAIZE

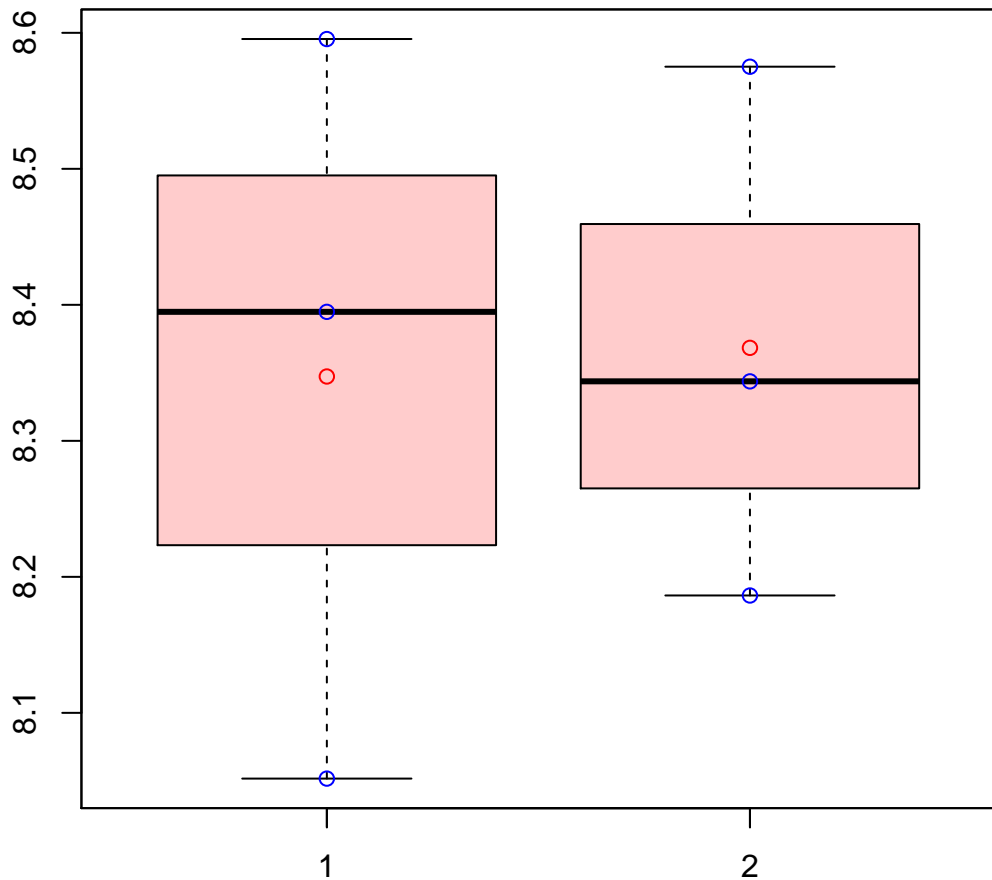

t-Test: p-value = 0.92

# B4FZ37|B4FZ37\_MAIZE

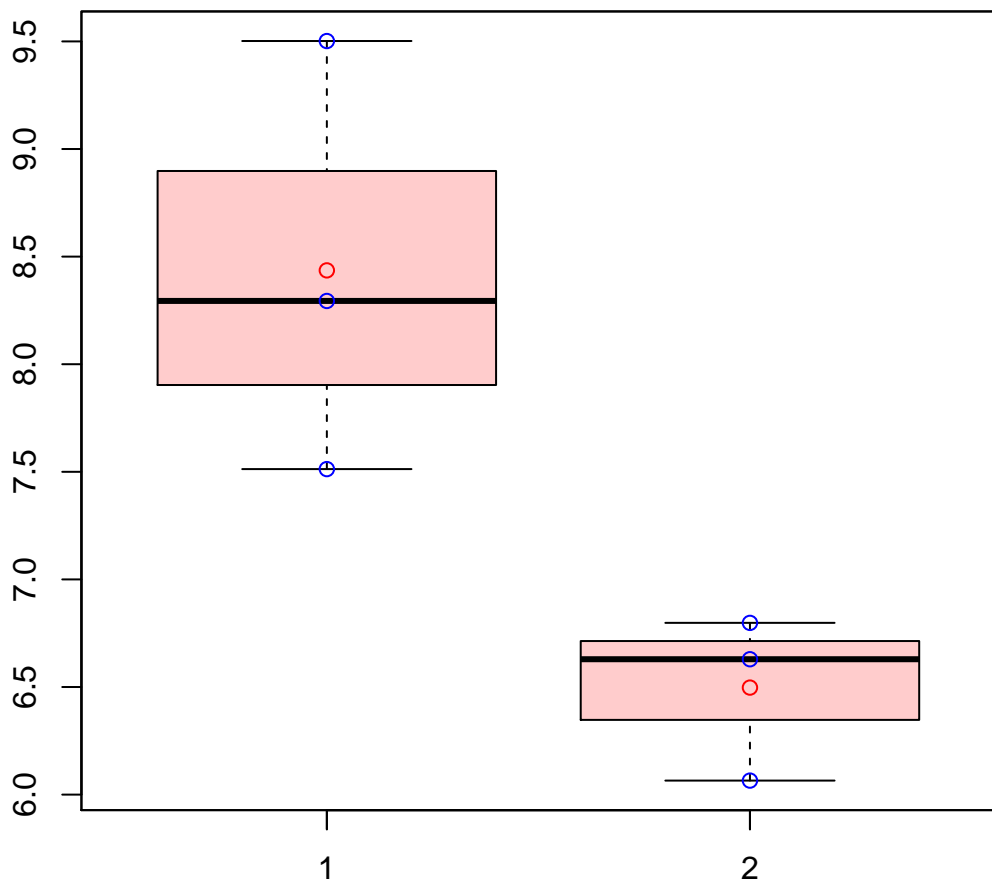

t-Test: p-value = 0.06

# B4FZB8|B4FZB8\_MAIZE

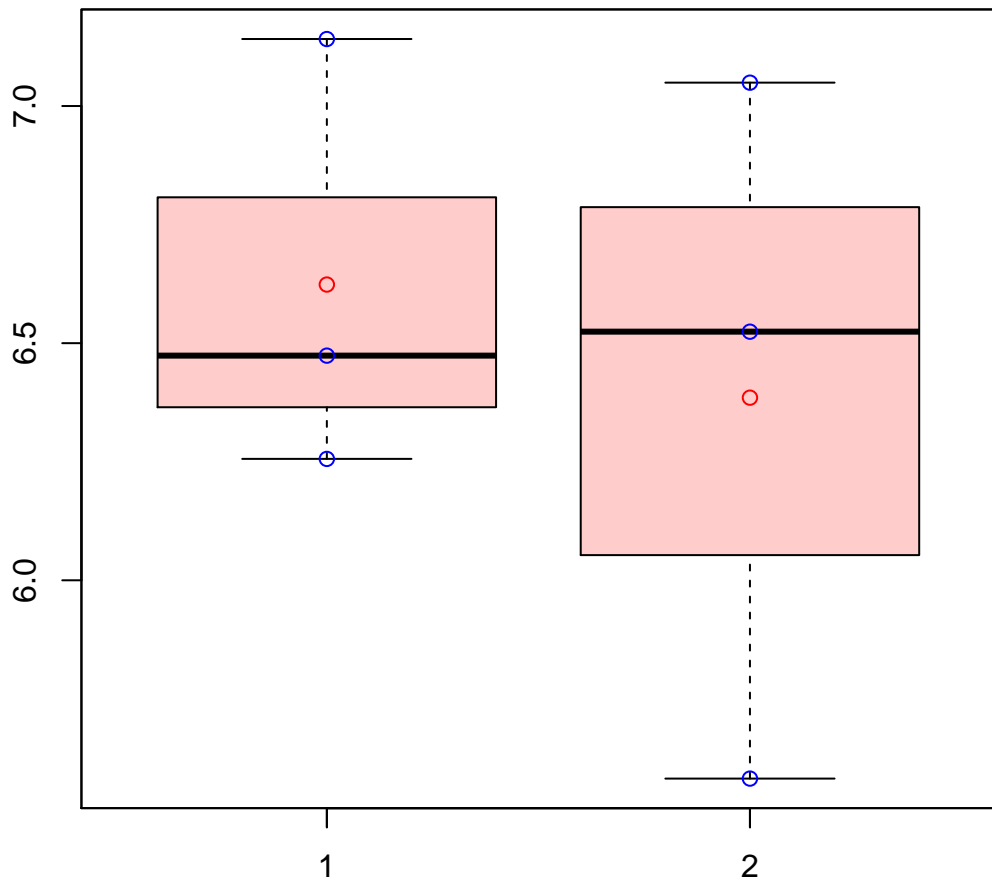

t-Test: p-value = 0.67

# B4FZL4|B4FZL4\_MAIZE

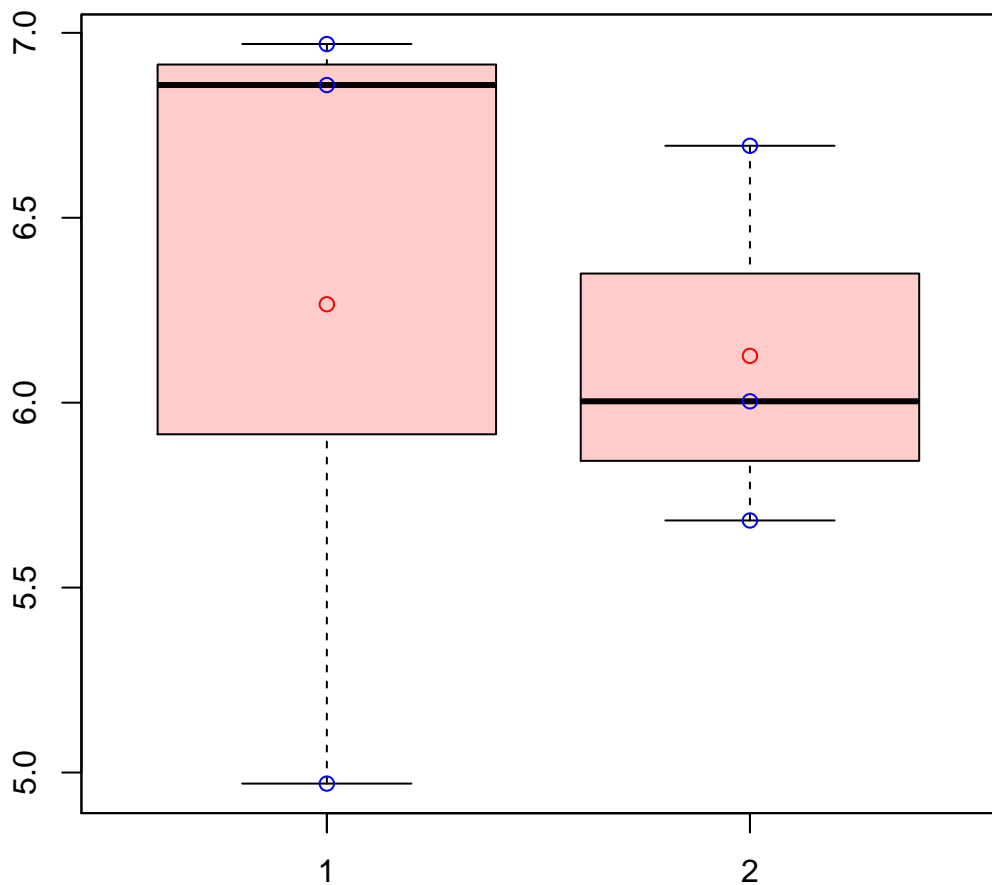

t-Test: p-value = 0.86

# B4FZP0|B4FZP0\_MAIZE

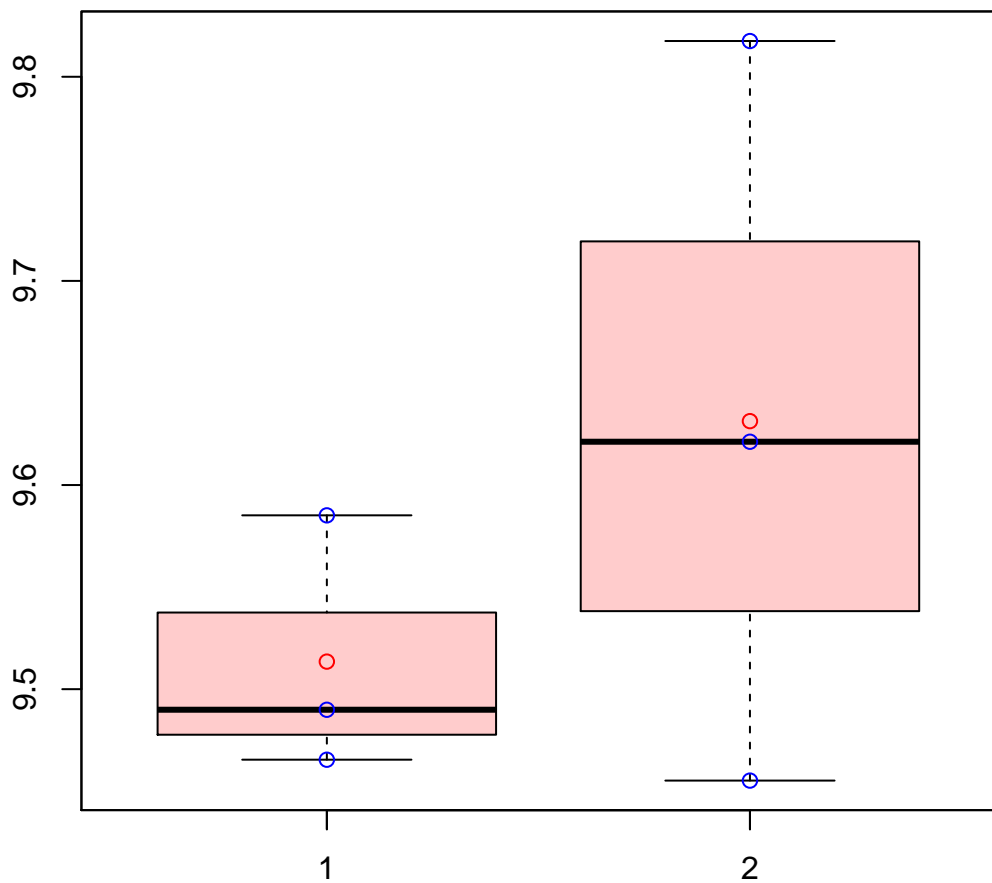

t-Test: p-value = 0.38



# B4FZU8|B4FZU8\_MAIZE

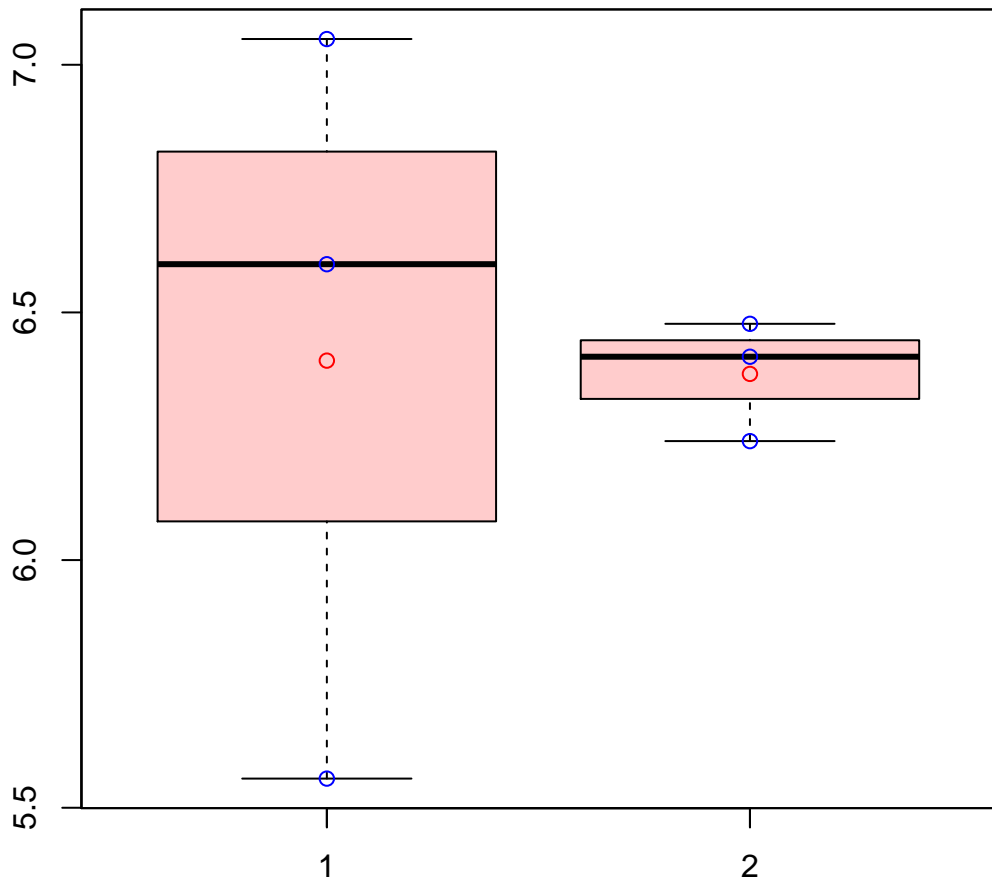

t-Test: p-value = 0.96

# B4G011|B4G011\_MAIZE

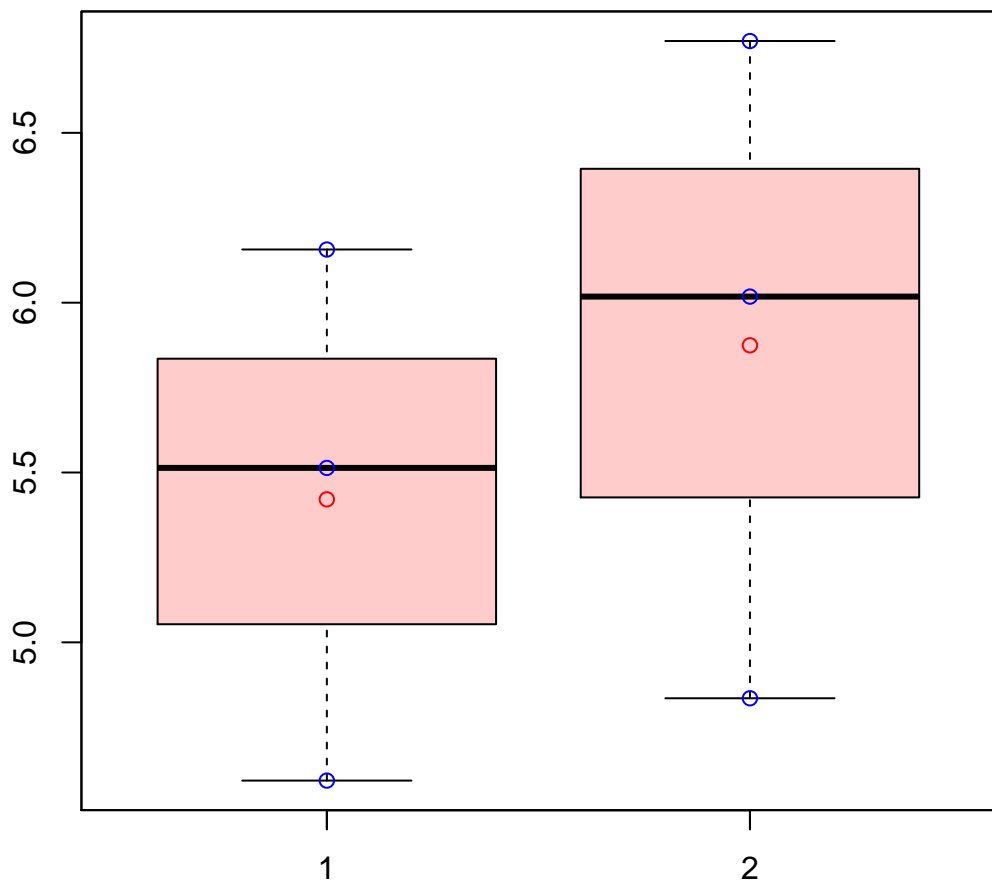

t-Test: p-value = 0.57

# B4G024|B4G024\_MAIZE

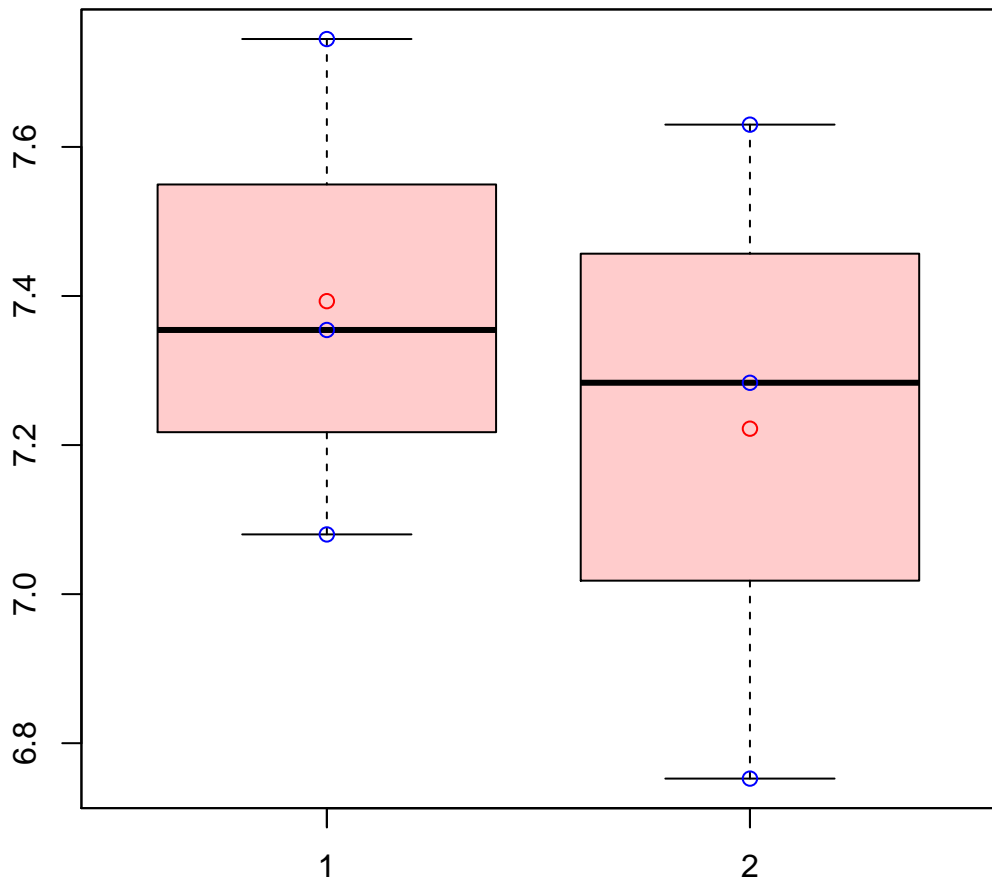

t-Test: p-value = 0.62

# B4G0A6|B4G0A6\_MAIZE

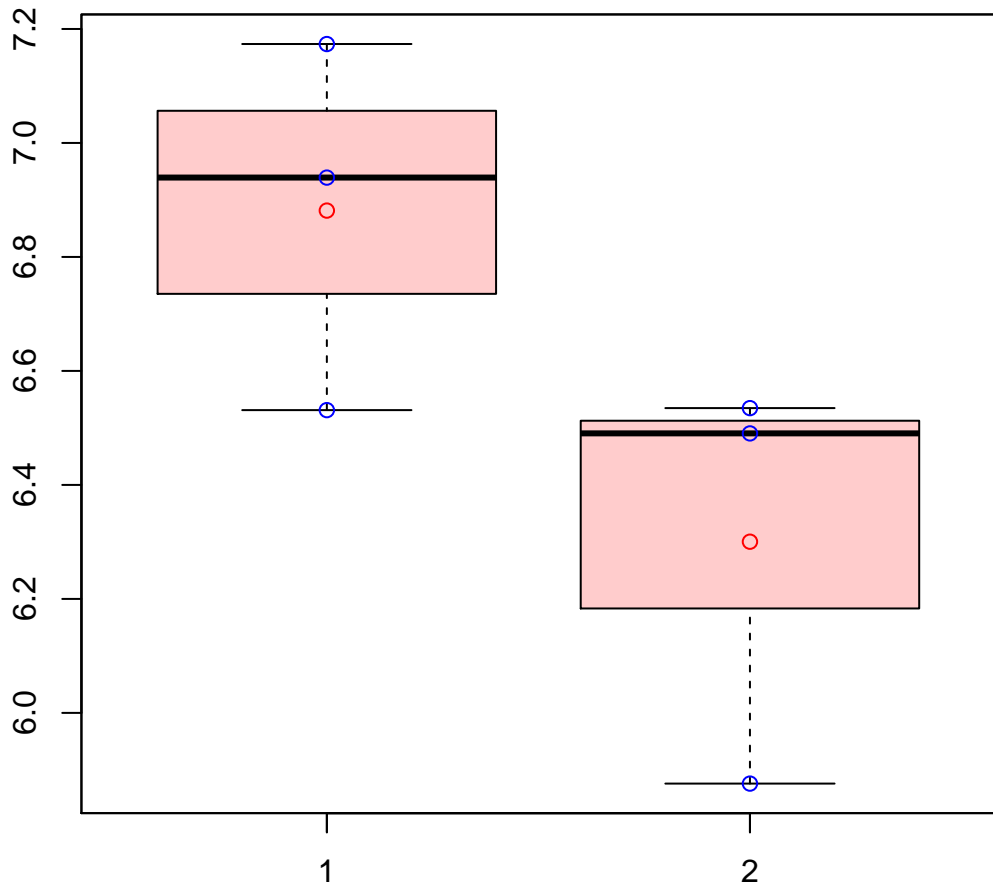

t-Test: p-value = 0.11

# B4G0K4|B4G0K4\_MAIZE

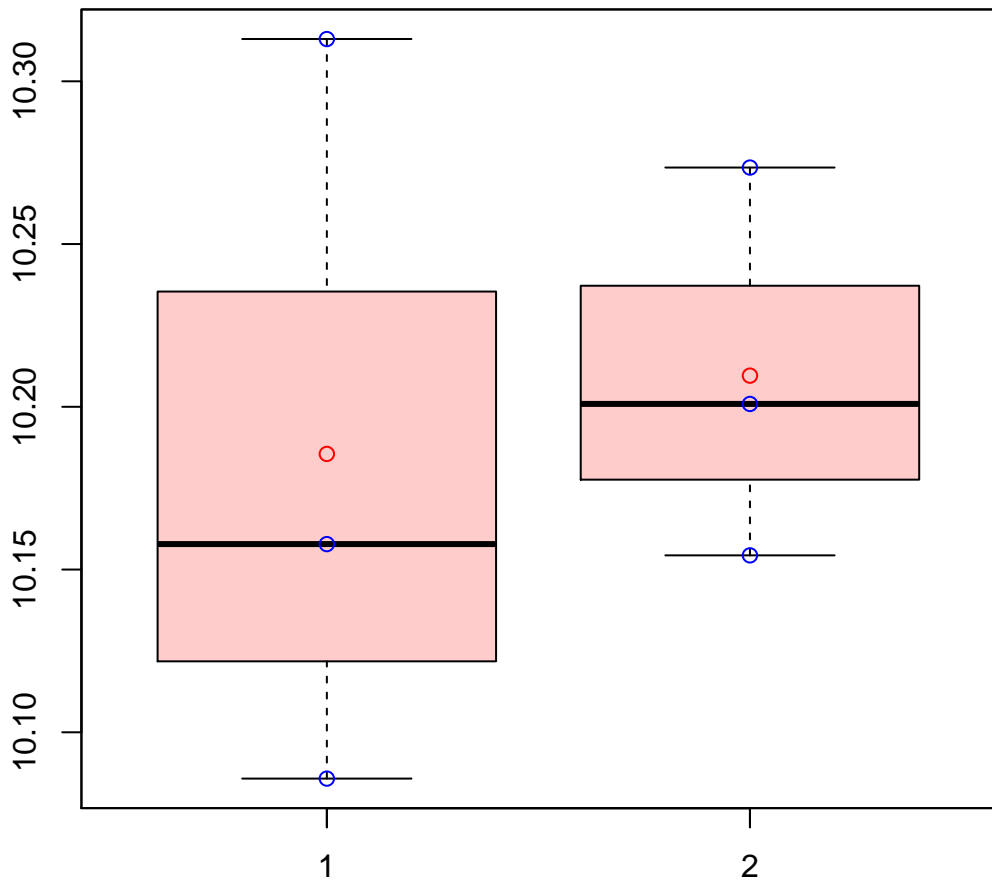

t-Test: p-value = 0.77

# B4G1H4|B4G1H4\_MAIZE

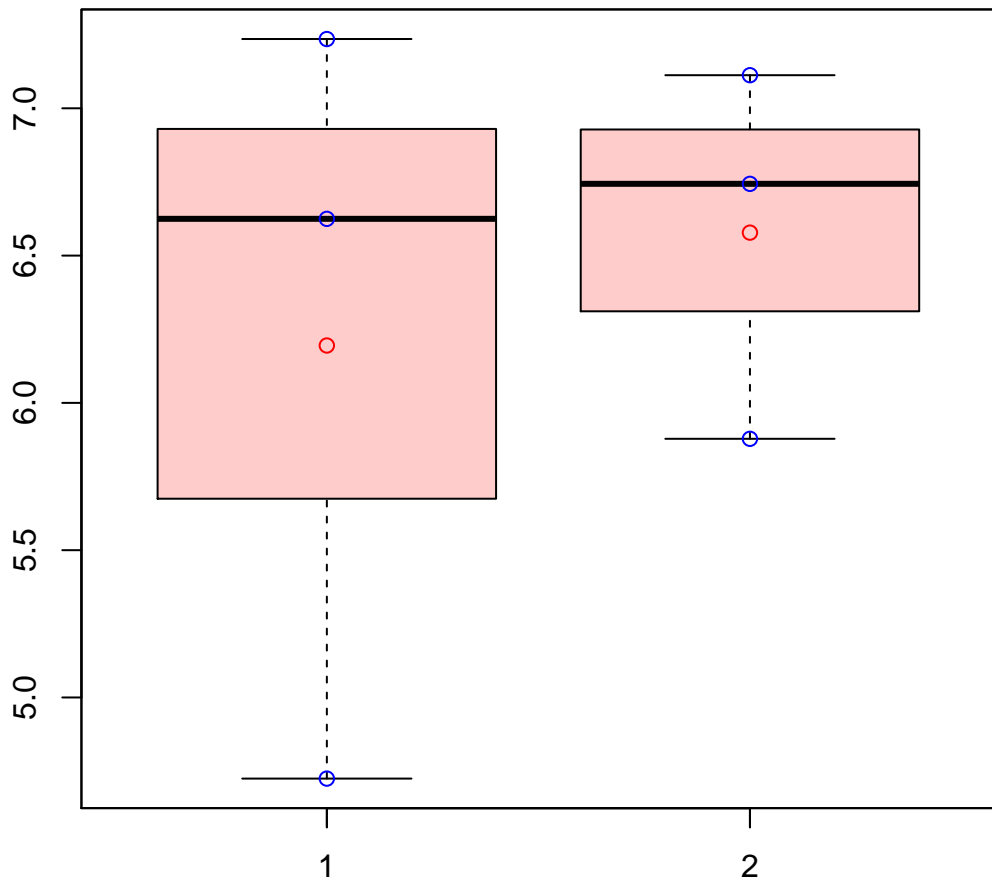

t-Test: p-value = 0.68

# B4G262|B4G262\_MAIZE

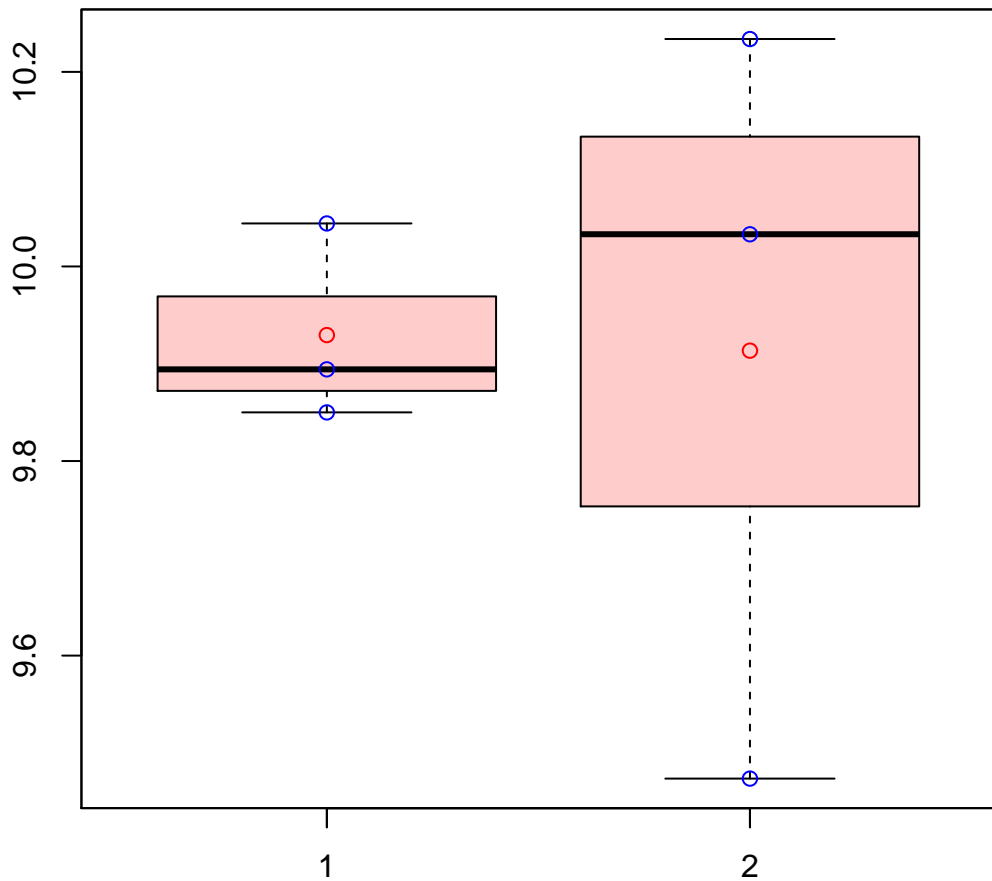

t-Test: p-value = 0.95

# B4G286|B4G286\_MAIZE

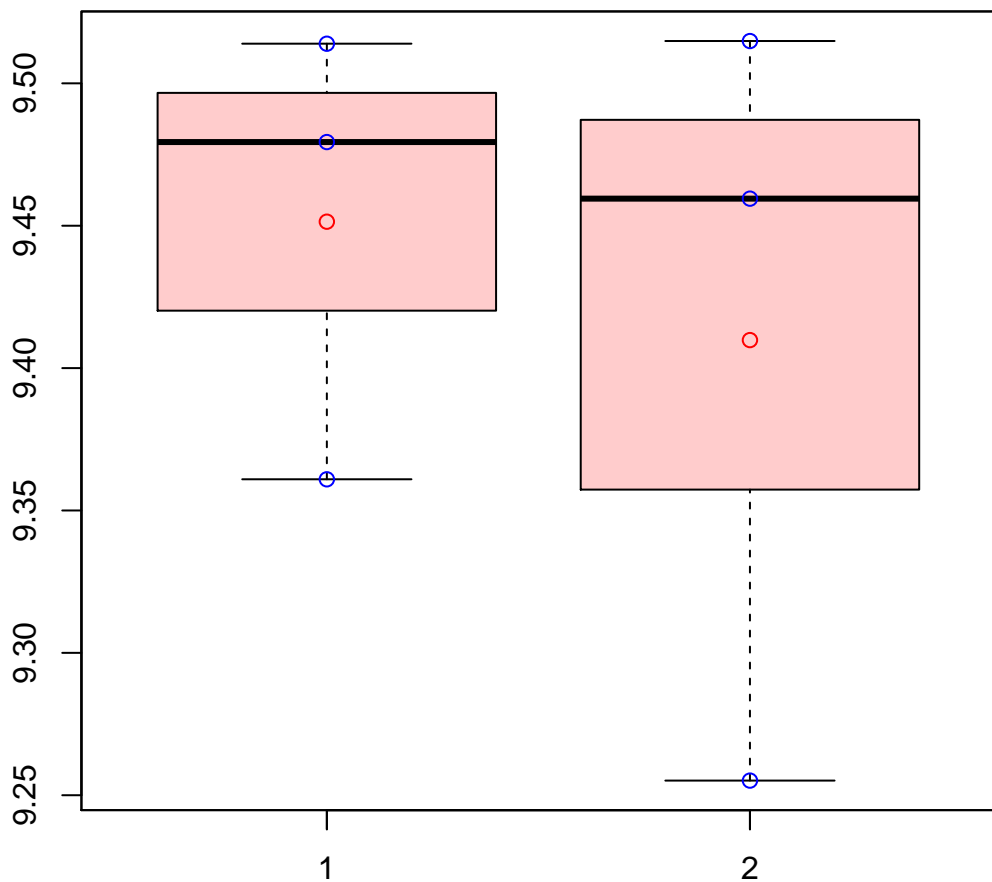

t-Test: p-value = 0.68



# B5AKW1|B5AKW1\_PENAM

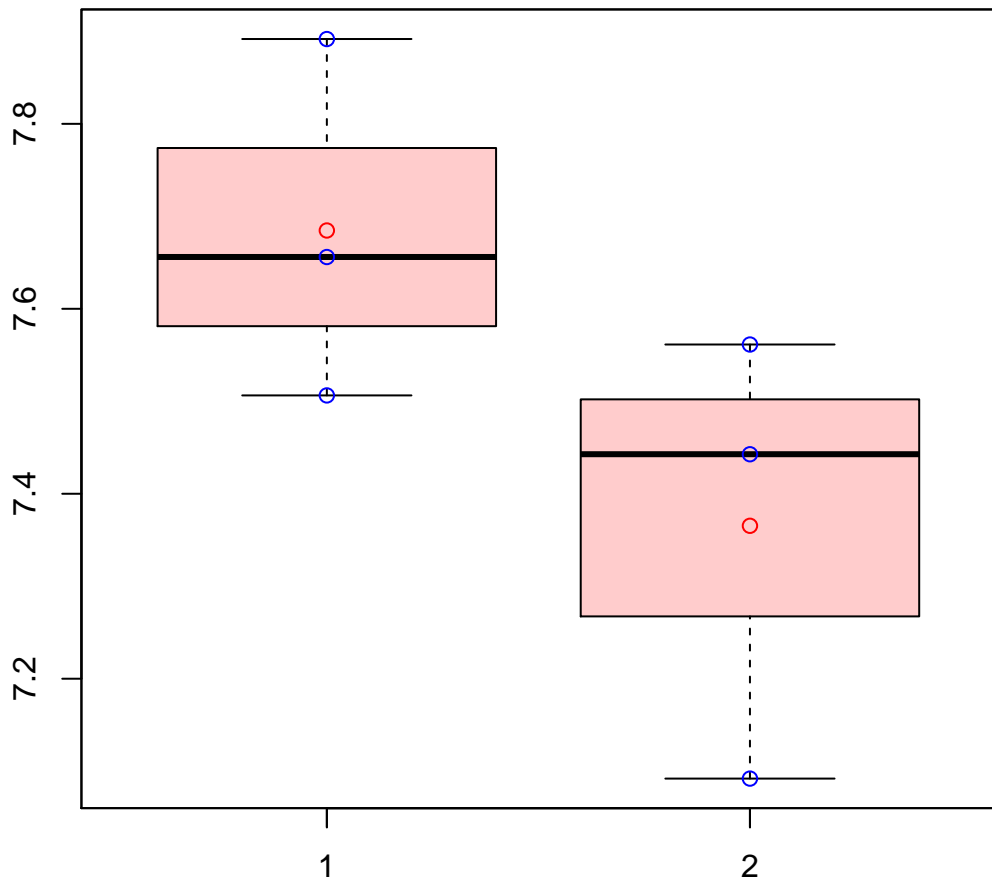

t-Test: p-value = 0.15

# B5AMJ8|B5AMJ8\_MAIZE

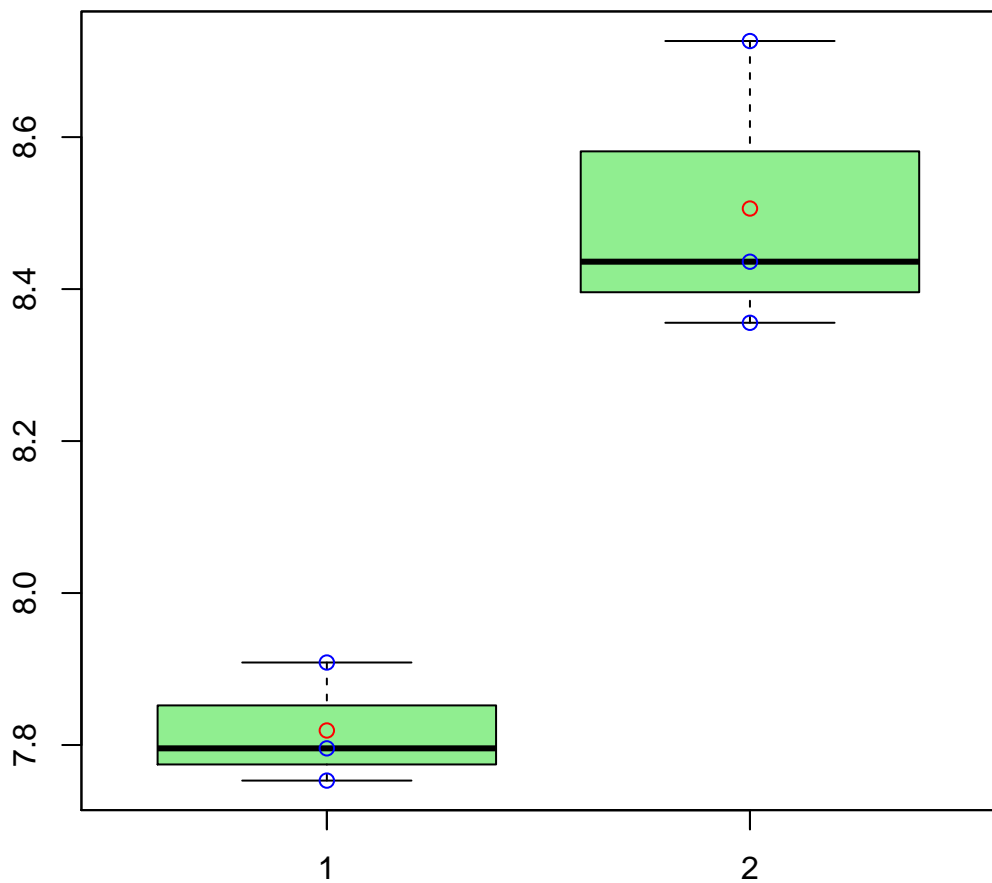

t-Test: p-value = 0.02

# B5KVP8|B5KVP8\_TRITU

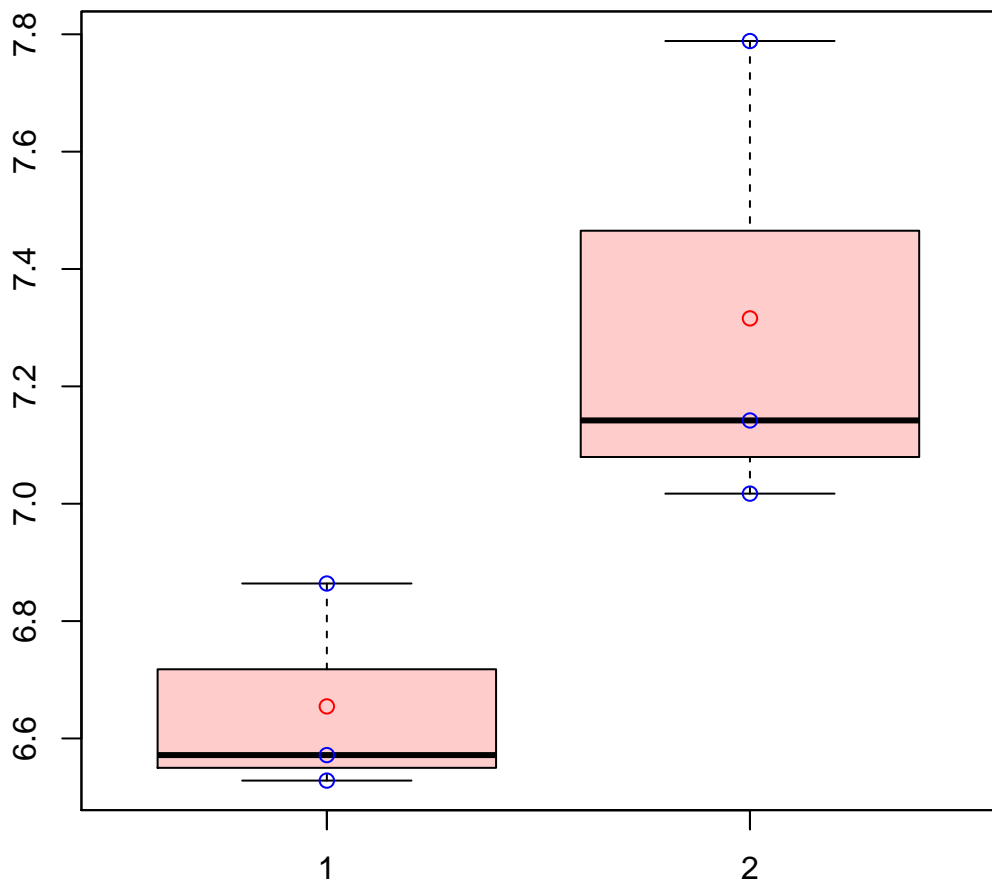

t-Test: p-value = 0.09

# B5Q SJ9|B5Q SJ9\_SETVI

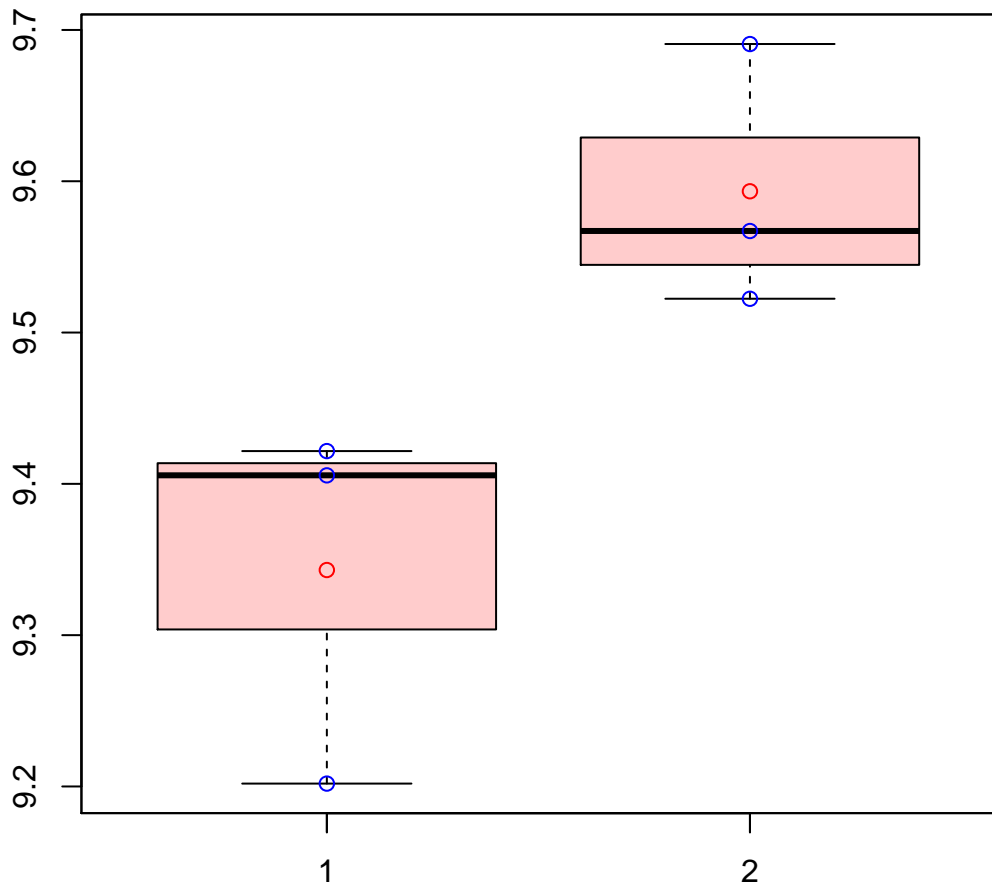

t-Test: p-value = 0.05

# B5RHH2|B5RHH2\_9ASPA

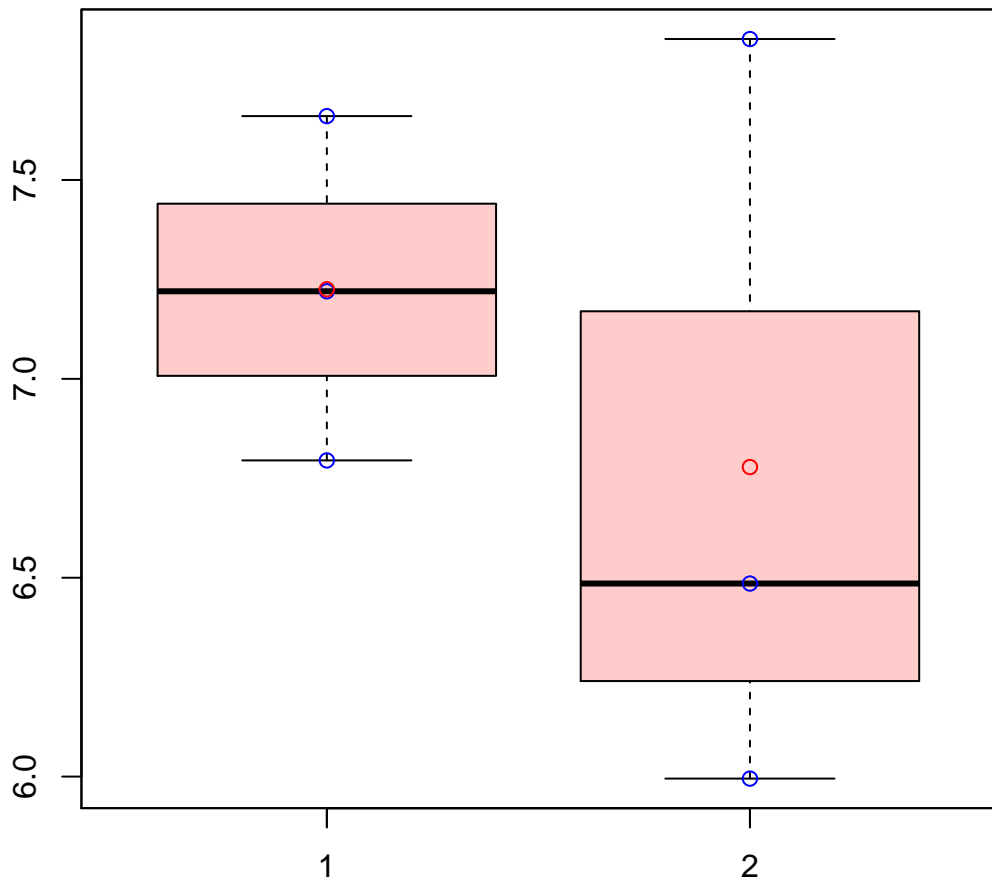

t-Test: p-value = 0.52

# B5WX84|B5WX84\_9ARAE

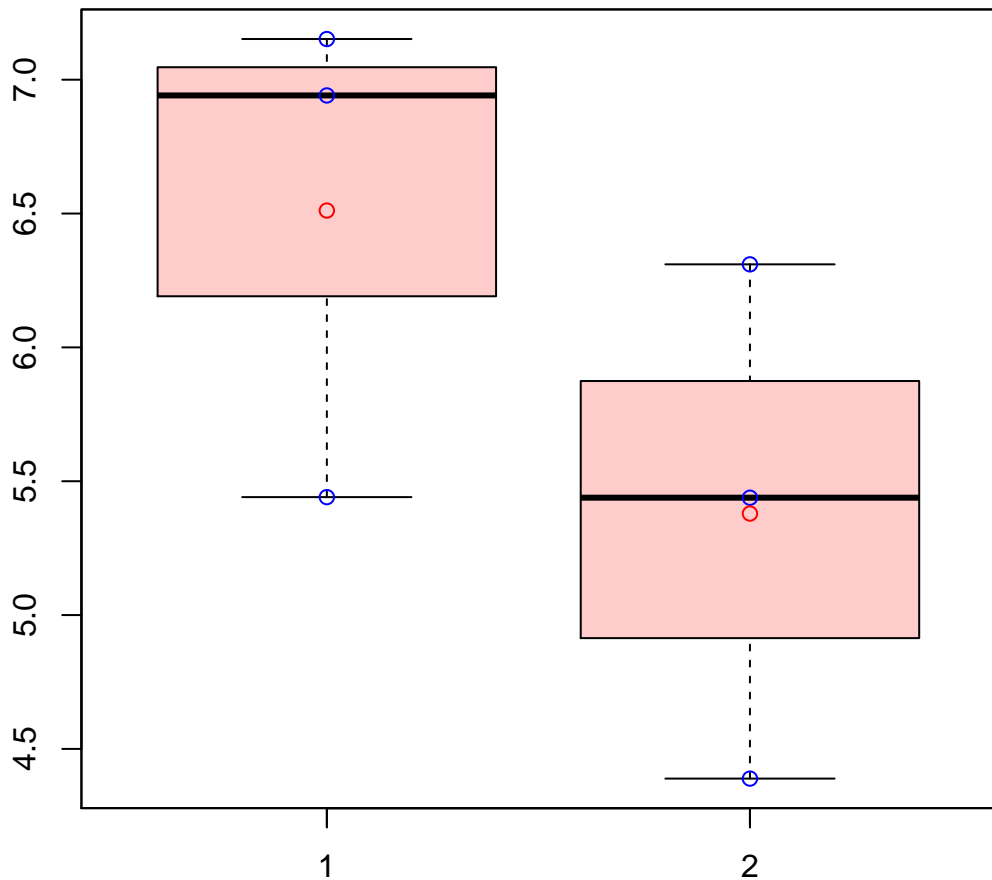

t-Test: p-value = 0.22

# B6EF35|B6EF35\_WHEAT

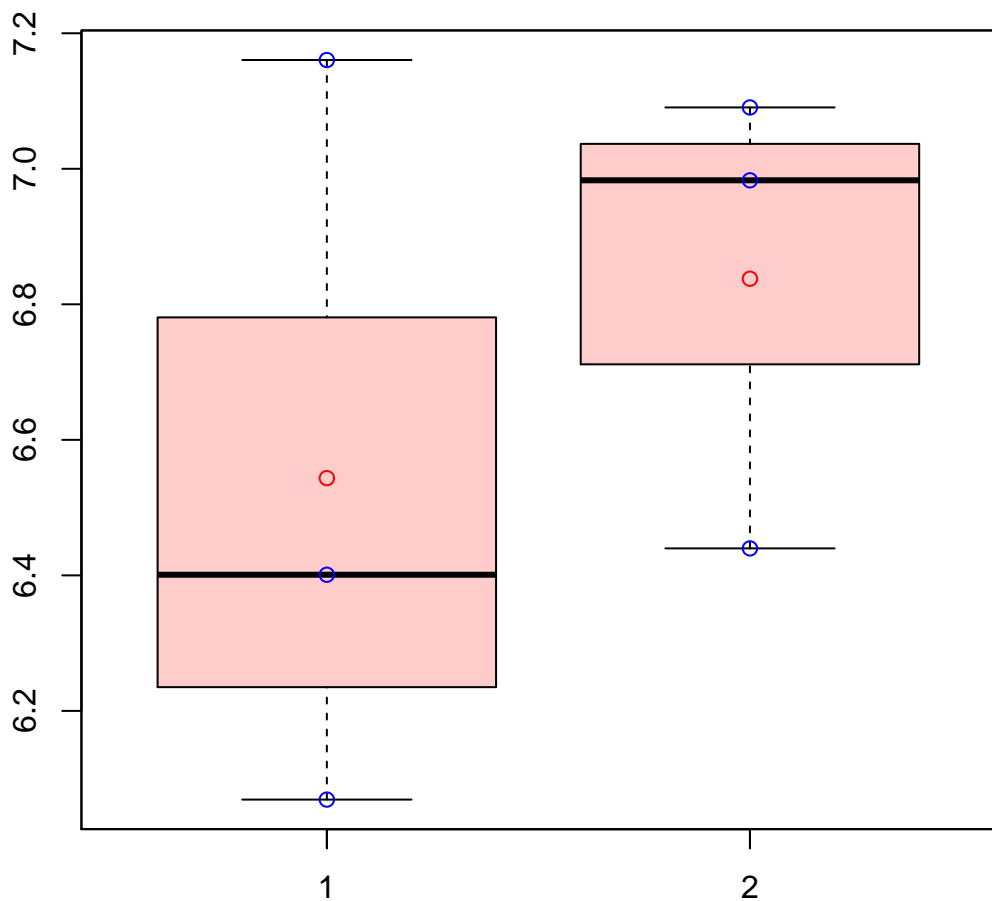

t-Test: p-value = 0.49

# B6RFC4|B6RFC4\_TRIDC

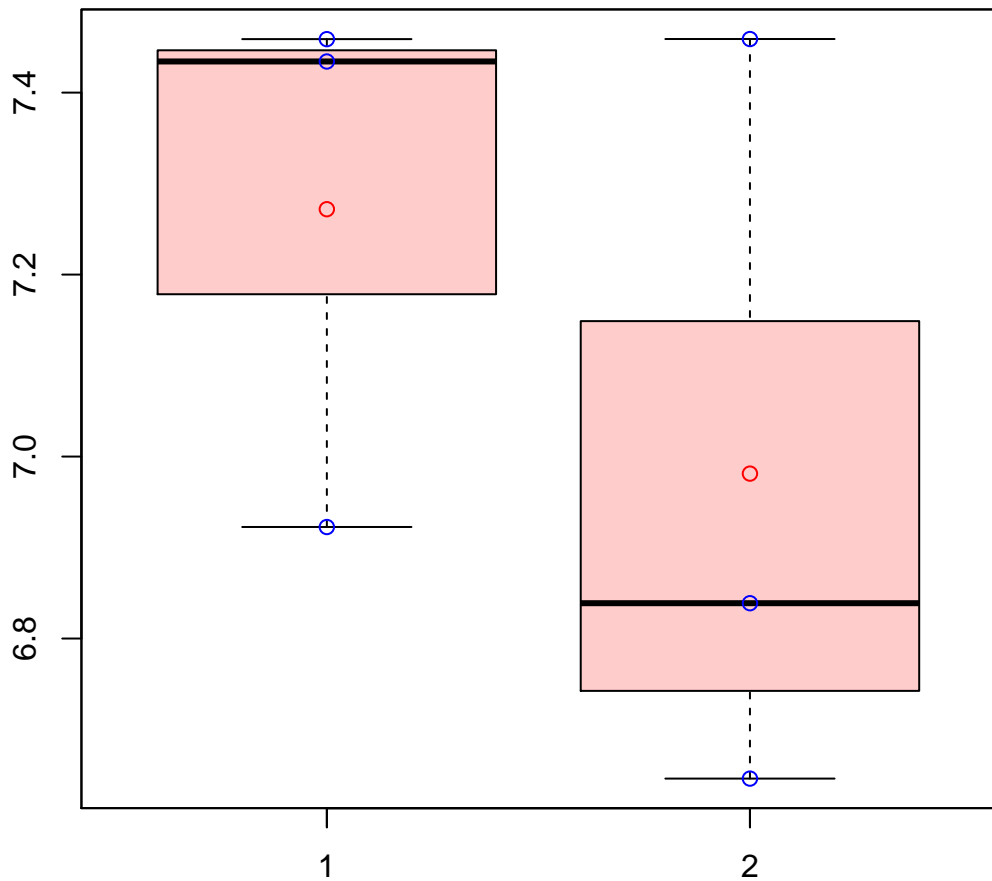

t-Test: p-value = 0.39



# B6RQL6|B6RQL6\_9POAL

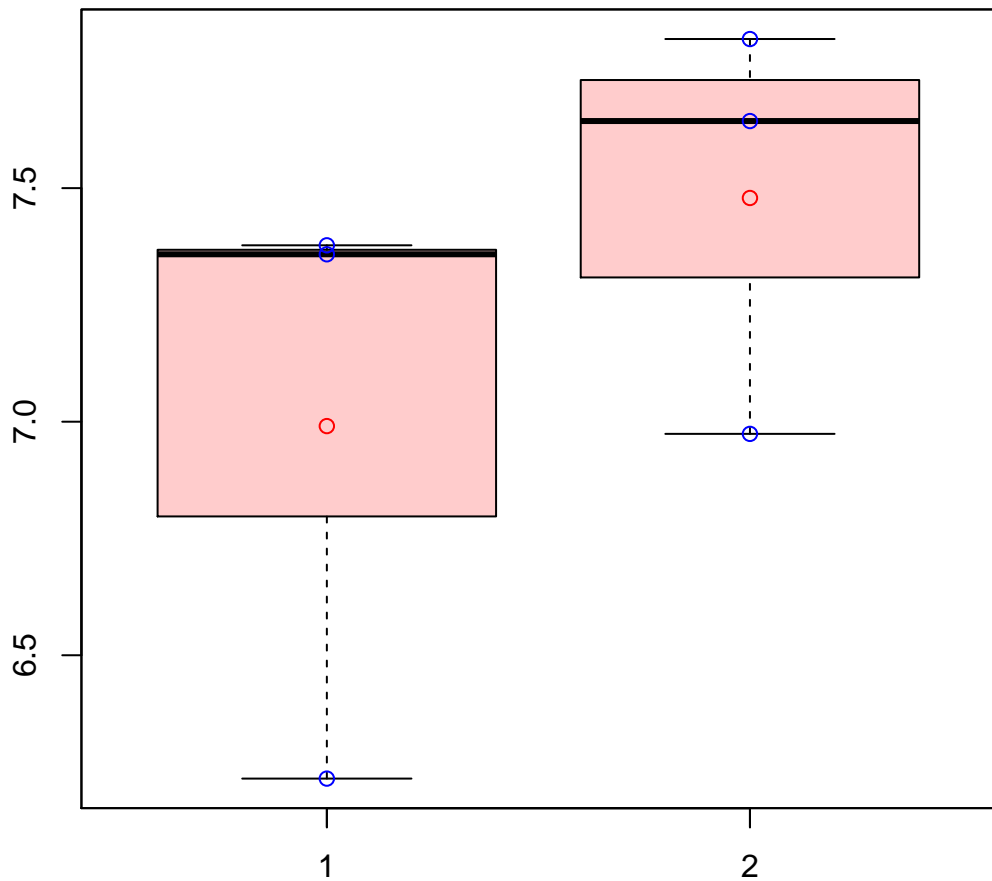

t-Test: p-value = 0.35

# B6SHD3|B6SHD3\_MAIZE

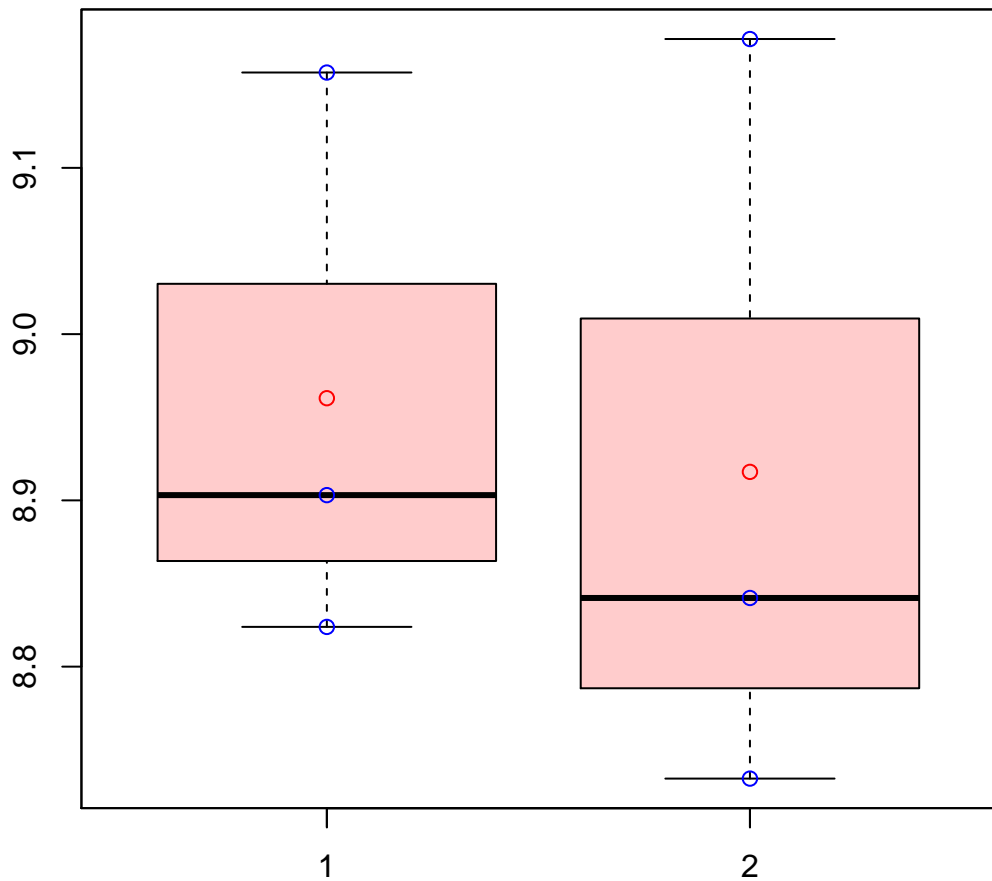

t-Test: p-value = 0.81

# B6SI49|B6SI49\_MAIZE

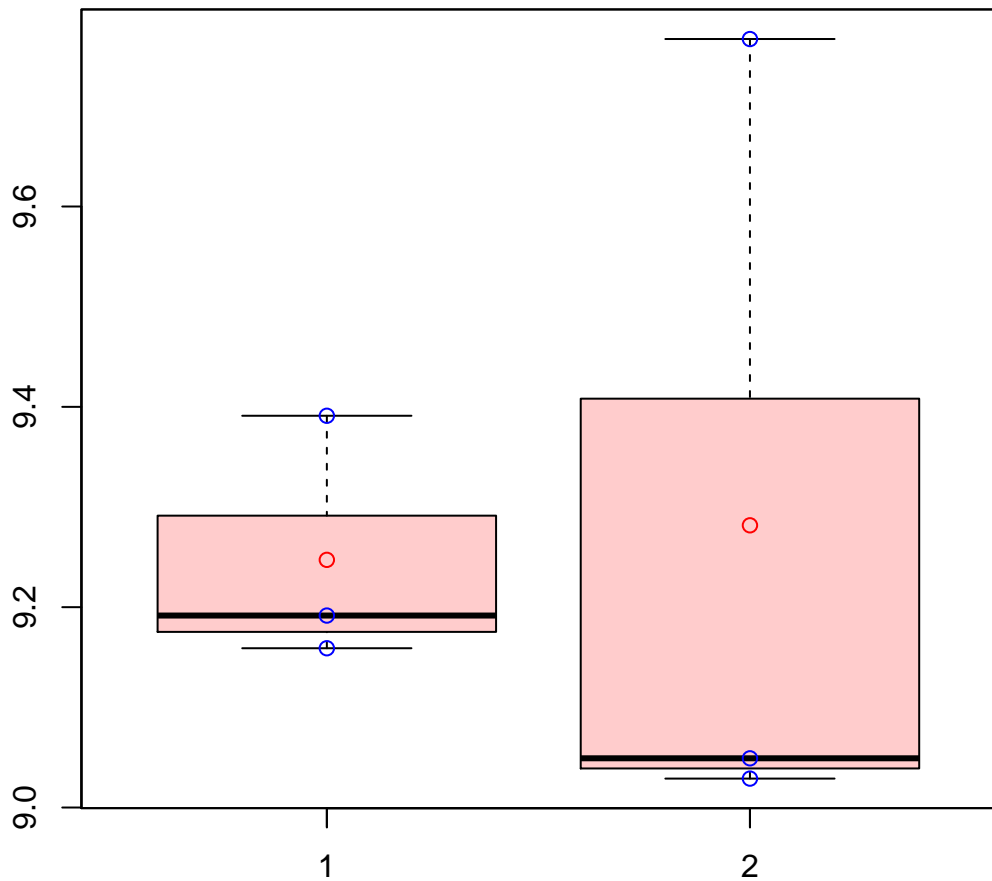

t-Test: p-value = 0.9

# B6SI53|B6SI53\_MAIZE

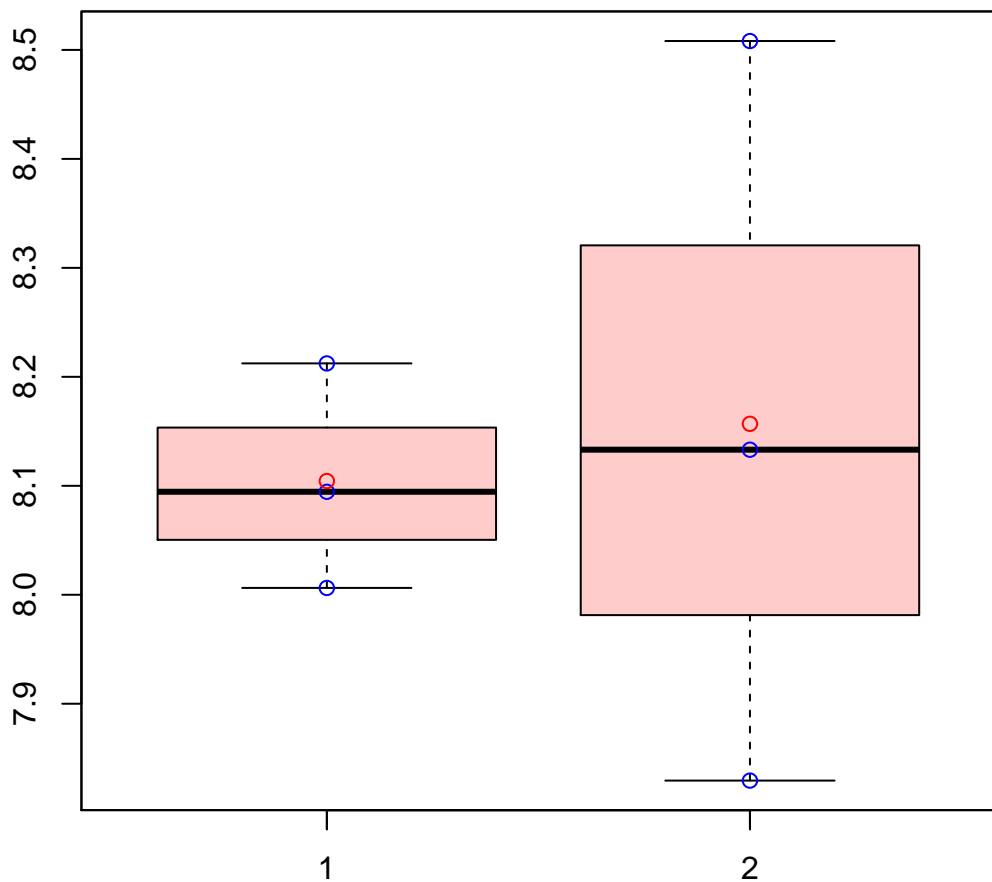

t-Test: p-value = 0.82

# B6SIG5|B6SIG5\_MAIZE

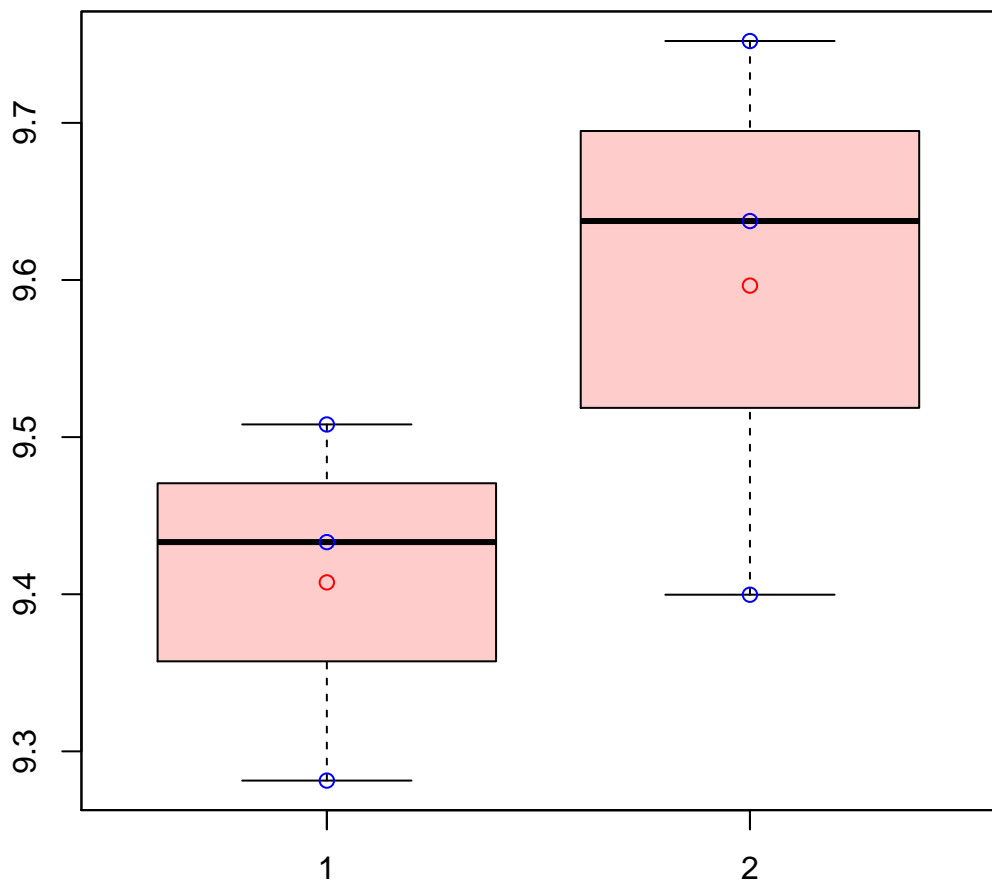

t-Test: p-value = 0.21

# B6SIZ3|B6SIZ3\_MAIZE

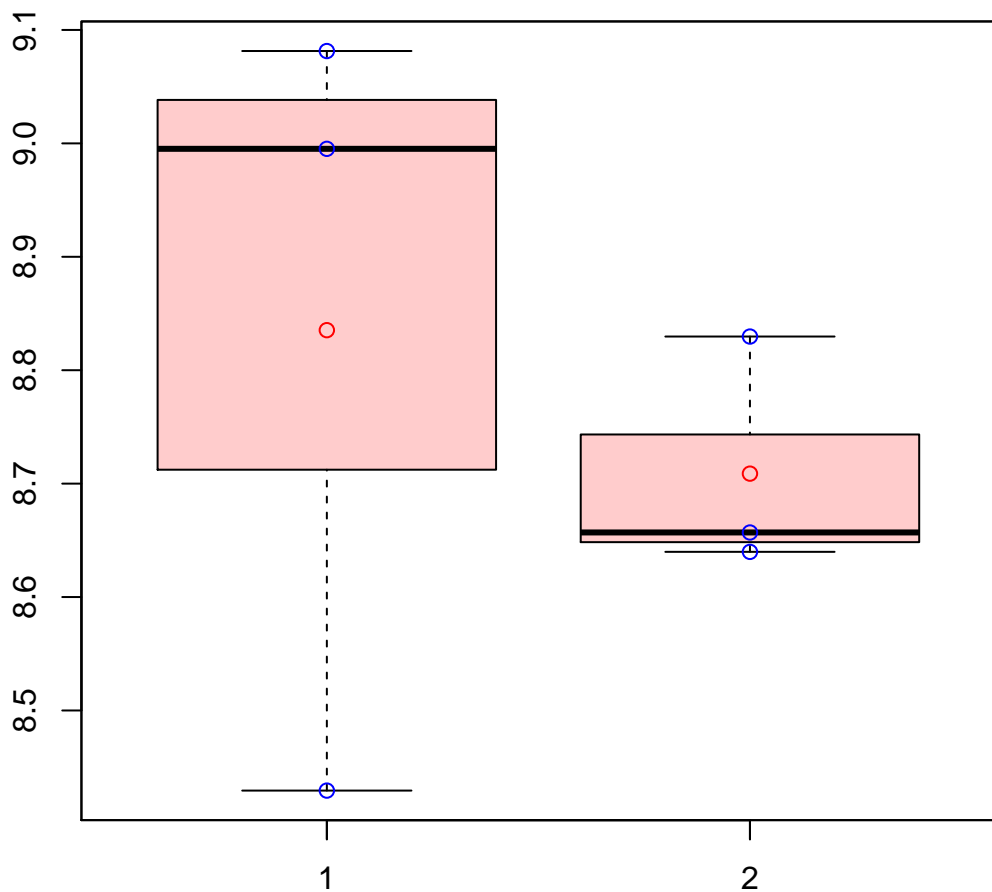

t-Test: p-value = 0.61

# B6SJW5|B6SJW5\_MAIZE

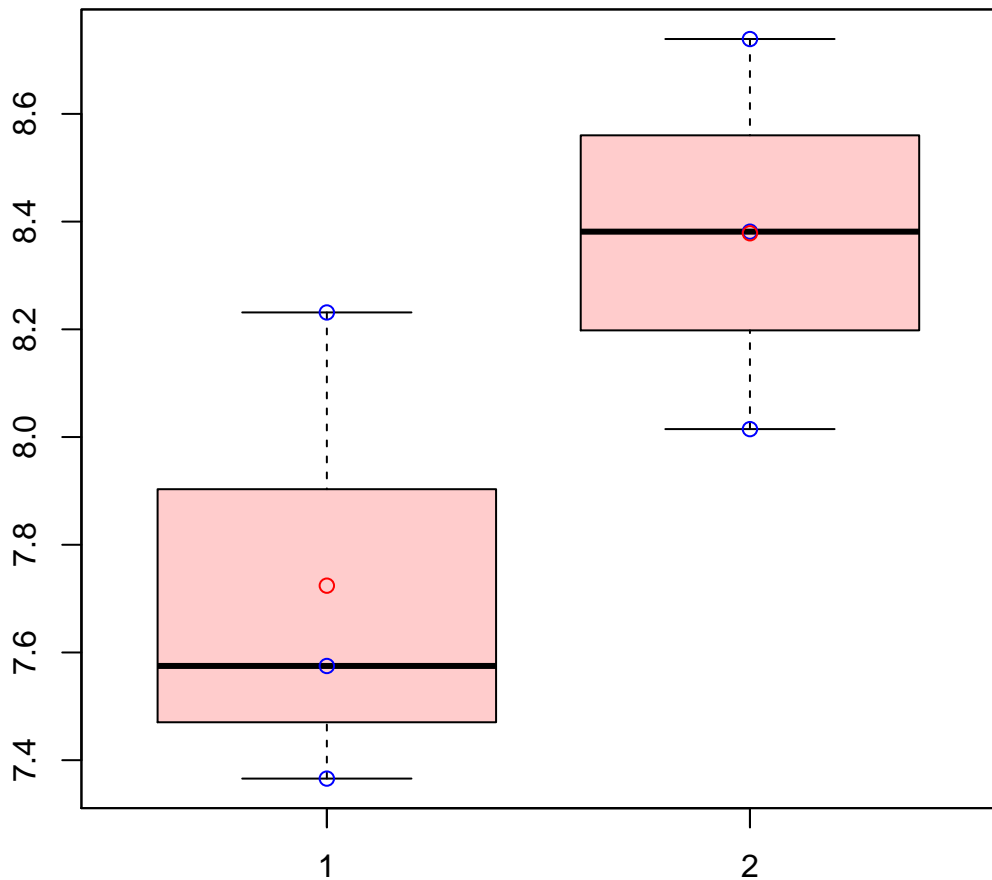

t-Test: p-value = 0.13

# B6SK56|B6SK56\_MAIZE

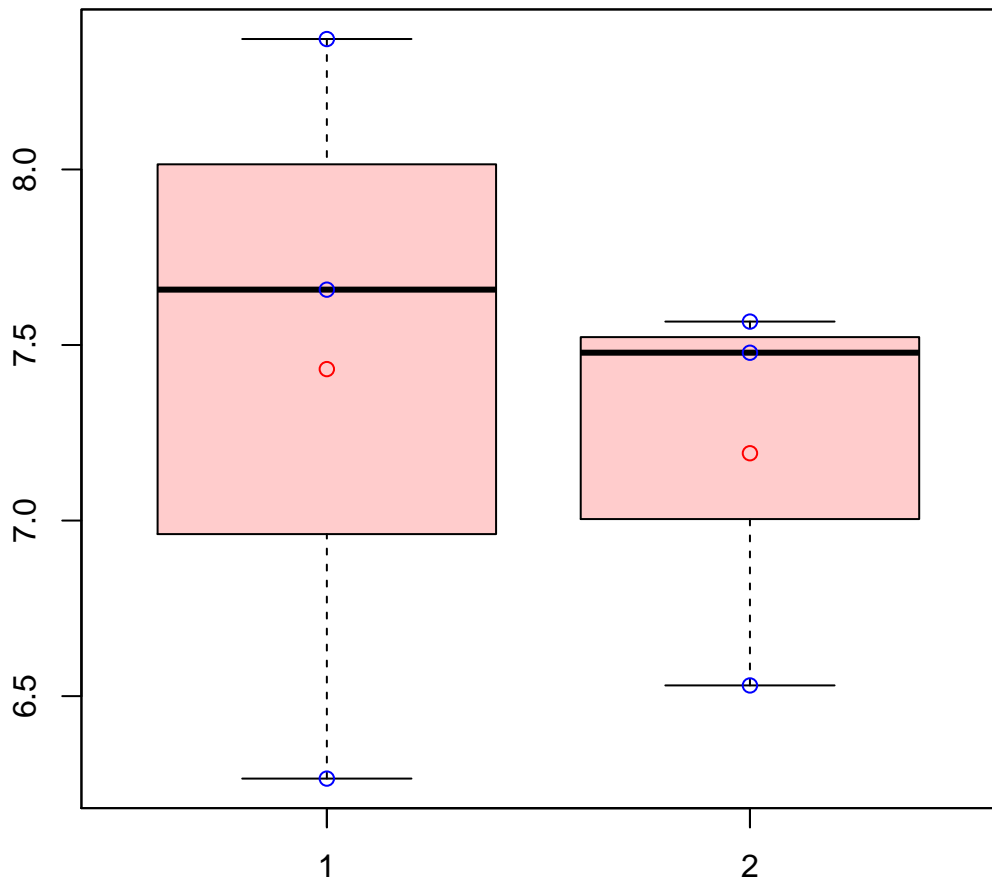

t-Test: p-value = 0.75



# B6SK79|B6SK79\_MAIZE

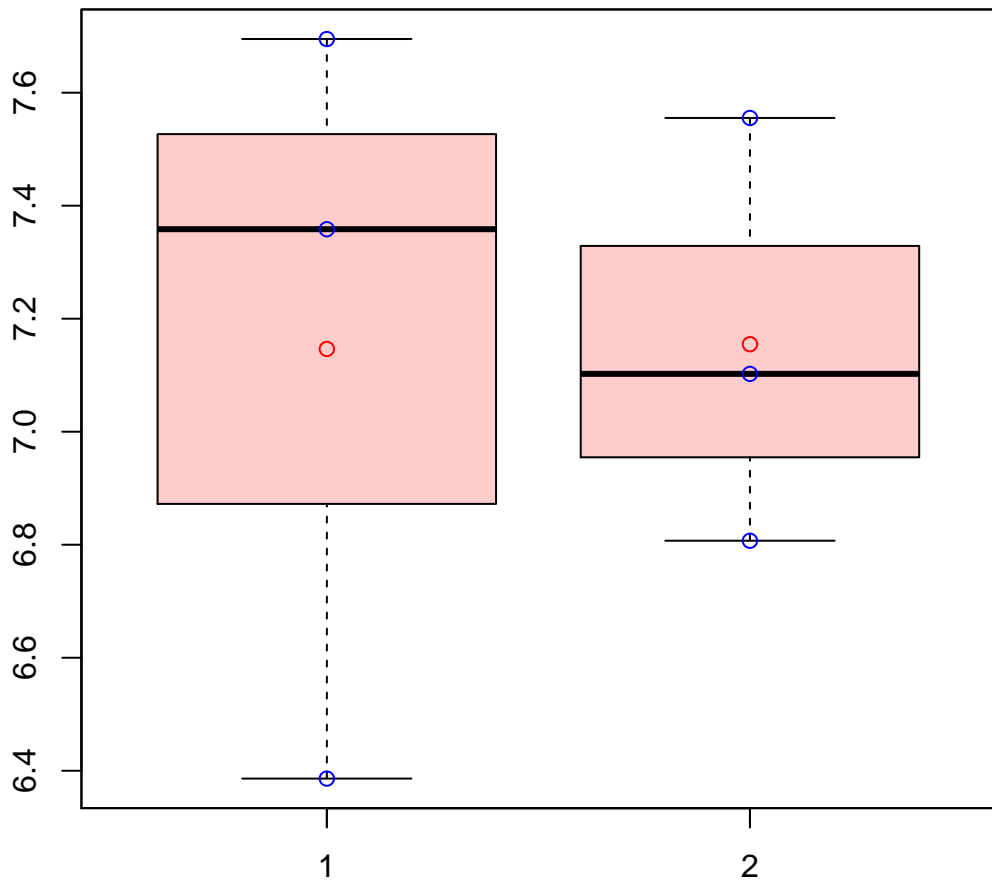

t-Test: p-value = 0.99

# B6SKB7|B6SKB7\_MAIZE

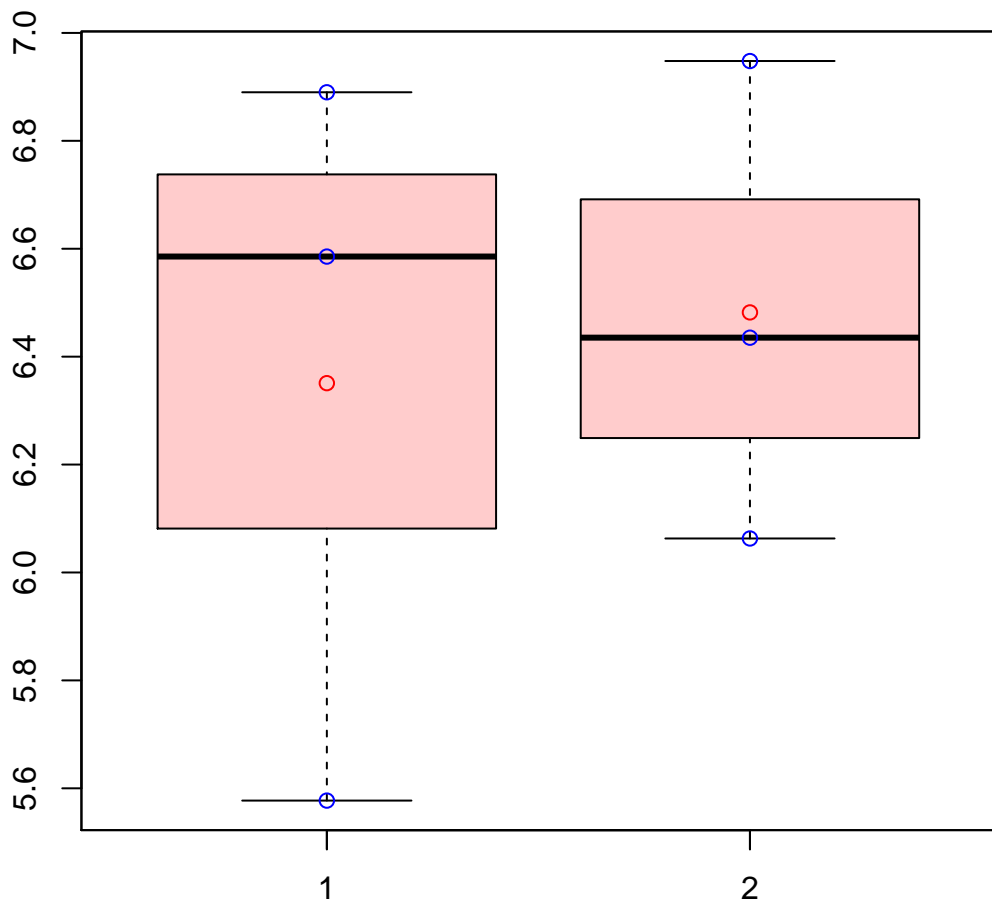

t-Test: p-value = 0.8

# B6SKC6|B6SKC6\_MAIZE

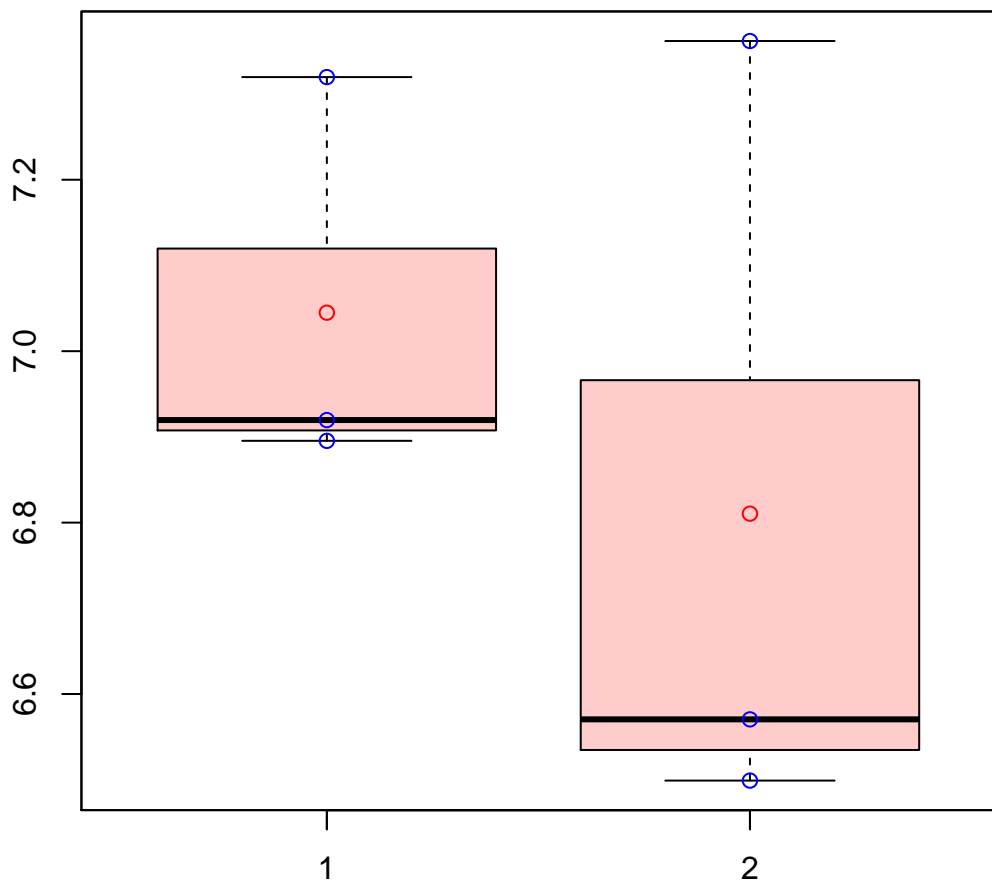

t-Test: p-value = 0.5

# B6SKV4|B6SKV4\_MAIZE

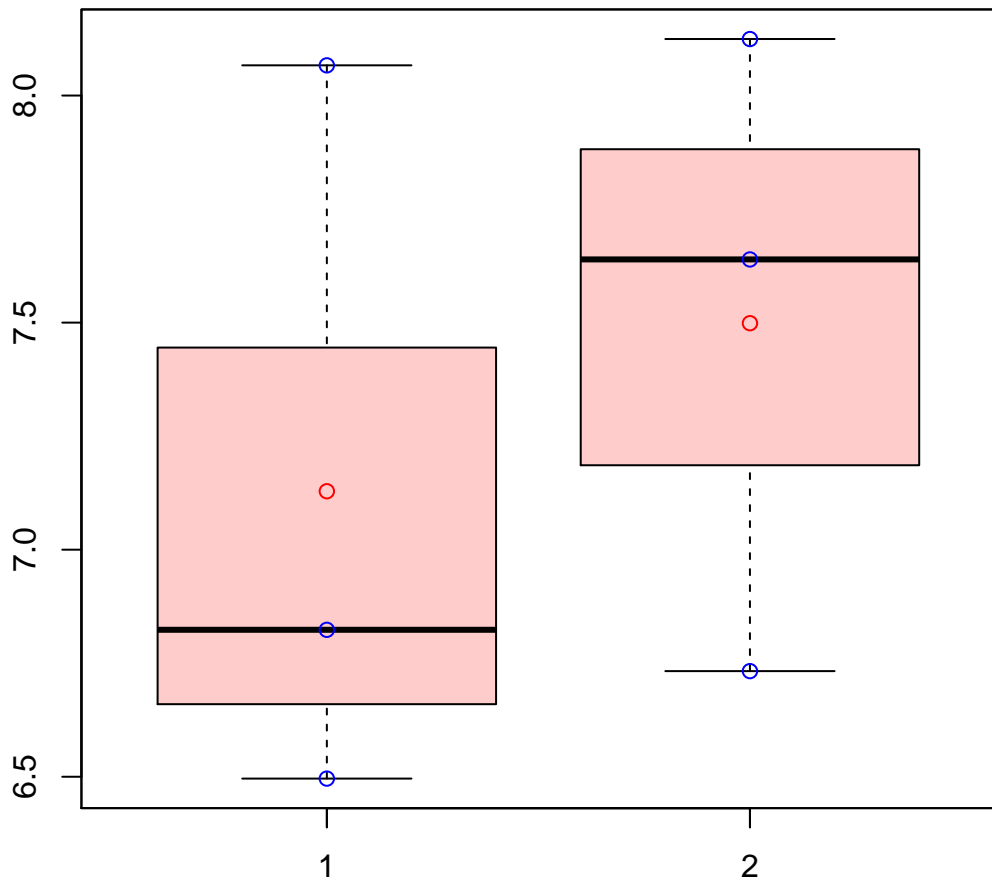

t-Test: p-value = 0.59

# B6SR15|B6SR15\_MAIZE

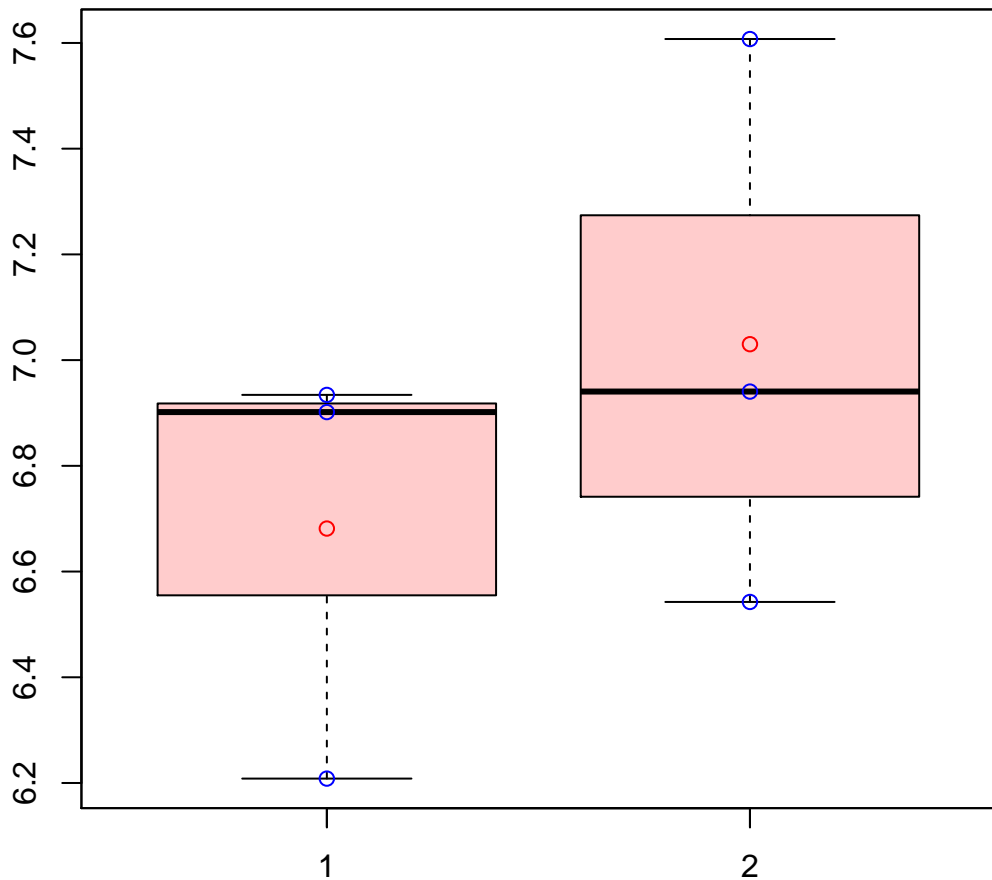

t-Test: p-value = 0.43

# B6SRI3|B6SRI3\_MAIZE

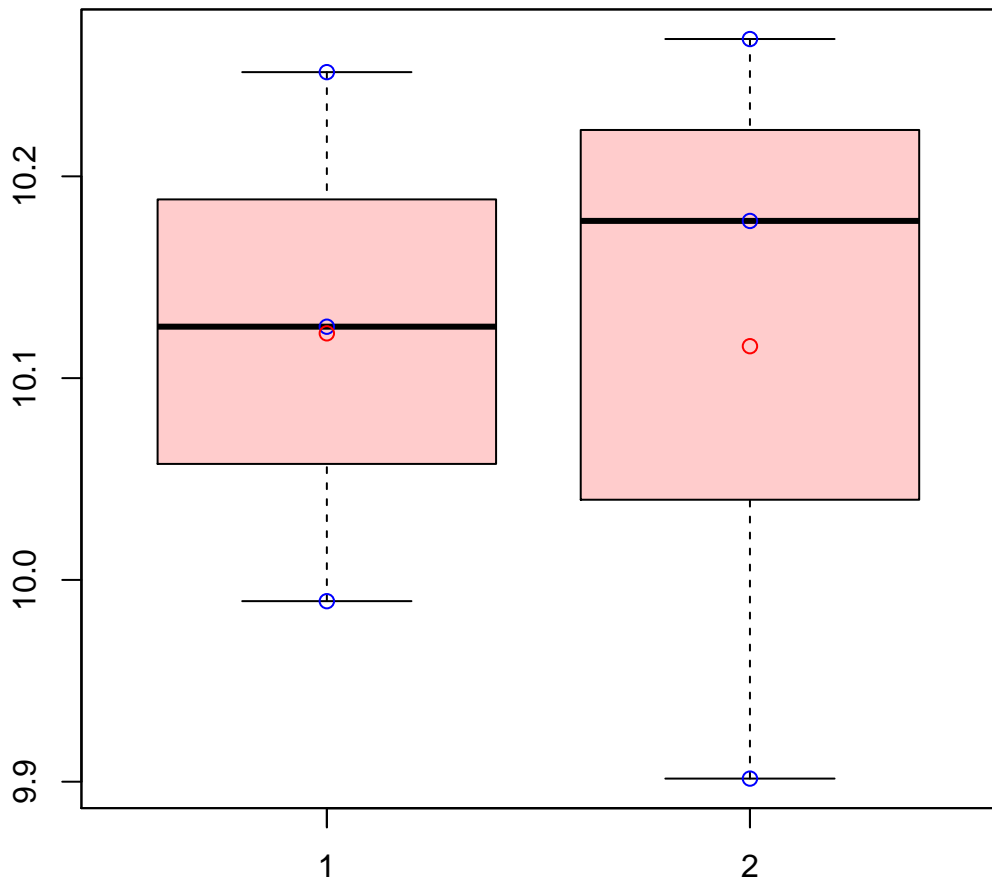

t-Test: p-value = 0.96

# B6SRL2|B6SRL2\_MAIZE

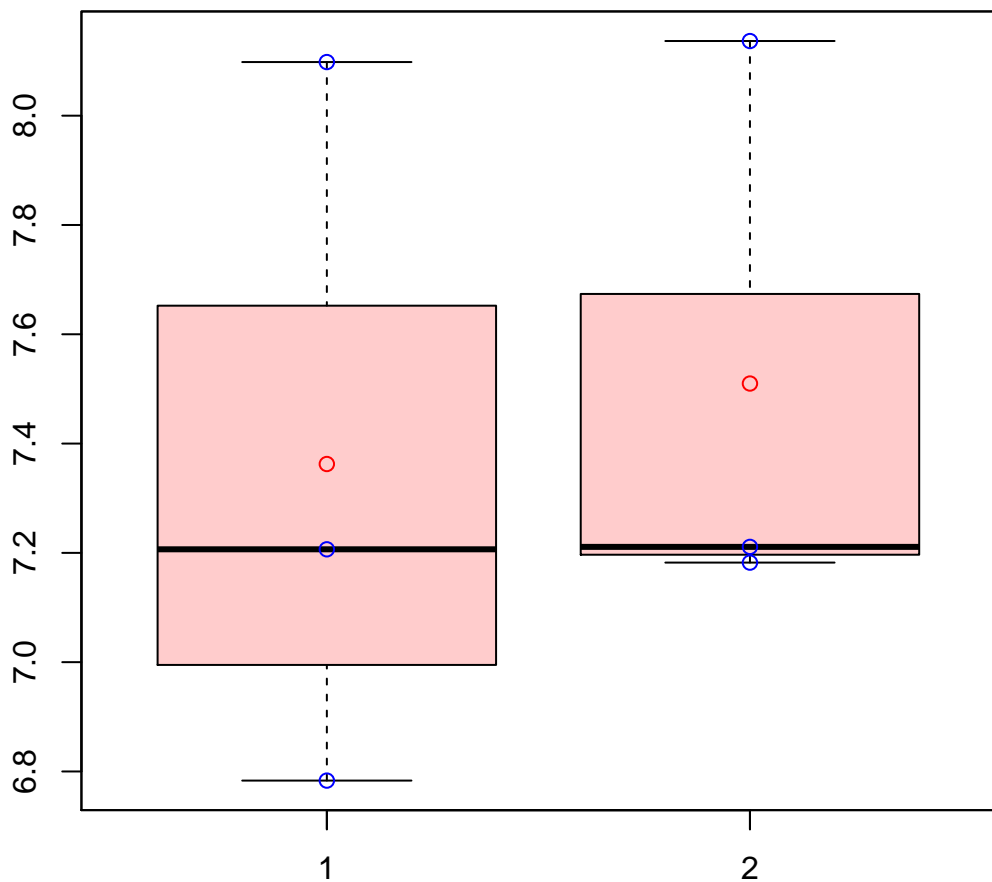

t-Test: p-value = 0.78

# B6SRL7|B6SRL7\_MAIZE

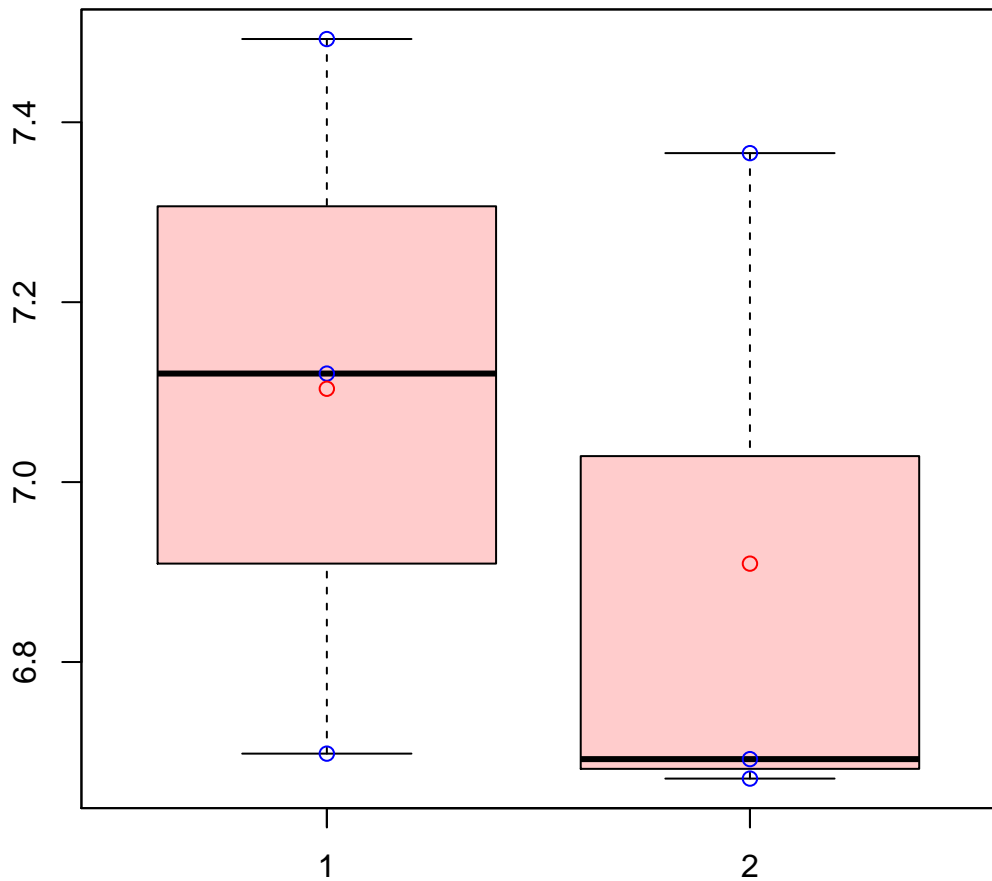

t-Test: p-value = 0.58



# B6SS48|B6SS48\_MAIZE

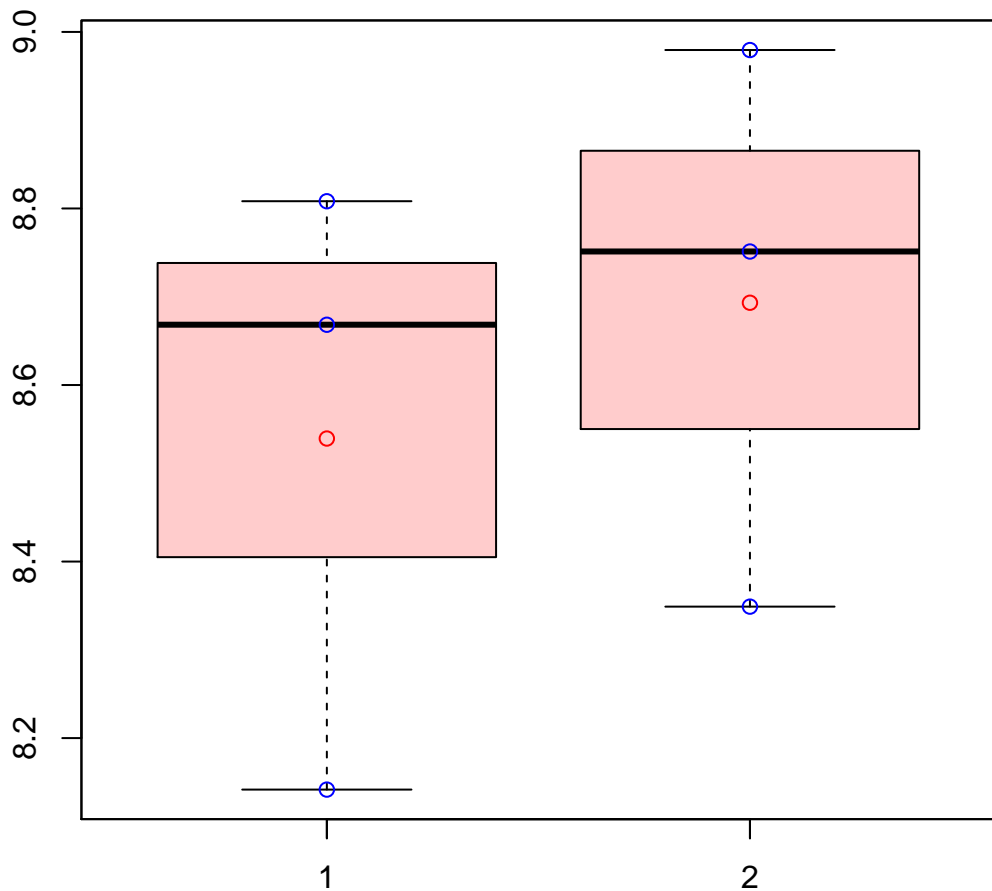

t-Test: p-value = 0.6

# B6SSN3|B6SSN3\_MAIZE

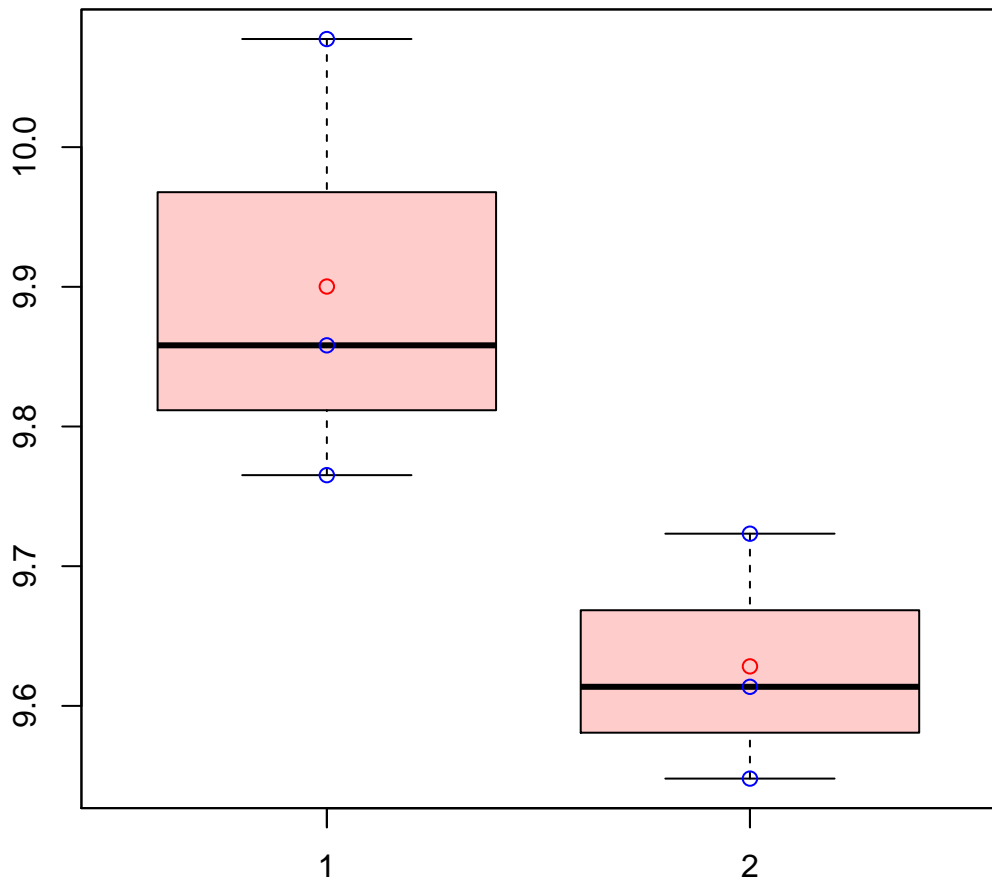

t-Test: p-value = 0.08

# B6SSU6|B6SSU6\_MAIZE

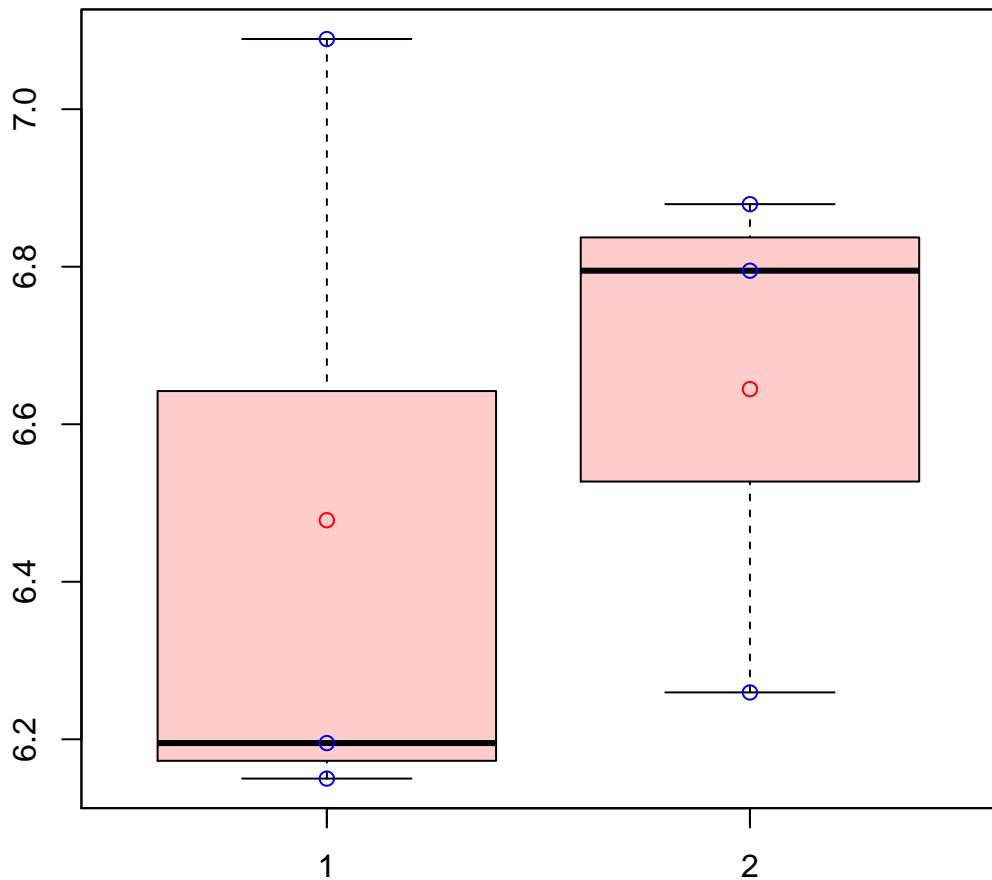

t-Test: p-value = 0.67

# B6STN4|B6STN4\_MAIZE

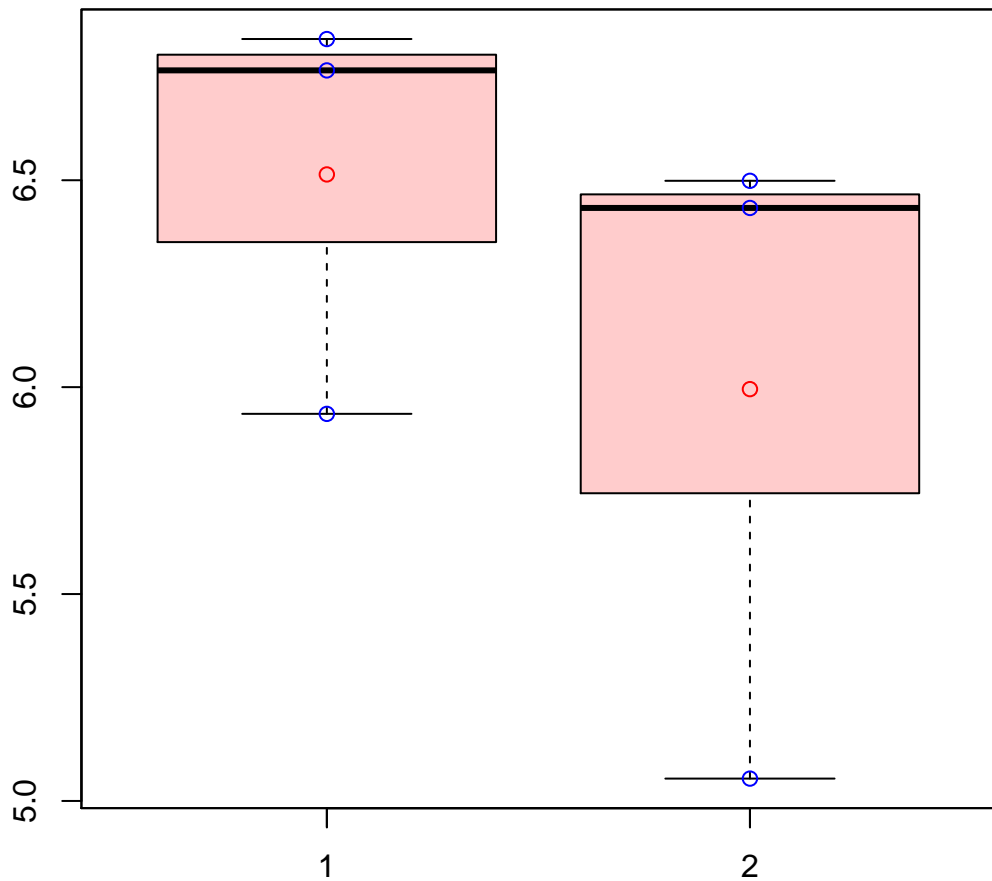

t-Test: p-value = 0.41

# B6SUC4|B6SUC4\_MAIZE

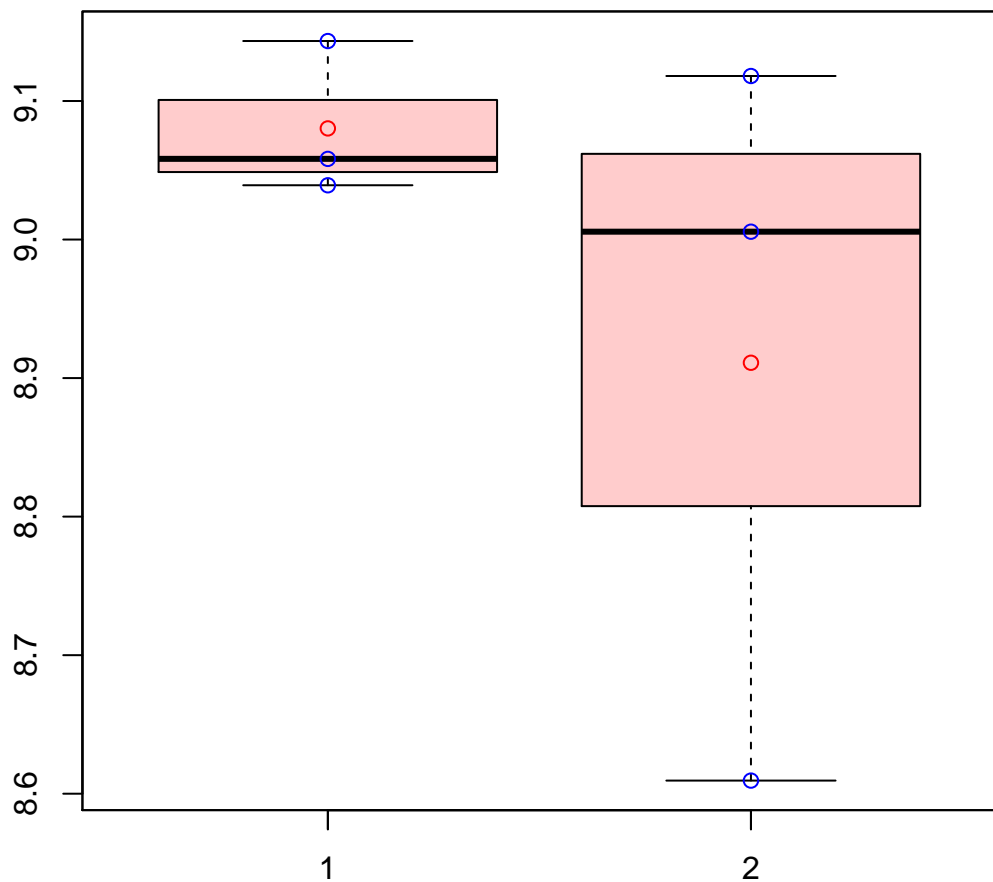

t-Test: p-value = 0.39

# B6SUC7|B6SUC7\_MAIZE

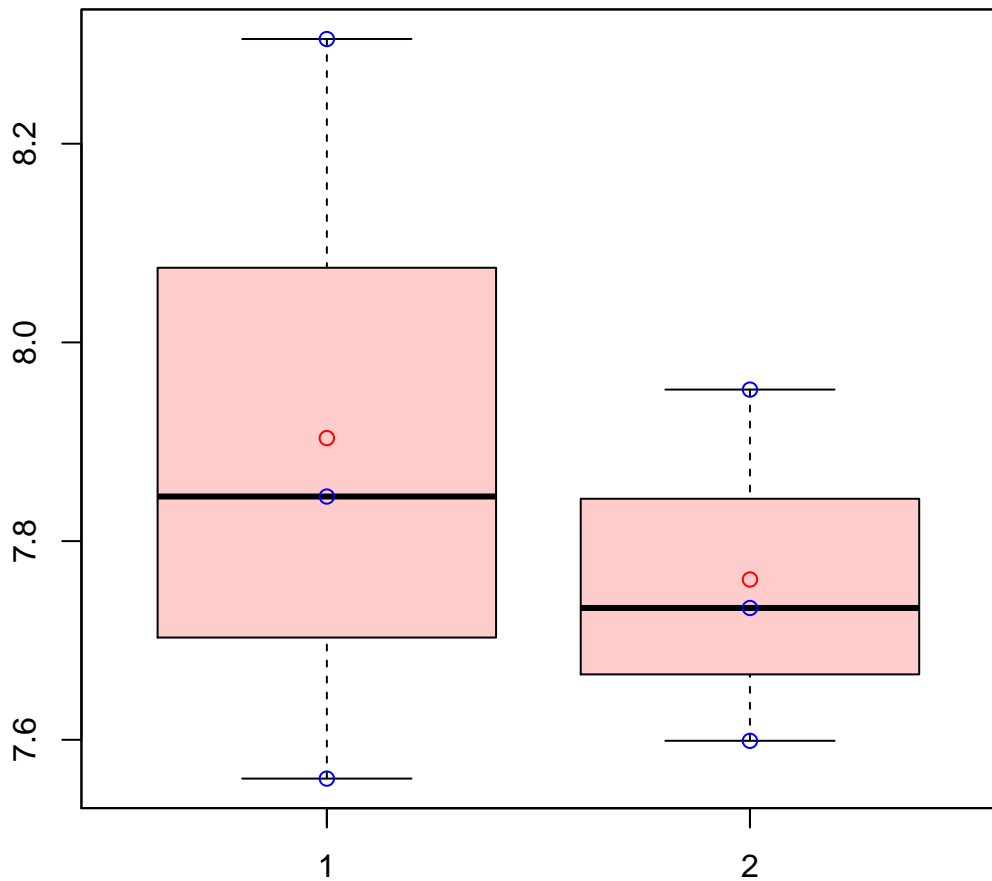

t-Test: p-value = 0.6

# B6SUM9|B6SUM9\_MAIZE

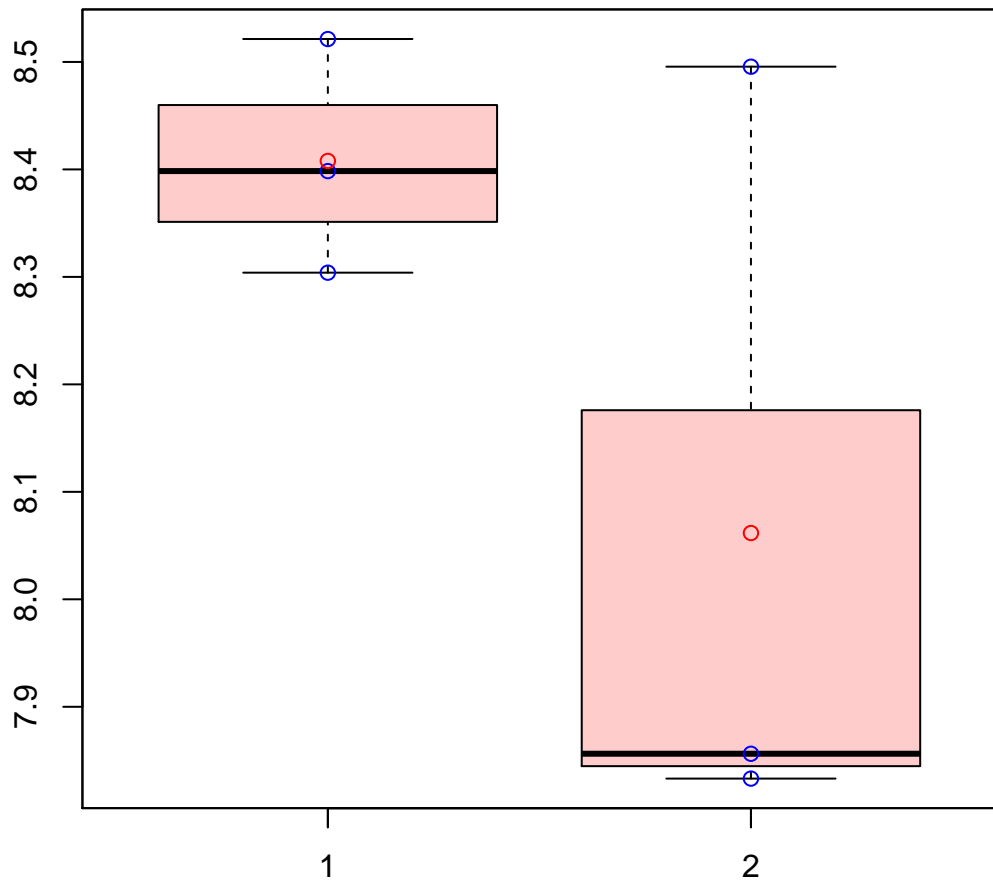

t-Test: p-value = 0.25

# B6SUV6|B6SUV6\_MAIZE

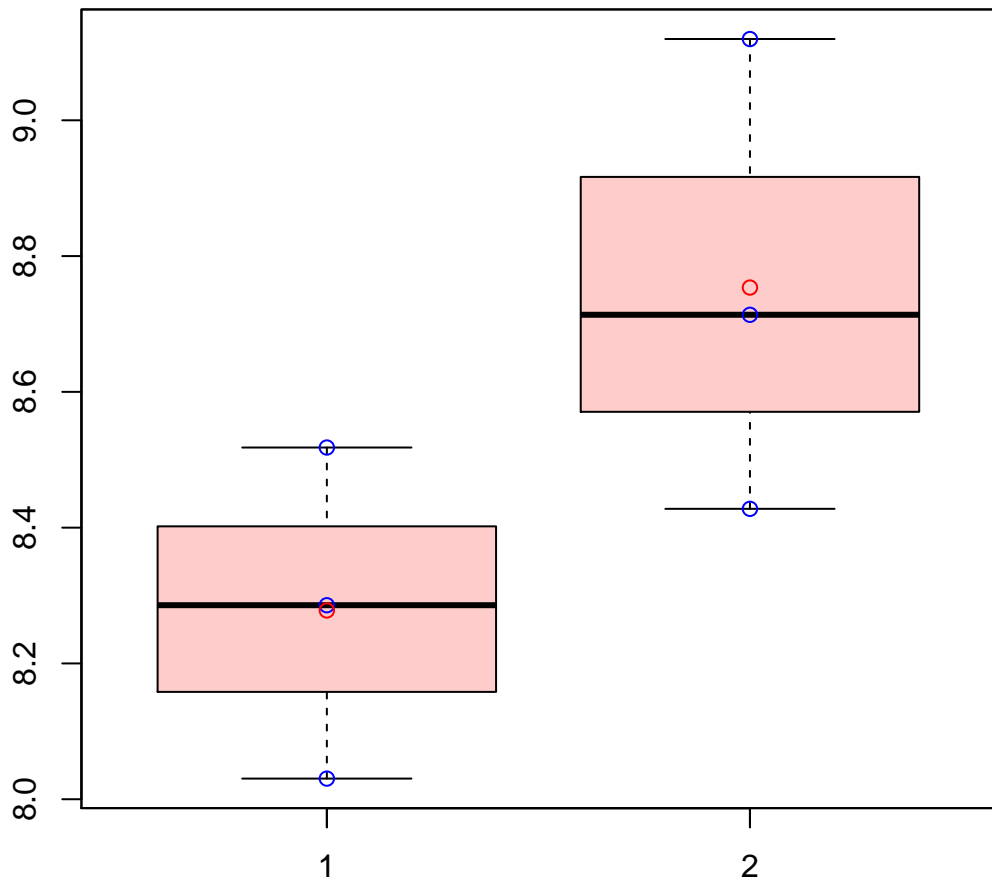

t-Test: p-value = 0.13



# B6SV44|B6SV44\_MAIZE

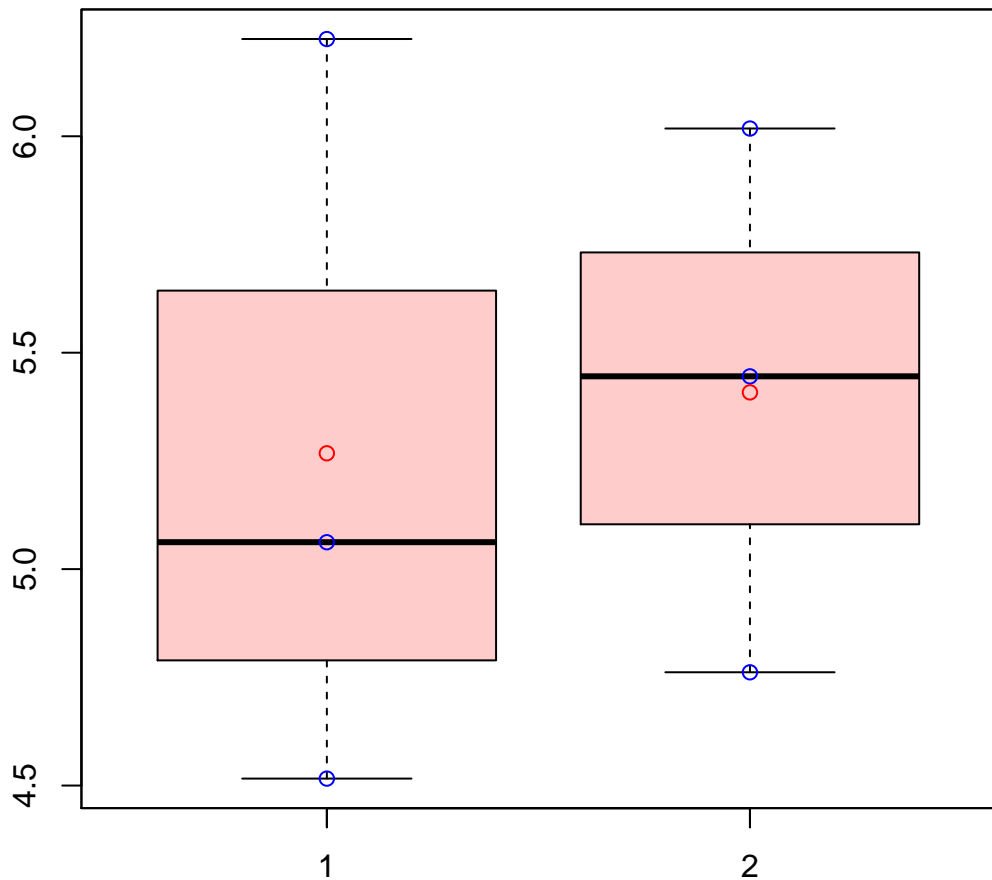

t-Test: p-value = 0.83

# B6SV64|B6SV64\_MAIZE

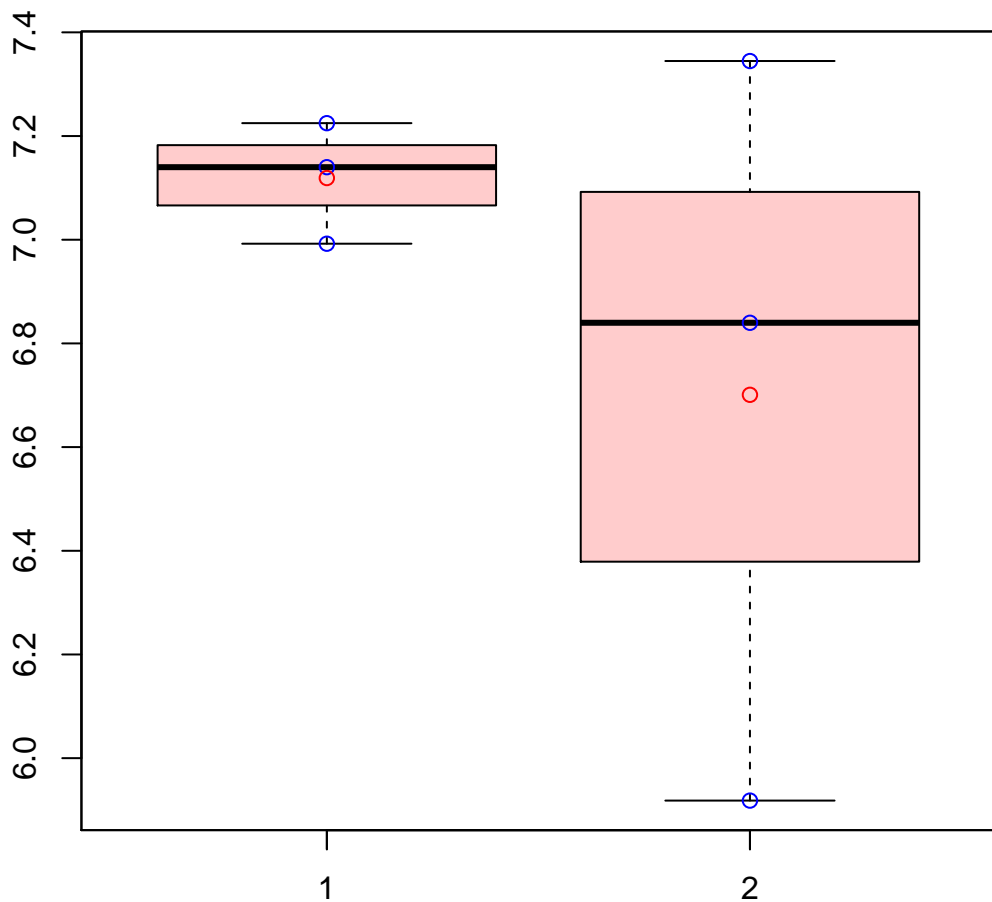

t-Test: p-value = 0.42

# B6SVK1|B6SVK1\_MAIZE

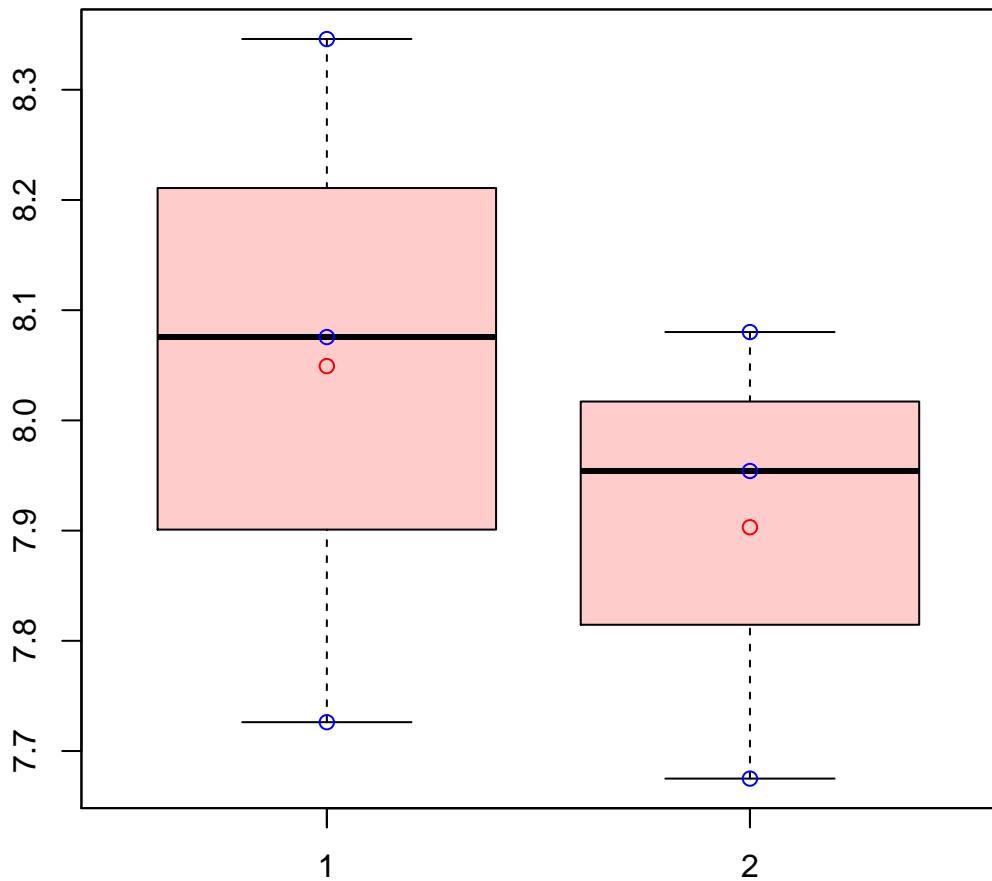

t-Test: p-value = 0.54

# B6SVK3|B6SVK3\_MAIZE

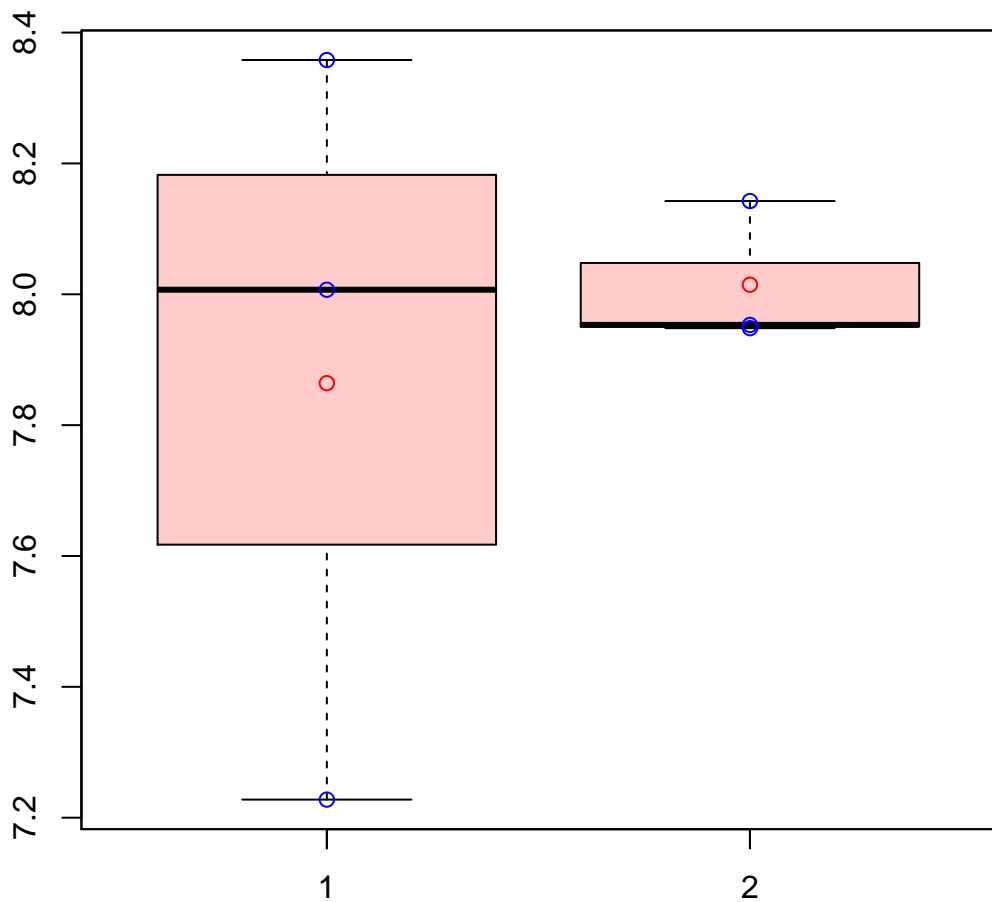

t-Test: p-value = 0.7

# B6SWT3|B6SWT3\_MAIZE

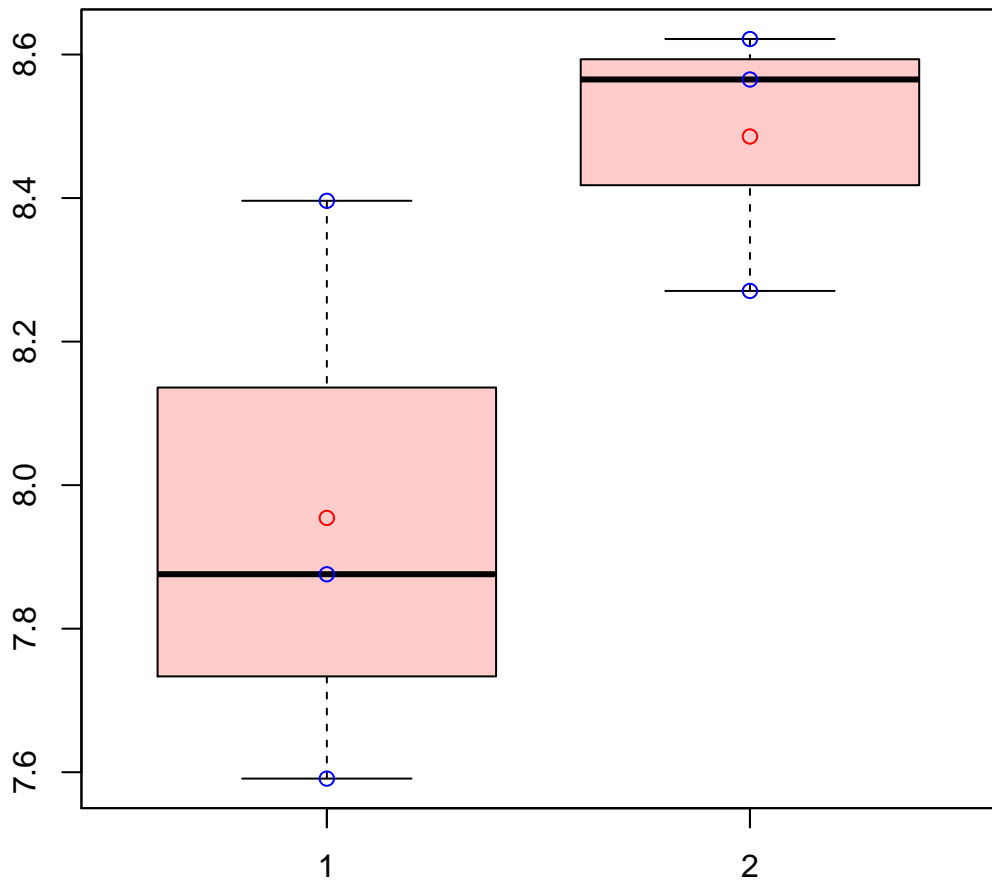

t-Test: p-value = 0.14

# B6SXN9|B6SXN9\_MAIZE

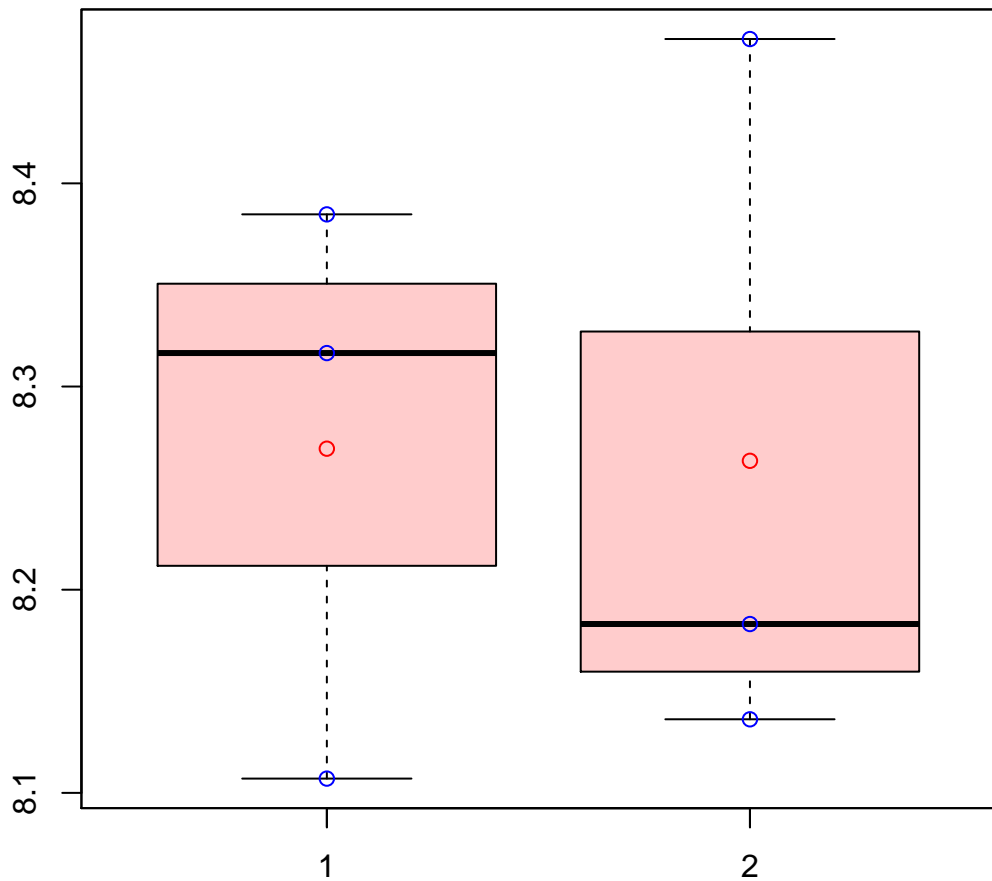

t-Test: p-value = 0.97

# B6SXQ9|B6SXQ9\_MAIZE

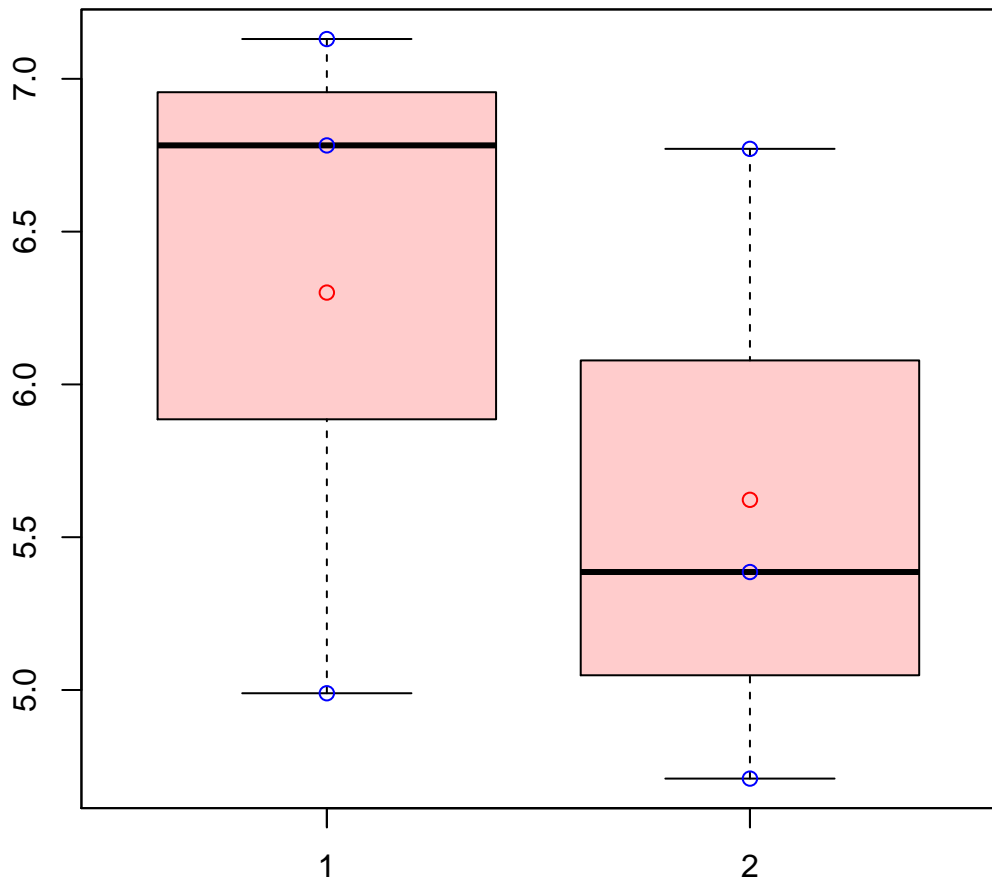

t-Test: p-value = 0.49

# B6SXW8|B6SXW8\_MAIZE

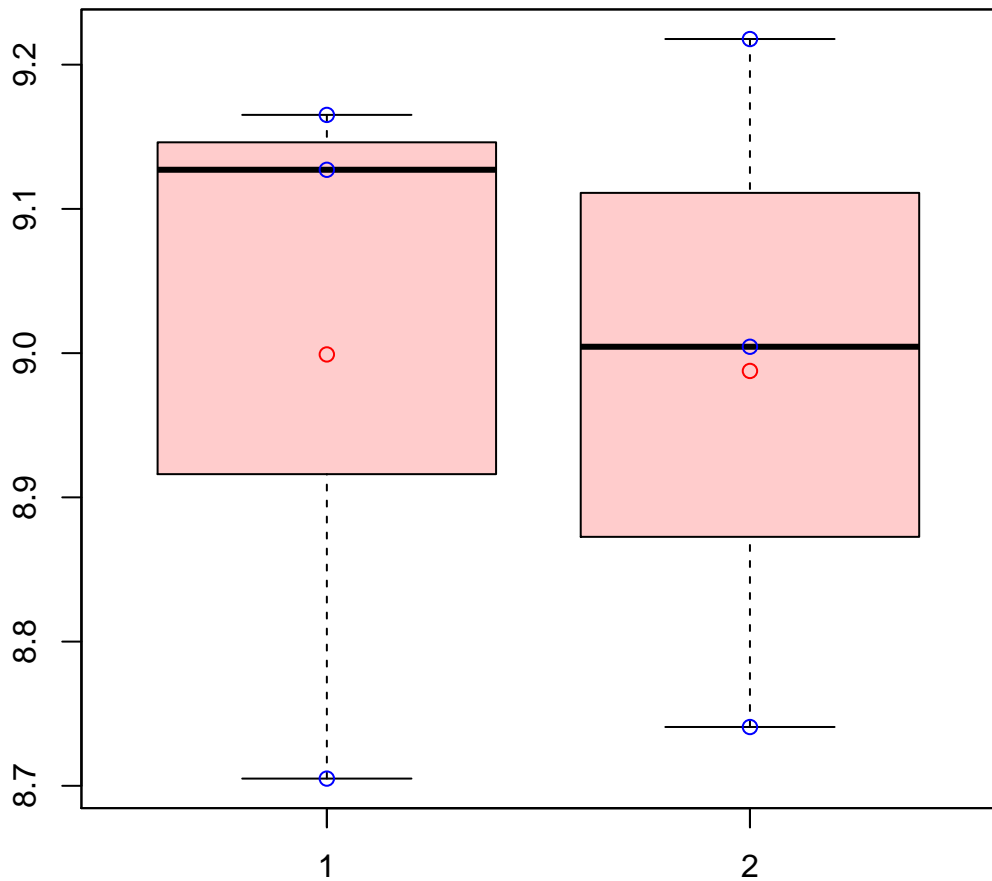

t-Test: p-value = 0.96



# B6SYK7|B6SYK7\_MAIZE

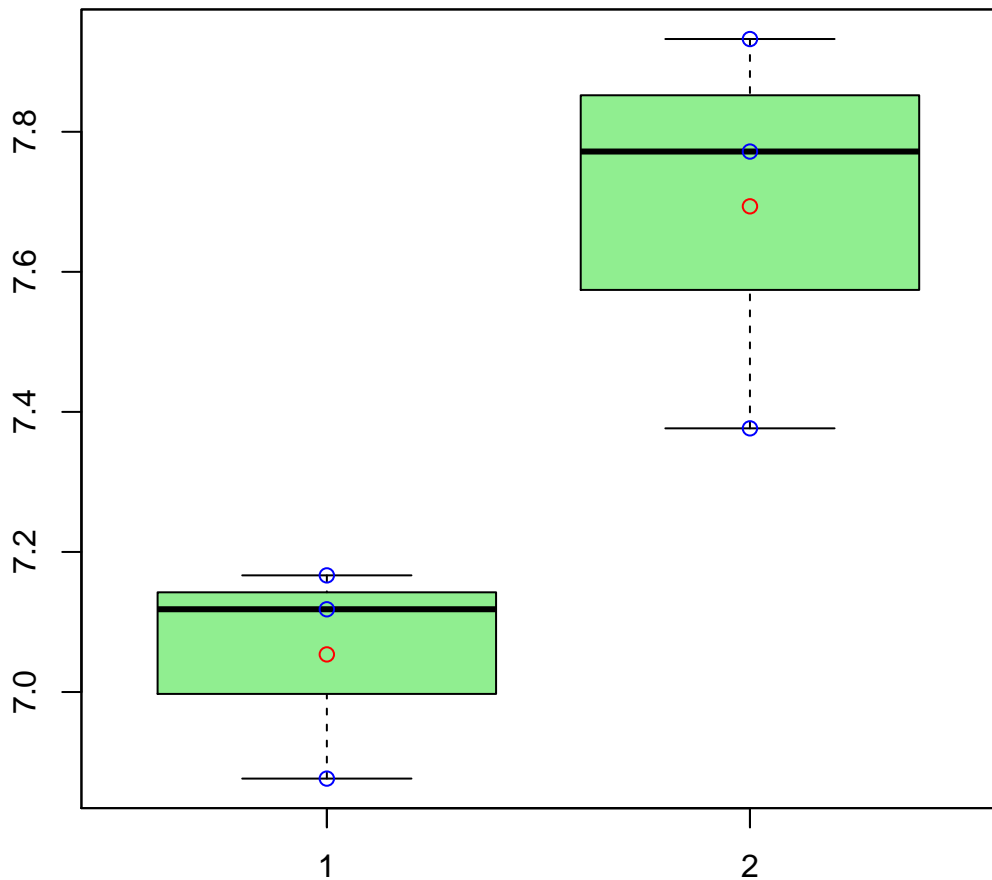

t-Test: p-value = 0.04

# B6SZC2|B6SZC2\_MAIZE

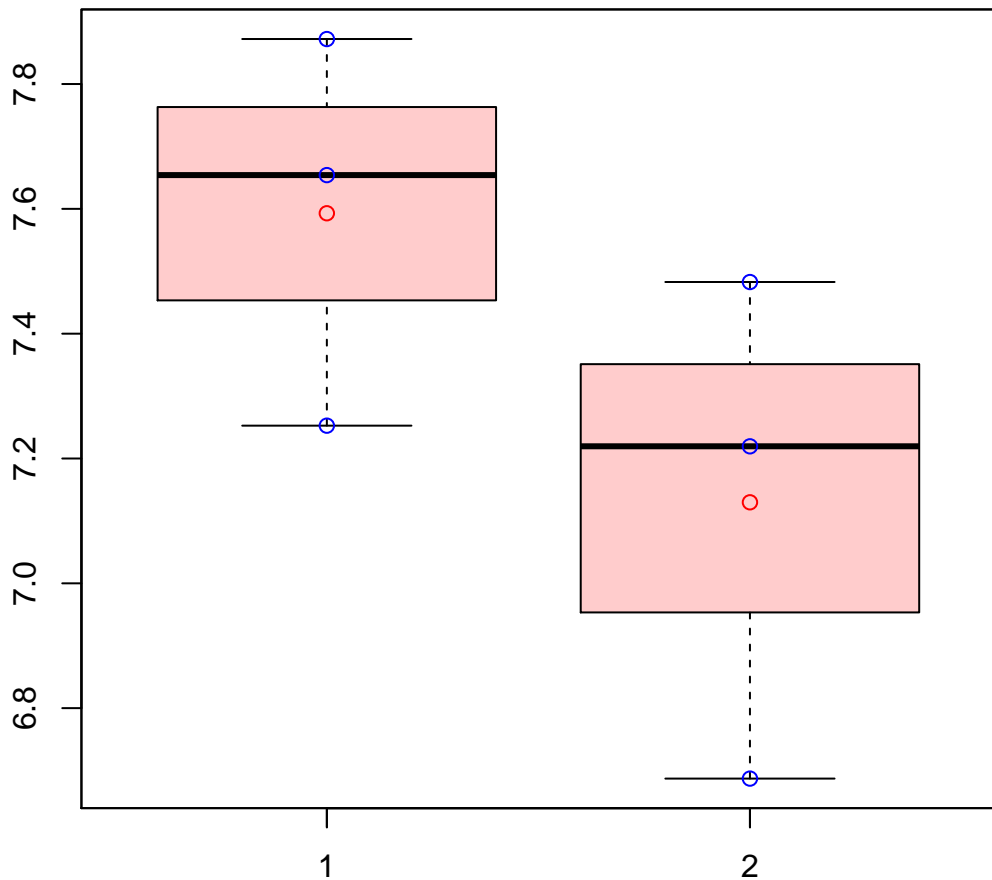

t-Test: p-value = 0.2

# B6SZH7|B6SZH7\_MAIZE

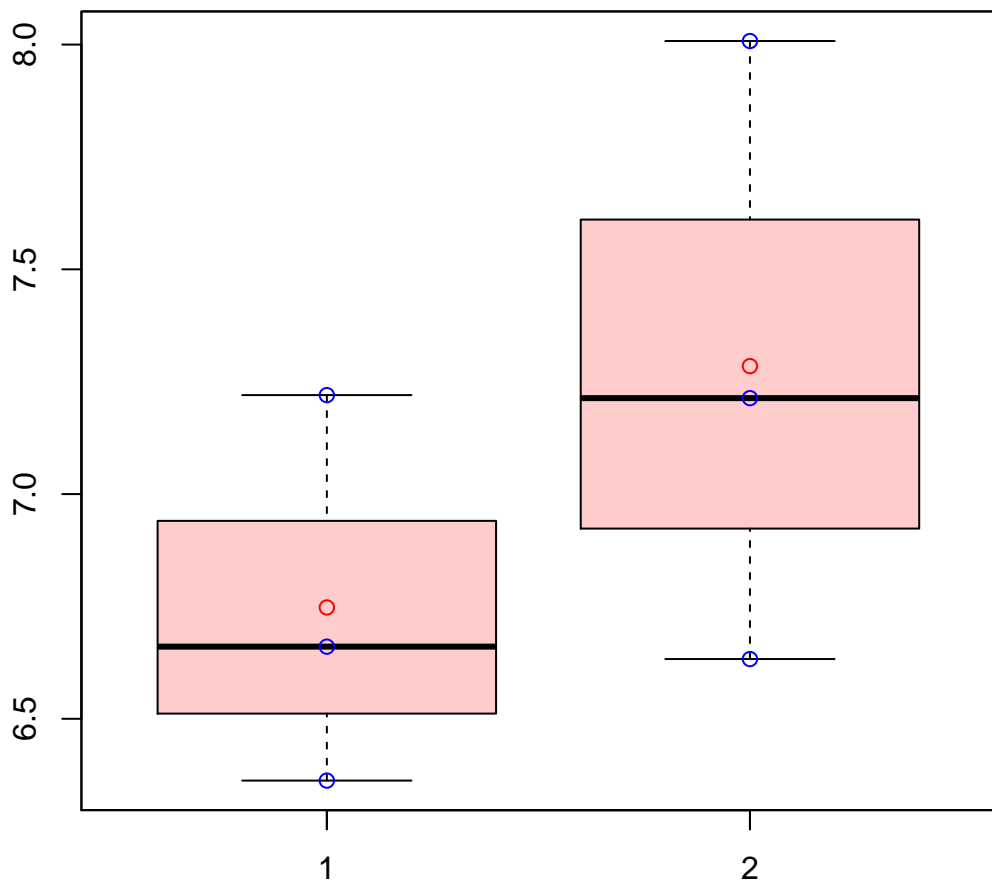

t-Test: p-value = 0.33

# B6SZJ3|B6SZJ3\_MAIZE

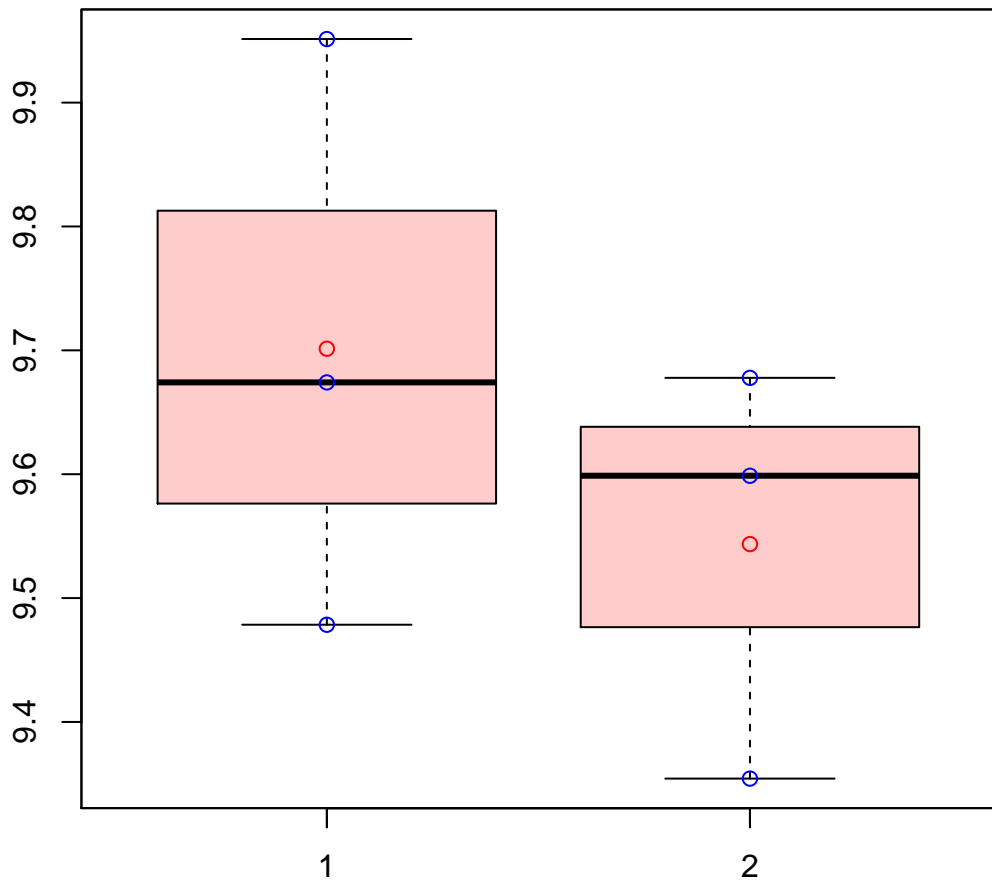

t-Test: p-value = 0.41

# B6T147|B6T147\_MAIZE

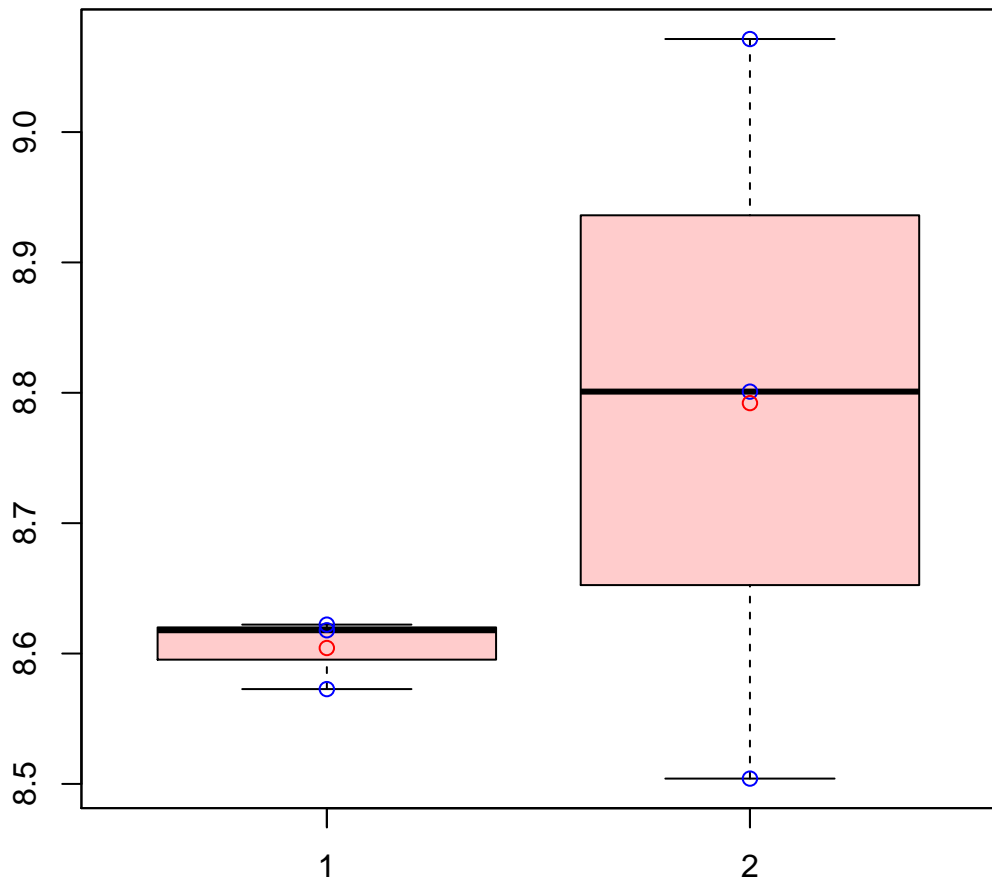

t-Test: p-value = 0.37

# B6T171|B6T171\_MAIZE

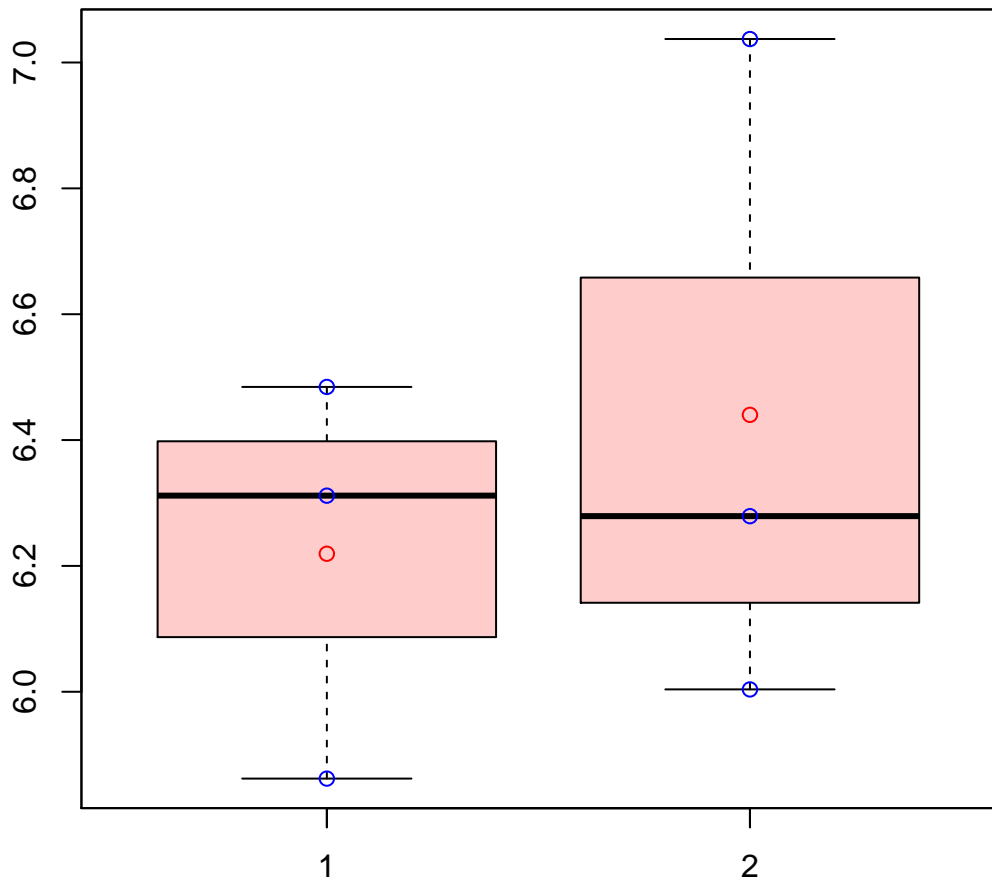

t-Test: p-value = 0.58

# B6T1R0|B6T1R0\_MAIZE

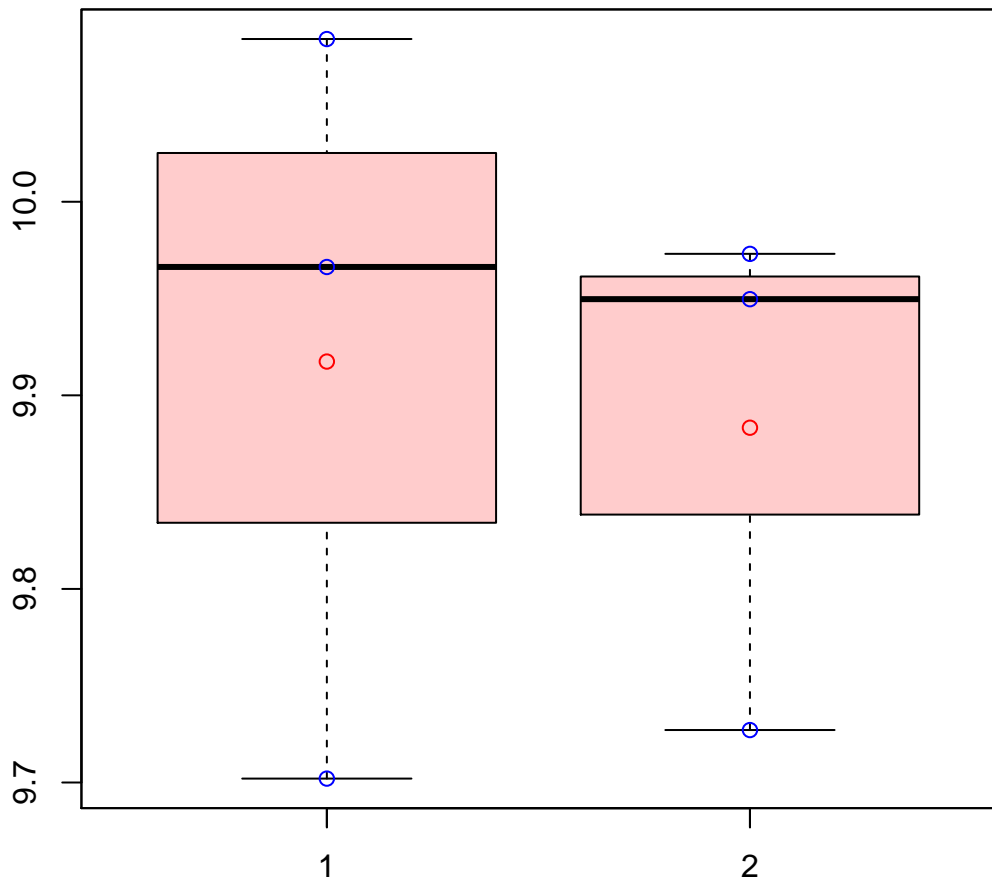

t-Test: p-value = 0.82

# B6T2L2|B6T2L2\_MAIZE

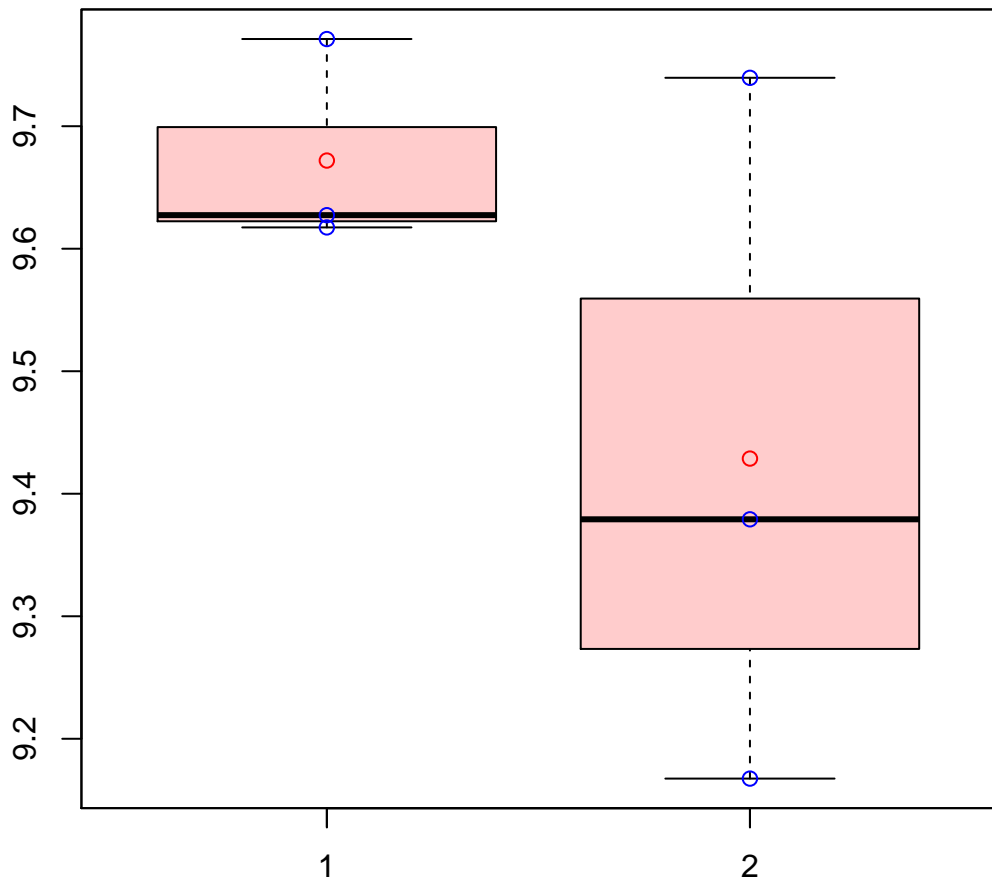

t-Test: p-value = 0.28



# B6T2R0|B6T2R0\_MAIZE

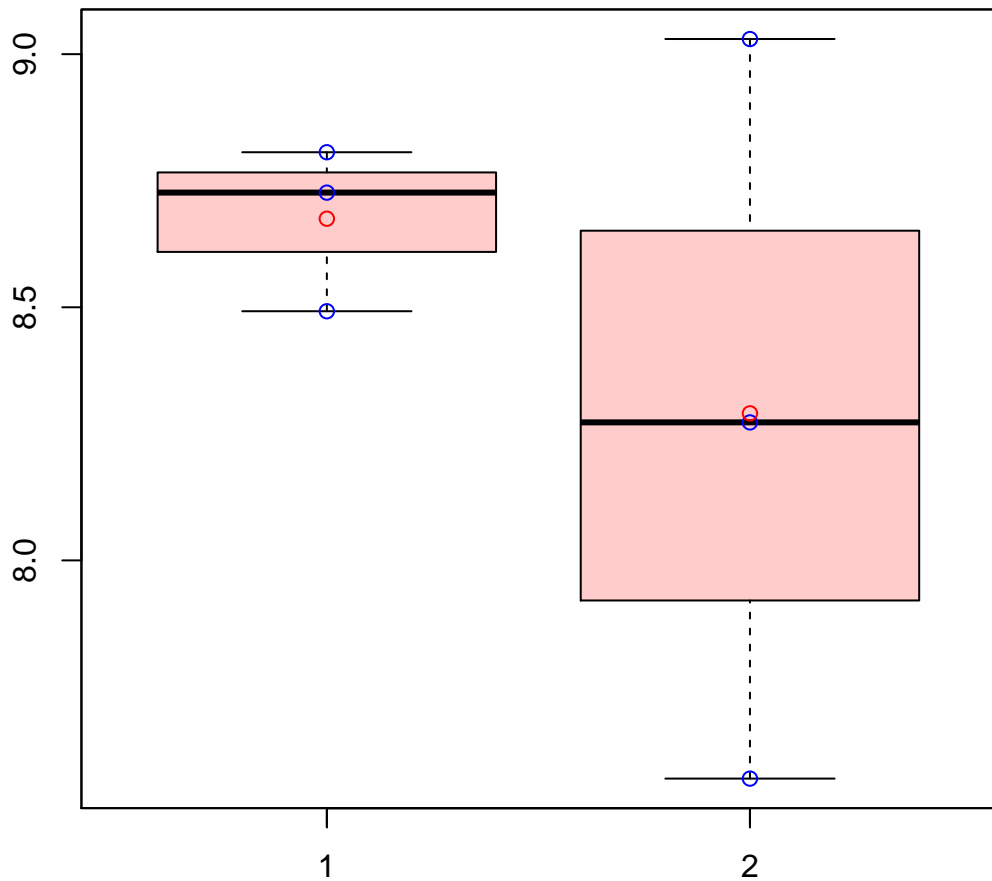

t-Test: p-value = 0.46

# B6T2W9|B6T2W9\_MAIZE

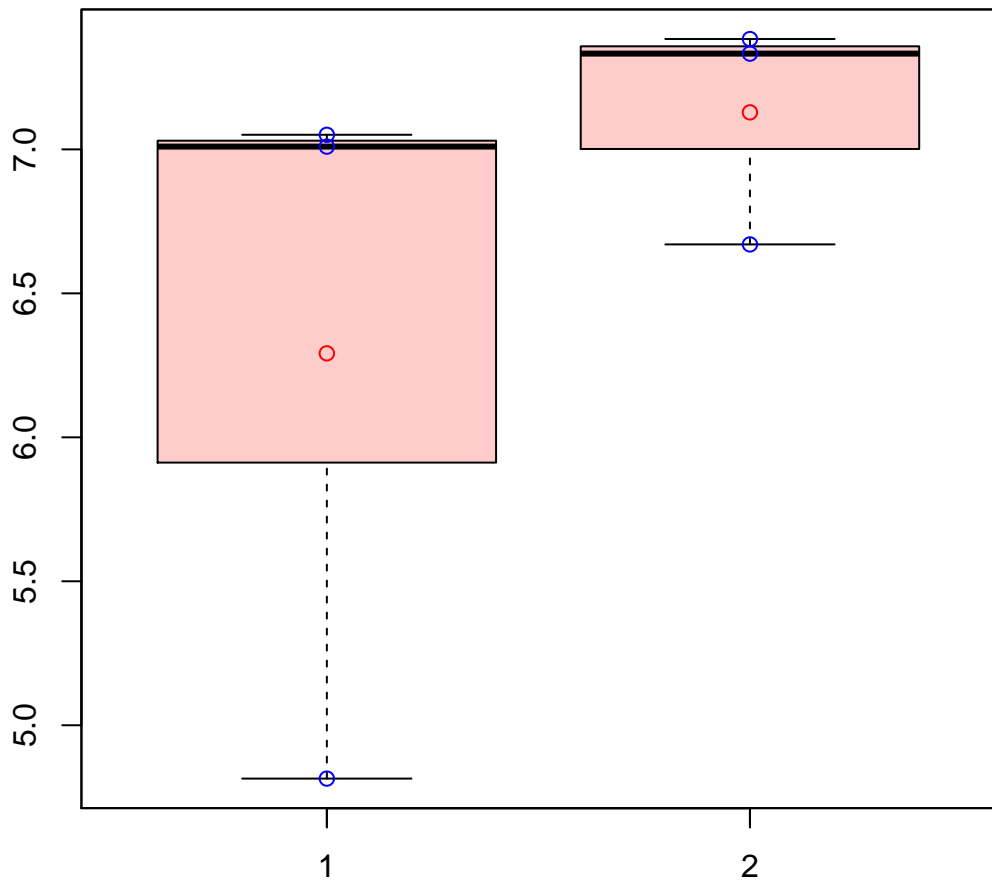

t-Test: p-value = 0.38

# B6T3B2|B6T3B2\_MAIZE

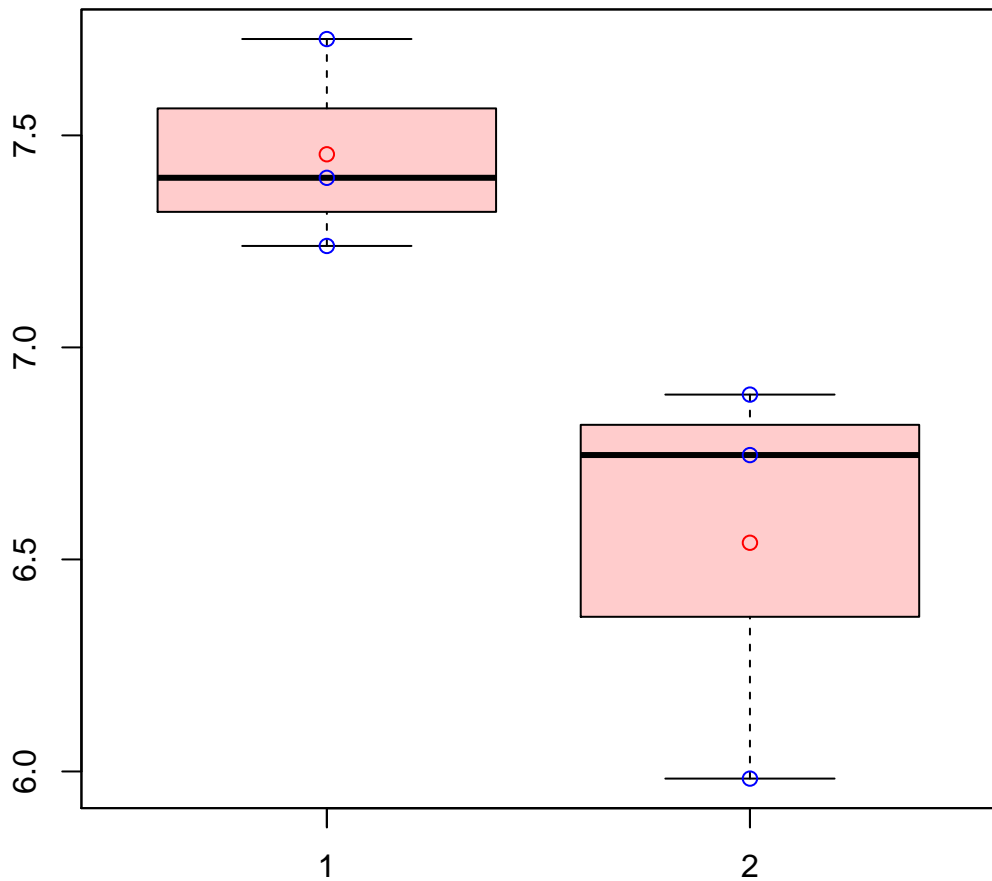

t-Test: p-value = 0.06

# B6T3F2|B6T3F2\_MAIZE

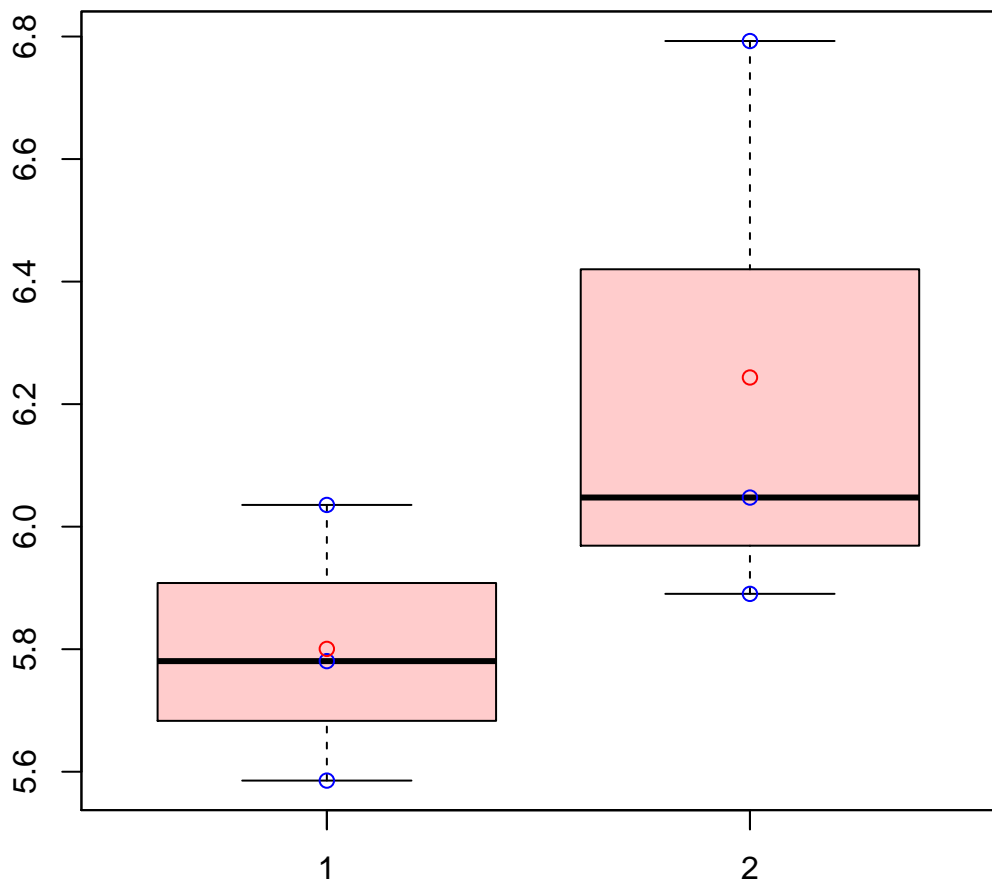

t-Test: p-value = 0.25

# B6T440|B6T440\_MAIZE

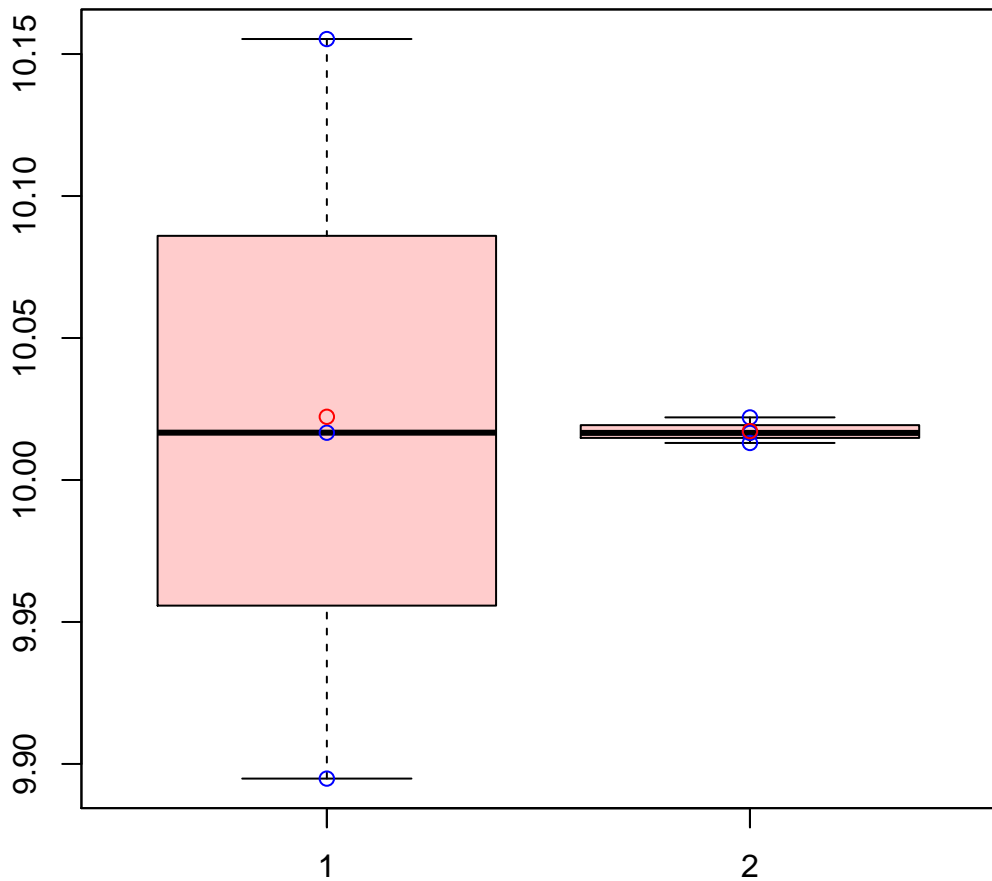

t-Test: p-value = 0.95

# B6T4J1|B6T4J1\_MAIZE

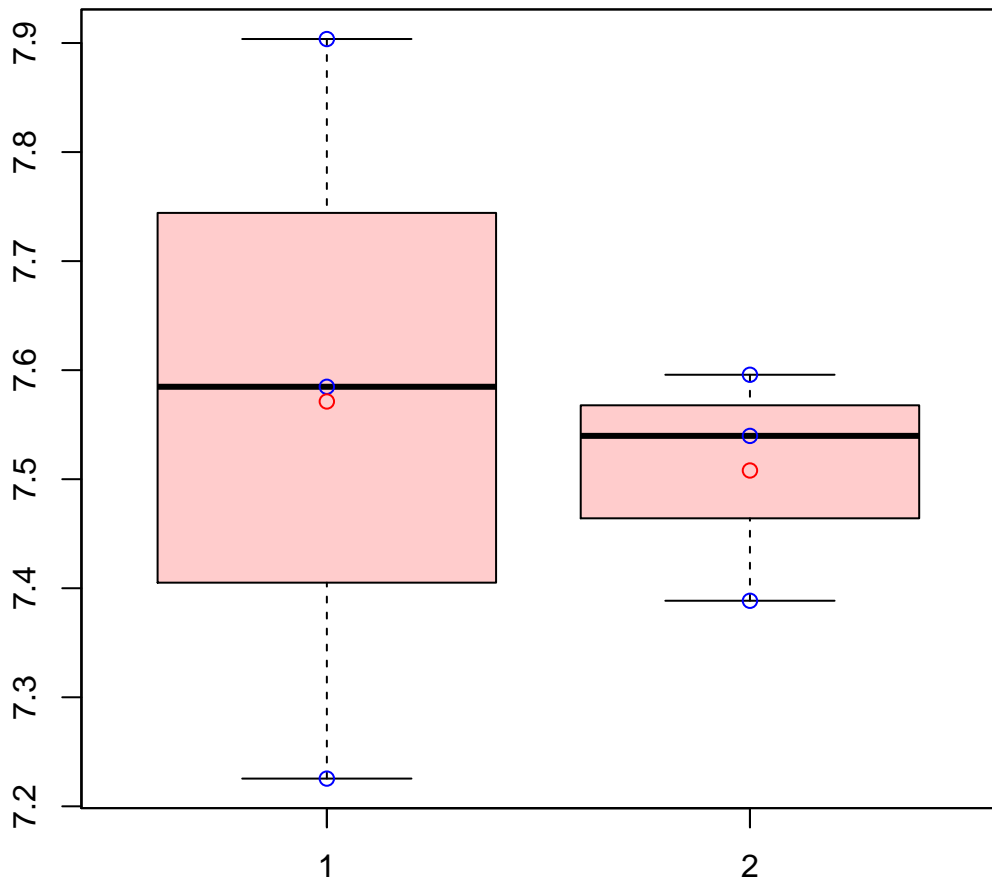

t-Test: p-value = 0.78

# B6T4U8|B6T4U8\_MAIZE

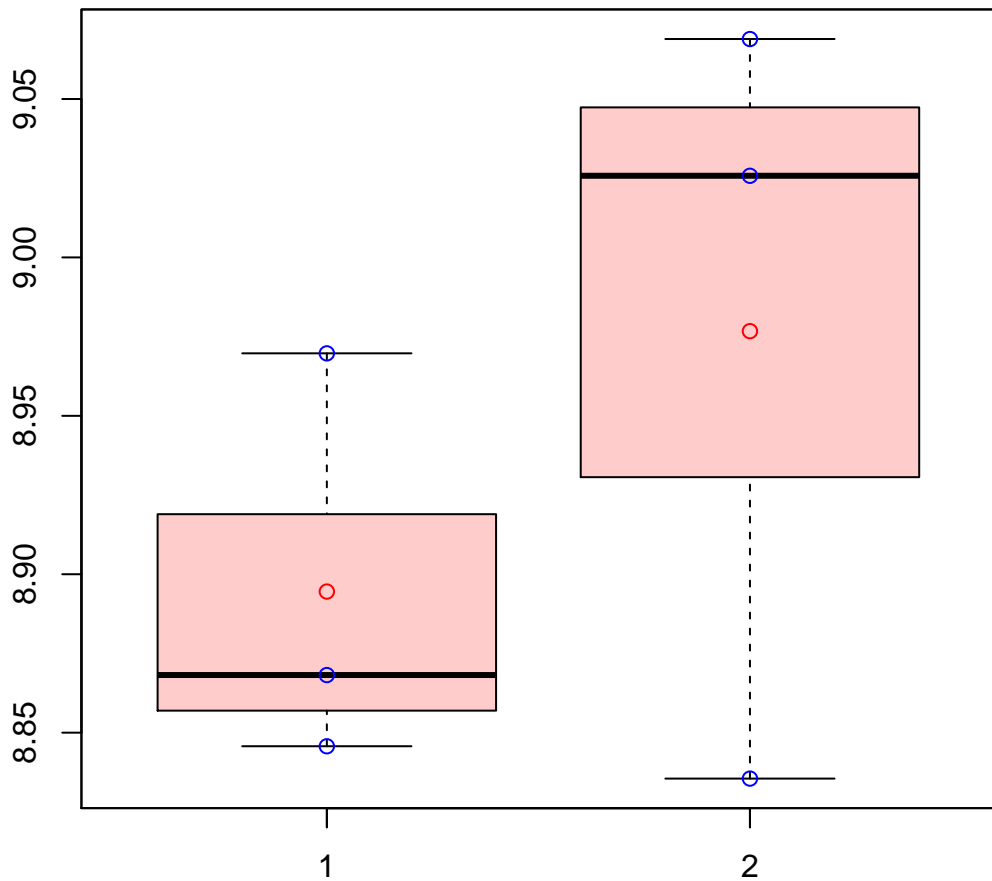

t-Test: p-value = 0.39

# B6T565|B6T565\_MAIZE

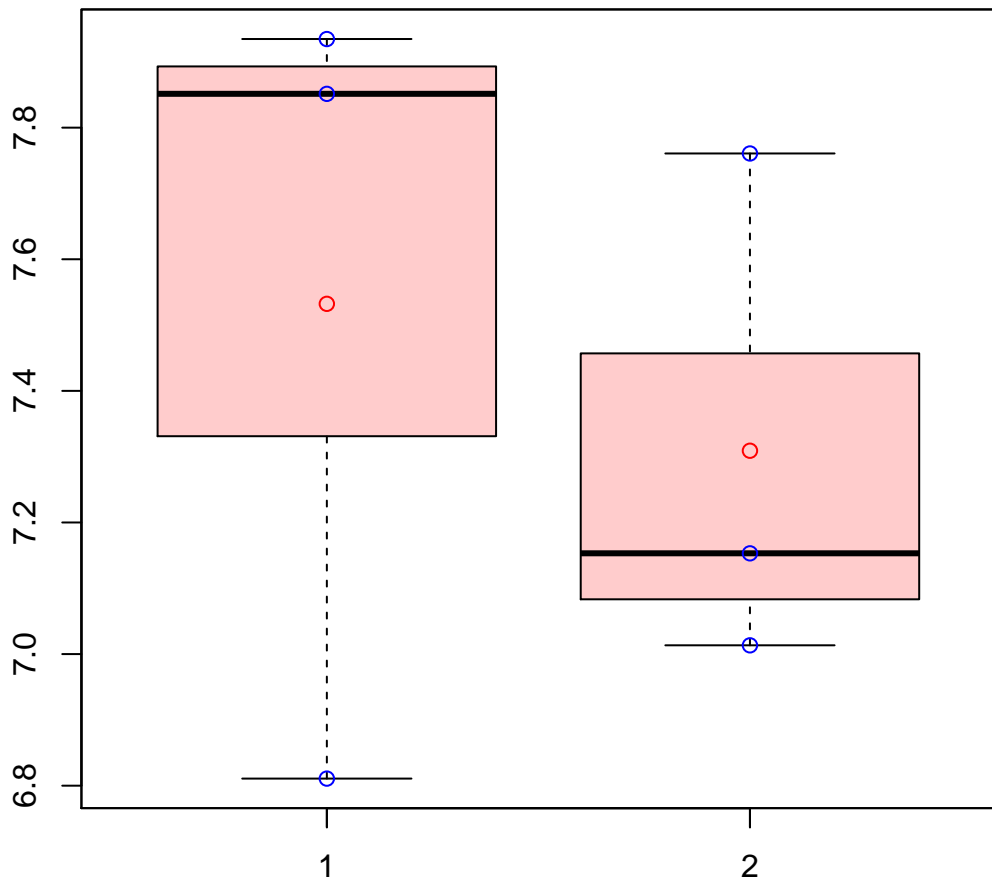

t-Test: p-value = 0.63



# B6T574|B6T574\_MAIZE

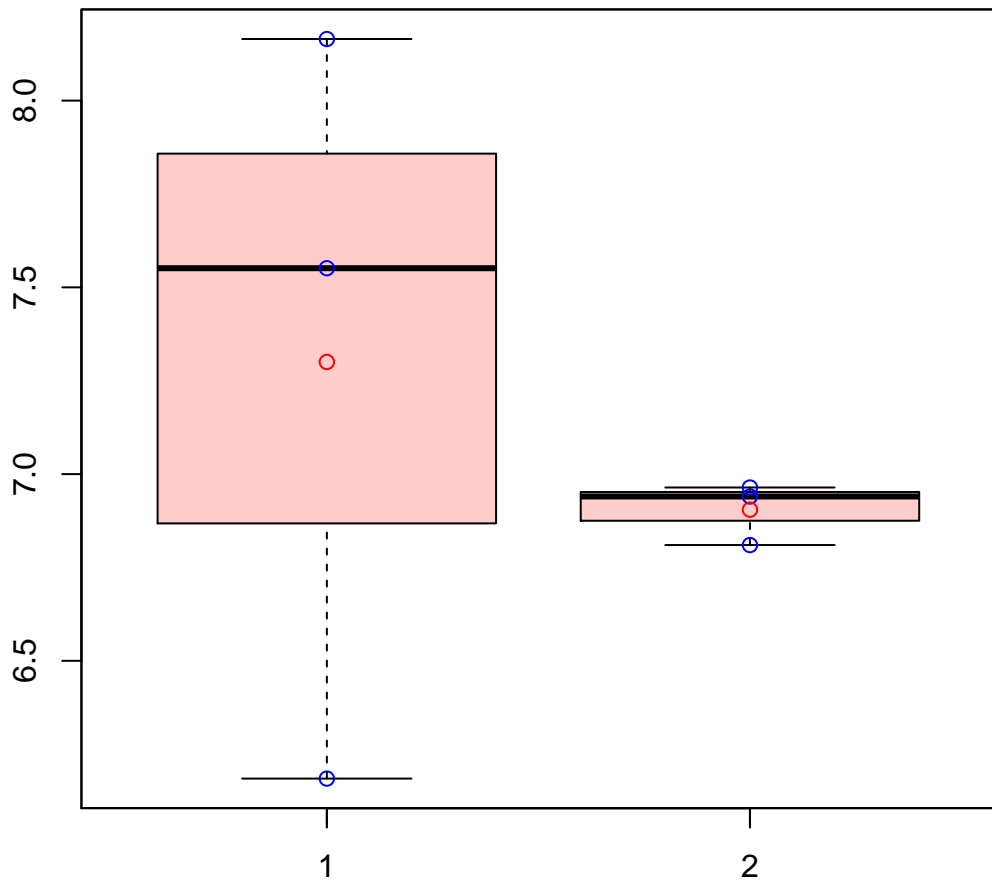

t-Test: p-value = 0.57

# B6T5N2|B6T5N2\_MAIZE

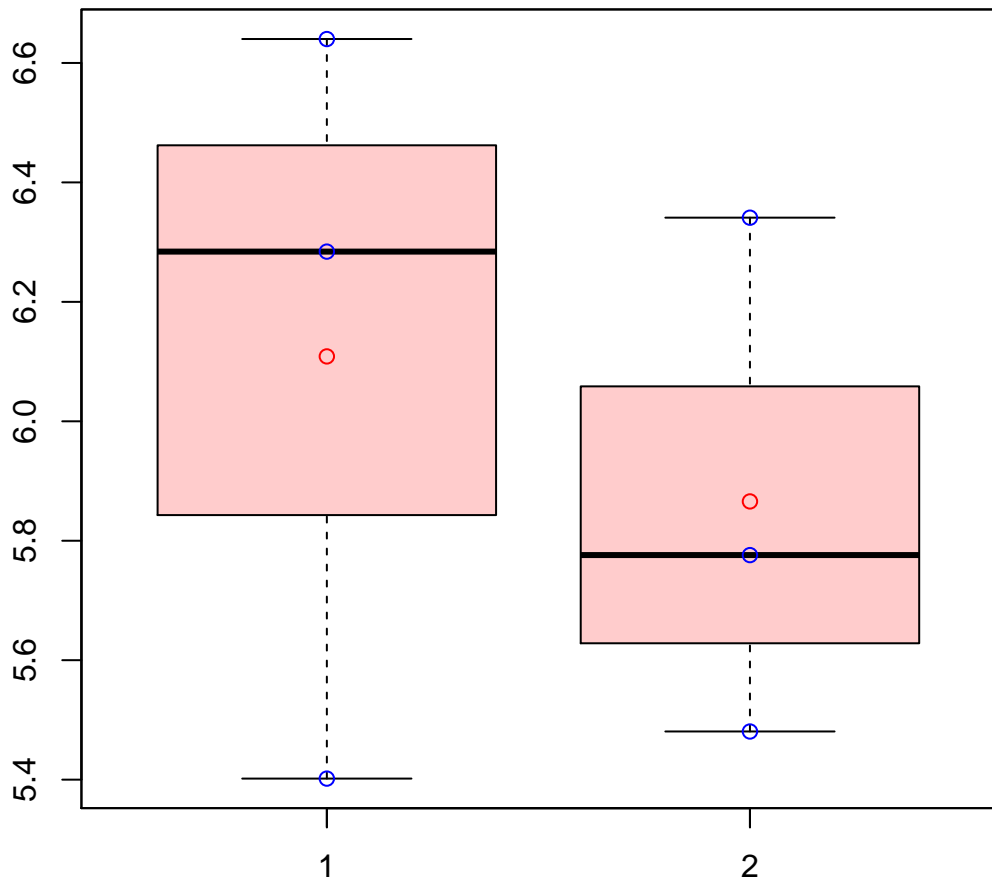

t-Test: p-value = 0.62

# B6T5S8|B6T5S8\_MAIZE

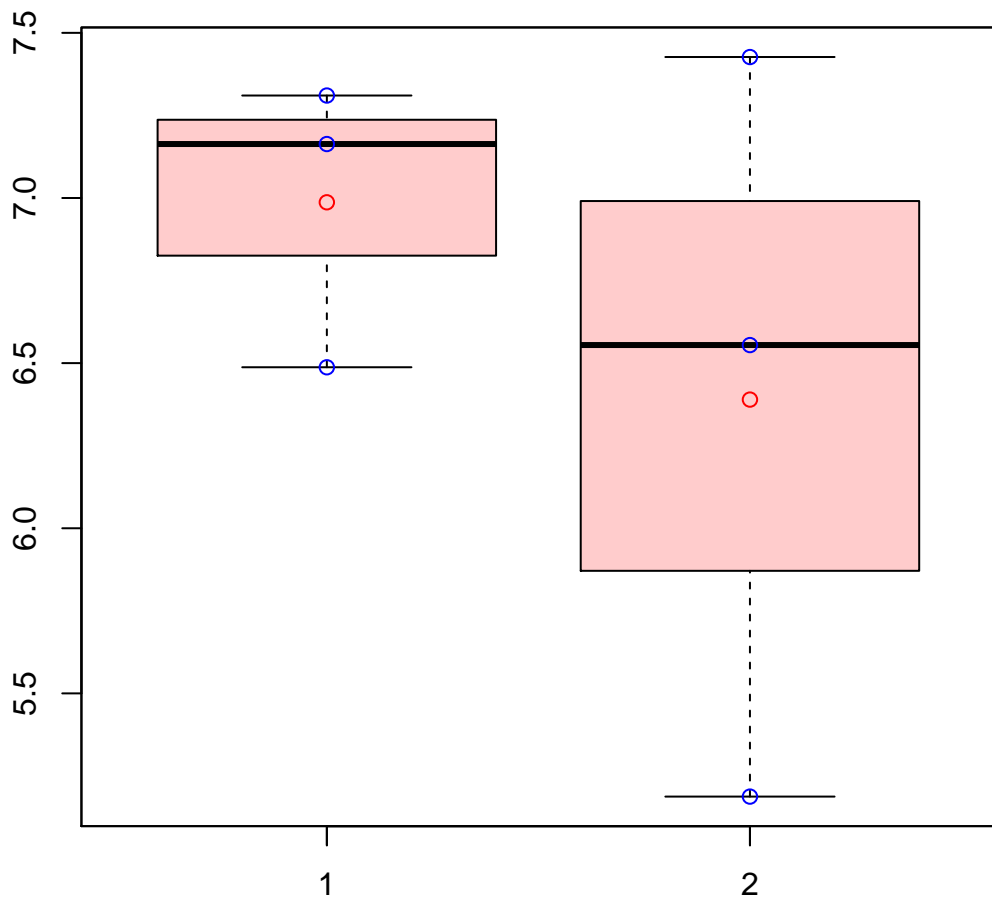

t-Test: p-value = 0.46

# B6T6H3|B6T6H3\_MAIZE

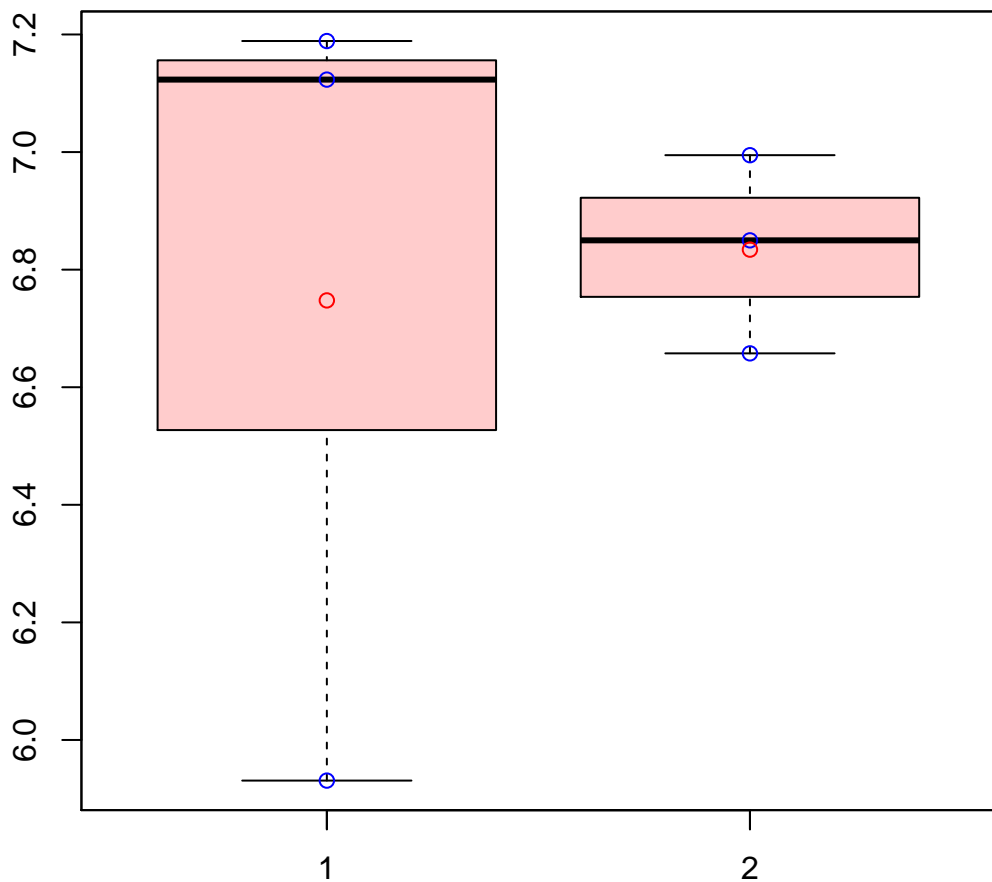

t-Test: p-value = 0.85

# B6T6V3|B6T6V3\_MAIZE

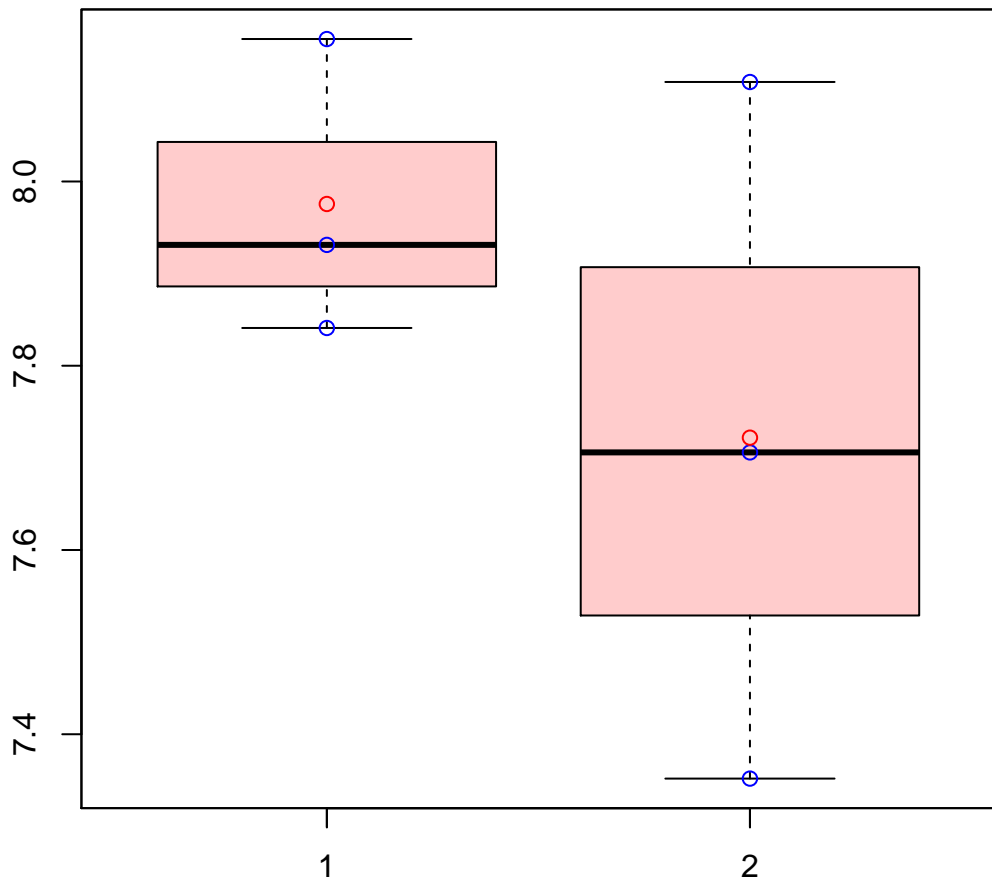

t-Test: p-value = 0.37

# B6T6W1|B6T6W1\_MAIZE

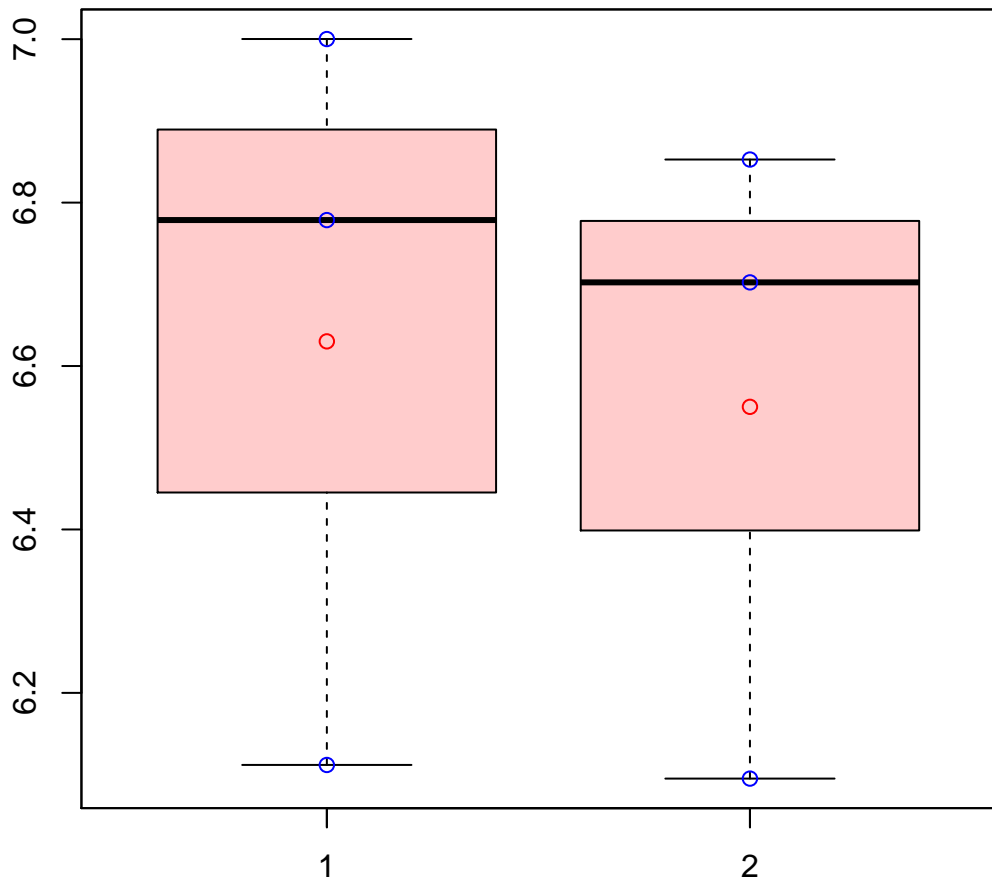

t-Test: p-value = 0.83

# B6T761|B6T761\_MAIZE

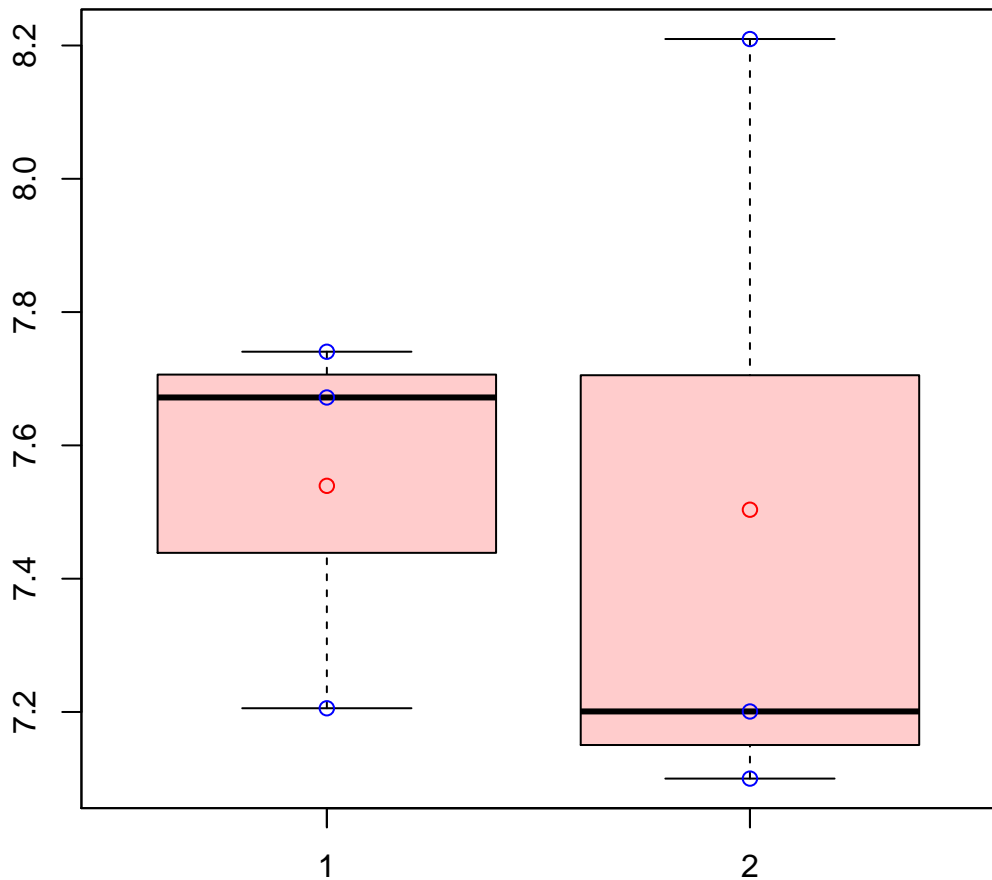

t-Test: p-value = 0.93

# B6T782|B6T782\_MAIZE

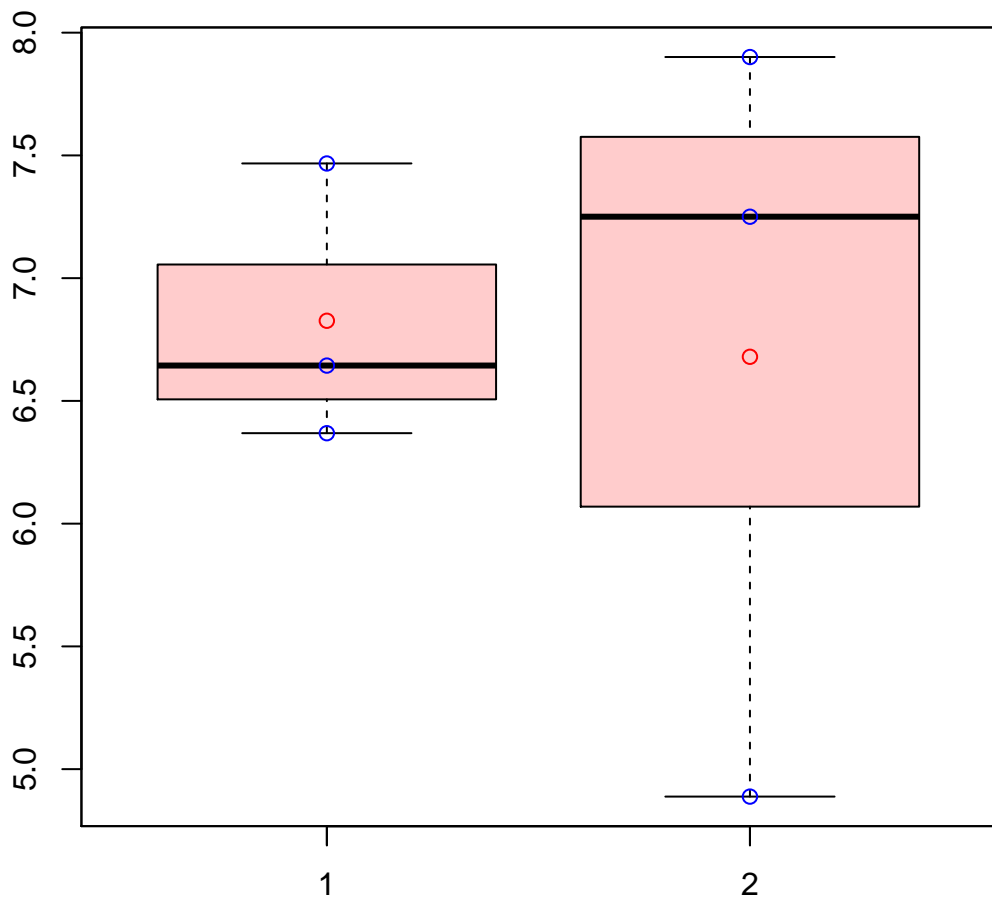

t-Test: p-value = 0.89



# B6T7D4|B6T7D4\_MAIZE

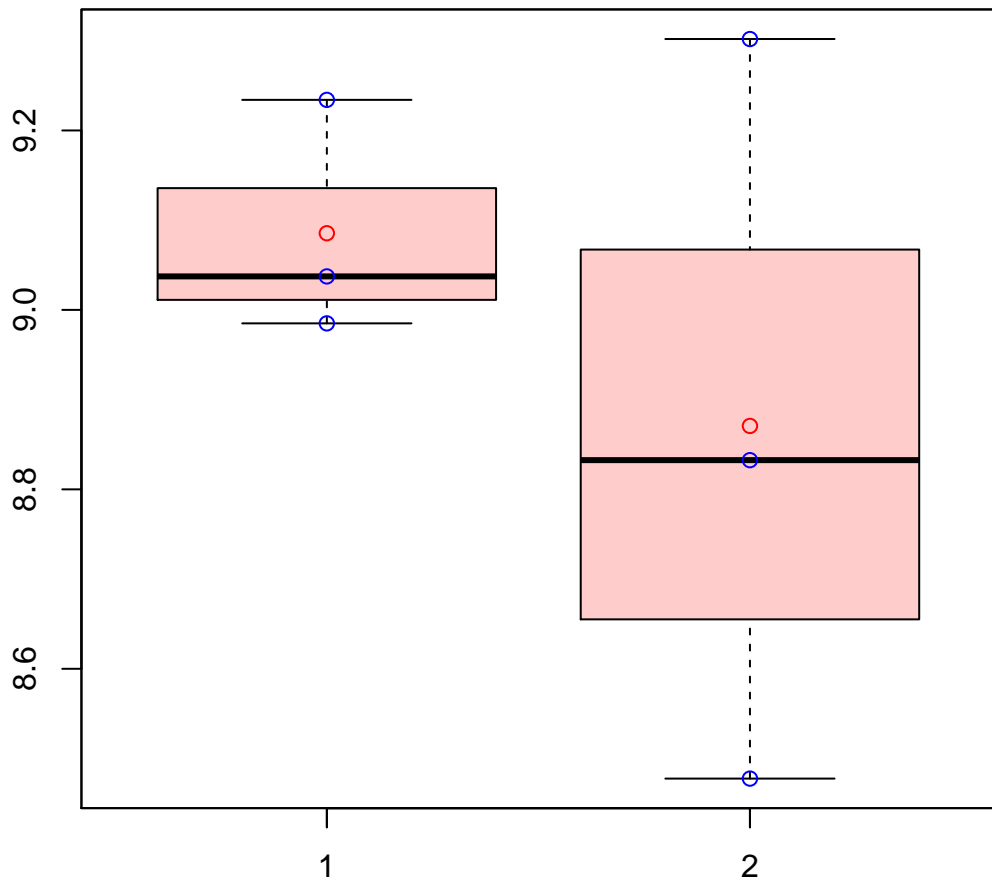

t-Test: p-value = 0.47

# B6T7G6|B6T7G6\_MAIZE

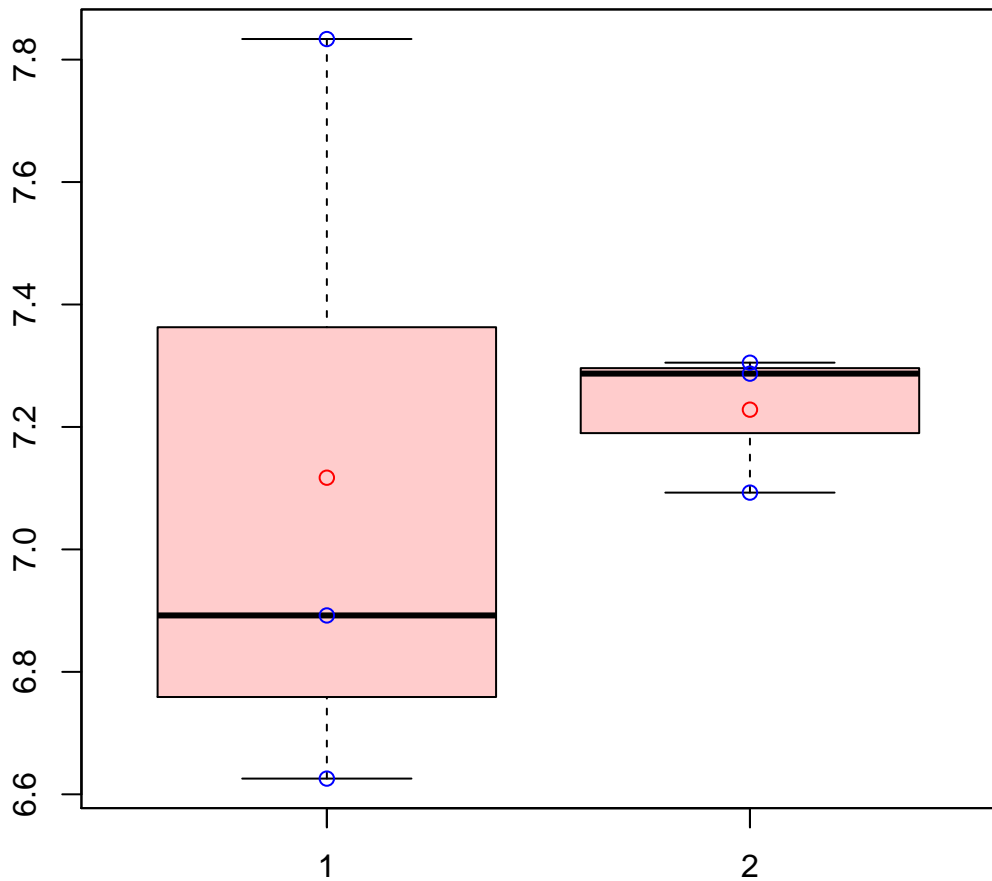

t-Test: p-value = 0.79

# B6T7Q7|B6T7Q7\_MAIZE

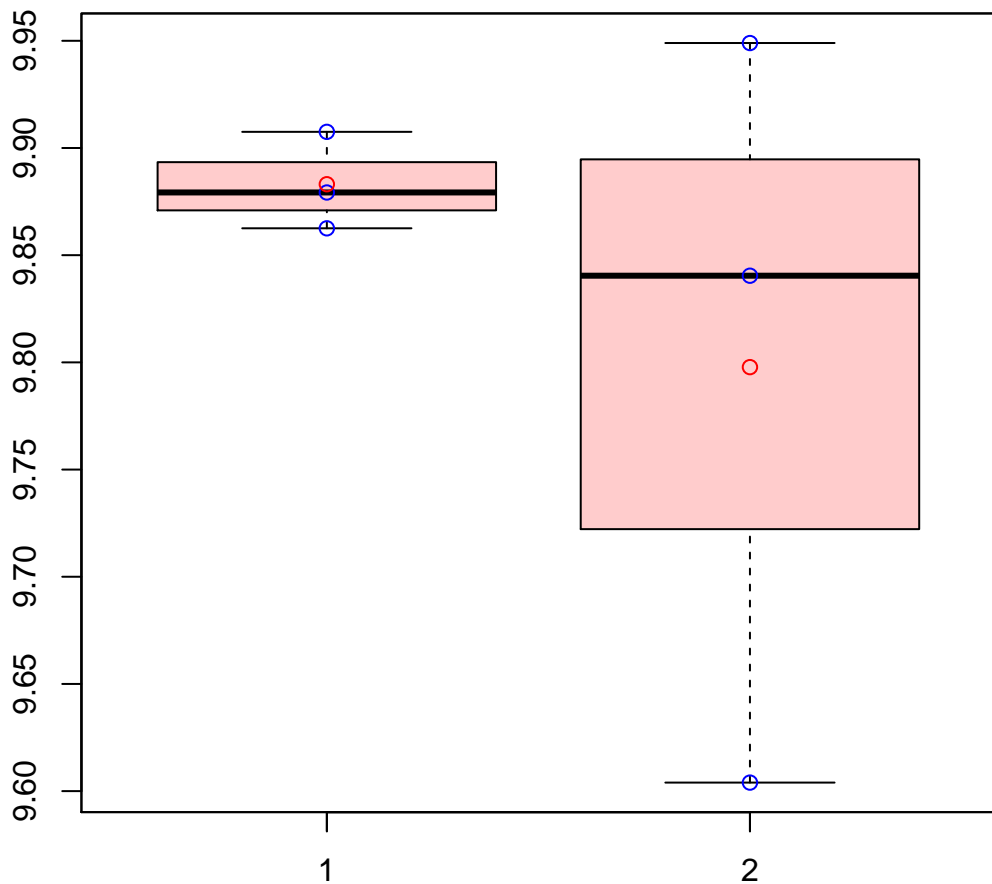

t-Test: p-value = 0.49

# B6T927|B6T927\_MAIZE

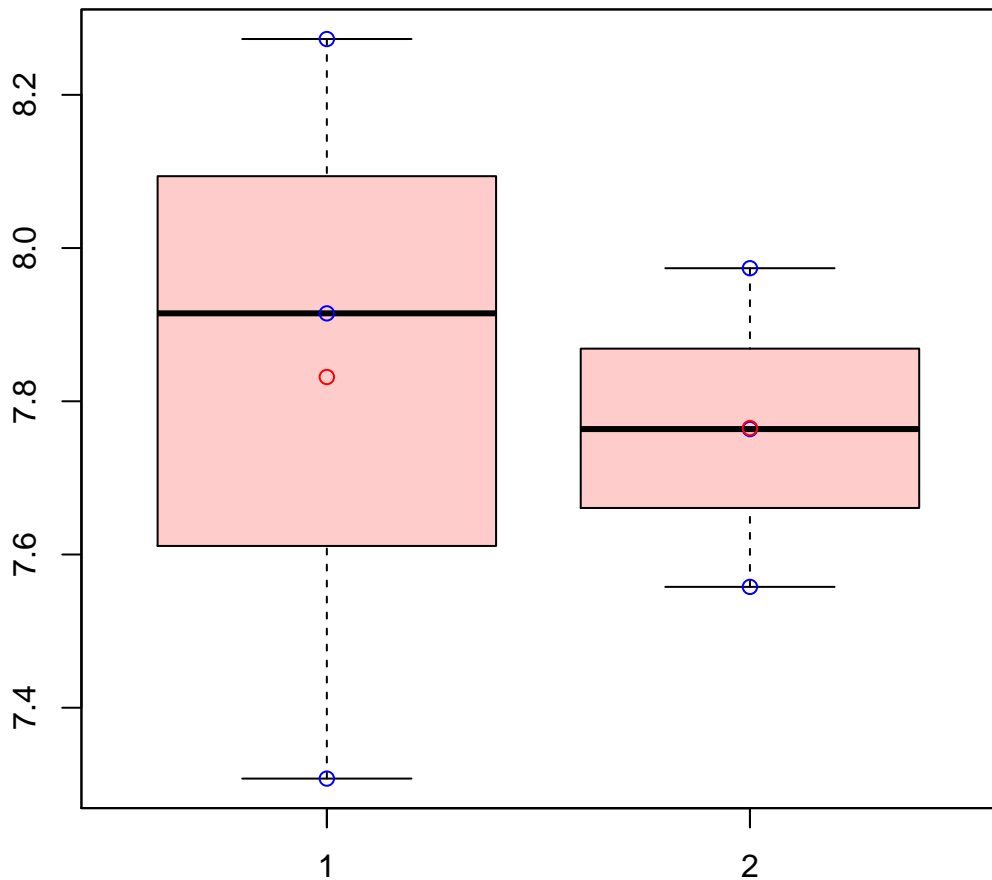

t-Test: p-value = 0.84

# B6T978|B6T978\_MAIZE

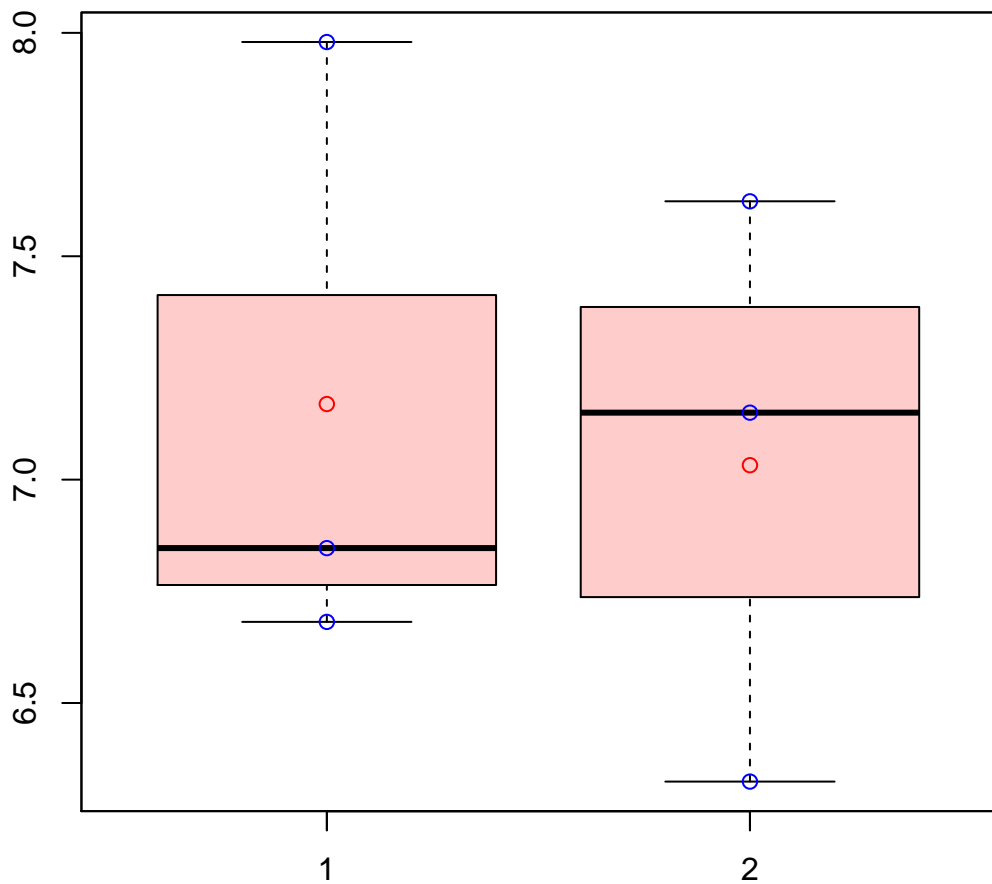

t-Test: p-value = 0.82

# B6T9P4|B6T9P4\_MAIZE

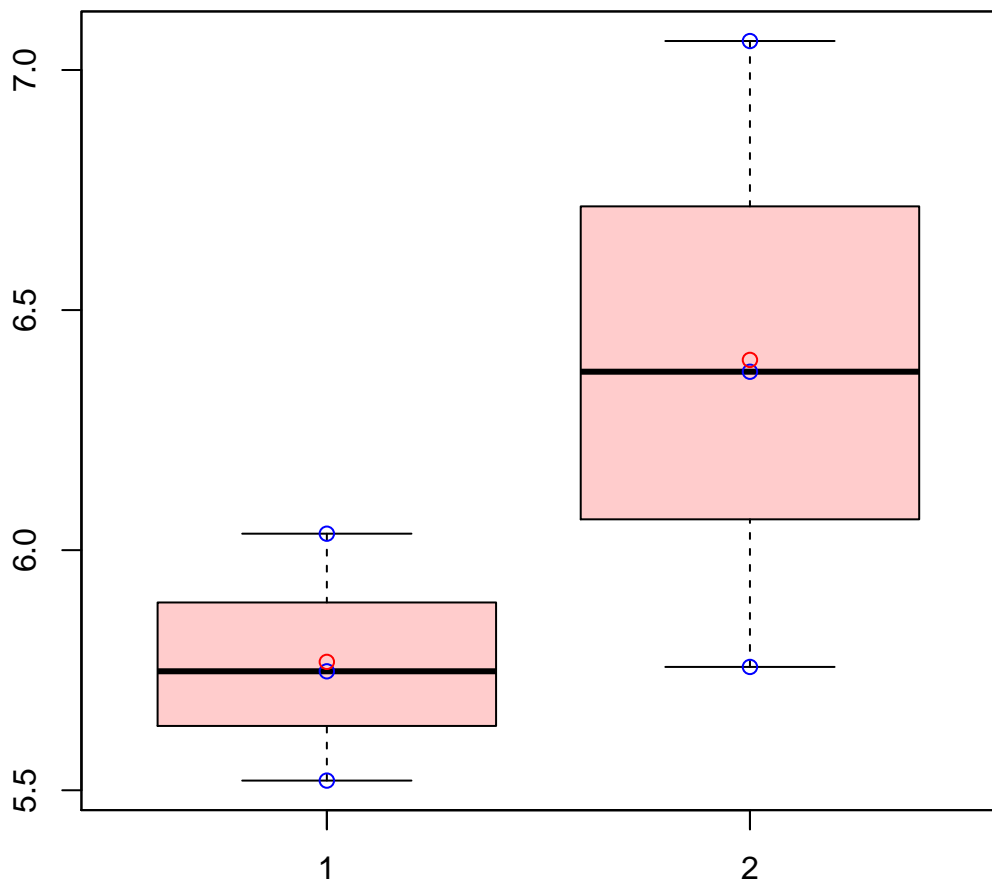

t-Test: p-value = 0.23

# B6T9S5|B6T9S5\_MAIZE

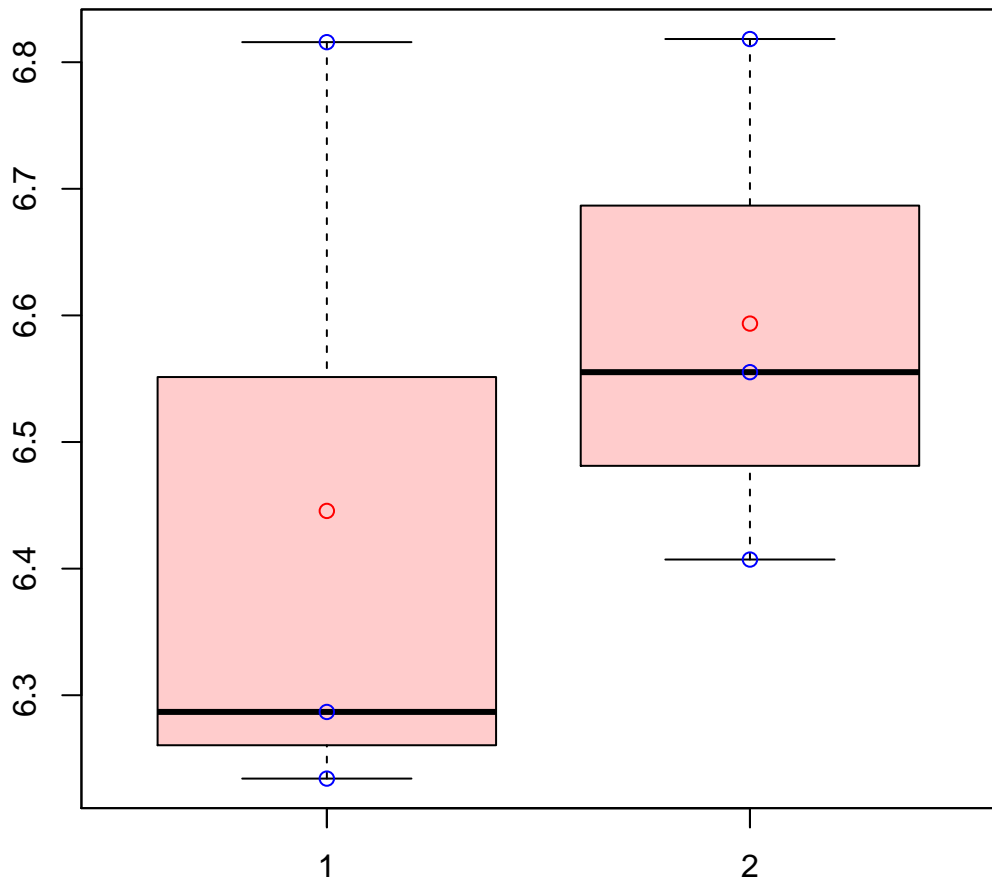

t-Test: p-value = 0.55

# B6TAI9|B6TAI9\_MAIZE

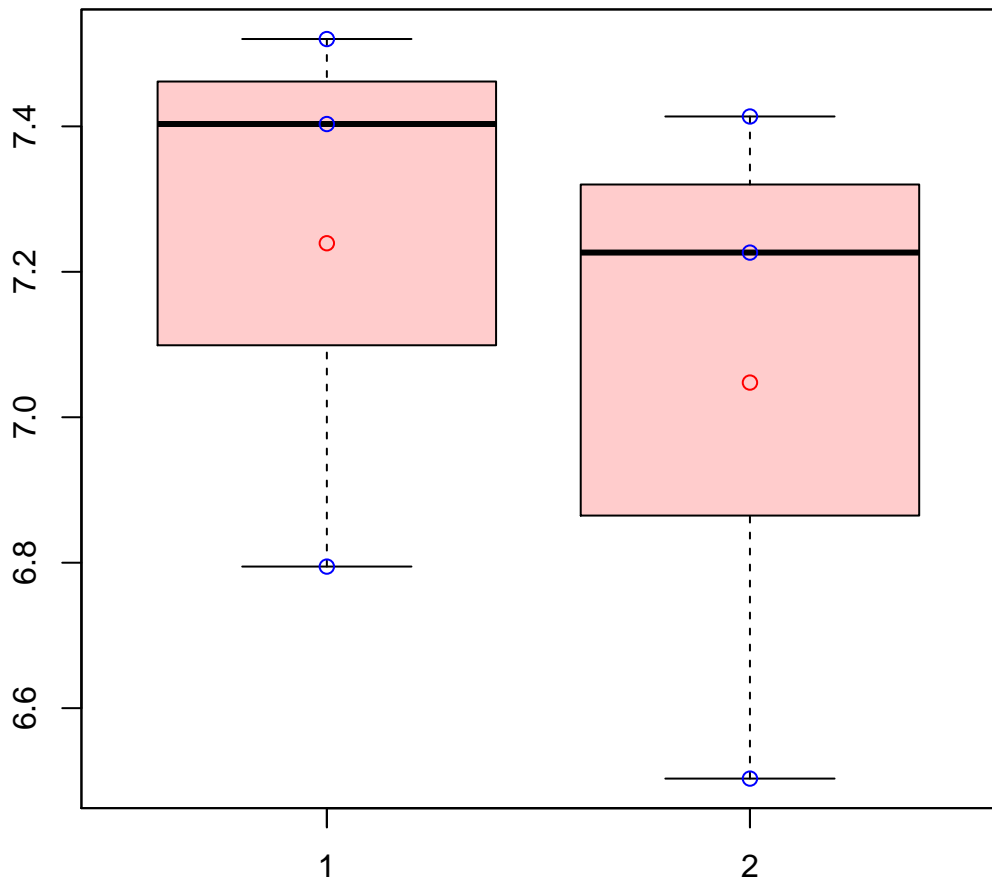

t-Test: p-value = 0.62



# B6TAJ3|B6TAJ3\_MAIZE

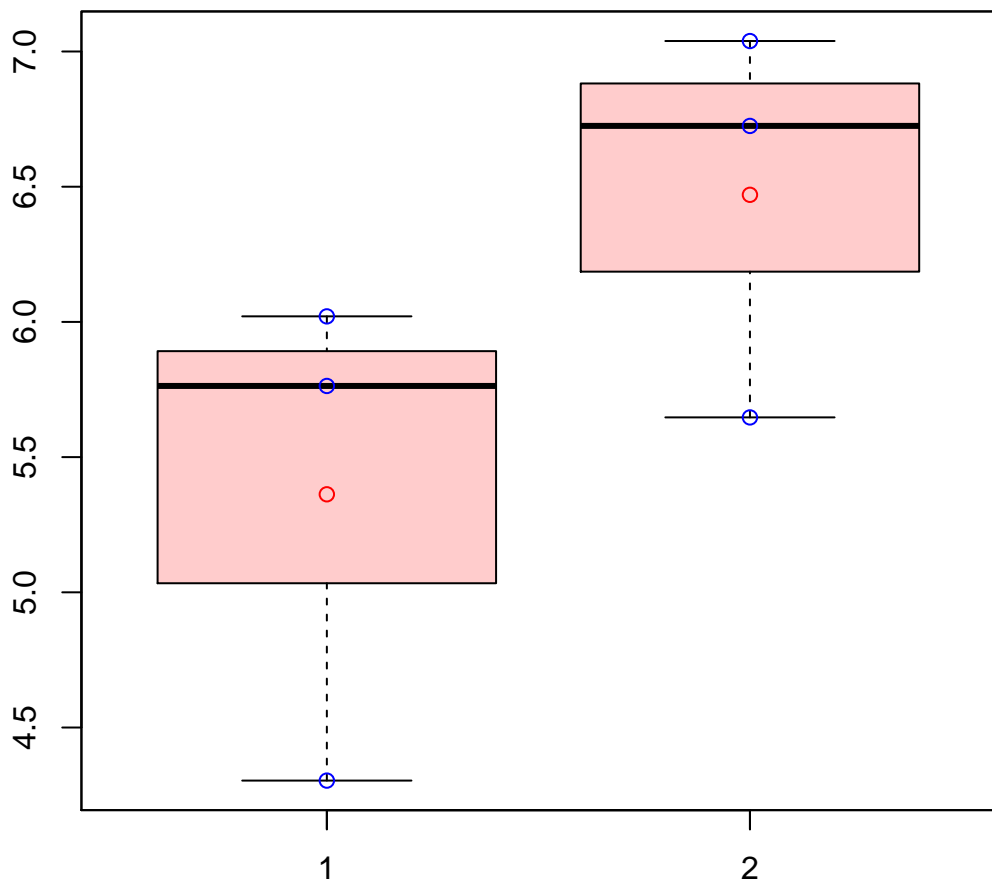

t-Test: p-value = 0.18

# B6TB75|B6TB75\_MAIZE

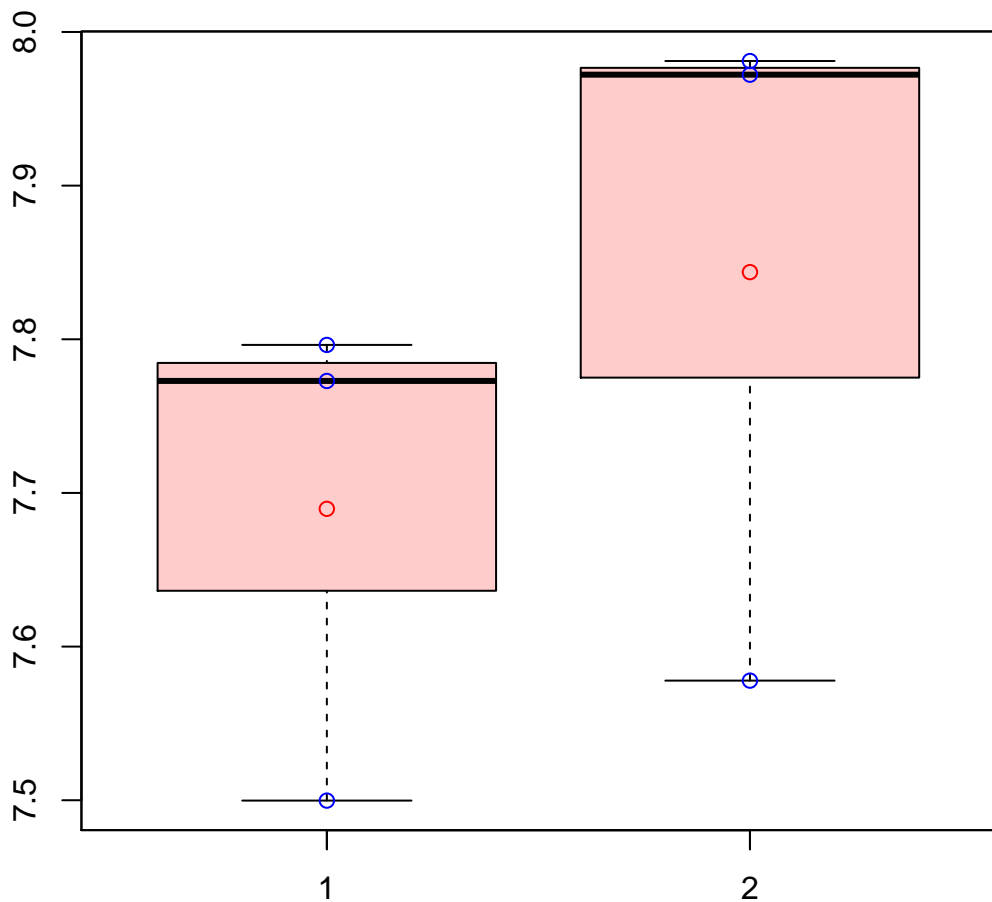

t-Test: p-value = 0.4

# B6TBZ1|B6TBZ1\_MAIZE

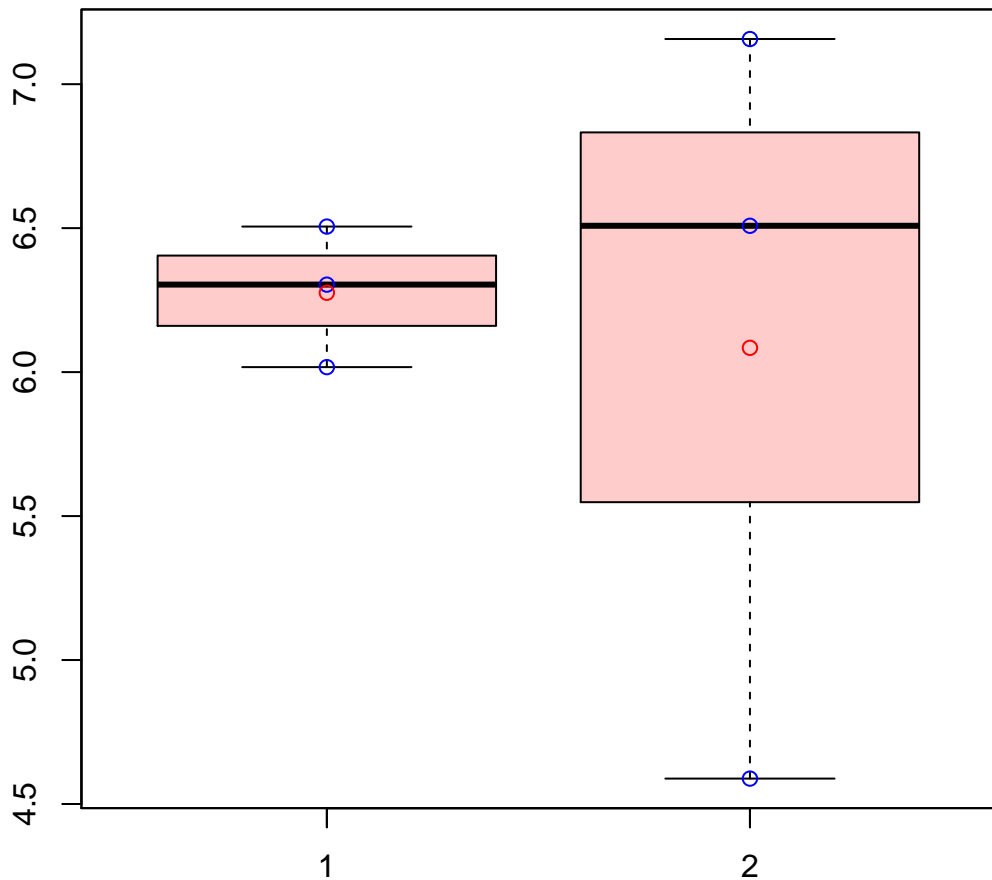

t-Test: p-value = 0.83

# B6TBZ8|B6TBZ8\_MAIZE

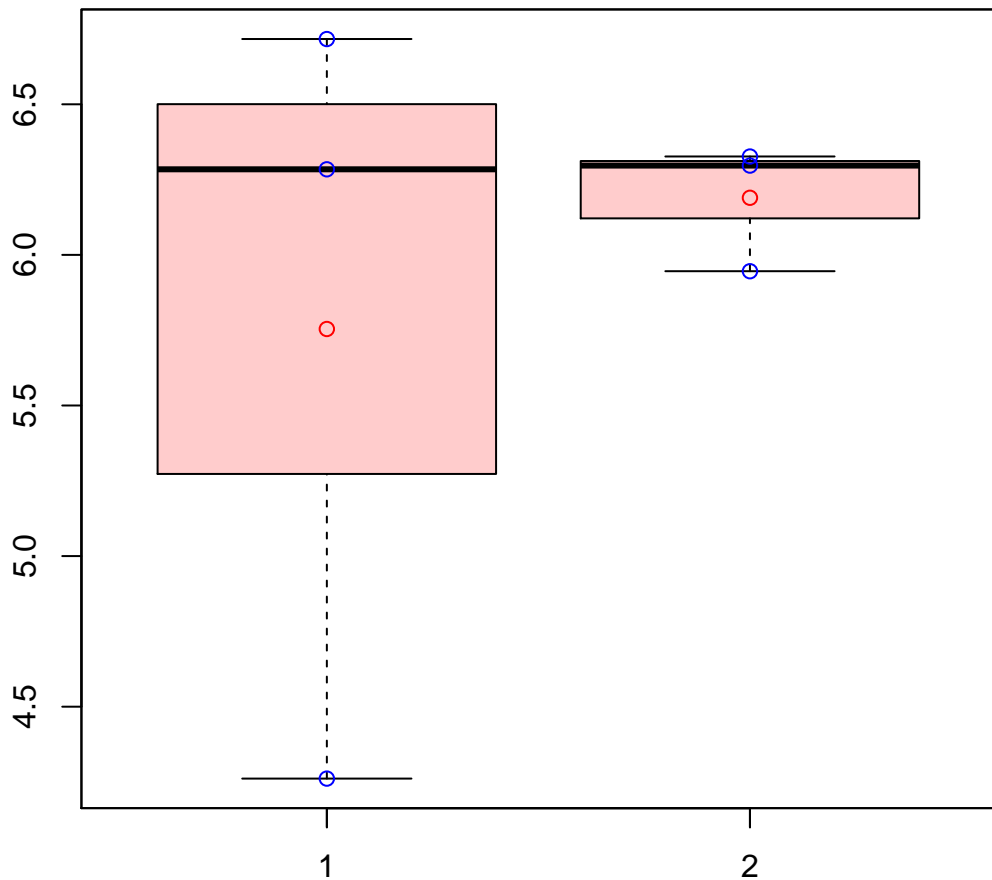

t-Test: p-value = 0.62

# B6TCR9|B6TCR9\_MAIZE

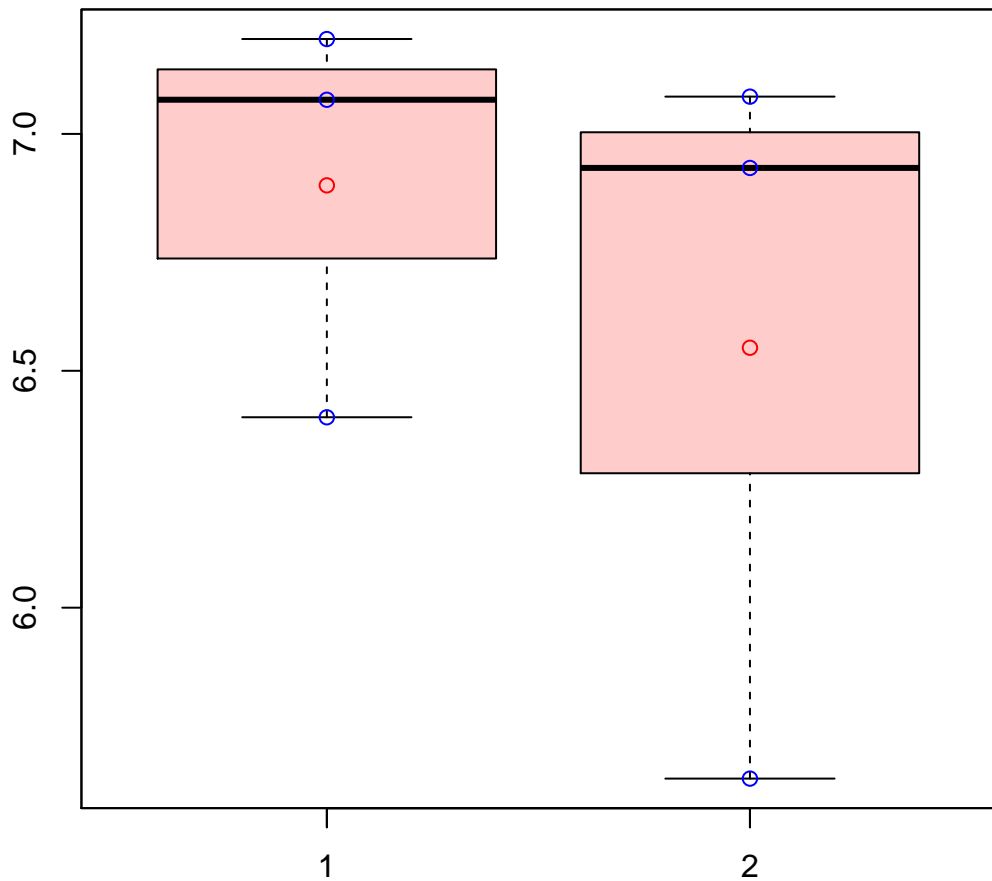

t-Test: p-value = 0.56

# B6TD12|B6TD12\_MAIZE

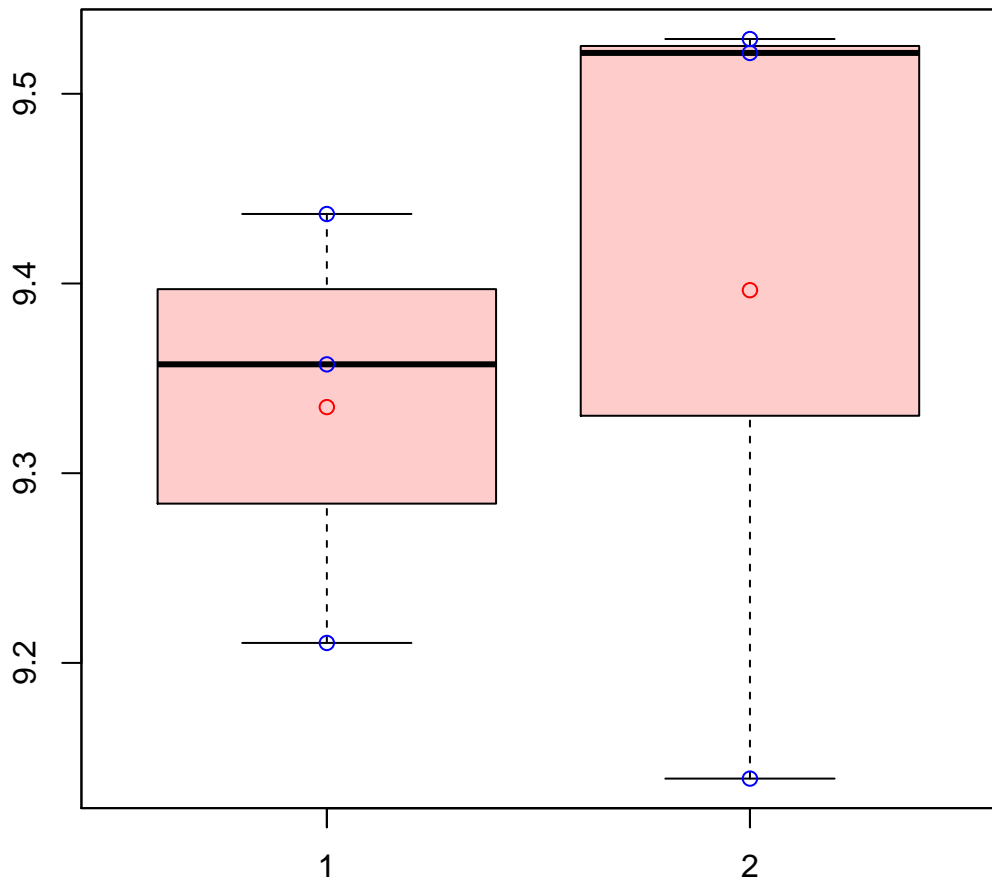

t-Test: p-value = 0.7

# B6TDR5|B6TDR5\_MAIZE

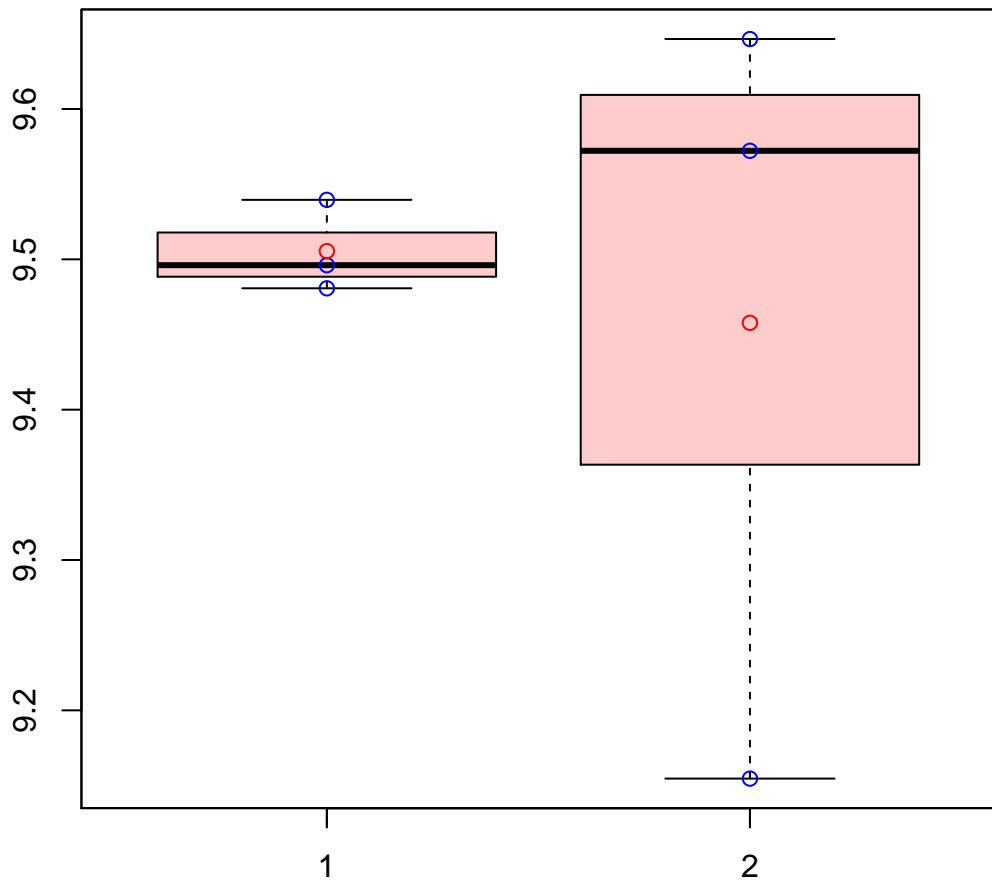

t-Test: p-value = 0.79

# B6TF10|B6TF10\_MAIZE

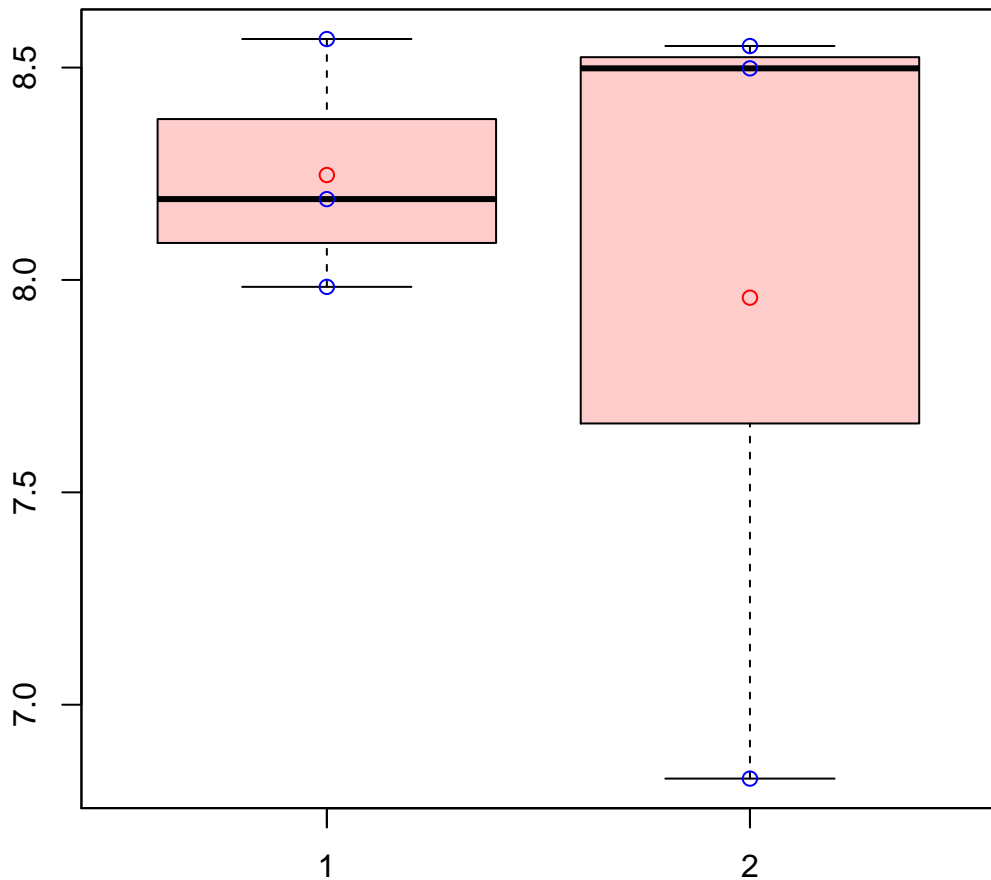

t-Test: p-value = 0.67



# B6TFB8|B6TFB8\_MAIZE

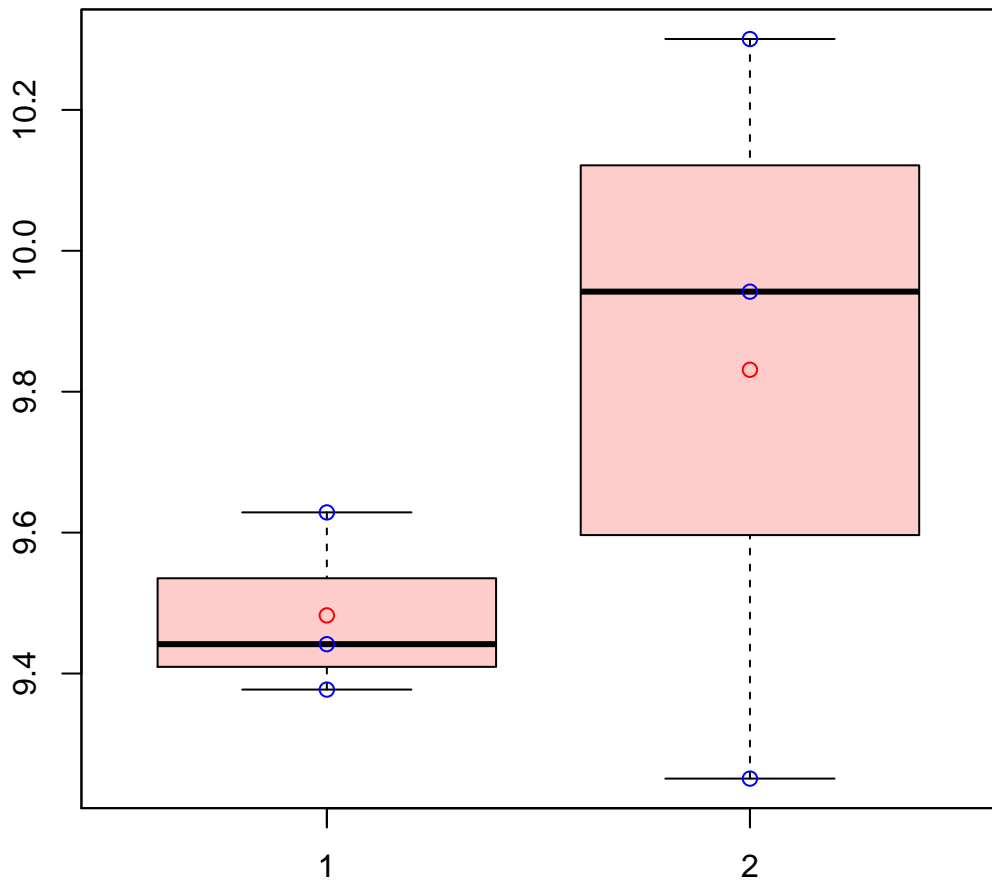

t-Test: p-value = 0.38

# B6TG70|B6TG70\_MAIZE

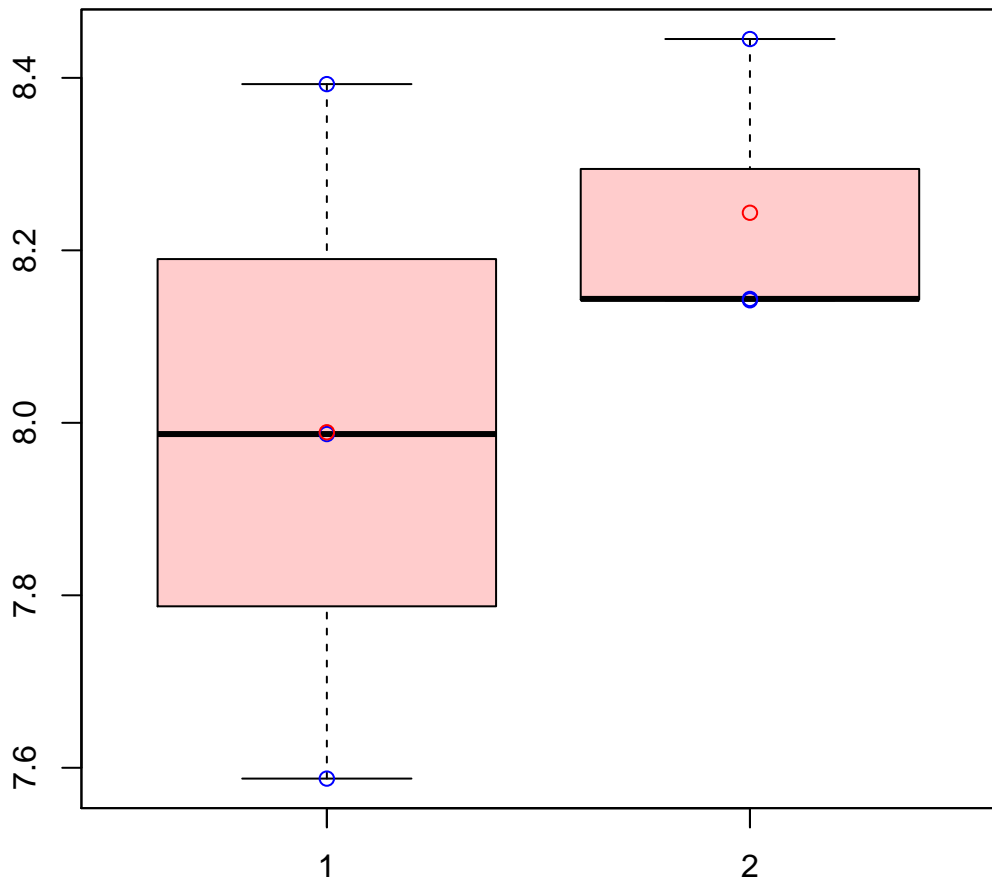

t-Test: p-value = 0.4

# B6TGL5|B6TGL5\_MAIZE

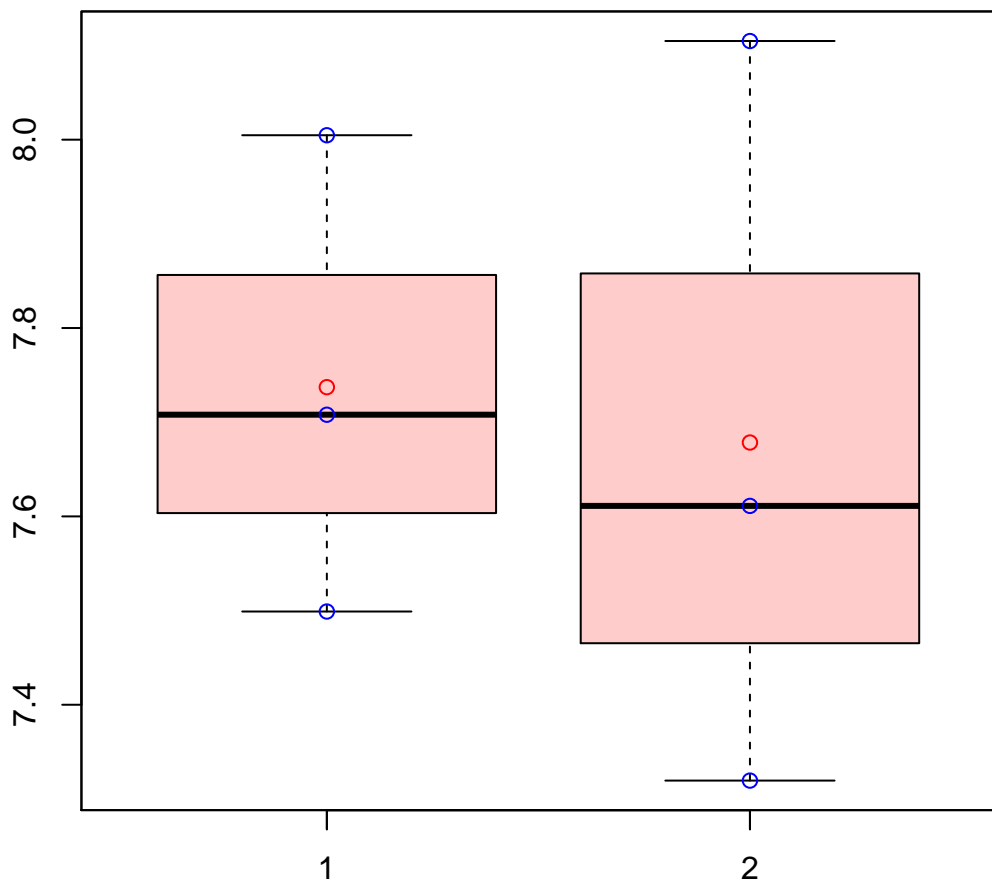

t-Test: p-value = 0.84

# B6TGL7|B6TGL7\_MAIZE

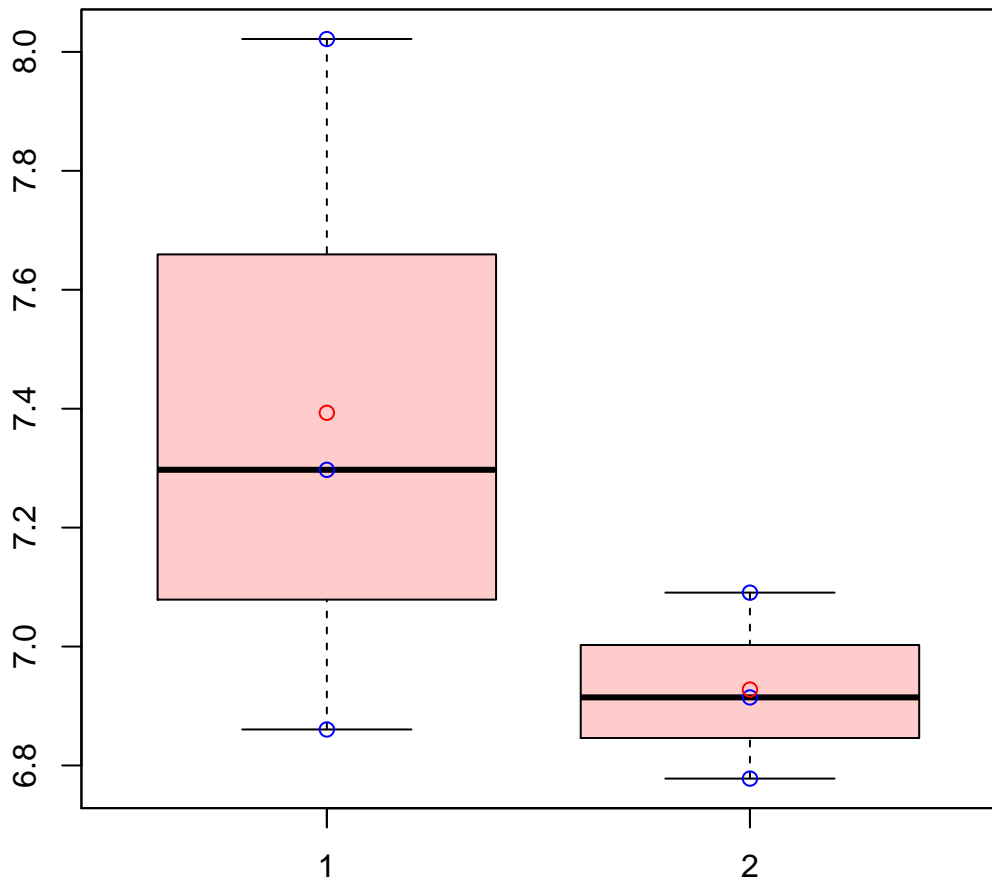

t-Test: p-value = 0.3

# B6TGT0|B6TGT0\_MAIZE

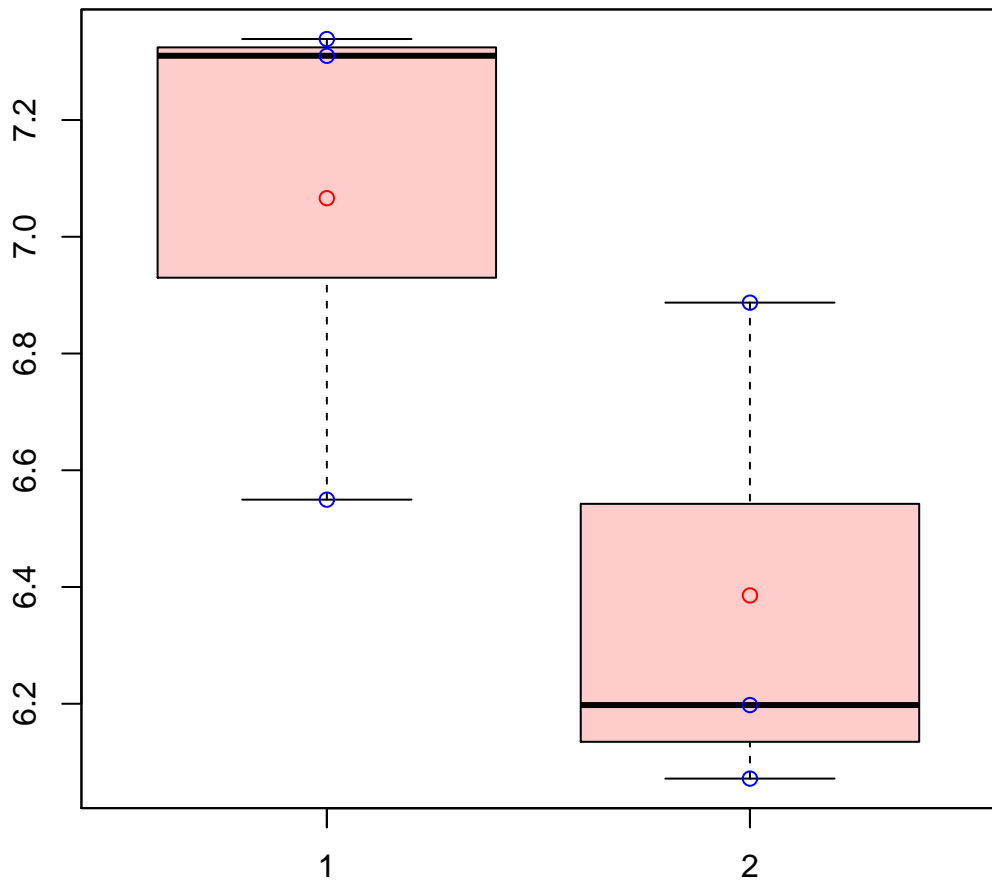

t-Test: p-value = 0.13

# B6TH55|B6TH55\_MAIZE

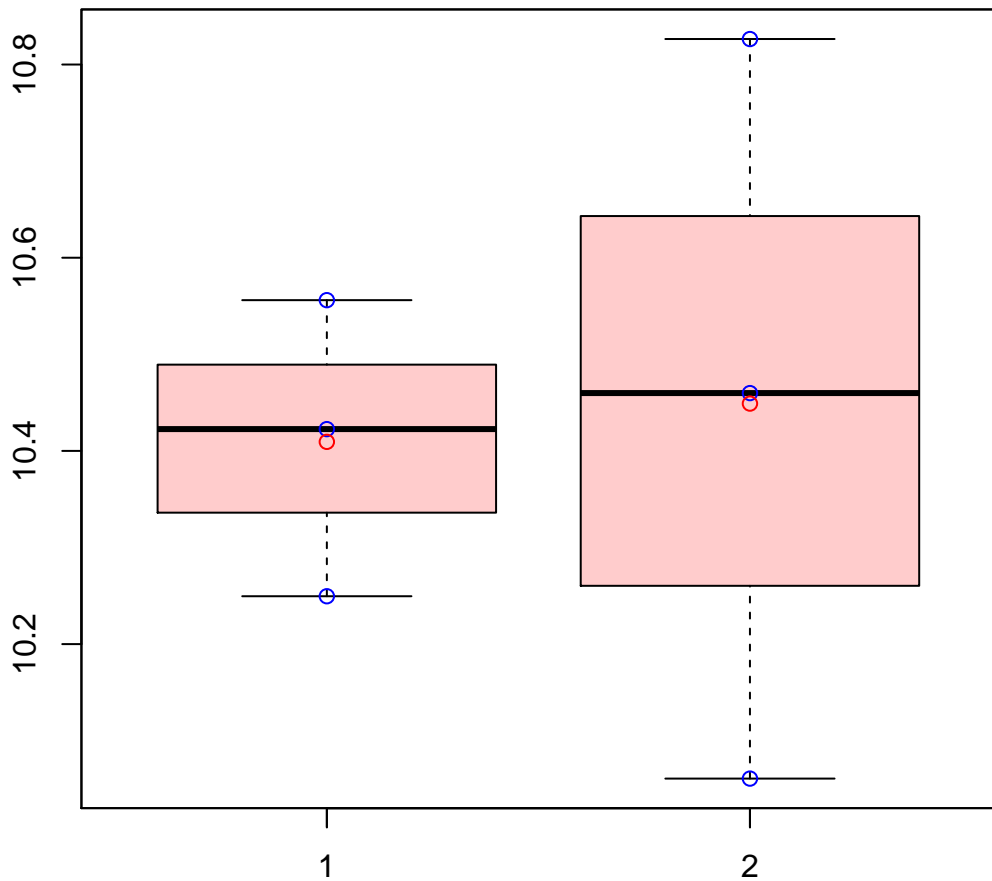

t-Test: p-value = 0.88

# B6TH57|B6TH57\_MAIZE

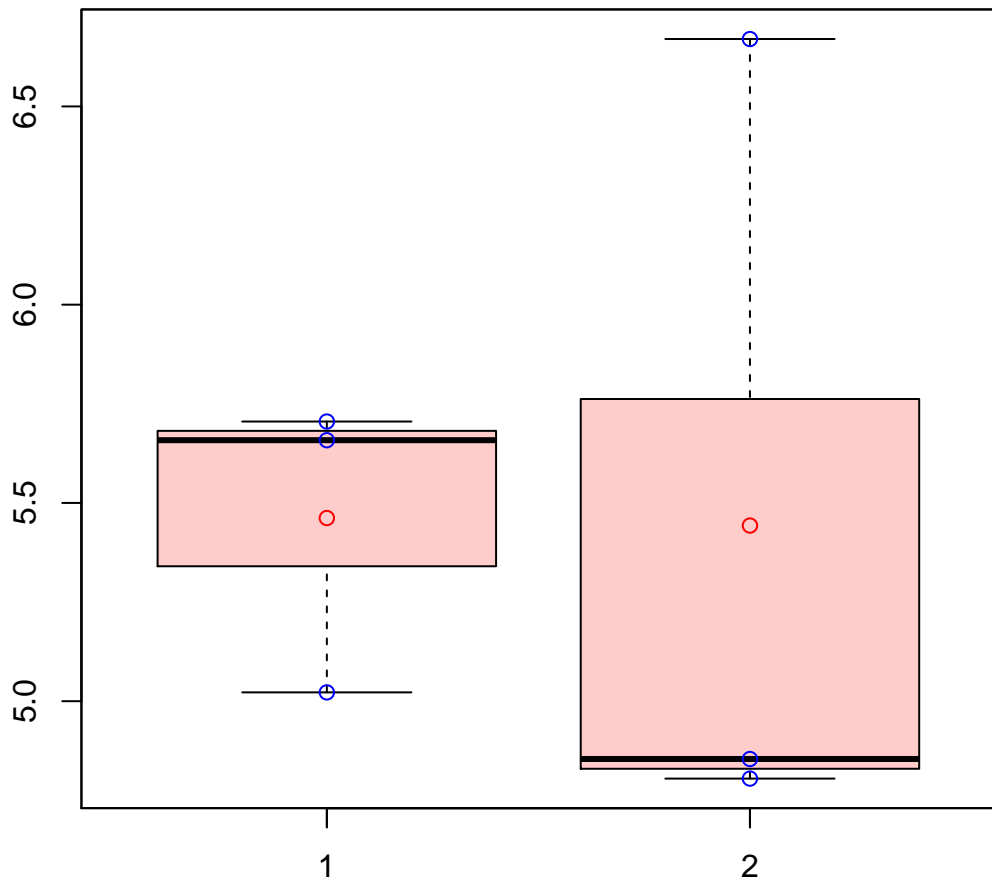

t-Test: p-value = 0.98

# B6THN2|B6THN2\_MAIZE

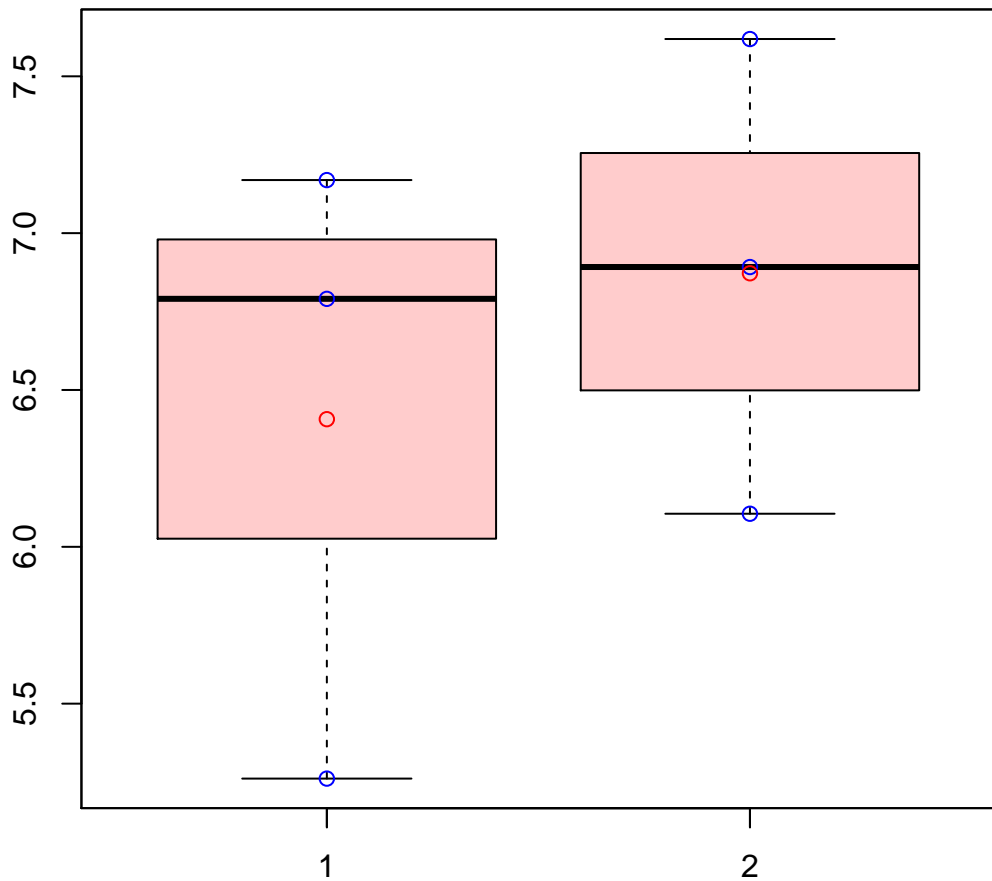

t-Test: p-value = 0.56



# B6TI56|B6TI56\_MAIZE

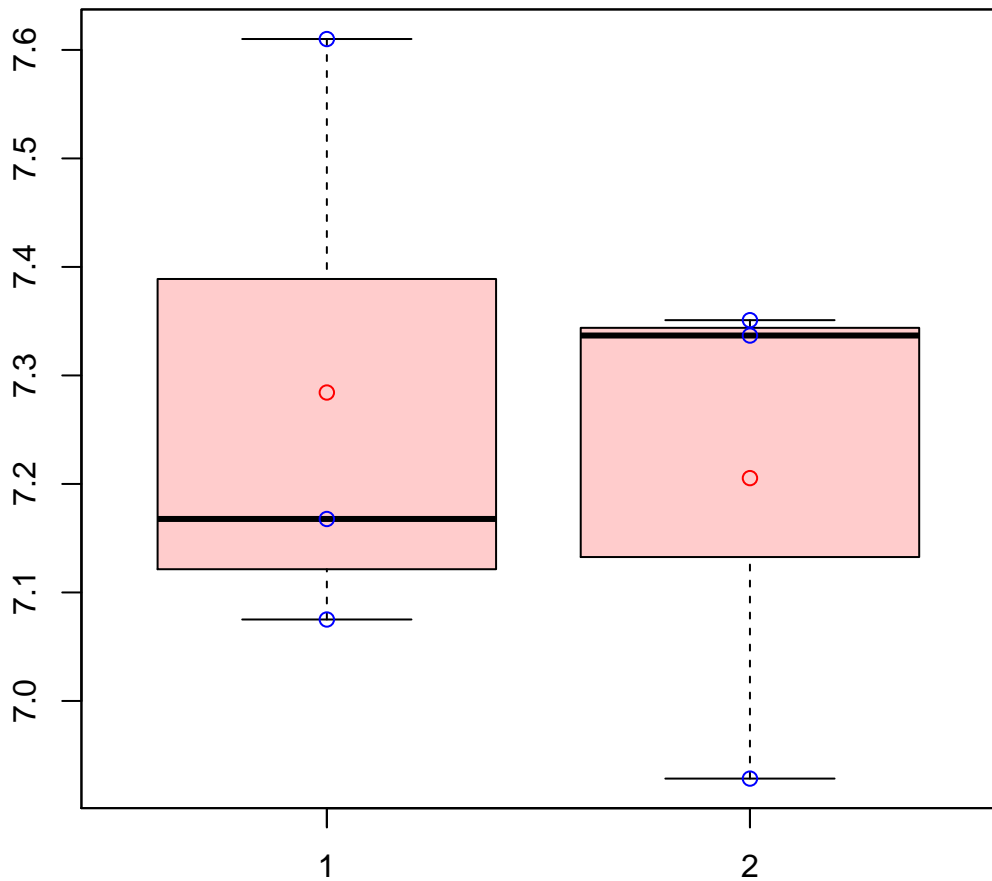

t-Test: p-value = 0.73

# B6TI65|B6TI65\_MAIZE

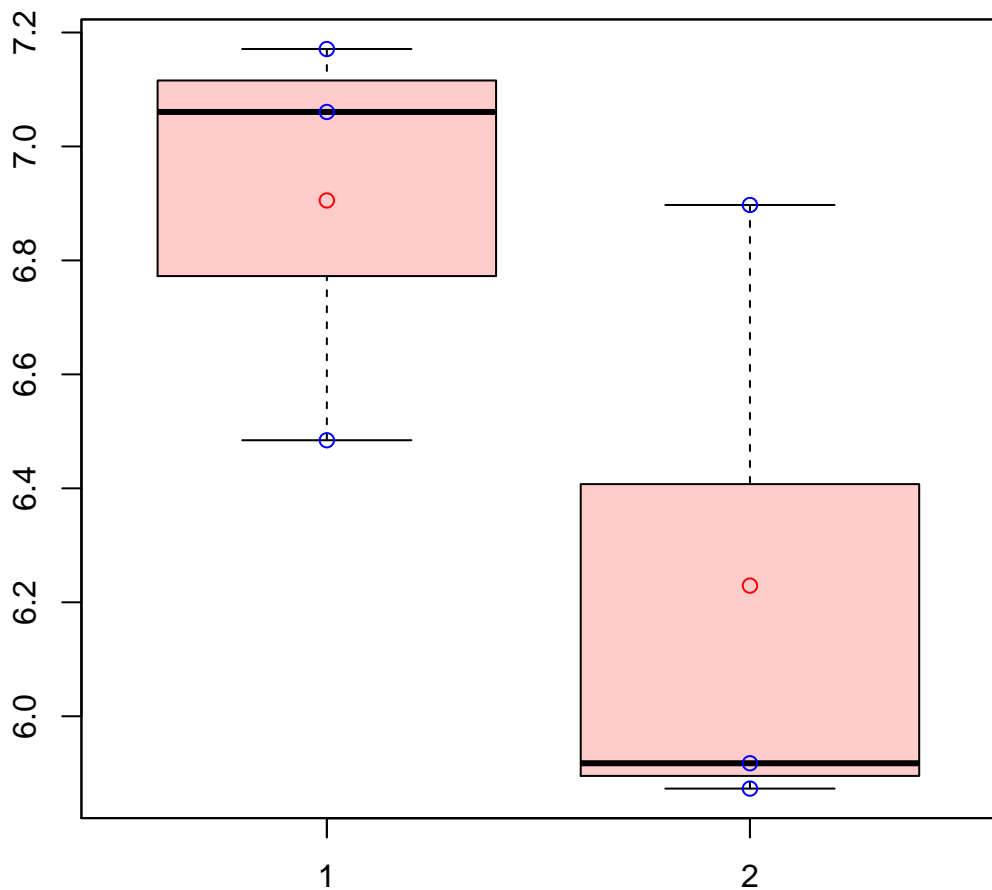

t-Test: p-value = 0.18

# B6TID5|B6TID5\_MAIZE

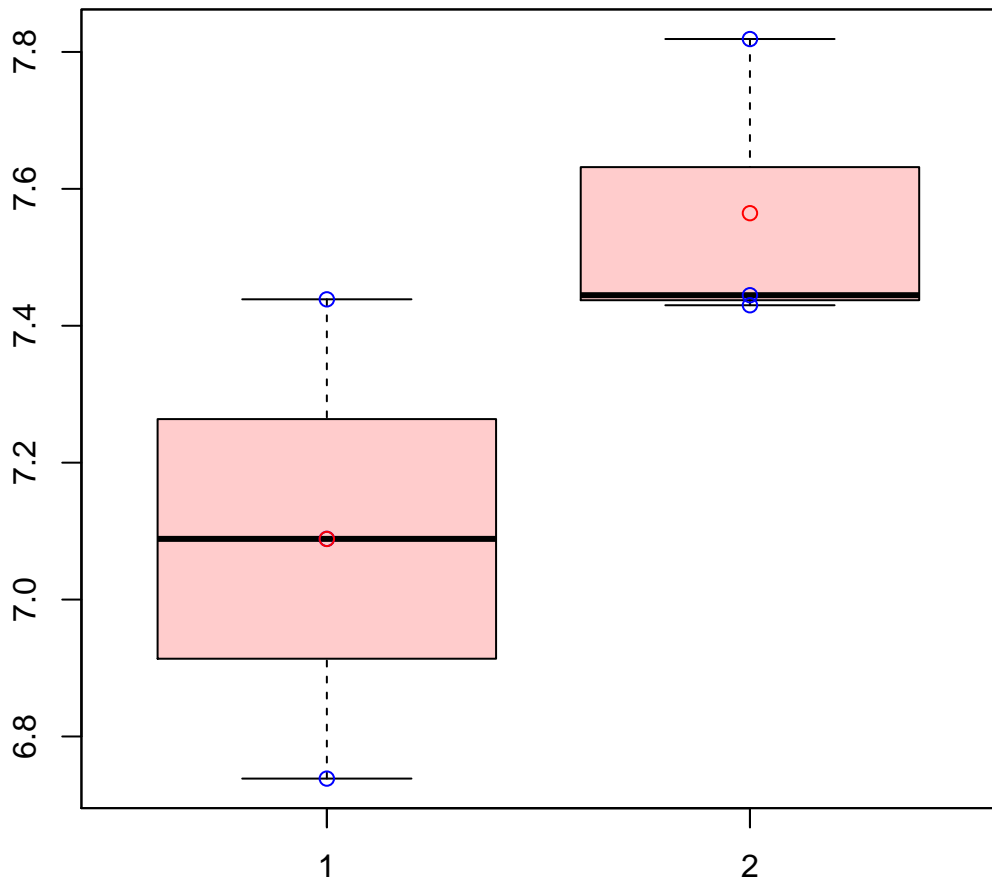

t-Test: p-value = 0.13

# B6TII5|B6TII5\_MAIZE

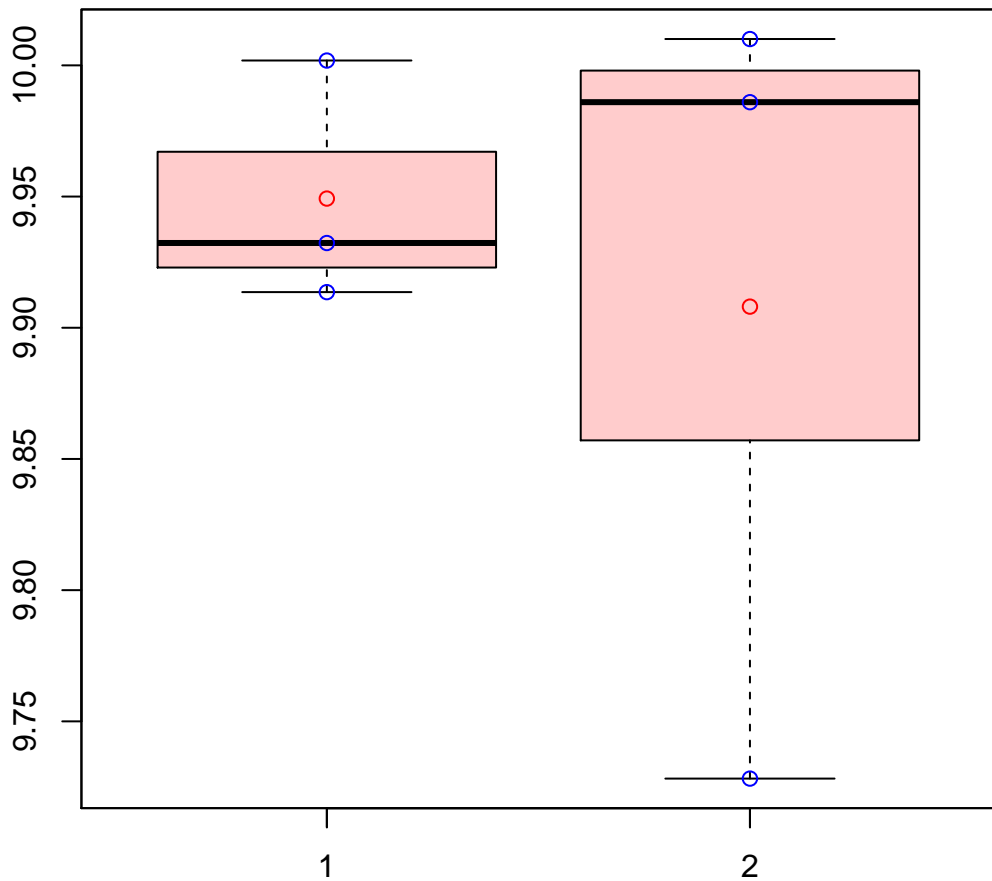

t-Test: p-value = 0.7

# B6TIP7|B6TIP7\_MAIZE

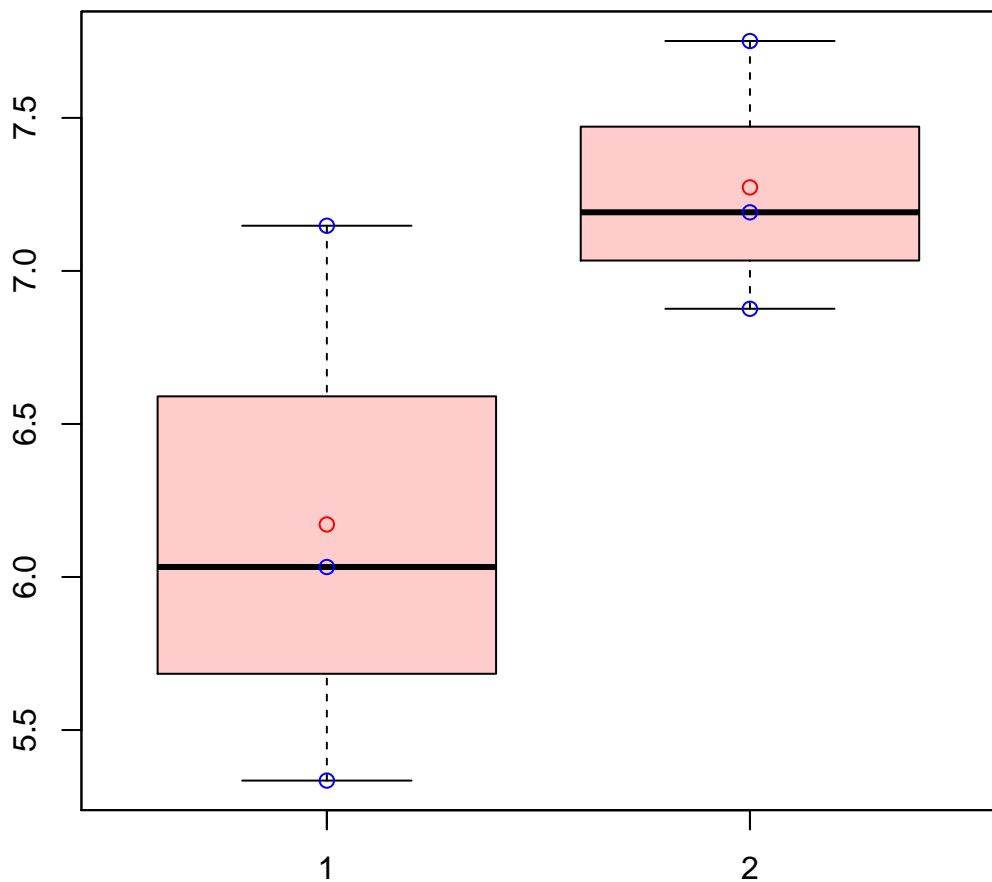

t-Test: p-value = 0.16

# B6TJ90|B6TJ90\_MAIZE

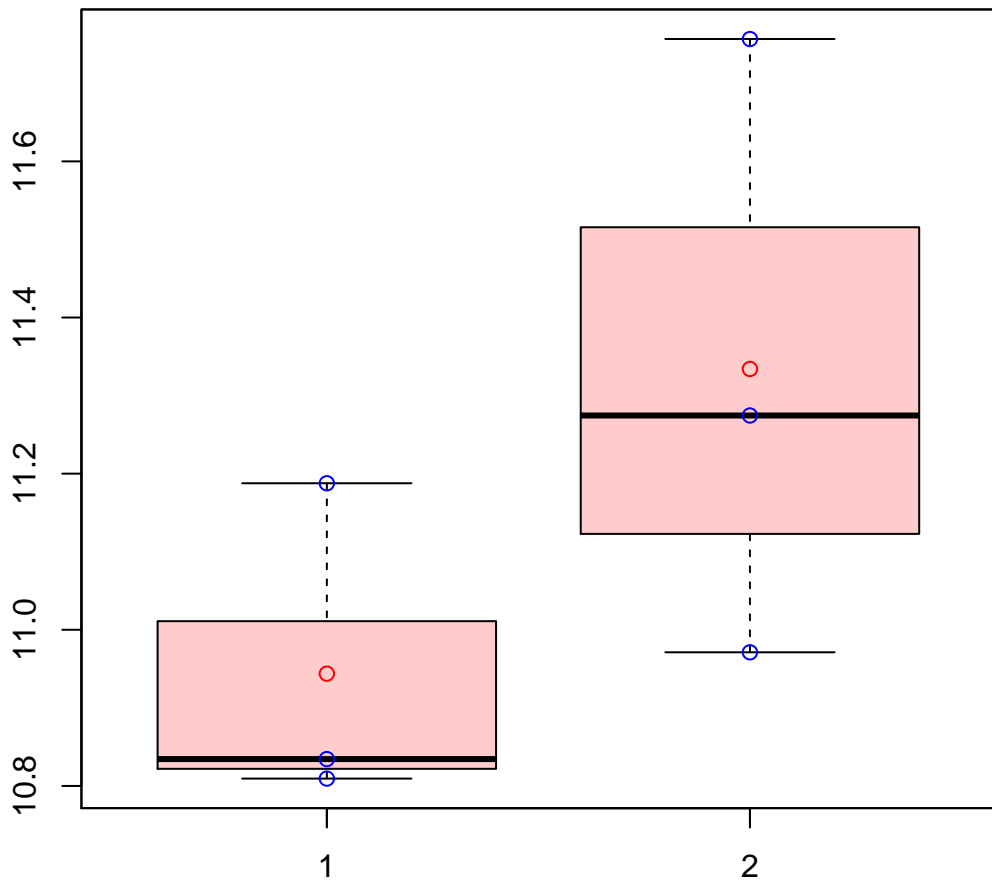

t-Test: p-value = 0.23

# B6TL24|B6TL24\_MAIZE

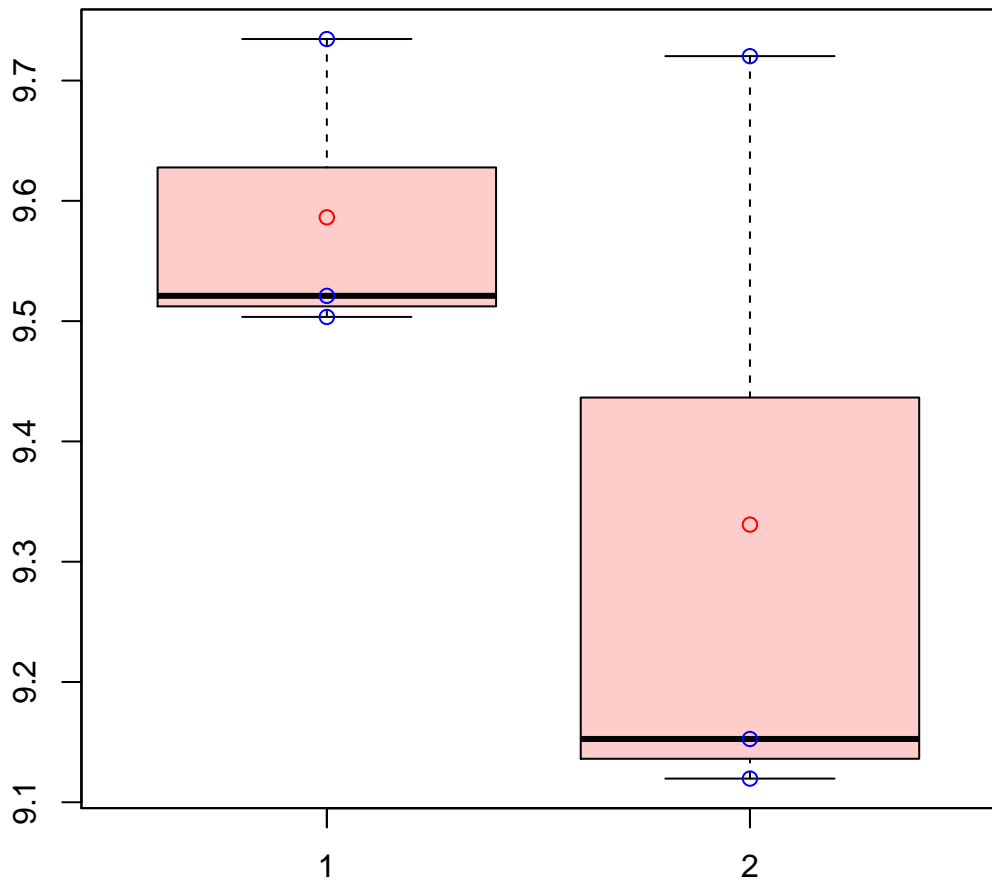

t-Test: p-value = 0.32

# B6TLR1|B6TLR1\_MAIZE

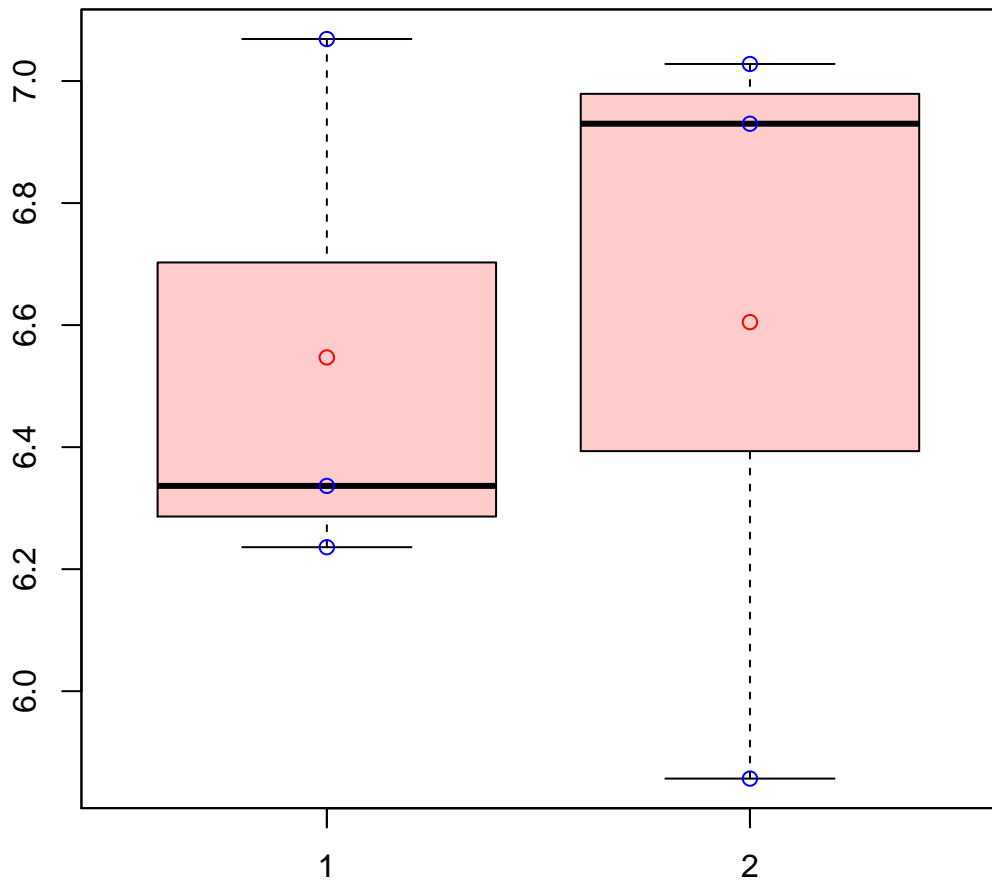

t-Test: p-value = 0.91



# B6TMG4|B6TMG4\_MAIZE

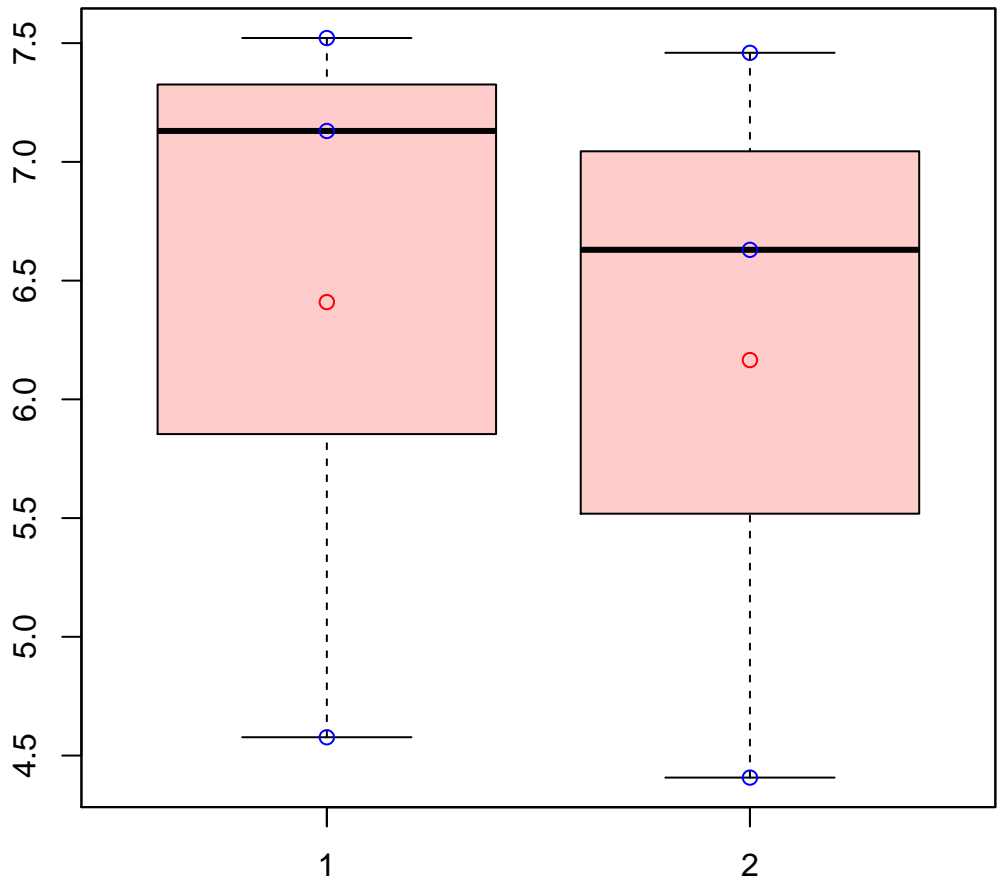

t-Test: p-value = 0.86

# B6TMP9|B6TMP9\_MAIZE

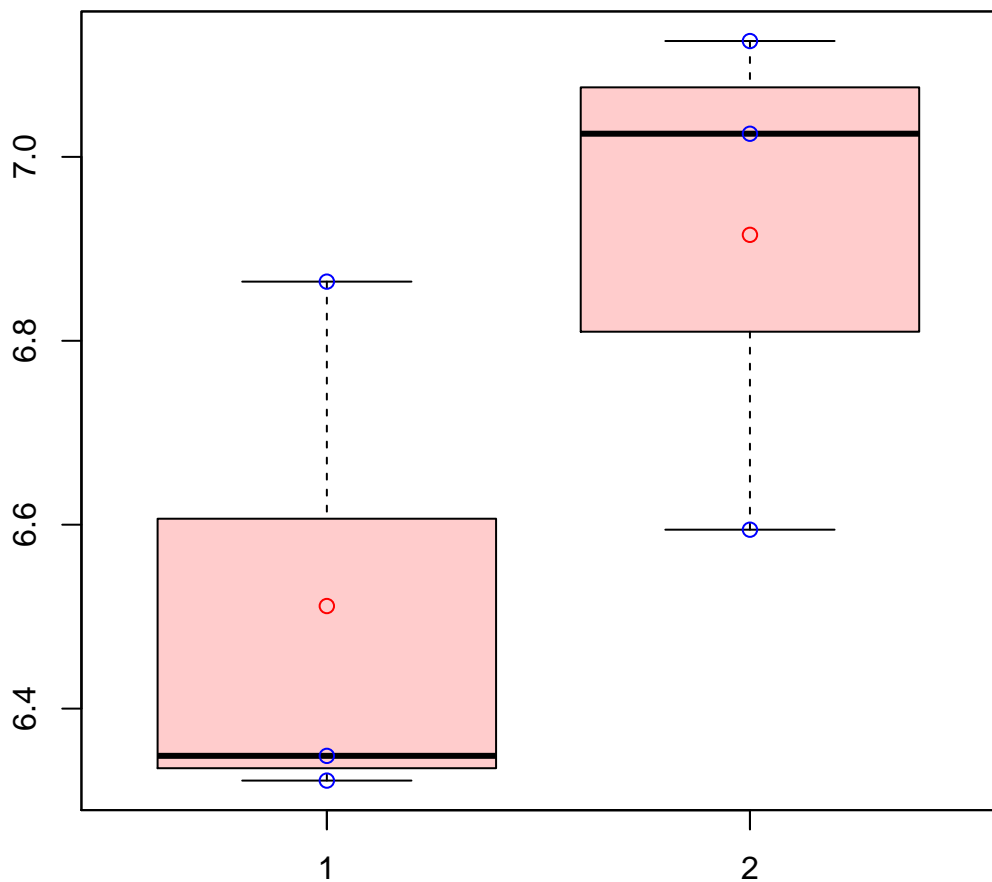

t-Test: p-value = 0.17

# B6TN03|B6TN03\_MAIZE

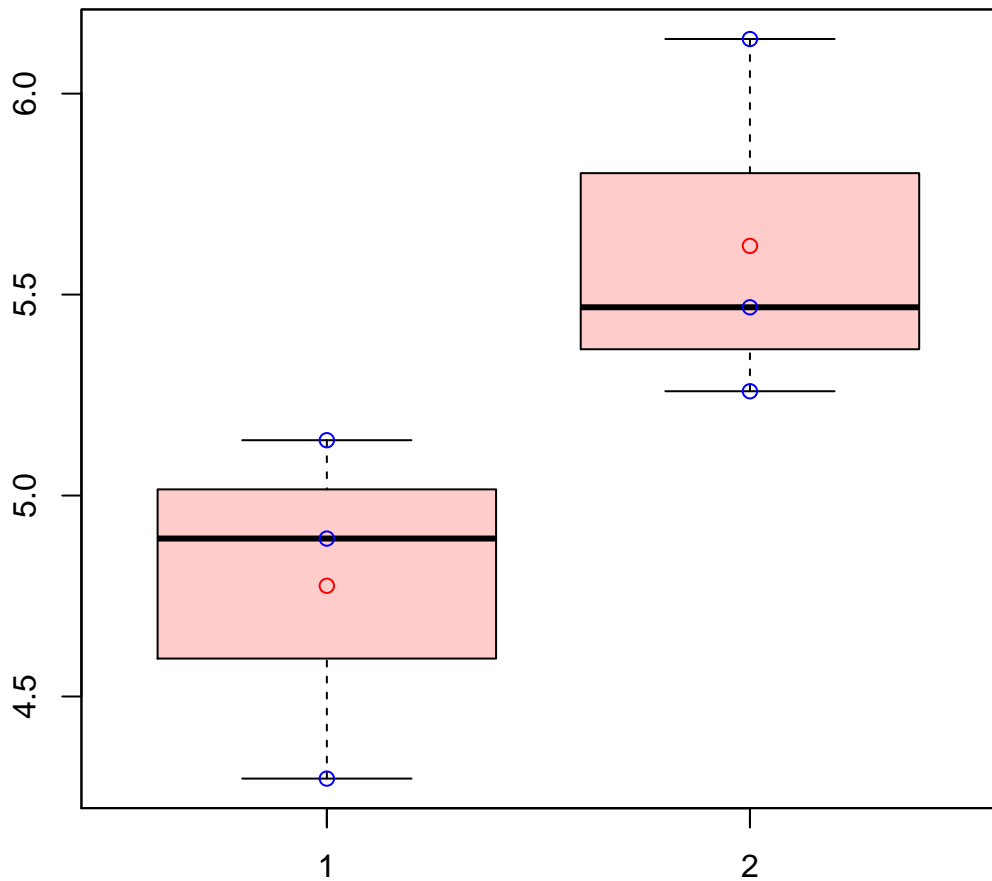

t-Test: p-value = 0.08

# B6TN30|B6TN30\_MAIZE

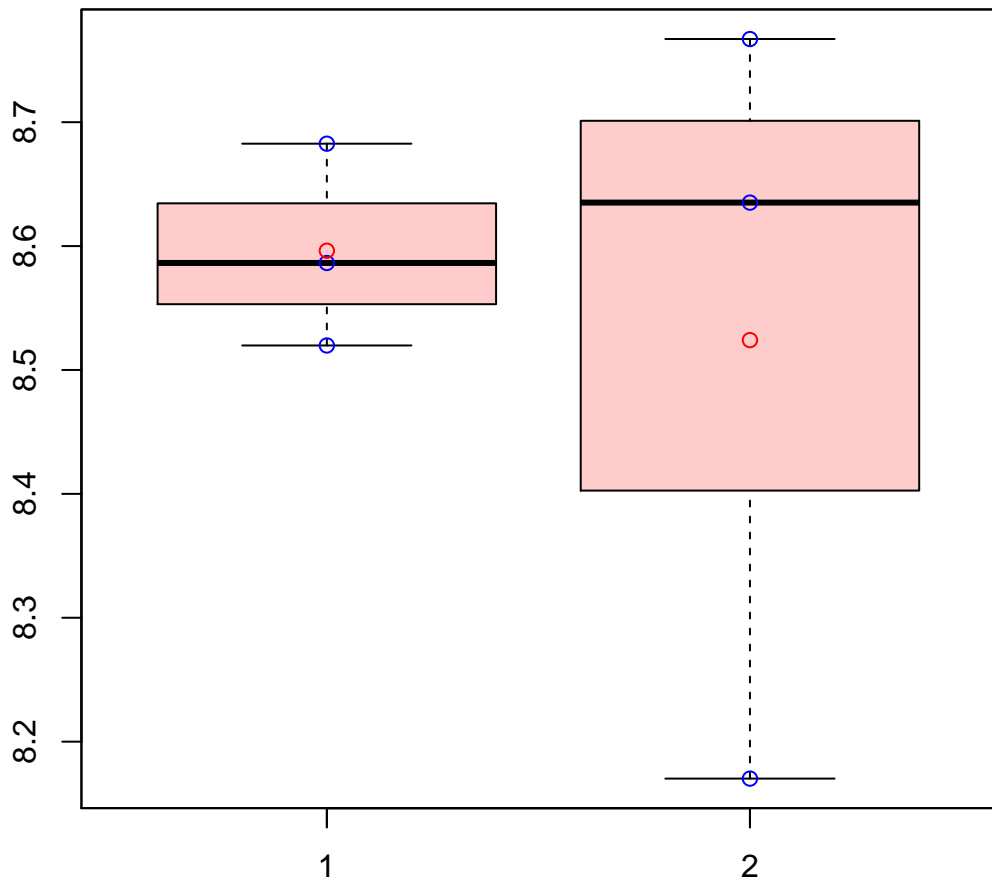

t-Test: p-value = 0.73

# B6TNA7|B6TNA7\_MAIZE

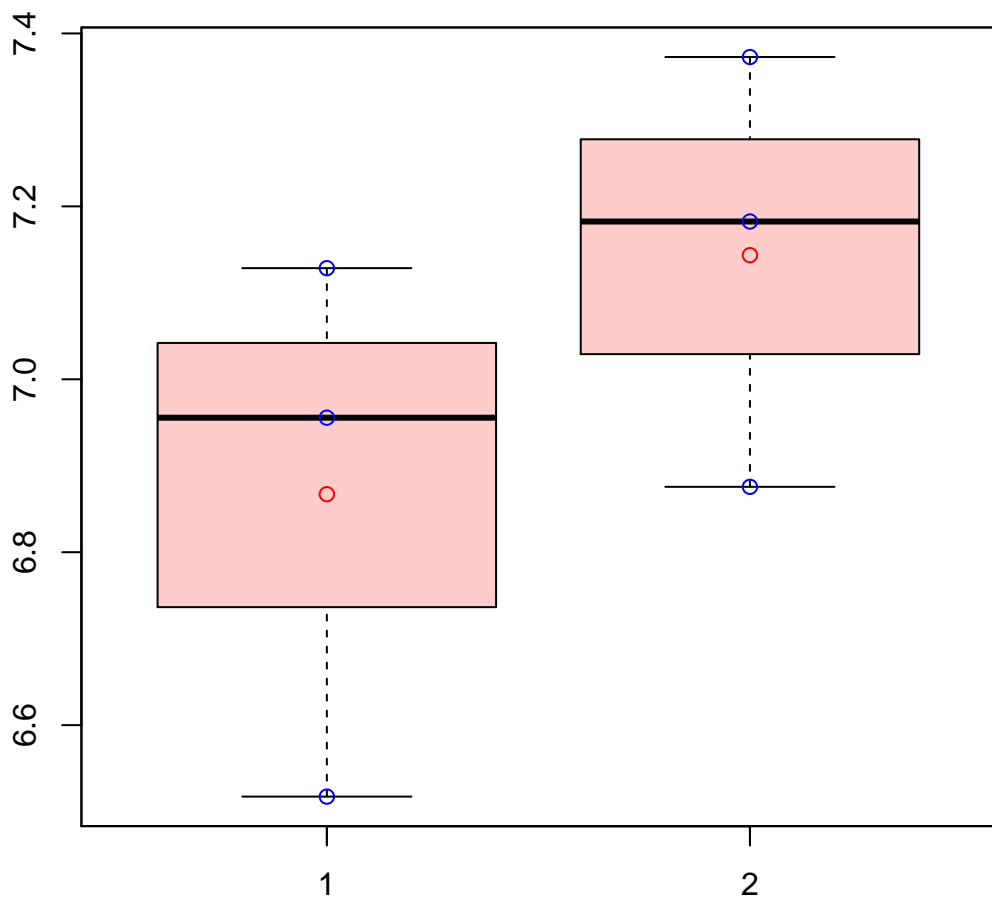

t-Test: p-value = 0.3

# B6TNl6|B6TNl6\_MAIZE

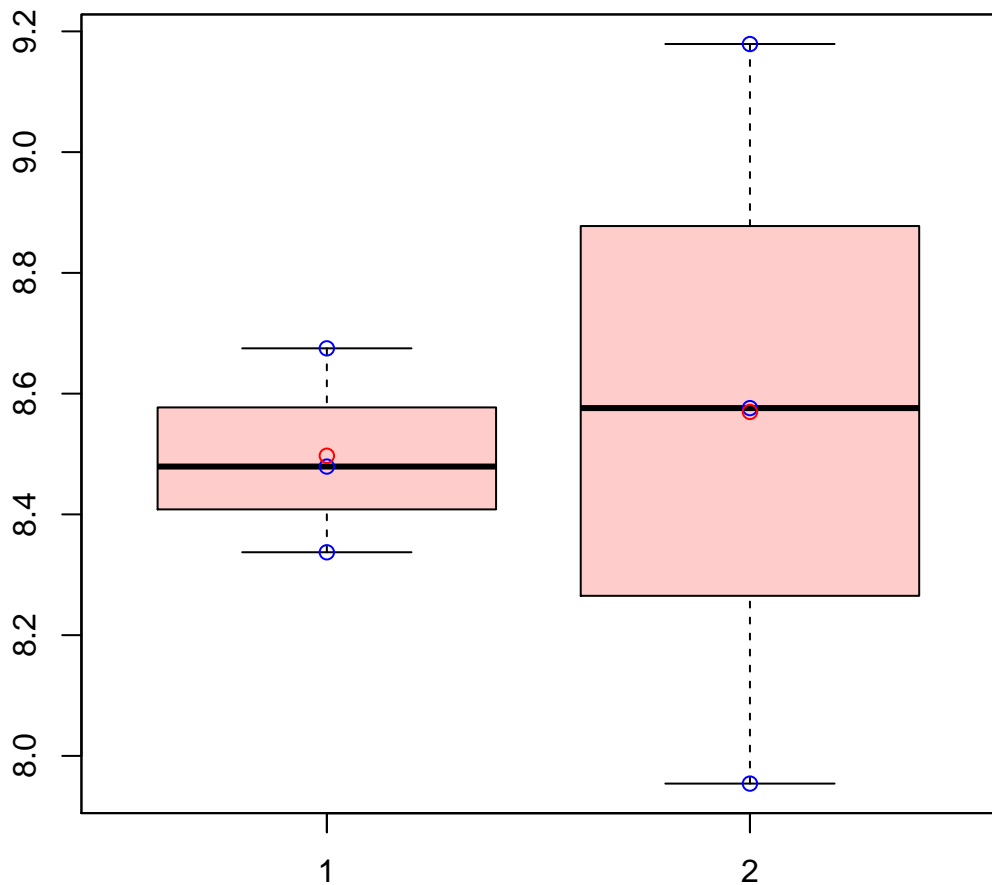

t-Test: p-value = 0.86

# B6TPG2|B6TPG2\_MAIZE

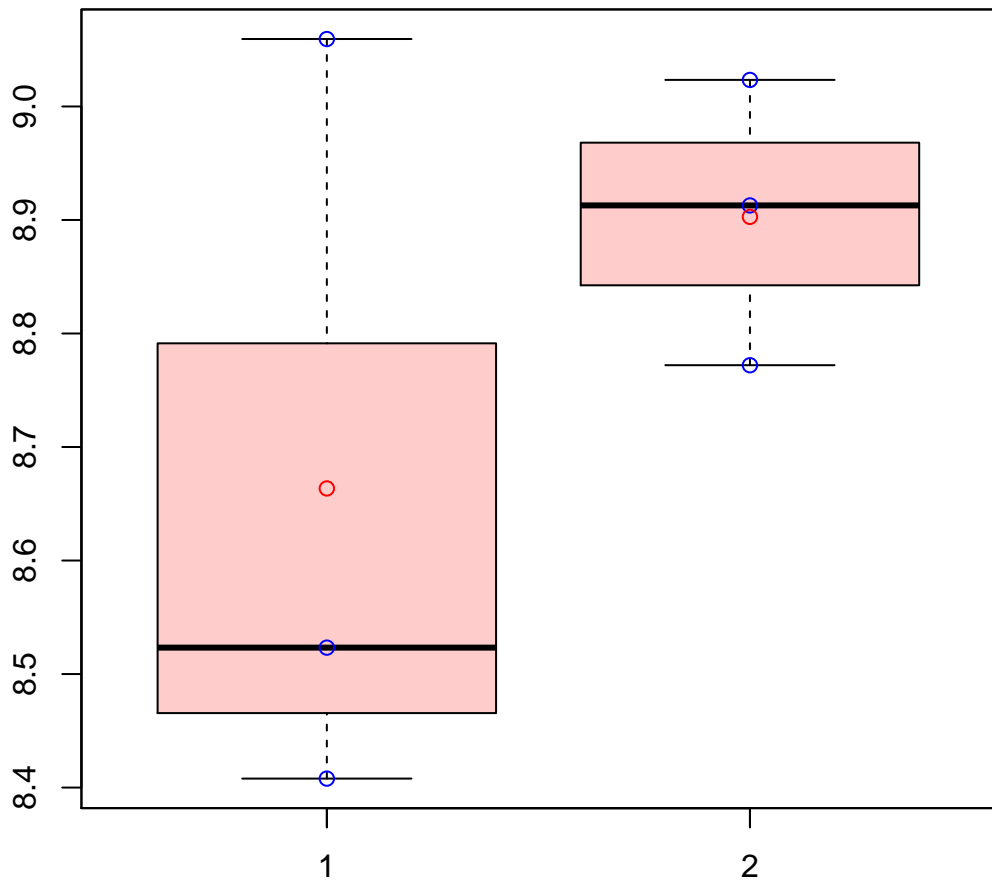

t-Test: p-value = 0.36

# B6TPW9|B6TPW9\_MAIZE

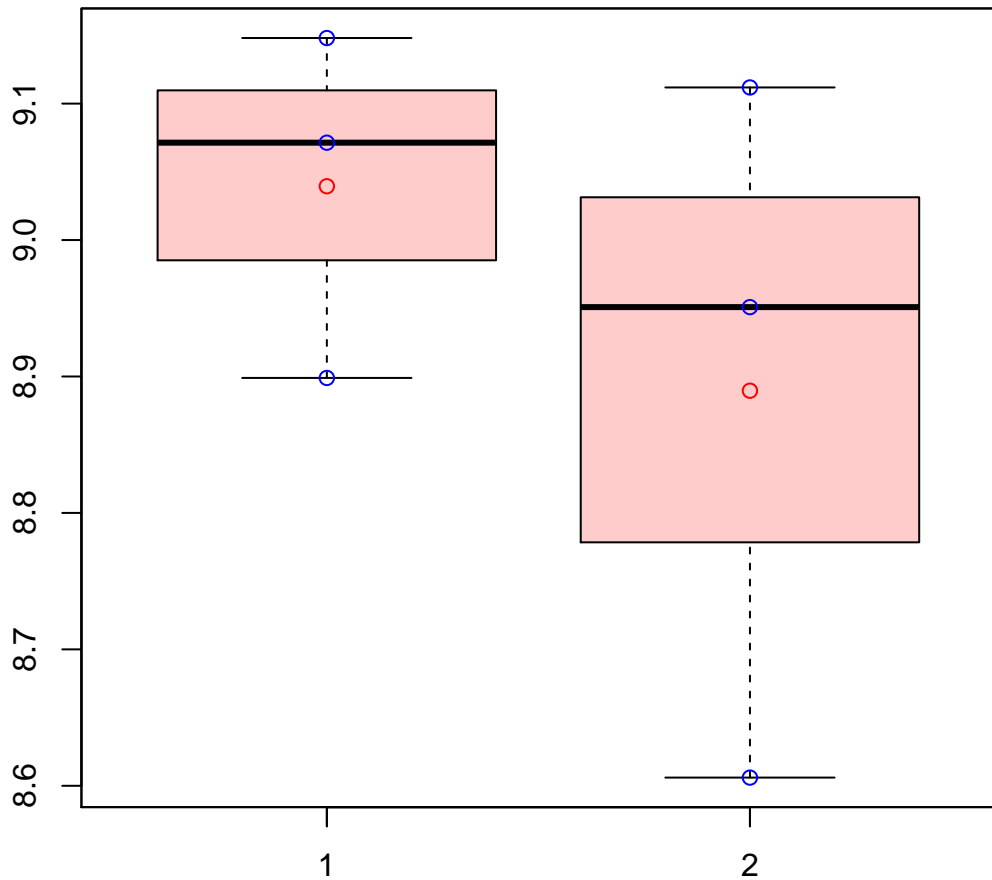

t-Test: p-value = 0.44



# B6TQC0|B6TQC0\_MAIZE

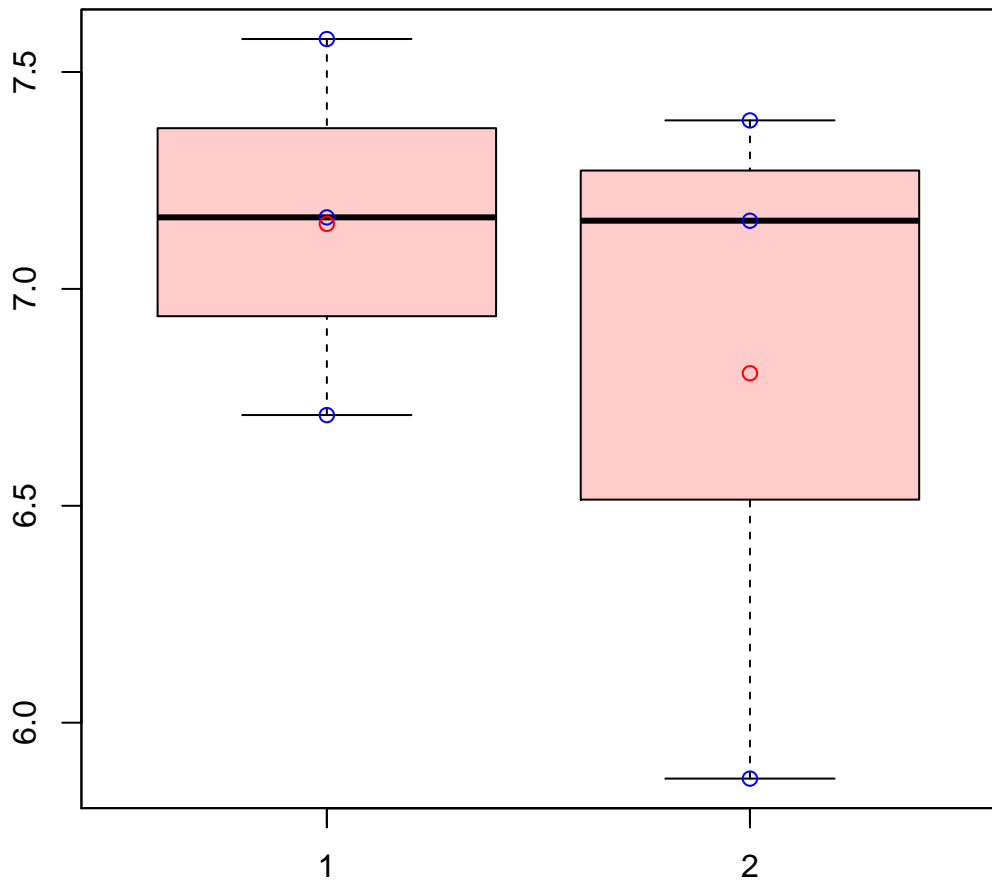

t-Test: p-value = 0.56

# B6TQG0|B6TQG0\_MAIZE

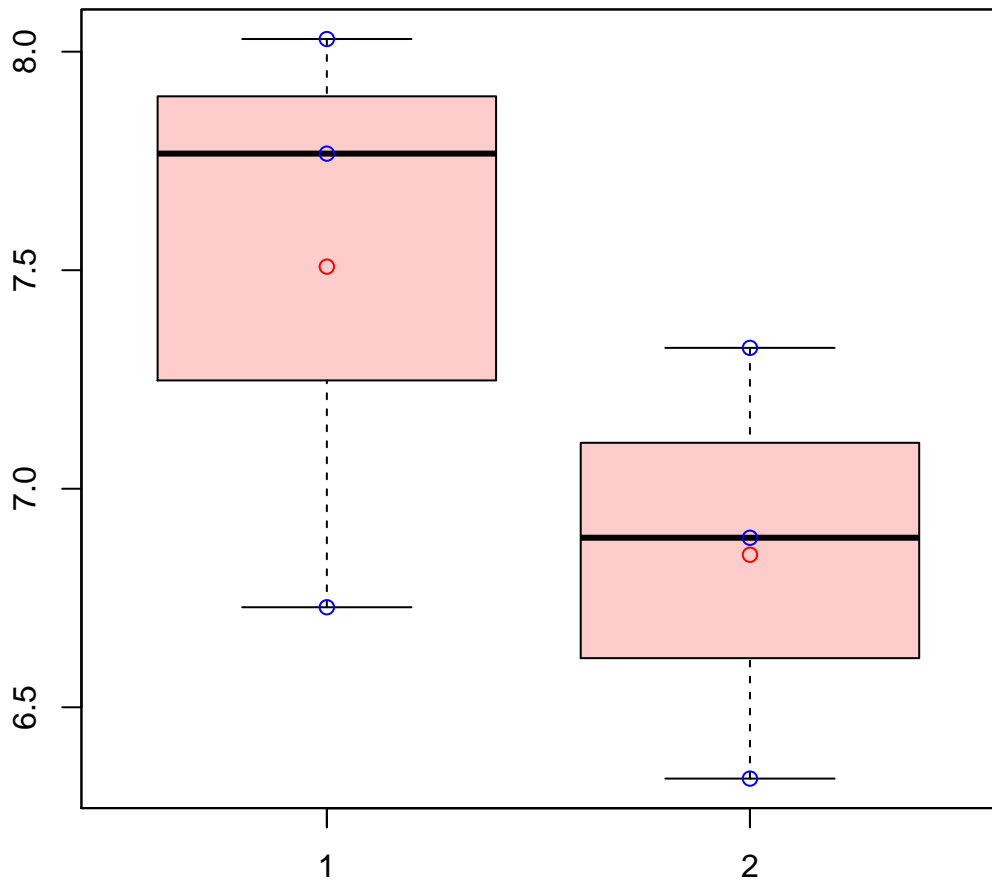

t-Test: p-value = 0.26

# B6TRK5|B6TRK5\_MAIZE

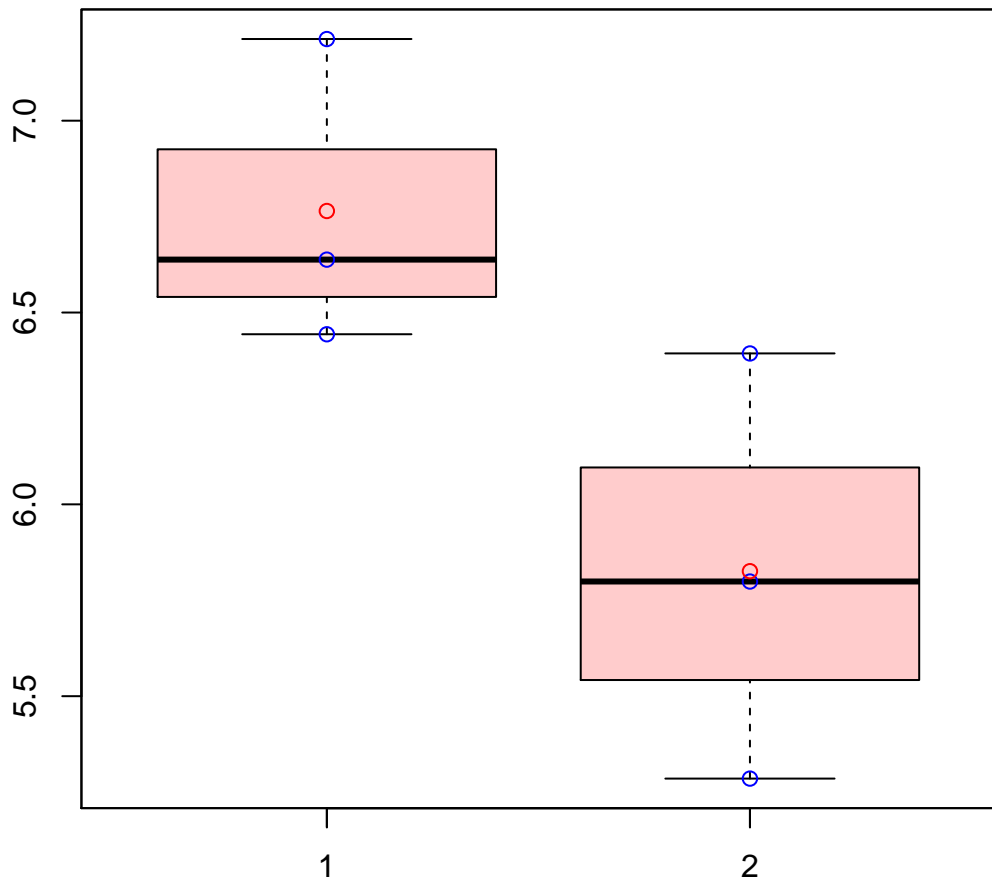

t-Test: p-value = 0.08

# B6TRR5|B6TRR5\_MAIZE

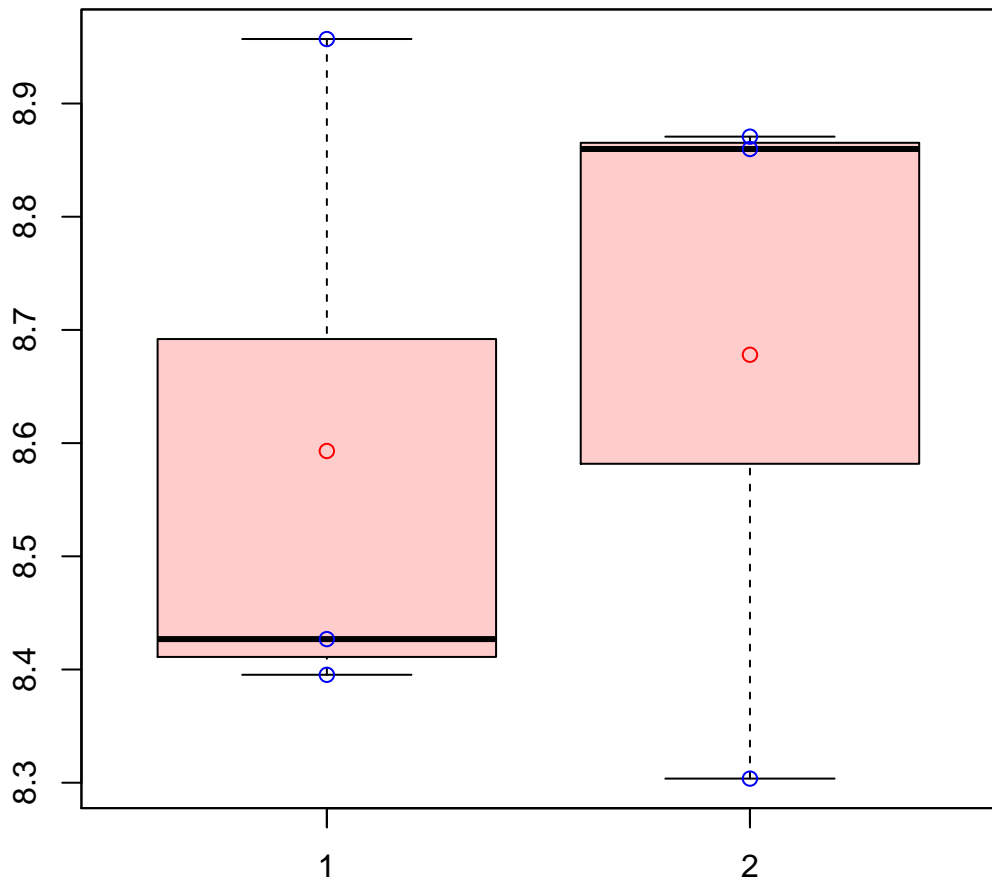

t-Test: p-value = 0.76

# B6TRV8|B6TRV8\_MAIZE

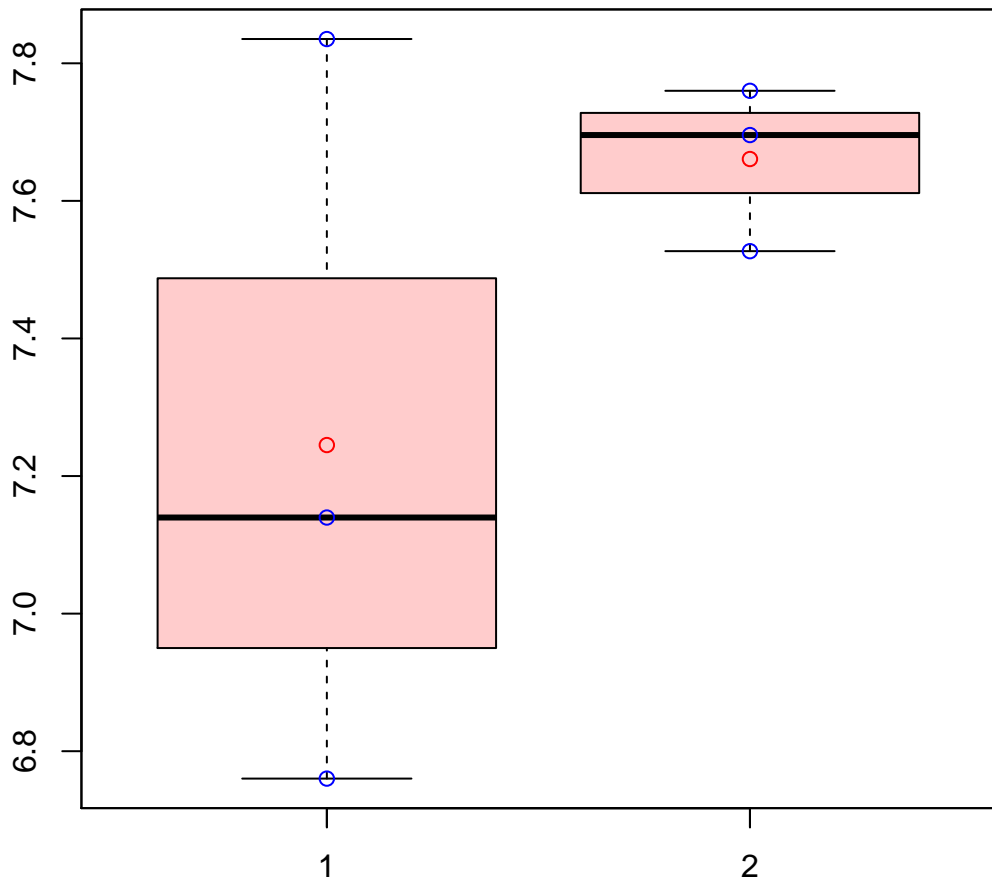

t-Test: p-value = 0.32

# B6TS21|B6TS21\_MAIZE

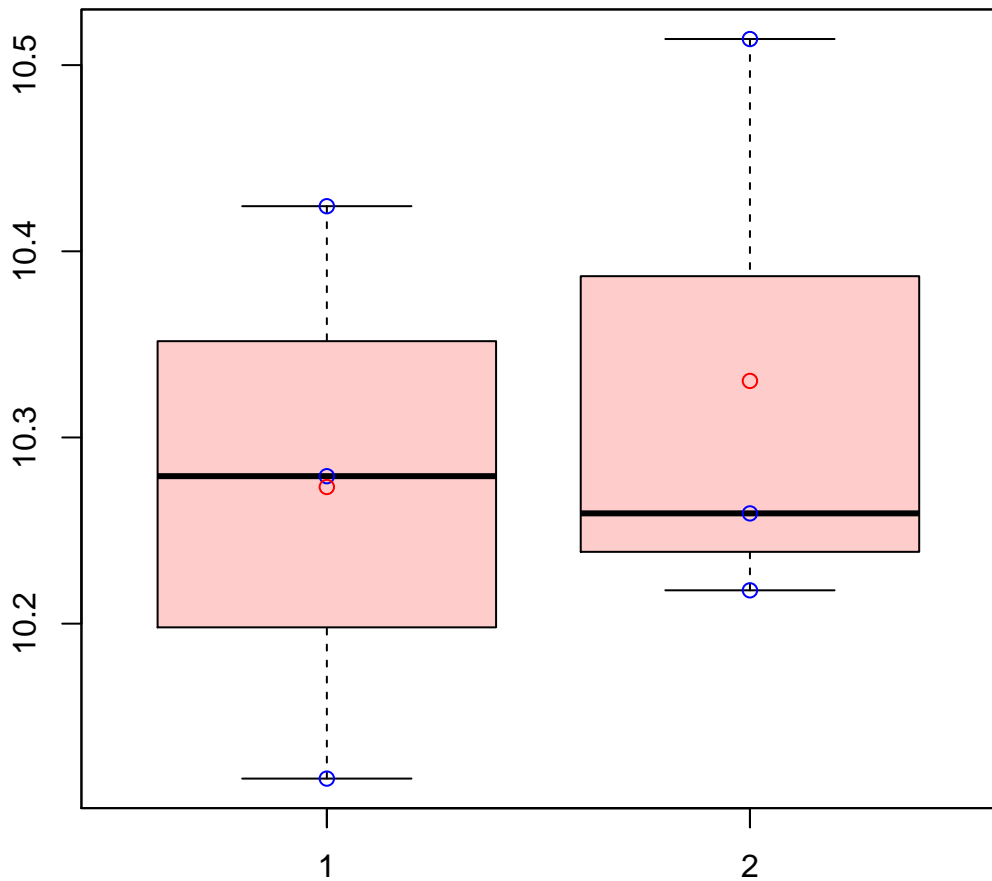

t-Test: p-value = 0.68

# B6TT32|B6TT32\_MAIZE

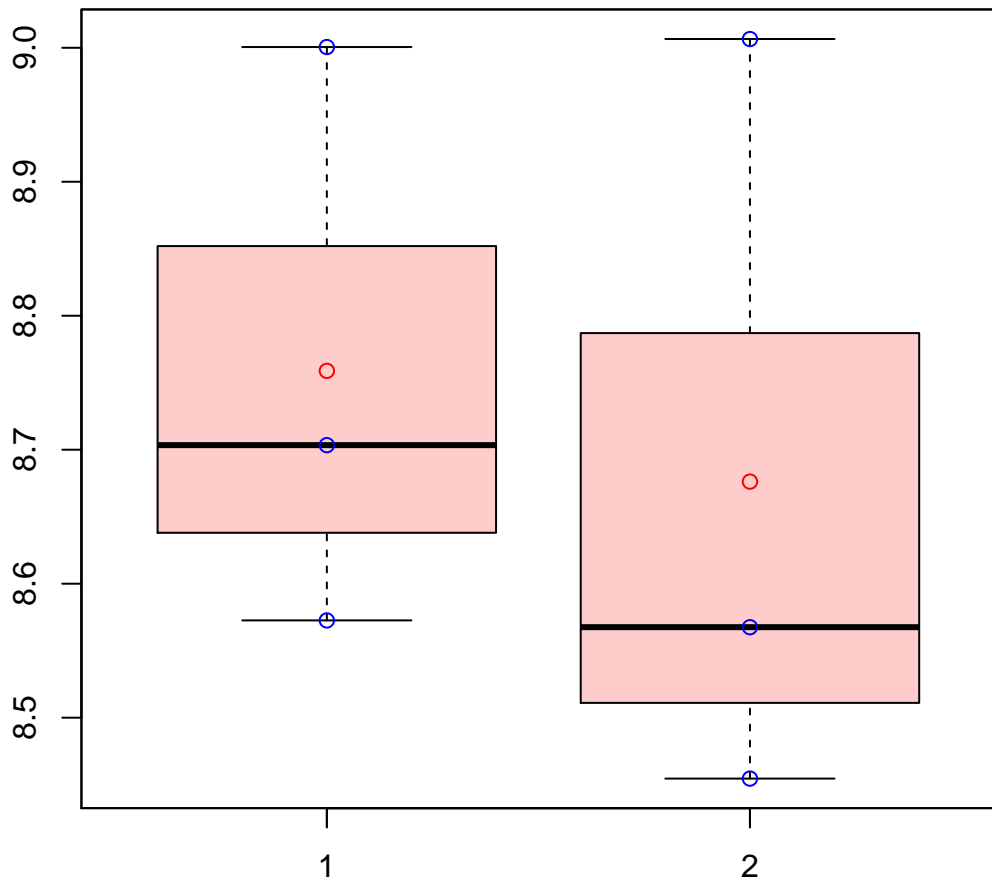

t-Test: p-value = 0.72

# B6TUA2|B6TUA2\_MAIZE

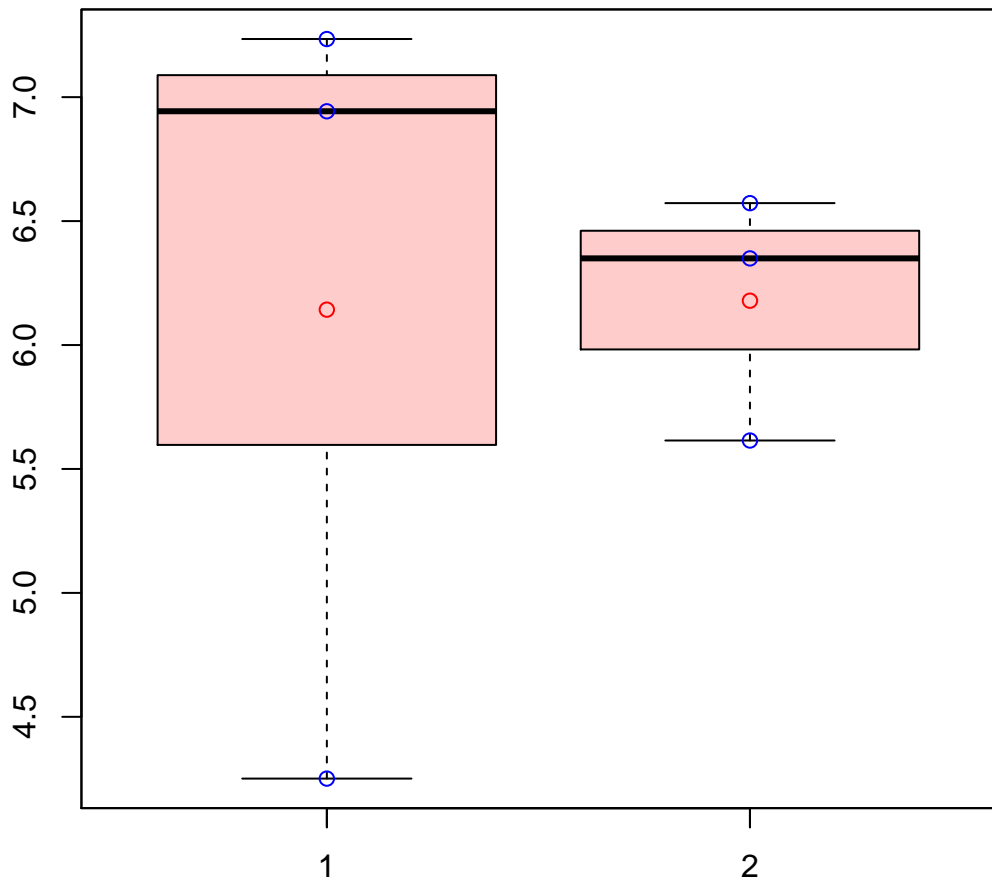

t-Test: p-value = 0.97



# B6TV07|B6TV07\_MAIZE

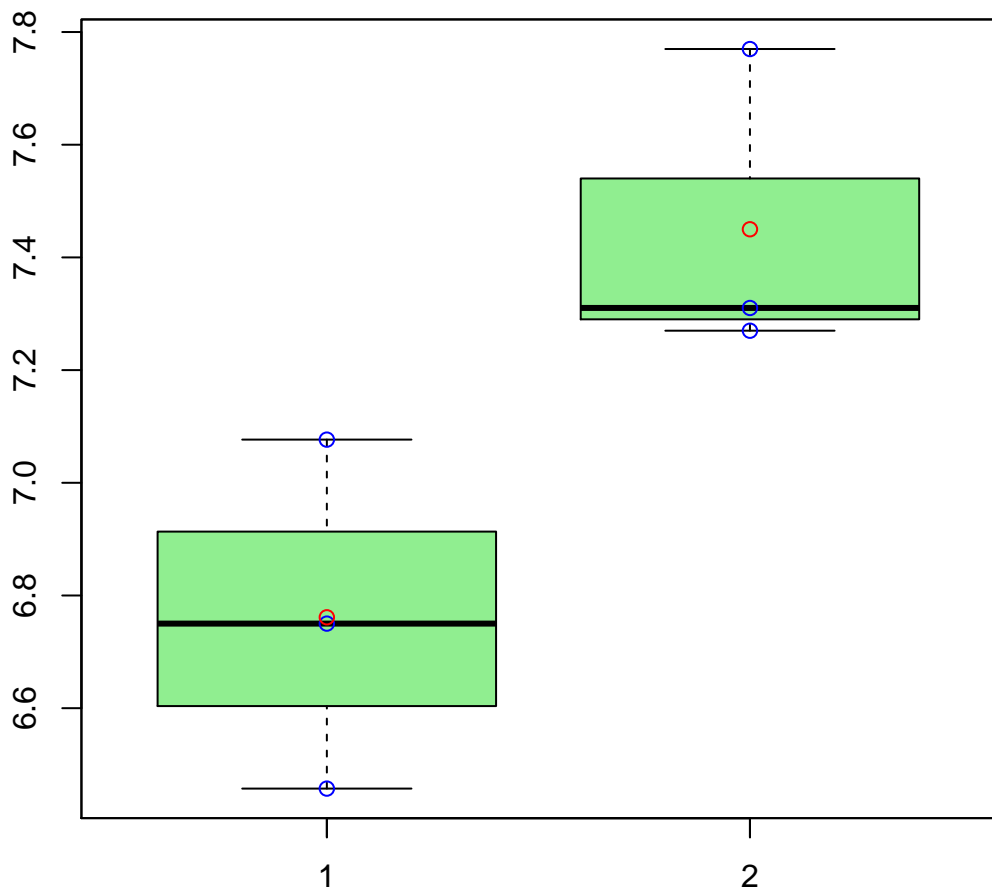

t-Test: p-value = 0.05

# B6TV58|B6TV58\_MAIZE

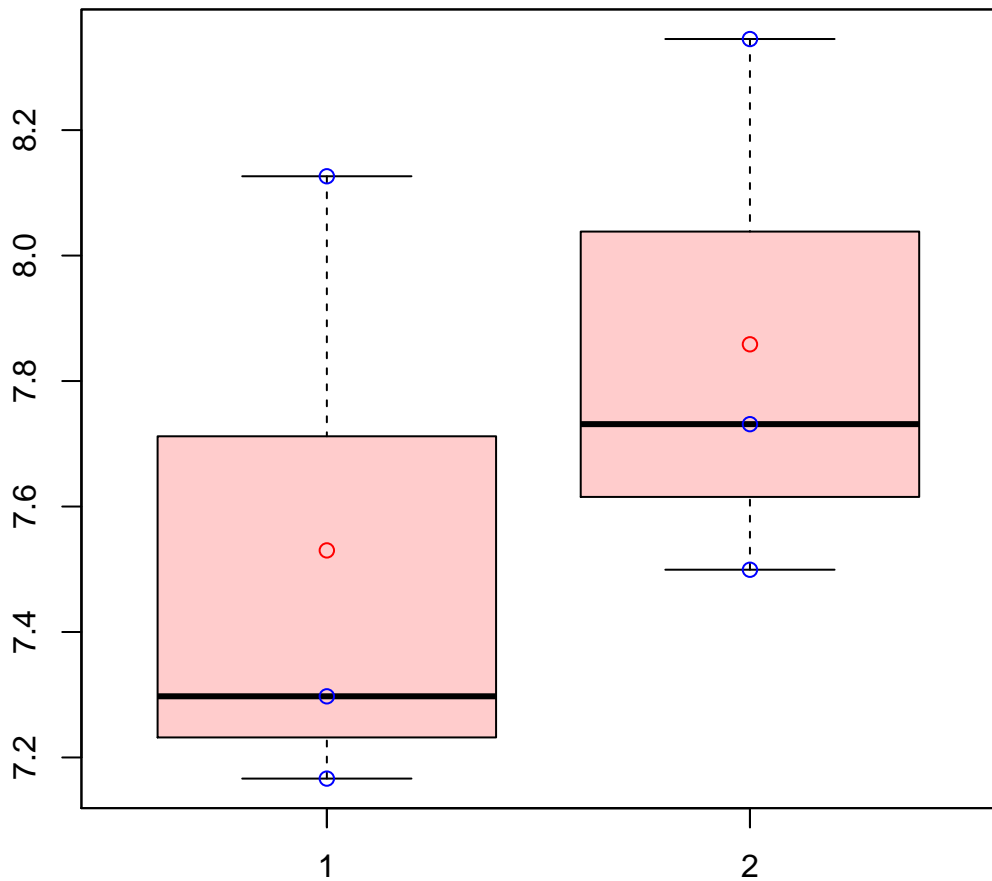

t-Test: p-value = 0.45

# B6TVP0|B6TVP0\_MAIZE

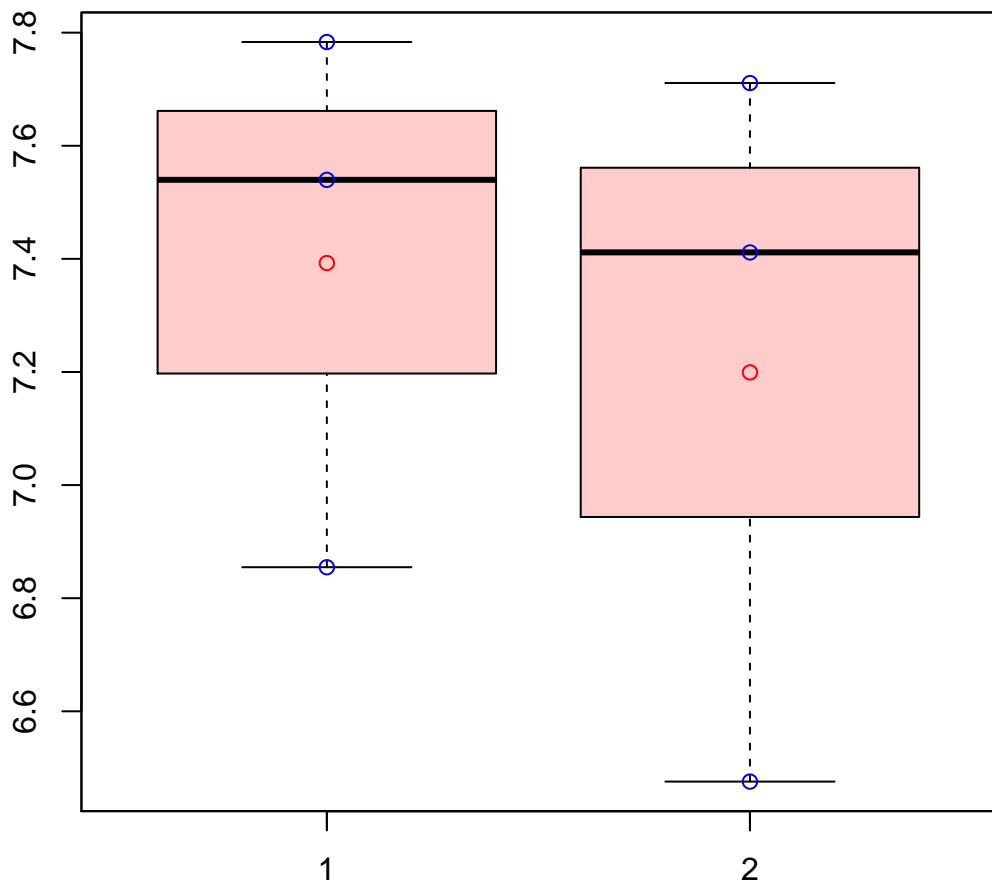

t-Test: p-value = 0.7

# B6TWW1|B6TWW1\_MAIZE

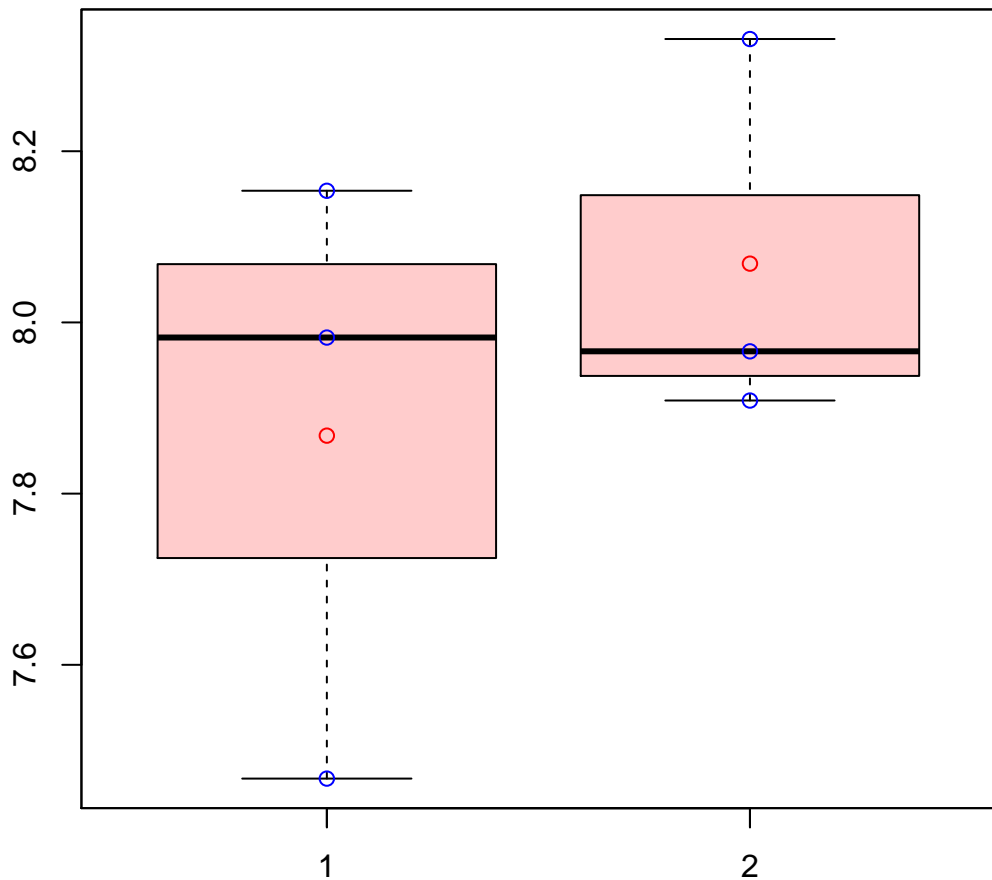

t-Test: p-value = 0.47

# B6TXR8|B6TXR8\_MAIZE

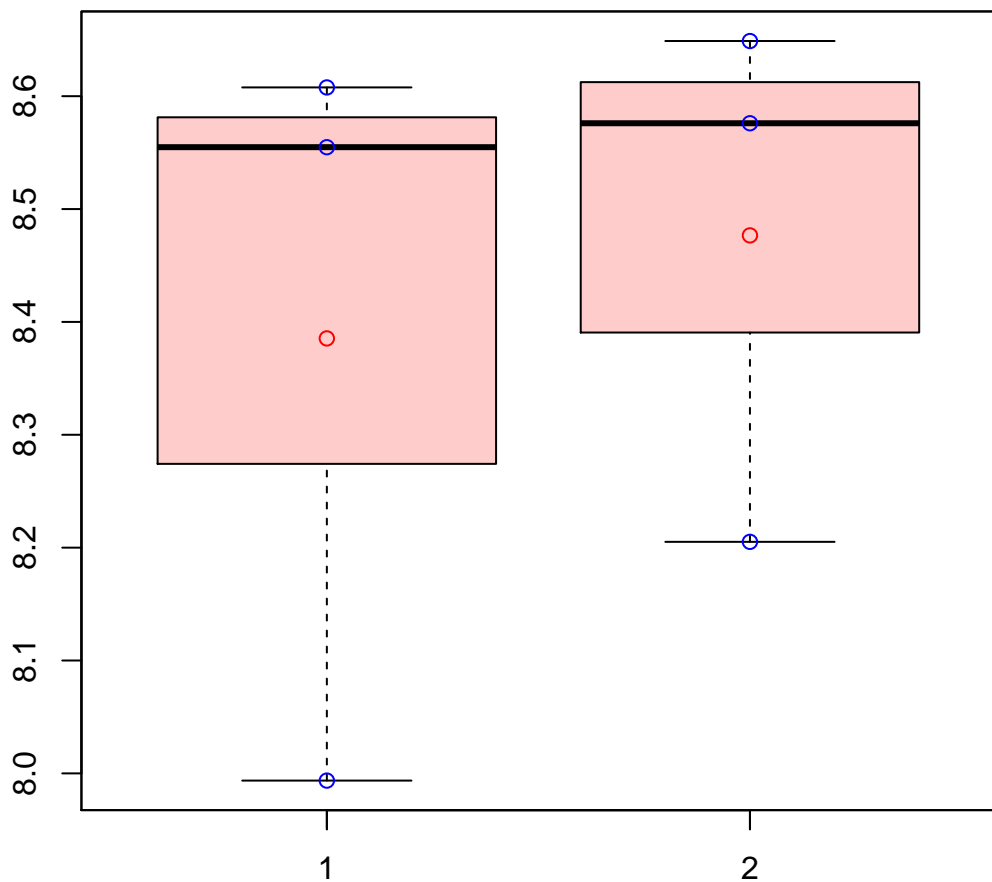

t-Test: p-value = 0.72

# B6TXZ8|B6TXZ8\_MAIZE

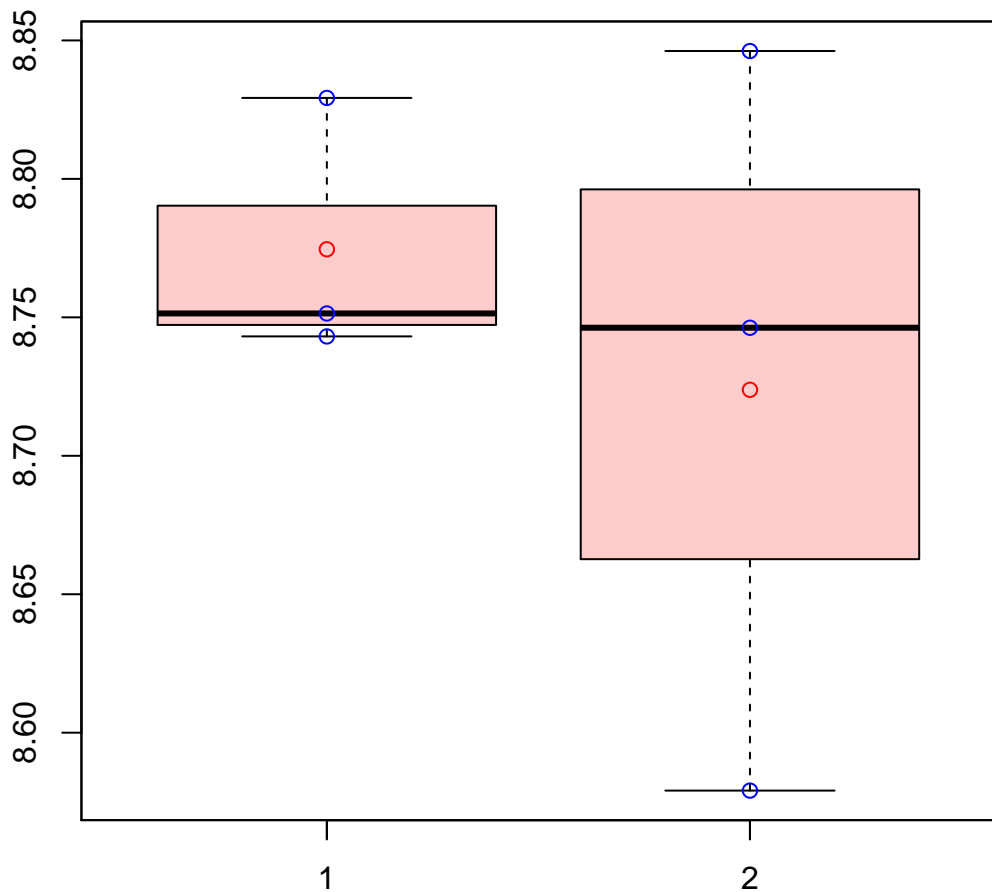

t-Test: p-value = 0.59

# B6TY97|B6TY97\_MAIZE

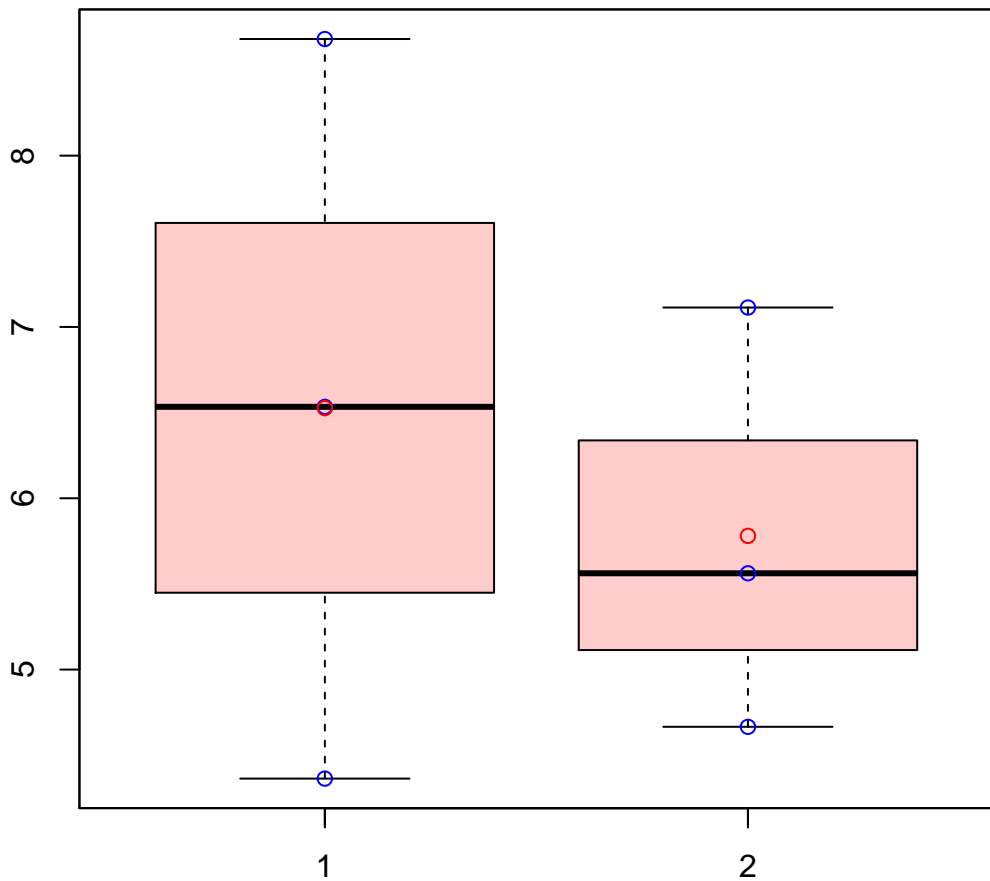

t-Test: p-value = 0.64

# B6TYM1|B6TYM1\_MAIZE

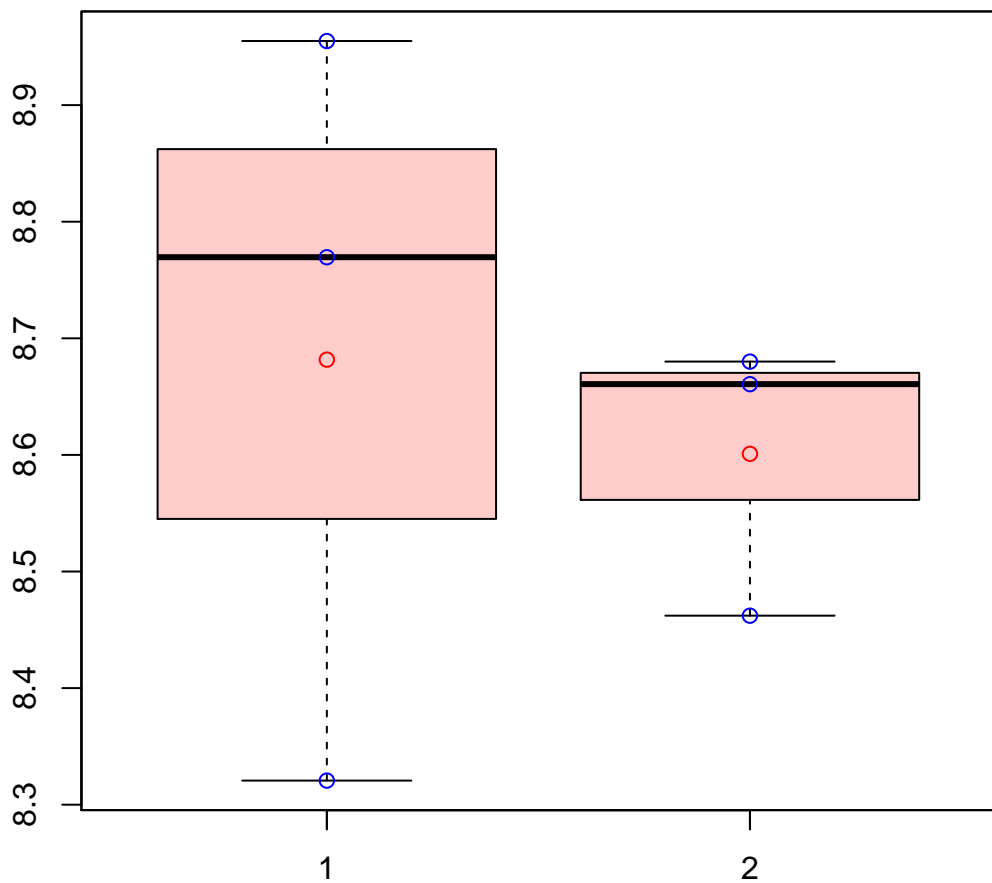

t-Test: p-value = 0.72



# B6TYM7|B6TYM7\_MAIZE

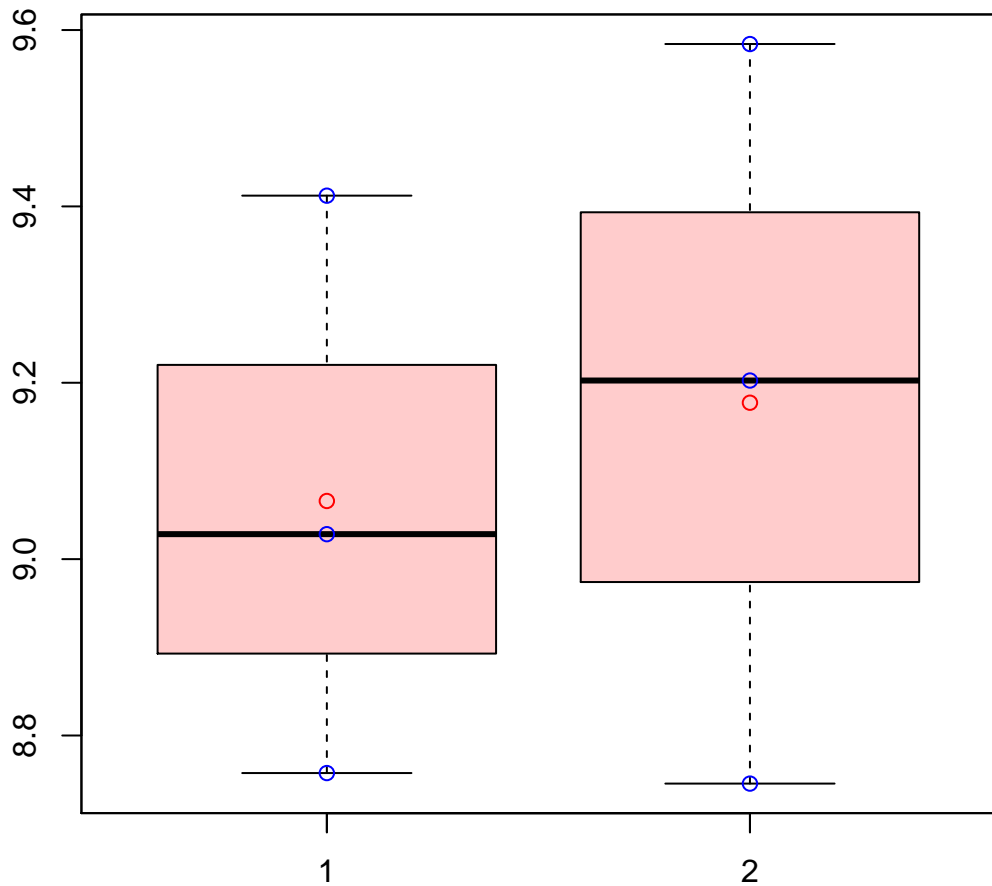

t-Test: p-value = 0.74

# B6U0R1|B6U0R1\_MAIZE

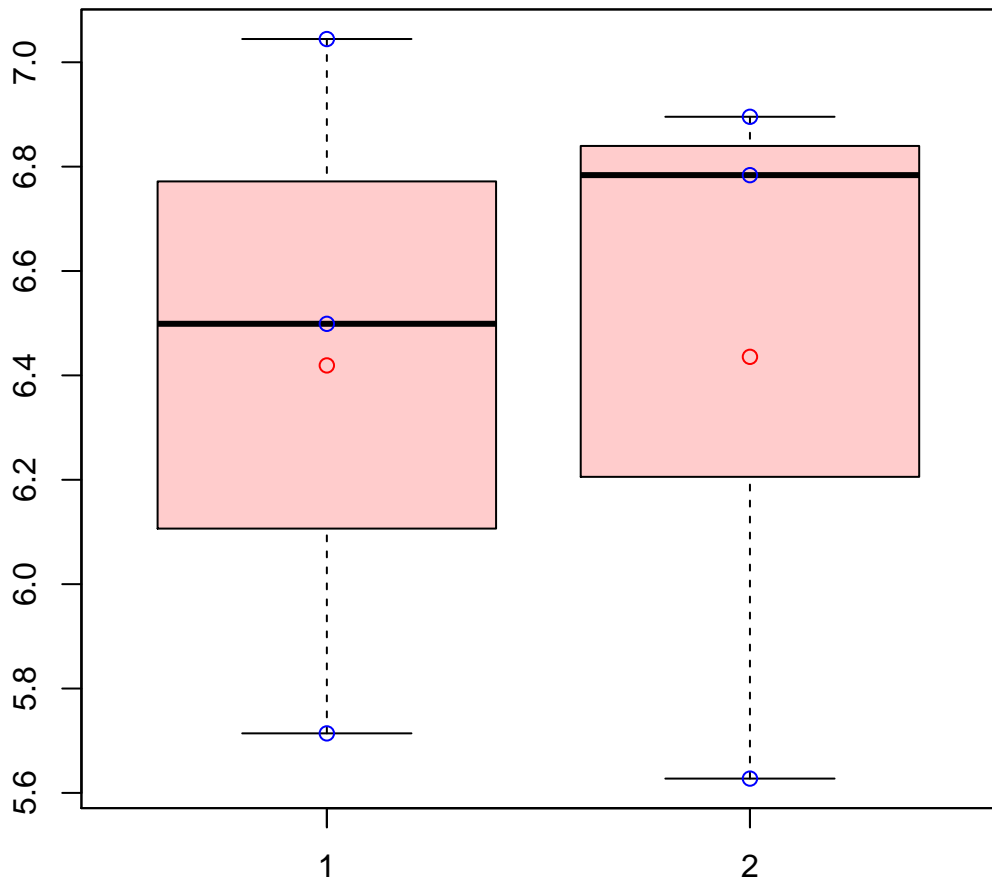

t-Test: p-value = 0.98

# B6U1R9|B6U1R9\_MAIZE

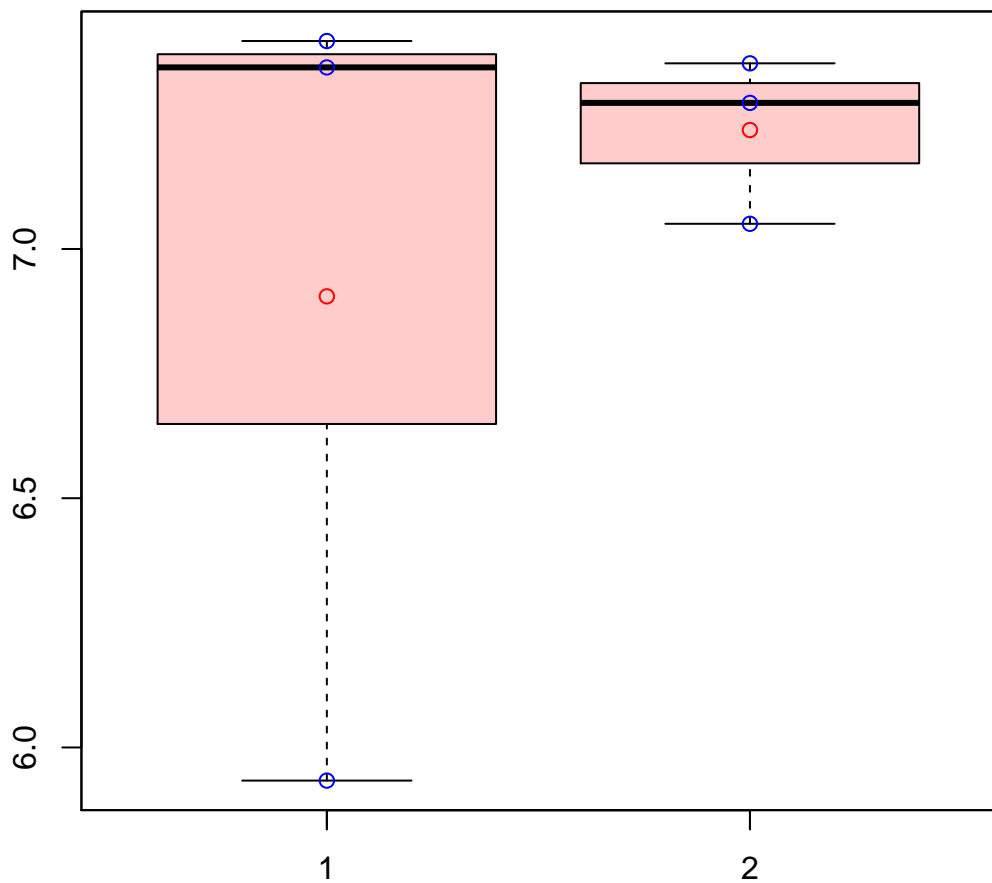

t-Test: p-value = 0.57

# B6U208|B6U208\_MAIZE

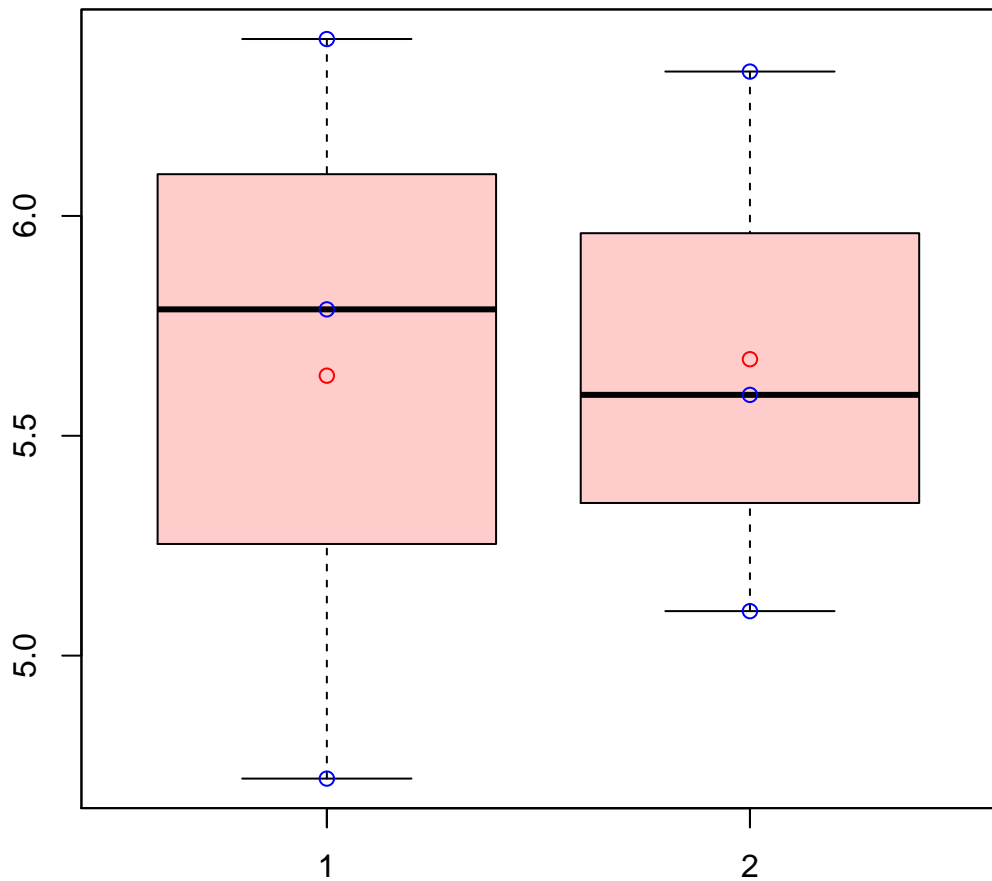

t-Test: p-value = 0.95

# B6U4A3|B6U4A3\_MAIZE

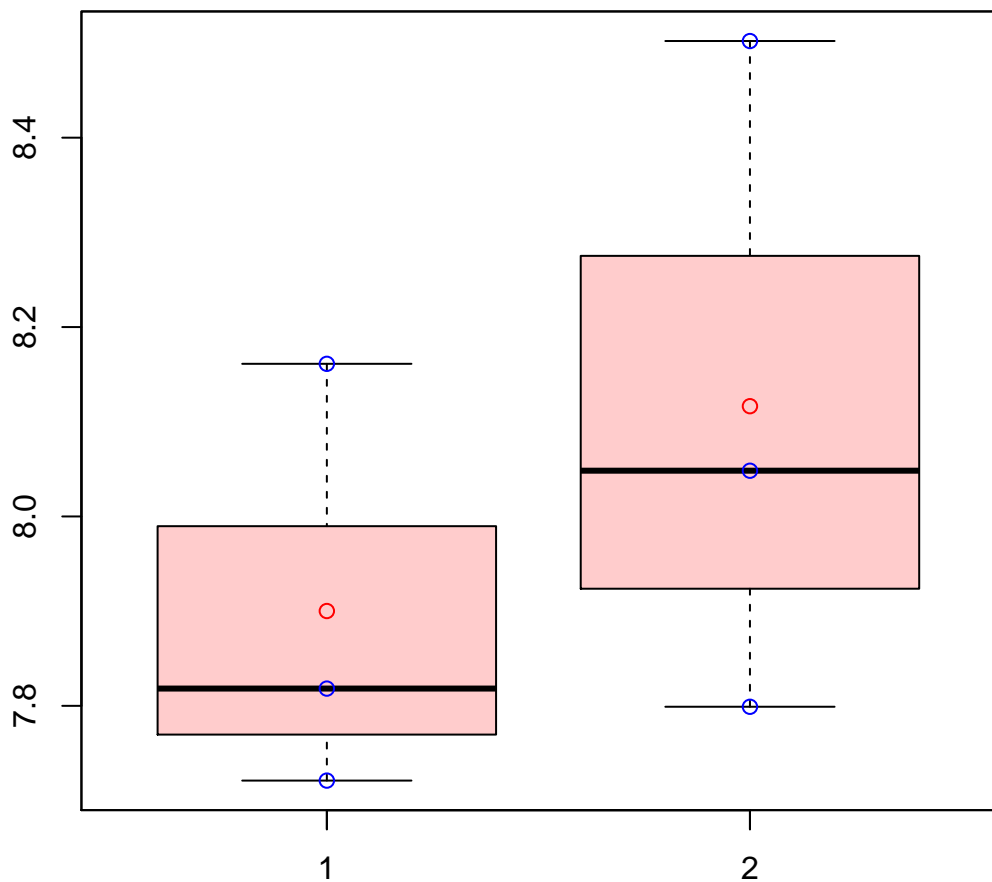

t-Test: p-value = 0.44

# B6U4D3|B6U4D3\_MAIZE

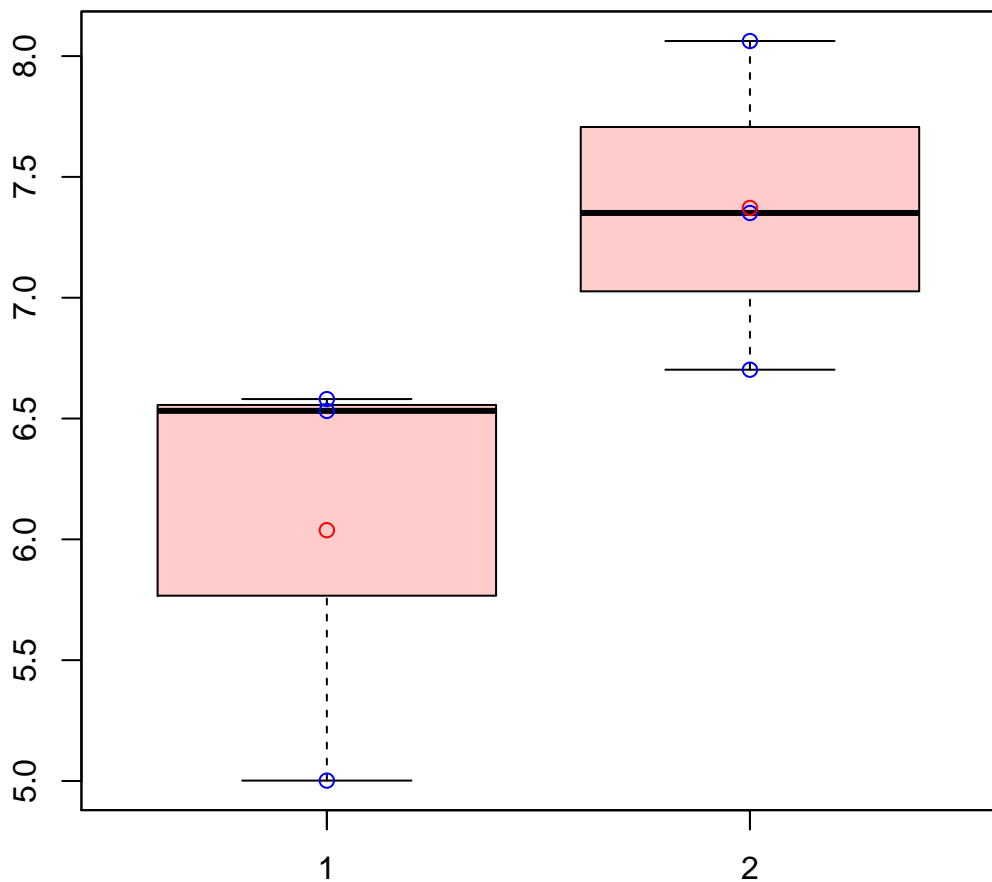

t-Test: p-value = 0.11

# B6U4G5|B6U4G5\_MAIZE

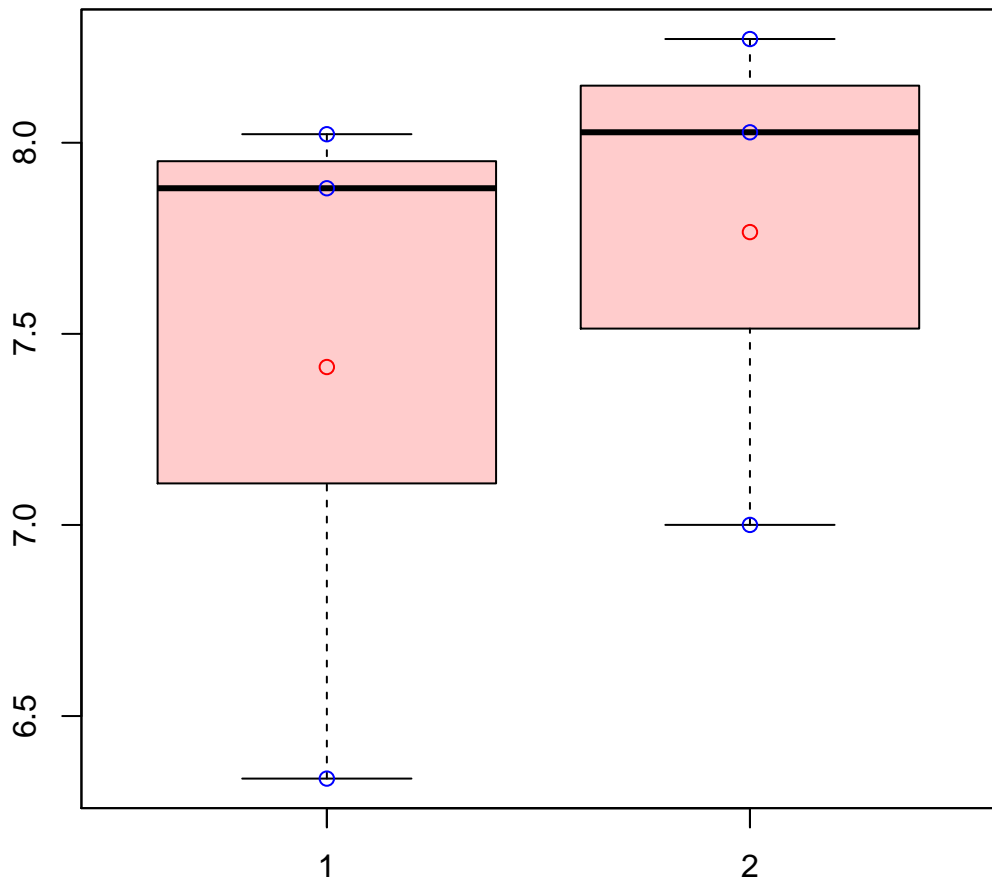

t-Test: p-value = 0.63

# B6U6P6|B6U6P6\_MAIZE

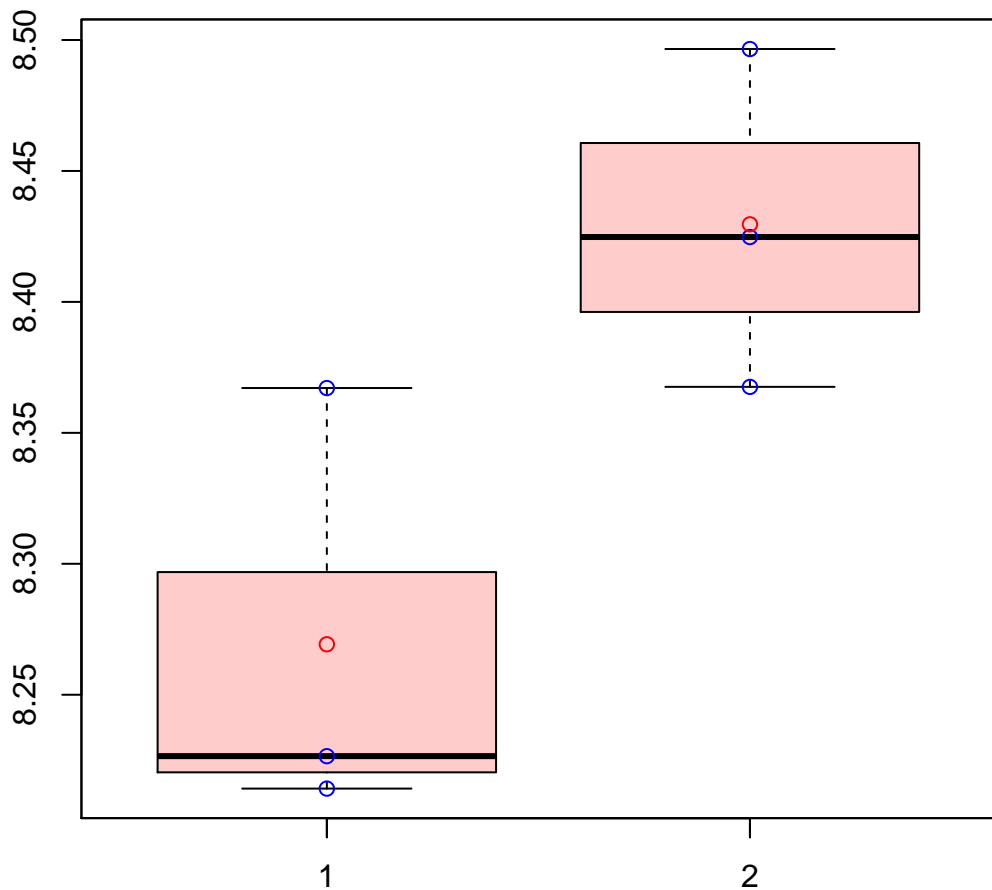

t-Test: p-value = 0.06



# B6U980|B6U980\_MAIZE

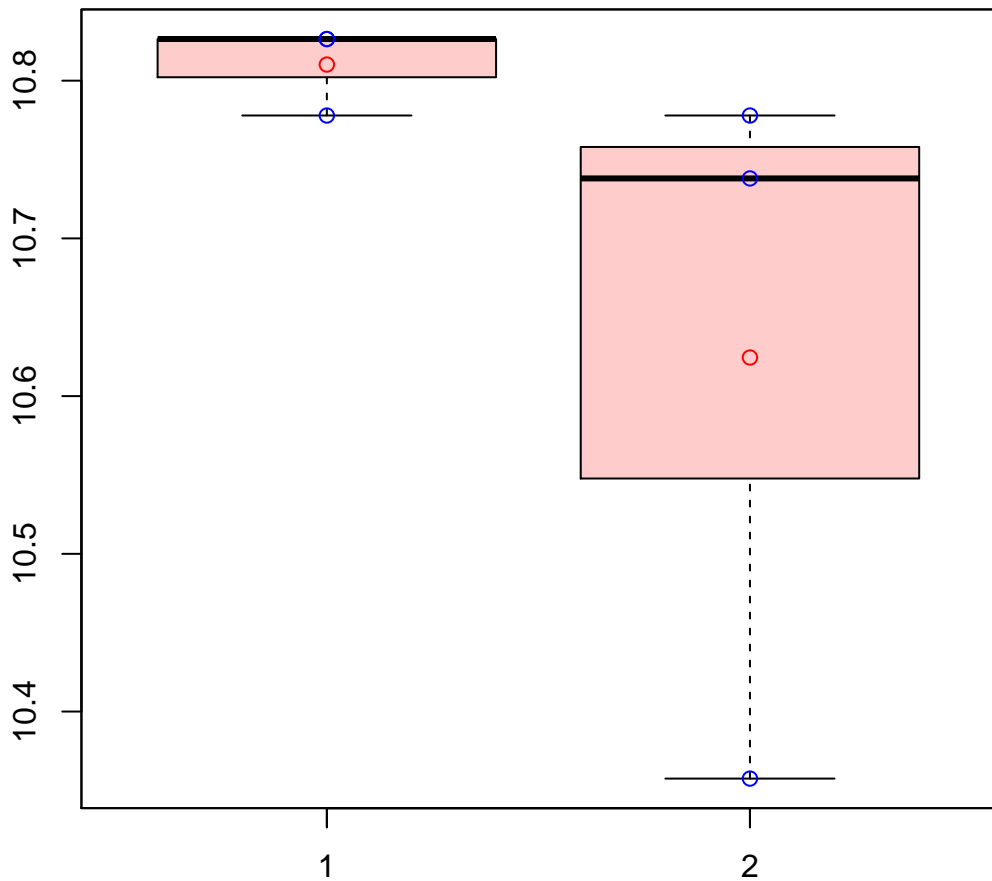

t-Test: p-value = 0.3

# B6UB87|B6UB87\_MAIZE

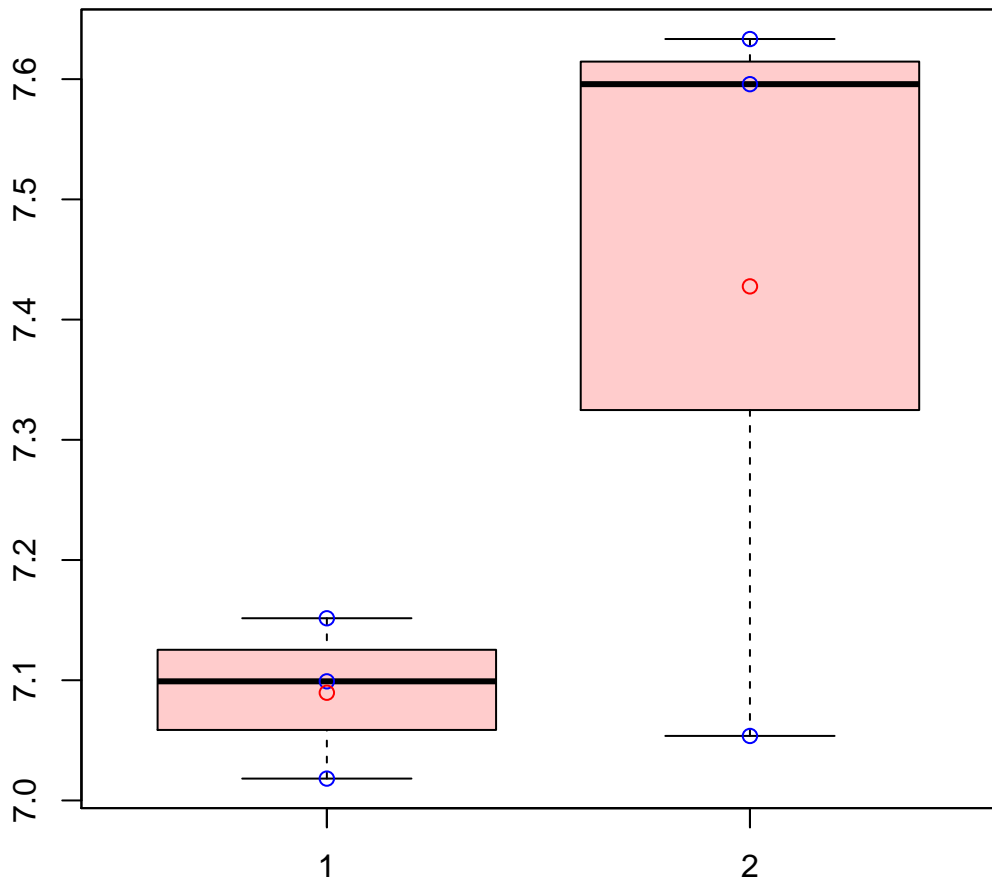

t-Test: p-value = 0.21

# B6UC34|B6UC34\_MAIZE

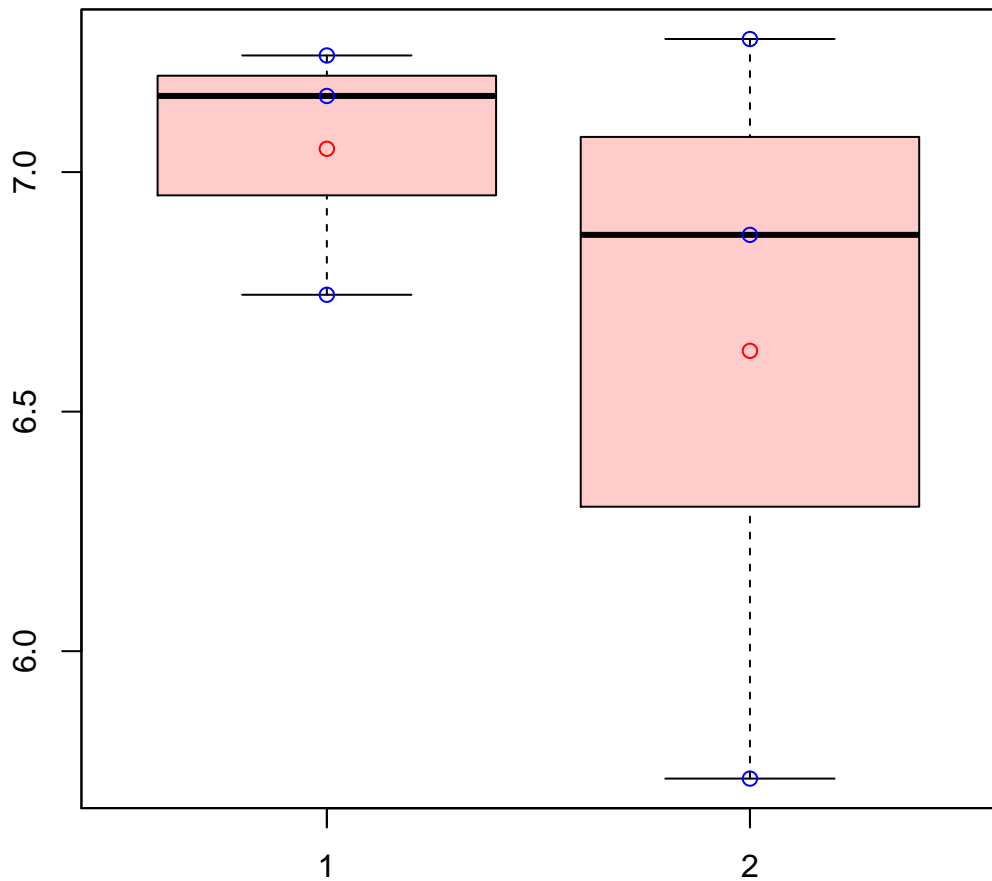

t-Test: p-value = 0.46

# B6UCF0|B6UCF0\_MAIZE

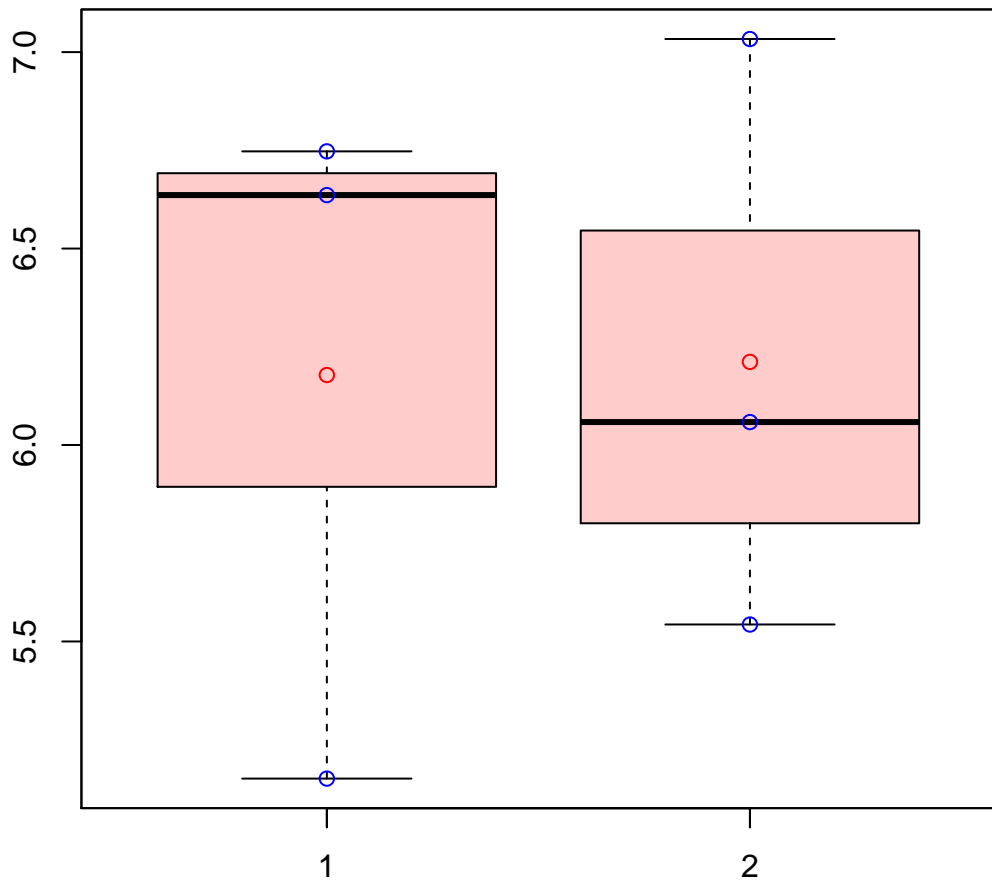

t-Test: p-value = 0.96

# B6UCN1|B6UCN1\_MAIZE

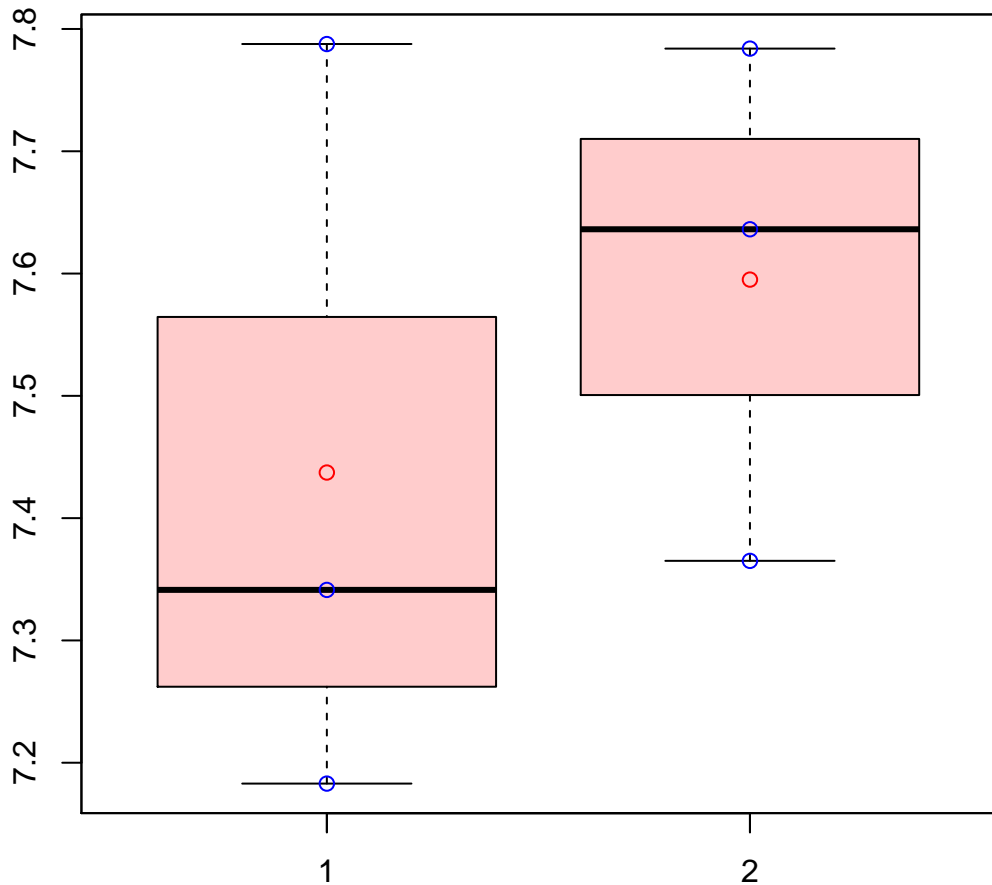

t-Test: p-value = 0.52

# B6UDN1|B6UDN1\_MAIZE

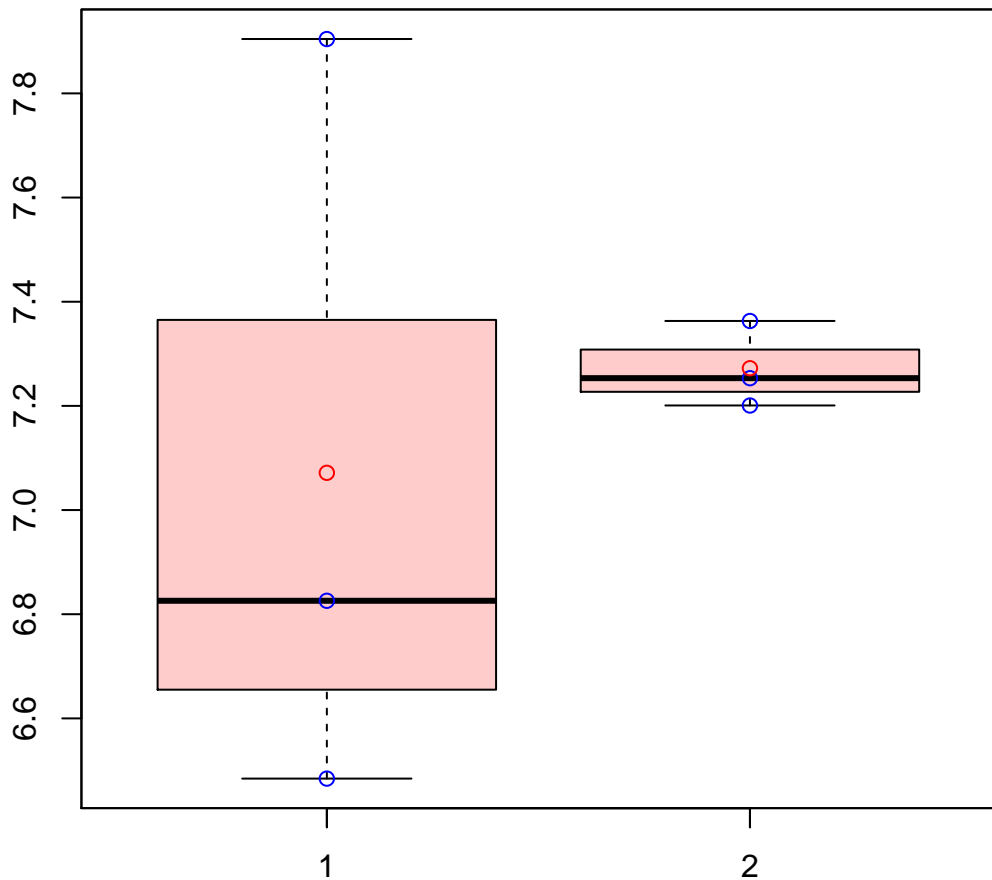

t-Test: p-value = 0.69

# B6UE09|B6UE09\_MAIZE

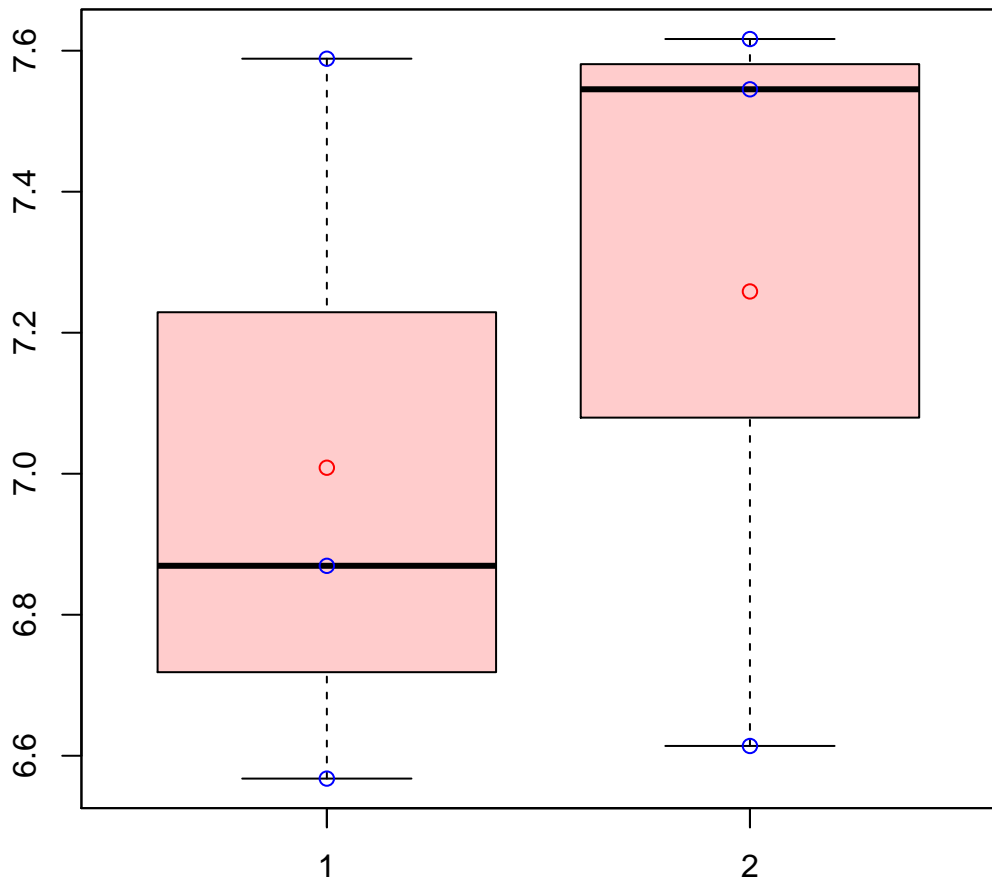

t-Test: p-value = 0.6

# B6UE22|B6UE22\_MAIZE

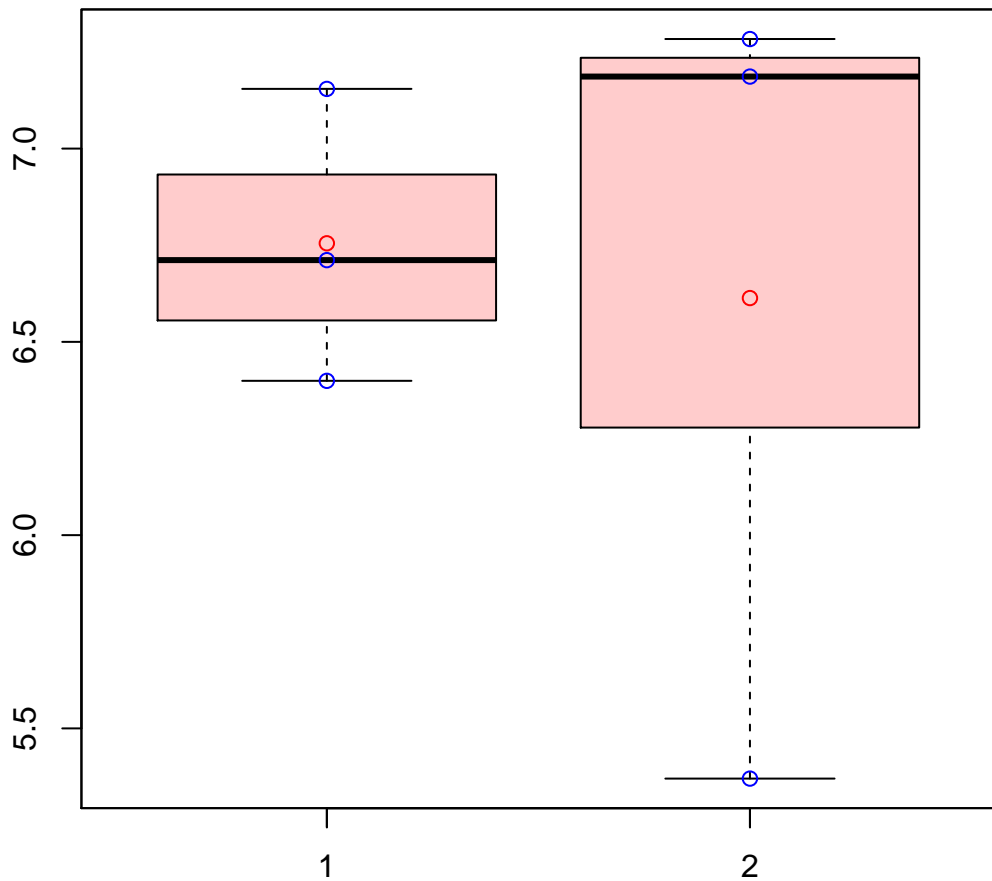

t-Test: p-value = 0.85



# B6UE93|B6UE93\_MAIZE

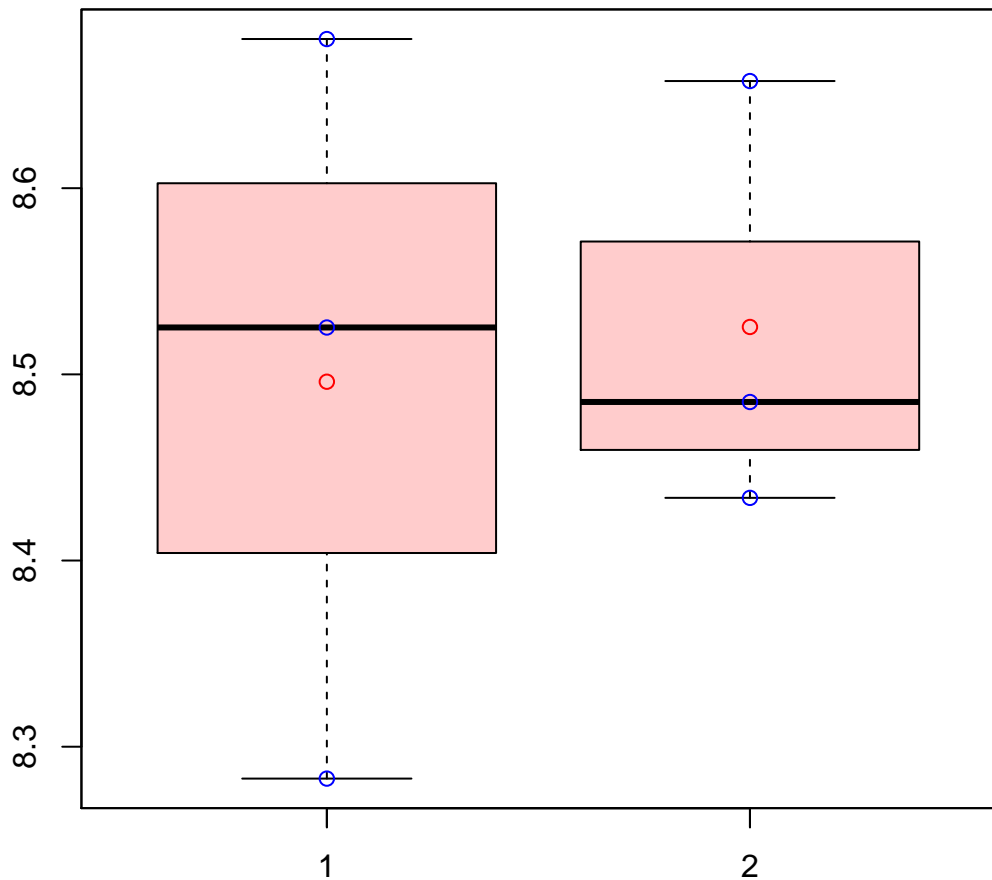

t-Test: p-value = 0.84

# B6UF55|B6UF55\_MAIZE

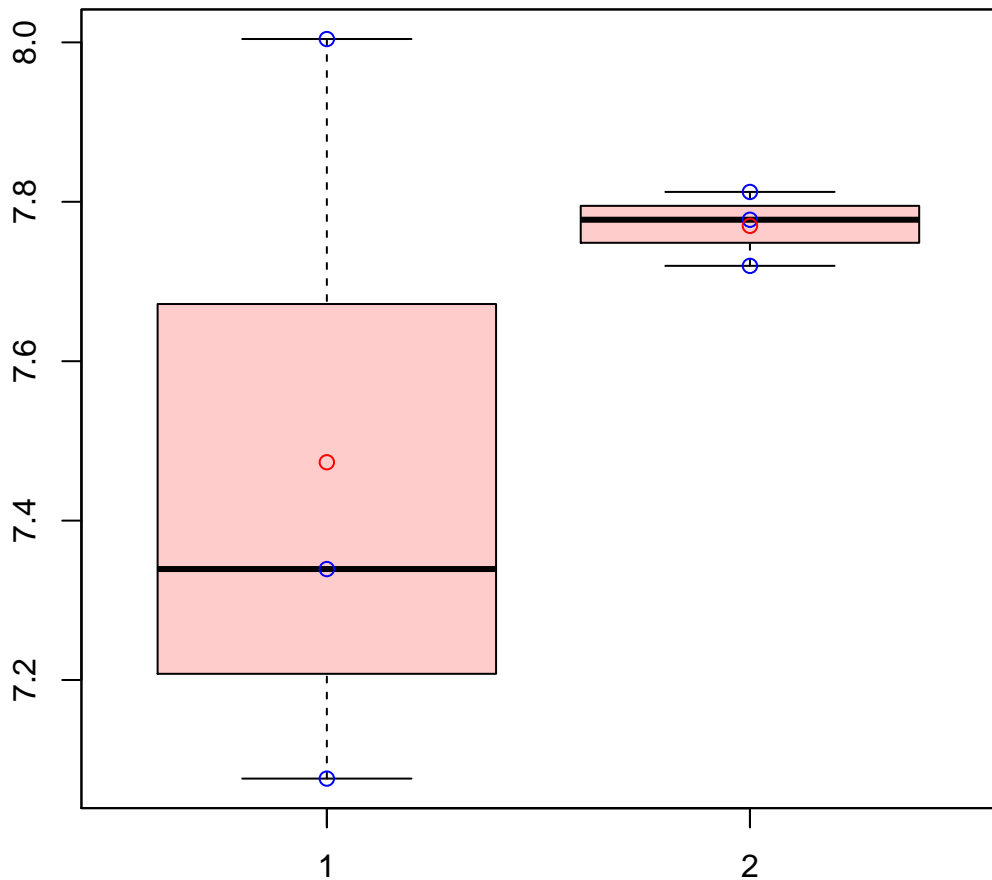

t-Test: p-value = 0.4

# B6V6K8|B6V6K8\_ORYCO

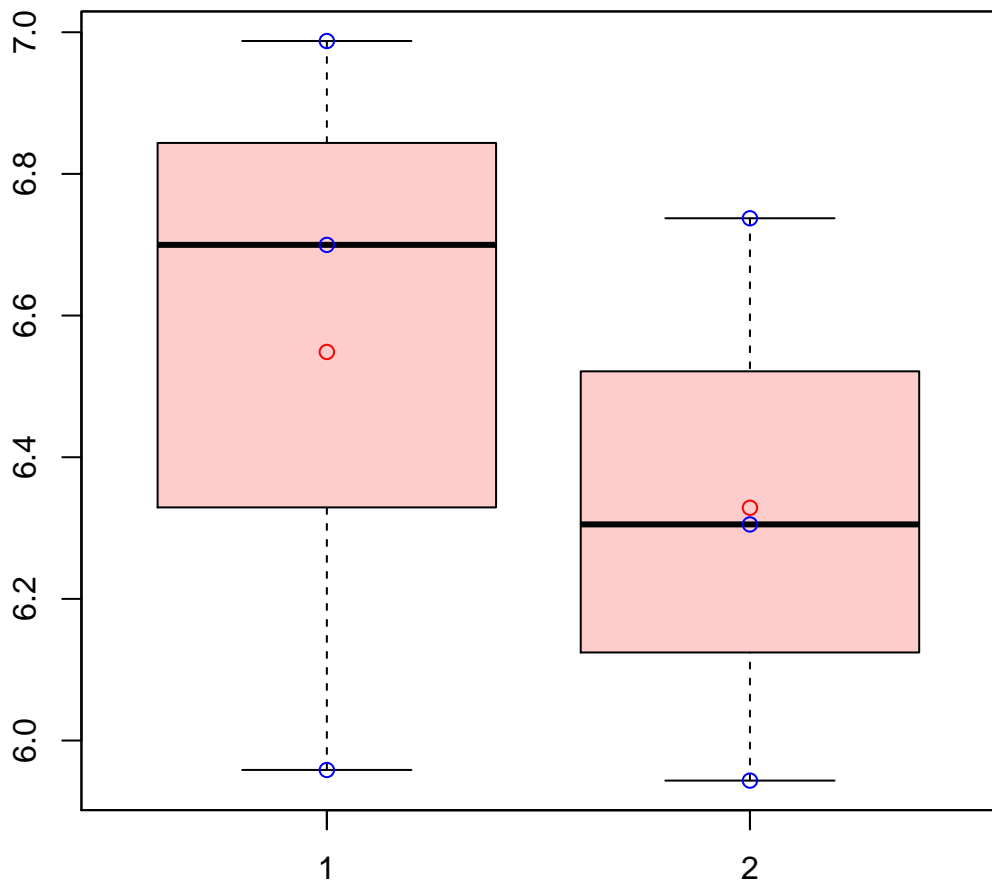

t-Test: p-value = 0.6

# B6V6K9|B6V6K9\_ORYCO

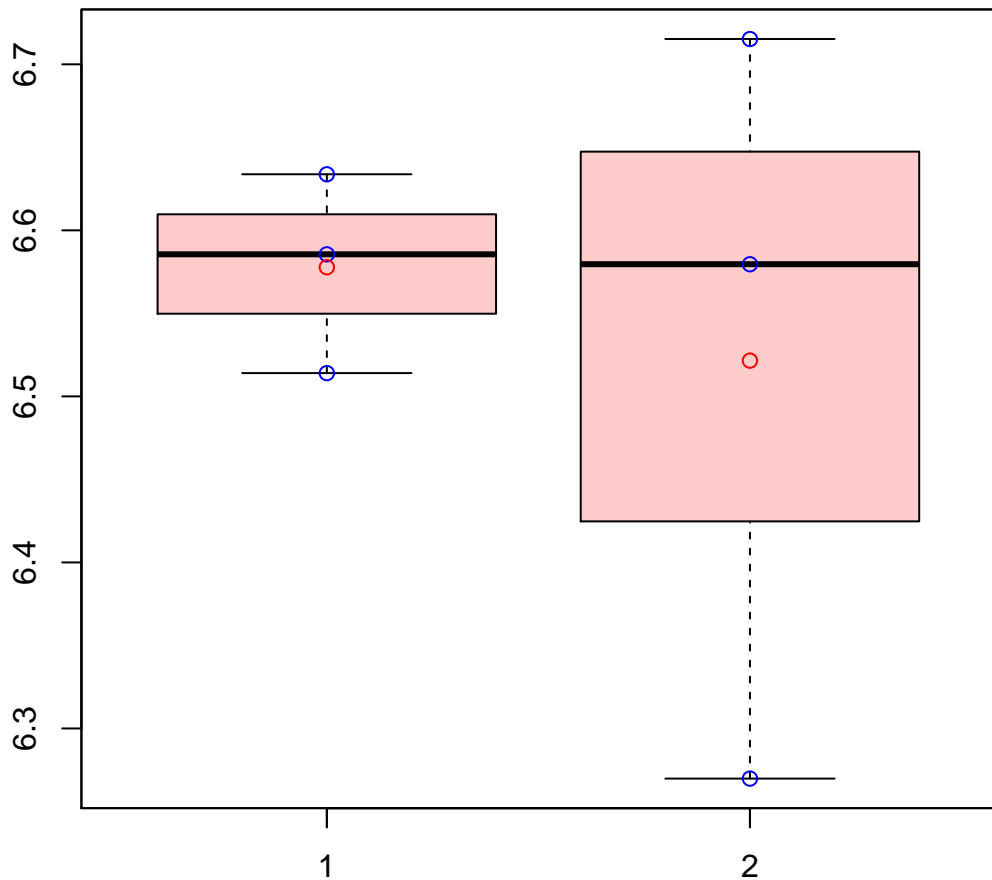

t-Test: p-value = 0.72

# B7ED25|B7ED25\_ORYSJ

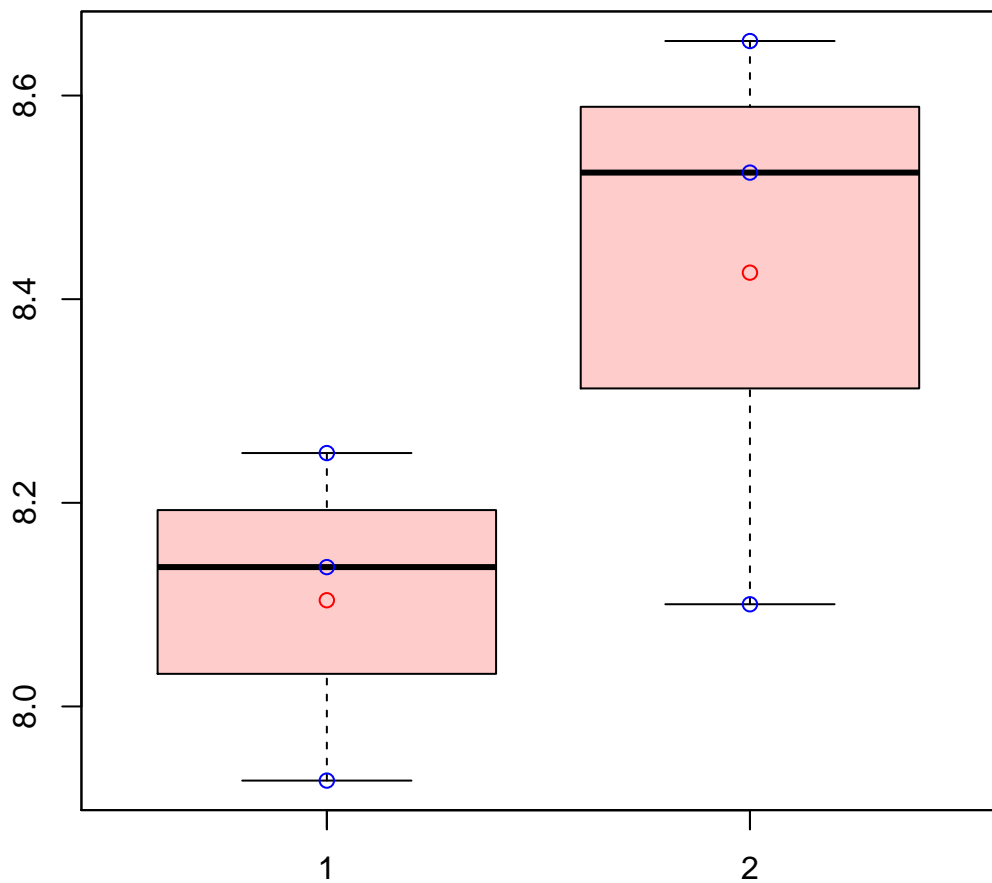

t-Test: p-value = 0.19

# B7EFL3|B7EFL3\_ORYSJ

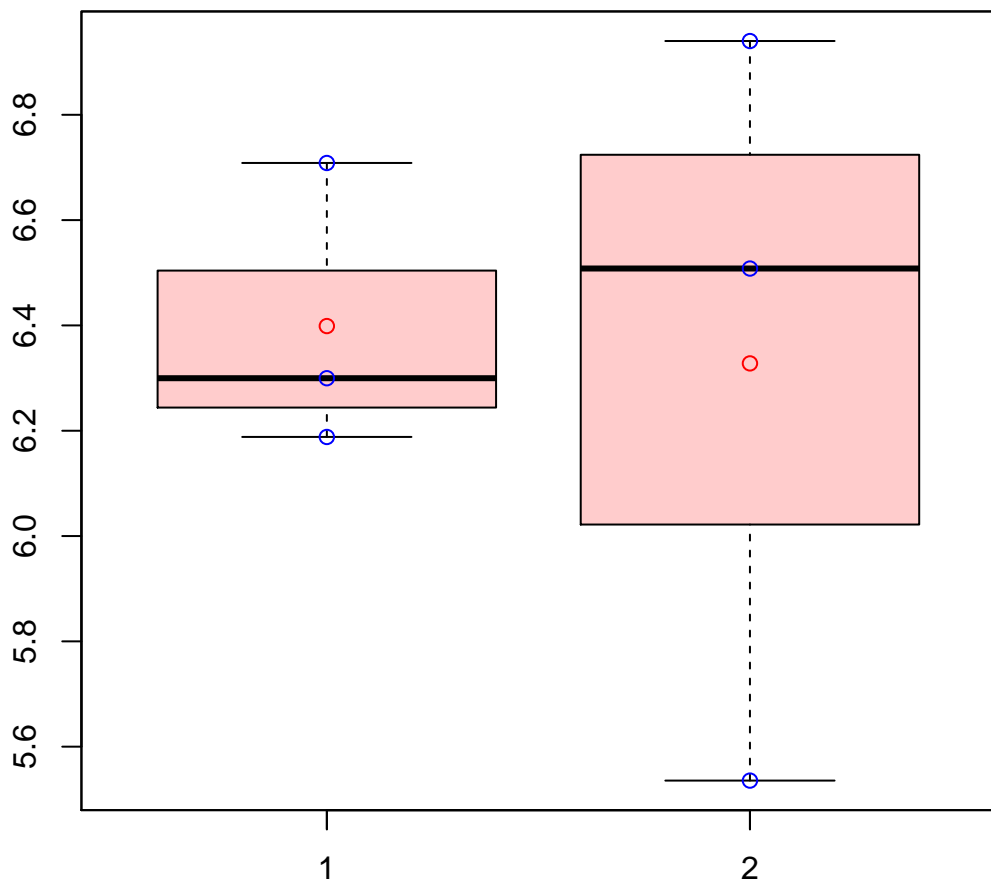

t-Test: p-value = 0.88

# B7EG94|B7EG94\_ORYSJ

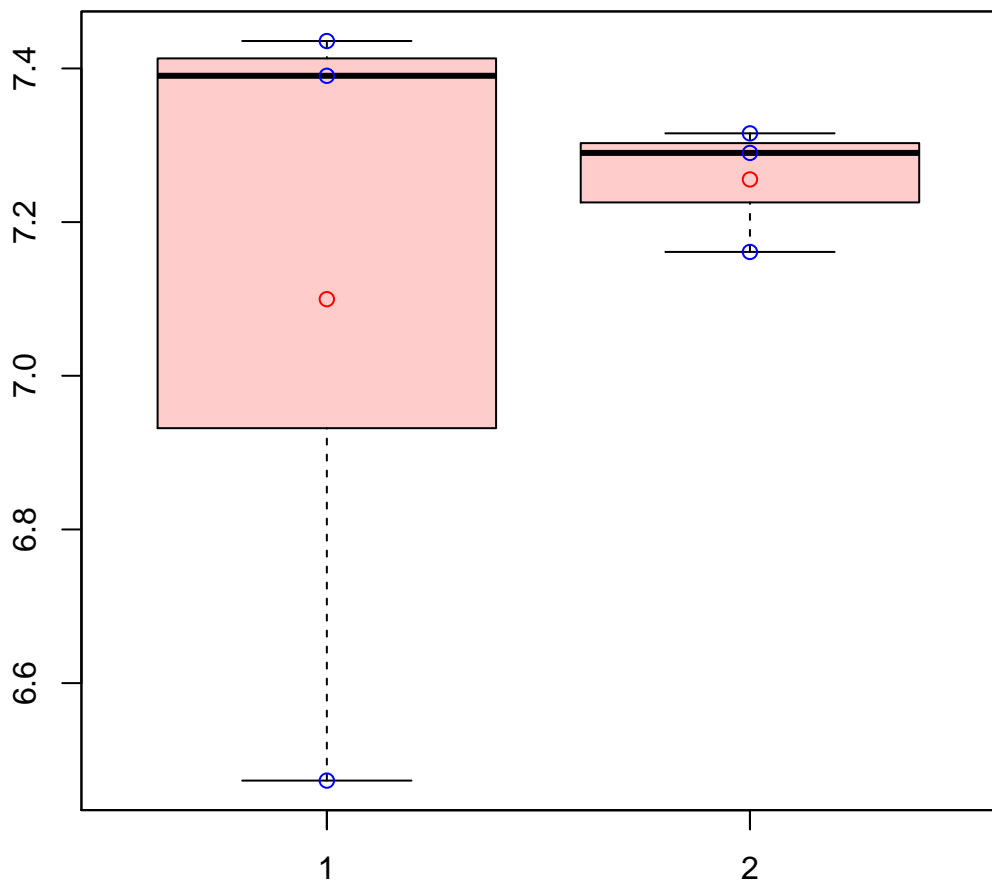

t-Test: p-value = 0.67

# B7EP08|B7EP08\_ORYSJ

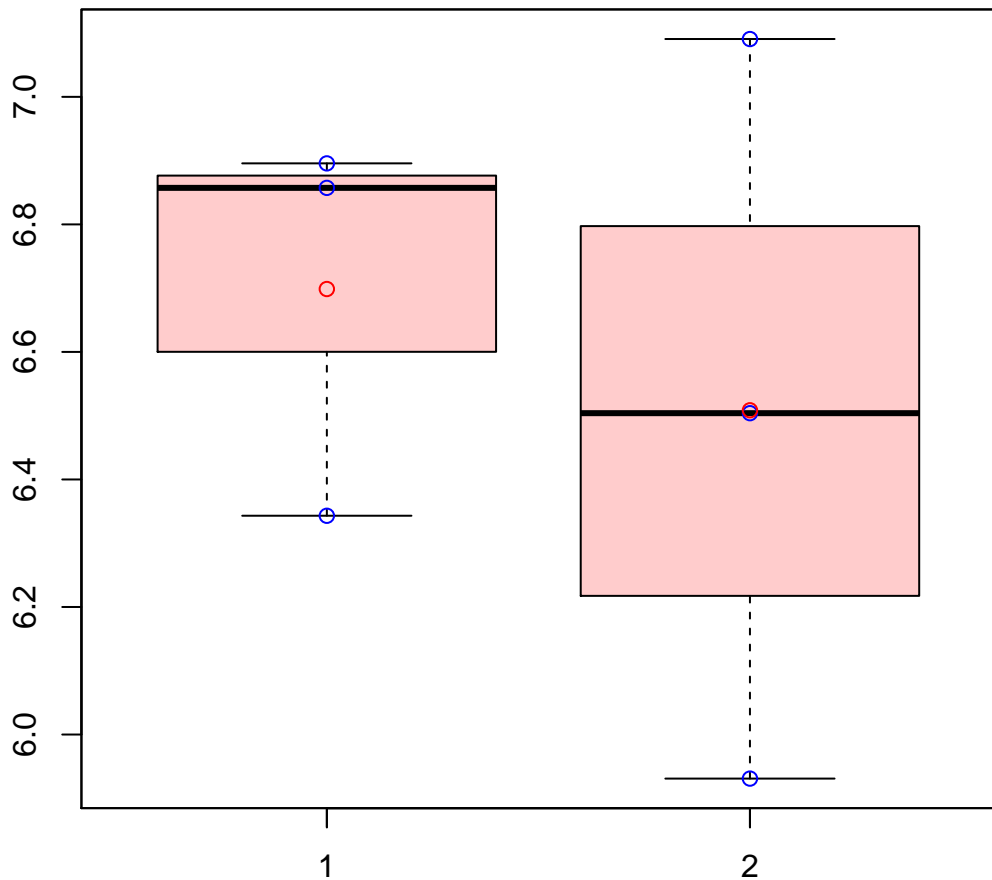

t-Test: p-value = 0.65



# B7EW17|B7EW17\_ORYSJ

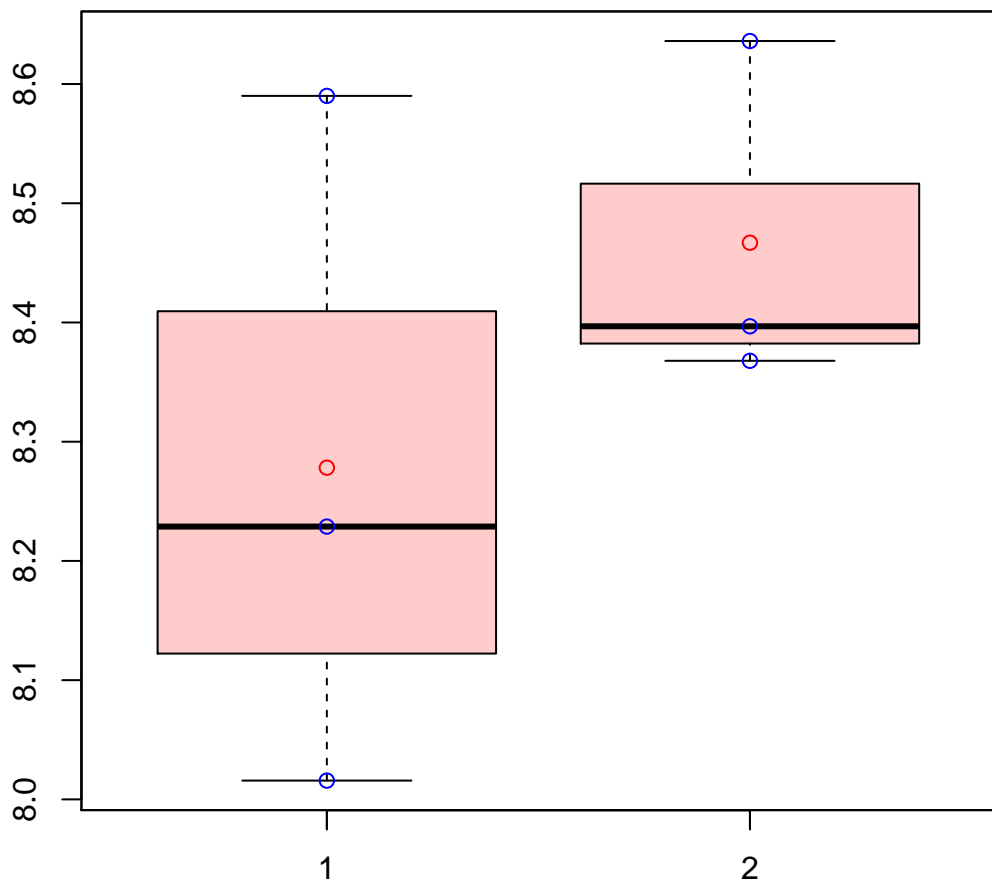

t-Test: p-value = 0.39

# B7EX80|B7EX80\_ORYSJ

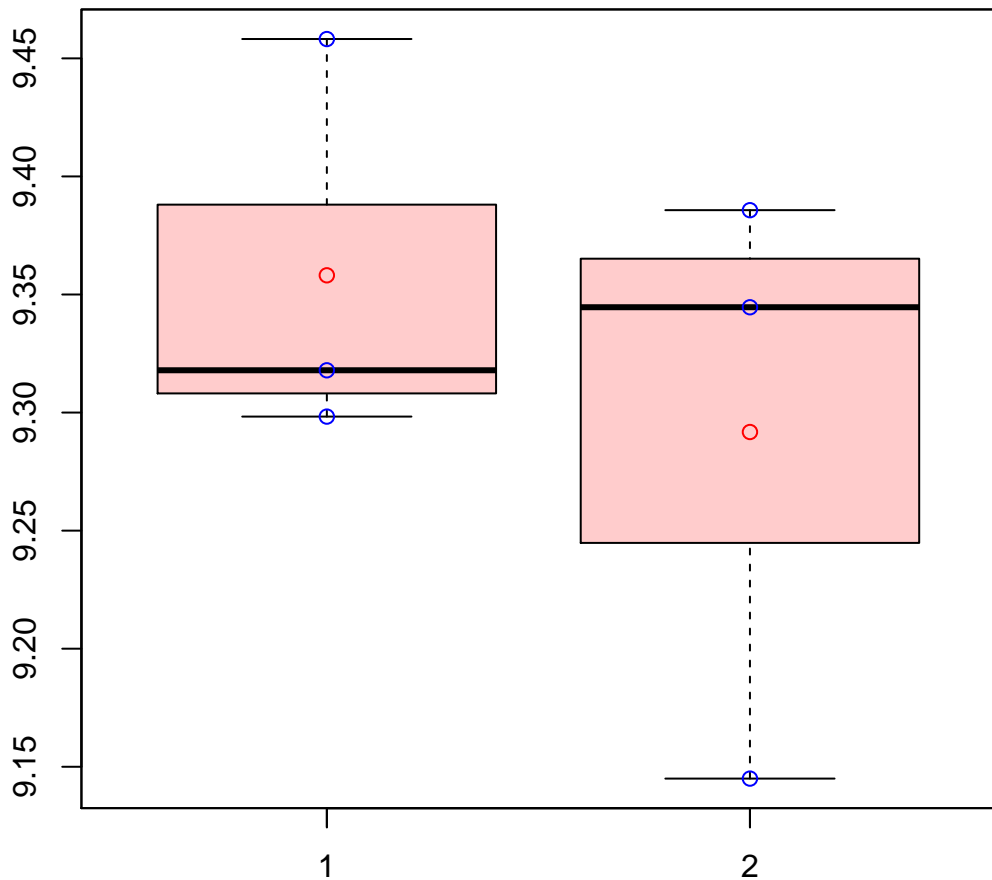

t-Test: p-value = 0.51

# B7F489|B7F489\_ORYSJ

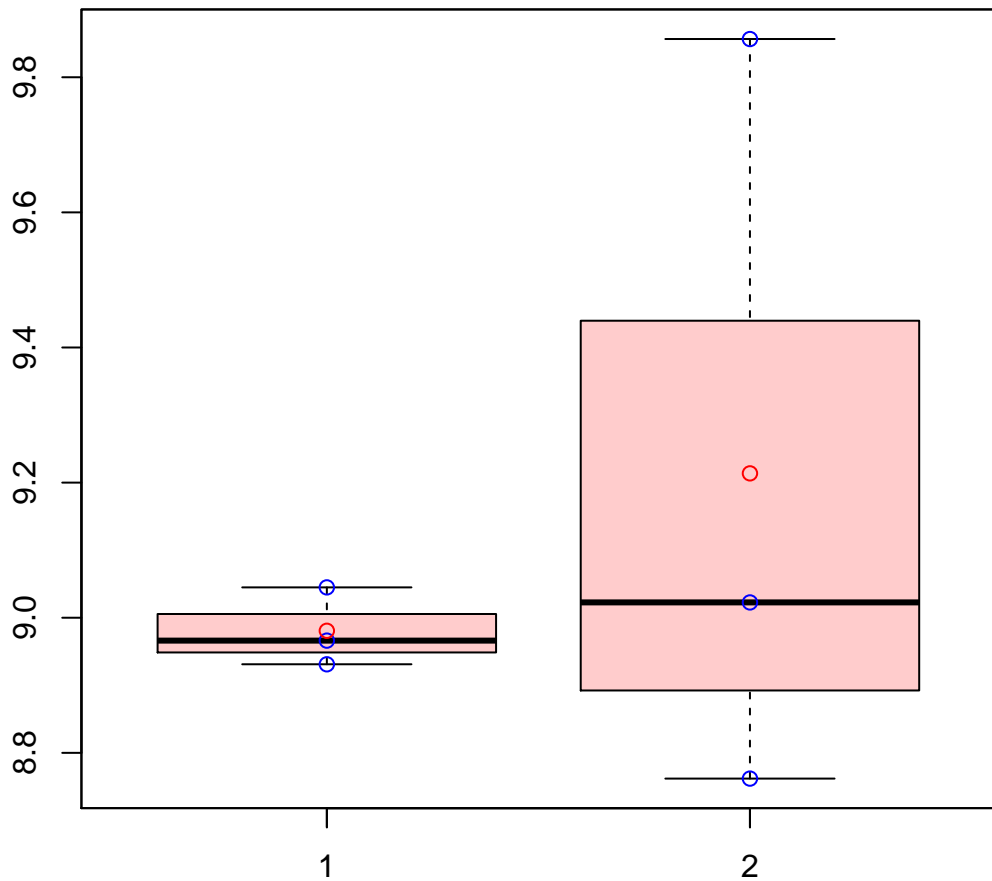

t-Test: p-value = 0.55

# B7F6T2|B7F6T2\_ORYSJ

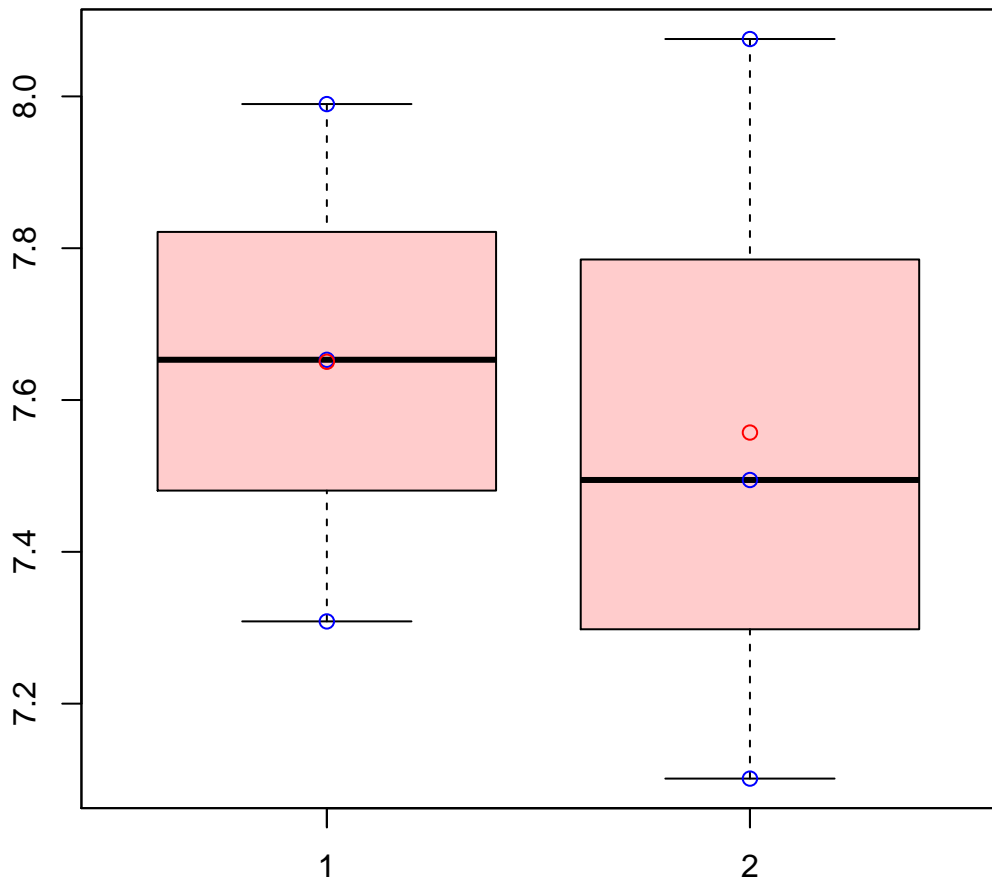

t-Test: p-value = 0.8

# B7FF22|B7FF22\_MAIZE

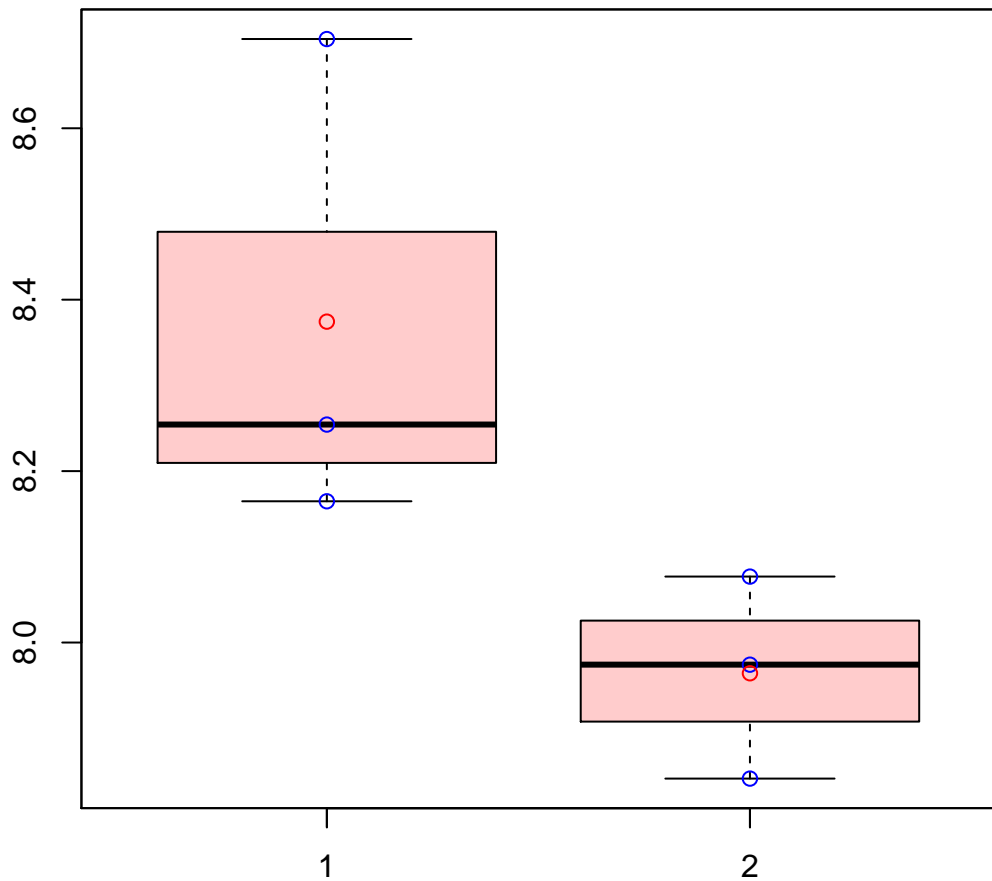

t-Test: p-value = 0.12

# B7SA66|B7SA66\_DACGL

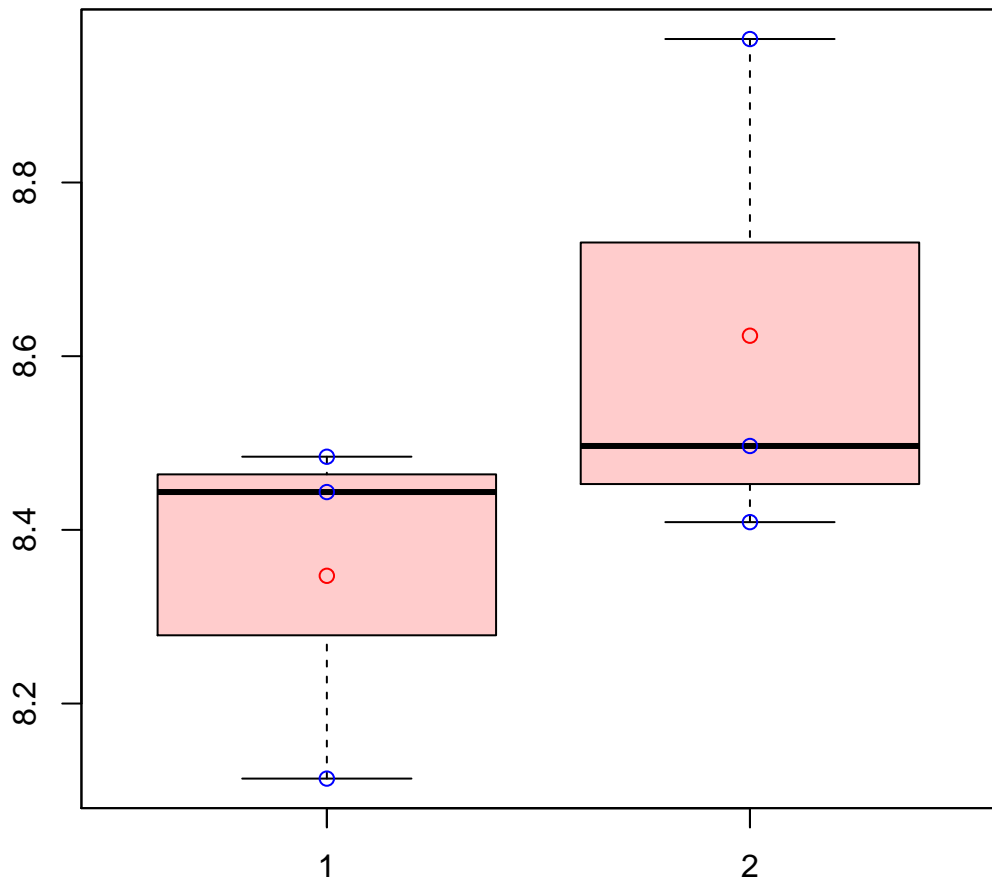

t-Test: p-value = 0.26

# B7SB29|B7SB29\_9POAL

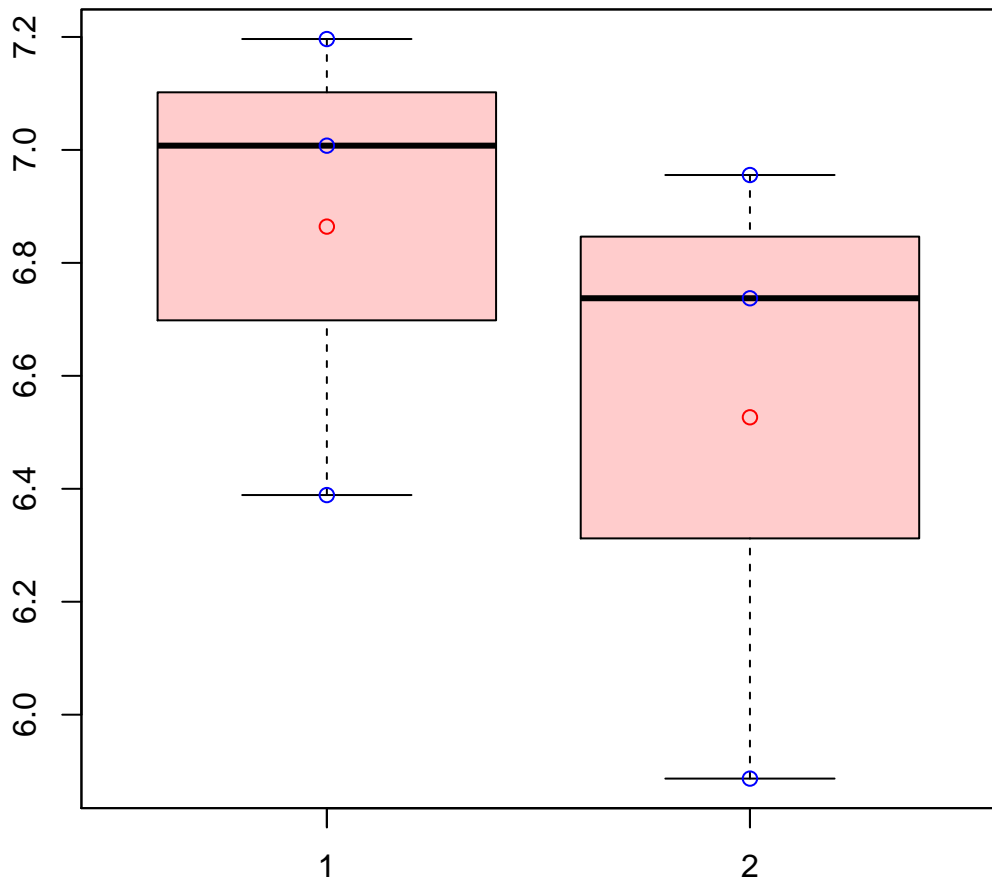

t-Test: p-value = 0.46

# B7SB30|B7SB30\_BAMOL

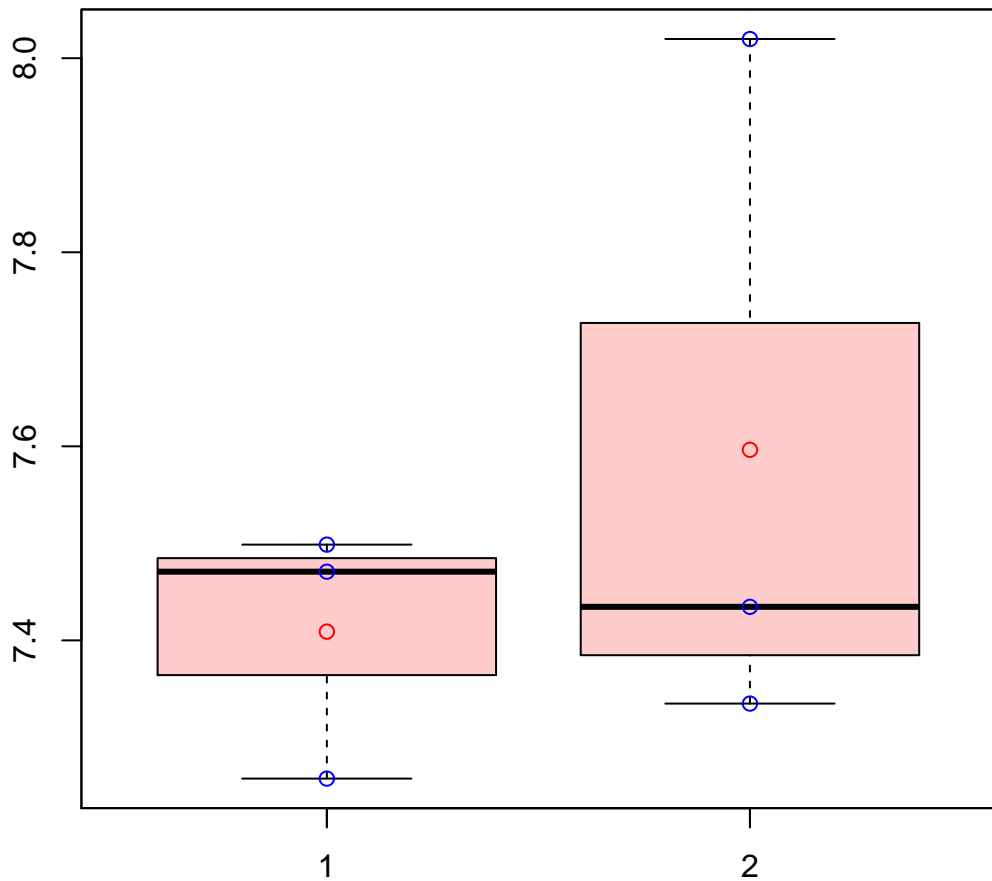

t-Test: p-value = 0.48



# B7ZF18|B7ZF18\_9LILI

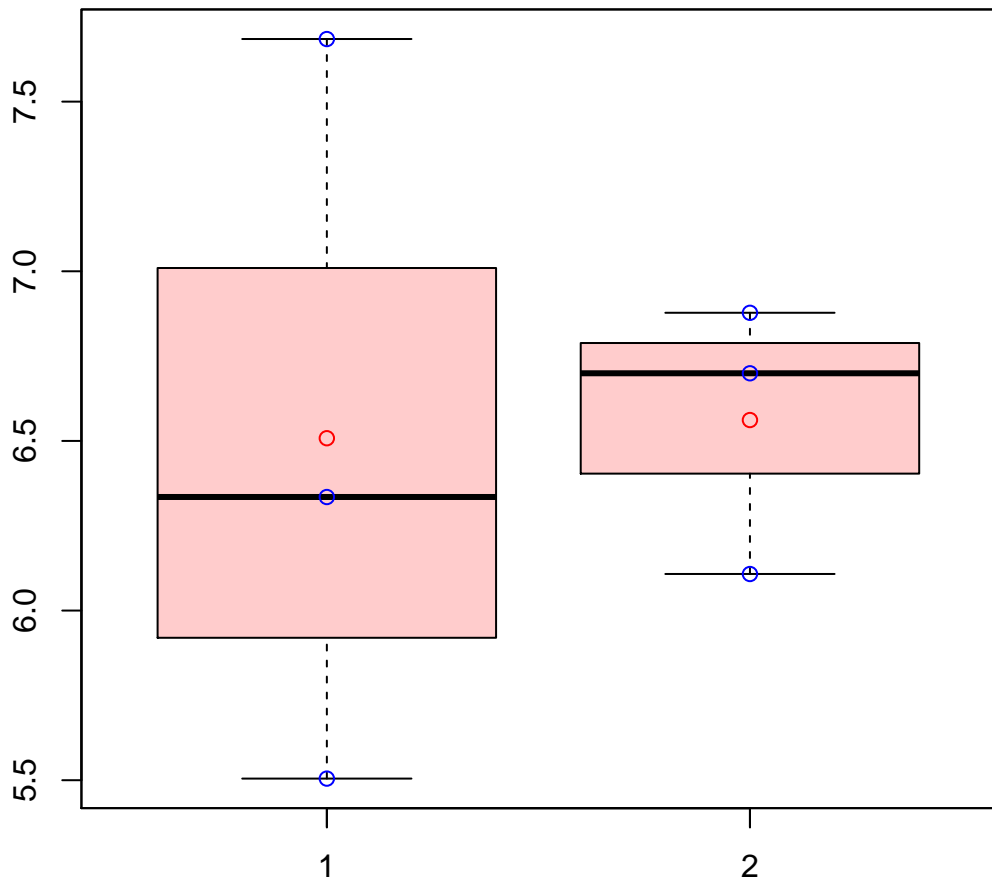

t-Test: p-value = 0.94

# B7ZX26|B7ZX26\_MAIZE

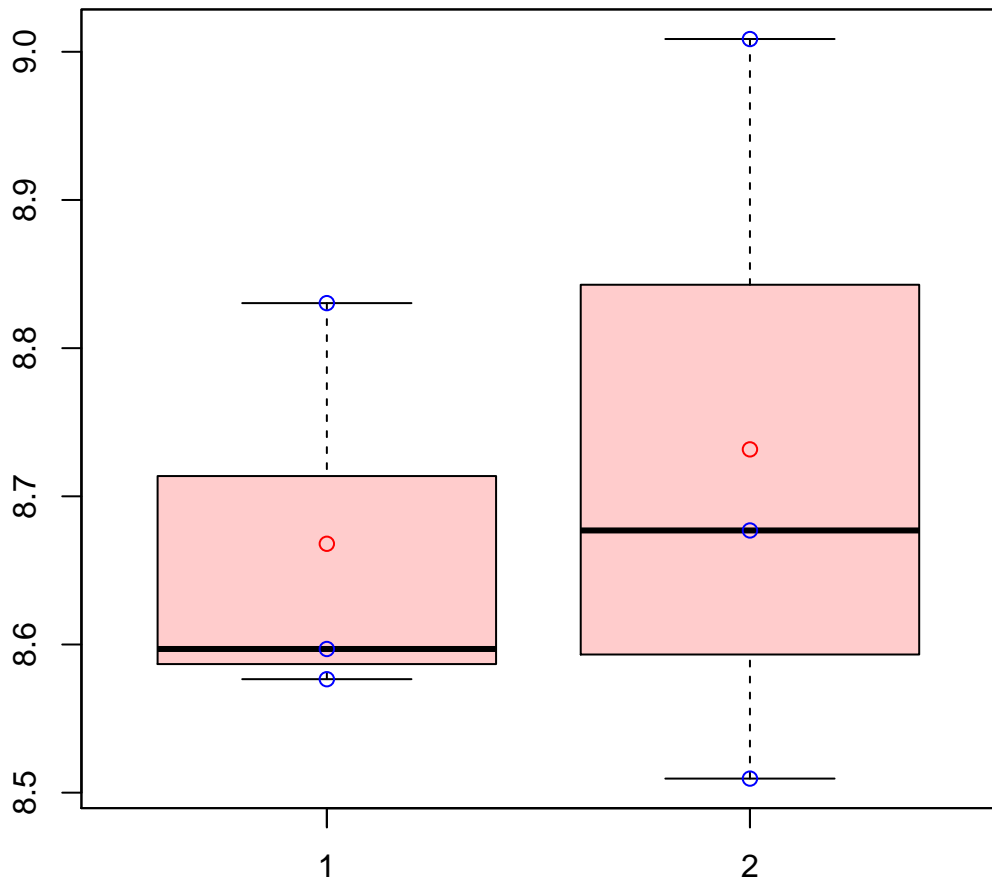

t-Test: p-value = 0.73

# B7ZXC5|B7ZXC5\_MAIZE

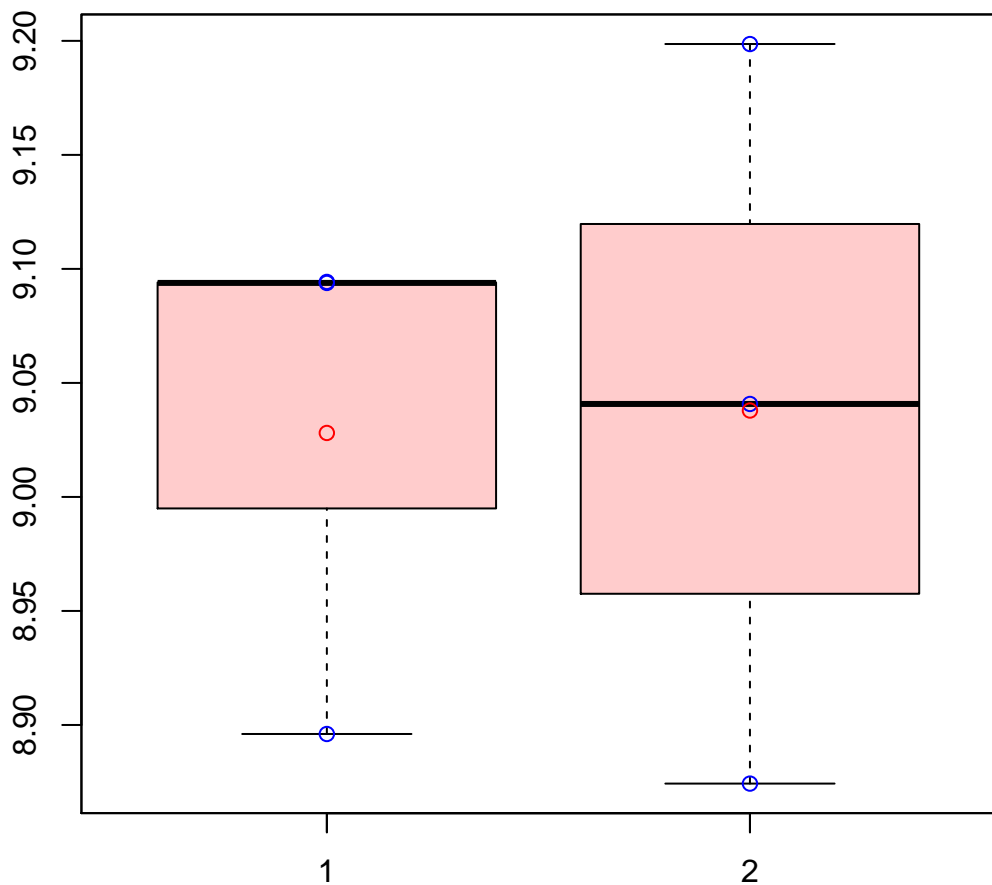

t-Test: p-value = 0.94

# B7ZYP5|B7ZYP5\_MAIZE

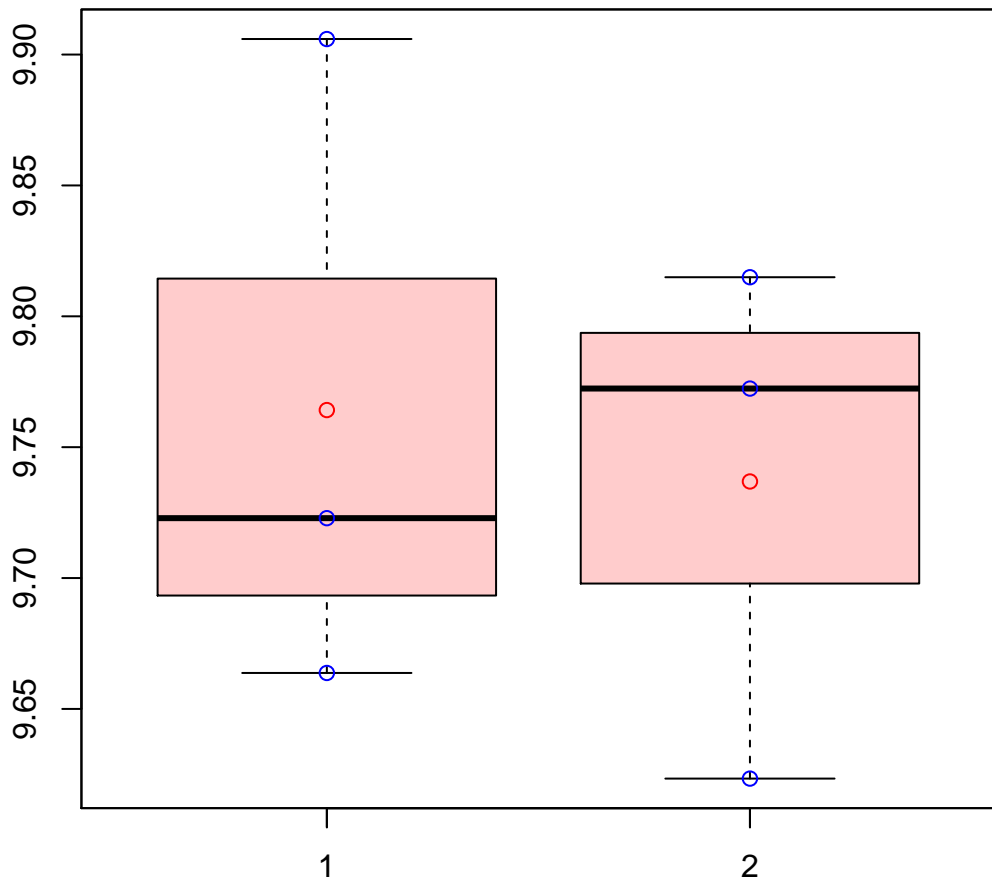

t-Test: p-value = 0.79

# B7ZZ39|B7ZZ39\_MAIZE

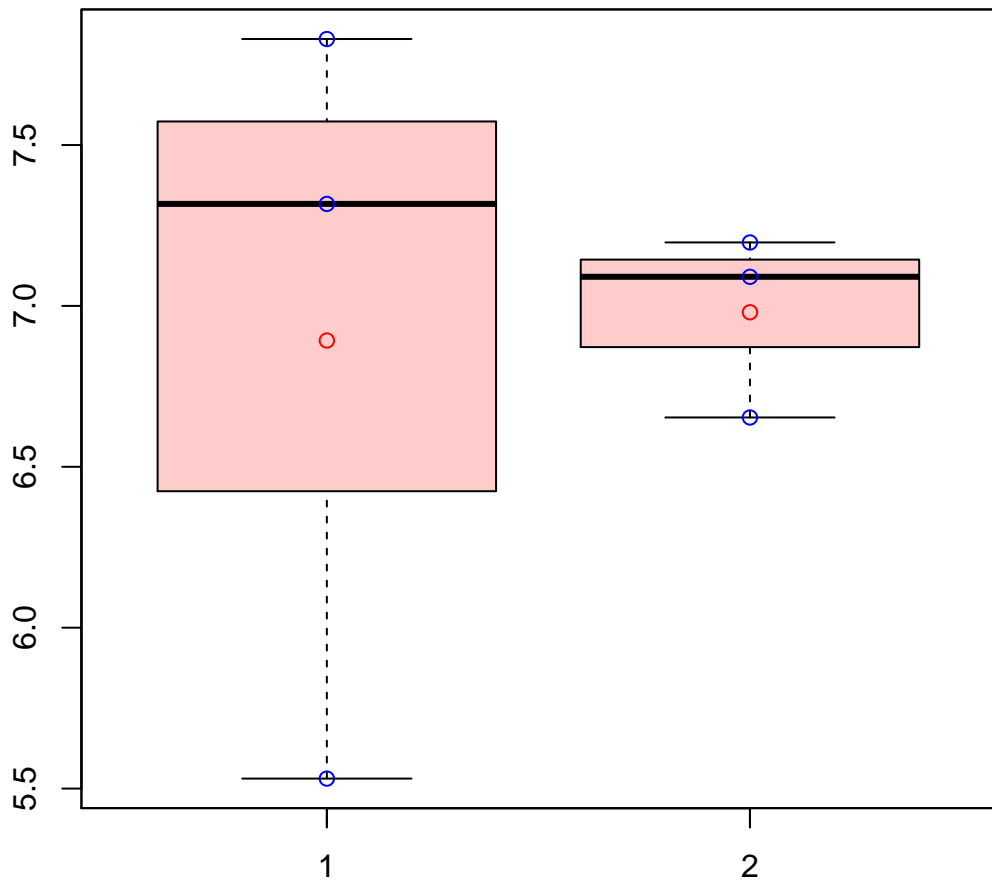

t-Test: p-value = 0.91

# B7ZZ42|B7ZZ42\_MAIZE

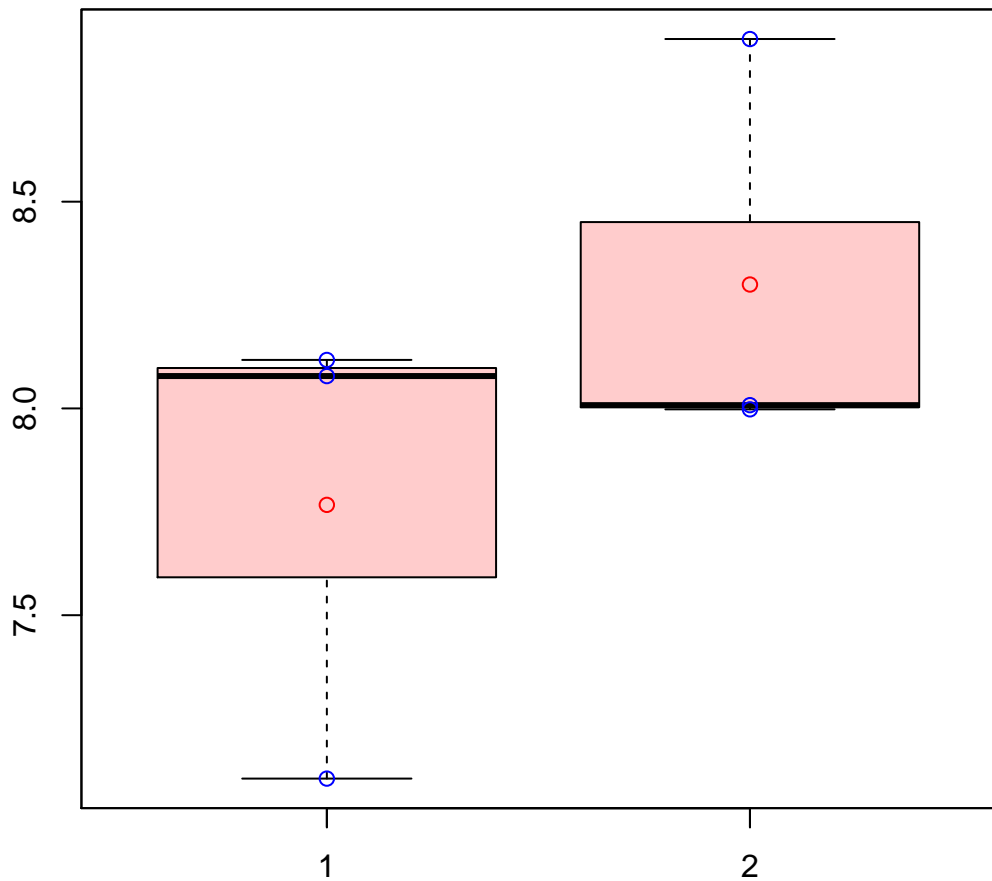

t-Test: p-value = 0.3

# B8A021|B8A021\_MAIZE

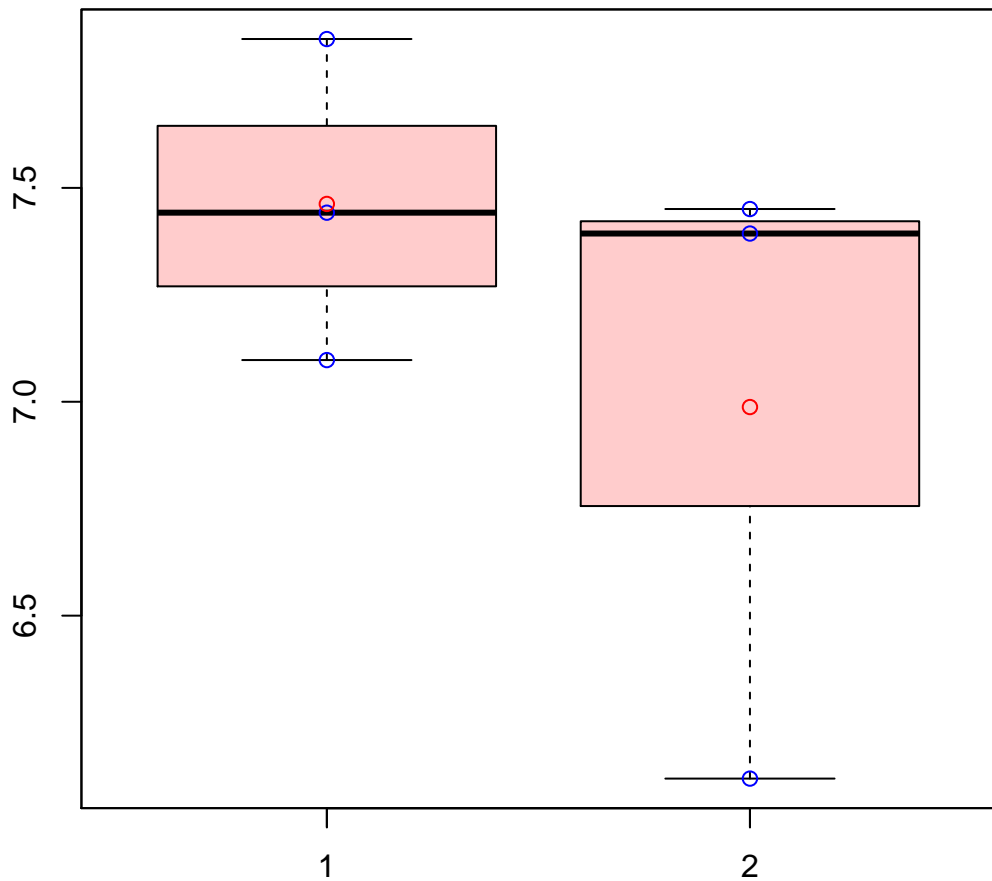

t-Test: p-value = 0.4

# B8A0J4|B8A0J4\_MAIZE

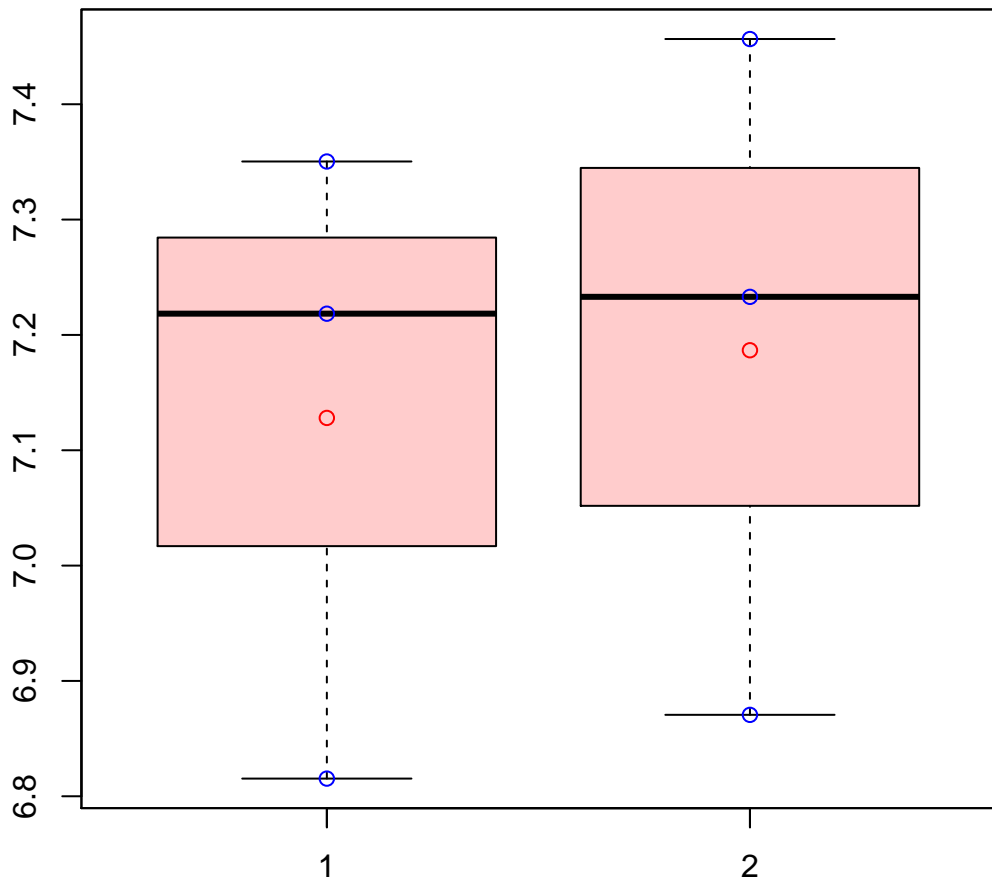

t-Test: p-value = 0.81



# B8A158|B8A158\_MAIZE

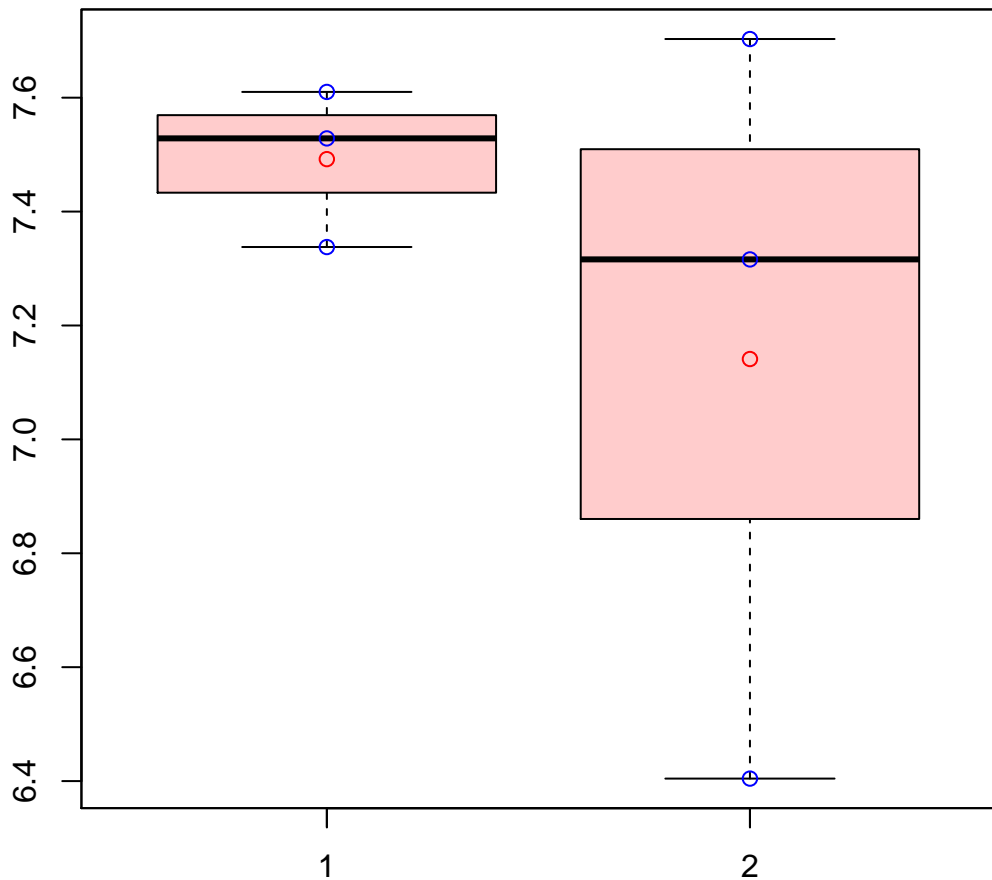

t-Test: p-value = 0.46

# B8A217|B8A217\_MAIZE

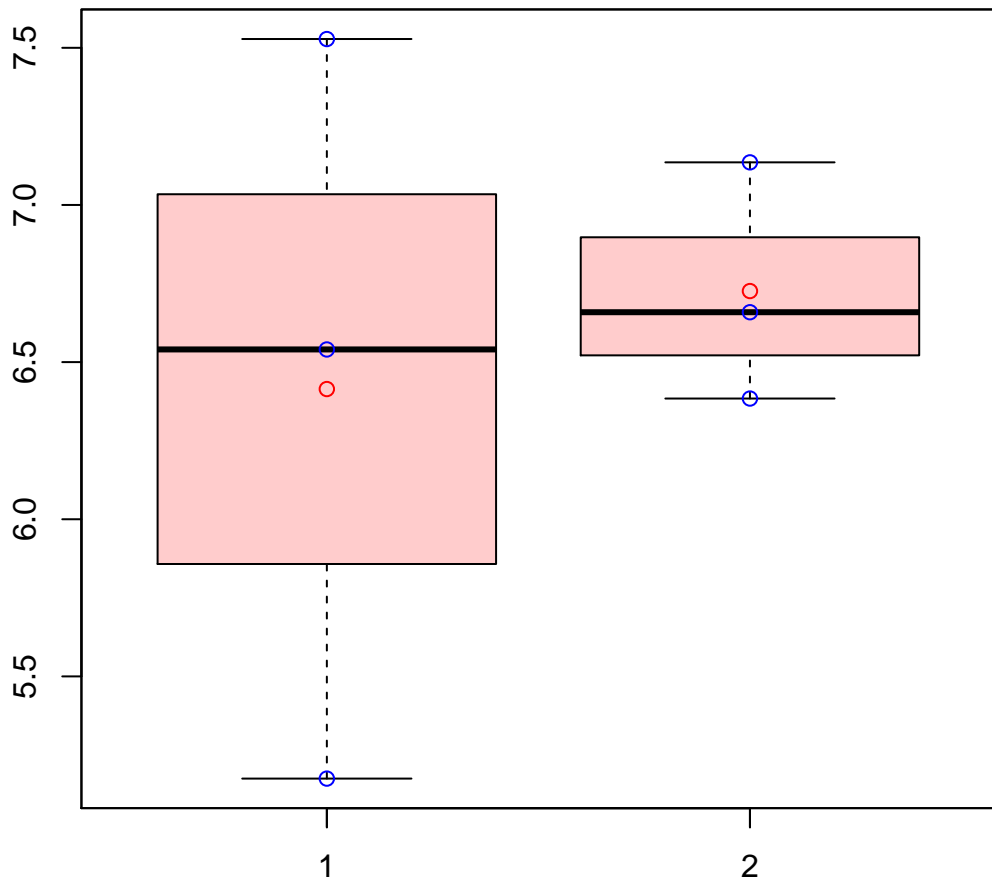

t-Test: p-value = 0.7

# B8A293|B8A293\_MAIZE

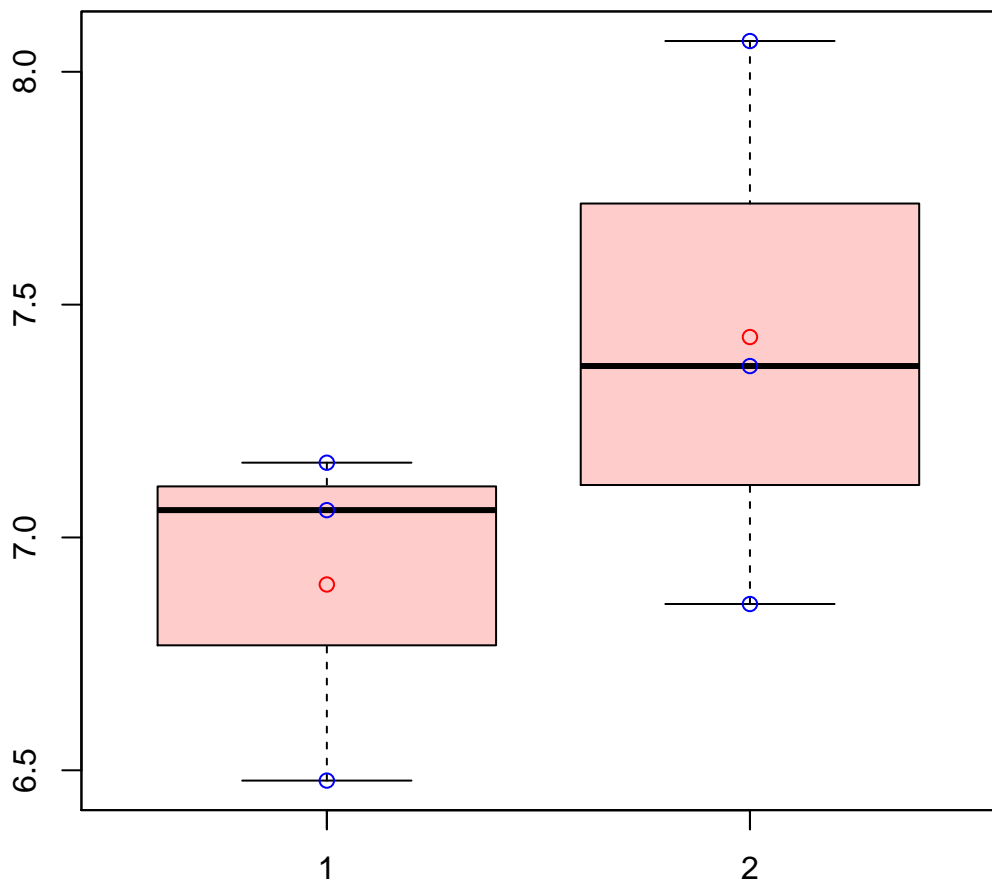

t-Test: p-value = 0.28

# B8A2B4|B8A2B4\_MAIZE

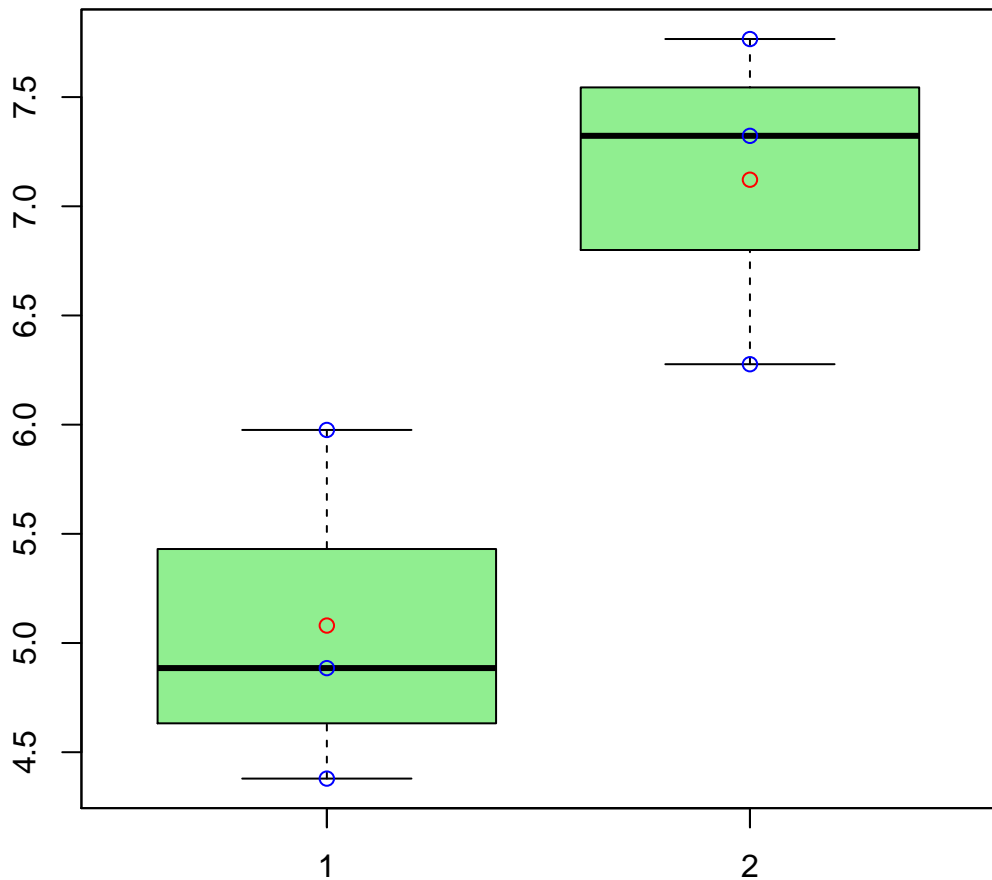

t-Test: p-value = 0.03

# B8A2J8|B8A2J8\_MAIZE

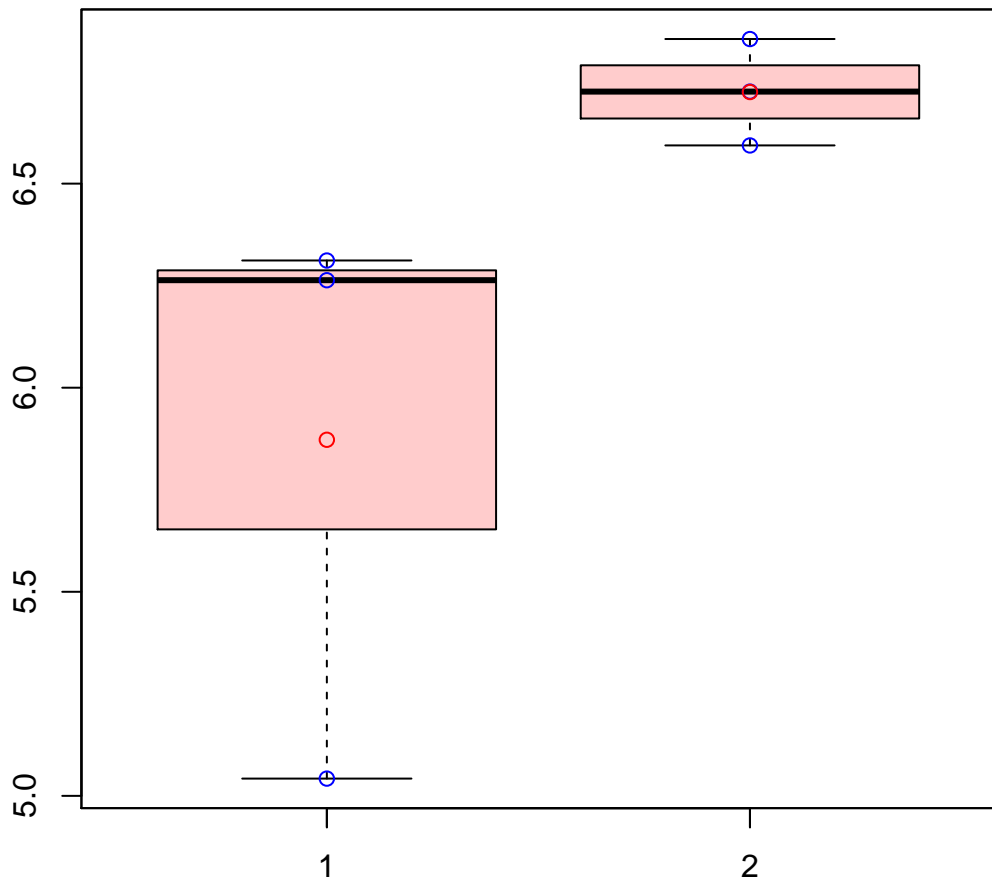

t-Test: p-value = 0.17

# B8A316|B8A316\_MAIZE

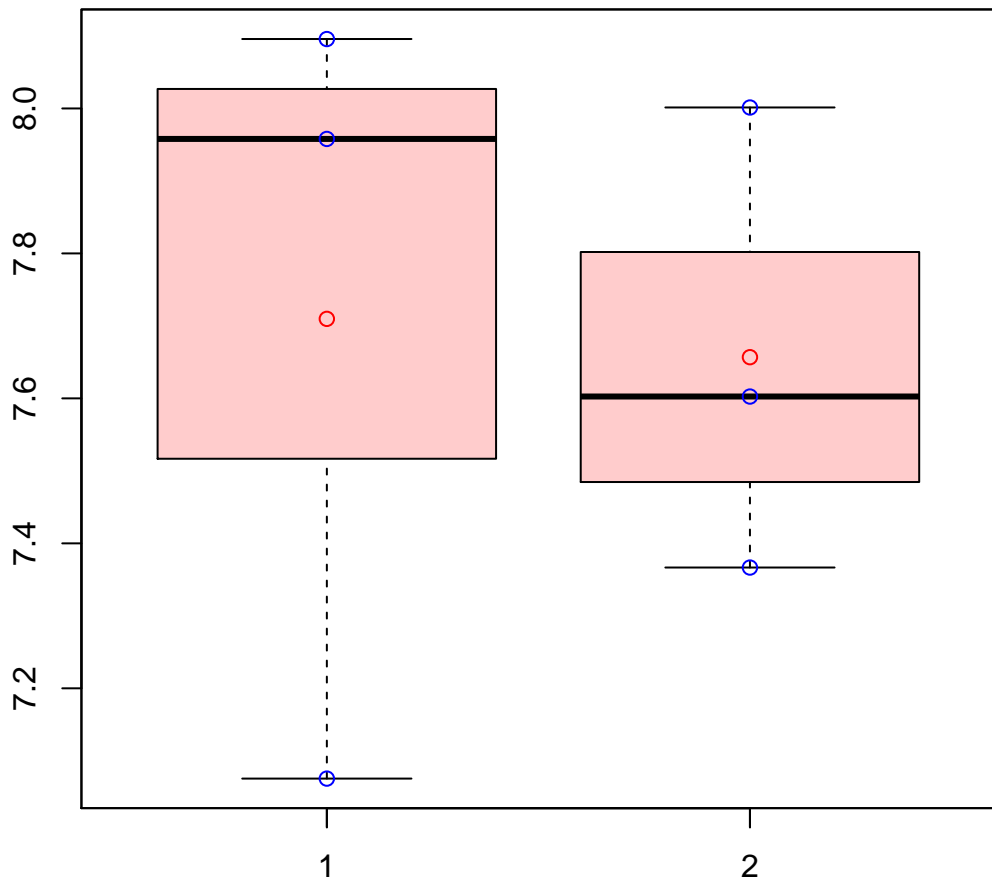

t-Test: p-value = 0.89

# B8A326|B8A326\_MAIZE

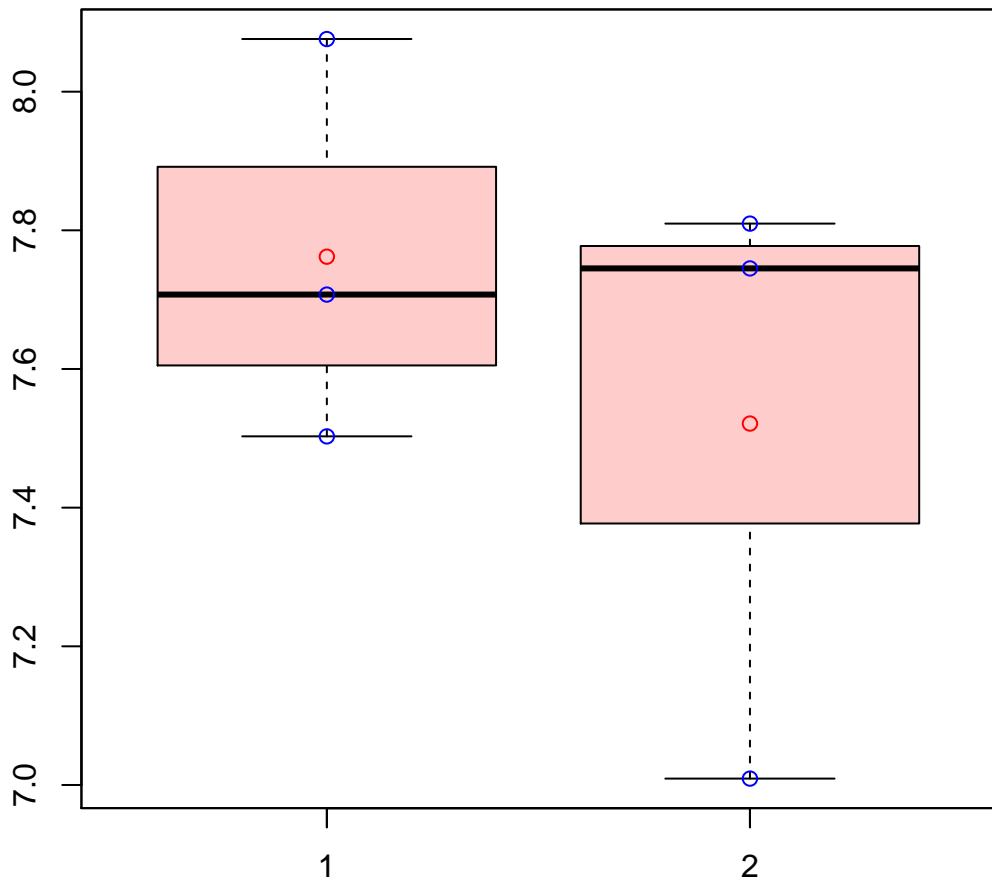

t-Test: p-value = 0.48

# B8A3D0|B8A3D0\_MAIZE

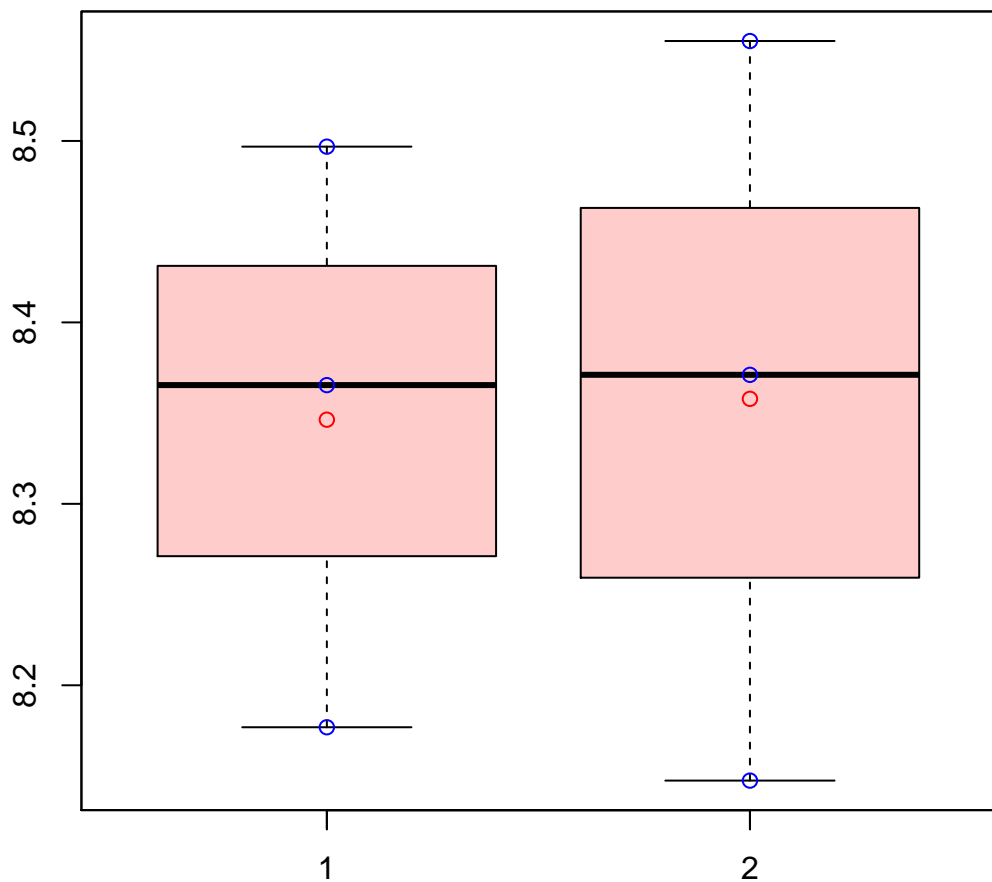

t-Test: p-value = 0.94



# B8A753|B8A753\_ORYSI

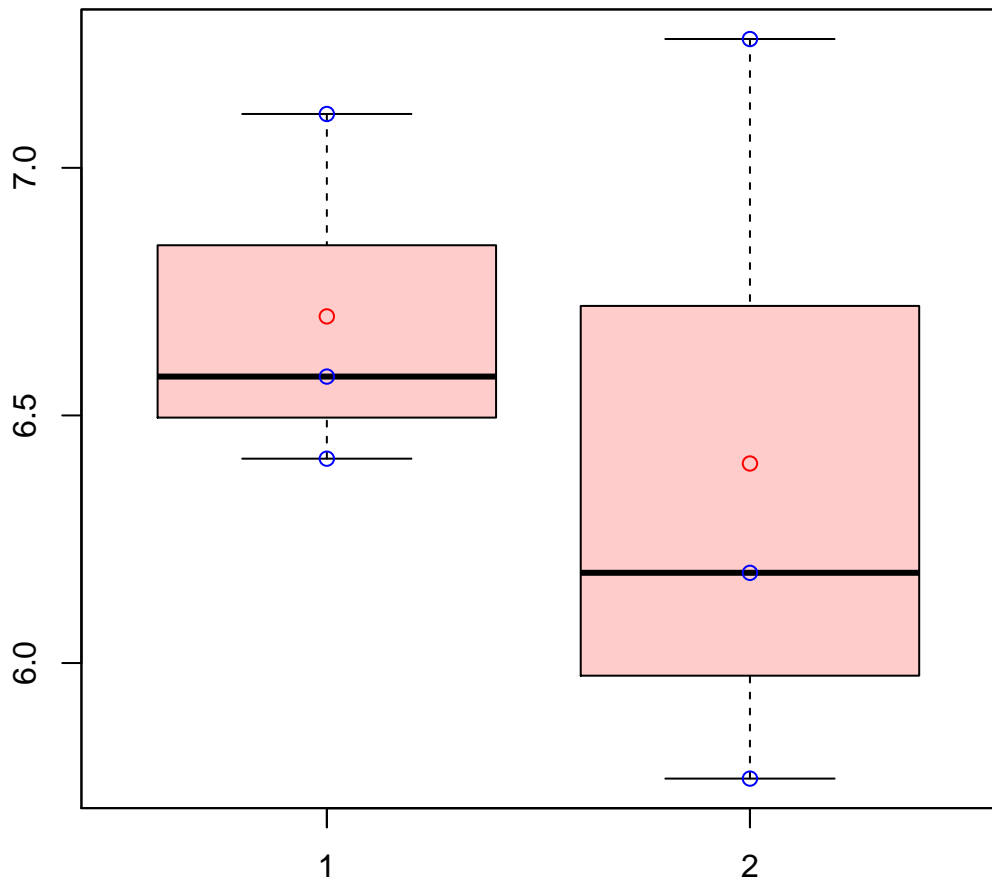

t-Test: p-value = 0.59

# B8A7J5|B8A7J5\_ORYSI

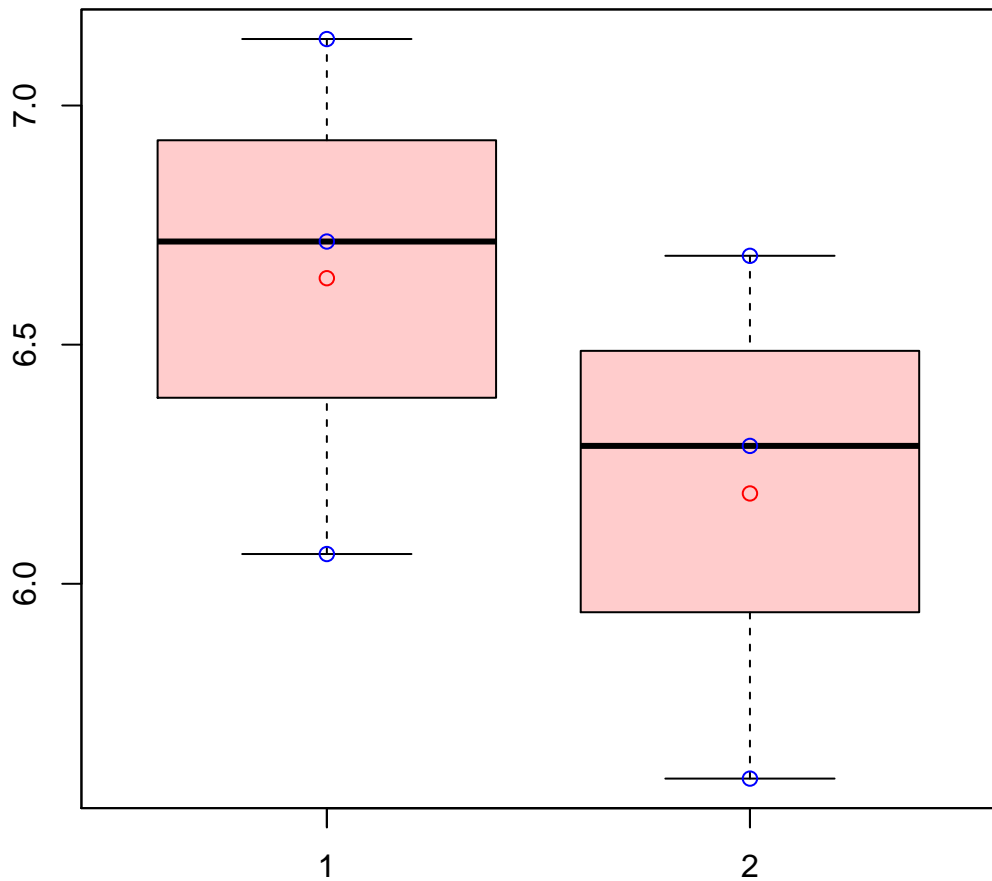

t-Test: p-value = 0.37

# B8A7P4|B8A7P4\_ORYSI

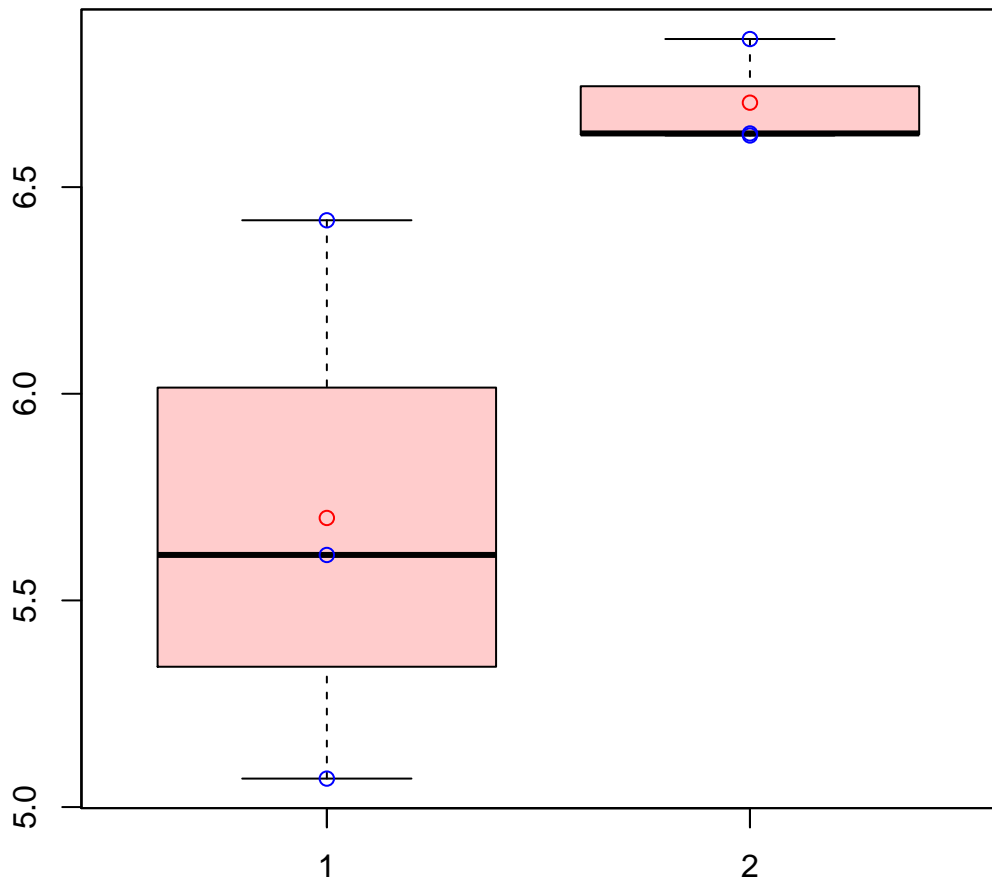

t-Test: p-value = 0.12

# B8A7T6|B8A7T6\_ORYSI

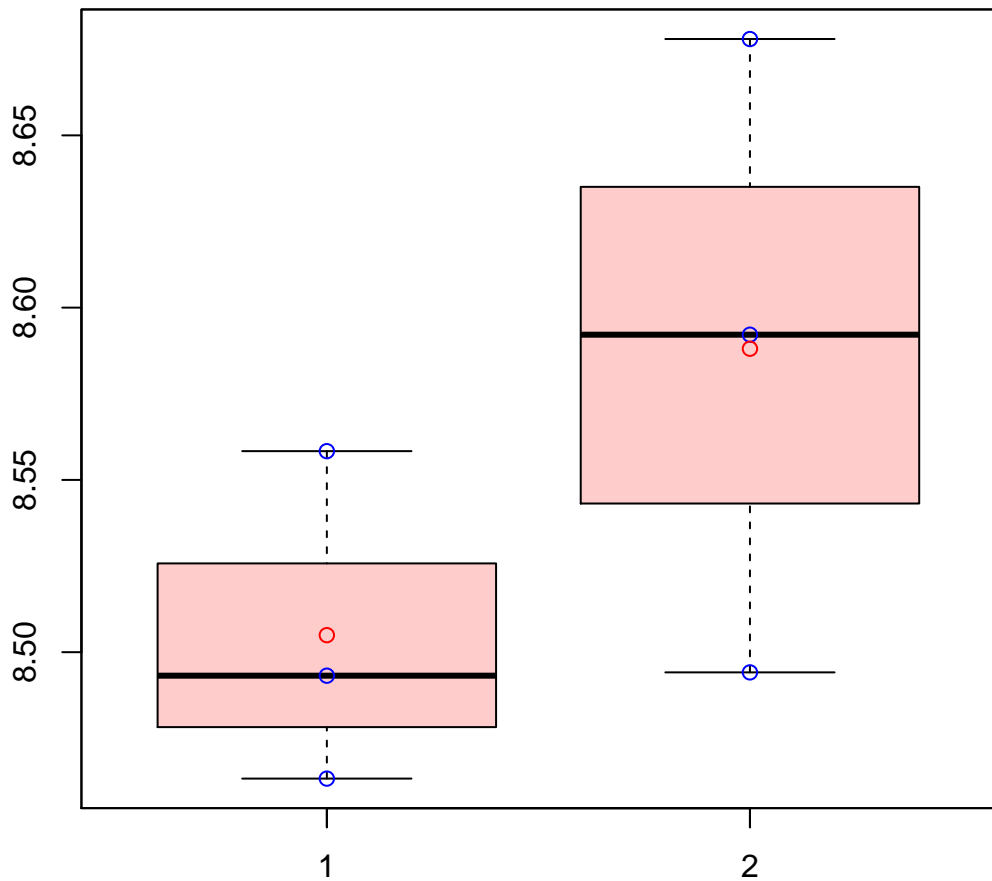

t-Test: p-value = 0.26

# B8A915|B8A915\_ORYSI

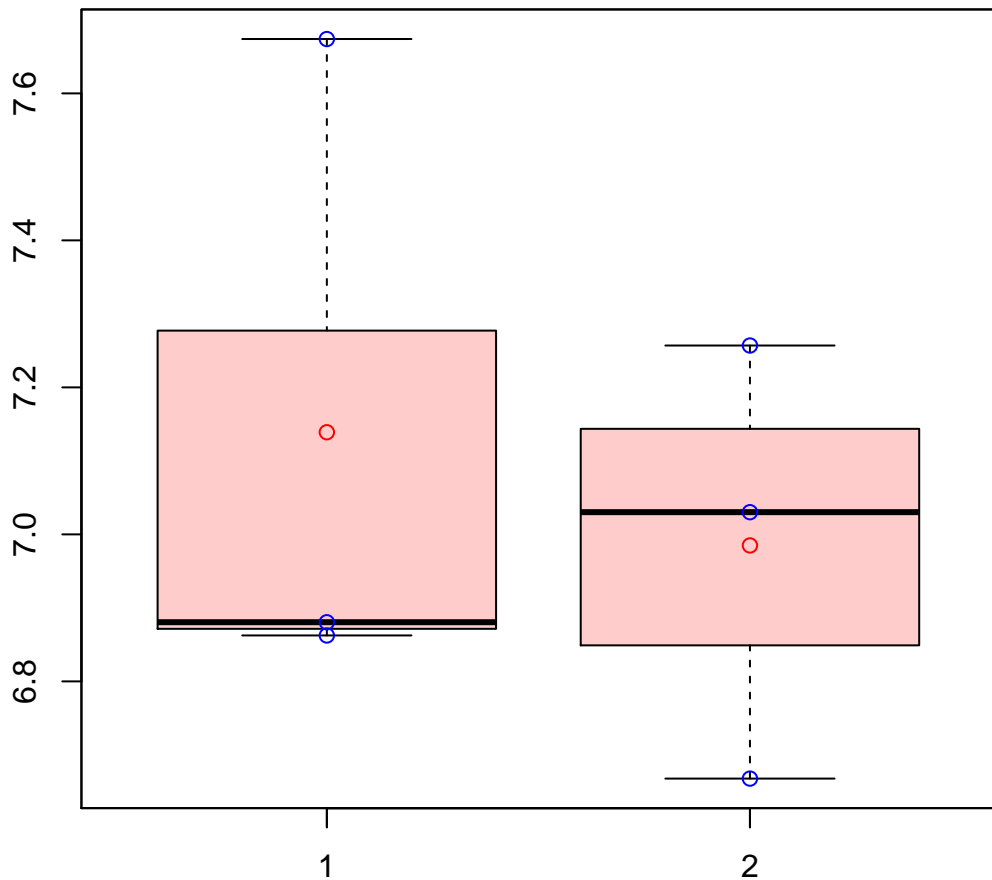

t-Test: p-value = 0.66

# B8AAS6|B8AAS6\_ORYSI

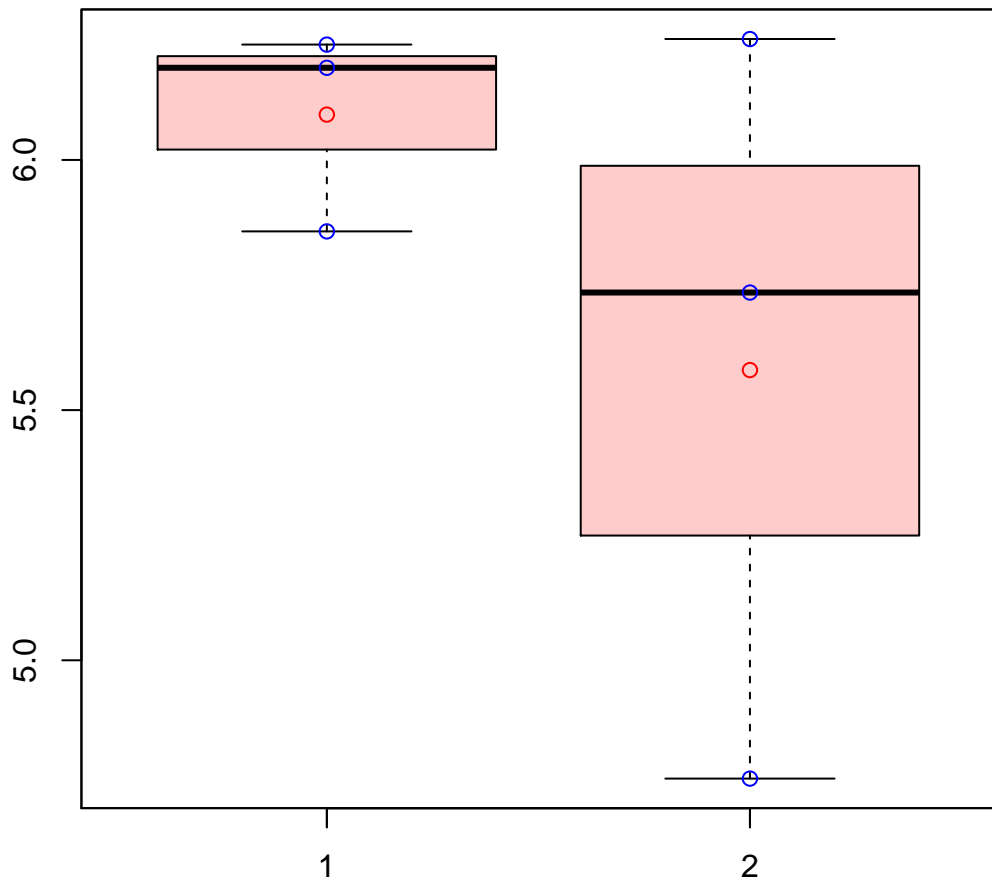

t-Test: p-value = 0.36

# B8AAY0|B8AAY0\_ORYSI

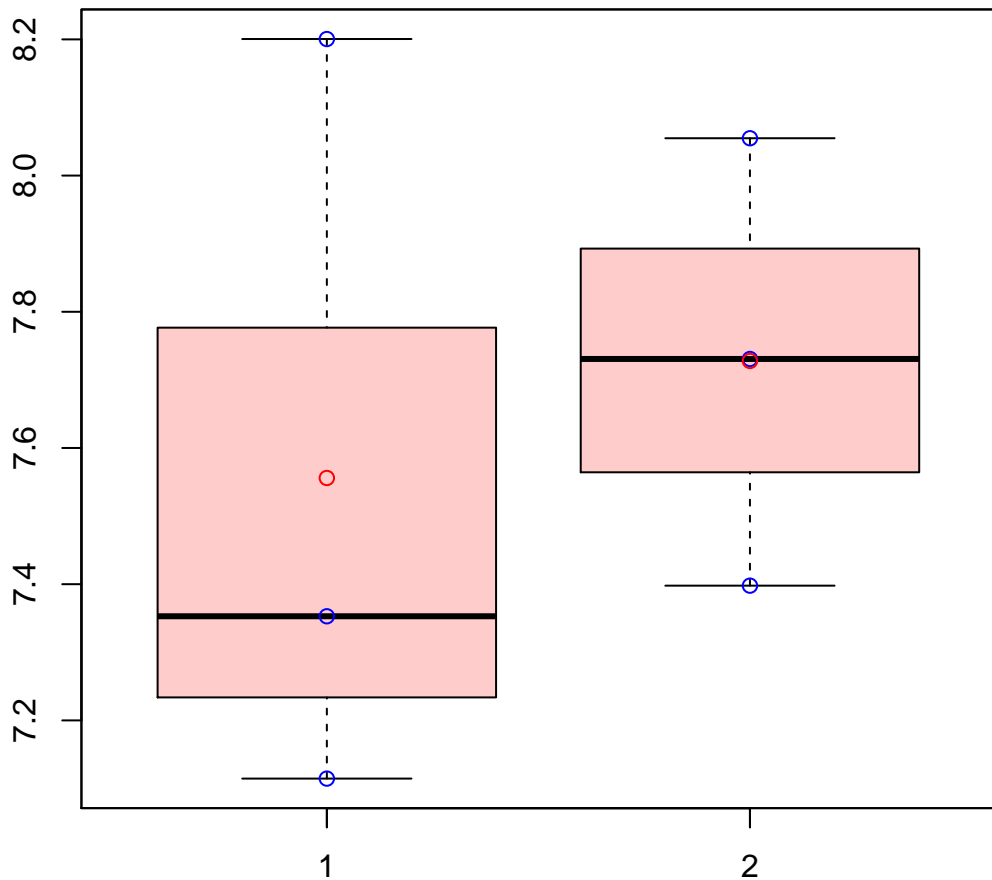

t-Test: p-value = 0.68

# B8ABT1|B8ABT1\_ORYSI

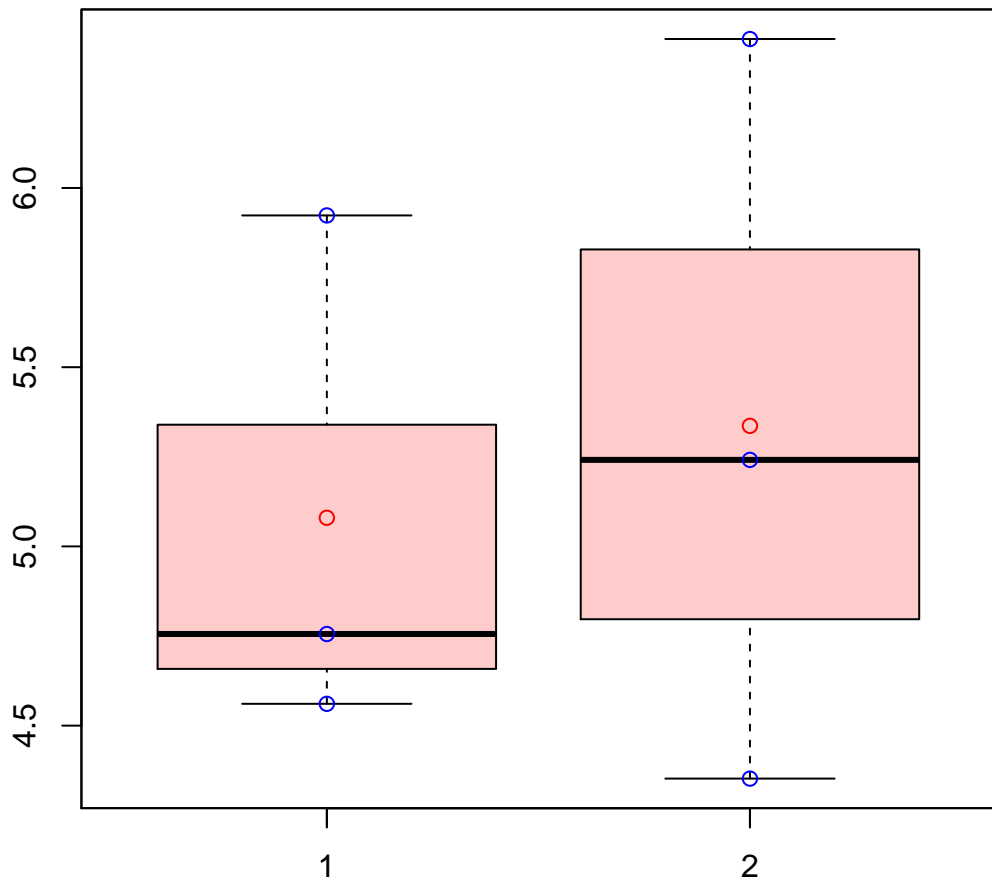

t-Test: p-value = 0.75



# B8AC95|B8AC95\_ORYSI

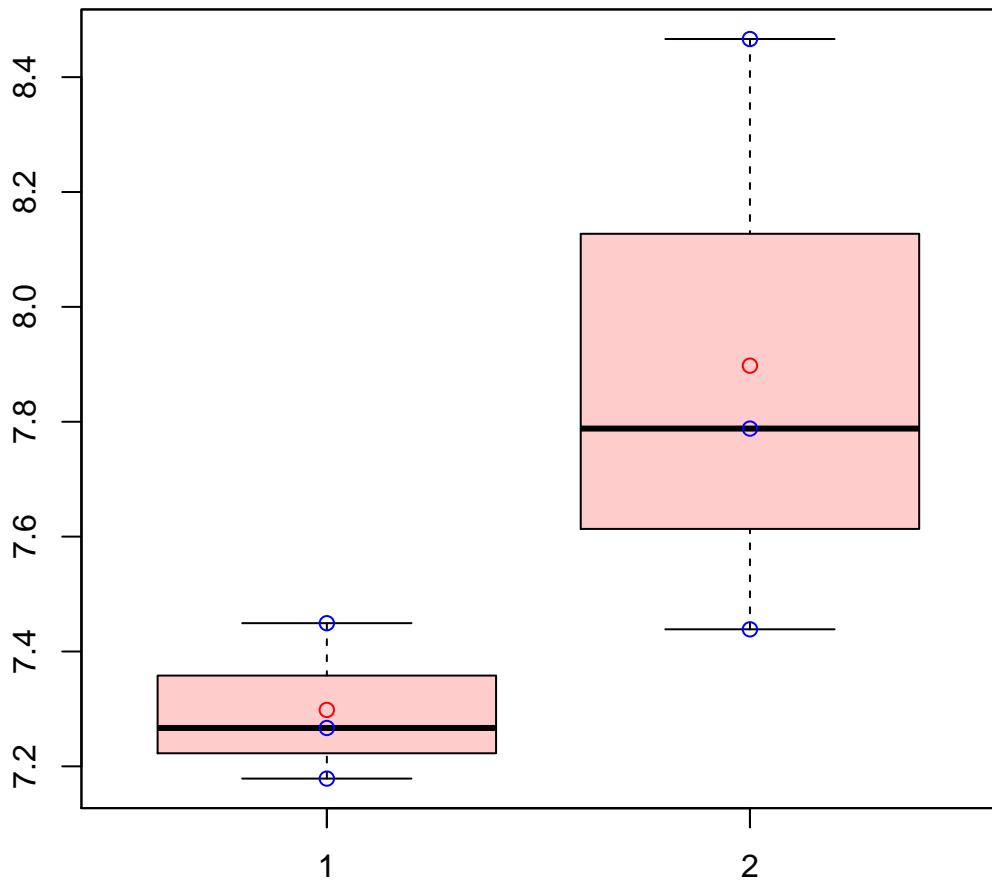

t-Test: p-value = 0.18

# B8ACP4|B8ACP4\_ORYSI

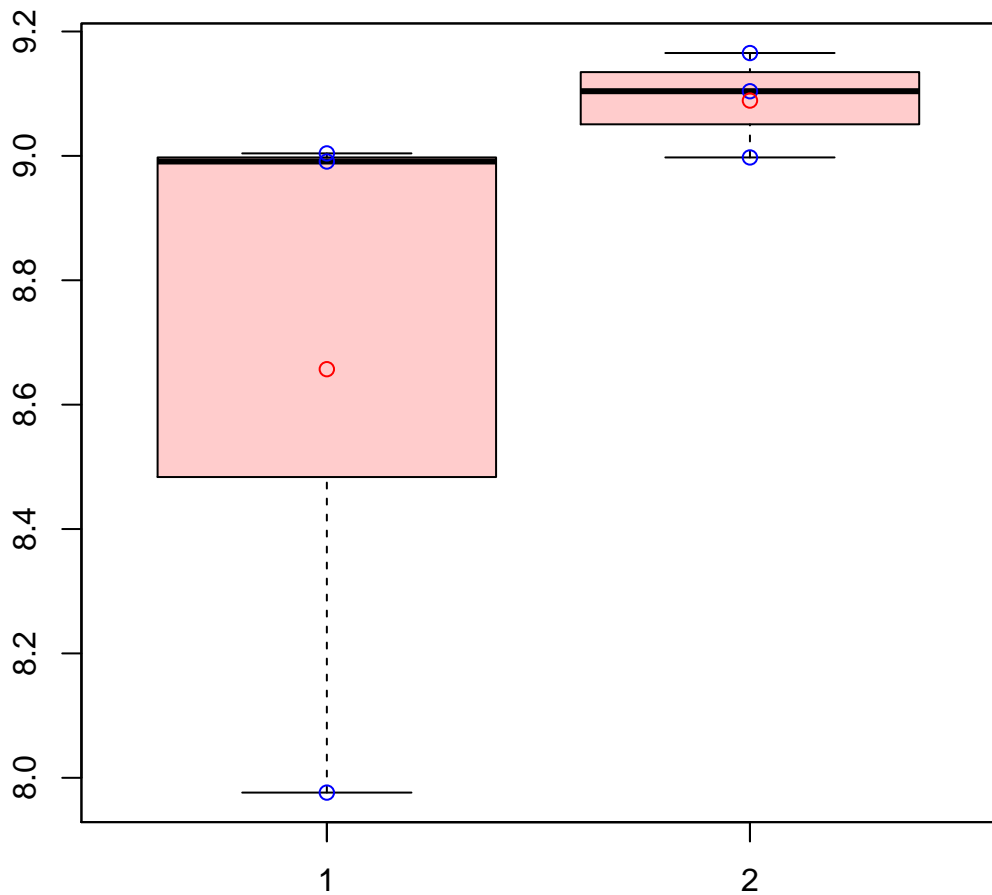

t-Test: p-value = 0.33

# B8ACY2|B8ACY2\_ORYSI

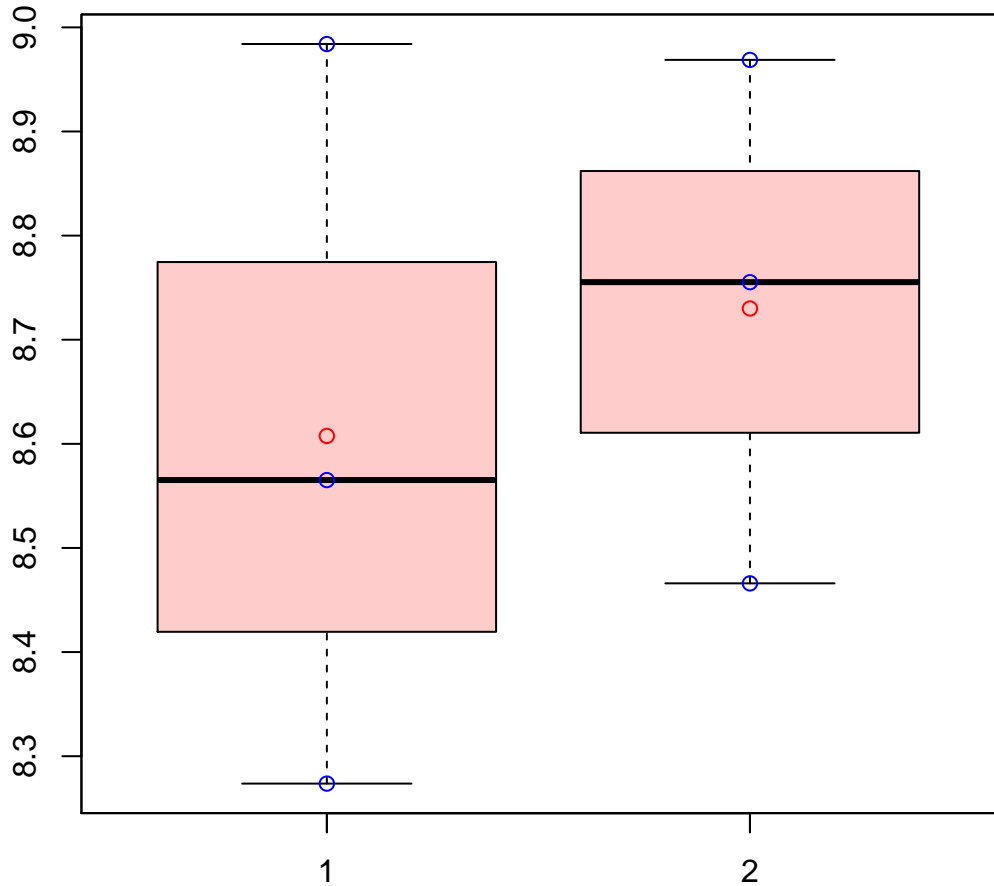

t-Test: p-value = 0.66

# B8ADI2|B8ADI2\_ORYSI

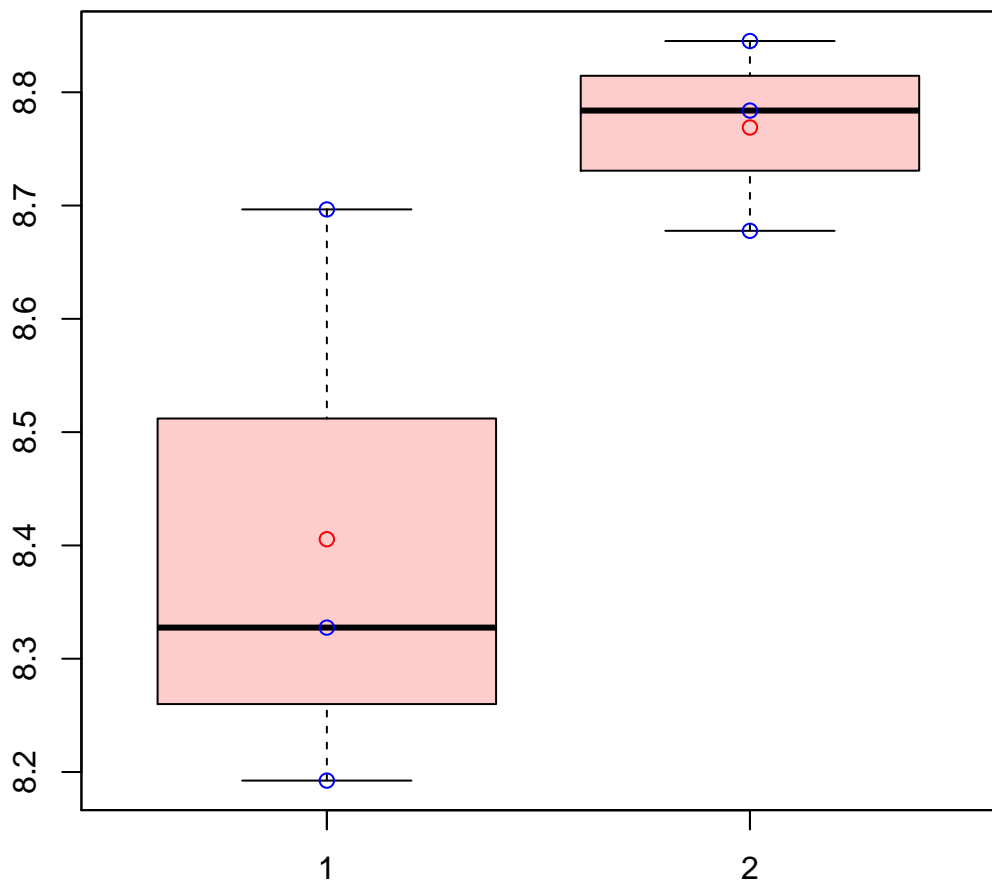

t-Test: p-value = 0.13

# B8ADJ4|B8ADJ4\_ORYSI

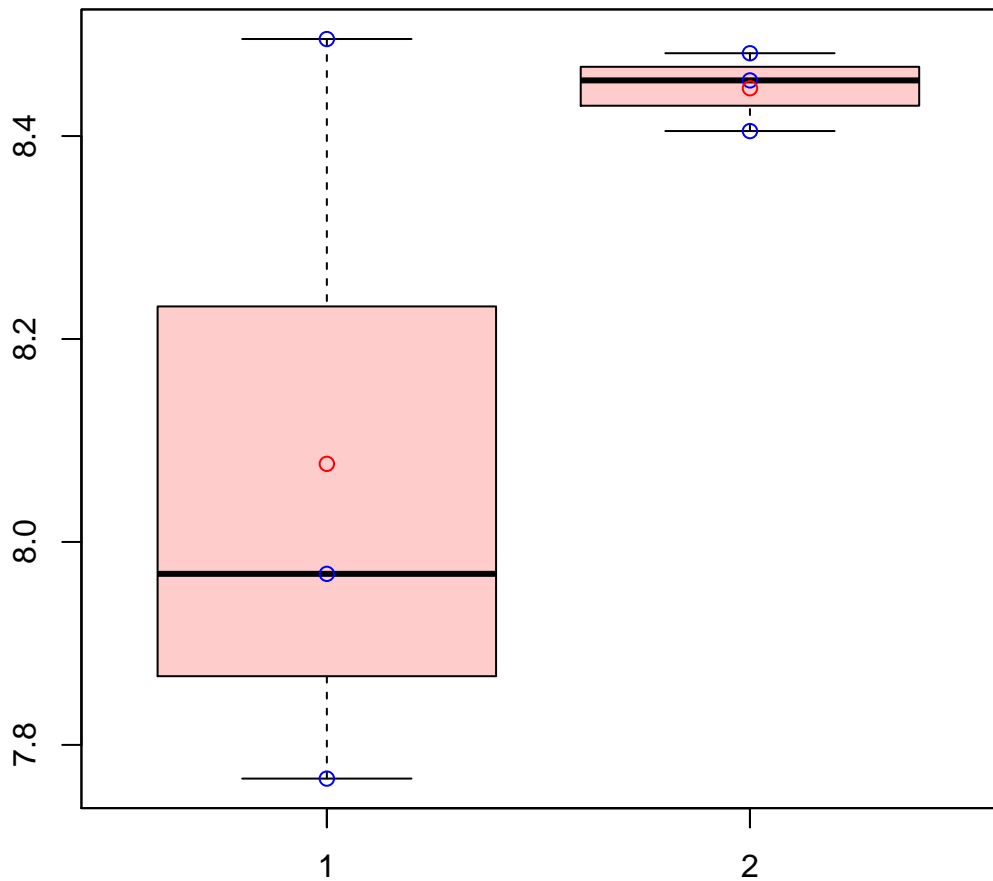

t-Test: p-value = 0.23

# B8AEK7|B8AEK7\_ORYSI

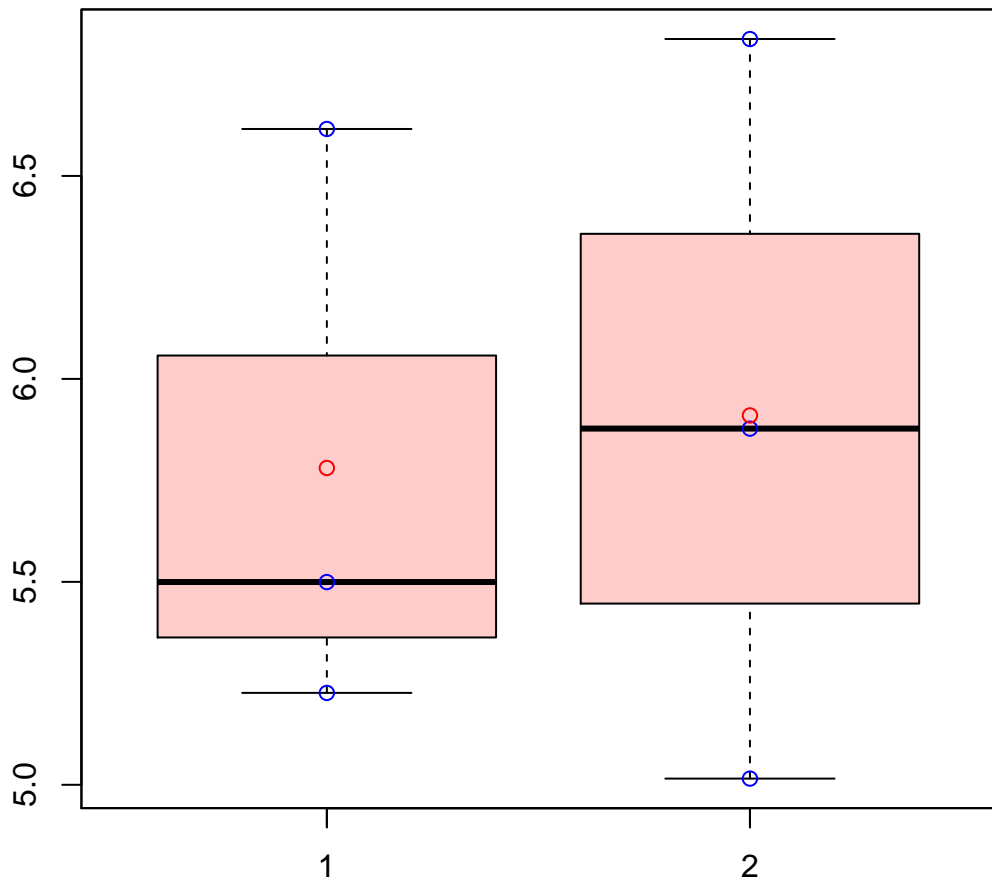

t-Test: p-value = 0.86

# B8AFN5|B8AFN5\_ORYSI

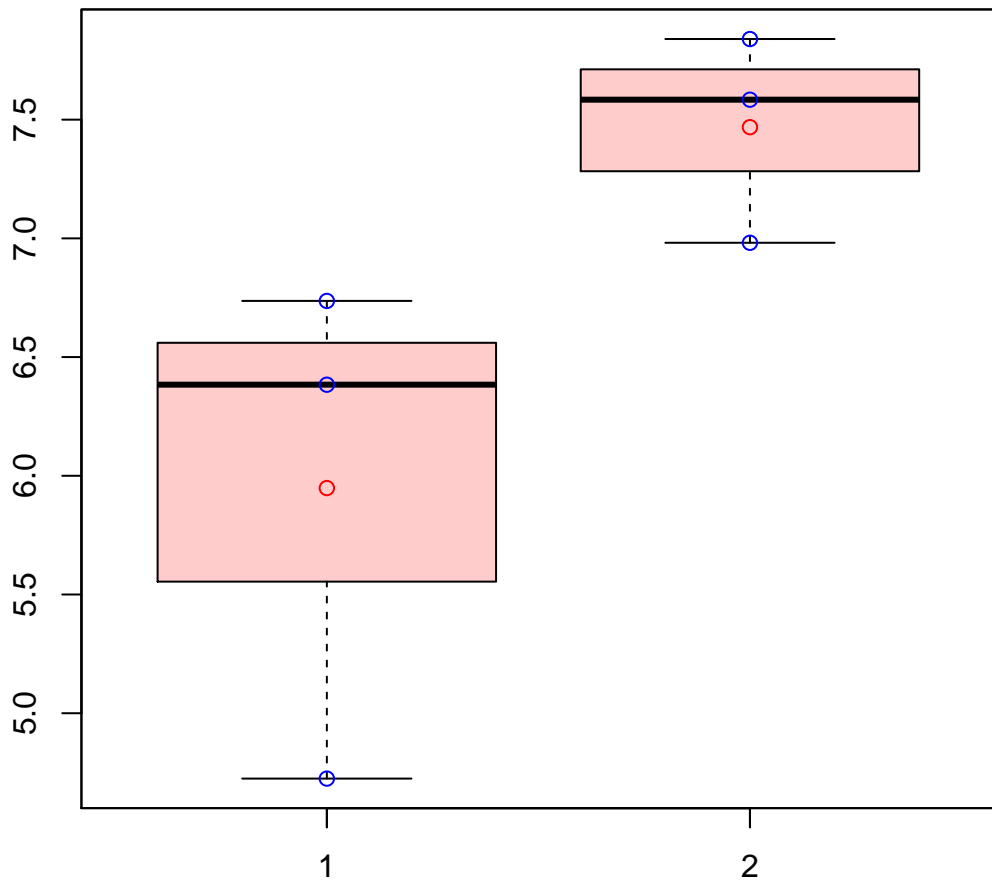

t-Test: p-value = 0.12

# B8AG42|B8AG42\_ORYSI

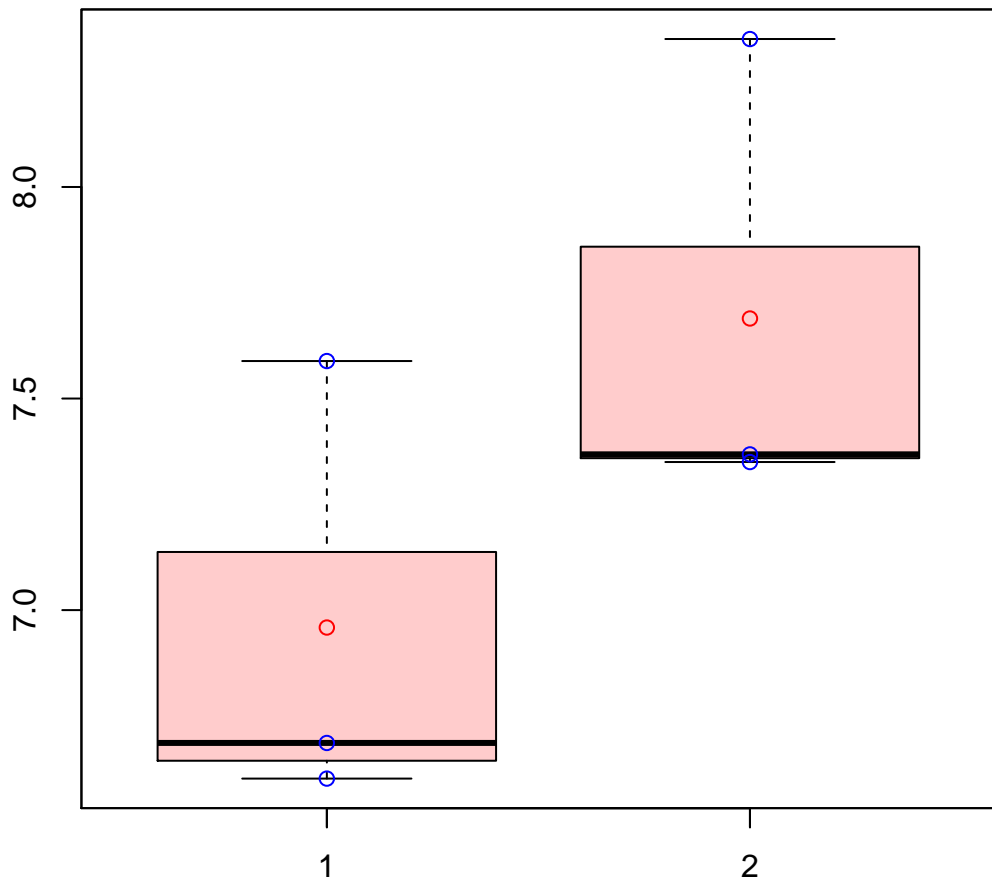

t-Test: p-value = 0.19



# B8AHG2|B8AHG2\_ORYSI

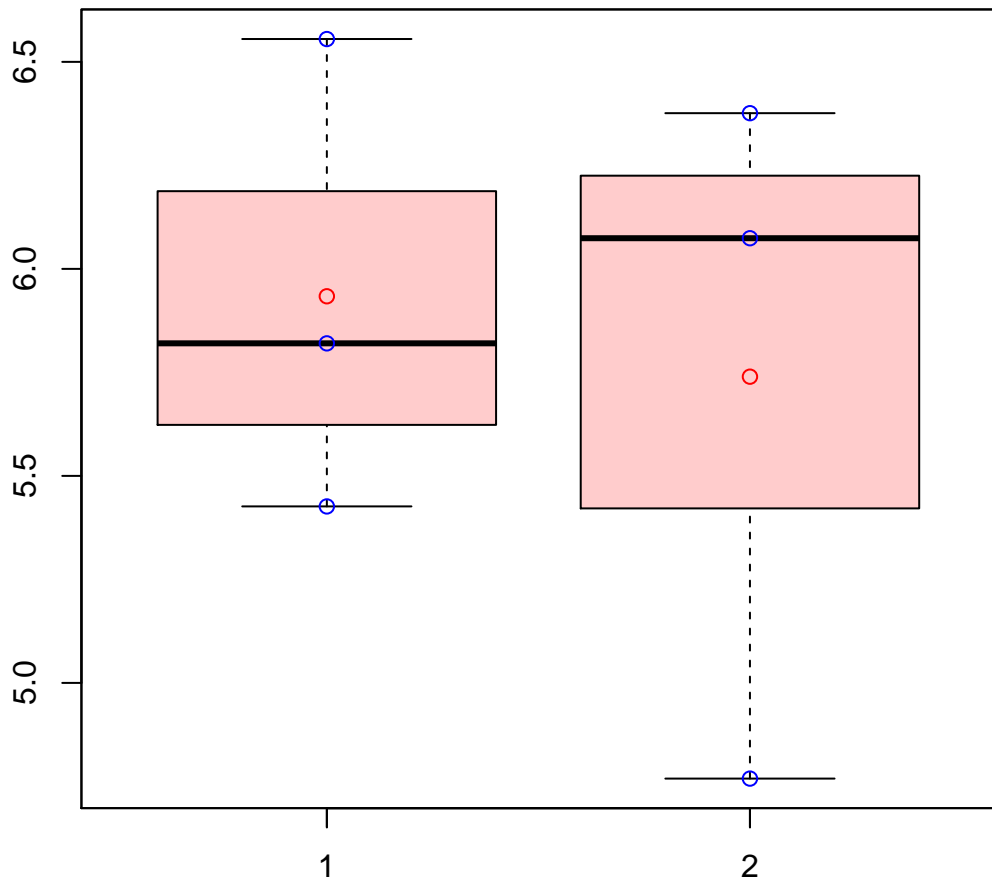

t-Test: p-value = 0.76

# B8AHM6|B8AHM6\_ORYSI

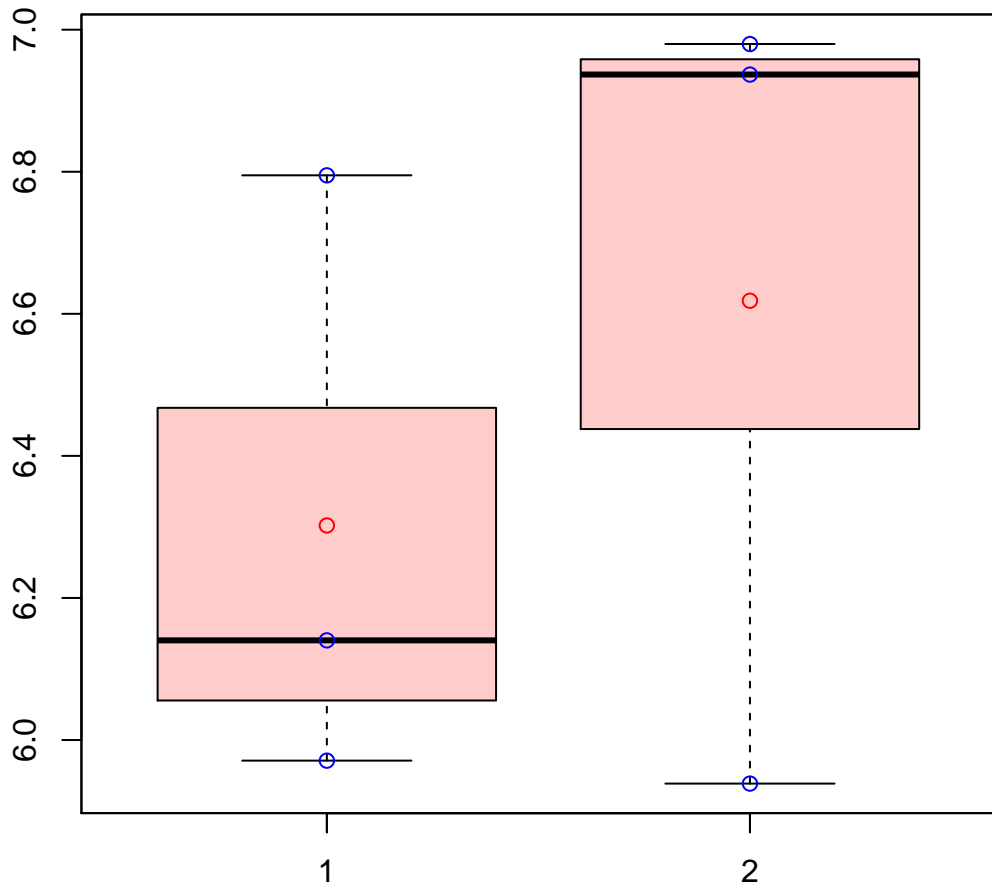

t-Test: p-value = 0.5

# B8AII9|B8AII9\_ORYSI

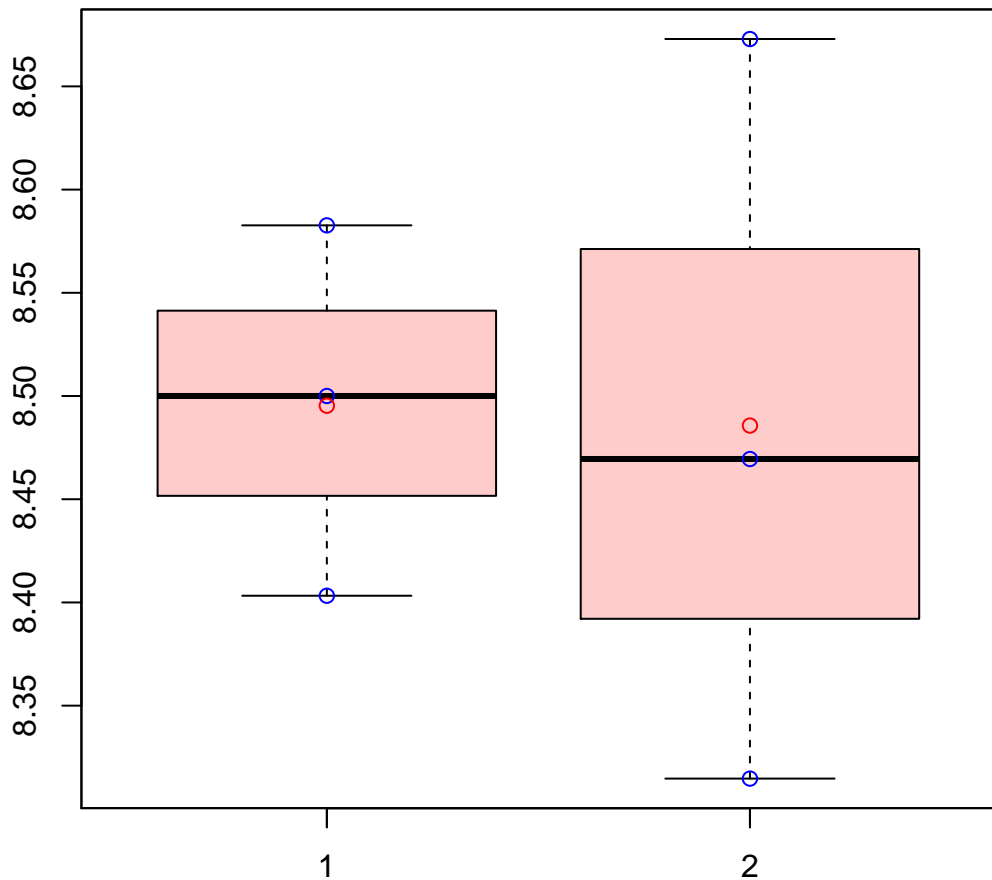

t-Test: p-value = 0.94

# B8AJB1|B8AJB1\_ORYSI

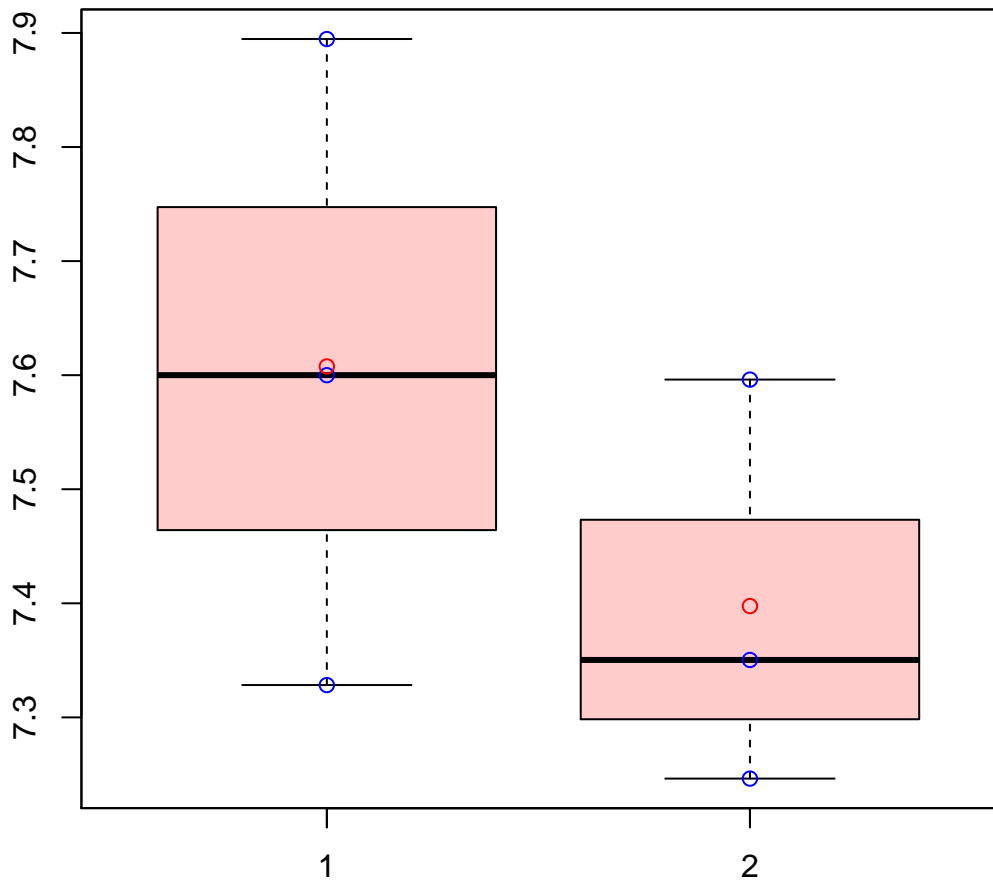

t-Test: p-value = 0.35

# B8AJG5|B8AJG5\_ORYSI

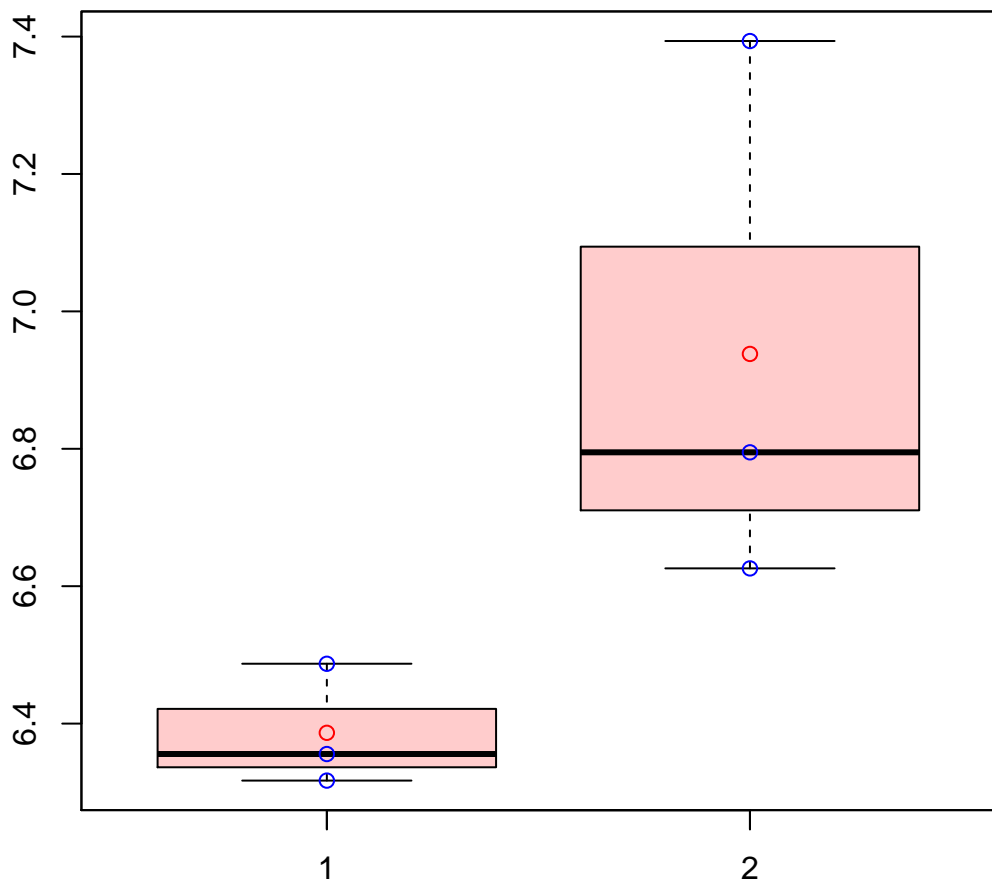

t-Test: p-value = 0.14

# B8AJN3|B8AJN3\_ORYSI

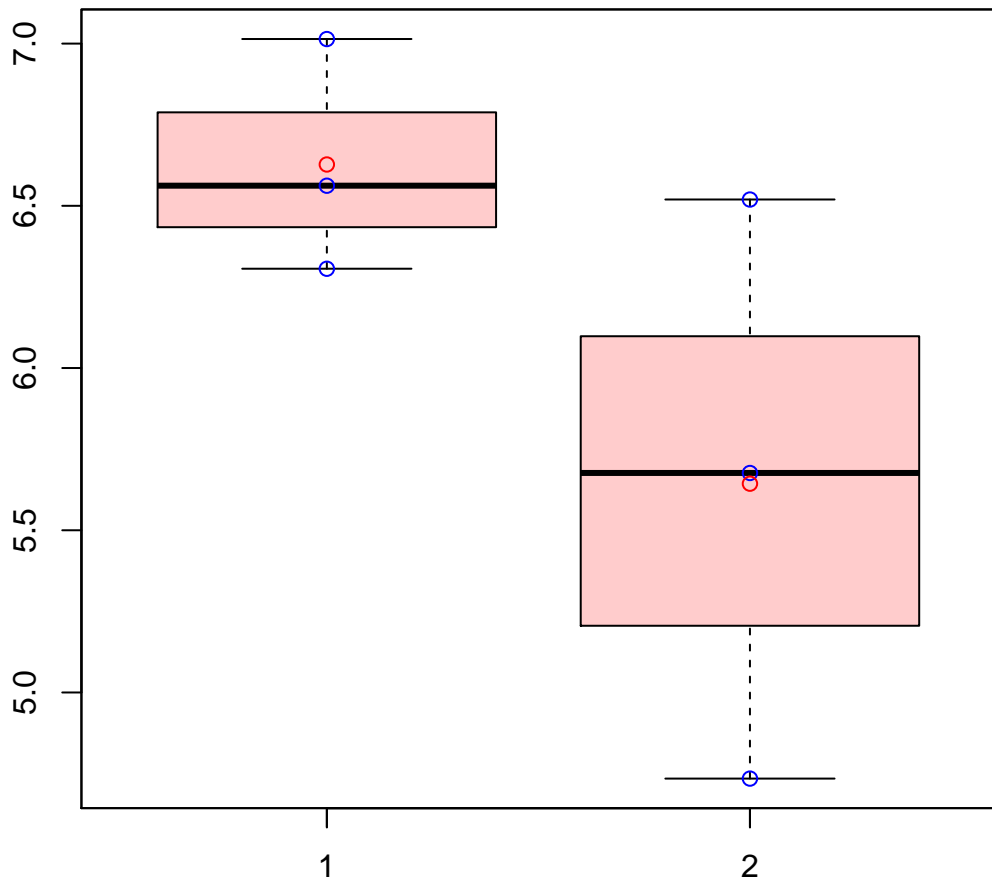

t-Test: p-value = 0.19

# B8AK27|B8AK27\_ORYSI

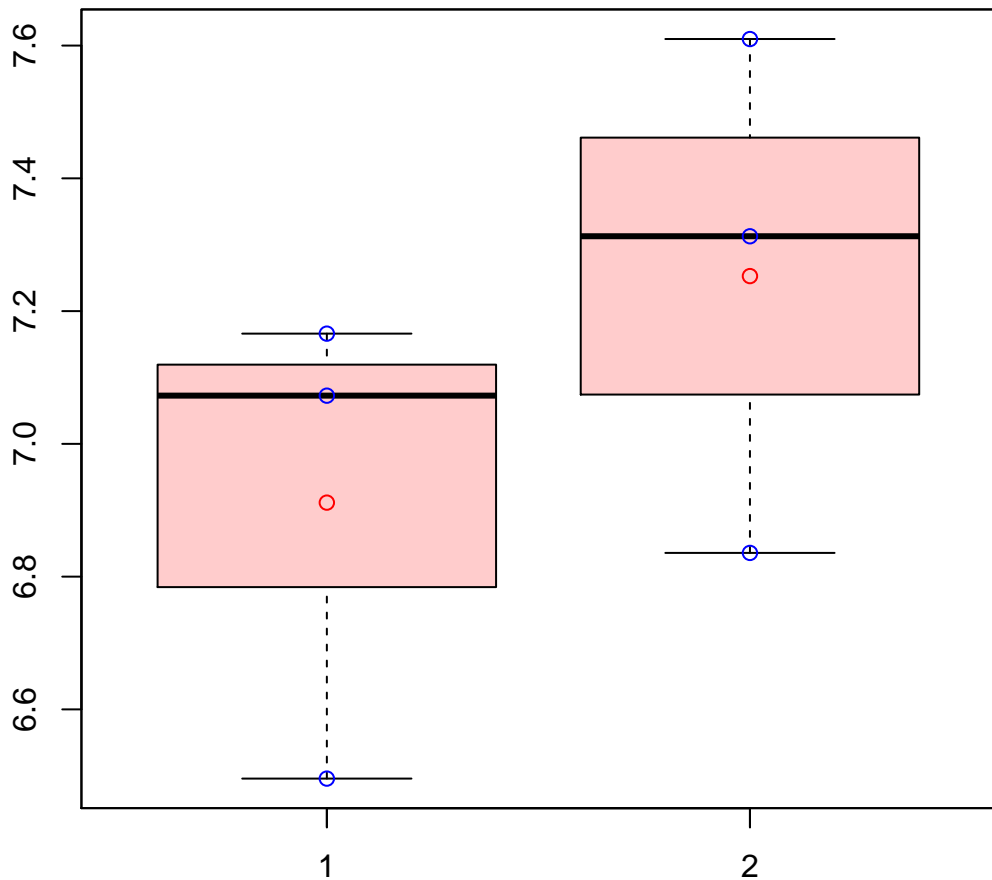

t-Test: p-value = 0.33

# B8AKV0|B8AKV0\_ORYSI

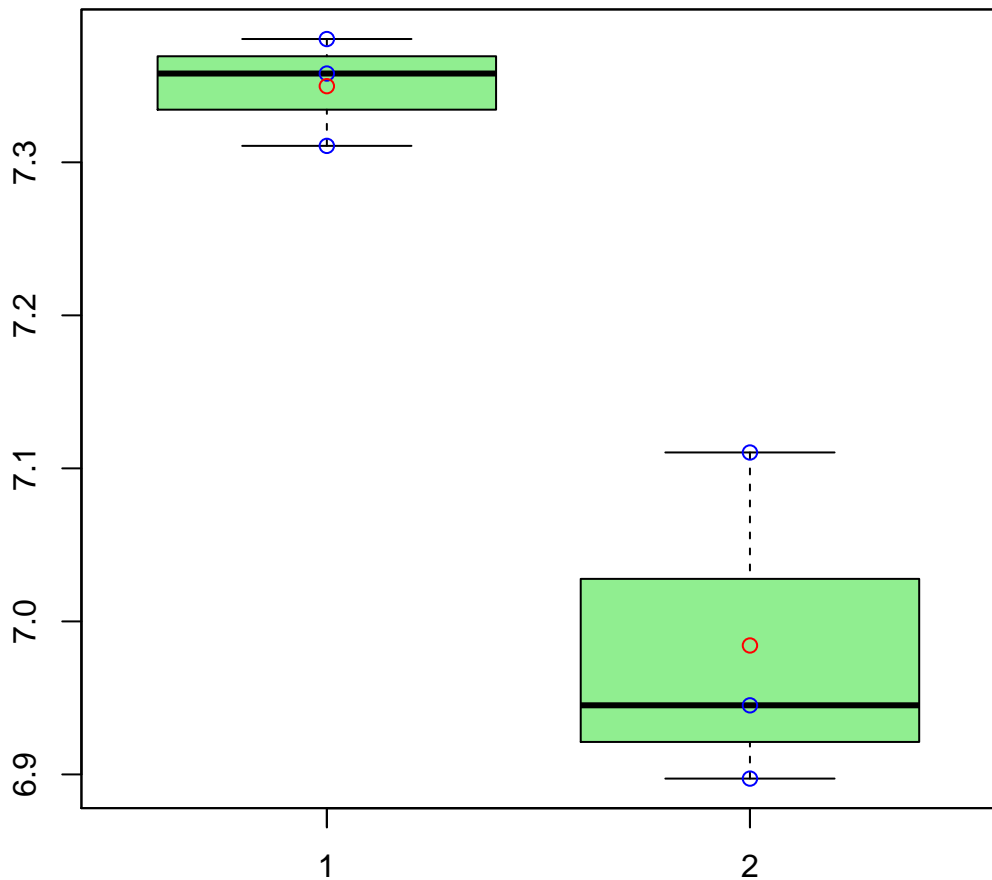

t-Test: p-value = 0.02



# B8AKV2|B8AKV2\_ORYSI

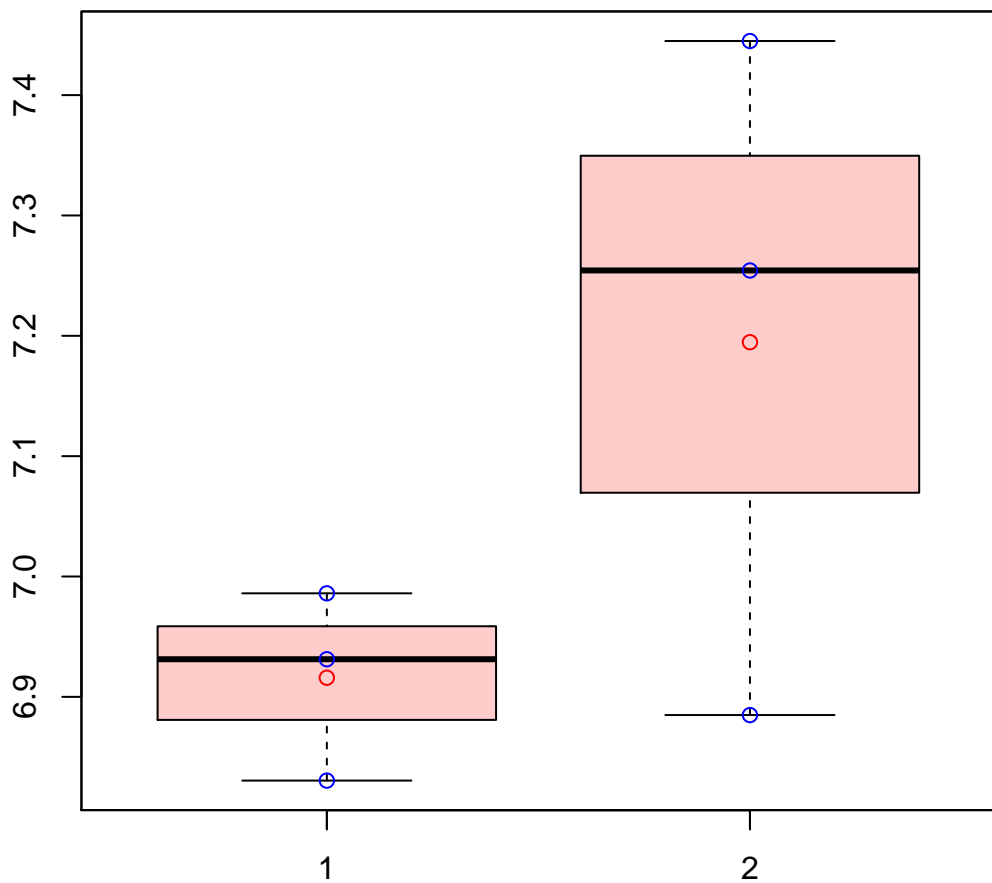

t-Test: p-value = 0.23

# B8AKX5|B8AKX5\_ORYSI

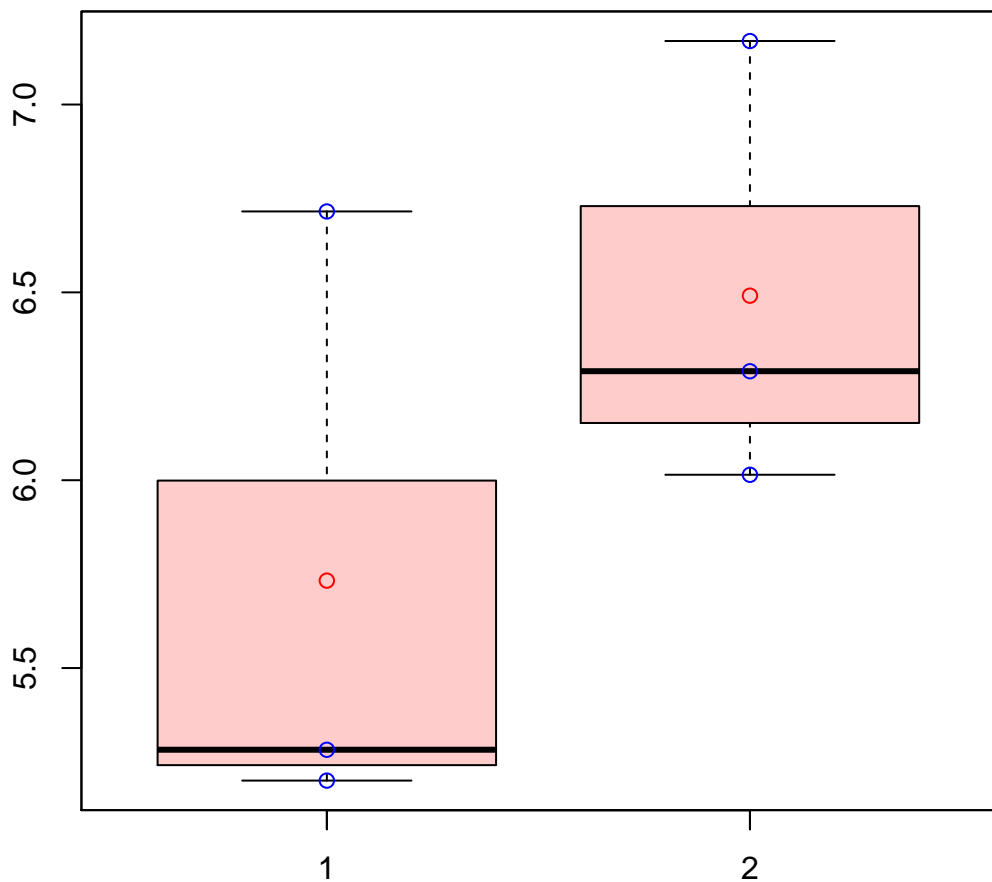

t-Test: p-value = 0.28

# B8AL25|B8AL25\_ORYSI

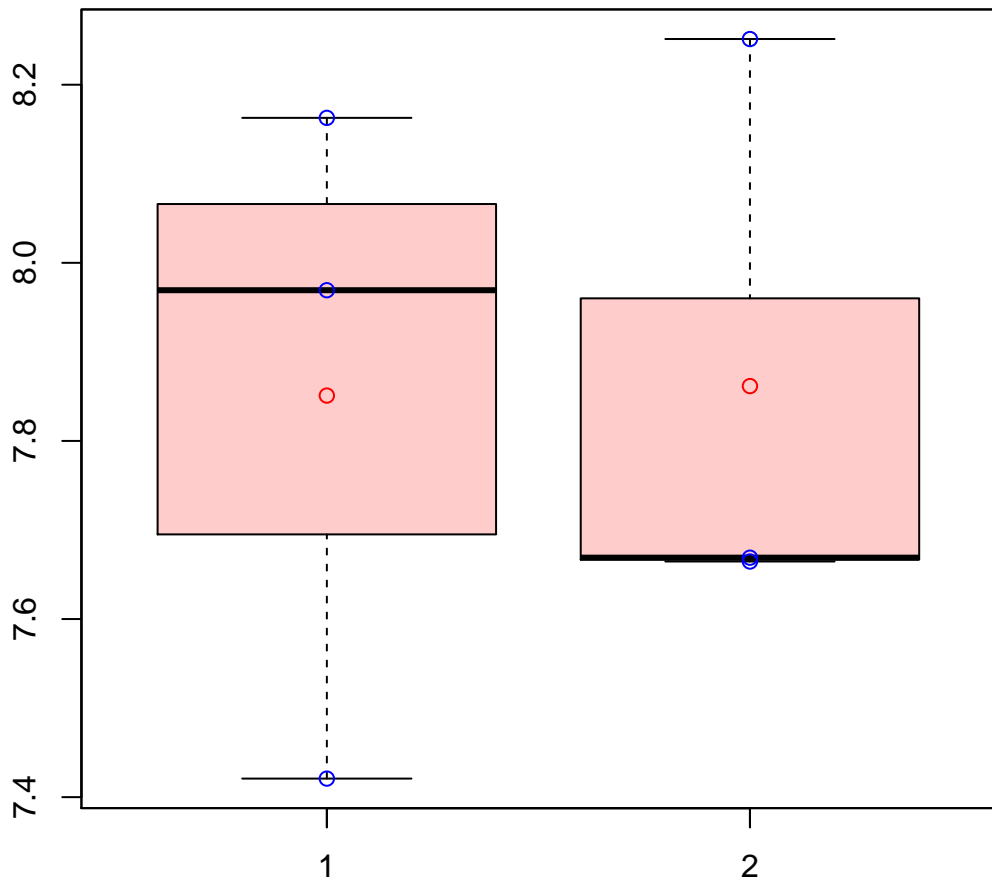

t-Test: p-value = 0.97

# B8AL92|B8AL92\_ORYSI

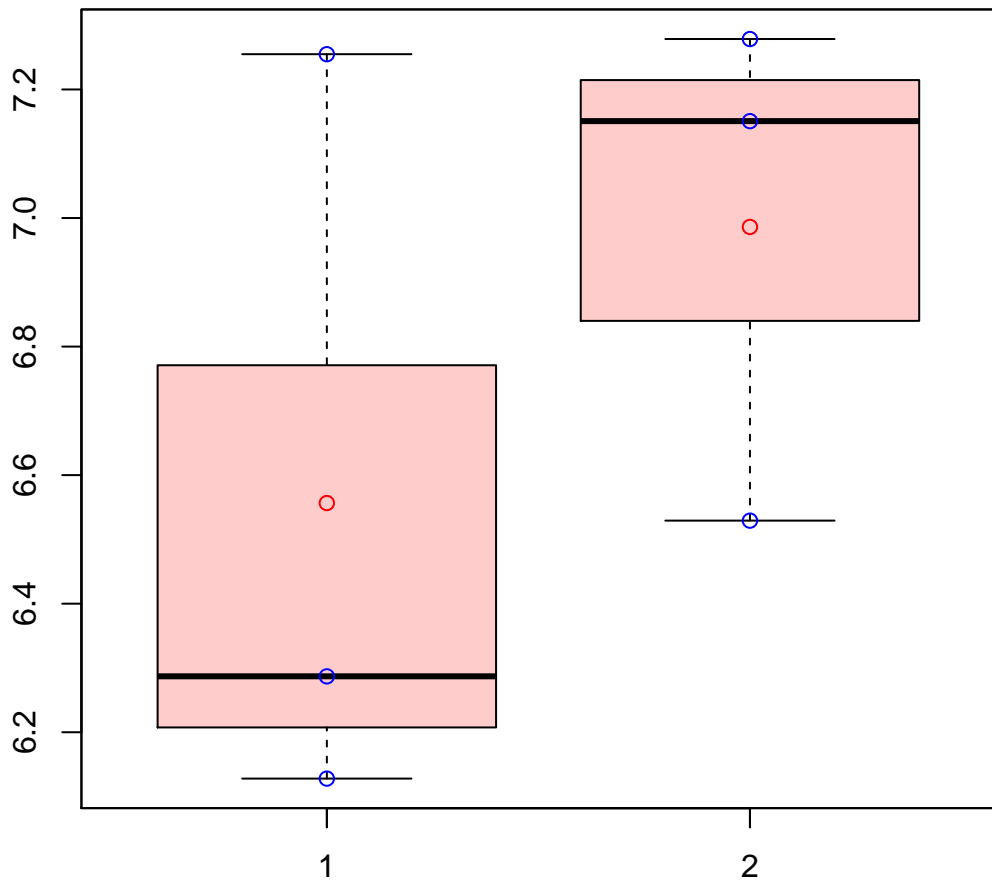

t-Test: p-value = 0.37

# B8ALH3|B8ALH3\_ORYSI

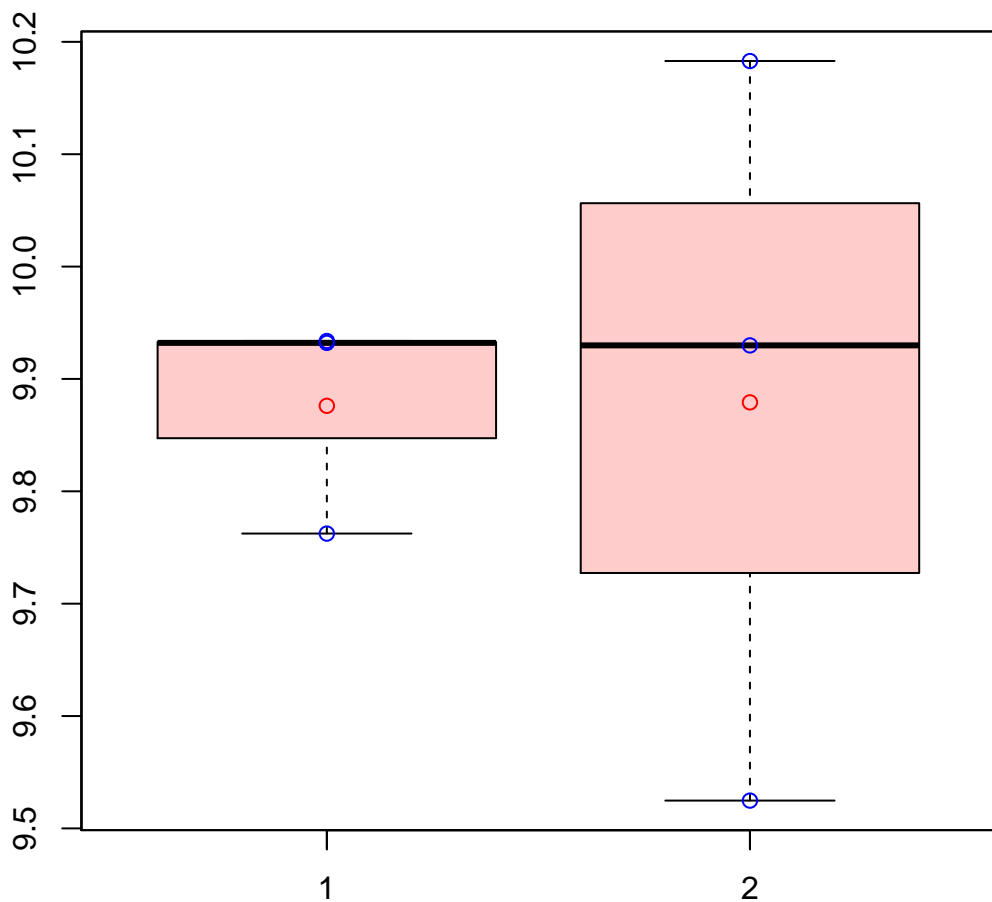

t-Test: p-value = 0.99

# B8ALH4|B8ALH4\_ORYSI

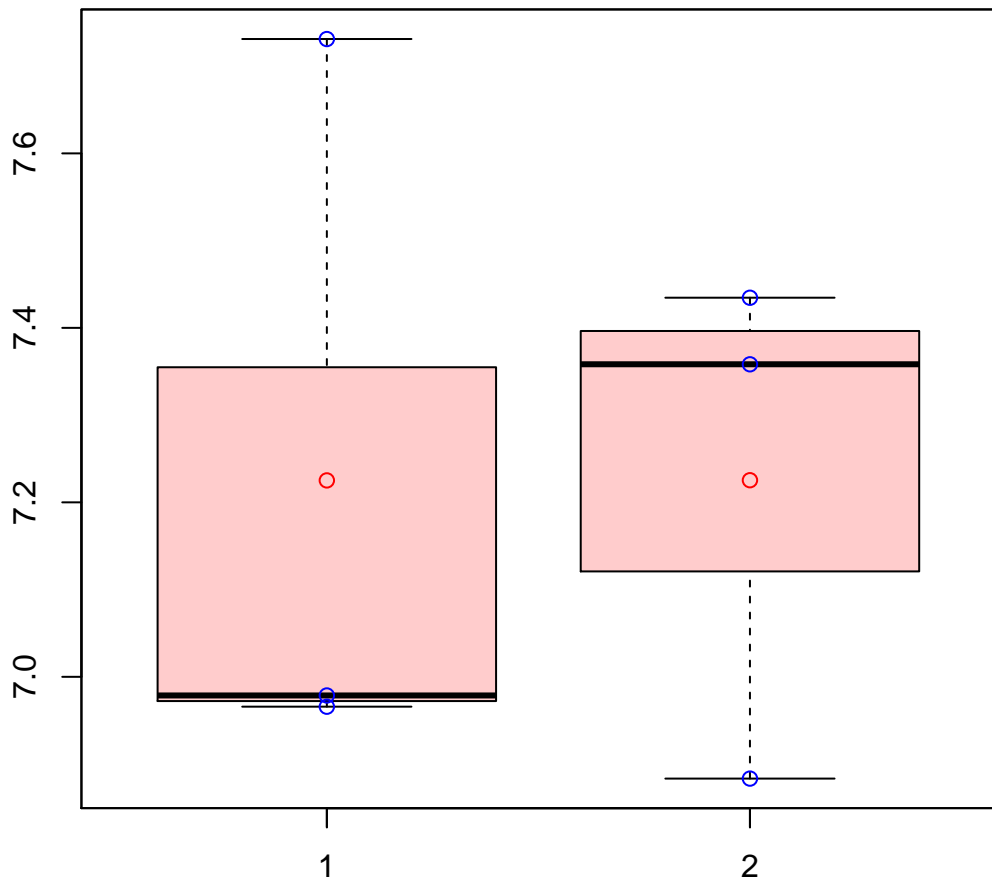

t-Test: p-value = 1

# B8ALM9|B8ALM9\_ORYSI

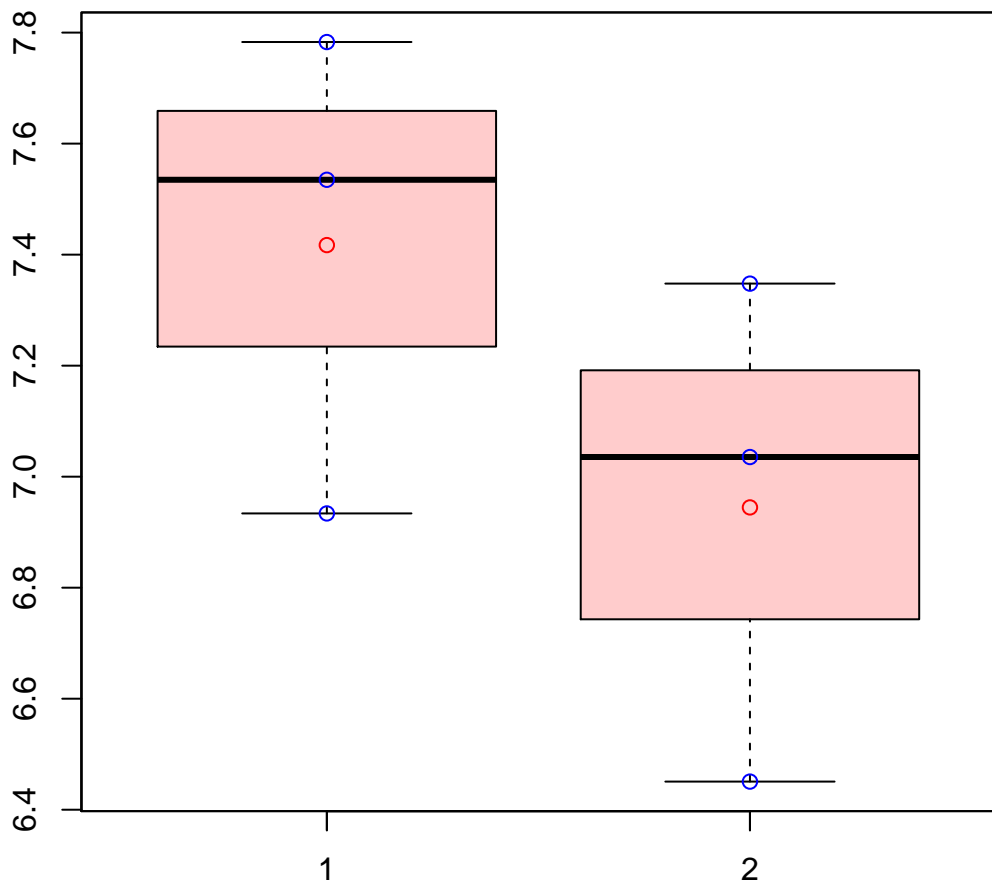

t-Test: p-value = 0.26

# B8ALY6|B8ALY6\_ORYSI

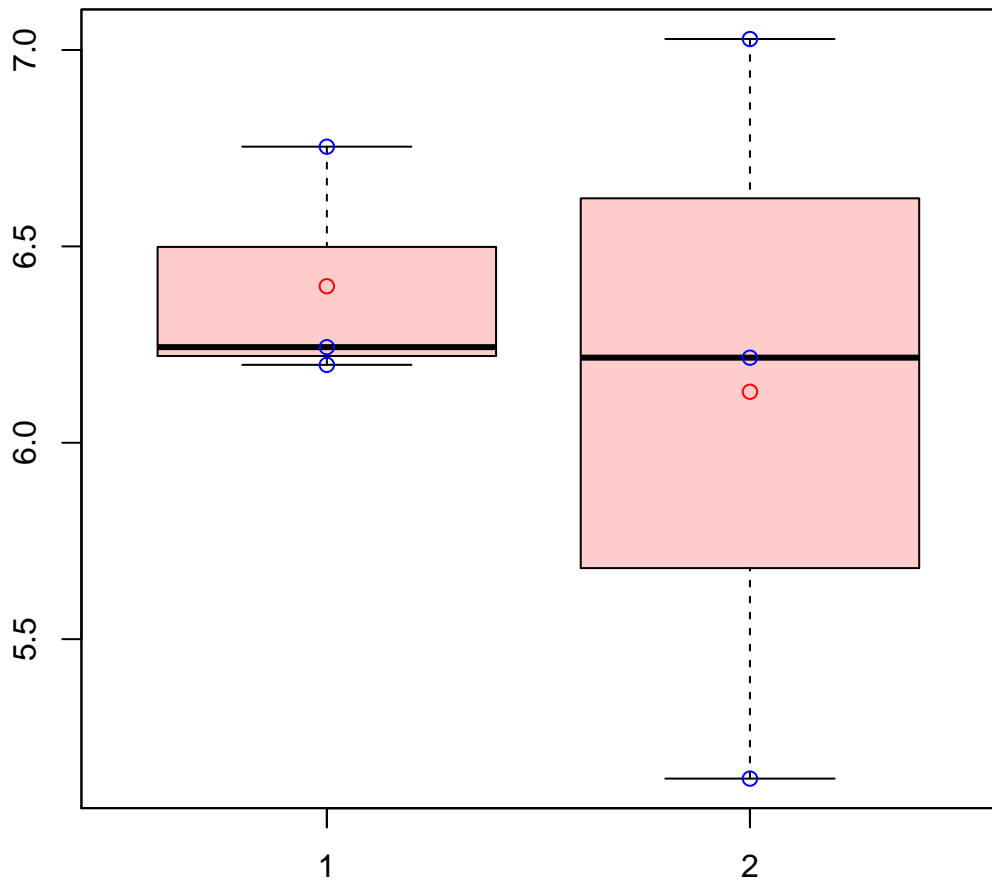

t-Test: p-value = 0.68



# B8AN26|B8AN26\_ORYSI

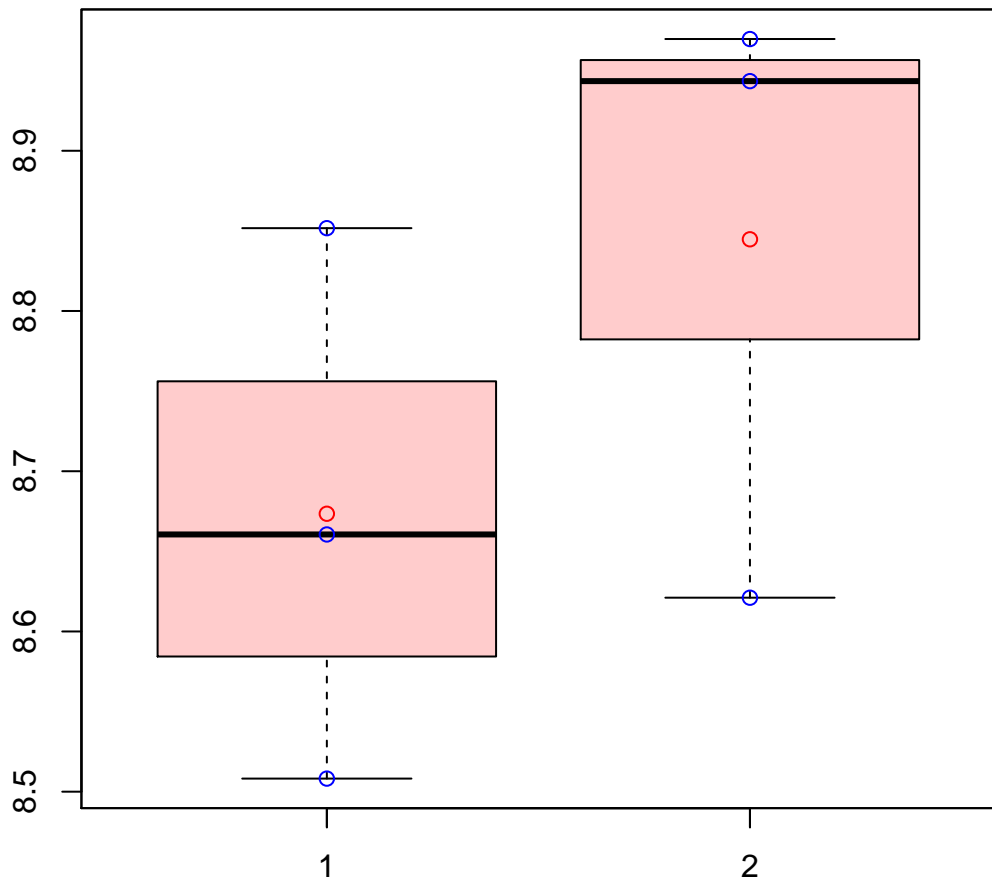

t-Test: p-value = 0.32

# B8AN78|B8AN78\_ORYSI

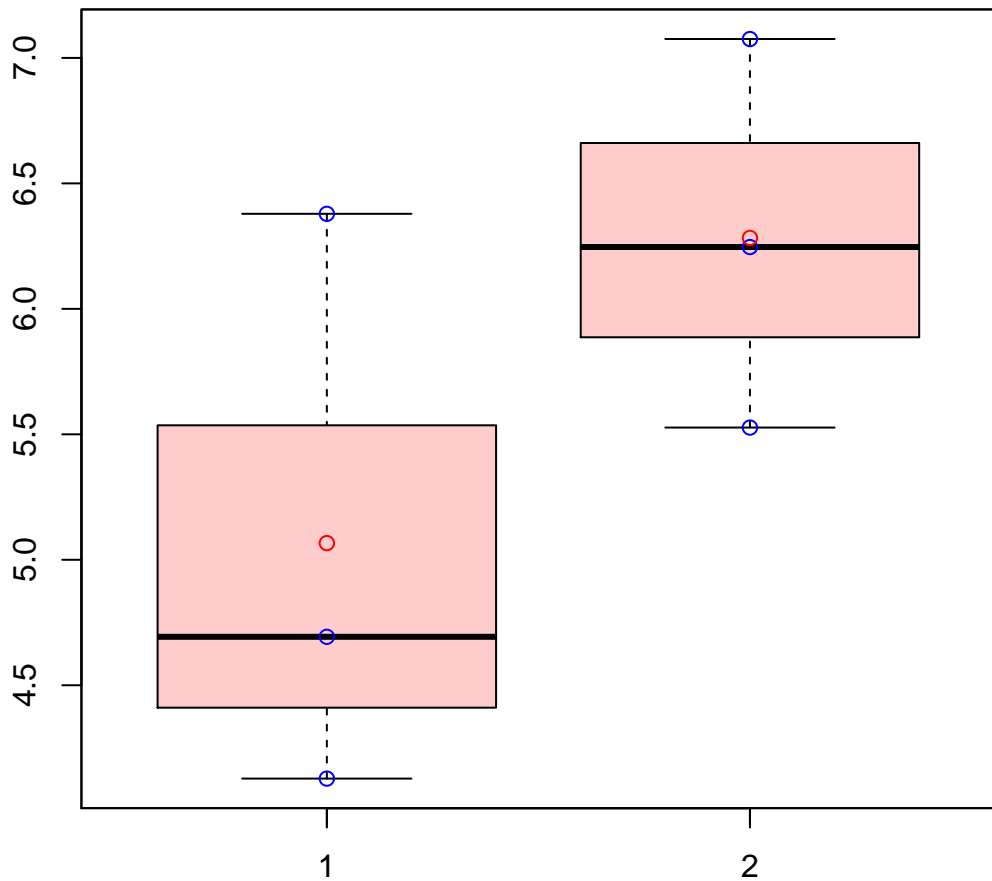

t-Test: p-value = 0.22

# B8APP5|B8APP5\_ORYSI

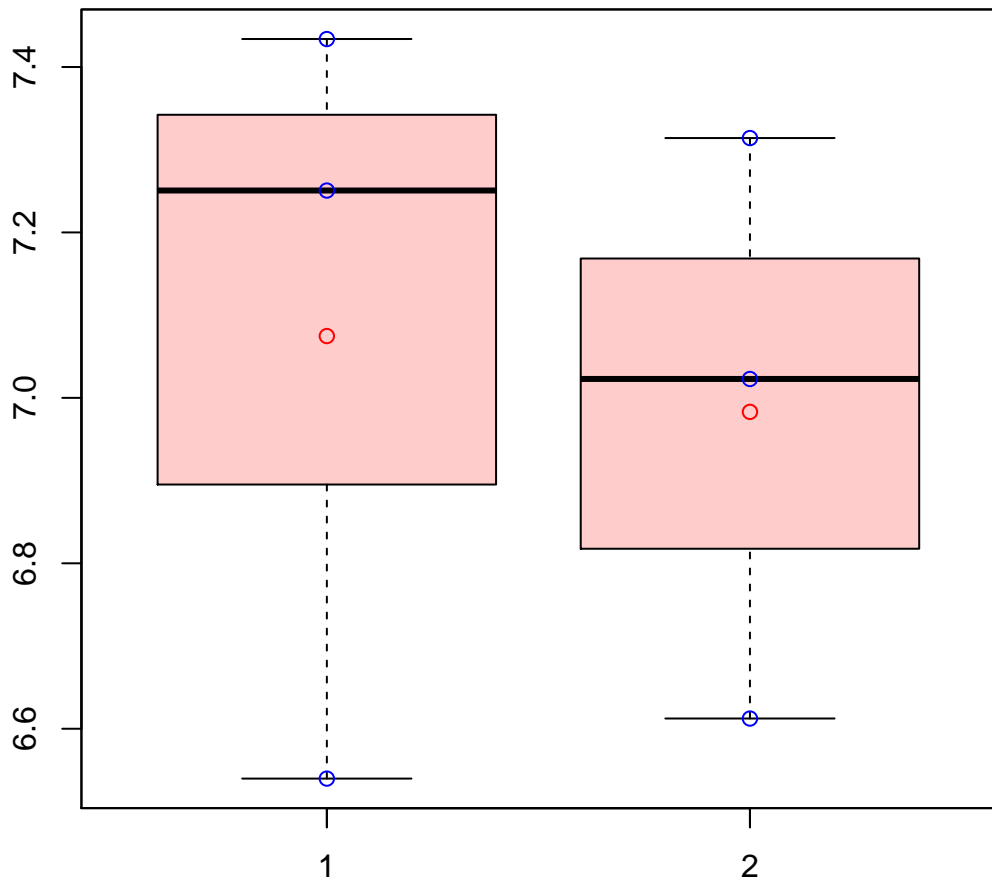

t-Test: p-value = 0.8

# B8AQ08|B8AQ08\_ORYSI

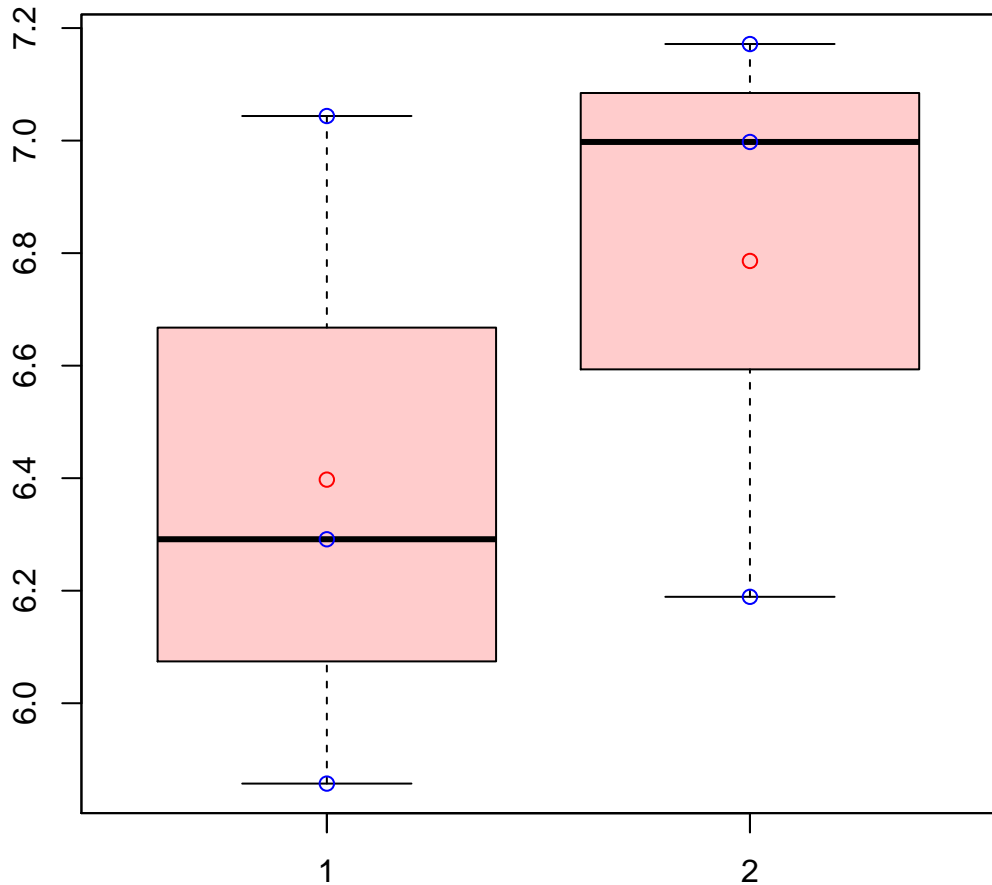

t-Test: p-value = 0.45

# B8AQ79|B8AQ79\_ORYSI

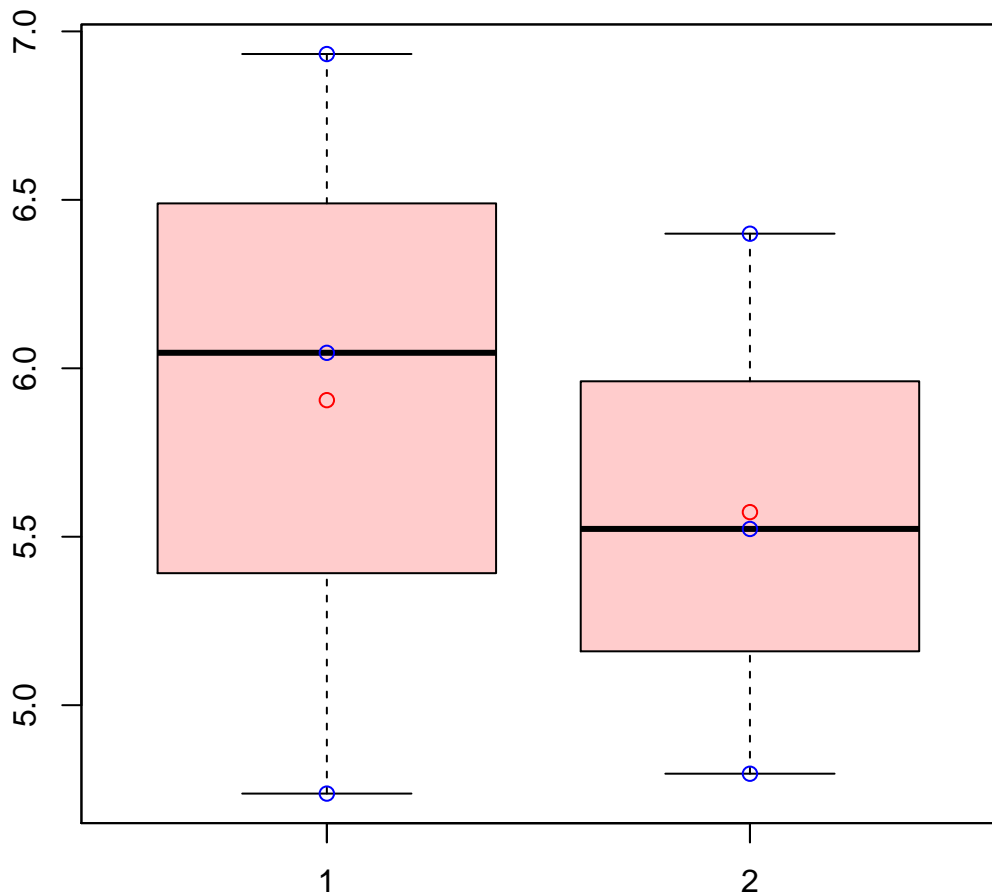

t-Test: p-value = 0.7

# B8AQE1|B8AQE1\_ORYSI

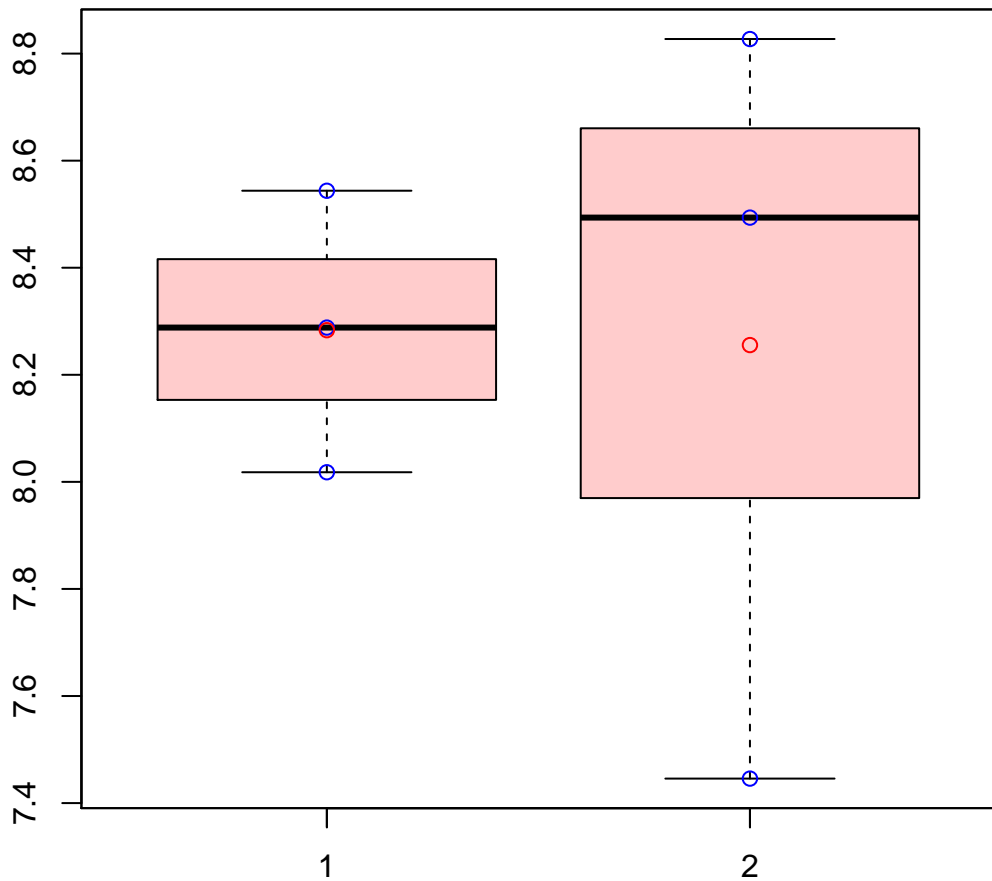

t-Test: p-value = 0.95

# B8AQE8|B8AQE8\_ORYSI

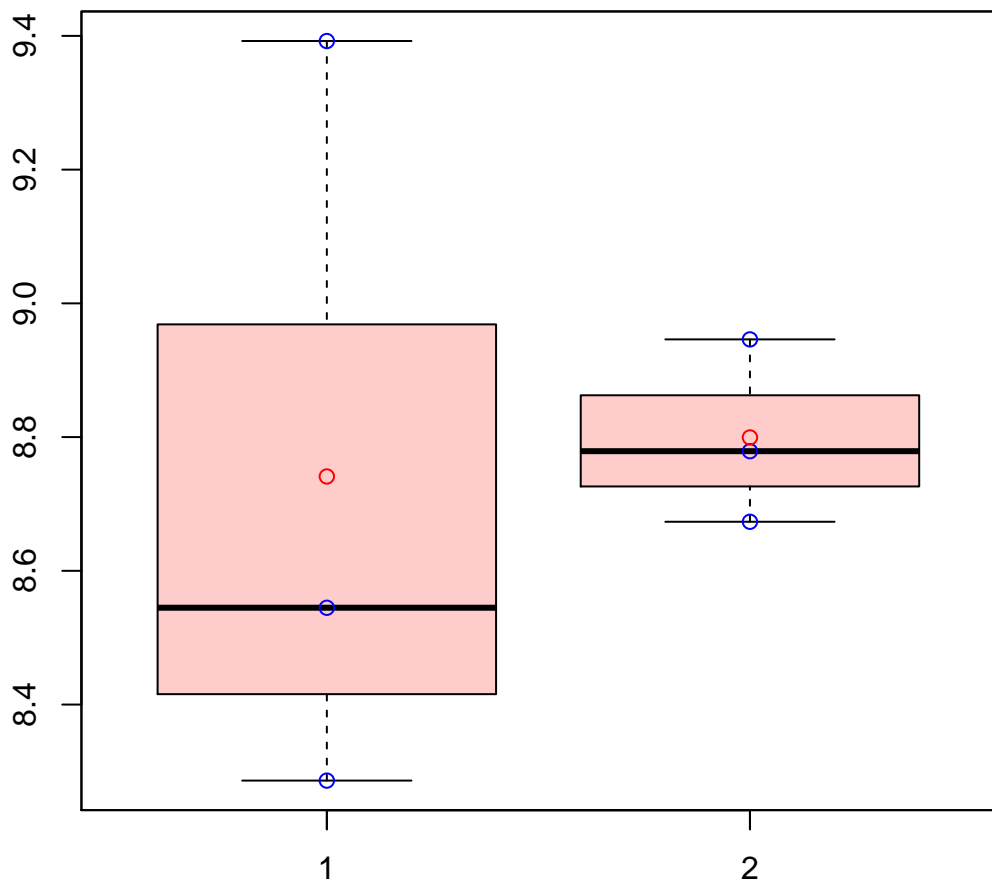

t-Test: p-value = 0.88

# B8AQM1|B8AQM1\_ORYSI

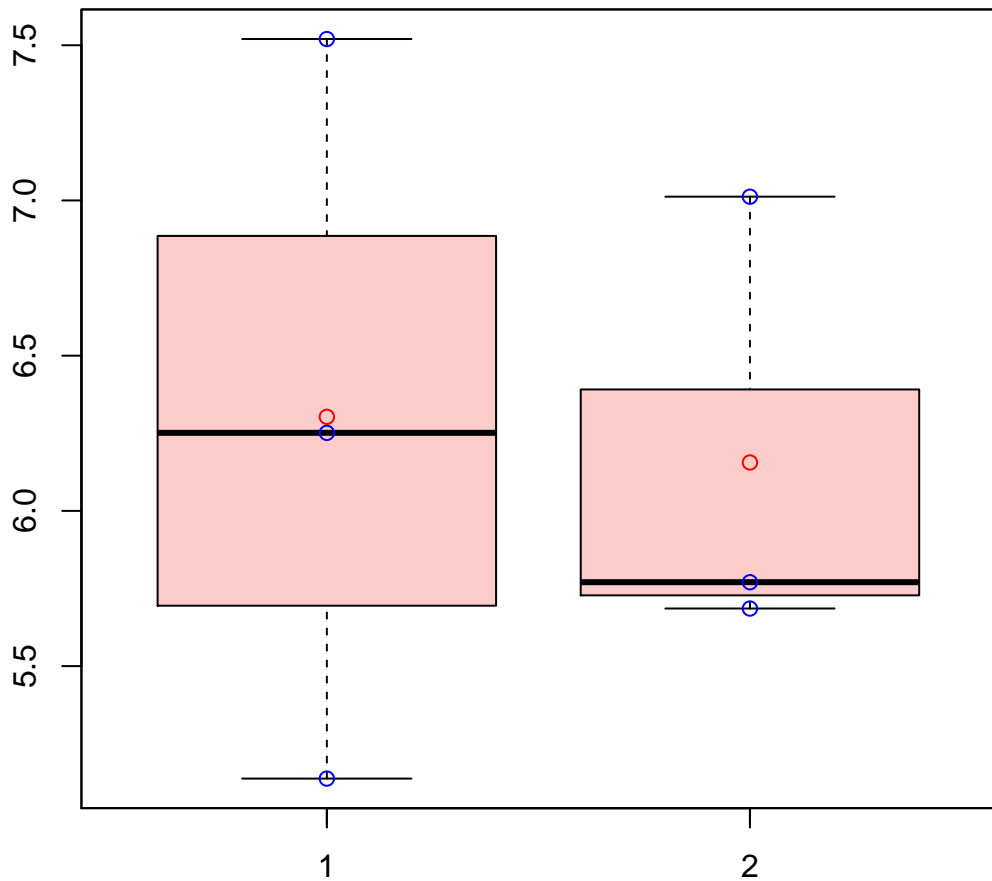

t-Test: p-value = 0.87



# B8AQR3|B8AQR3\_ORYSI

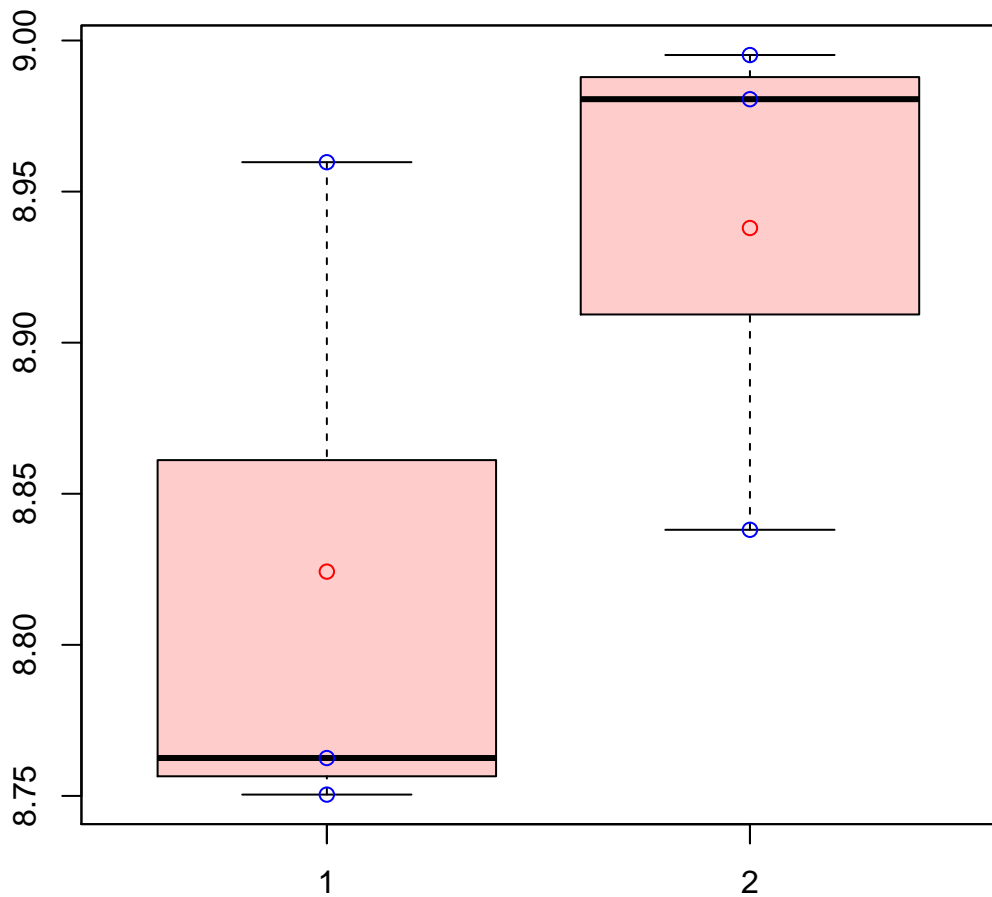

t-Test: p-value = 0.25

# B8AQS3|B8AQS3\_ORYSI

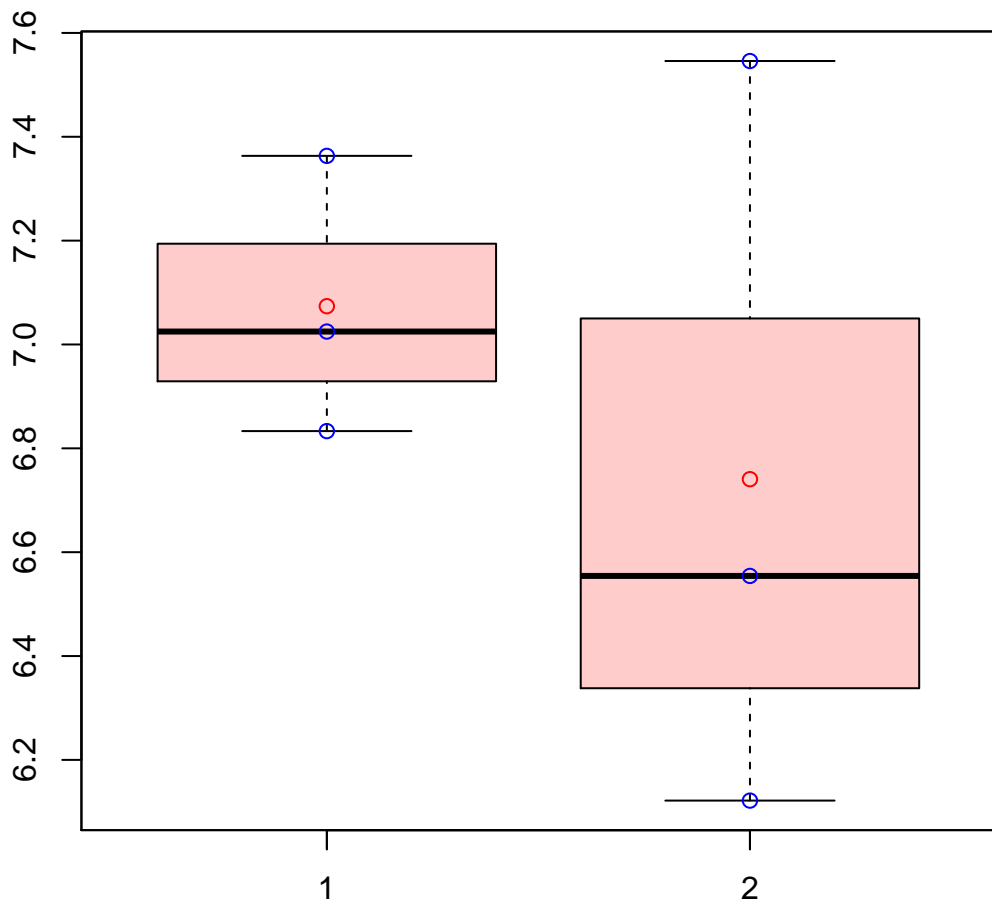

t-Test: p-value = 0.52

# B8AR31|B8AR31\_ORYSI

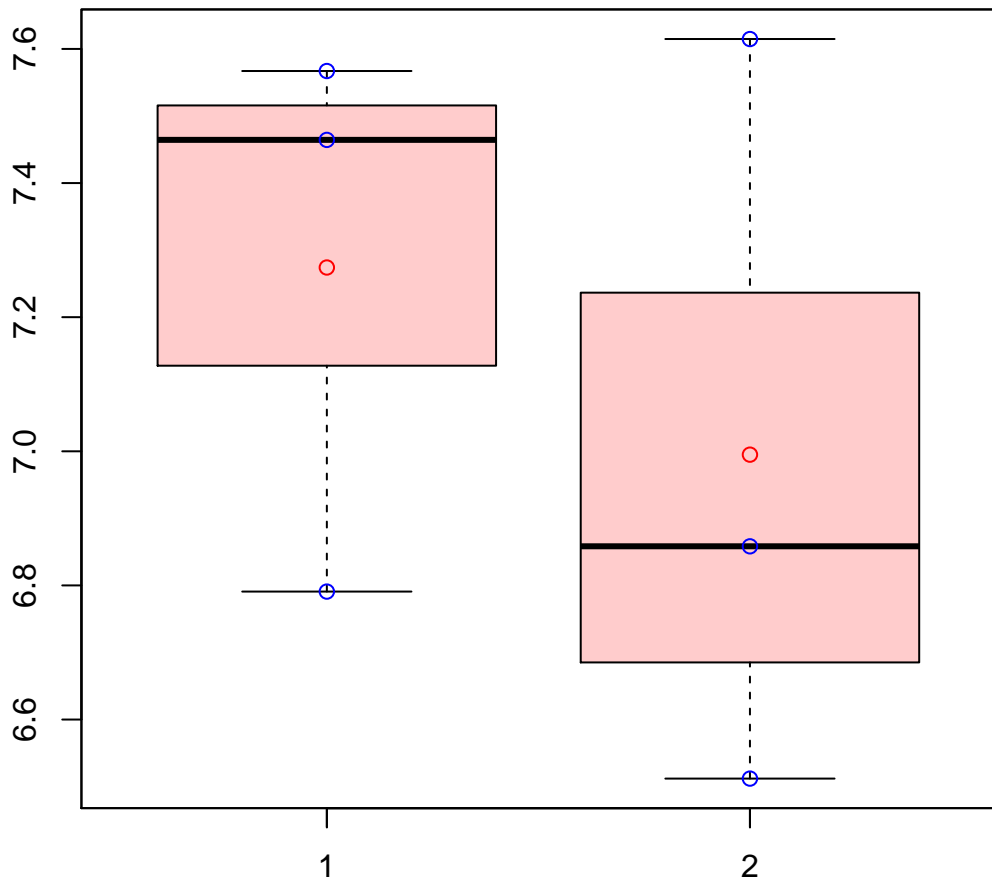

t-Test: p-value = 0.53

# B8AR75|B8AR75\_ORYSI

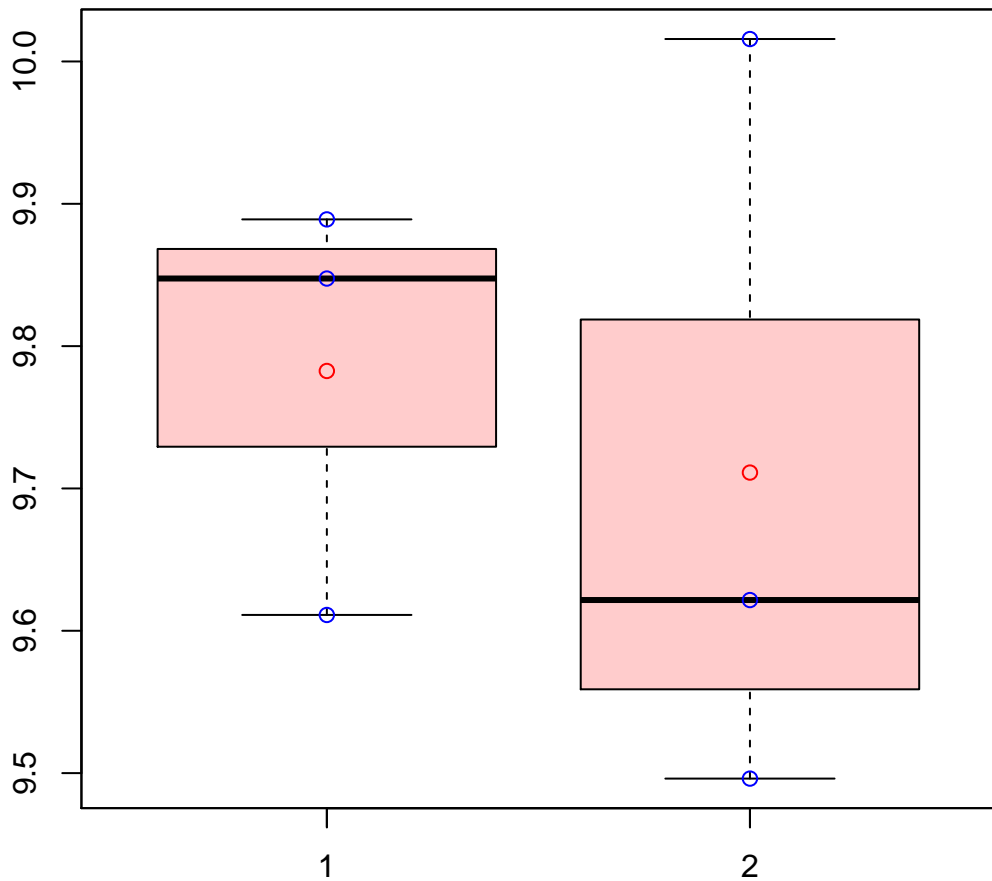

t-Test: p-value = 0.72

# B8AR85|B8AR85\_ORYSI

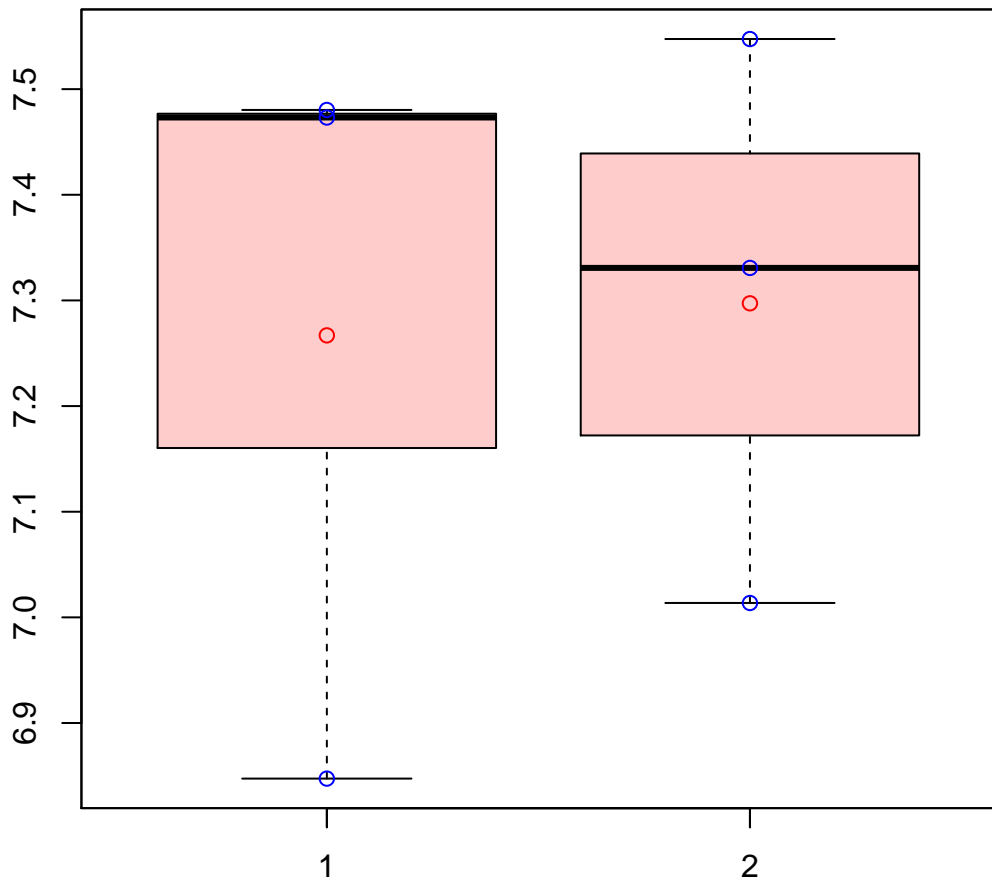

t-Test: p-value = 0.91

# B8ARP6|B8ARP6\_ORYSI

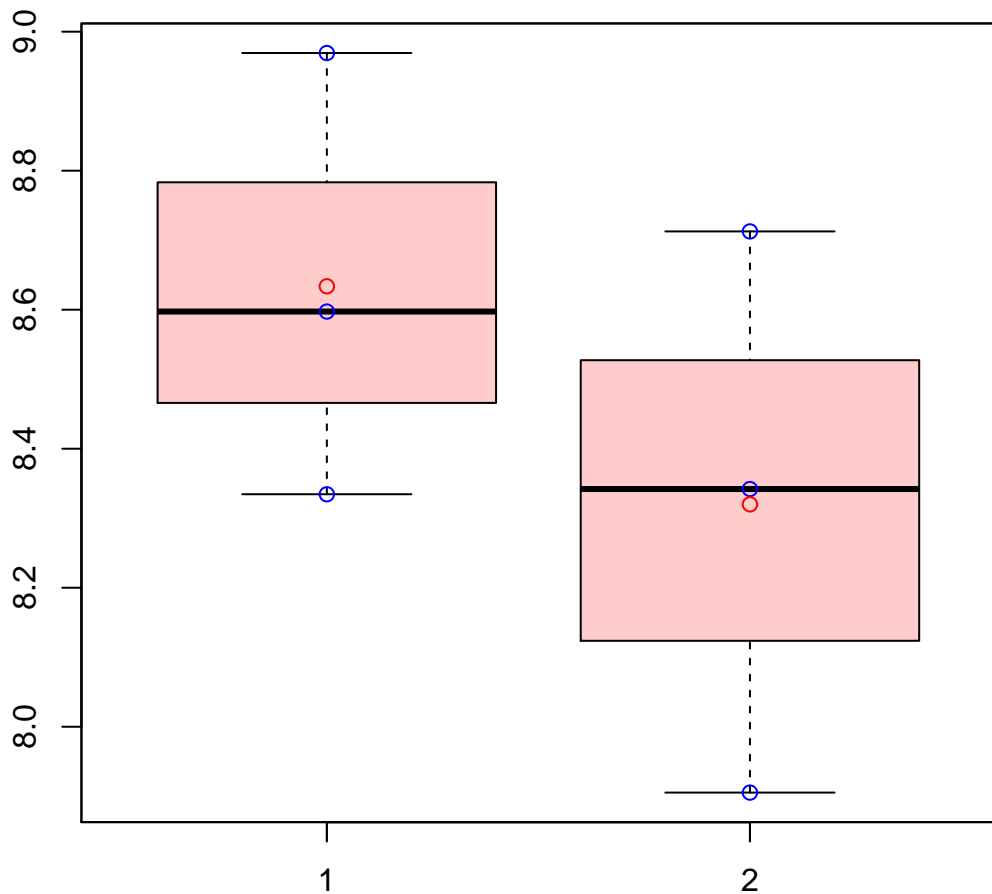

t-Test: p-value = 0.35

# B8ARW9|B8ARW9\_ORYSI

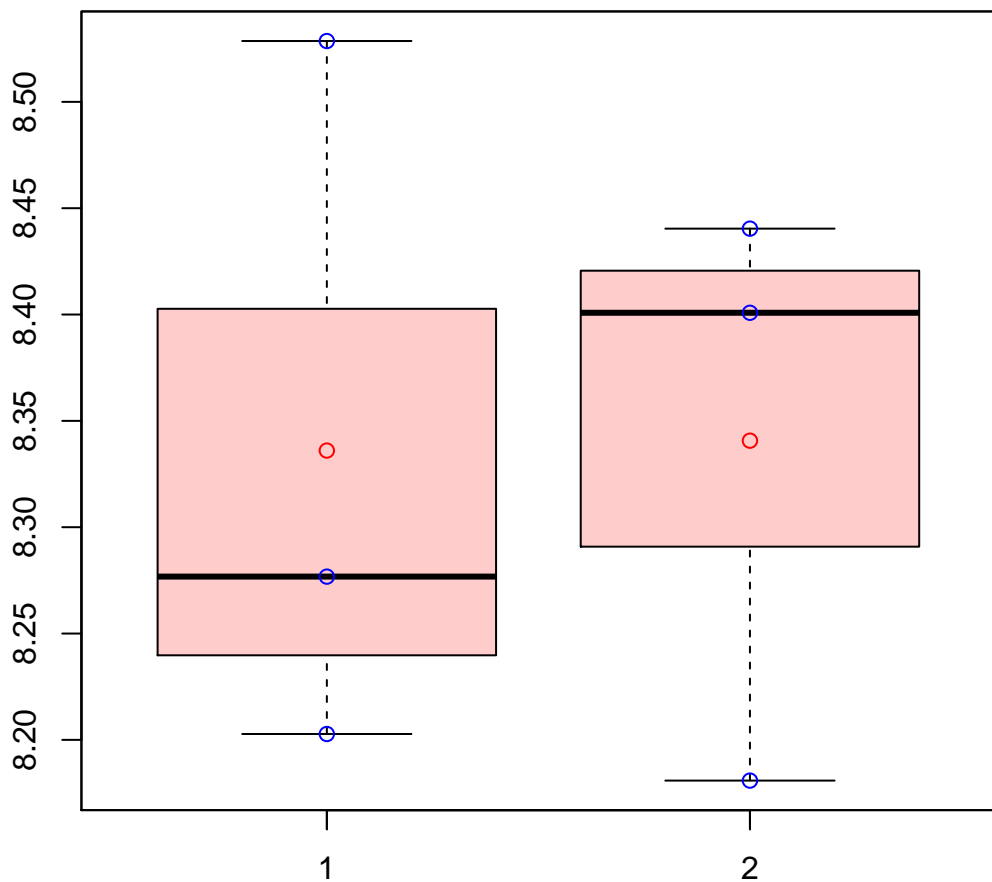

t-Test: p-value = 0.97

# B8ARY5|B8ARY5\_ORYSI

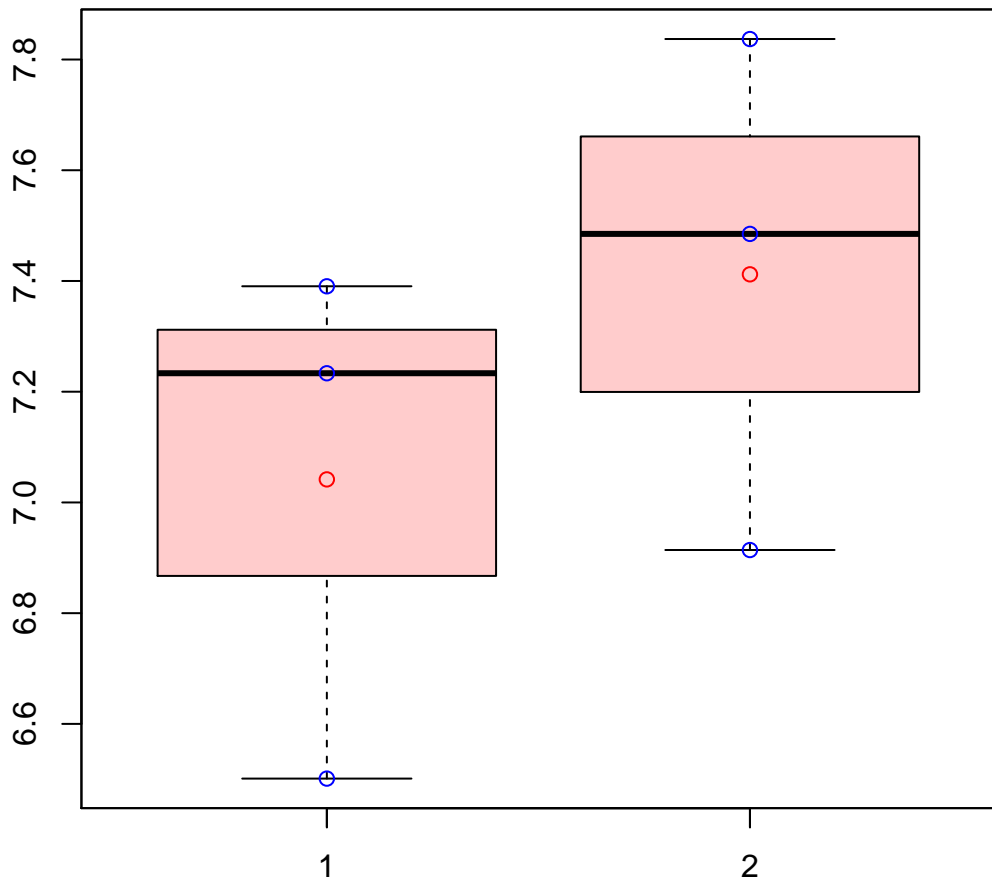

t-Test: p-value = 0.39



# B8ATC5|B8ATC5\_ORYSI

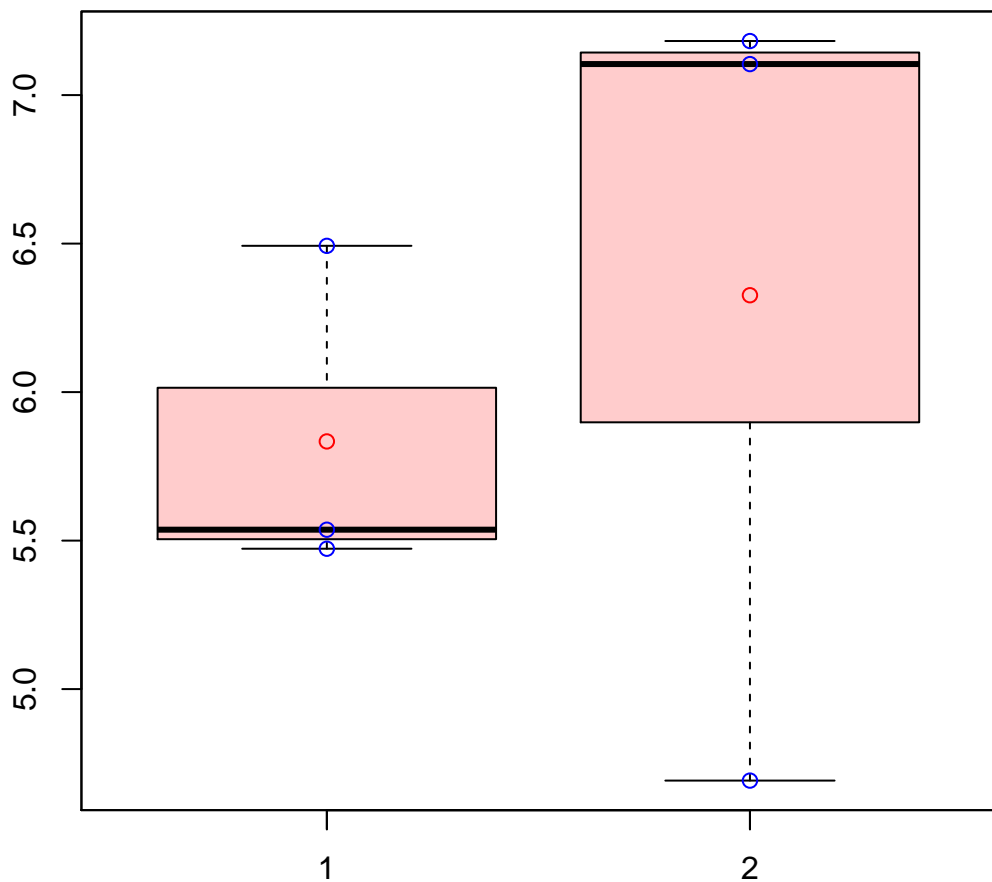

t-Test: p-value = 0.62

# B8AUY3|B8AUY3\_ORYSI

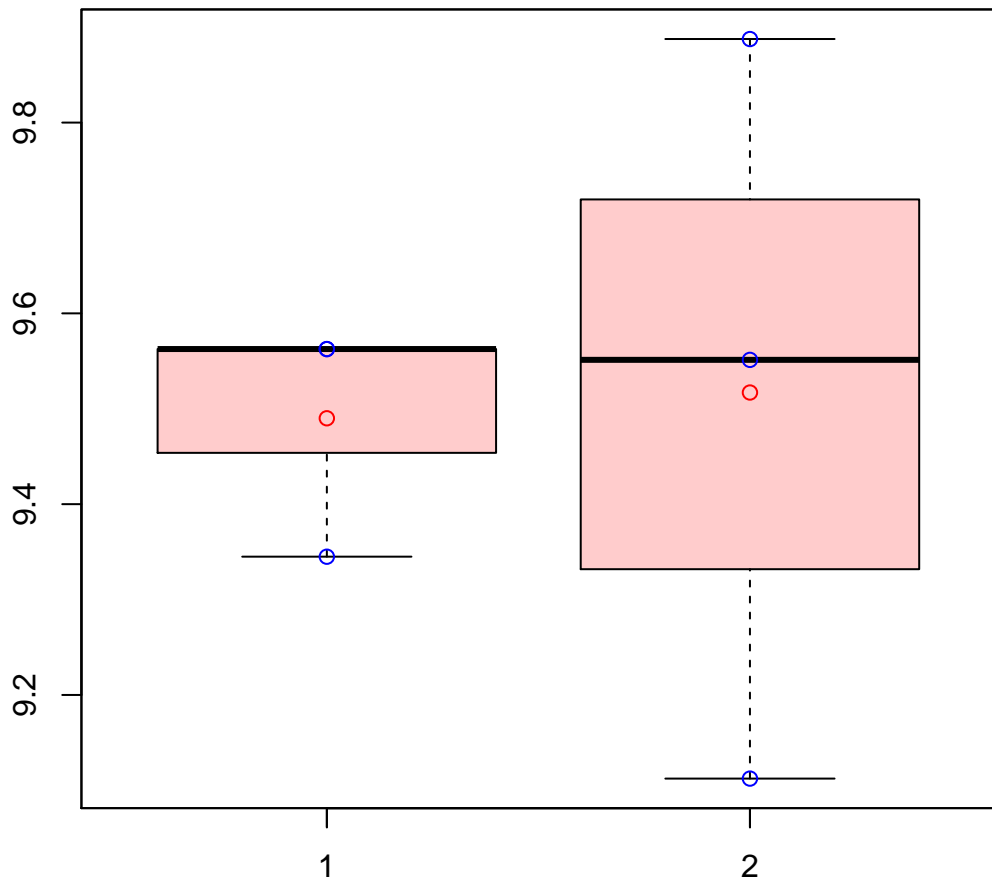

t-Test: p-value = 0.92

# B8AV81|B8AV81\_ORYSI

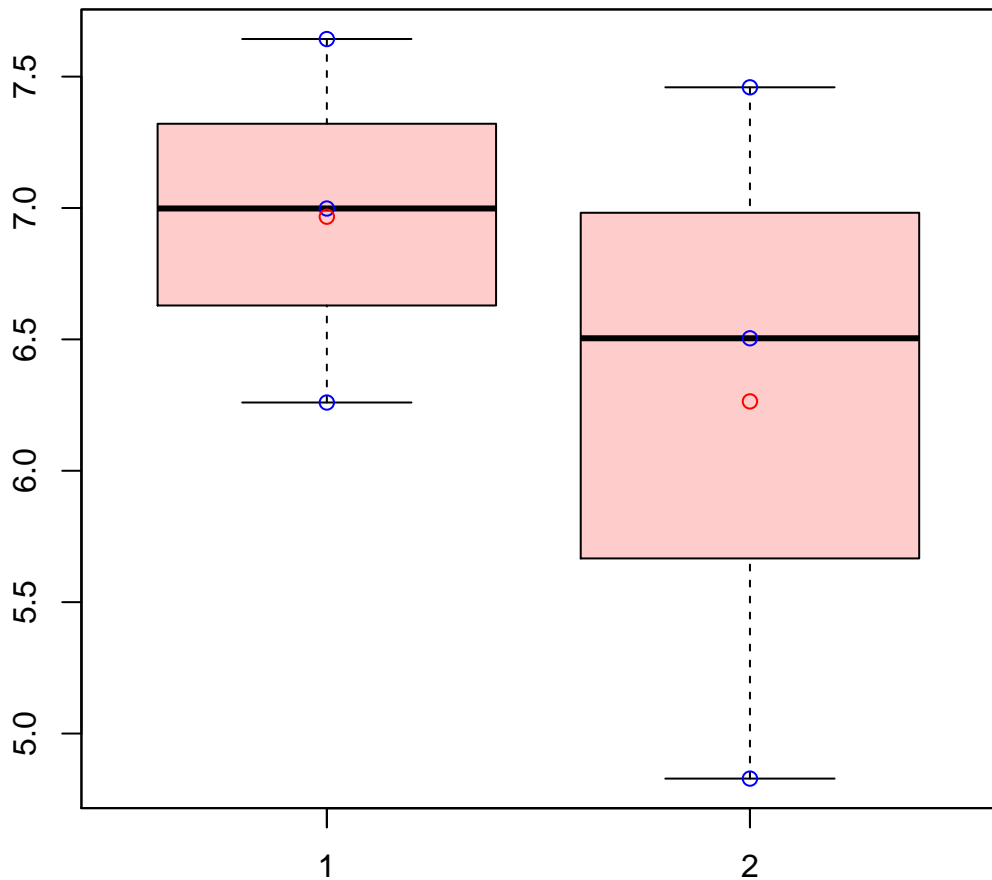

t-Test: p-value = 0.48

# B8AVB8|B8AVB8\_ORYSI

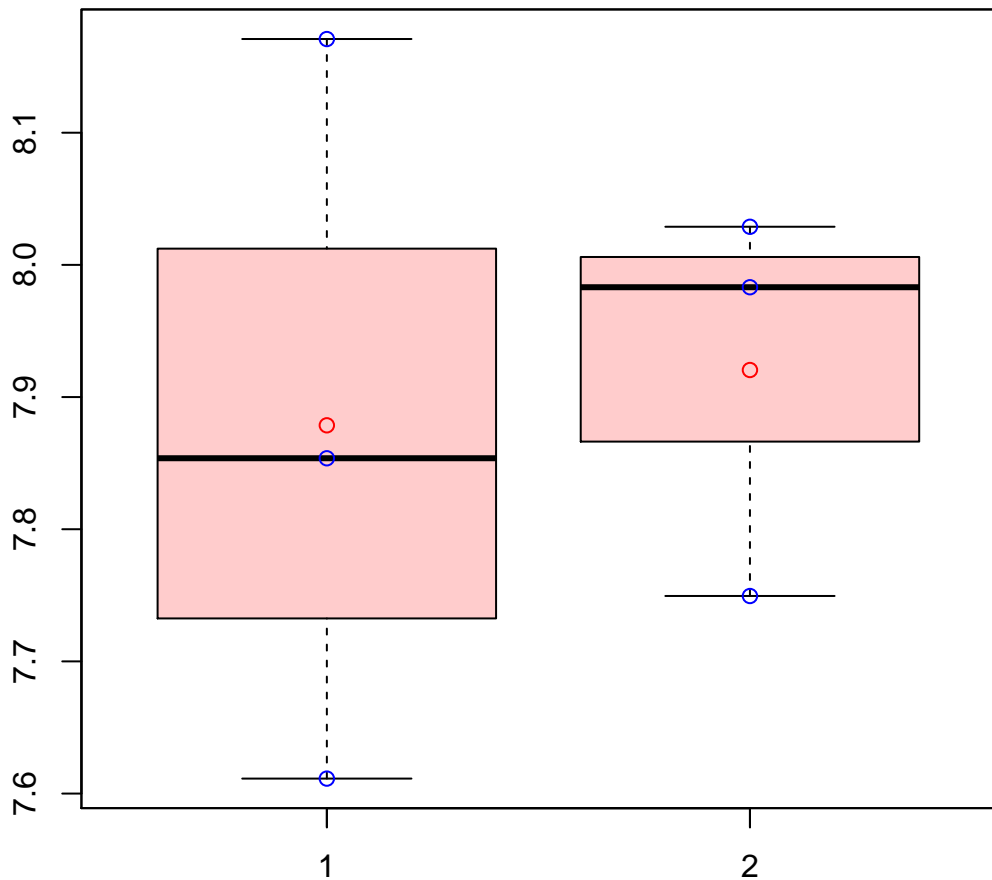

t-Test: p-value = 0.83

# B8AVI5|B8AVI5\_ORYSI

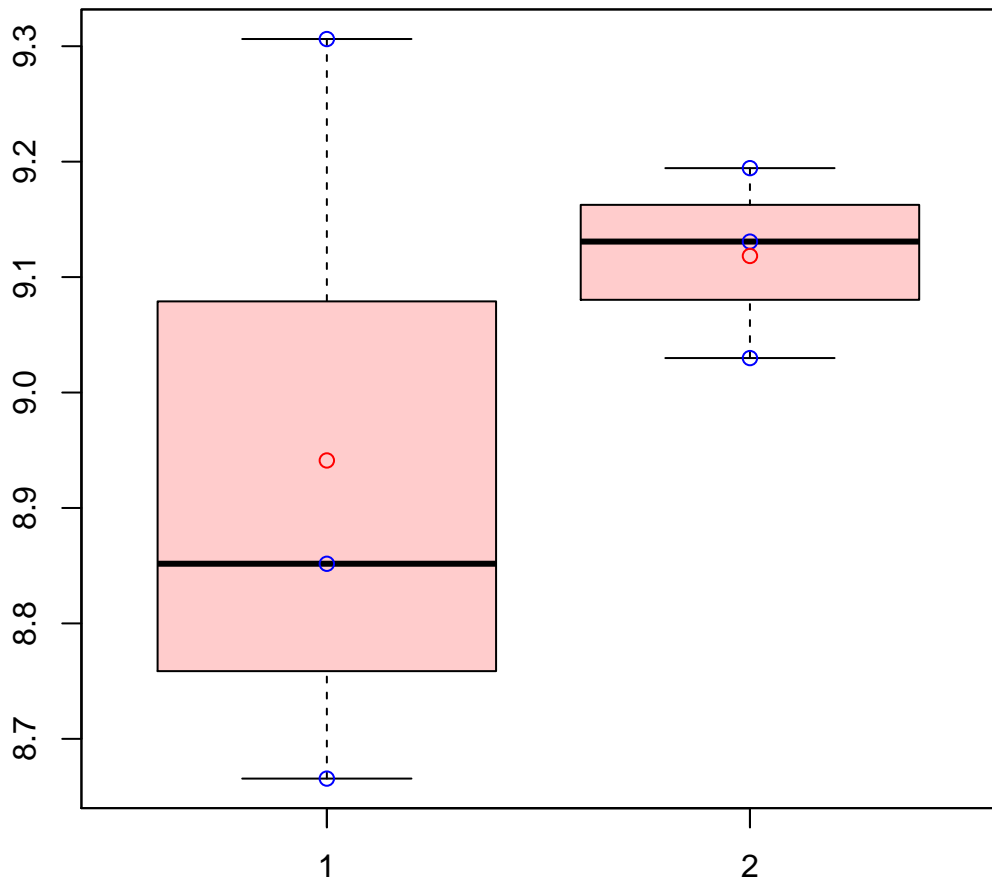

t-Test: p-value = 0.45

# B8AVU6|B8AVU6\_ORYSI

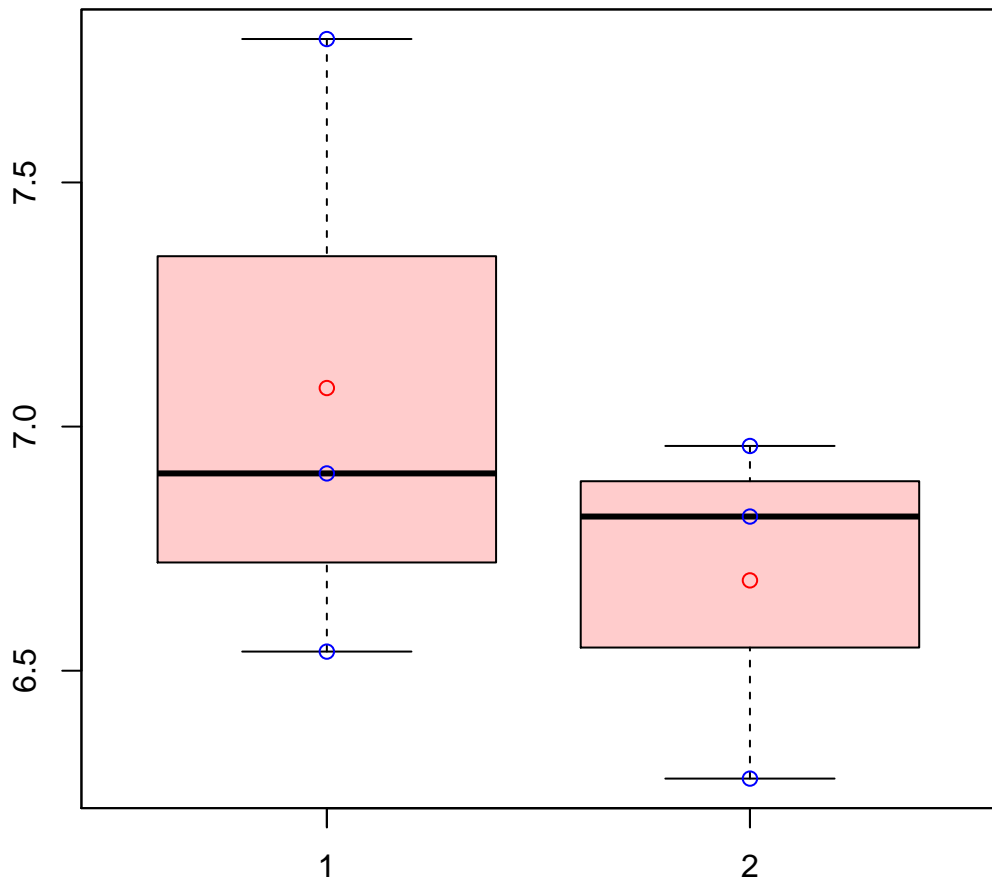

t-Test: p-value = 0.42

# B8AW94|B8AW94\_ORYSI

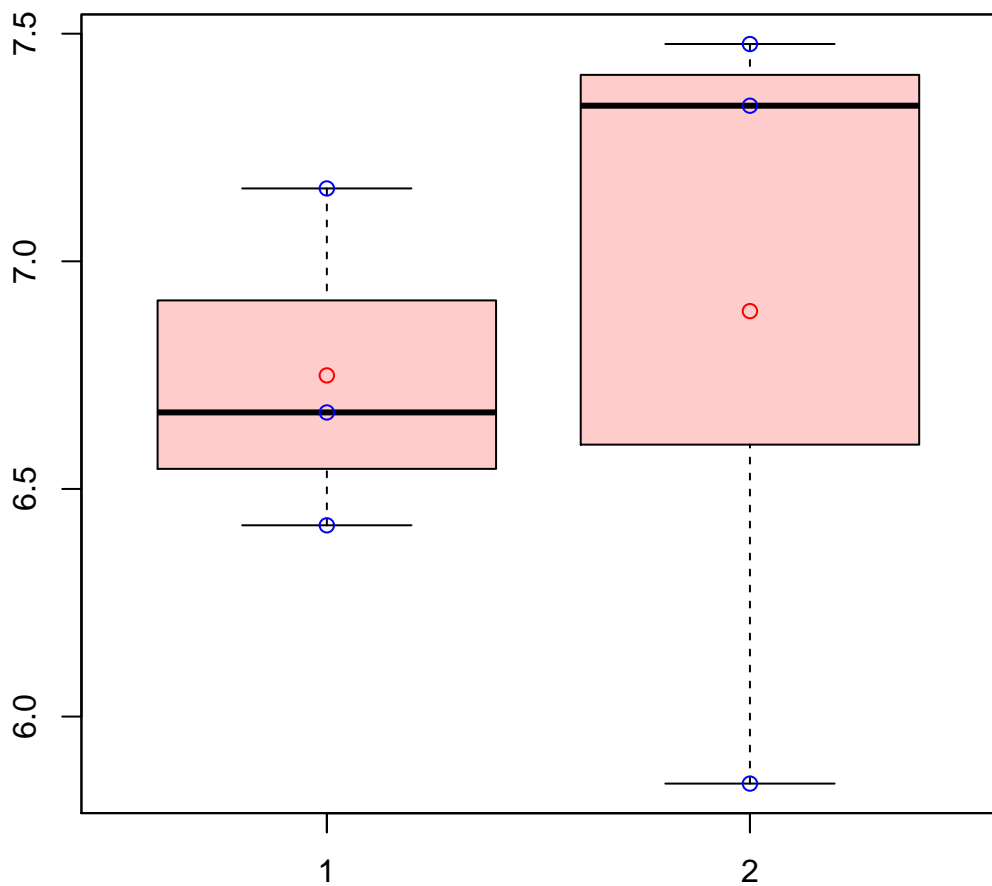

t-Test: p-value = 0.82

# B8AWM0|B8AWM0\_ORYSI

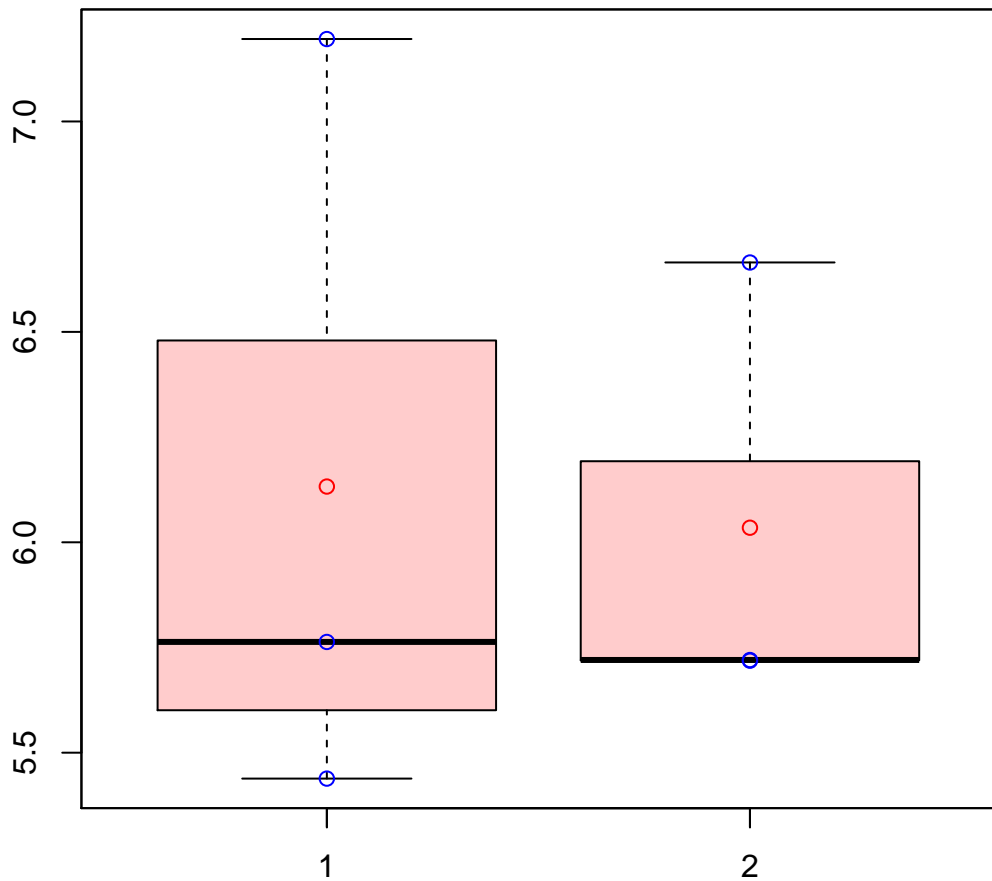

t-Test: p-value = 0.88



# B8AXS1|B8AXS1\_ORYSI

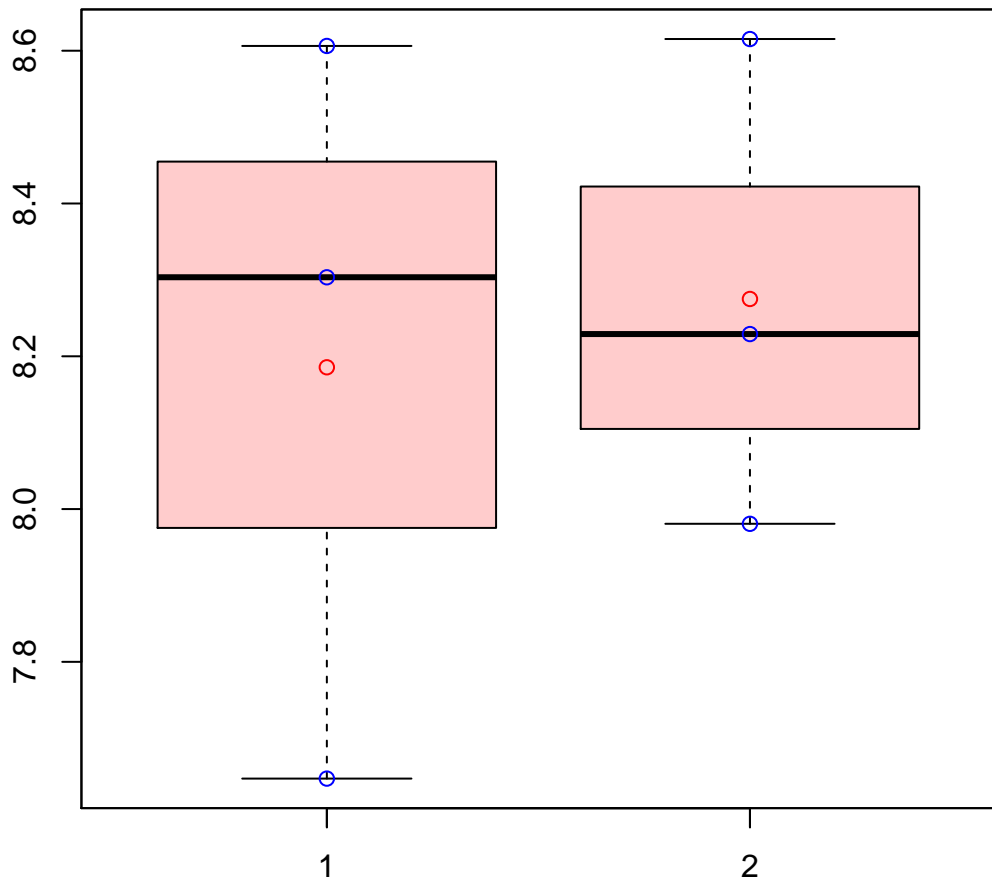

t-Test: p-value = 0.81

# B8AY31|B8AY31\_ORYSI

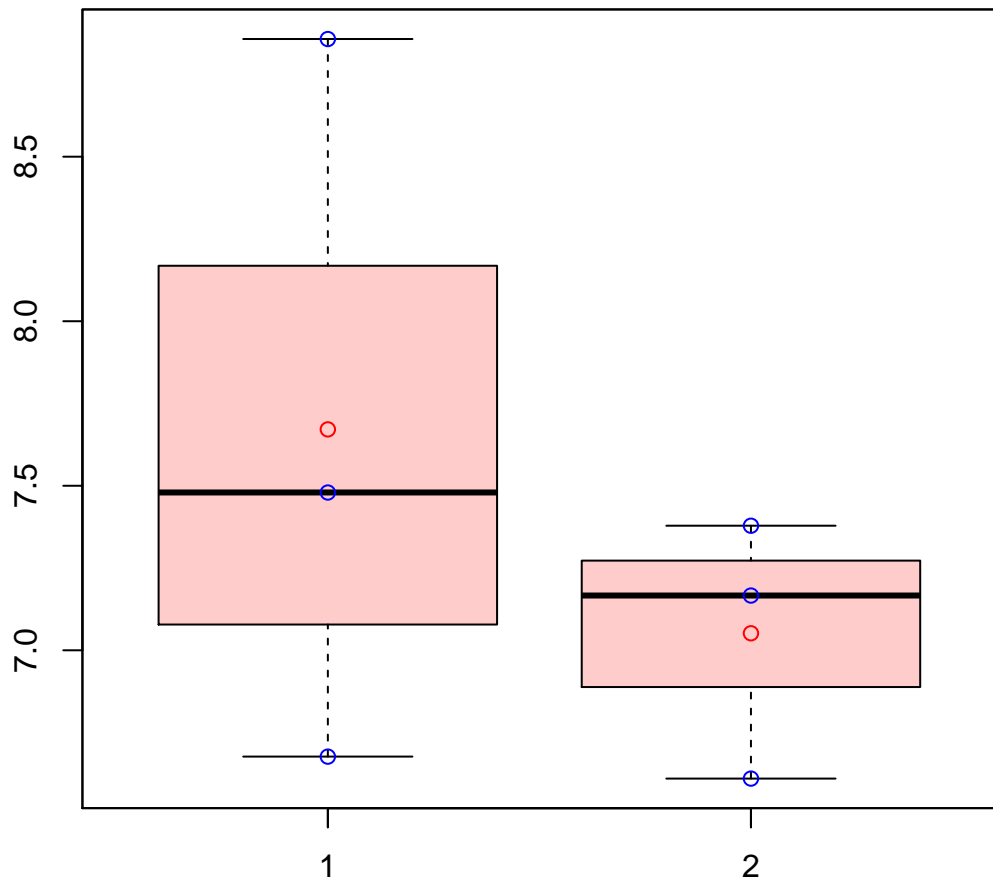

t-Test: p-value = 0.44

# B8AY75|B8AY75\_ORYSI

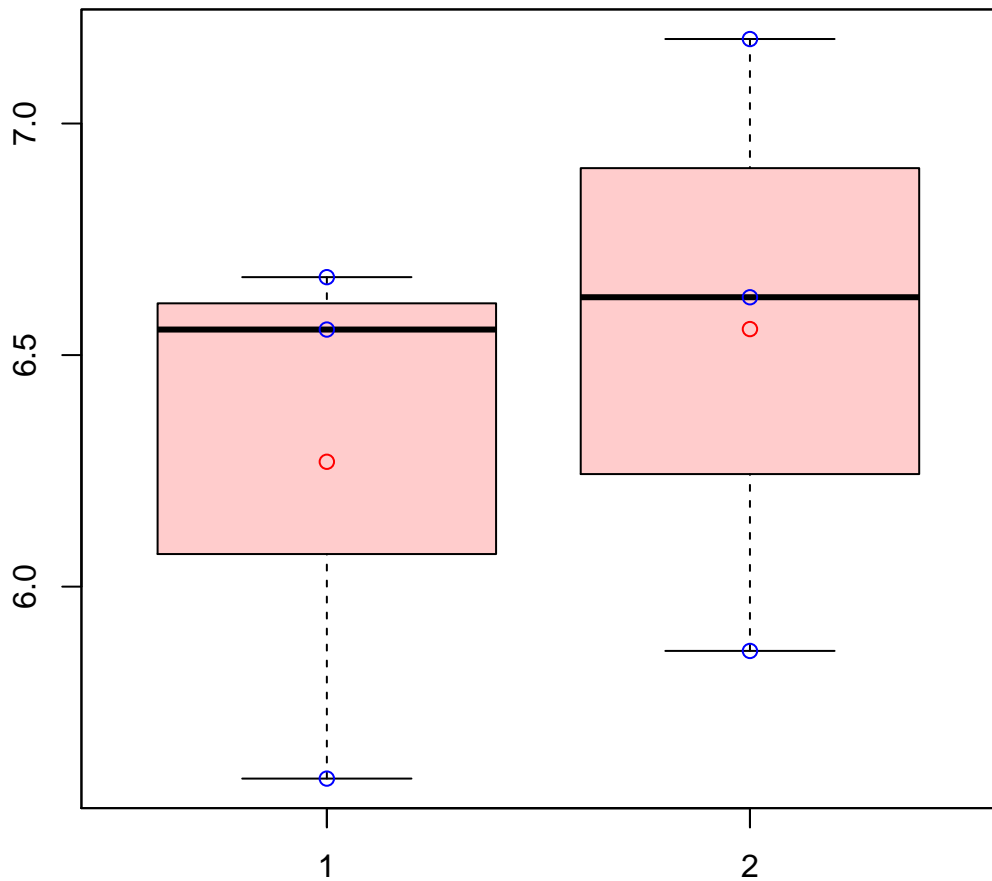

t-Test: p-value = 0.61

# B8AYE1|B8AYE1\_ORYSI

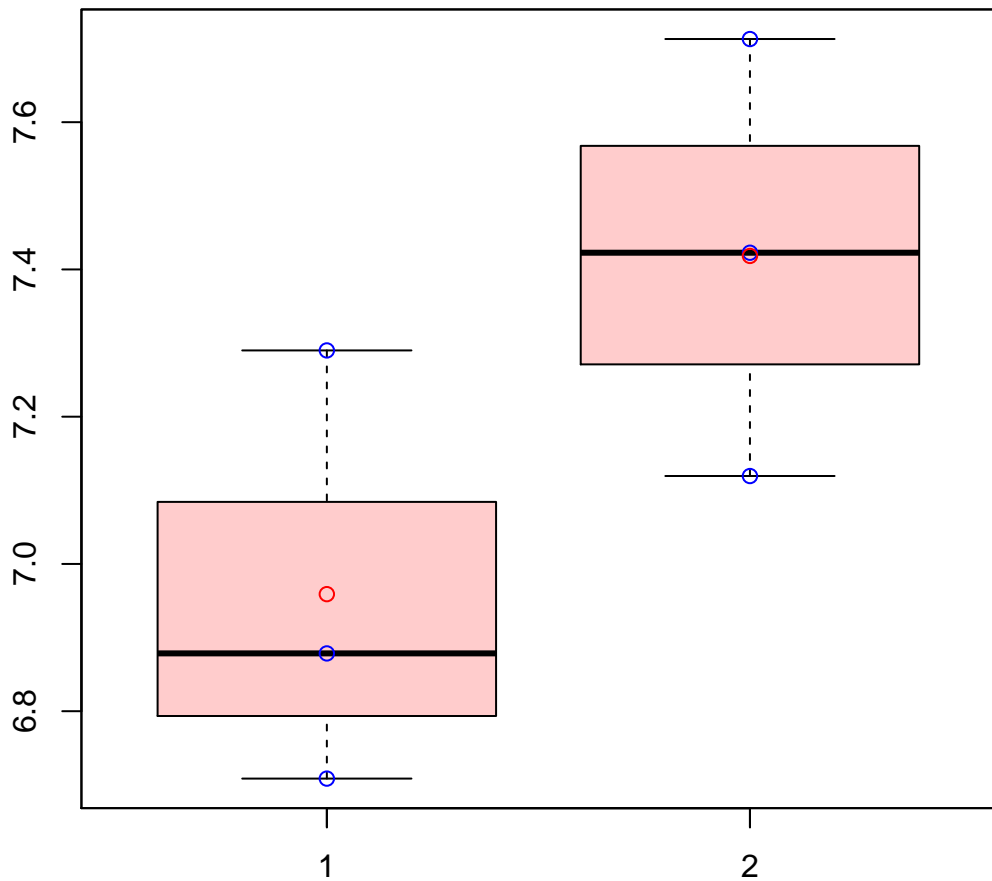

t-Test: p-value = 0.13

# B8AYT8|B8AYT8\_ORYSI

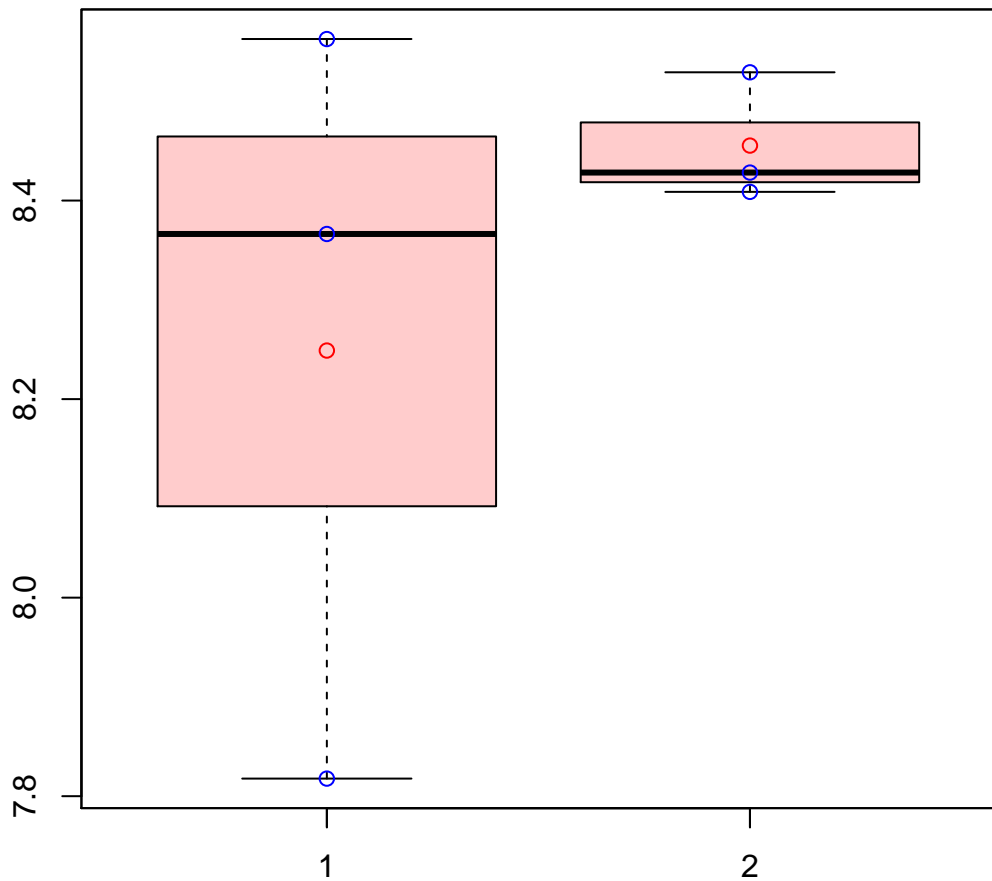

t-Test: p-value = 0.45

# B8AZ97|B8AZ97\_ORYSI

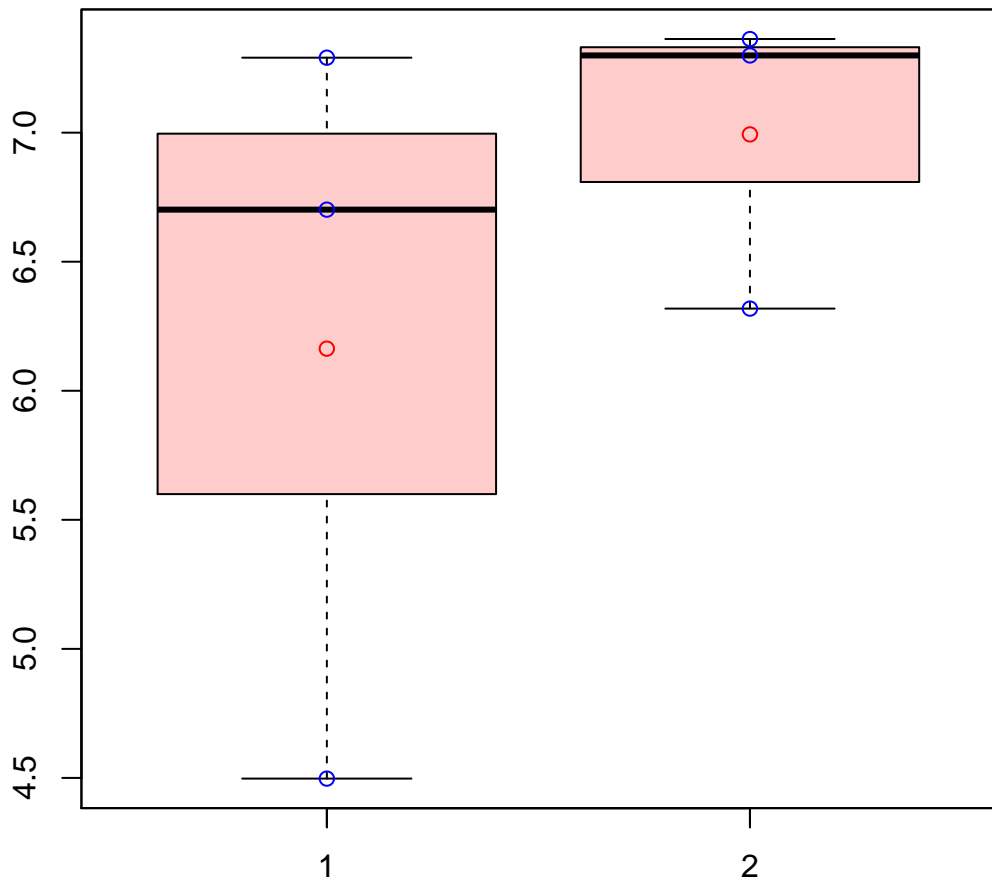

t-Test: p-value = 0.44

# B8AZP2|B8AZP2\_ORYSI

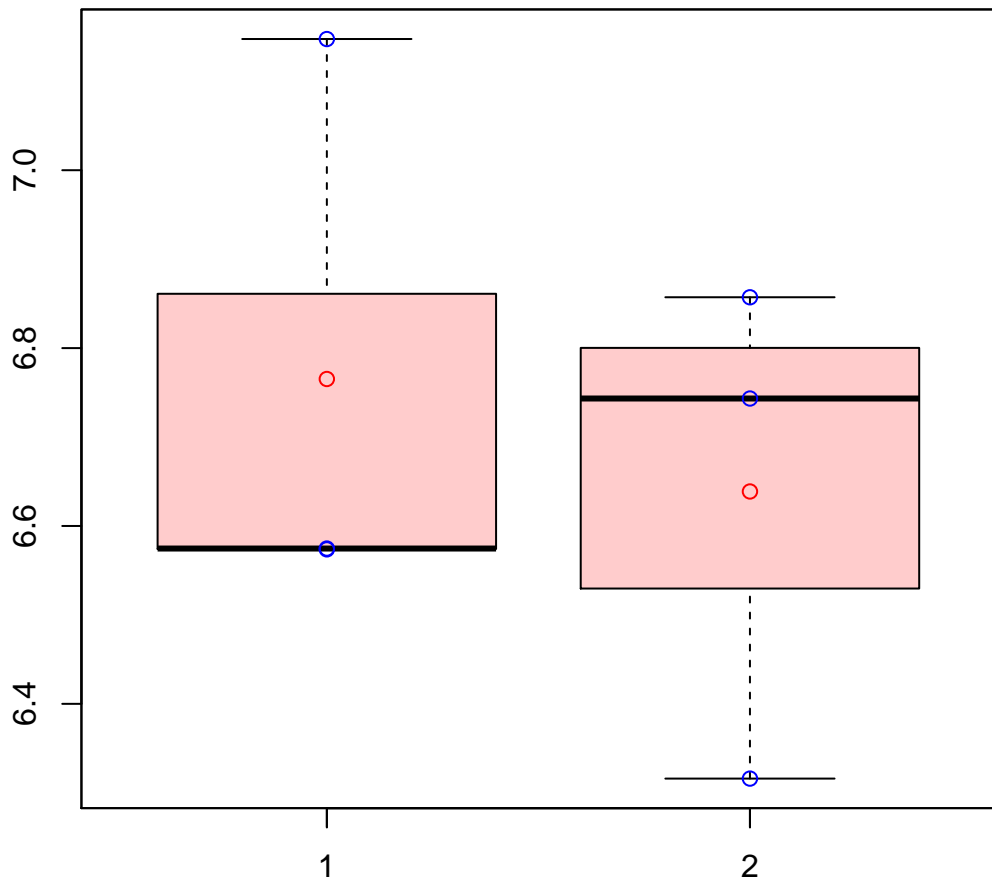

t-Test: p-value = 0.64

# B8B025|B8B025\_ORYSI

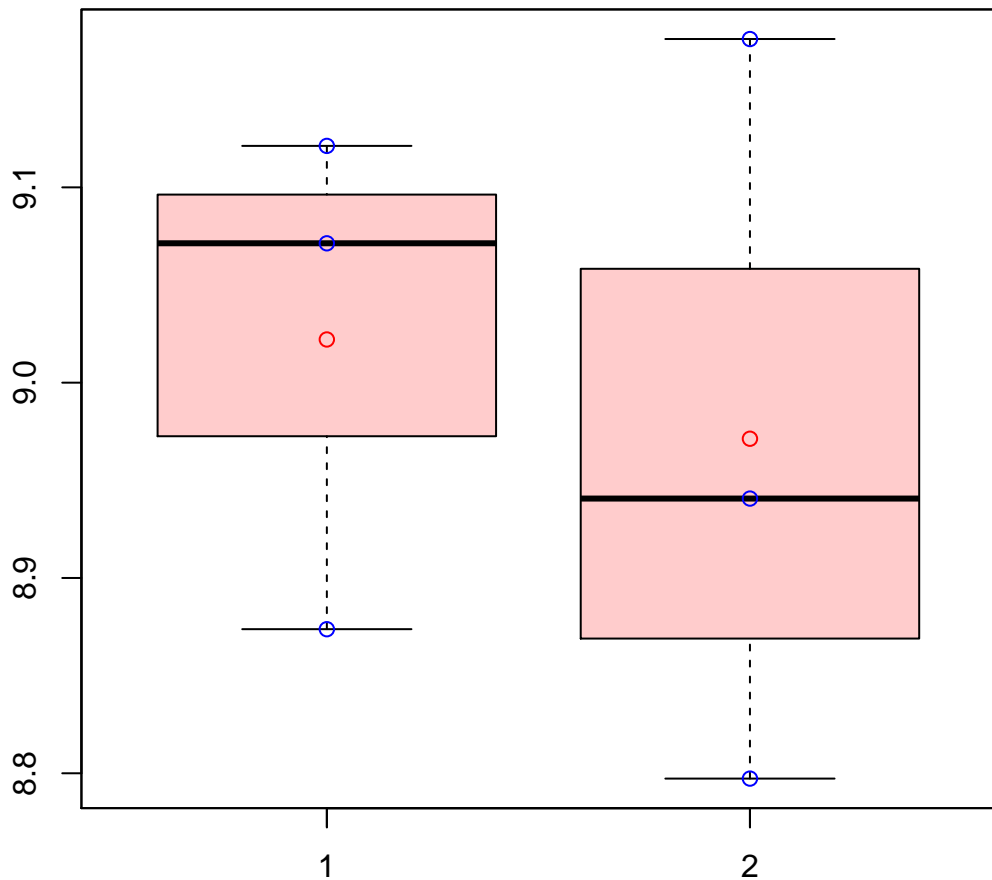

t-Test: p-value = 0.73



# B8B098|B8B098\_ORYSI

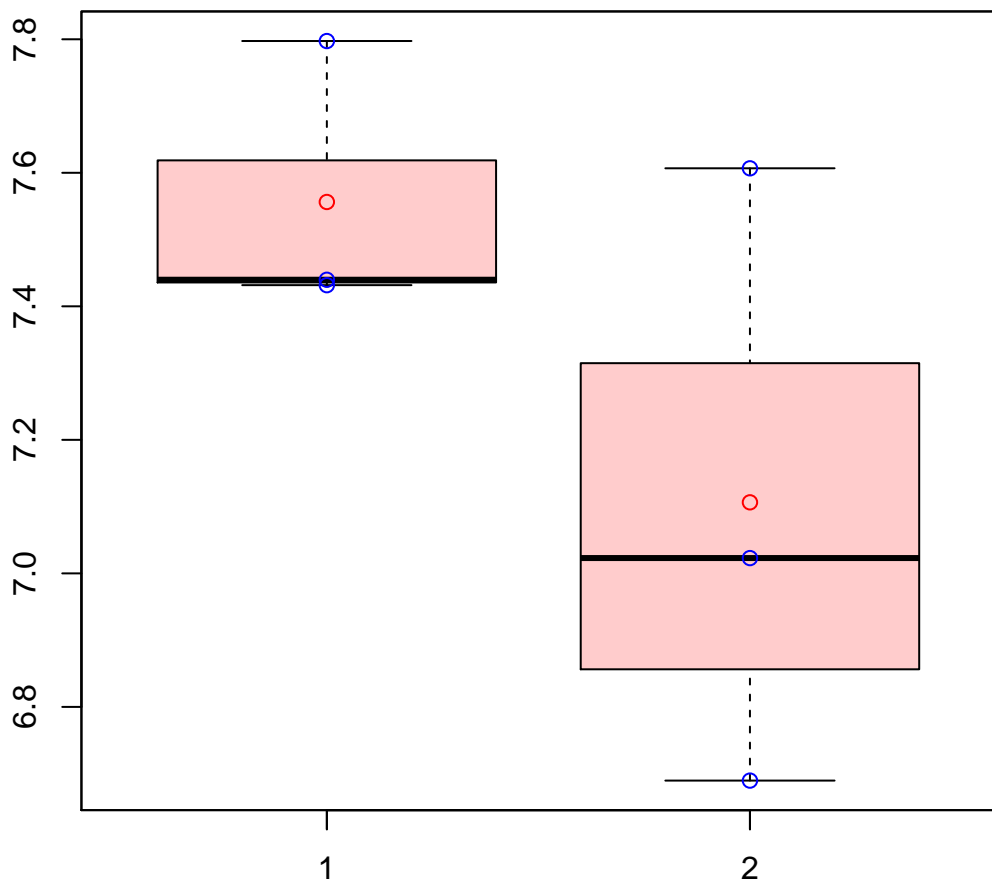

t-Test: p-value = 0.23

# B8B0C7|B8B0C7\_ORYSI

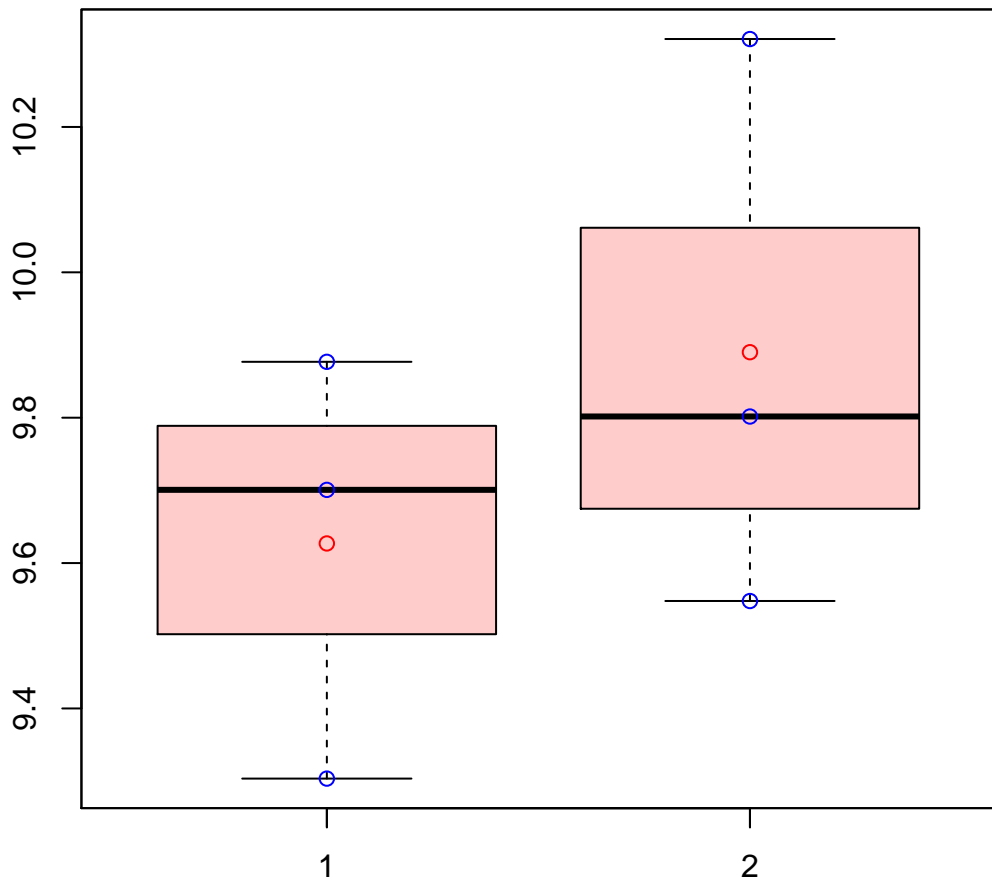

t-Test: p-value = 0.41

# B8B0V0|B8B0V0\_ORYSI

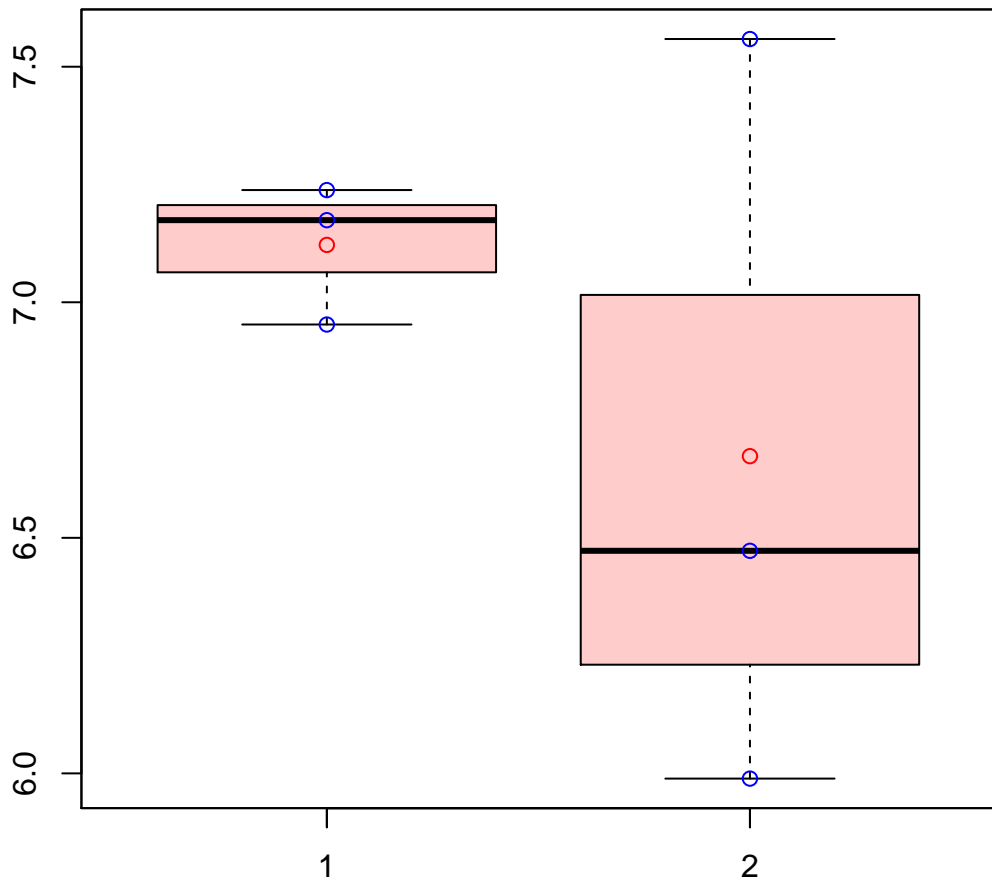

t-Test: p-value = 0.44

# B8B1G1|B8B1G1\_ORYSI

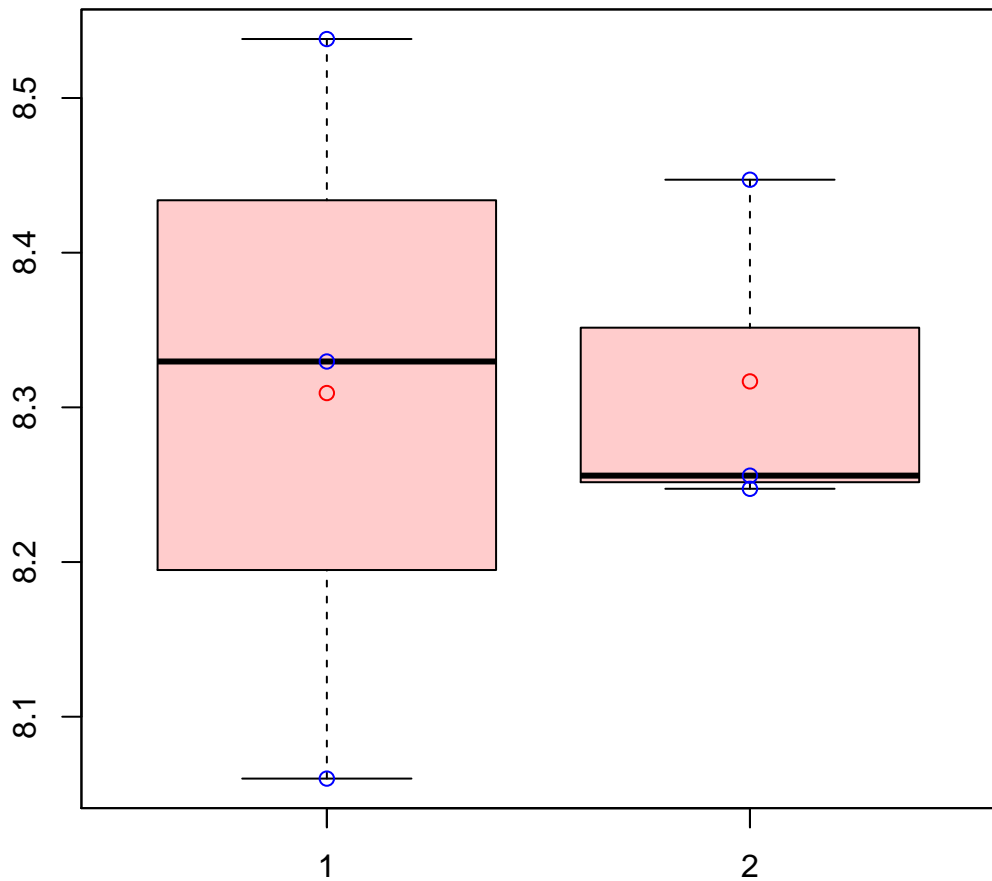

t-Test: p-value = 0.96

# B8B1P1|B8B1P1\_ORYSI

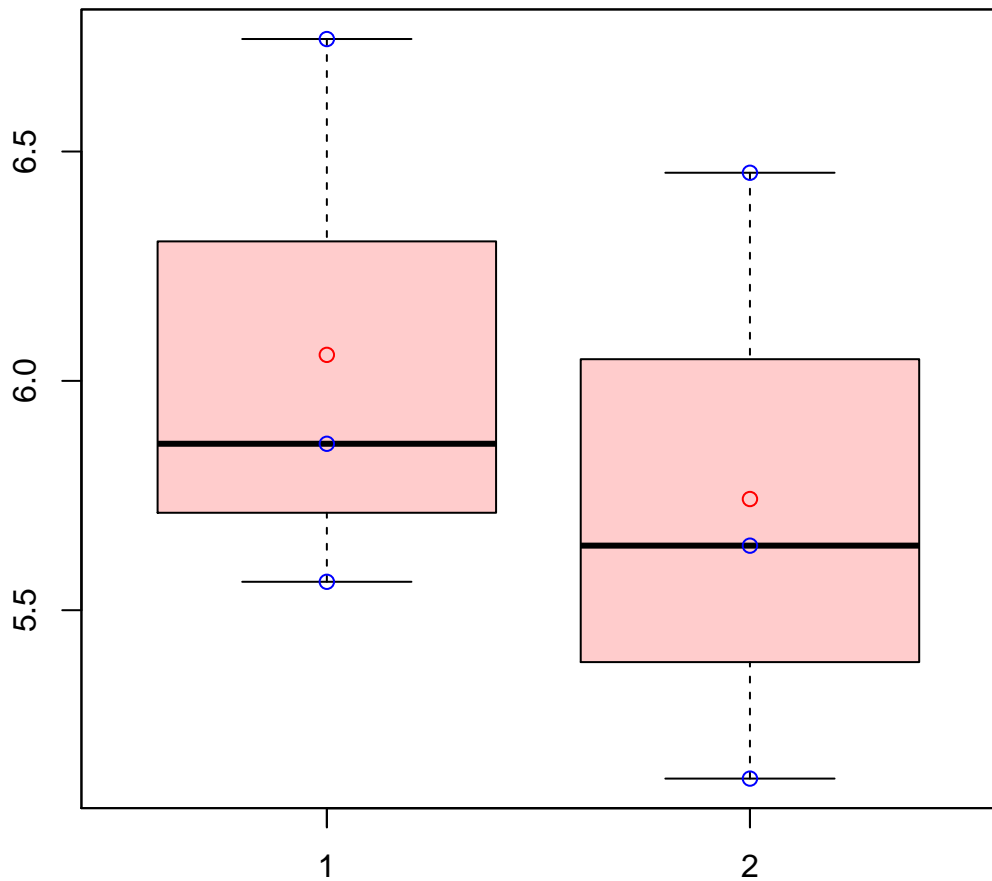

t-Test: p-value = 0.58

# B8B2M3|B8B2M3\_ORYSI

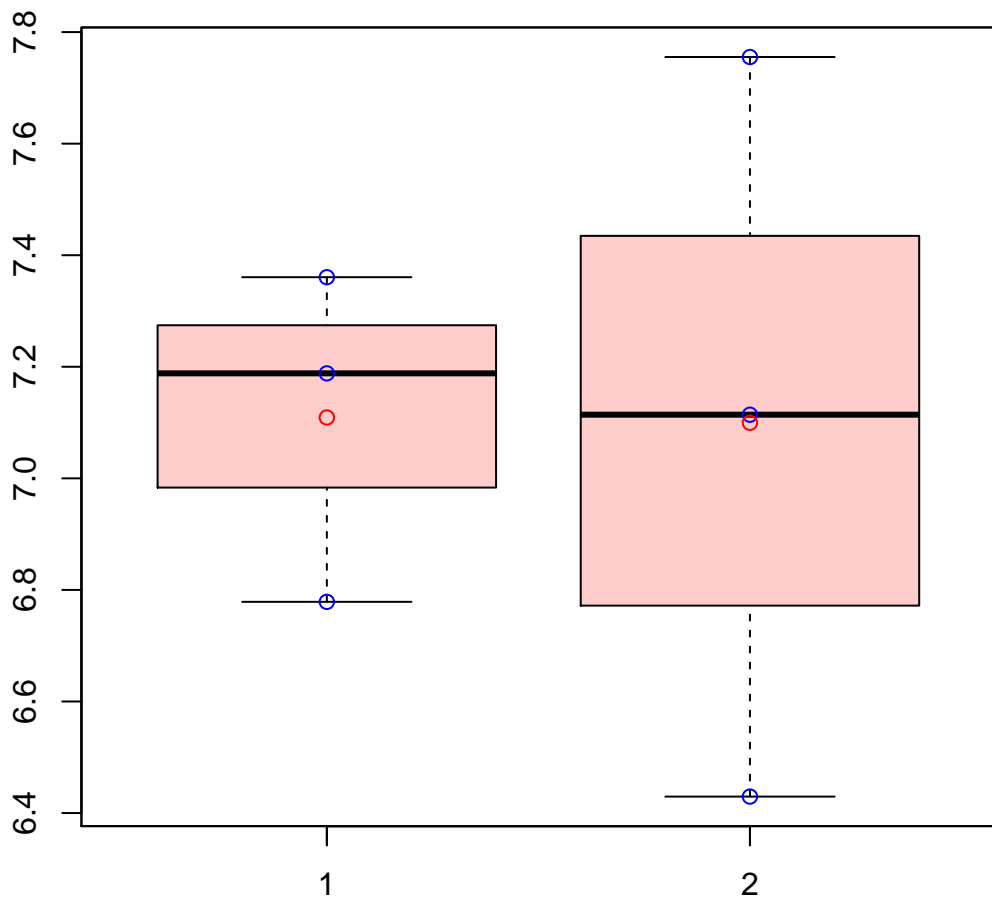

t-Test: p-value = 0.98

# B8B2Q1|B8B2Q1\_ORYSI

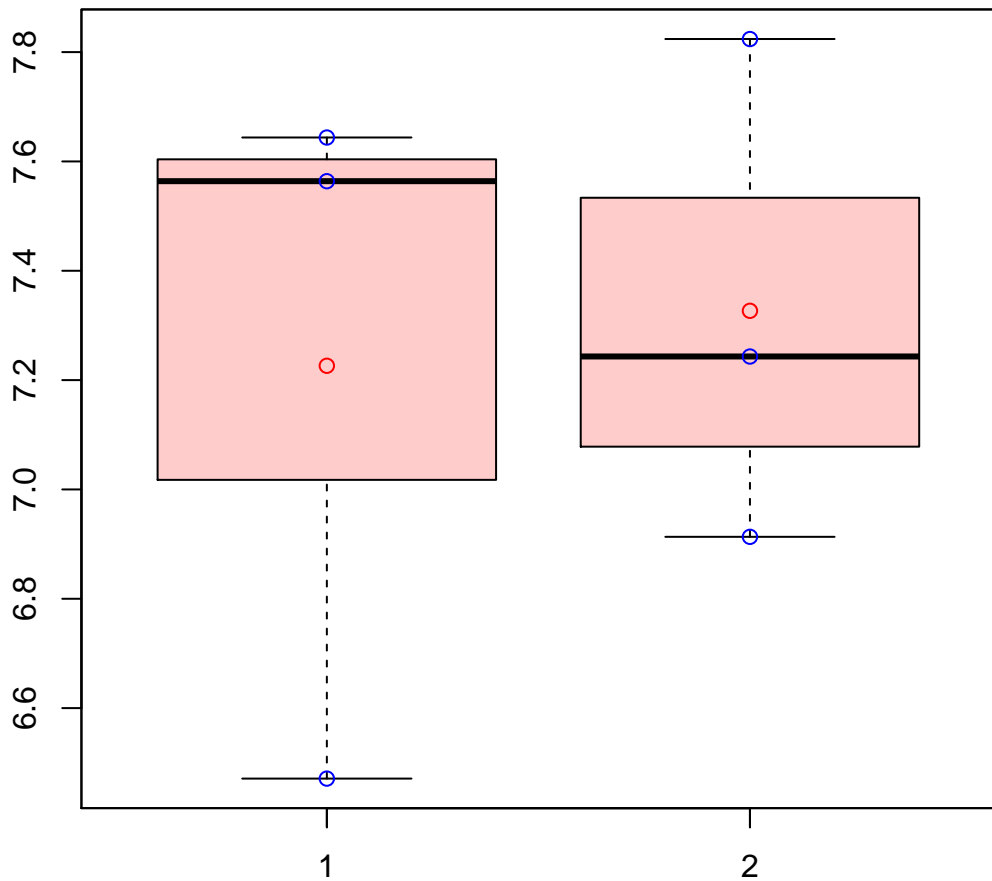

t-Test: p-value = 0.84

# B8B2X2|B8B2X2\_ORYSI

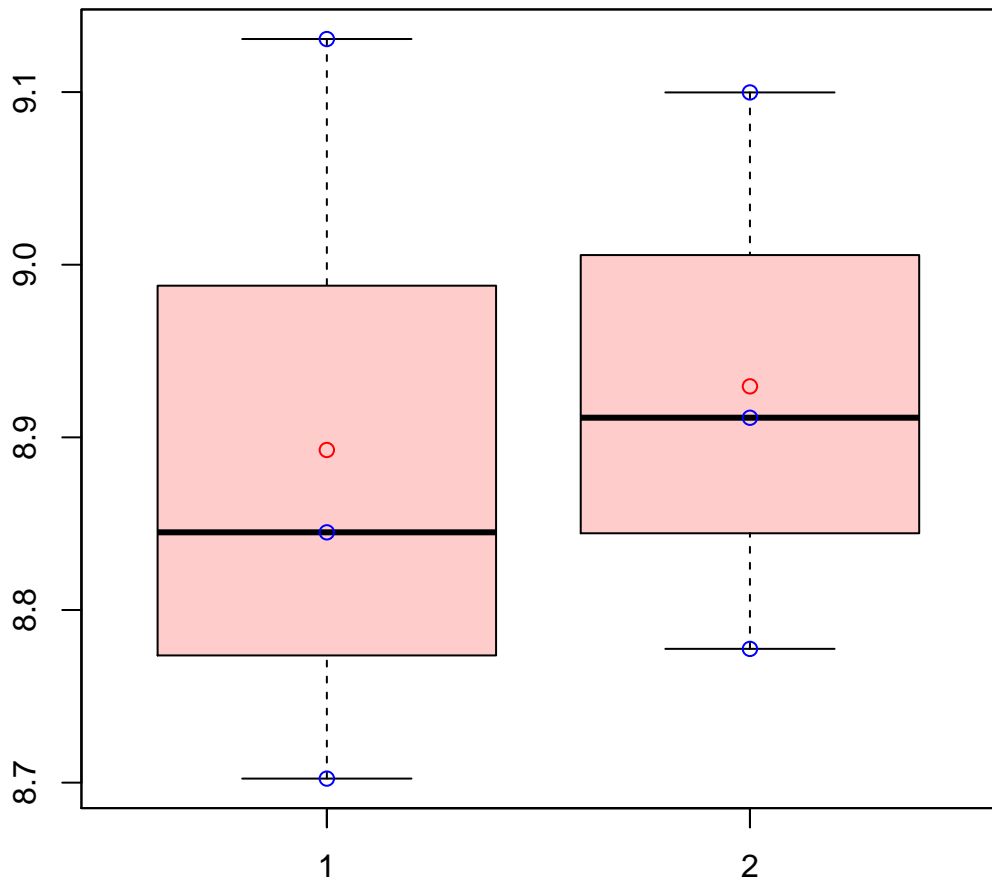

t-Test: p-value = 0.83



# B8B402|B8B402\_ORYSI

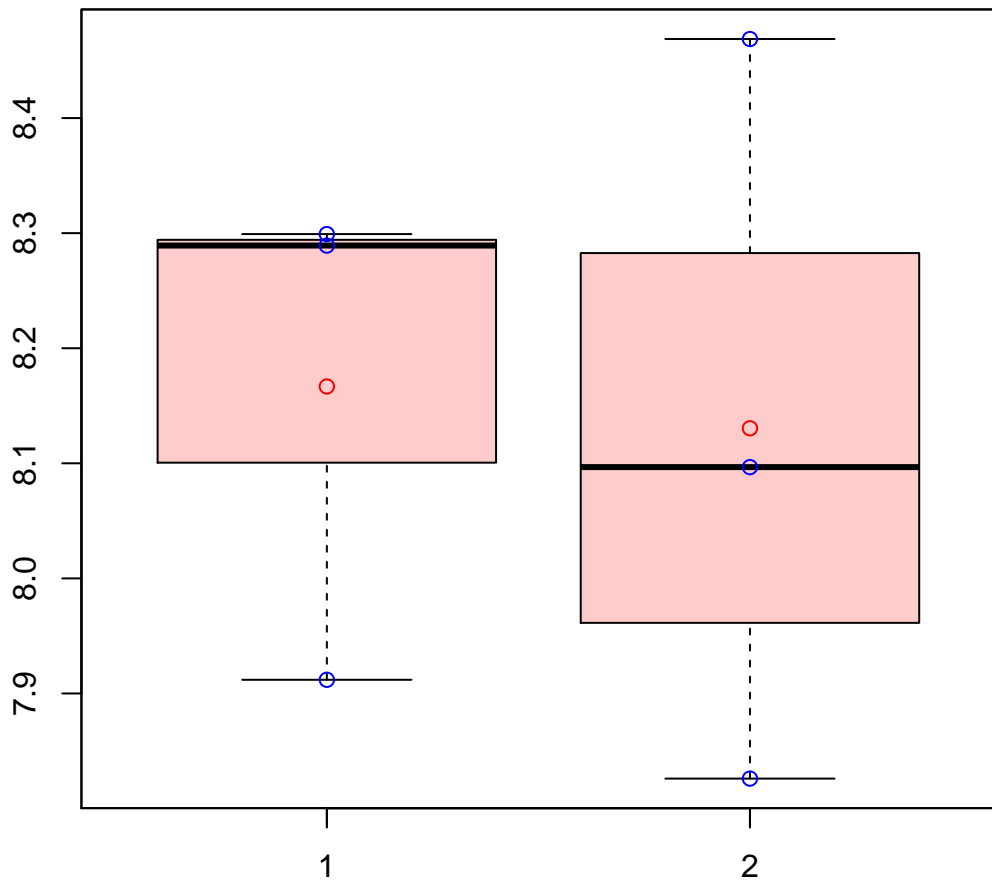

t-Test: p-value = 0.88

# B8B5W8|B8B5W8\_ORYSI

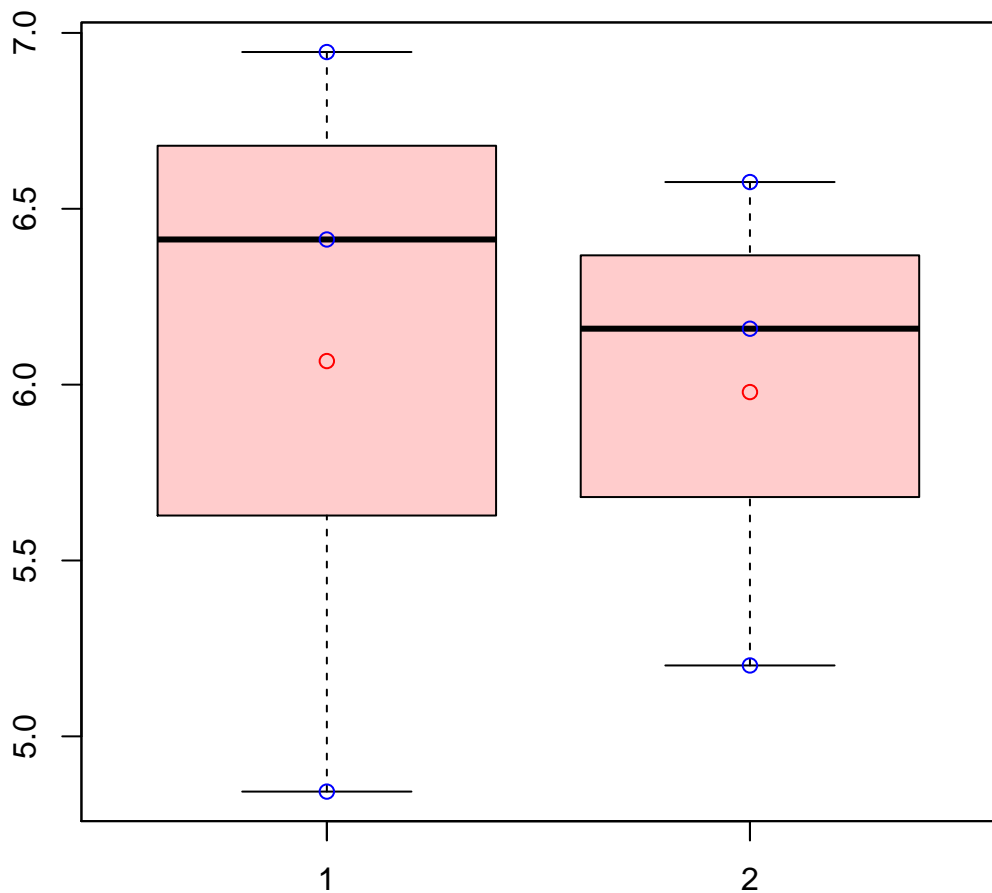

t-Test: p-value = 0.91

# B8B5X4|B8B5X4\_ORYSI

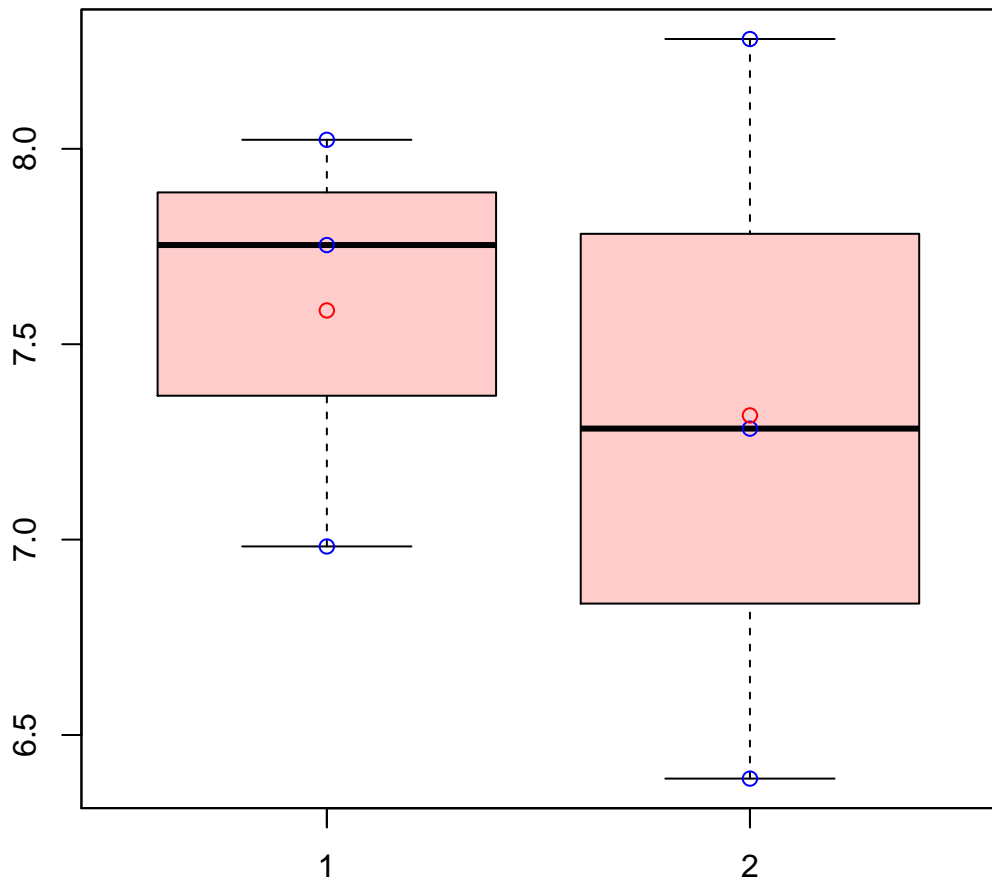

t-Test: p-value = 0.7

# B8B604|B8B604\_ORYSI

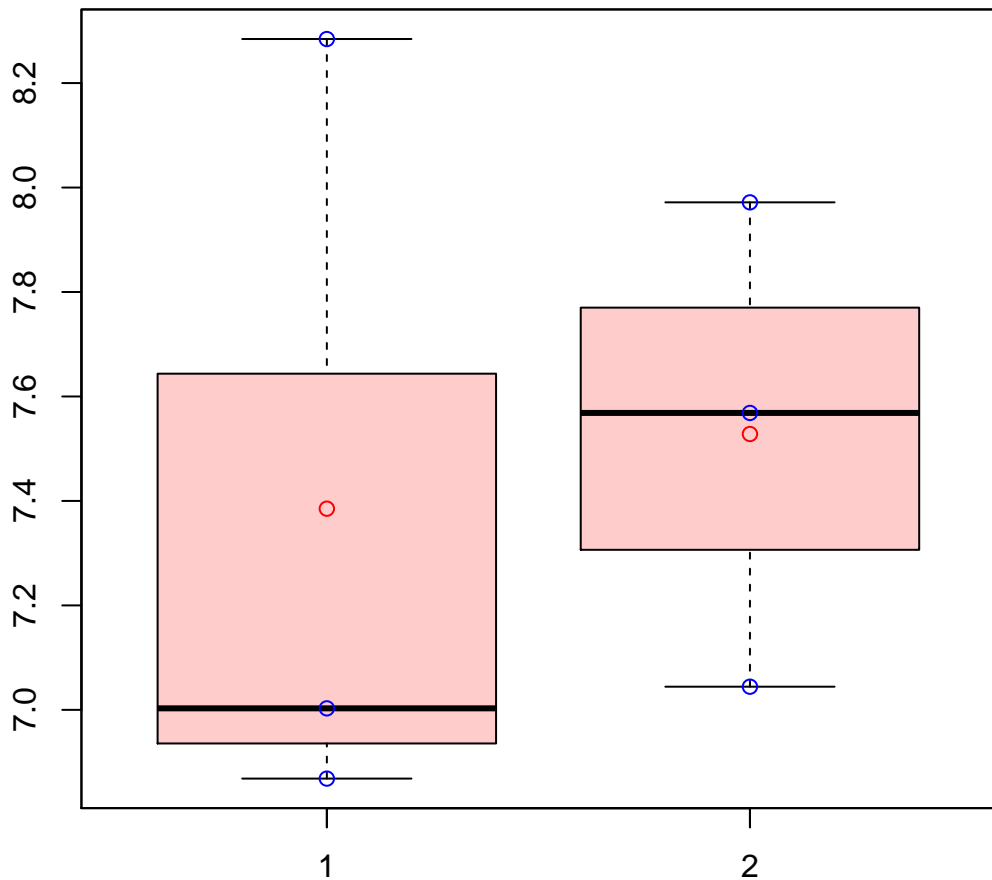

t-Test: p-value = 0.8

# B8B626|B8B626\_ORYSI

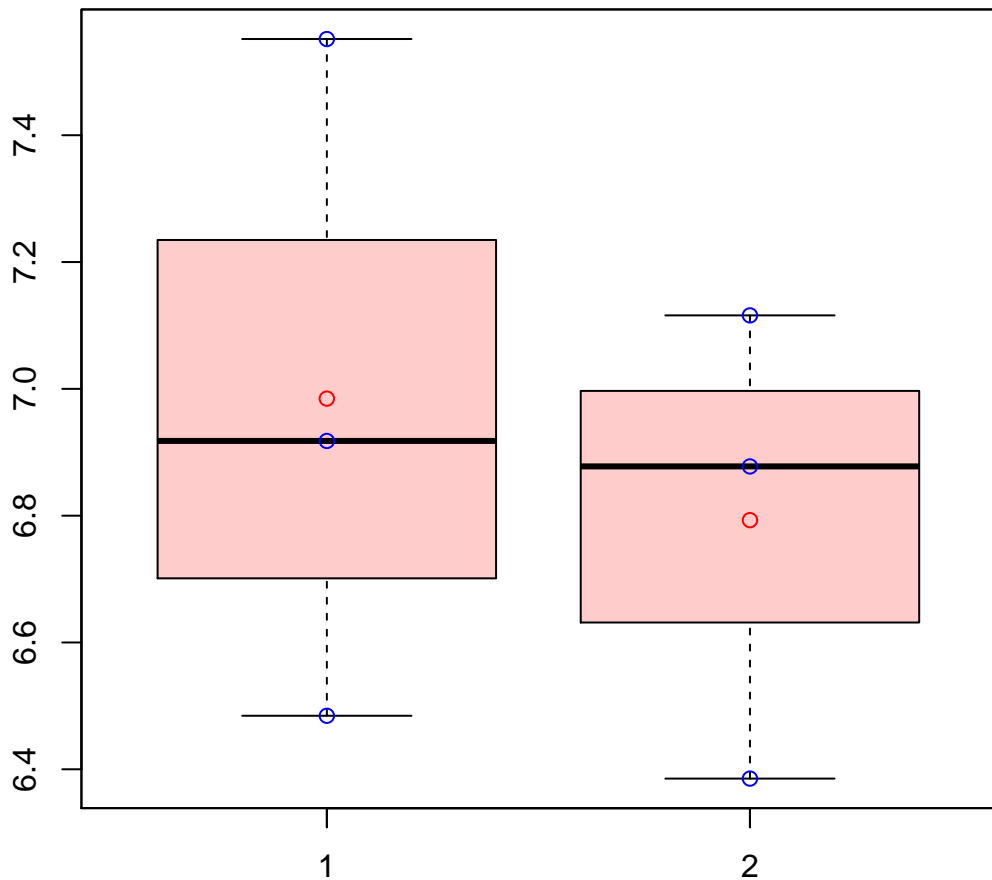

t-Test: p-value = 0.64

# B8B6B4|B8B6B4\_ORYSI

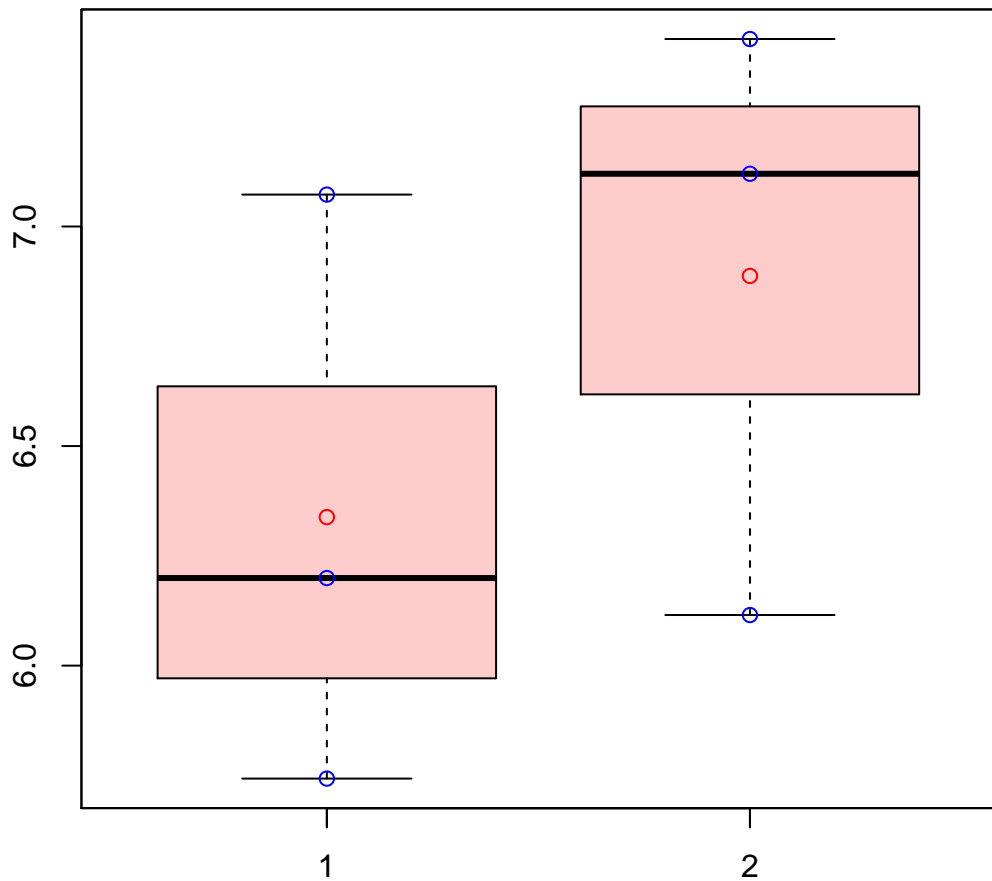

t-Test: p-value = 0.38

# B8B6D2|B8B6D2\_ORYSI

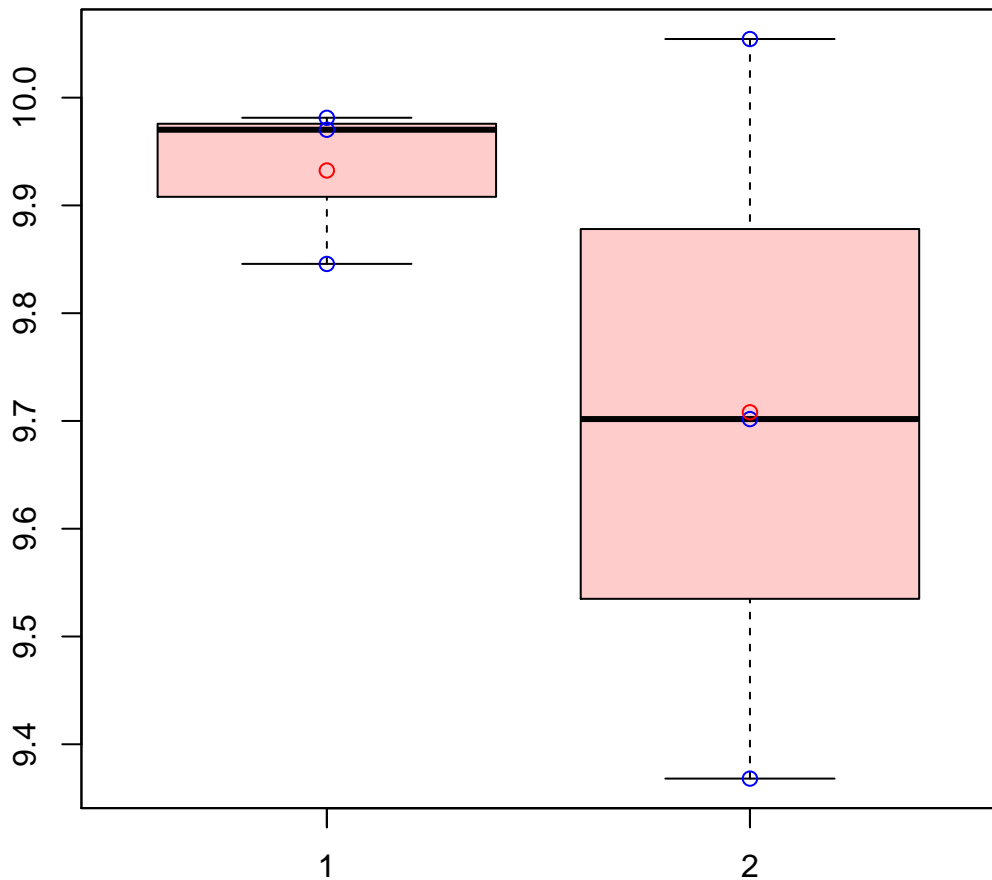

t-Test: p-value = 0.38

# B8B708|B8B708\_ORYSI

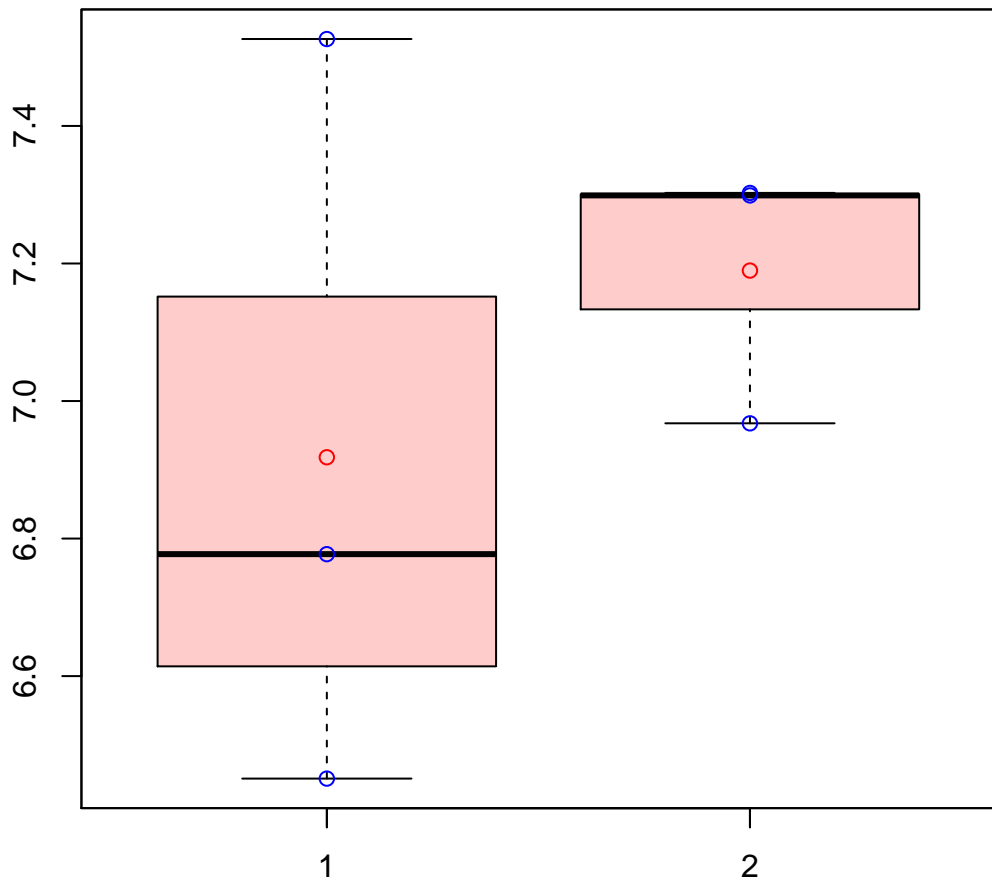

t-Test: p-value = 0.49



# B8B7R8|B8B7R8\_ORYSI

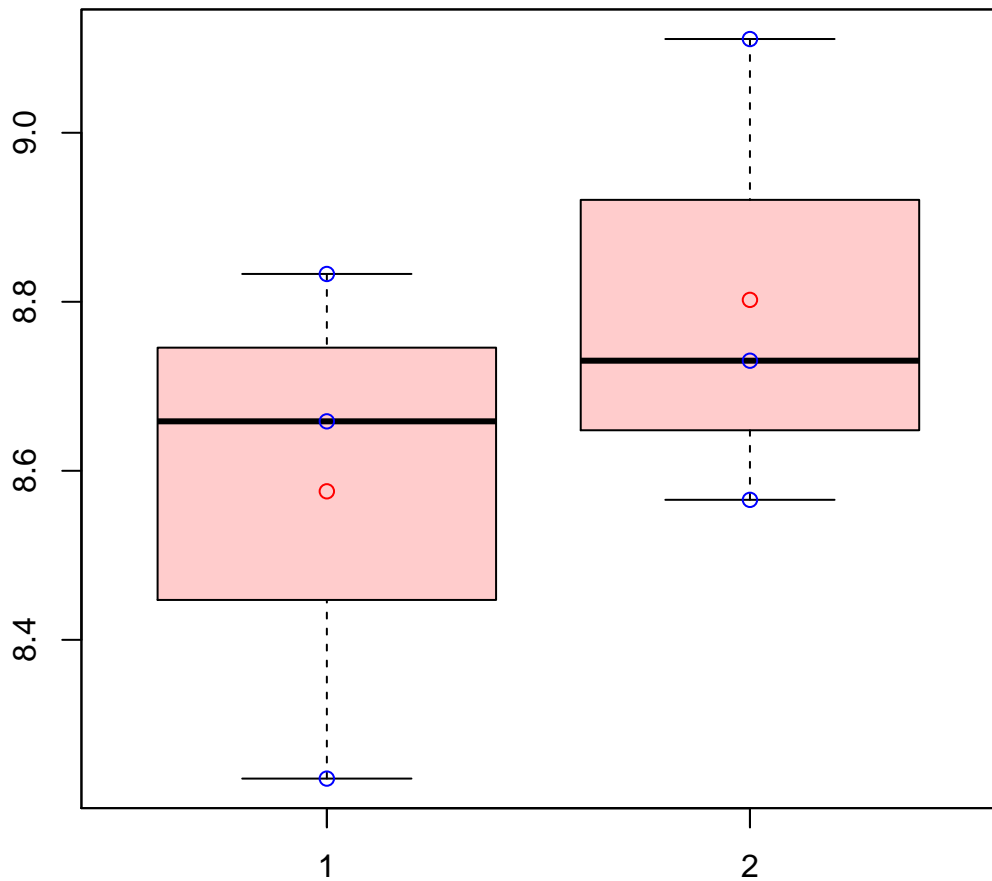

t-Test: p-value = 0.4

# B8B7Y9|B8B7Y9\_ORYSI

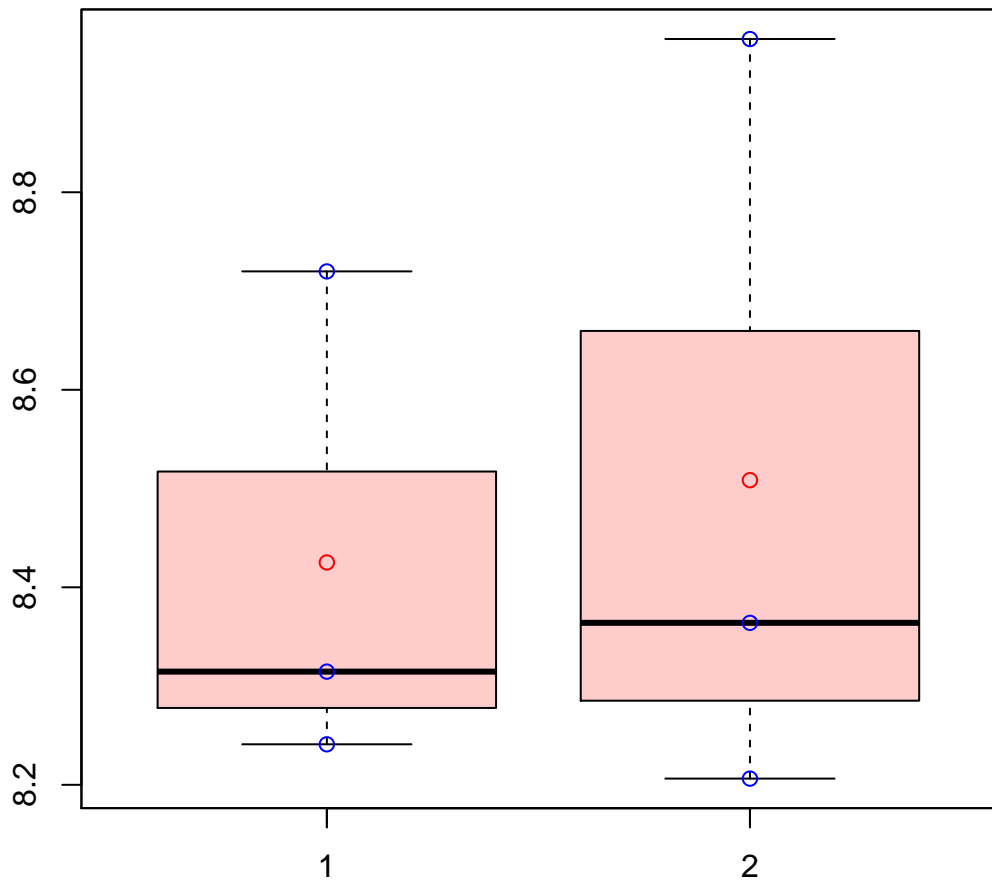

t-Test: p-value = 0.78

# B8B841|B8B841\_ORYSI

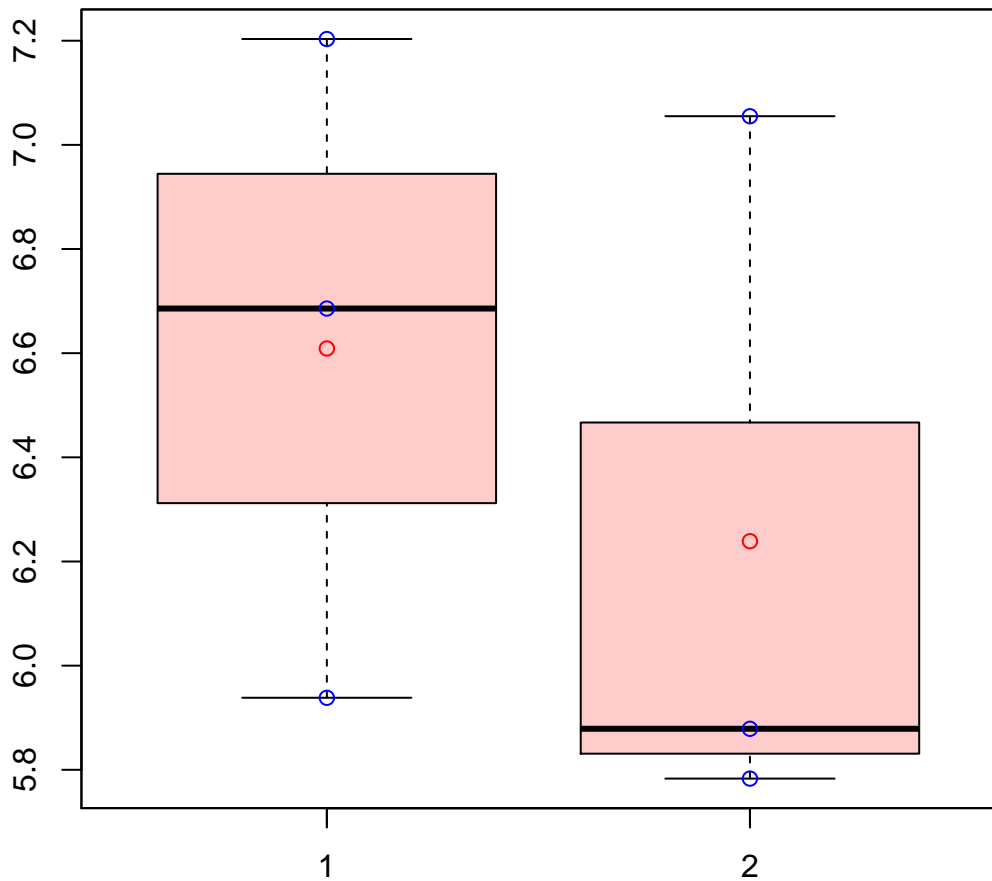

t-Test: p-value = 0.54

# B8B877|B8B877\_ORYSI

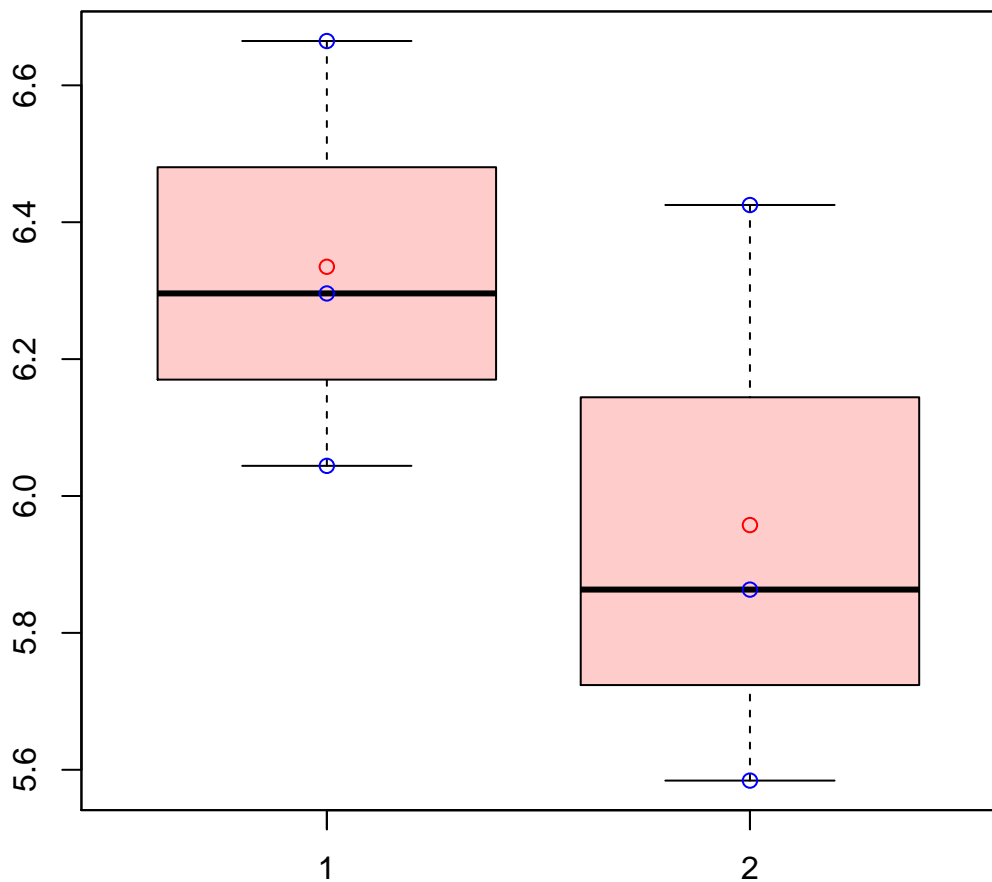

t-Test: p-value = 0.29

# B8B893|B8B893\_ORYSI

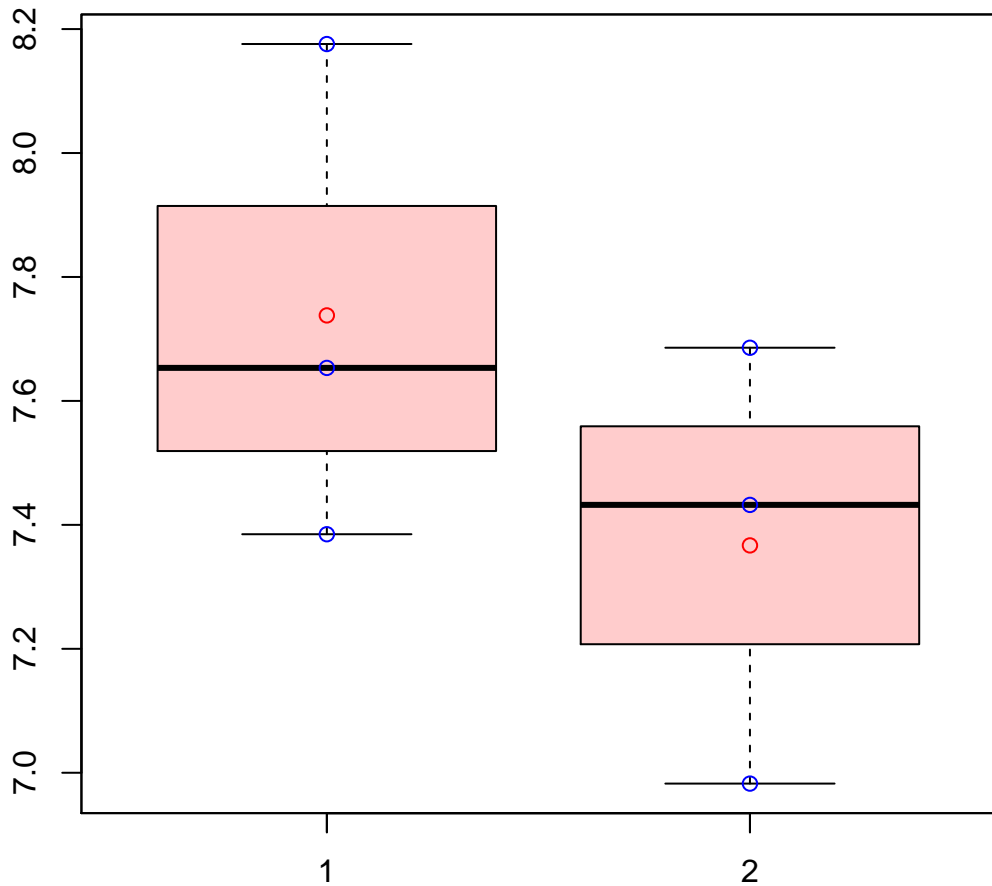

t-Test: p-value = 0.3

# B8B8A3|B8B8A3\_ORYSI

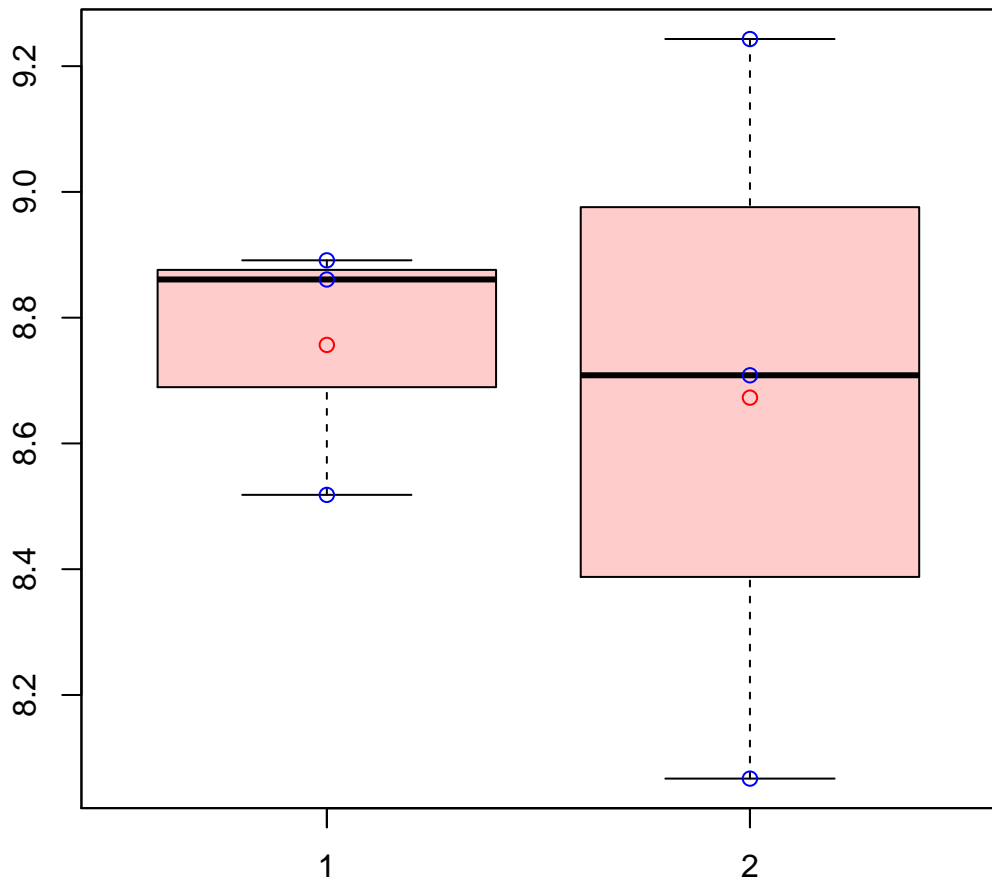

t-Test: p-value = 0.83

# B8B8G2|B8B8G2\_ORYSI

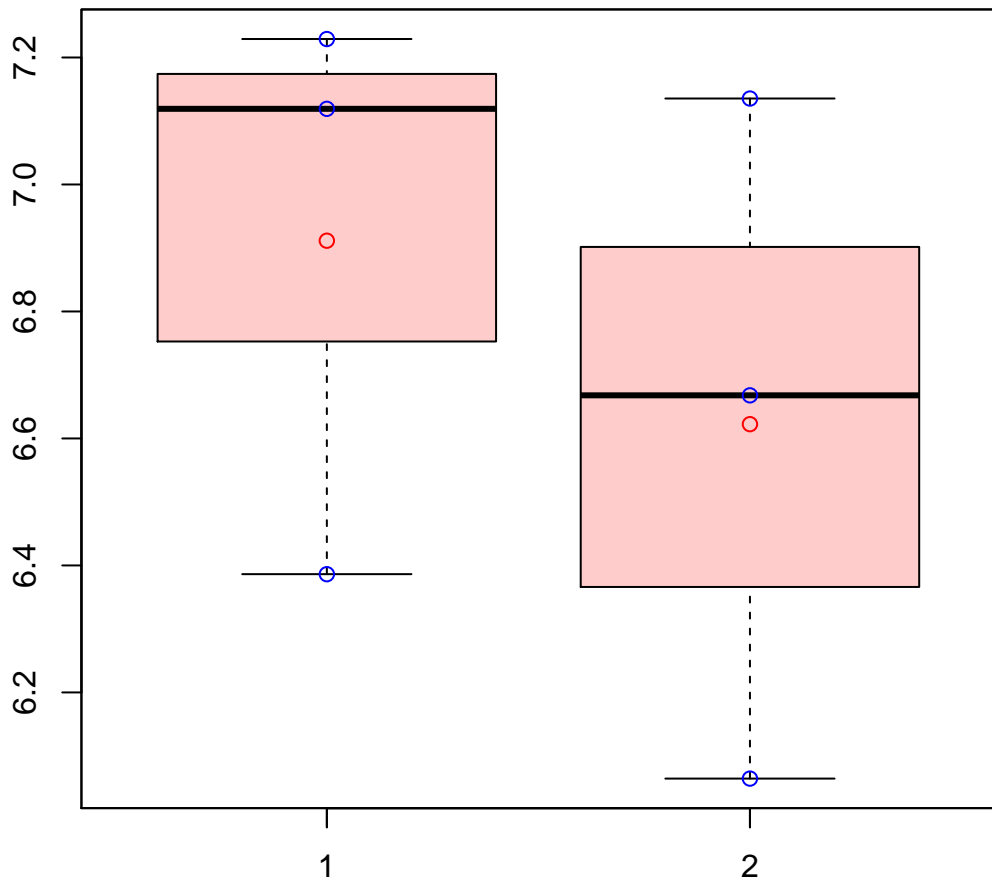

t-Test: p-value = 0.52

# B8B8V3|B8B8V3\_ORYSI

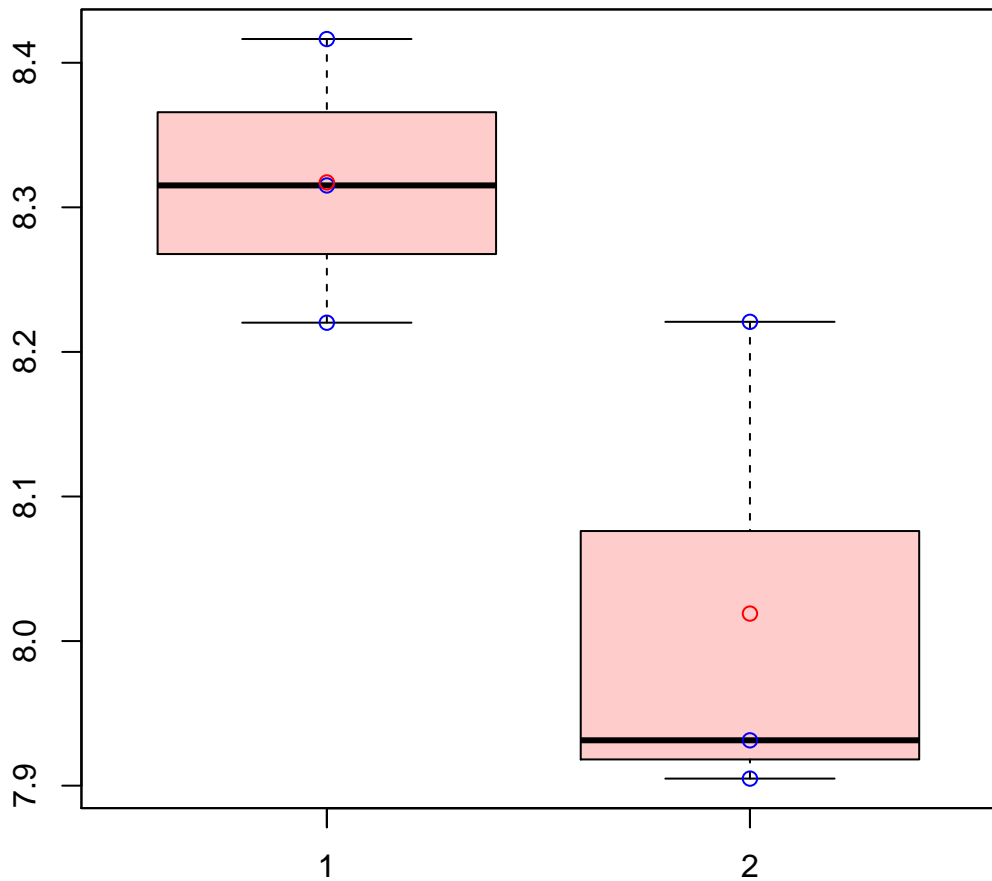

t-Test: p-value = 0.08



# B8B9L3|B8B9L3\_ORYSI

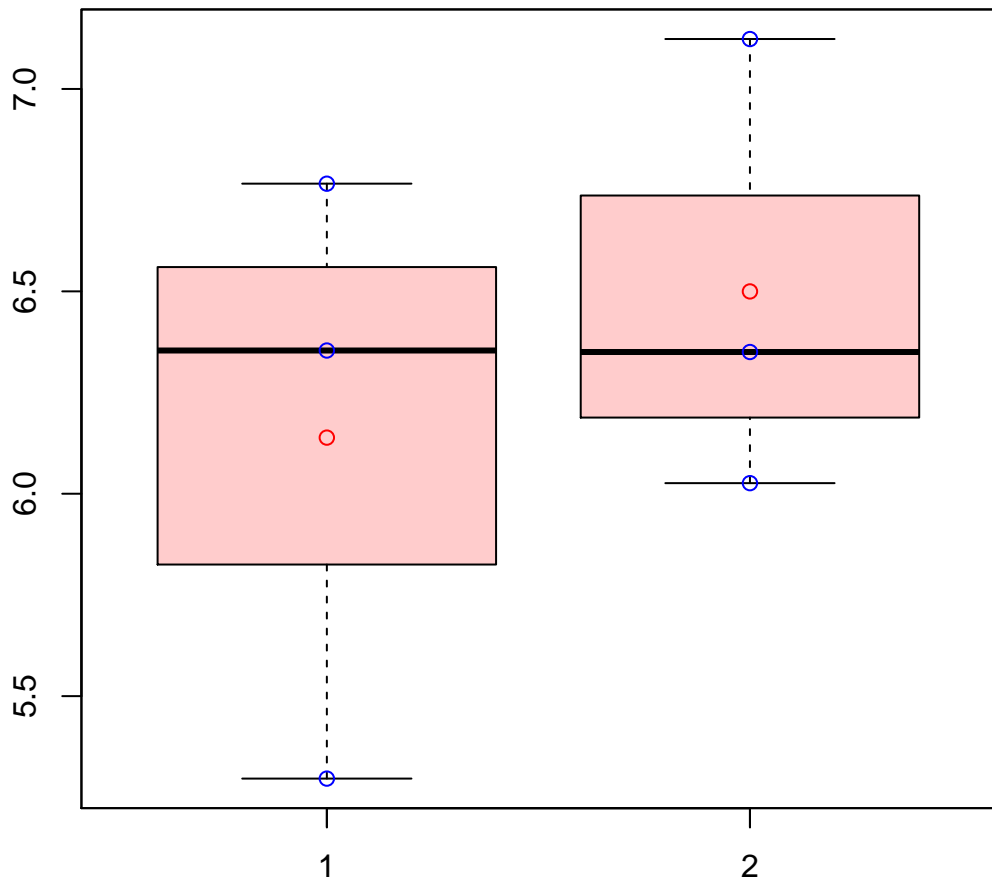

t-Test: p-value = 0.55

# B8B9N6|B8B9N6\_ORYSI

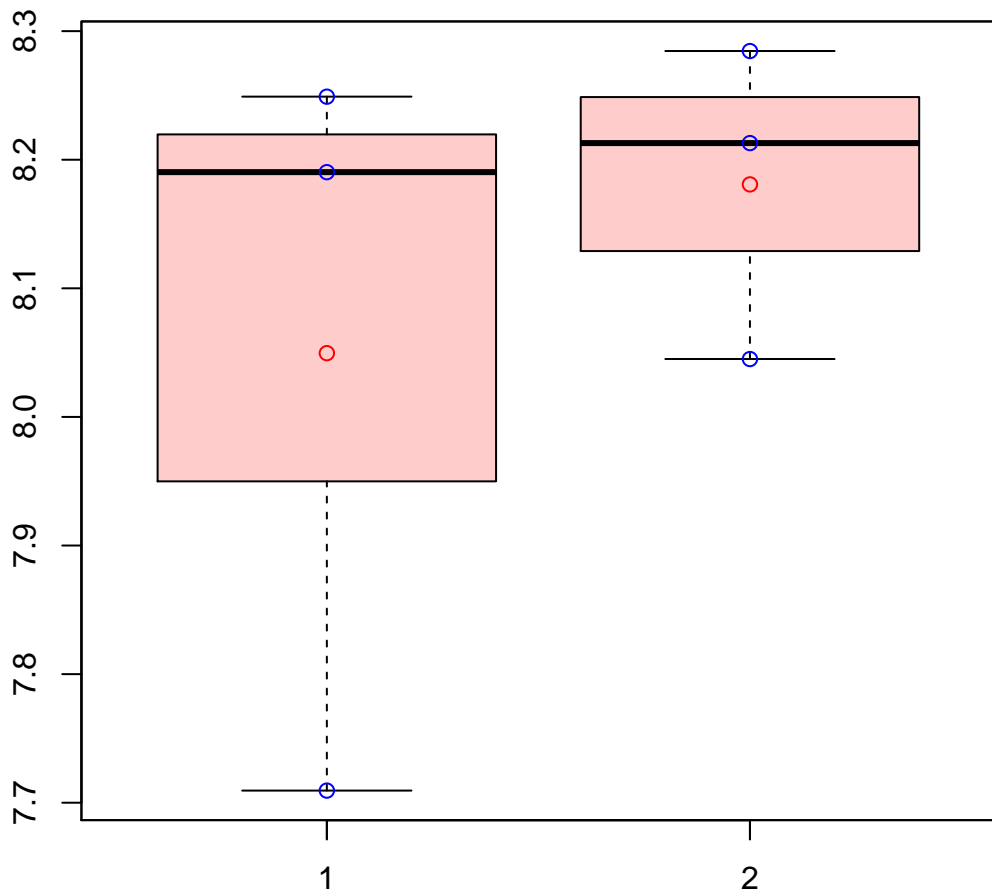

t-Test: p-value = 0.54

# B8BB35|B8BB35\_ORYSI

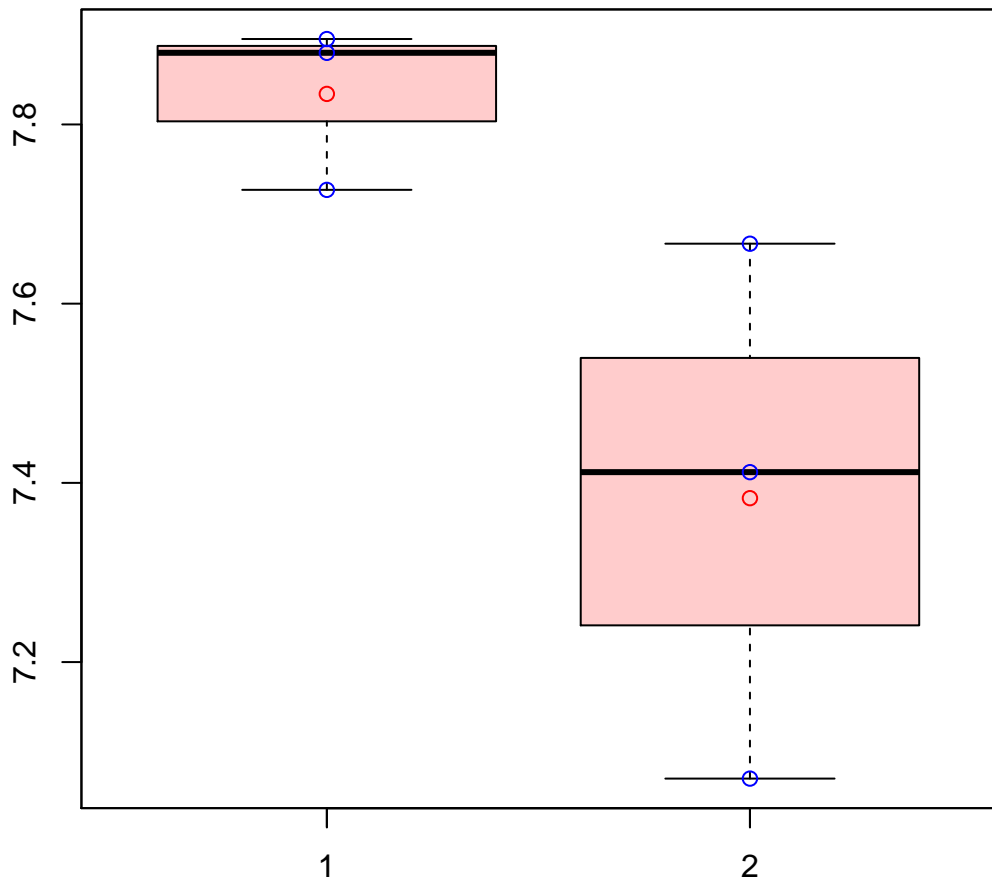

t-Test: p-value = 0.11

# B8BCZ9|B8BCZ9\_ORYSI

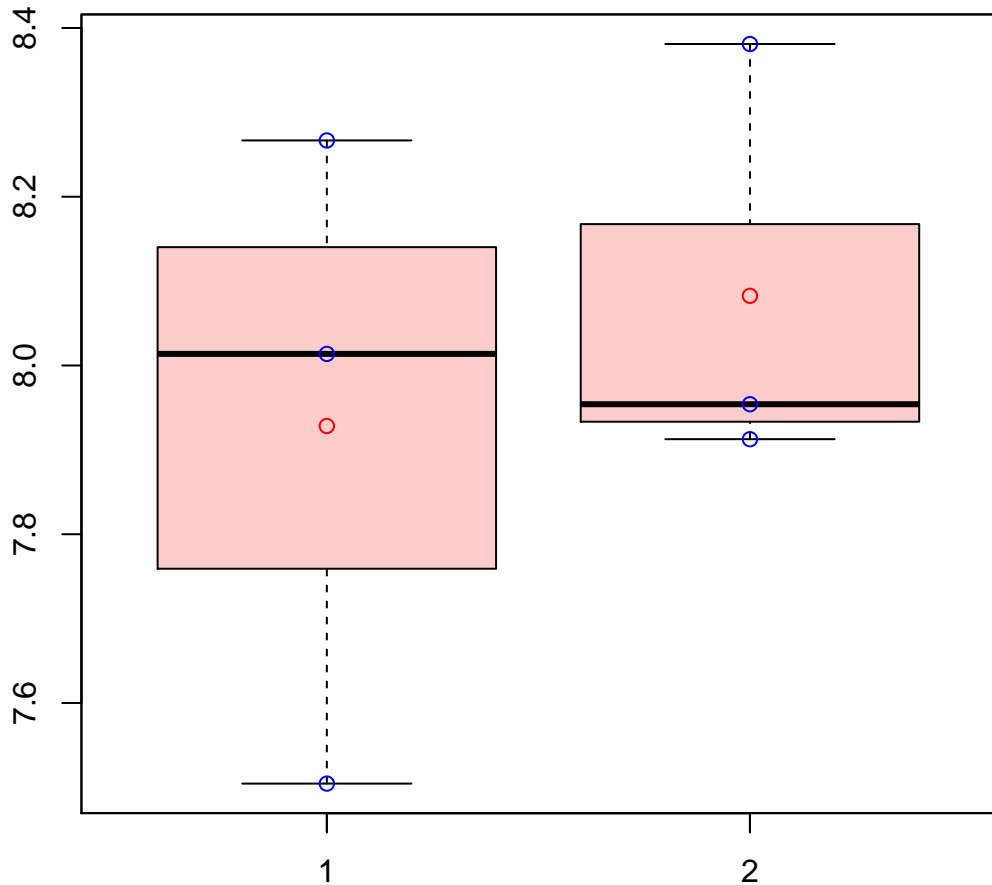

t-Test: p-value = 0.6

# B8BD60|B8BD60\_ORYSI

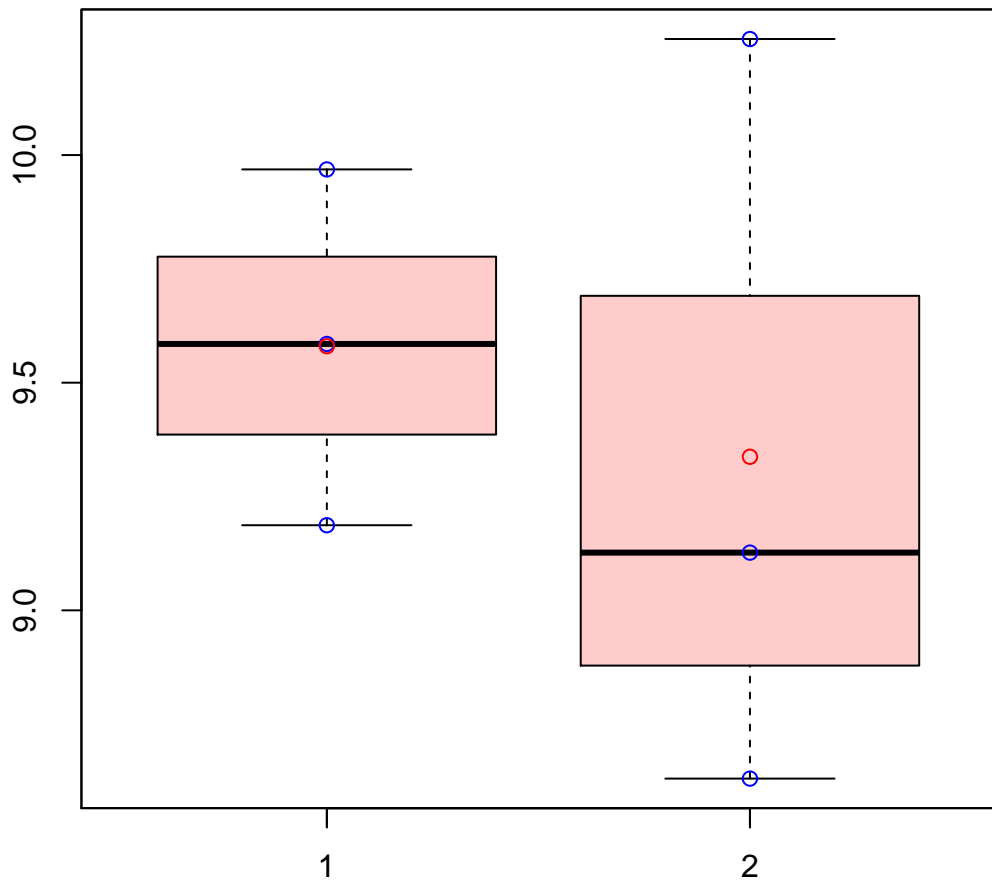

t-Test: p-value = 0.68

# B8BD97|B8BD97\_ORYSI

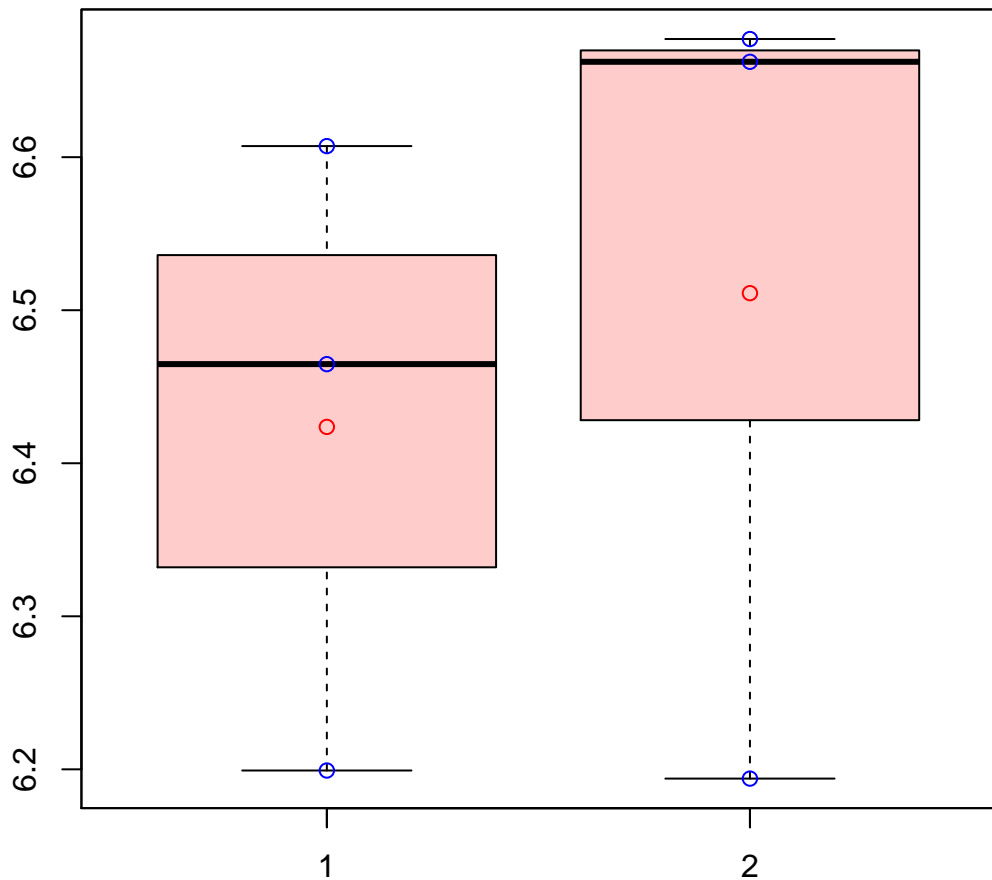

t-Test: p-value = 0.68

# B8BDB0|B8BDB0\_ORYSI

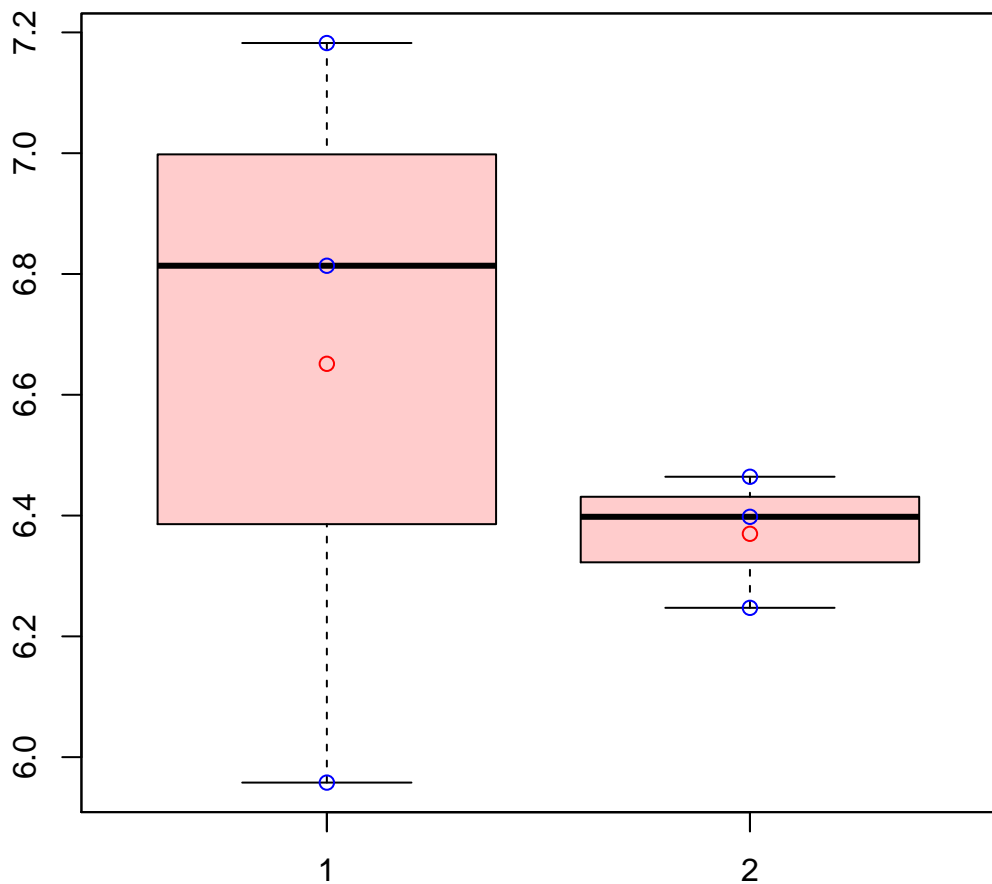

t-Test: p-value = 0.52

# B8BDV7|B8BDV7\_ORYSI

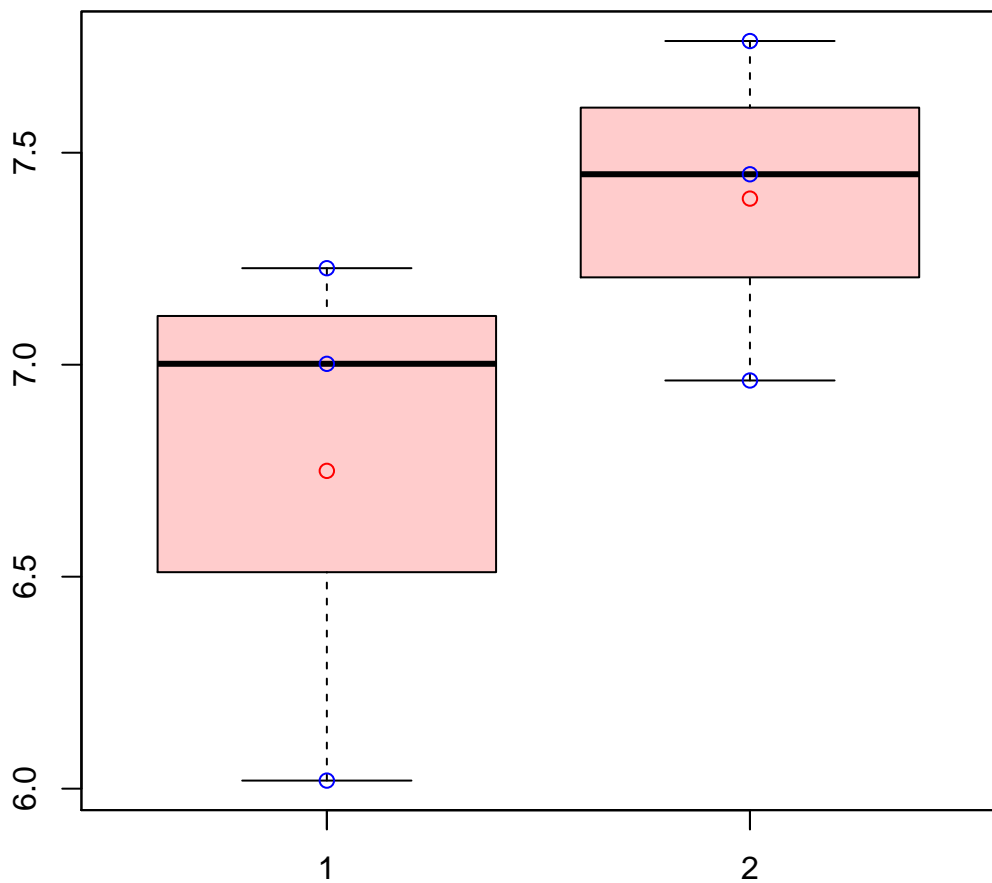

t-Test: p-value = 0.23



# B8BE03|B8BE03\_ORYSI

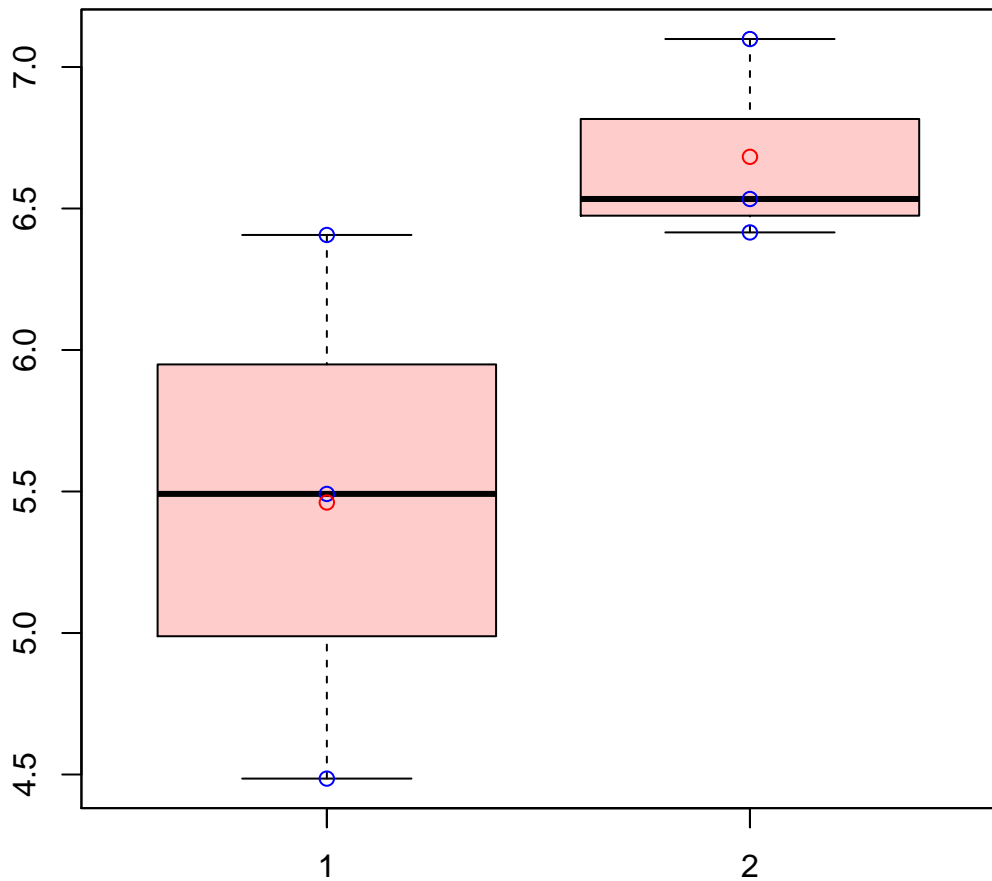

t-Test: p-value = 0.15

# B8BFE8|B8BFE8\_ORYSI

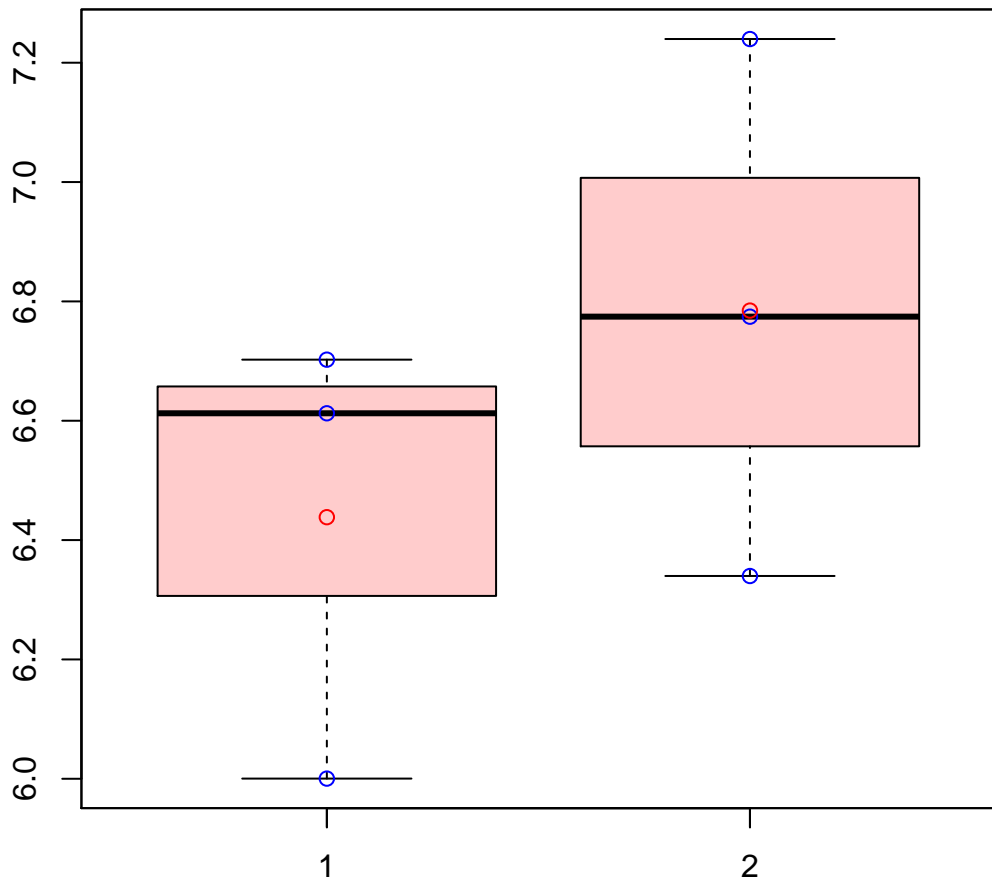

t-Test: p-value = 0.37

# B8BF18|B8BF18\_ORYSI

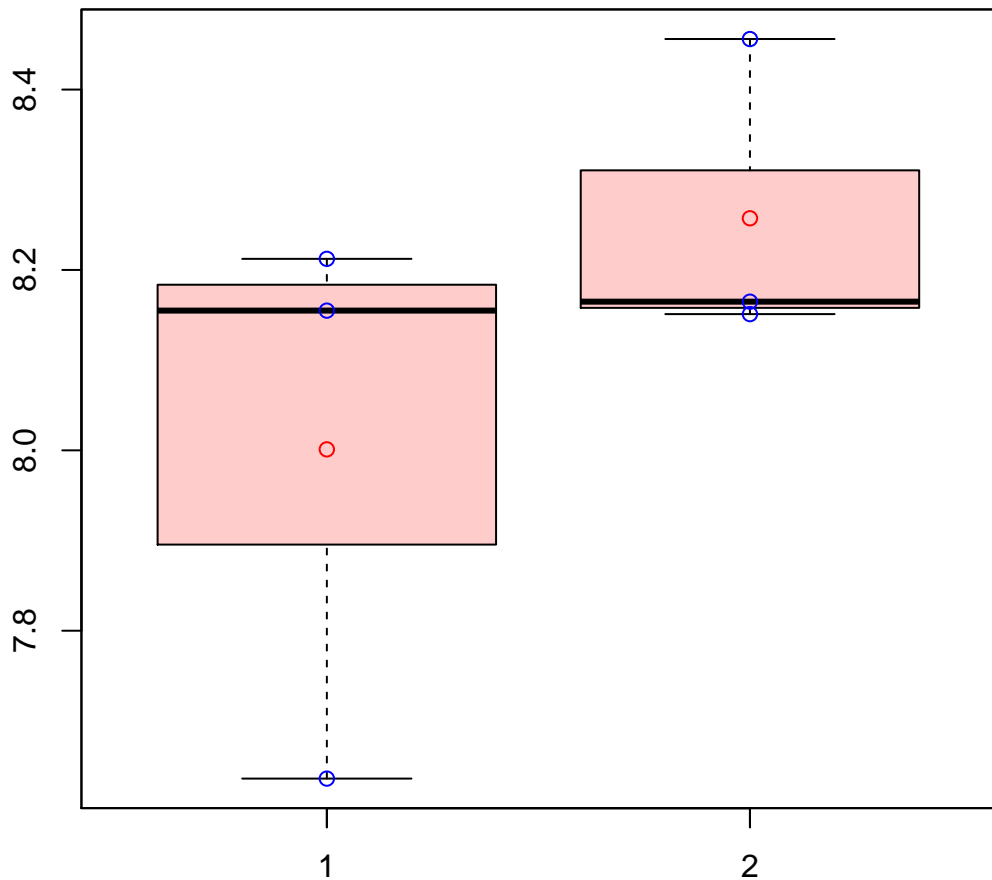

t-Test: p-value = 0.3

# B8BG59|B8BG59\_ORYSI

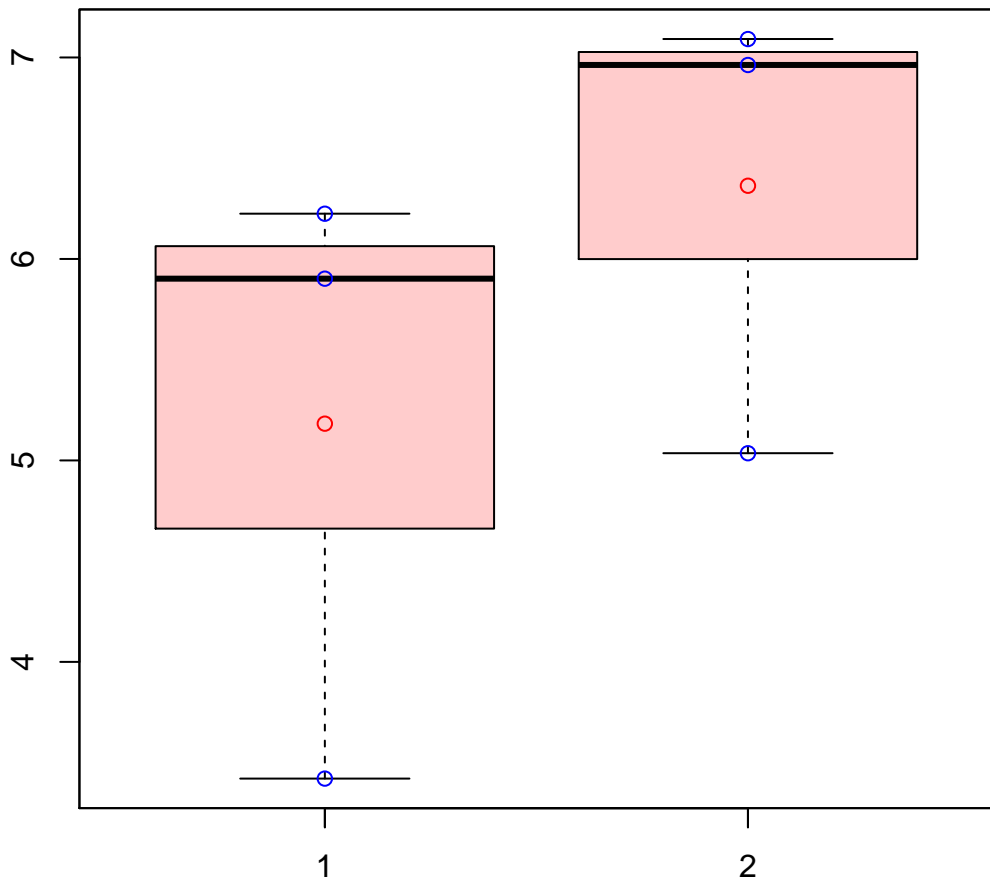

t-Test: p-value = 0.35

# B8BG81|B8BG81\_ORYSI

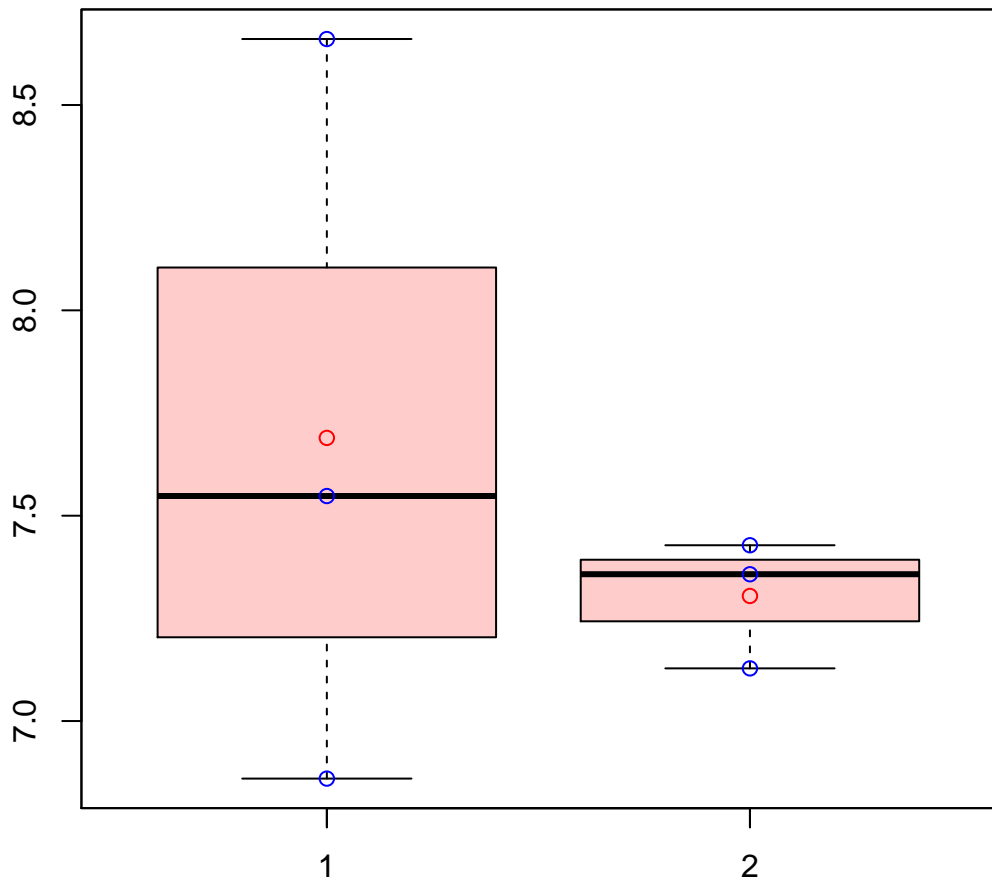

t-Test: p-value = 0.54

# B8BGX5|B8BGX5\_ORYSI

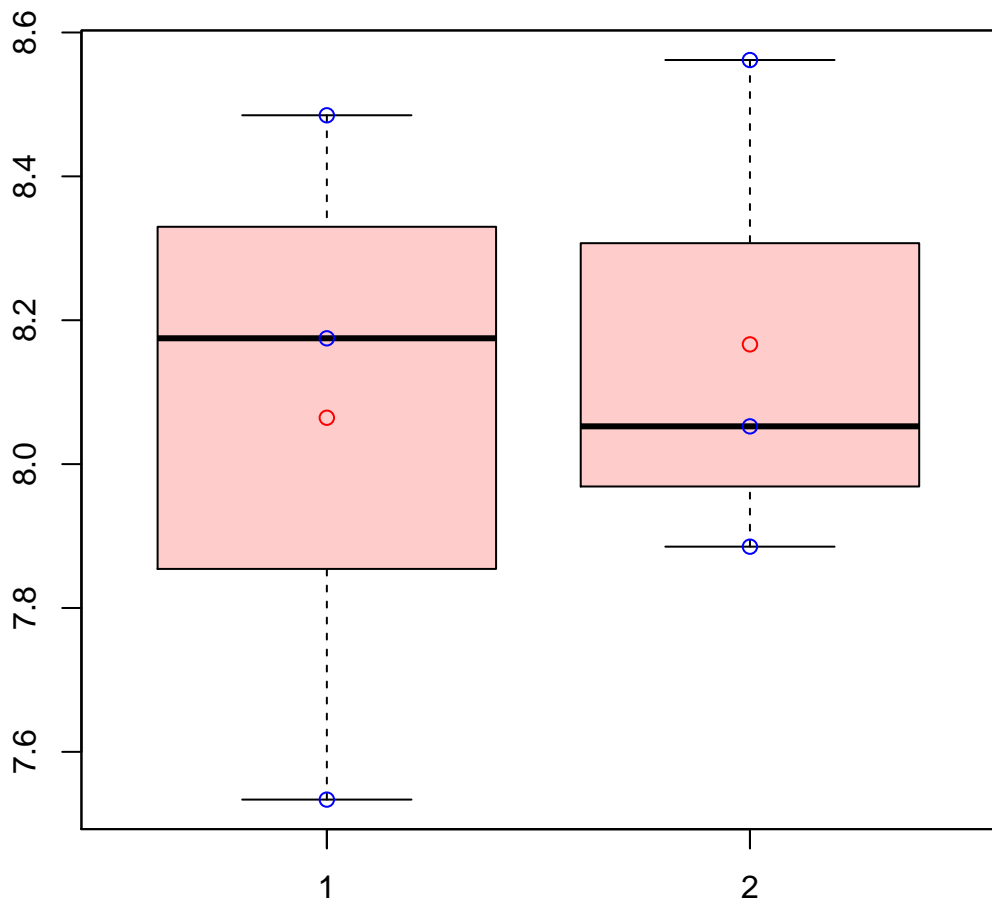

t-Test: p-value = 0.78

# B8BH08|B8BH08\_ORYSI

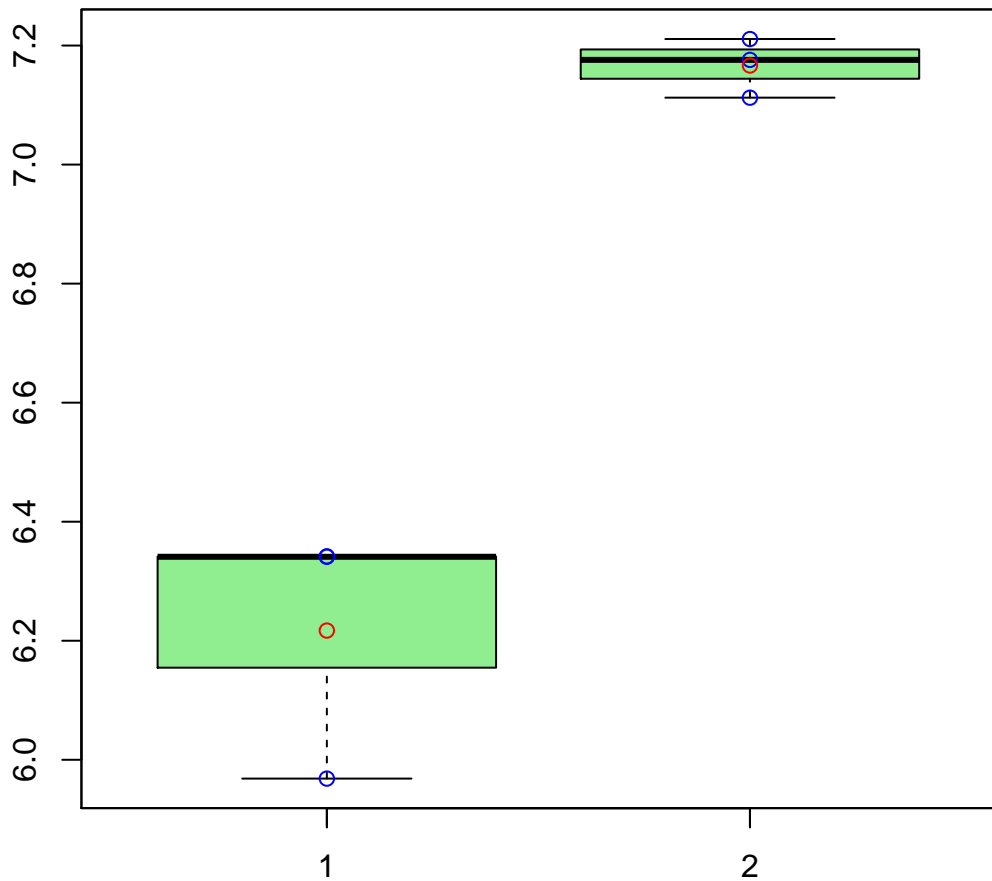

t-Test: p-value = 0.01

# B8BH45|B8BH45\_ORYSI

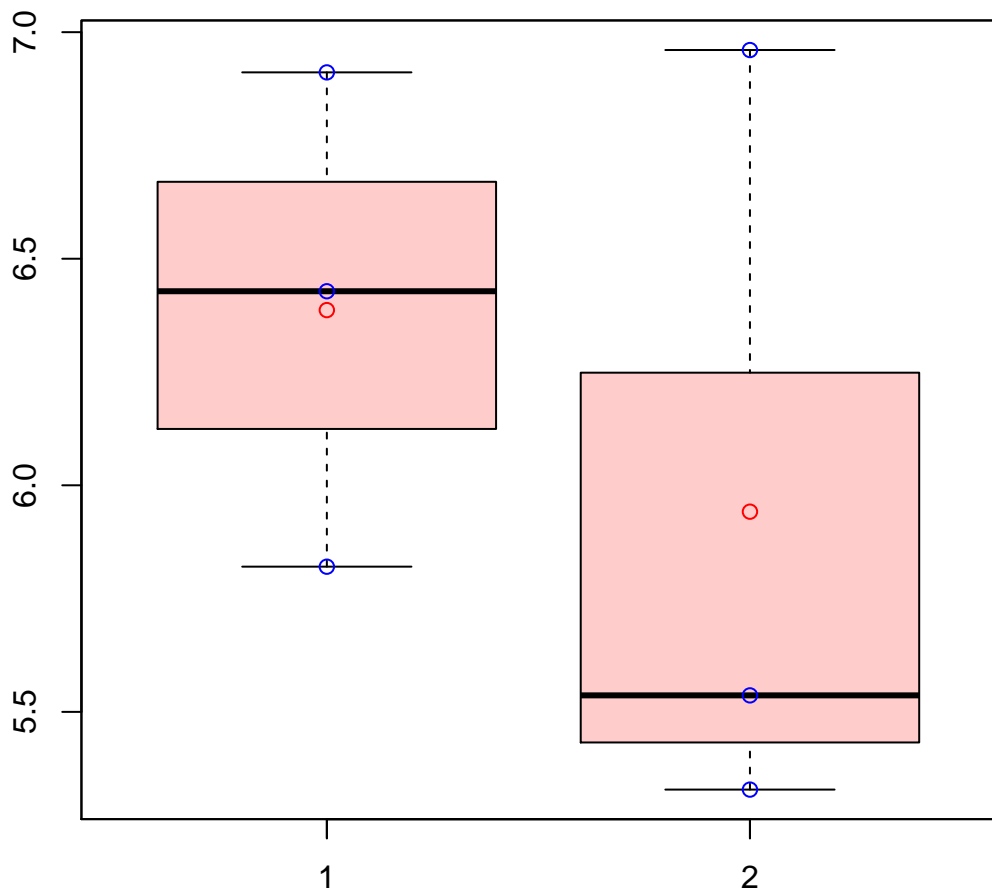

t-Test: p-value = 0.51



# B8BH86|B8BH86\_ORYSI

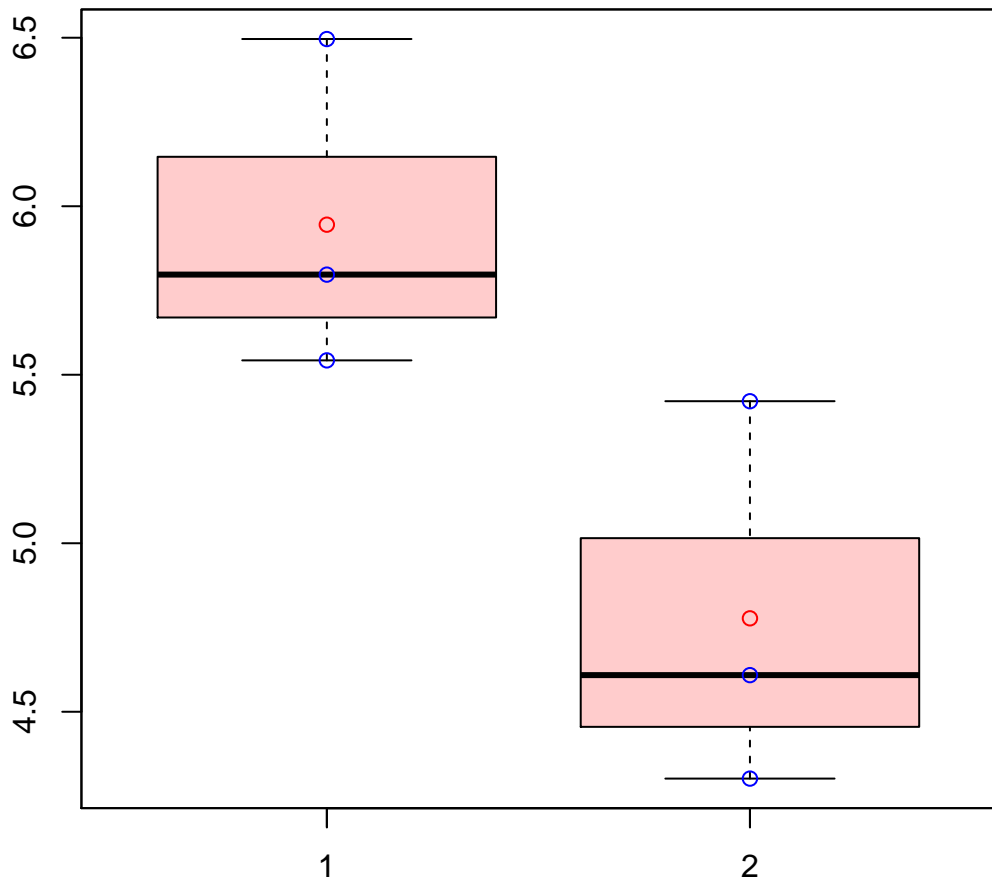

t-Test: p-value = 0.06

# B8BIA0|B8BIA0\_ORYSI

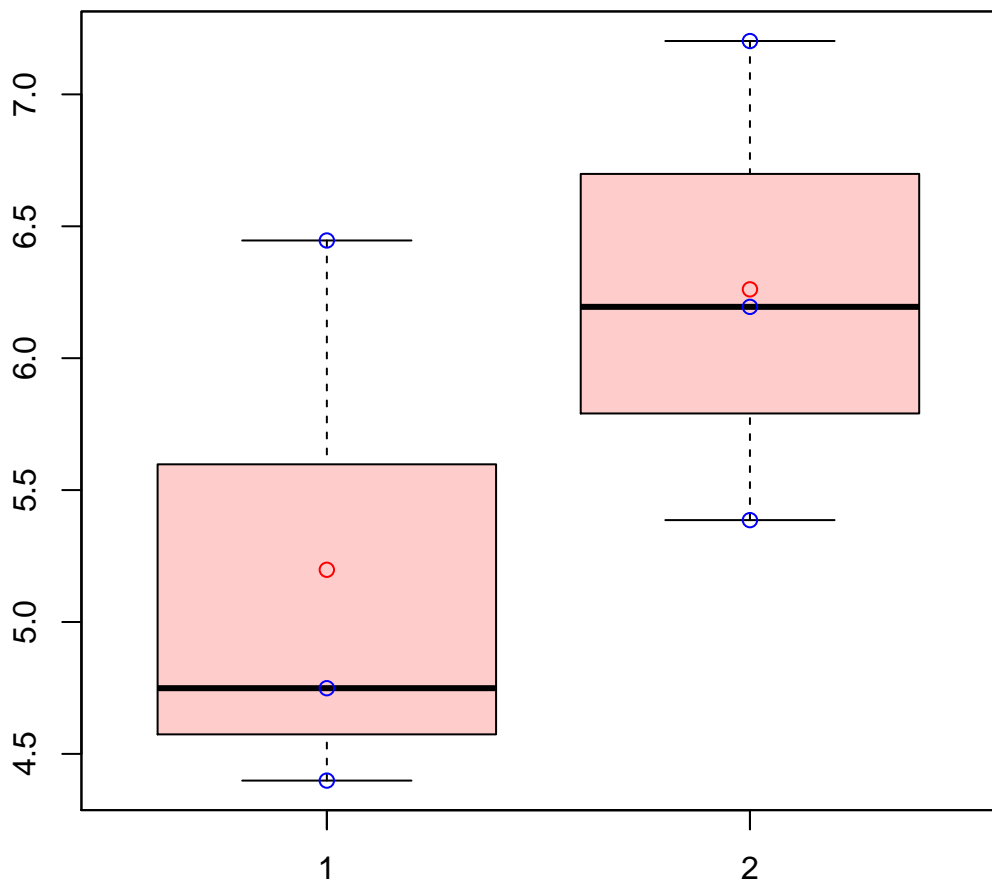

t-Test: p-value = 0.27

# B8BK04|B8BK04\_ORYSI

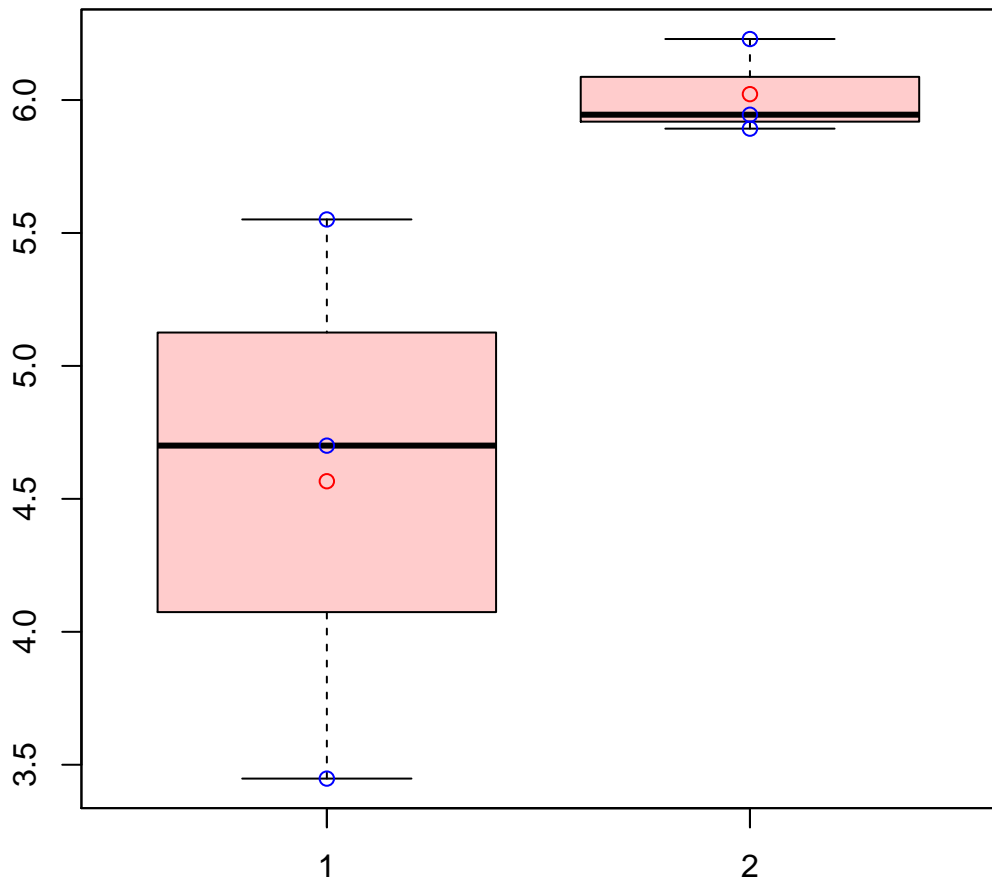

t-Test: p-value = 0.14

# B8BL47|B8BL47\_ORYSI

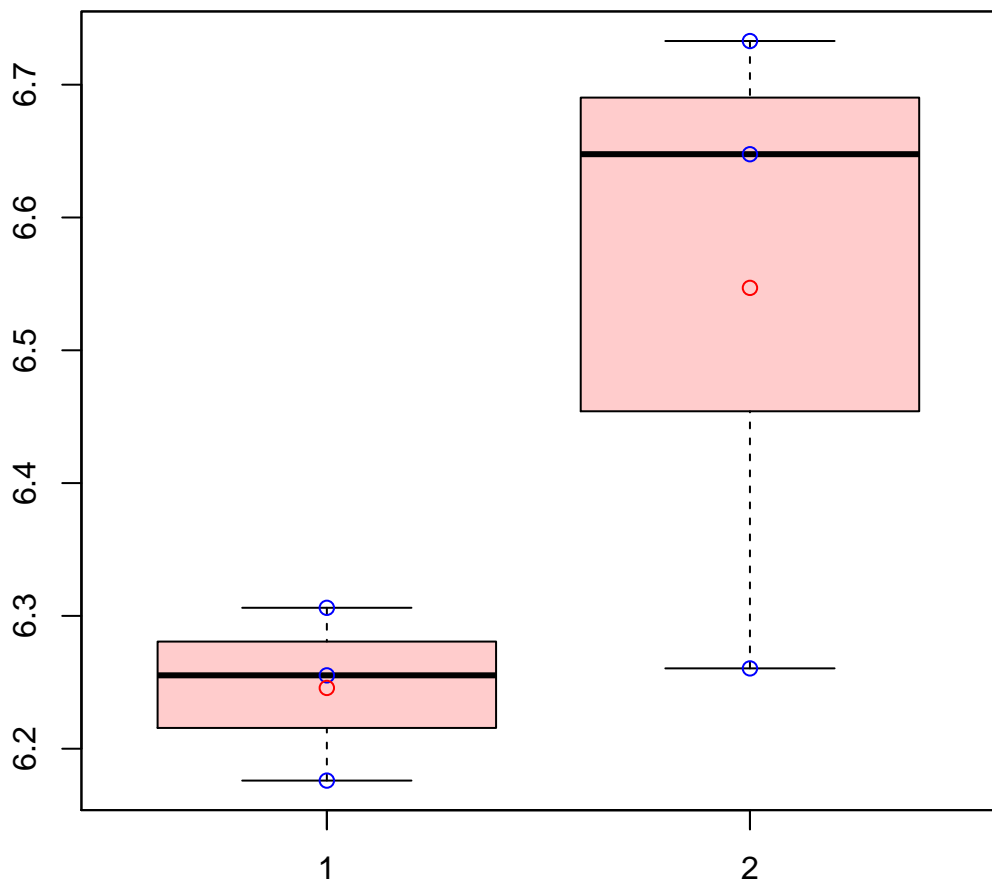

t-Test: p-value = 0.17

# B8BL48|B8BL48\_ORYSI

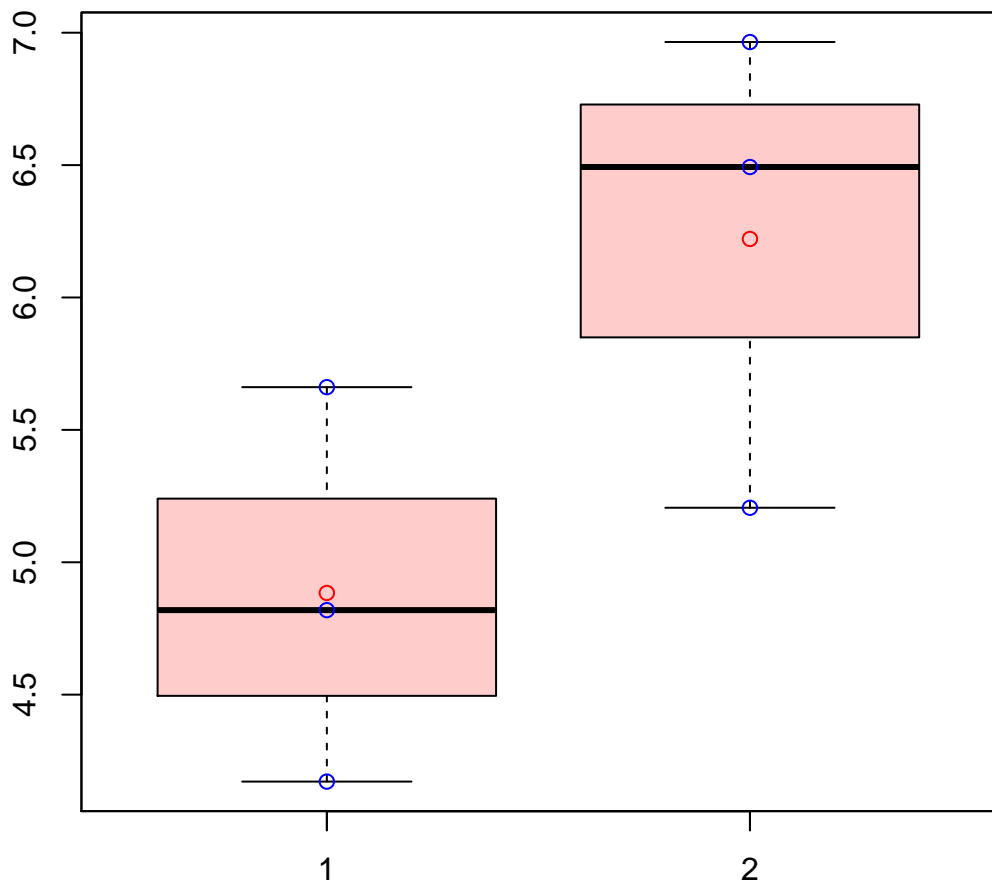

t-Test: p-value = 0.12

# B8BLP4|B8BLP4\_ORYSI

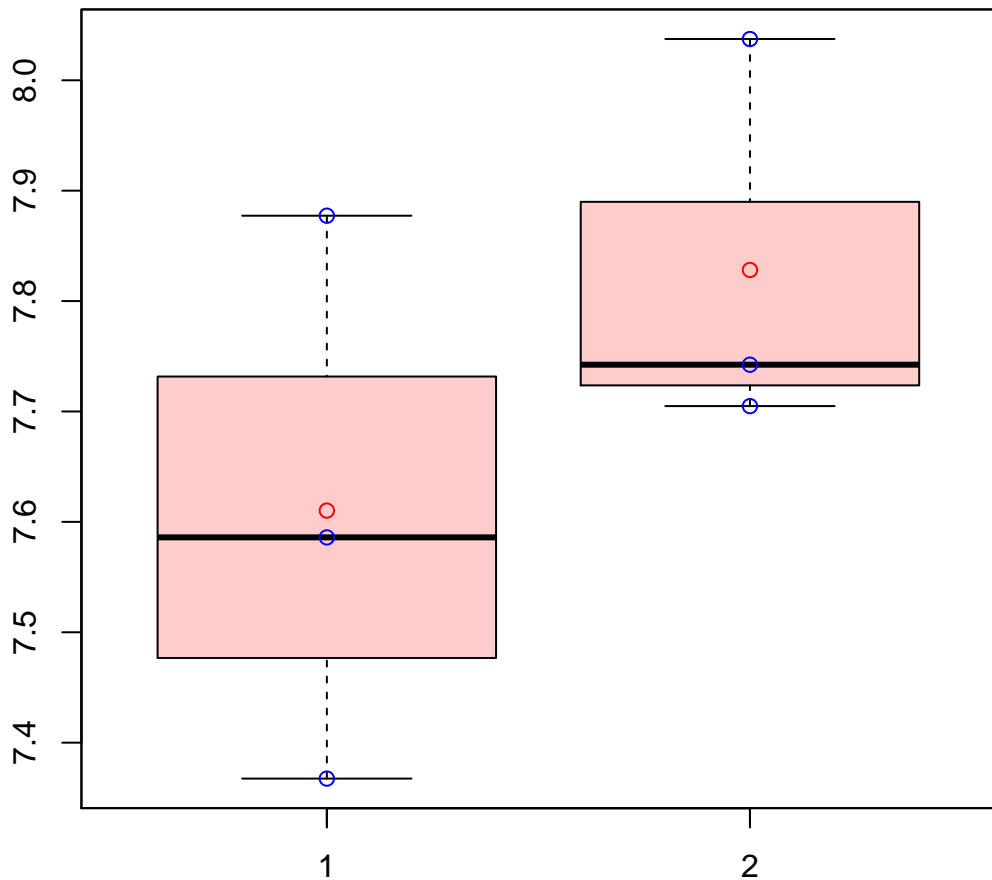

t-Test: p-value = 0.3

# B8BM64|B8BM64\_ORYSI

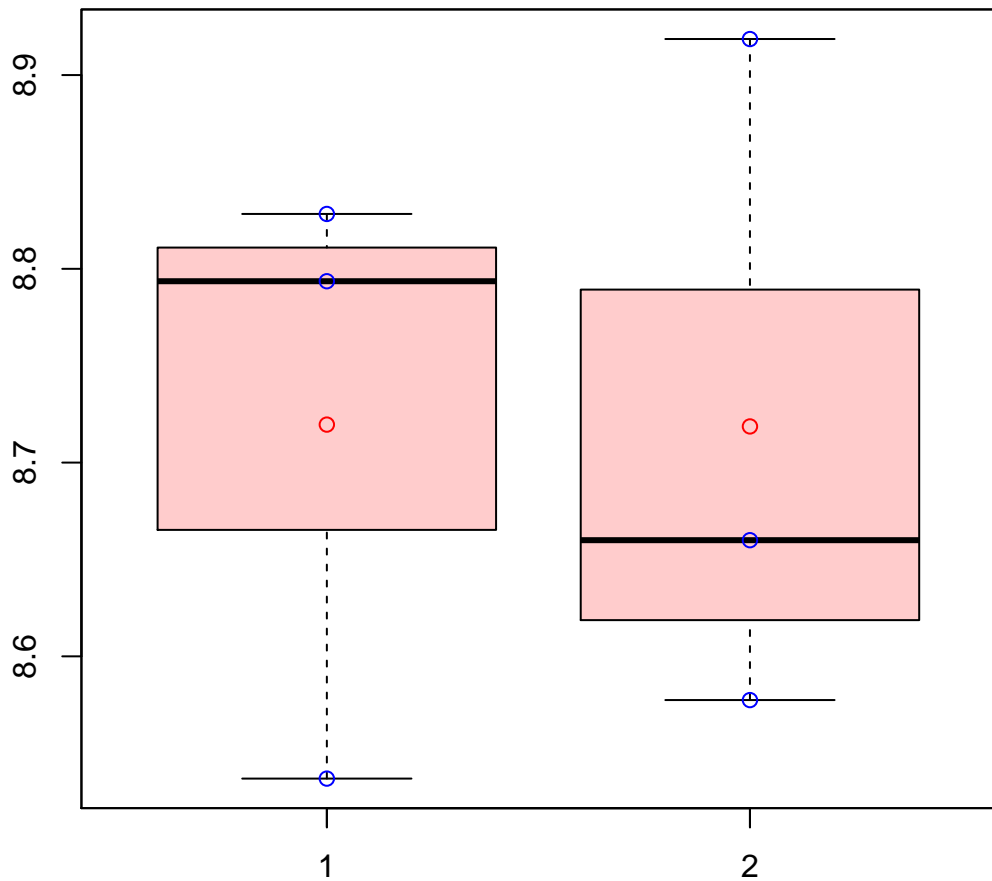

t-Test: p-value = 0.99

# B8BMP3|B8BMP3\_ORYSI

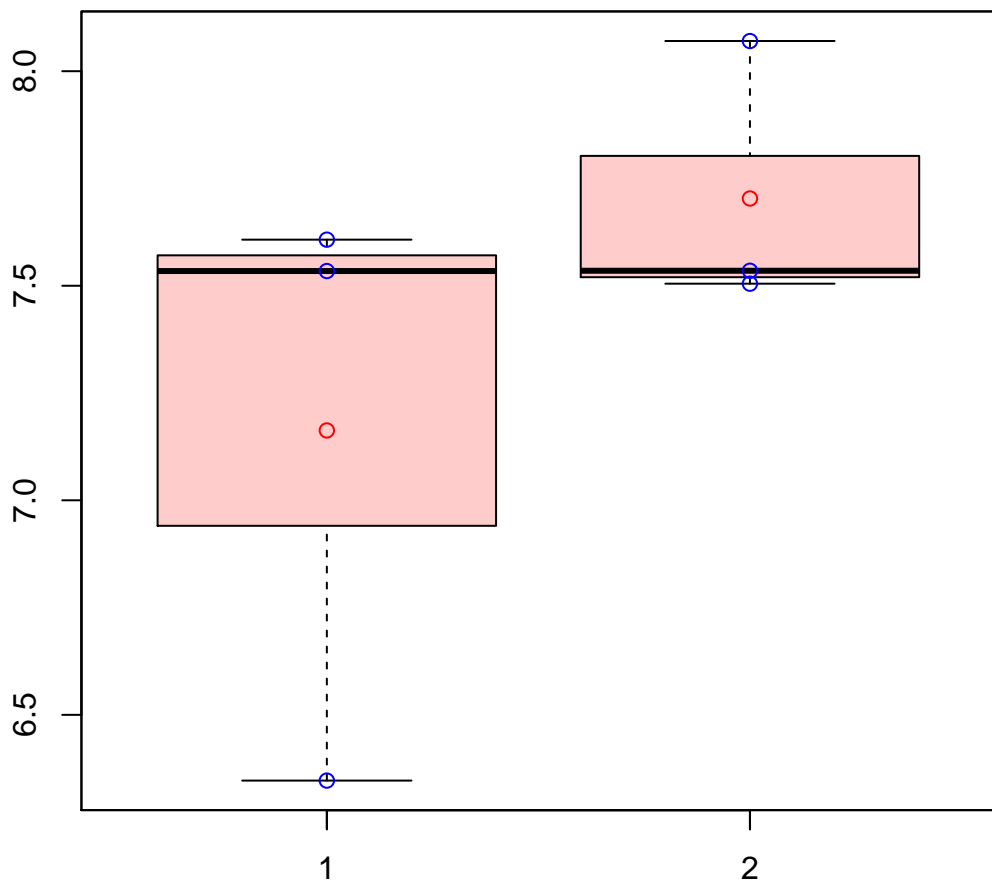

t-Test: p-value = 0.32



# B8BND7|B8BND7\_ORYSI

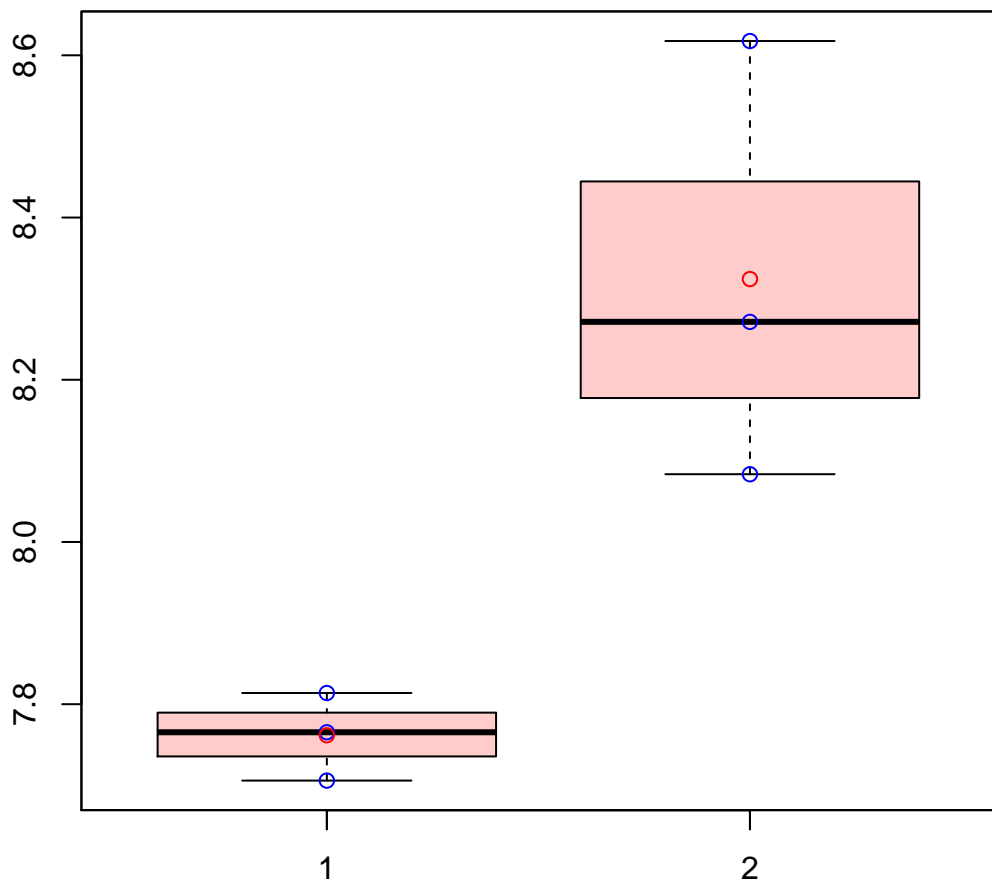

t-Test: p-value = 0.06

# B8BNQ4|B8BNQ4\_ORYSI

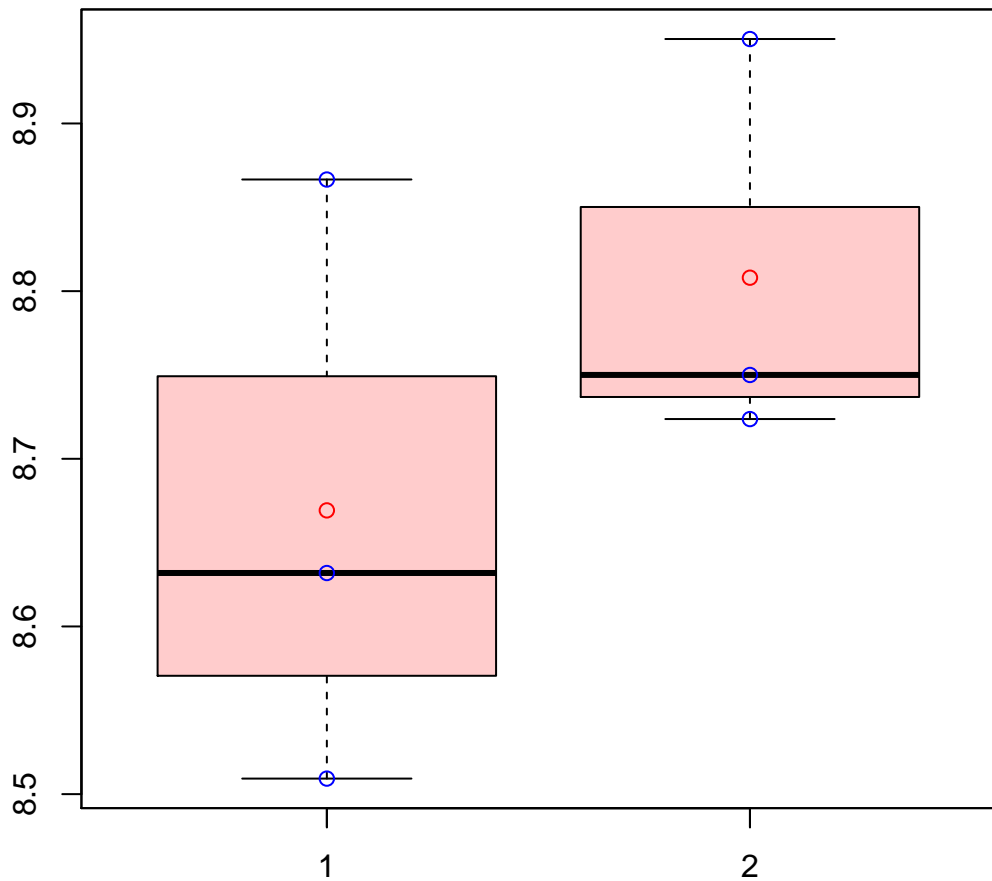

t-Test: p-value = 0.34

# B8BP70|B8BP70\_ORYSI

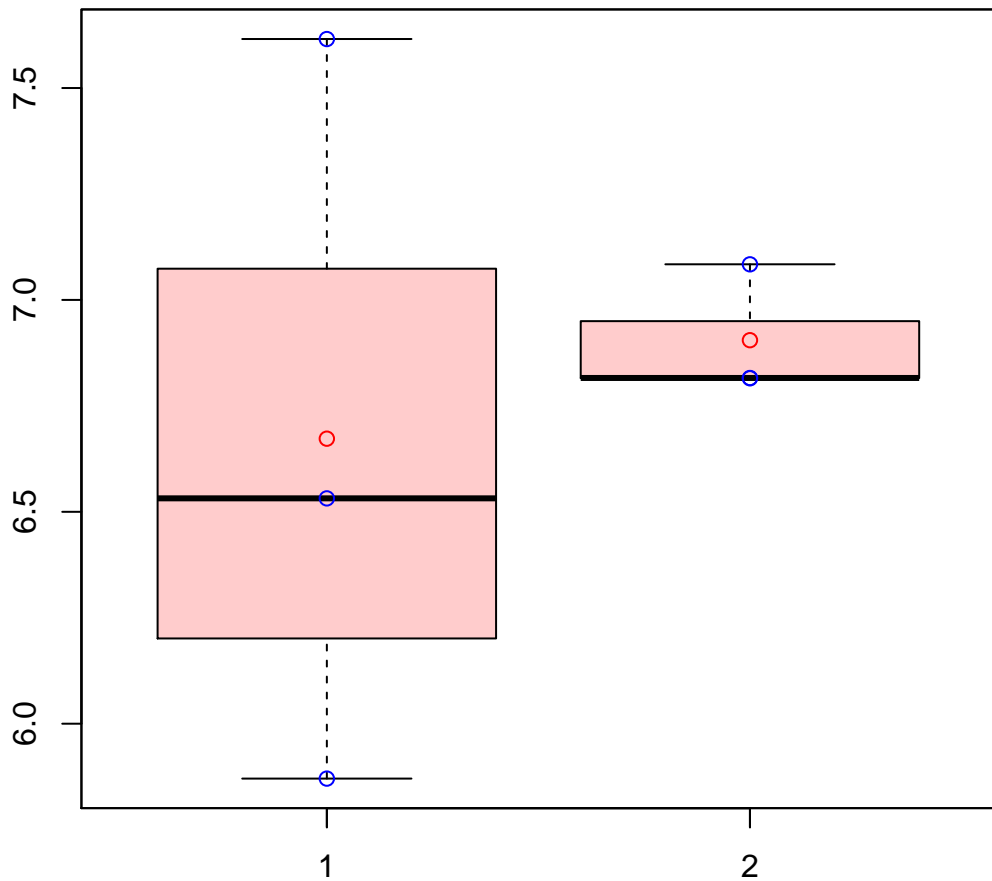

t-Test: p-value = 0.69

# B8BPH4|B8BPH4\_ORYSI

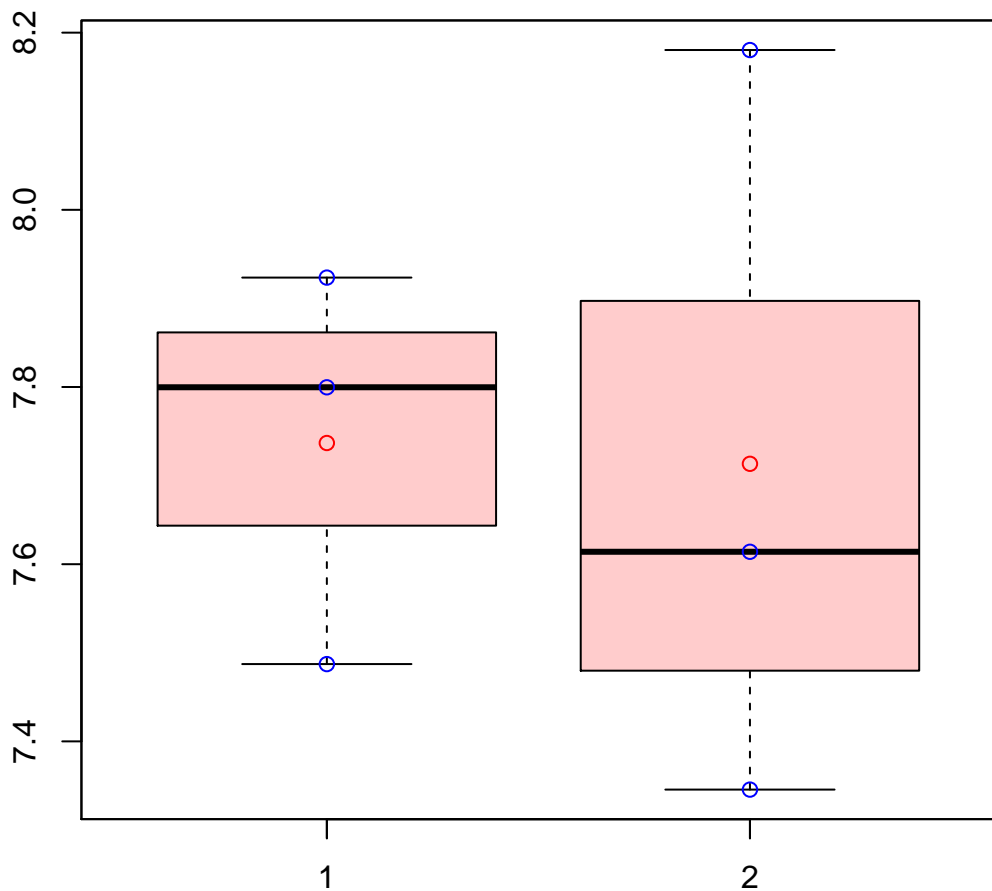

t-Test: p-value = 0.94

# B8Q5I1|B8Q5I1\_TRIMO

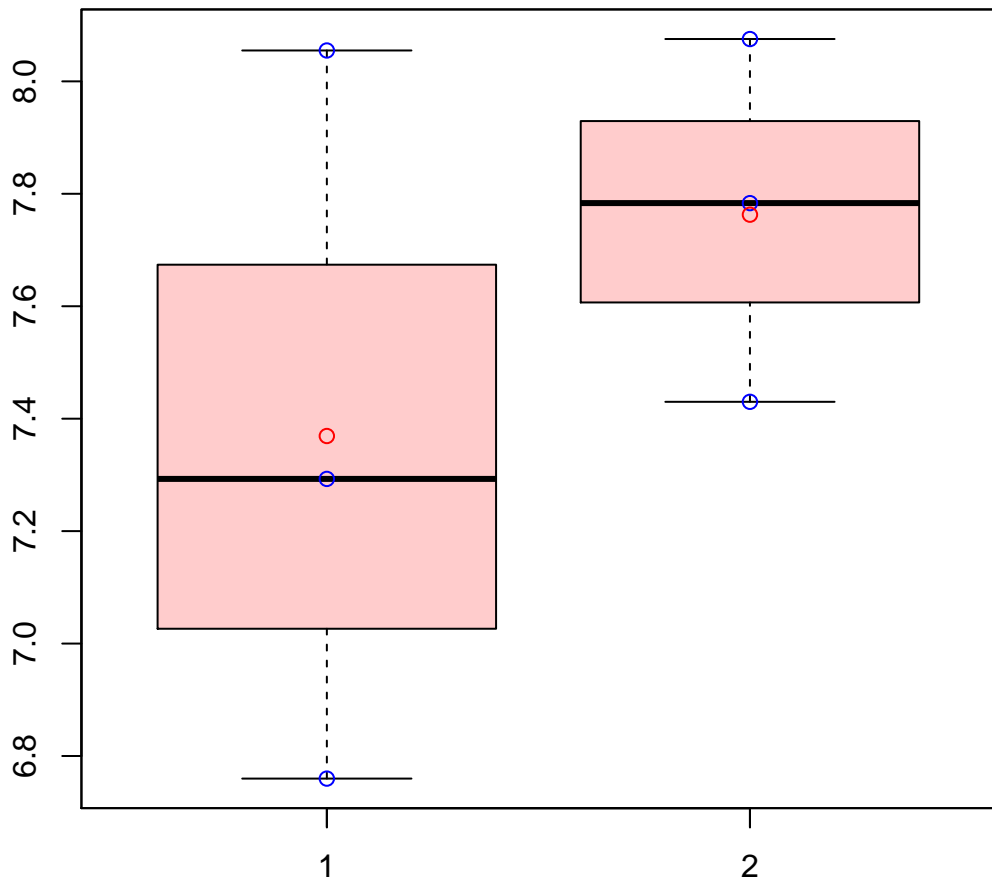

t-Test: p-value = 0.42

# B8Q6N8|B8Q6N8\_BAMOL

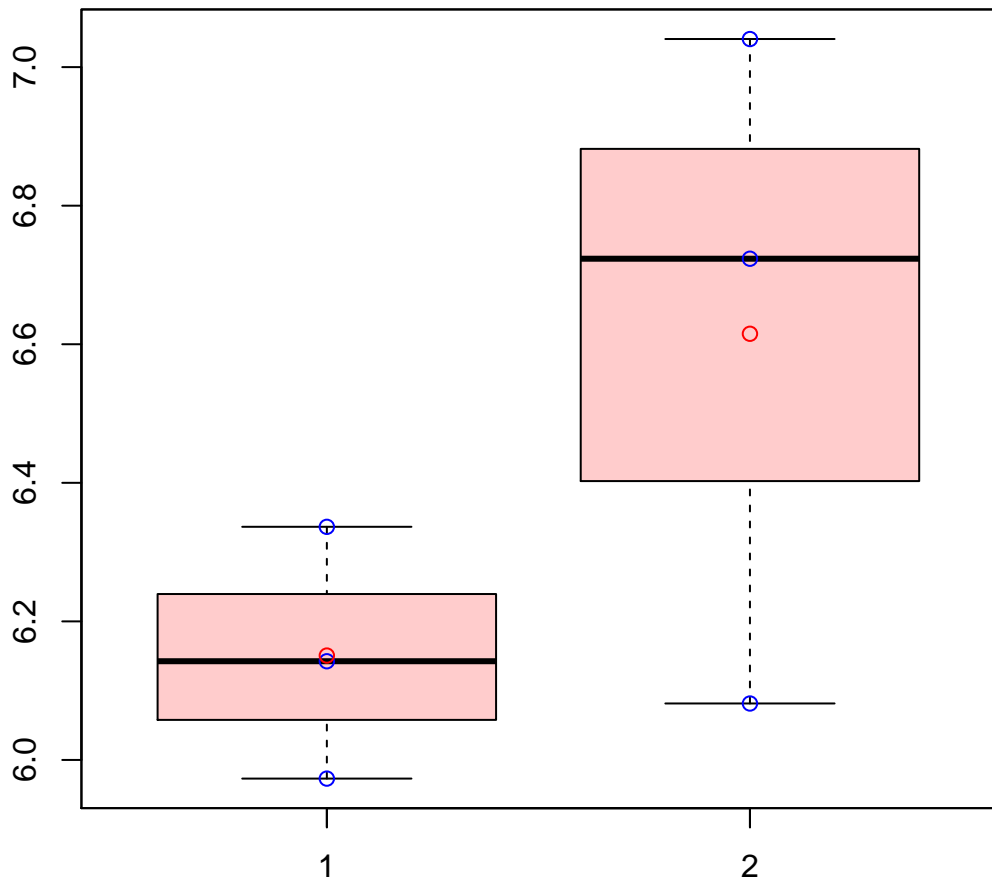

t-Test: p-value = 0.24

# B8QWB6|B8QWB6\_ZEAMP

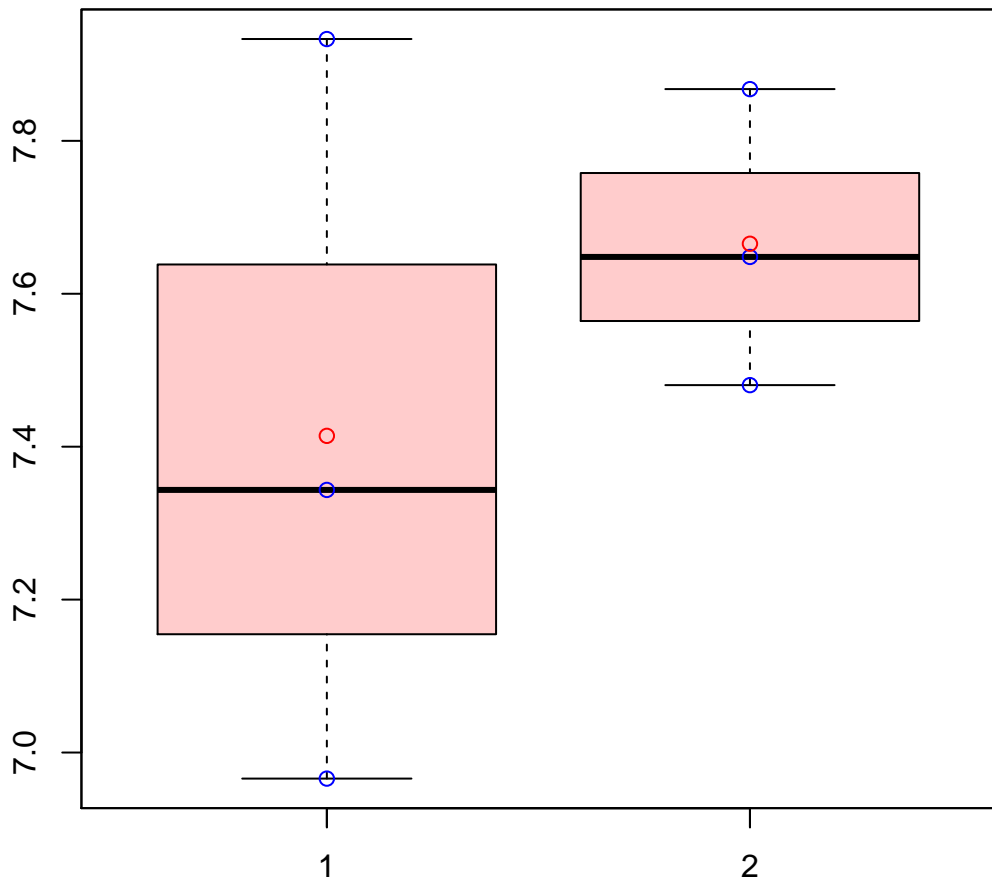

t-Test: p-value = 0.48

# B8XEE9|B8XEE9\_ORYSI

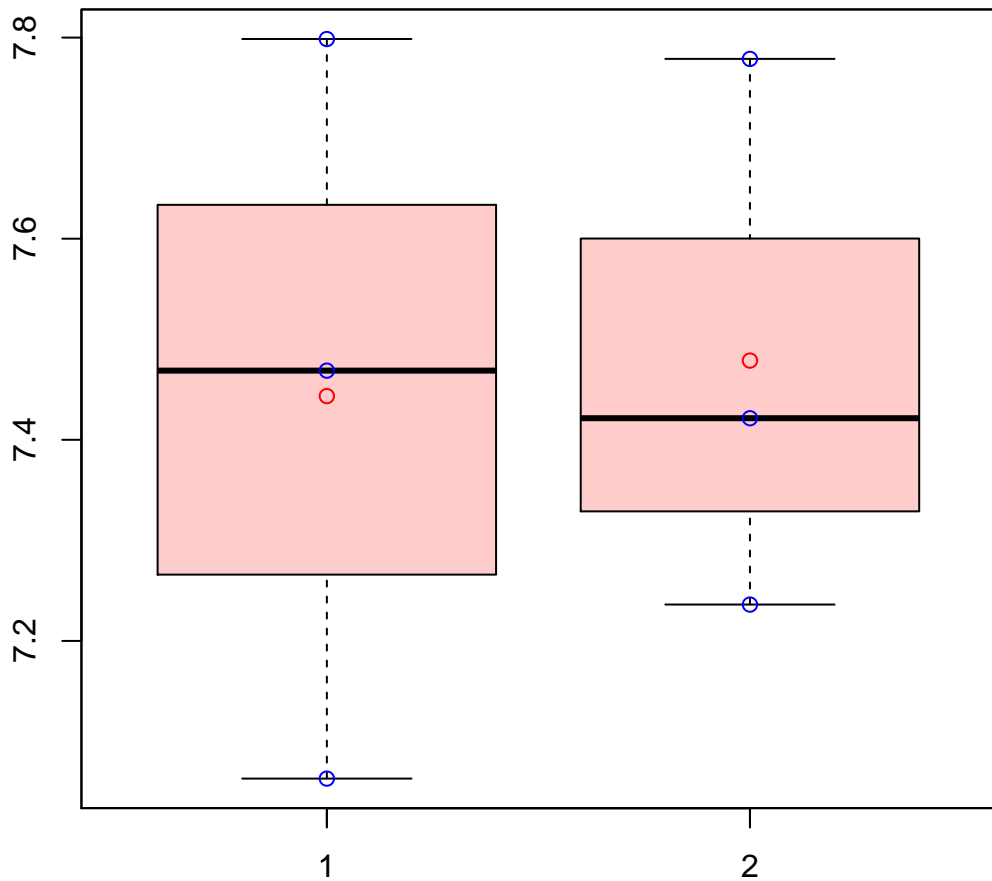

t-Test: p-value = 0.9



# B8XF08|B8XF08\_ONCHC

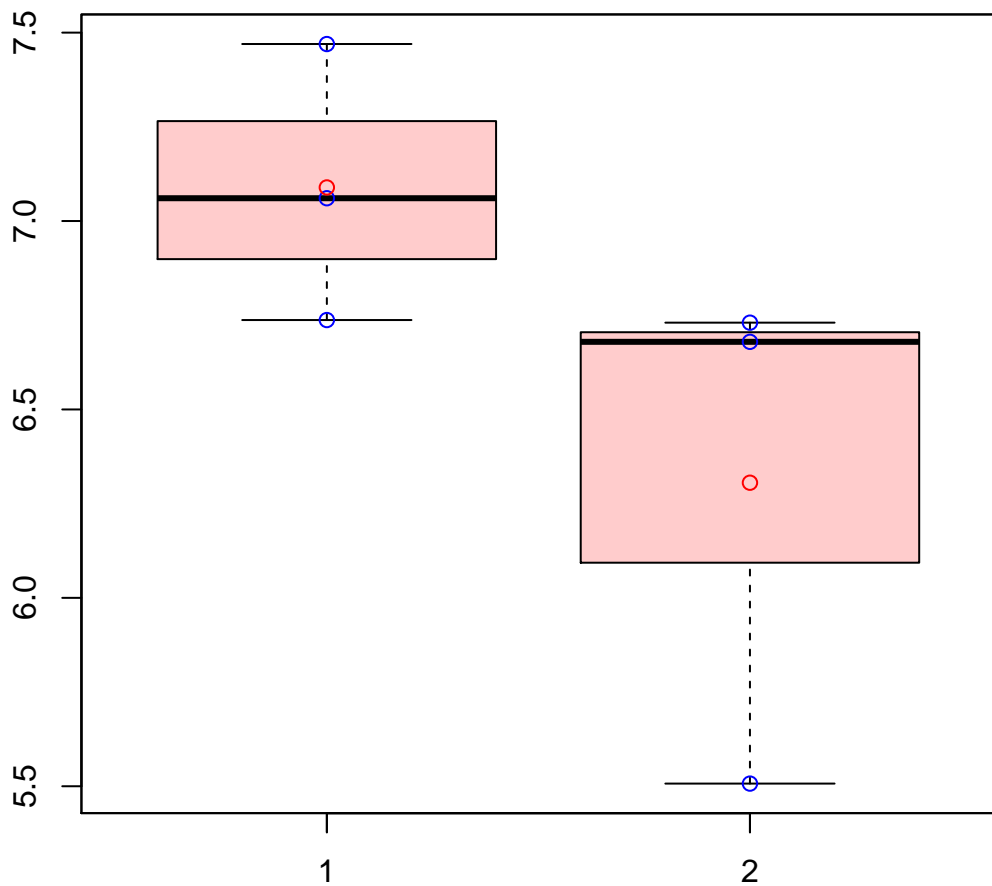

t-Test: p-value = 0.18

# B8XVQ4|B8XVQ4\_MAIZE

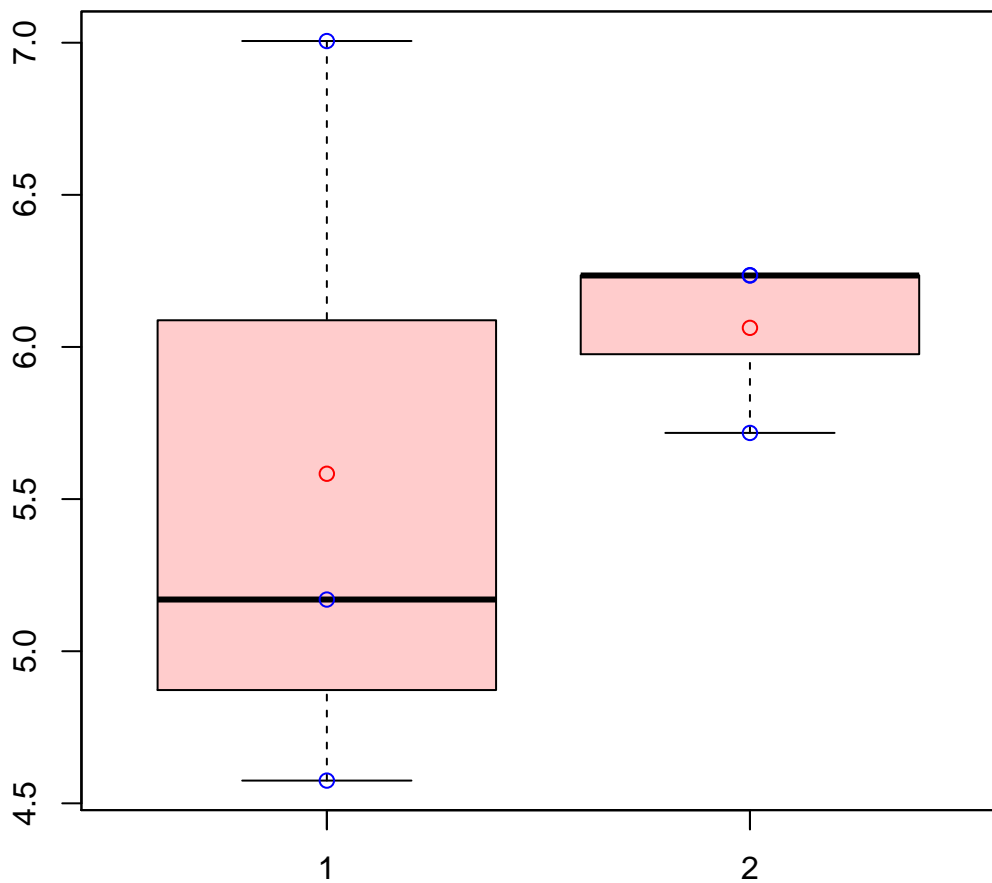

t-Test: p-value = 0.58

# B8Y2W7|B8Y2W7\_FESAR

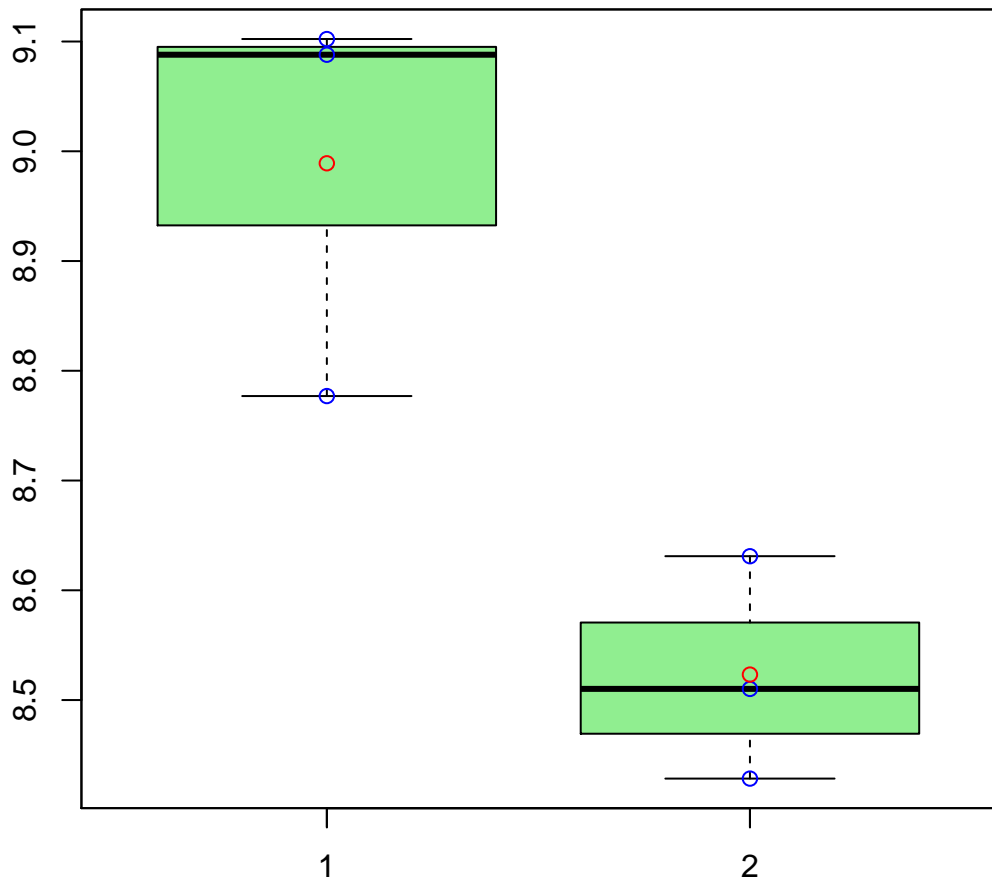

t-Test: p-value = 0.03

# B8Y2Y4|B8Y2Y4\_FESAR

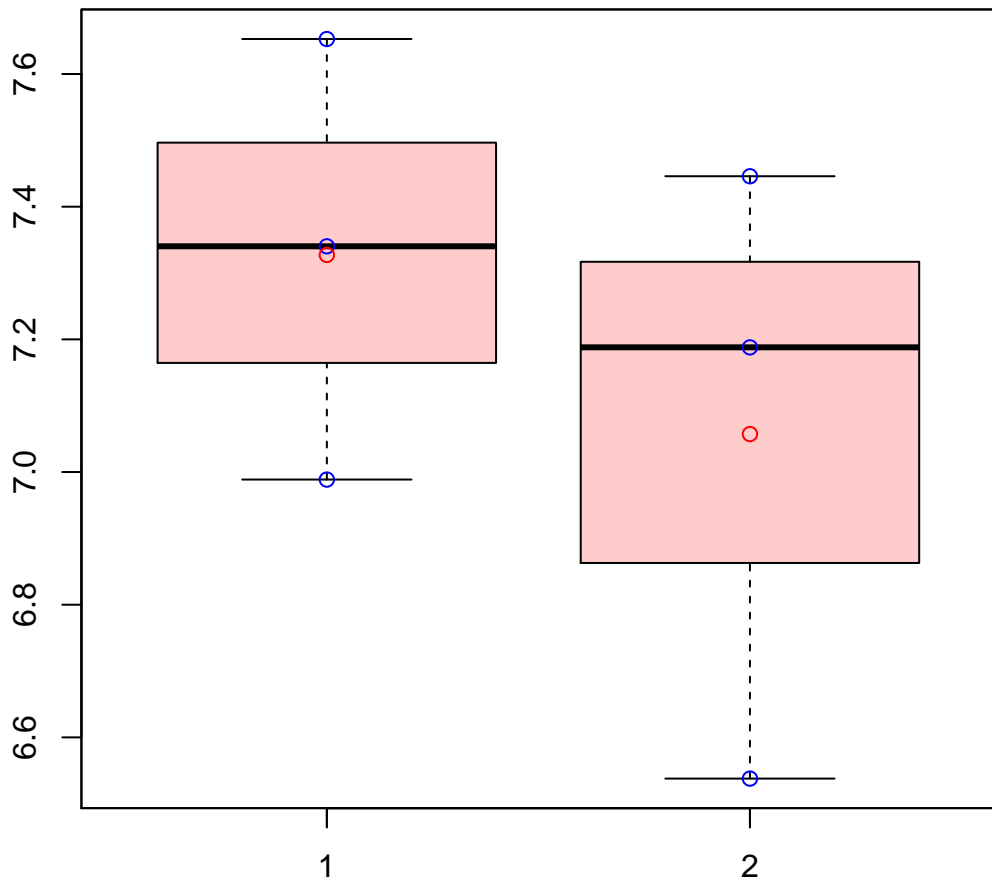

t-Test: p-value = 0.47

# B8Y2Y8|B8Y2Y8\_FESAR

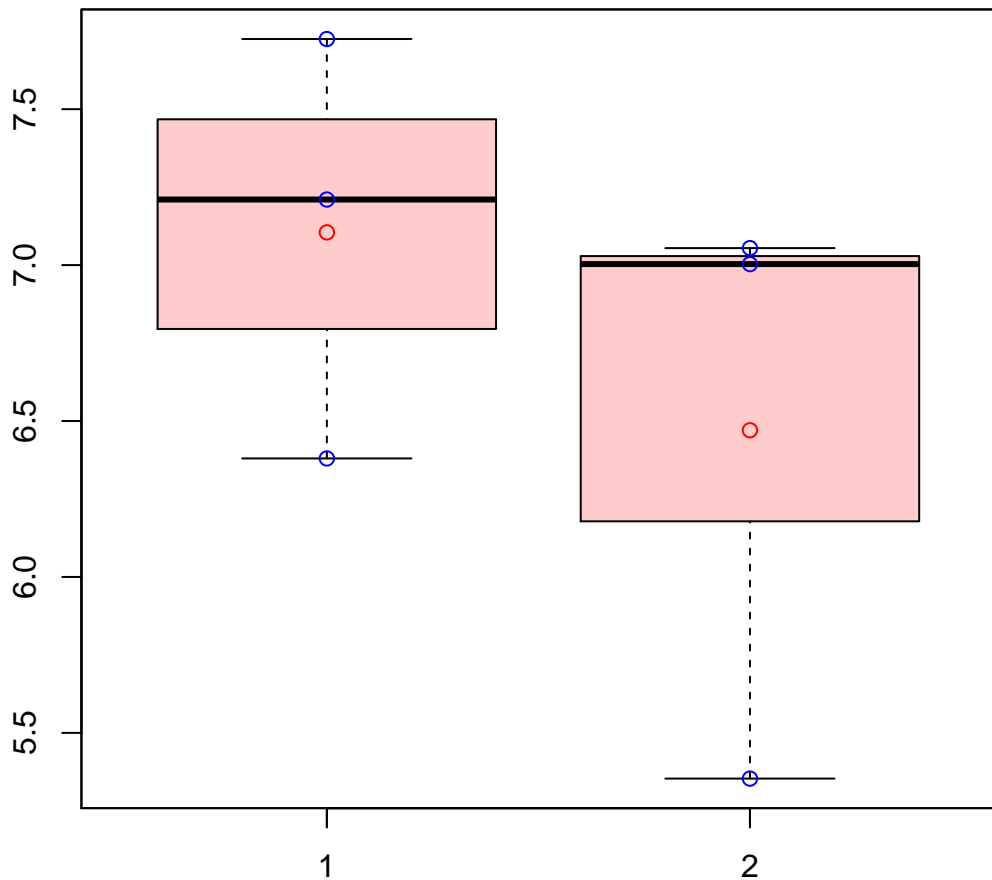

t-Test: p-value = 0.41

# B8YAB7|B8YAB7\_9POAL

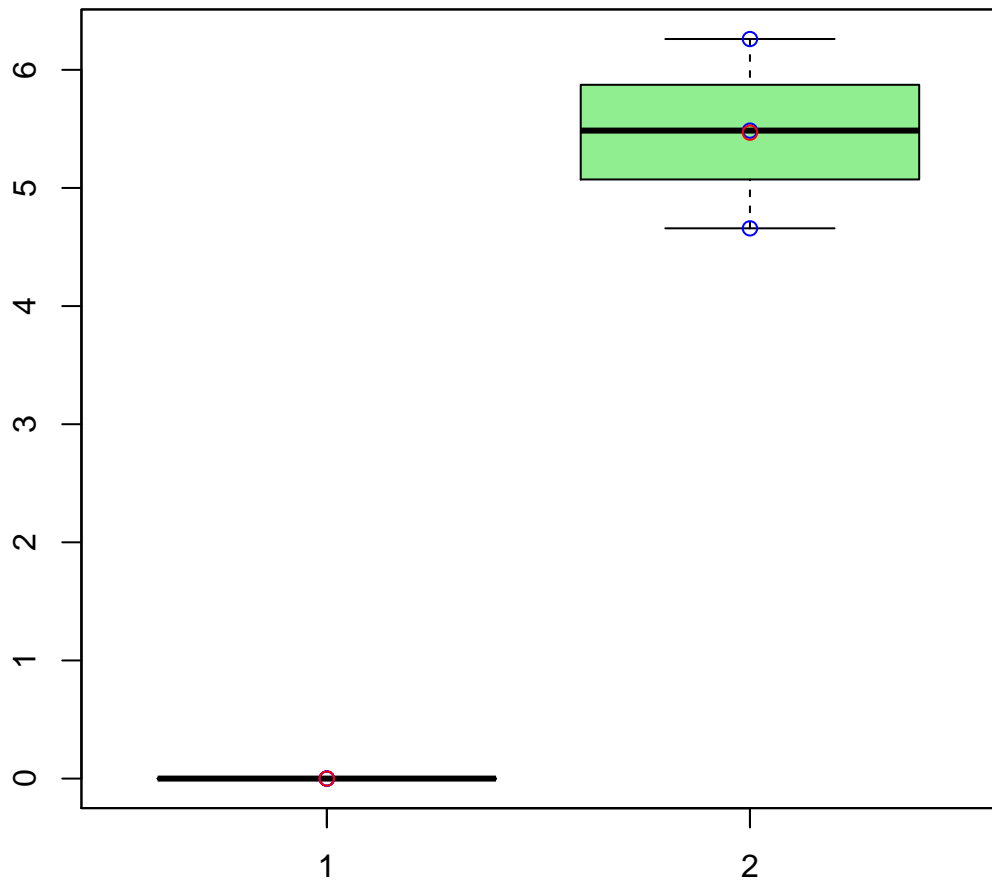

t-Test: p-value = 0.01

# B9A8E4|B9A8E4\_WHEAT

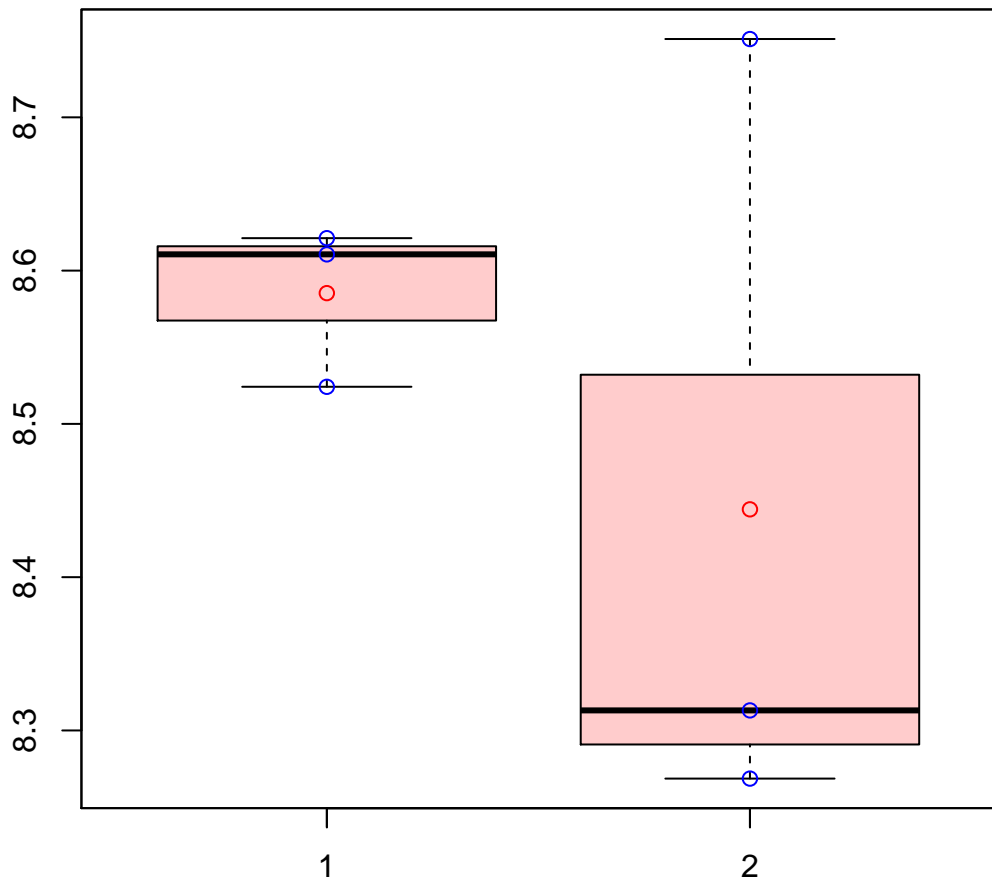

t-Test: p-value = 0.46

# B9ESY0|B9ESY0\_ORYSJ

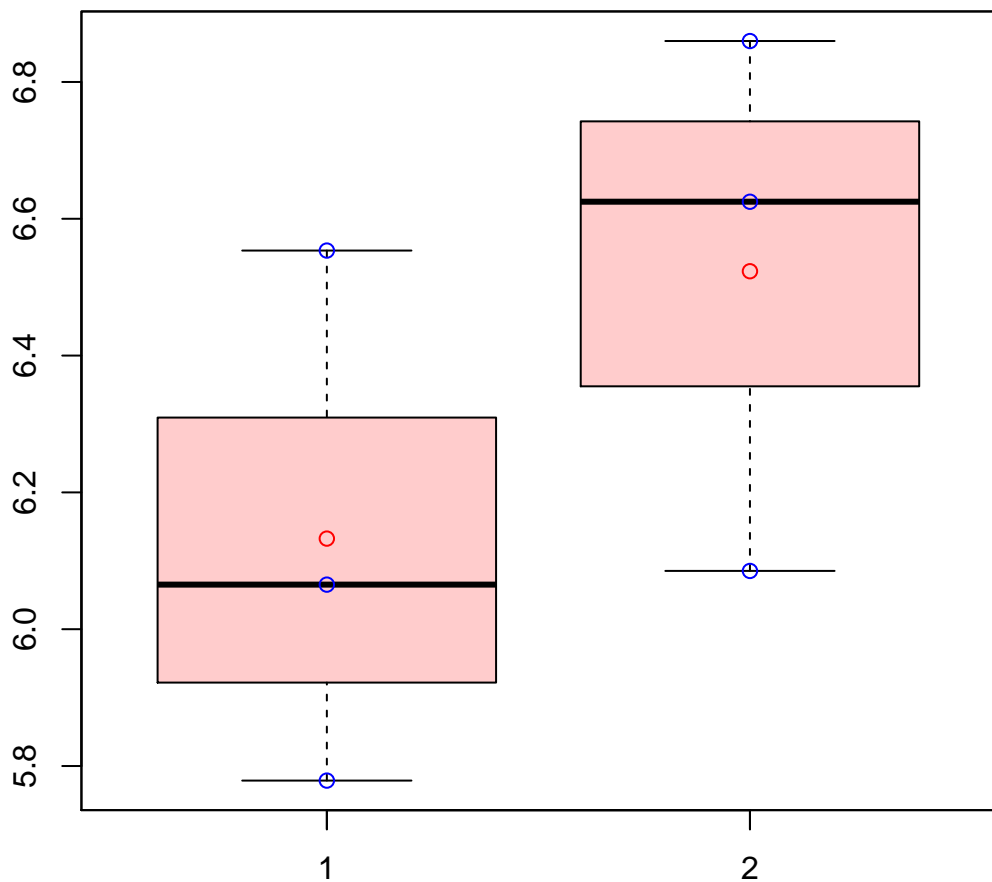

t-Test: p-value = 0.29



# B9ETS8|B9ETS8\_ORYSJ

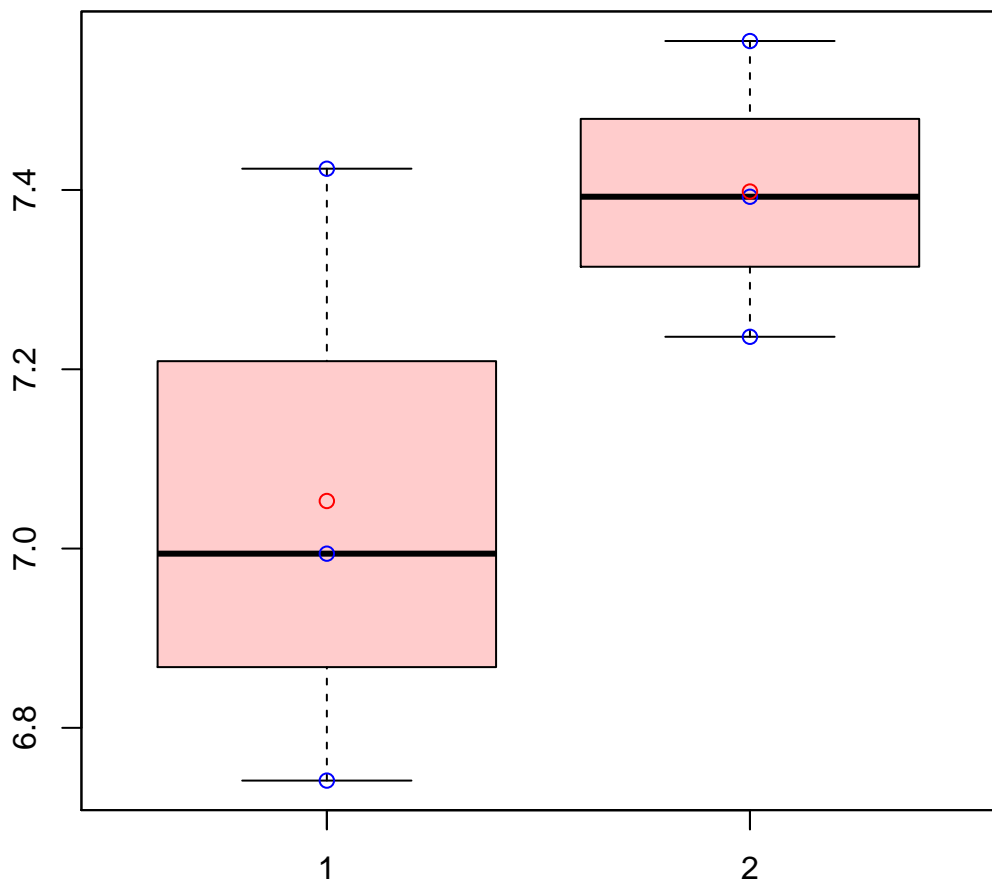

t-Test: p-value = 0.22

# B9EUA8|B9EUA8\_ORYSJ

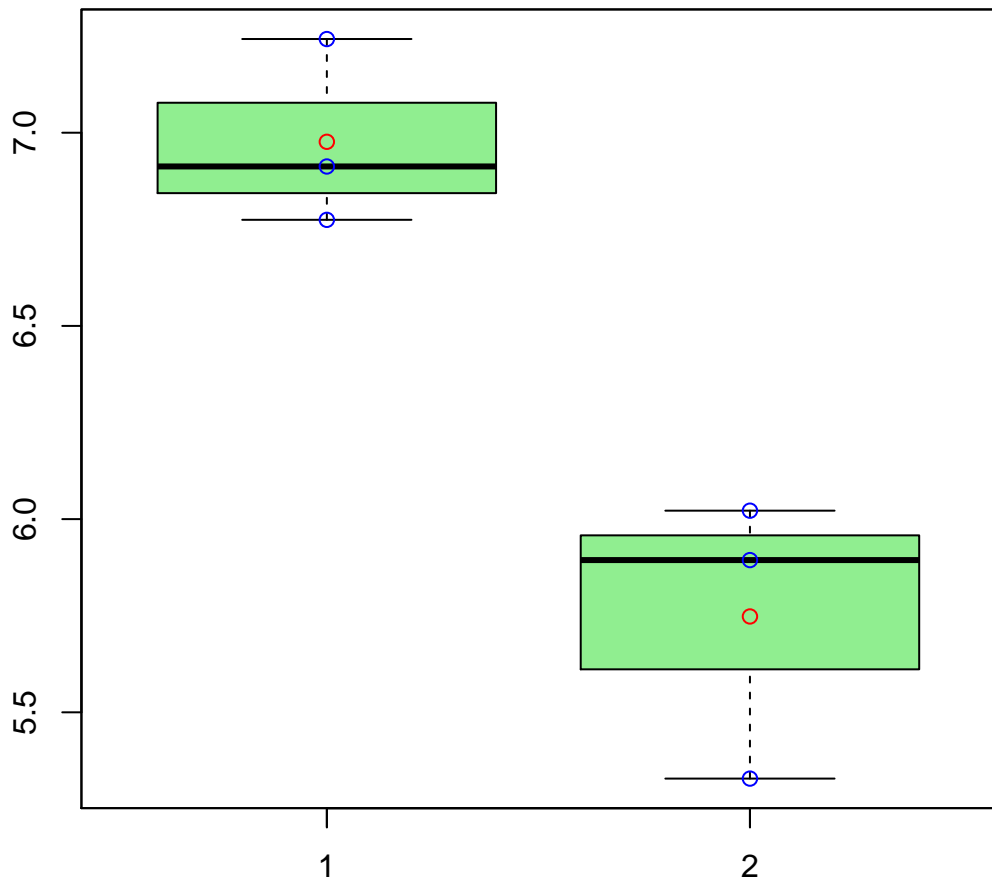

t-Test: p-value = 0.01

# B9EUG2|B9EUG2\_ORYSJ

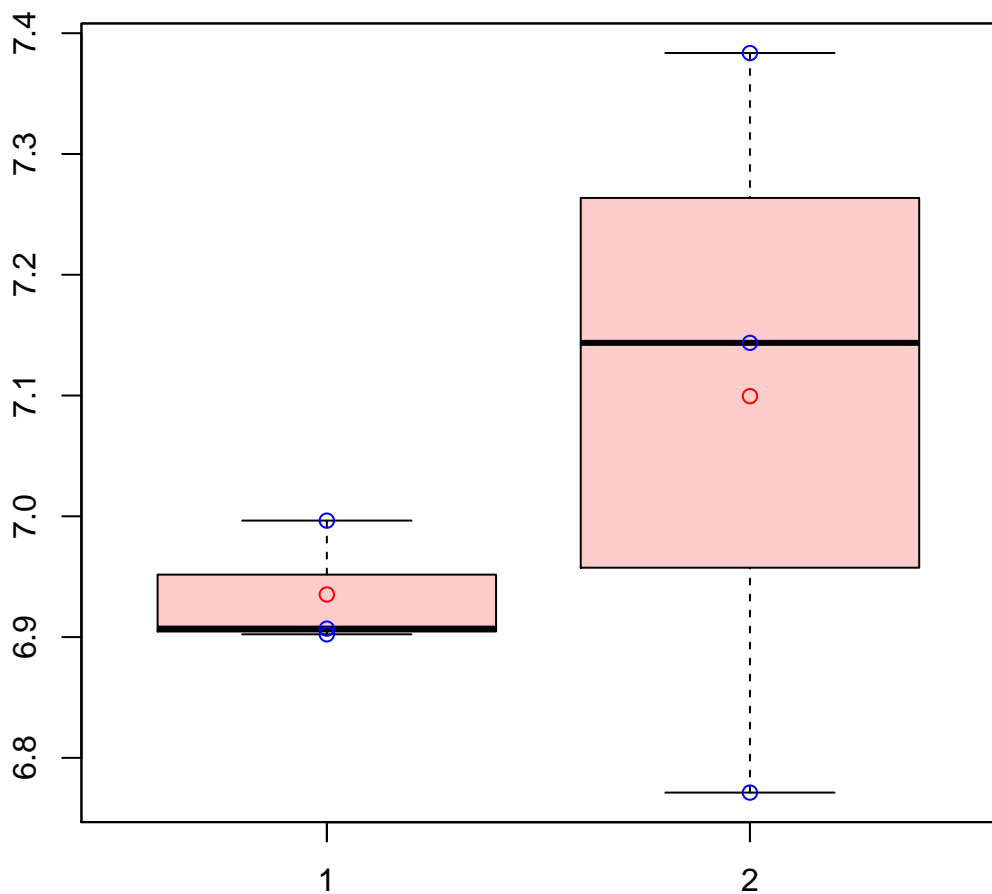

t-Test: p-value = 0.45

# B9EXF2|B9EXF2\_ORYSJ

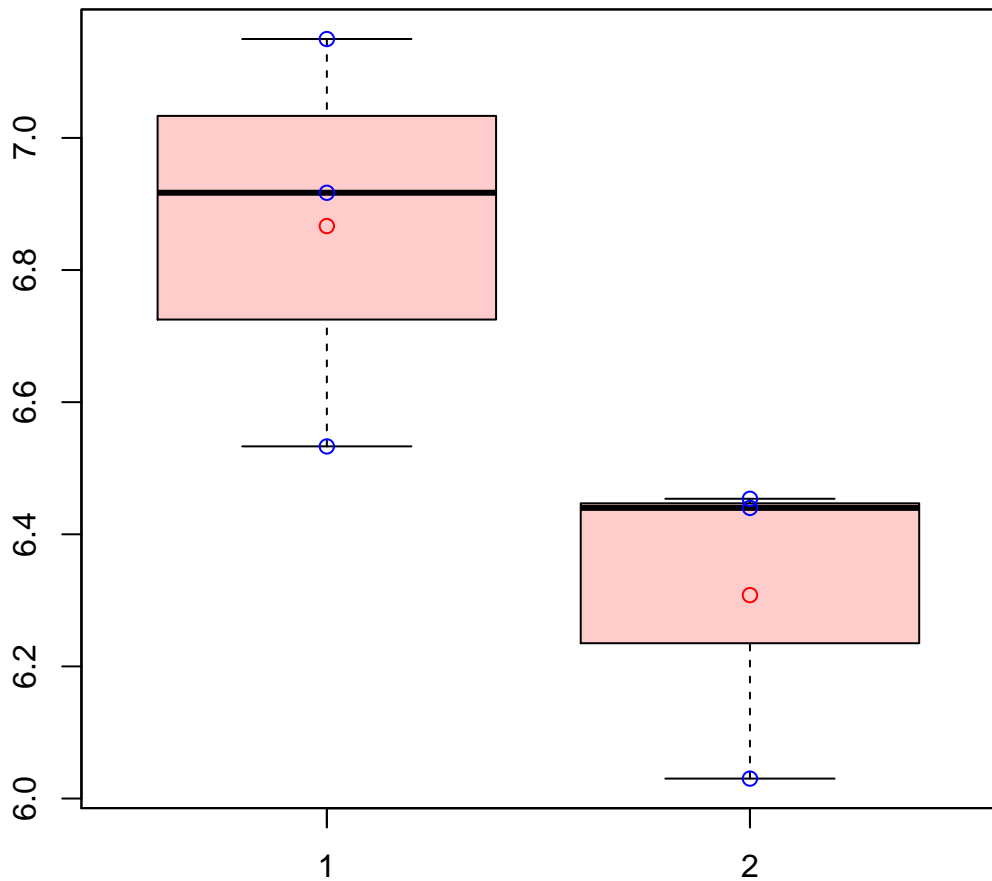

t-Test: p-value = 0.07

# B9EY00|B9EY00\_ORYSJ

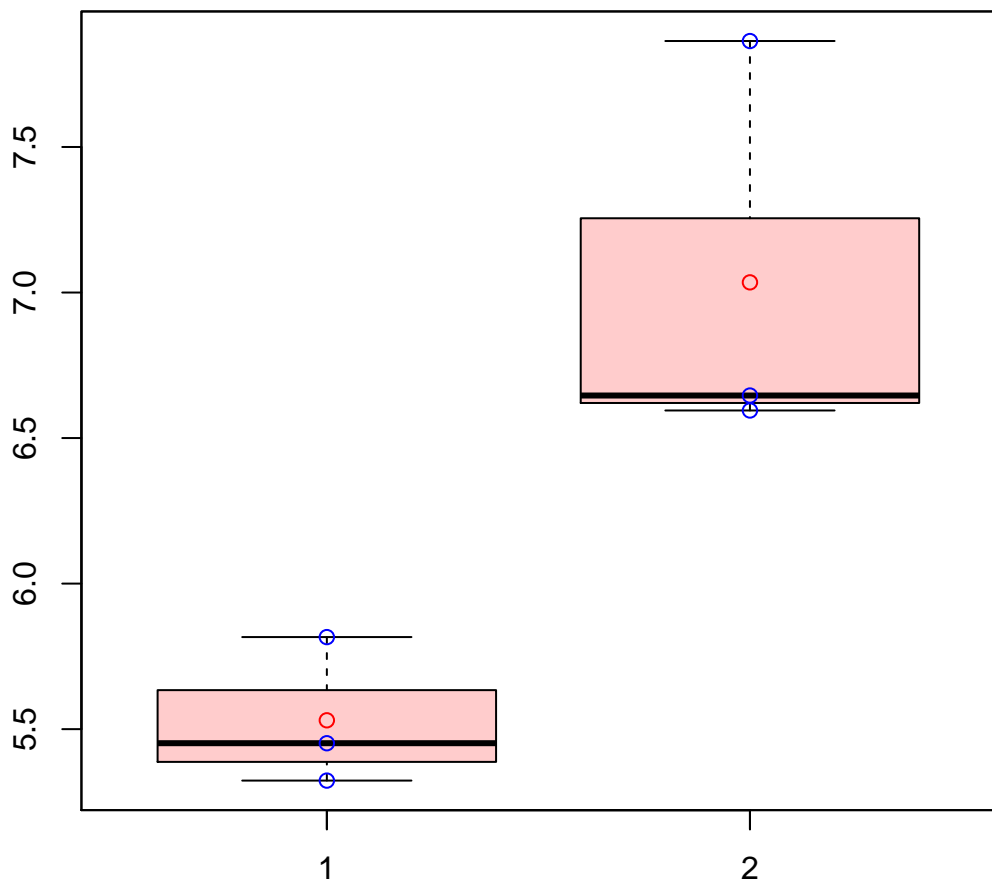

t-Test: p-value = 0.06

# B9EY26|B9EY26\_ORYSJ

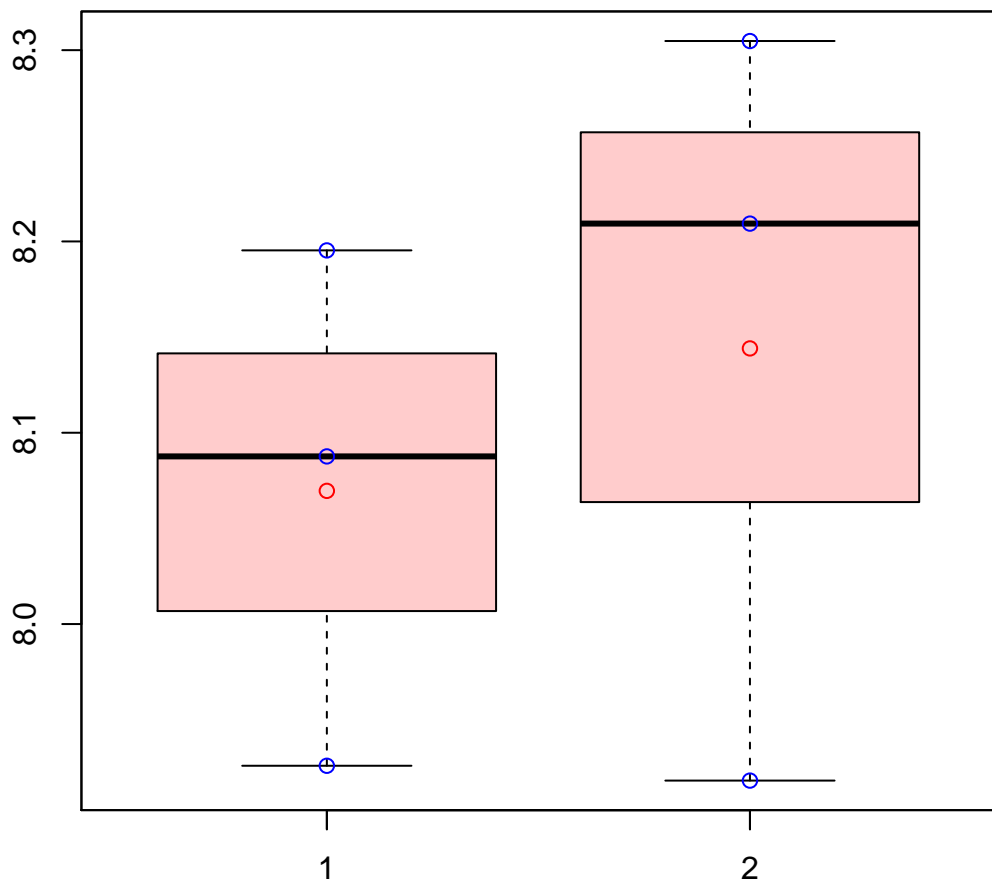

t-Test: p-value = 0.63

# B9EY87|B9EY87\_ORYSJ

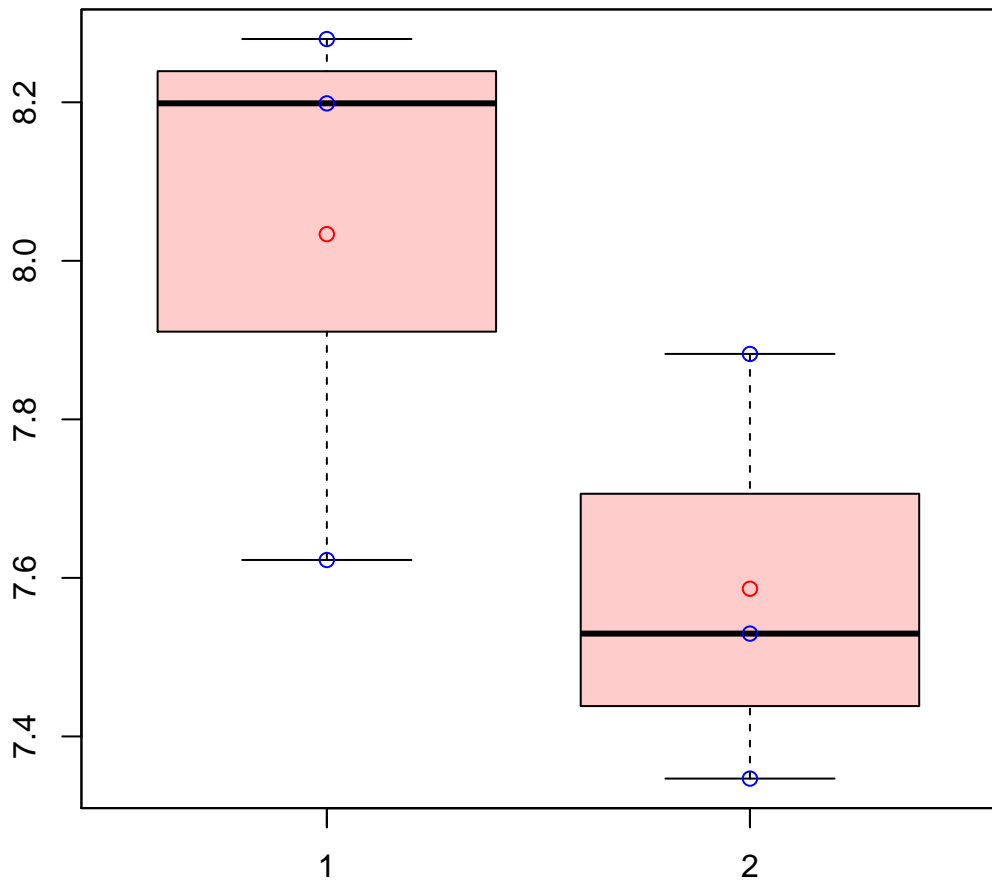

t-Test: p-value = 0.17

# B9EY99|B9EY99\_ORYSJ

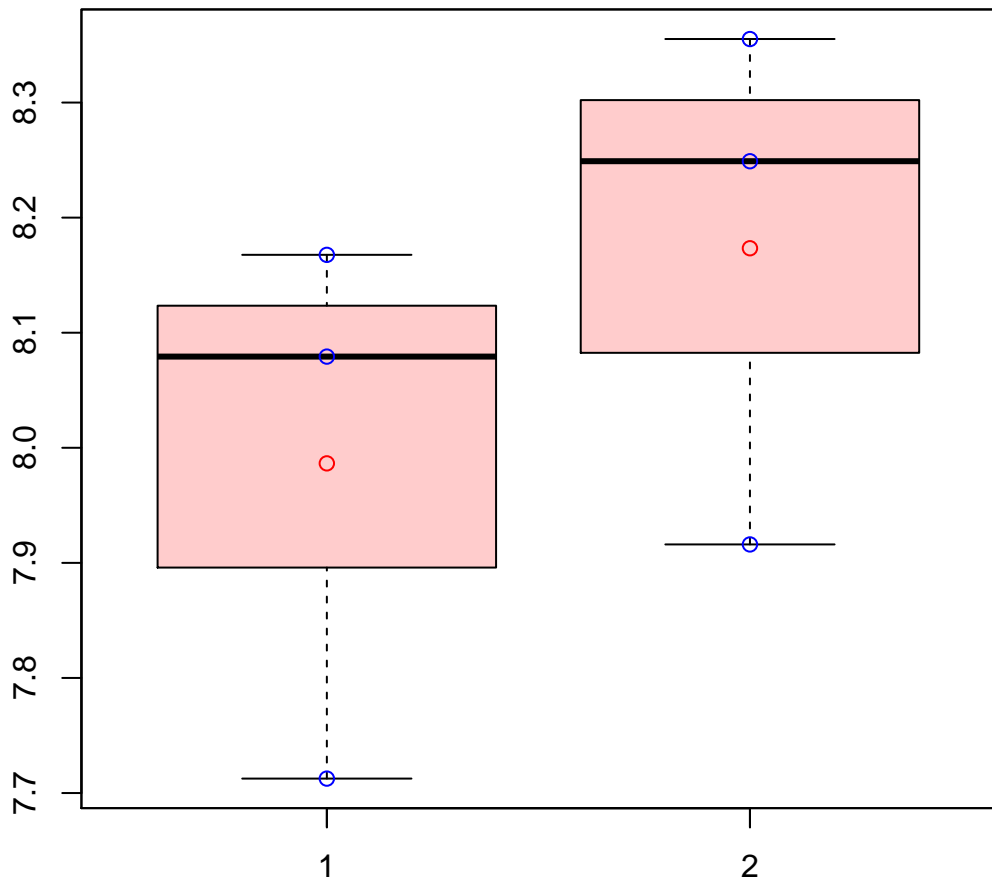

t-Test: p-value = 0.39



# B9EYI2|B9EYI2\_ORYSJ

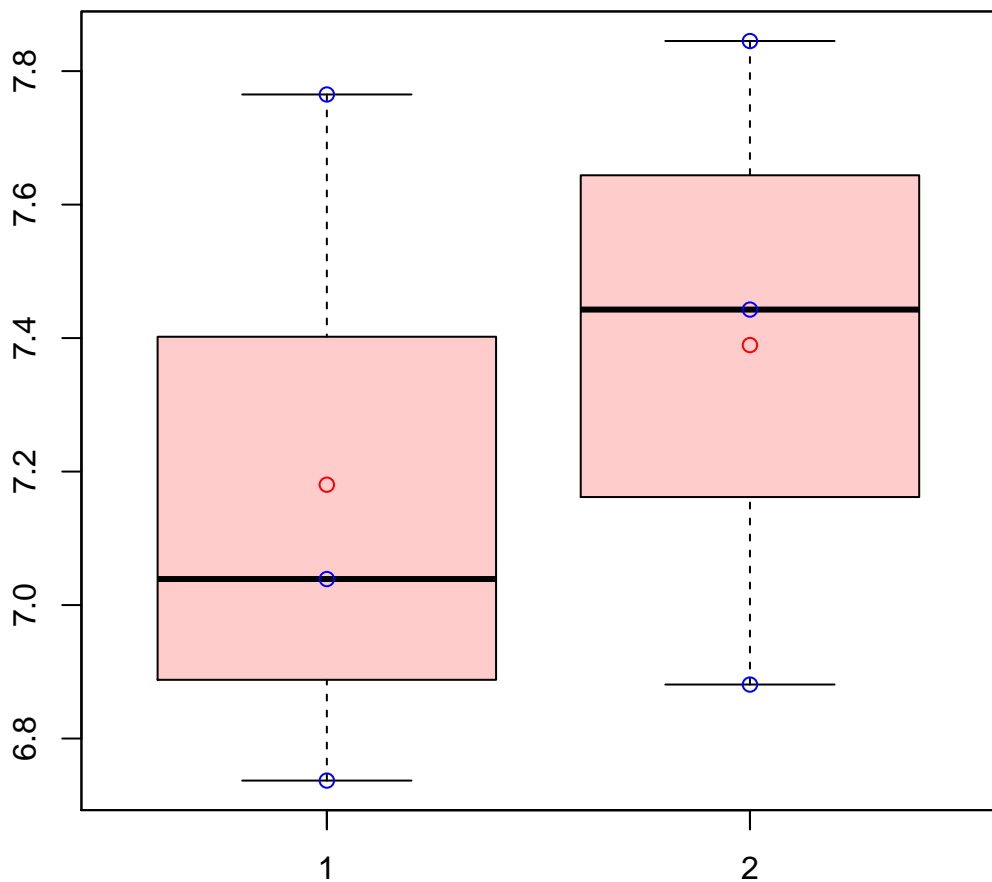

t-Test: p-value = 0.64

# B9EZA1|B9EZA1\_ORYSJ

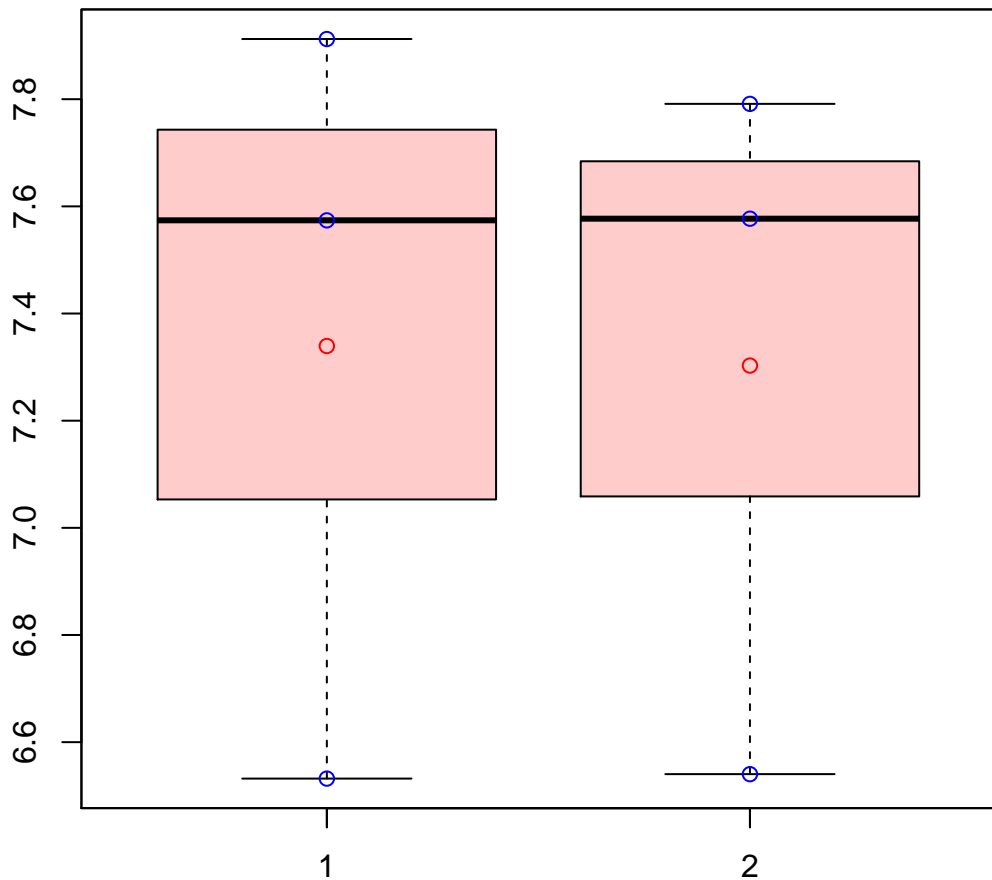

t-Test: p-value = 0.95

# B9F1I6|B9F1I6\_ORYSJ

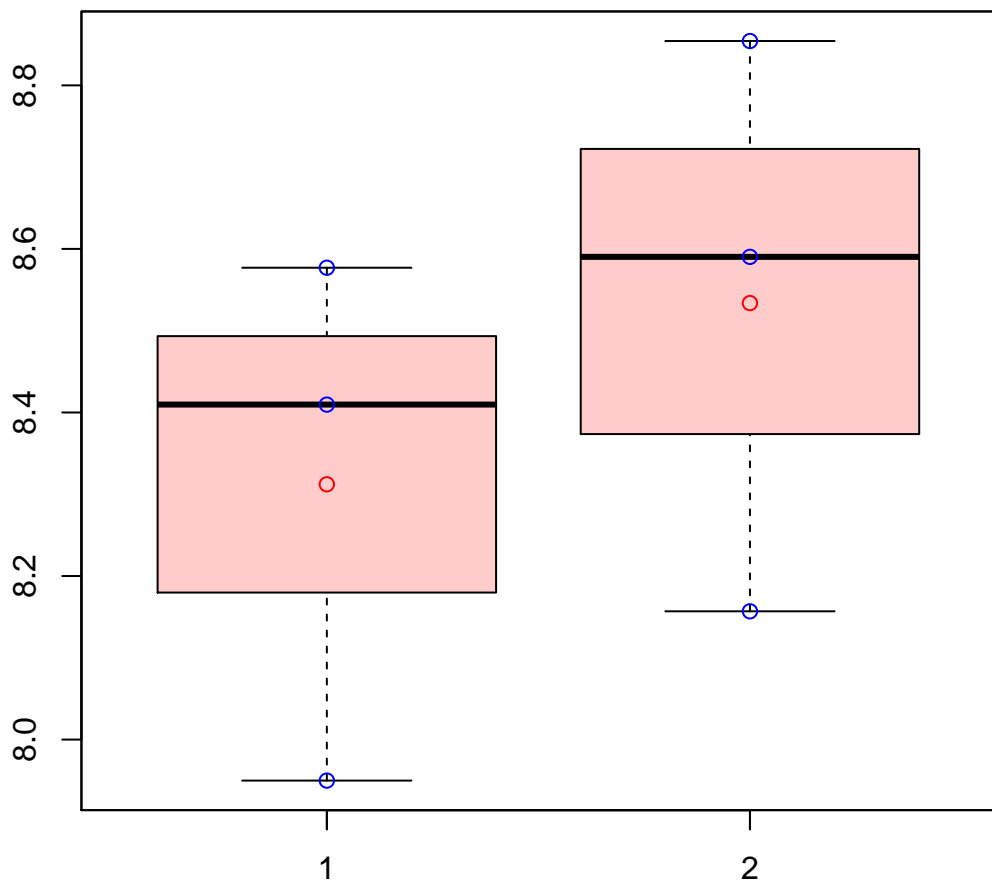

t-Test: p-value = 0.47

# B9F1T3|B9F1T3\_ORYSJ

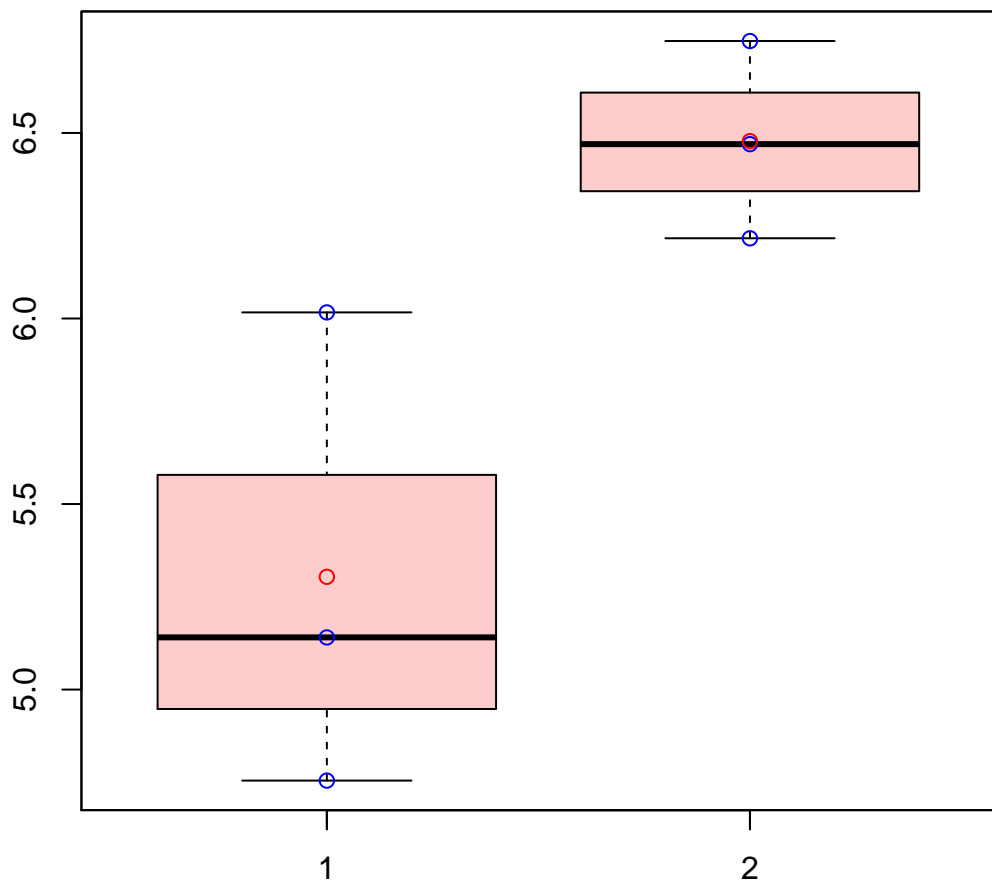

t-Test: p-value = 0.07

# B9F1Z3|B9F1Z3\_ORYSJ

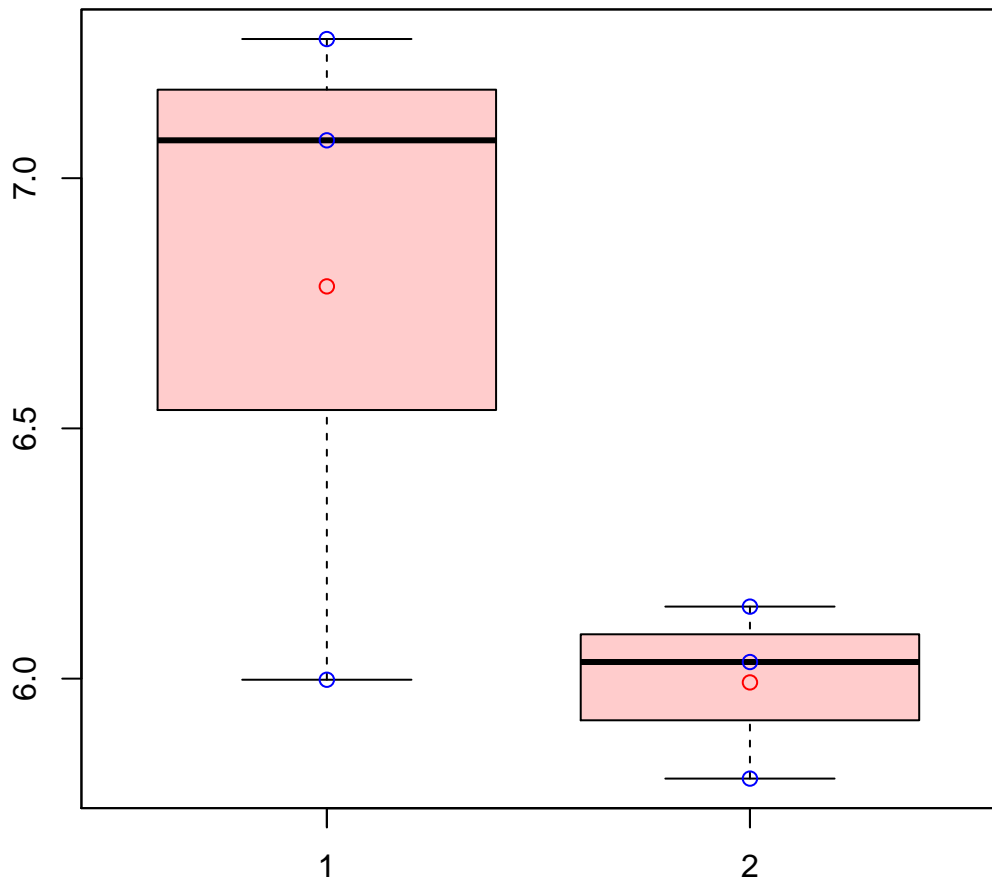

t-Test: p-value = 0.18

# B9F3Q8|B9F3Q8\_ORYSJ

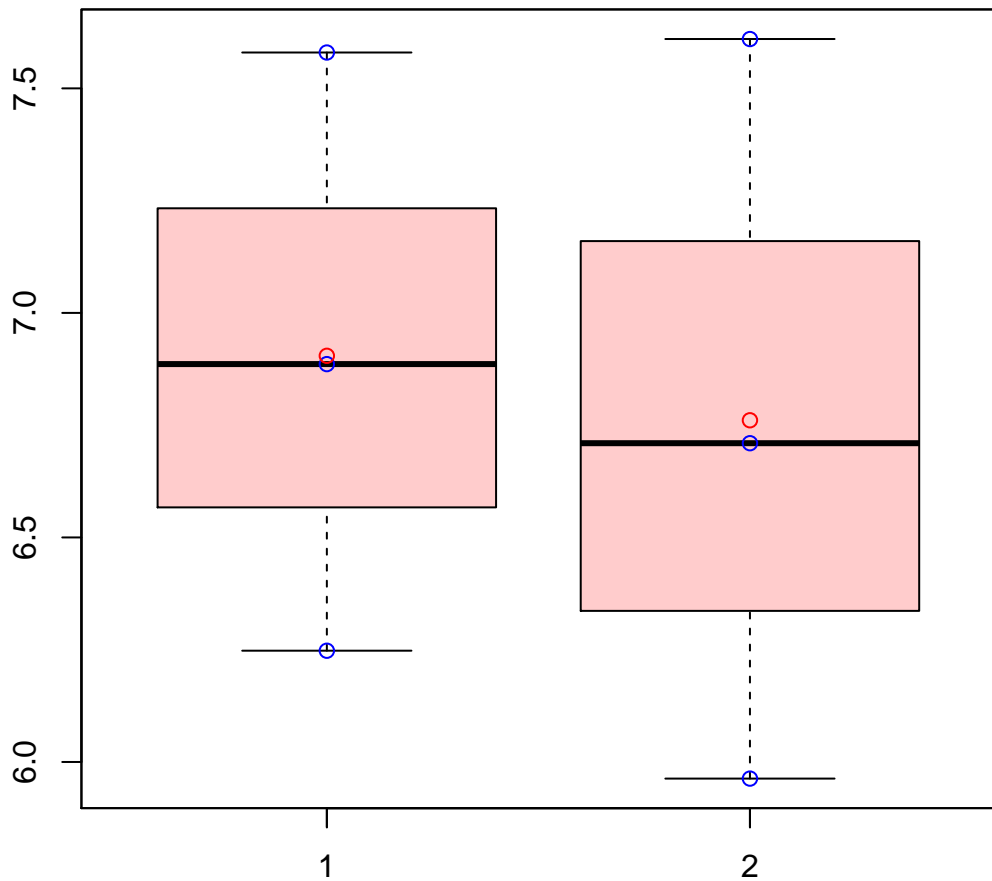

t-Test: p-value = 0.83

# B9F4E7|B9F4E7\_ORYSJ

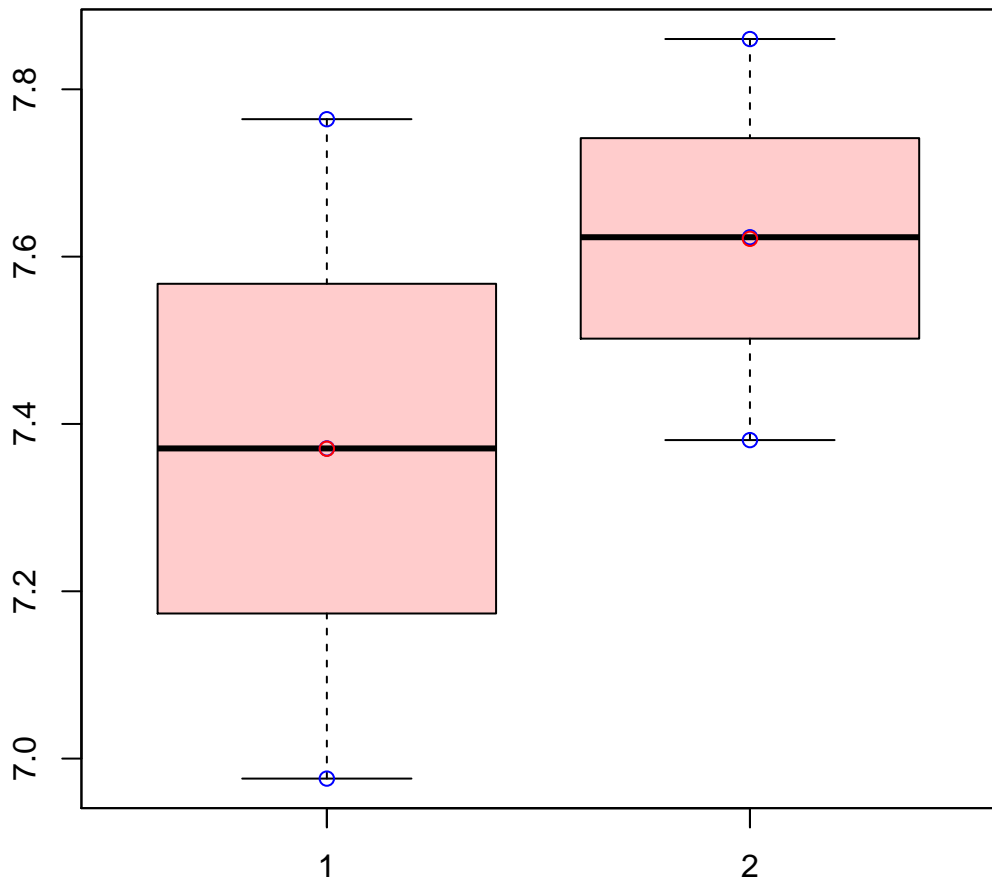

t-Test: p-value = 0.41

# B9F569|B9F569\_ORYSJ

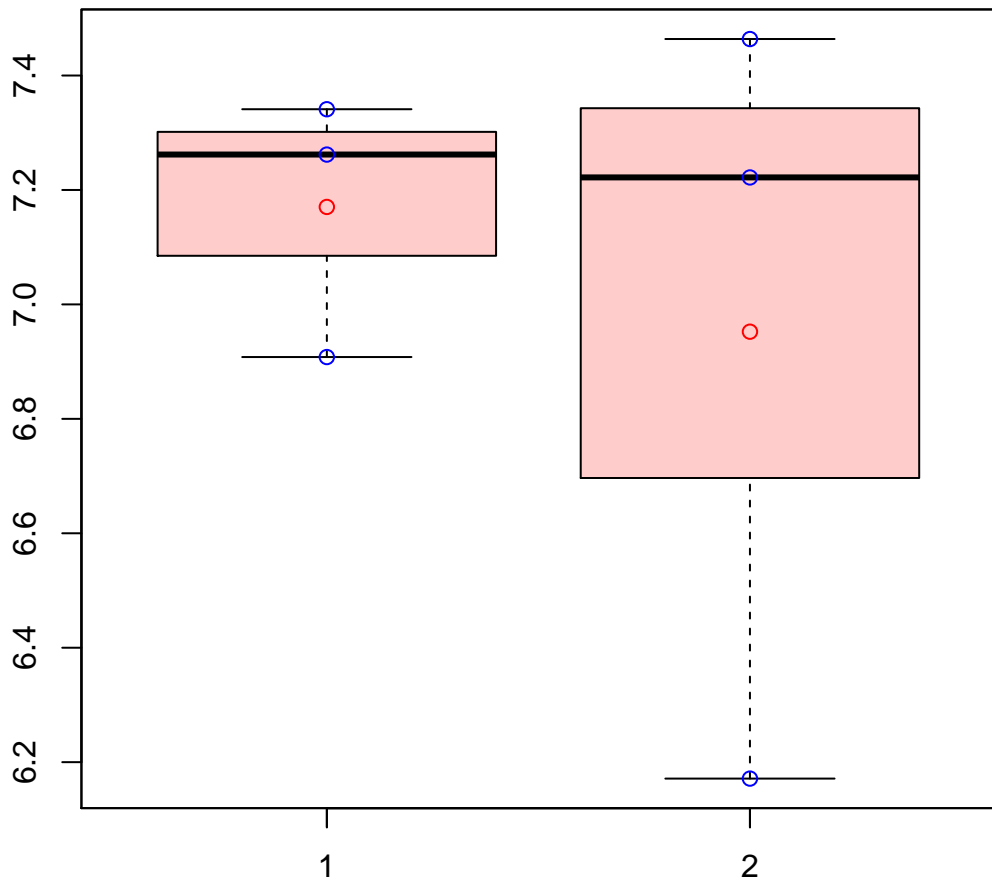

t-Test: p-value = 0.65



# B9F5K9|B9F5K9\_ORYSJ

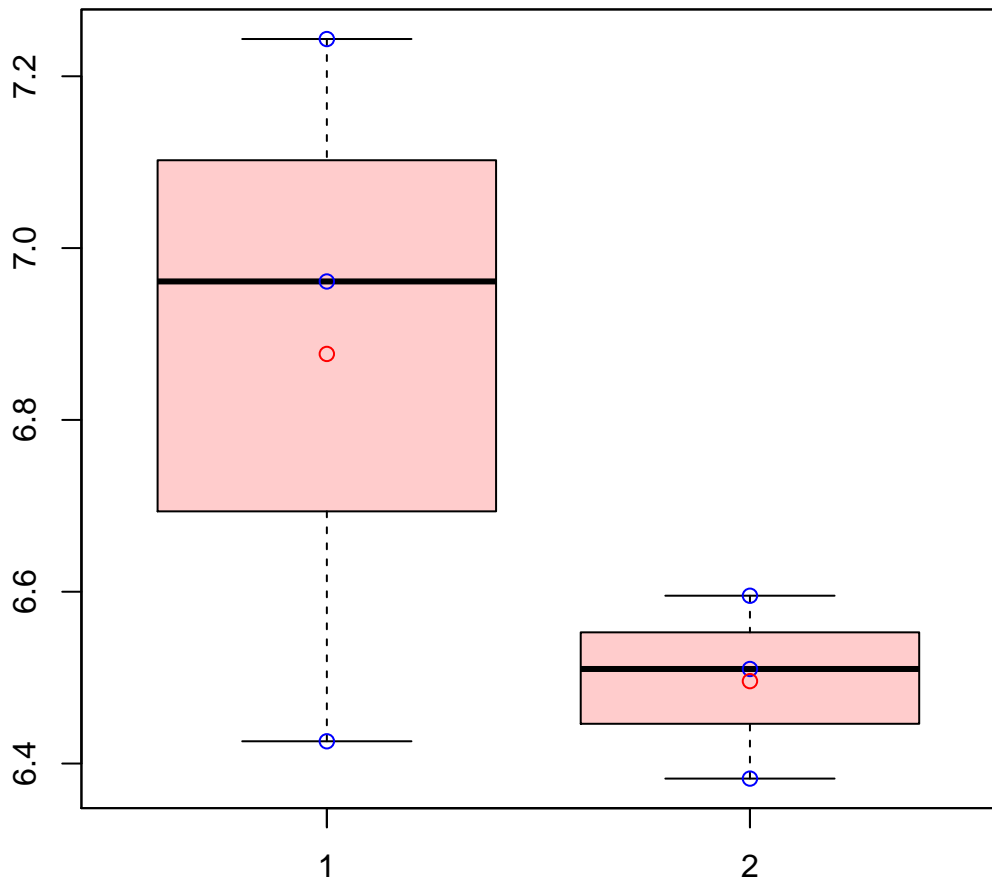

t-Test: p-value = 0.25

# B9F5X5|B9F5X5\_ORYSJ

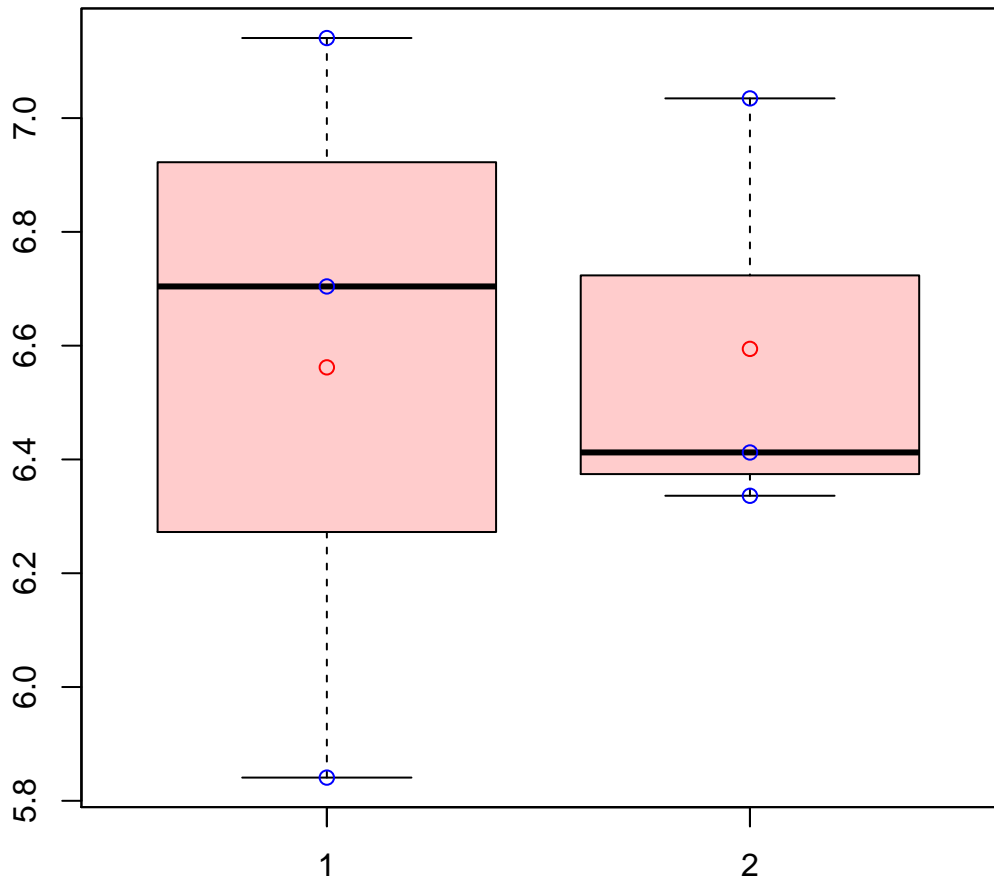

t-Test: p-value = 0.95

# B9F5Z4|B9F5Z4\_ORYSJ

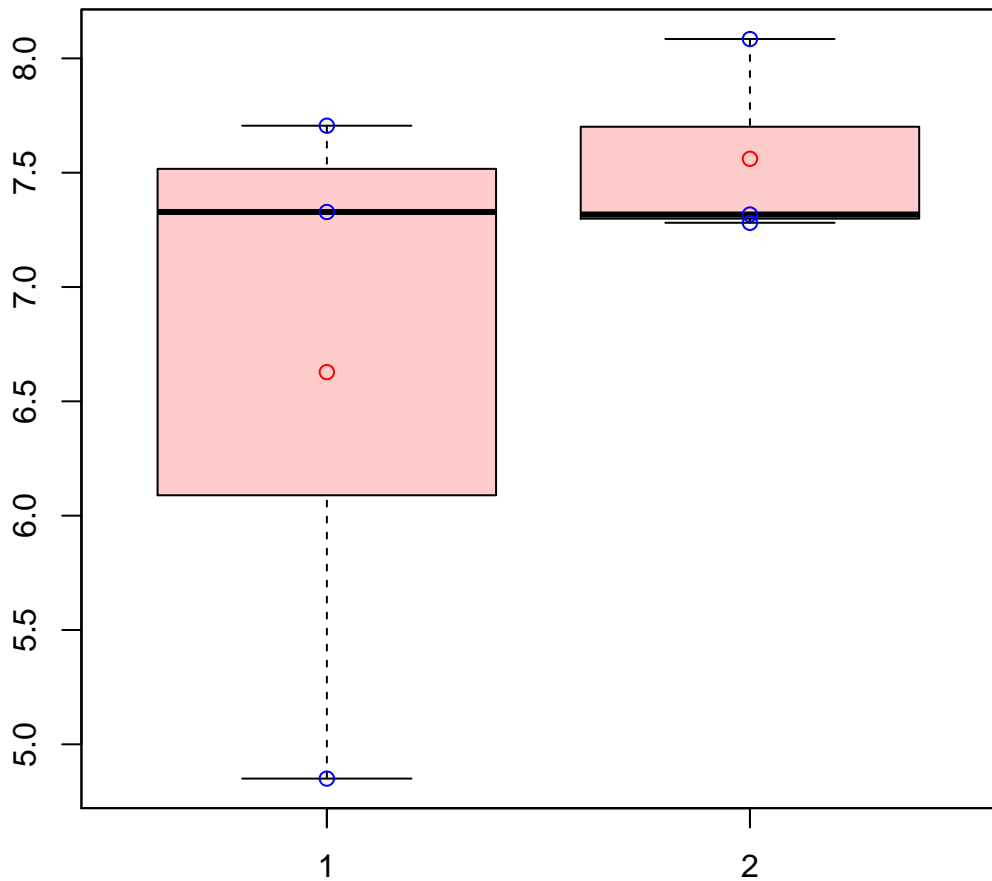

t-Test: p-value = 0.41

# B9F6D9|B9F6D9\_ORYSJ

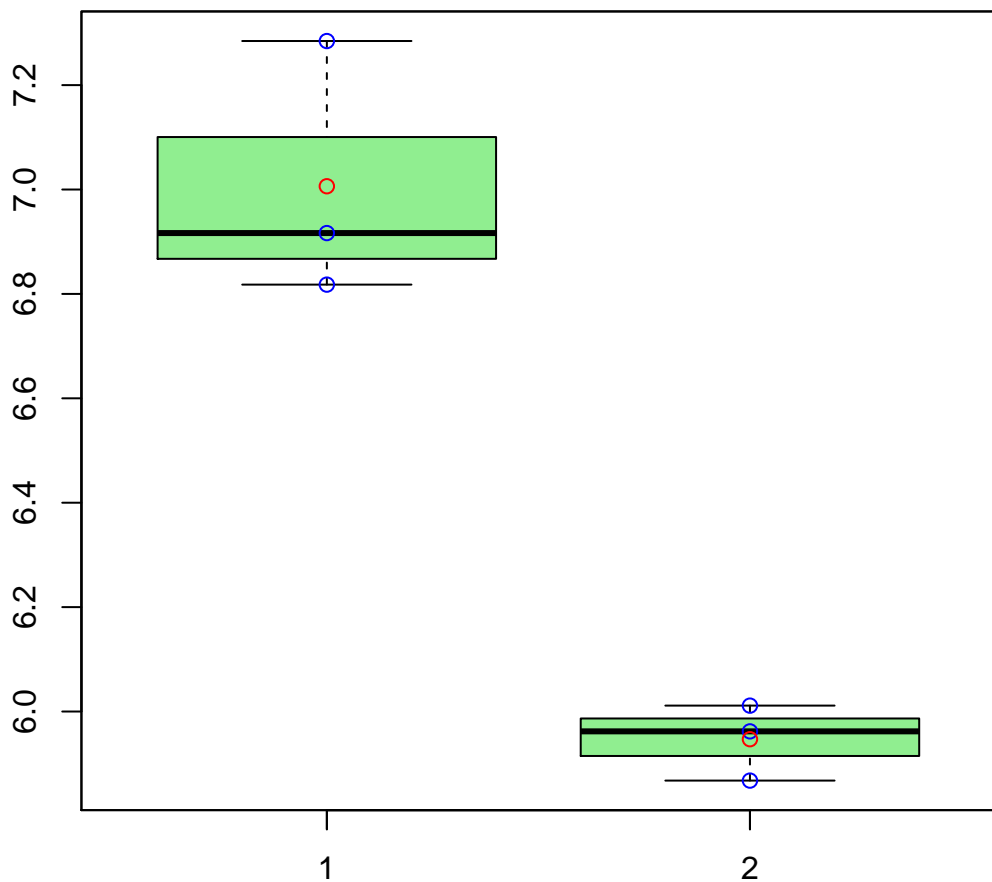

t-Test: p-value = 0.01

# B9F795|B9F795\_ORYSJ

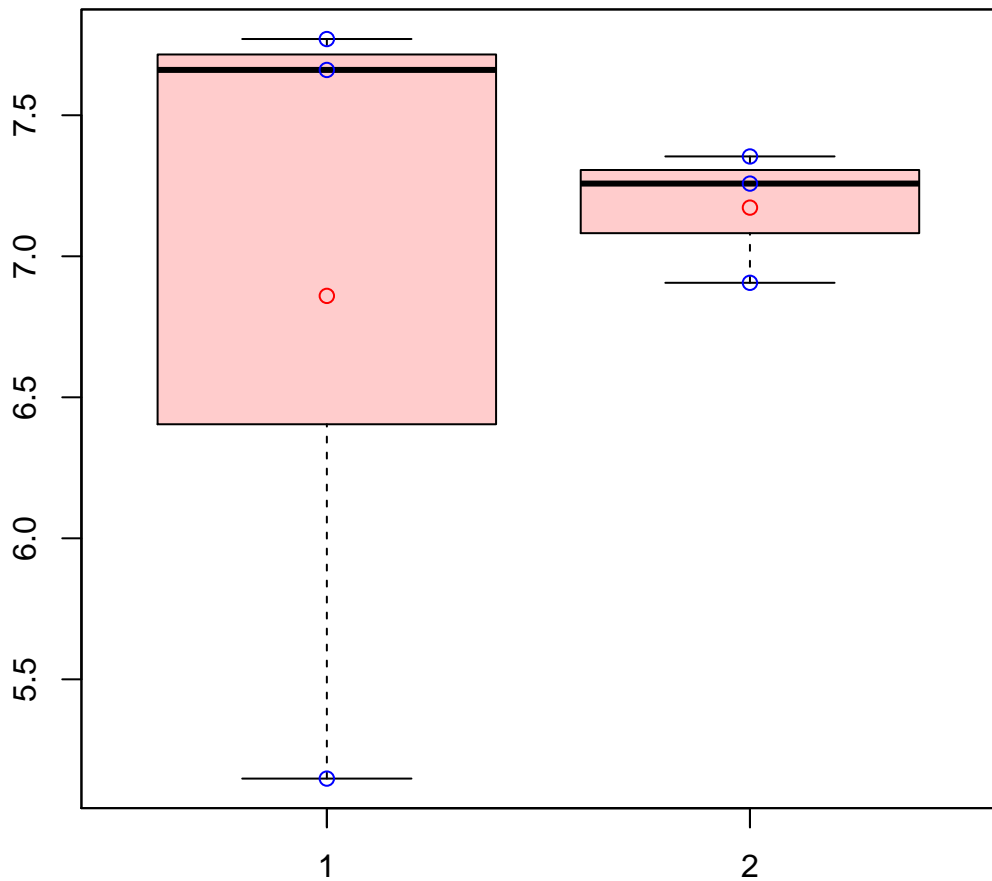

t-Test: p-value = 0.75

# B9F800|B9F800\_ORYSJ

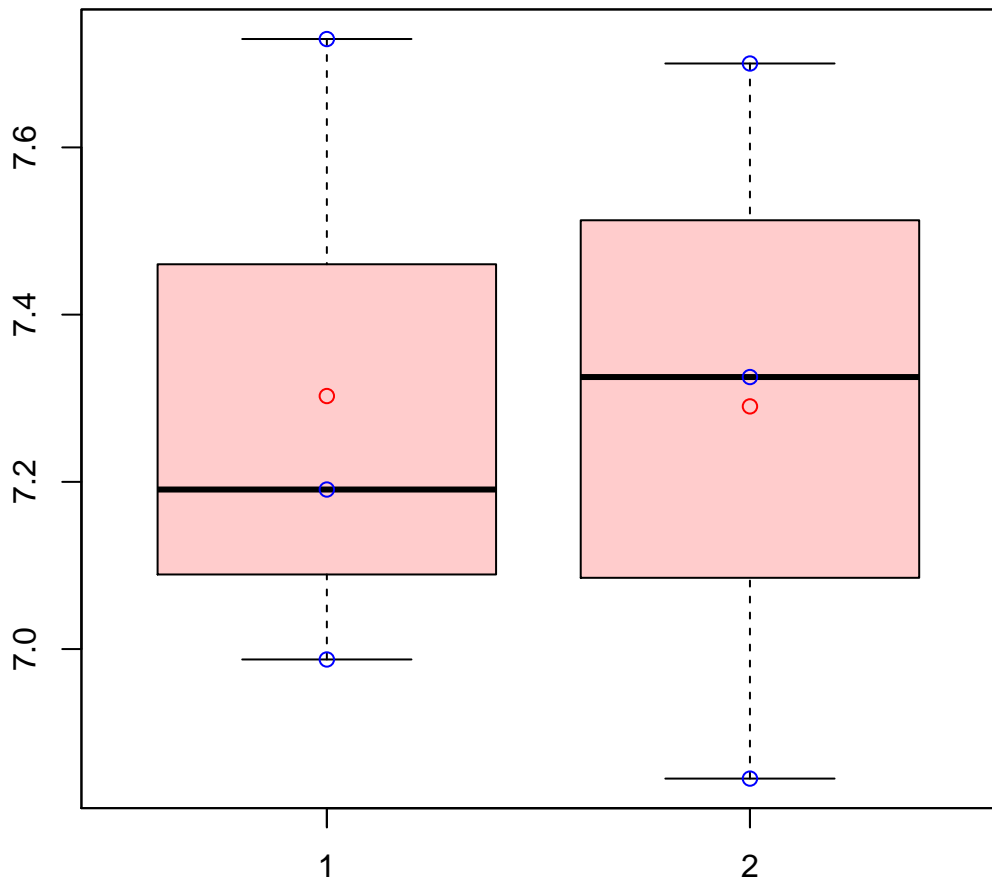

t-Test: p-value = 0.97

# B9F8C3|B9F8C3\_ORYSJ

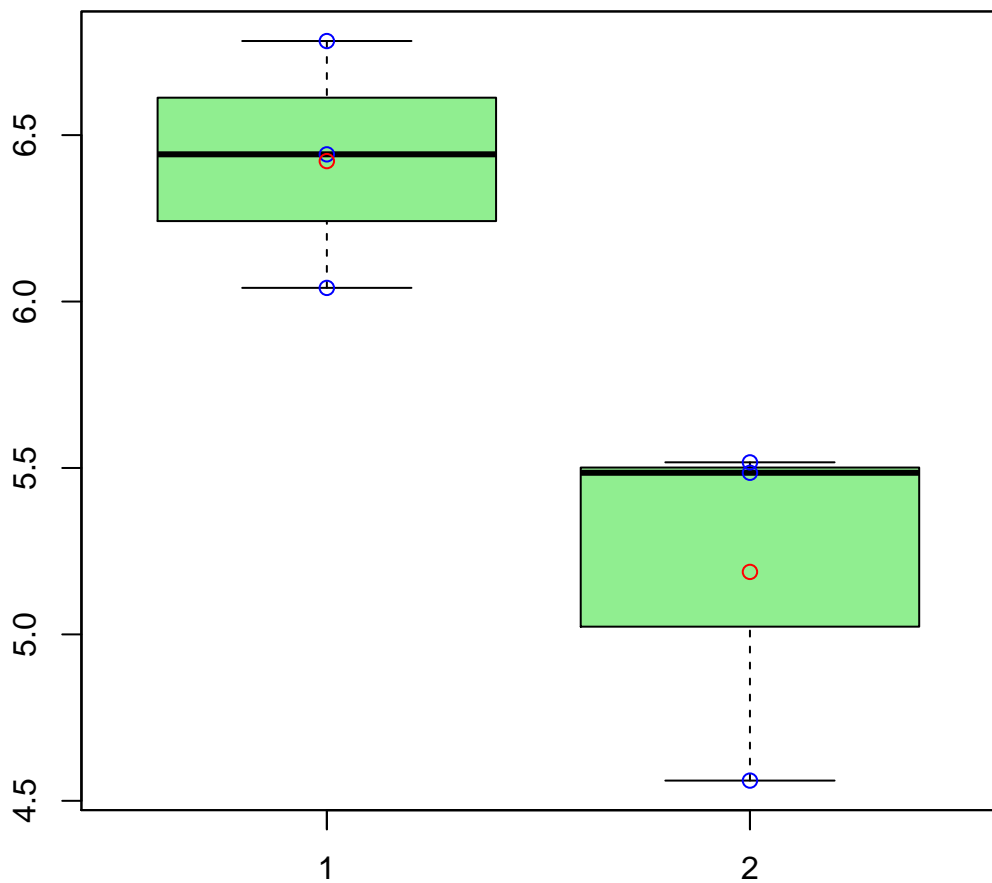

t-Test: p-value = 0.04

# B9F8L5|B9F8L5\_ORYSJ

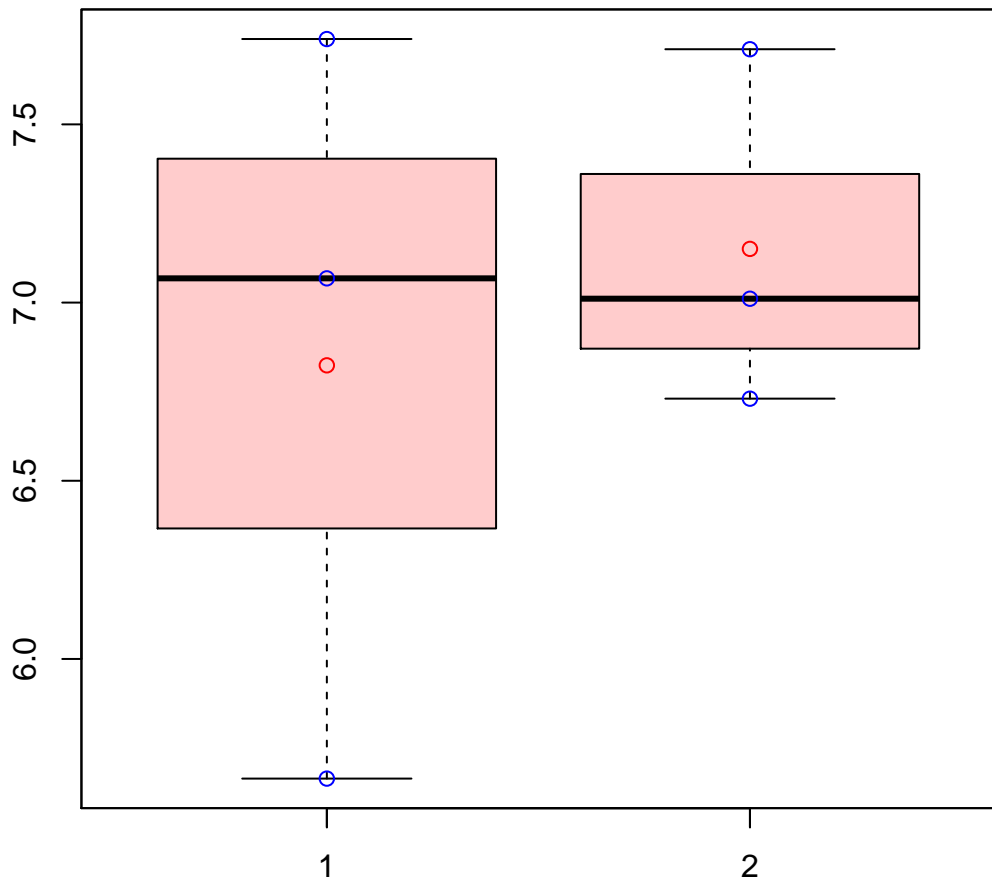

t-Test: p-value = 0.66



# B9F8Y9|B9F8Y9\_ORYSJ

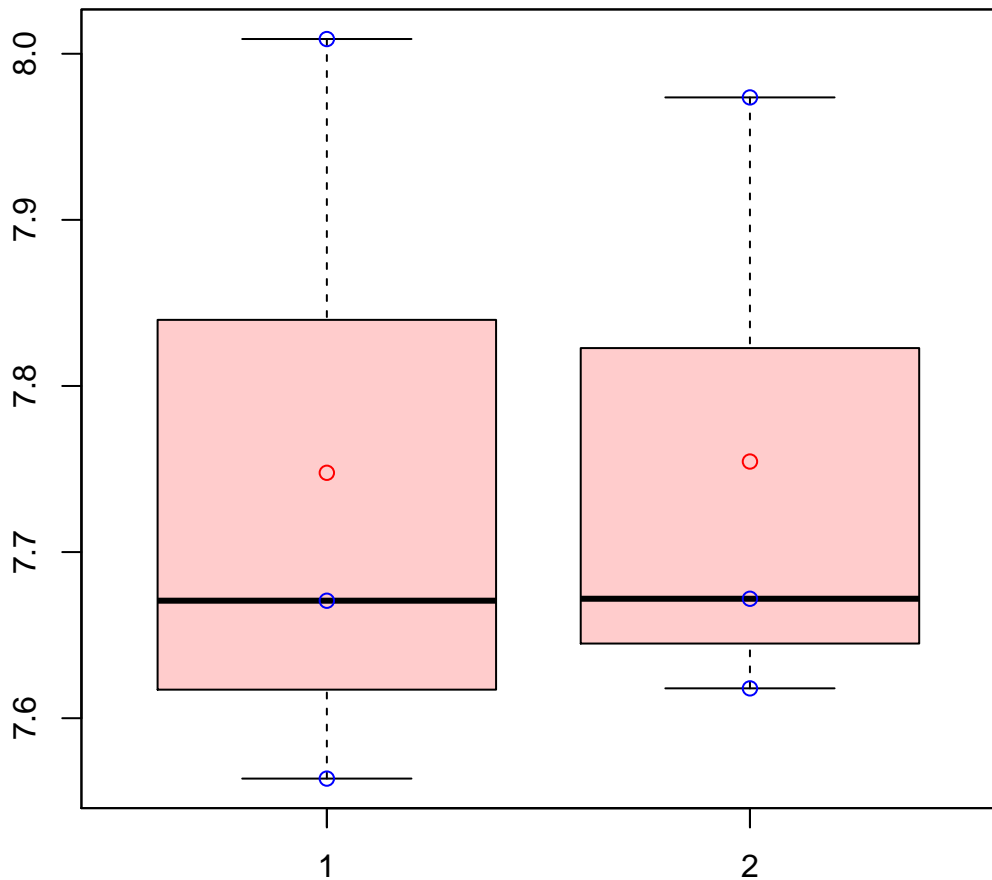

t-Test: p-value = 0.97

# B9F9Y4|B9F9Y4\_ORYSJ

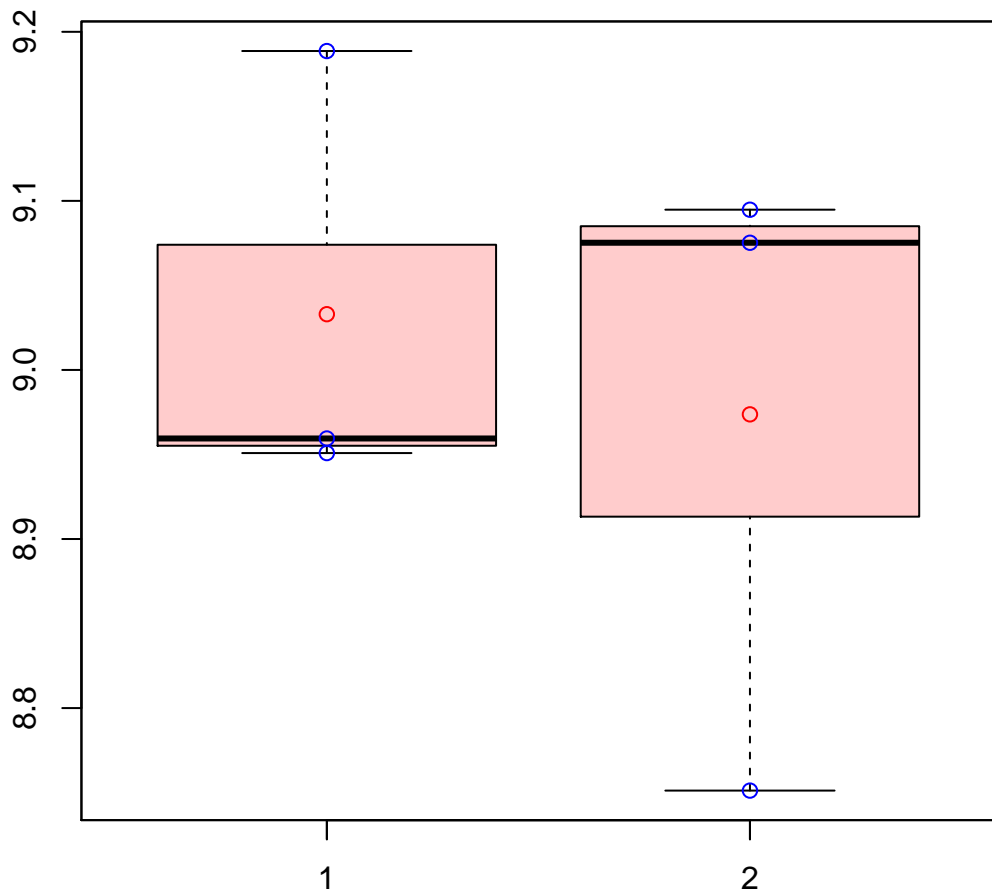

t-Test: p-value = 0.69

# B9FAE9|B9FAE9\_ORYSJ

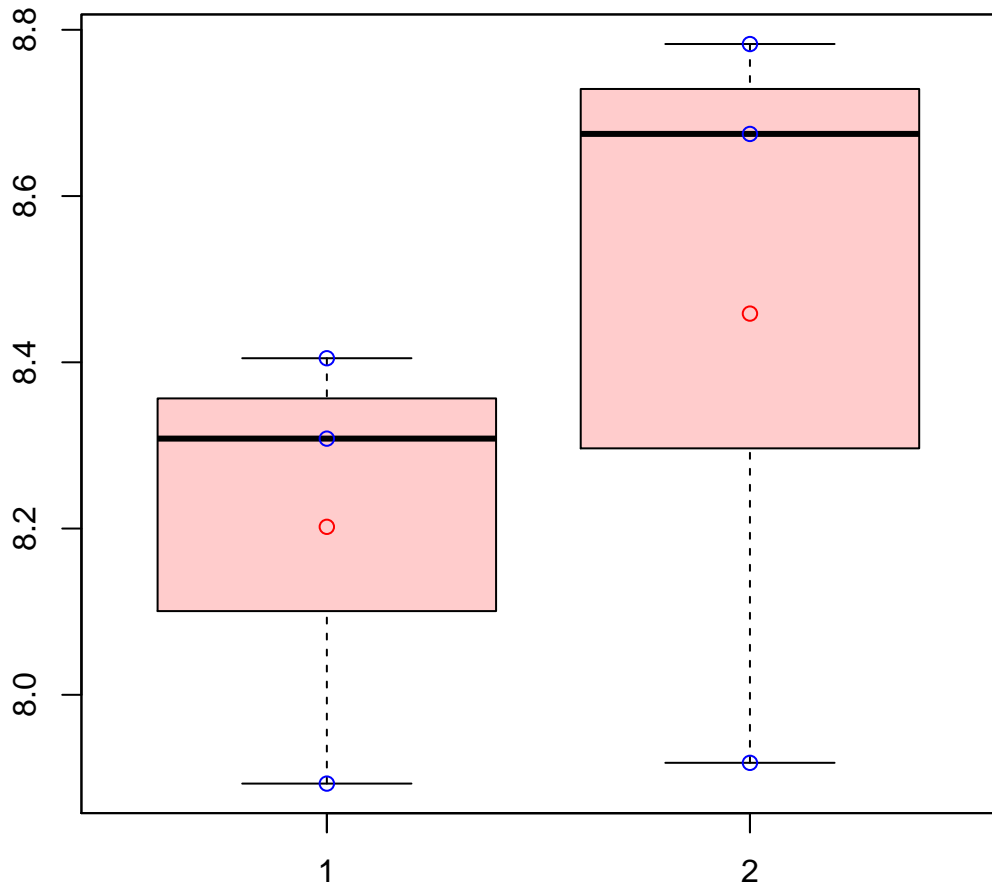

t-Test: p-value = 0.47

# B9FAM5|B9FAM5\_ORYSJ

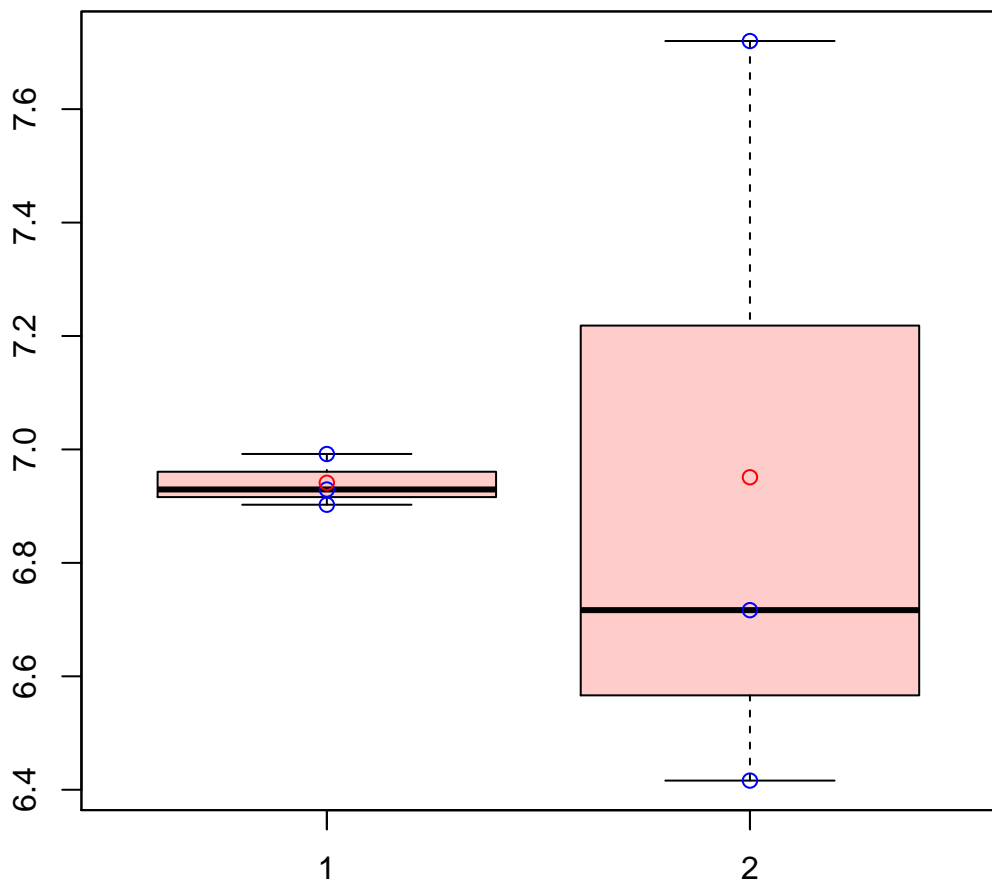

t-Test: p-value = 0.98

# B9FAN3|B9FAN3\_ORYSJ

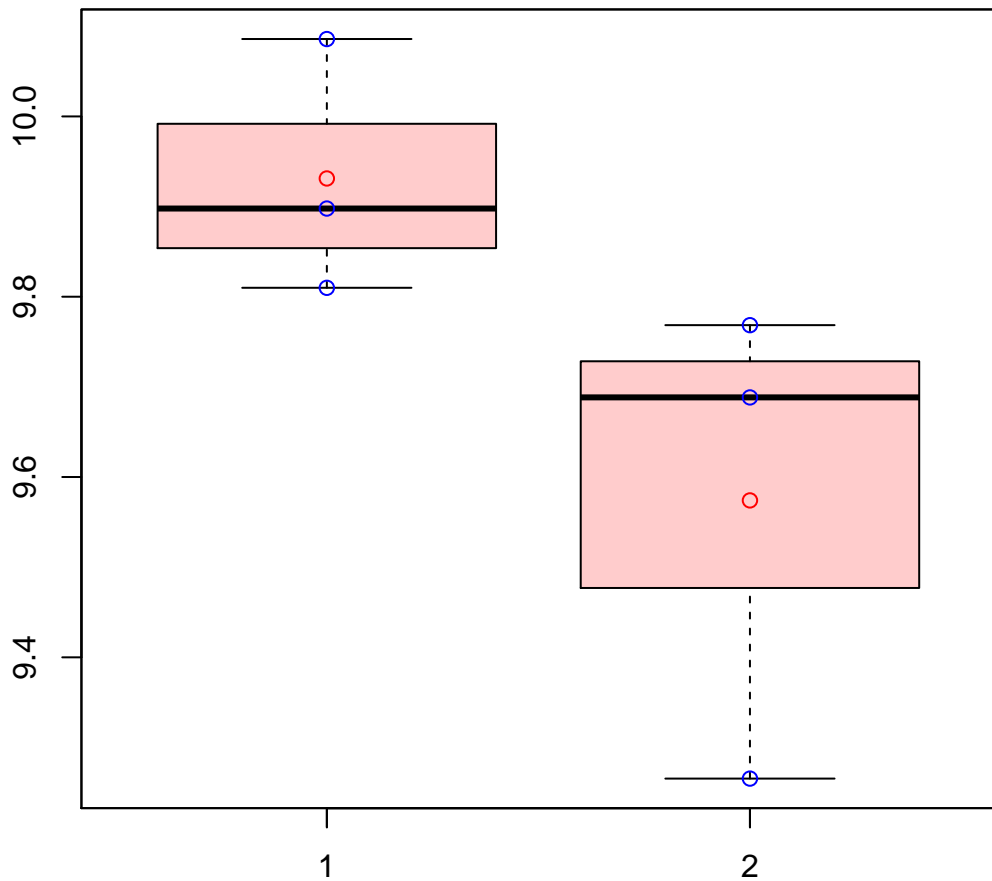

t-Test: p-value = 0.14

# B9FAZ4|B9FAZ4\_ORYSJ

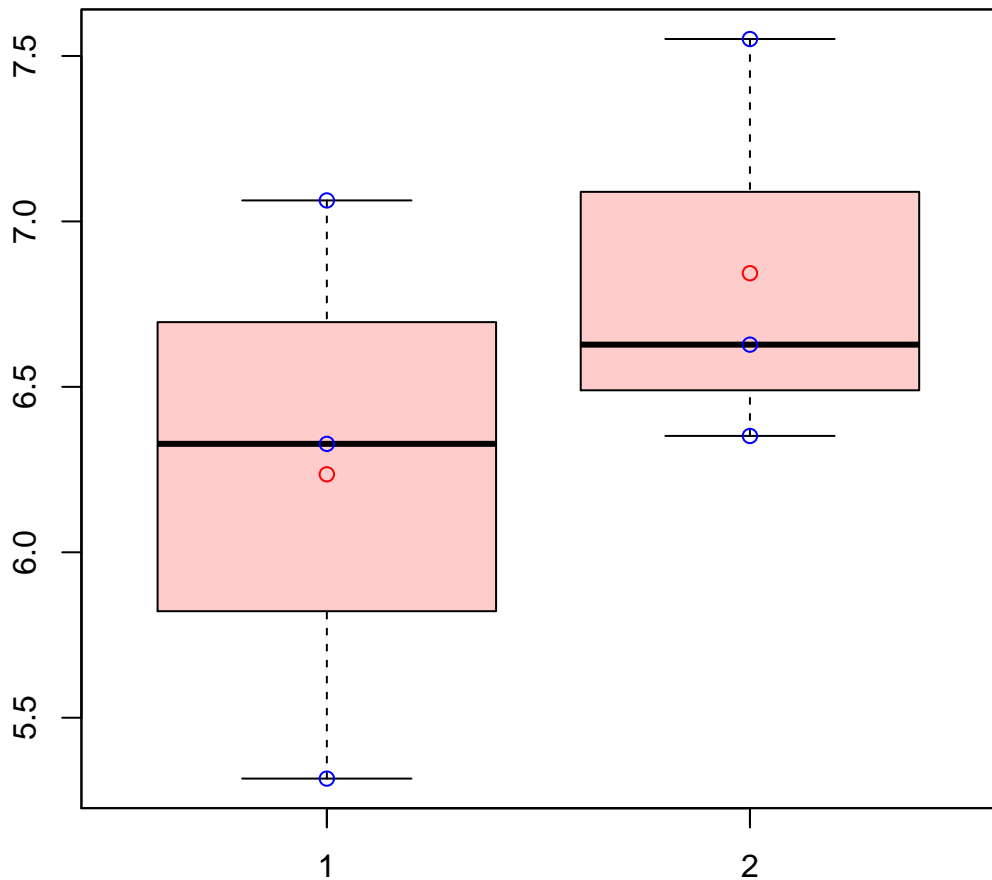

t-Test: p-value = 0.39

# B9FBH7|B9FBH7\_ORYSJ

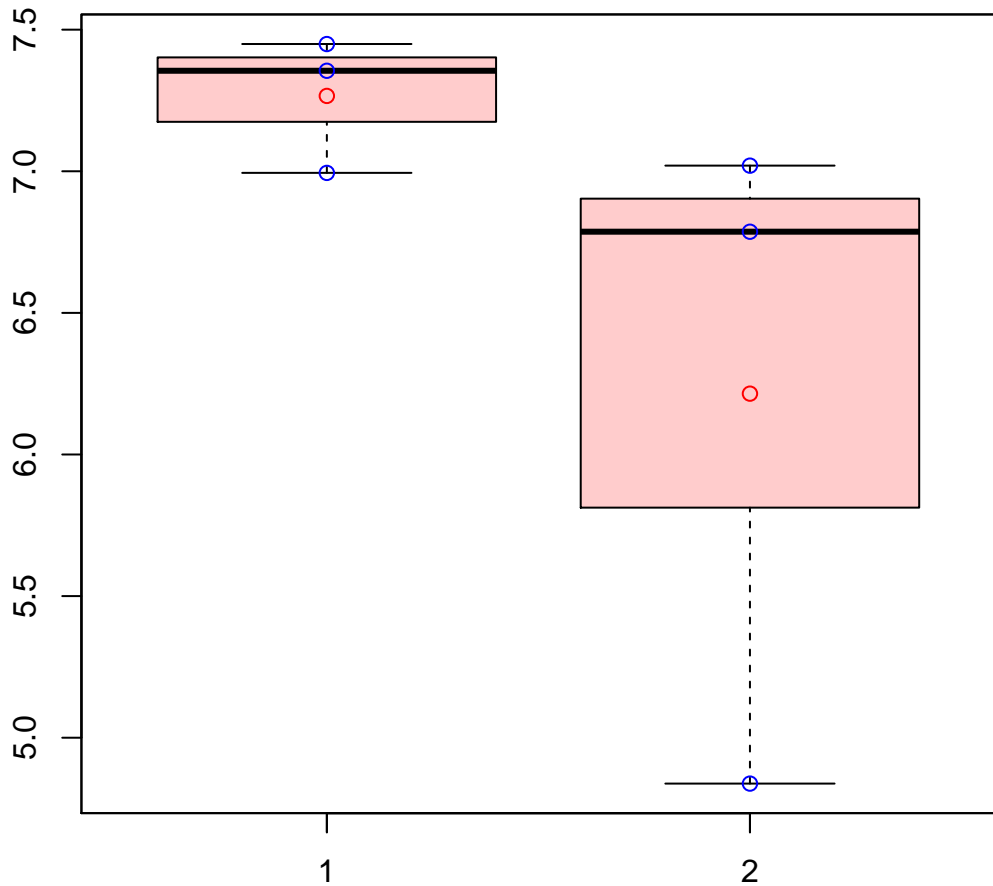

t-Test: p-value = 0.27

# B9FBQ3|B9FBQ3\_ORYSJ

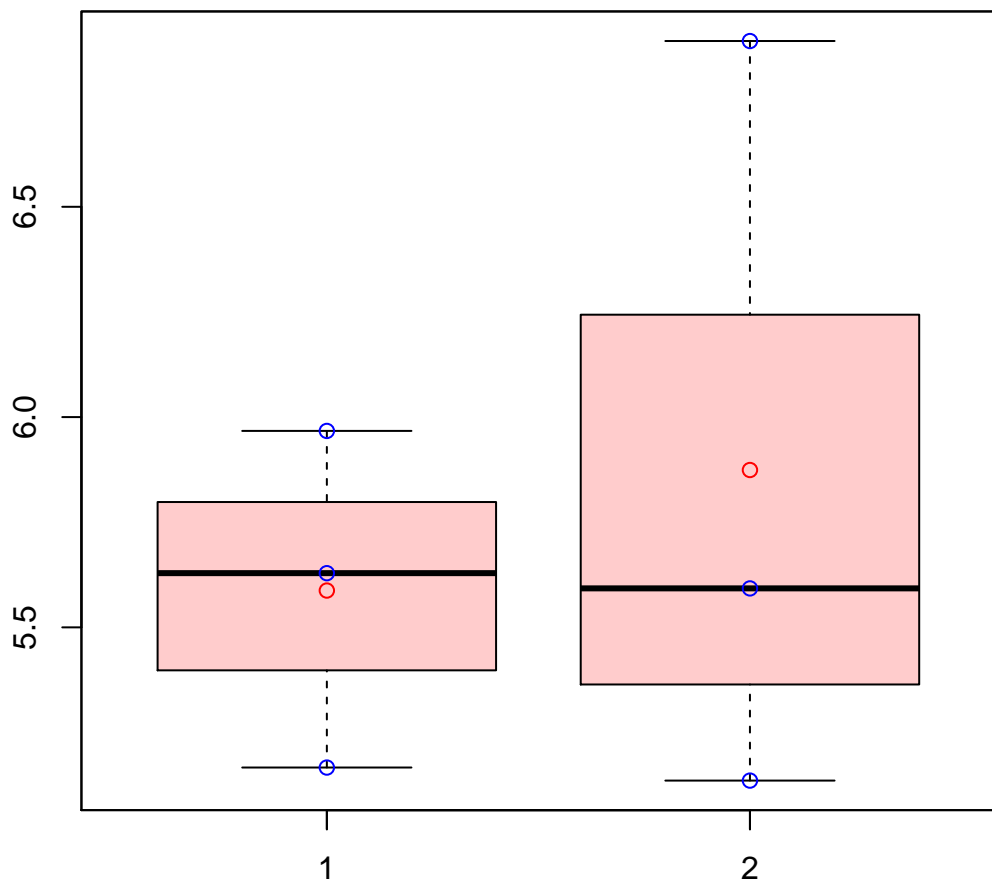

t-Test: p-value = 0.66



# B9FBT4|B9FBT4\_ORYSJ

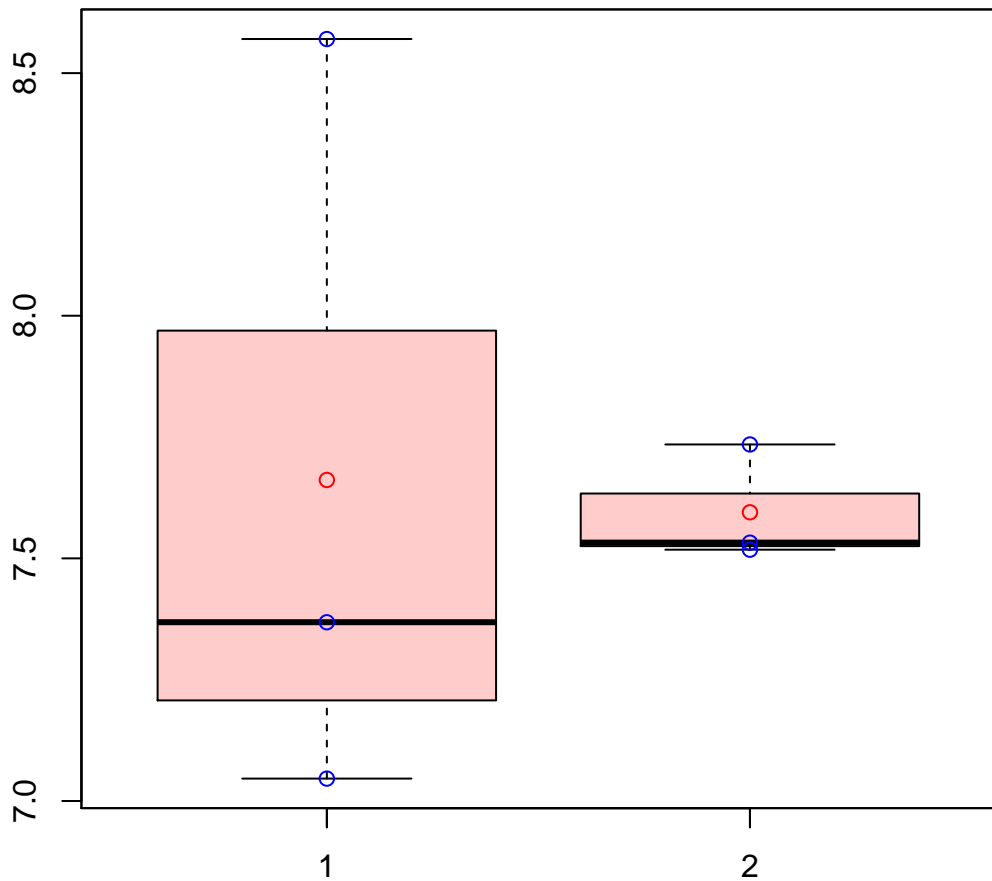

t-Test: p-value = 0.9

# B9FBT5|B9FBT5\_ORYSJ

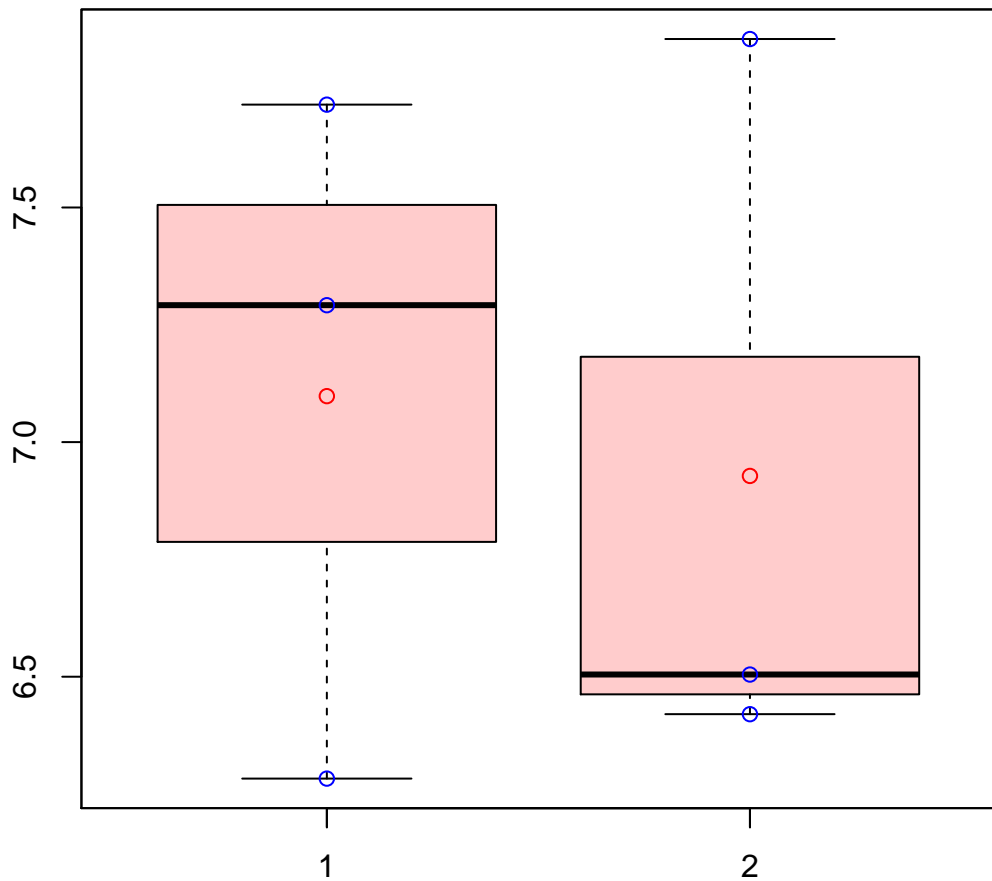

t-Test: p-value = 0.8

# B9FCW9|B9FCW9\_ORYSJ

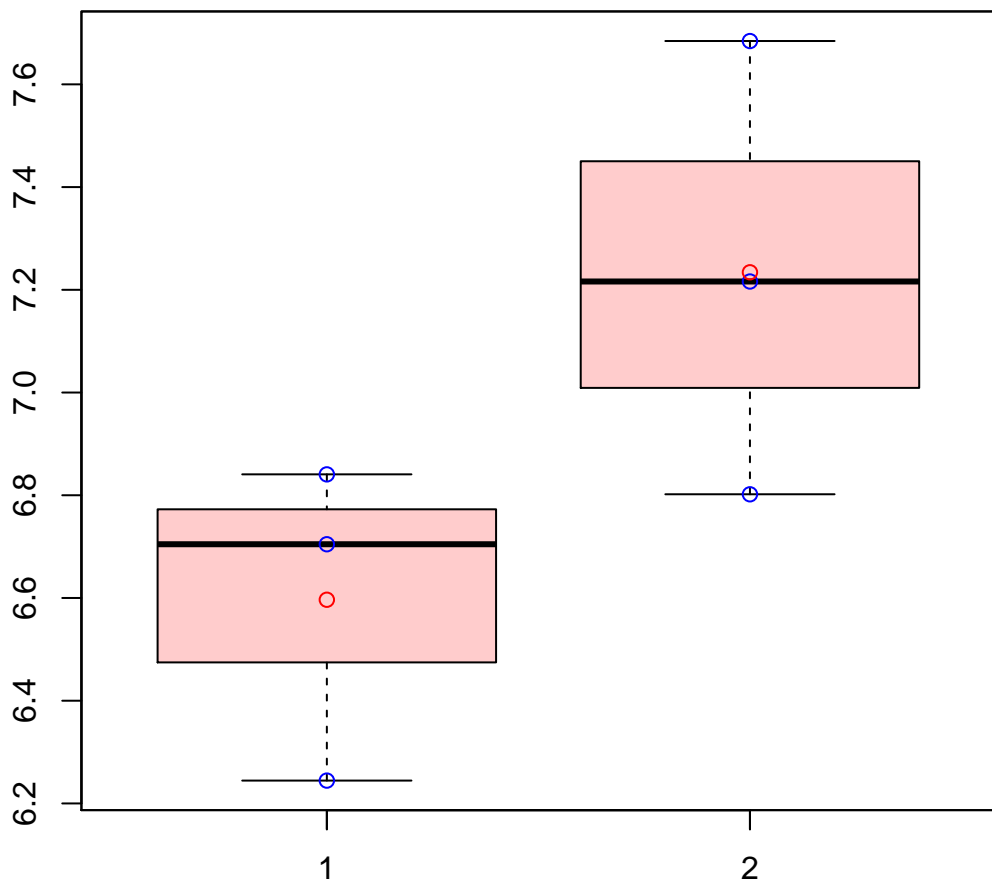

t-Test: p-value = 0.12

# B9FEN1|B9FEN1\_ORYSJ

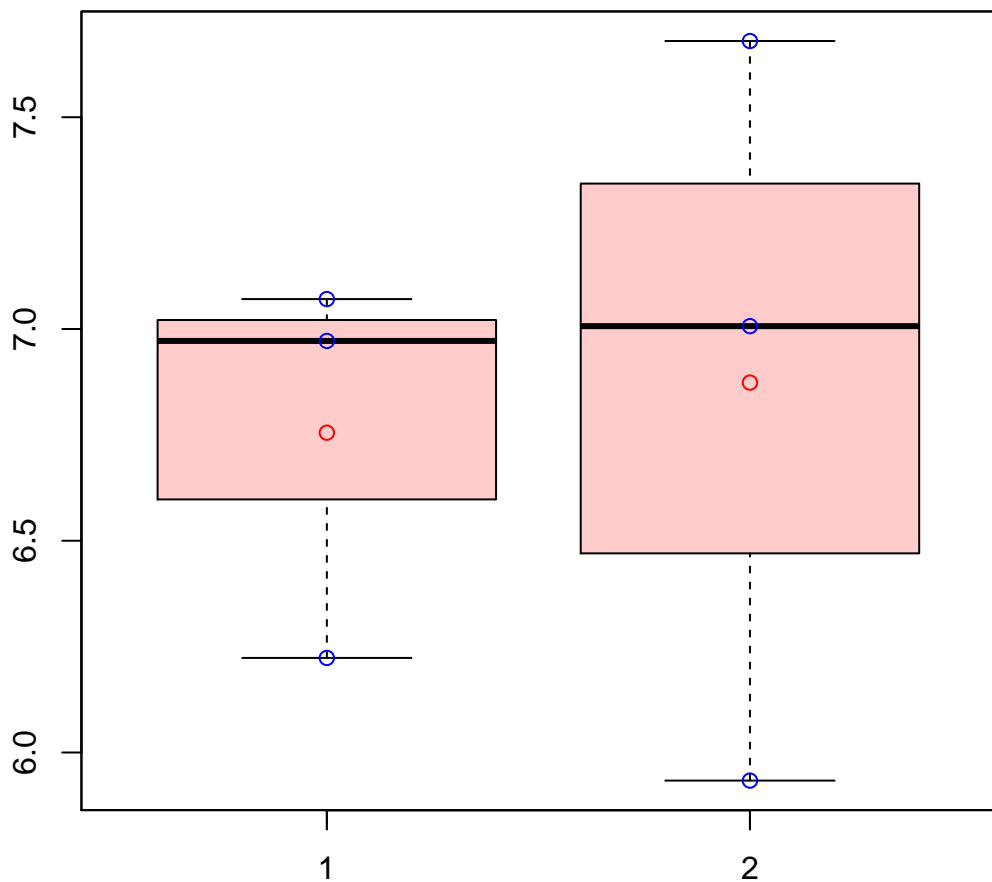

t-Test: p-value = 0.85

# B9FEW6|B9FEW6\_ORYSJ

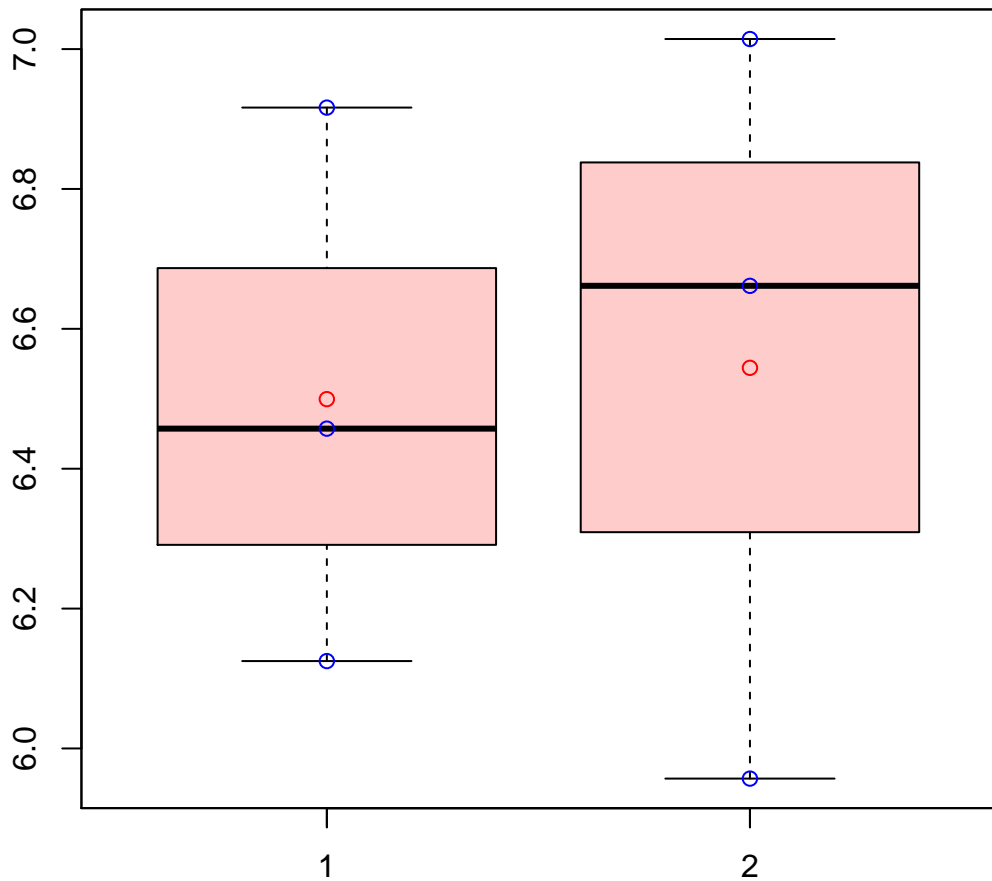

t-Test: p-value = 0.91

# B9FF16|B9FF16\_ORYSJ

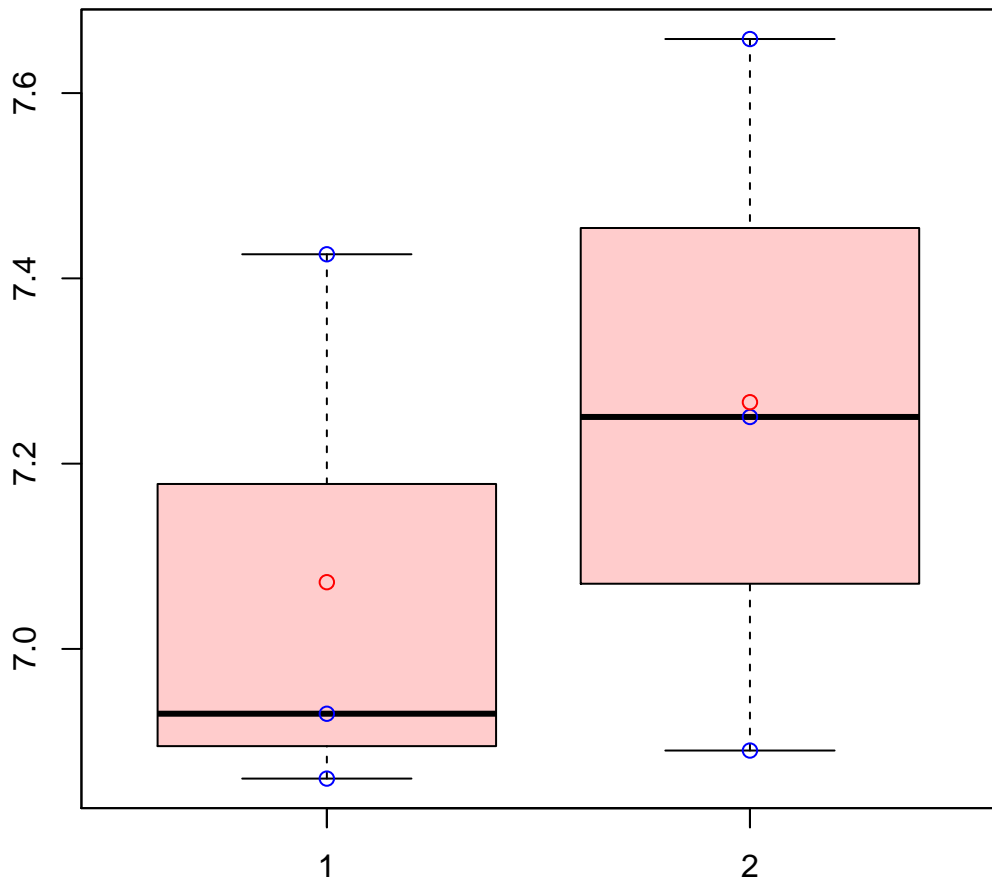

t-Test: p-value = 0.53

# B9FGE6|B9FGE6\_ORYSJ

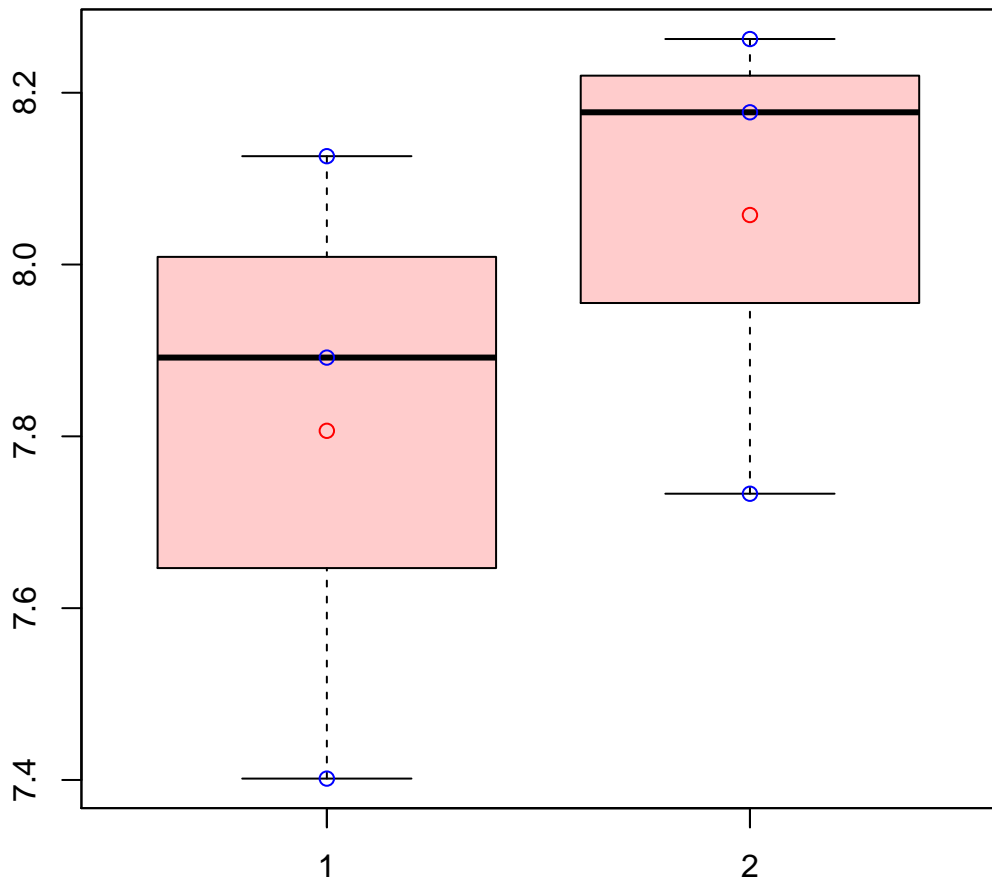

t-Test: p-value = 0.41

# B9FGP3|B9FGP3\_ORYSJ

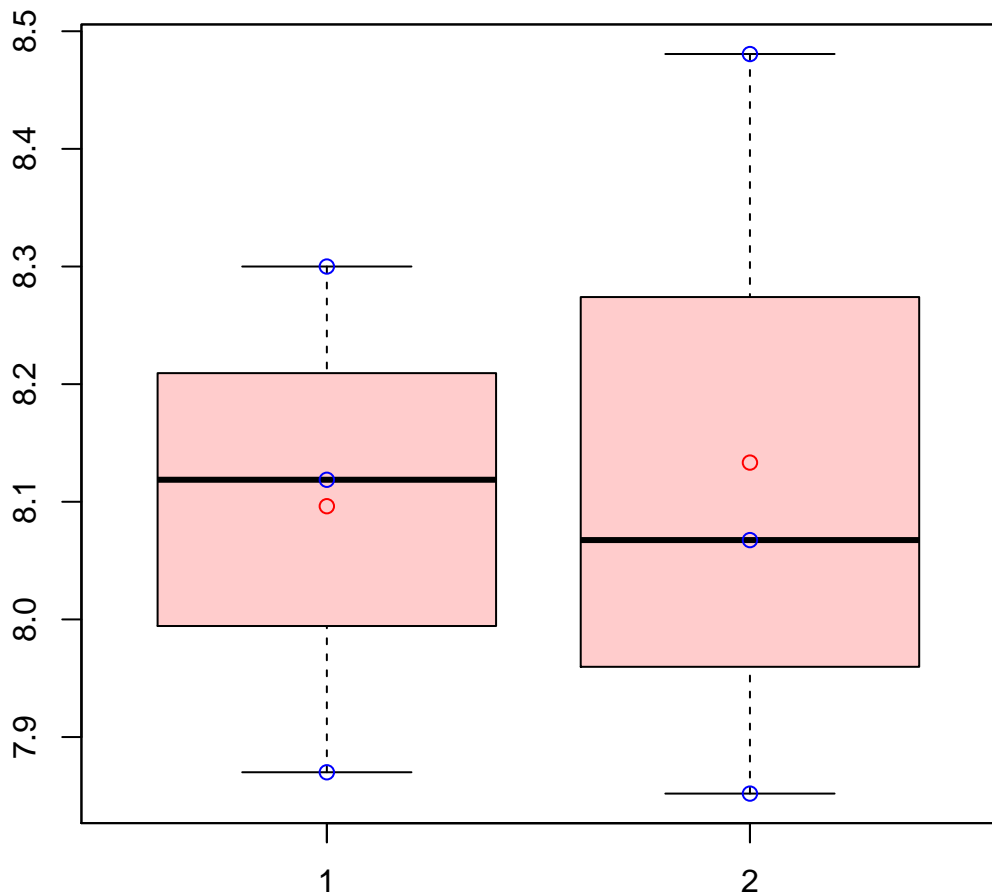

t-Test: p-value = 0.88



# B9FHI2|B9FHI2\_ORYSJ

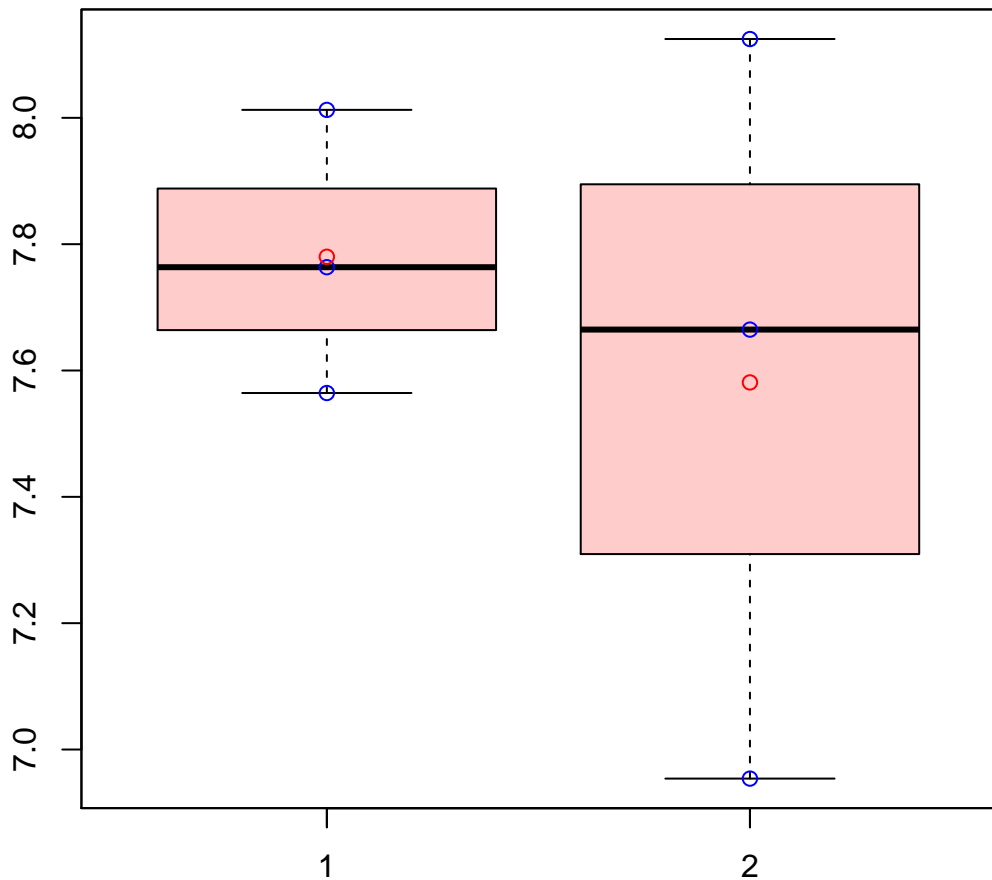

t-Test: p-value = 0.63

# B9FI80|B9FI80\_ORYSJ

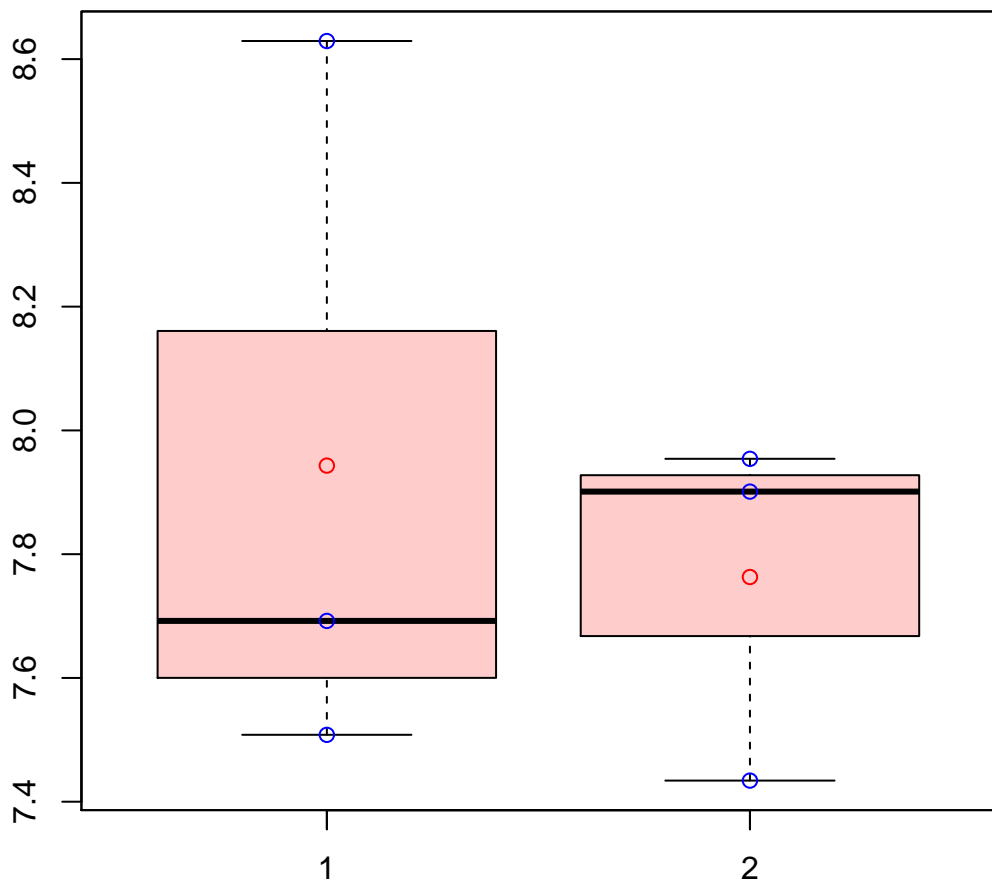

t-Test: p-value = 0.67

# B9FJK5|B9FJK5\_ORYSJ

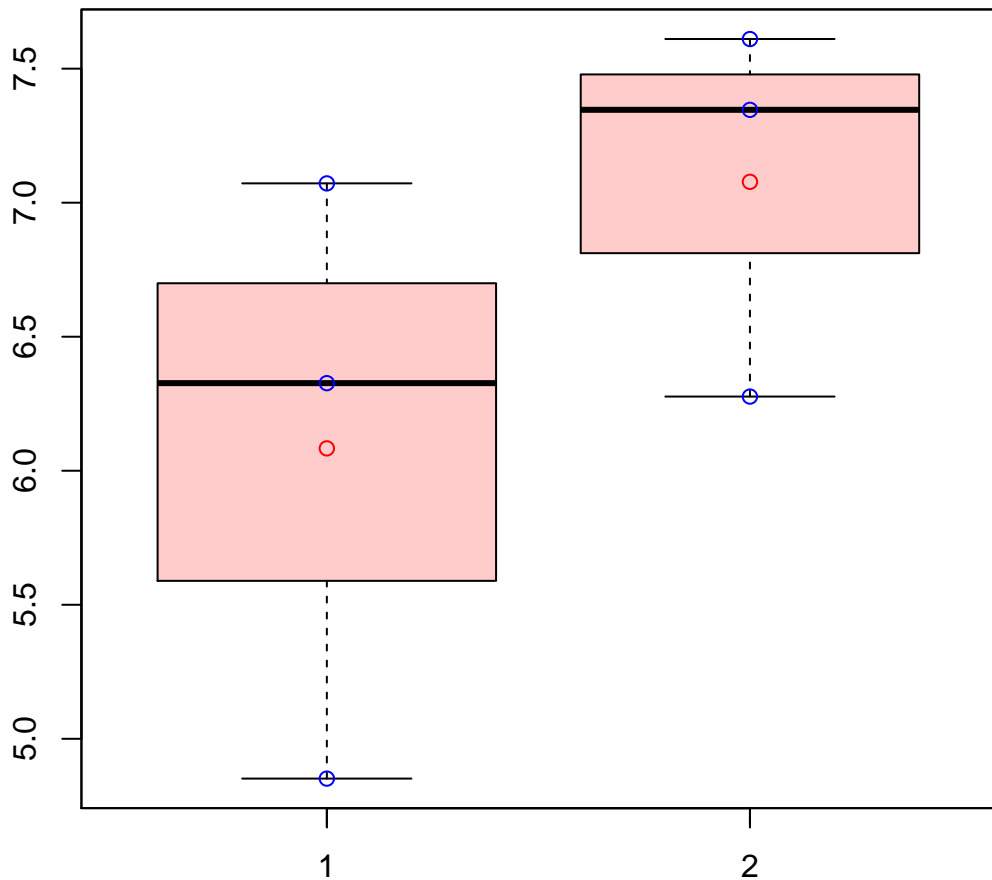

t-Test: p-value = 0.28

# B9FJU9|B9FJU9\_ORYSJ

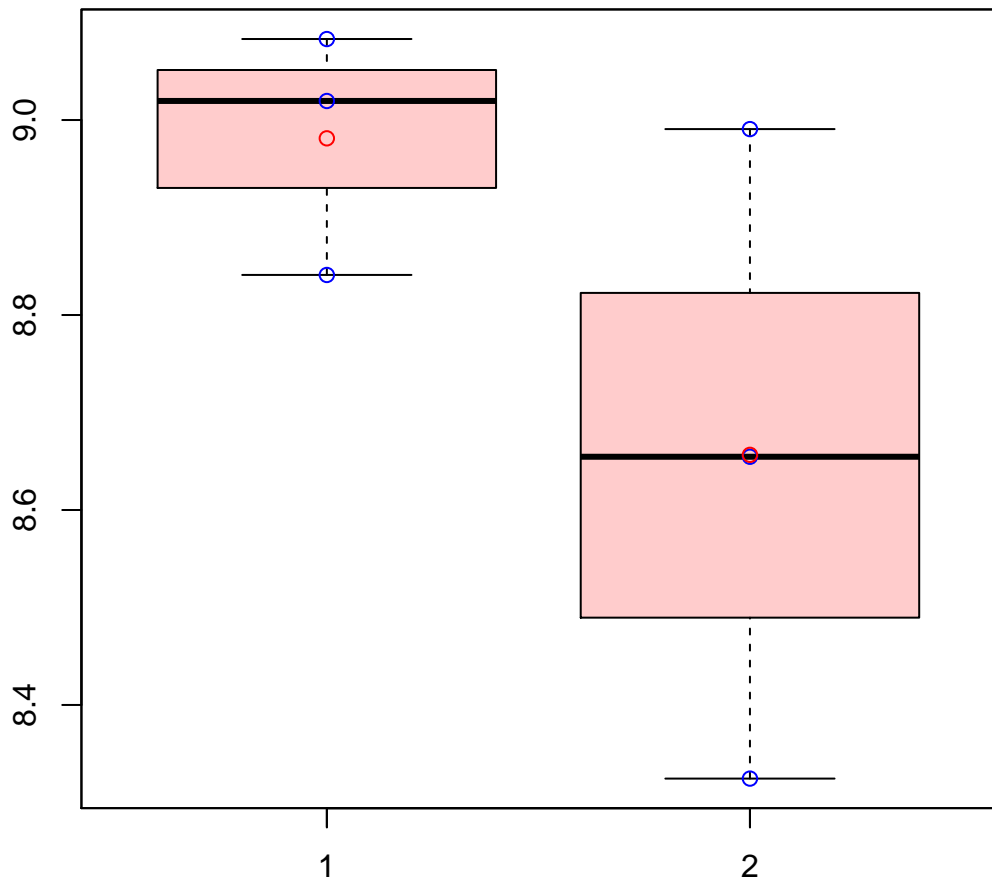

t-Test: p-value = 0.23

# B9FLI4|B9FLI4\_ORYSJ

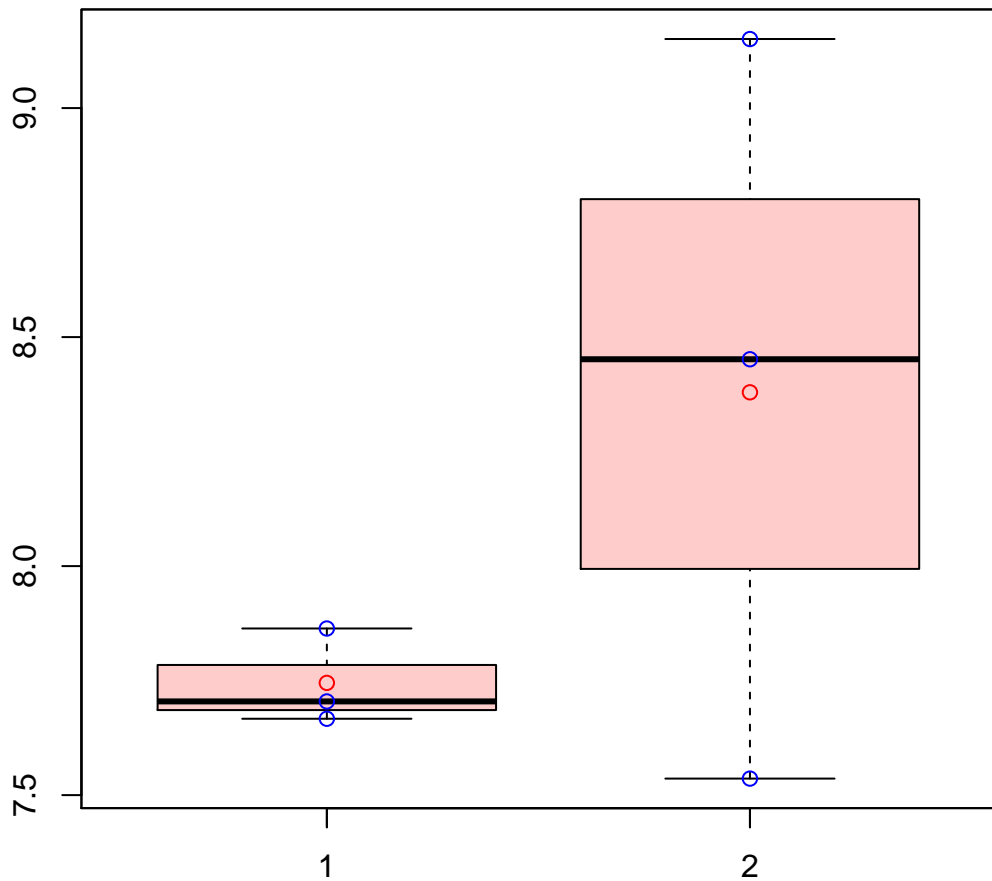

t-Test: p-value = 0.31

# B9FNB5|B9FNB5\_ORYSJ

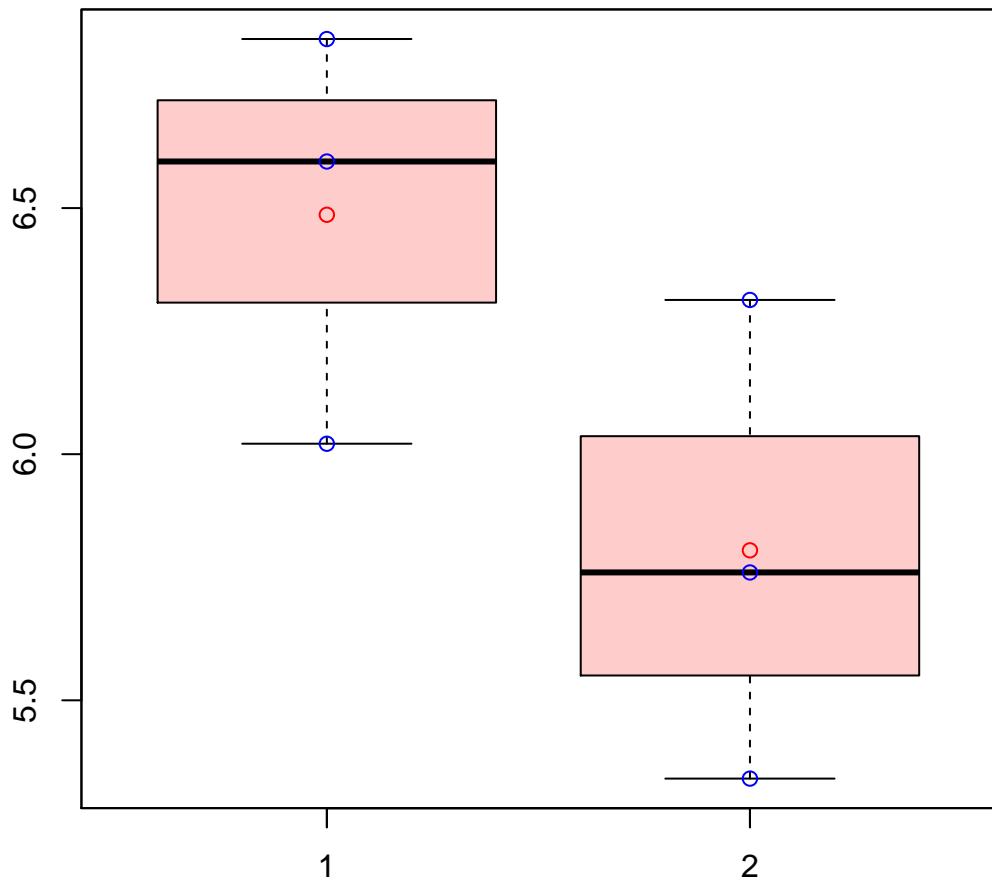

t-Test: p-value = 0.14

# B9FNC7|B9FNC7\_ORYSJ

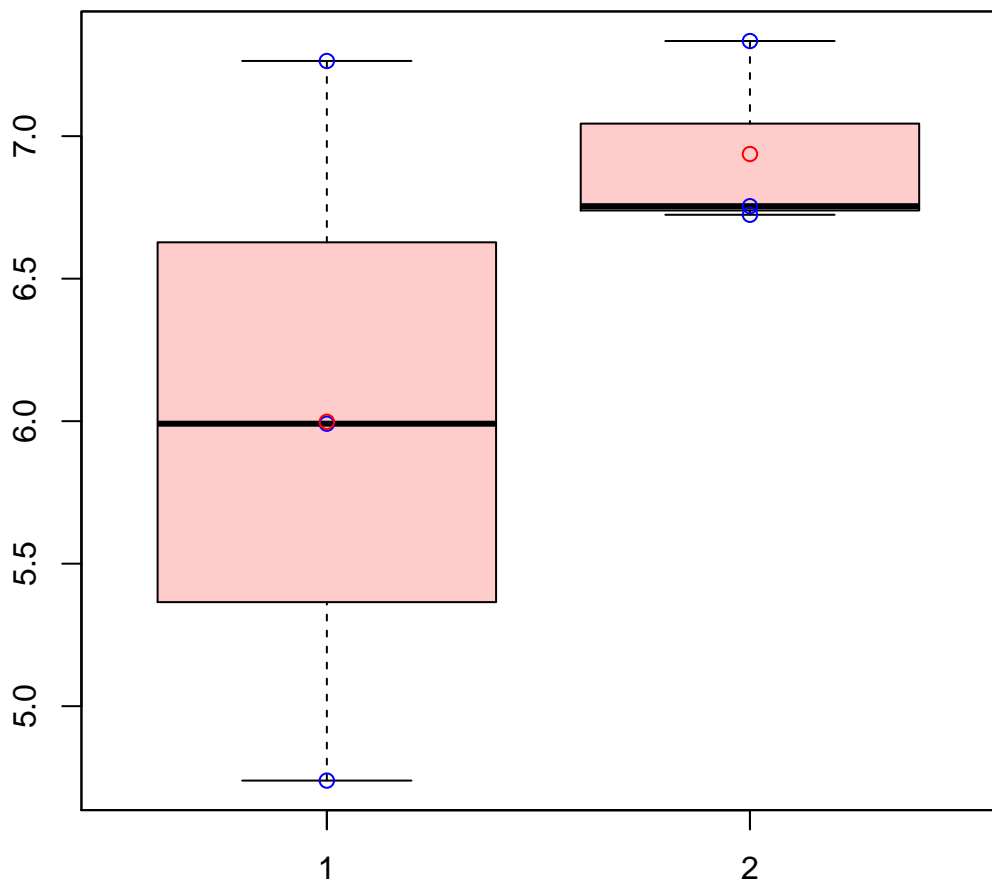

t-Test: p-value = 0.33

# B9FND8|B9FND8\_ORYSJ

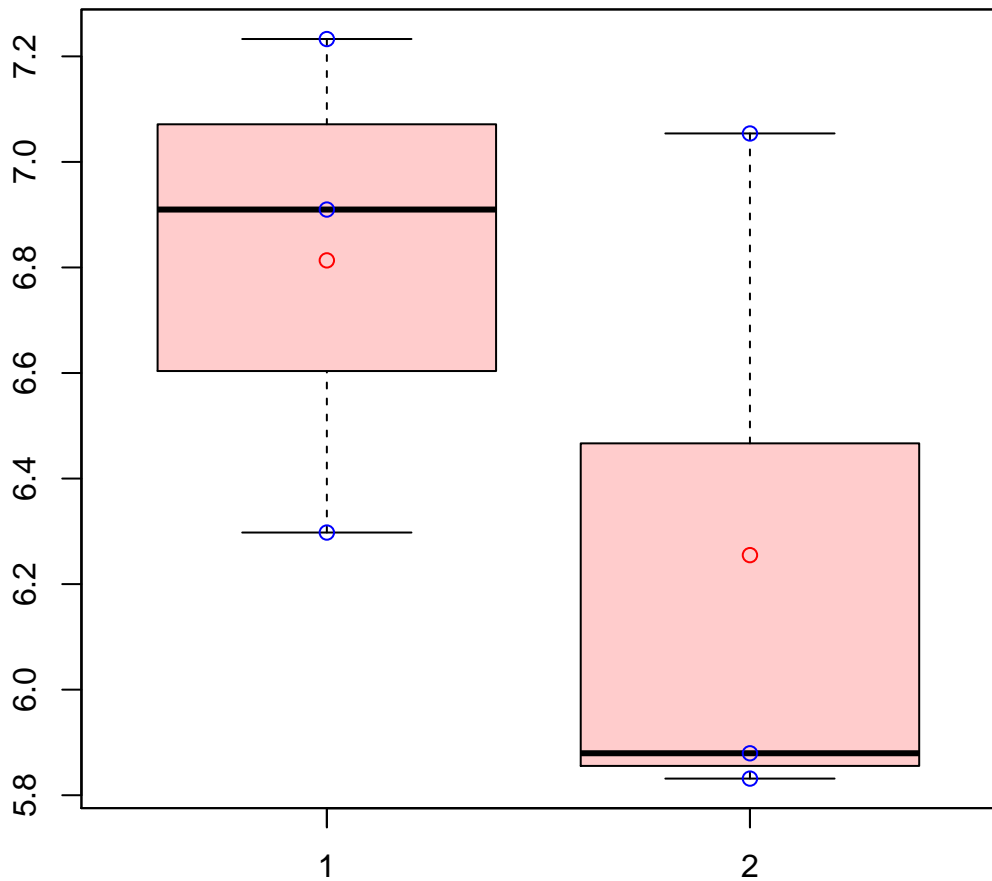

t-Test: p-value = 0.32



# B9FPK8|B9FPK8\_ORYSJ

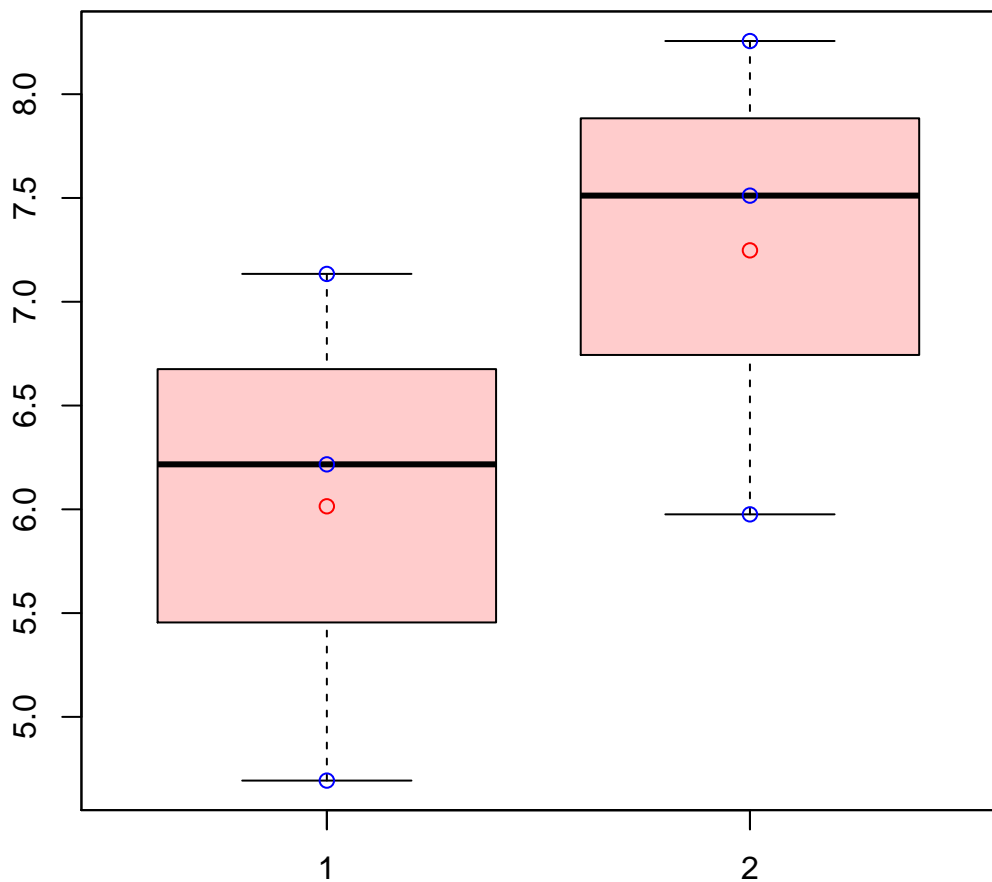

t-Test: p-value = 0.28

# B9FQ61|B9FQ61\_ORYSJ

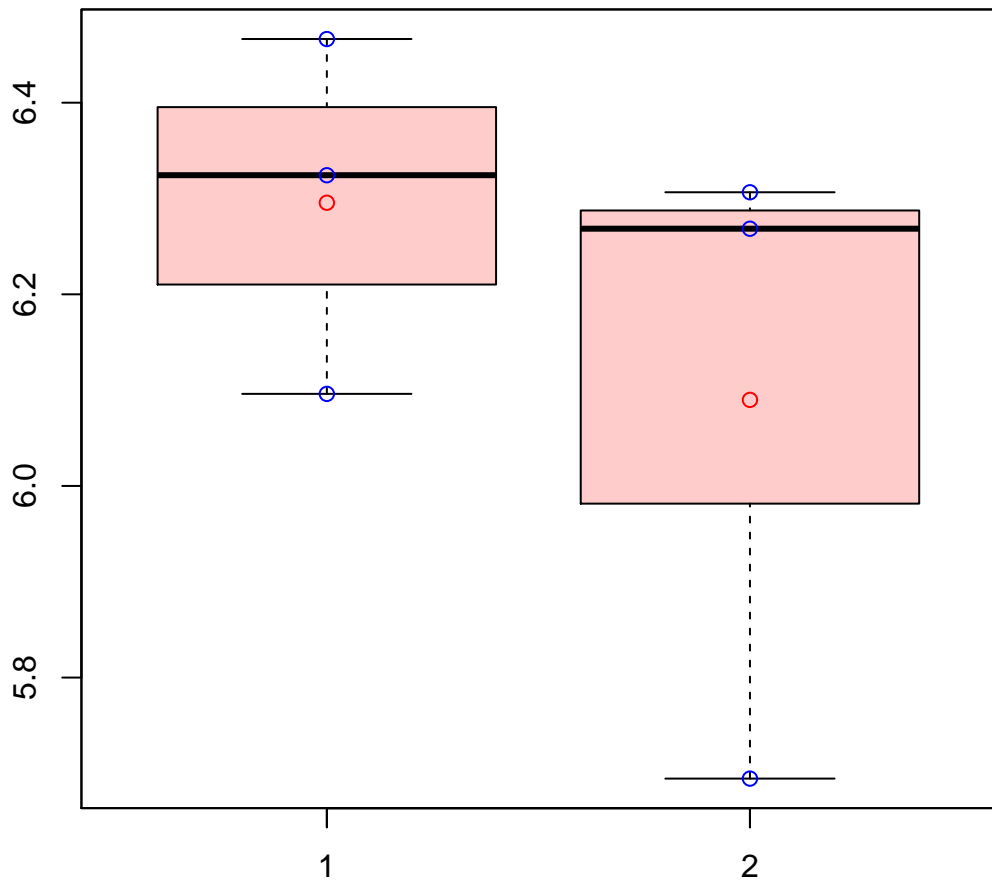

t-Test: p-value = 0.43

# B9FQ62|B9FQ62\_ORYSJ

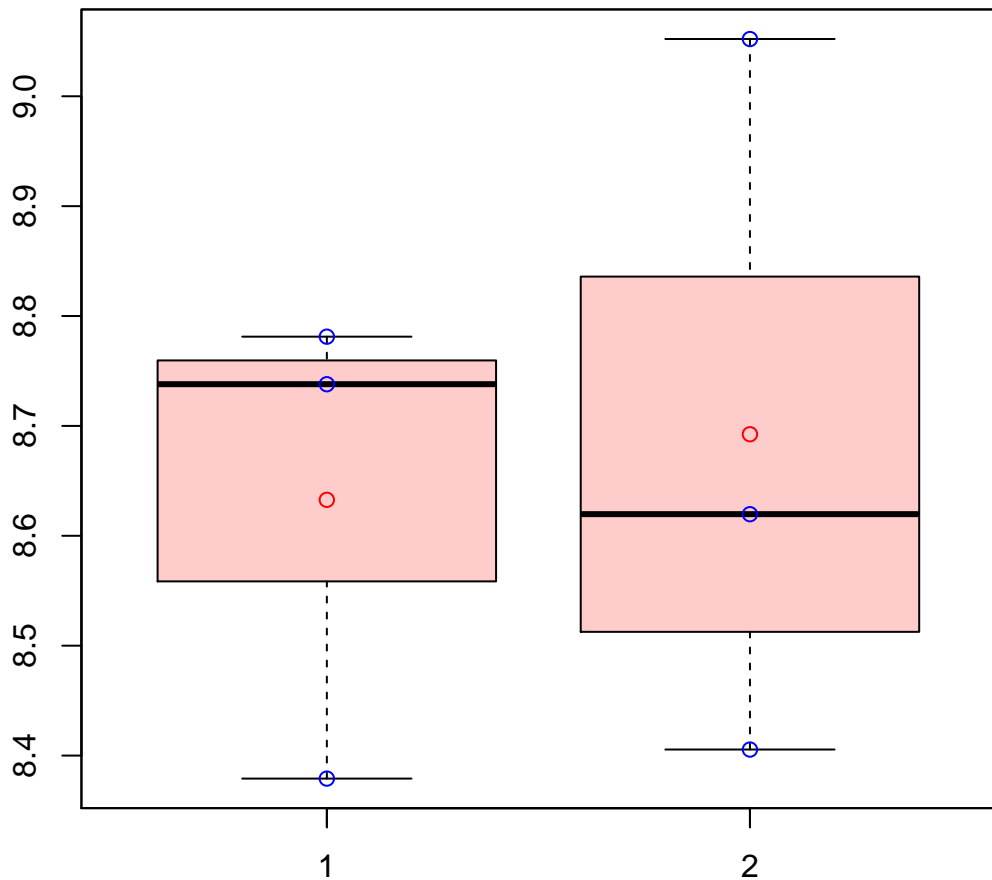

t-Test: p-value = 0.81

# B9FR06|B9FR06\_ORYSJ

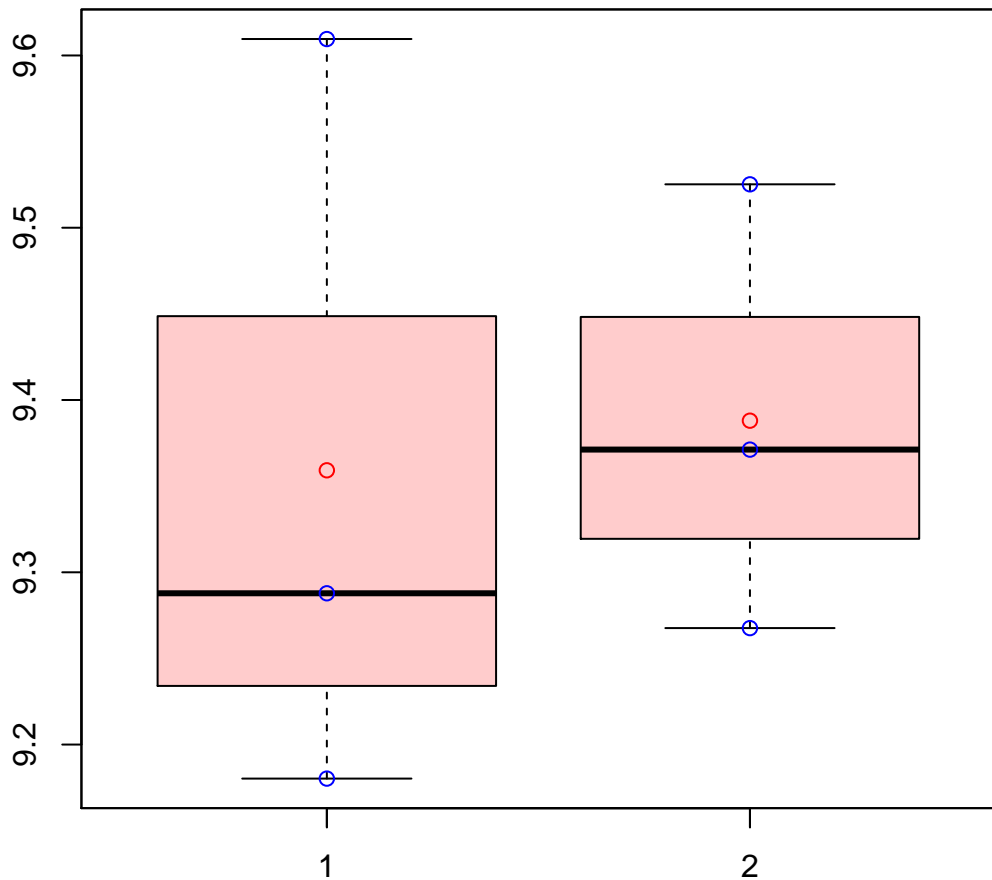

t-Test: p-value = 0.86

# B9FS66|B9FS66\_ORYSJ

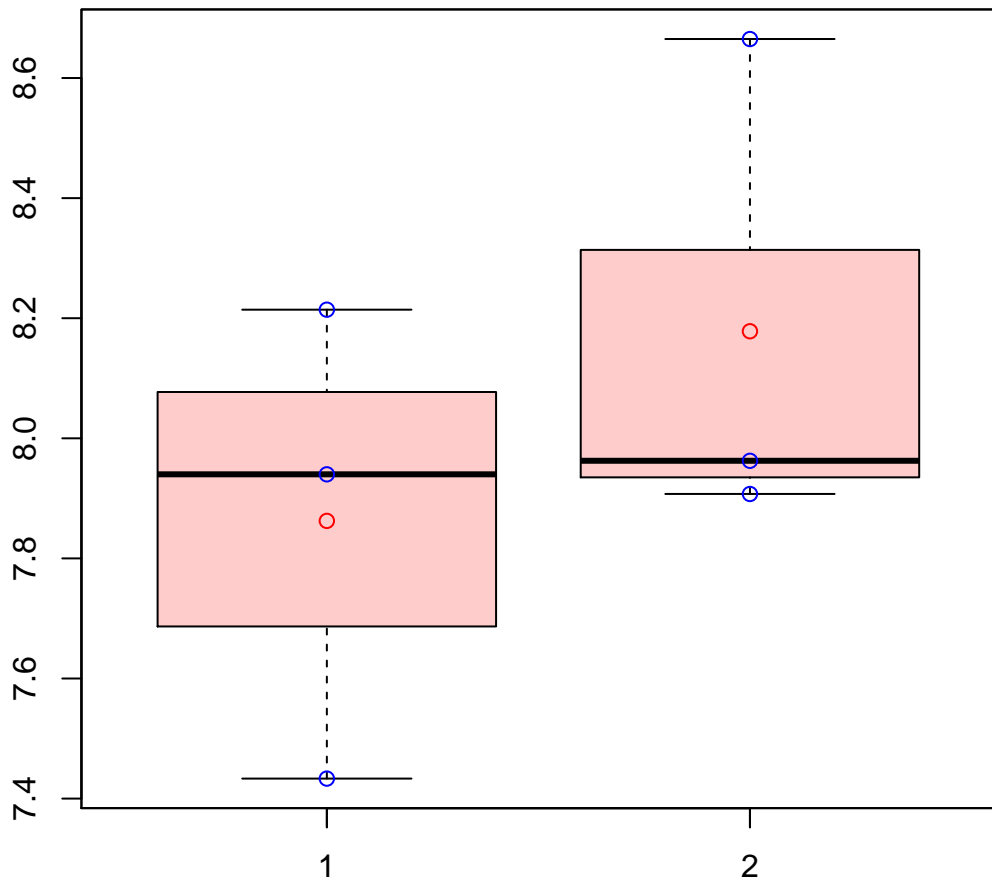

t-Test: p-value = 0.4

# B9FST9|B9FST9\_ORYSJ

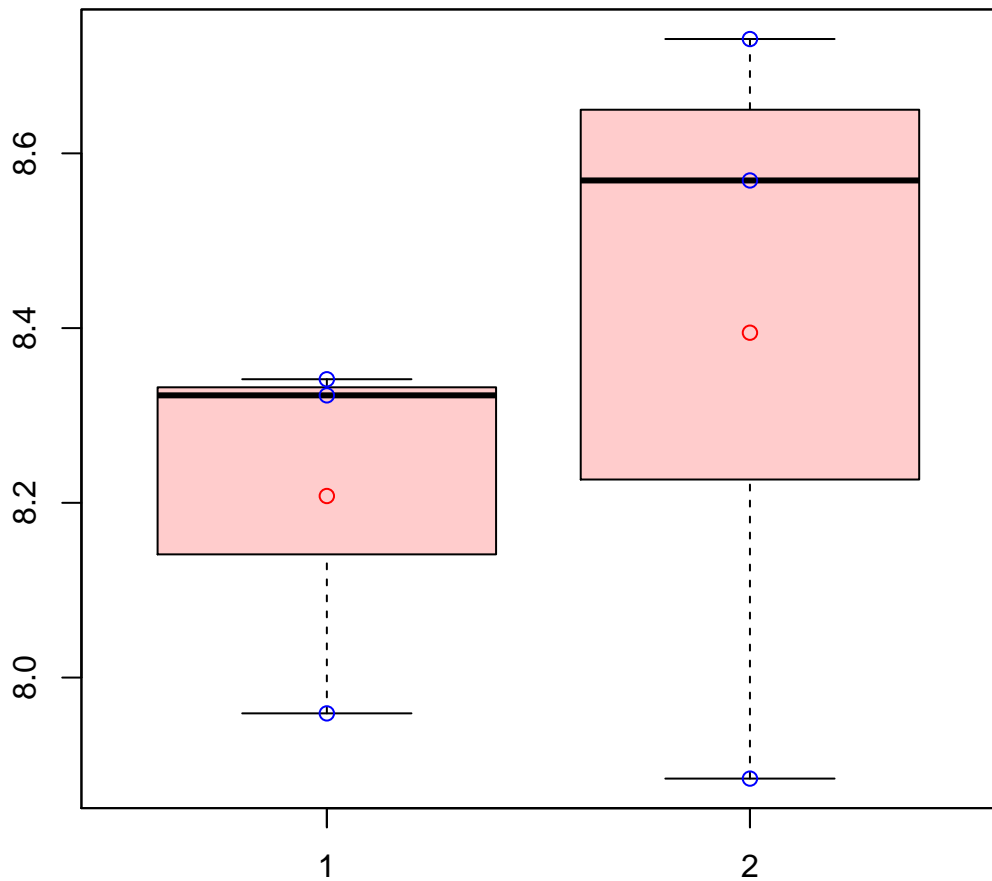

t-Test: p-value = 0.56

# B9FSU4|B9FSU4\_ORYSJ

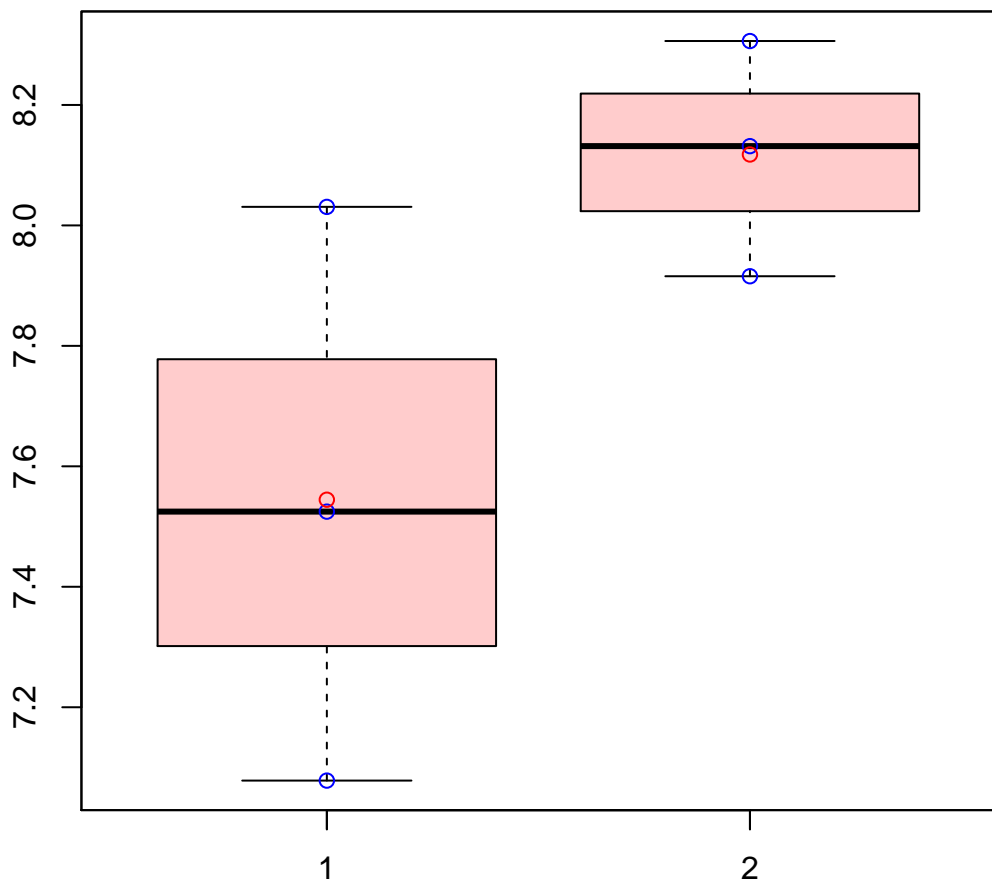

t-Test: p-value = 0.16

# B9FUE6|B9FUE6\_ORYSJ

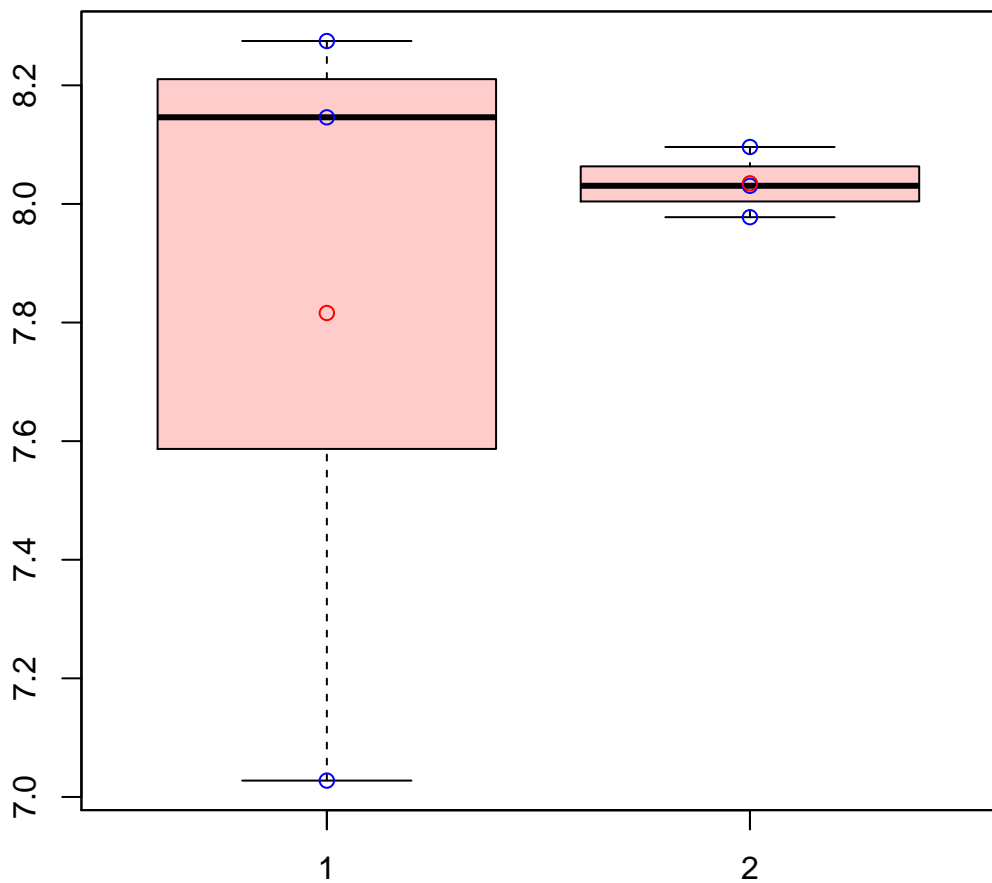

t-Test: p-value = 0.64



# B9FW82|B9FW82\_ORYSJ

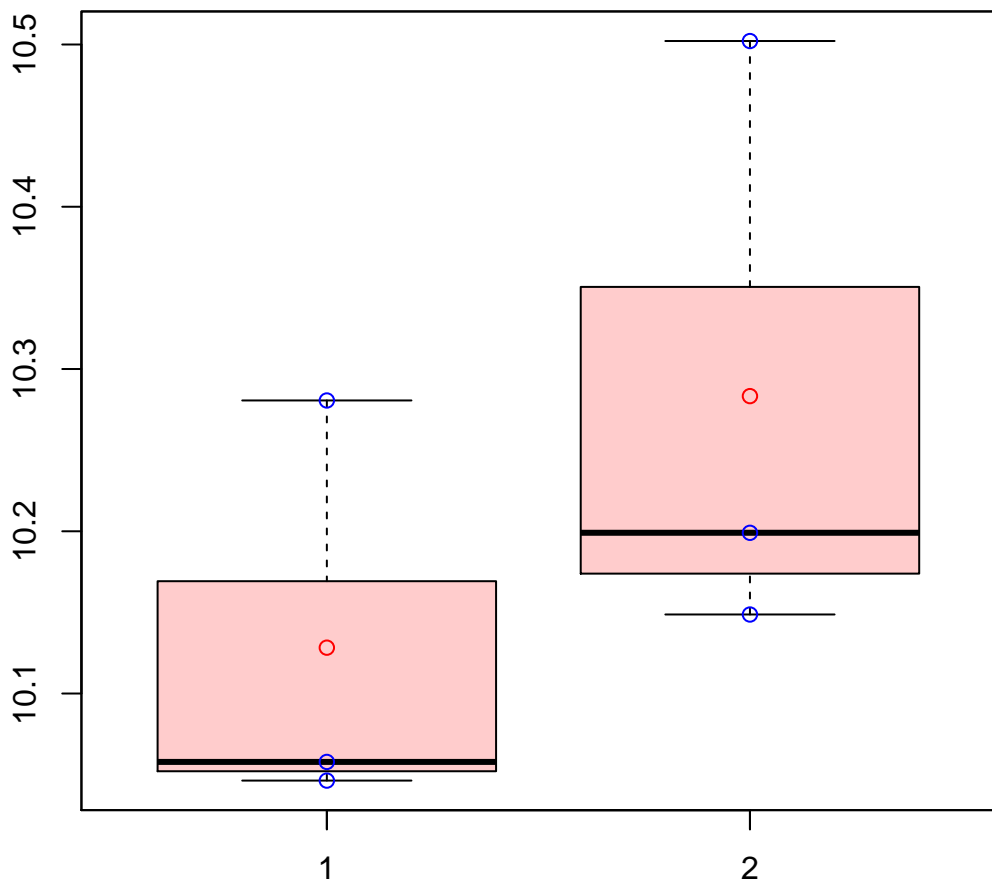

t-Test: p-value = 0.32

# B9FWW9|B9FWW9\_ORYSJ

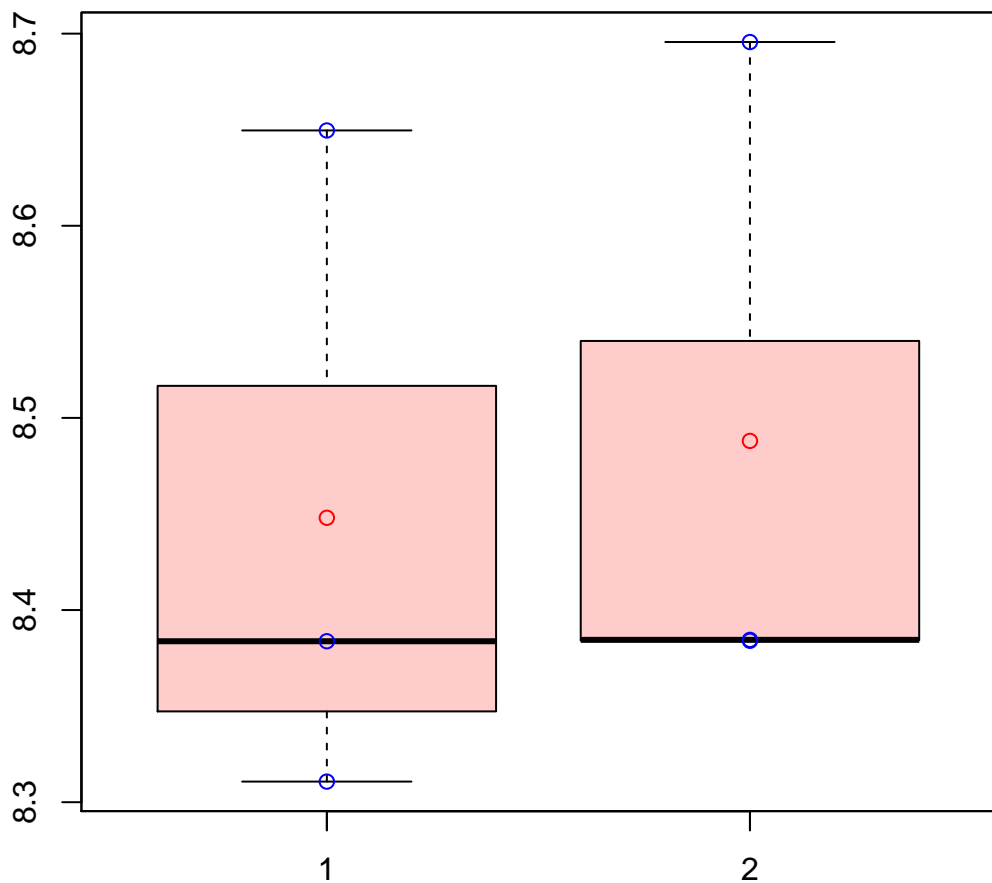

t-Test: p-value = 0.8

# B9FXA7|B9FXA7\_ORYSJ

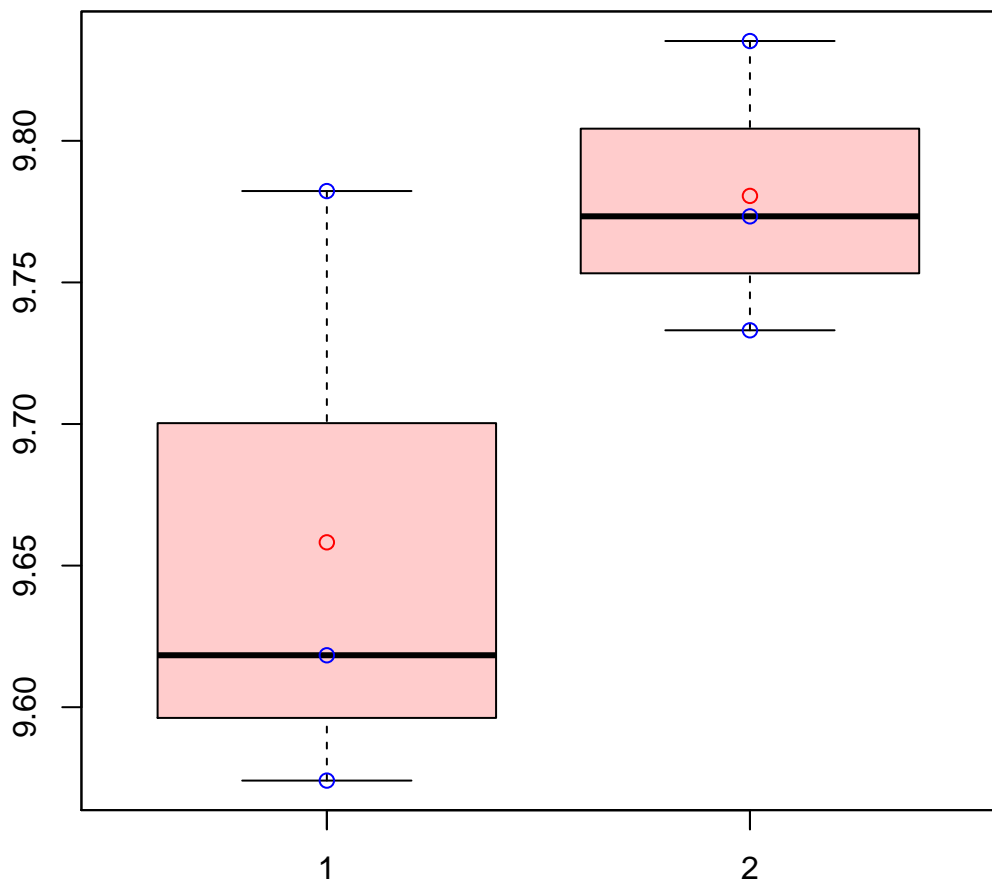

t-Test: p-value = 0.18

# B9FXH0|B9FXH0\_ORYSJ

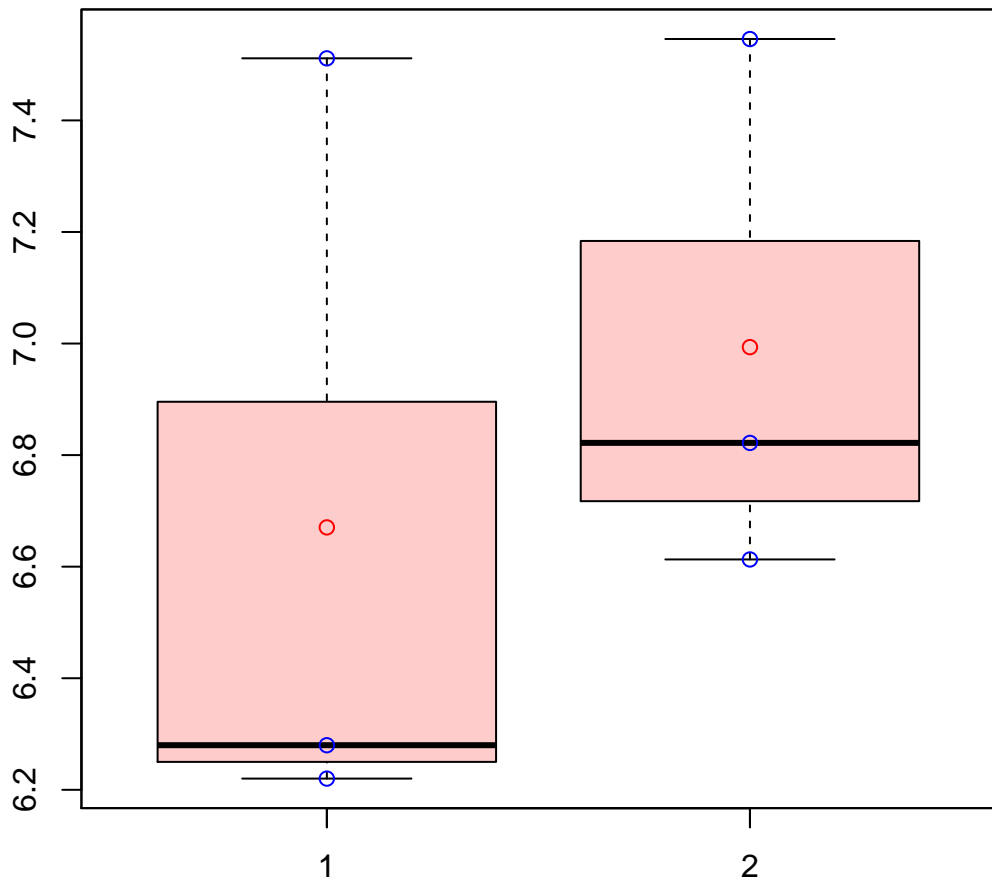

t-Test: p-value = 0.56

# B9FXJ2|B9FXJ2\_ORYSJ

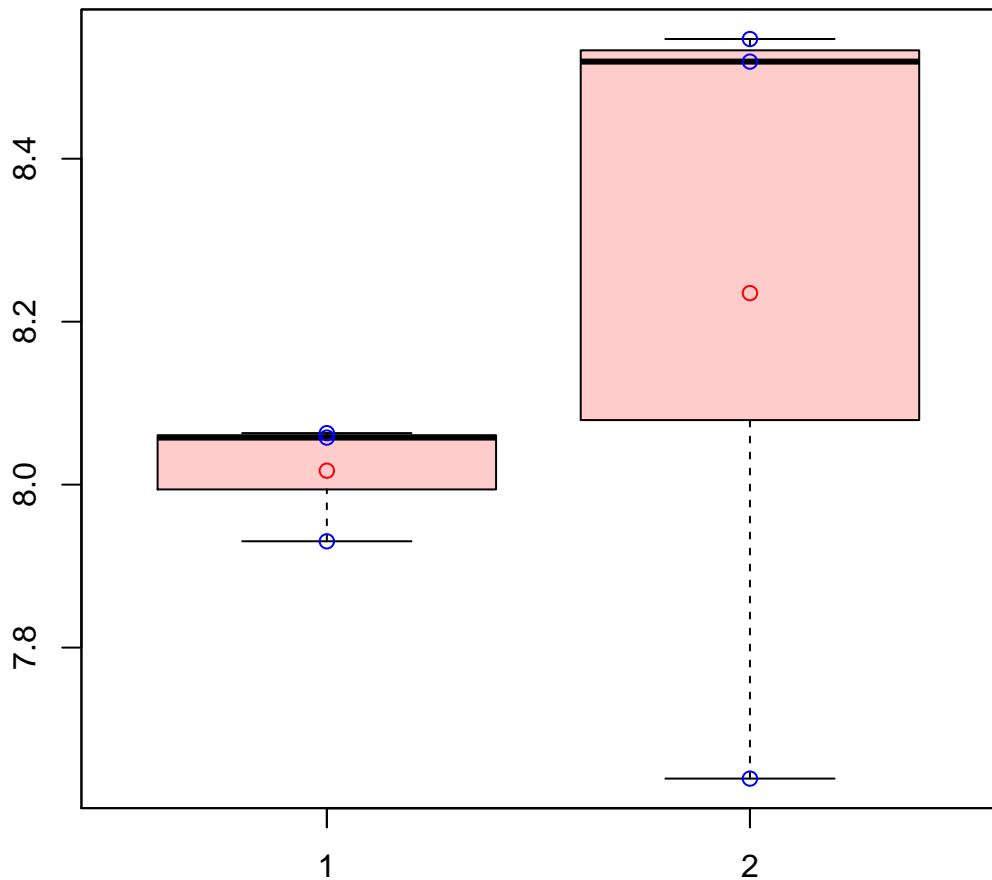

t-Test: p-value = 0.54

# B9FYJ2|B9FYJ2\_ORYSJ

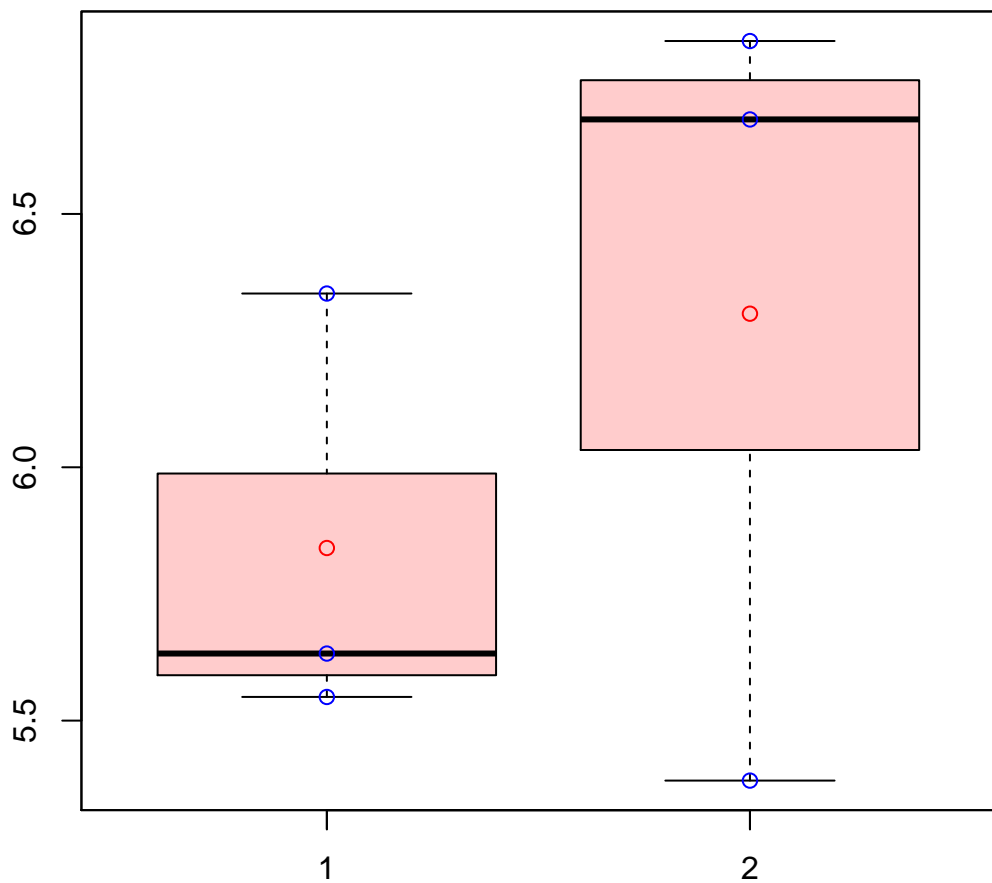

t-Test: p-value = 0.44

# B9FZ94|B9FZ94\_ORYSJ

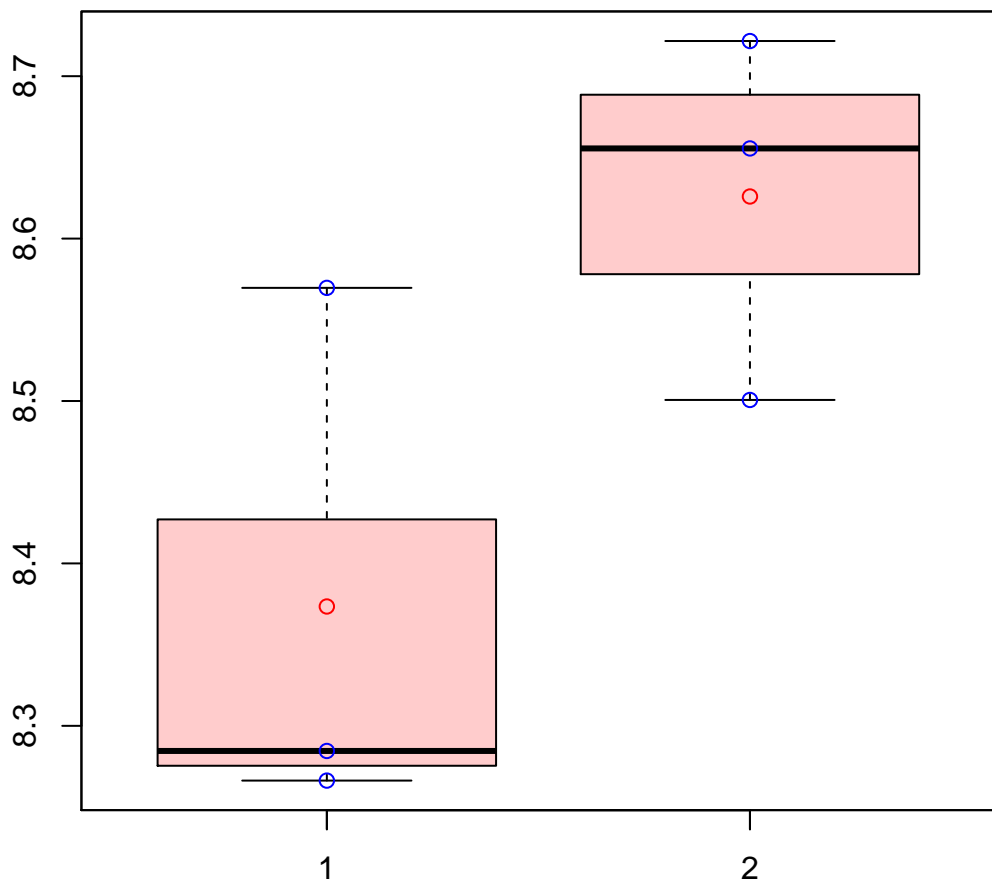

t-Test: p-value = 0.11

# B9G011|B9G011\_ORYSJ

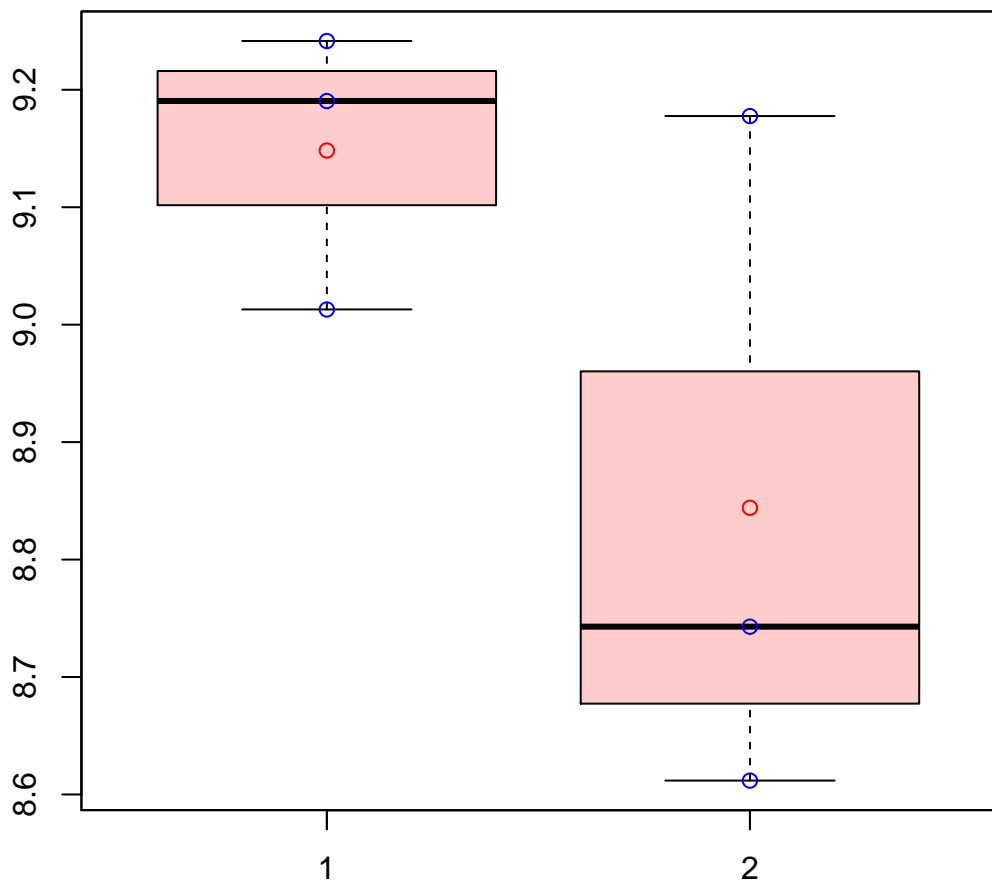

t-Test: p-value = 0.21



# B9G2B5|B9G2B5\_ORYSJ

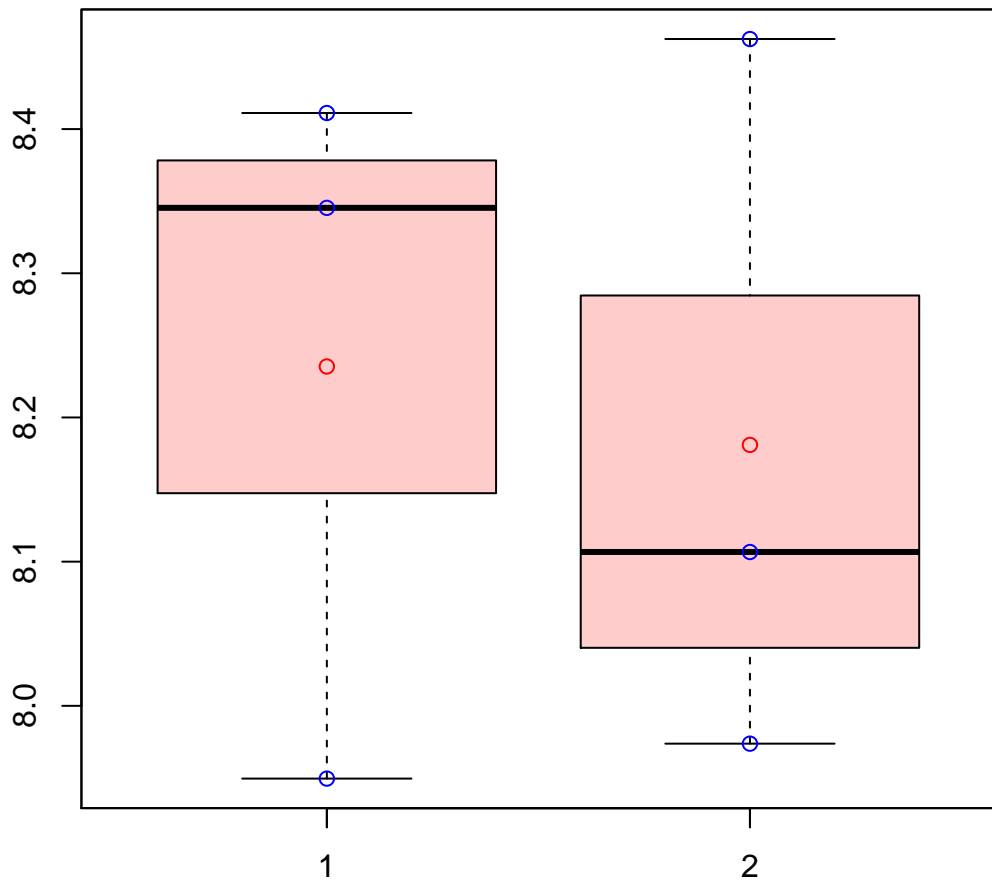

t-Test: p-value = 0.8

# B9G2G7|B9G2G7\_ORYSJ

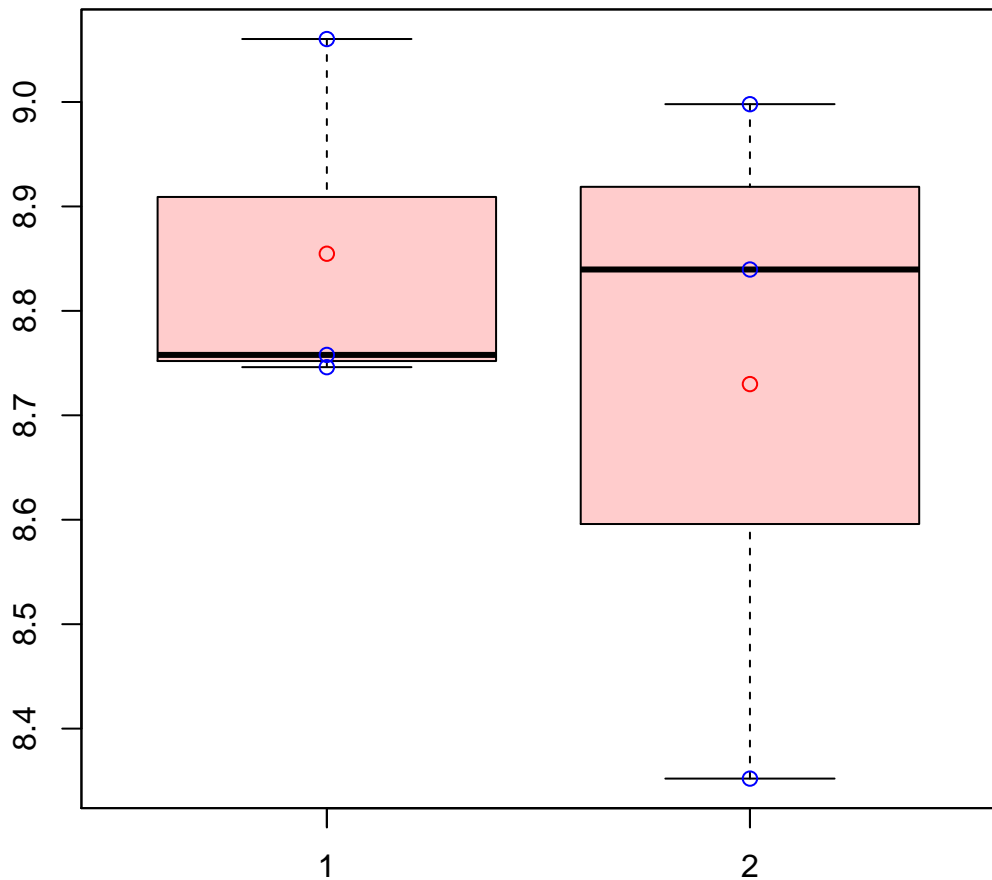

t-Test: p-value = 0.61

# B9G329|B9G329\_ORYSJ

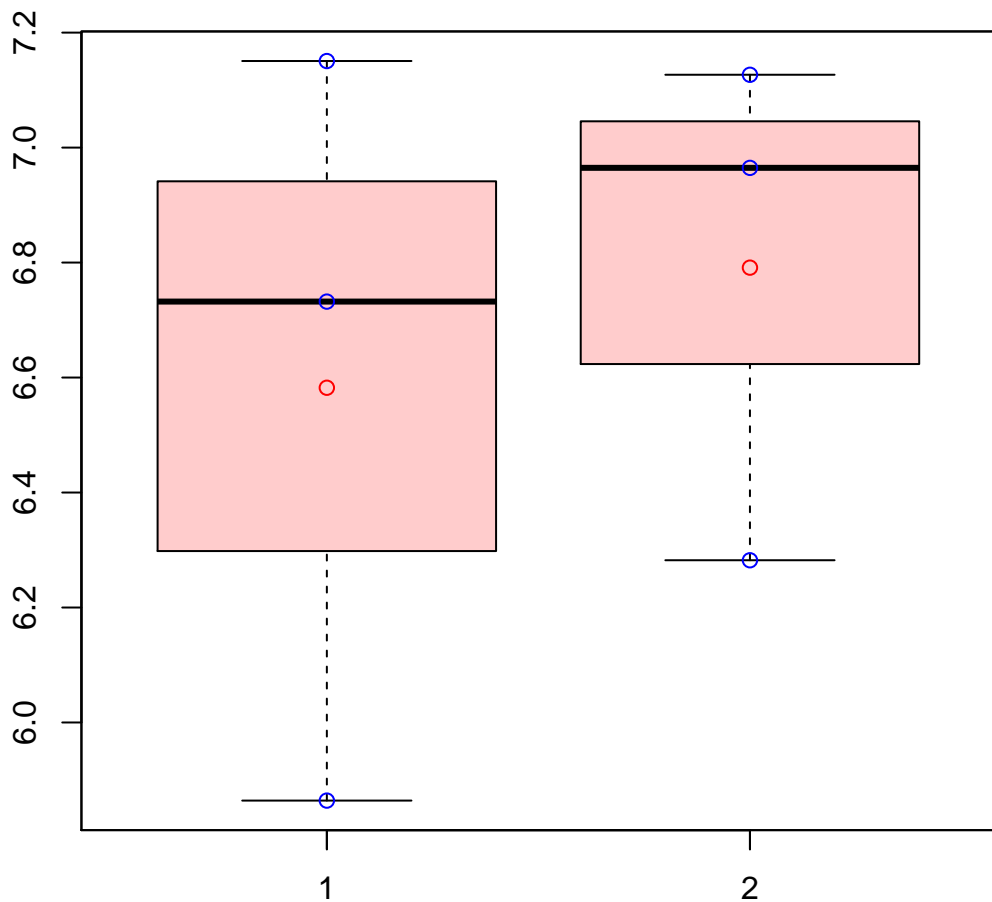

t-Test: p-value = 0.68

# B9G3A0|B9G3A0\_ORYSJ

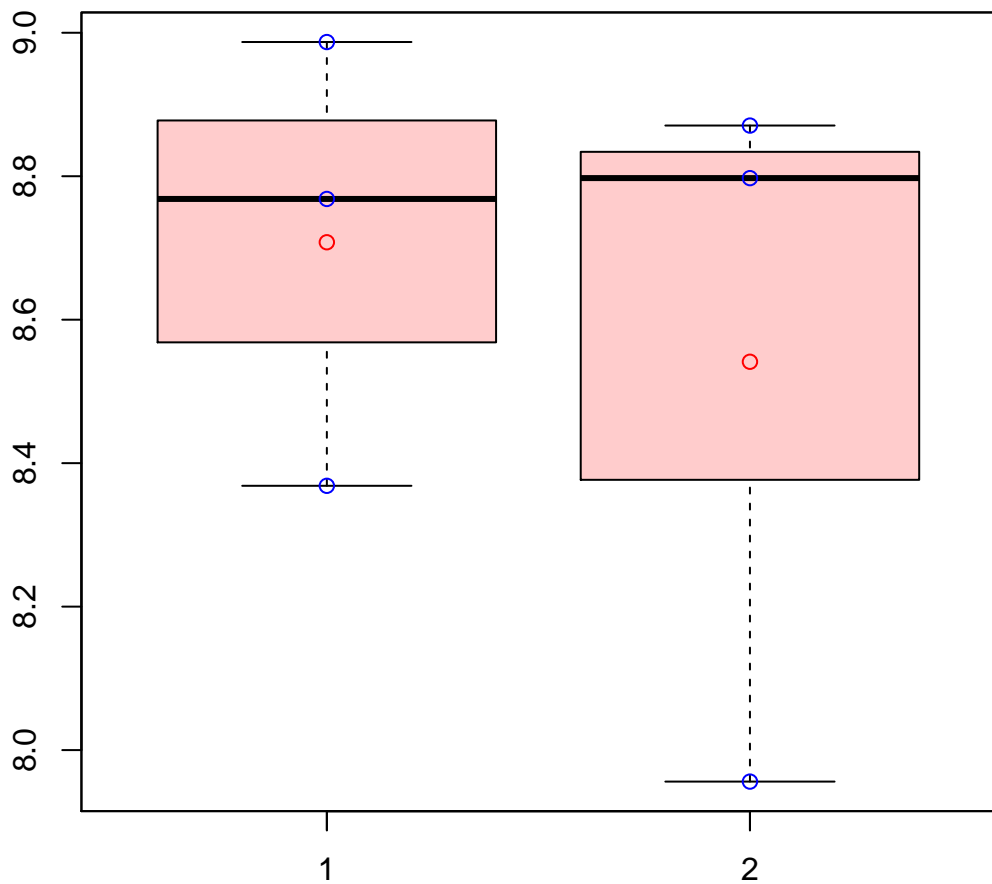

t-Test: p-value = 0.66

# B9G3U8|B9G3U8\_ORYSJ

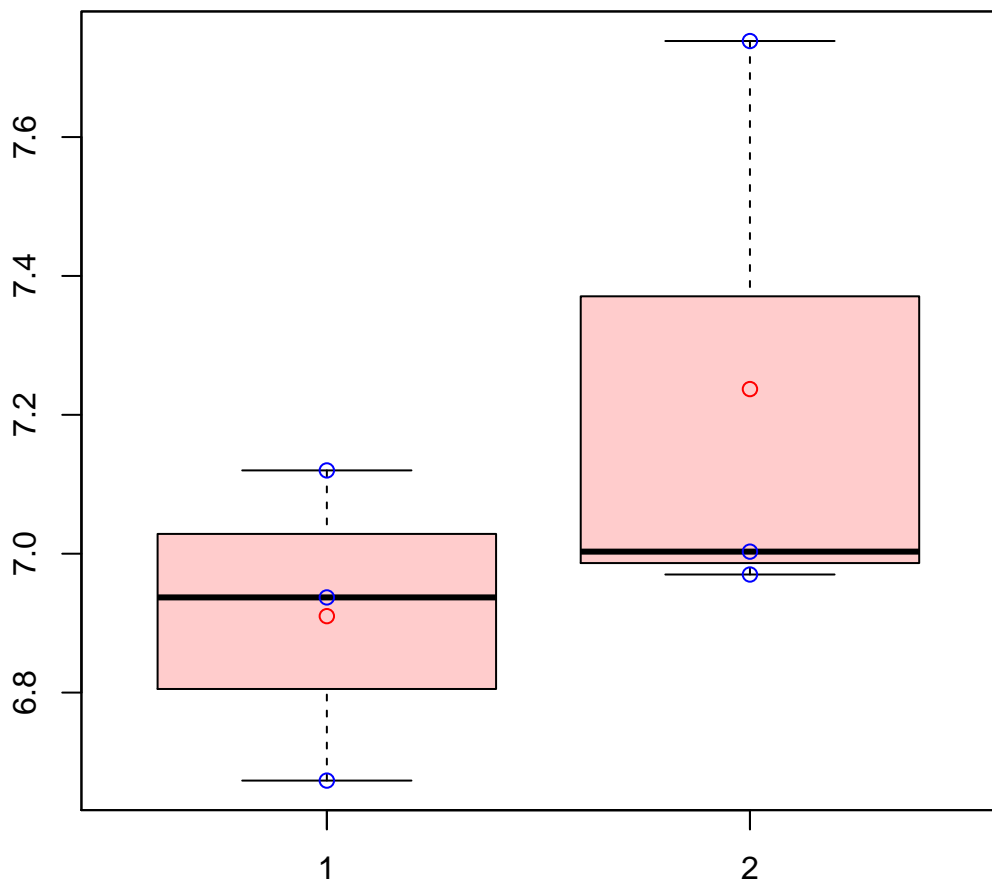

t-Test: p-value = 0.33

# B9G402|B9G402\_ORYSJ

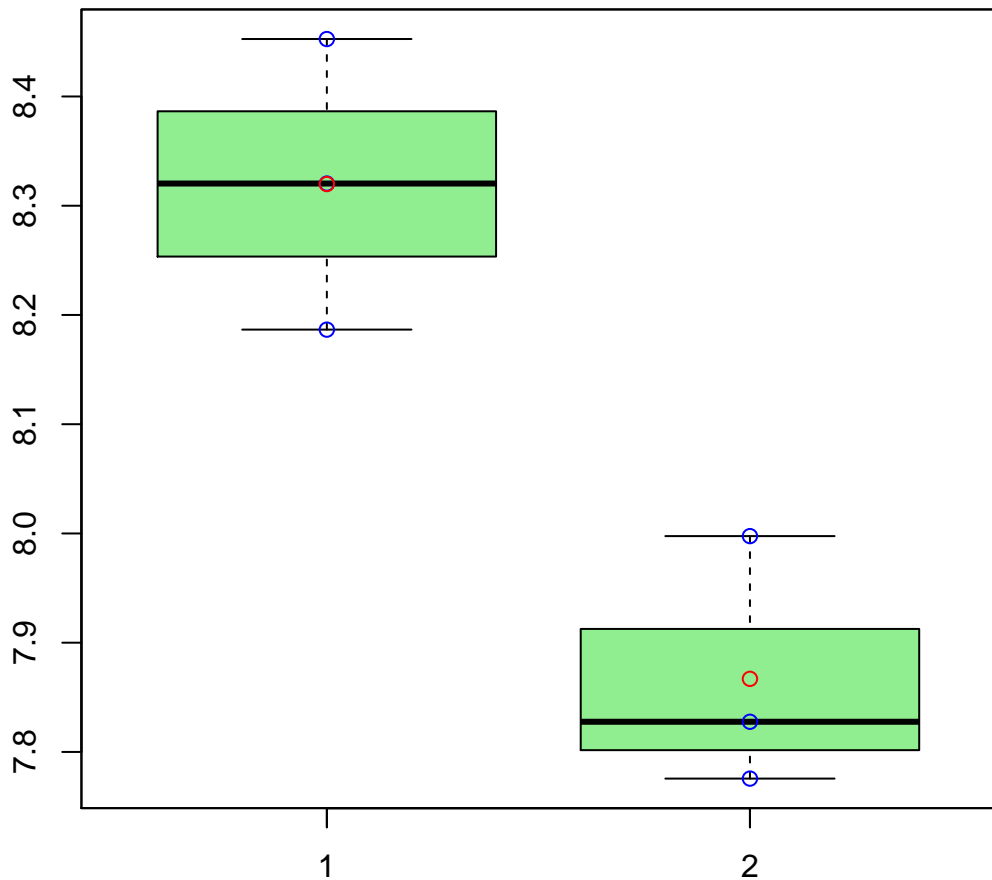

t-Test: p-value = 0.01

# B9G430|B9G430\_ORYSJ

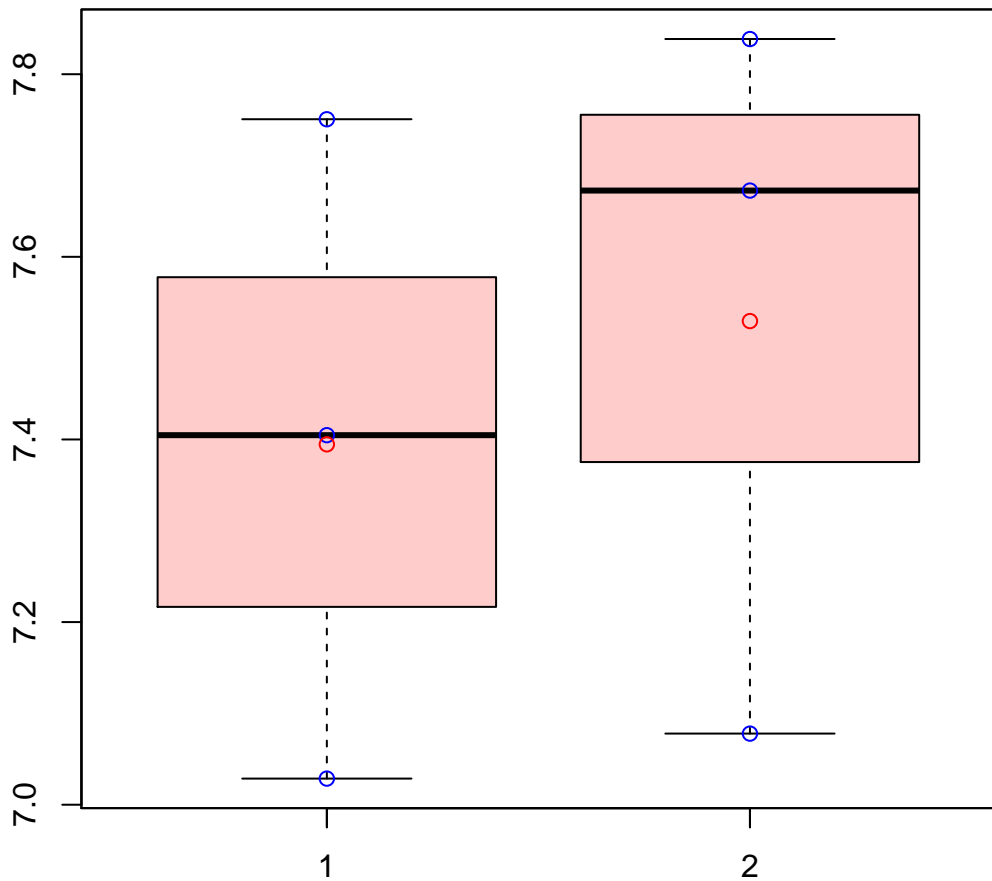

t-Test: p-value = 0.69

# B9G449|B9G449\_ORYSJ

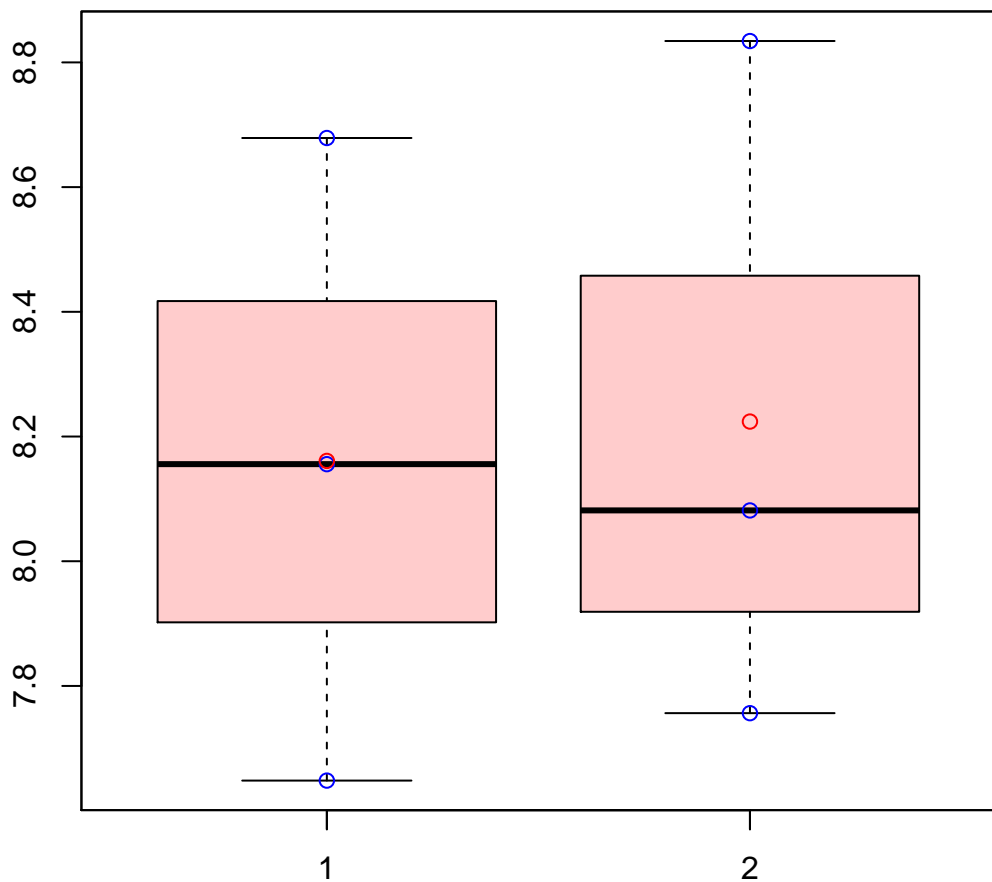

t-Test: p-value = 0.89



# B9G476|B9G476\_ORYSJ

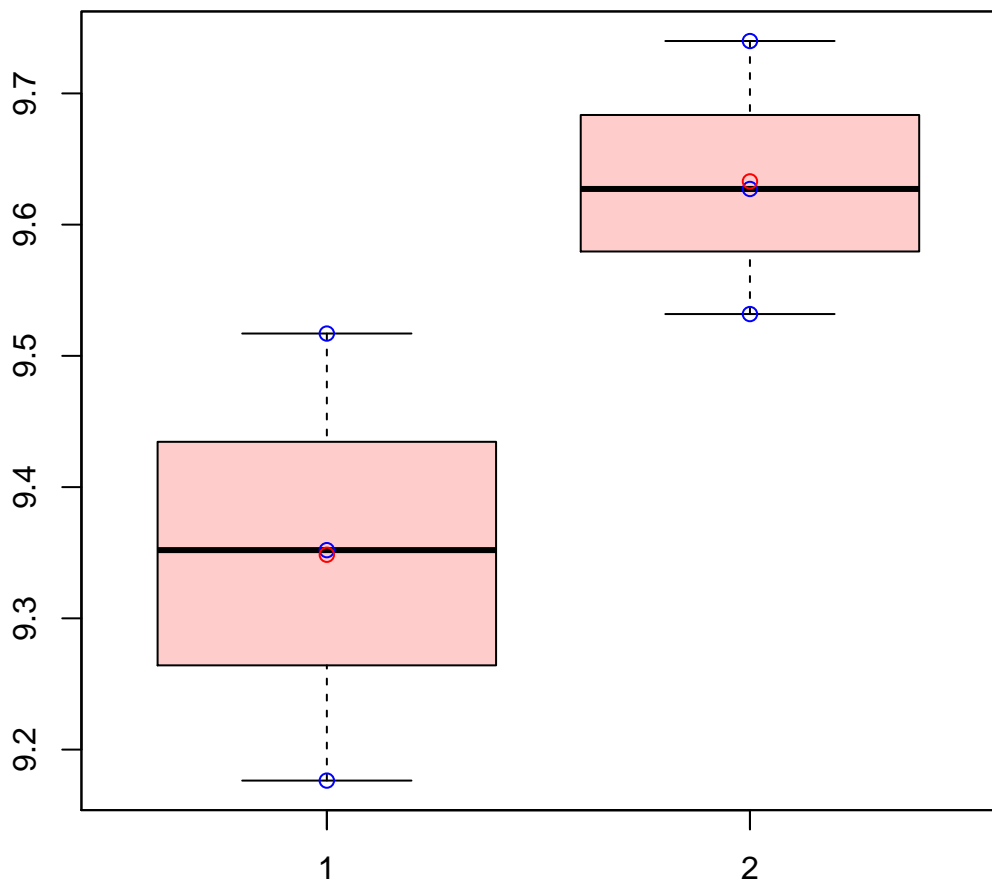

t-Test: p-value = 0.08

# B9G4H8|B9G4H8\_ORYSJ

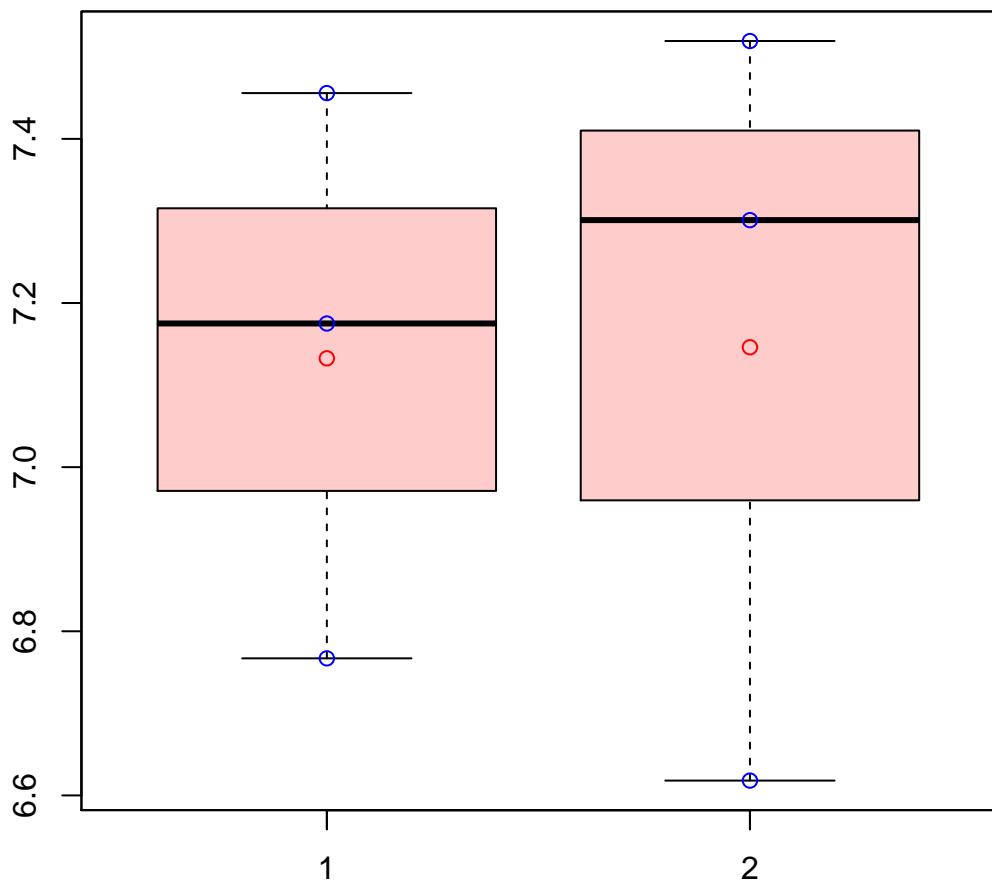

t-Test: p-value = 0.97

# B9G4K3|B9G4K3\_ORYSJ

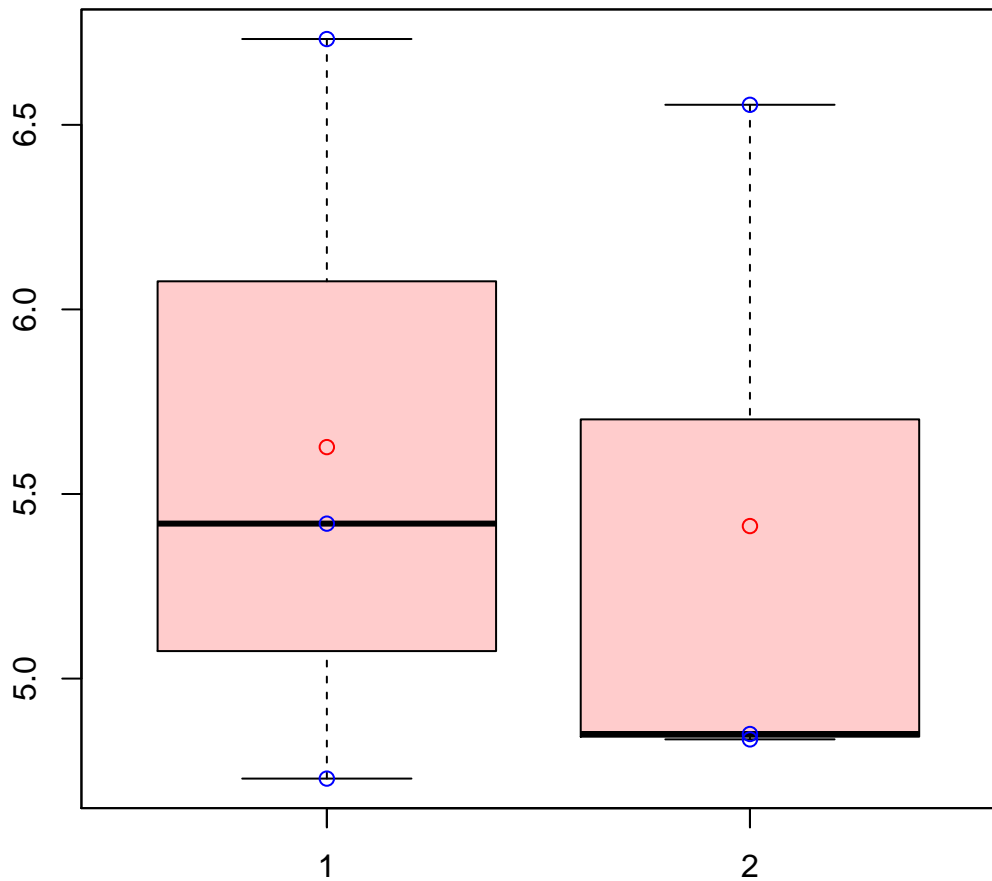

t-Test: p-value = 0.81

# B9G5T0|B9G5T0\_ORYSJ

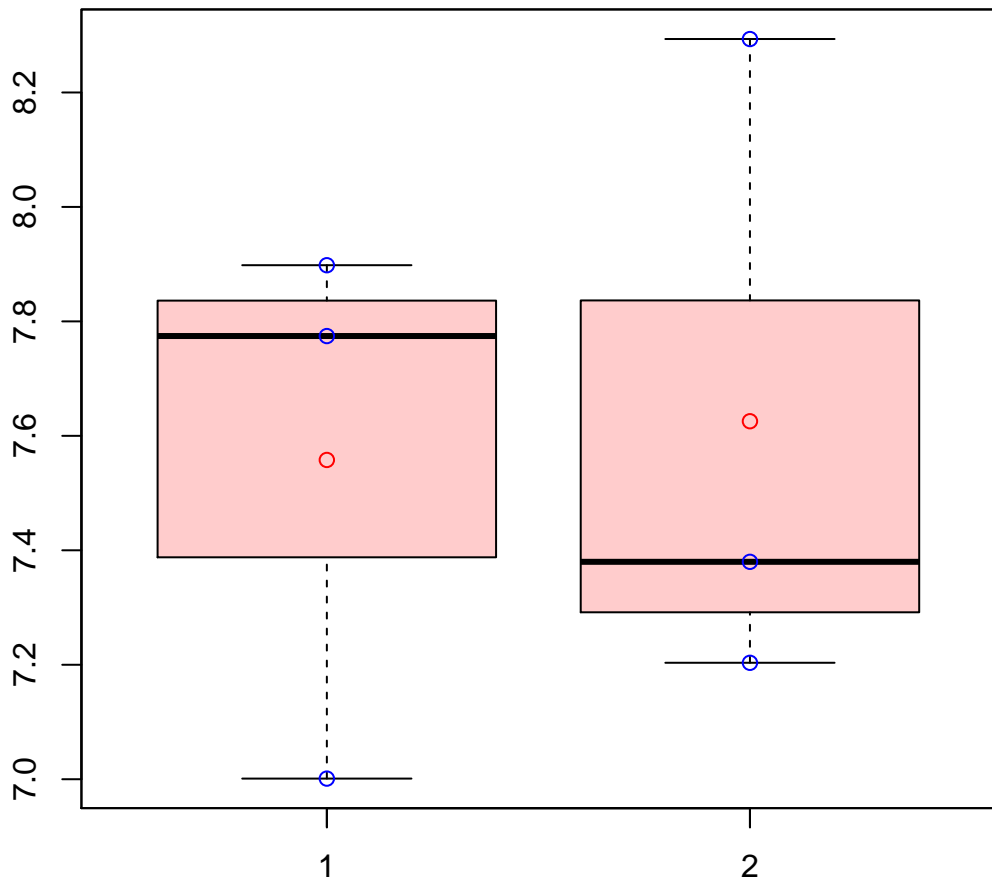

t-Test: p-value = 0.89

# B9G625|B9G625\_ORYSJ

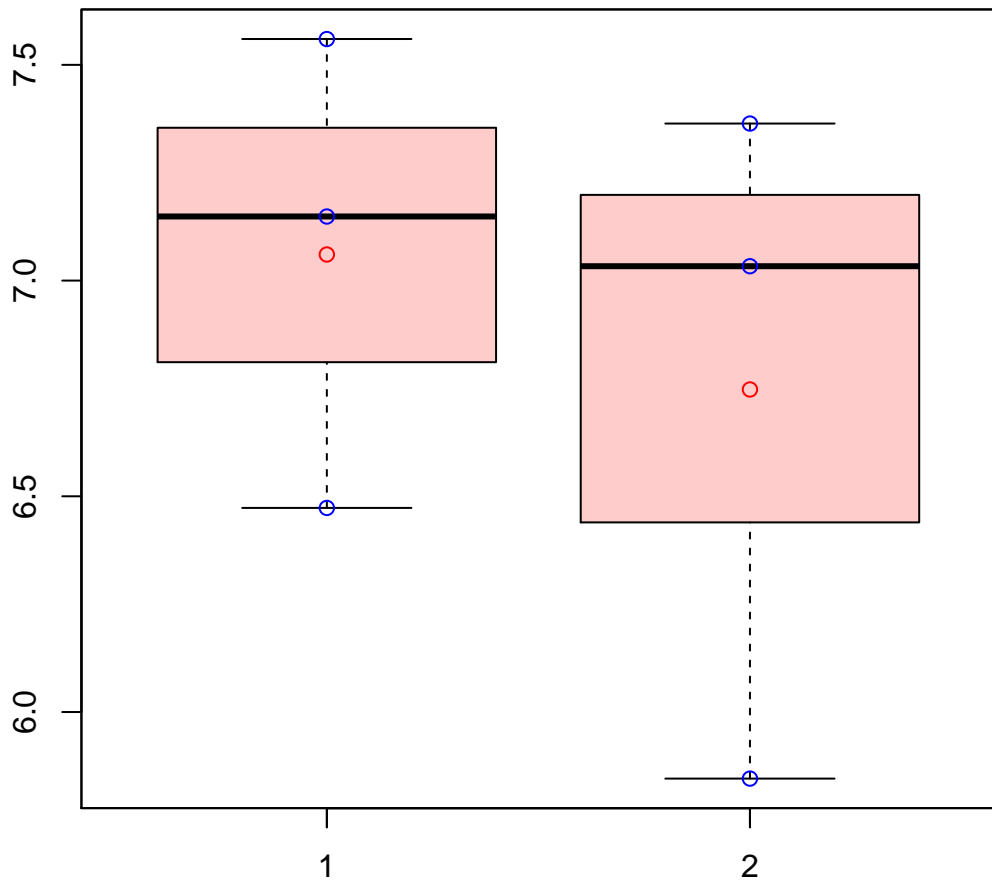

t-Test: p-value = 0.61

# B9G6F2|B9G6F2\_ORYSJ

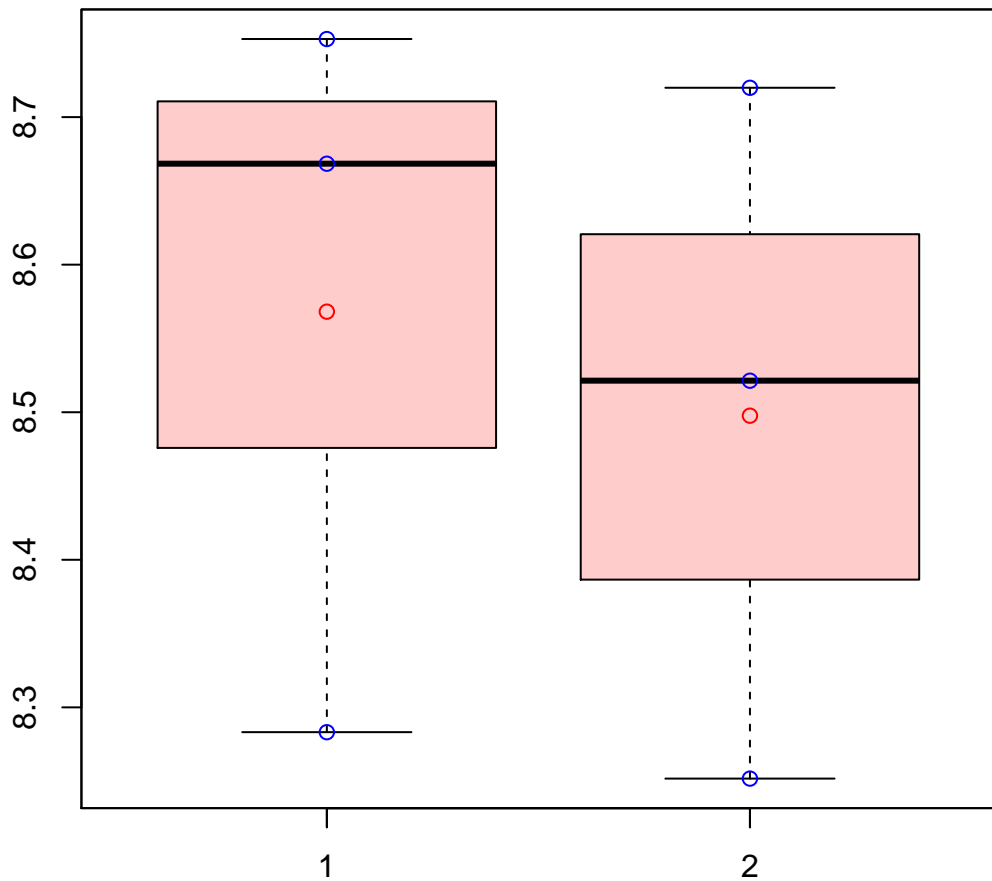

t-Test: p-value = 0.74

# B9G7D9|B9G7D9\_ORYSJ

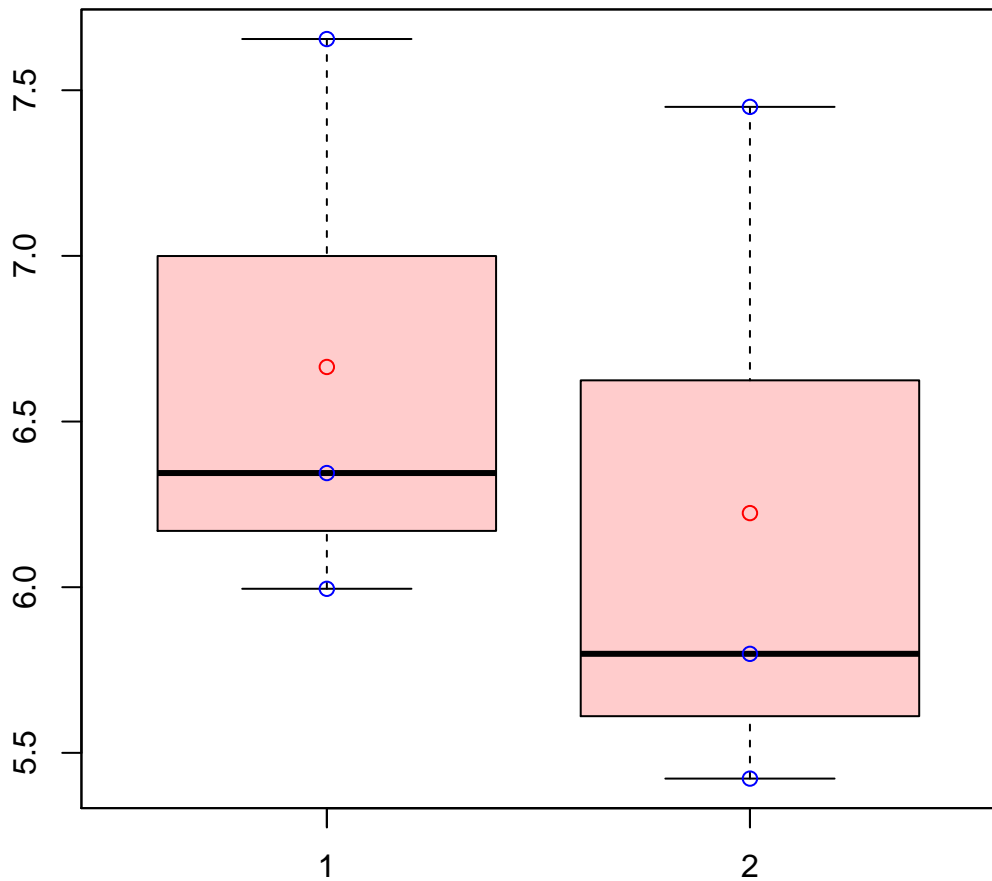

t-Test: p-value = 0.61

# B9G7K8|B9G7K8\_ORYSJ

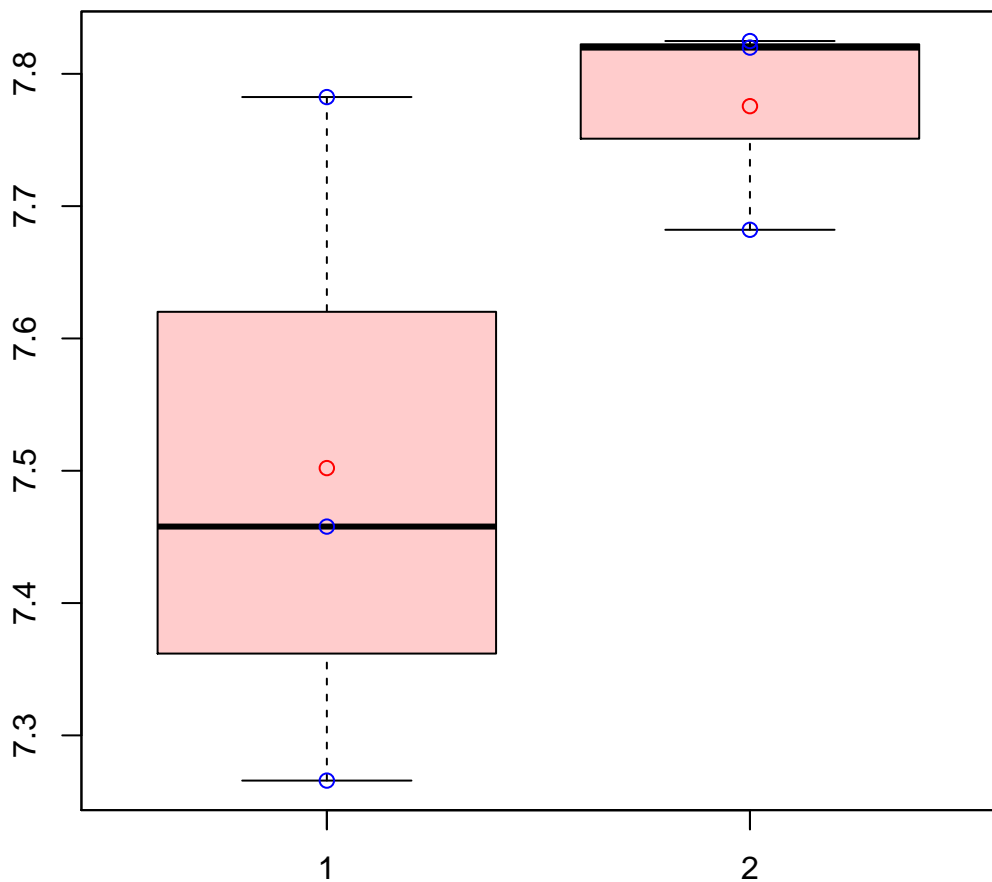

t-Test: p-value = 0.2



# B9G7S3|B9G7S3\_ORYSJ

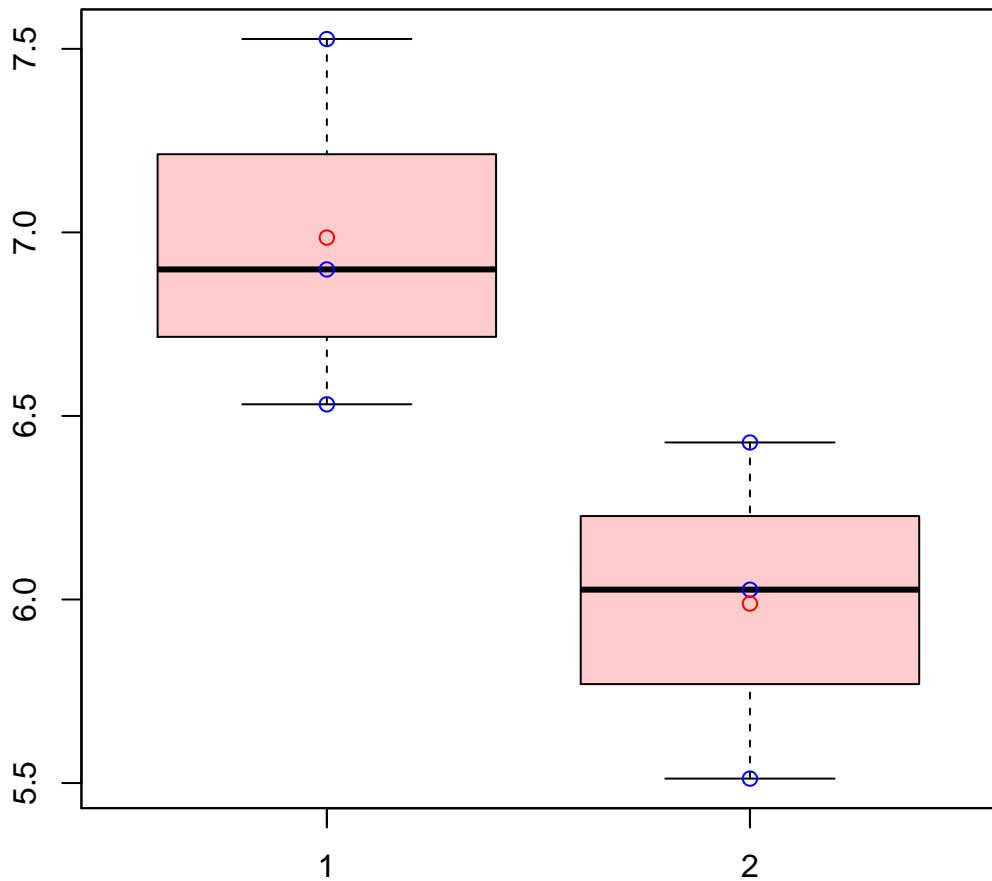

t-Test: p-value = 0.06

# B9GAQ9|B9GAQ9\_ORYSJ

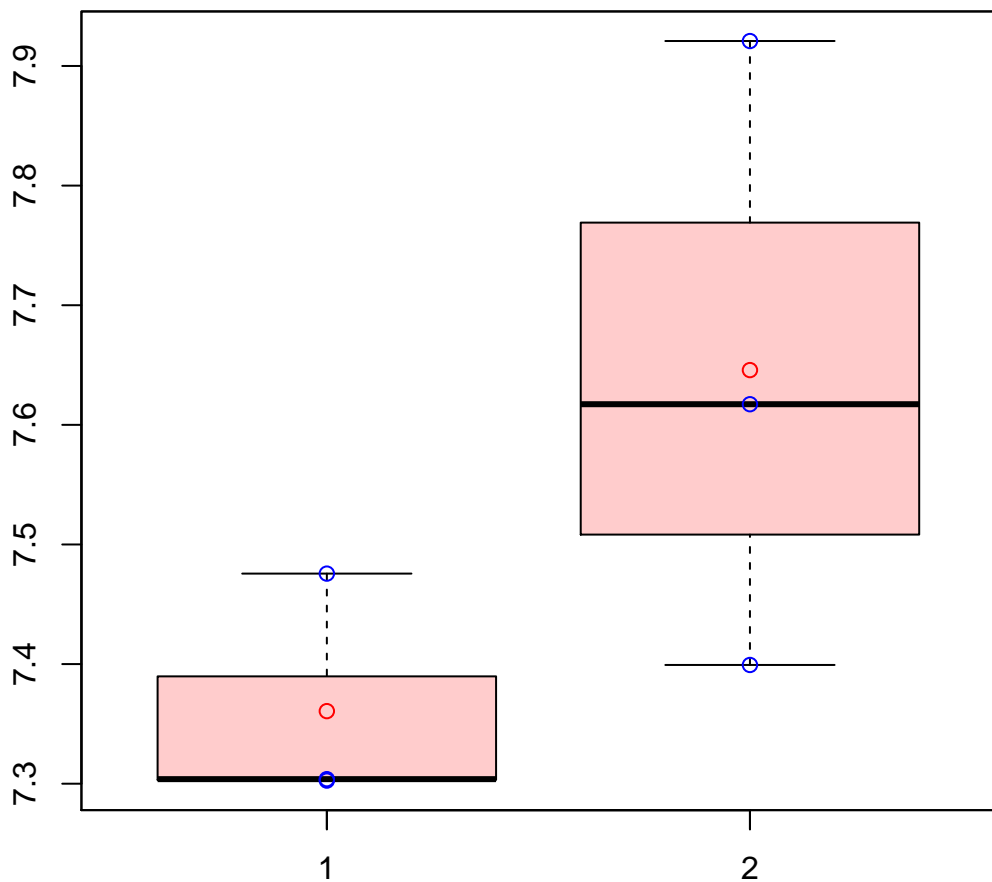

t-Test: p-value = 0.19

# B9GBC2|B9GBC2\_ORYSJ

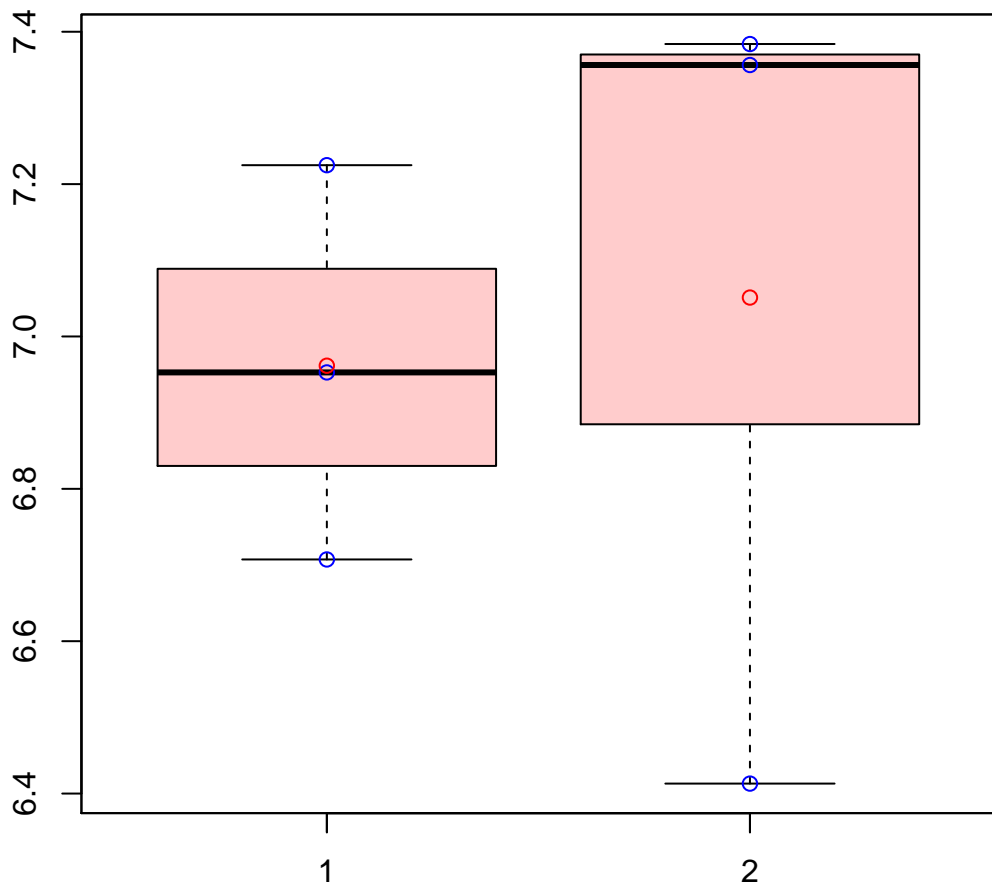

t-Test: p-value = 0.82

# B9GBM2|B9GBM2\_ORYSJ

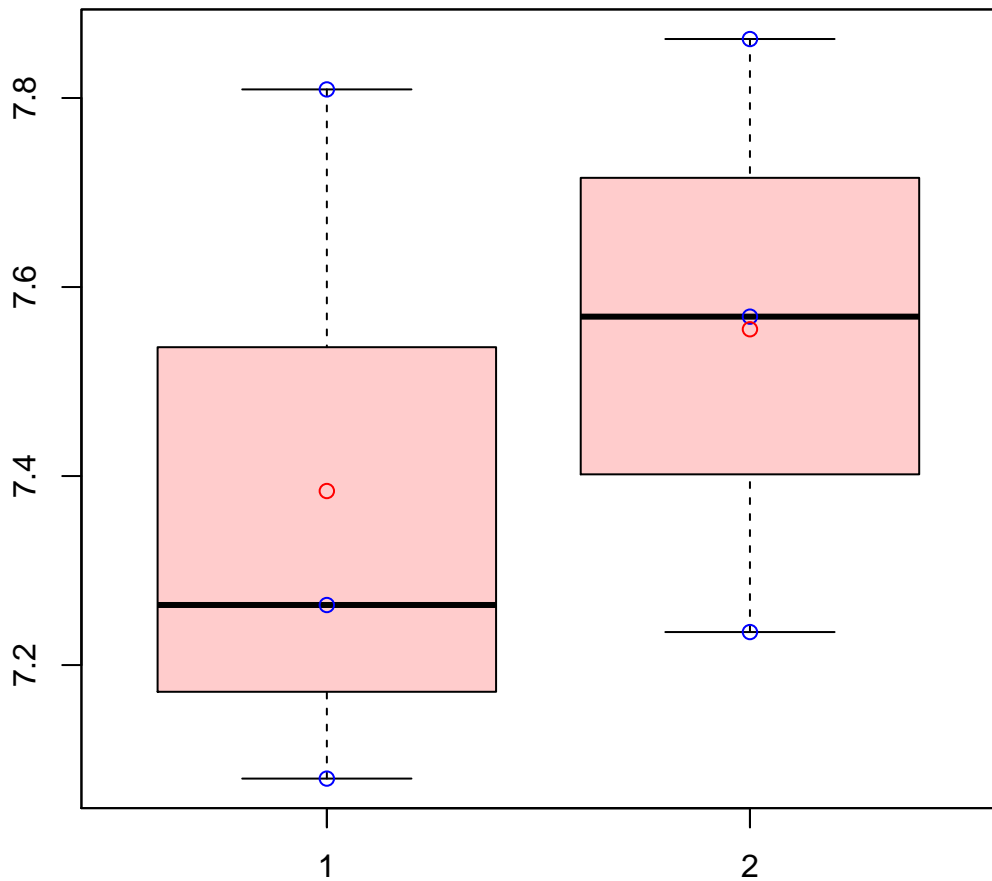

t-Test: p-value = 0.58

# B9GCB6|B9GCB6\_ORYSJ

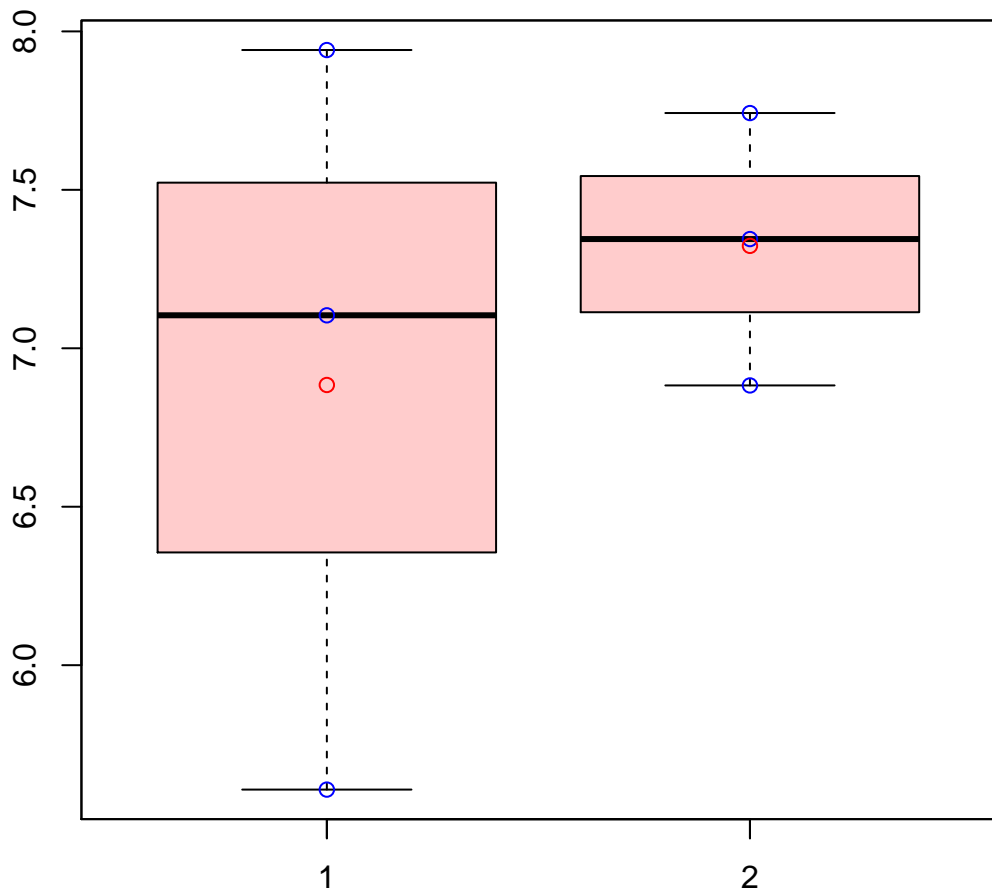

t-Test: p-value = 0.6

# B9GCG4|B9GCG4\_ORYSJ

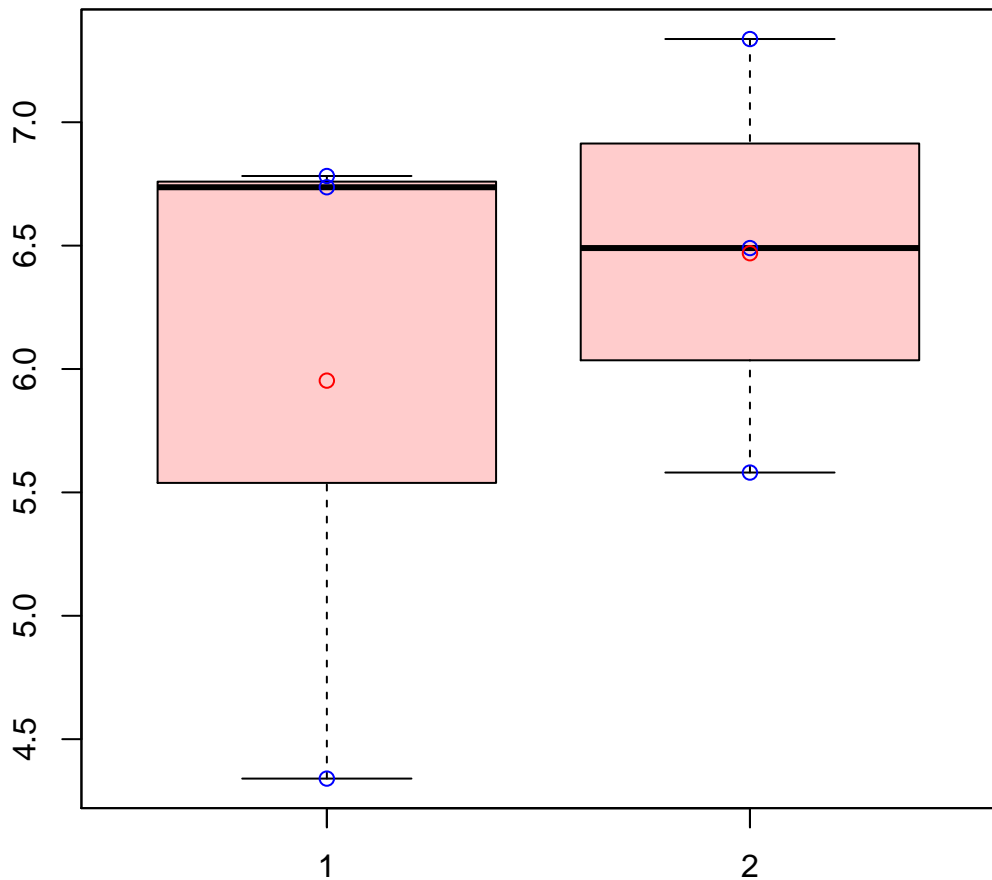

t-Test: p-value = 0.62

# B9GCM0|B9GCM0\_ORYSJ

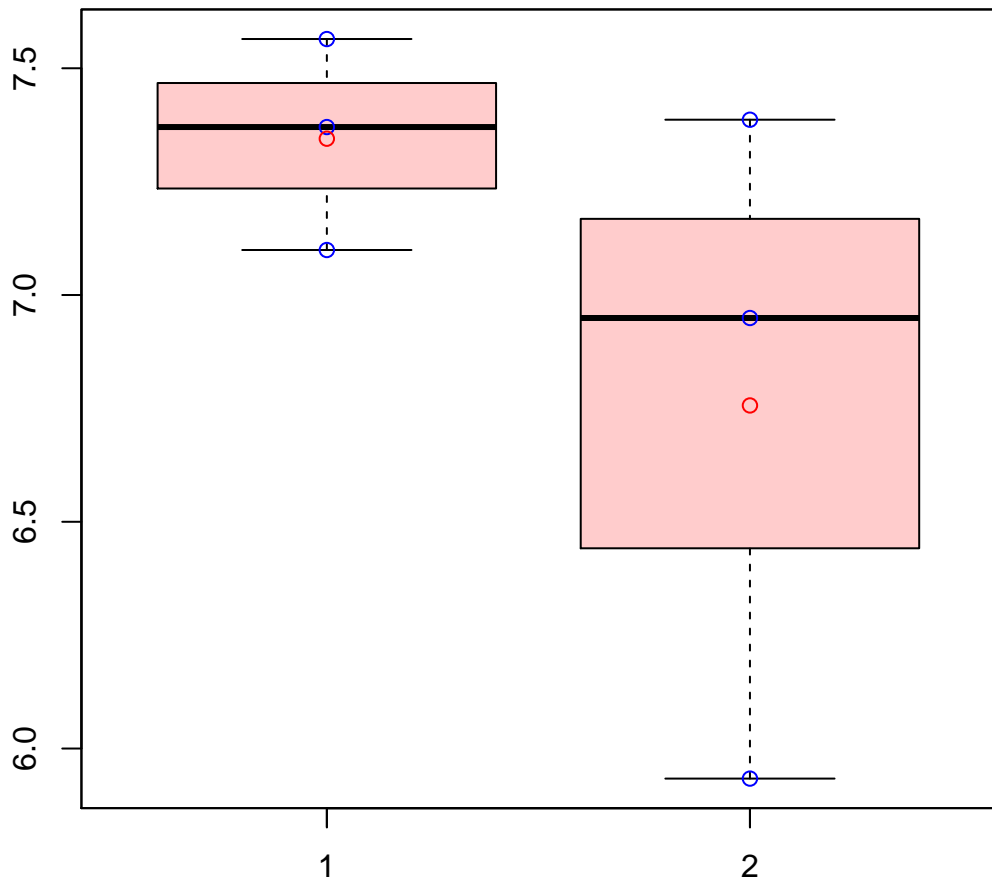

t-Test: p-value = 0.3

# B9GCR7|B9GCR7\_ORYSJ

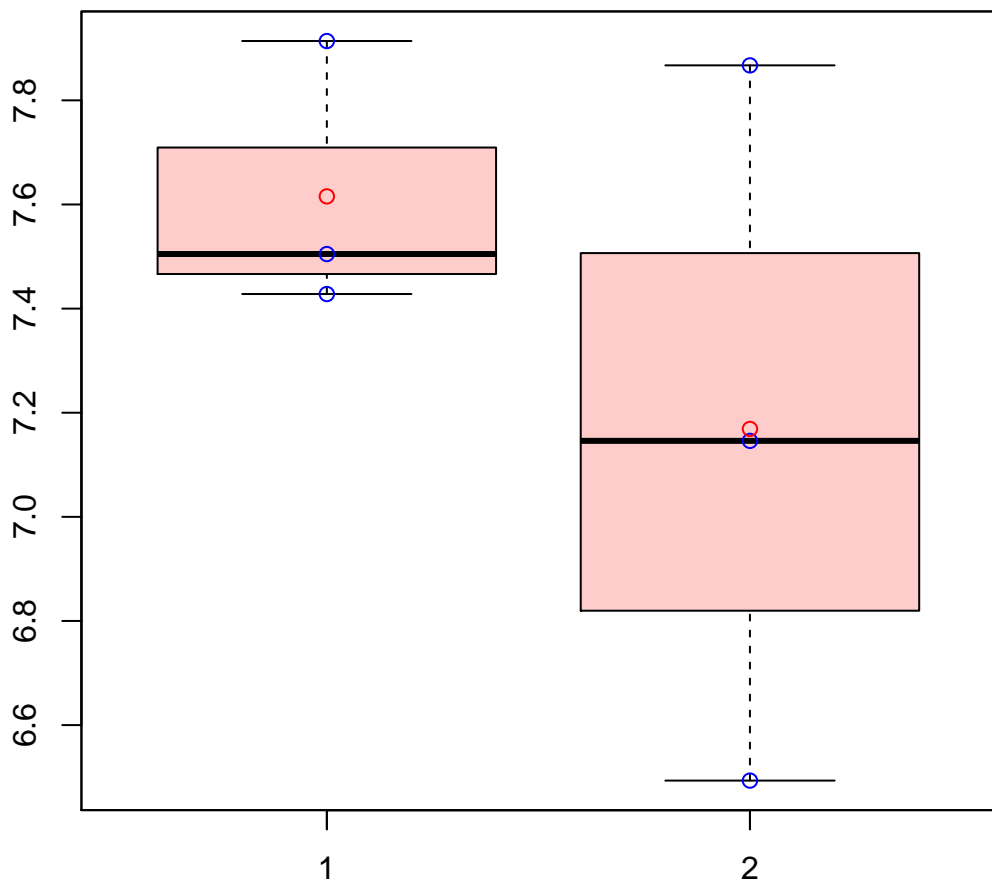

t-Test: p-value = 0.38



# B9GD29|B9GD29\_ORYSJ

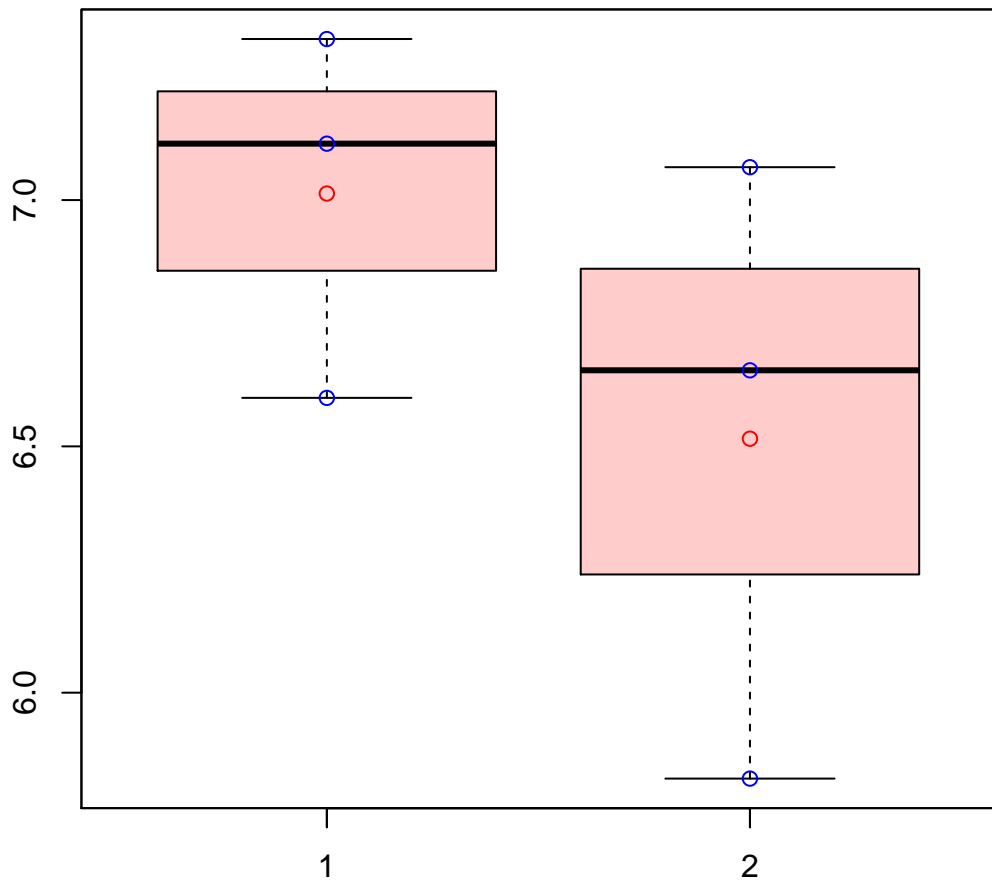

t-Test: p-value = 0.32

# B9GDC3|B9GDC3\_ORYSJ

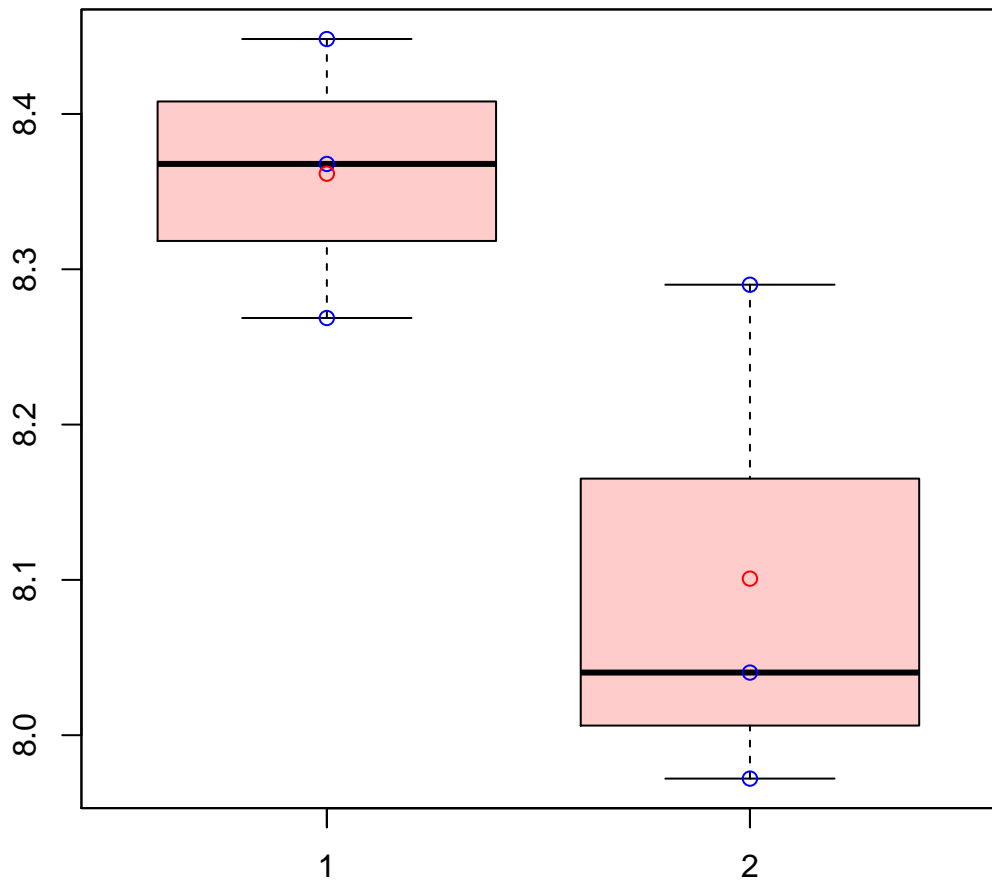

t-Test: p-value = 0.1

# B9GDT7|B9GDT7\_ORYSJ

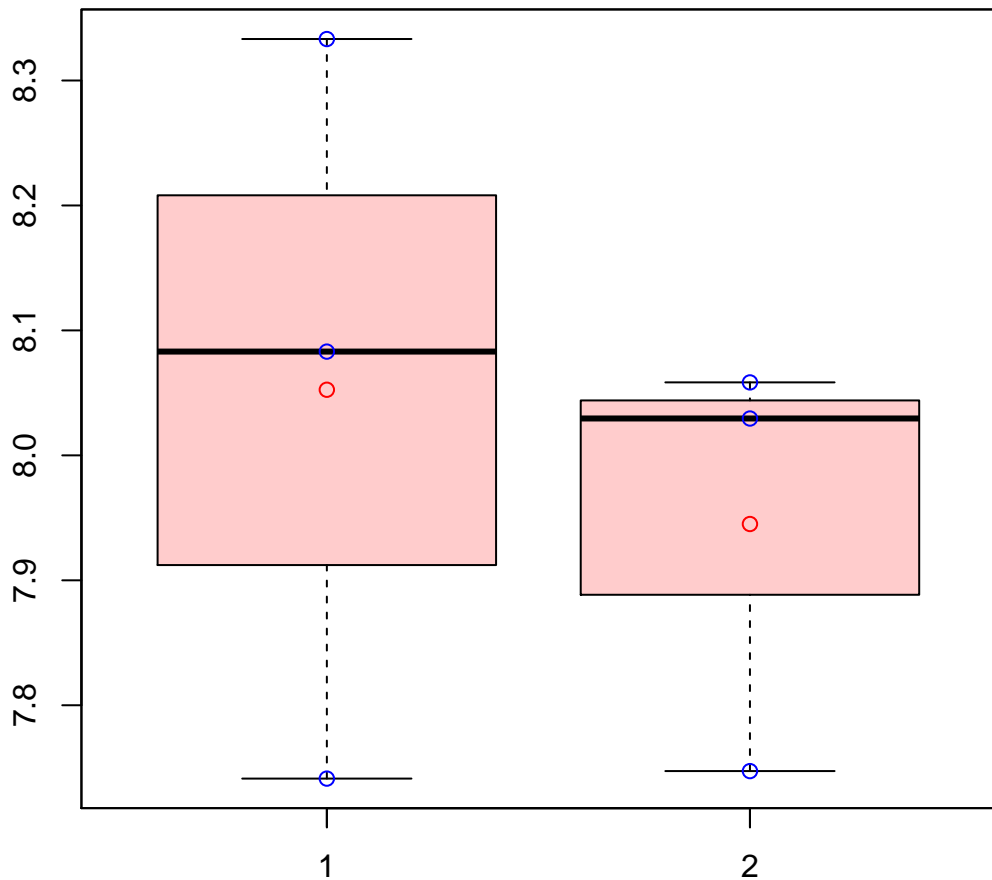

t-Test: p-value = 0.62

# B9GDU8|B9GDU8\_ORYSJ

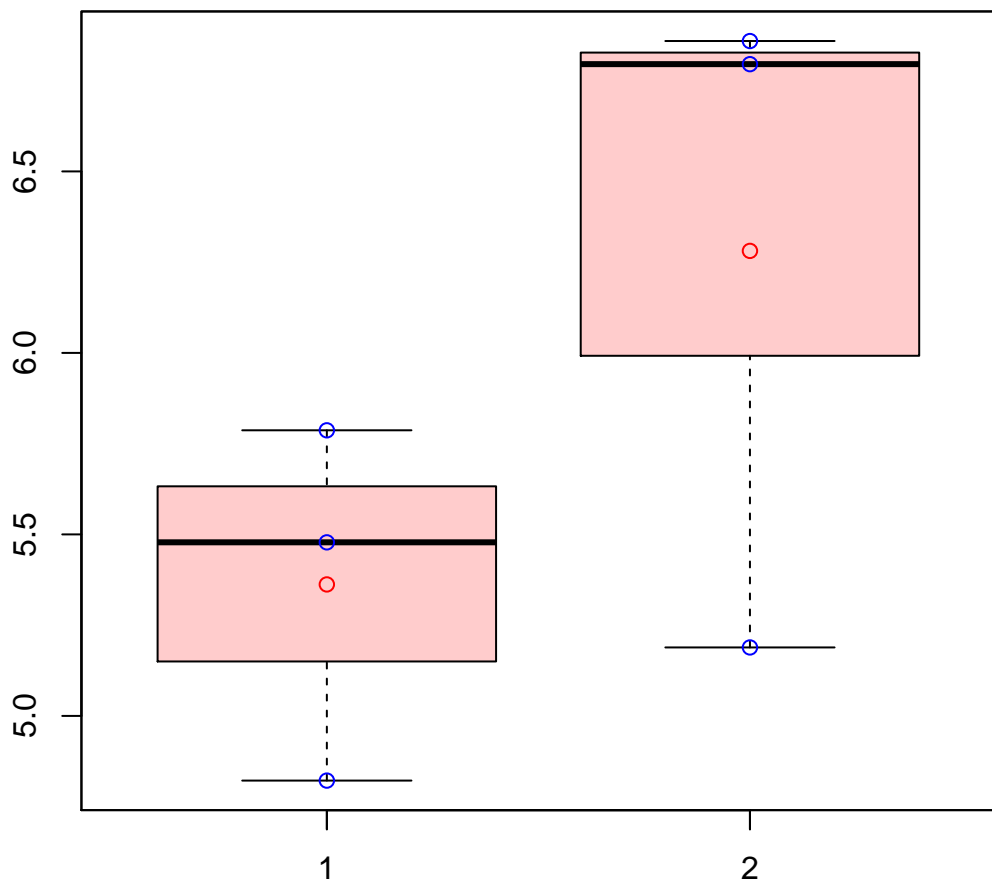

t-Test: p-value = 0.23

# B9GE13|B9GE13\_ORYSJ

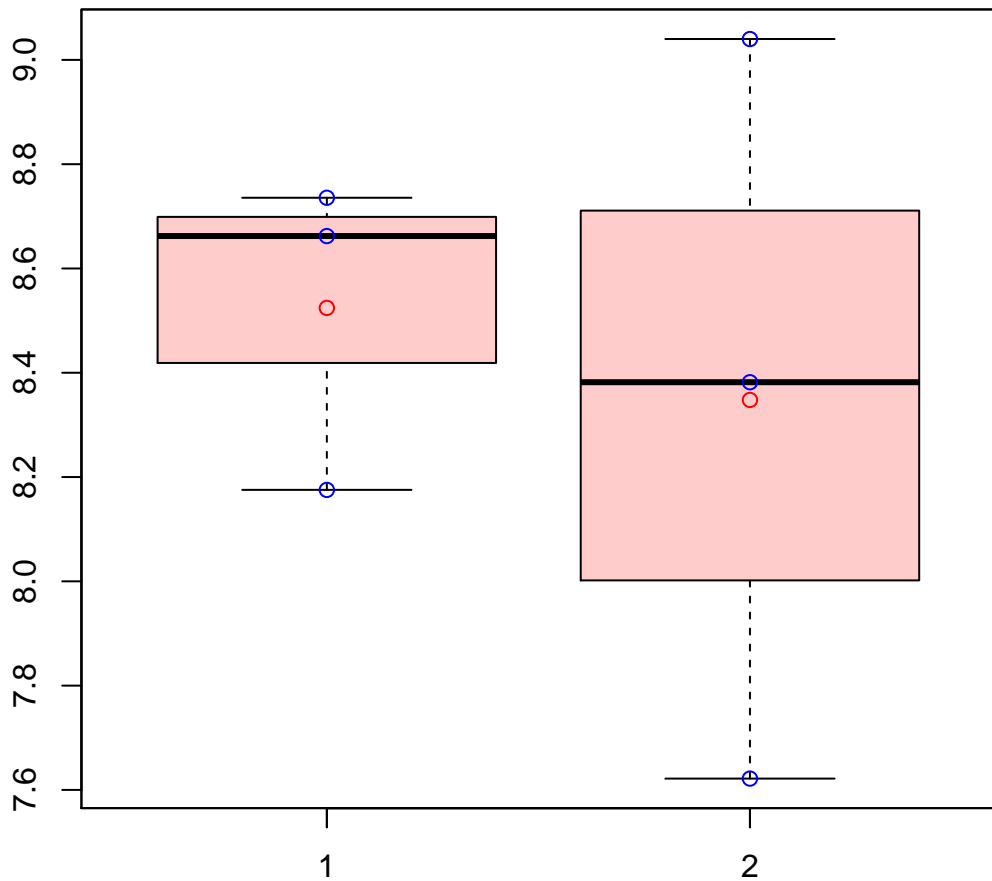

t-Test: p-value = 0.72

# B9TST3|B9TST3\_MAIZE

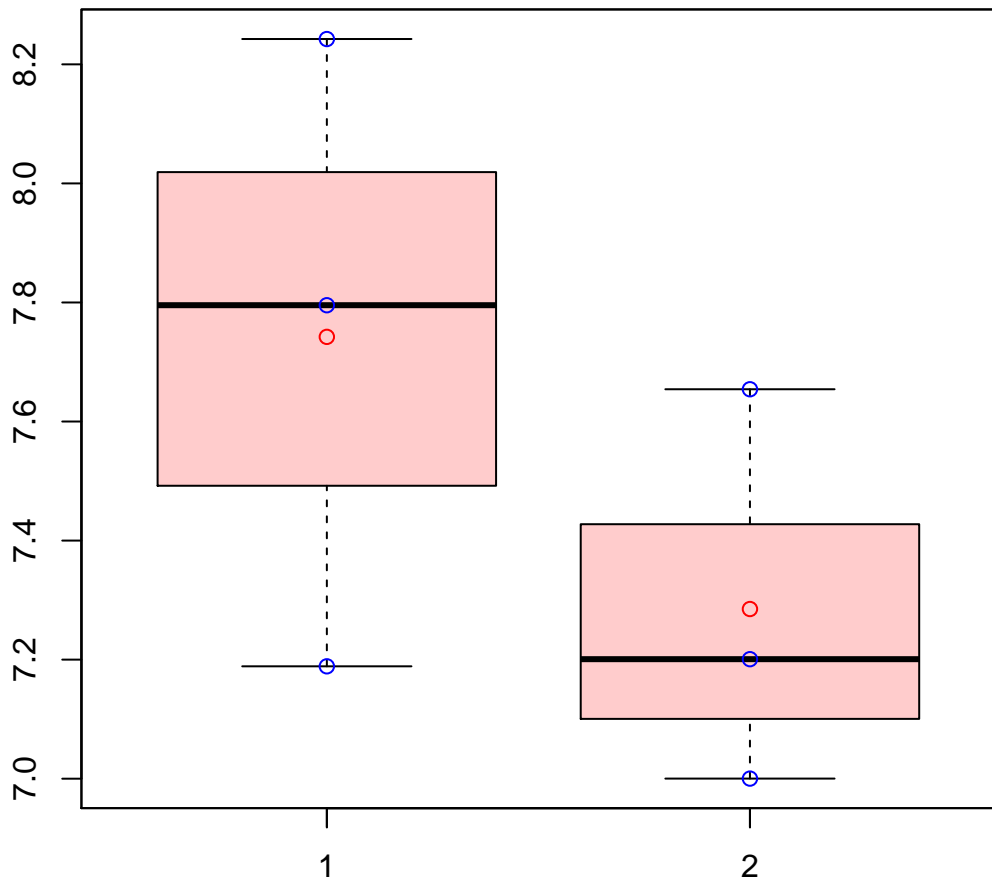

t-Test: p-value = 0.29

# C0HE90|C0HE90\_MAIZE

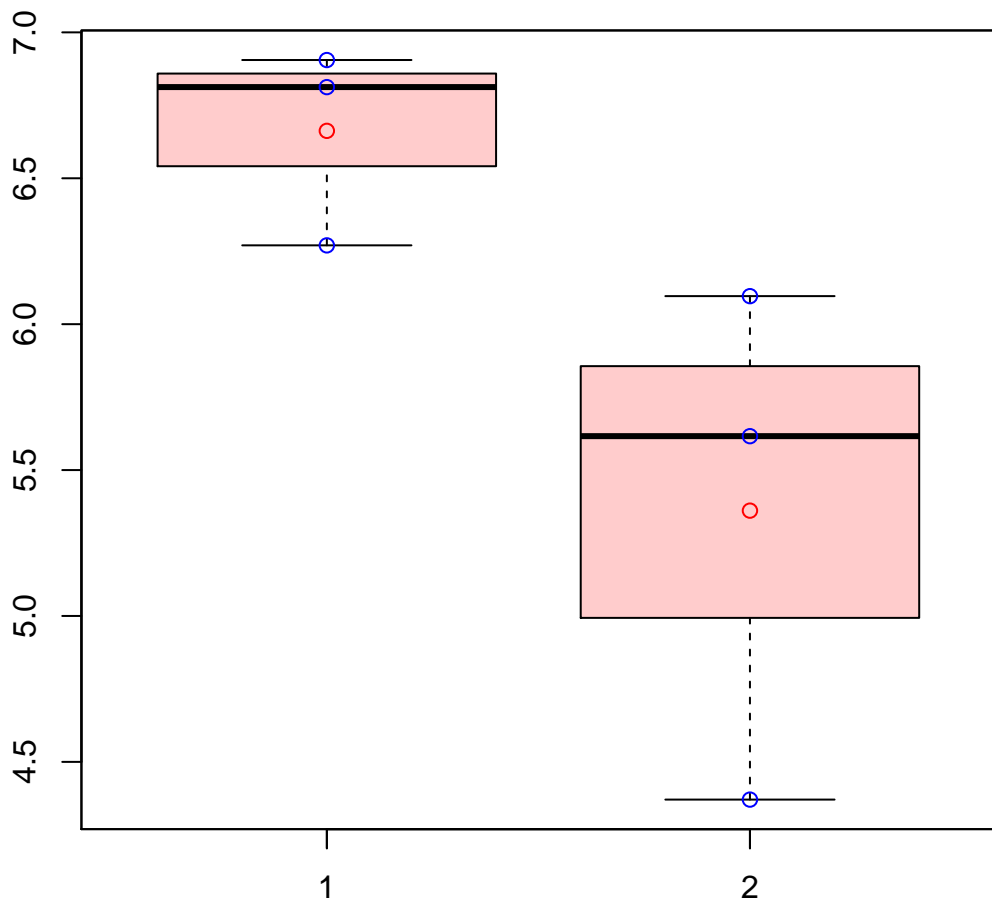

t-Test: p-value = 0.11

# C0HEG7|C0HEG7\_MAIZE

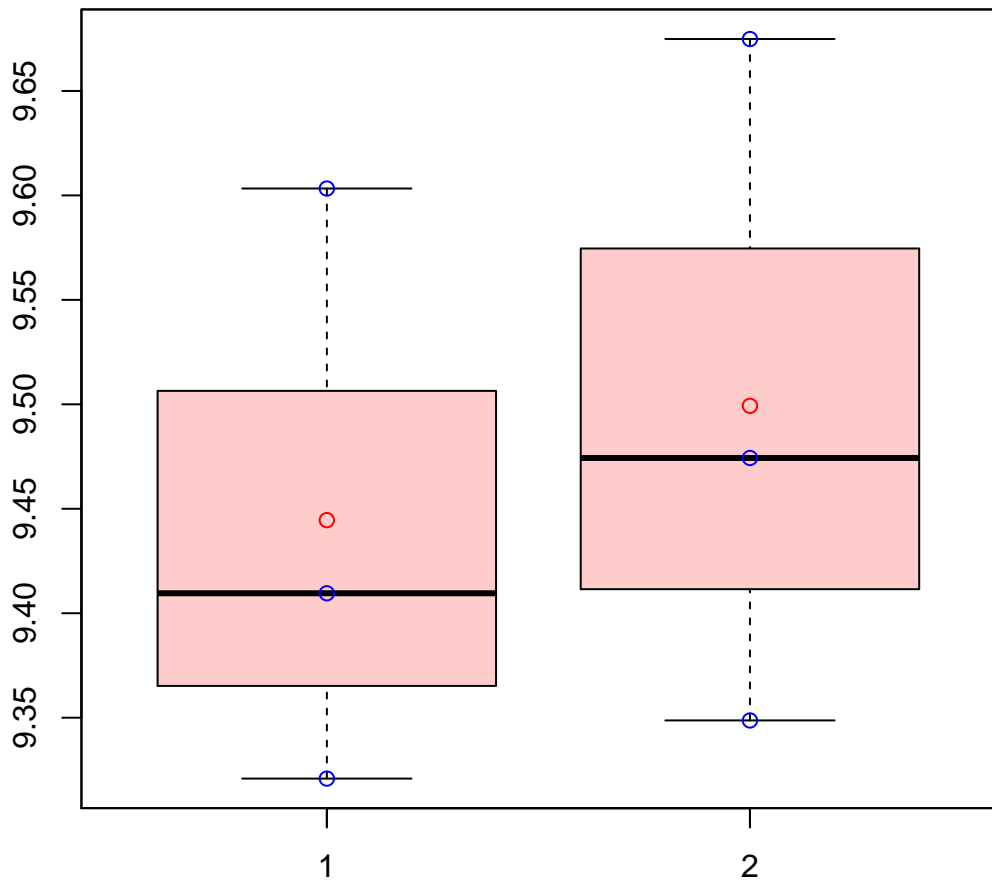

t-Test: p-value = 0.69



# C0HER4|C0HER4\_MAIZE

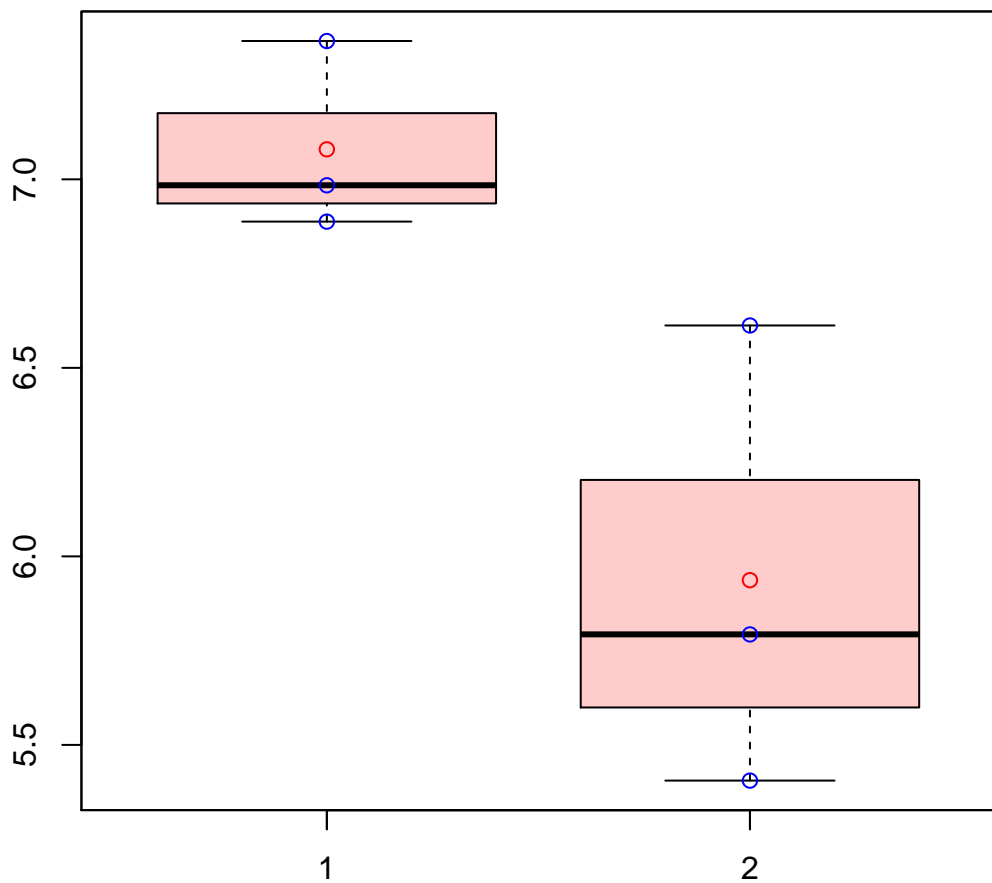

t-Test: p-value = 0.07

# C0HHR4|C0HHR4\_MAIZE

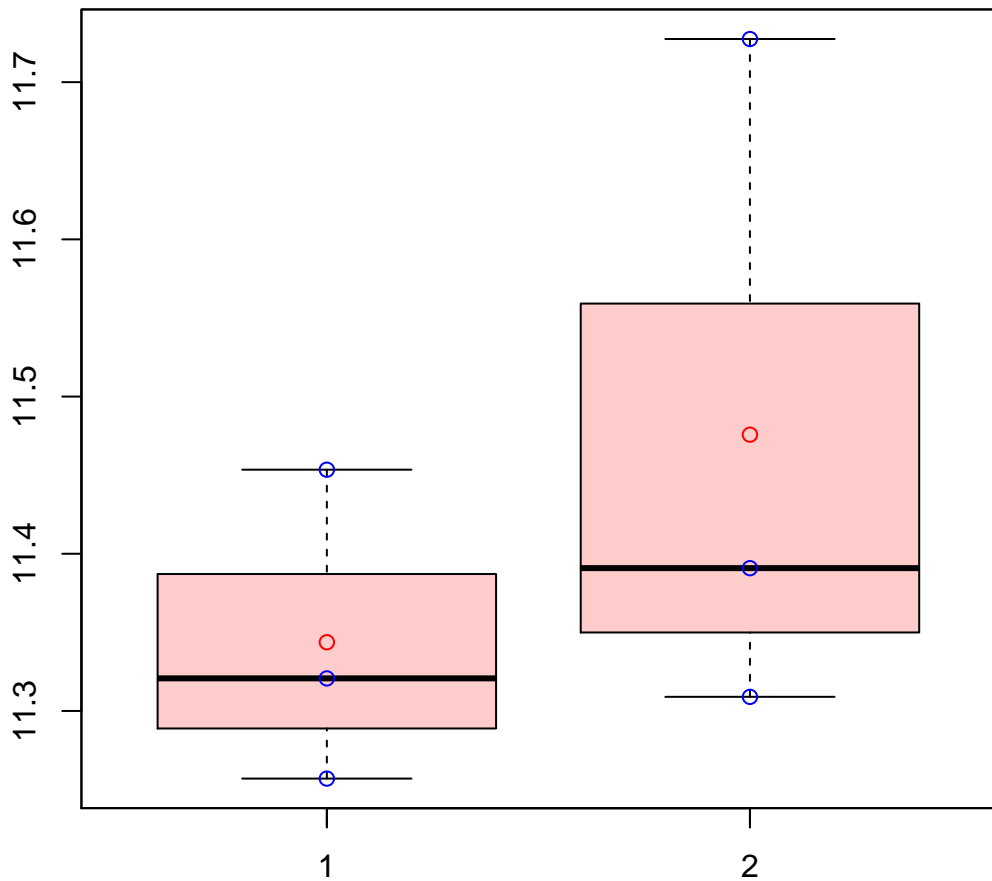

t-Test: p-value = 0.42

# C0HIR4|C0HIR4\_MAIZE

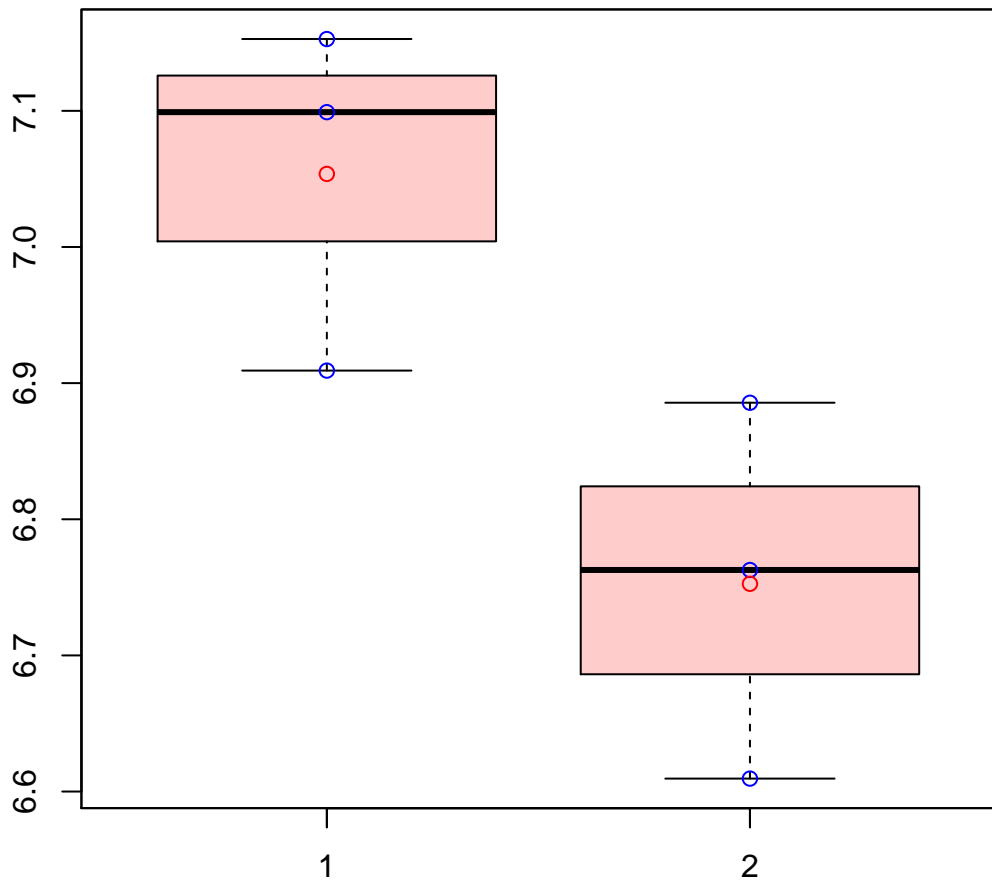

t-Test: p-value = 0.05

# C0JAC0|C0JAC0\_ORYCO

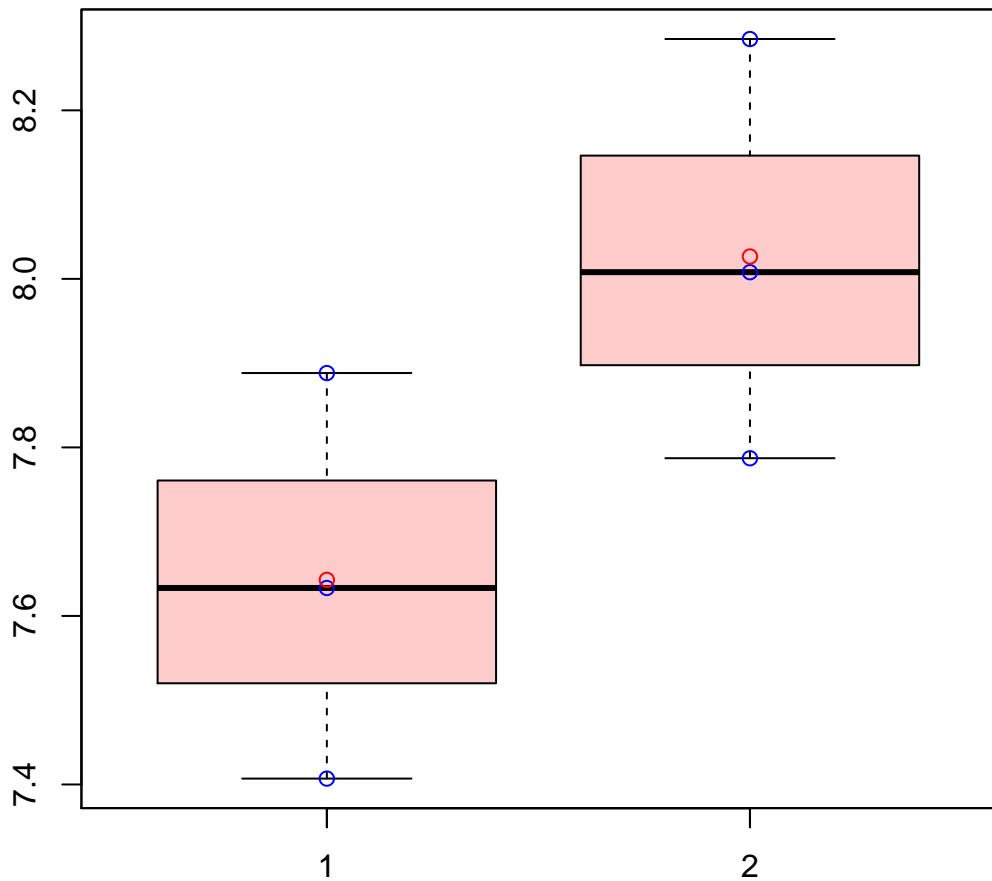

t-Test: p-value = 0.13

# C0JW71|C0JW71\_PENAM

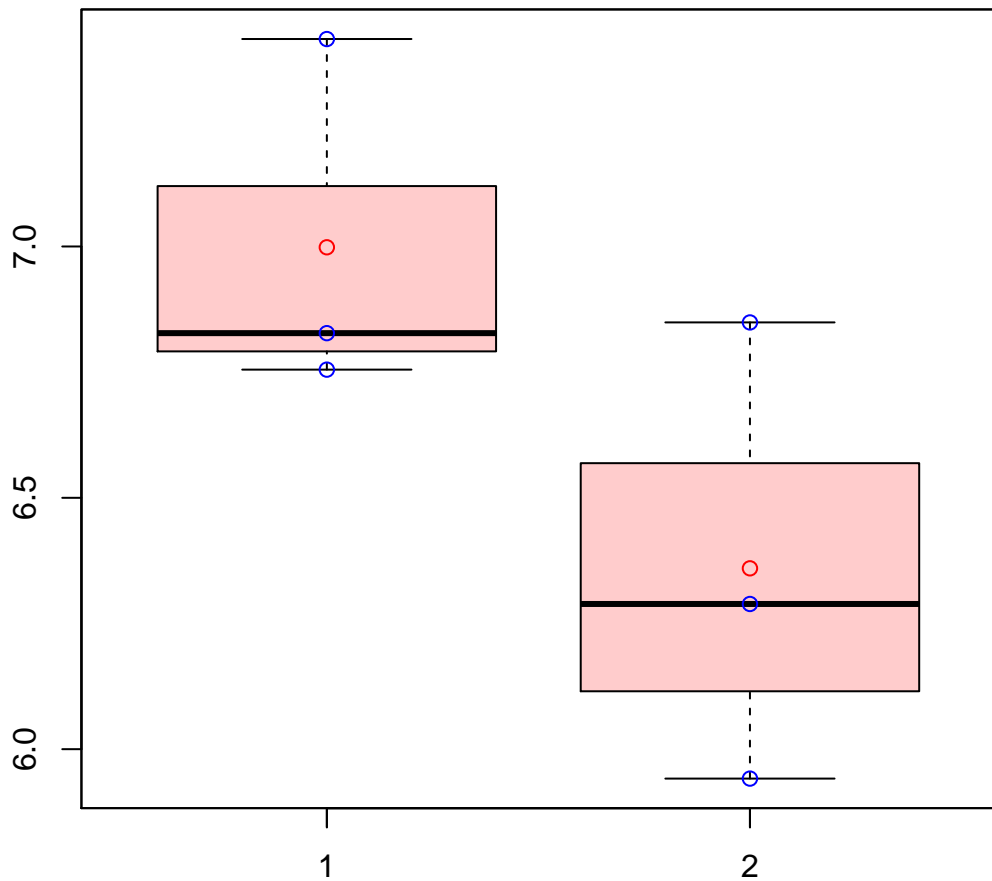

t-Test: p-value = 0.13

# C0K6P8|C0K6P8\_9ASPA

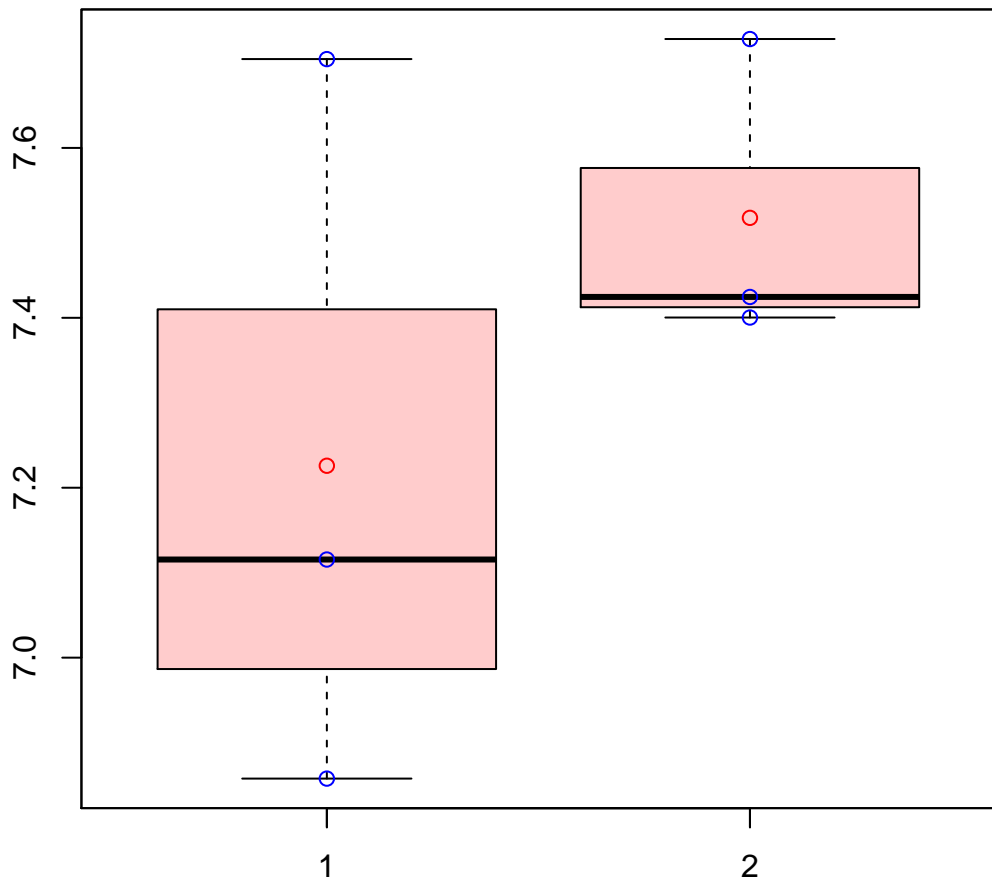

t-Test: p-value = 0.37

# C0KTA6|C0KTA6\_WHEAT

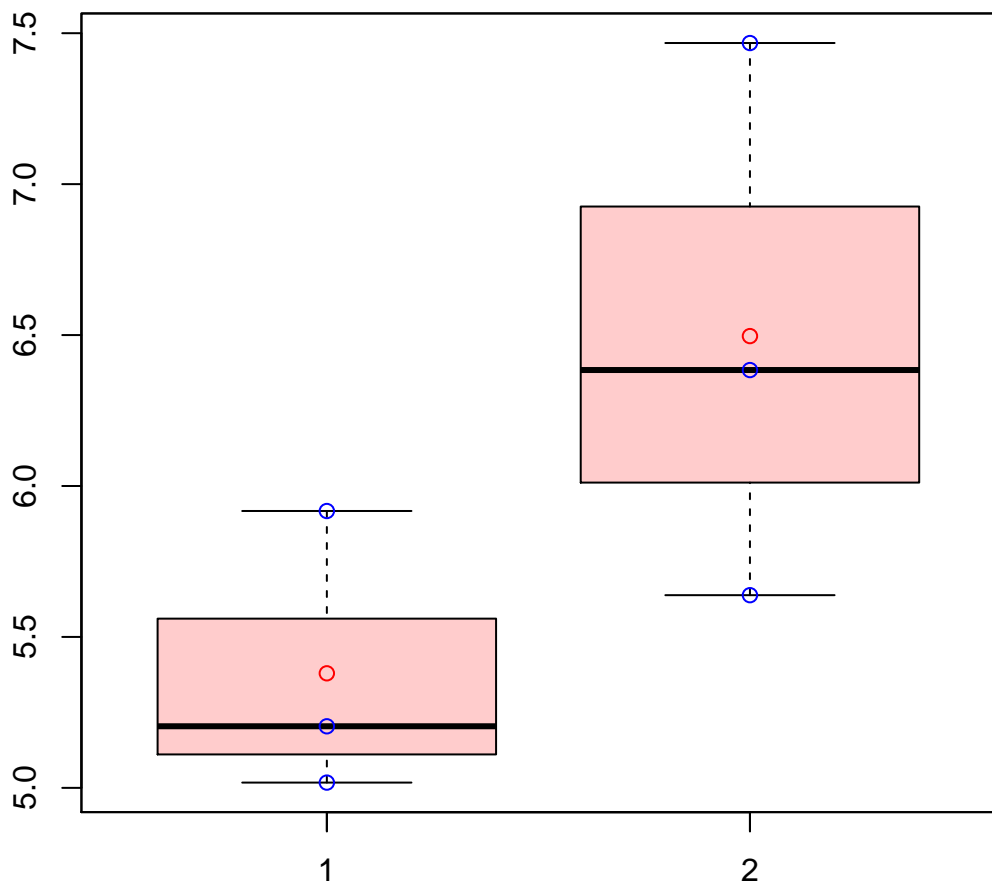

t-Test: p-value = 0.16

# COLL37|COLL37\_BAMOL

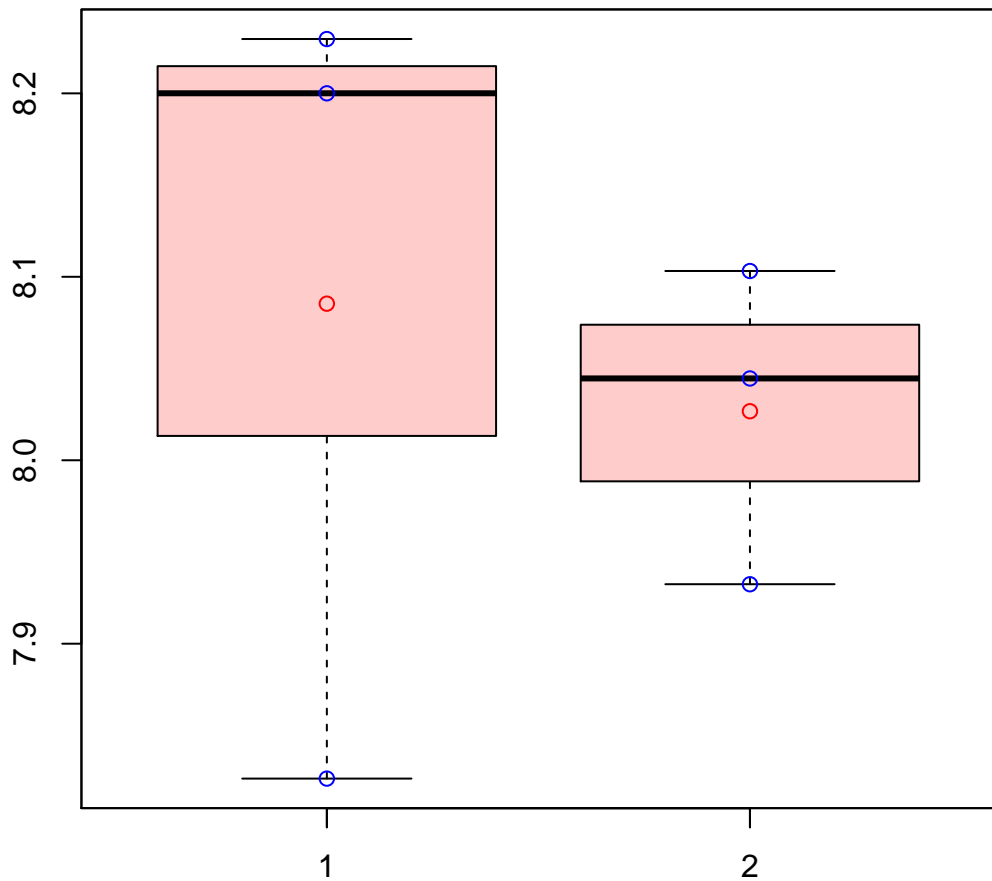

t-Test: p-value = 0.71



# C0P2Y3|C0P2Y3\_MAIZE

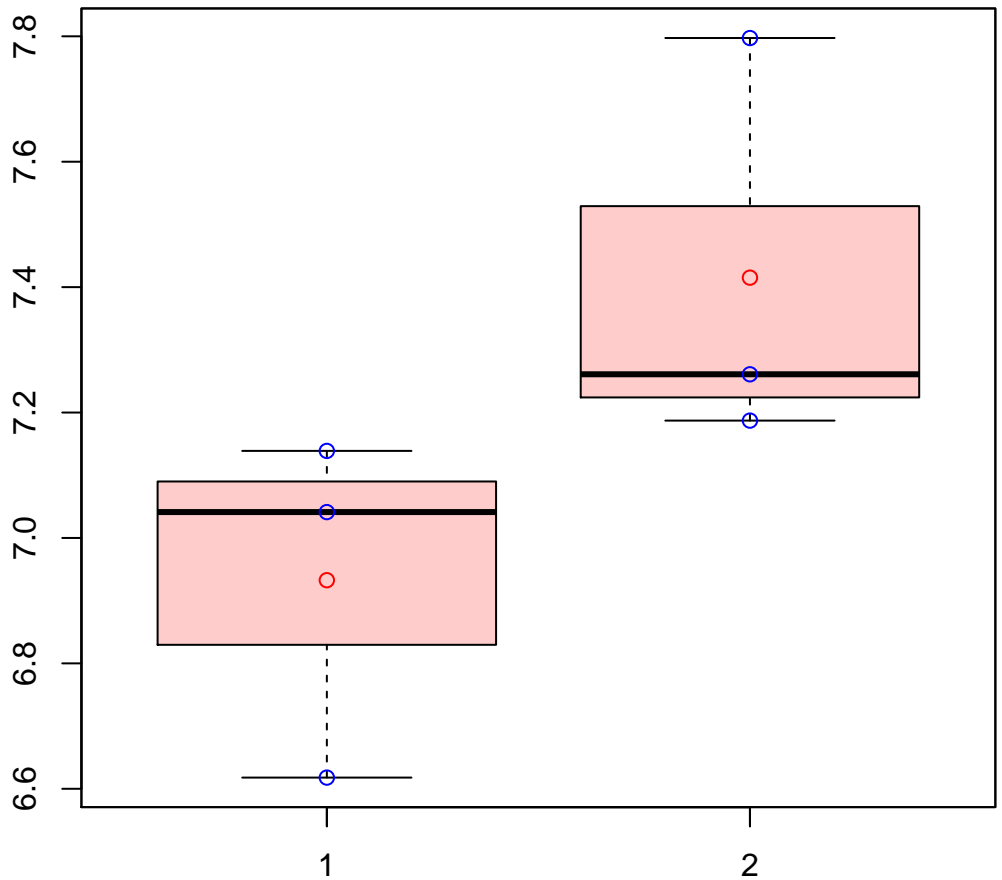

t-Test: p-value = 0.13

# C0P2Y6|C0P2Y6\_MAIZE

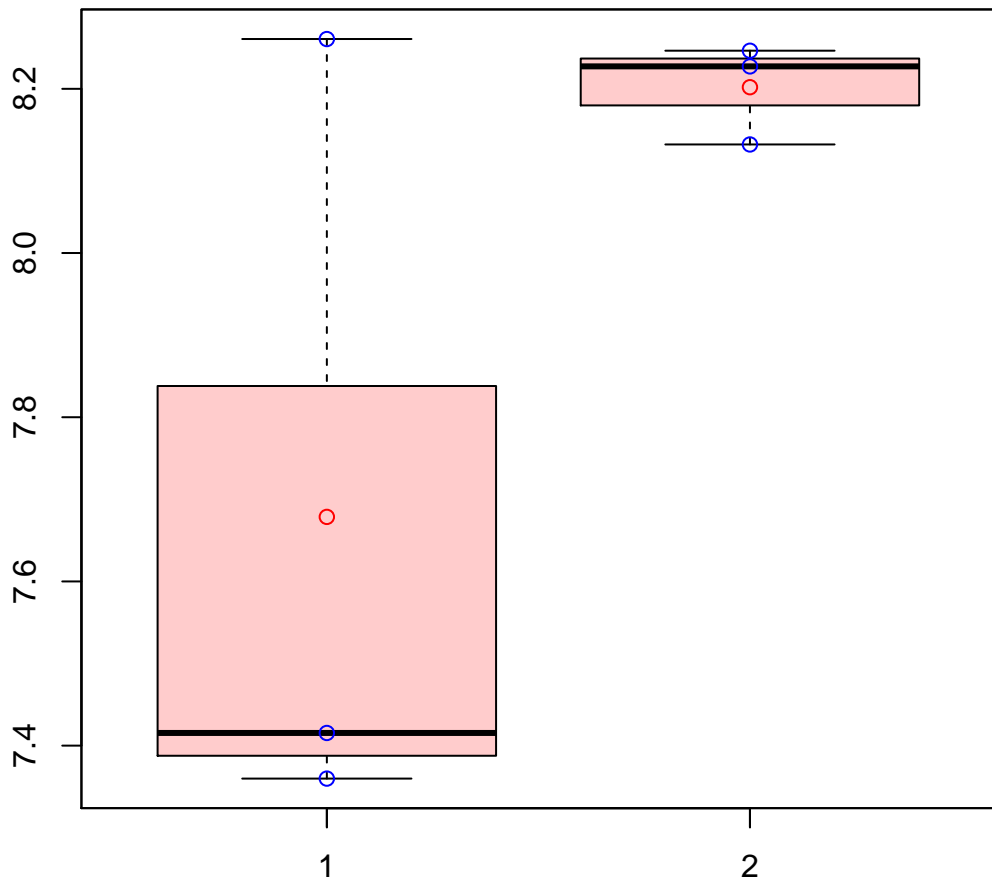

t-Test: p-value = 0.21

# C0P3S2|C0P3S2\_MAIZE

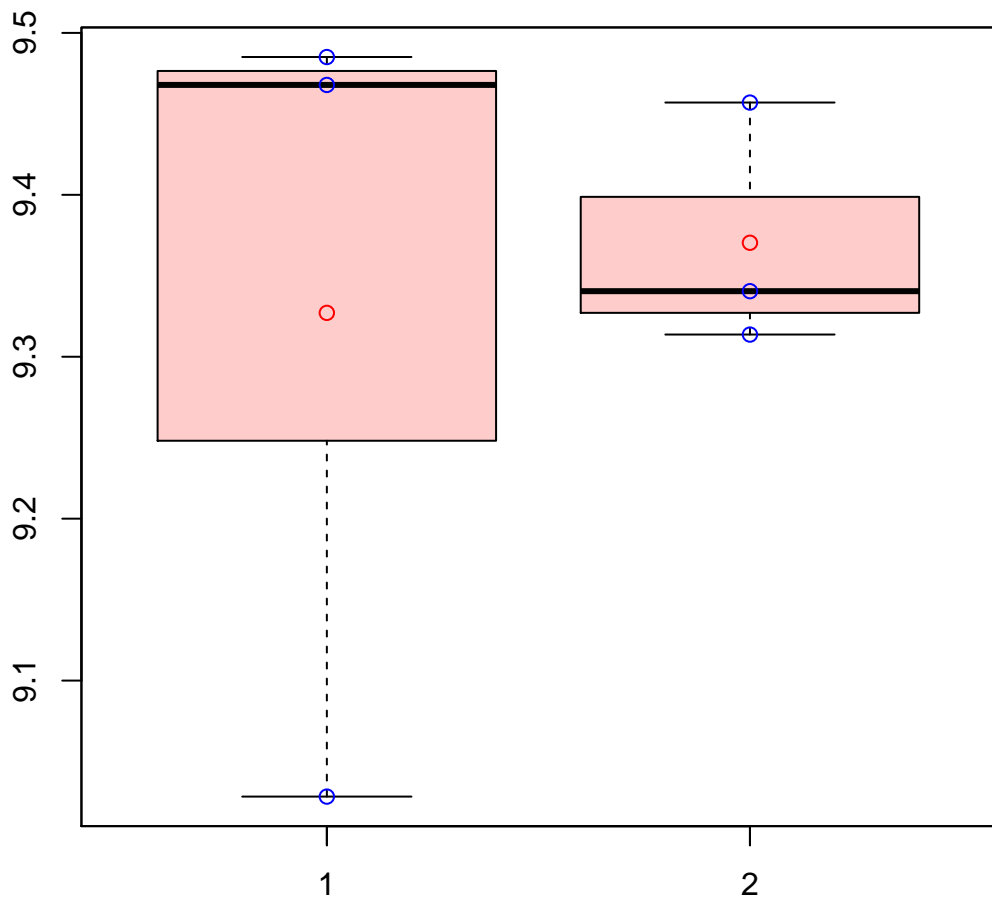

t-Test: p-value = 0.8

# C0P3T2|C0P3T2\_MAIZE

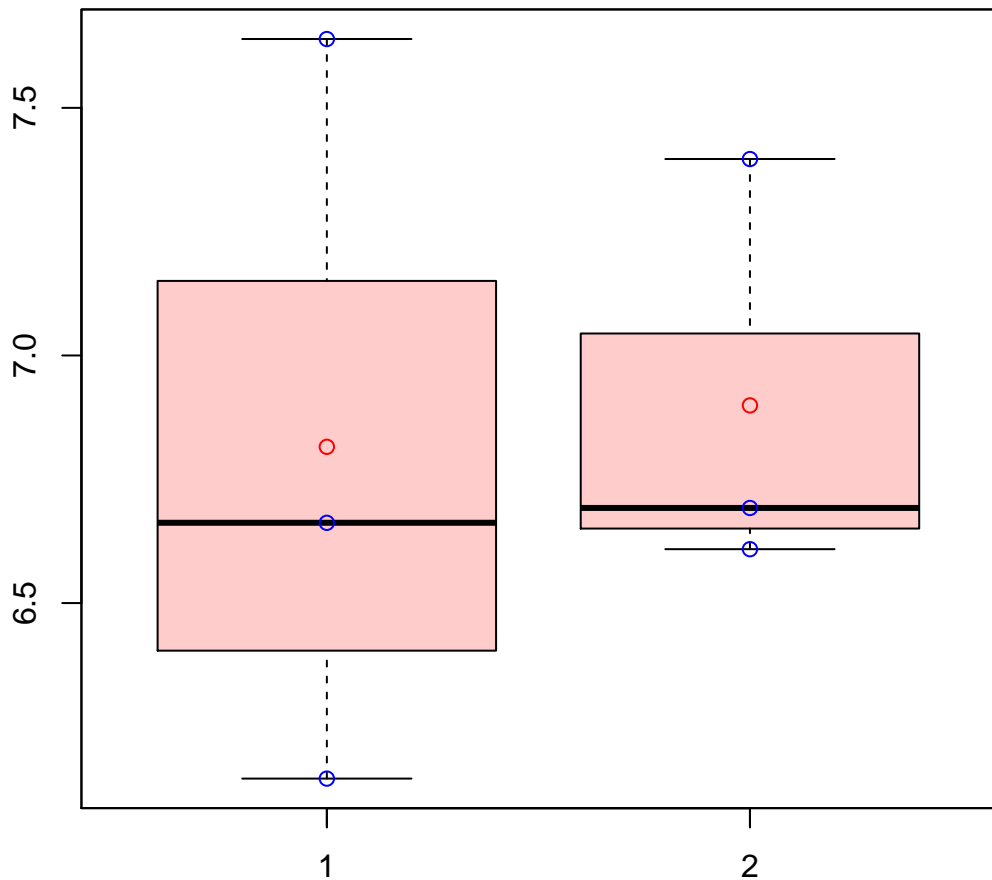

t-Test: p-value = 0.88

# C0P429|C0P429\_MAIZE

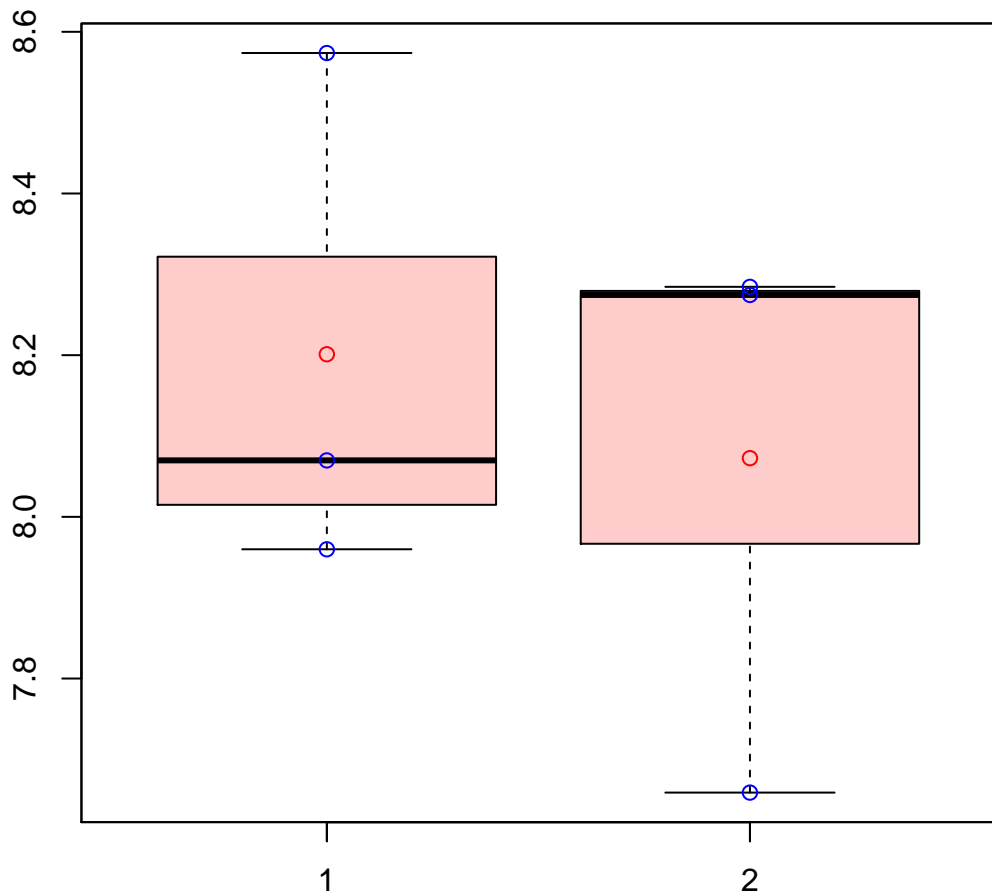

t-Test: p-value = 0.67

# C0P4U5|C0P4U5\_MAIZE

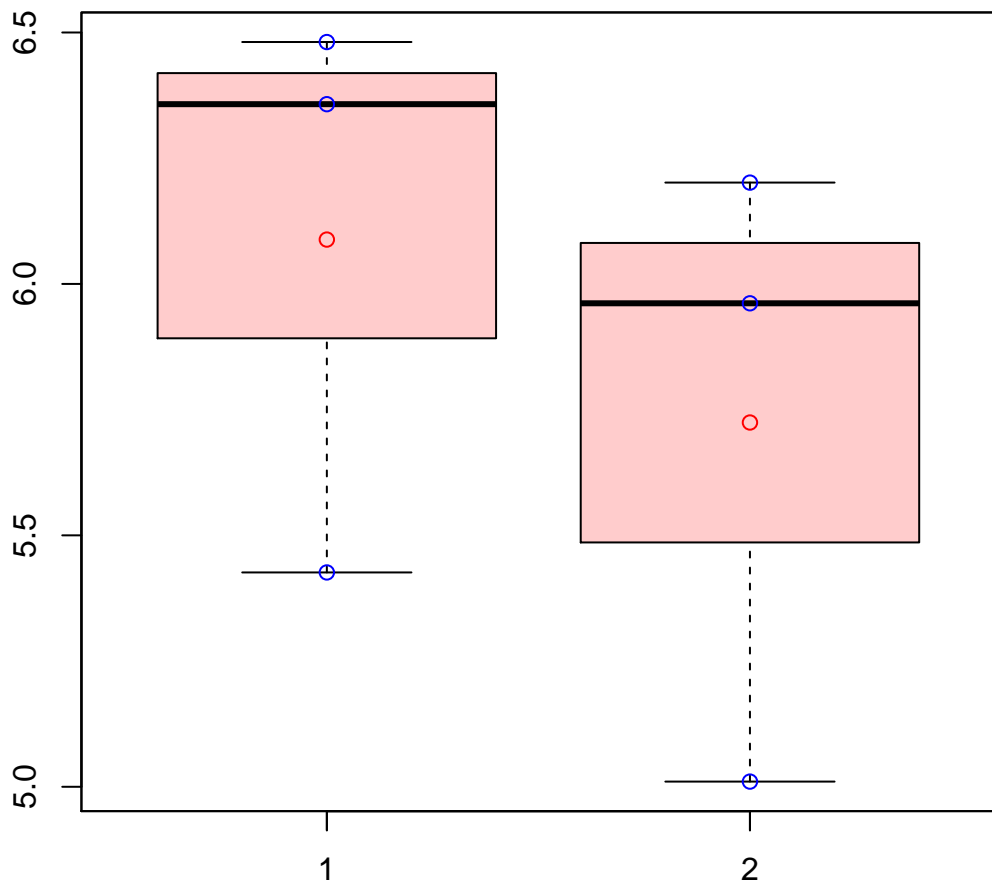

t-Test: p-value = 0.5

# C0P4U8|C0P4U8\_MAIZE

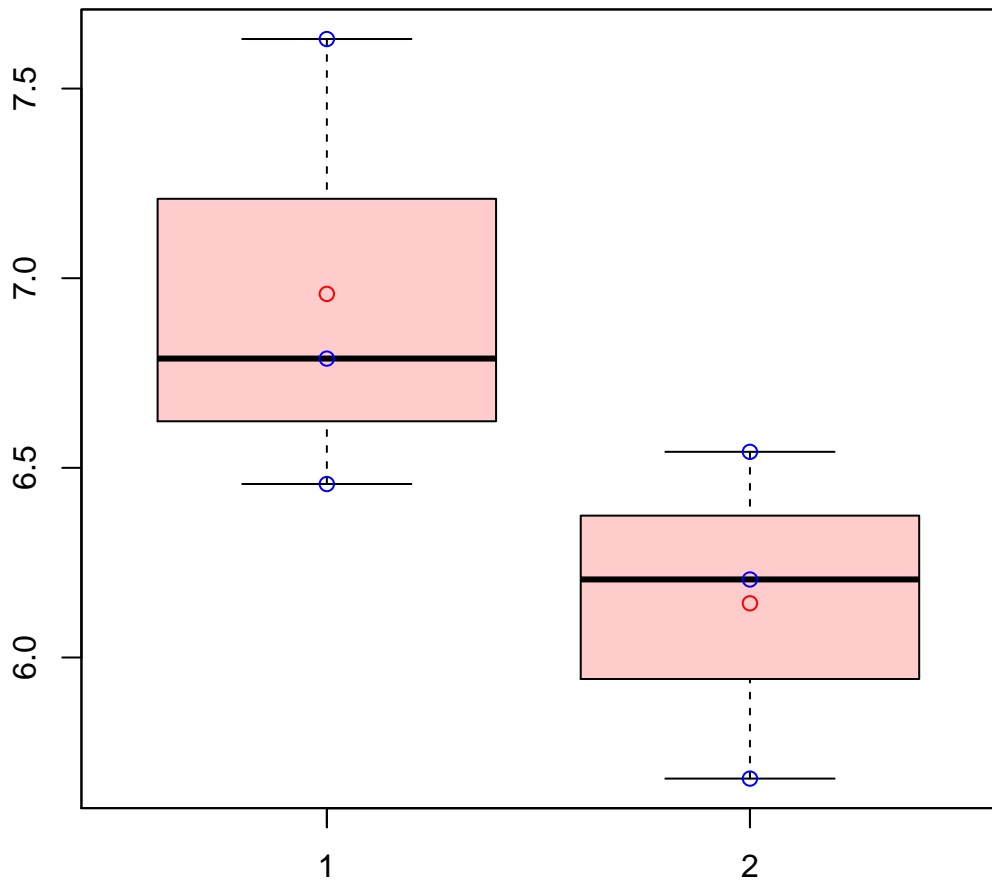

t-Test: p-value = 0.14

# C0P4Y1|C0P4Y1\_MAIZE

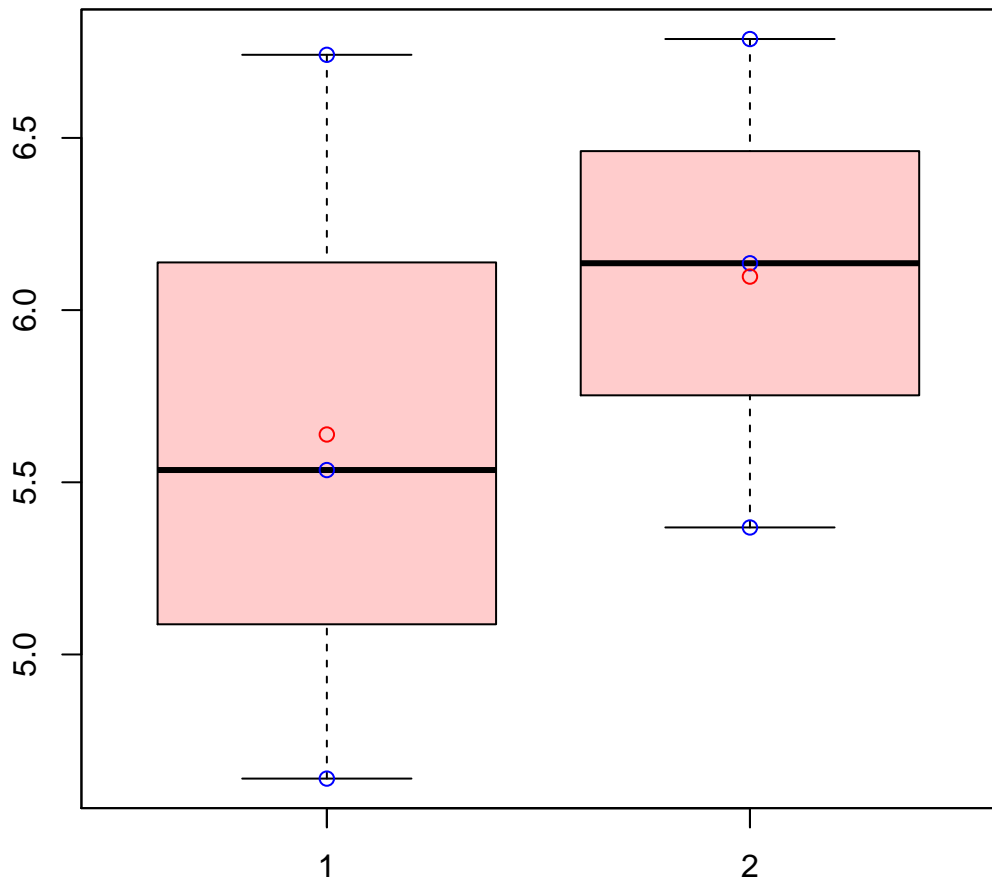

t-Test: p-value = 0.57



# C0P530|C0P530\_MAIZE

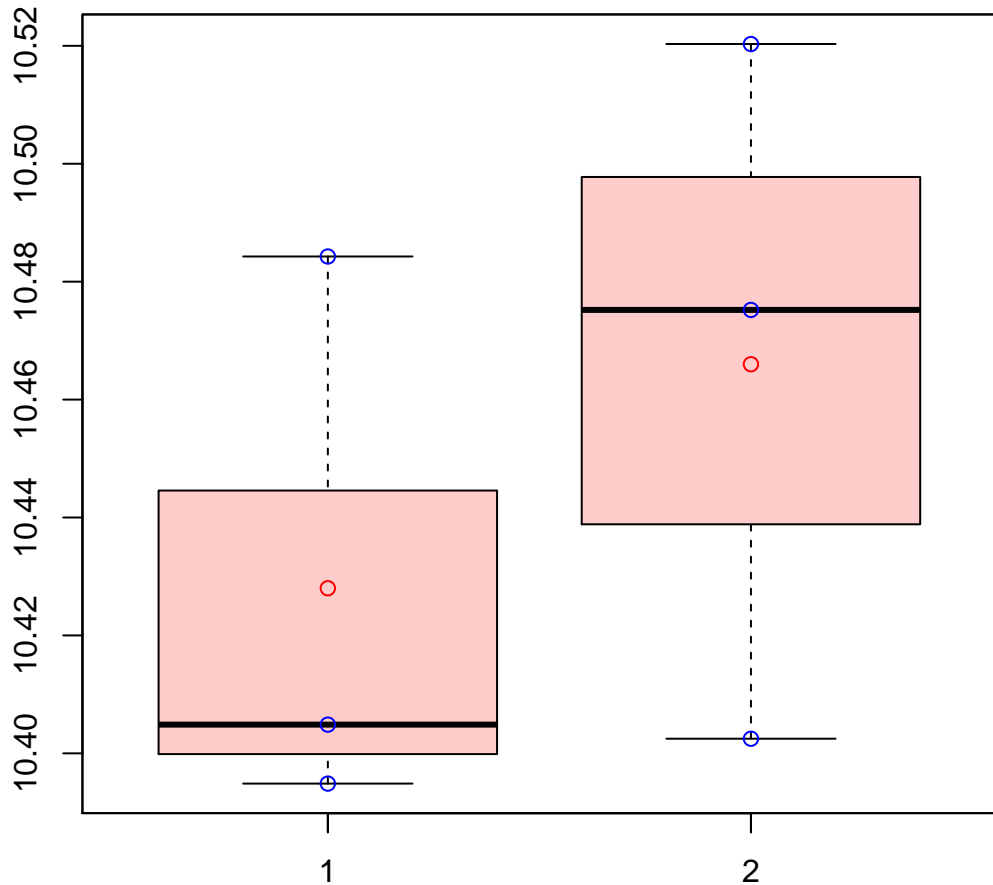

t-Test: p-value = 0.44

# C0P5C0|C0P5C0\_MAIZE

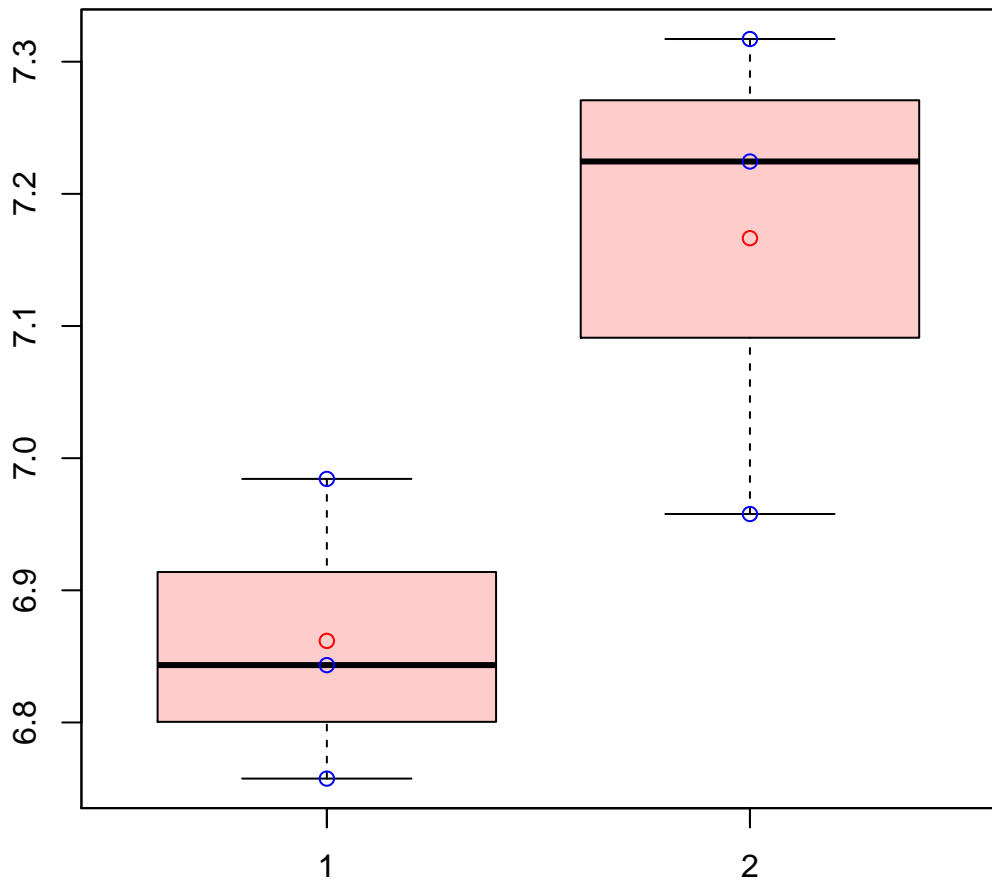

t-Test: p-value = 0.09

# C0P5W4|C0P5W4\_MAIZE

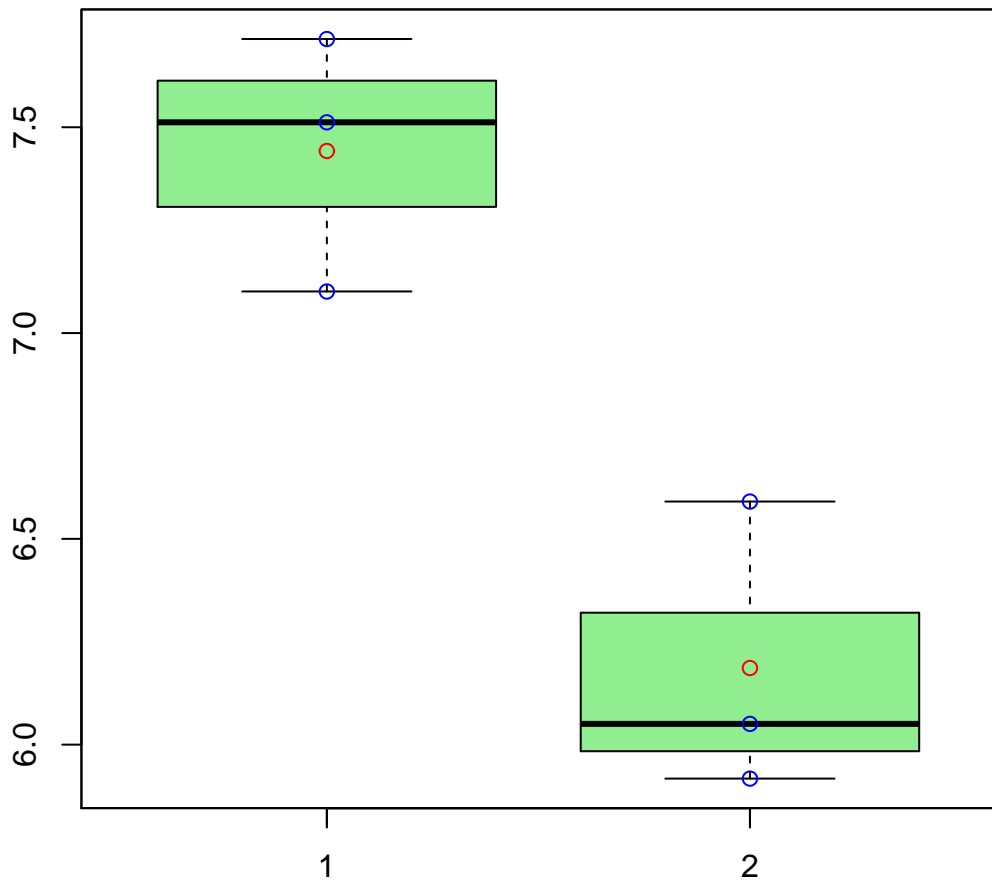

t-Test: p-value = 0.01

# C0P5X1|C0P5X1\_MAIZE

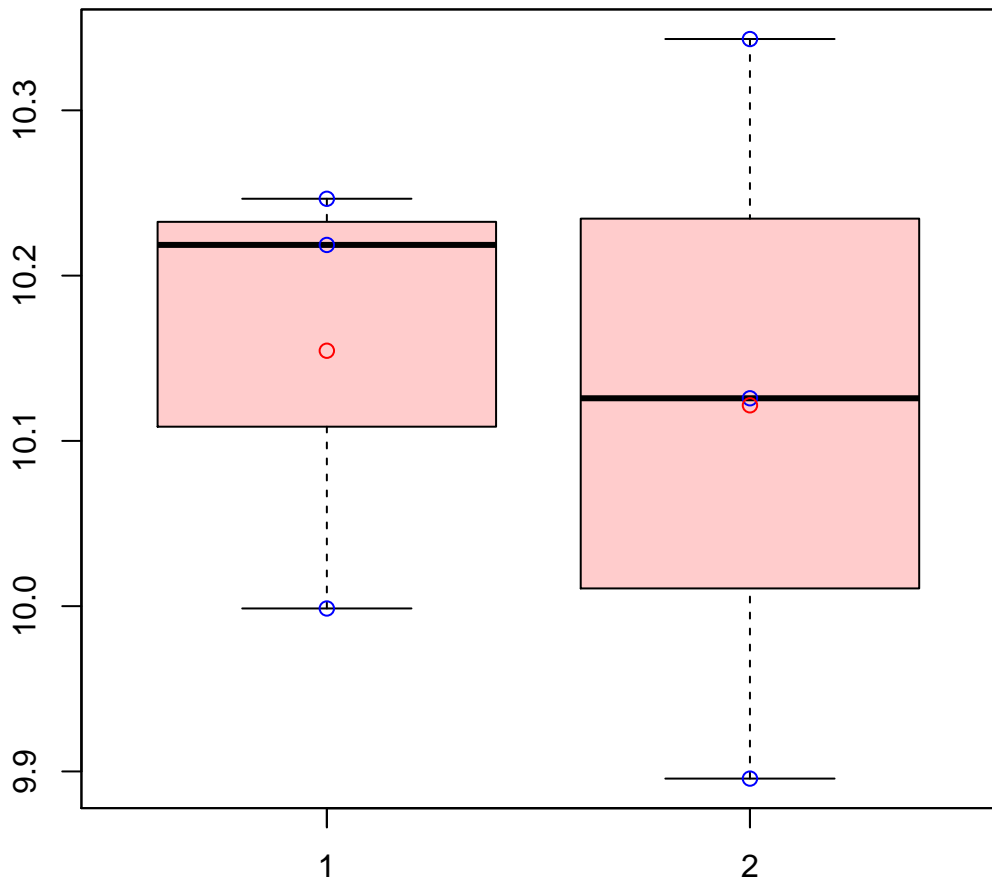

t-Test: p-value = 0.84

# C0P5Y3|C0P5Y3\_MAIZE

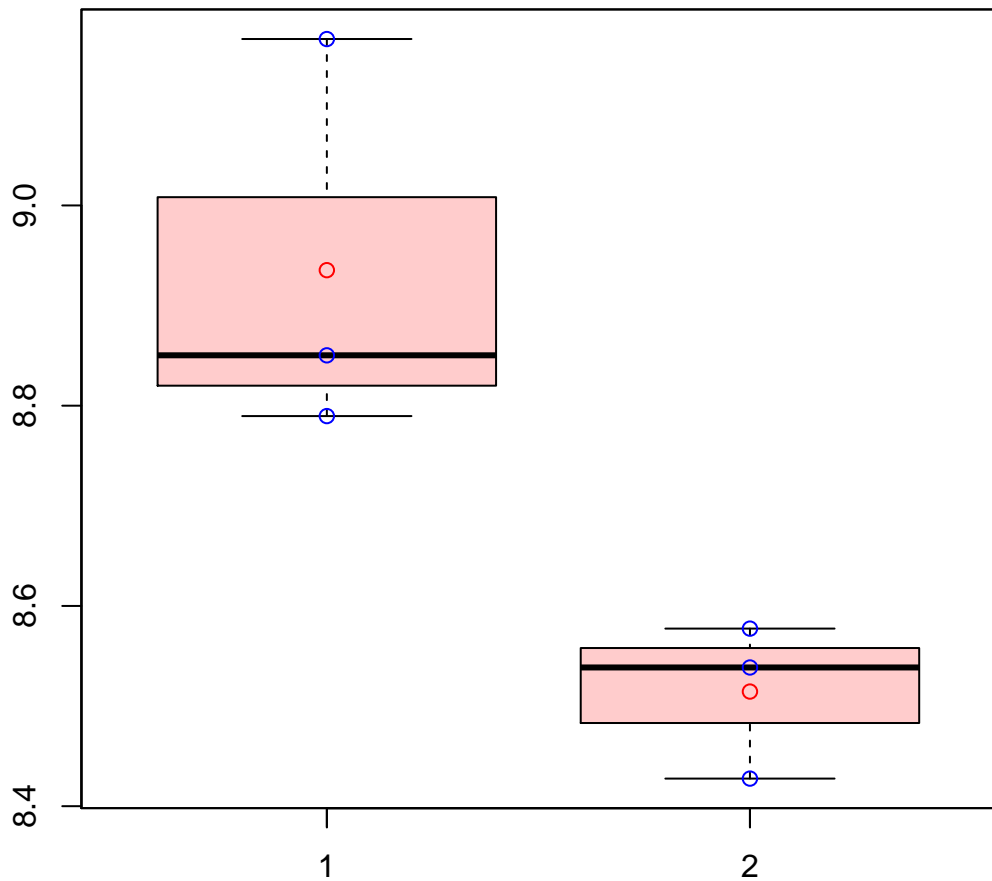

t-Test: p-value = 0.05

# C0P699|C0P699\_MAIZE

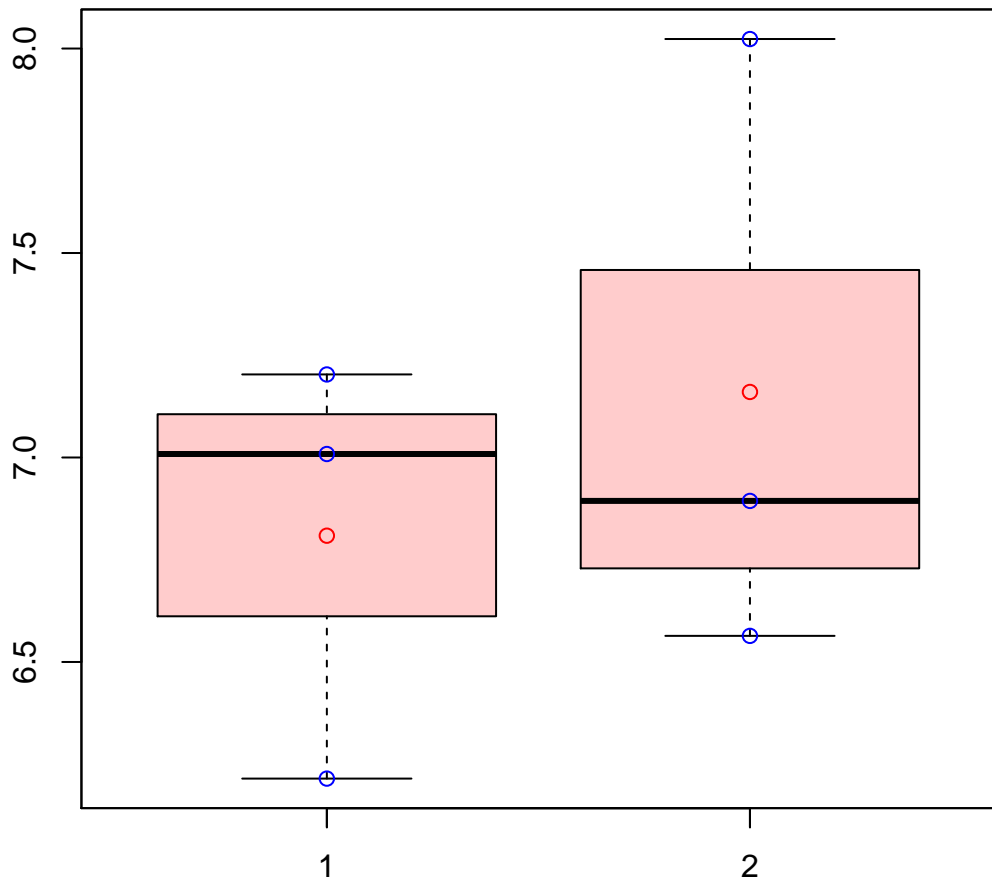

t-Test: p-value = 0.55

# C0P6B9|C0P6B9\_MAIZE

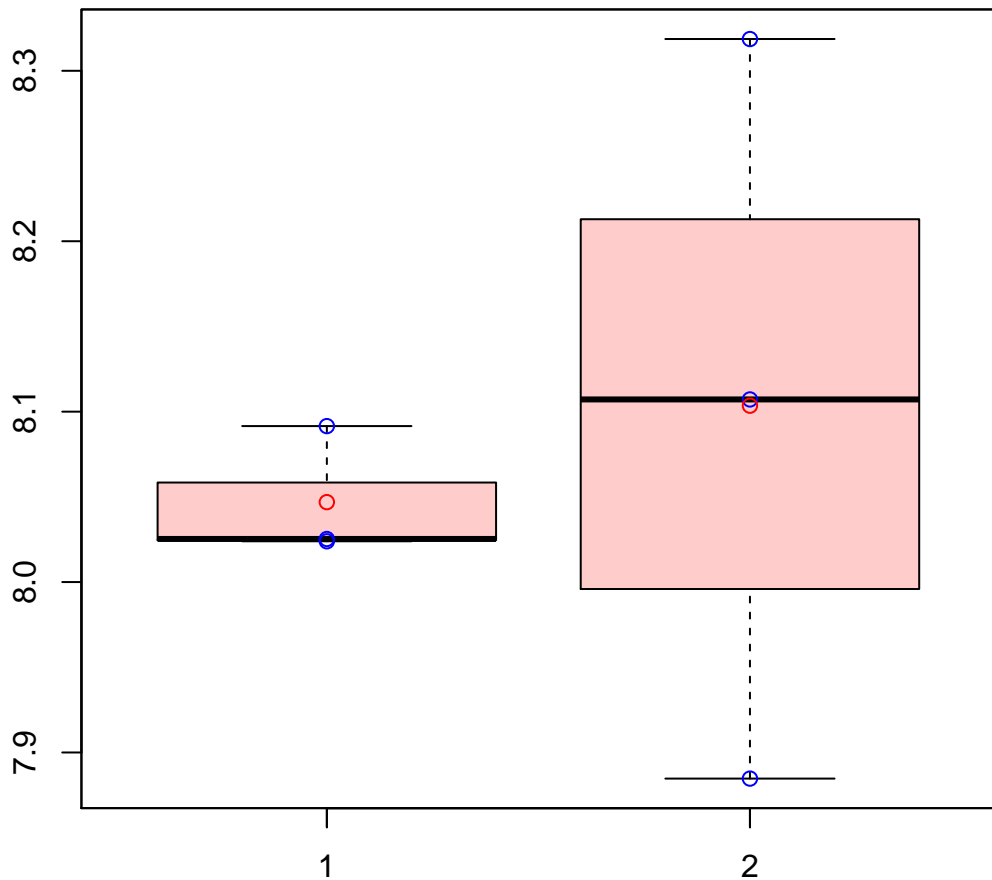

t-Test: p-value = 0.7

# C0P887|C0P887\_MAIZE

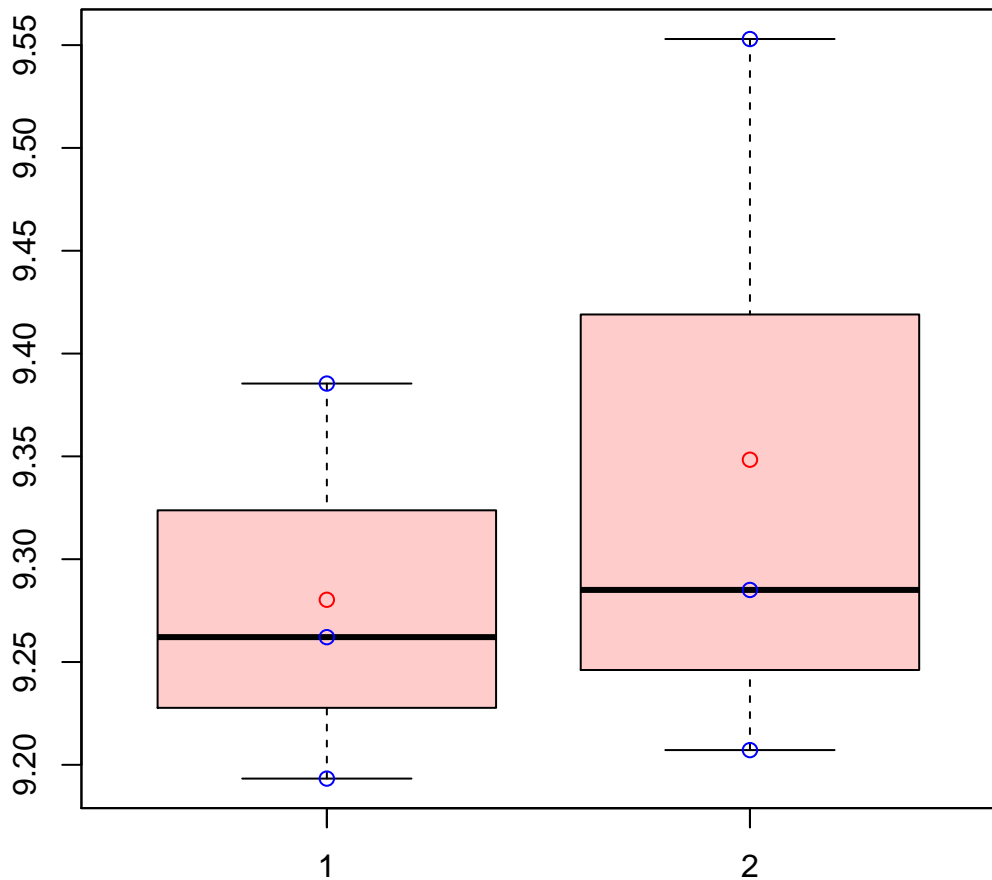

t-Test: p-value = 0.61



# C0P8F3|C0P8F3\_MAIZE

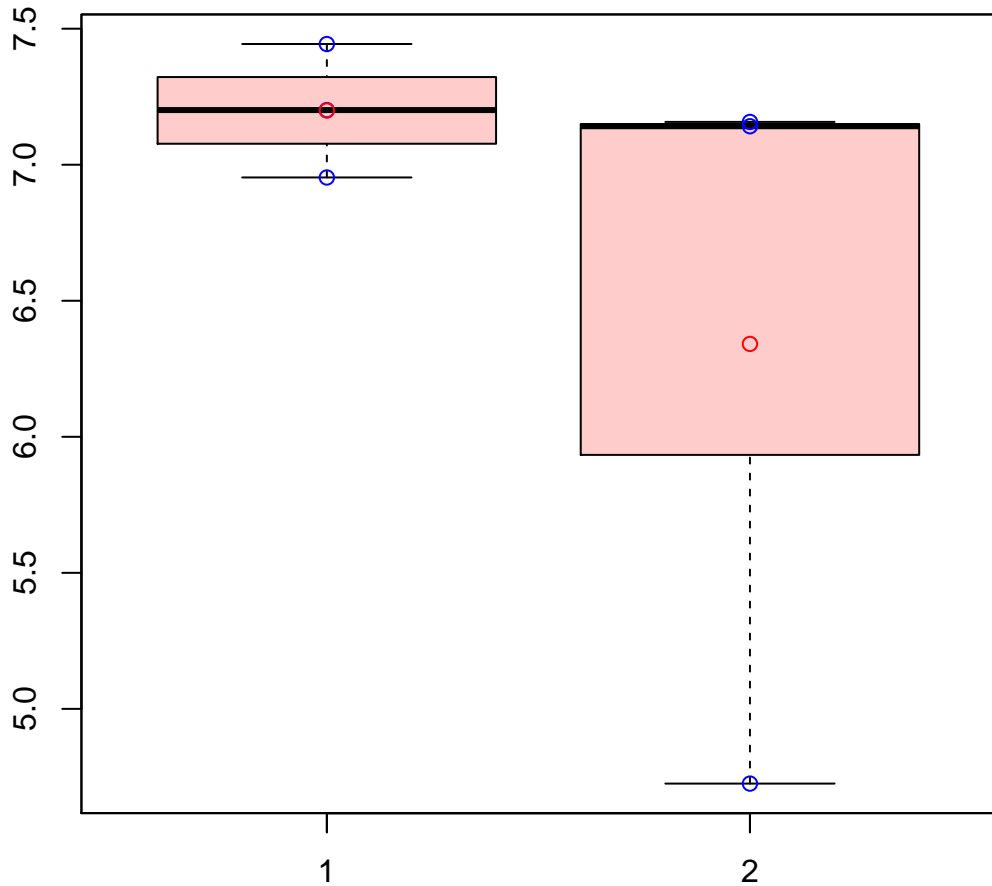

t-Test: p-value = 0.4

# C0P978|C0P978\_MAIZE

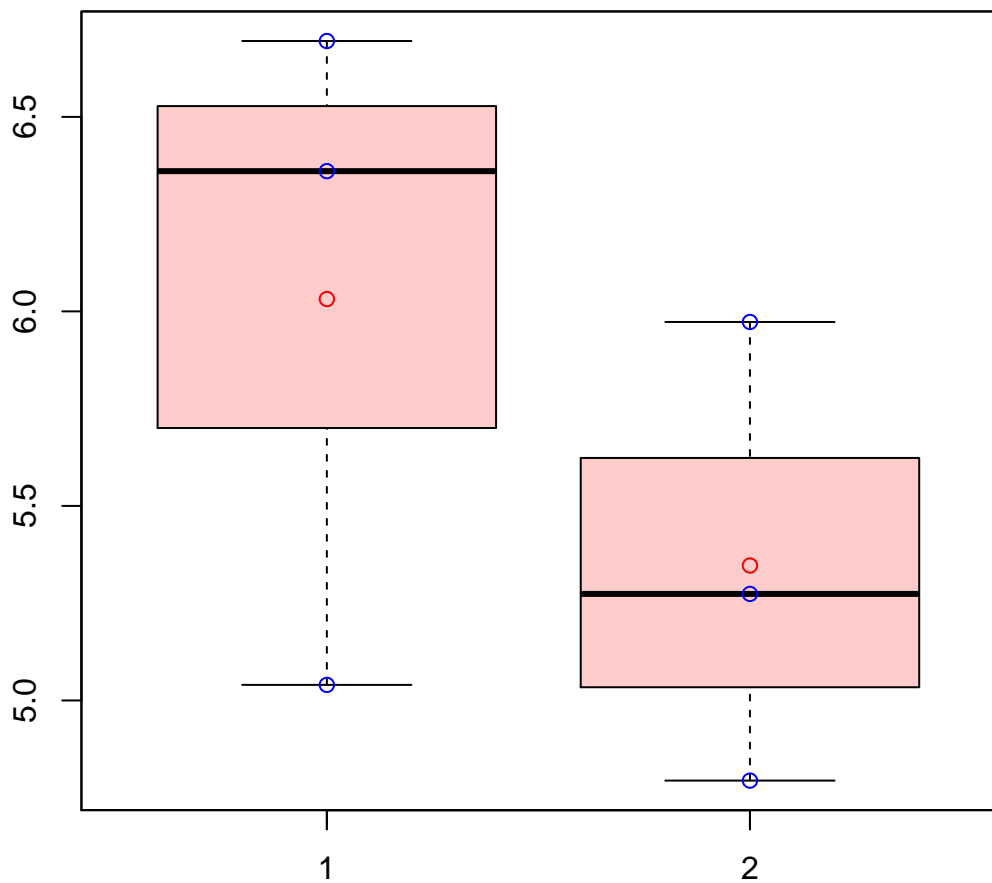

t-Test: p-value = 0.33

# C0P9K2|C0P9K2\_MAIZE

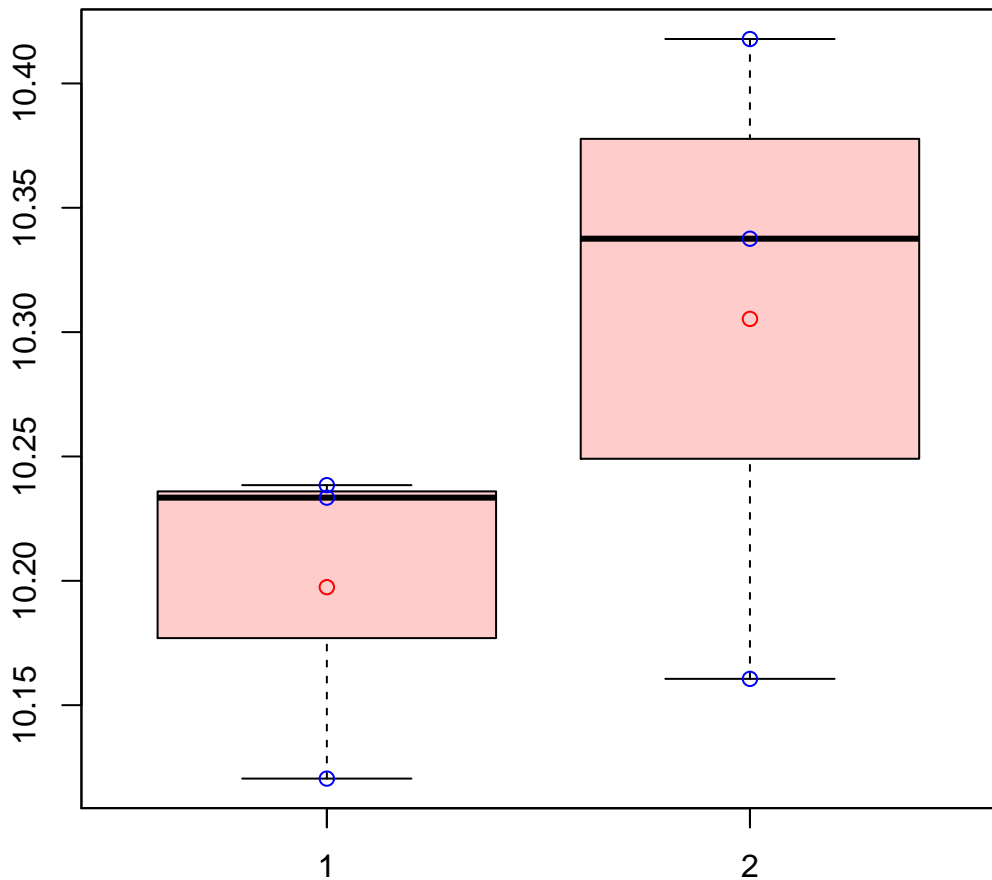

t-Test: p-value = 0.3

# C0PBX3|C0PBX3\_MAIZE

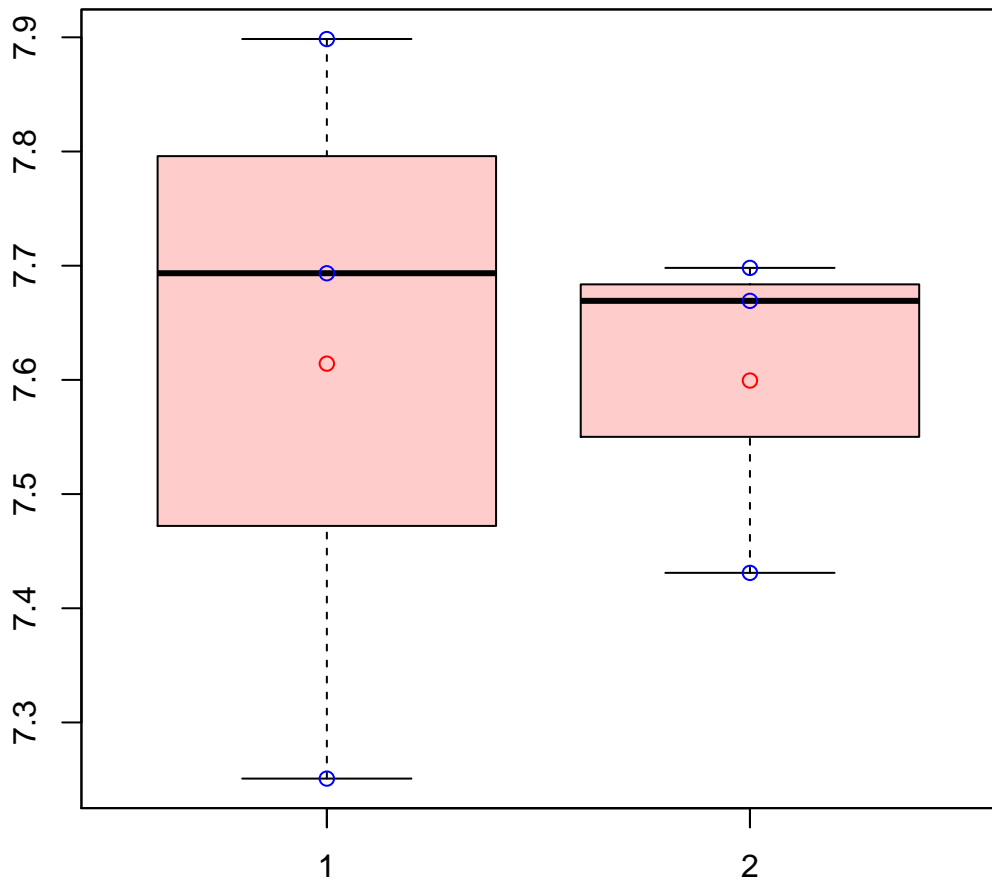

t-Test: p-value = 0.95

# C0PBY7|C0PBY7\_MAIZE

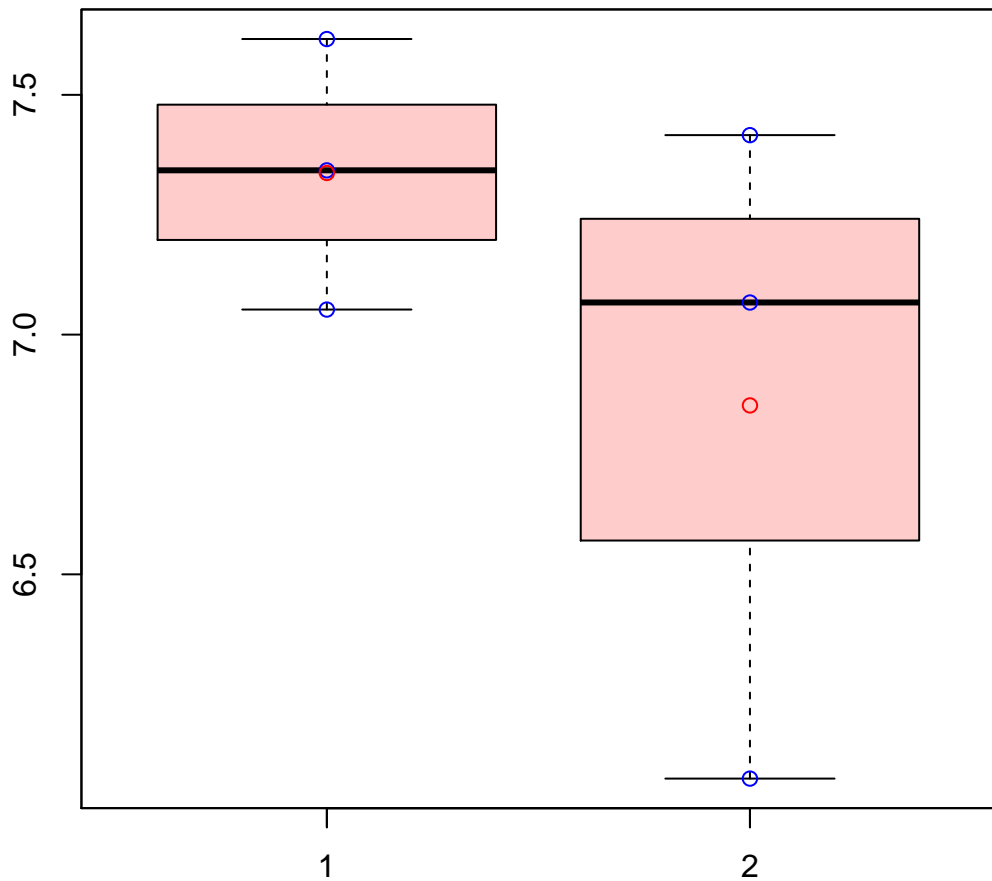

t-Test: p-value = 0.36

# C0PC62|C0PC62\_MAIZE

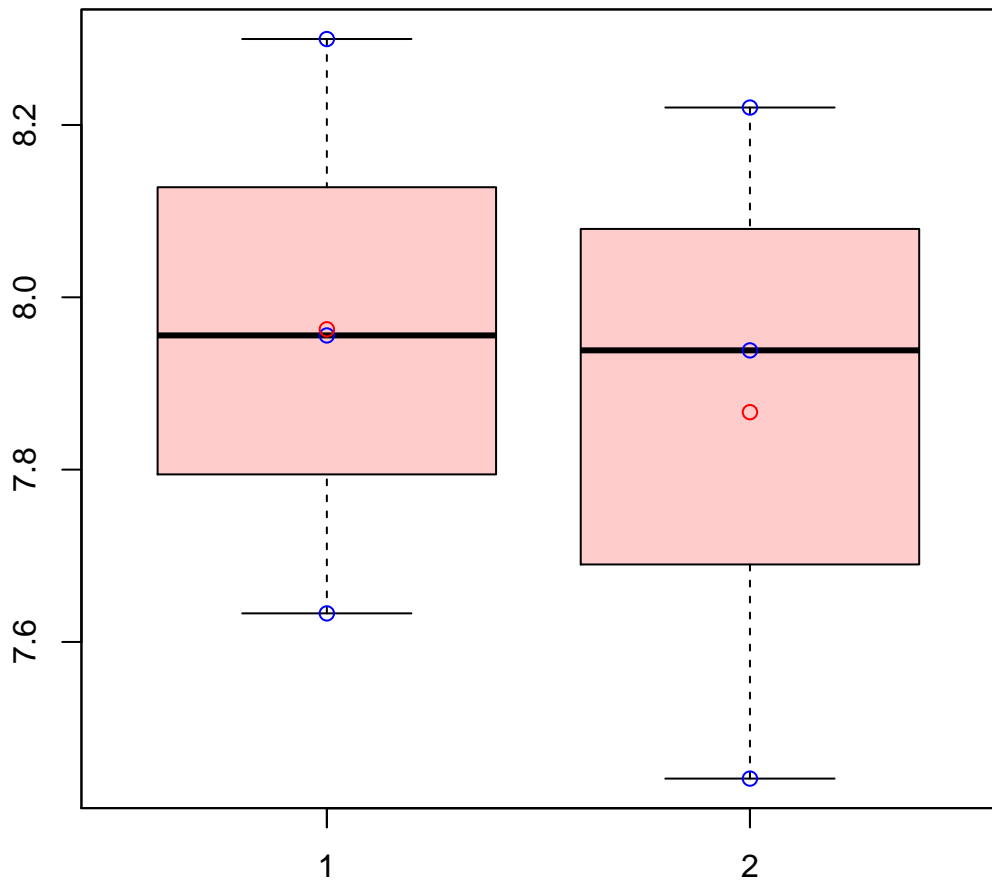

t-Test: p-value = 0.76

# C0PCM4|C0PCM4\_MAIZE

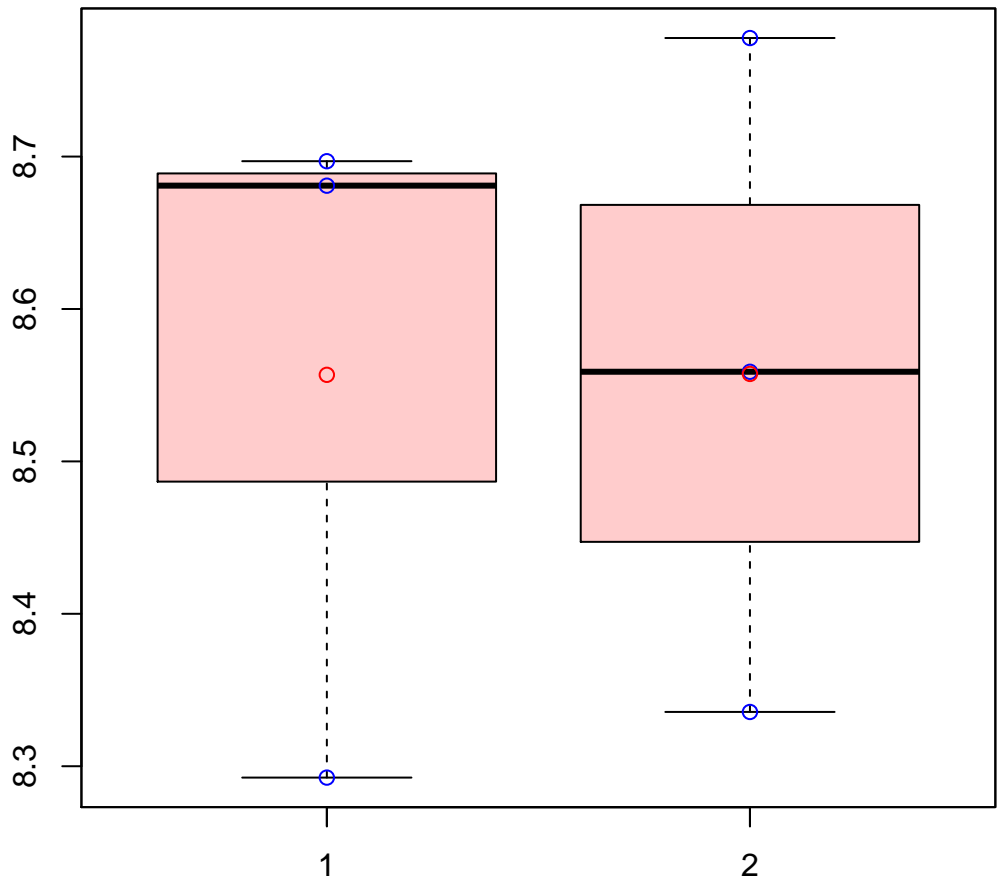

t-Test: p-value = 1

# C0PCQ6|C0PCQ6\_MAIZE

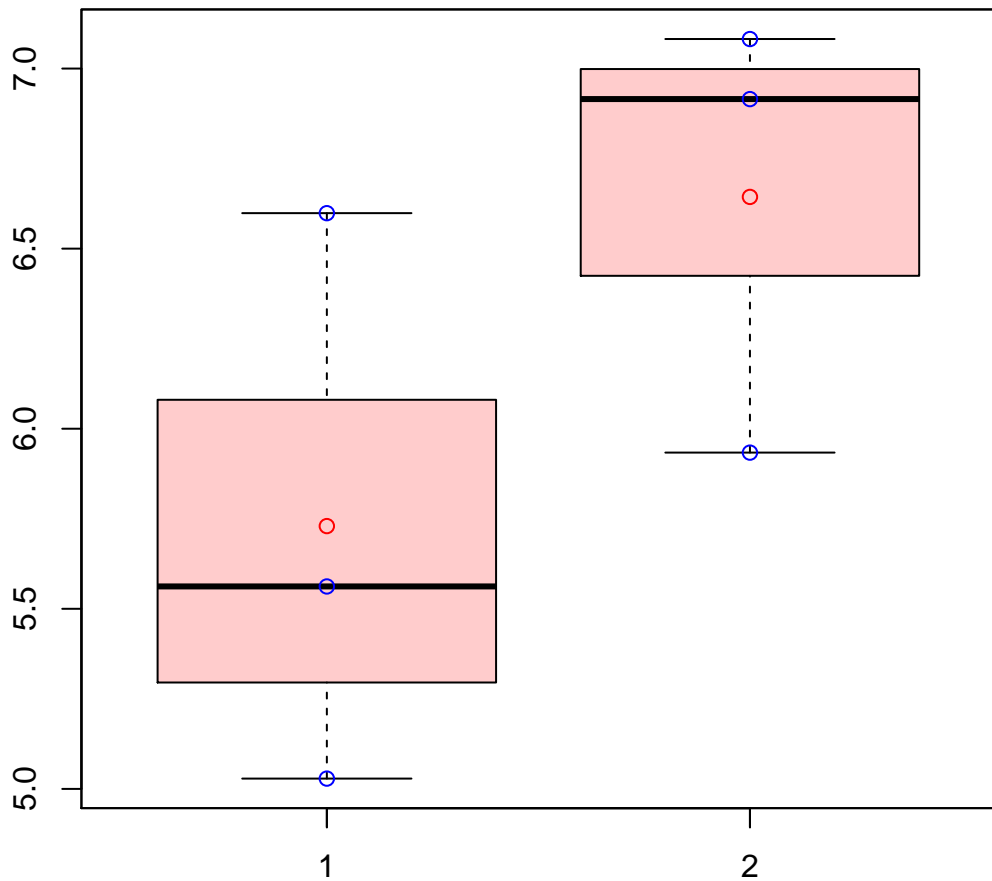

t-Test: p-value = 0.2



# C0PCV2|C0PCV2\_MAIZE

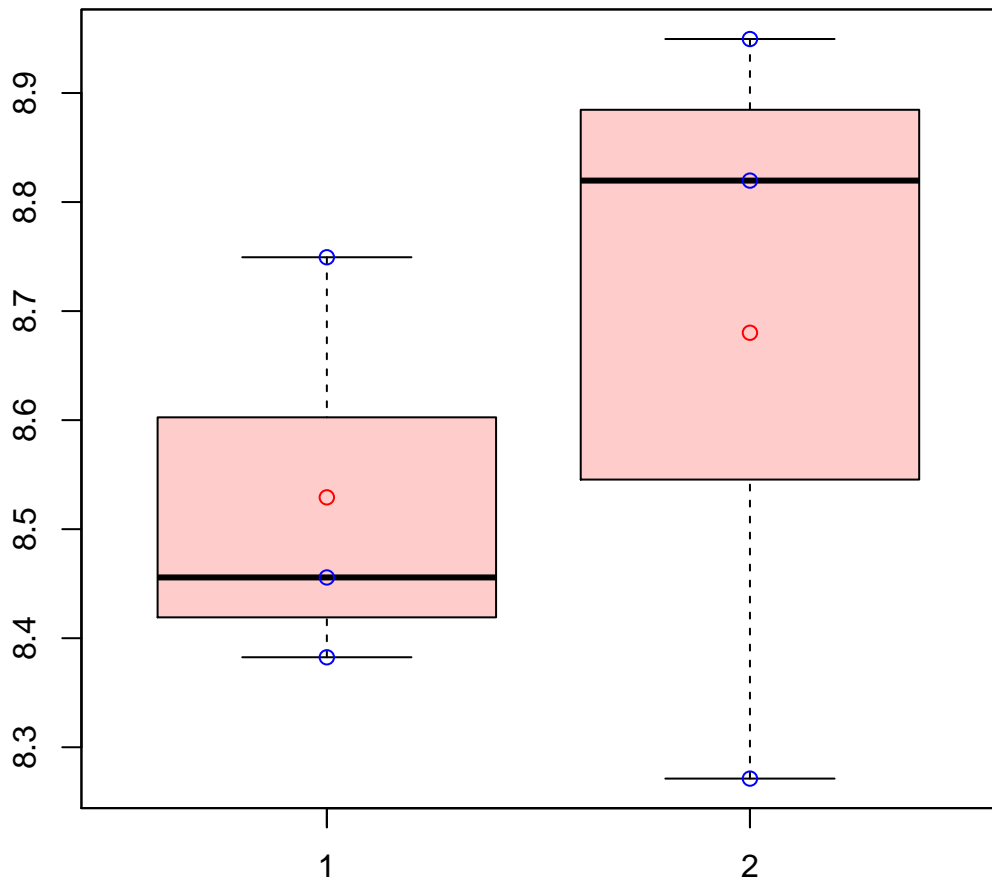

t-Test: p-value = 0.57

# C0PCW6|C0PCW6\_MAIZE

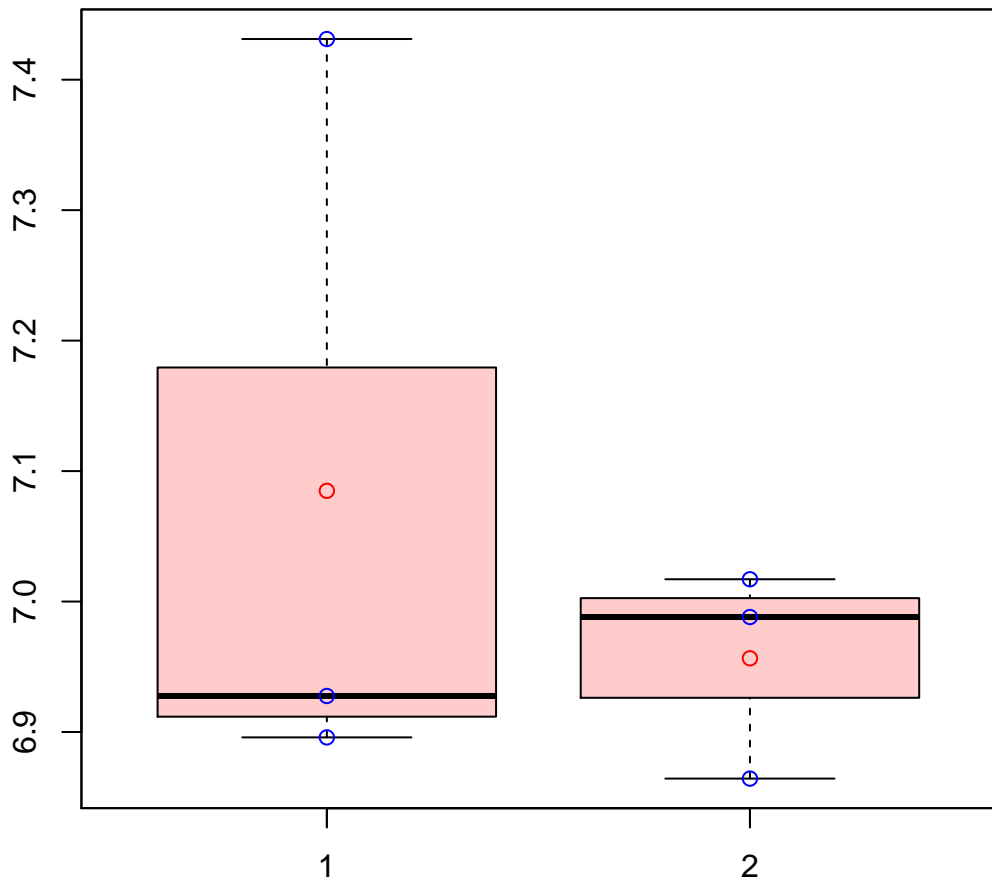

t-Test: p-value = 0.54

# C0PD77|C0PD77\_MAIZE

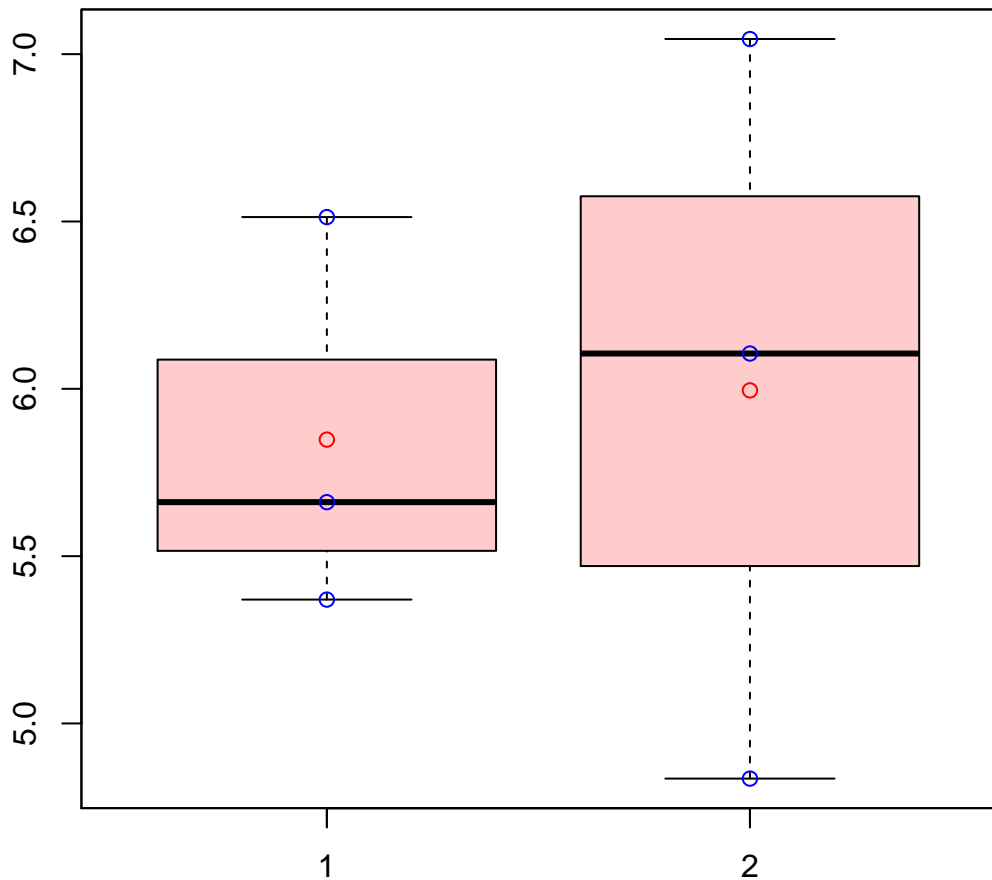

t-Test: p-value = 0.85

# C0PDB0|C0PDB0\_MAIZE

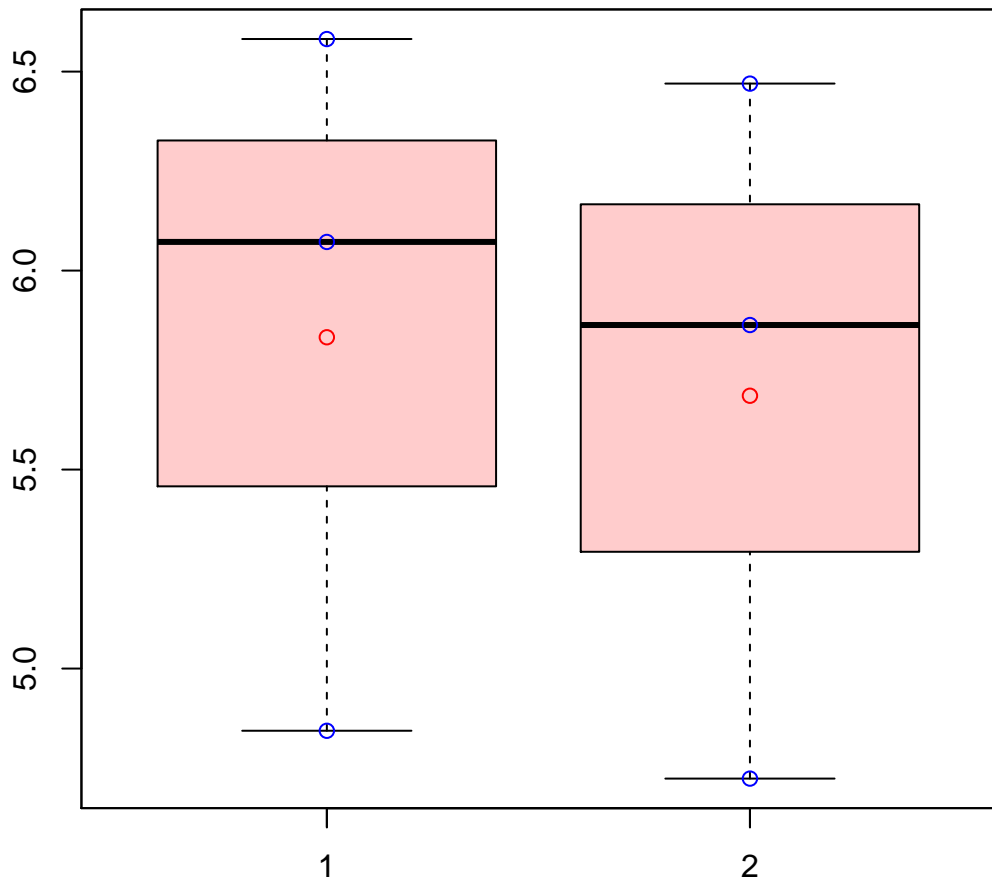

t-Test: p-value = 0.85

# C0PDX2|C0PDX2\_MAIZE

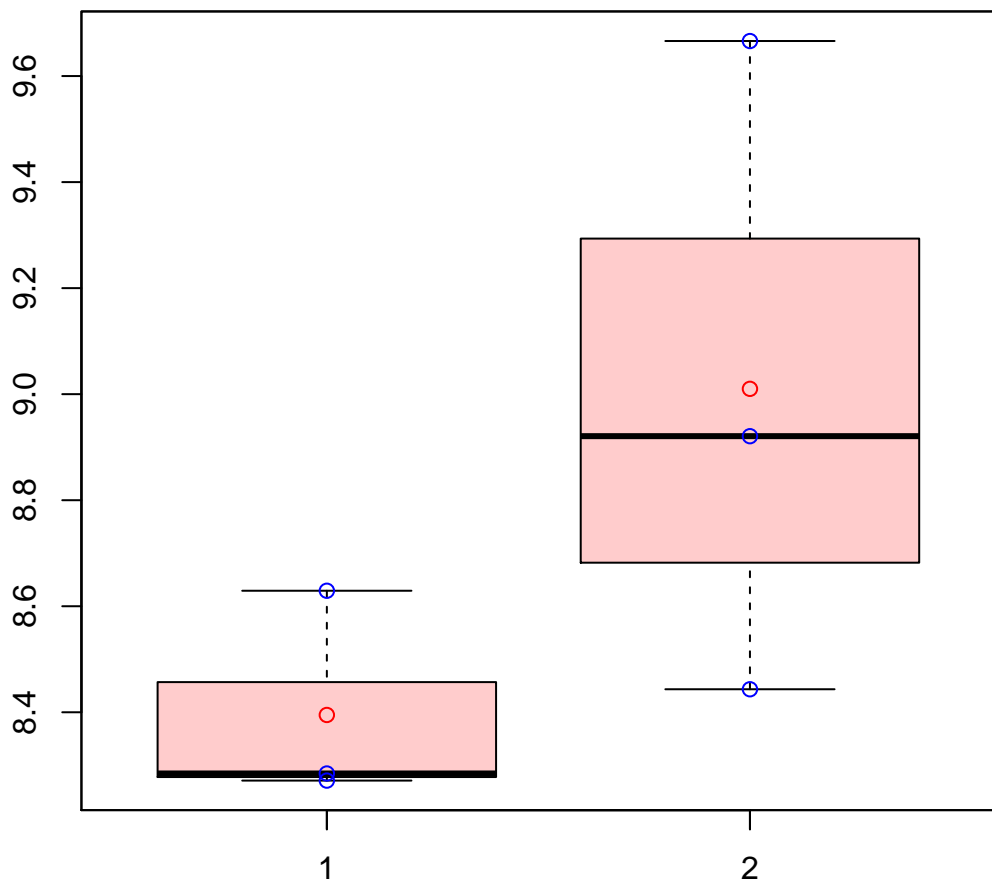

t-Test: p-value = 0.22

# C0PE12|C0PE12\_MAIZE

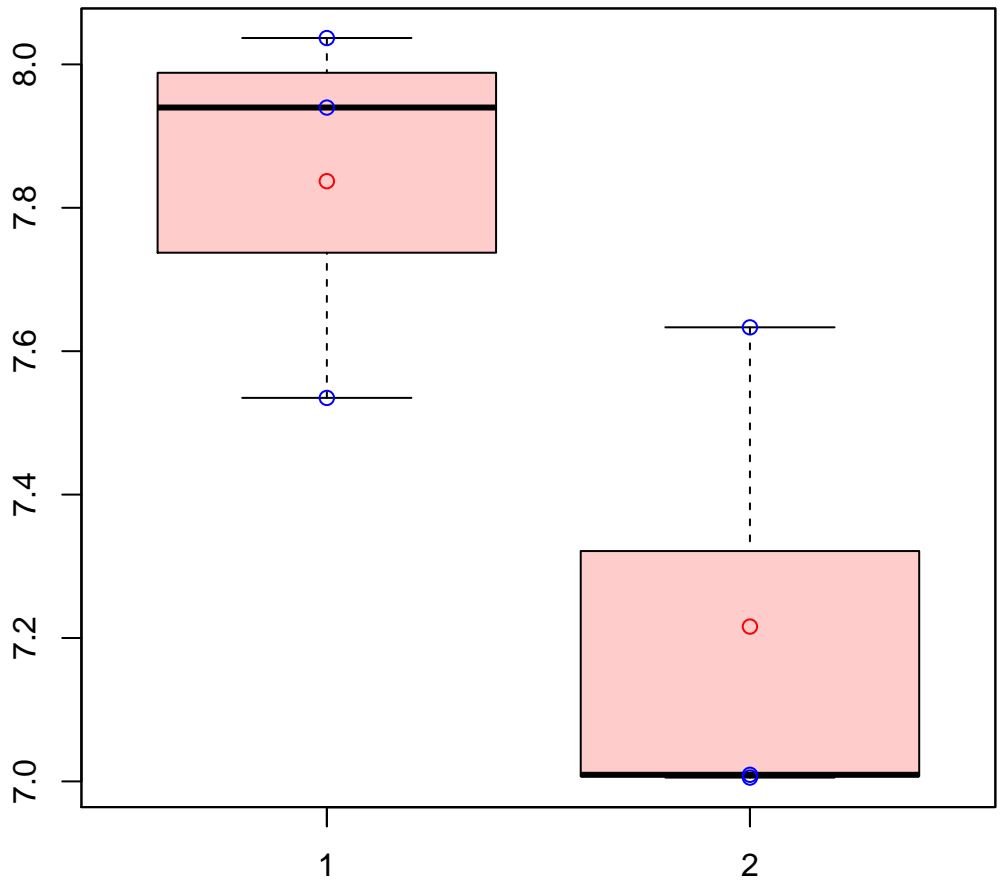

t-Test: p-value = 0.08

# C0PE77|C0PE77\_MAIZE

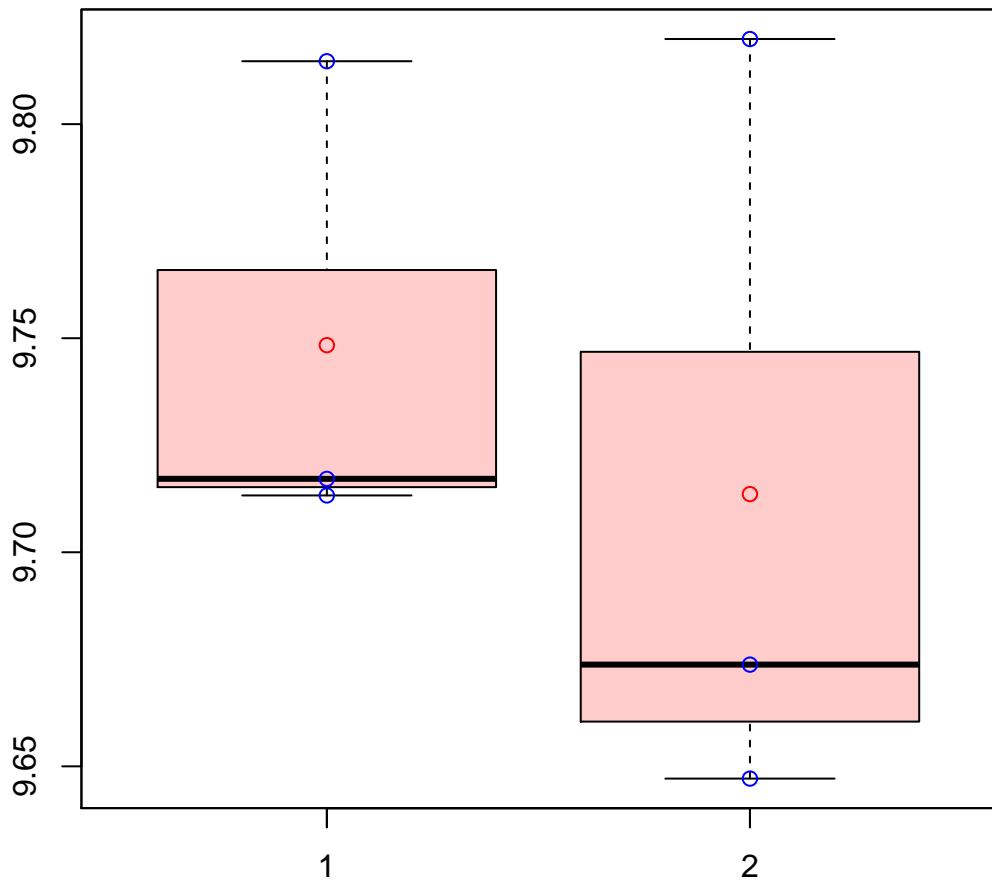

t-Test: p-value = 0.62

# C0PFV4|C0PFV4\_MAIZE

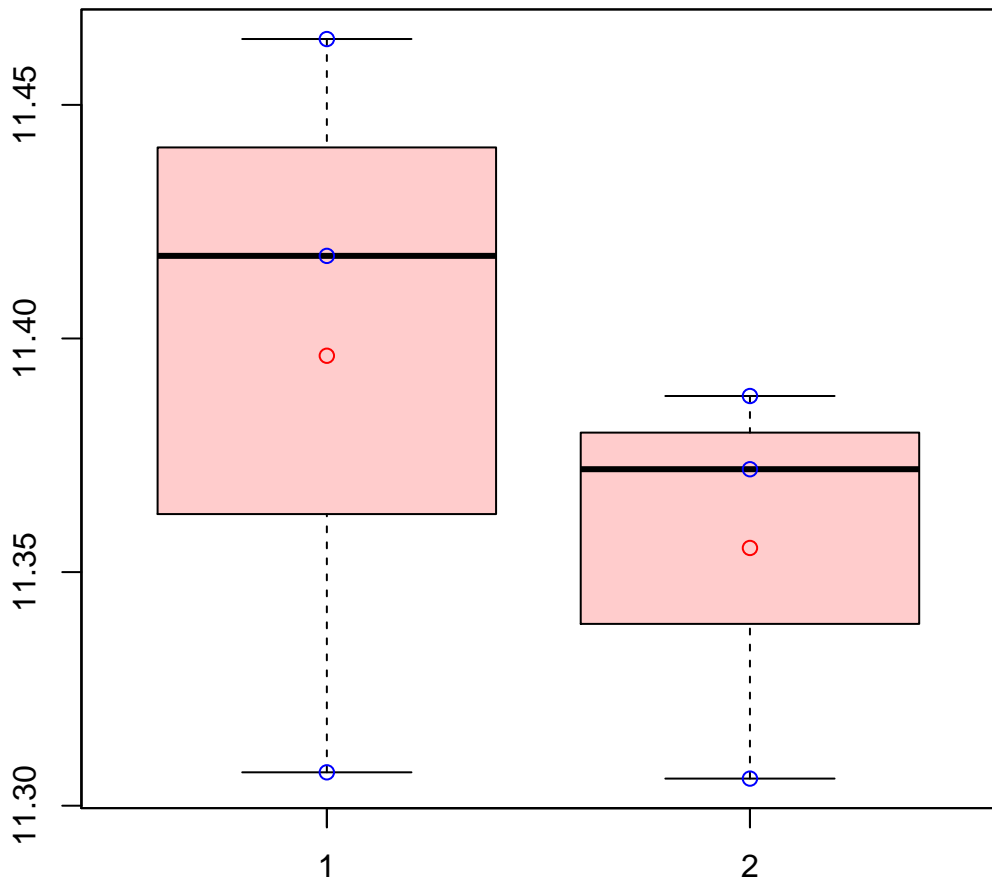

t-Test: p-value = 0.49



# C0PG07|C0PG07\_MAIZE

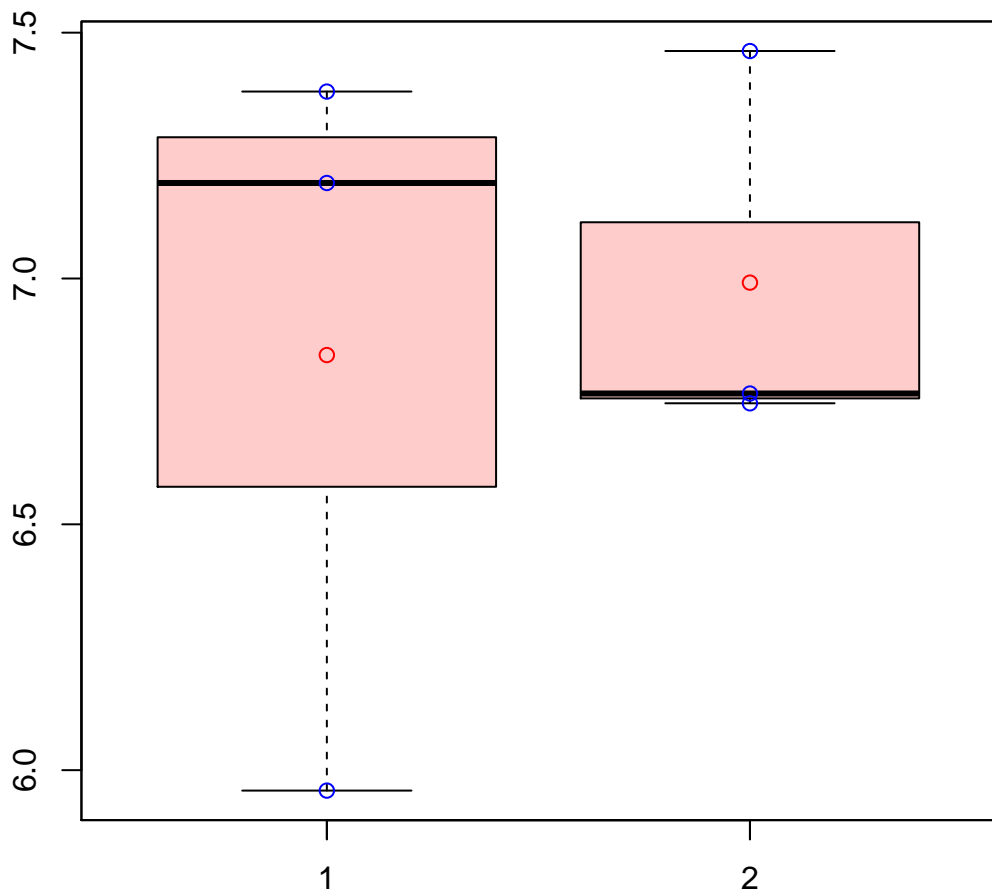

t-Test: p-value = 0.79

# C0PGM6|C0PGM6\_MAIZE

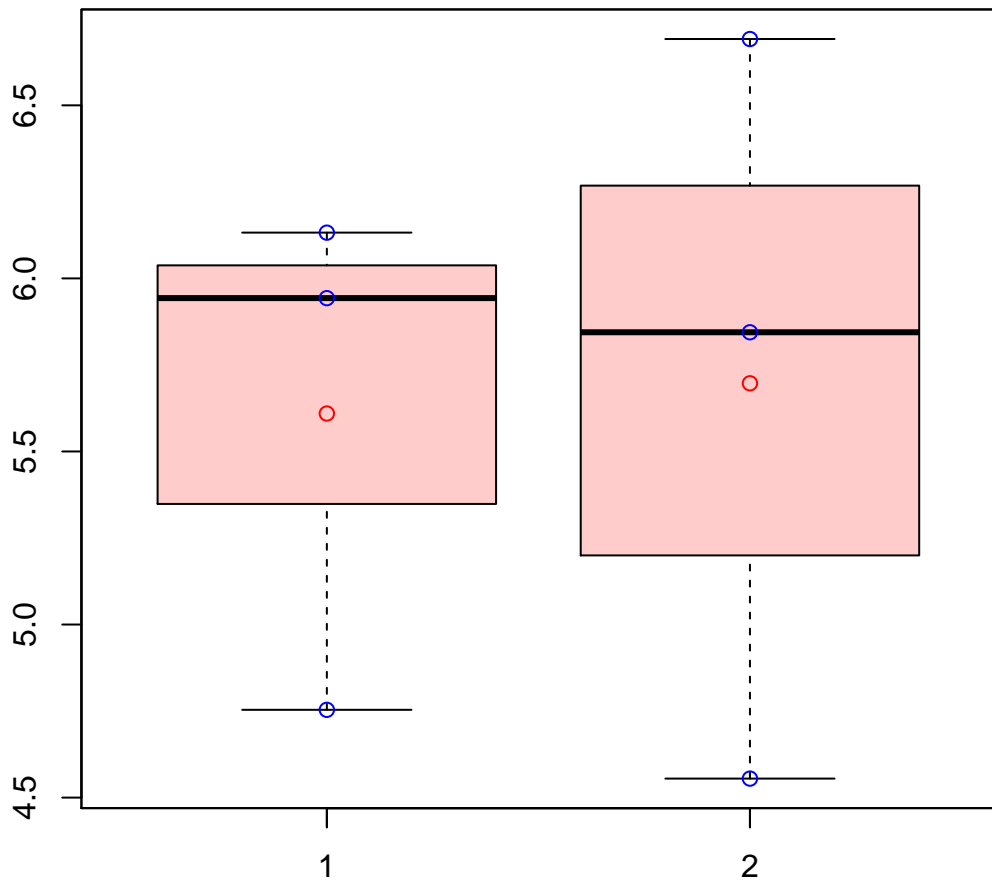

t-Test: p-value = 0.91

# C0PGN7|C0PGN7\_MAIZE

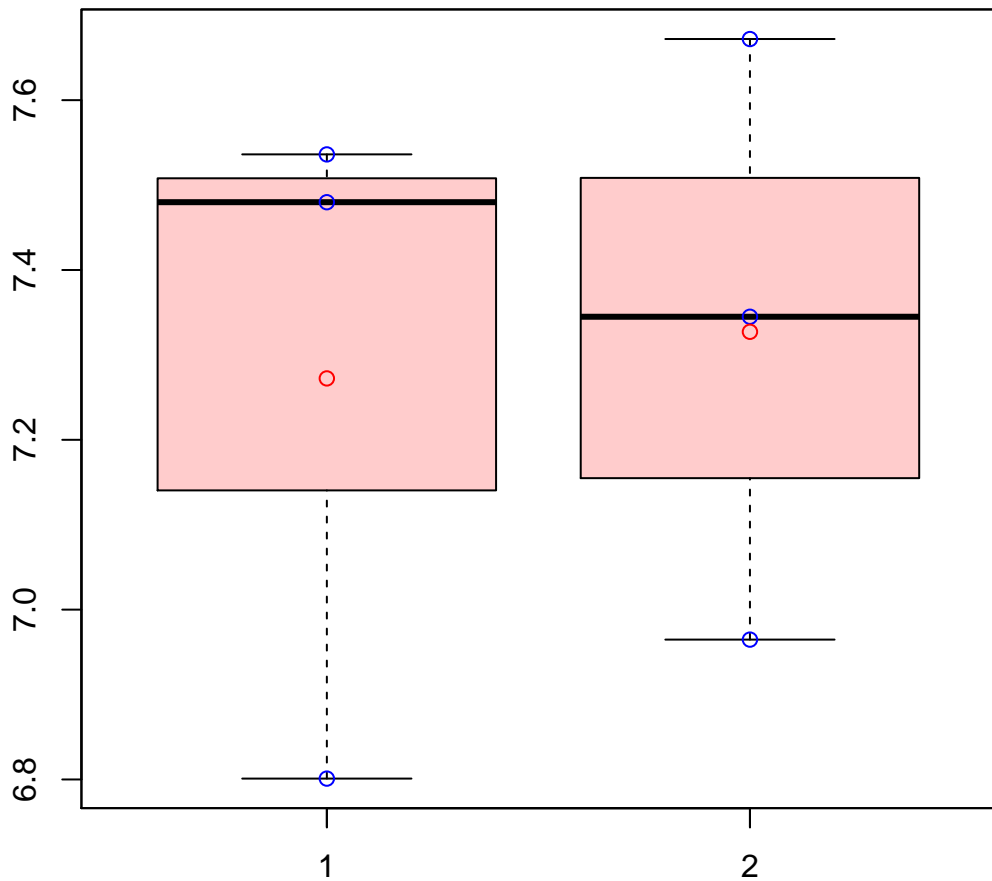

t-Test: p-value = 0.87

# C0PGP7|C0PGP7\_MAIZE

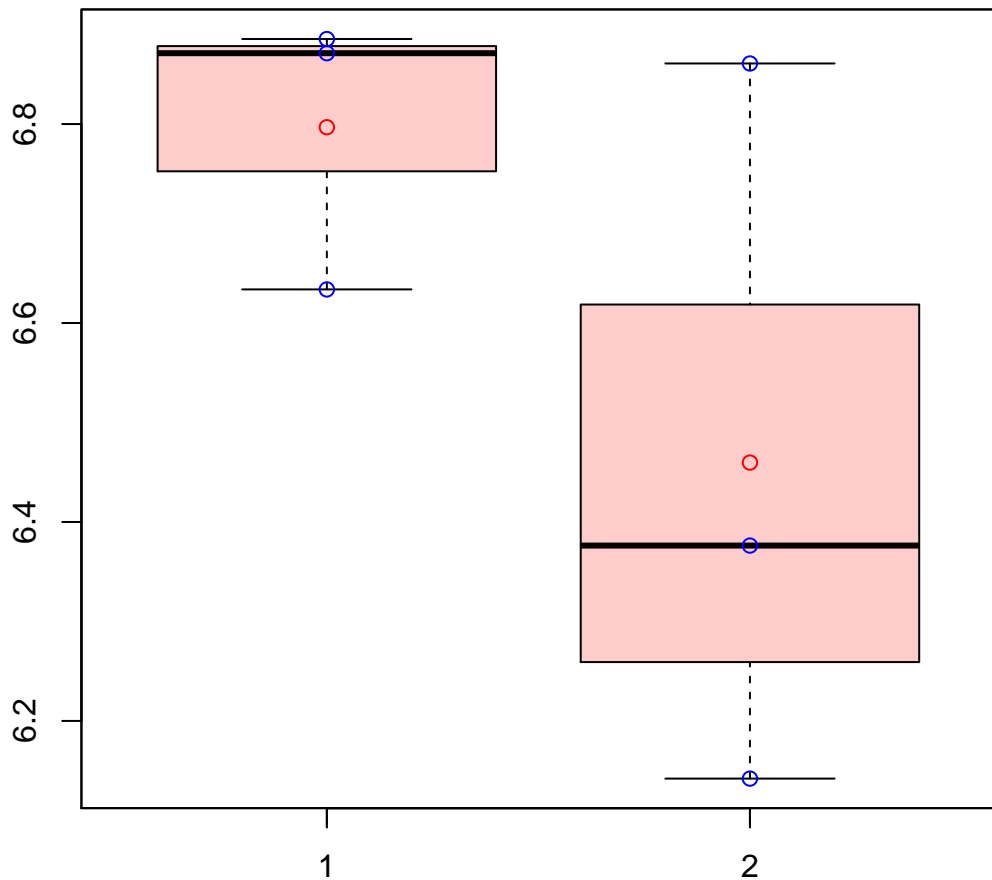

t-Test: p-value = 0.25

# C0PH50|C0PH50\_MAIZE

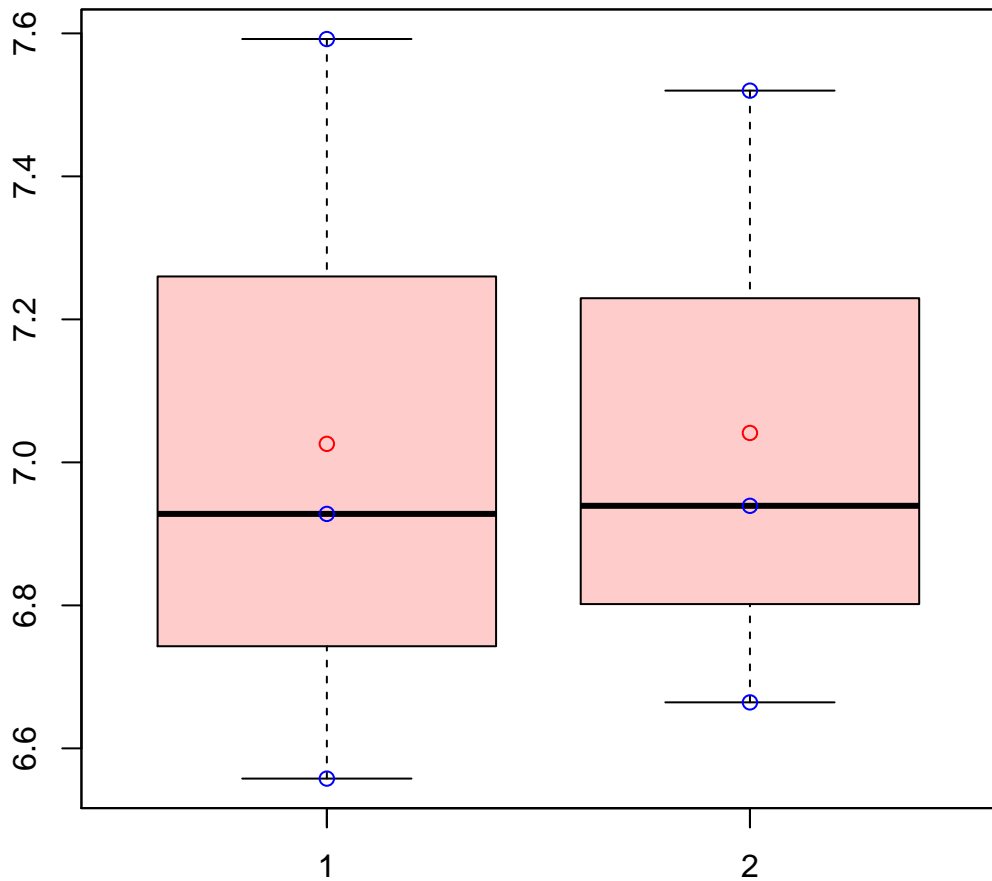

t-Test: p-value = 0.97

# C0PHD4|C0PHD4\_MAIZE

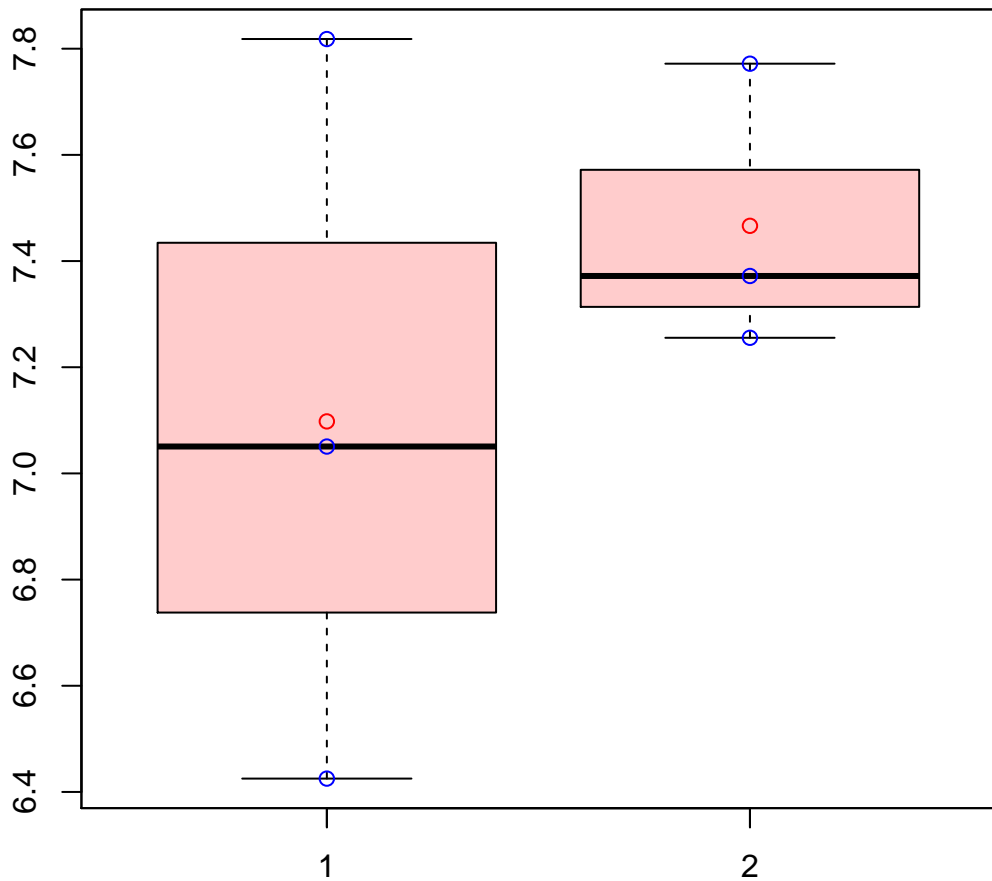

t-Test: p-value = 0.47

# C0PHT2|C0PHT2\_MAIZE

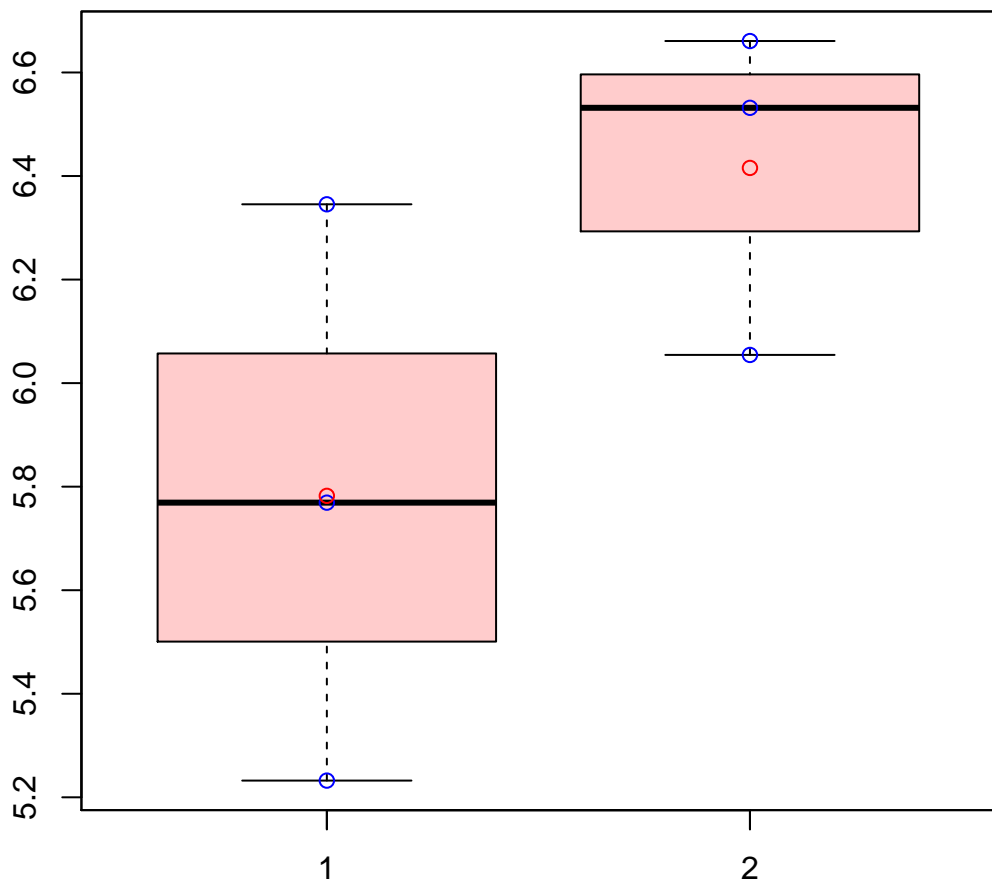

t-Test: p-value = 0.18

# C0PI81|C0PI81\_MAIZE

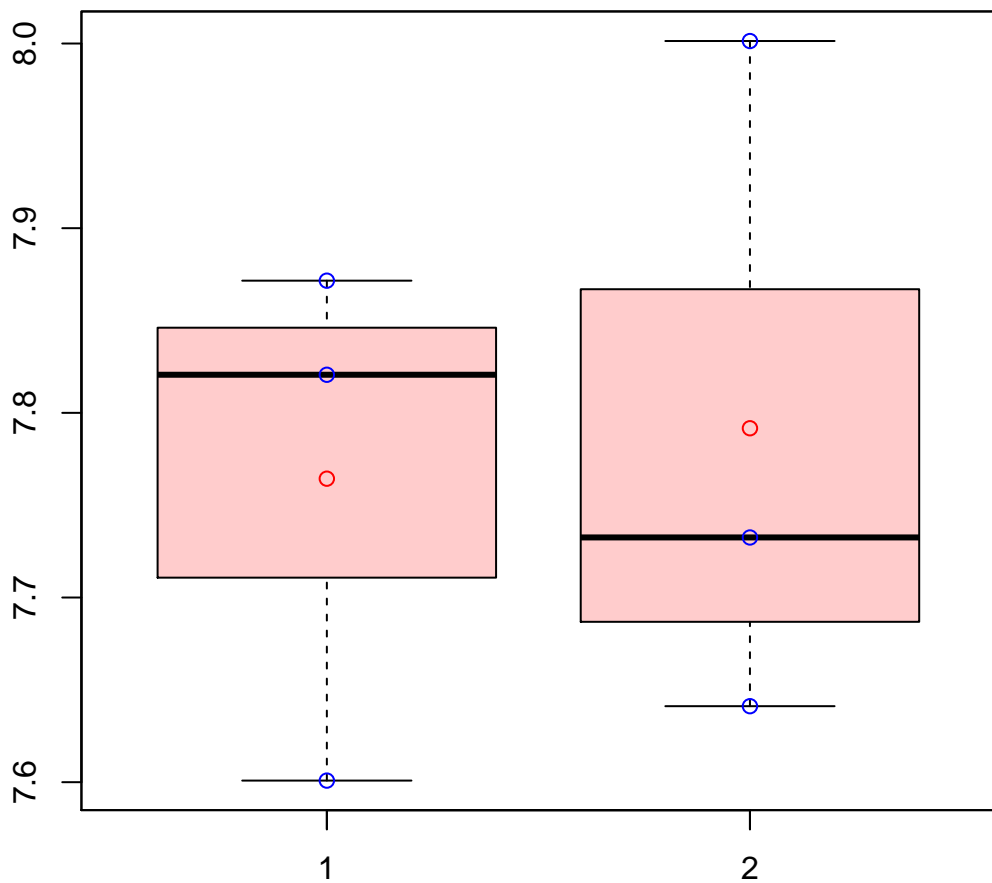

t-Test: p-value = 0.85



# C0PL03|C0PL03\_MAIZE

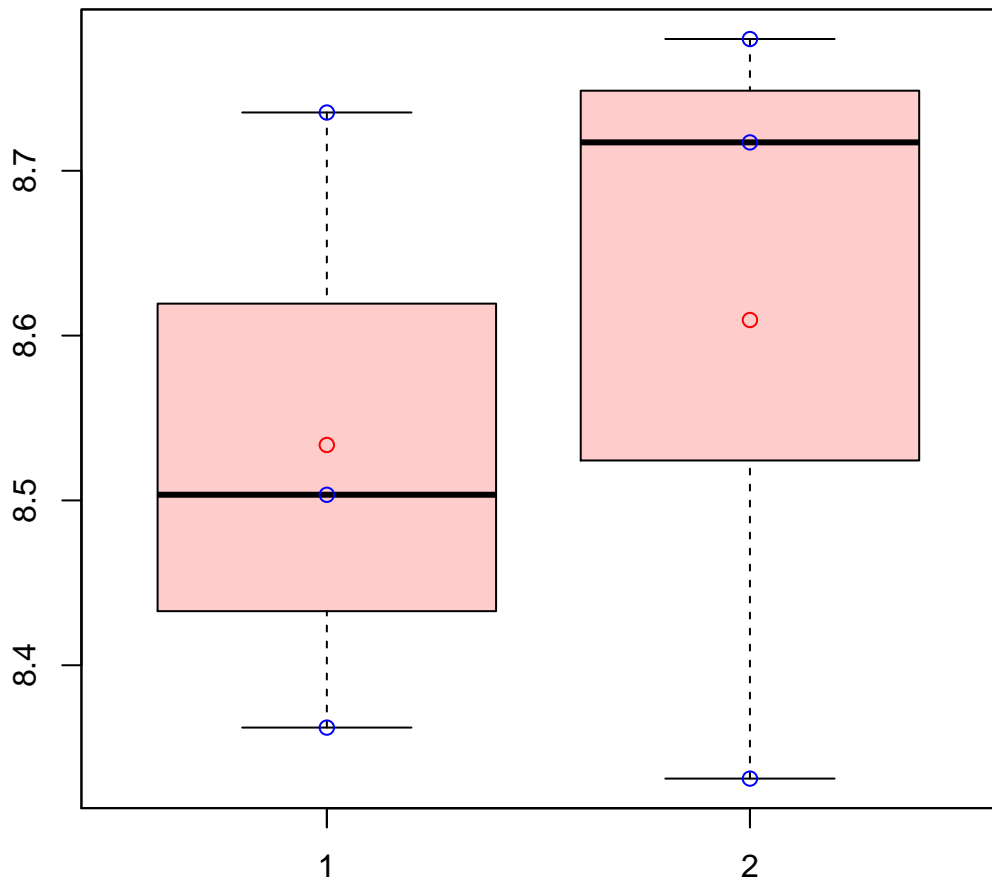

t-Test: p-value = 0.69

# C0PLX3|C0PLX3\_MAIZE

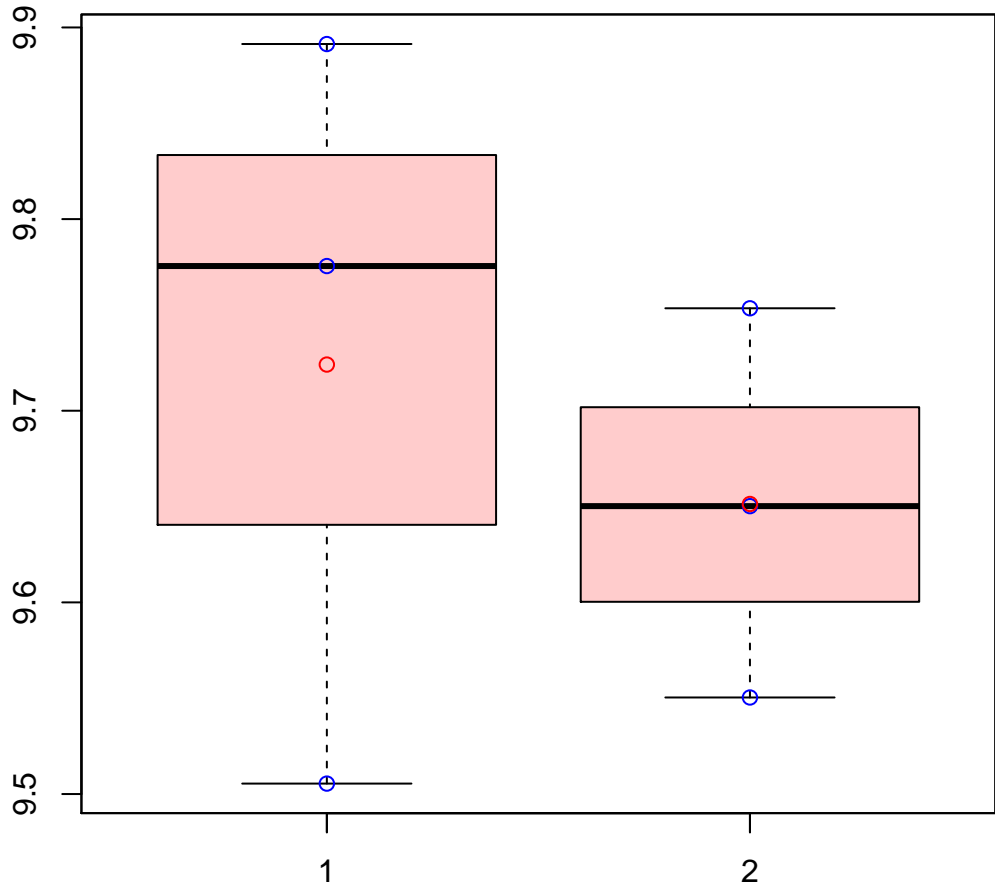

t-Test: p-value = 0.61

# C0PM74|C0PM74\_MAIZE

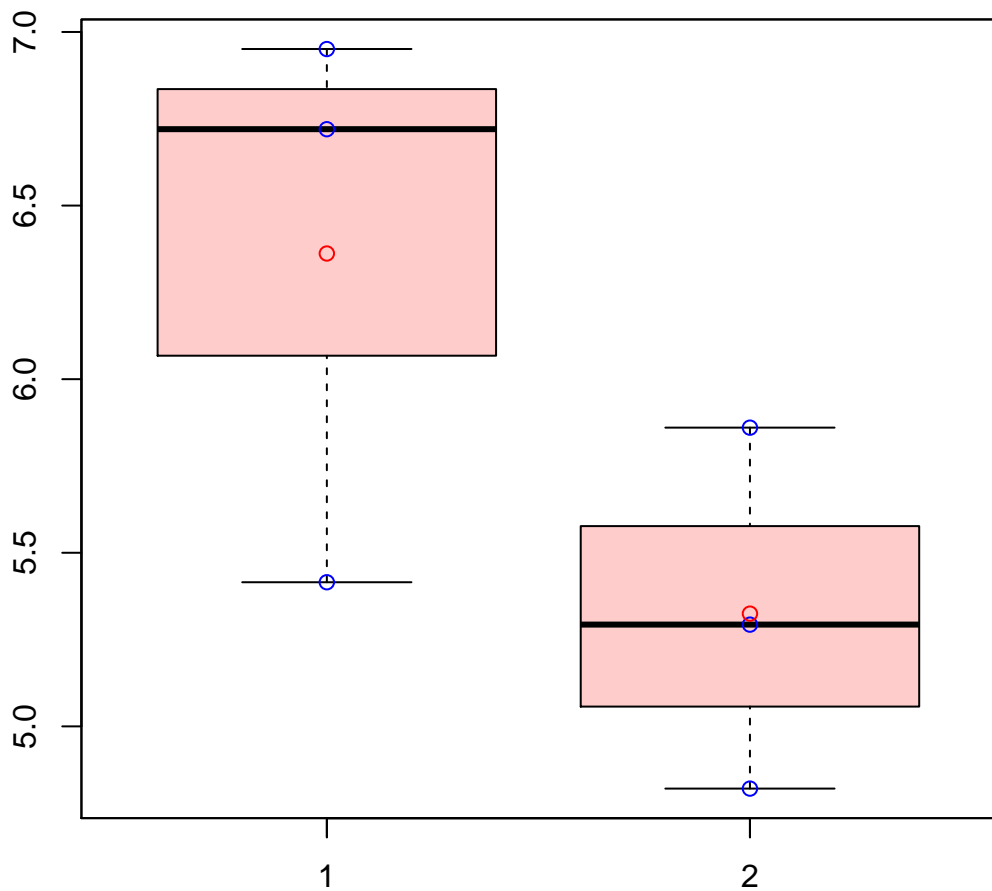

t-Test: p-value = 0.15

# C0PMC5|C0PMC5\_MAIZE

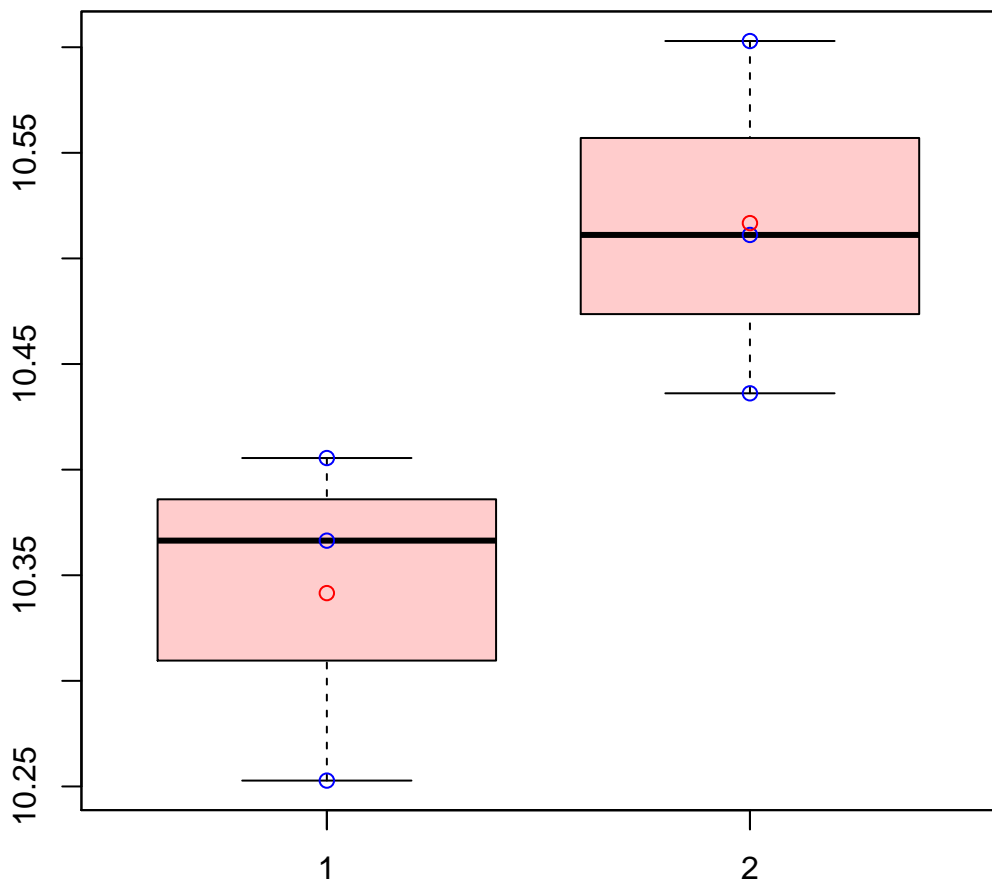

t-Test: p-value = 0.06

# C0PMI3|C0PMI3\_MAIZE

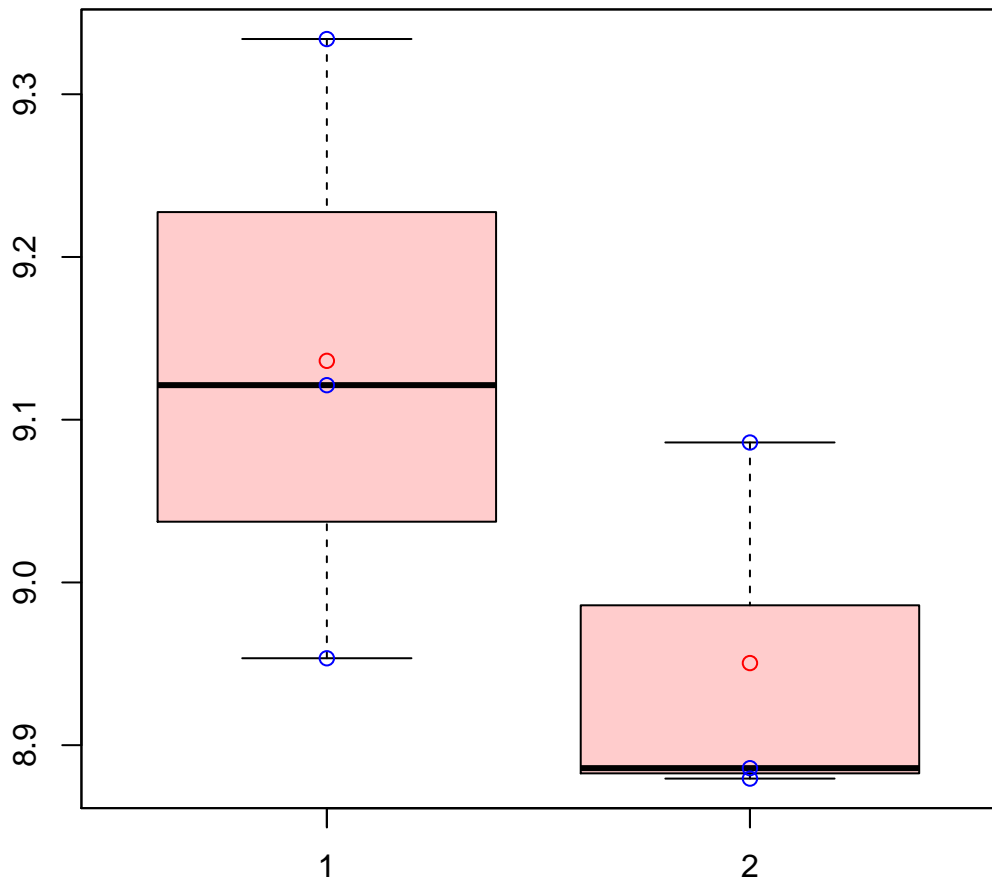

t-Test: p-value = 0.24

# C0PNF6|C0PNF6\_MAIZE

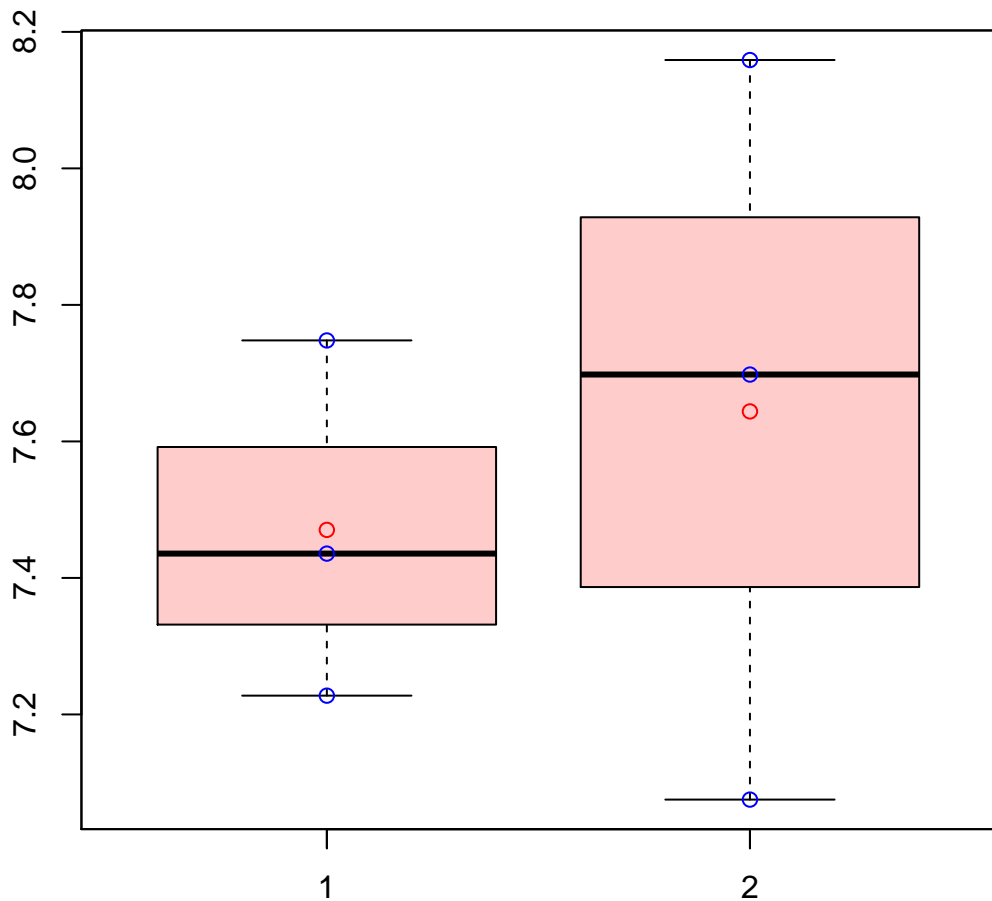

t-Test: p-value = 0.65

# C0PP08|C0PP08\_MAIZE

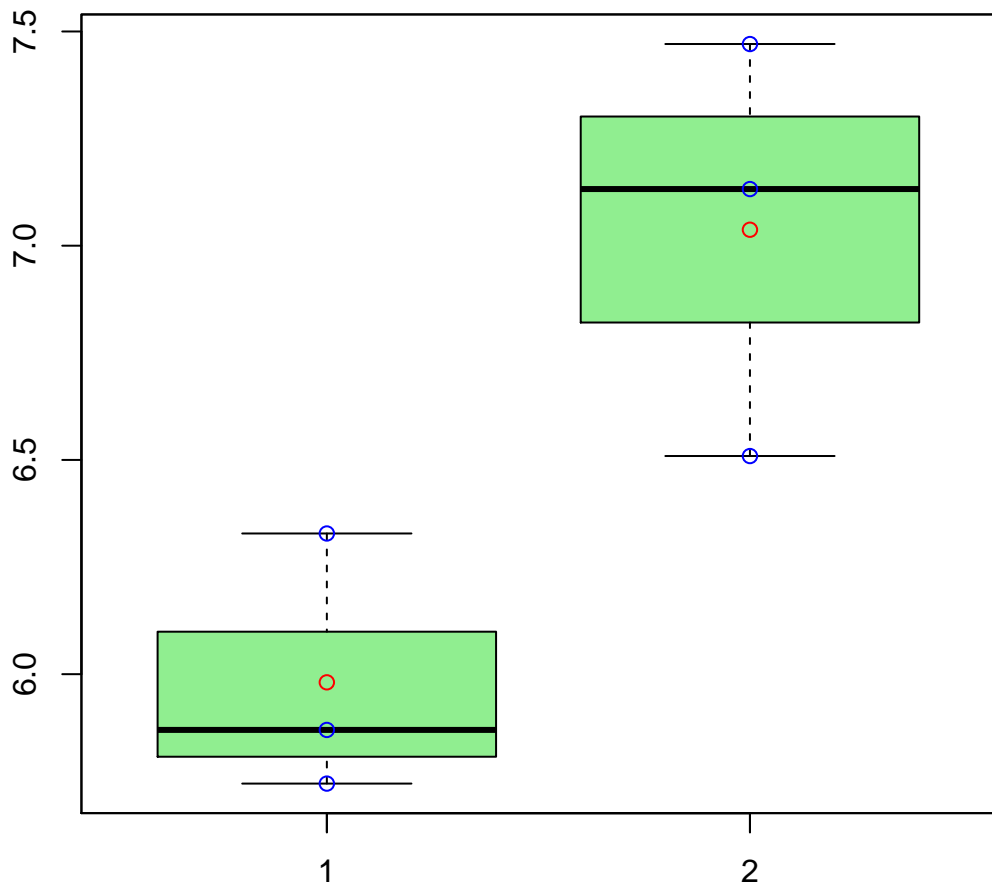

t-Test: p-value = 0.04

# C0PPF5|C0PPF5\_MAIZE

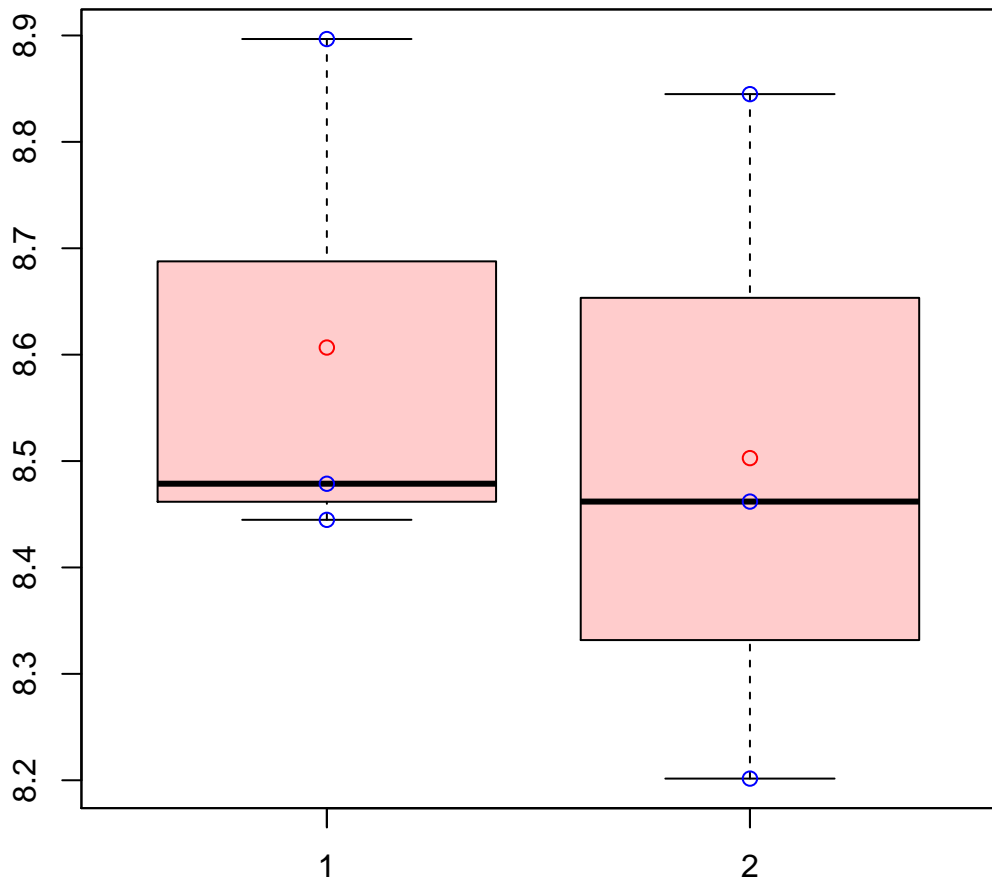

t-Test: p-value = 0.68



# C0SJM8|C0SJM8\_9POAL

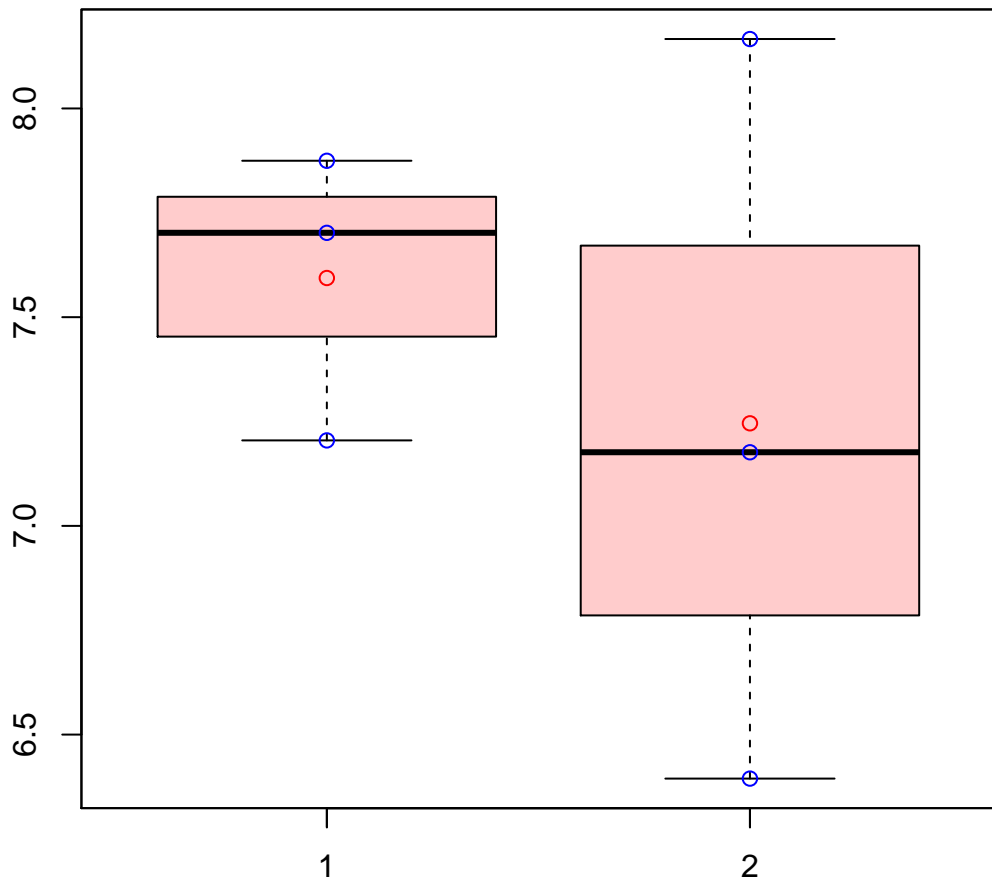

t-Test: p-value = 0.58

# C0SJP3|C0SJP3\_ELEIN

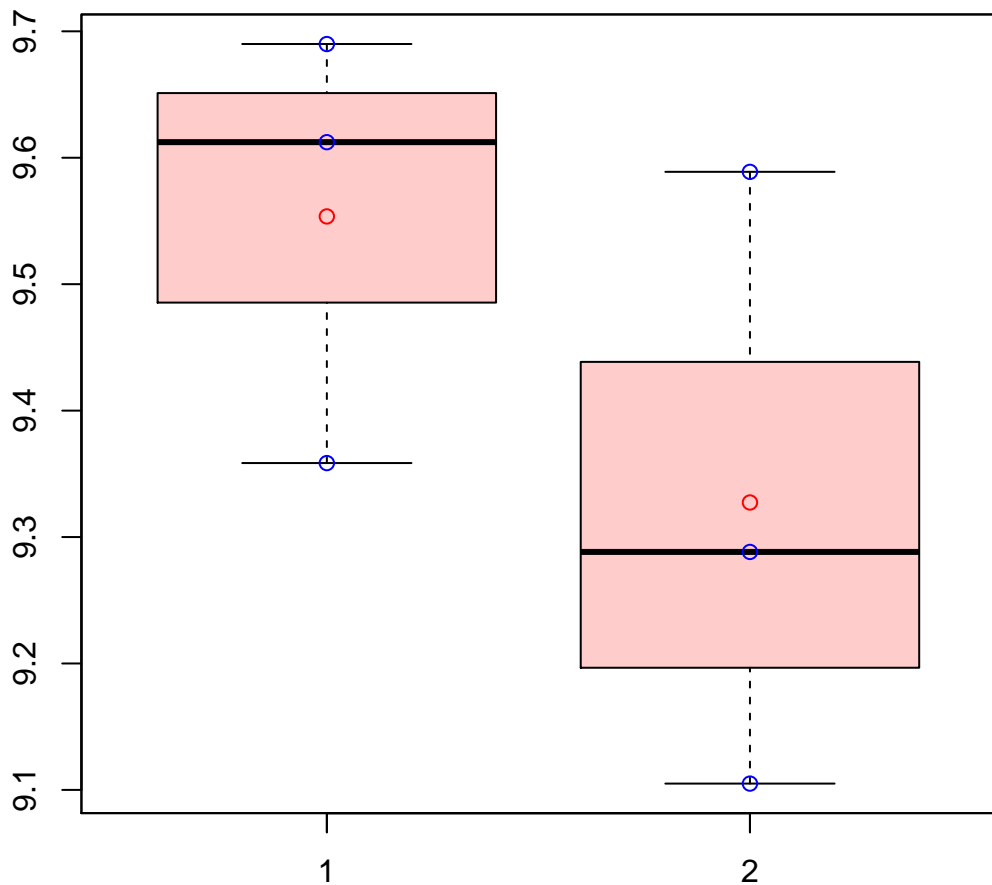

t-Test: p-value = 0.27

# C1JJS6|C1JJS6\_MUSAC

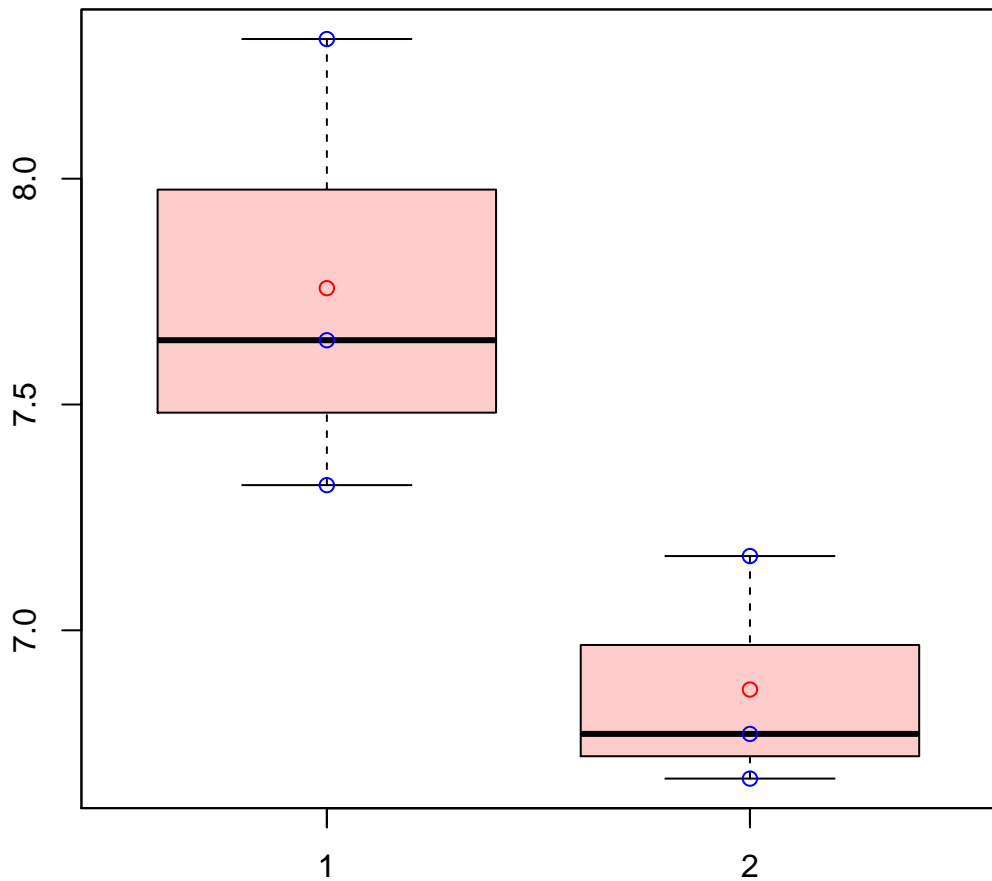

t-Test: p-value = 0.07

# C1JXQ0|C1JXQ0\_ZEALU

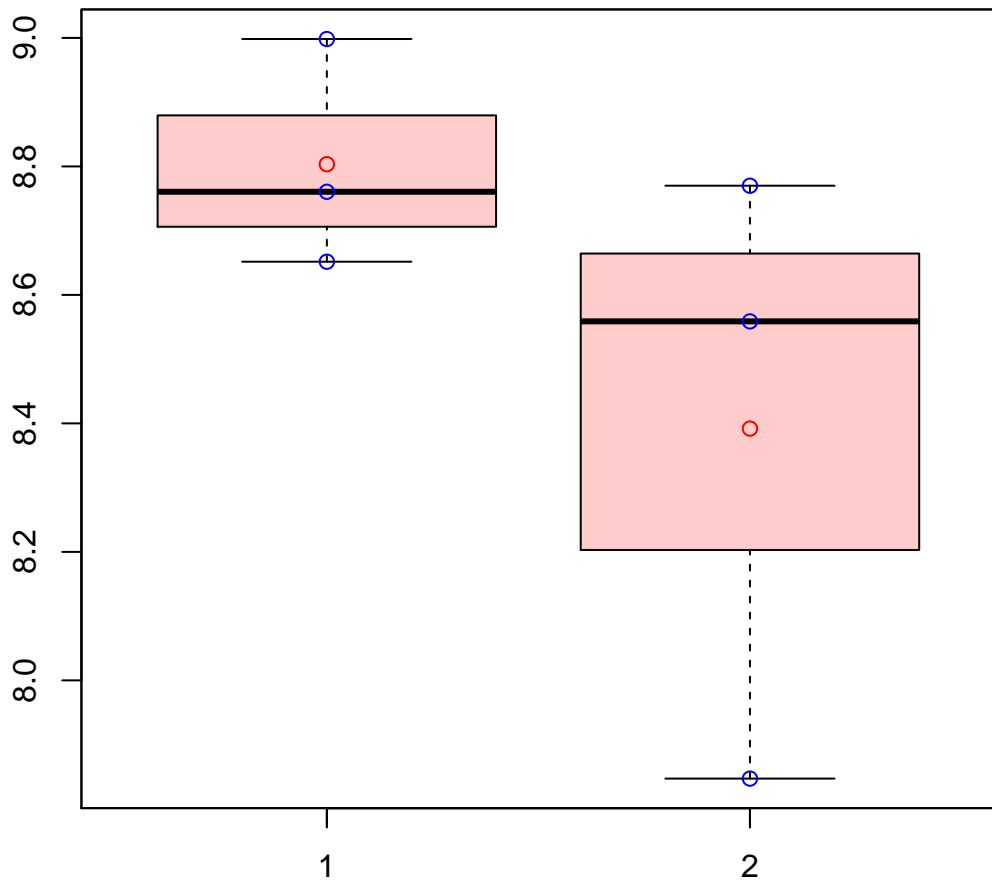

t-Test: p-value = 0.28

# C1K5B8|C1K5B8\_WHEAT

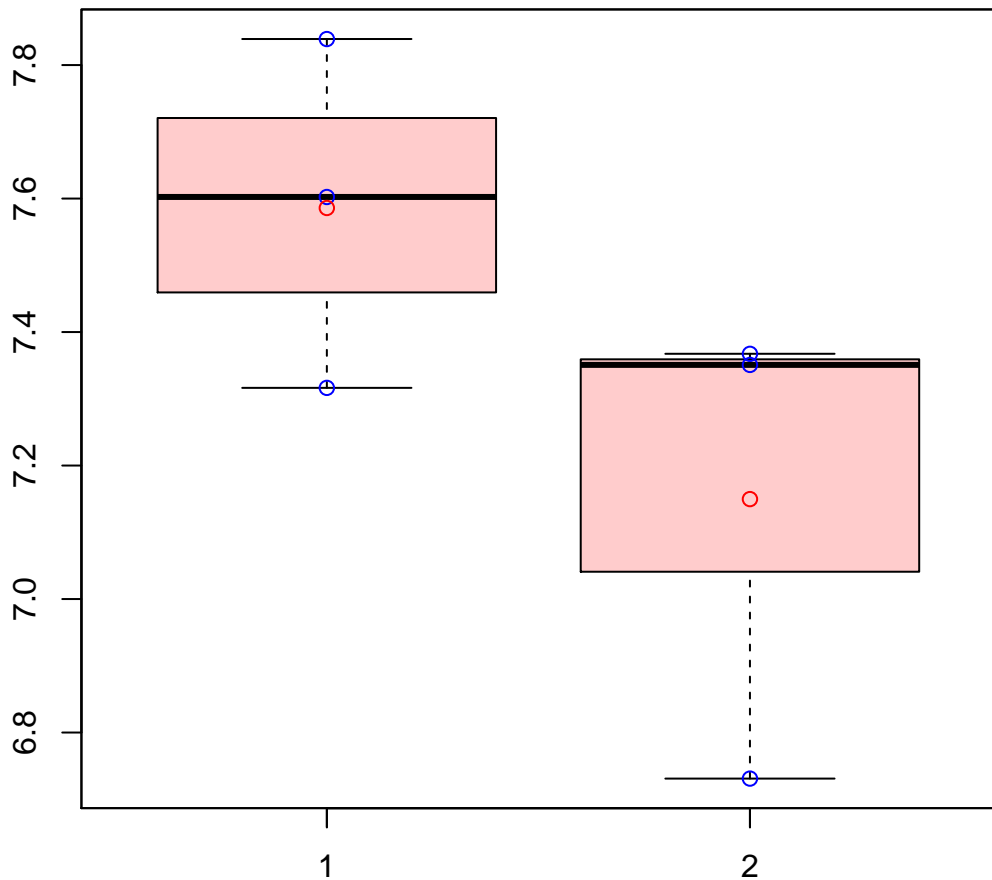

t-Test: p-value = 0.17

# C1PGB7|C1PGB7\_POTGR

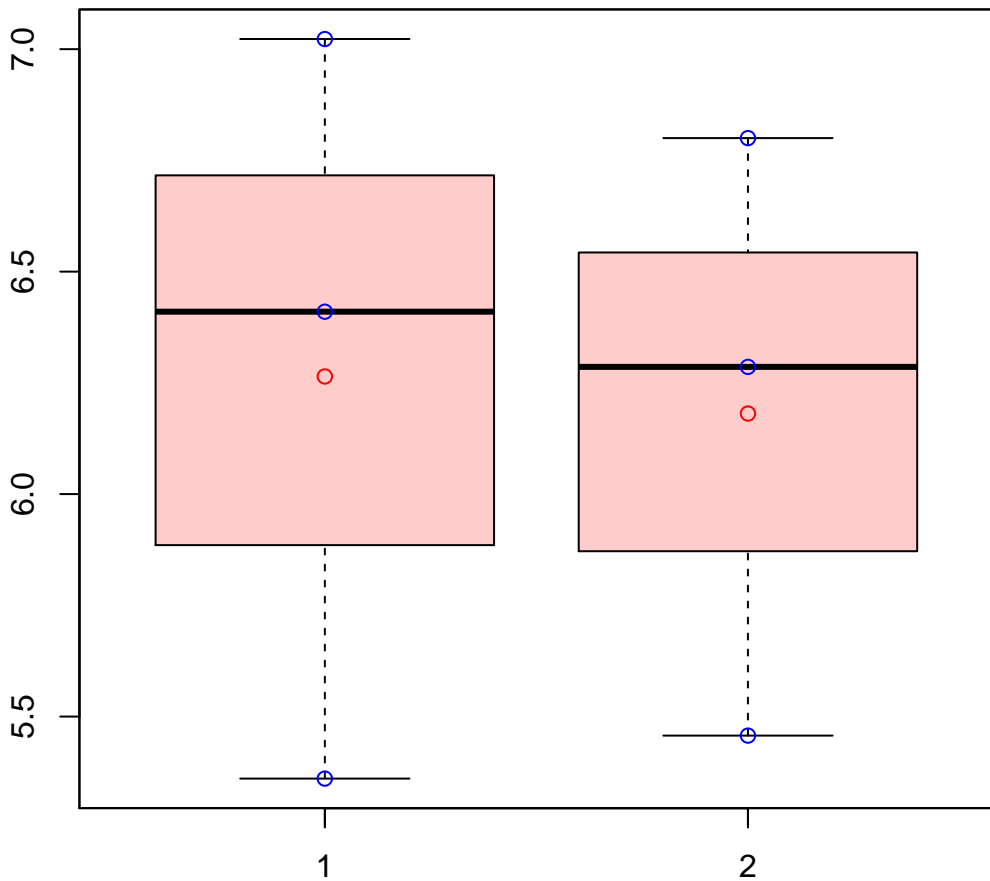

t-Test: p-value = 0.9

# C3KEQ2|C3KEQ2\_9ASPA

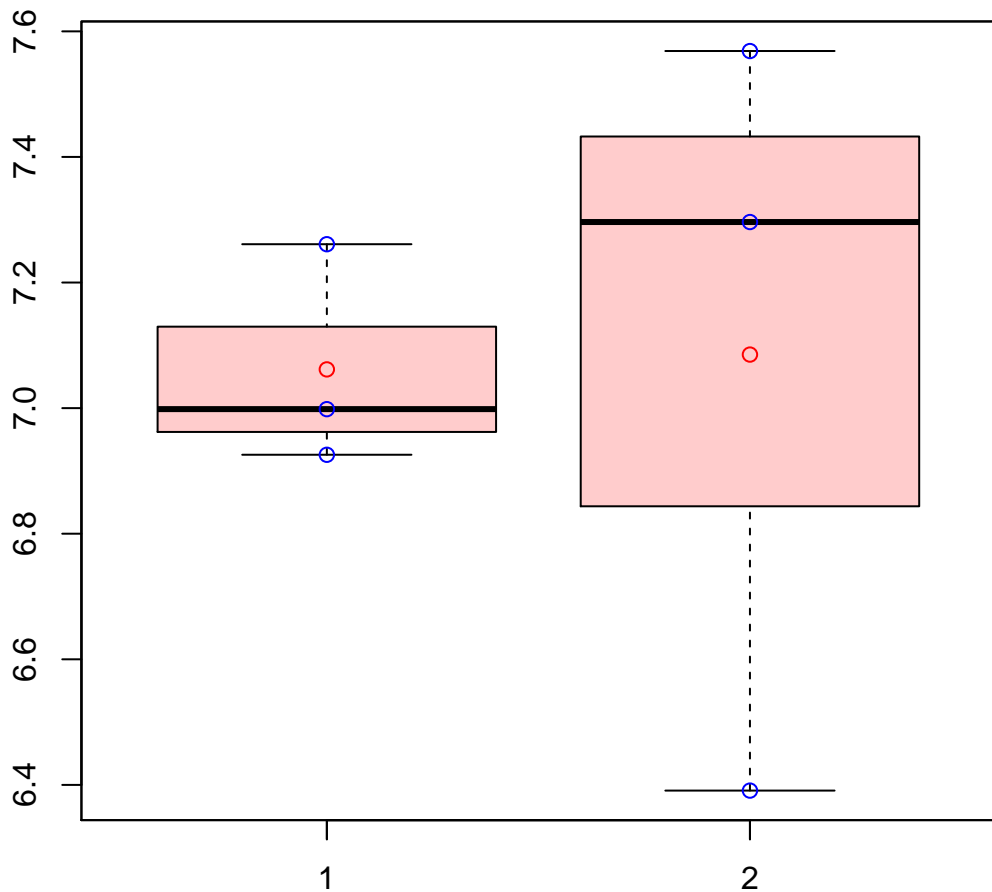

t-Test: p-value = 0.95

# C3SAE1|C3SAE1\_BRADI

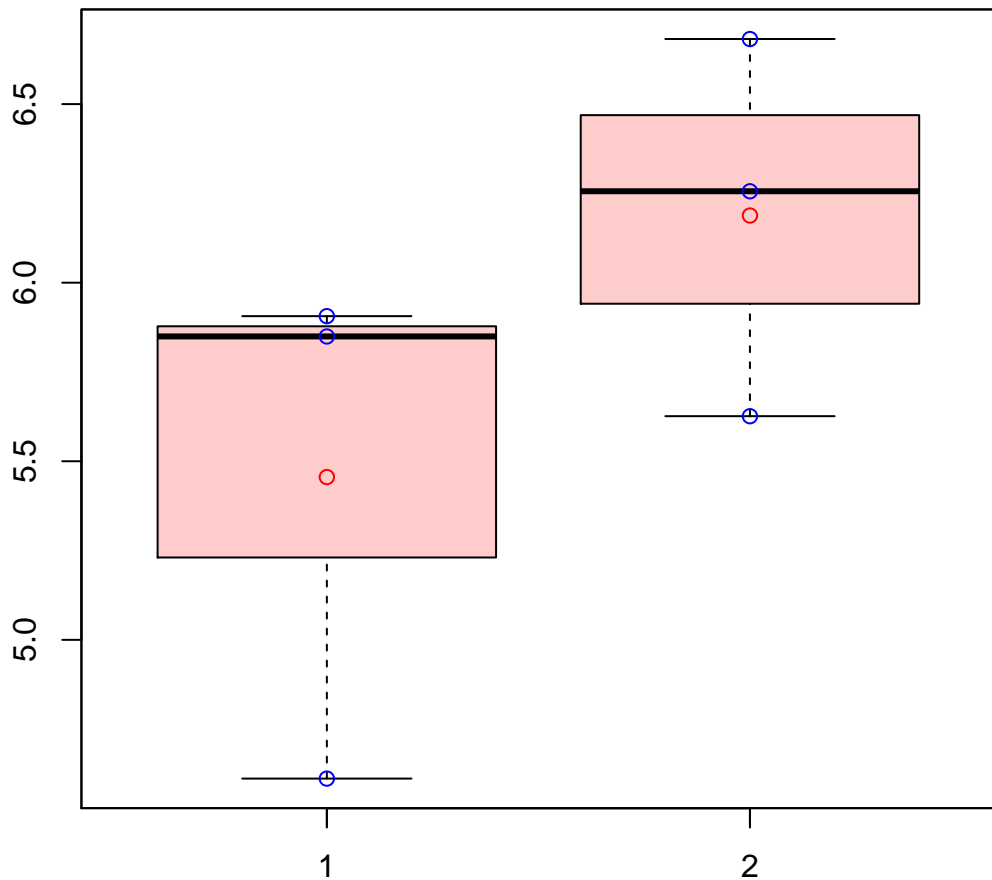

t-Test: p-value = 0.24



# C3SAF2|C3SAF2\_BRADI

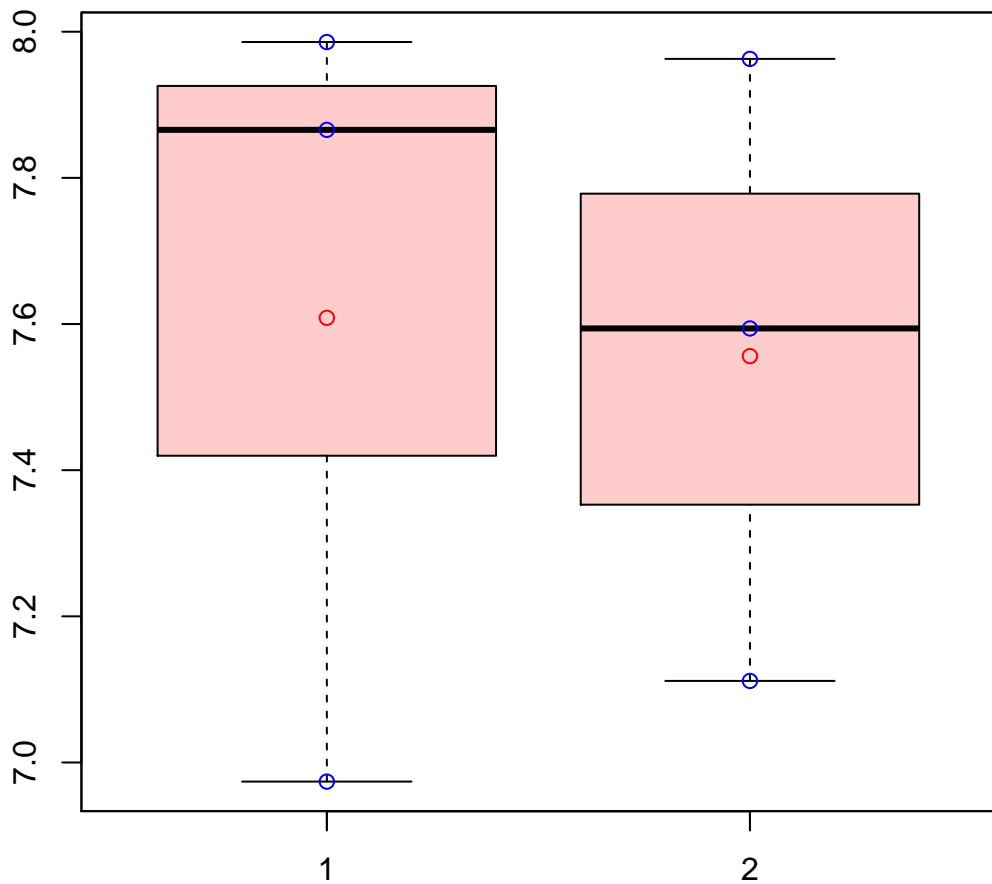

t-Test: p-value = 0.9

# C3W5J0|C3W5J0\_ELAOL

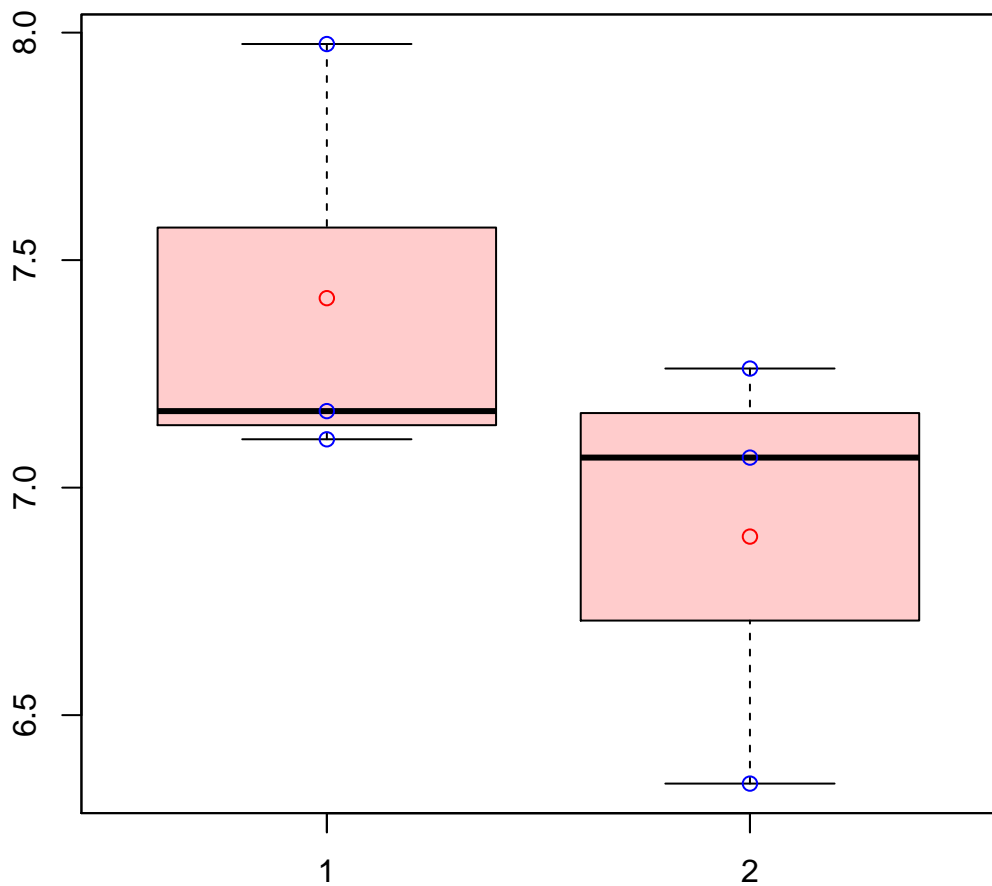

t-Test: p-value = 0.25

# C4J0P7|C4J0P7\_MAIZE

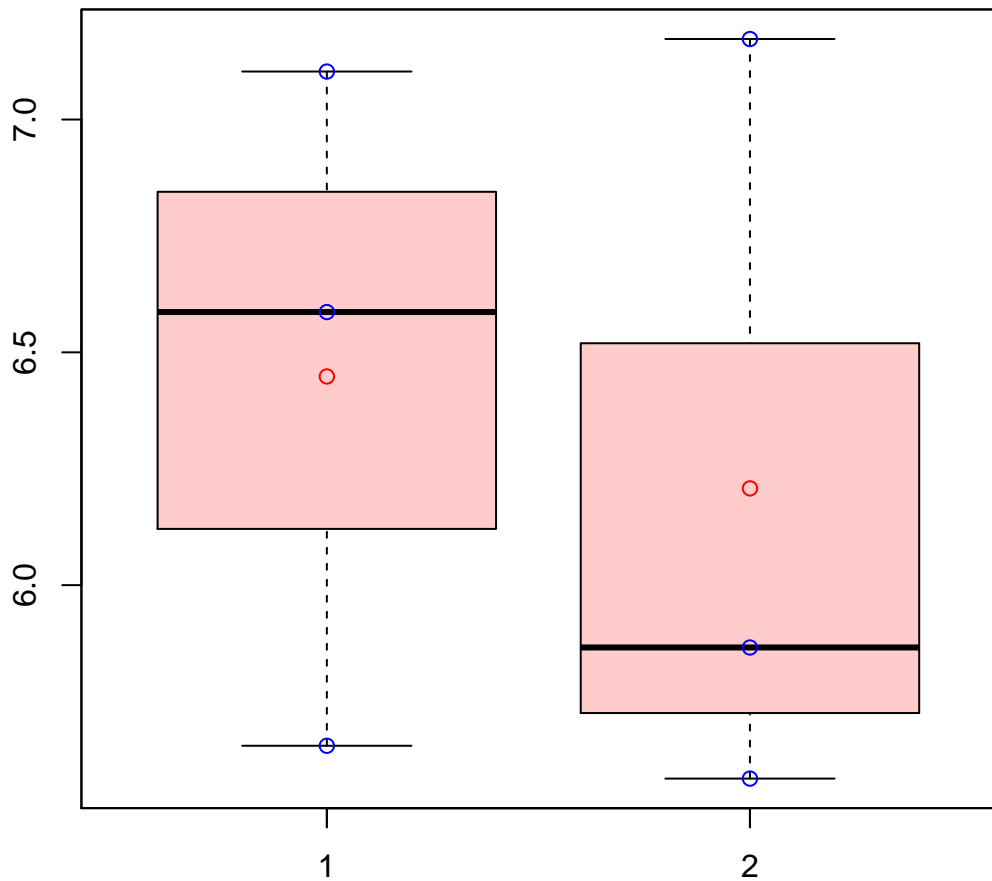

t-Test: p-value = 0.73

# C4J316|C4J316\_MAIZE

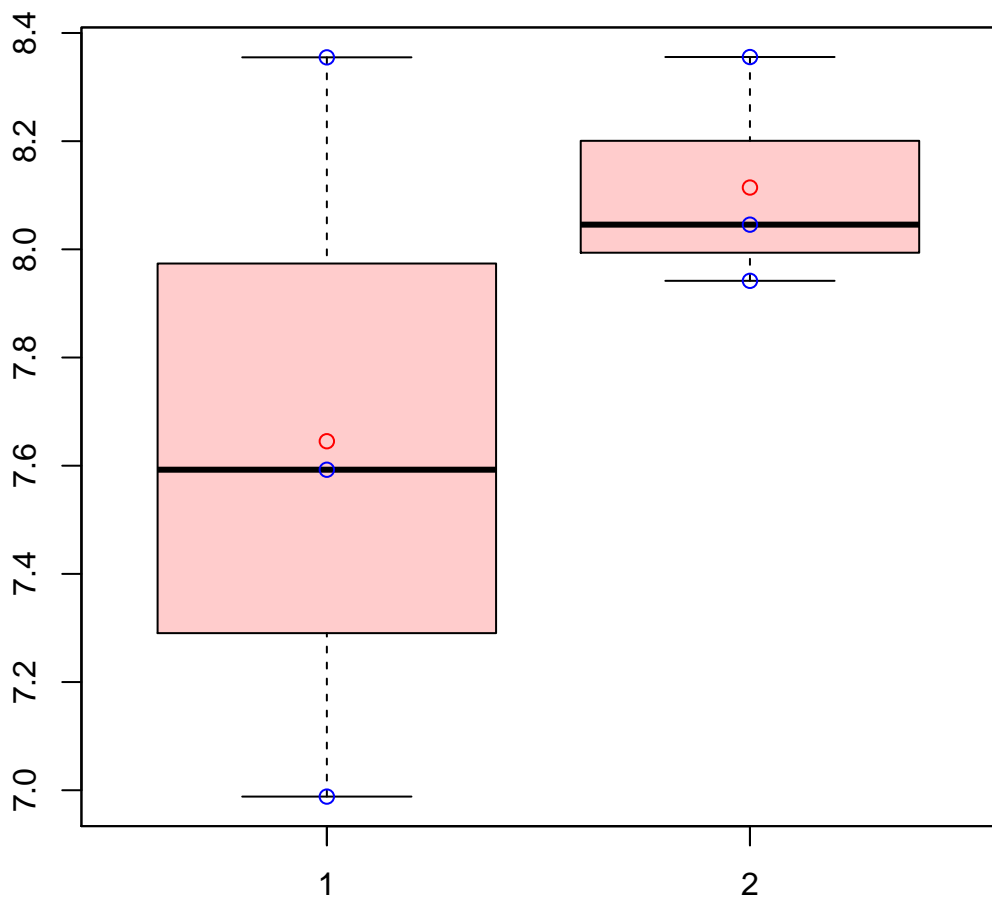

t-Test: p-value = 0.36

# C4J320|C4J320\_MAIZE

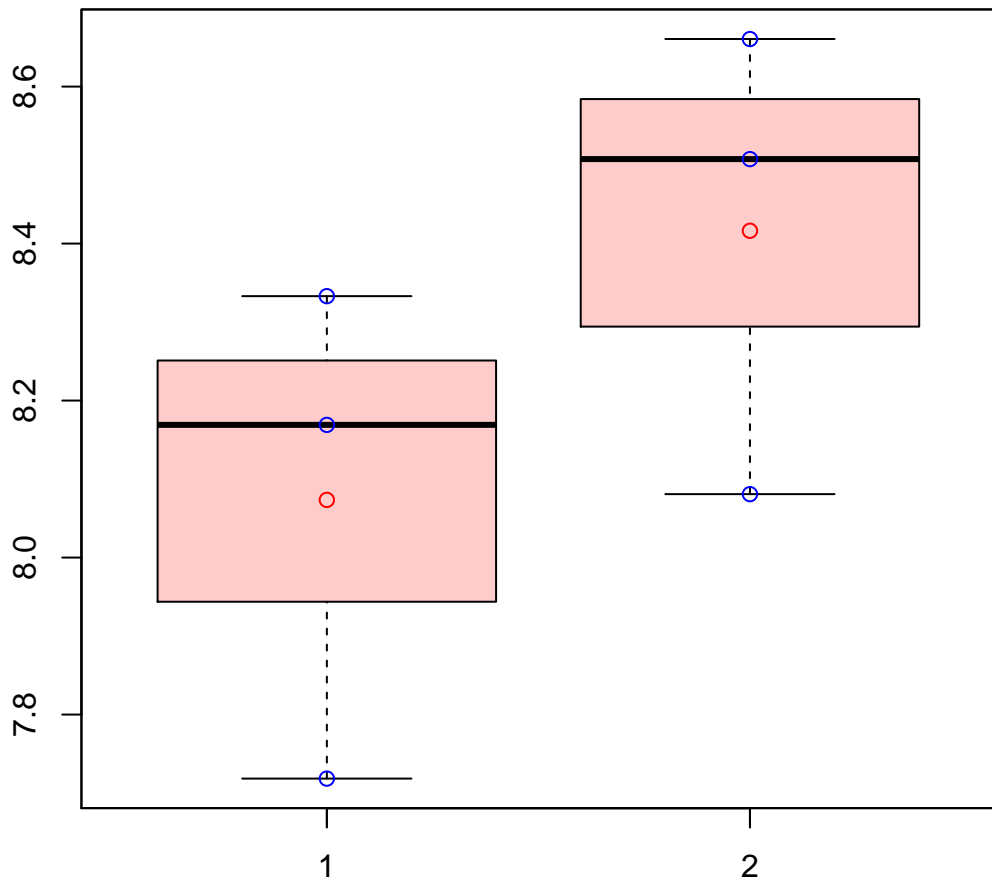

t-Test: p-value = 0.25

# C4J3M2|C4J3M2\_MAIZE

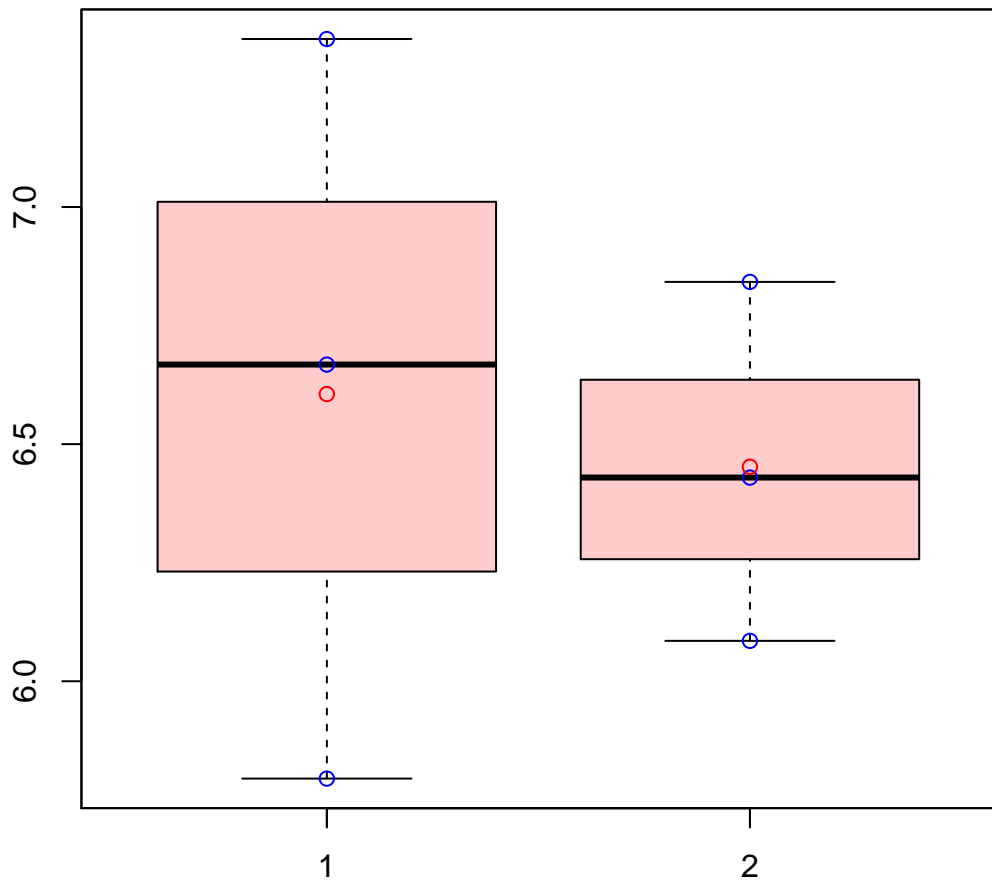

t-Test: p-value = 0.78

# C4J3S6|C4J3S6\_MAIZE

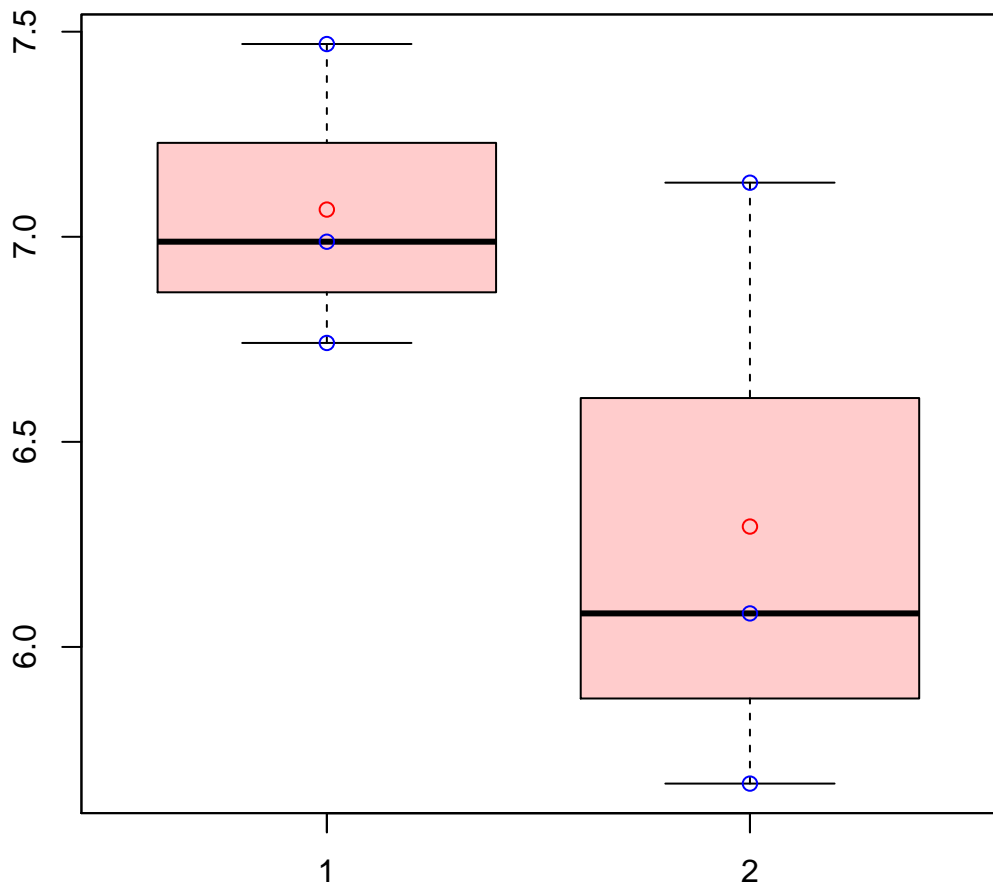

t-Test: p-value = 0.21

# C4J4B7|C4J4B7\_MAIZE

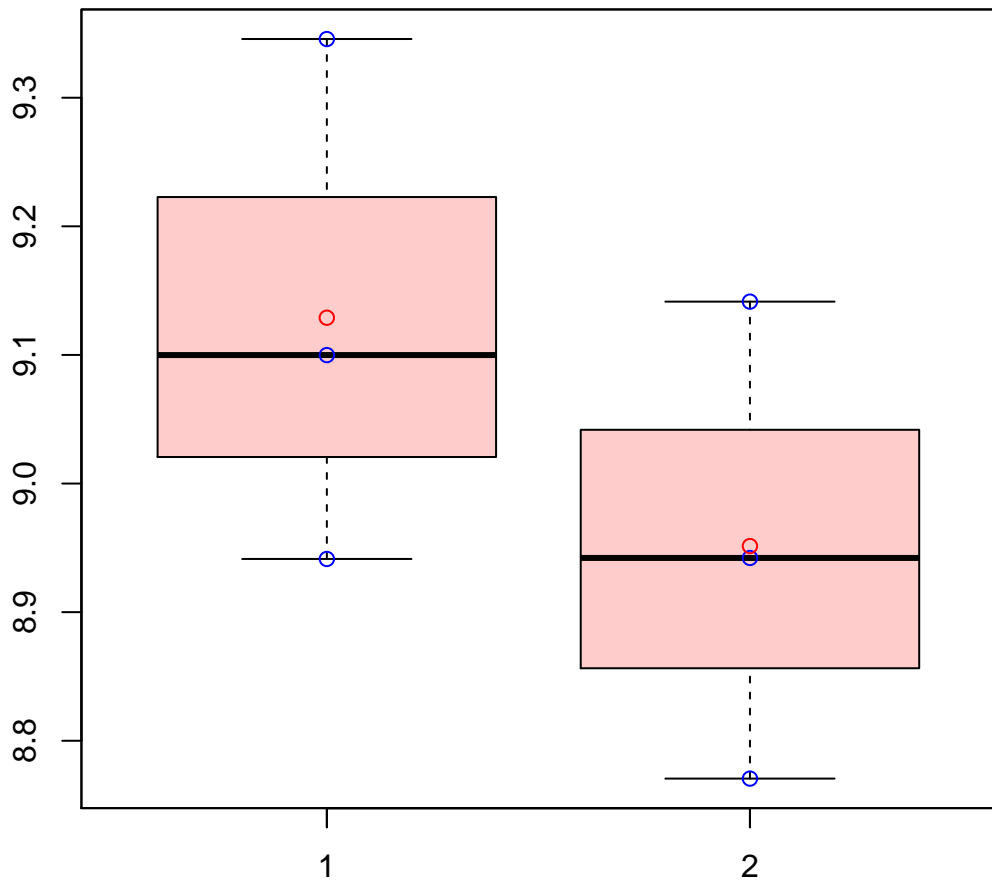

t-Test: p-value = 0.33



# C4J4M8|C4J4M8\_MAIZE

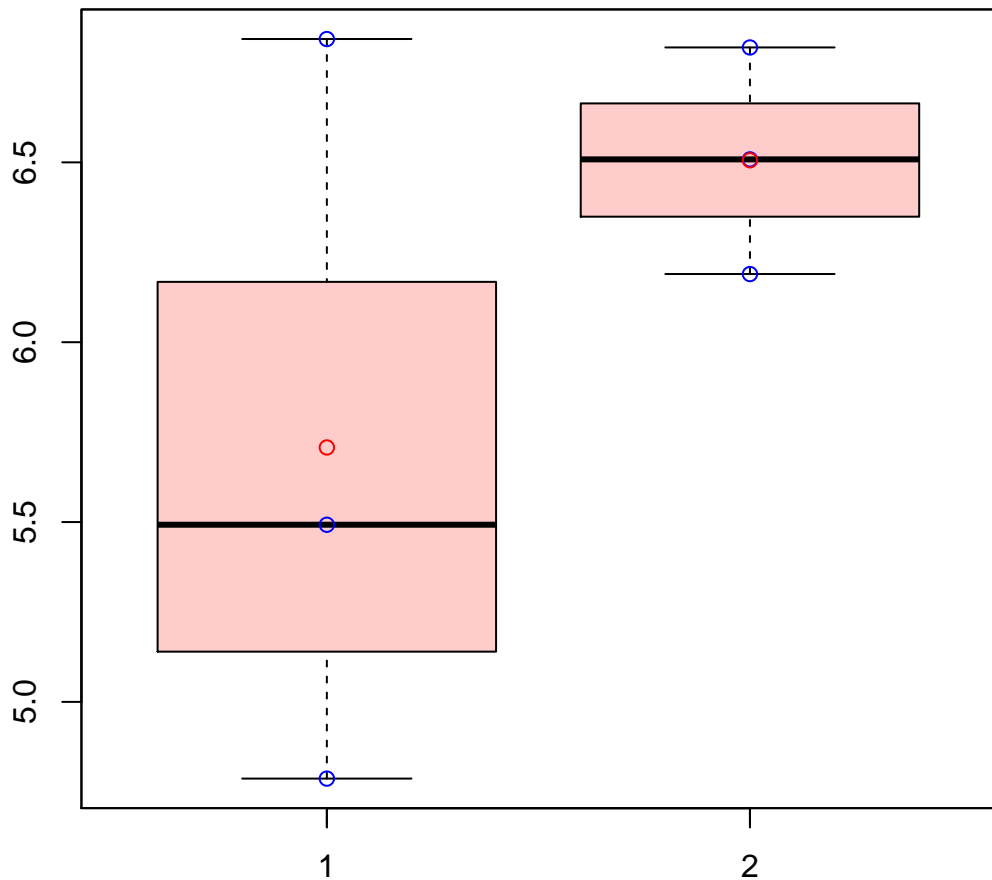

t-Test: p-value = 0.32

# C4J929|C4J929\_MAIZE

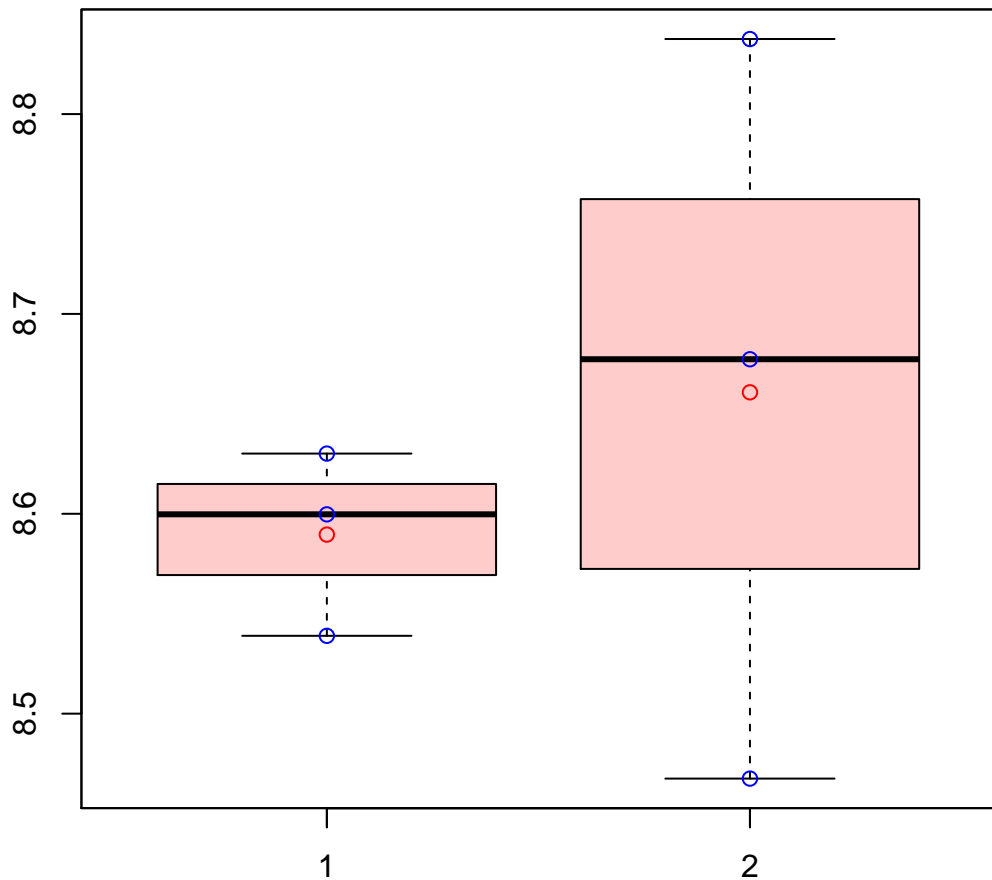

t-Test: p-value = 0.58

# C4J9M7|C4J9M7\_MAIZE

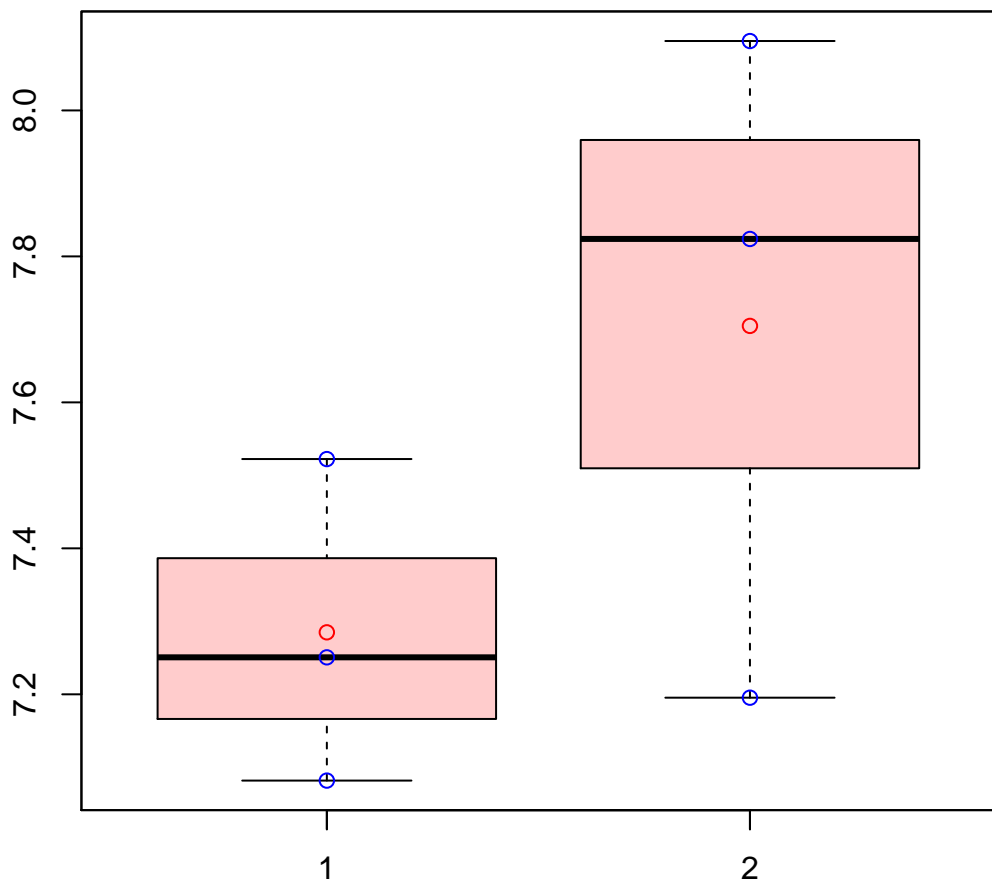

t-Test: p-value = 0.25

# C4JAX7|C4JAX7\_MAIZE

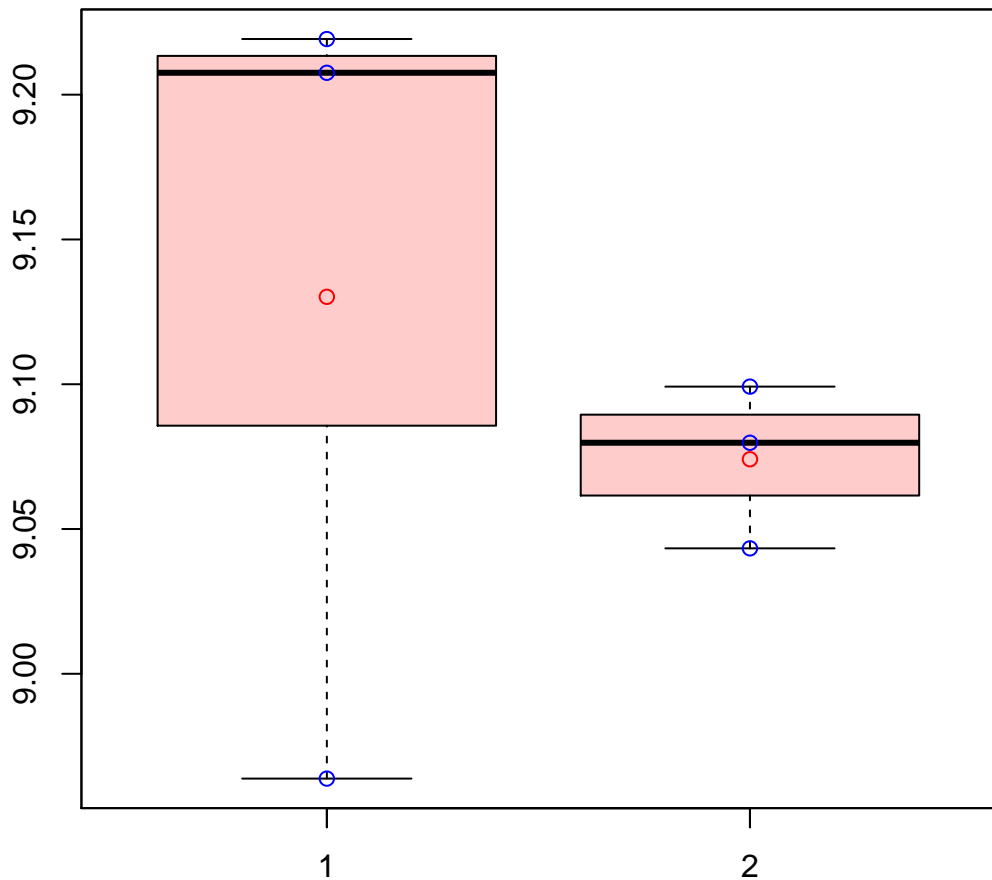

t-Test: p-value = 0.57

# C4JBS8|C4JBS8\_MAIZE

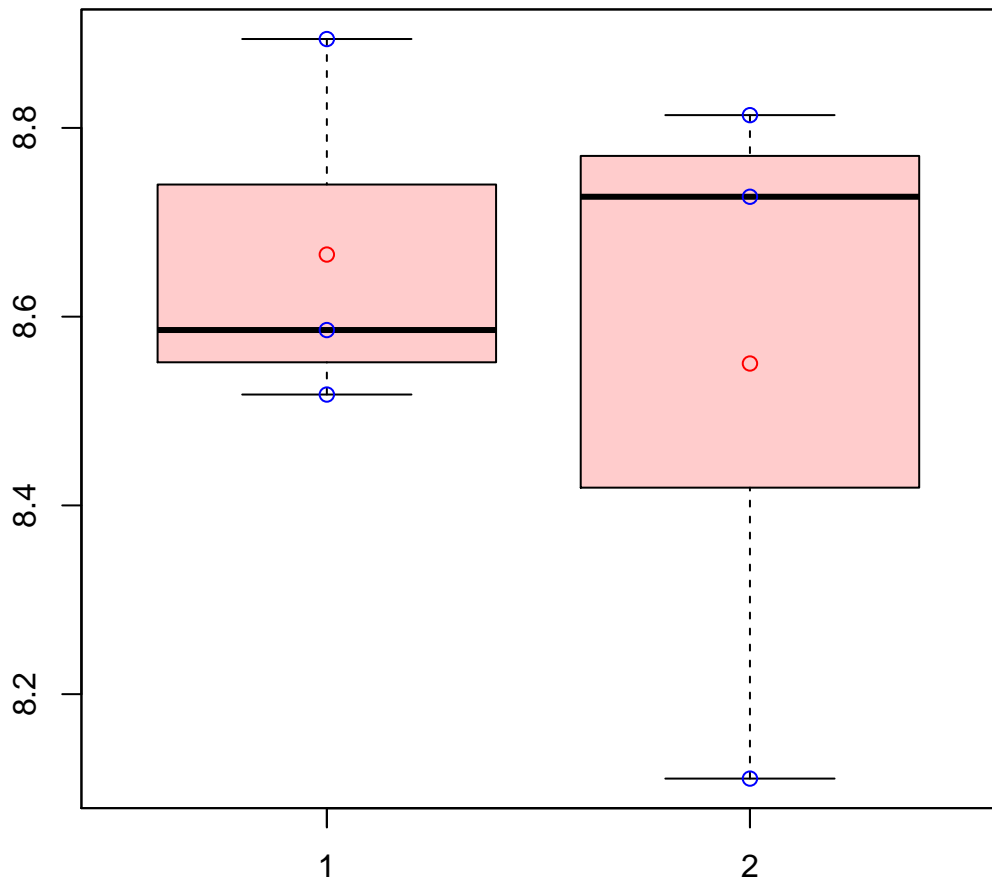

t-Test: p-value = 0.68

# C4JBZ8|C4JBZ8\_MAIZE

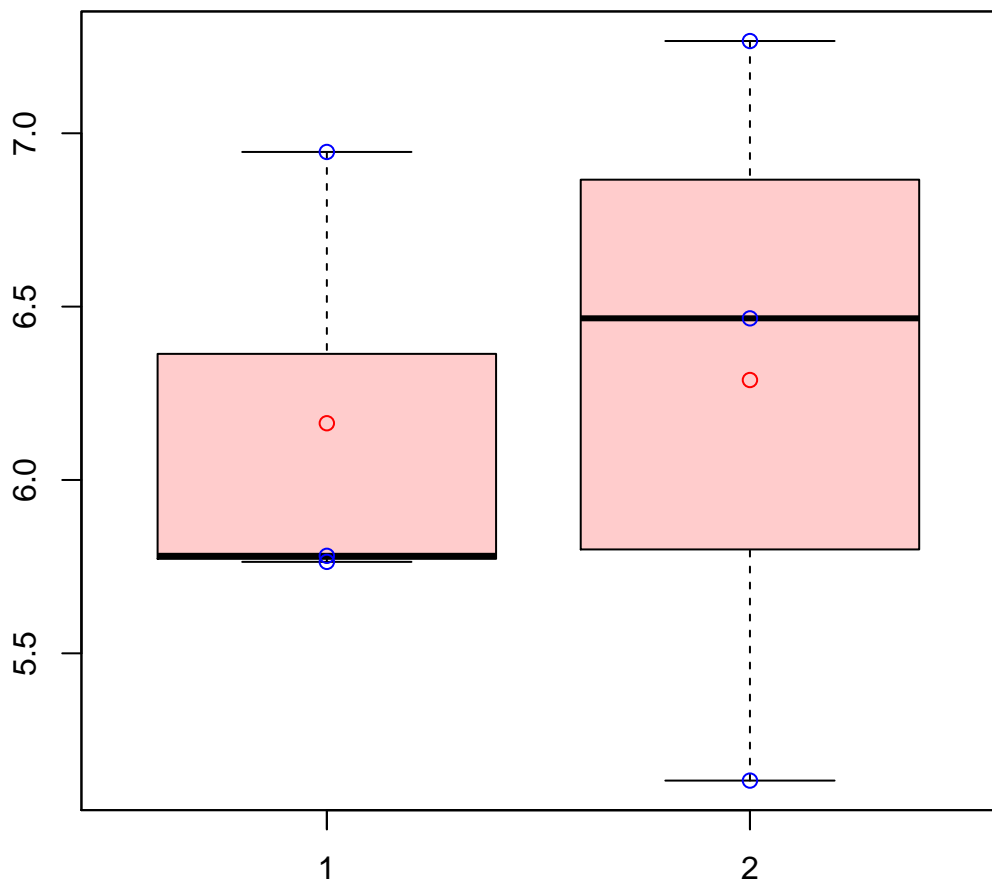

t-Test: p-value = 0.87

# C4P9N1|C4P9N1\_MAIZE

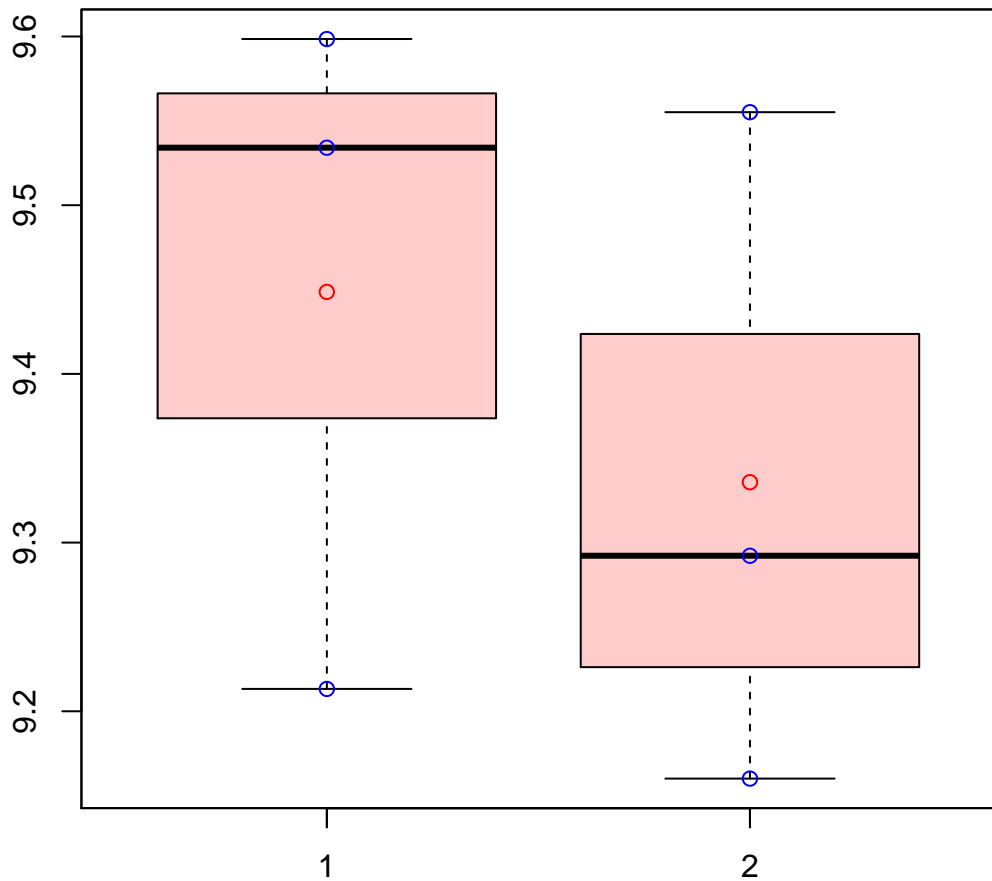

t-Test: p-value = 0.53

# C5G5X5|C5G5X5\_MAIZE

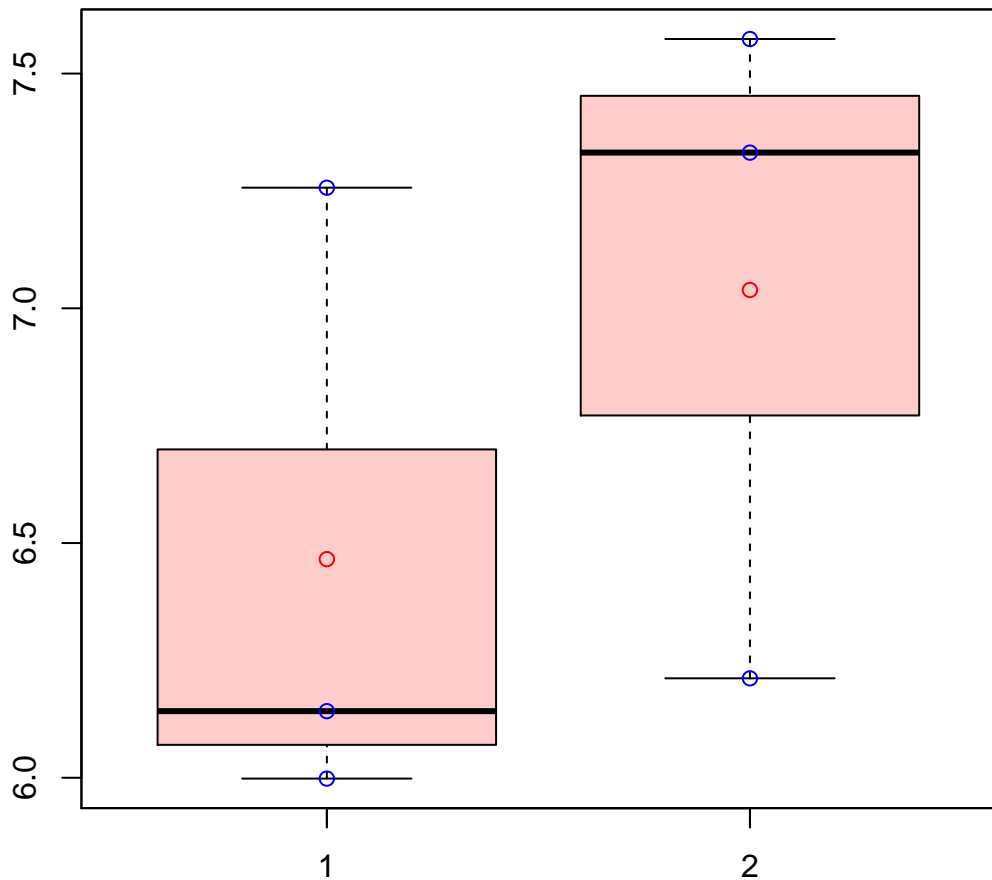

t-Test: p-value = 0.38



# C5IHD9|C5IHD9\_MAIZE

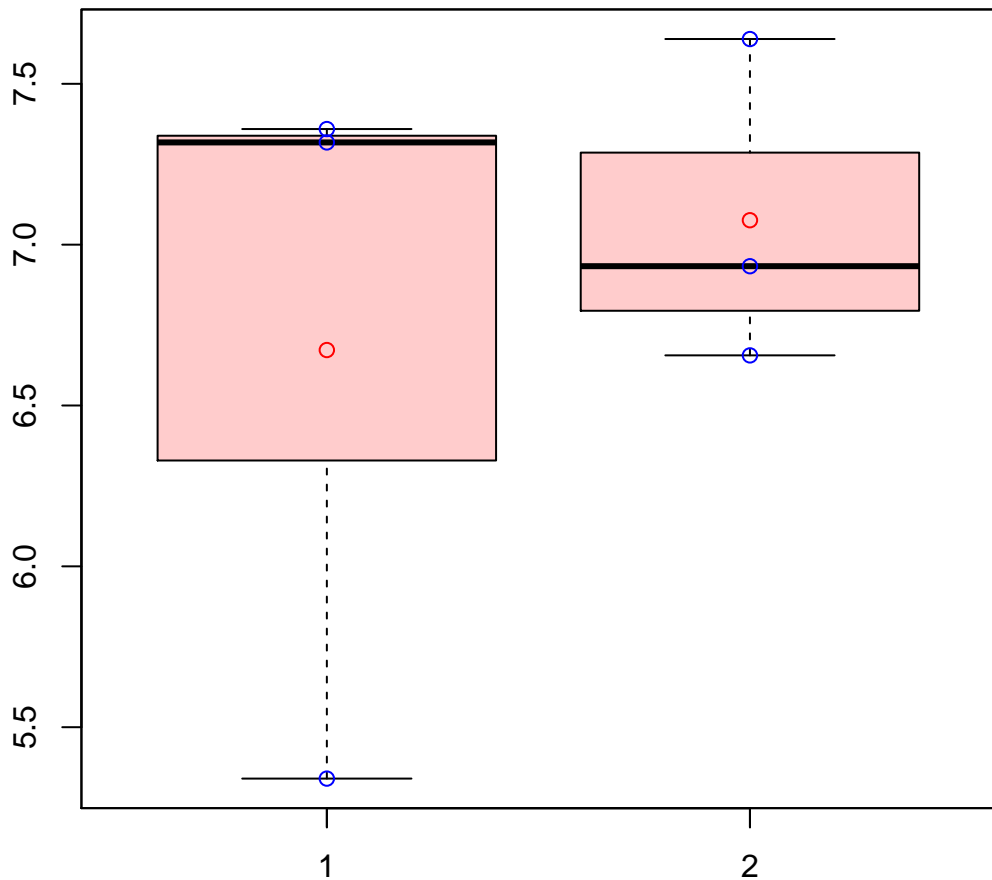

t-Test: p-value = 0.62

# C5NNR0|C5NNR0\_ORYSI

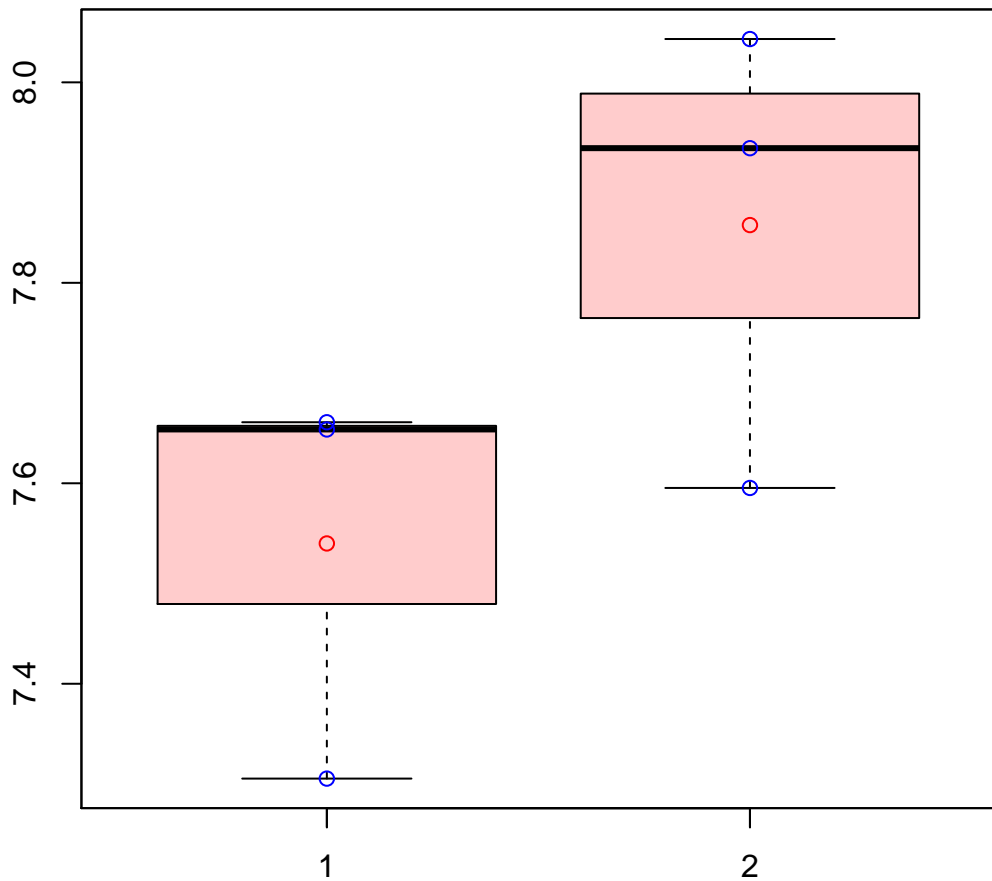

t-Test: p-value = 0.15

# C5NNS6|C5NNS6\_ORYSI

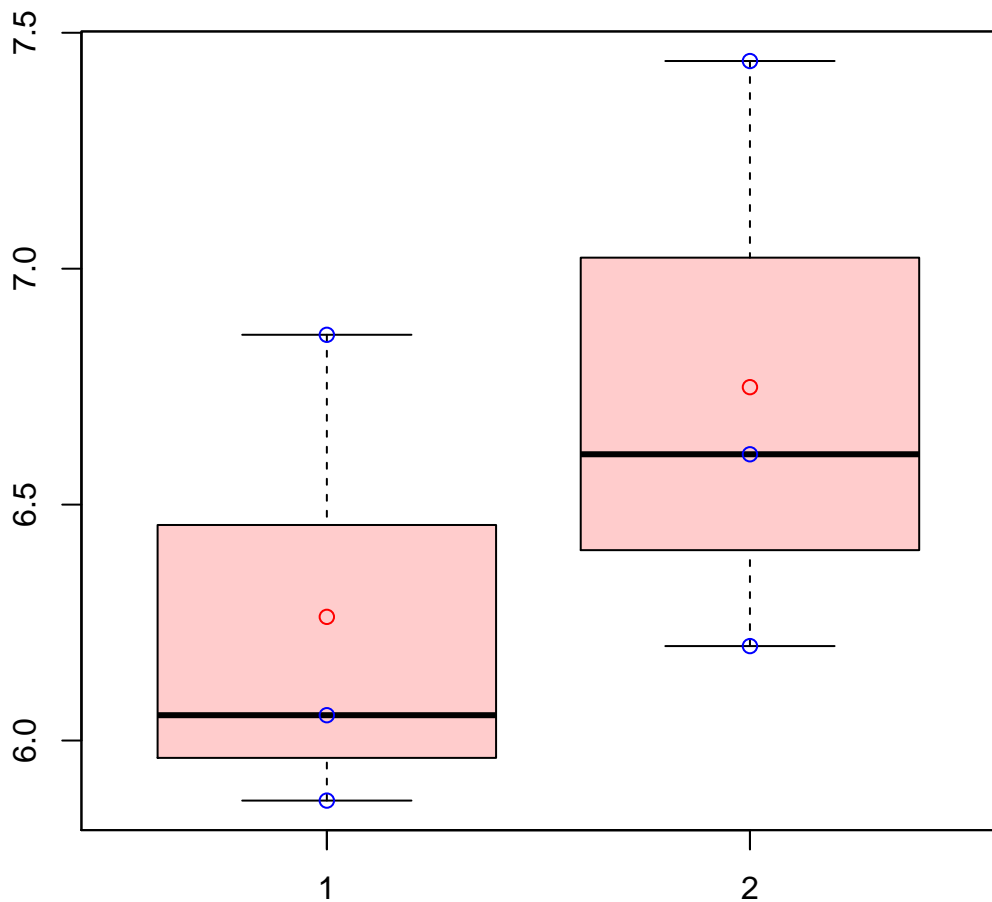

t-Test: p-value = 0.36

# C5WMI3|C5WMI3\_SORBI

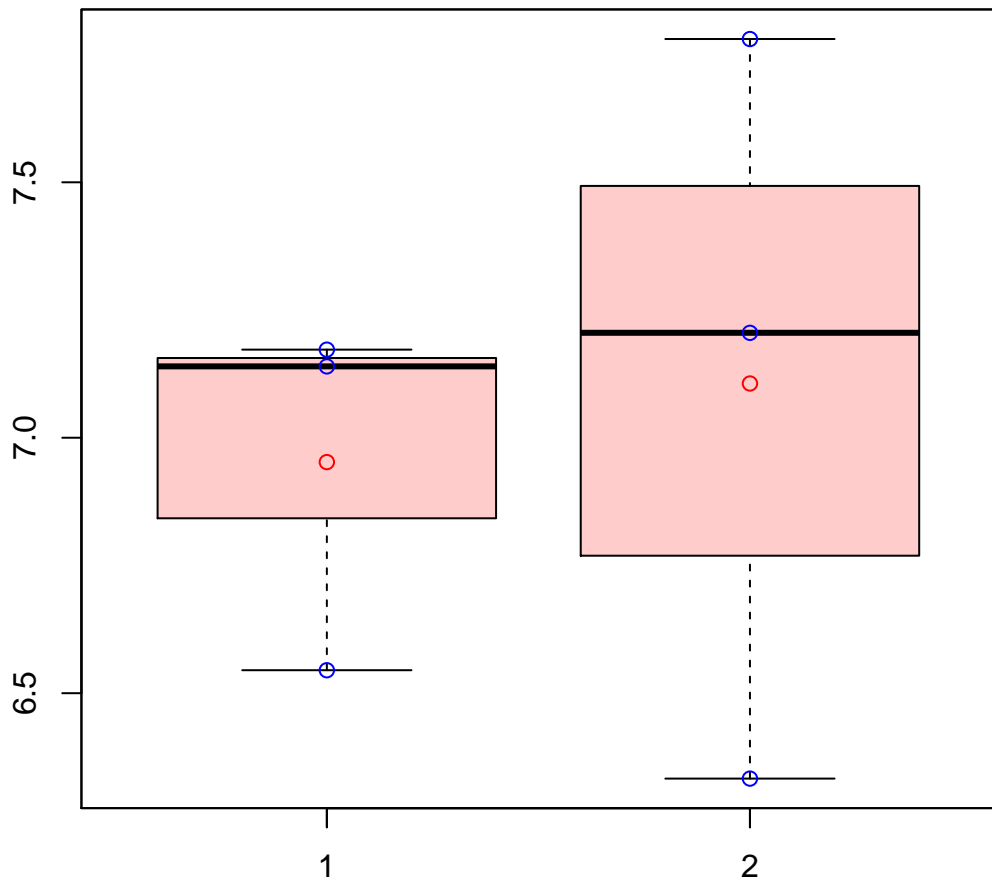

t-Test: p-value = 0.76

# C5WMX1|C5WMX1\_SORBI

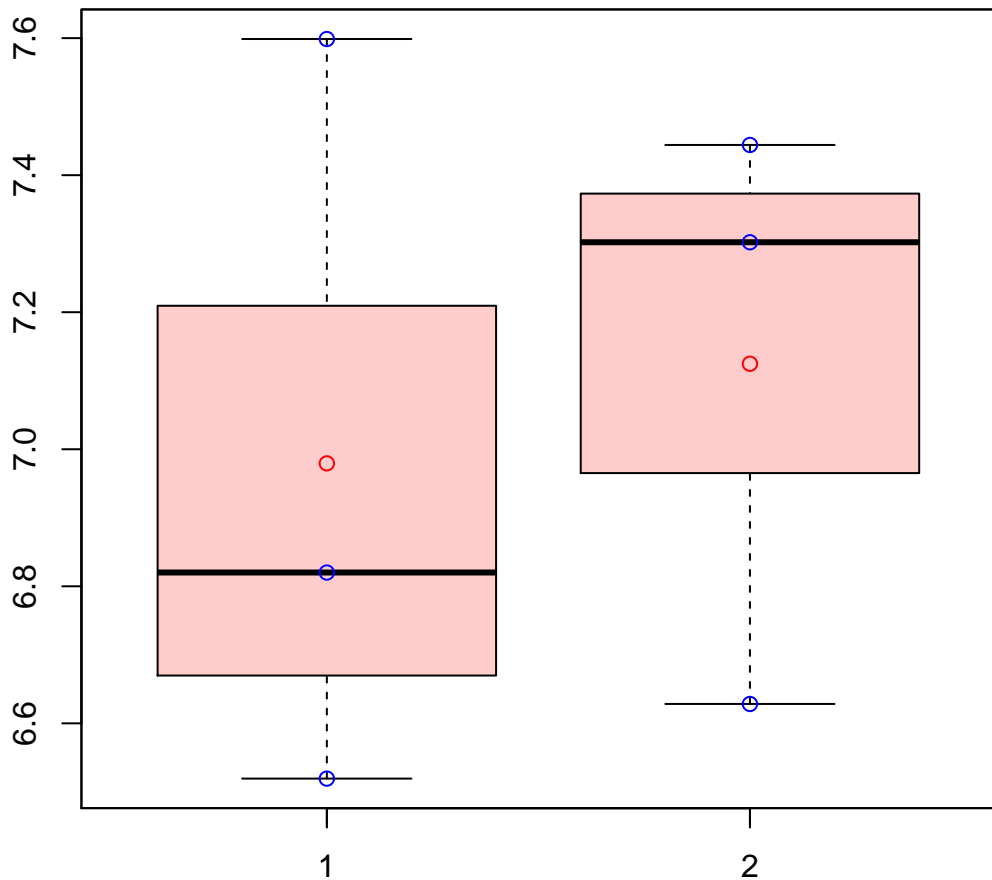

t-Test: p-value = 0.74

# C5WMZ0|C5WMZ0\_SORBI

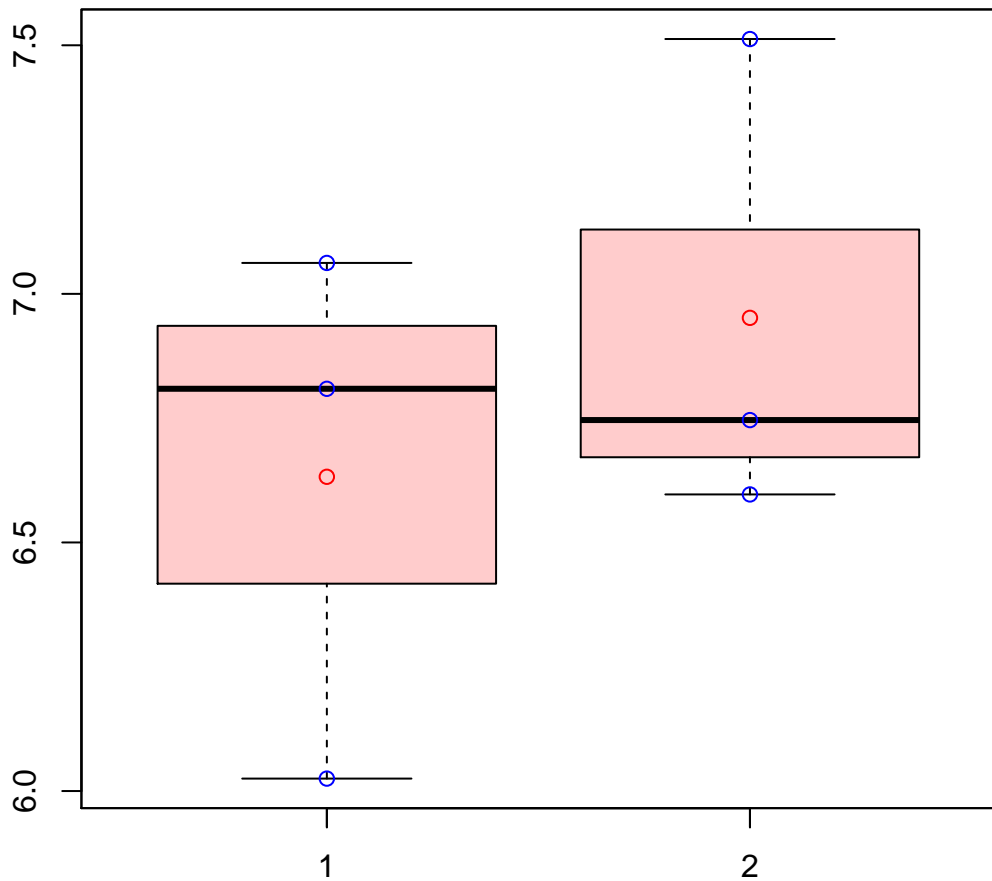

t-Test: p-value = 0.49

# C5WN48|C5WN48\_SORBI

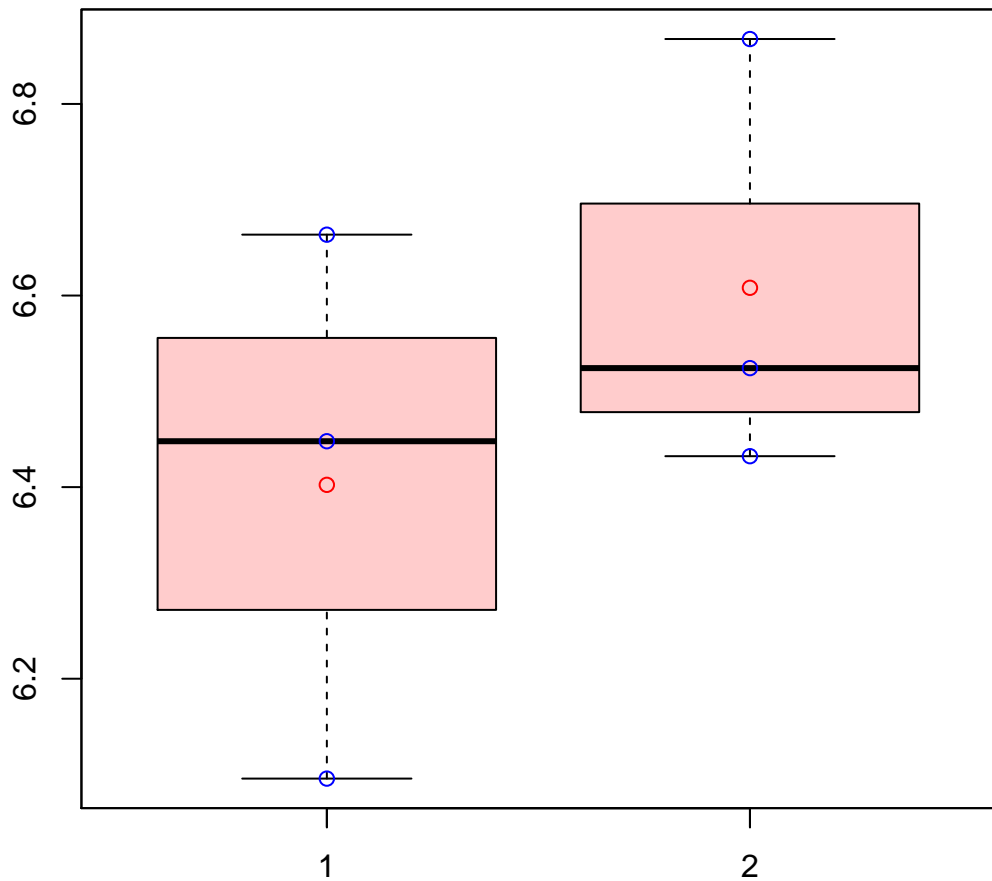

t-Test: p-value = 0.39

# C5WNE7|C5WNE7\_SORBI

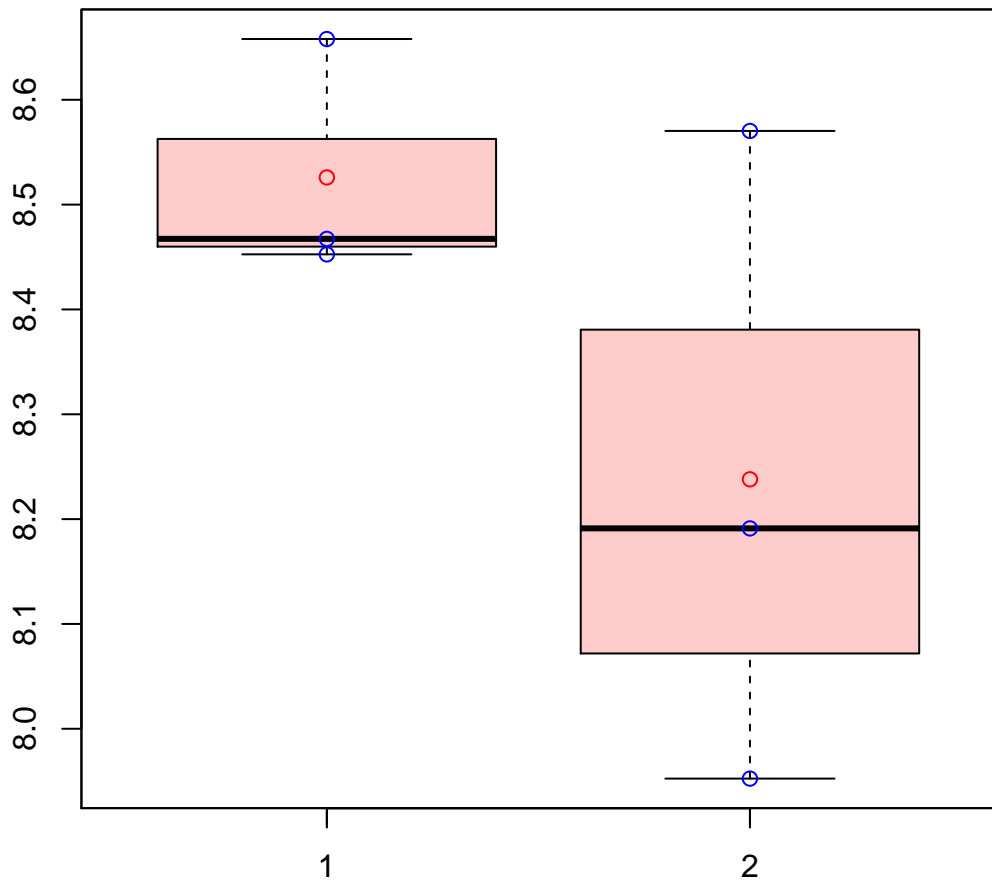

t-Test: p-value = 0.25



# C5WNJ9|C5WNJ9\_SORBI

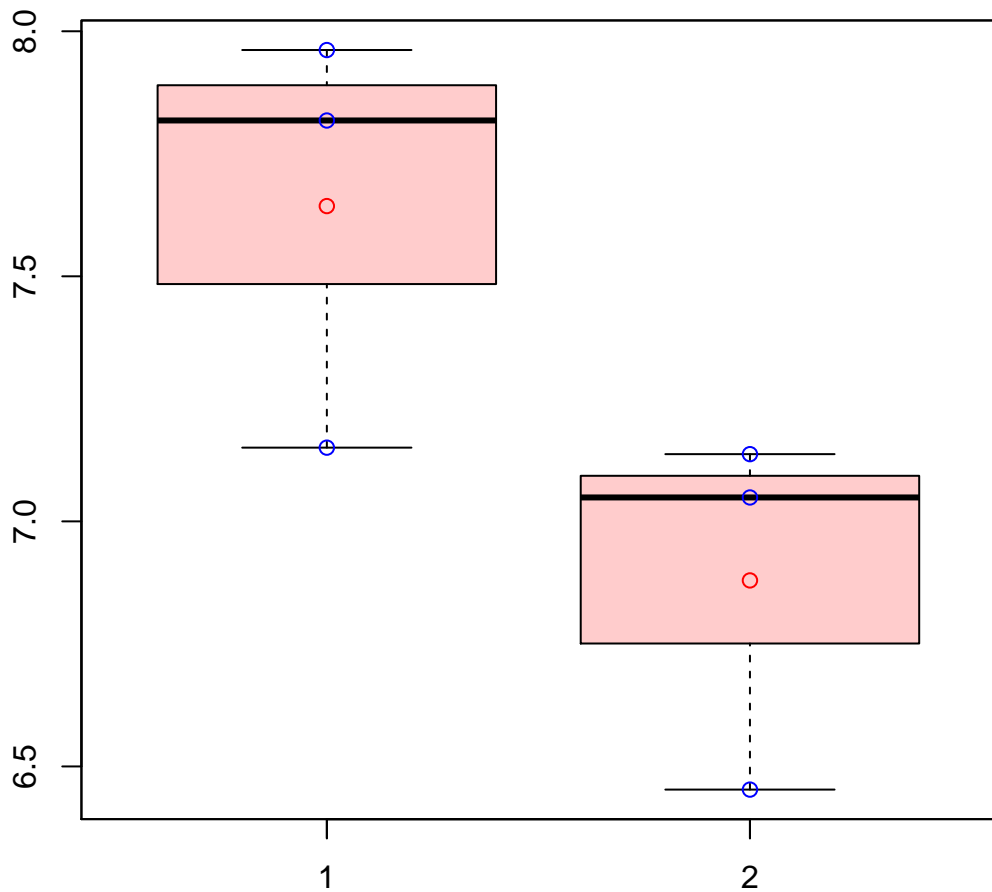

t-Test: p-value = 0.08

# C5WNV6|C5WNV6\_SORBI

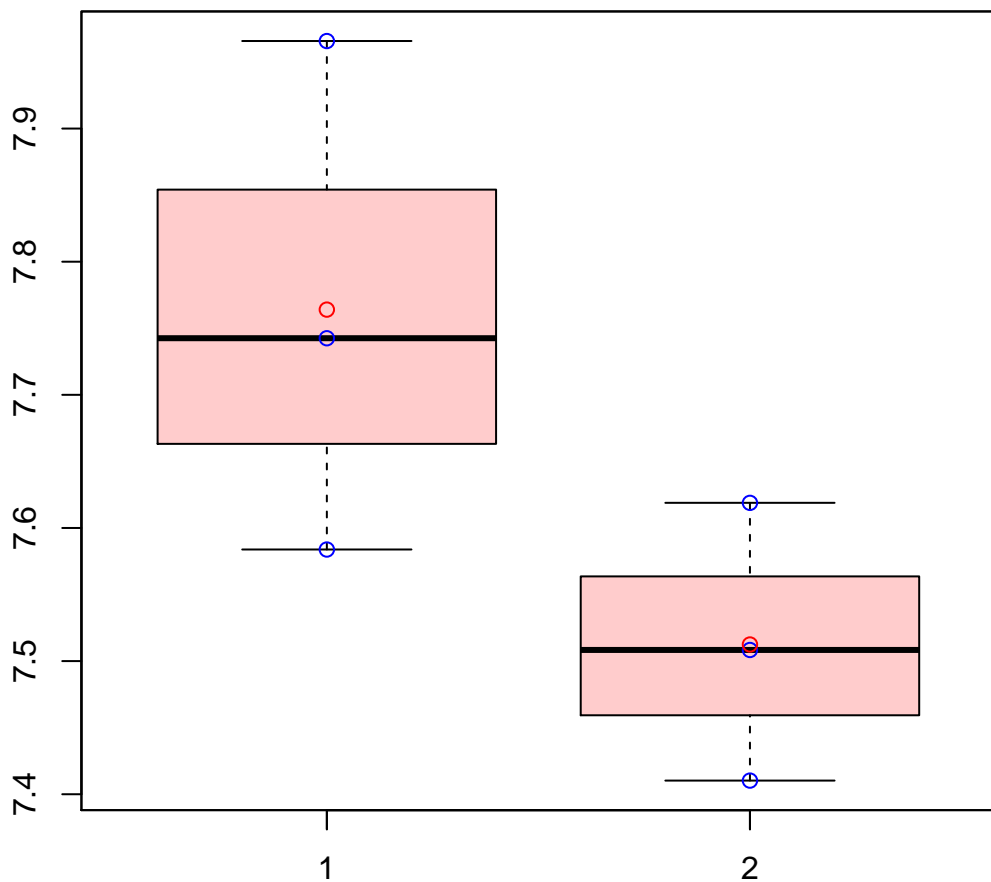

t-Test: p-value = 0.14

# C5WPE9|C5WPE9\_SORBI

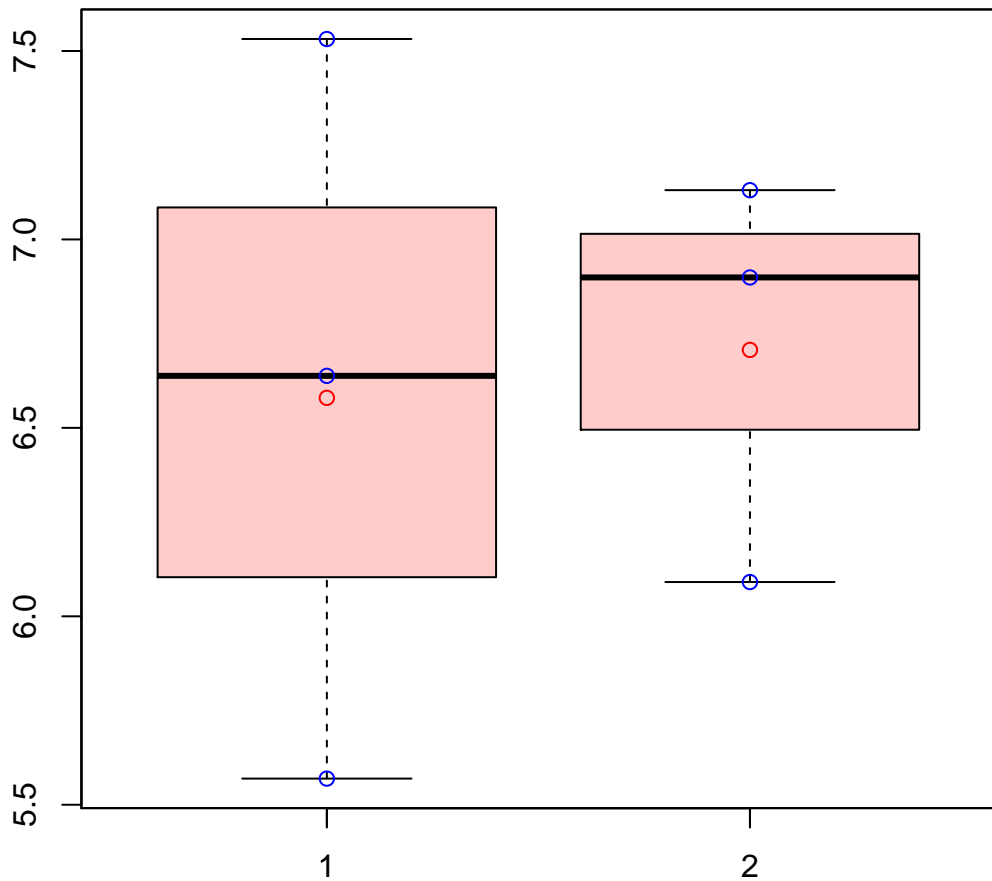

t-Test: p-value = 0.86

# C5WPF7|C5WPF7\_SORBI

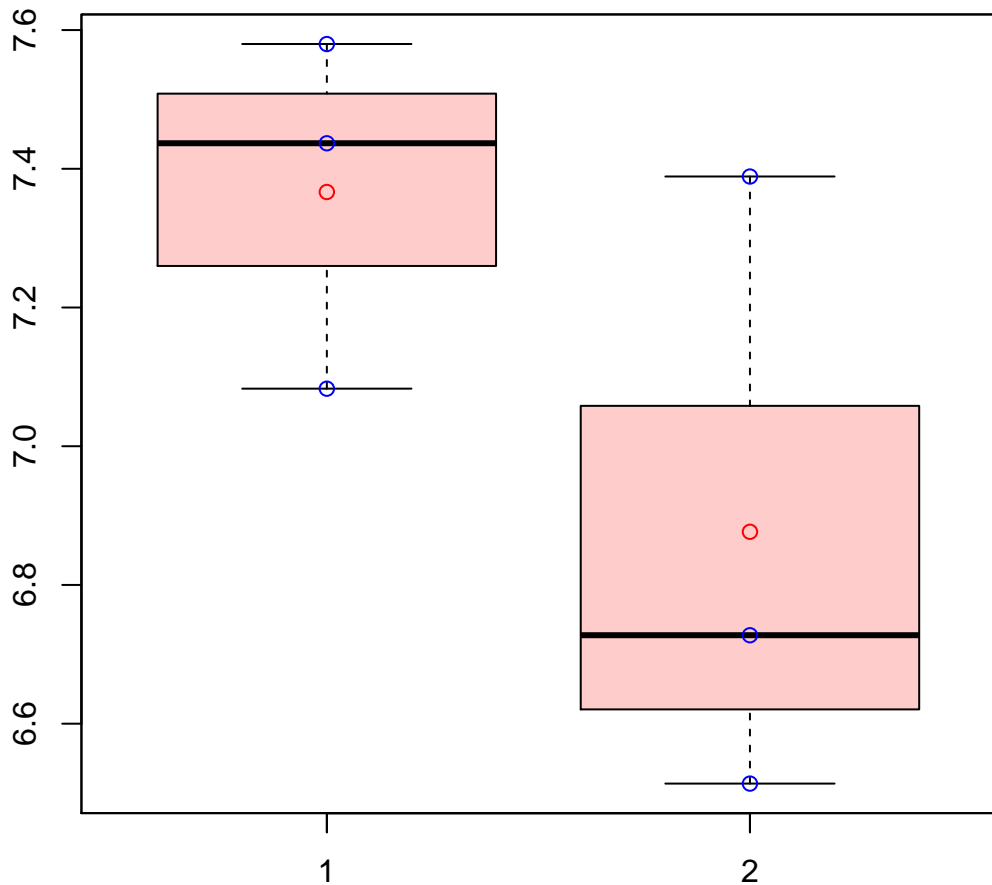

t-Test: p-value = 0.2

# C5WPY8|C5WPY8\_SORBI

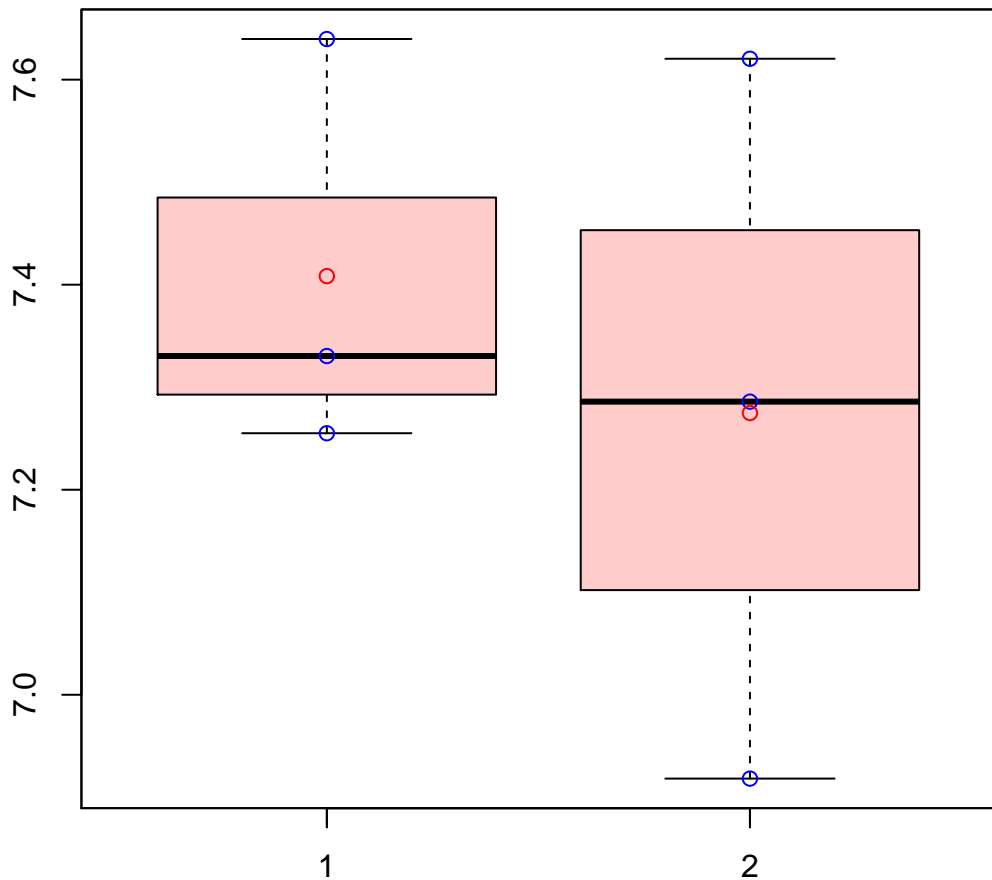

t-Test: p-value = 0.61

# C5WQW9|C5WQW9\_SORBI

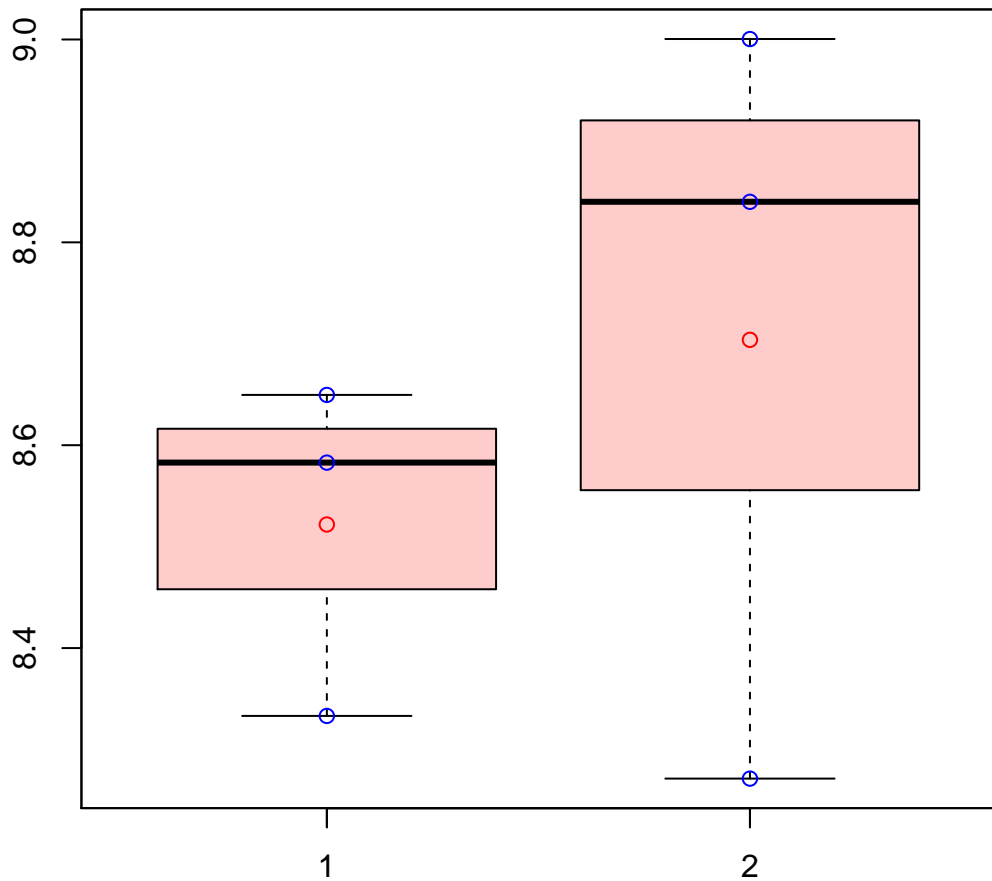

t-Test: p-value = 0.51

# C5WQX5|C5WQX5\_SORBI

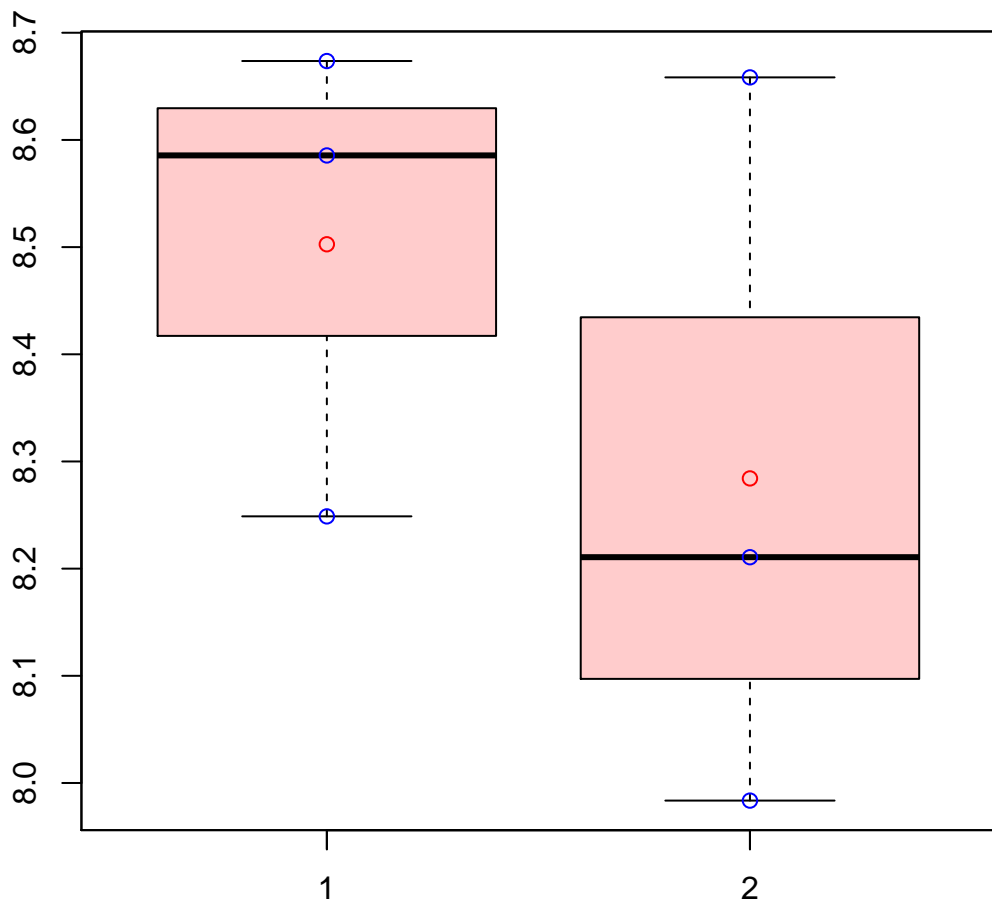

t-Test: p-value = 0.42

# C5WR49|C5WR49\_SORBI

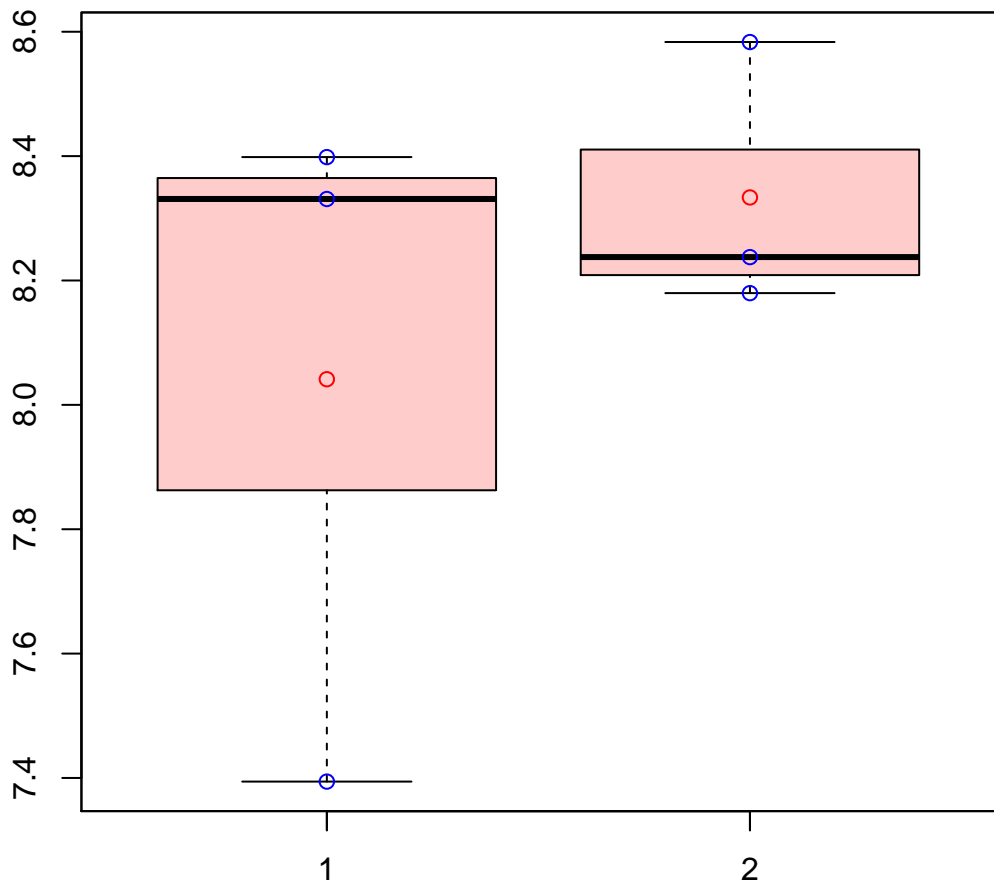

t-Test: p-value = 0.47



# C5WRD0|C5WRD0\_SORBI

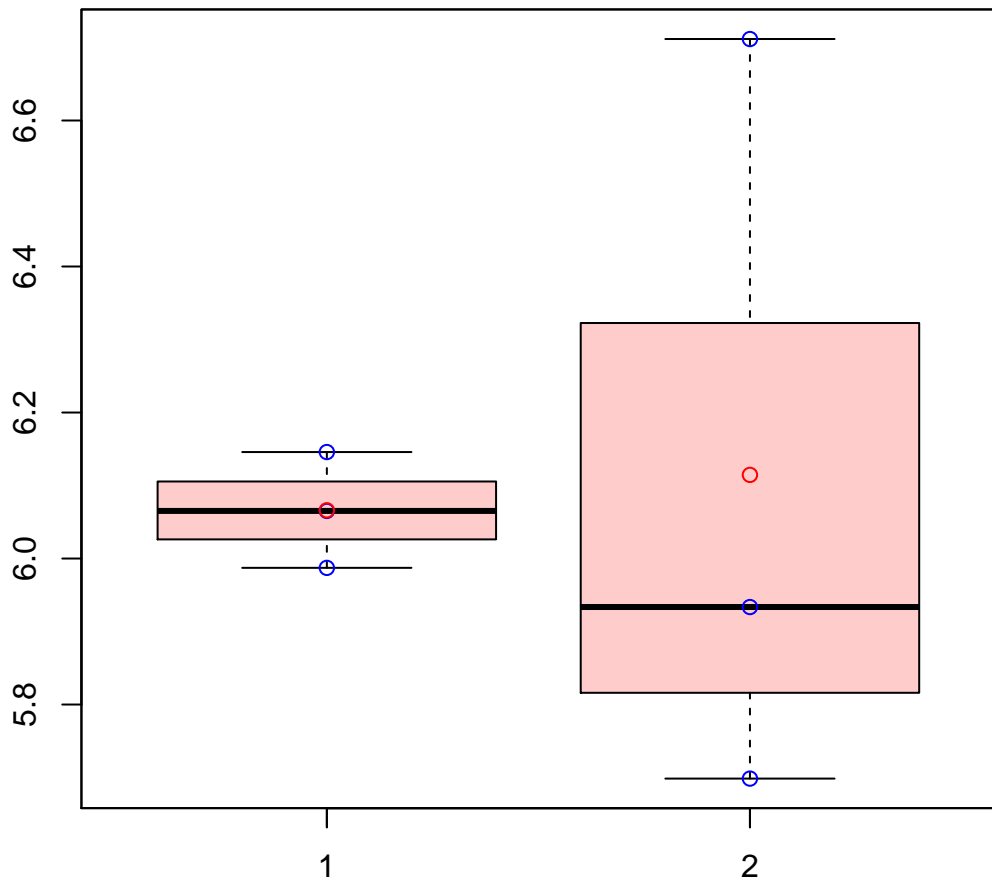

t-Test: p-value = 0.89

# C5WRI0|C5WRI0\_SORBI

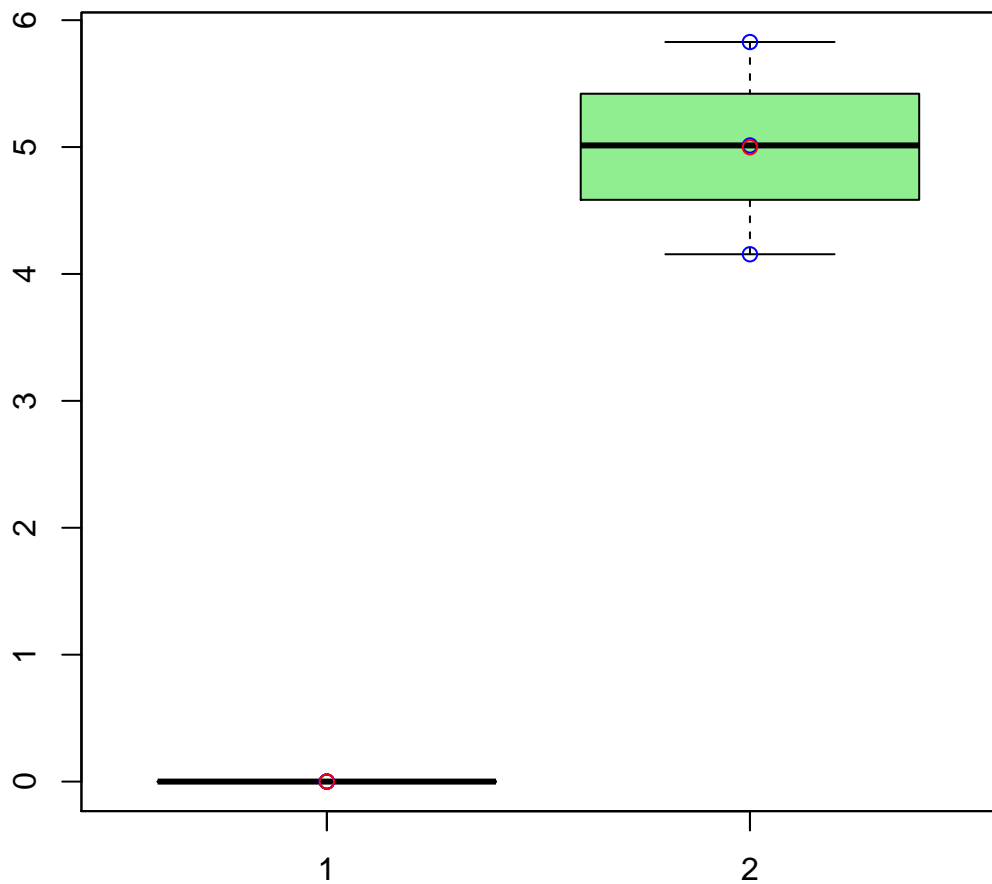

t-Test: p-value = 0.01

# C5WRT7|C5WRT7\_SORBI

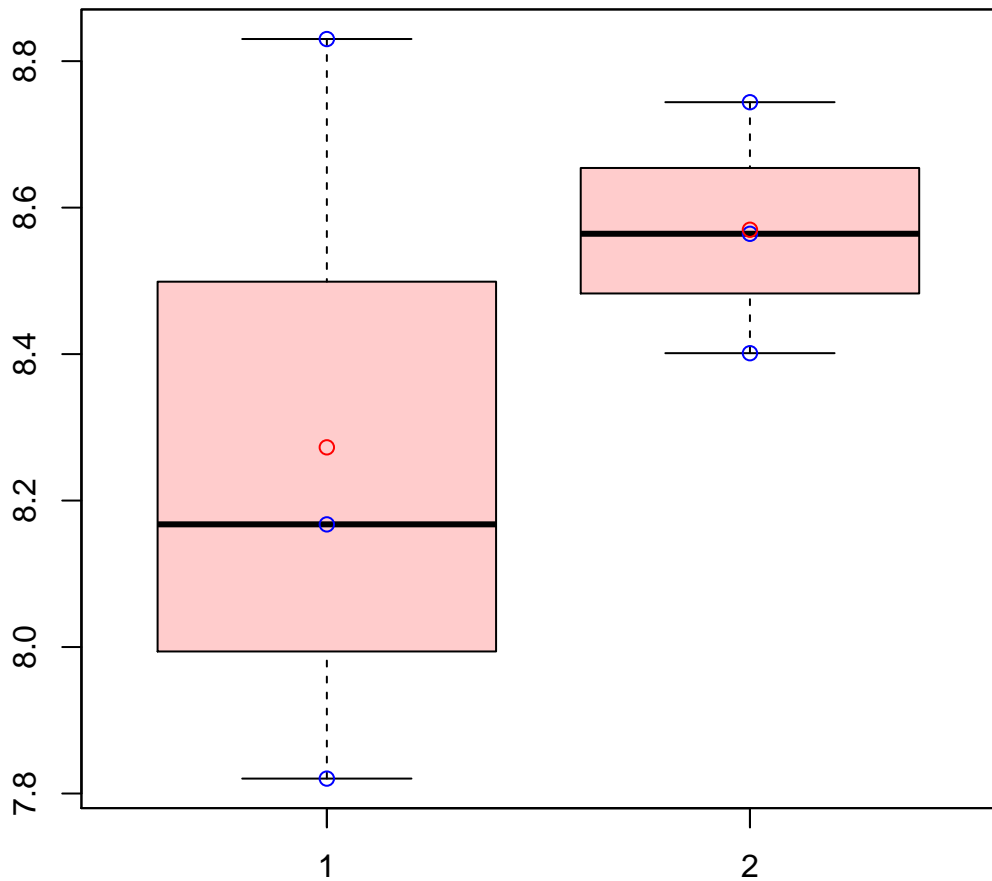

t-Test: p-value = 0.43

# C5WRV5|C5WRV5\_SORBI

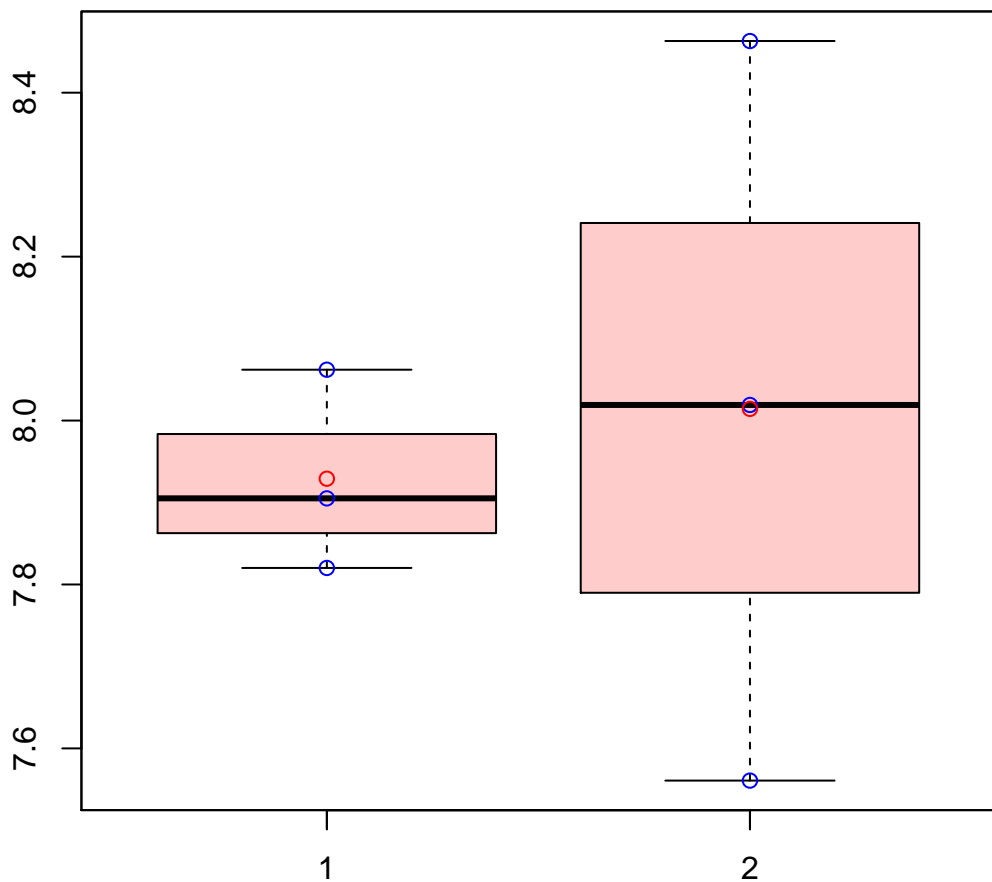

t-Test: p-value = 0.78

# C5WT08|C5WT08\_SORBI

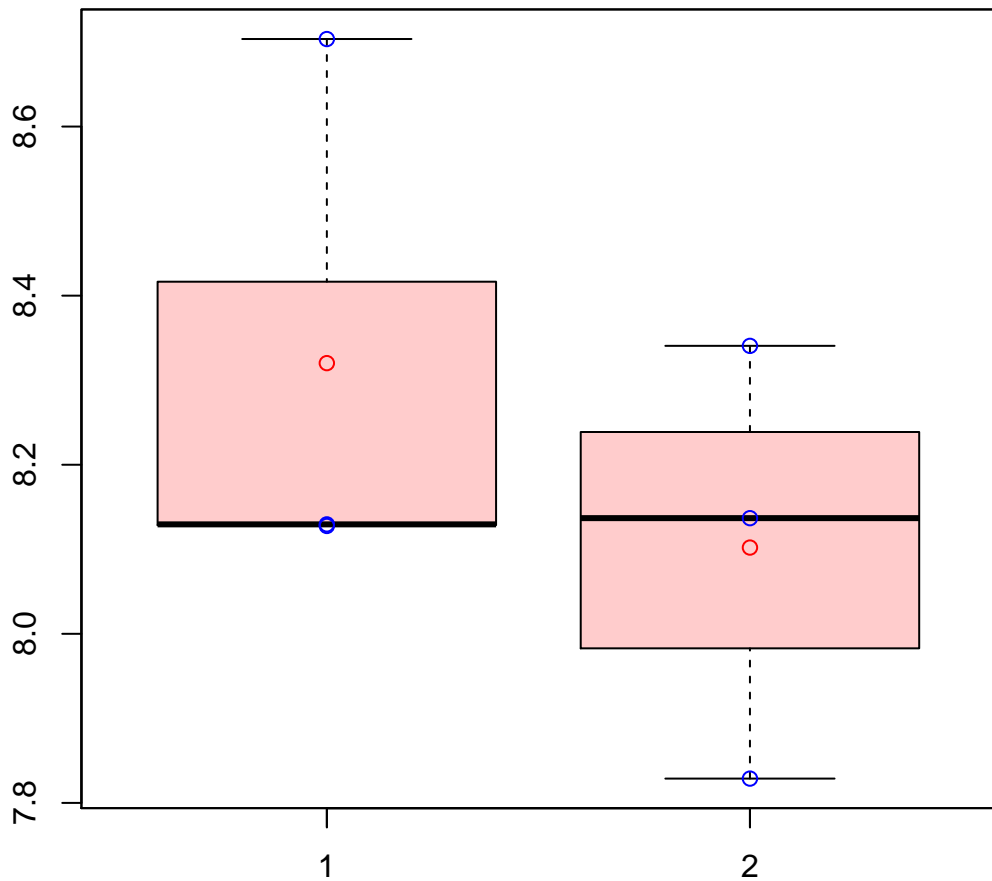

t-Test: p-value = 0.42

# C5WT43|C5WT43\_SORBI

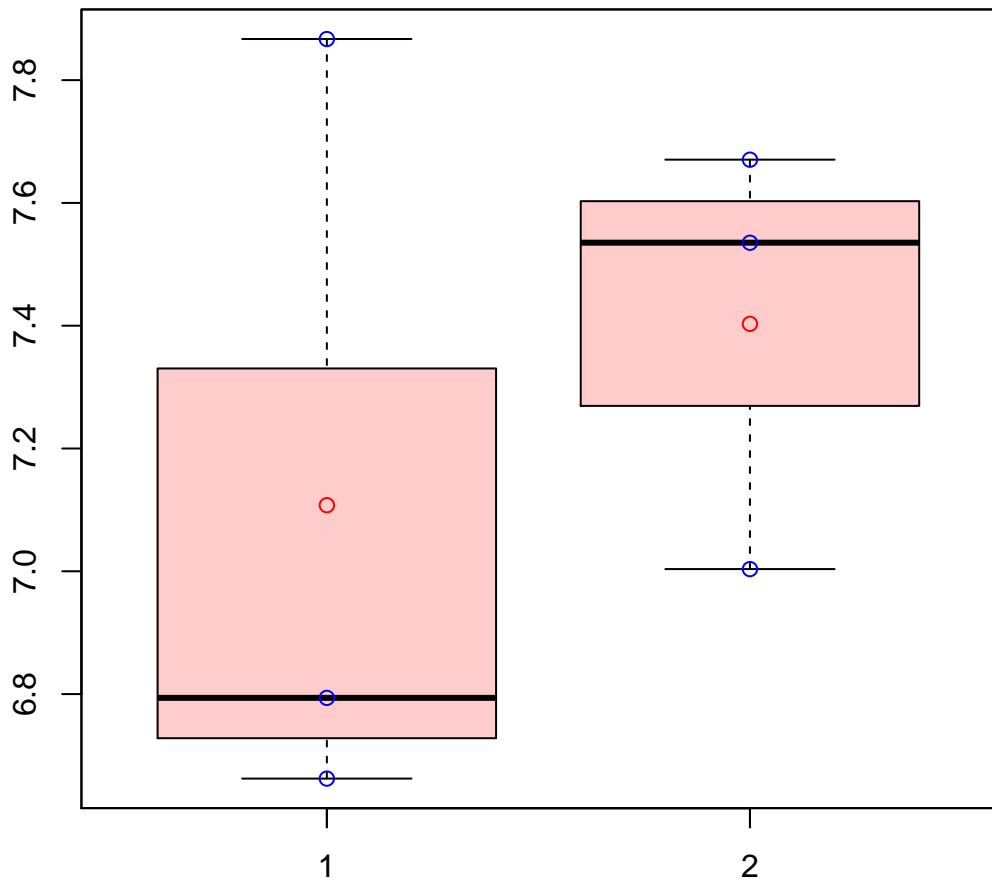

t-Test: p-value = 0.54

# C5WT59|C5WT59\_SORBI

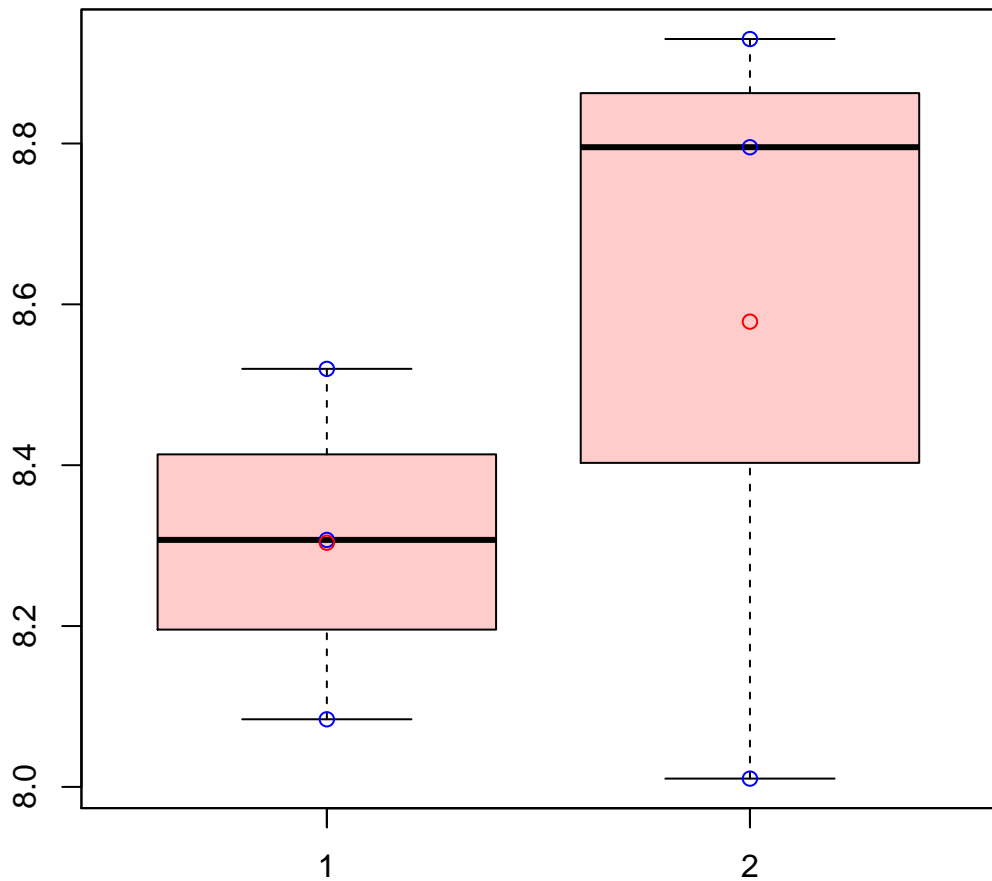

t-Test: p-value = 0.45

# C5WT74|C5WT74\_SORBI

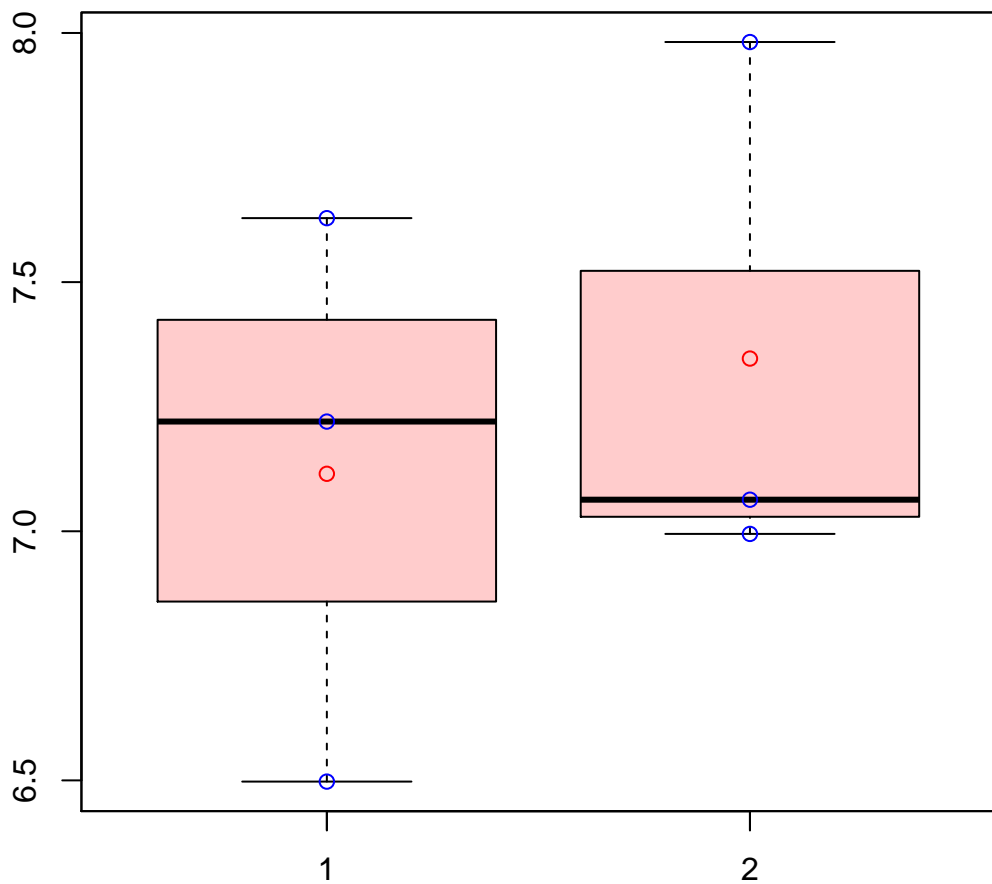

t-Test: p-value = 0.64



# C5WTC1|C5WTC1\_SORBI

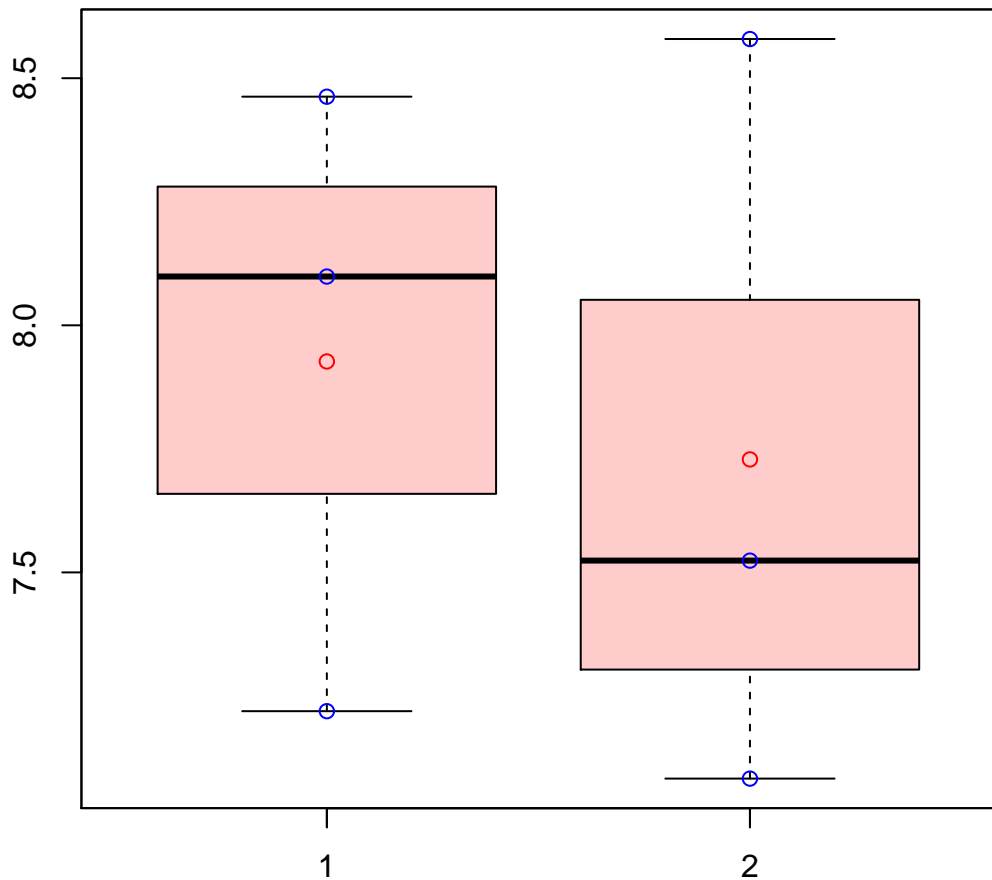

t-Test: p-value = 0.75

# C5WTN6|C5WTN6\_SORBI

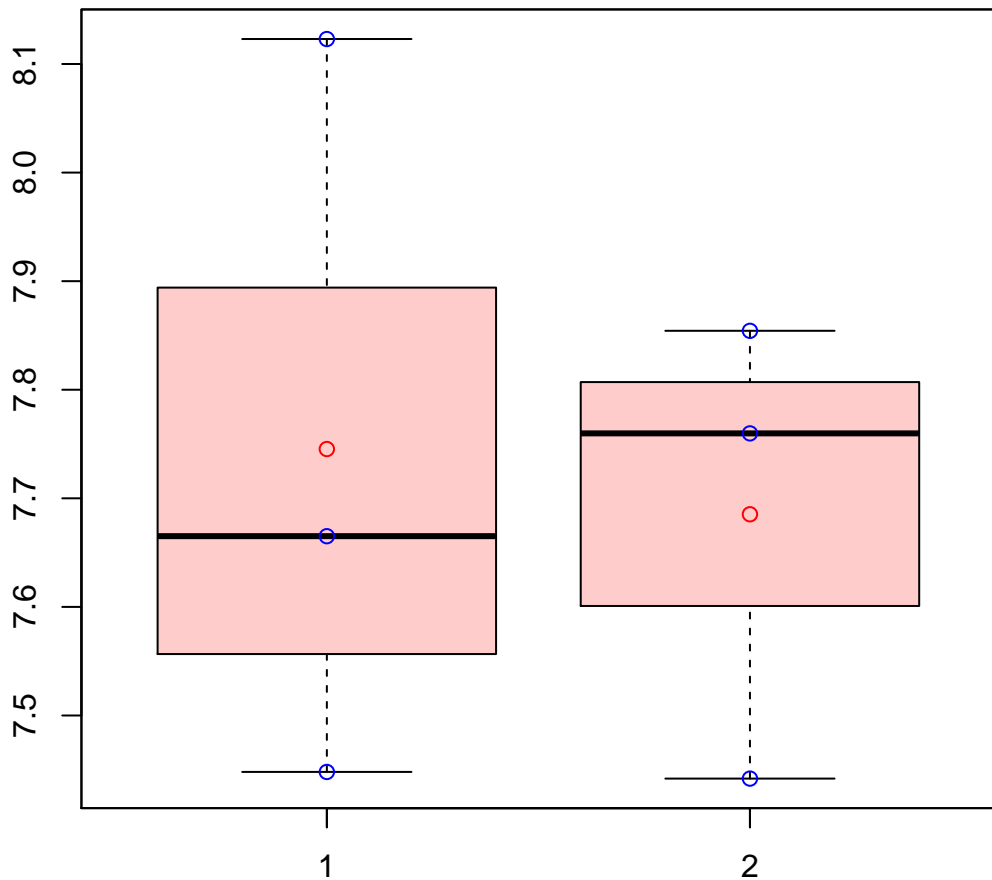

t-Test: p-value = 0.81

# C5WTR6|C5WTR6\_SORBI

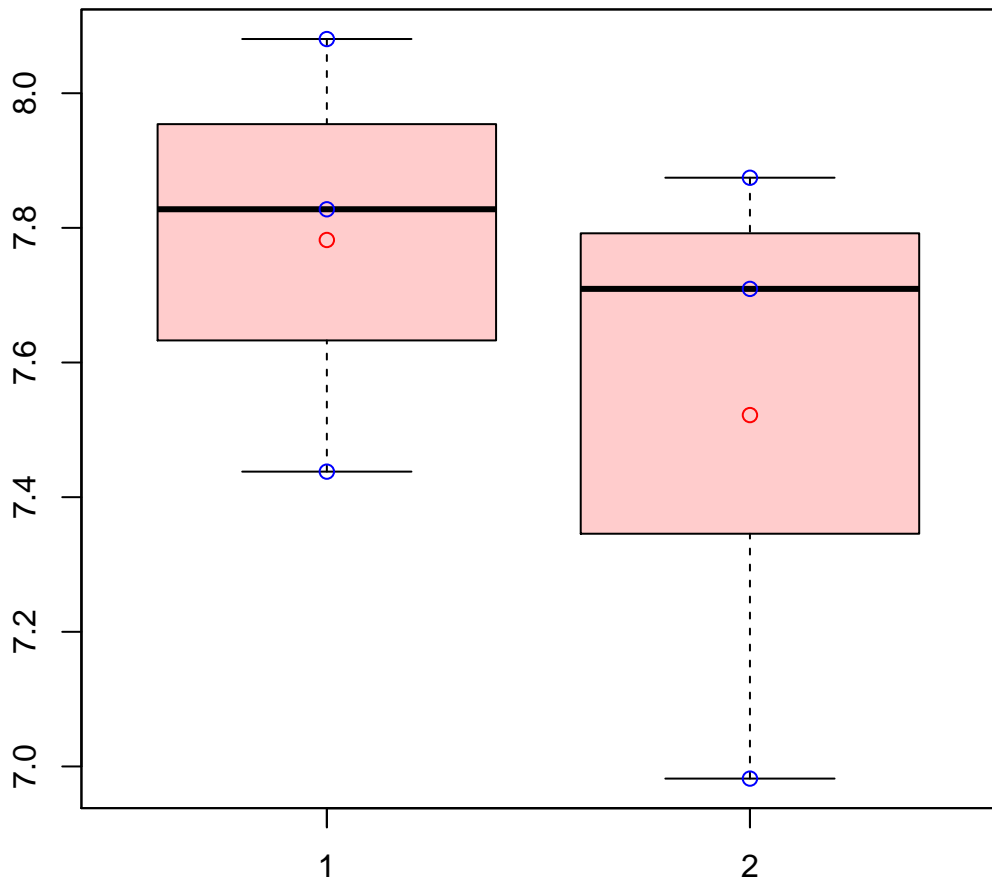

t-Test: p-value = 0.48

# C5WUK7|C5WUK7\_SORBI

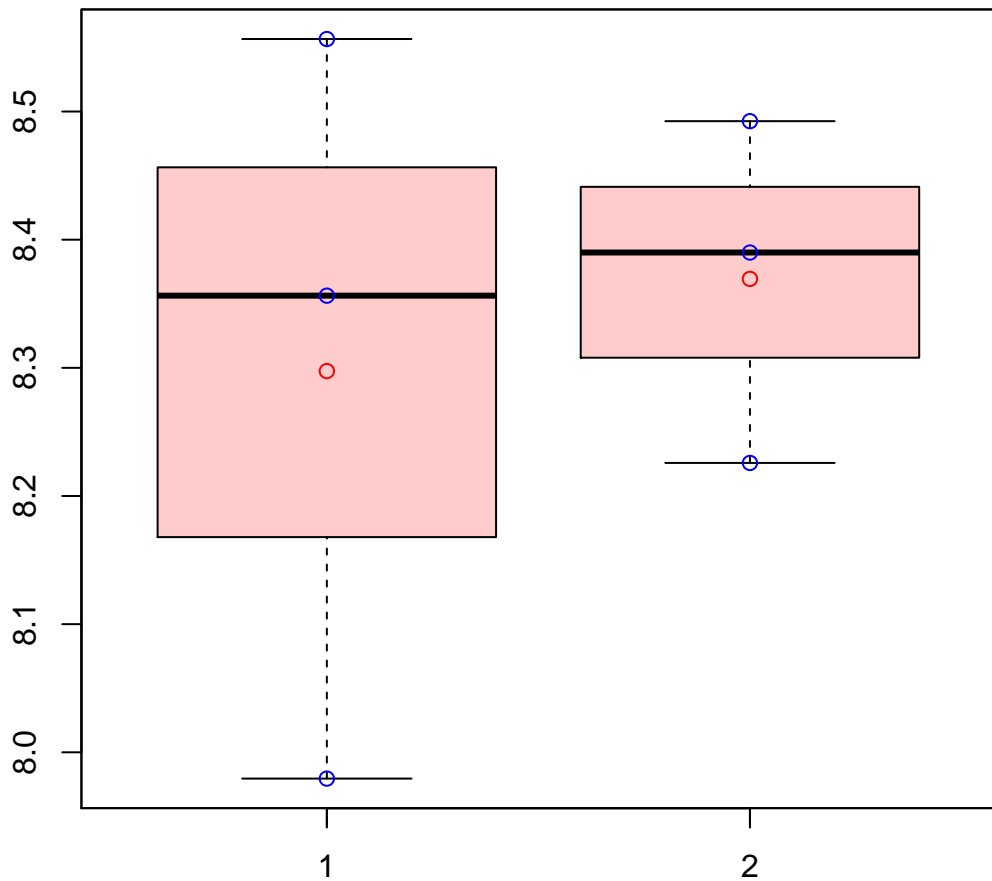

t-Test: p-value = 0.73

# C5WVJ1|C5WVJ1\_SORBI

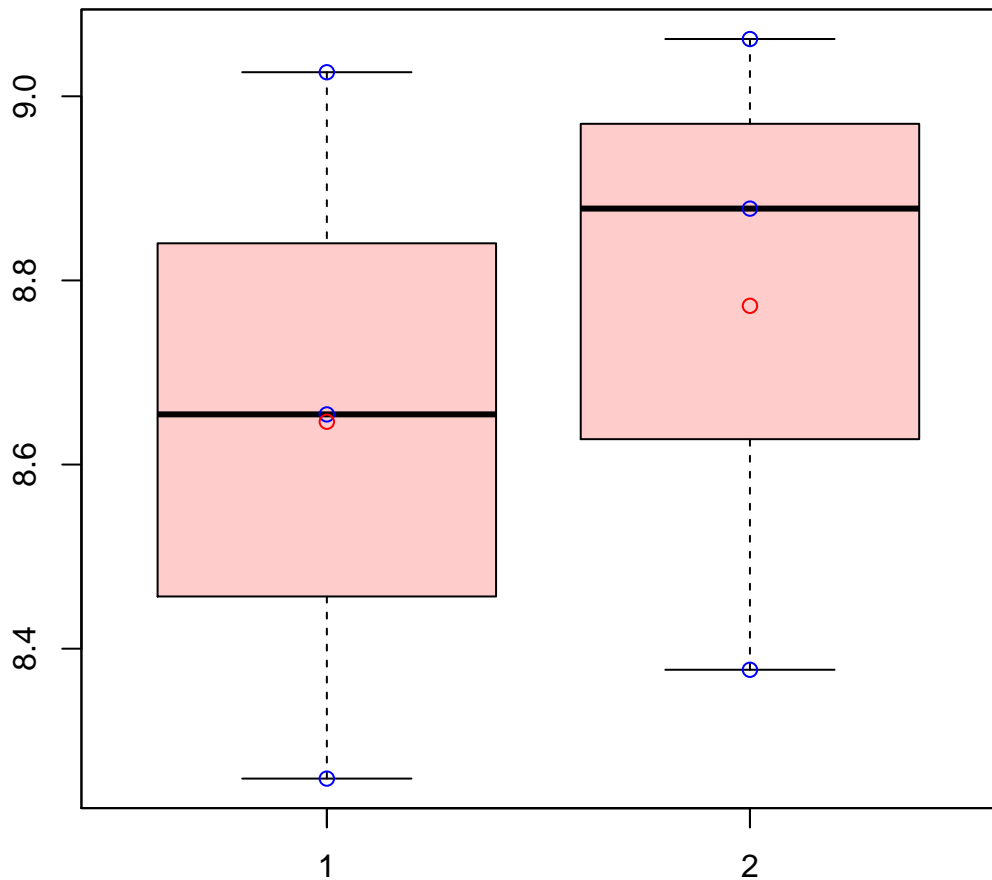

t-Test: p-value = 0.7

# C5WVQ9|C5WVQ9\_SORBI

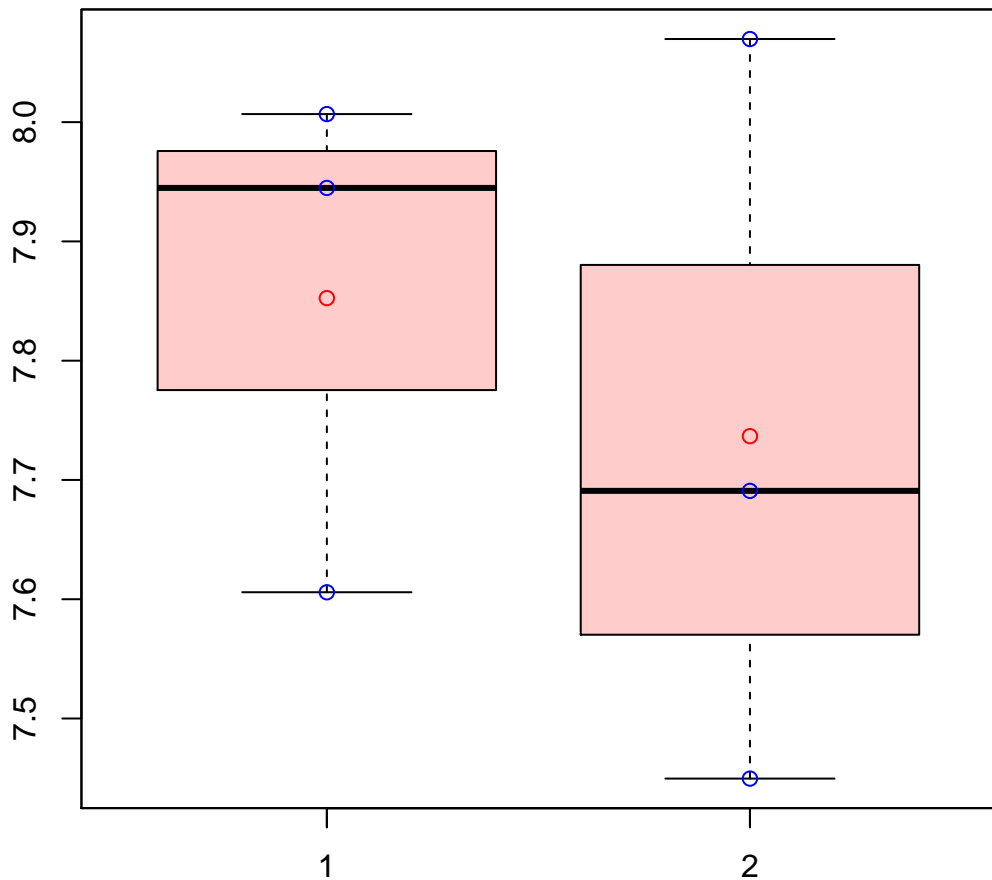

t-Test: p-value = 0.63

# C5WVU9|C5WVU9\_SORBI

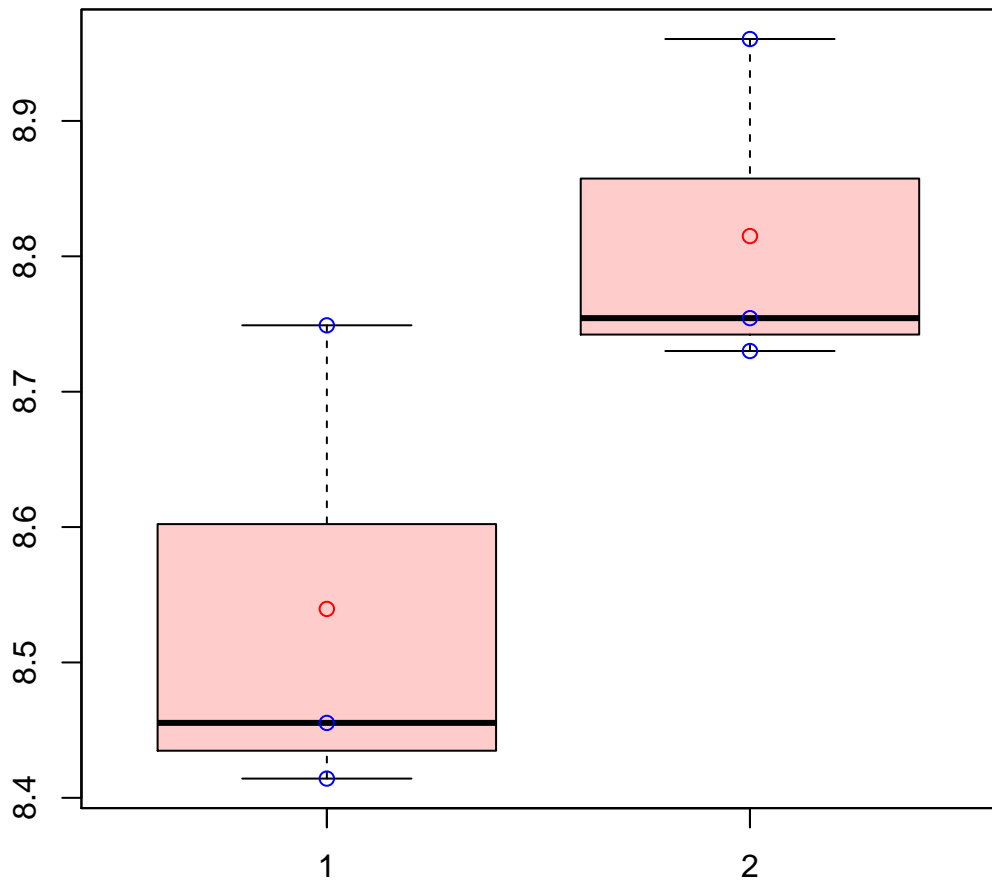

t-Test: p-value = 0.11

# C5WW09|C5WW09\_SORBI

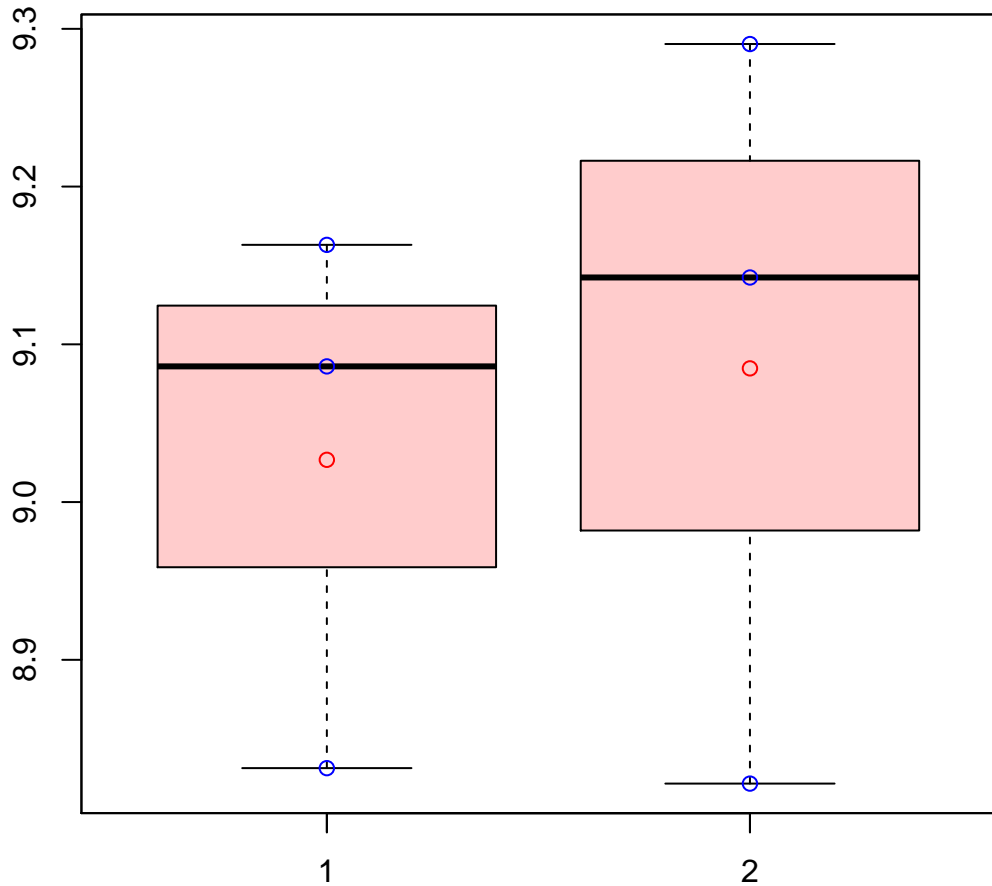

t-Test: p-value = 0.75



# C5WWD3|C5WWD3\_SORBI

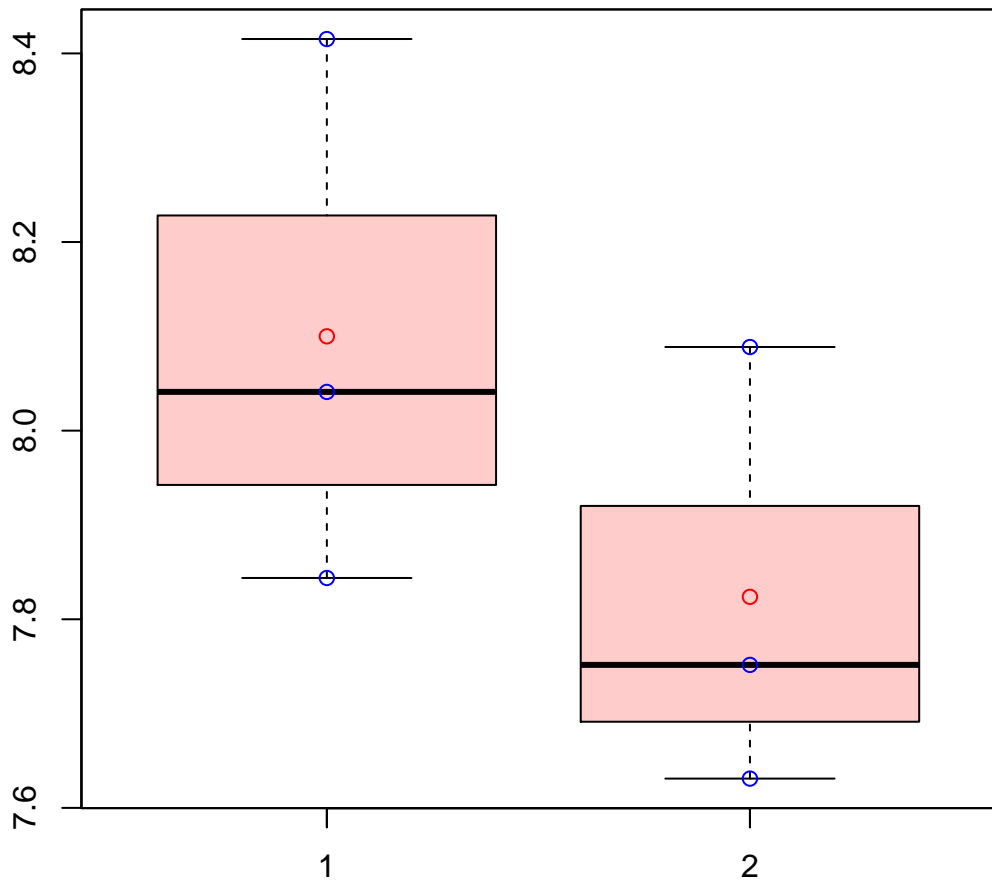

t-Test: p-value = 0.27

# C5WWE2|C5WWE2\_SORBI

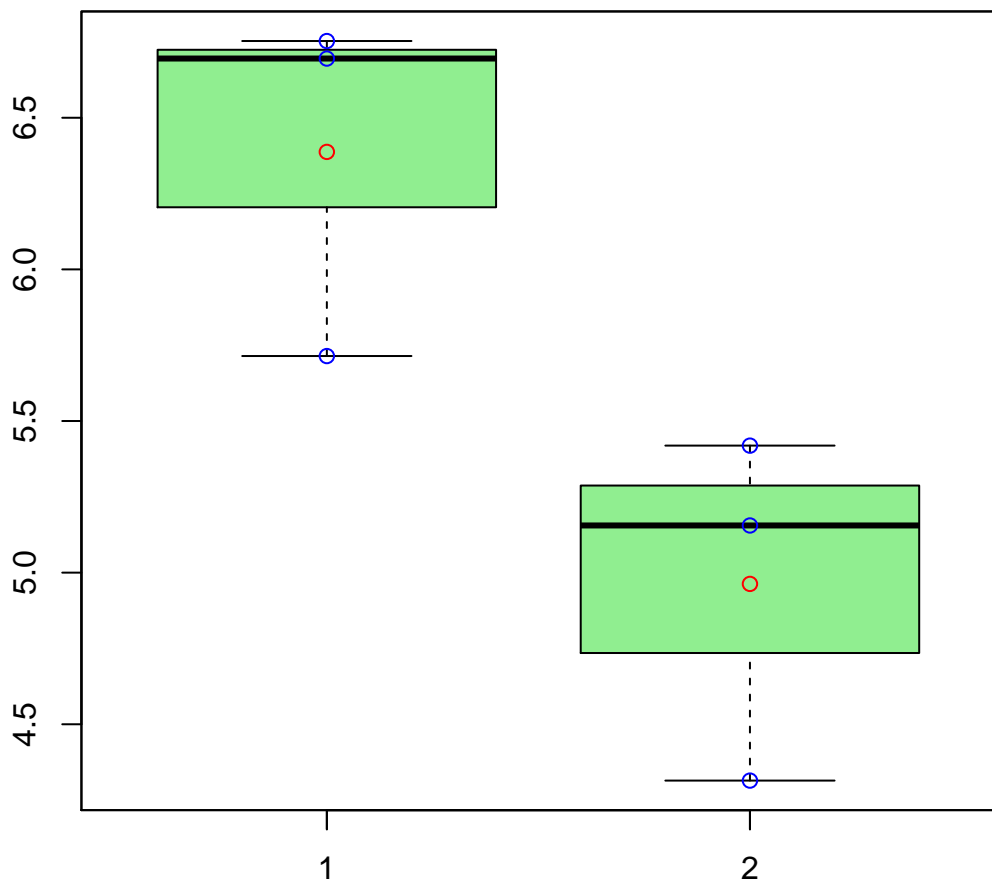

t-Test: p-value = 0.04

# C5WWS7|C5WWS7\_SORBI

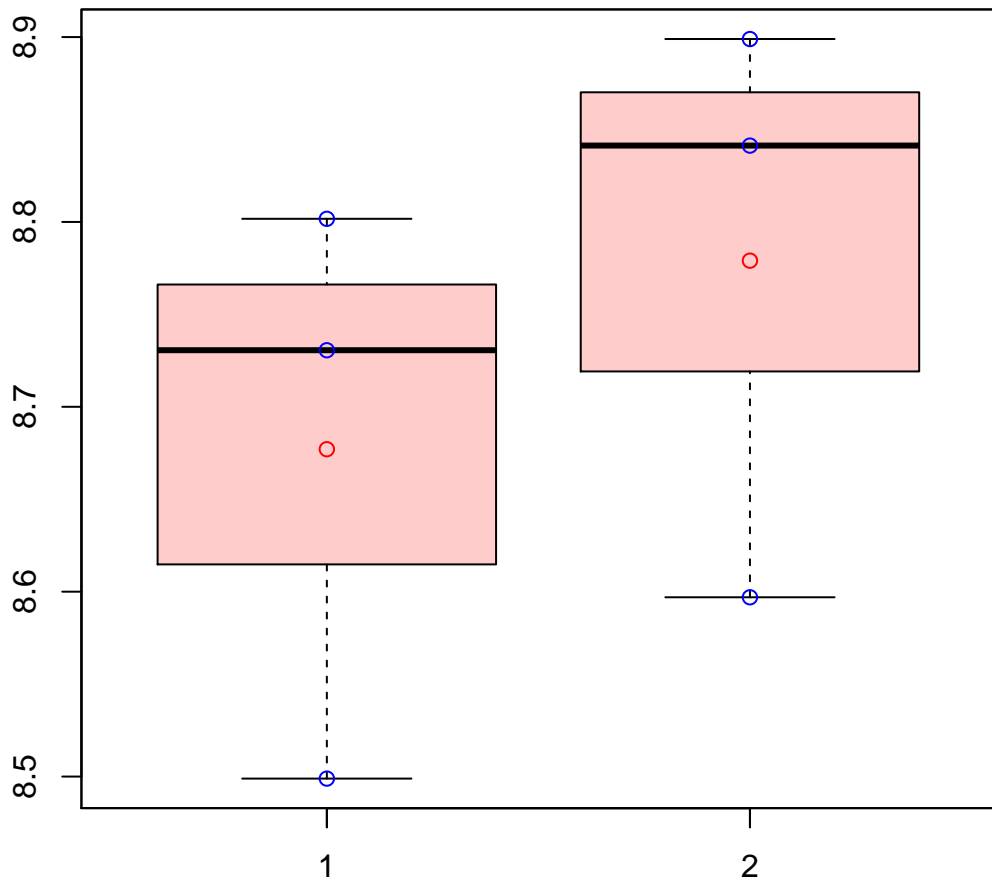

t-Test: p-value = 0.48

# C5WWT1|C5WWT1\_SORBI

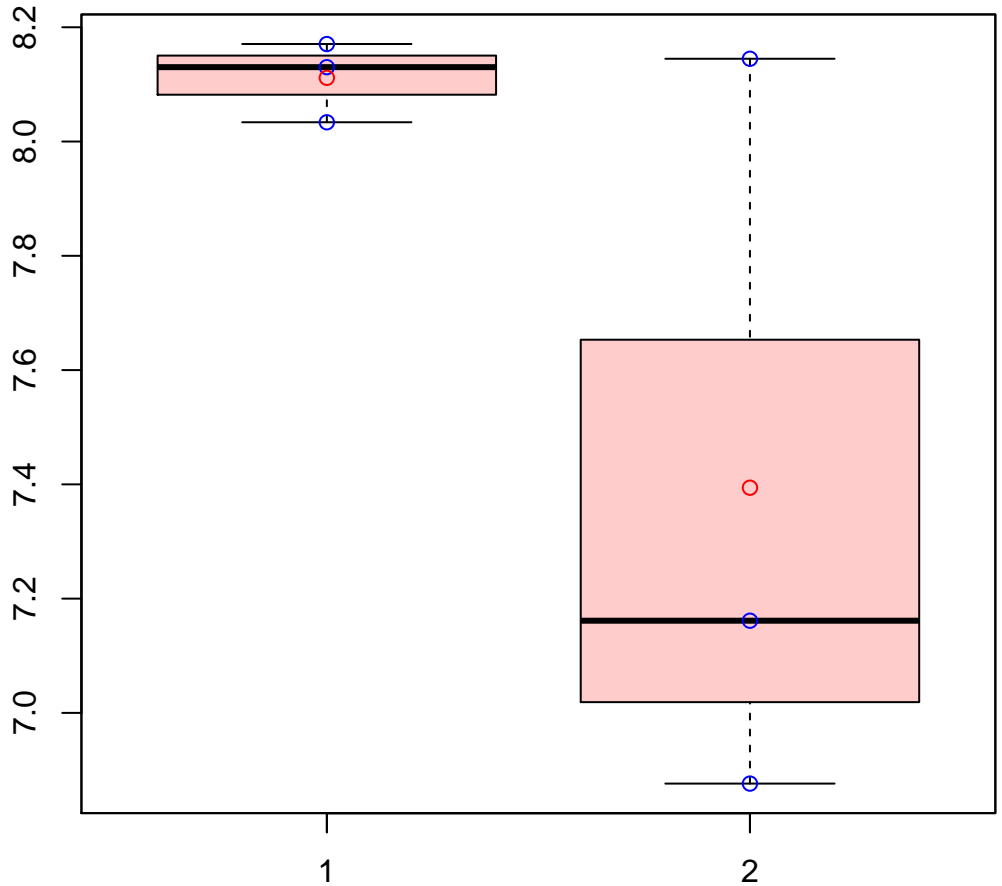

t-Test: p-value = 0.2

# C5WX74|C5WX74\_SORBI

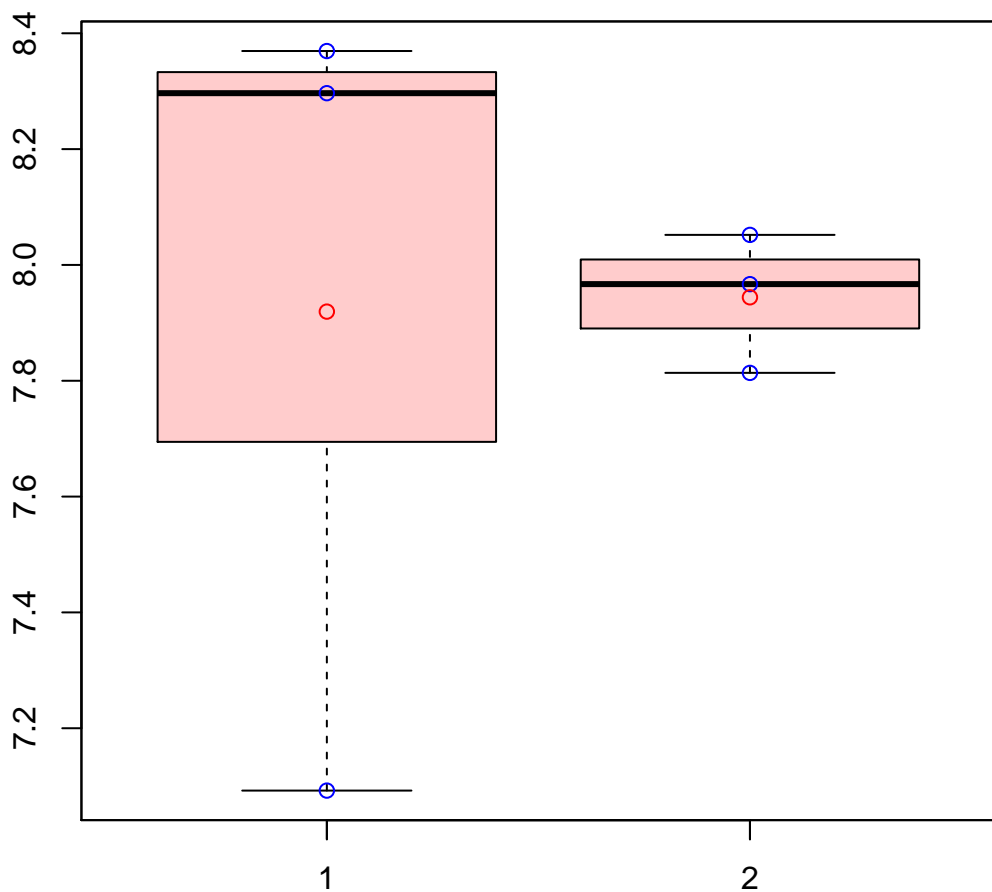

t-Test: p-value = 0.96

# C5WXD2|C5WXD2\_SORBI

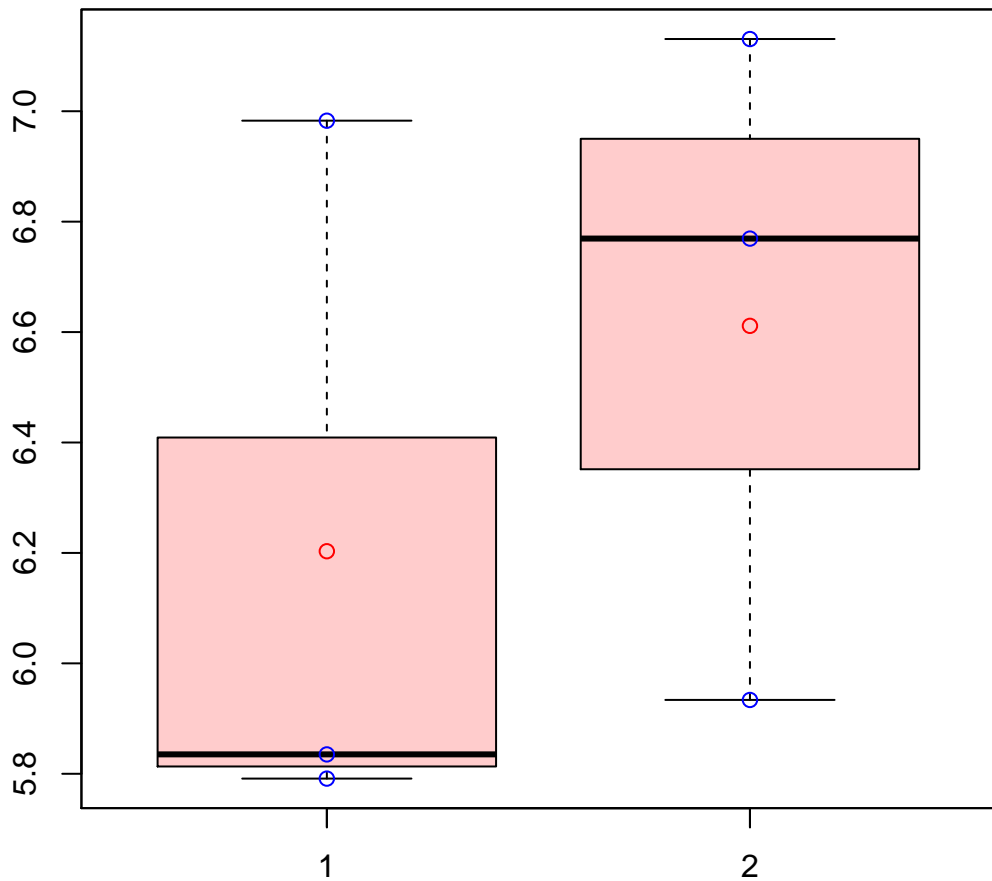

t-Test: p-value = 0.48

# C5WY19|C5WY19\_SORBI

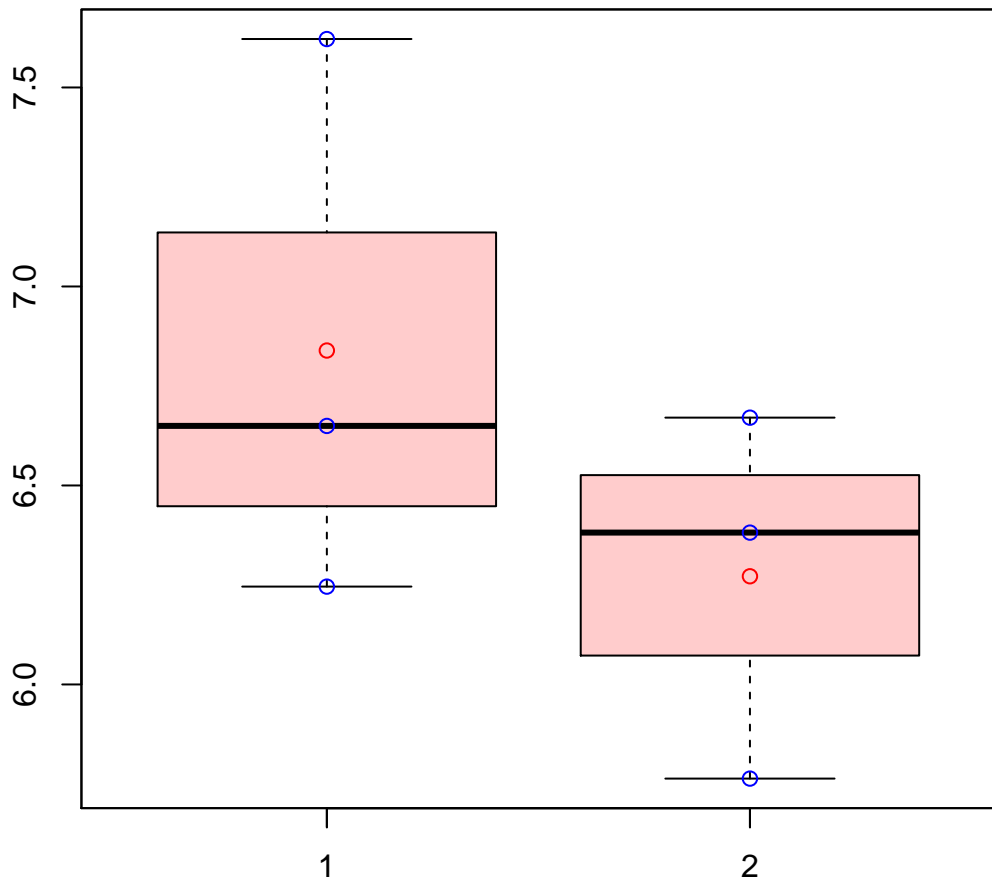

t-Test: p-value = 0.32

# C5WY64|C5WY64\_SORBI

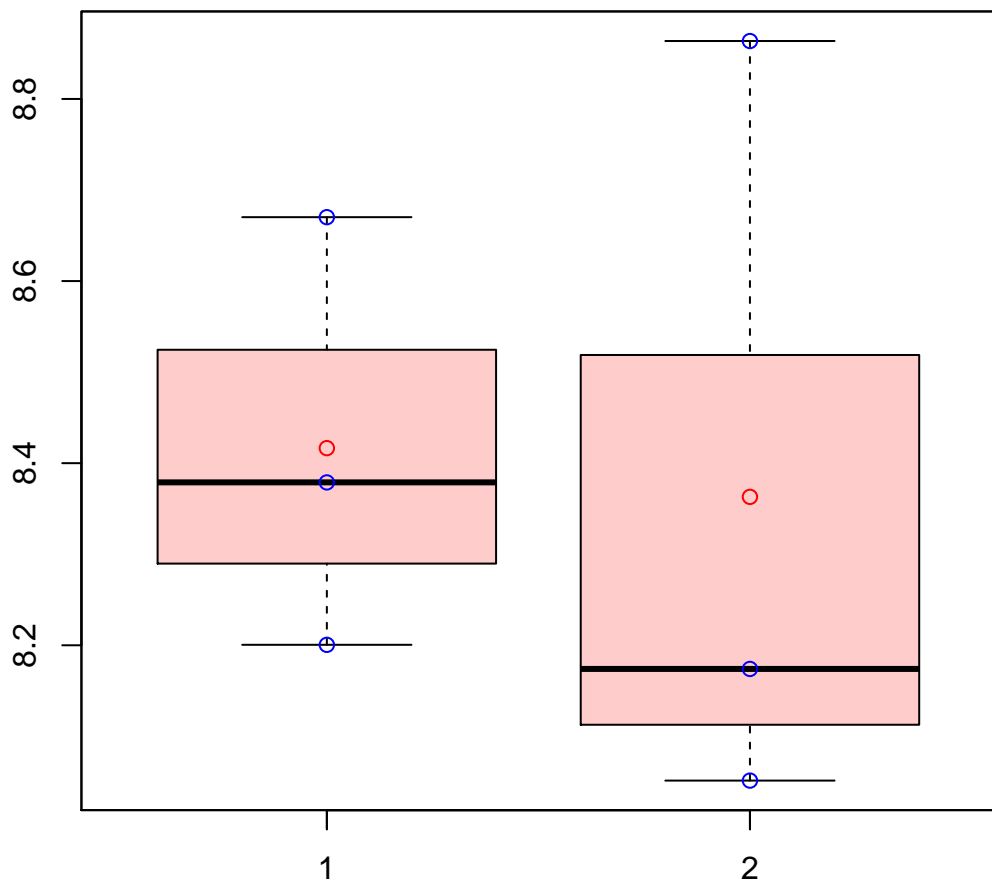

t-Test: p-value = 0.86



# C5WY71|C5WY71\_SORBI

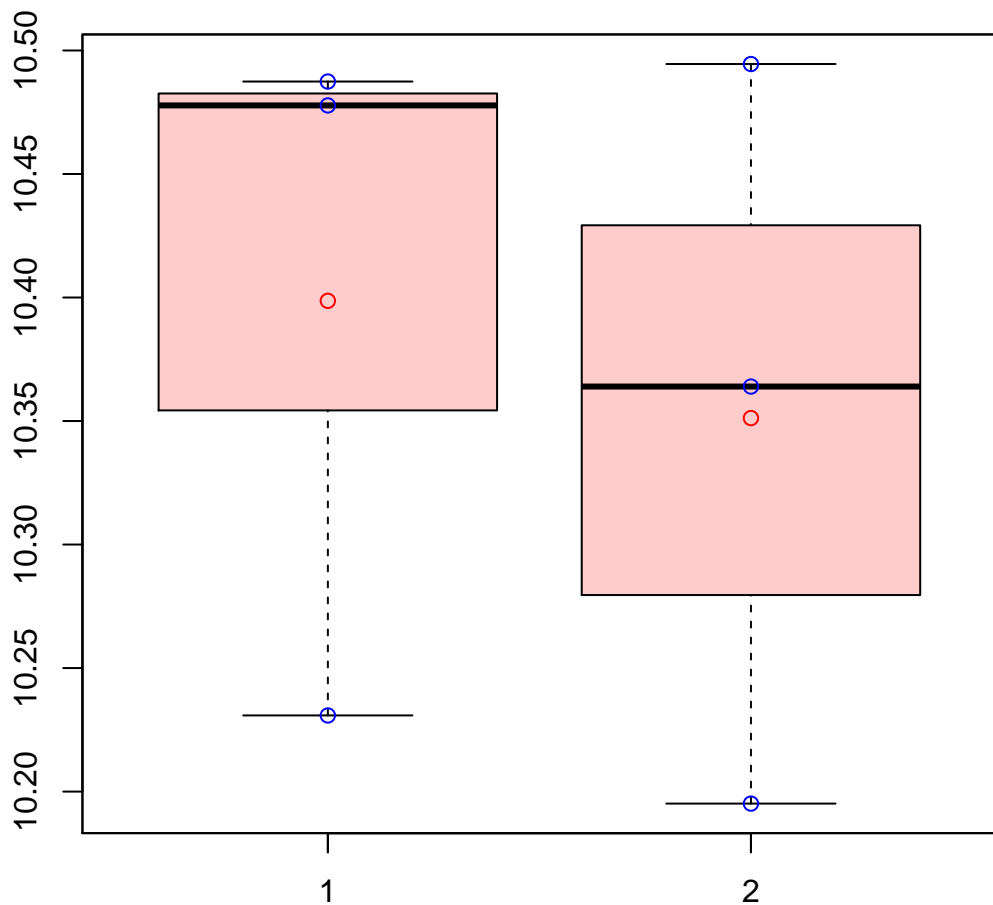

t-Test: p-value = 0.71

# C5WYF2|C5WYF2\_SORBI

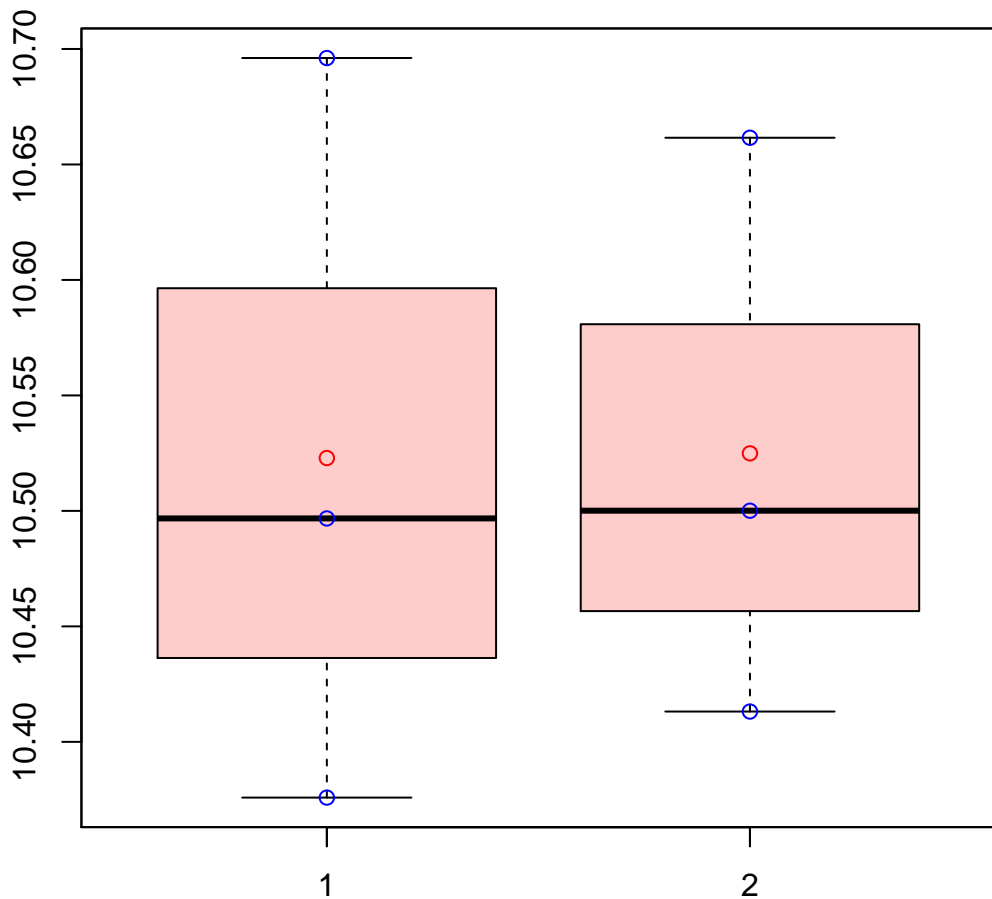

t-Test: p-value = 0.99

# C5WYF5|C5WYF5\_SORBI

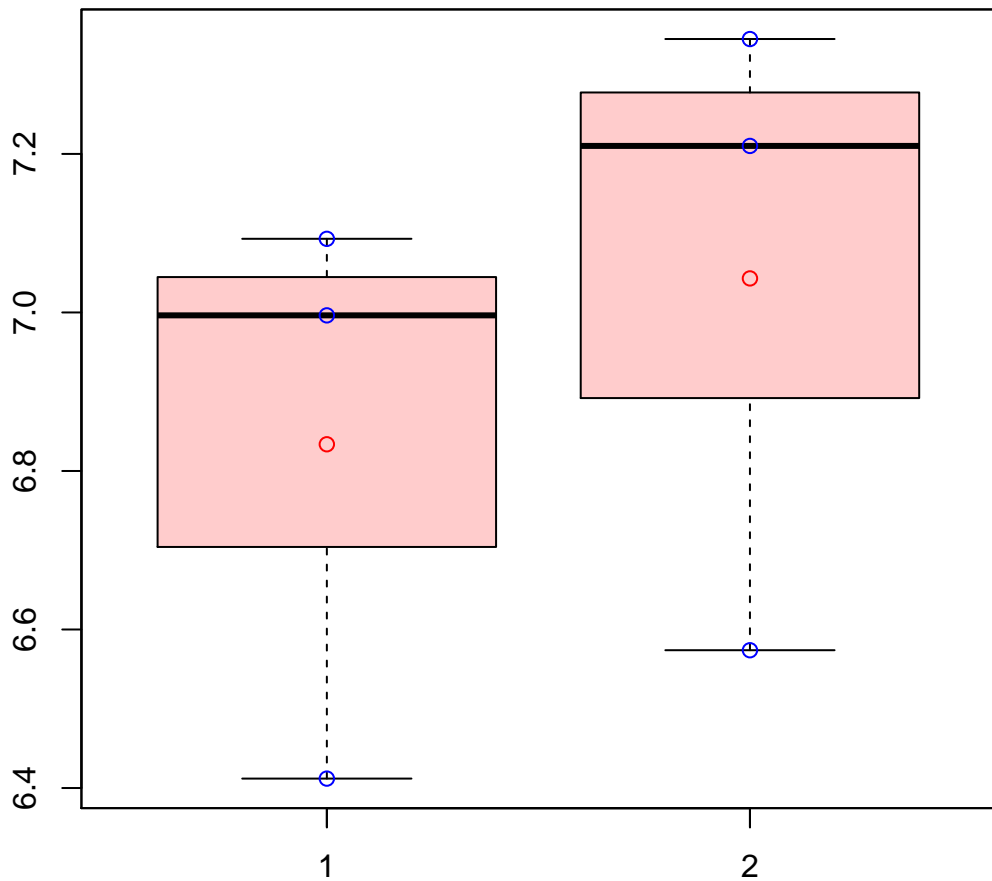

t-Test: p-value = 0.55

# C5WYH9|C5WYH9\_SORBI

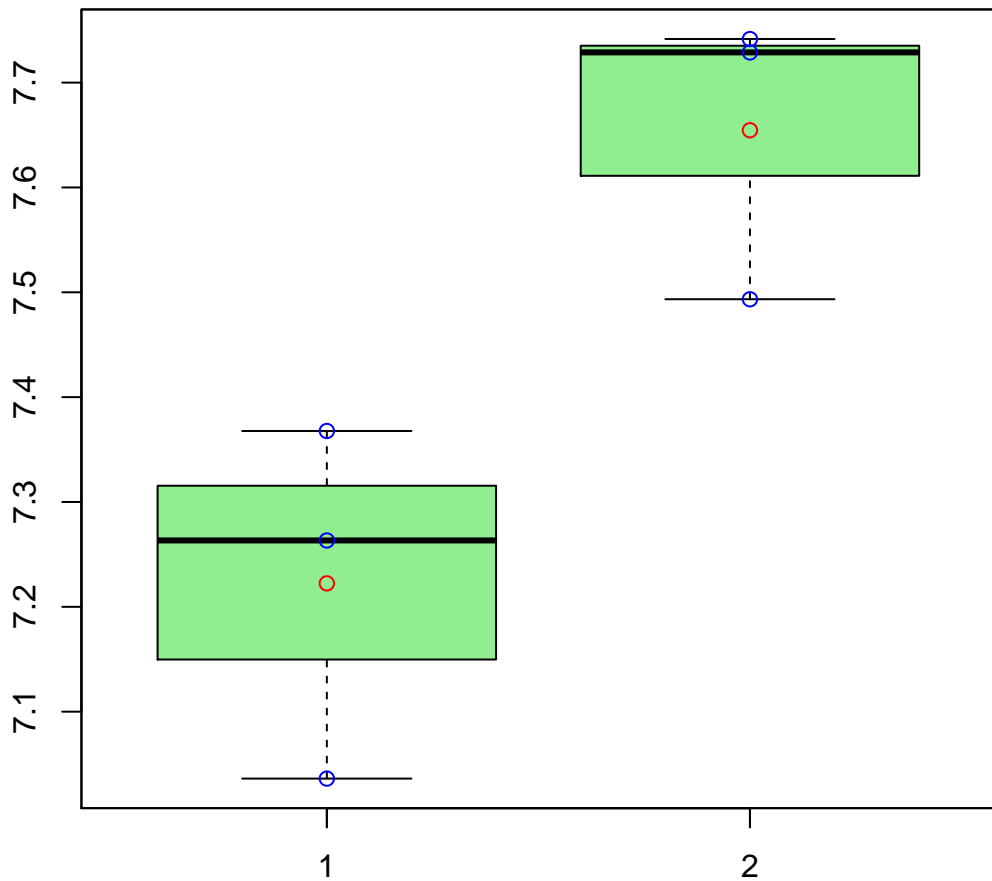

t-Test: p-value = 0.03

# C5WYU4|C5WYU4\_SORBI

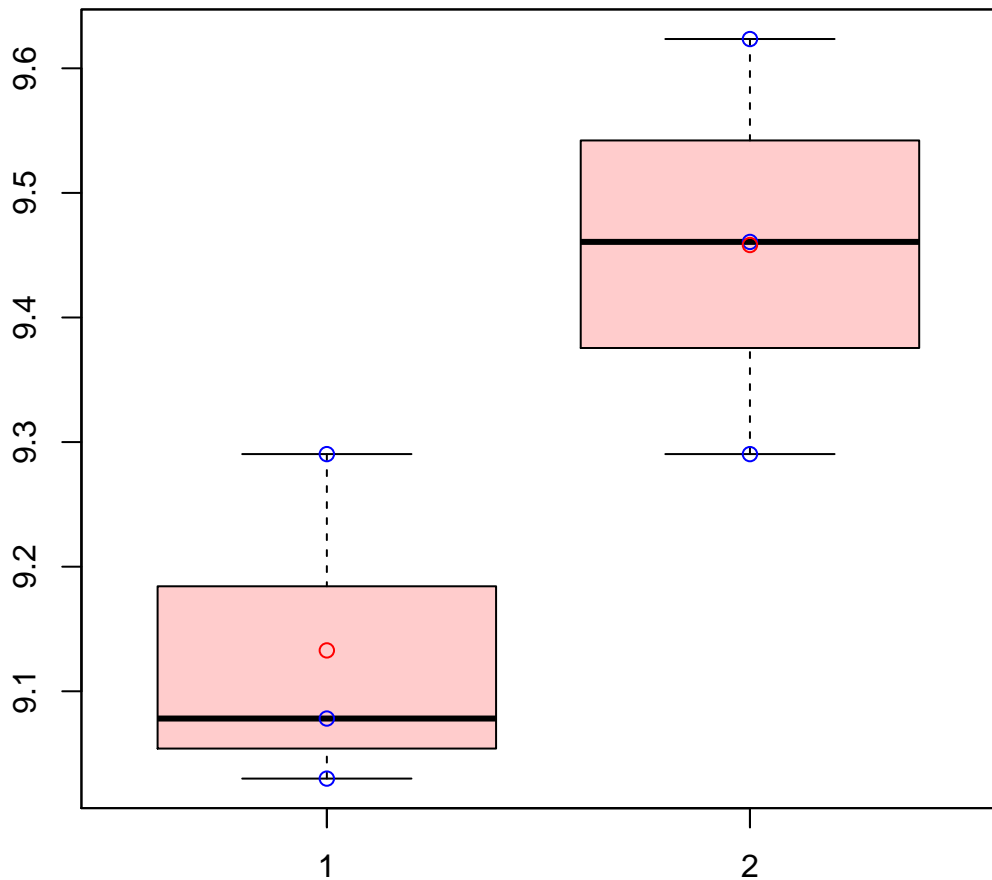

t-Test: p-value = 0.06

# C5WZ22|C5WZ22\_SORBI

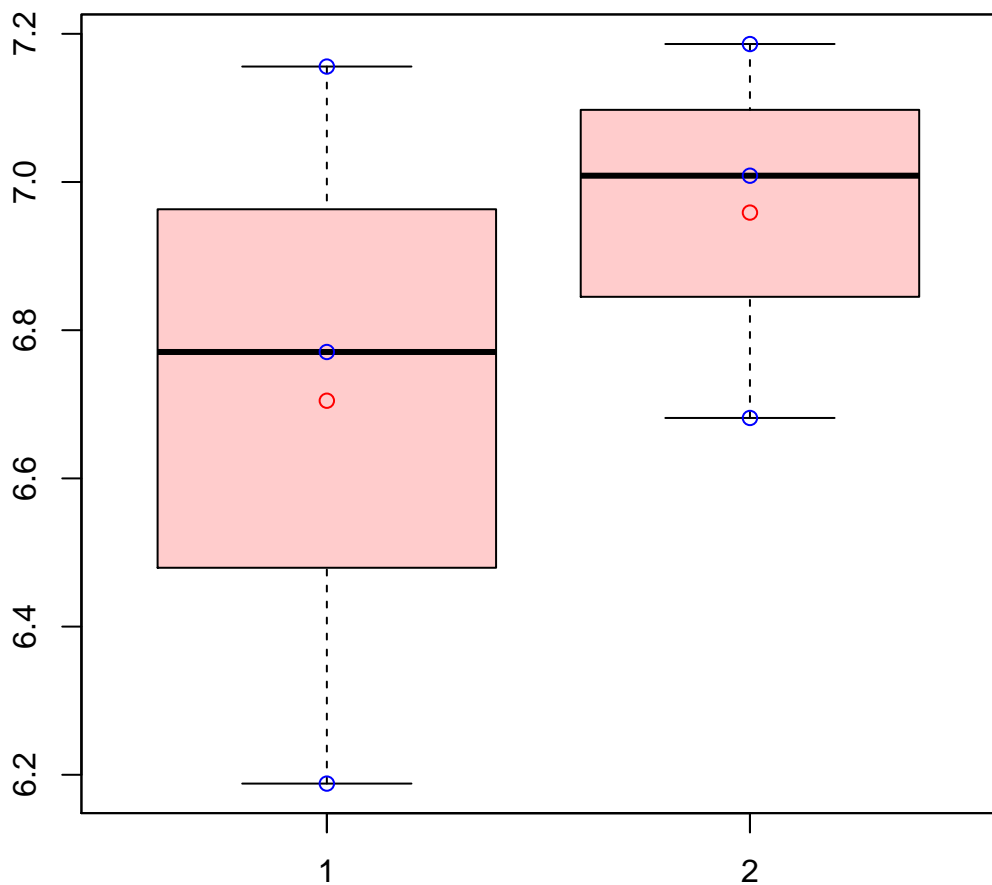

t-Test: p-value = 0.48

# C5WZ45|C5WZ45\_SORBI

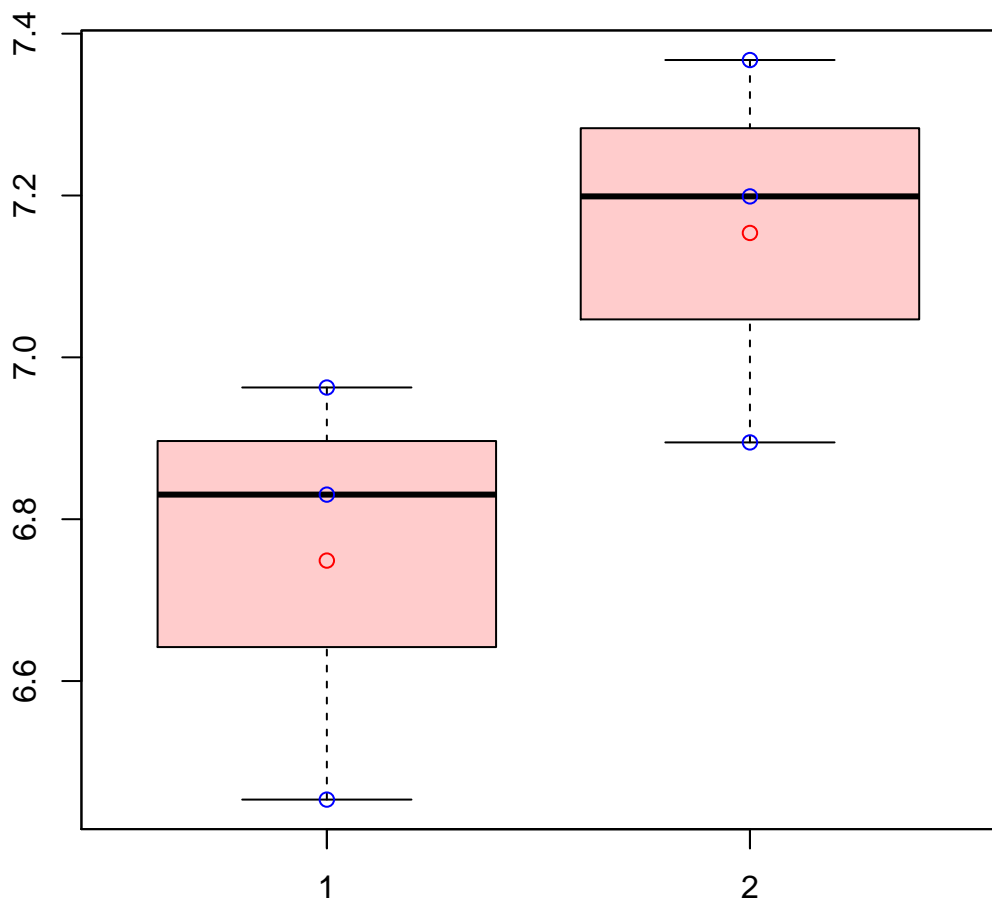

t-Test: p-value = 0.12

# C5WZ62|C5WZ62\_SORBI

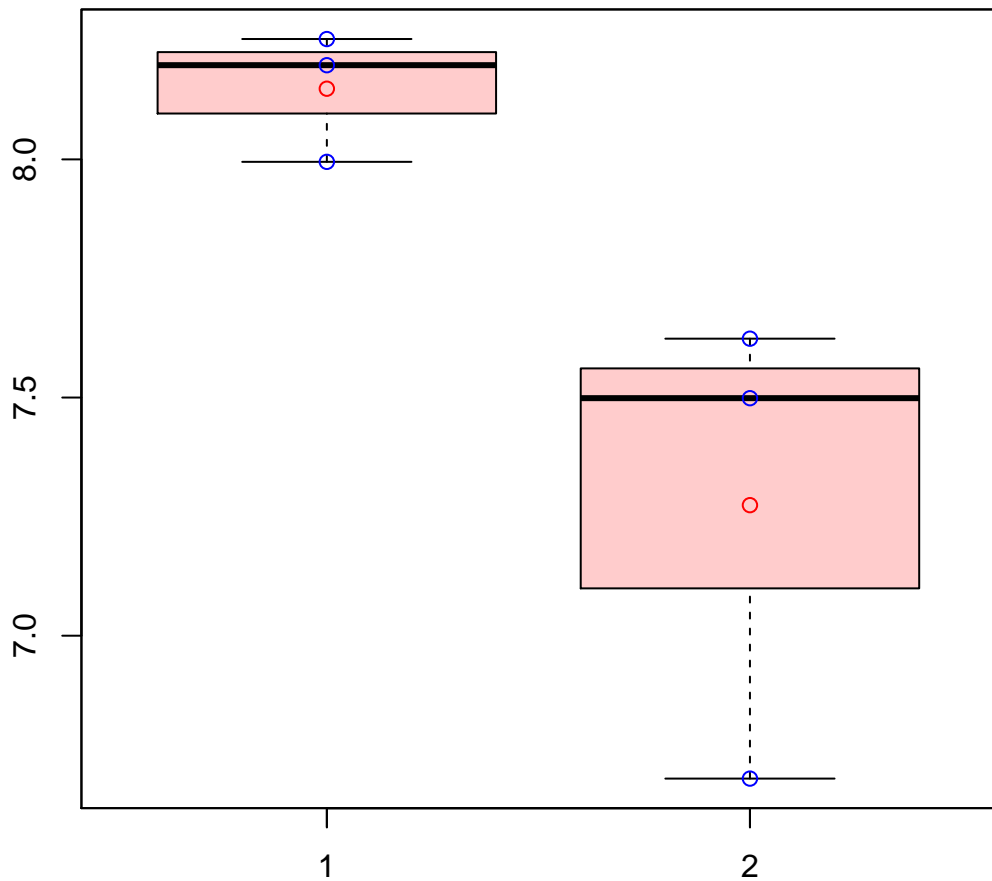

t-Test: p-value = 0.09



# C5WZF8|C5WZF8\_SORBI

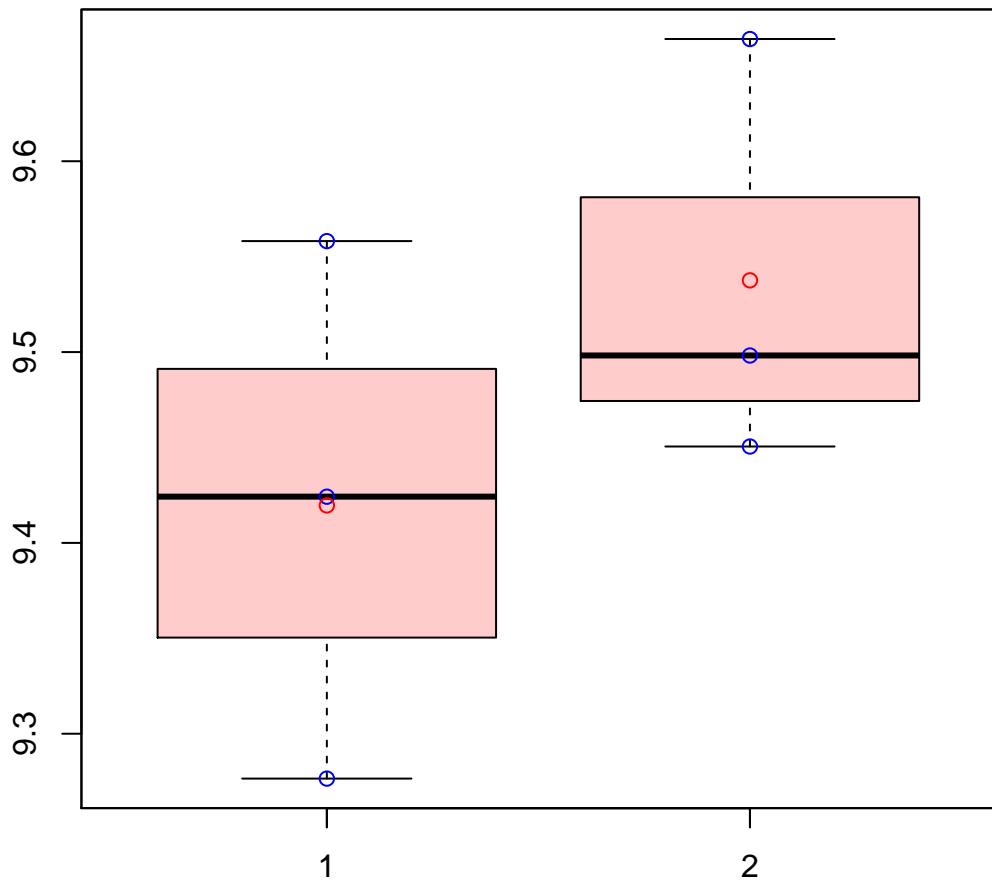

t-Test: p-value = 0.32

# C5WZT7|C5WZT7\_SORBI

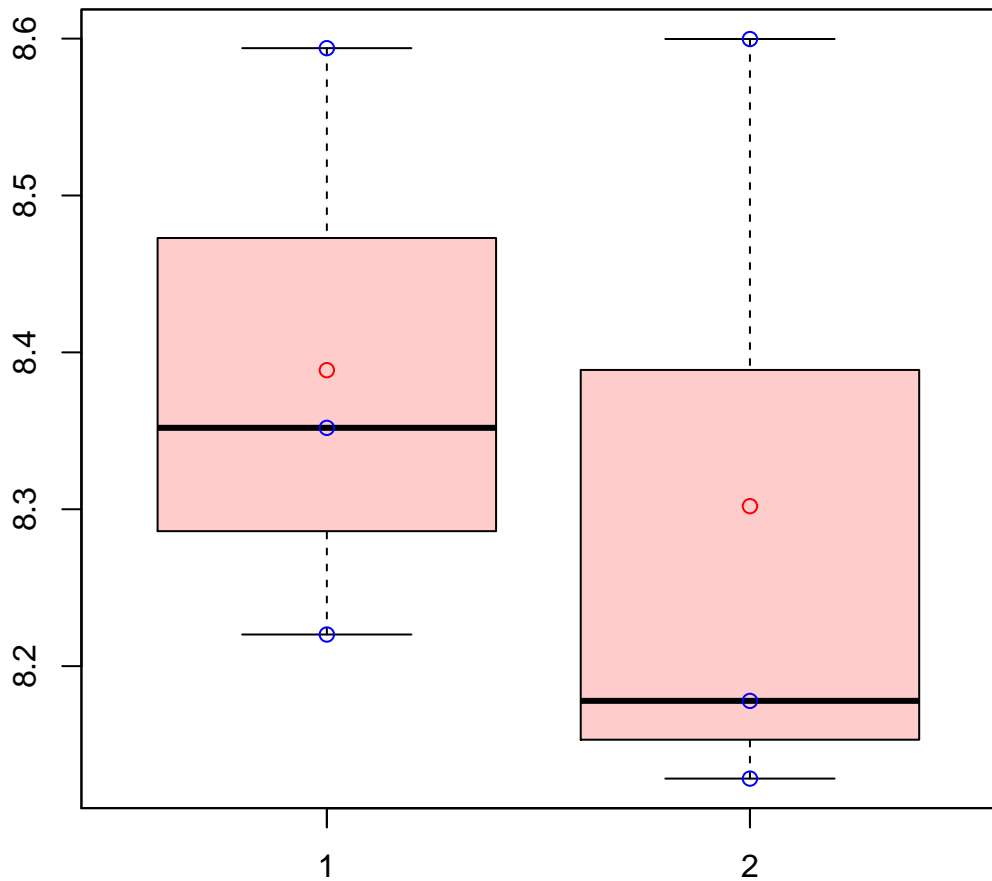

t-Test: p-value = 0.67

# C5WZW1|C5WZW1\_SORBI

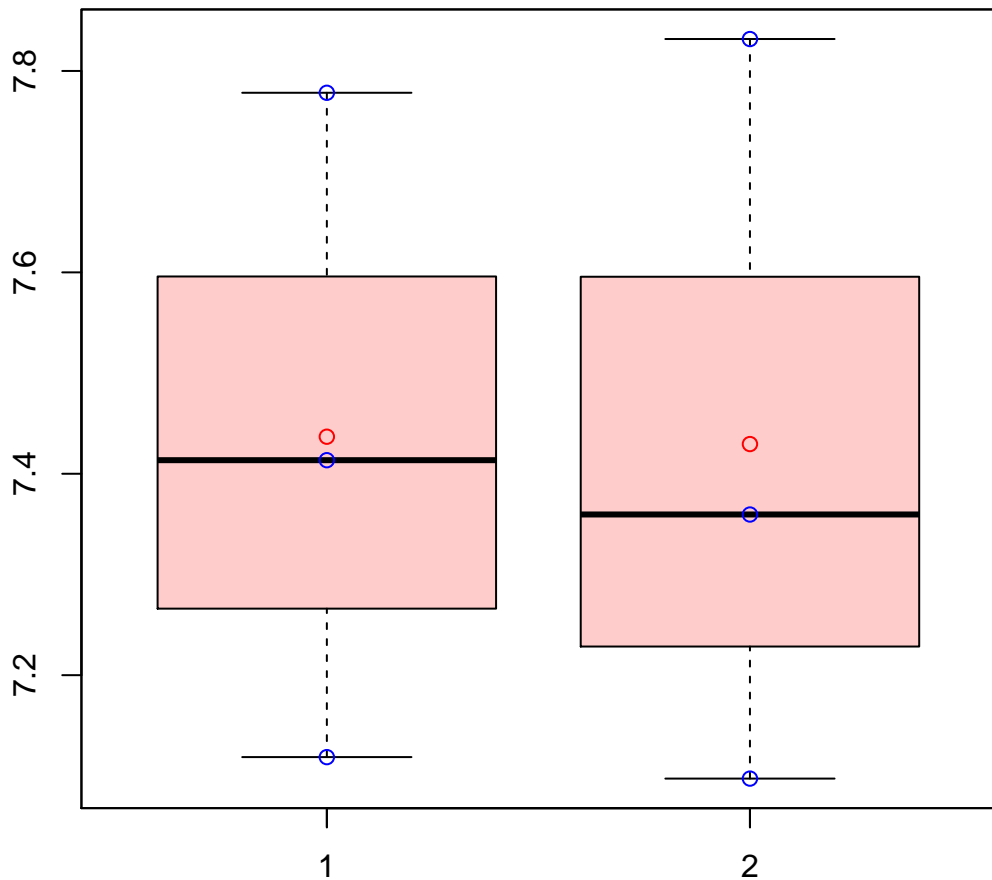

t-Test: p-value = 0.98

# C5X0W2|C5X0W2\_SORBI

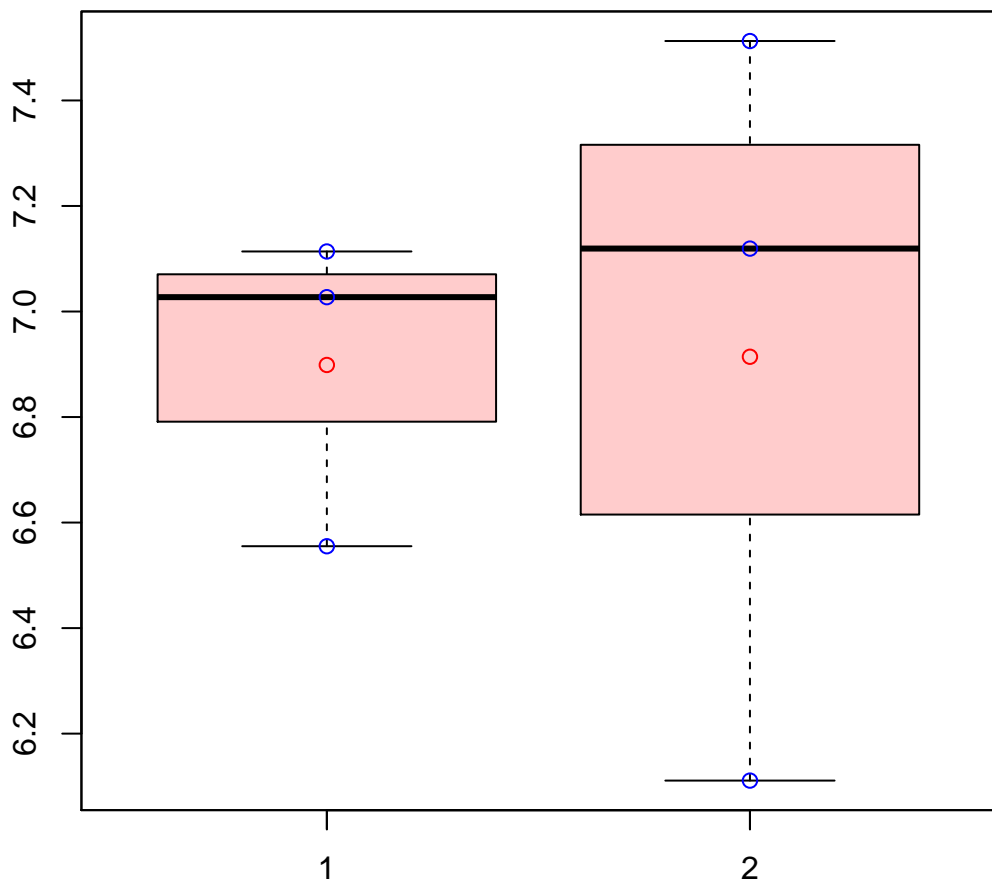

t-Test: p-value = 0.97

# C5X143|C5X143\_SORBI

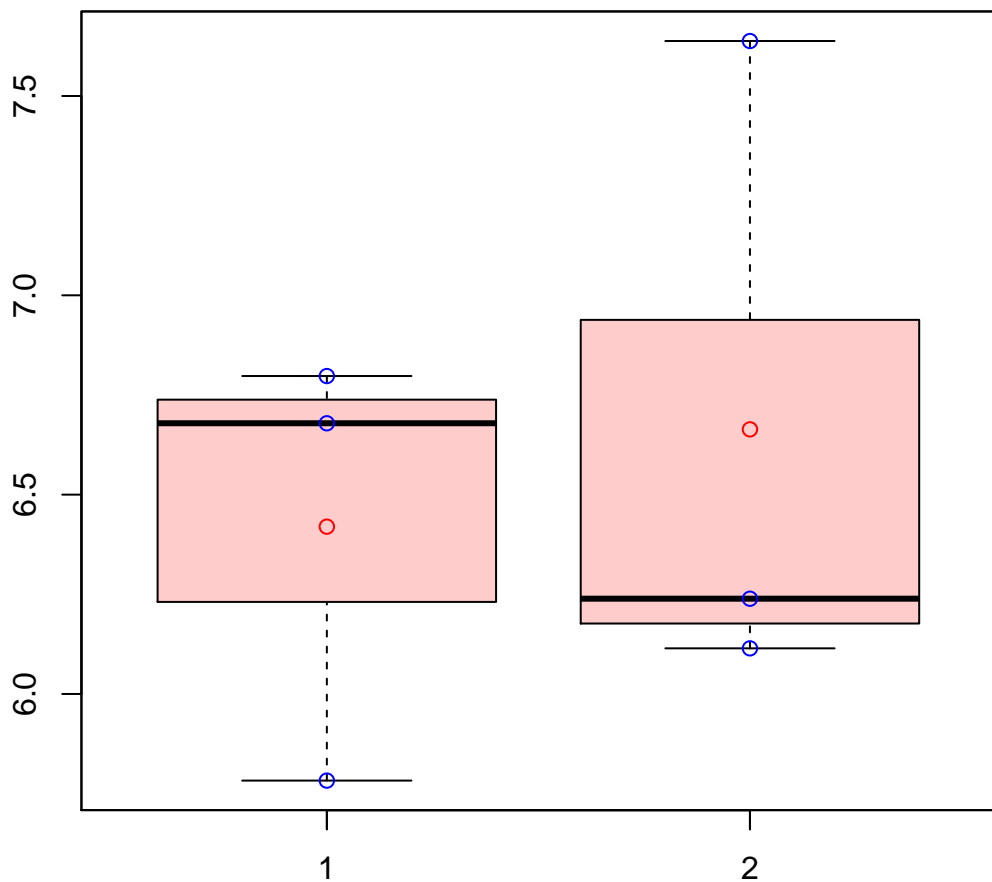

t-Test: p-value = 0.7

# C5X183|C5X183\_SORBI

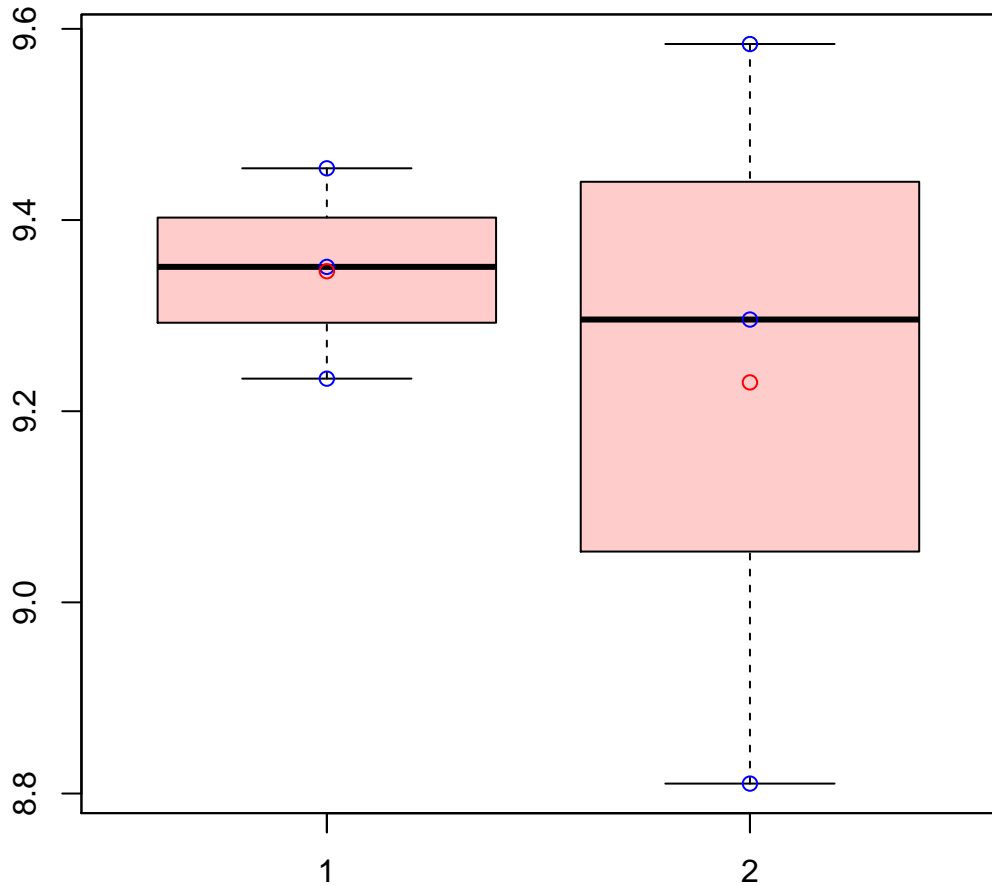

t-Test: p-value = 0.66

# C5X1Q1|C5X1Q1\_SORBI

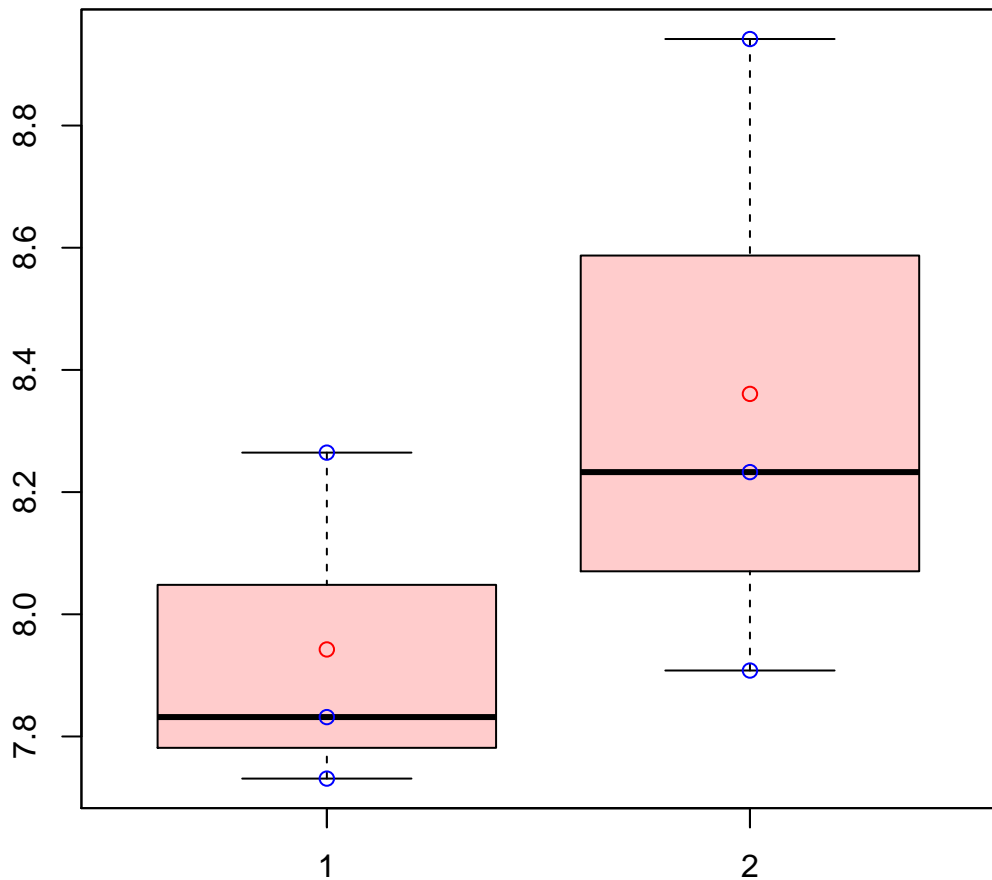

t-Test: p-value = 0.31

# C5X1Q6|C5X1Q6\_SORBI

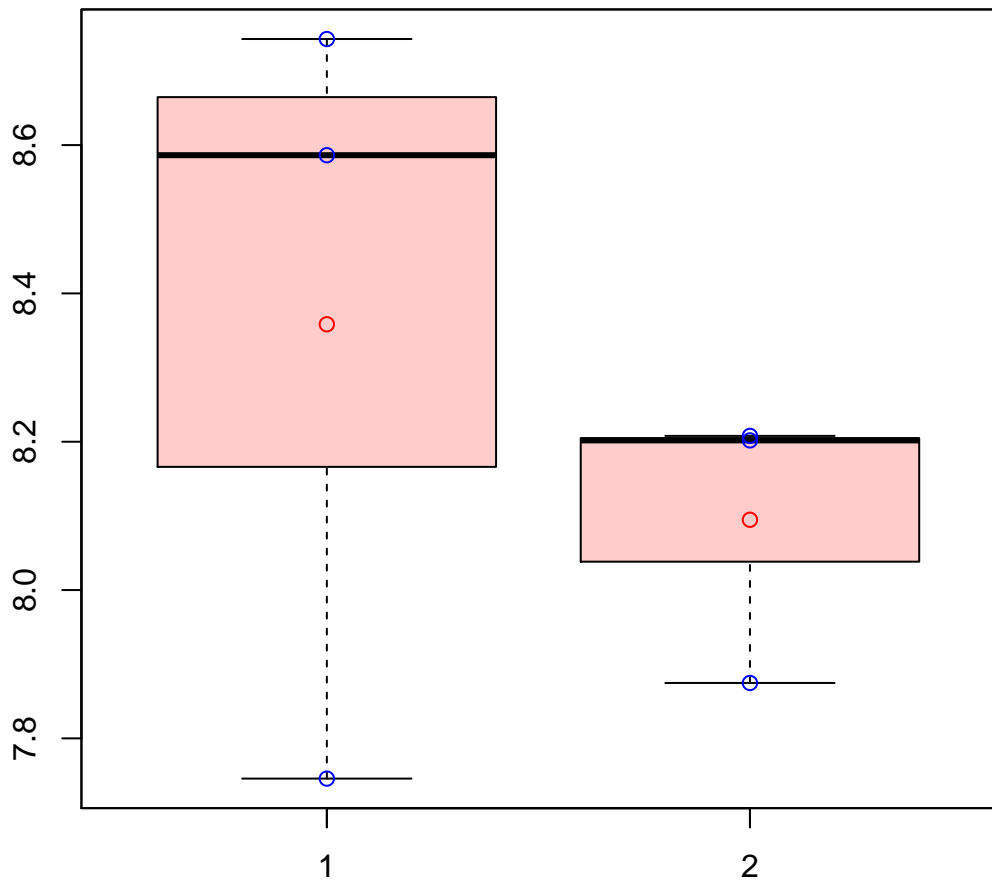

t-Test: p-value = 0.49



# C5X1R1|C5X1R1\_SORBI

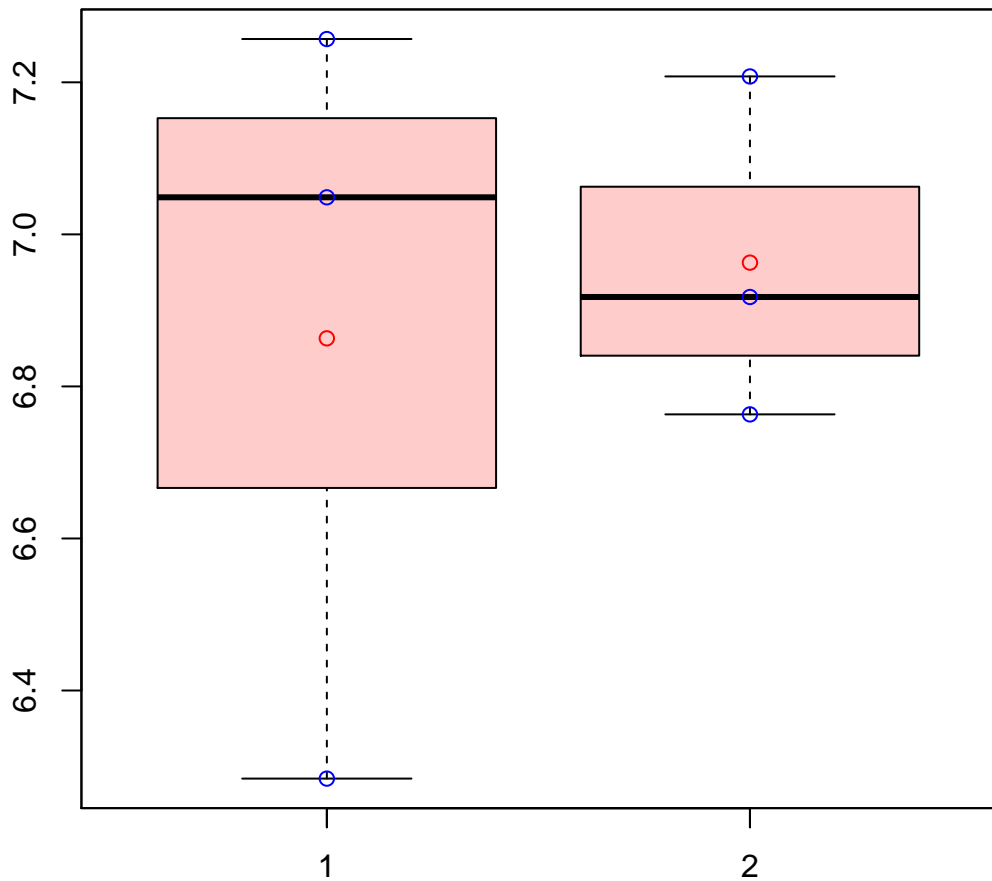

t-Test: p-value = 0.78

# C5X2E3|C5X2E3\_SORBI

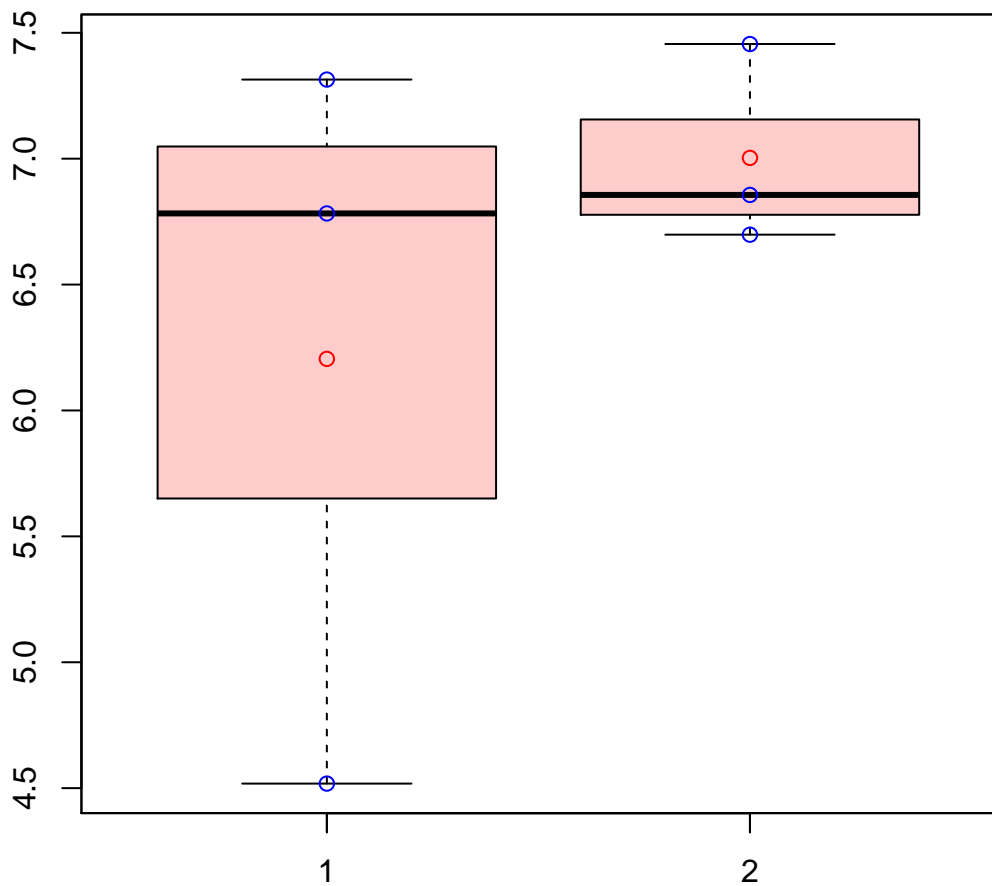

t-Test: p-value = 0.45

# C5X2G7|C5X2G7\_SORBI

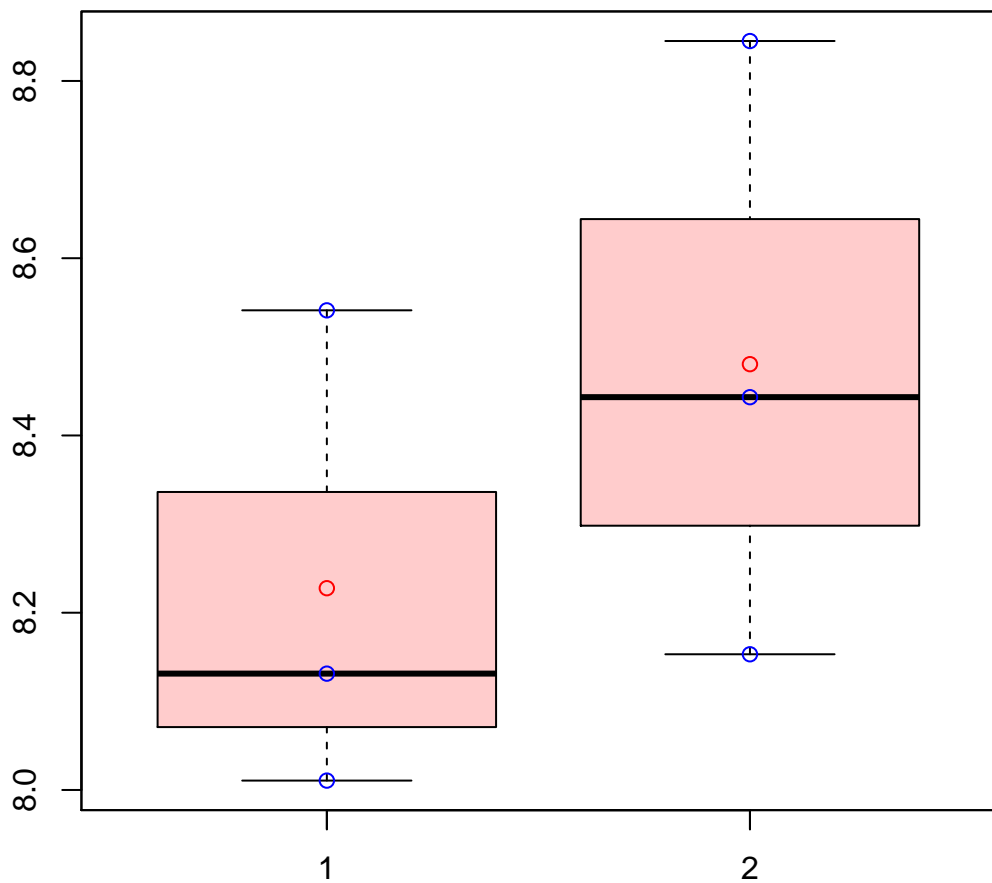

t-Test: p-value = 0.38

# C5X3W1|C5X3W1\_SORBI

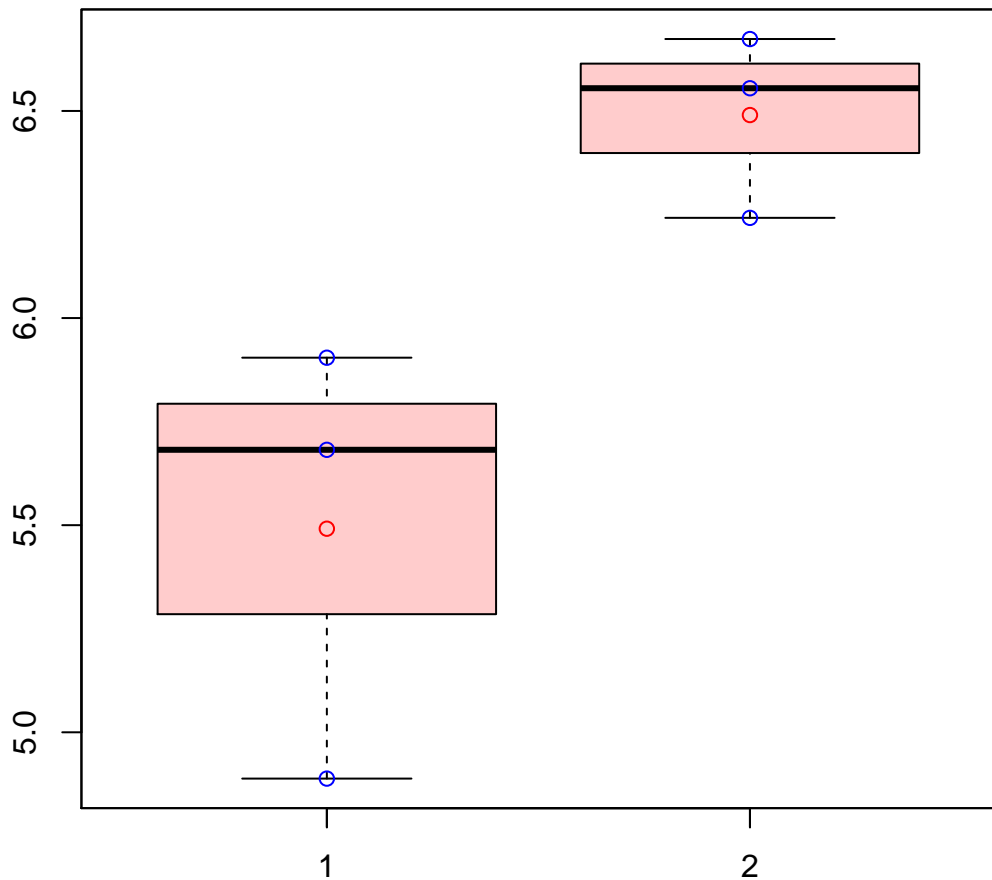

t-Test: p-value = 0.07

# C5X3Y6|C5X3Y6\_SORBI

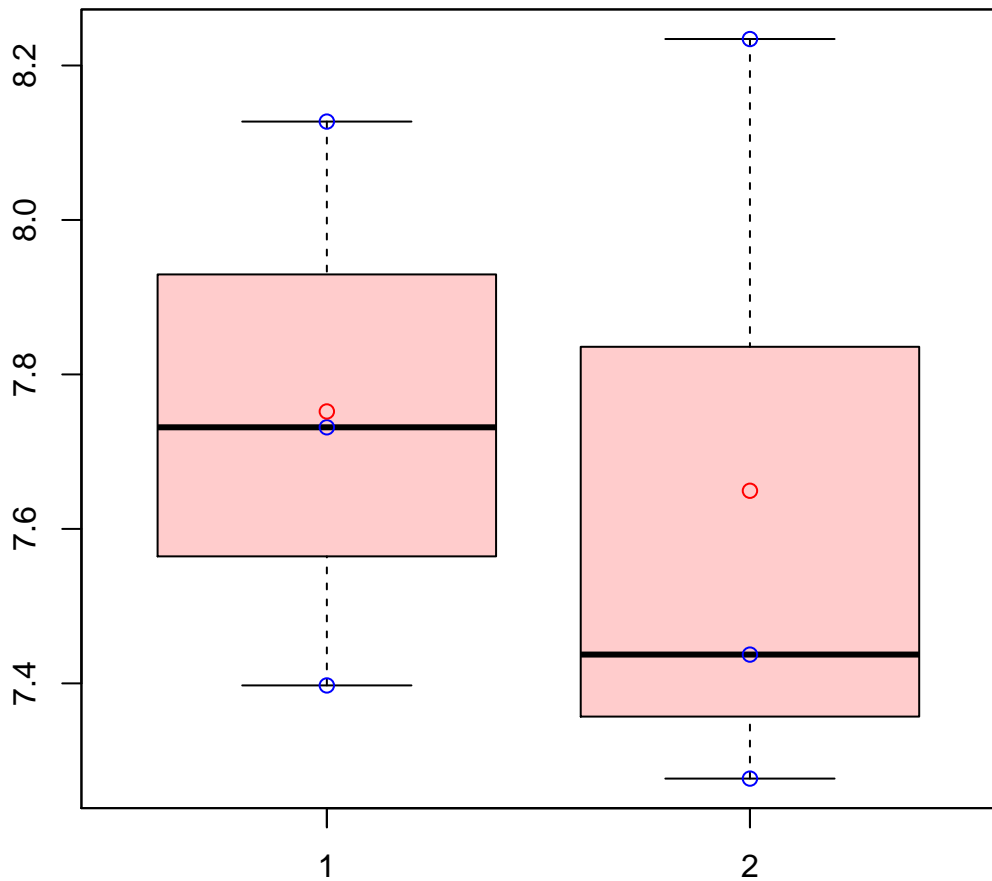

t-Test: p-value = 0.79

# C5X3Z0|C5X3Z0\_SORBI

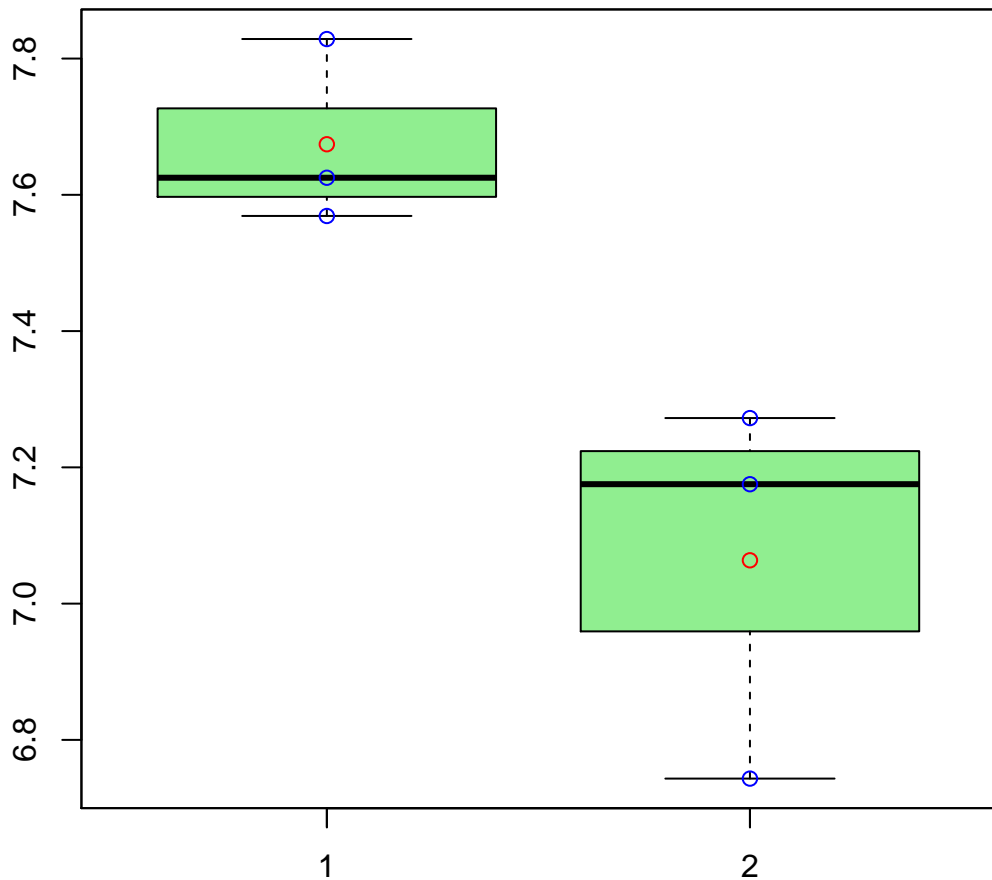

t-Test: p-value = 0.05

# C5X4S0|C5X4S0\_SORBI

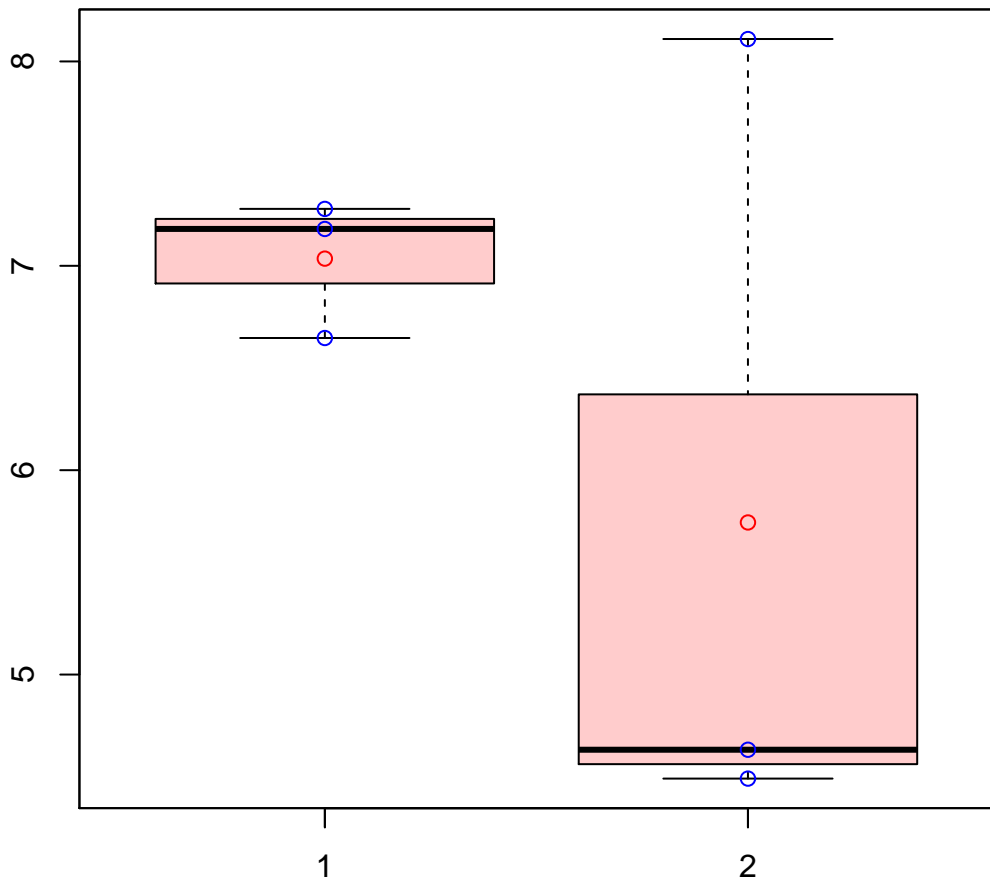

t-Test: p-value = 0.39

# C5X4S1|C5X4S1\_SORBI

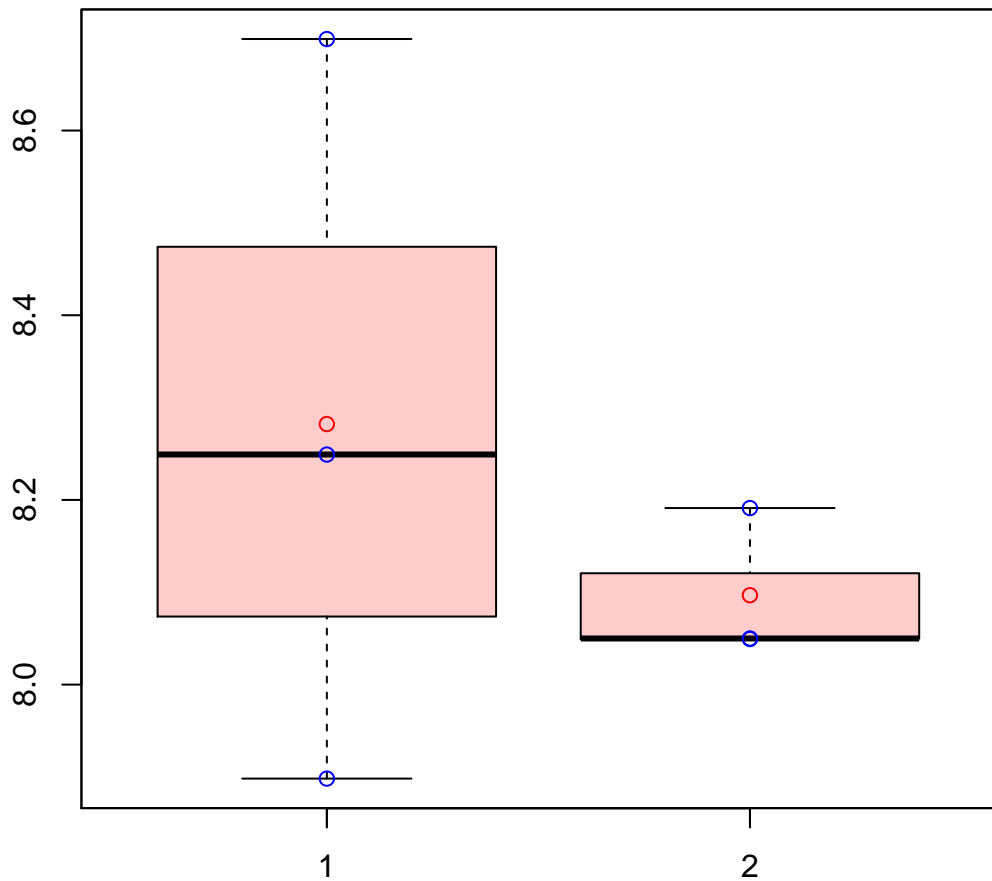

t-Test: p-value = 0.51



# C5X4S3|C5X4S3\_SORBI

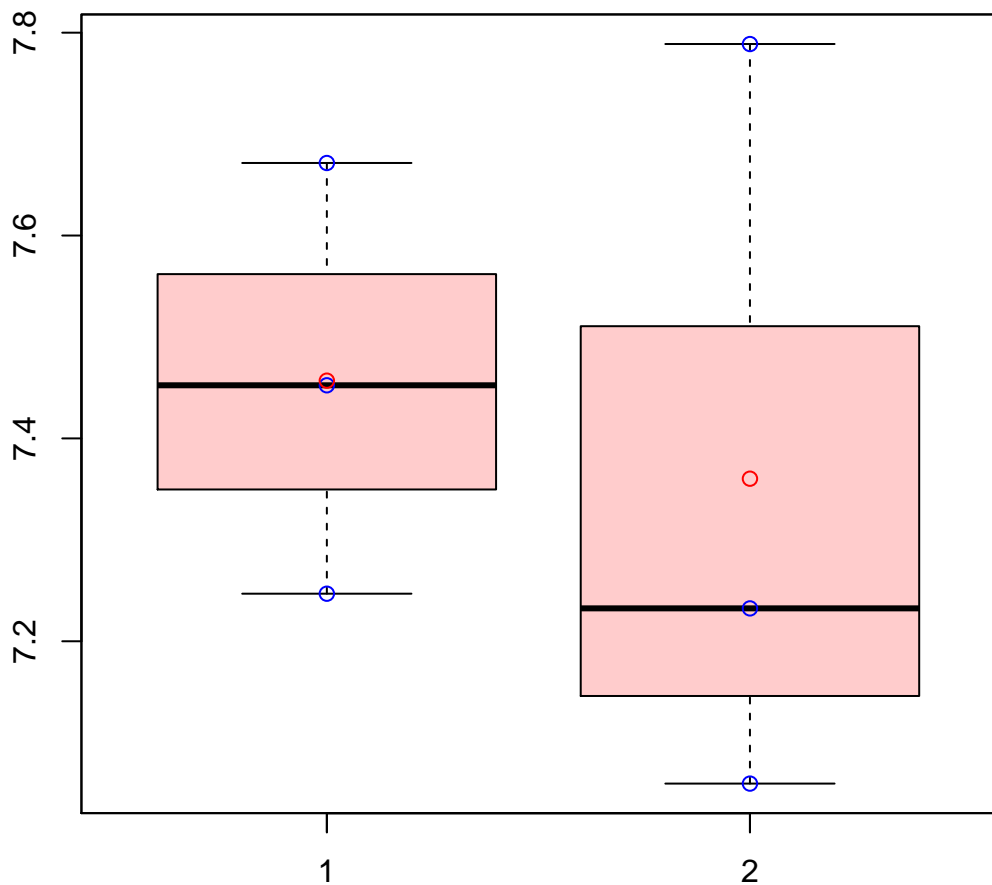

t-Test: p-value = 0.73

# C5X5E2|C5X5E2\_SORBI

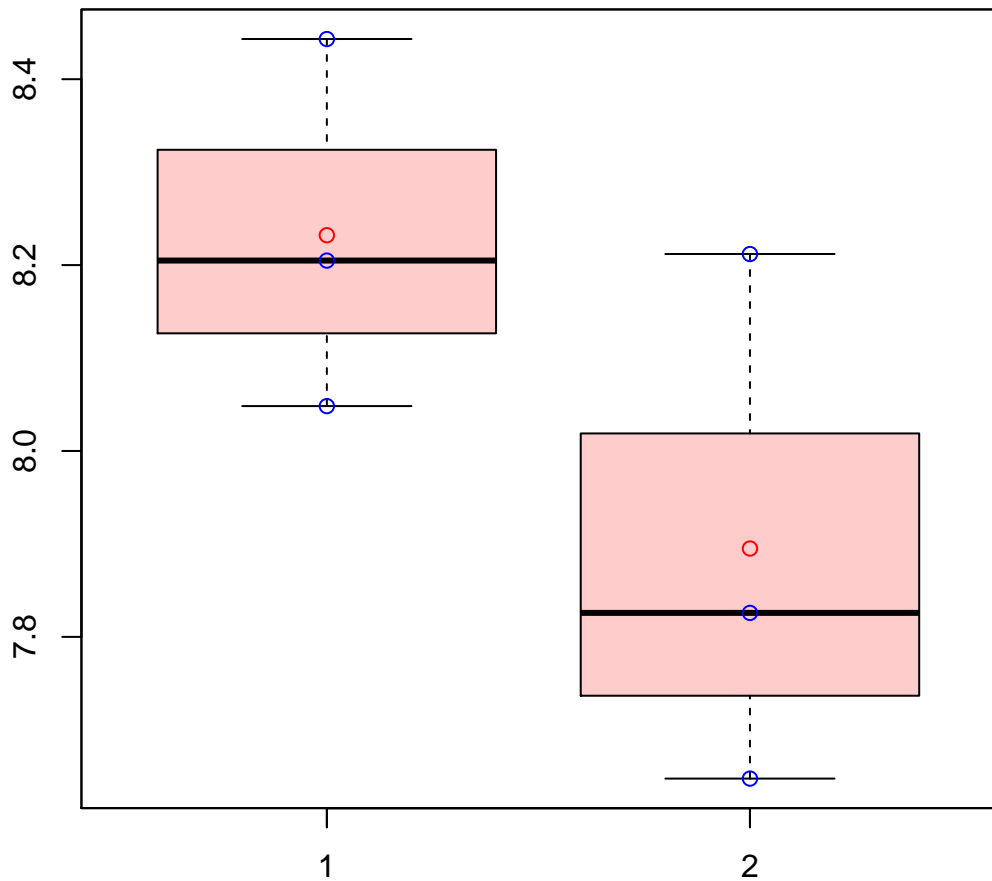

t-Test: p-value = 0.18

# C5X5U3|C5X5U3\_SORBI

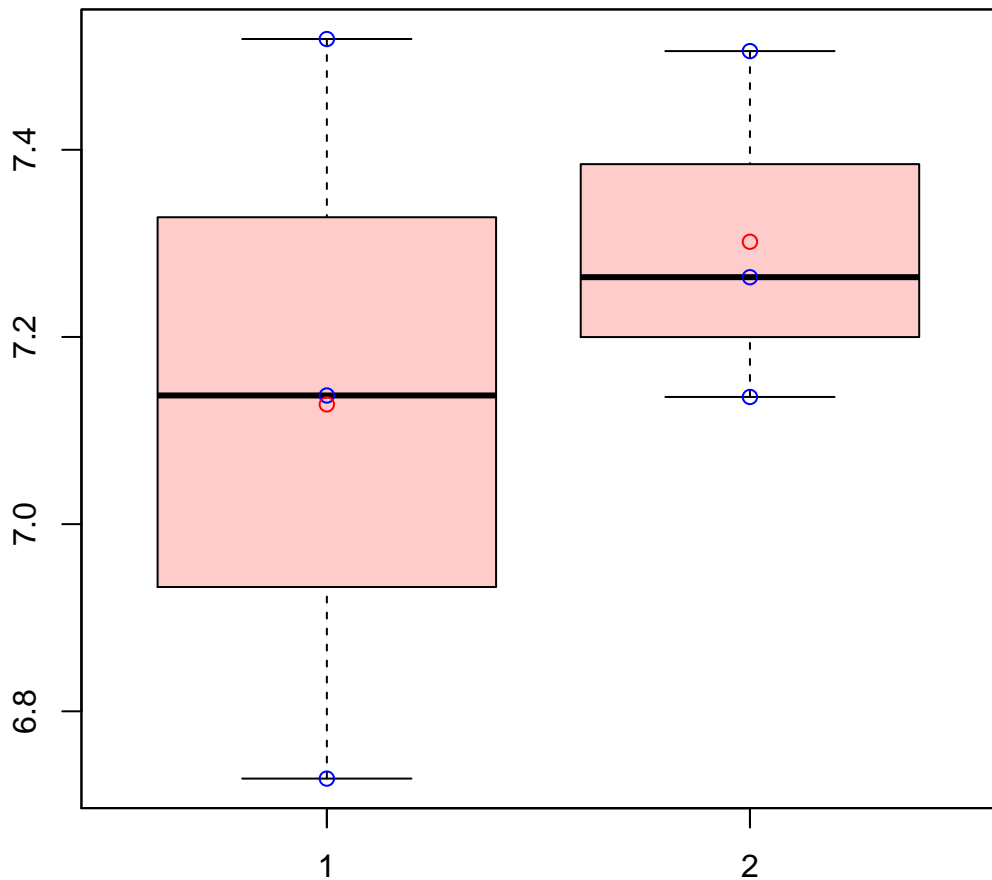

t-Test: p-value = 0.54

# C5X6G9|C5X6G9\_SORBI

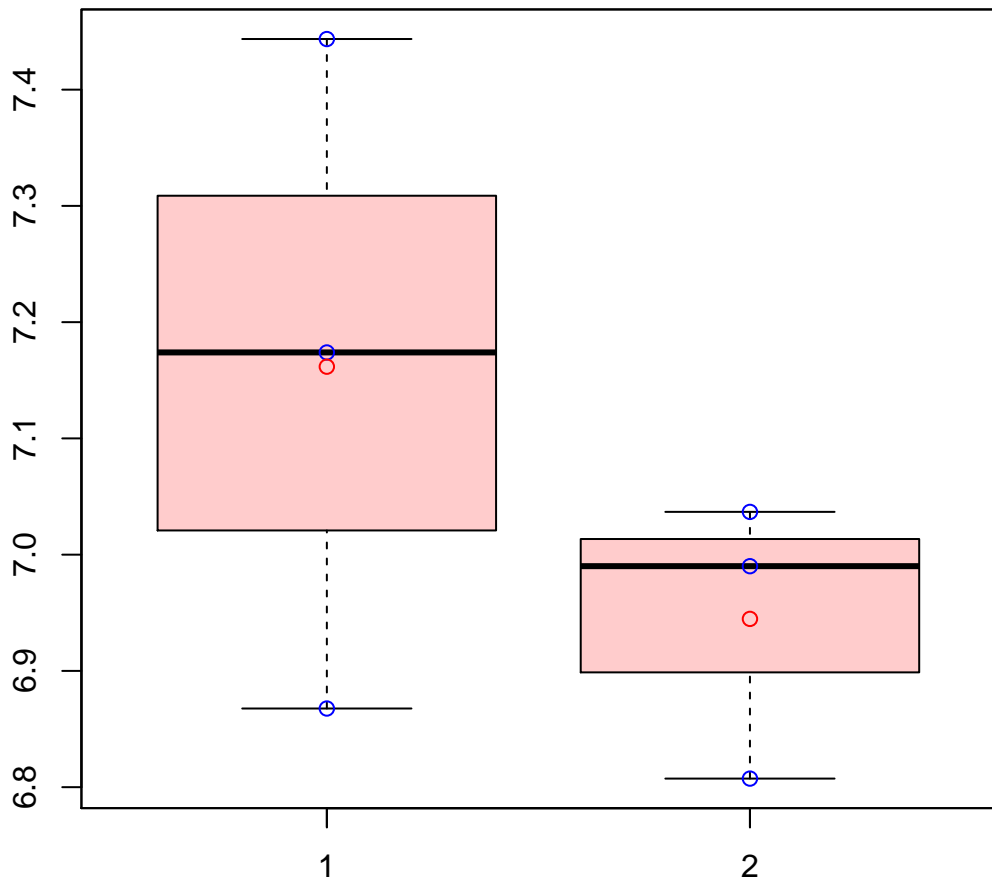

t-Test: p-value = 0.32

# C5X6V7|C5X6V7\_SORBI

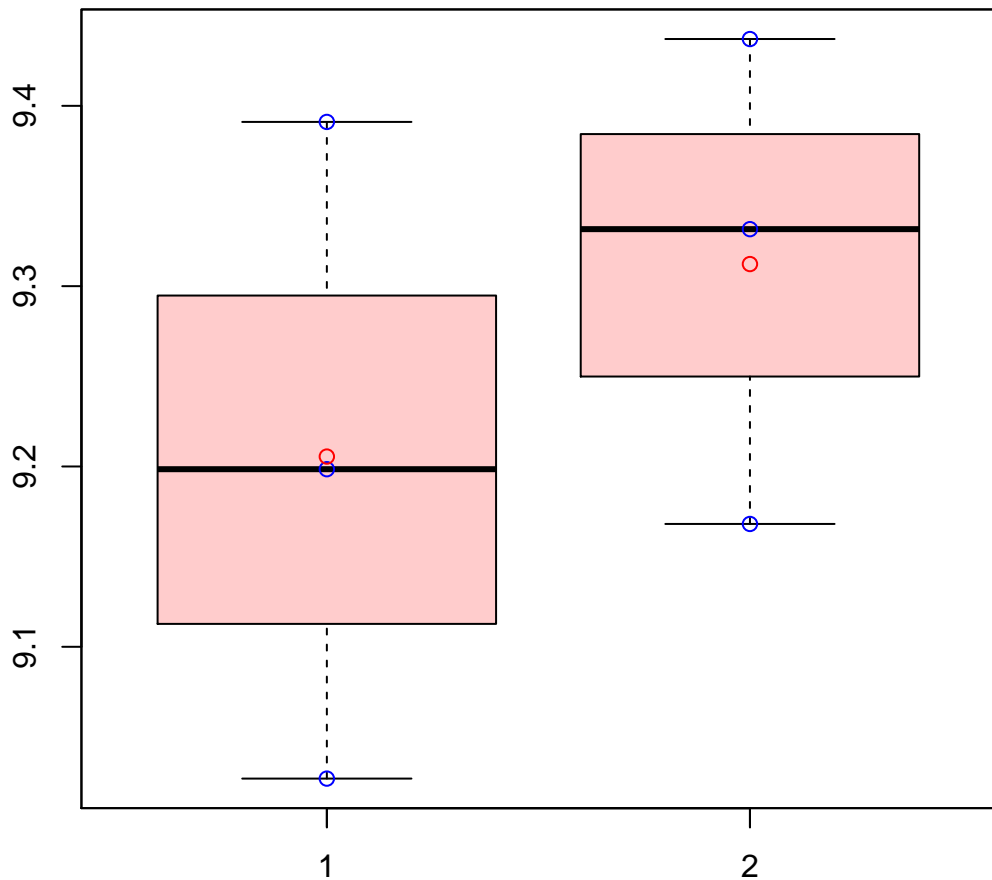

t-Test: p-value = 0.46

# C5X783|C5X783\_SORBI

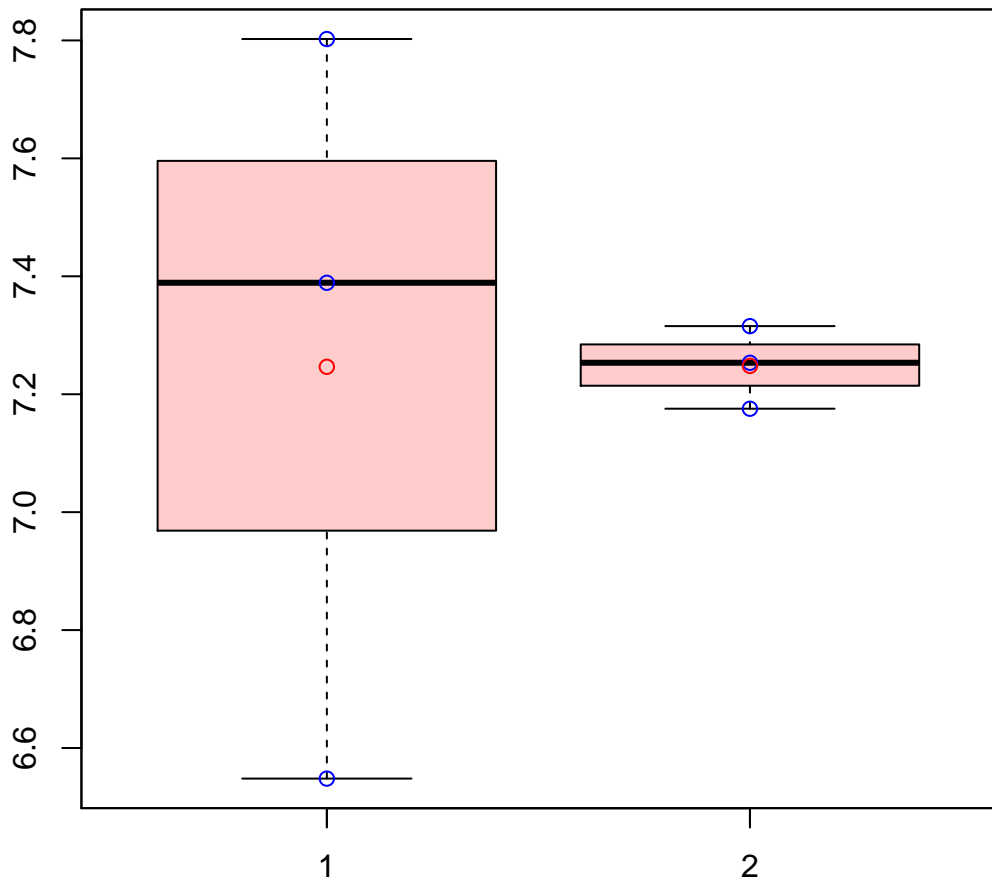

t-Test: p-value = 1

# C5X7F7|C5X7F7\_SORBI

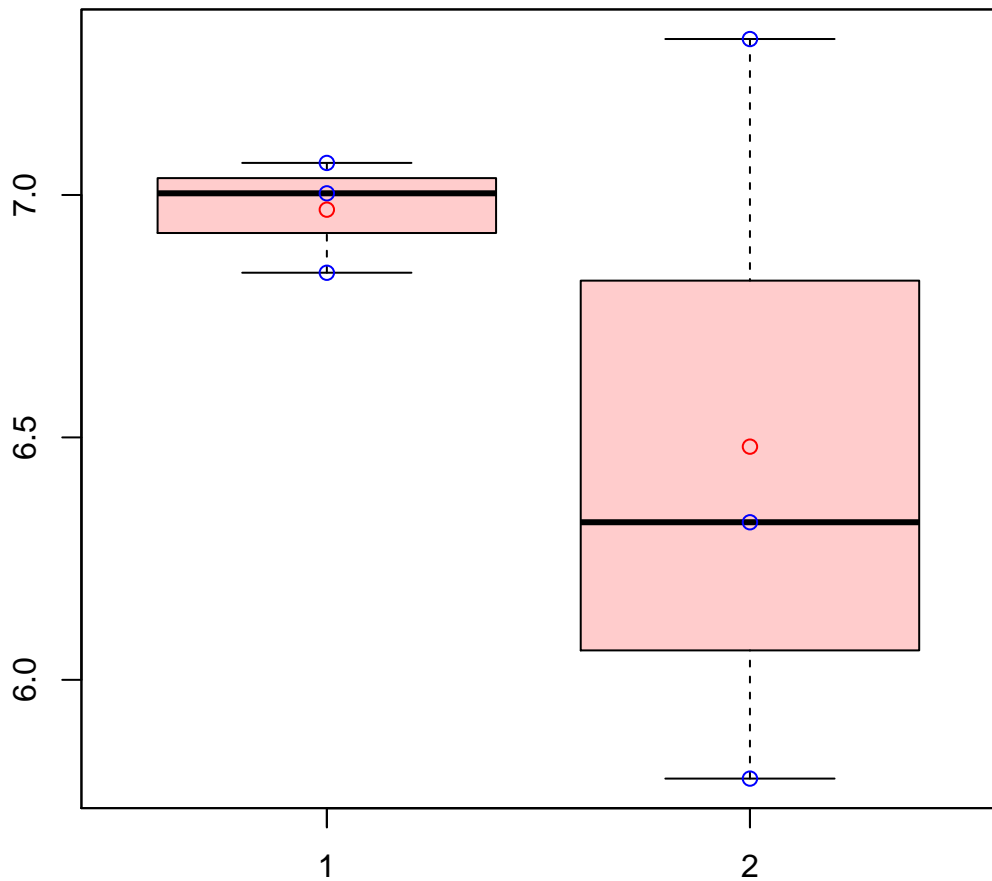

t-Test: p-value = 0.39

# C5X7S2|C5X7S2\_SORBI

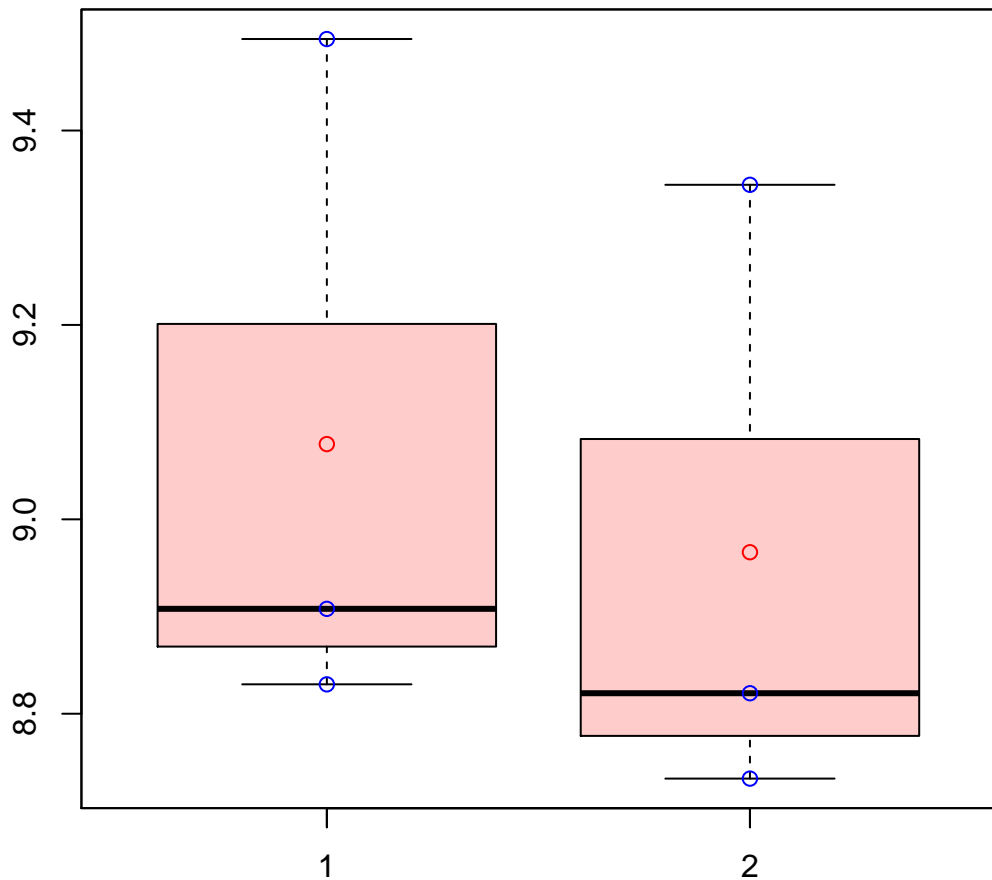

t-Test: p-value = 0.71



# C5X7U3|C5X7U3\_SORBI

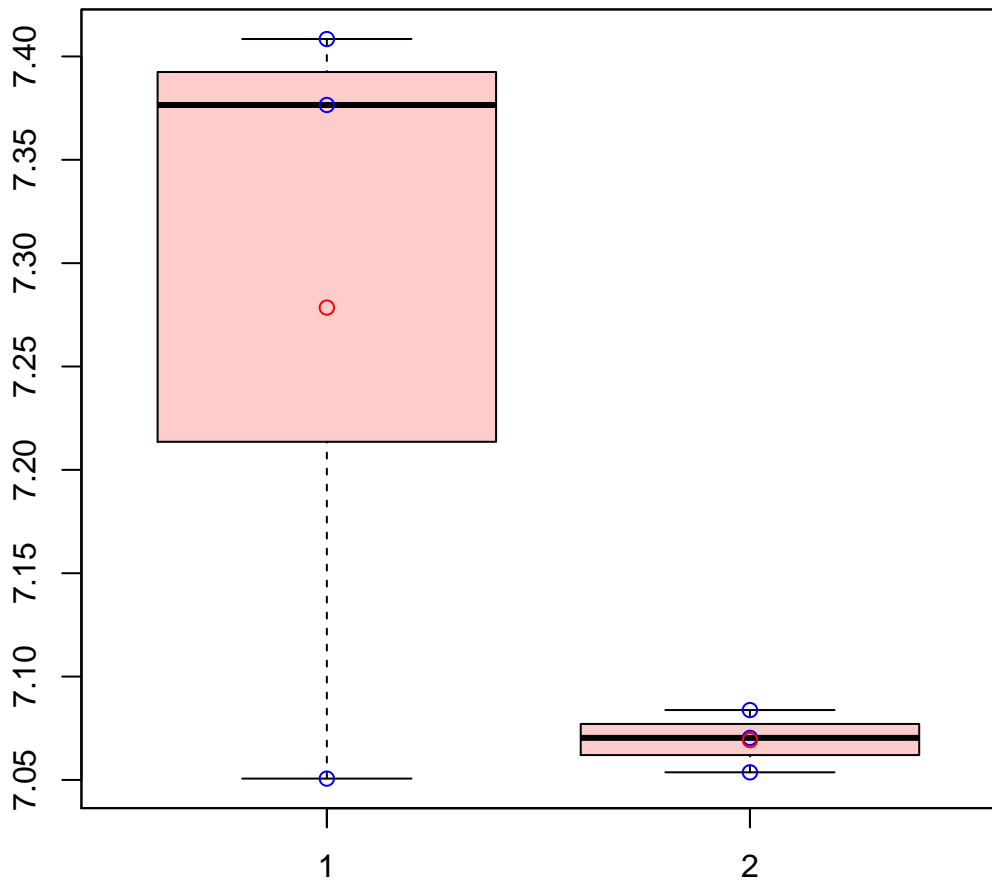

t-Test: p-value = 0.21

# C5X8D0|C5X8D0\_SORBI

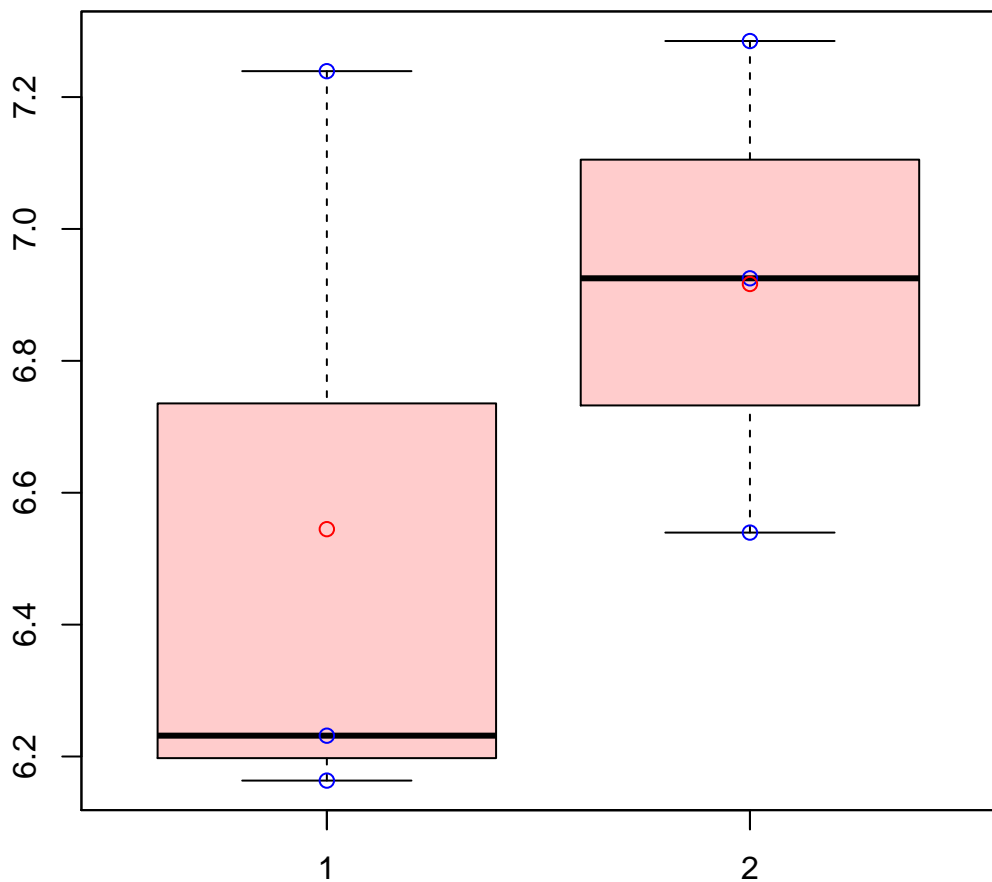

t-Test: p-value = 0.42

# C5X8I1|C5X8I1\_SORBI

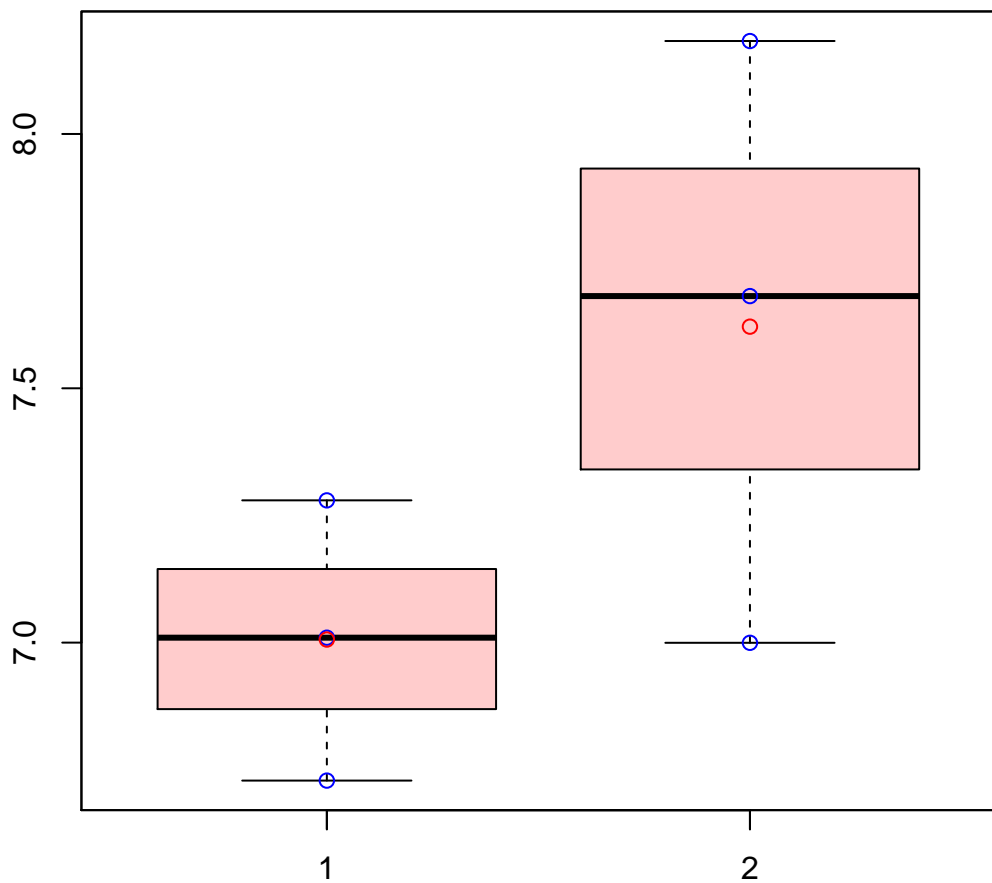

t-Test: p-value = 0.21

# C5X967|C5X967\_SORBI

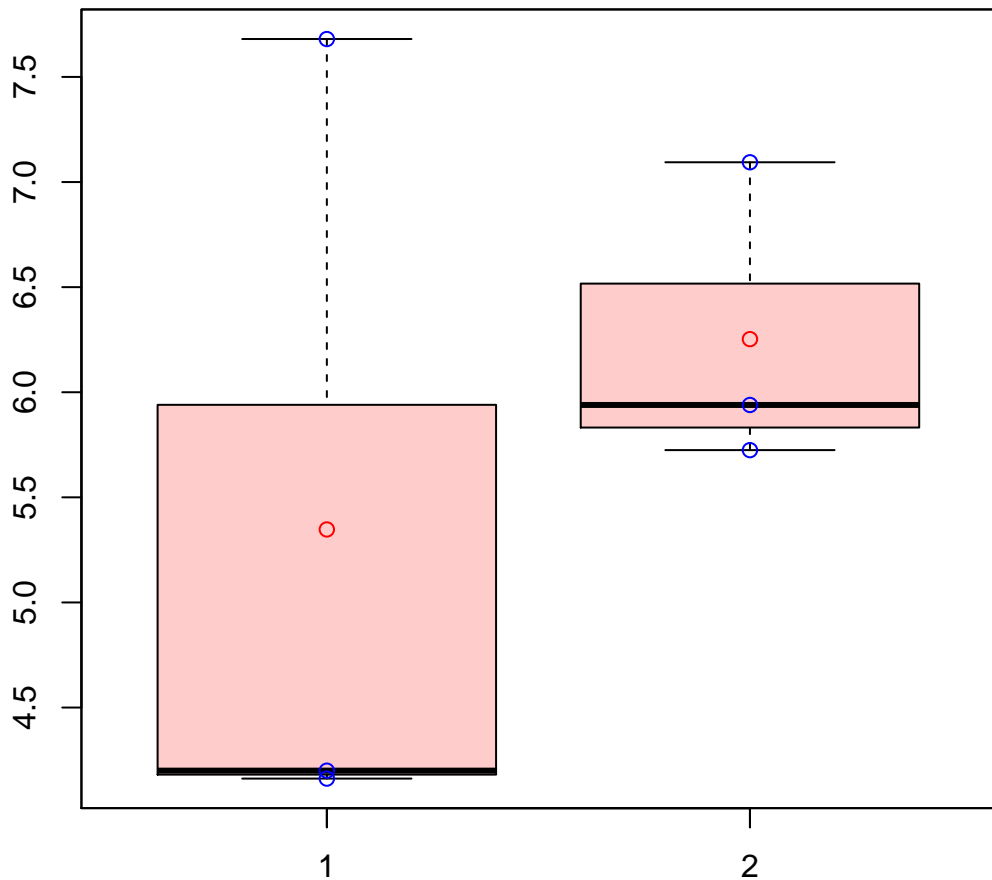

t-Test: p-value = 0.53

# C5X998|C5X998\_SORBI

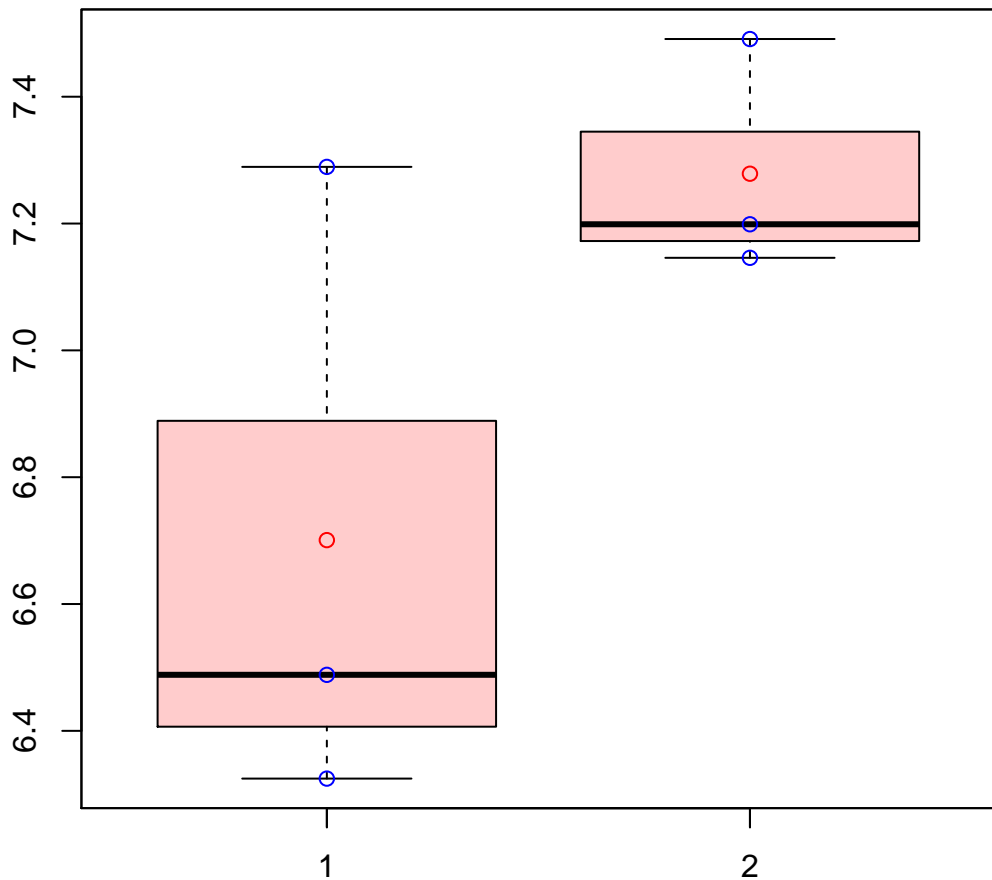

t-Test: p-value = 0.18

# C5XA56|C5XA56\_SORBI

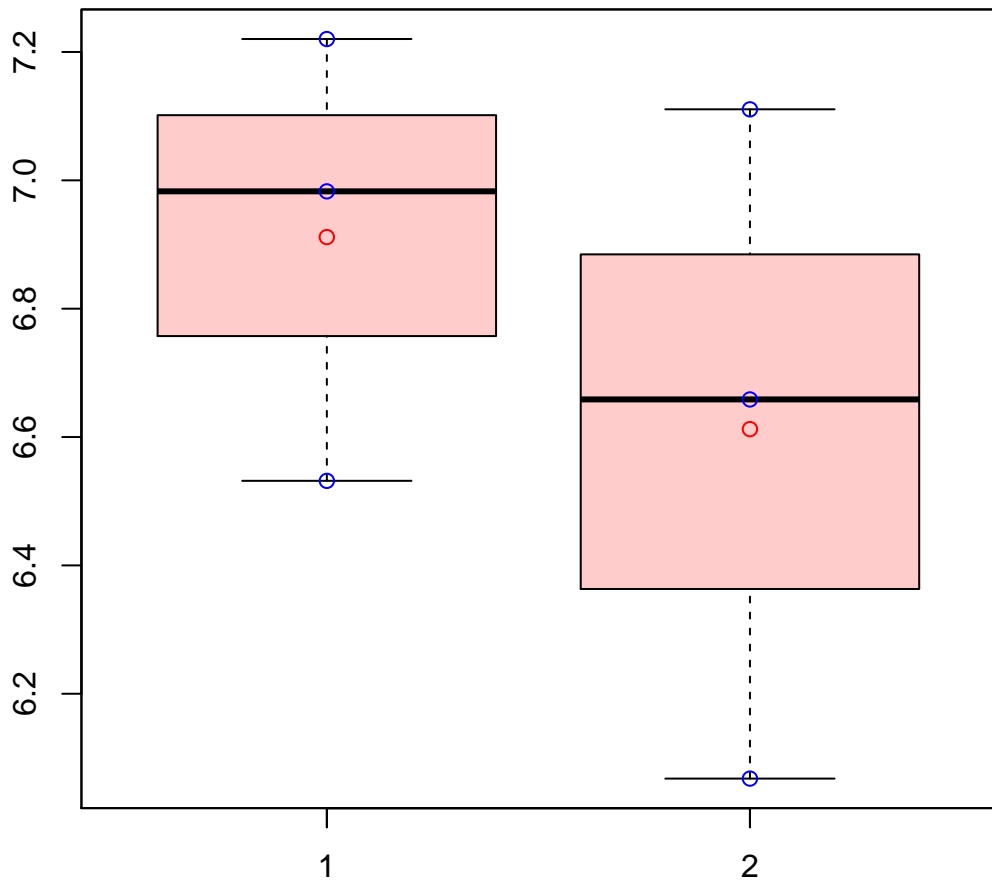

t-Test: p-value = 0.46

# C5XAD3|C5XAD3\_SORBI

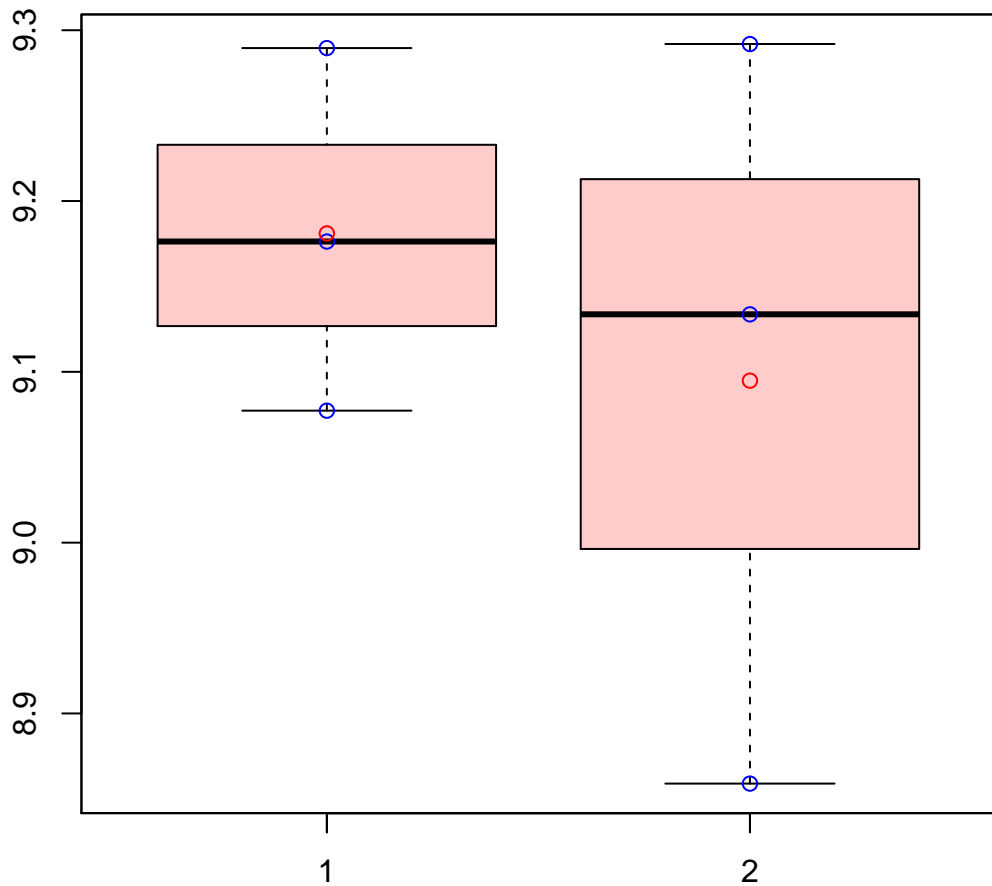

t-Test: p-value = 0.58

# C5XAN5|C5XAN5\_SORBI

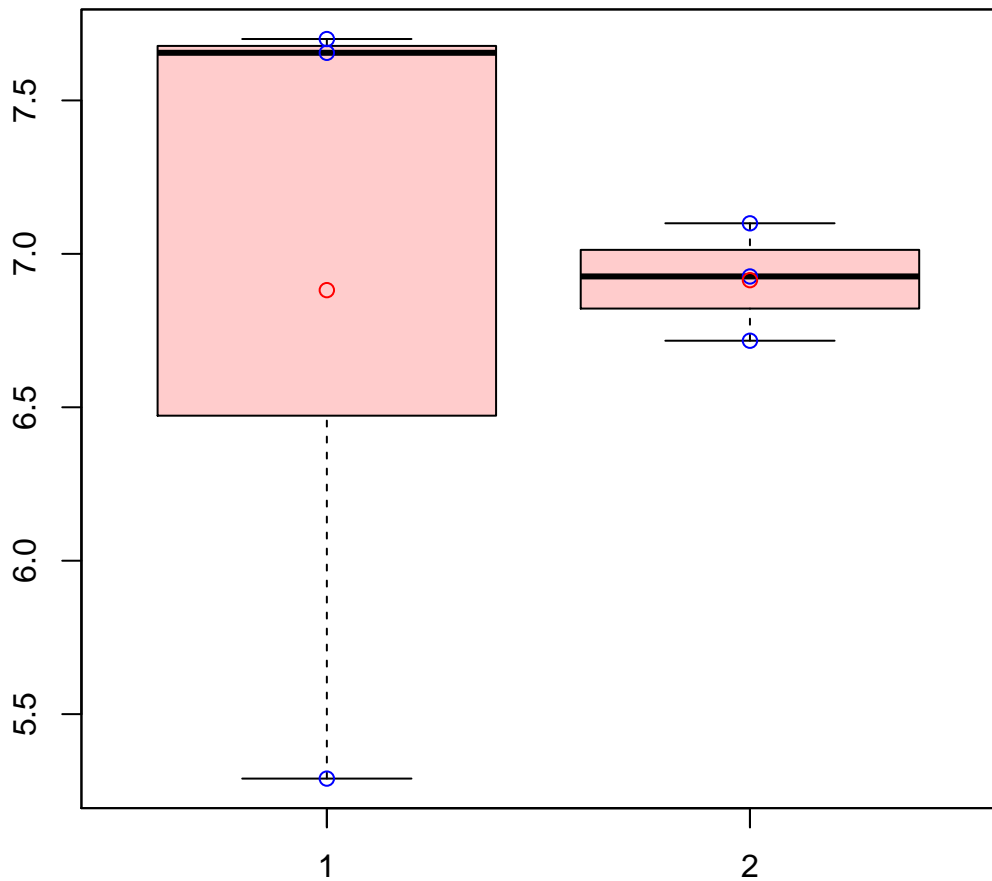

t-Test: p-value = 0.97



# C5XAT4|C5XAT4\_SORBI

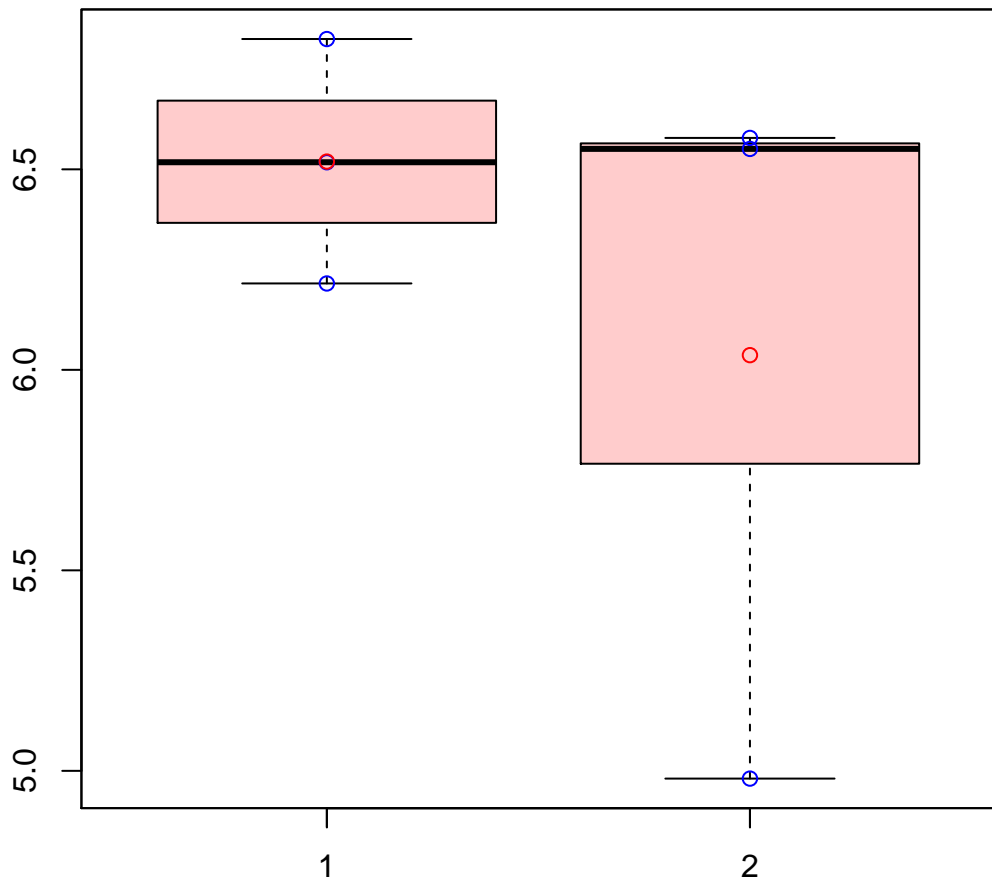

t-Test: p-value = 0.46

# C5XBD4|C5XBD4\_SORBI

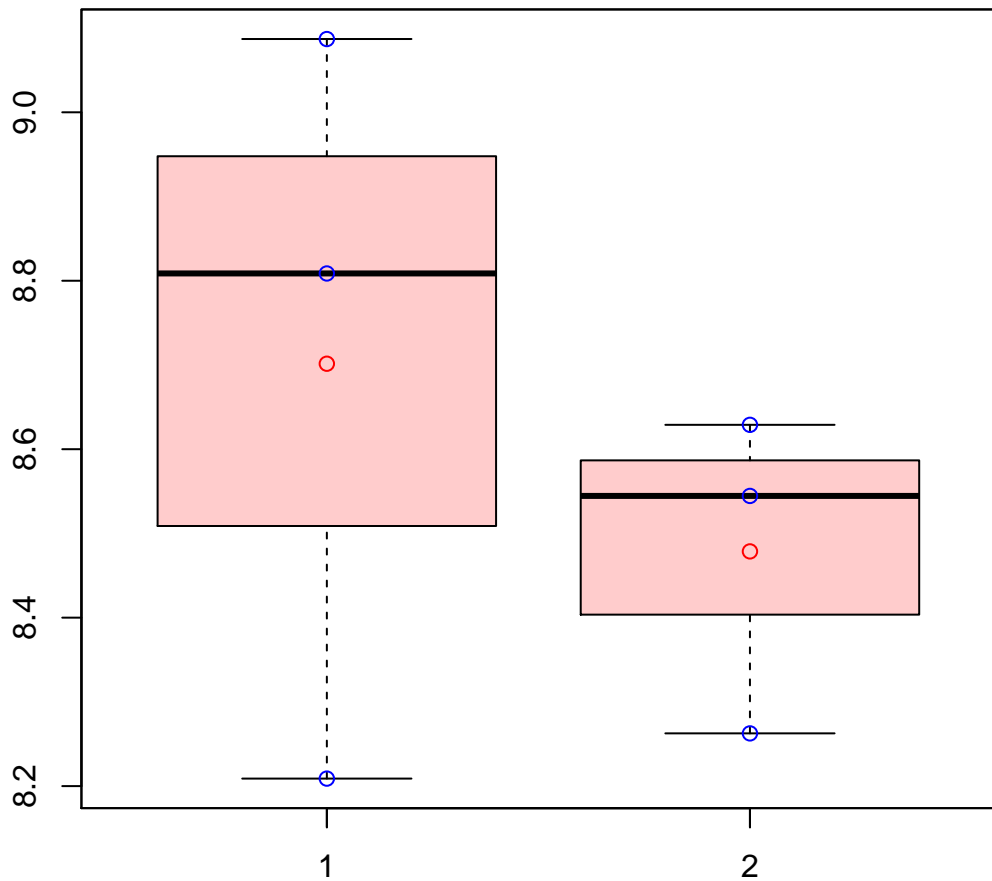

t-Test: p-value = 0.49

# C5XBF0|C5XBF0\_SORBI

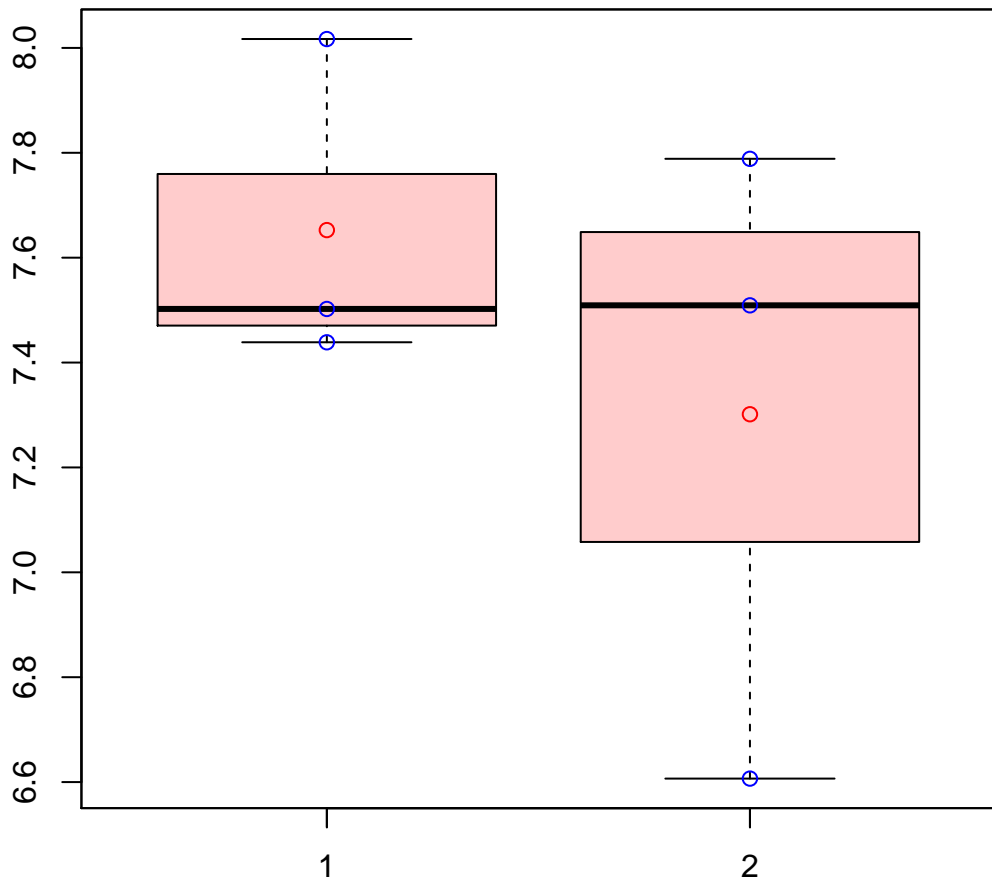

t-Test: p-value = 0.45

# C5XB19|C5XB19\_SORBI

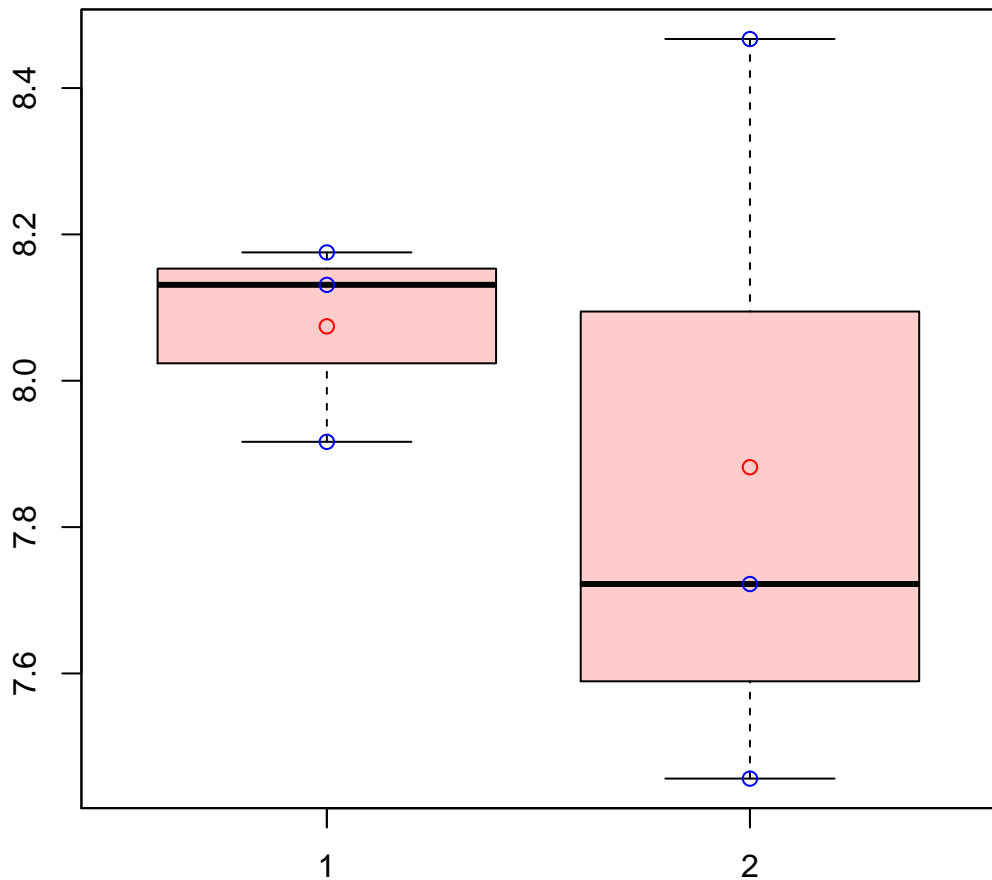

t-Test: p-value = 0.59

# C5XBM3|C5XBM3\_SORBI

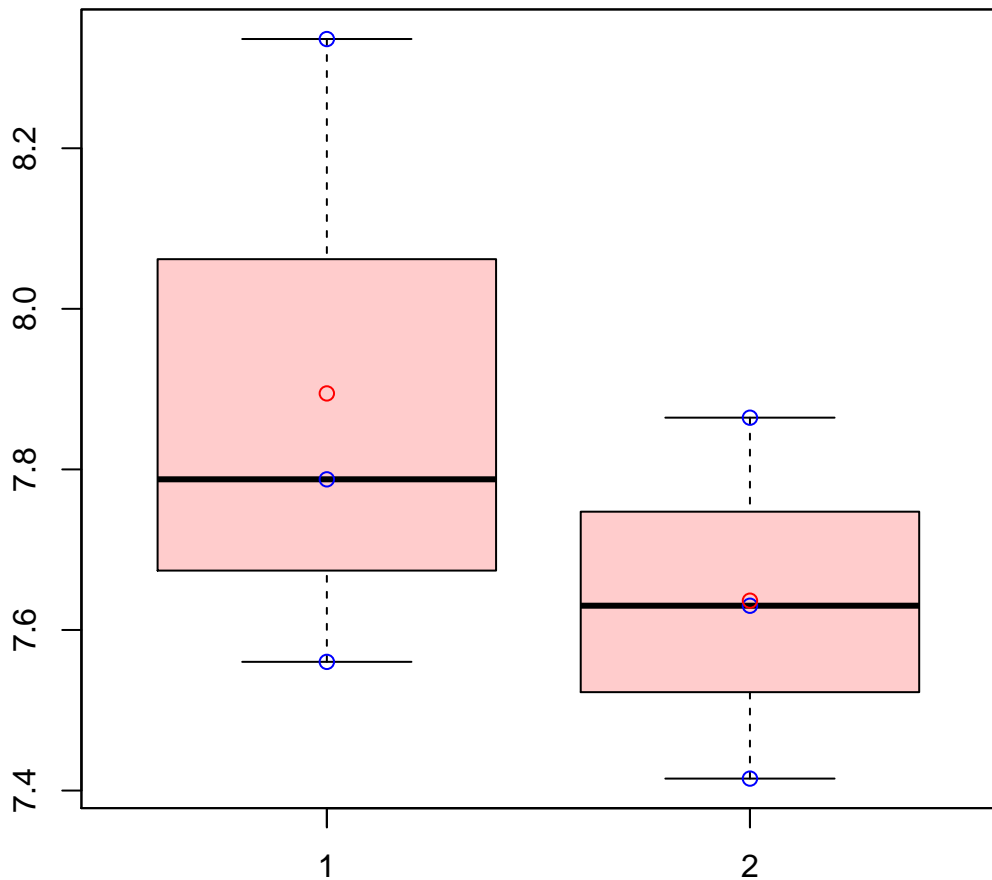

t-Test: p-value = 0.4

# C5XBW6|C5XBW6\_SORBI

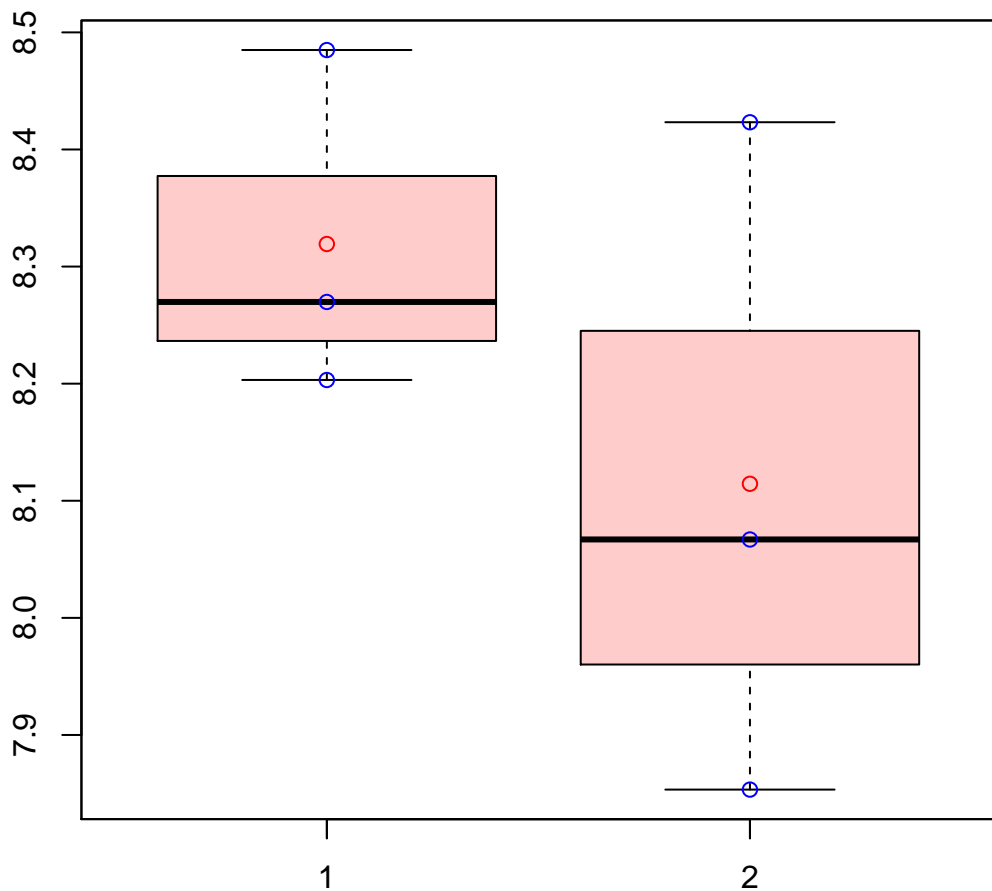

t-Test: p-value = 0.35

# C5XC97|C5XC97\_SORBI

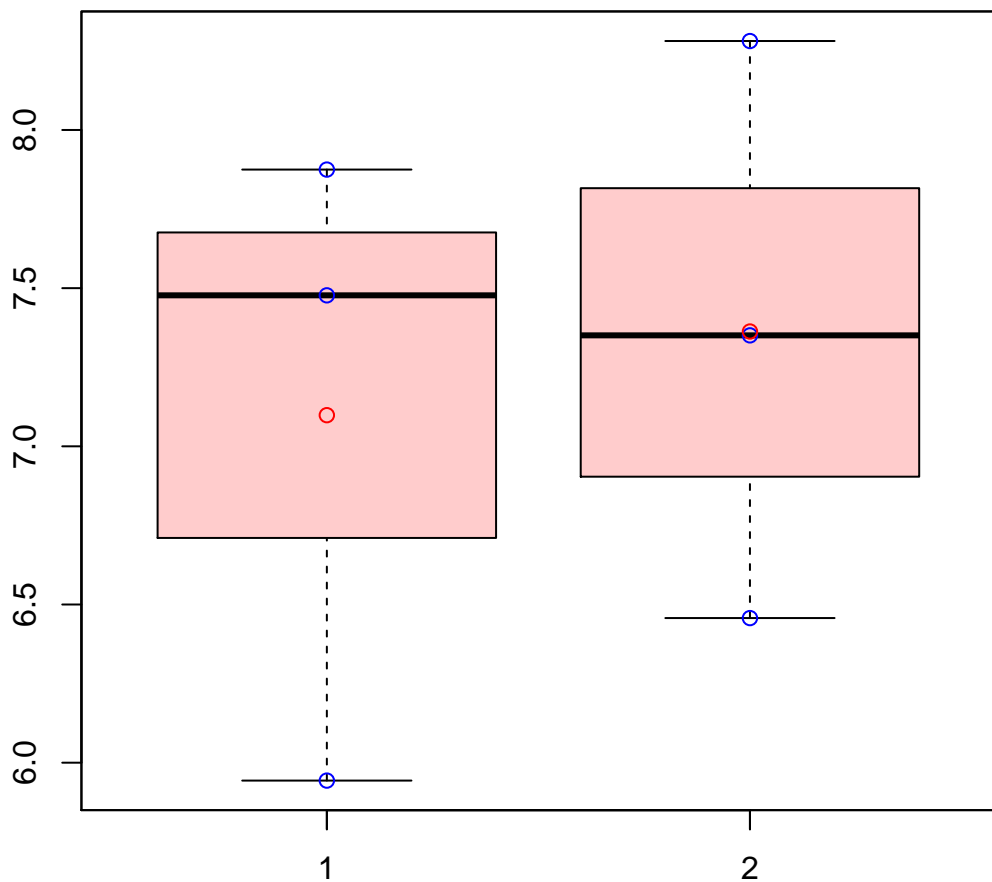

t-Test: p-value = 0.75

# C5XCN3|C5XCN3\_SORBI

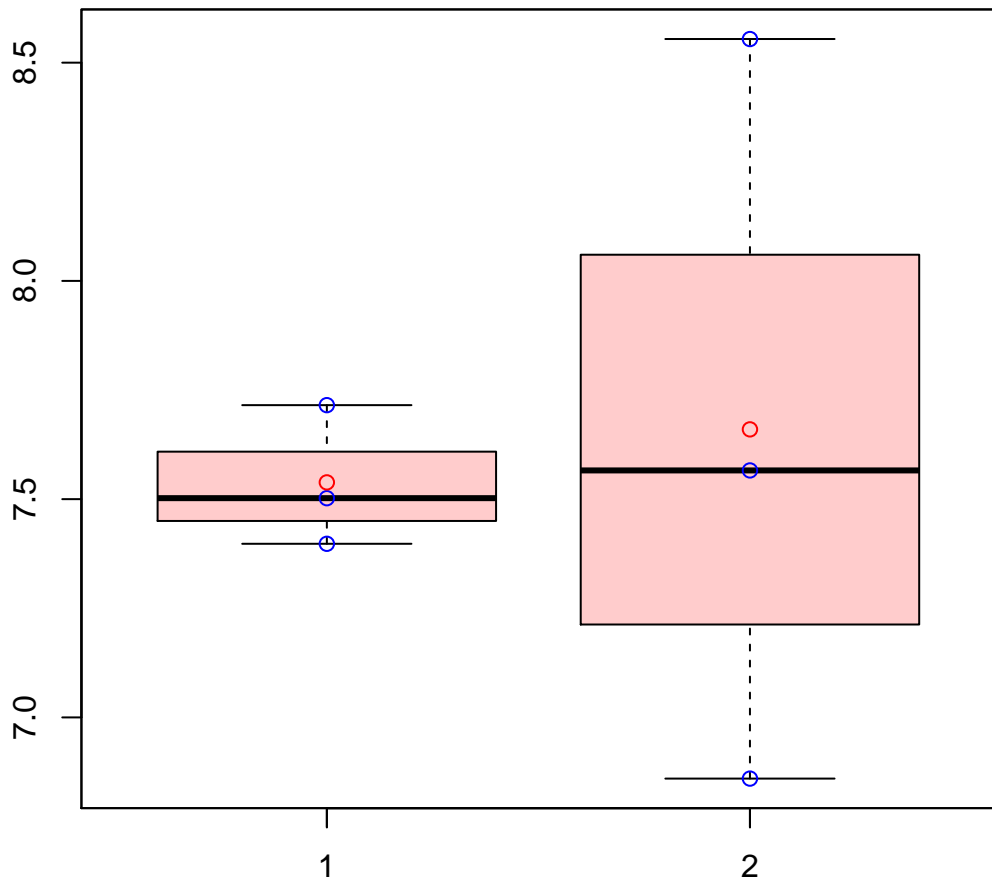

t-Test: p-value = 0.83



# C5XCP6|C5XCP6\_SORBI

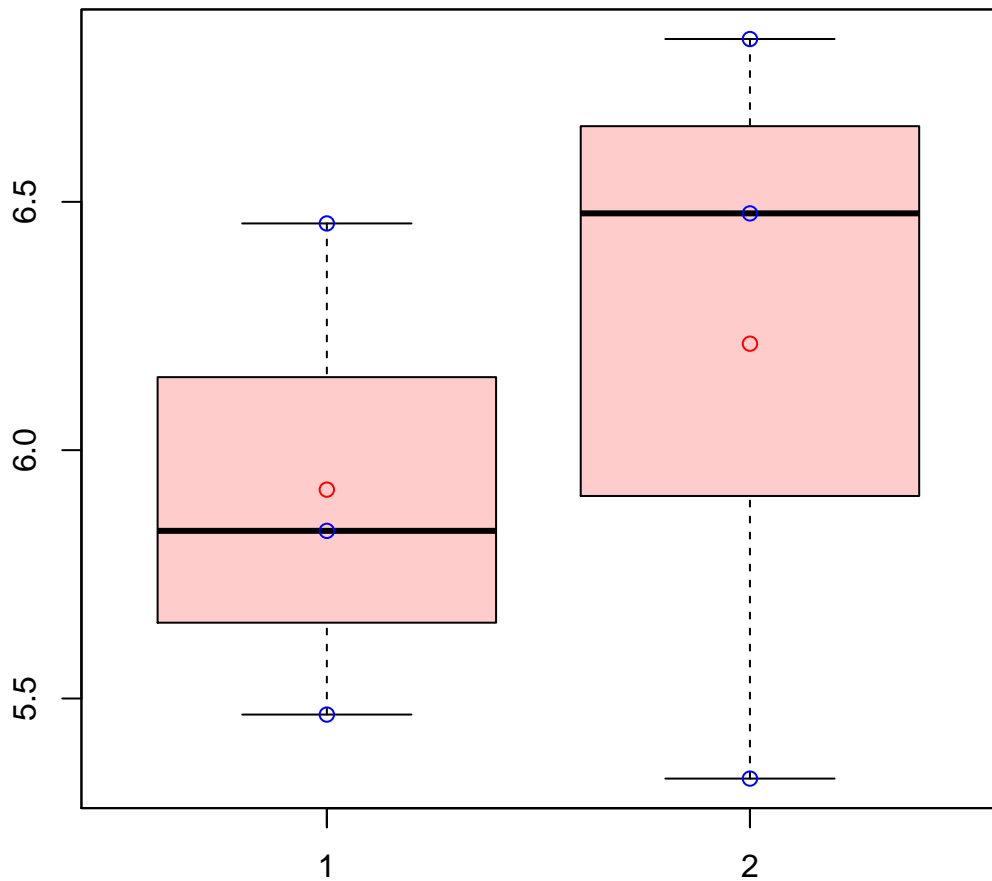

t-Test: p-value = 0.62

# C5XD35|C5XD35\_SORBI

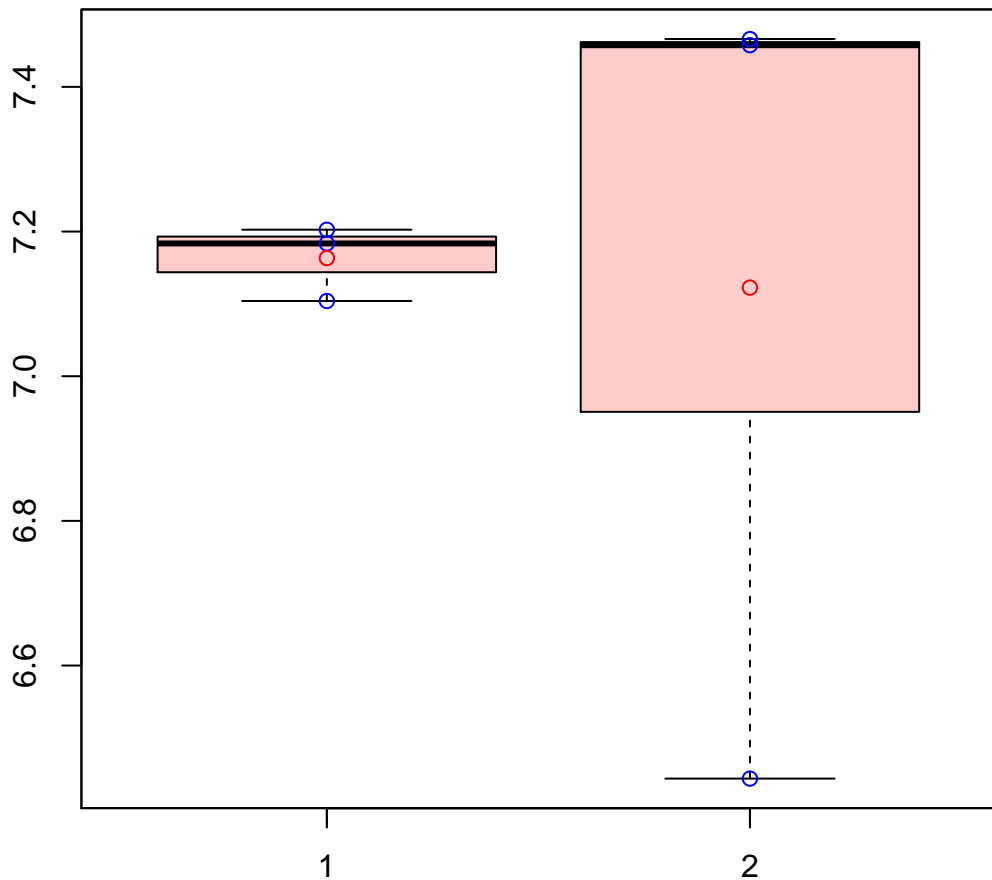

t-Test: p-value = 0.92

# C5XE72|C5XE72\_SORBI

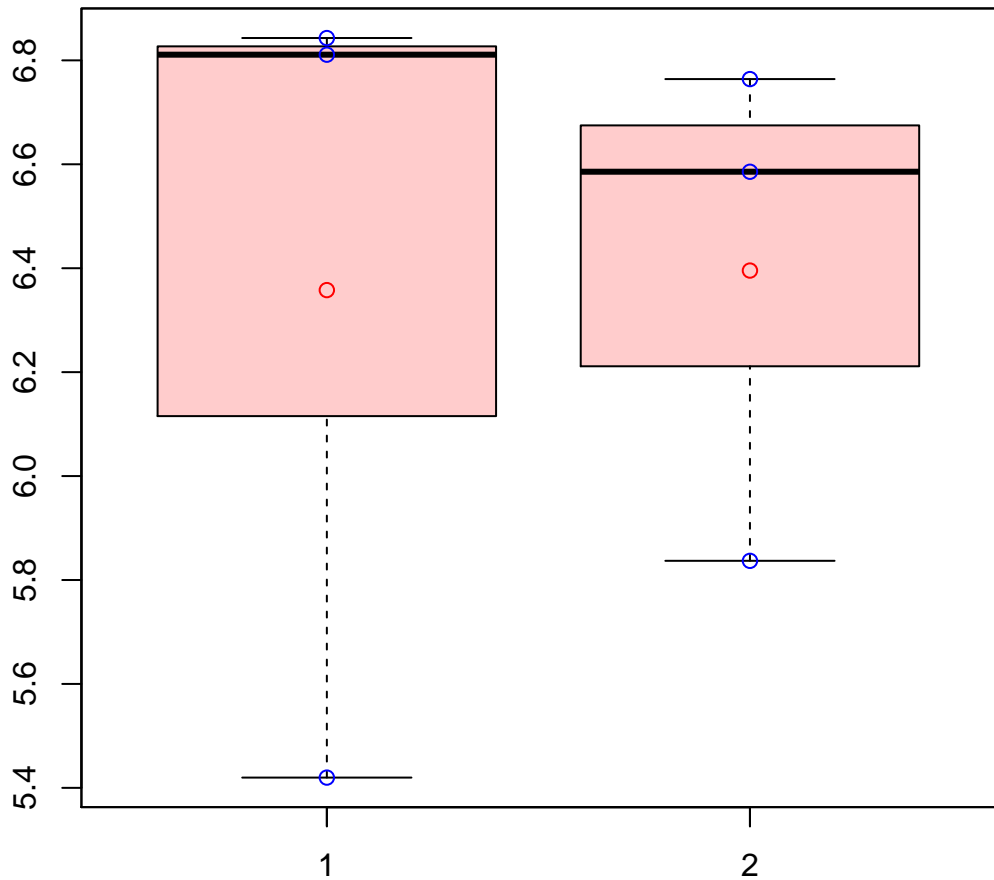

t-Test: p-value = 0.95

# C5XEI1|C5XEI1\_SORBI

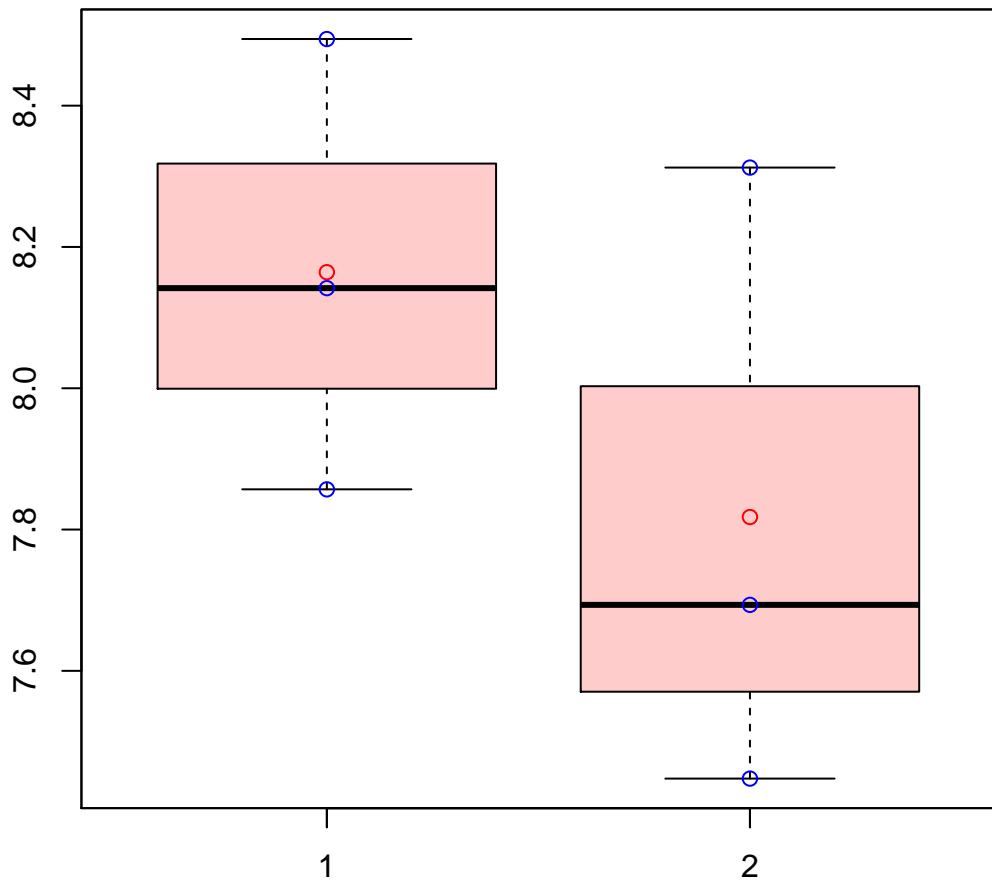

t-Test: p-value = 0.34

# C5XEL1|C5XEL1\_SORBI

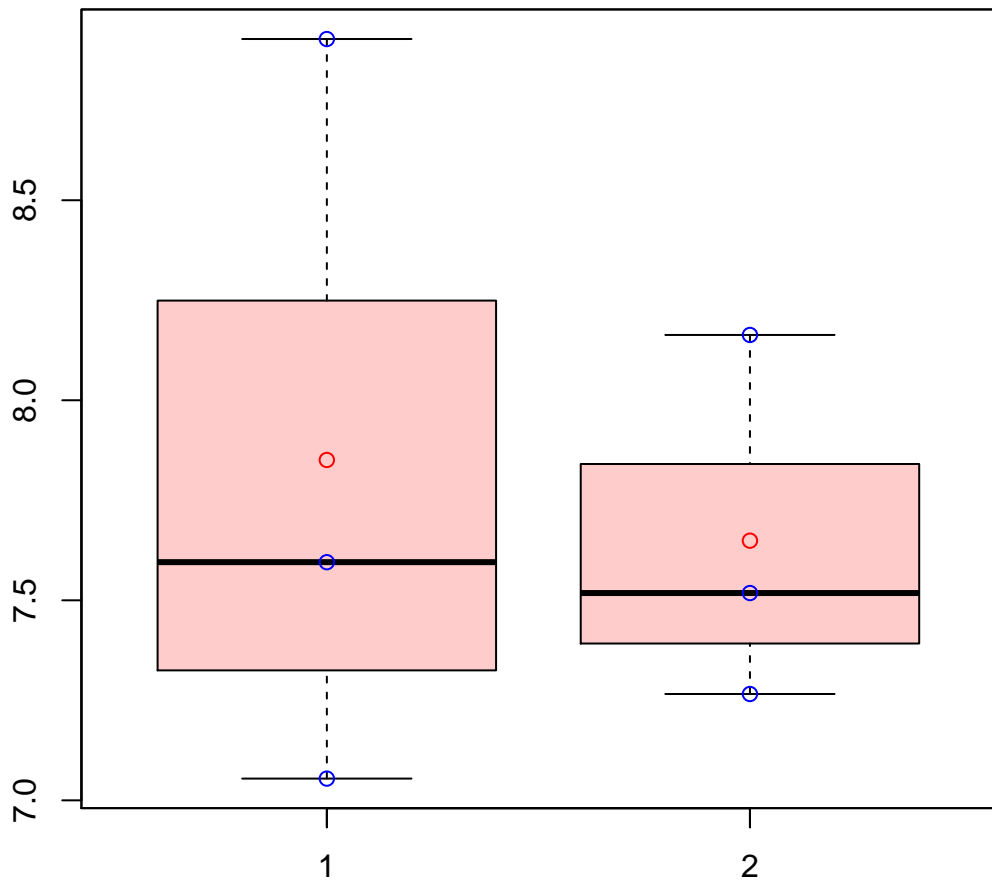

t-Test: p-value = 0.76

# C5XEP2|C5XEP2\_SORBI

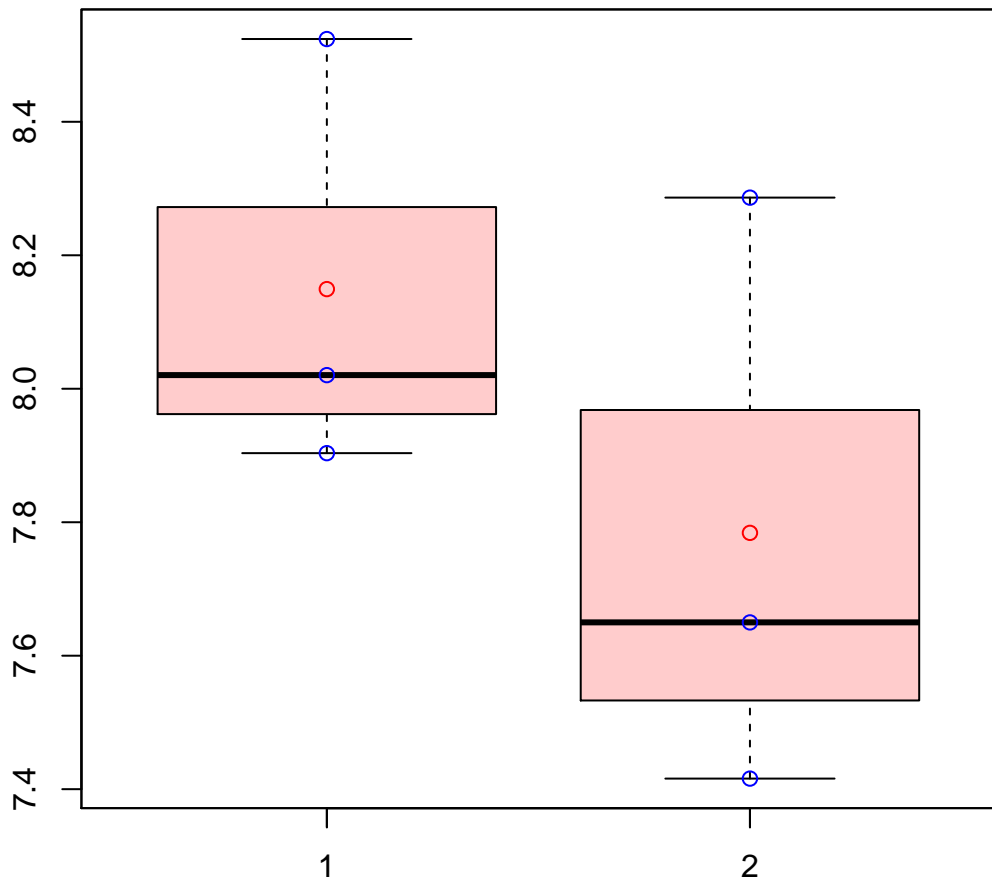

t-Test: p-value = 0.33

# C5XEU1|C5XEU1\_SORBI

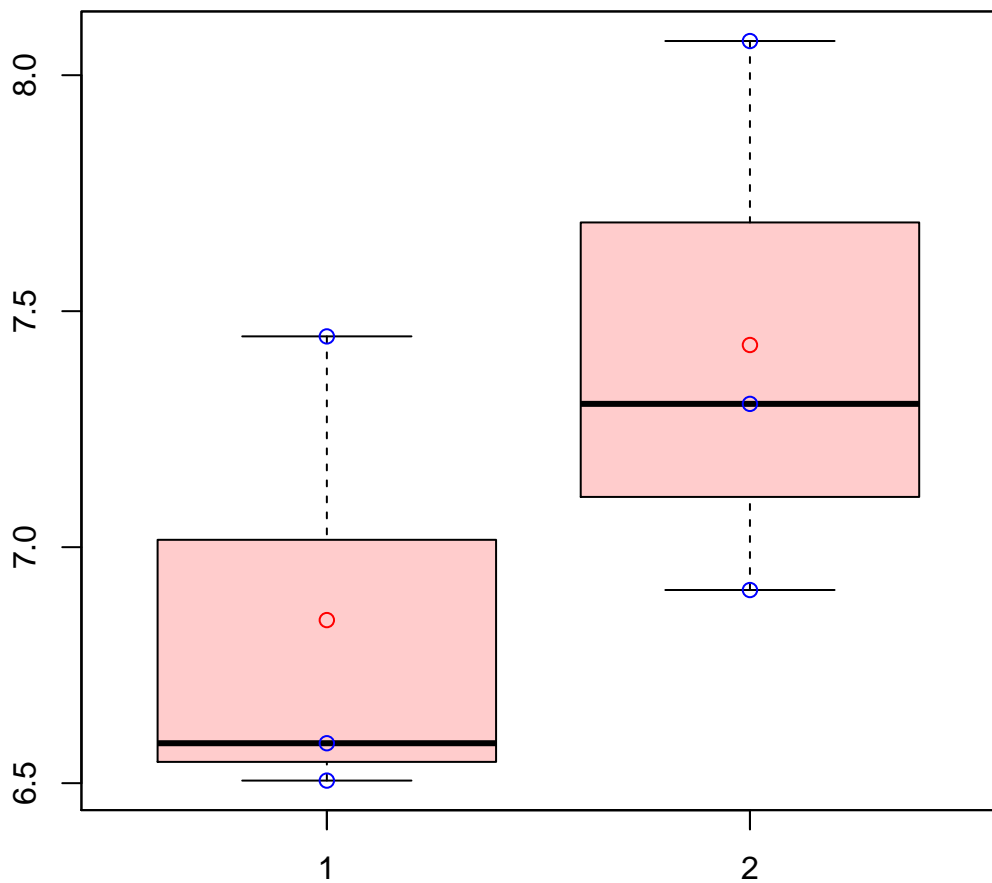

t-Test: p-value = 0.27

# C5XEW1|C5XEW1\_SORBI

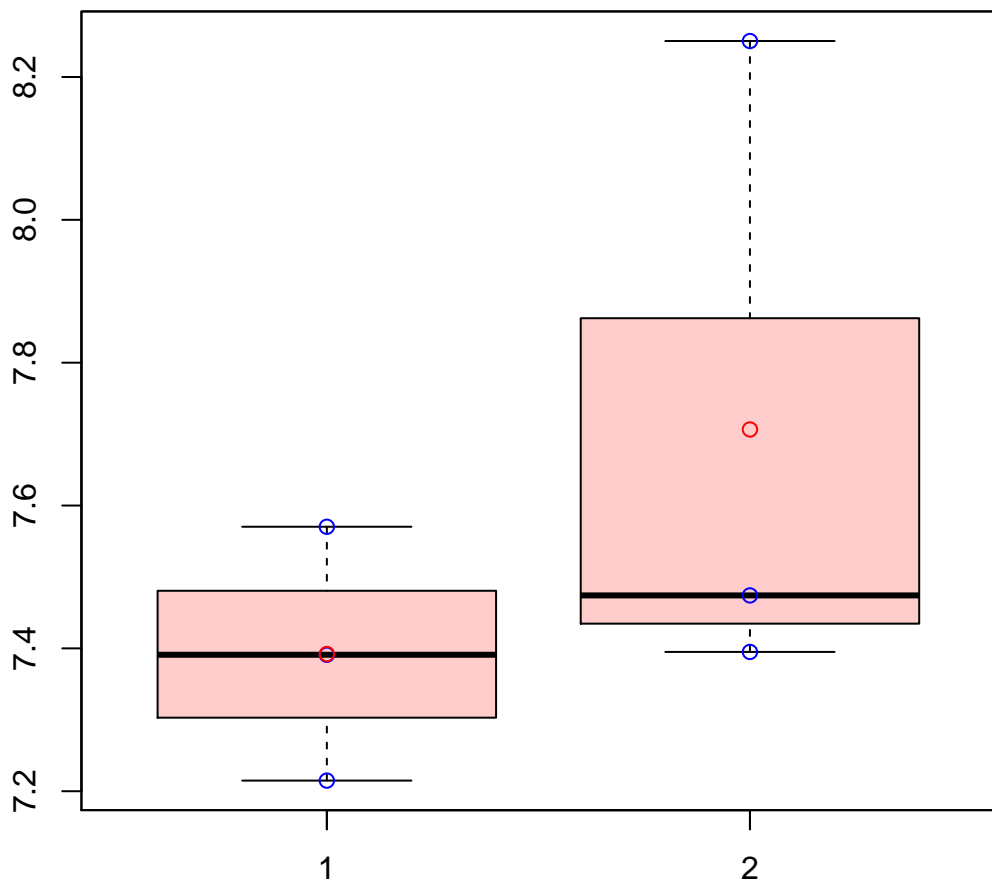

t-Test: p-value = 0.37



# C5XF10|C5XF10\_SORBI

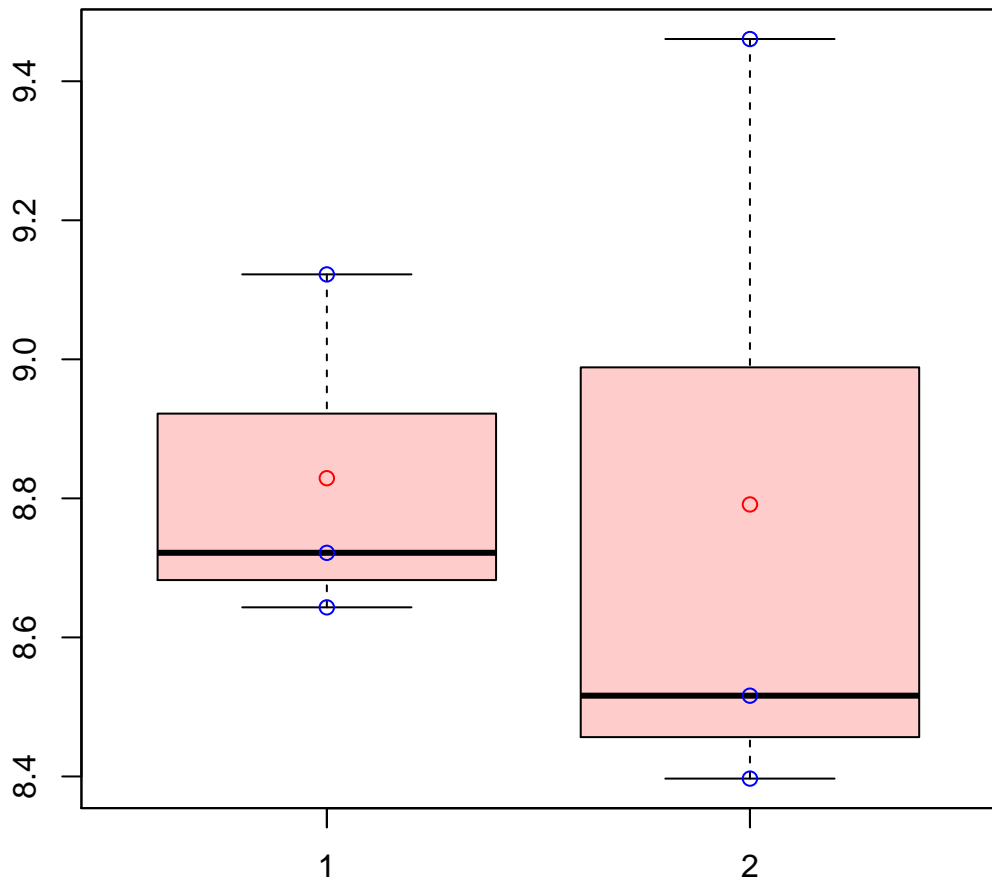

t-Test: p-value = 0.93

# C5XF60|C5XF60\_SORBI

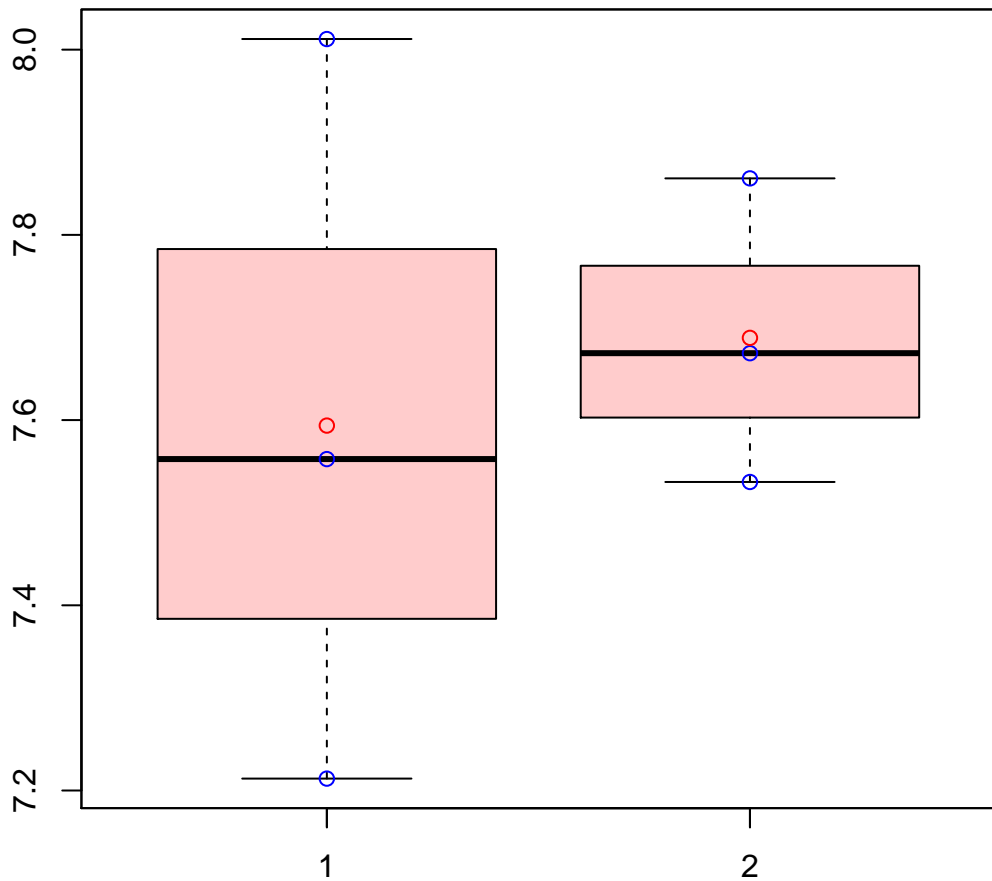

t-Test: p-value = 0.73

# C5XF87|C5XF87\_SORBI

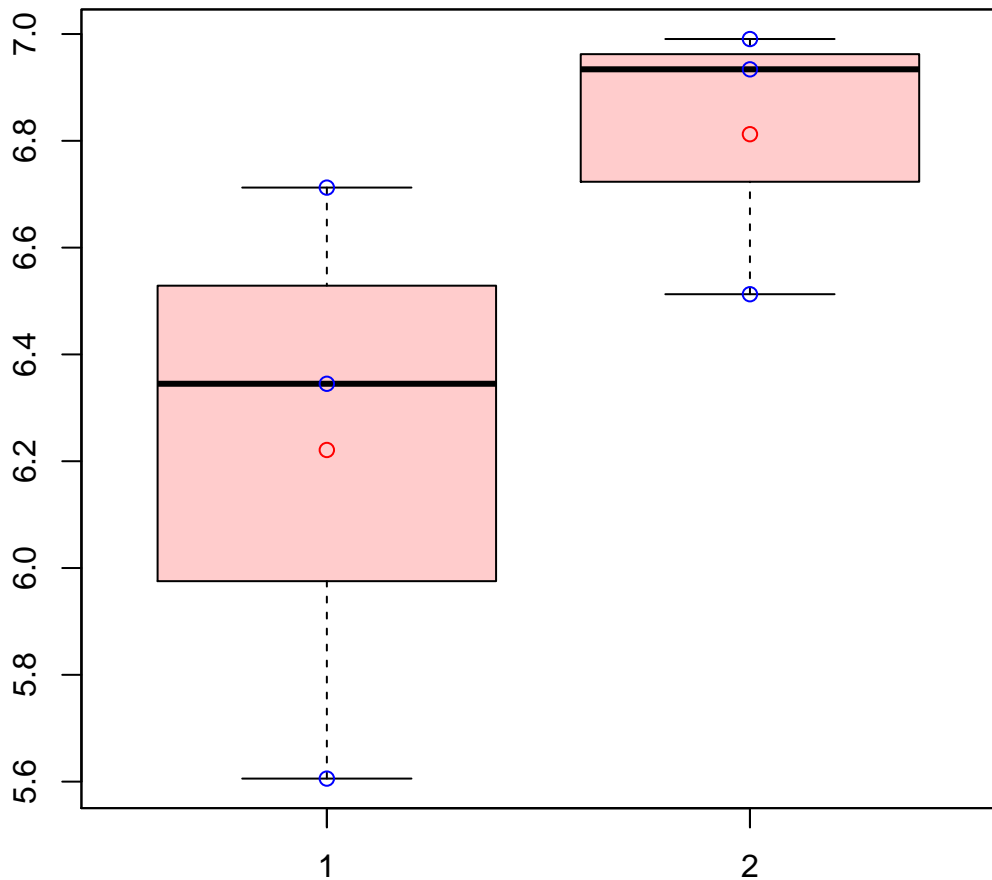

t-Test: p-value = 0.2

# C5XFJ2|C5XFJ2\_SORBI

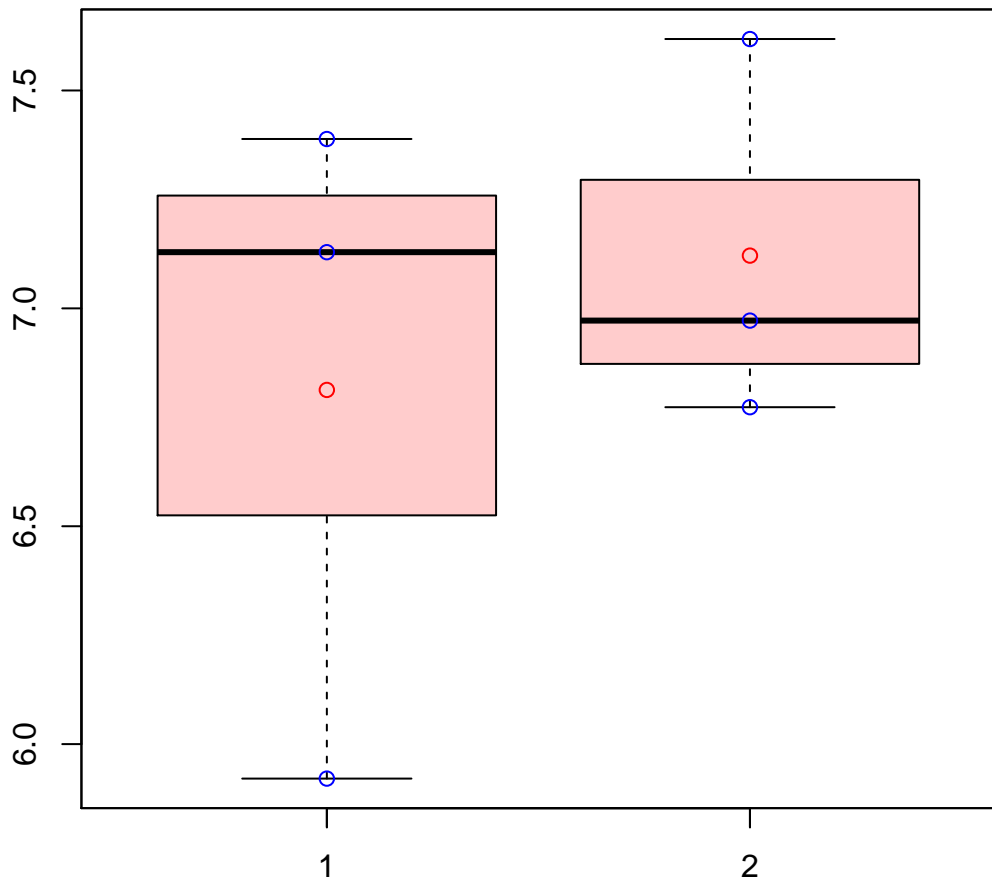

t-Test: p-value = 0.59

# C5XFK8|C5XFK8\_SORBI

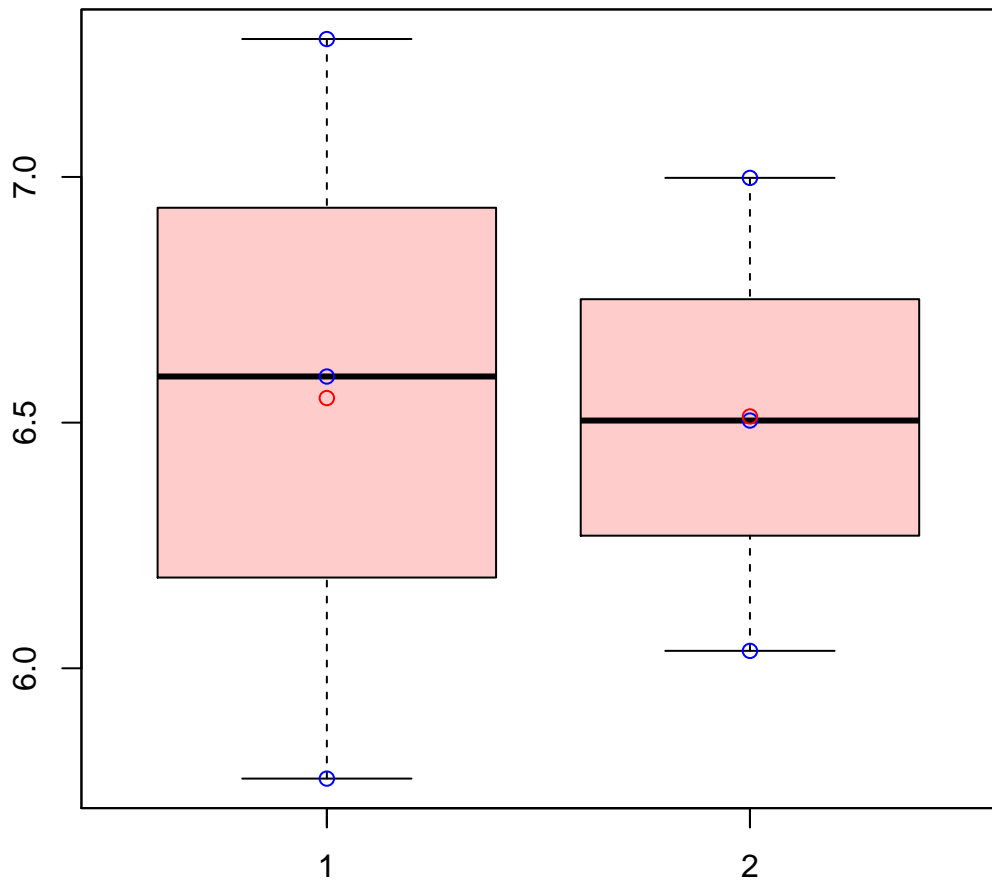

t-Test: p-value = 0.95

# C5XG00|C5XG00\_SORBI

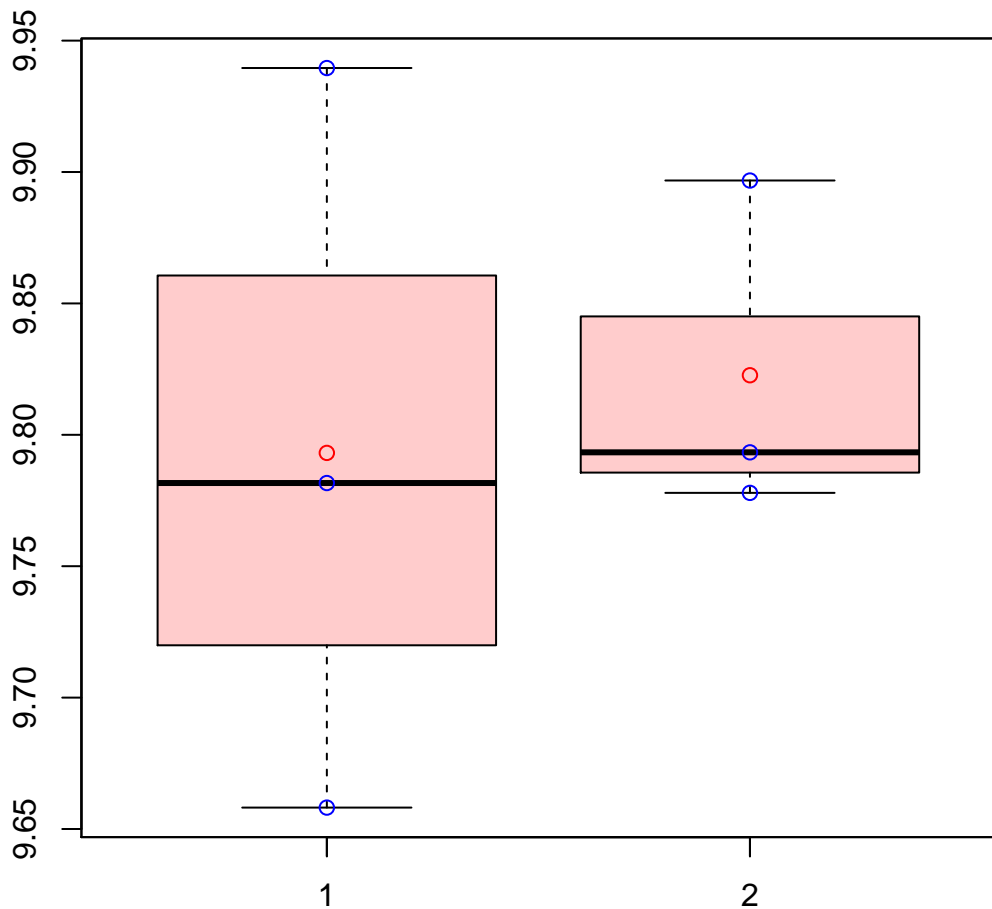

t-Test: p-value = 0.76

# C5XGI2|C5XGI2\_SORBI

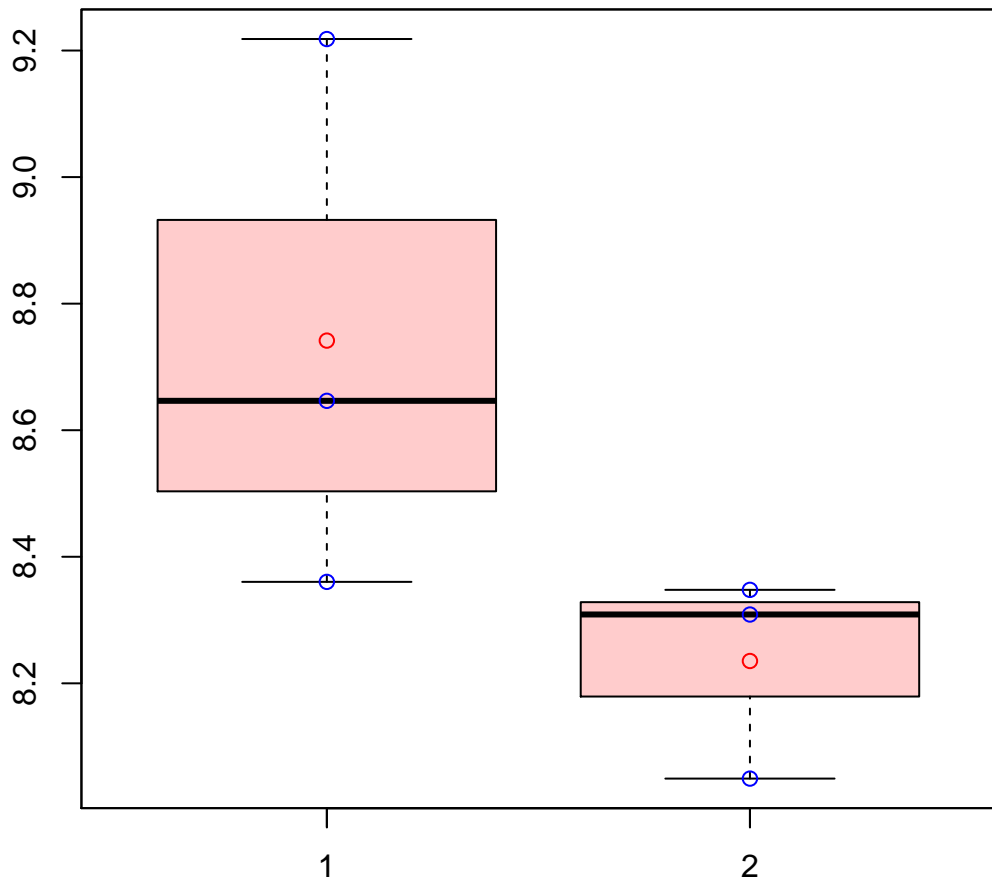

t-Test: p-value = 0.17

# C5XHC2|C5XHC2\_SORBI

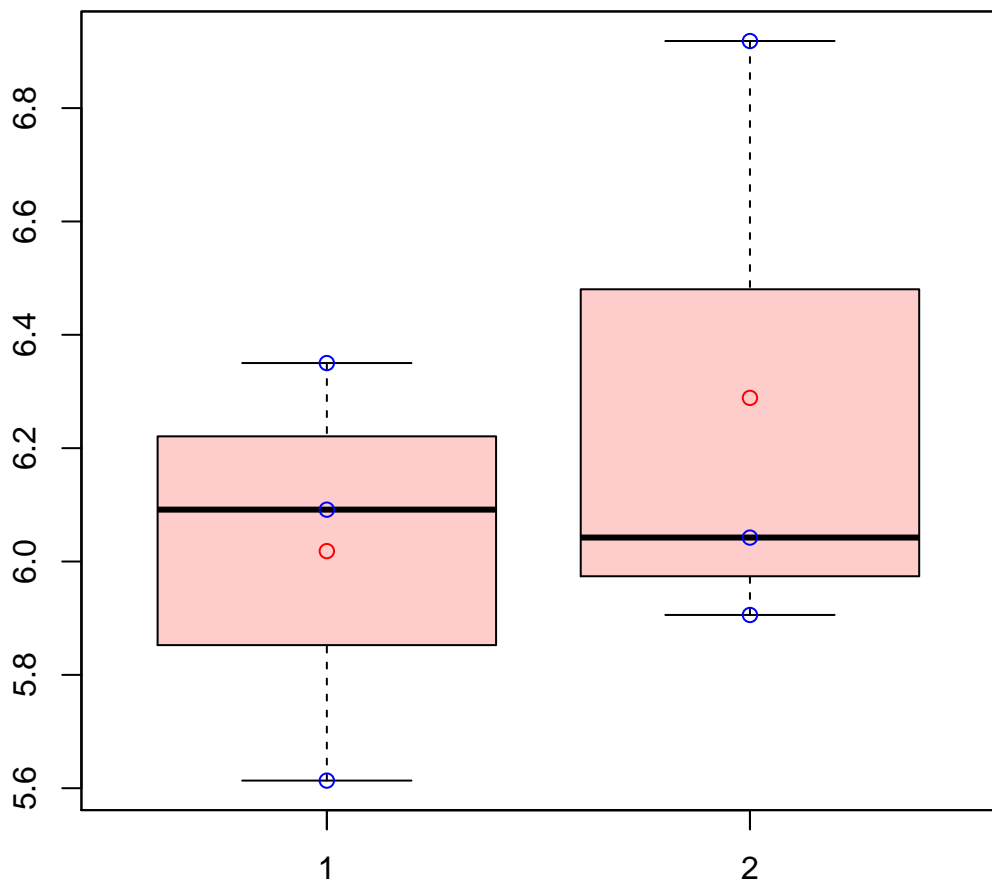

t-Test: p-value = 0.52



# C5XHZ0|C5XHZ0\_SORBI

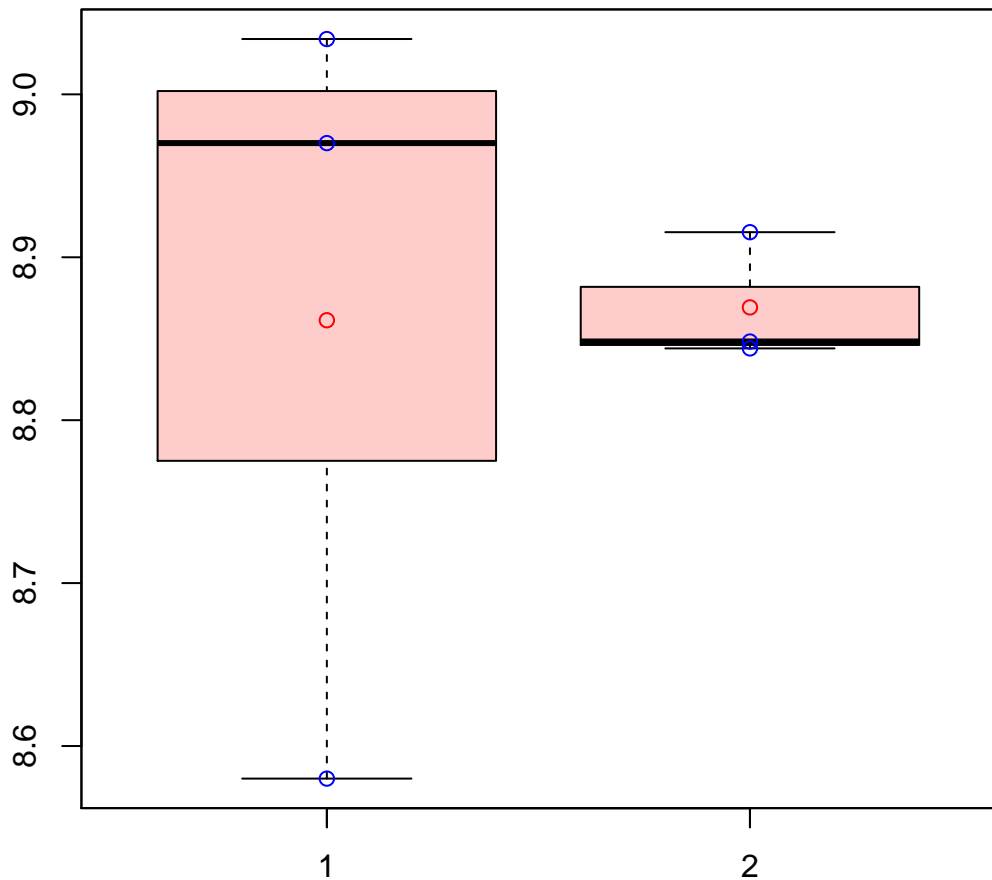

t-Test: p-value = 0.96

# C5XHZ2|C5XHZ2\_SORBI

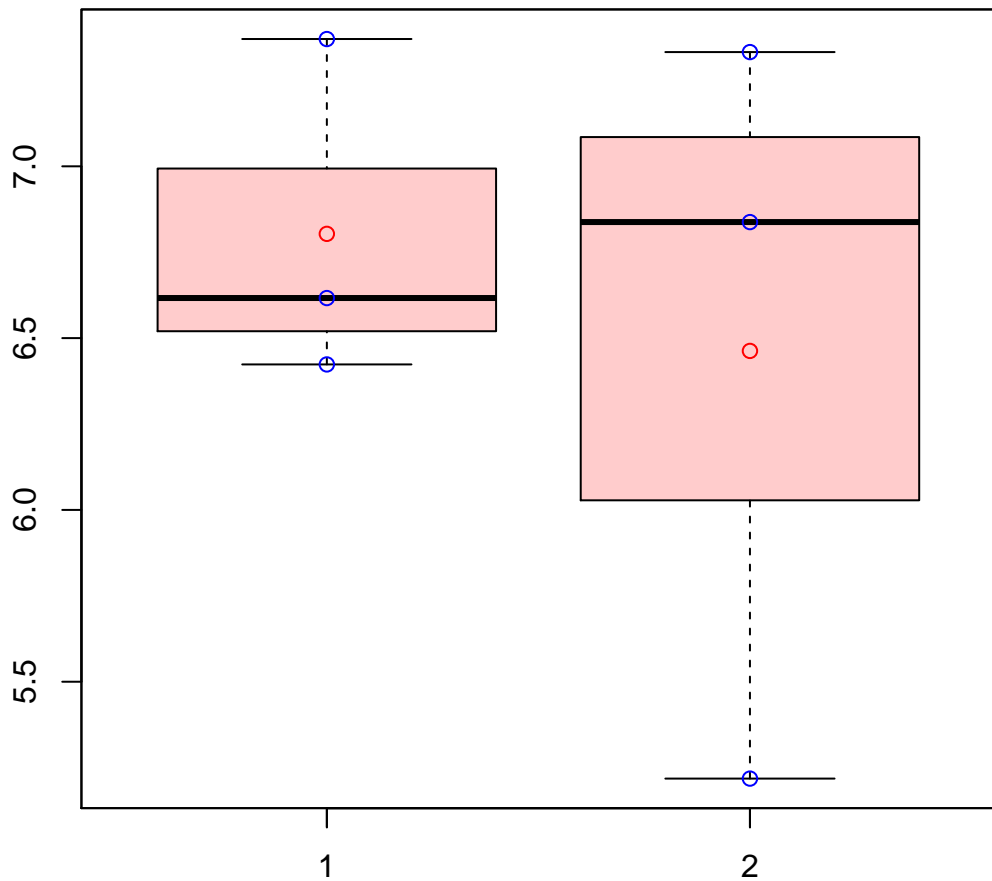

t-Test: p-value = 0.66

# C5XIE3|C5XIE3\_SORBI

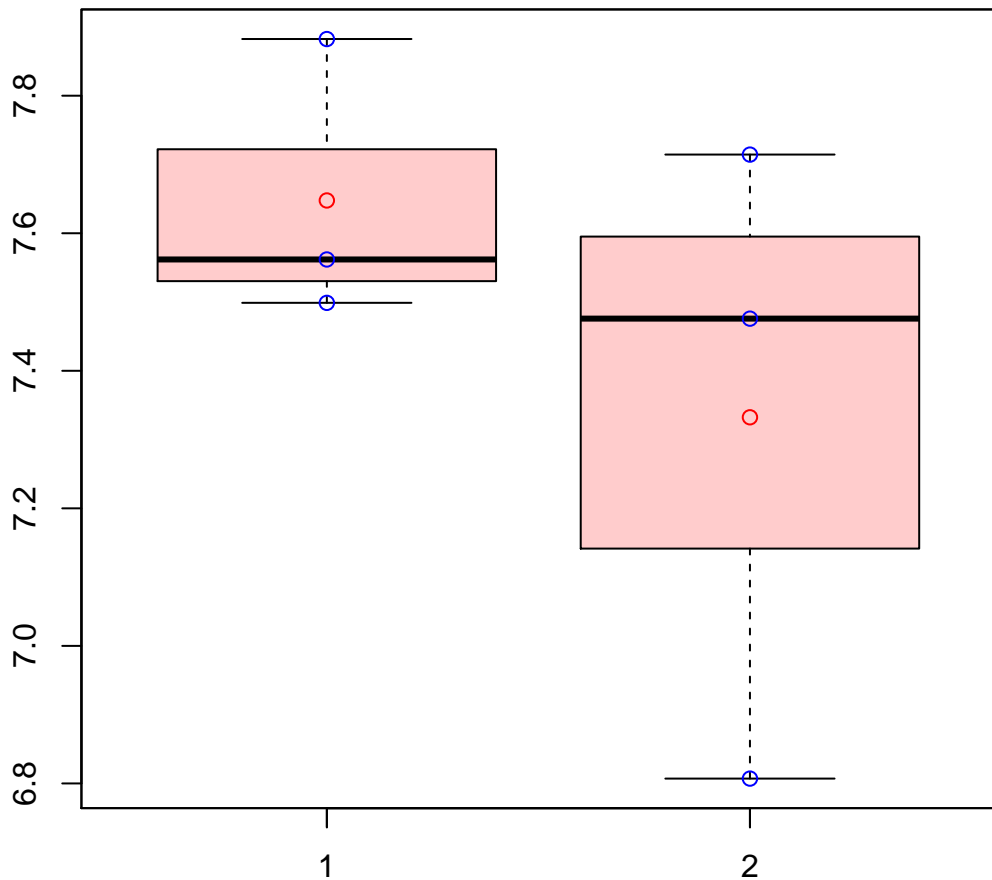

t-Test: p-value = 0.37

# C5XIJ3|C5XIJ3\_SORBI

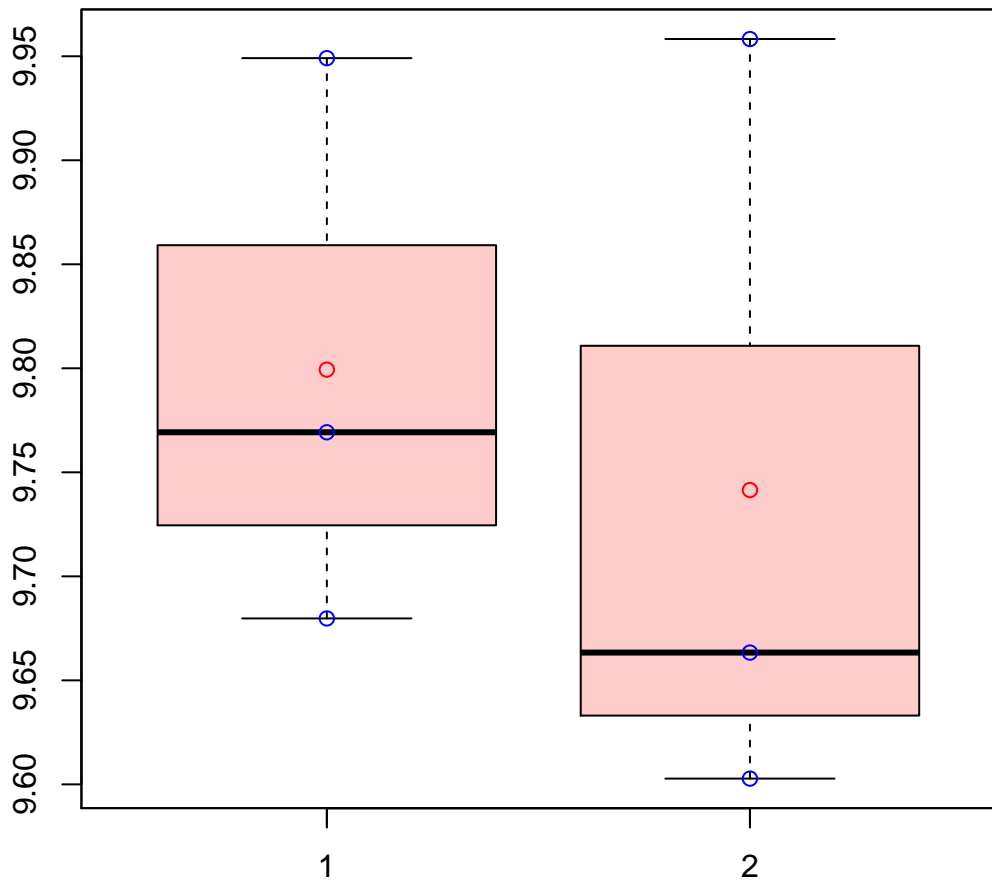

t-Test: p-value = 0.69

# C5XIL2|C5XIL2\_SORBI

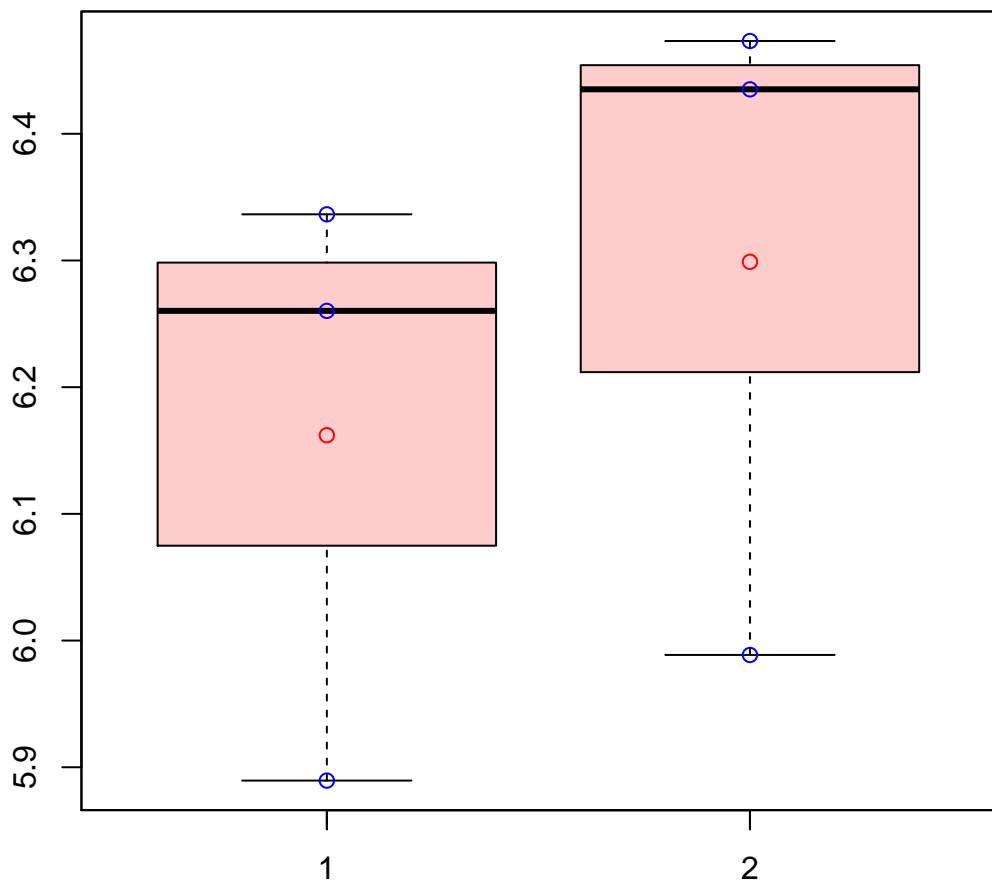

t-Test: p-value = 0.55

# C5XIY2|C5XIY2\_SORBI

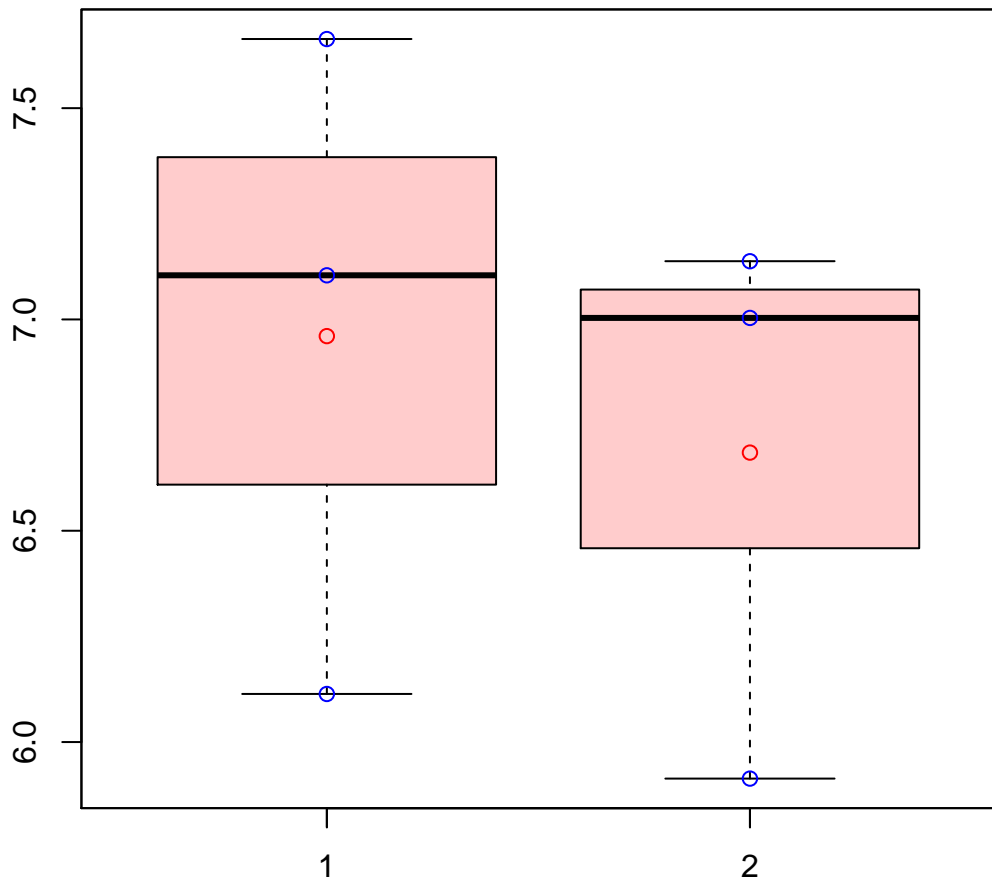

t-Test: p-value = 0.67

# C5XIY9|C5XIY9\_SORBI

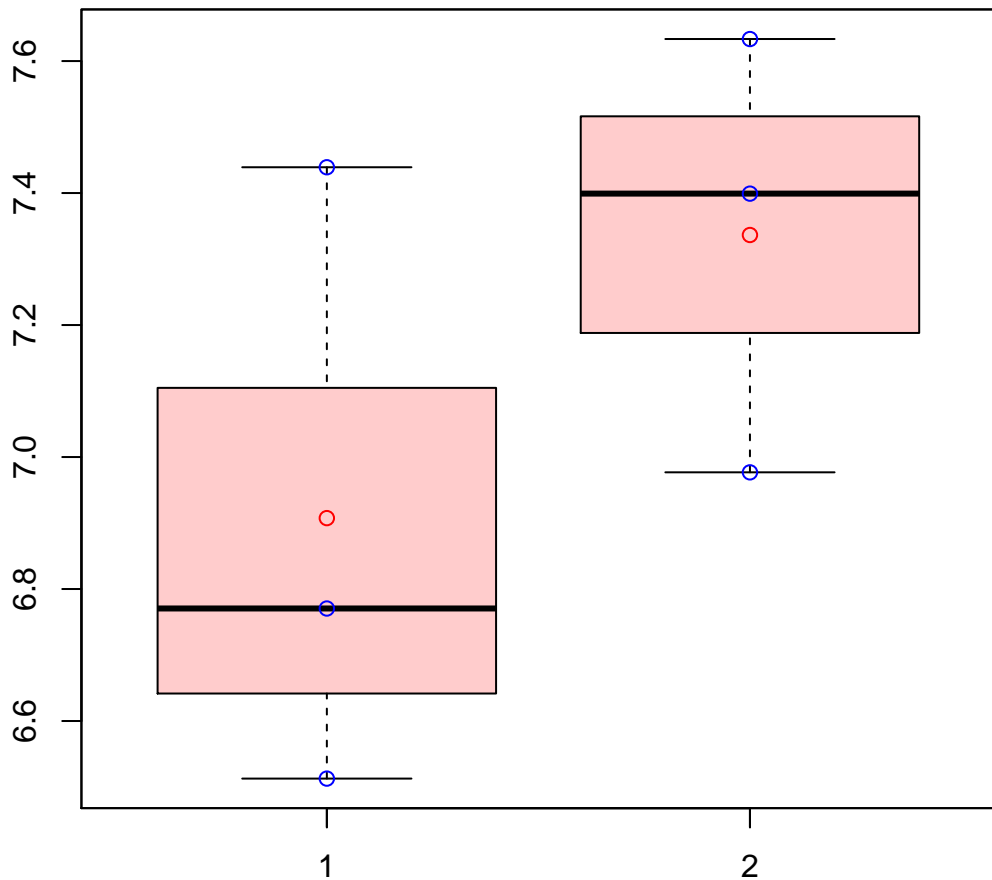

t-Test: p-value = 0.28

# C5XJP7|C5XJP7\_SORBI

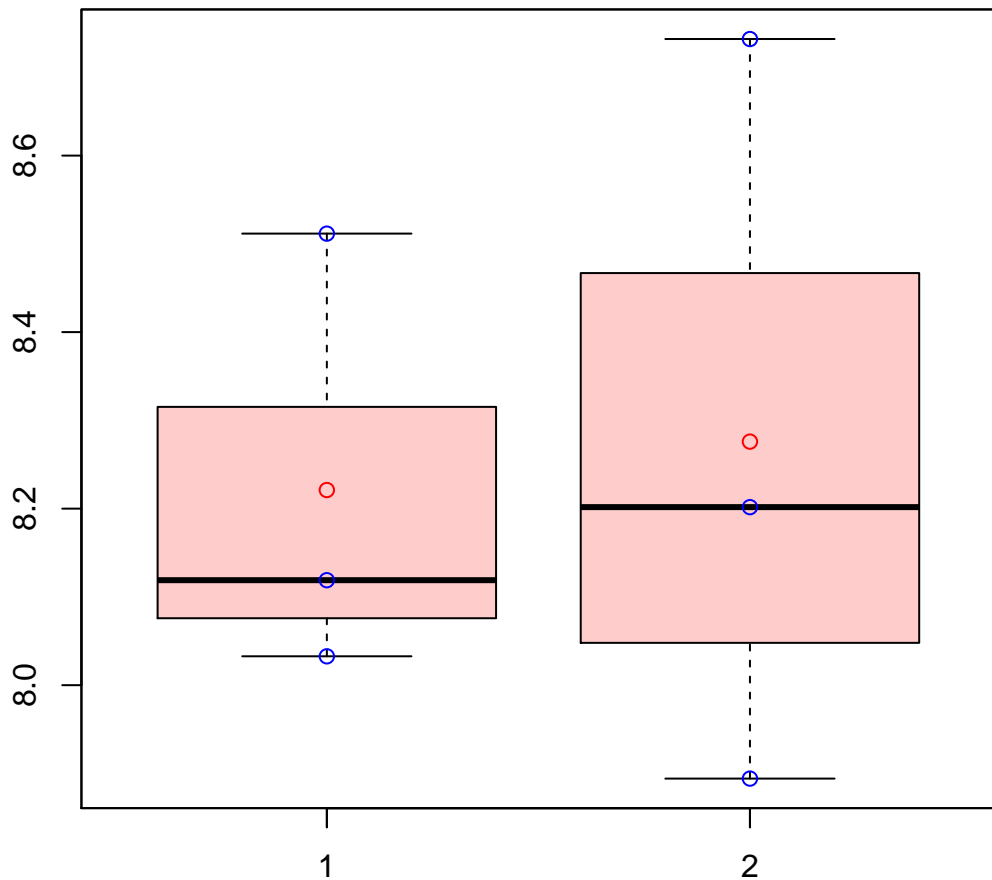

t-Test: p-value = 0.86



# C5XJT8|C5XJT8\_SORBI

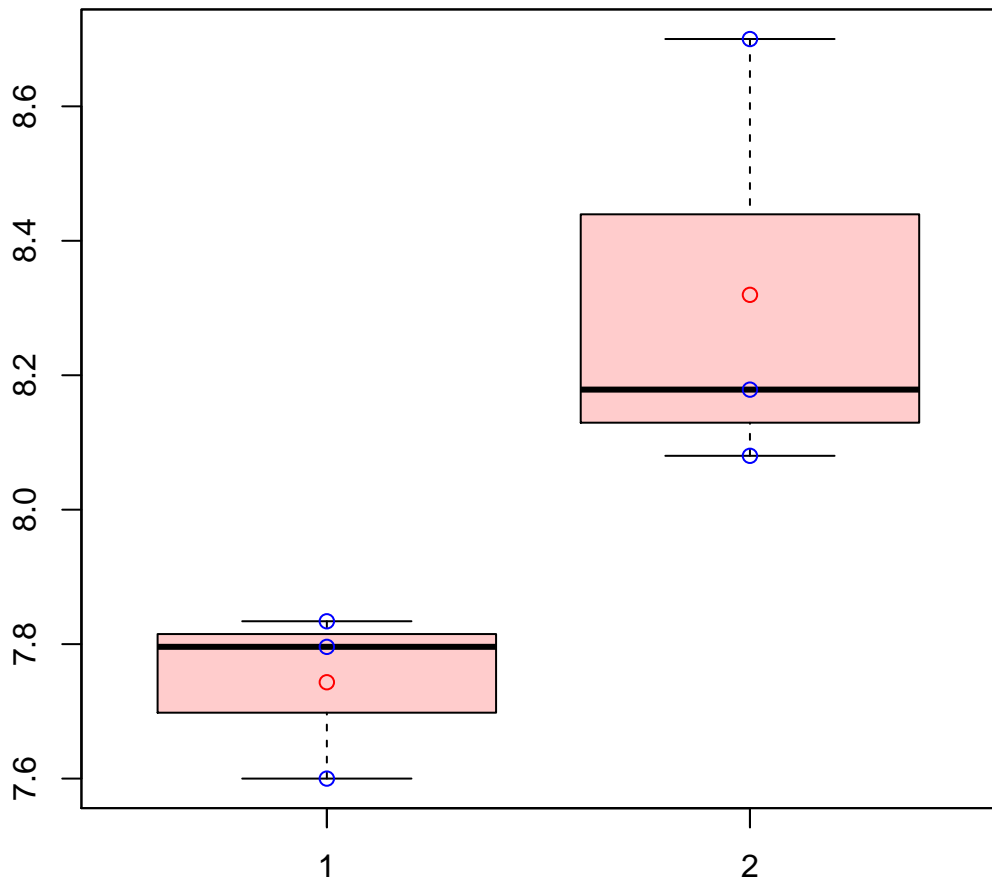

t-Test: p-value = 0.08

# C5XJZ3|C5XJZ3\_SORBI

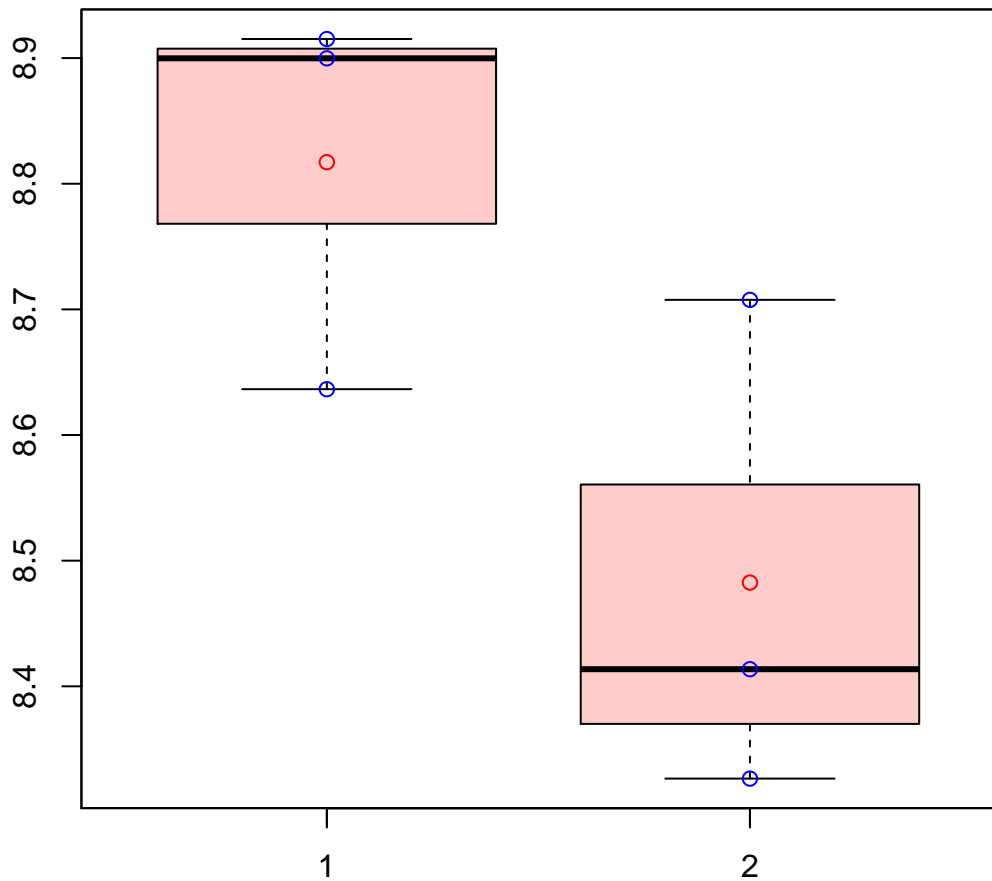

t-Test: p-value = 0.09

# C5XKC8|C5XKC8\_SORBI

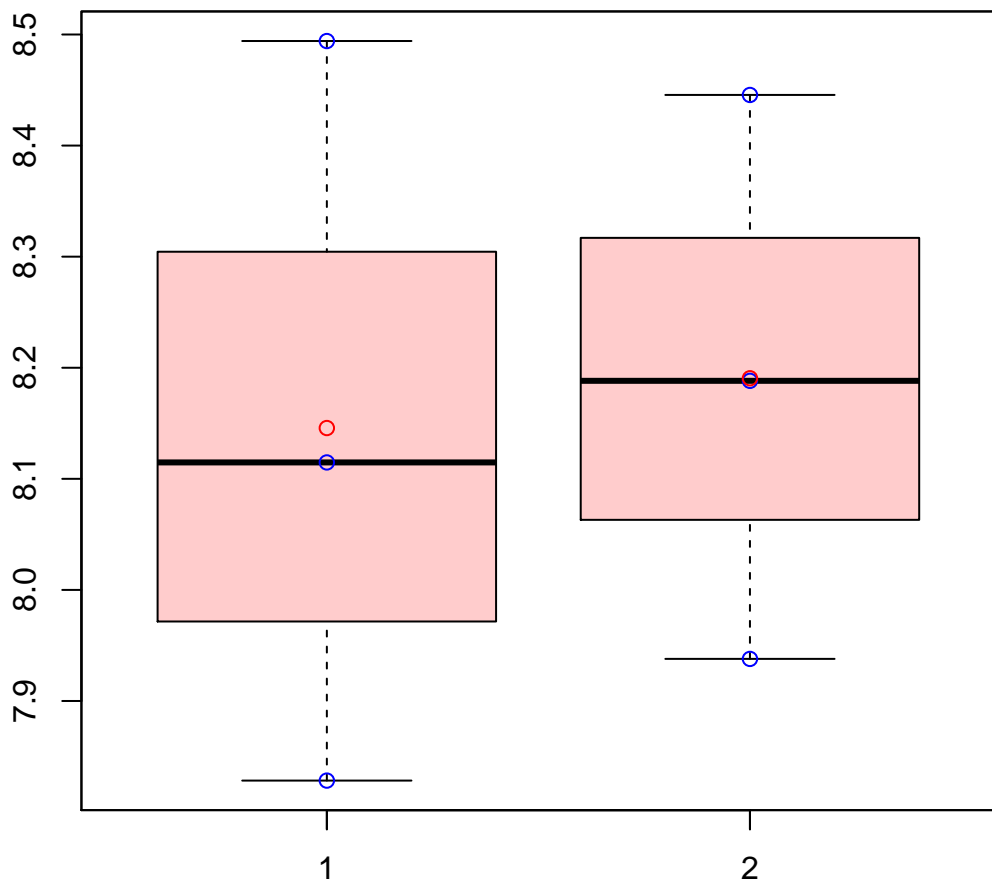

t-Test: p-value = 0.86

# C5XKF4|C5XKF4\_SORBI

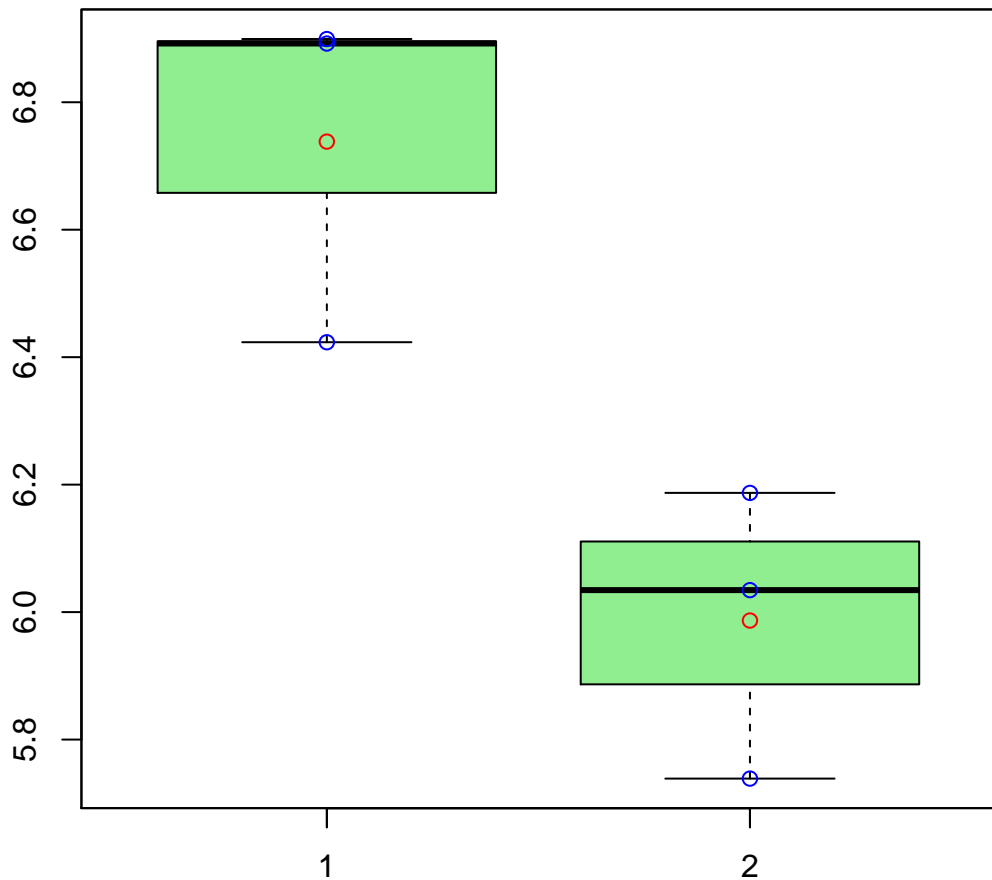

t-Test: p-value = 0.02

# C5XKU8|C5XKU8\_SORBI

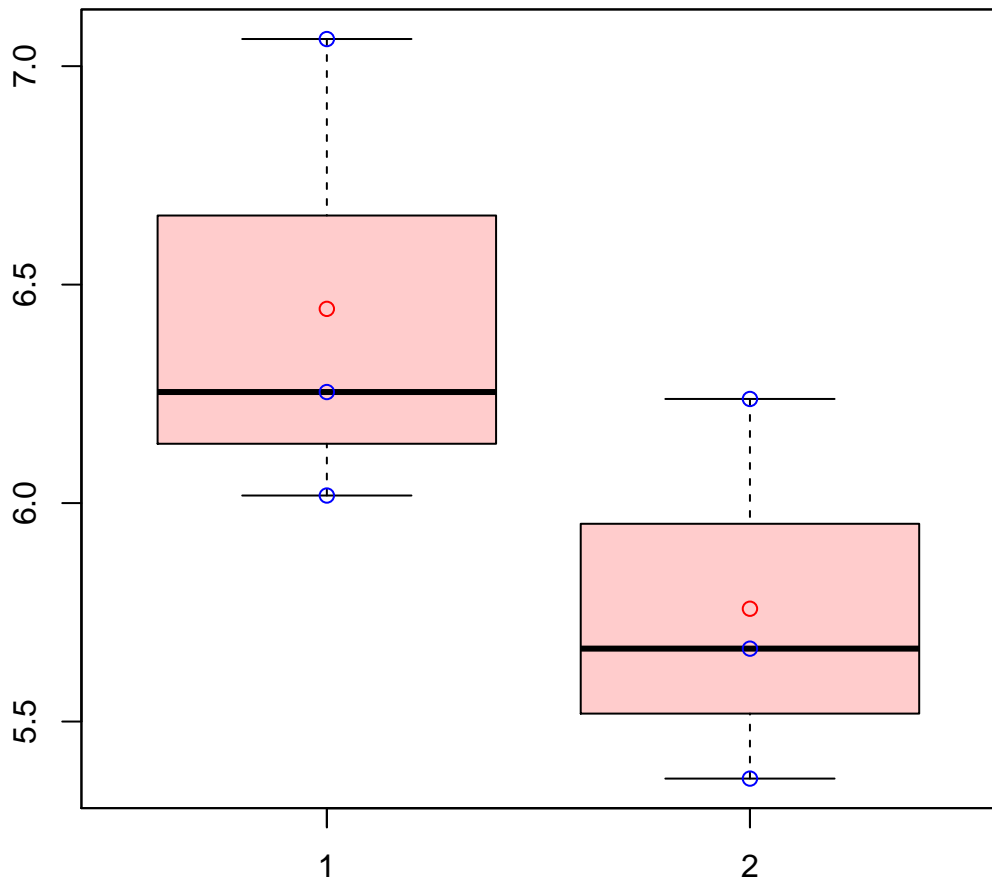

t-Test: p-value = 0.17

# C5XLI5|C5XLI5\_SORBI

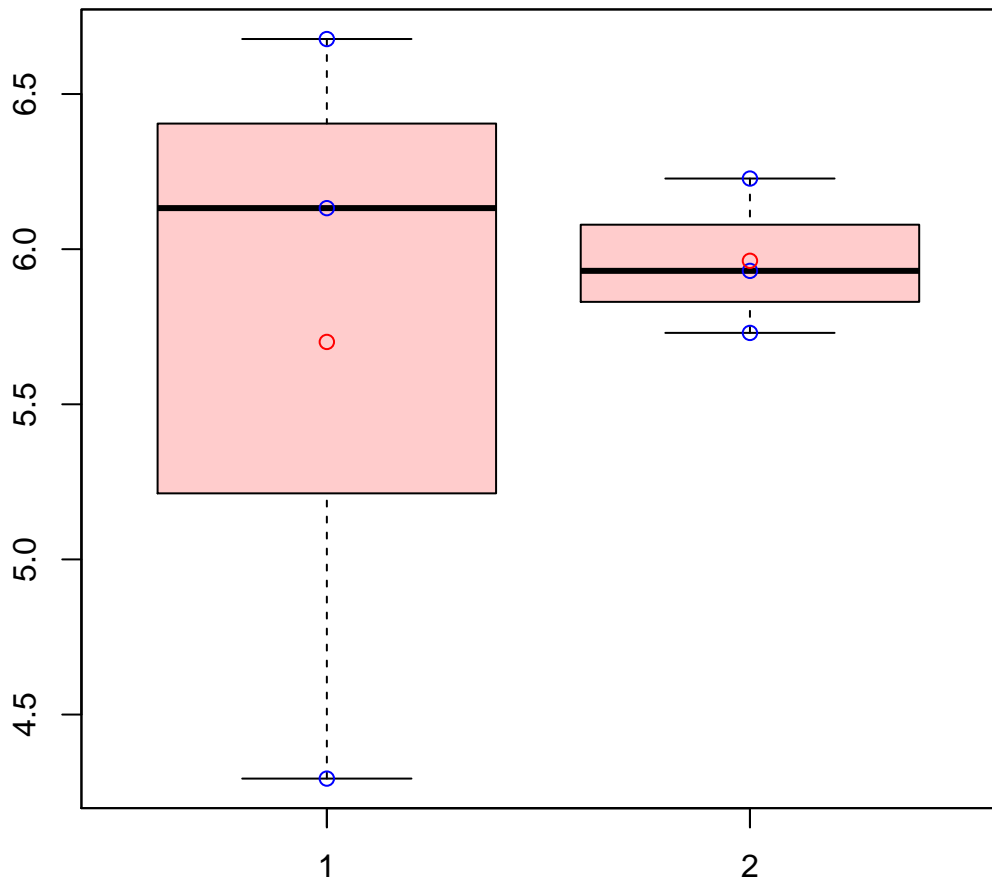

t-Test: p-value = 0.75

# C5XM26|C5XM26\_SORBI

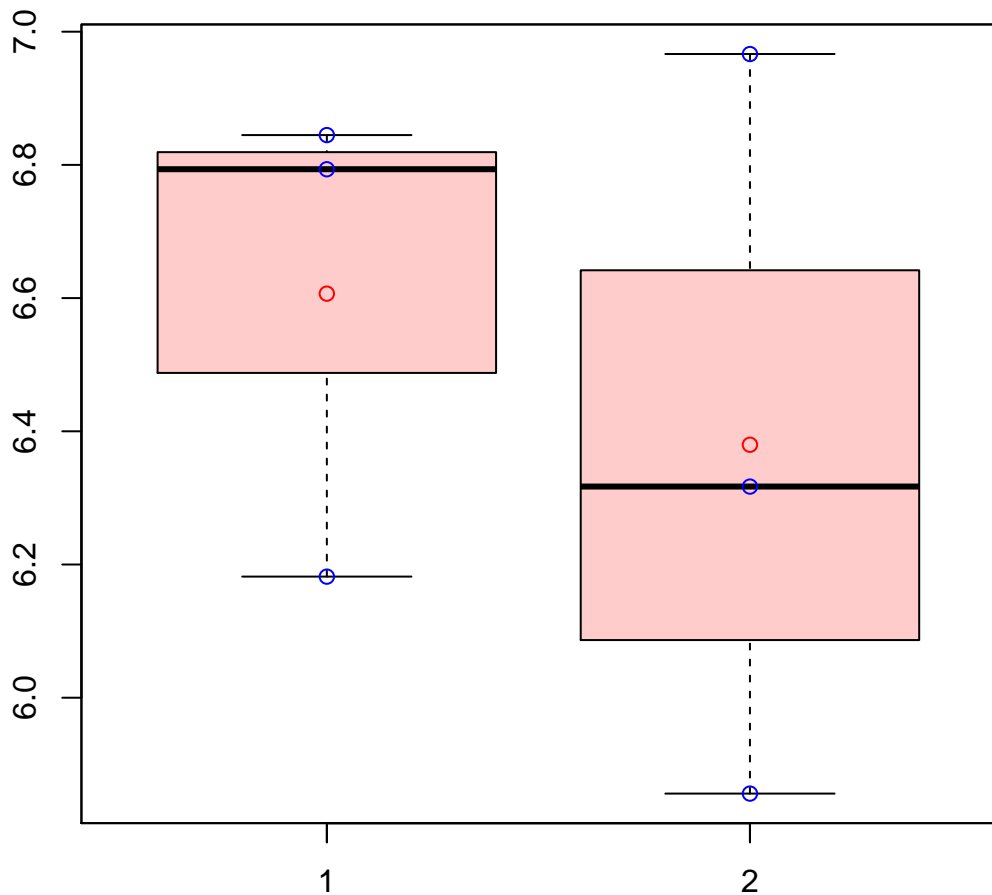

t-Test: p-value = 0.59

# C5XN42|C5XN42\_SORBI

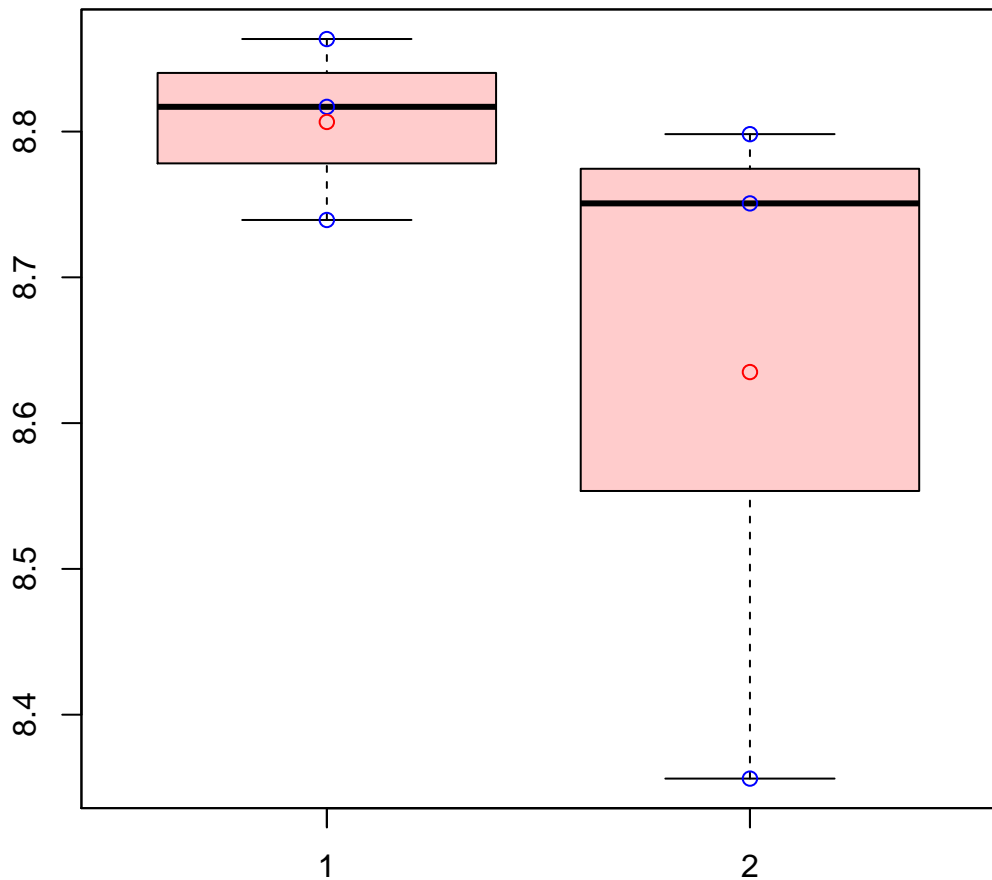

t-Test: p-value = 0.35



# C5XNA4|C5XNA4\_SORBI

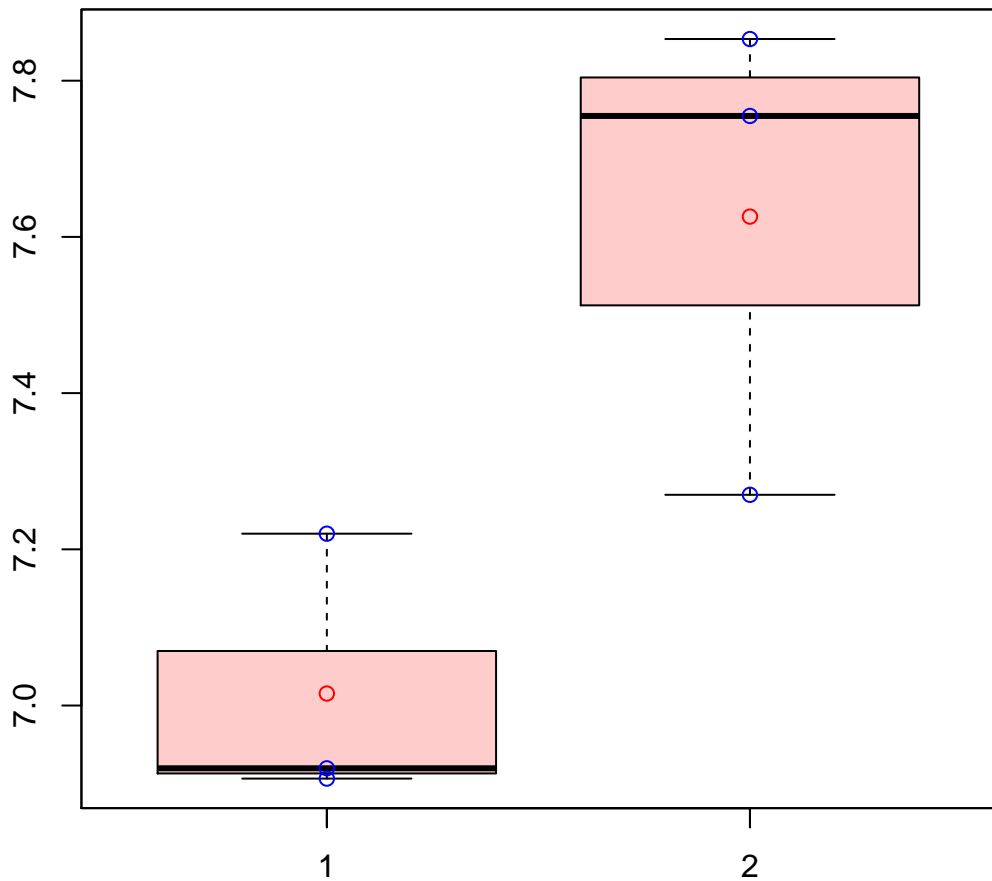

t-Test: p-value = 0.06

# C5XPC6|C5XPC6\_SORBI

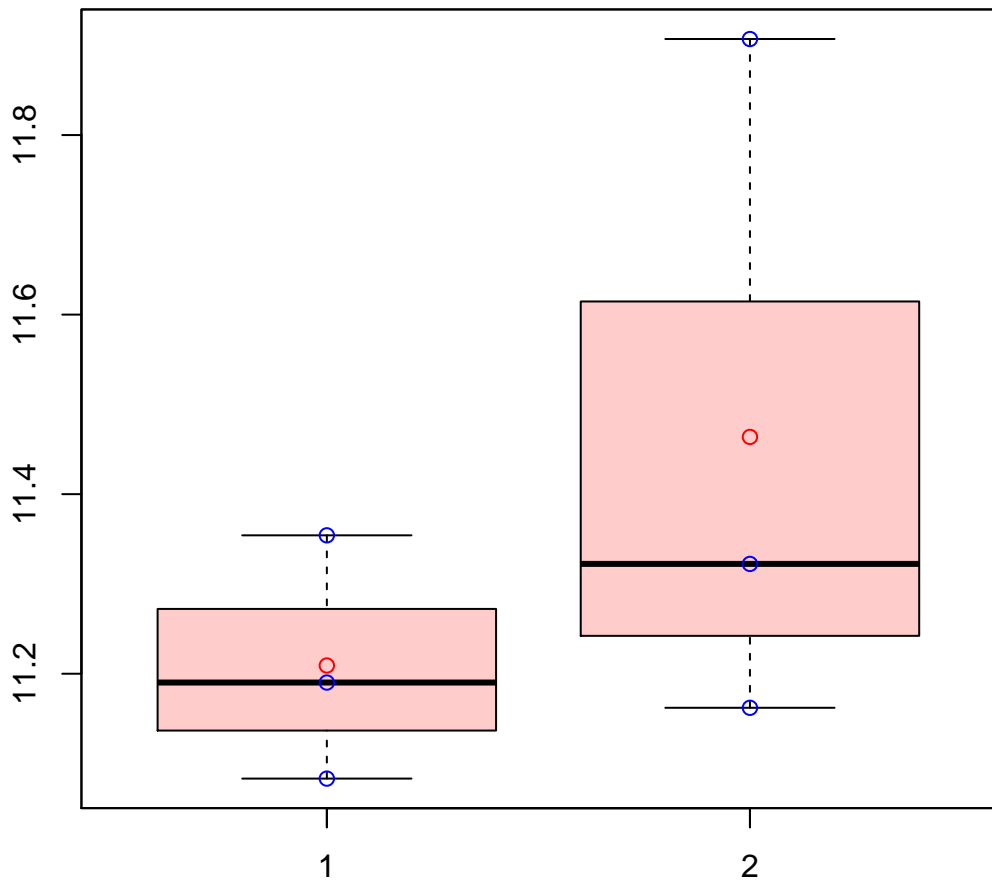

t-Test: p-value = 0.38

# C5XPF5|C5XPF5\_SORBI

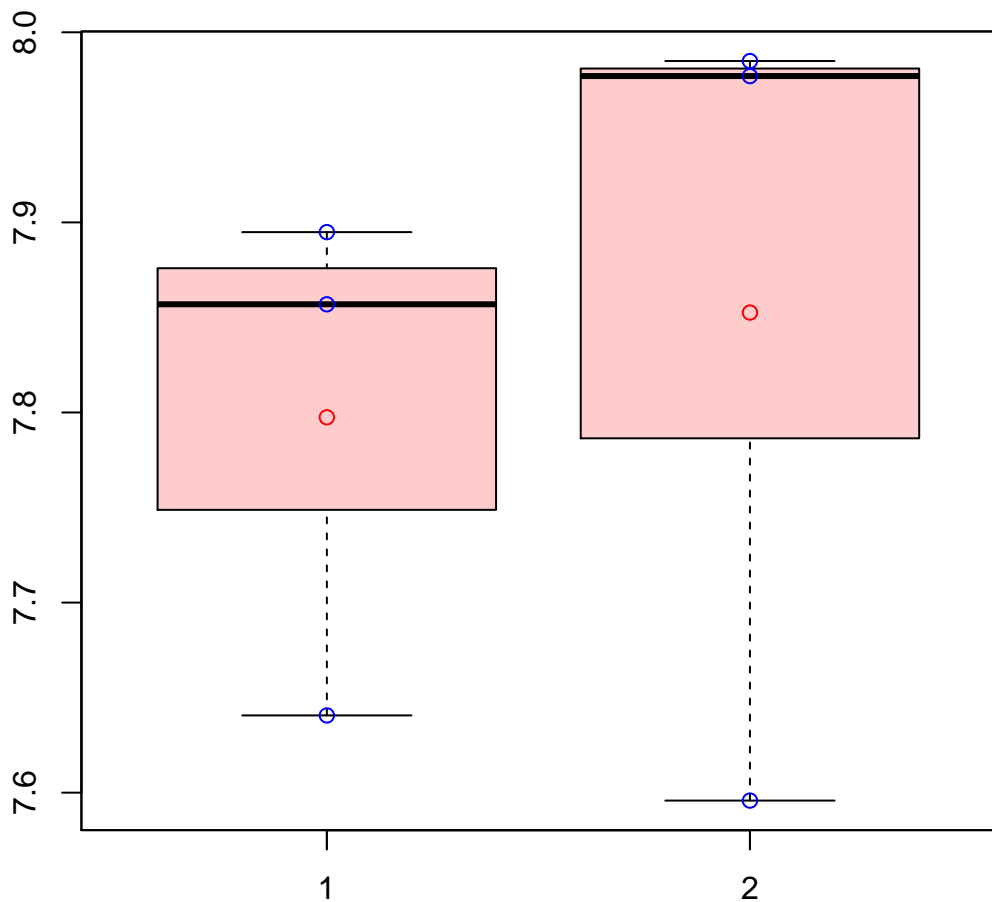

t-Test: p-value = 0.74

# C5XPF6|C5XPF6\_SORBI

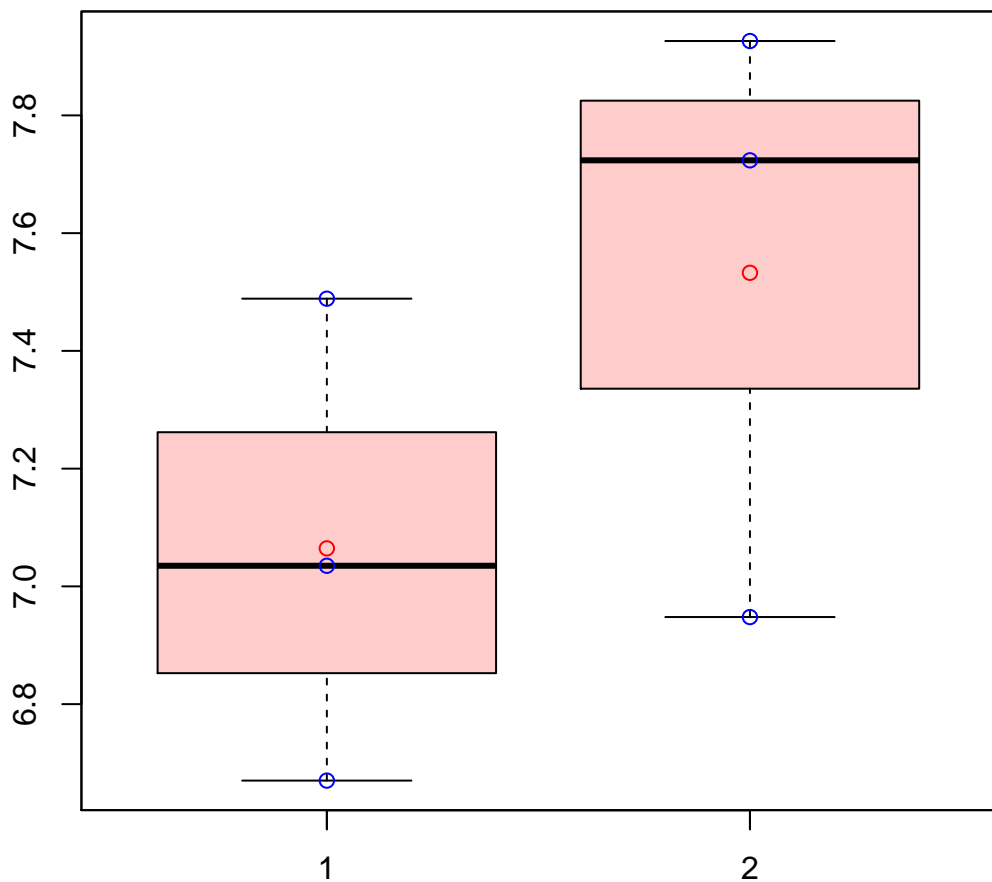

t-Test: p-value = 0.29

# C5XPP3|C5XPP3\_SORBI

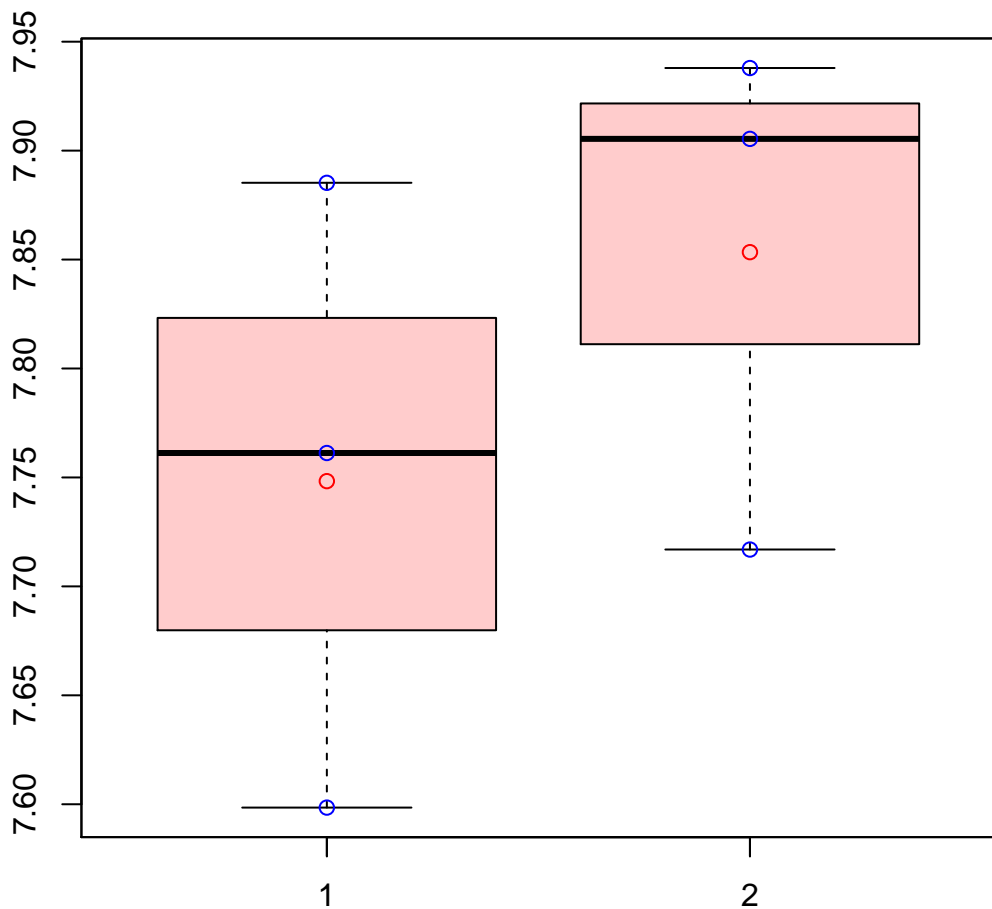

t-Test: p-value = 0.39

# C5XPT2|C5XPT2\_SORBI

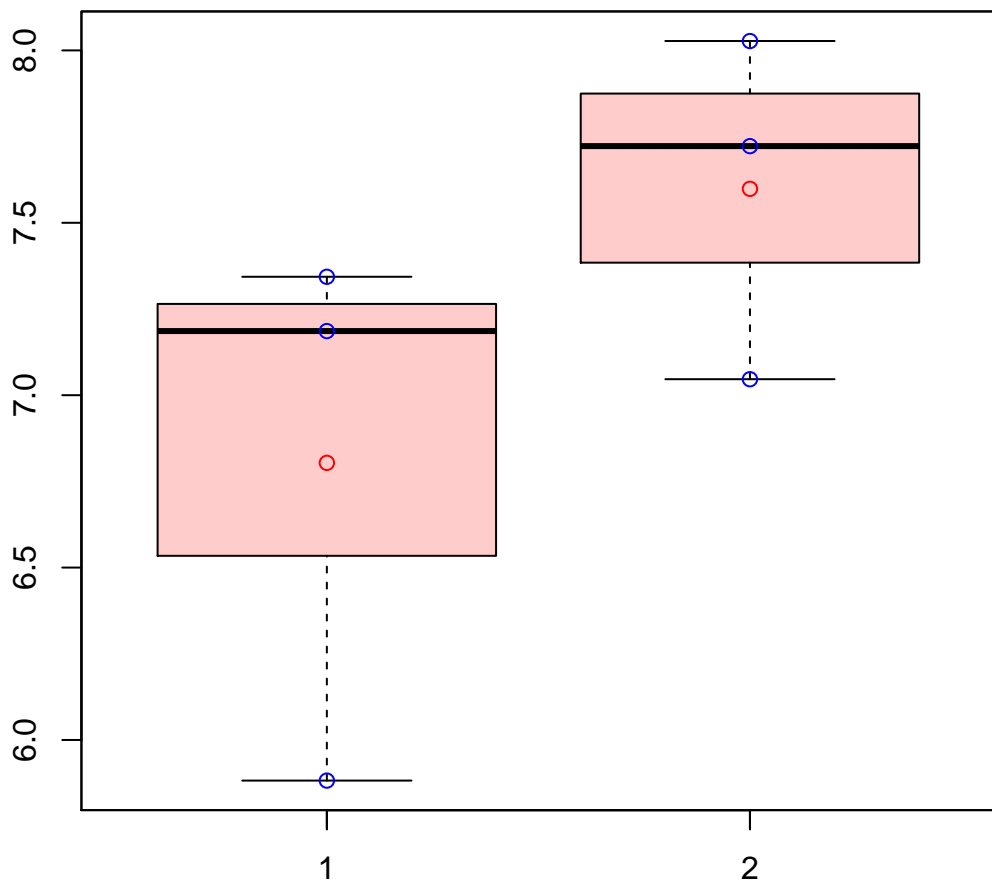

t-Test: p-value = 0.23

# C5XPV6|C5XPV6\_SORBI

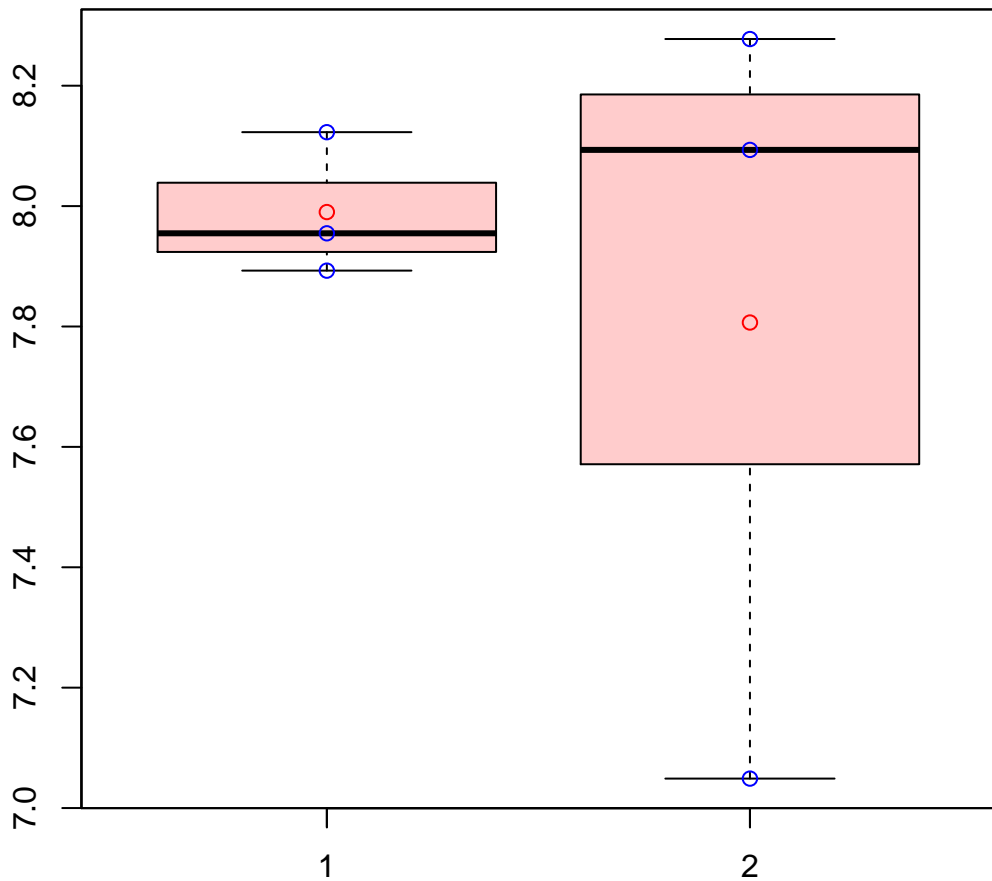

t-Test: p-value = 0.68

# C5XQ07|C5XQ07\_SORBI

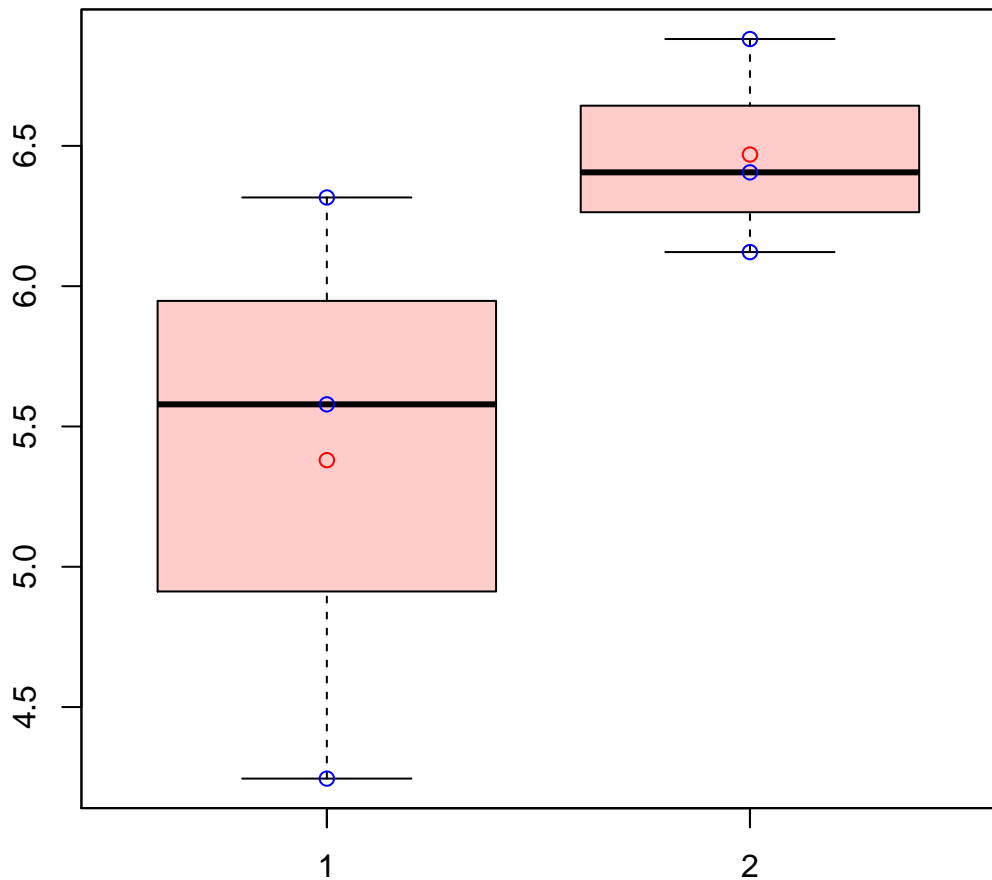

t-Test: p-value = 0.21



# C5XQ83|C5XQ83\_SORBI

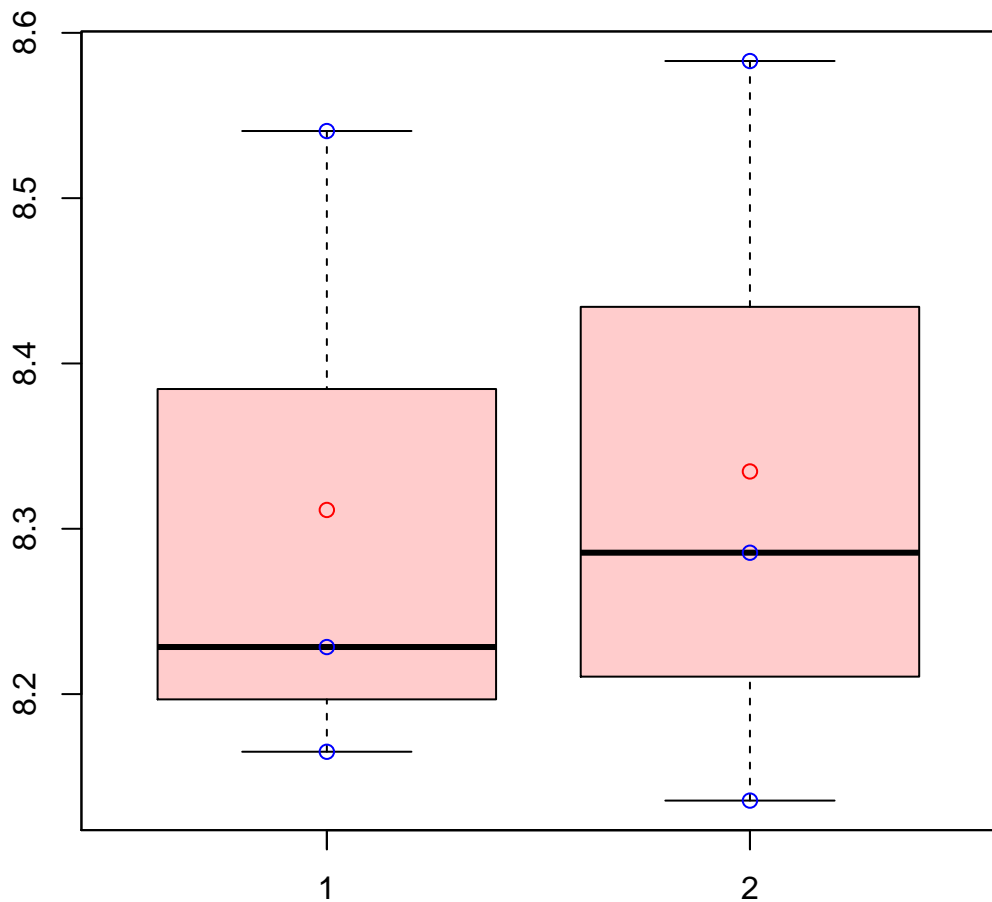

t-Test: p-value = 0.9

# C5XQI0|C5XQI0\_SORBI

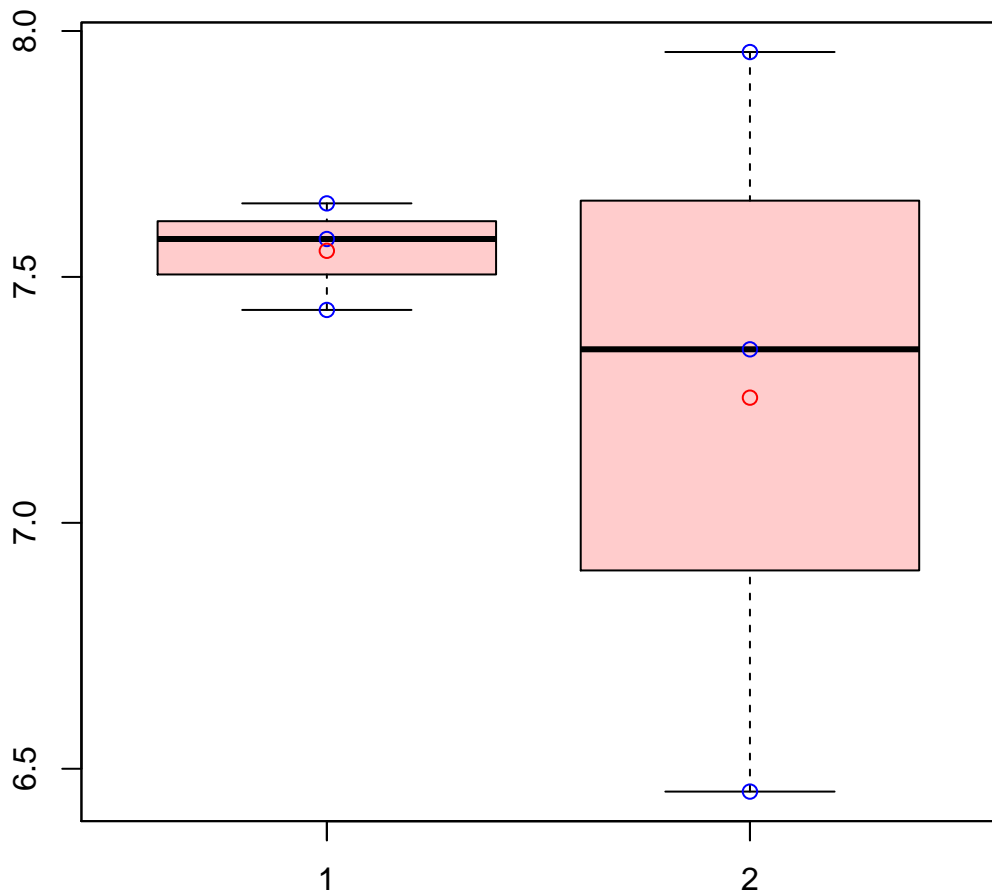

t-Test: p-value = 0.57

# C5XQK7|C5XQK7\_SORBI

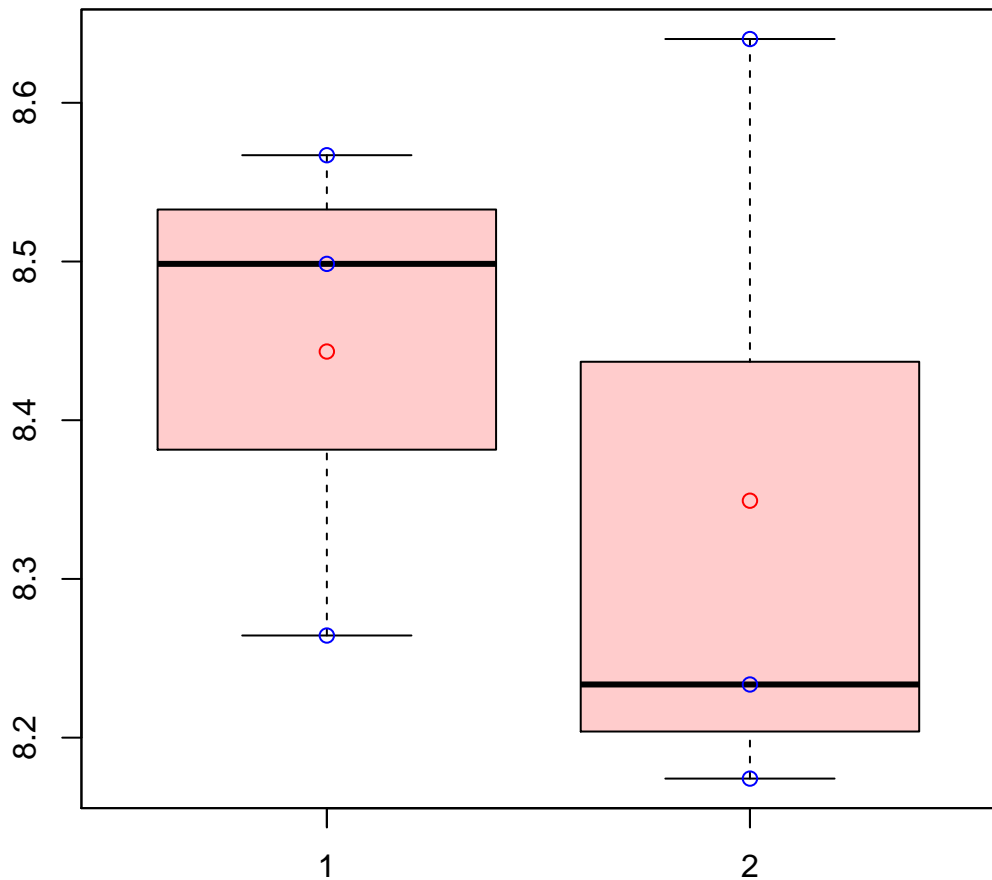

t-Test: p-value = 0.62

# C5XR33|C5XR33\_SORBI

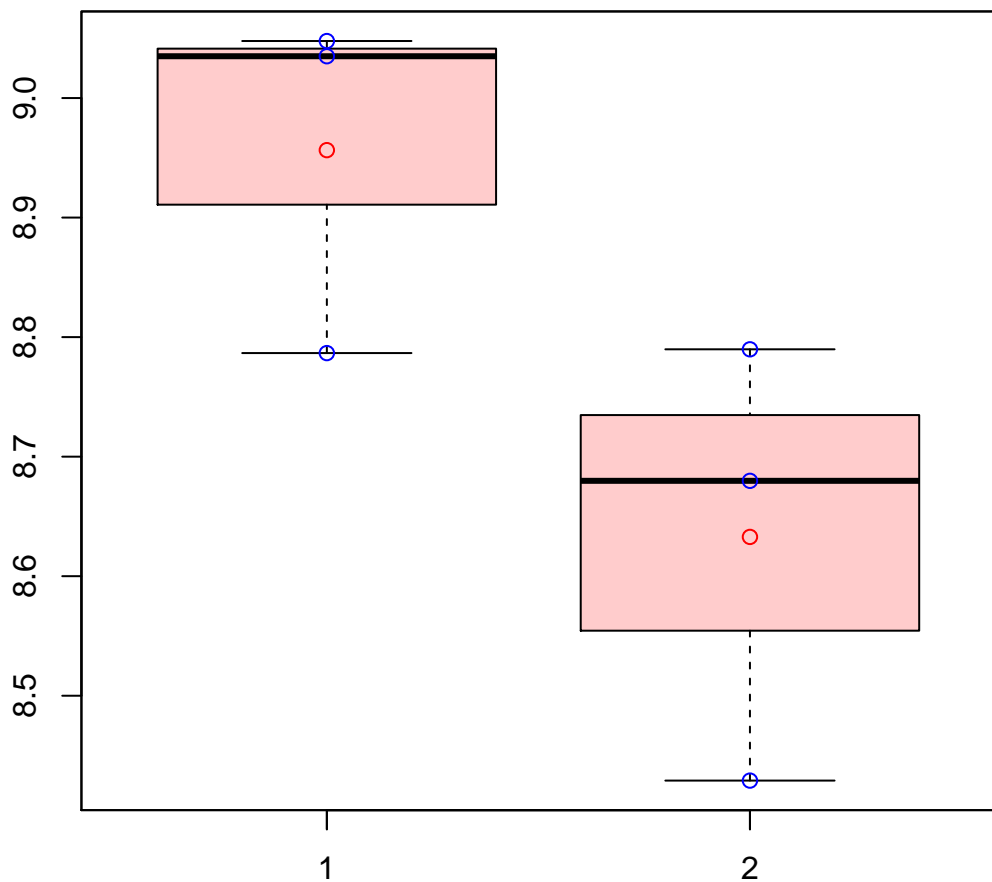

t-Test: p-value = 0.08

# C5XRA0|C5XRA0\_SORBI

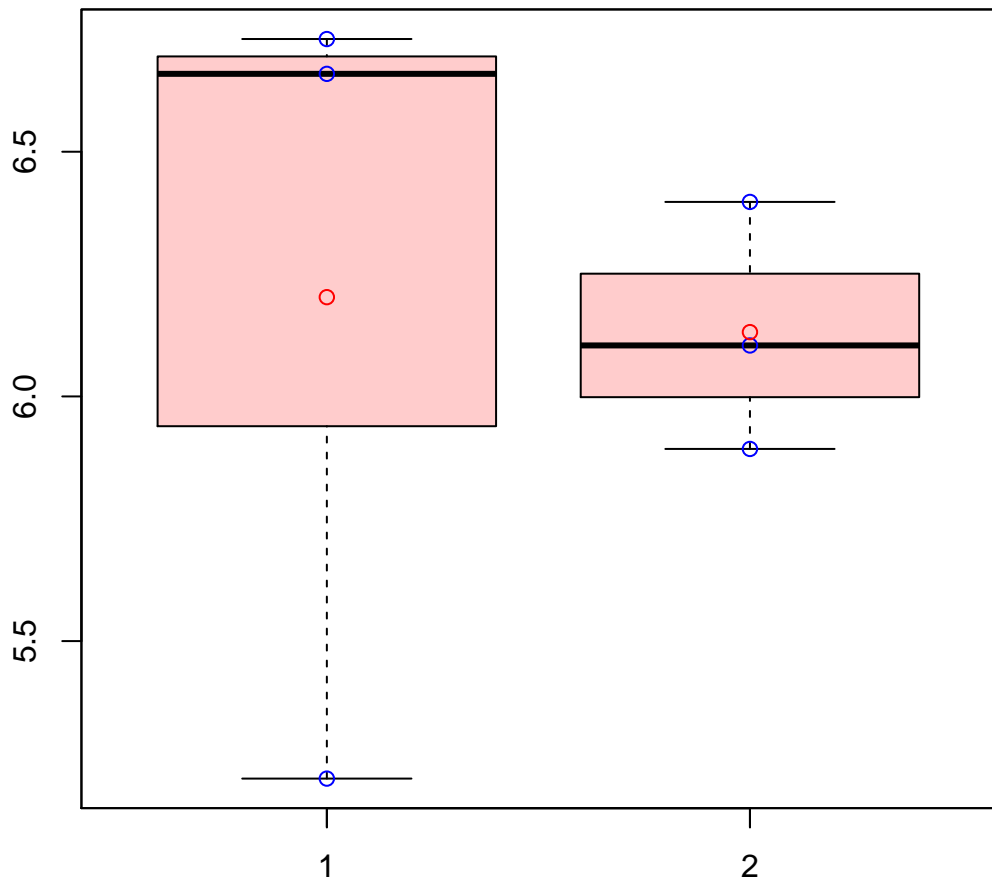

t-Test: p-value = 0.9

# C5XRA7|C5XRA7\_SORBI

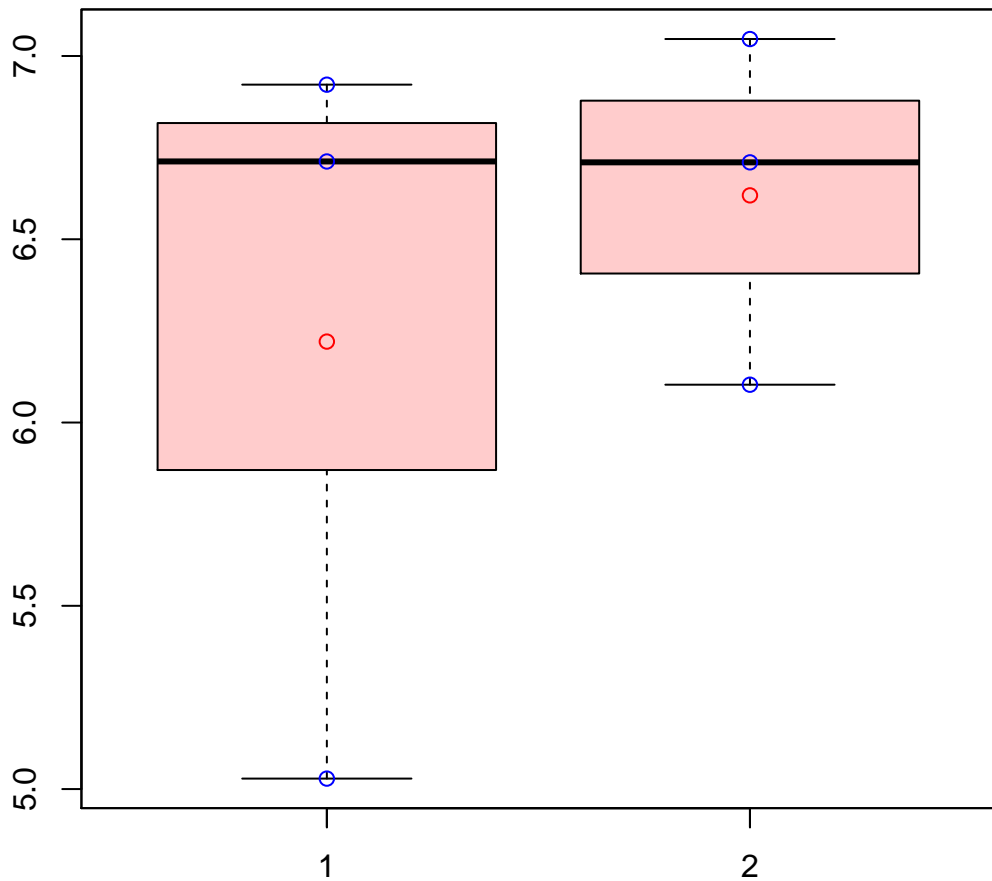

t-Test: p-value = 0.59

# C5XSE2|C5XSE2\_SORBI

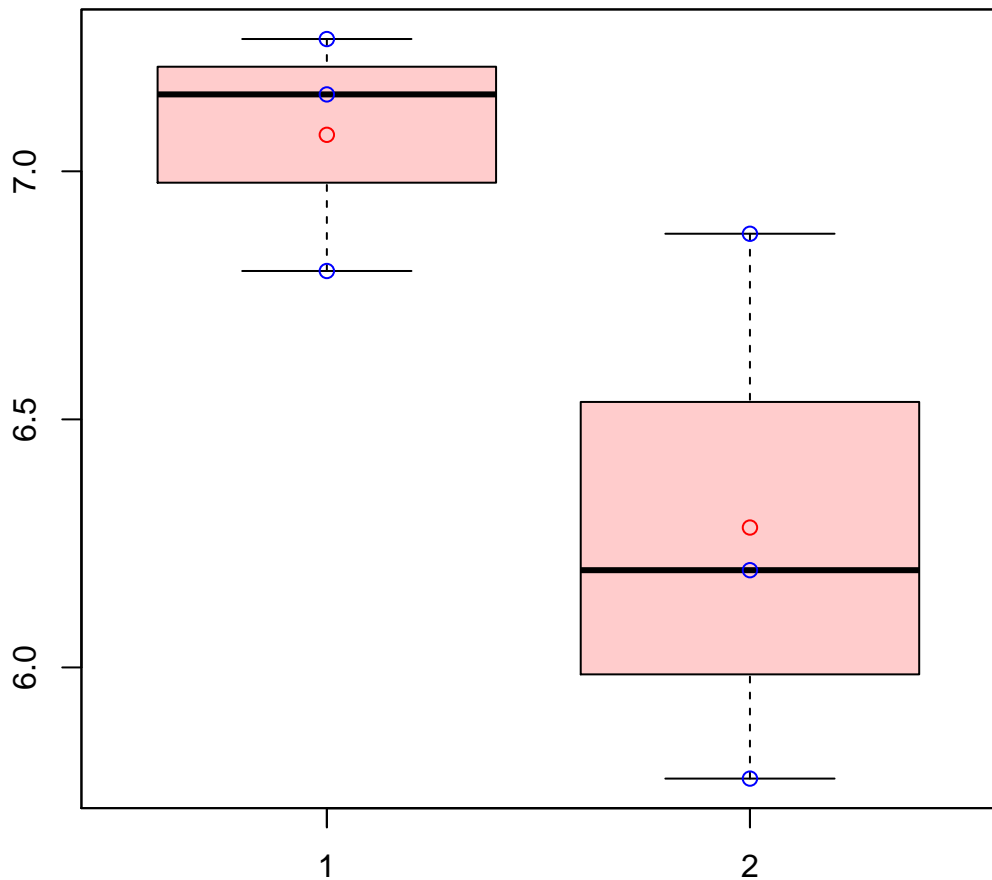

t-Test: p-value = 0.12

# C5XSH8|C5XSH8\_SORBI

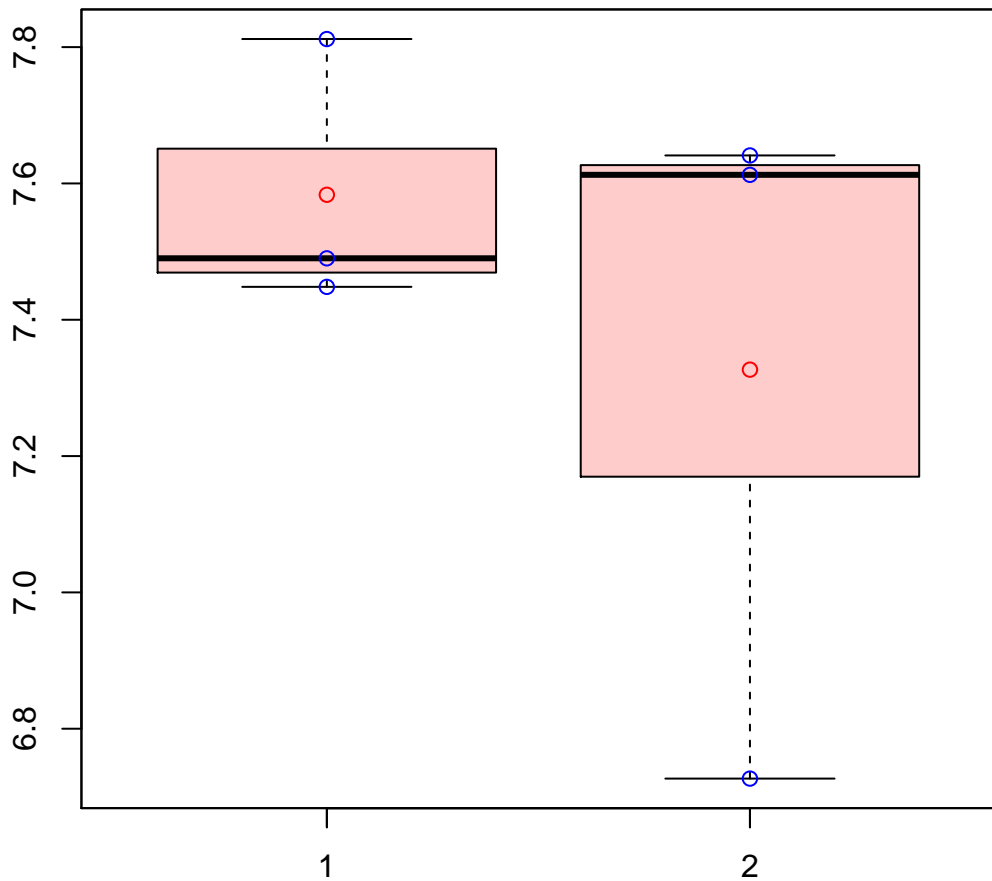

t-Test: p-value = 0.49



# C5XSJ5|C5XSJ5\_SORBI

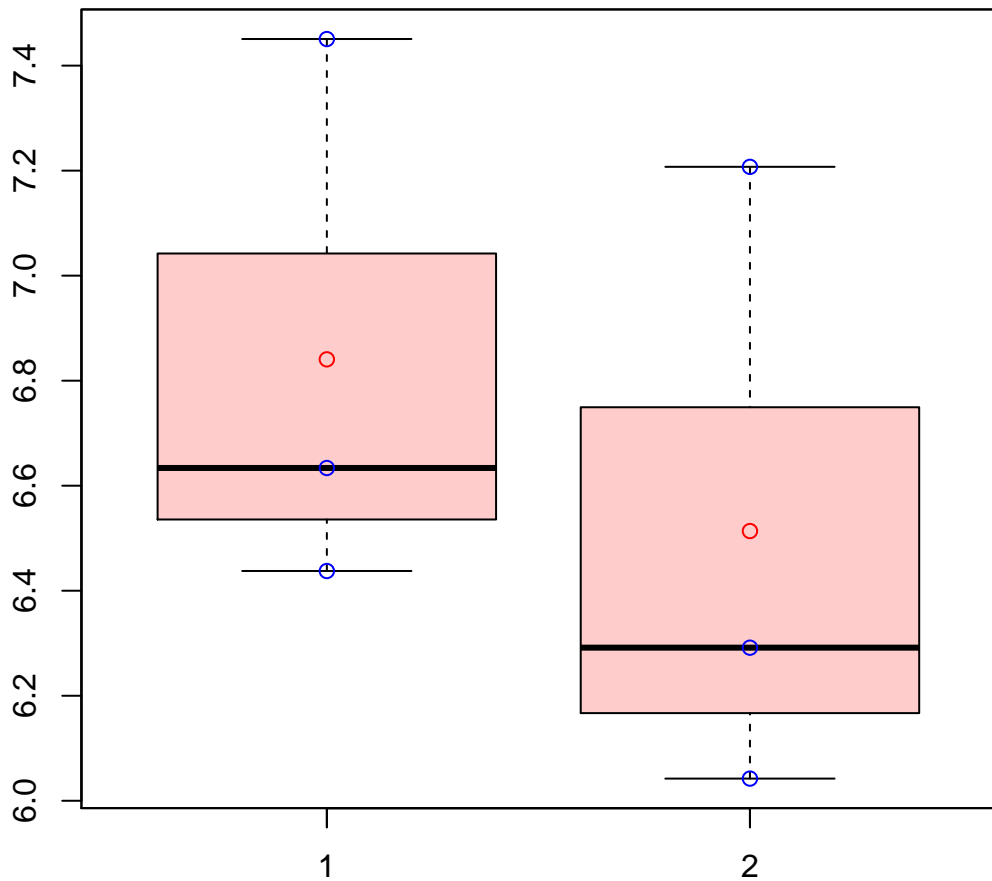

t-Test: p-value = 0.53

# C5XSW1|C5XSW1\_SORBI

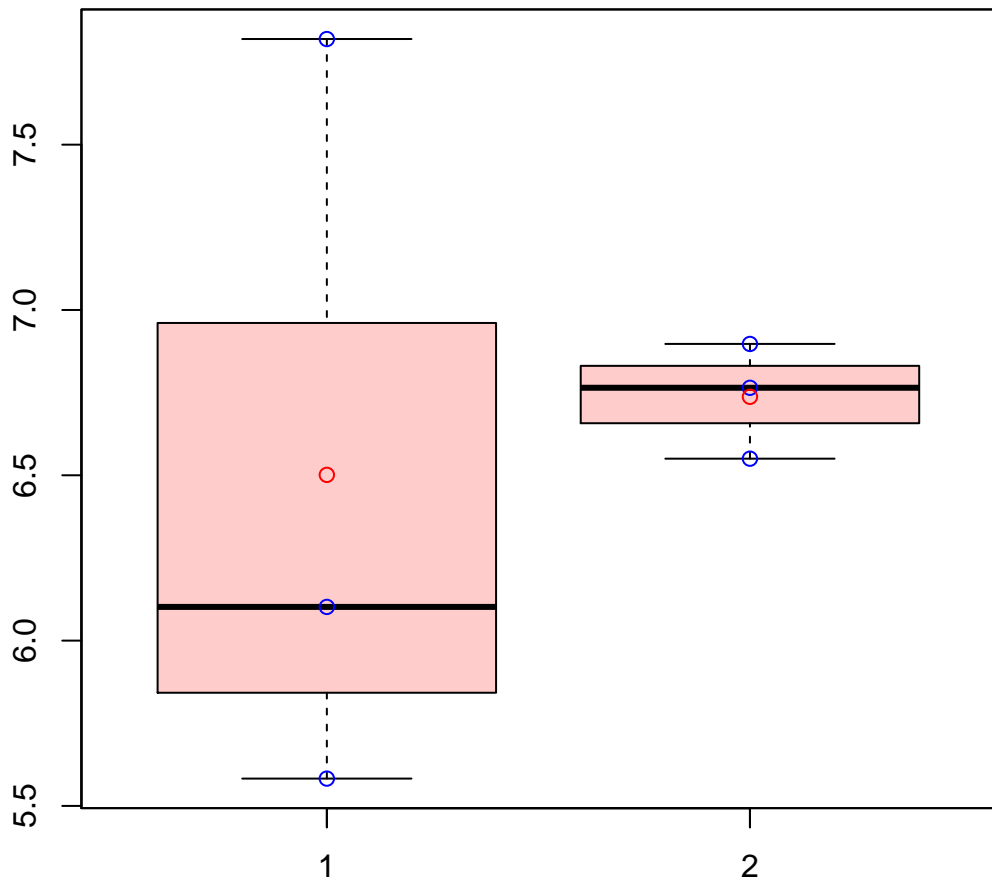

t-Test: p-value = 0.76

# C5XSW9|C5XSW9\_SORBI

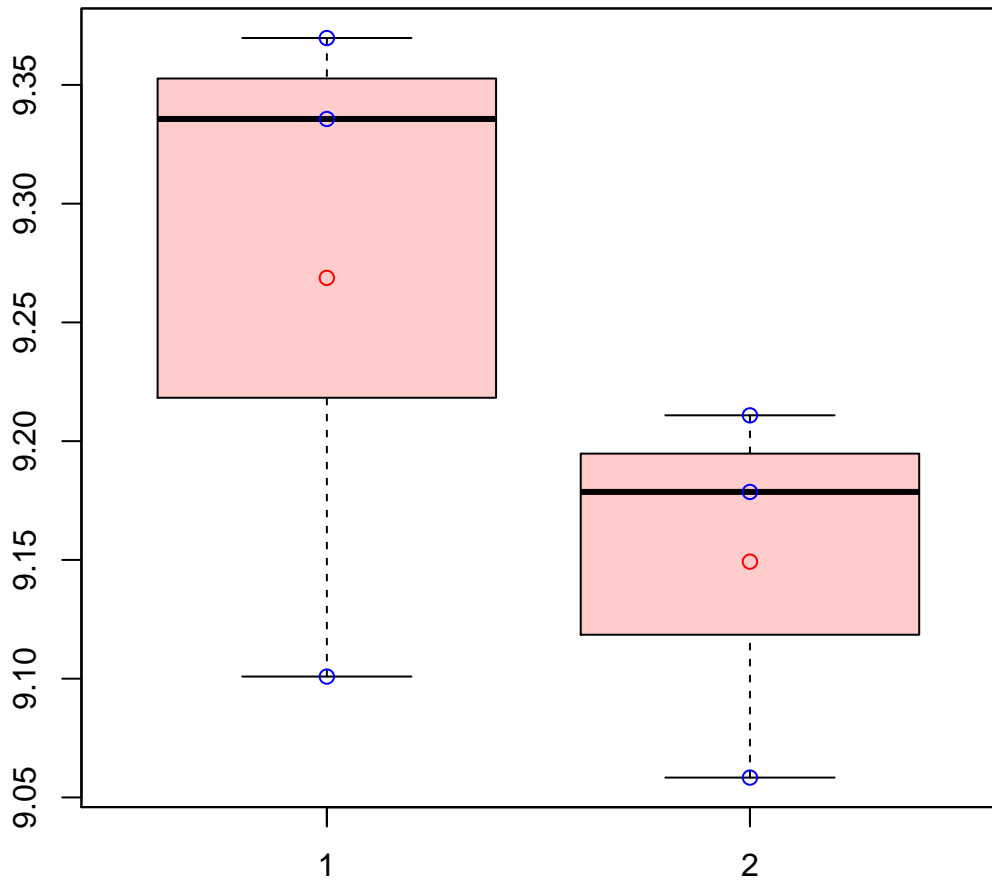

t-Test: p-value = 0.3

# C5XT06|C5XT06\_SORBI

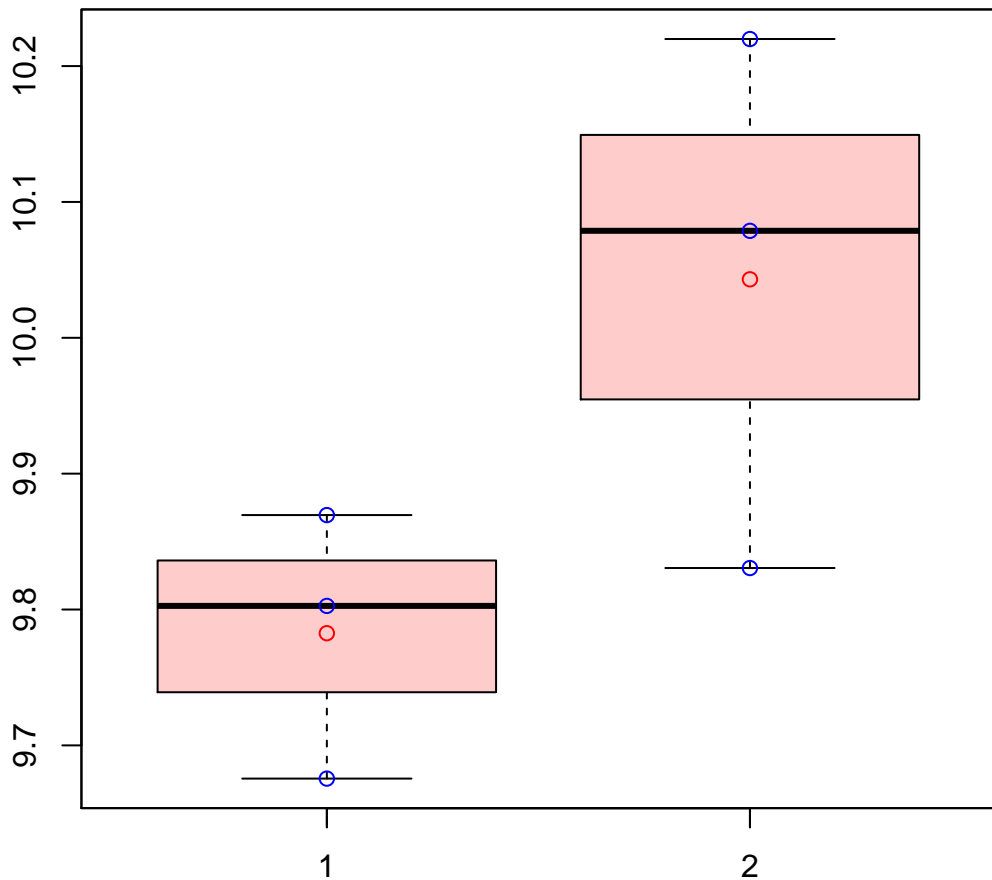

t-Test: p-value = 0.13

# C5XT25|C5XT25\_SORBI

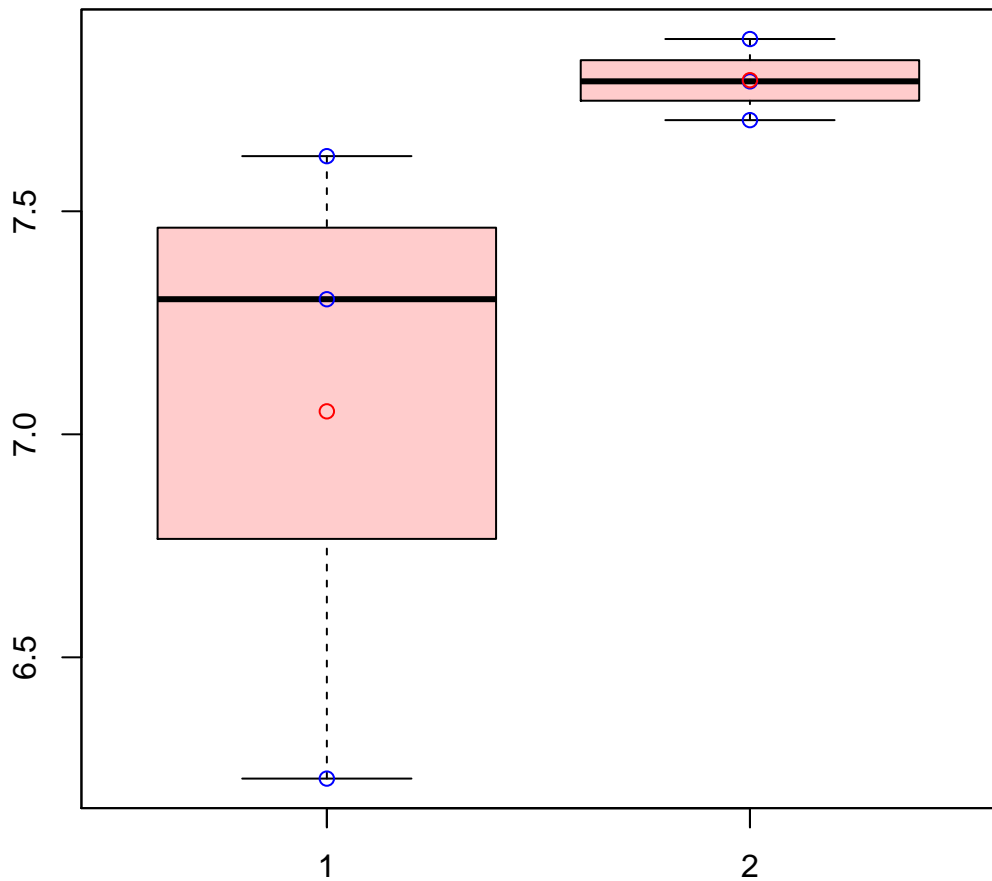

t-Test: p-value = 0.22

# C5XT35|C5XT35\_SORBI

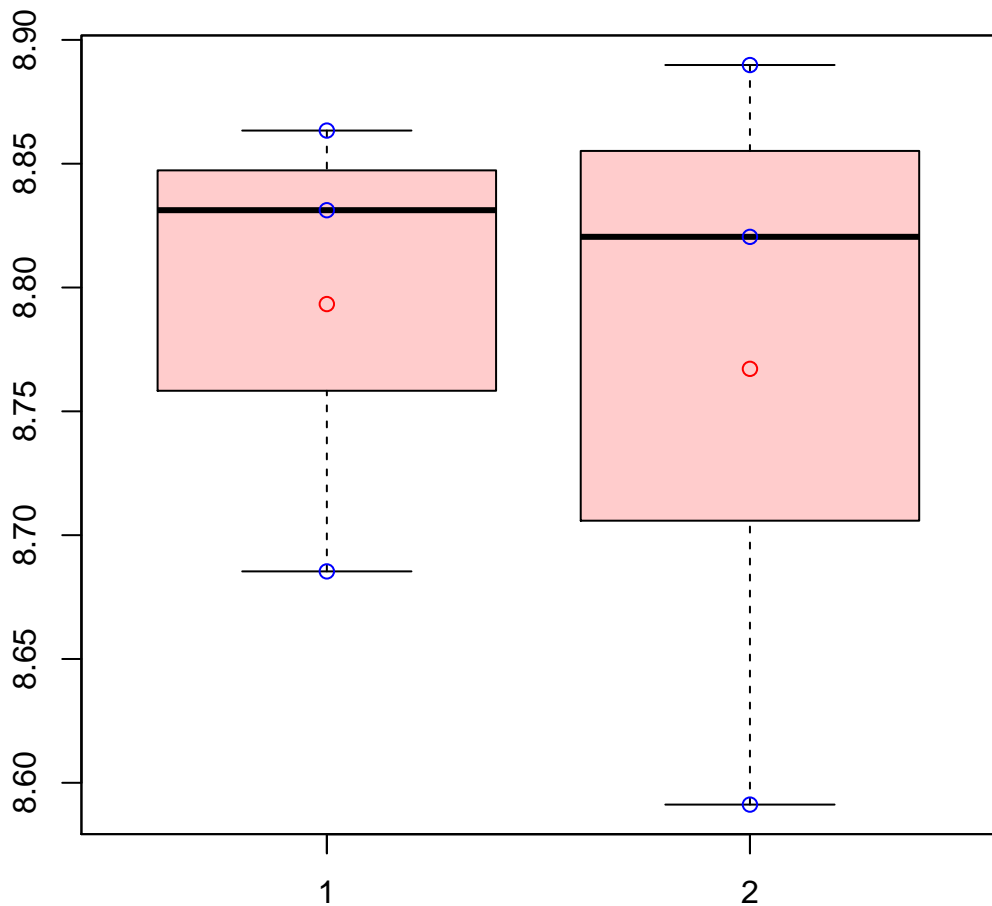

t-Test: p-value = 0.82

# C5XTP0|C5XTP0\_SORBI

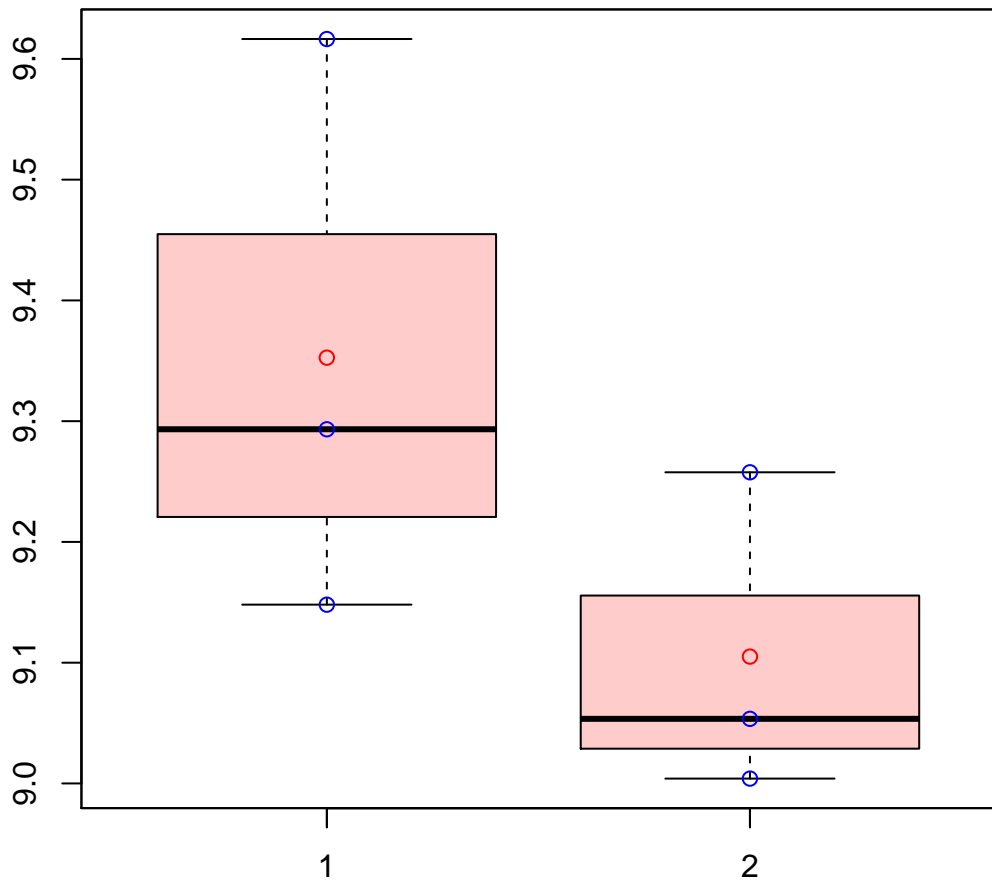

t-Test: p-value = 0.21

# C5XTY9|C5XTY9\_SORBI

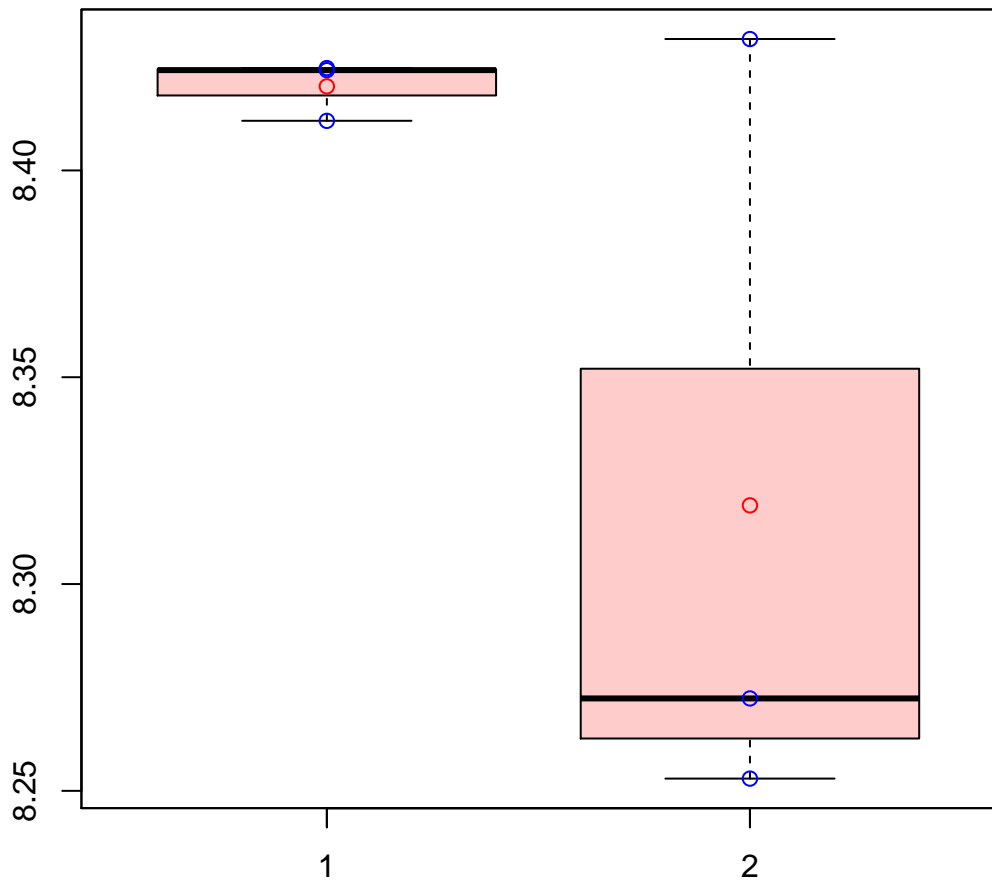

t-Test: p-value = 0.22



# C5XTZ4|C5XTZ4\_SORBI

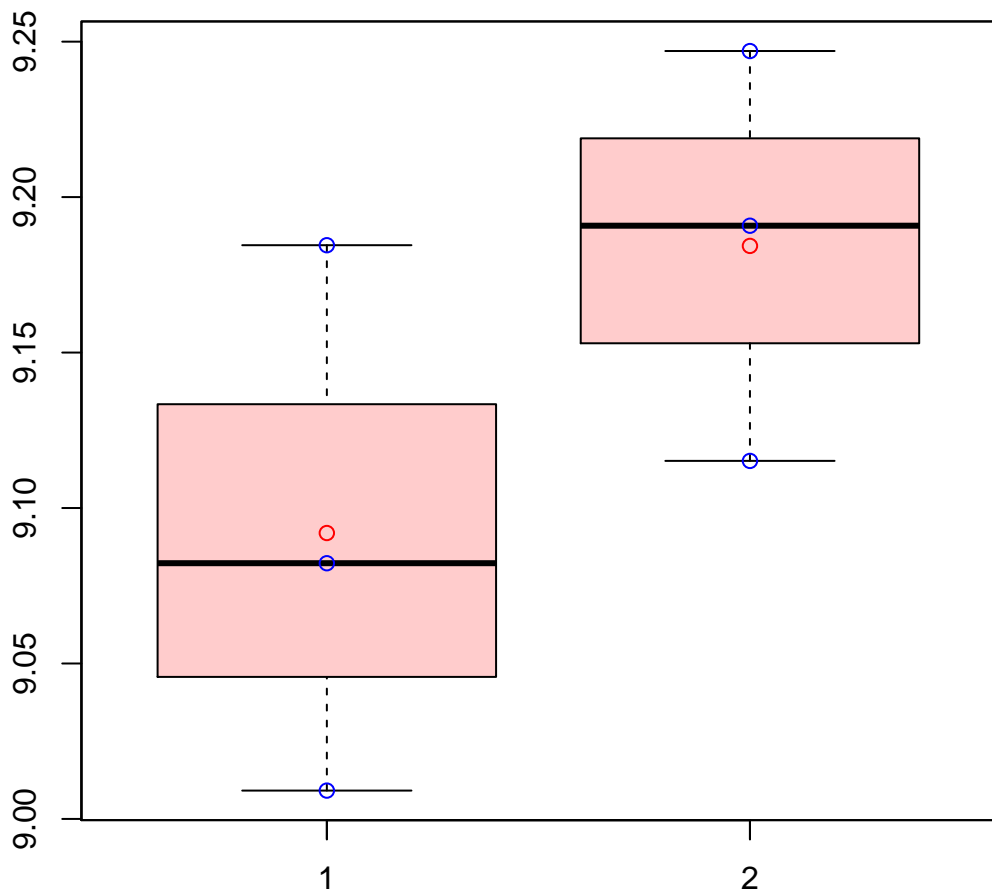

t-Test: p-value = 0.23

# C5XU80|C5XU80\_SORBI

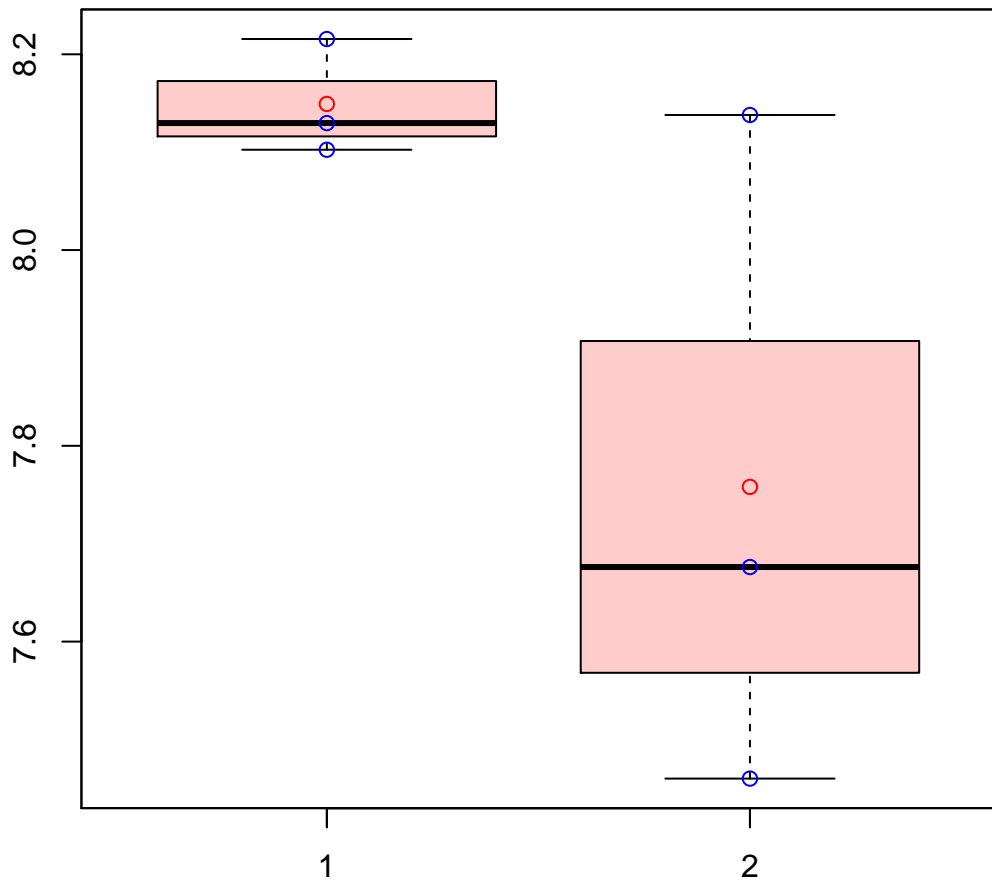

t-Test: p-value = 0.19

# C5XUC3|C5XUC3\_SORBI

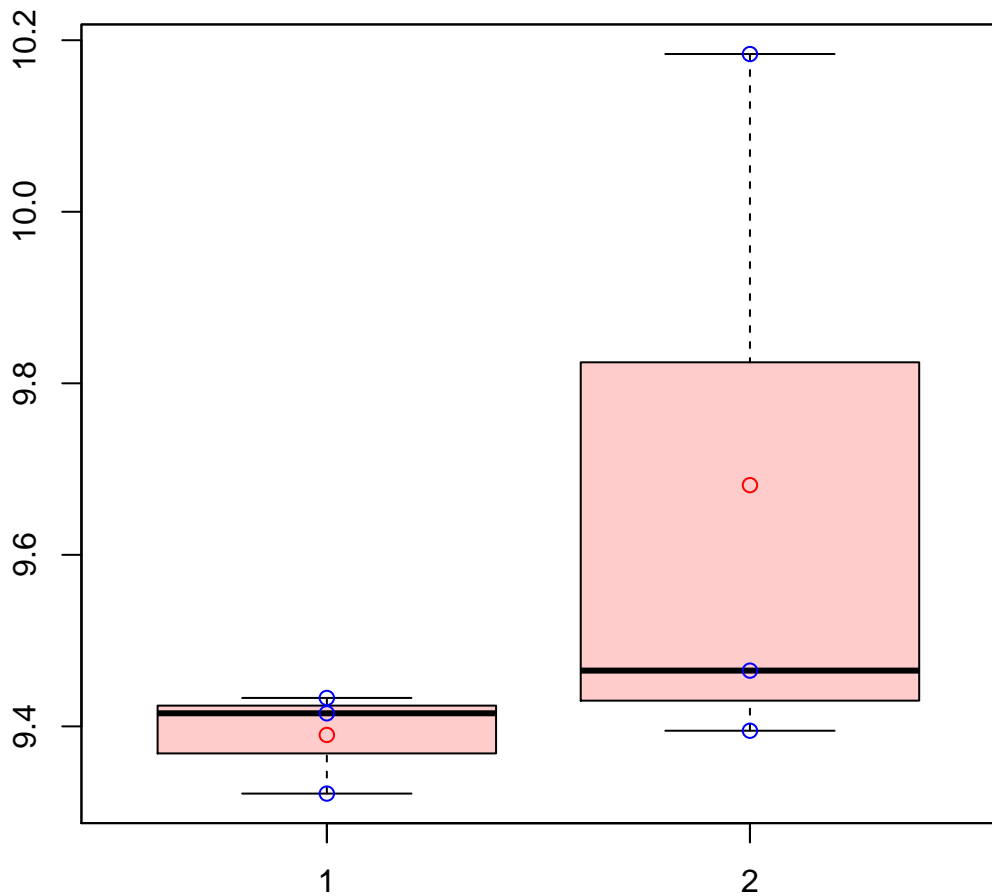

t-Test: p-value = 0.37

# C5XUD5|C5XUD5\_SORBI

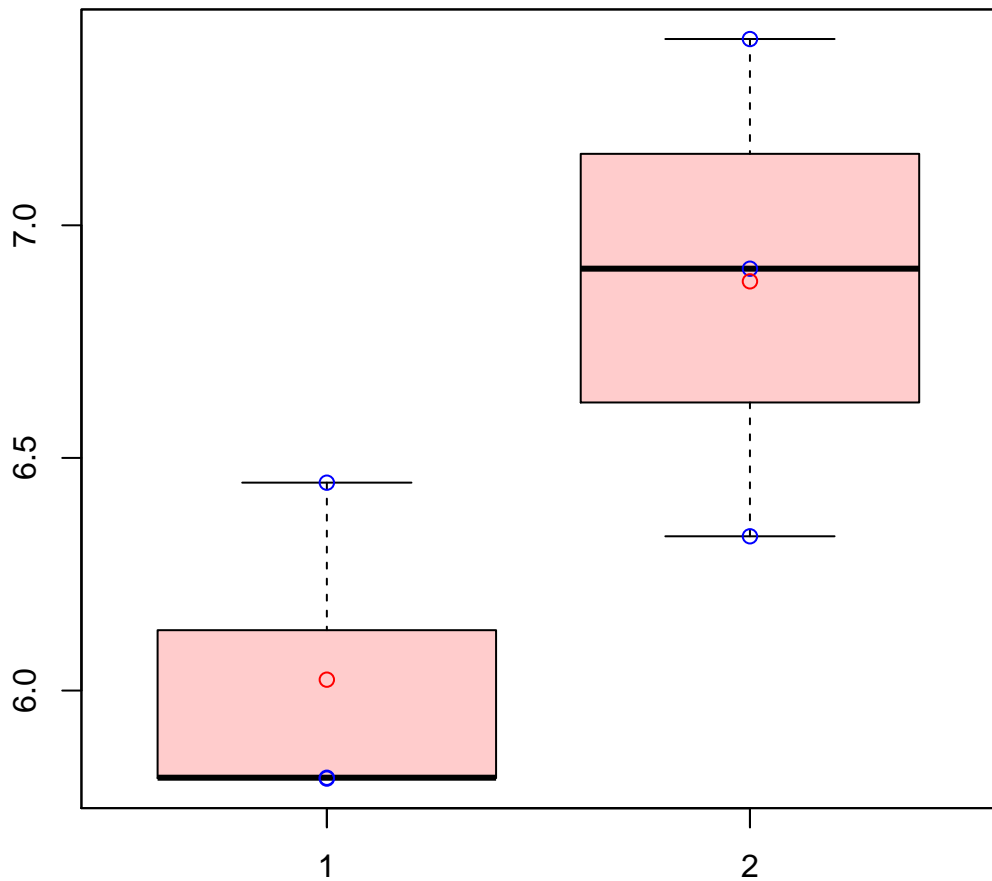

t-Test: p-value = 0.09

# C5XUF6|C5XUF6\_SORBI

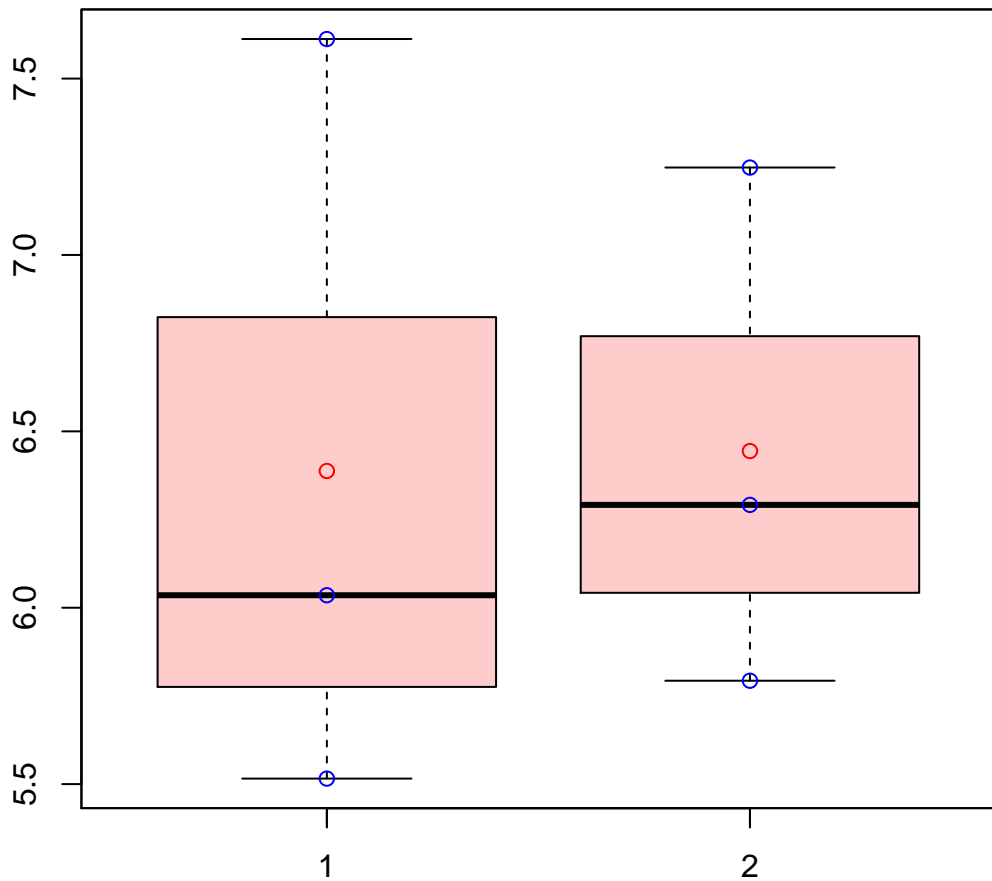

t-Test: p-value = 0.94

# C5XUT2|C5XUT2\_SORBI

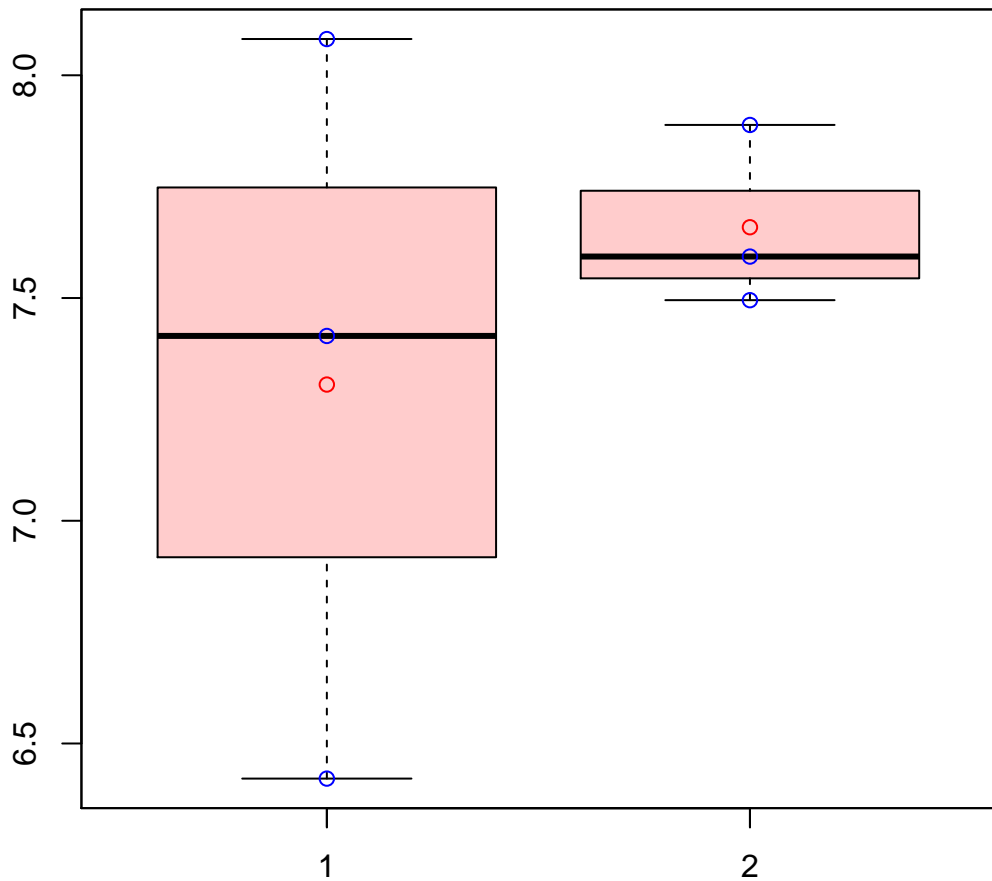

t-Test: p-value = 0.54

# C5XV73|C5XV73\_SORBI

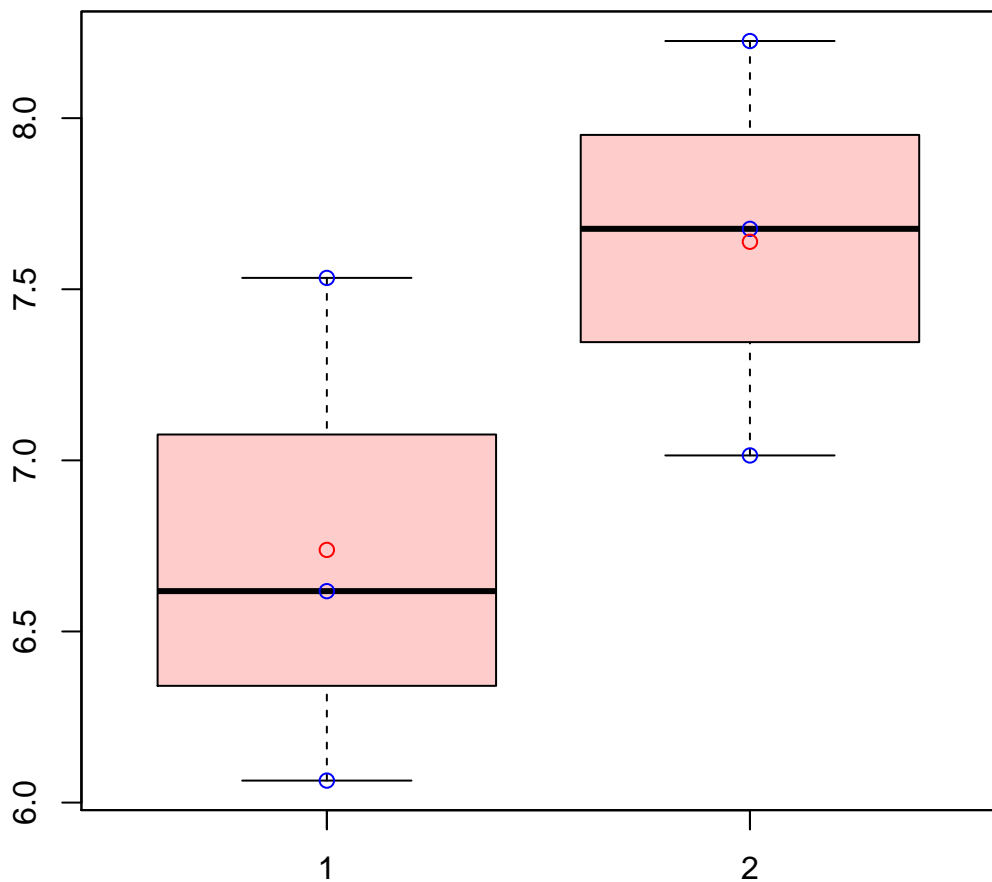

t-Test: p-value = 0.18

# C5XV75|C5XV75\_SORBI

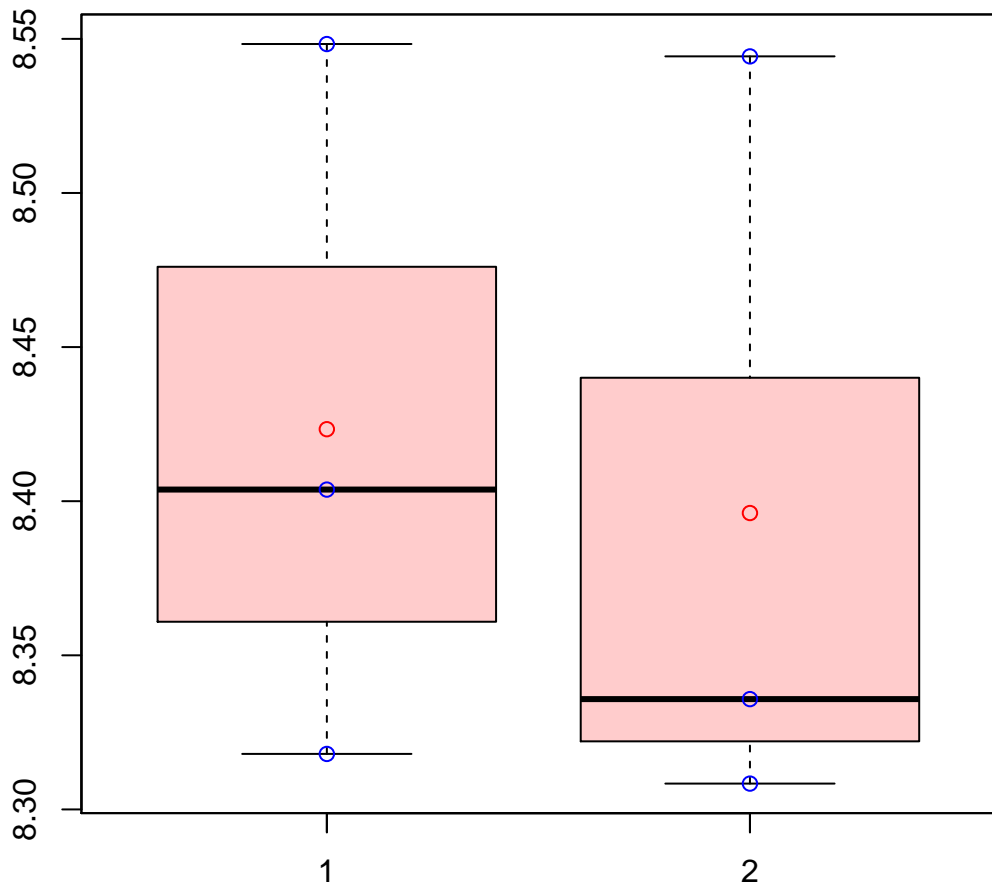

t-Test: p-value = 0.8



# C5XVJ1|C5XVJ1\_SORBI

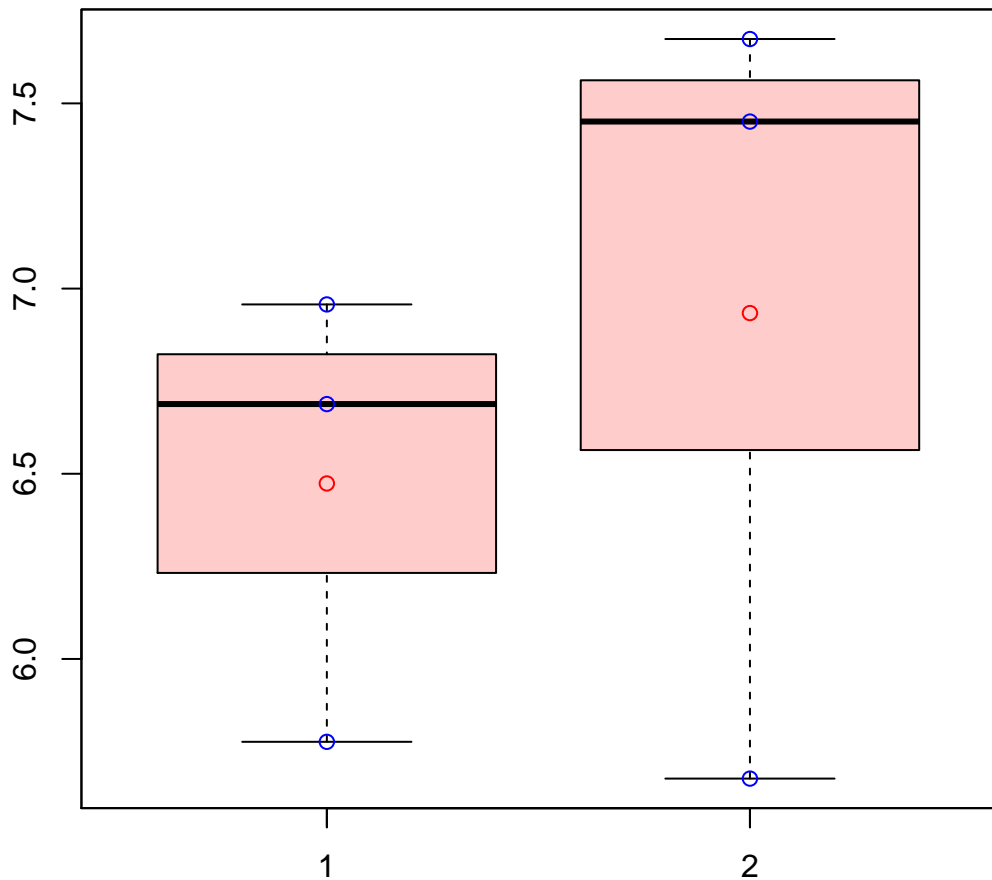

t-Test: p-value = 0.57

# C5XVY5|C5XVY5\_SORBI

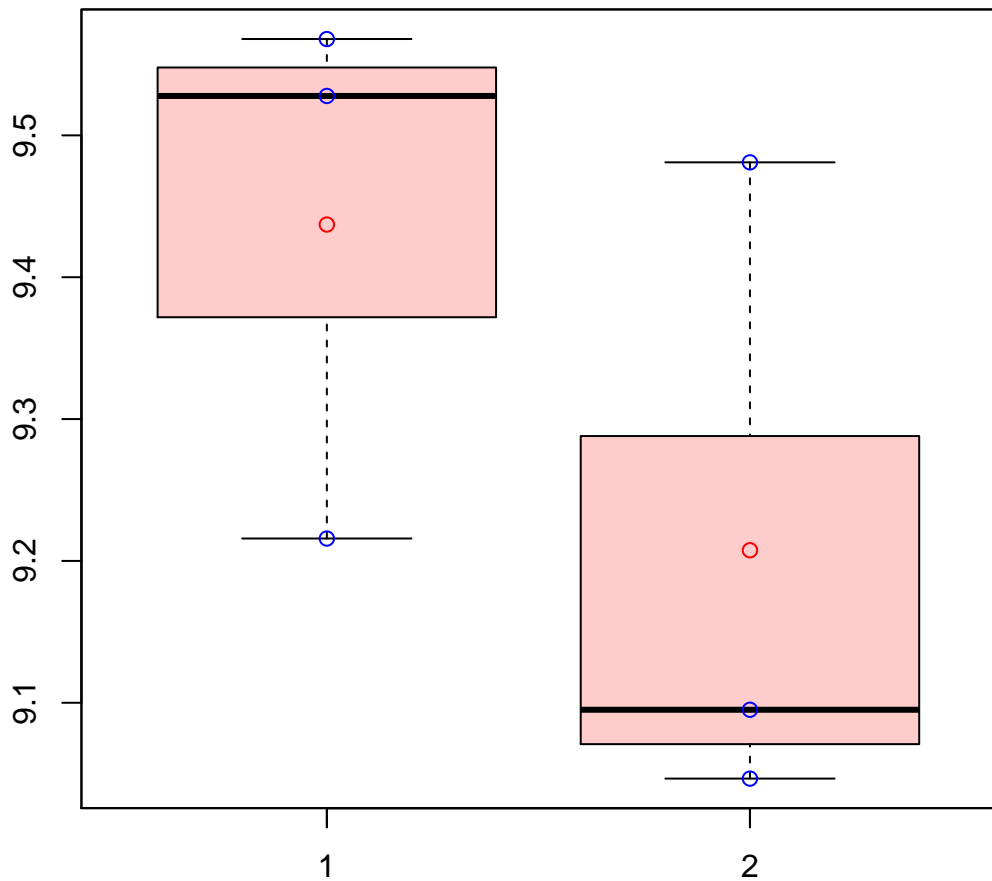

t-Test: p-value = 0.27

# C5XW31|C5XW31\_SORBI

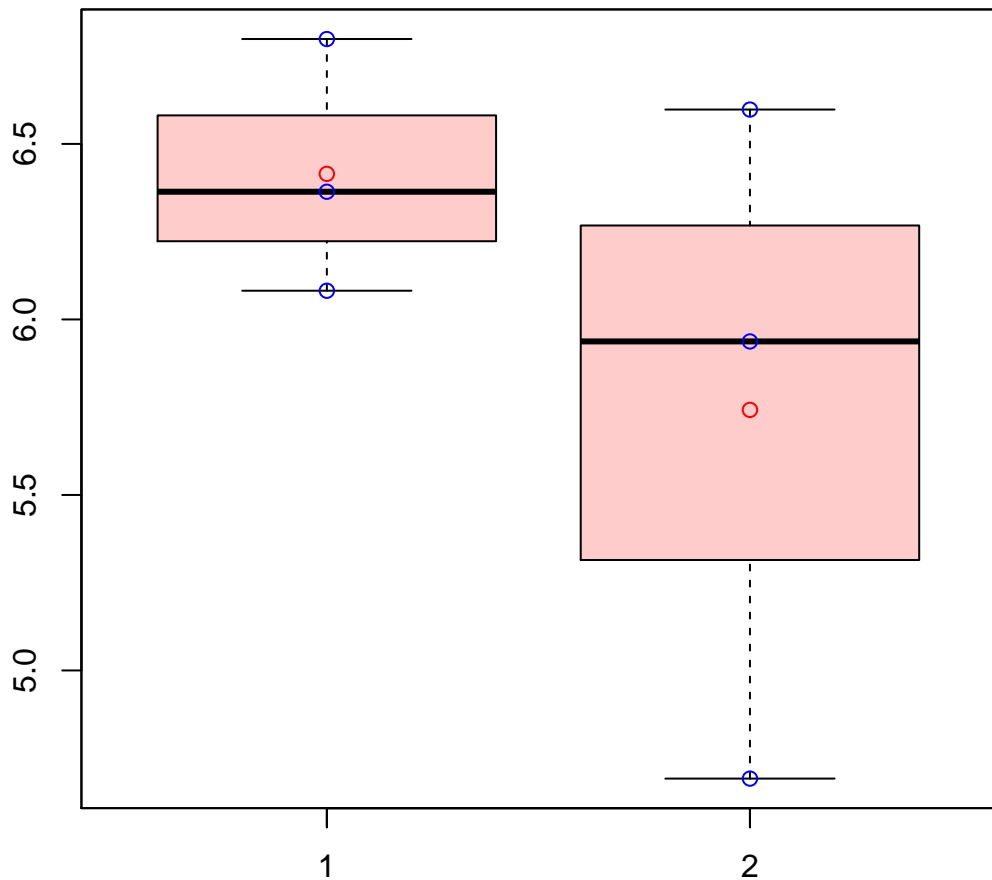

t-Test: p-value = 0.35

# C5XW73|C5XW73\_SORBI

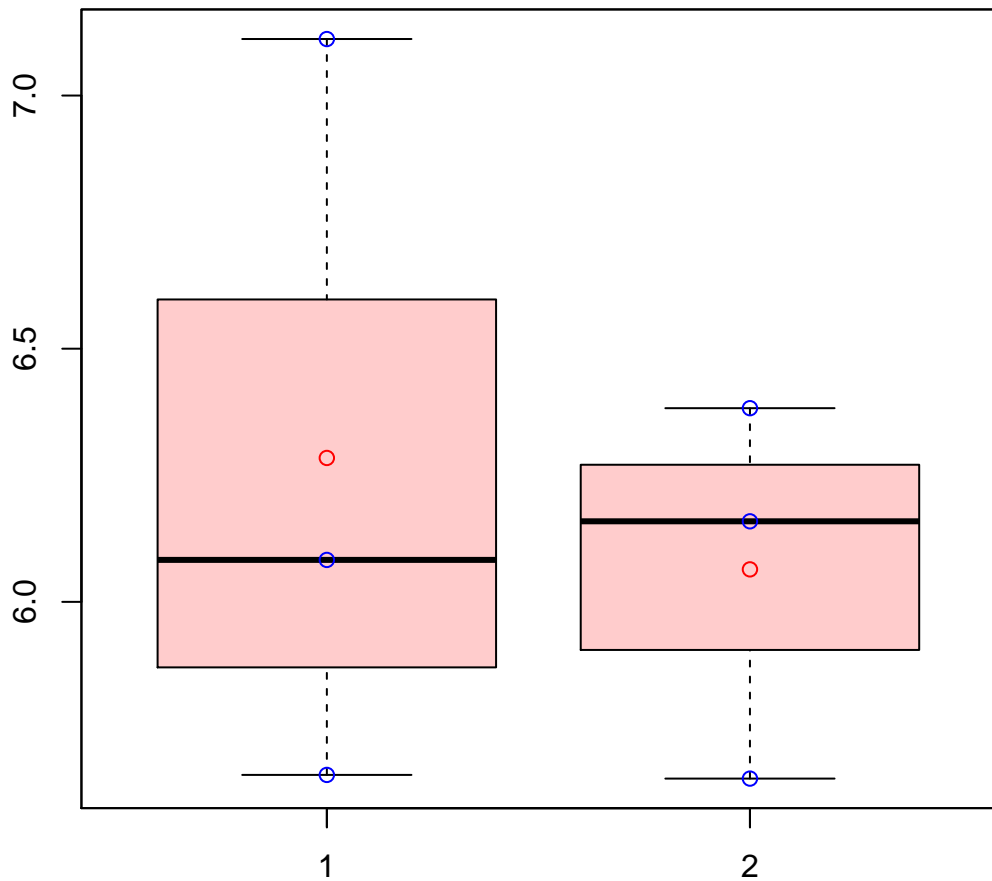

t-Test: p-value = 0.68

# C5XWE5|C5XWE5\_SORBI

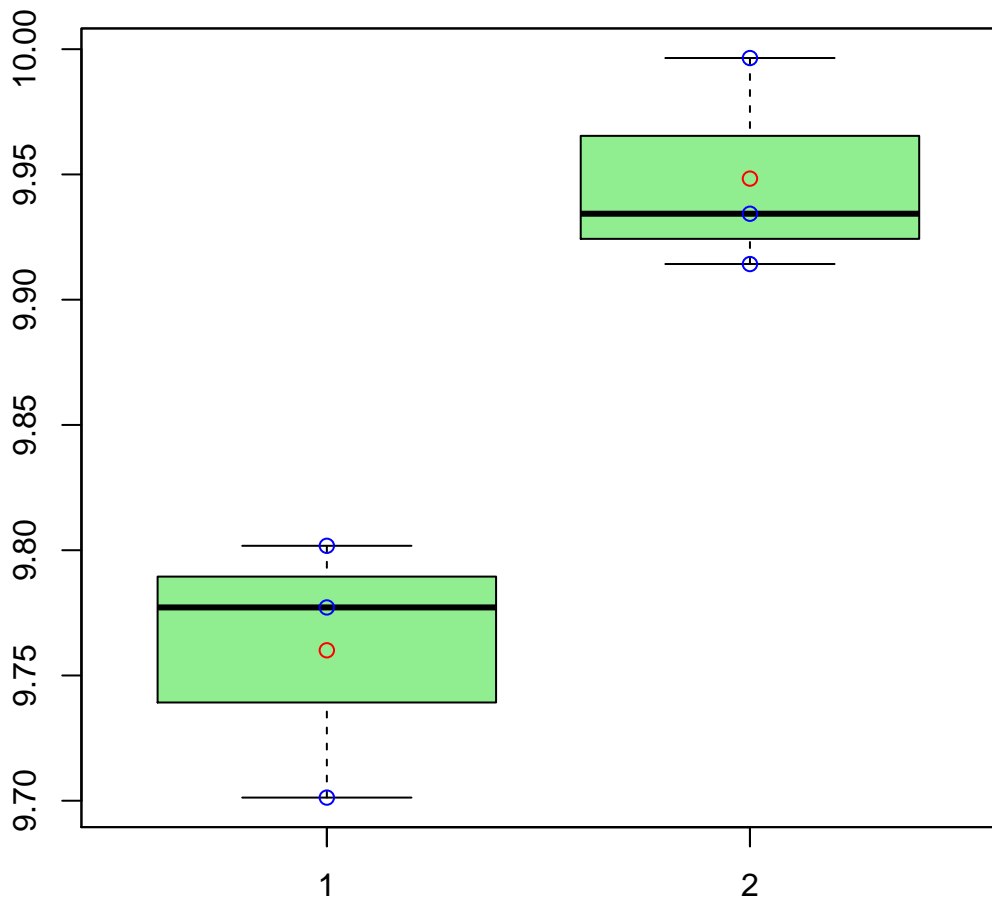

t-Test: p-value = 0.01

# C5XWJ8|C5XWJ8\_SORBI

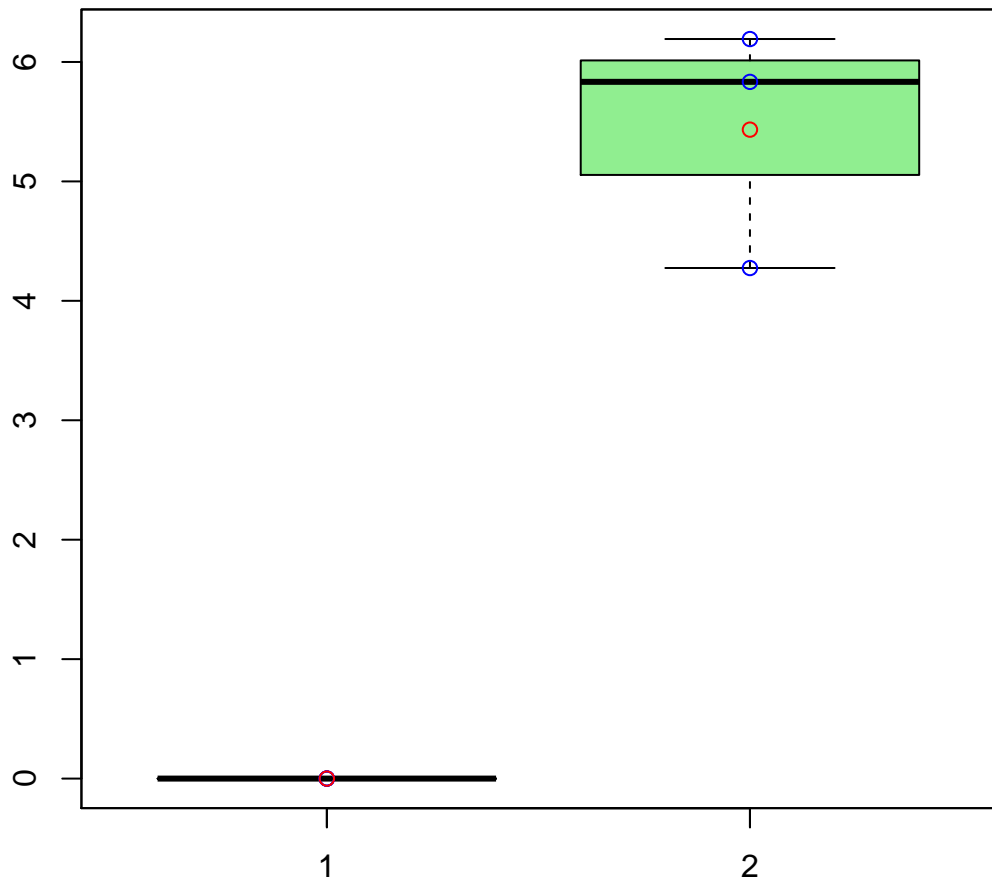

t-Test: p-value = 0.01

# C5XWR4|C5XWR4\_SORBI

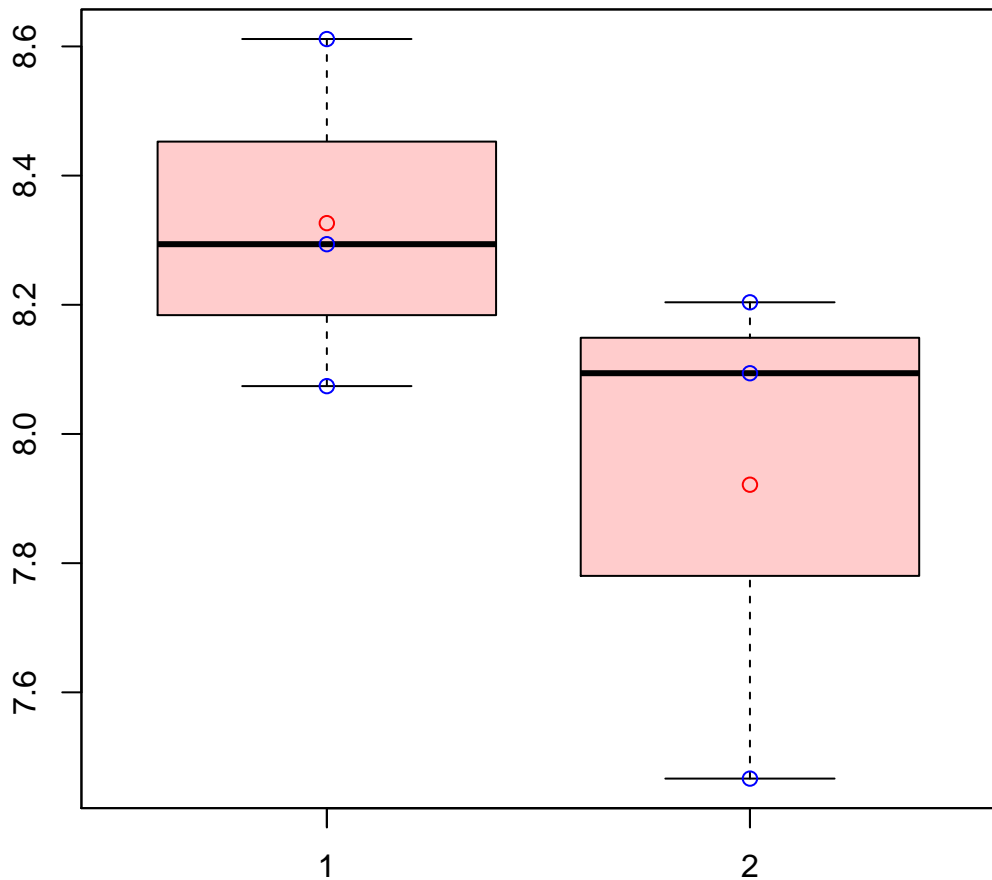

t-Test: p-value = 0.23

# C5XWS4|C5XWS4\_SORBI

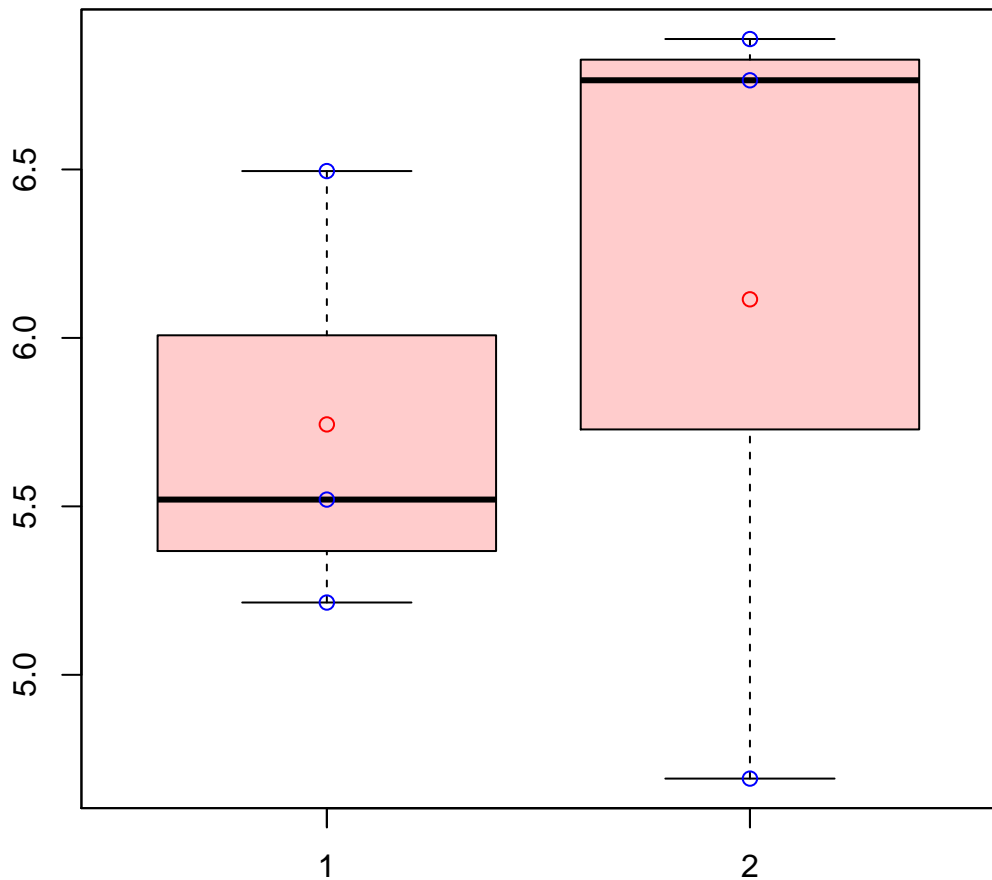

t-Test: p-value = 0.68



# C5XWY1|C5XWY1\_SORBI

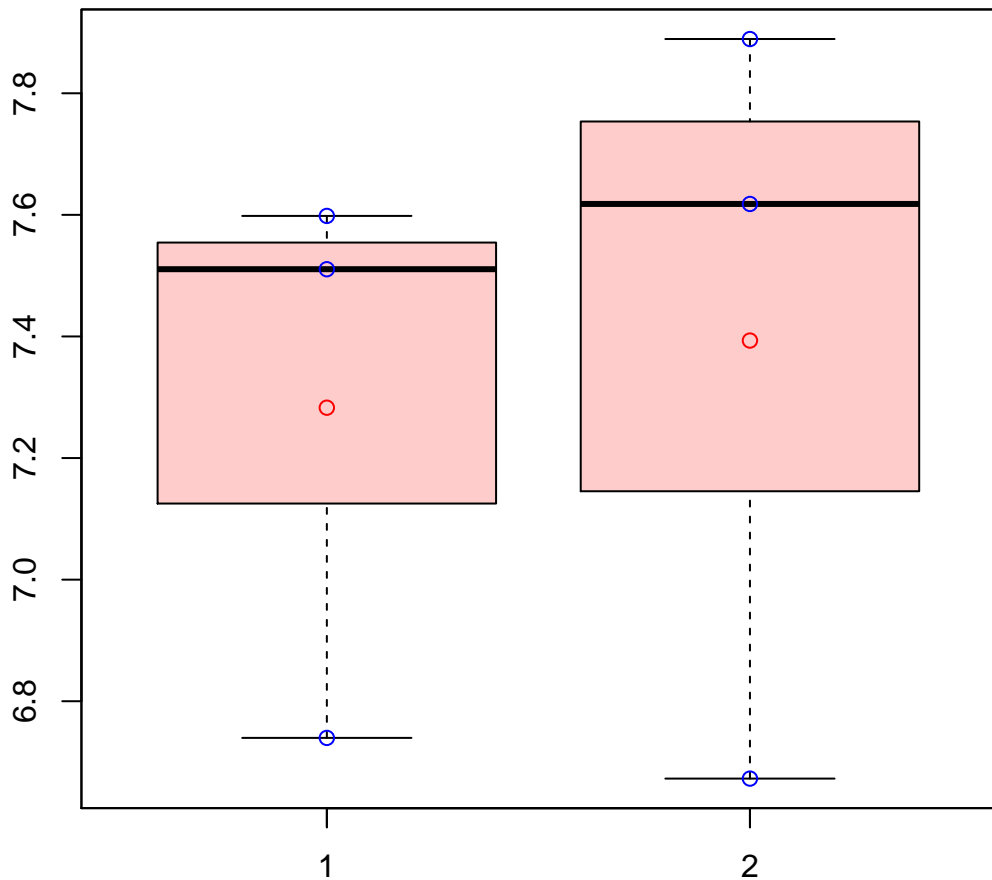

t-Test: p-value = 0.82

# C5XX72|C5XX72\_SORBI

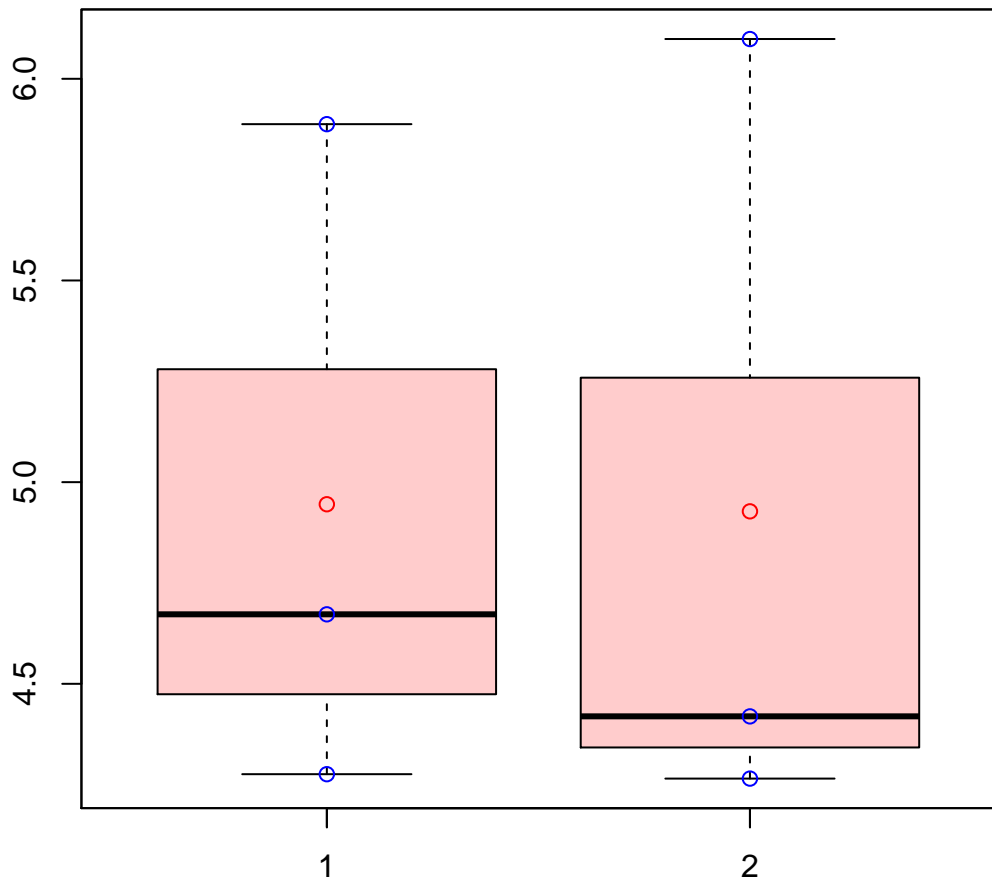

t-Test: p-value = 0.98

# C5XXC4|C5XXC4\_SORBI

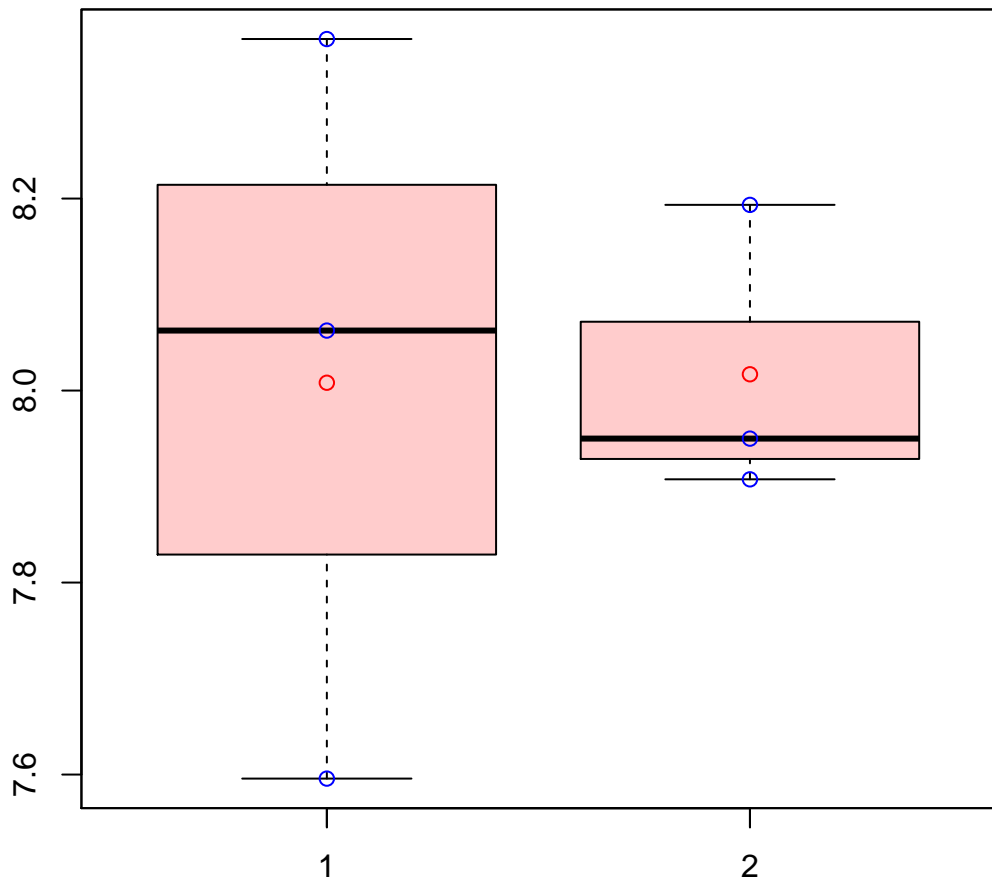

t-Test: p-value = 0.97

# C5XXD7|C5XXD7\_SORBI

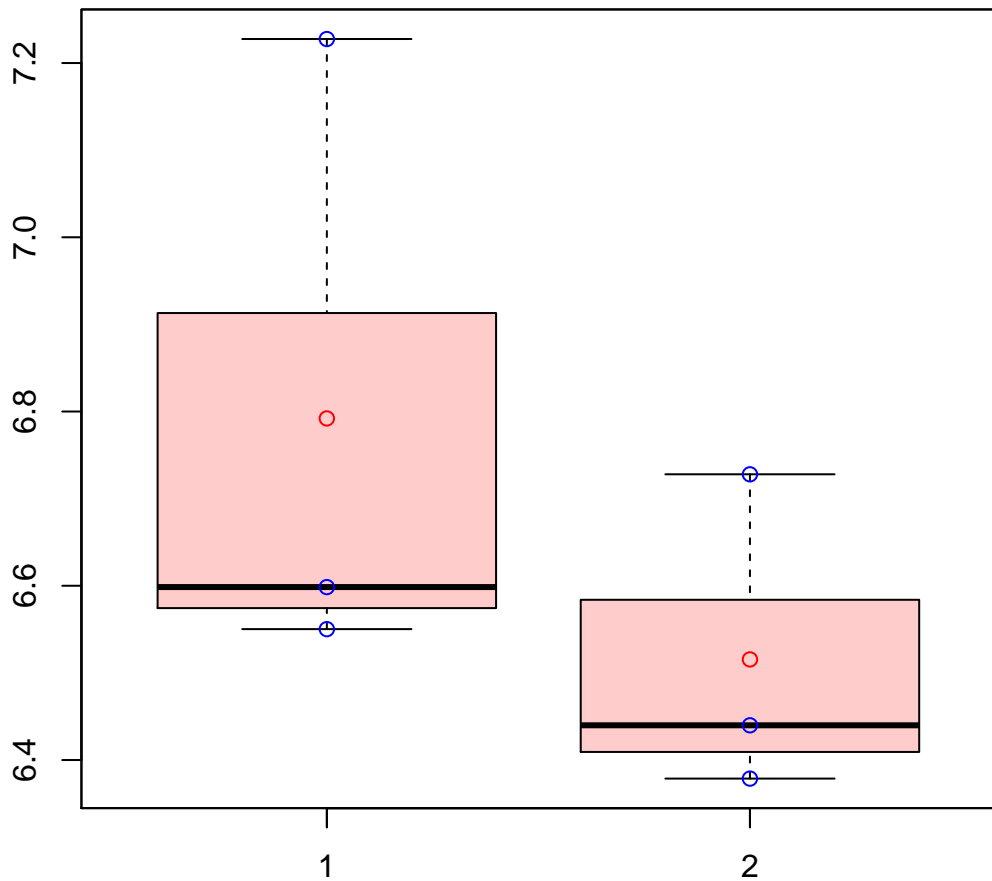

t-Test: p-value = 0.34

# C5XXH2|C5XXH2\_SORBI

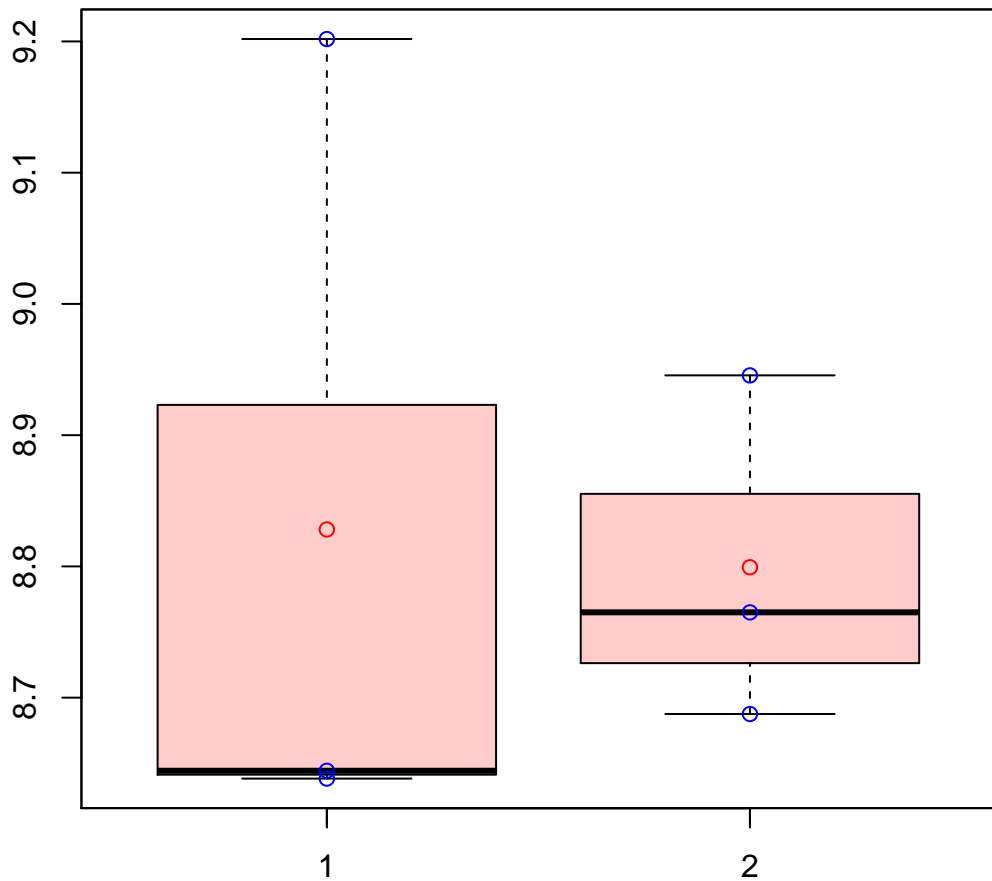

t-Test: p-value = 0.9

# C5XXS0|C5XXS0\_SORBI

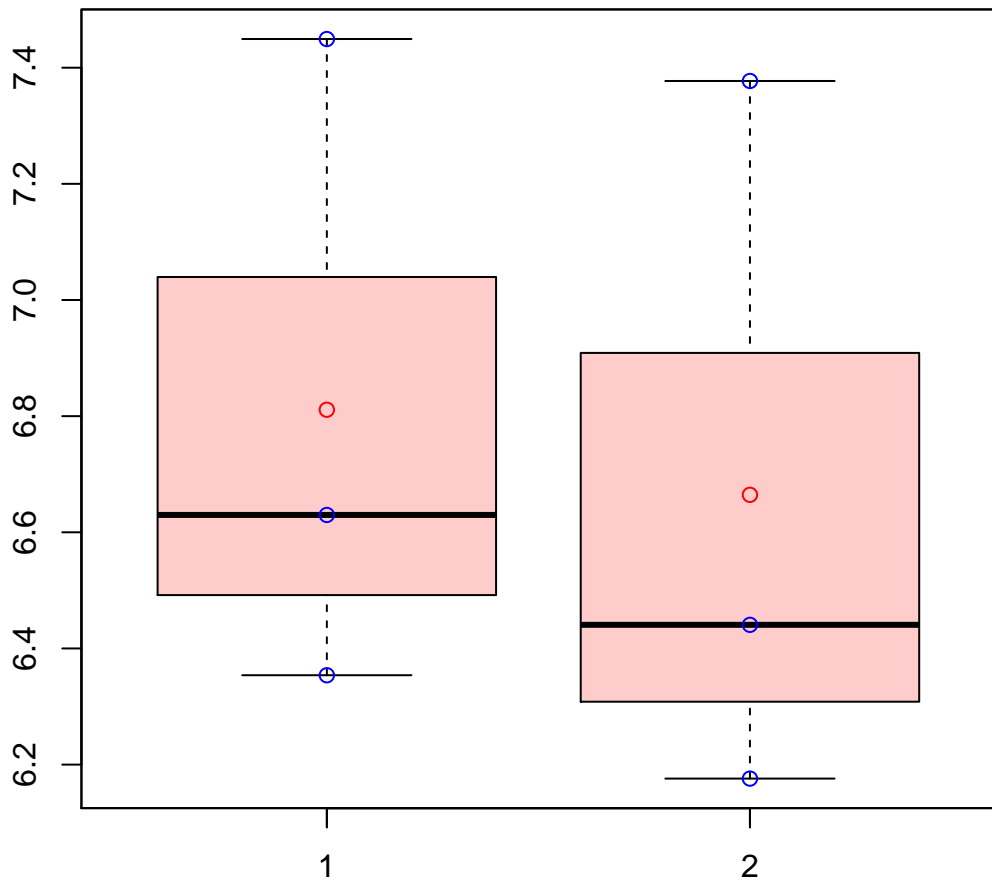

t-Test: p-value = 0.78

# C5XXU7|C5XXU7\_SORBI

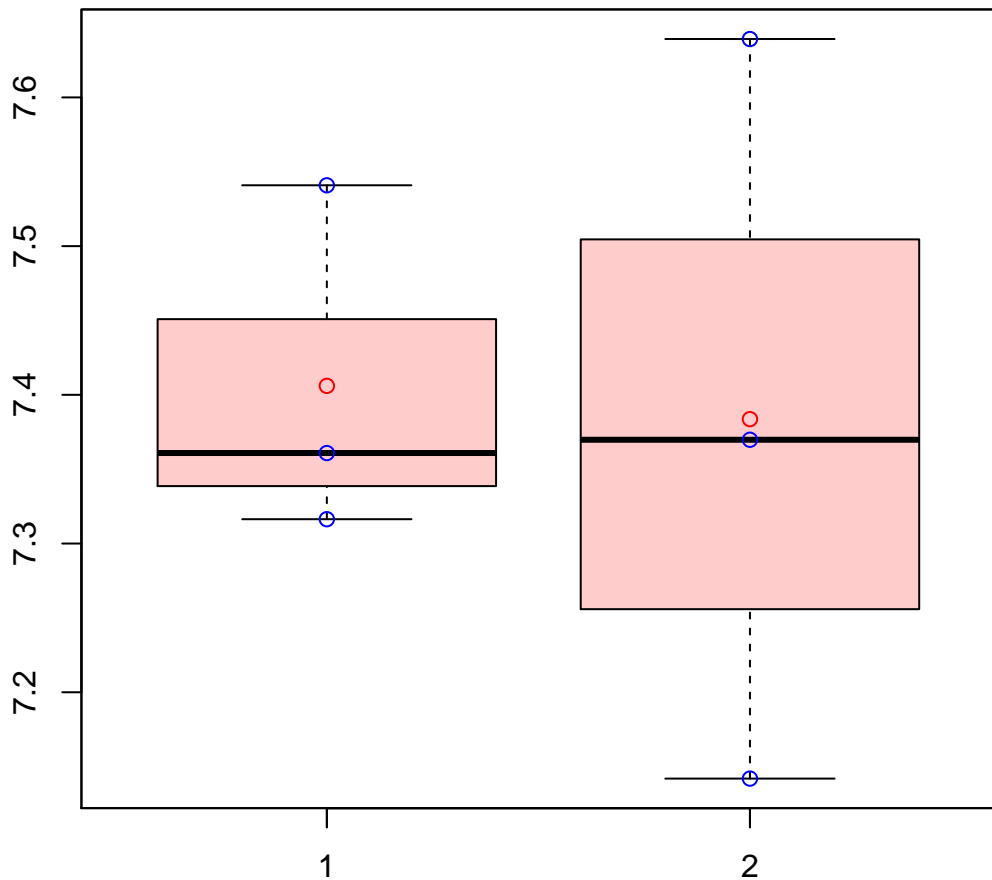

t-Test: p-value = 0.9

# C5XXY5|C5XXY5\_SORBI

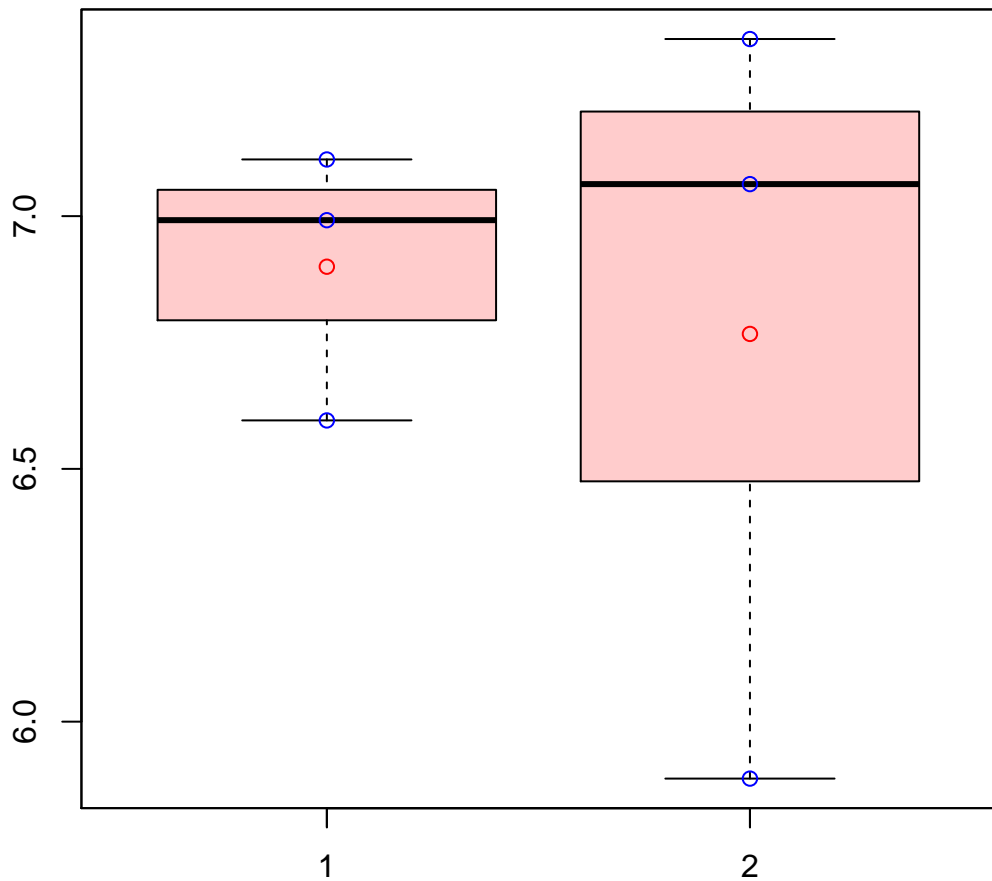

t-Test: p-value = 0.8



# C5XXZ3|C5XXZ3\_SORBI

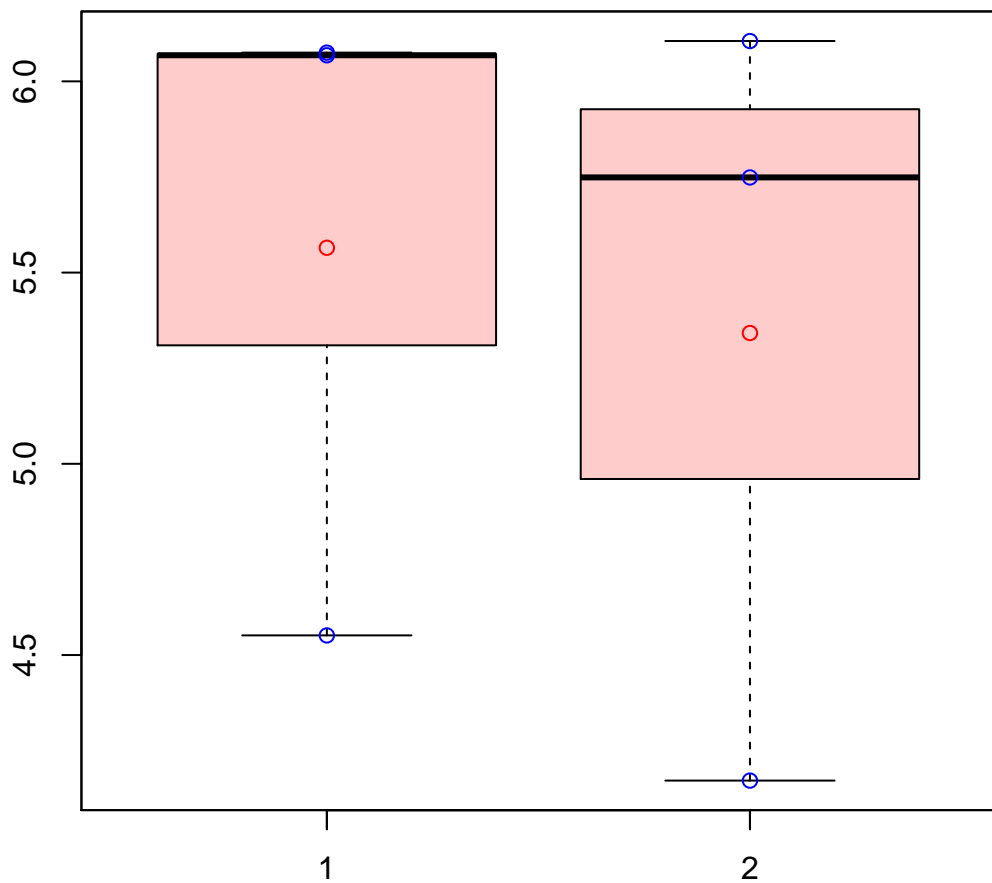

t-Test: p-value = 0.79

# C5XYS1|C5XYS1\_SORBI

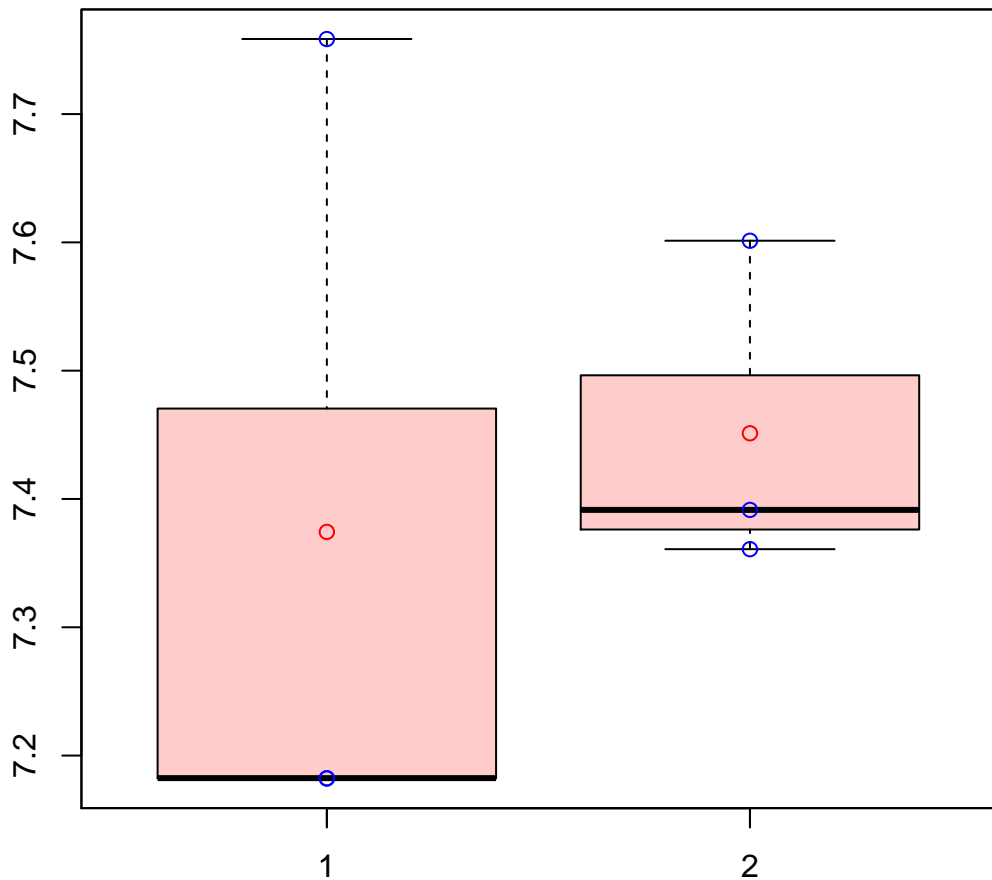

t-Test: p-value = 0.74

# C5XYX0|C5XYX0\_SORBI

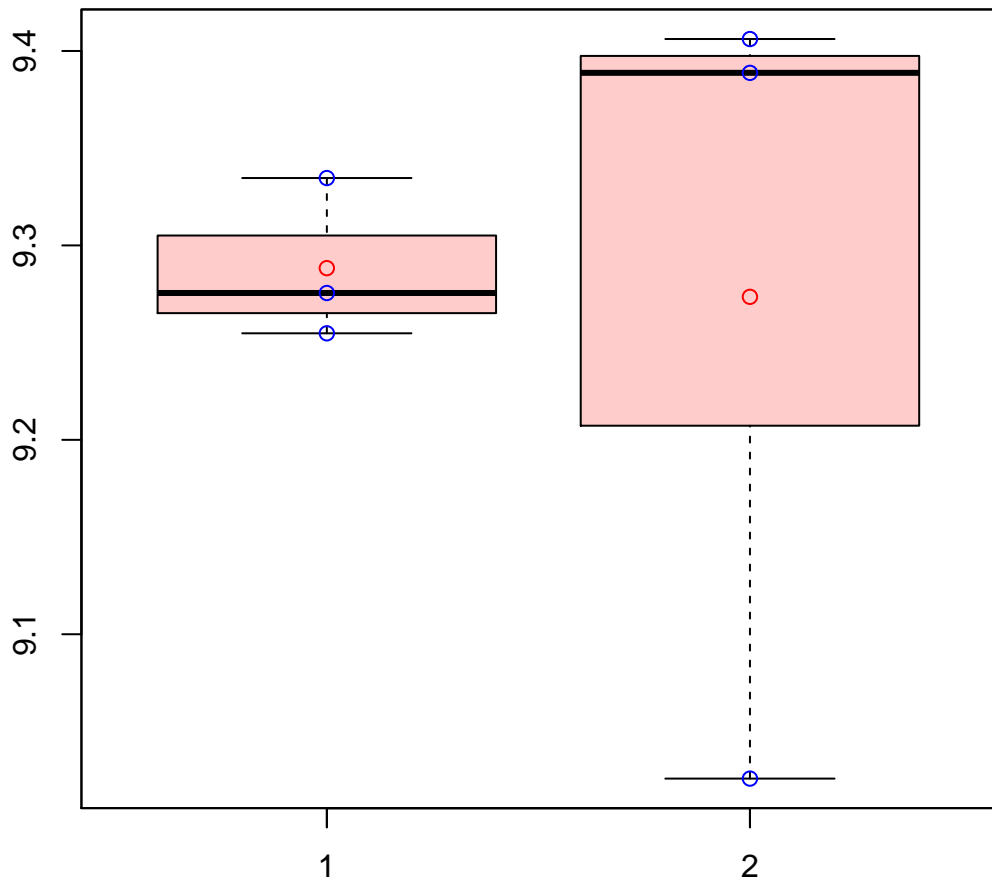

t-Test: p-value = 0.92

# C5XZB6|C5XZB6\_SORBI

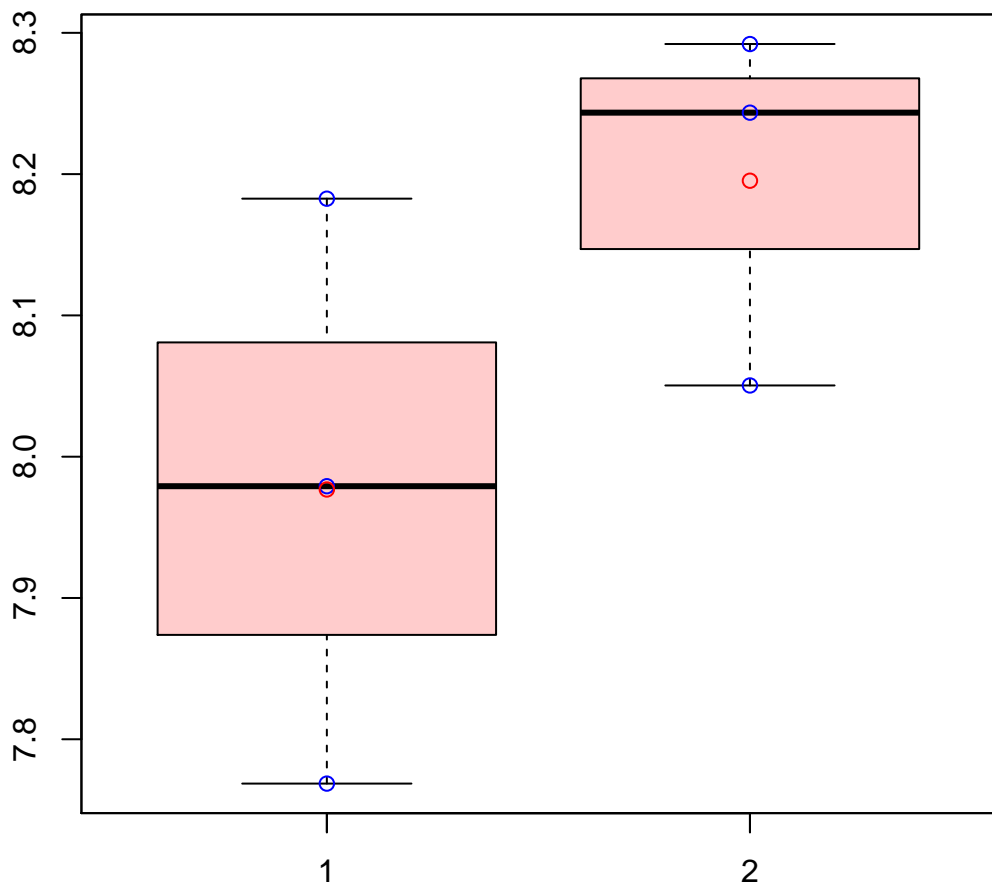

t-Test: p-value = 0.21

# C5XZG6|C5XZG6\_SORBI

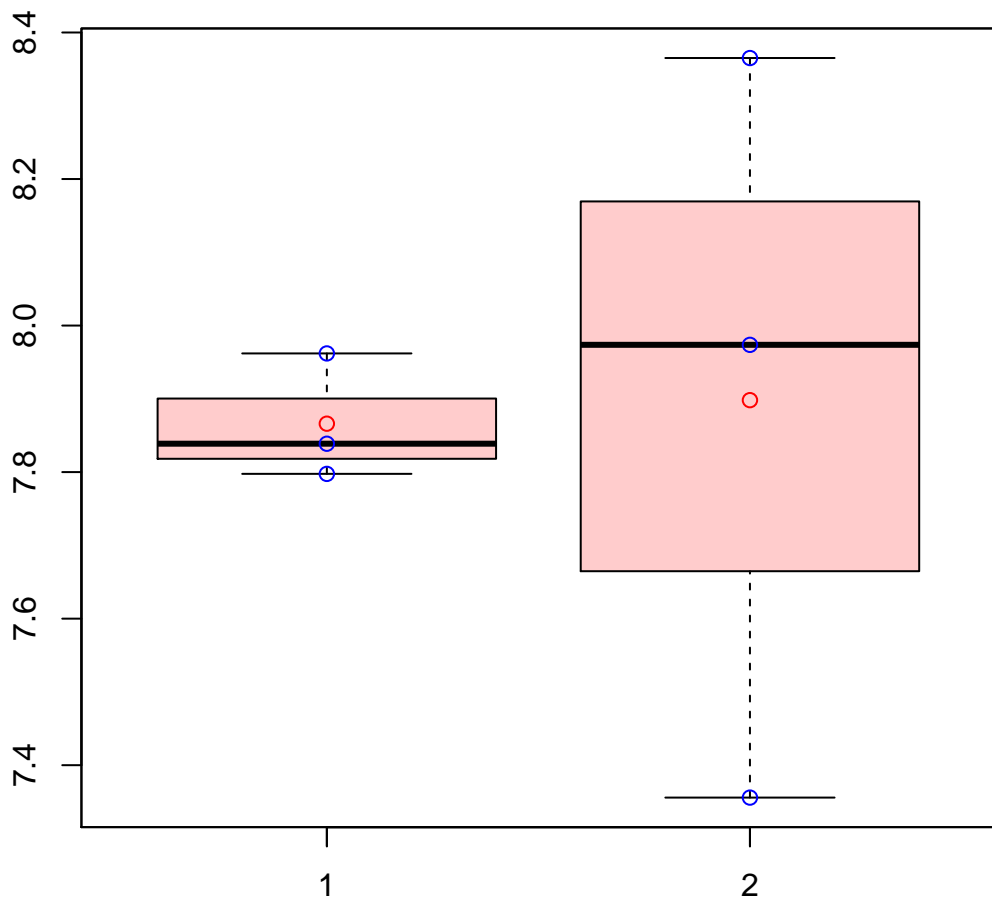

t-Test: p-value = 0.92

# C5Y1E8|C5Y1E8\_SORBI

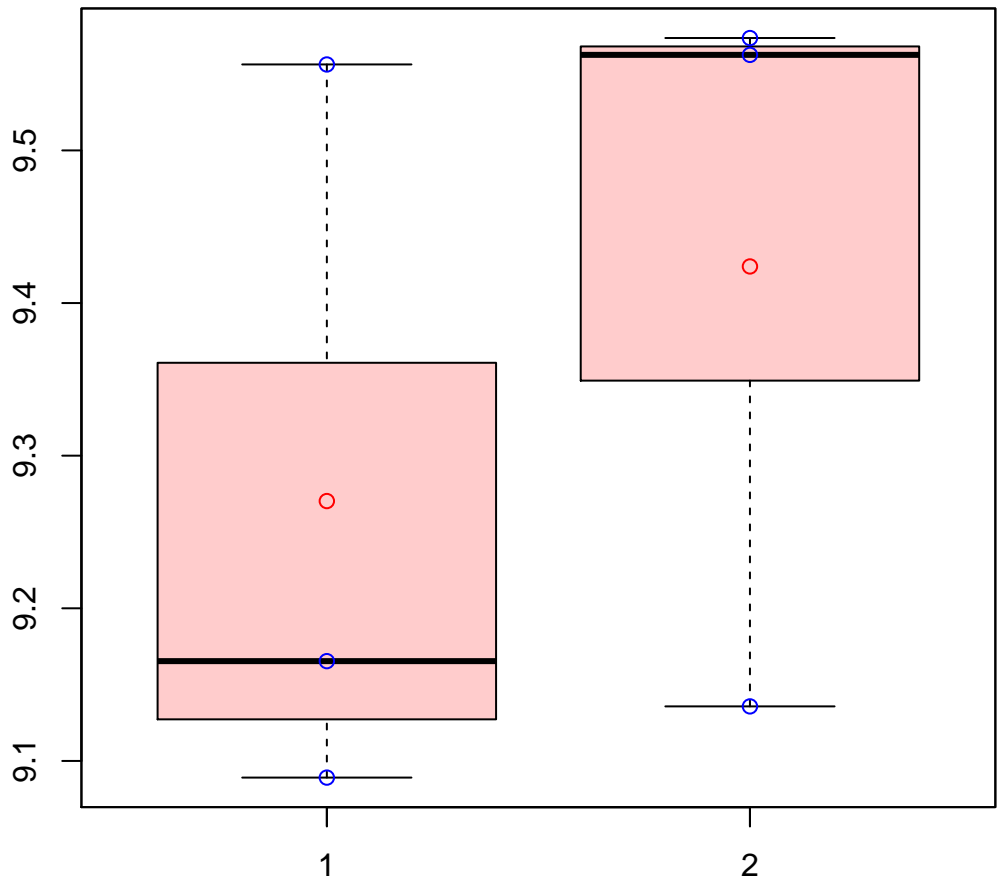

t-Test: p-value = 0.49

# C5Y1I6|C5Y1I6\_SORBI

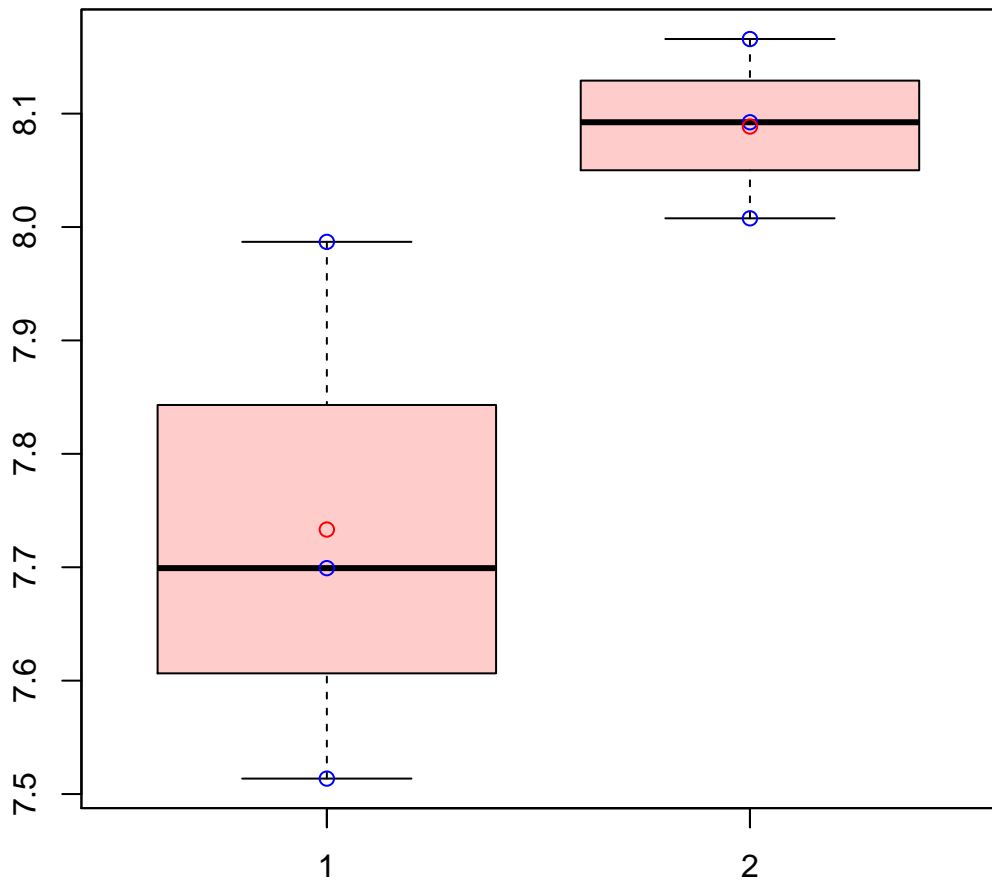

t-Test: p-value = 0.11

# C5Y1T5|C5Y1T5\_SORBI

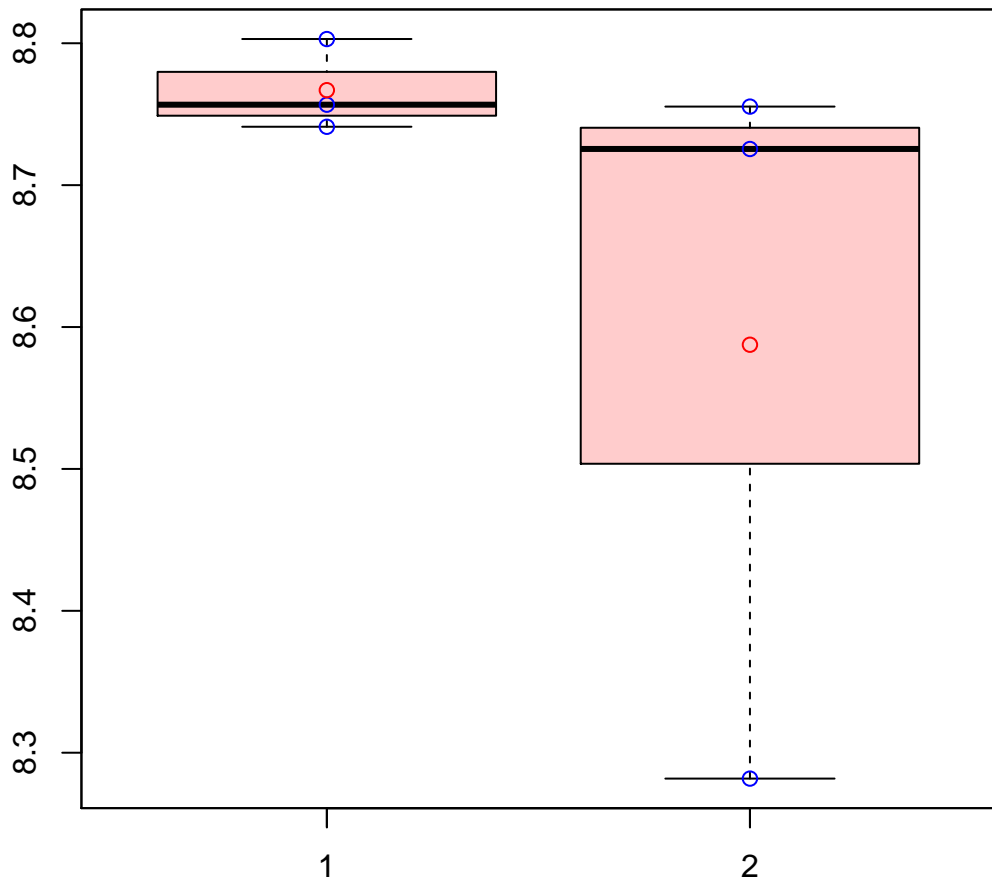

t-Test: p-value = 0.36



# C5Y1T6|C5Y1T6\_SORBI

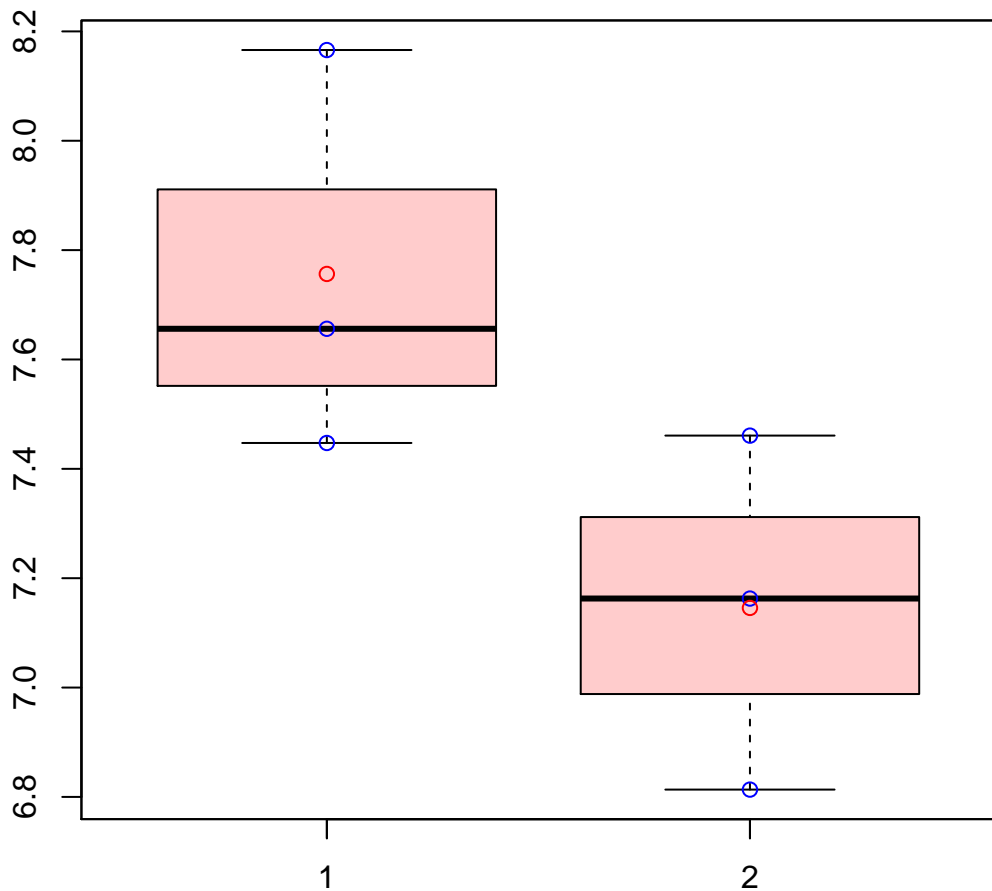

t-Test: p-value = 0.1

# C5Y1Z6|C5Y1Z6\_SORBI

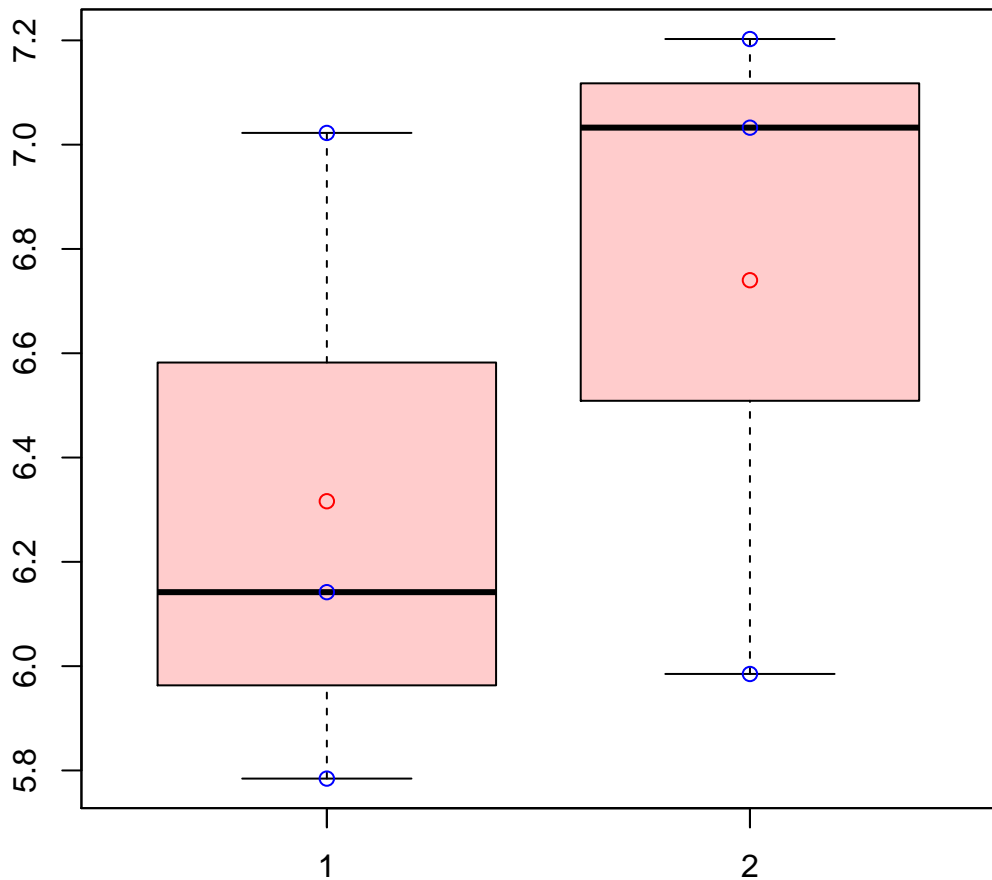

t-Test: p-value = 0.47

# C5Y356|C5Y356\_SORBI

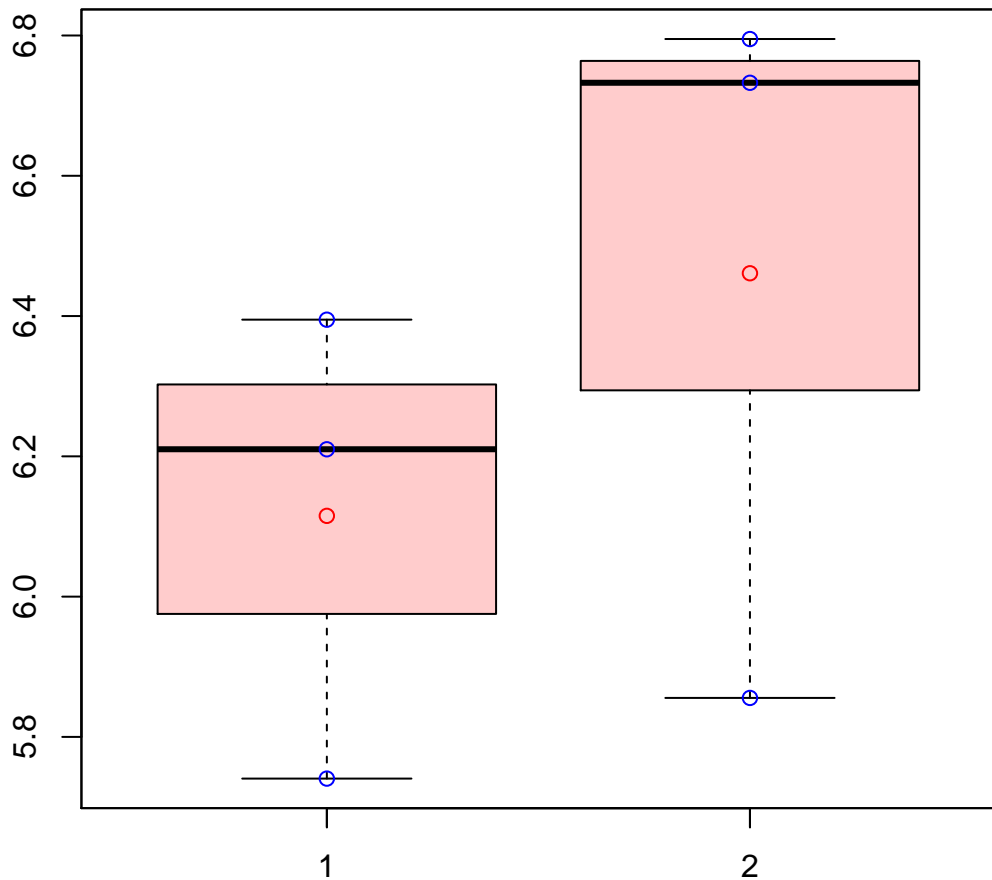

t-Test: p-value = 0.4

# C5Y3A4|C5Y3A4\_SORBI

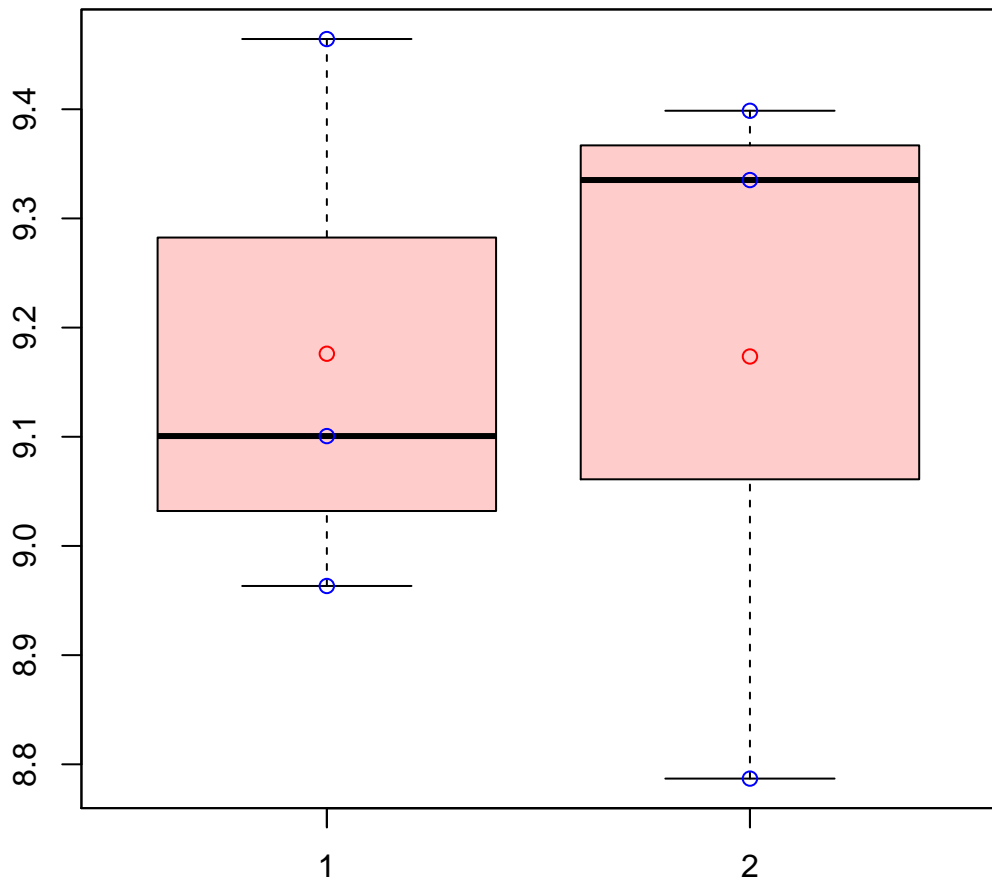

t-Test: p-value = 0.99

# C5Y3G3|C5Y3G3\_SORBI

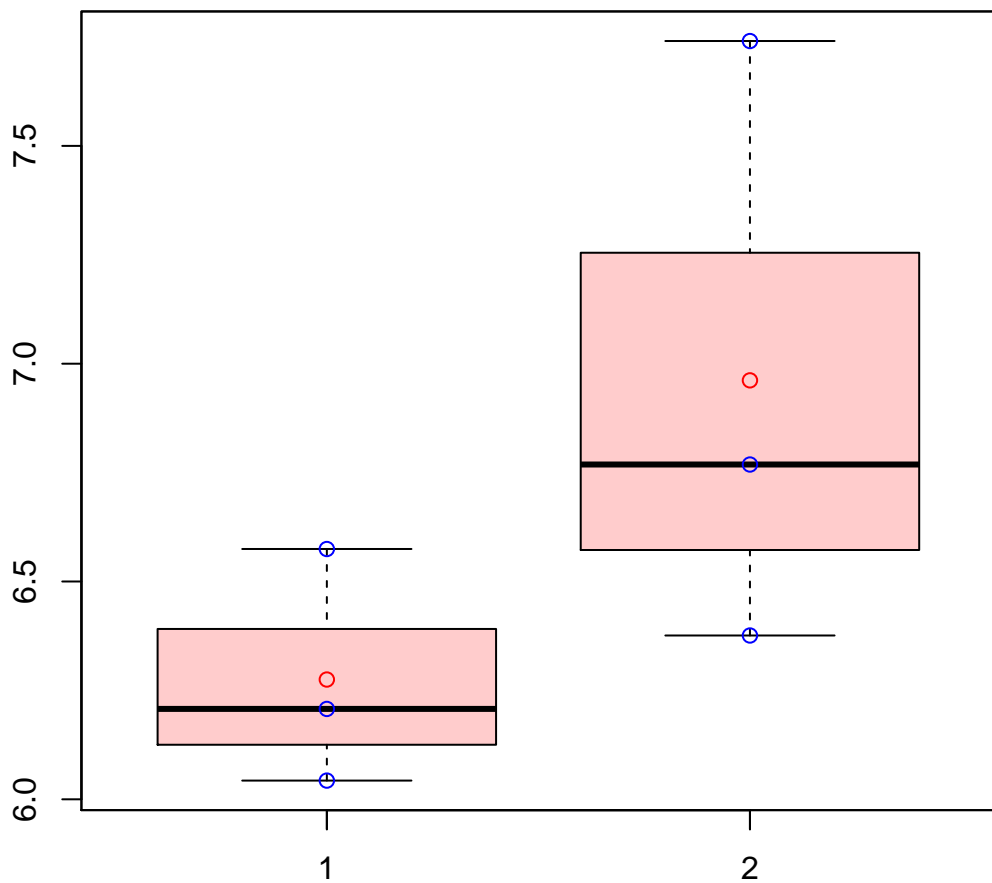

t-Test: p-value = 0.23

# C5Y3R4|C5Y3R4\_SORBI

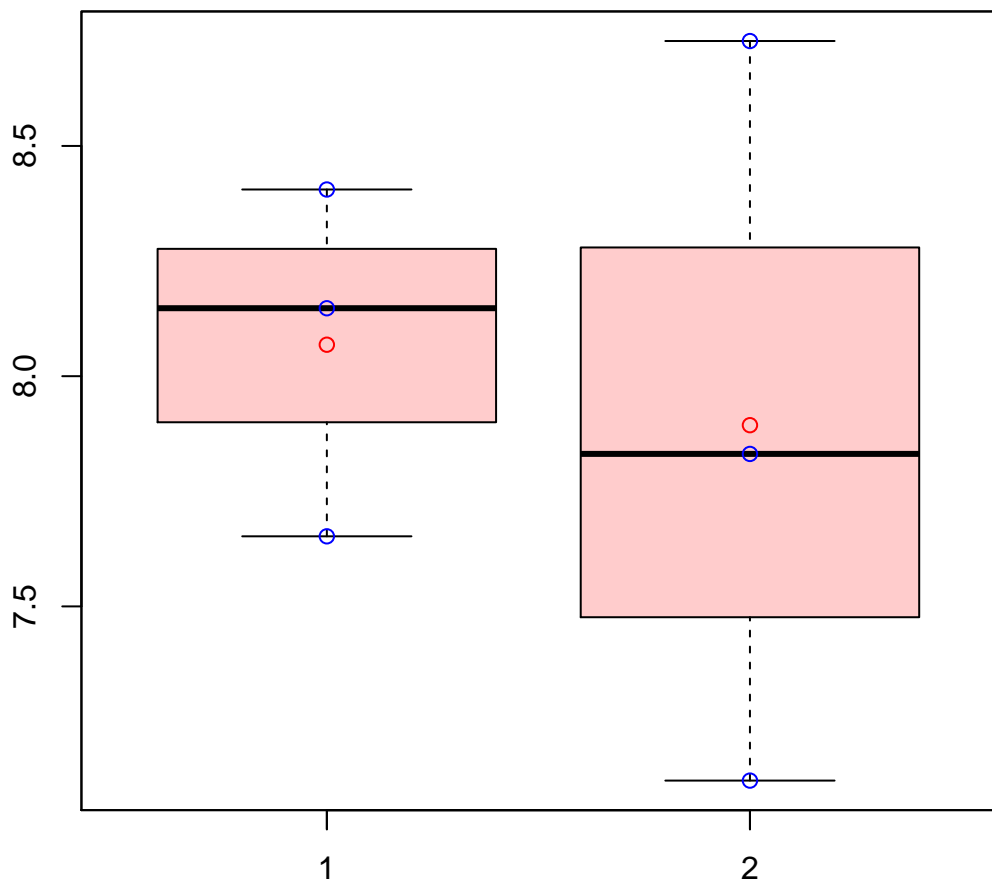

t-Test: p-value = 0.76

# C5Y3S1|C5Y3S1\_SORBI

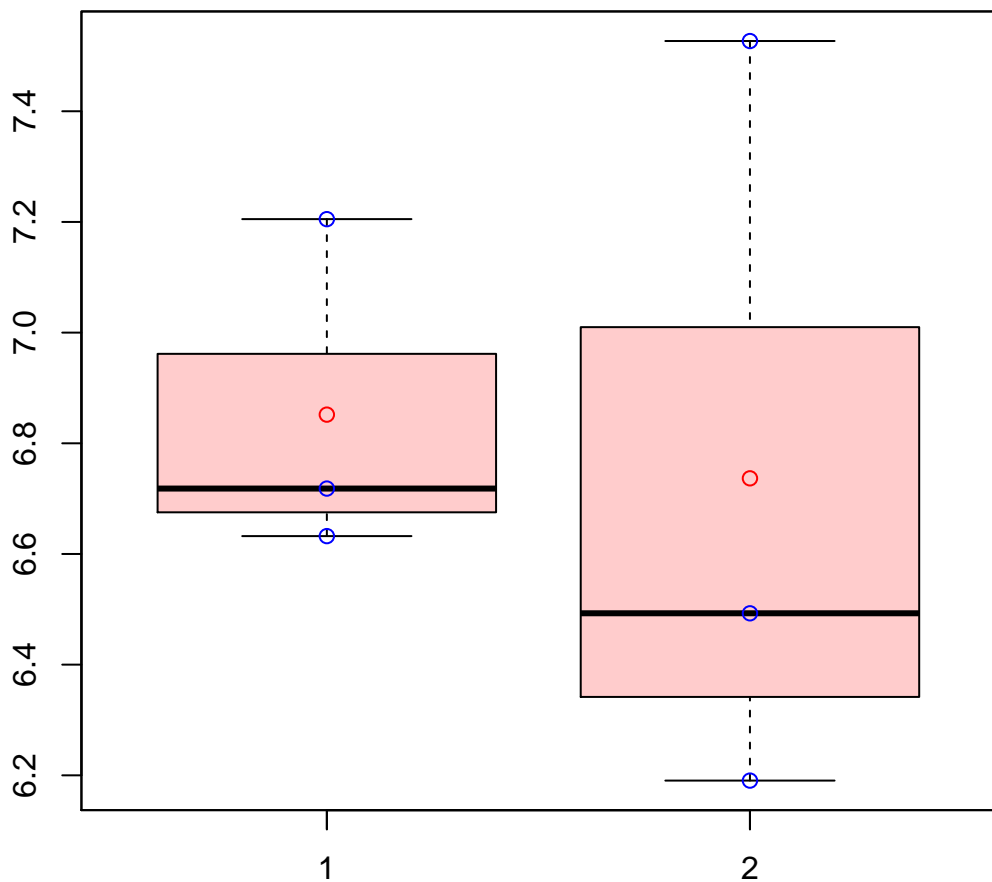

t-Test: p-value = 0.81

# C5Y3X7|C5Y3X7\_SORBI

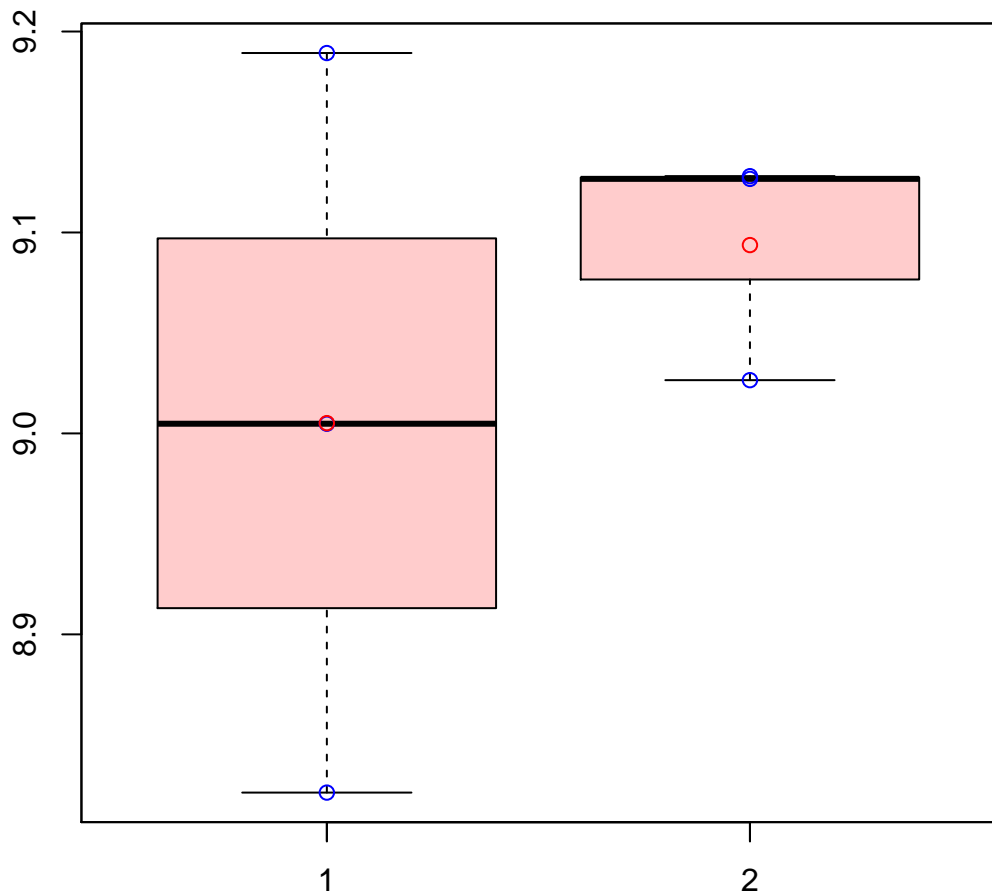

t-Test: p-value = 0.5



# C5Y5H9|C5Y5H9\_SORBI

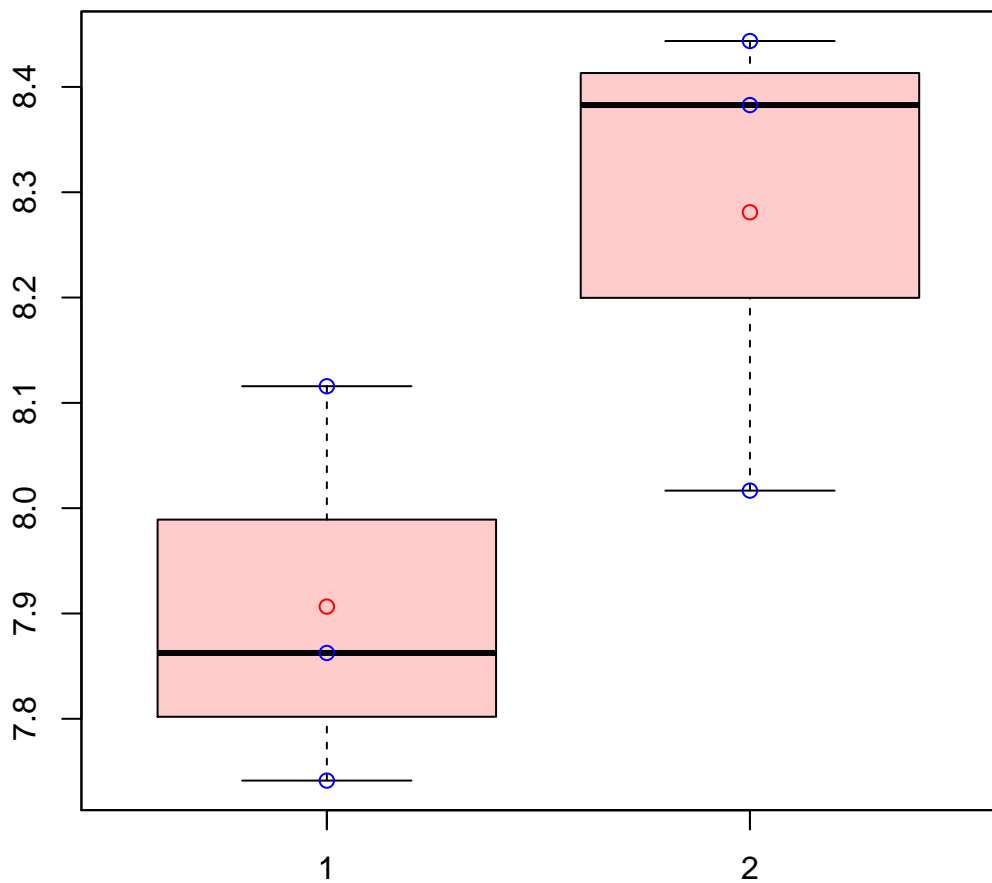

t-Test: p-value = 0.1

# C5Y5Q8|C5Y5Q8\_SORBI

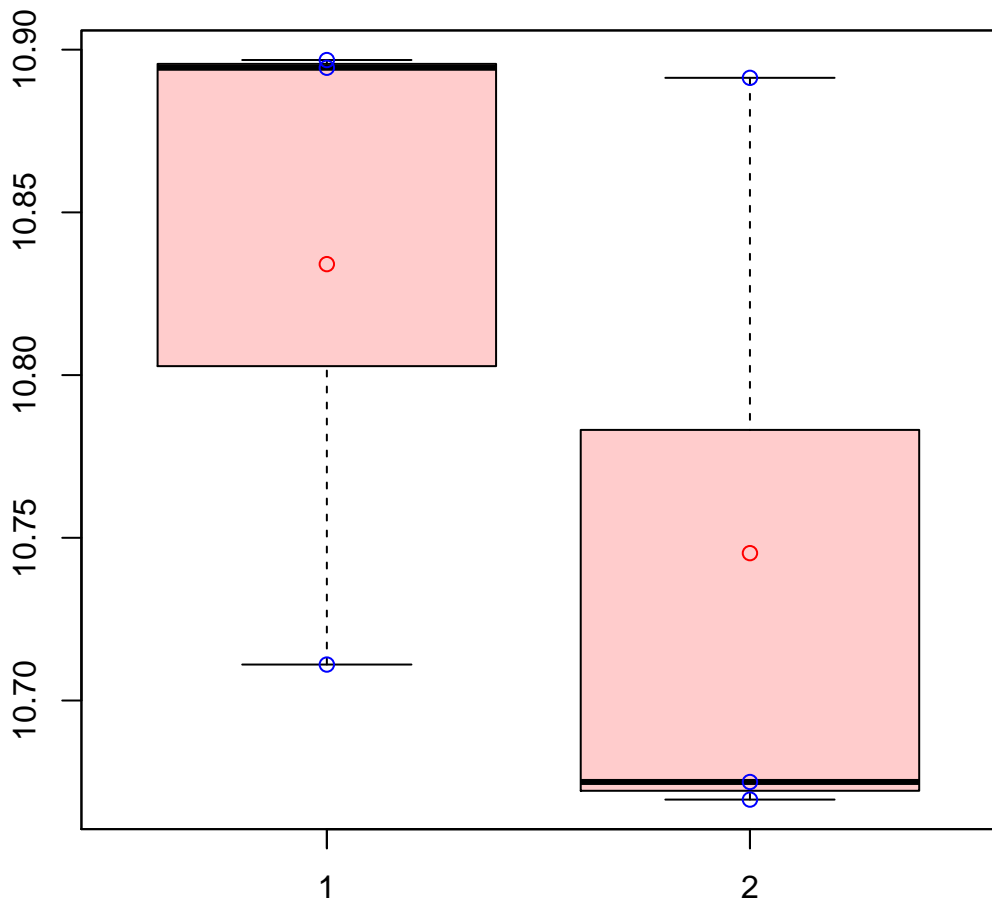

t-Test: p-value = 0.41

# C5Y5Z4|C5Y5Z4\_SORBI

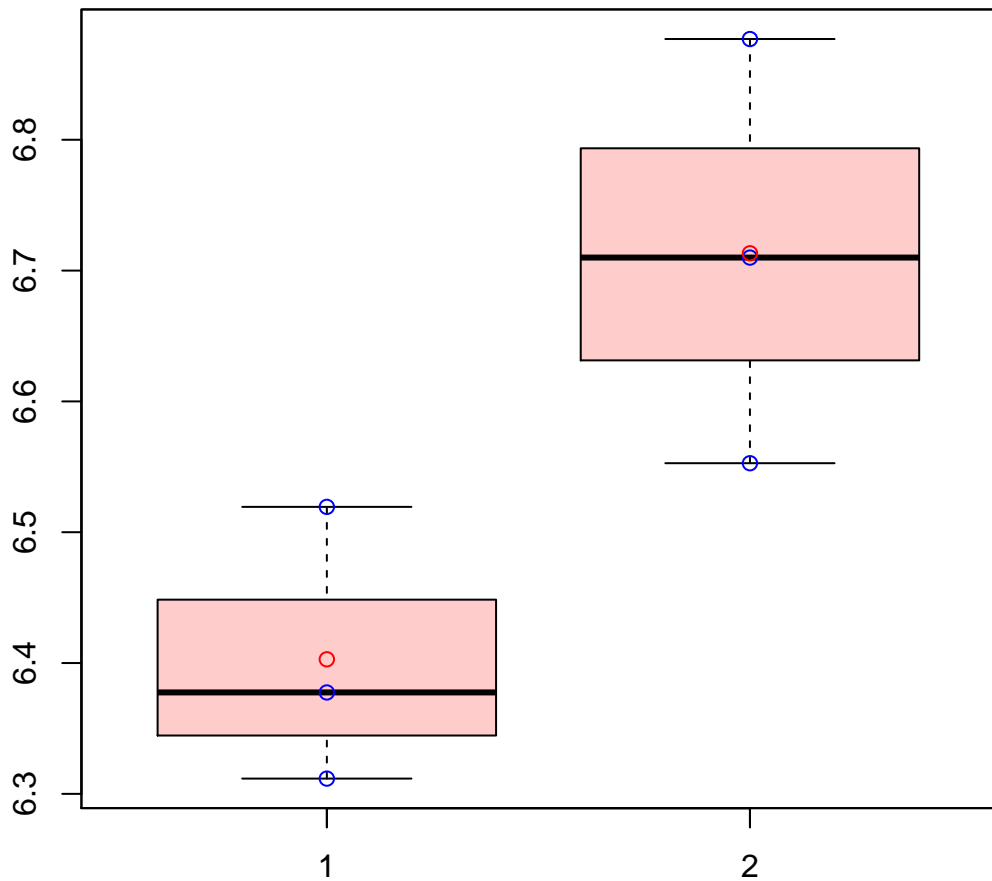

t-Test: p-value = 0.06

# C5Y688|C5Y688\_SORBI

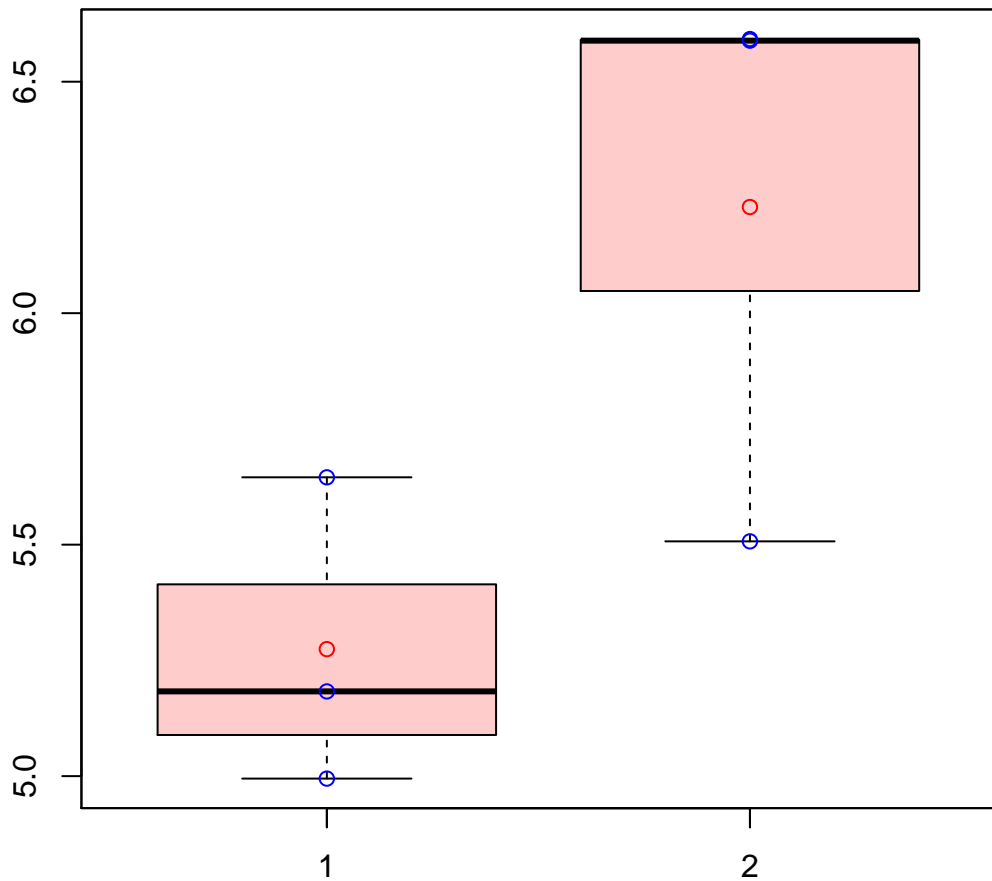

t-Test: p-value = 0.1

# C5Y6E7|C5Y6E7\_SORBI

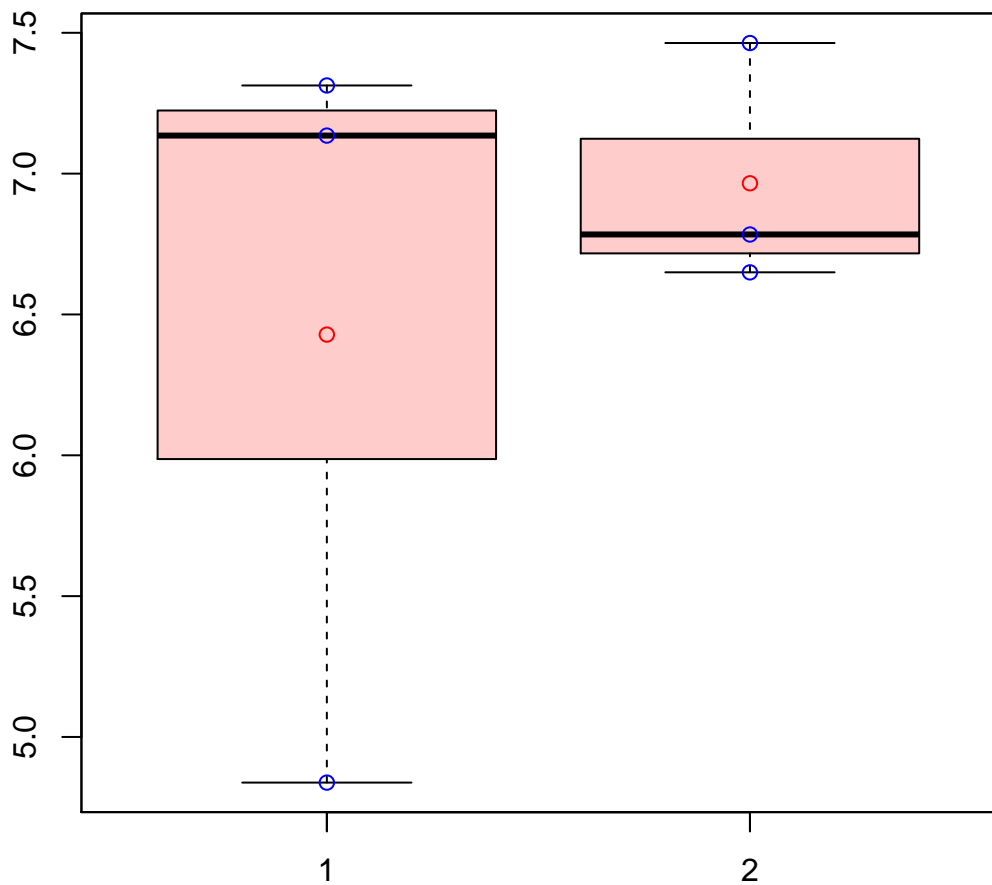

t-Test: p-value = 0.58

# C5Y6M9|C5Y6M9\_SORBI

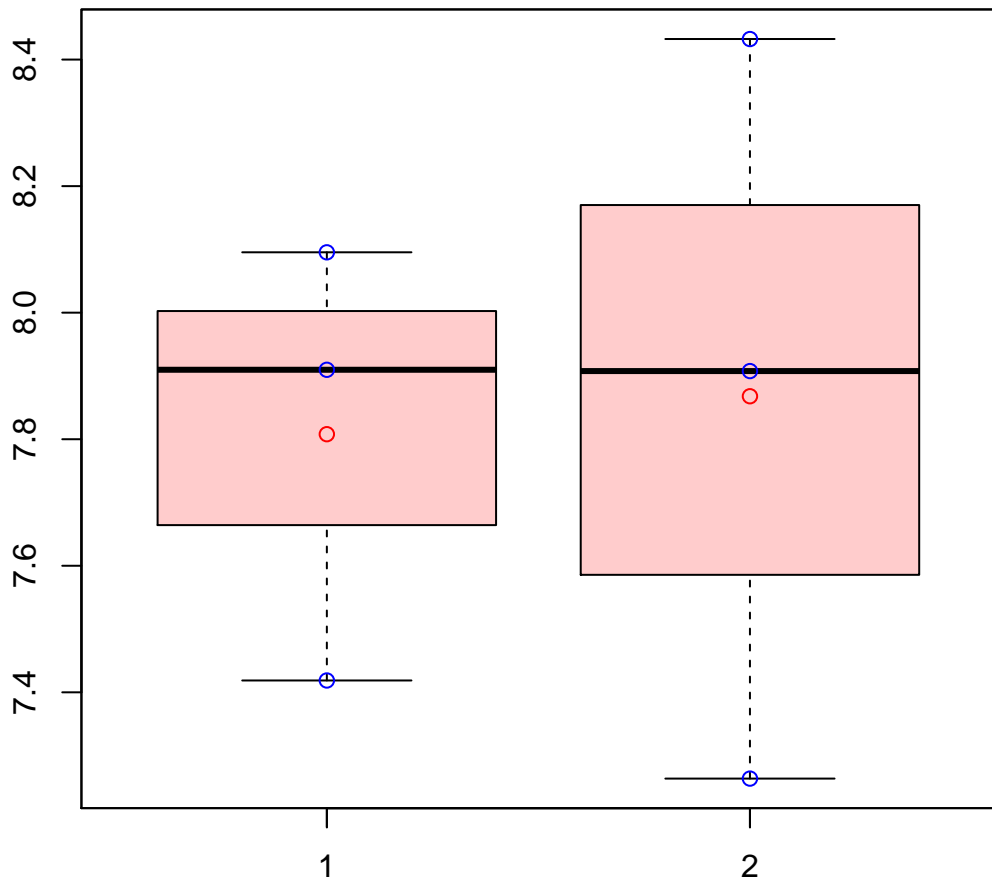

t-Test: p-value = 0.89

# C5Y6Y1|C5Y6Y1\_SORBI

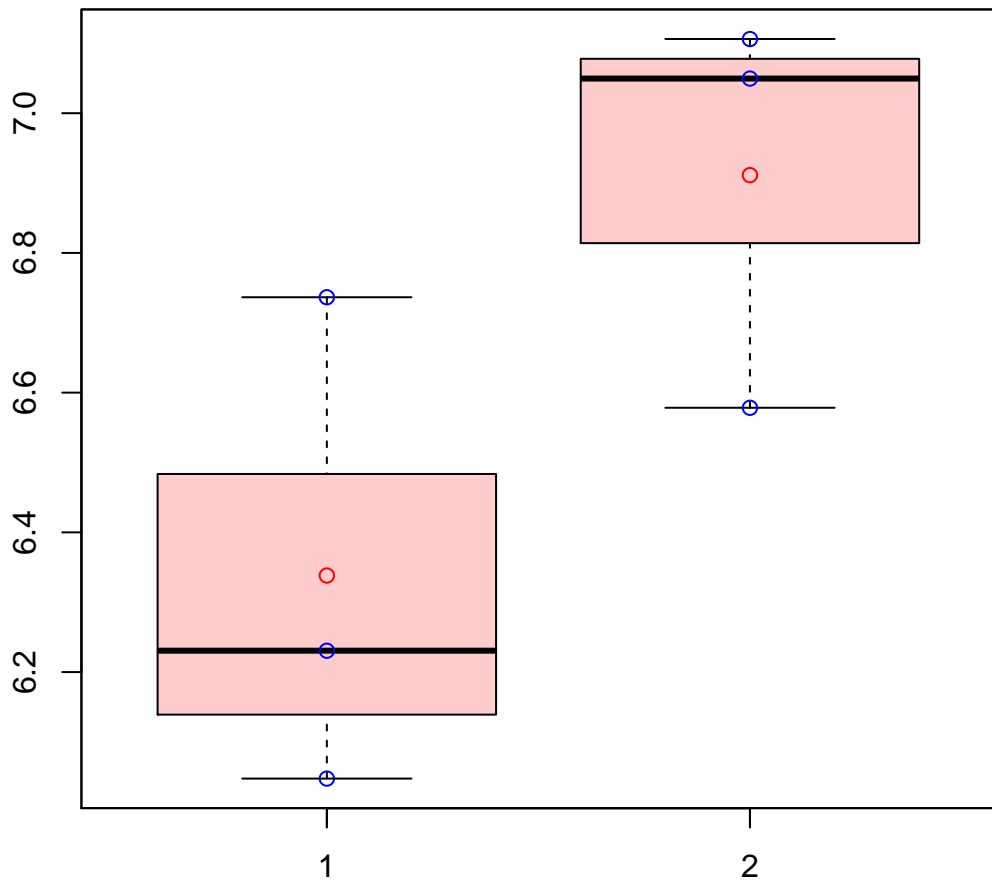

t-Test: p-value = 0.1

# C5Y891|C5Y891\_SORBI

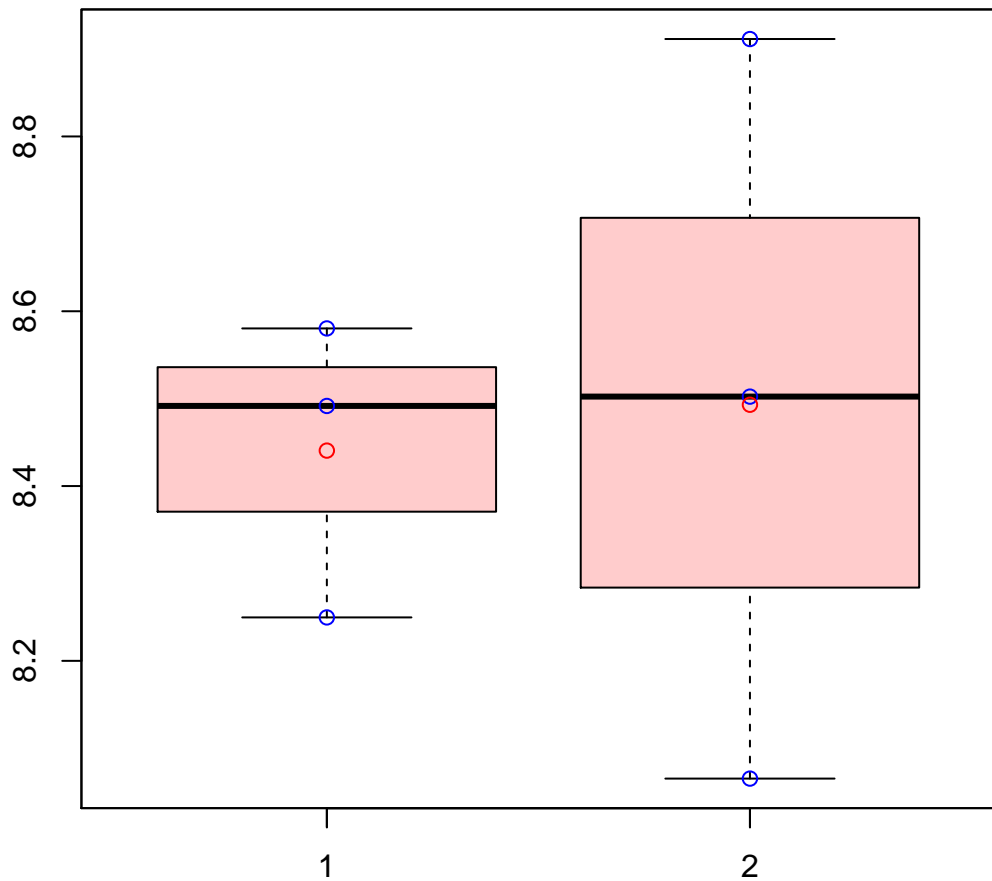

t-Test: p-value = 0.86



# C5Y9B9|C5Y9B9\_SORBI

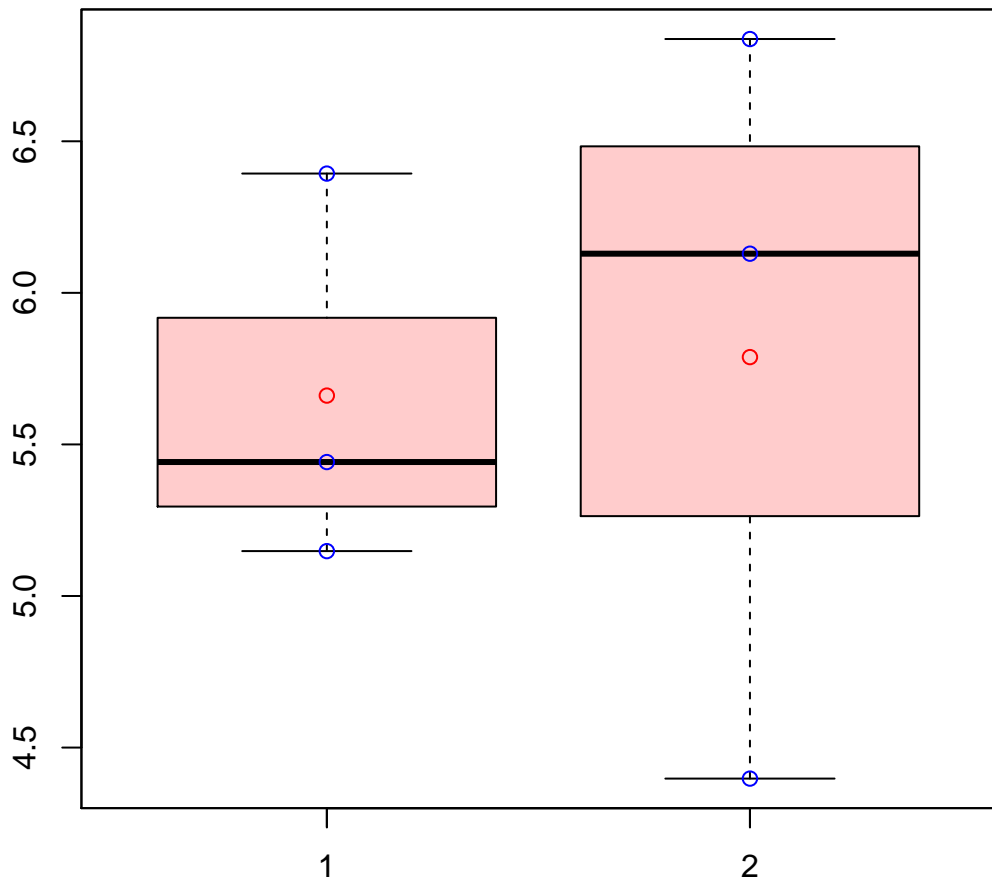

t-Test: p-value = 0.89

# C5Y9I0|C5Y9I0\_SORBI

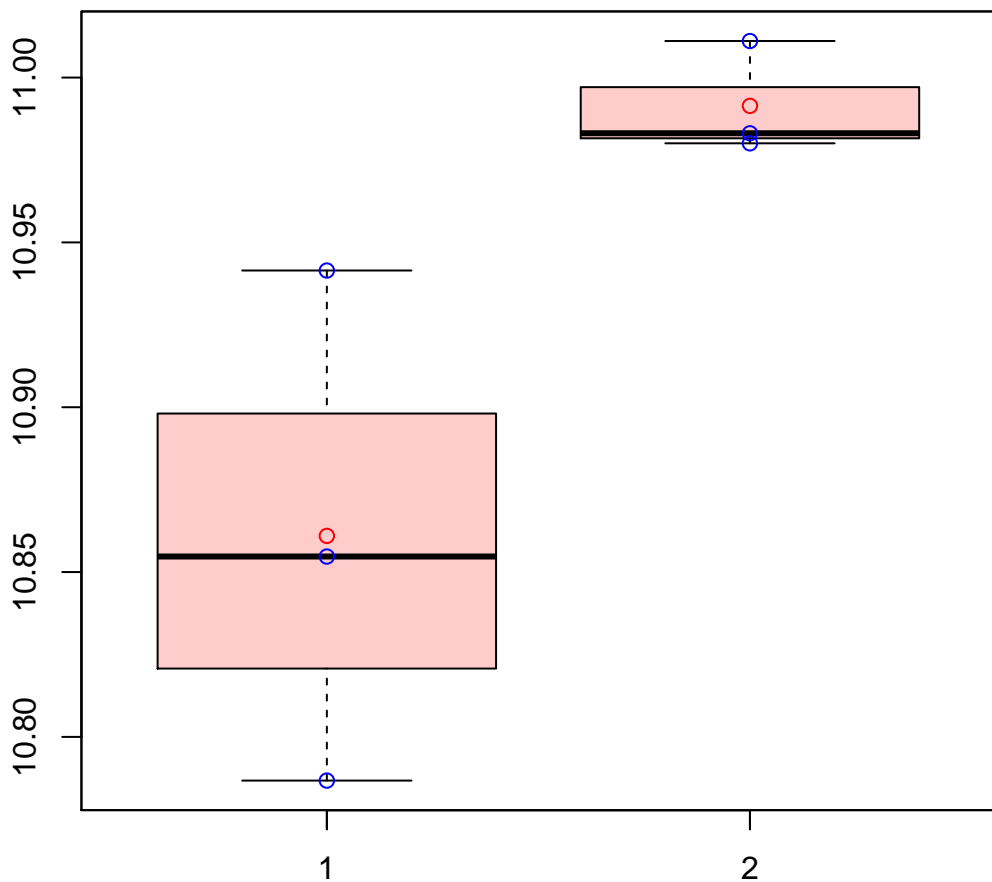

t-Test: p-value = 0.09

# C5YAD0|C5YAD0\_SORBI

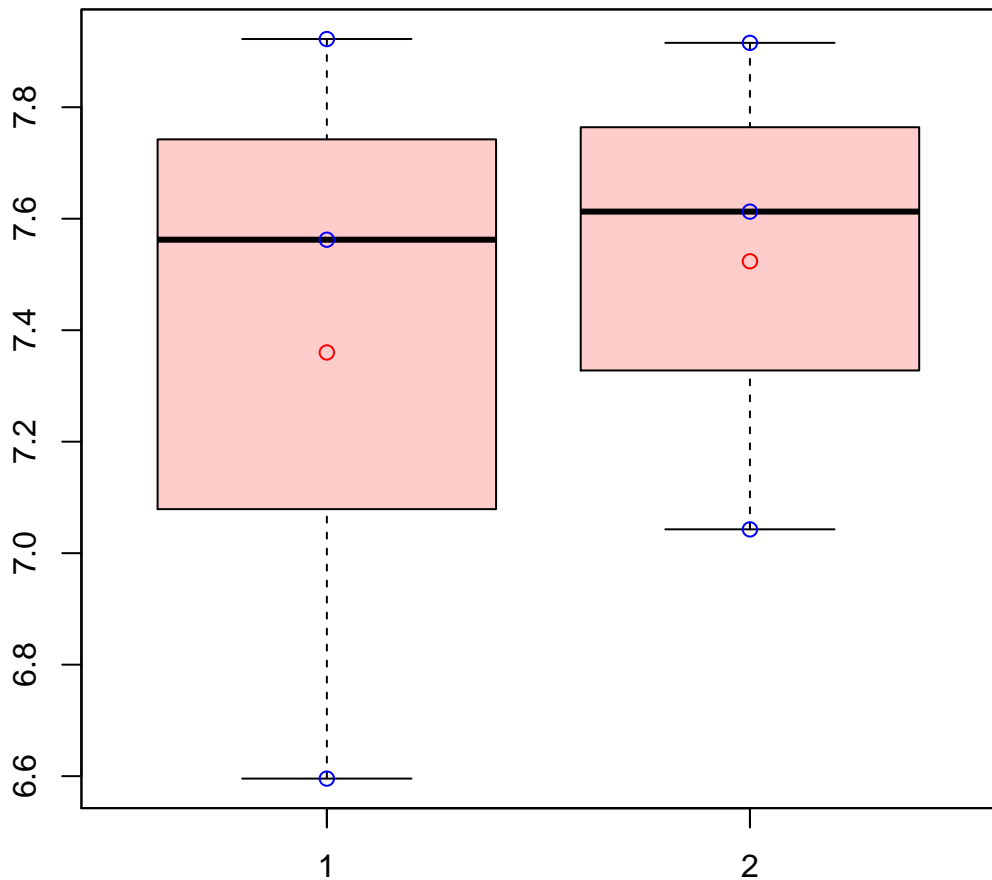

t-Test: p-value = 0.75

# C5YAG7|C5YAG7\_SORBI

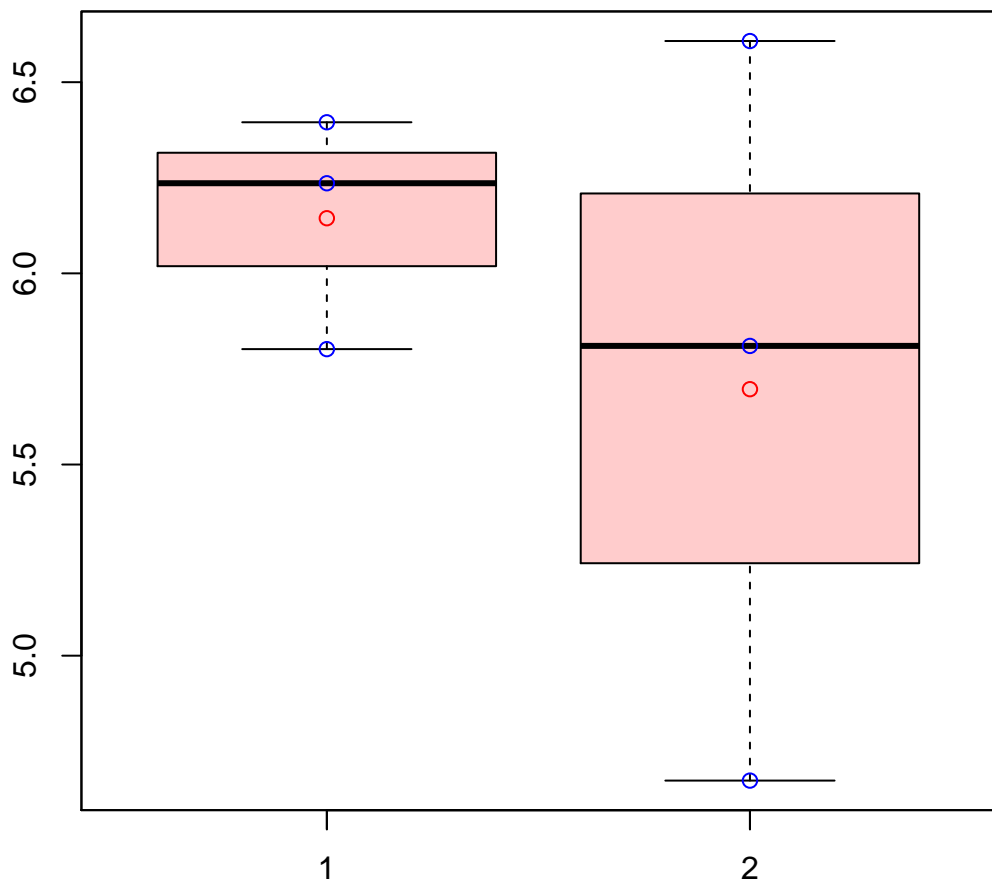

t-Test: p-value = 0.52

# C5YAM9|C5YAM9\_SORBI

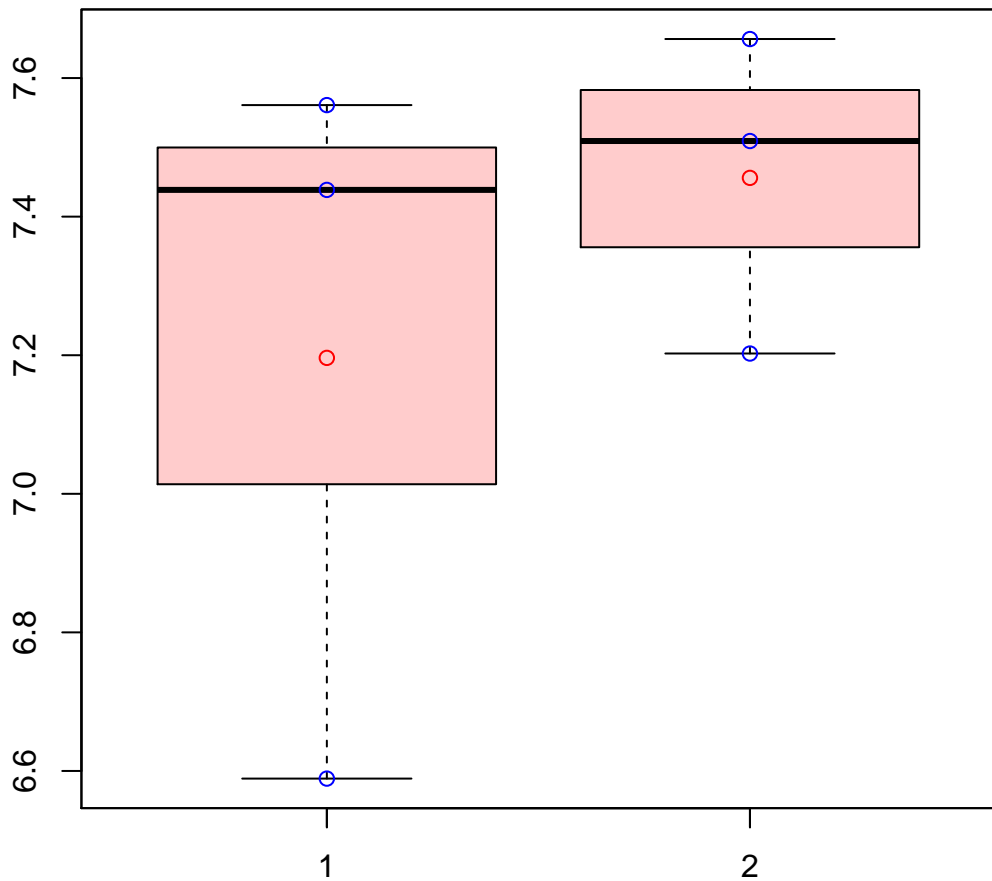

t-Test: p-value = 0.5

# C5YBL4|C5YBL4\_SORBI

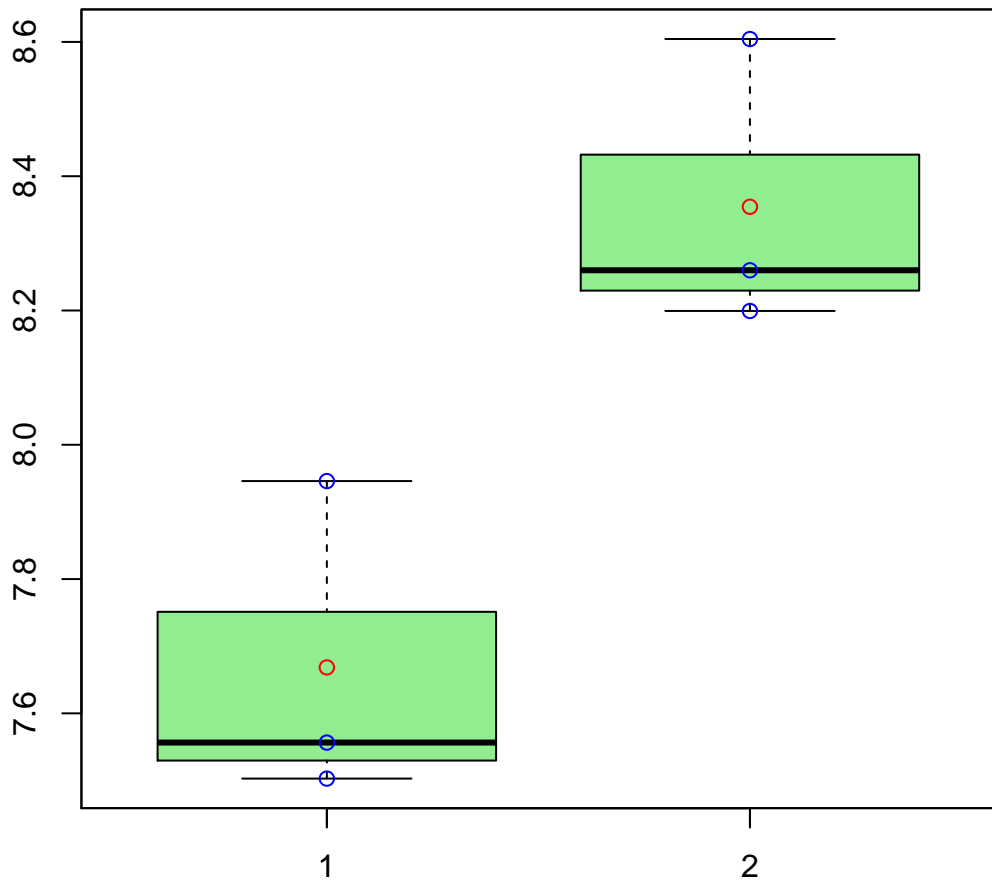

t-Test: p-value = 0.02

# C5YBP4|C5YBP4\_SORBI

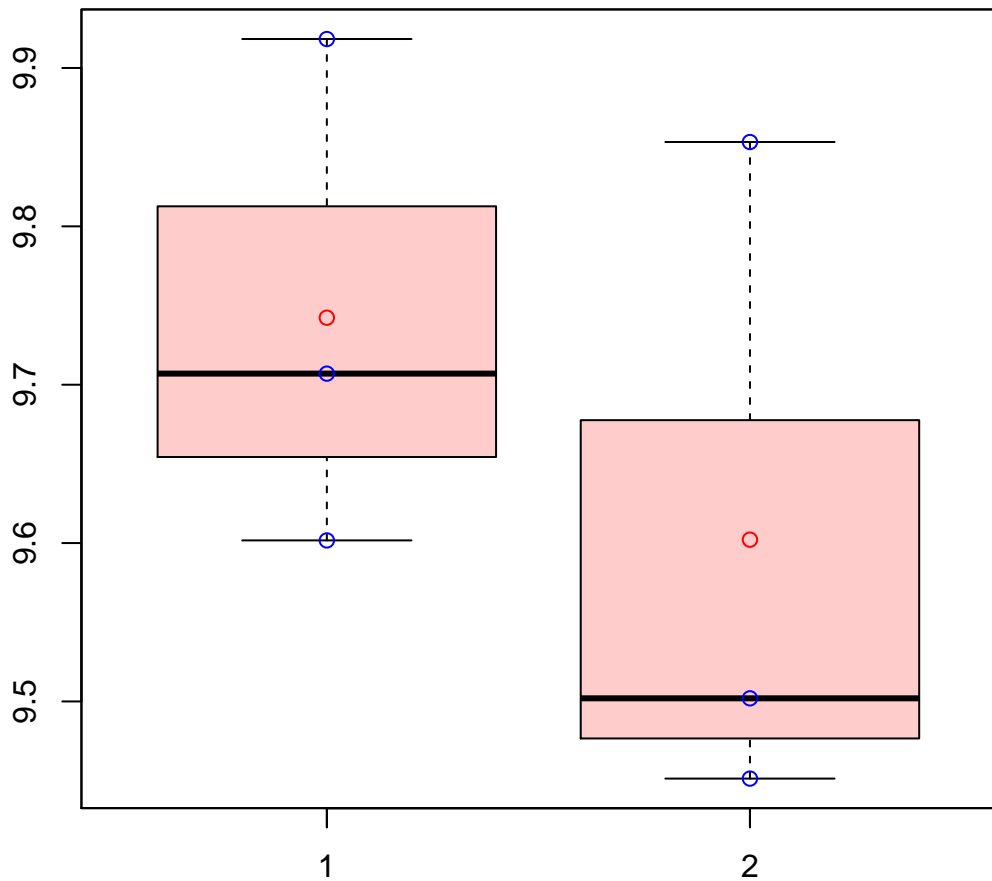

t-Test: p-value = 0.43

# C5YBV1|C5YBV1\_SORBI

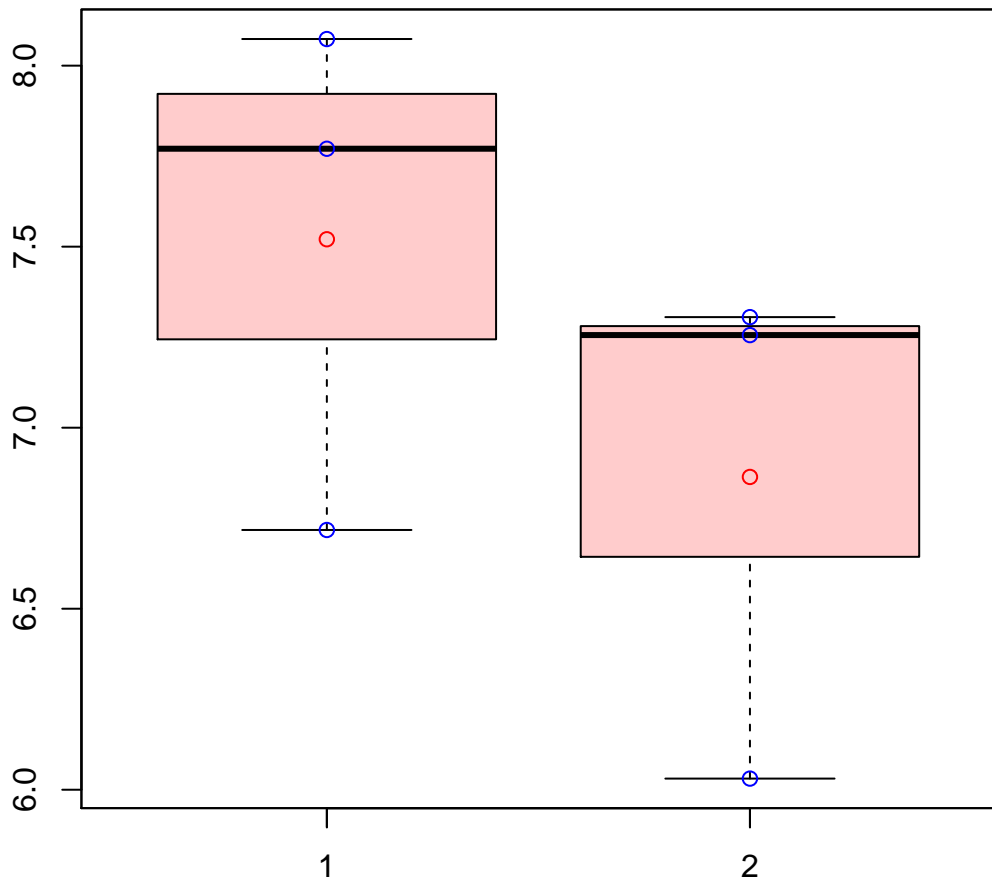

t-Test: p-value = 0.32



# C5YCY4|C5YCY4\_SORBI

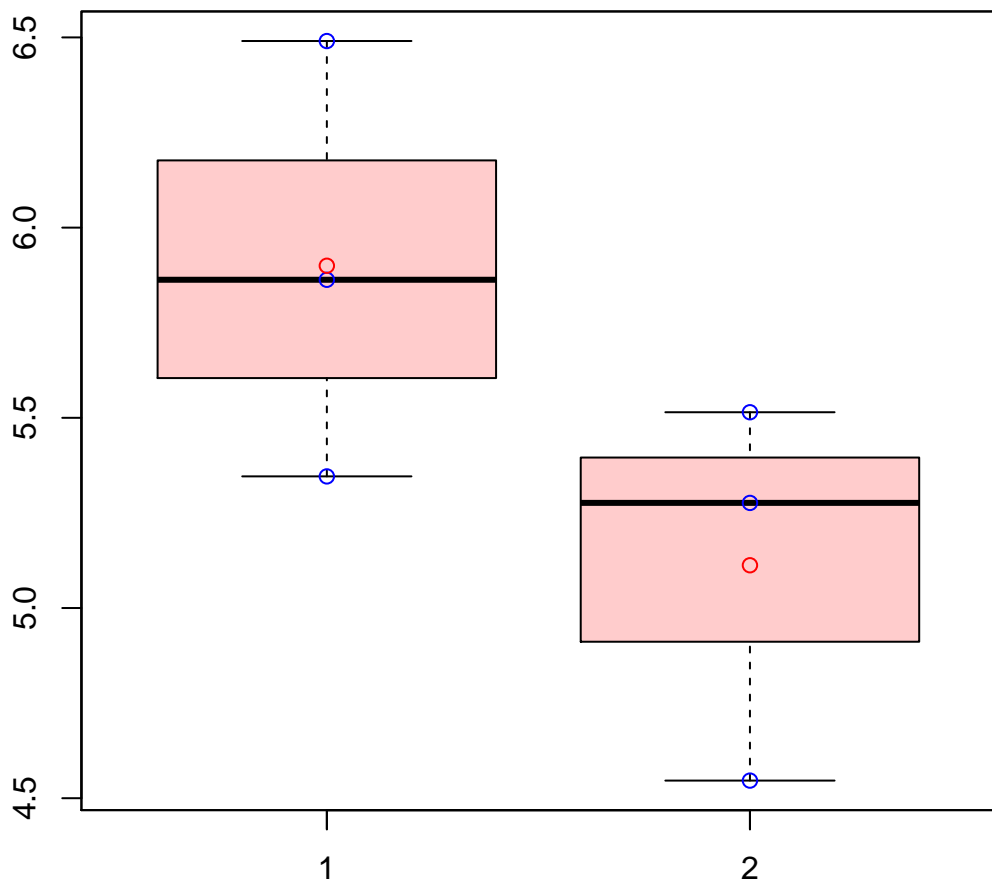

t-Test: p-value = 0.15

# C5YCZ2|C5YCZ2\_SORBI

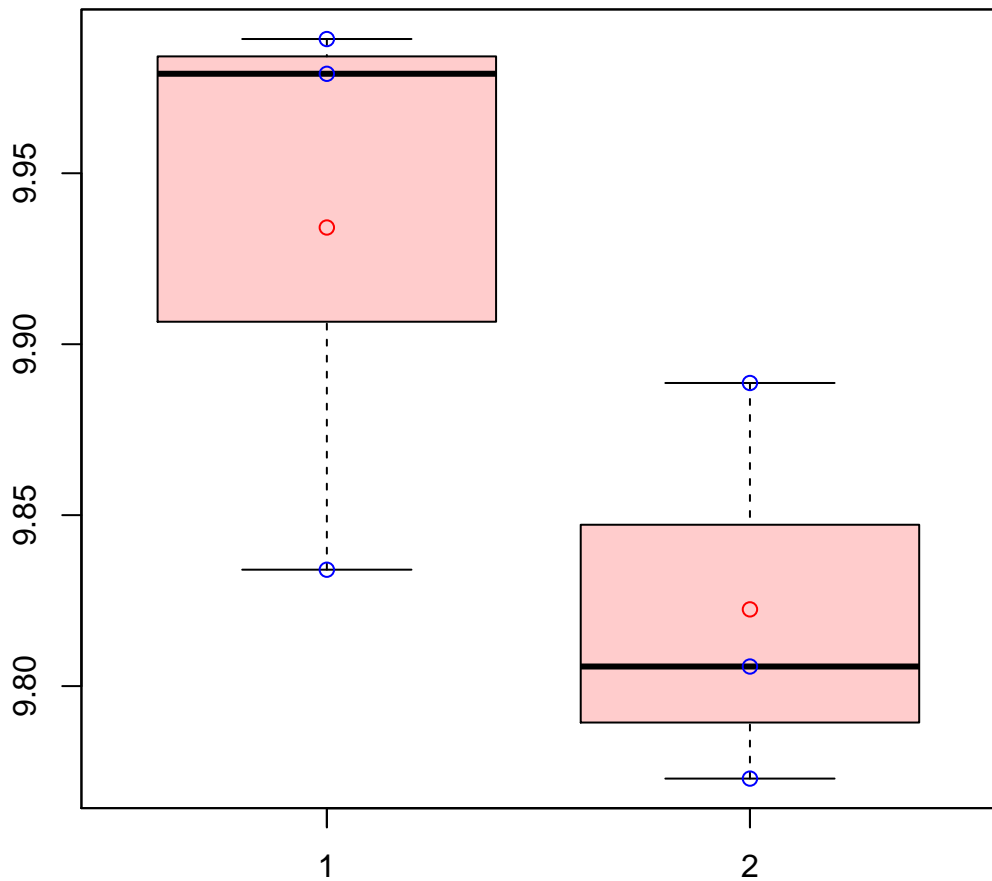

t-Test: p-value = 0.15

# C5YD49|C5YD49\_SORBI

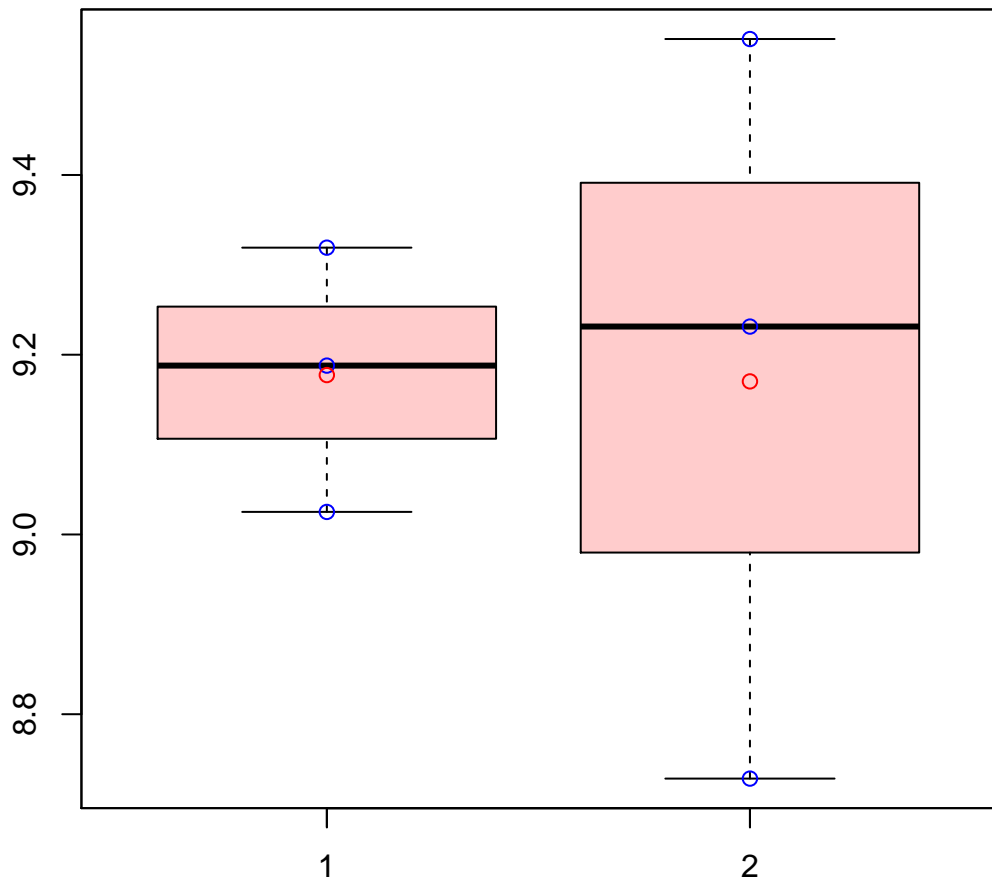

t-Test: p-value = 0.98

# C5YD56|C5YD56\_SORBI

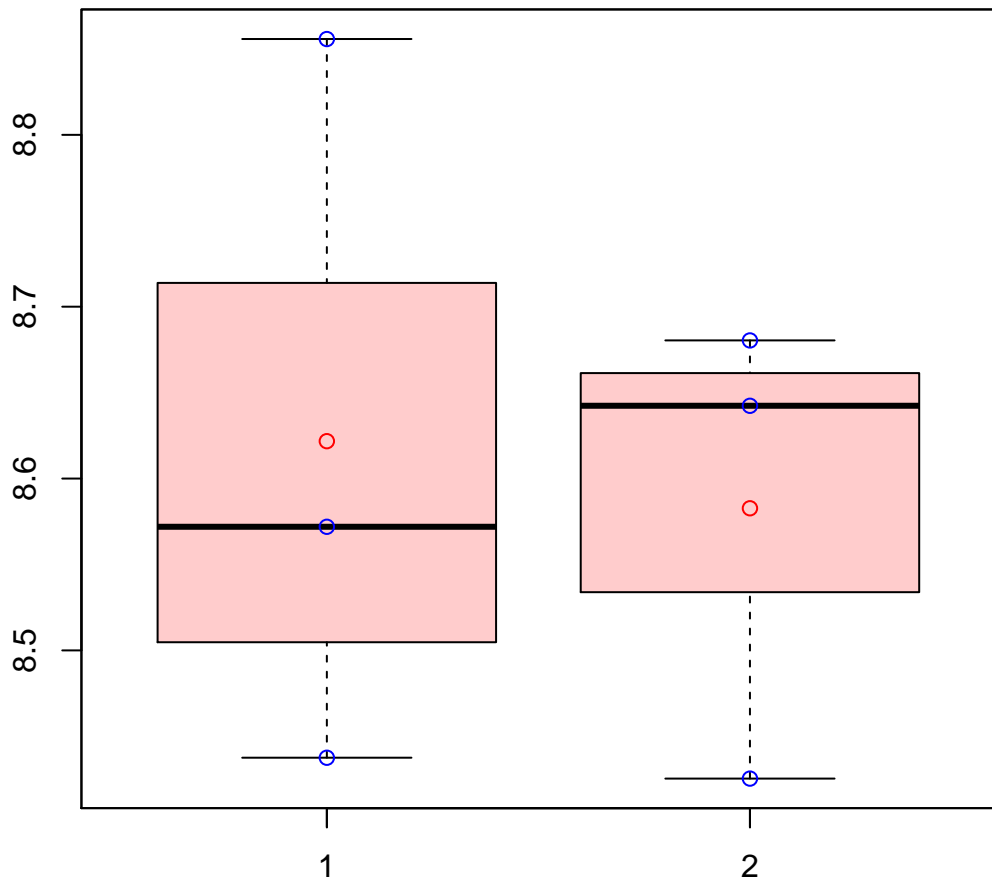

t-Test: p-value = 0.81

# C5YDK1|C5YDK1\_SORBI

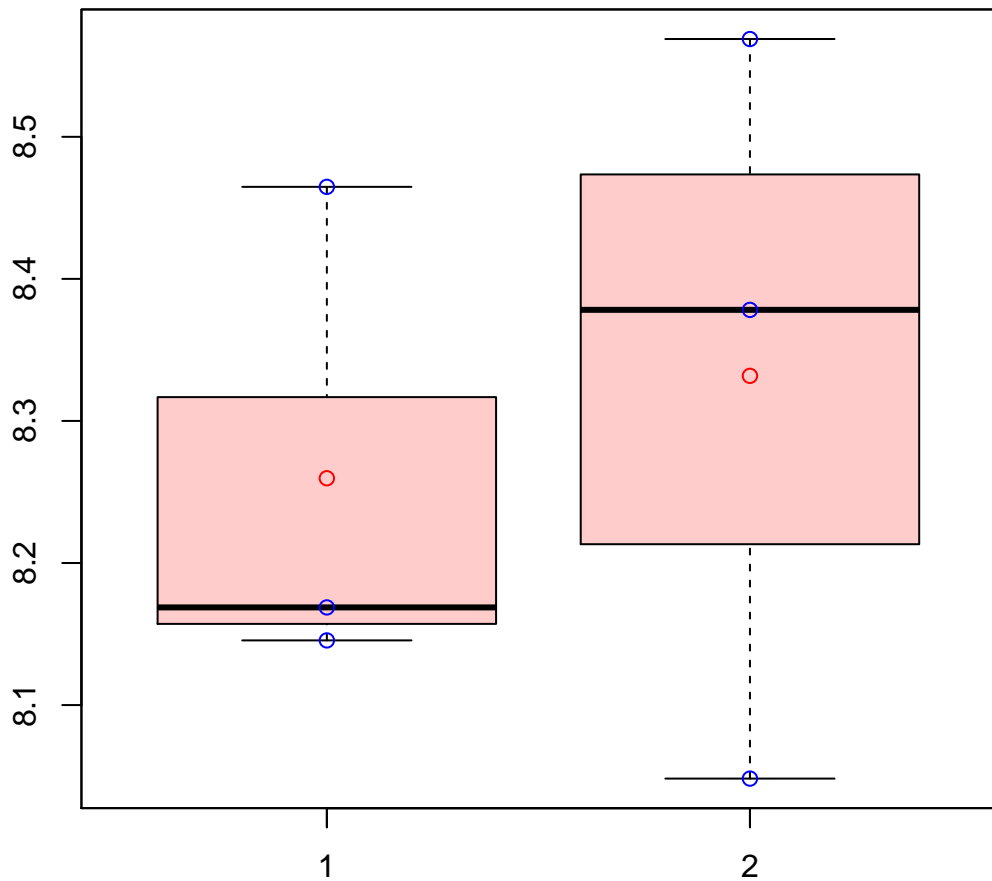

t-Test: p-value = 0.72

# C5YDV6|C5YDV6\_SORBI

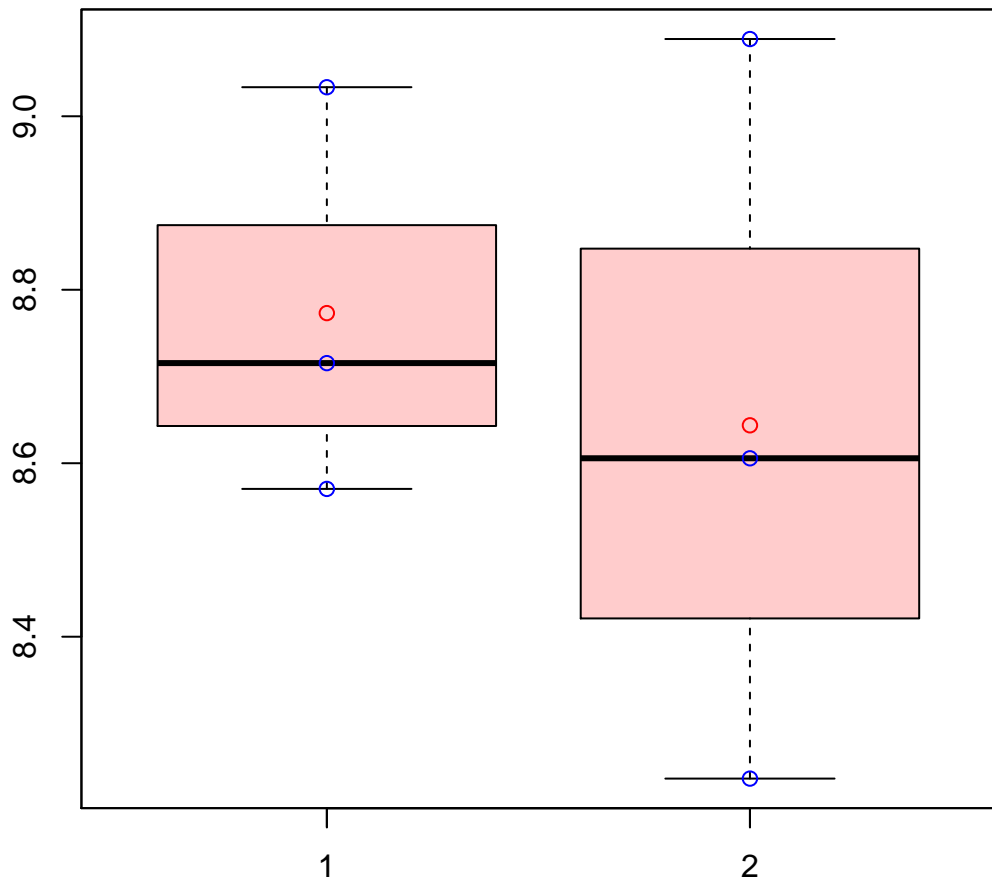

t-Test: p-value = 0.68

# C5YE50|C5YE50\_SORBI

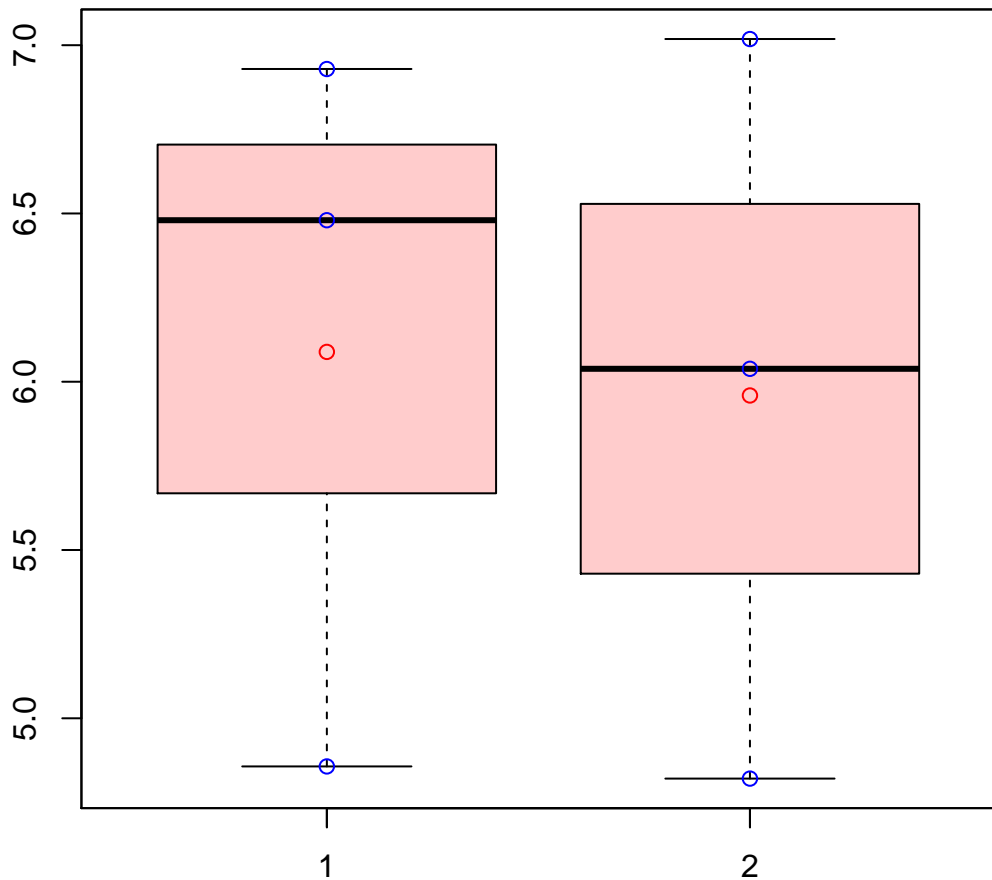

t-Test: p-value = 0.89

# C5YEA9|C5YEA9\_SORBI

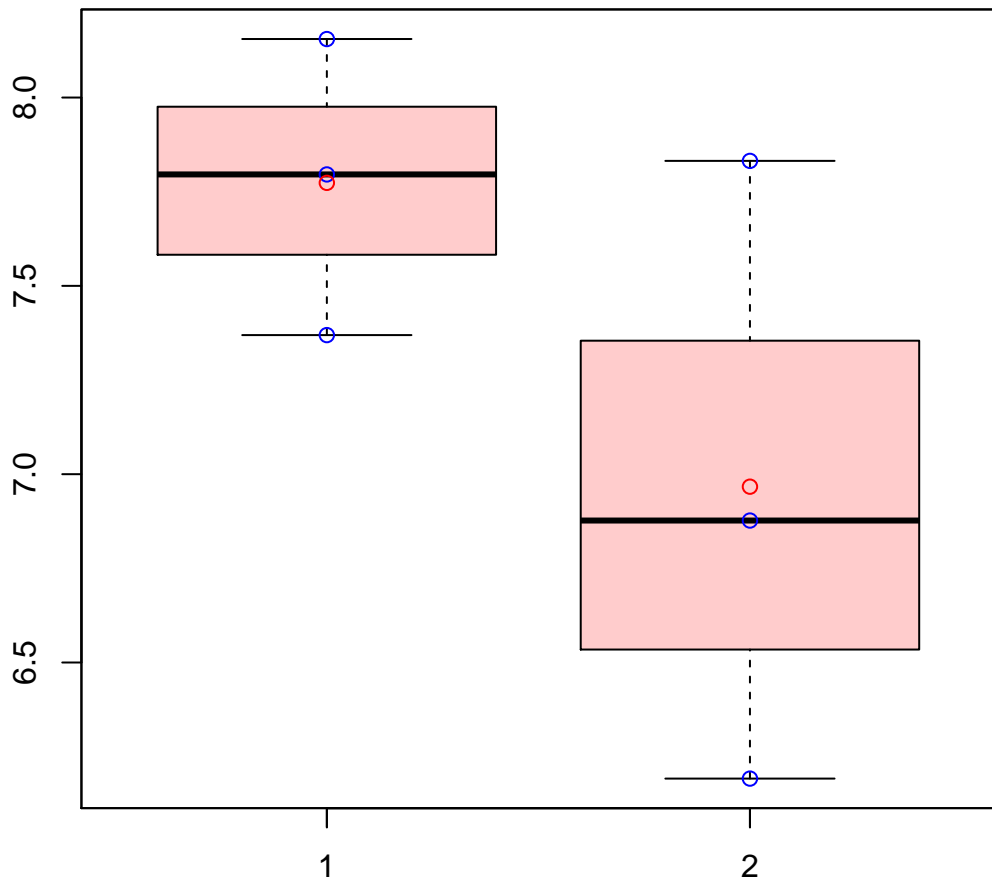

t-Test: p-value = 0.23



# C5YET5|C5YET5\_SORBI

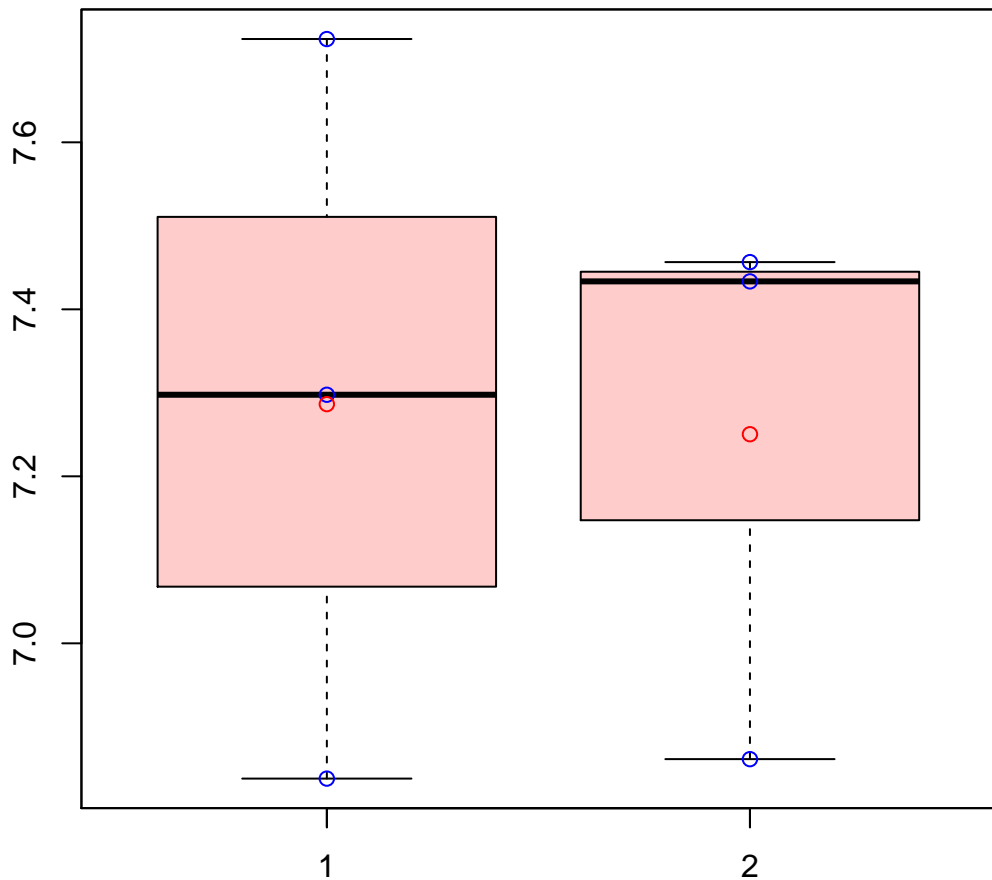

t-Test: p-value = 0.92

# C5YEW8|C5YEW8\_SORBI

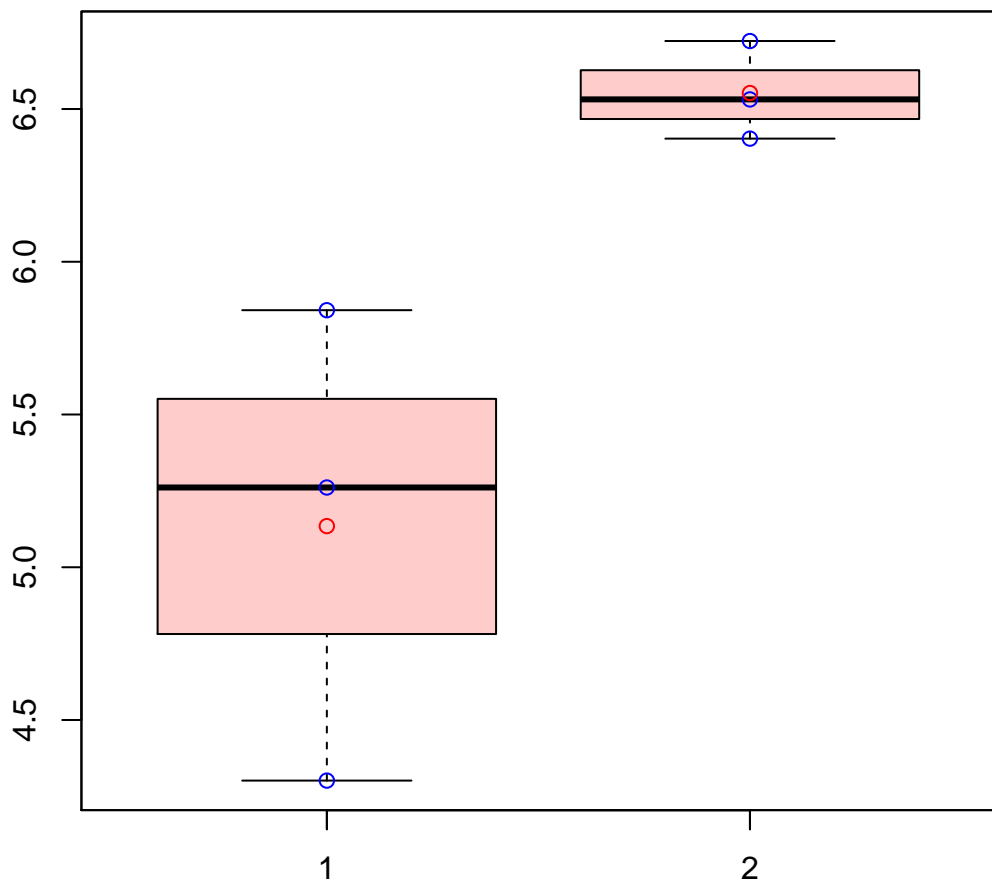

t-Test: p-value = 0.08

# C5YF57|C5YF57\_SORBI

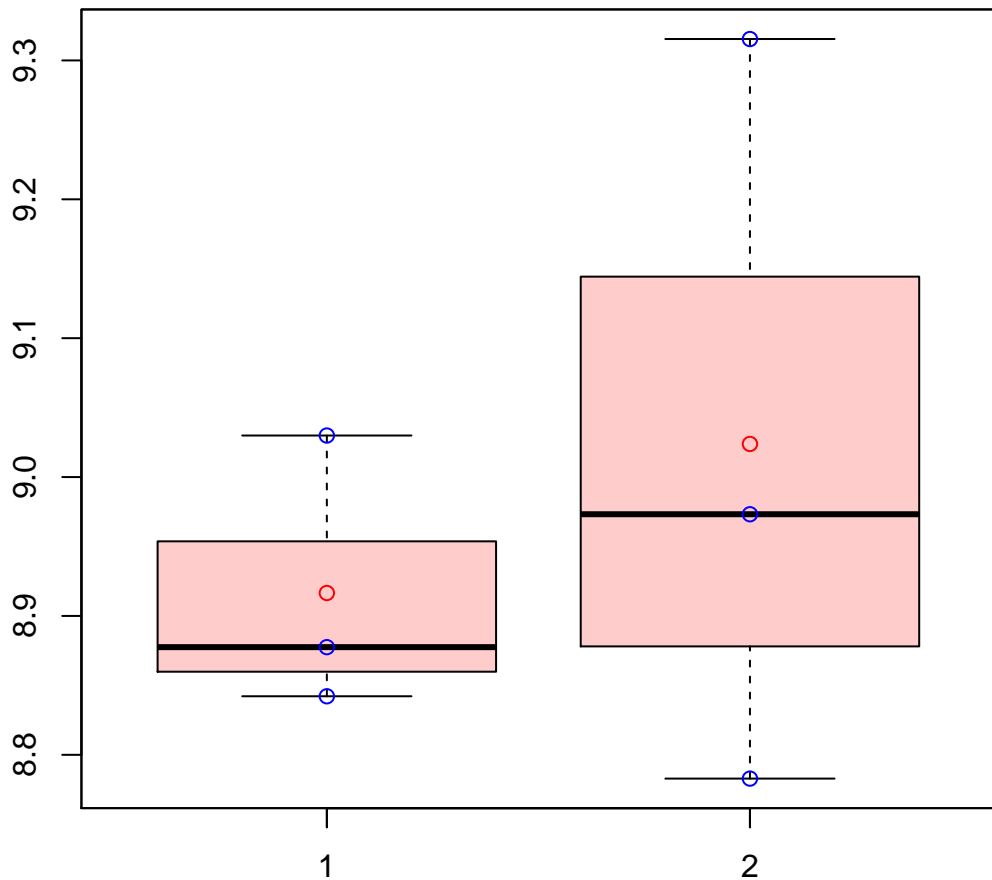

t-Test: p-value = 0.57

# C5YF66|C5YF66\_SORBI

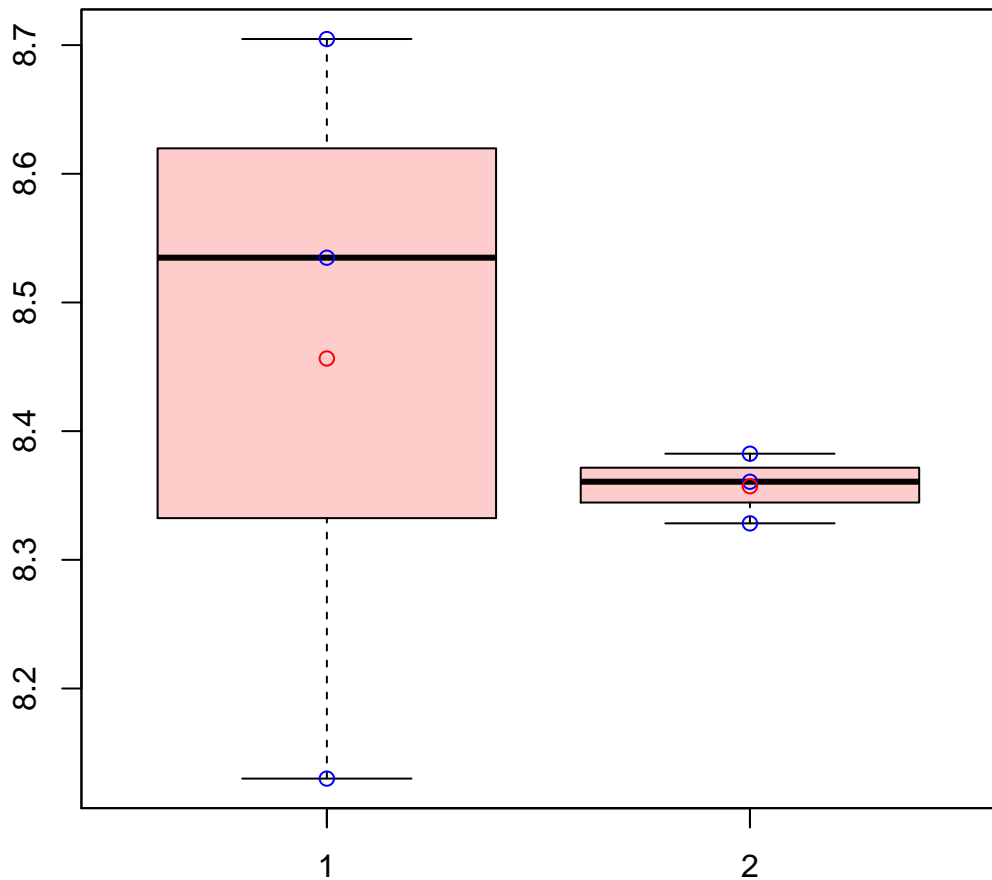

t-Test: p-value = 0.62

# C5YFI5|C5YFI5\_SORBI

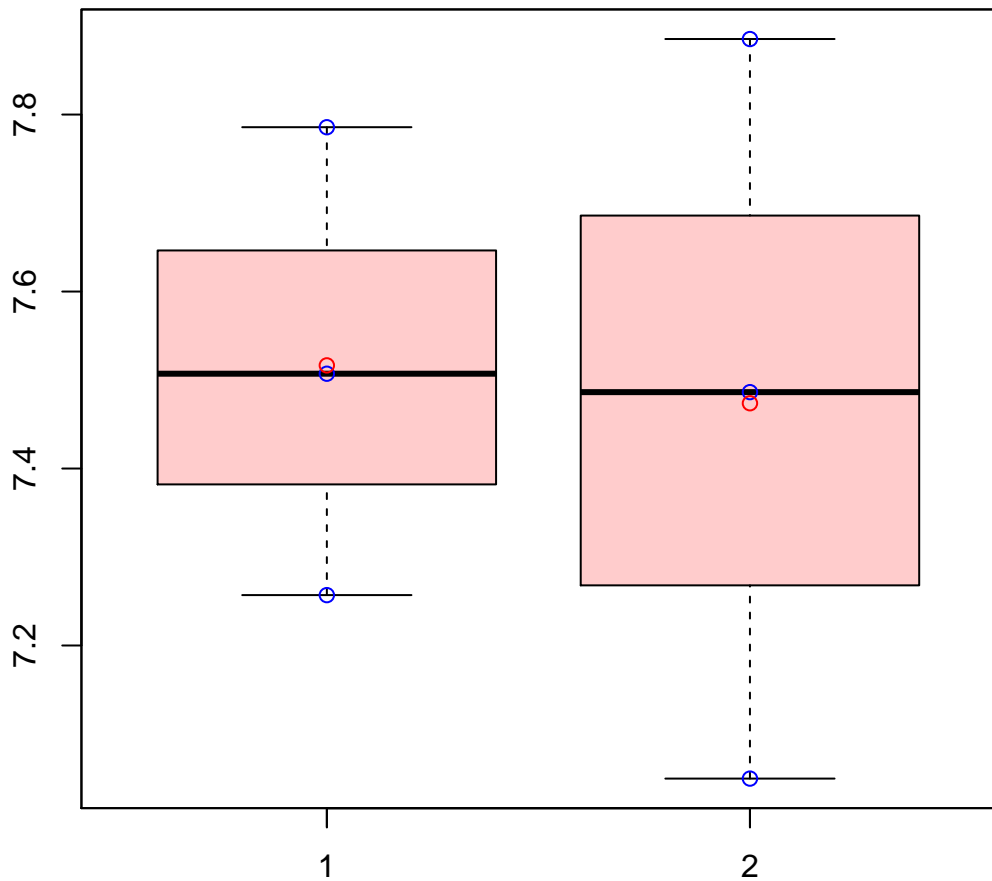

t-Test: p-value = 0.89

# C5YFN1|C5YFN1\_SORBI

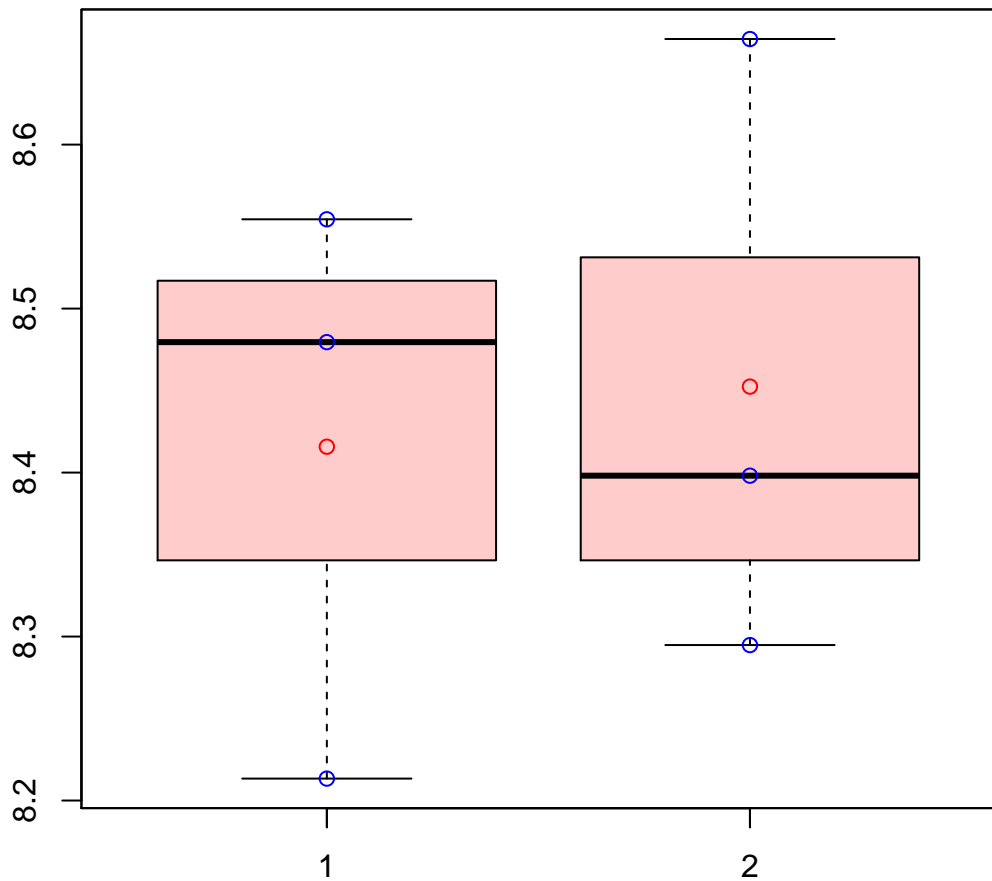

t-Test: p-value = 0.82

# C5YFR0|C5YFR0\_SORBI

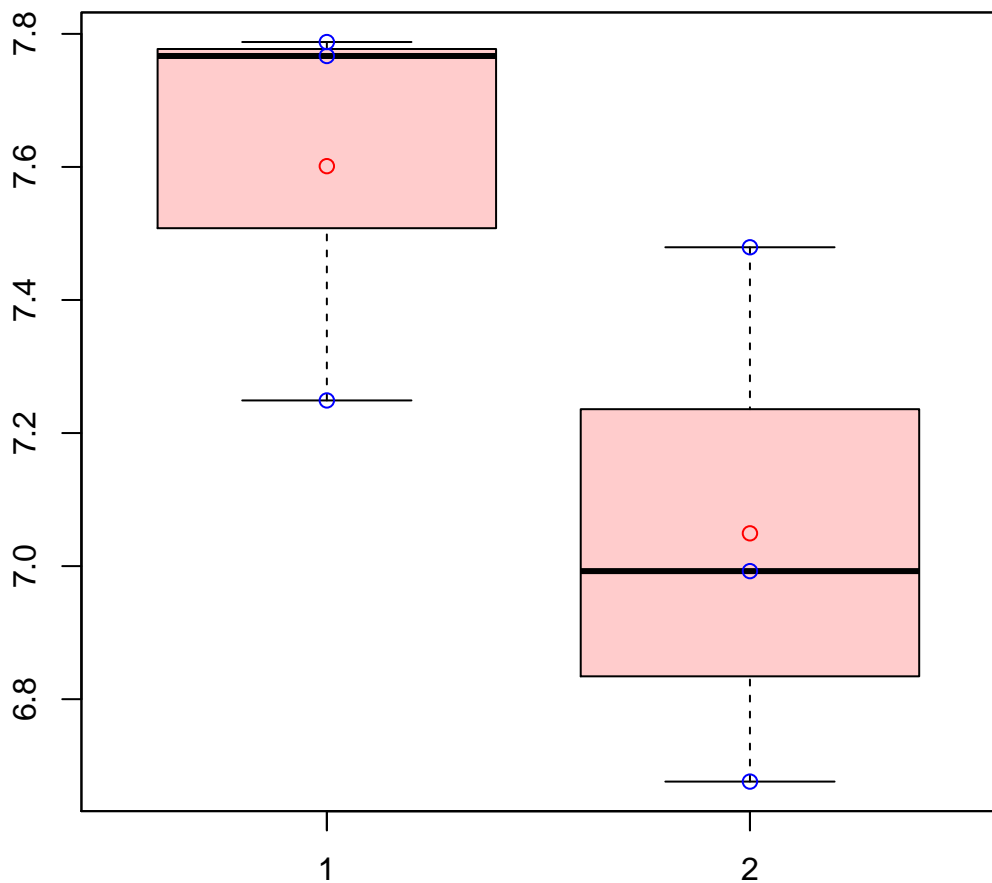

t-Test: p-value = 0.14

# C5YFS4|C5YFS4\_SORBI

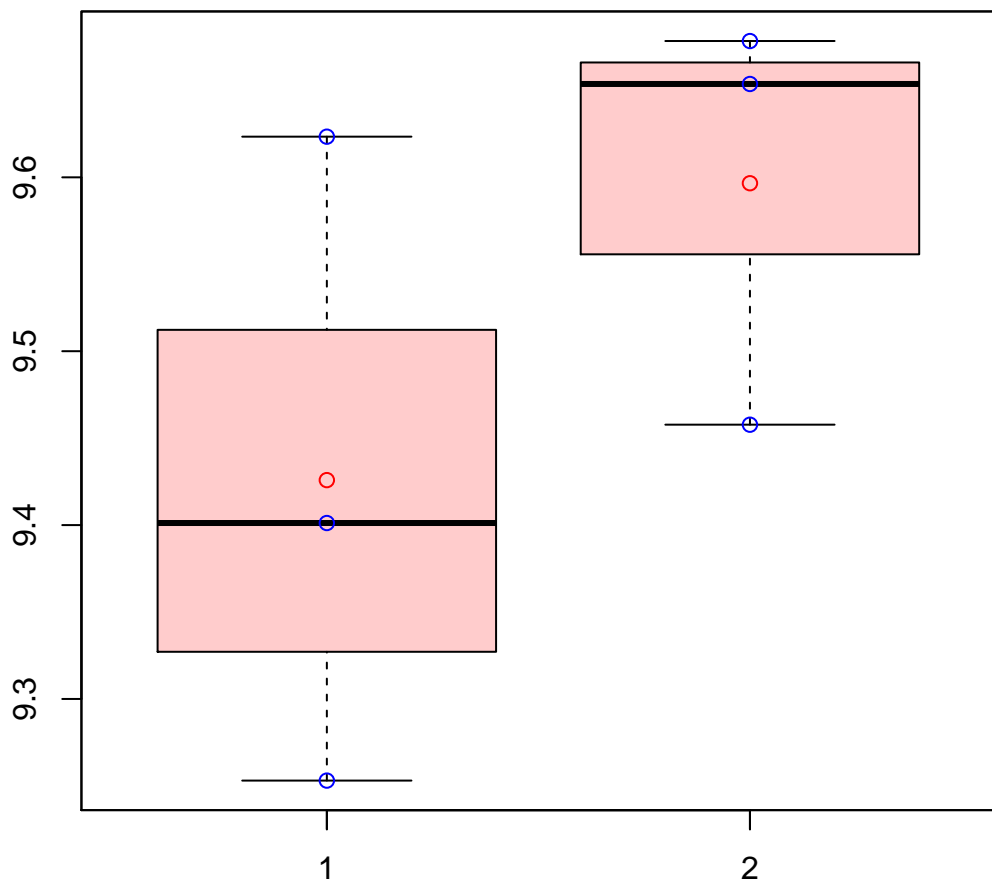

t-Test: p-value = 0.26



# C5YG29|C5YG29\_SORBI

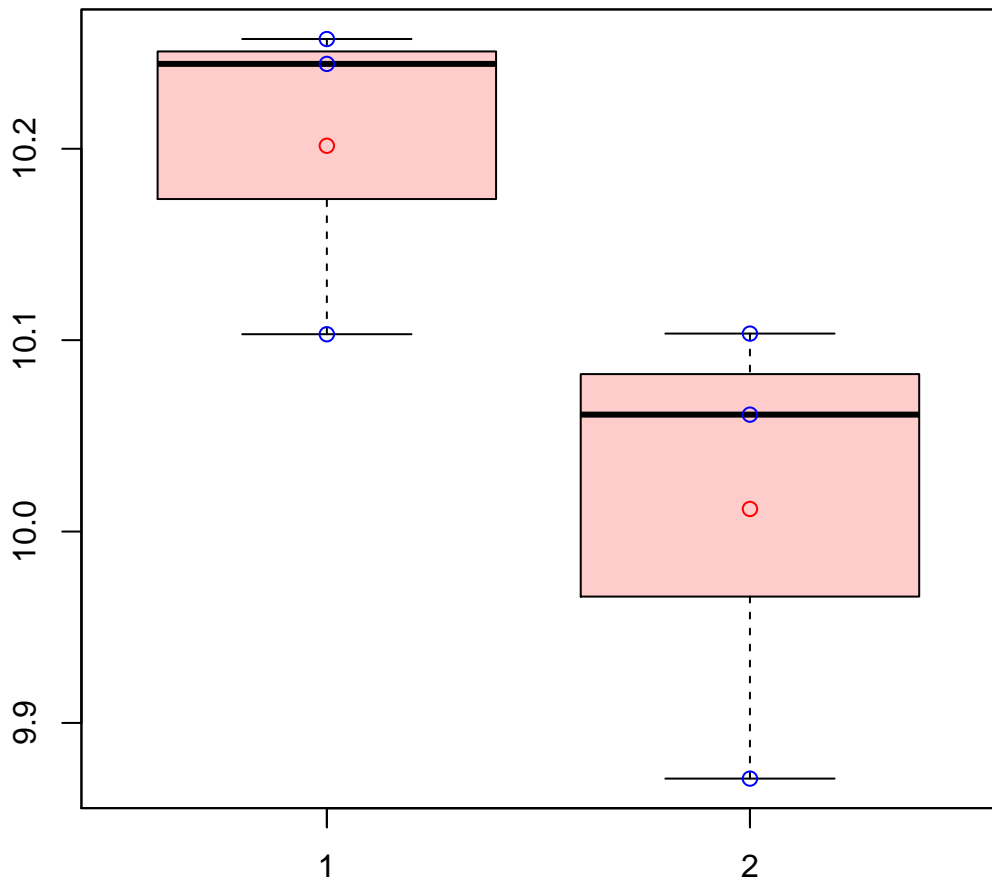

t-Test: p-value = 0.1

# C5YG34|C5YG34\_SORBI

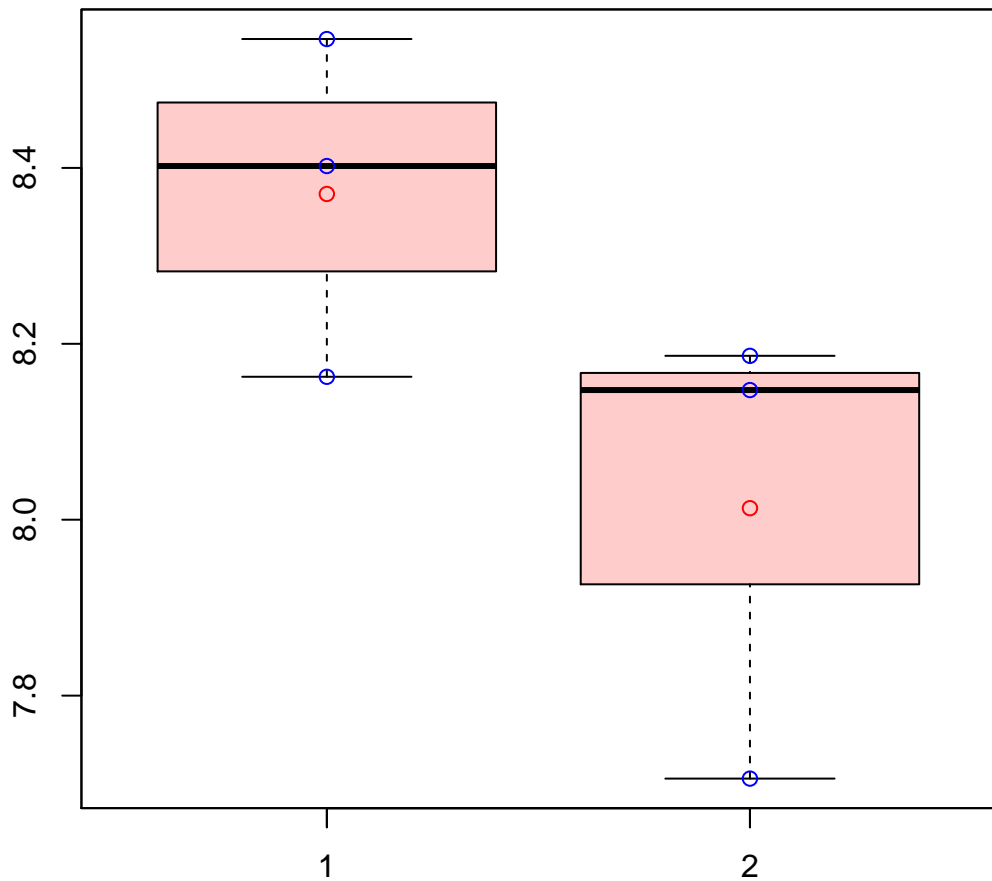

t-Test: p-value = 0.14

# C5YG66|C5YG66\_SORBI

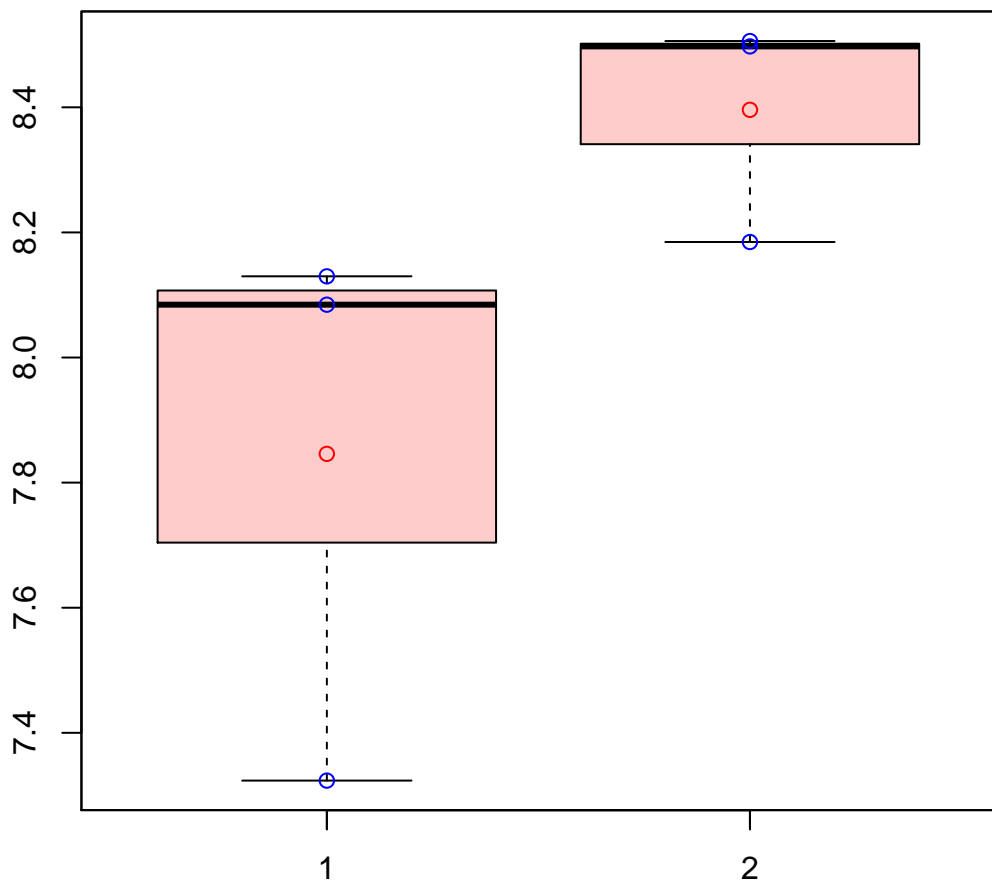

t-Test: p-value = 0.16

**C5YGH8|C5YGH8\_SORBI**

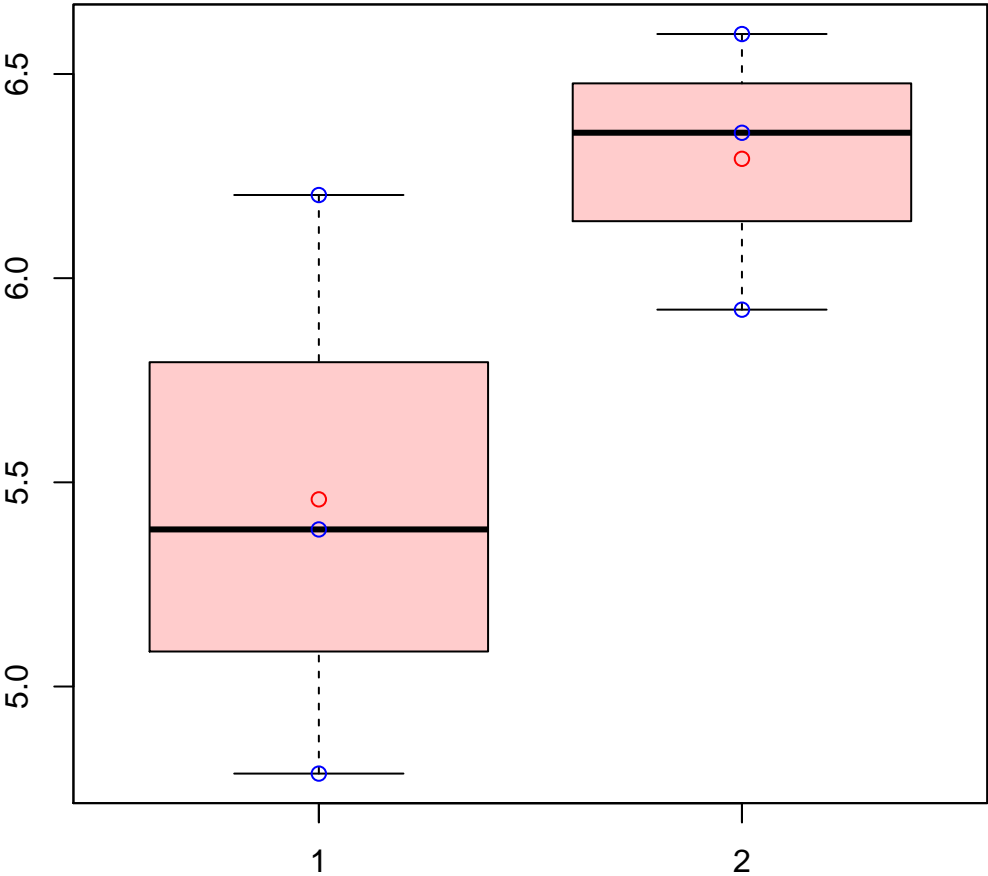

t-Test: p-value = 0.17

# C5YGJ2|C5YGJ2\_SORBI

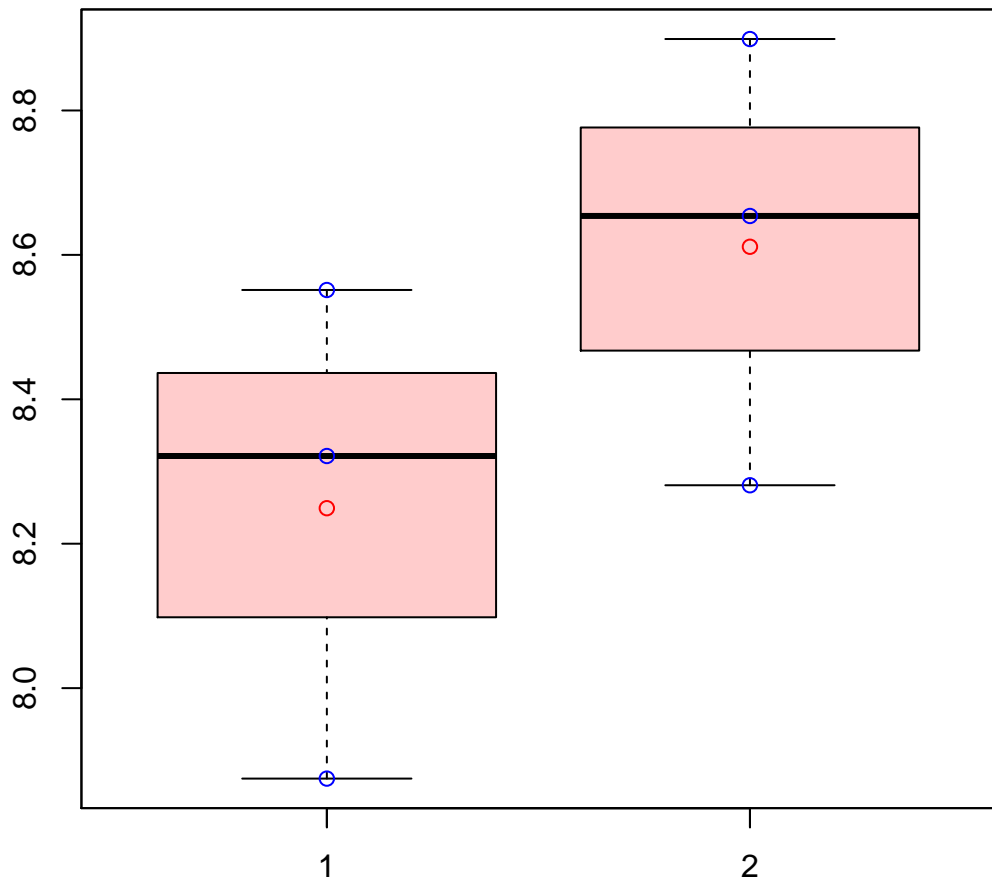

t-Test: p-value = 0.25

# C5YH53|C5YH53\_SORBI

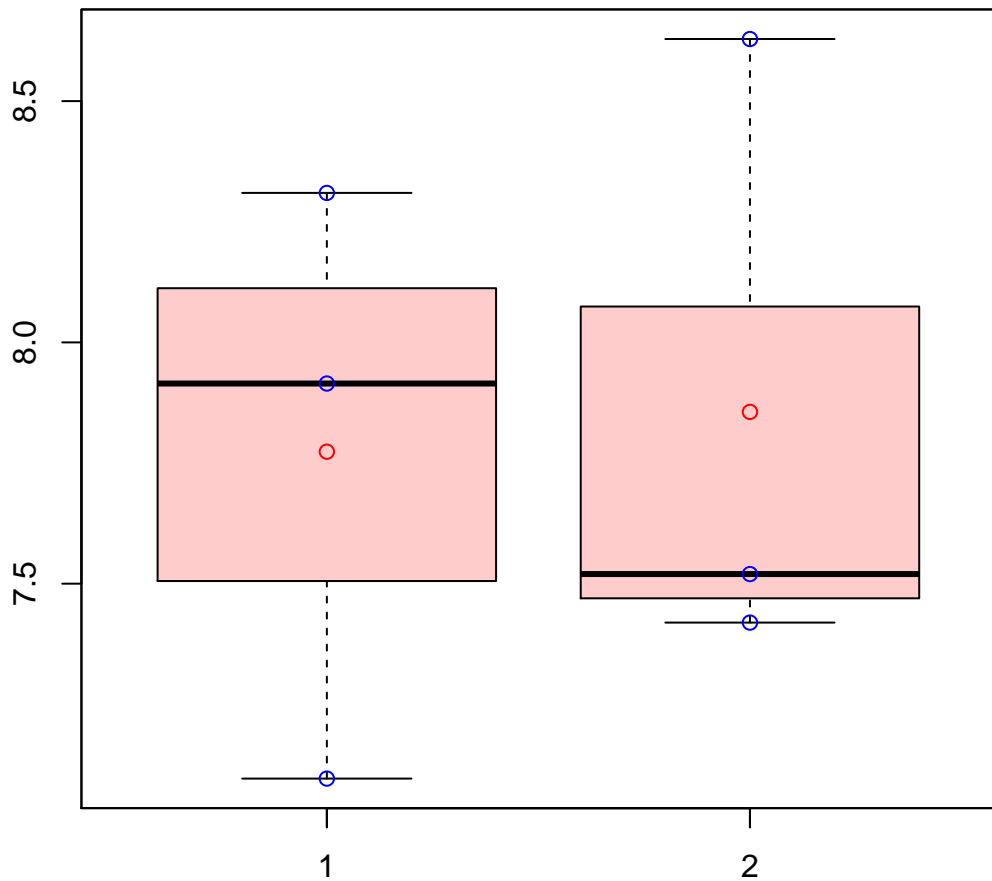

t-Test: p-value = 0.88

# C5YHJ2|C5YHJ2\_SORBI

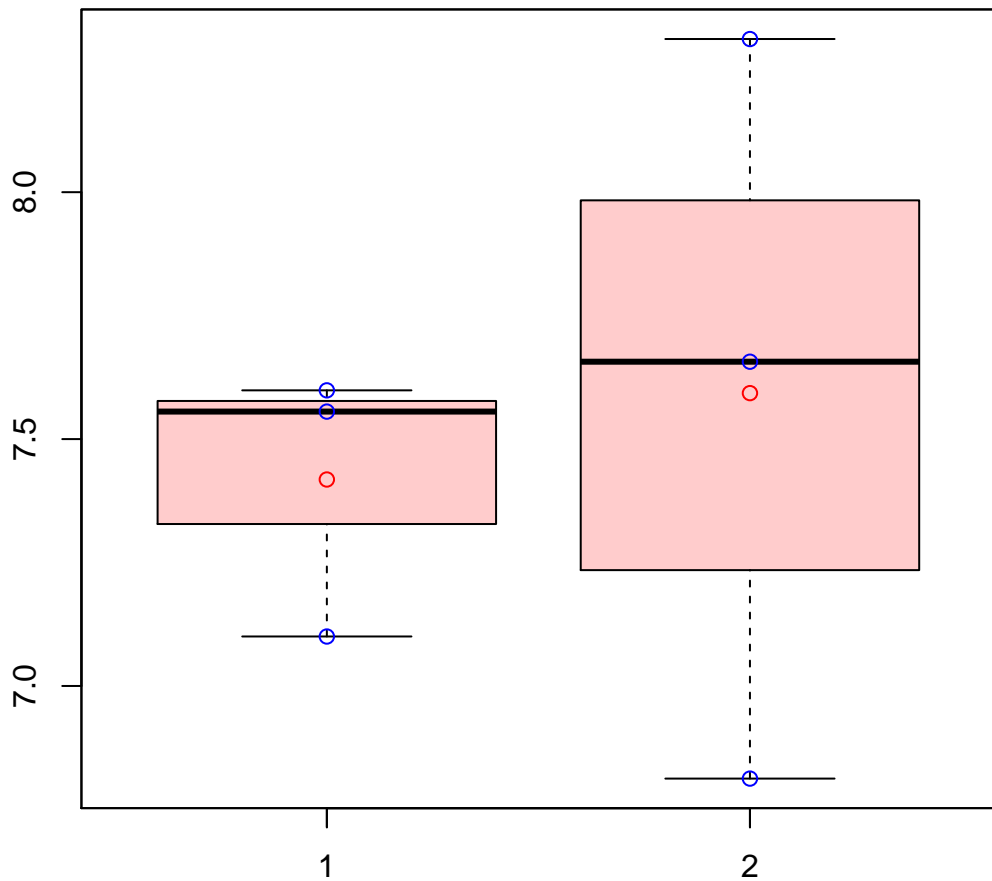

t-Test: p-value = 0.73

# C5YHN2|C5YHN2\_SORBI

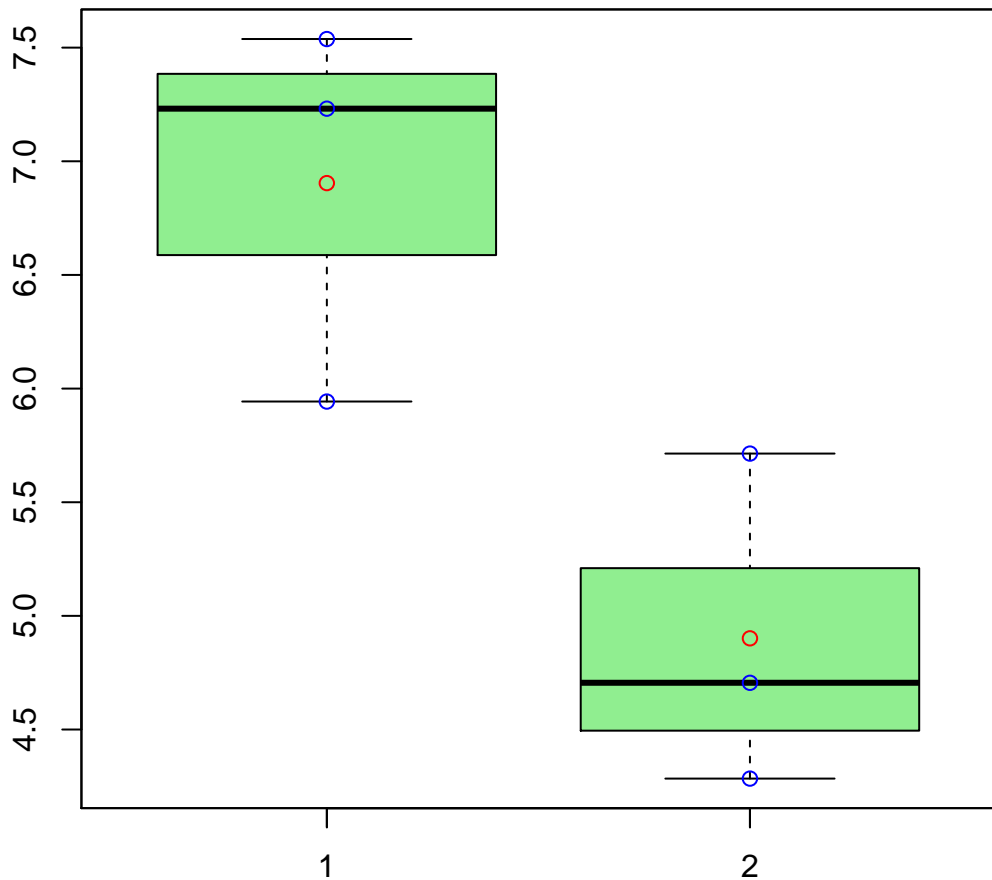

t-Test: p-value = 0.04



# C5YHZ1|C5YHZ1\_SORBI

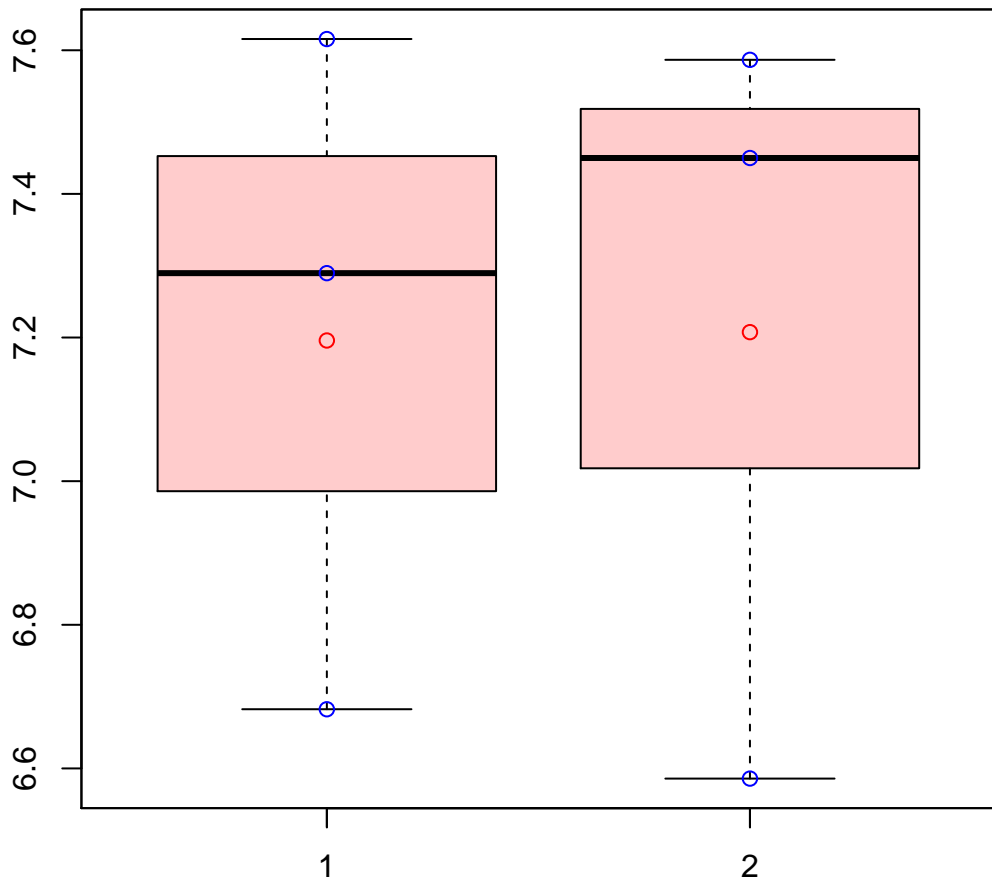

t-Test: p-value = 0.98

# C5YI11|C5YI11\_SORBI

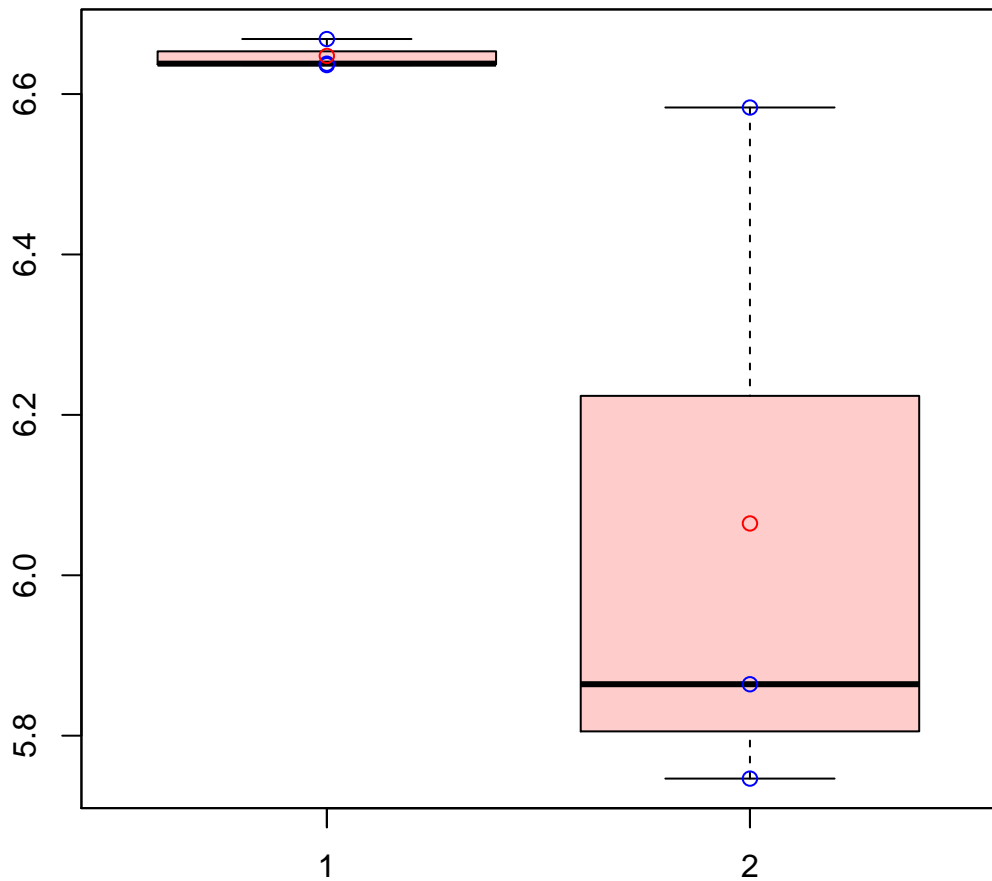

t-Test: p-value = 0.16

# C5YI48|C5YI48\_SORBI

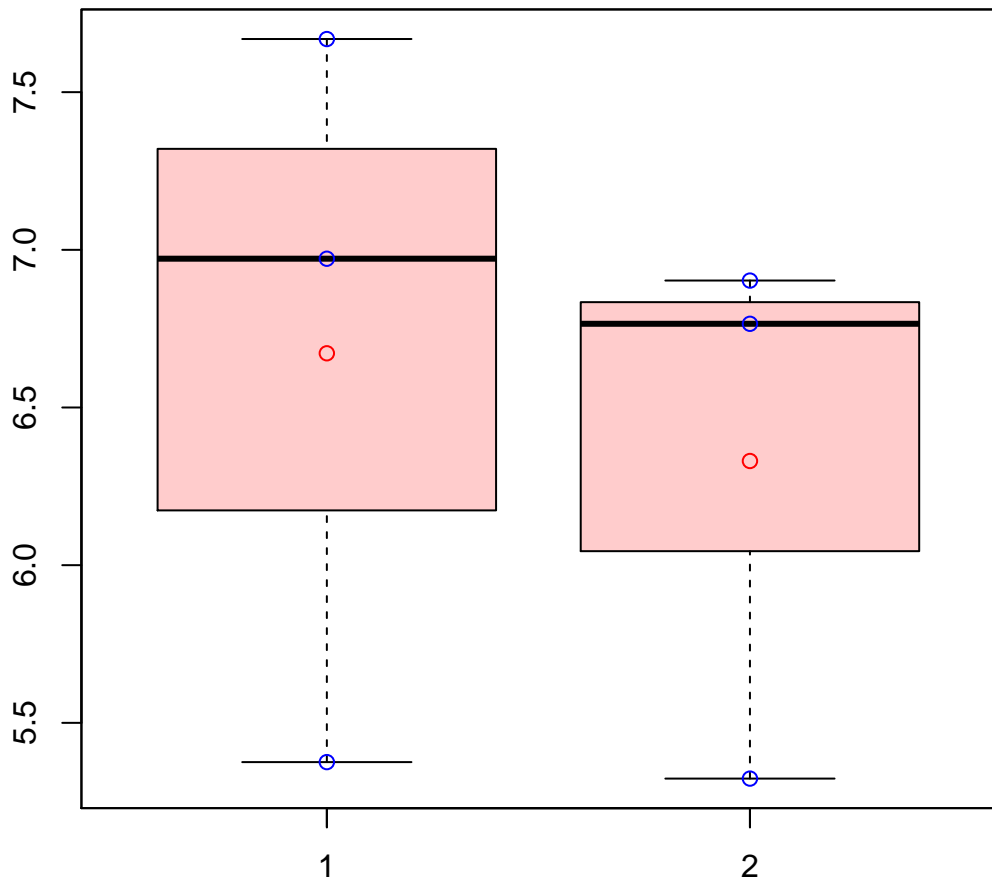

t-Test: p-value = 0.71

# C5YIC1|C5YIC1\_SORBI

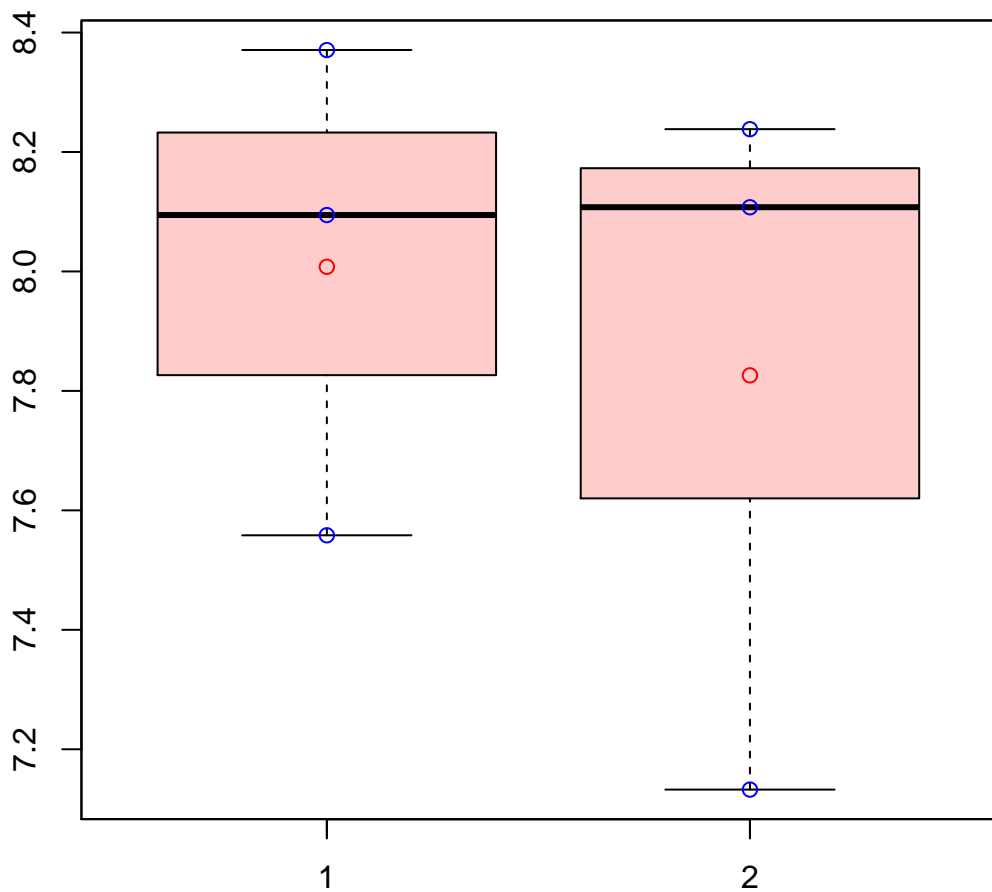

t-Test: p-value = 0.69

# C5YJN5|C5YJN5\_SORBI

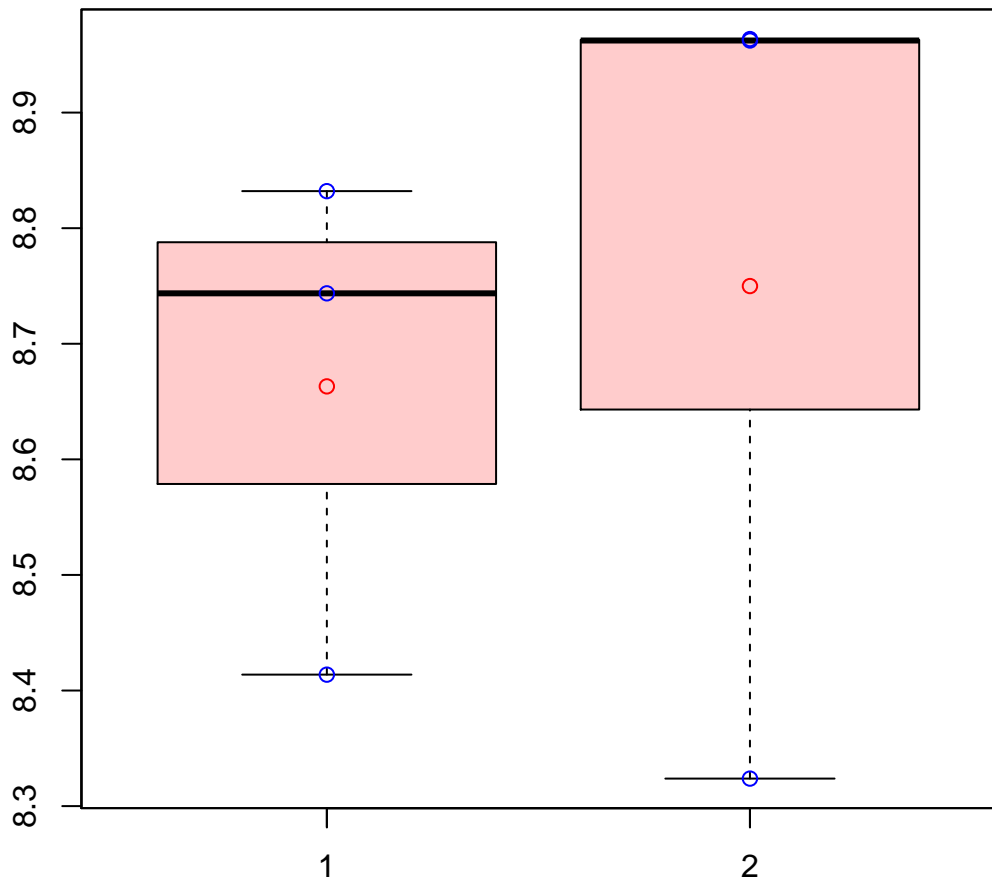

t-Test: p-value = 0.75

# C5YJV9|C5YJV9\_SORBI

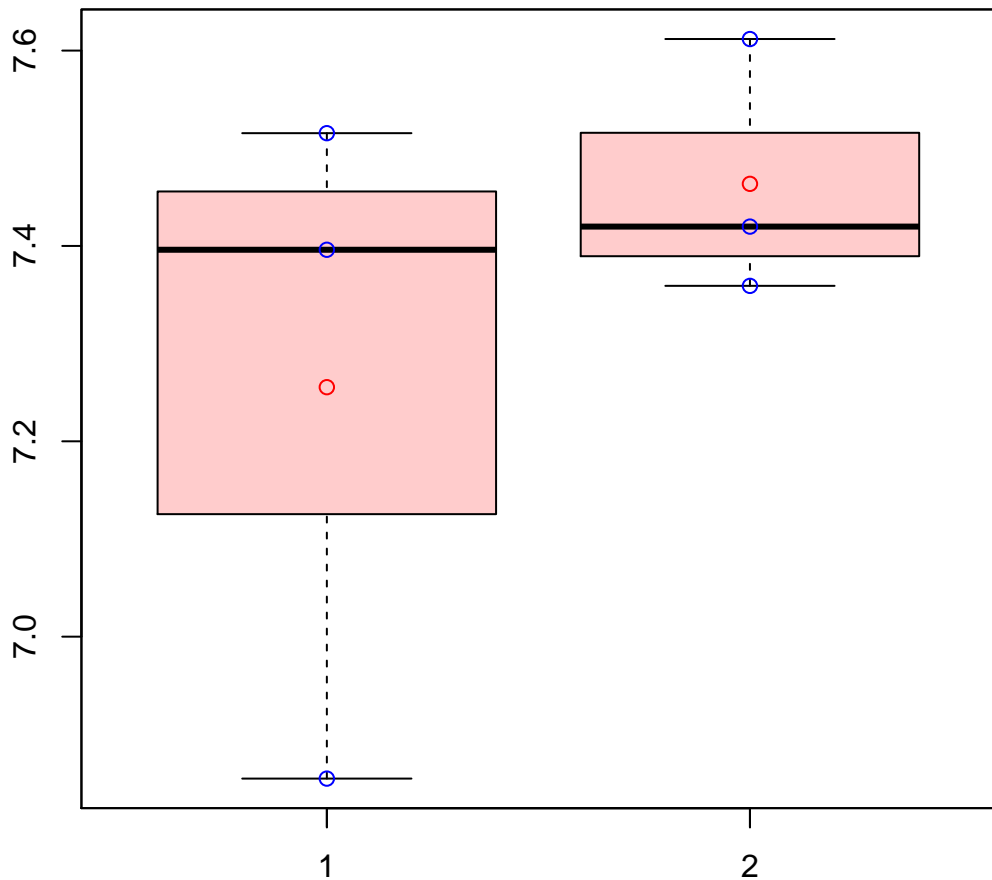

t-Test: p-value = 0.42

# C5YK79|C5YK79\_SORBI

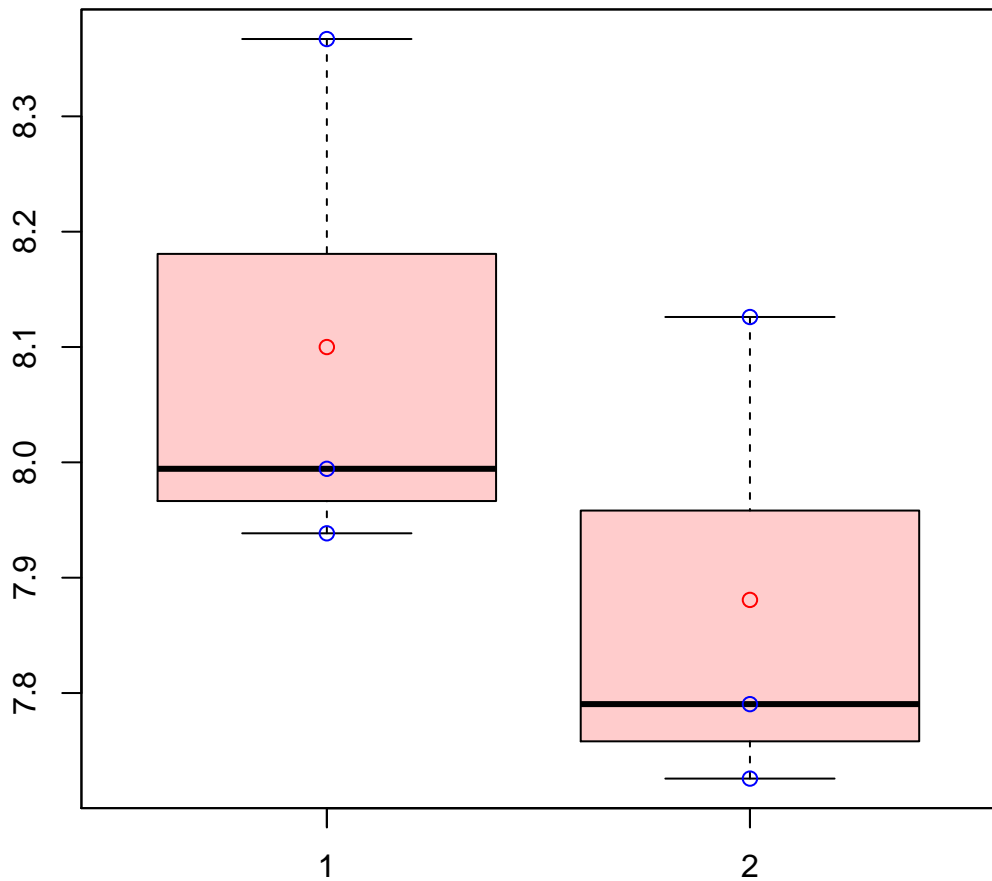

t-Test: p-value = 0.3

# C5YK81|C5YK81\_SORBI

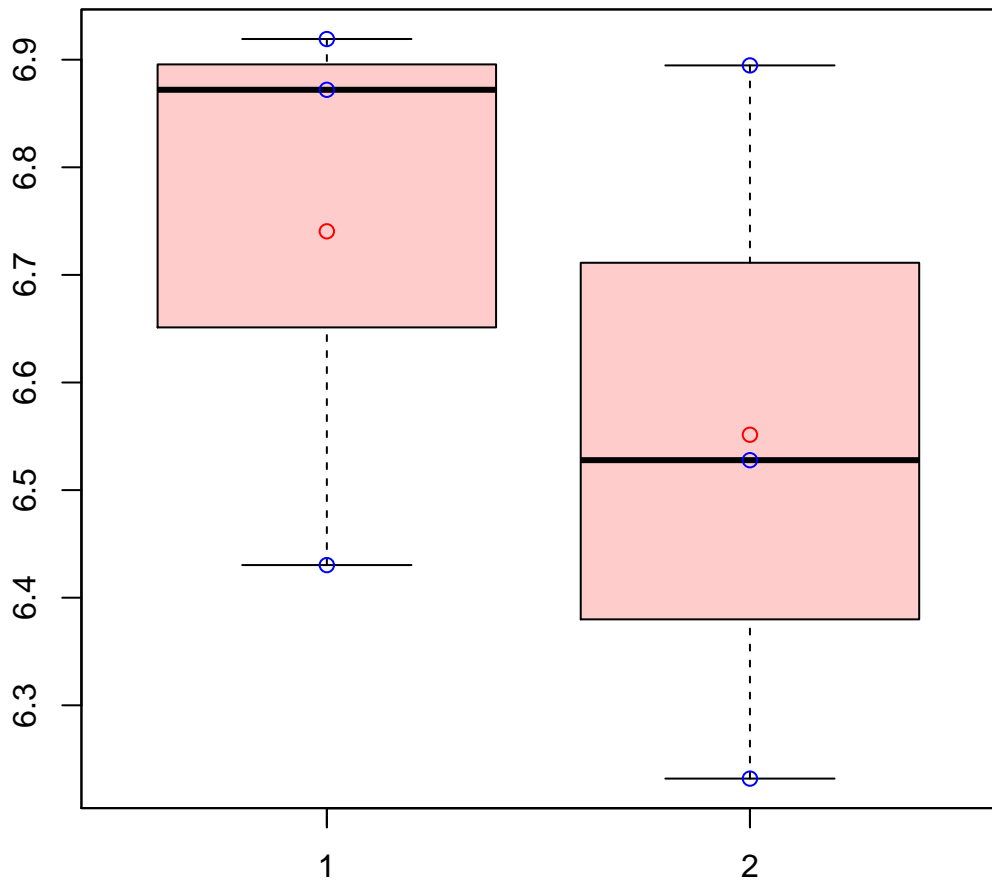

t-Test: p-value = 0.49



# C5YKK8|C5YKK8\_SORBI

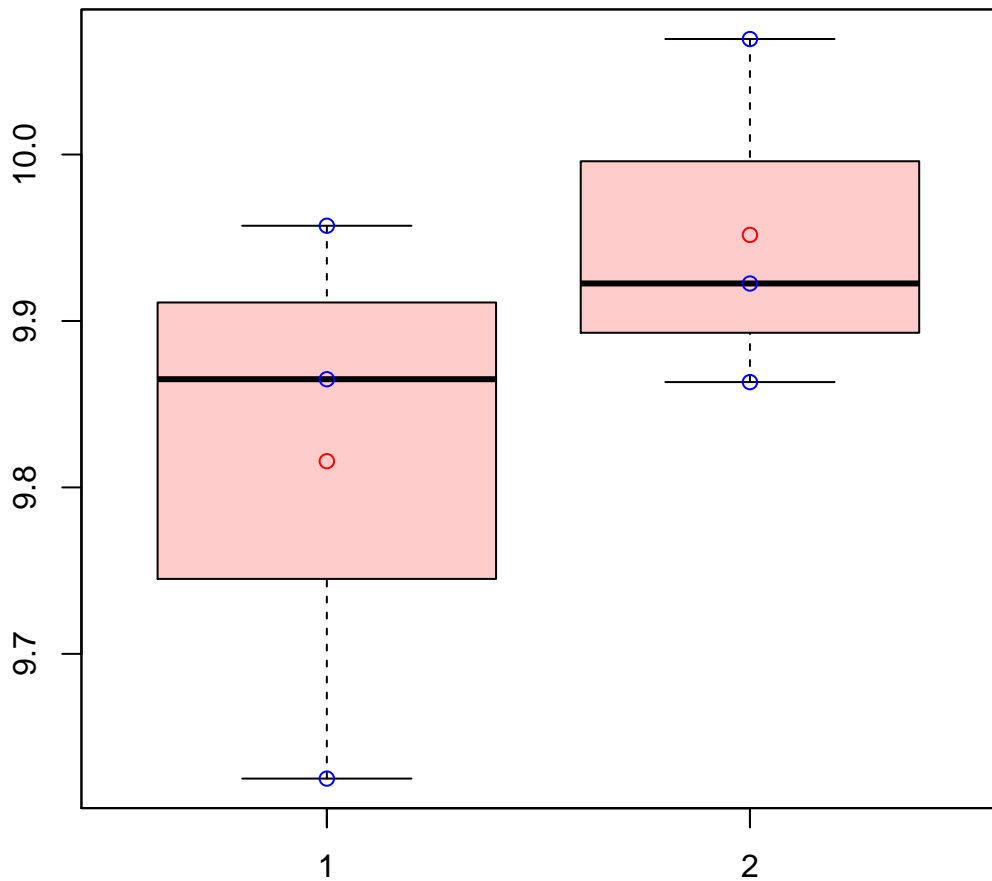

t-Test: p-value = 0.32

# C5YLB7|C5YLB7\_SORBI

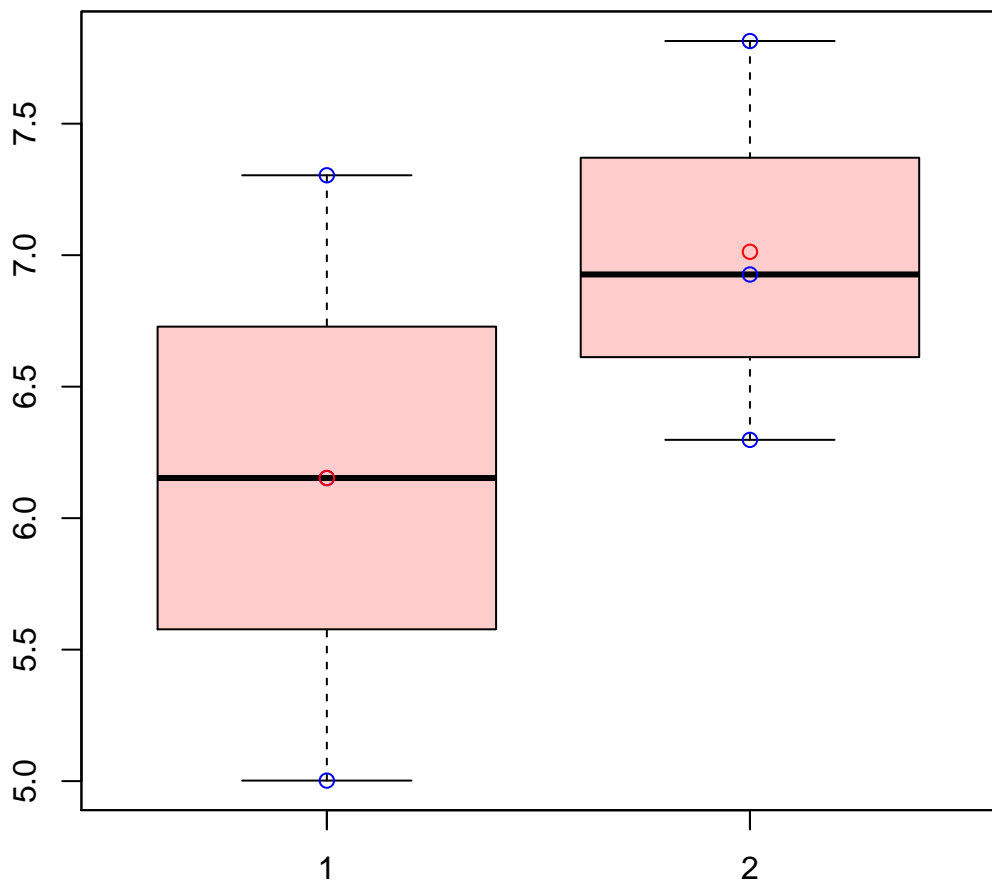

t-Test: p-value = 0.35

# C5YLK6|C5YLK6\_SORBI

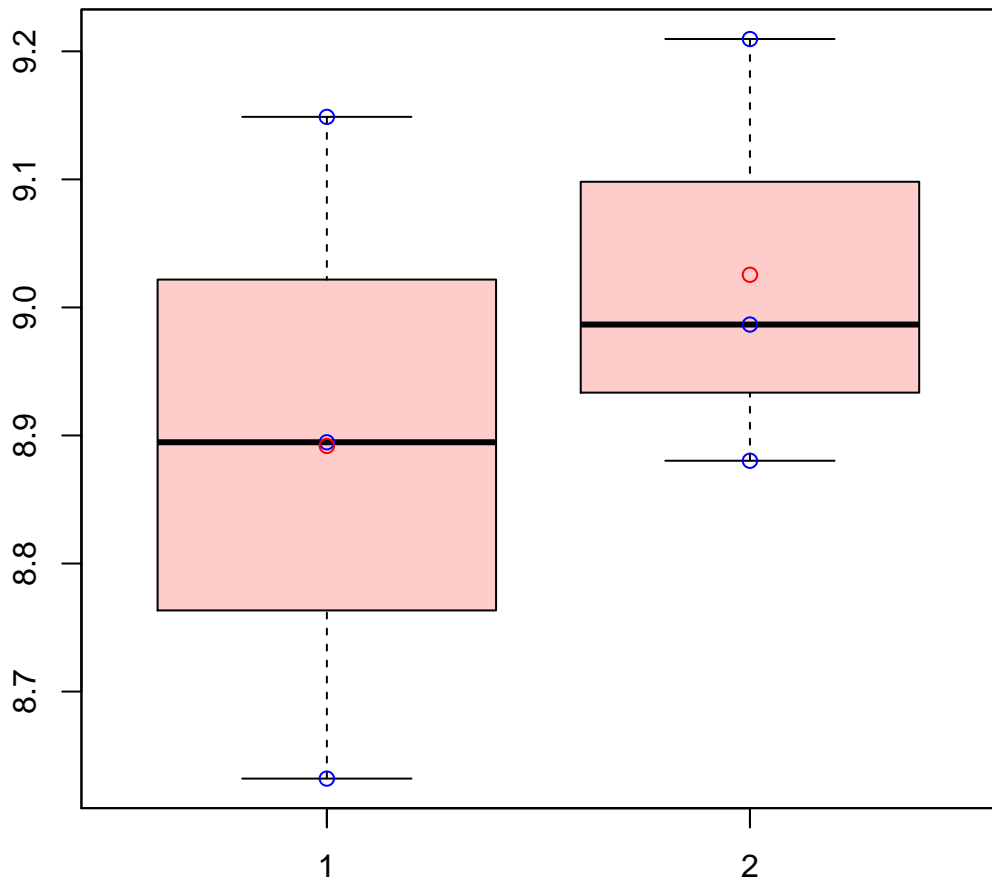

t-Test: p-value = 0.5

# C5YLN9|C5YLN9\_SORBI

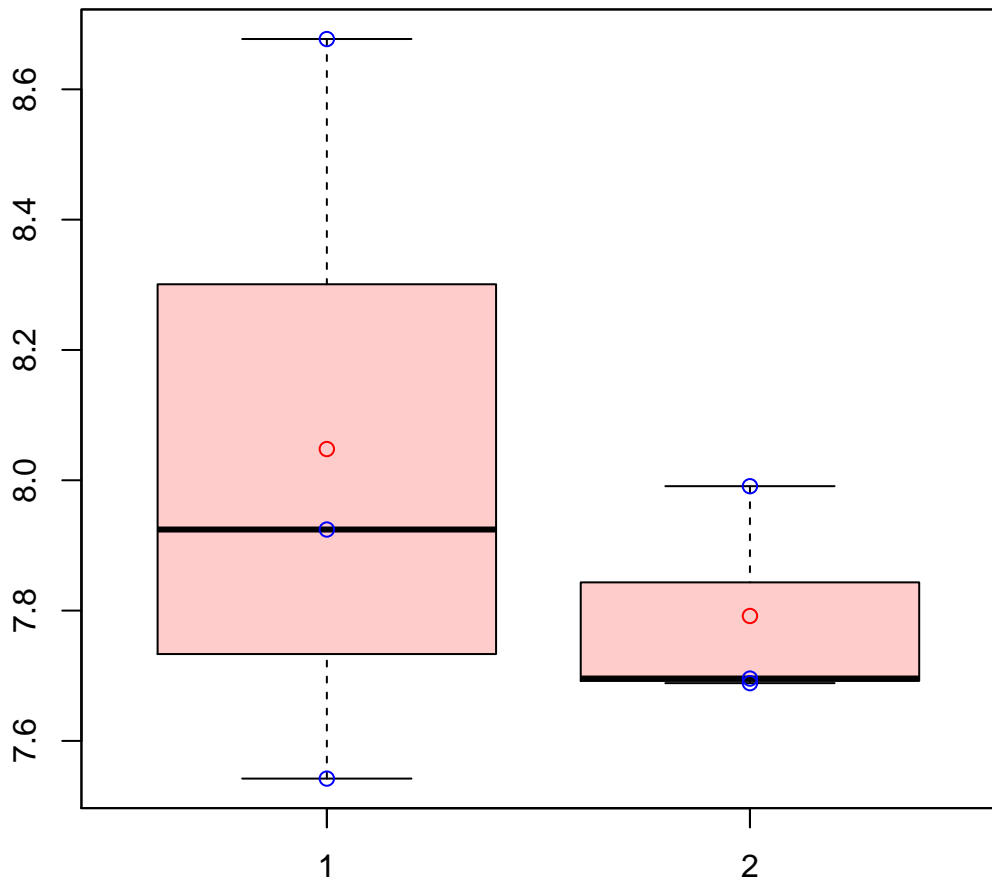

t-Test: p-value = 0.53

# C5YLV3|C5YLV3\_SORBI

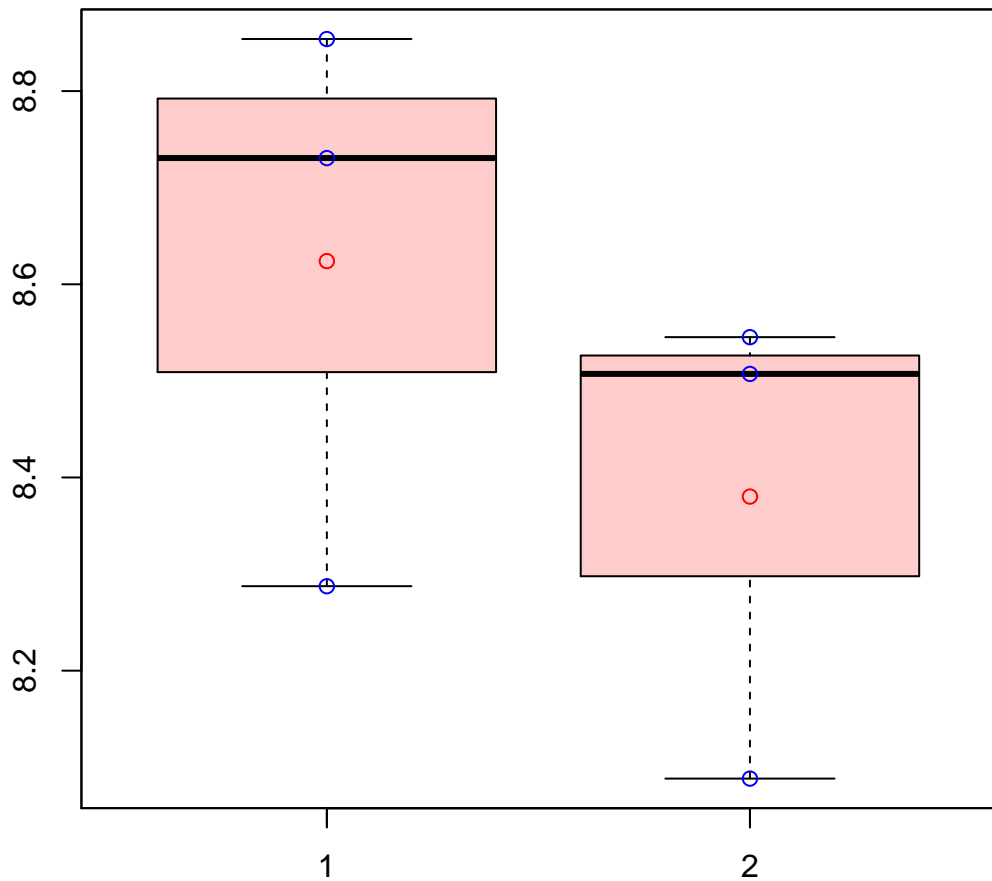

t-Test: p-value = 0.34

# C5YM25|C5YM25\_SORBI

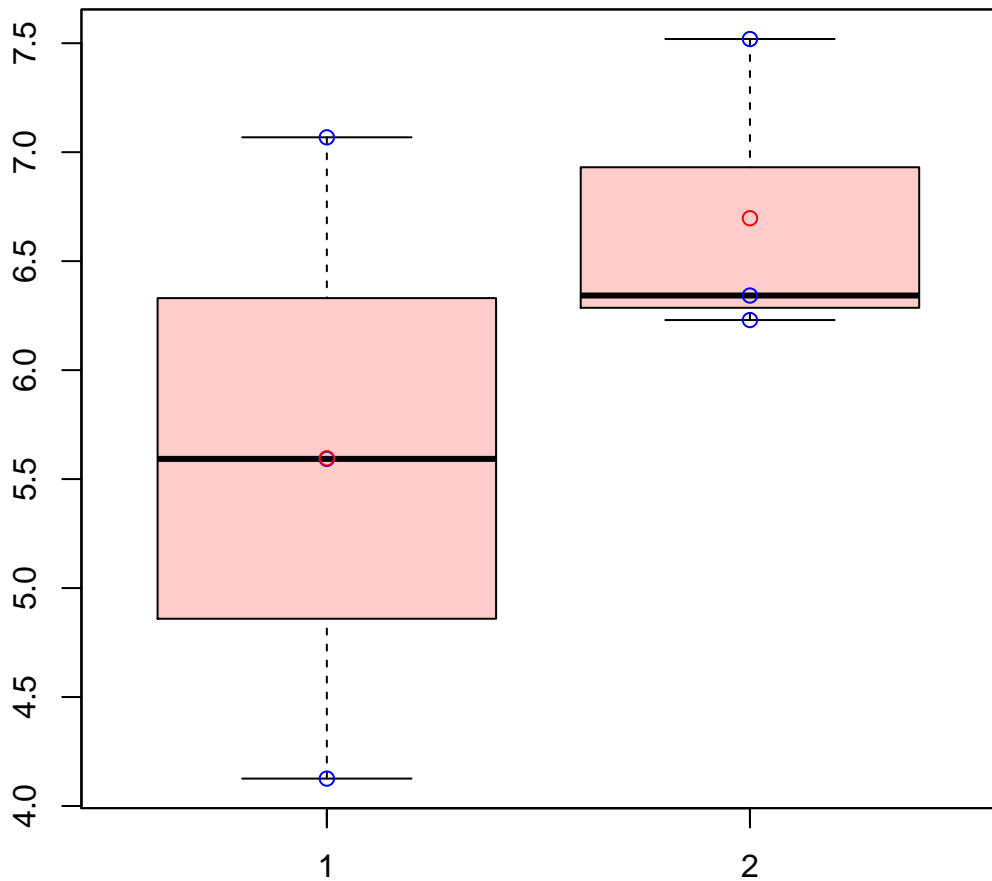

t-Test: p-value = 0.33

# C5YMC5|C5YMC5\_SORBI

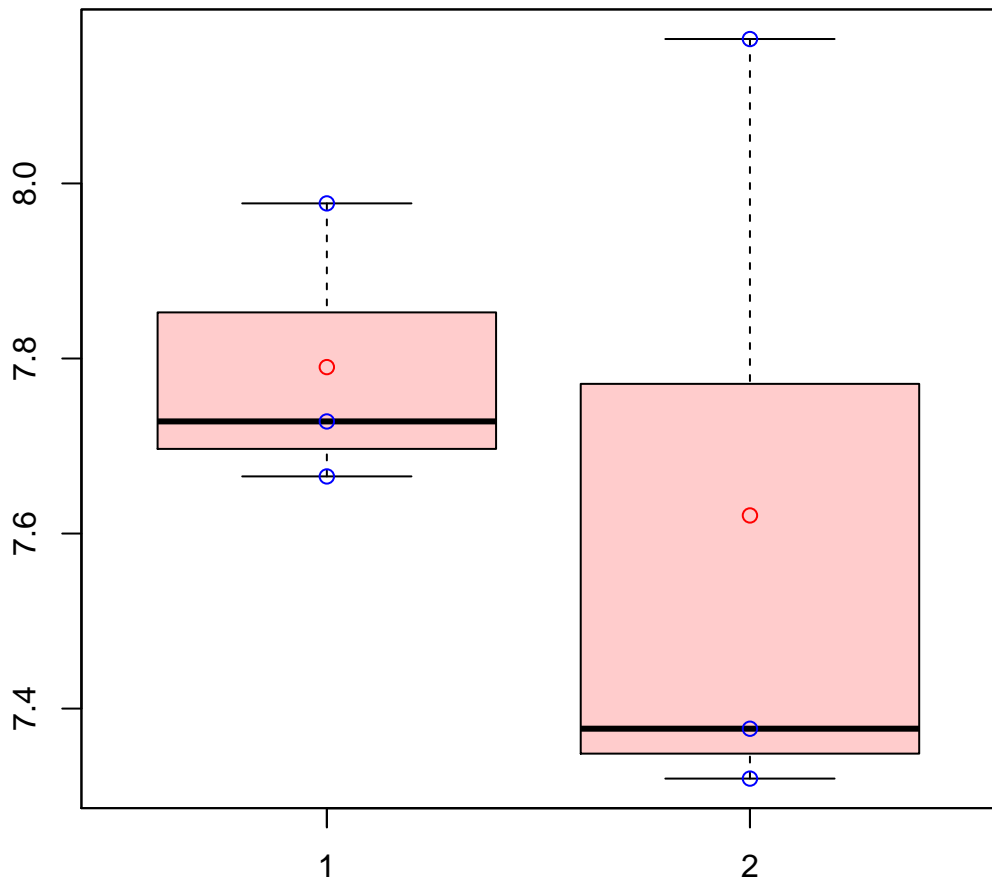

t-Test: p-value = 0.61

# C5YMX6|C5YMX6\_SORBI

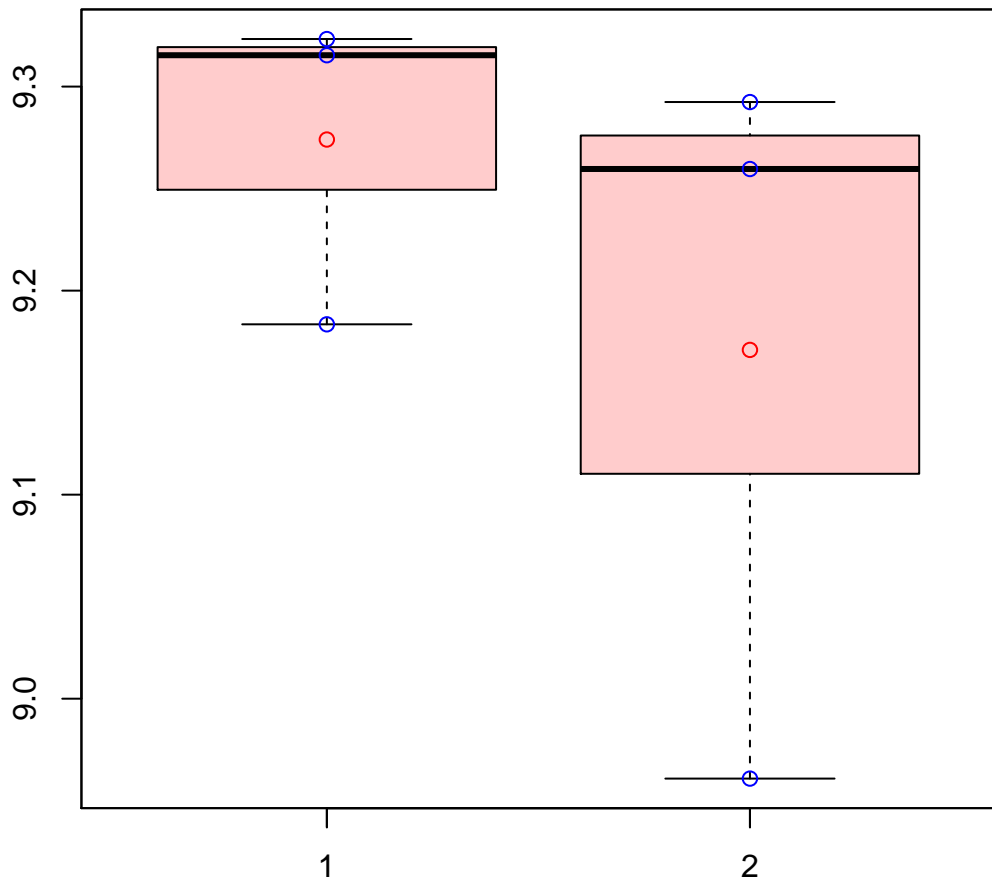

t-Test: p-value = 0.44



# C5YN46|C5YN46\_SORBI

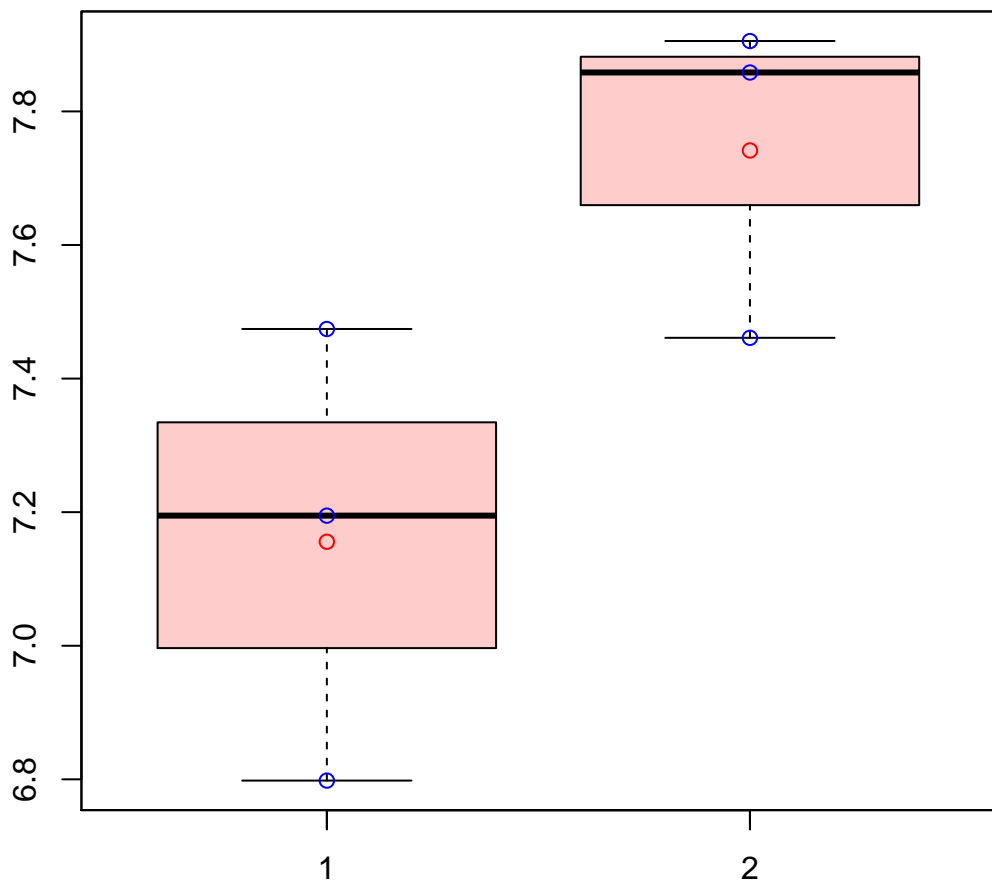

t-Test: p-value = 0.08

# C5YNB9|C5YNB9\_SORBI

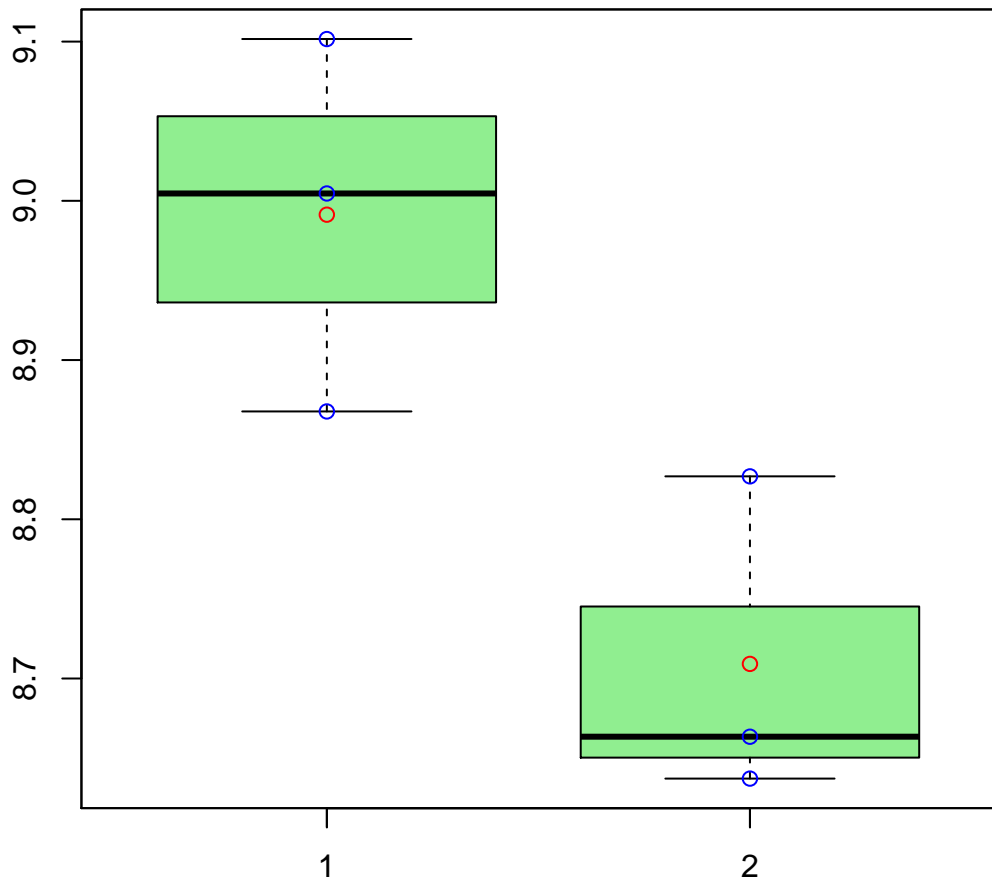

t-Test: p-value = 0.04

# C5YP19|C5YP19\_SORBI

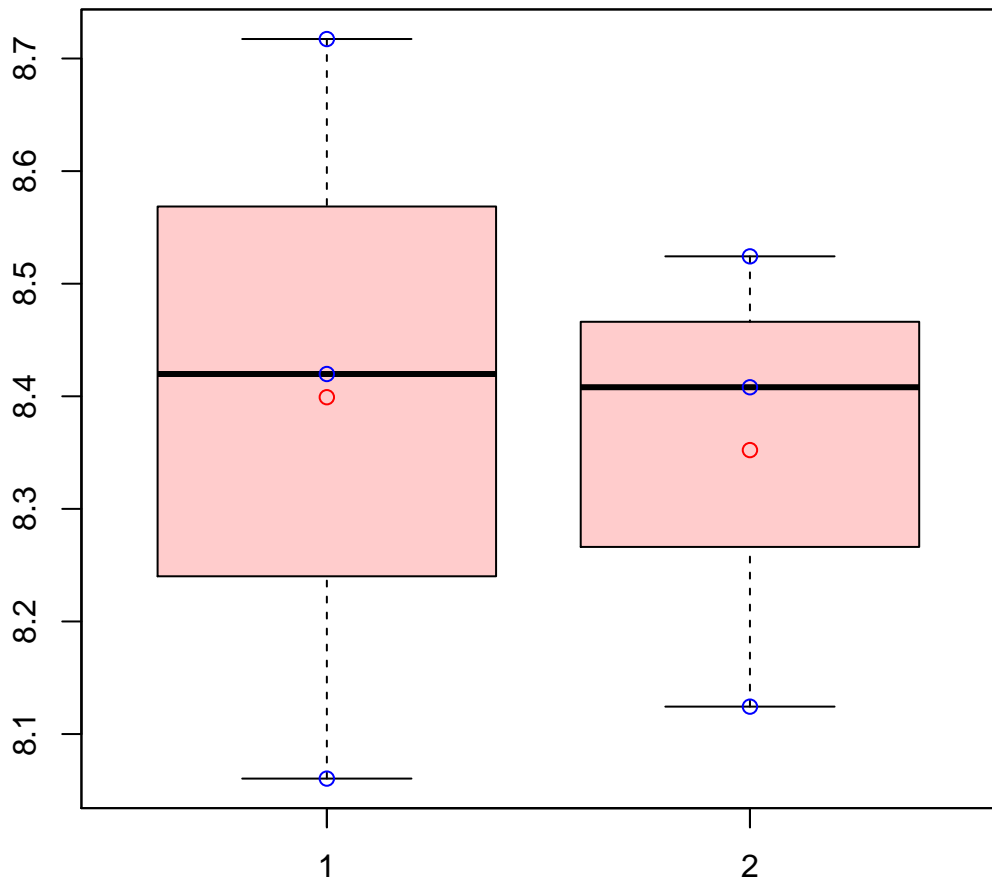

t-Test: p-value = 0.85

# C5YPL6|C5YPL6\_SORBI

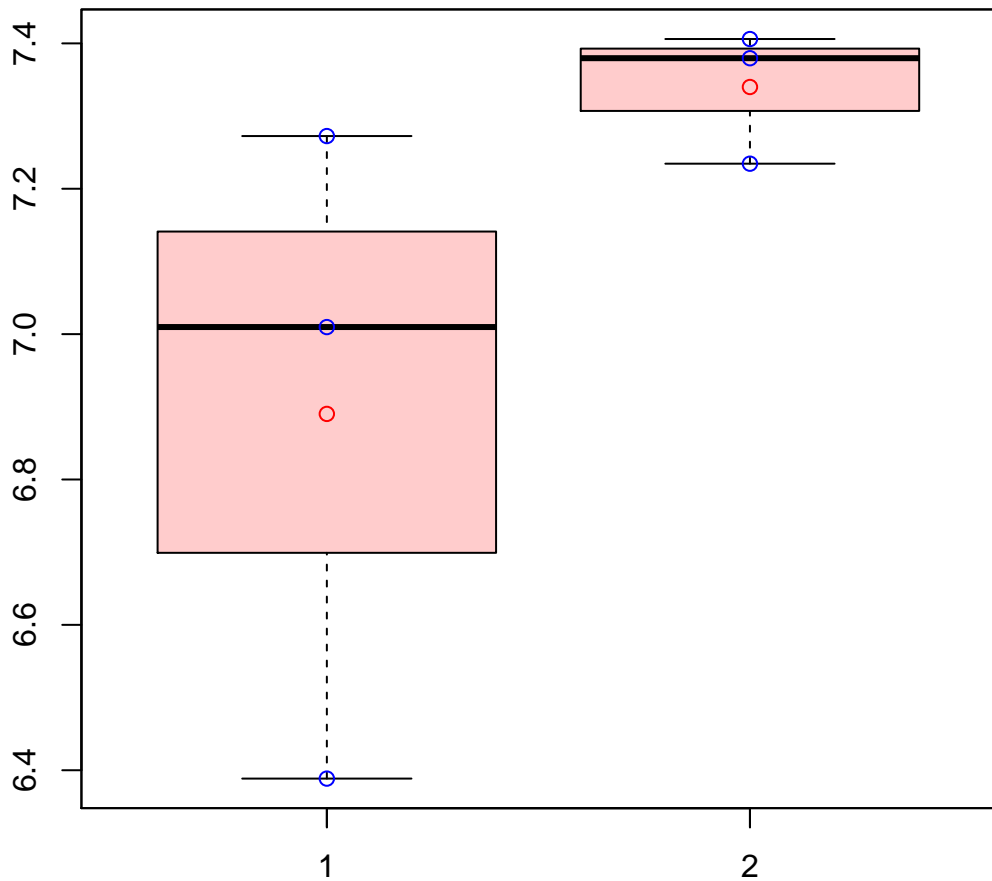

t-Test: p-value = 0.23

# C5YPM8|C5YPM8\_SORBI

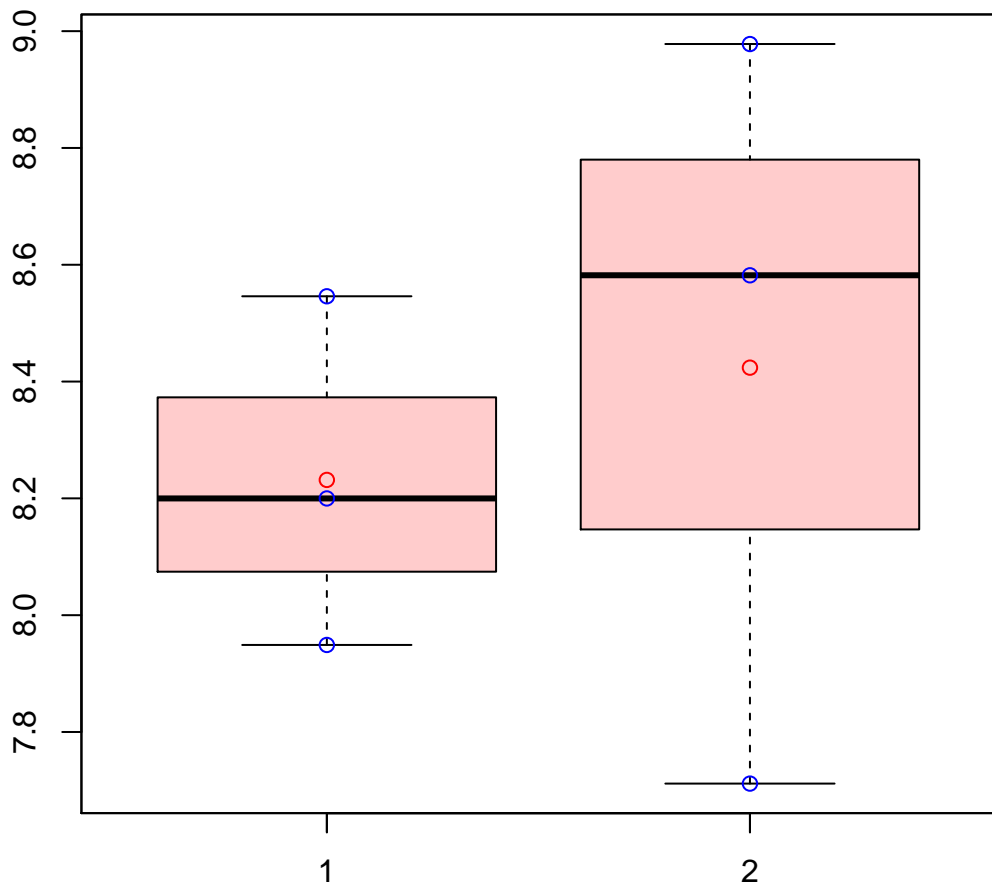

t-Test: p-value = 0.67

# C5YQ24|C5YQ24\_SORBI

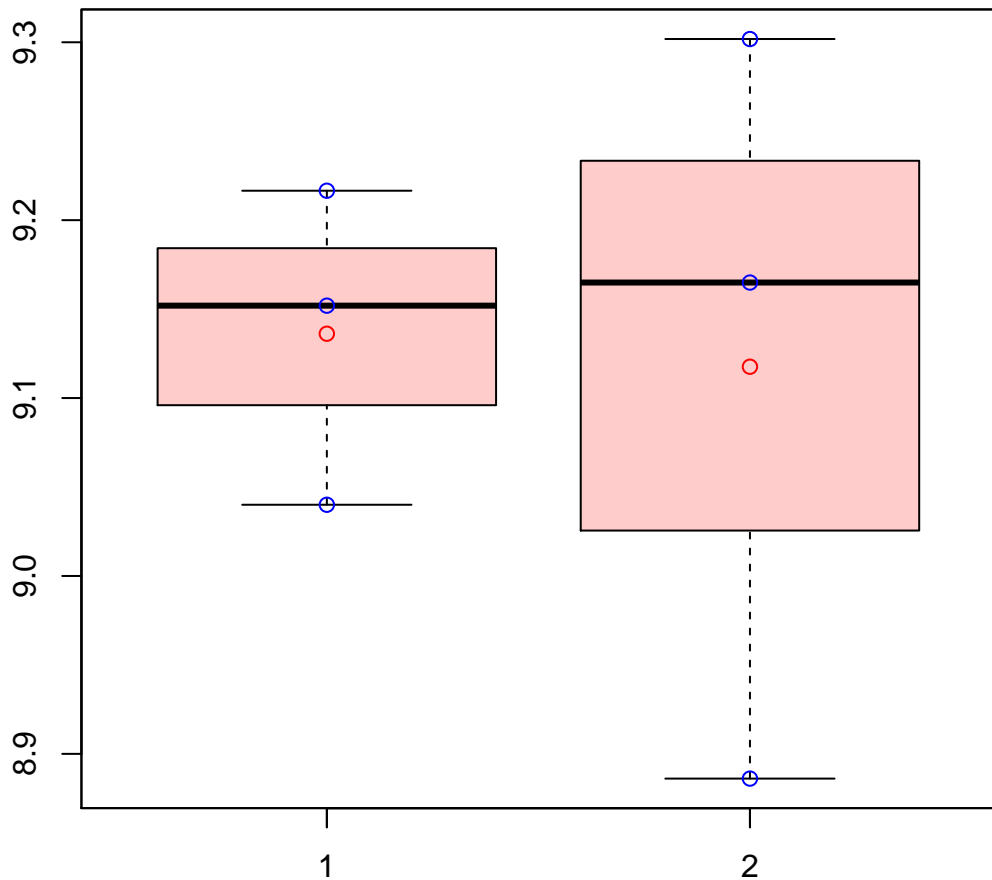

t-Test: p-value = 0.9

# C5YQN5|C5YQN5\_SORBI

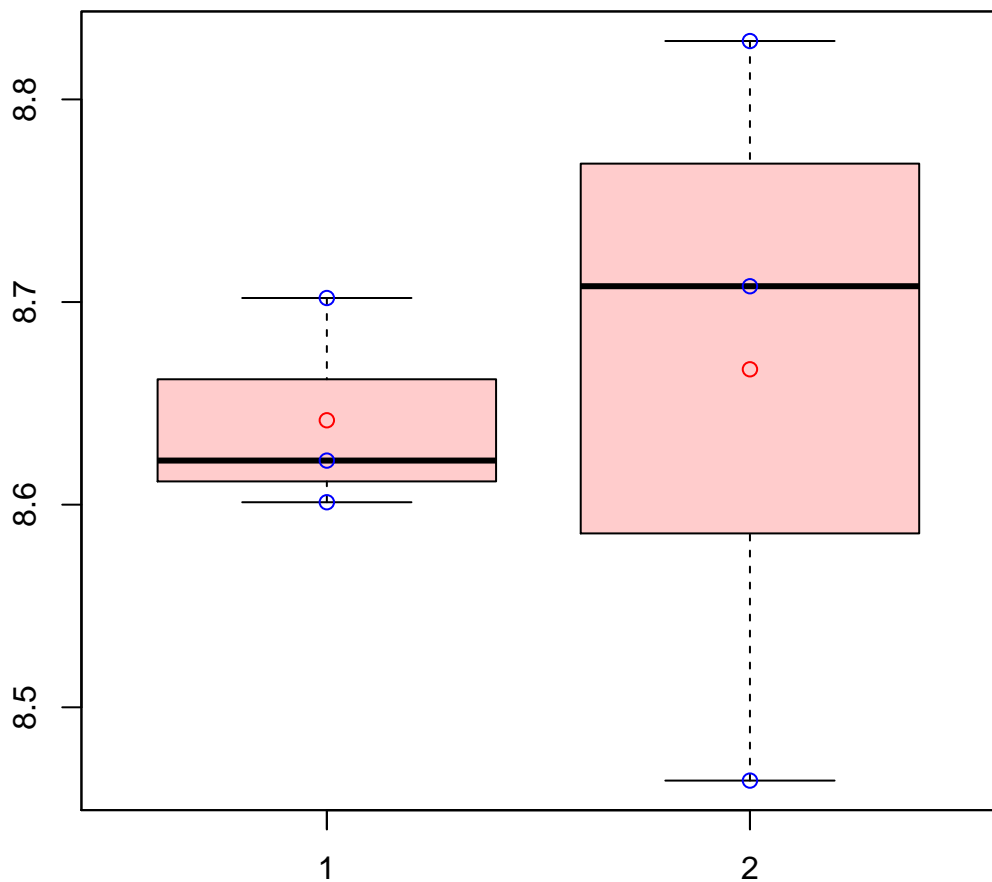

t-Test: p-value = 0.84

# C5YQV9|C5YQV9\_SORBI

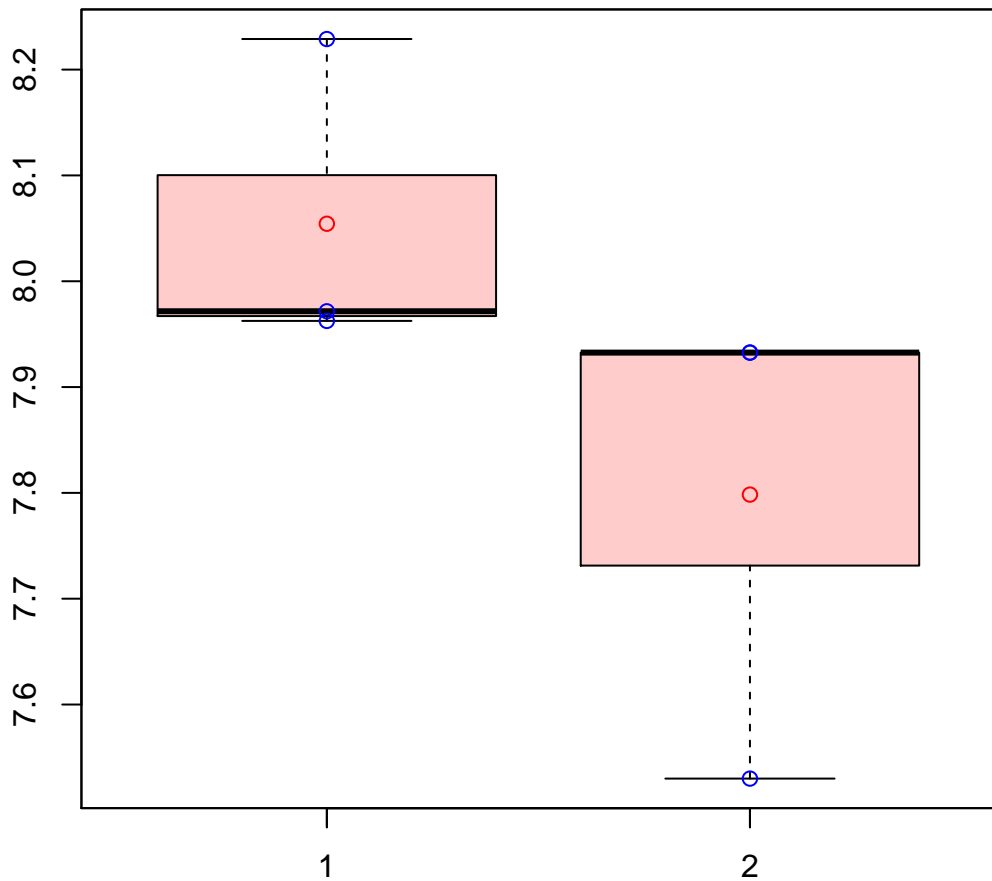

t-Test: p-value = 0.2



# C5YRW4|C5YRW4\_SORBI

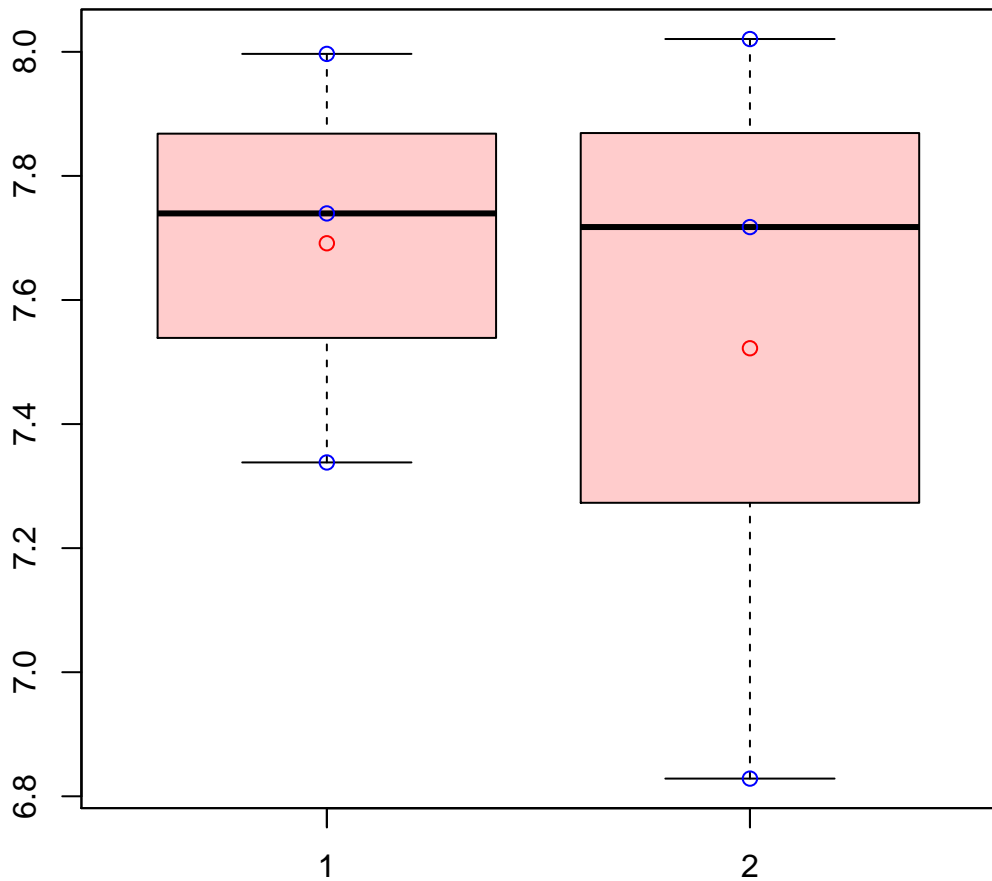

t-Test: p-value = 0.7

# C5YSD0|C5YSD0\_SORBI

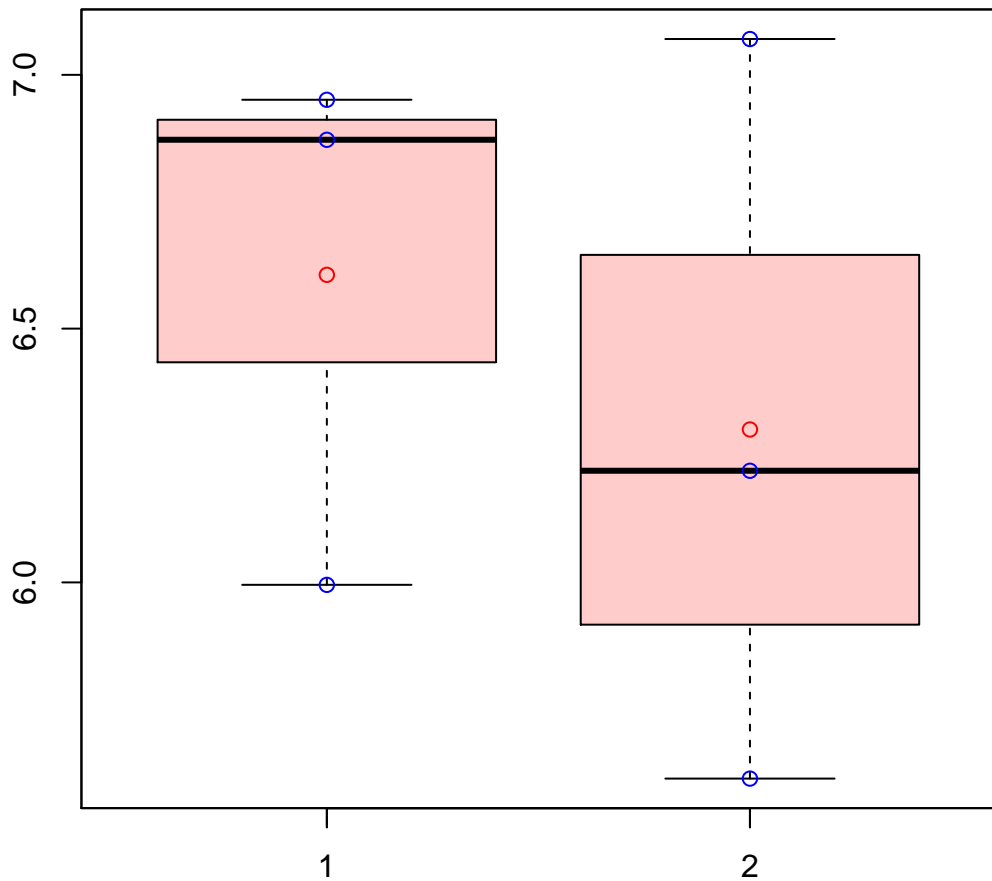

t-Test: p-value = 0.59

# C5YSM6|C5YSM6\_SORBI

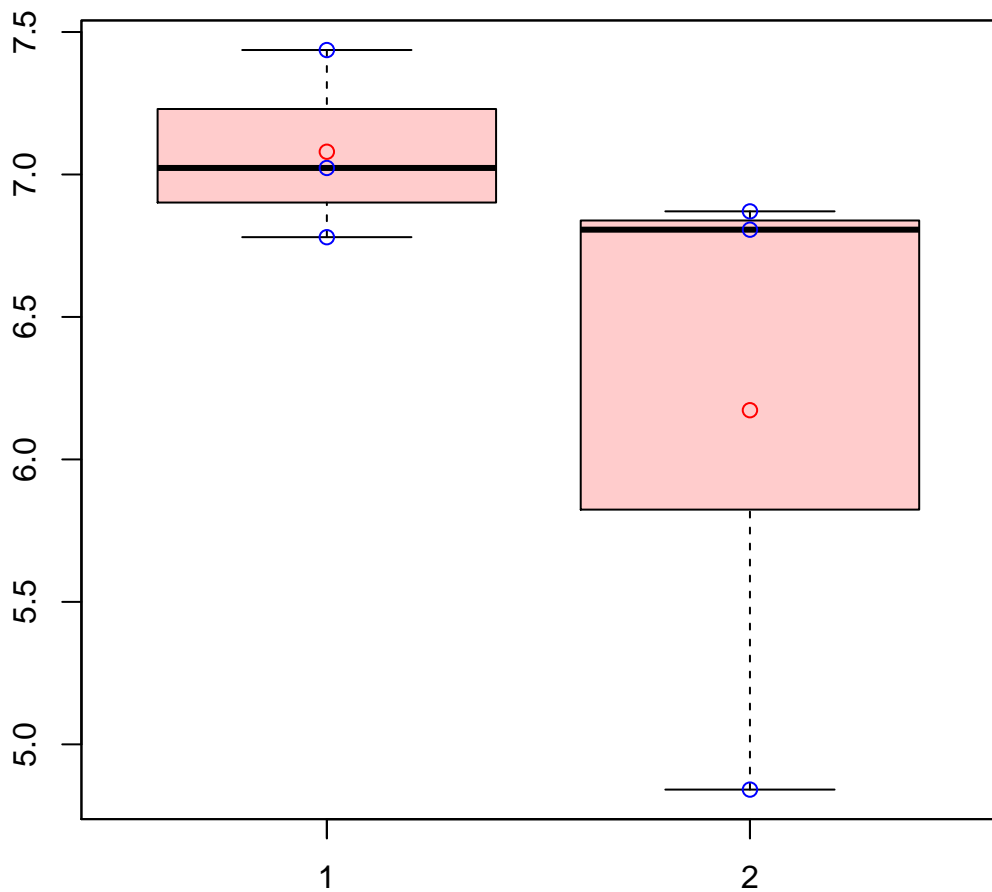

t-Test: p-value = 0.3

# C5YSP7|C5YSP7\_SORBI

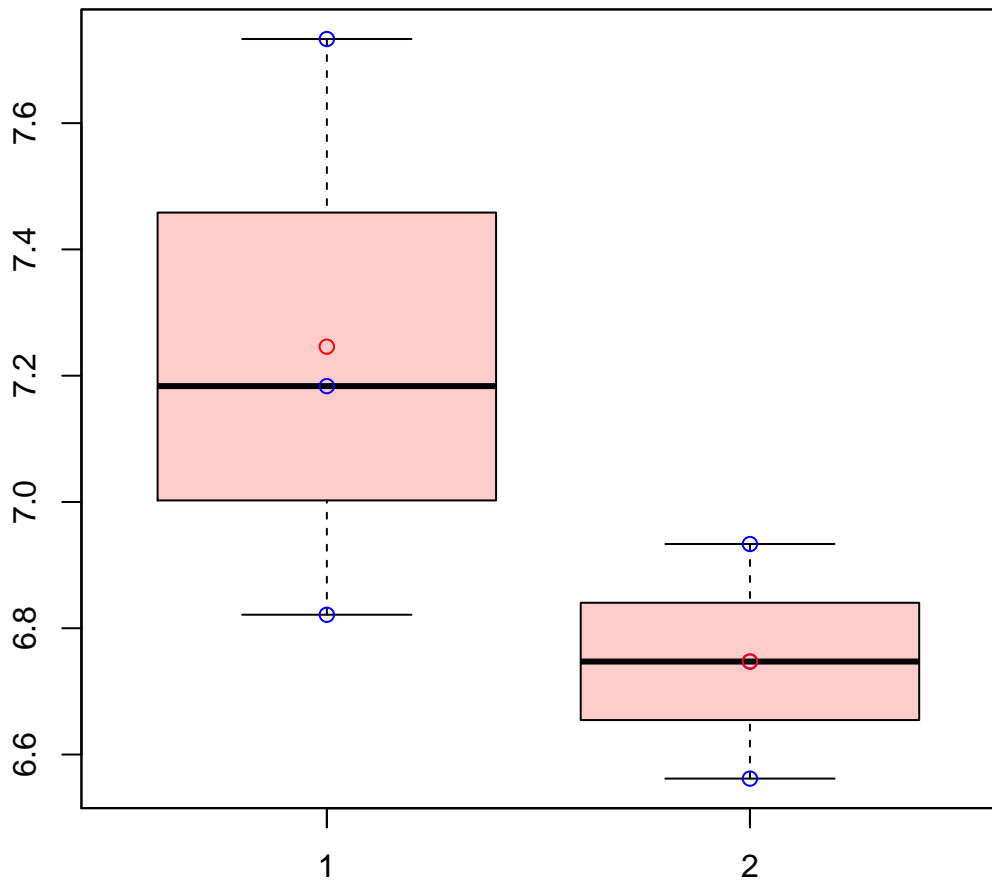

t-Test: p-value = 0.19

# C5YSU1|C5YSU1\_SORBI

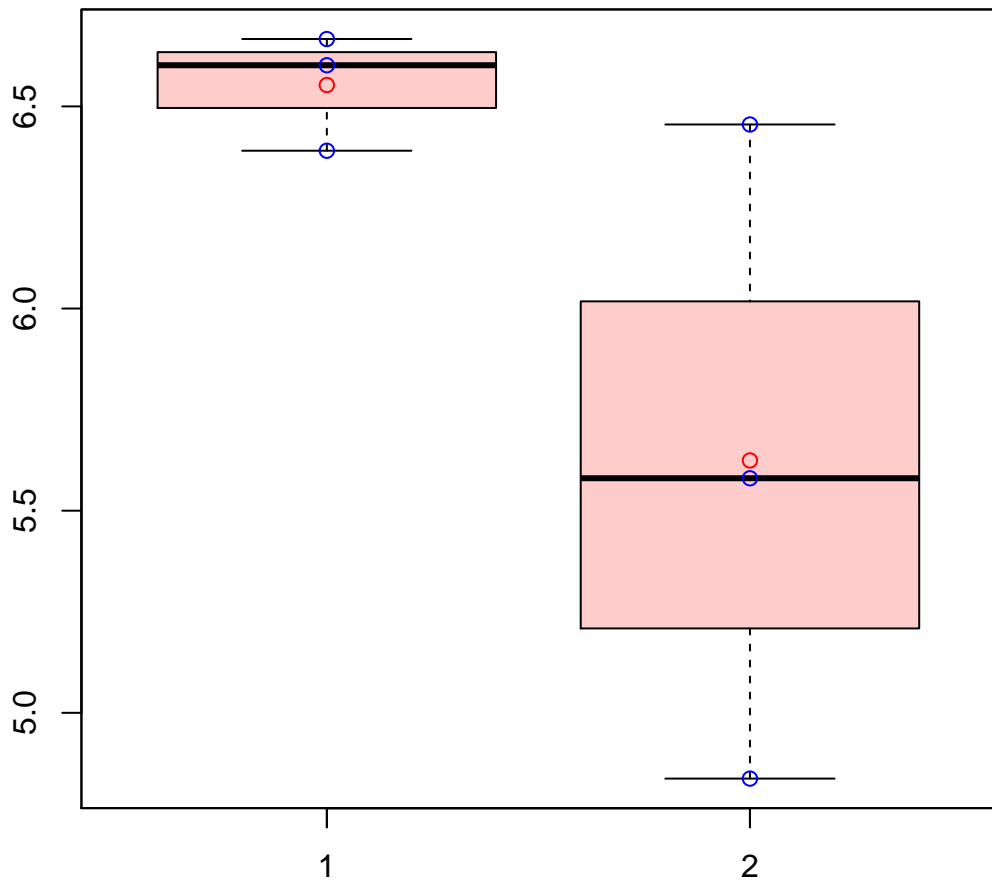

t-Test: p-value = 0.18

# C5YSV6|C5YSV6\_SORBI

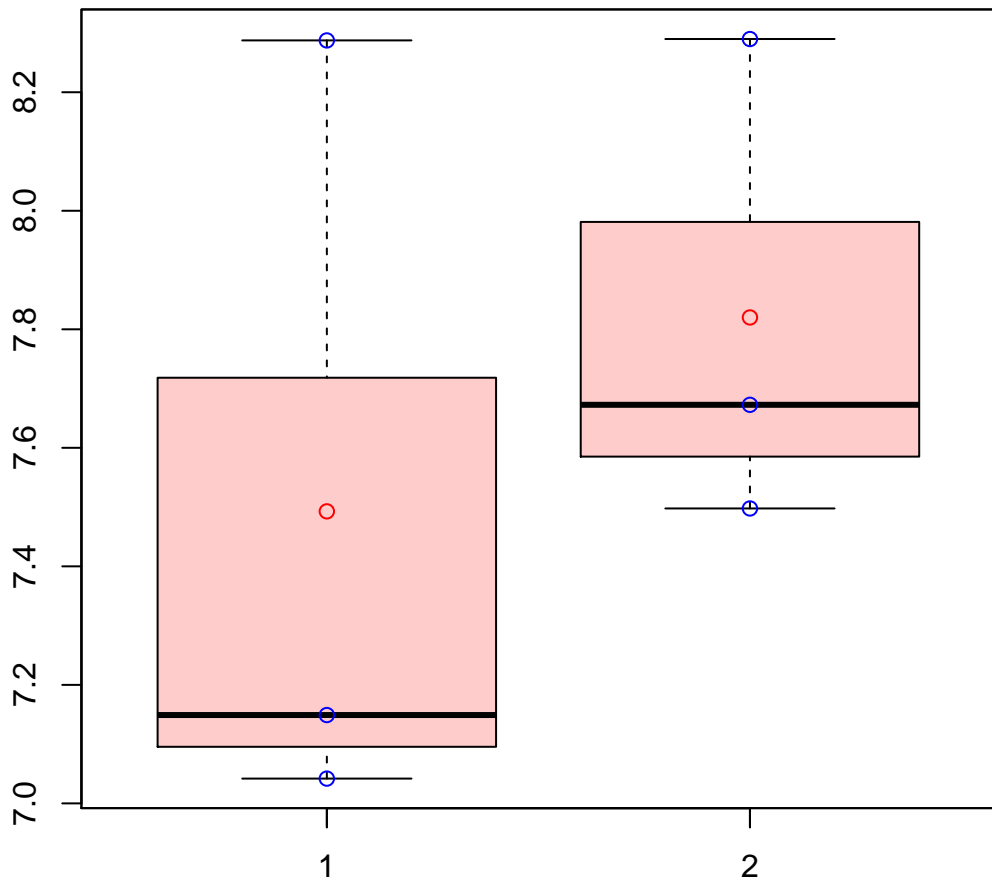

t-Test: p-value = 0.53

# C5YTE5|C5YTE5\_SORBI

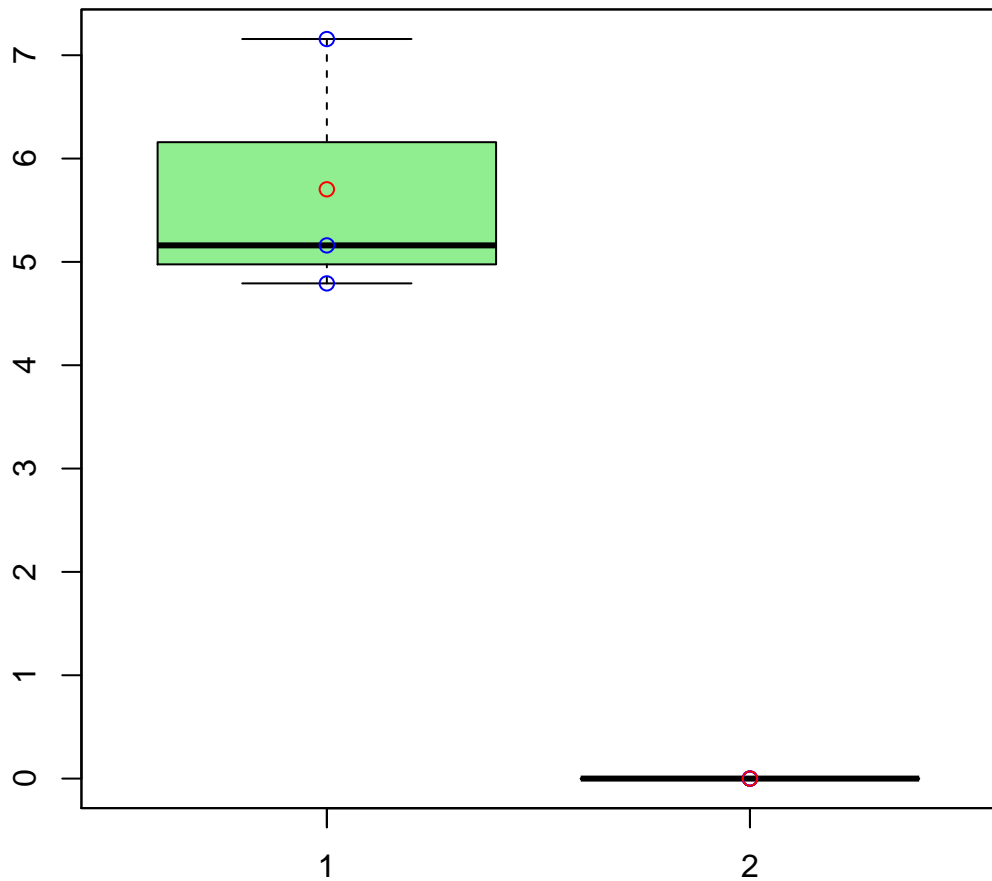

t-Test: p-value = 0.02

# C5YTS7|C5YTS7\_SORBI

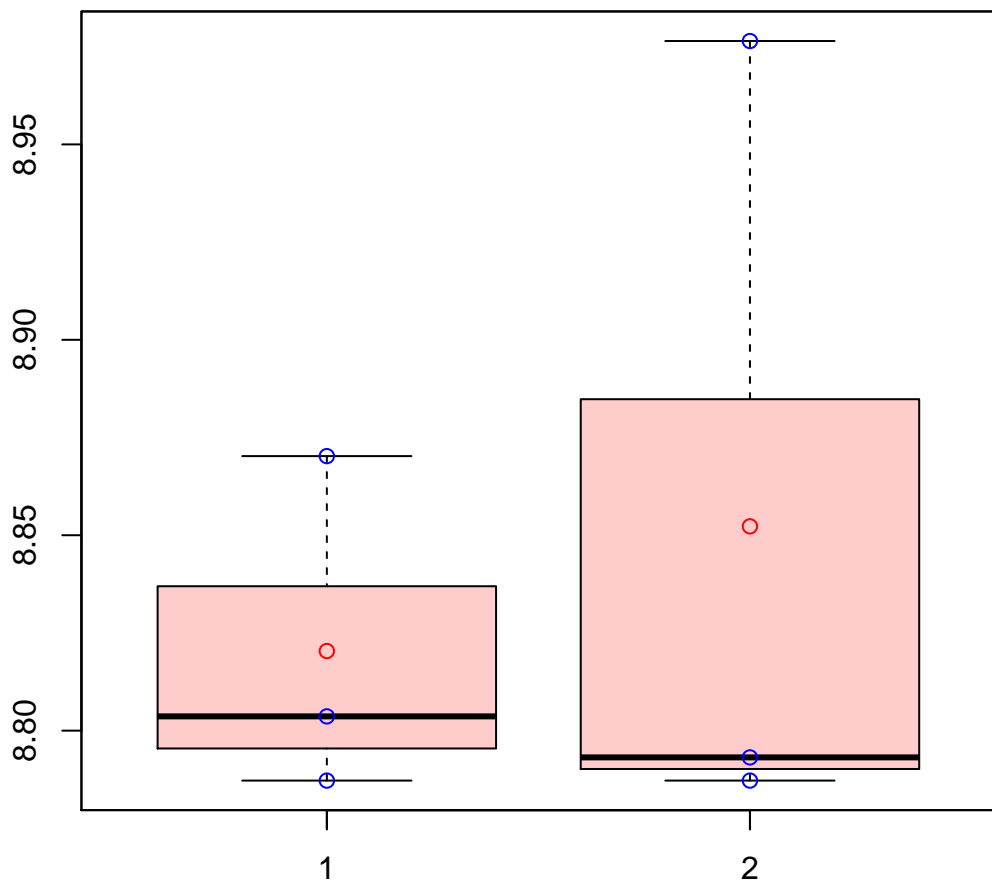

t-Test: p-value = 0.67



# C5YU53|C5YU53\_SORBI

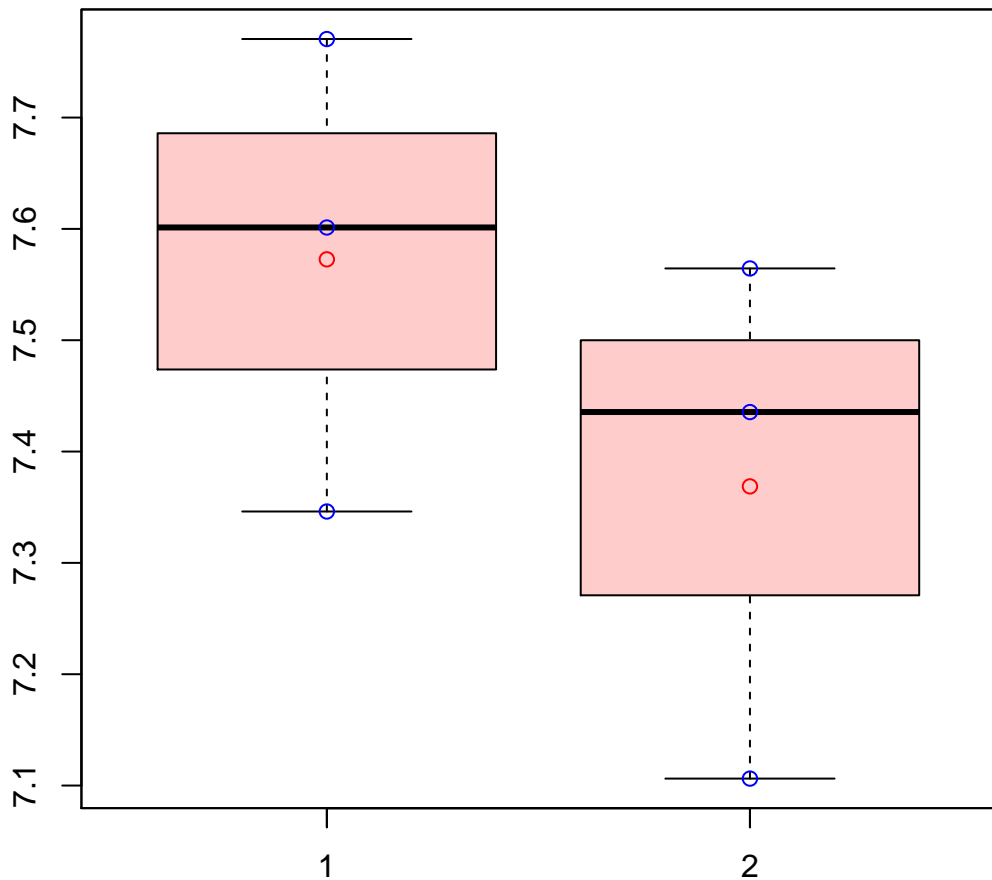

t-Test: p-value = 0.33

# C5YU58|C5YU58\_SORBI

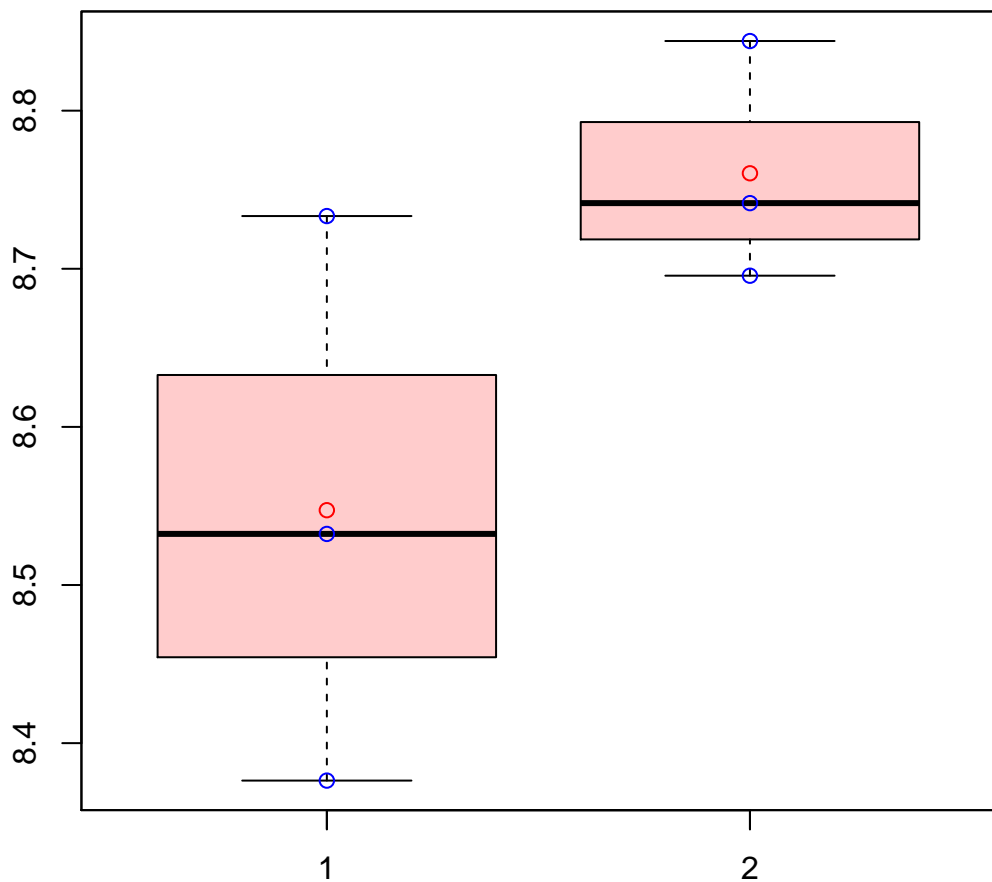

t-Test: p-value = 0.16

# C5YU66|C5YU66\_SORBI

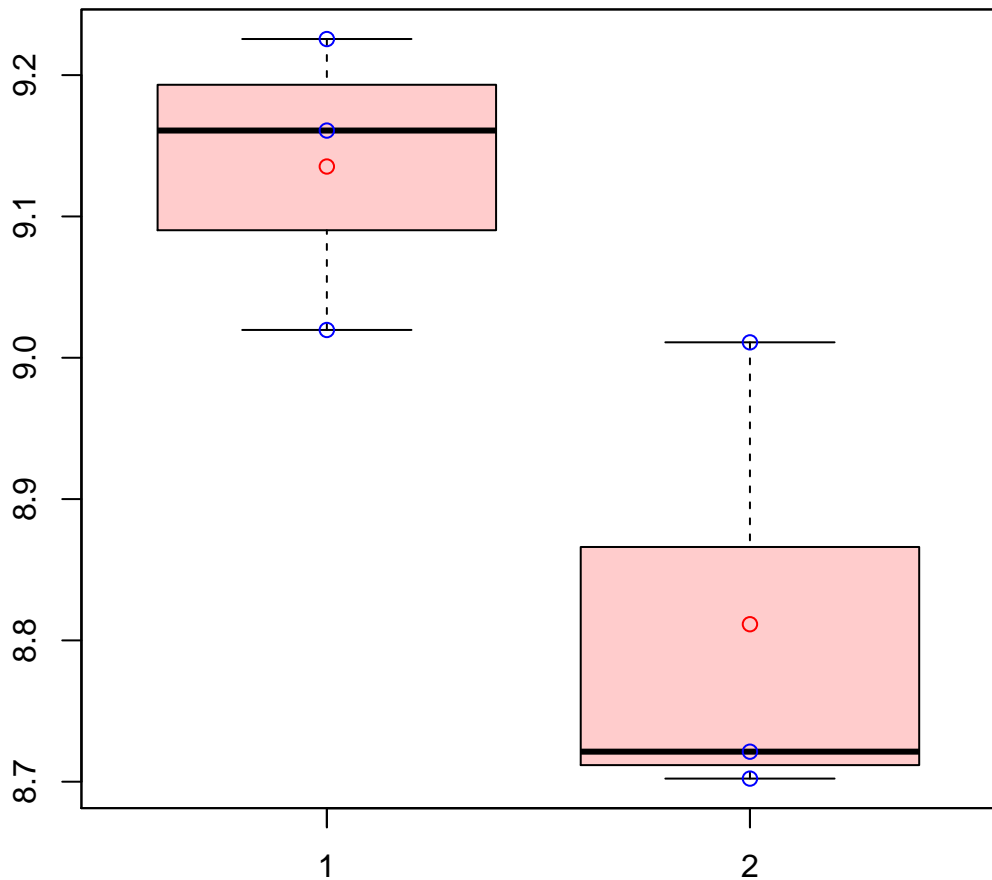

t-Test: p-value = 0.06

# C5YUI6|C5YUI6\_SORBI

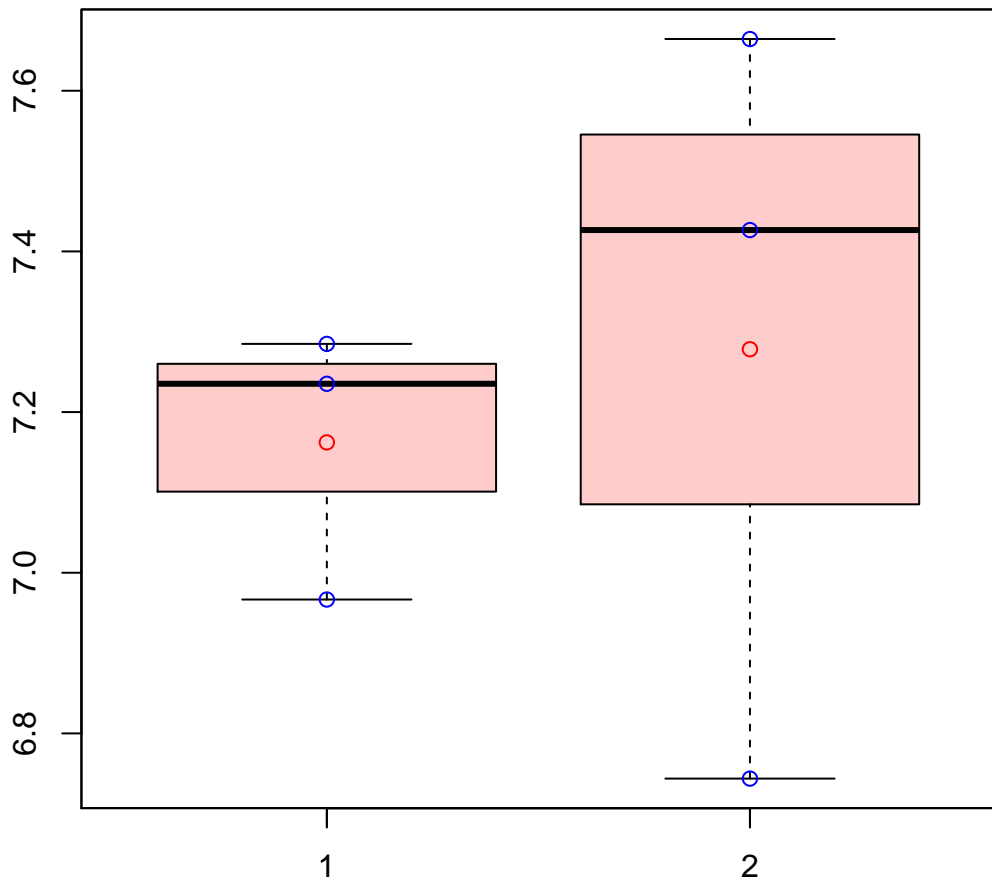

t-Test: p-value = 0.72

# C5YUN5|C5YUN5\_SORBI

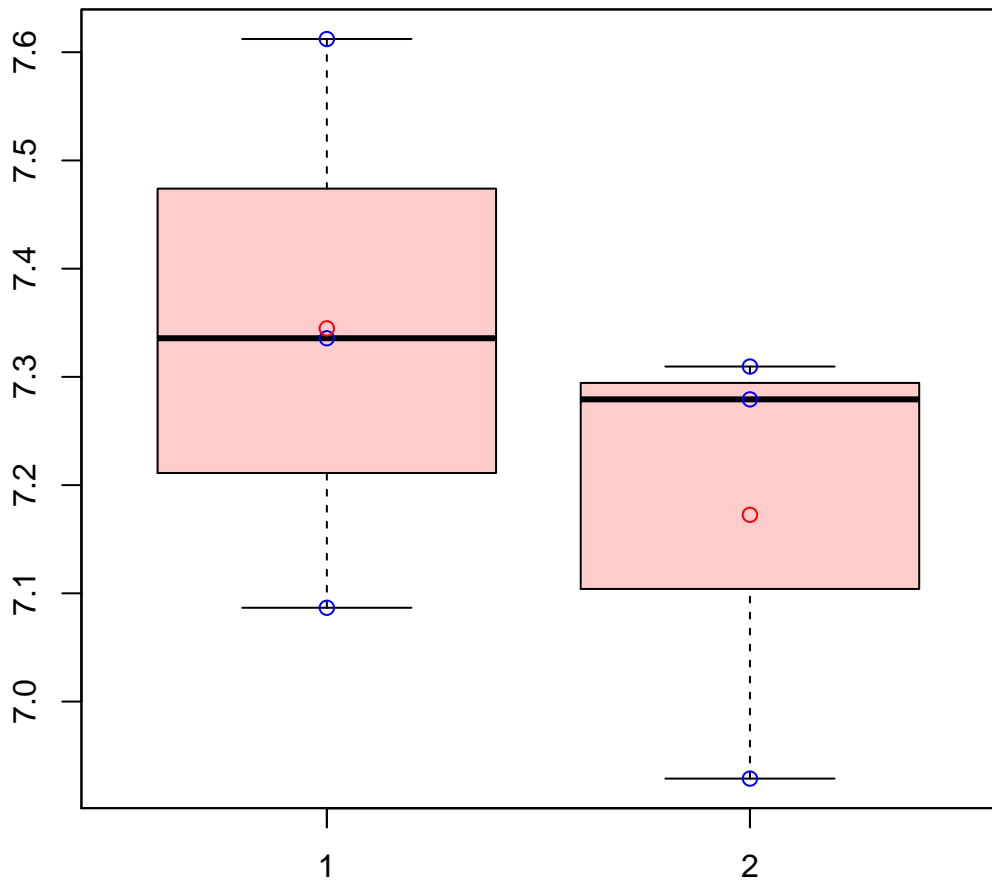

t-Test: p-value = 0.43

# C5YUY4|C5YUY4\_SORBI

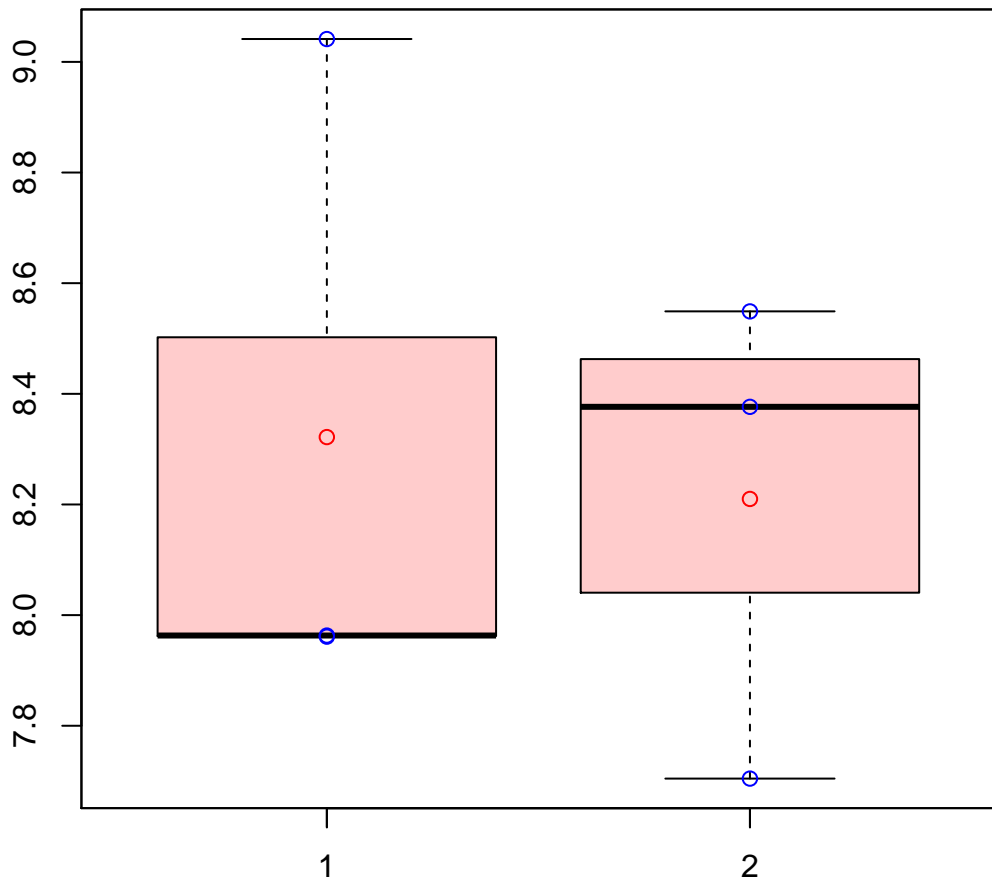

t-Test: p-value = 0.81

# C5YV18|C5YV18\_SORBI

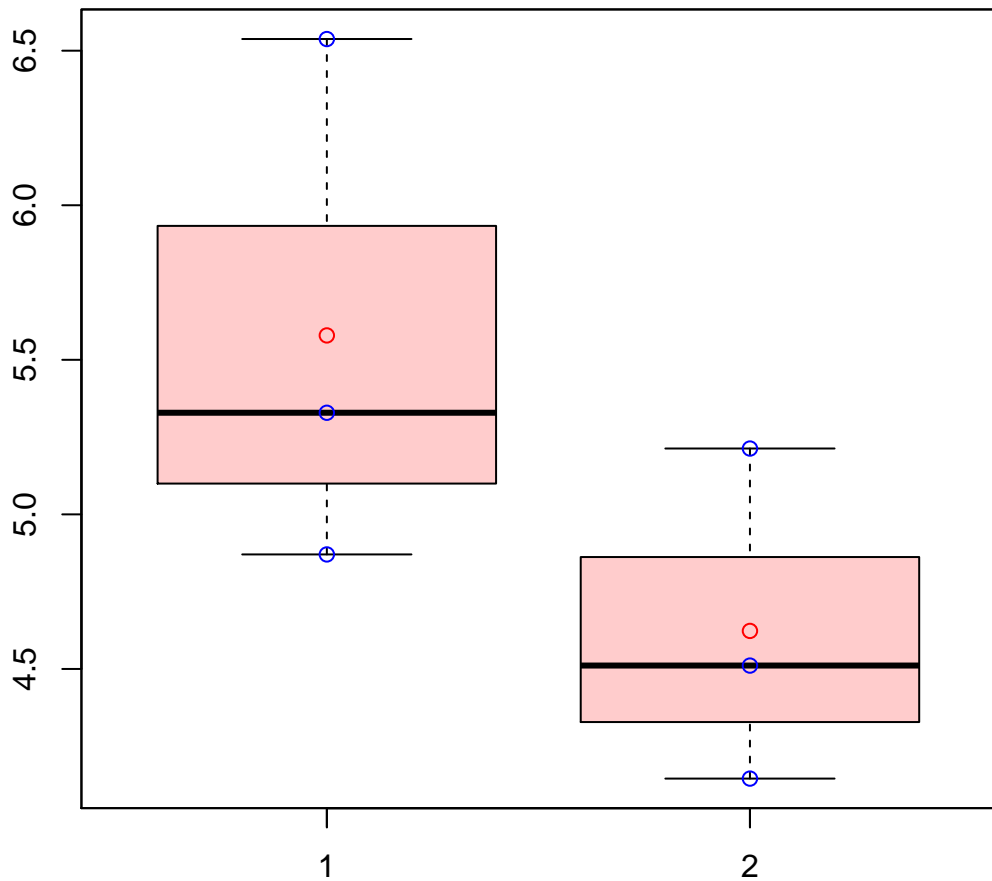

t-Test: p-value = 0.19

# C5YV65|C5YV65\_SORBI

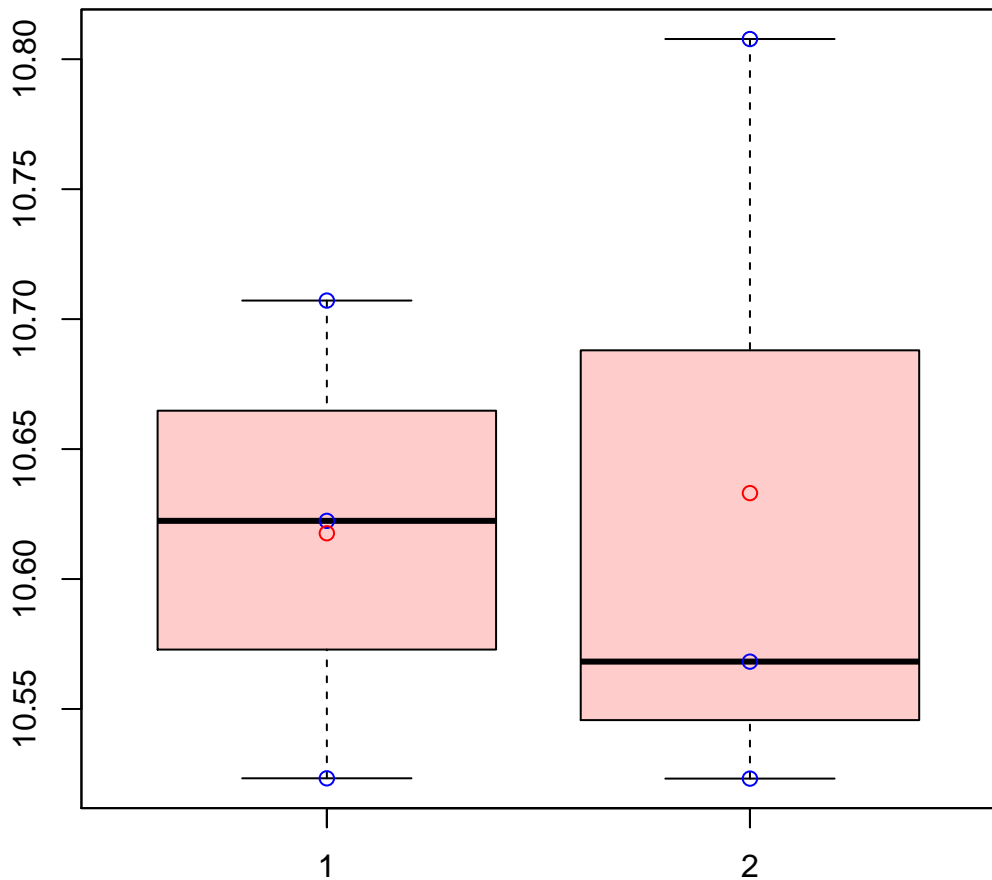

t-Test: p-value = 0.89



# C5YW21|C5YW21\_SORBI

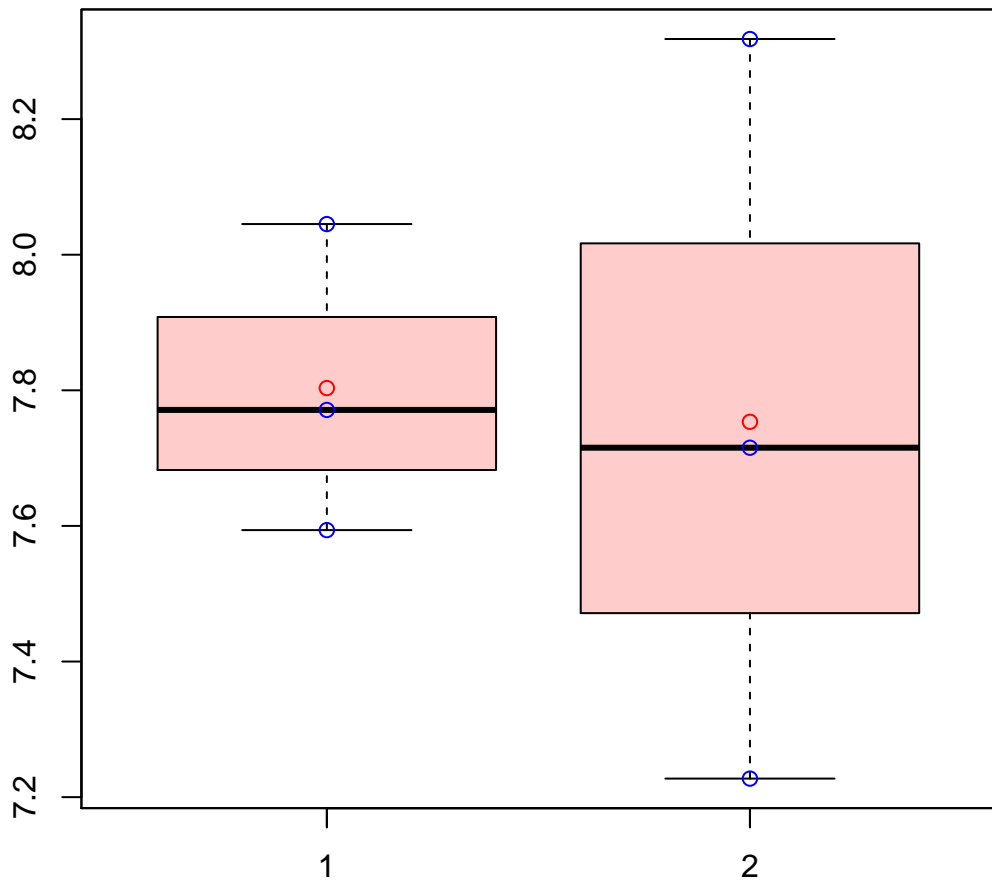

t-Test: p-value = 0.89

# C5YW53|C5YW53\_SORBI

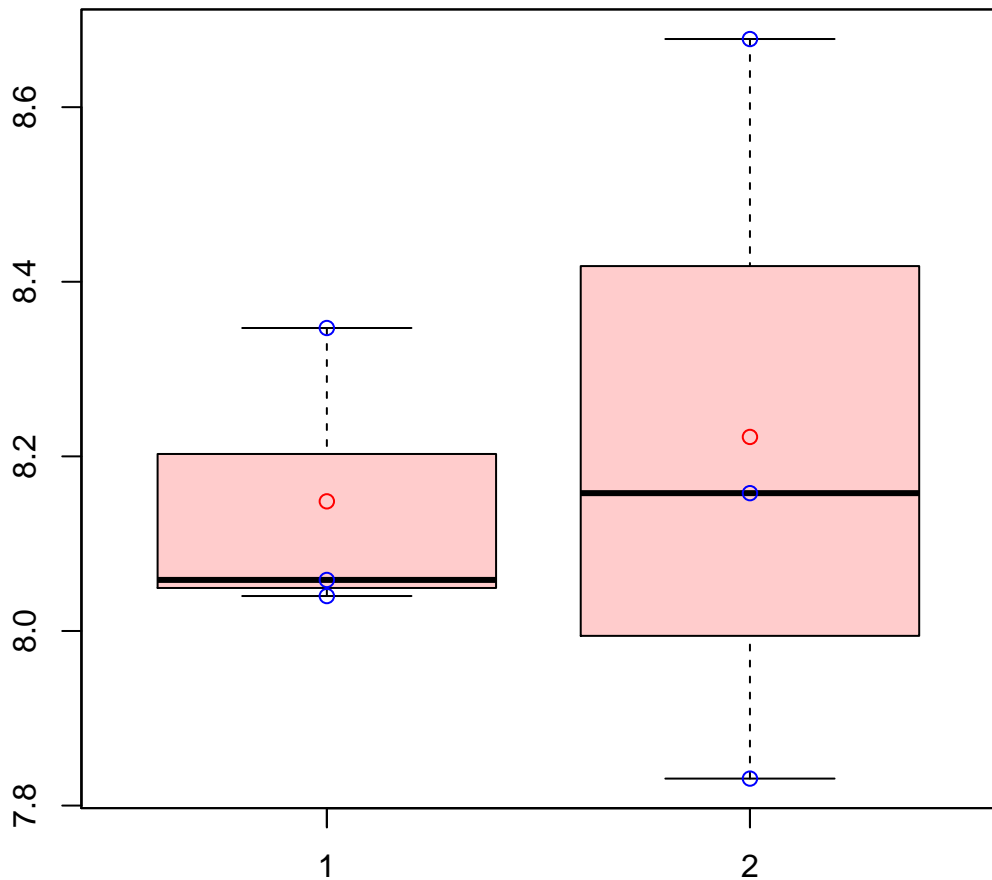

t-Test: p-value = 0.8

# C5YX05|C5YX05\_SORBI

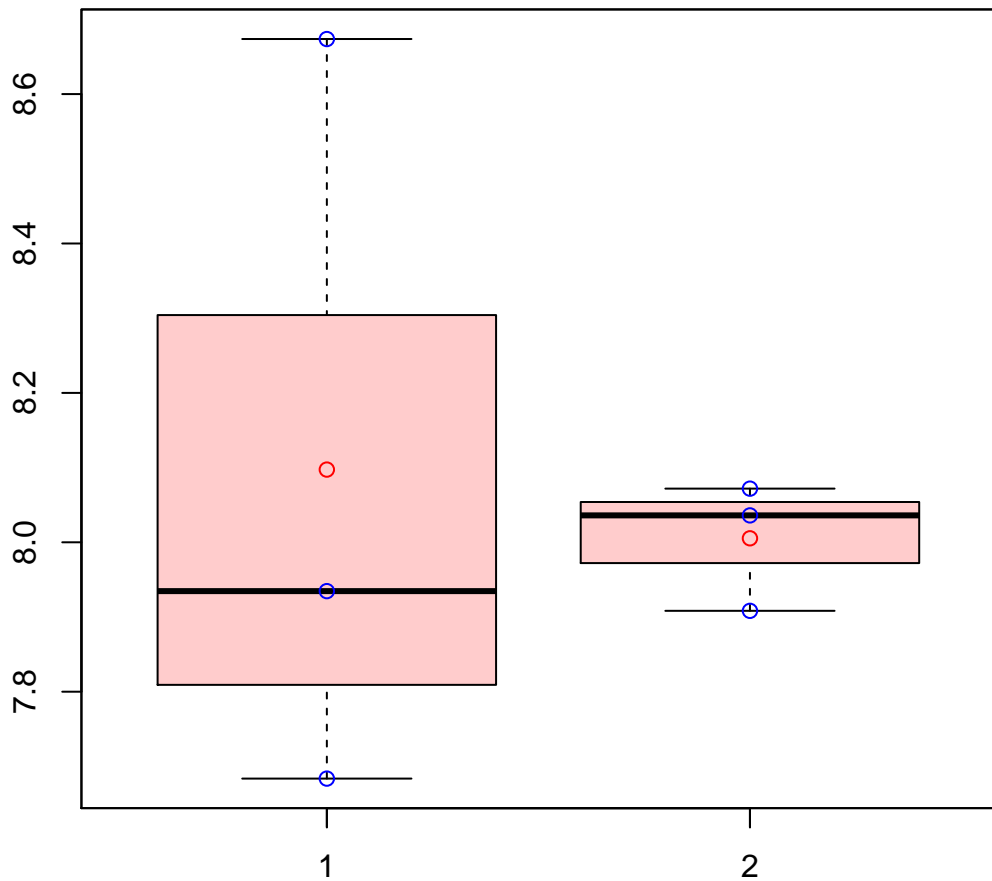

t-Test: p-value = 0.79

# C5YX18|C5YX18\_SORBI

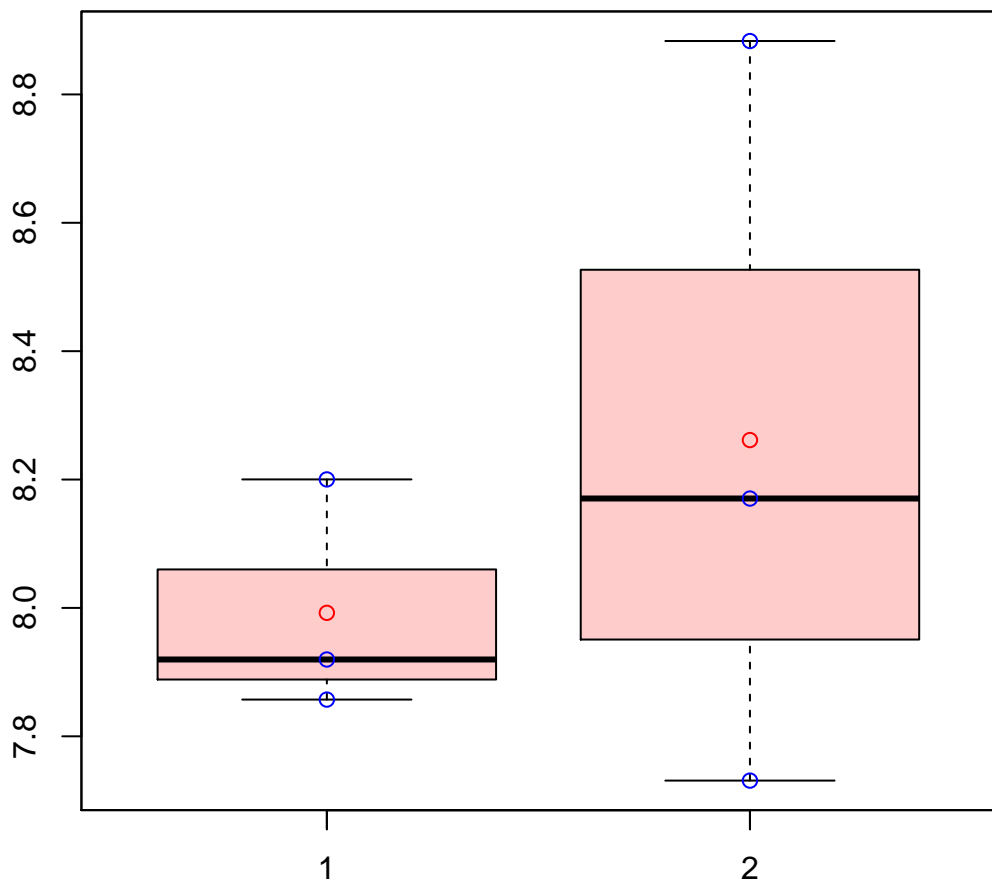

t-Test: p-value = 0.51

# C5YXG7|C5YXG7\_SORBI

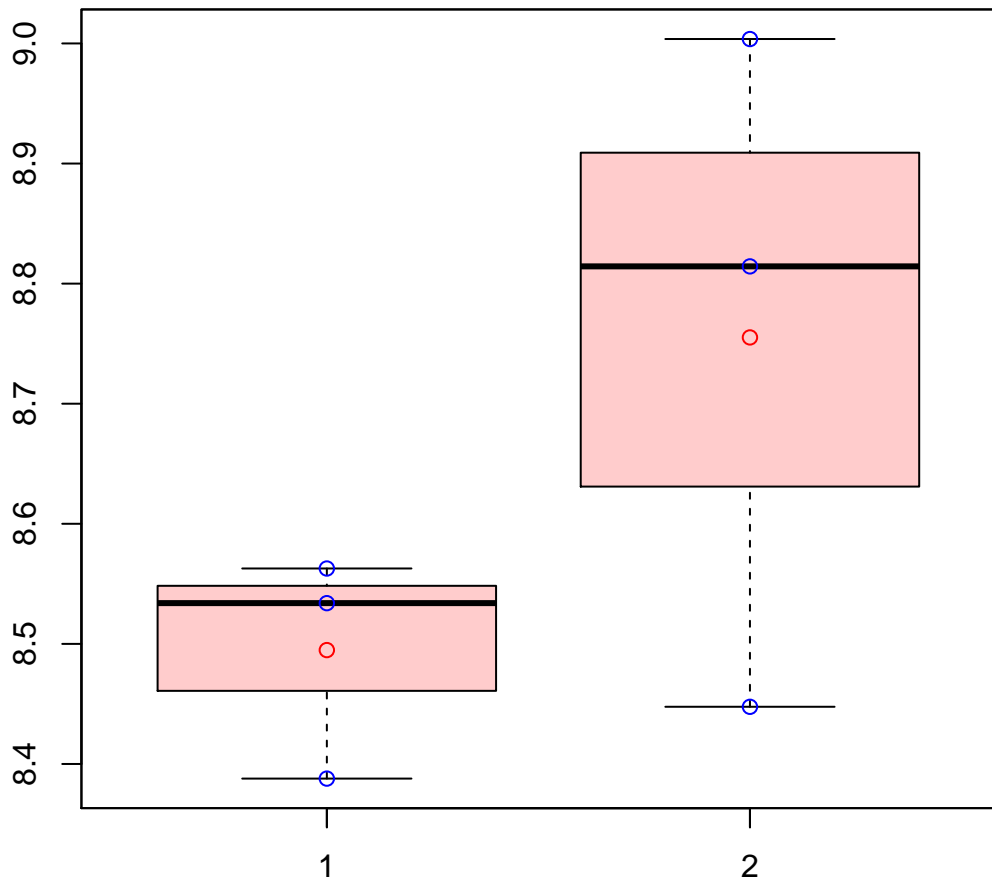

t-Test: p-value = 0.25

# C5YXJ1|C5YXJ1\_SORBI

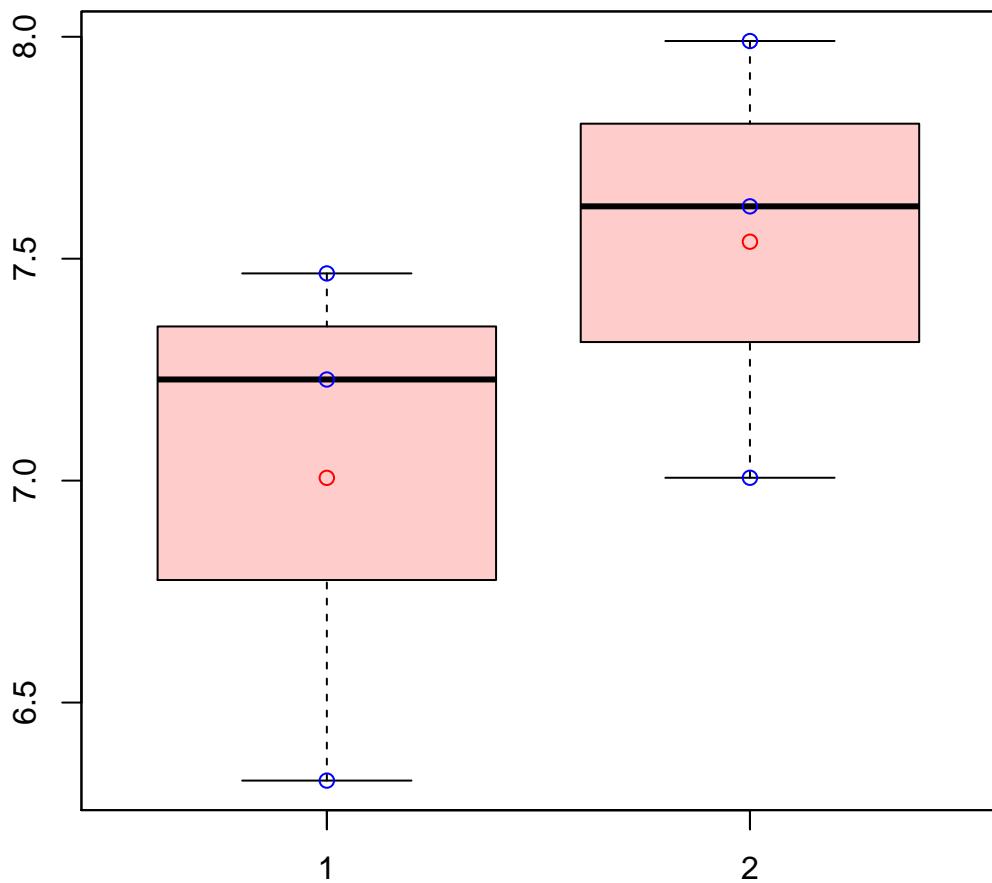

t-Test: p-value = 0.31

# C5YXW0|C5YXW0\_SORBI

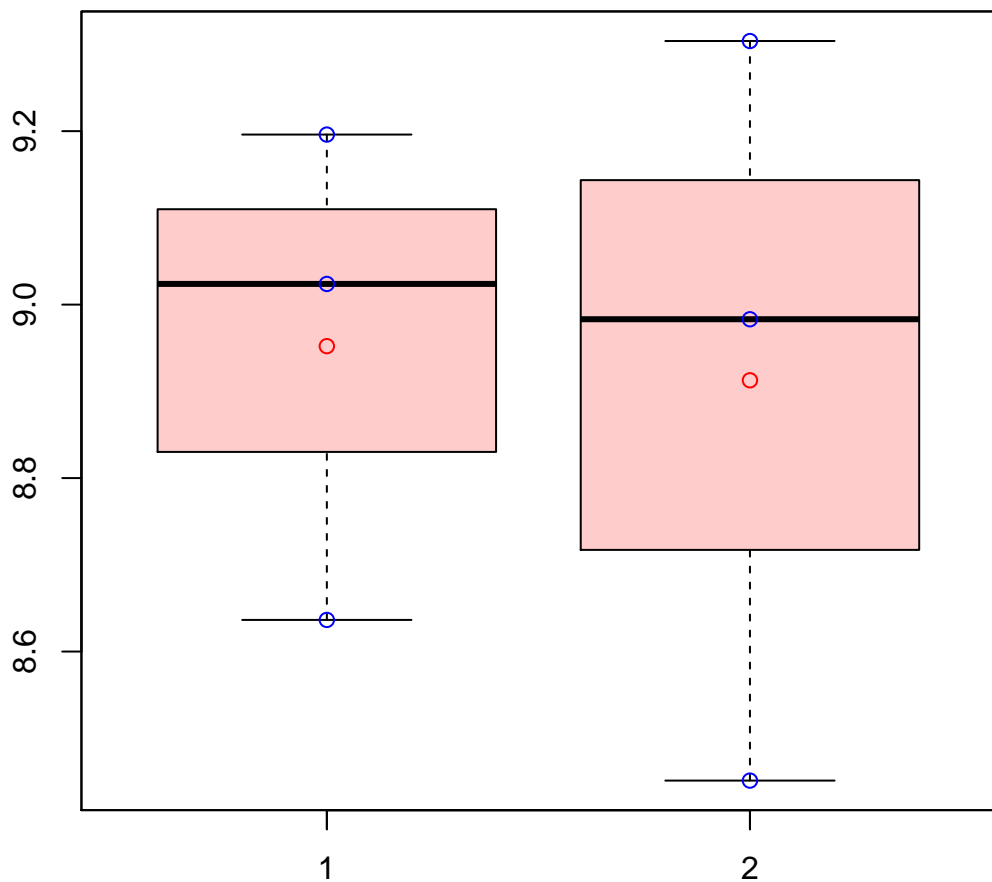

t-Test: p-value = 0.9

# C5YXY3|C5YXY3\_SORBI

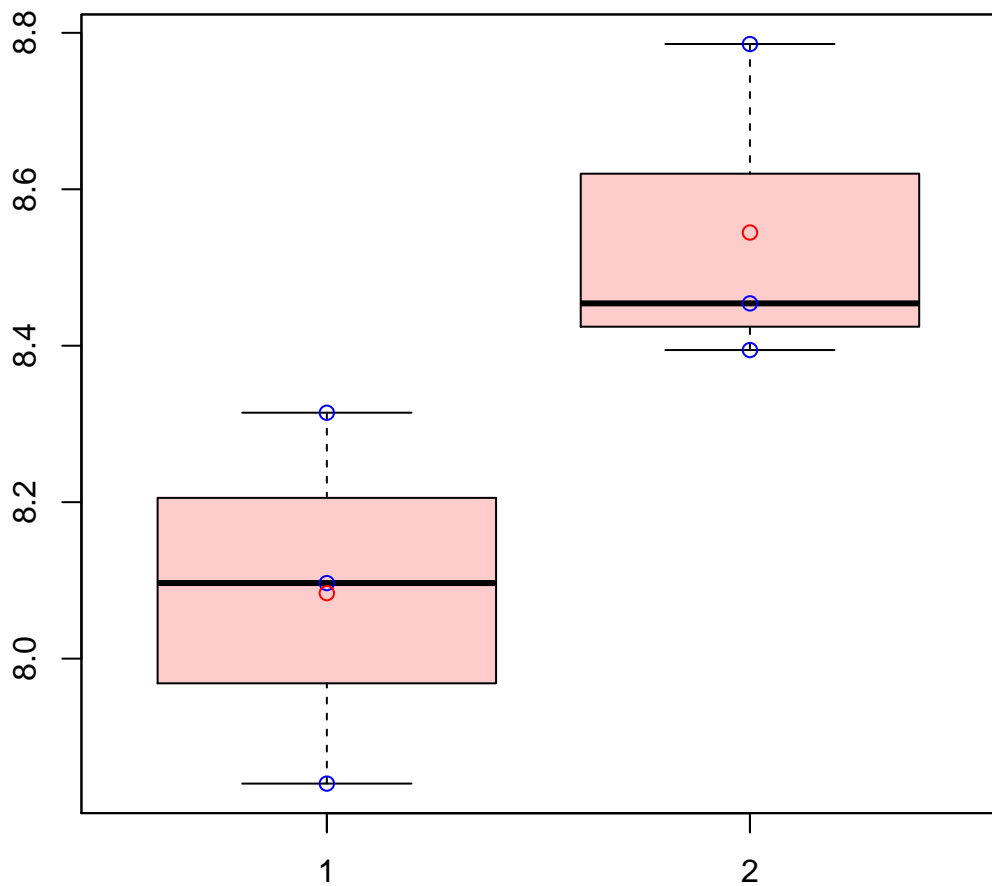

t-Test: p-value = 0.07



# C5YYC3|C5YYC3\_SORBI

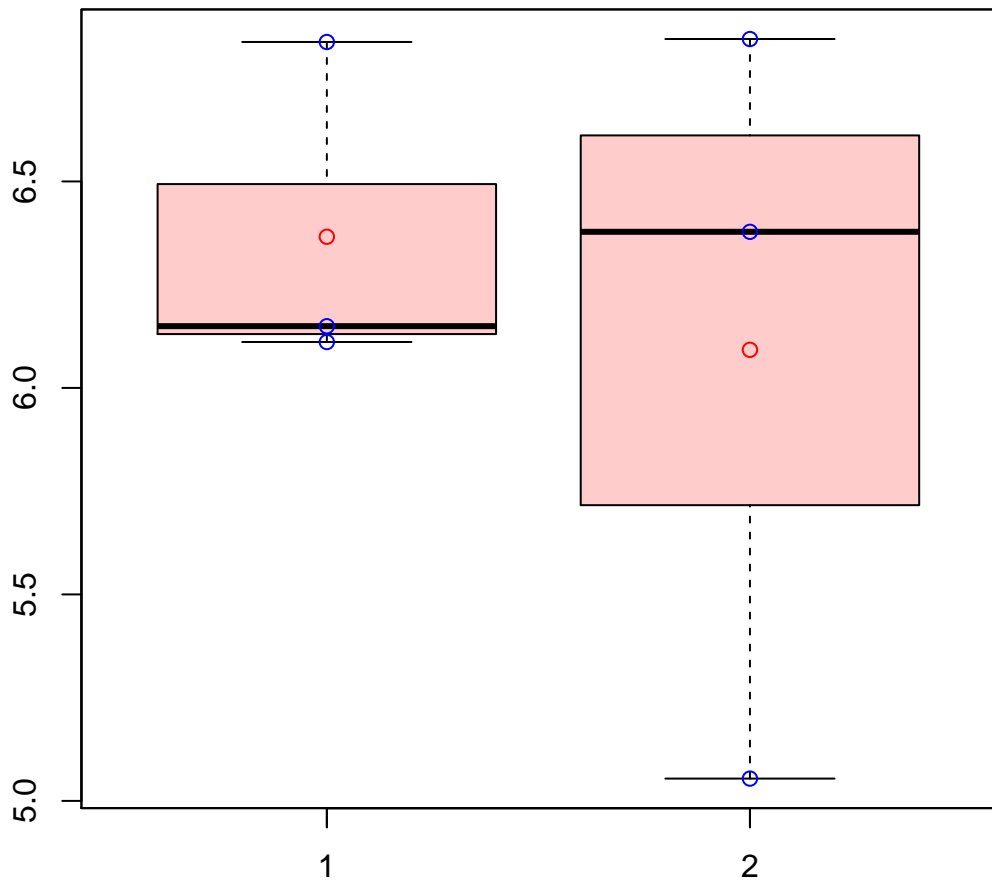

t-Test: p-value = 0.67

# C5YYC6|C5YYC6\_SORBI

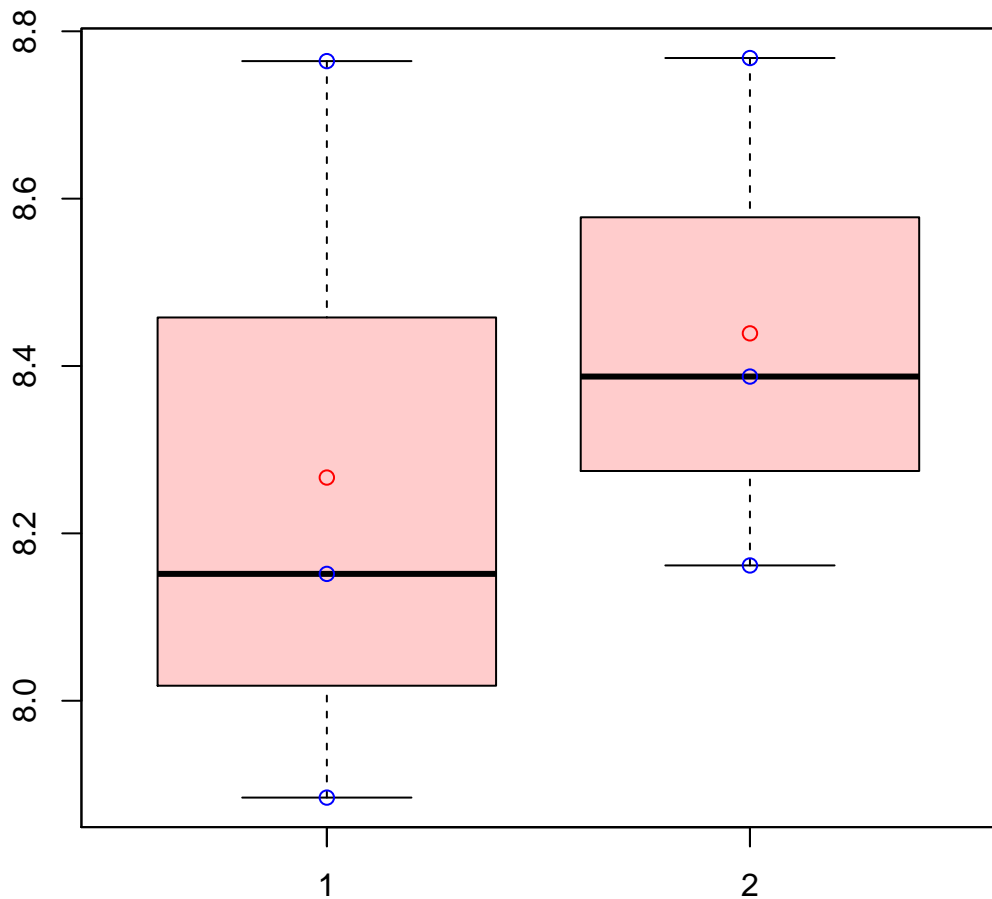

t-Test: p-value = 0.62

# C5YYG4|C5YYG4\_SORBI

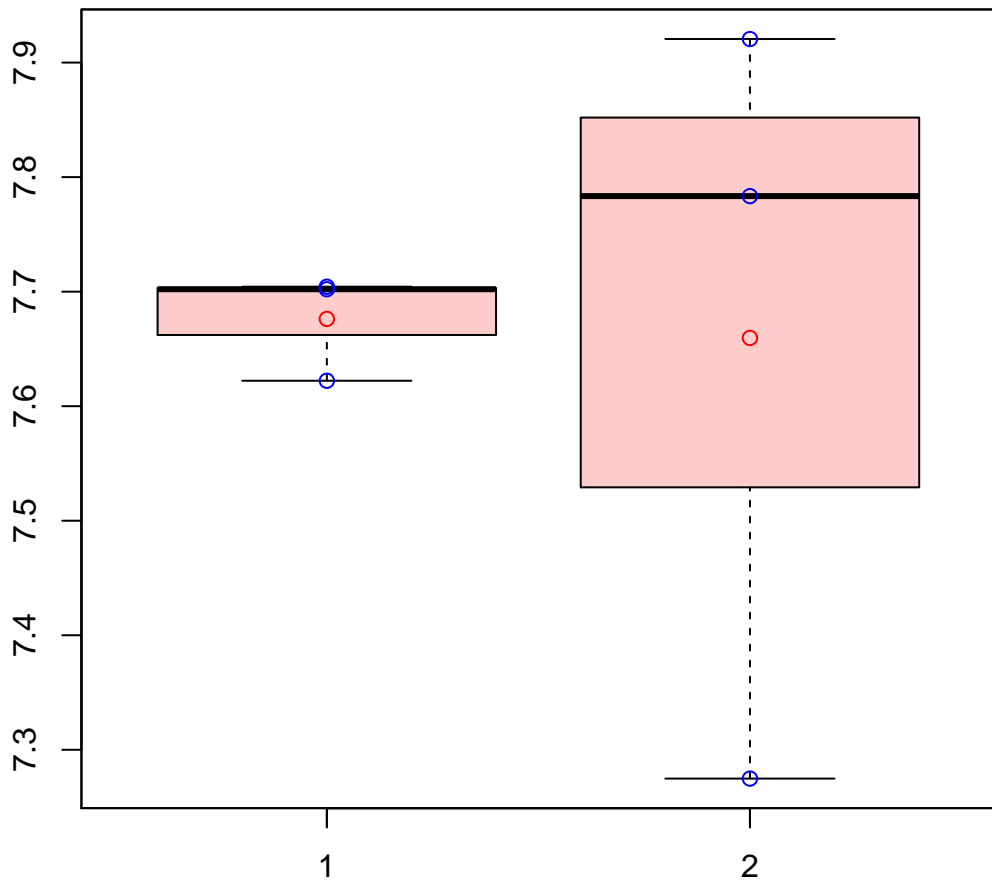

t-Test: p-value = 0.94

# C5YYK9|C5YYK9\_SORBI

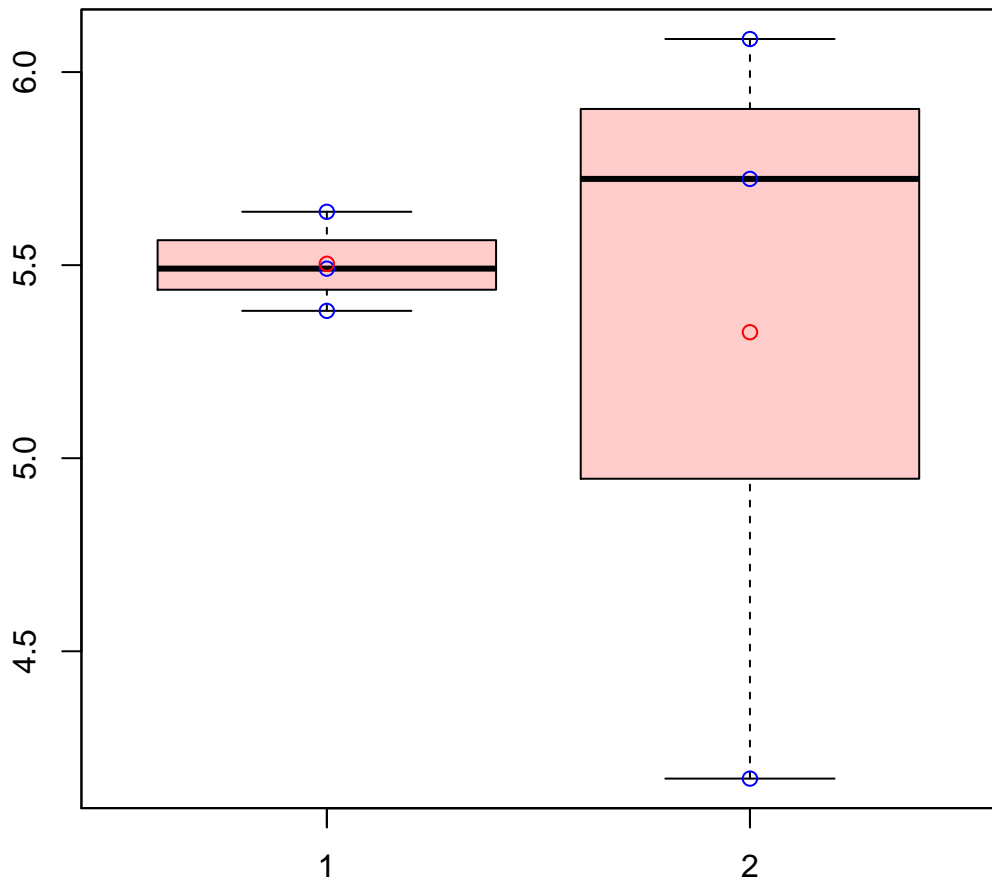

t-Test: p-value = 0.79

# C5YZC1|C5YZC1\_SORBI

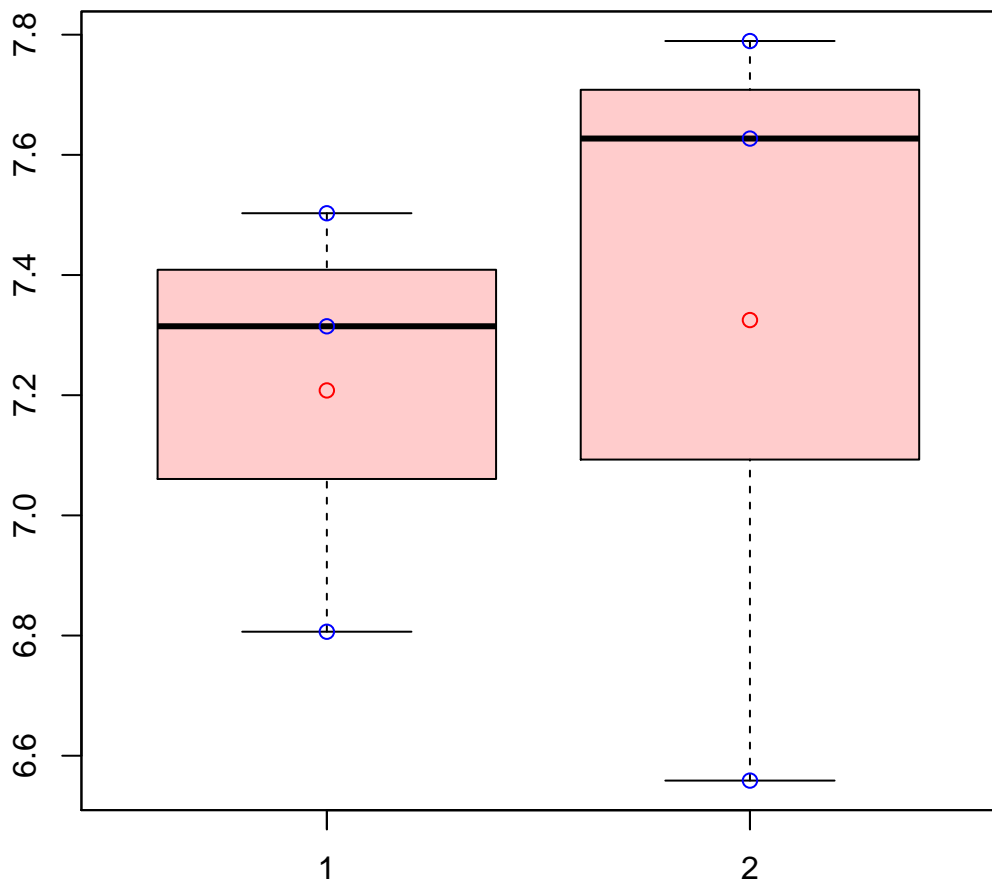

t-Test: p-value = 0.81

# C5YZM6|C5YZM6\_SORBI

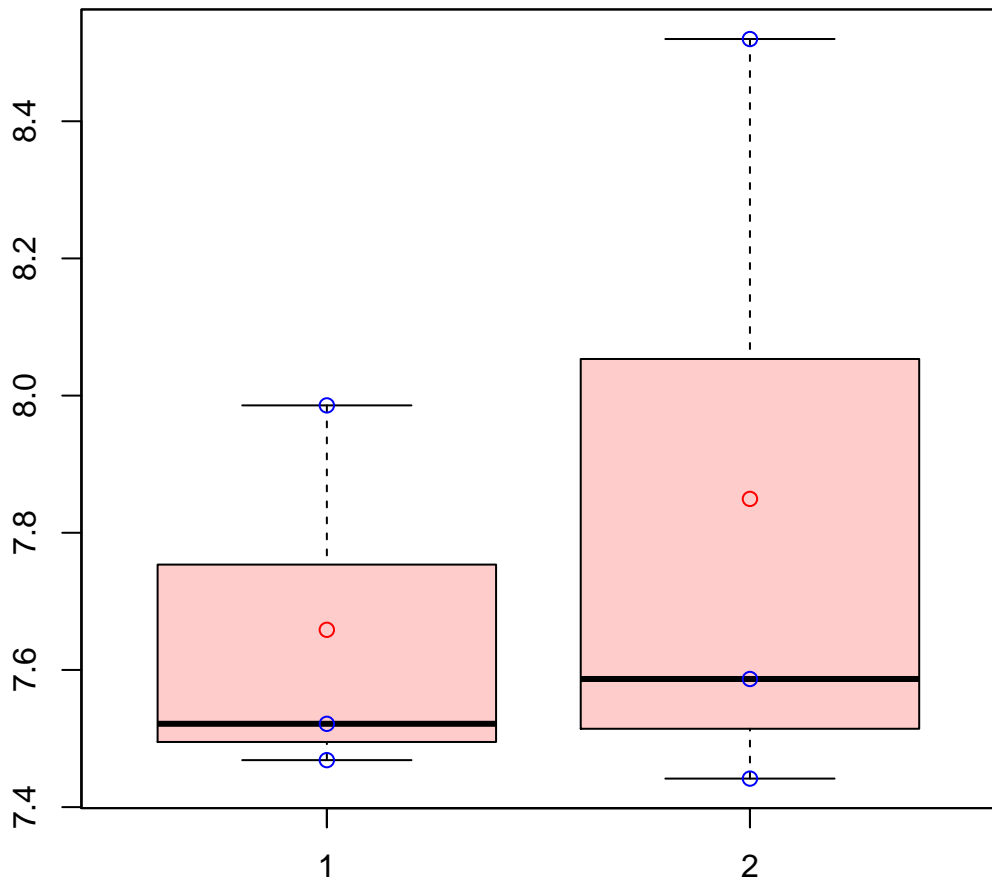

t-Test: p-value = 0.65

# C5YZM7|C5YZM7\_SORBI

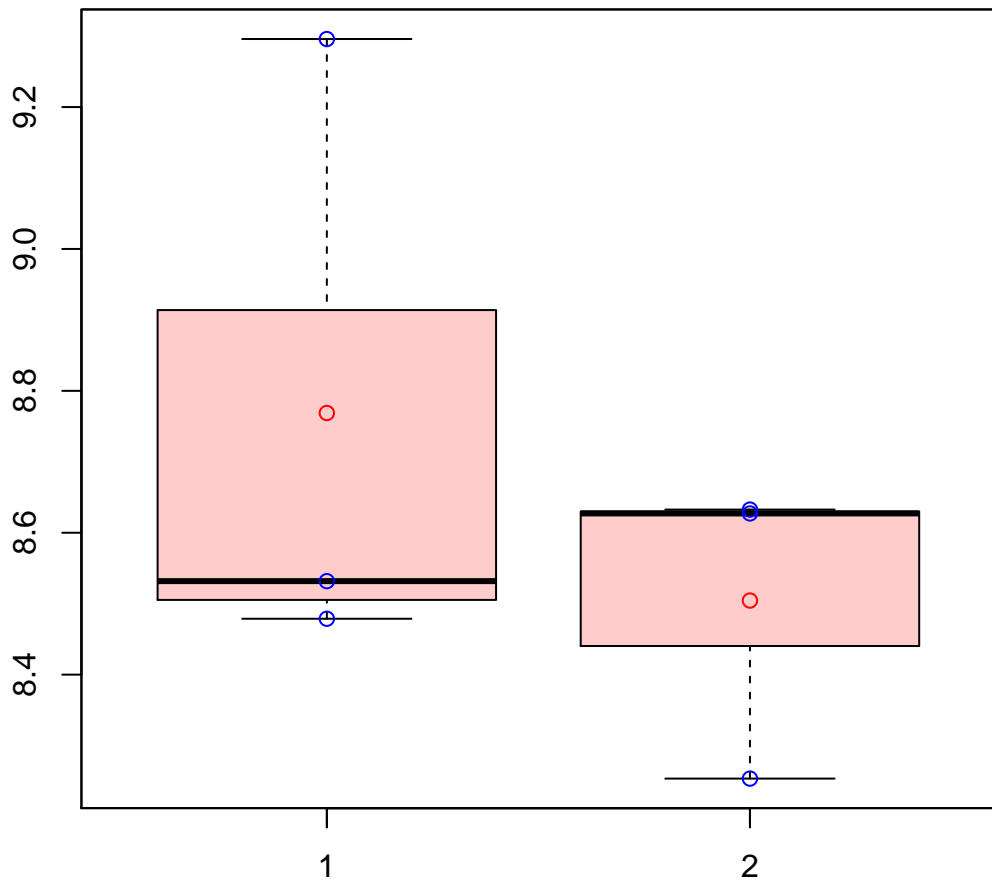

t-Test: p-value = 0.44

# C5Z147|C5Z147\_SORBI

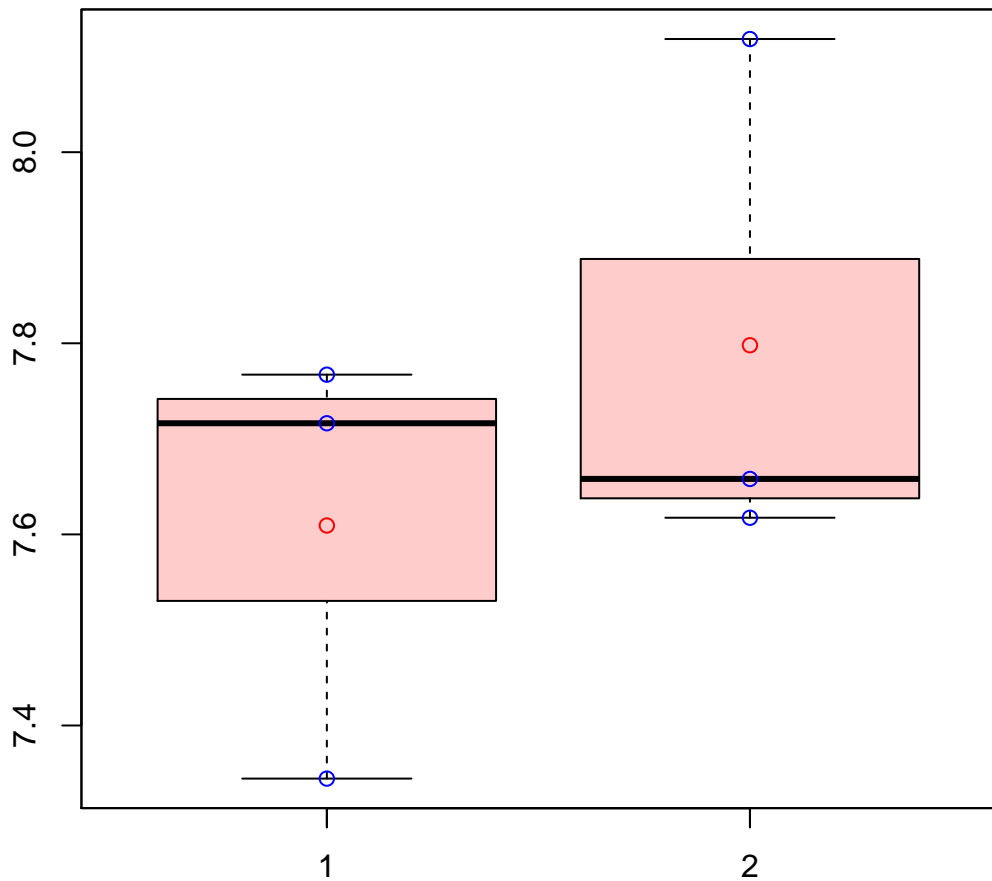

t-Test: p-value = 0.42



# C5Z1D3|C5Z1D3\_SORBI

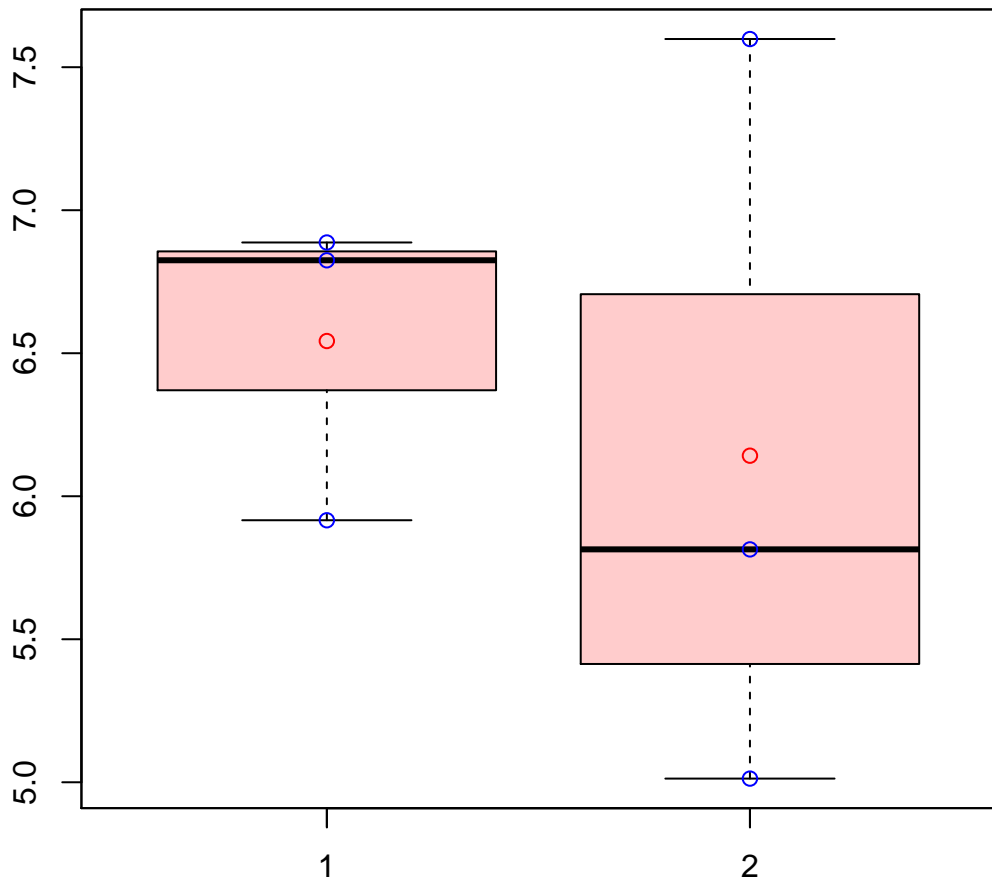

t-Test: p-value = 0.66

# C5Z1D6|C5Z1D6\_SORBI

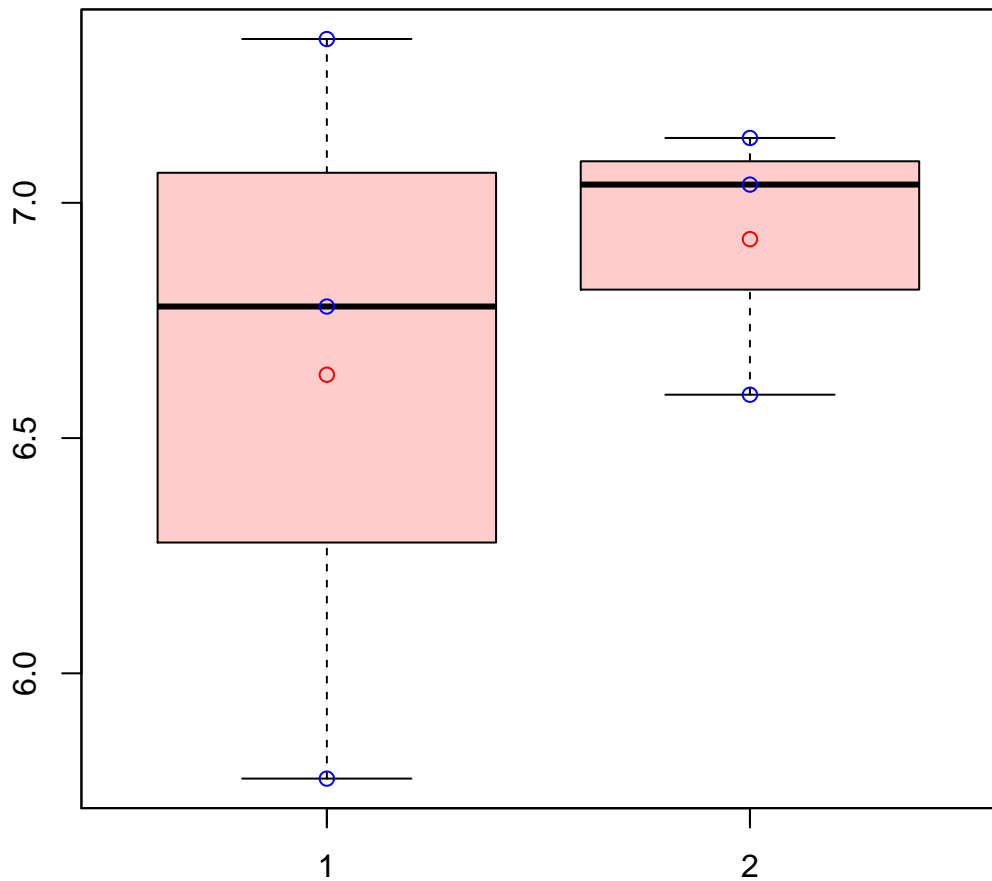

t-Test: p-value = 0.6

# C5Z1W4|C5Z1W4\_SORBI

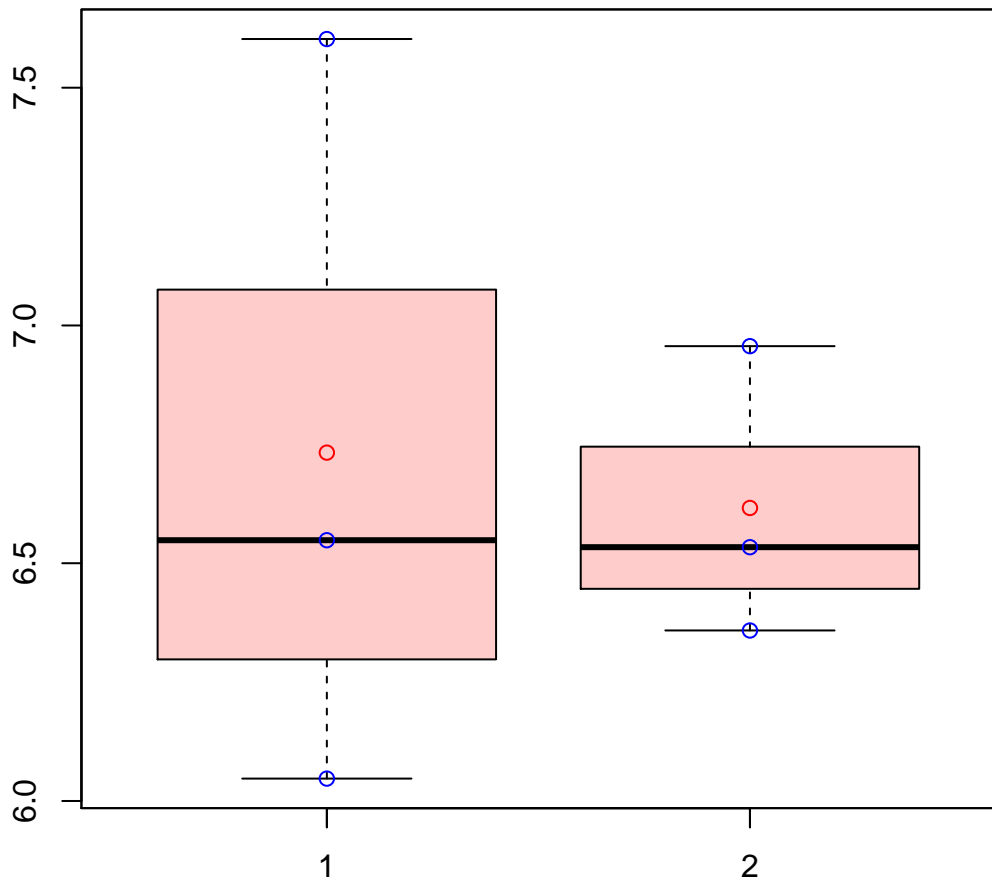

t-Test: p-value = 0.83

# C5Z267|C5Z267\_SORBI

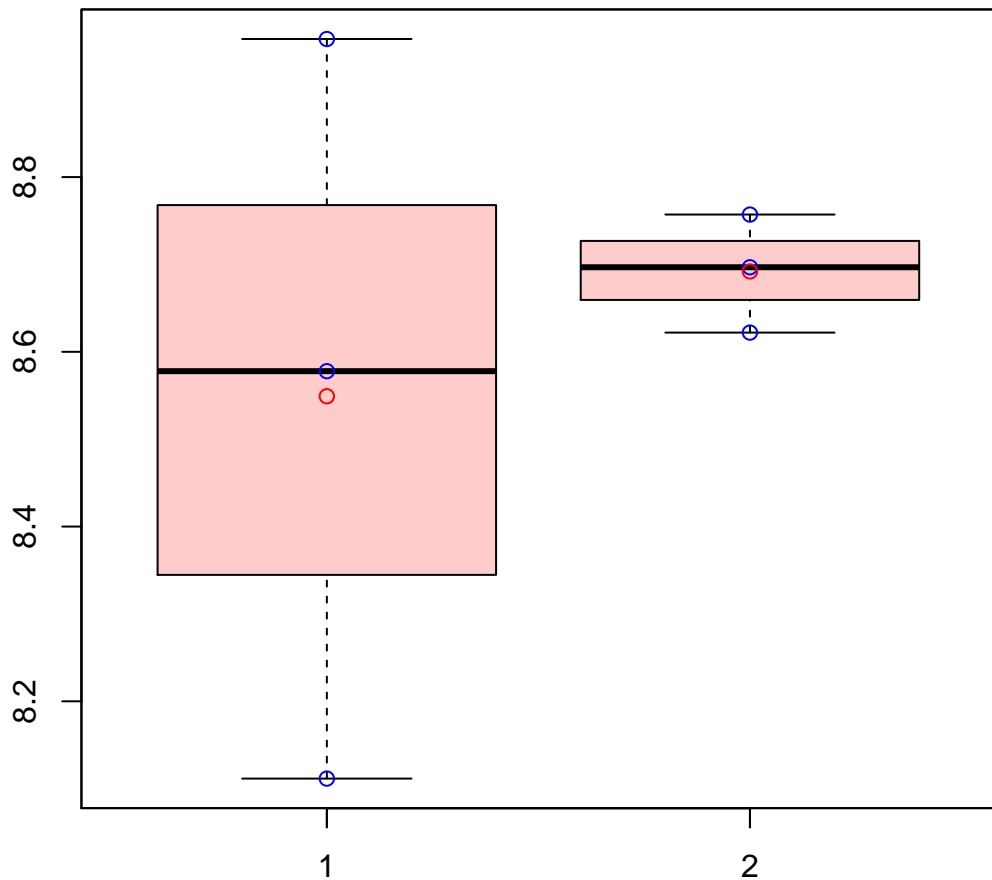

t-Test: p-value = 0.62

# C5Z269|C5Z269\_SORBI

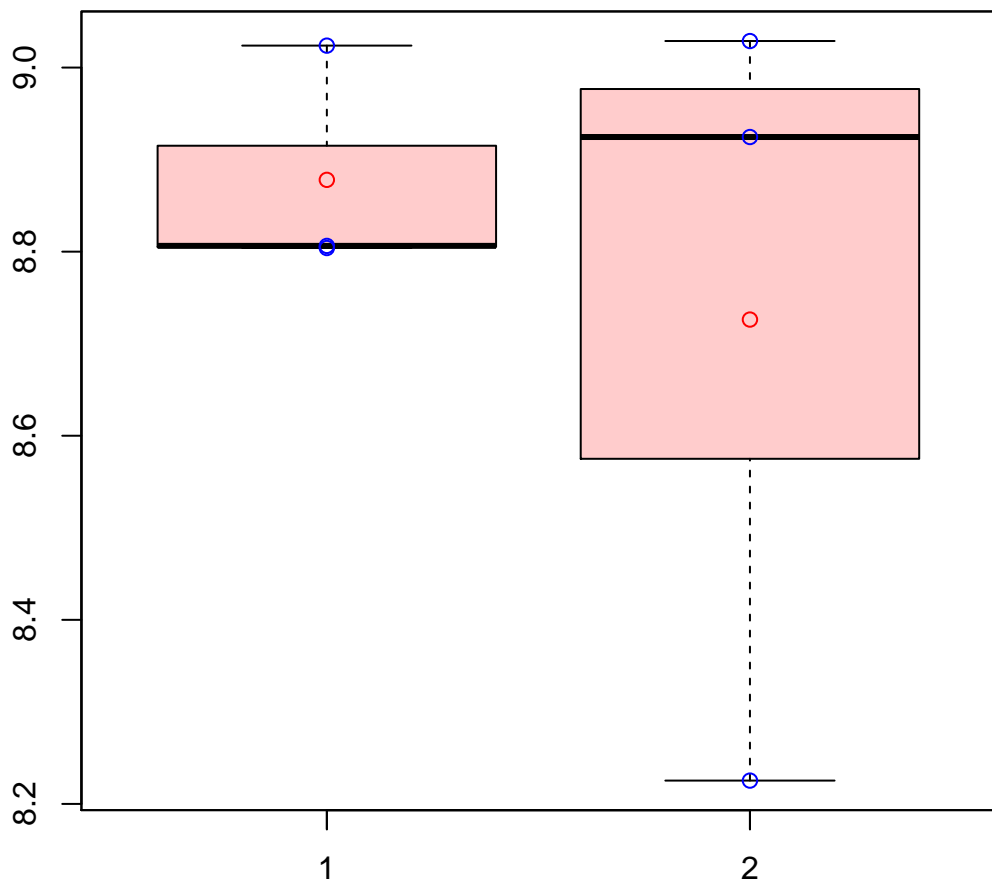

t-Test: p-value = 0.61

# C5Z2G8|C5Z2G8\_SORBI

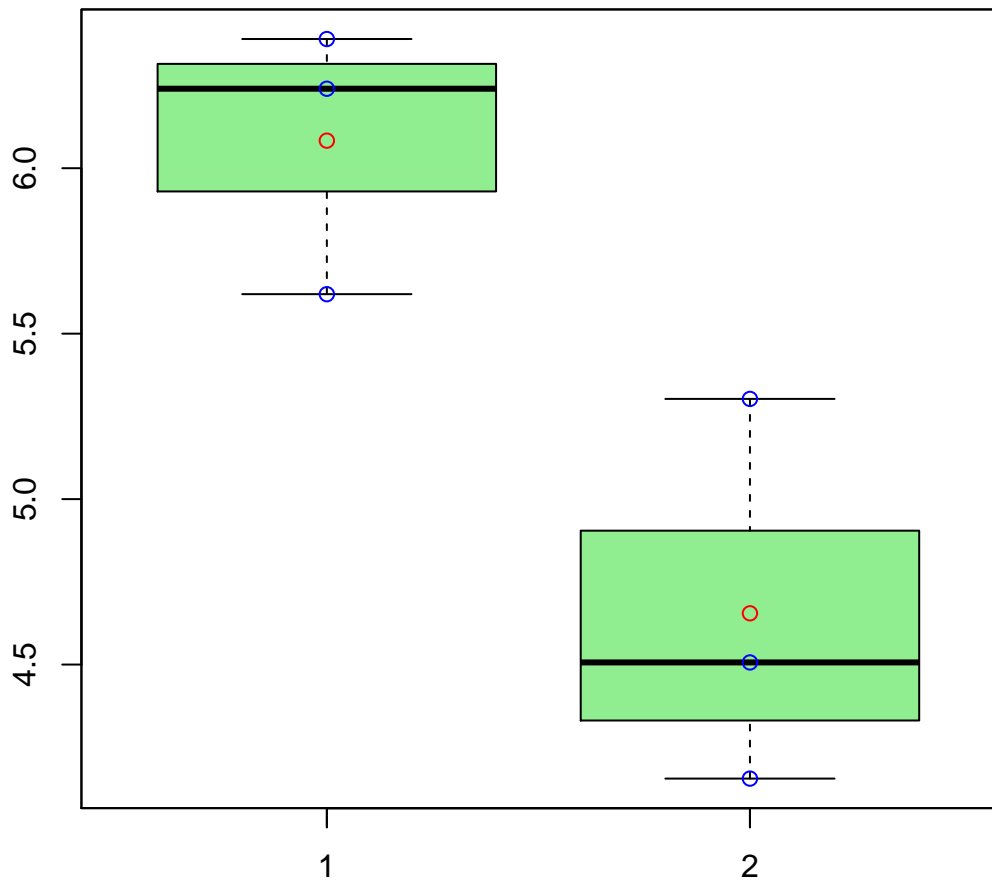

t-Test: p-value = 0.03

# C5Z2J8|C5Z2J8\_SORBI

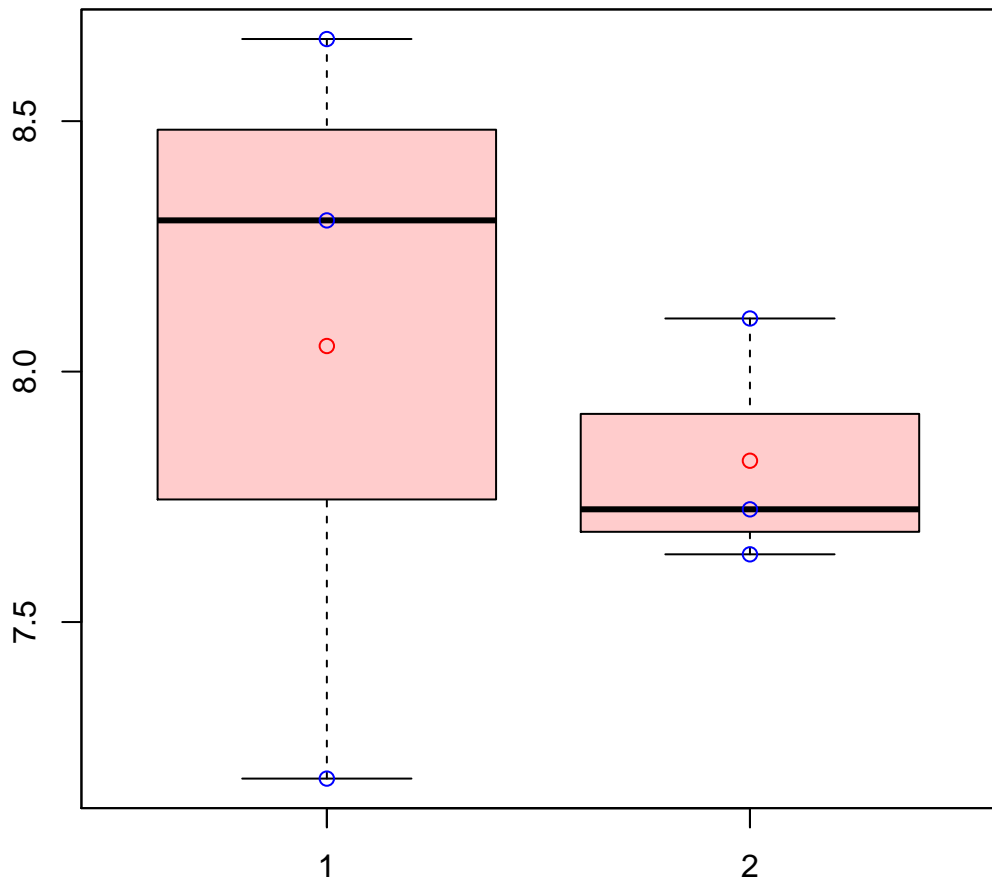

t-Test: p-value = 0.66

# C5Z2L8|C5Z2L8\_SORBI

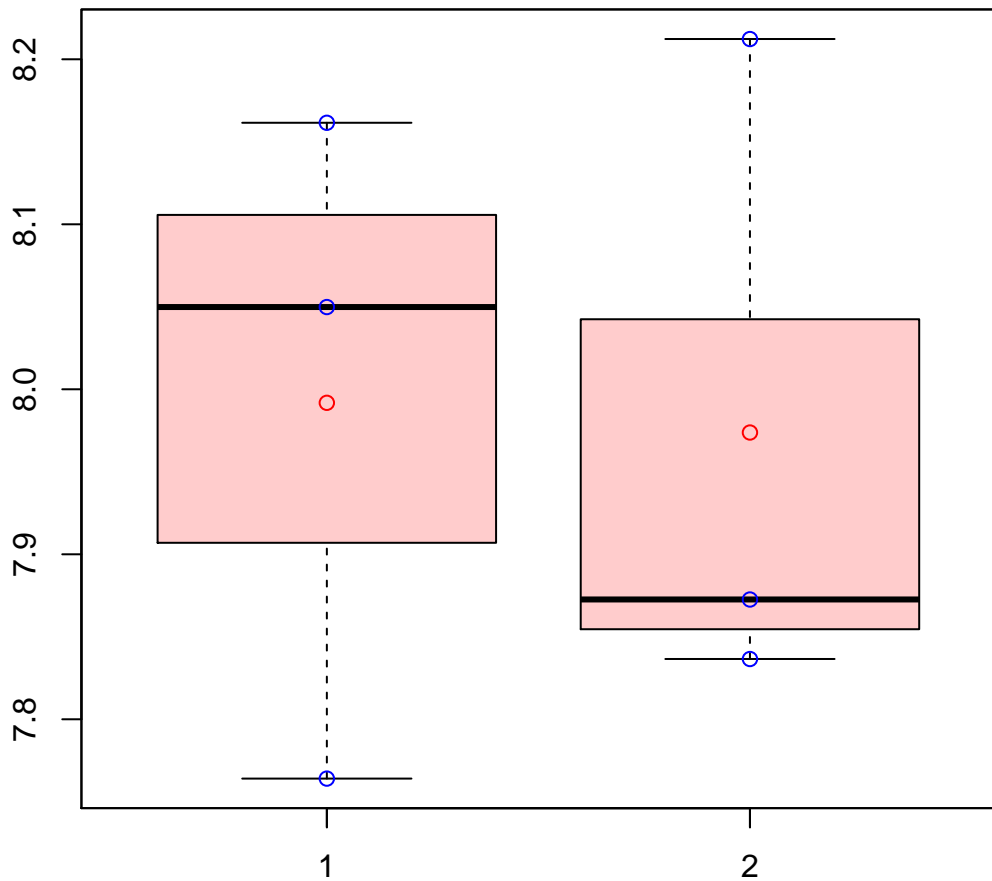

t-Test: p-value = 0.92



# C5Z3D3|C5Z3D3\_SORBI

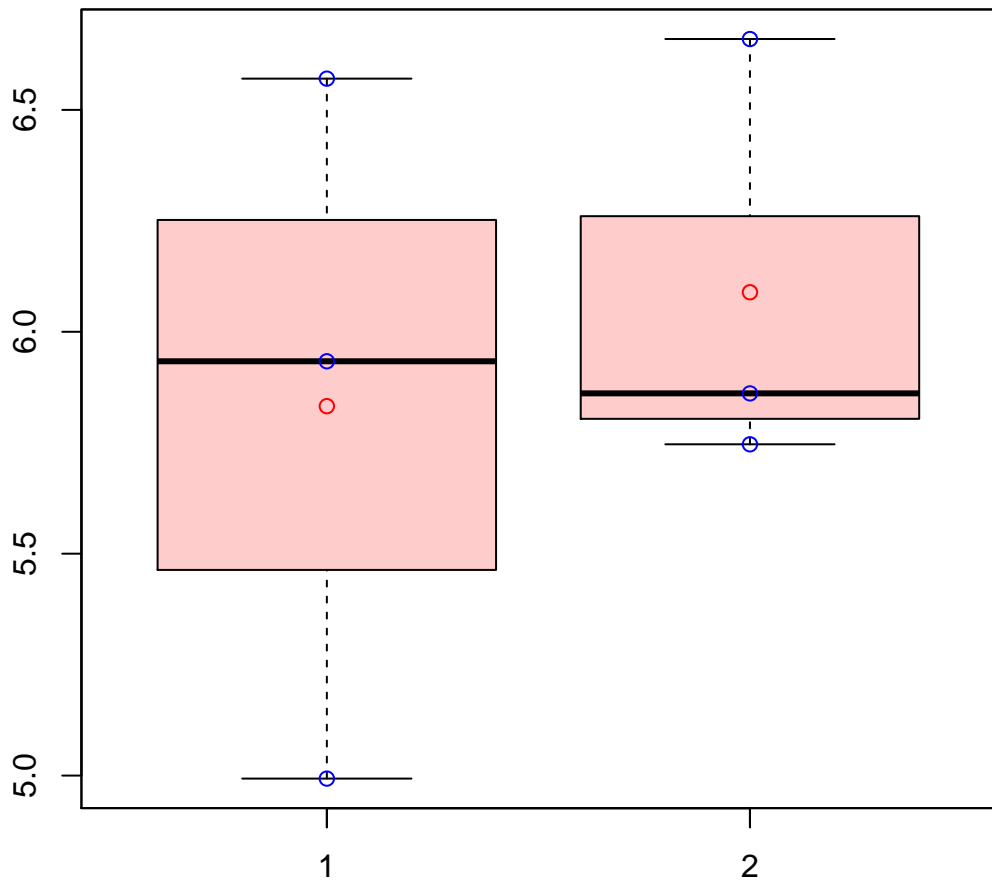

t-Test: p-value = 0.66

# C5Z3J3|C5Z3J3\_SORBI

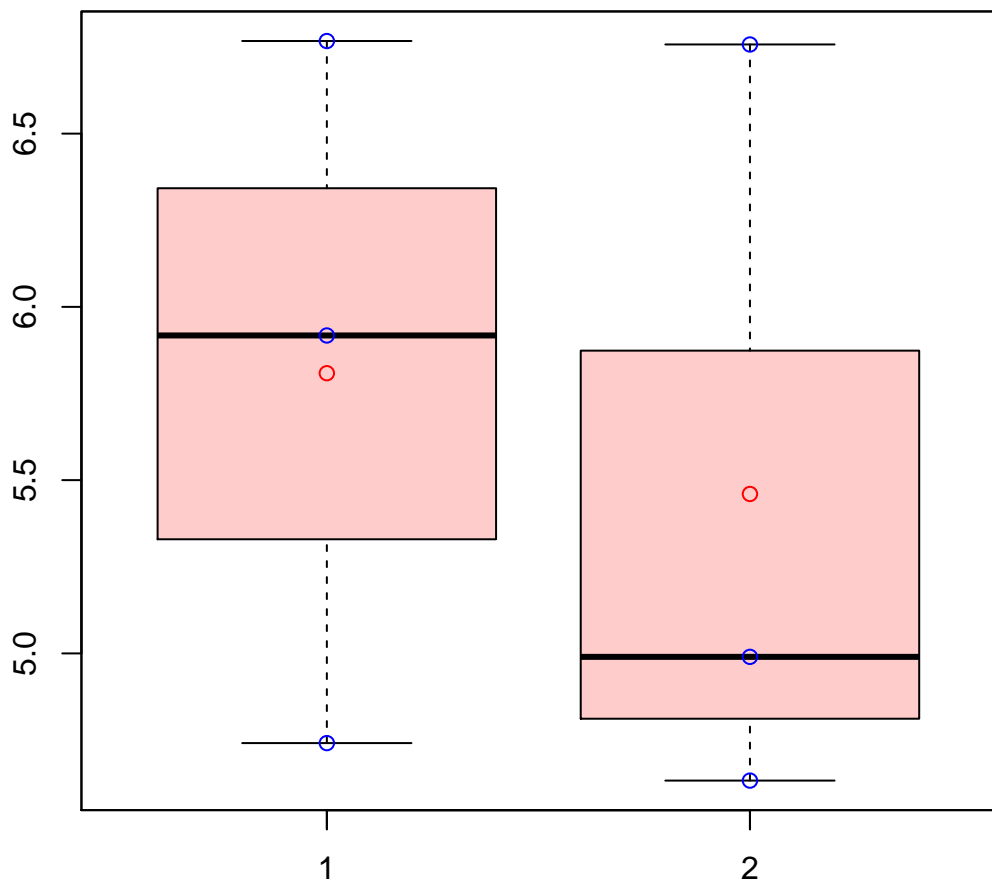

t-Test: p-value = 0.71

# C5Z3P7|C5Z3P7\_SORBI

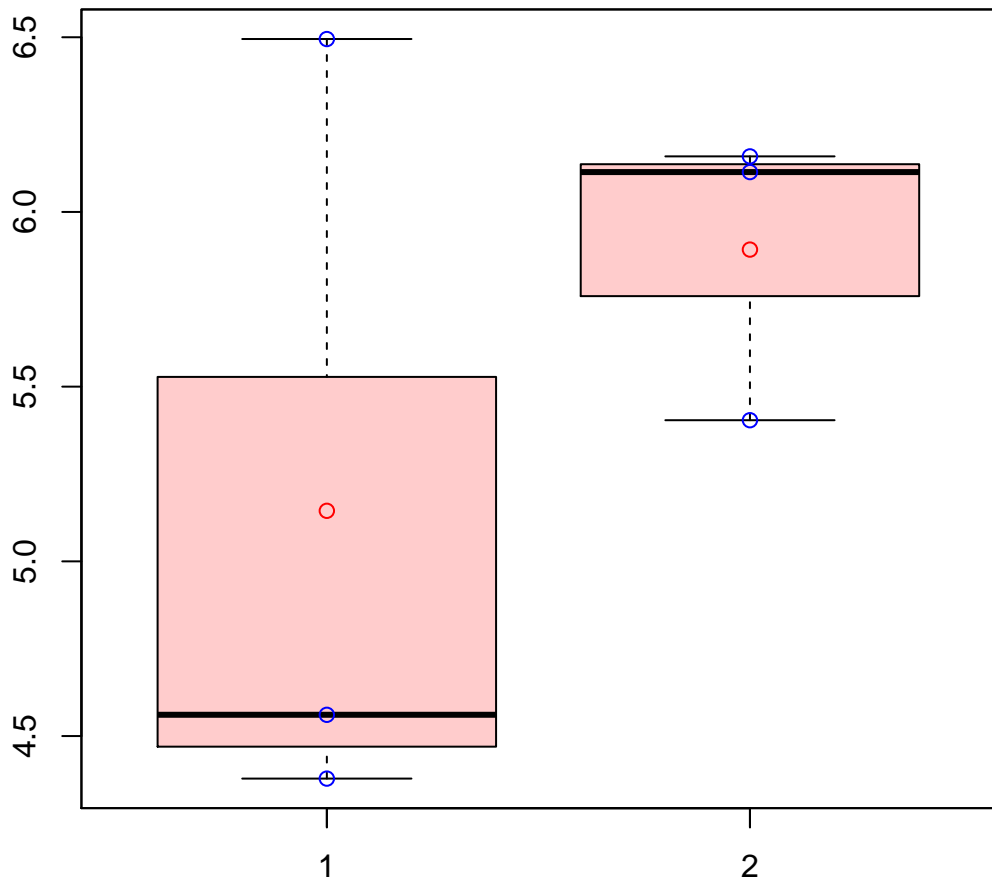

t-Test: p-value = 0.39

# C5Z4M6|C5Z4M6\_SORBI

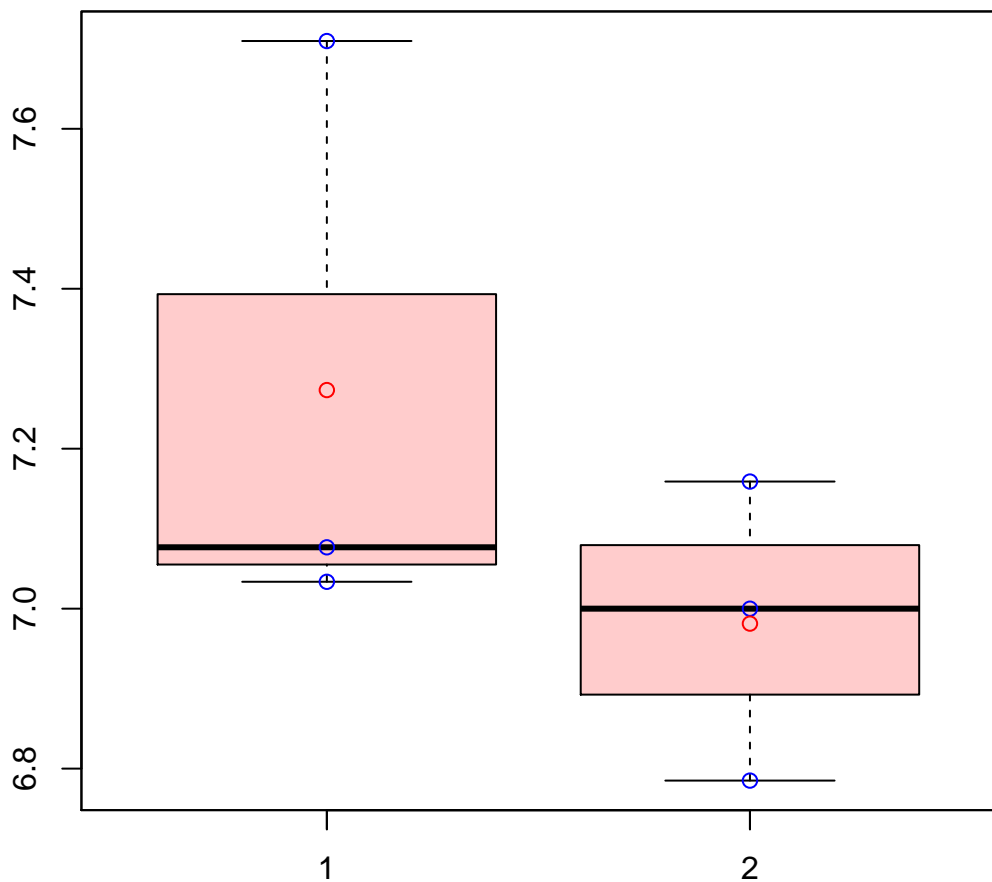

t-Test: p-value = 0.32

# C5Z4Y2|C5Z4Y2\_SORBI

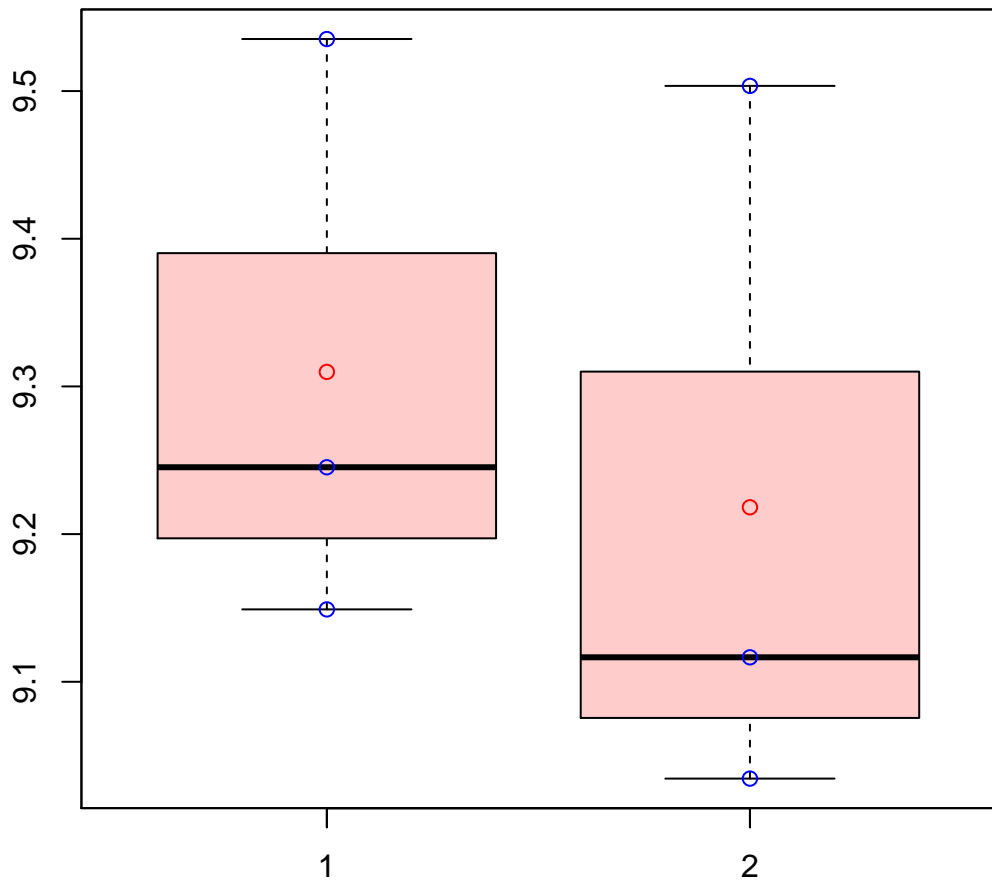

t-Test: p-value = 0.65

# C5Z529|C5Z529\_SORBI

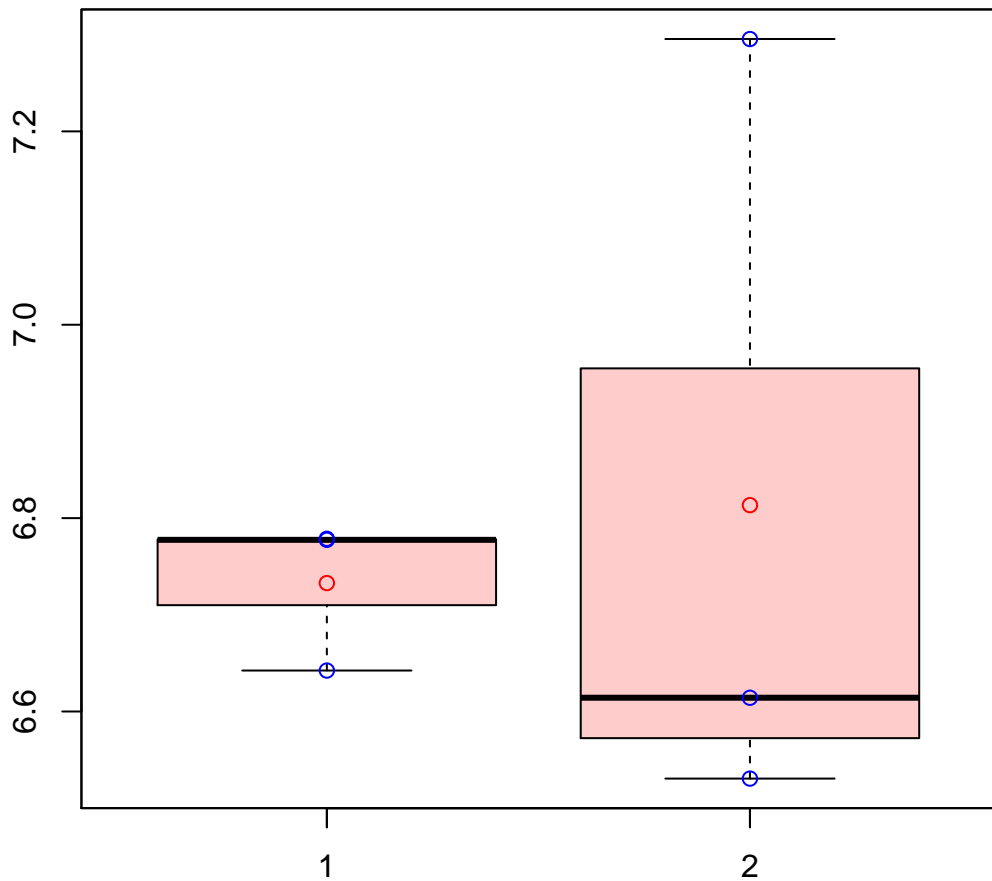

t-Test: p-value = 0.77

# C5Z562|C5Z562\_SORBI

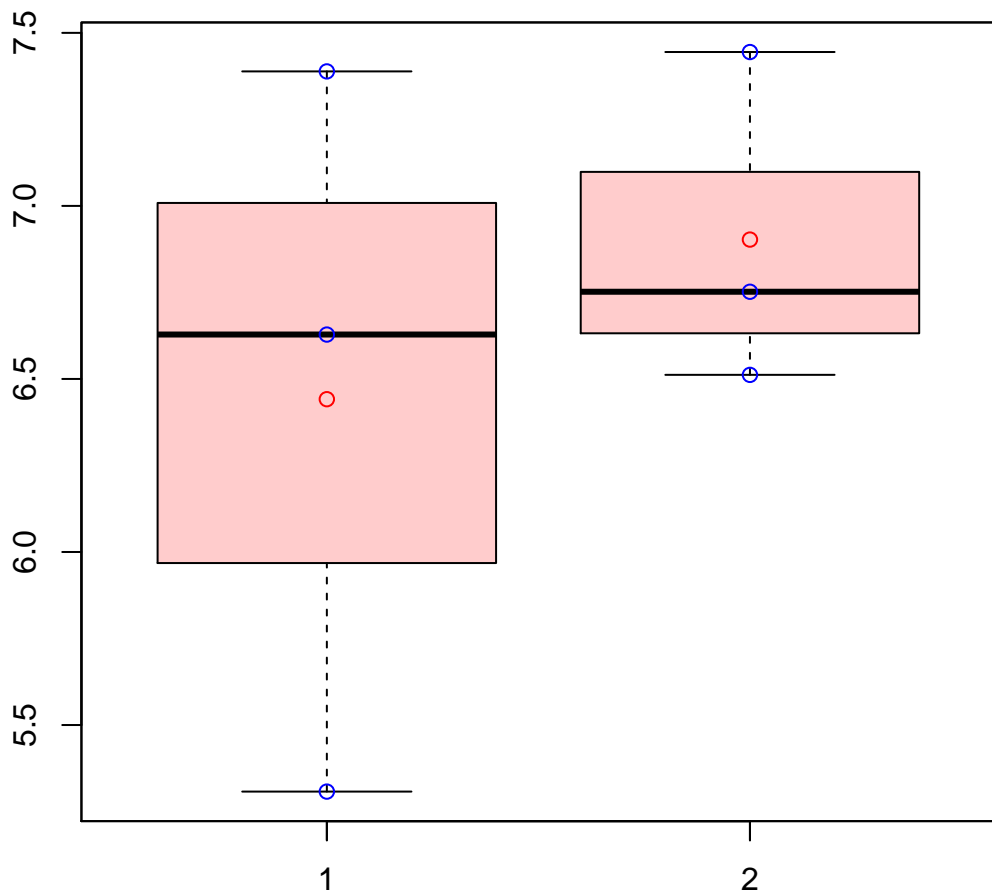

t-Test: p-value = 0.54

# C5Z578|C5Z578\_SORBI

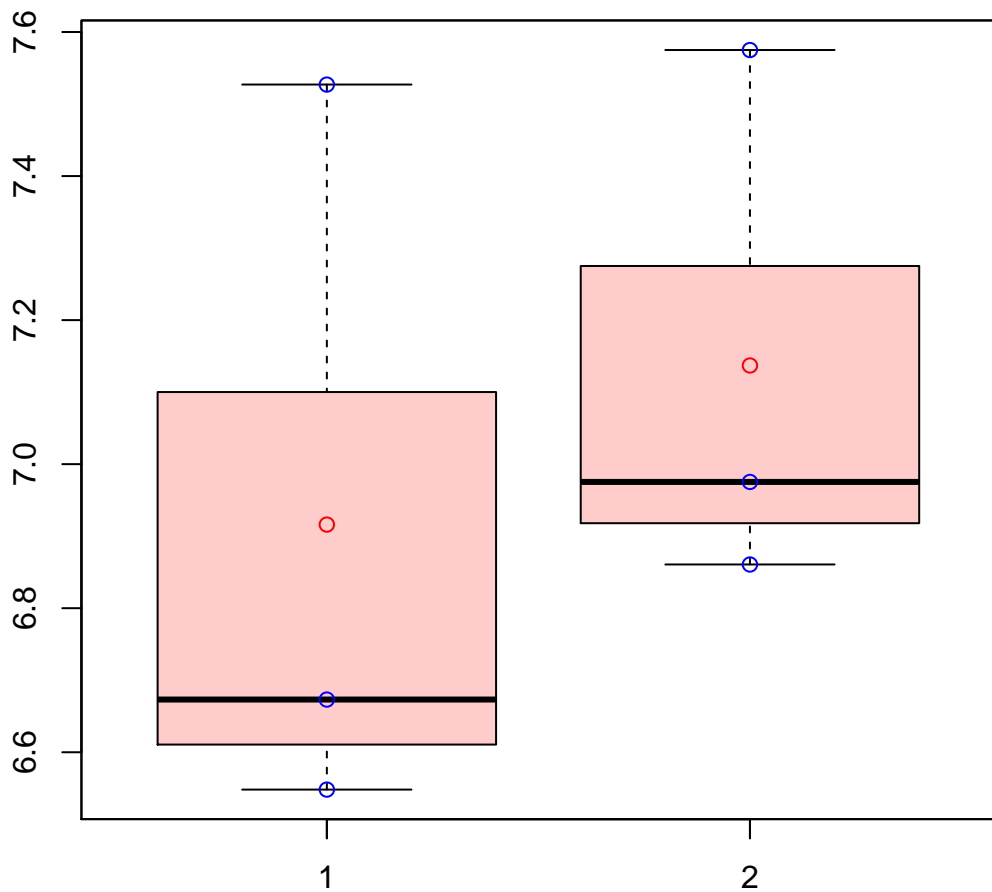

t-Test: p-value = 0.59



# C5Z588|C5Z588\_SORBI

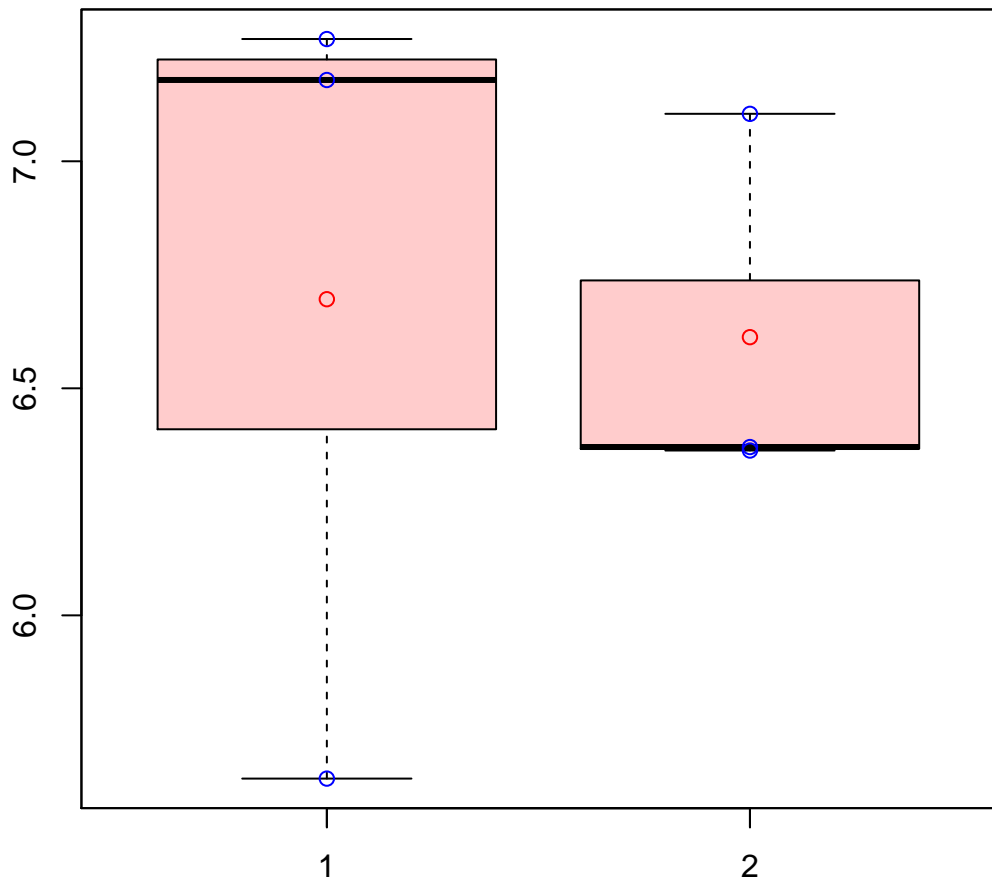

t-Test: p-value = 0.9

# C5Z5N9|C5Z5N9\_SORBI

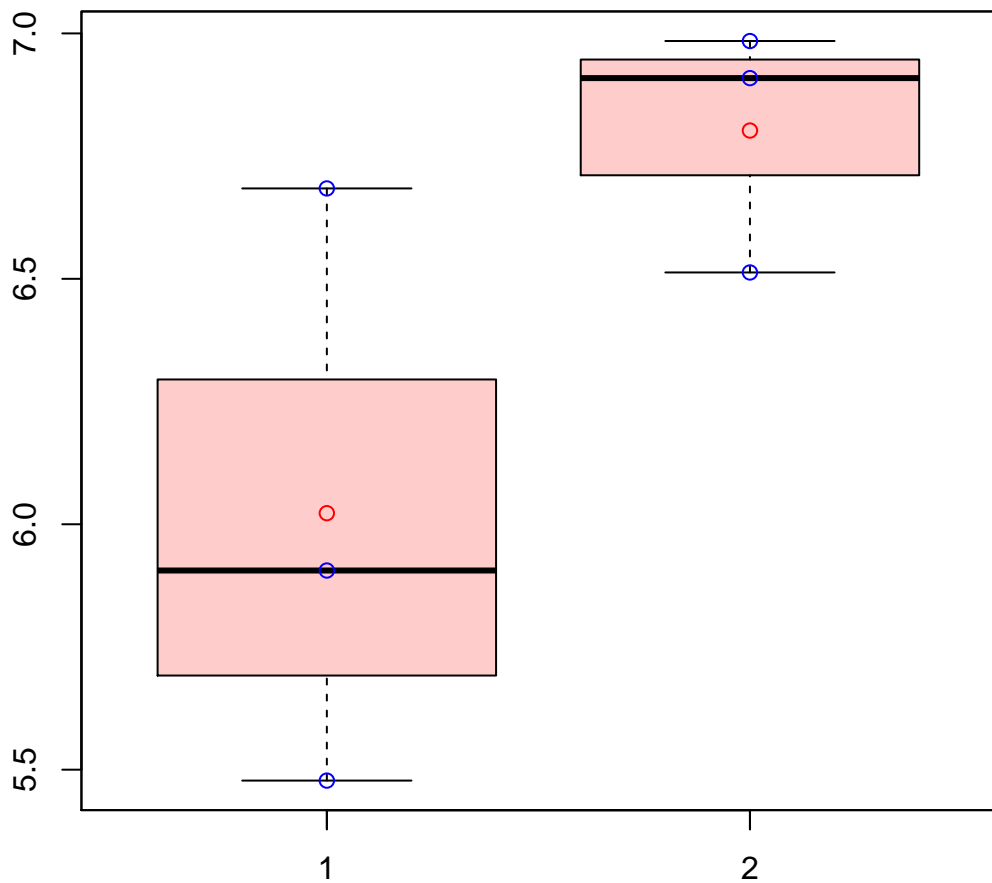

t-Test: p-value = 0.15

# C5Z5R1|C5Z5R1\_SORBI

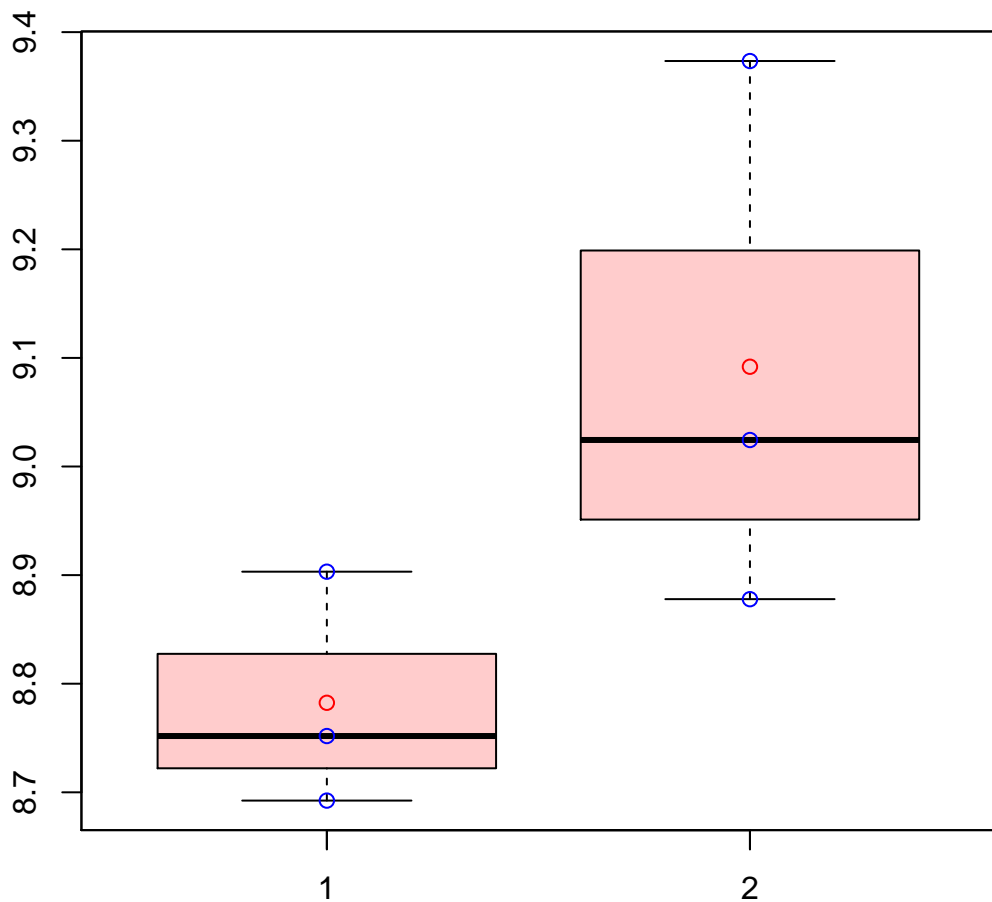

t-Test: p-value = 0.16

# C5Z5Z4|C5Z5Z4\_SORBI

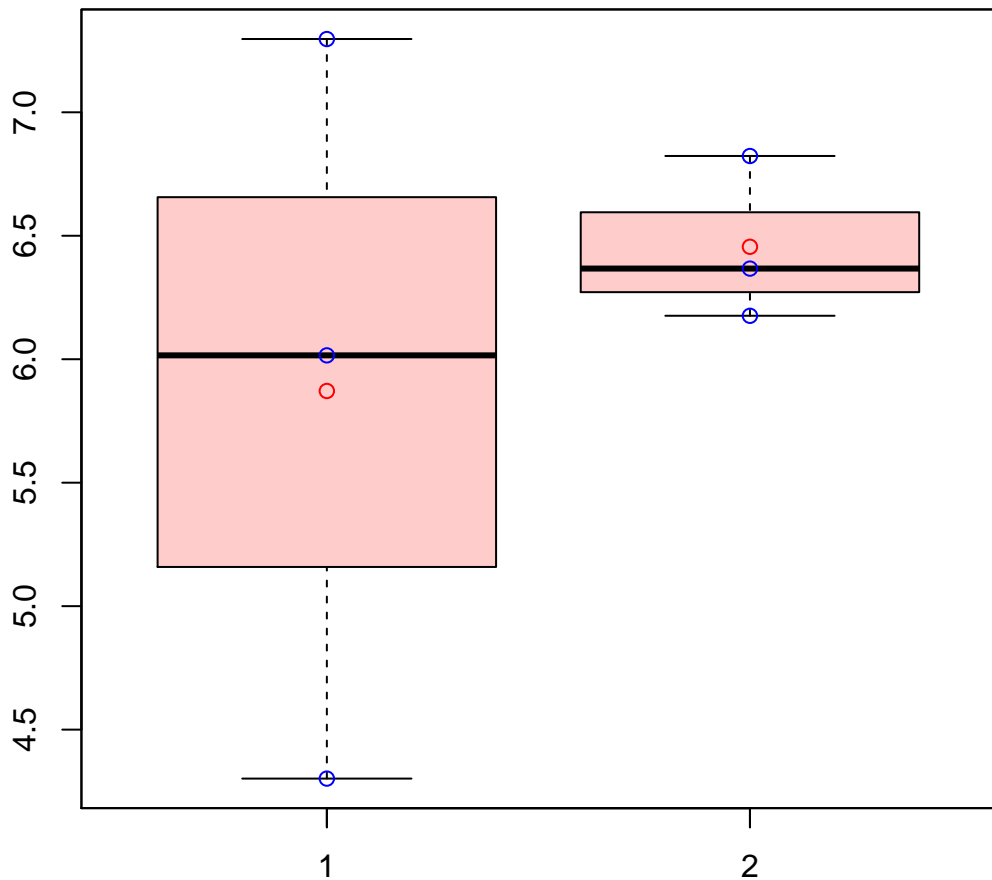

t-Test: p-value = 0.57

# C5Z6F8|C5Z6F8\_SORBI

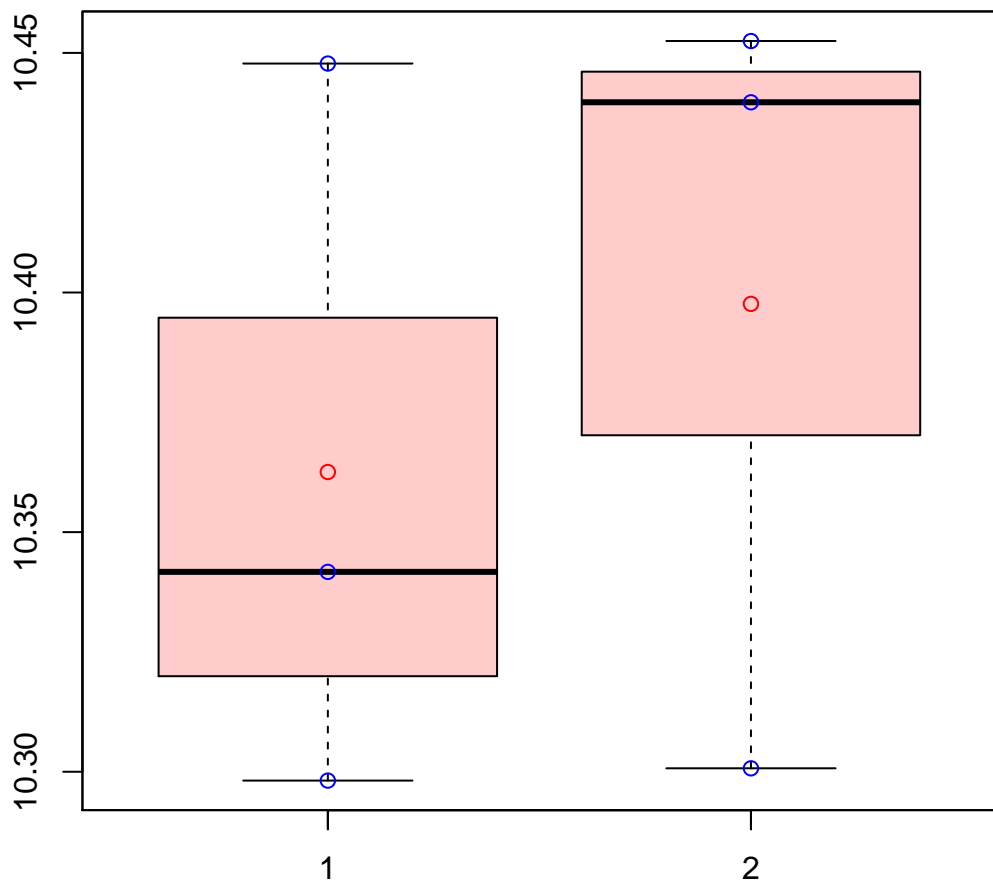

t-Test: p-value = 0.62

# C5Z716|C5Z716\_SORBI

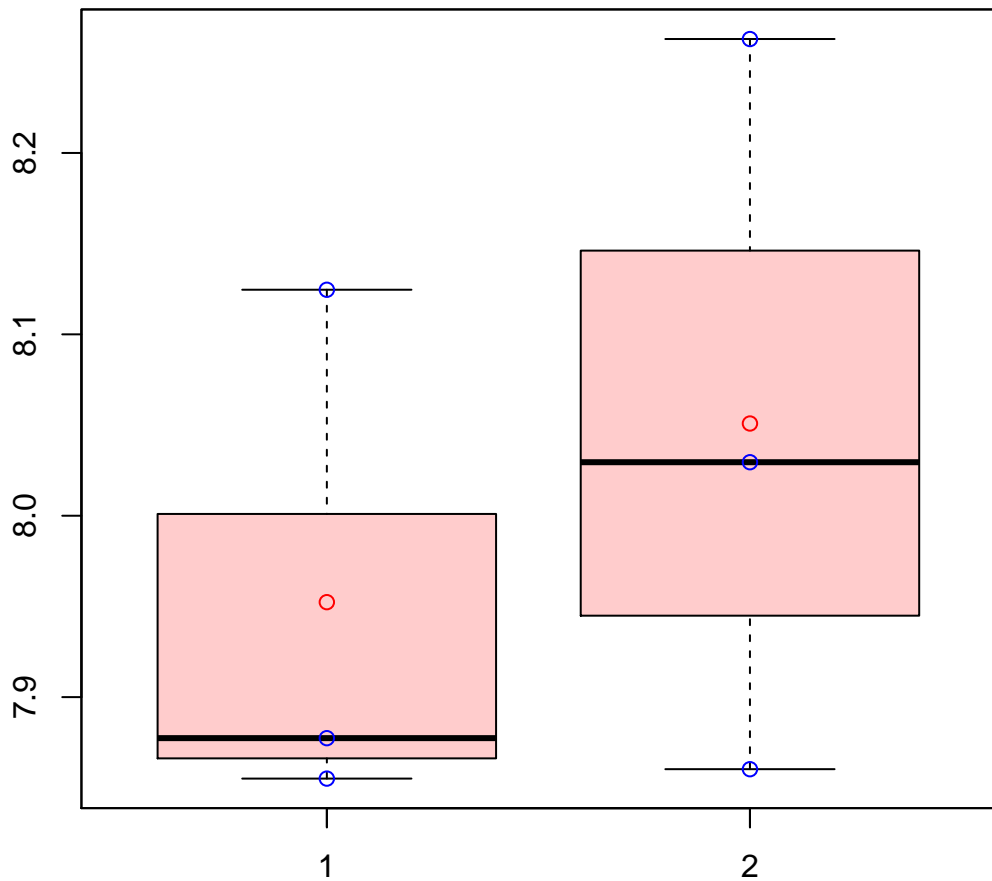

t-Test: p-value = 0.54

# C5Z755|C5Z755\_SORBI

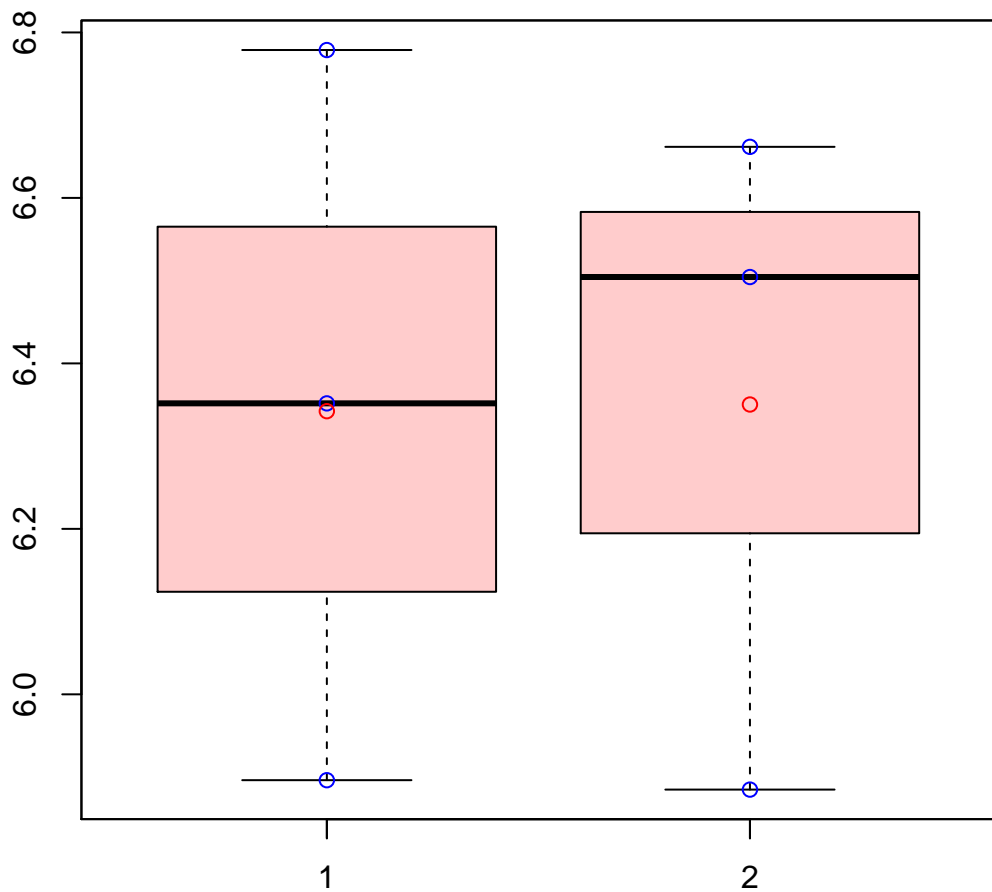

t-Test: p-value = 0.98

# C5Z776|C5Z776\_SORBI

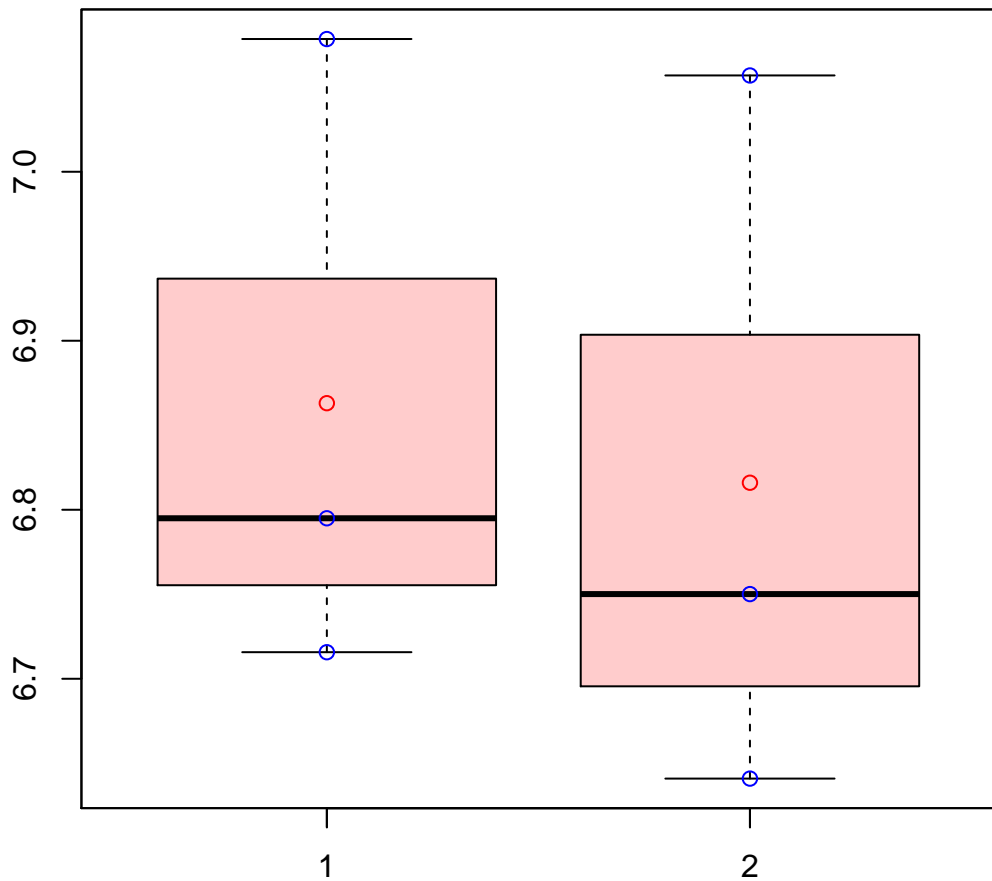

t-Test: p-value = 0.79



# C5Z7B5|C5Z7B5\_SORBI

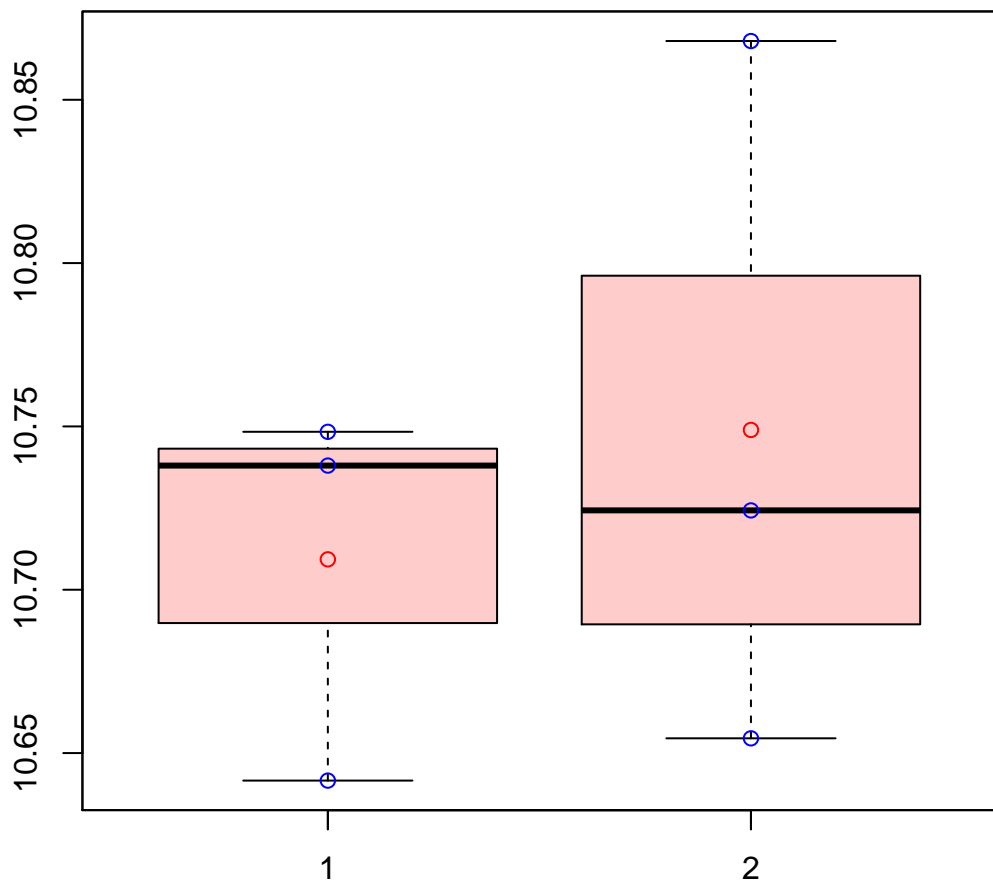

t-Test: p-value = 0.62

# C5Z876|C5Z876\_SORBI

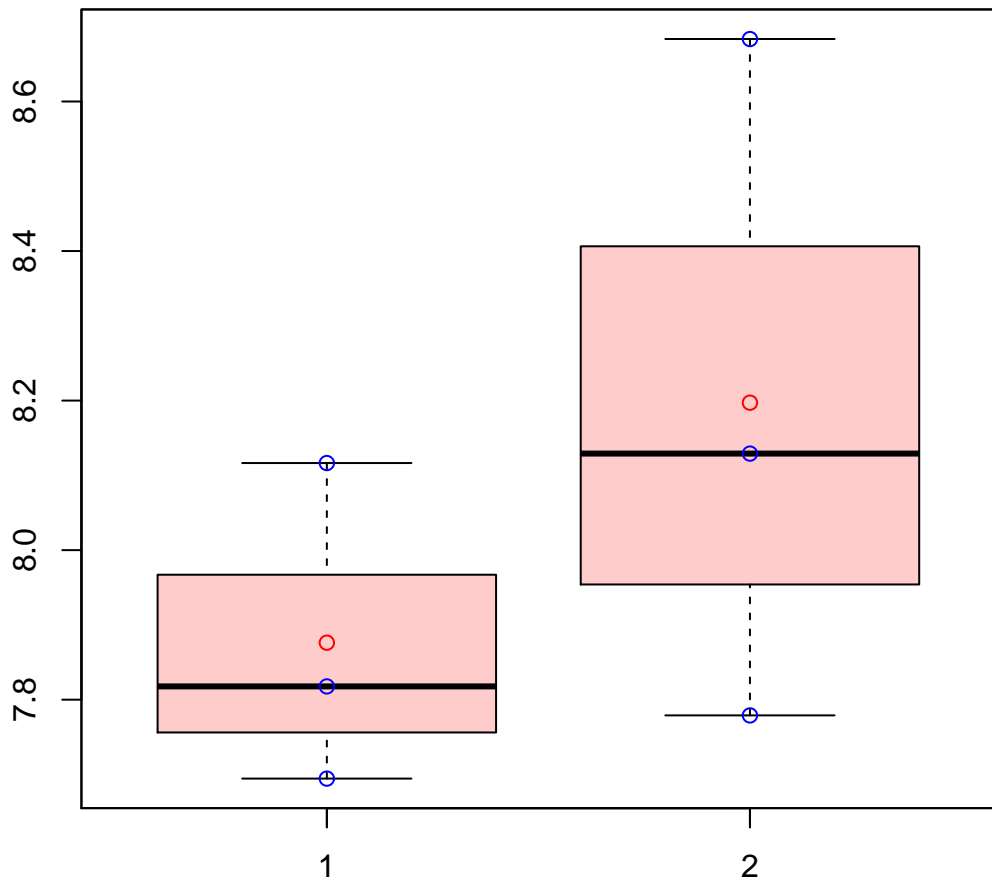

t-Test: p-value = 0.35

# C5Z899|C5Z899\_SORBI

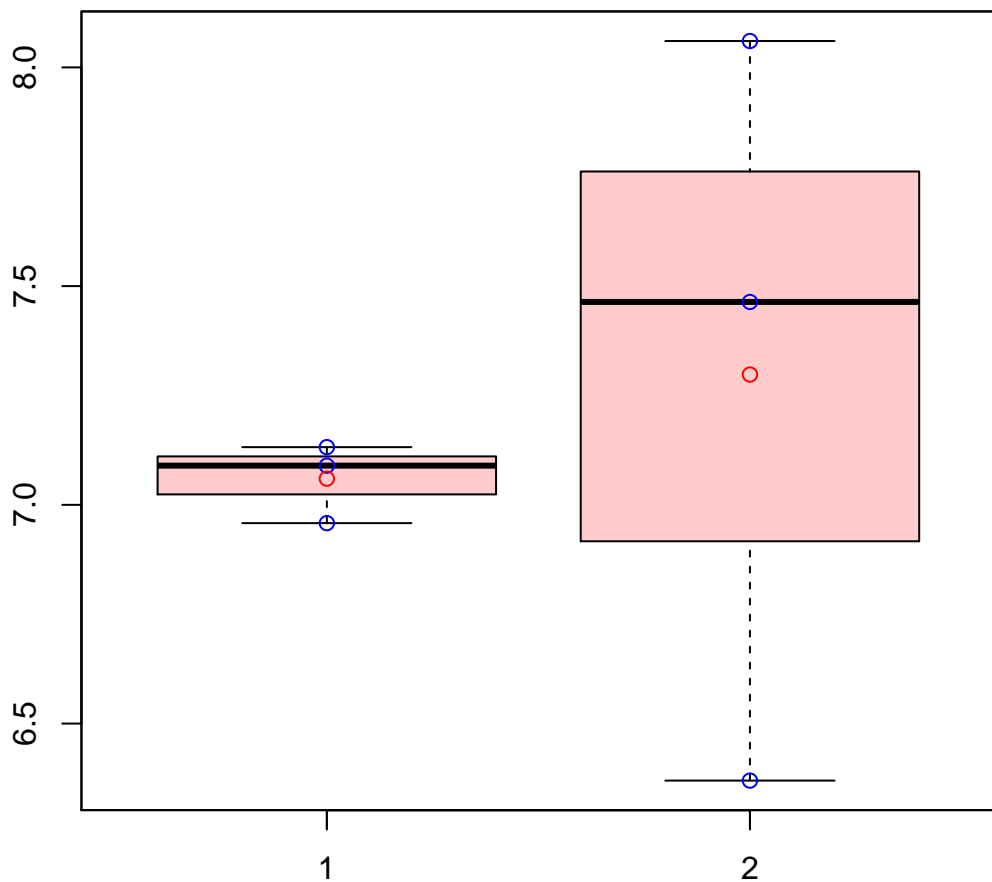

t-Test: p-value = 0.68

# C5Z8X0|C5Z8X0\_SORBI

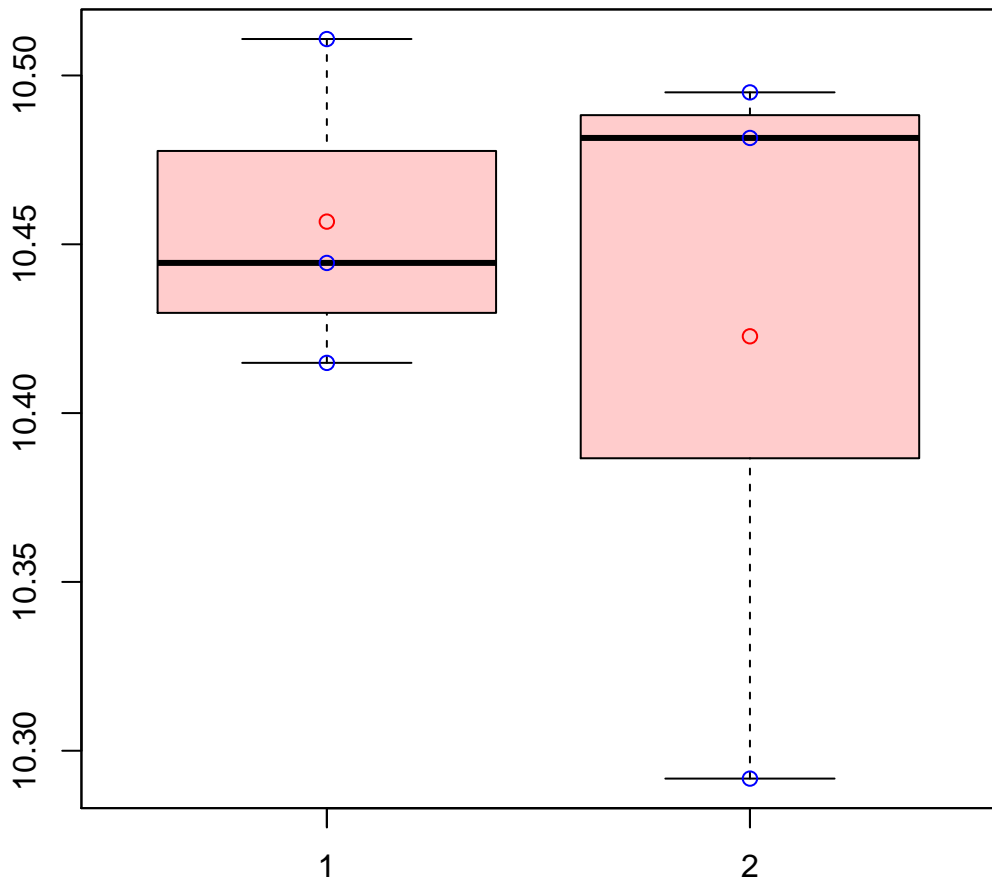

t-Test: p-value = 0.67

# C5Z915|C5Z915\_SORBI

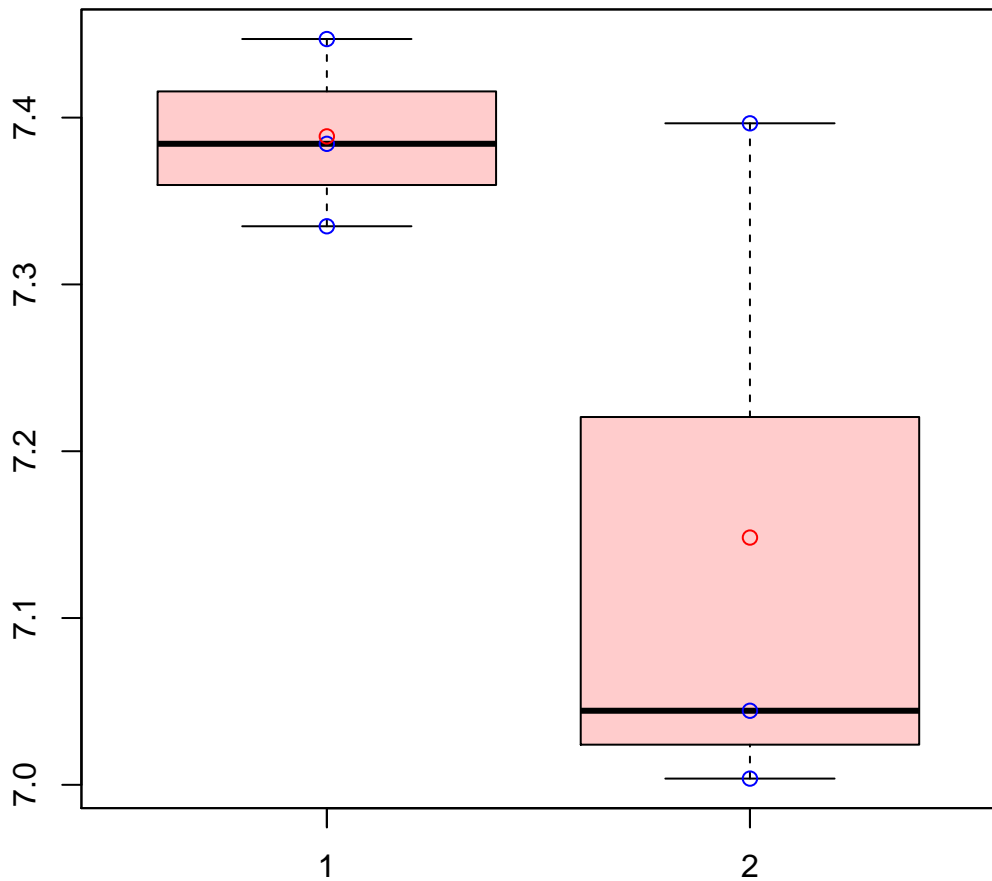

t-Test: p-value = 0.19

# C5Z9C5|C5Z9C5\_SORBI

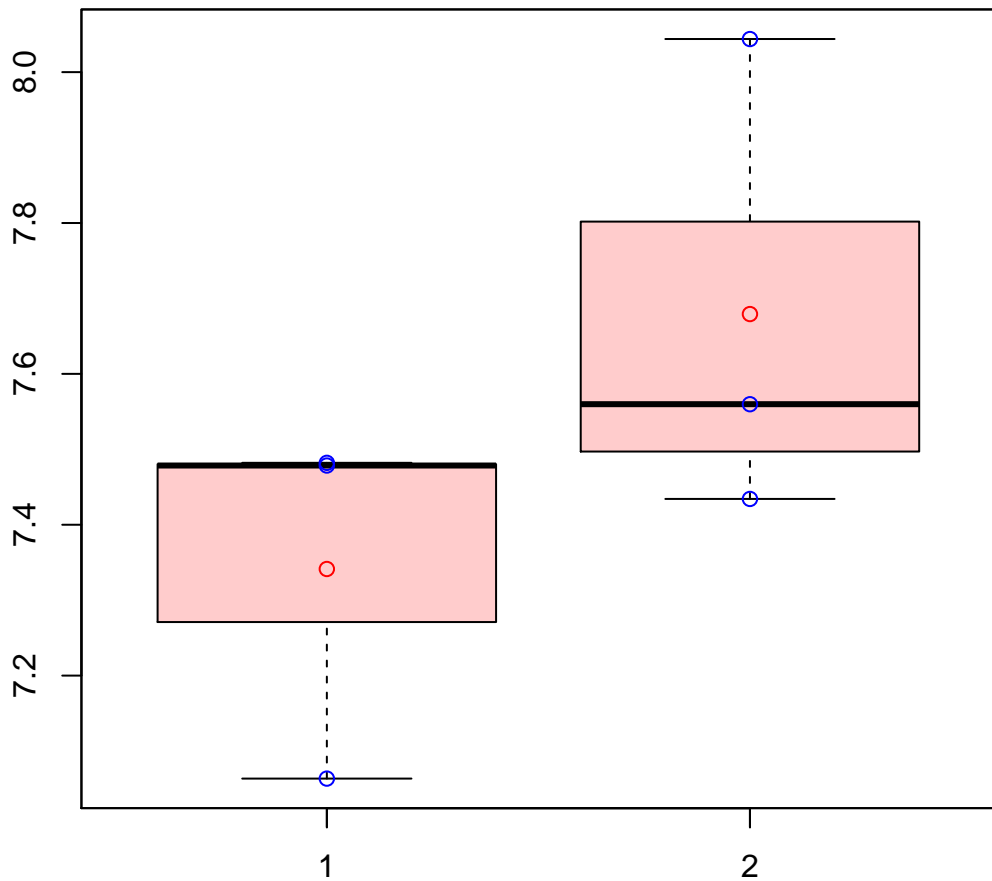

t-Test: p-value = 0.22

# C6G4L5|C6G4L5\_9ASPA

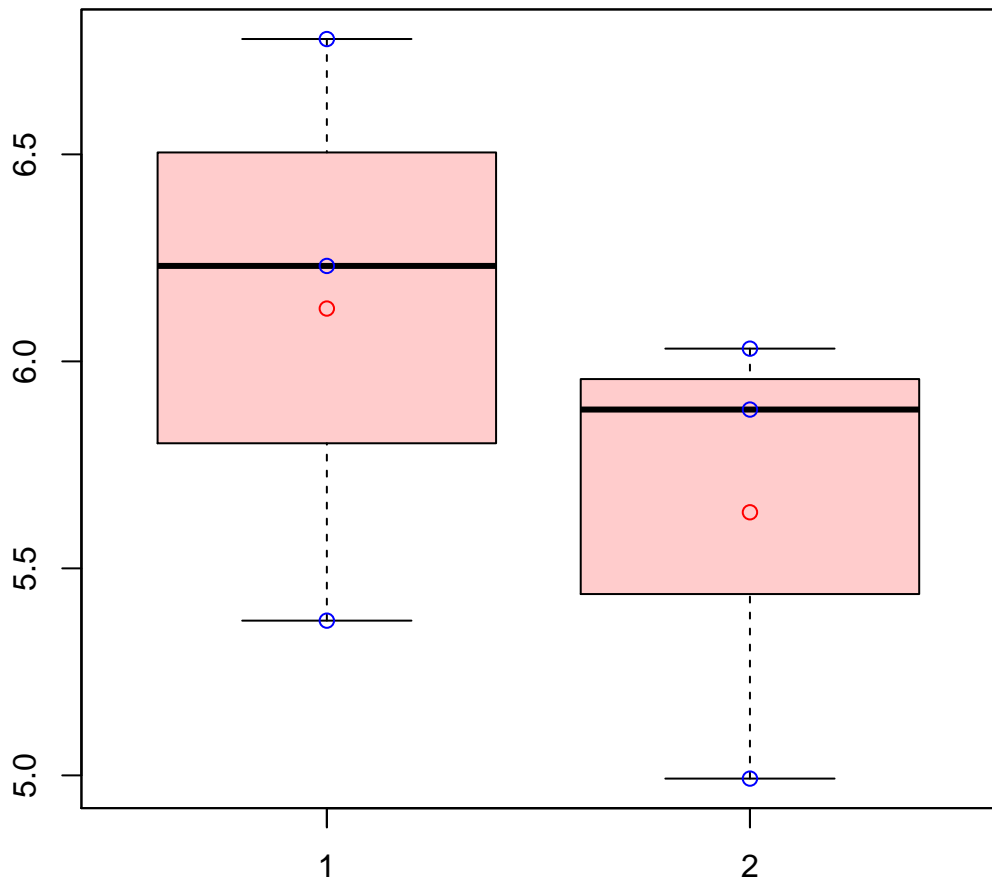

t-Test: p-value = 0.4

# C6G4U0|C6G4U0\_9ASPA

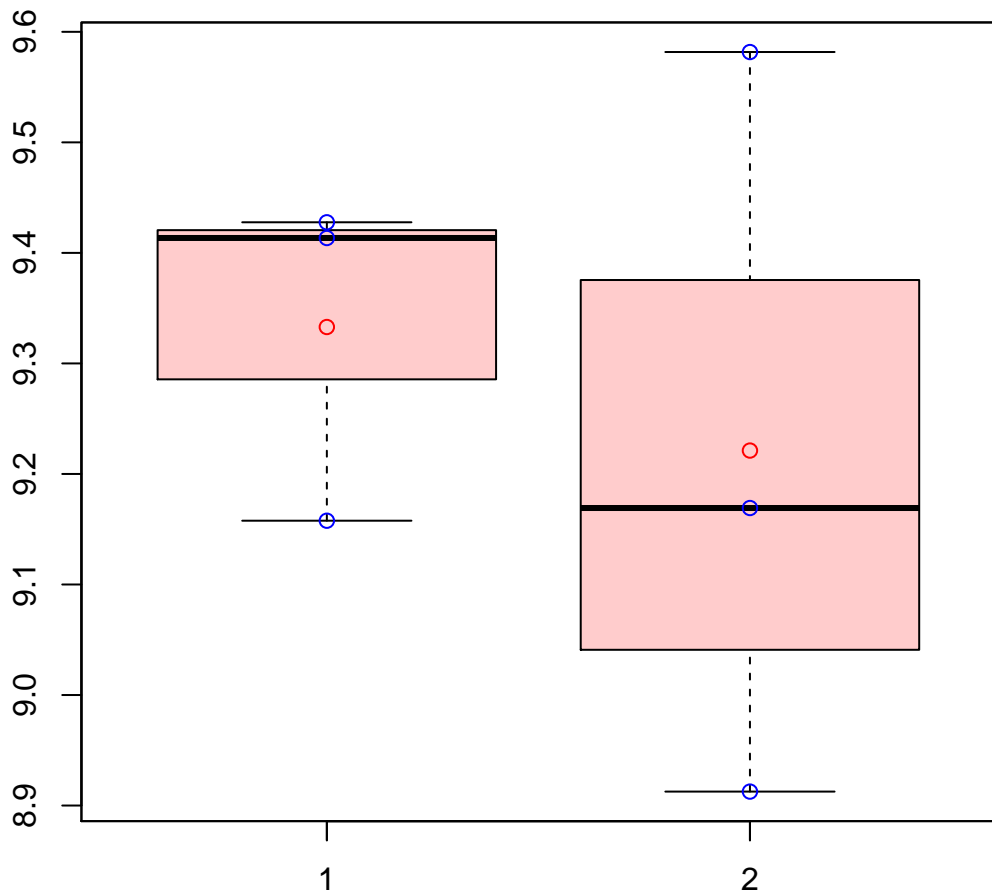

t-Test: p-value = 0.64



# C6GJ63|C6GJ63\_BAMOL

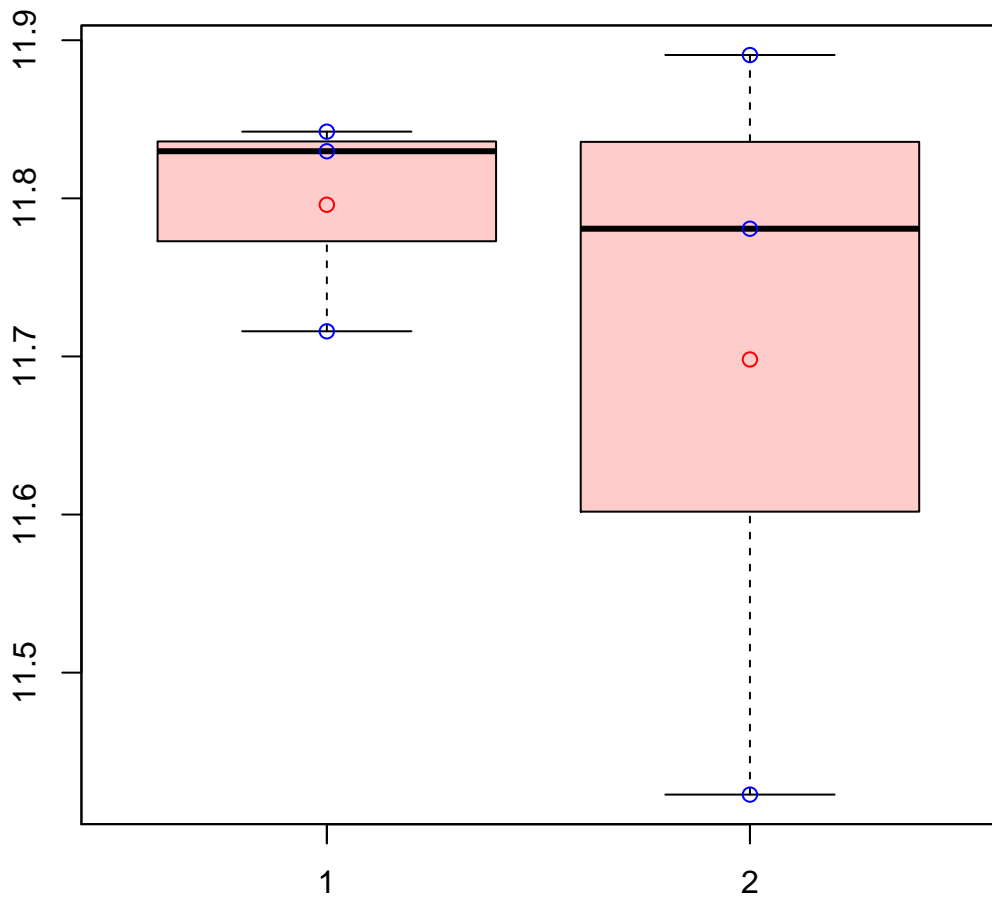

t-Test: p-value = 0.57

# C6GJ64|C6GJ64\_BAMOL

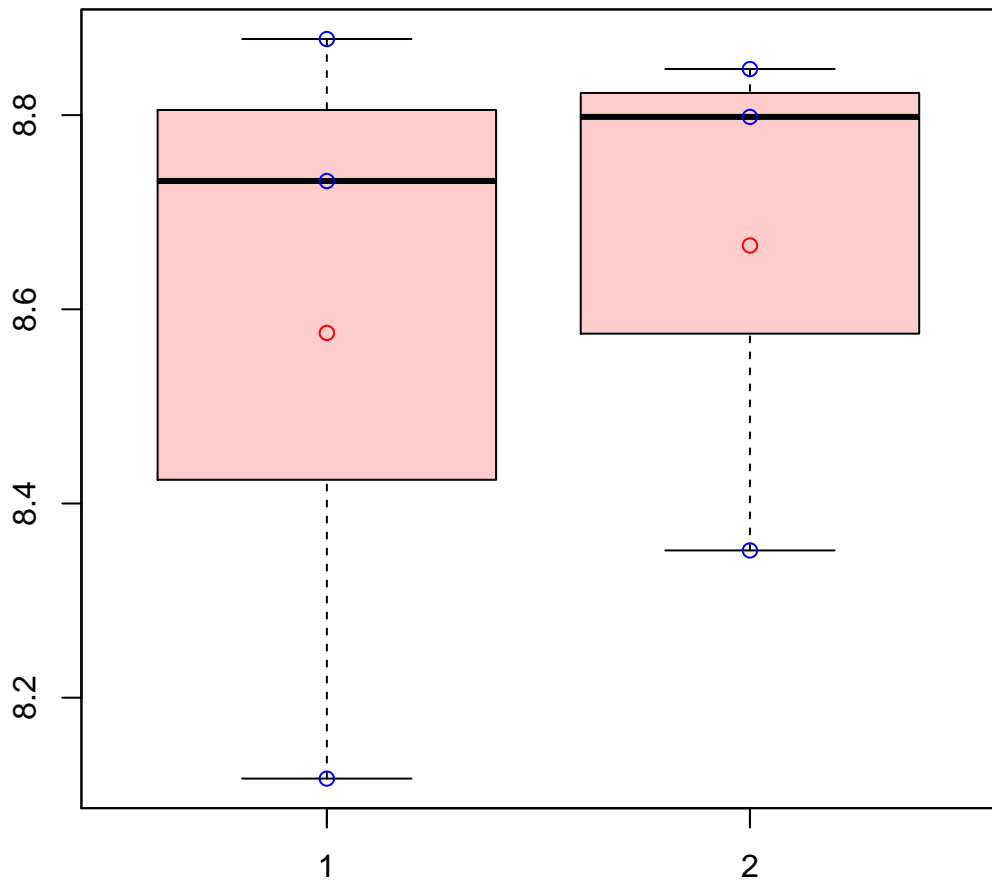

t-Test: p-value = 0.77

# C6JRU8|C6JRU8\_SORBI

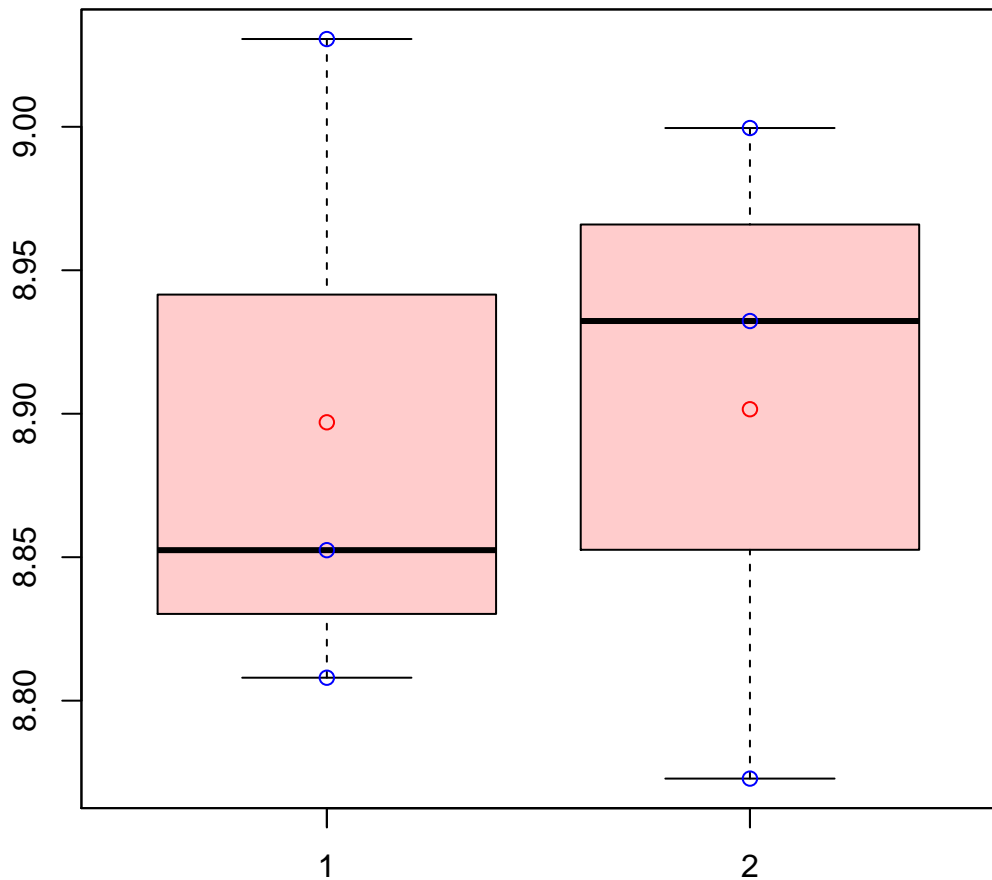

t-Test: p-value = 0.96

# C6L8P3|C6L8P3\_MAIZE

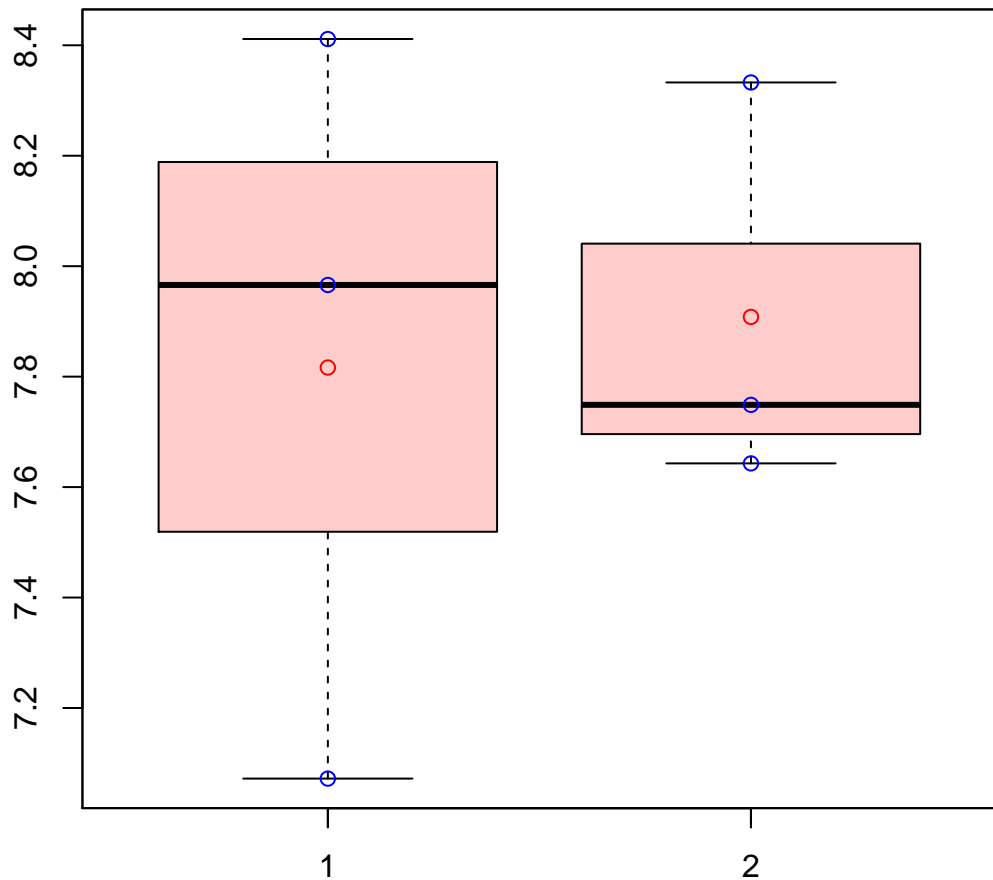

t-Test: p-value = 0.85

# C7BF73|C7BF73\_DENLA

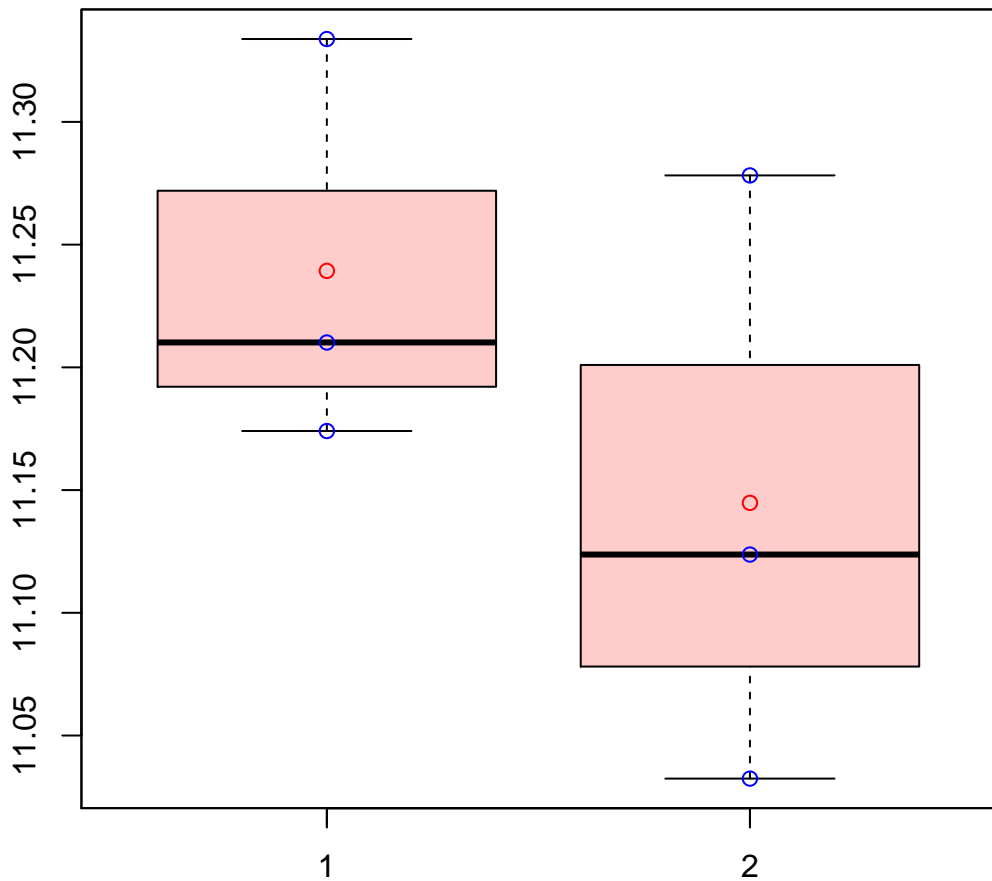

t-Test: p-value = 0.34

# C7ENF7|C7ENF7\_WHEAT

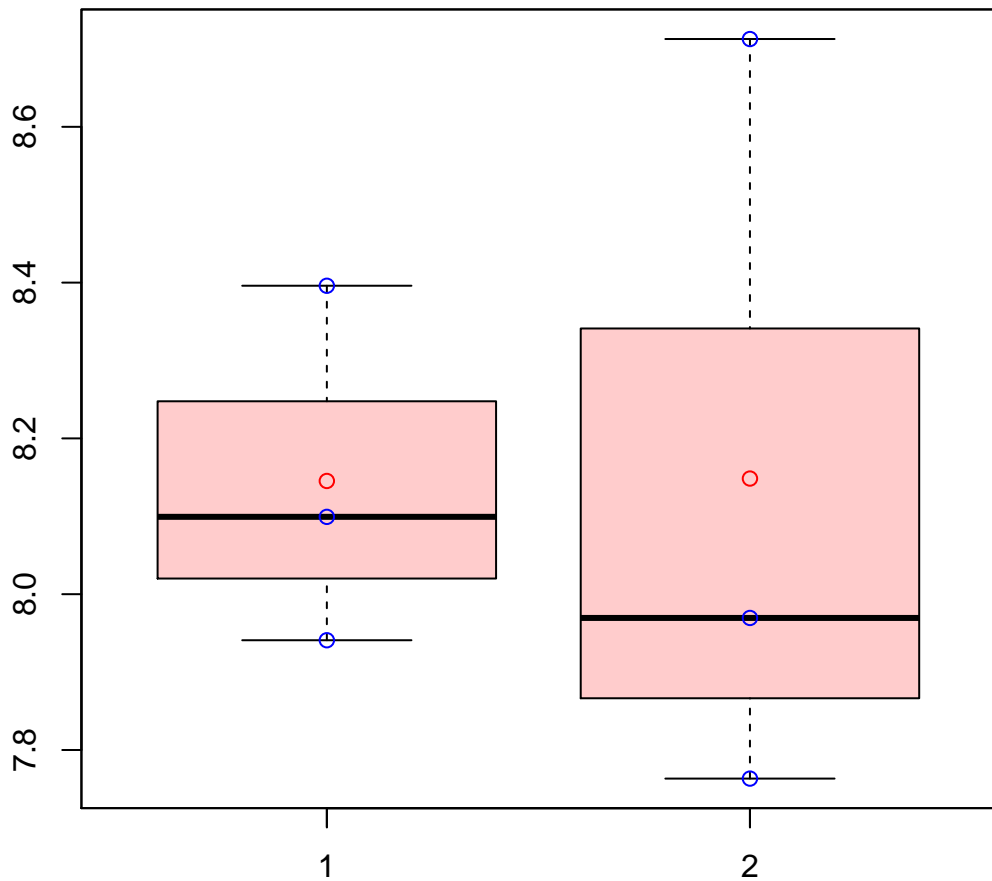

t-Test: p-value = 0.99

# C7IWD0|C7IWD0\_ORYSJ

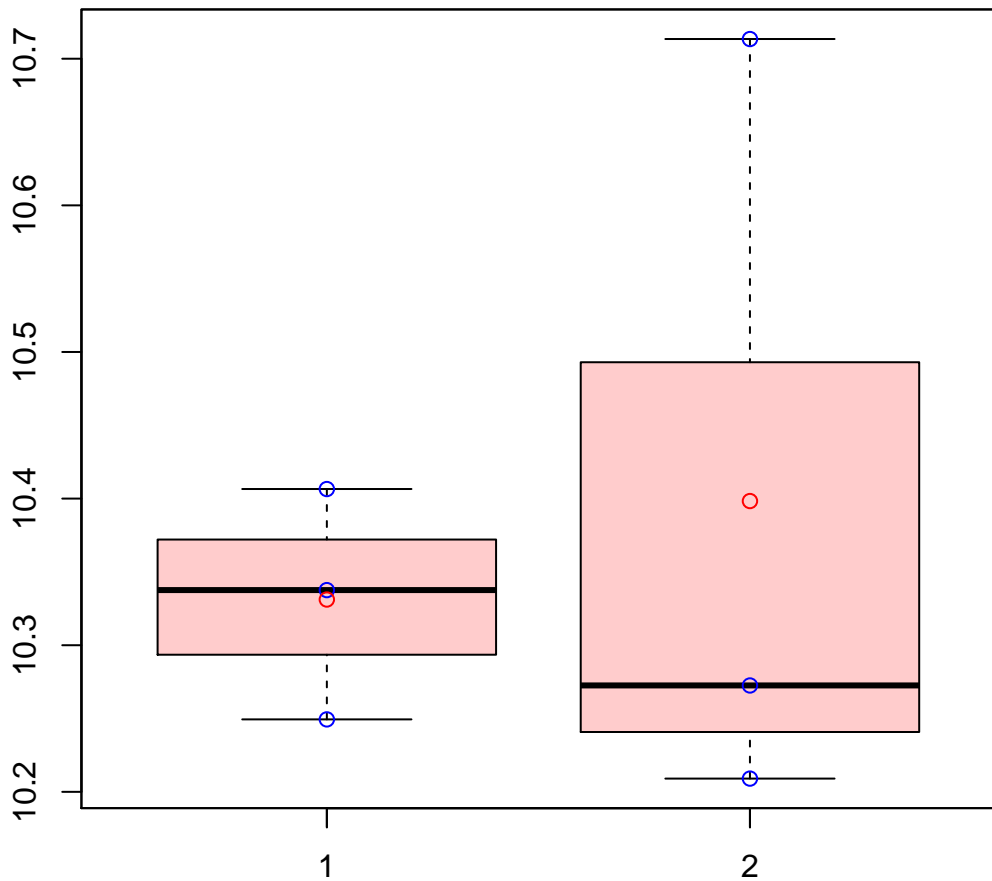

t-Test: p-value = 0.72

# C7IWS8|C7IWS8\_ORYSJ

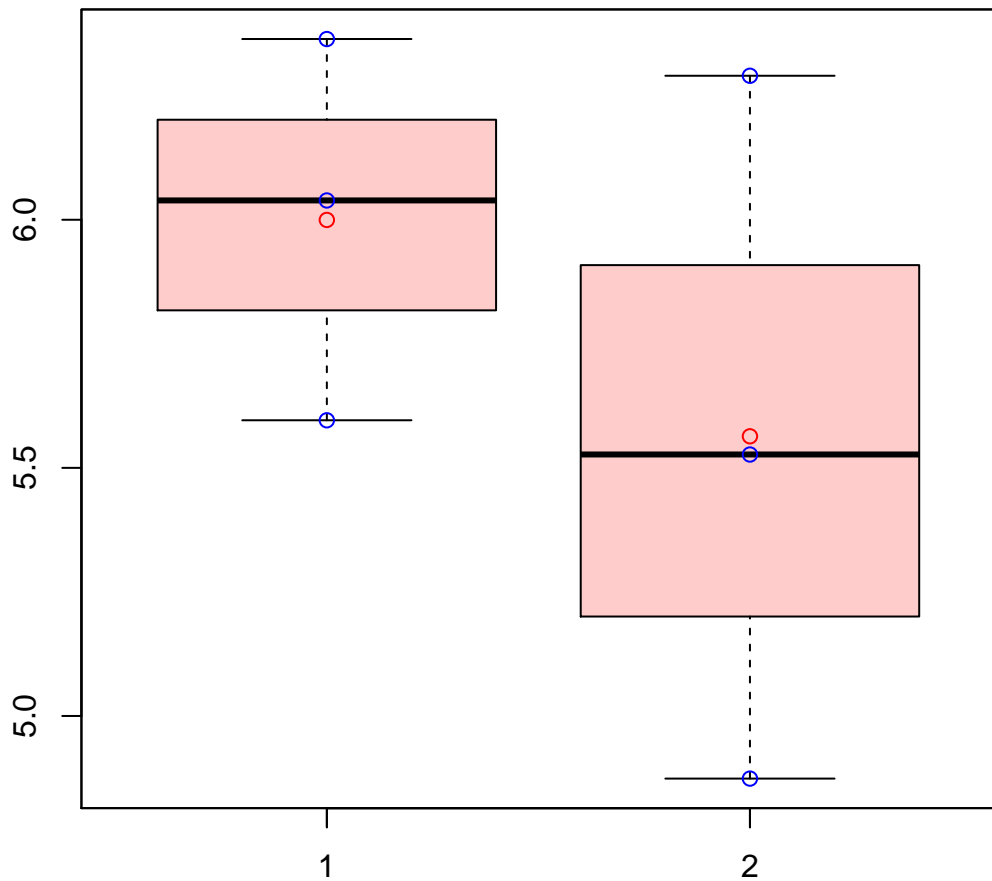

t-Test: p-value = 0.42



# C7IXG8|C7IXG8\_ORYSJ

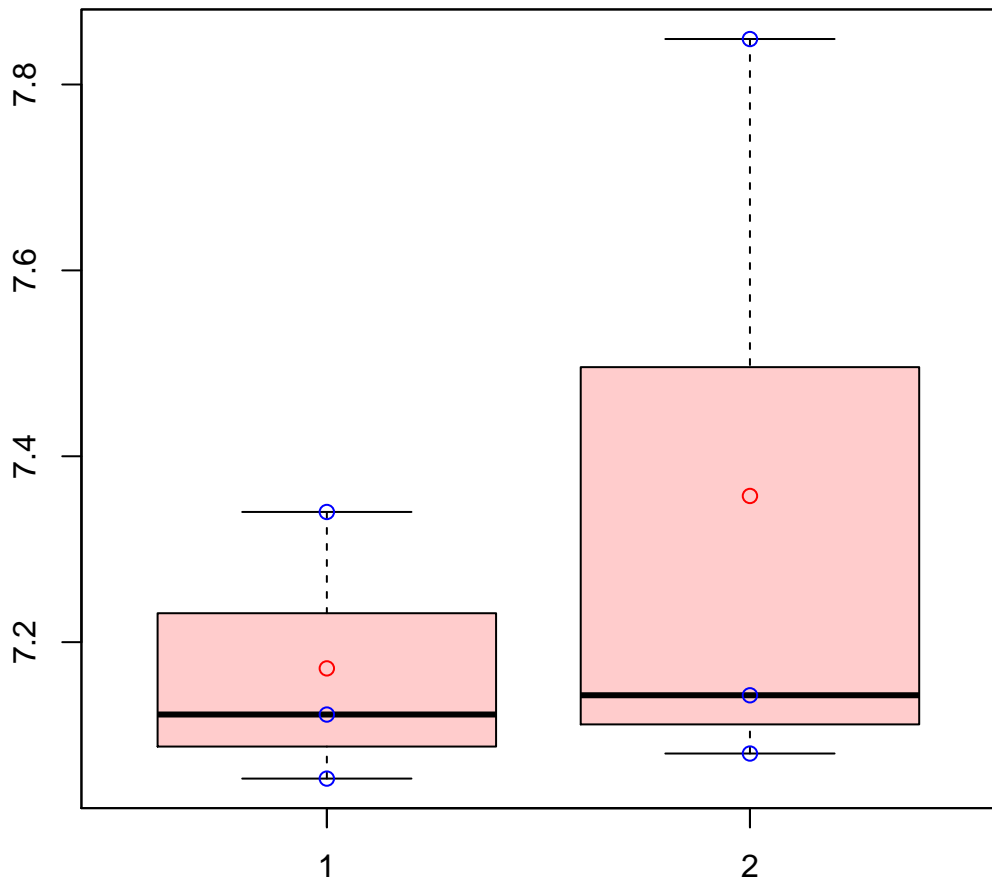

t-Test: p-value = 0.54

# C7IYY2|C7IYY2\_ORYSJ

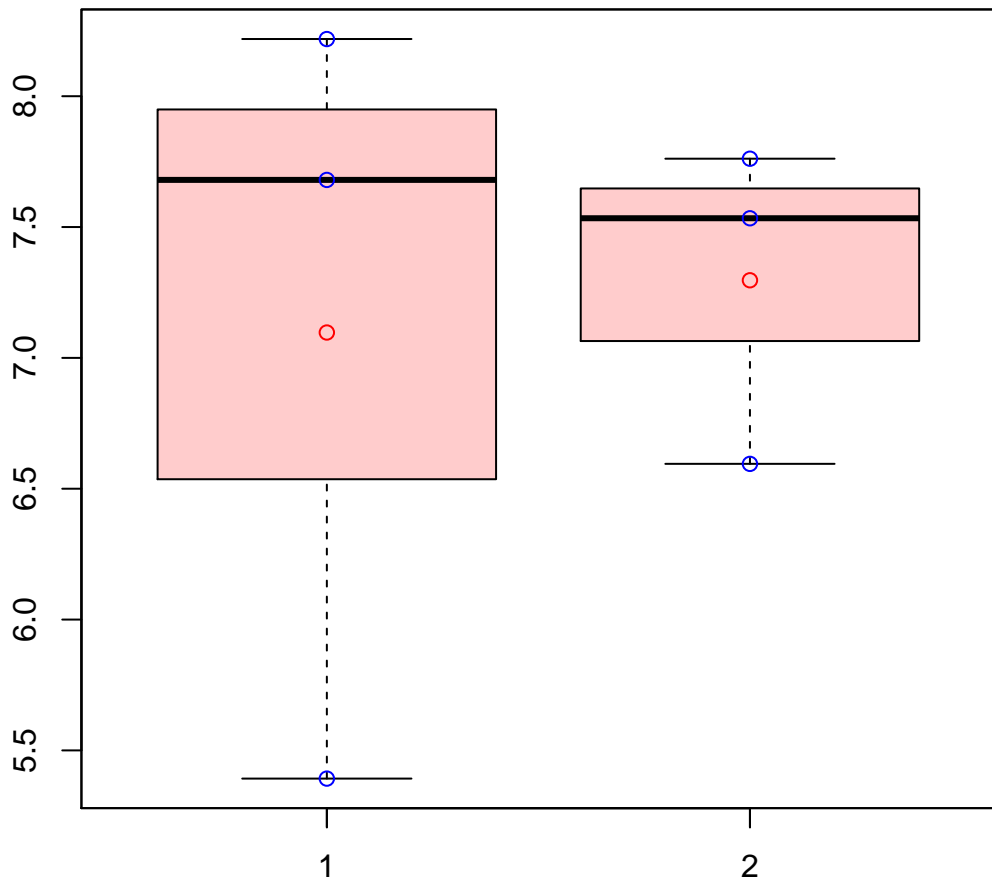

t-Test: p-value = 0.85

# C7IZC8|C7IZC8\_ORYSJ

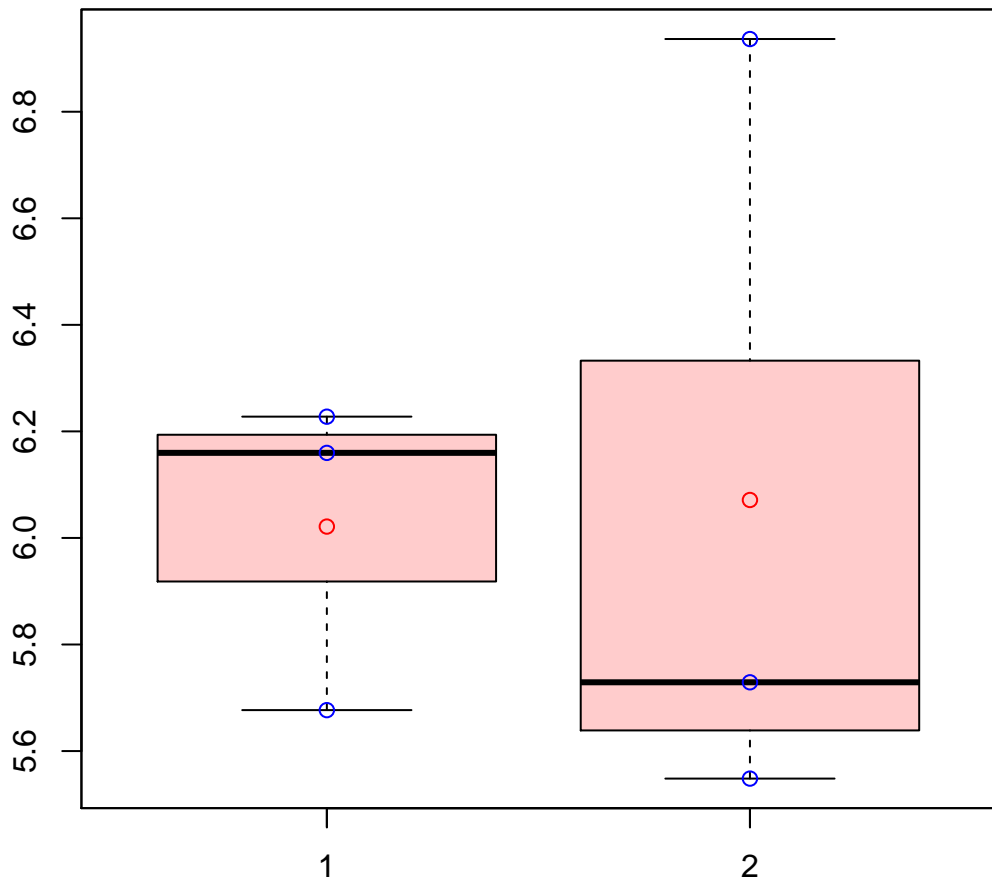

t-Test: p-value = 0.92

# C7J056|C7J056\_ORYSJ

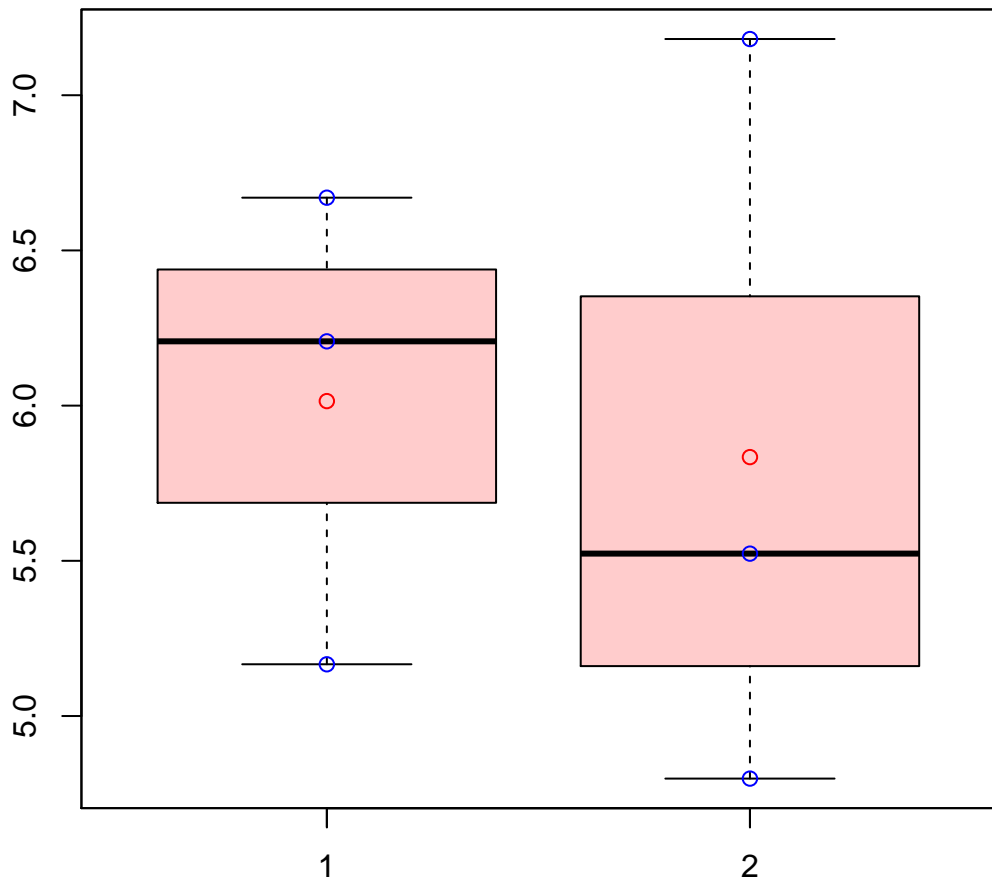

t-Test: p-value = 0.84

# C7J1L6|C7J1L6\_ORYSJ

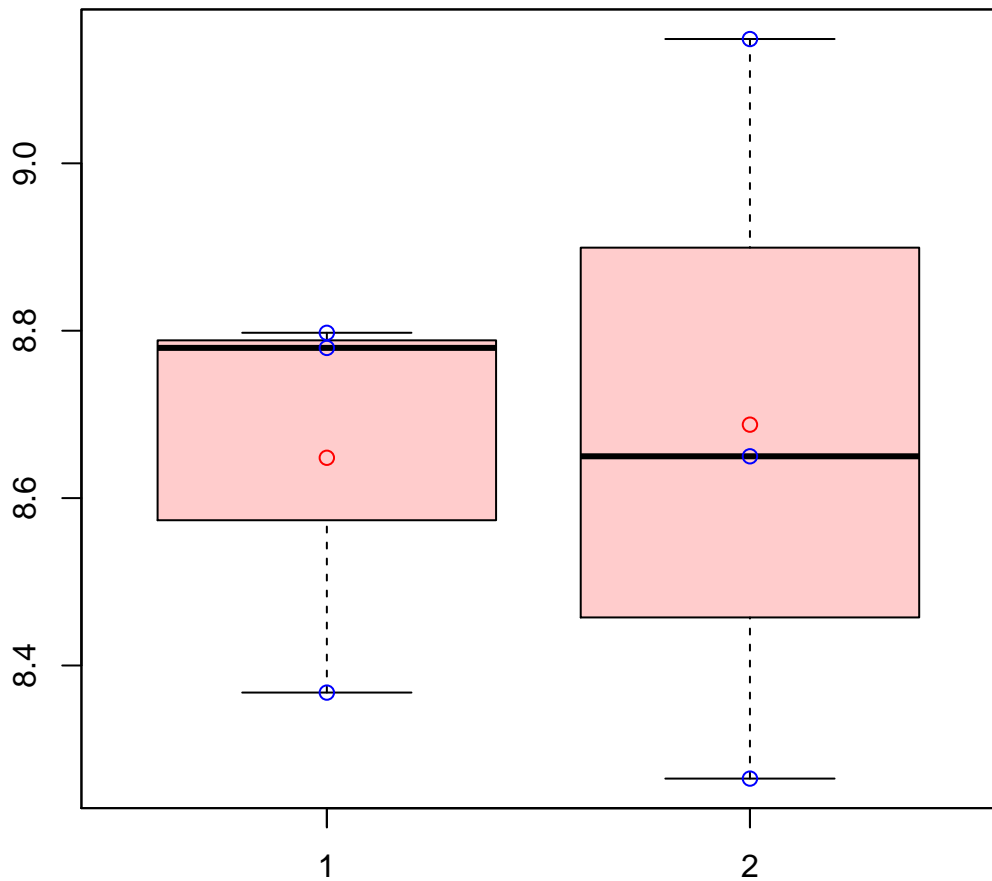

t-Test: p-value = 0.9

# C7J2L0|C7J2L0\_ORYSJ

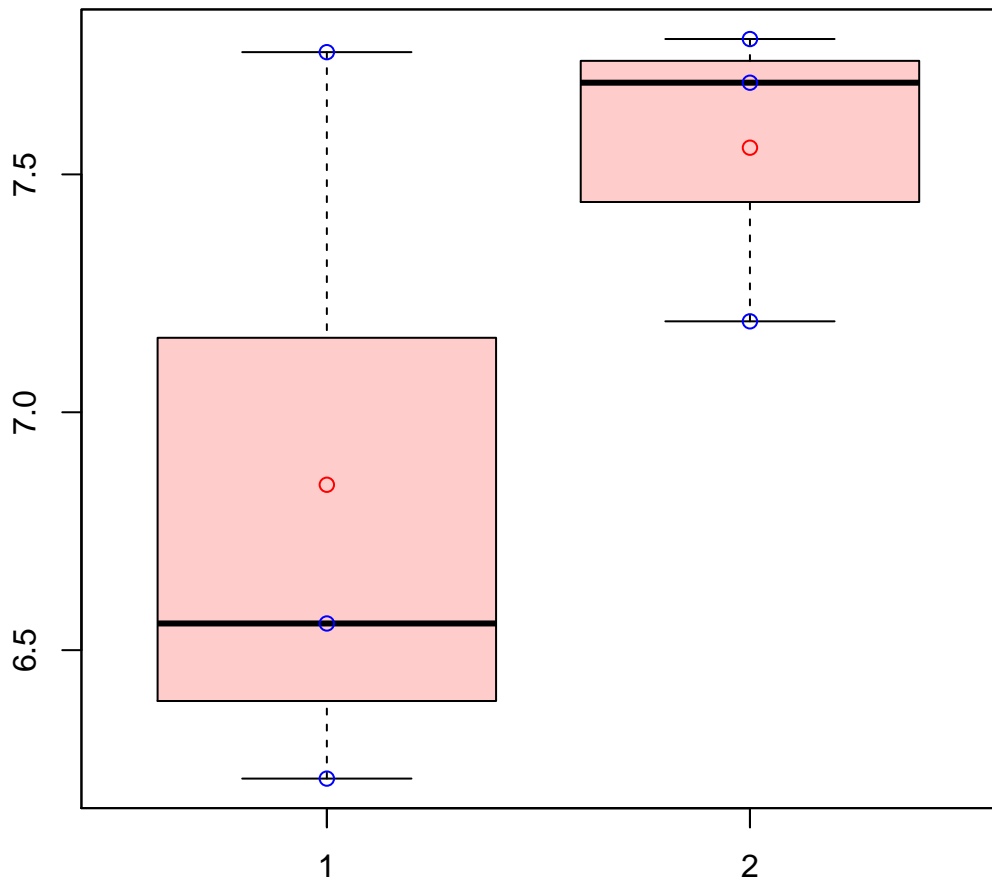

t-Test: p-value = 0.26

# C7J7J1|C7J7J1\_ORYSJ

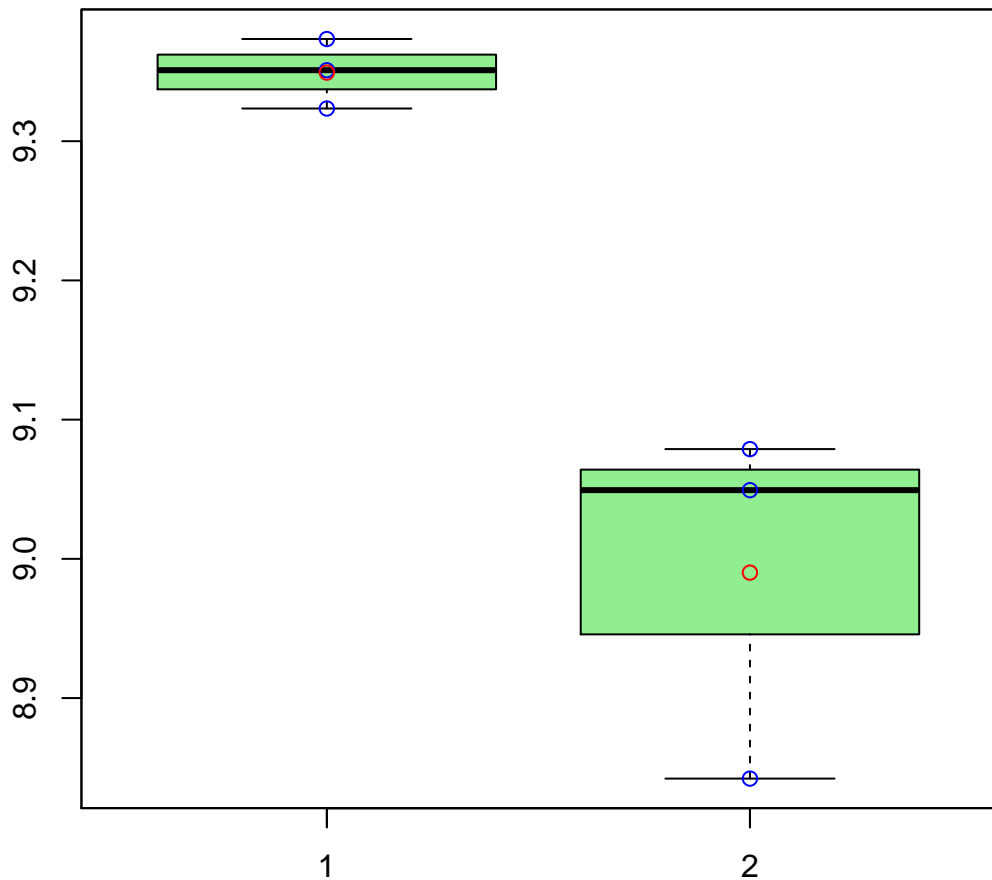

t-Test: p-value = 0.04

# C7J891|C7J891\_ORYSJ

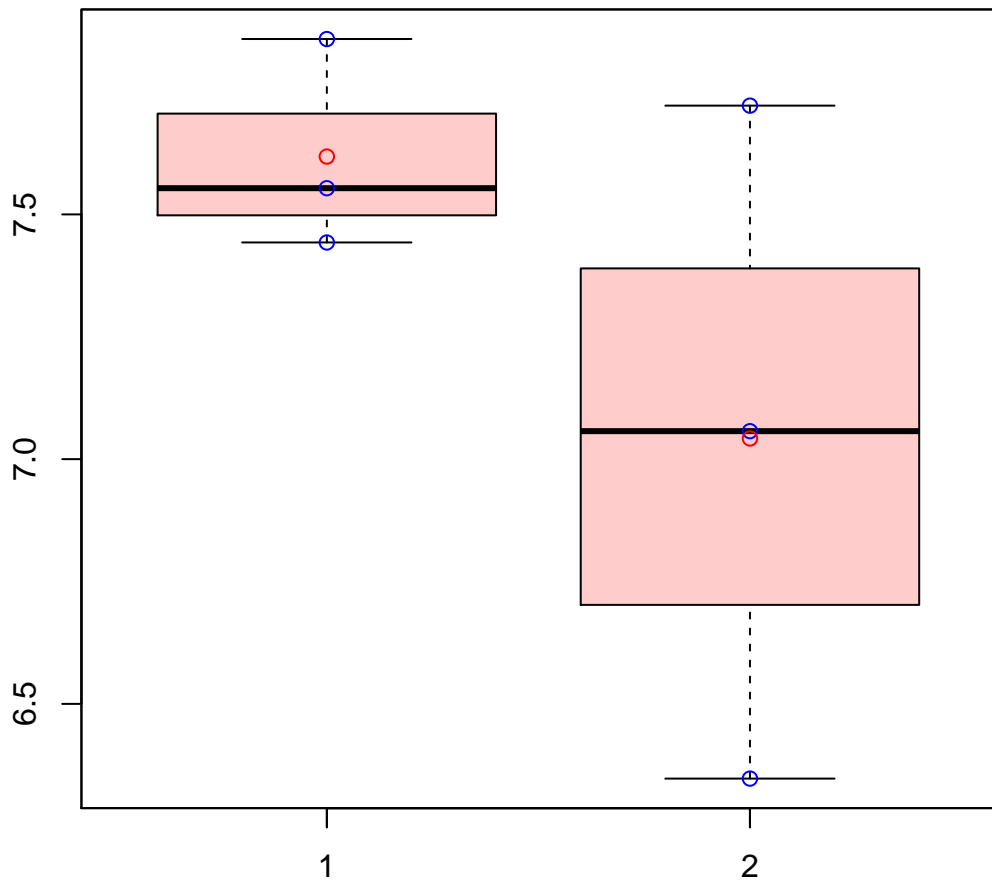

t-Test: p-value = 0.28



# C7J8A3|C7J8A3\_ORYSJ

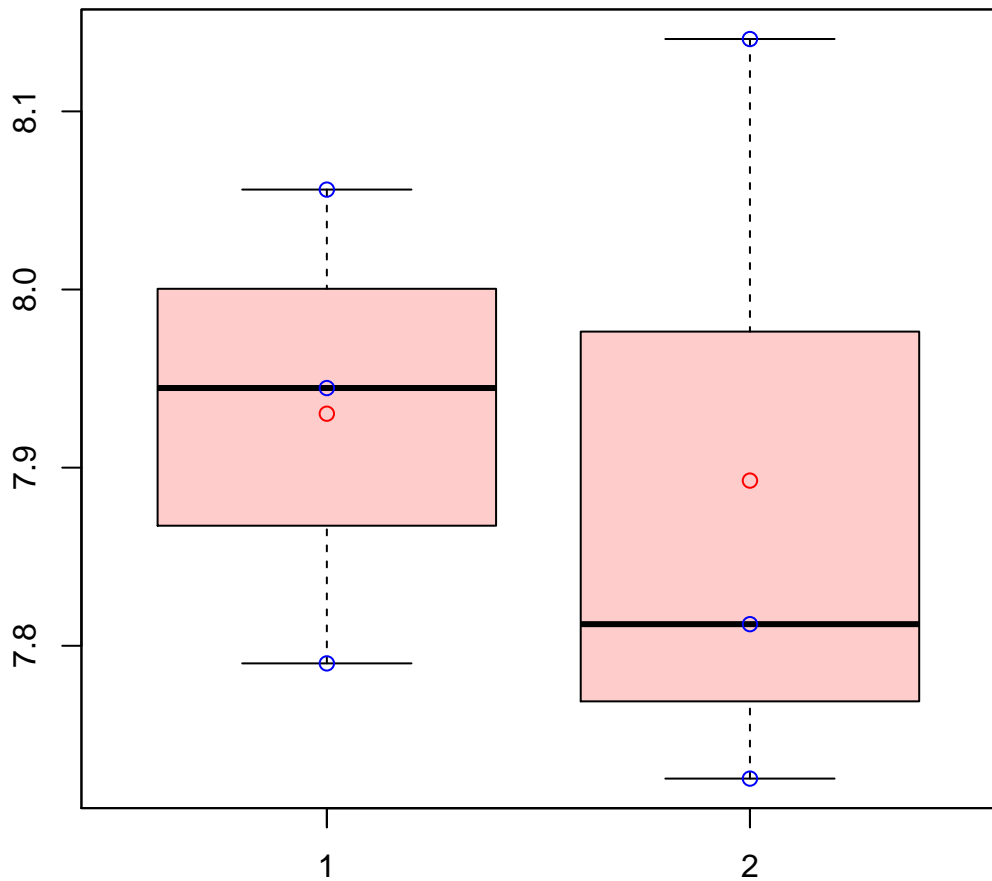

t-Test: p-value = 0.81

# C7J906|C7J906\_ORYSJ

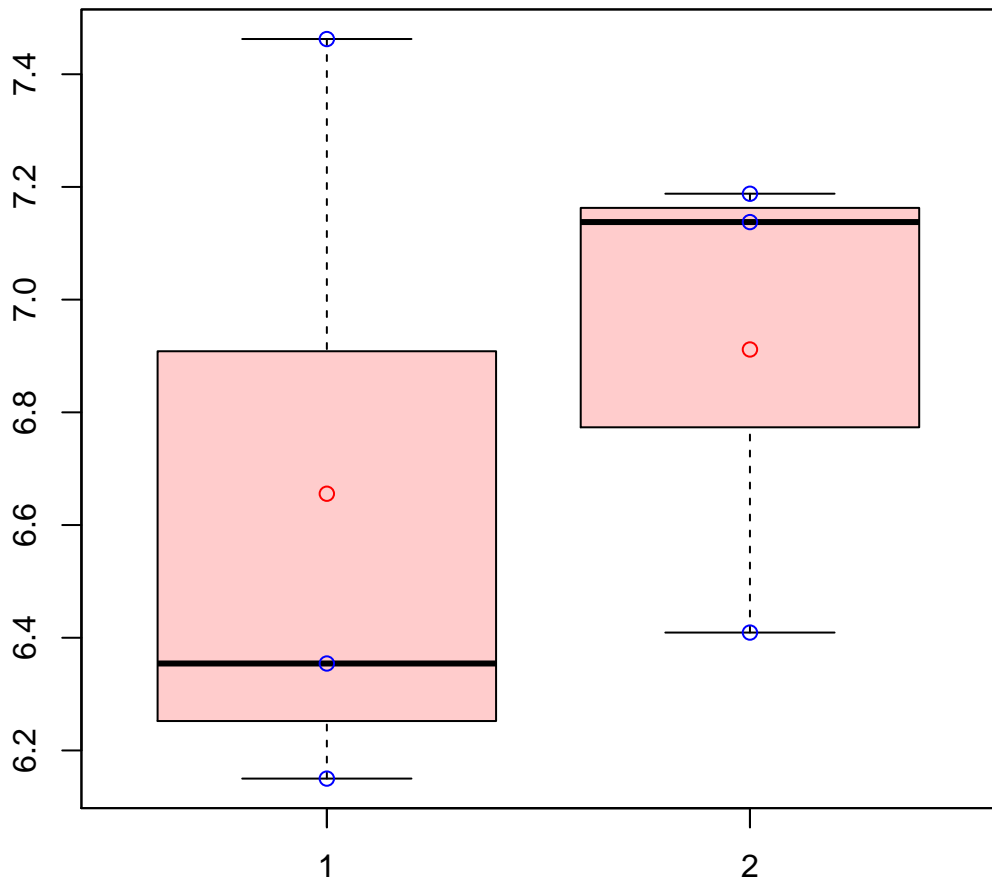

t-Test: p-value = 0.63

# C7S853|C7S853\_SECCE

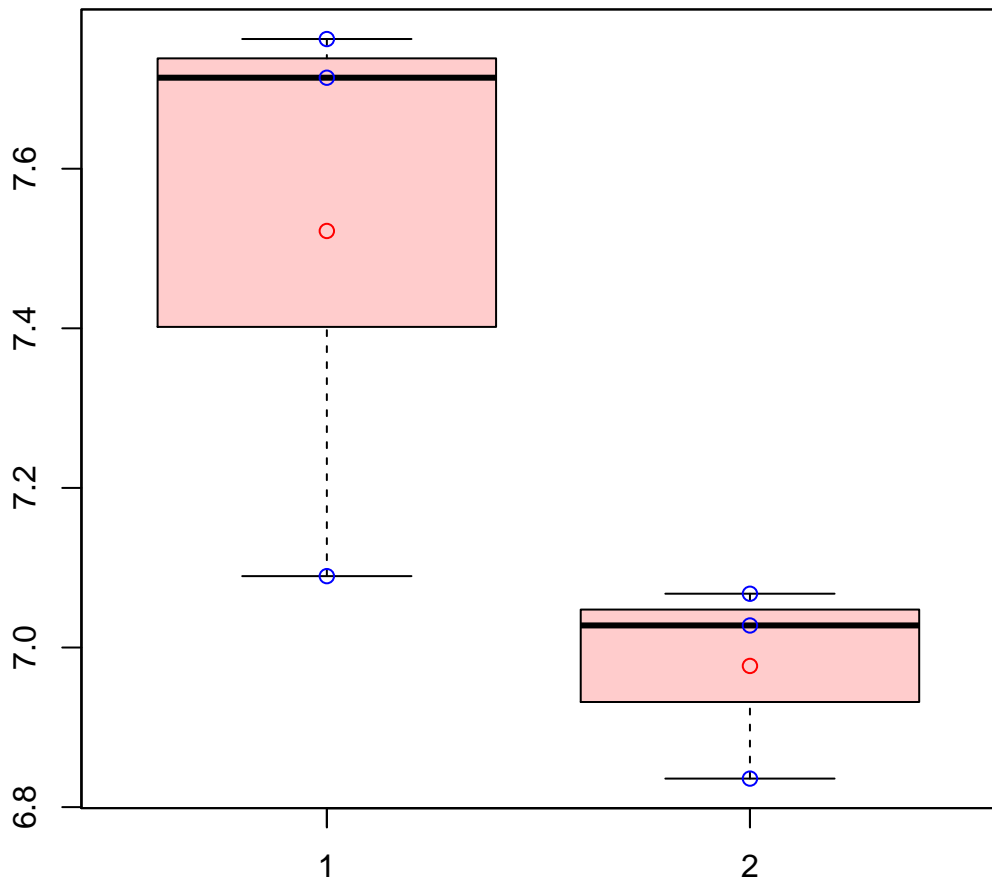

t-Test: p-value = 0.12

# C7S867|C7S867\_9ASPA

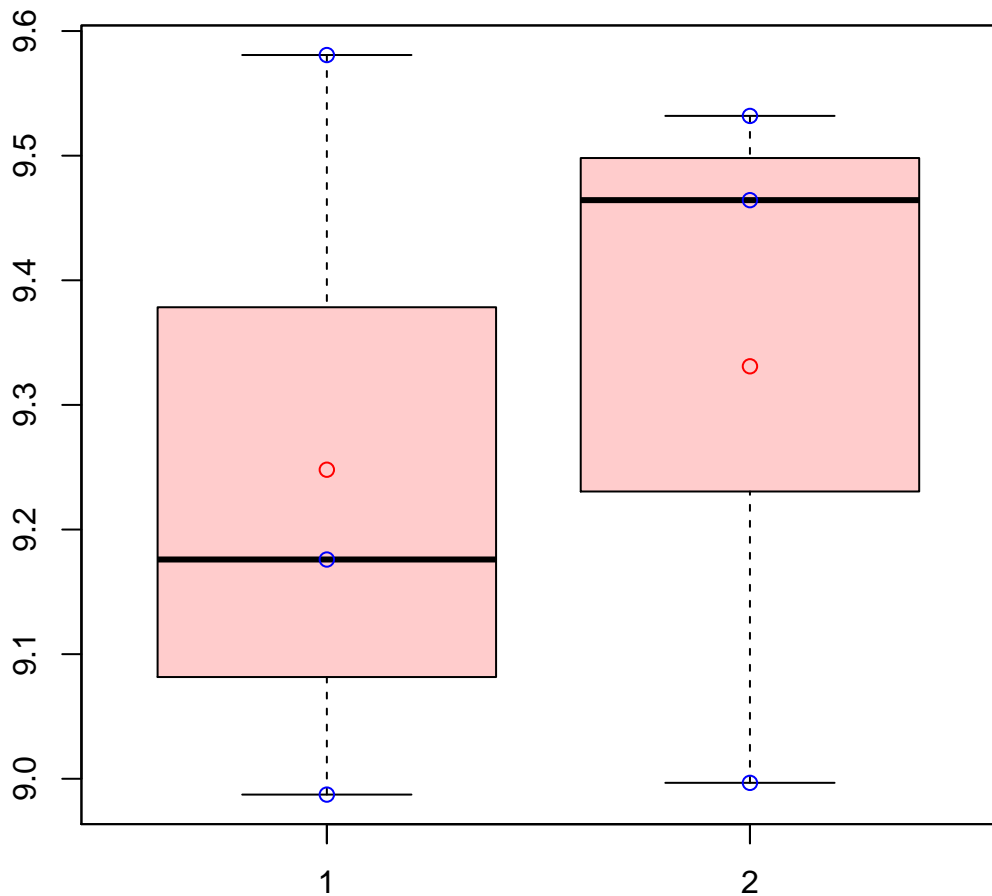

t-Test: p-value = 0.75

# C7SN44|C7SN44\_9POAL

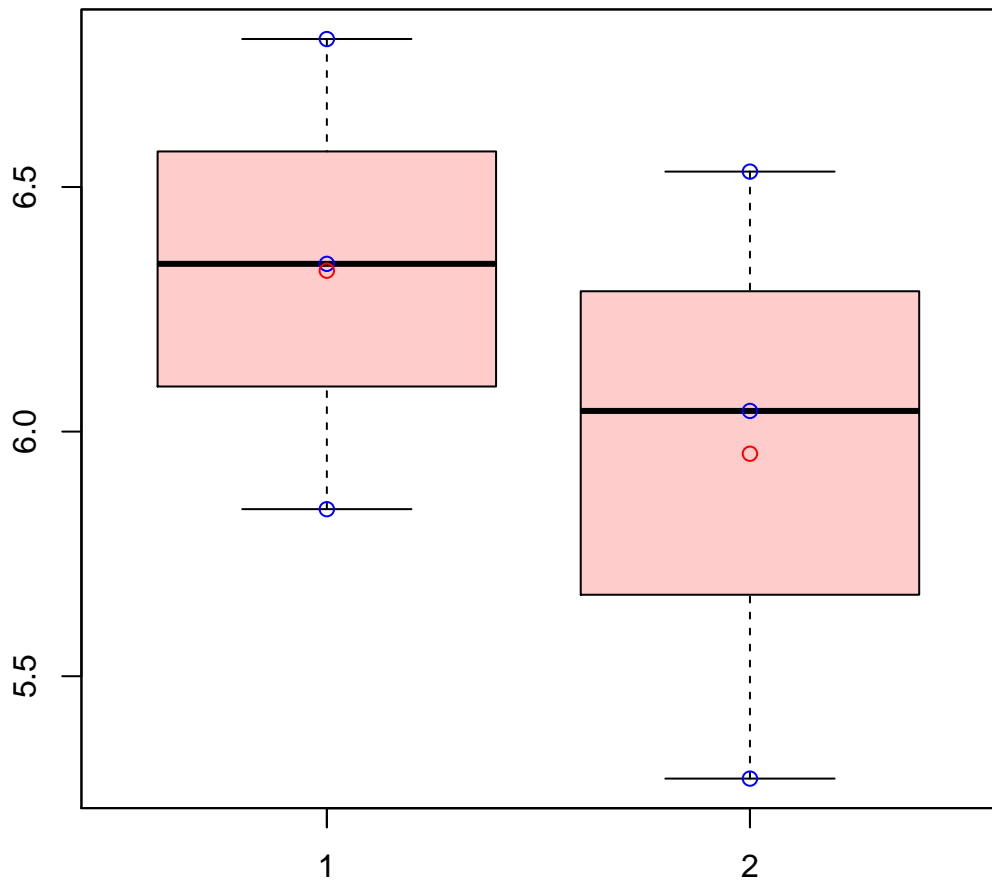

t-Test: p-value = 0.46

# C8CB71|C8CB71\_SORBI

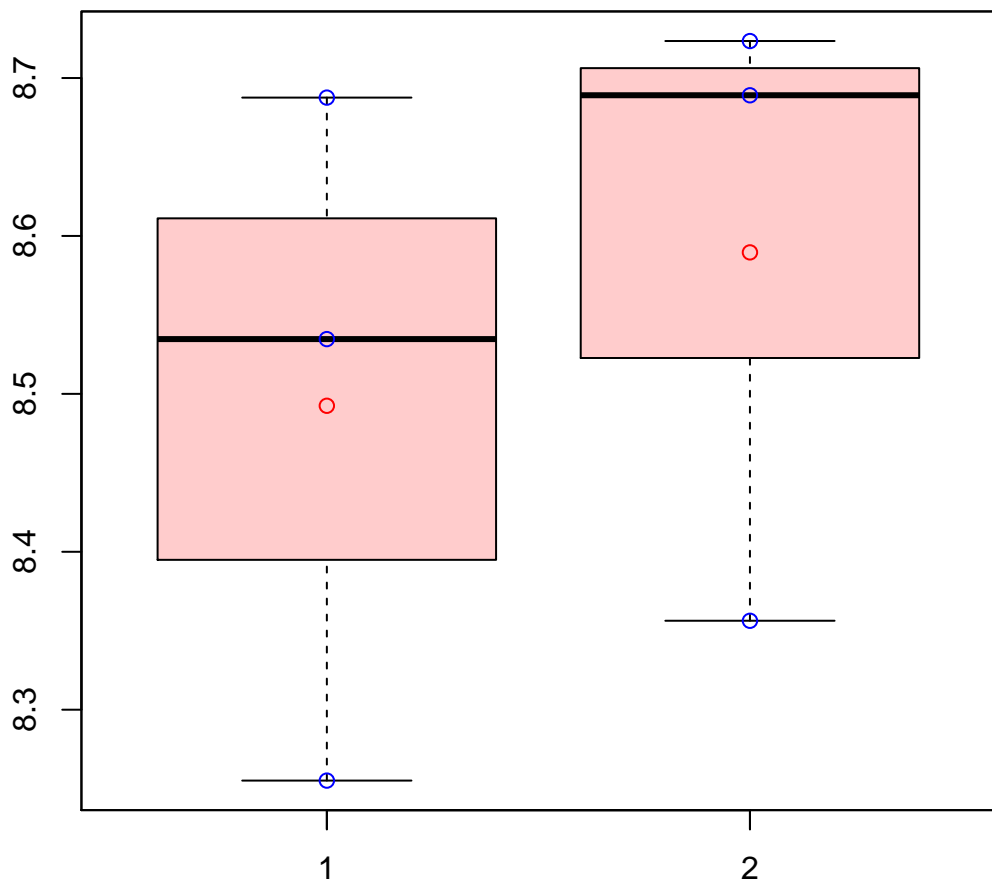

t-Test: p-value = 0.6

# C8XTZ7|C8XTZ7\_COILA

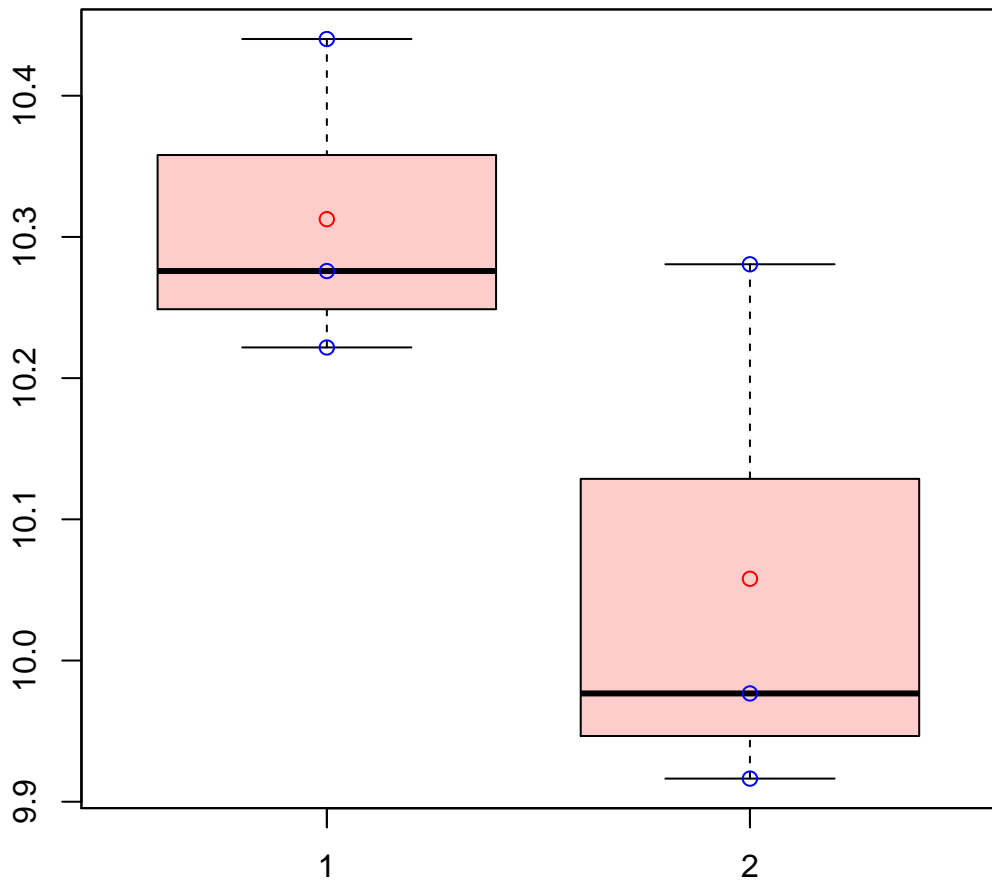

t-Test: p-value = 0.14

# D1MPT2|D1MPT2\_ROYRE

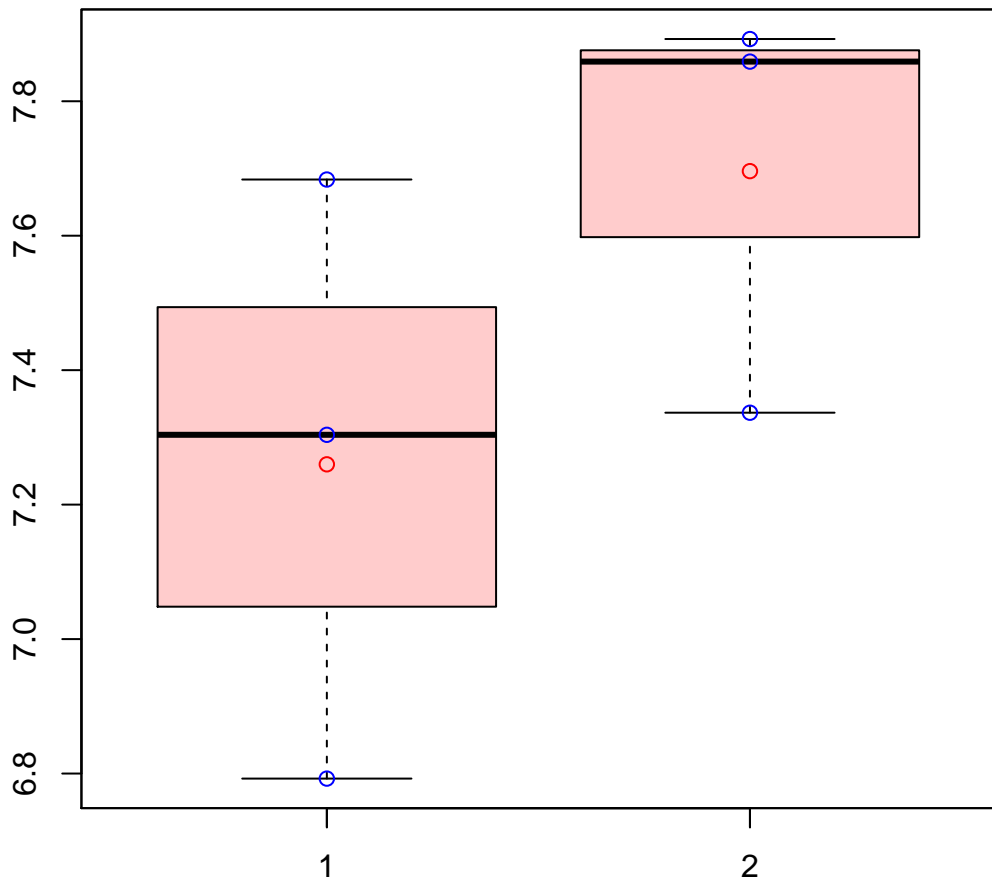

t-Test: p-value = 0.25



# D1MY57|D1MY57\_9POAL

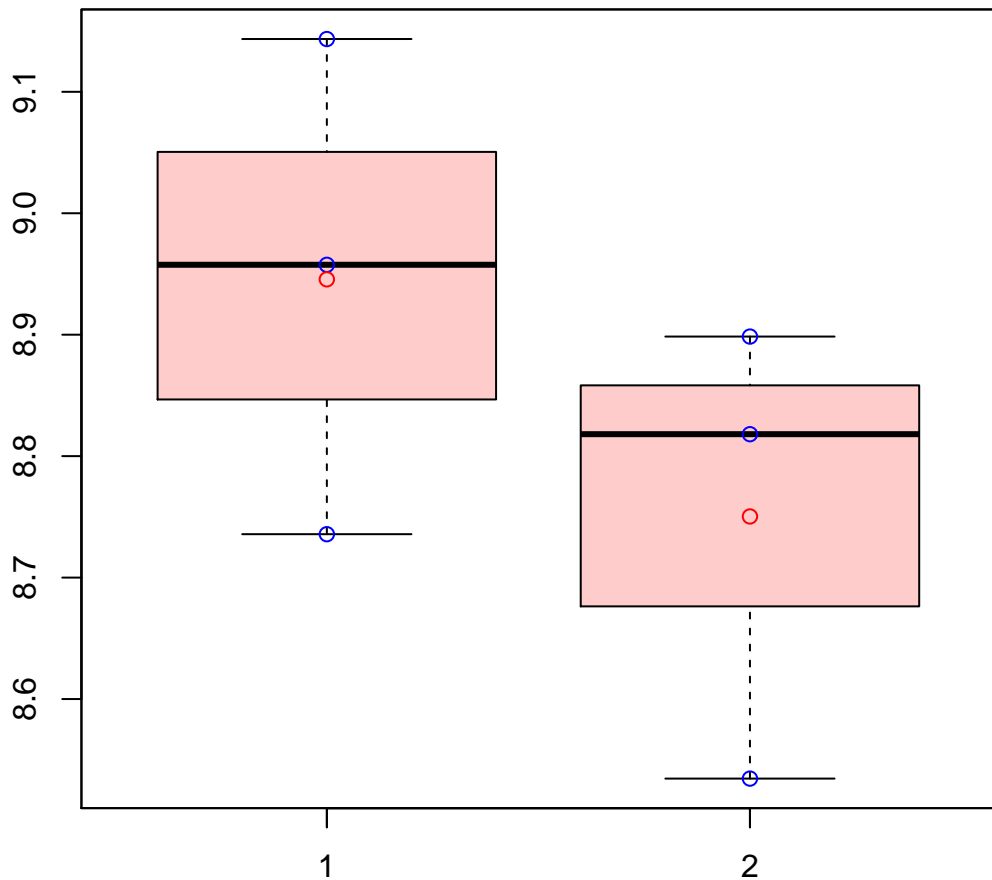

t-Test: p-value = 0.29

# D2IX41|D2IX41\_PANVG

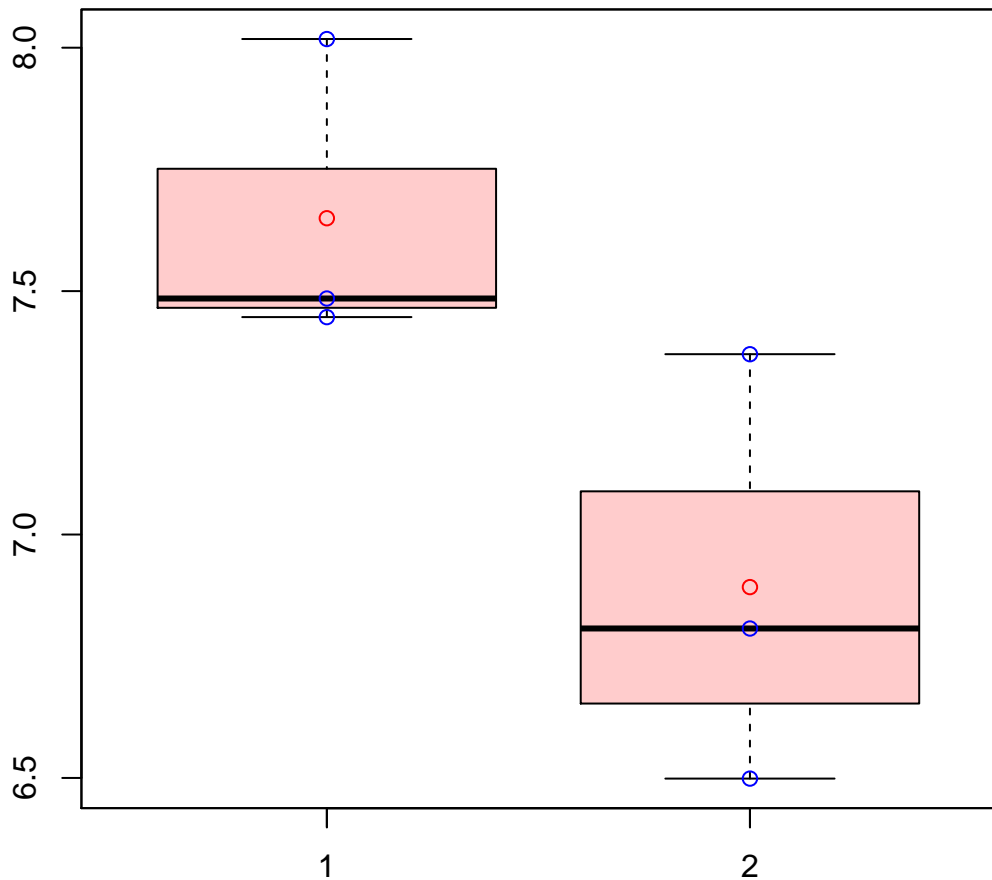

t-Test: p-value = 0.08

## D2JSQ3|D2JSQ3\_MAIZE

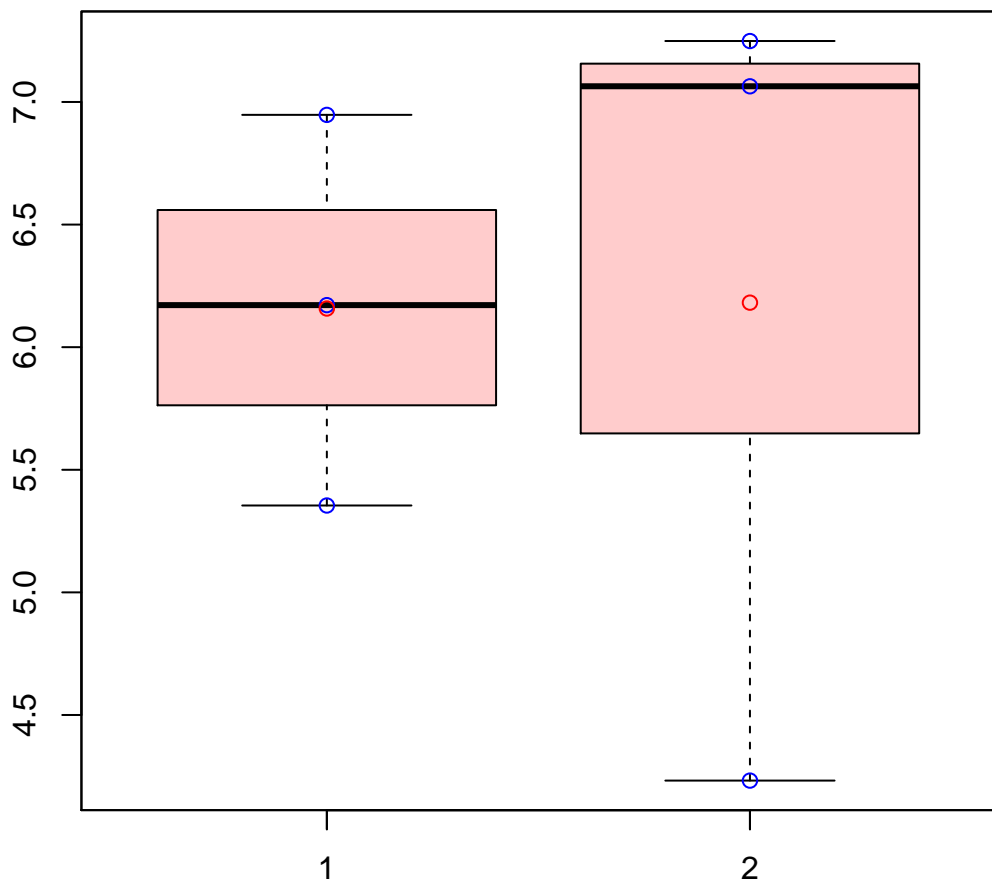

t-Test: p-value = 0.98

## D2JYR9|D2JYR9\_WOLAR

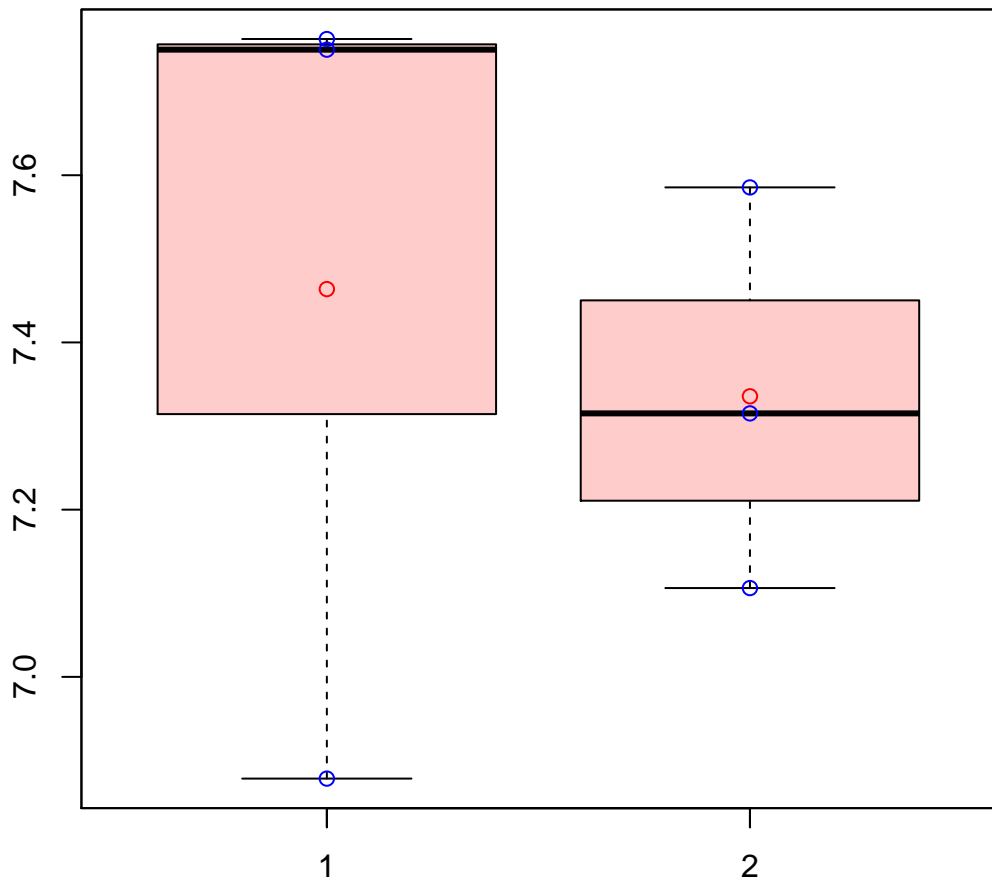

t-Test: p-value = 0.72

# D2SSP8|D2SSP8\_9ARAE

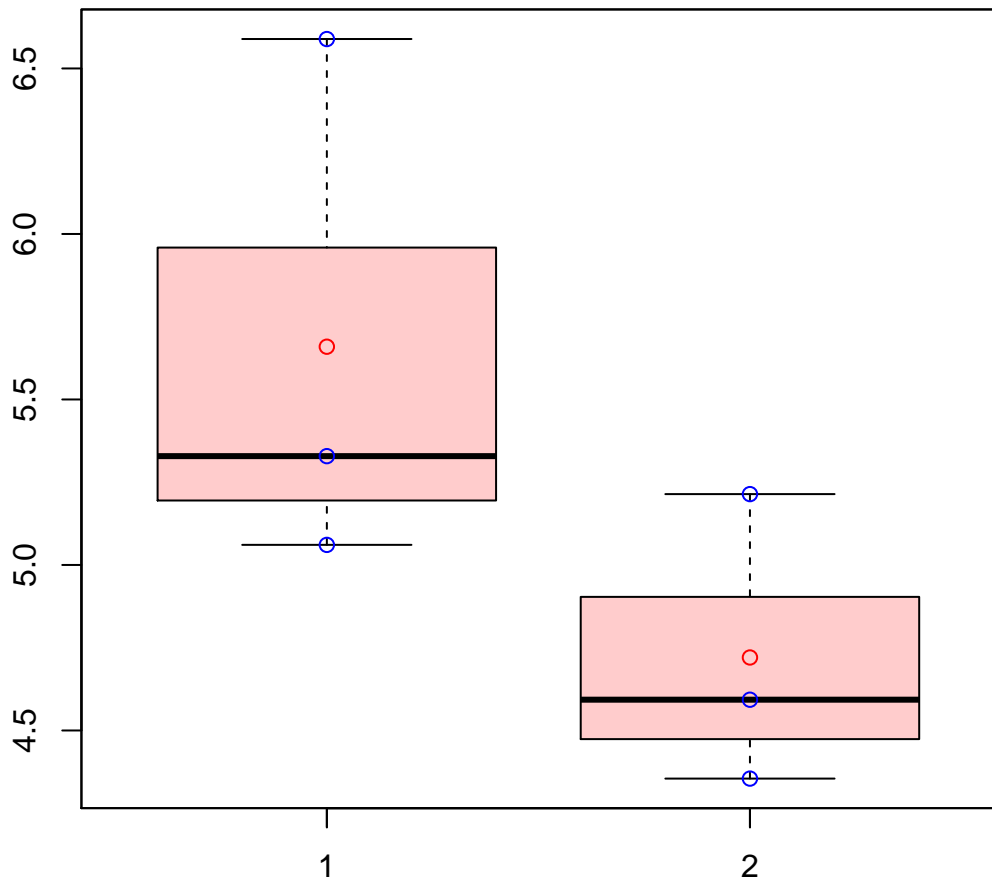

t-Test: p-value = 0.18

## D2XT92|D2XT92\_ALLCE

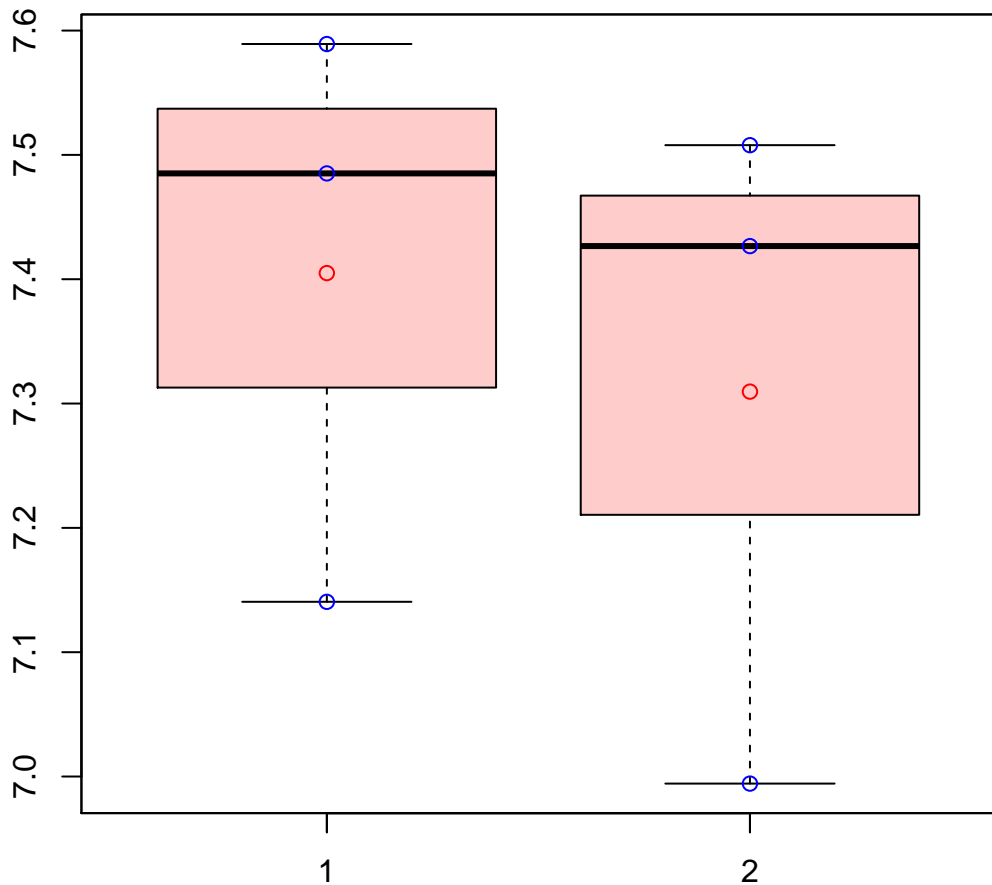

t-Test: p-value = 0.67

# D3IVH3|D3IVH3\_9POAL

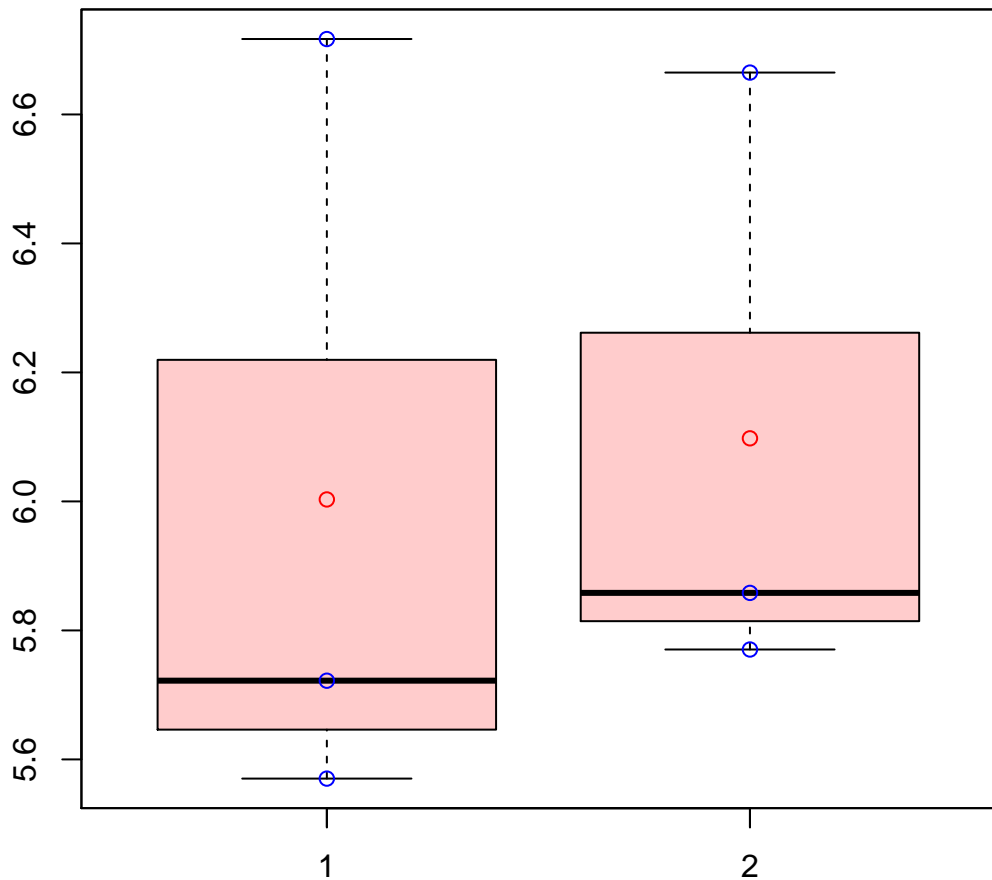

t-Test: p-value = 0.85

# D3JJB8|D3JJB8\_TYPLA

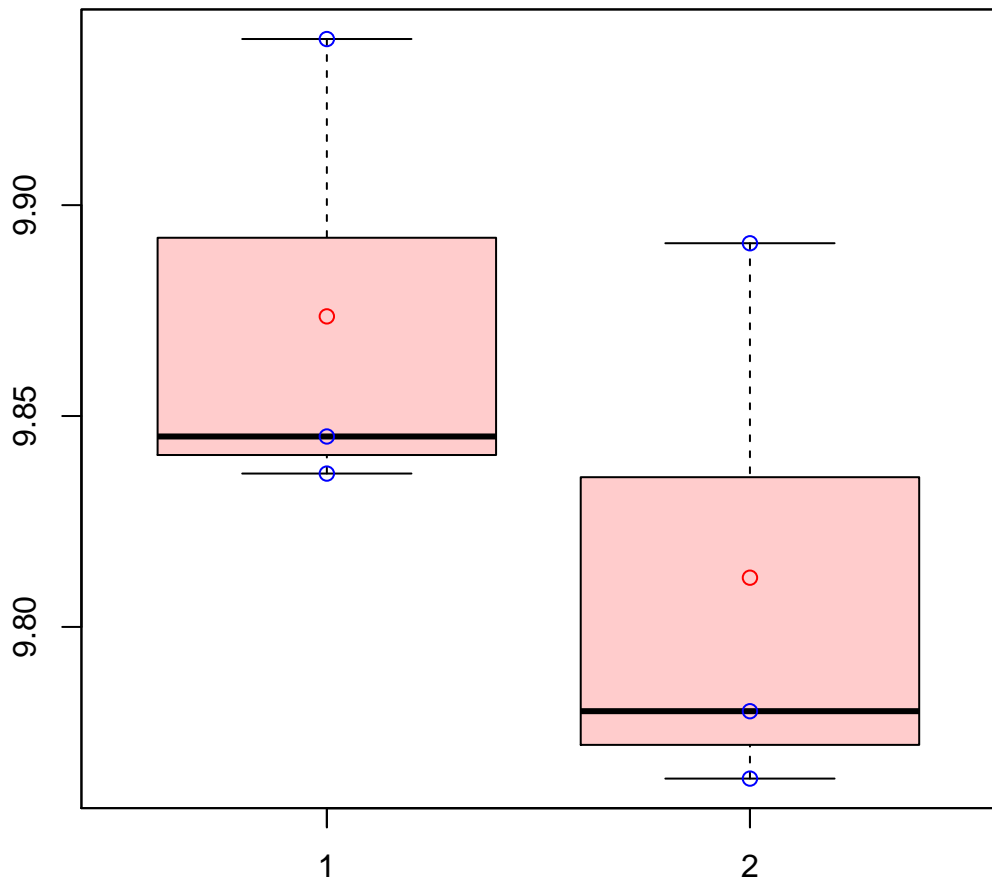

t-Test: p-value = 0.3



# D3K4E0|D3K4E0\_HORVU

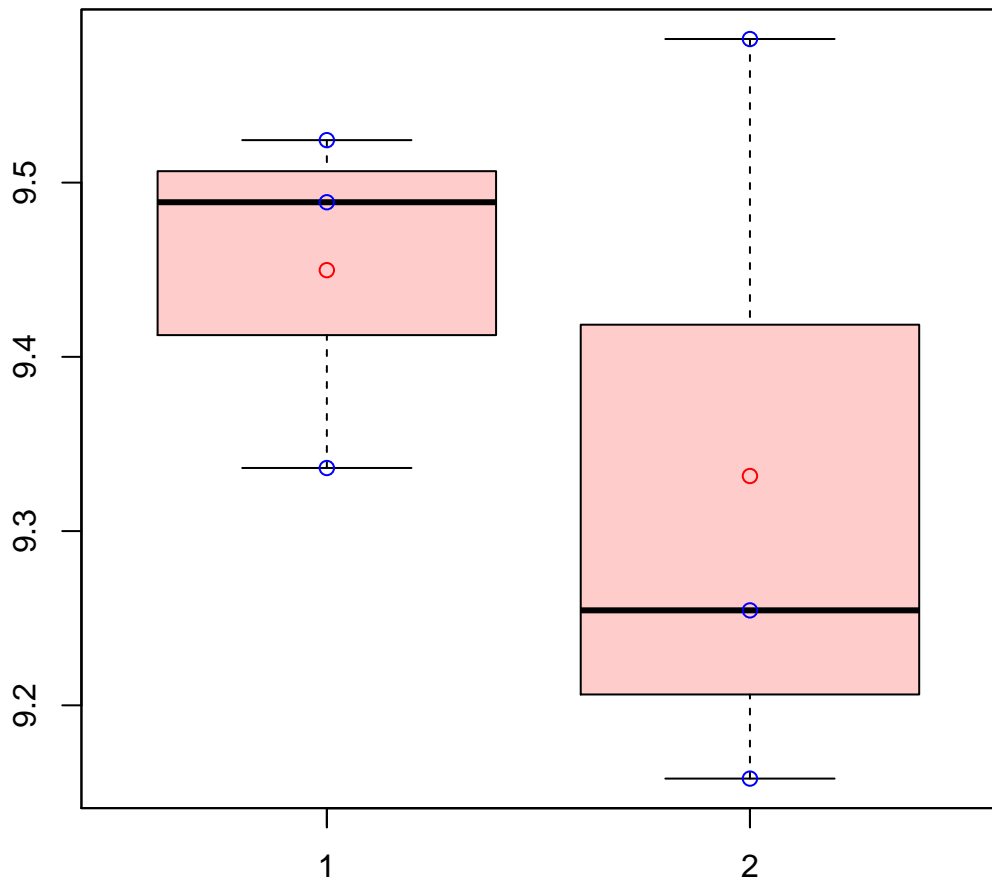

t-Test: p-value = 0.47

# D3KY86|D3KY86\_ANACO

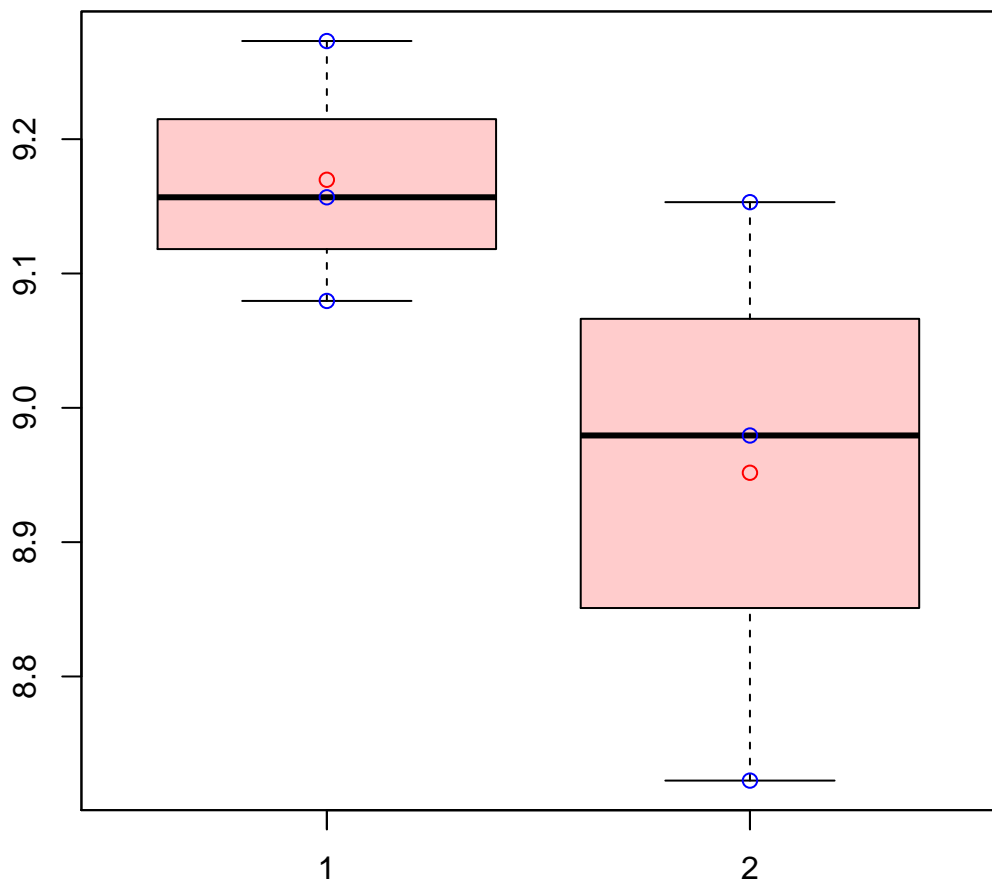

t-Test: p-value = 0.22

# D3U2H7|D3U2H7\_ORYSA

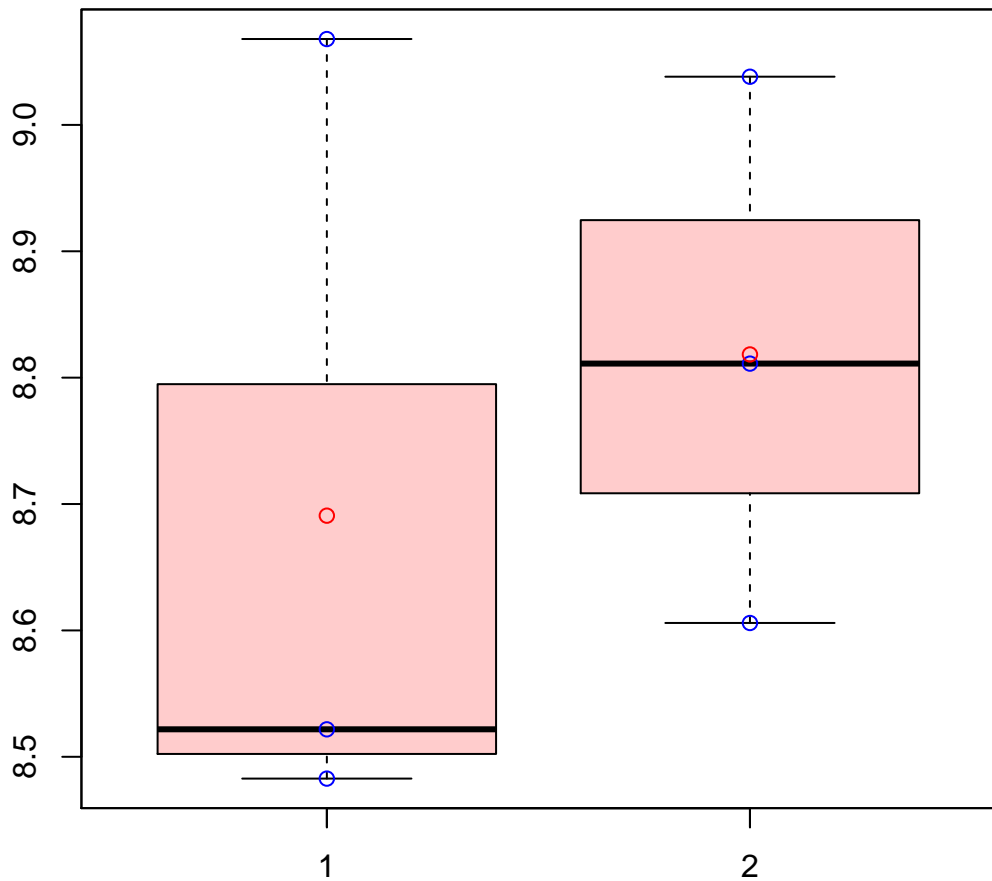

t-Test: p-value = 0.61

# D4N3W3|D4N3W3\_ORYBR

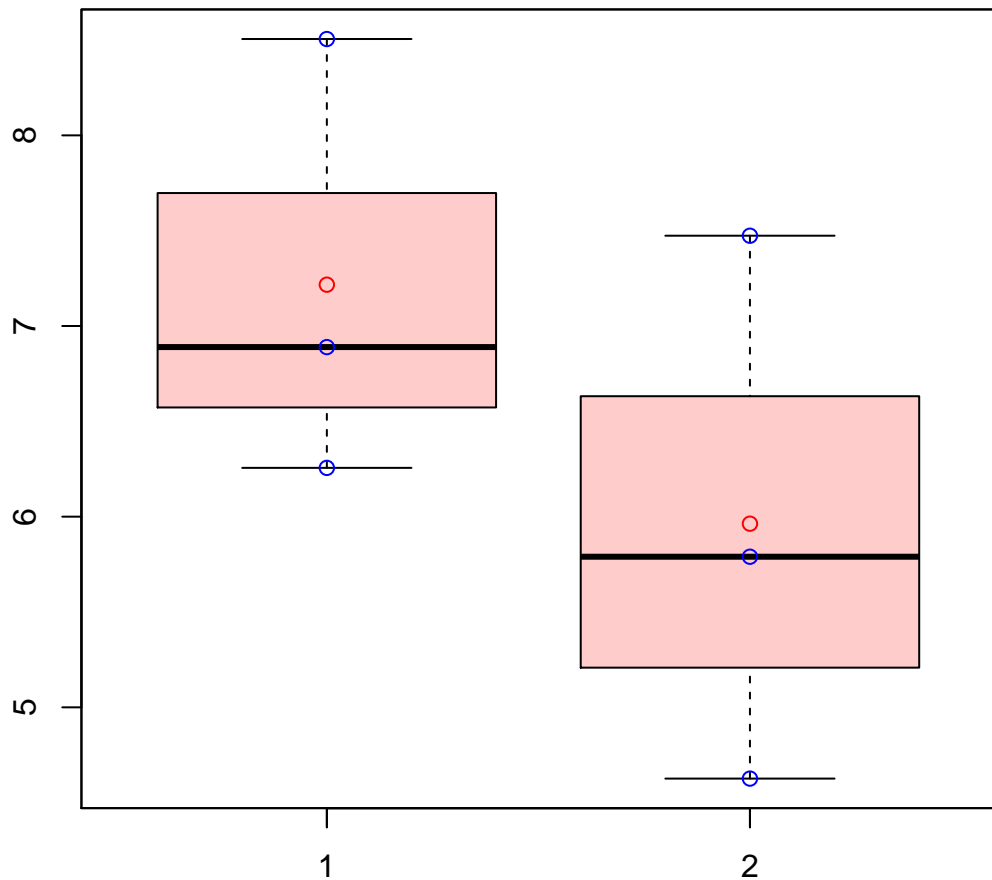

t-Test: p-value = 0.31

# D5HQ36|D5HQ36\_ONCHC

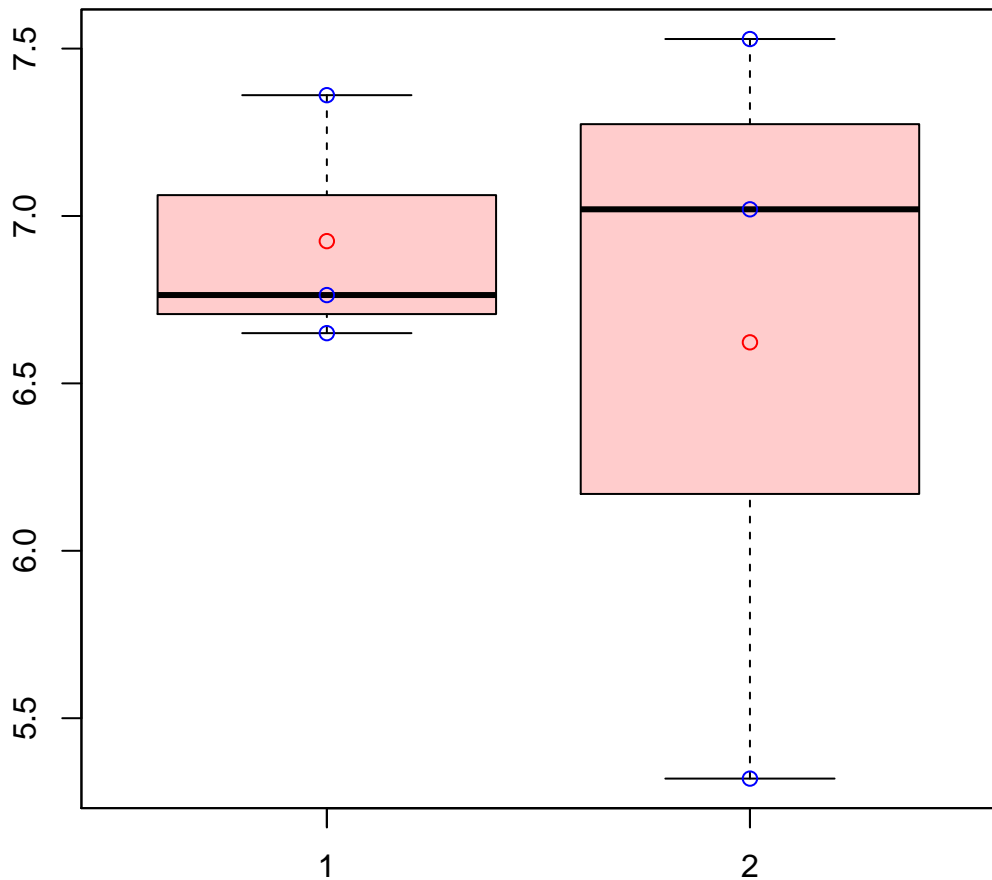

t-Test: p-value = 0.7

# D5HQI9|D5HQI9\_ANOMA

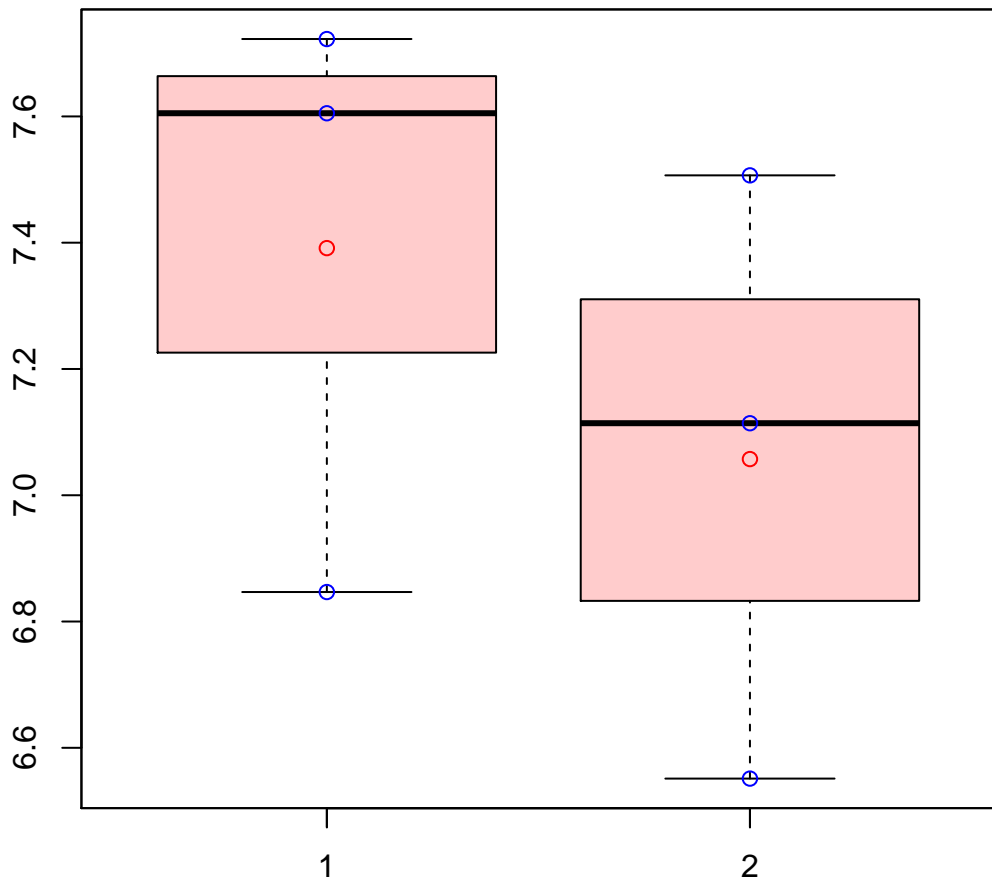

t-Test: p-value = 0.44

# D5LMH3|D5LMH3\_LILLO

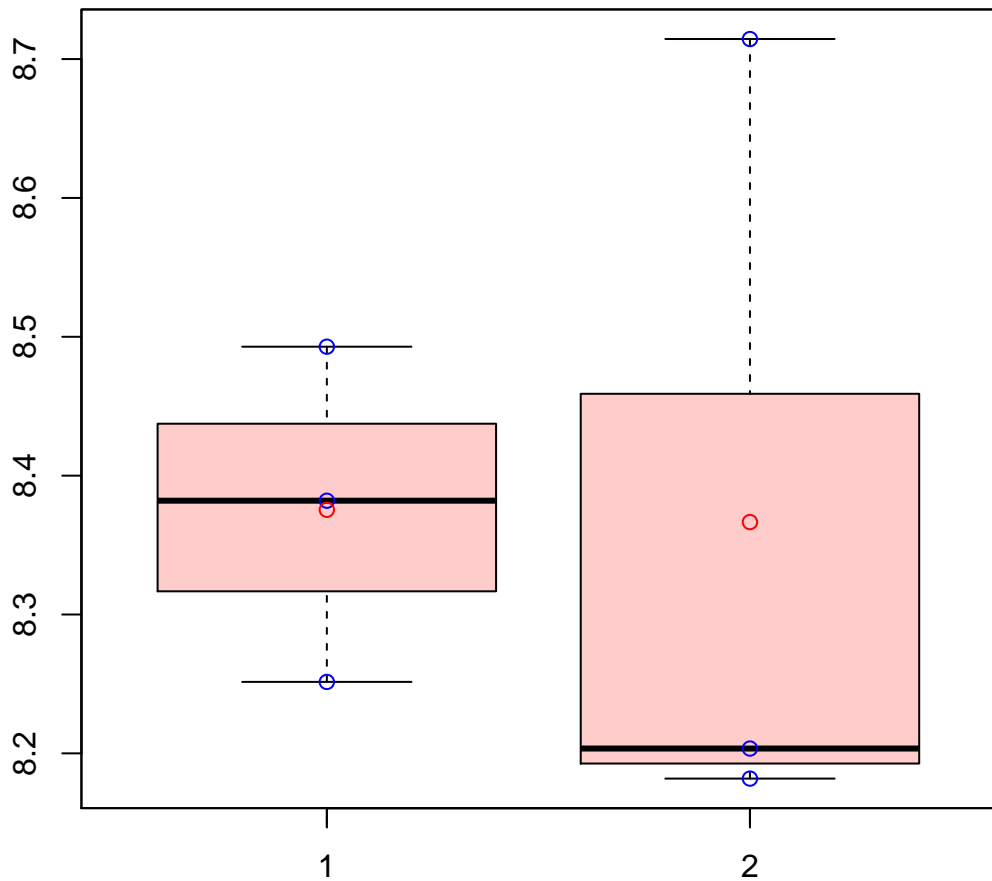

t-Test: p-value = 0.97

# D5LVZ2|D5LVZ2\_9POAL

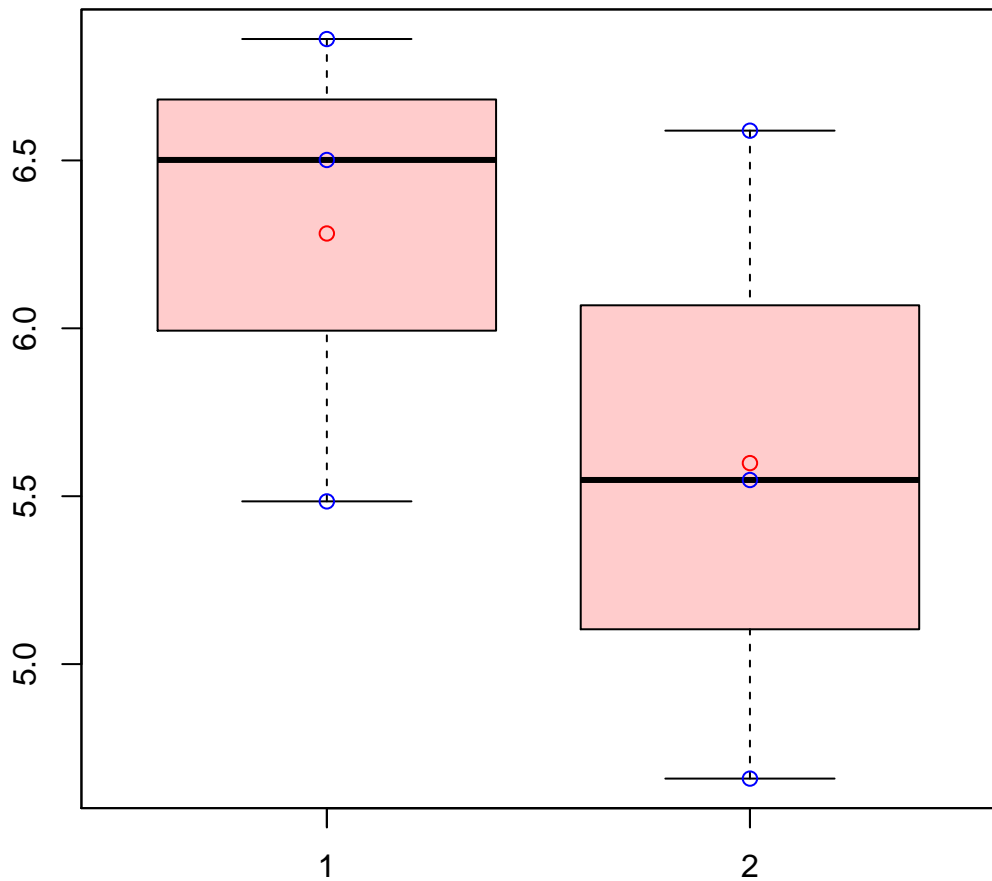

t-Test: p-value = 0.38



# D6C786|D6C786\_9POAL

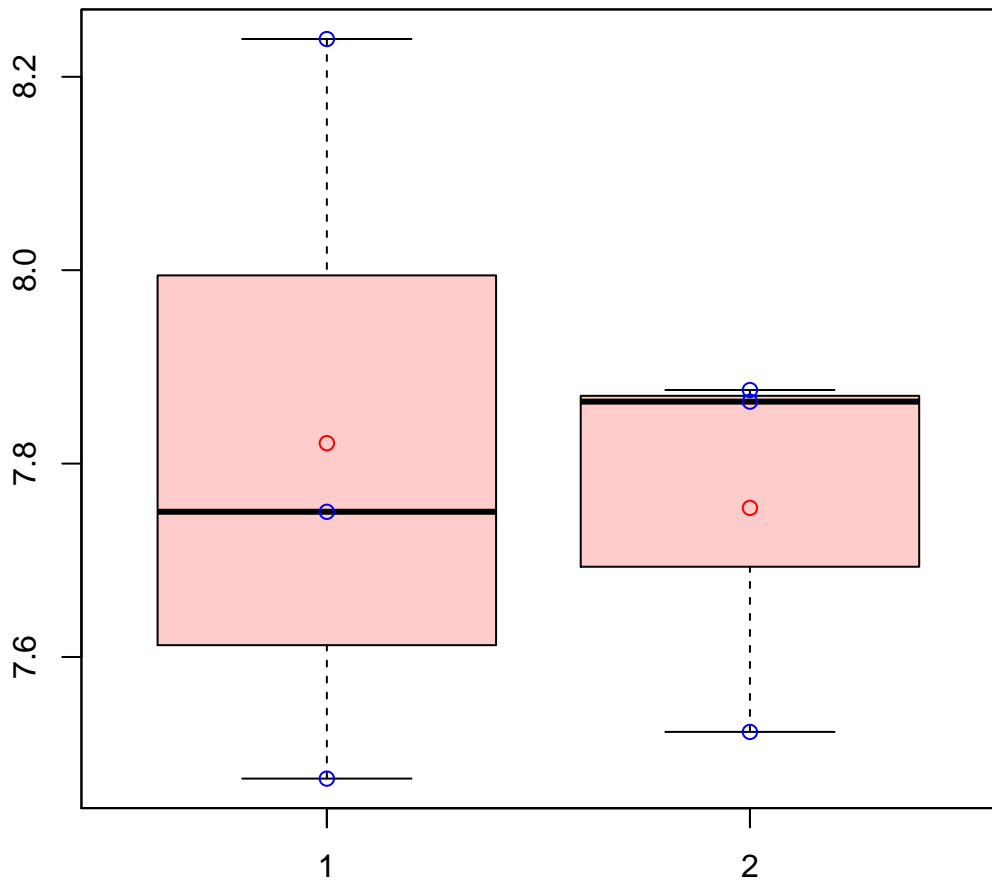

t-Test: p-value = 0.81

# D6C788|D6C788\_9POAL

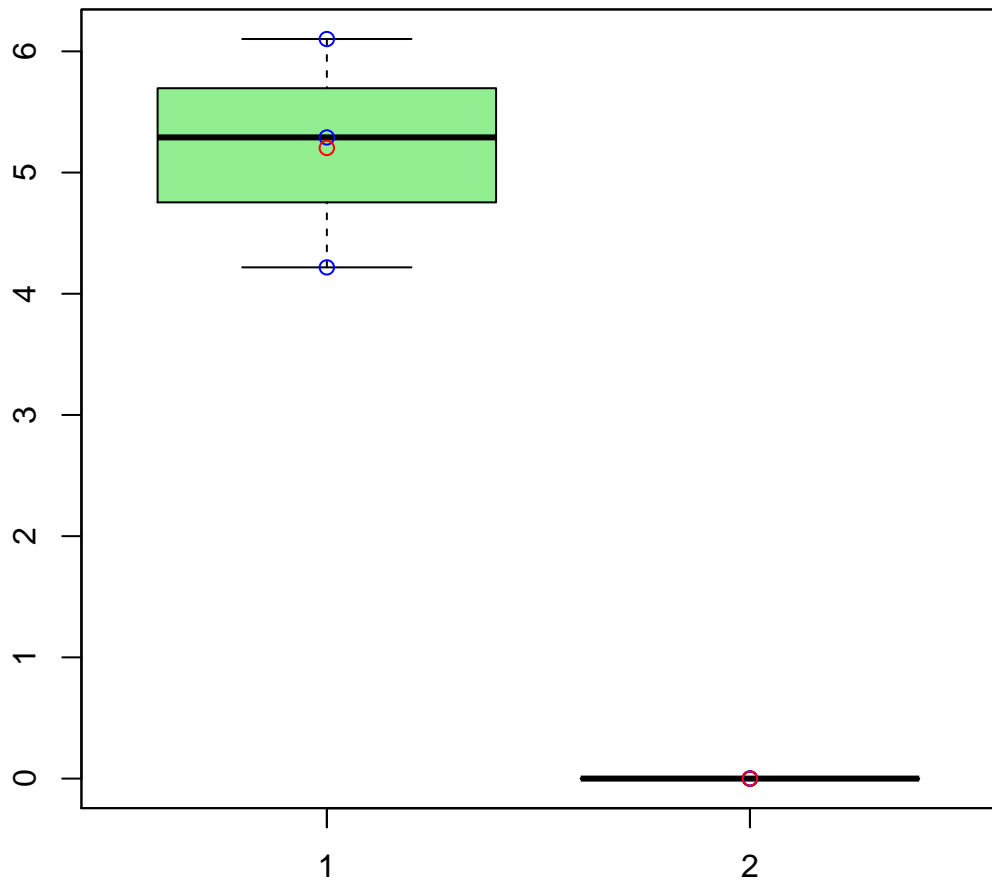

t-Test: p-value = 0.01

# D6C793|D6C793\_9POAL

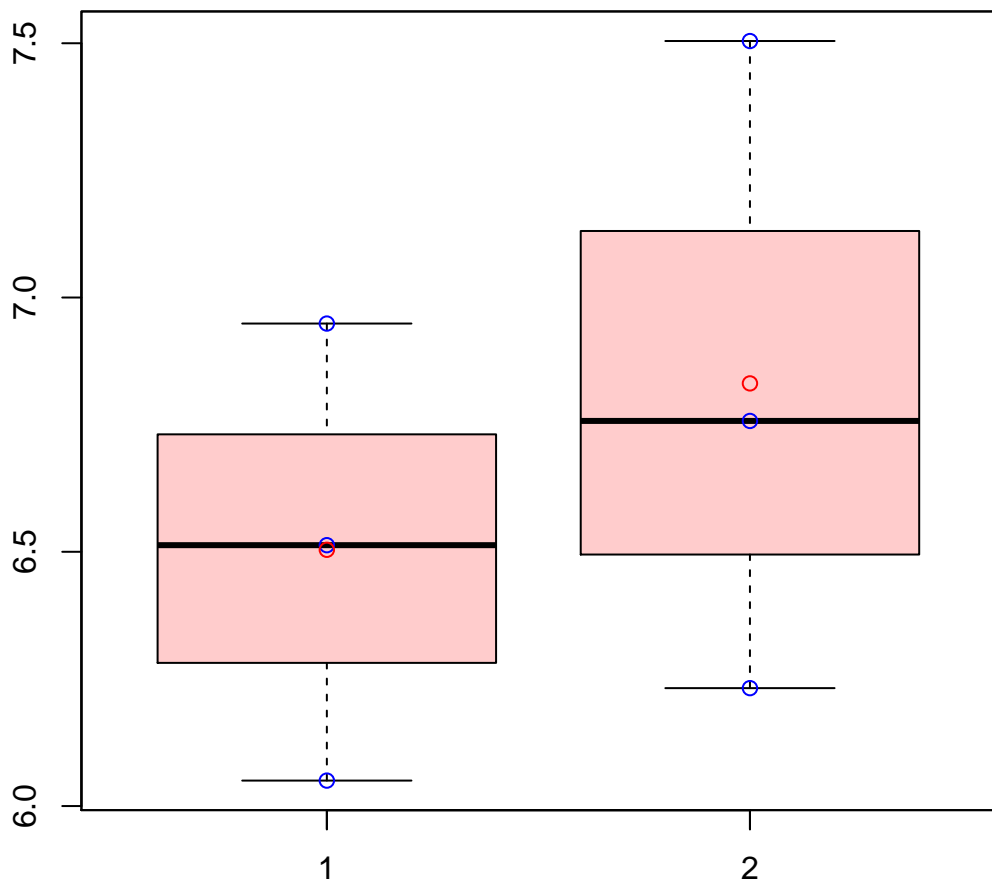

t-Test: p-value = 0.51

# D7PC64|D7PC64\_9POAL

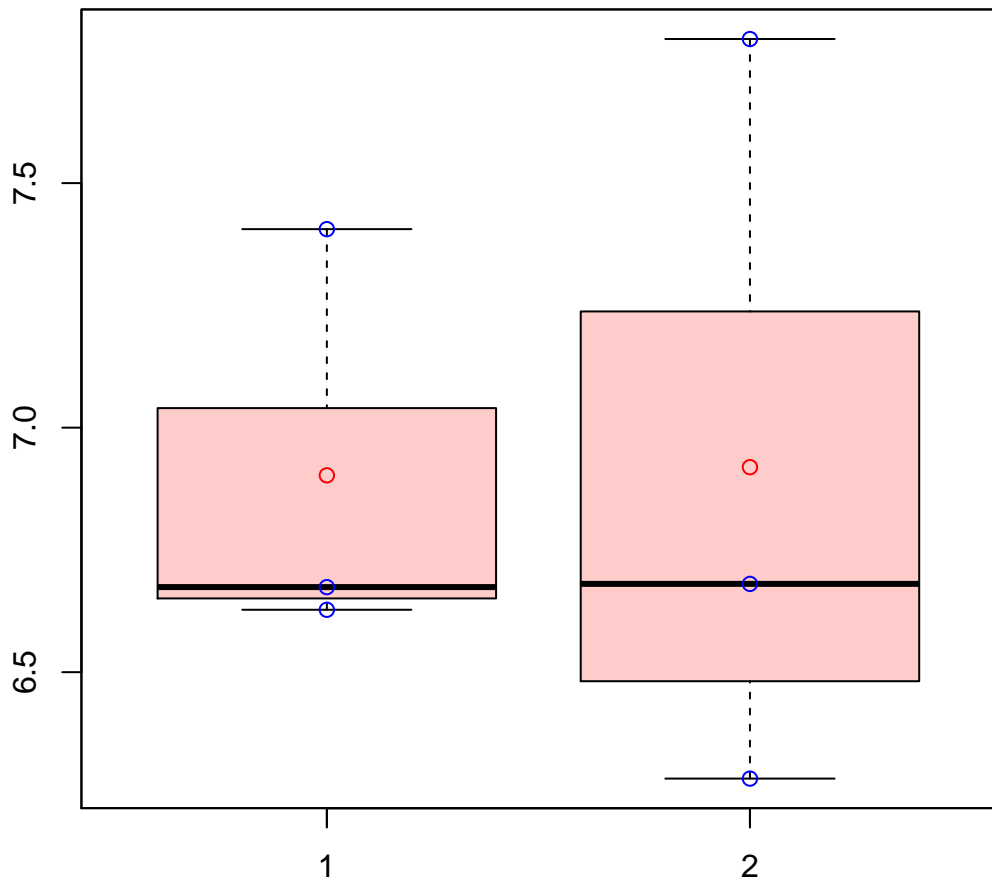

t-Test: p-value = 0.98

# D7PDA3|D7PDA3\_9POAL

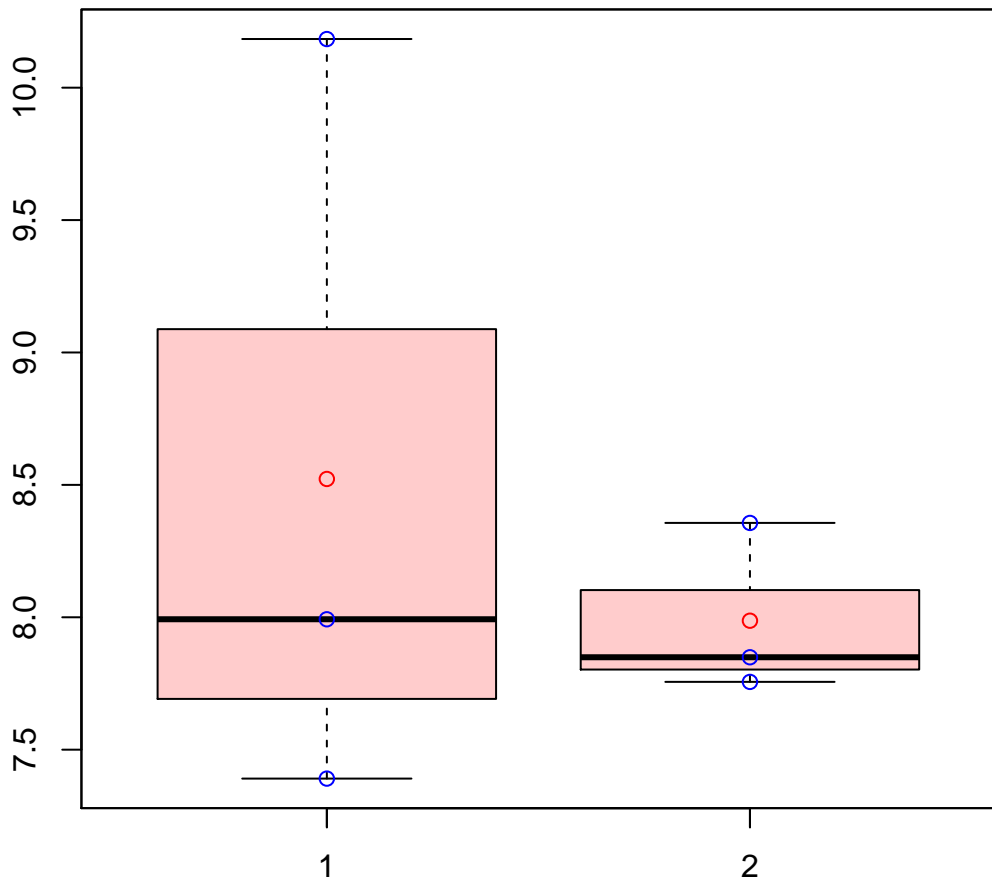

t-Test: p-value = 0.6

# D7RZT7|D7RZT7\_9ASPA

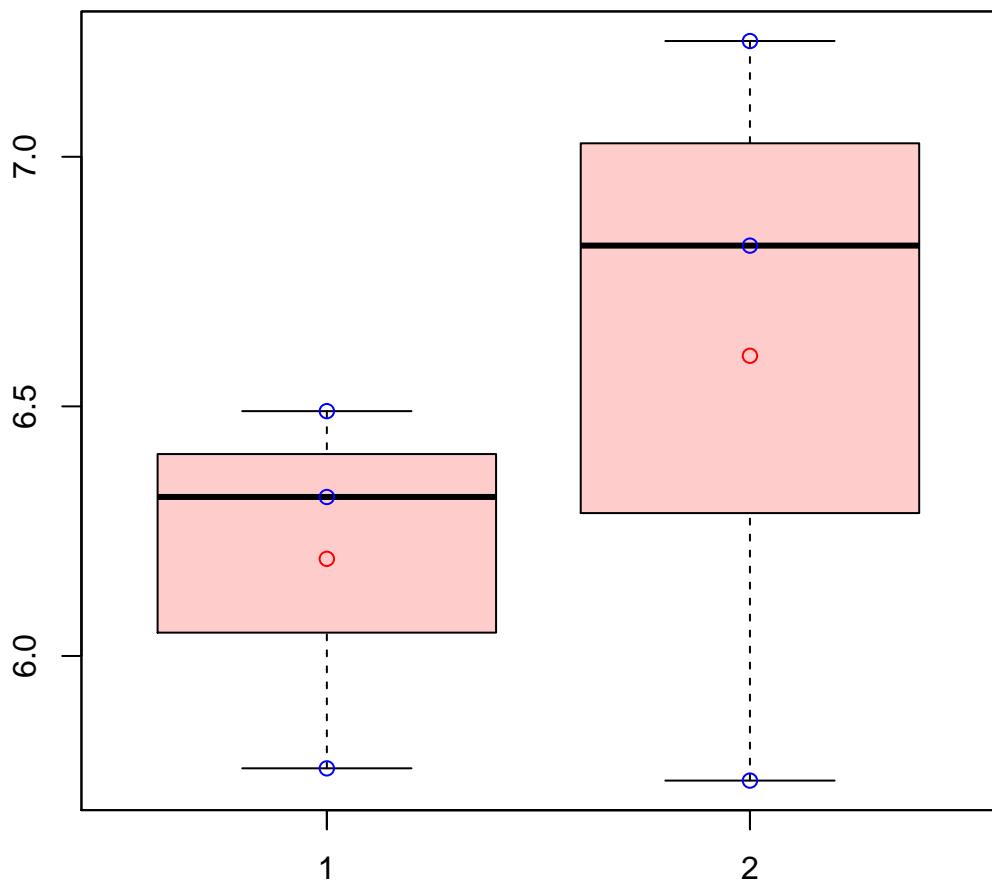

t-Test: p-value = 0.47

# D8L9G6|D8L9G6\_WHEAT

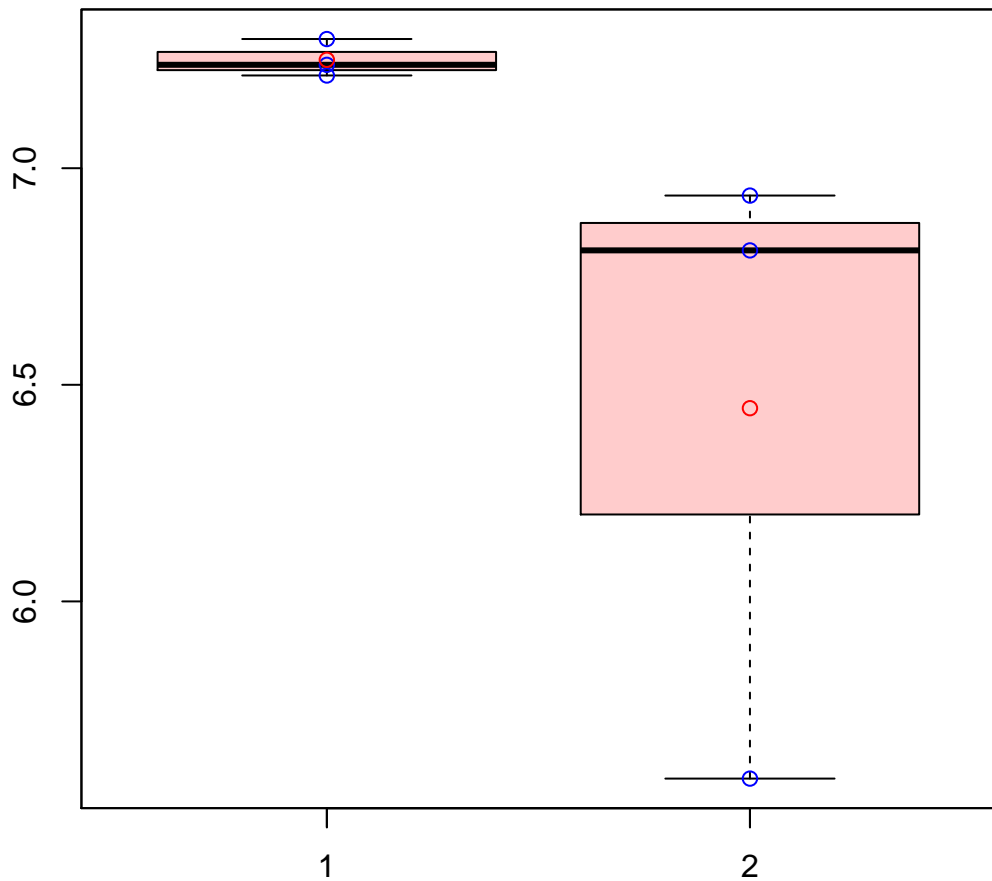

t-Test: p-value = 0.2

# D8WQU0|D8WQU0\_ERATE

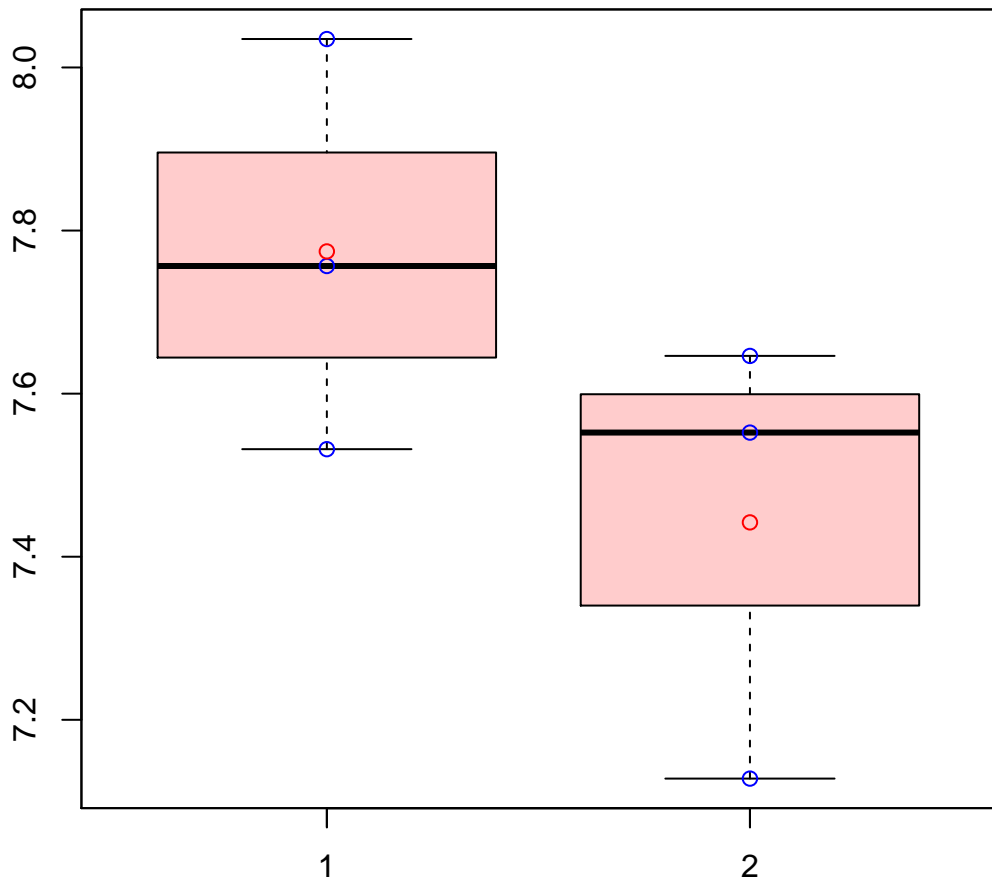

t-Test: p-value = 0.2



# D8WQV1|D8WQV1\_ARUDO

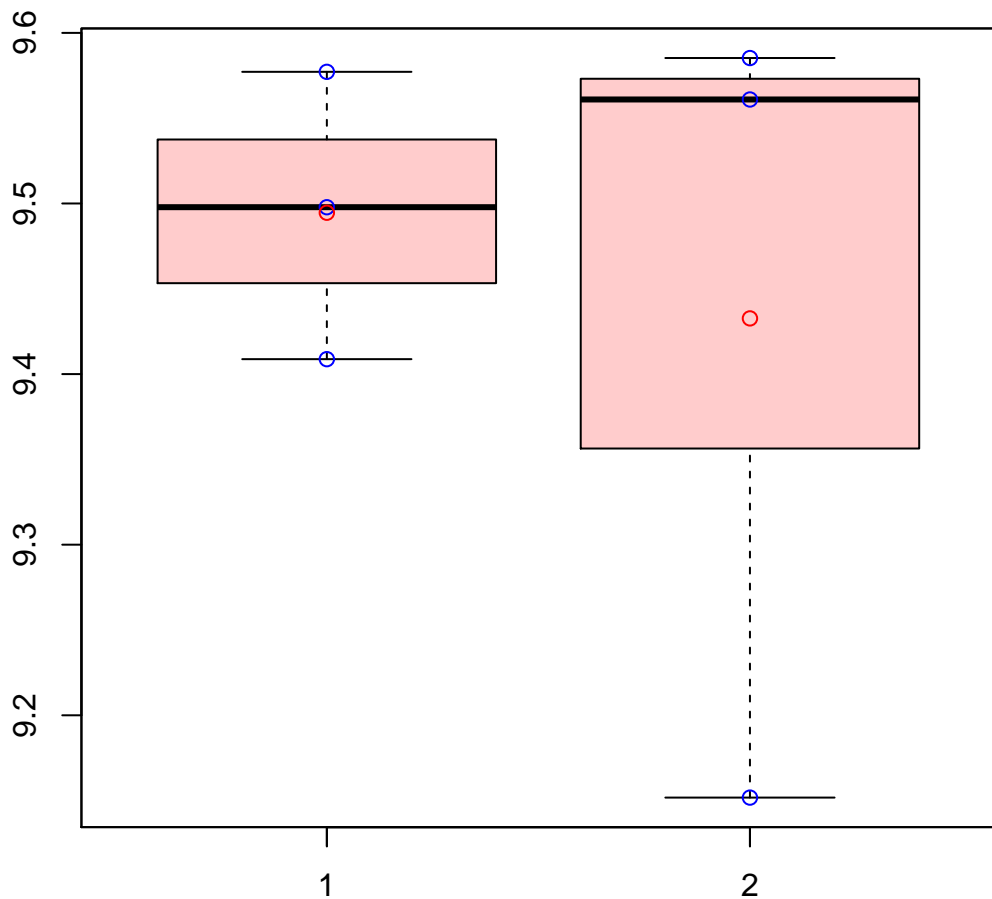

t-Test: p-value = 0.71

# D8WQW6|D8WQW6\_NARST

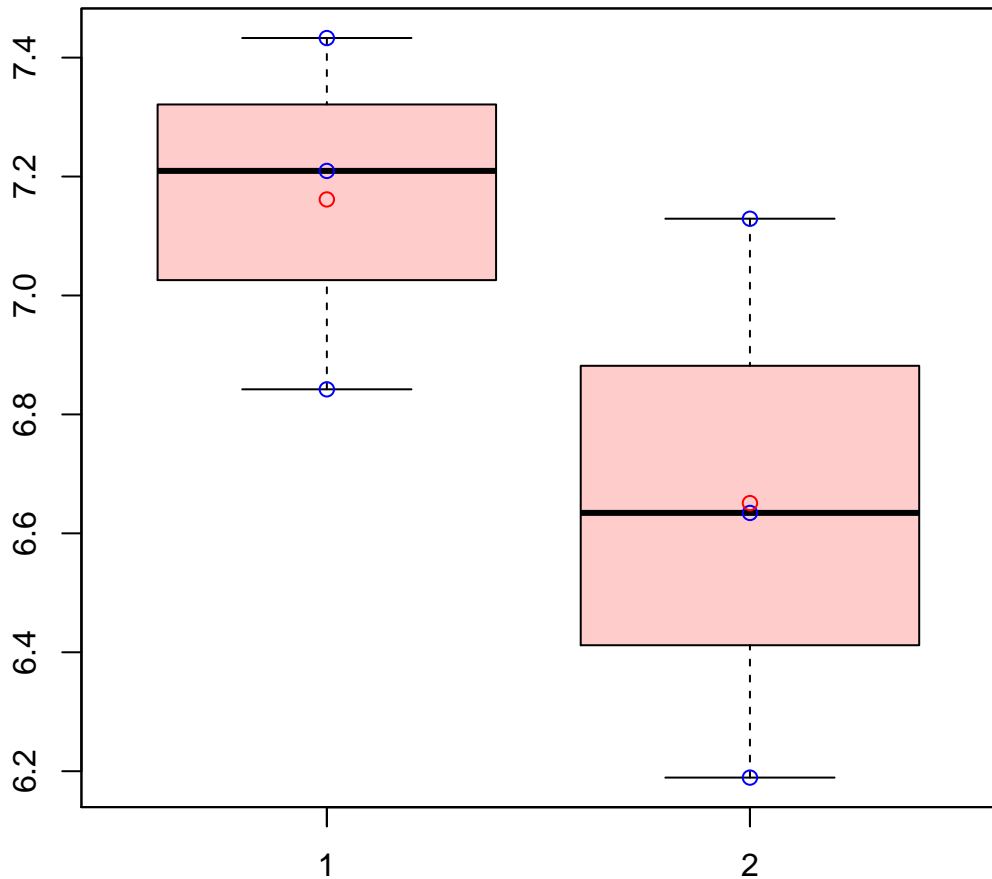

t-Test: p-value = 0.2

# D9IUX3|D9IUX3\_9POAL

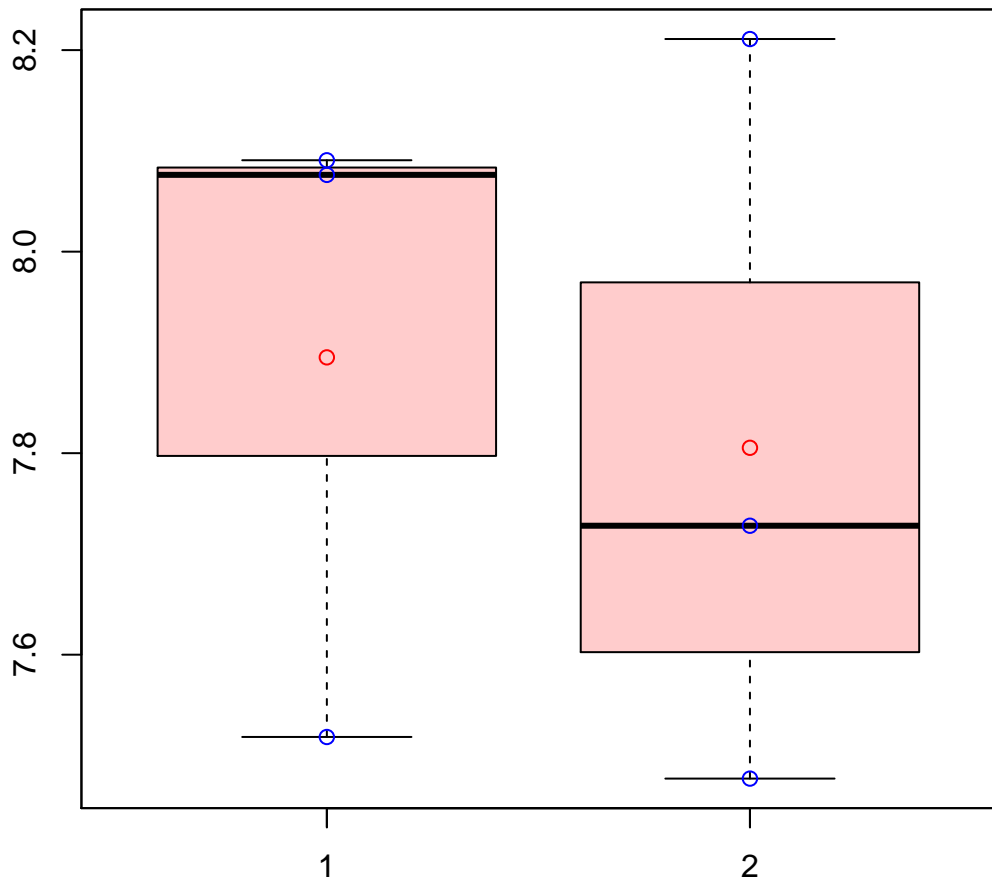

t-Test: p-value = 0.77

# D9UAH3|D9UAH3\_9POAL

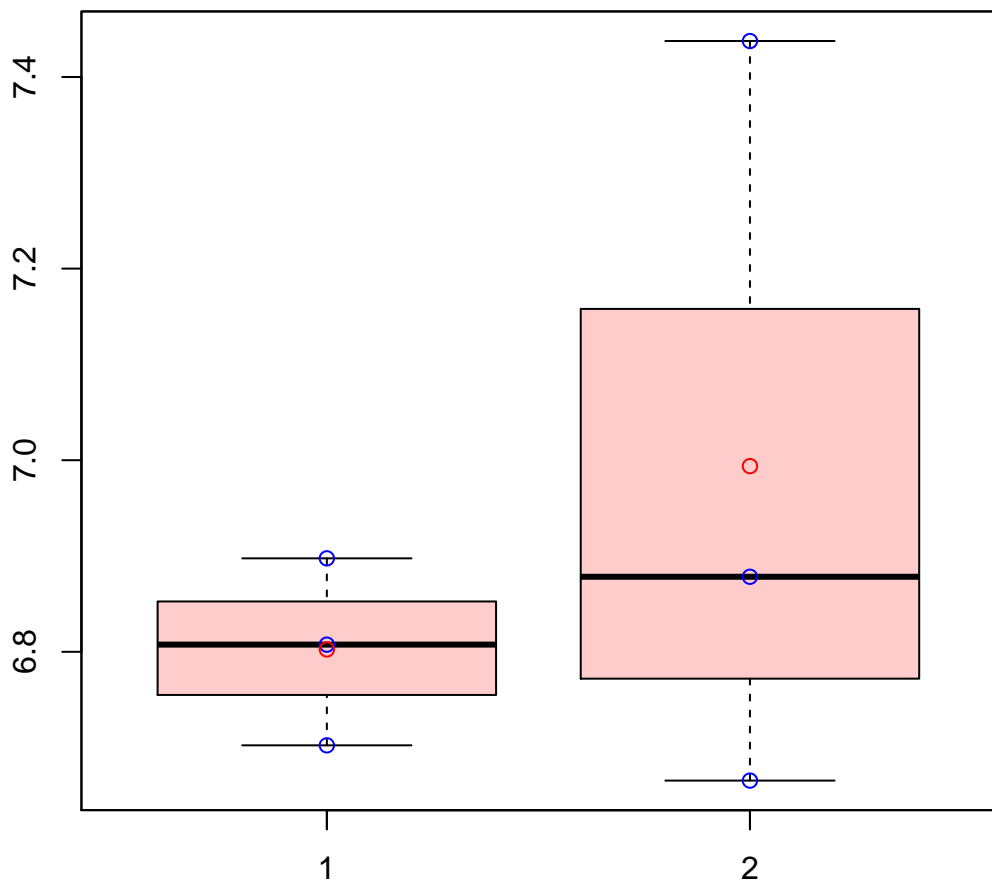

t-Test: p-value = 0.5

# D9UAH8|D9UAH8\_9POAL

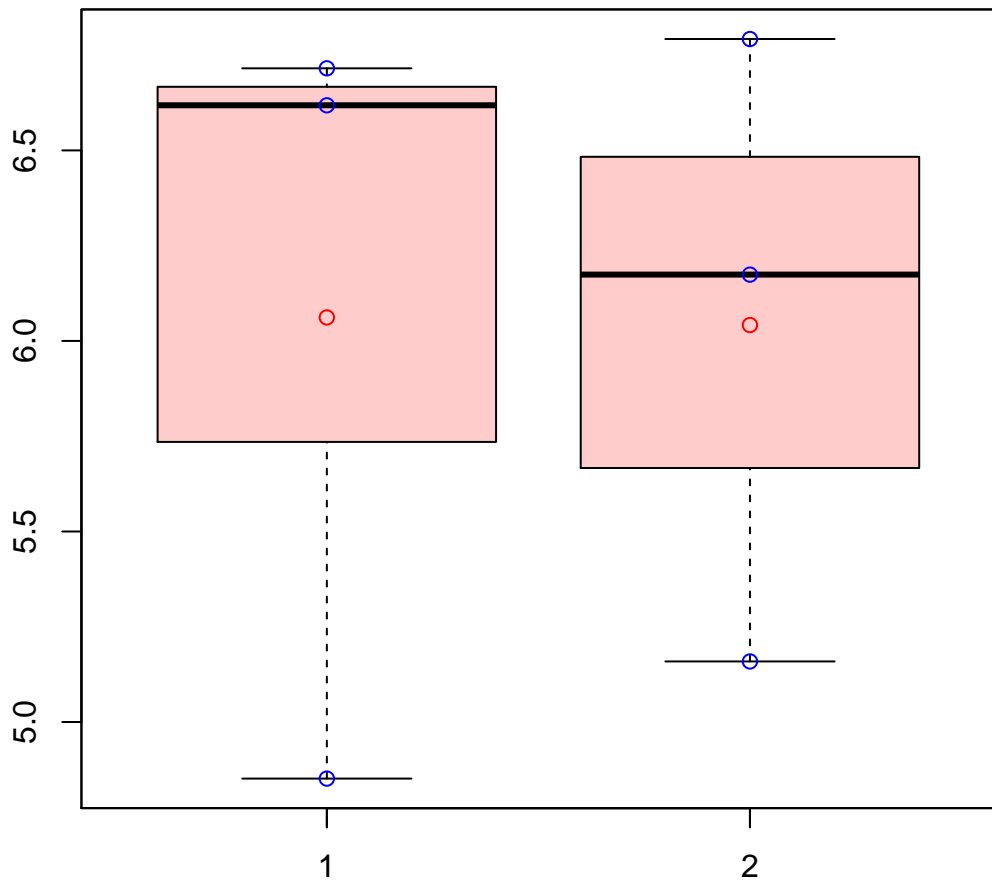

t-Test: p-value = 0.98

# D9ZHB9|D9ZHB9\_MUSAC

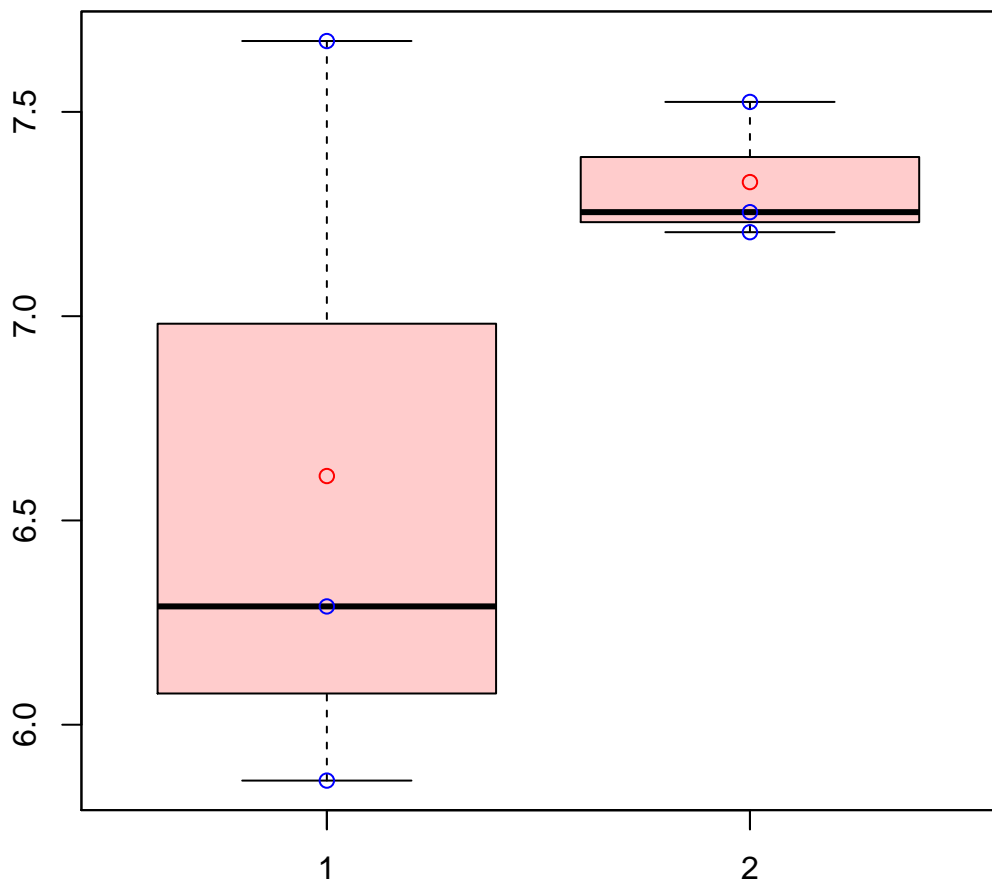

t-Test: p-value = 0.32

# D9ZJG7|D9ZJG7\_9POAL

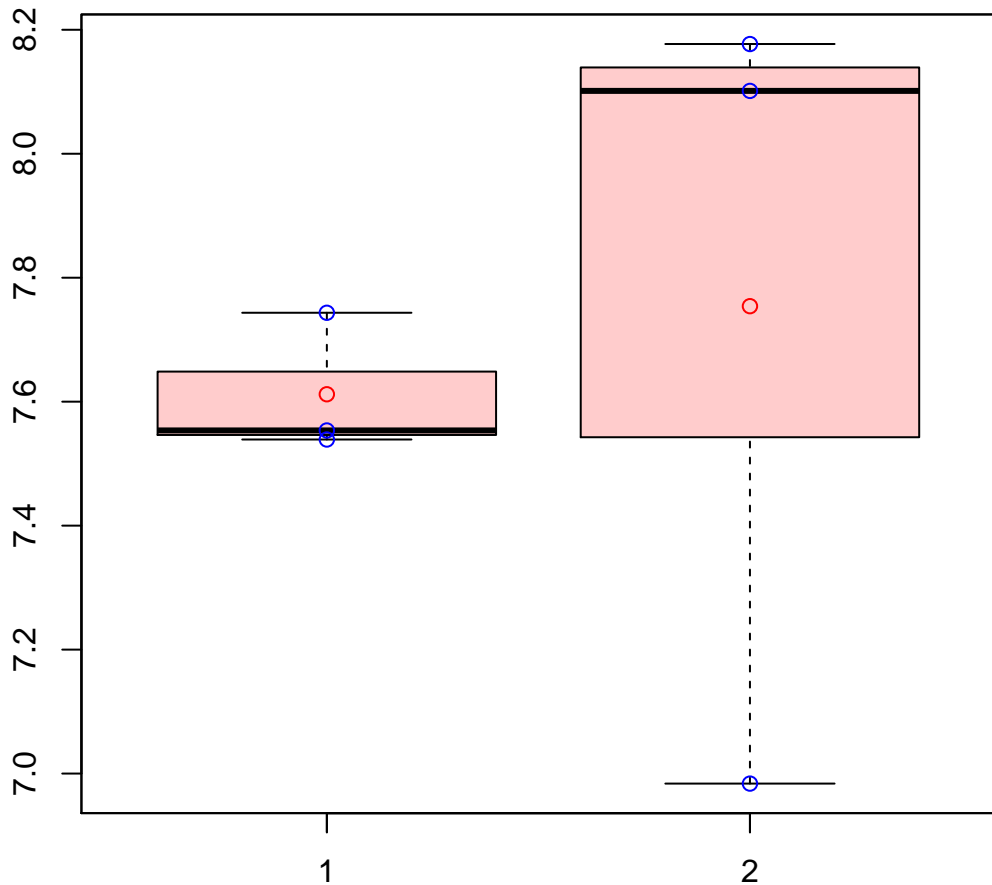

t-Test: p-value = 0.75

# E0WCN5|E0WCN5\_9POAL

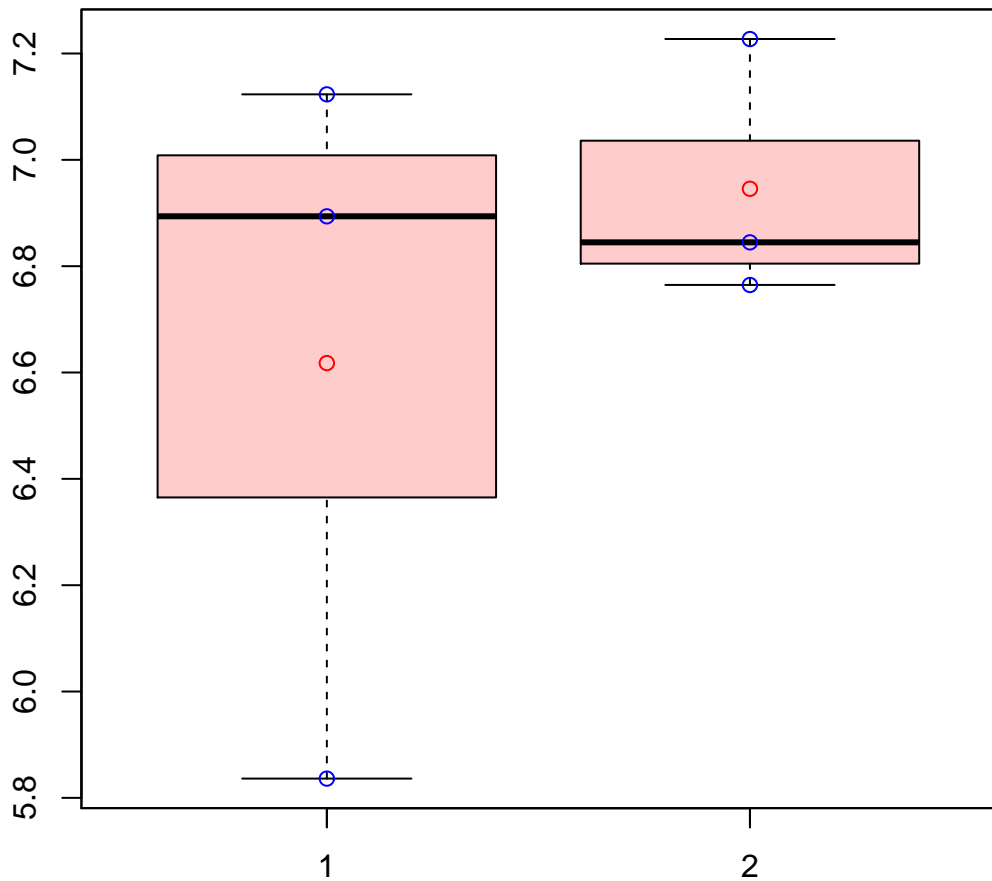

t-Test: p-value = 0.5



# E0WCS5|E0WCS5\_9POAL

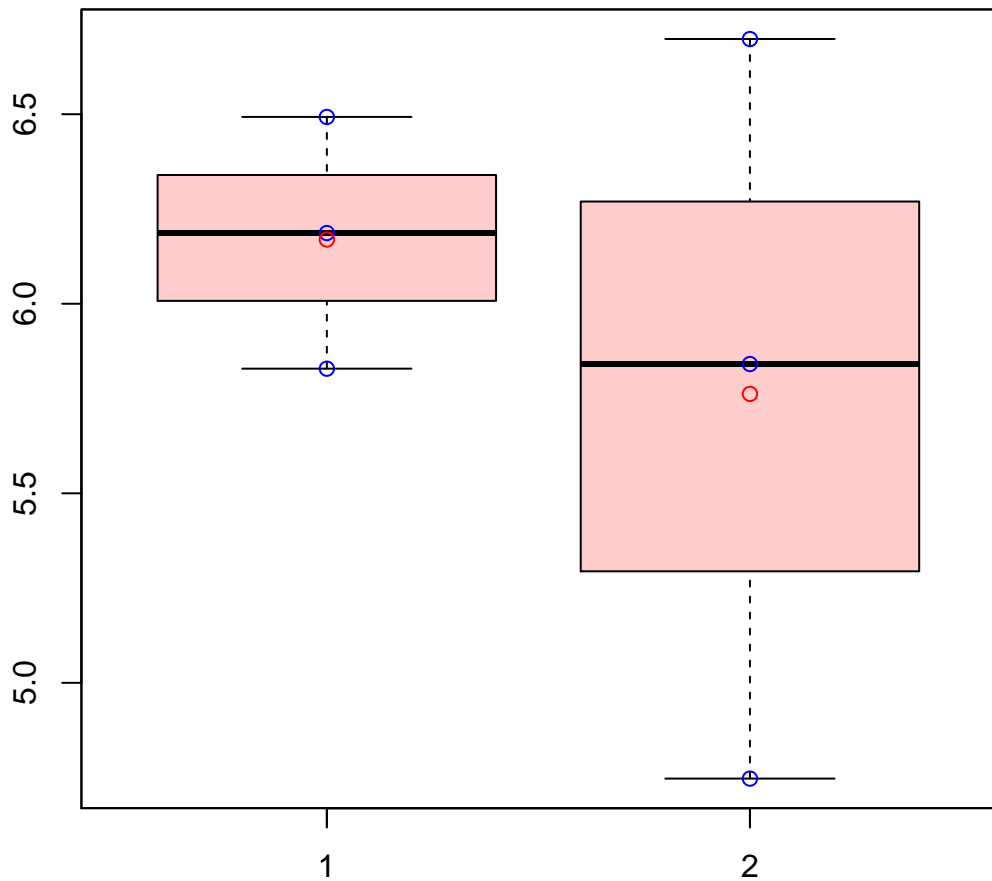

t-Test: p-value = 0.55

# E0WCS7|E0WCS7\_9POAL

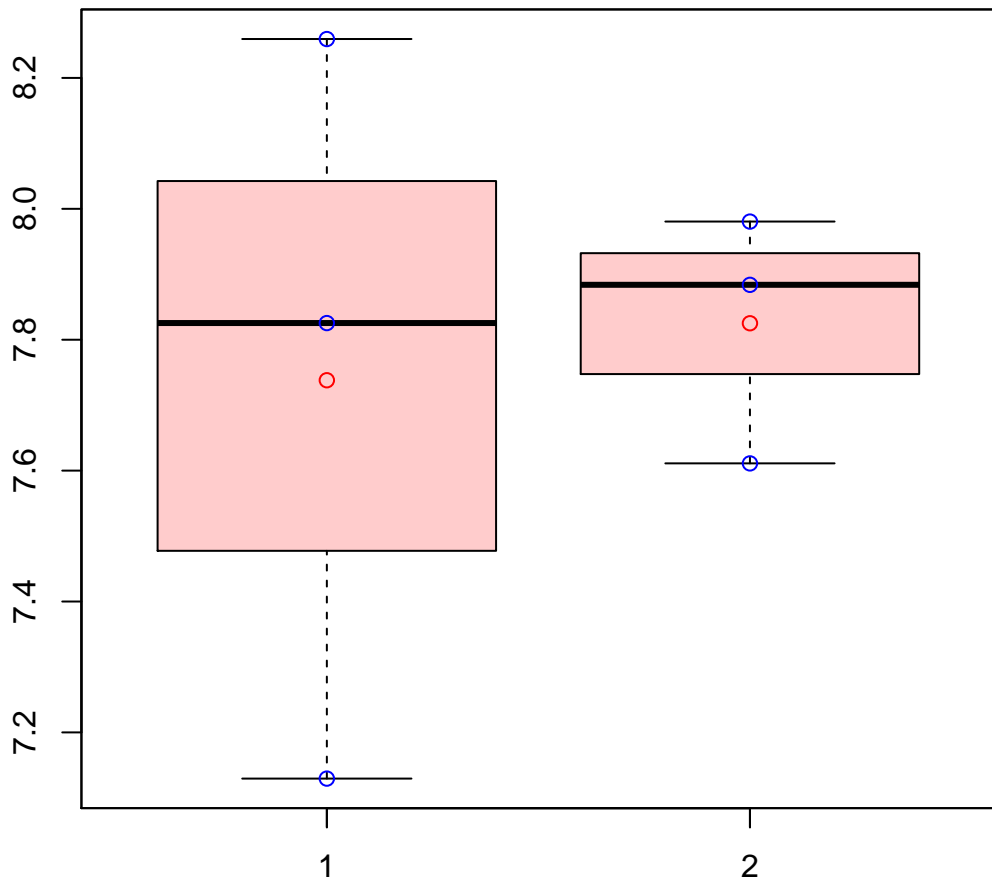

t-Test: p-value = 0.82

# E0WCS9|E0WCS9\_9POAL

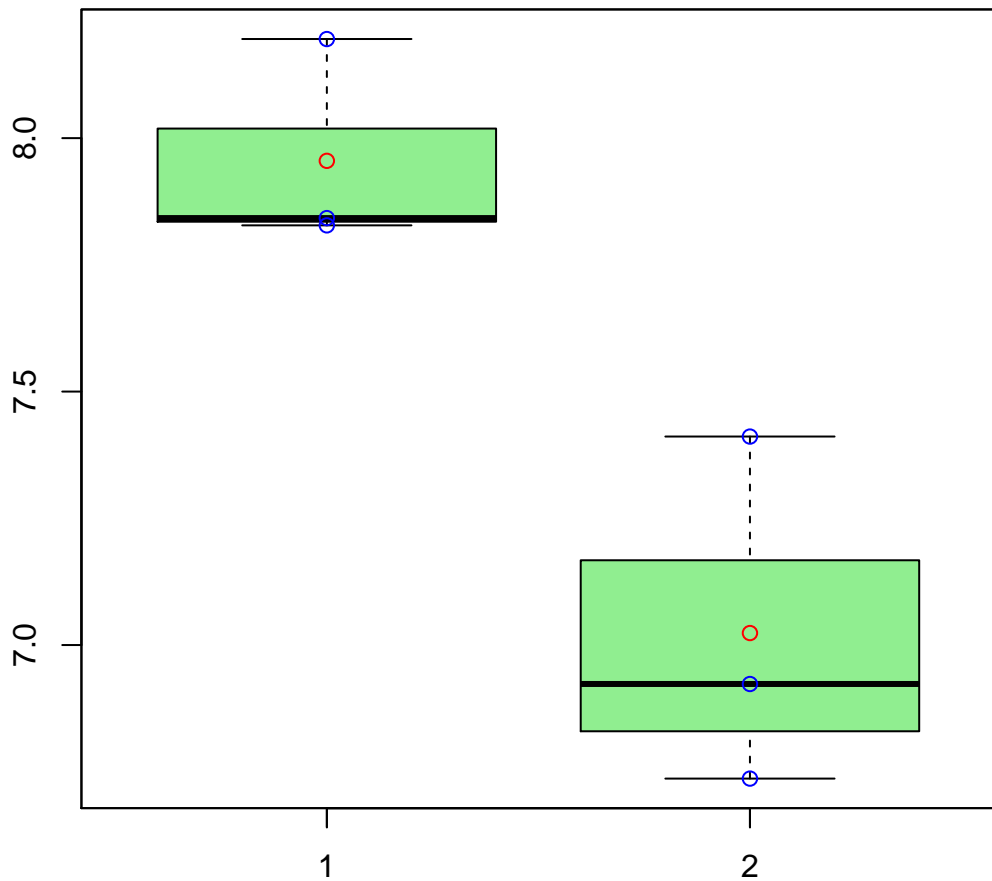

t-Test: p-value = 0.02

# E0WCU2|E0WCU2\_9POAL

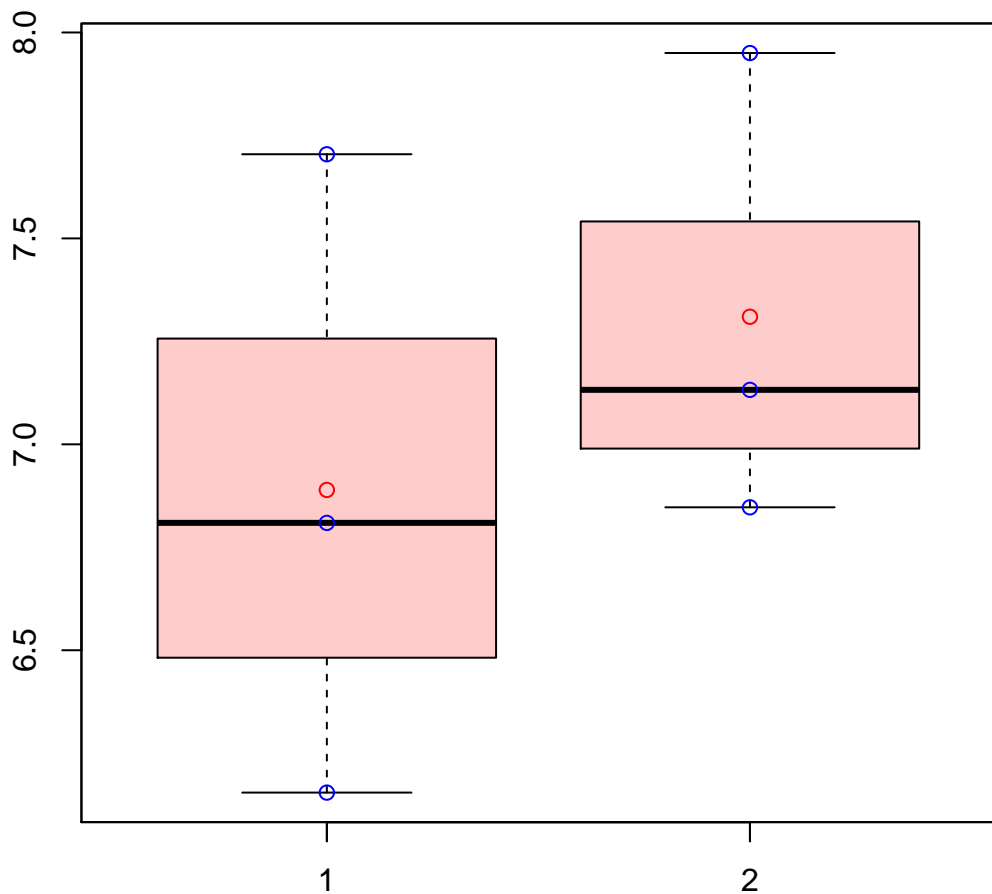

t-Test: p-value = 0.5

# E0Y9Y5|E0Y9Y5\_ORYNI

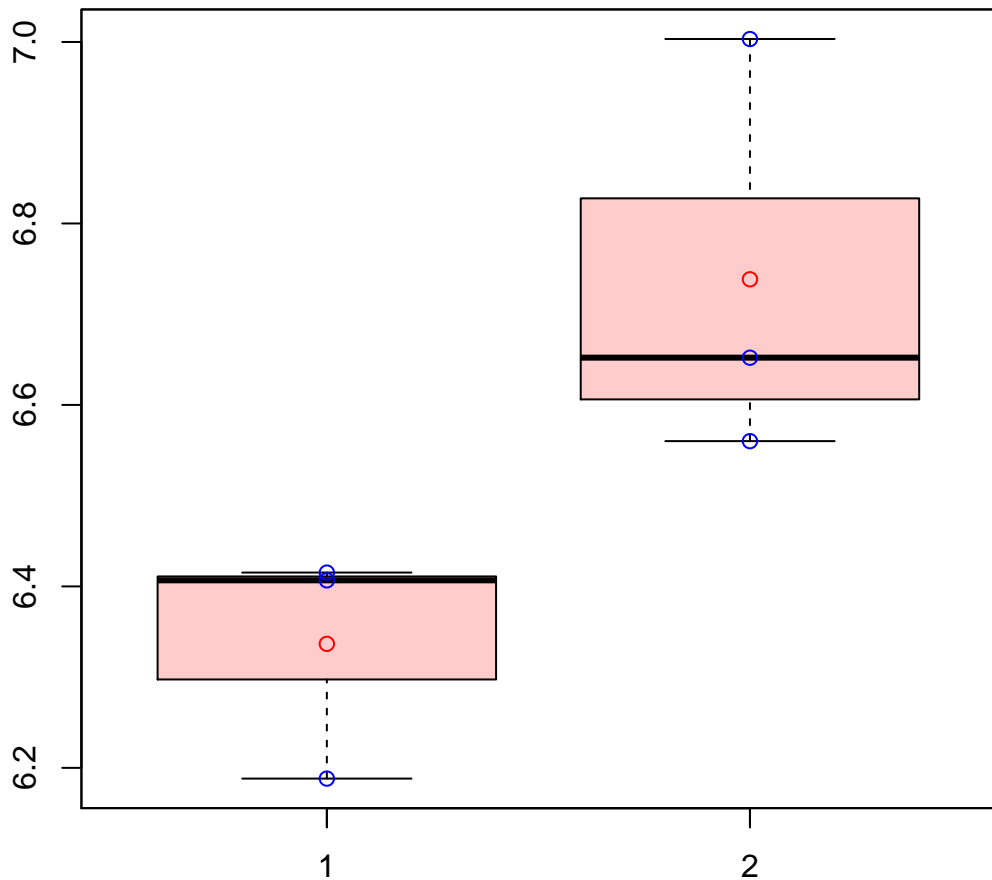

t-Test: p-value = 0.08

# E1UHL3|E1UHL3\_MUSBA

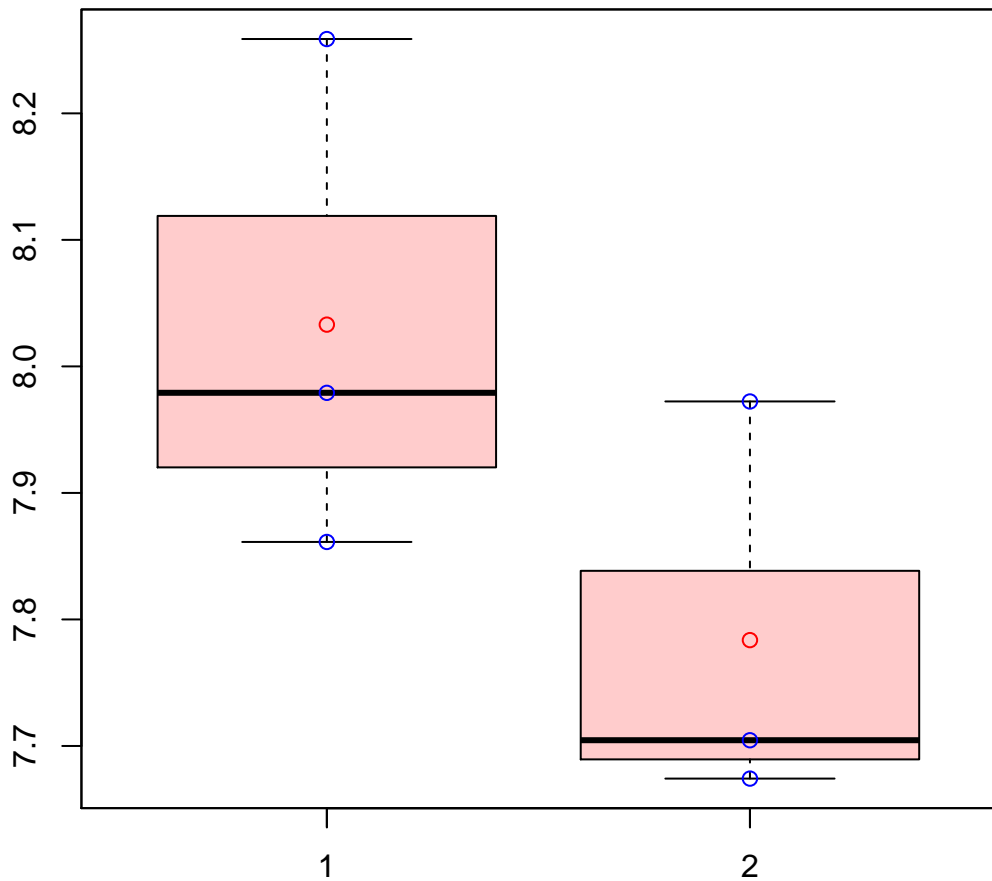

t-Test: p-value = 0.18

# E1XUD2|E1XUD2\_9POAL

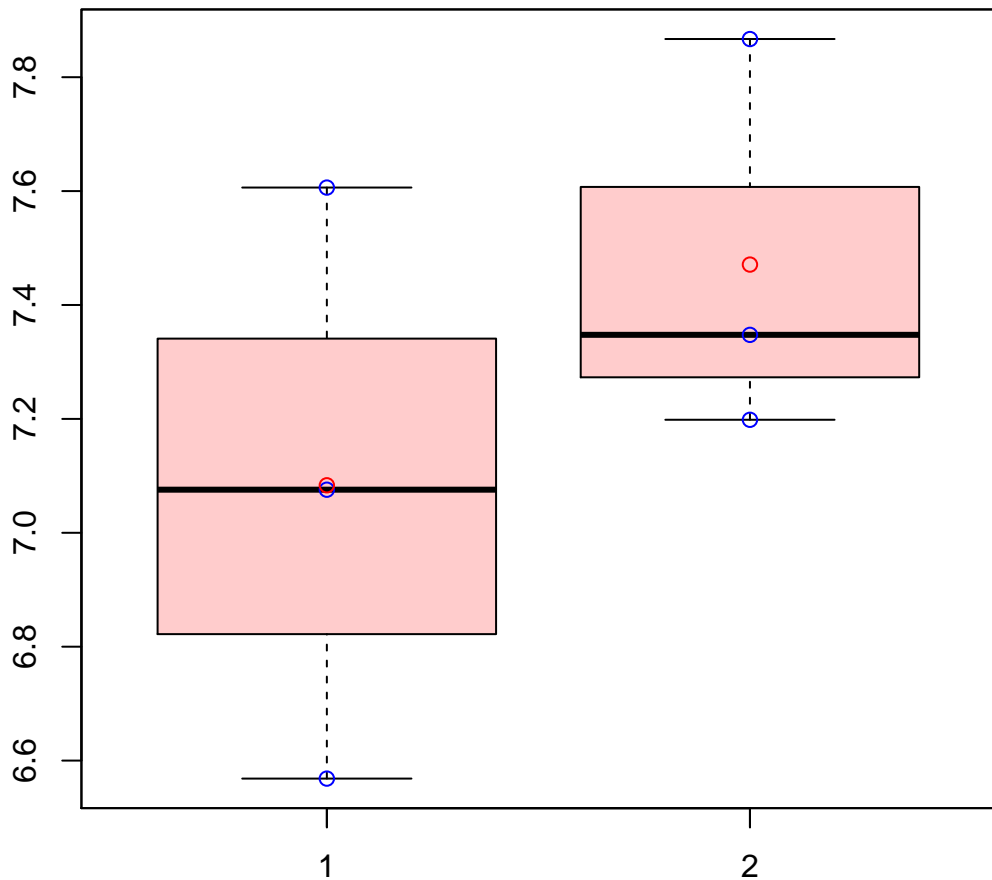

t-Test: p-value = 0.35

# E2CU71|E2CU71\_ORYMI

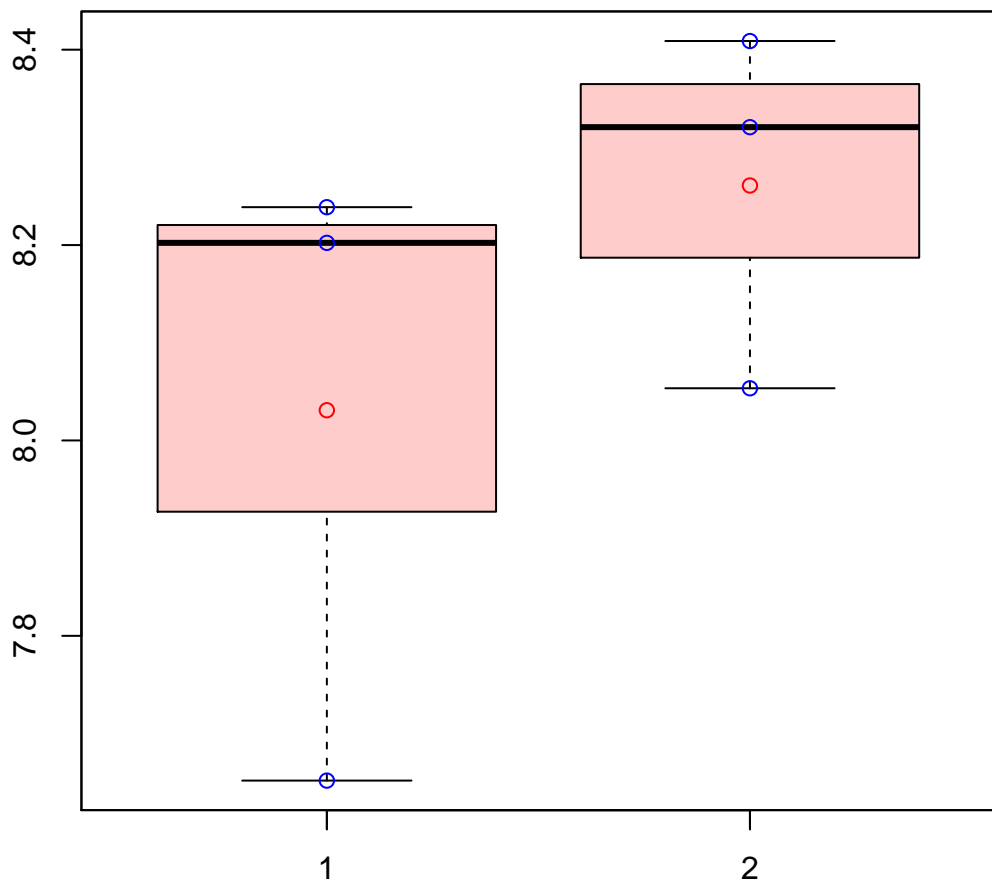

t-Test: p-value = 0.37



# E2GJX7|E2GJX7\_9POAL

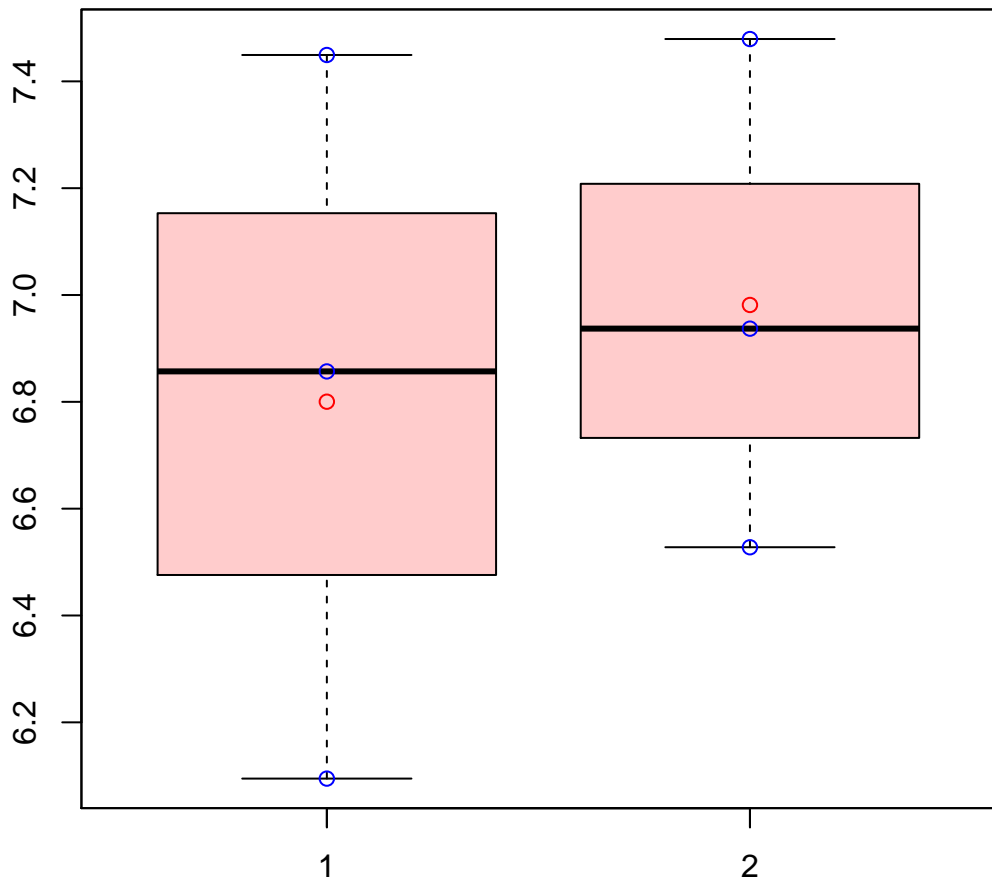

t-Test: p-value = 0.73

# E3W9C5|E3W9C5\_ZINZE

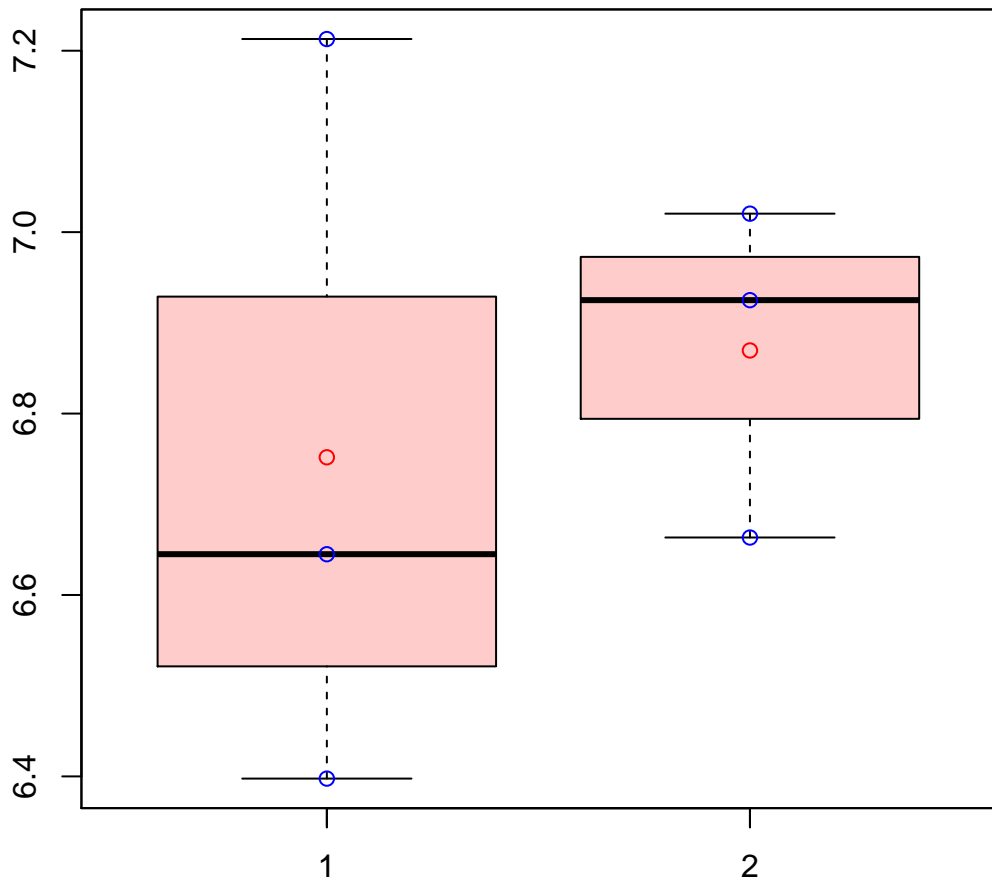

t-Test: p-value = 0.69

# E5FQ64|E5FQ64\_PENAM

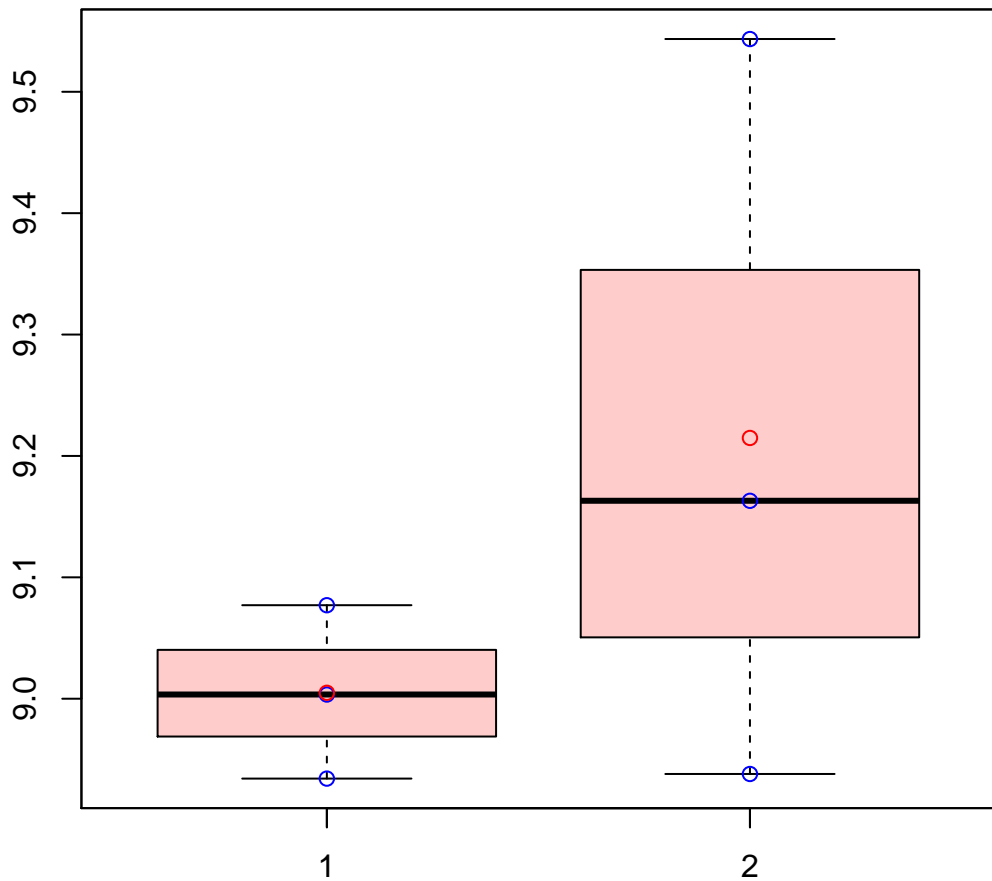

t-Test: p-value = 0.36

# E5LAH2|E5LAH2\_9POAL

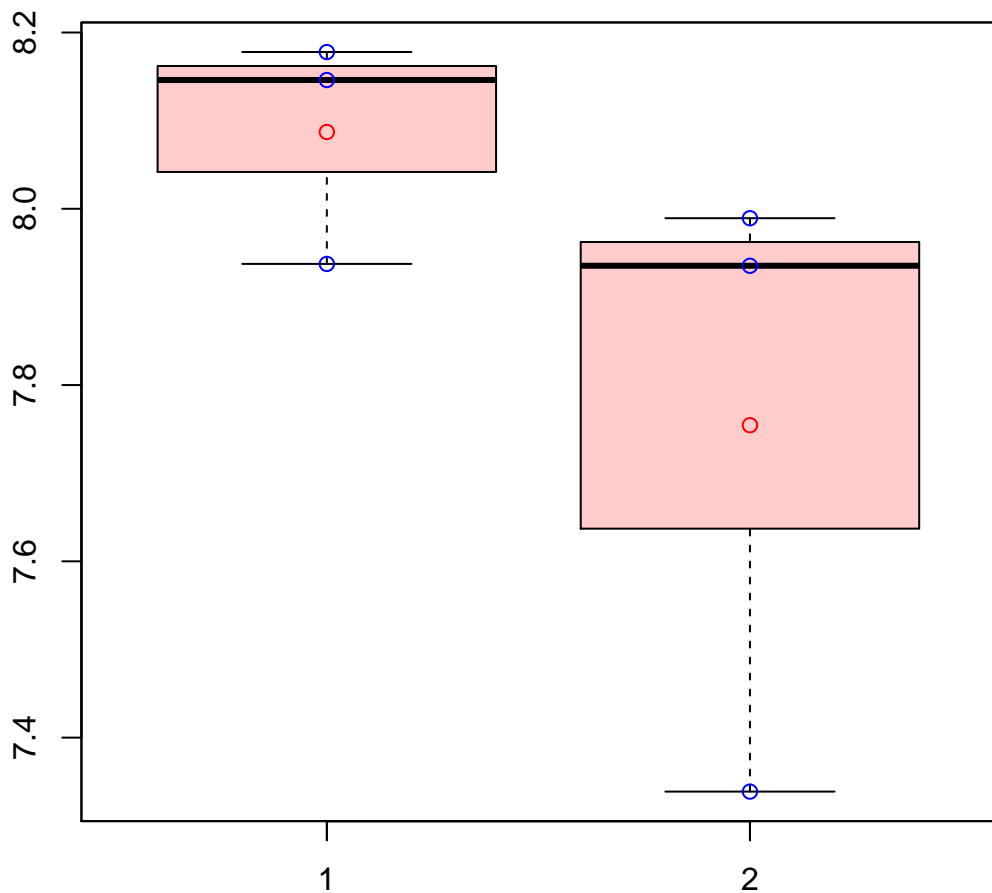

t-Test: p-value = 0.25

# E6Y429|E6Y429\_9POAL

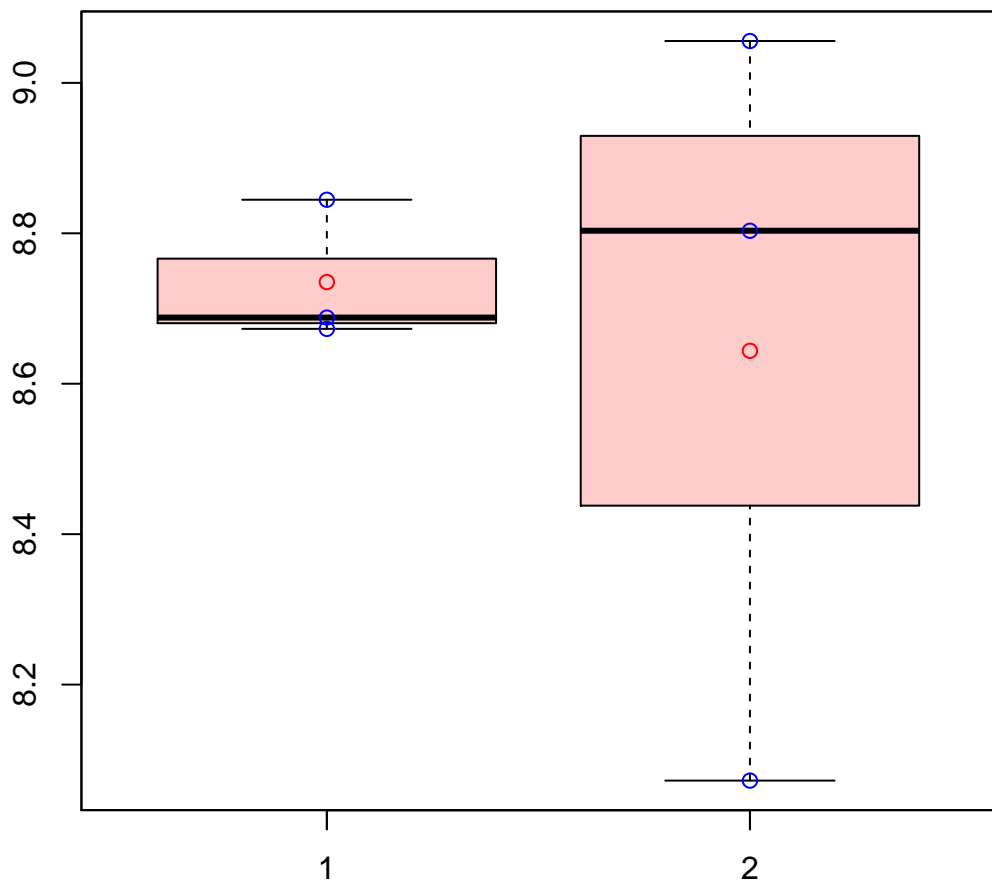

t-Test: p-value = 0.79

# E7BM00|E7BM00\_9ASPA

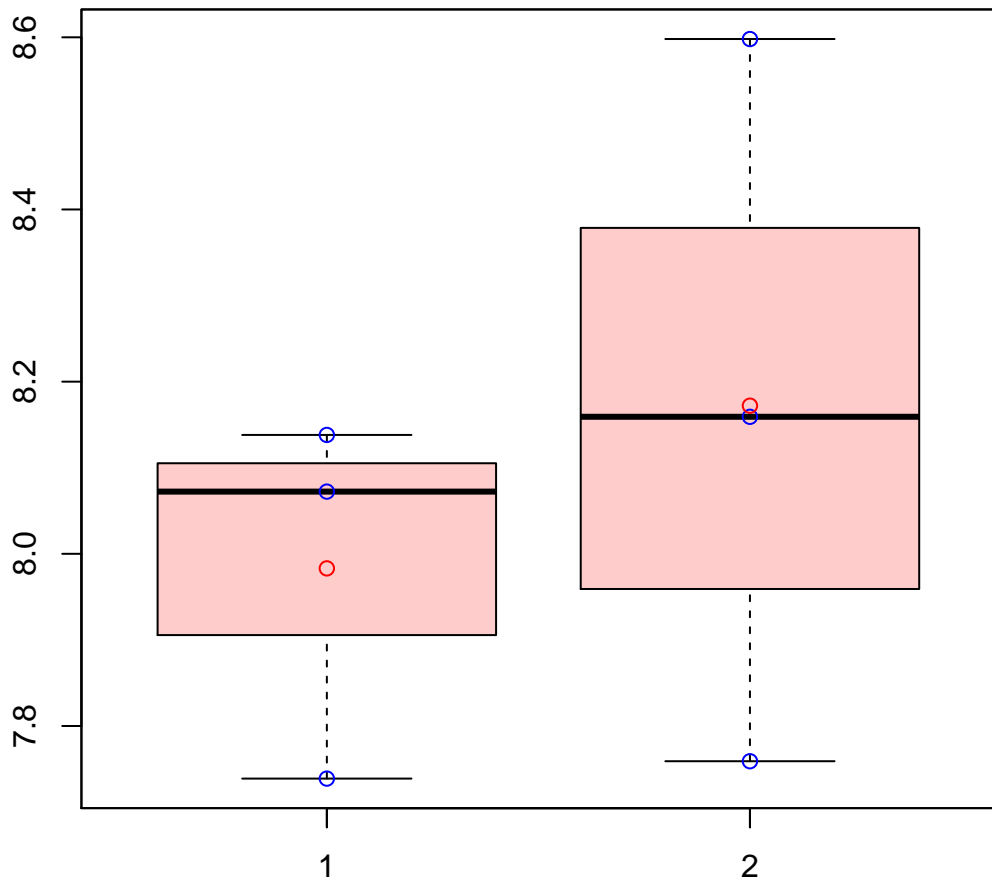

t-Test: p-value = 0.54

# E9KIP4|E9KIP4\_ORYSJ

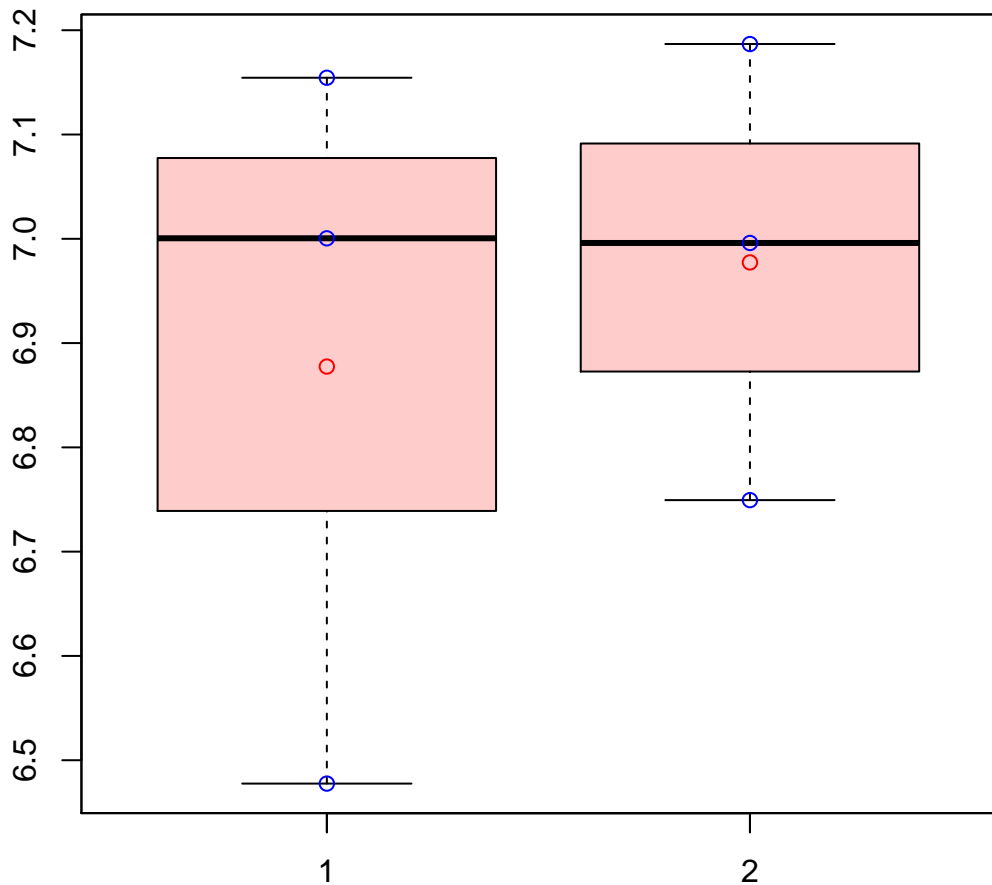

t-Test: p-value = 0.7

# E9KIQ1|E9KIQ1\_ORYSJ

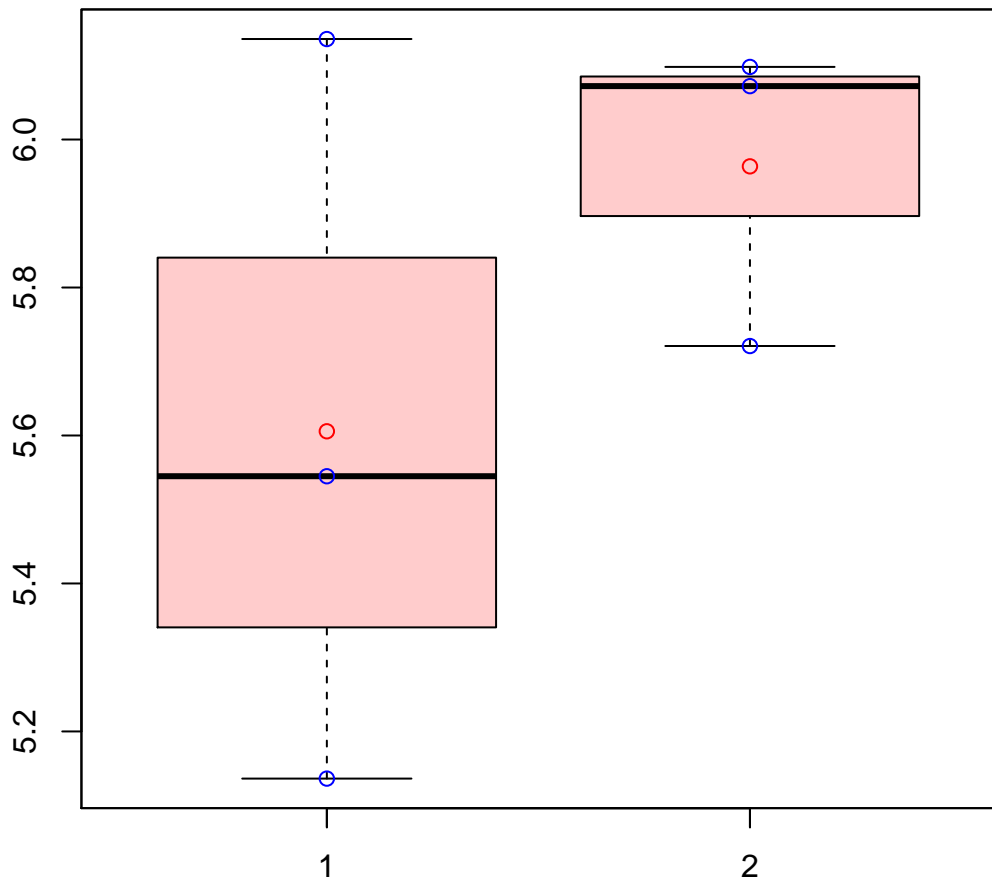

t-Test: p-value = 0.35



# E9KIV8|E9KIV8\_9ORYZ

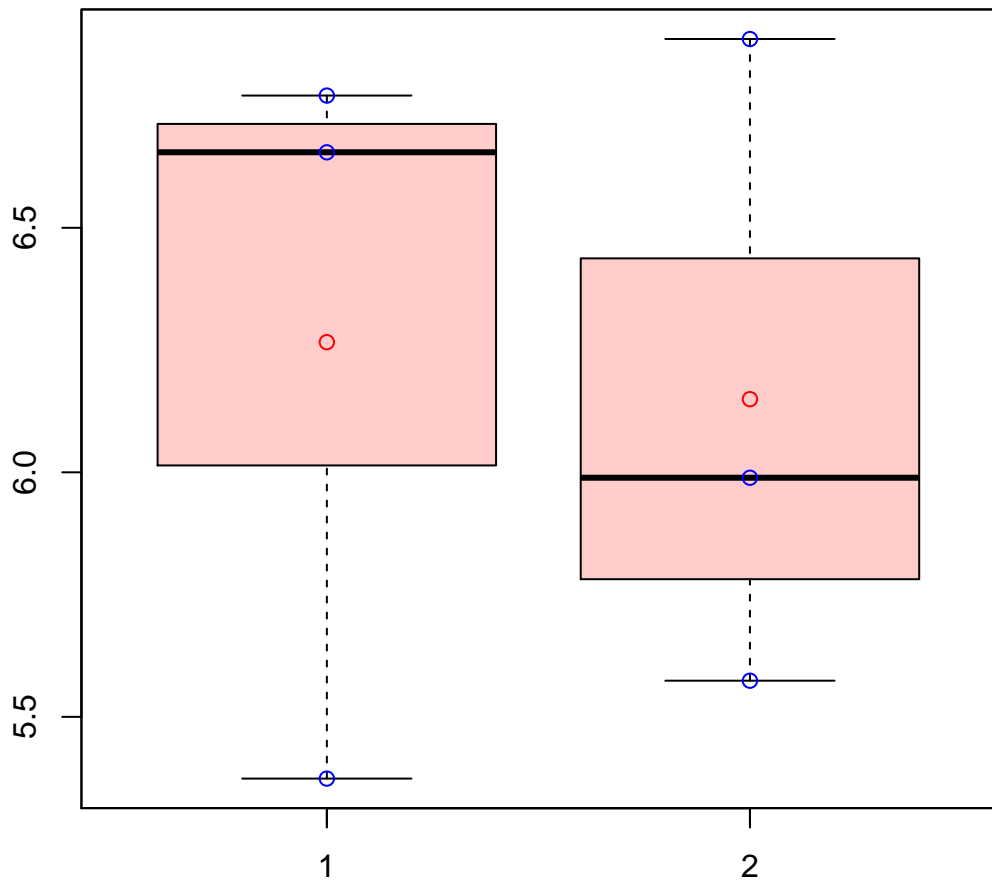

t-Test: p-value = 0.85

# E9KJF9|E9KJF9\_9POAL

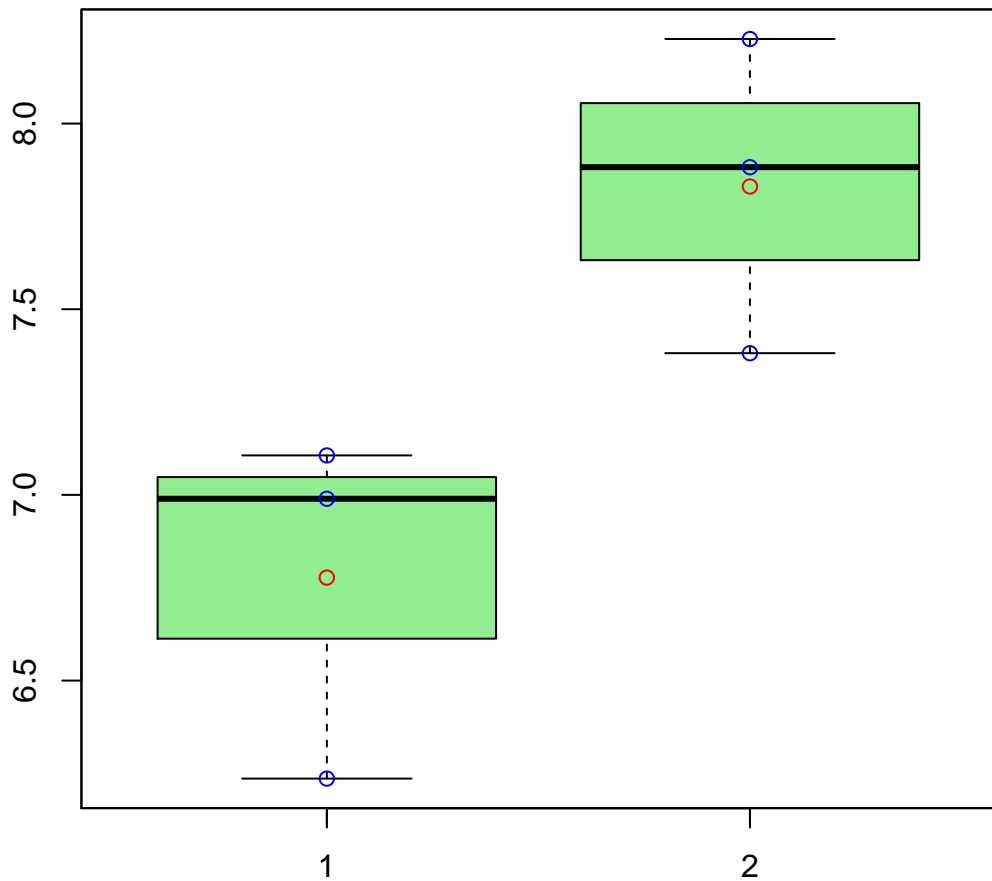

t-Test: p-value = 0.05

E9KUH8|E9KUH8\_9POAL

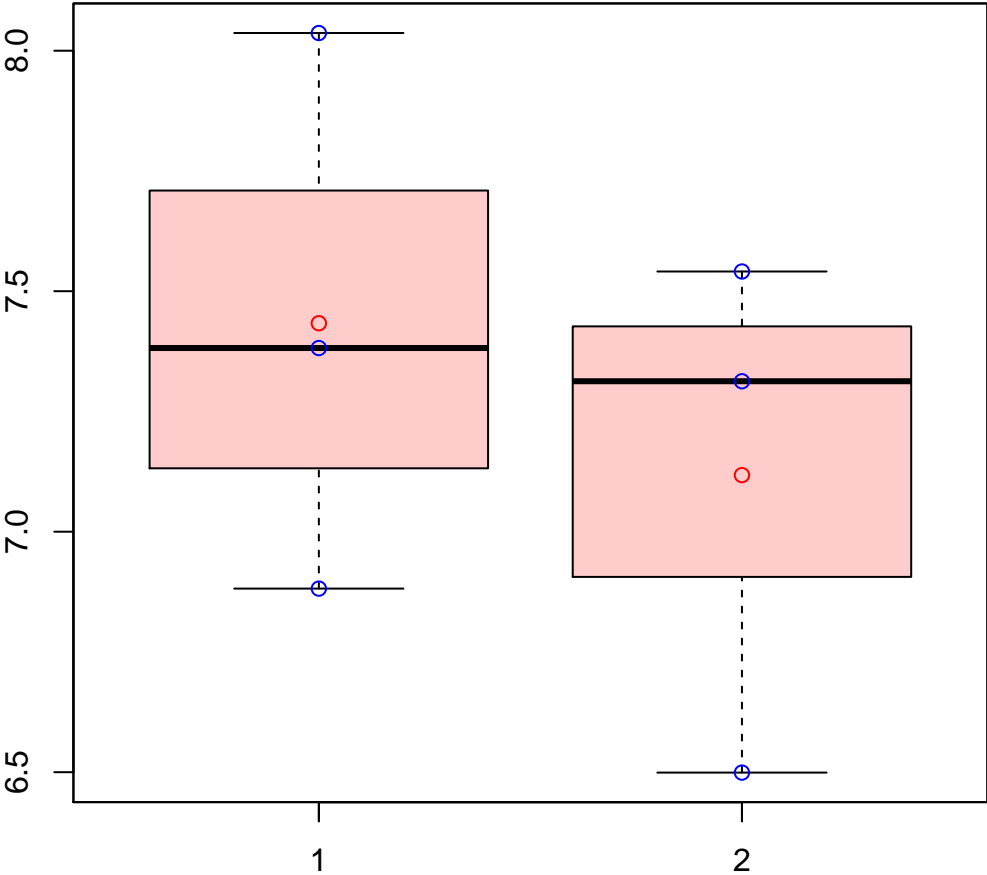

t-Test: p-value = 0.53

# E9KUM9|E9KUM9\_9POAL

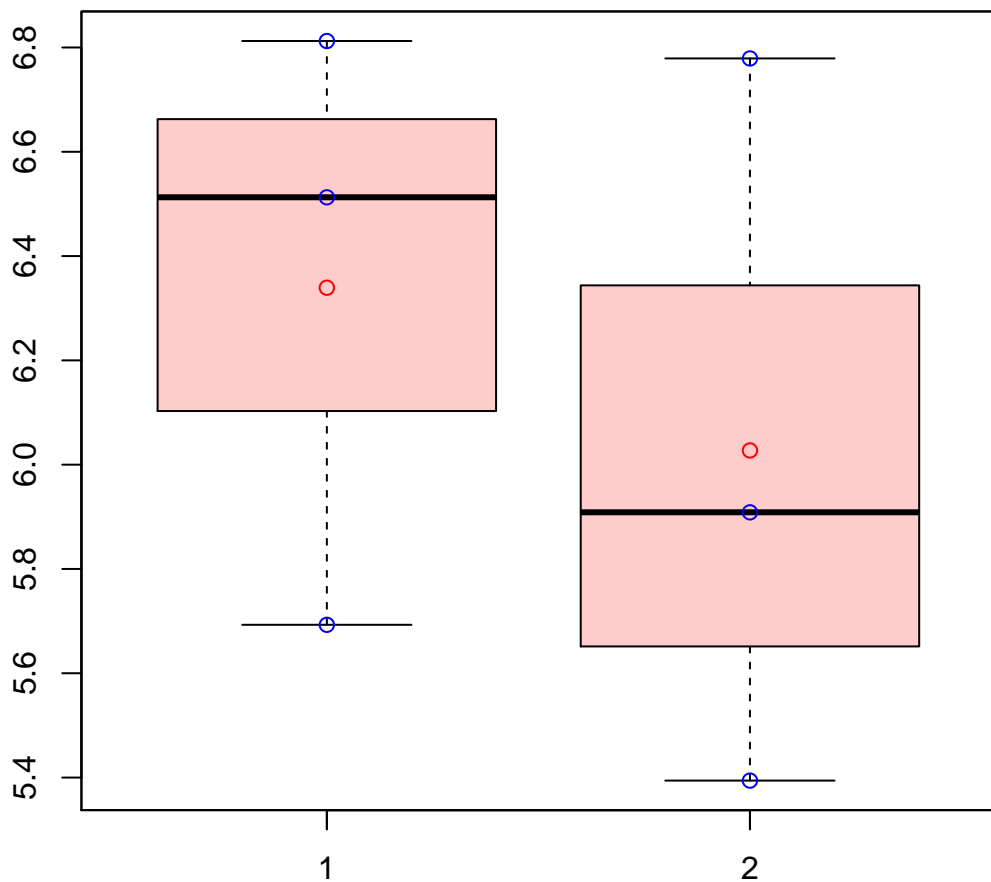

t-Test: p-value = 0.59

# E9NM57|E9NM57\_MUSAC

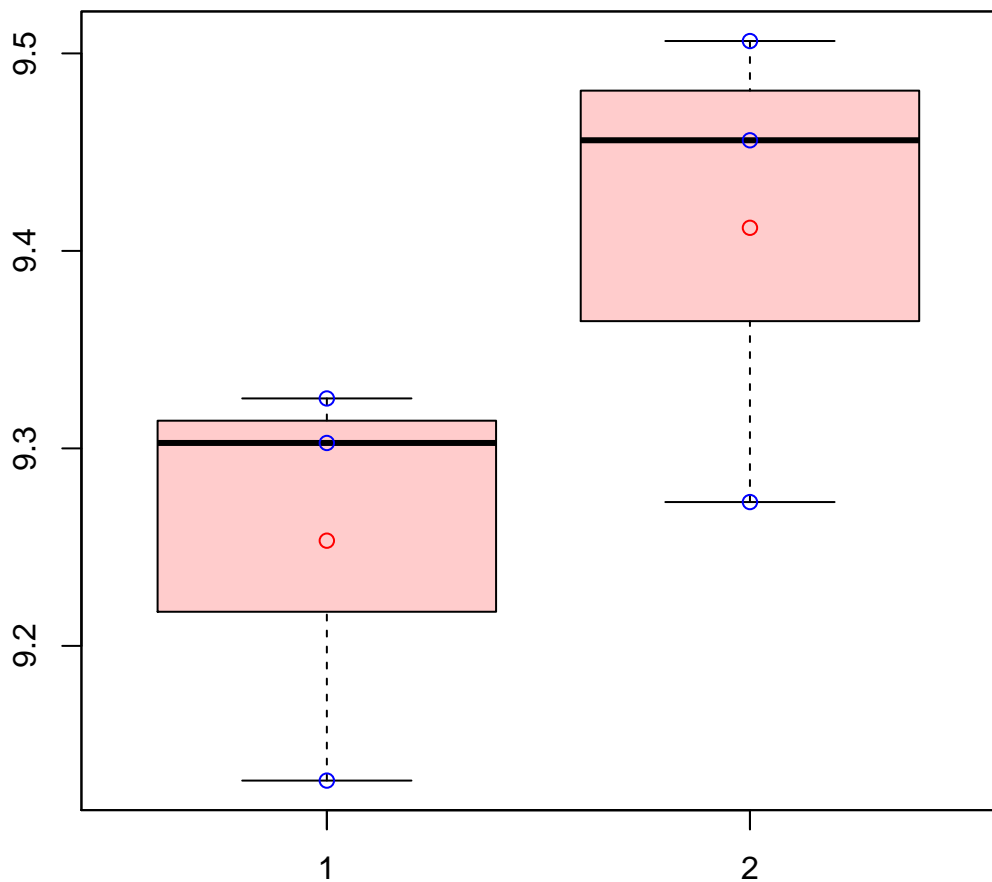

t-Test: p-value = 0.17

# E9NQE1|E9NQE1\_MAIZE

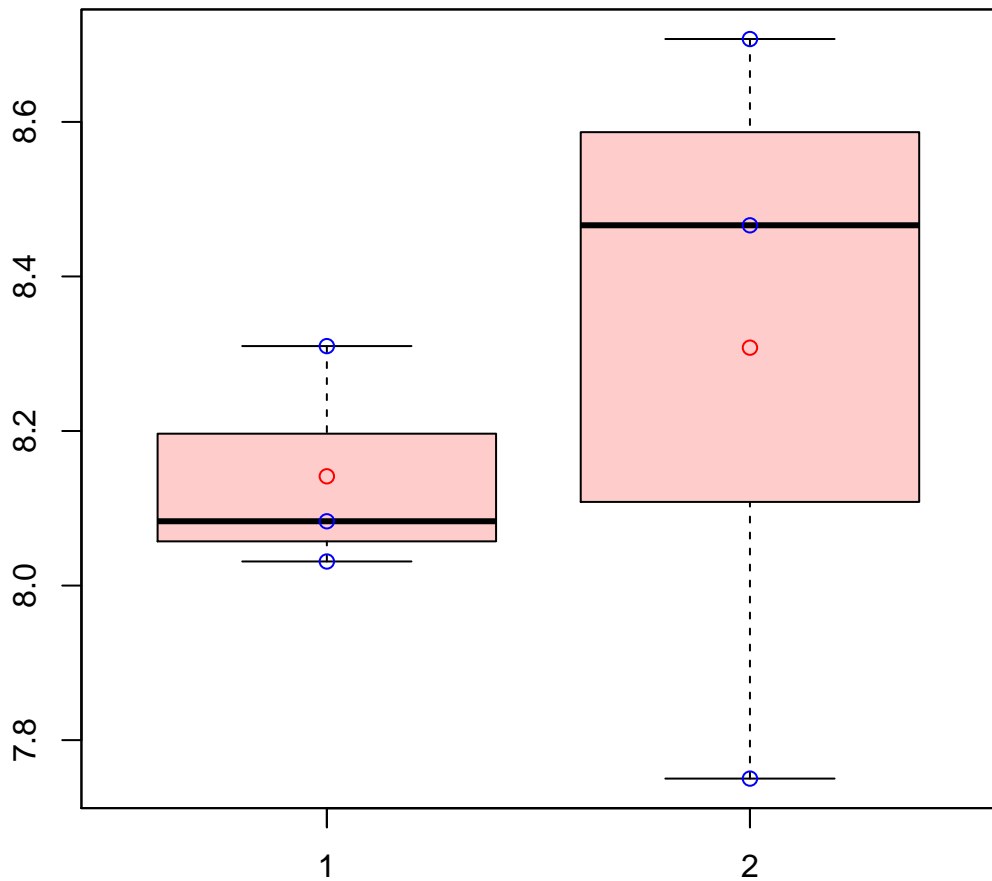

t-Test: p-value = 0.63

# E9RJM8|E9RJM8\_PANMI

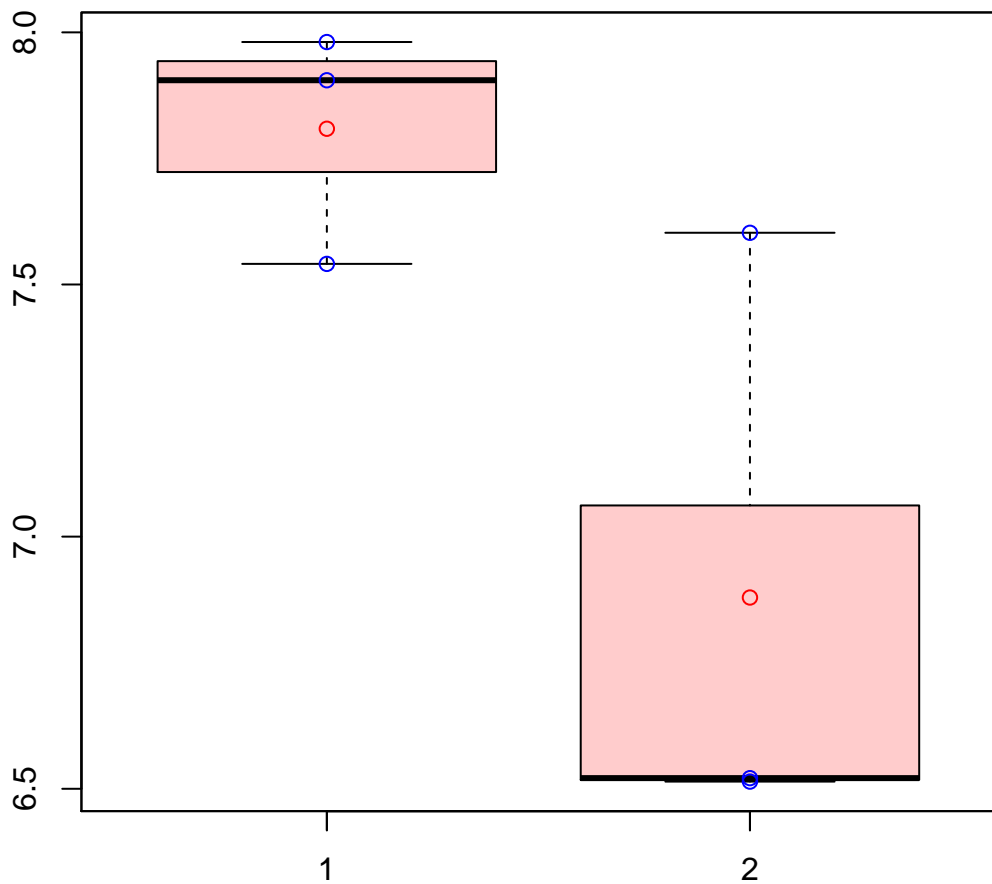

t-Test: p-value = 0.11

# F1DI22|F1DI22\_PENAM

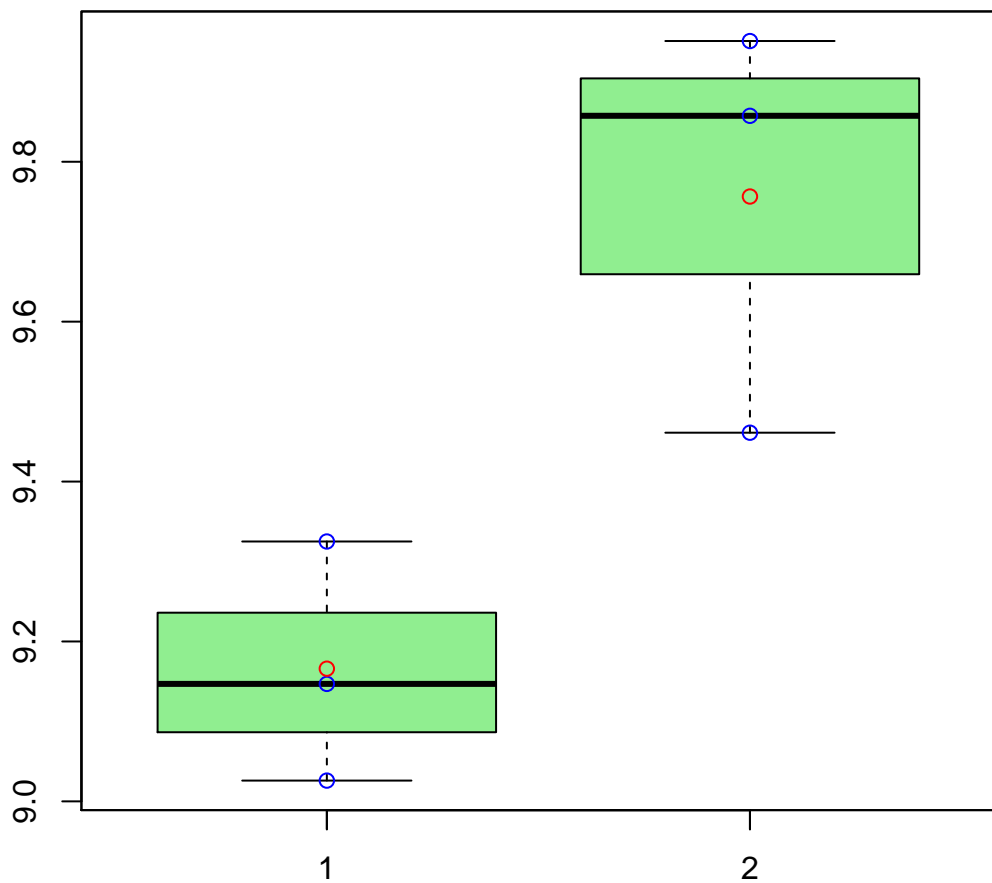

t-Test: p-value = 0.04



# F2CQH7|F2CQH7\_HORVD

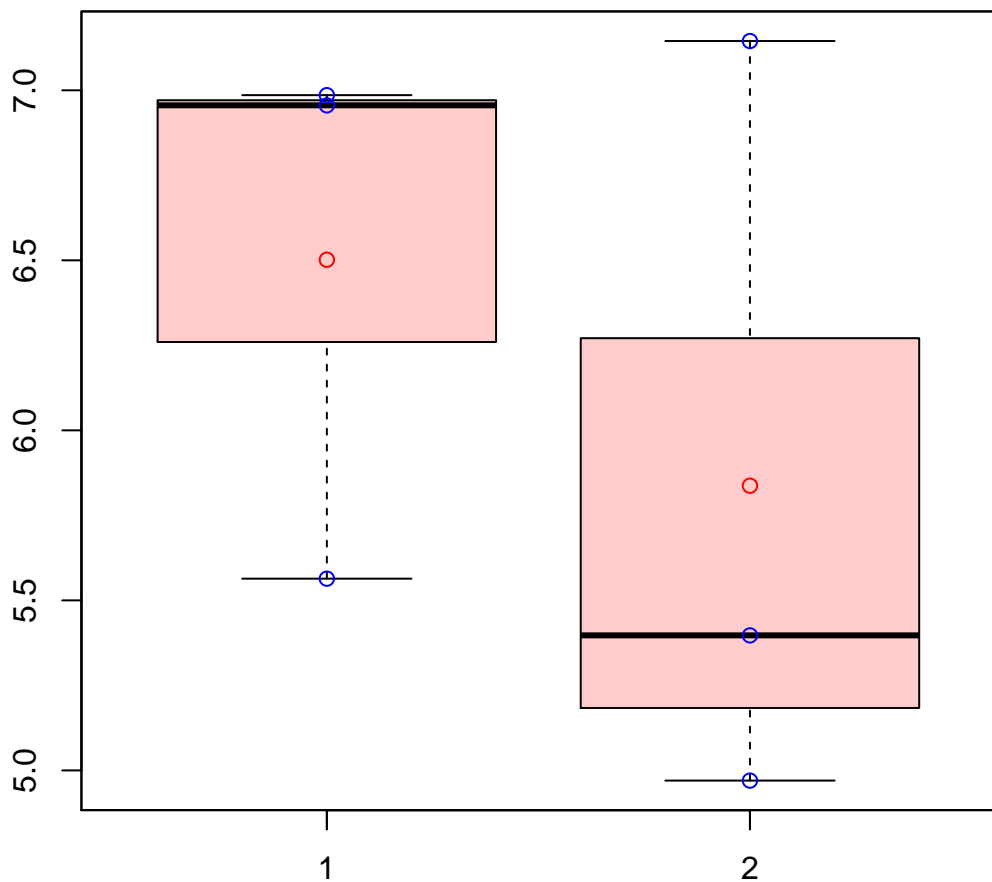

t-Test: p-value = 0.46

## F2CQV1|F2CQV1\_HORVD

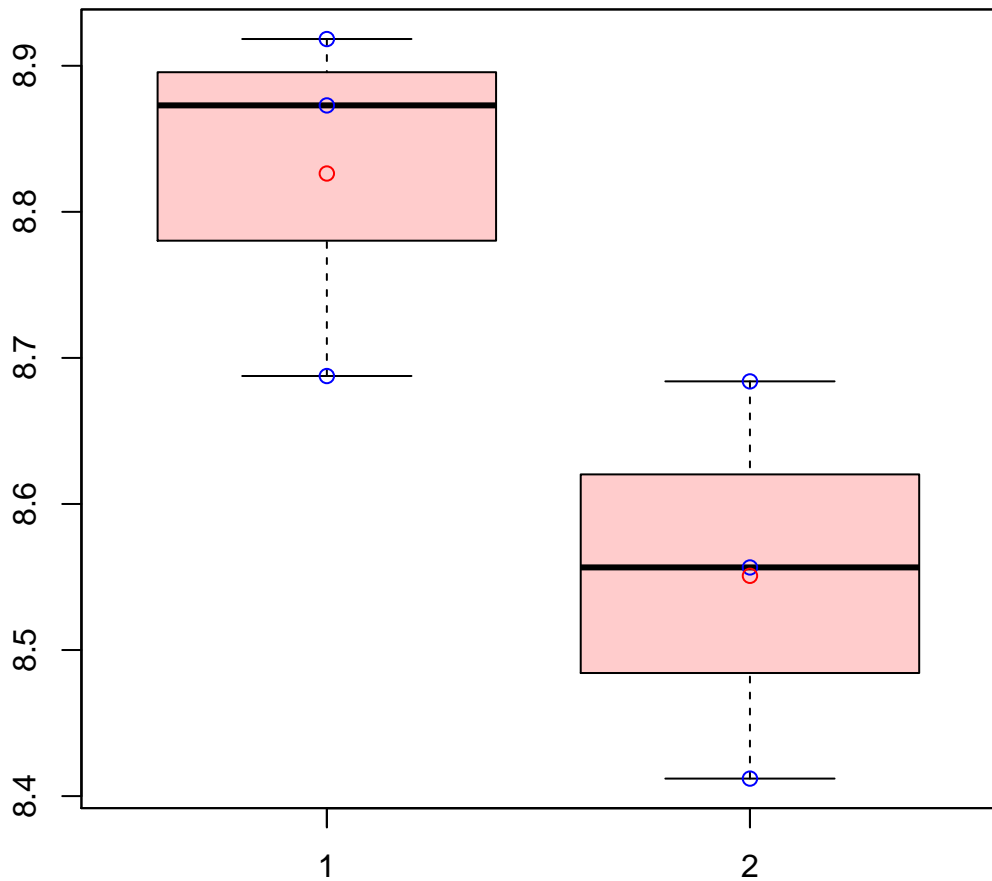

t-Test: p-value = 0.06

# F2CQZ3|F2CQZ3\_HORVD

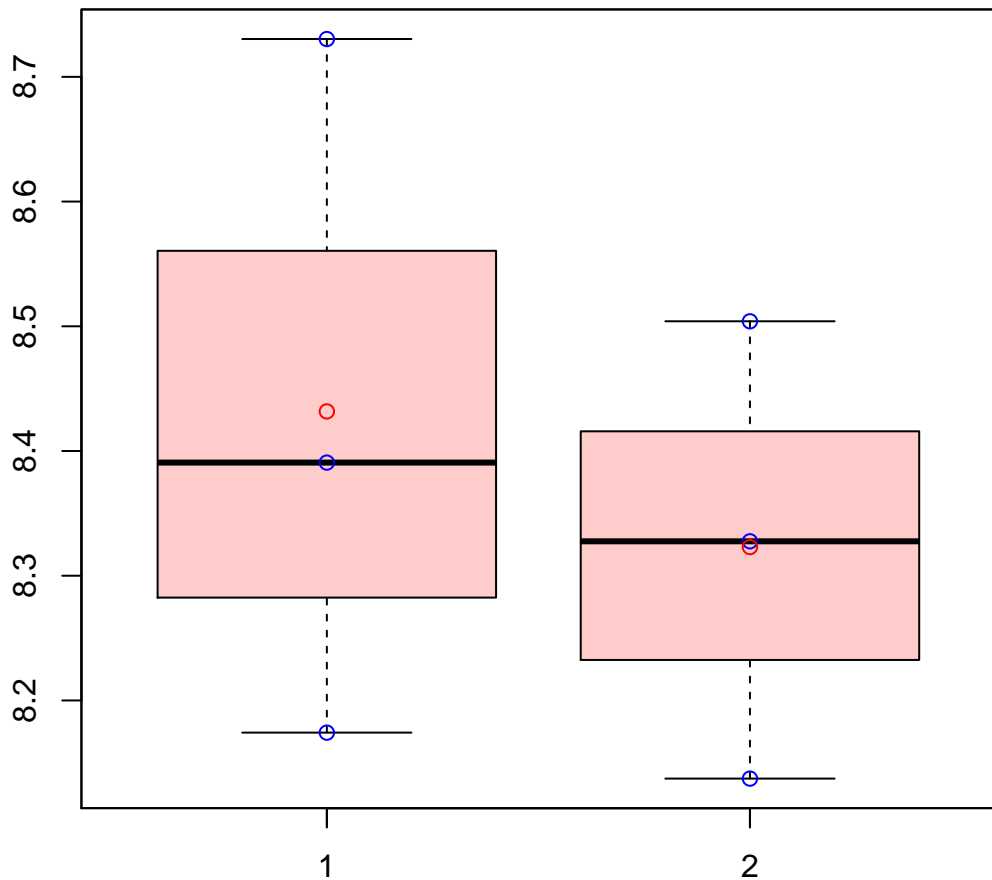

t-Test: p-value = 0.61

## F2CR16|F2CR16\_HORVD

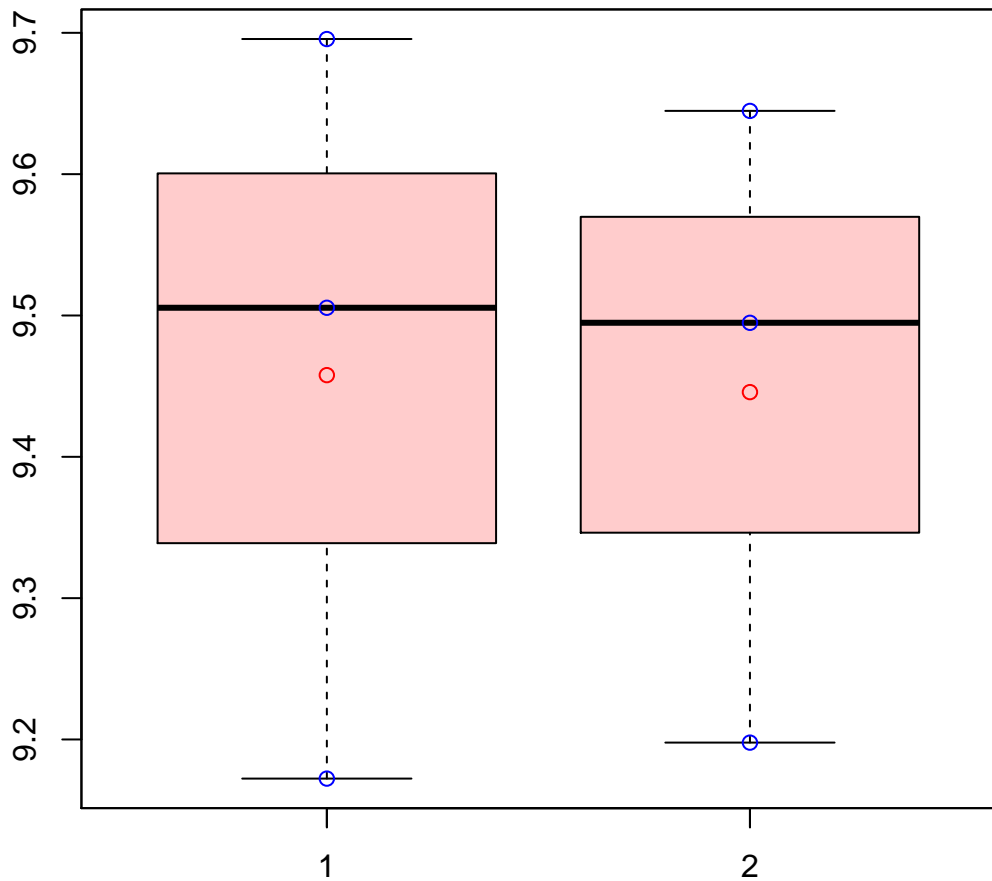

t-Test: p-value = 0.96

## F2CRH9|F2CRH9\_HORVD

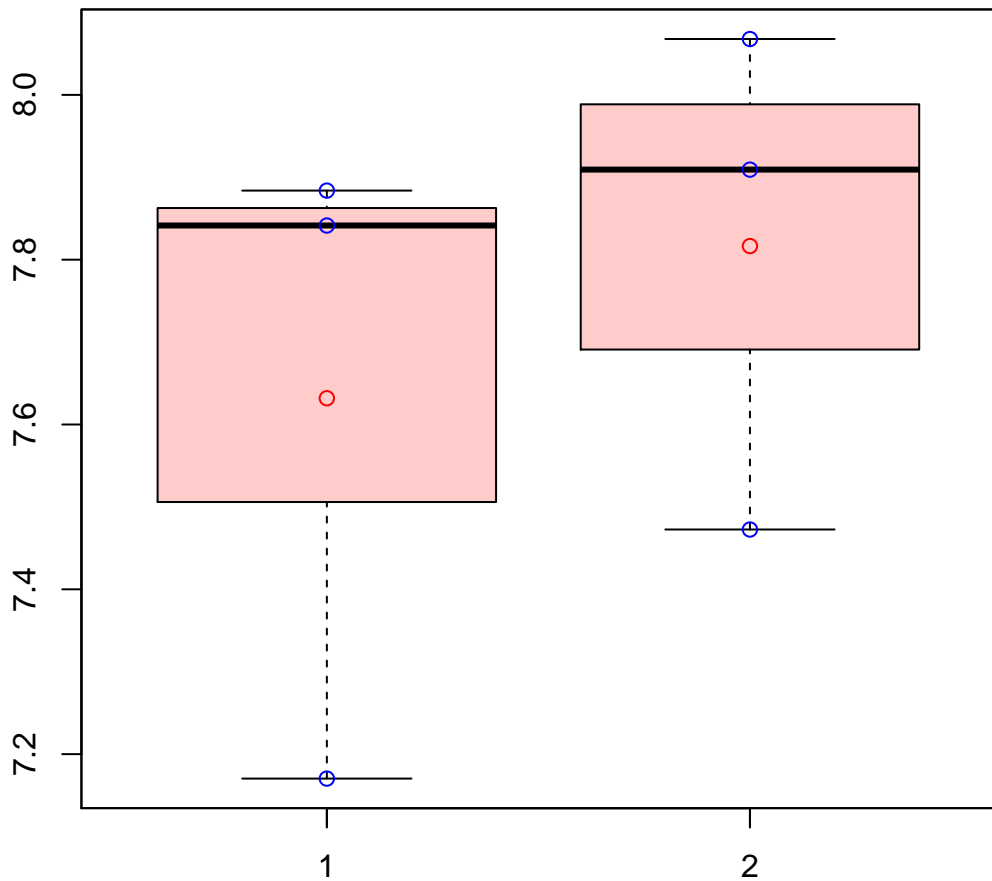

t-Test: p-value = 0.56

# F2CRJ8|F2CRJ8\_HORVD

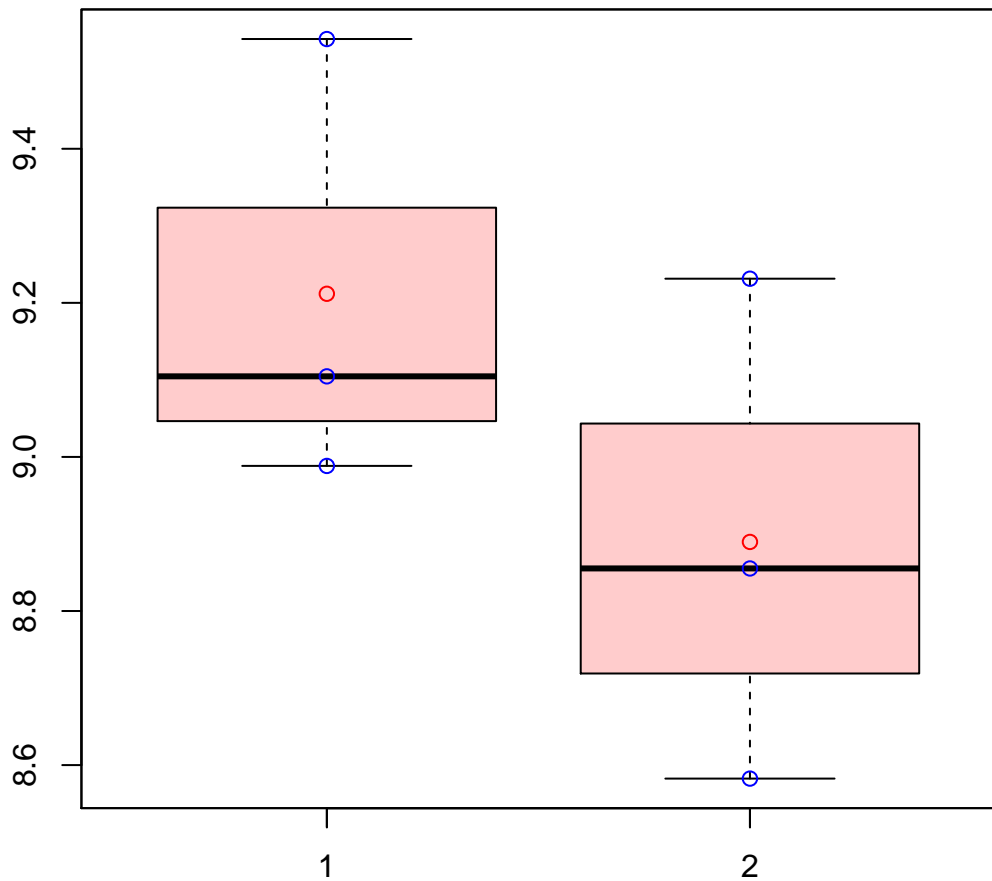

t-Test: p-value = 0.27

## F2CRK9|F2CRK9\_HORVD

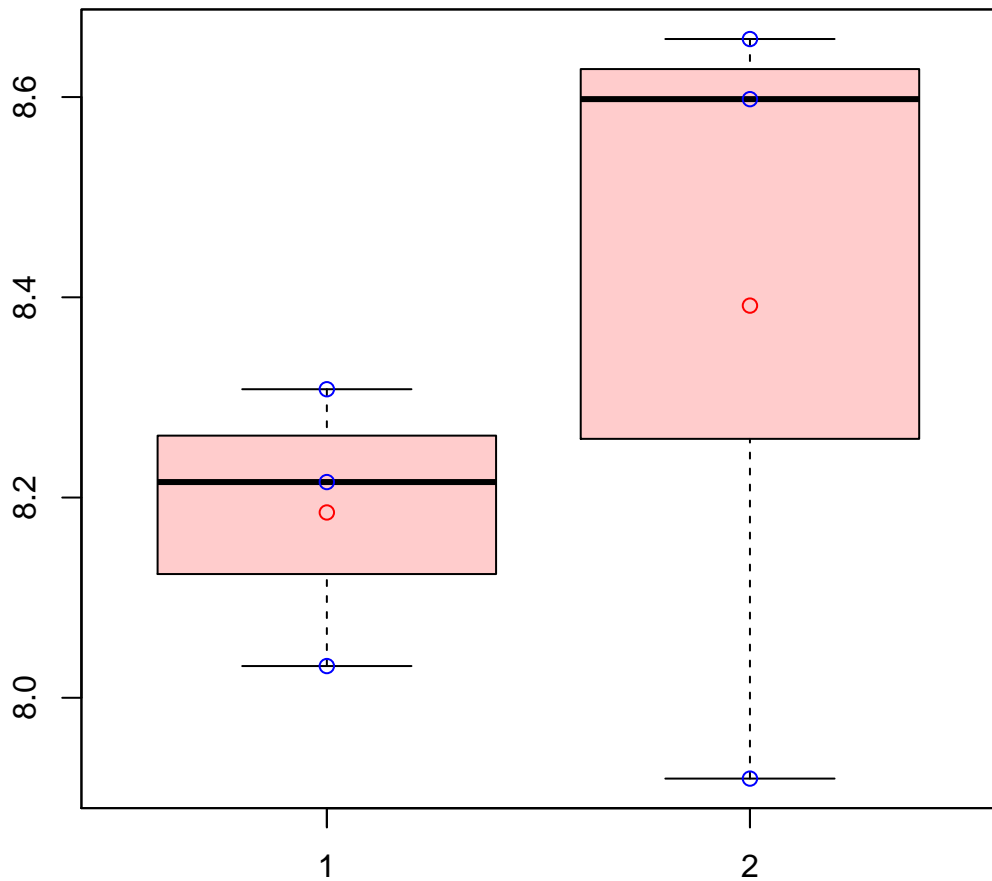

t-Test: p-value = 0.48

# F2CRL3|F2CRL3\_HORVD

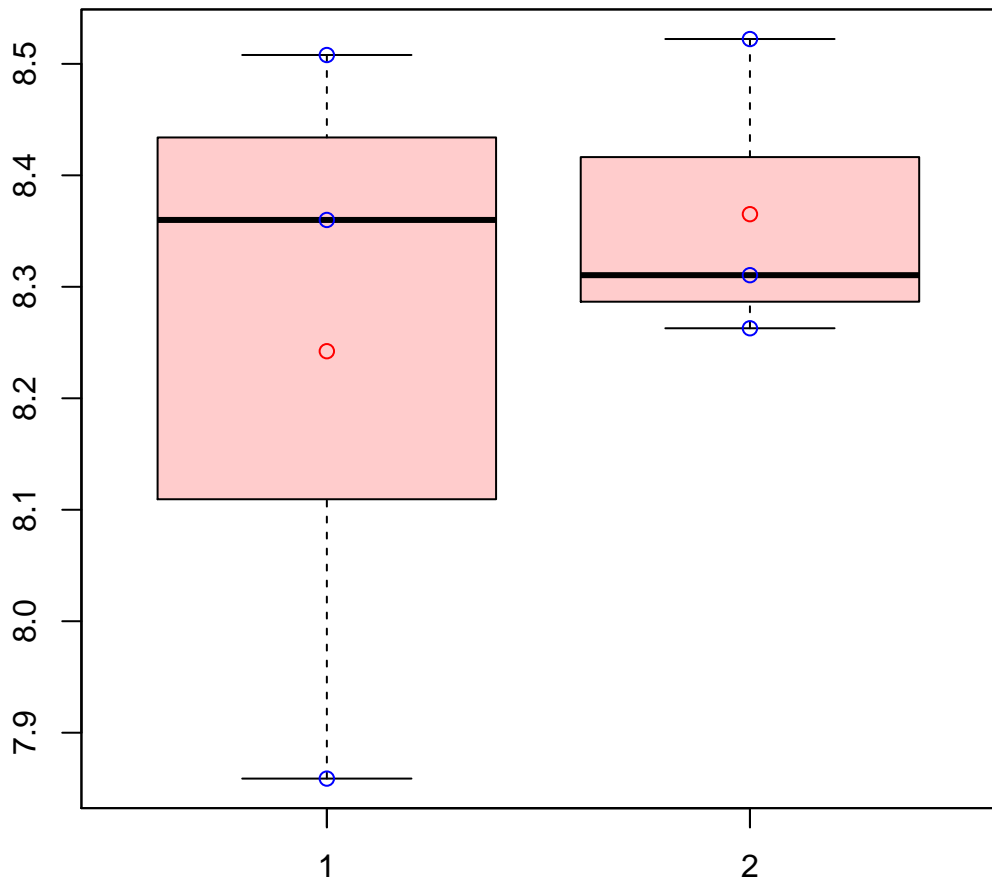

t-Test: p-value = 0.61



## F2CRM3|F2CRM3\_HORVD

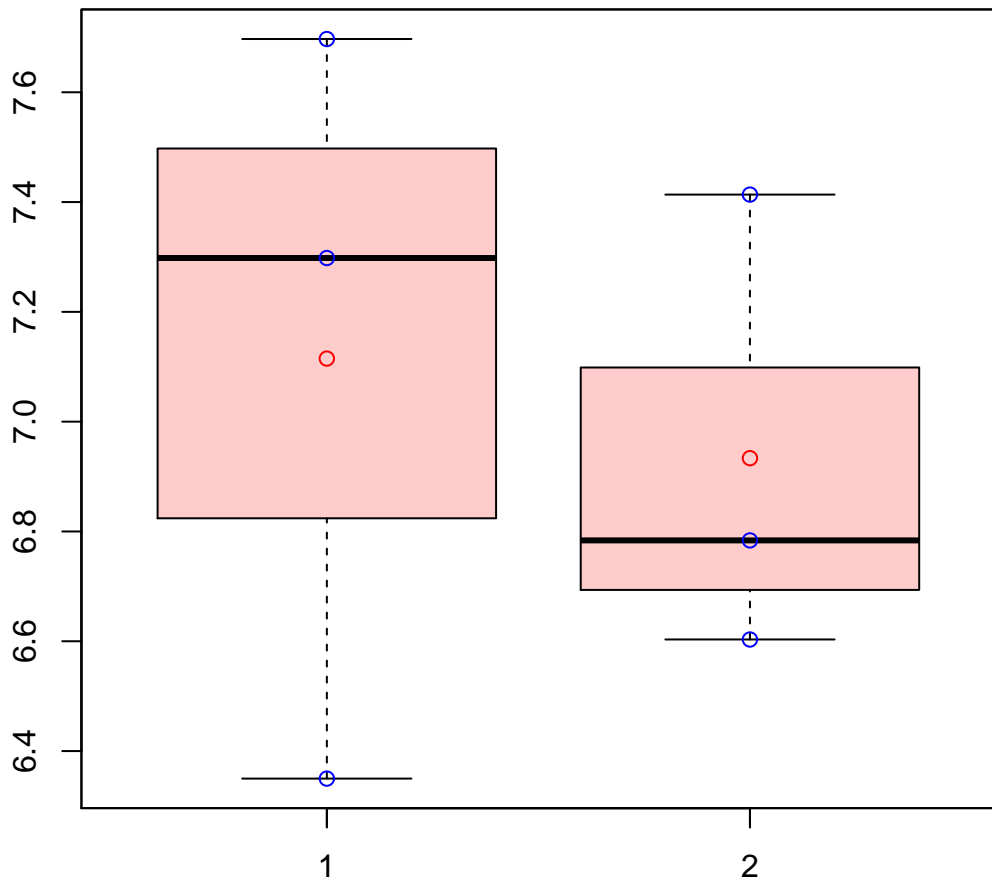

t-Test: p-value = 0.72

# F2CS63|F2CS63\_HORVD

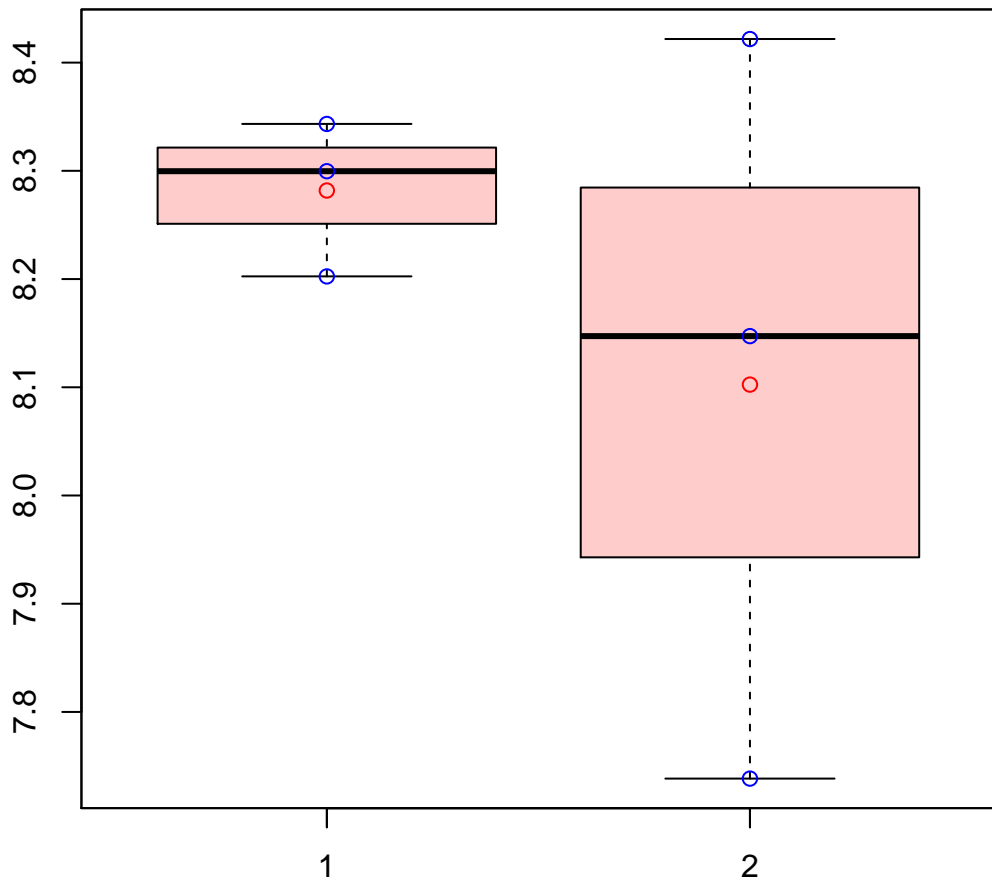

t-Test: p-value = 0.46

# F2CS78|F2CS78\_HORVD

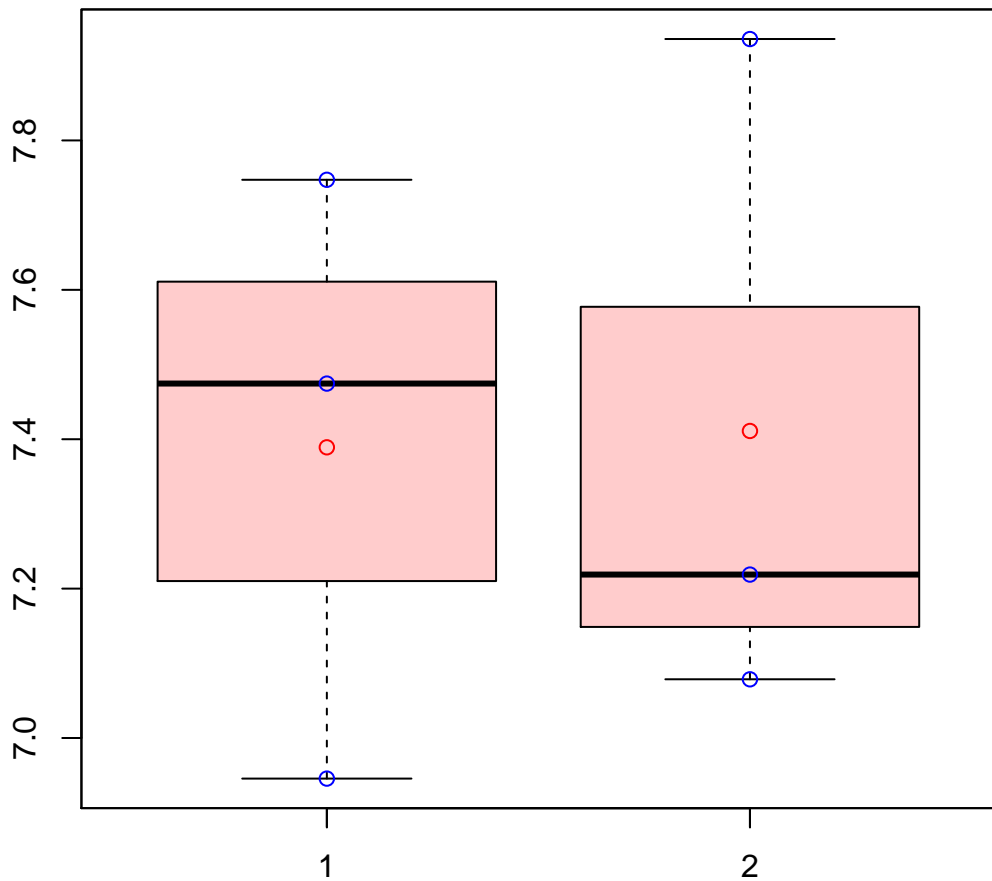

t-Test: p-value = 0.95

# F2CSA7|F2CSA7\_HORVD

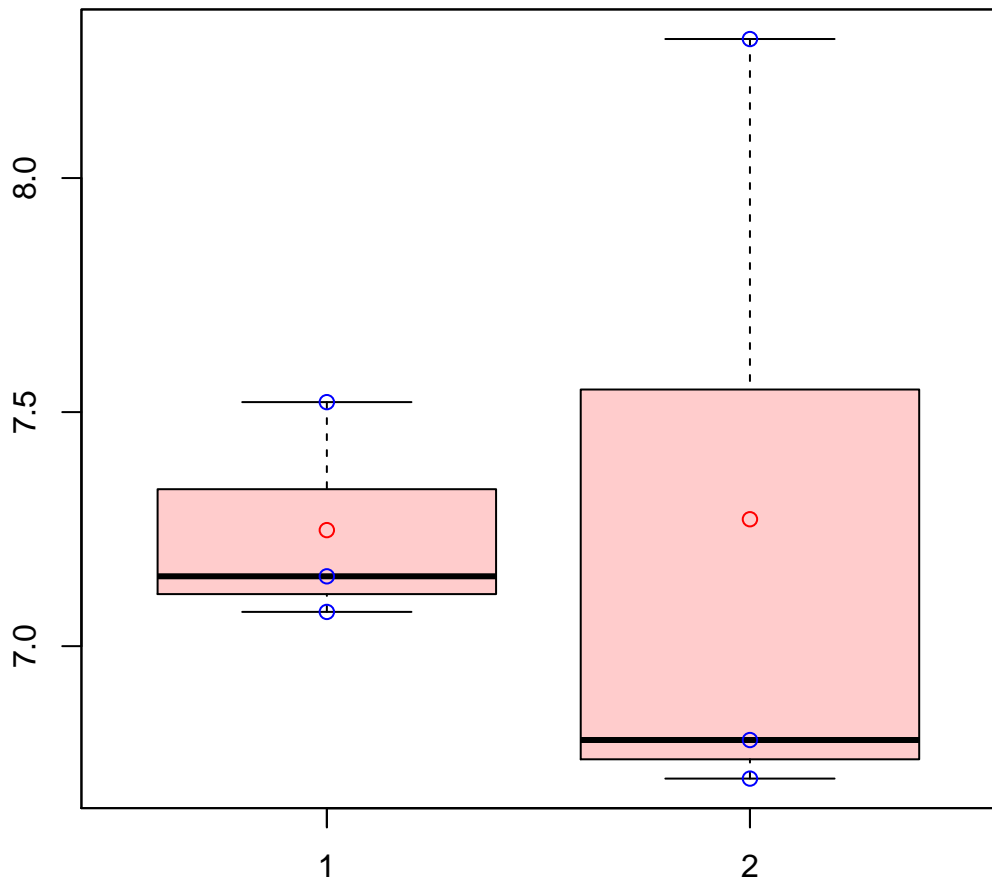

t-Test: p-value = 0.97

## F2CTE6|F2CTE6\_HORVD

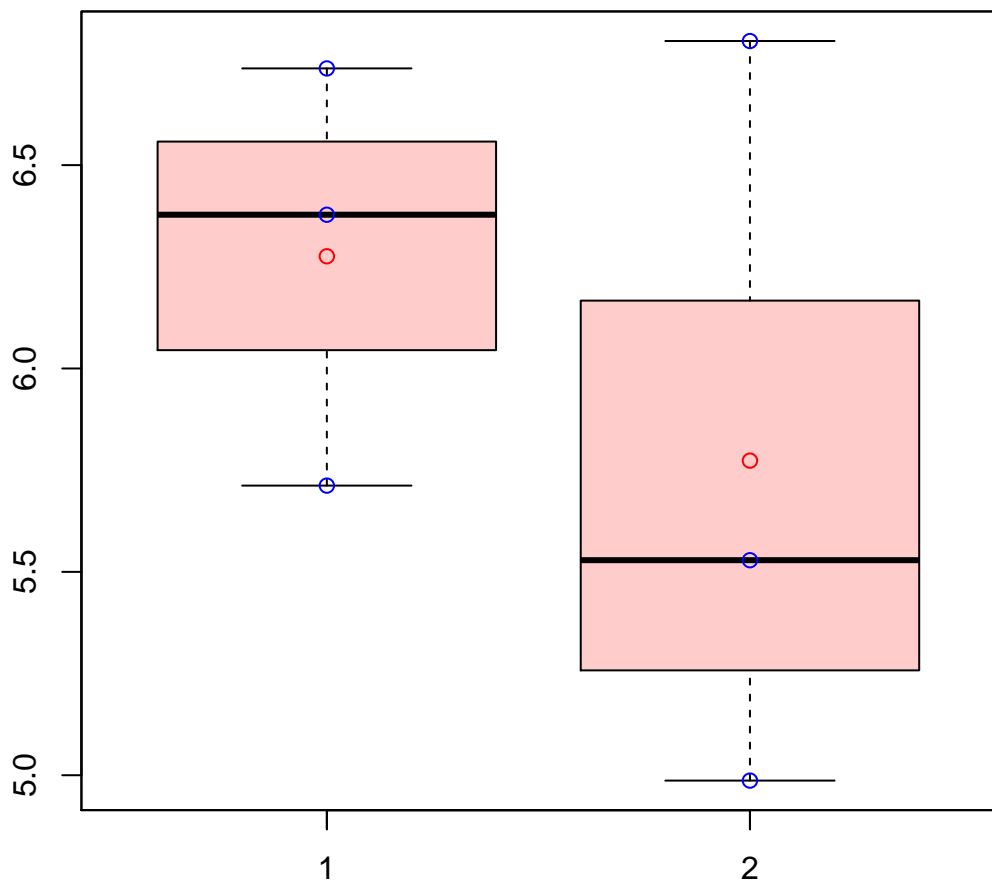

t-Test: p-value = 0.47

# F2CTM7|F2CTM7\_HORVD

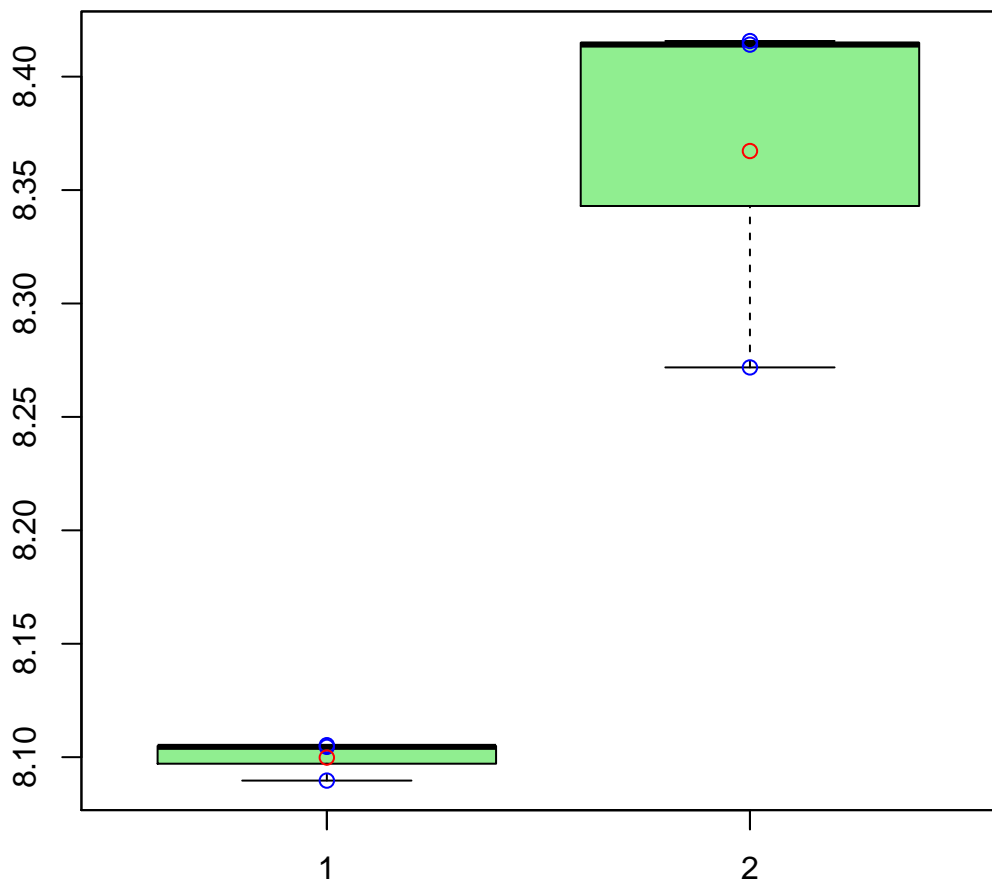

t-Test: p-value = 0.03

# F2CTY5|F2CTY5\_HORVD

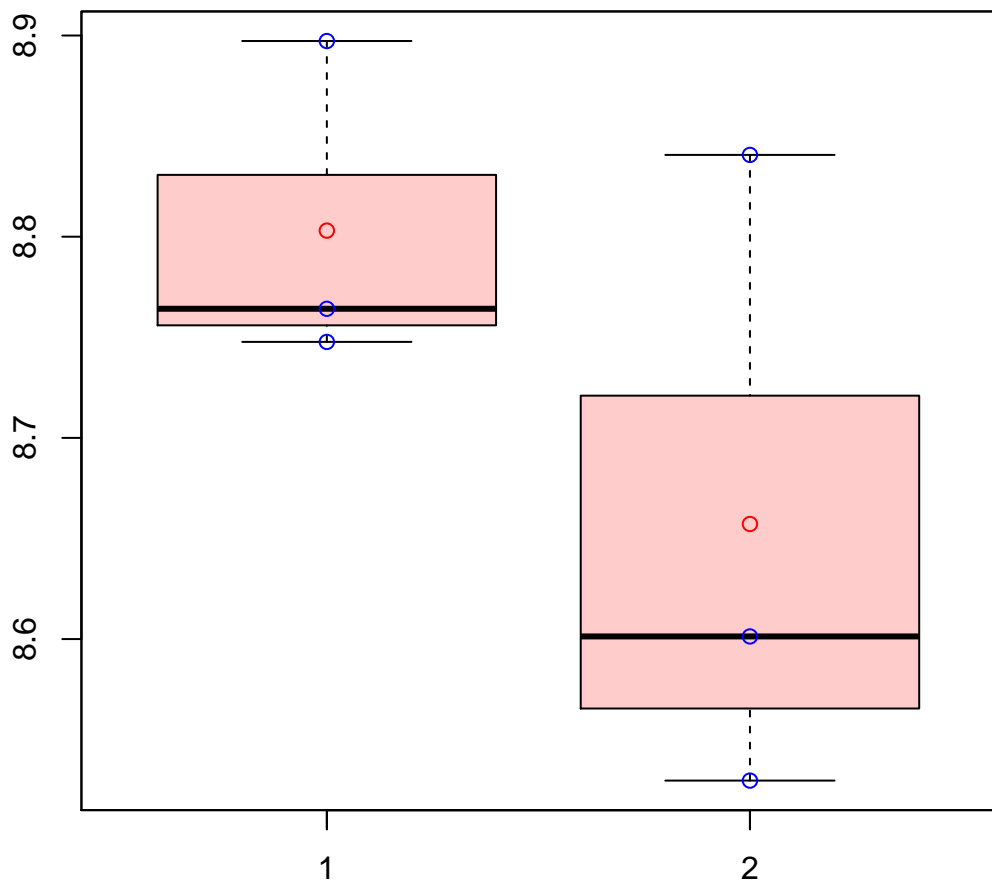

t-Test: p-value = 0.26

## F2CUA6|F2CUA6\_HORVD

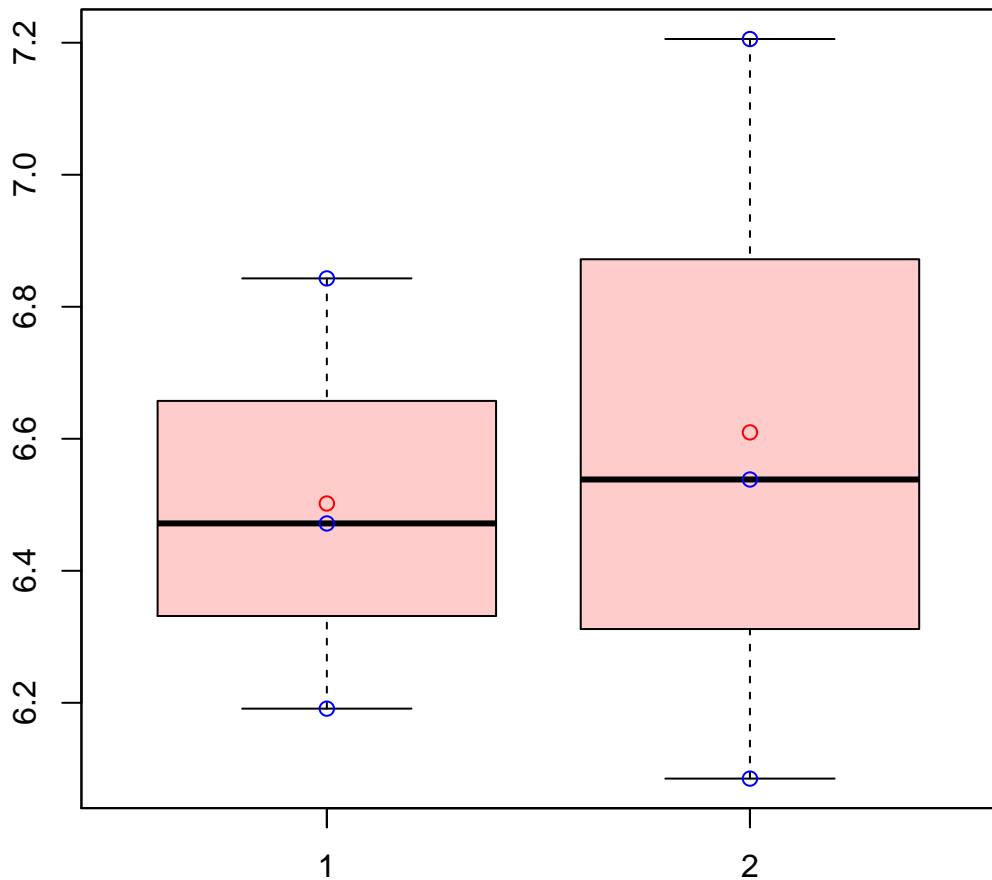

t-Test: p-value = 0.79



# F2CVI3|F2CVI3\_HORVD

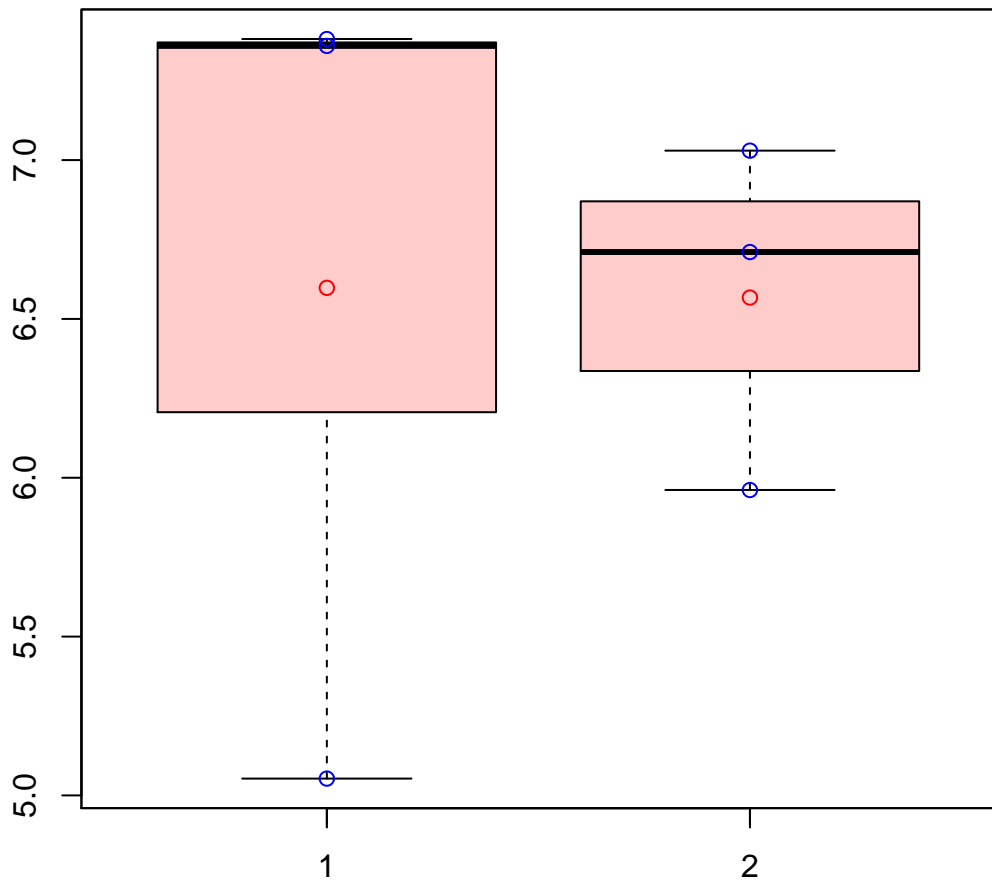

t-Test: p-value = 0.97

## F2CVK1|F2CVK1\_HORVD

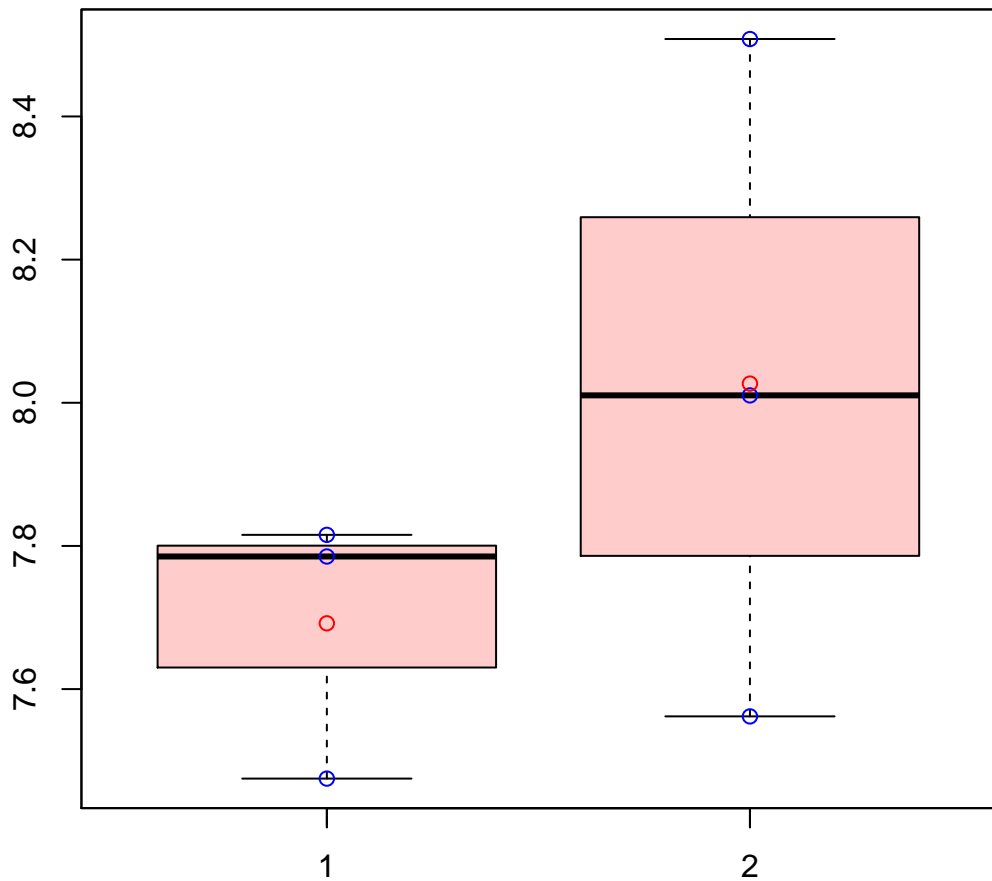

t-Test: p-value = 0.35

# F2CVU4|F2CVU4\_HORVD

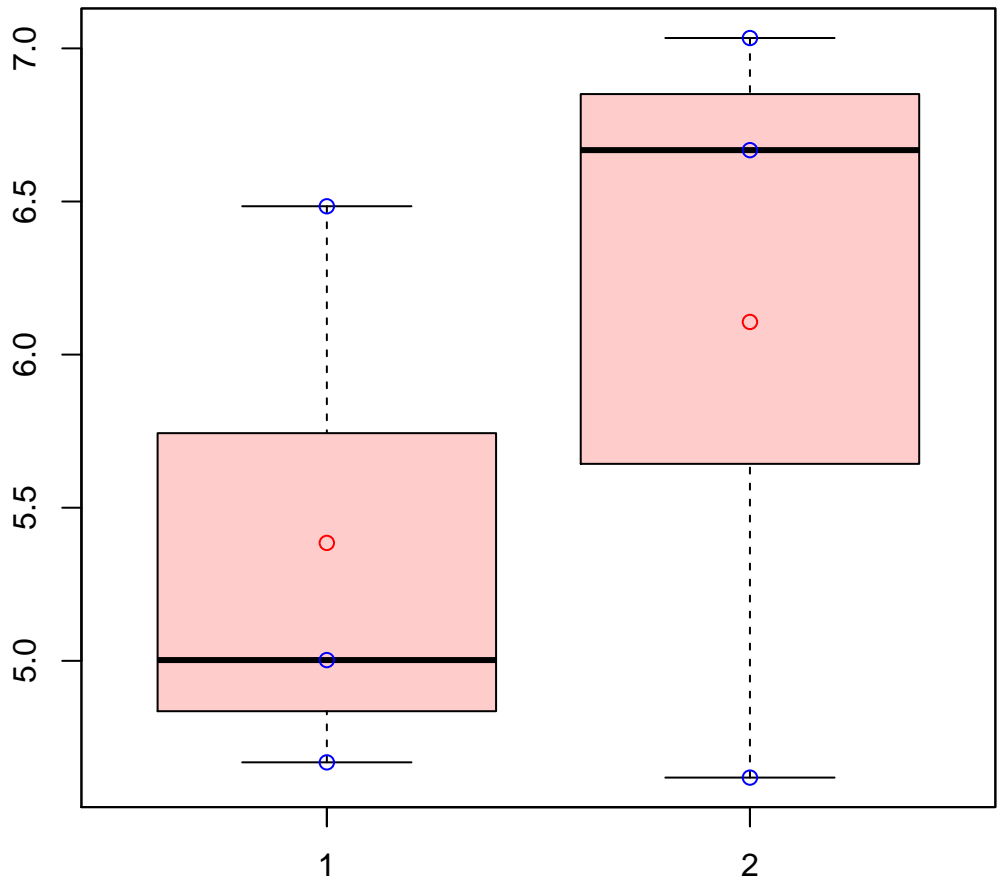

t-Test: p-value = 0.49

## F2CW23|F2CW23\_HORVD

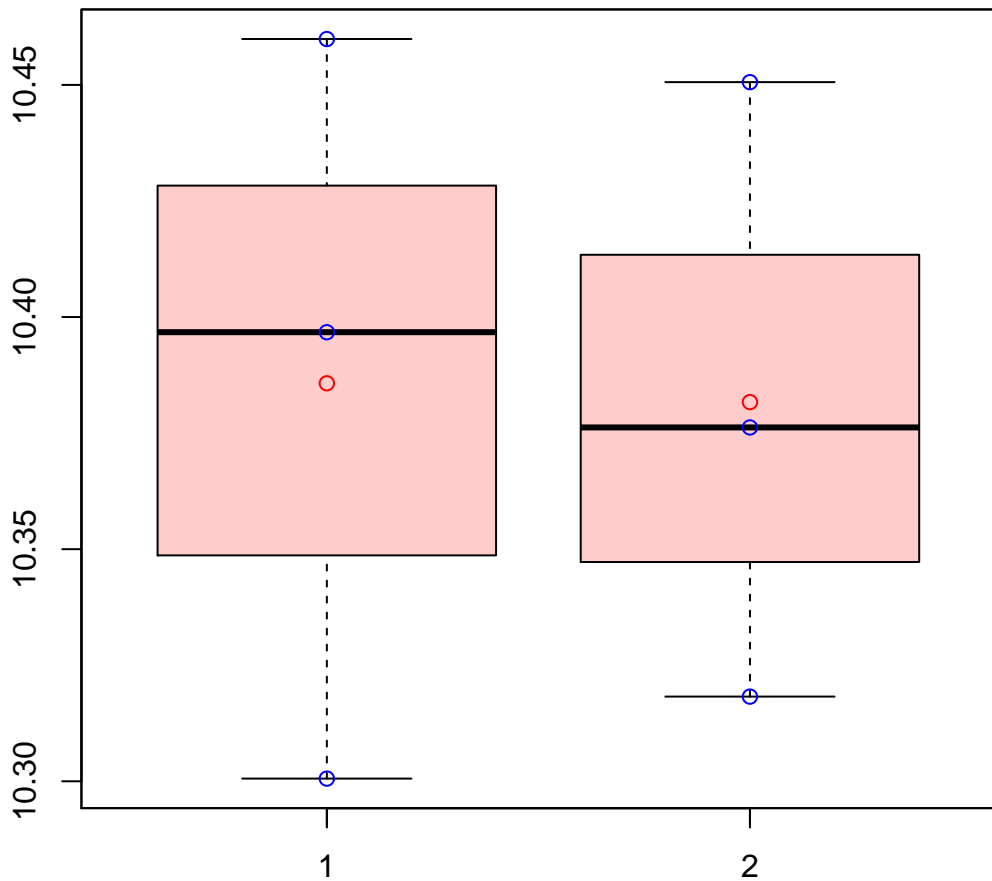

t-Test: p-value = 0.95

## F2CWF6|F2CWF6\_HORVD

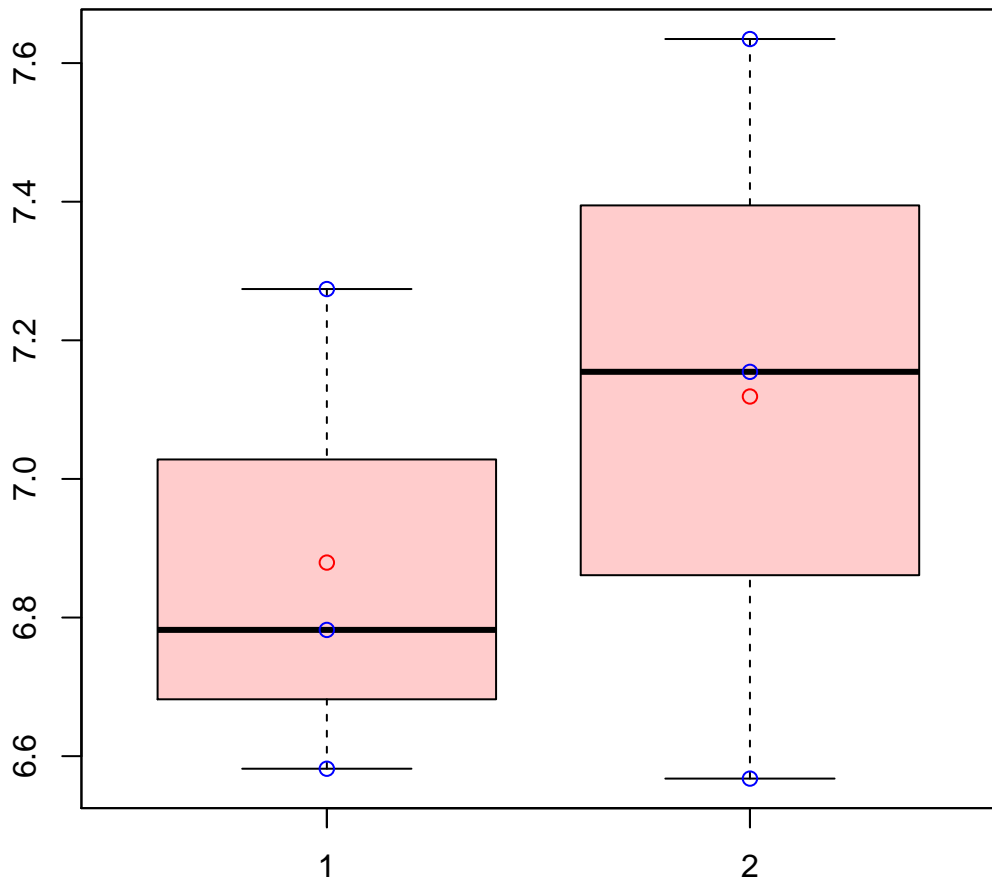

t-Test: p-value = 0.56

## F2CWW4|F2CWW4\_HORVD

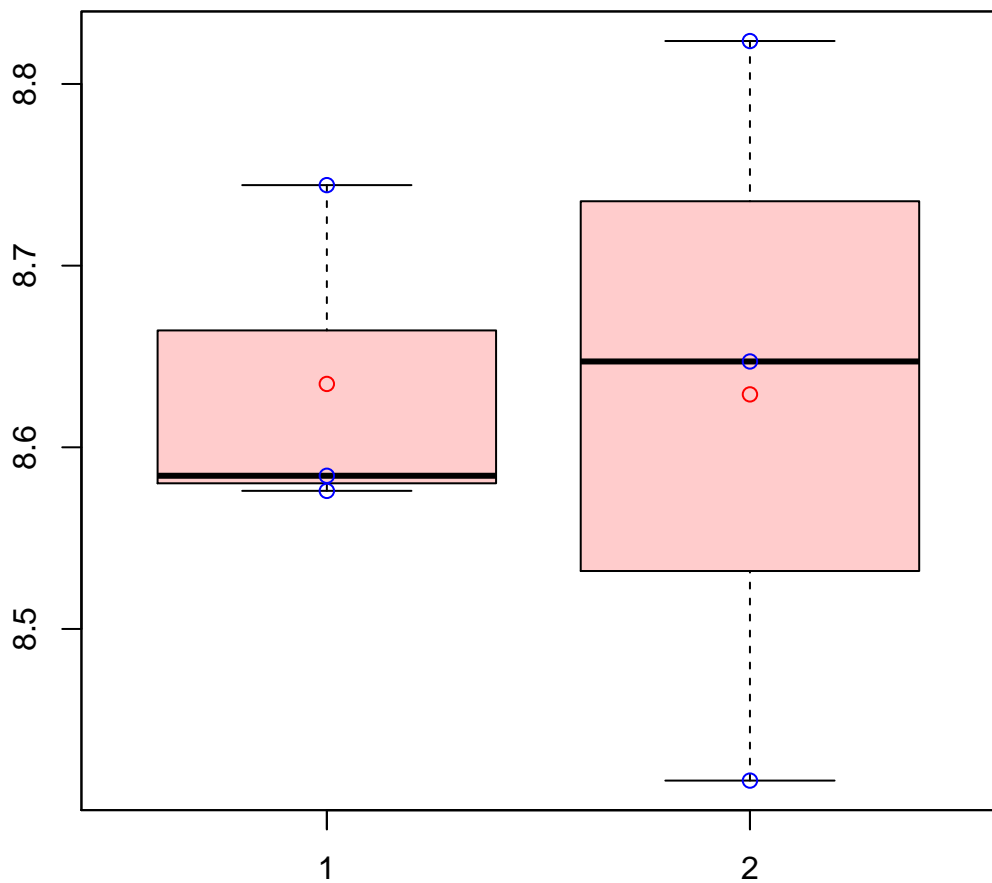

t-Test: p-value = 0.97

## F2CXC6|F2CXC6\_HORVD

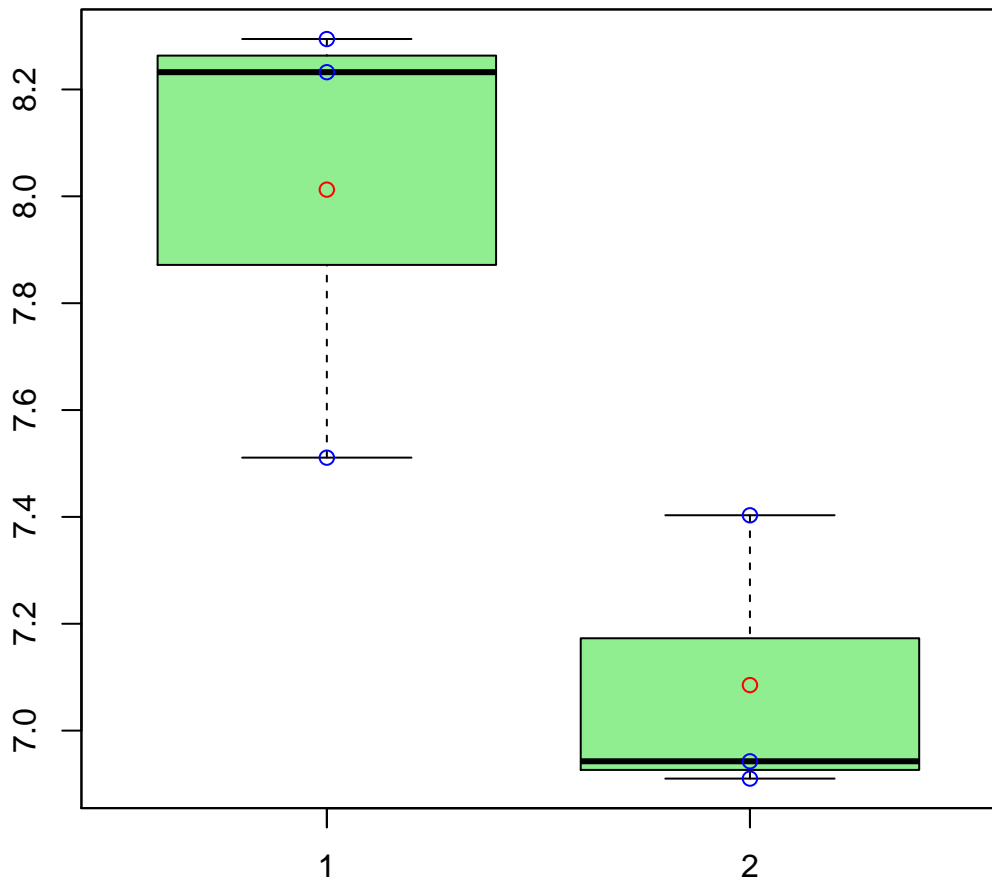

t-Test: p-value = 0.04

## F2CXH4|F2CXH4\_HORVD

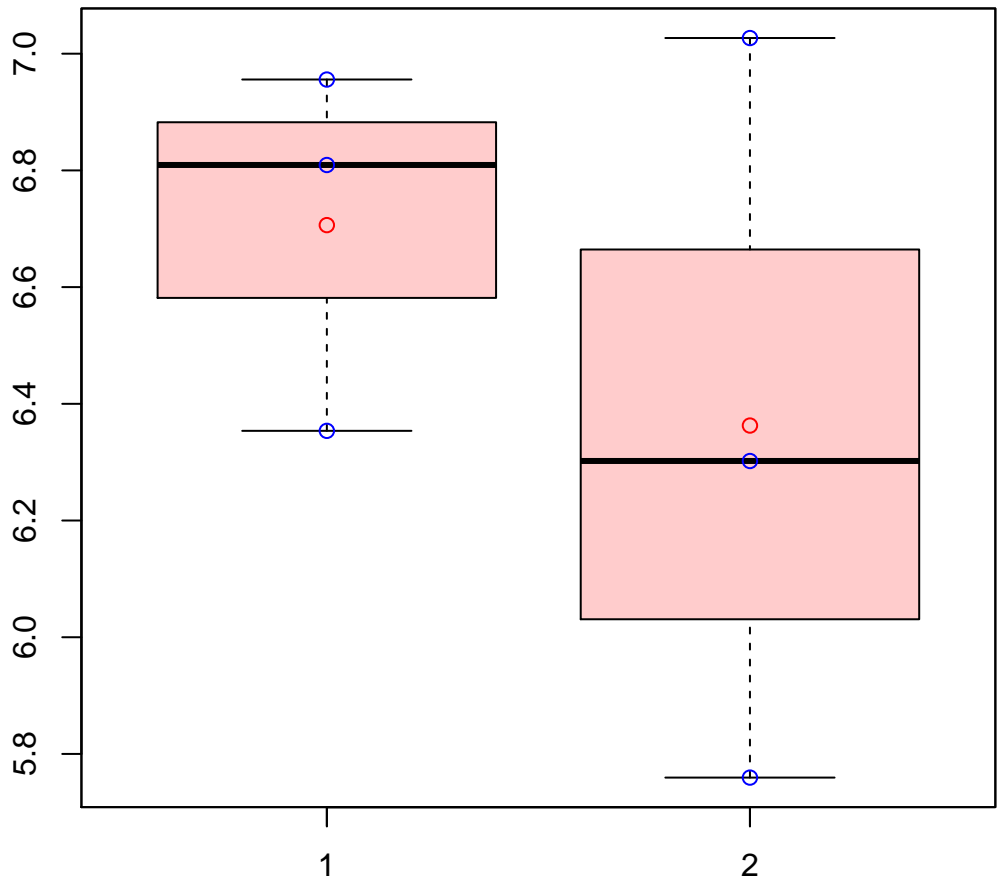

t-Test: p-value = 0.46



# F2CXN3|F2CXN3\_HORVD

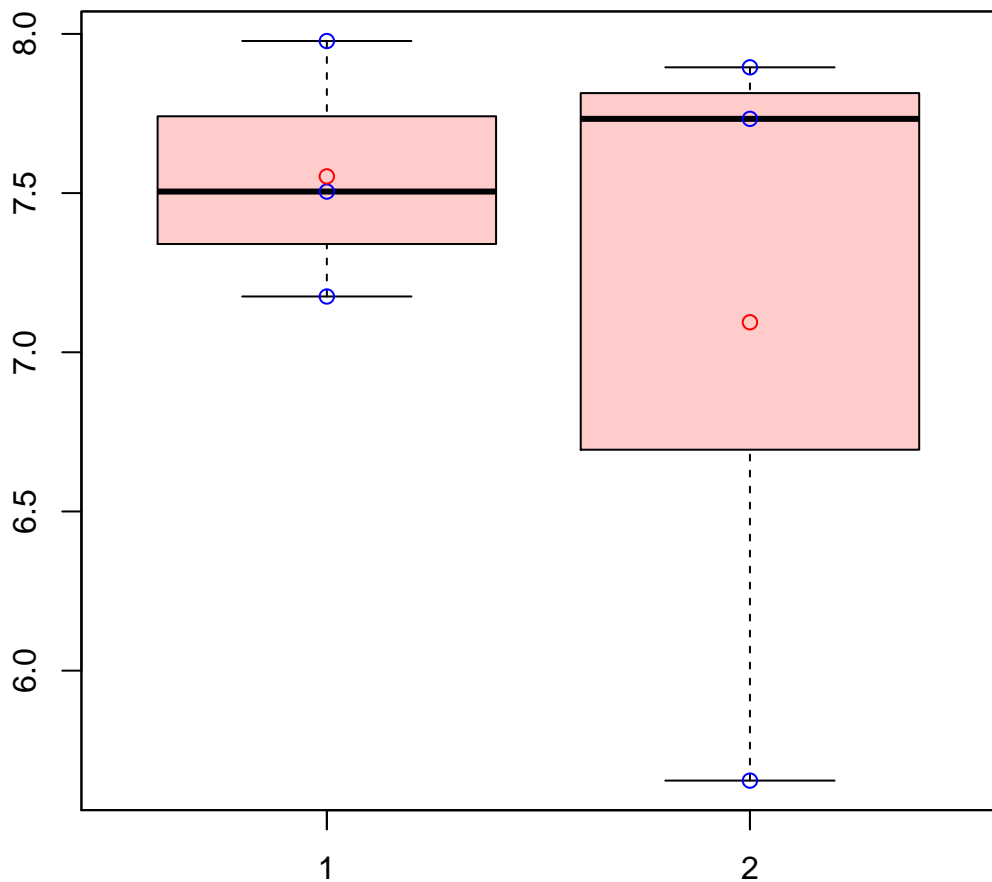

t-Test: p-value = 0.6

# F2CXX0|F2CXX0\_HORVD

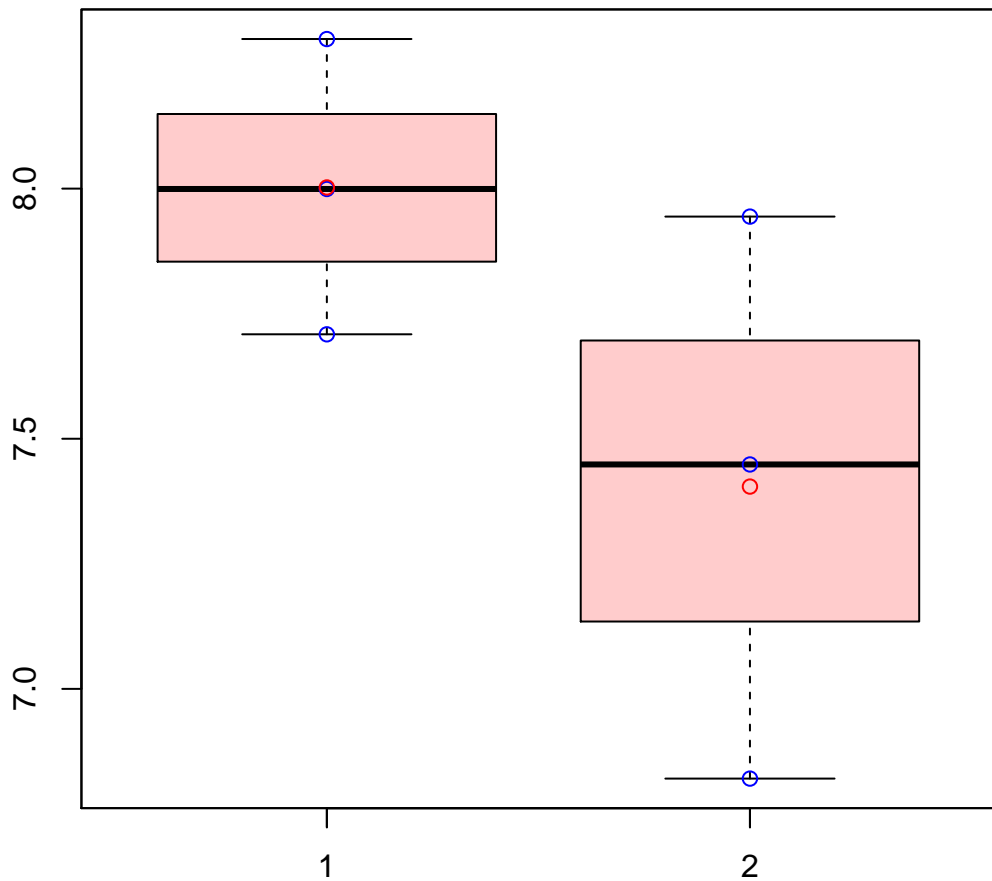

t-Test: p-value = 0.2

# F2CY15|F2CY15\_HORVD

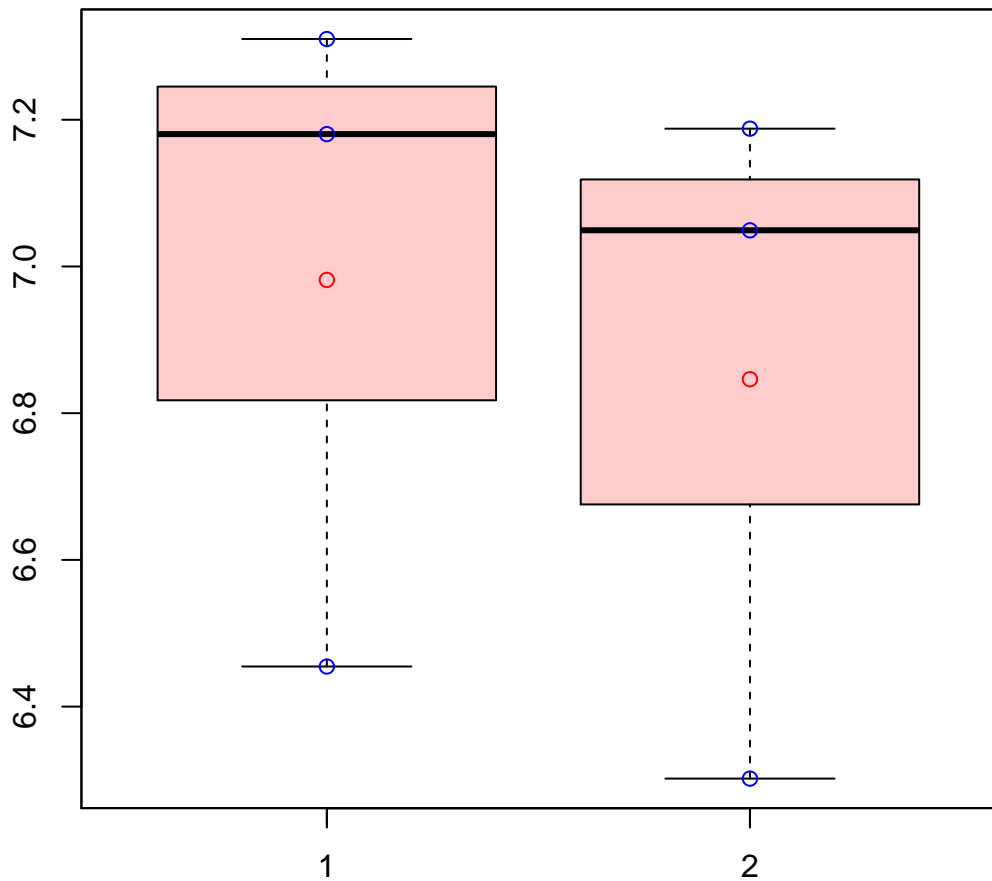

t-Test: p-value = 0.74

## F2CYU4|F2CYU4\_HORVD

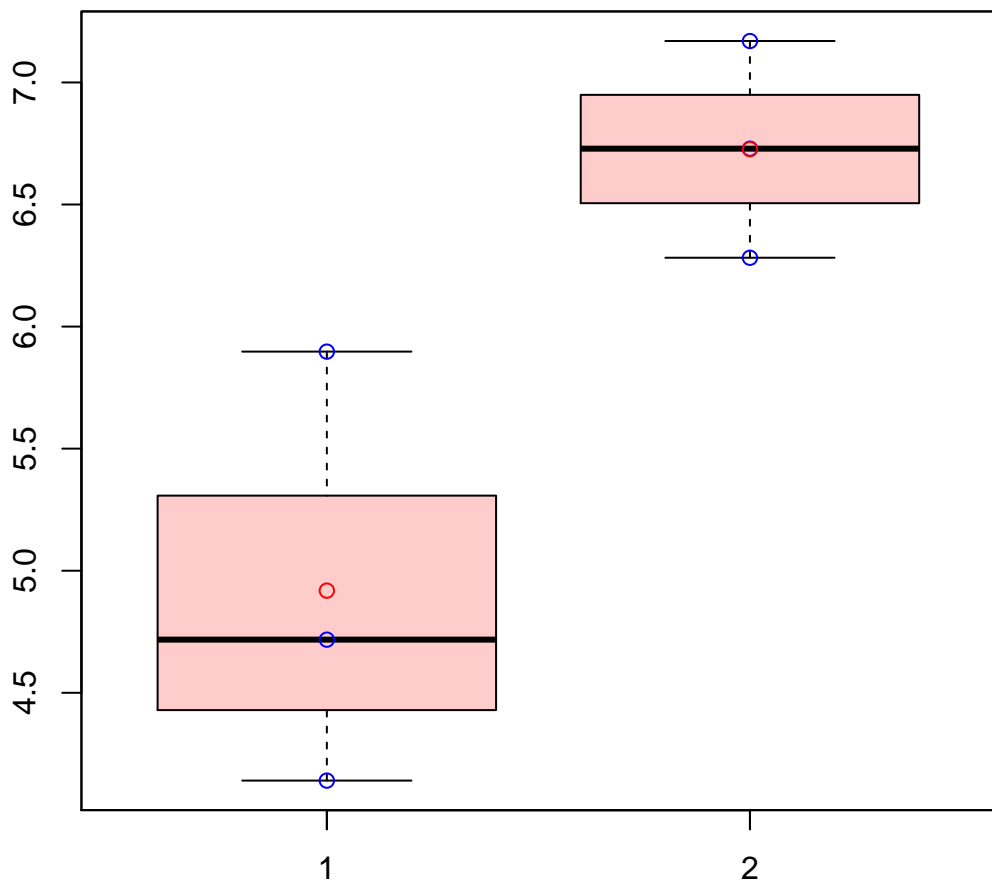

t-Test: p-value = 0.05

## F2CYX9|F2CYX9\_HORVD

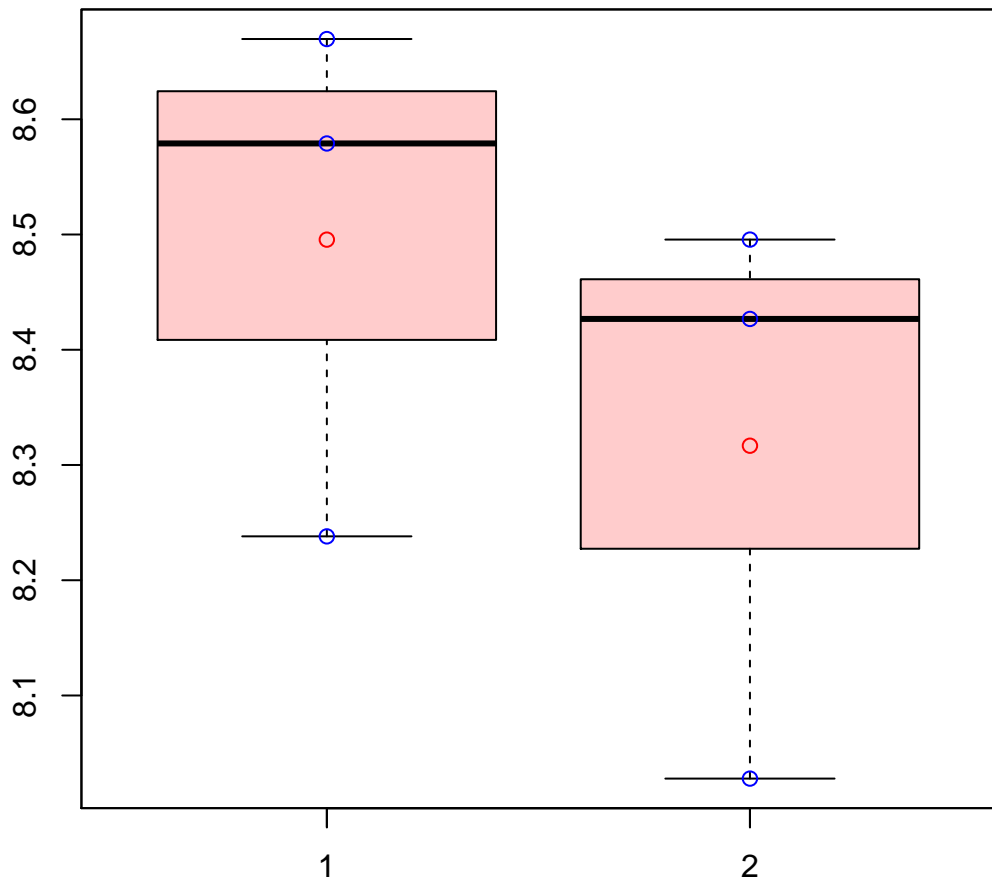

t-Test: p-value = 0.41

# F2CZH1|F2CZH1\_HORVD

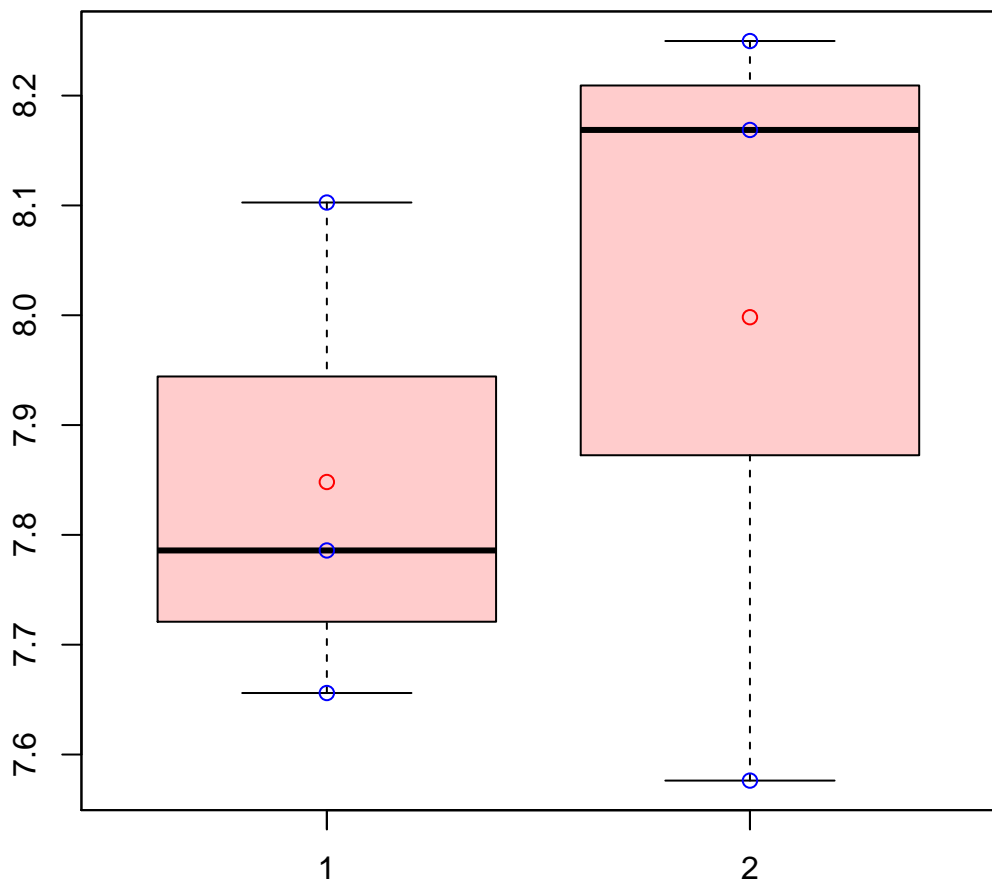

t-Test: p-value = 0.59

# F2CZL9|F2CZL9\_HORVD

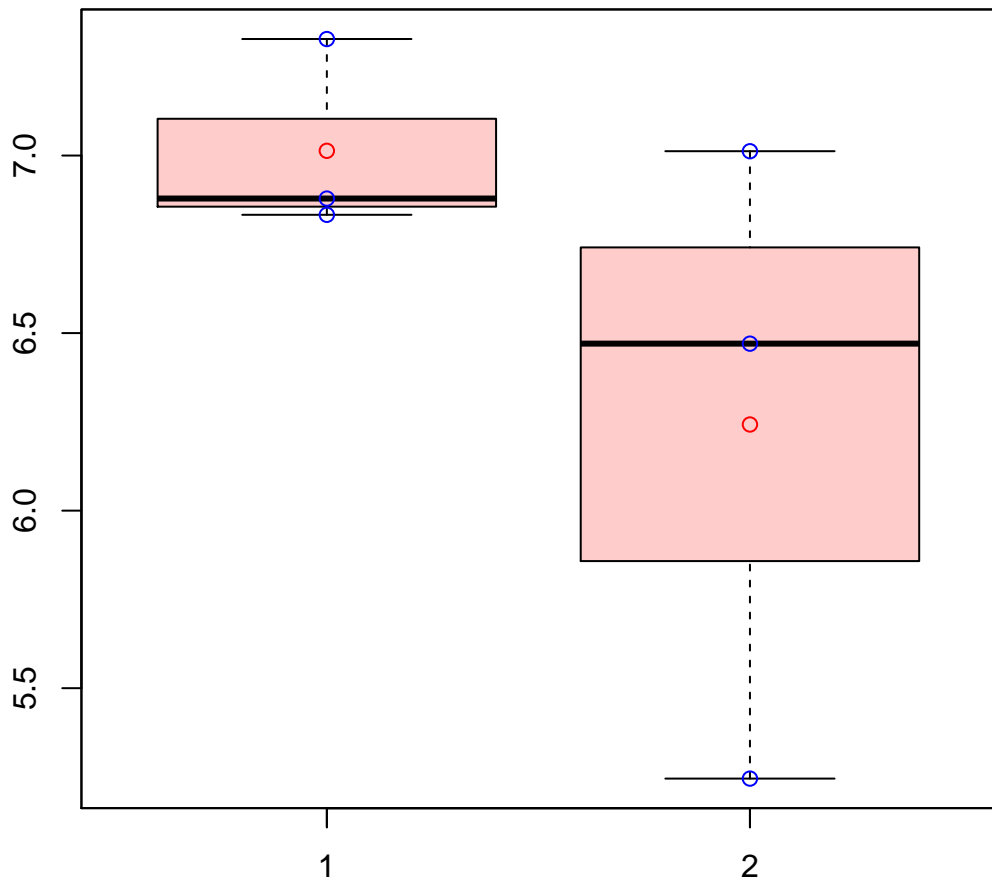

t-Test: p-value = 0.28

# F2D1J5|F2D1J5\_HORVD

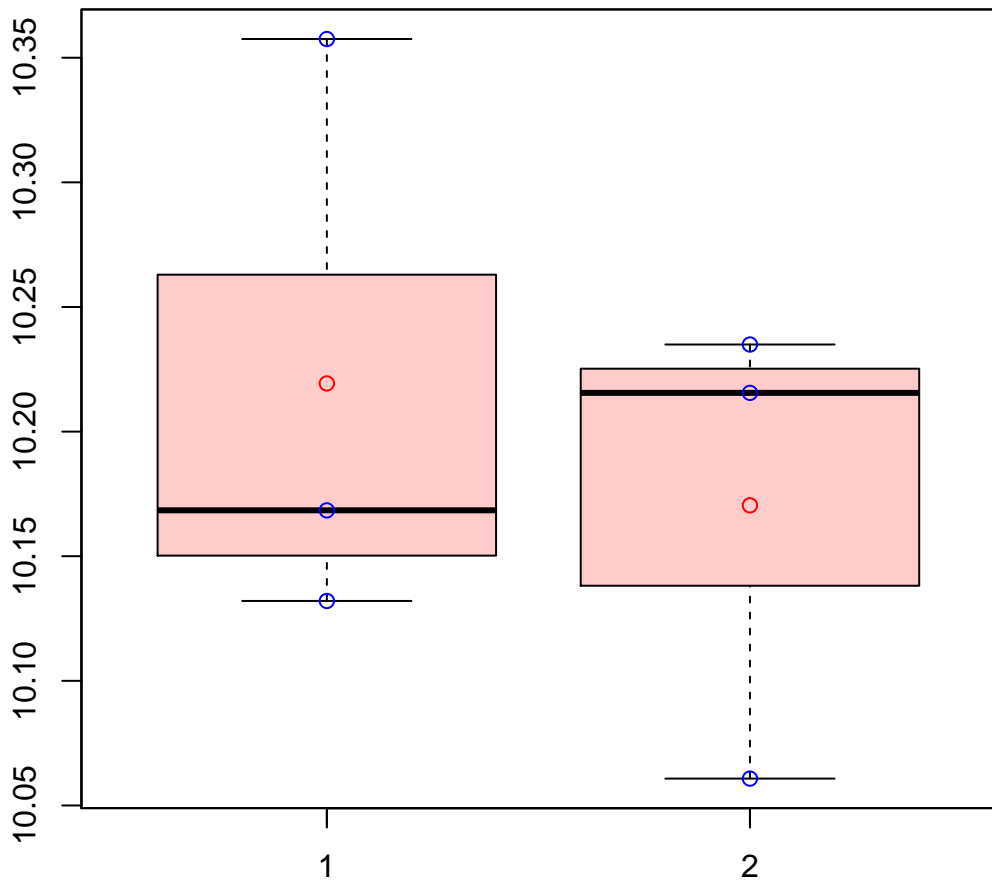

t-Test: p-value = 0.61



## F2D2B6|F2D2B6\_HORVD

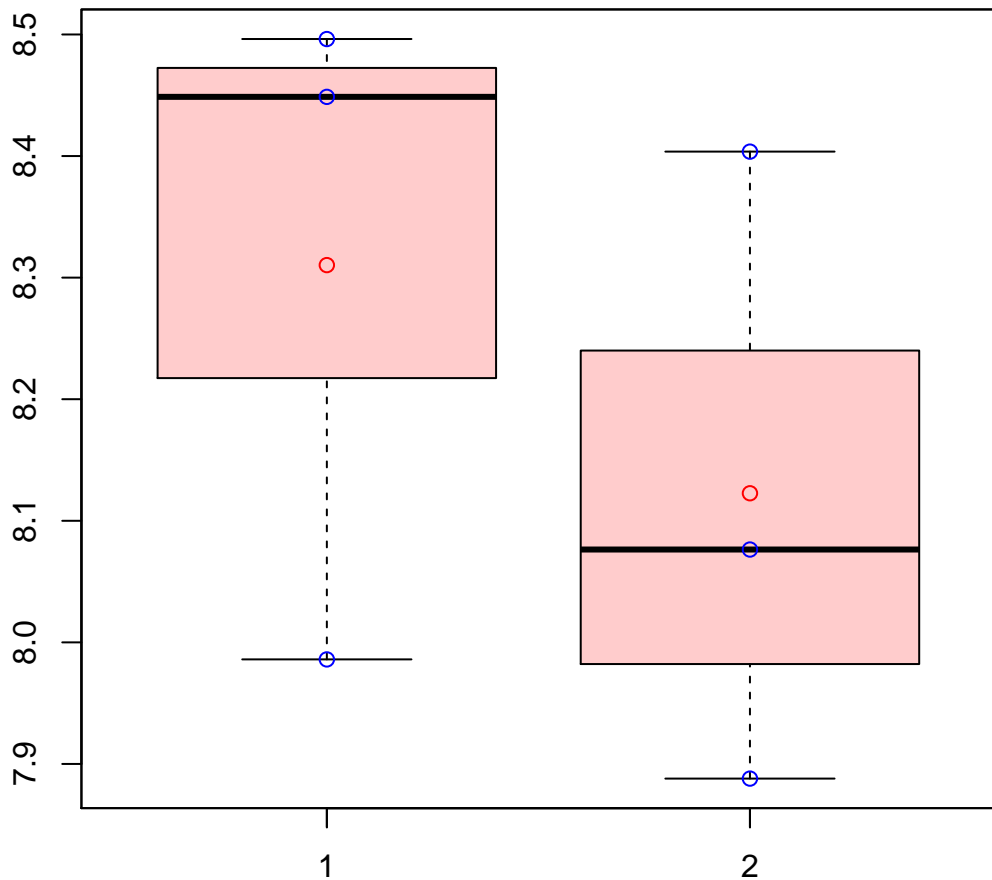

t-Test: p-value = 0.45

## F2D2M0|F2D2M0\_HORVD

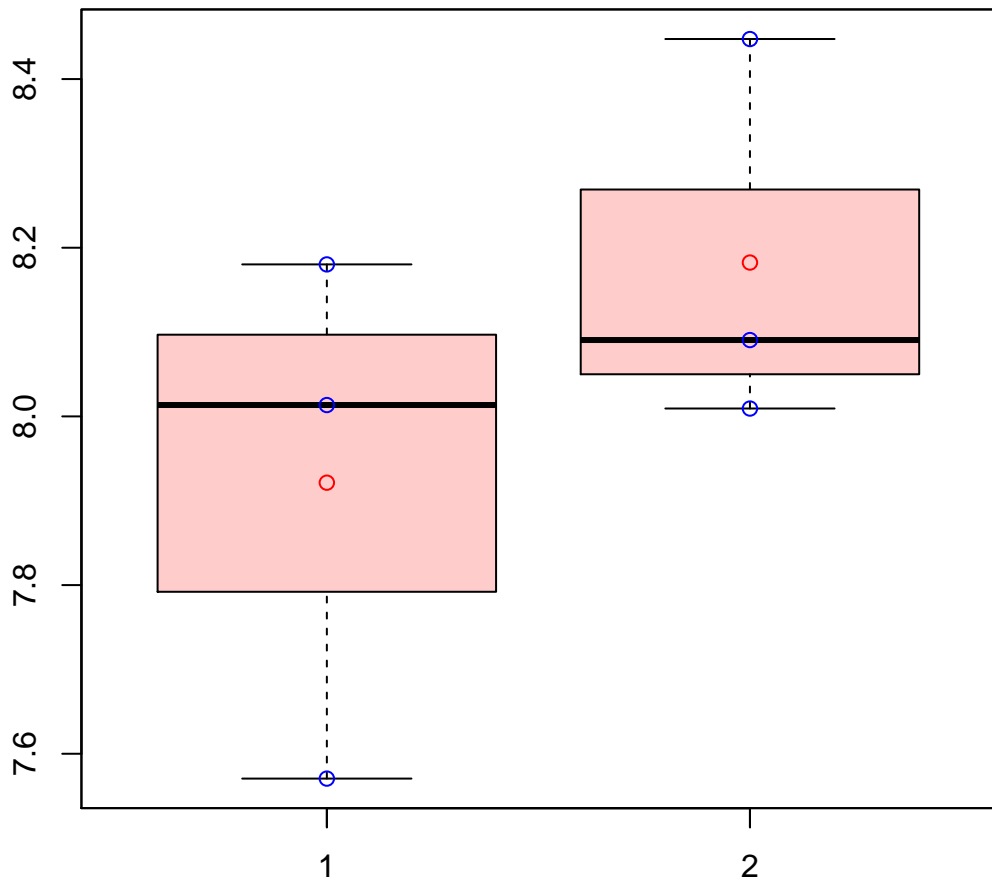

t-Test: p-value = 0.32

# F2D2S6|F2D2S6\_HORVD

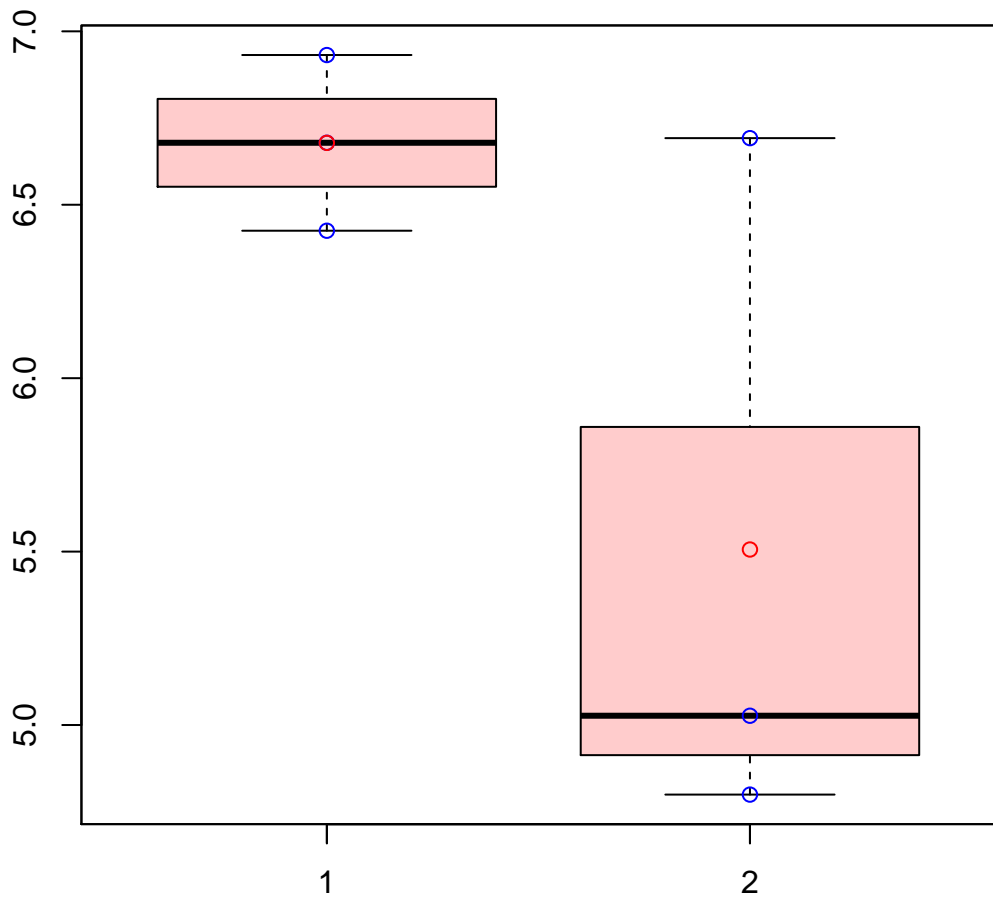

t-Test: p-value = 0.18

# F2D340|F2D340\_HORVD

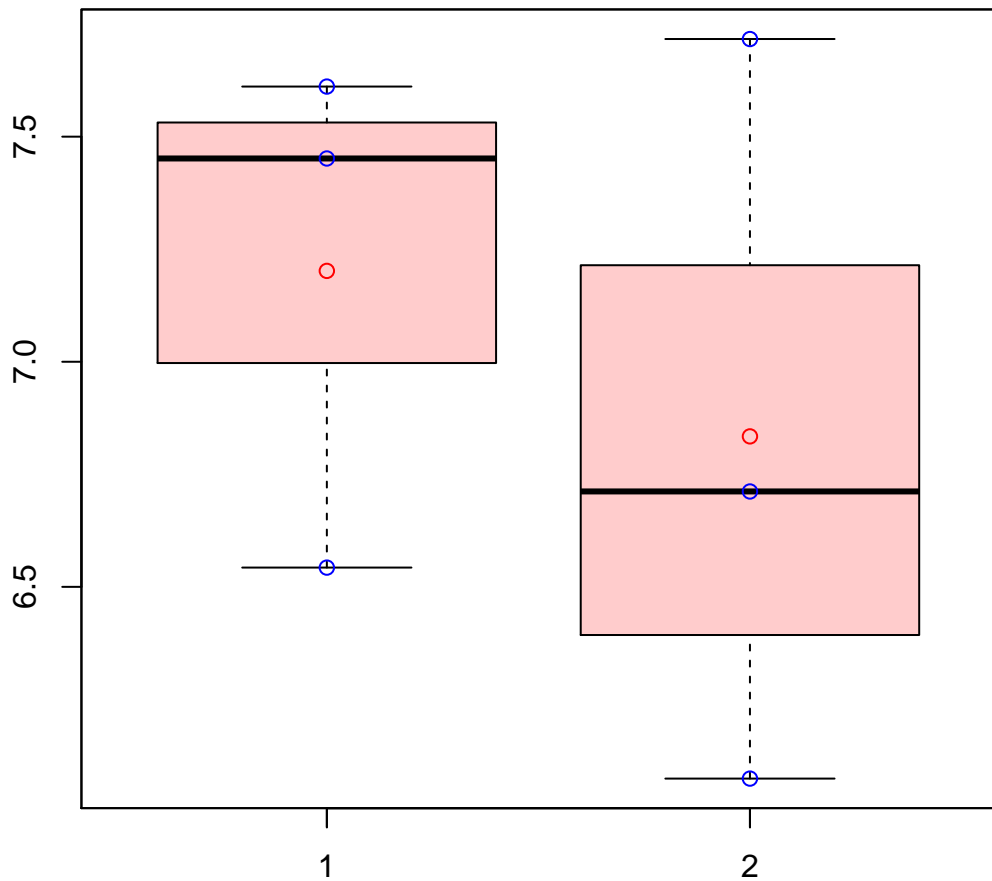

t-Test: p-value = 0.57

# F2D3L2|F2D3L2\_HORVD

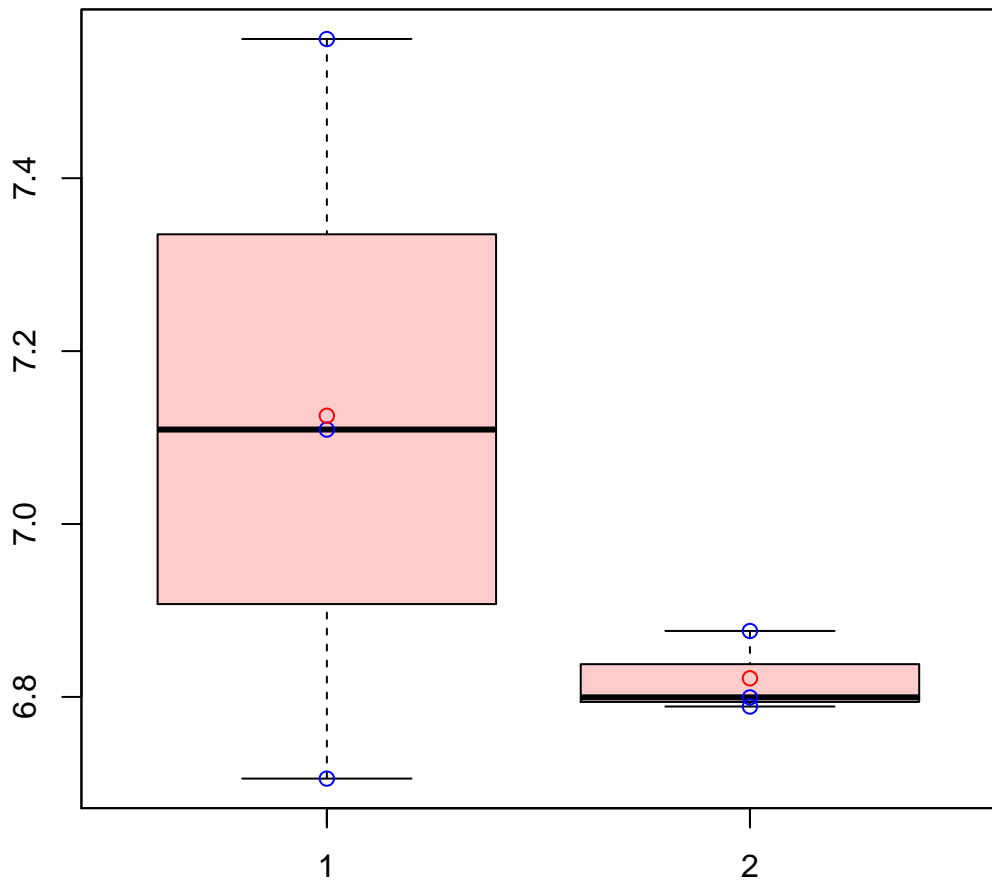

t-Test: p-value = 0.34

# F2D3S8|F2D3S8\_HORVD

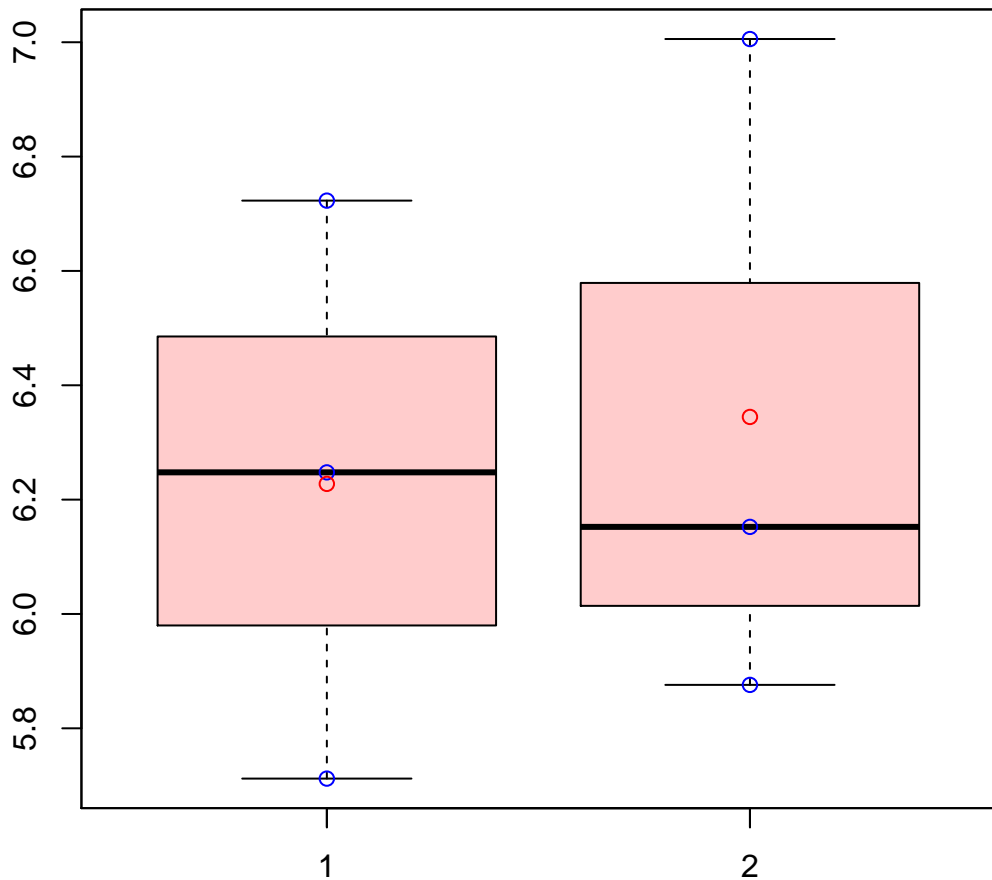

t-Test: p-value = 0.81

# F2D4C4|F2D4C4\_HORVD

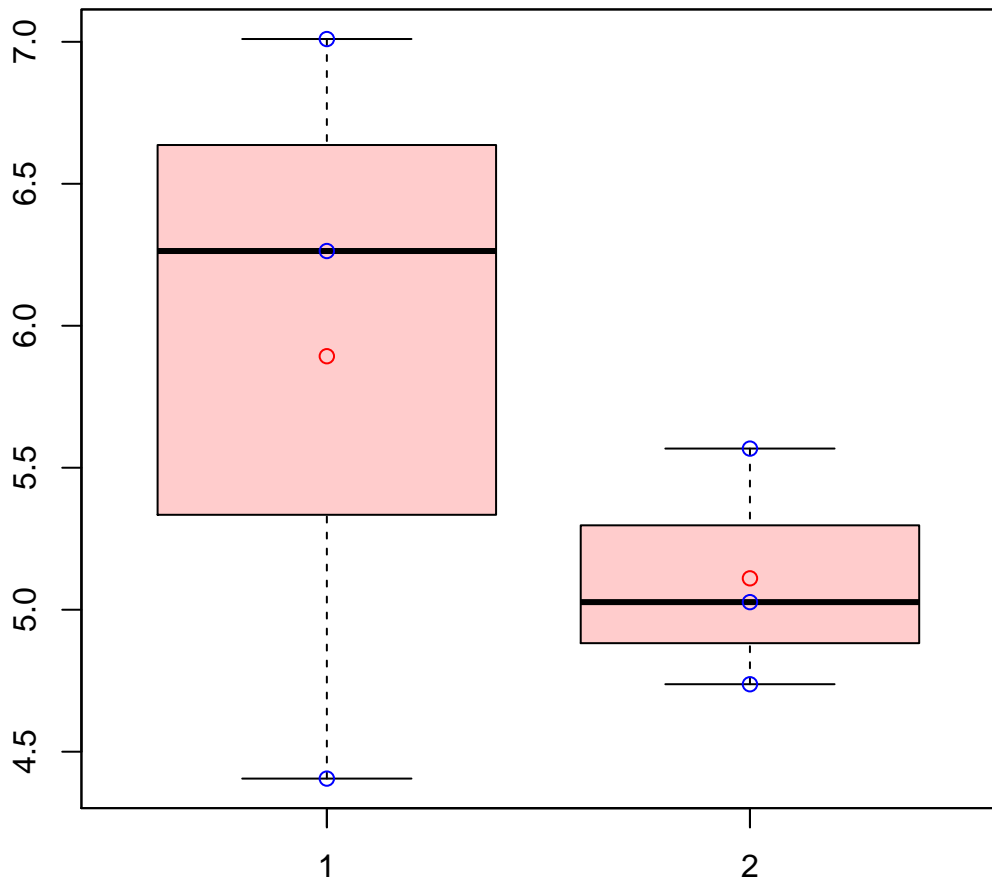

t-Test: p-value = 0.42

# F2D4I4|F2D4I4\_HORVD

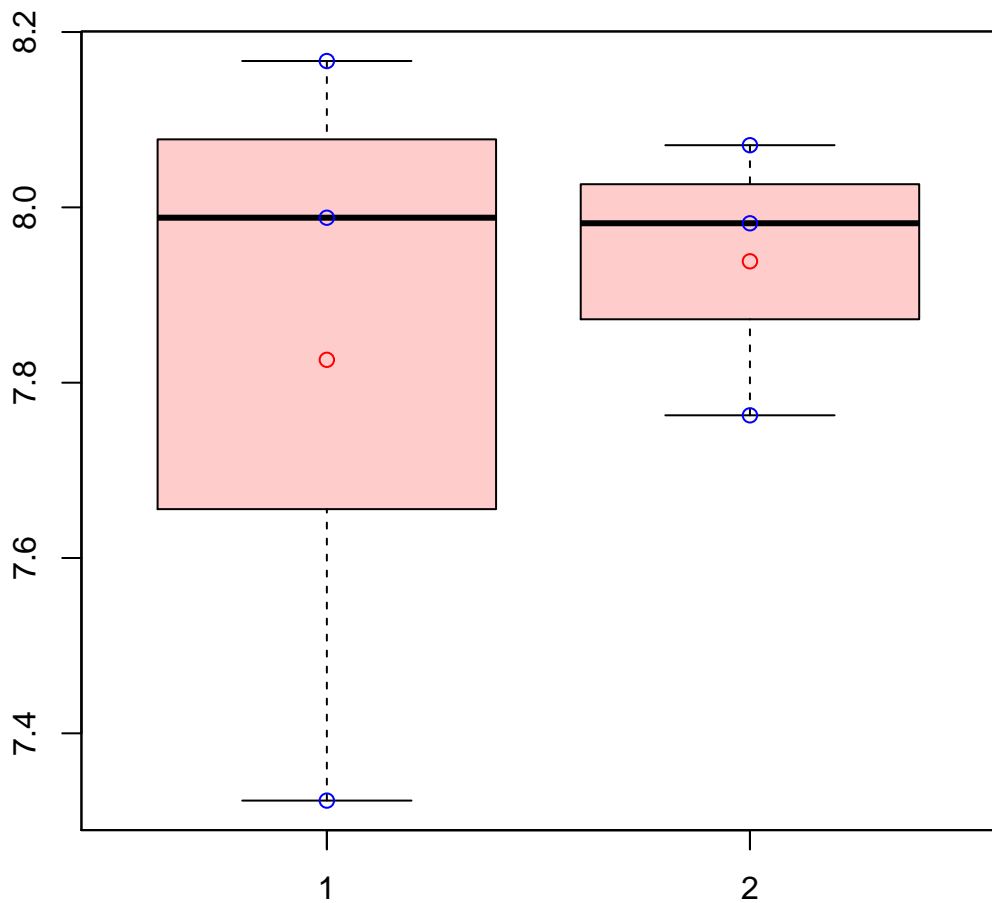

t-Test: p-value = 0.71



# F2D4I5|F2D4I5\_HORVD

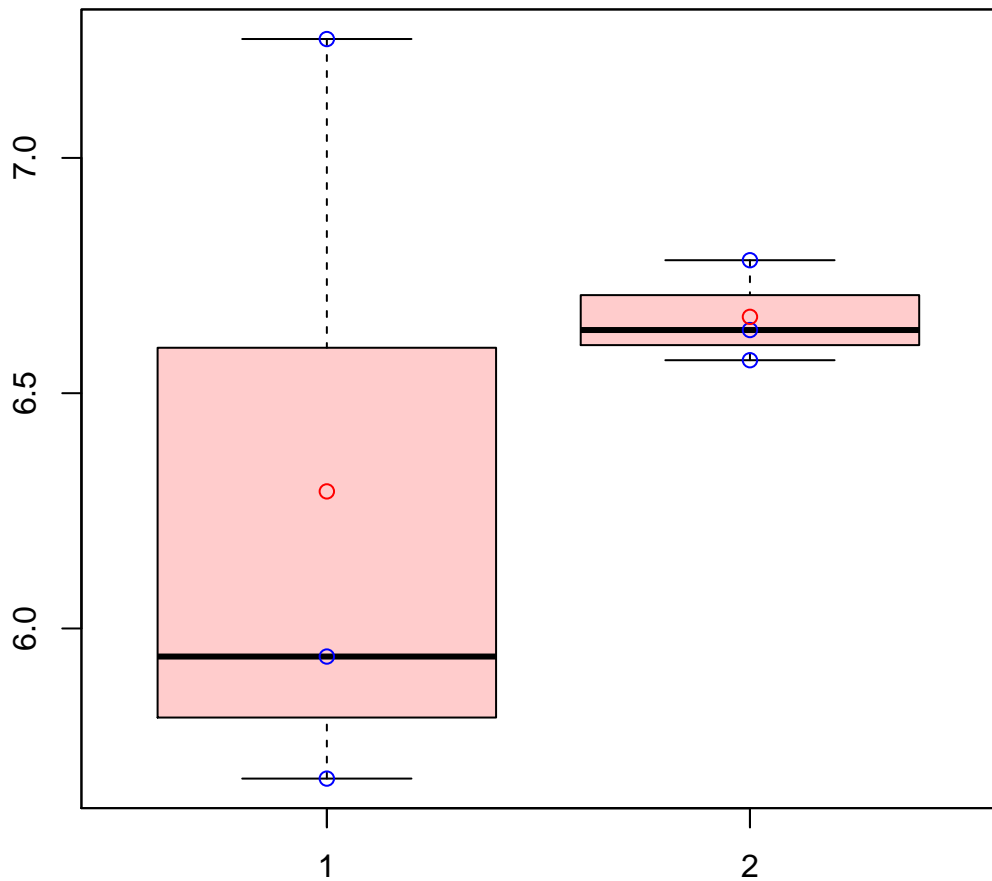

t-Test: p-value = 0.53

# F2D4I8|F2D4I8\_HORVD

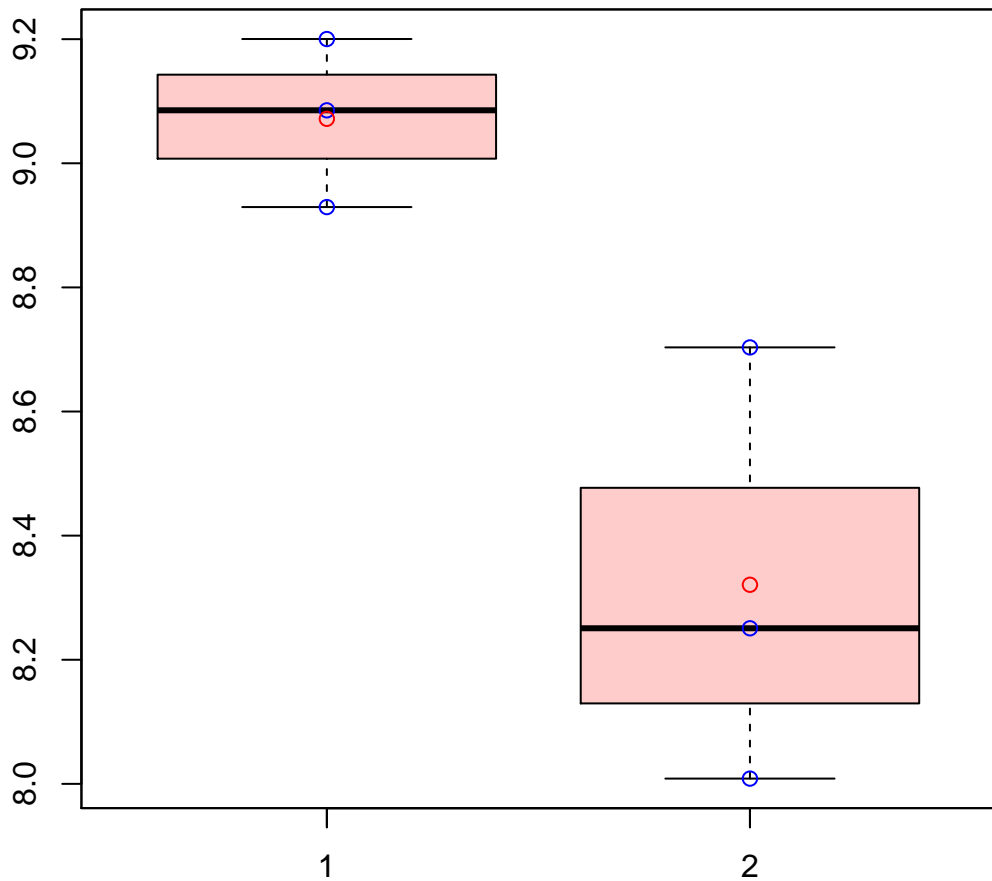

t-Test: p-value = 0.05

# F2D4W1|F2D4W1\_HORVD

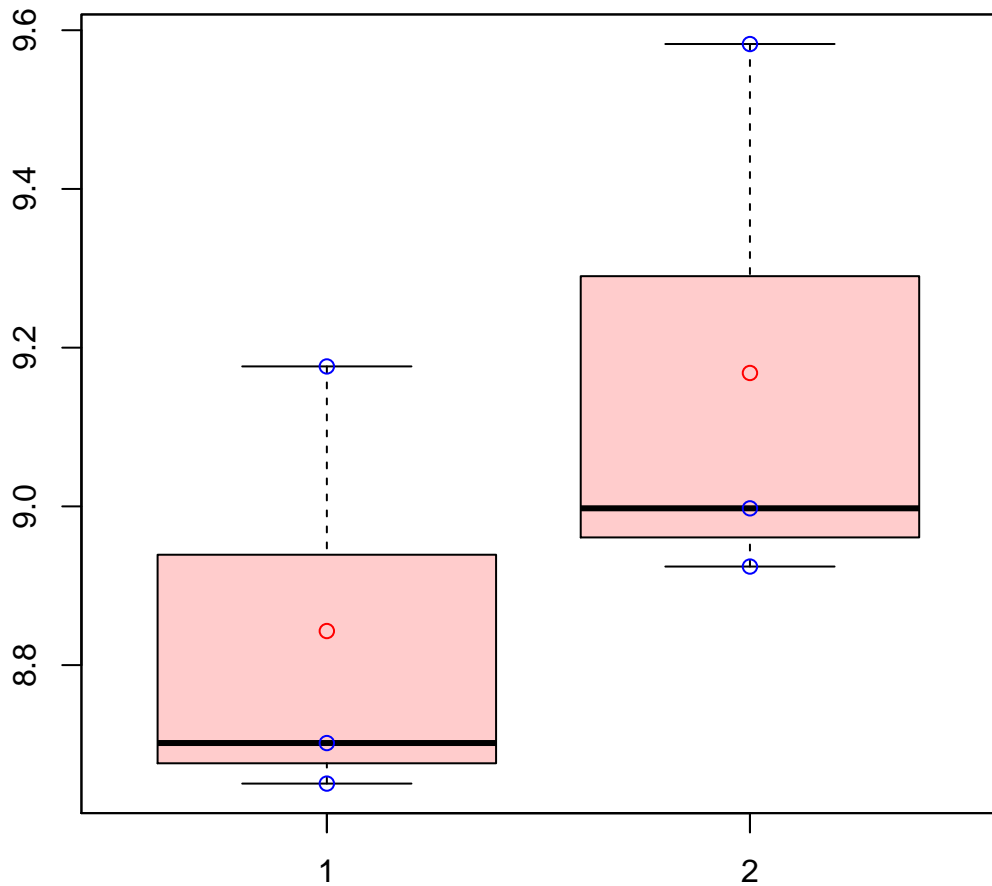

t-Test: p-value = 0.29

# F2D4X0|F2D4X0\_HORVD

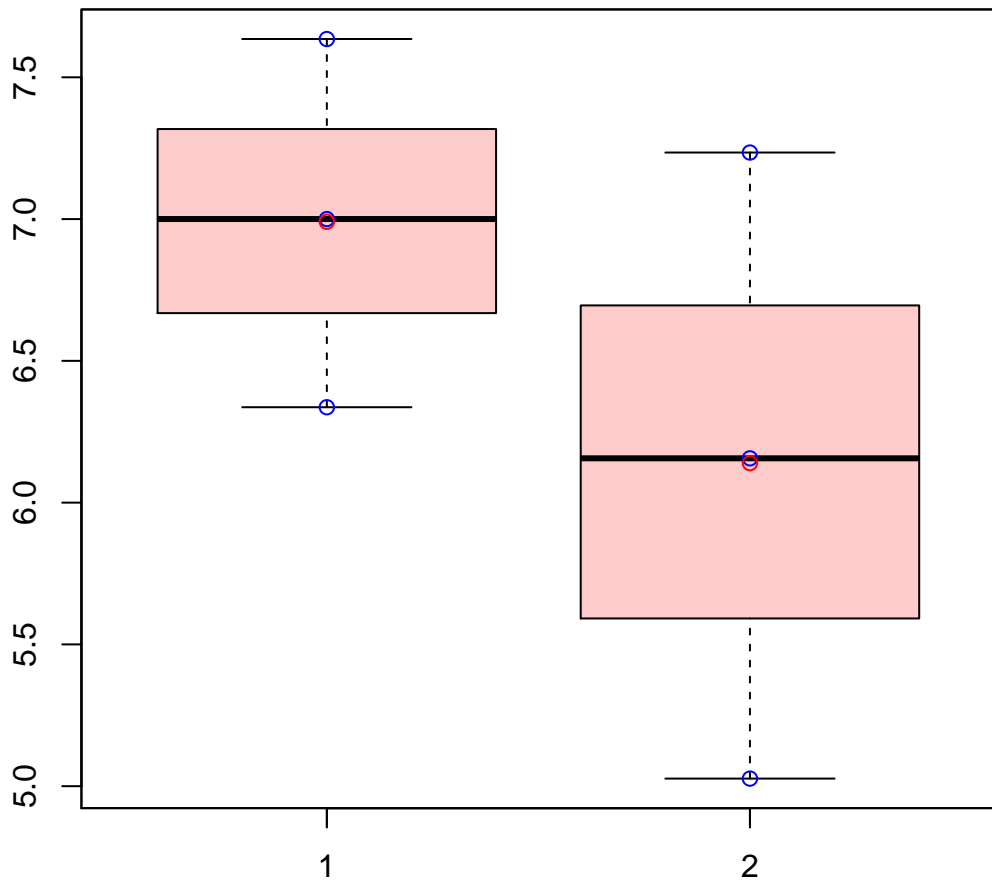

t-Test: p-value = 0.33

# F2D536|F2D536\_HORVD

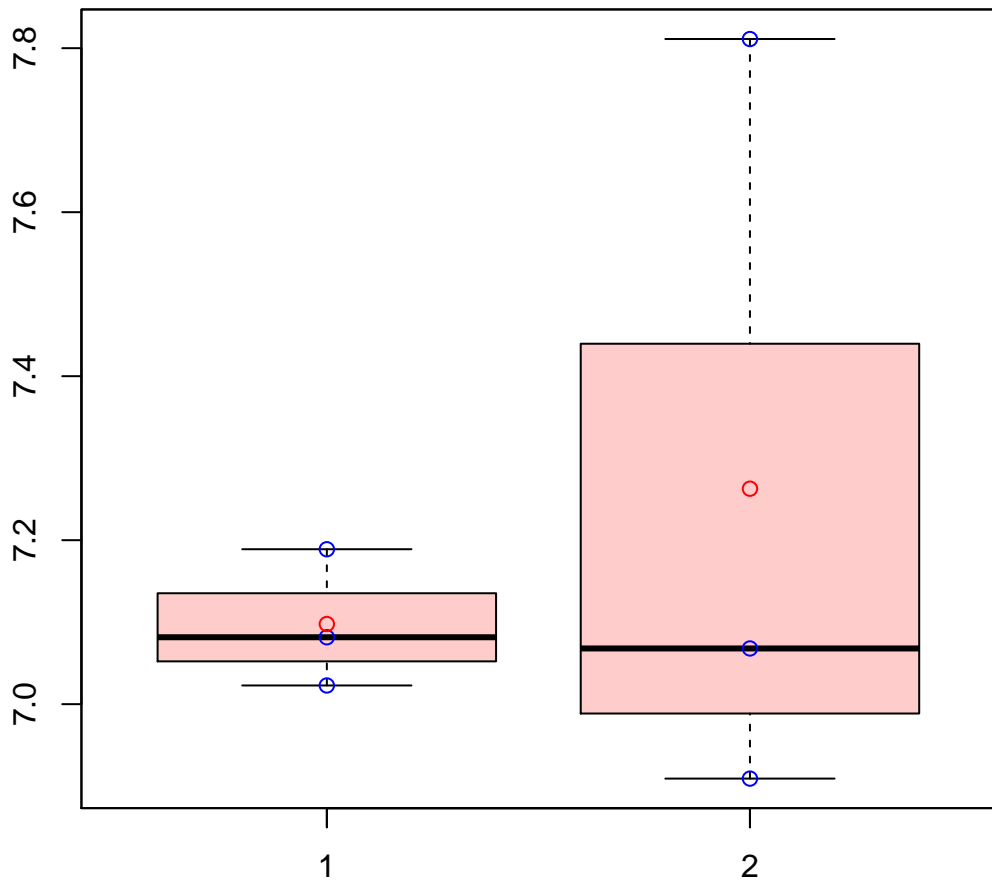

t-Test: p-value = 0.61

## F2D5A1|F2D5A1\_HORVD

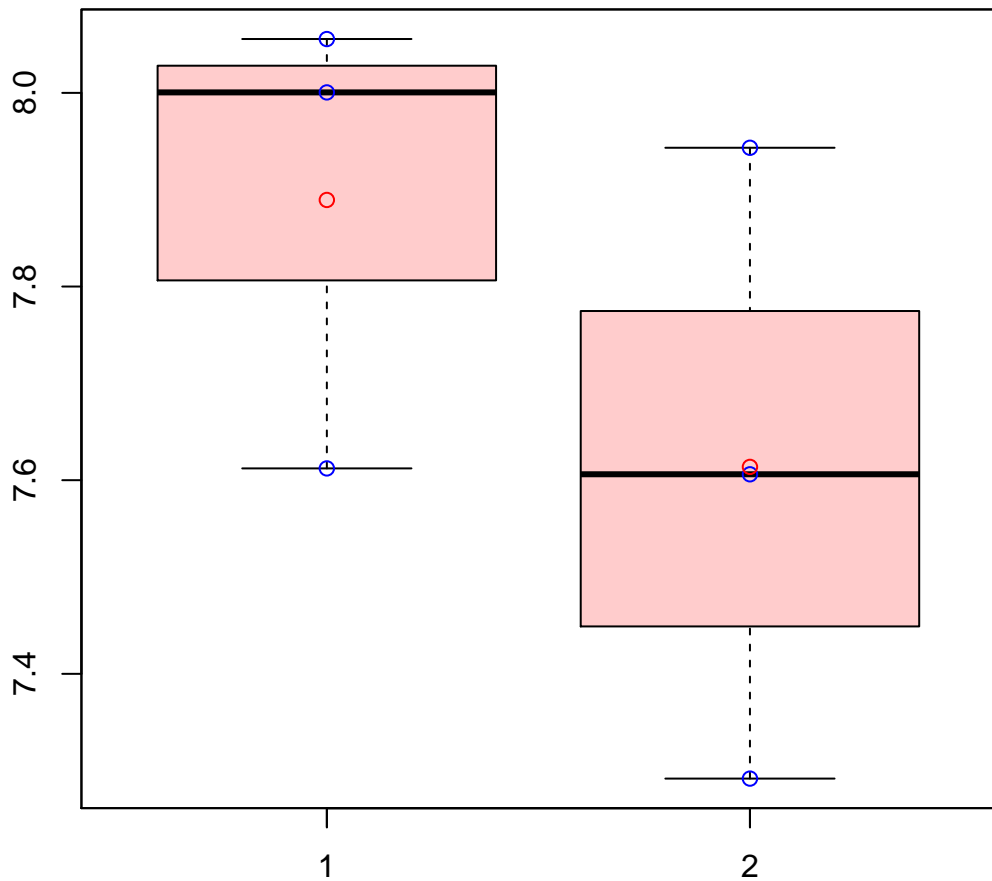

t-Test: p-value = 0.31

## F2D5A5|F2D5A5\_HORVD

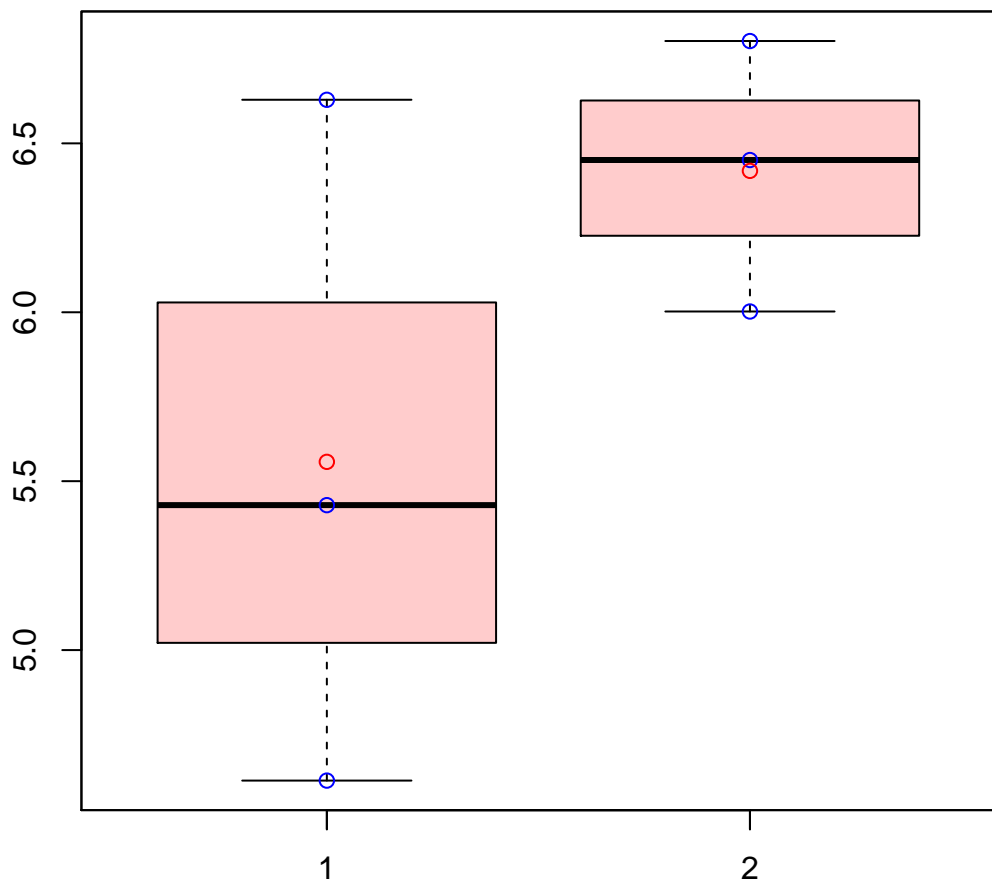

t-Test: p-value = 0.28

## F2D609|F2D609\_HORVD

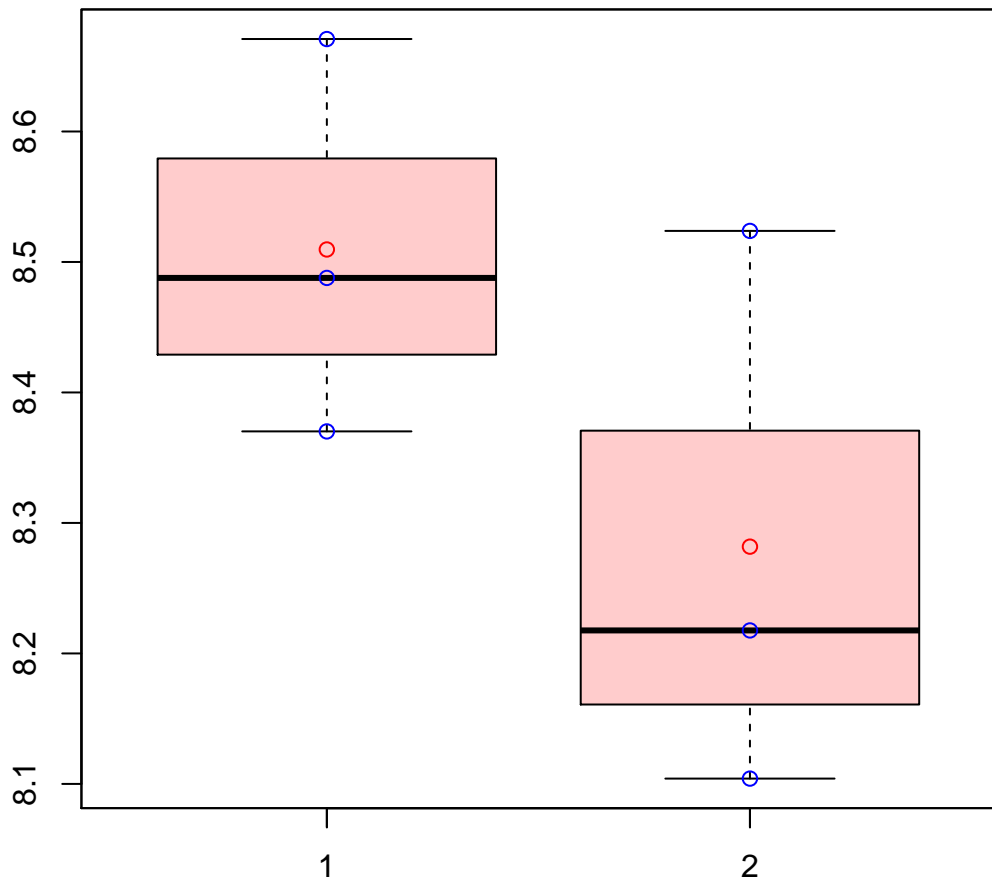

t-Test: p-value = 0.22



# F2D643|F2D643\_HORVD

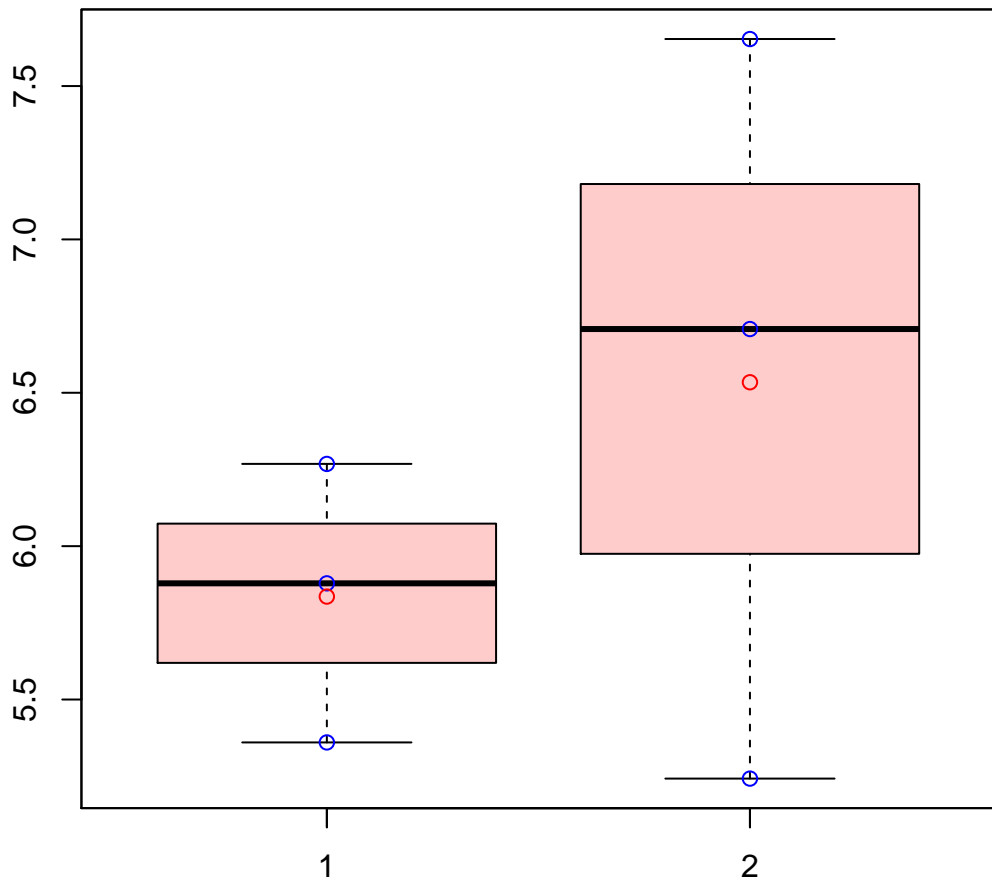

t-Test: p-value = 0.43

# F2D653|F2D653\_HORVD

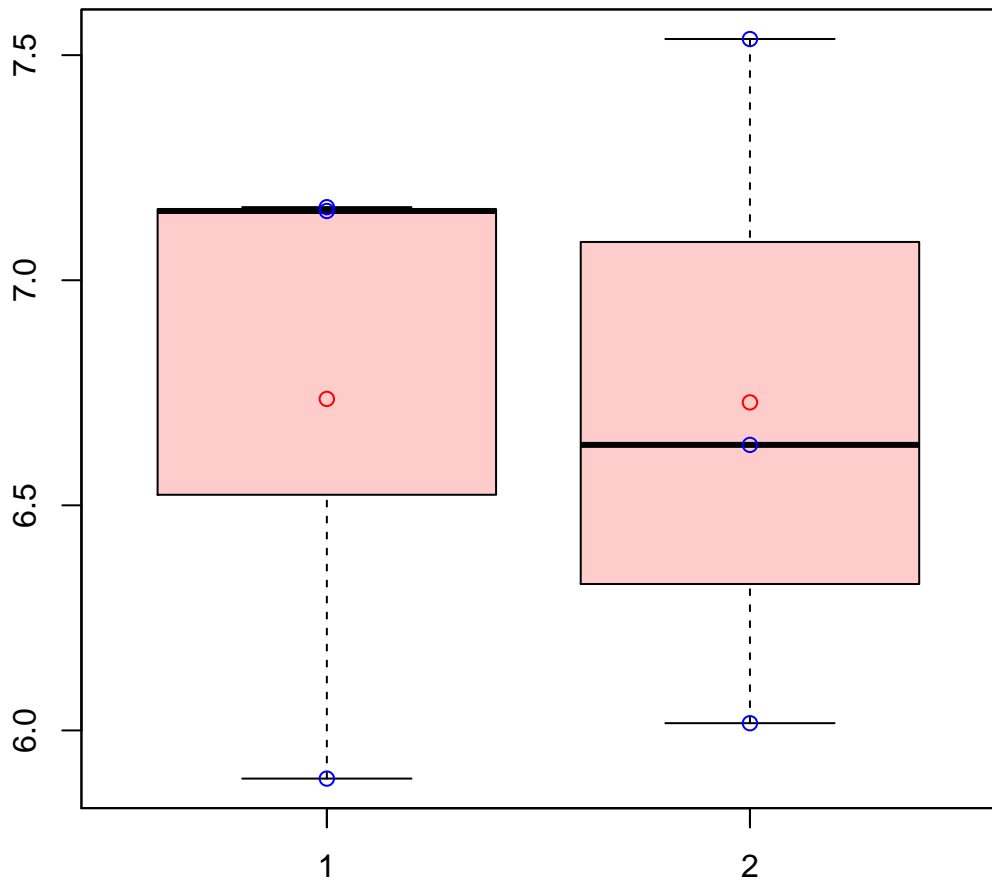

t-Test: p-value = 0.99

# F2D6B1|F2D6B1\_HORVD

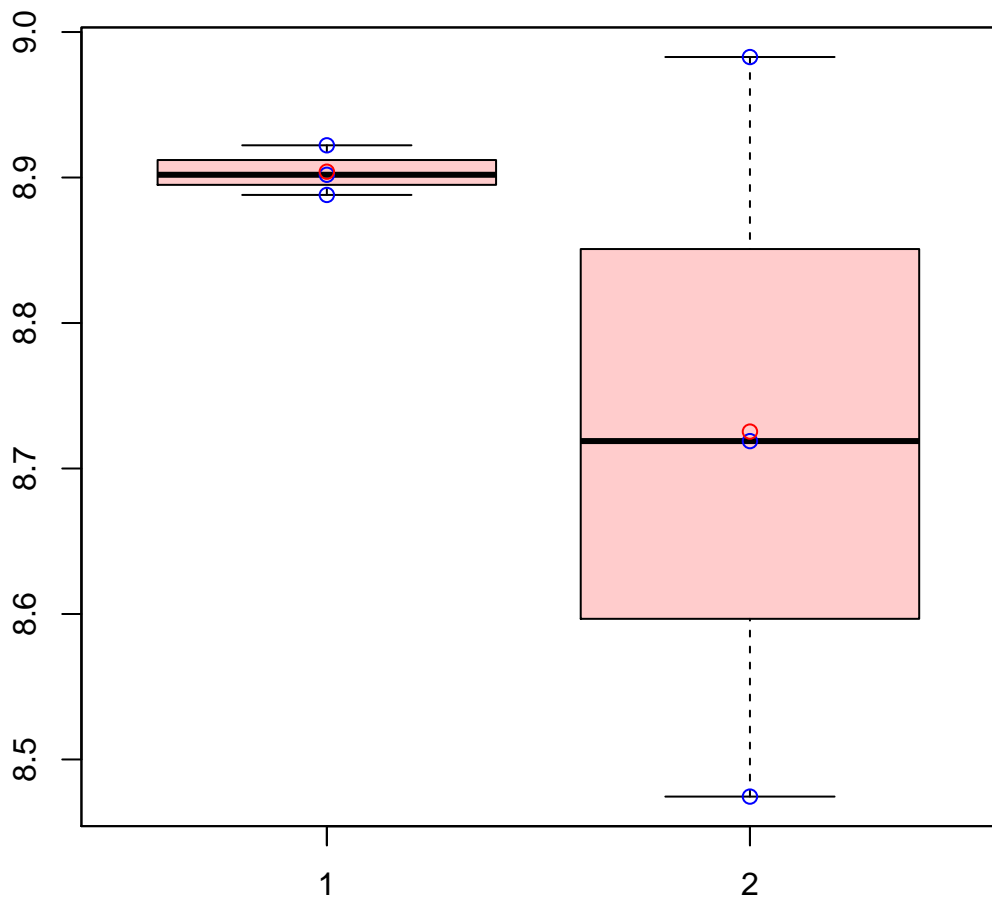

t-Test: p-value = 0.35

# F2D6S1|F2D6S1\_HORVD

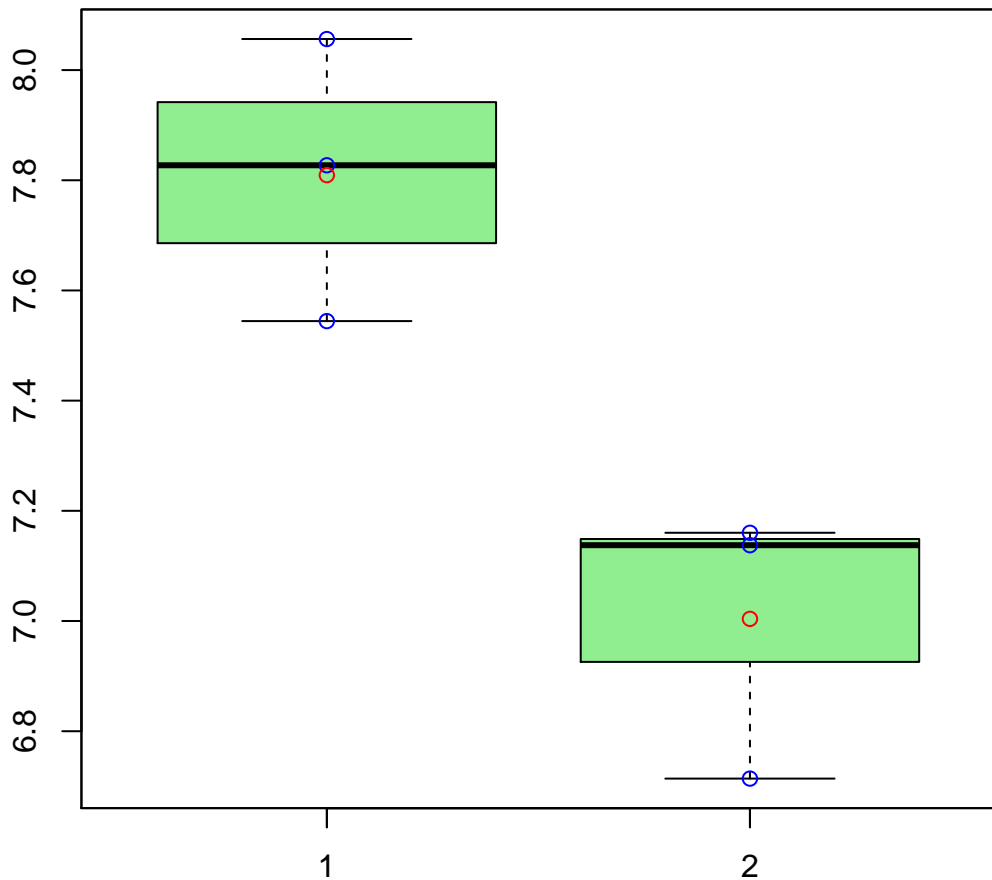

t-Test: p-value = 0.02

# F2D6T1|F2D6T1\_HORVD

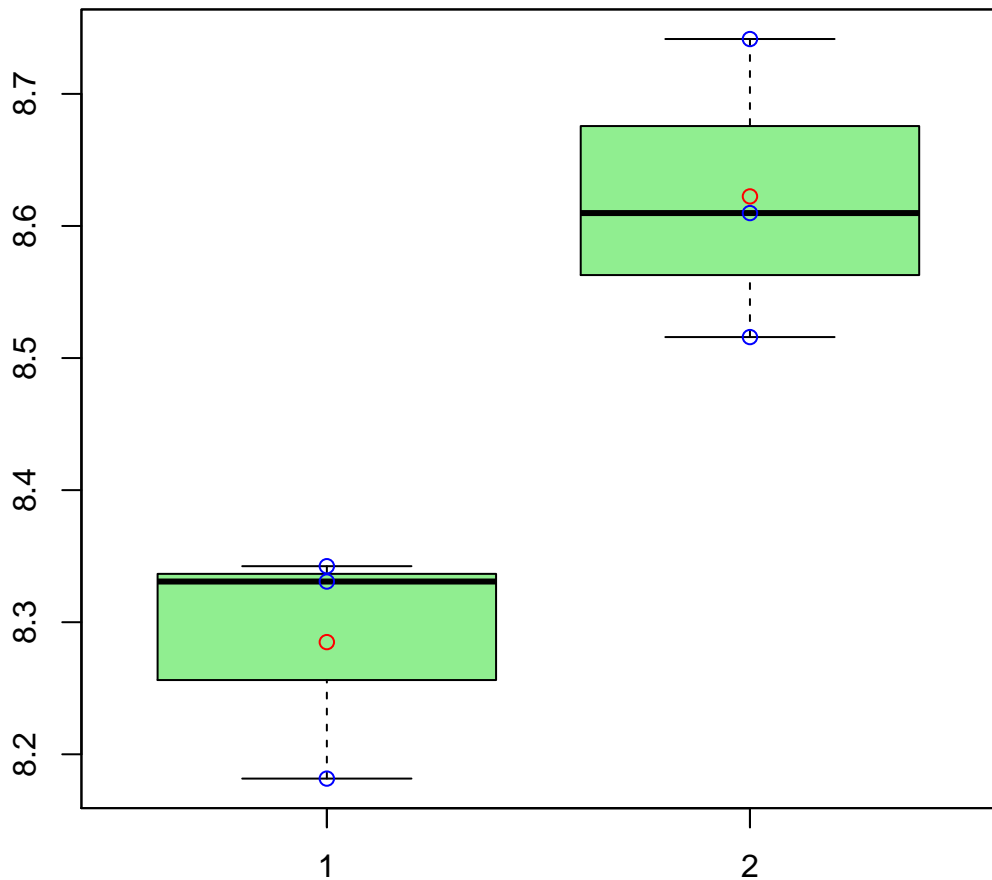

t-Test: p-value = 0.02

# F2D7G7|F2D7G7\_HORVD

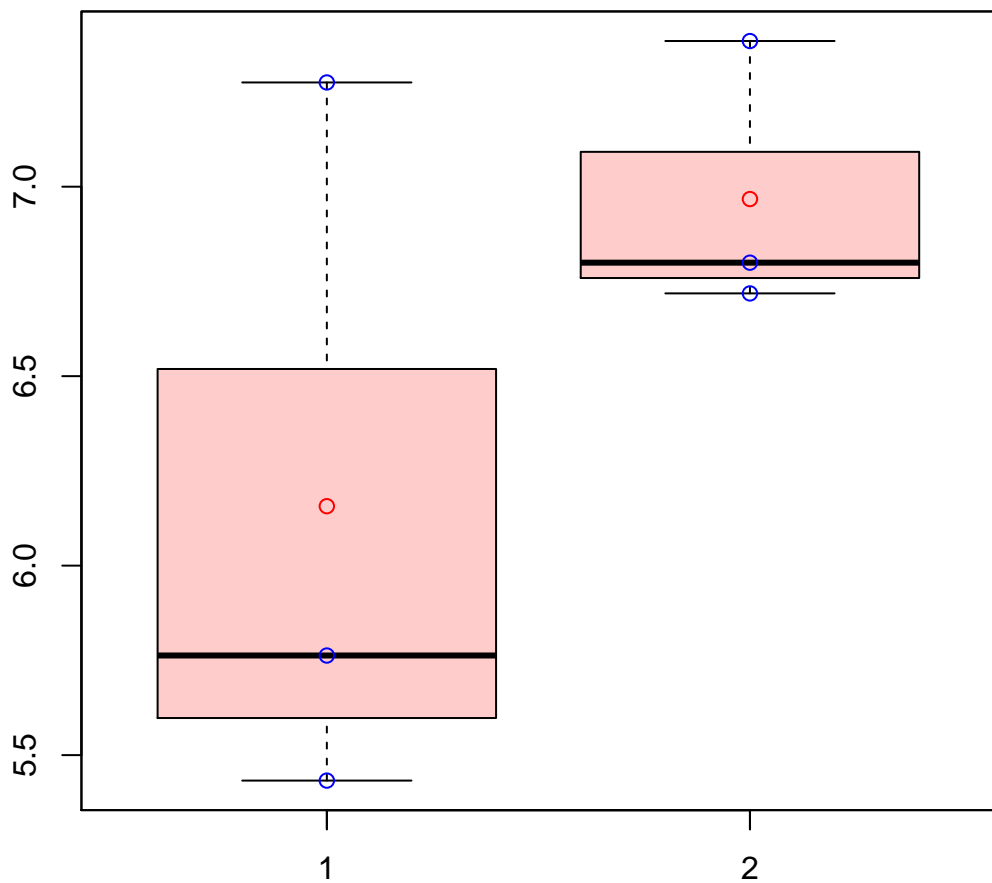

t-Test: p-value = 0.29

# F2D807|F2D807\_HORVD

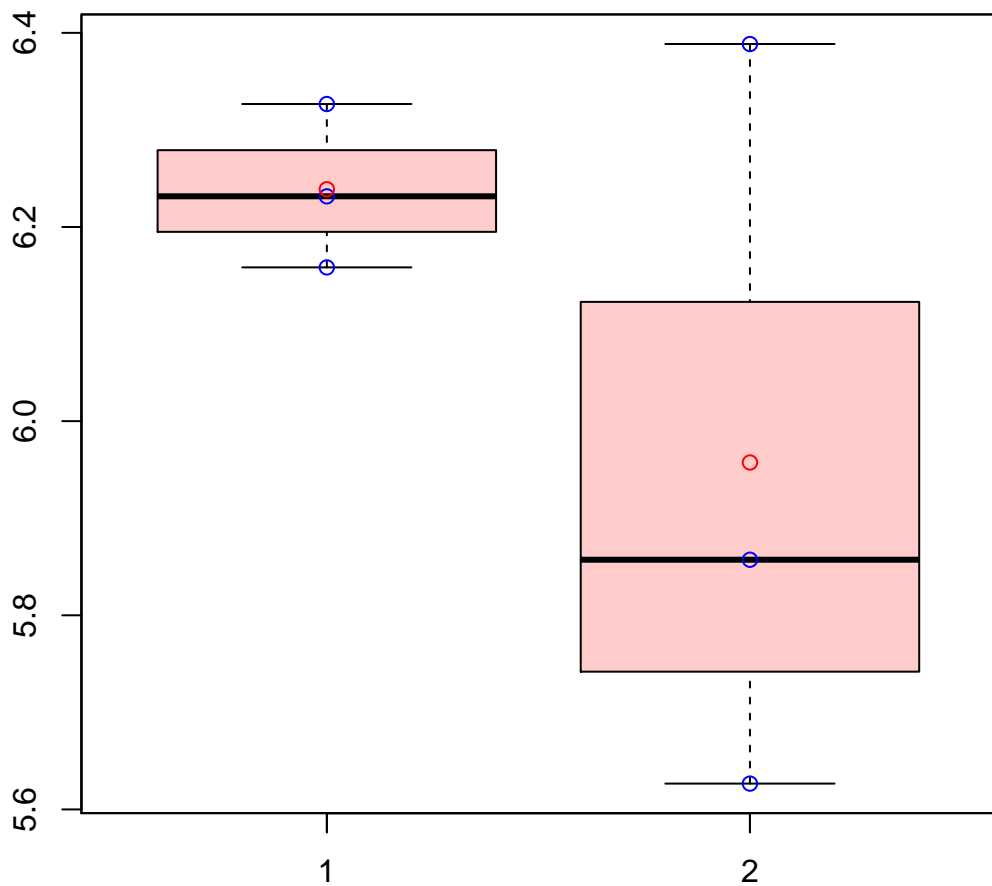

t-Test: p-value = 0.34

## F2D8A6|F2D8A6\_HORVD

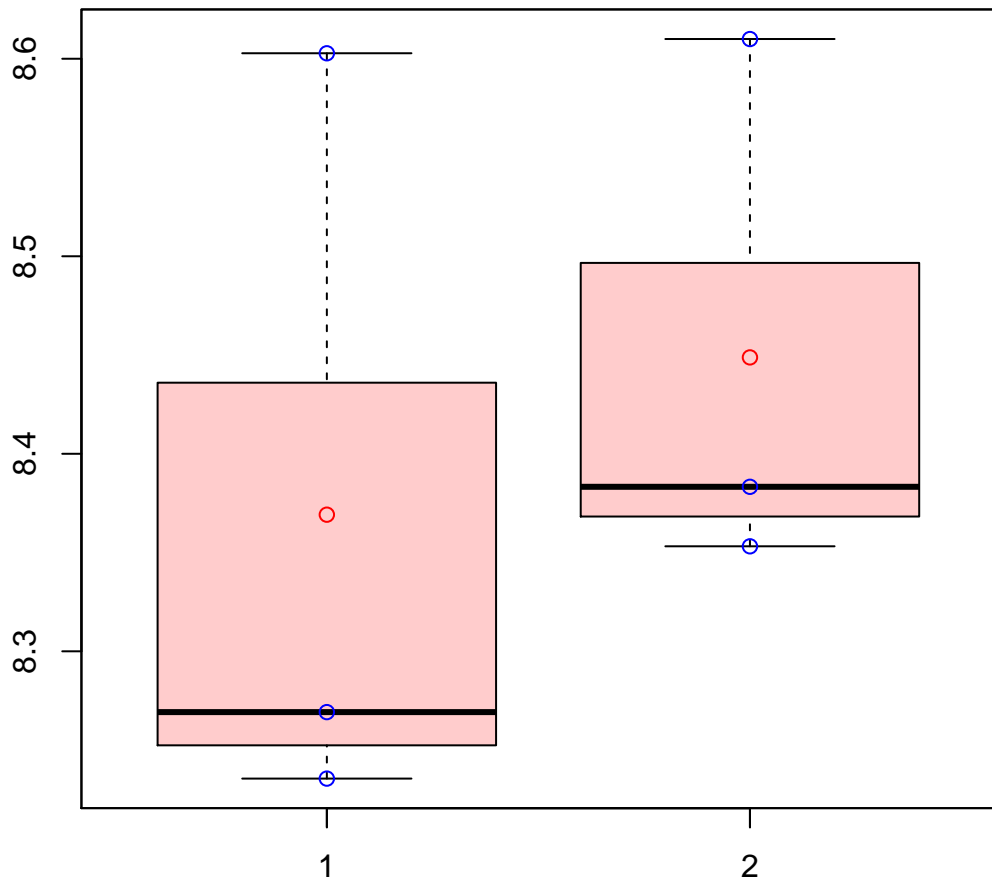

t-Test: p-value = 0.61



# F2D9C0|F2D9C0\_HORVD

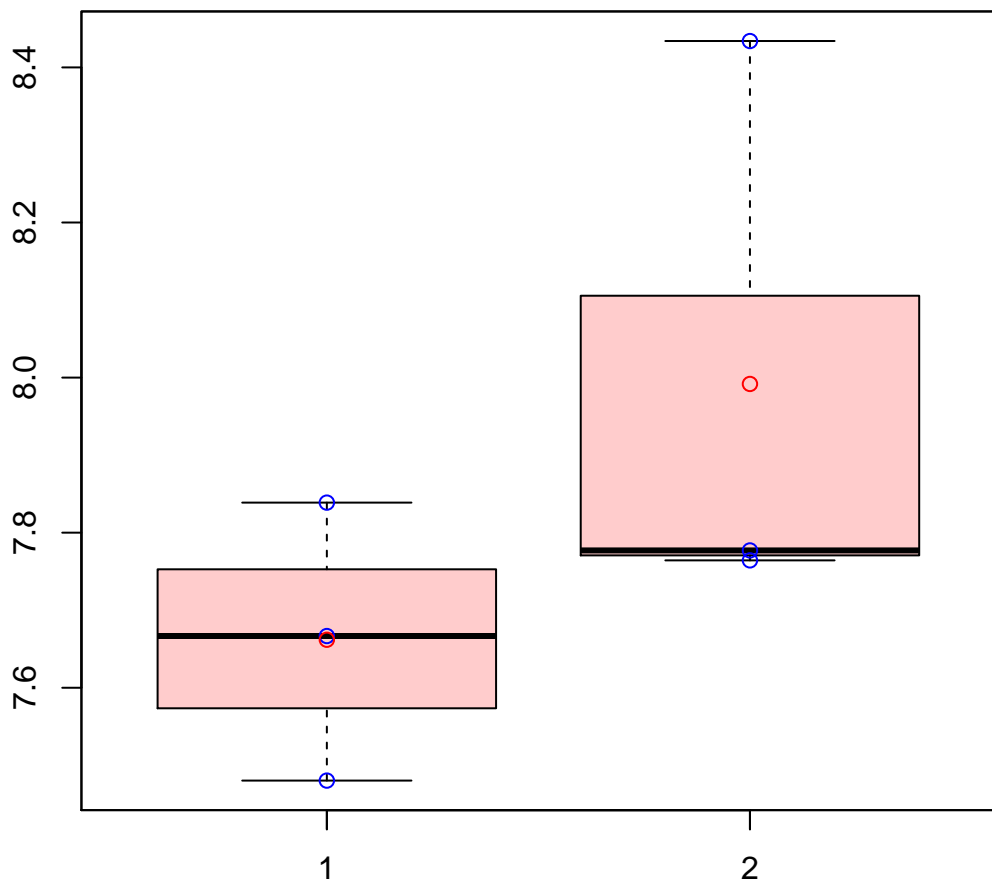

t-Test: p-value = 0.27

# F2DAL0|F2DAL0\_HORVD

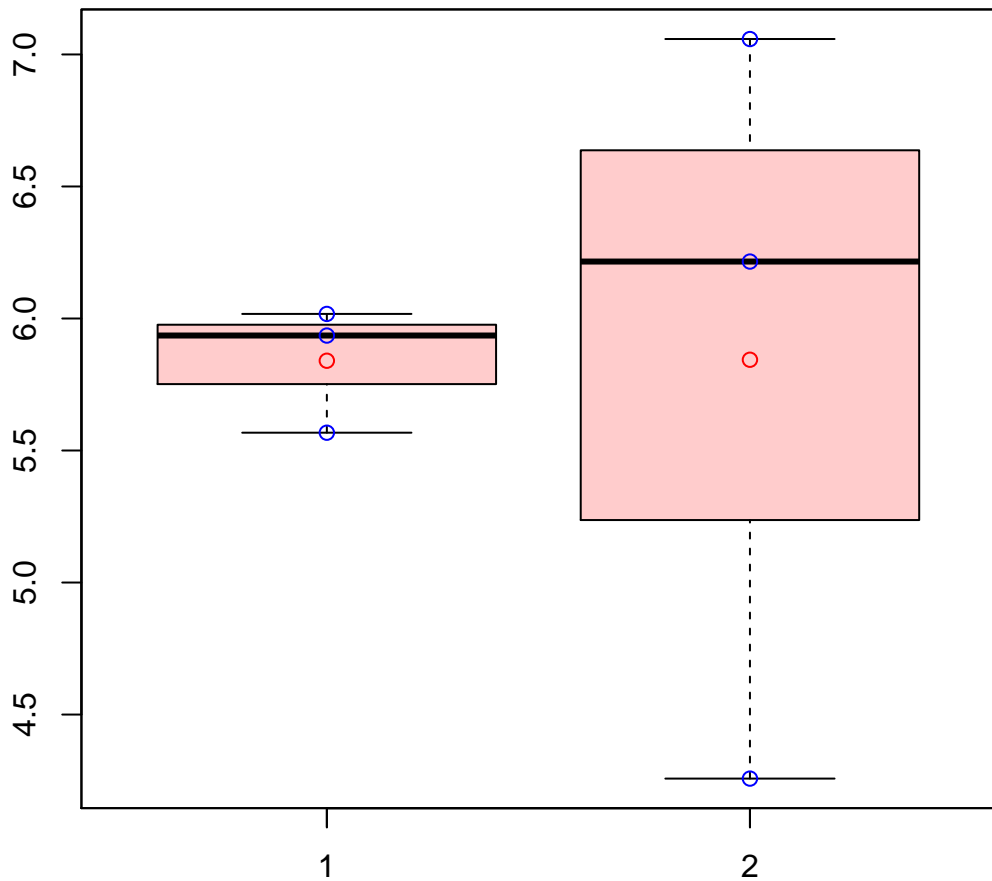

t-Test: p-value = 1

## F2DAP7|F2DAP7\_HORVD

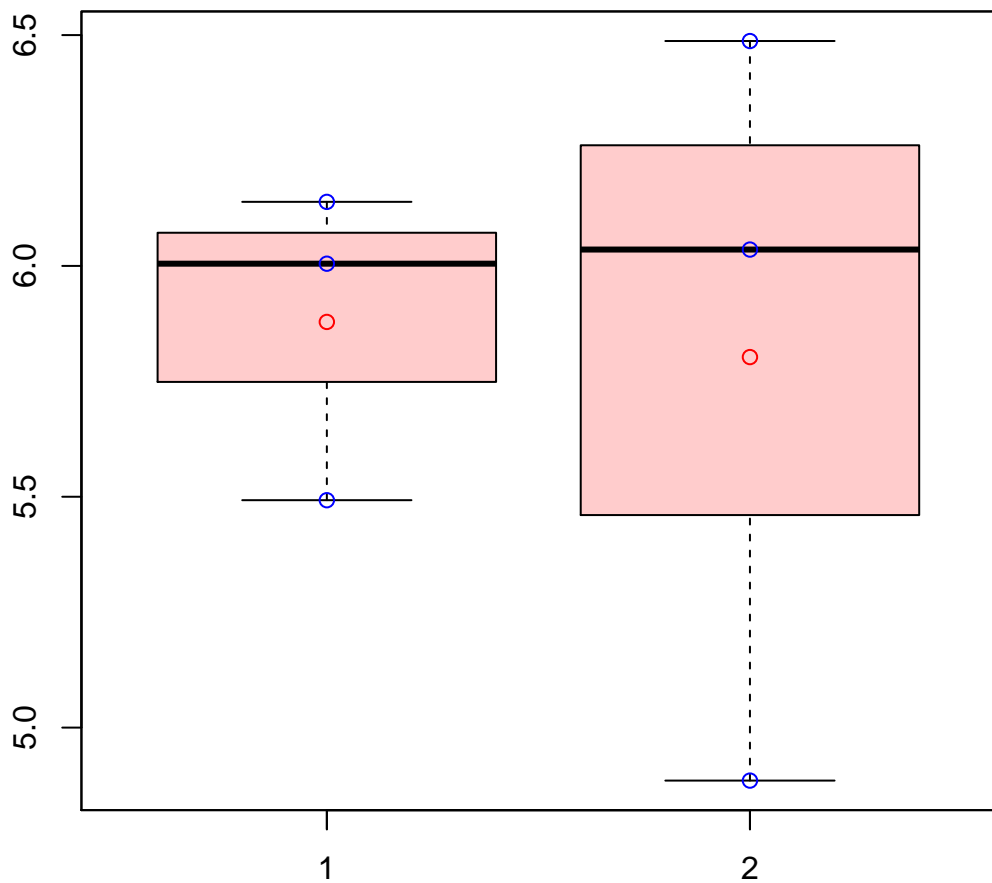

t-Test: p-value = 0.89

# F2DB61|F2DB61\_HORVD

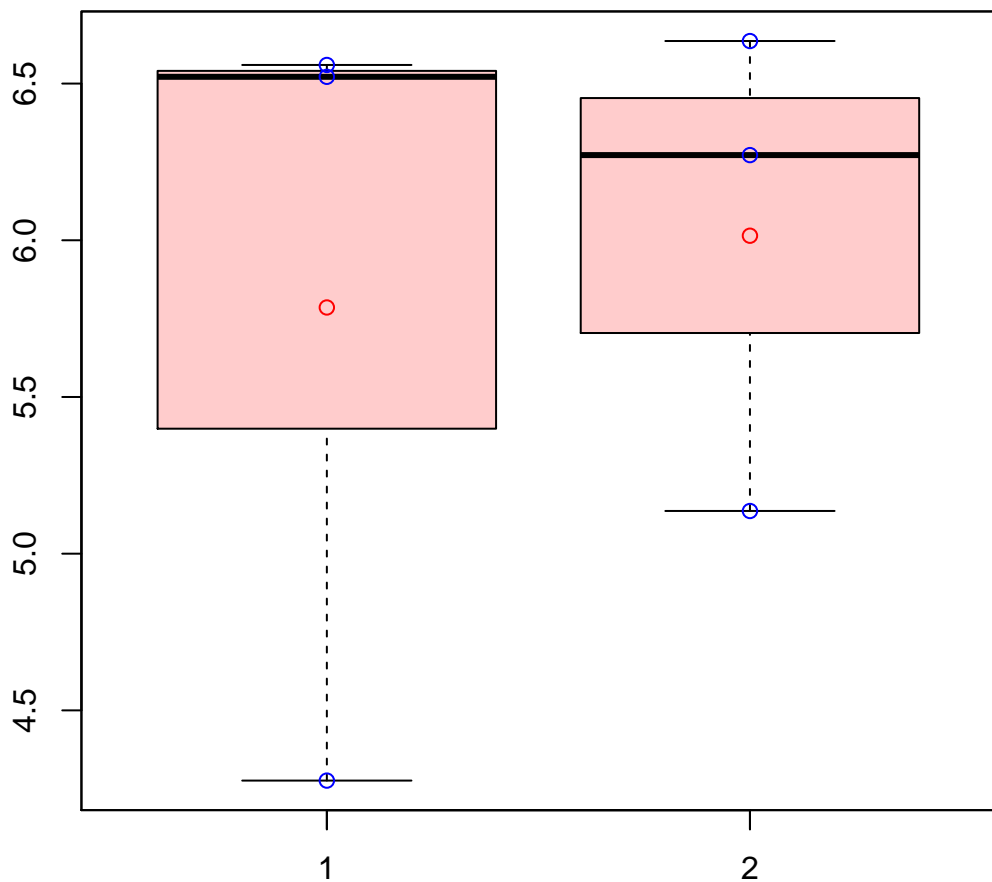

t-Test: p-value = 0.81

## F2DCE3|F2DCE3\_HORVD

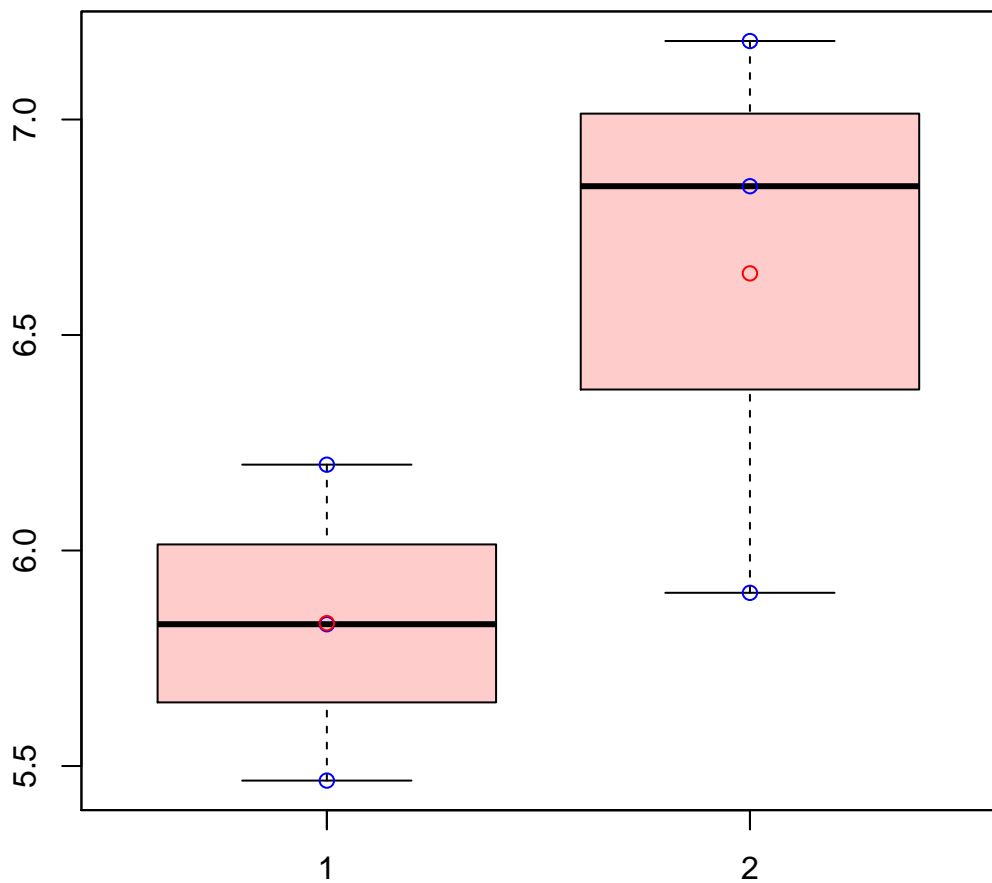

t-Test: p-value = 0.16

## F2DCJ3|F2DCJ3\_HORVD

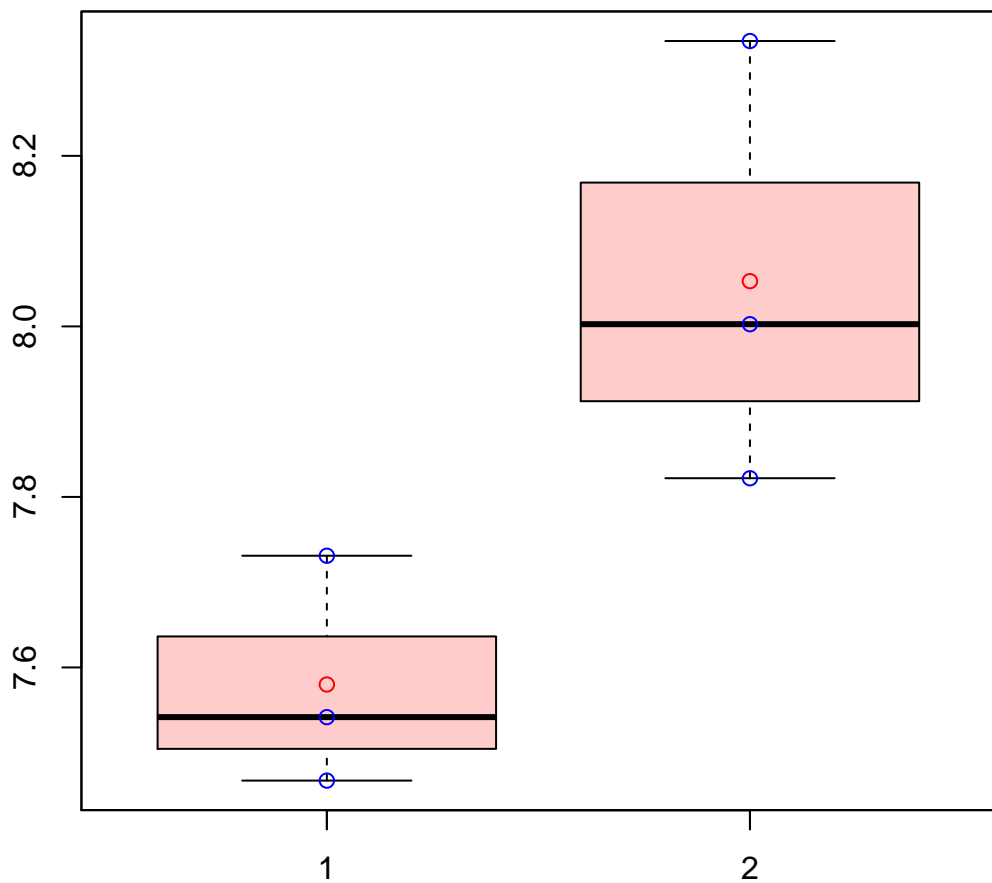

t-Test: p-value = 0.07

# F2DCL2|F2DCL2\_HORVD

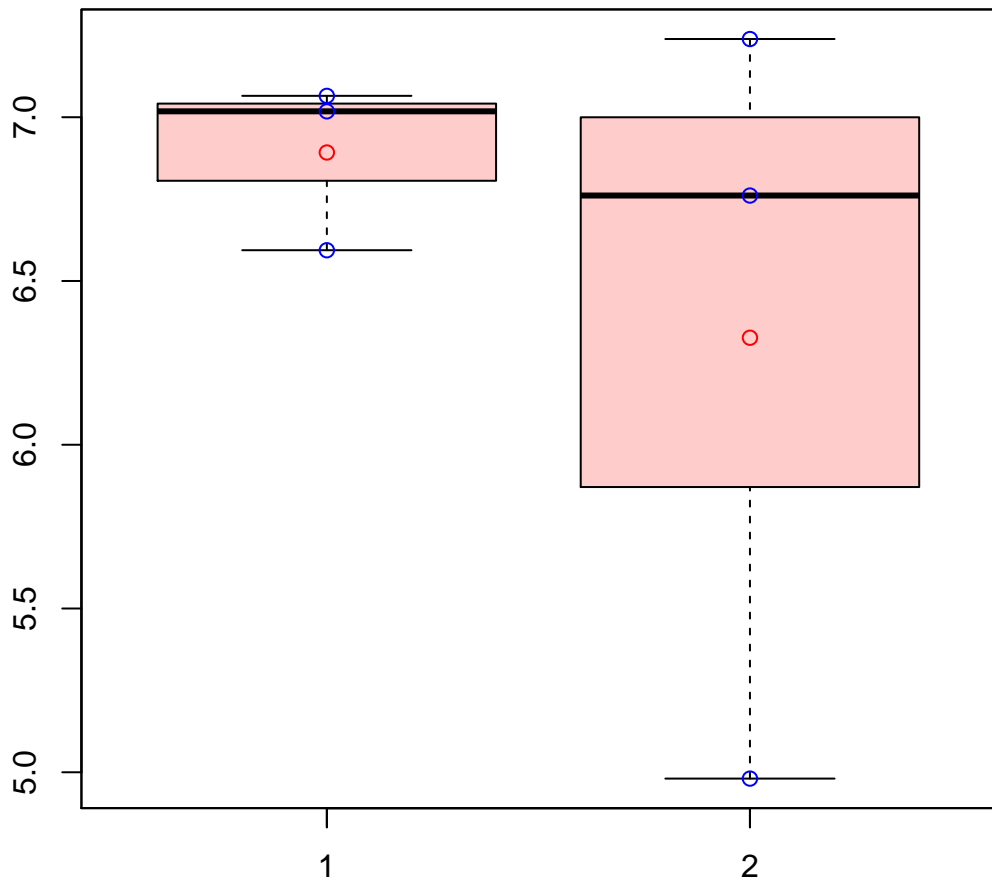

t-Test: p-value = 0.5

# F2DCS7|F2DCS7\_HORVD

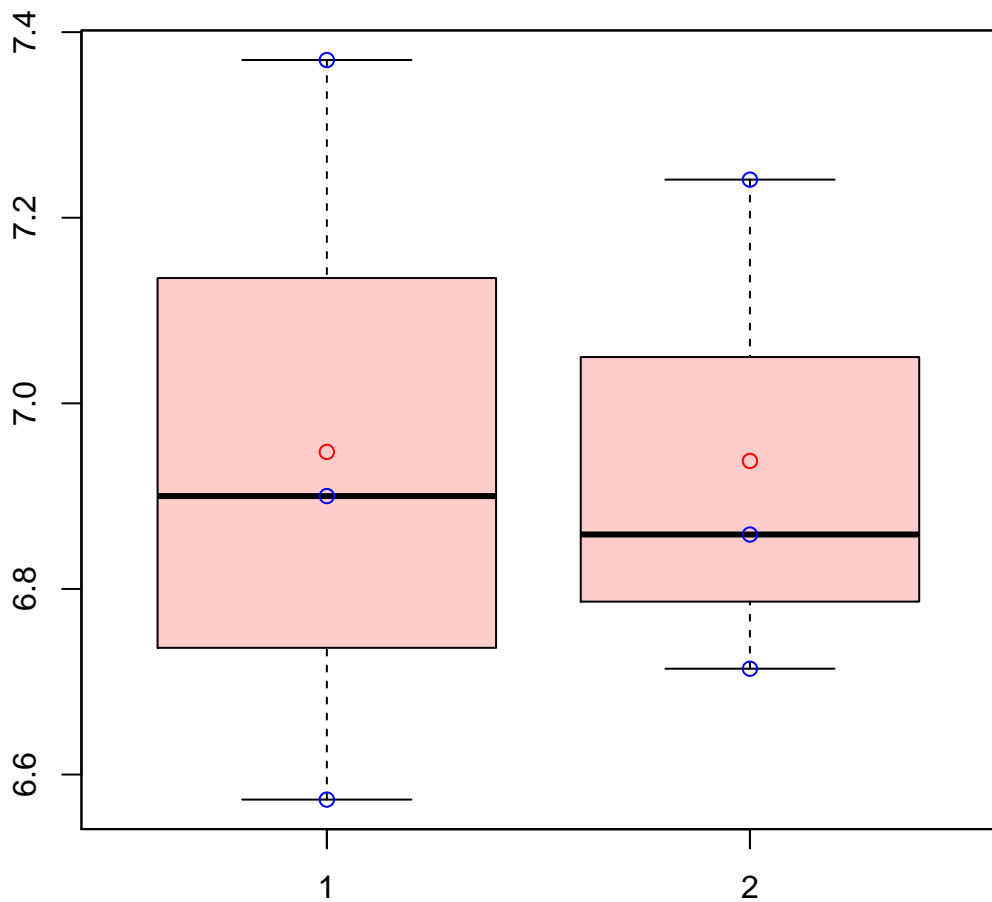

t-Test: p-value = 0.97



# F2DCW6|F2DCW6\_HORVD

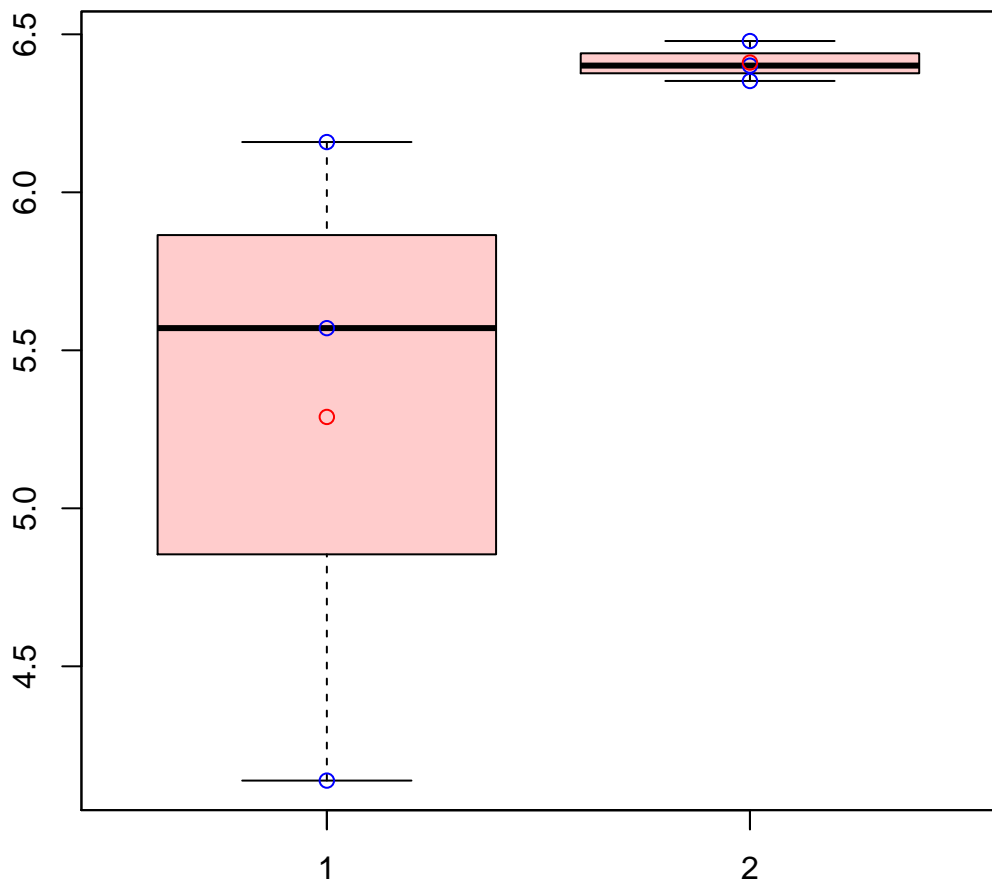

t-Test: p-value = 0.2

## F2DCY3|F2DCY3\_HORVD

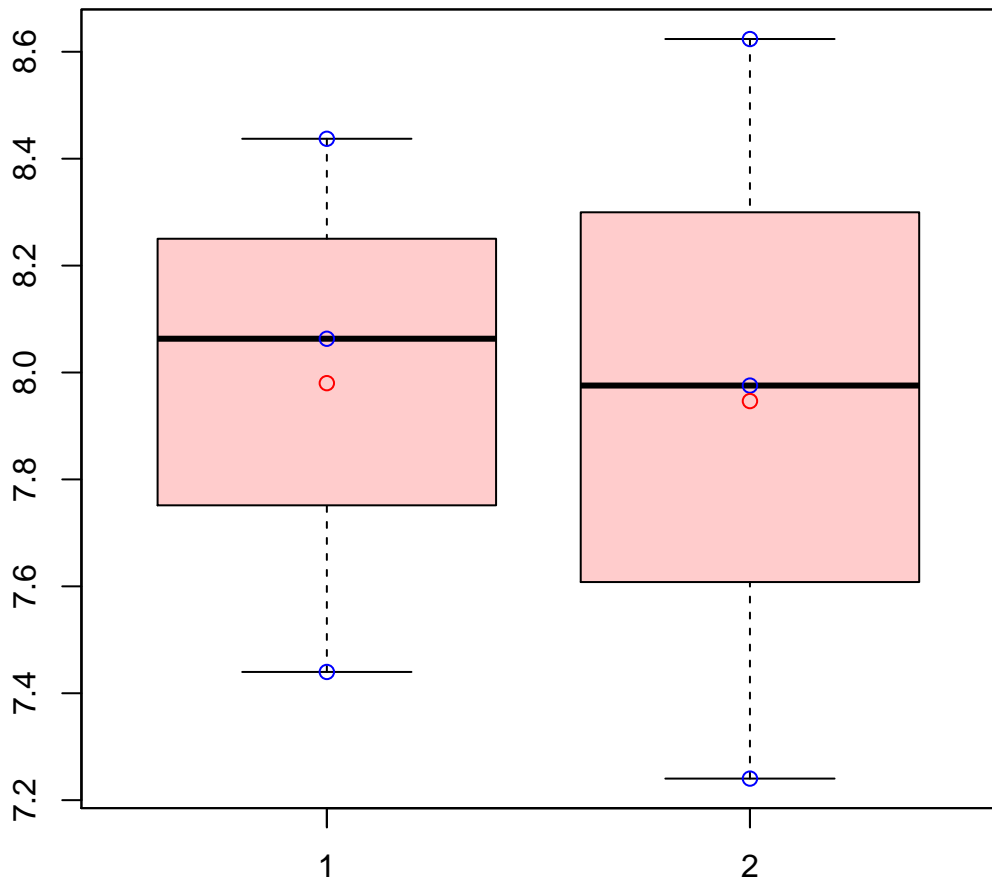

t-Test: p-value = 0.95

## F2DD93|F2DD93\_HORVD

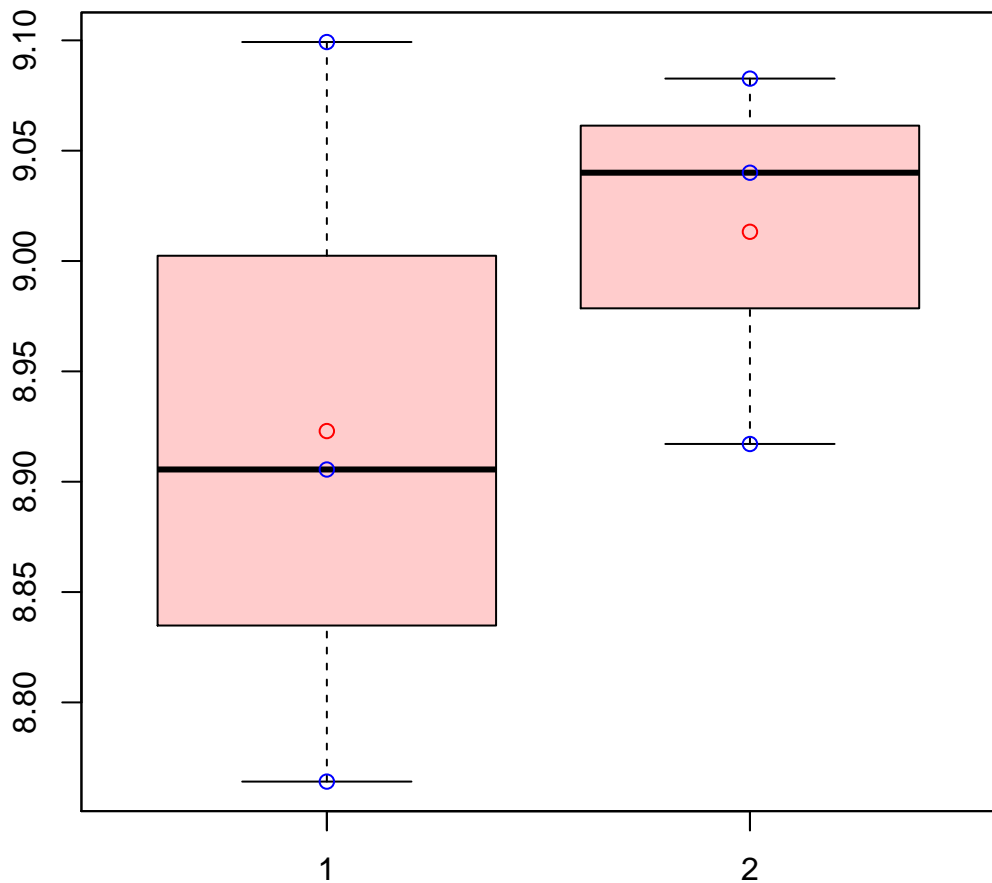

t-Test: p-value = 0.47

## F2DDB2|F2DDB2\_HORVD

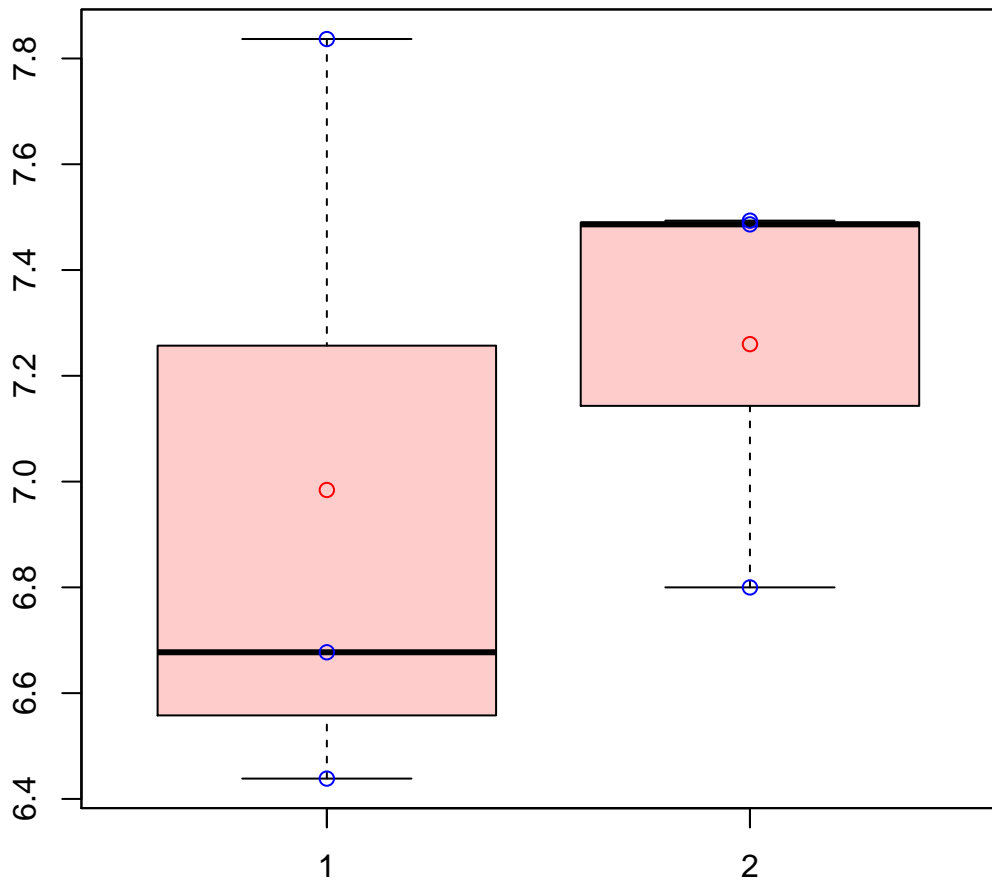

t-Test: p-value = 0.61

# F2DDB8|F2DDB8\_HORVD

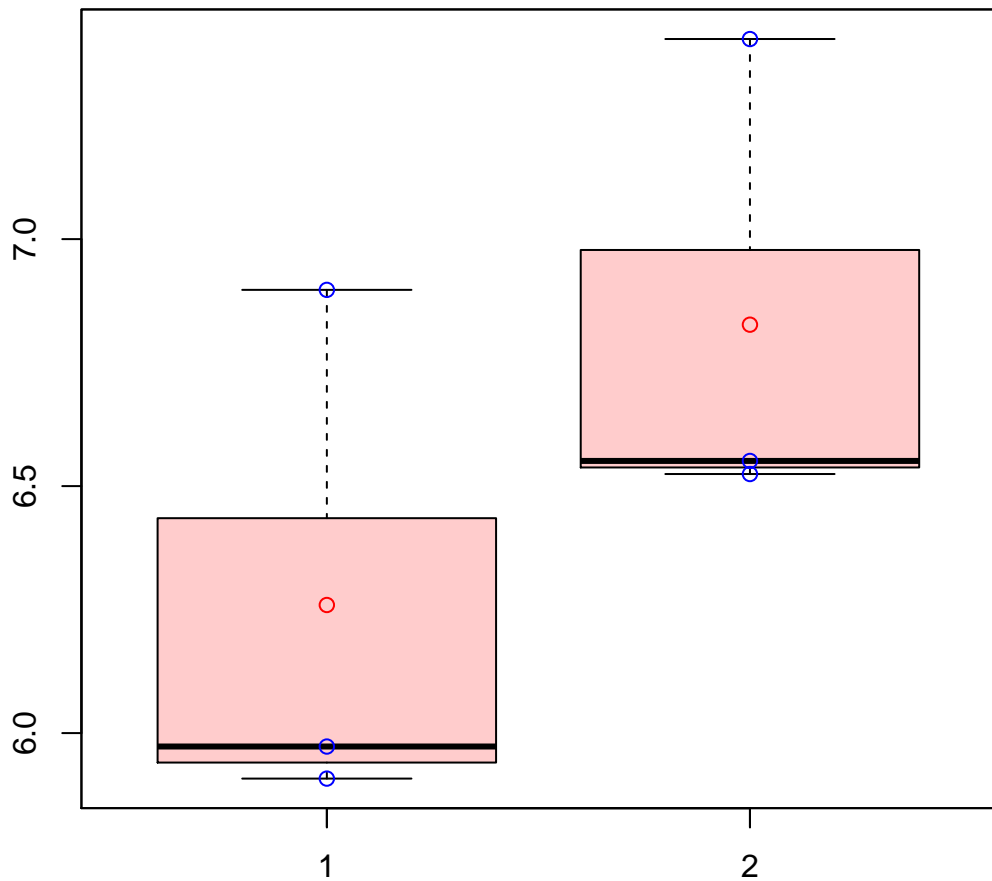

t-Test: p-value = 0.26

## F2DDE9|F2DDE9\_HORVD

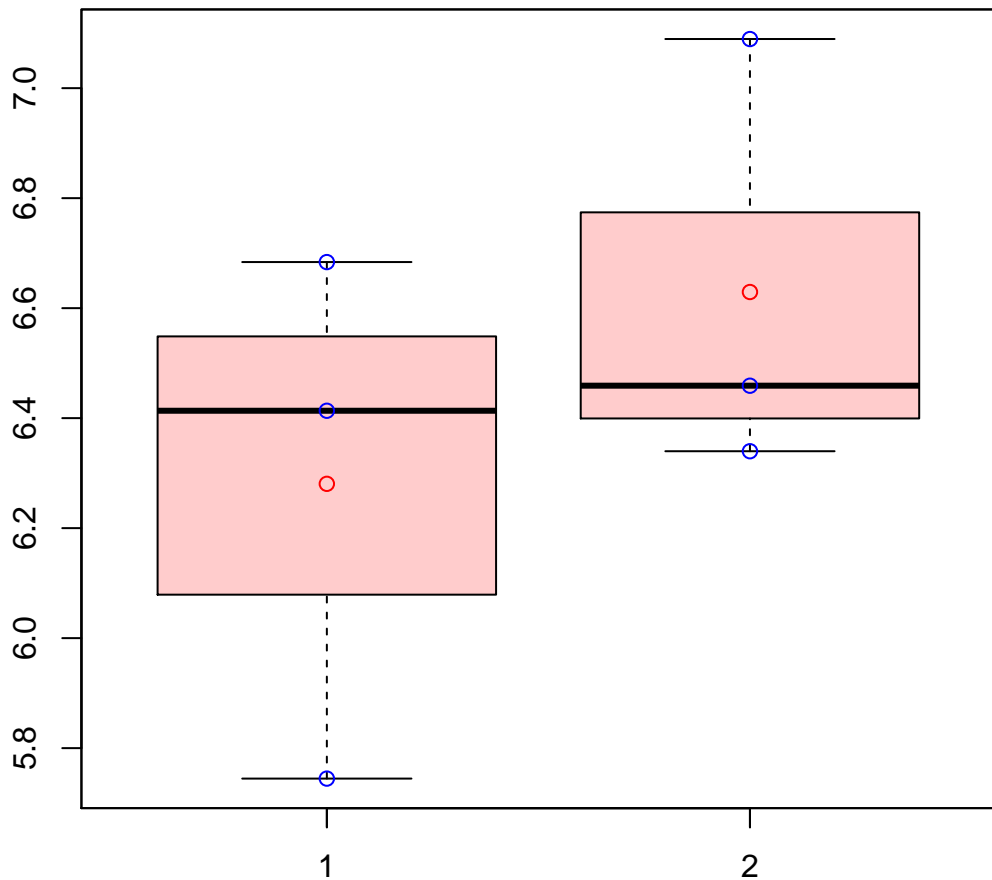

t-Test: p-value = 0.39

# F2DDK1|F2DDK1\_HORVD

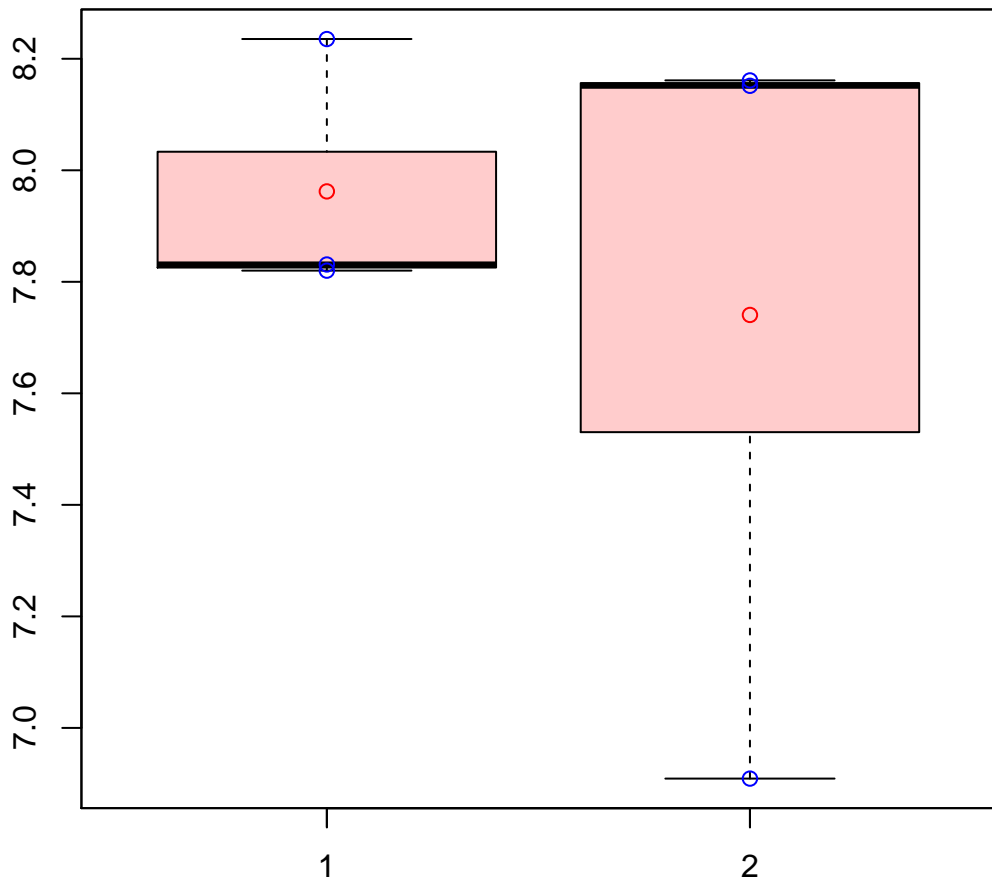

t-Test: p-value = 0.66

# F2DEB3|F2DEB3\_HORVD

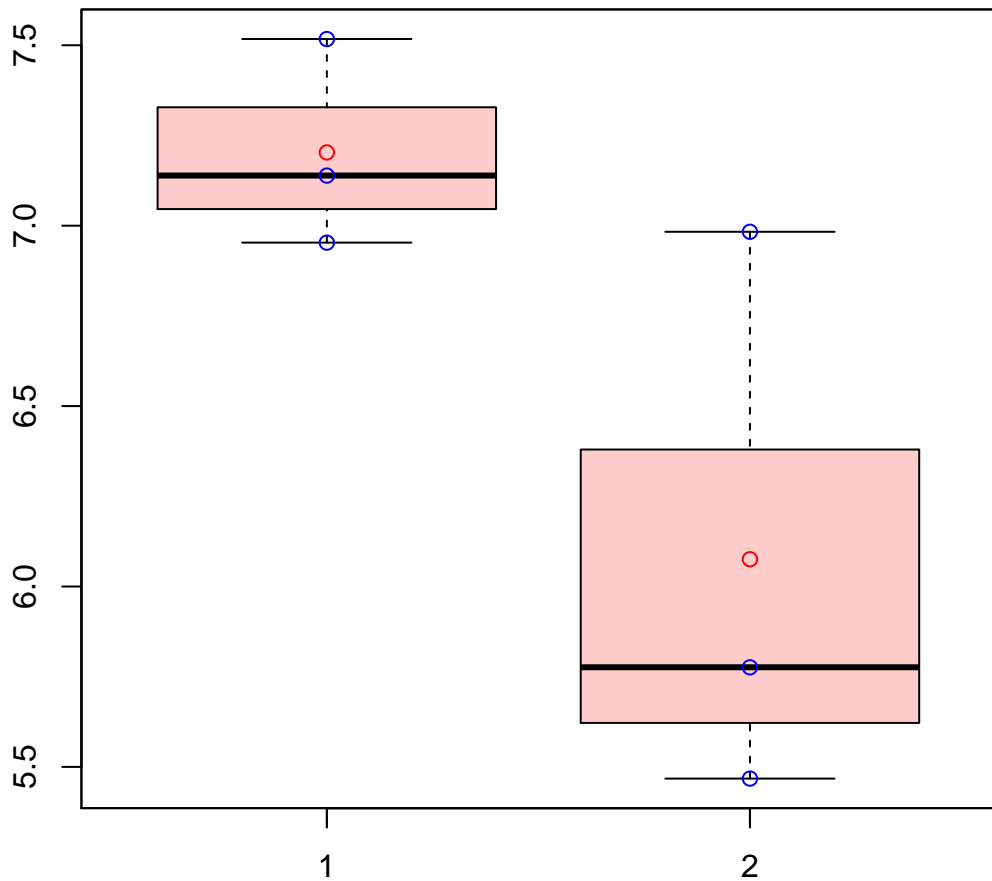

t-Test: p-value = 0.12



## F2DEG3|F2DEG3\_HORVD

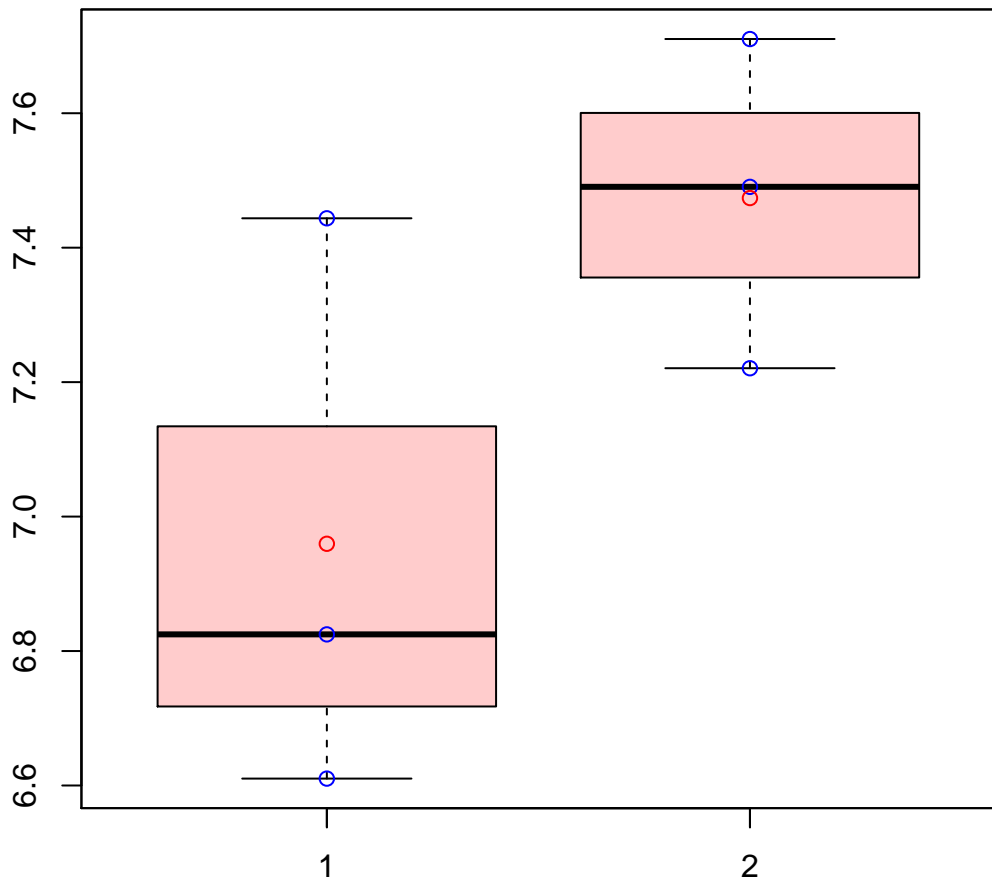

t-Test: p-value = 0.17

# F2DEW5|F2DEW5\_HORVD

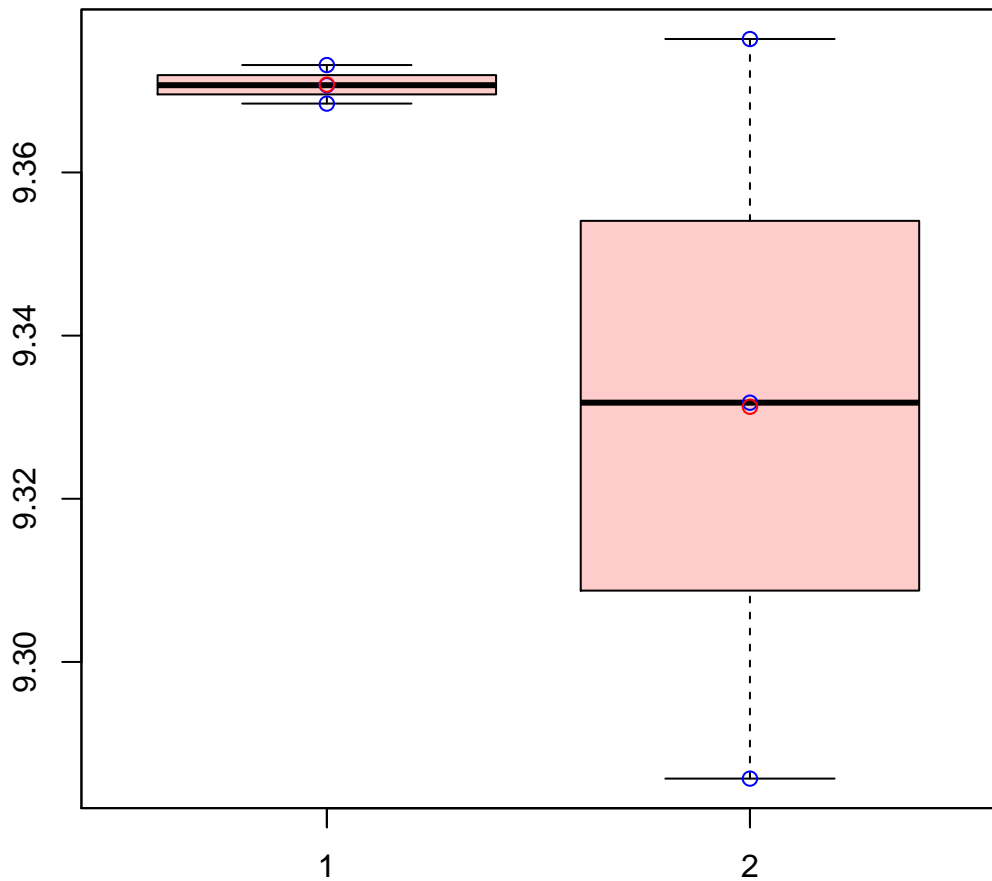

t-Test: p-value = 0.27

# F2DEY7|F2DEY7\_HORVD

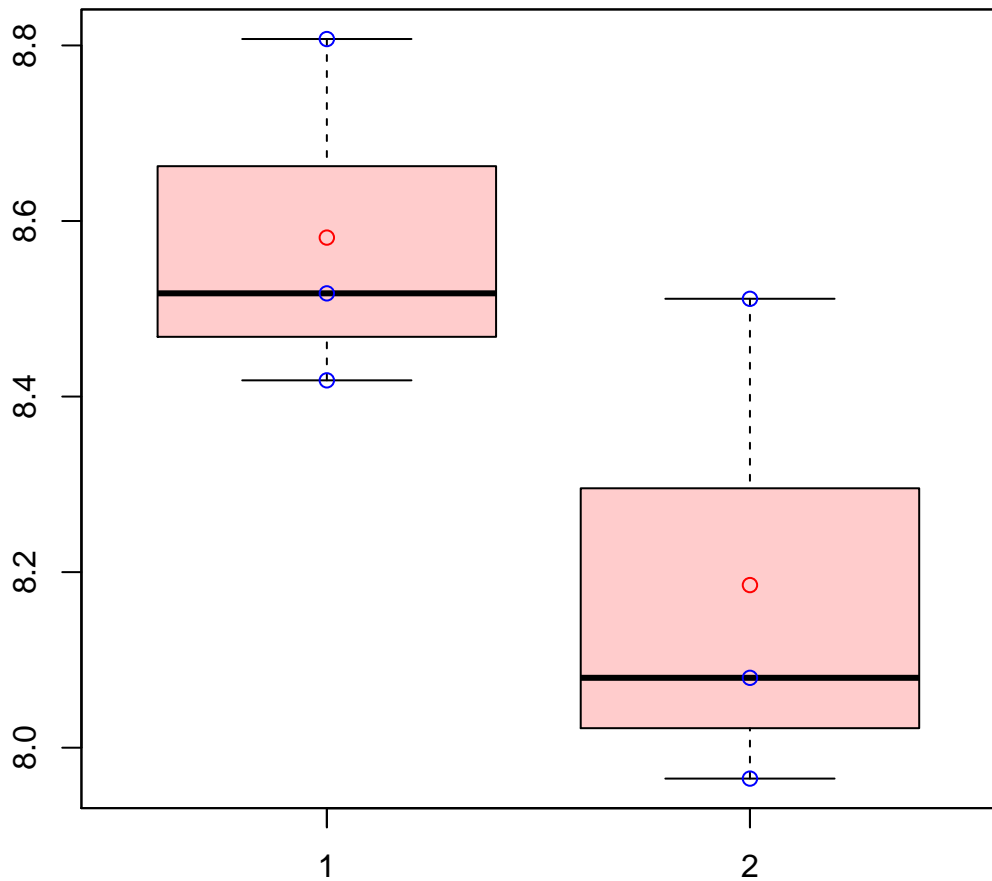

t-Test: p-value = 0.13

# F2DF25|F2DF25\_HORVD

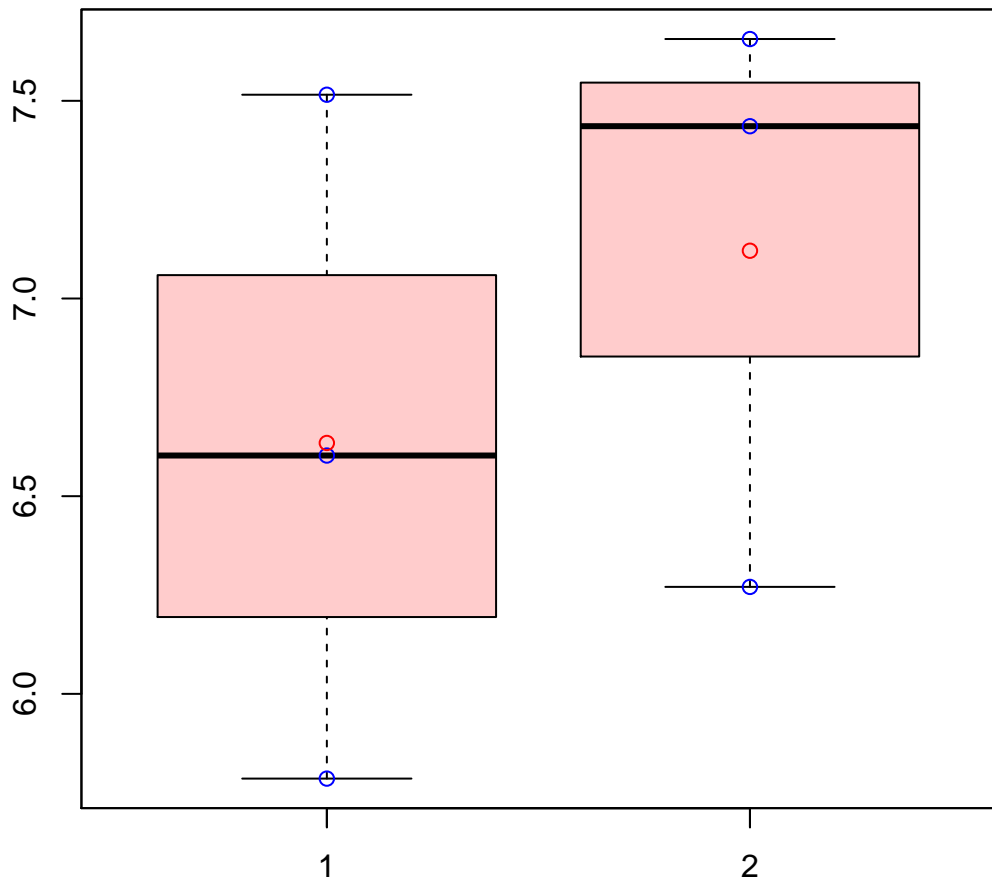

t-Test: p-value = 0.5

# F2DFI5|F2DFI5\_HORVD

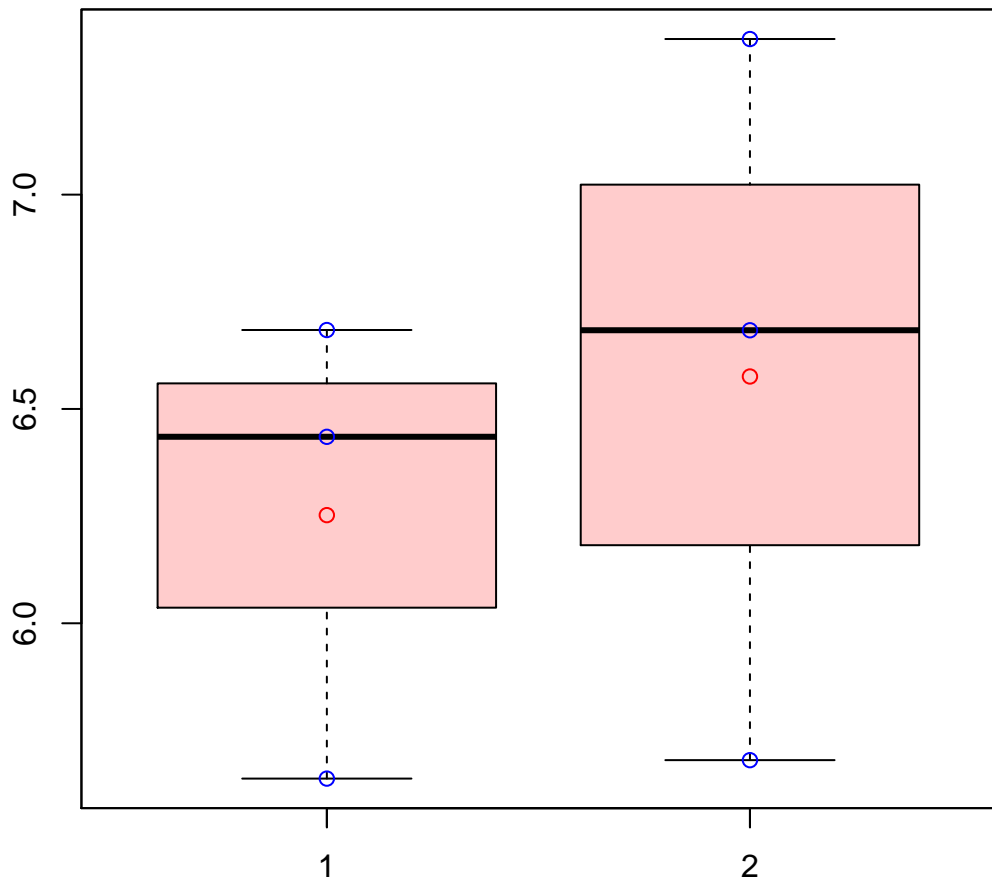

t-Test: p-value = 0.61

## F2DFK1|F2DFK1\_HORVD

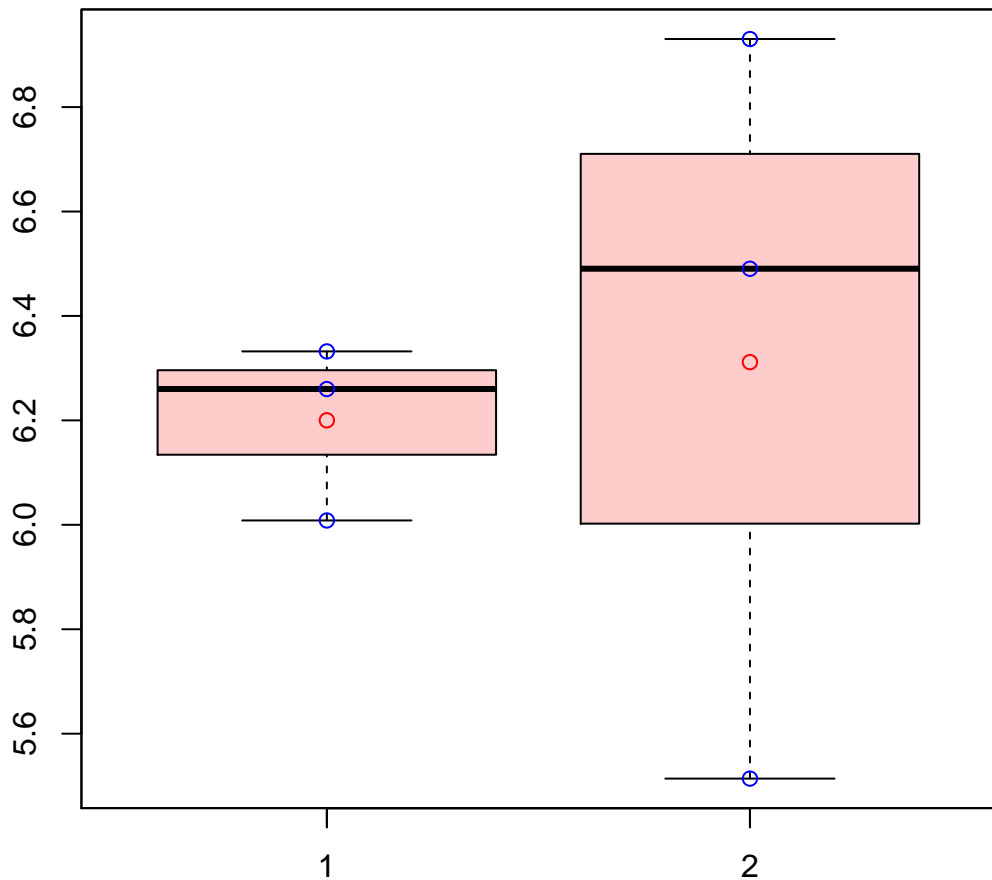

t-Test: p-value = 0.82

## F2DGA0|F2DGA0\_HORVD

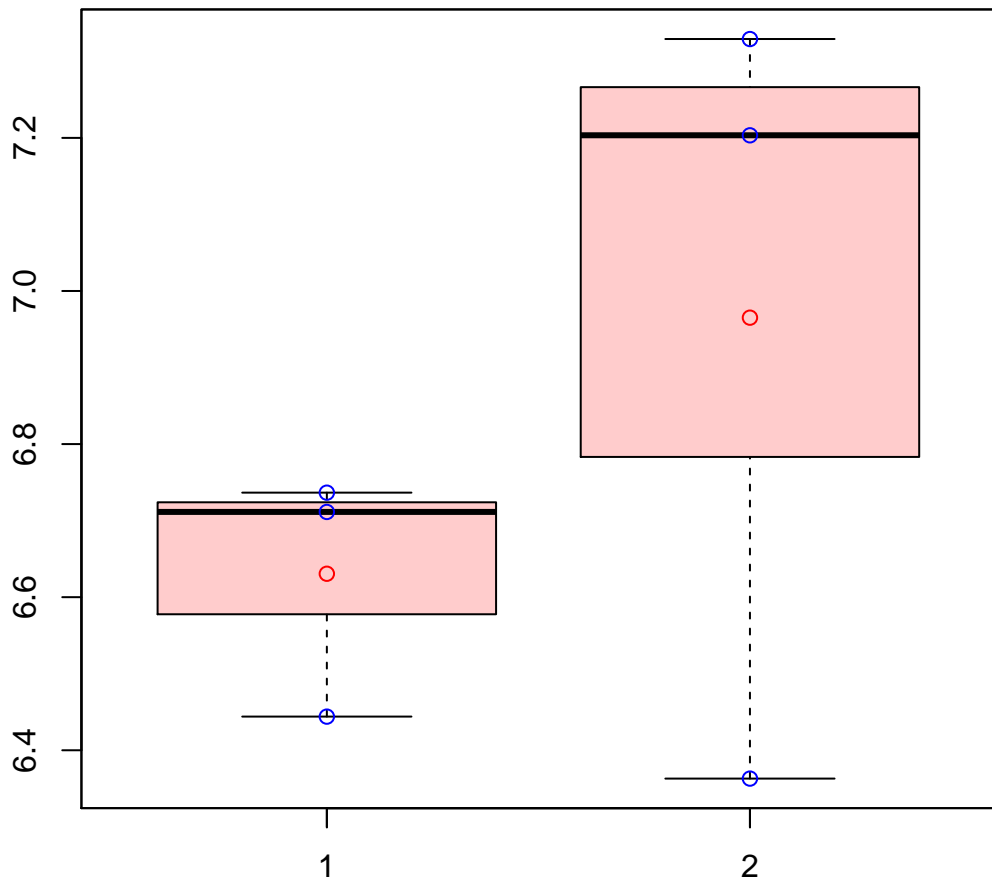

t-Test: p-value = 0.39

## F2DHK4|F2DHK4\_HORVD

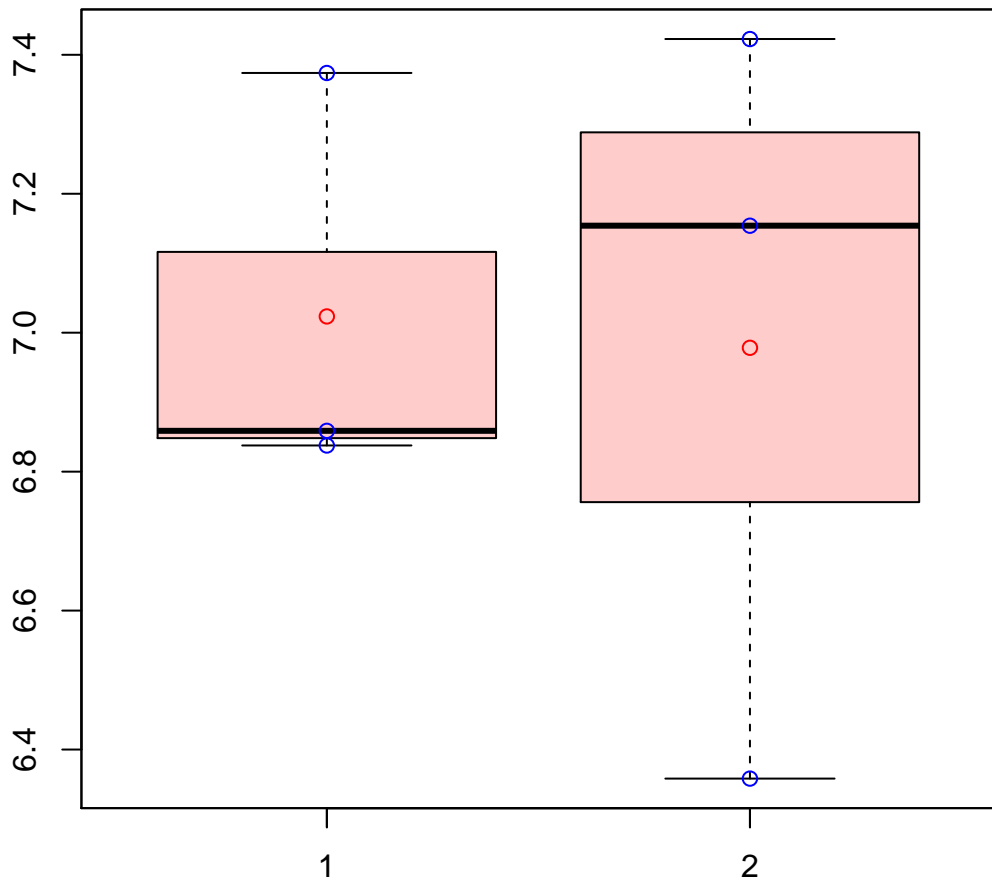

t-Test: p-value = 0.91



# F2DIS9|F2DIS9\_HORVD

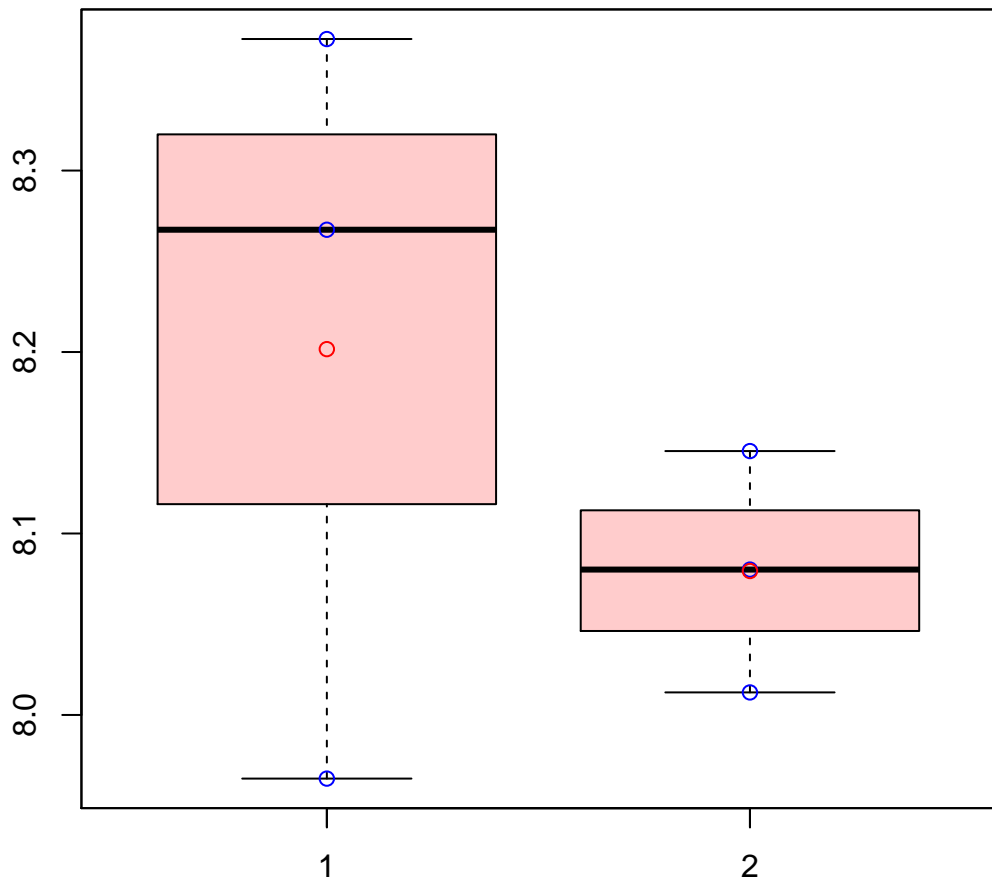

t-Test: p-value = 0.43

# F2DIT5|F2DIT5\_HORVD

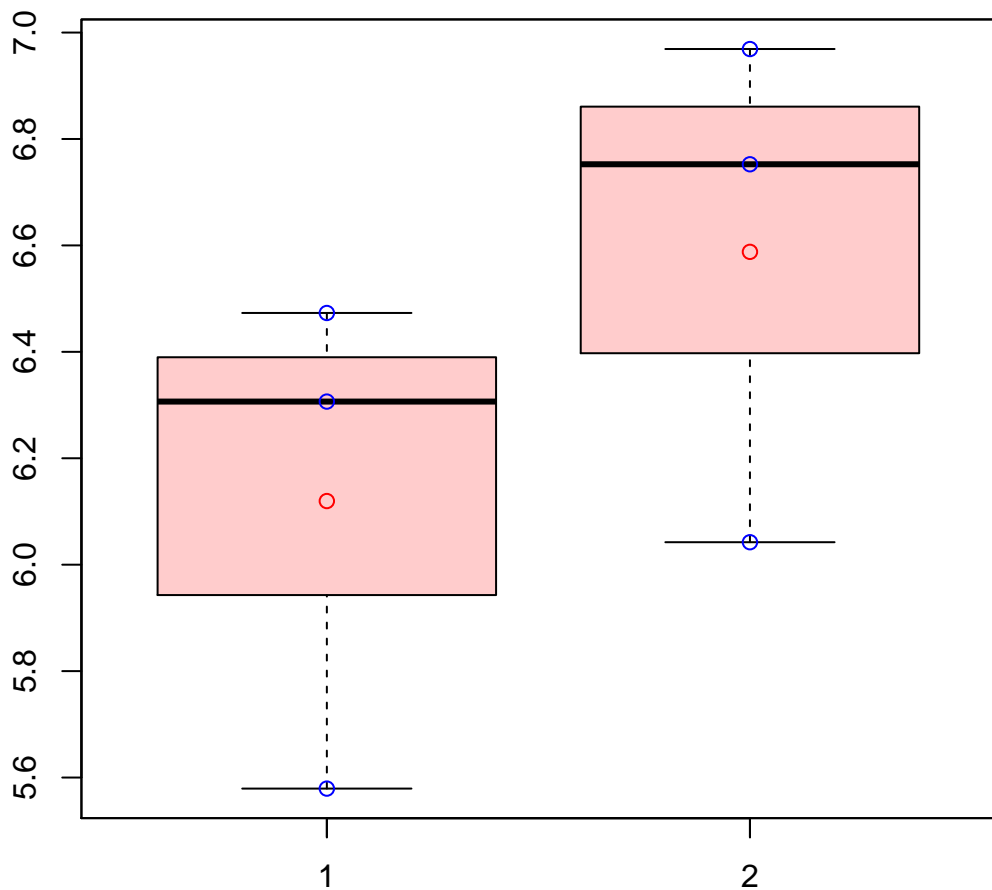

t-Test: p-value = 0.3

## F2DJN9|F2DJN9\_HORVD

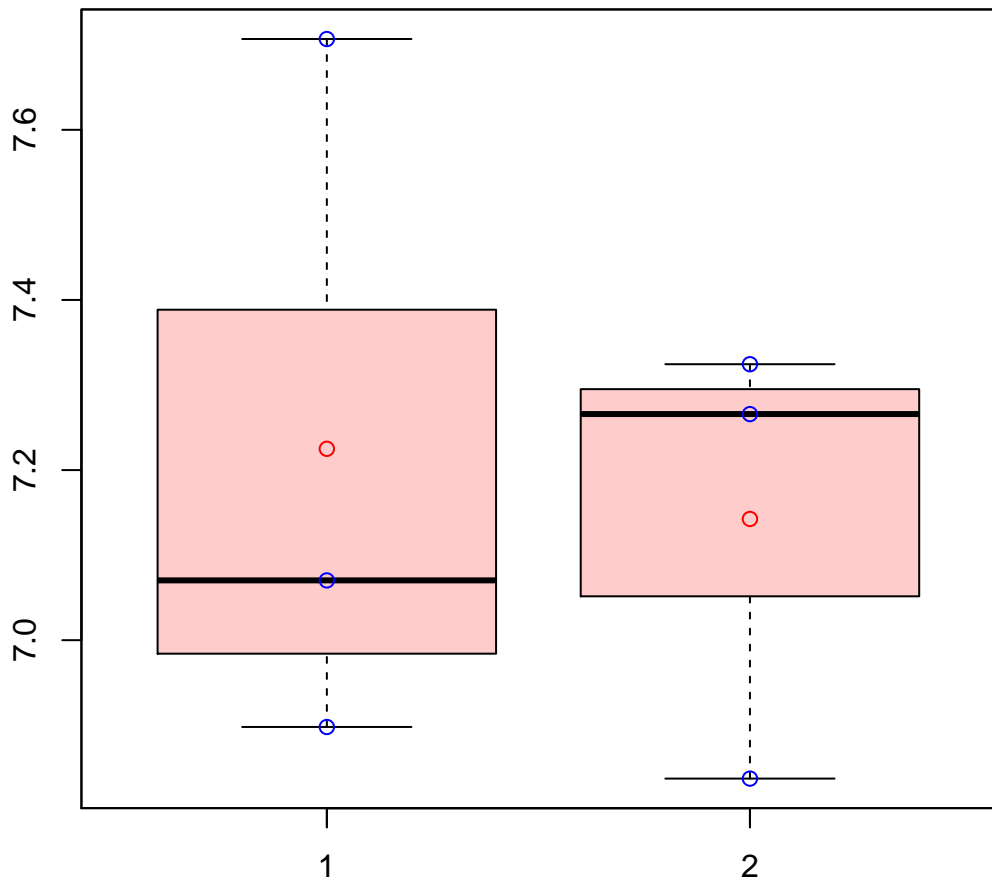

t-Test: p-value = 0.79

# F2DL49|F2DL49\_HORVD

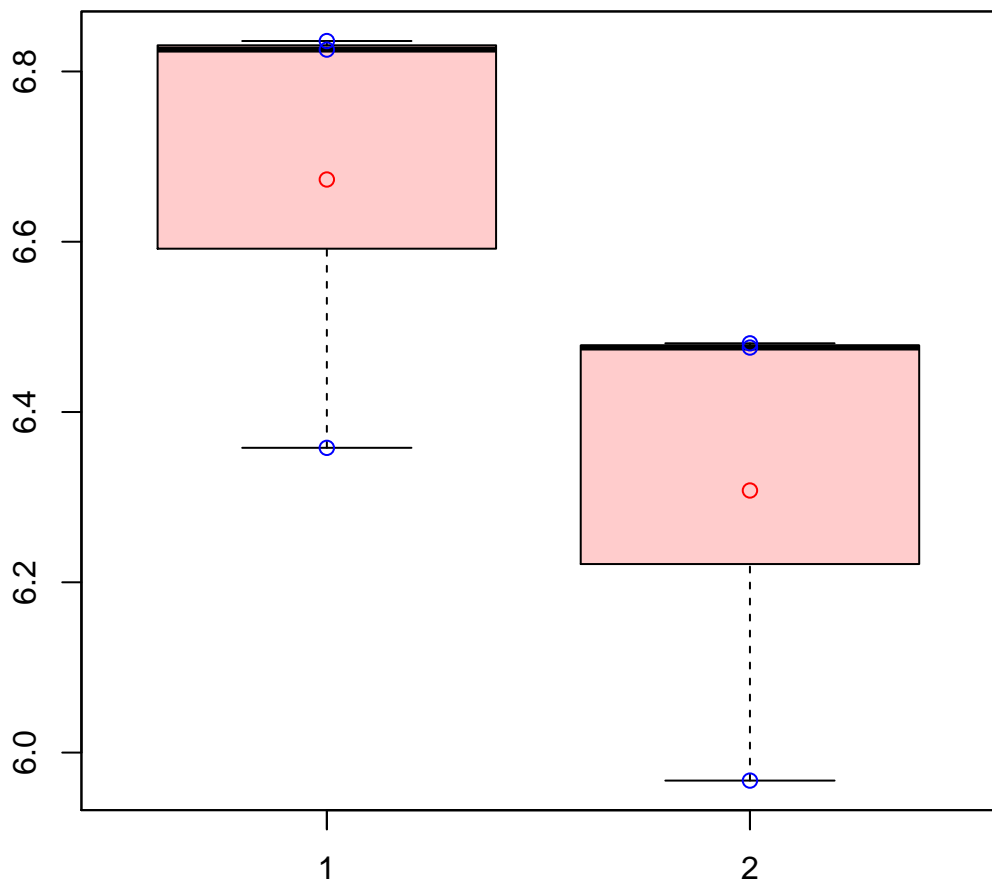

t-Test: p-value = 0.19

# F2DL93|F2DL93\_HORVD

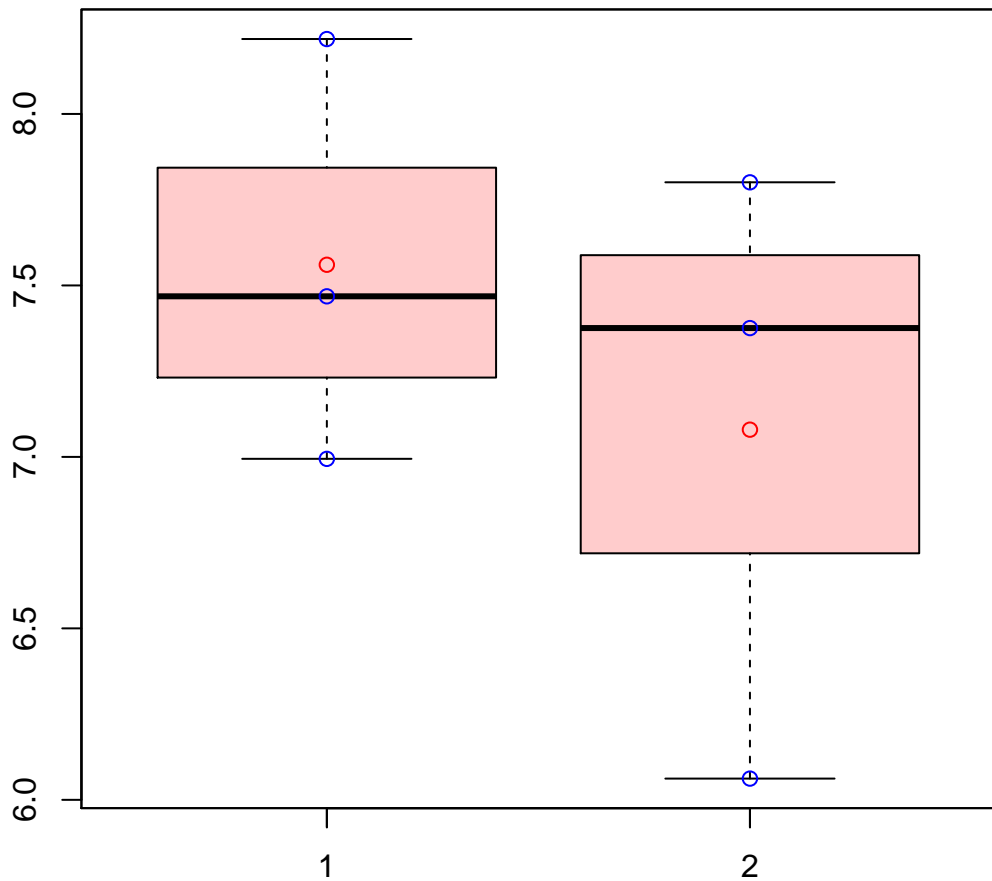

t-Test: p-value = 0.5

# F2DLA9|F2DLA9\_HORVD

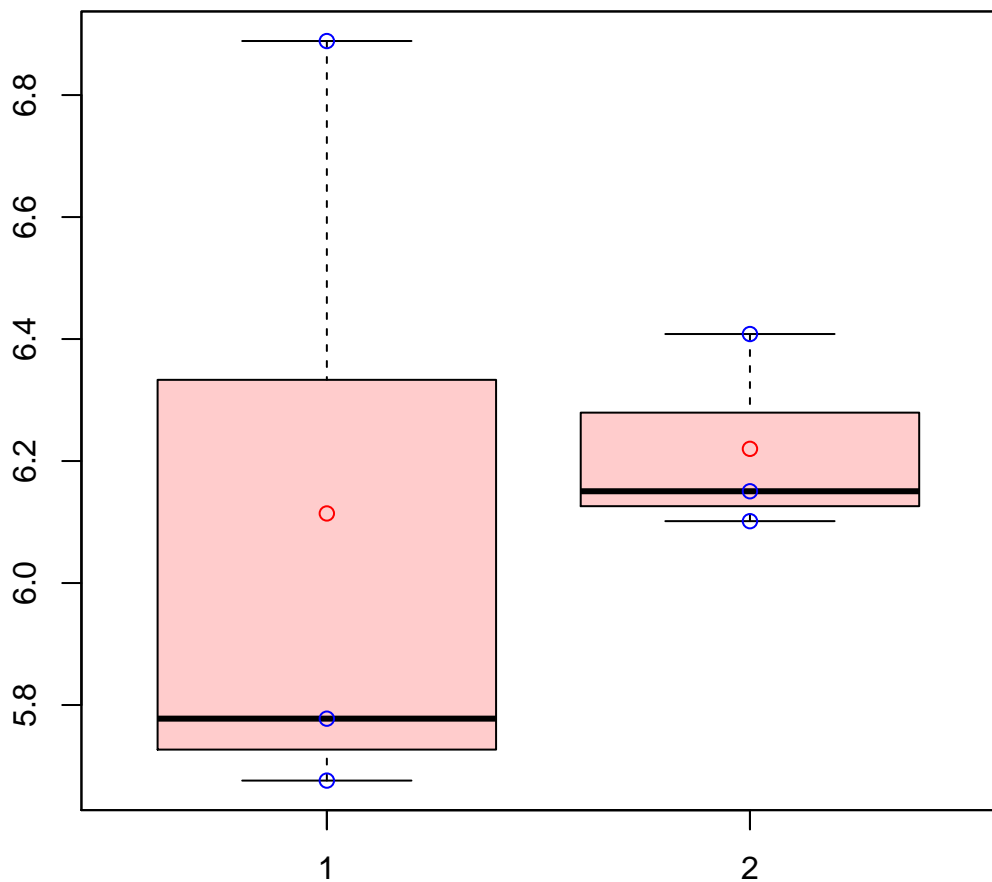

t-Test: p-value = 0.81

## F2DLG2|F2DLG2\_HORVD

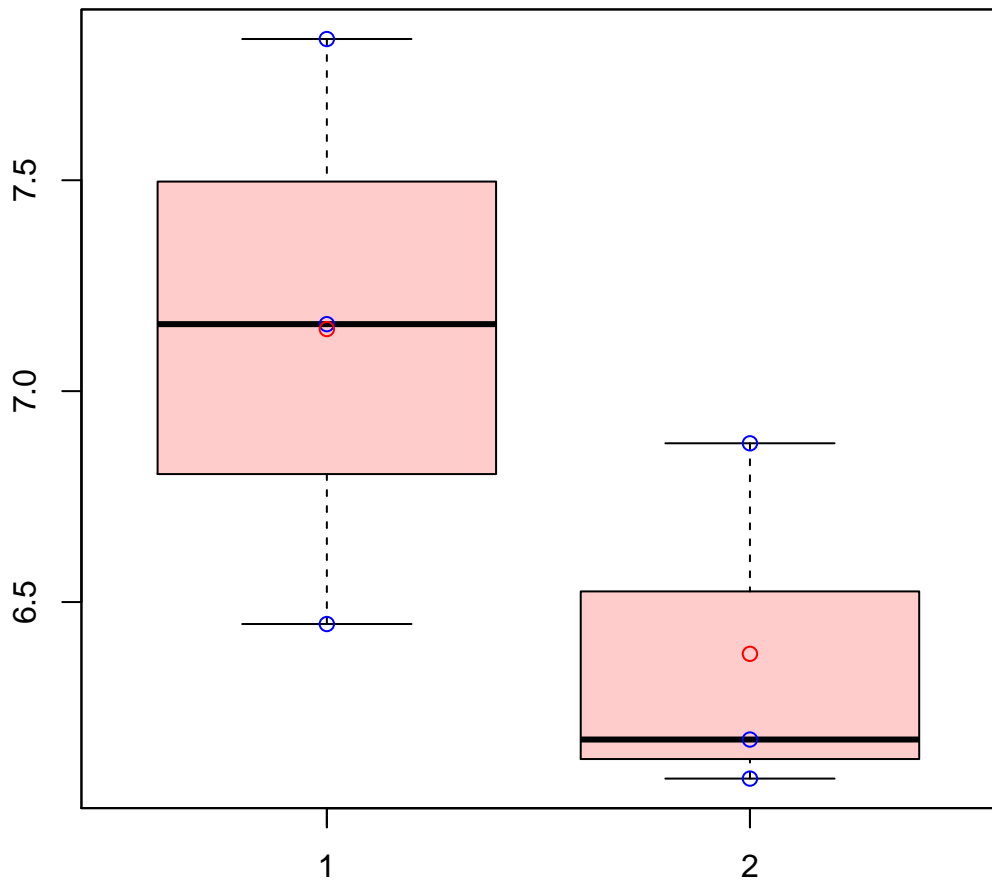

t-Test: p-value = 0.19

## F2DMC3|F2DMC3\_HORVD

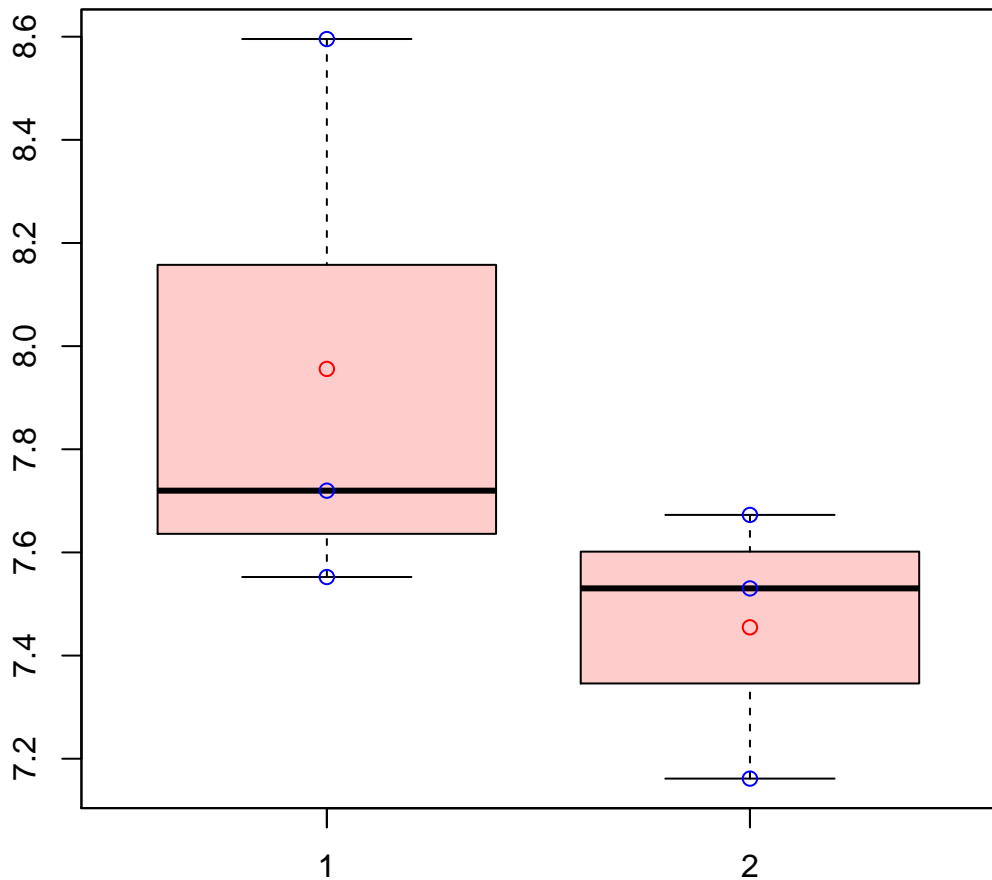

t-Test: p-value = 0.26



## F2DND3|F2DND3\_HORVD

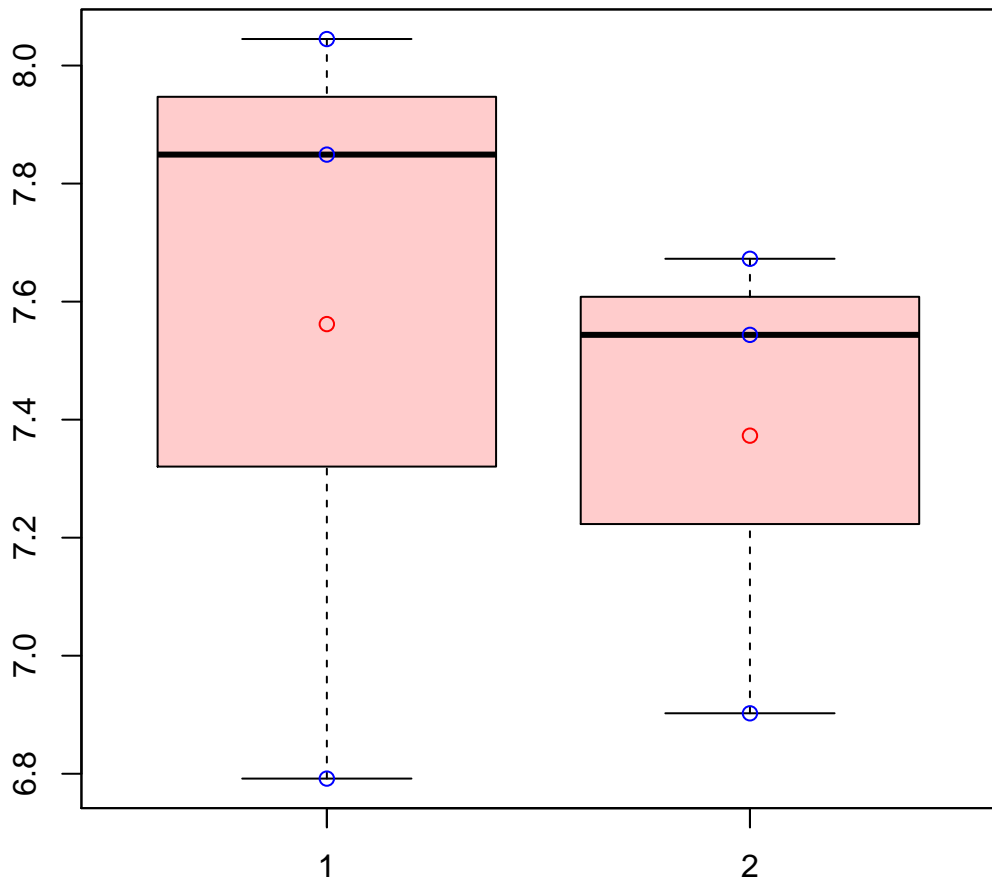

t-Test: p-value = 0.7

## F2DNQ6|F2DNQ6\_HORVD

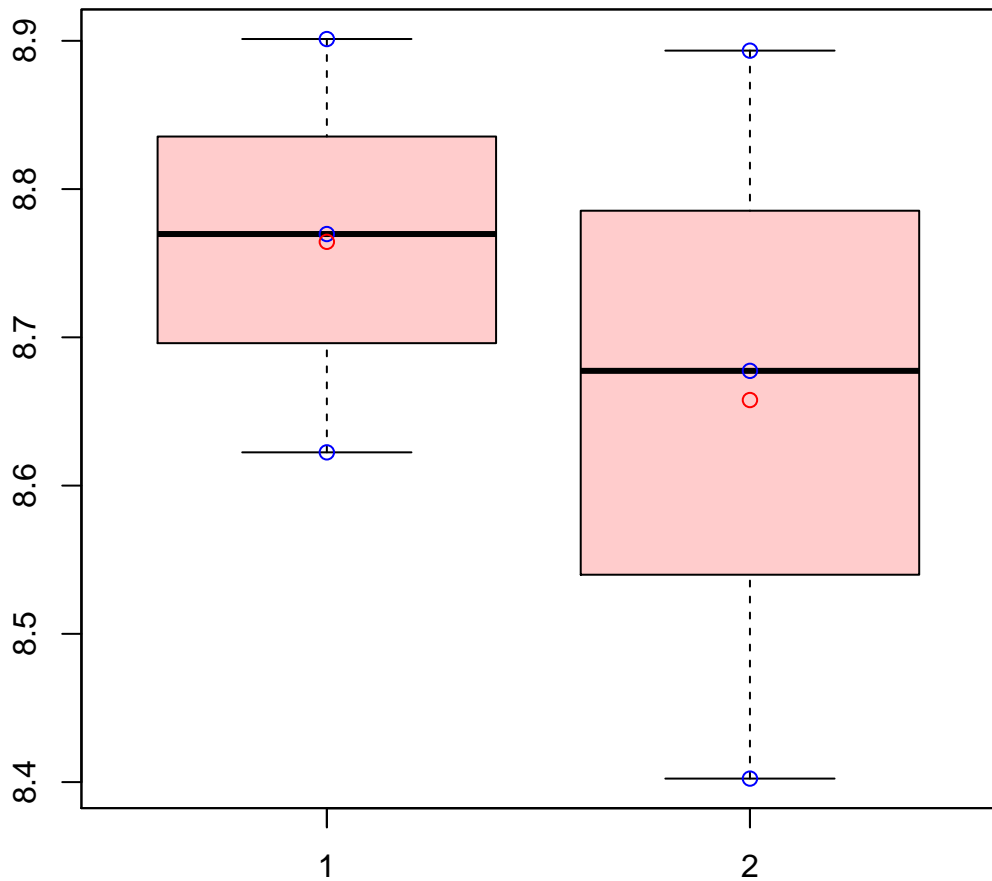

t-Test: p-value = 0.56

## F2DPB8|F2DPB8\_HORVD

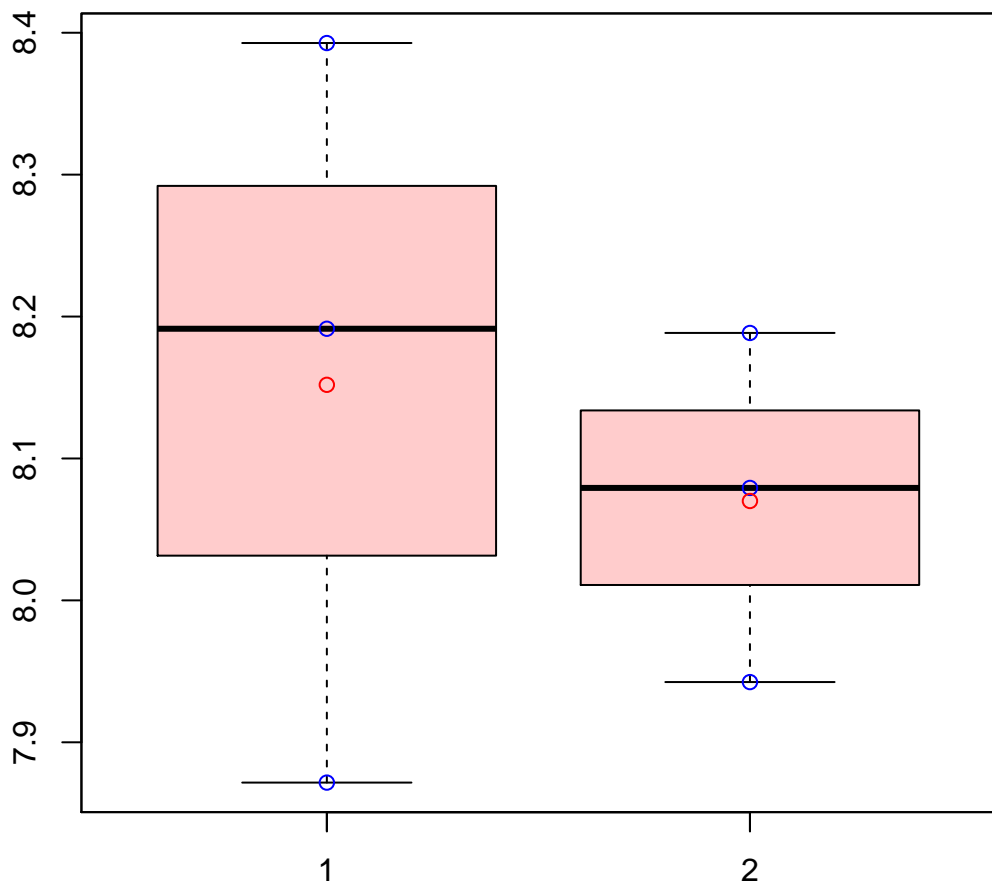

t-Test: p-value = 0.66

# F2DPQ8|F2DPQ8\_HORVD

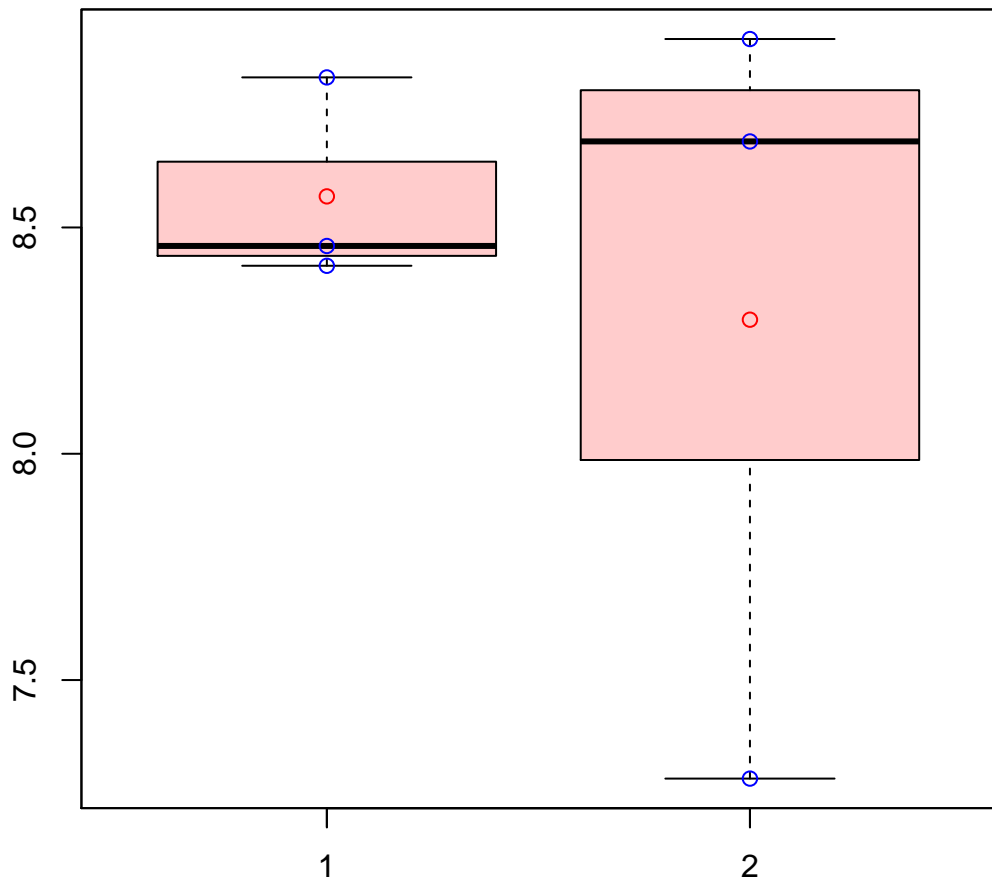

t-Test: p-value = 0.65

## F2DQT4|F2DQT4\_HORVD

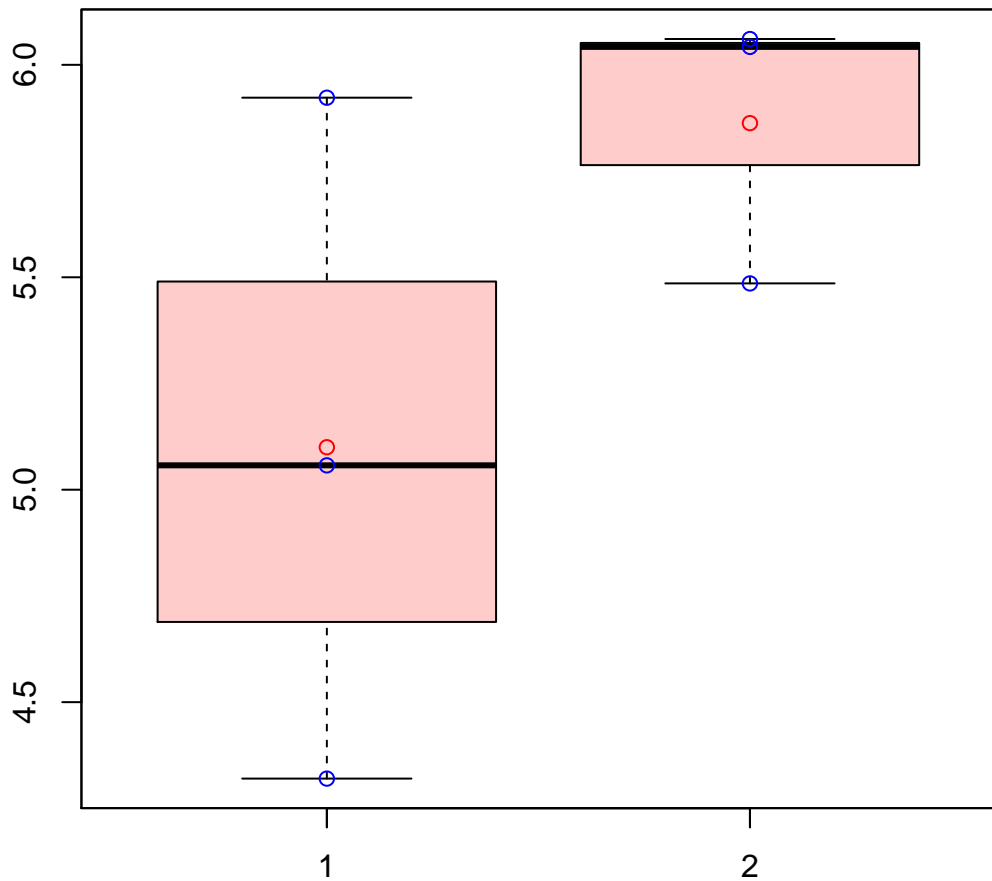

t-Test: p-value = 0.24

## F2DQX8|F2DQX8\_HORVD

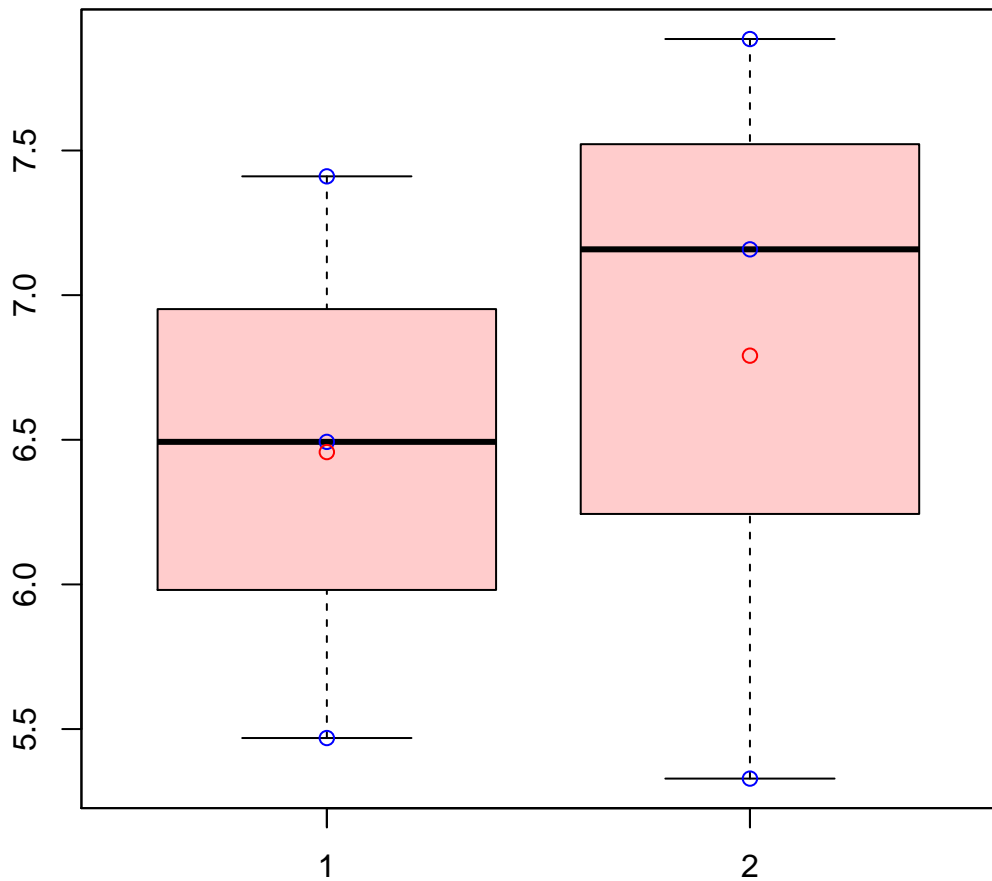

t-Test: p-value = 0.74

# F2DSA4|F2DSA4\_HORVD

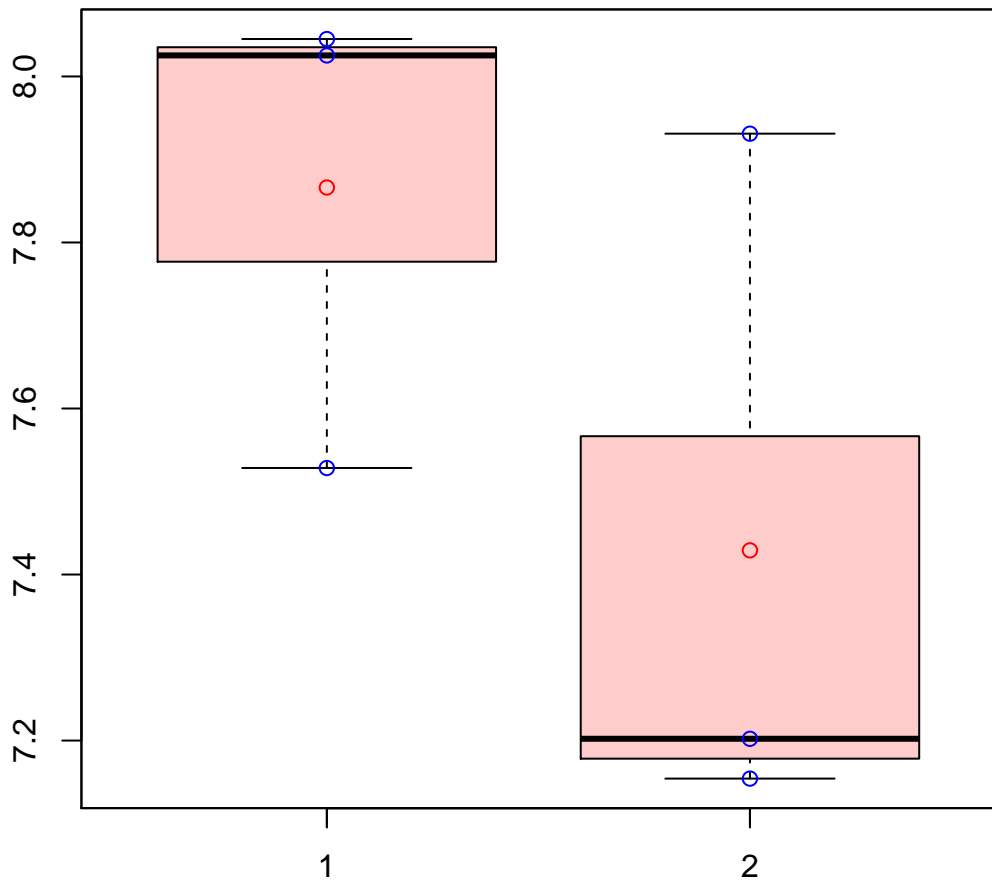

t-Test: p-value = 0.23

# F2DT51|F2DT51\_HORVD

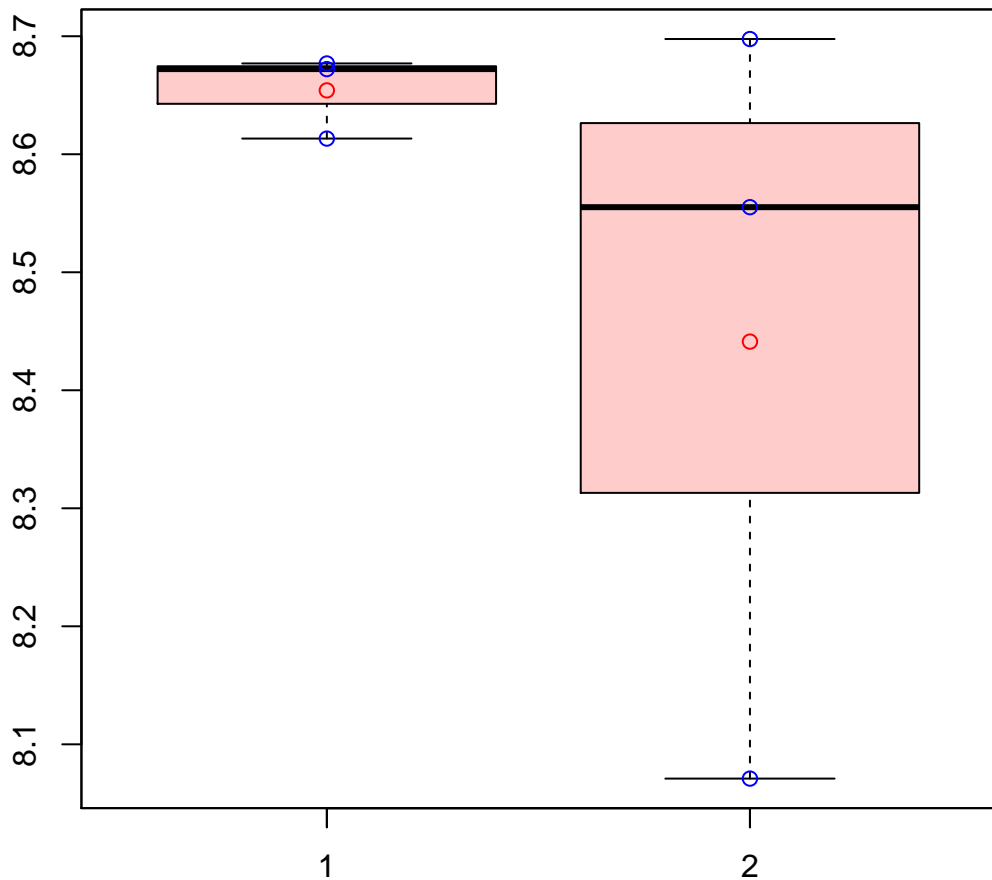

t-Test: p-value = 0.38



# F2DT83|F2DT83\_HORVD

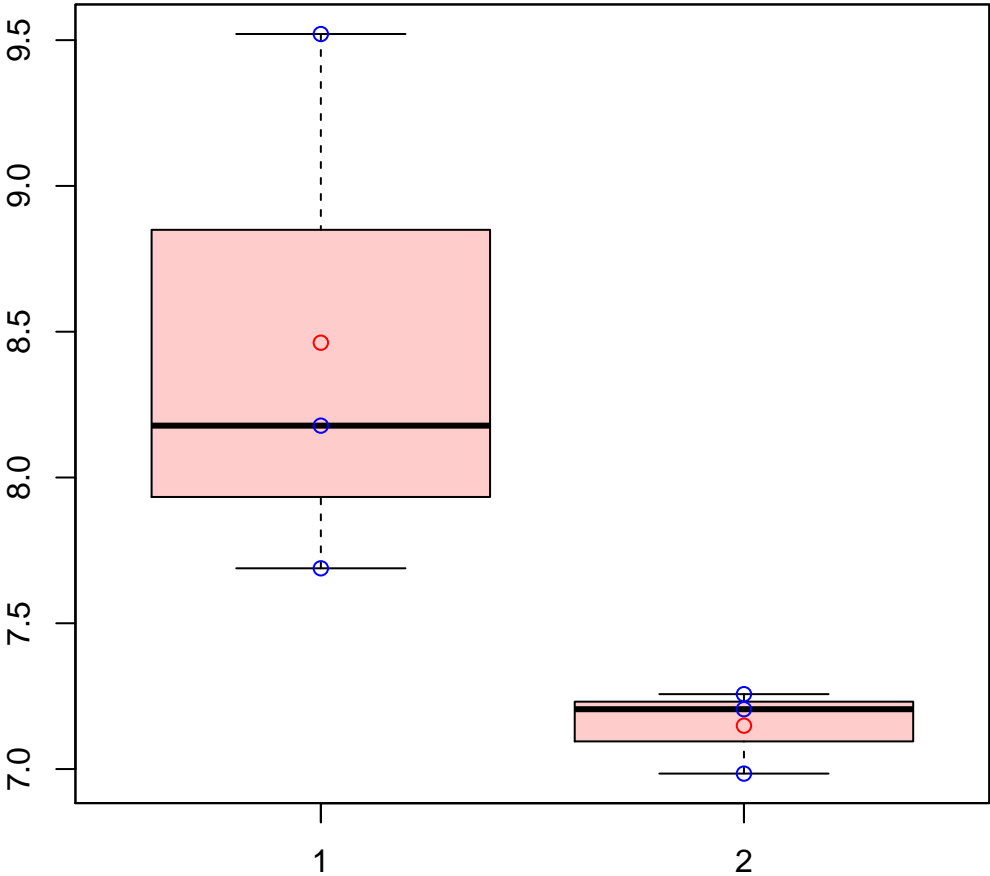

t-Test: p-value = 0.14

## F2DTT4|F2DTT4\_HORVD

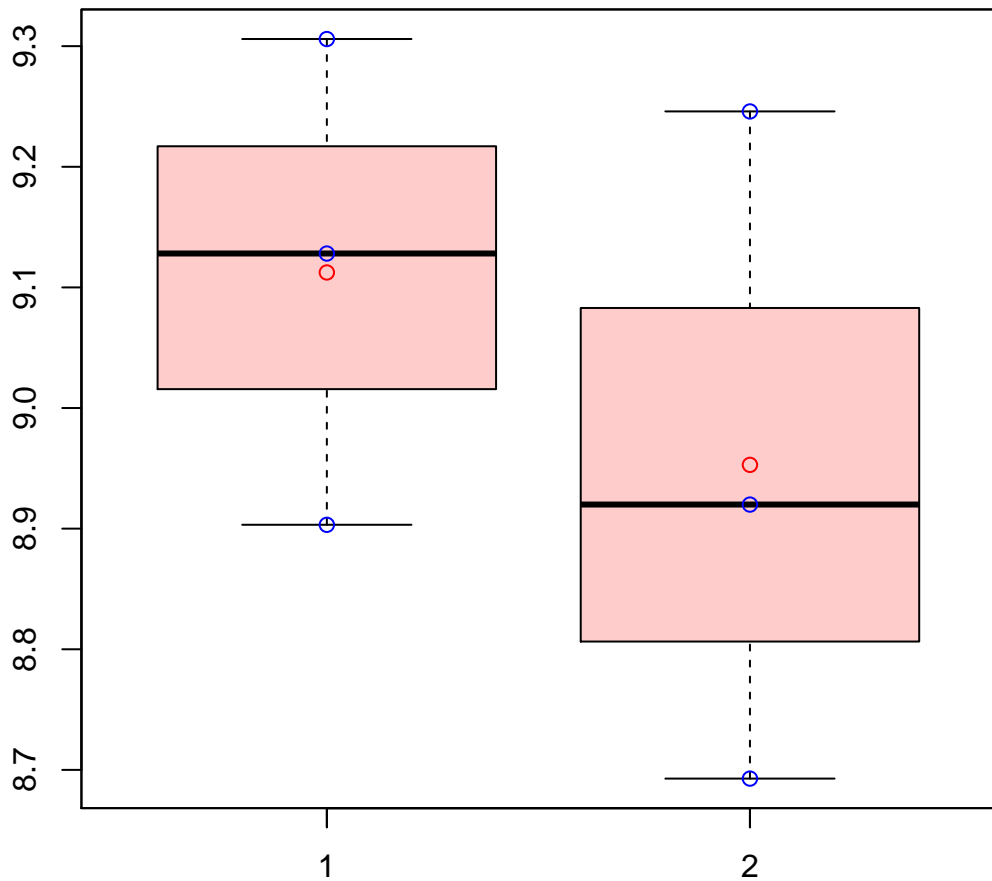

t-Test: p-value = 0.47

## F2DTX4|F2DTX4\_HORVD

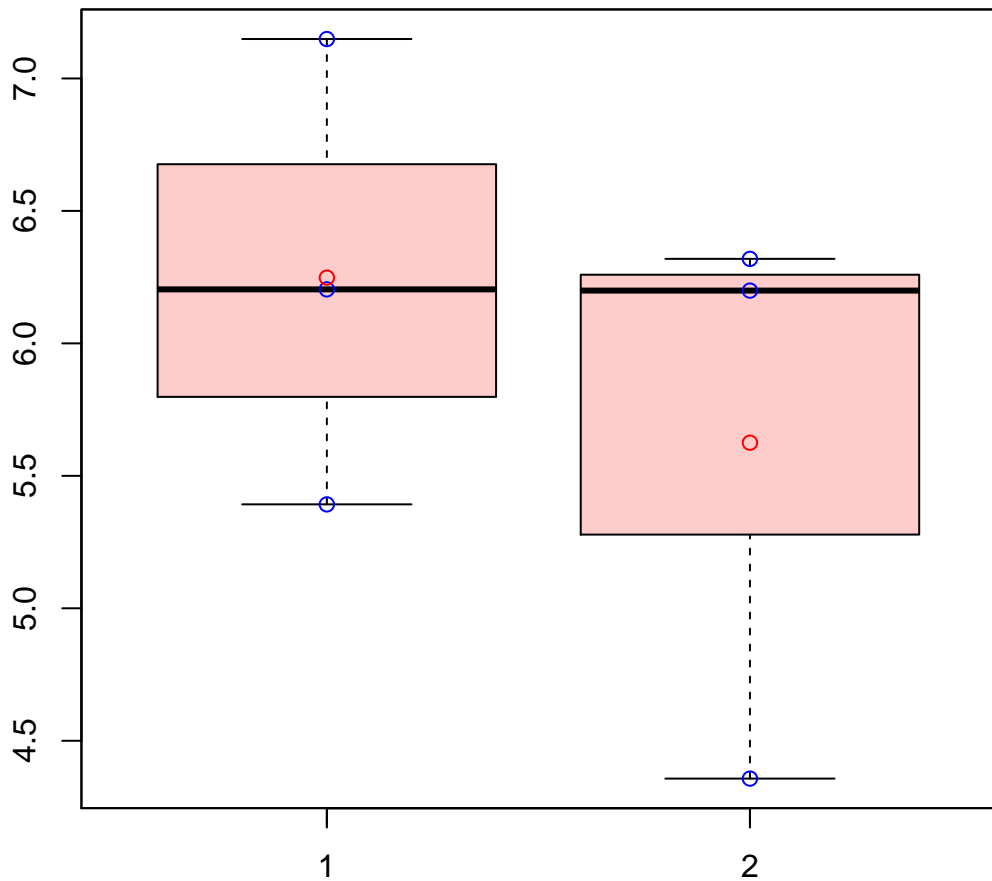

t-Test: p-value = 0.49

# F2DU45|F2DU45\_HORVD

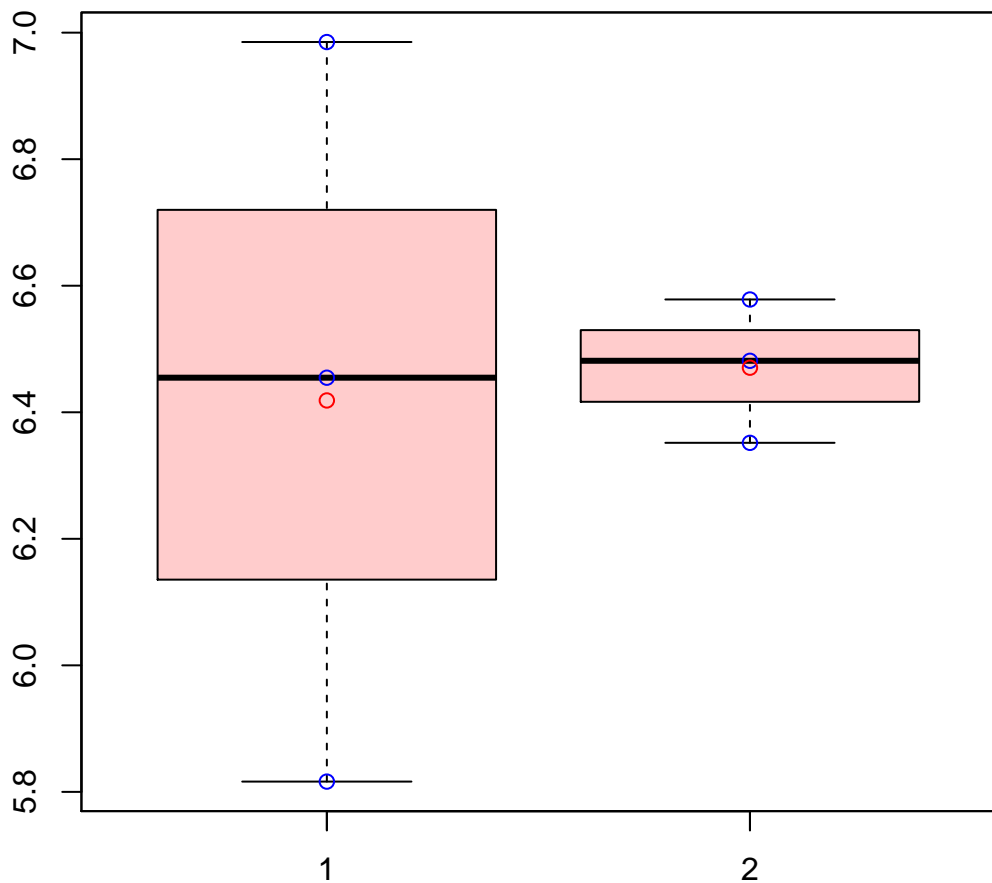

t-Test: p-value = 0.89

# F2DUB8|F2DUB8\_HORVD

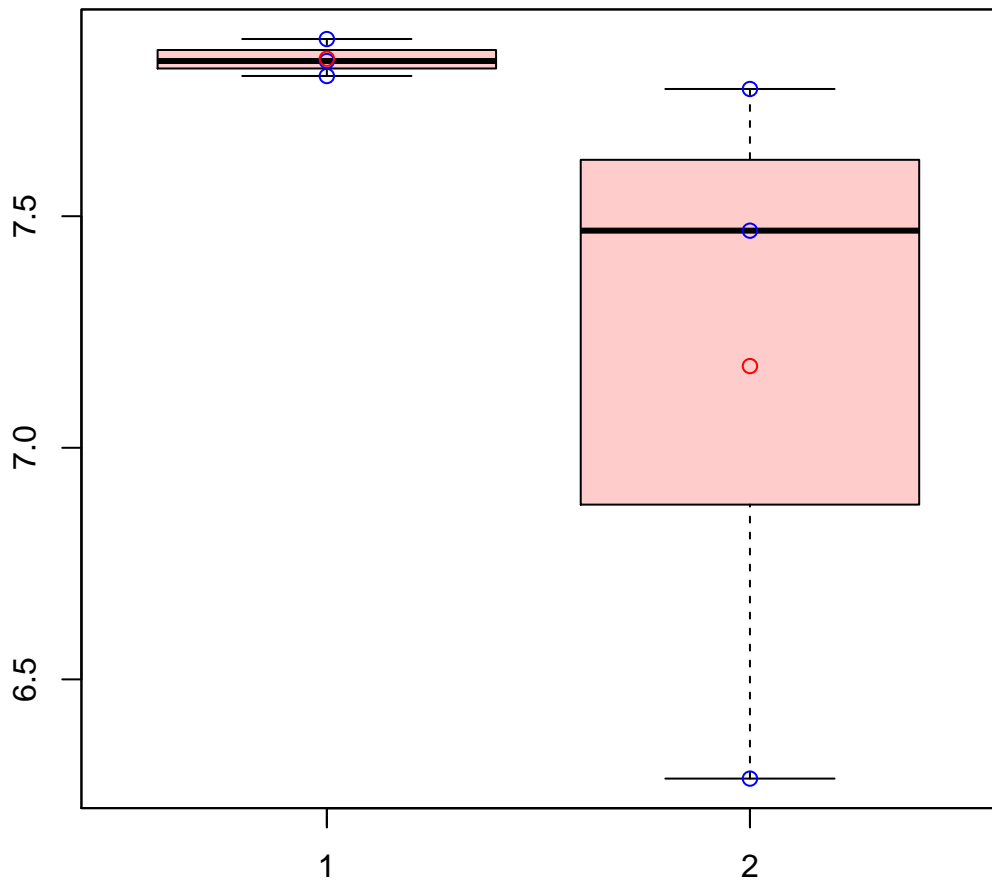

t-Test: p-value = 0.28

## F2DUE4|F2DUE4\_HORVD

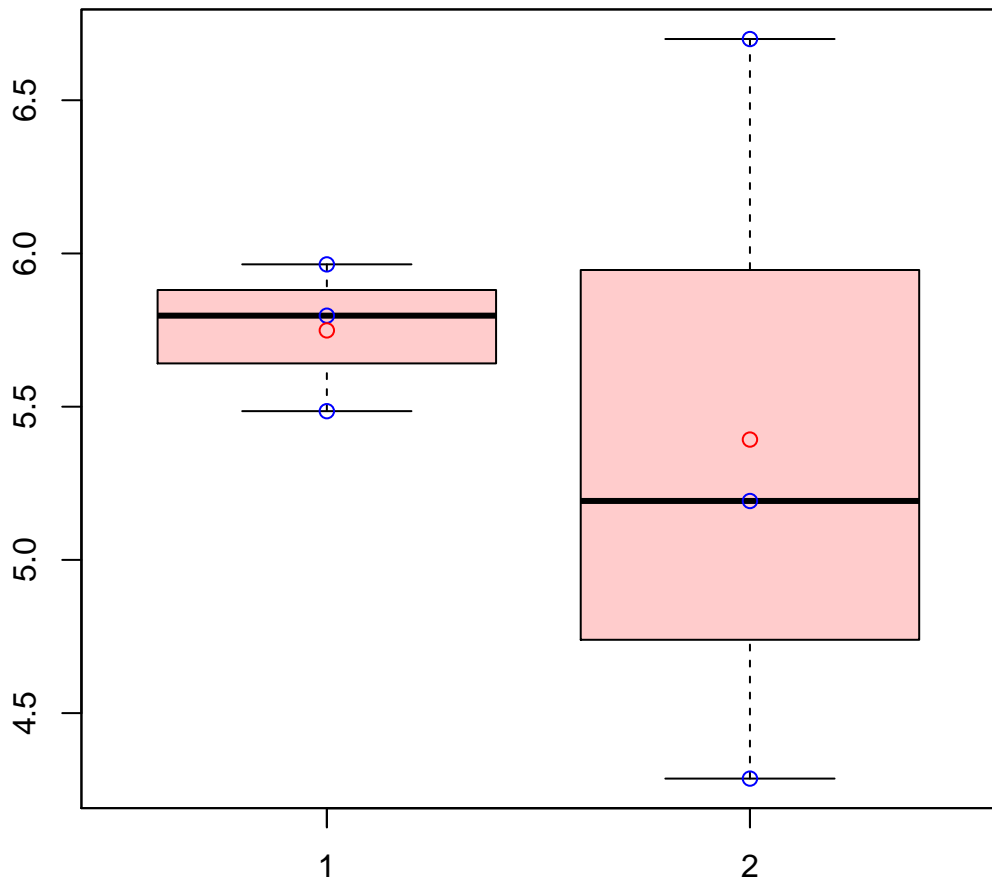

t-Test: p-value = 0.67

## F2DWM5|F2DWM5\_HORVD

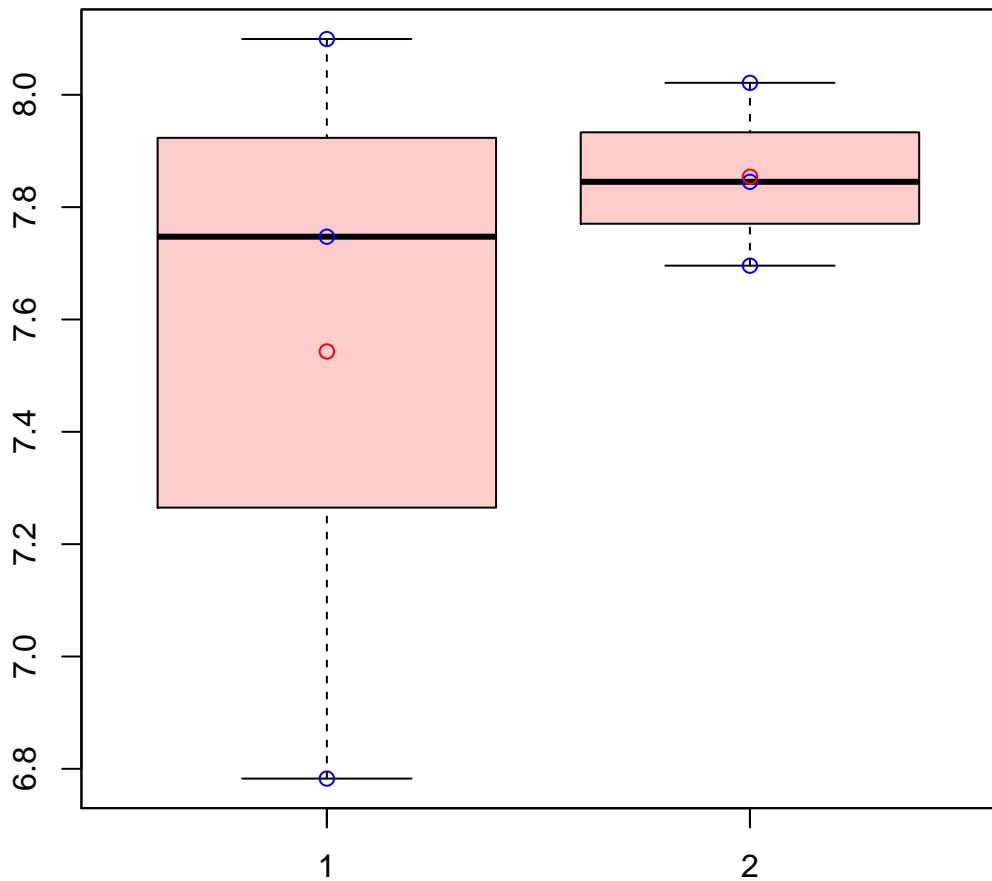

t-Test: p-value = 0.52

## F2DWT1|F2DWT1\_HORVD

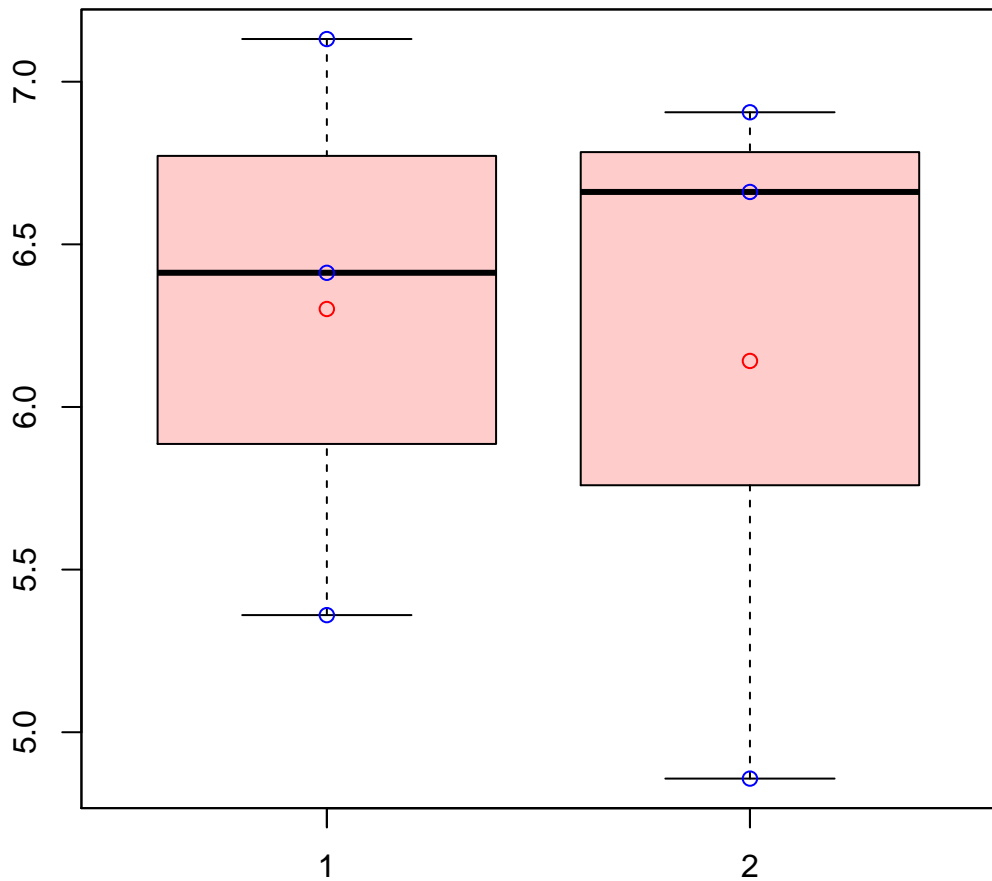

t-Test: p-value = 0.86



## F2DX45|F2DX45\_HORVD

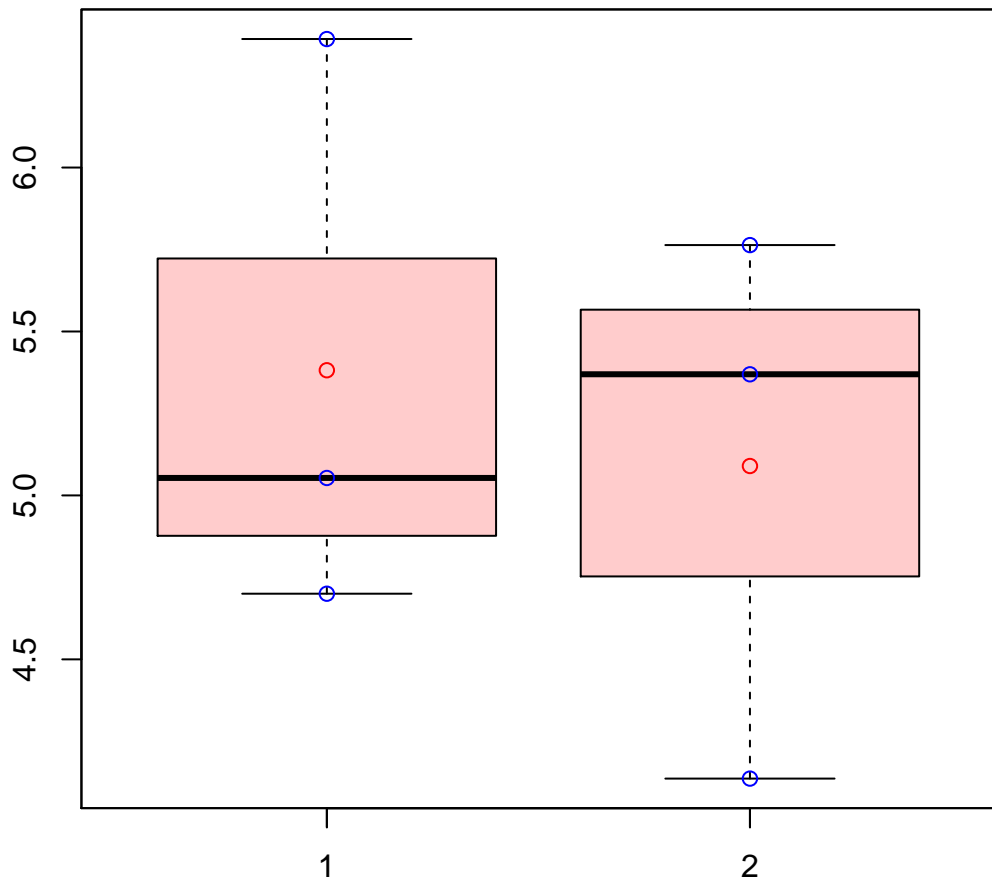

t-Test: p-value = 0.7

# F2DXI0|F2DXI0\_HORVD

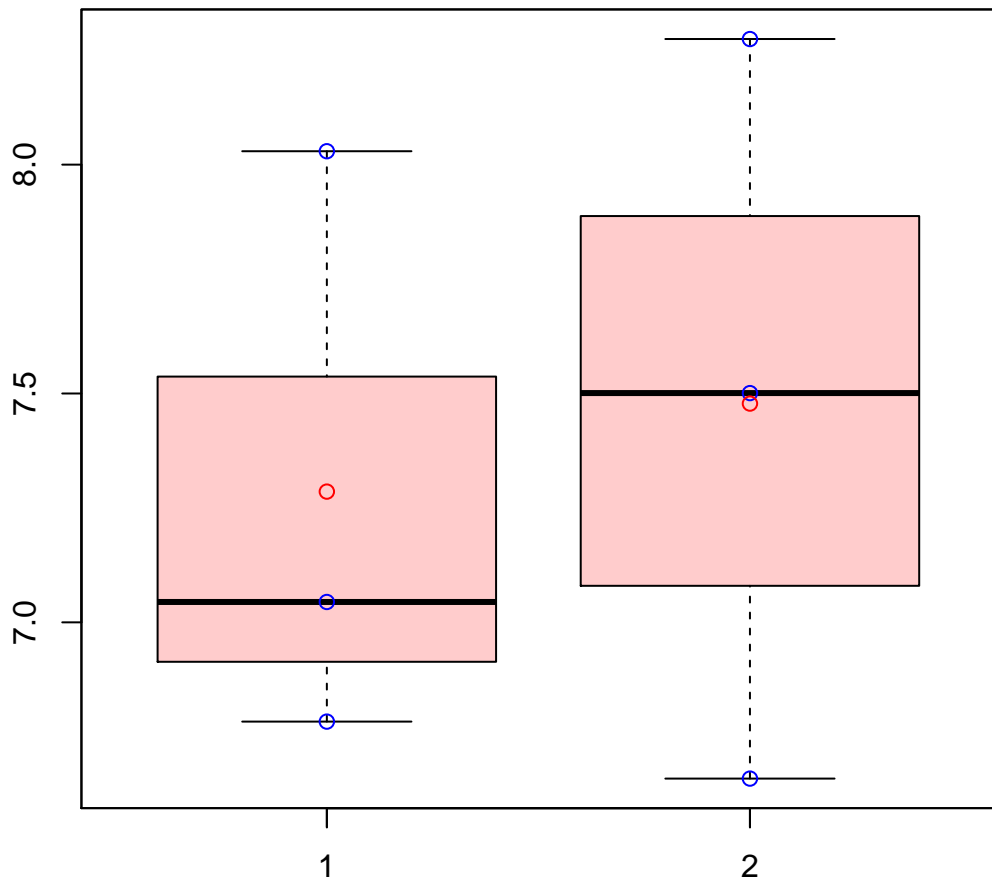

t-Test: p-value = 0.77

# F2DXP4|F2DXP4\_HORVD

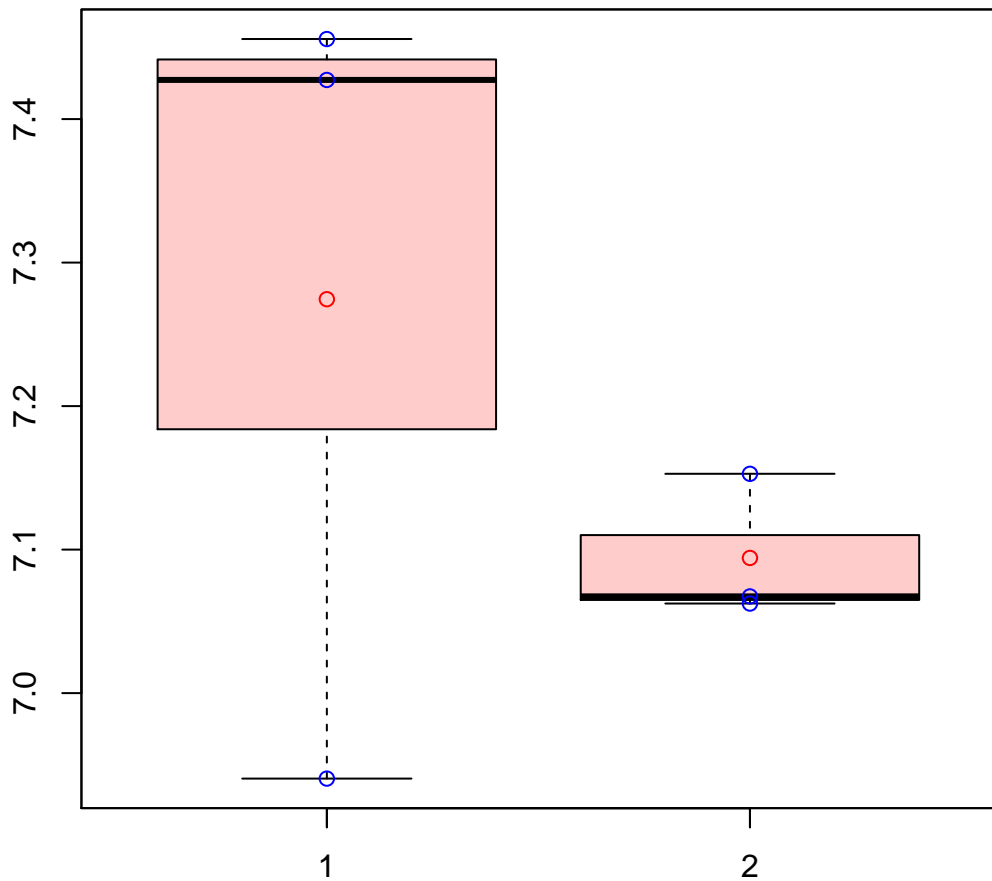

t-Test: p-value = 0.39

## F2DXQ4|F2DXQ4\_HORVD

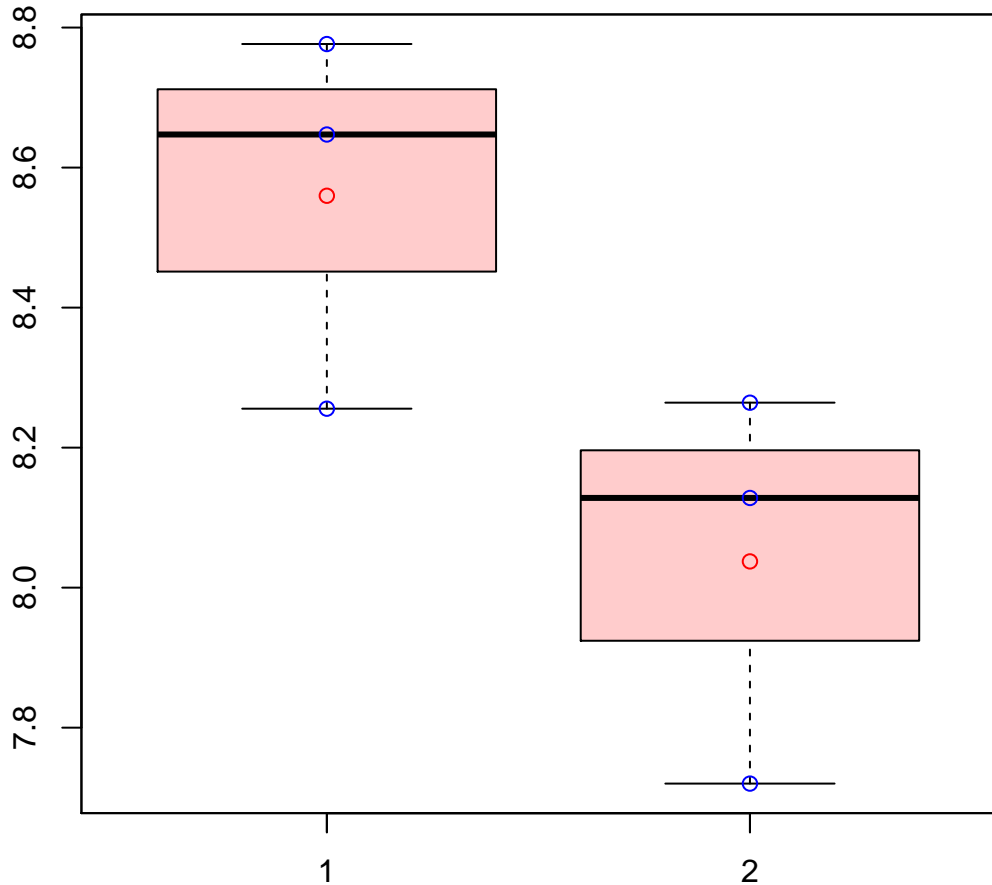

t-Test: p-value = 0.08

# F2DY73|F2DY73\_HORVD

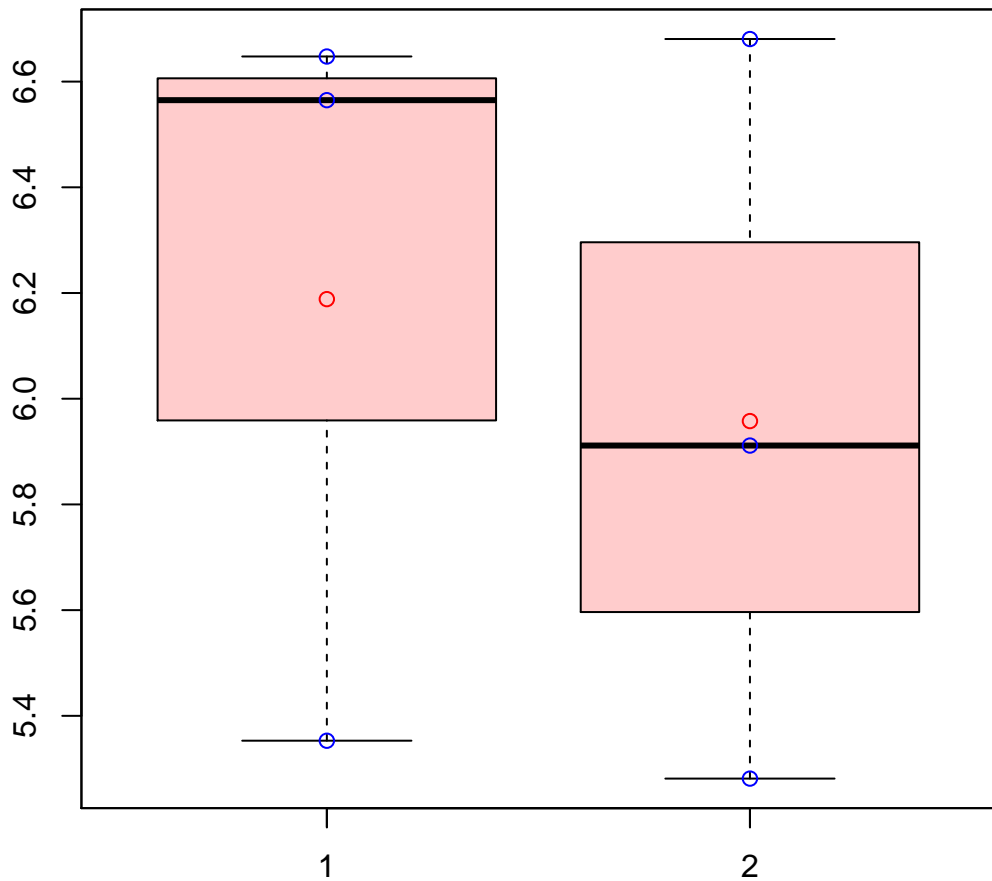

t-Test: p-value = 0.71

# F2DY84|F2DY84\_HORVD

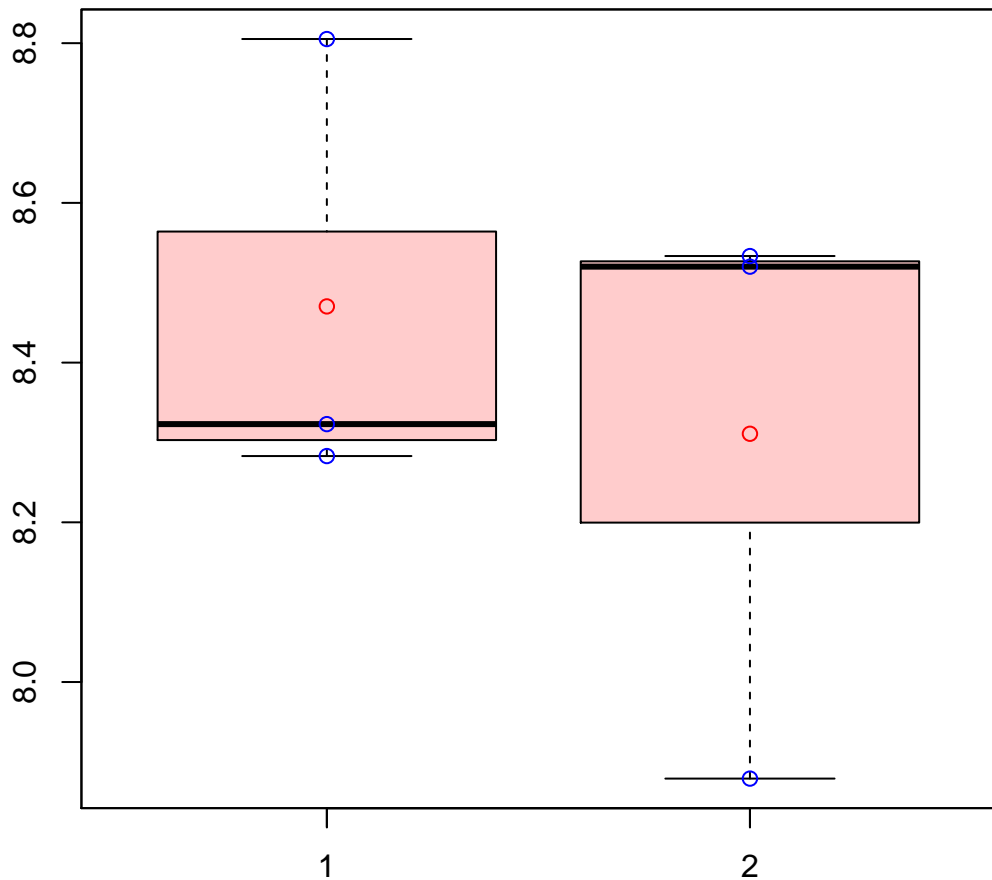

t-Test: p-value = 0.59

## F2DYG3|F2DYG3\_HORVD

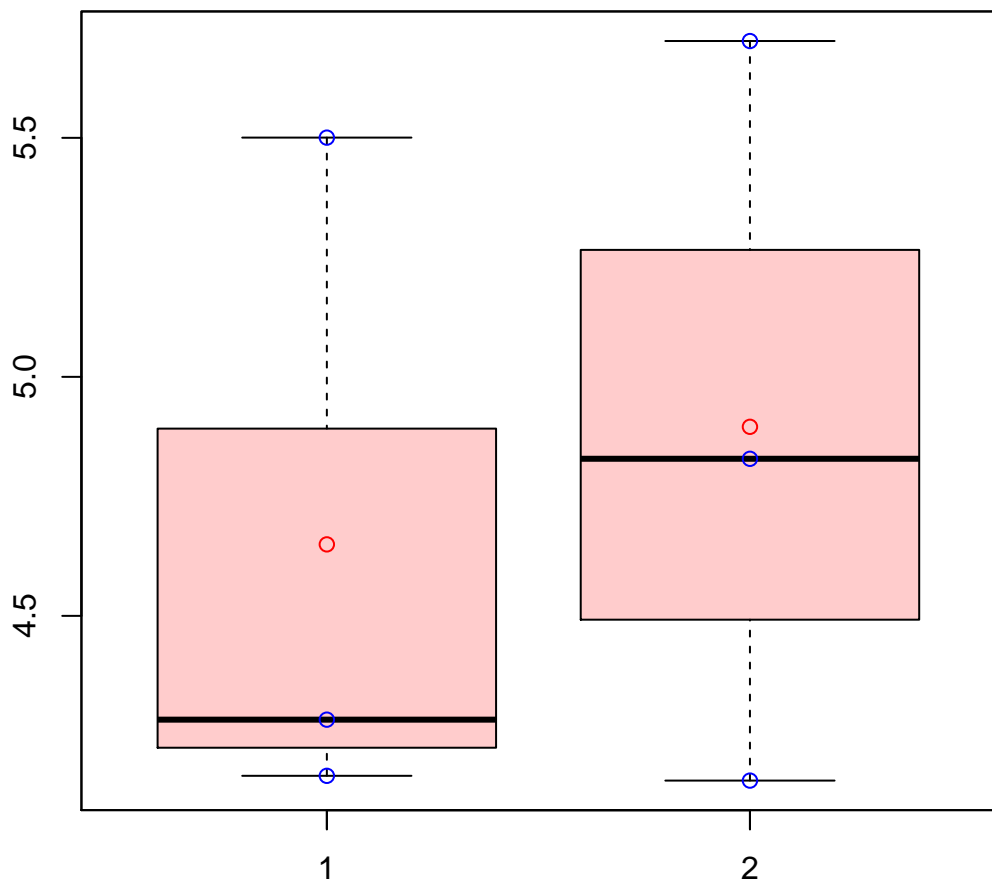

t-Test: p-value = 0.71

# F2DZL0|F2DZL0\_HORVD

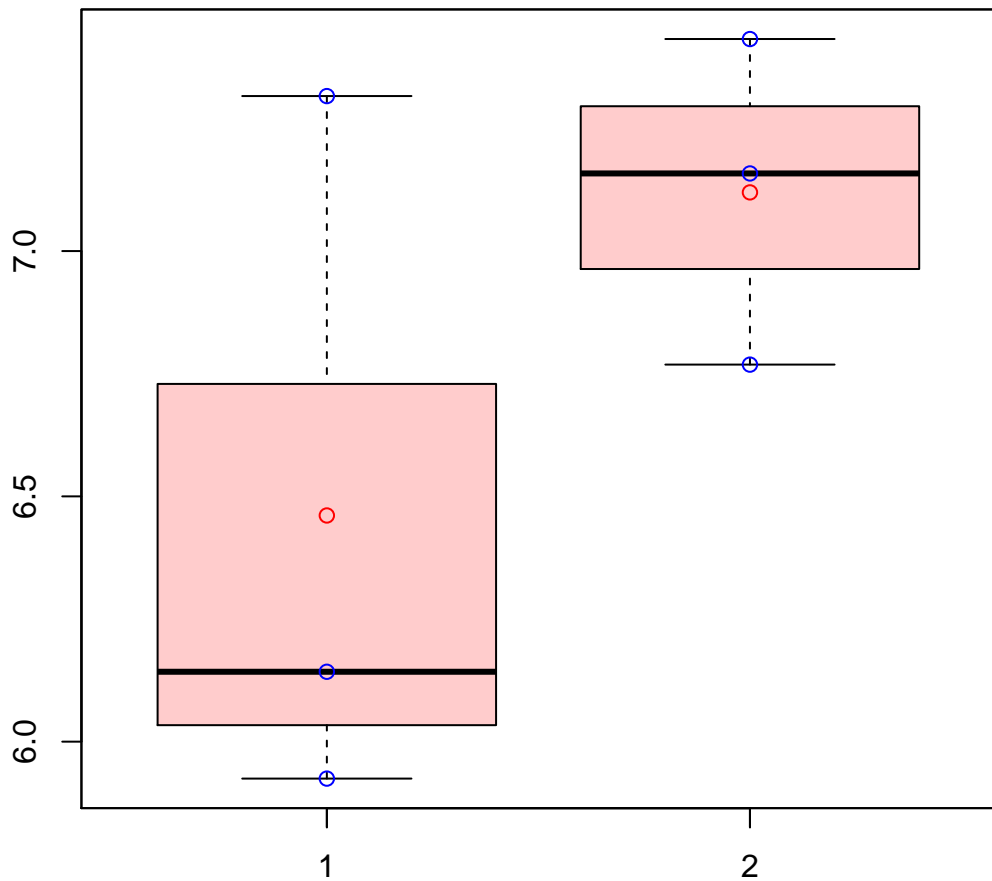

t-Test: p-value = 0.27



# F2E035|F2E035\_HORVD

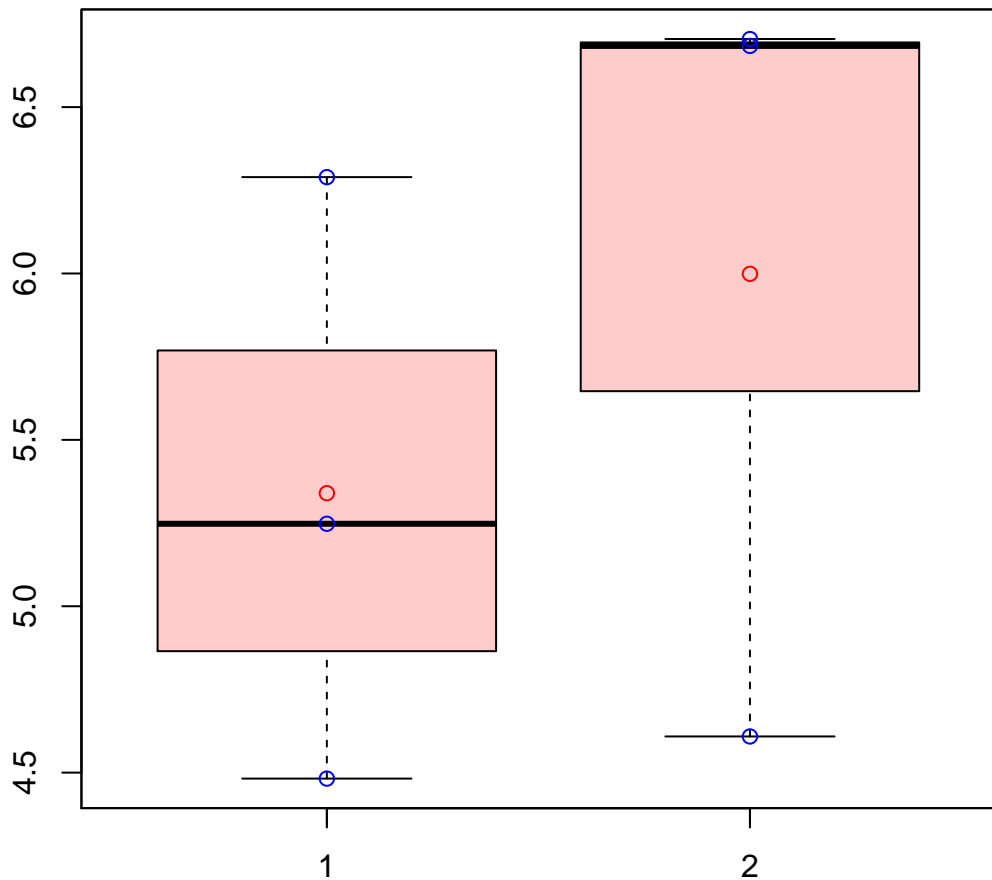

t-Test: p-value = 0.49

# F2E071|F2E071\_HORVD

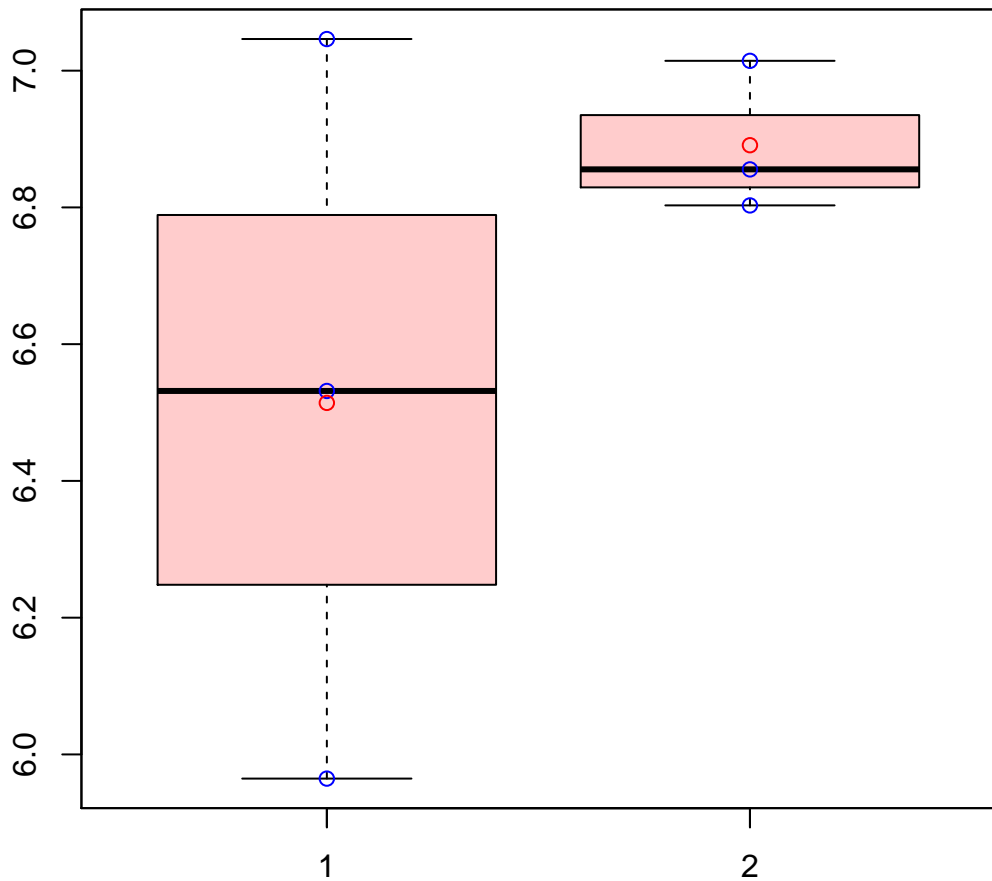

t-Test: p-value = 0.35

# F2E075|F2E075\_HORVD

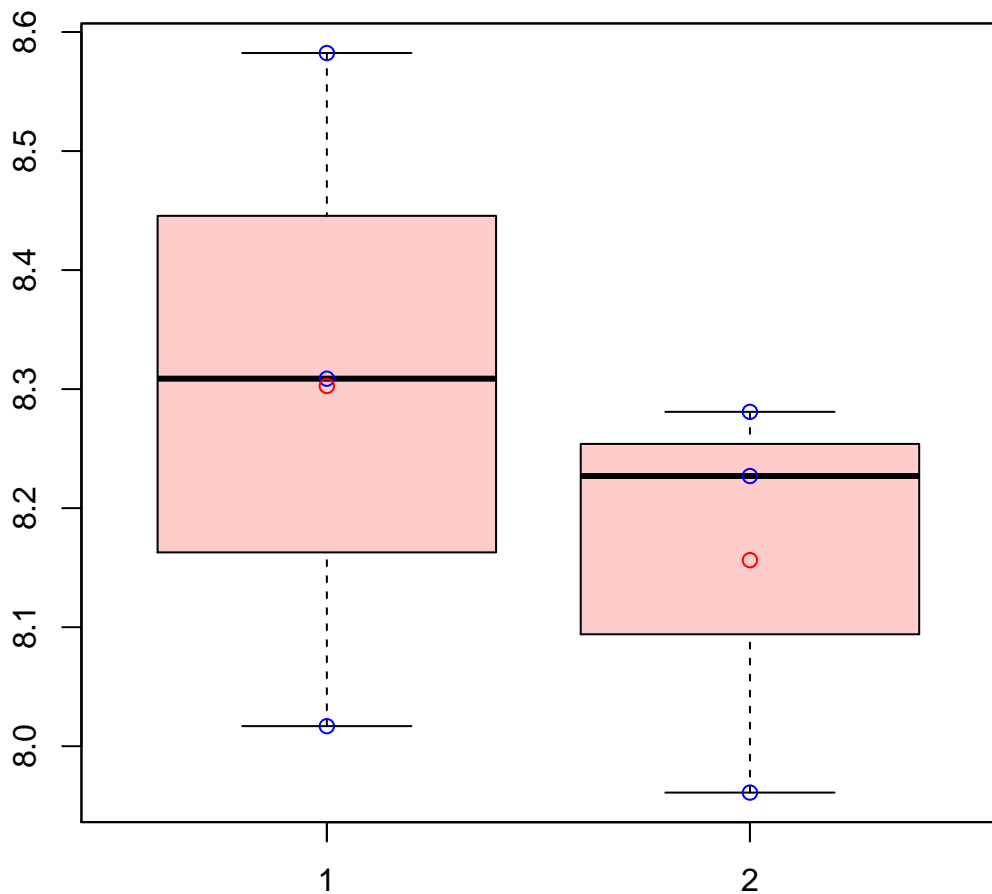

t-Test: p-value = 0.49

# F2E0C0|F2E0C0\_HORVD

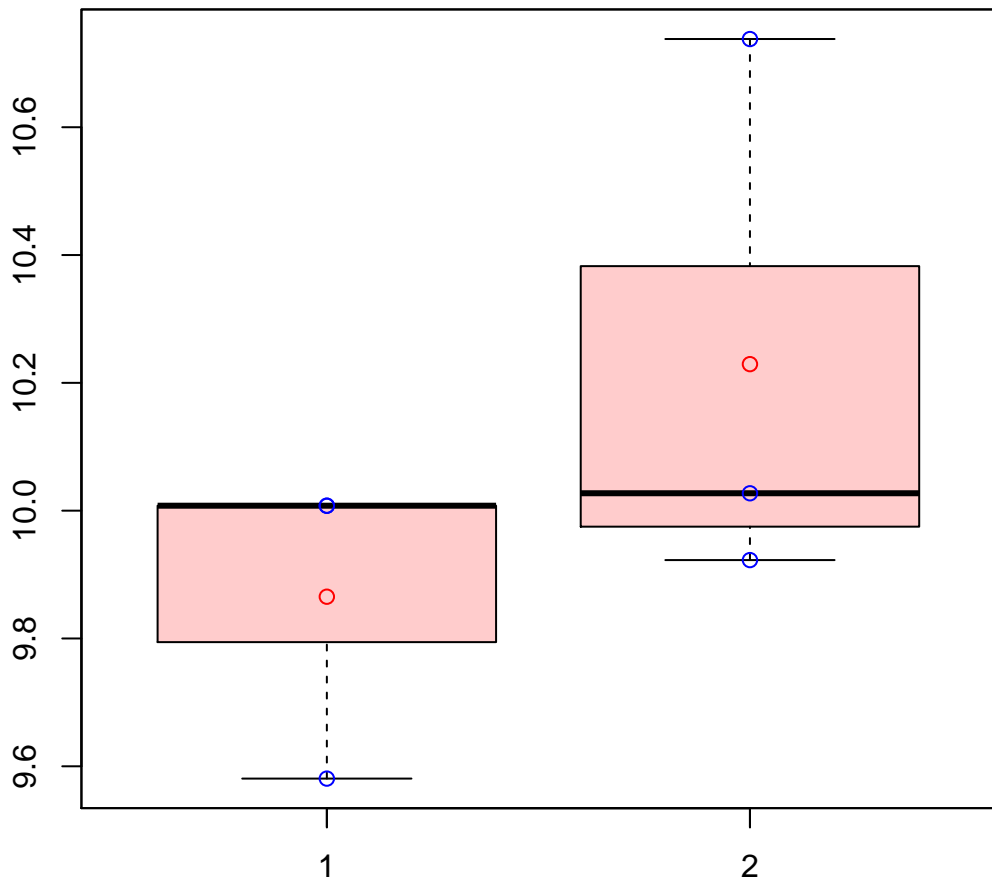

t-Test: p-value = 0.3

# F2E1A4|F2E1A4\_HORVD

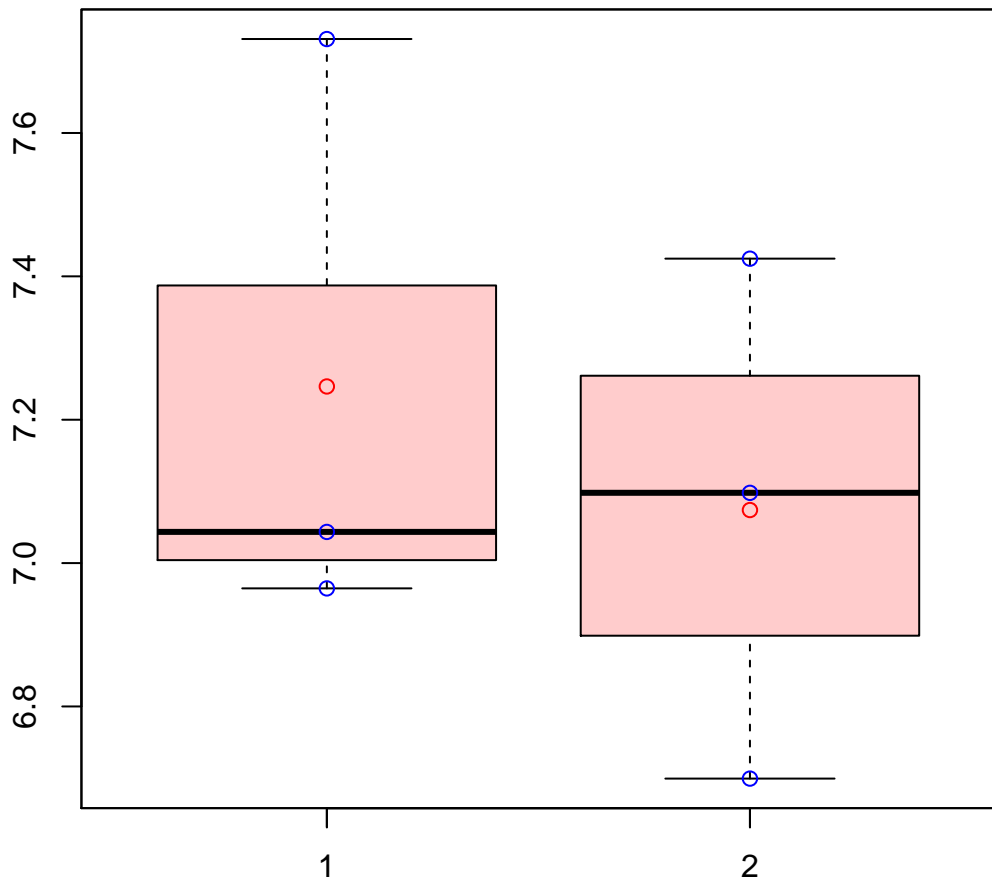

t-Test: p-value = 0.62

# F2E1B2|F2E1B2\_HORVD

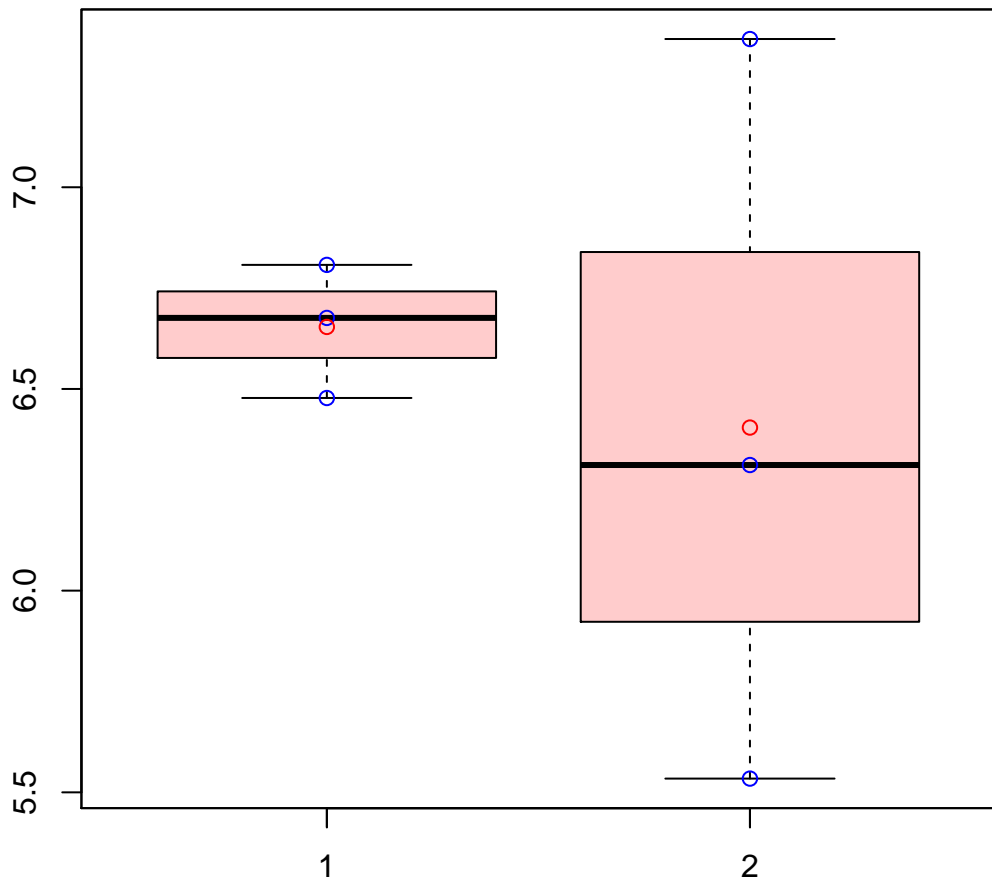

t-Test: p-value = 0.69

# F2E1S0|F2E1S0\_HORVD

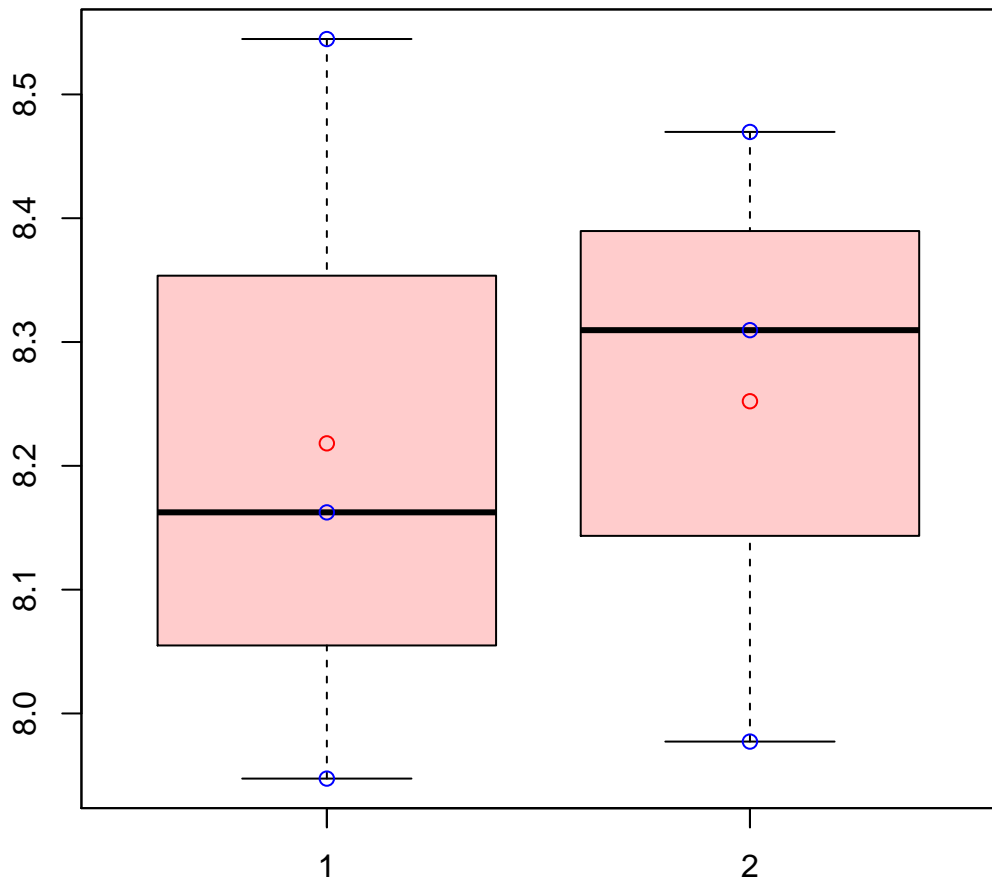

t-Test: p-value = 0.89

# F2E1T0|F2E1T0\_HORVD

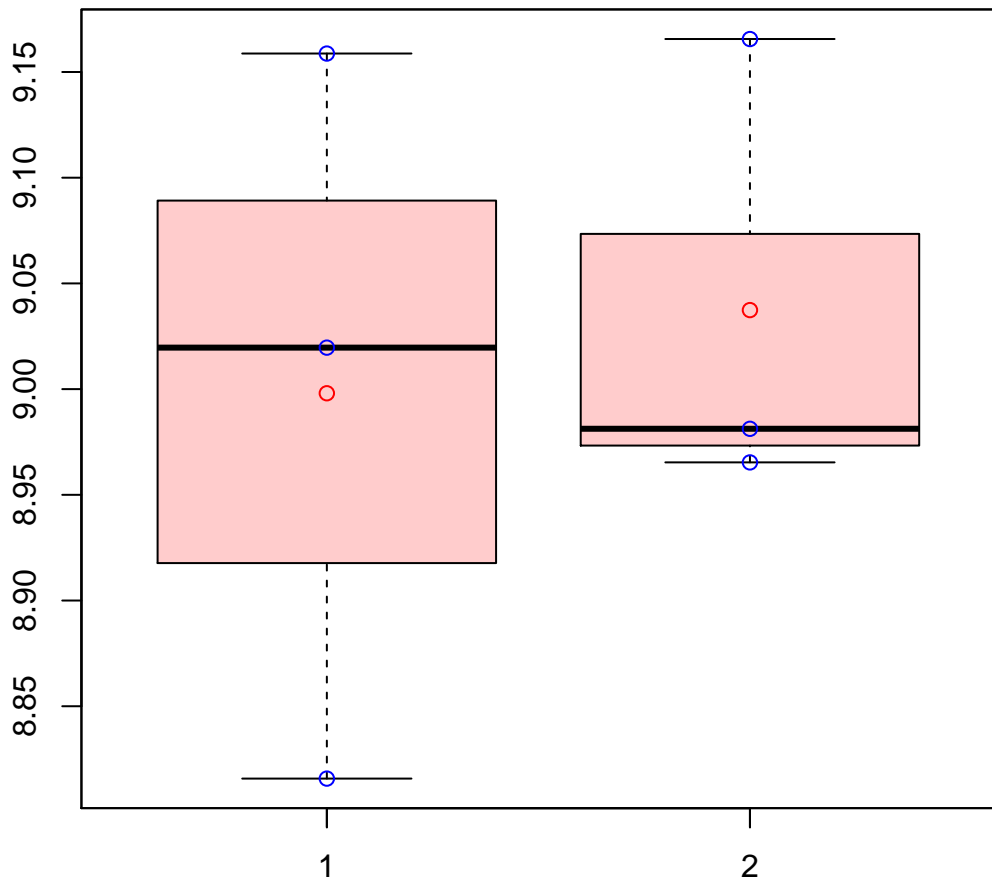

t-Test: p-value = 0.76



# F2E2E2|F2E2E2\_HORVD

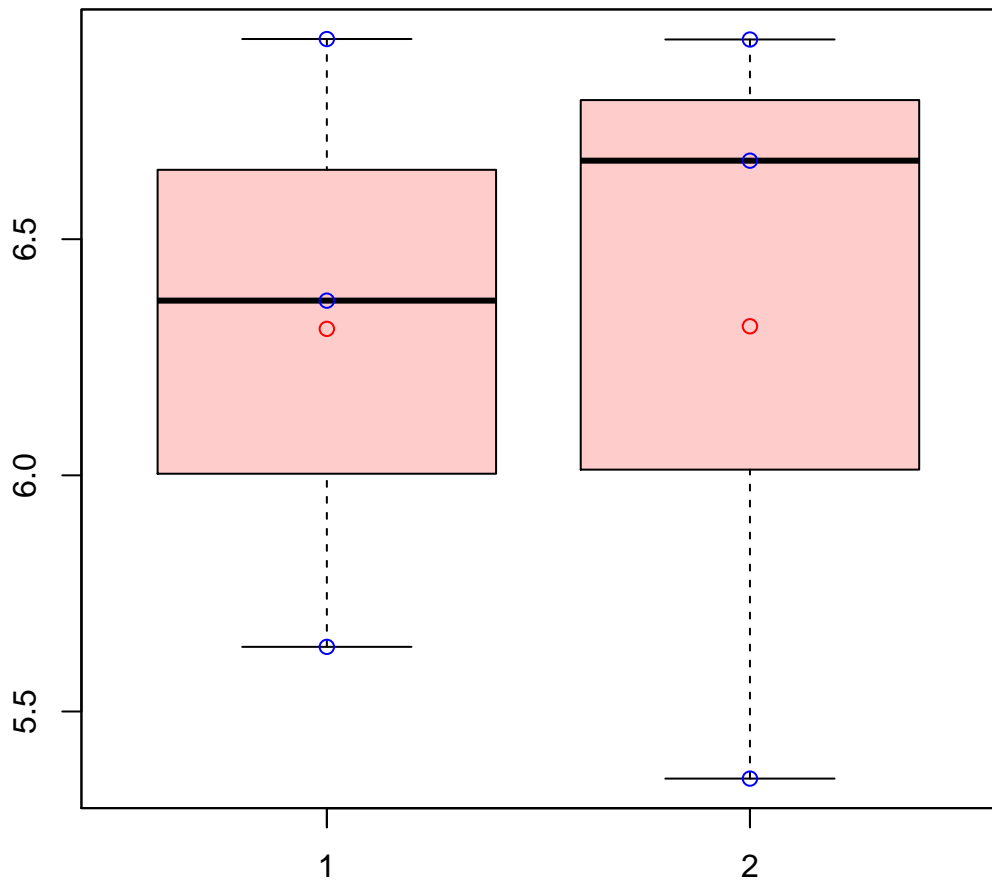

t-Test: p-value = 0.99

# F2E2I3|F2E2I3\_HORVD

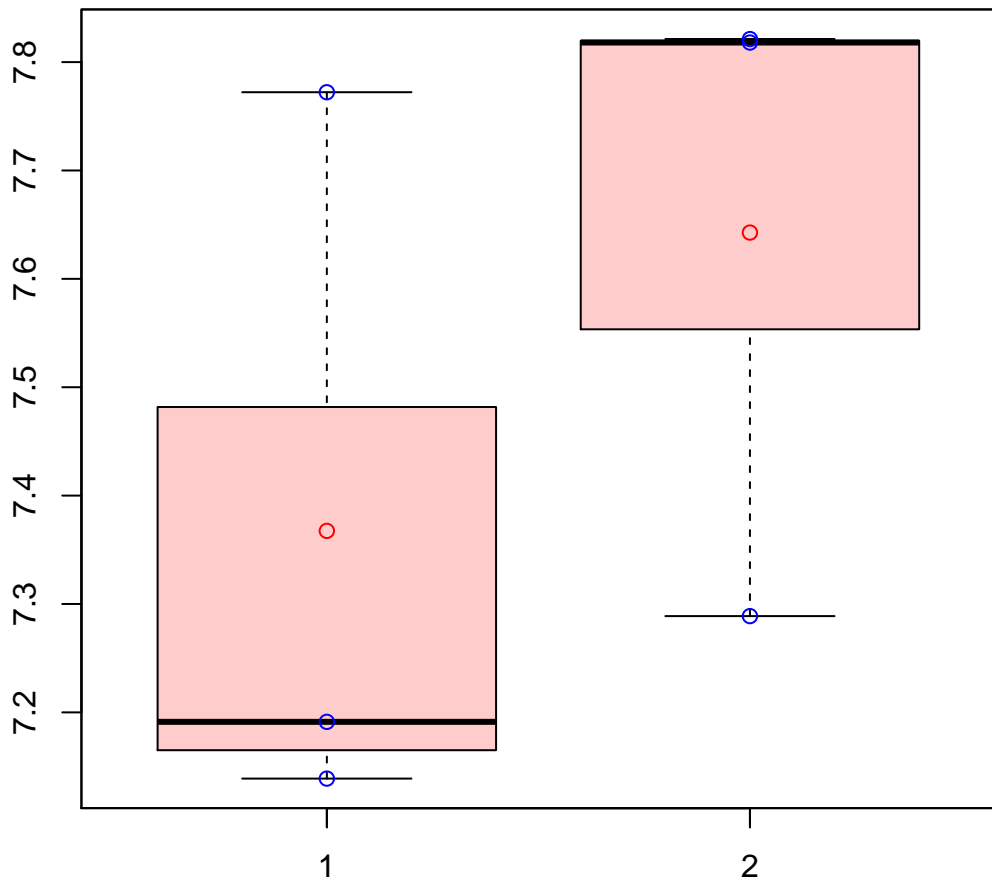

t-Test: p-value = 0.37

# F2E2T6|F2E2T6\_HORVD

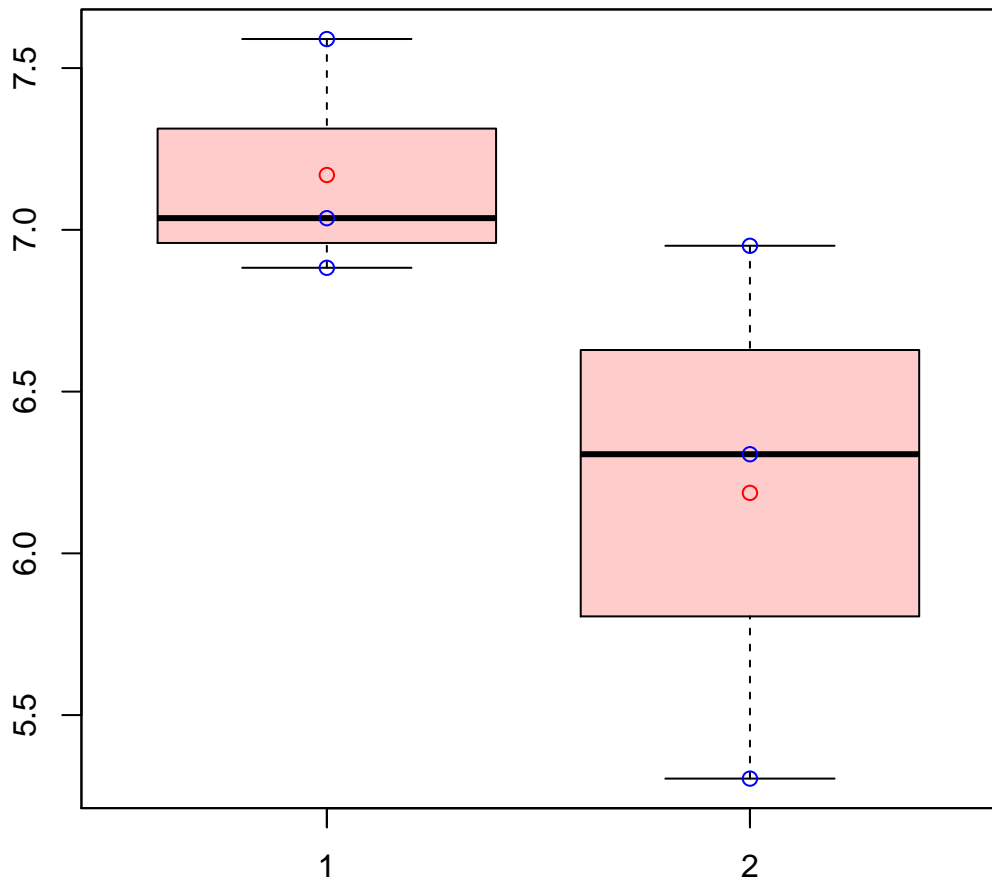

t-Test: p-value = 0.17

# F2E416|F2E416\_HORVD

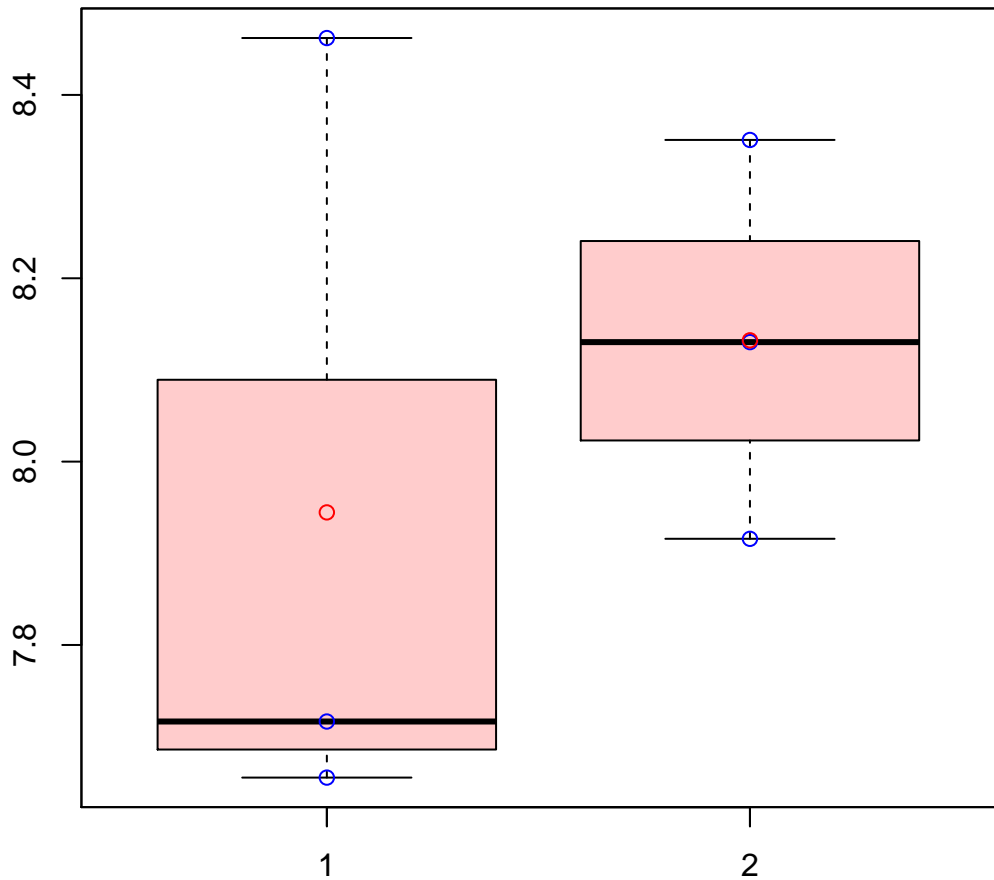

t-Test: p-value = 0.56

# F2E446|F2E446\_HORVD

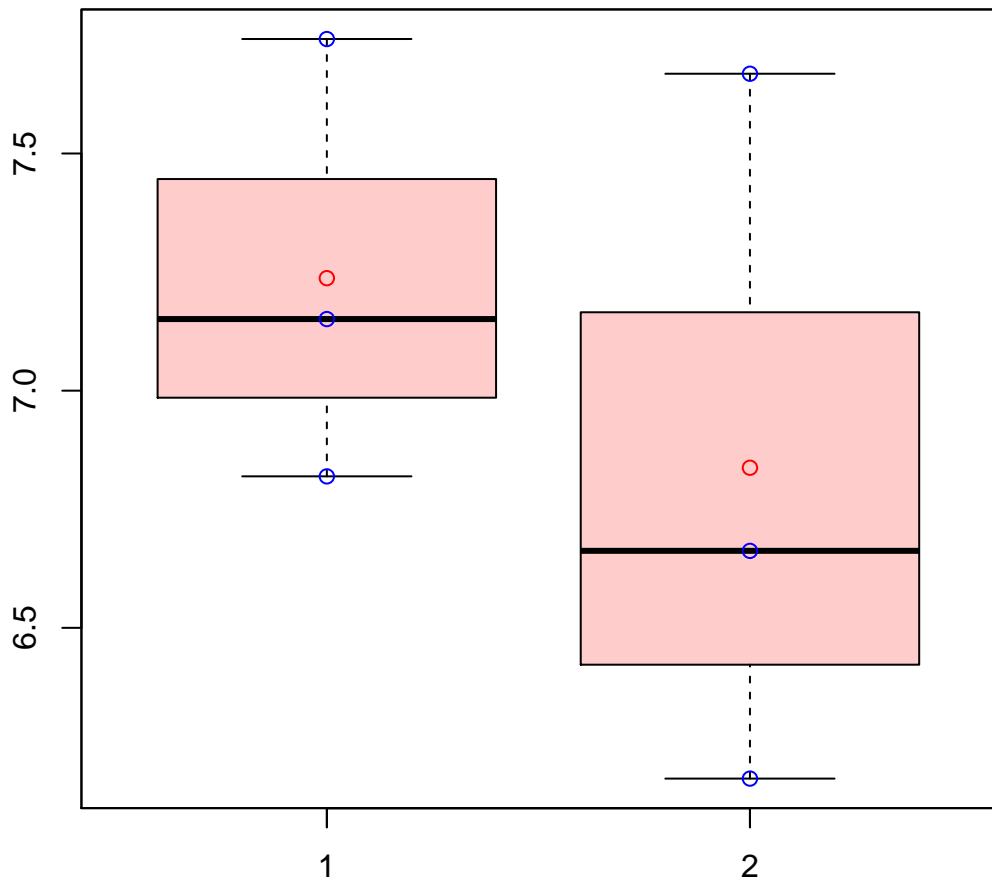

t-Test: p-value = 0.49

## F2E4B4|F2E4B4\_HORVD

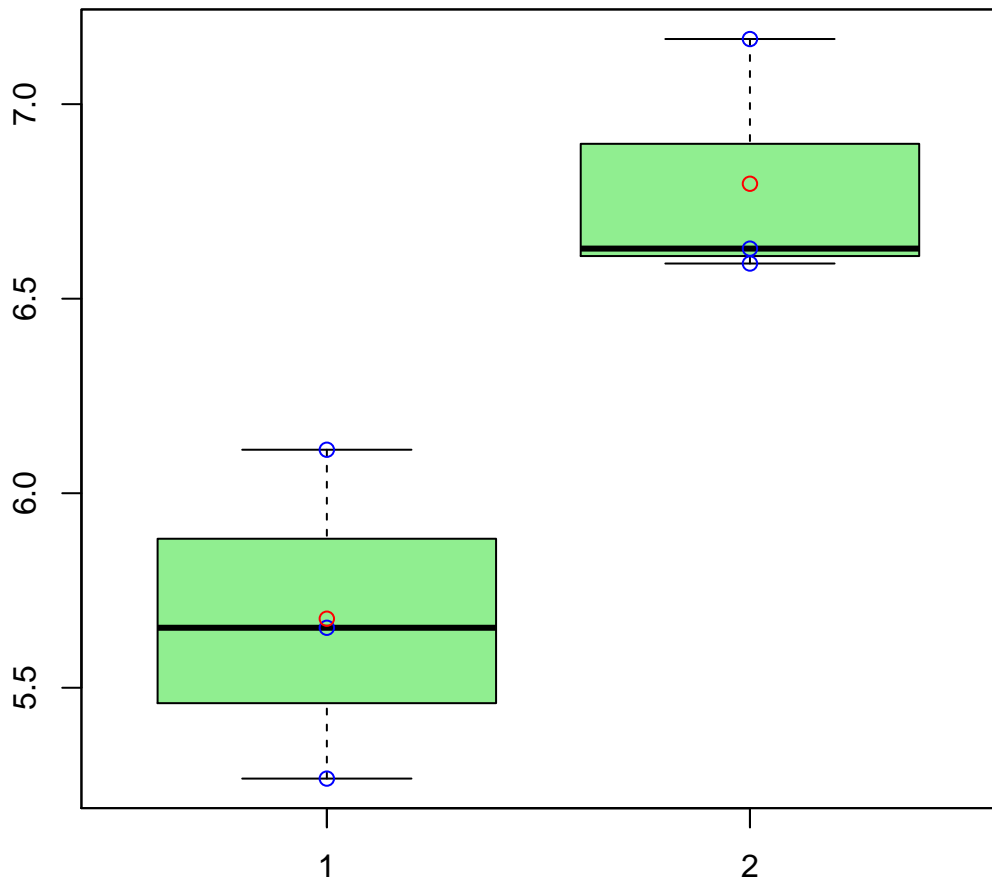

t-Test: p-value = 0.02

# F2E4I2|F2E4I2\_HORVD

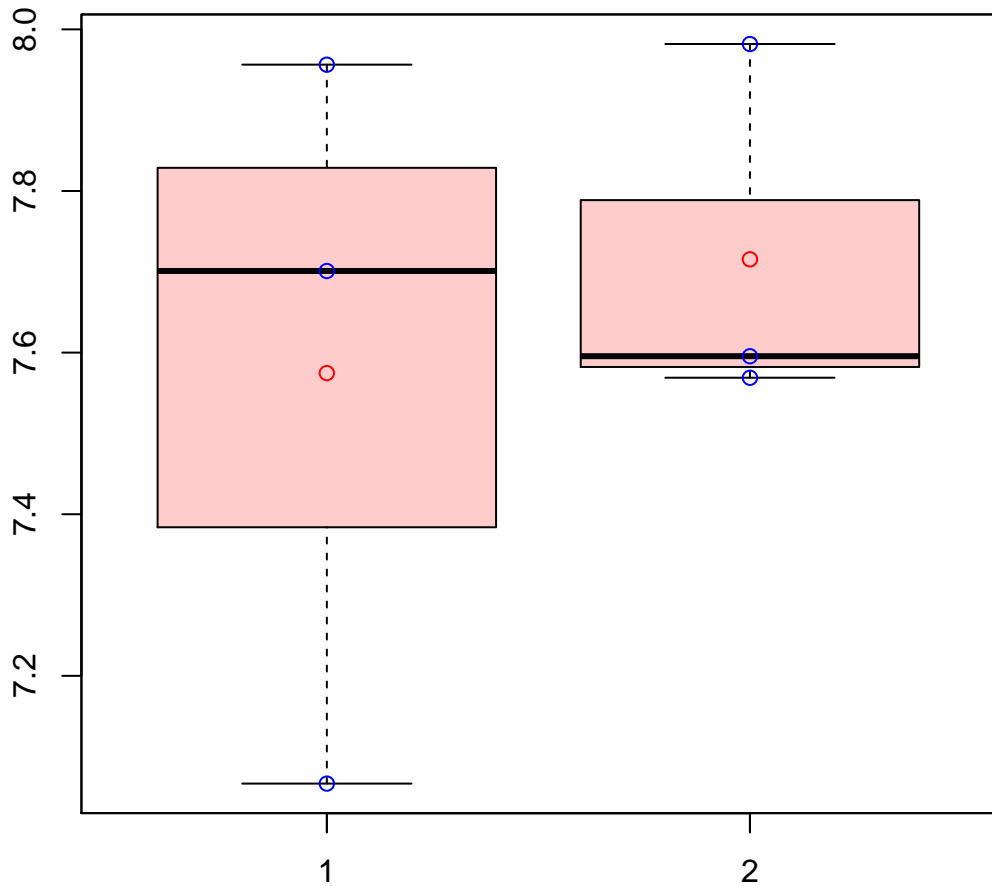

t-Test: p-value = 0.67

# F2E4N4|F2E4N4\_HORVD

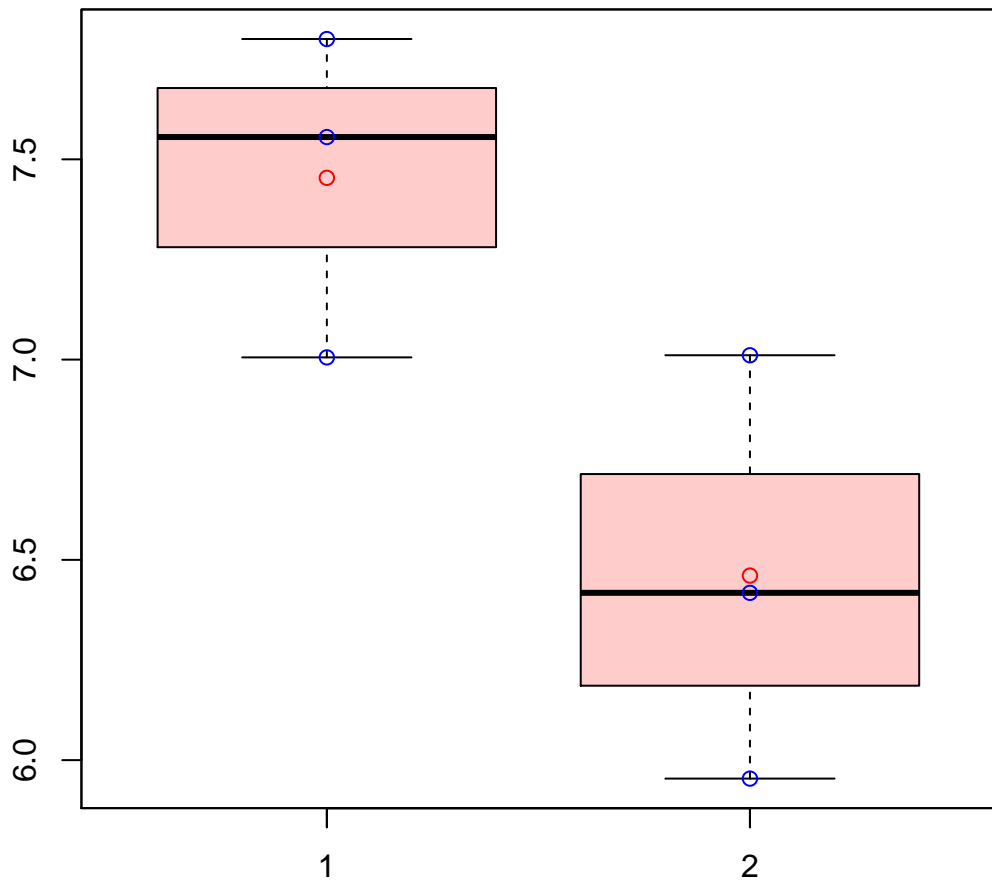

t-Test: p-value = 0.07



# F2E4Q3|F2E4Q3\_HORVD

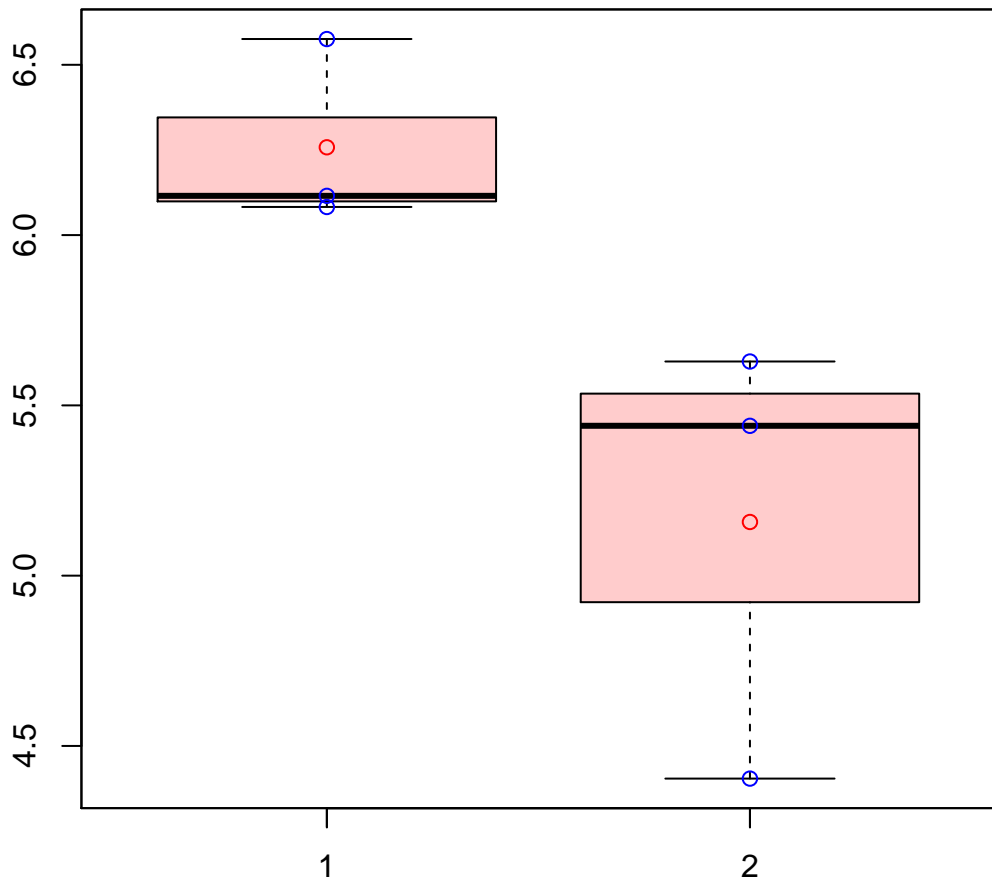

t-Test: p-value = 0.09

# F2E5M4|F2E5M4\_HORVD

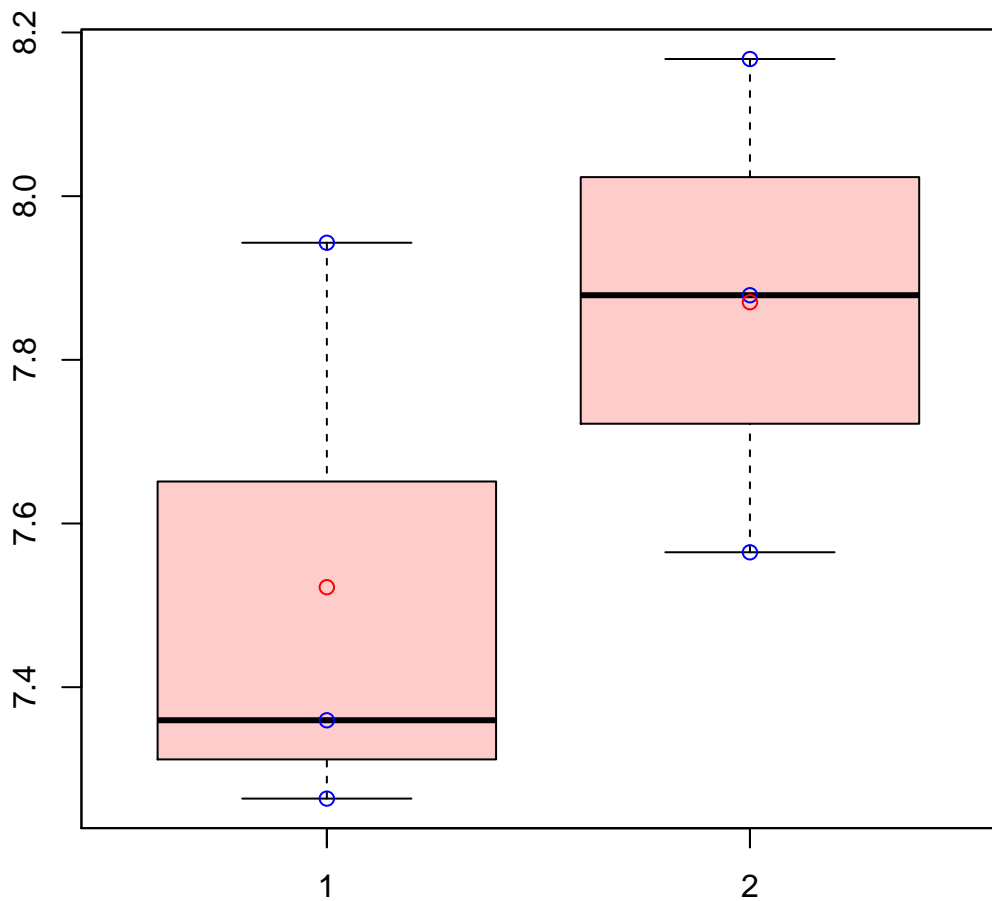

t-Test: p-value = 0.28

## F2E611|F2E611\_HORVD

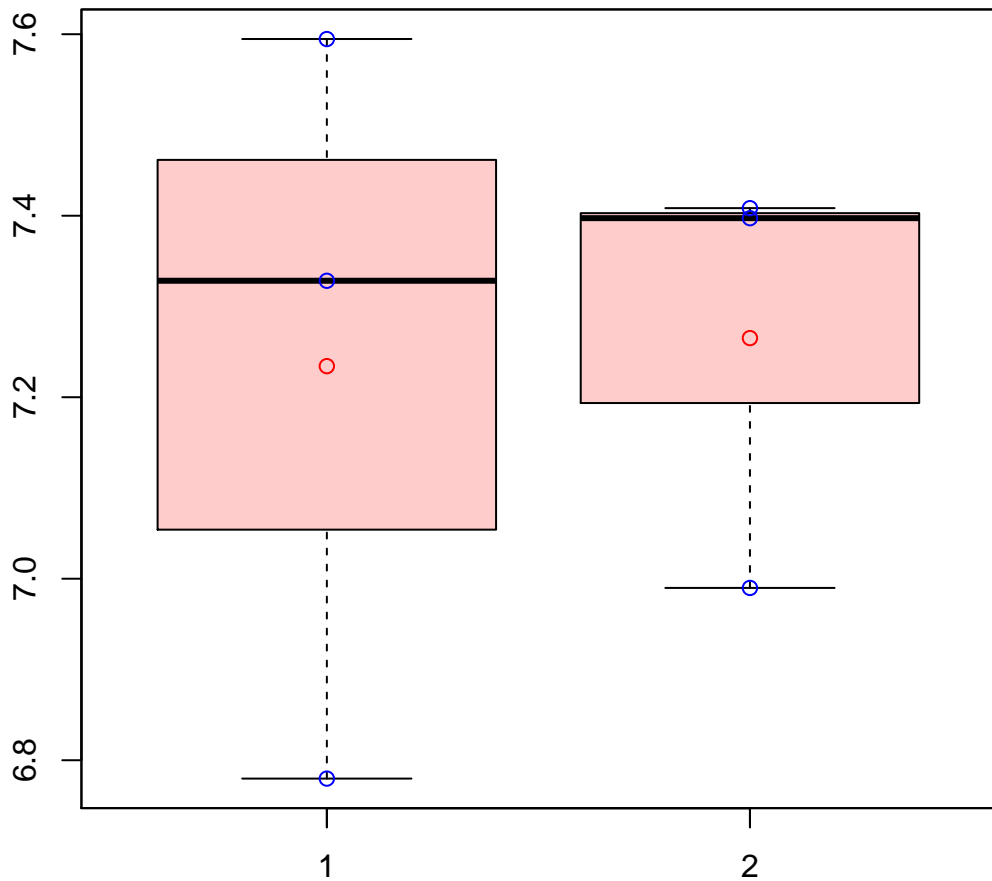

t-Test: p-value = 0.92

# F2E645|F2E645\_HORVD

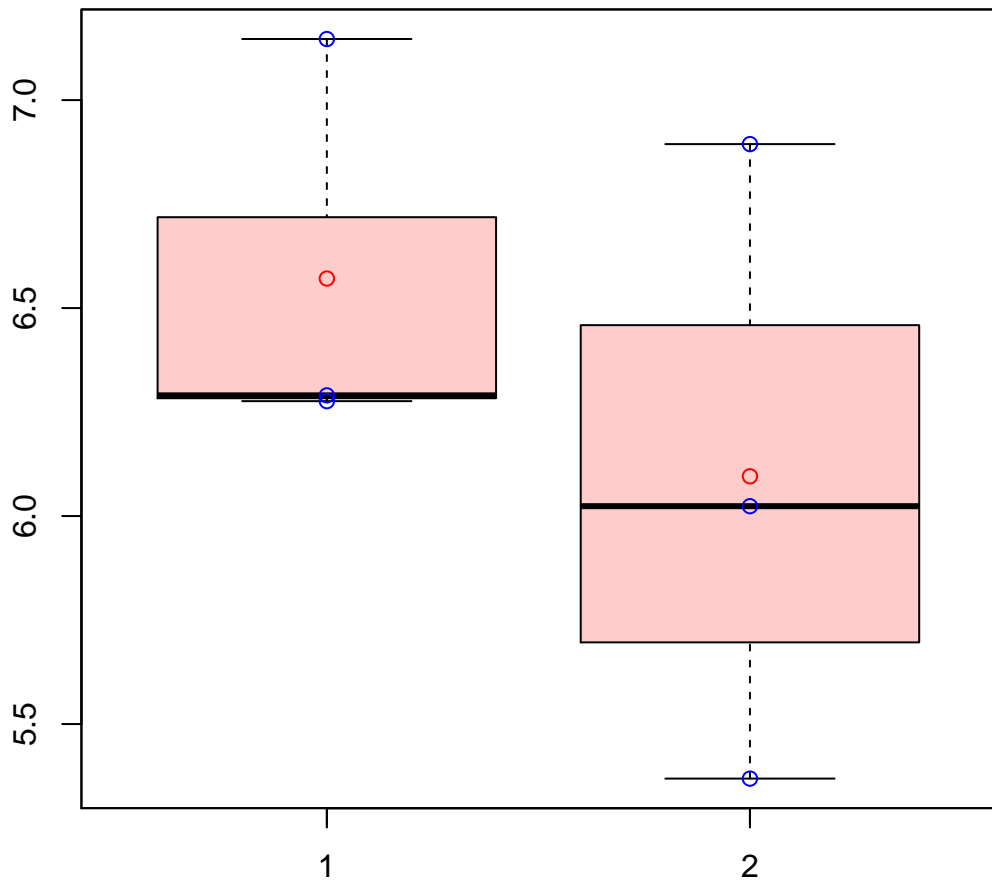

t-Test: p-value = 0.43

# F2E720|F2E720\_HORVD

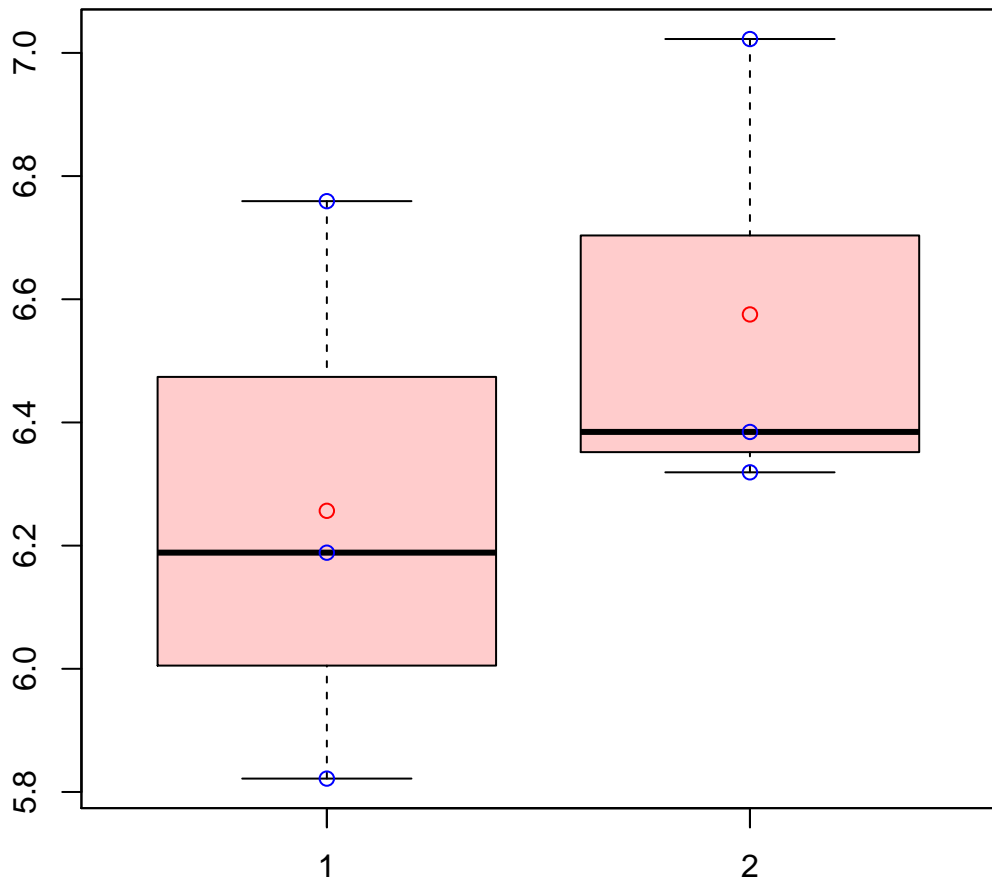

t-Test: p-value = 0.42

# F2E797|F2E797\_HORVD

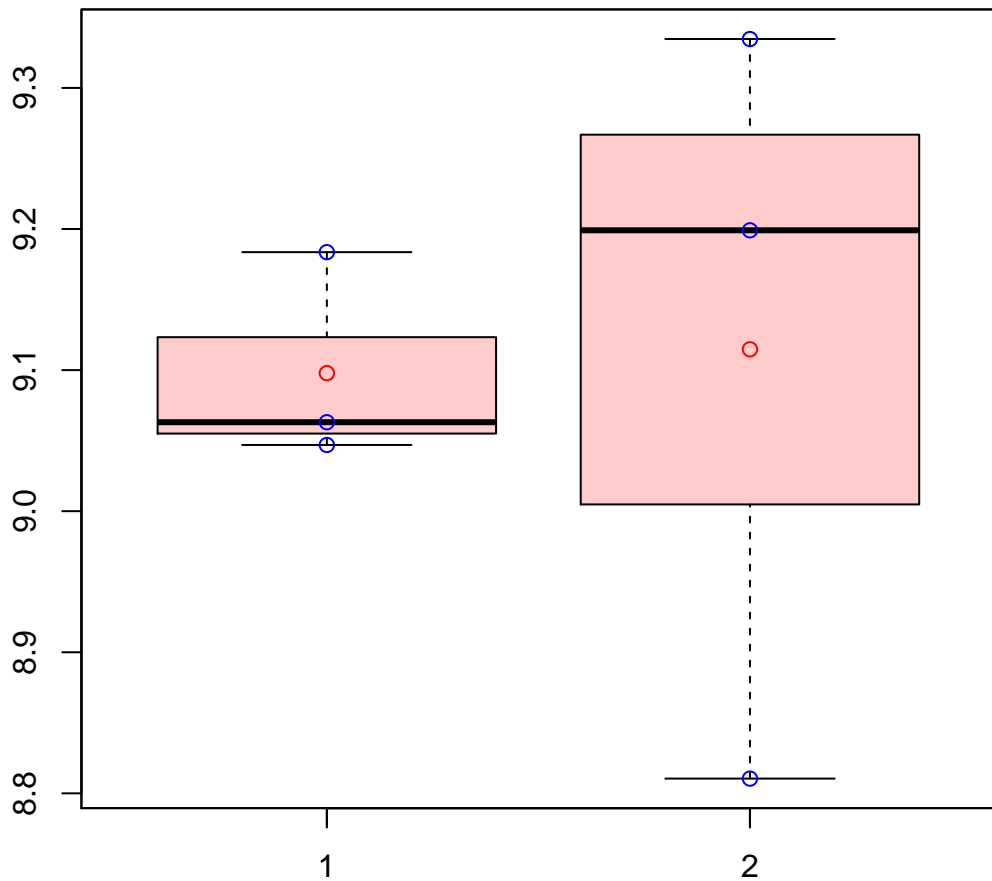

t-Test: p-value = 0.93

# F2E847|F2E847\_HORVD

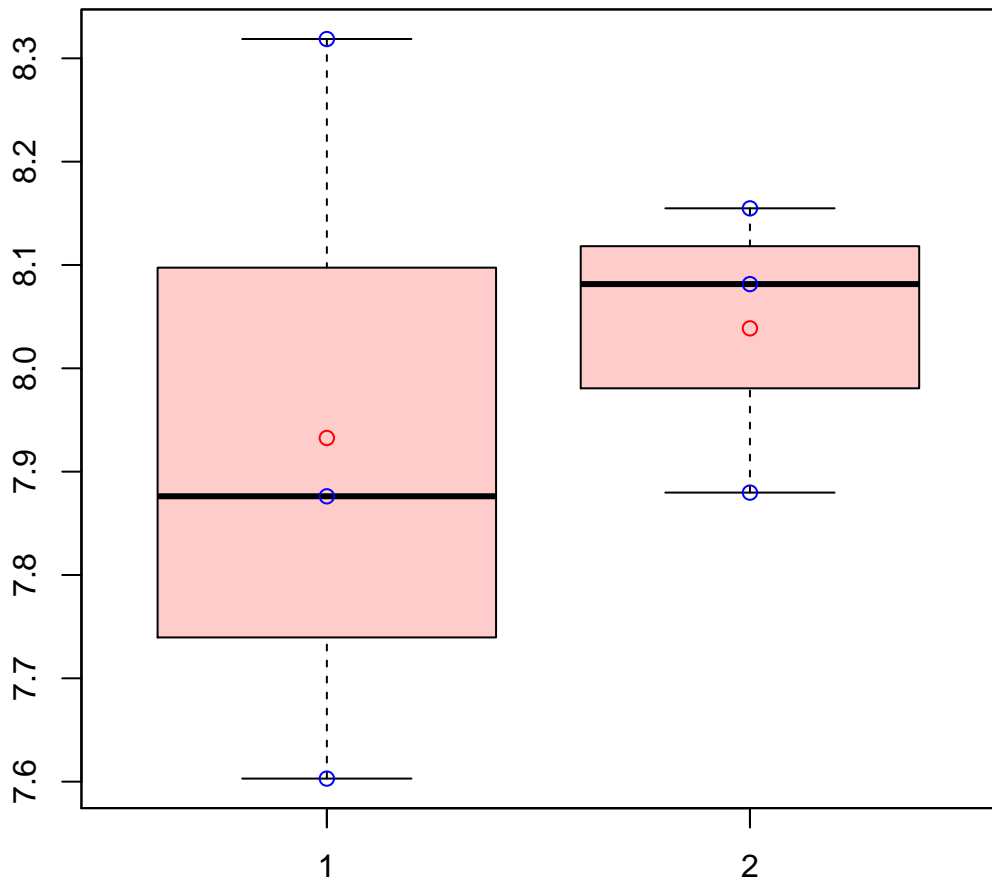

t-Test: p-value = 0.67

# F2E8E3|F2E8E3\_HORVD

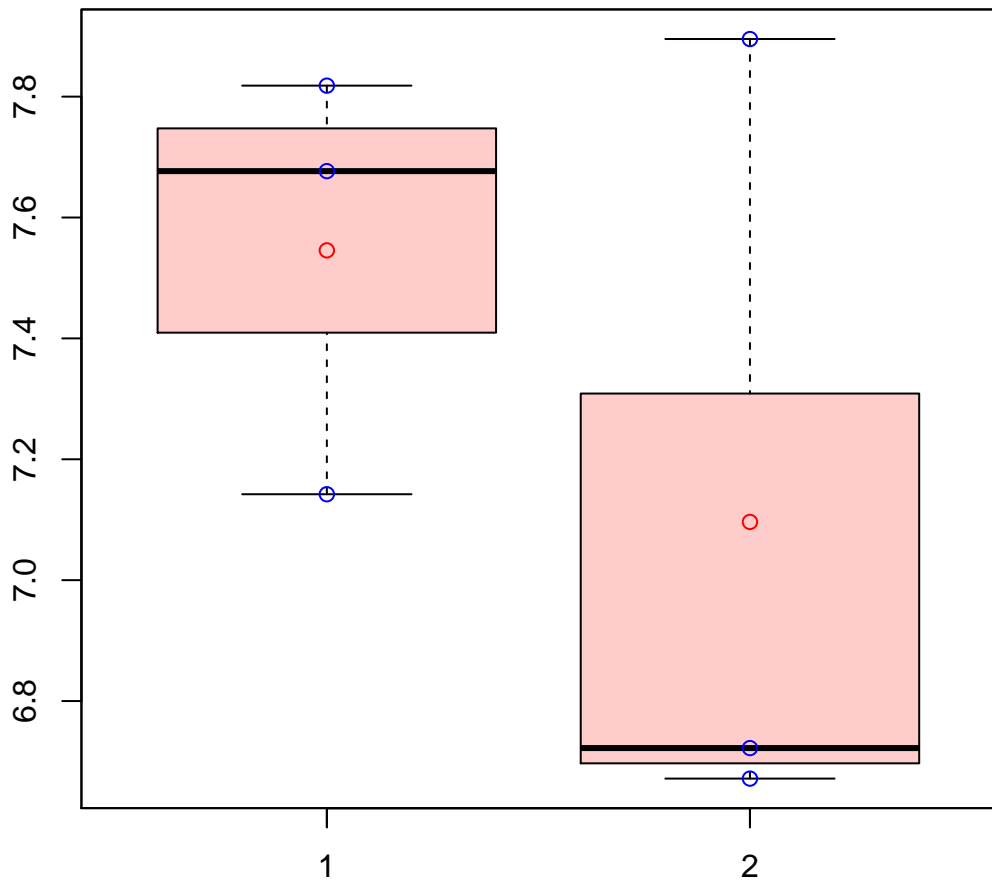

t-Test: p-value = 0.39



## F2E8G3|F2E8G3\_HORVD

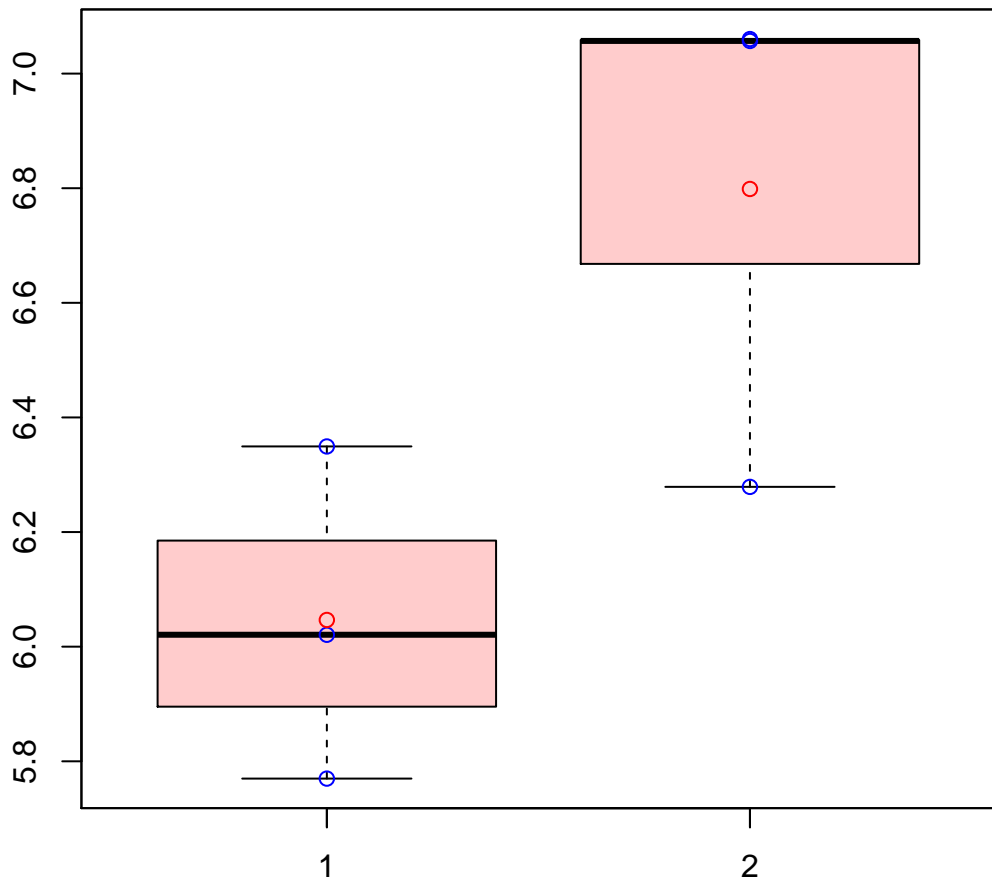

t-Test: p-value = 0.08

# F2E9F1|F2E9F1\_HORVD

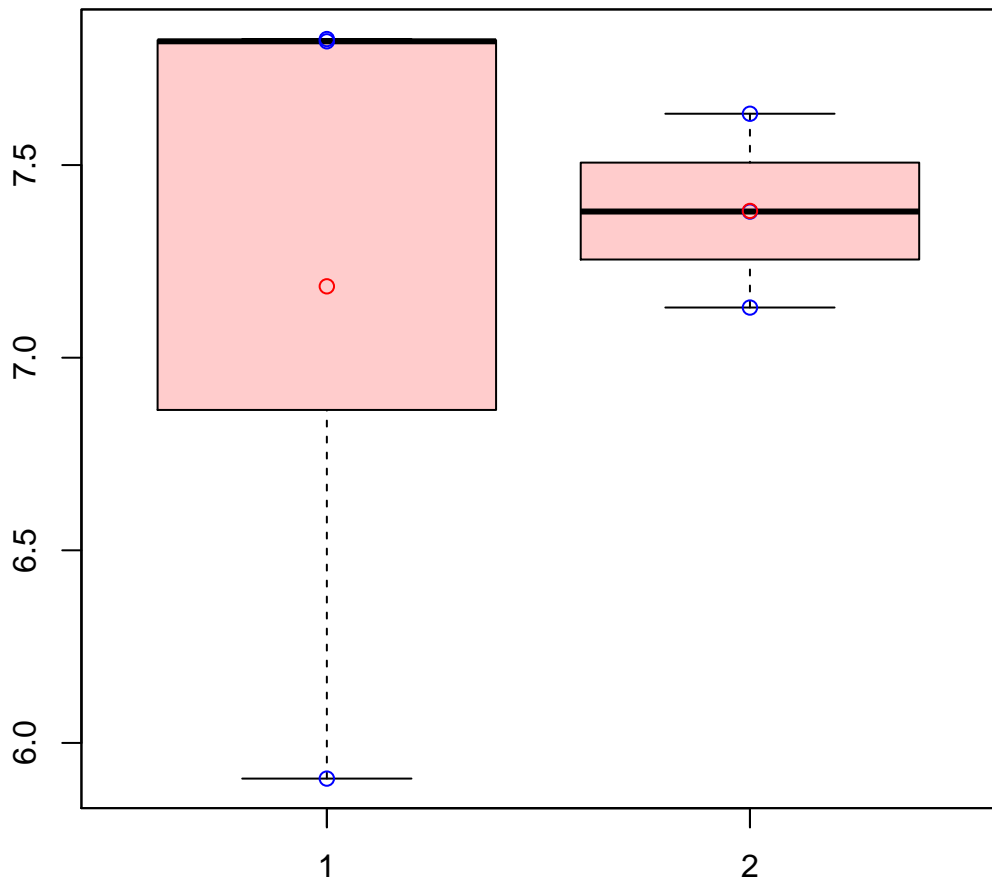

t-Test: p-value = 0.79

## F2EAC5|F2EAC5\_HORVD

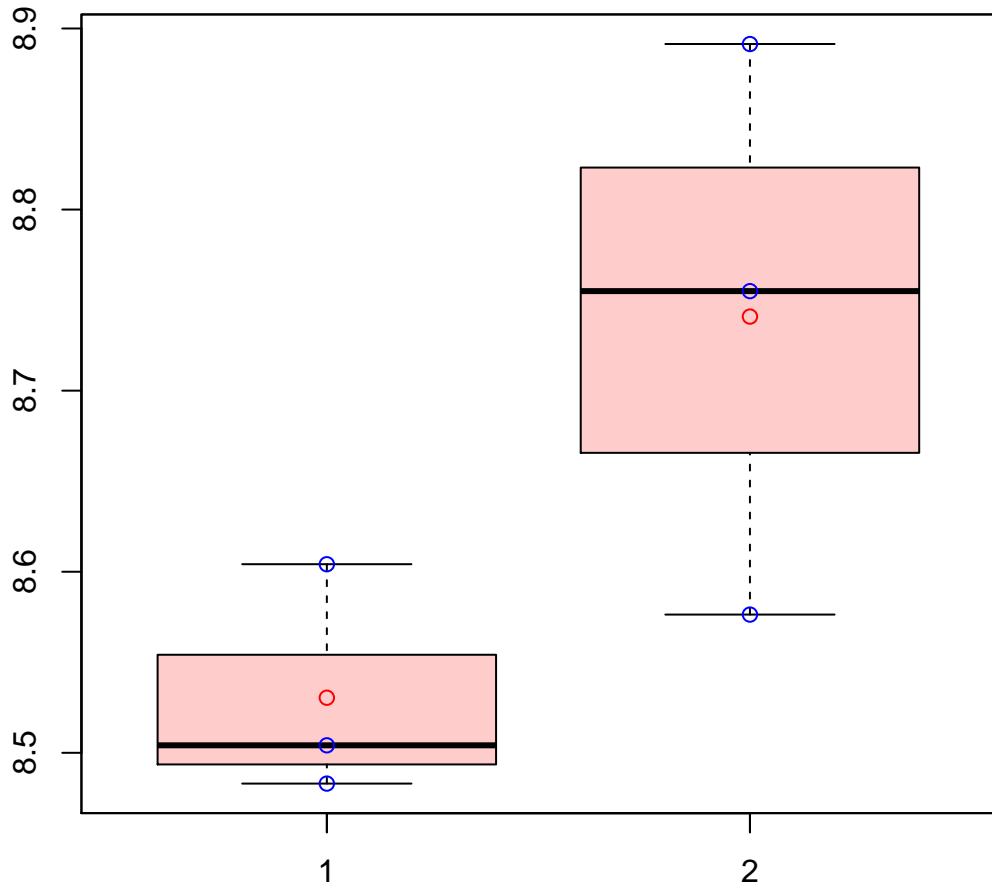

t-Test: p-value = 0.13

# F2EAG4|F2EAG4\_HORVD

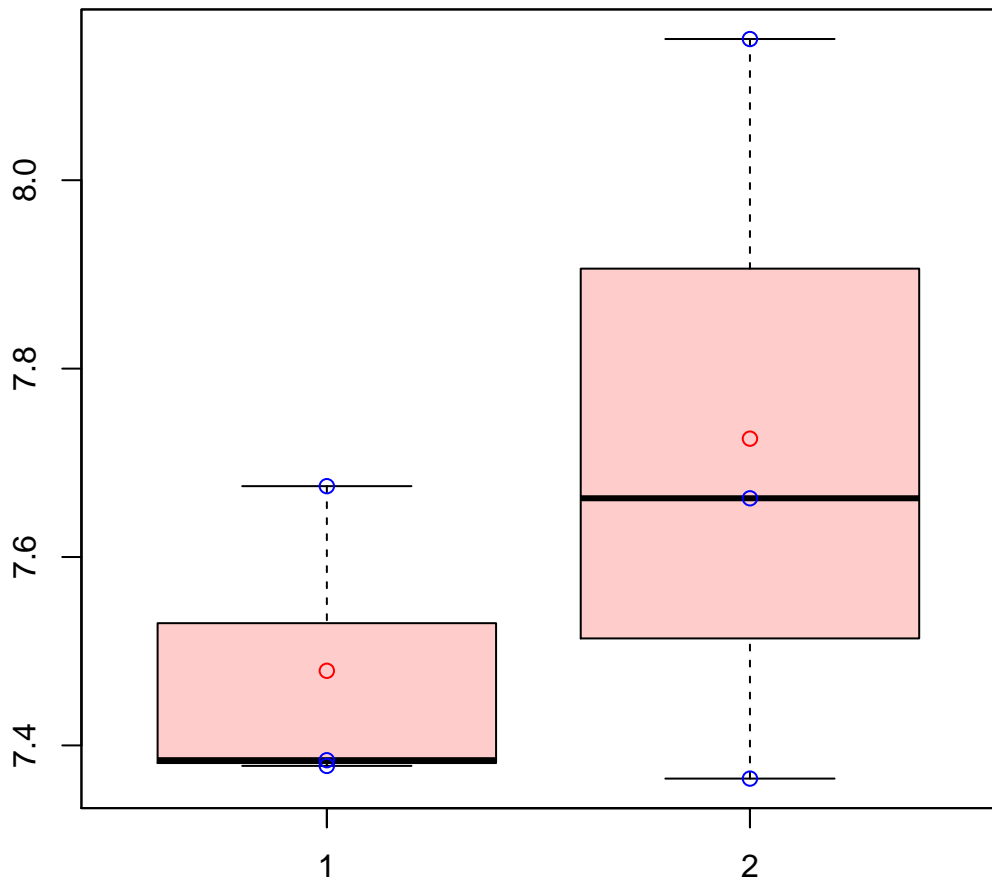

t-Test: p-value = 0.4

# F2EB29|F2EB29\_HORVD

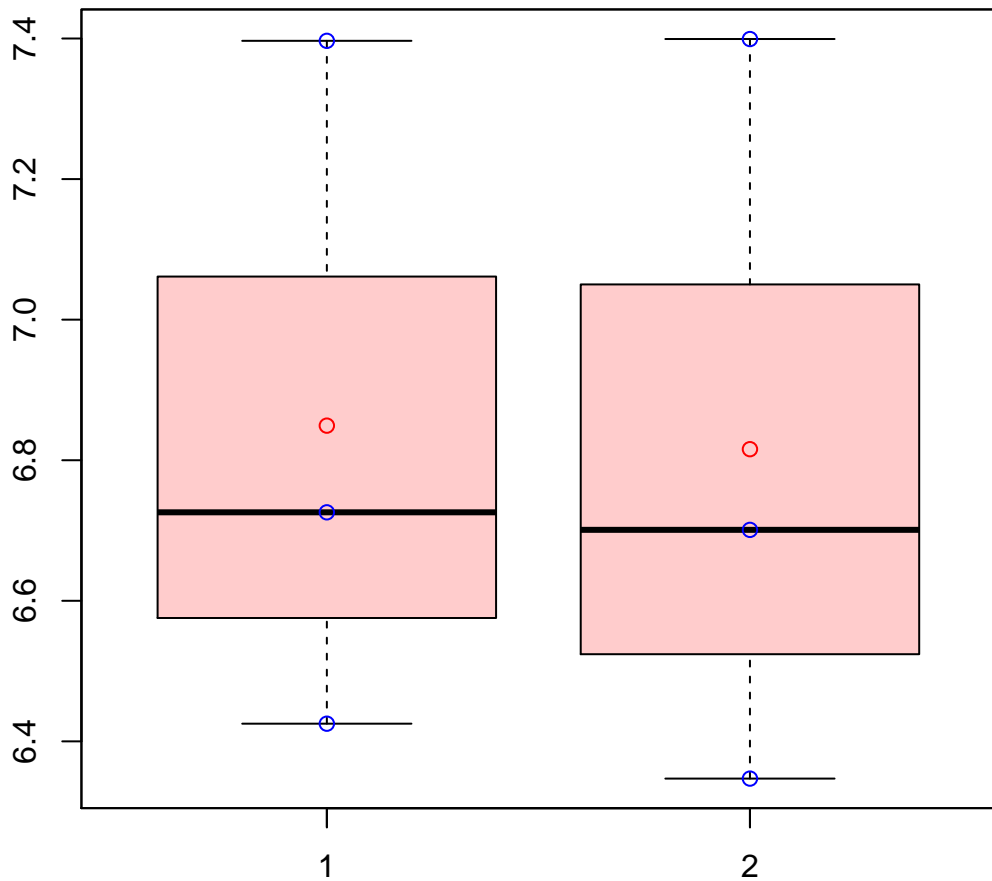

t-Test: p-value = 0.94

# F2EBB5|F2EBB5\_HORVD

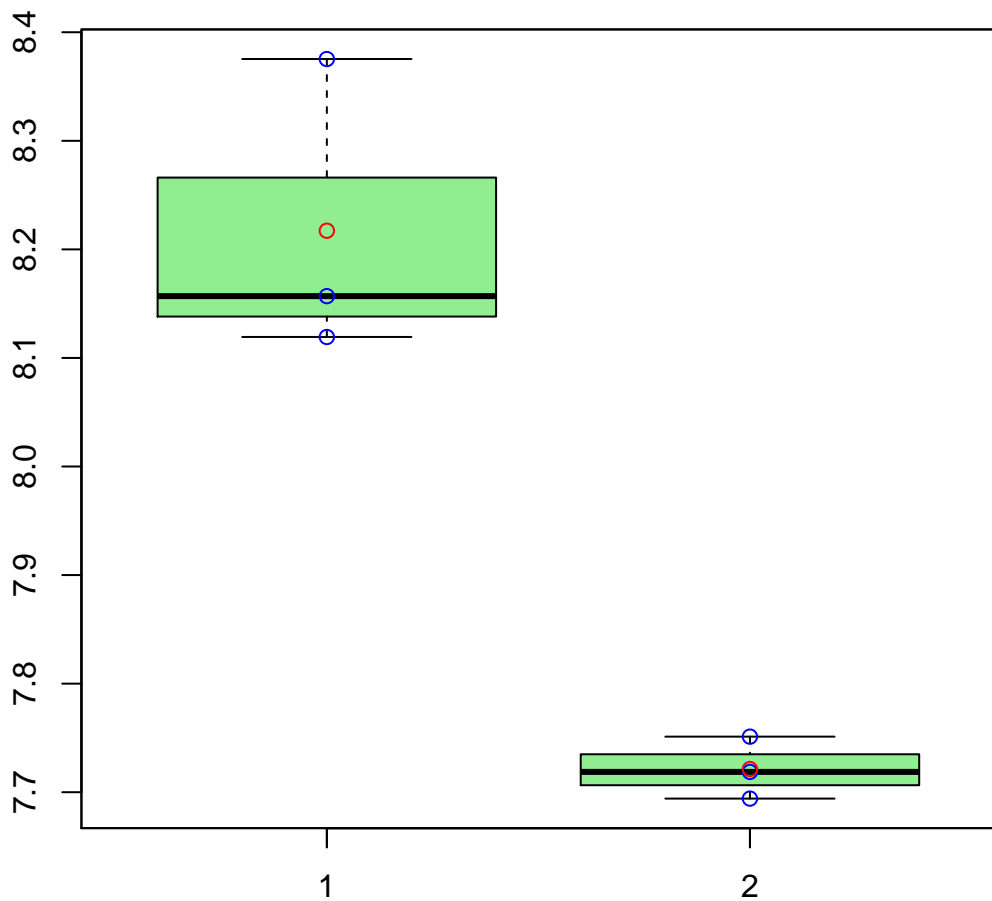

t-Test: p-value = 0.02

# F2EBI3|F2EBI3\_HORVD

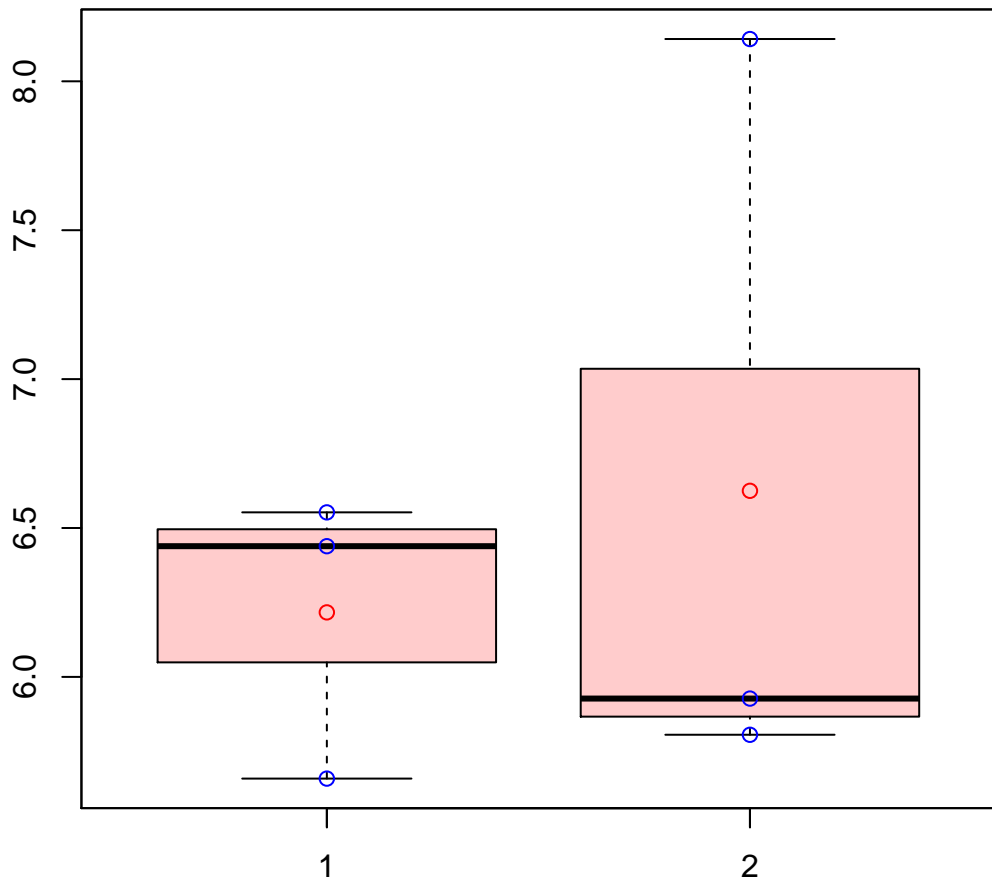

t-Test: p-value = 0.65

## F2ECA4|F2ECA4\_HORVD

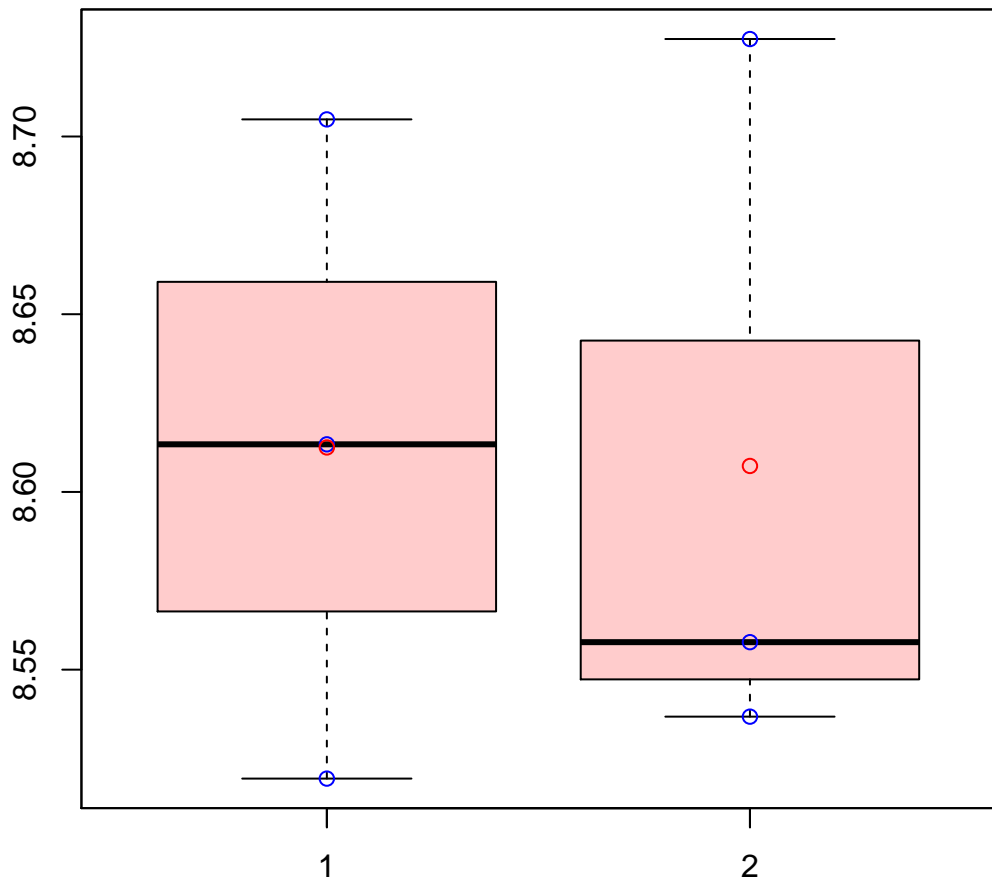

t-Test: p-value = 0.95



## F2ECU7|F2ECU7\_HORVD

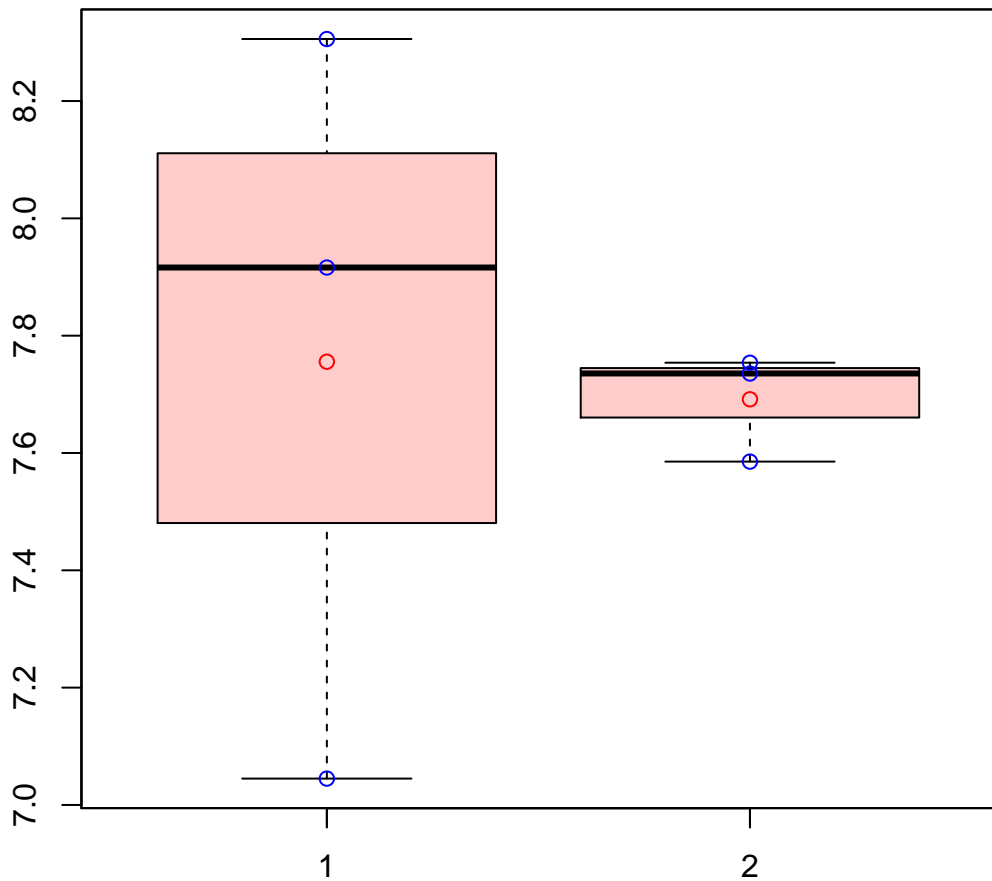

t-Test: p-value = 0.88

# F2EE28|F2EE28\_HORVD

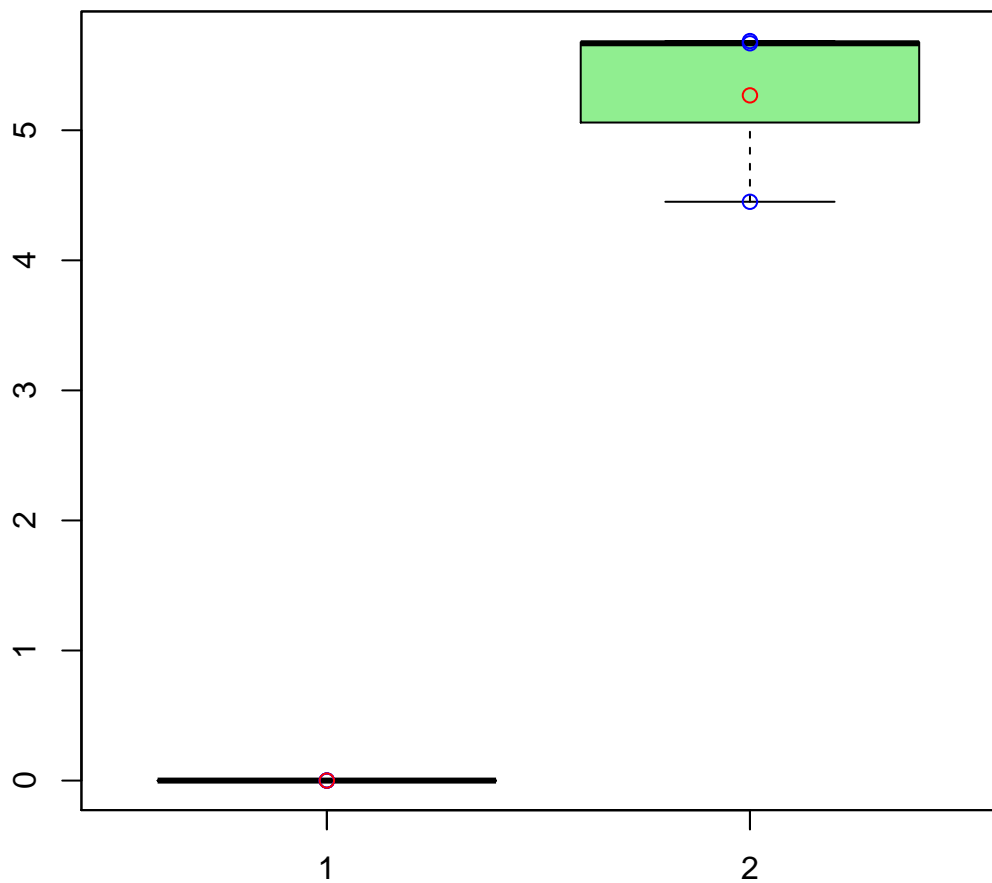

t-Test: p-value = 0.01

## F2EFA8|F2EFA8\_HORVD

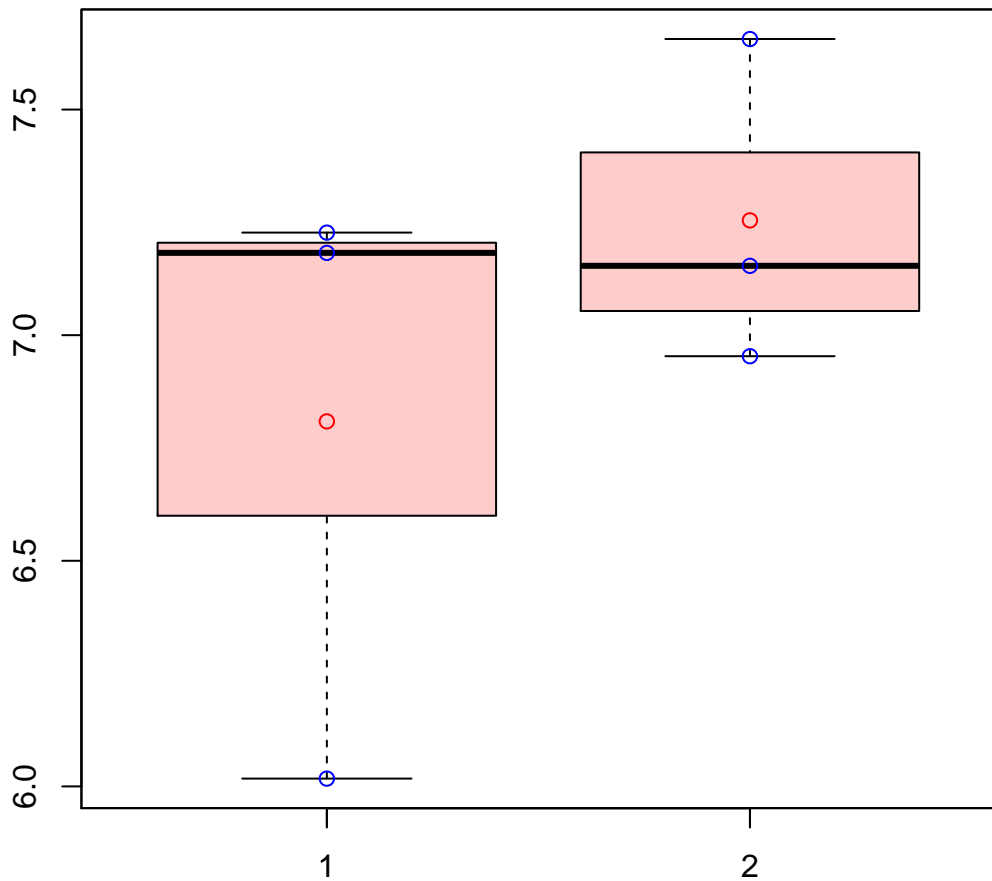

t-Test: p-value = 0.39

## F2EFM4|F2EFM4\_HORVD

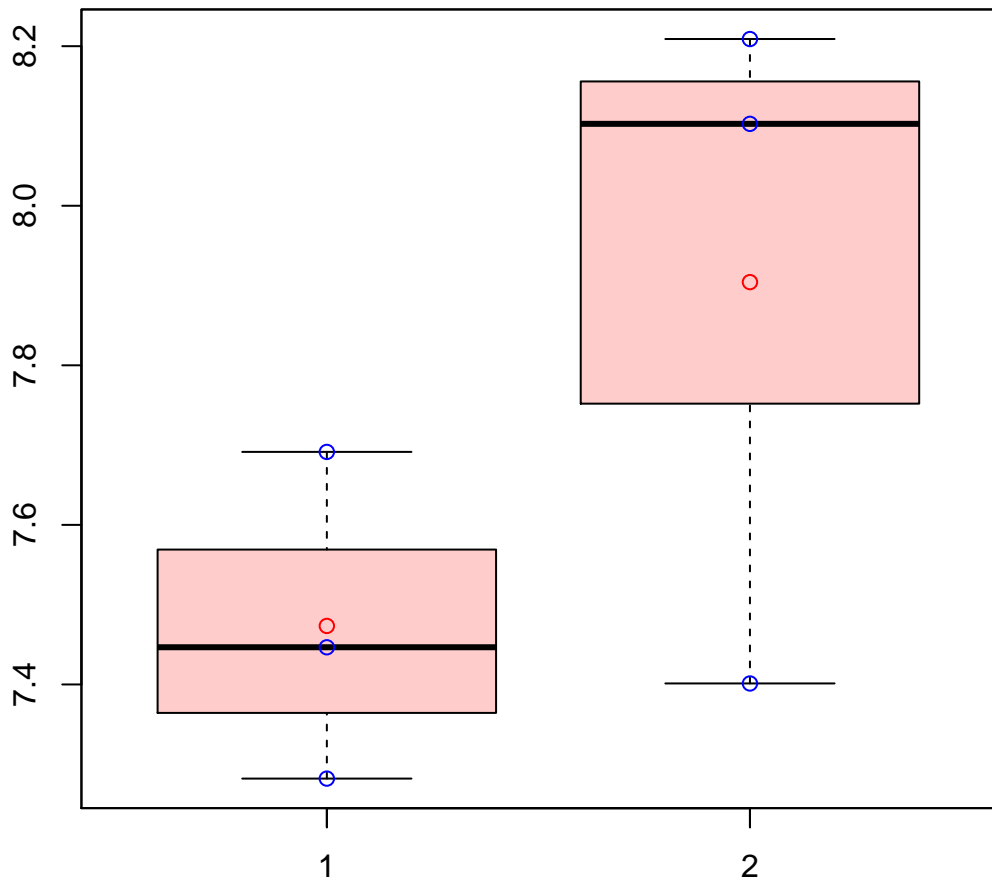

t-Test: p-value = 0.23

# F2EG22|F2EG22\_HORVD

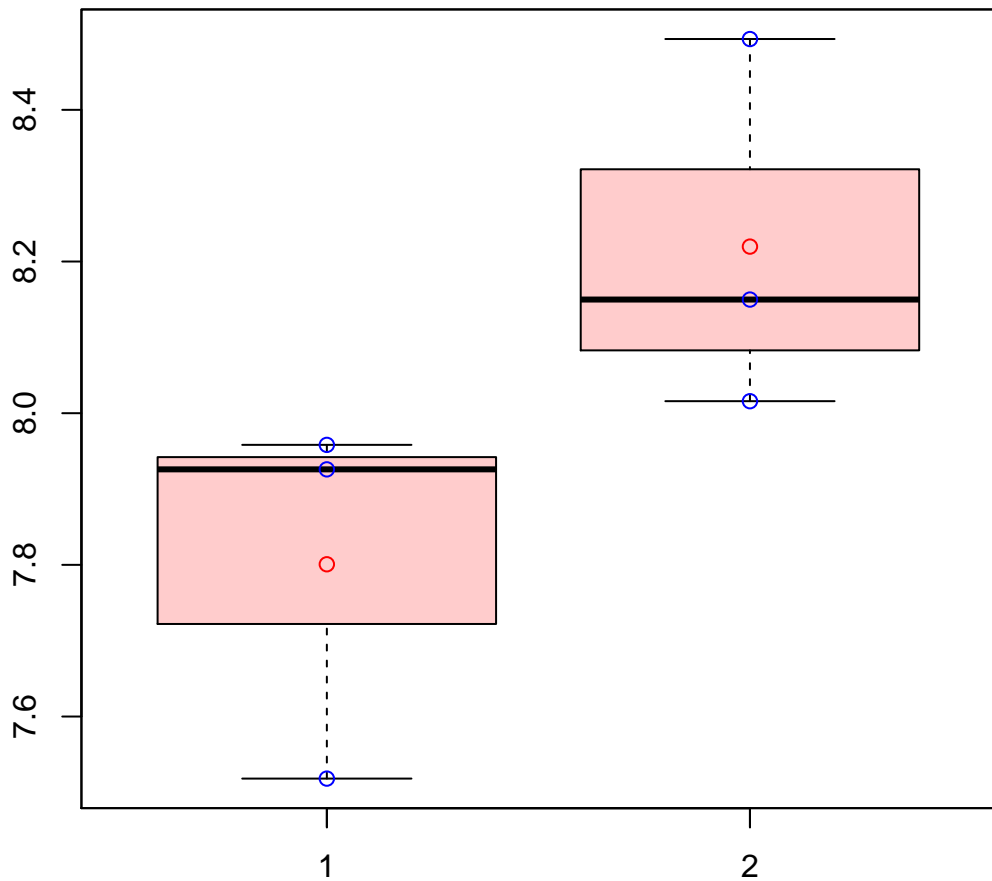

t-Test: p-value = 0.11

## F2EGV9|F2EGV9\_HORVD

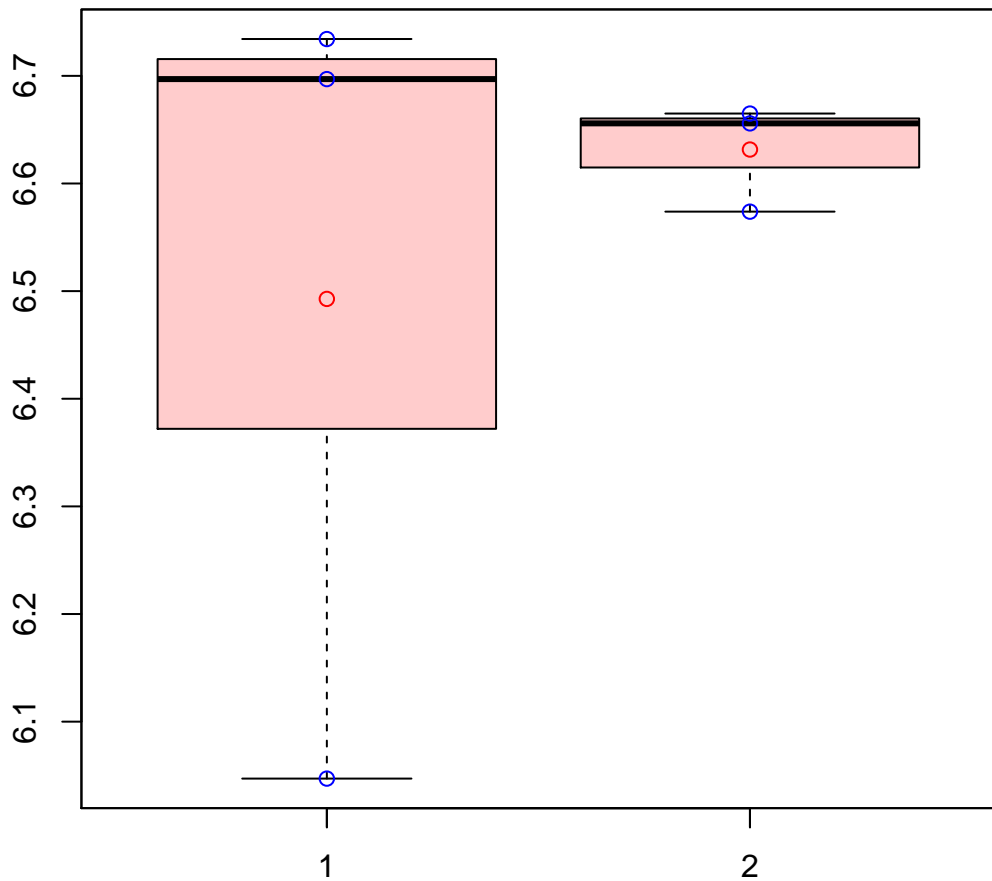

t-Test: p-value = 0.6

# F2EHF8|F2EHF8\_HORVD

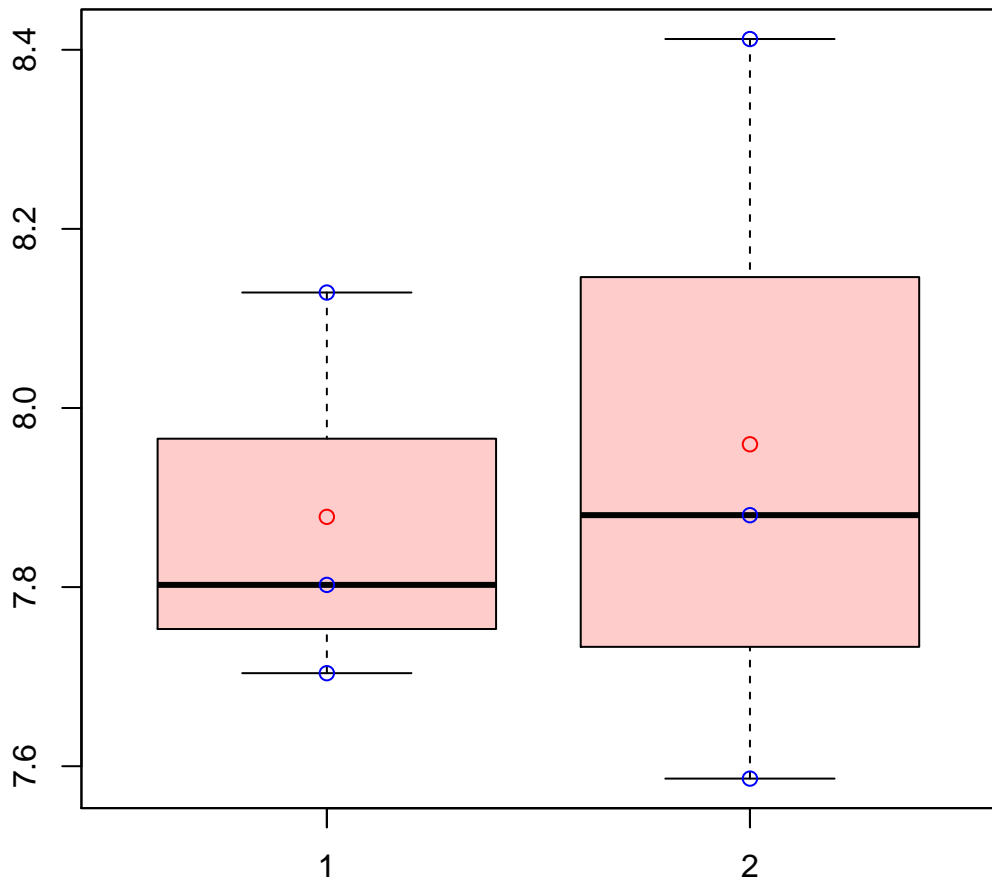

t-Test: p-value = 0.79

# F2EH17|F2EH17\_HORVD

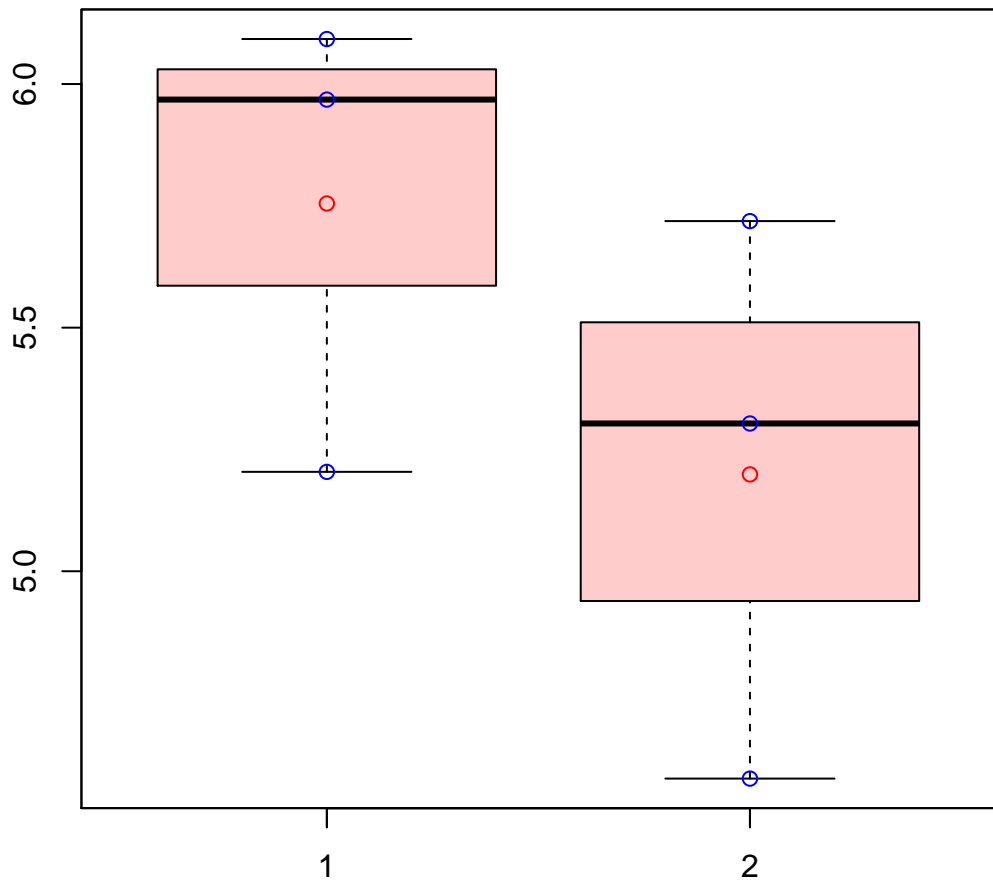

t-Test: p-value = 0.27



## F2EHX1|F2EHX1\_HORVD

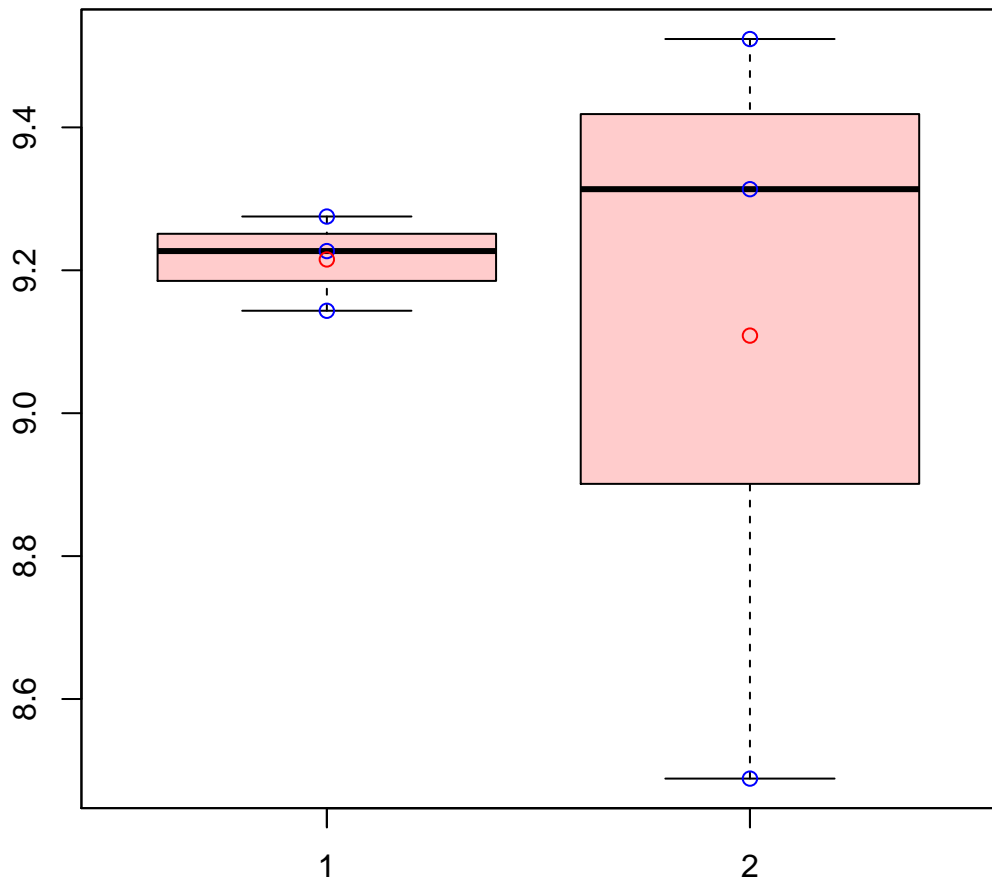

t-Test: p-value = 0.77

# F2EJ93|F2EJ93\_HORVD

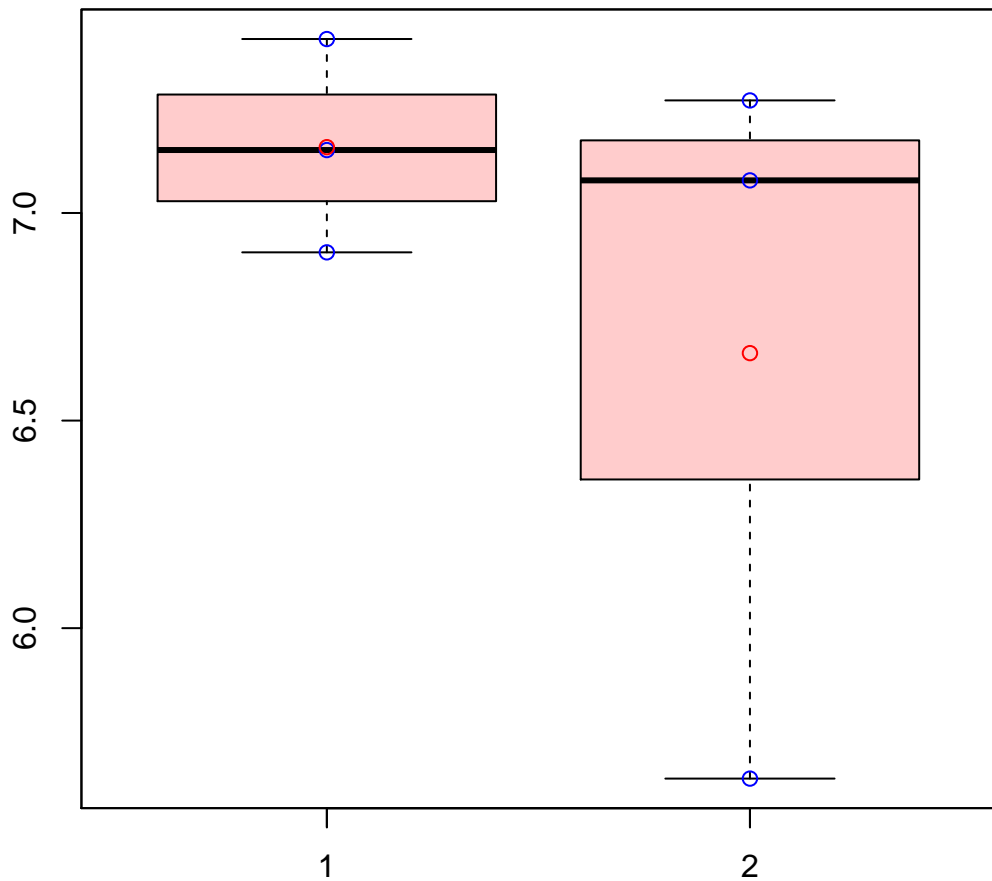

t-Test: p-value = 0.44

# F2EJU5|F2EJU5\_HORVD

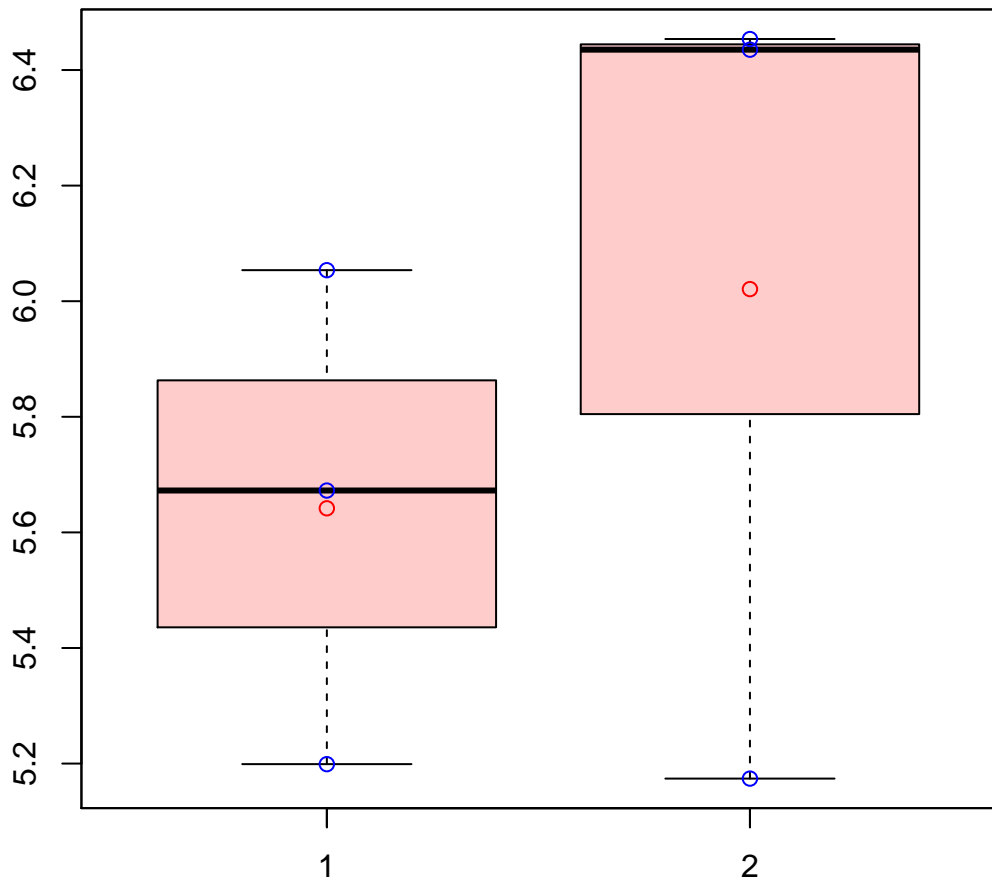

t-Test: p-value = 0.49

# F2EK26|F2EK26\_HORVD

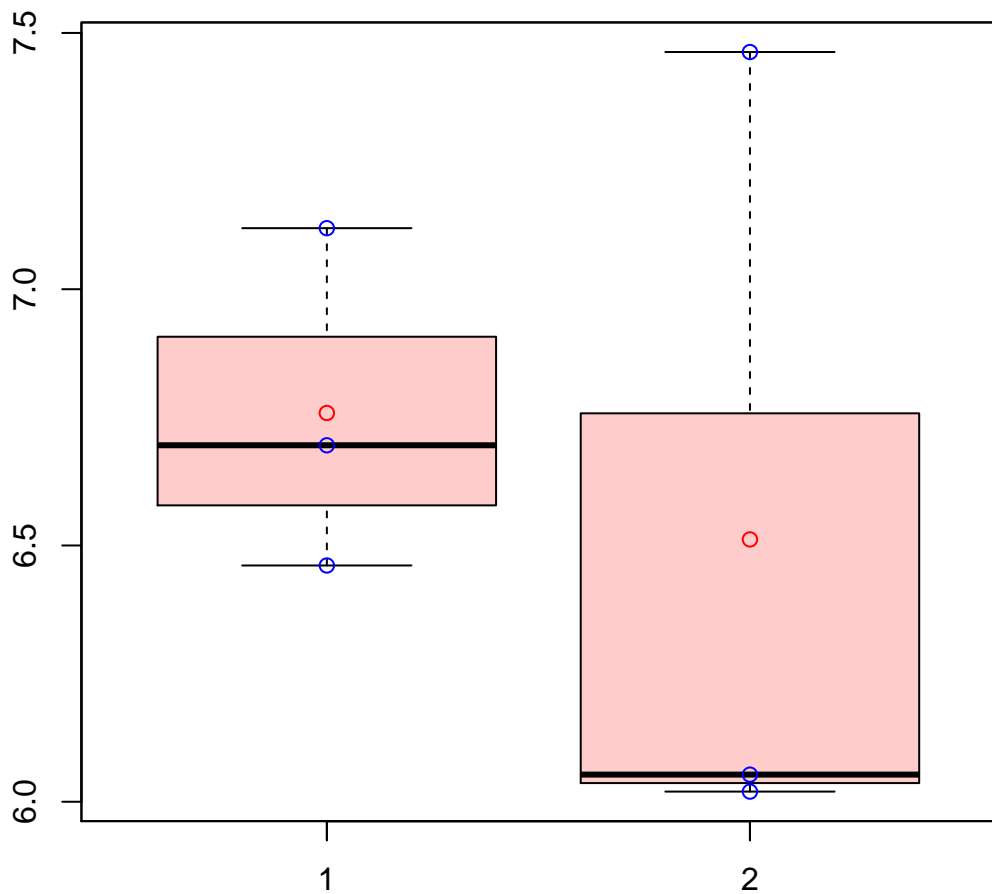

t-Test: p-value = 0.67

## F2EKI5|F2EKI5\_HORVD

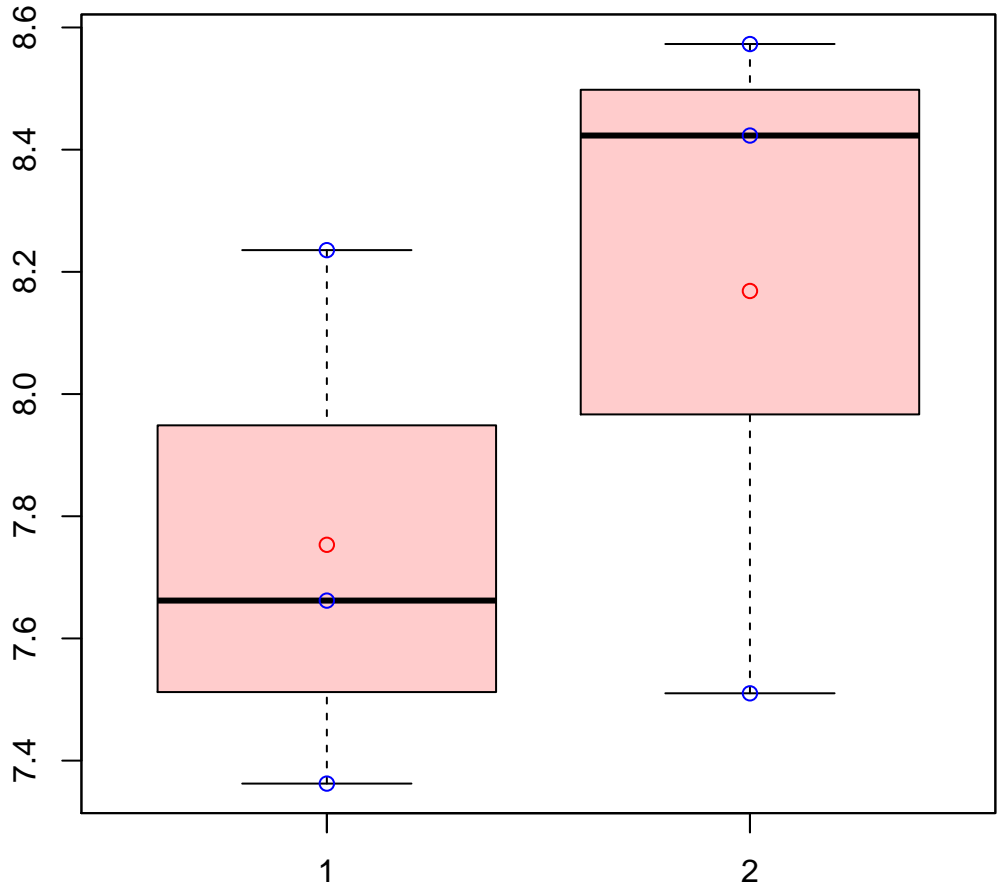

t-Test: p-value = 0.38

# F2ELG7|F2ELG7\_HORVD

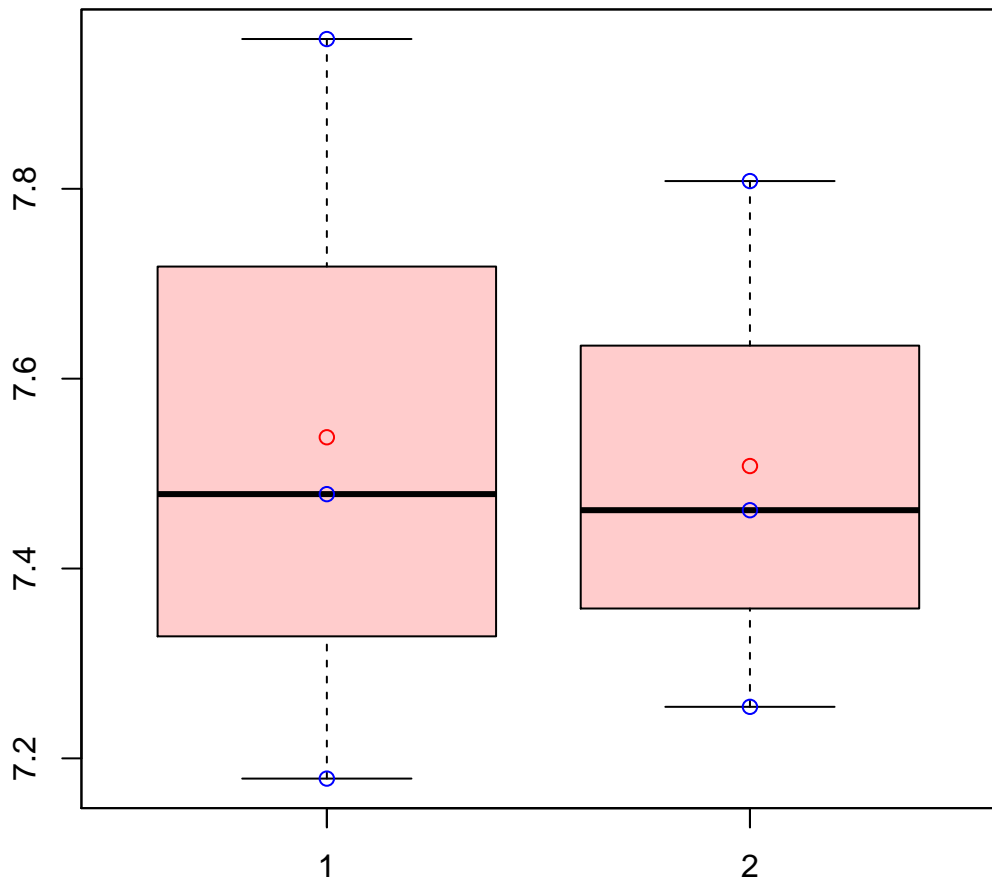

t-Test: p-value = 0.92

## F2ELP0|F2ELP0\_HORVD

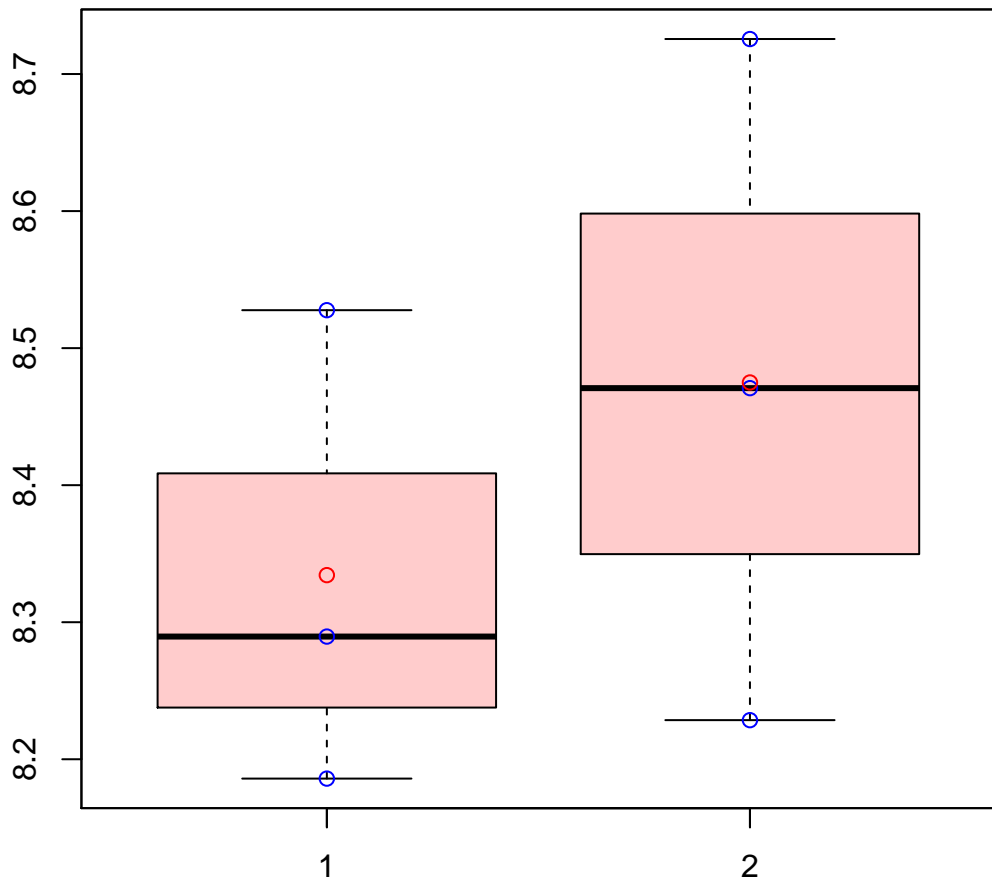

t-Test: p-value = 0.47

# F4Y5B2|F4Y5B2\_AEGTA

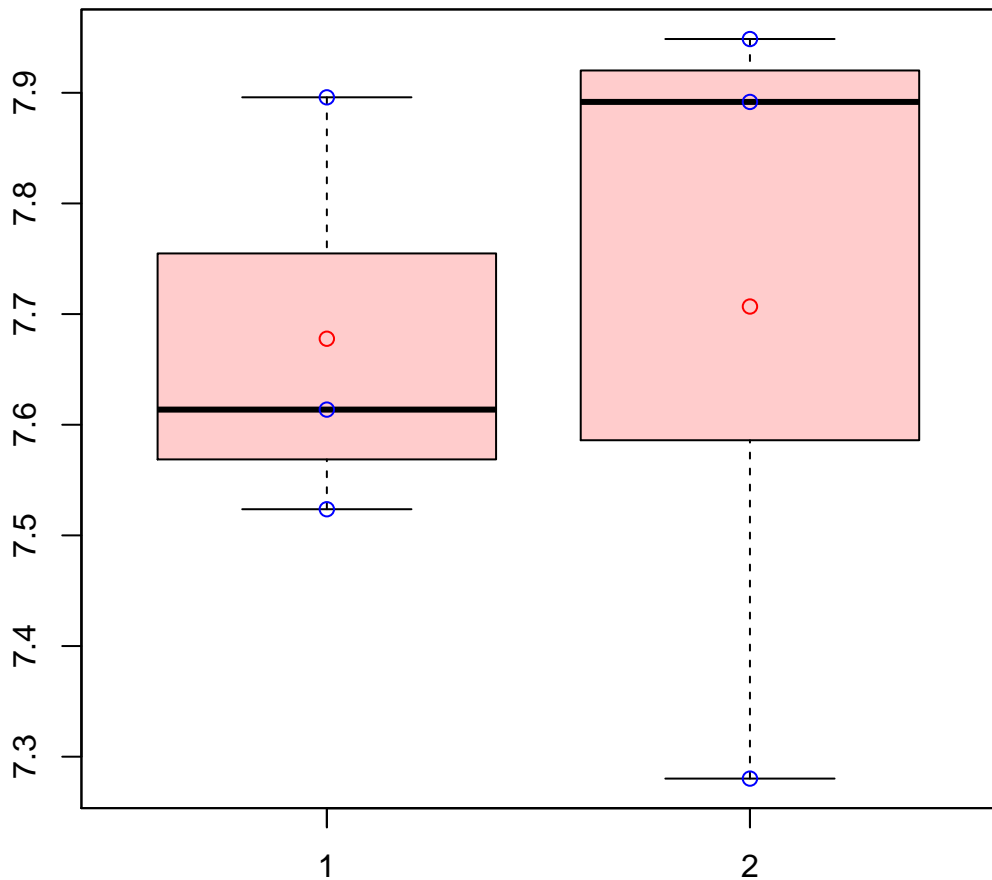

t-Test: p-value = 0.91



# F4Y5B3|F4Y5B3\_TRIDC

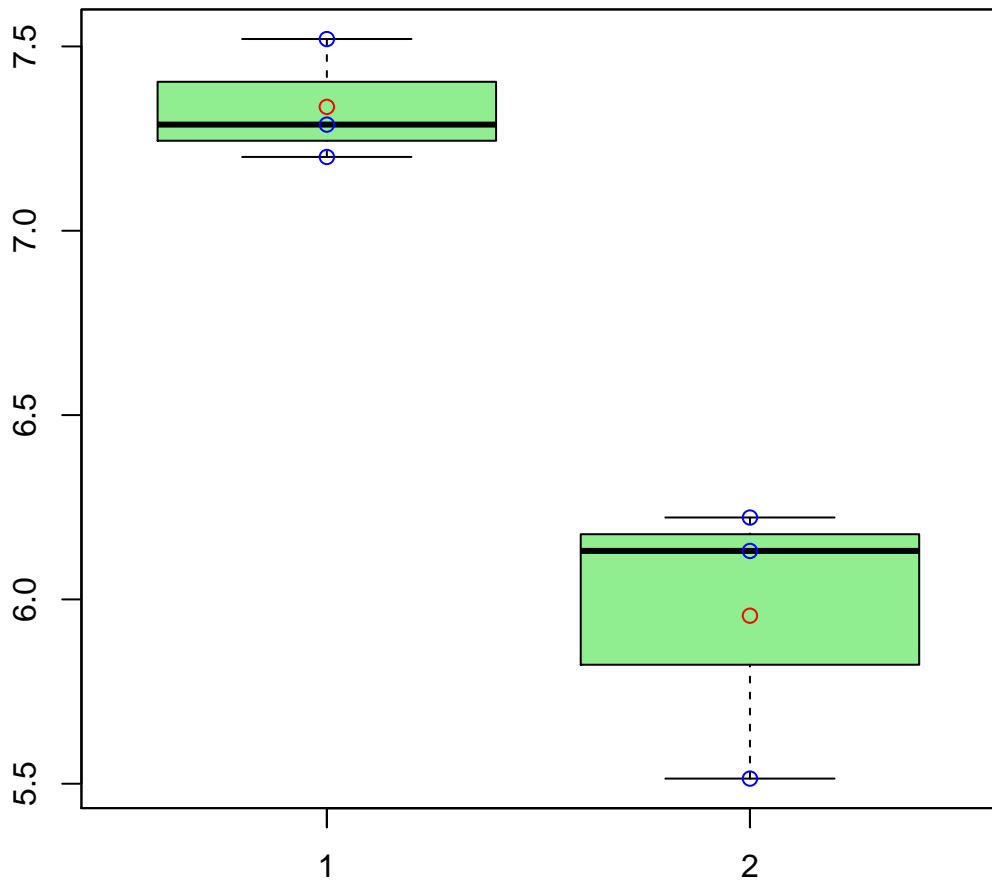

t-Test: p-value = 0.01

# F5BYH1|F5BYH1\_ONCHC

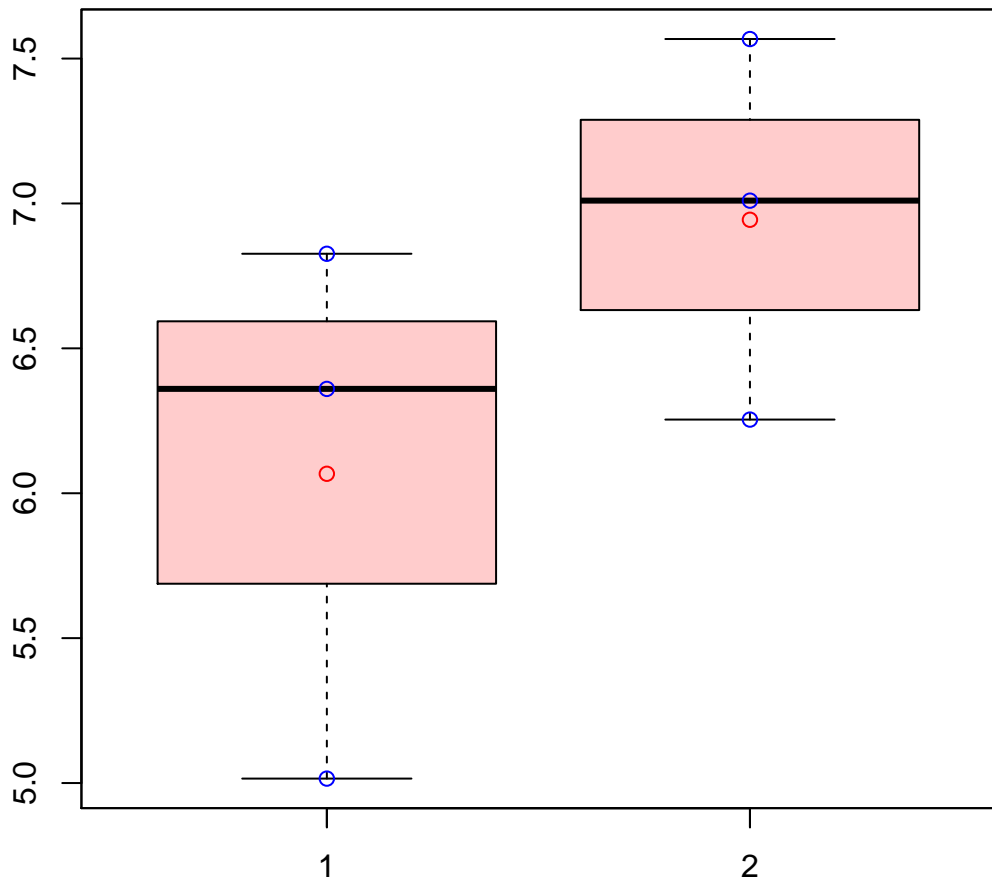

t-Test: p-value = 0.26

# F6KUG3|F6KUG3\_ELECO

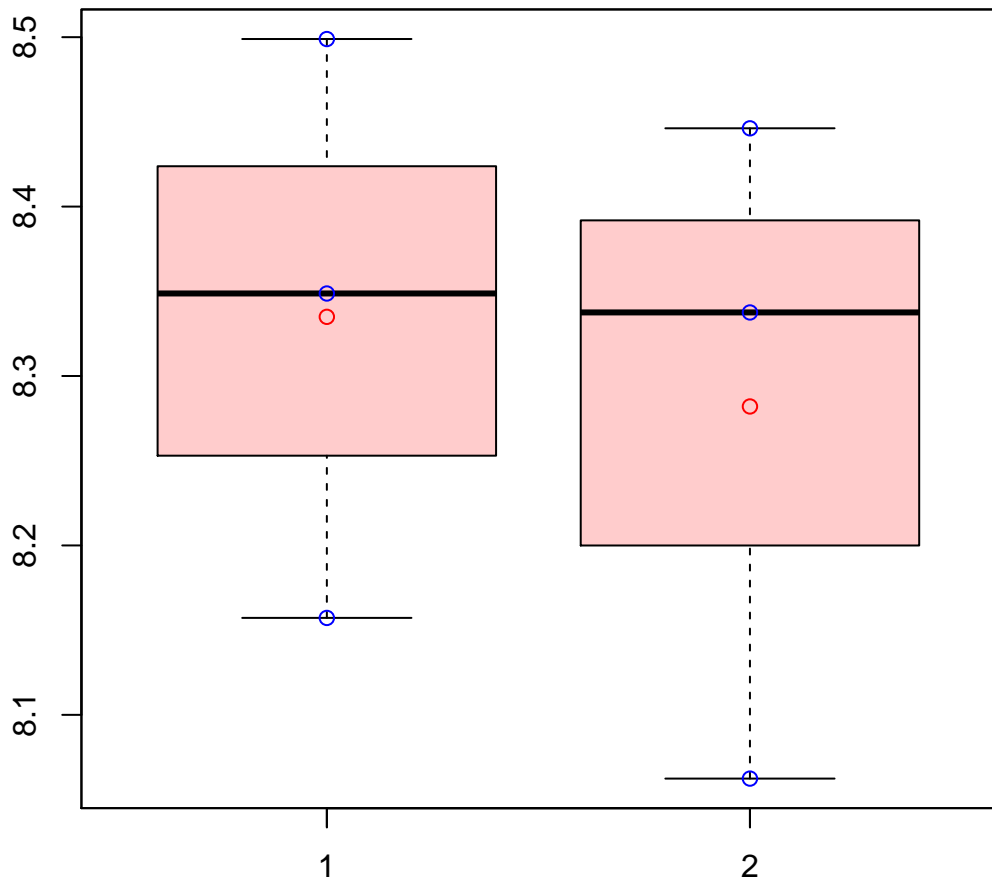

t-Test: p-value = 0.74

# F8RS09|F8RS09\_9POAL

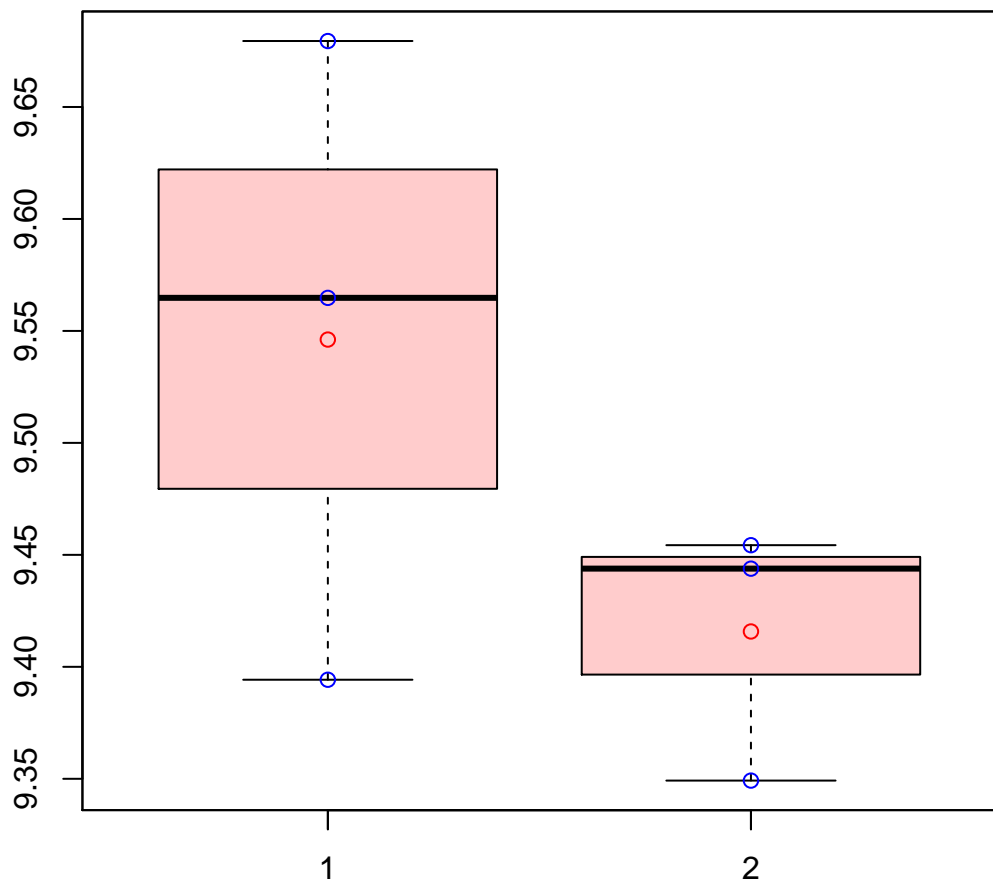

t-Test: p-value = 0.25

# F8RS86|F8RS86\_9POAL

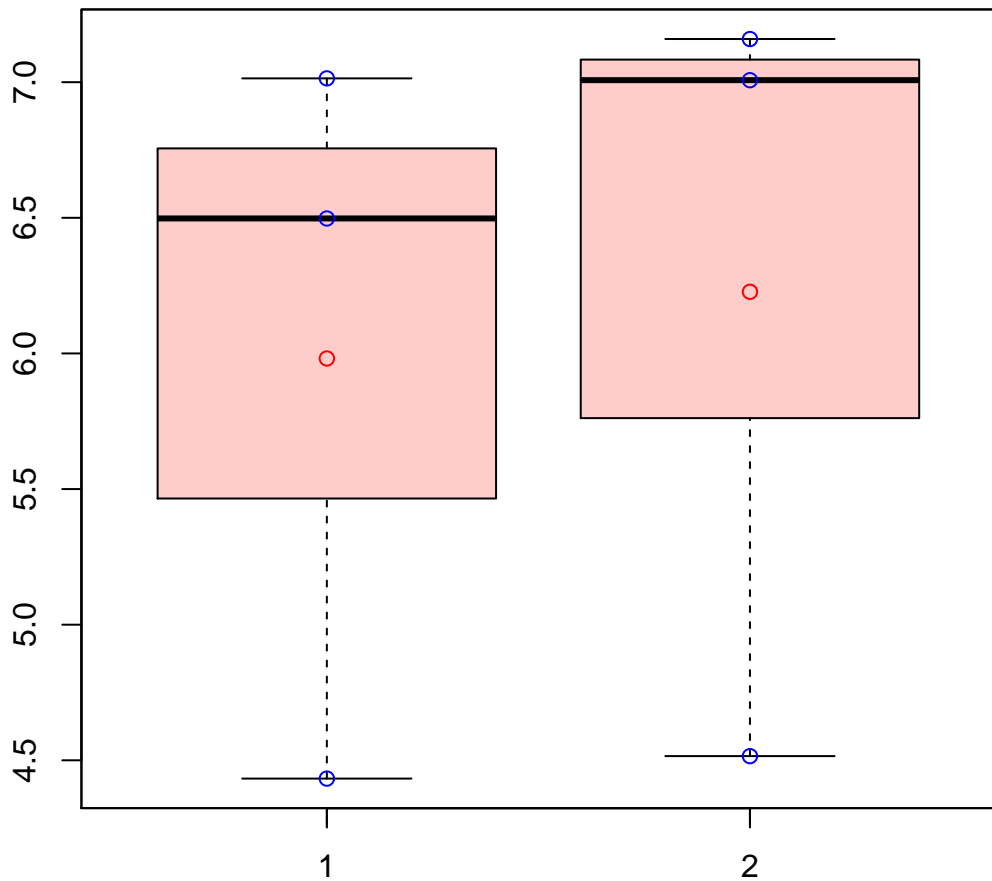

t-Test: p-value = 0.84

# F8RS88|F8RS88\_9POAL

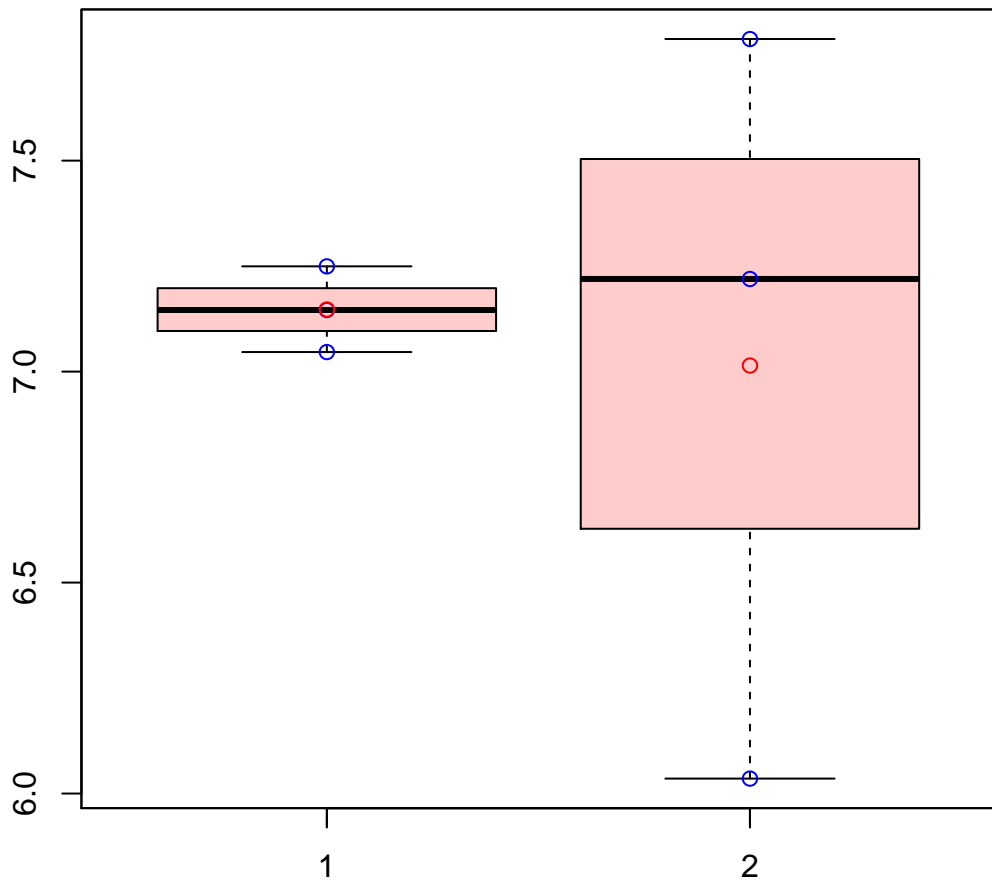

t-Test: p-value = 0.82

# F8RS89|F8RS89\_ELECO

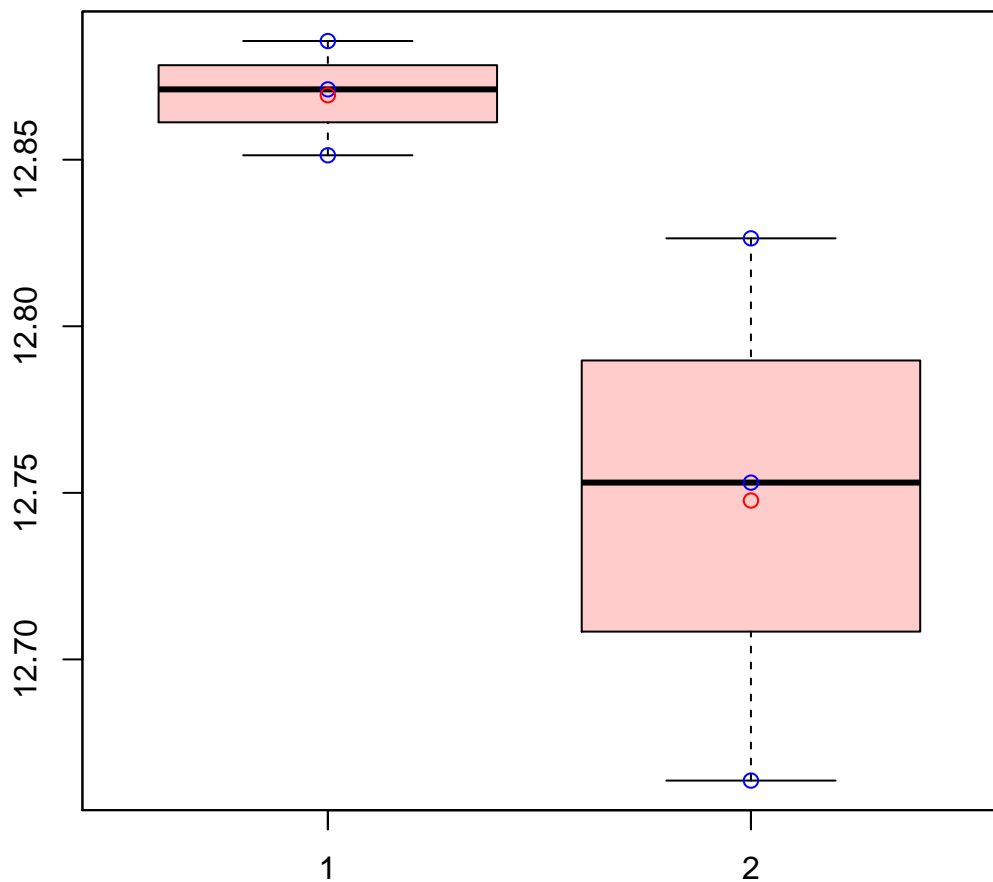

t-Test: p-value = 0.12

# F8RS90|F8RS90\_9POAL

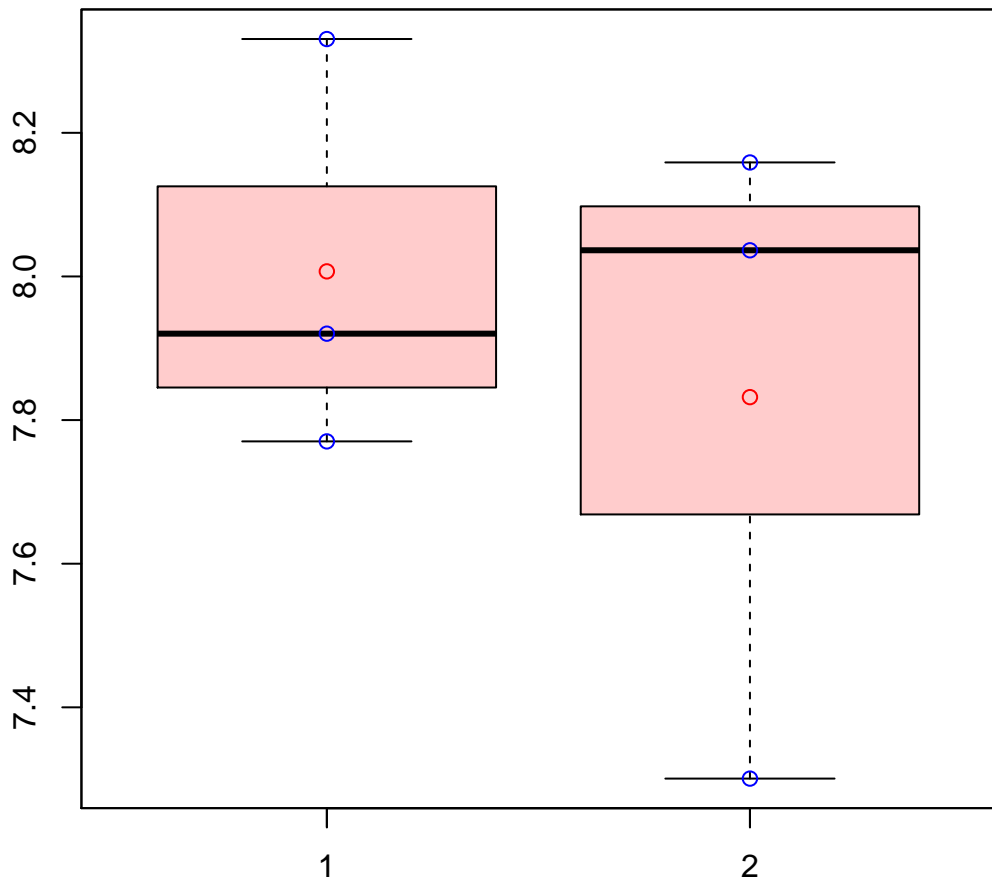

t-Test: p-value = 0.61



# F8RS92|F8RS92\_9POAL

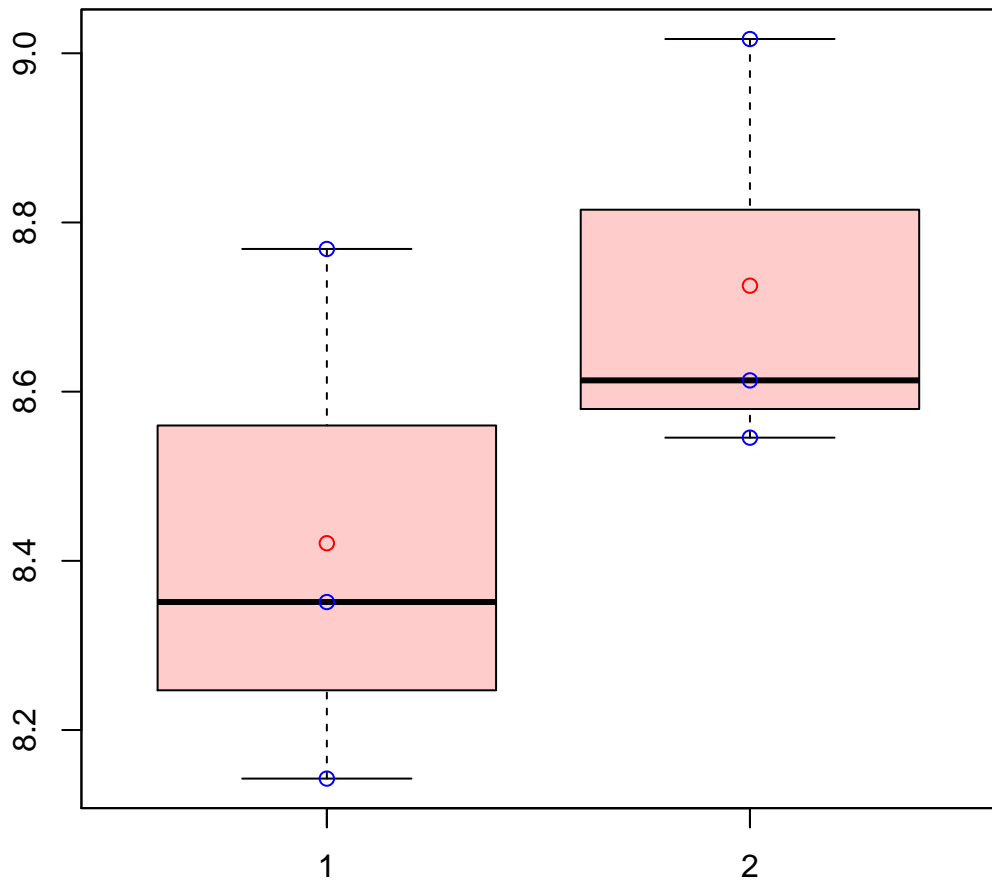

t-Test: p-value = 0.27

# F8RSA1|F8RSA1\_9POAL

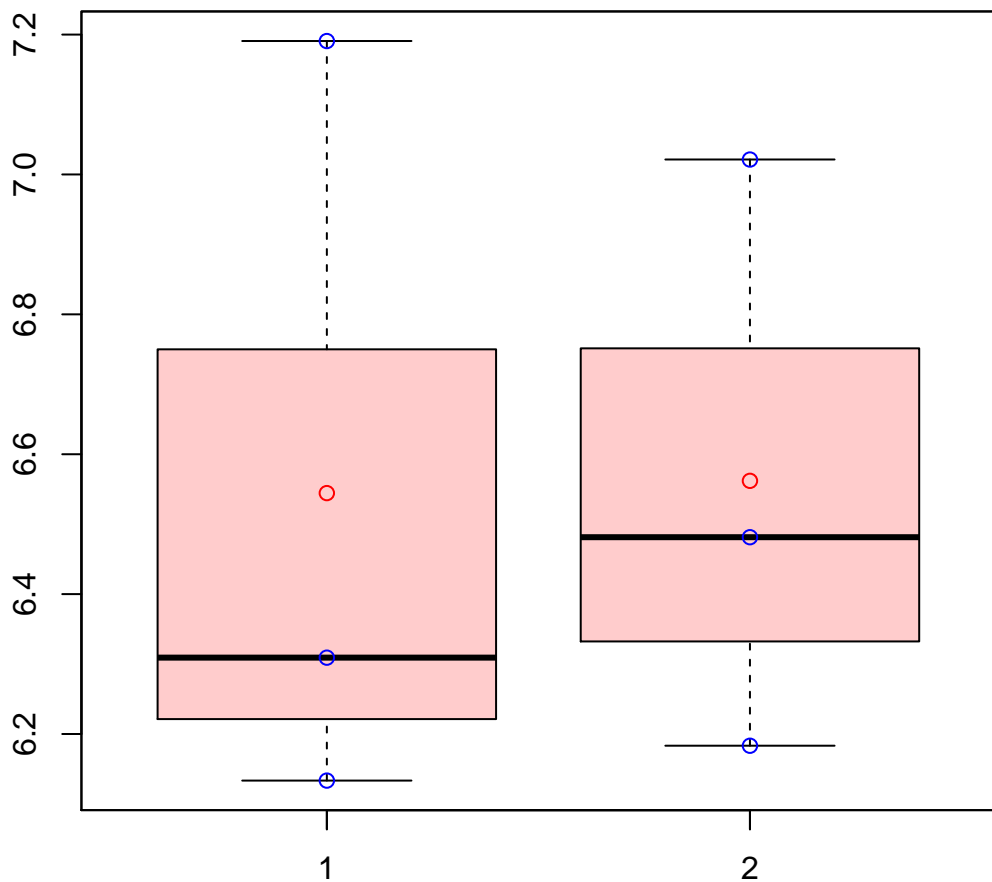

t-Test: p-value = 0.97

# F8RT42|F8RT42\_9ASPA

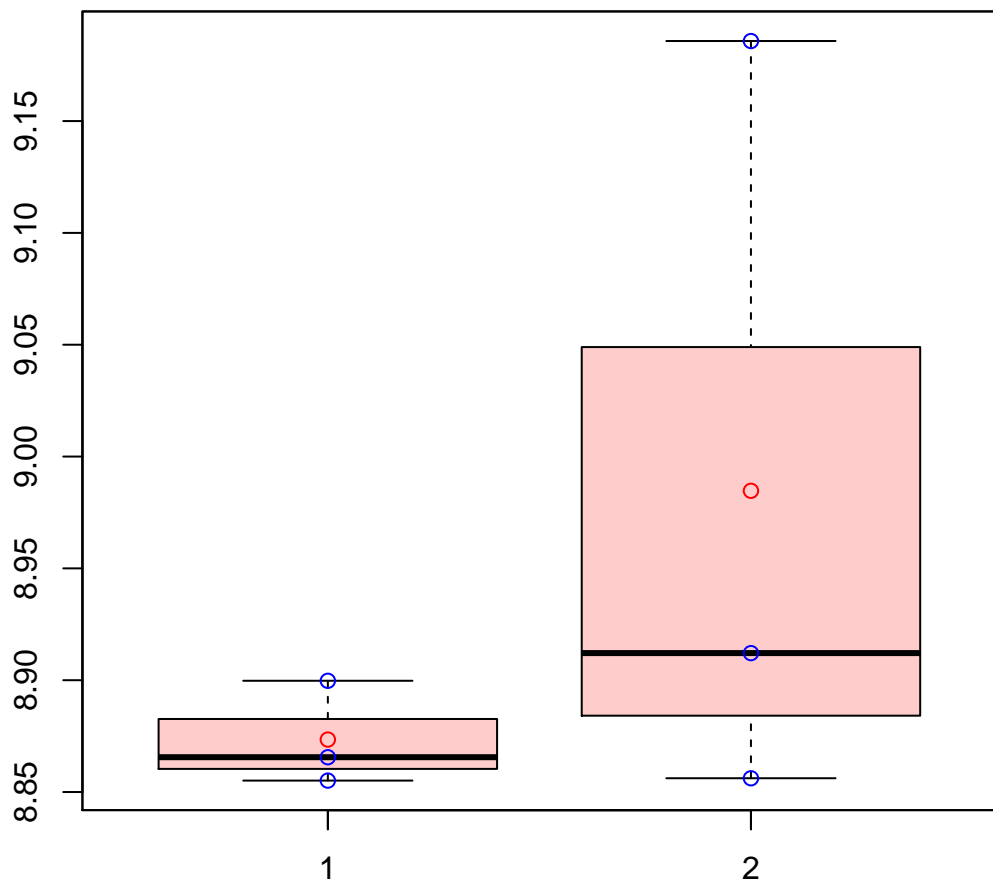

t-Test: p-value = 0.39

# F8RT59|F8RT59\_9LILI

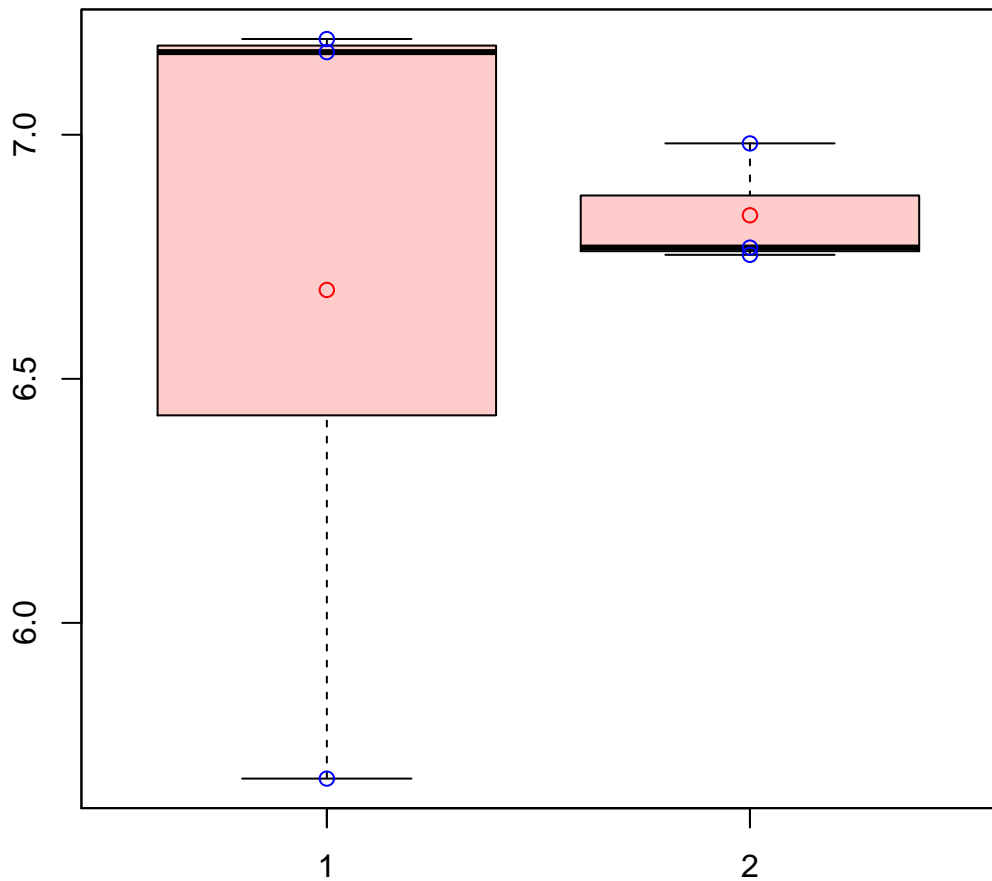

t-Test: p-value = 0.79

# F8RXJ0|F8RXJ0\_9POAL

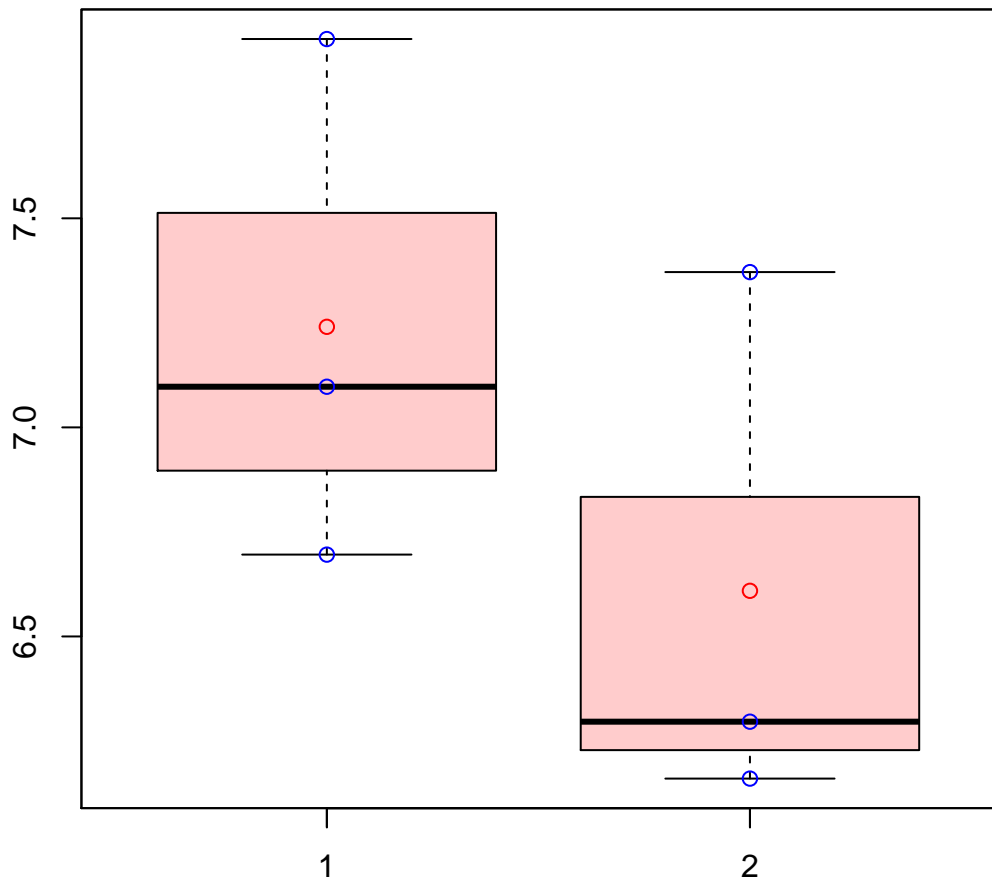

t-Test: p-value = 0.3

# F8RYE6|F8RYE6\_9POAL

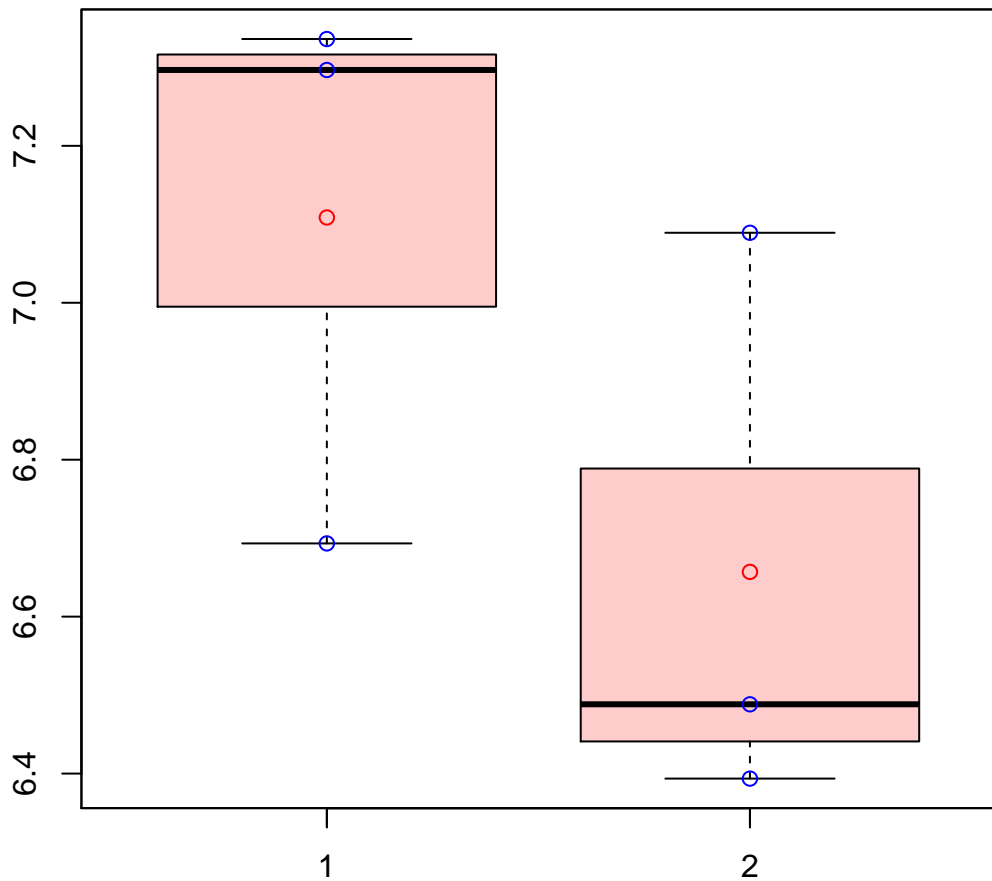

t-Test: p-value = 0.21

# F8S892|F8S892\_9POAL

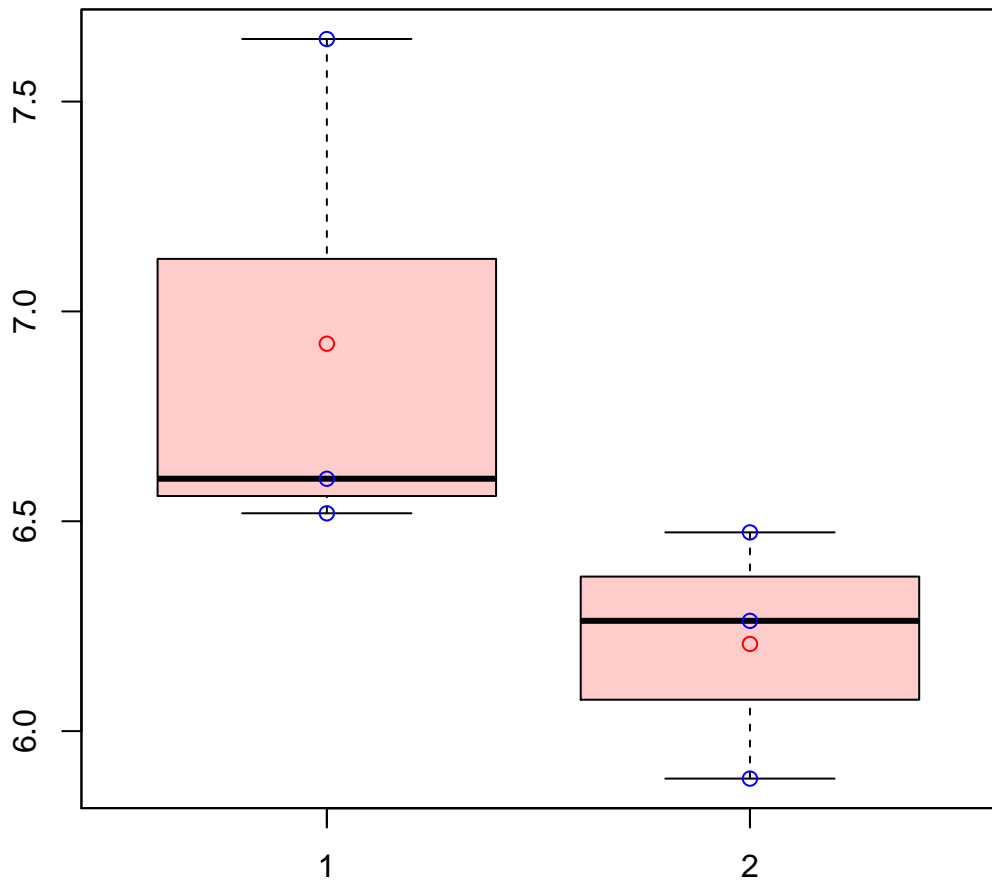

t-Test: p-value = 0.18

# F8S8C7|F8S8C7\_9POAL

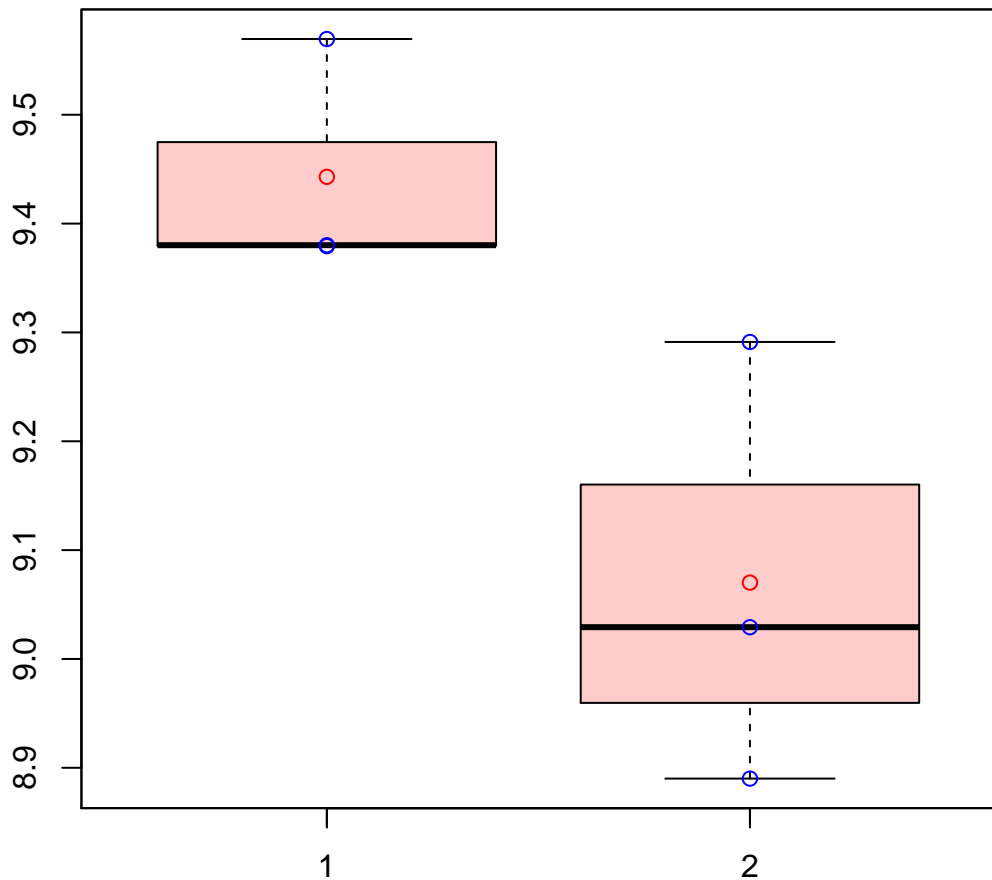

t-Test: p-value = 0.07



# F8THZ6|F8THZ6\_WHEAT

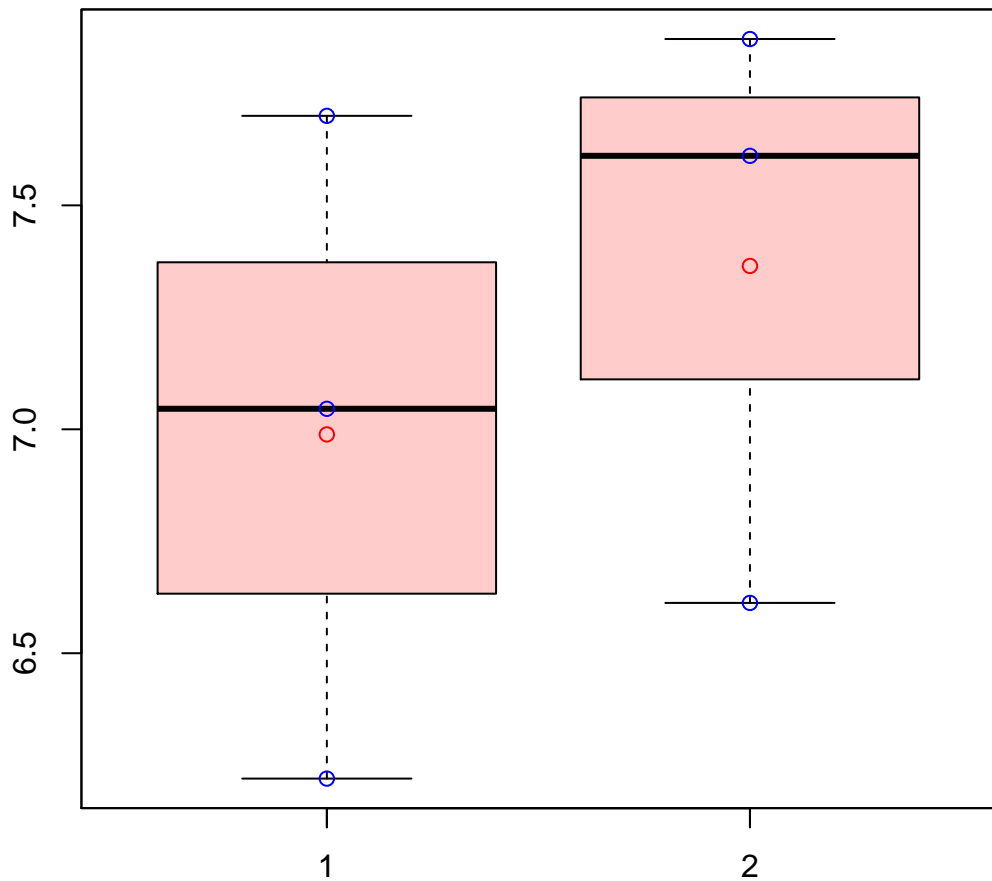

t-Test: p-value = 0.55

# F8U875|F8U875\_AMOKO

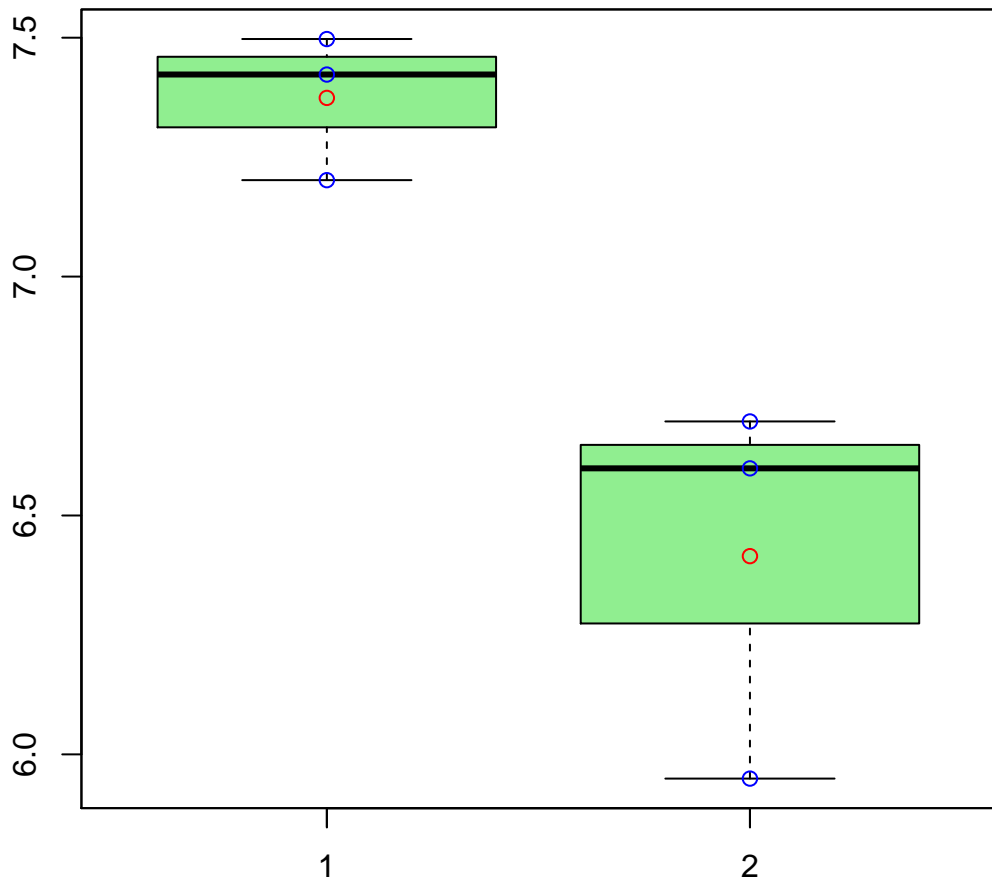

t-Test: p-value = 0.04

# F8UAA7|F8UAA7\_9ASPA

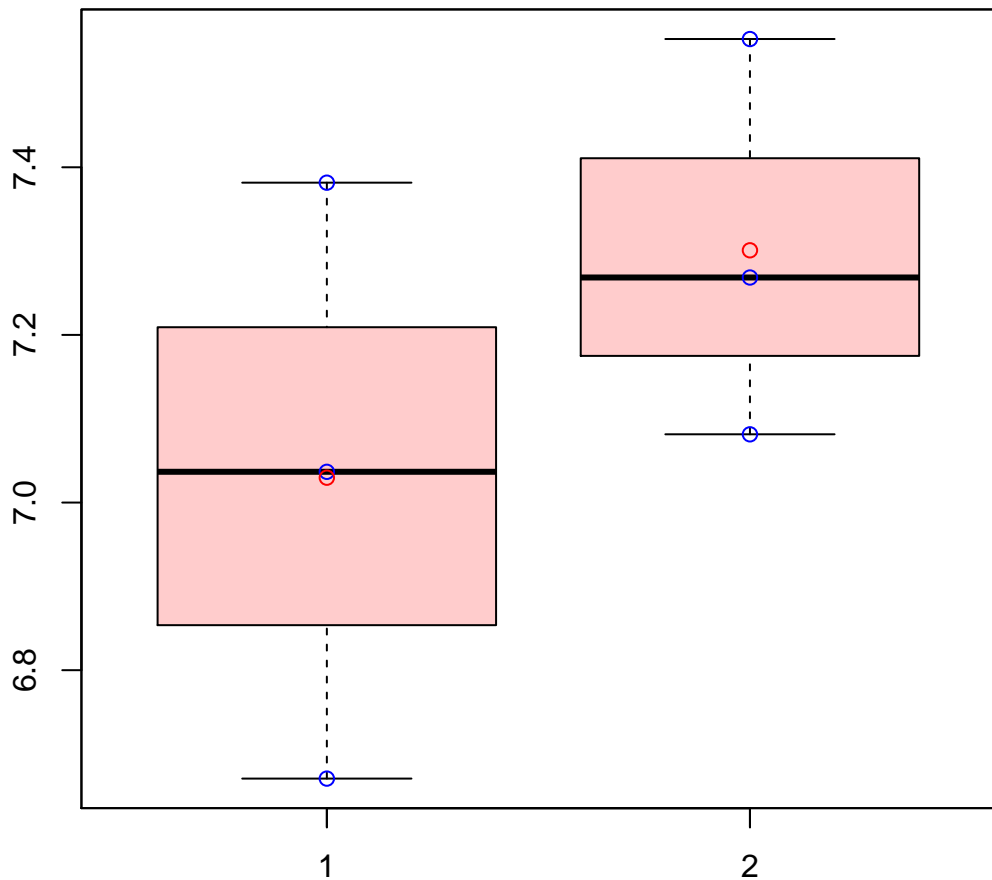

t-Test: p-value = 0.34

# F8UCF0|F8UCF0\_ALLCE

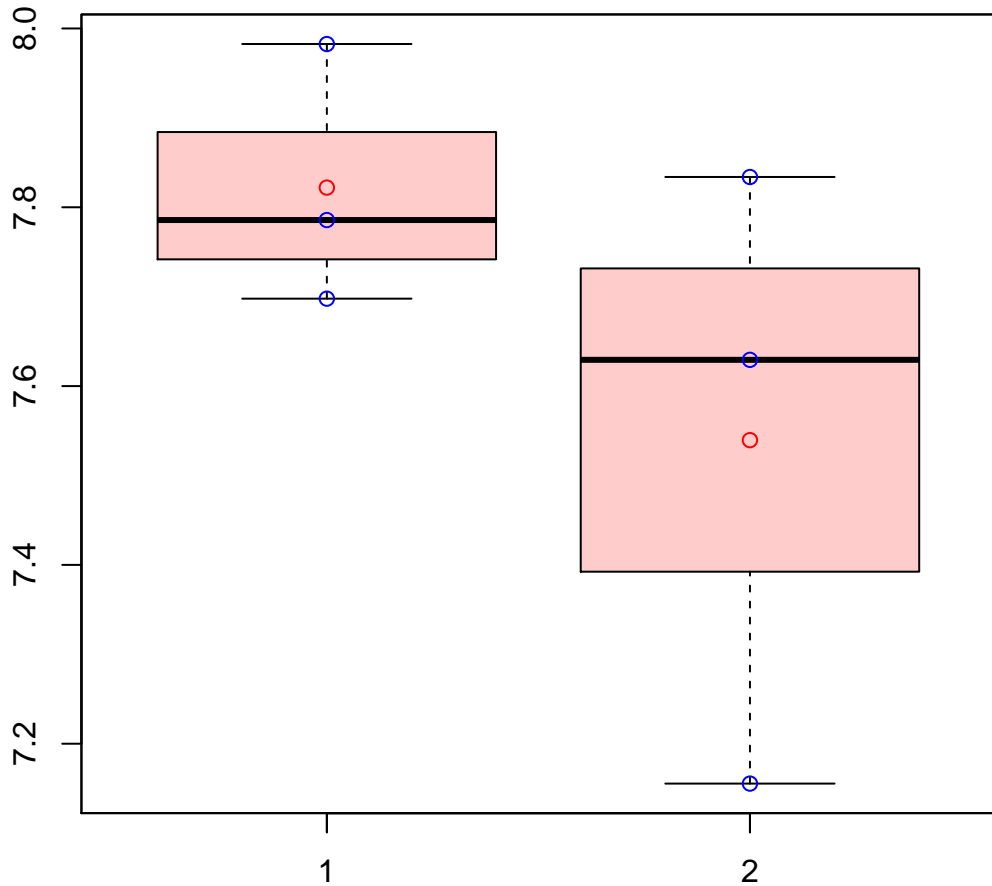

t-Test: p-value = 0.3

# F8V327|F8V327\_ELECO

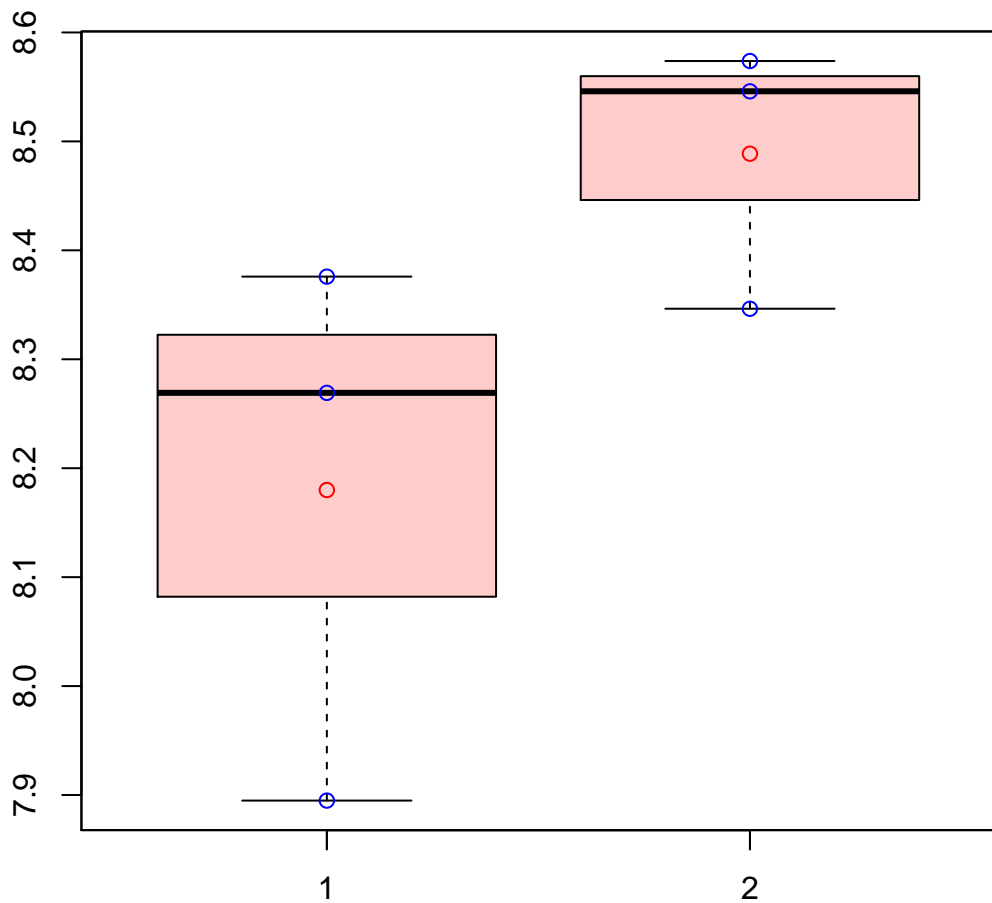

t-Test: p-value = 0.16

# G0Y3G1|G0Y3G1\_9ASPA

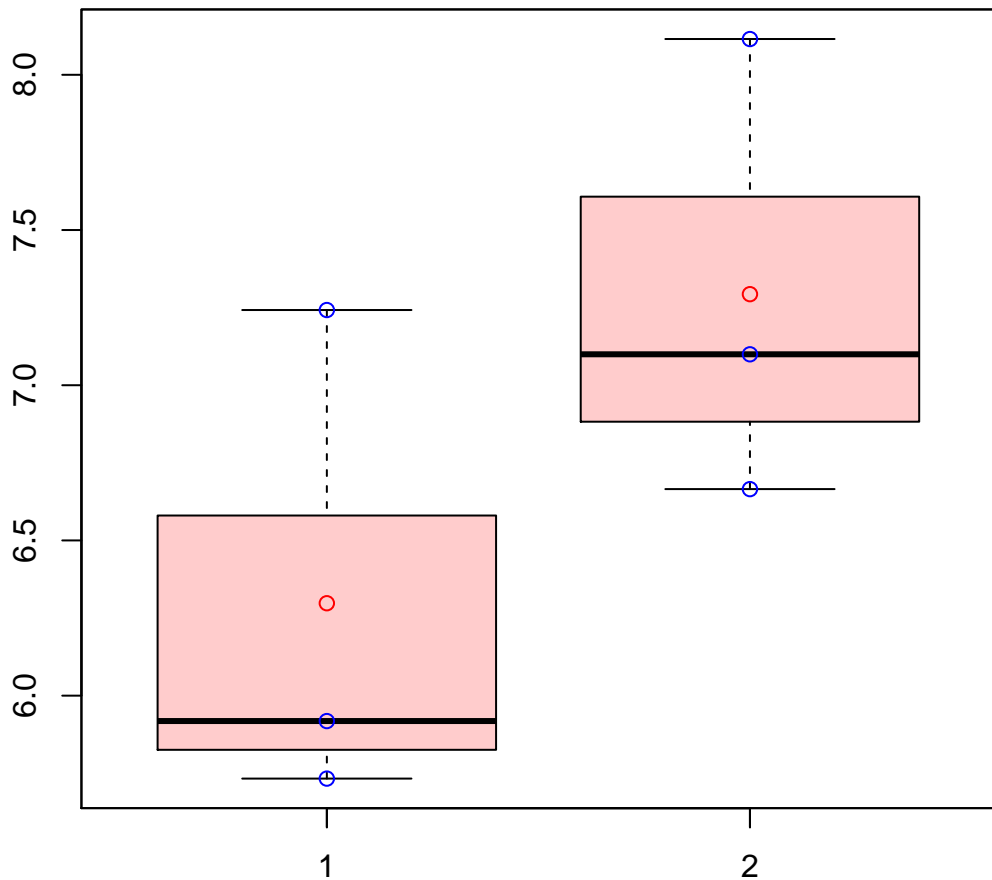

t-Test: p-value = 0.2

# G0YLW6|G0YLW6\_9ARAE

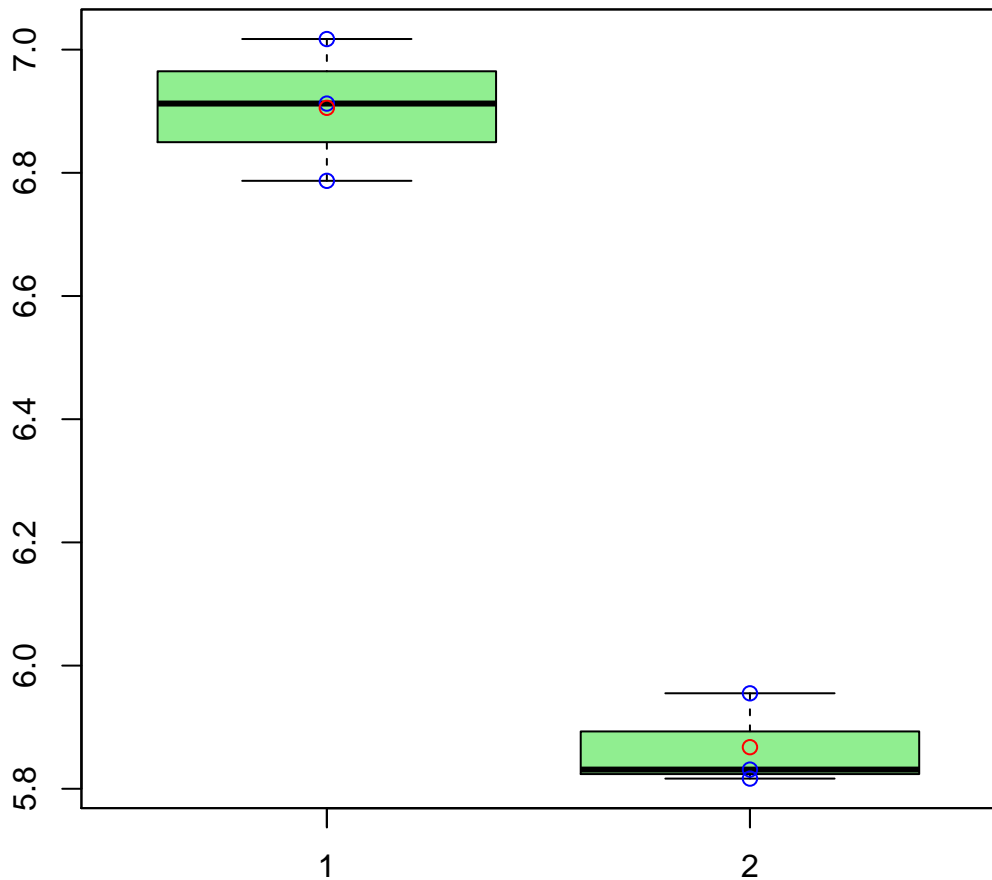

t-Test: p-value = 0

# G0YYE5|G0YYE5\_9LILI

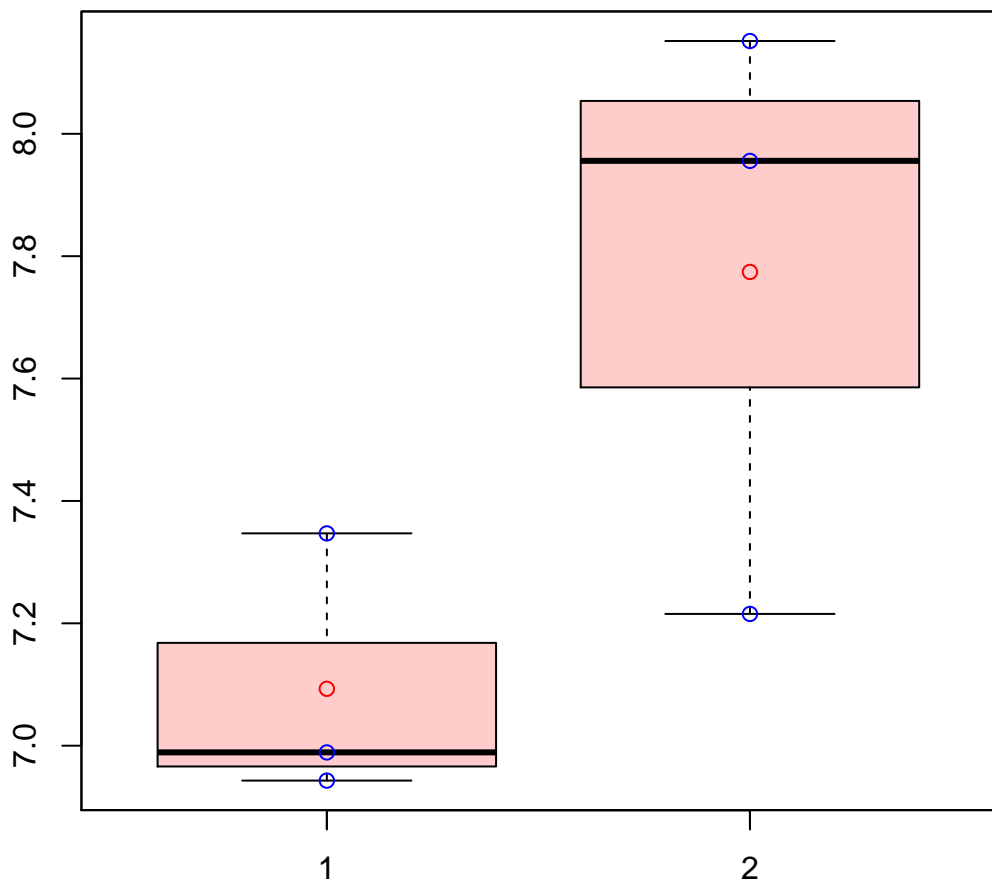

t-Test: p-value = 0.12



# G1EN32|G1EN32\_9ARAE

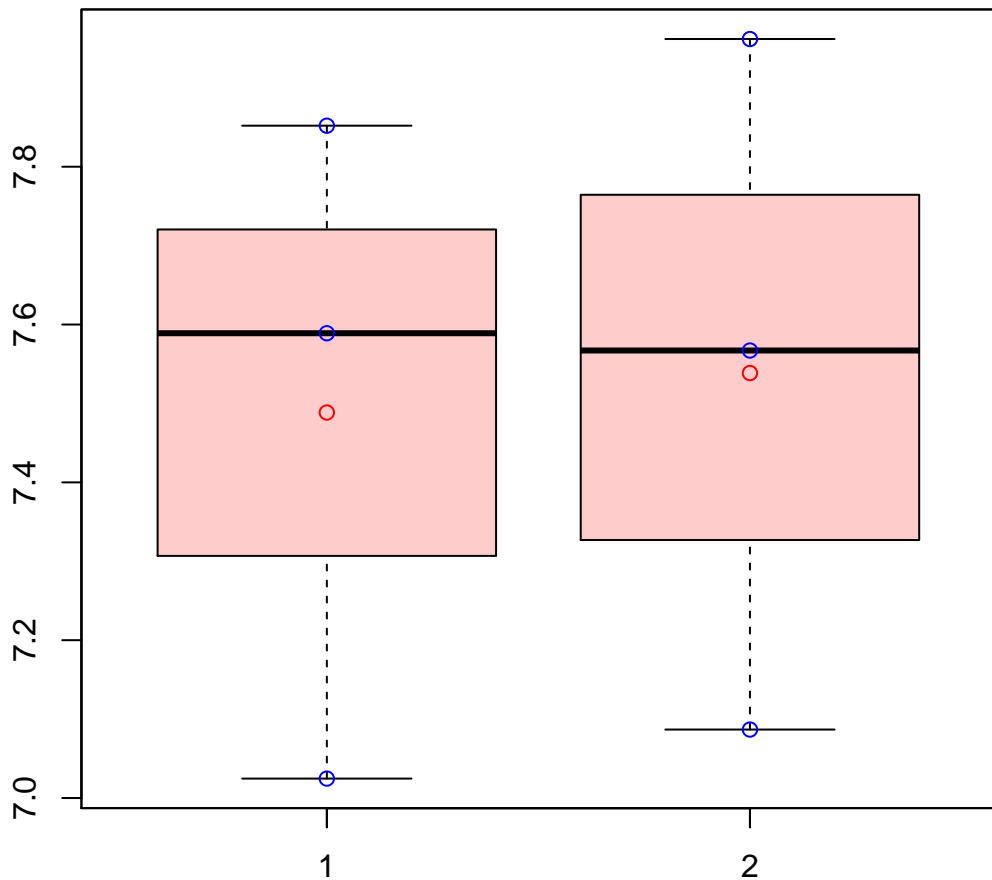

t-Test: p-value = 0.89

# G1FBB8|G1FBB8\_9ARAE

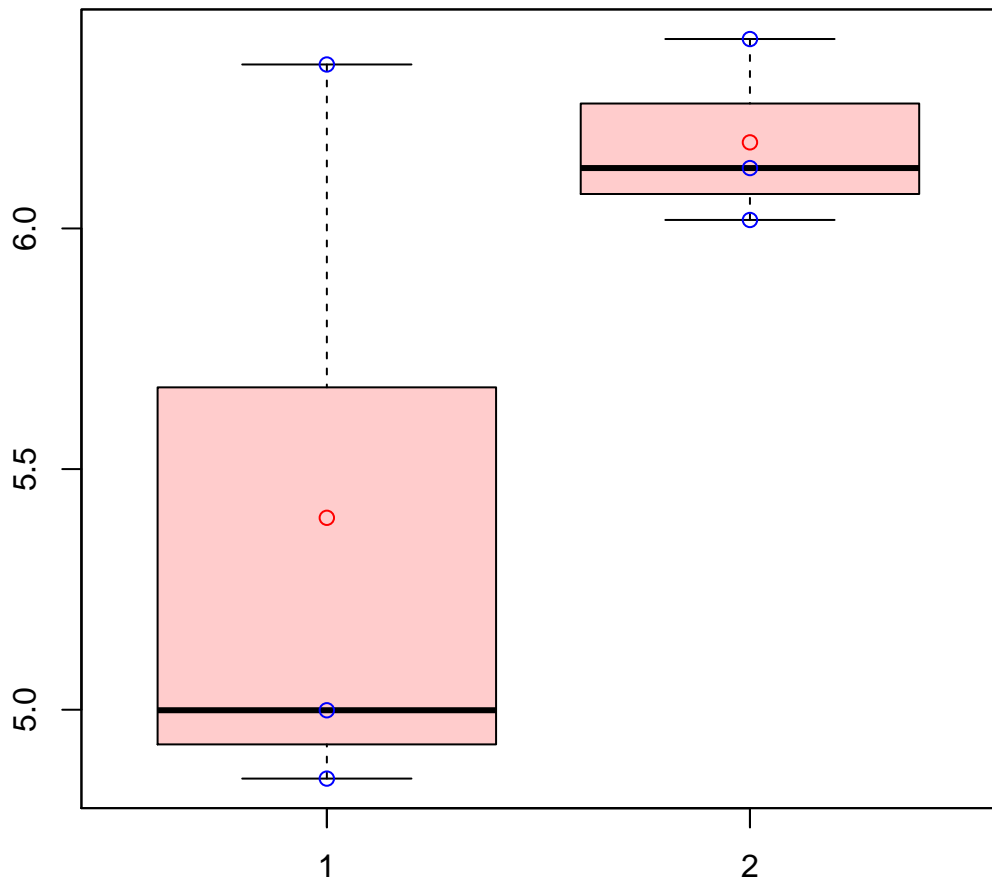

t-Test: p-value = 0.24

# G1FFN1|G1FFN1\_9POAL

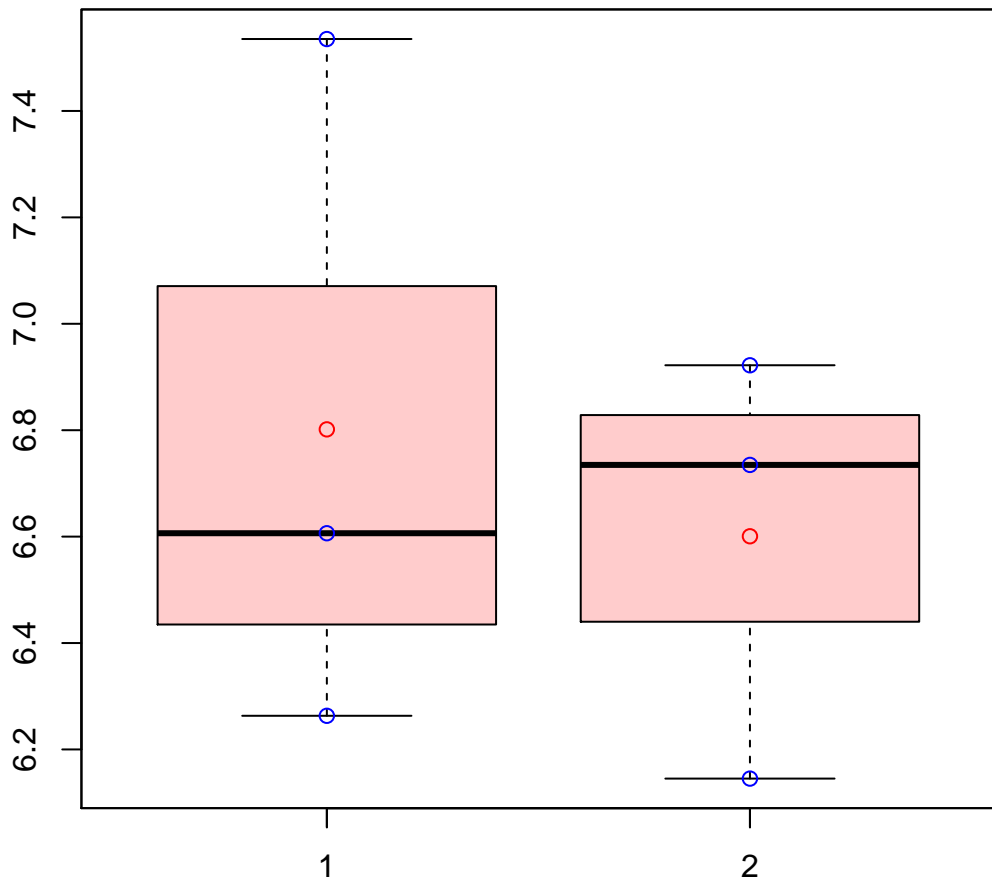

t-Test: p-value = 0.68

# G2XKA2|G2XKA2\_9ASPA

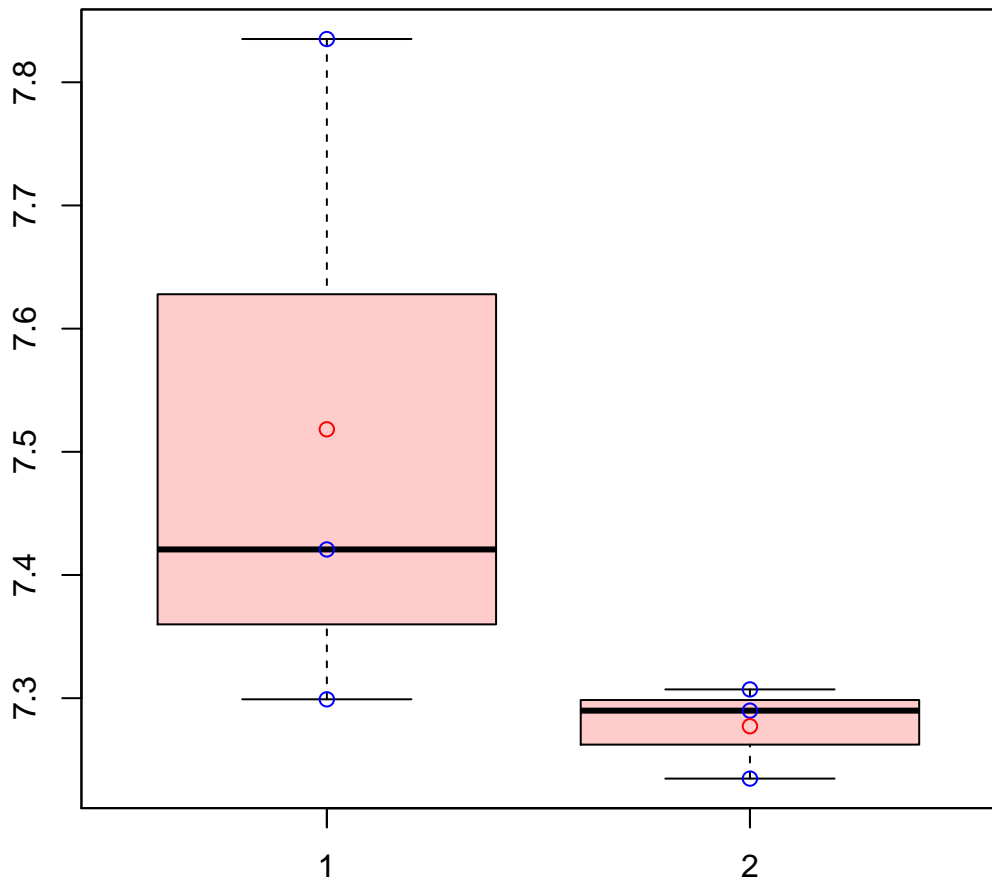

t-Test: p-value = 0.27

# G2XM87|G2XM87\_ORYBR

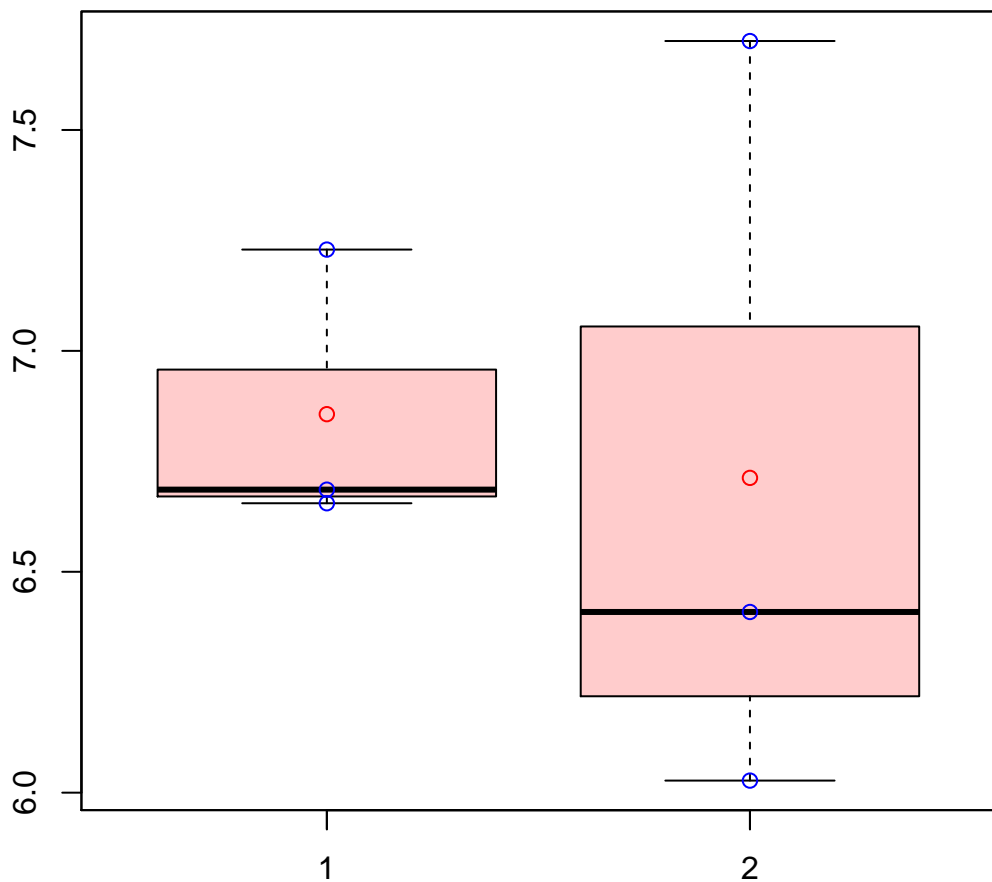

t-Test: p-value = 0.81

# G3EFC4|G3EFC4\_PANVG

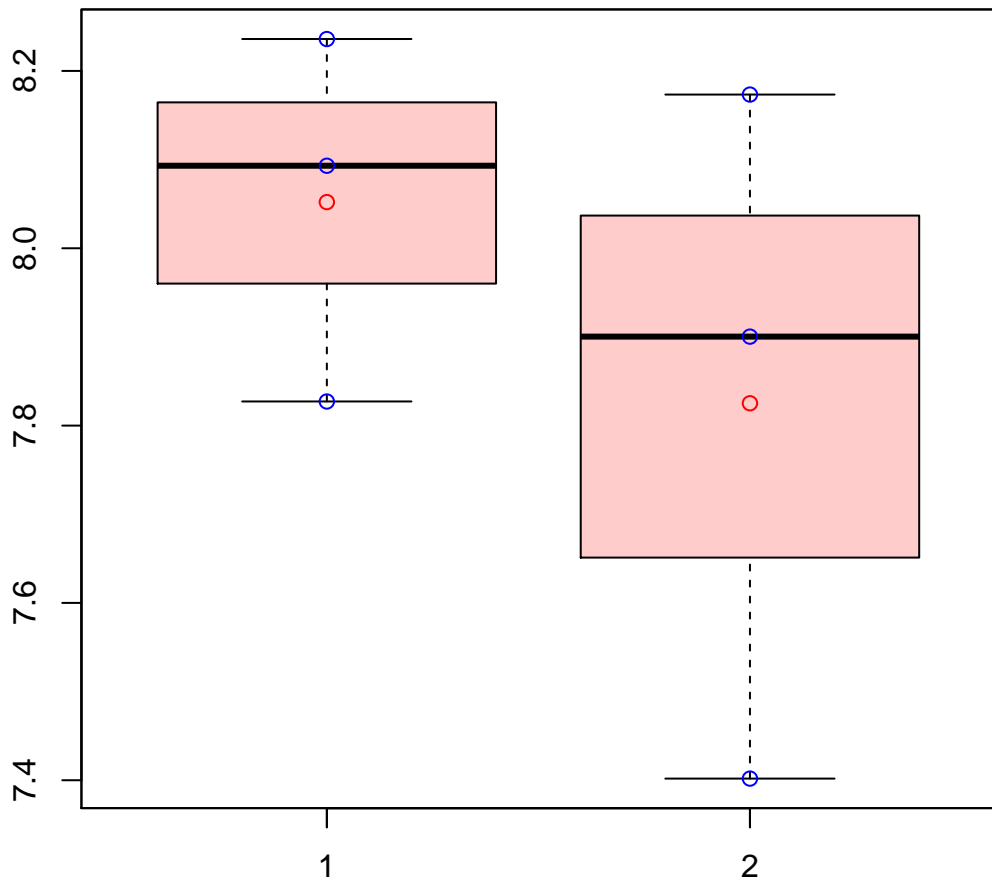

t-Test: p-value = 0.44

# G3EFI2|G3EFI2\_PANVG

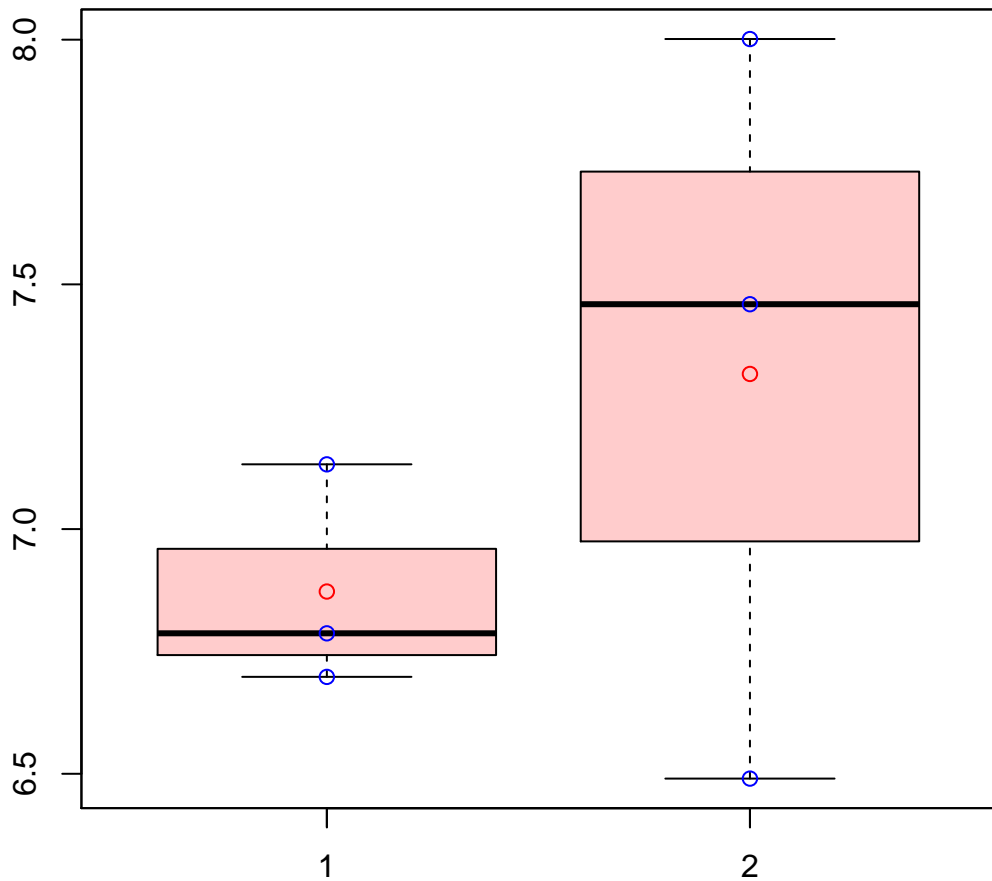

t-Test: p-value = 0.42

# G3EFY6|G3EFY6\_PANVG

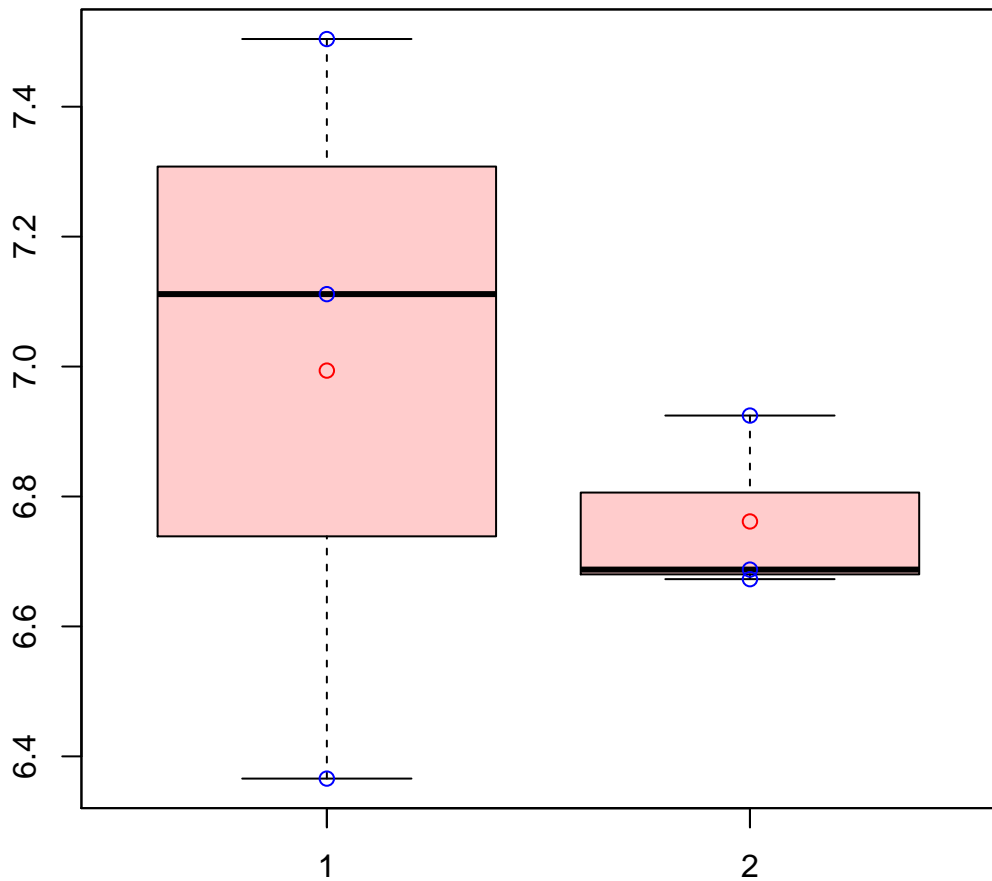

t-Test: p-value = 0.56



# G3ETN8|G3ETN8\_9LILI

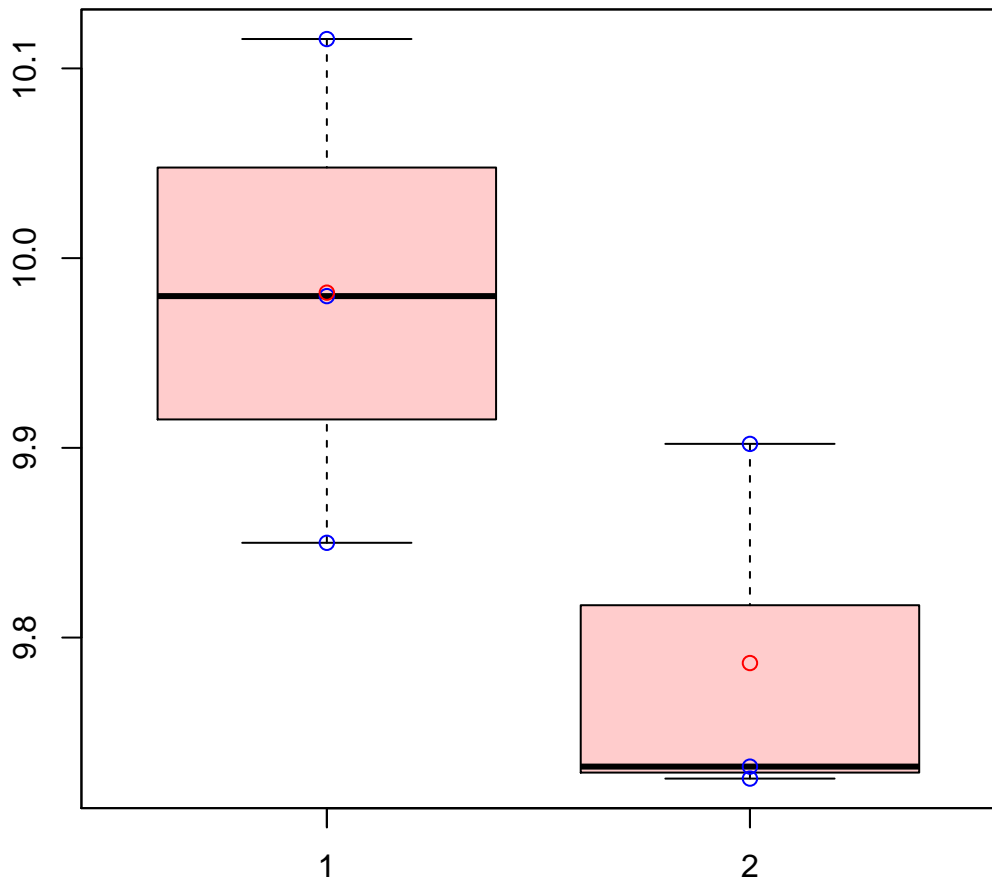

t-Test: p-value = 0.12

# G3KB83|G3KB83\_9ASPA

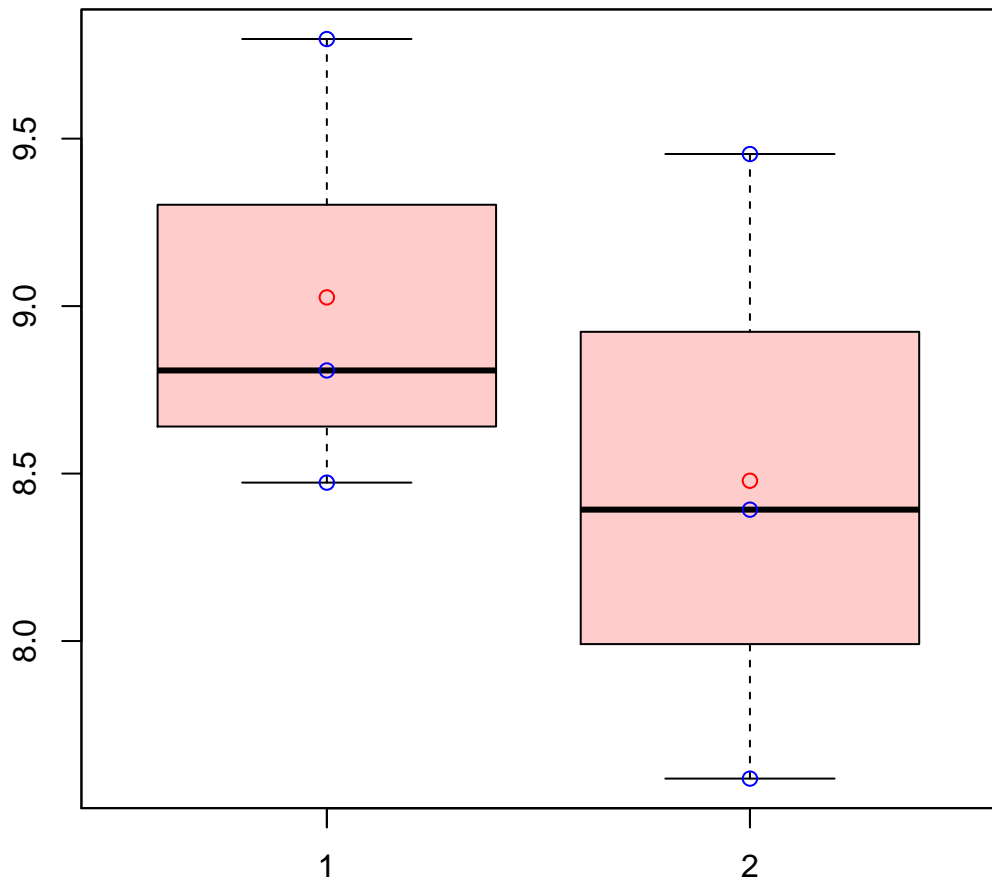

t-Test: p-value = 0.46

# G3KB87|G3KB87\_9ASPA

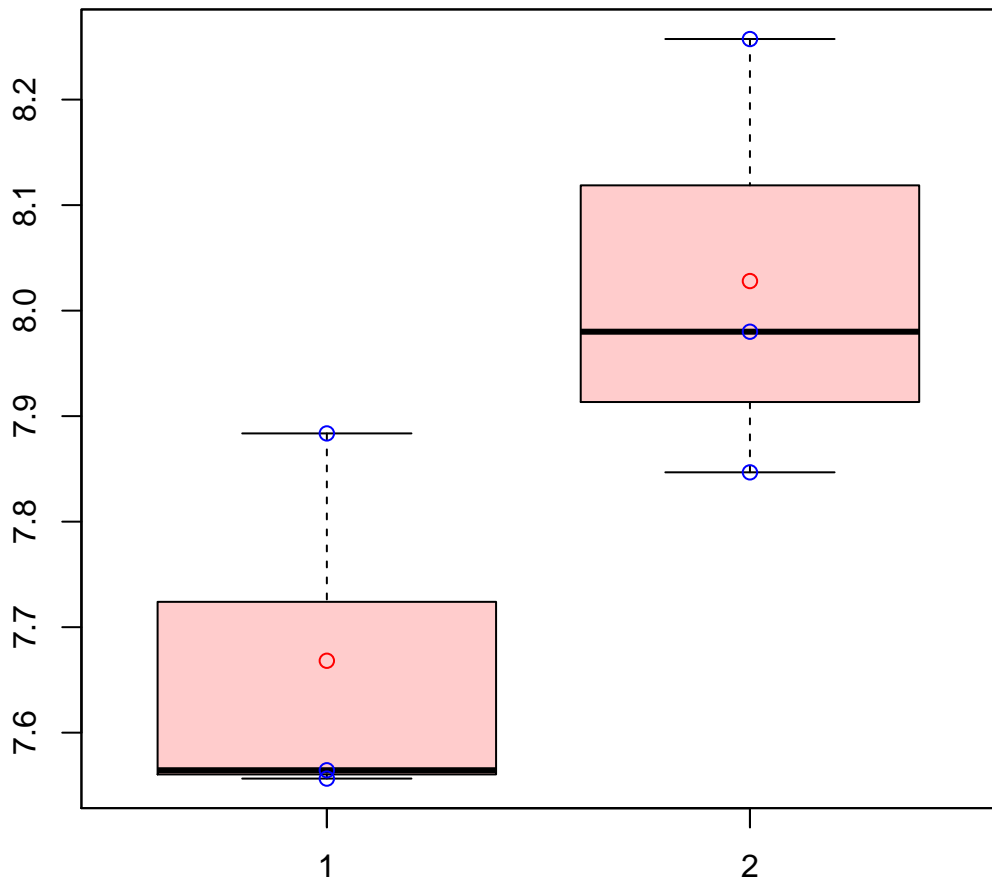

t-Test: p-value = 0.09

# G3KF67|G3KF67\_NARTA

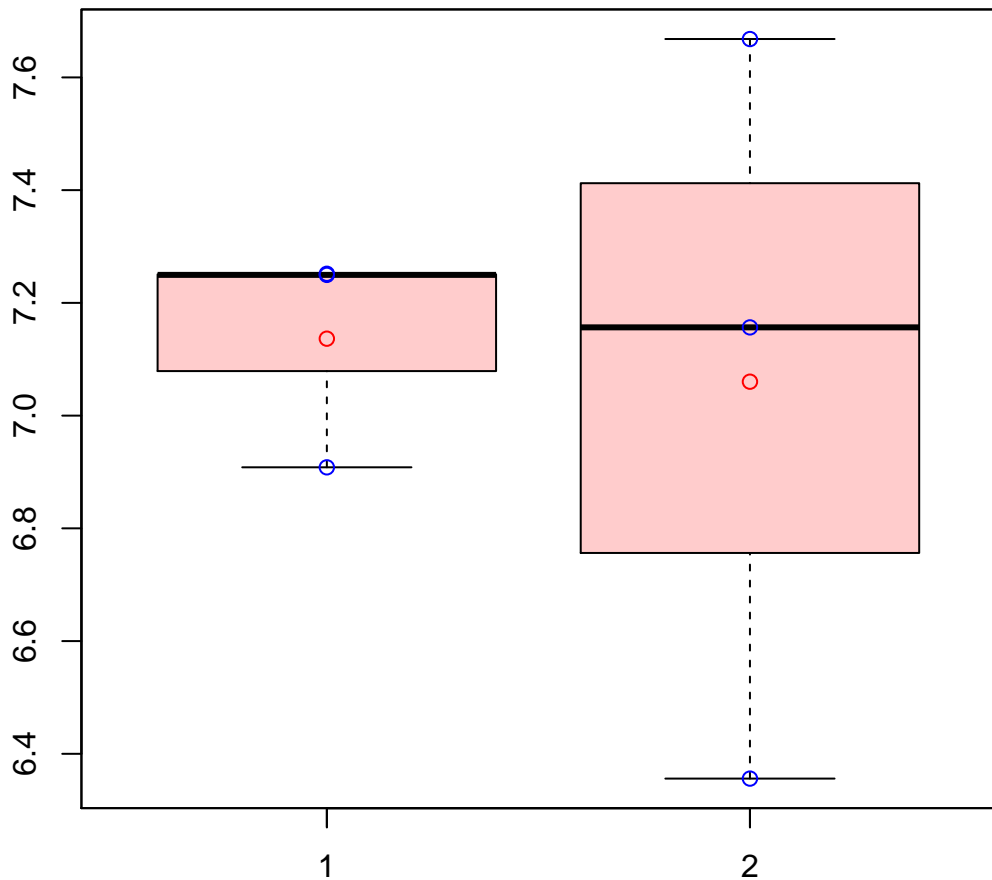

t-Test: p-value = 0.86

# G3LT25|G3LT25\_WHEAT

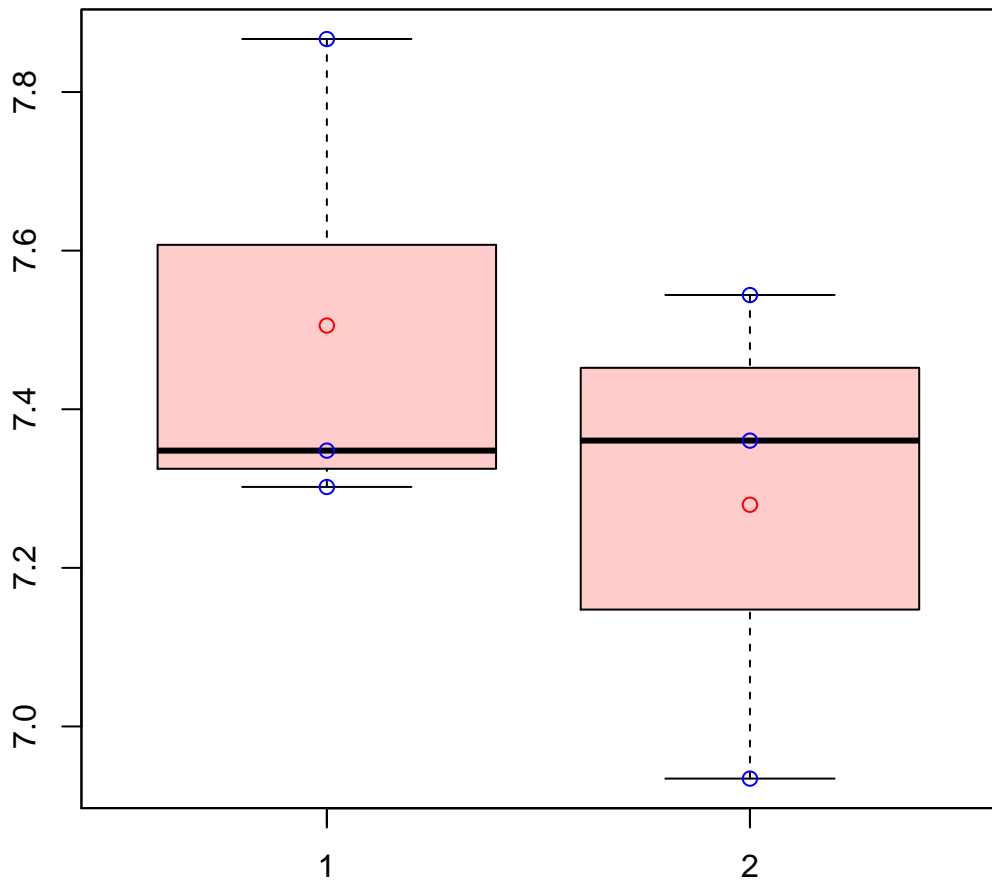

t-Test: p-value = 0.43

# G3LZX6|G3LZX6\_9POAL

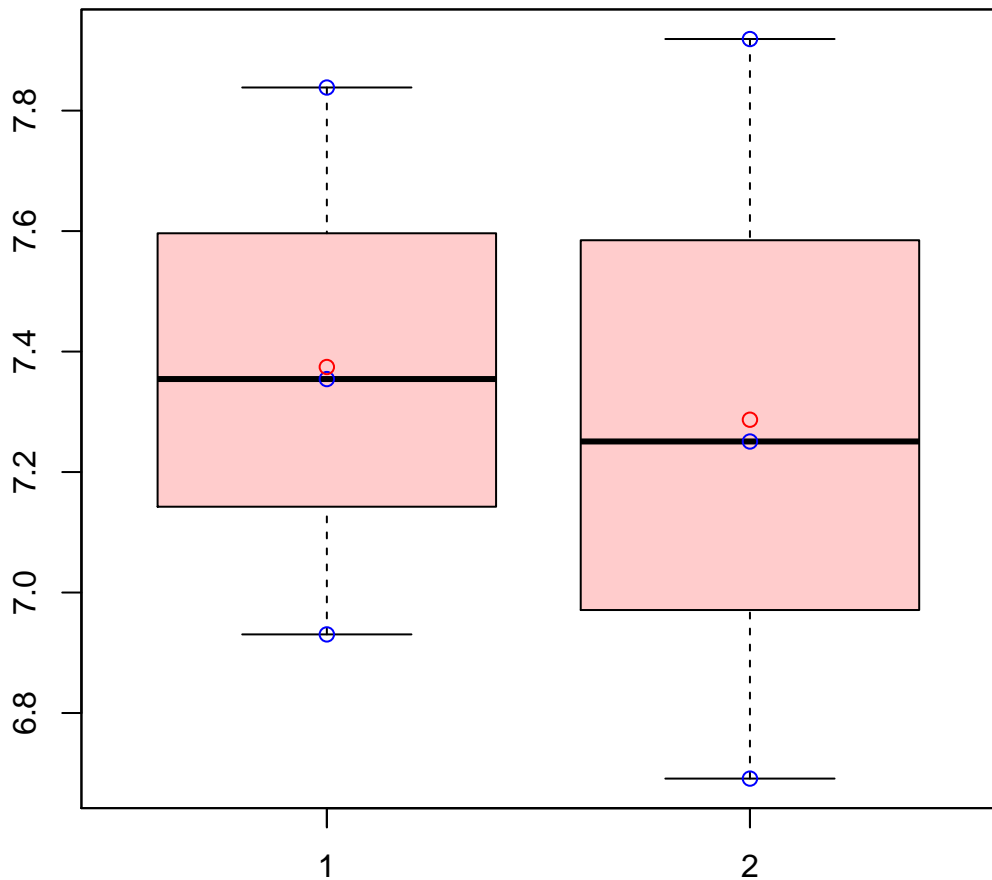

t-Test: p-value = 0.85

# G3M3G8|G3M3G8\_9POAL

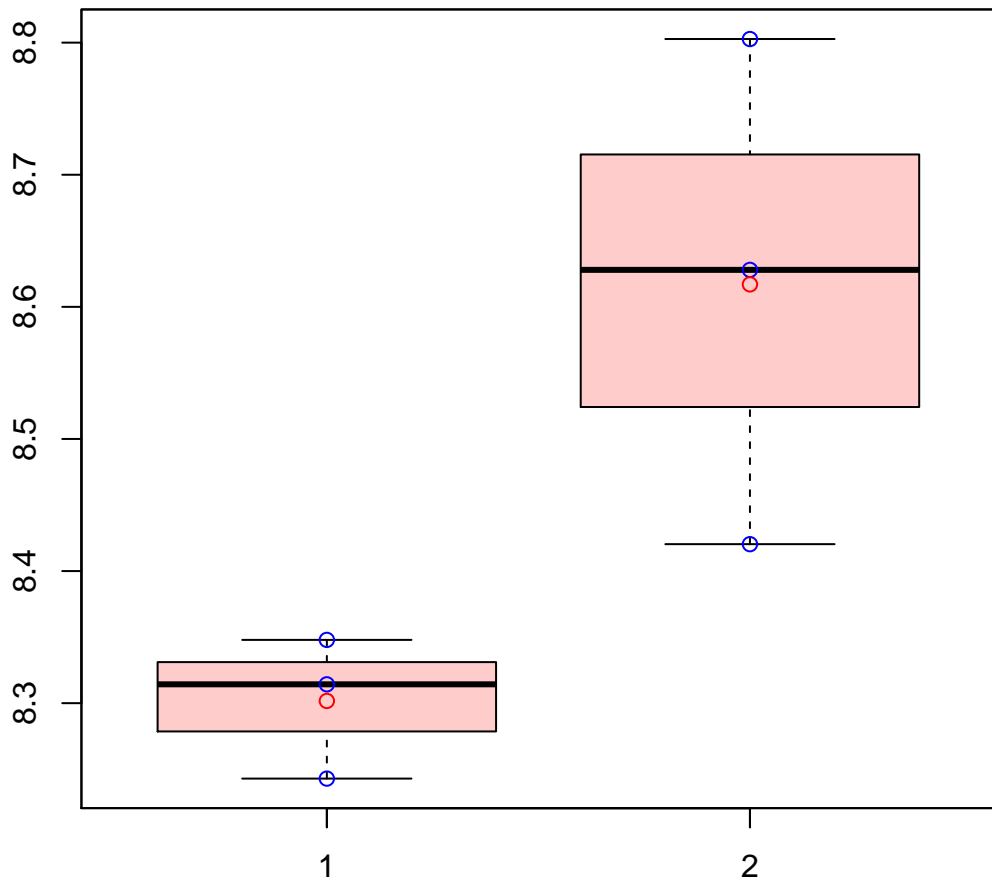

t-Test: p-value = 0.09

# G4WMV6|G4WMV6\_WOLAR

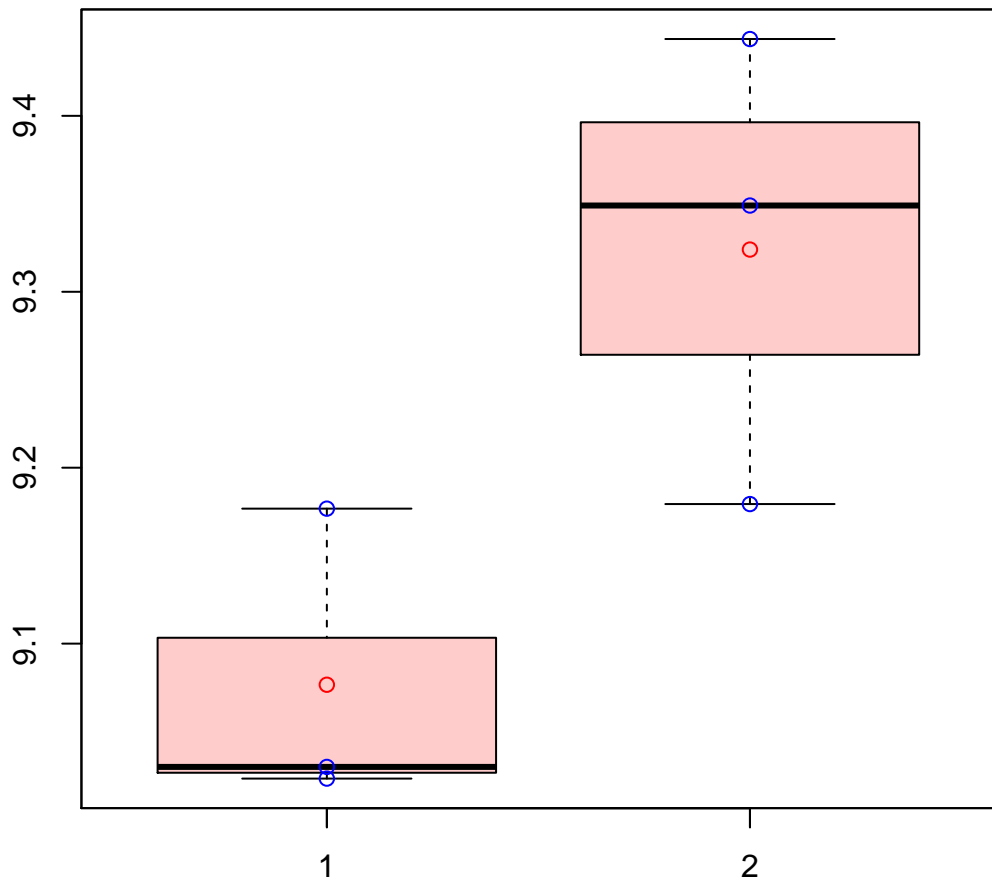

t-Test: p-value = 0.06



# G8CN62|G8CN62\_AEGLO

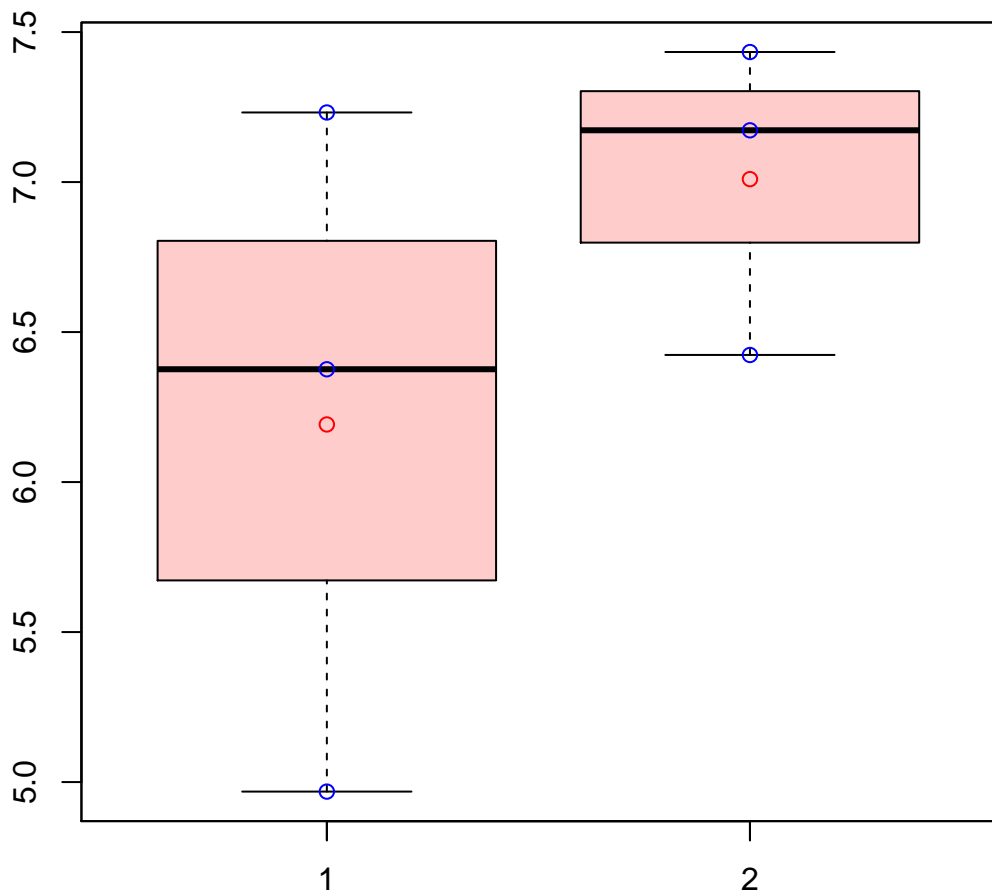

t-Test: p-value = 0.35

# G8DML2|G8DML2\_ORYSJ

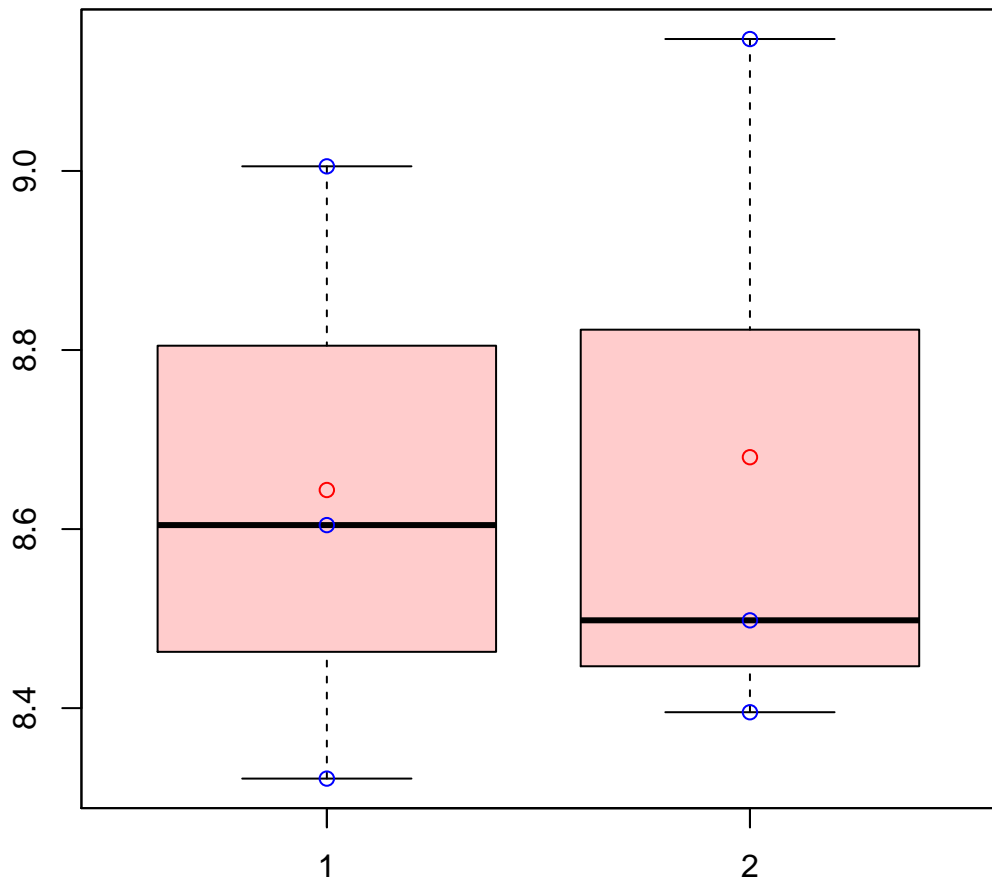

t-Test: p-value = 0.91

# G8FGJ2|G8FGJ2\_ELAGV

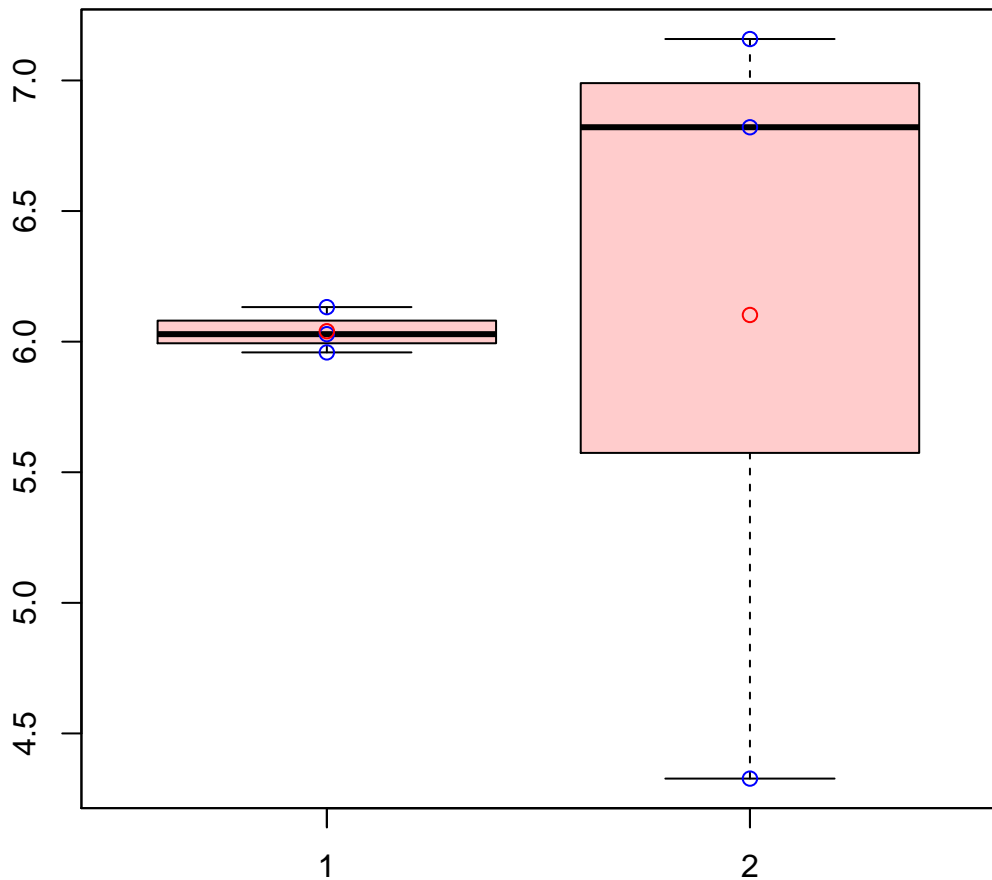

# G8JBA5|G8JBA5\_ORYBR

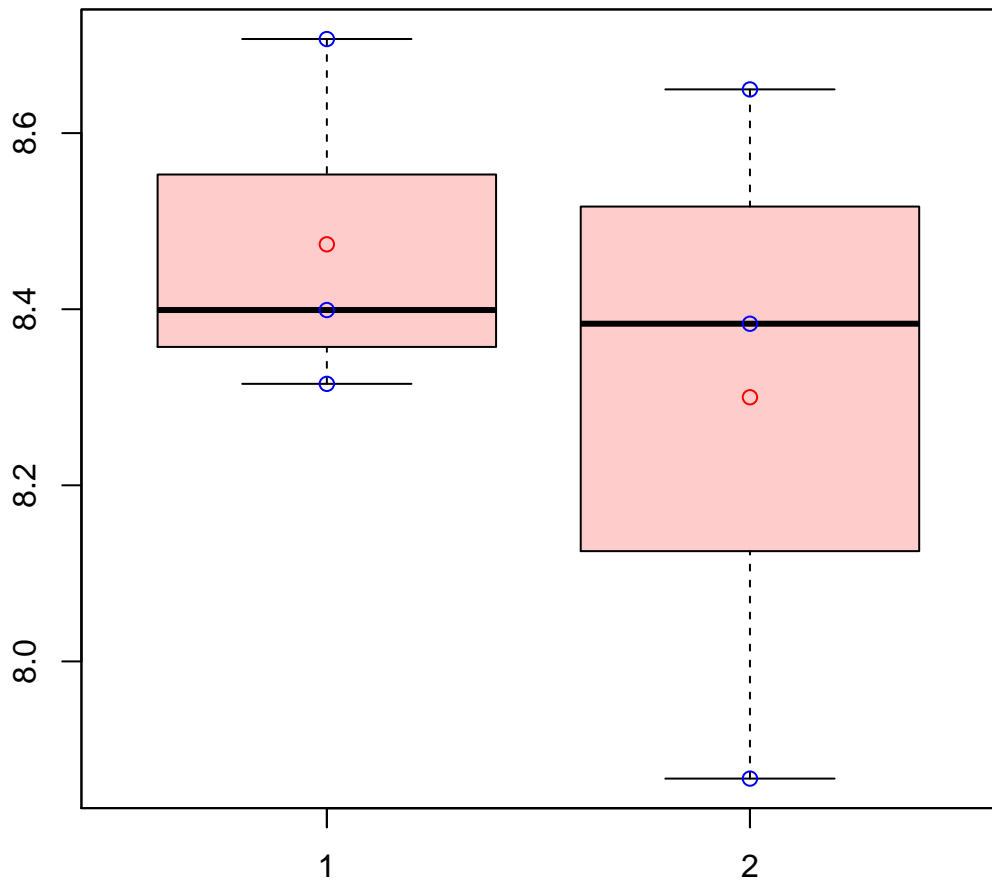

t-Test: p-value = 0.55

# G8XUN1|G8XUN1\_COILA

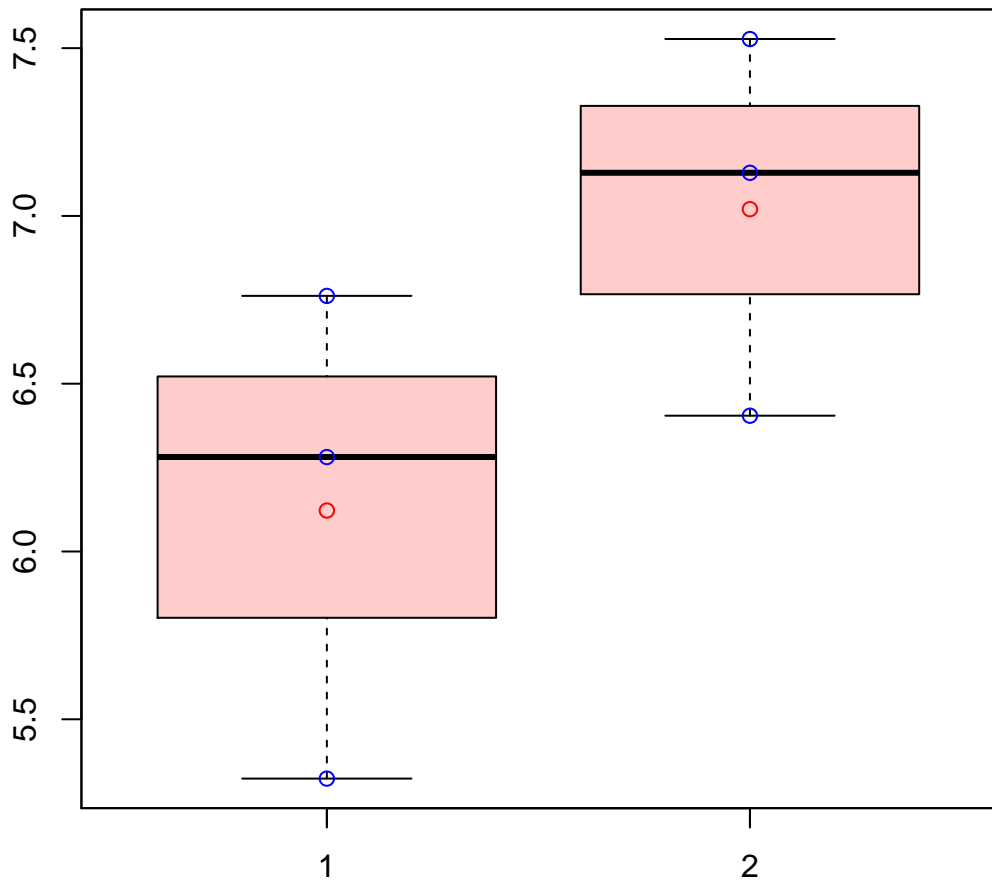

t-Test: p-value = 0.17

# G9BAF6|G9BAF6\_9POAL

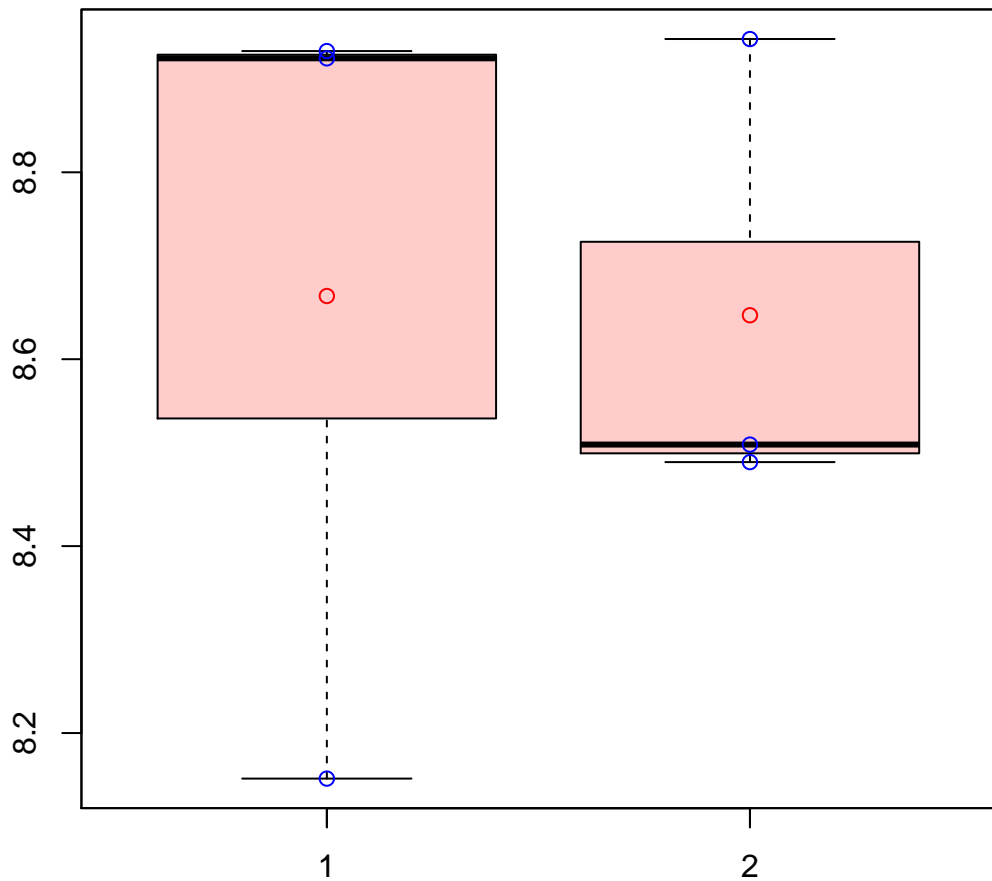

t-Test: p-value = 0.95

# G9BAG2|G9BAG2\_ELECO

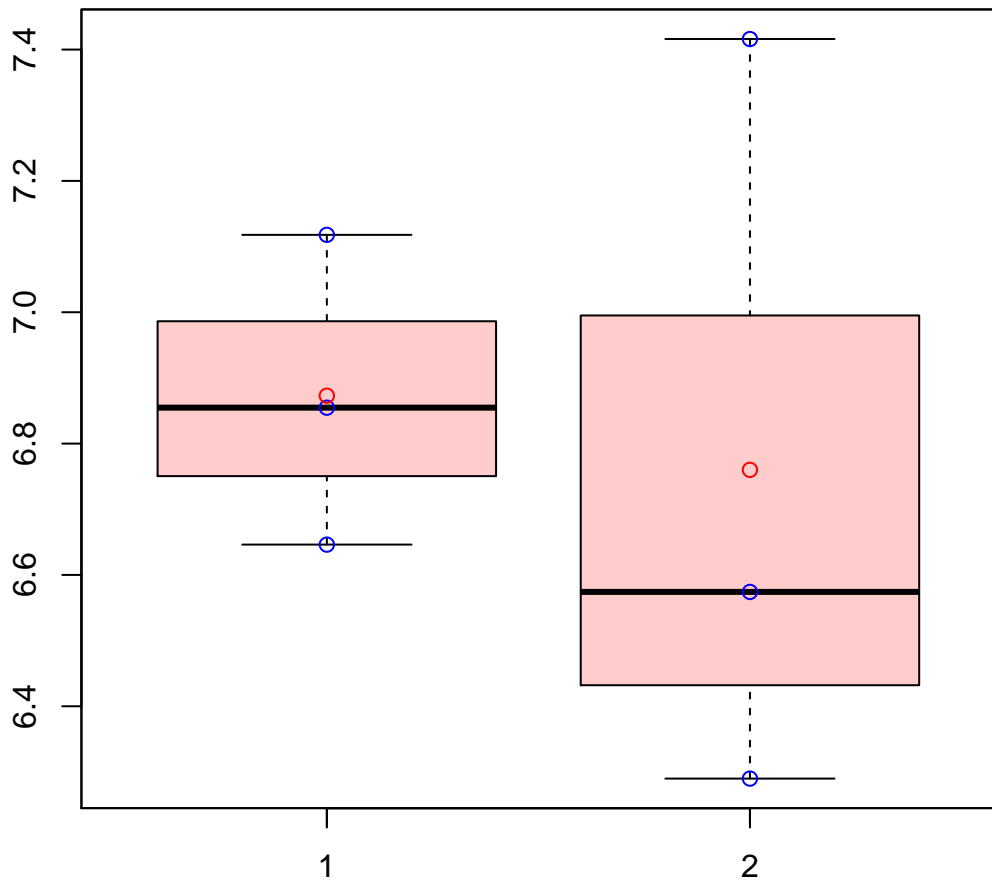

t-Test: p-value = 0.78

# G9BAJ2|G9BAJ2\_9POAL

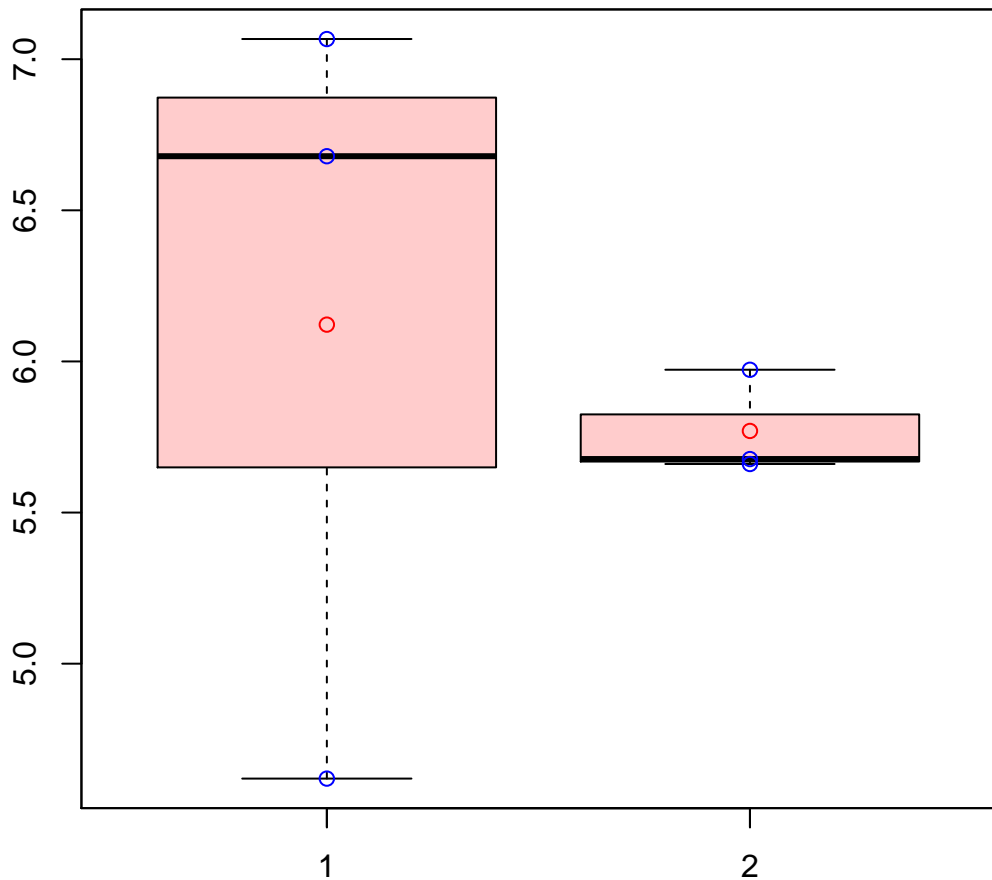

t-Test: p-value = 0.69



# G9C2Y5|G9C2Y5\_ORYPU

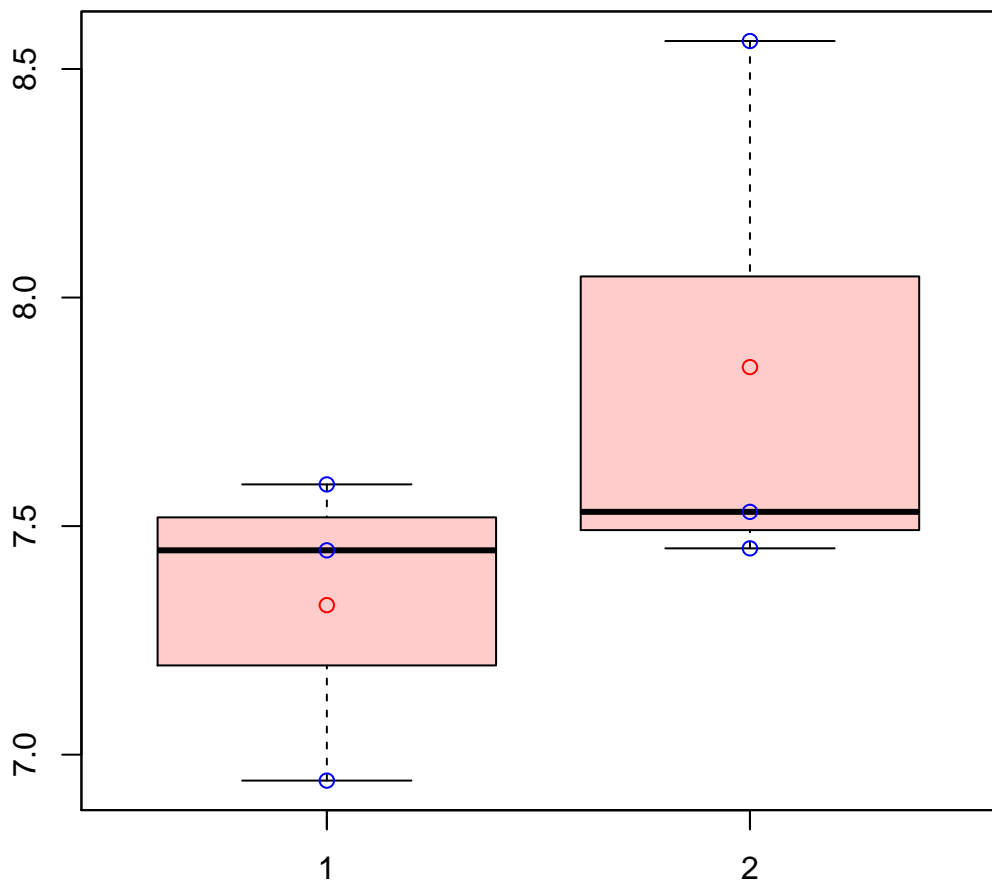

t-Test: p-value = 0.29

# G9C355|G9C355\_ORYMI

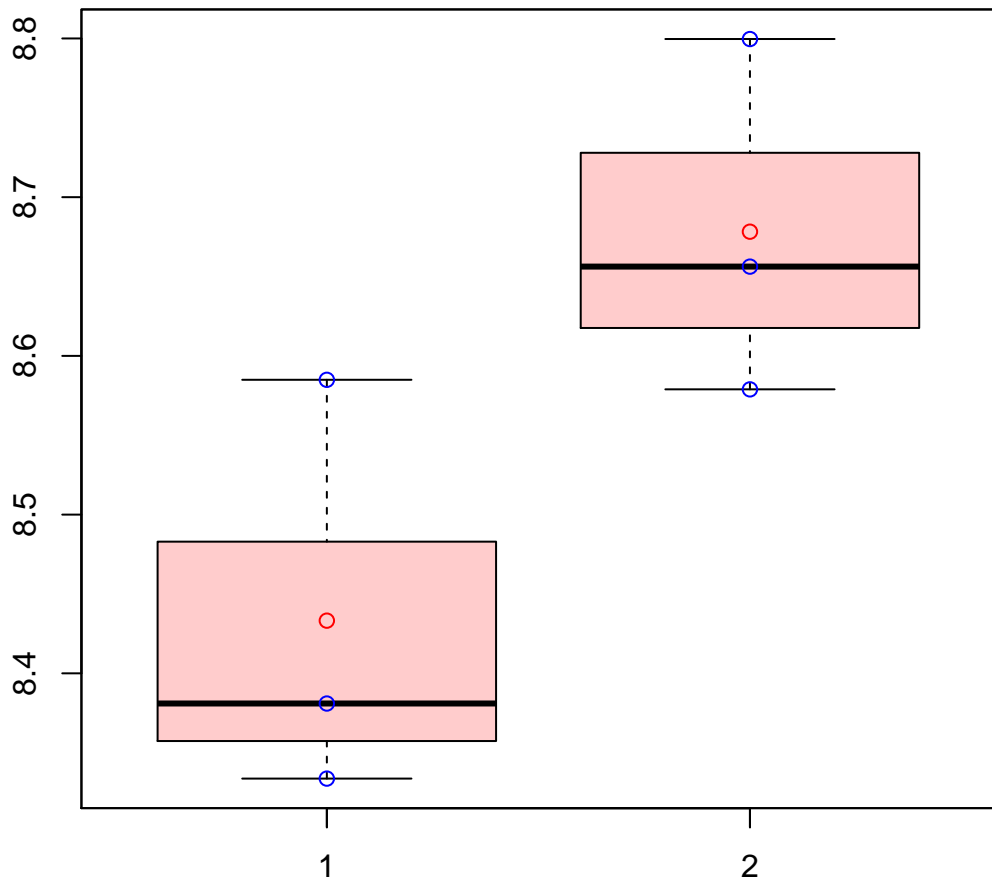

t-Test: p-value = 0.07

# G9DR98|G9DR98\_WHEAT

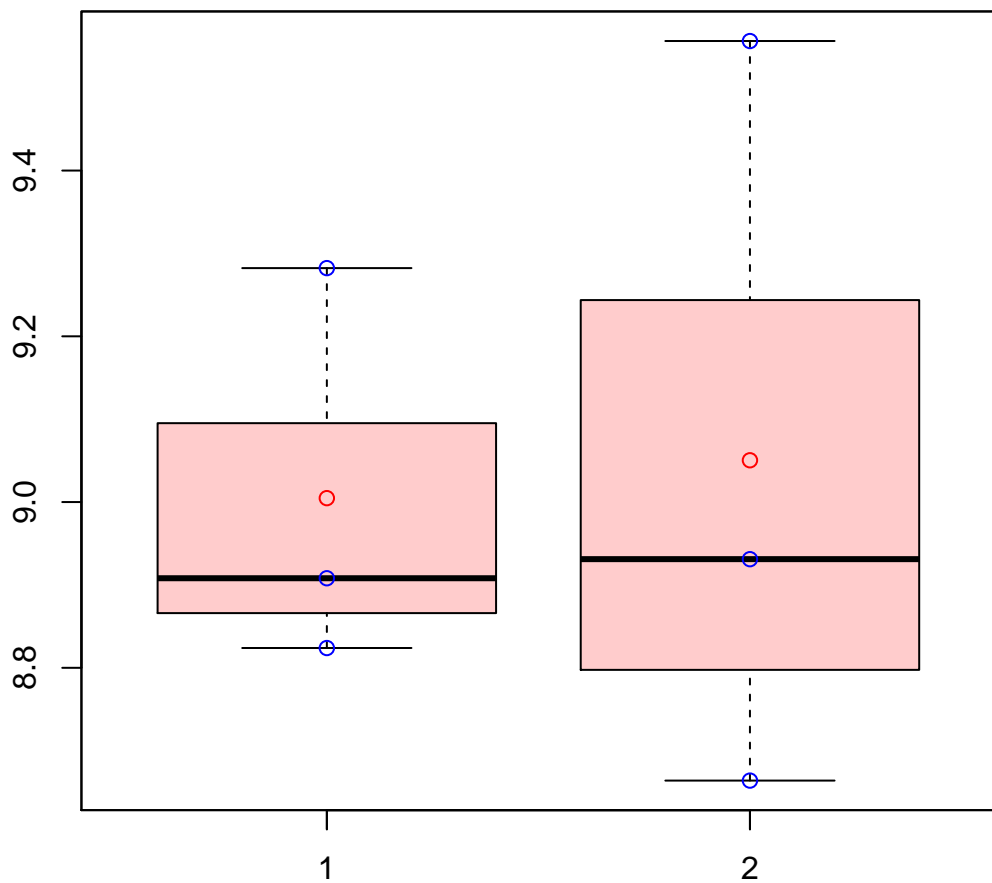

t-Test: p-value = 0.89

# G9FLW8|G9FLW8\_SPIPO

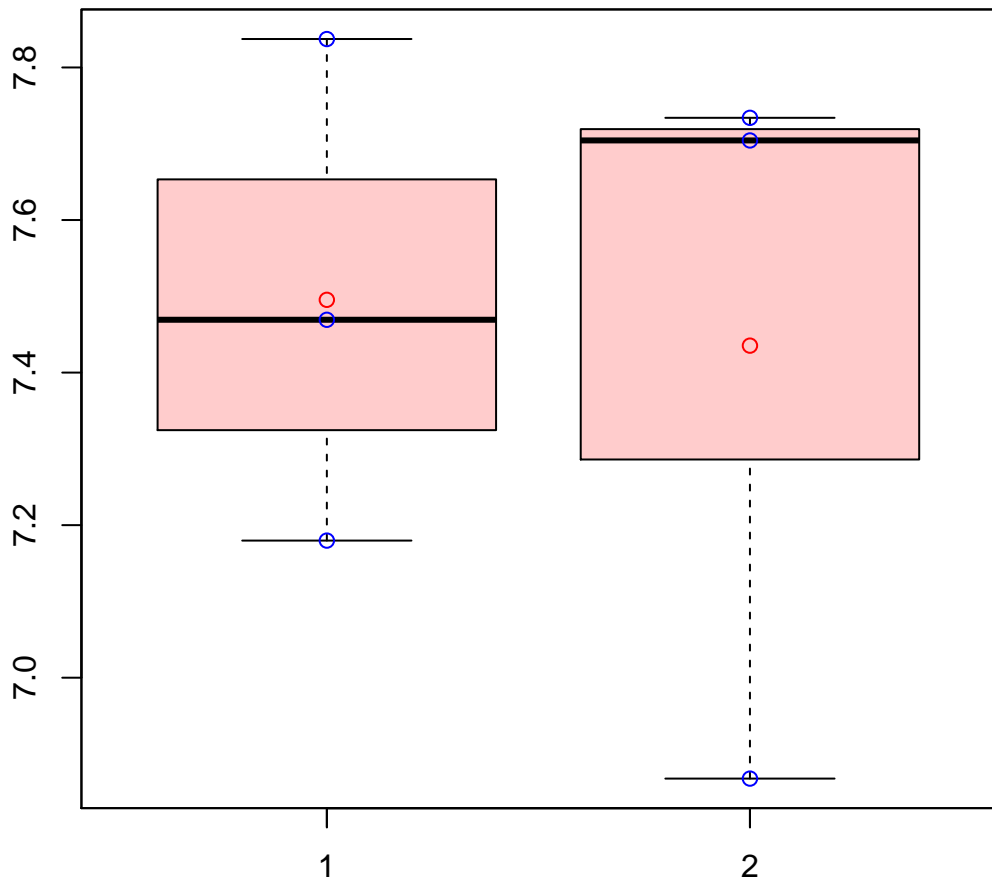

t-Test: p-value = 0.87

# G9HXQ7|G9HXQ7\_9ORYZ

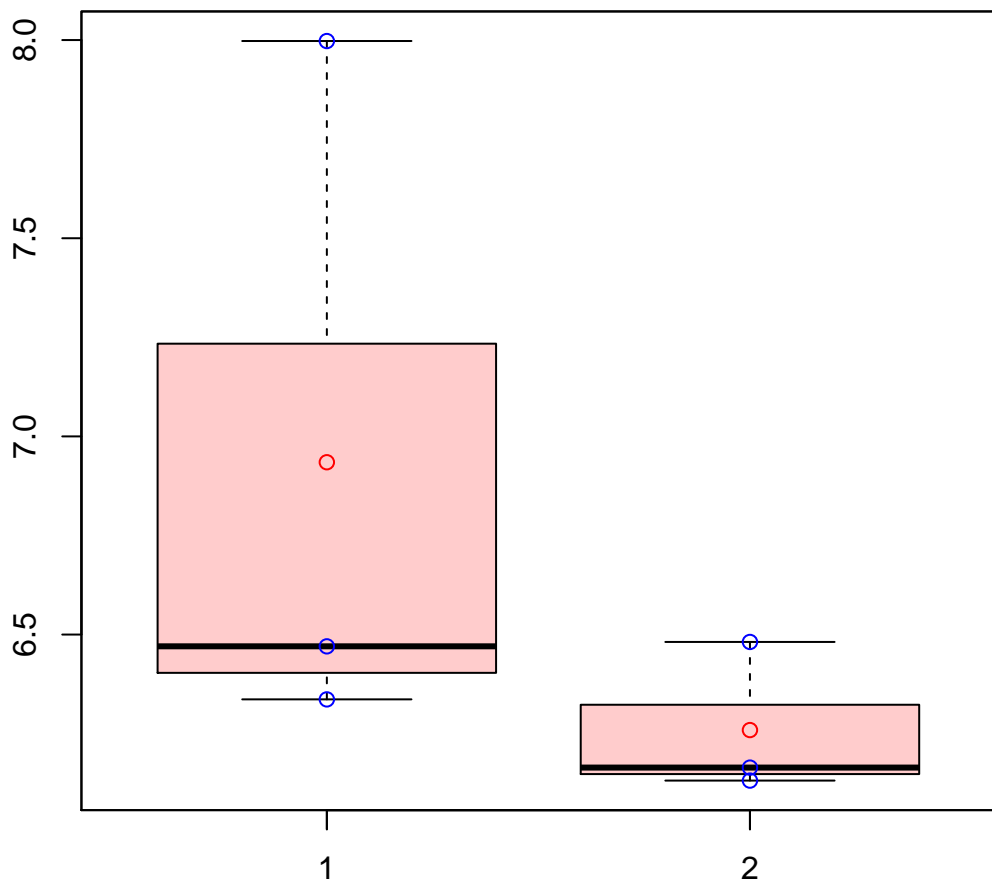

t-Test: p-value = 0.33

# G9HXR6|G9HXR6\_9ORYZ

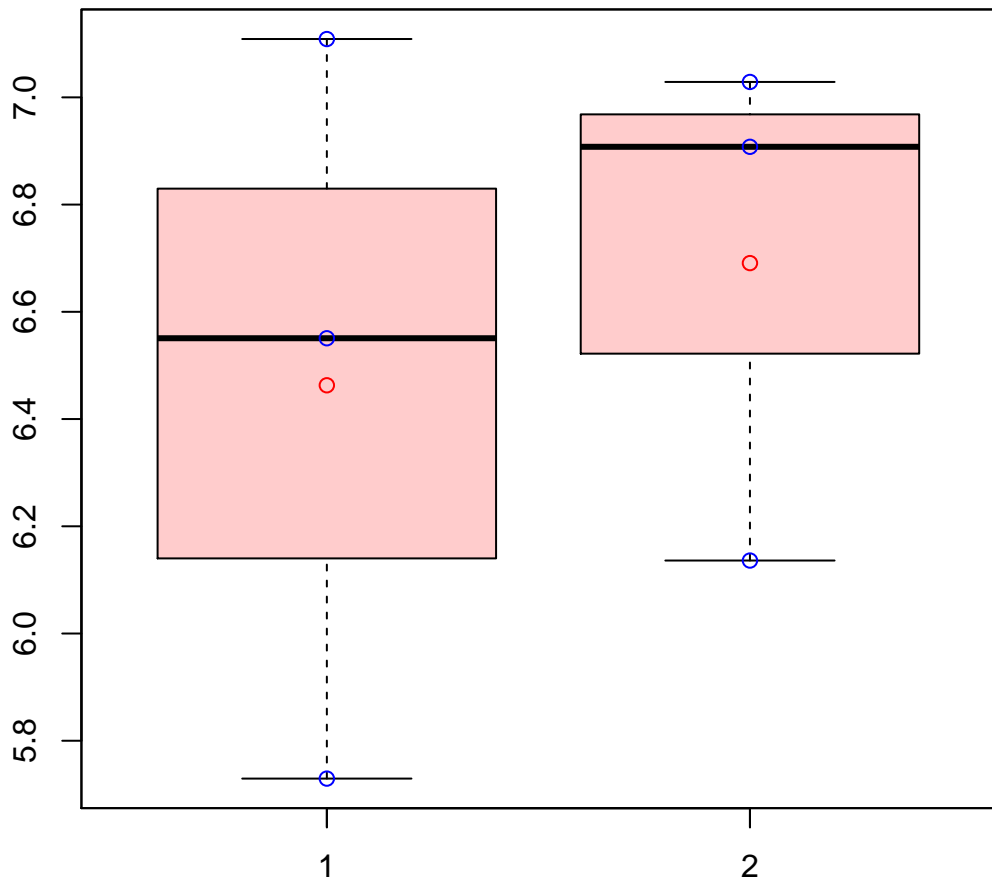

t-Test: p-value = 0.67

# G9HXY9|G9HXY9\_9POAL

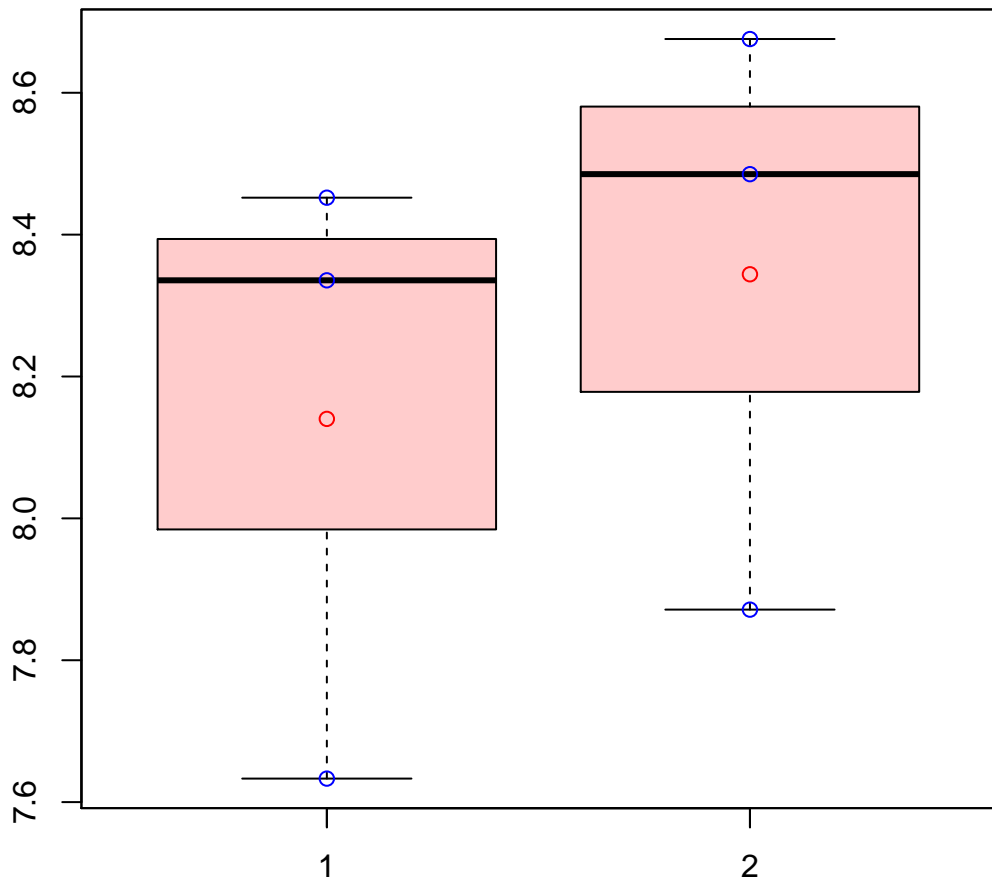

t-Test: p-value = 0.59

# G9HY80|G9HY80\_9ORYZ

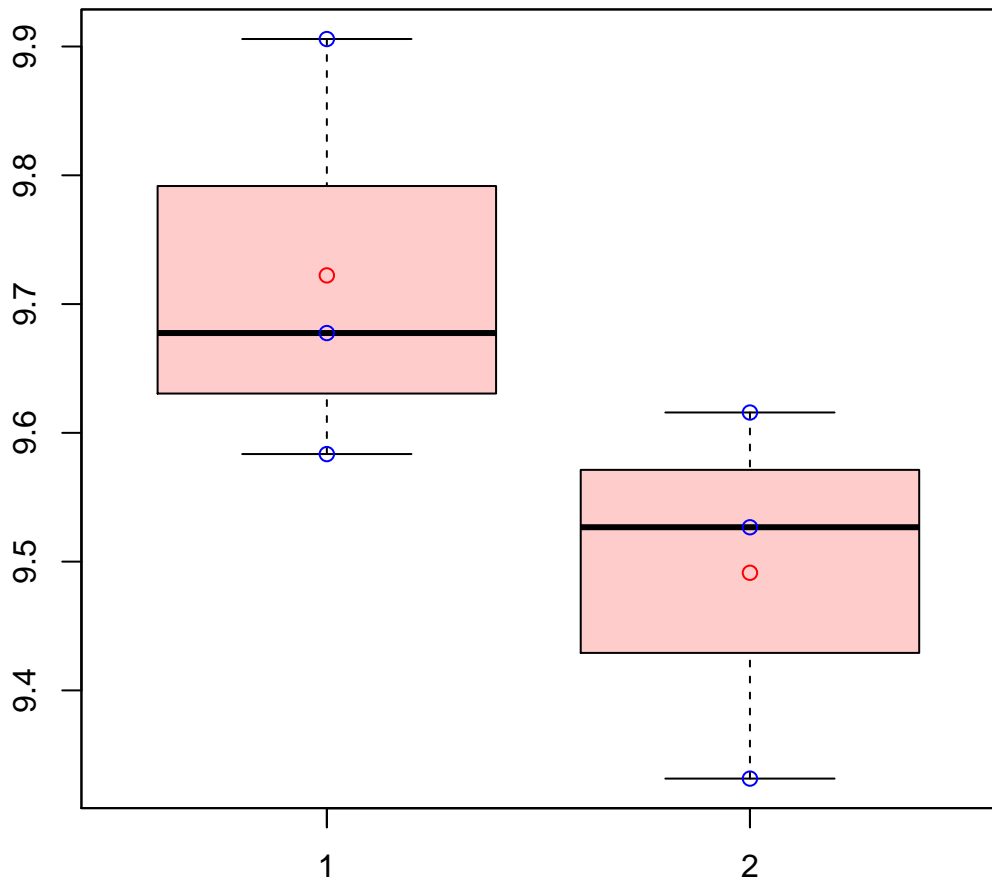

t-Test: p-value = 0.15



# G9JKH7|G9JKH7\_9LILI

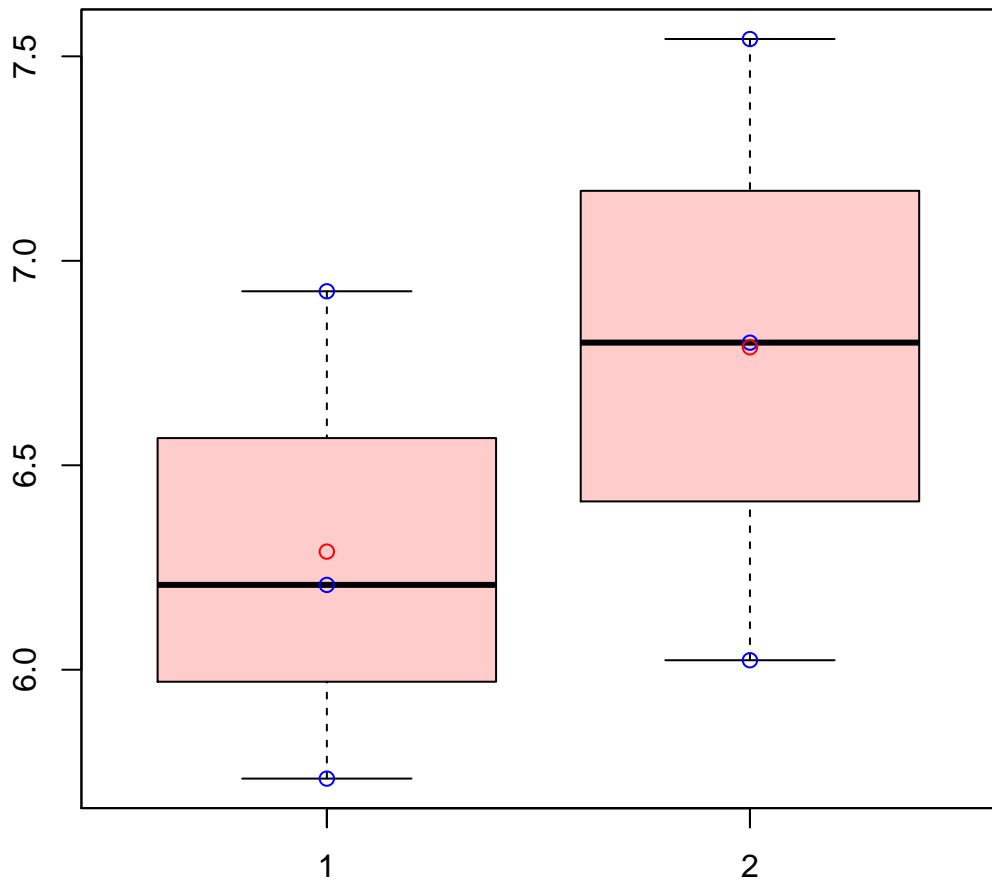

t-Test: p-value = 0.42

# H1ZX79|H1ZX79\_TRIDB

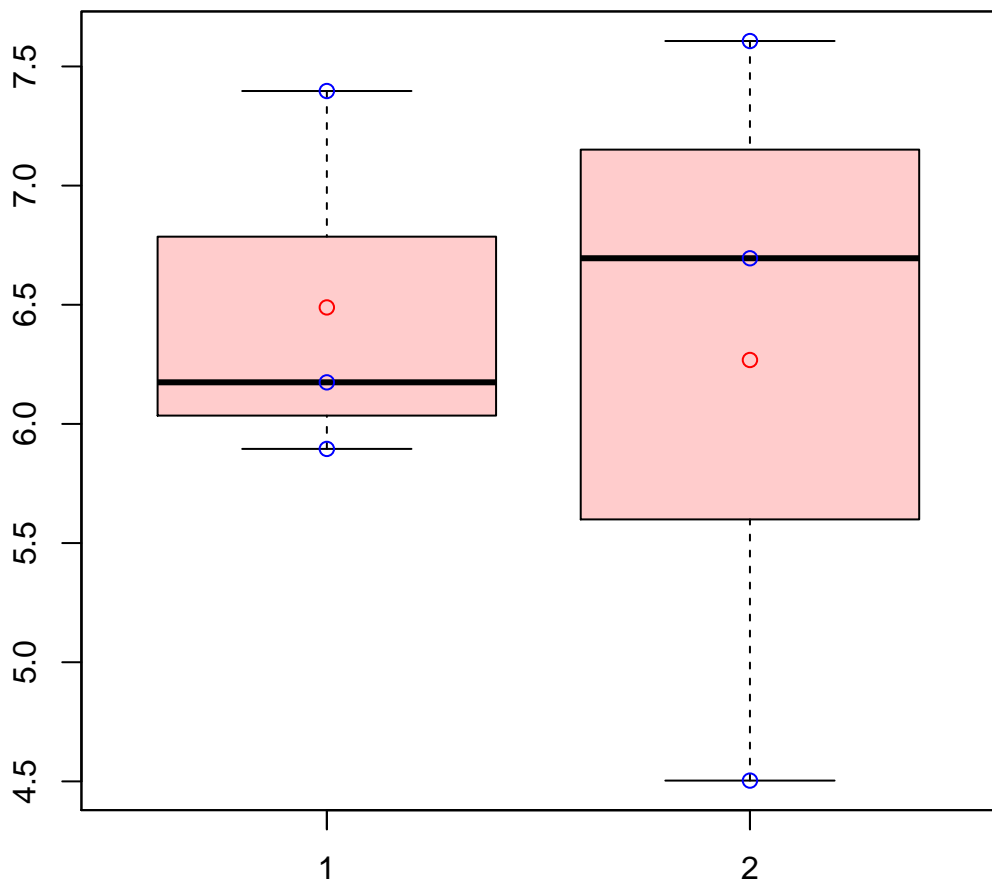

t-Test: p-value = 0.84

## H2CLX3|H2CLX3\_ALLSA

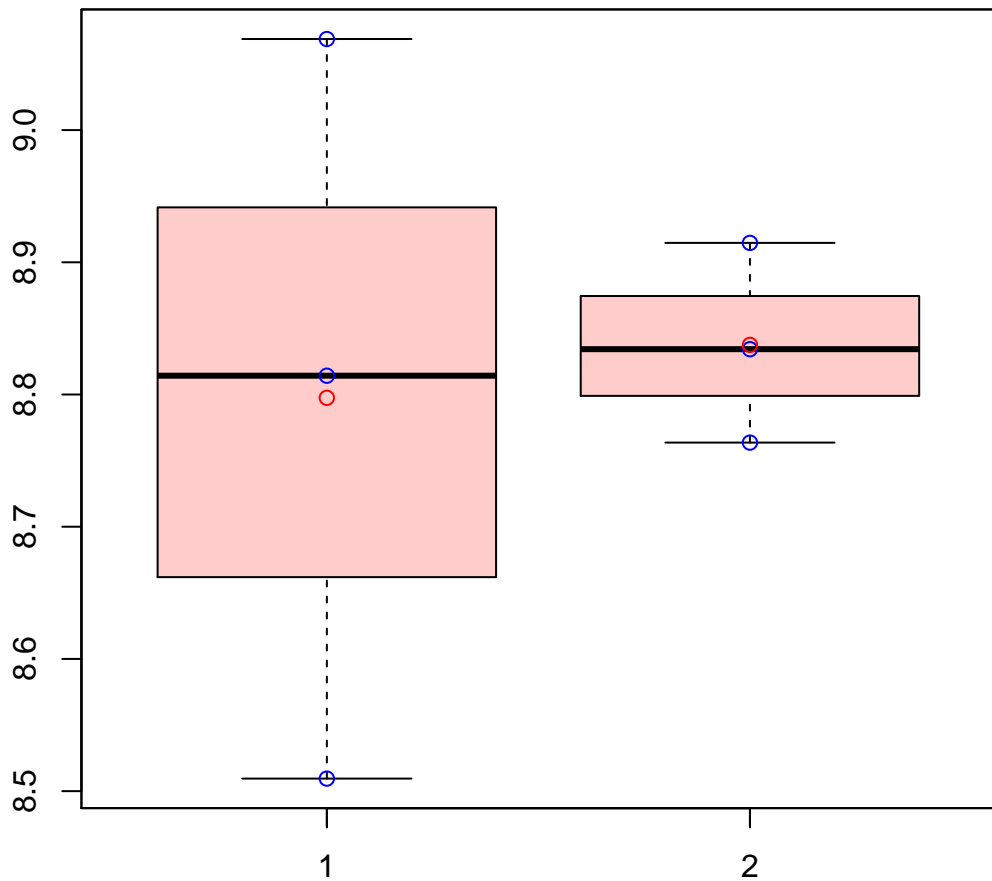

t-Test: p-value = 0.83

## H2CPF0|H2CPF0\_COLES

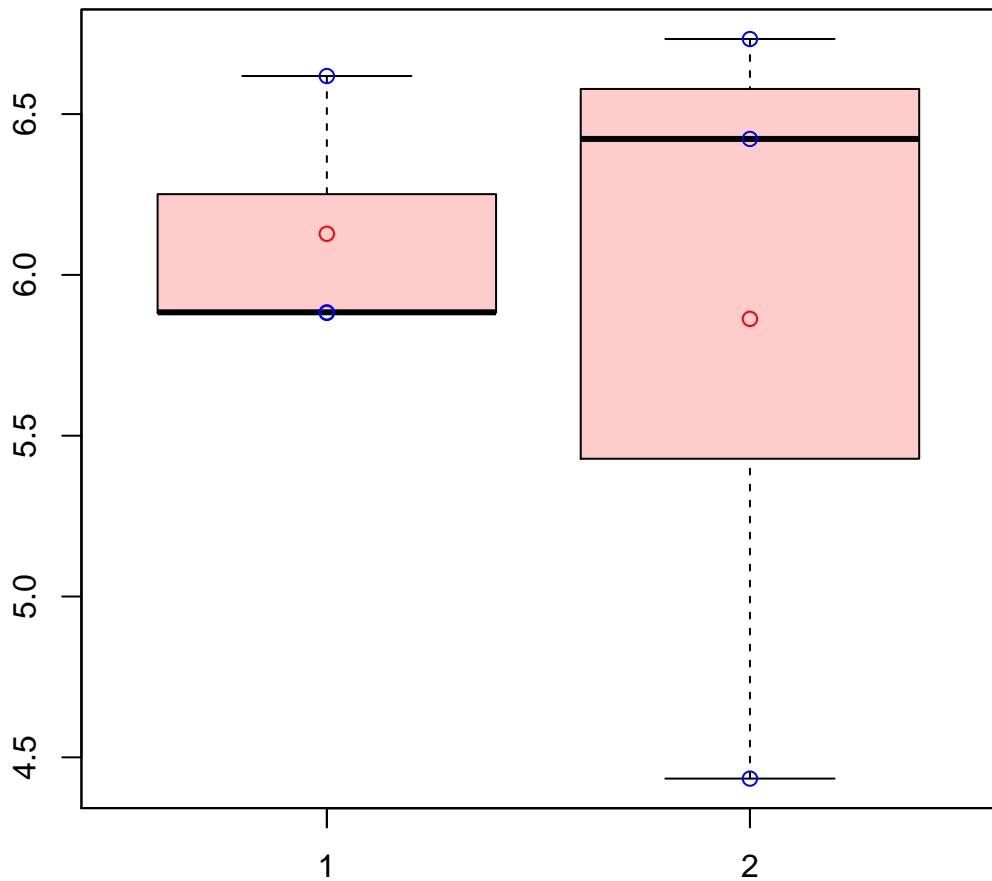

t-Test: p-value = 0.76

## H2F4K5|H2F4K5\_9ASPA

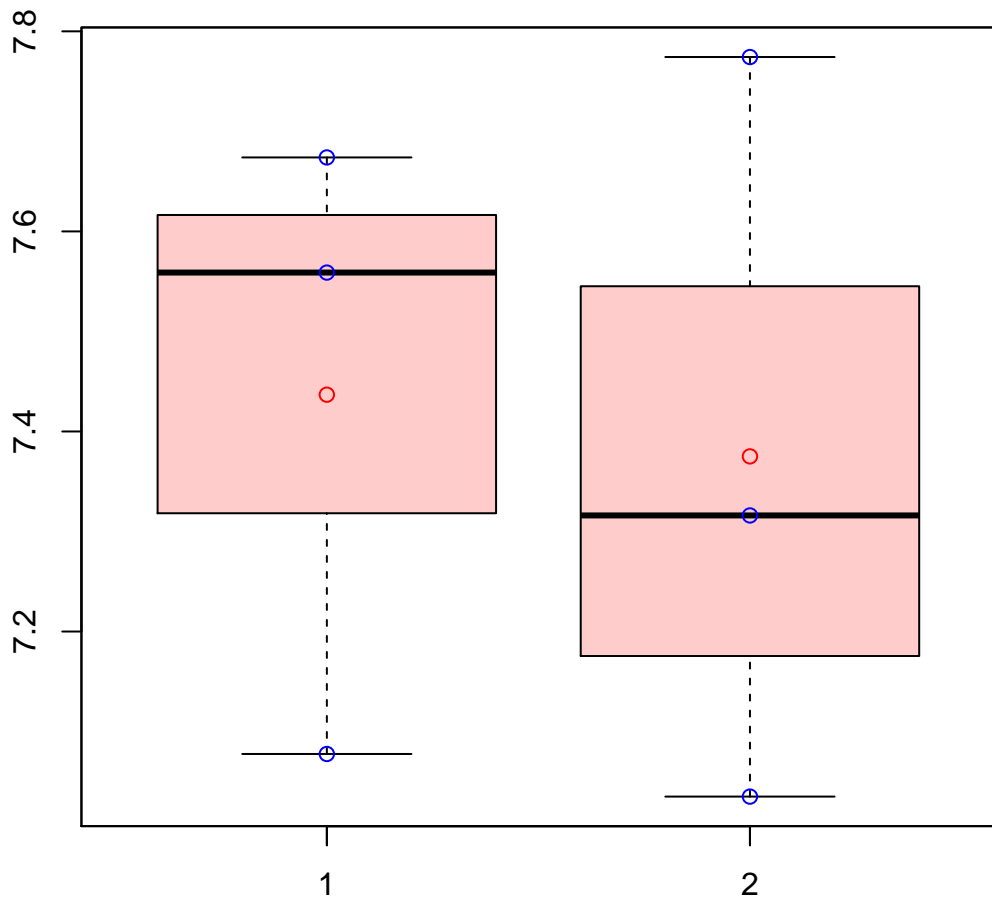

t-Test: p-value = 0.84

## H2F5U9|H2F5U9\_9ASPA

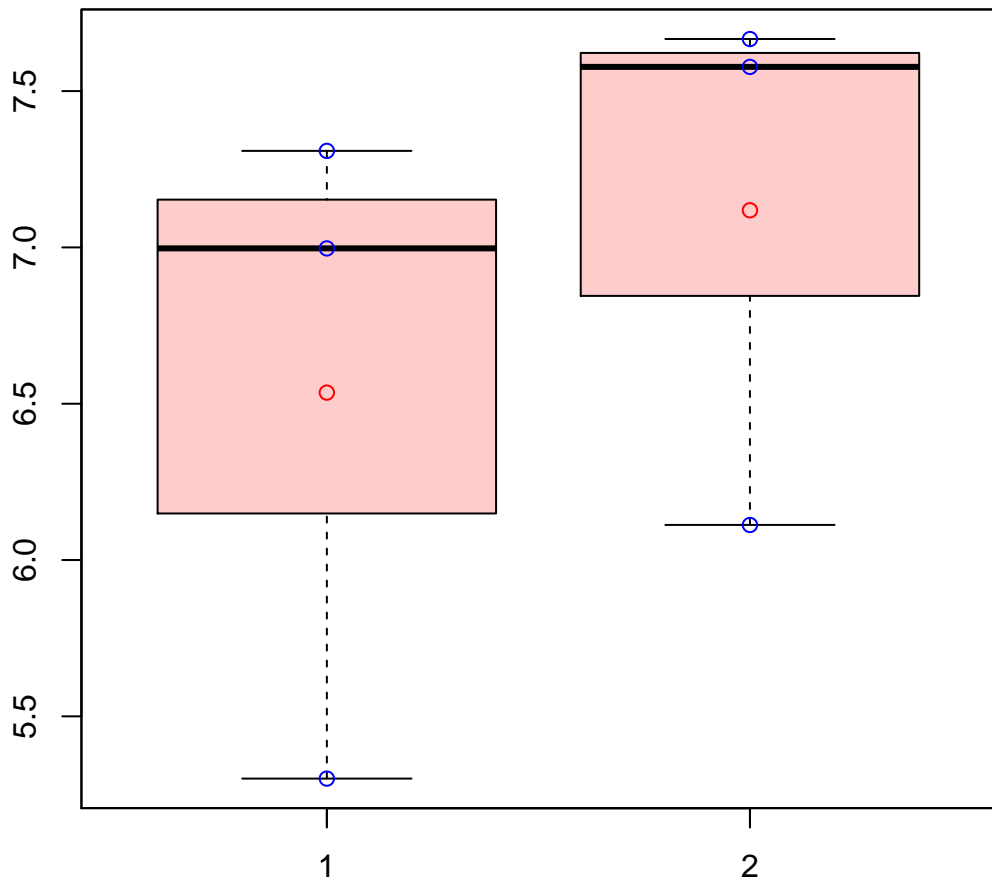

t-Test: p-value = 0.51

**H2F8P8|H2F8P8\_9ASPA**

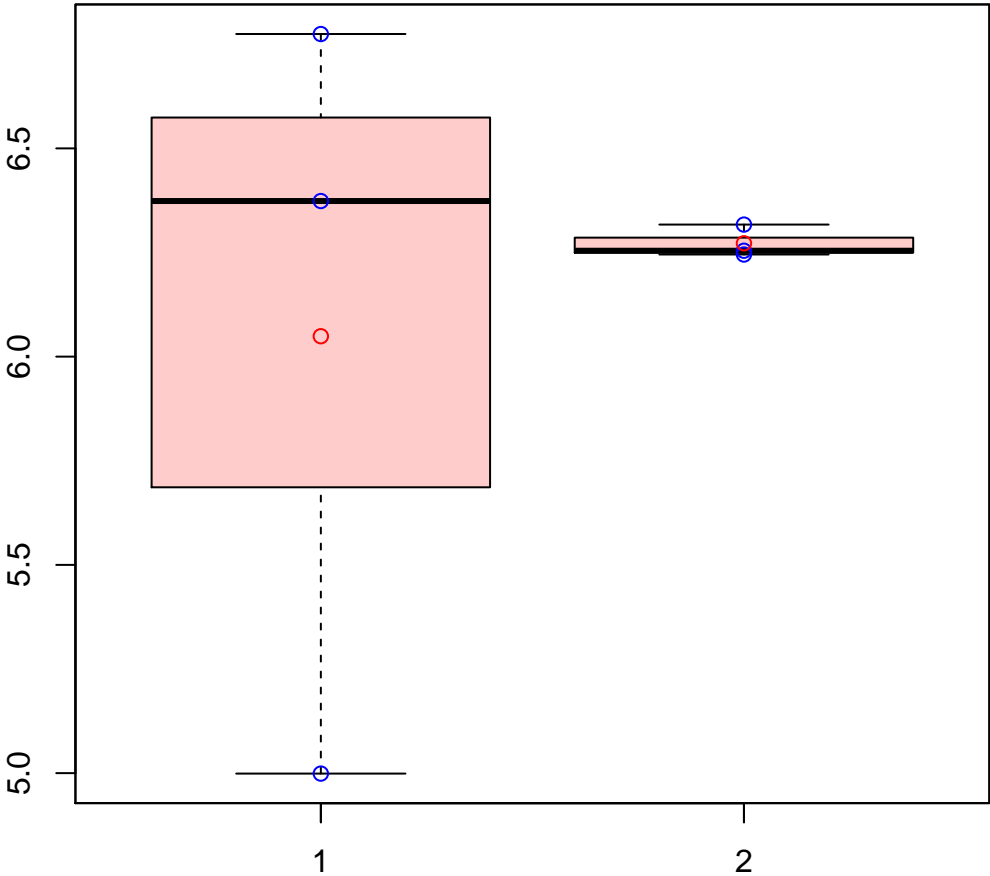

t-Test: p-value = 0.72

## H2FAG0|H2FAG0\_ALOVR

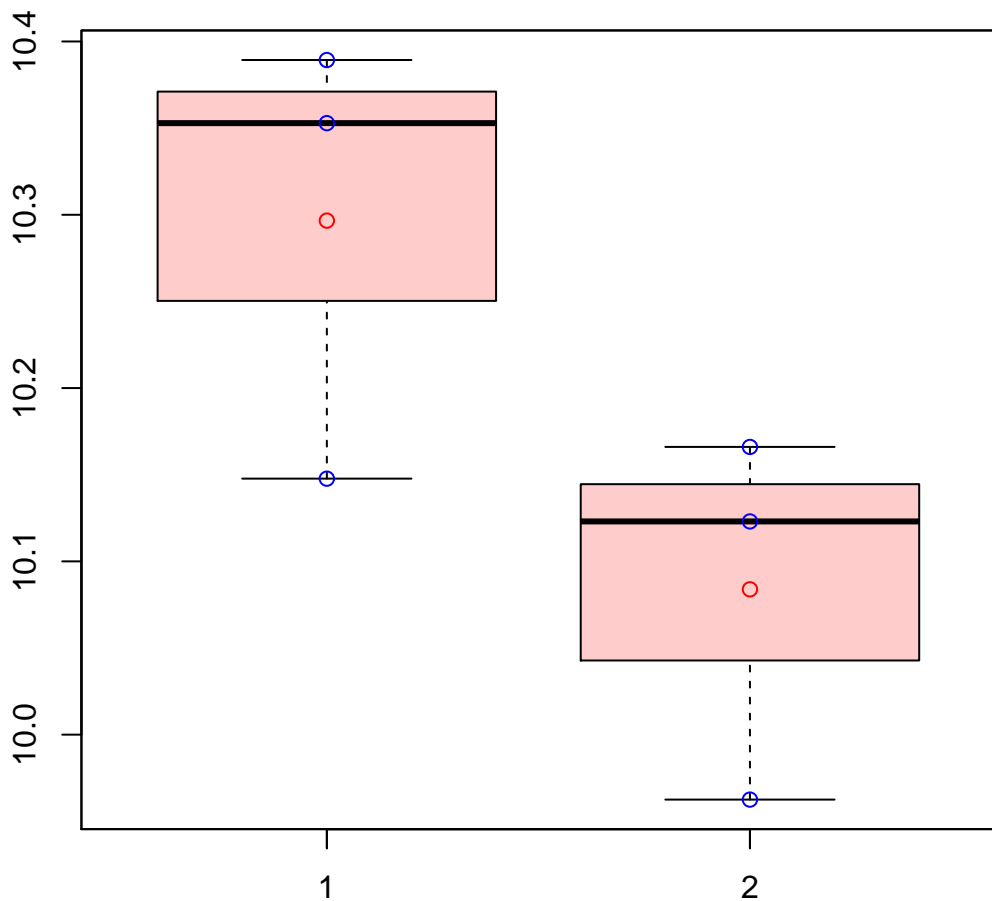

t-Test: p-value = 0.1



## H2FAV5|H2FAV5\_ALOVR

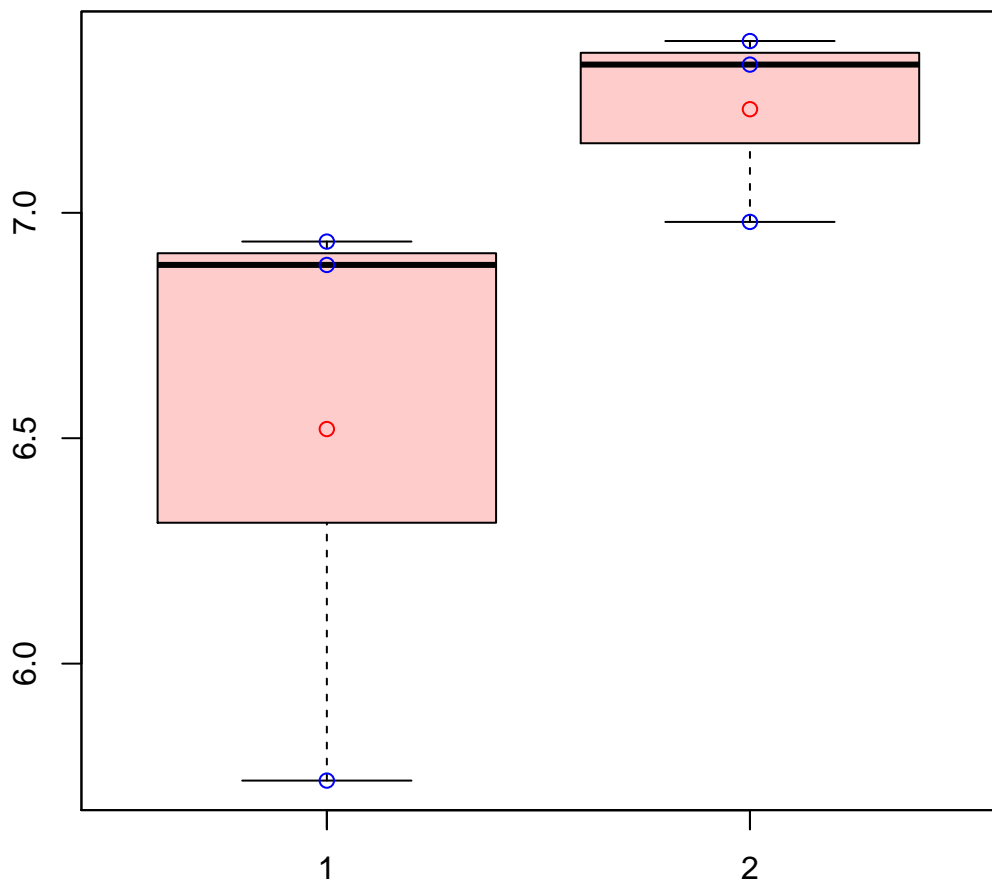

t-Test: p-value = 0.2

## H2FB91|H2FB91\_9ASPA

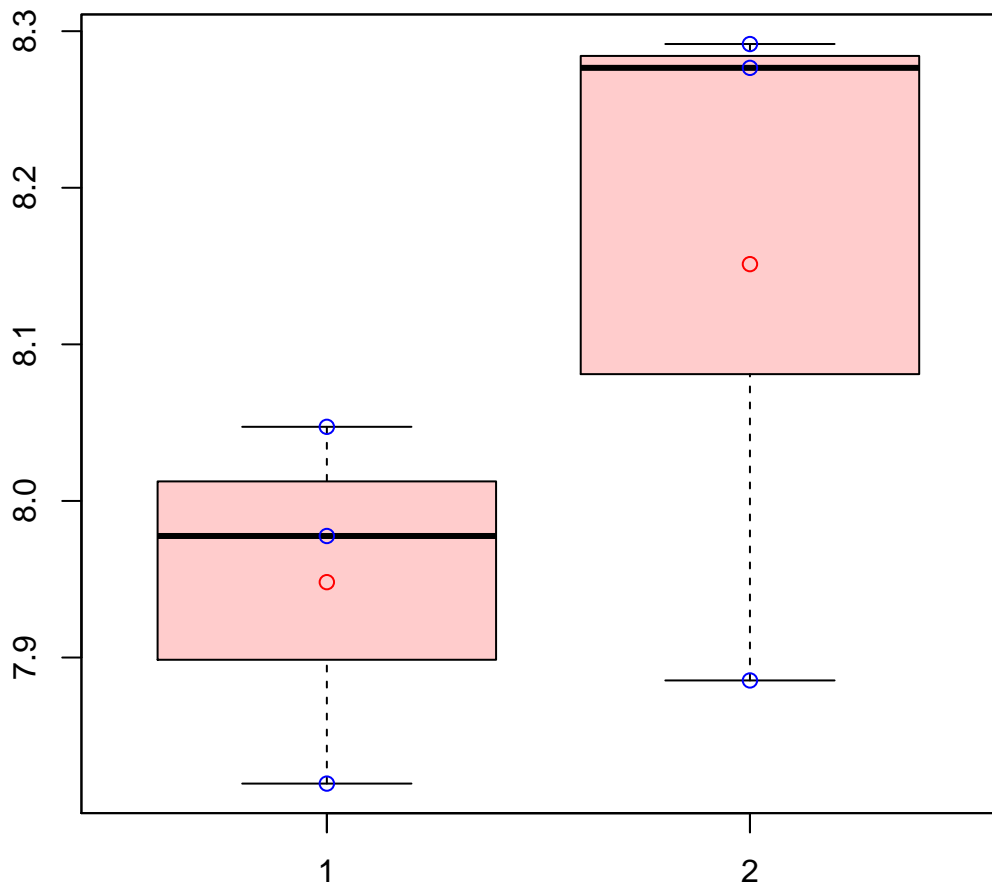

t-Test: p-value = 0.27

## H2FBM1|H2FBM1\_9ASPA

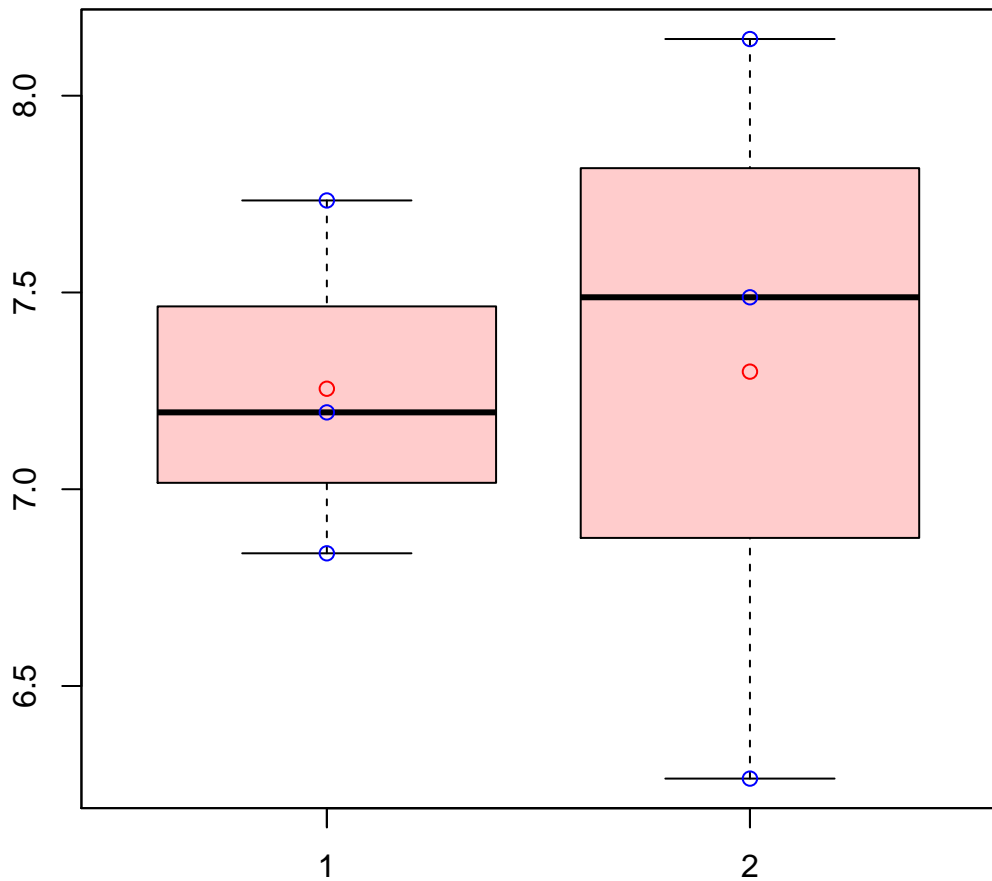

t-Test: p-value = 0.95

## H2FCA9|H2FCA9\_RUSAC

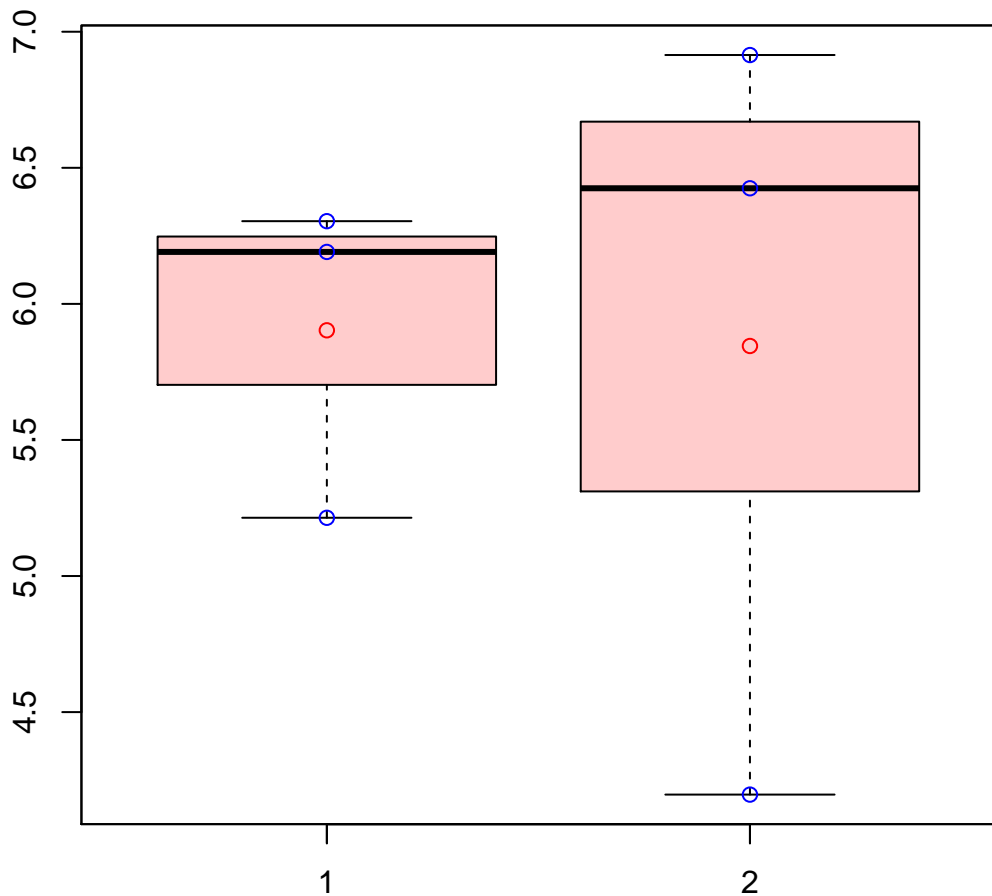

t-Test: p-value = 0.95

## H2FDV5|H2FDV5\_9ASPA

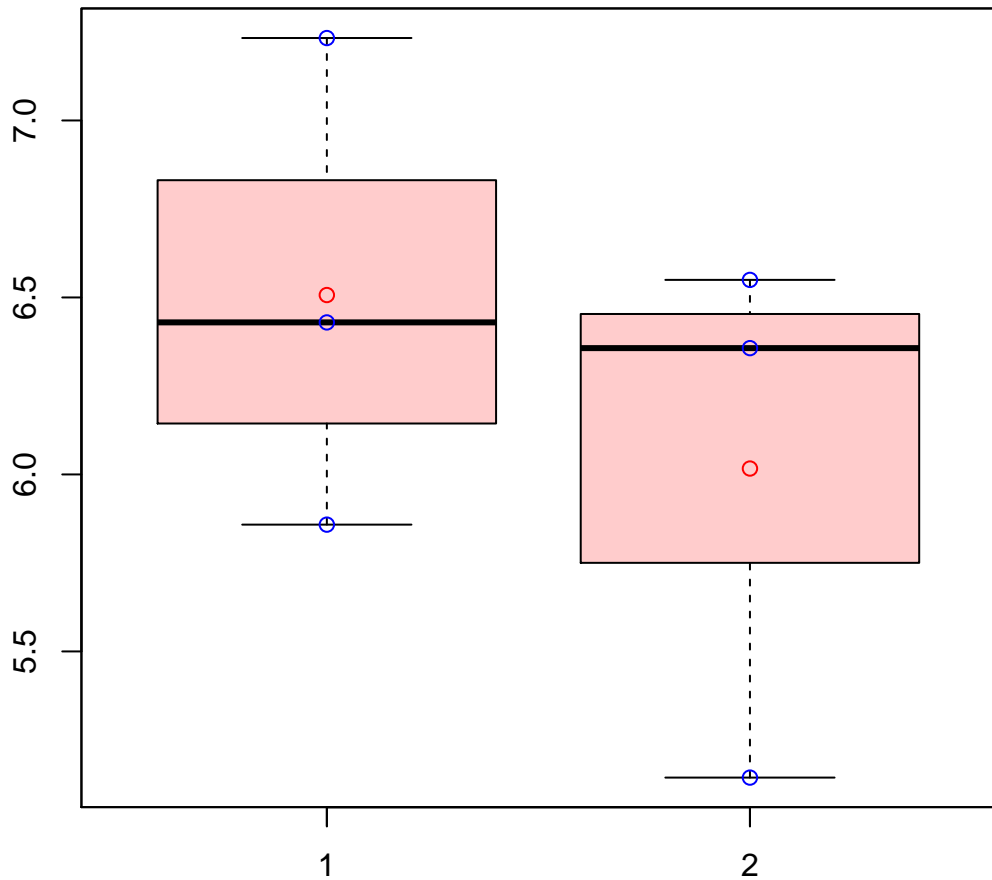

t-Test: p-value = 0.46

## H2FDX6|H2FDX6\_9ASPA

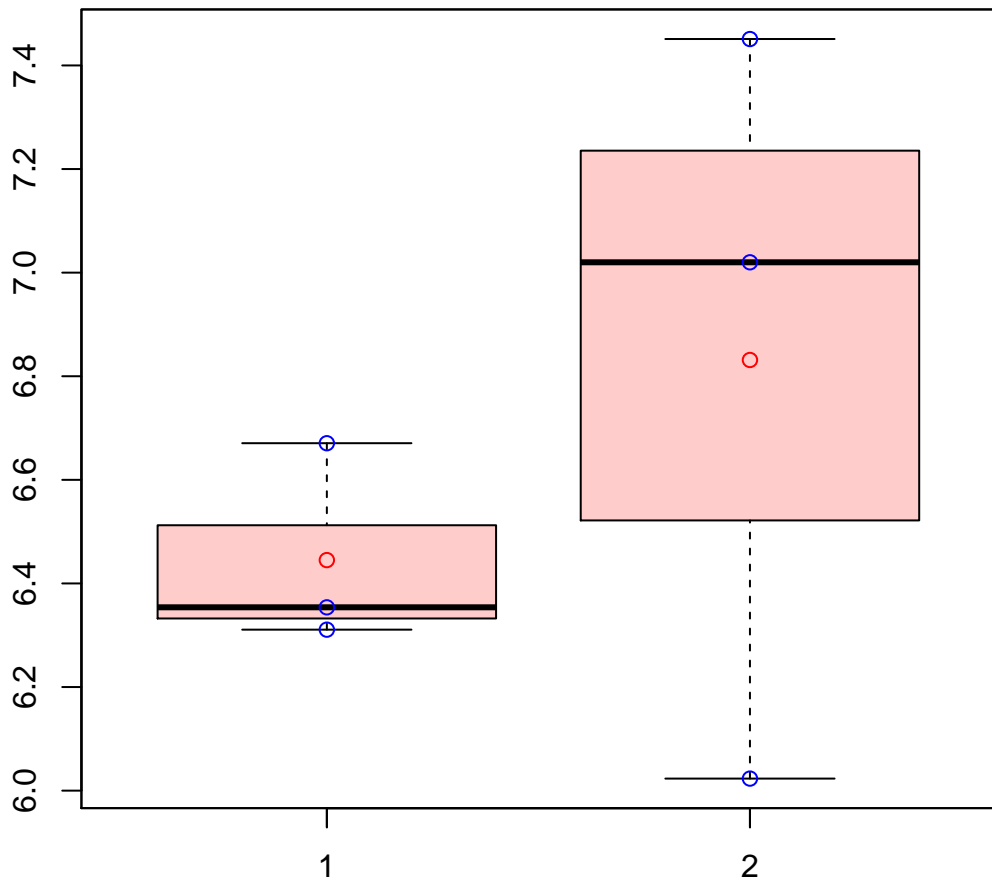

t-Test: p-value = 0.46

## H2KWJ8|H2KWJ8\_ORYSJ

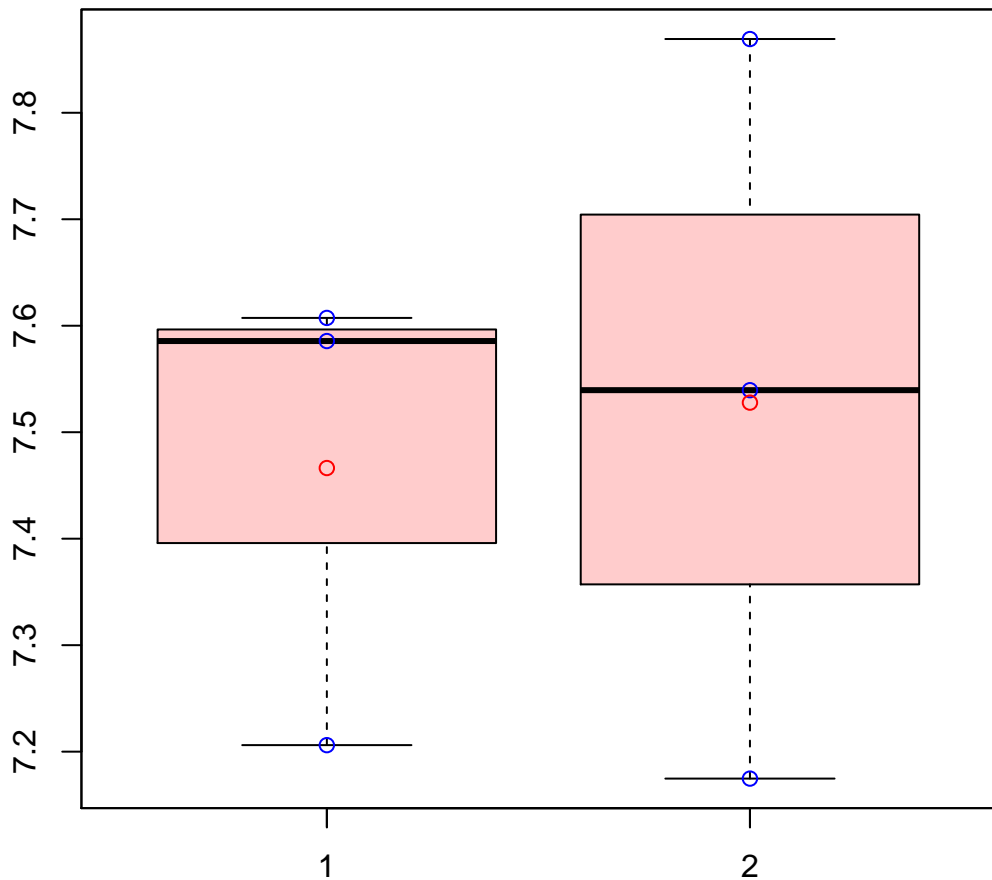

t-Test: p-value = 0.81

# H2KWR6|H2KWR6\_ORYSJ

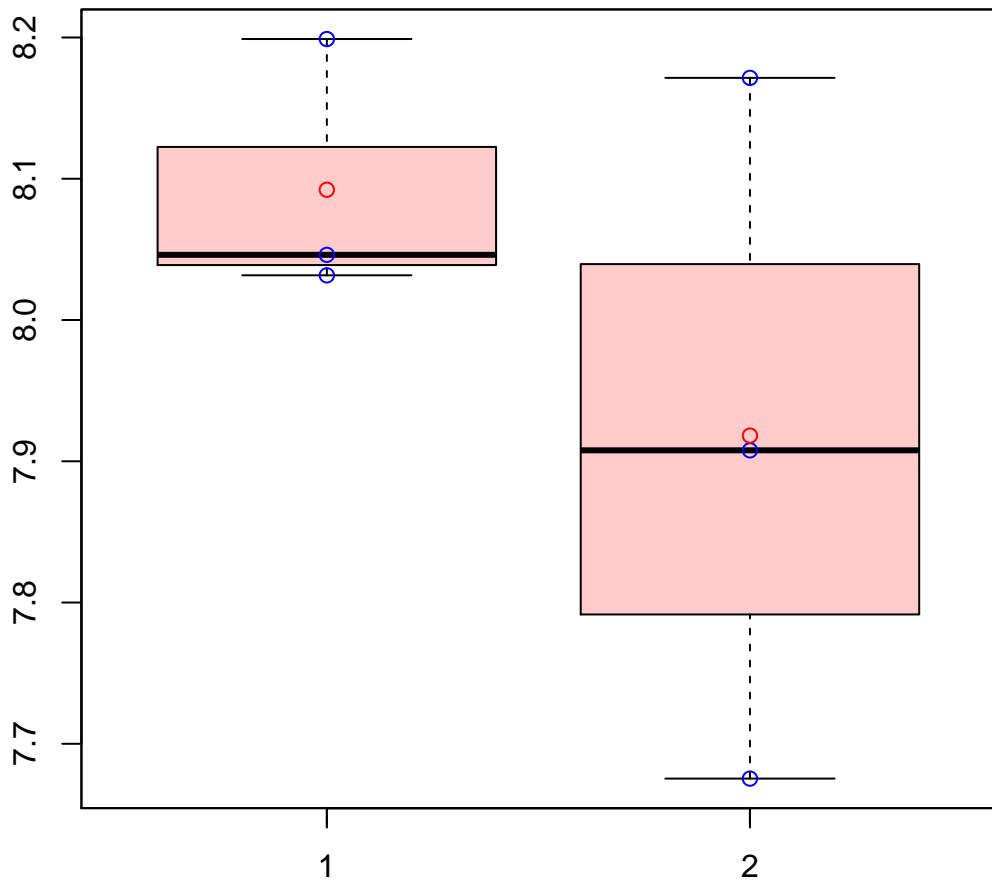

t-Test: p-value = 0.35



## H2KX19|H2KX19\_ORYSJ

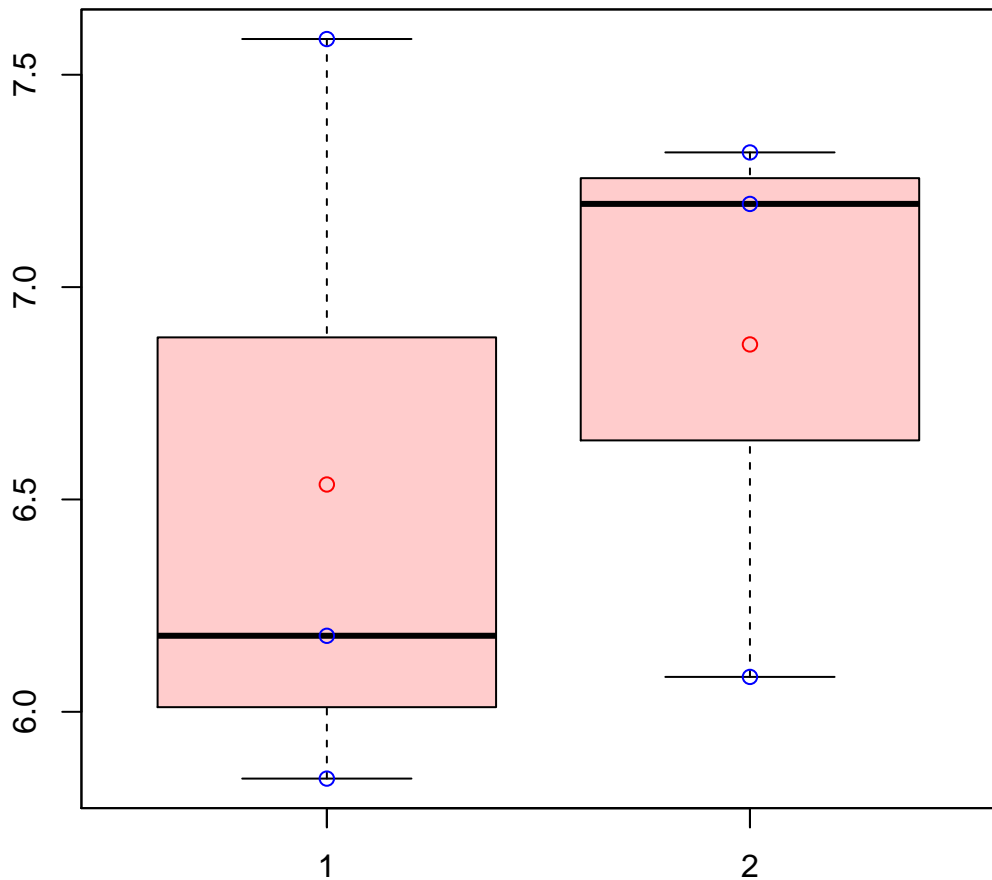

t-Test: p-value = 0.65

# H2KX75|H2KX75\_ORYSJ

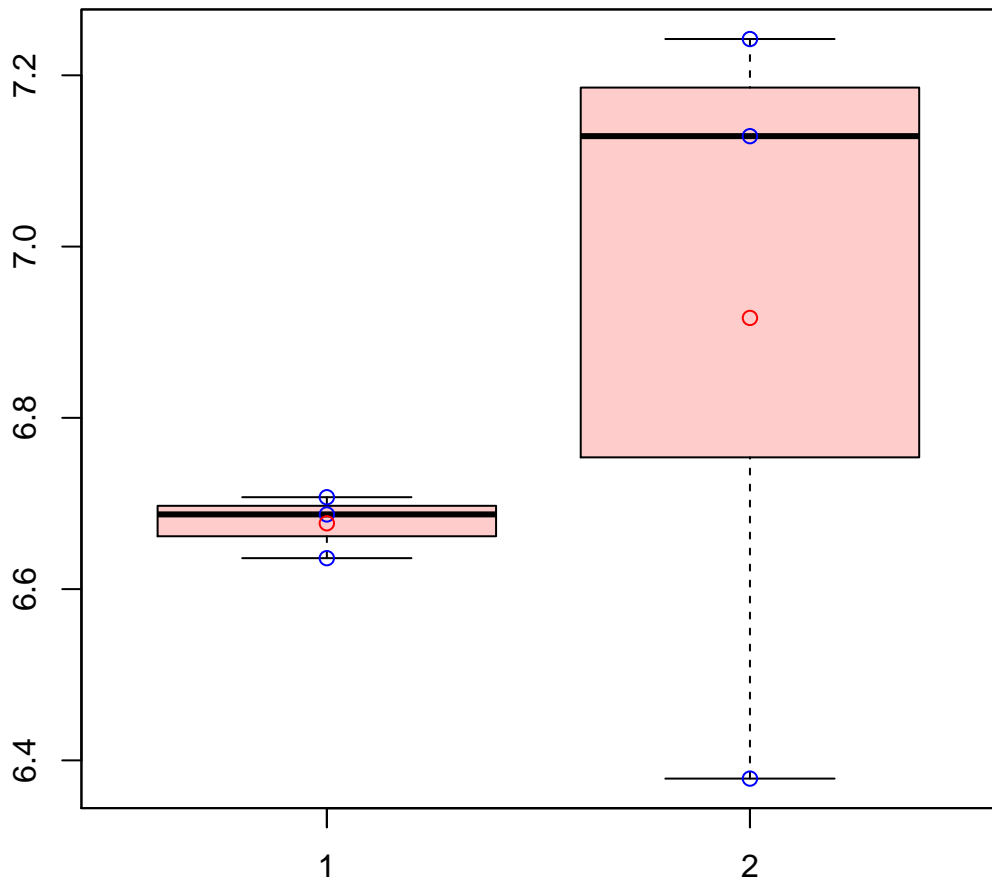

t-Test: p-value = 0.47

## H2KX87|H2KX87\_ORYSJ

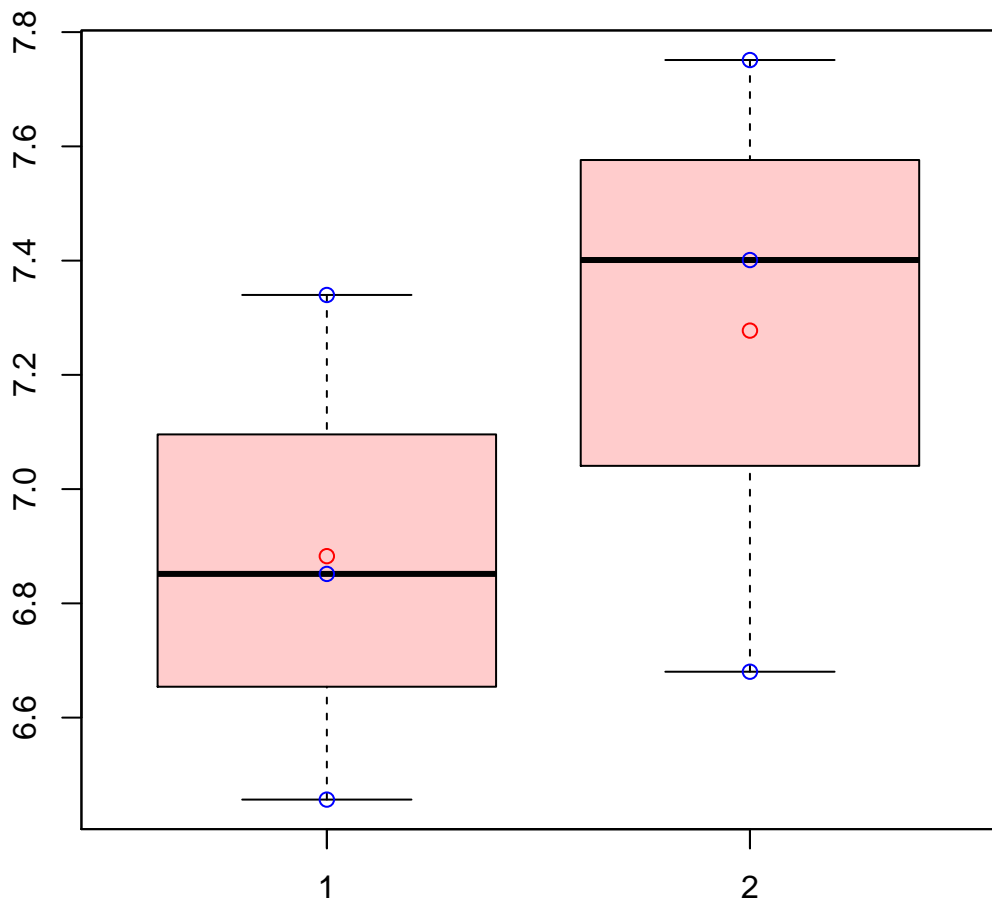

t-Test: p-value = 0.39

# H6SWW3|H6SWW3\_9POAL

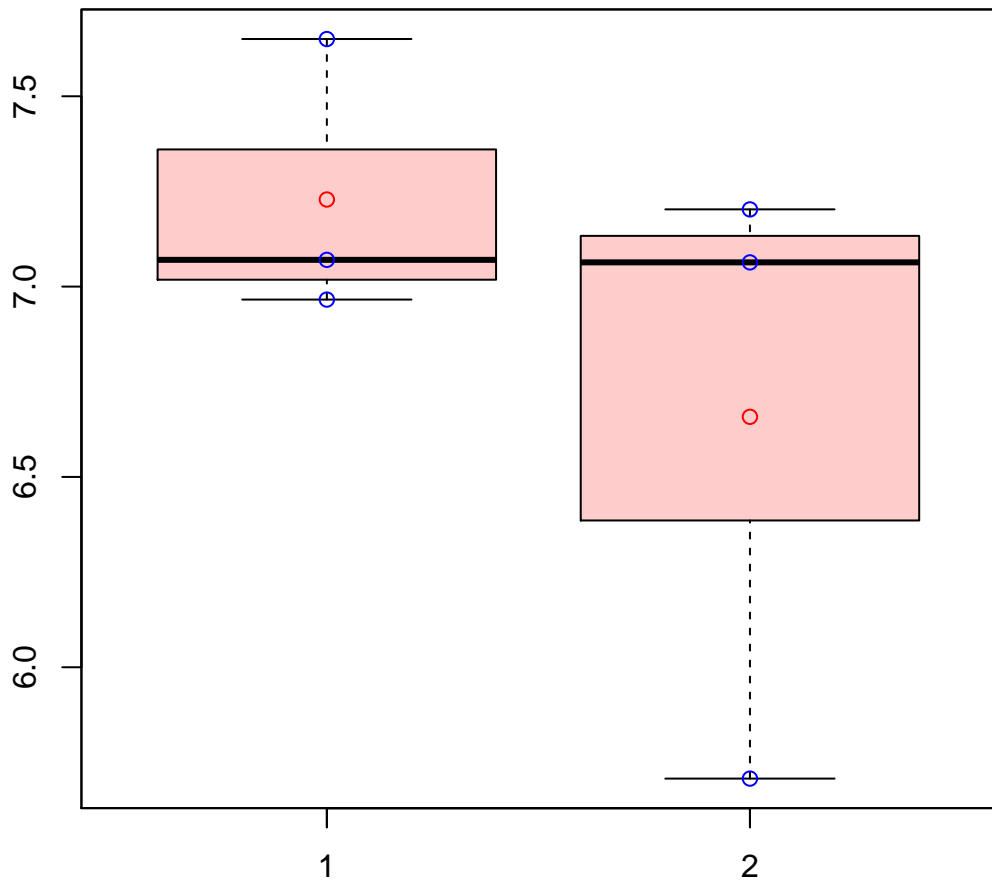

t-Test: p-value = 0.36

# H6SWW4|H6SWW4\_ELECO

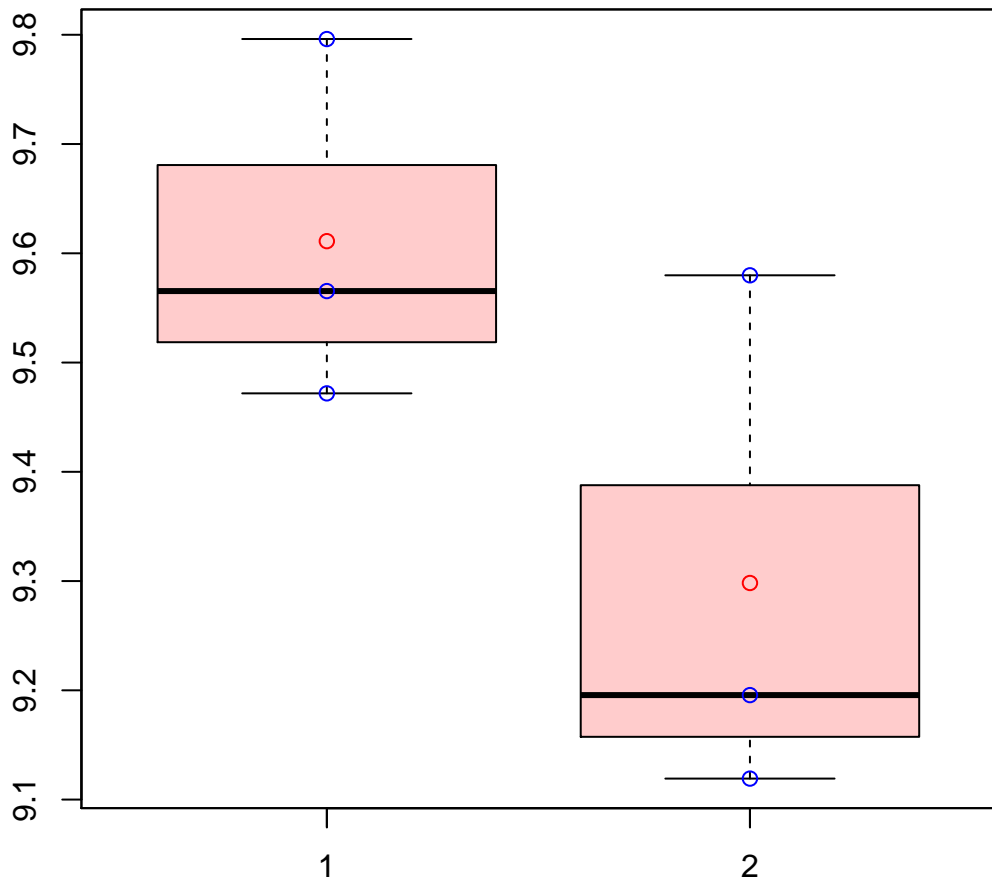

t-Test: p-value = 0.15

# H6SWW6|H6SWW6\_9POAL

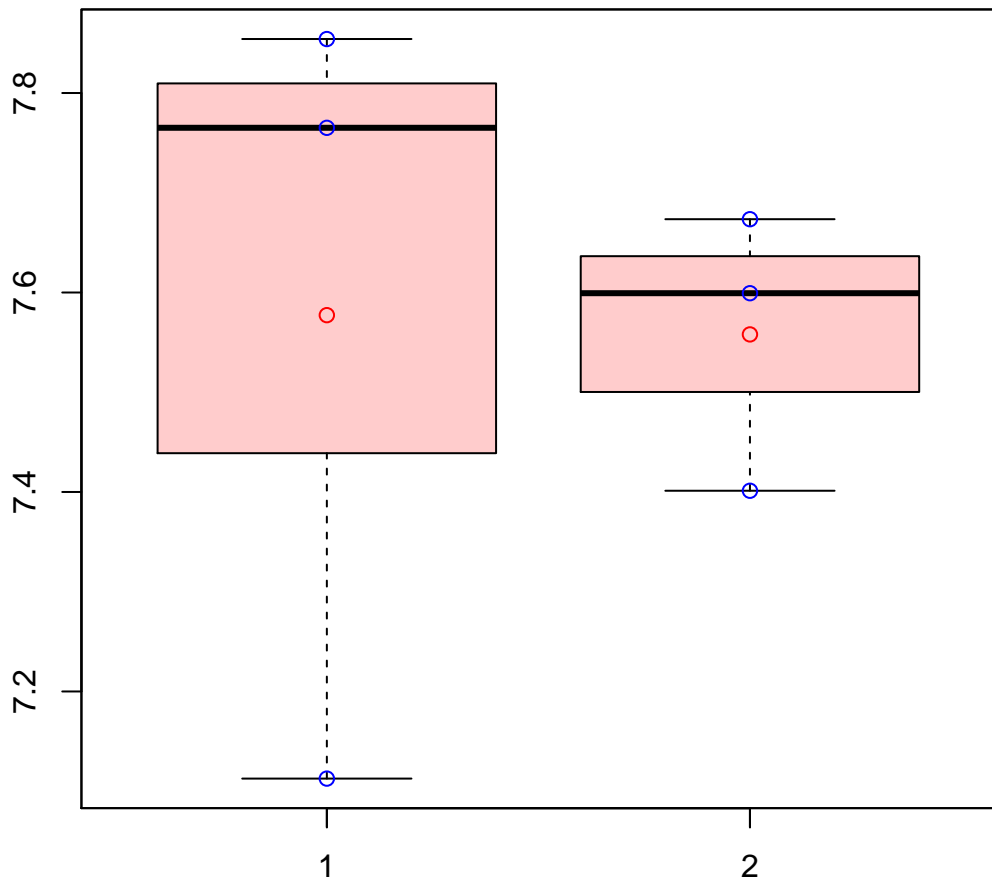

t-Test: p-value = 0.94

# H6SX50|H6SX50\_9ASPA

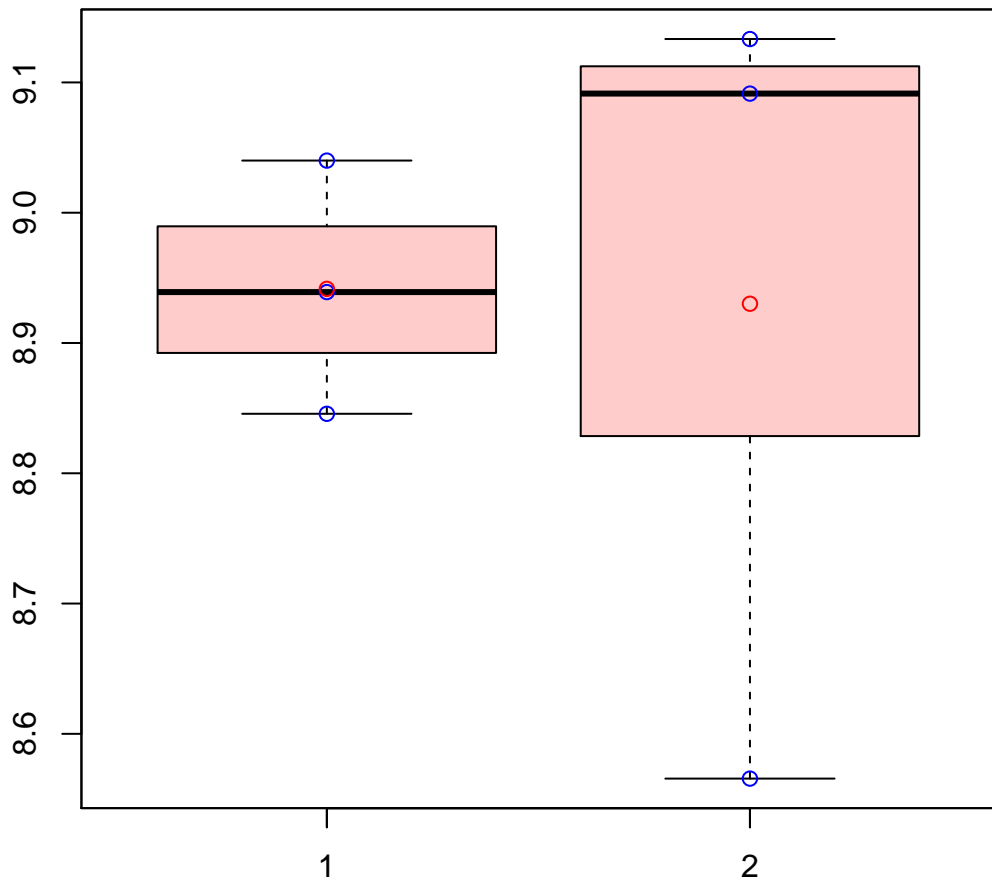

t-Test: p-value = 0.96

# H6SX61|H6SX61\_9POAL

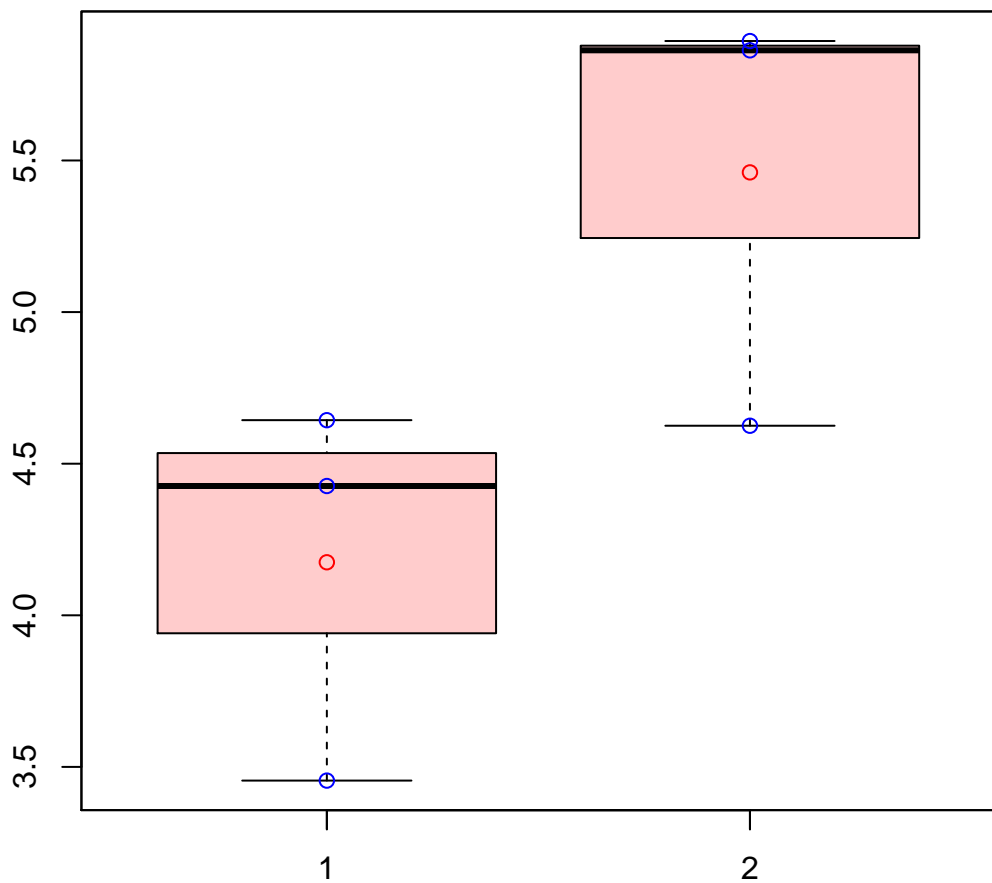

t-Test: p-value = 0.08



# H6SX69|H6SX69\_9POAL

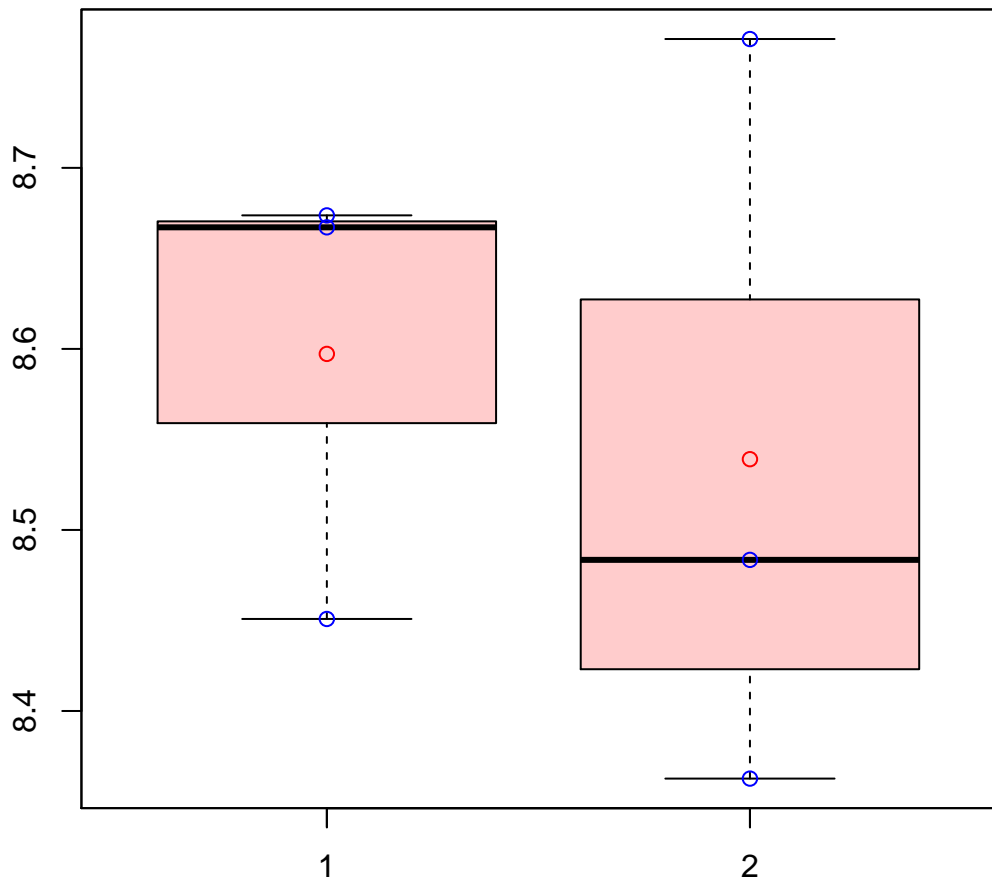

t-Test: p-value = 0.71

# H6SY93|H6SY93\_9POAL

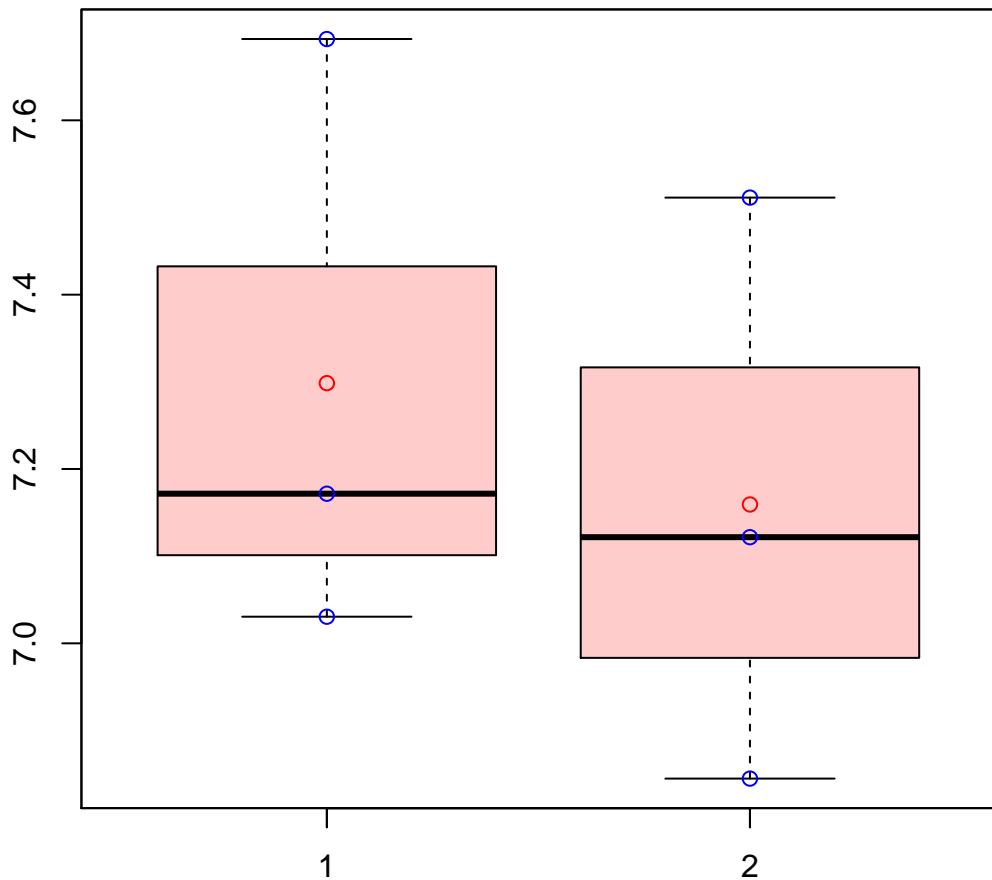

t-Test: p-value = 0.64

# H6SYE8|H6SYE8\_ELECO

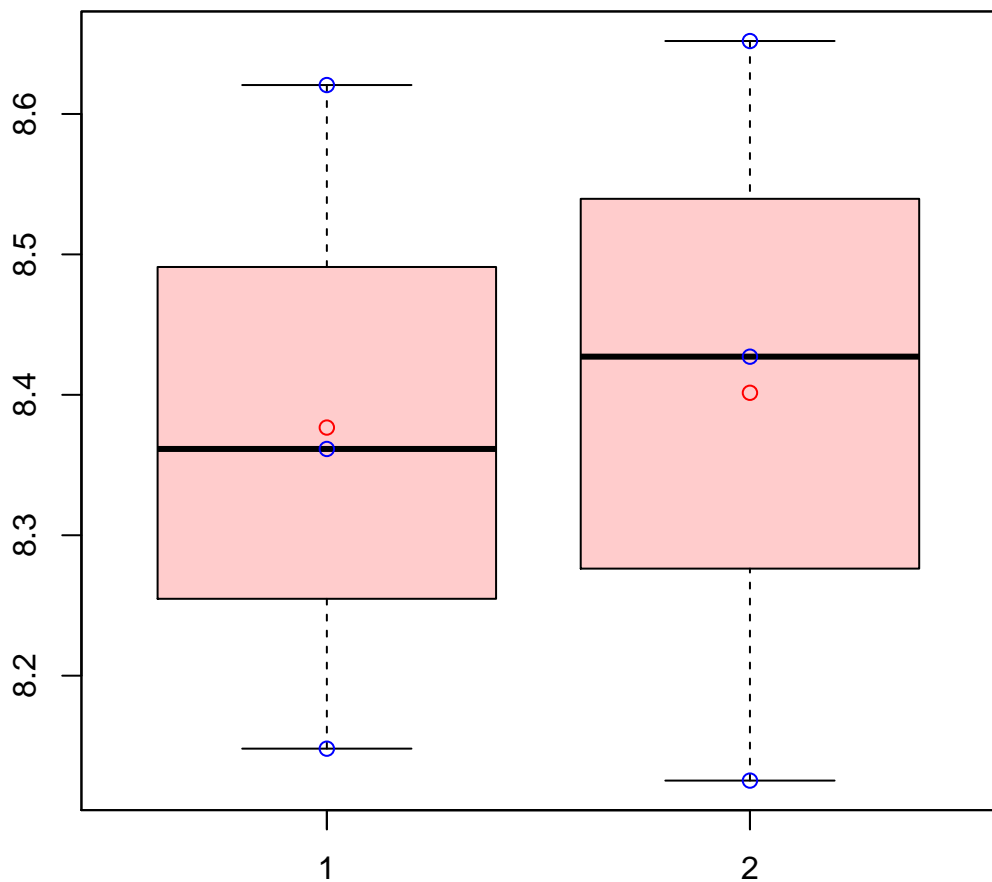

t-Test: p-value = 0.91

# H6SYI9|H6SYI9\_ELECO

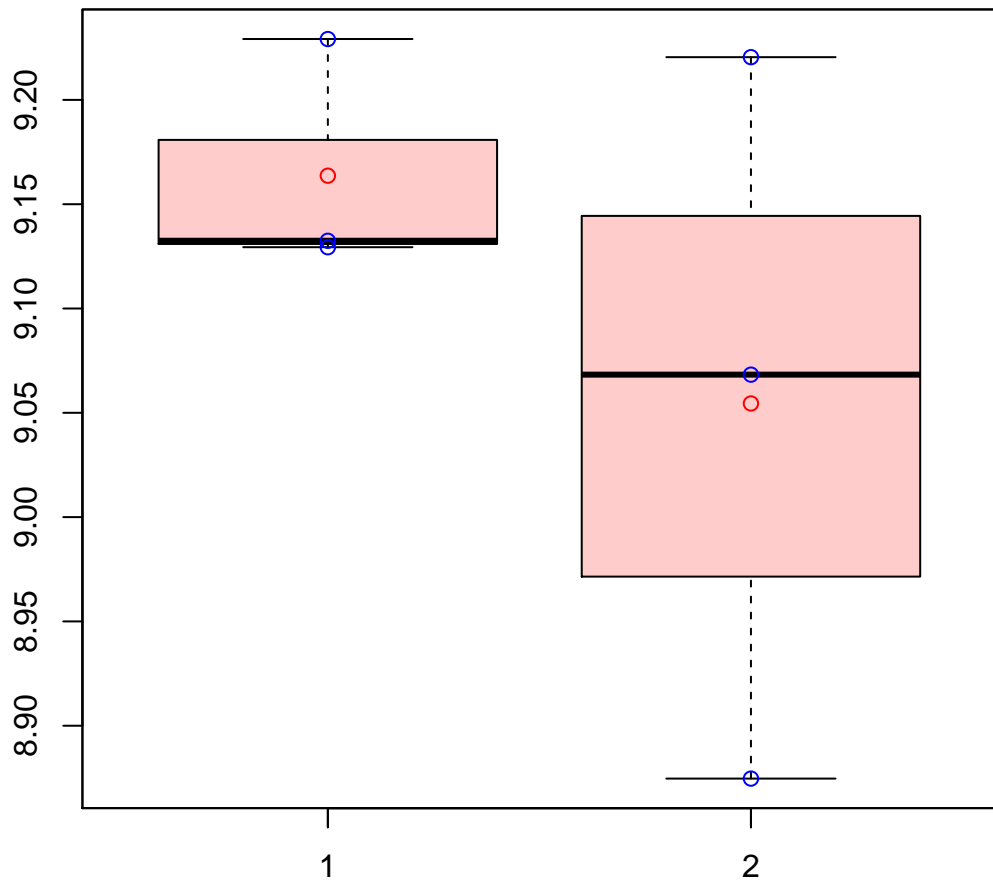

t-Test: p-value = 0.39

# H6SYL7|H6SYL7\_9POAL

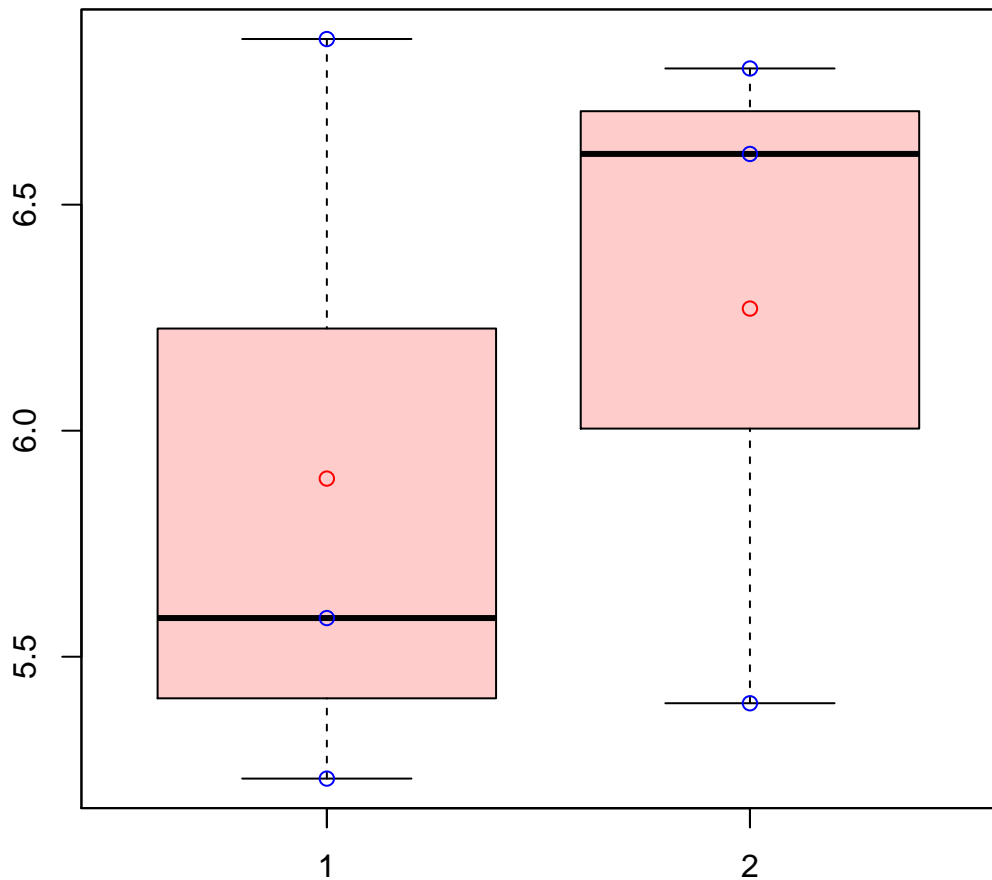

t-Test: p-value = 0.6

# H6SYM5|H6SYM5\_9POAL

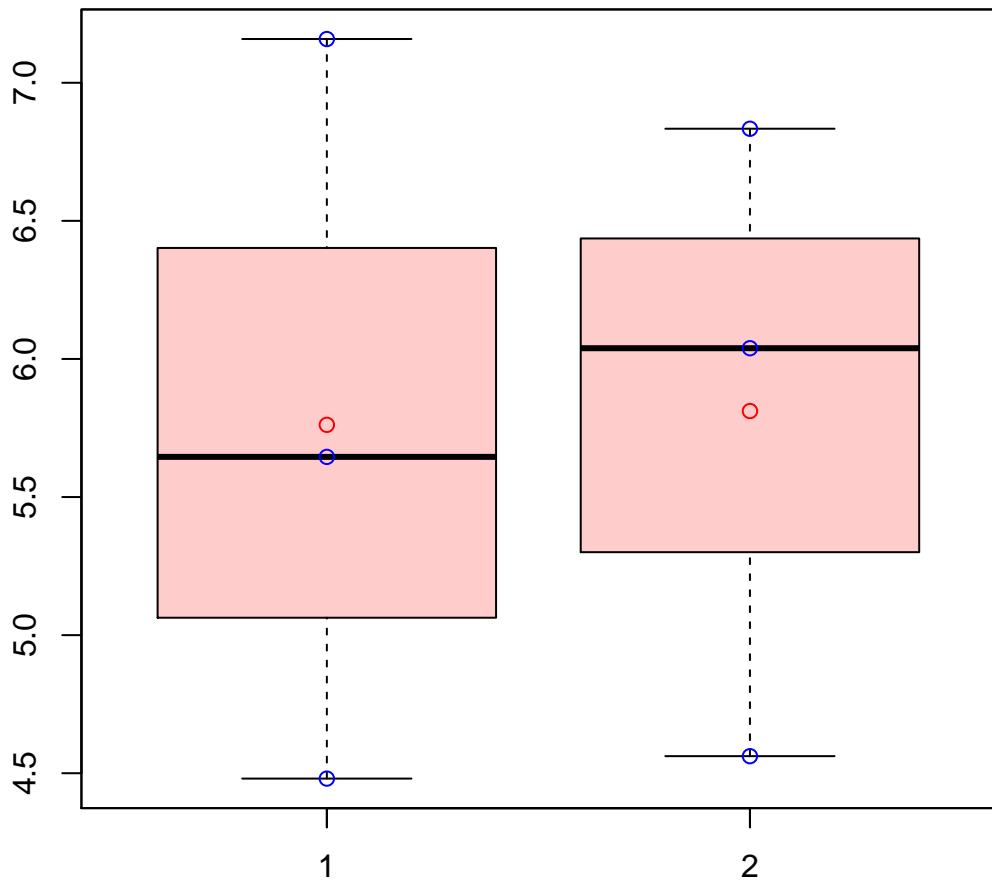

t-Test: p-value = 0.96

# H6SYP1|H6SYP1\_9POAL

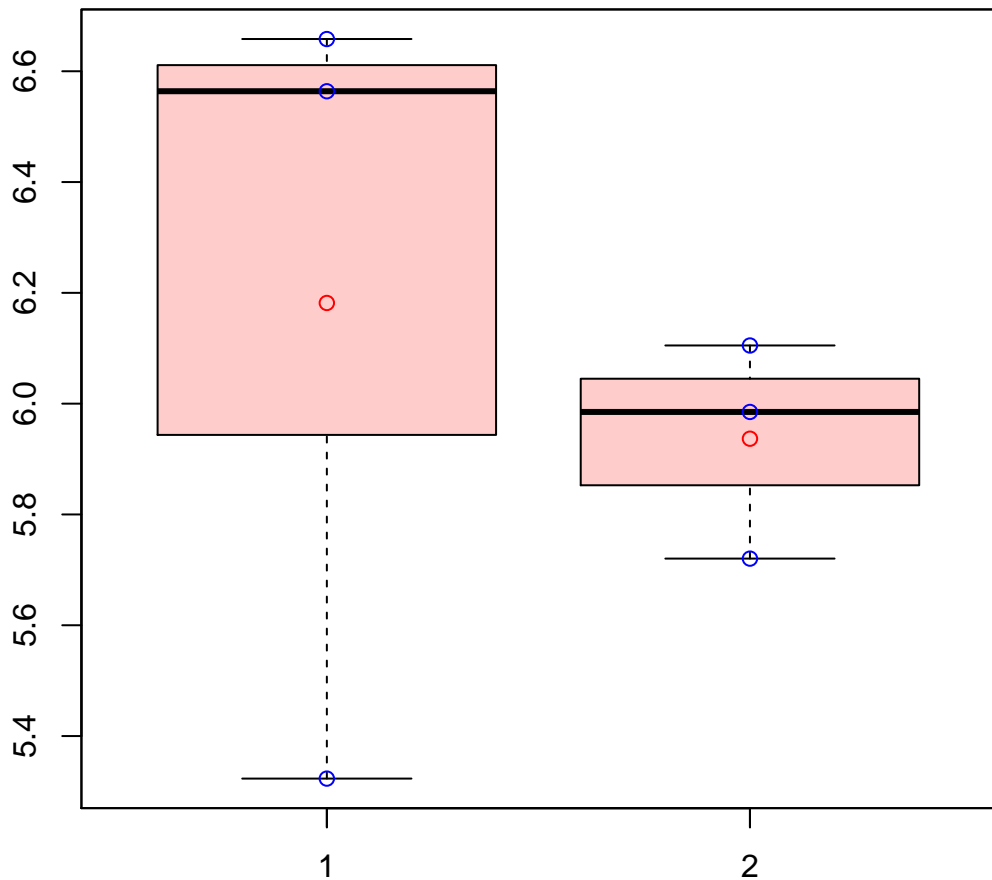

t-Test: p-value = 0.63

# H6SYR5|H6SYR5\_LILSU

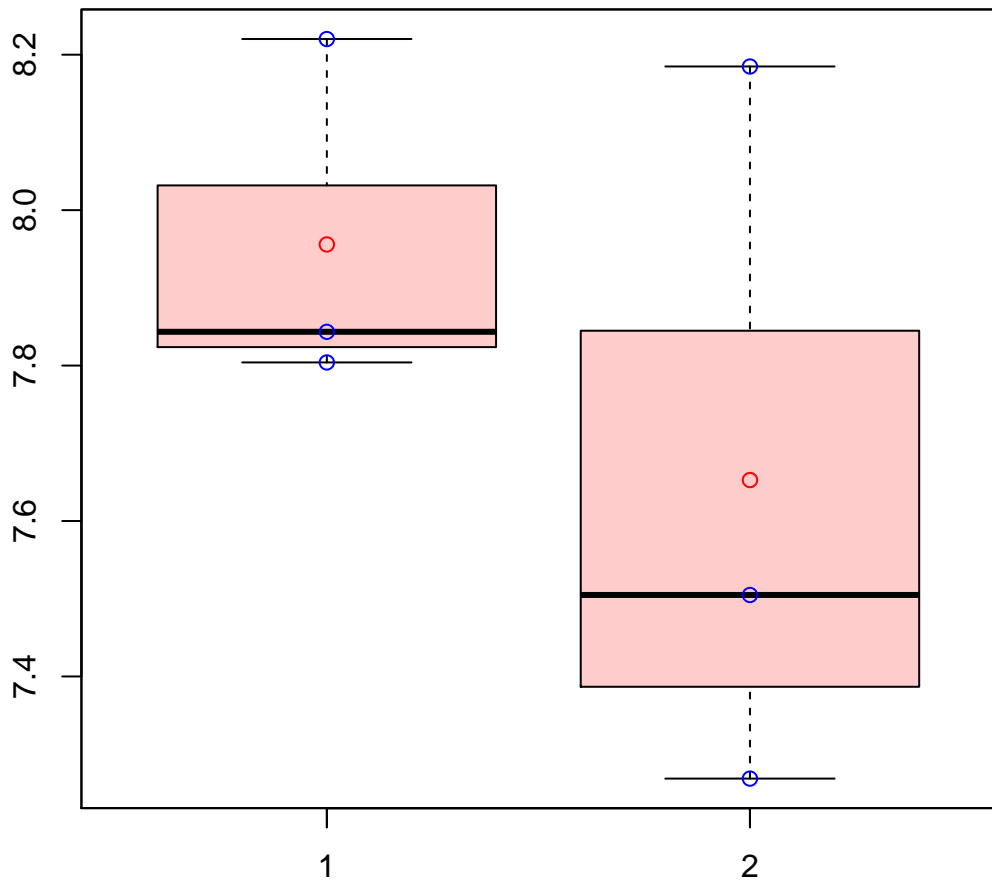

t-Test: p-value = 0.4



# H6SZA3|H6SZA3\_9POAL

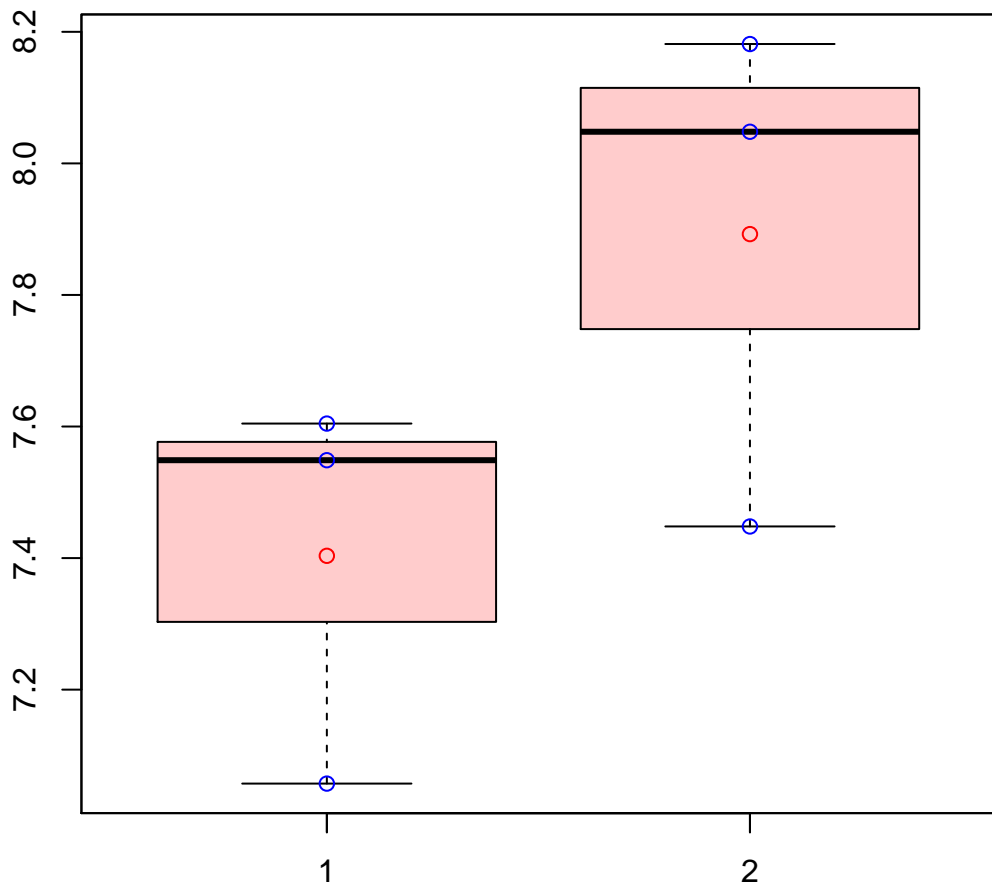

t-Test: p-value = 0.17

# H6T028|H6T028\_9POAL

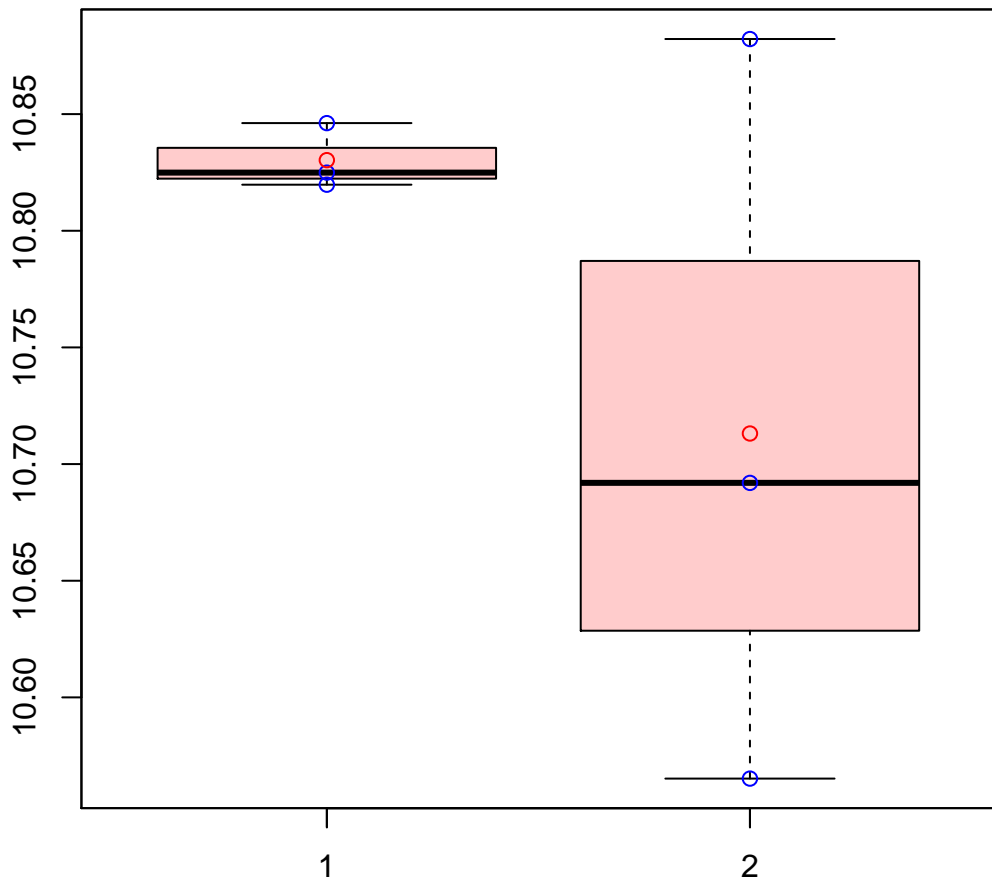

t-Test: p-value = 0.33

# H6T039|H6T039\_9POAL

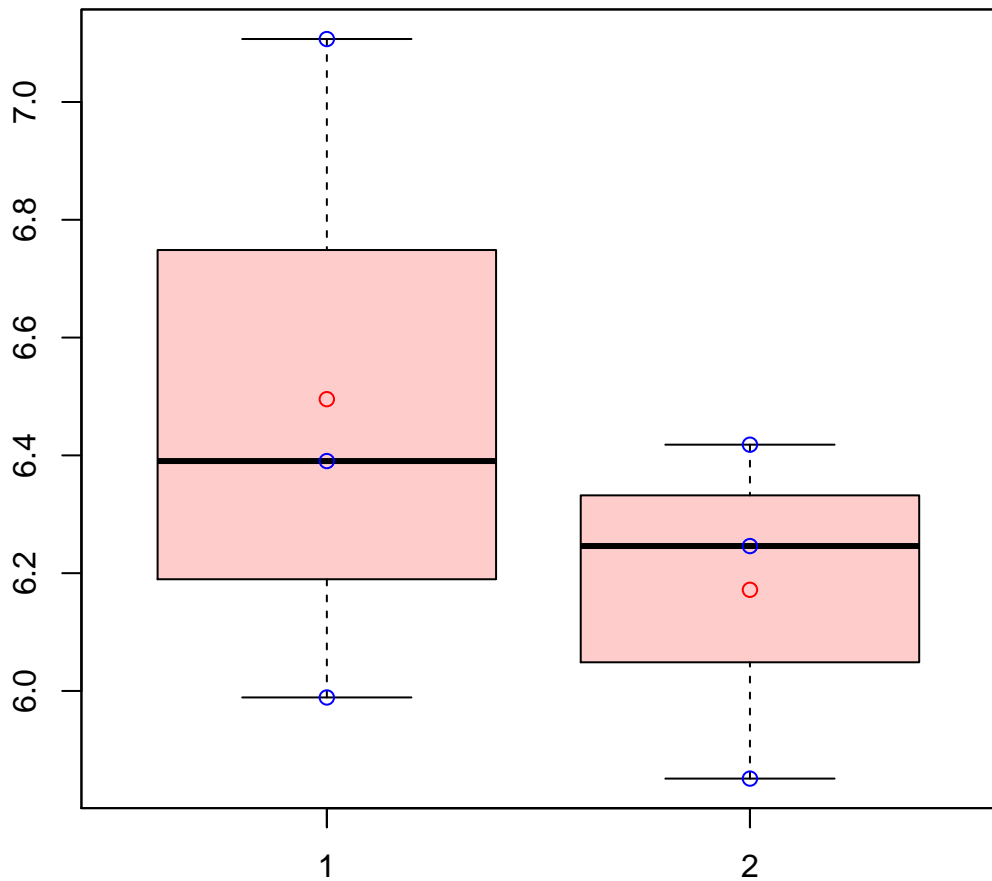

t-Test: p-value = 0.44

# H6T068|H6T068\_9POAL

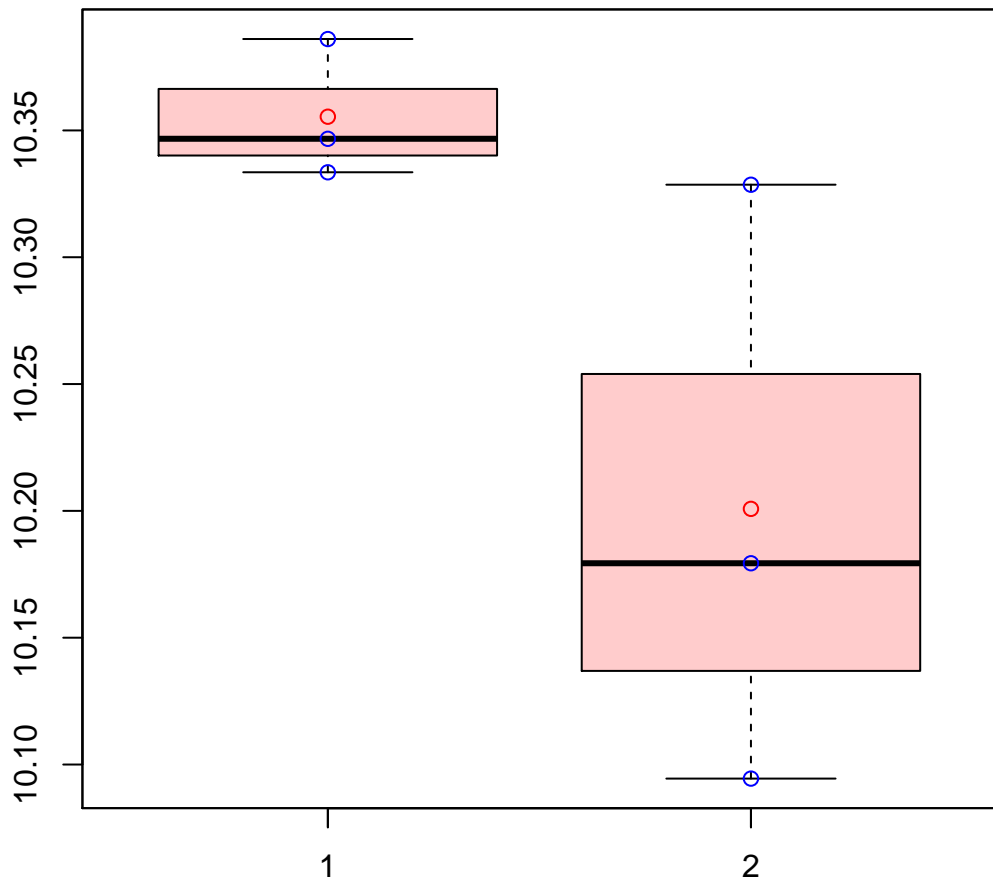

t-Test: p-value = 0.15

# H6T072|H6T072\_9POAL

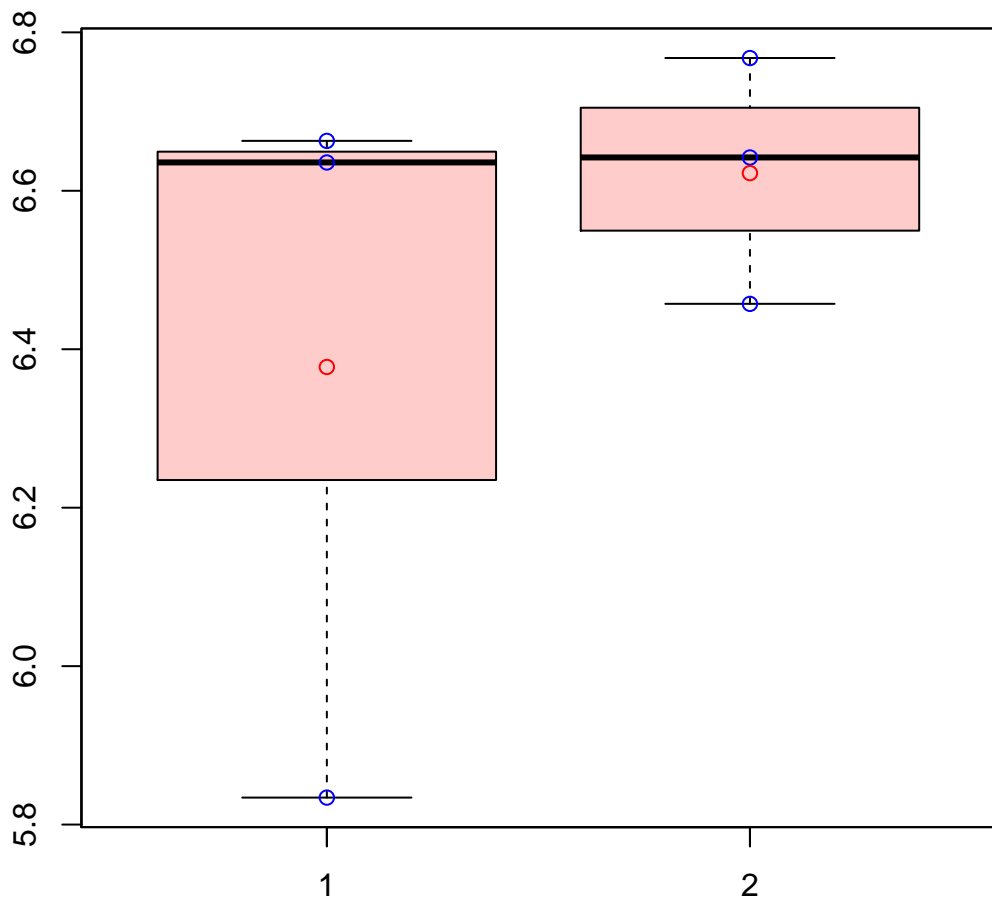

t-Test: p-value = 0.47

# H6T0N3|H6T0N3\_9POAL

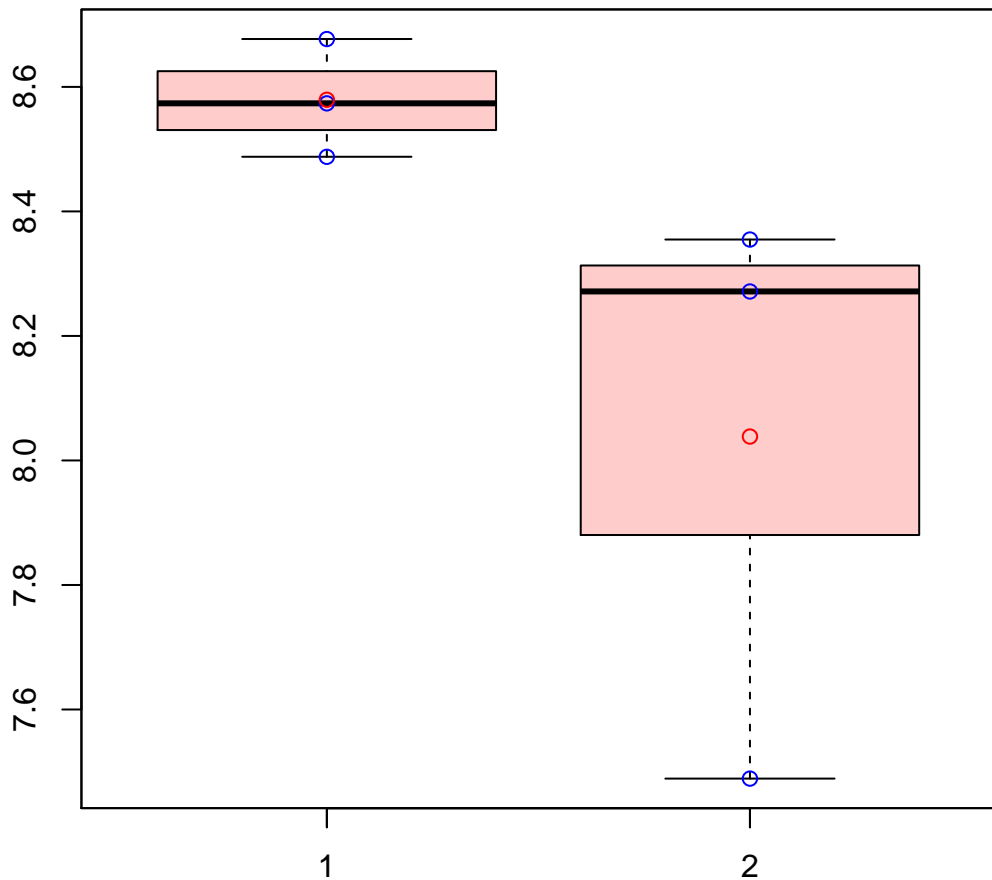

t-Test: p-value = 0.18

# H6T2Q6|H6T2Q6\_9LILI

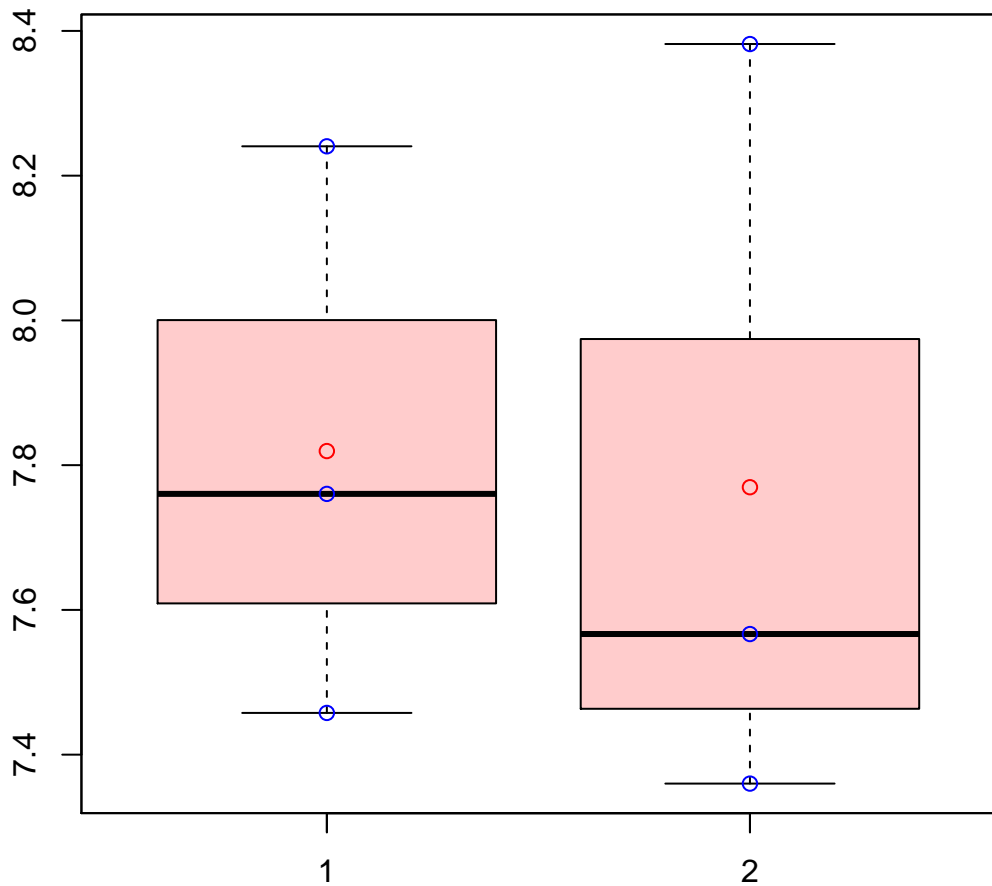

t-Test: p-value = 0.9

# H6T2S0|H6T2S0\_9POAL

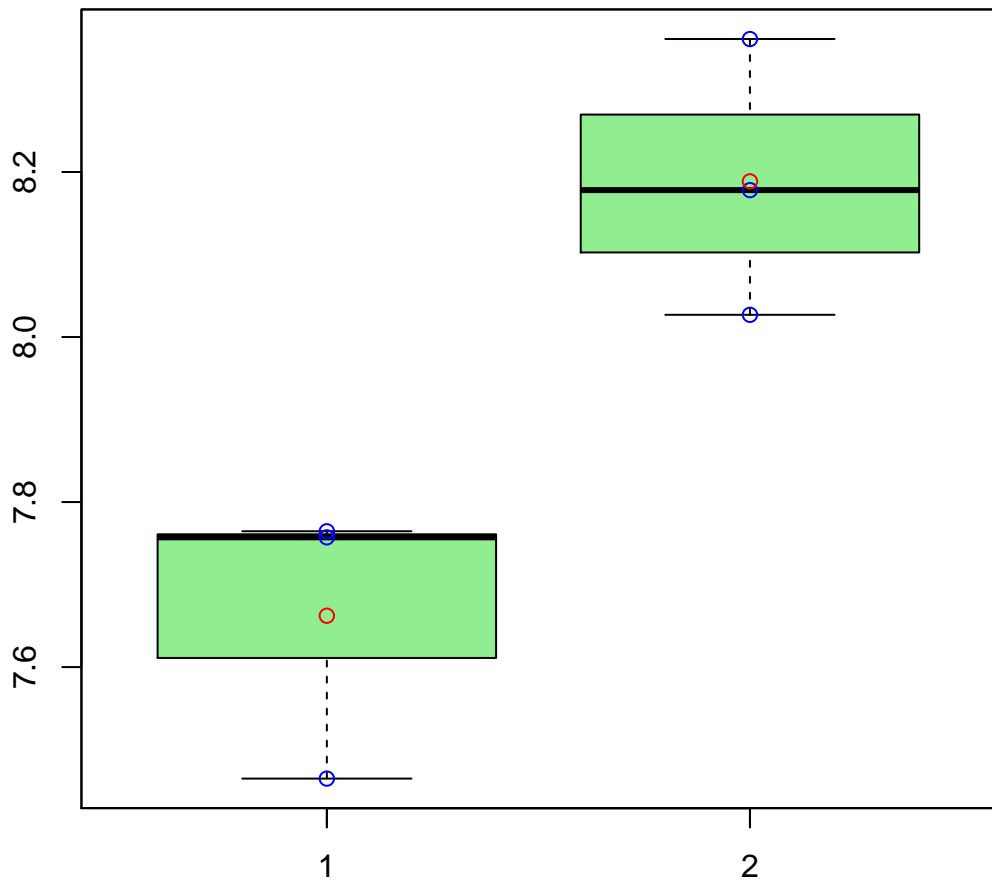

t-Test: p-value = 0.02



# H6T2S5|H6T2S5\_9POAL

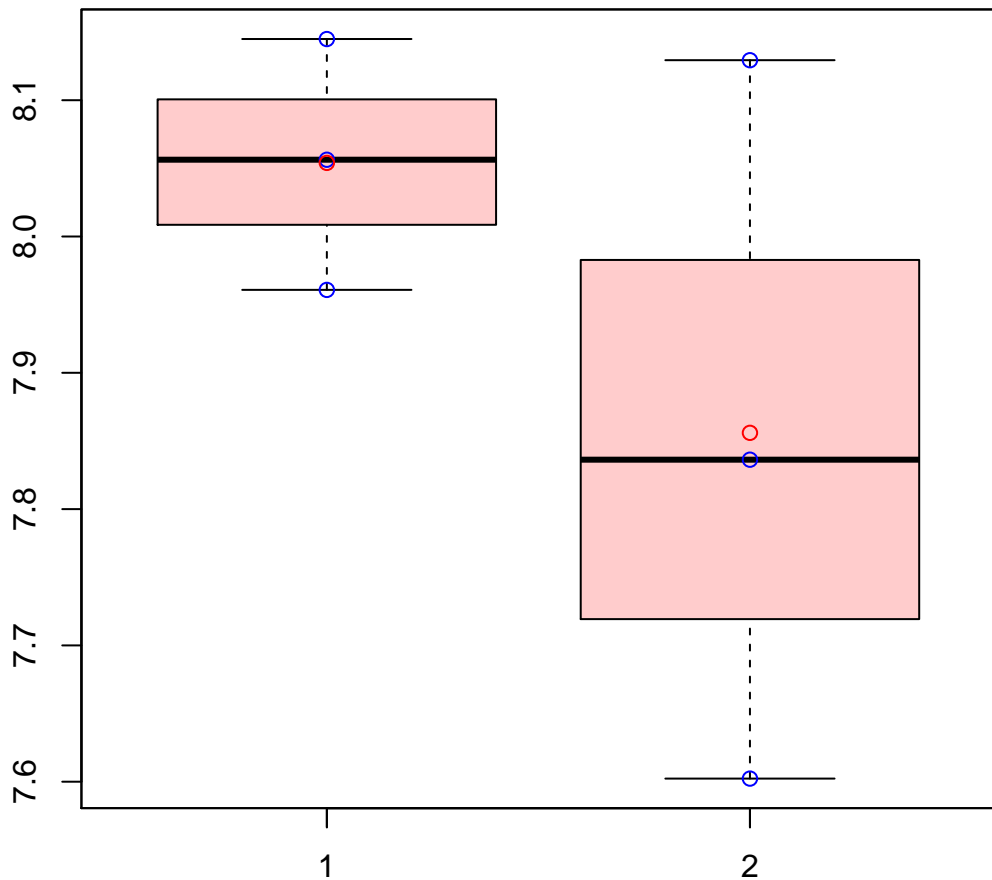

t-Test: p-value = 0.32

# H6T2Y9|H6T2Y9\_9POAL

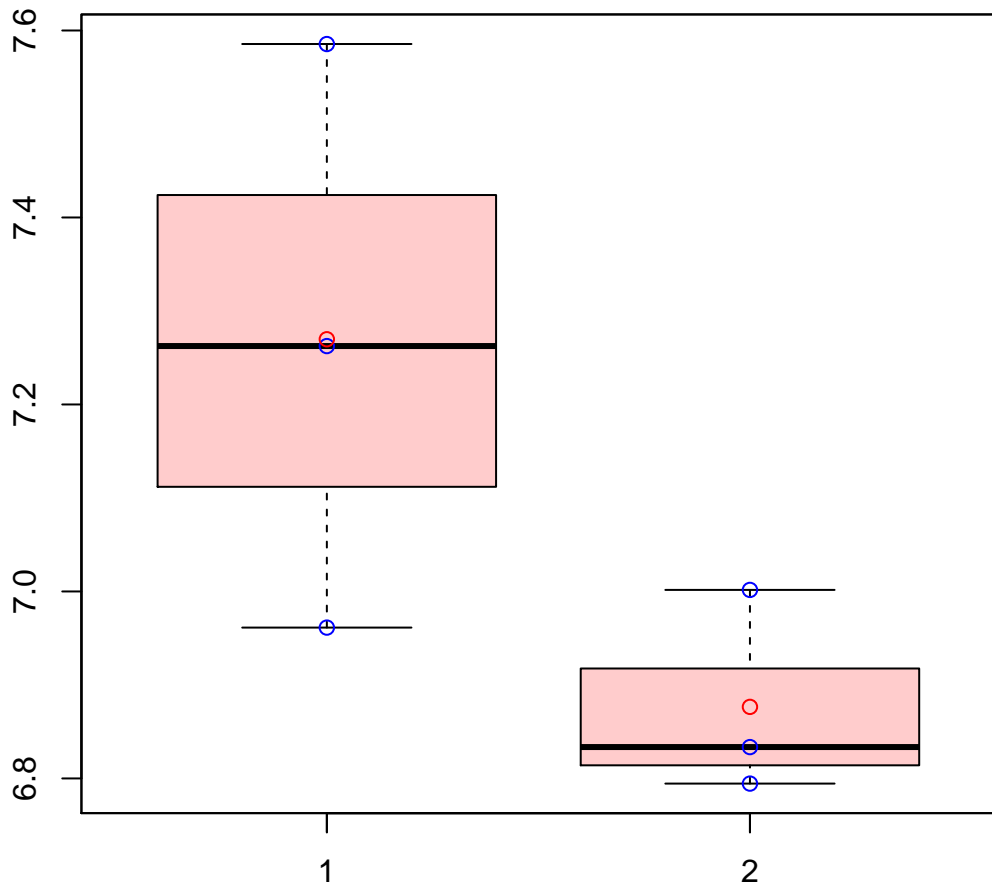

t-Test: p-value = 0.15

# H6T3C5|H6T3C5\_9ASPA

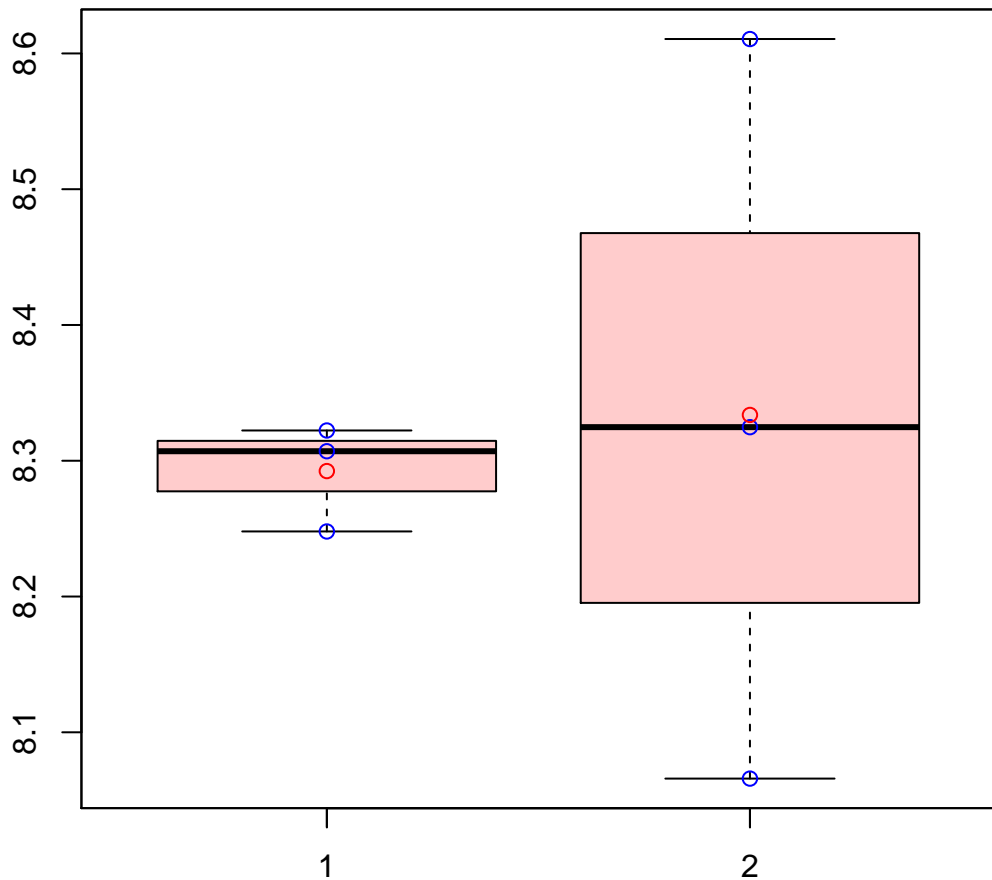

t-Test: p-value = 0.82

# H6T3K4|H6T3K4\_9POAL

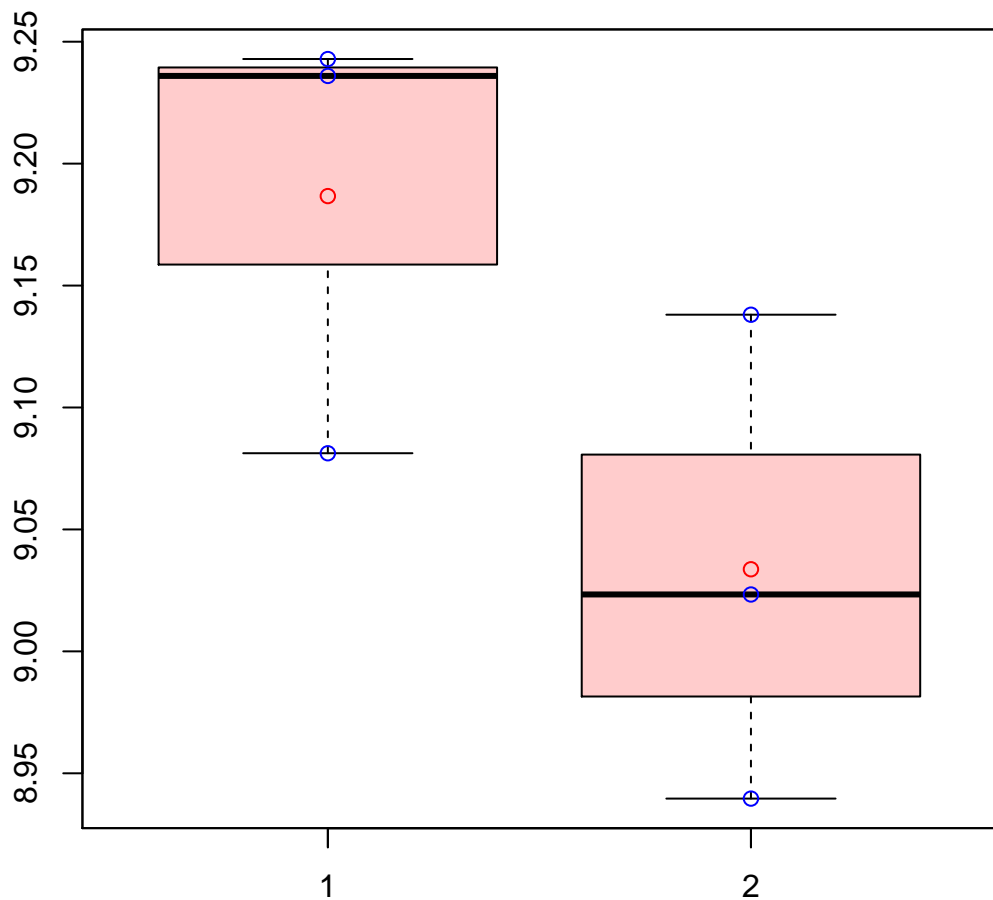

t-Test: p-value = 0.12

# H6THA4|H6THA4\_9LILI

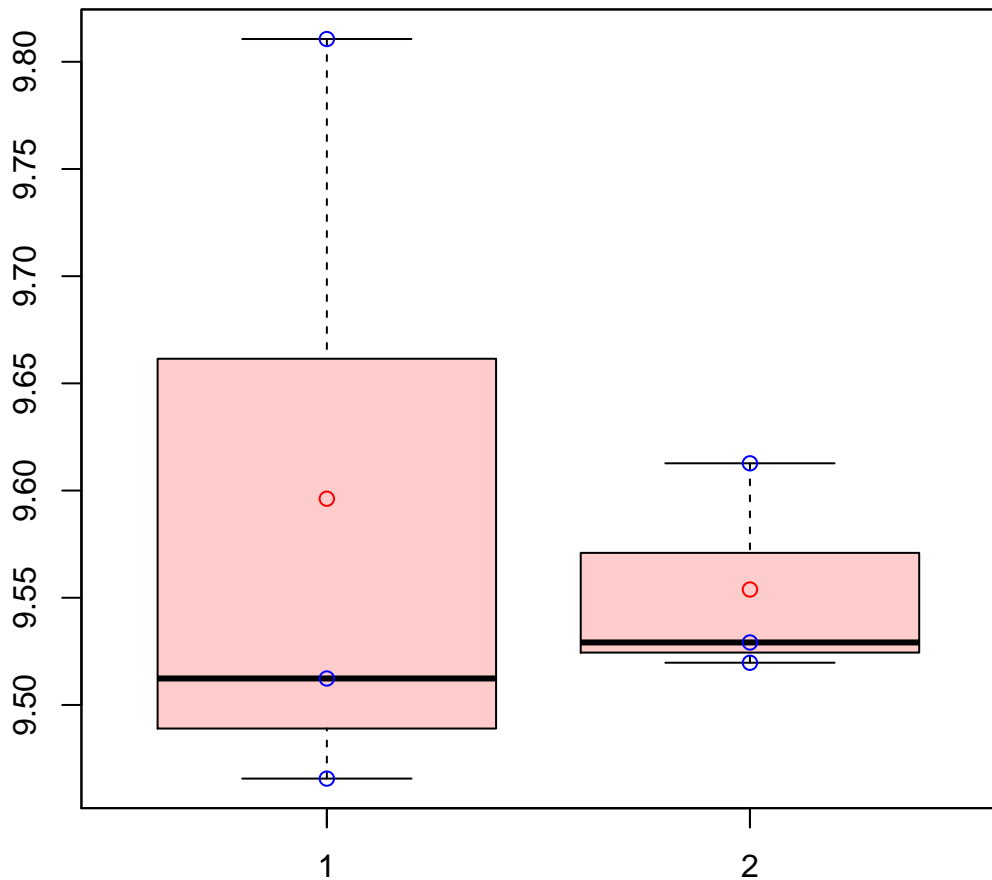

t-Test: p-value = 0.74

# H6U267|H6U267\_9LILI

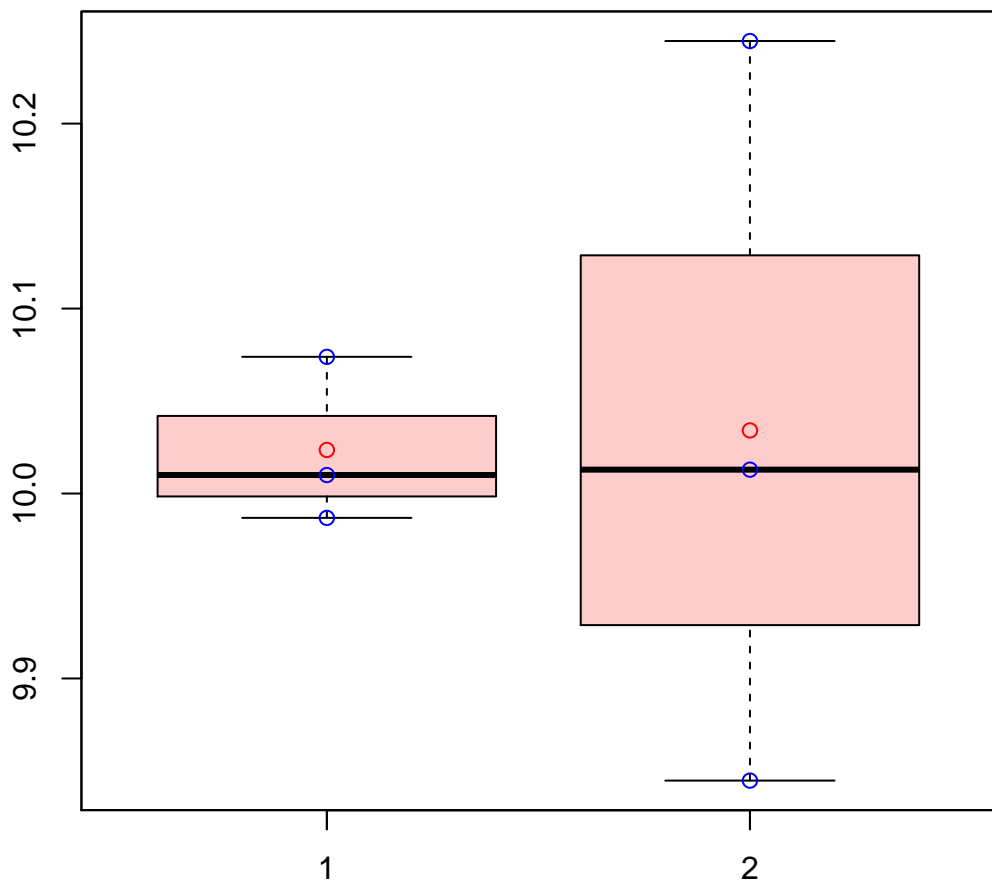

t-Test: p-value = 0.94

# H6U638|H6U638\_CYMEN

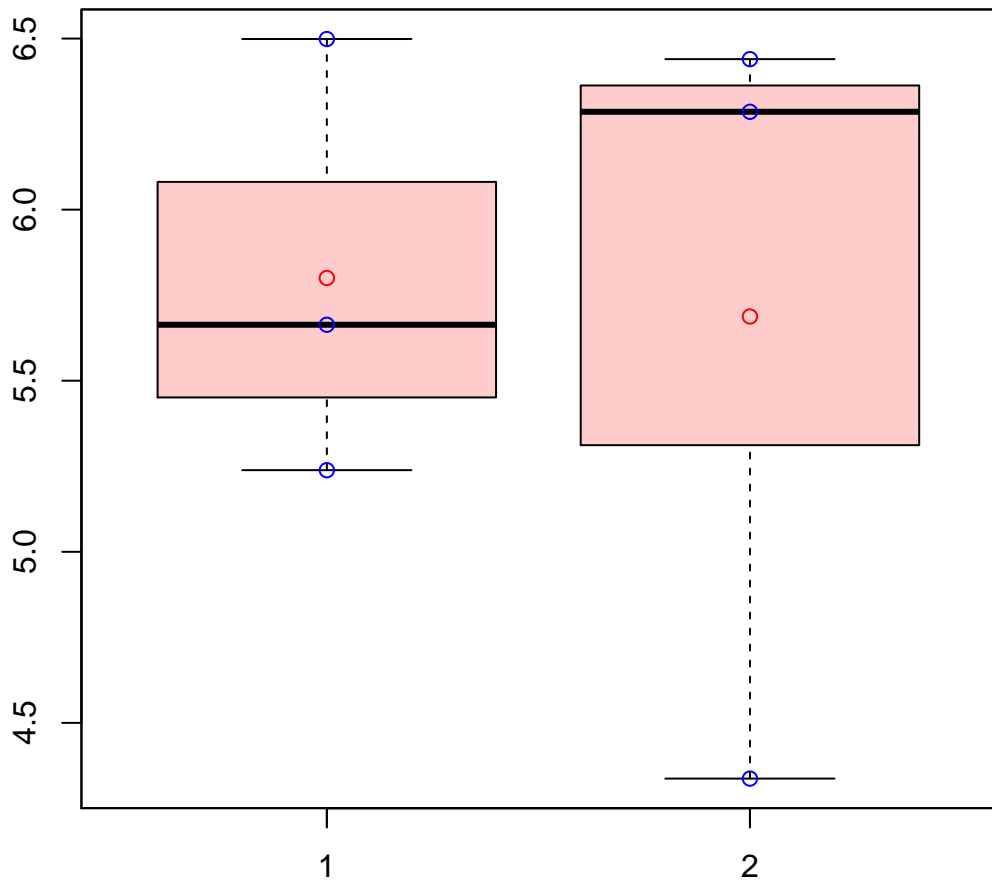

t-Test: p-value = 0.89

# H6UDT7|H6UDT7\_9ARAE

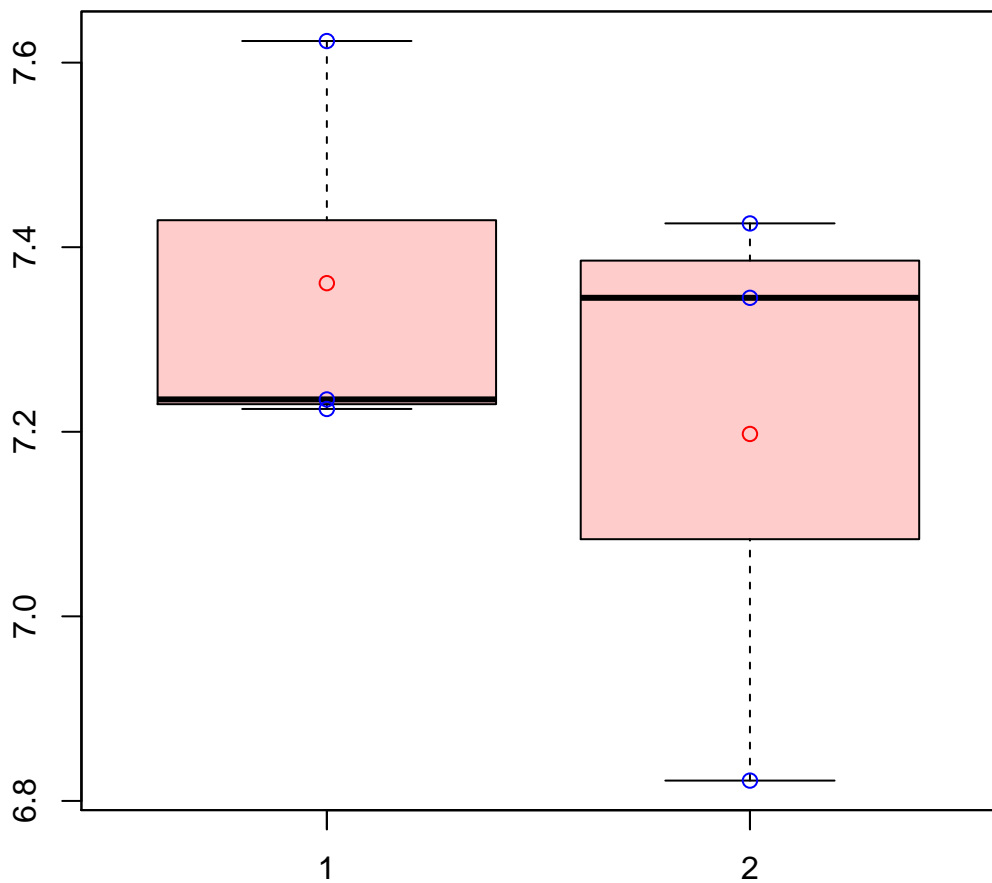

t-Test: p-value = 0.52



# H6UDT8|H6UDT8\_9ARAE

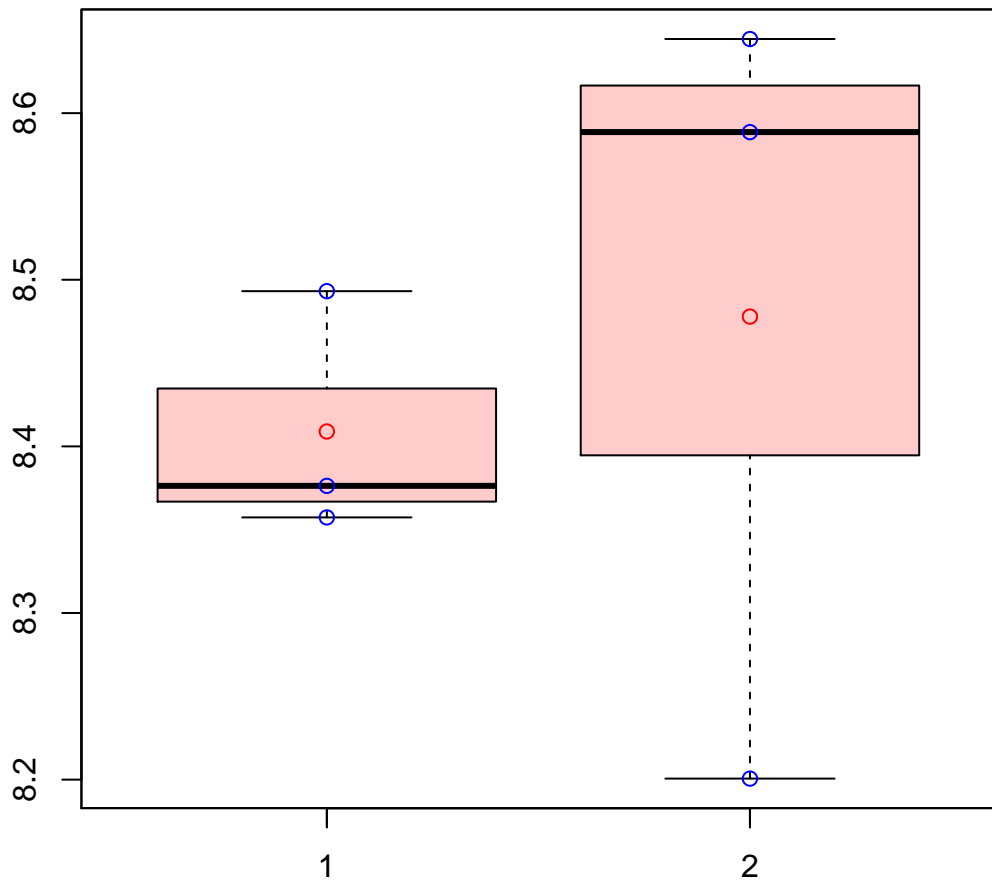

t-Test: p-value = 0.68

# H6UDT9|H6UDT9\_9ARAE

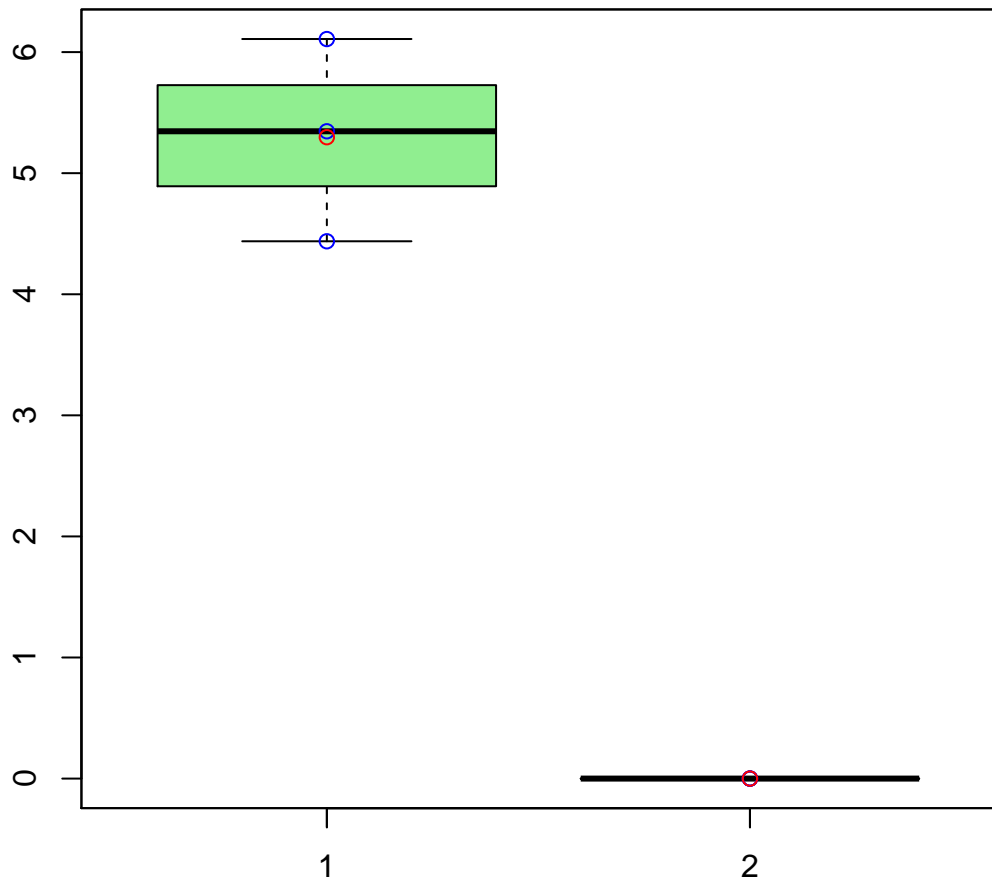

t-Test: p-value = 0.01

H6WBW0|H6WBW0\_9LILI

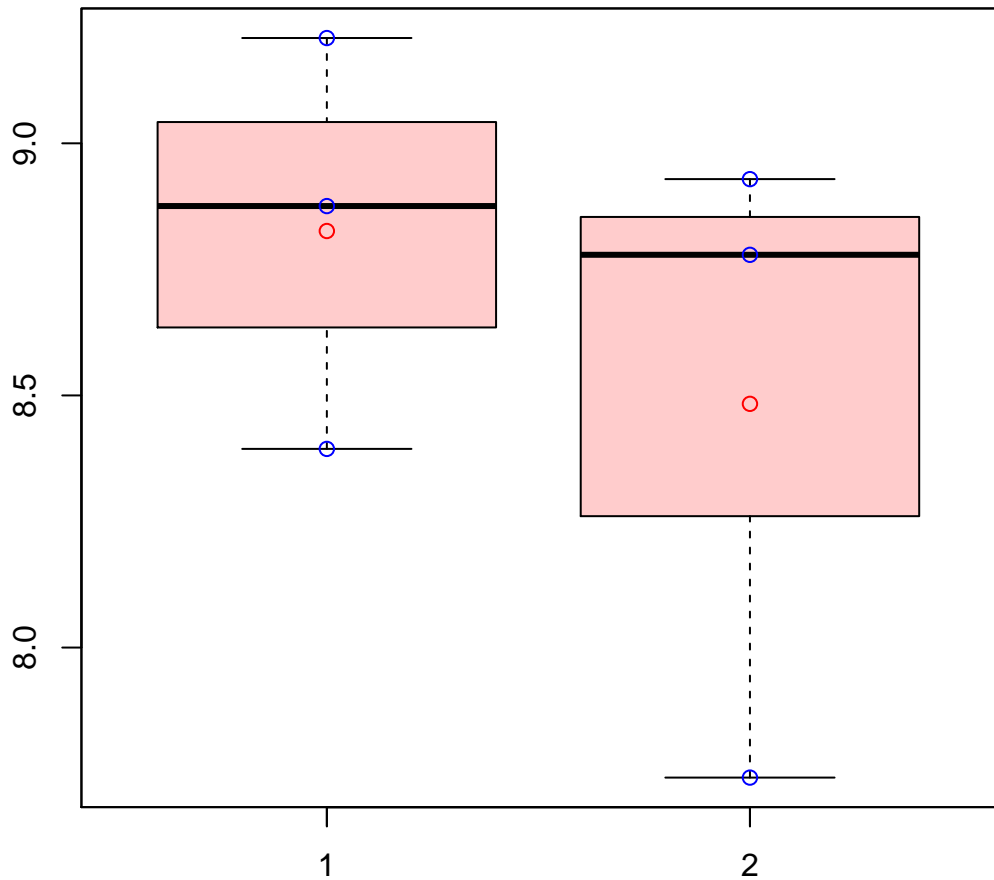

t-Test: p-value = 0.49

# H6WBW9|H6WBW9\_9LILI

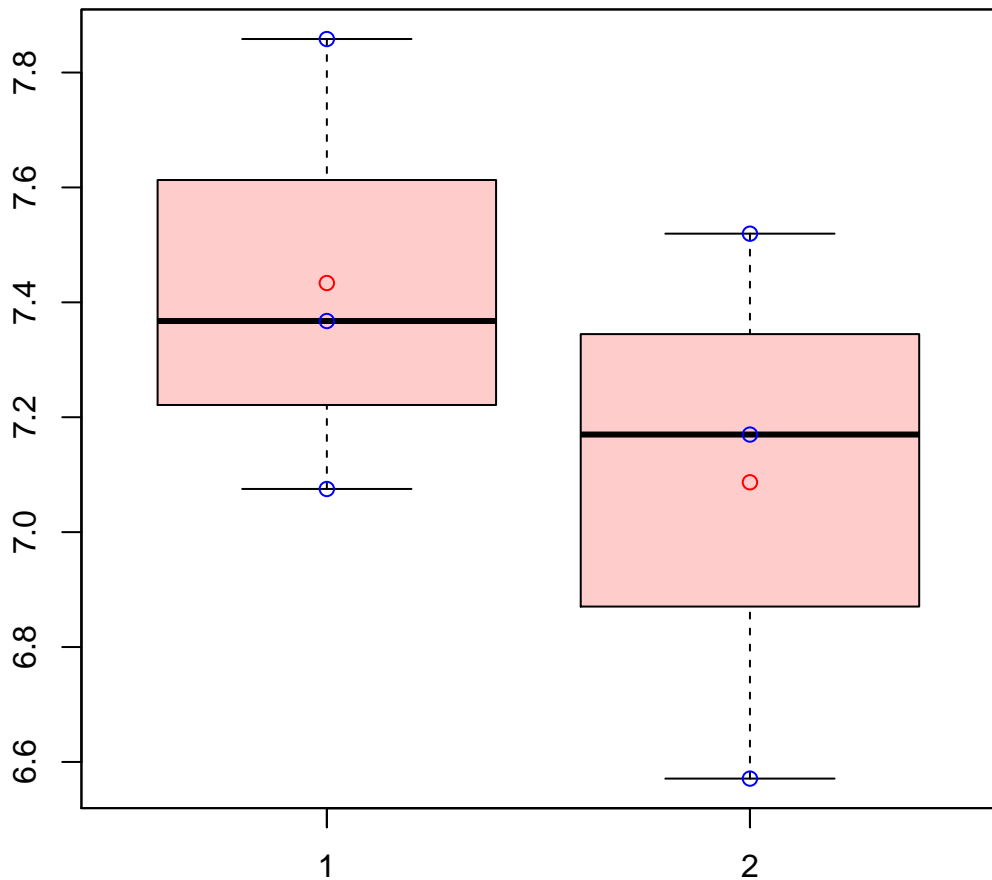

t-Test: p-value = 0.39

# H6WCP2|H6WCP2\_SECCE

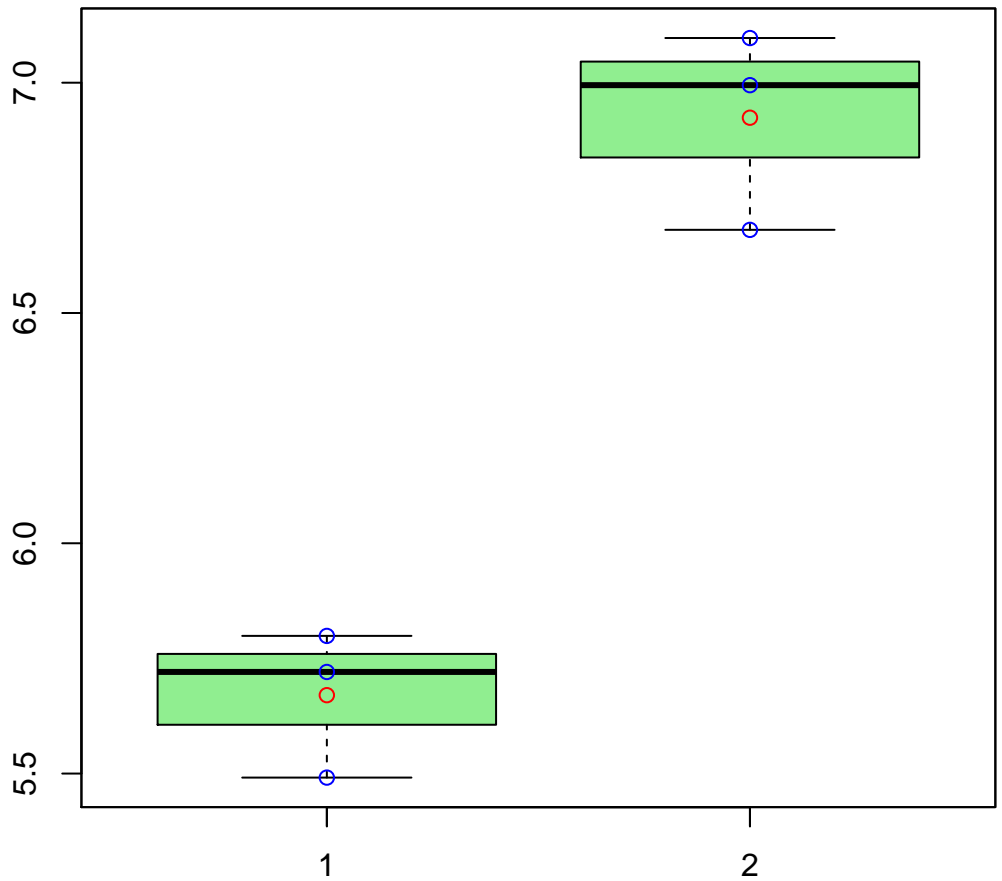

t-Test: p-value = 0

# H8PFB5|H8PFB5\_9POAL

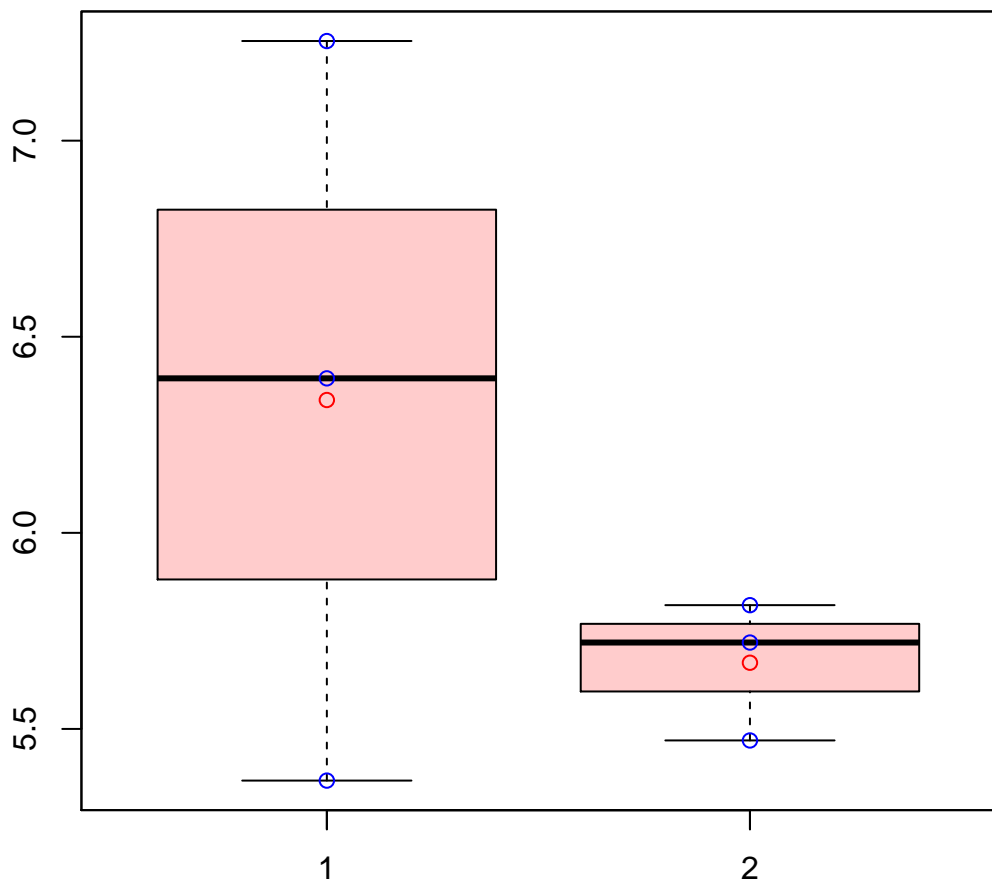

t-Test: p-value = 0.34

# H8WFP3|H8WFP3\_9POAL

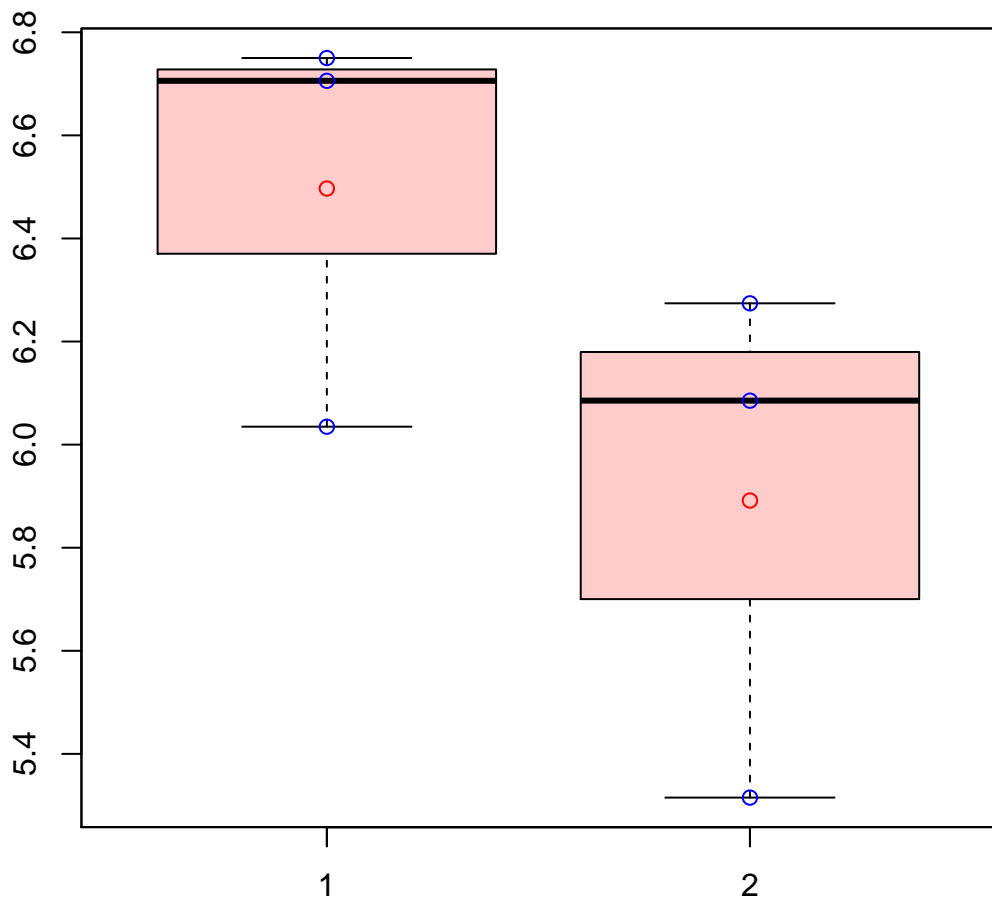

t-Test: p-value = 0.18

# H8WFP8|H8WFP8\_HOLLA

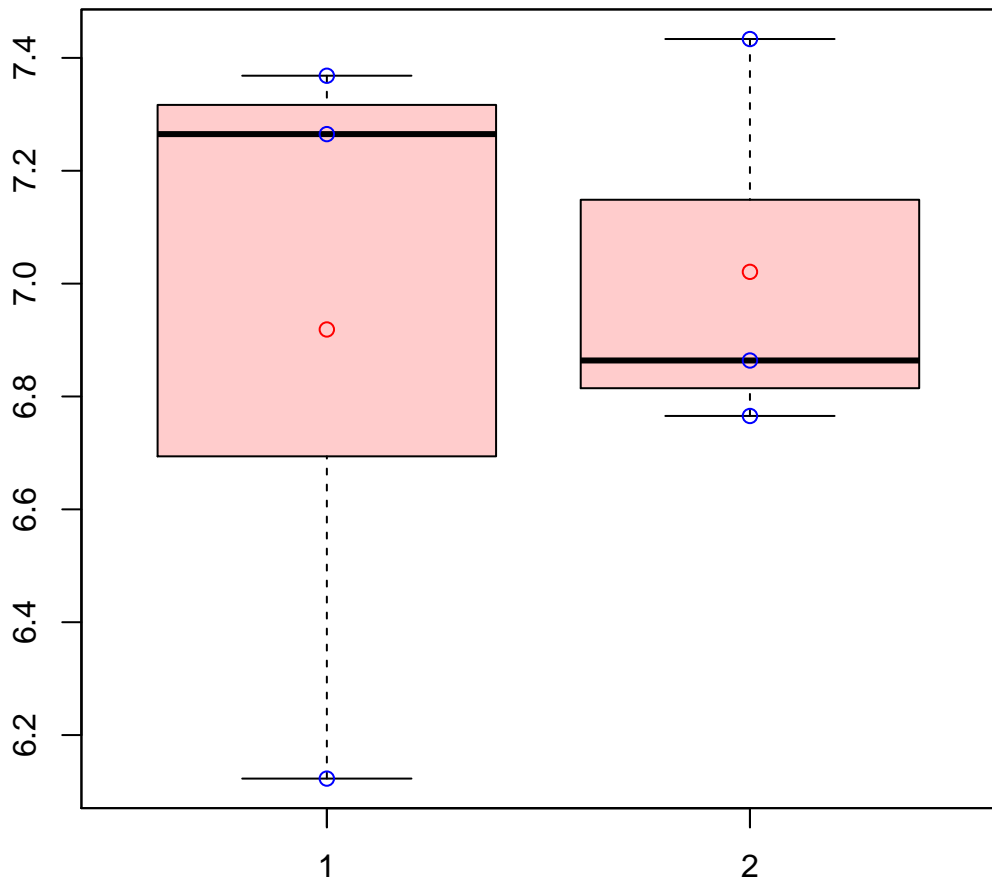

t-Test: p-value = 0.83



# H8WFX6|H8WFX6\_9POAL

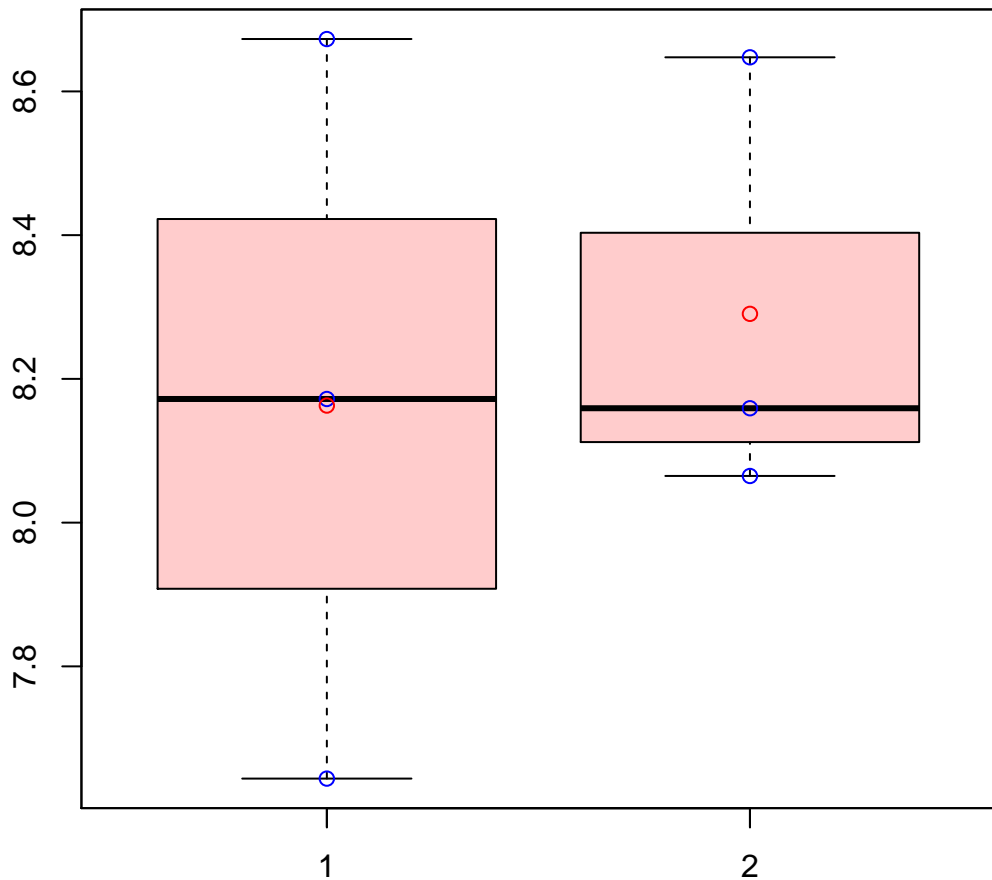

t-Test: p-value = 0.74

# H8WFY2|H8WFY2\_9POAL

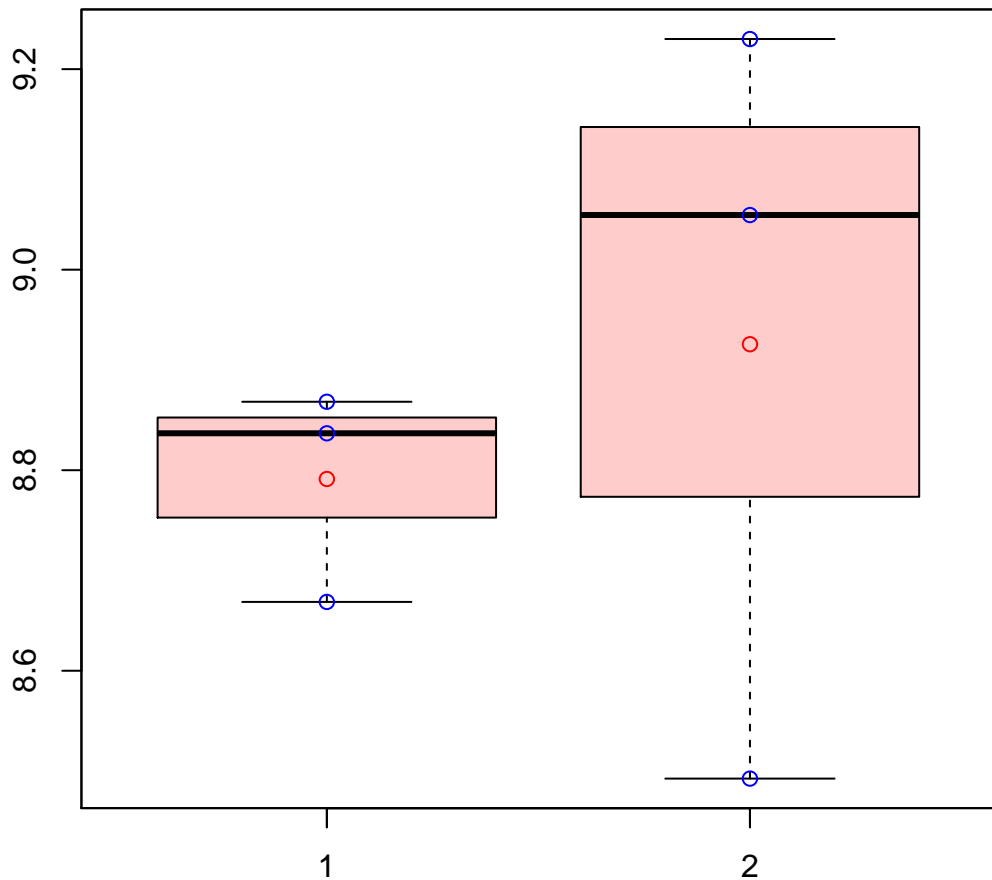

t-Test: p-value = 0.61

# H8WFY4|H8WFY4\_9POAL

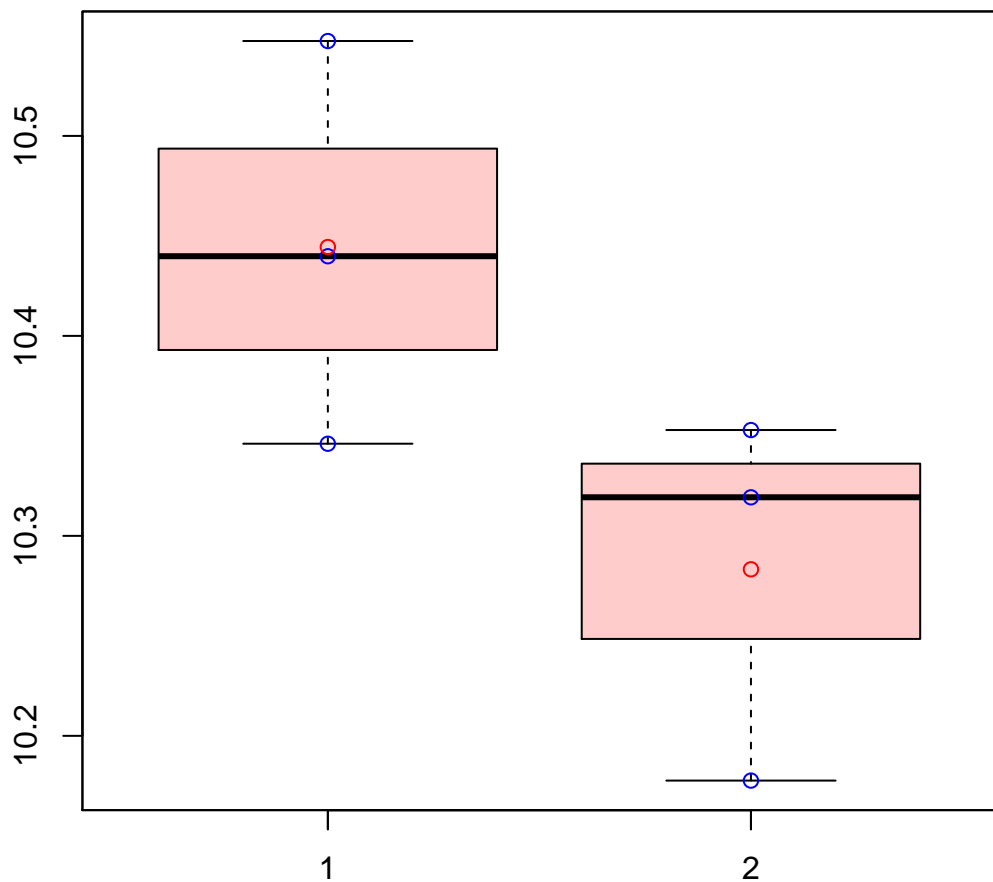

t-Test: p-value = 0.11

# H8WFY5|H8WFY5\_PHRAU

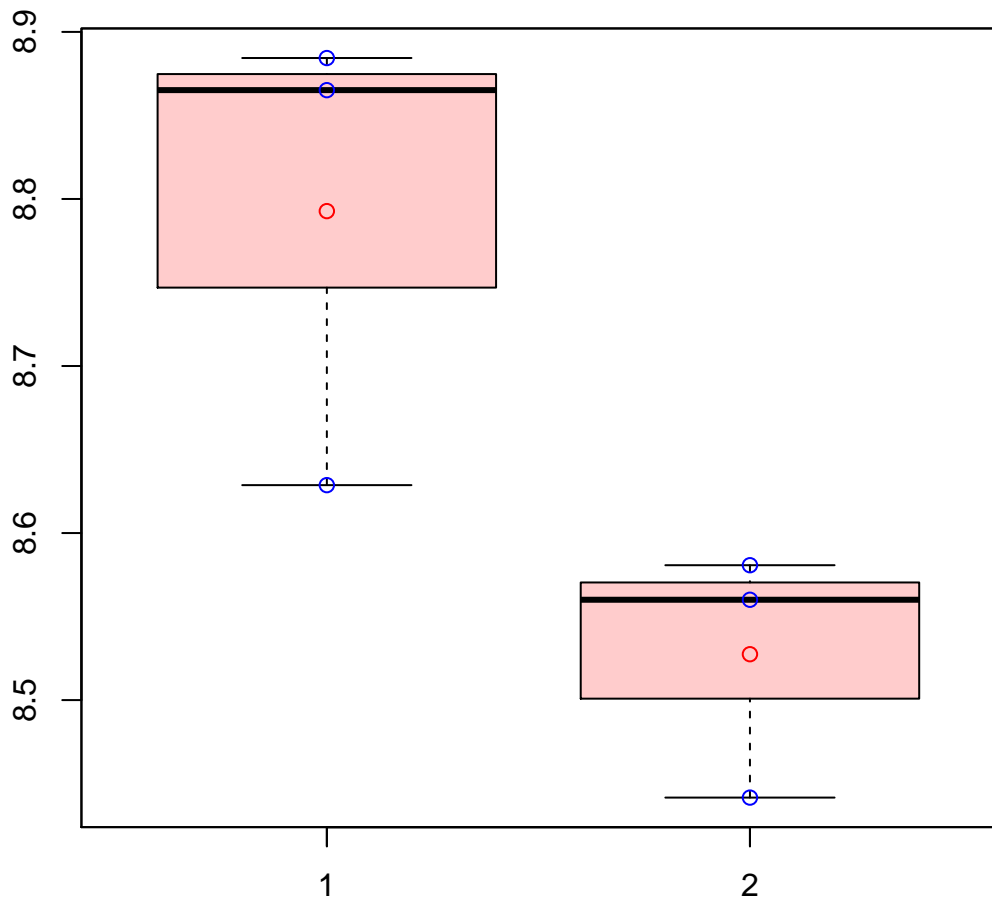

t-Test: p-value = 0.06

# H8WFY6|H8WFY6\_ELEIN

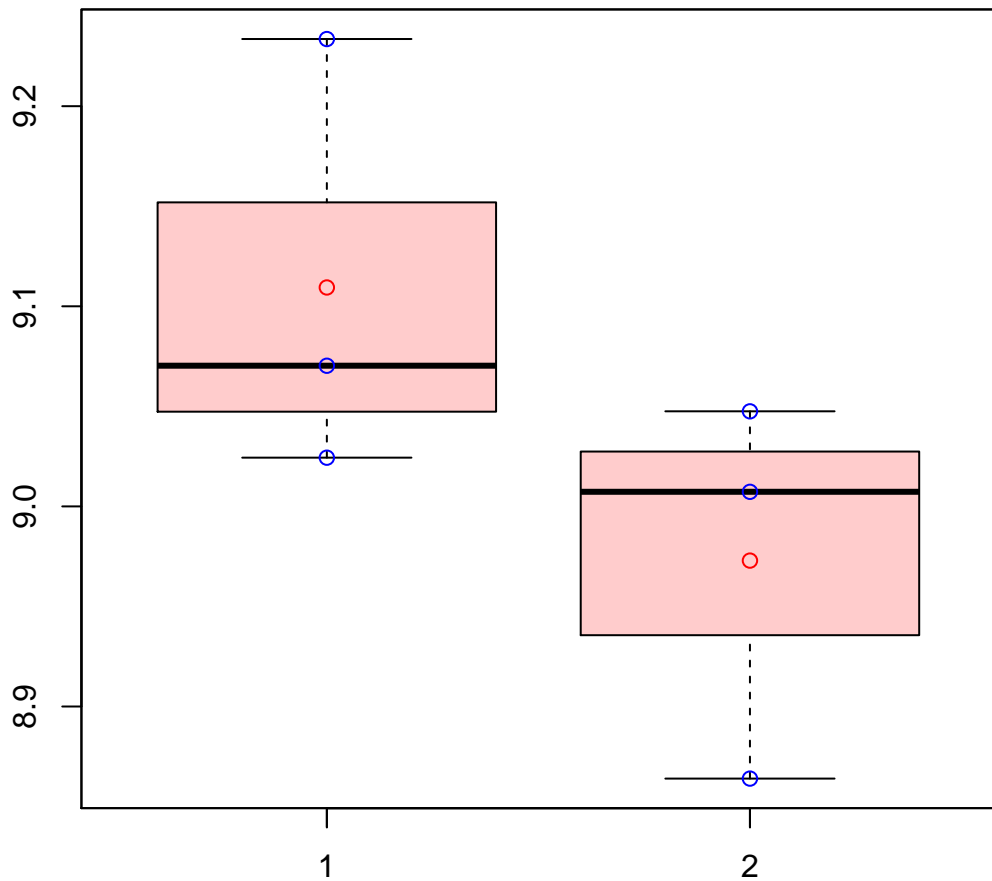

t-Test: p-value = 0.18

# H8WFY7|H8WFY7\_9POAL

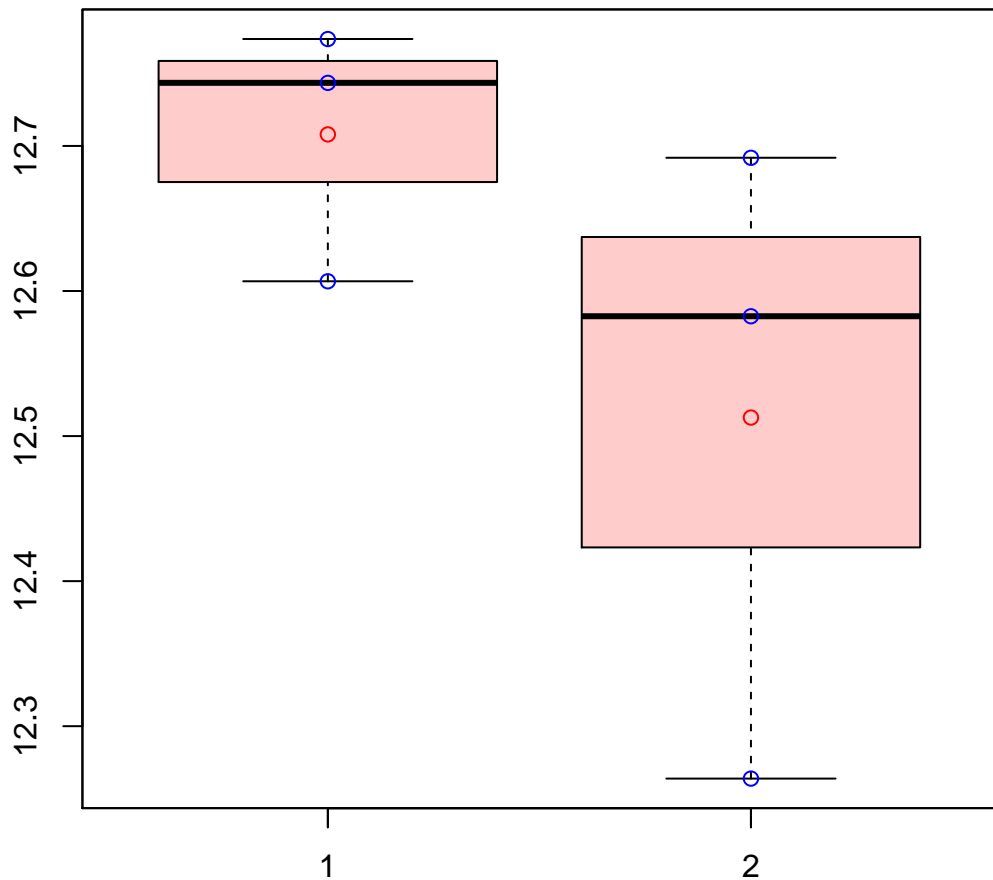

t-Test: p-value = 0.26

# H8WFY8|H8WFY8\_9POAL

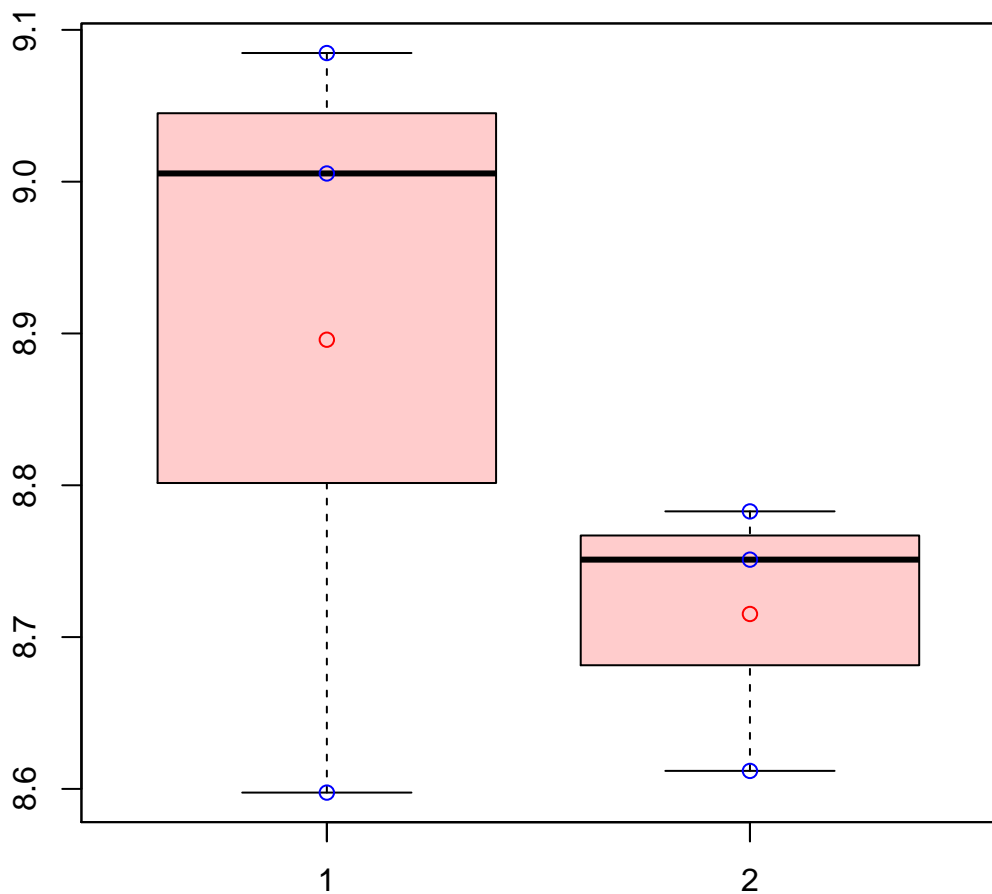

t-Test: p-value = 0.36

# H8WG19|H8WG19\_9POAL

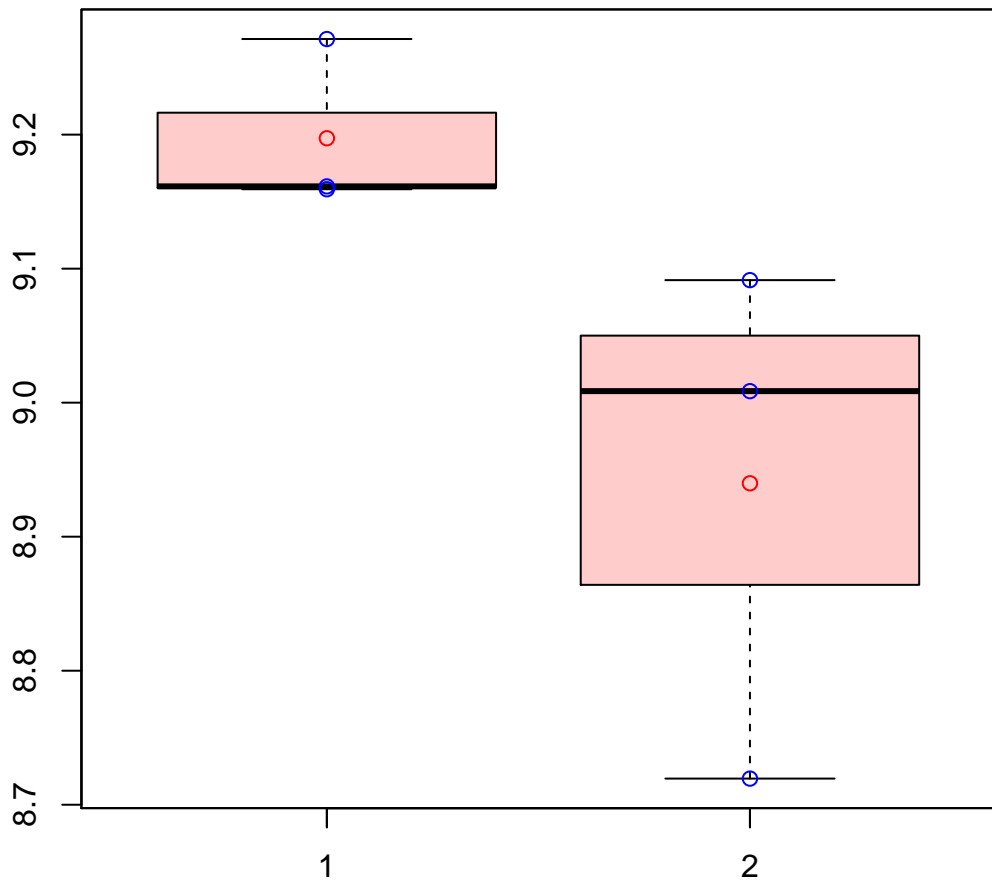

t-Test: p-value = 0.14



# H8WG28|H8WG28\_9POAL

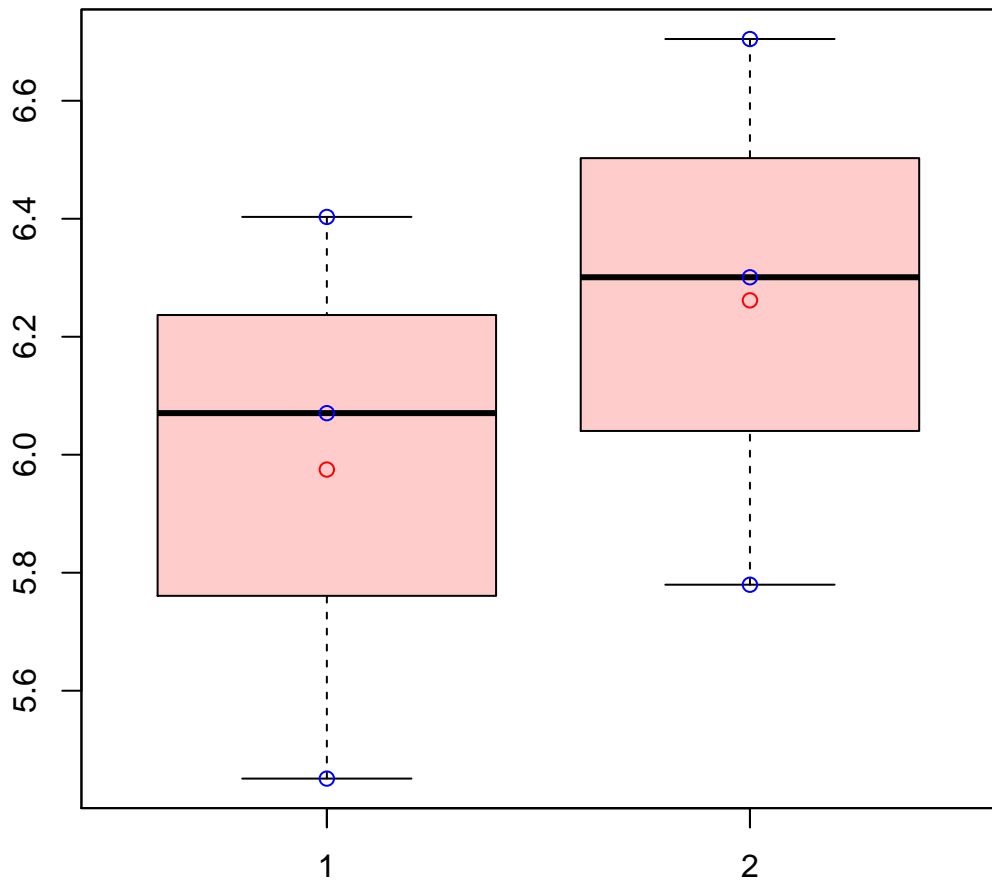

t-Test: p-value = 0.5

# H8ZZZ9|H8ZZZ9\_9POAL

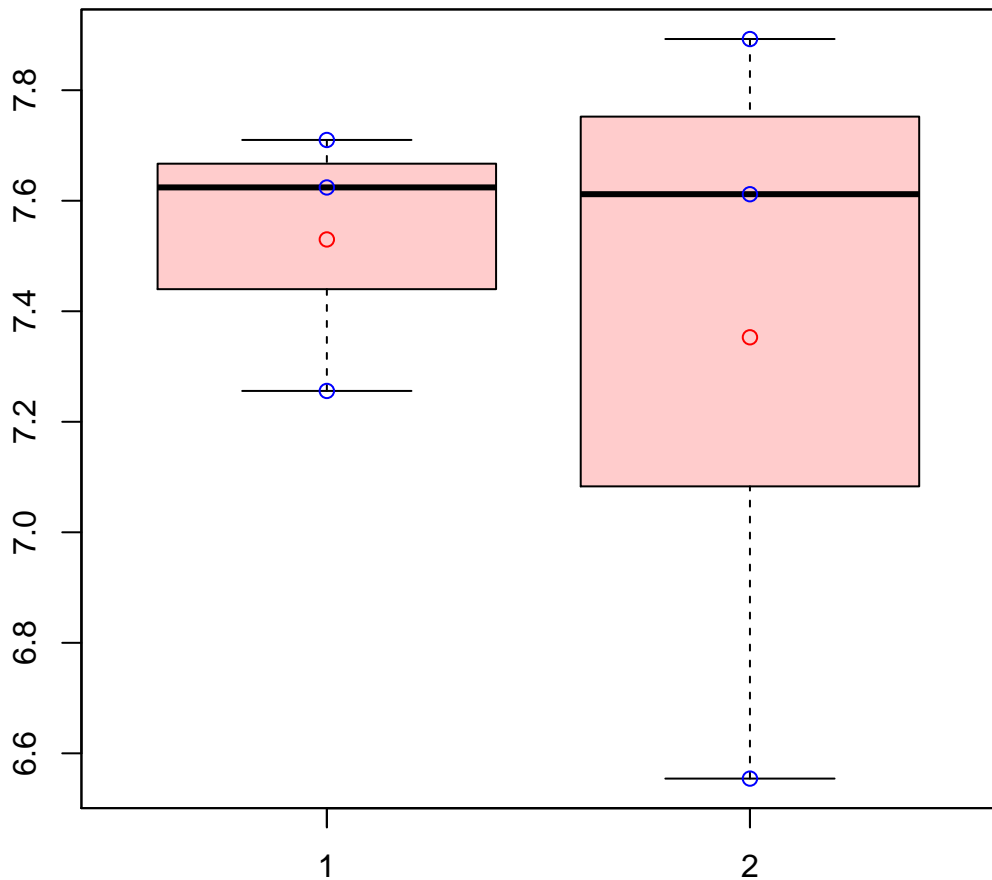

t-Test: p-value = 0.71

# H9A044|H9A044\_9POAL

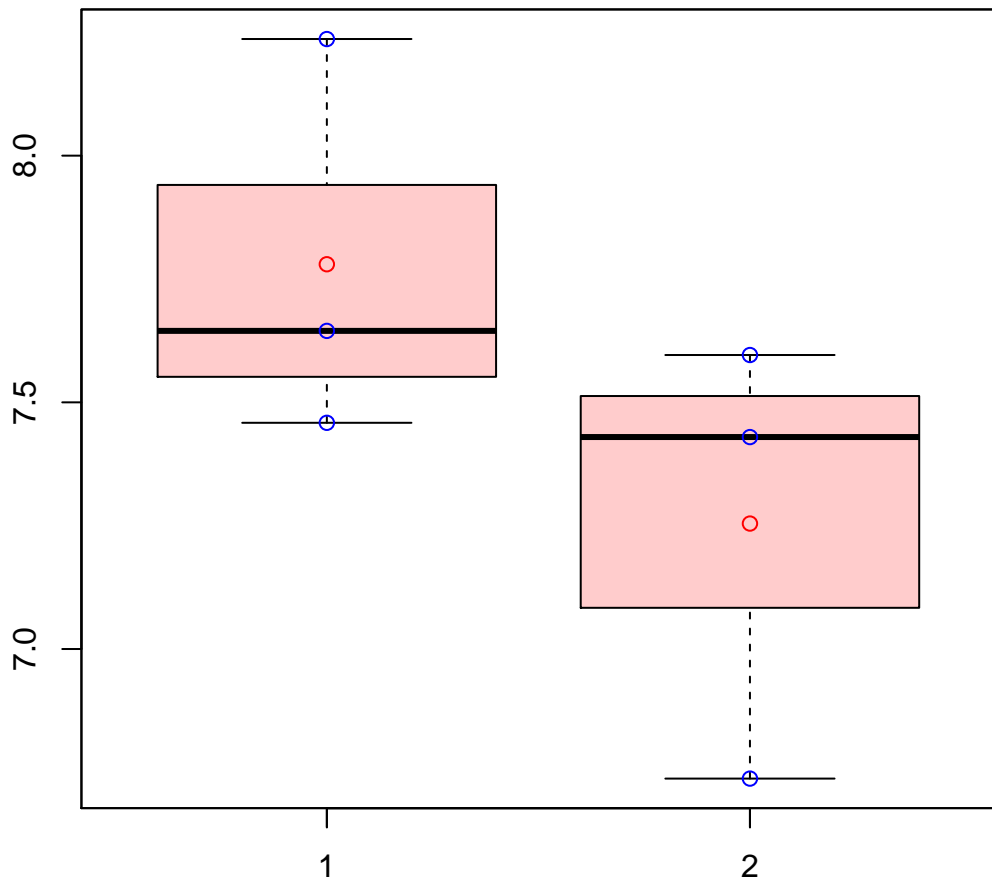

t-Test: p-value = 0.21

# H9A099|H9A099\_9POAL

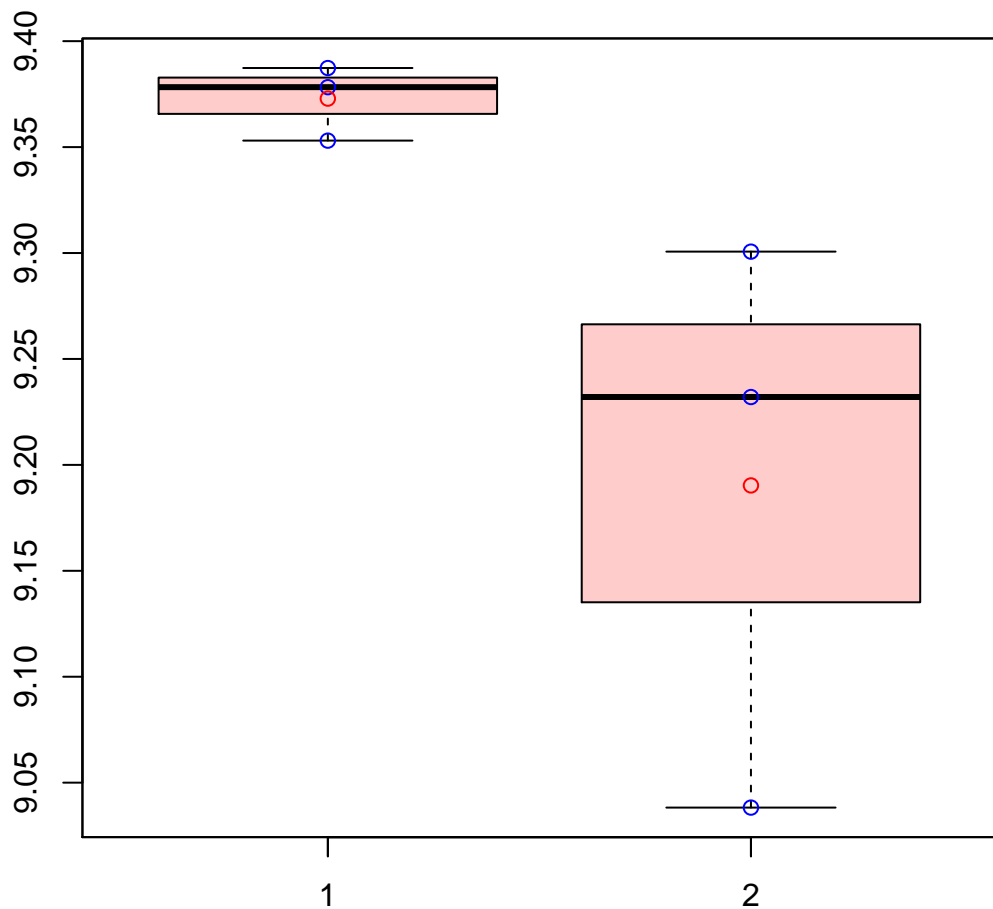

t-Test: p-value = 0.14

# H9APQ2|H9APQ2\_9POAL

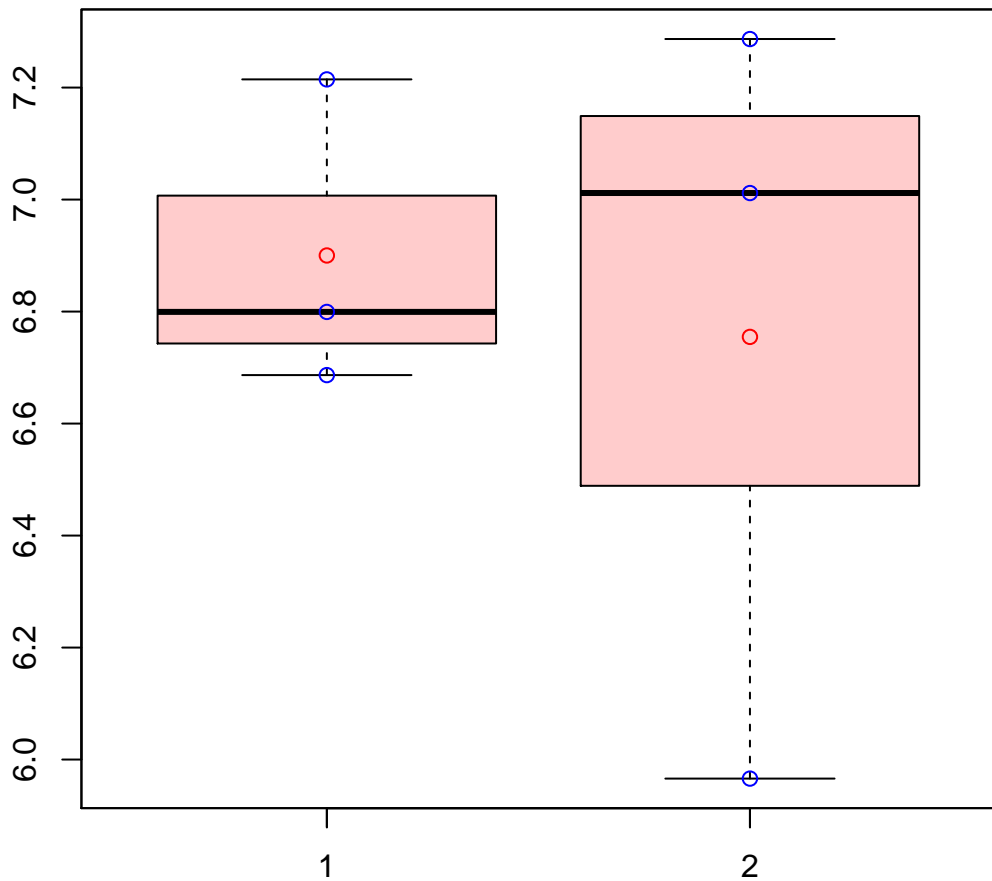

t-Test: p-value = 0.76

# H9B636|H9B636\_ONCHC

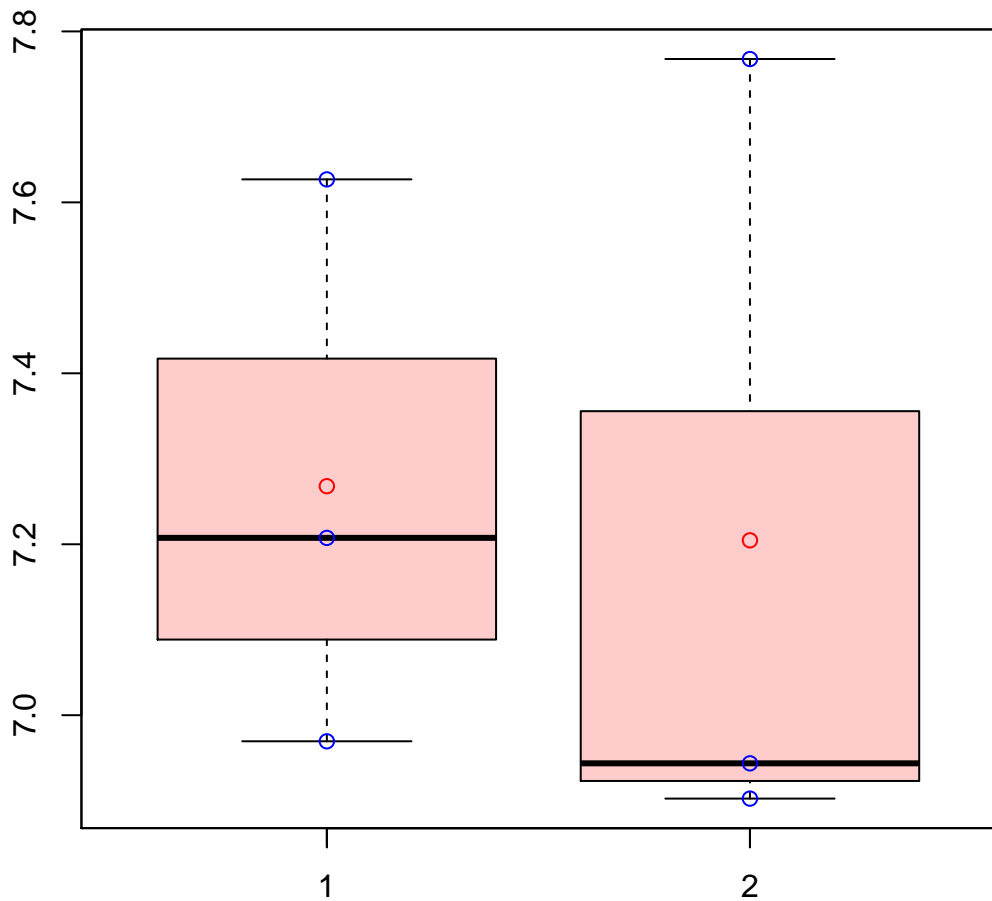

t-Test: p-value = 0.86

# H9B8G4|H9B8G4\_MISSI

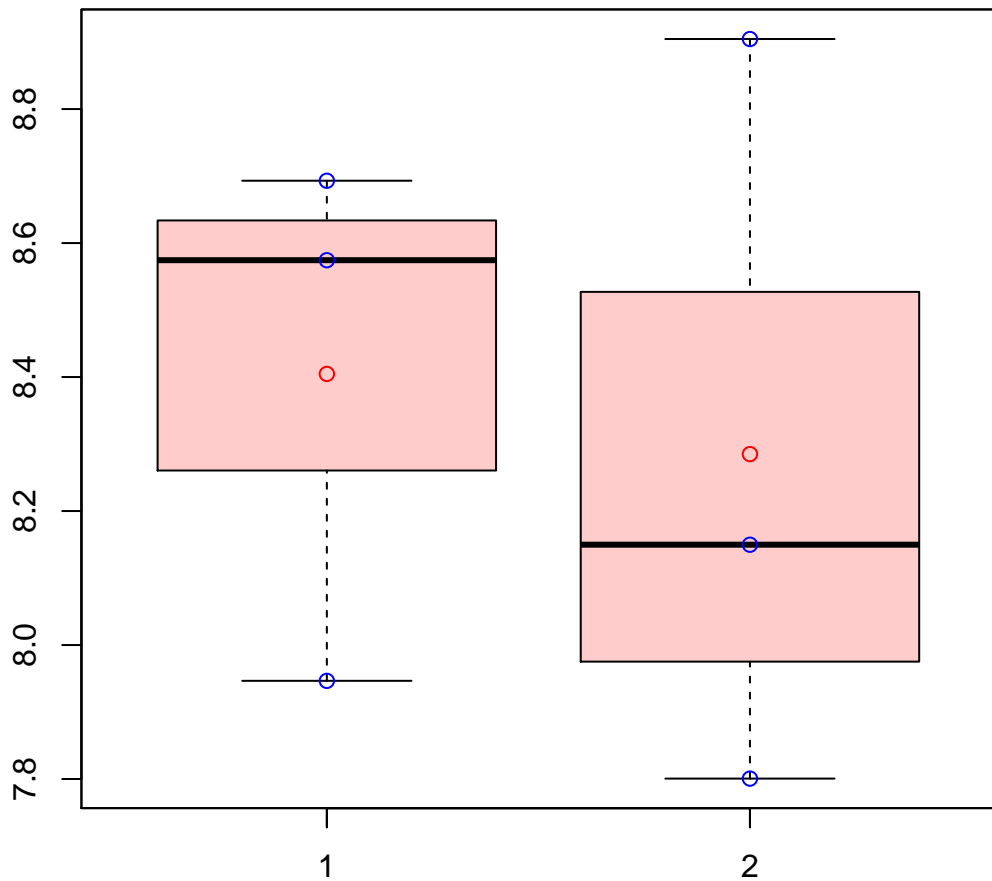

t-Test: p-value = 0.78

# H9BG21|H9BG21\_WHEAT

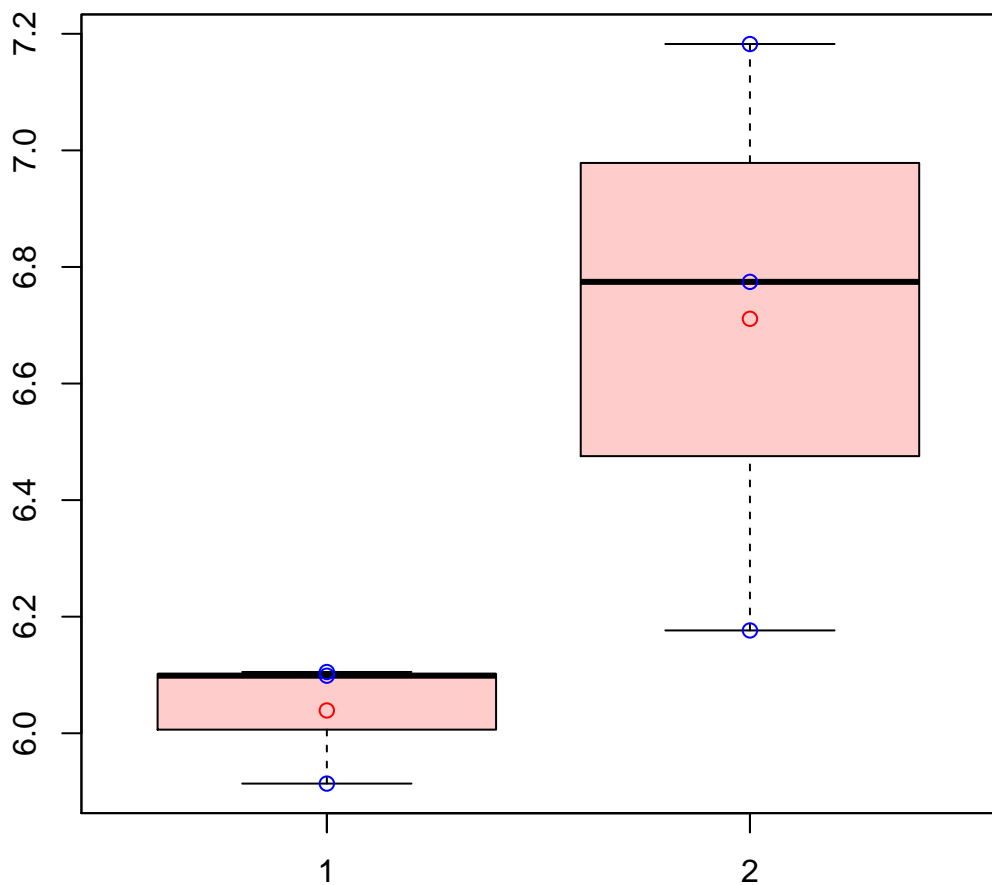

t-Test: p-value = 0.14



# H9C8A5|H9C8A5\_WHEAT

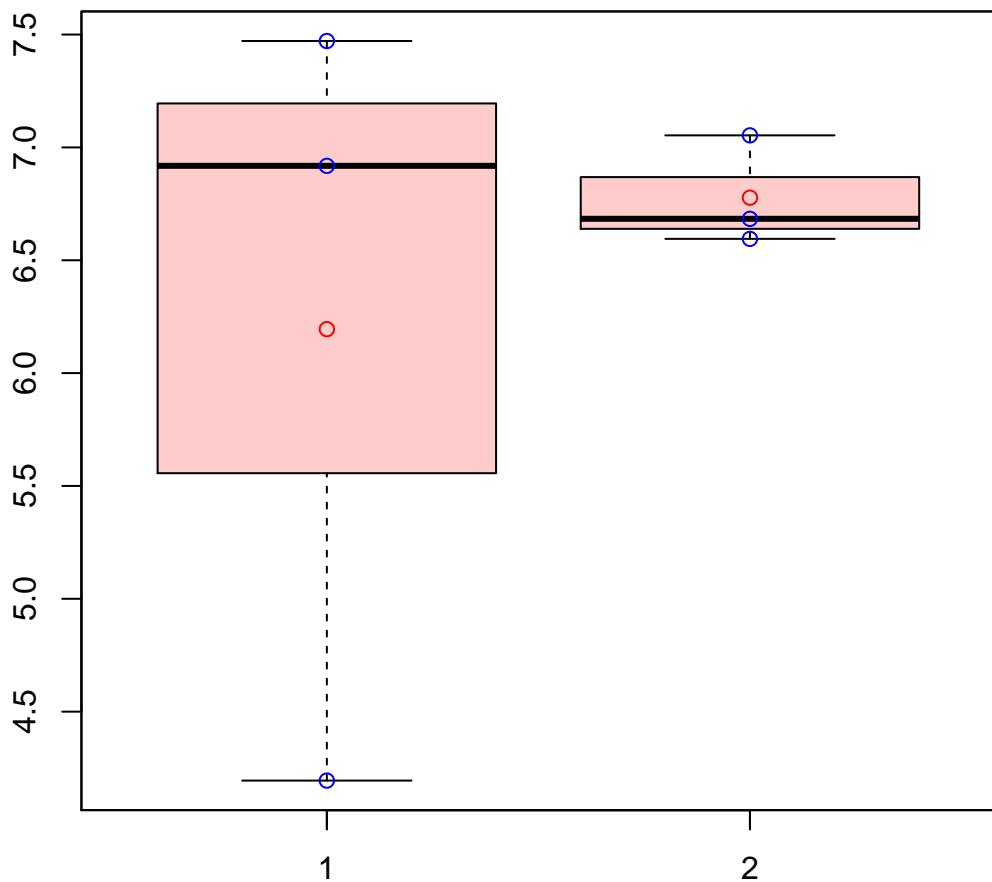

t-Test: p-value = 0.62

# H9CDF6|H9CDF6\_WHEAT

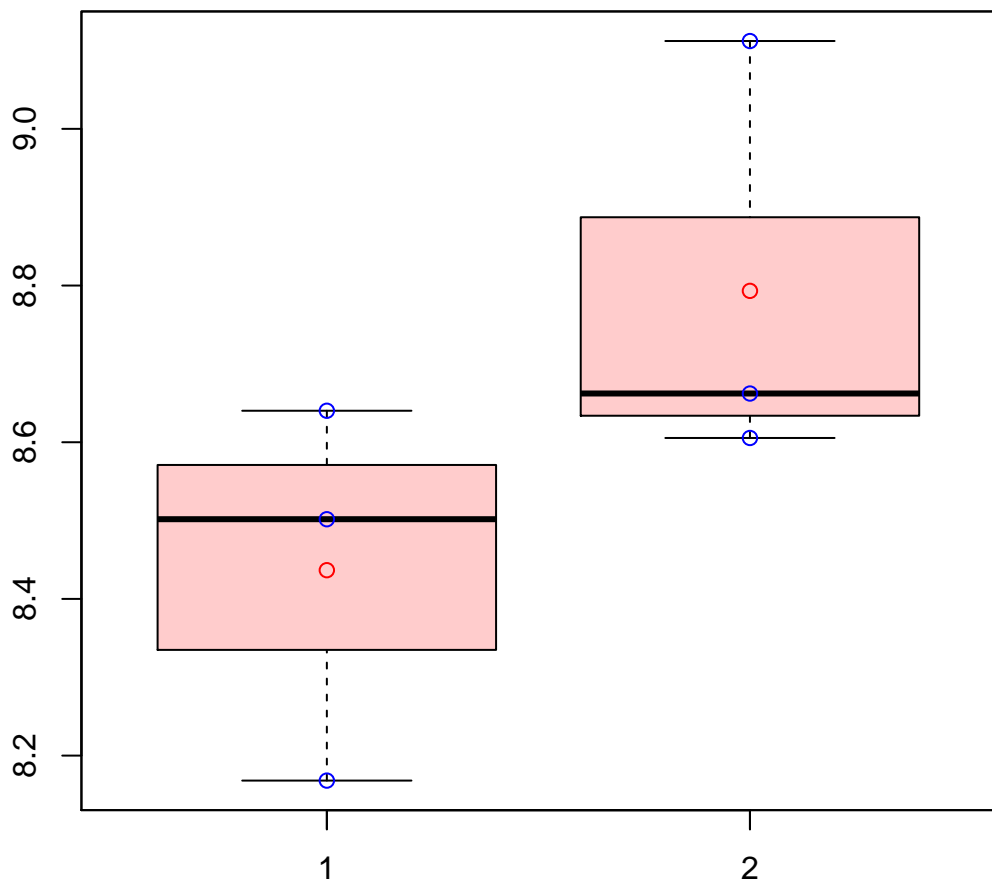

t-Test: p-value = 0.17

# H9NAV2|H9NAV2\_WHEAT

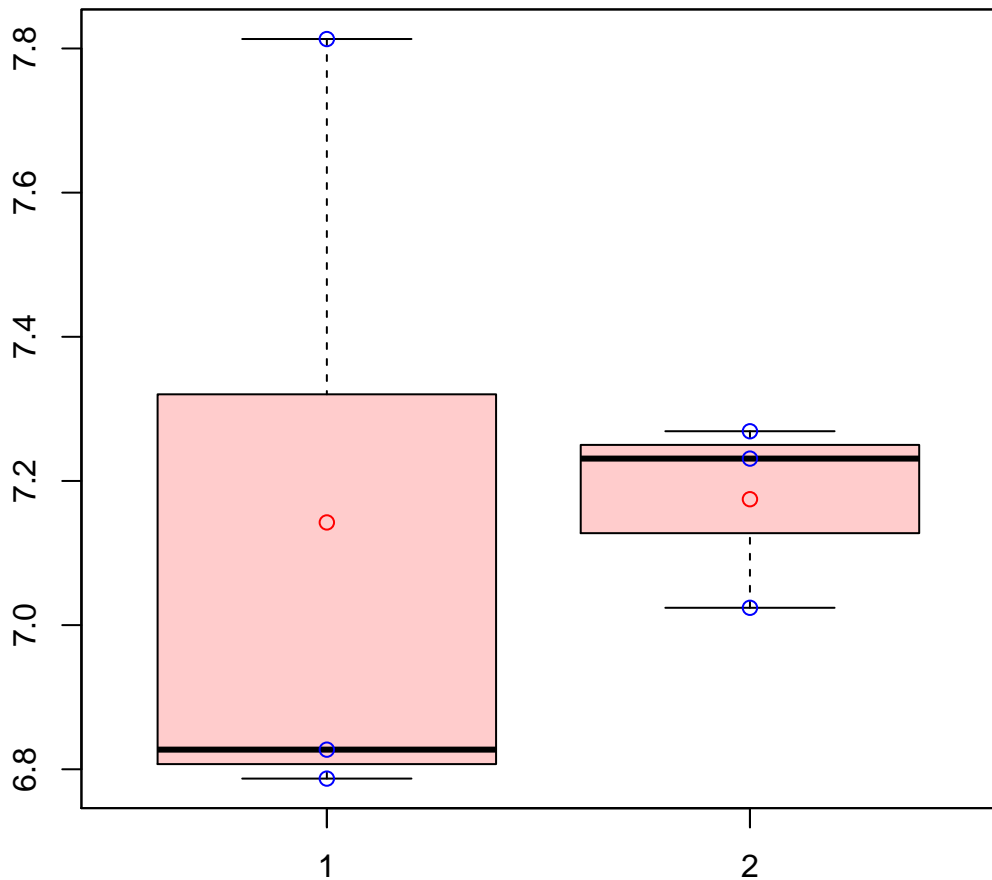

t-Test: p-value = 0.93

# I0J189|I0J189\_ORYBR

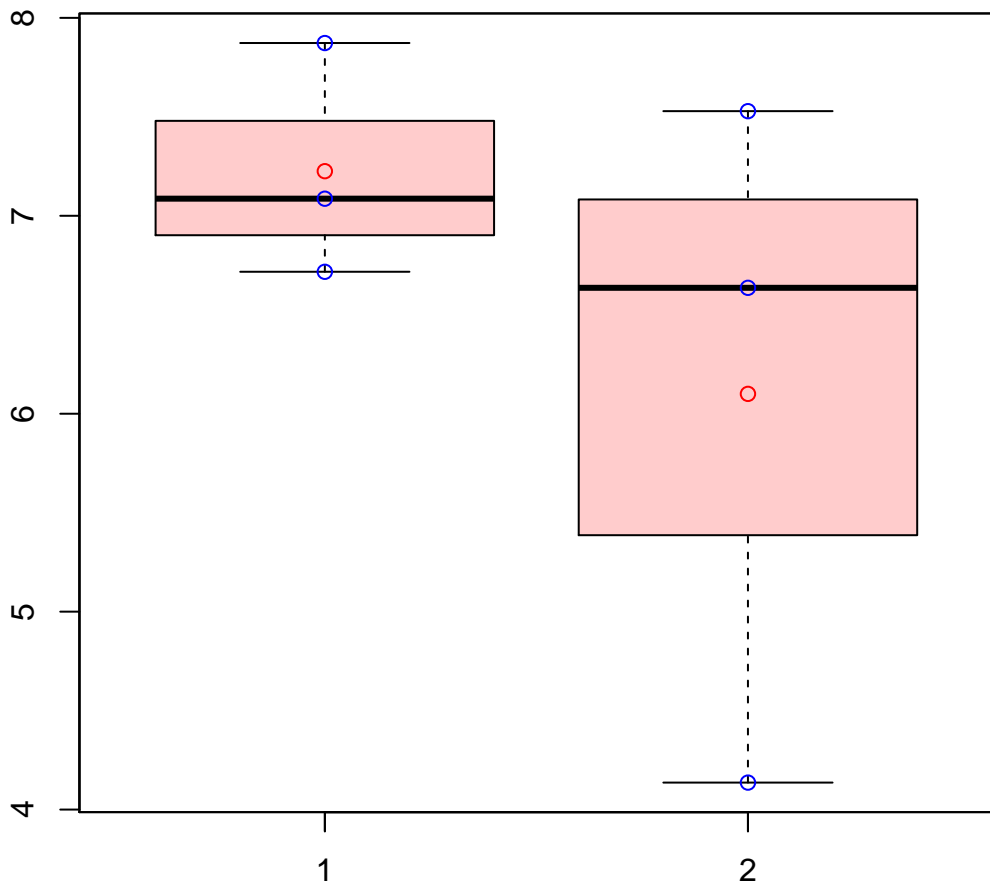

t-Test: p-value = 0.39

# I0JTT9|I0JTT9\_WHEAT

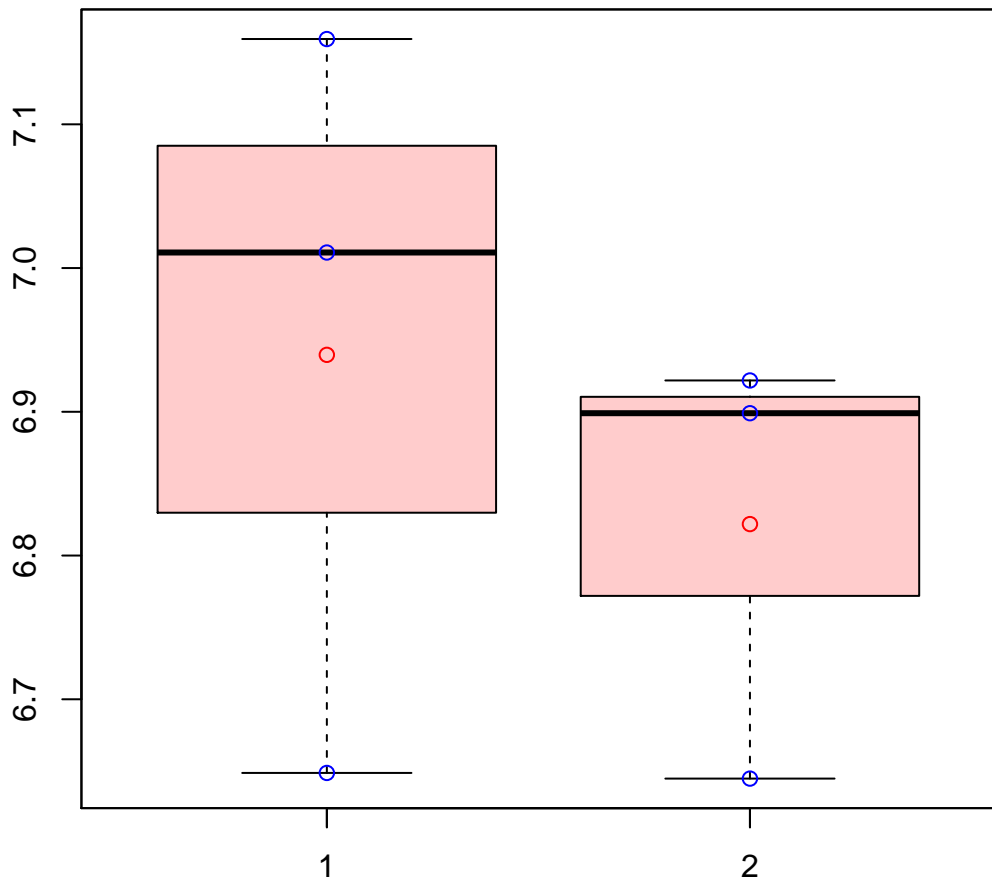

t-Test: p-value = 0.55

# I1GKJ9|I1GKJ9\_BRADI

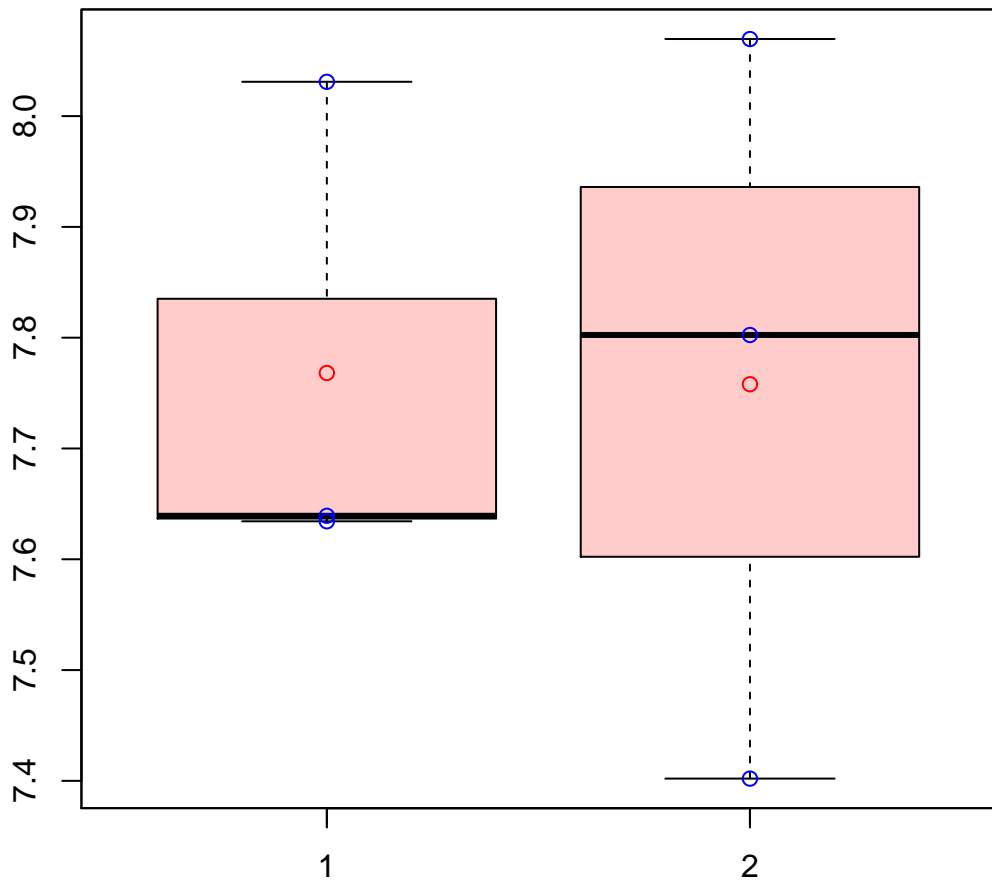

t-Test: p-value = 0.97

# I1GKL4|I1GKL4\_BRADI

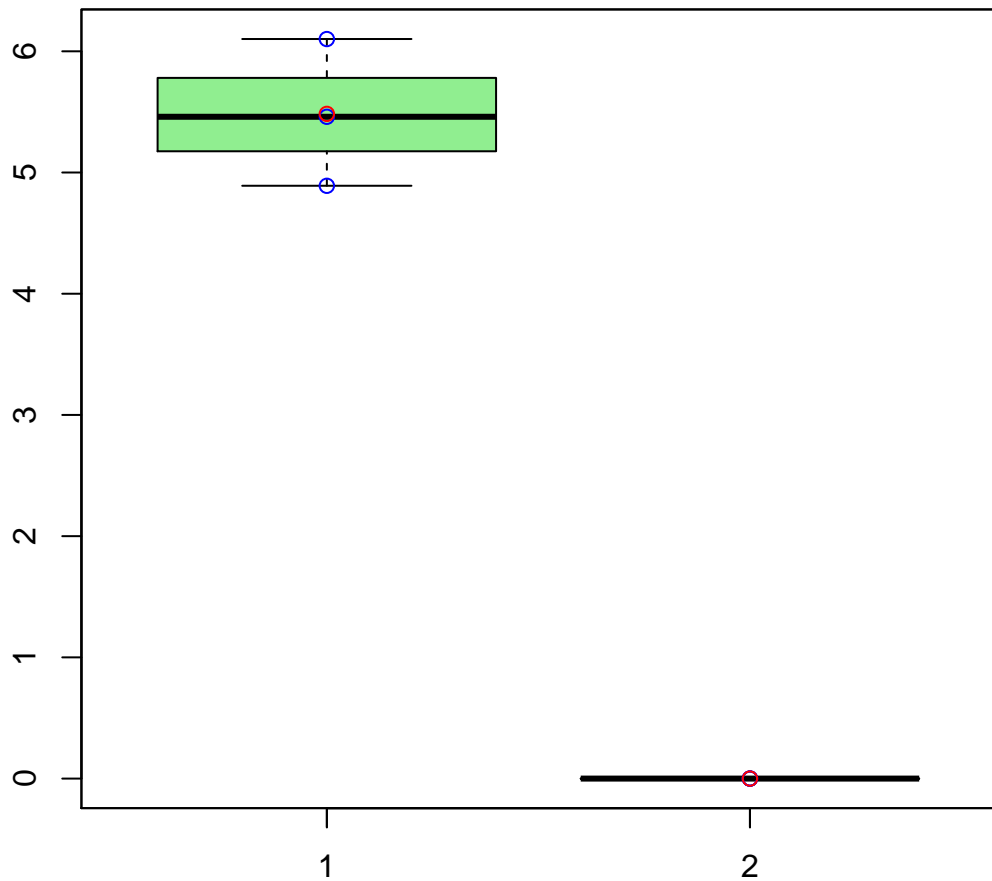

t-Test: p-value = 0

# I1GL11|I1GL11\_BRADI

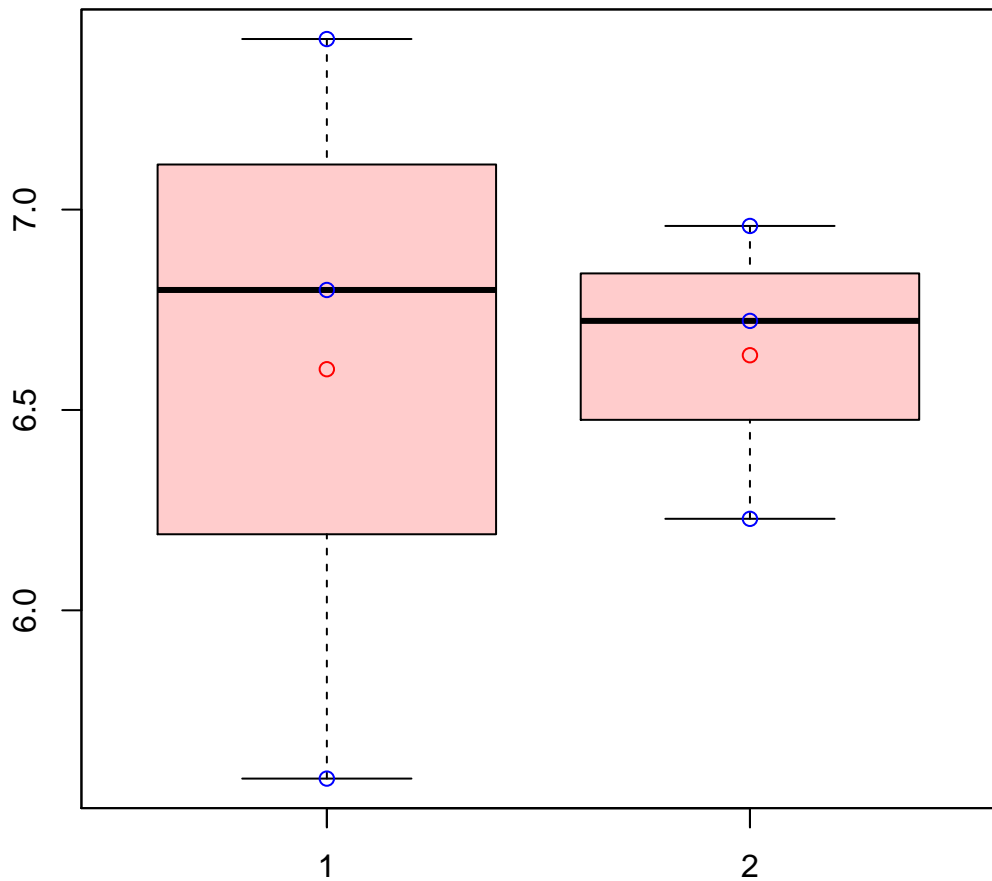

t-Test: p-value = 0.96



# I1GL13|I1GL13\_BRADI

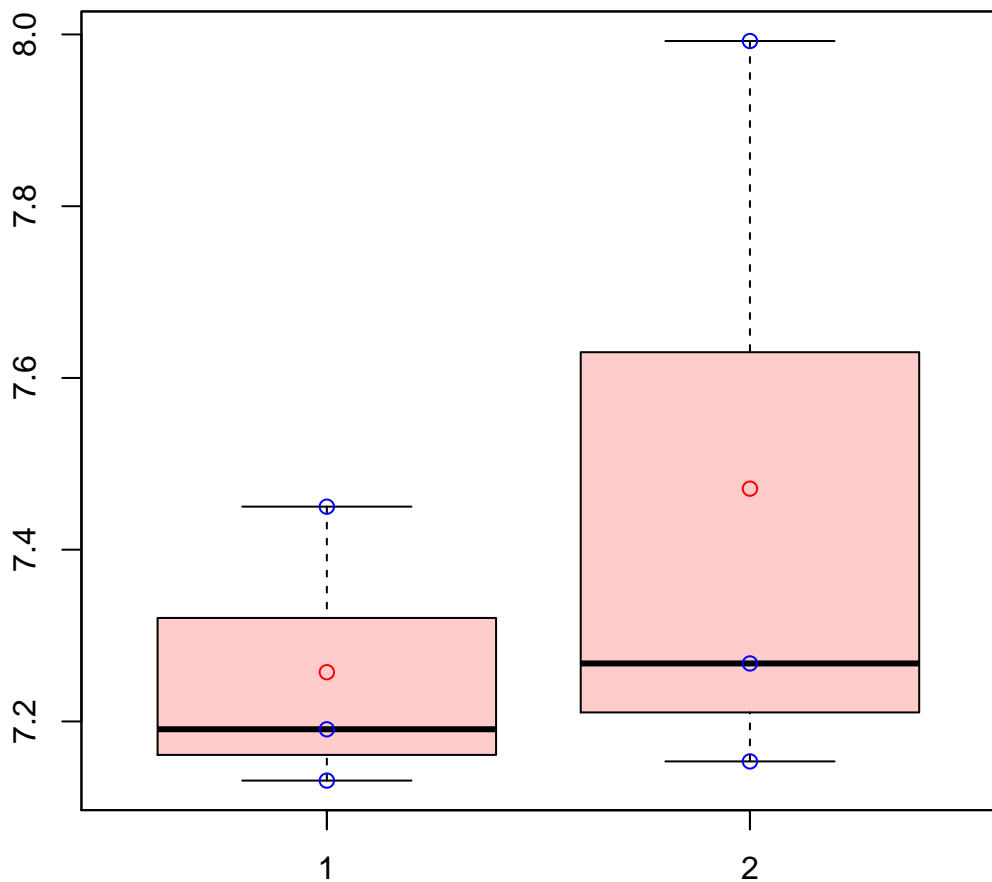

t-Test: p-value = 0.51

# I1GL21|I1GL21\_BRADI

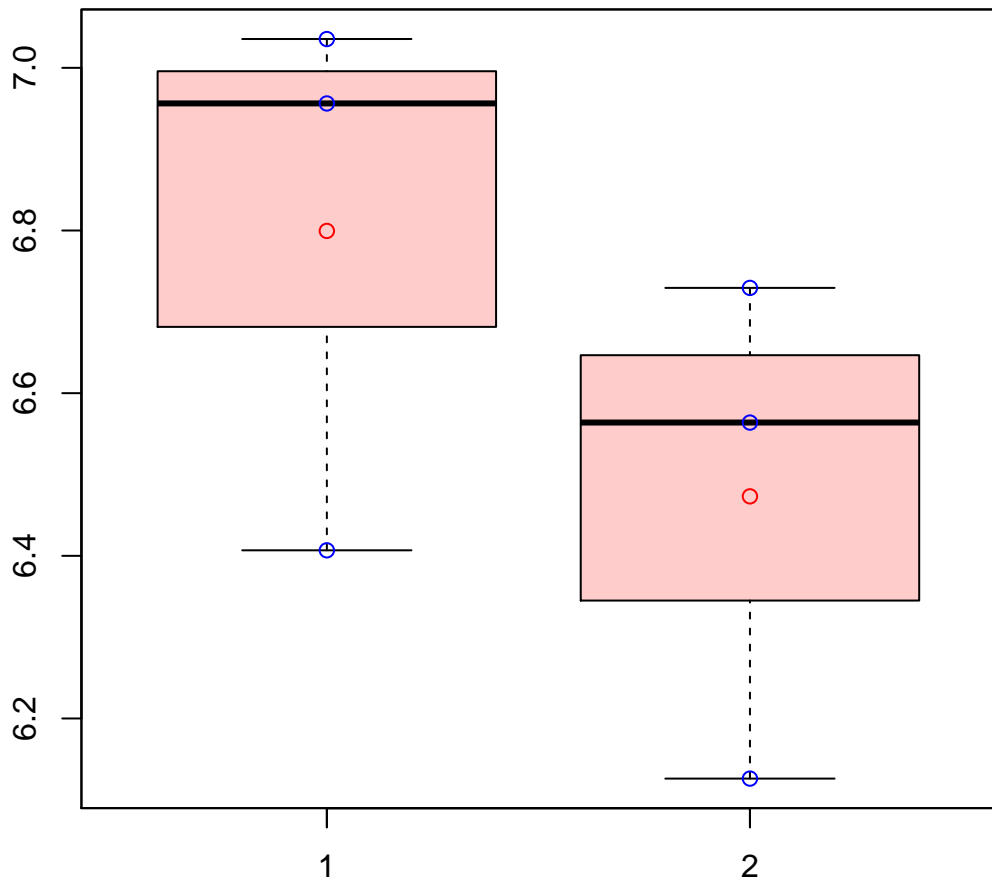

t-Test: p-value = 0.29

# I1GLJ7|I1GLJ7\_BRADI

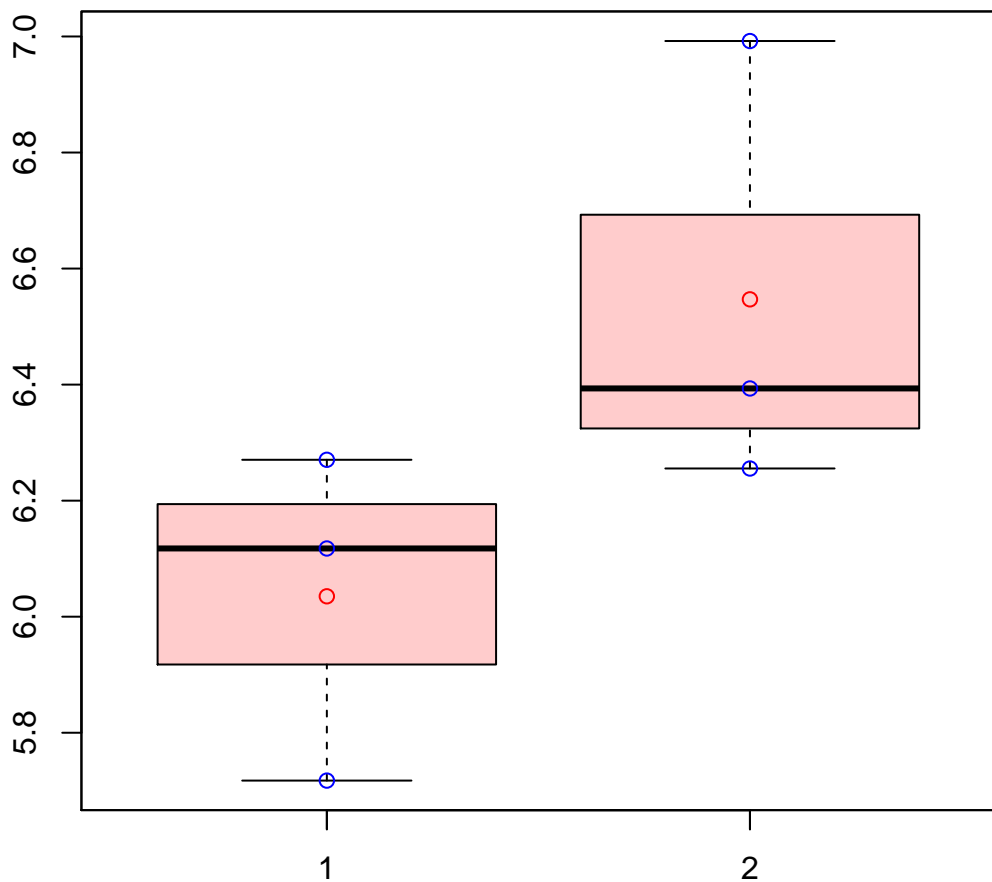

t-Test: p-value = 0.15

# I1GM99|I1GM99\_BRADI

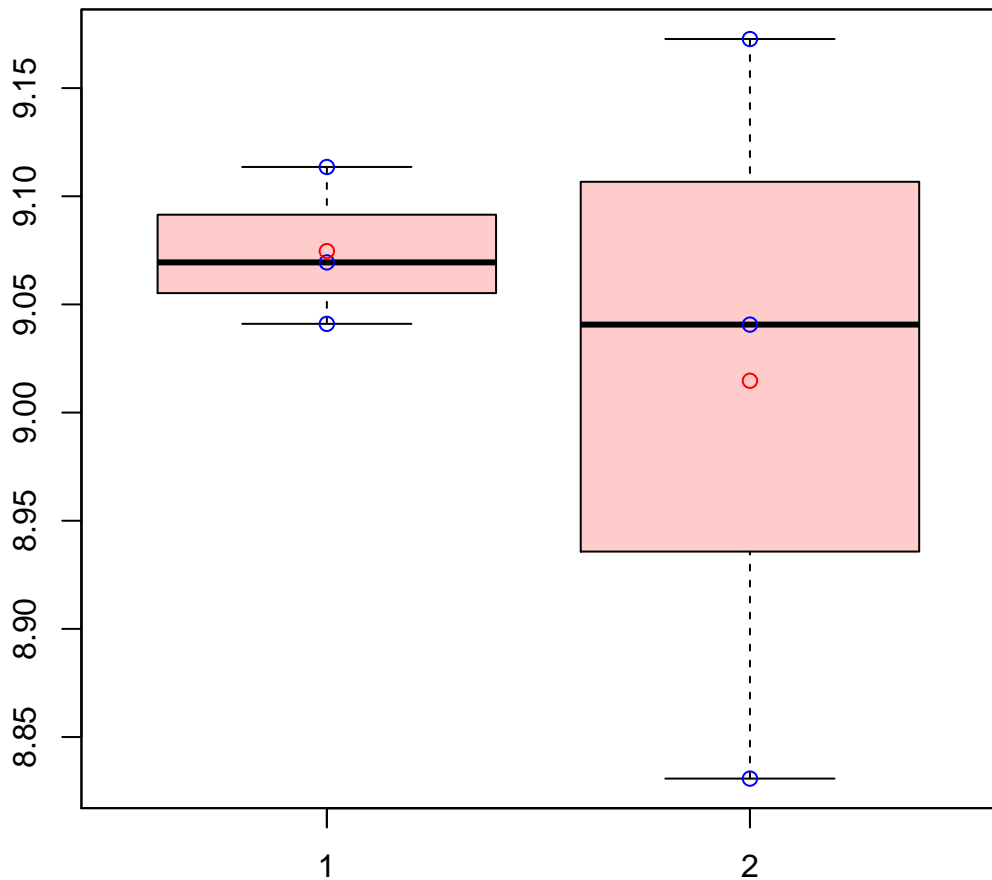

t-Test: p-value = 0.61

# I1GMI4|I1GMI4\_BRADI

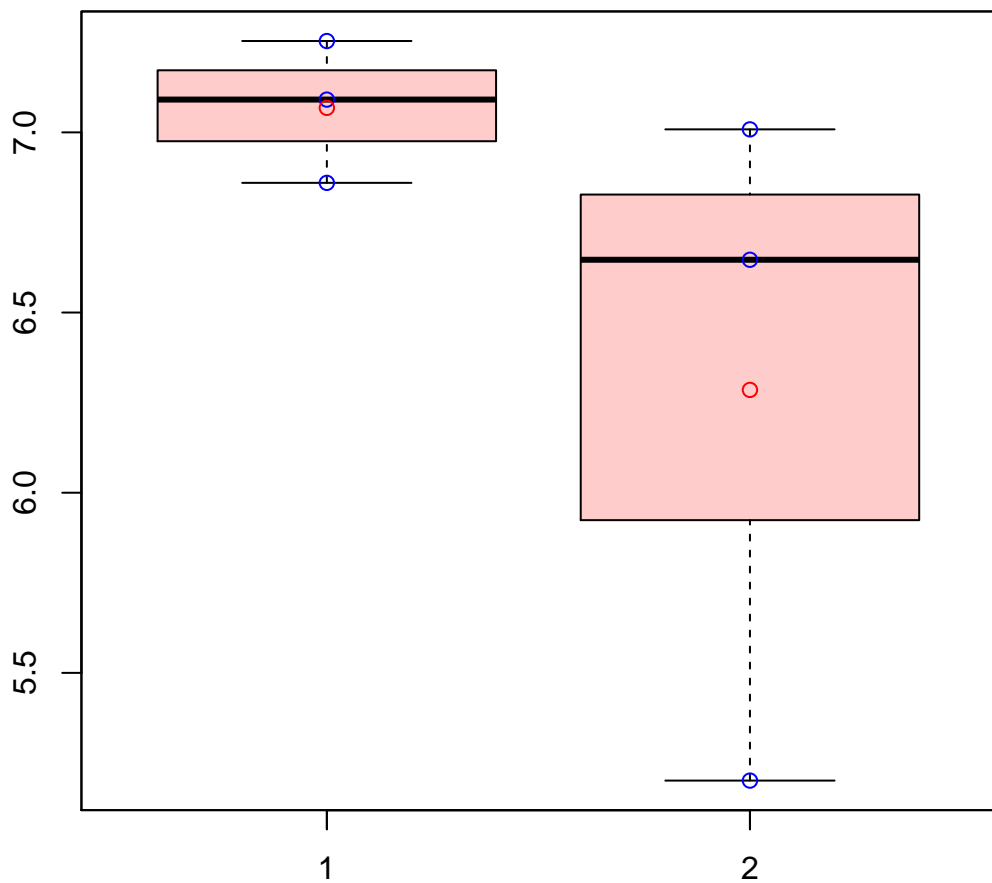

t-Test: p-value = 0.29

# I1GMY1|I1GMY1\_BRADI

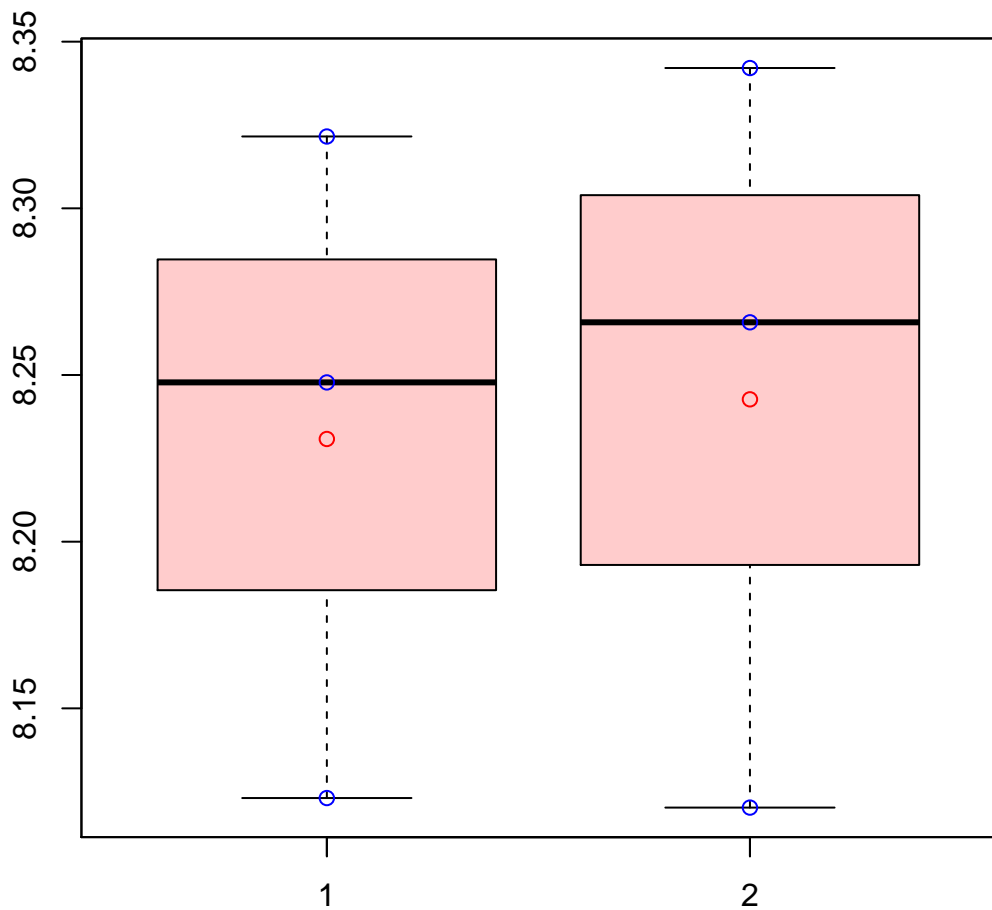

t-Test: p-value = 0.9

# I1GN45|I1GN45\_BRADI

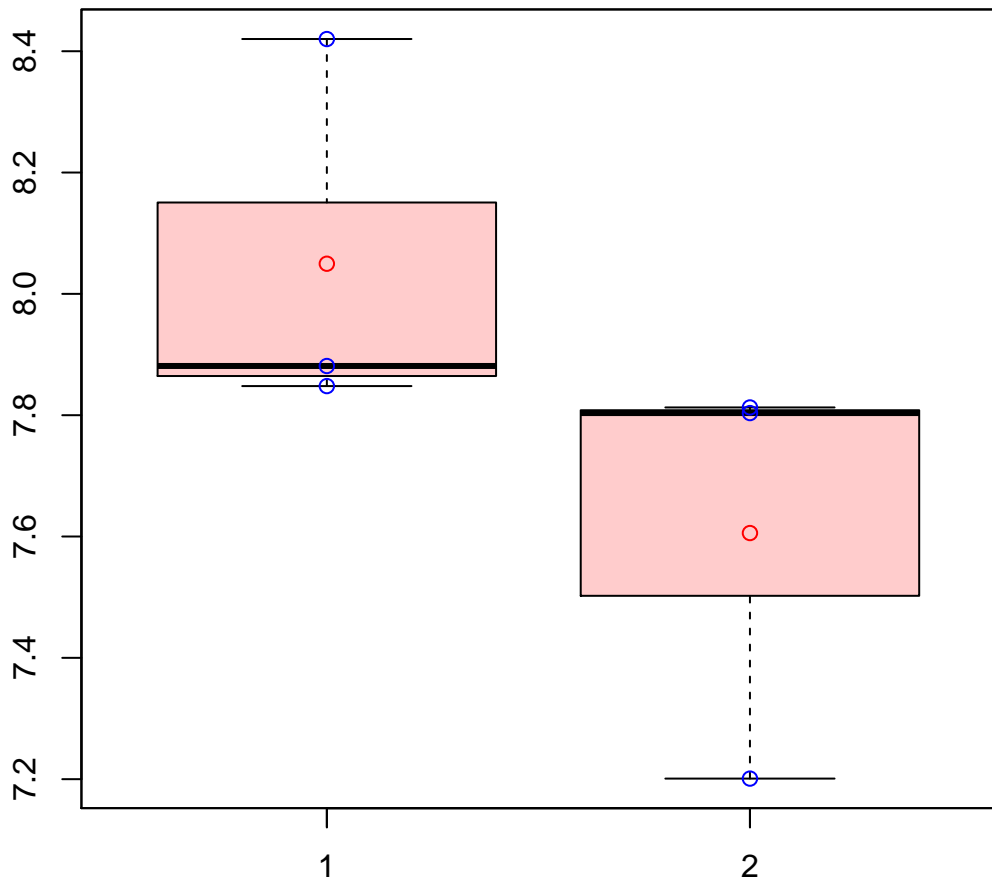

t-Test: p-value = 0.18

# I1GNL6|I1GNL6\_BRADI

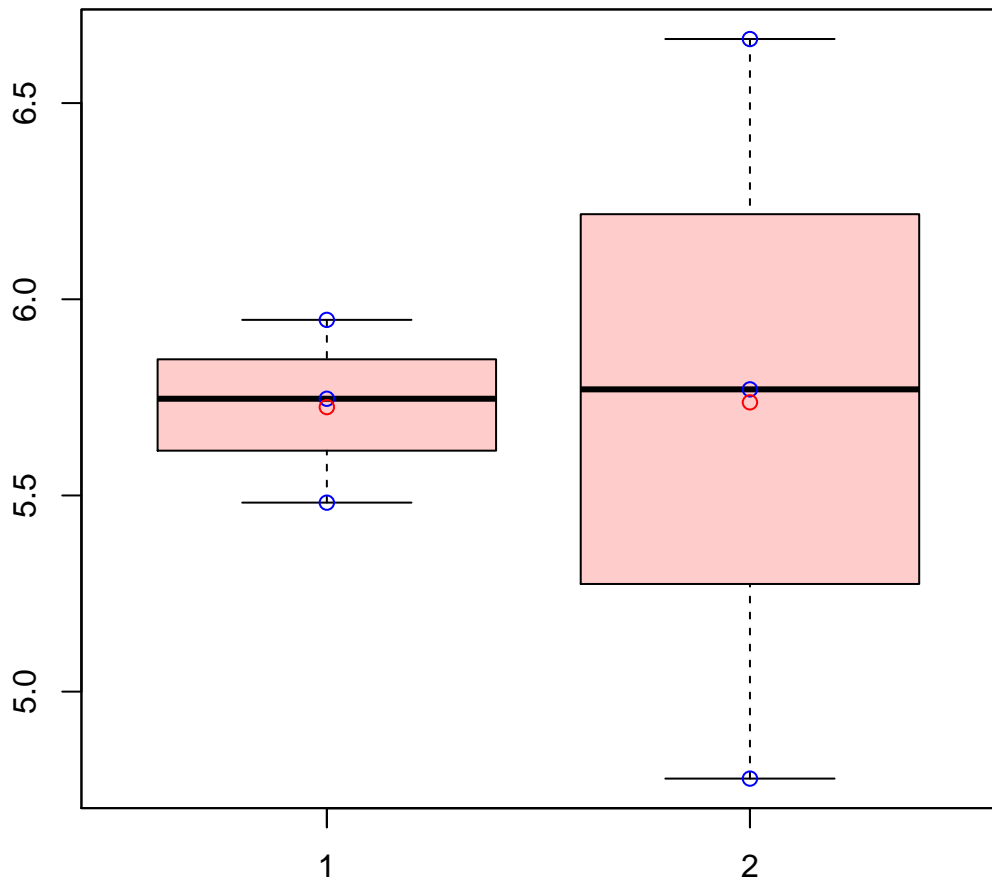

t-Test: p-value = 0.98



# I1GP65|I1GP65\_BRADI

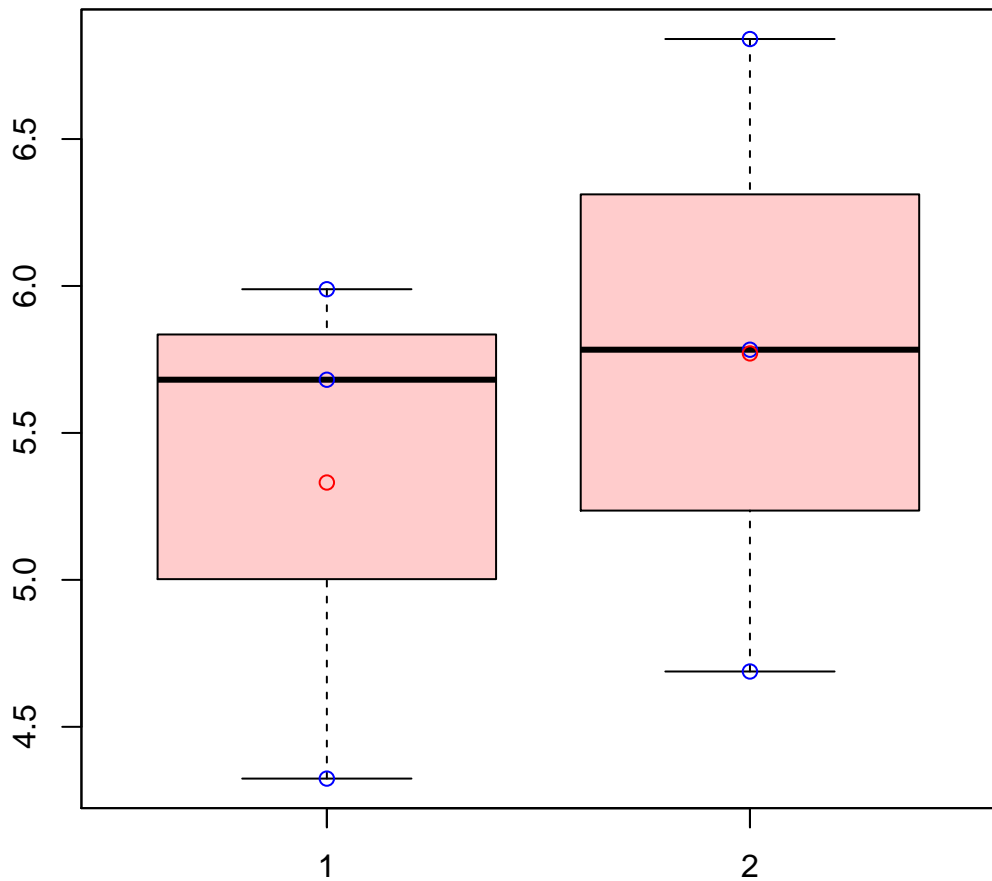

t-Test: p-value = 0.62

# I1GP93|I1GP93\_BRADI

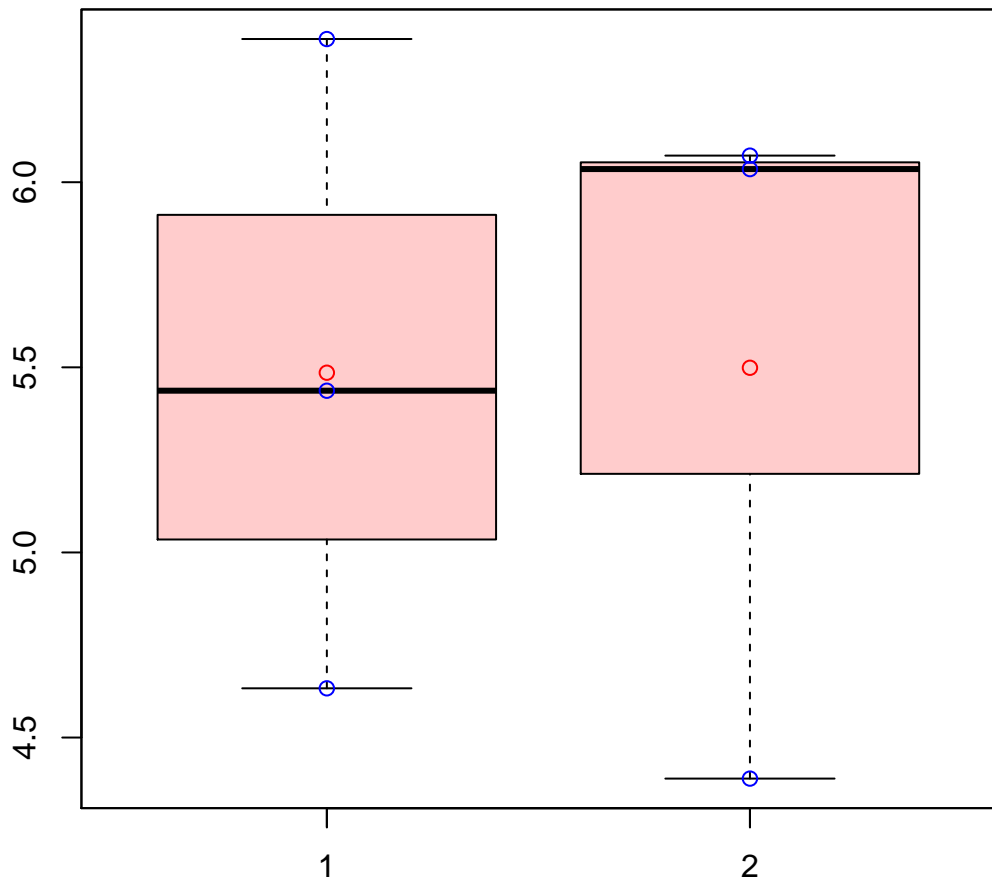

t-Test: p-value = 0.99

# I1GPB7|I1GPB7\_BRADI

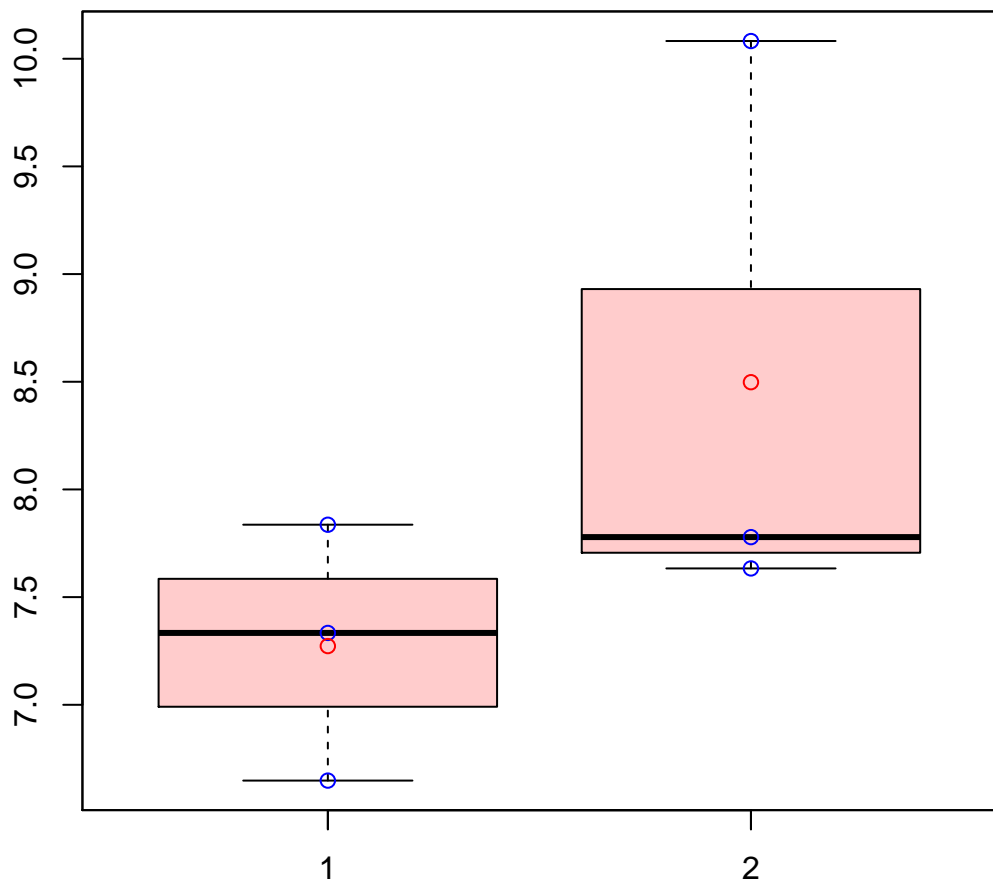

t-Test: p-value = 0.26

# I1GPD0|I1GPD0\_BRADI

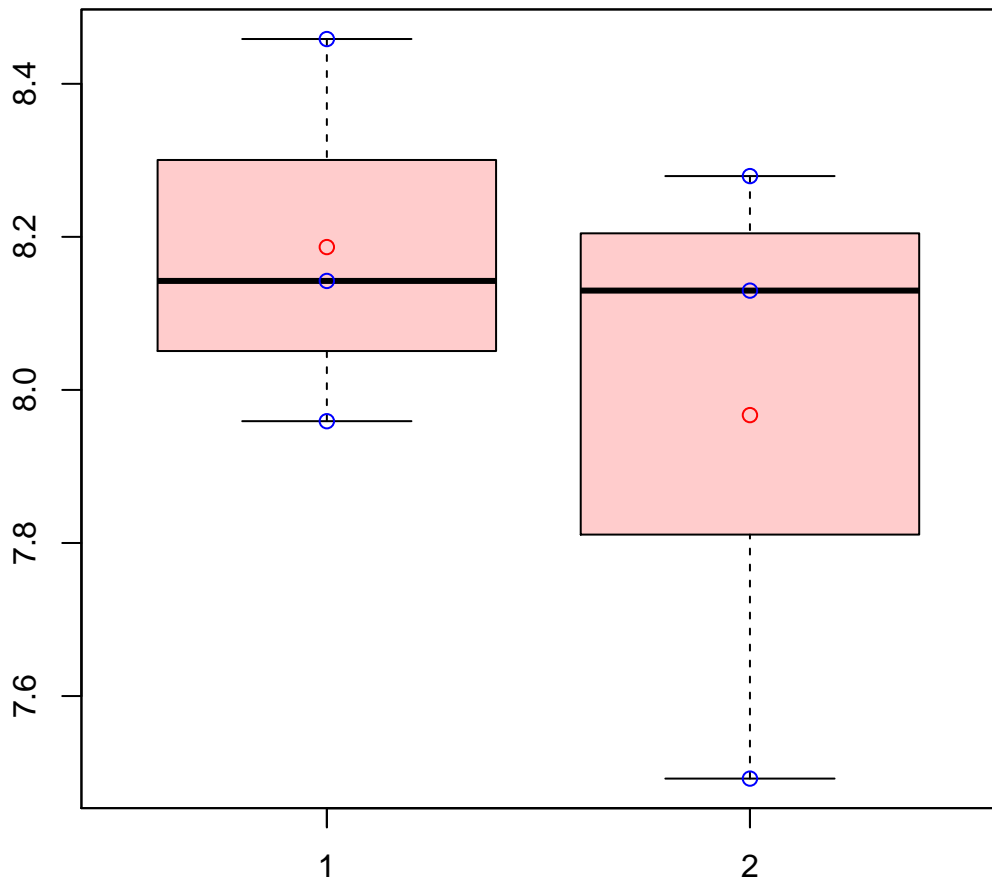

t-Test: p-value = 0.49

# I1GPP5|I1GPP5\_BRADI

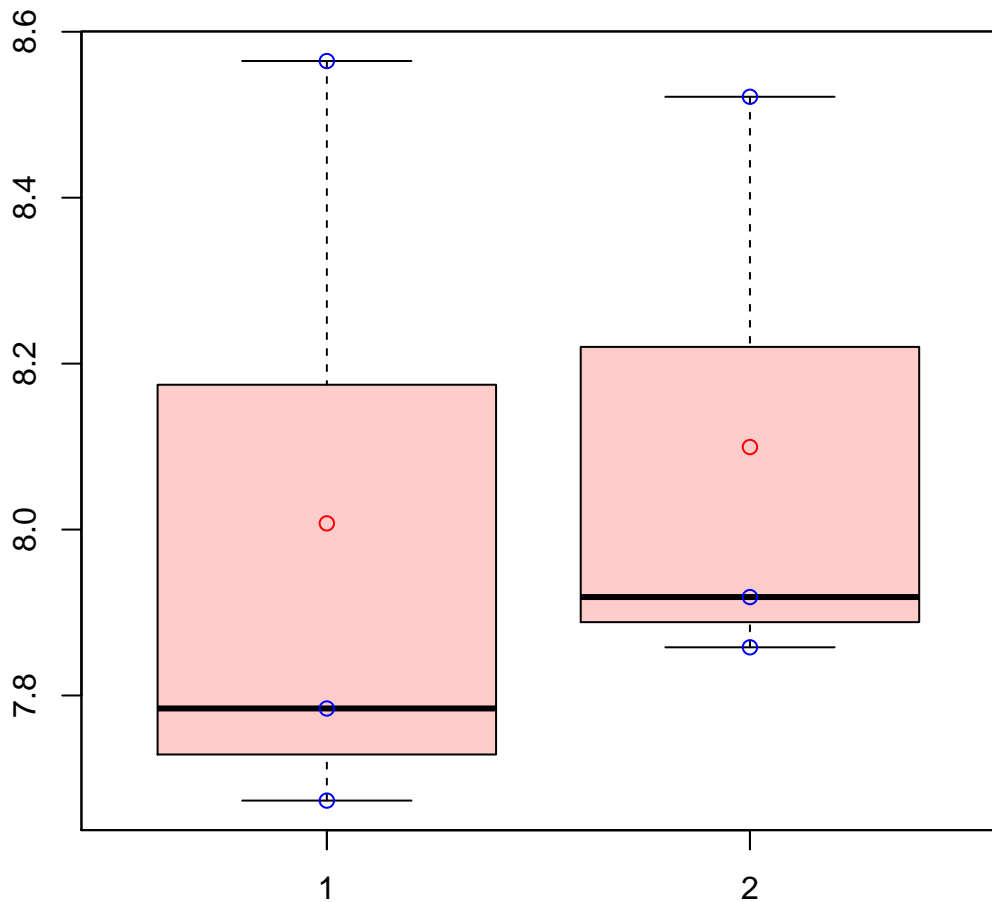

t-Test: p-value = 0.81

# I1GPV3|I1GPV3\_BRADI

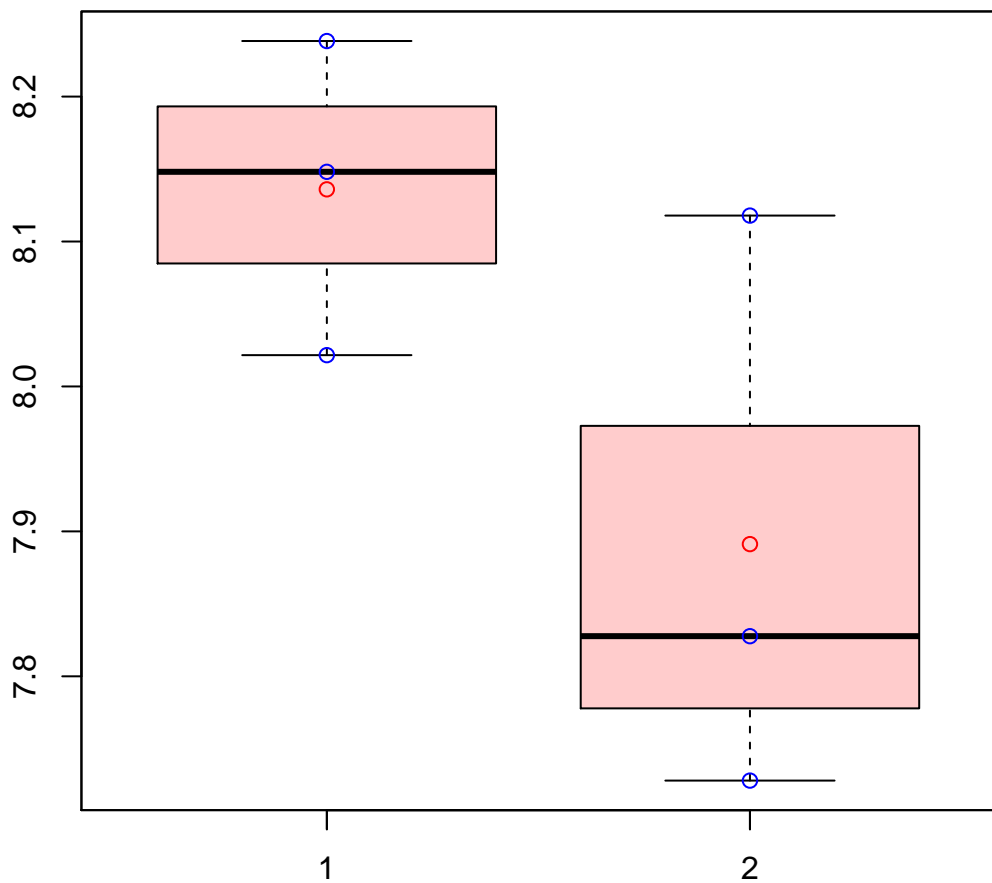

t-Test: p-value = 0.16

# I1GQ19|I1GQ19\_BRADI

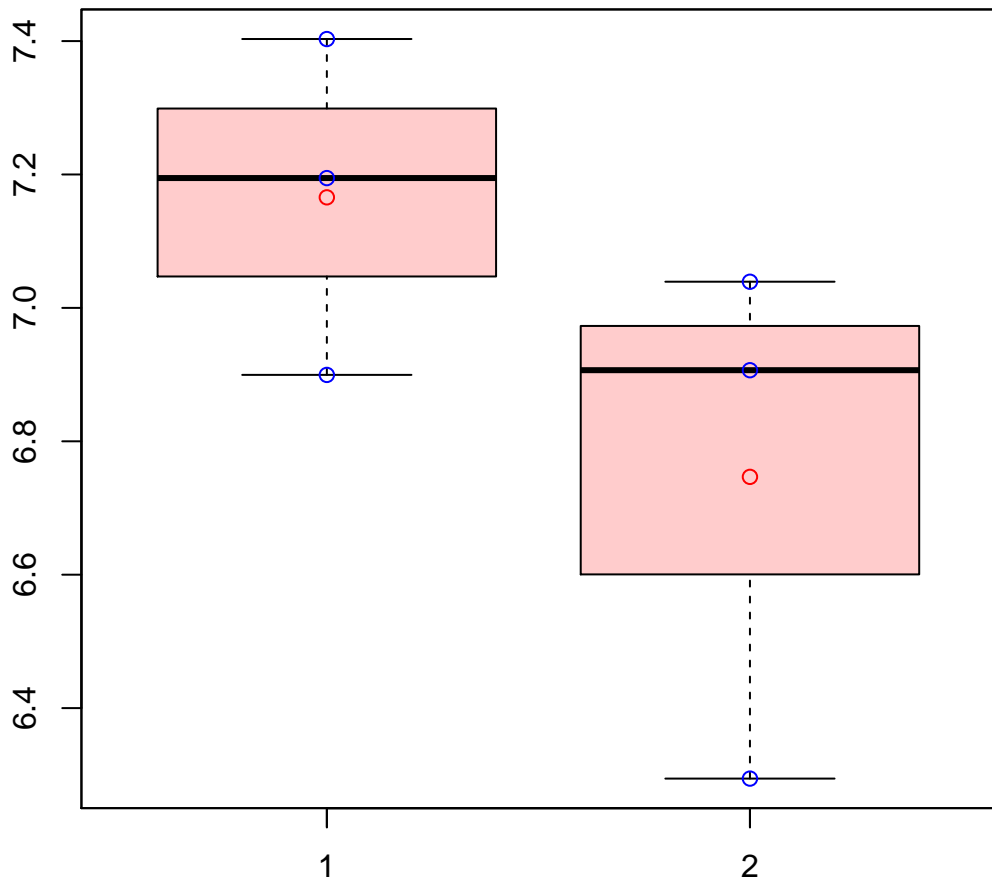

t-Test: p-value = 0.21

# I1GQ36|I1GQ36\_BRADI

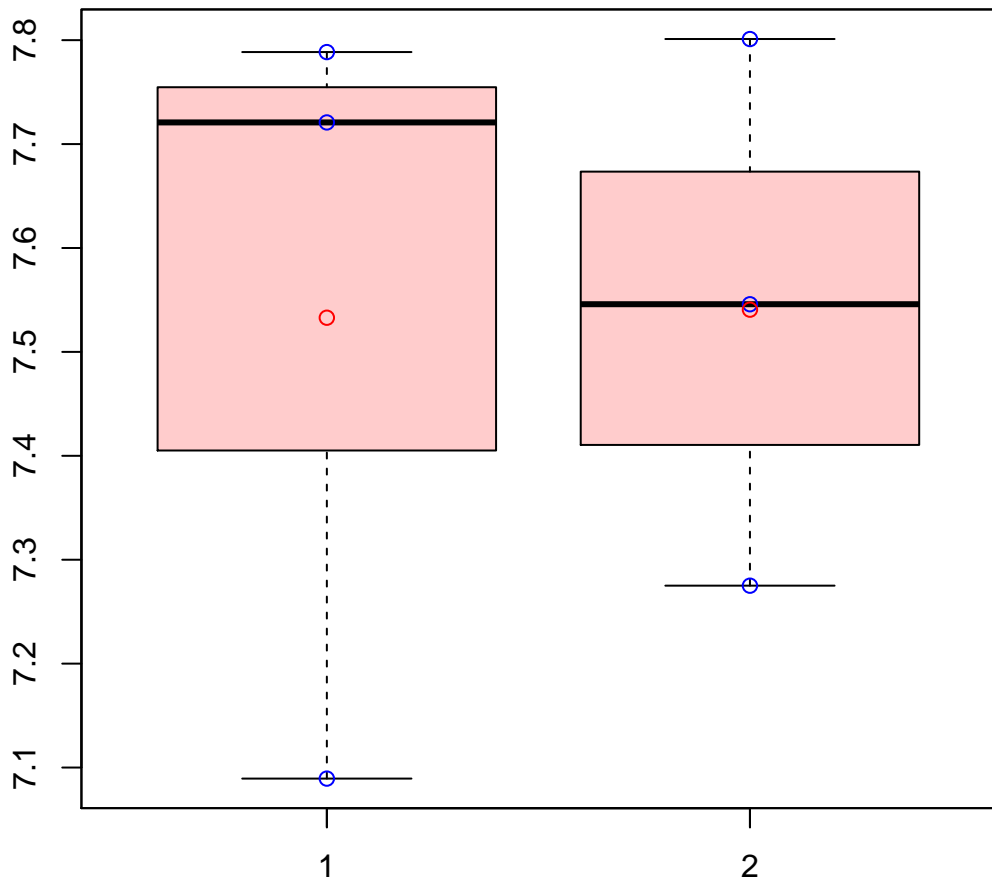

t-Test: p-value = 0.98



# I1GQ59|I1GQ59\_BRADI

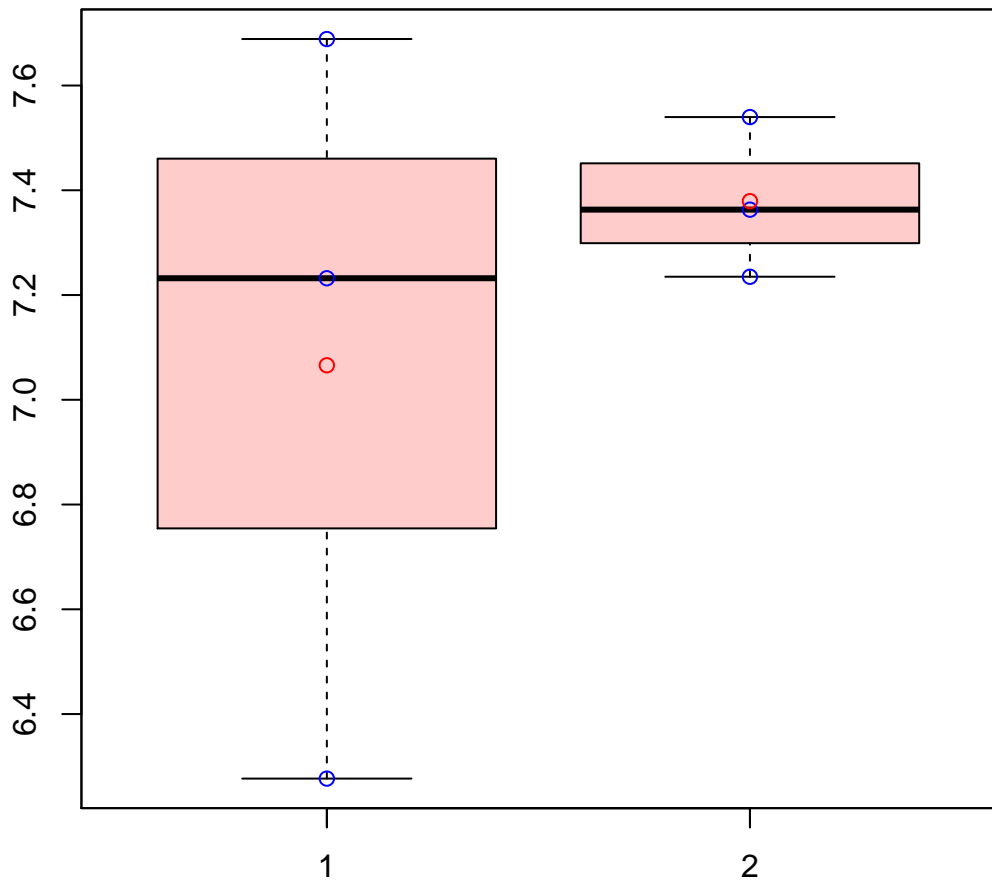

t-Test: p-value = 0.53

# I1GQB3|I1GQB3\_BRADI

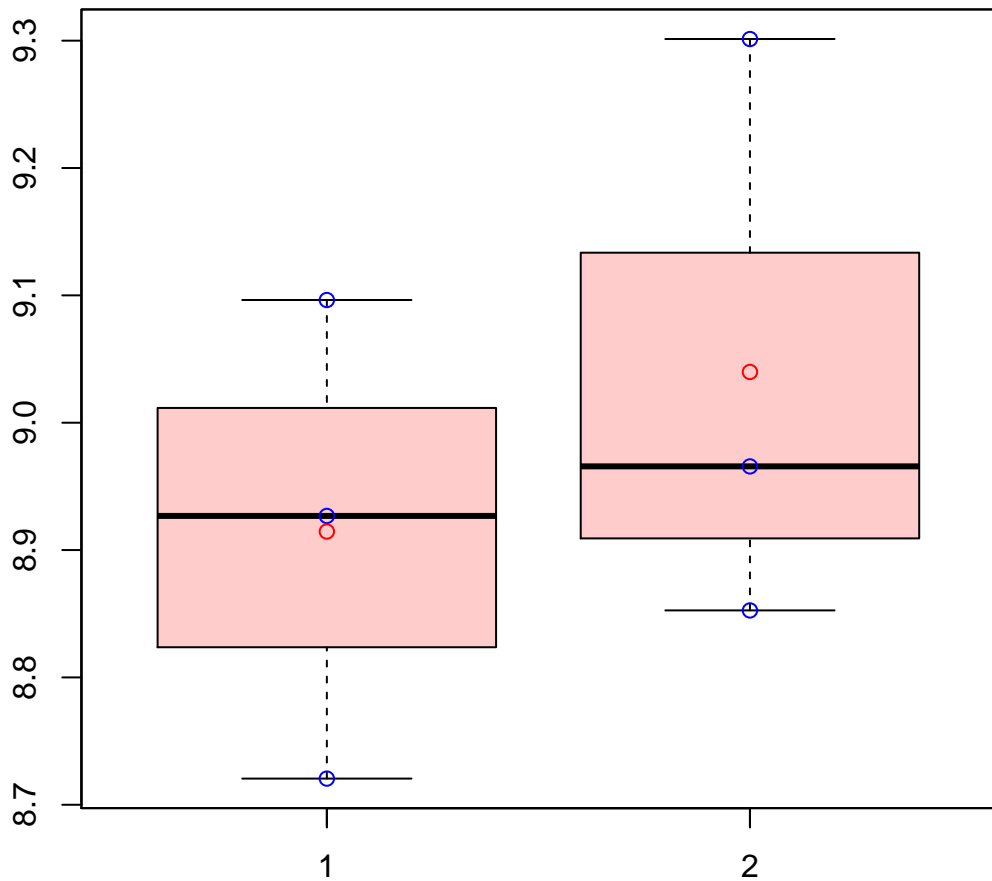

t-Test: p-value = 0.51

# I1GQN7|I1GQN7\_BRADI

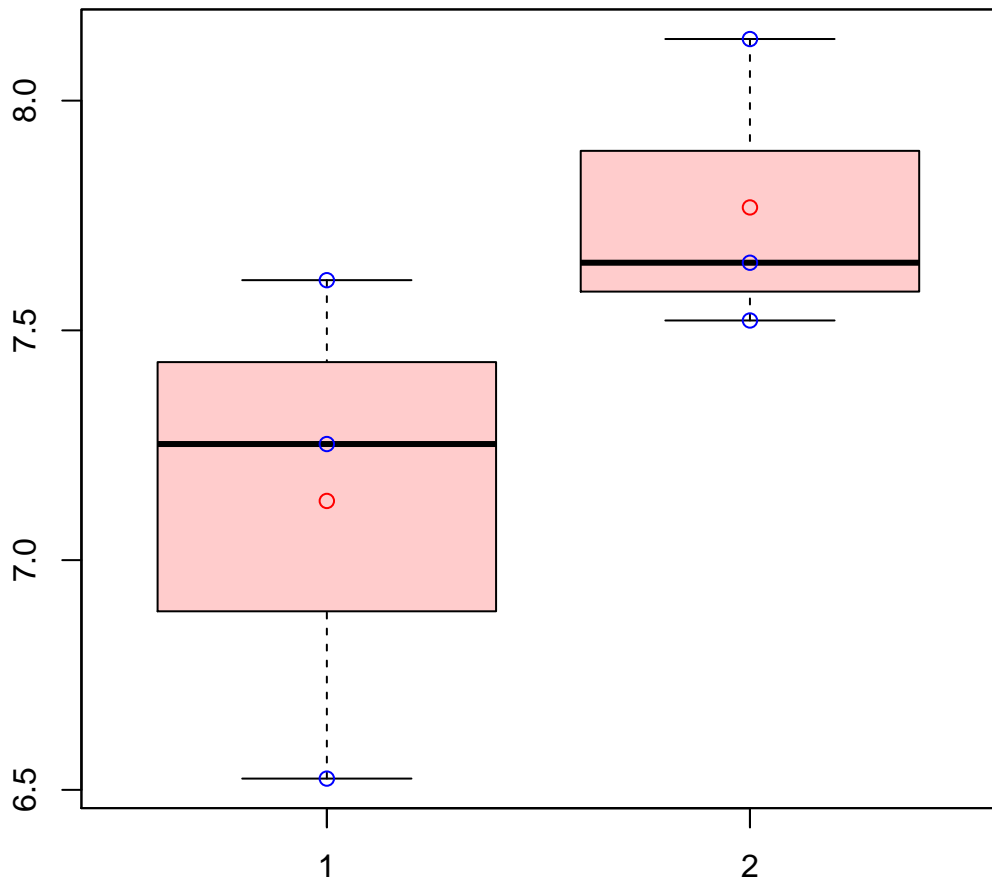

t-Test: p-value = 0.18

# I1GQY7|I1GQY7\_BRADI

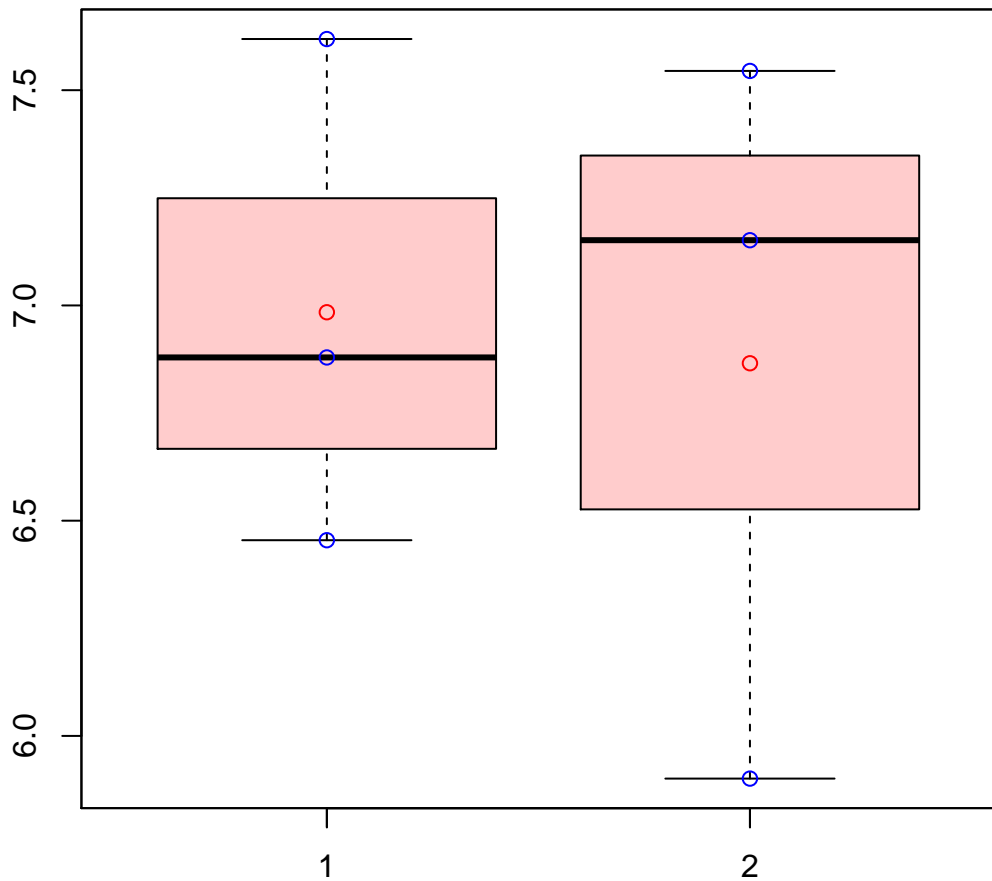

t-Test: p-value = 0.85

# I1GR07|I1GR07\_BRADI

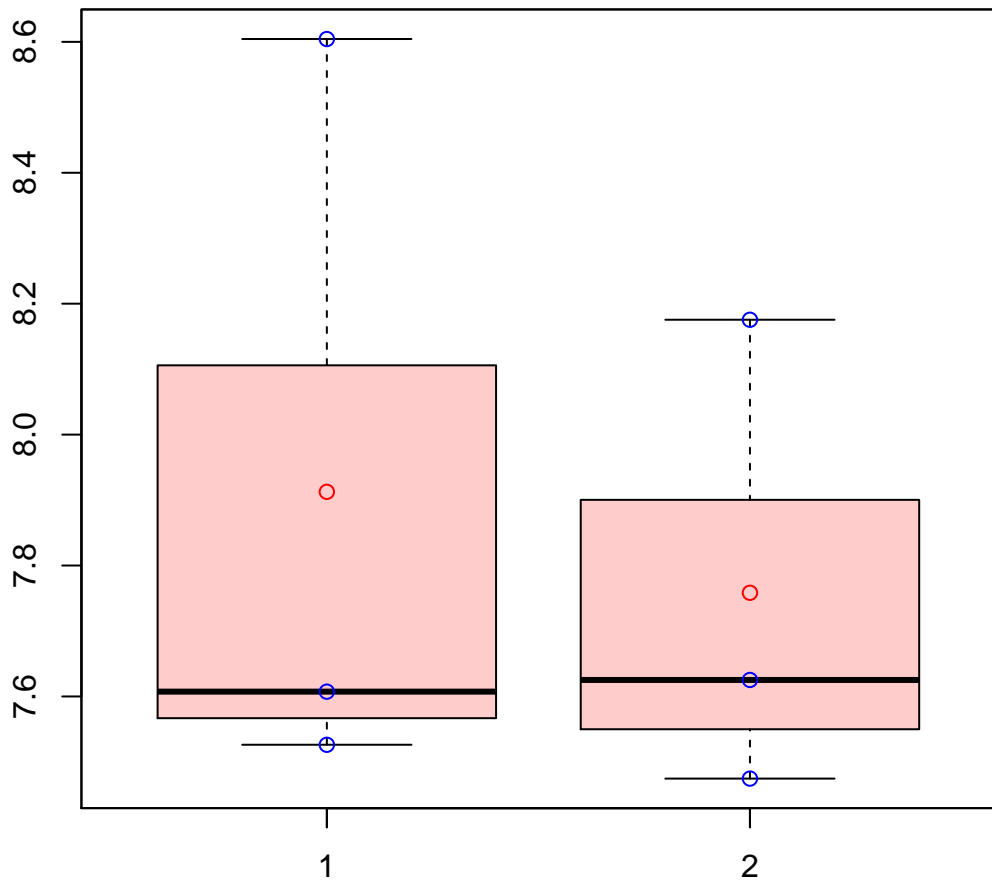

t-Test: p-value = 0.73

# I1GR17|I1GR17\_BRADI

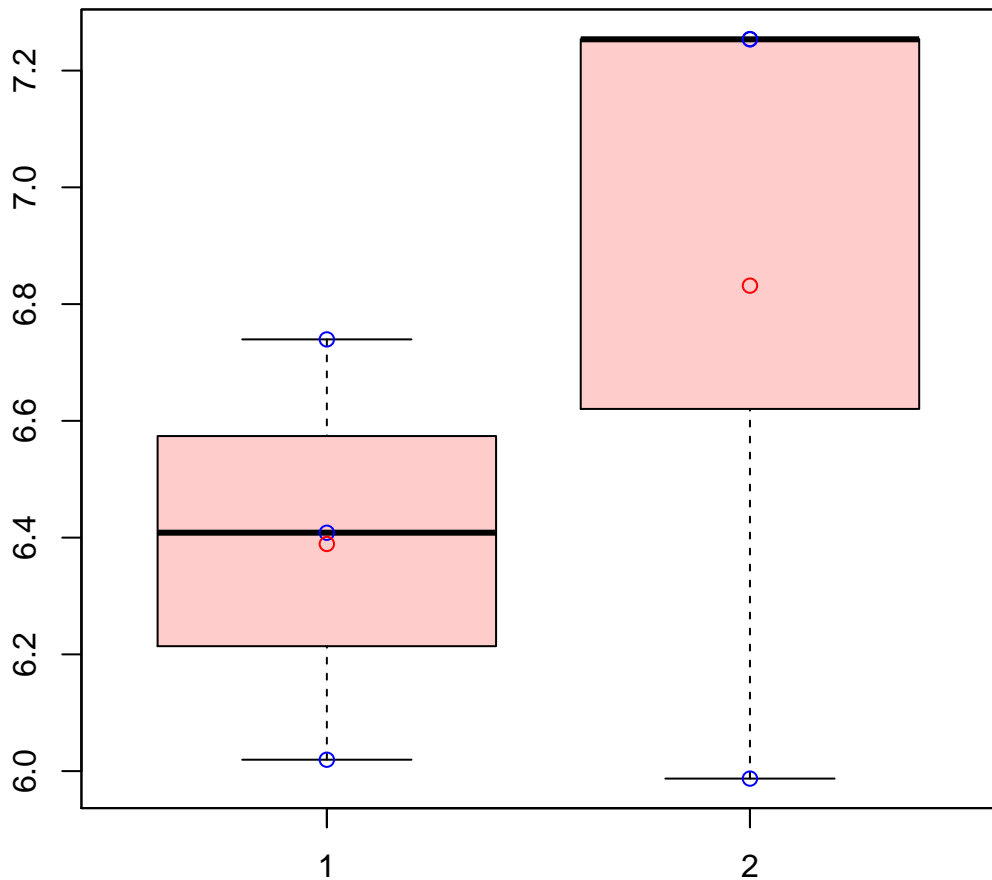

t-Test: p-value = 0.42

# I1GRB0|I1GRB0\_BRADI

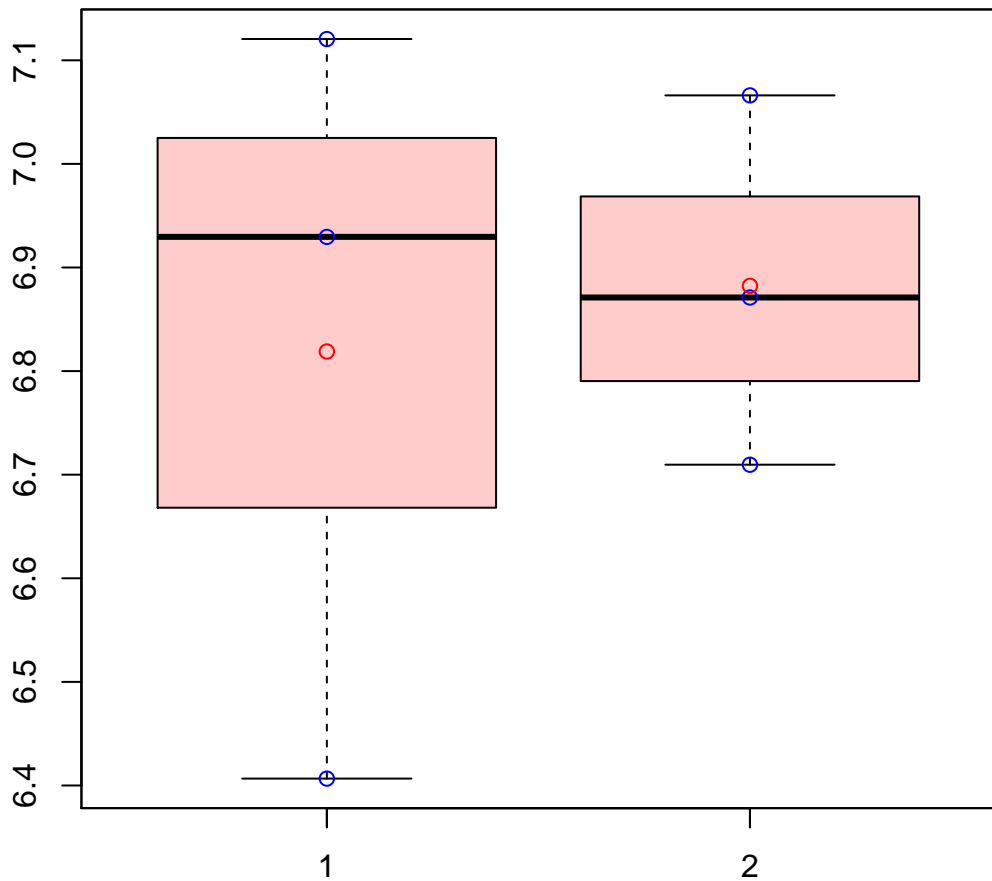

t-Test: p-value = 0.81

# I1GRD1|I1GRD1\_BRADI

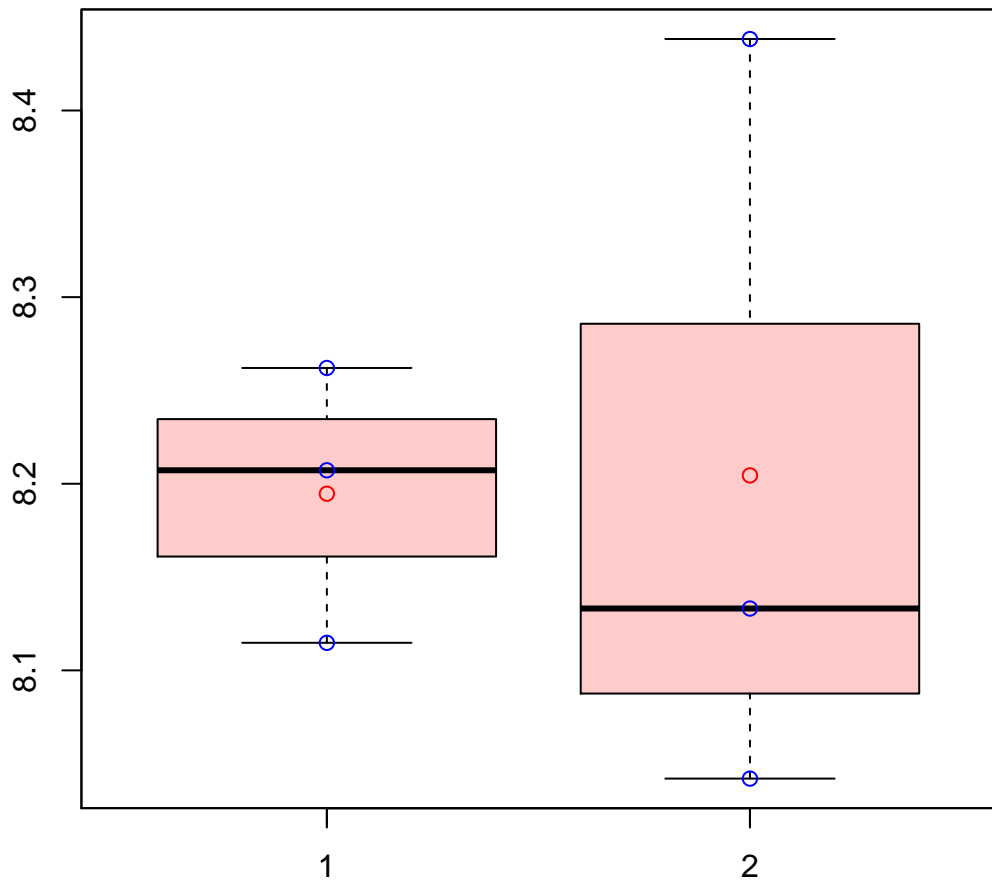

t-Test: p-value = 0.94



# I1GRS0|I1GRS0\_BRADI

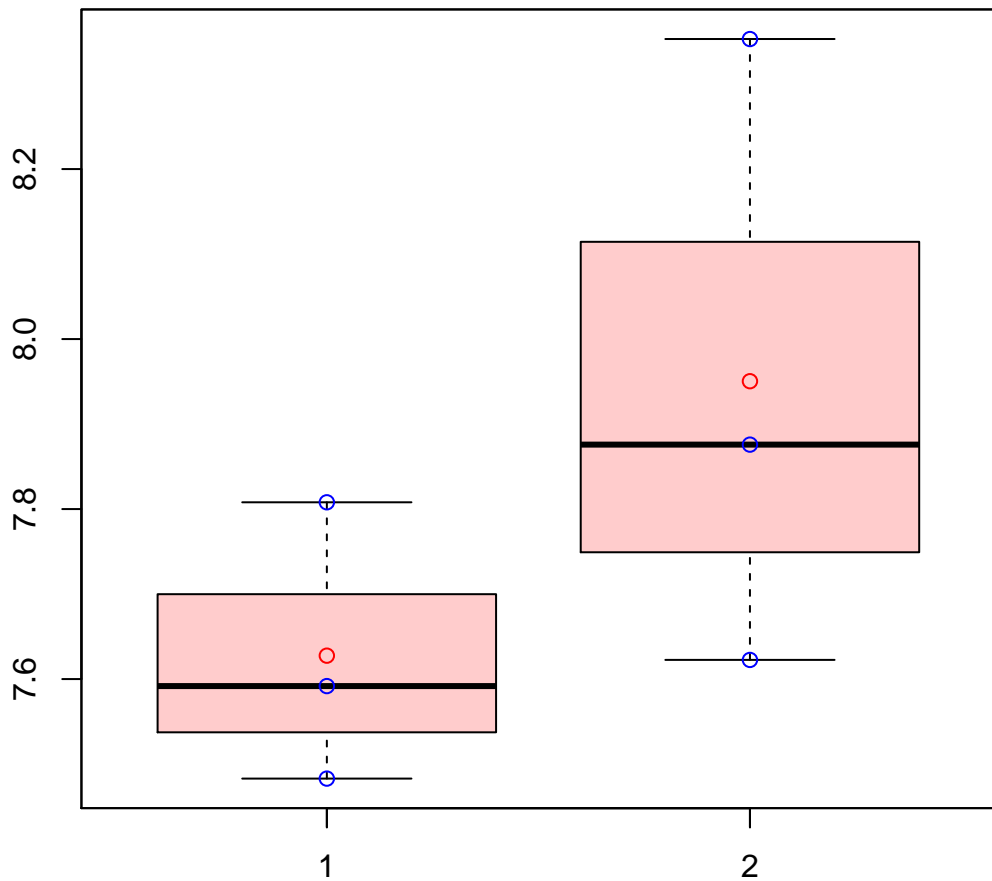

t-Test: p-value = 0.27

# I1GS37|I1GS37\_BRADI

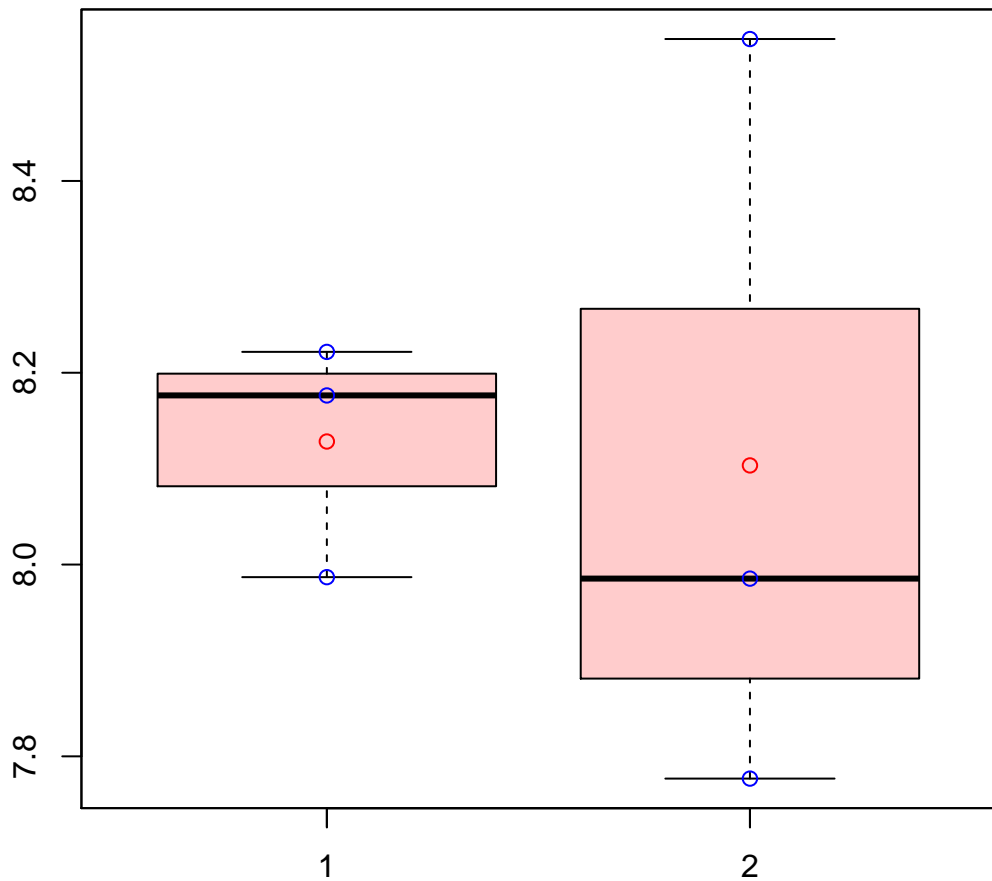

t-Test: p-value = 0.93

# I1GS77|I1GS77\_BRADI

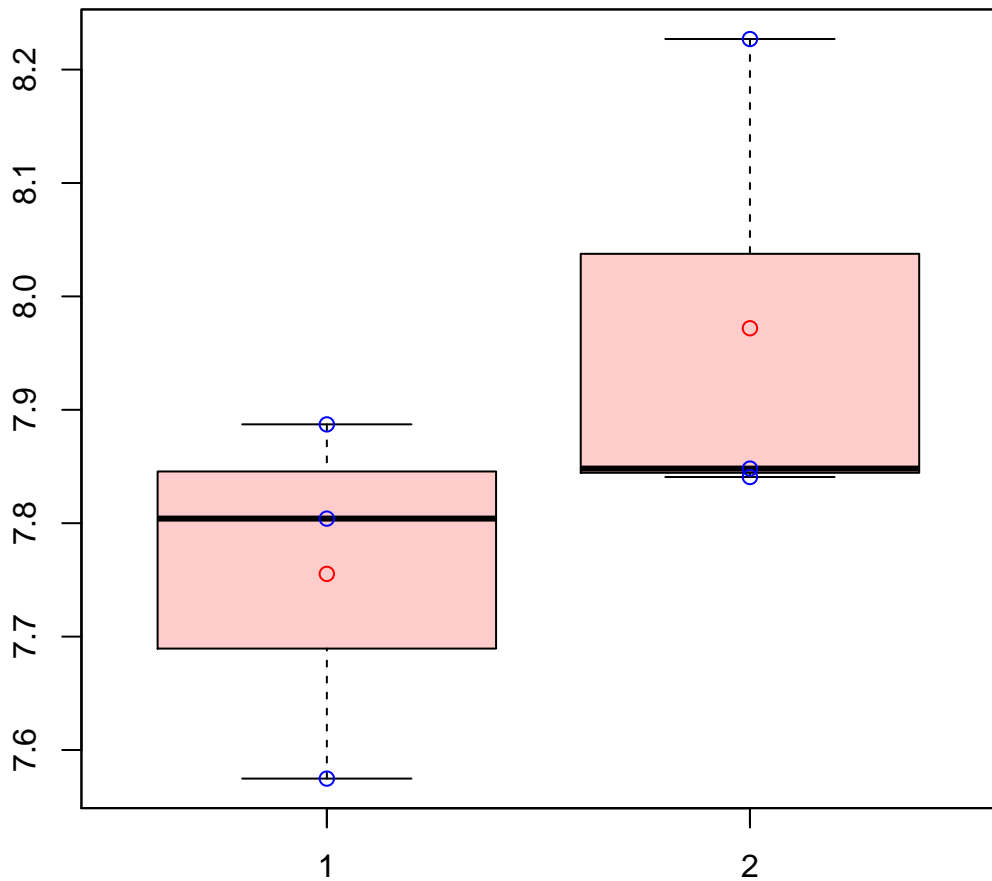

t-Test: p-value = 0.25

# I1GSE4|I1GSE4\_BRADI

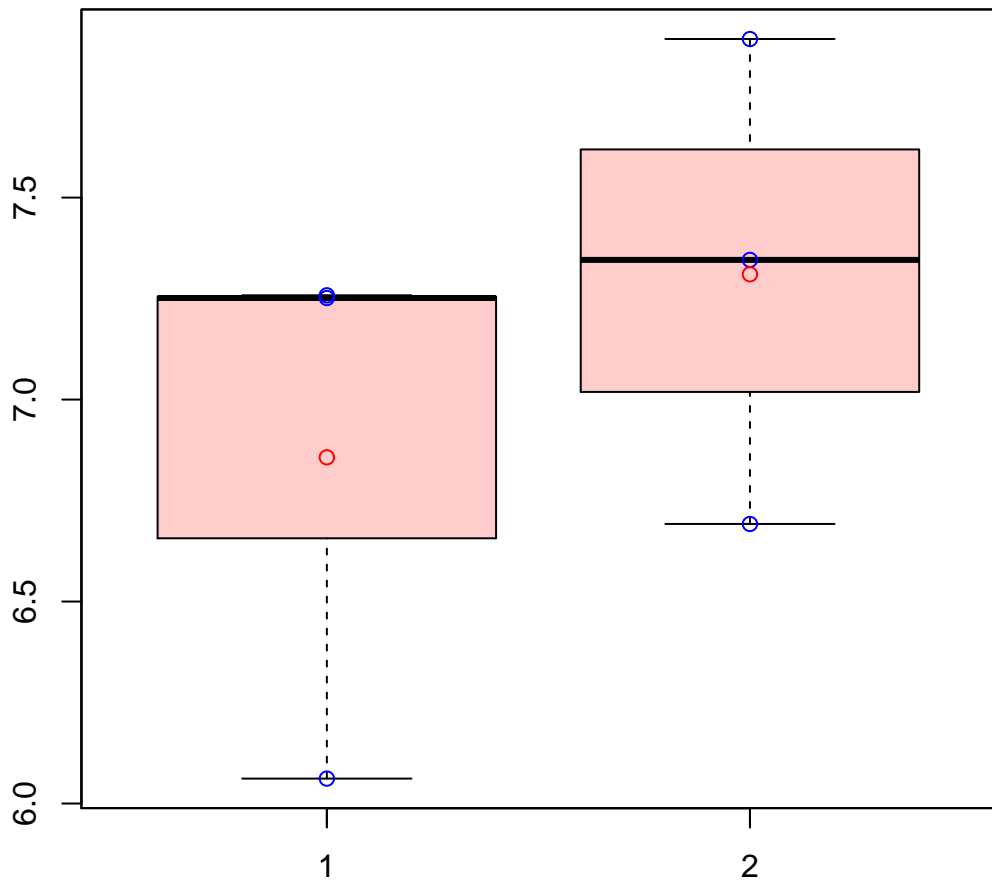

t-Test: p-value = 0.44

# I1GTP7|I1GTP7\_BRADI

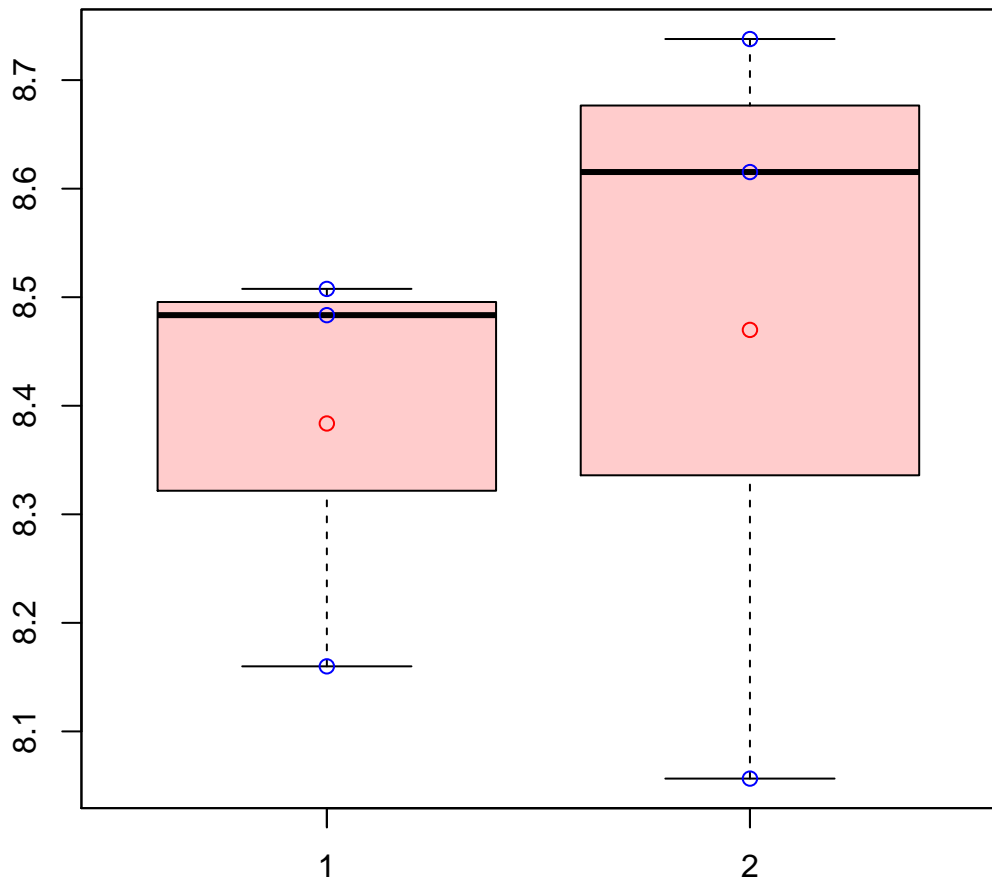

t-Test: p-value = 0.74

# I1GUH7|I1GUH7\_BRADI

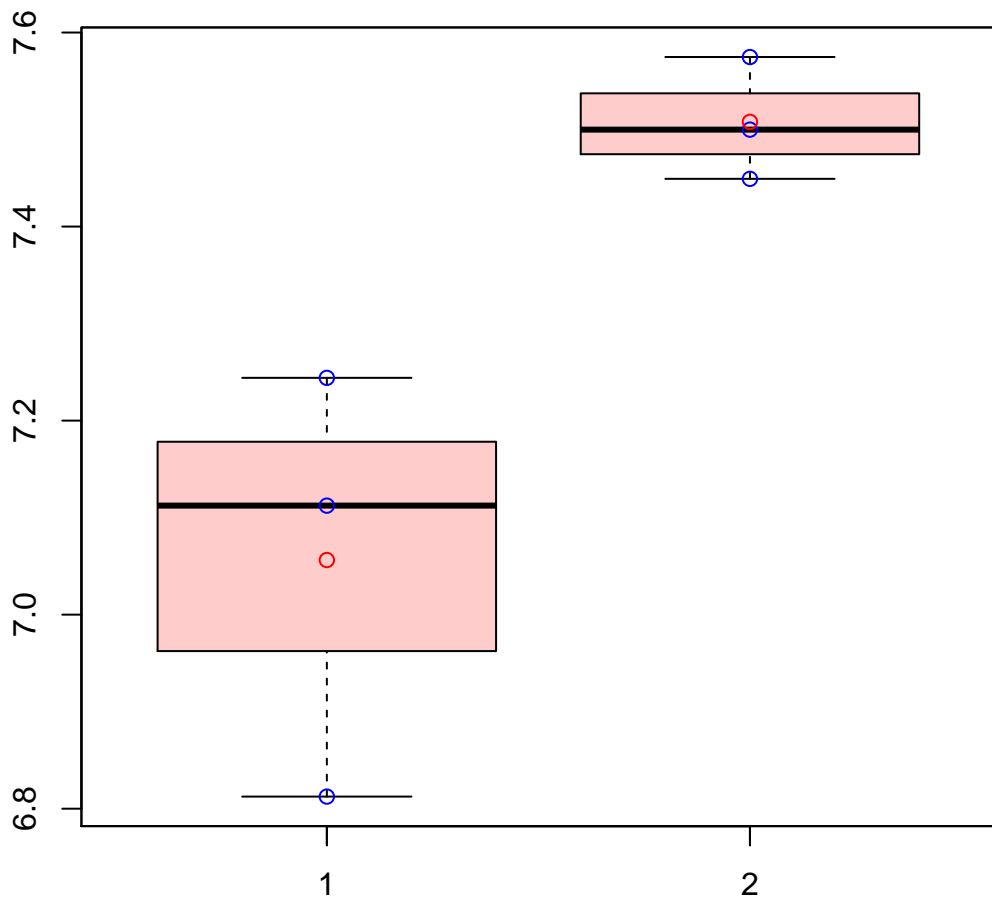

t-Test: p-value = 0.06

# I1GUX0|I1GUX0\_BRADI

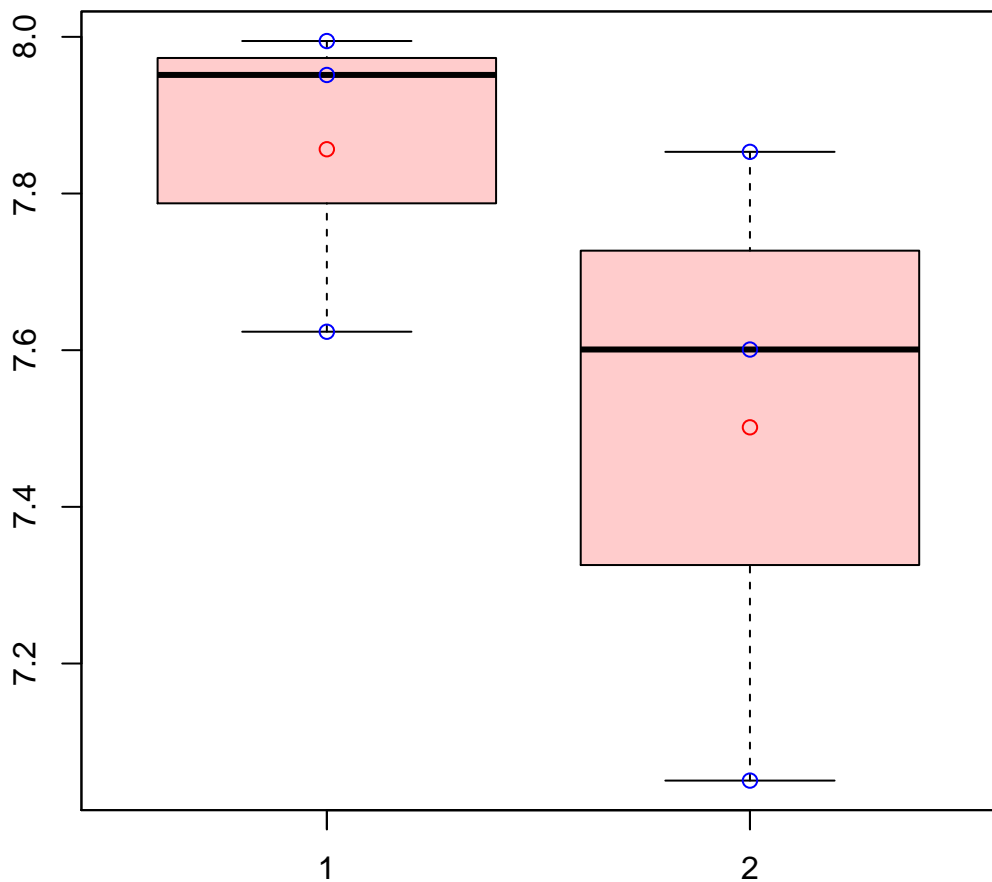

t-Test: p-value = 0.27

# I1GV34|I1GV34\_BRADI

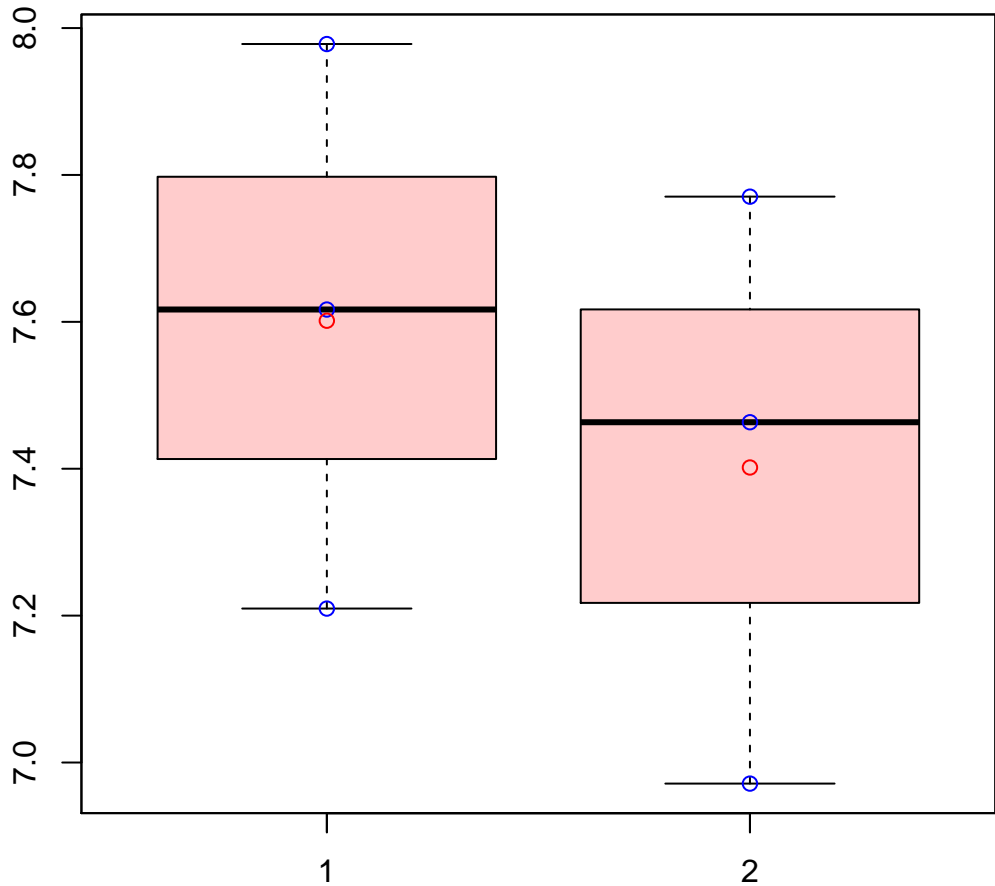

t-Test: p-value = 0.57



# I1GVJ4|I1GVJ4\_BRADI

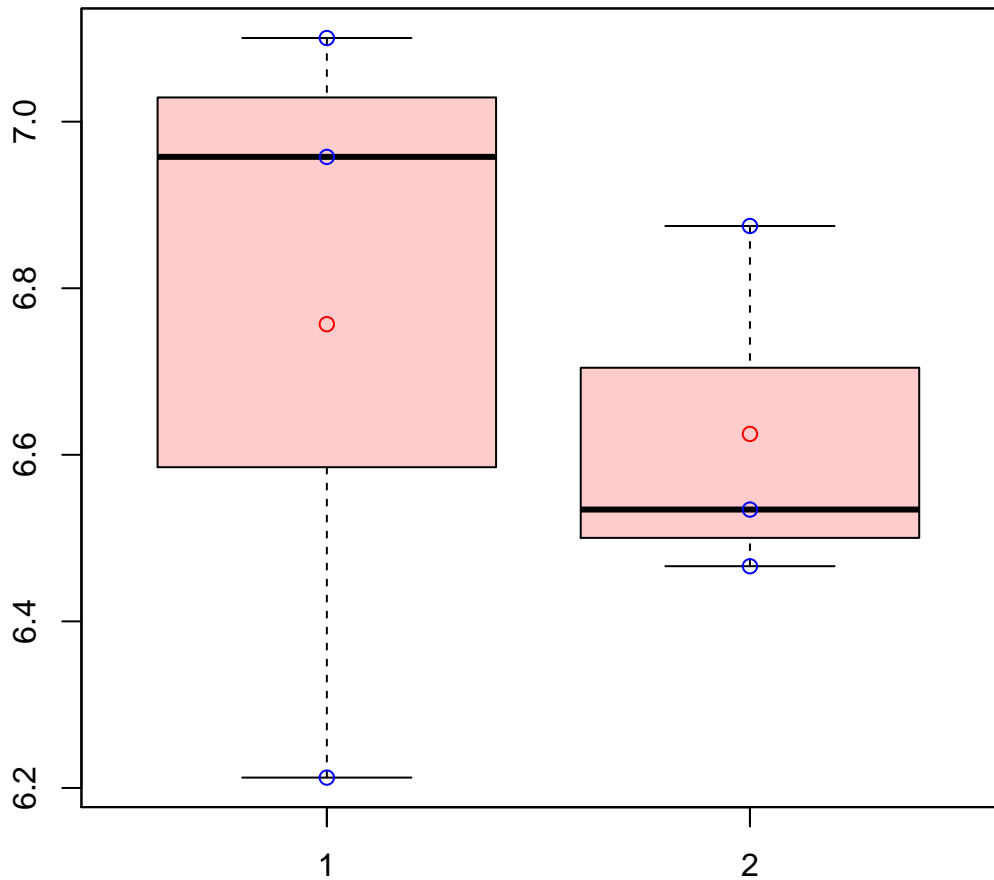

# I1GVU6|I1GVU6\_BRADI

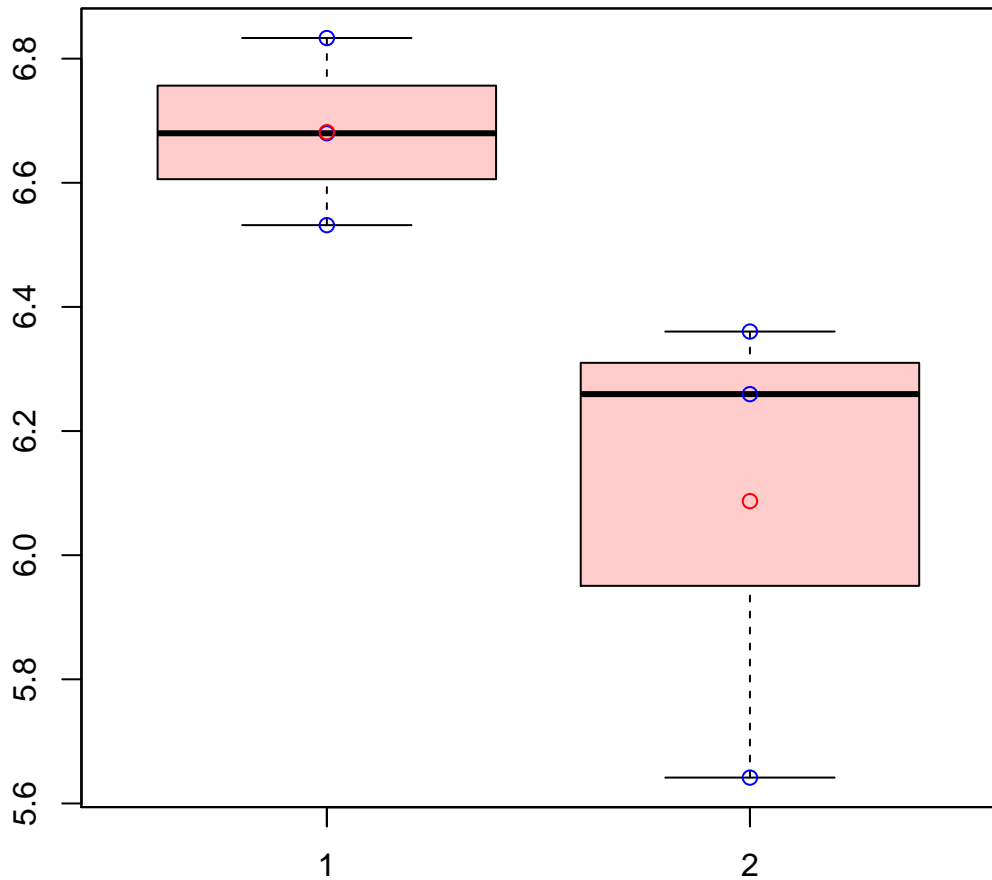

t-Test: p-value = 0.1

# I1GWA8|I1GWA8\_BRADI

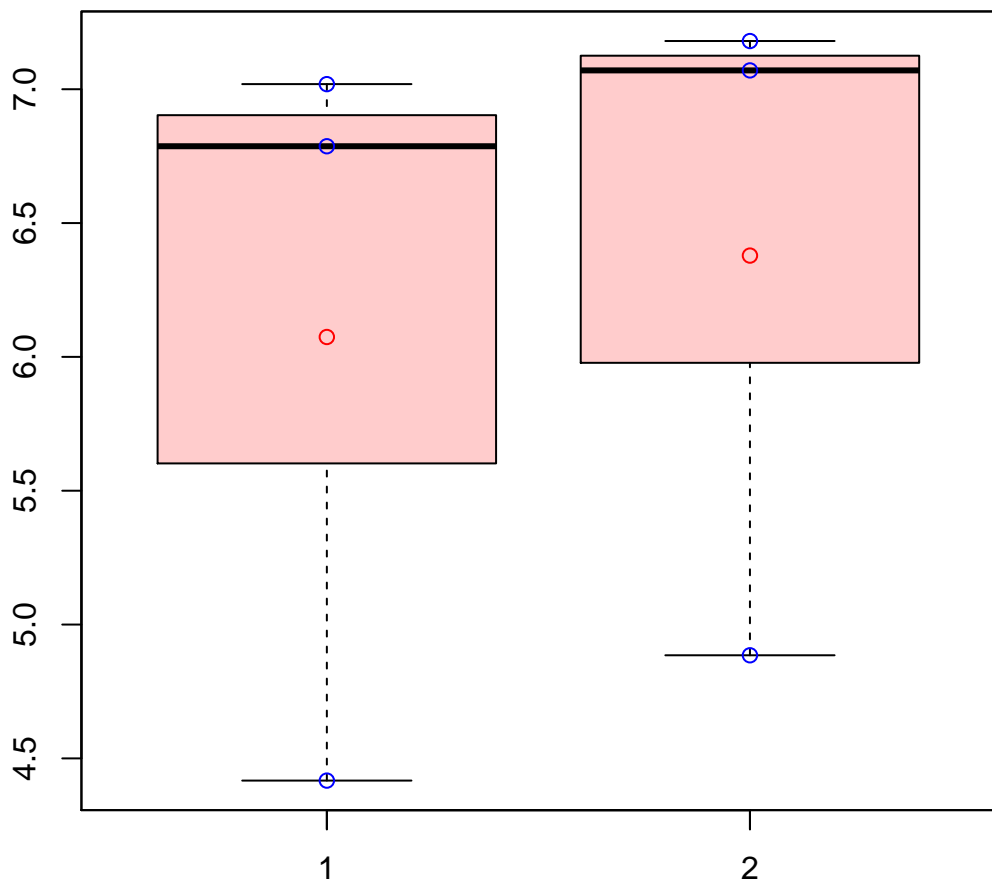

t-Test: p-value = 0.8

# I1GWN9|I1GWN9\_BRADI

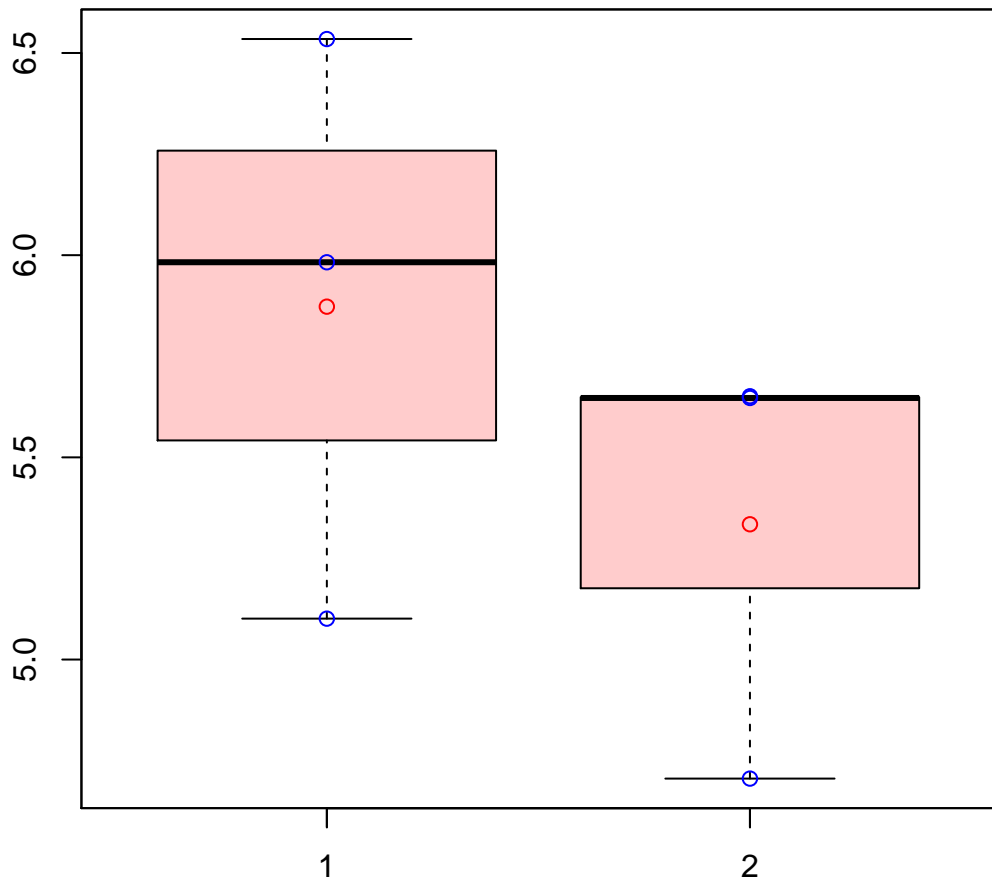

t-Test: p-value = 0.37

# I1GXL1|I1GXL1\_BRADI

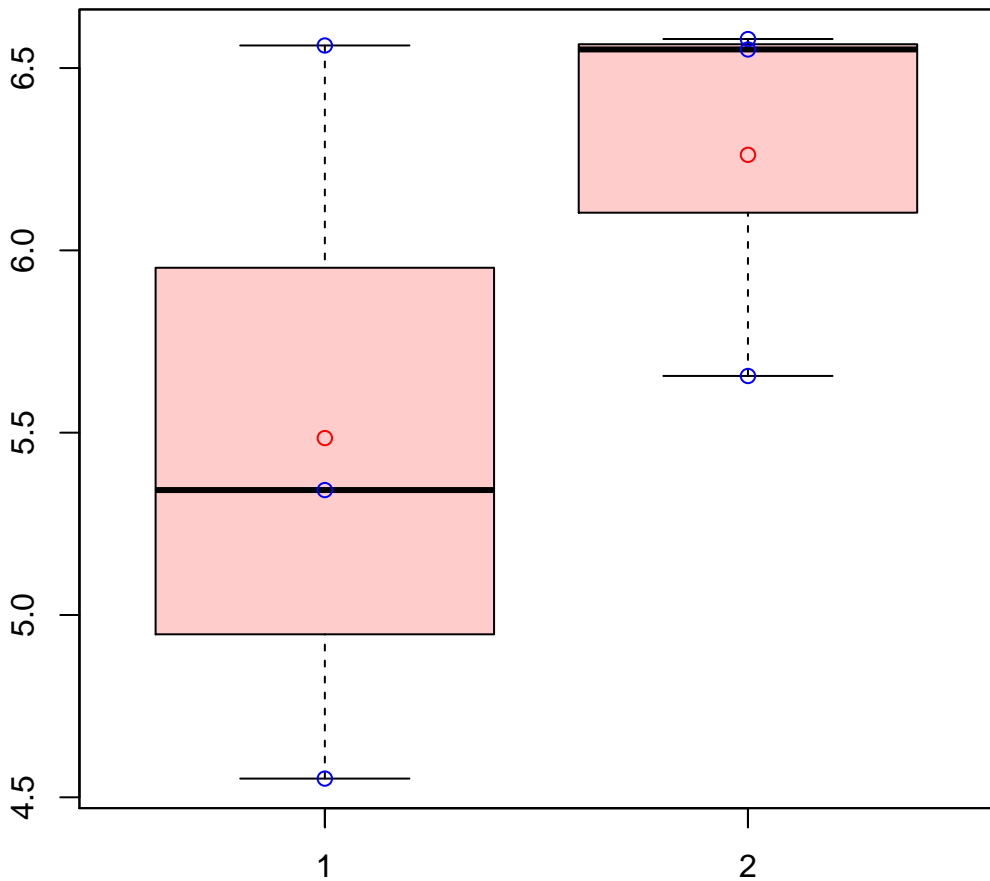

t-Test: p-value = 0.32

# I1GY41|I1GY41\_BRADI

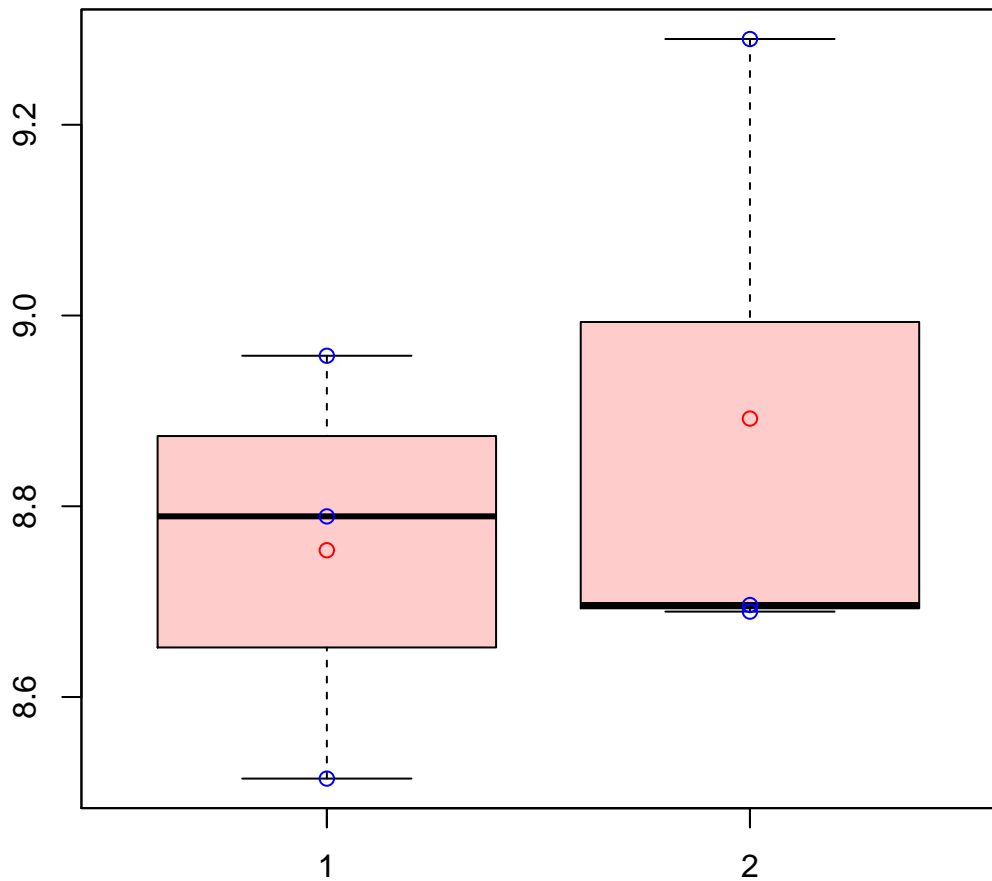

t-Test: p-value = 0.6

# I1GY49|I1GY49\_BRADI

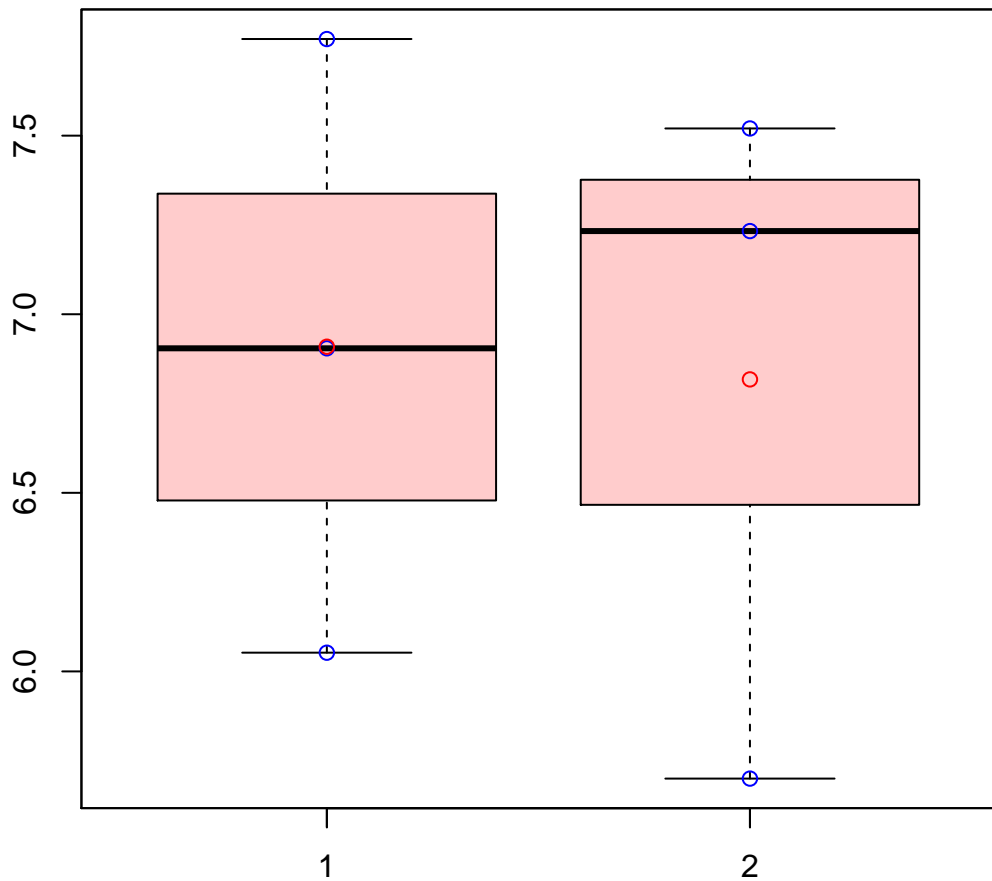

t-Test: p-value = 0.91

# I1GYB4|I1GYB4\_BRADI

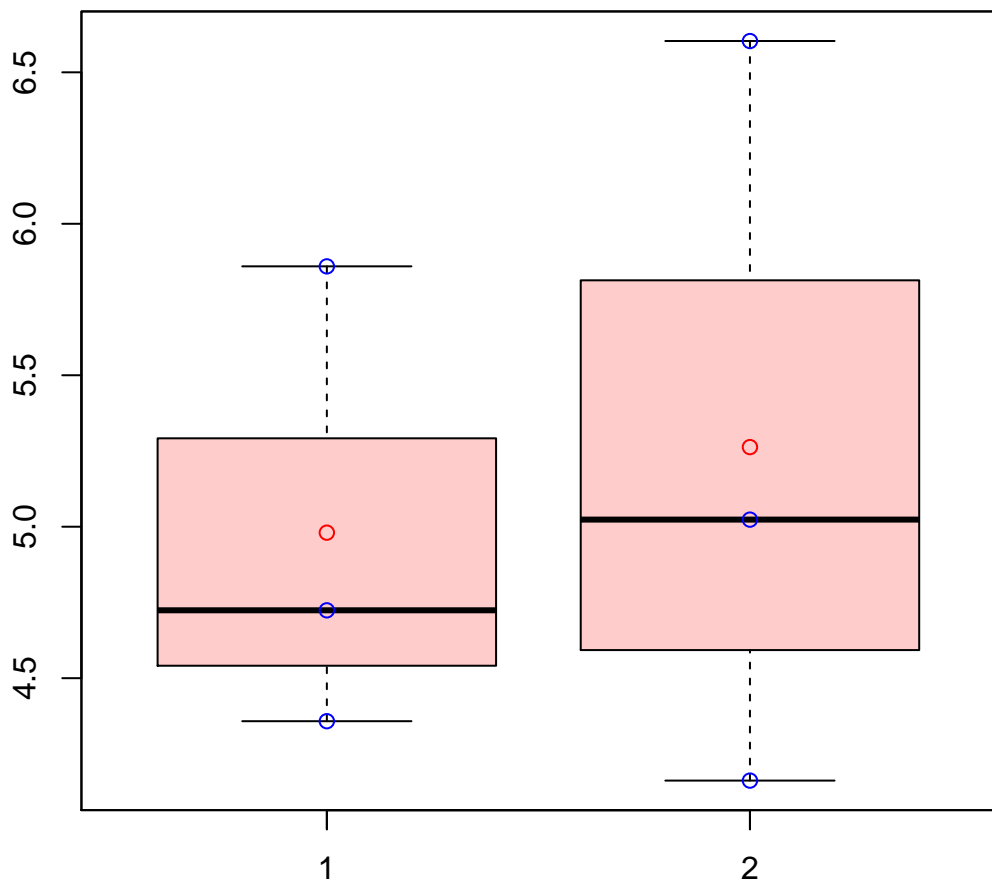

t-Test: p-value = 0.76



# I1GYH8|I1GYH8\_BRADI

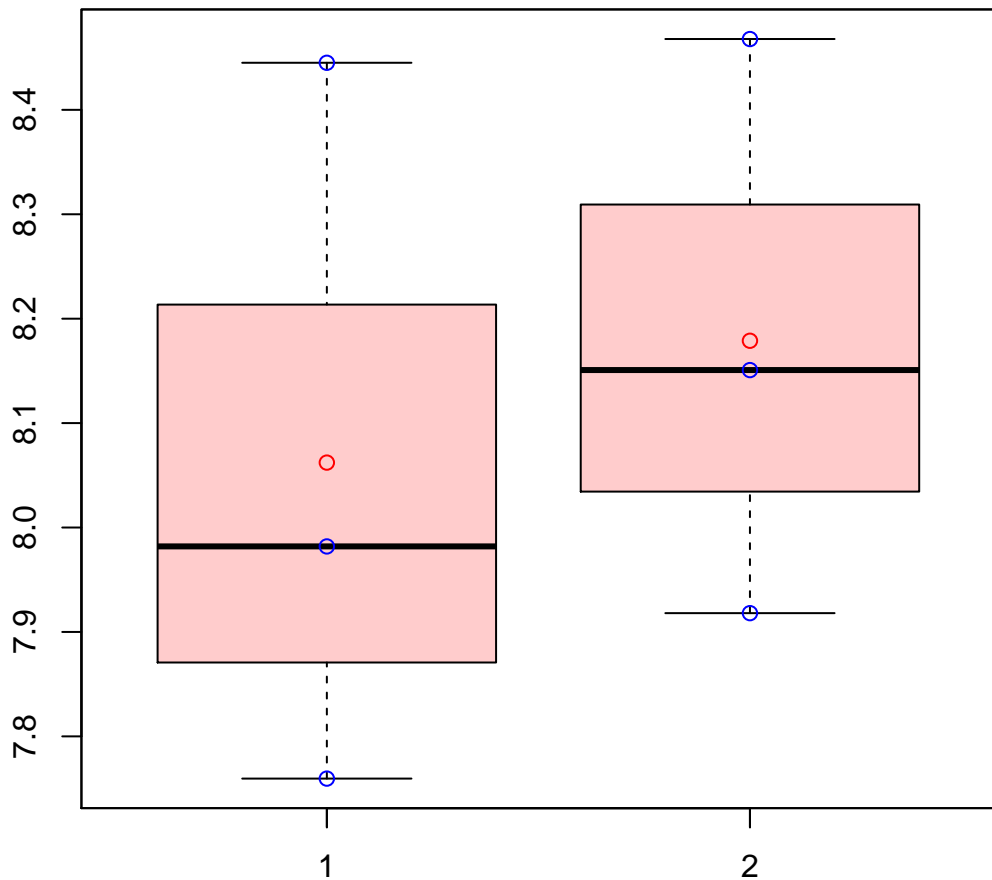

t-Test: p-value = 0.67

# I1GYJ5|I1GYJ5\_BRADI

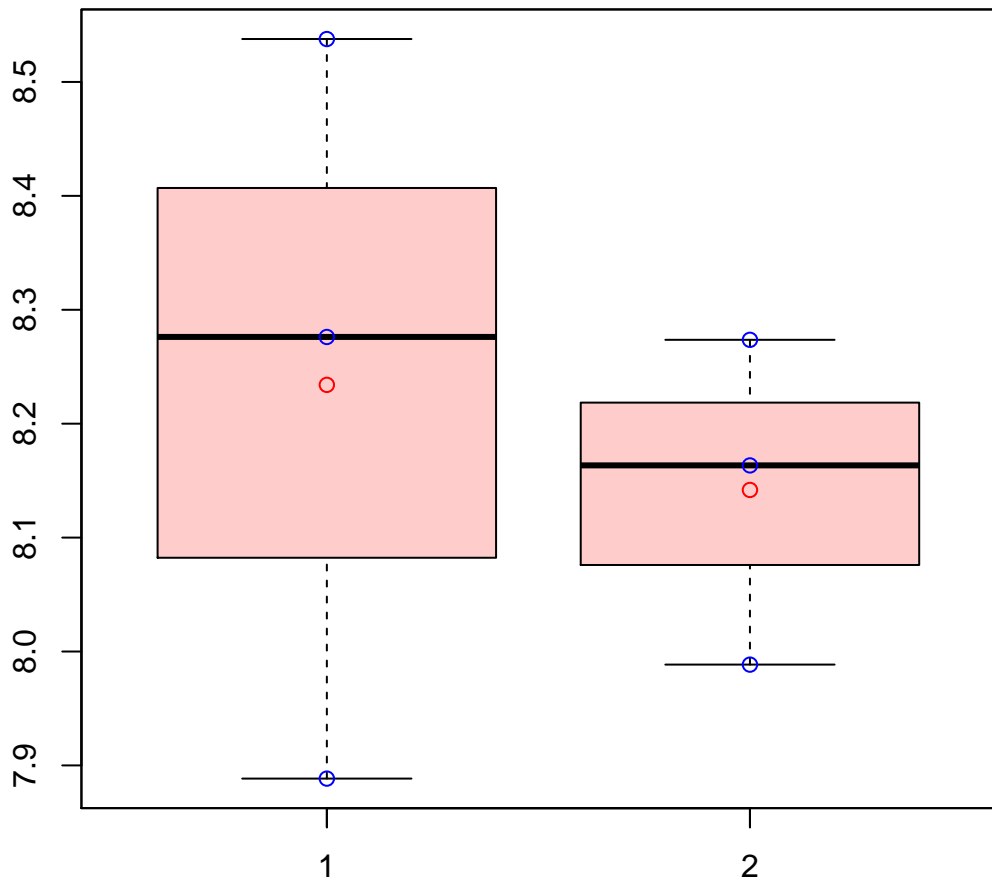

t-Test: p-value = 0.69

# I1GYJ9|I1GYJ9\_BRADI

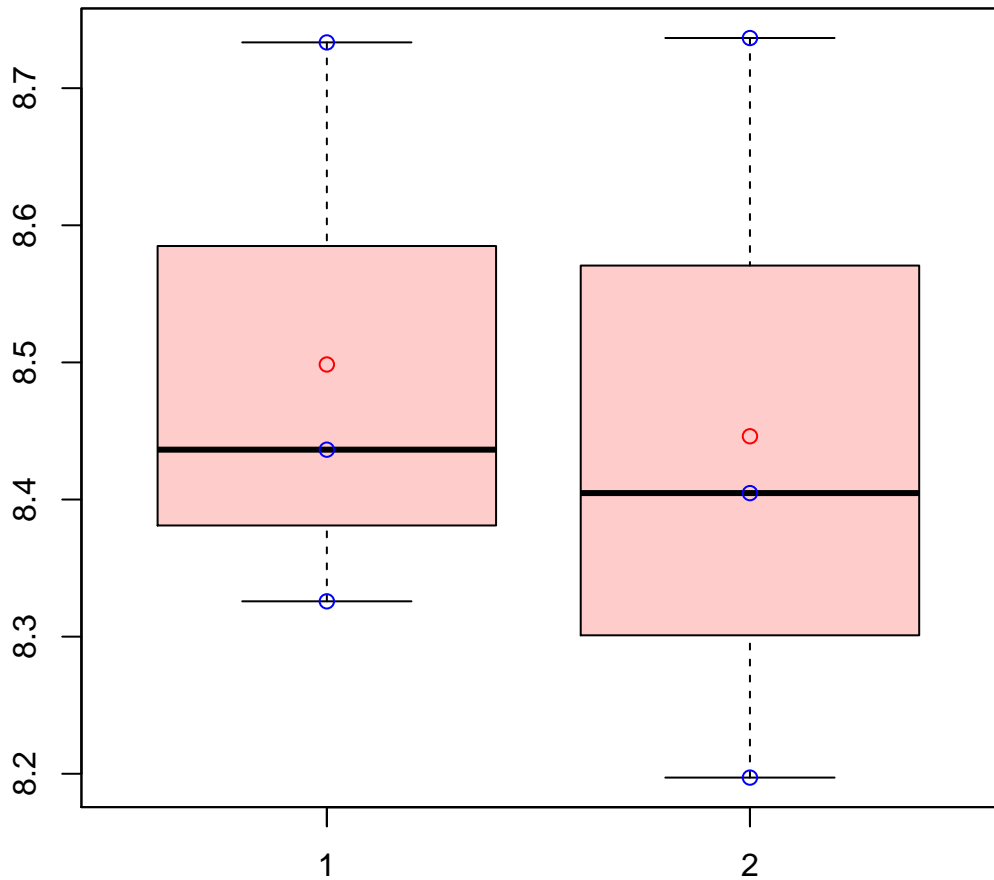

t-Test: p-value = 0.81

# I1H099|I1H099\_BRADI

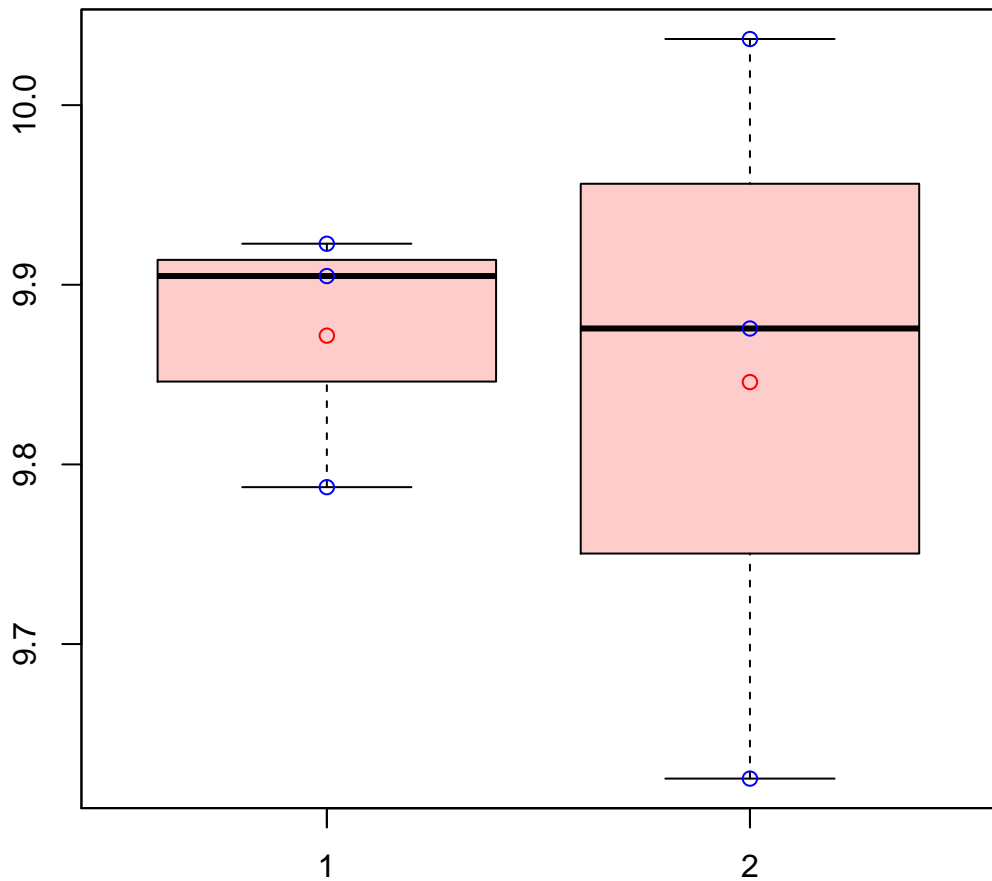

t-Test: p-value = 0.85

# I1H0F2|I1H0F2\_BRADI

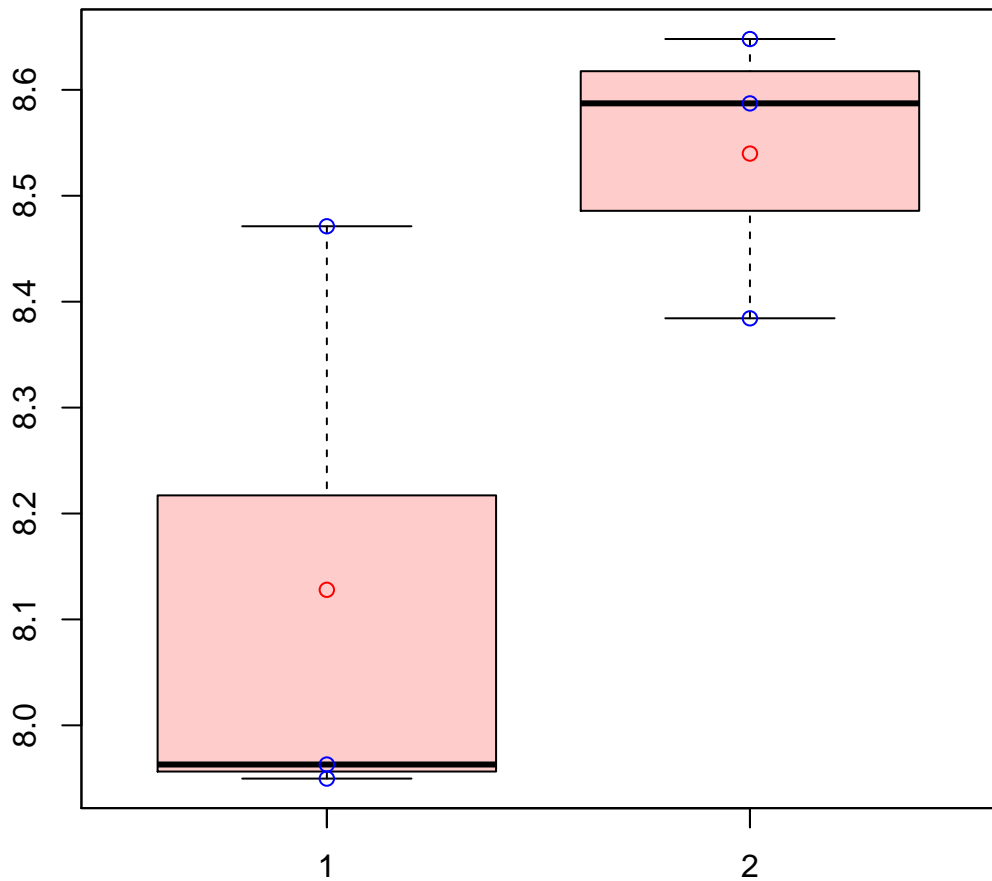

t-Test: p-value = 0.12

# I1H0F4|I1H0F4\_BRADI

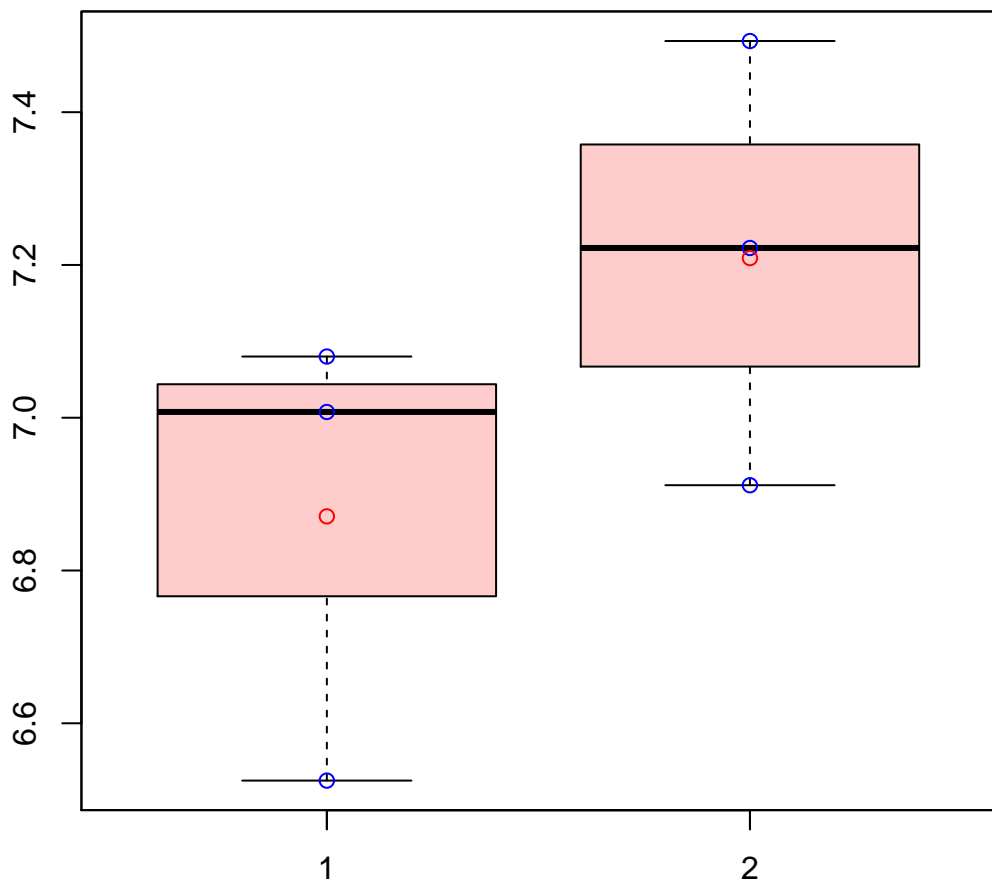

t-Test: p-value = 0.23

# I1H0H7|I1H0H7\_BRADI

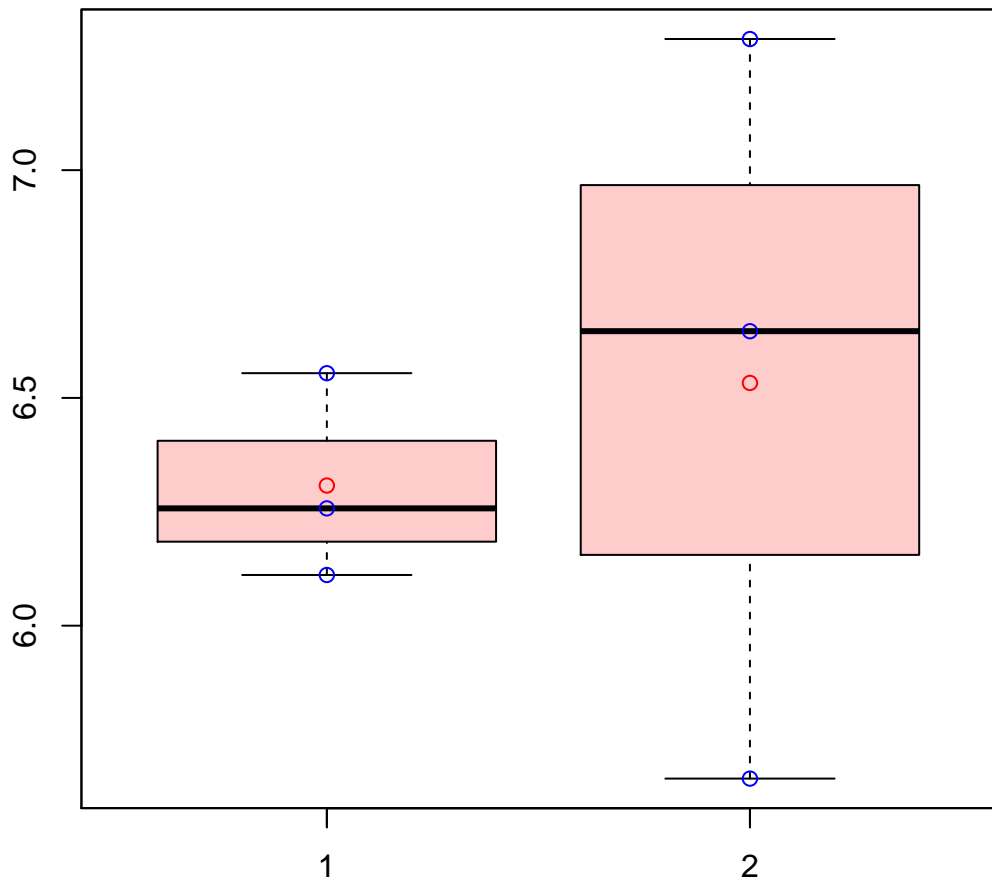

t-Test: p-value = 0.69

# I1H0K5|I1H0K5\_BRADI

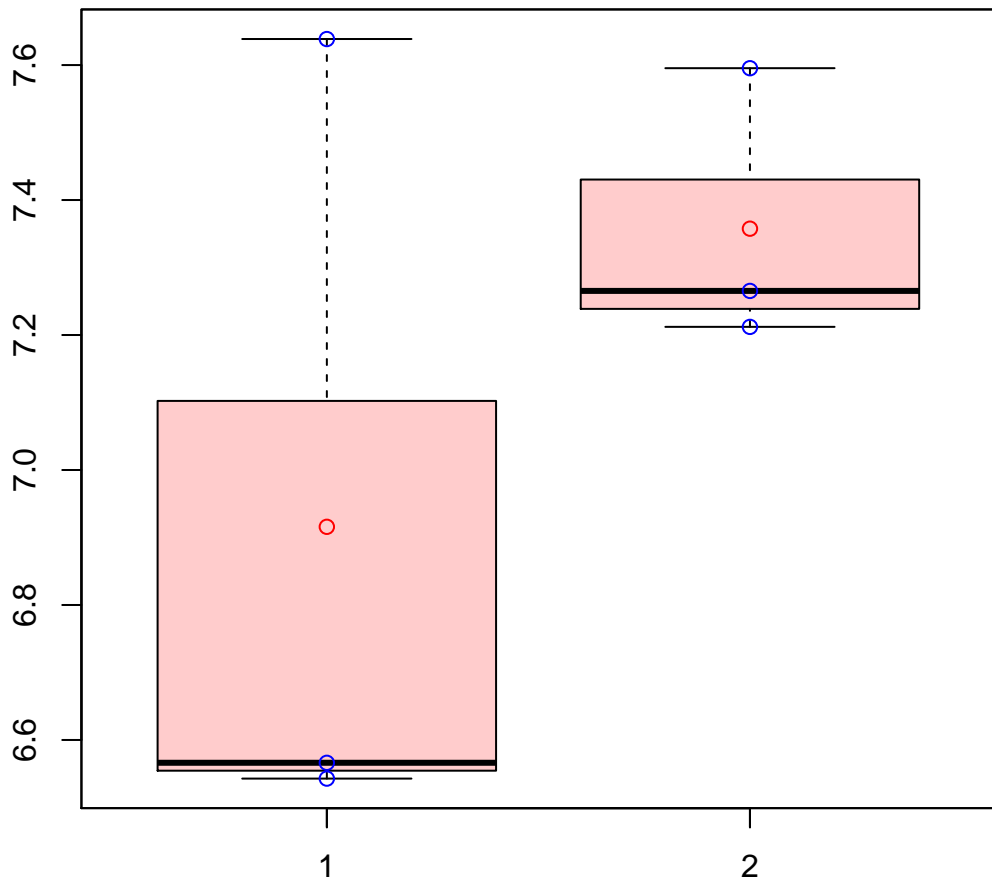

t-Test: p-value = 0.35



# I1H0K8|I1H0K8\_BRADI

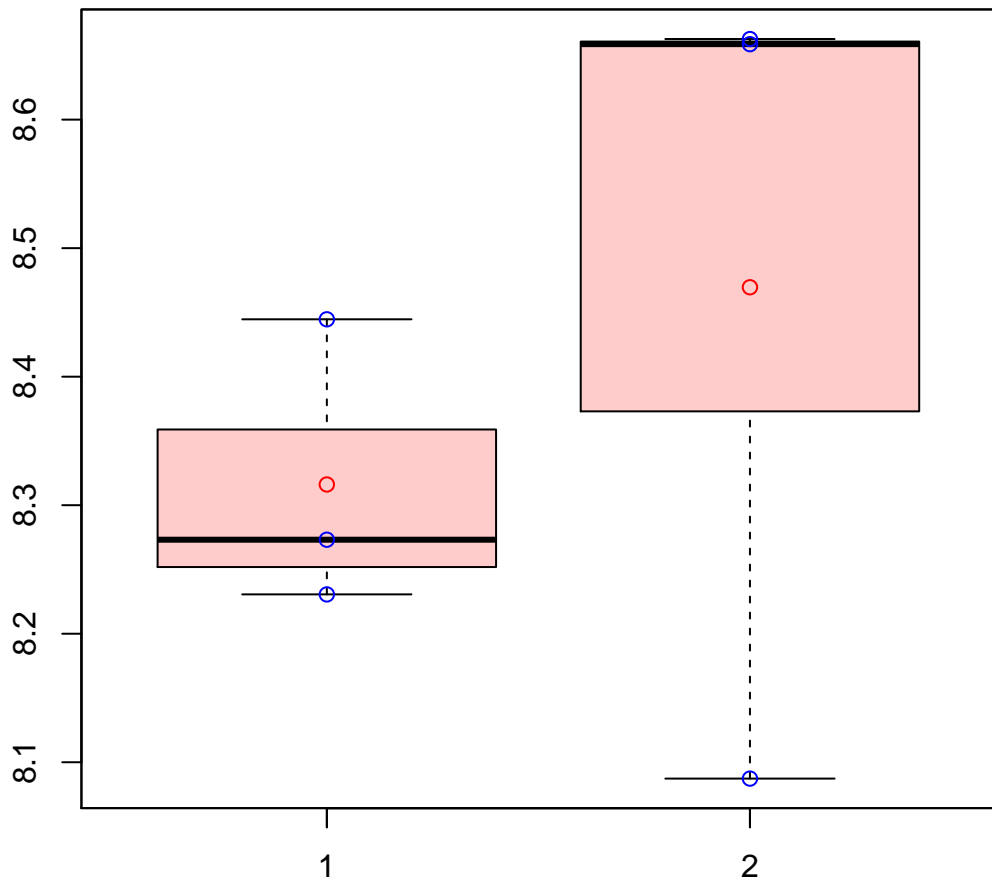

t-Test: p-value = 0.51

# I1H0Z8|I1H0Z8\_BRADI

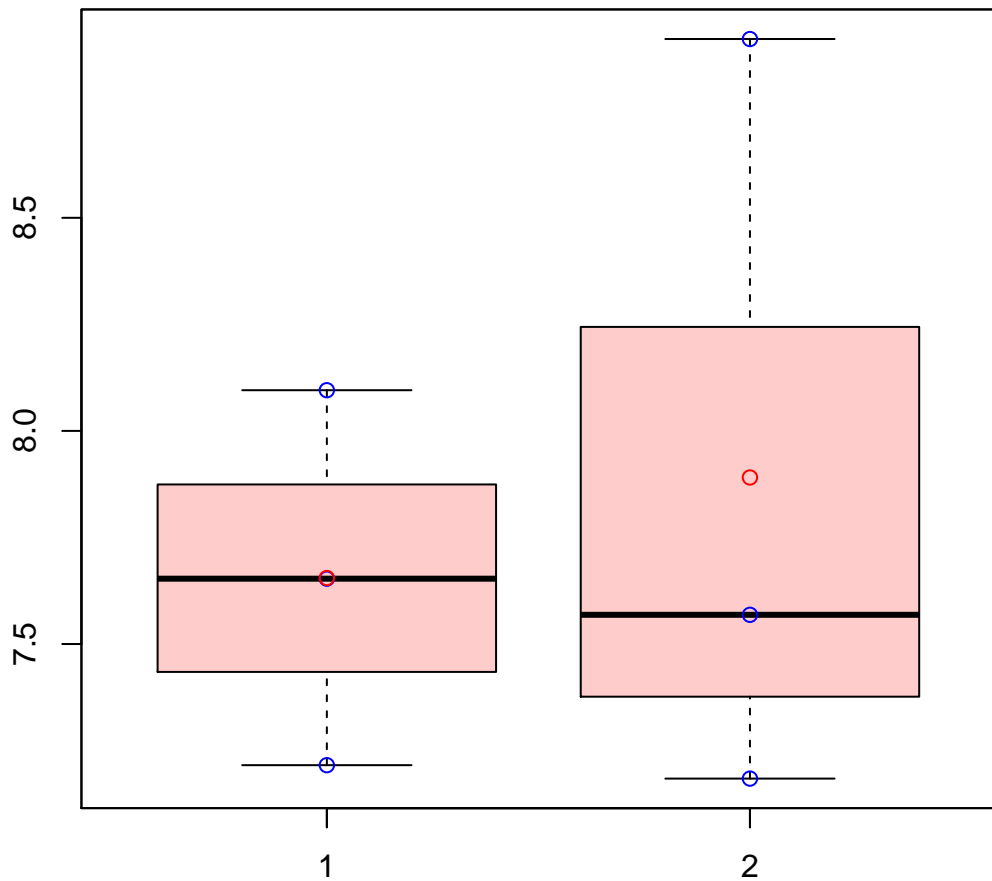

t-Test: p-value = 0.71

# I1H117|I1H117\_BRADI

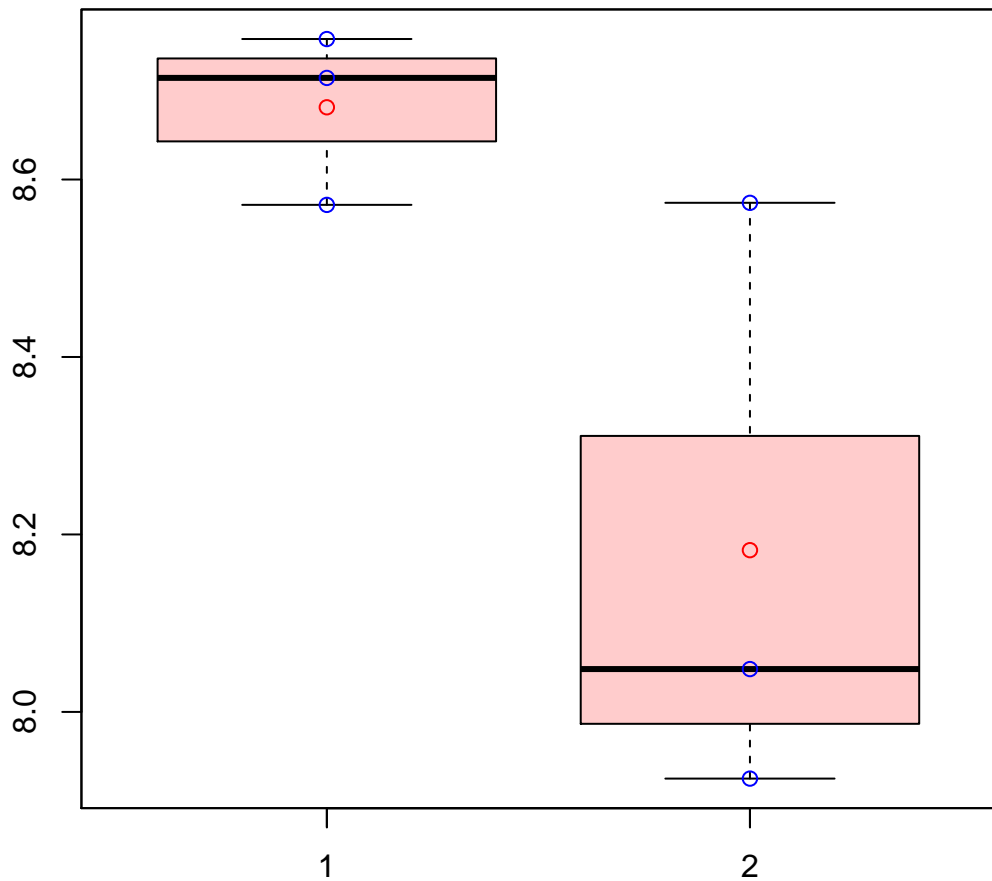

t-Test: p-value = 0.12

# I1H1C9|I1H1C9\_BRADI

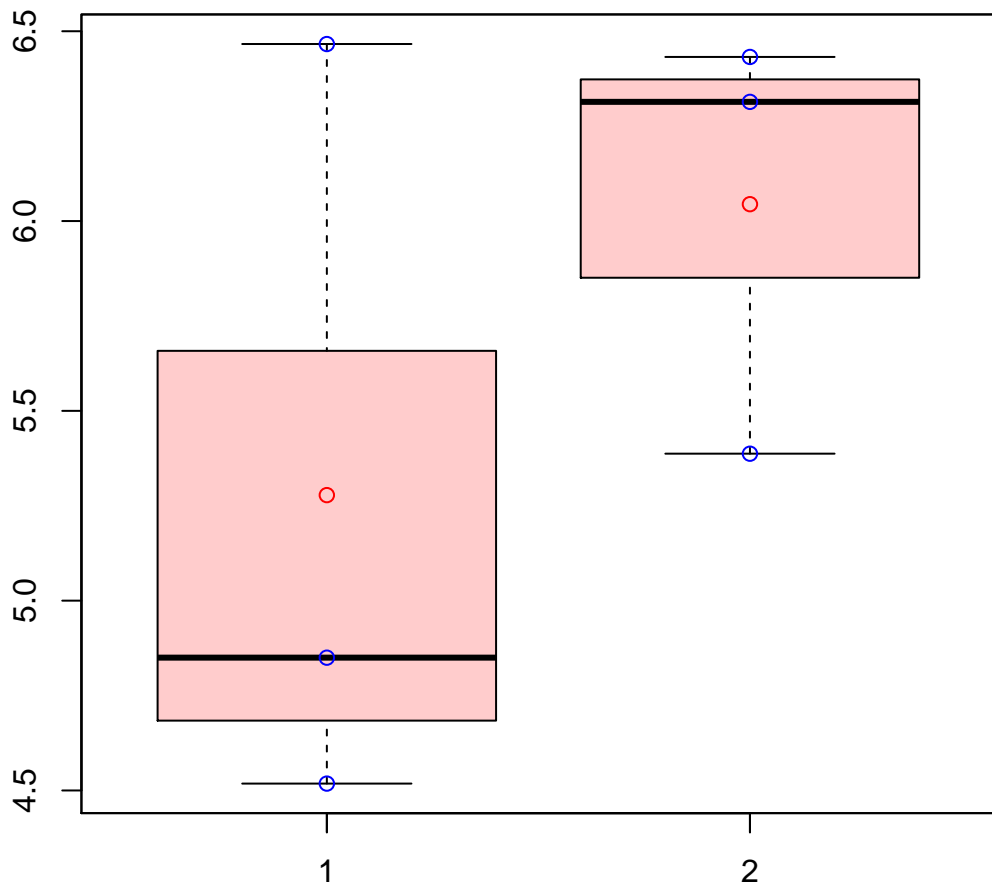

t-Test: p-value = 0.34

# I1H1V5|I1H1V5\_BRADI

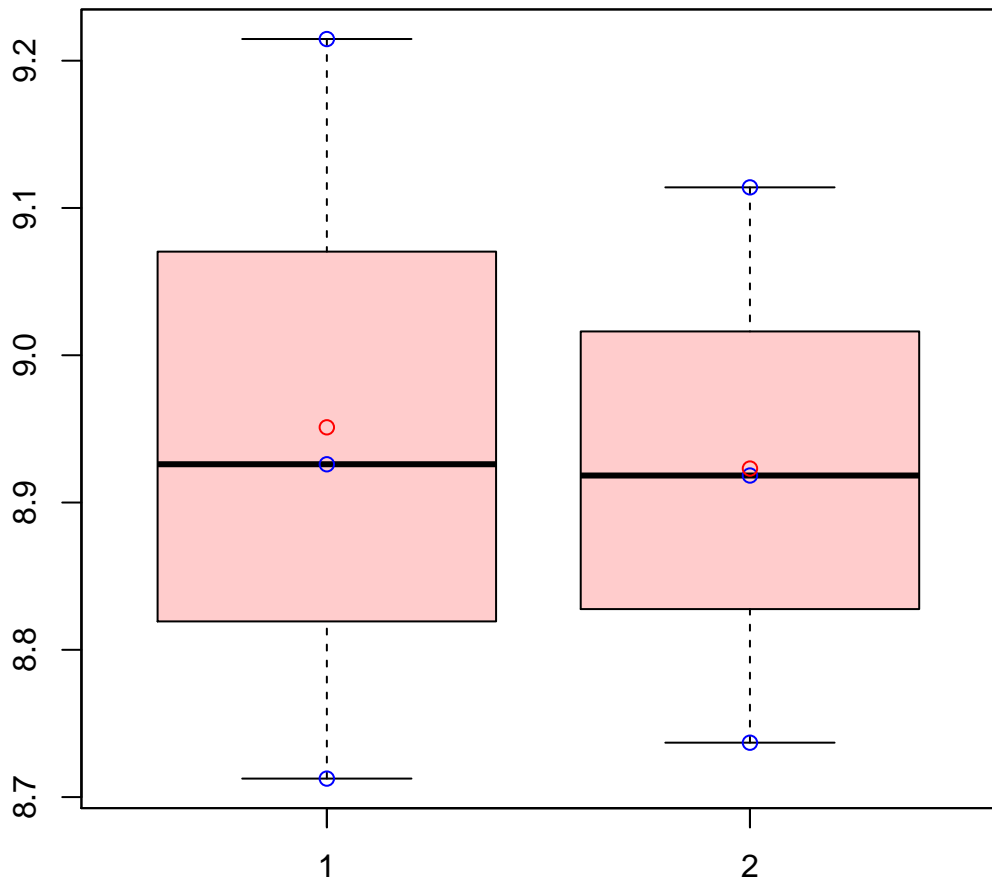

t-Test: p-value = 0.89

# I1H1Z5|I1H1Z5\_BRADI

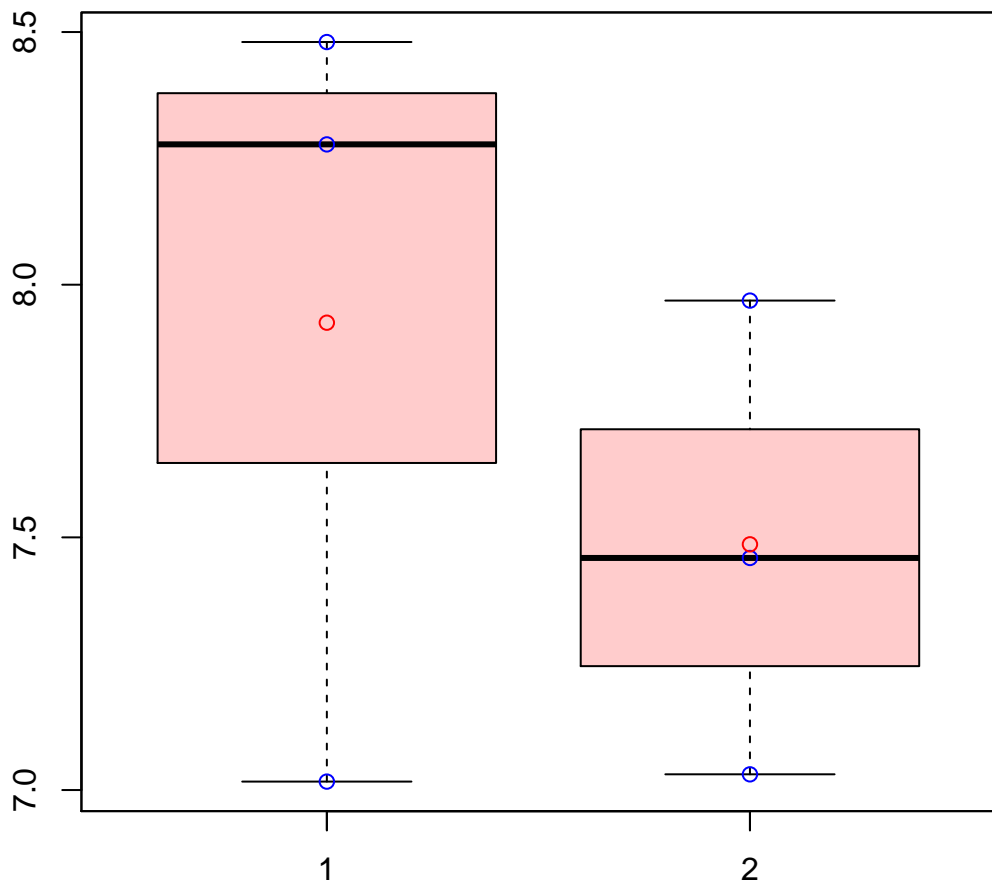

t-Test: p-value = 0.47

# I1H1Z7|I1H1Z7\_BRADI

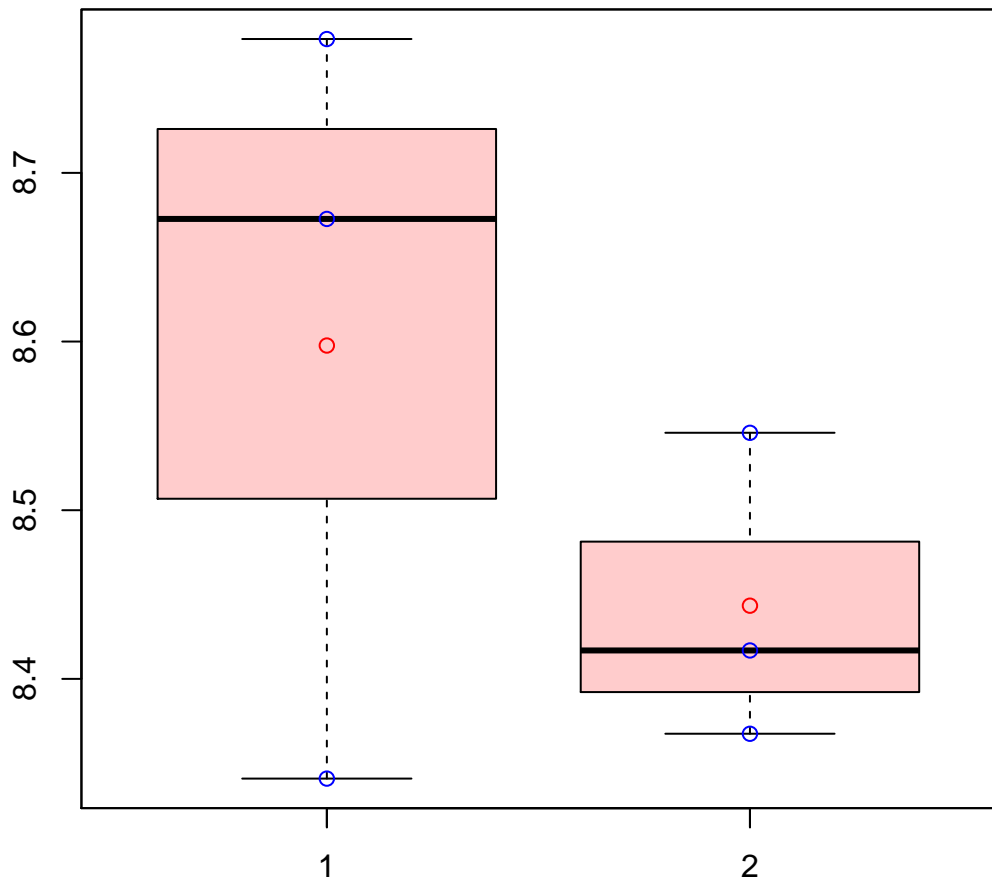

t-Test: p-value = 0.37

# I1H2H9|I1H2H9\_BRADI

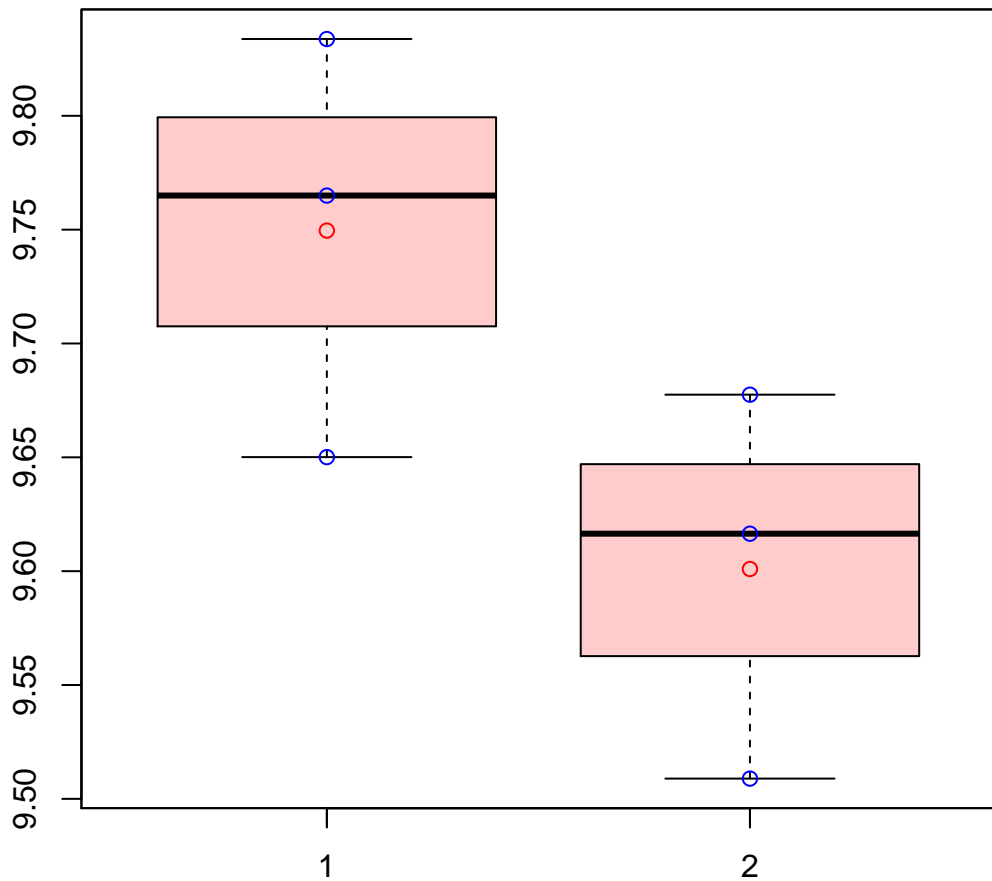

t-Test: p-value = 0.11



# I1H2K5|I1H2K5\_BRADI

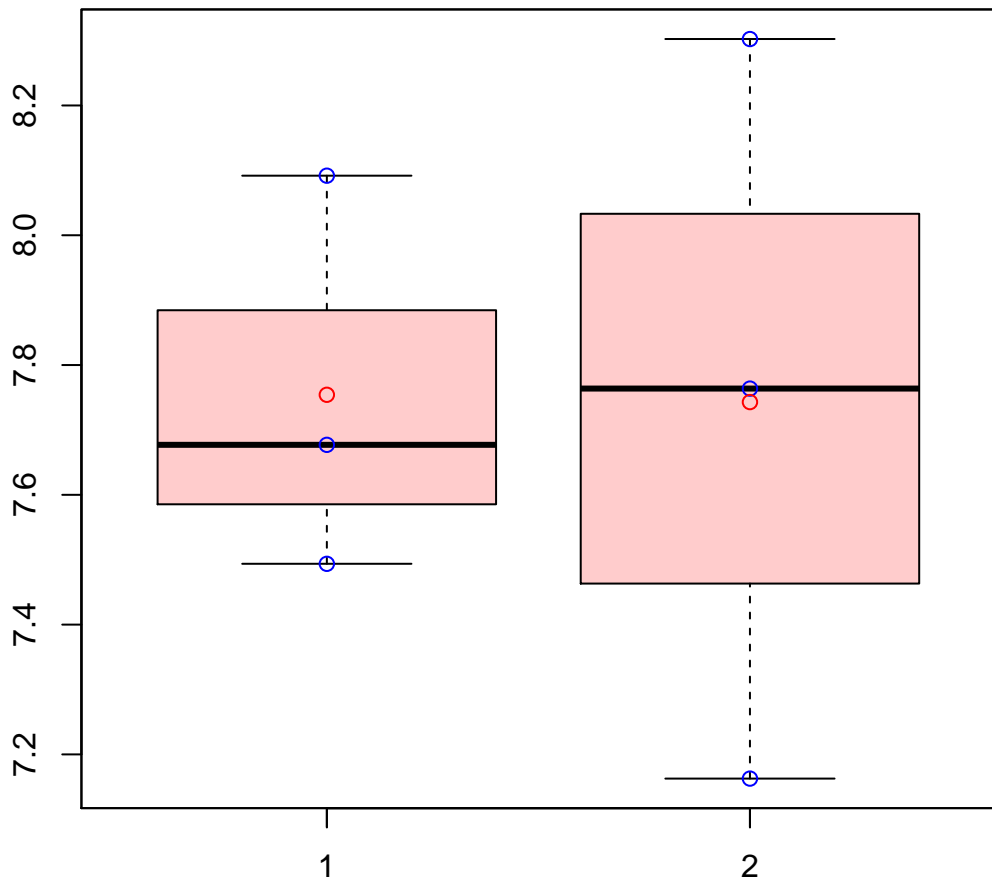

t-Test: p-value = 0.98

# I1H2M7|I1H2M7\_BRADI

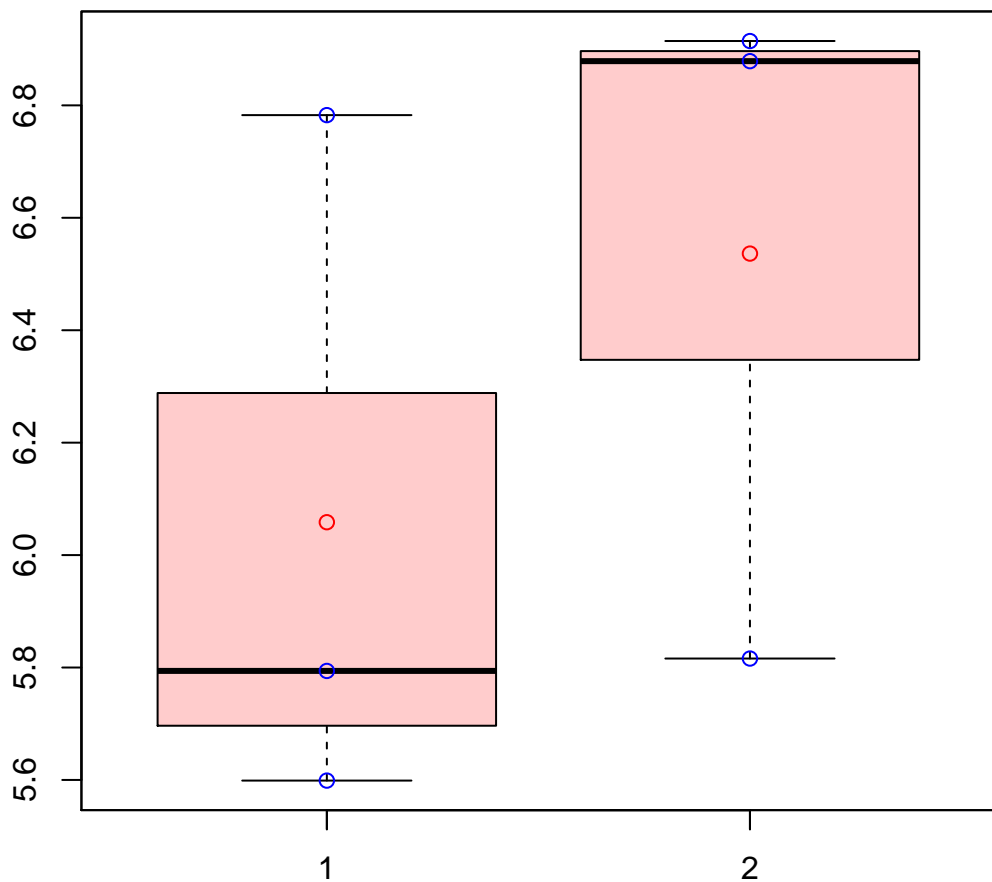

t-Test: p-value = 0.41

# I1H2W7|I1H2W7\_BRADI

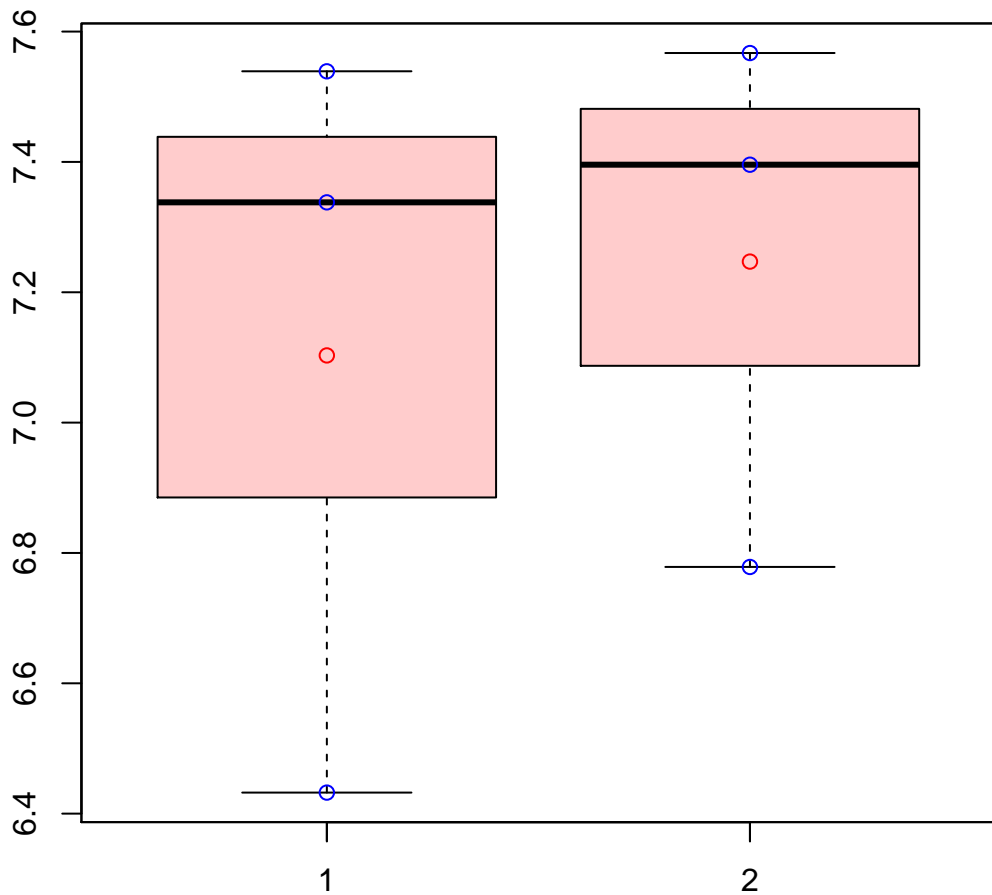

t-Test: p-value = 0.75

# I1H2Z2|I1H2Z2\_BRADI

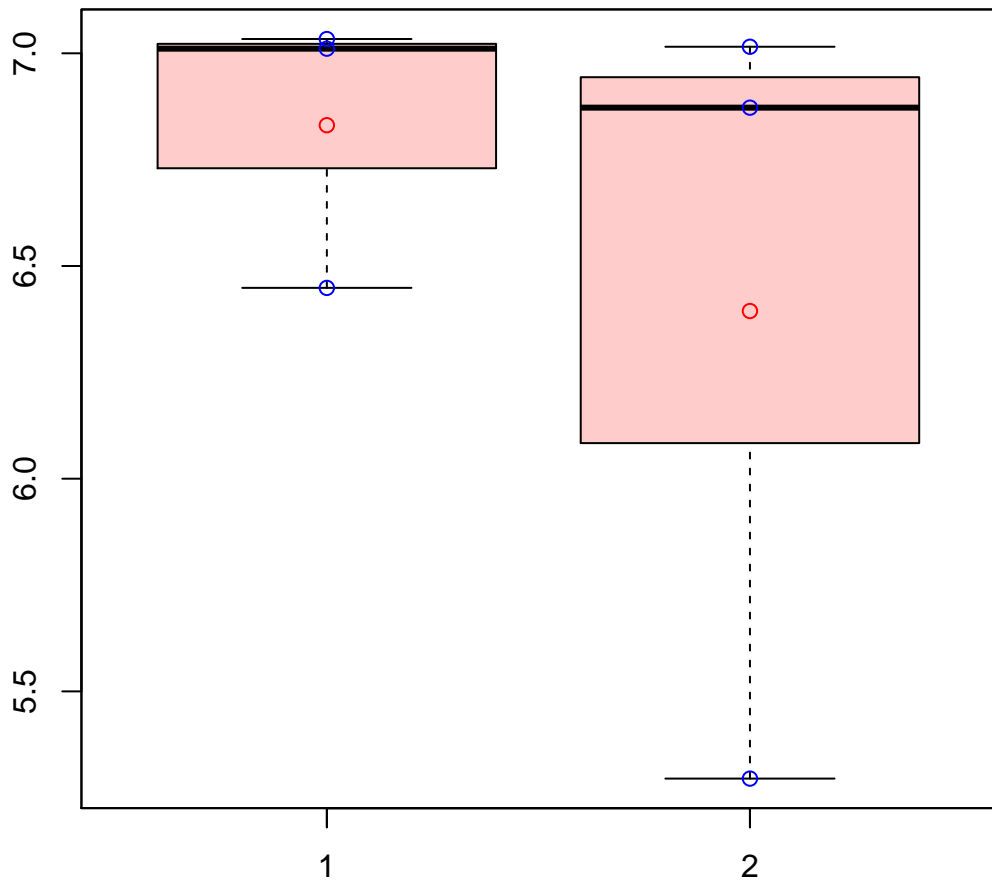

t-Test: p-value = 0.52

# I1H3B2|I1H3B2\_BRADI

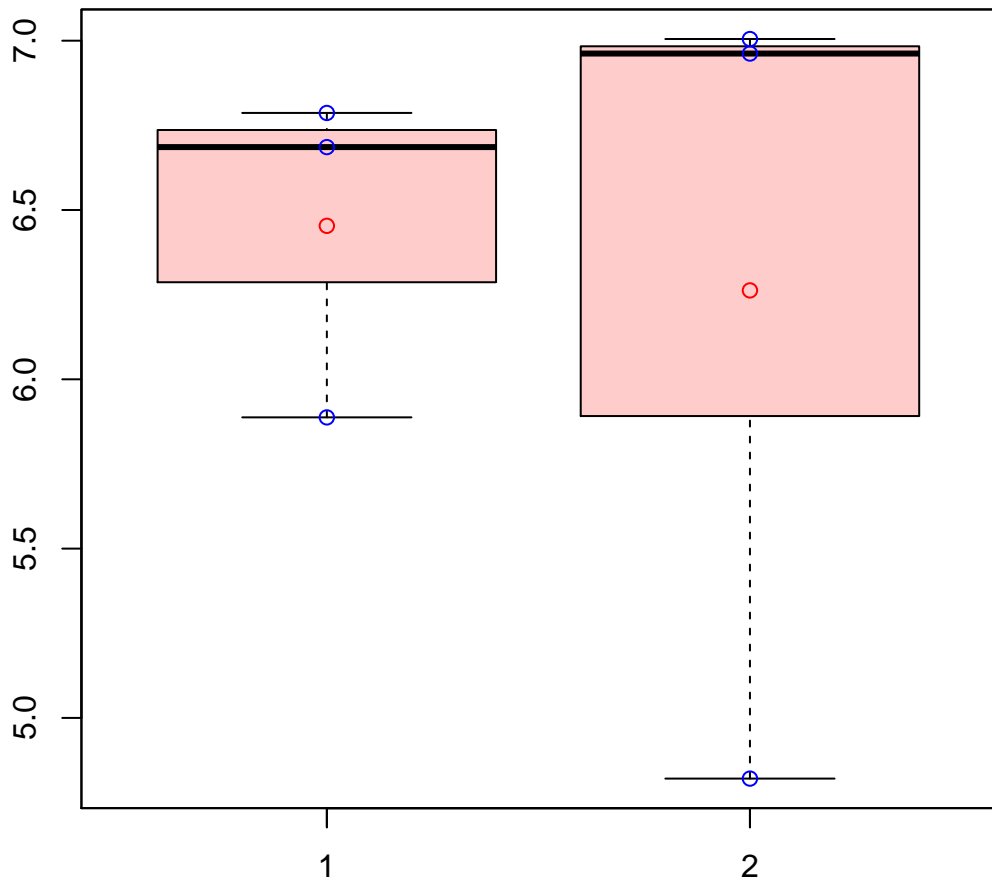

t-Test: p-value = 0.82

# I1H3F3|I1H3F3\_BRADI

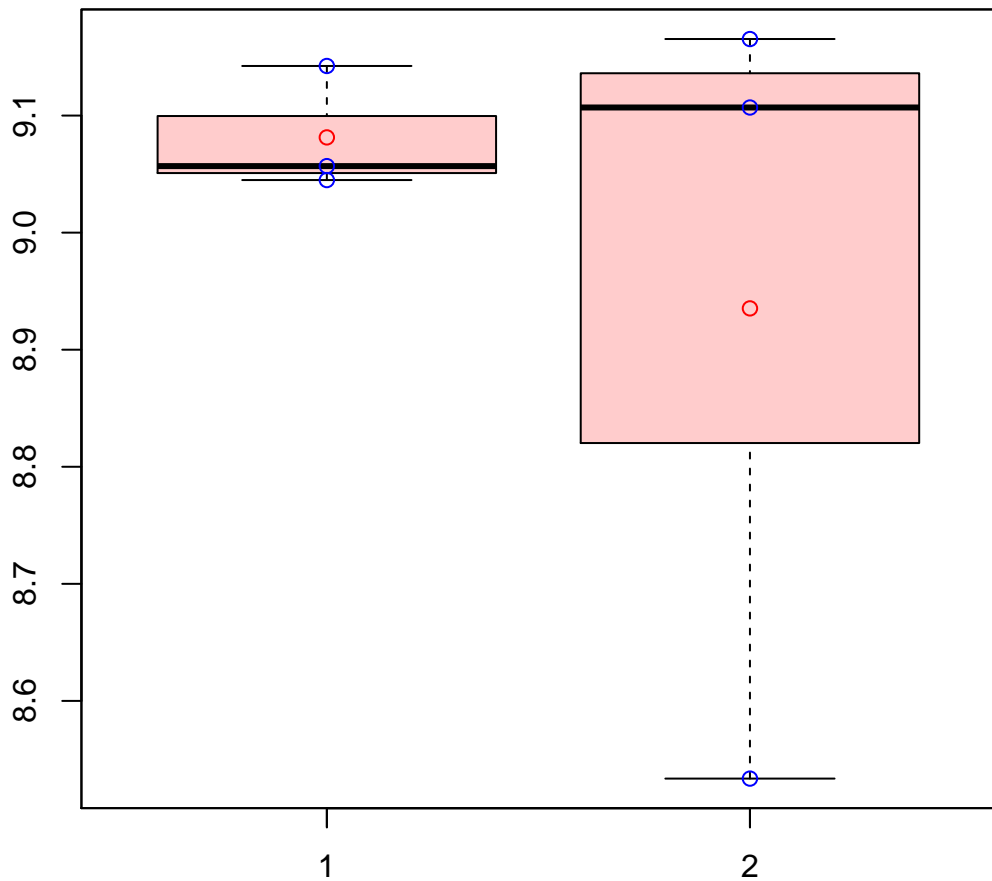

t-Test: p-value = 0.55

# I1H3G7|I1H3G7\_BRADI

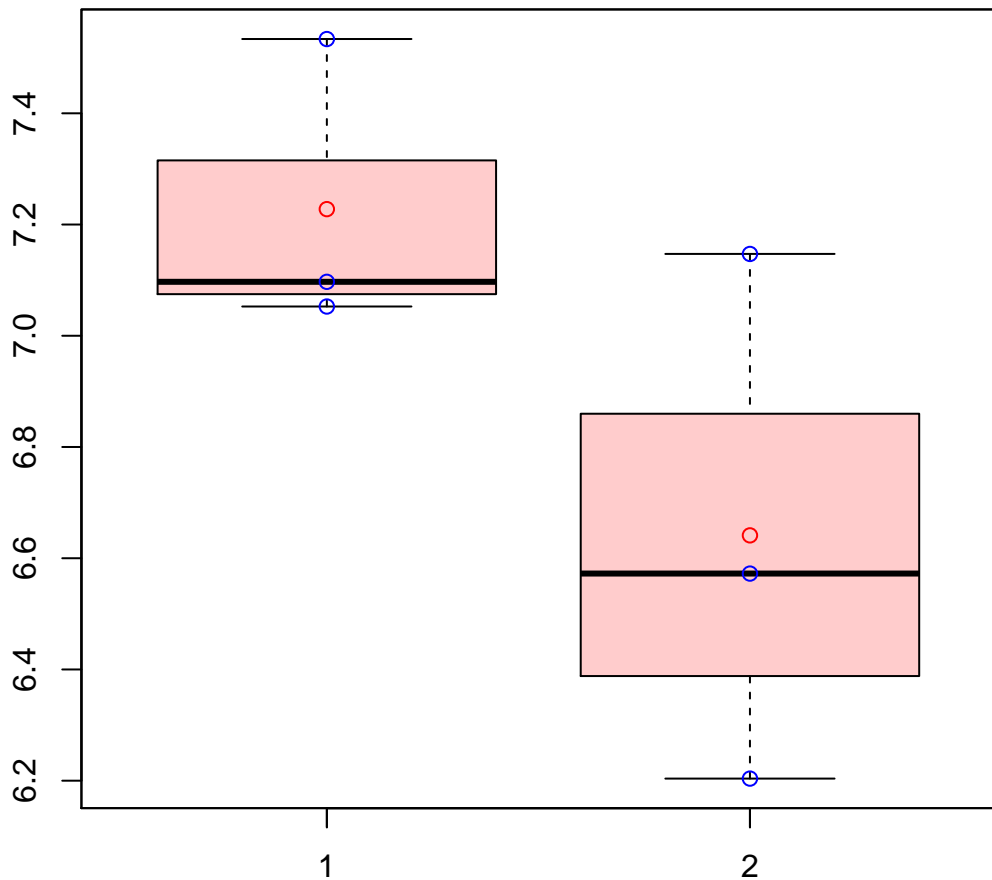

t-Test: p-value = 0.15

# I1H3K5|I1H3K5\_BRADI

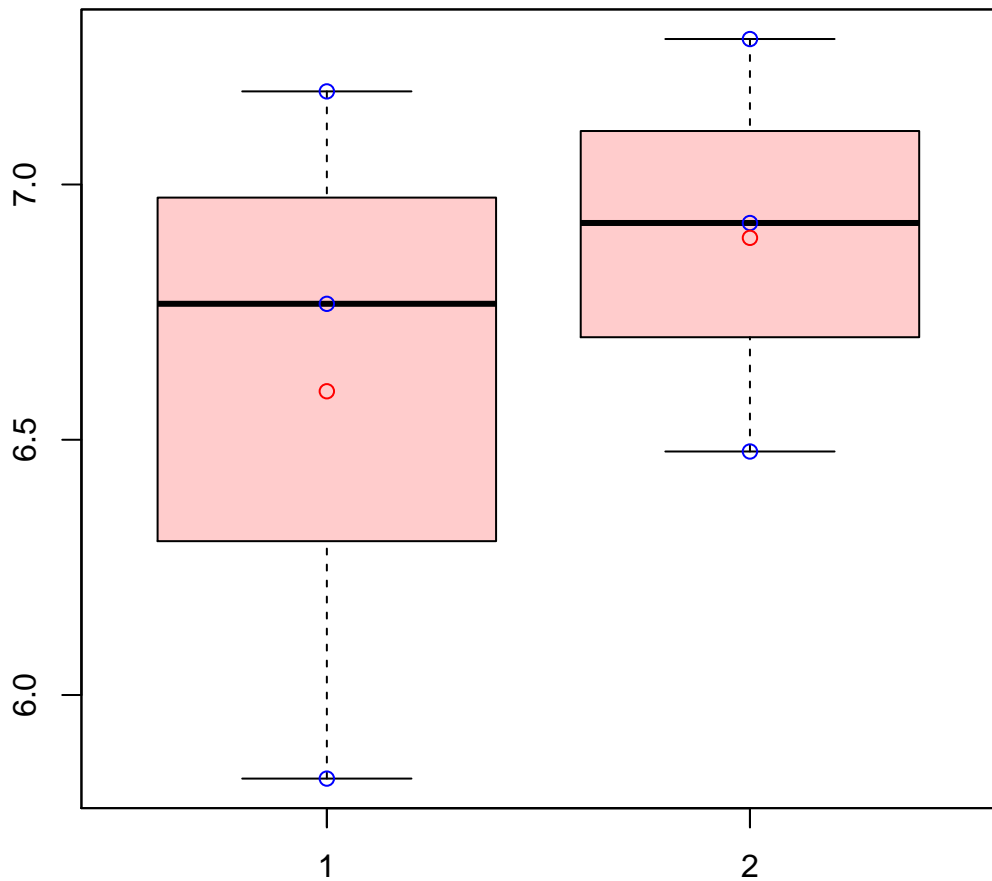

t-Test: p-value = 0.56



# I1H3L2|I1H3L2\_BRADI

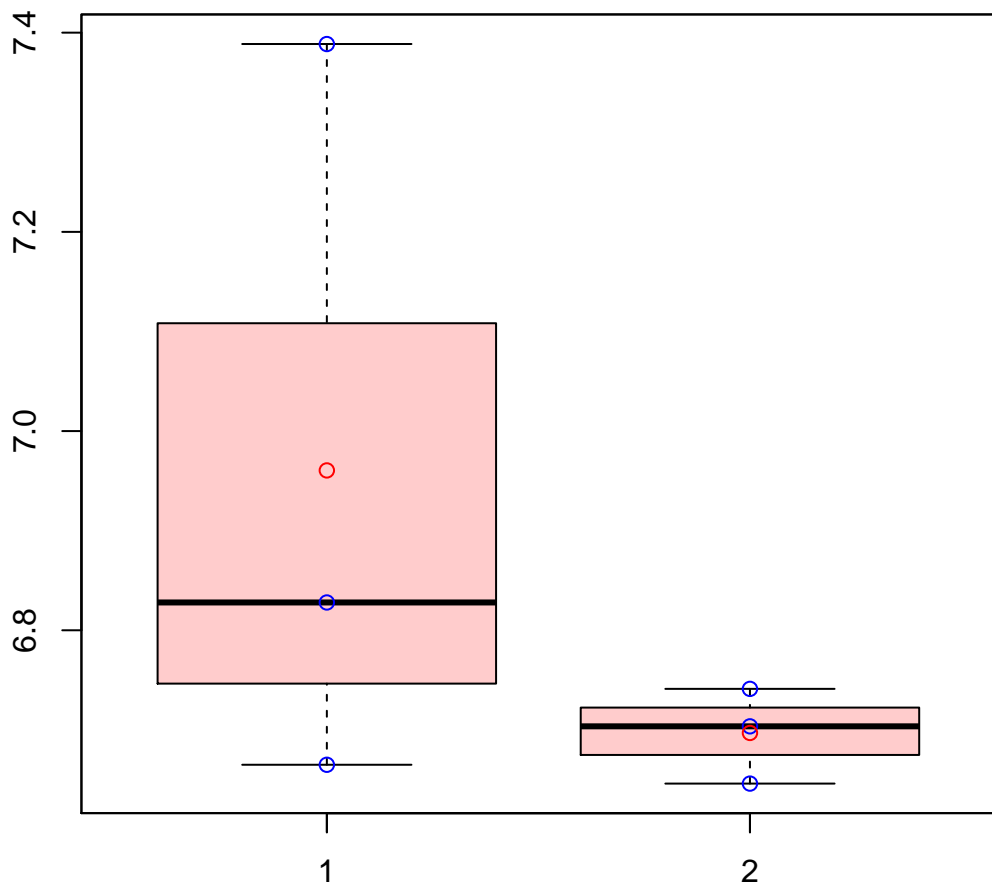

t-Test: p-value = 0.35

# I1H3U0|I1H3U0\_BRADI

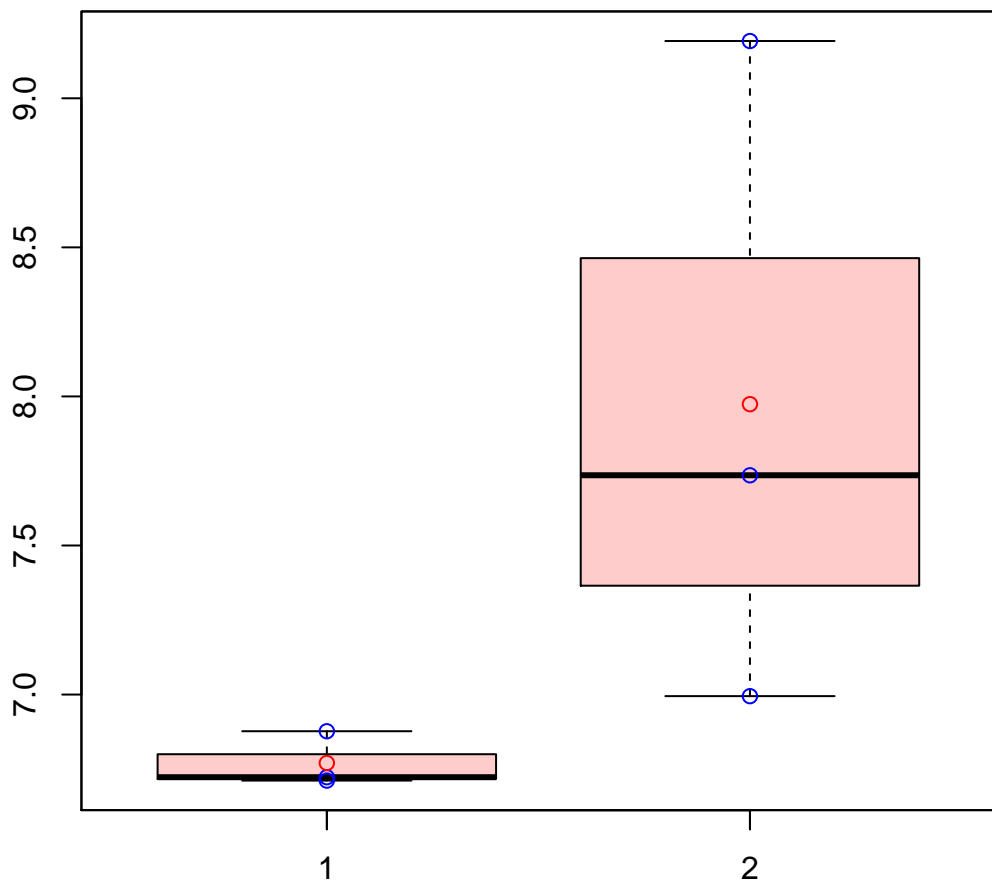

t-Test: p-value = 0.2

# I1H4B2|I1H4B2\_BRADI

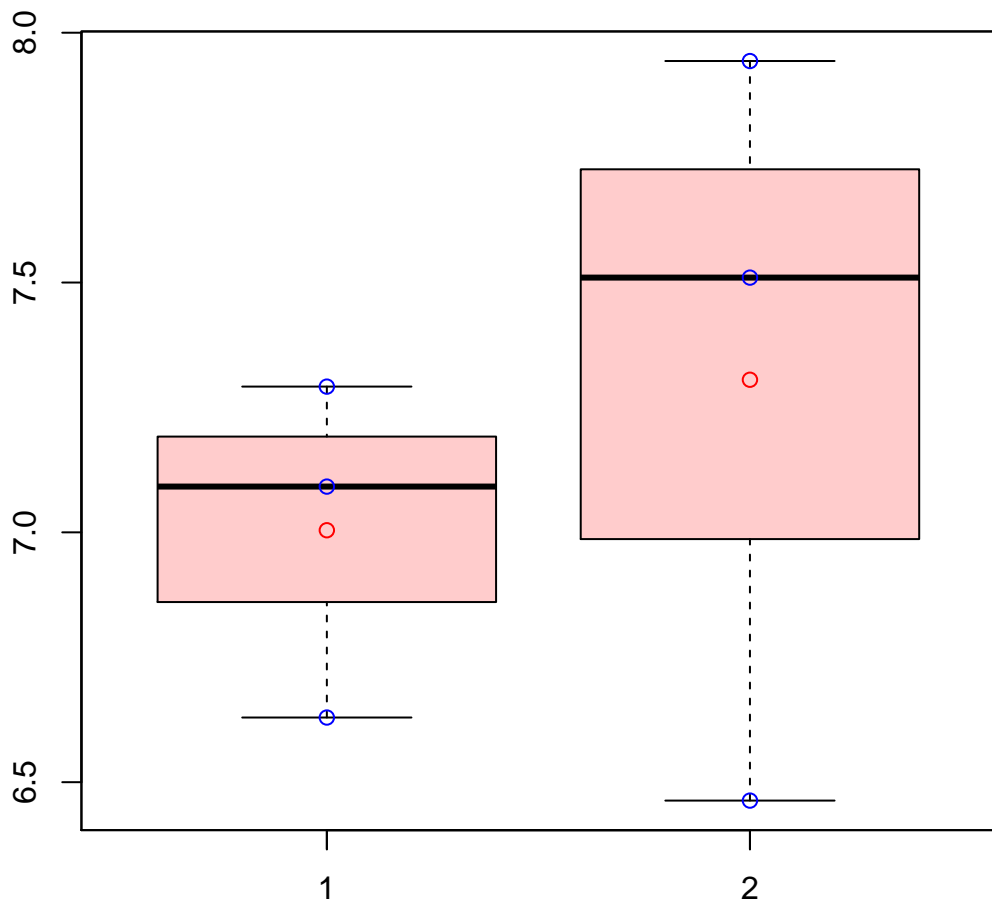

t-Test: p-value = 0.58

# I1H4F7|I1H4F7\_BRADI

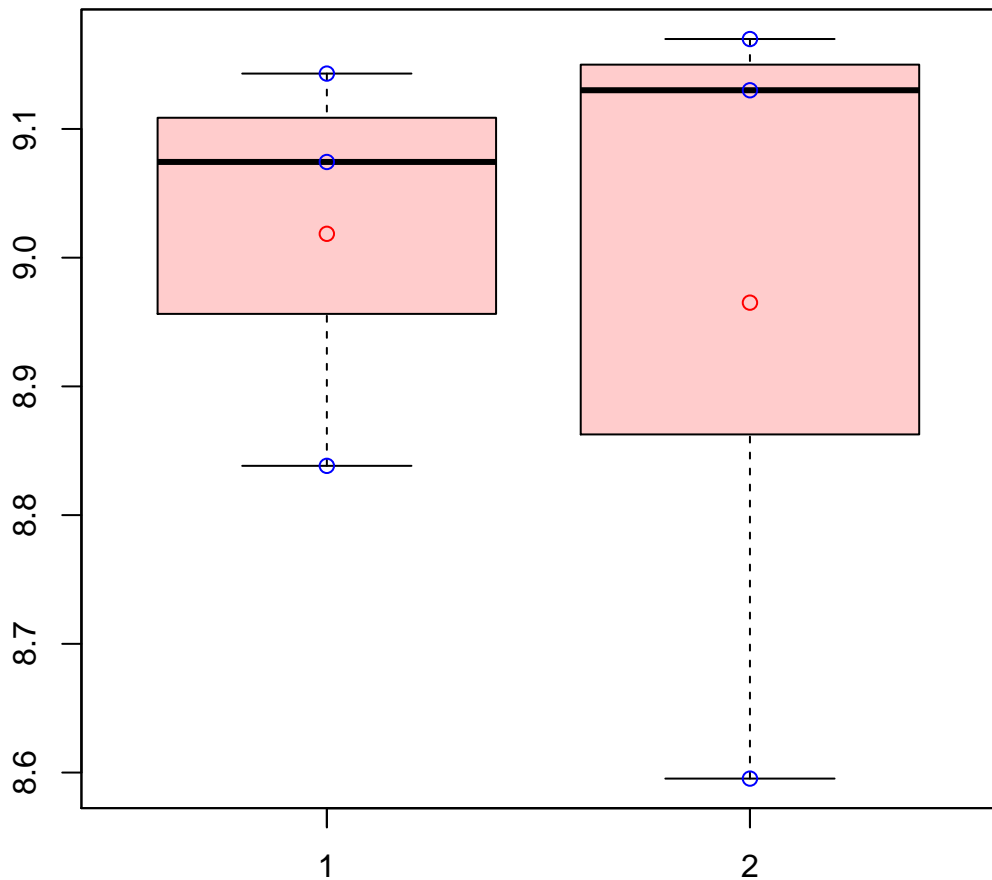

t-Test: p-value = 0.81

# I1H4K1|I1H4K1\_BRADI

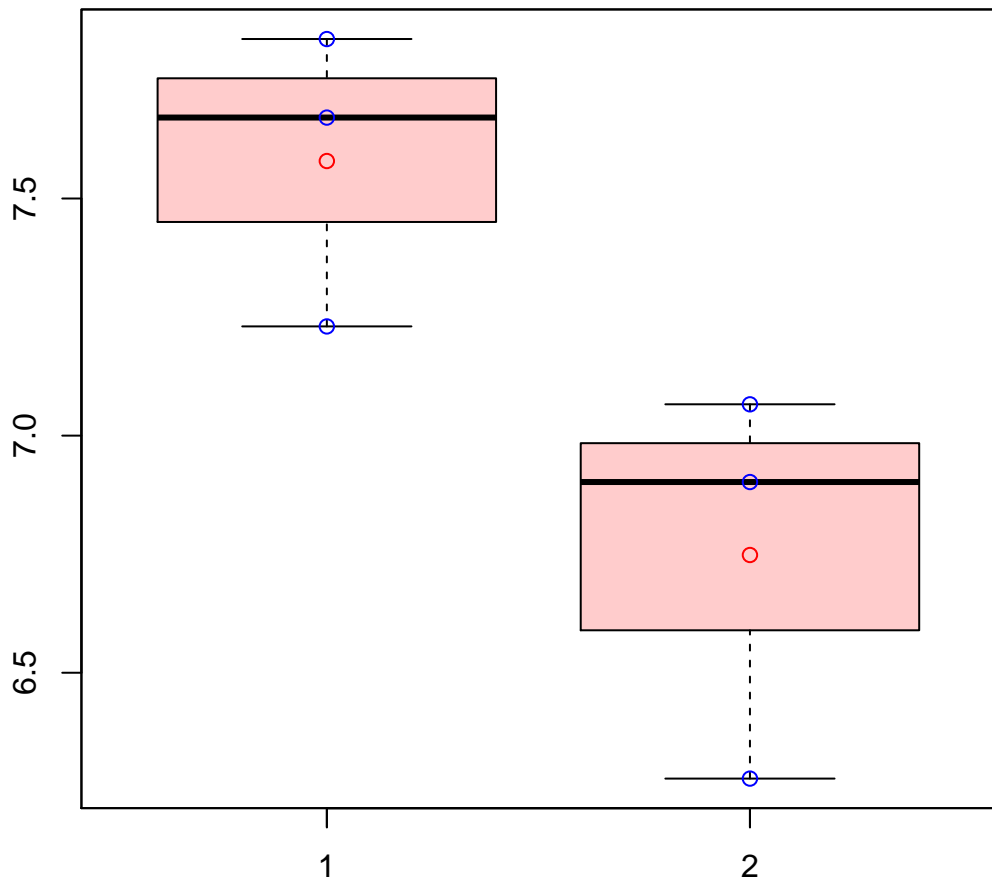

t-Test: p-value = 0.06

# I1H4L2|I1H4L2\_BRADI

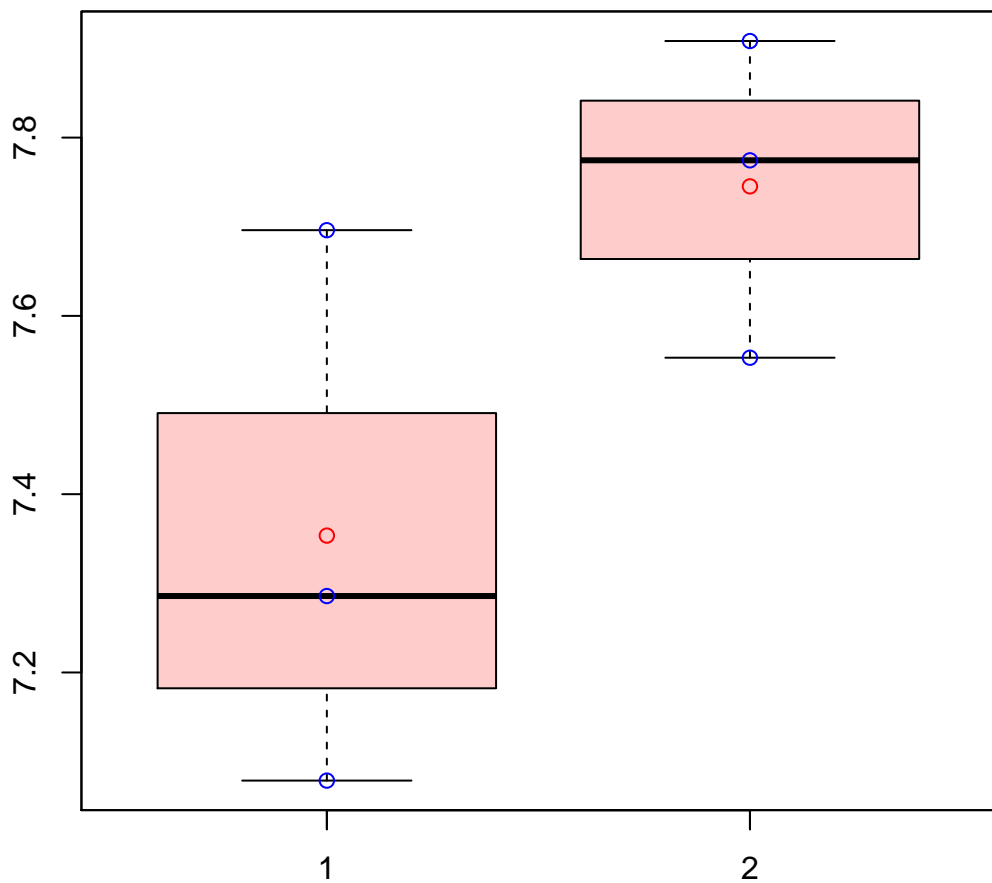

t-Test: p-value = 0.15

# I1H4V9|I1H4V9\_BRADI

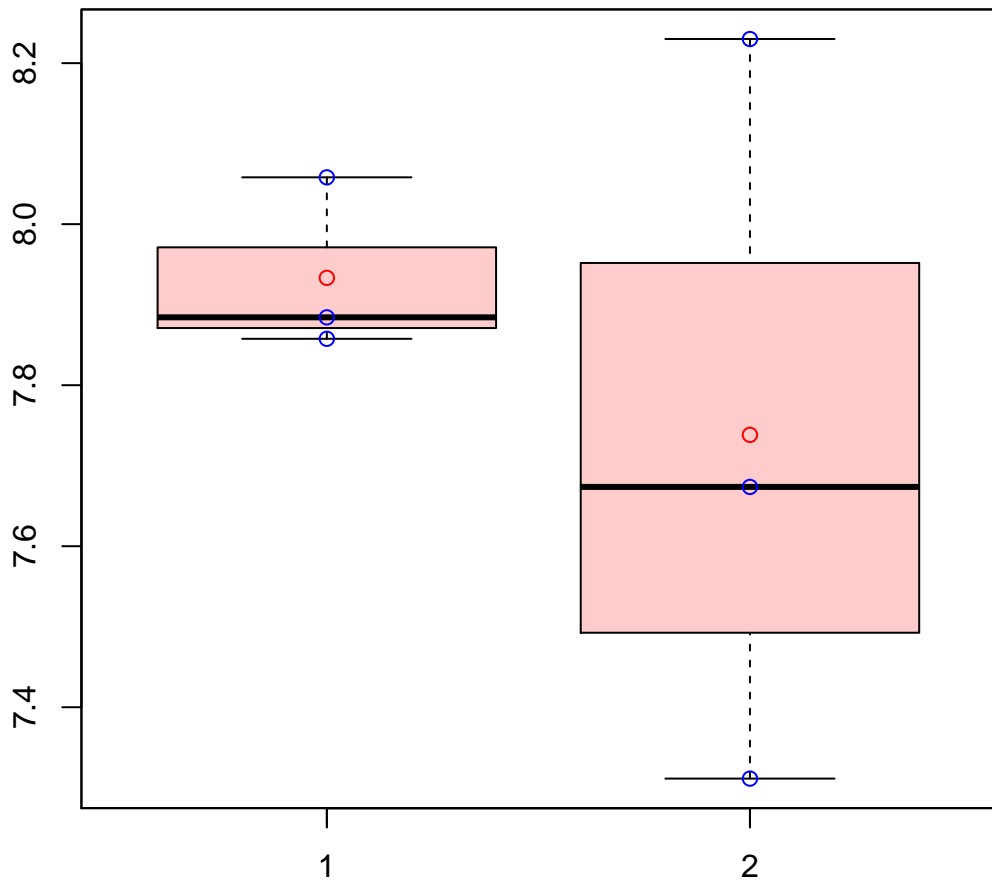

t-Test: p-value = 0.54

I1H4Y3|I1H4Y3\_BRADI

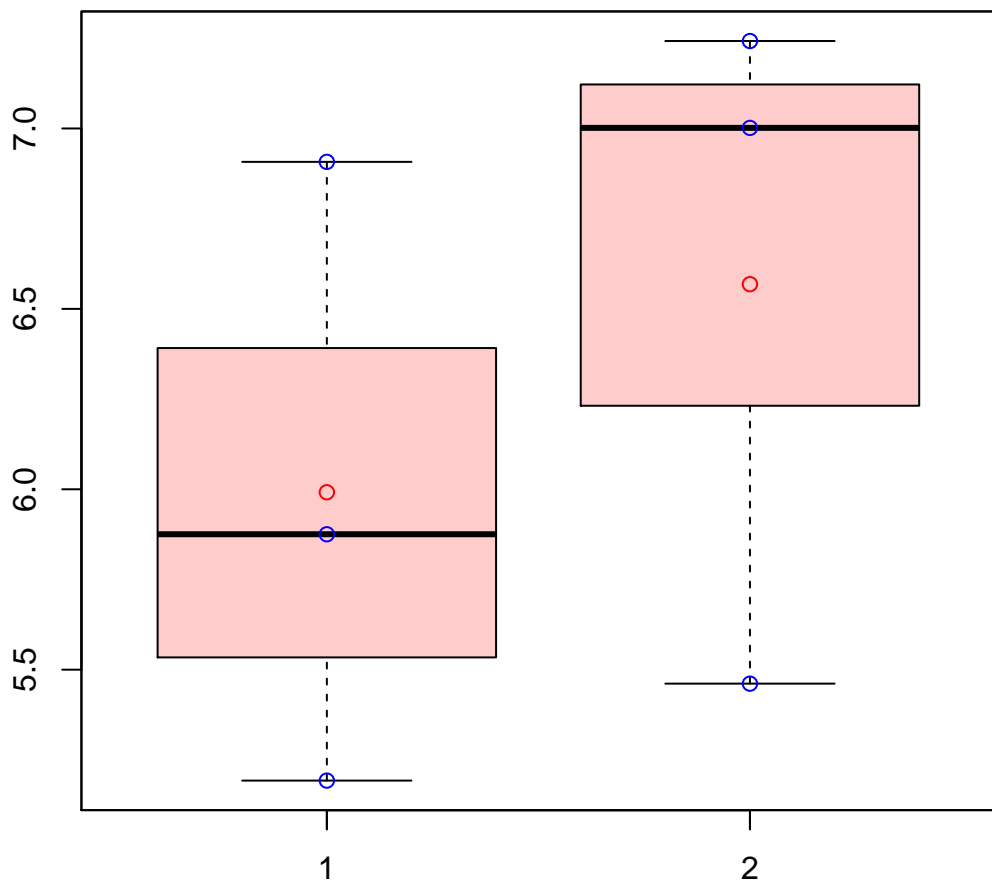

t-Test: p-value = 0.48



# I1H5E9|I1H5E9\_BRADI

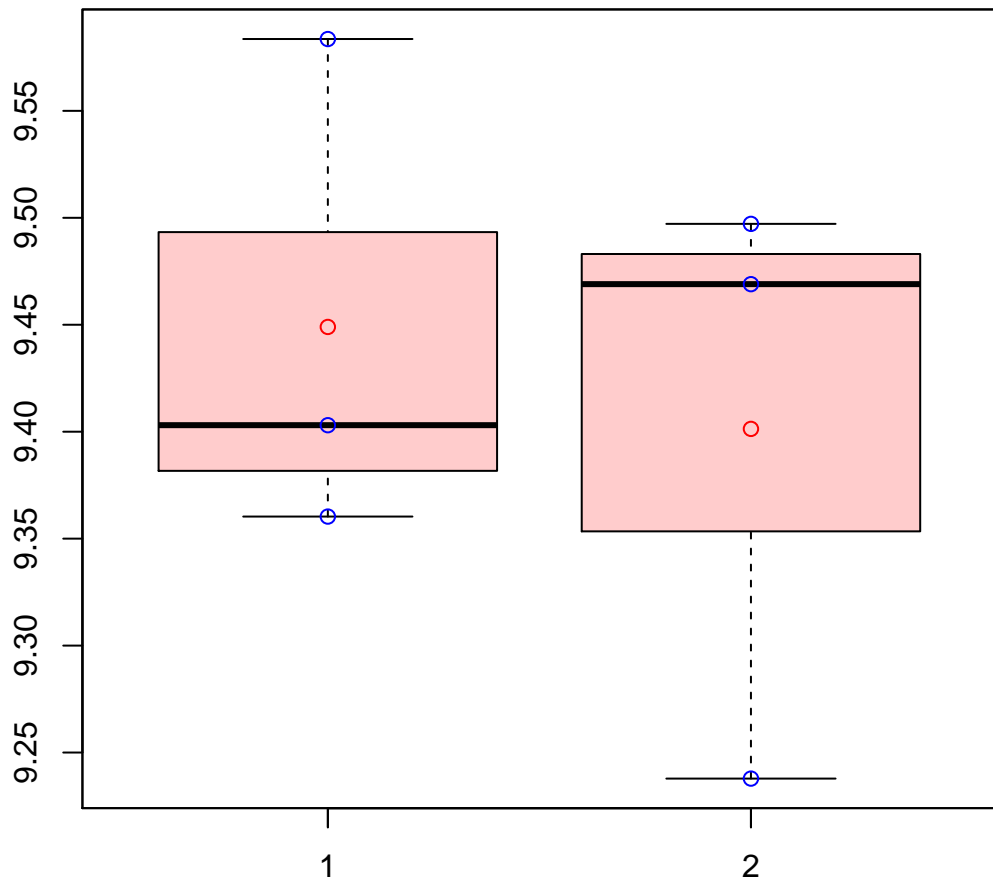

t-Test: p-value = 0.68

# I1H638|I1H638\_BRADI

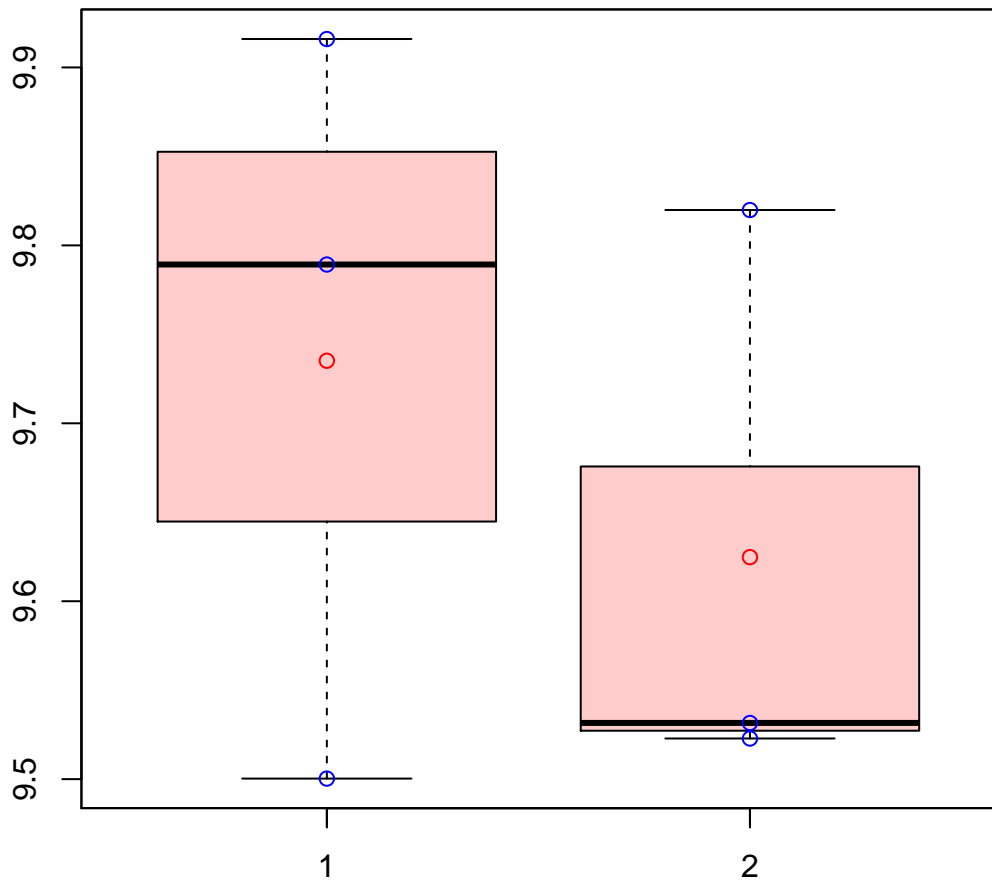

t-Test: p-value = 0.52

# I1H680|I1H680\_BRADI

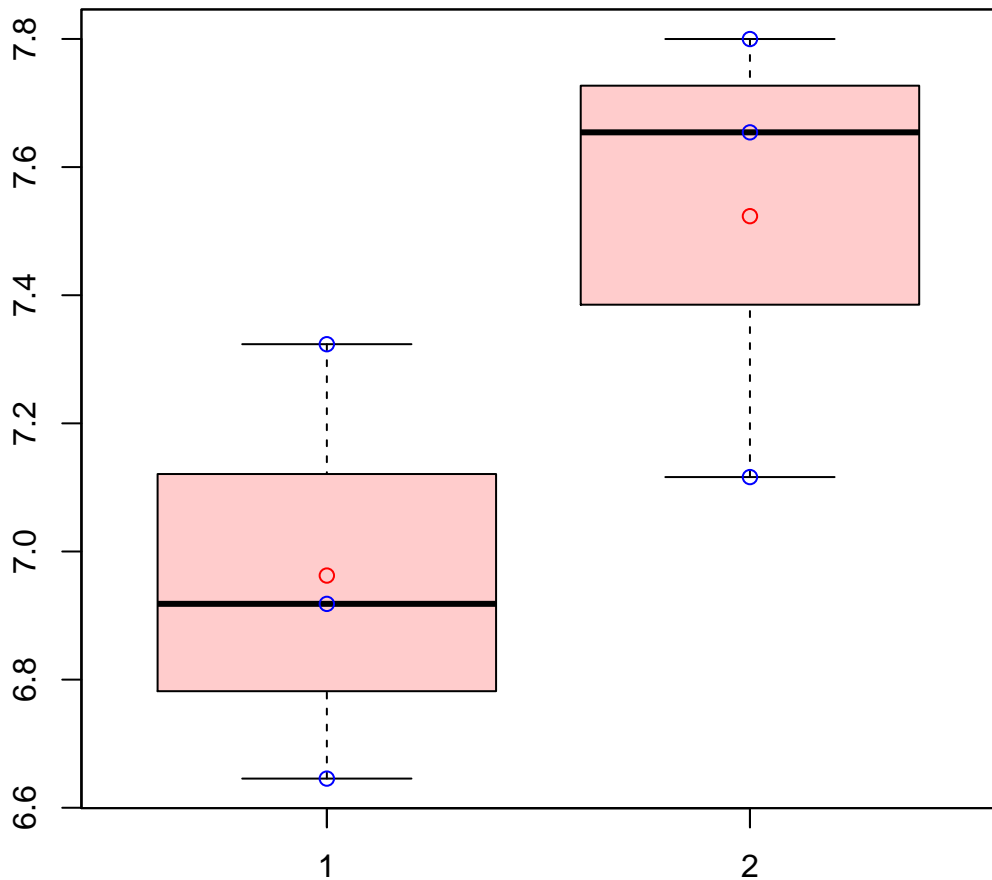

t-Test: p-value = 0.12

# I1H6R7|I1H6R7\_BRADI

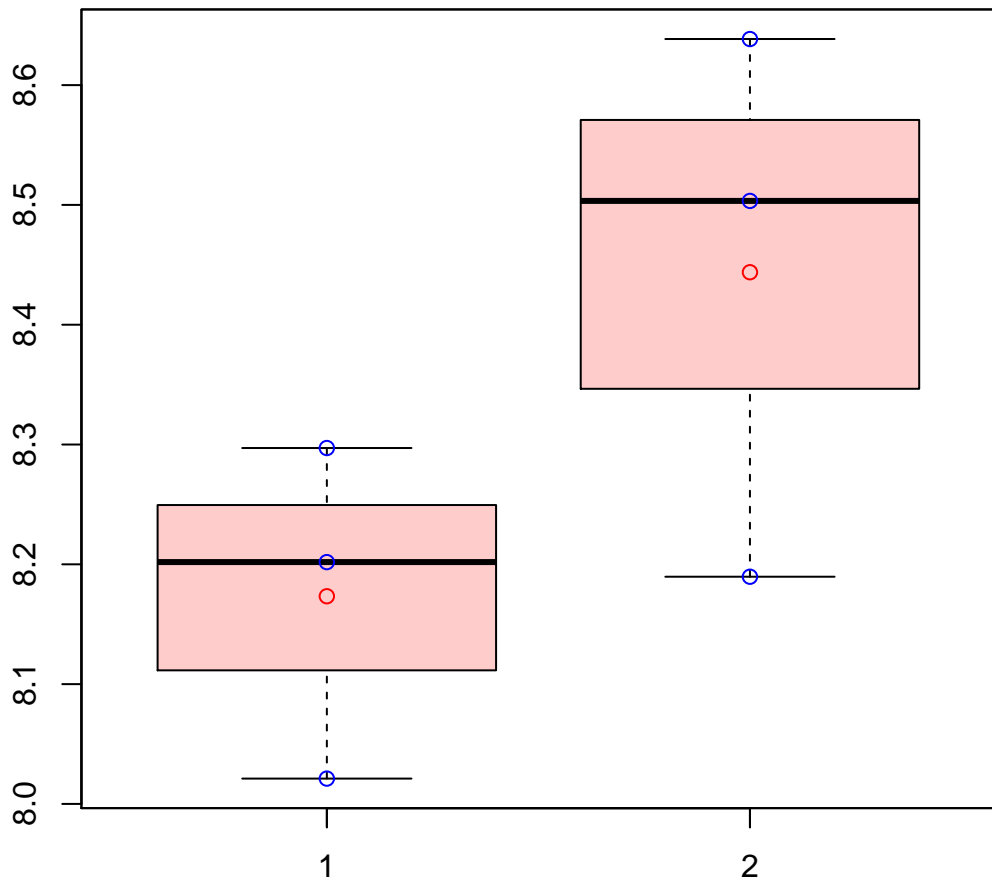

t-Test: p-value = 0.17

# I1H6W1|I1H6W1\_BRADI

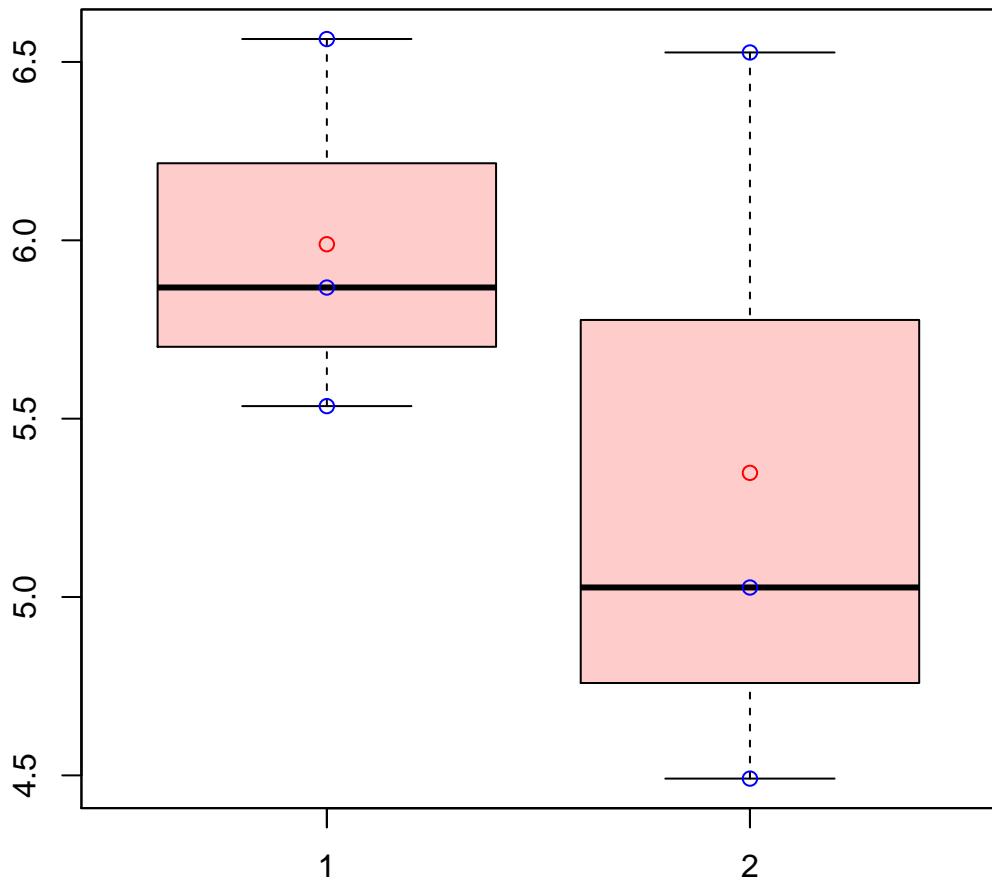

t-Test: p-value = 0.42

# I1H6X1|I1H6X1\_BRADI

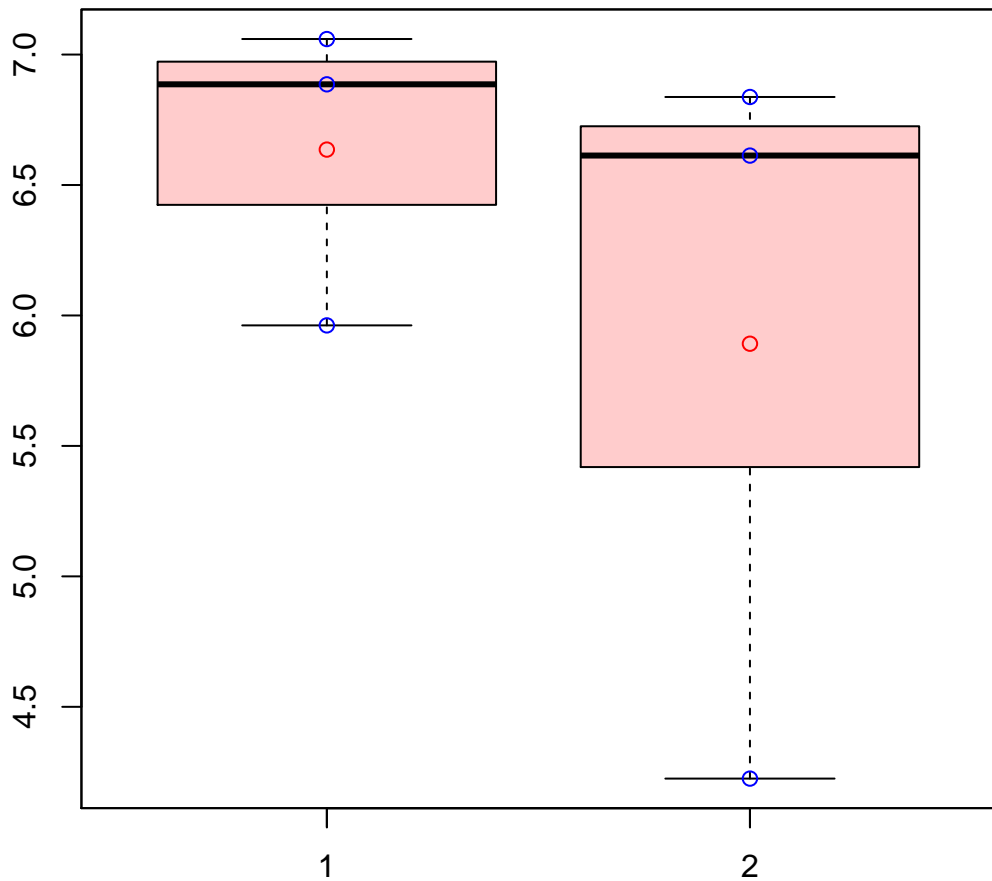

t-Test: p-value = 0.48

# I1H6Y3|I1H6Y3\_BRADI

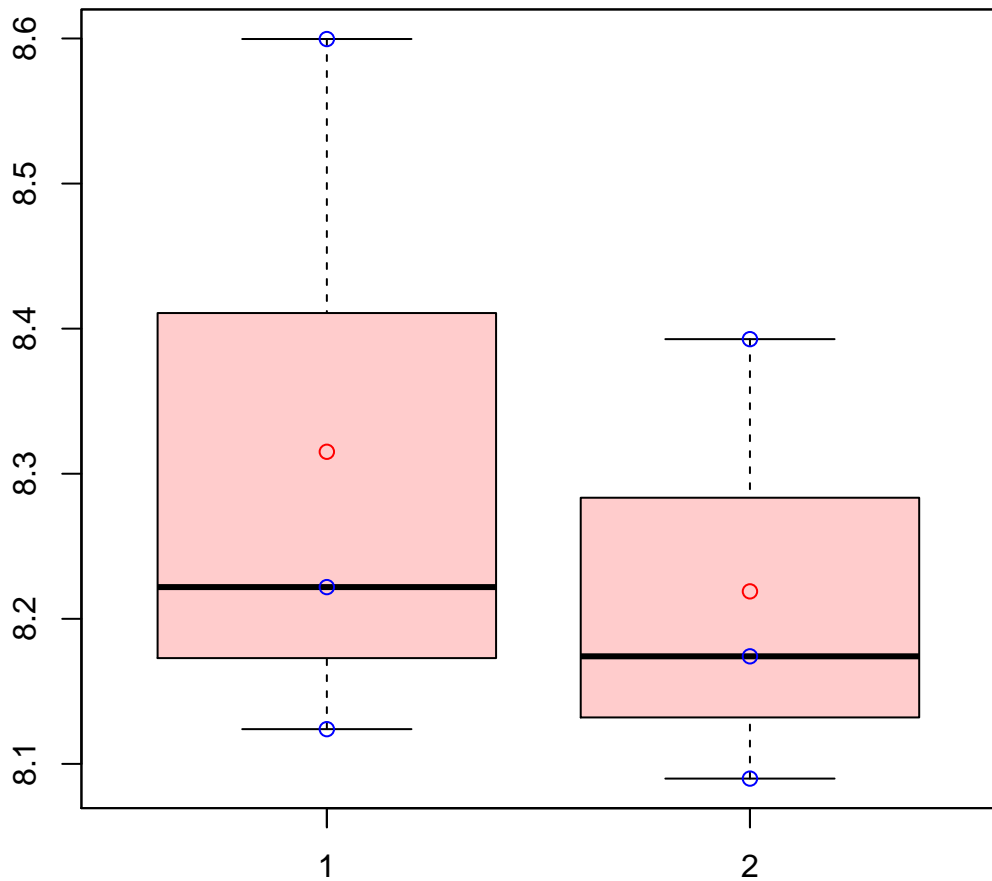

t-Test: p-value = 0.61

# I1H739|I1H739\_BRADI

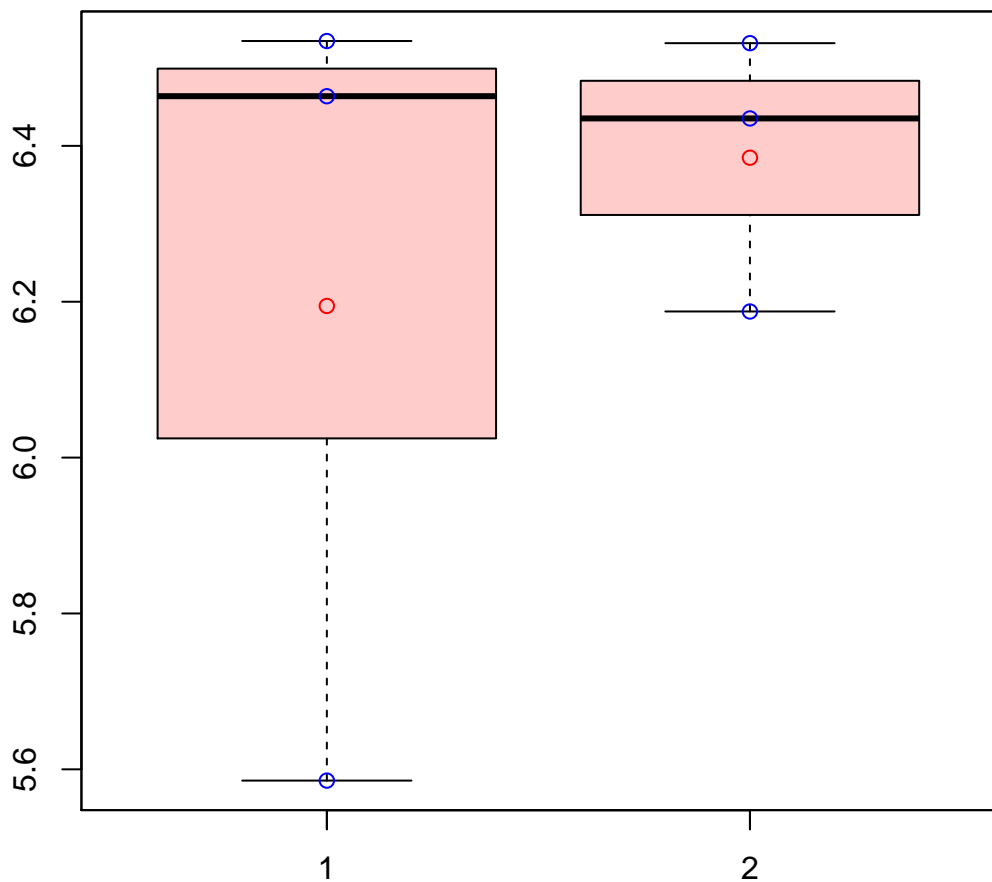

t-Test: p-value = 0.6



# I1H755|I1H755\_BRADI

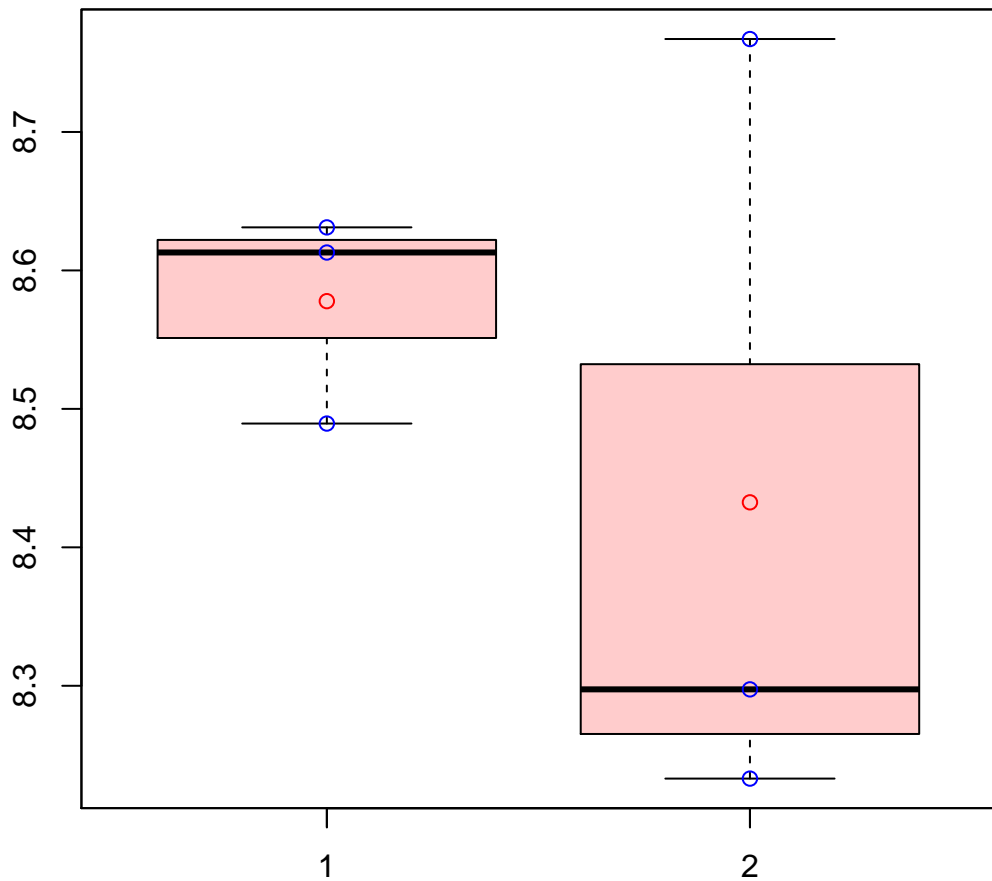

t-Test: p-value = 0.48

# I1H7F9|I1H7F9\_BRADI

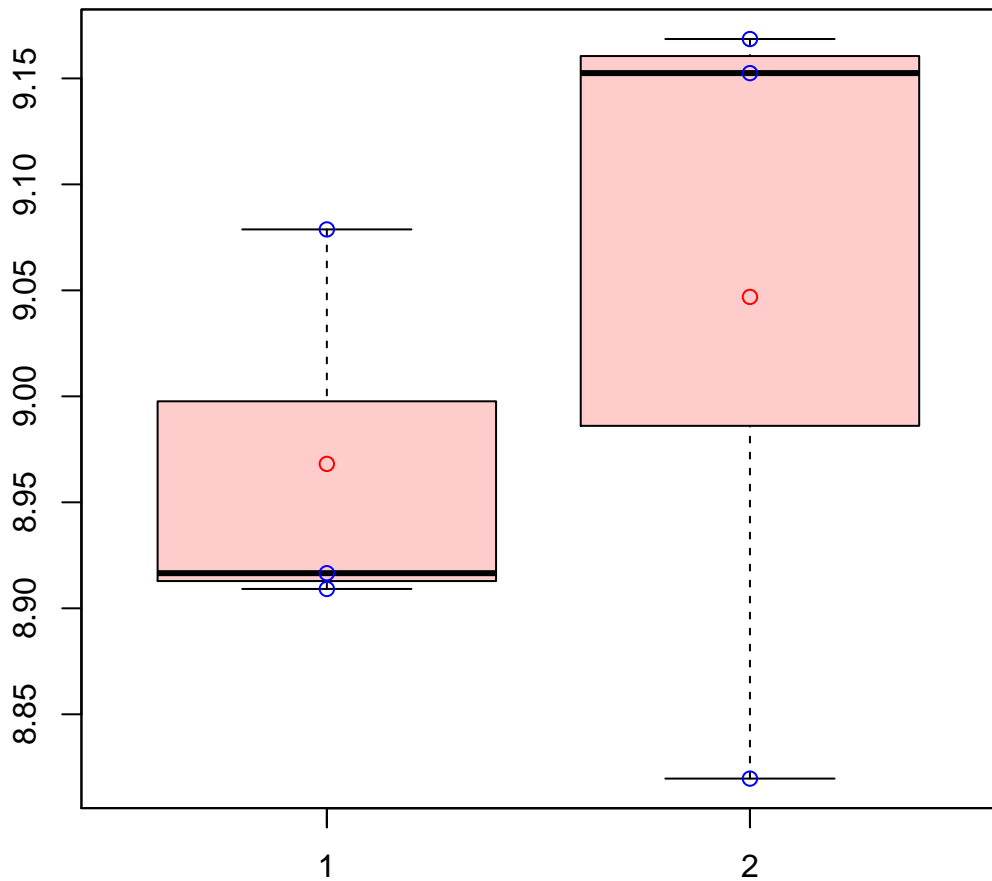

t-Test: p-value = 0.58

# I1H7H3|I1H7H3\_BRADI

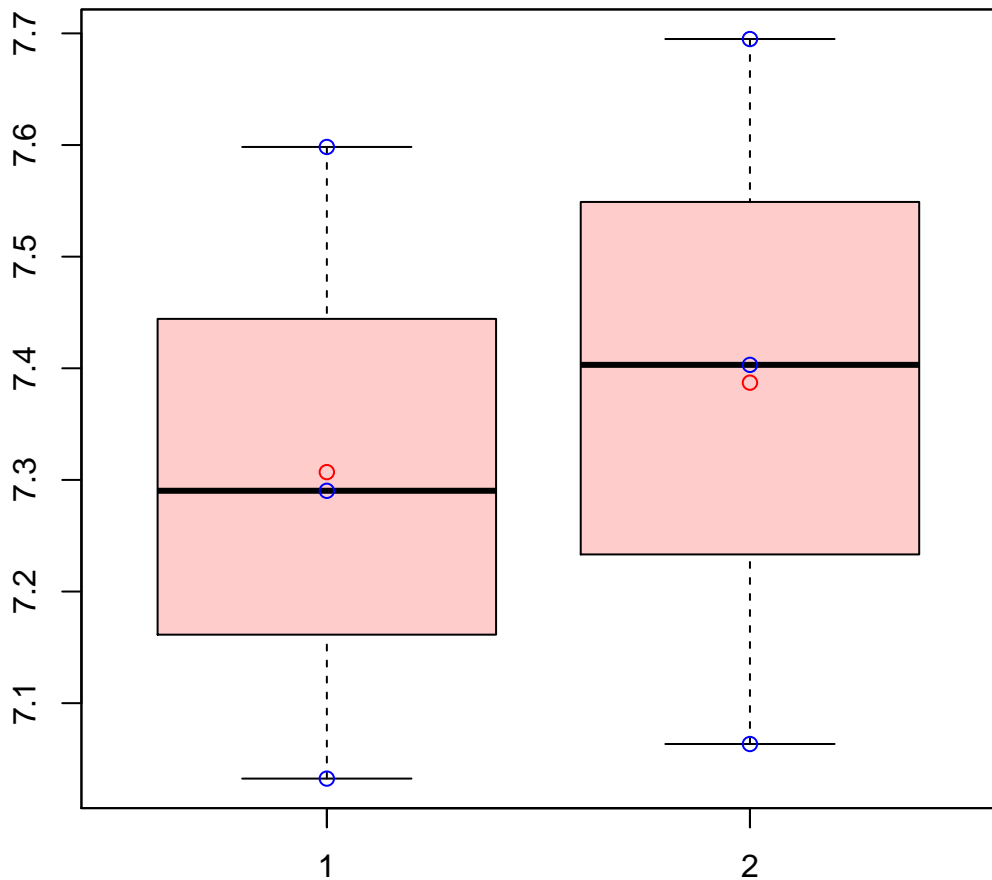

t-Test: p-value = 0.76

# I1H7H9|I1H7H9\_BRADI

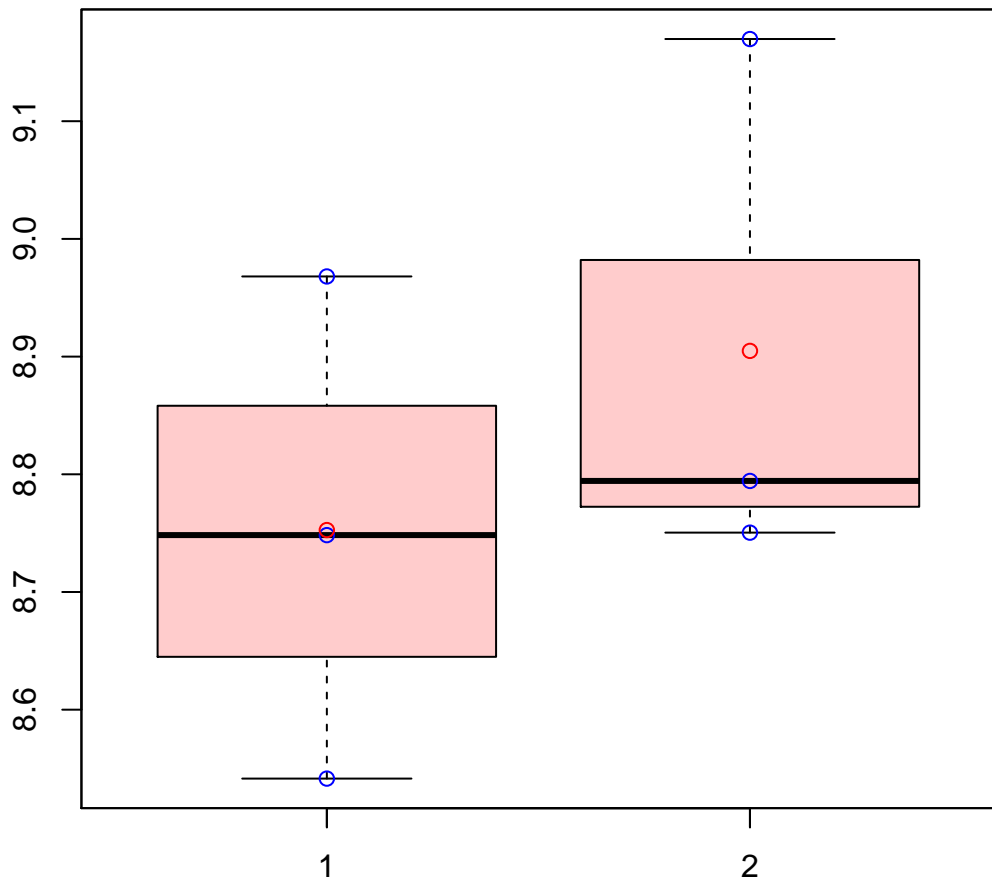

t-Test: p-value = 0.45

# I1H862|I1H862\_BRADI

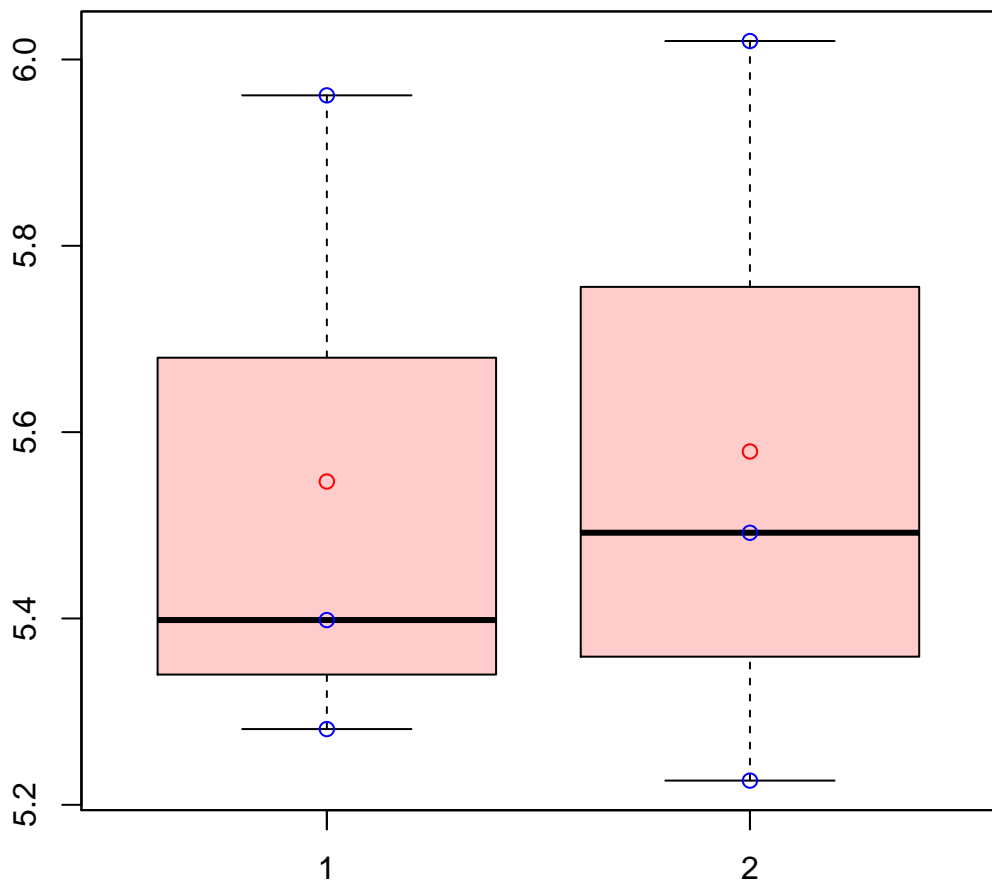

t-Test: p-value = 0.92

# I1H8E9|I1H8E9\_BRADI

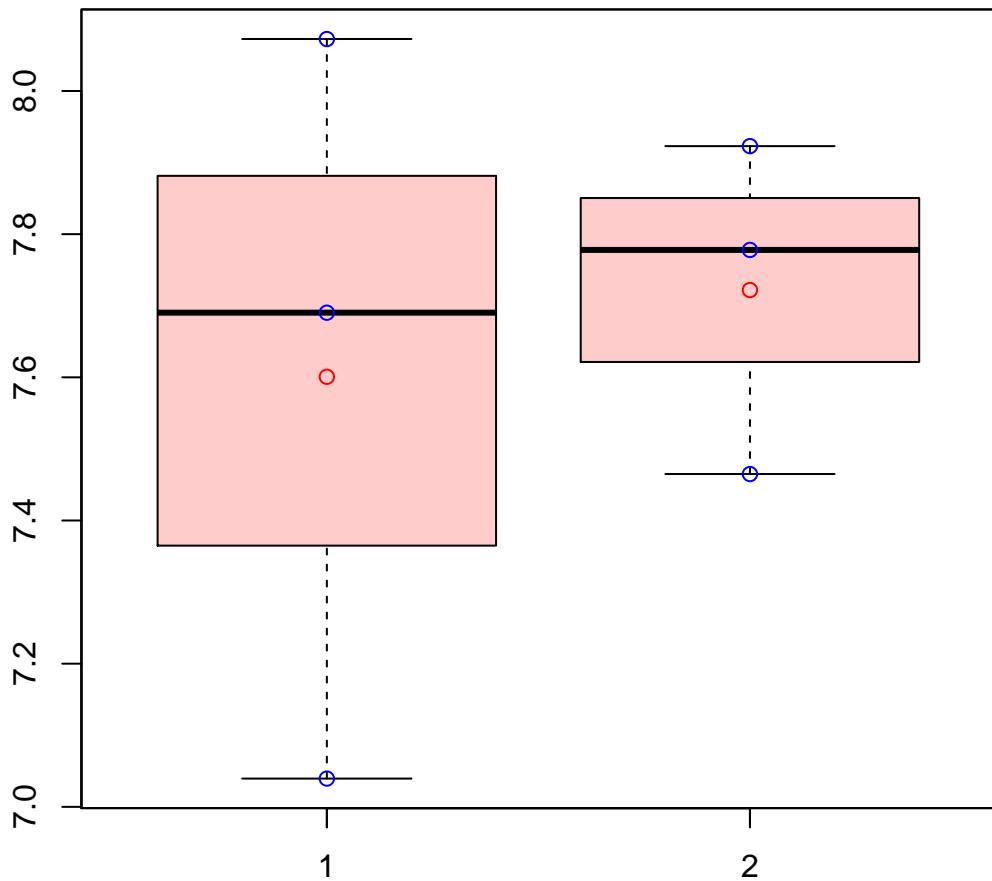

t-Test: p-value = 0.74

# I1H8G4|I1H8G4\_BRADI

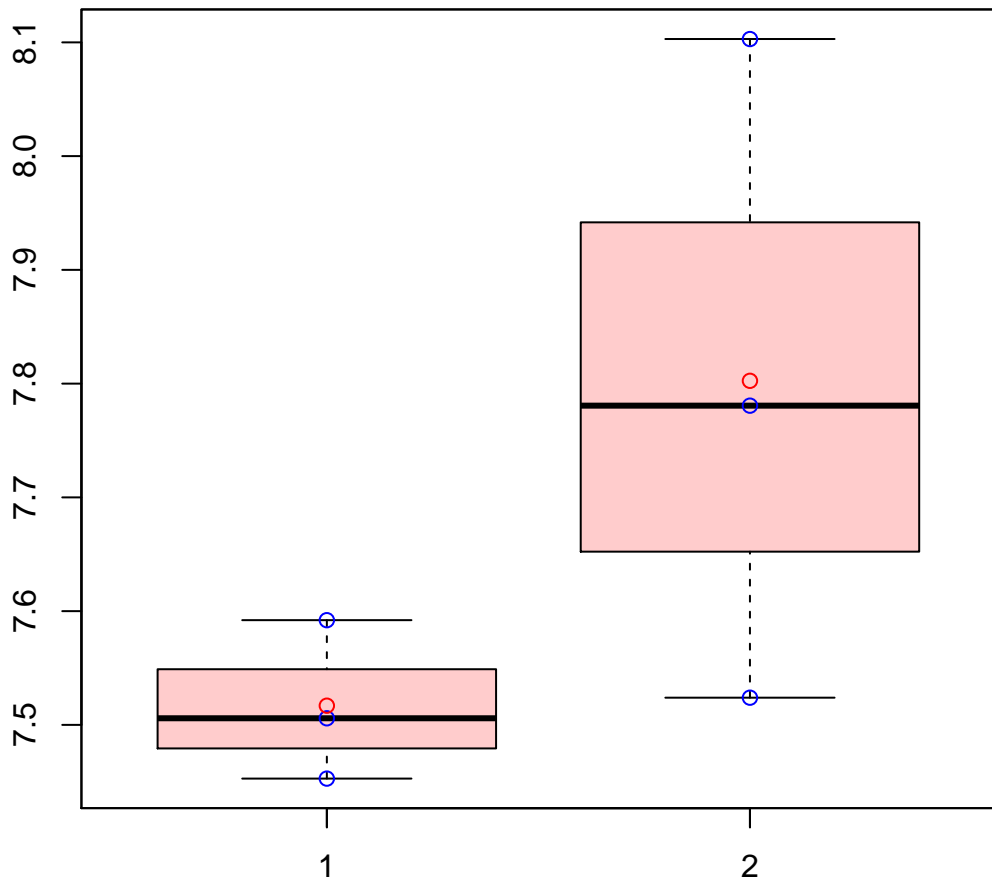

t-Test: p-value = 0.23

# I1H8Y5|I1H8Y5\_BRADI

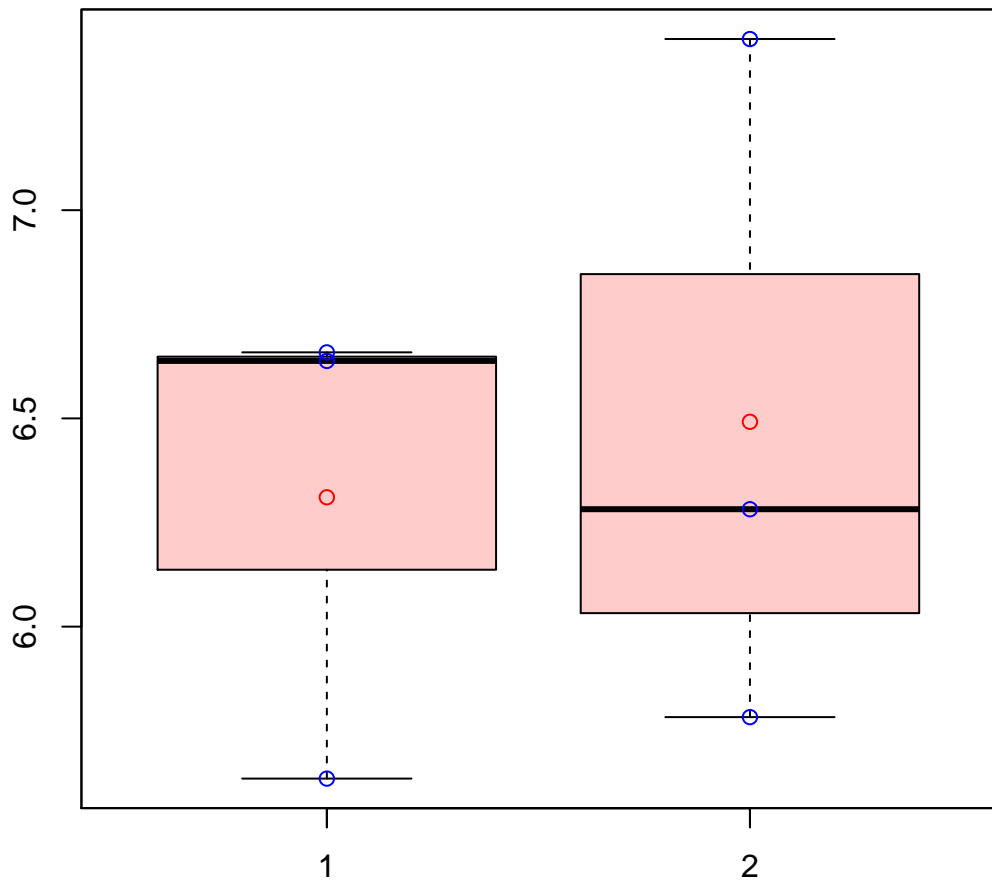

t-Test: p-value = 0.78



# I1H940|I1H940\_BRADI

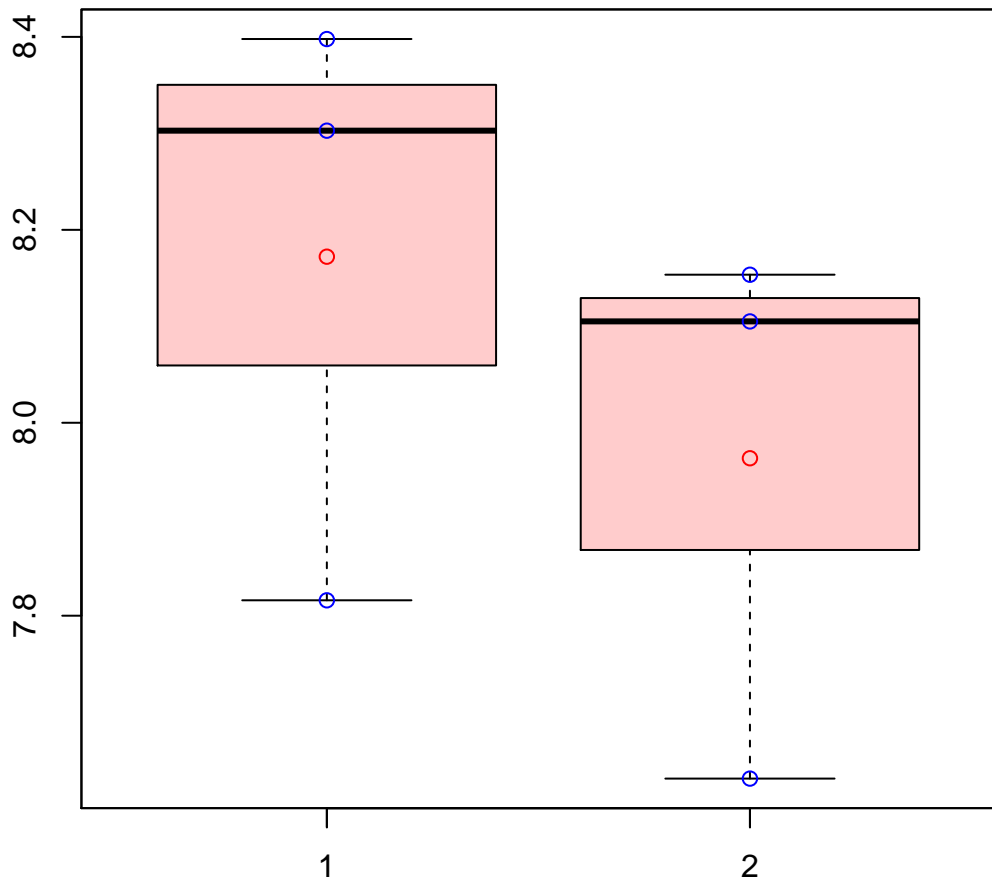

t-Test: p-value = 0.44

# I1H9J2|I1H9J2\_BRADI

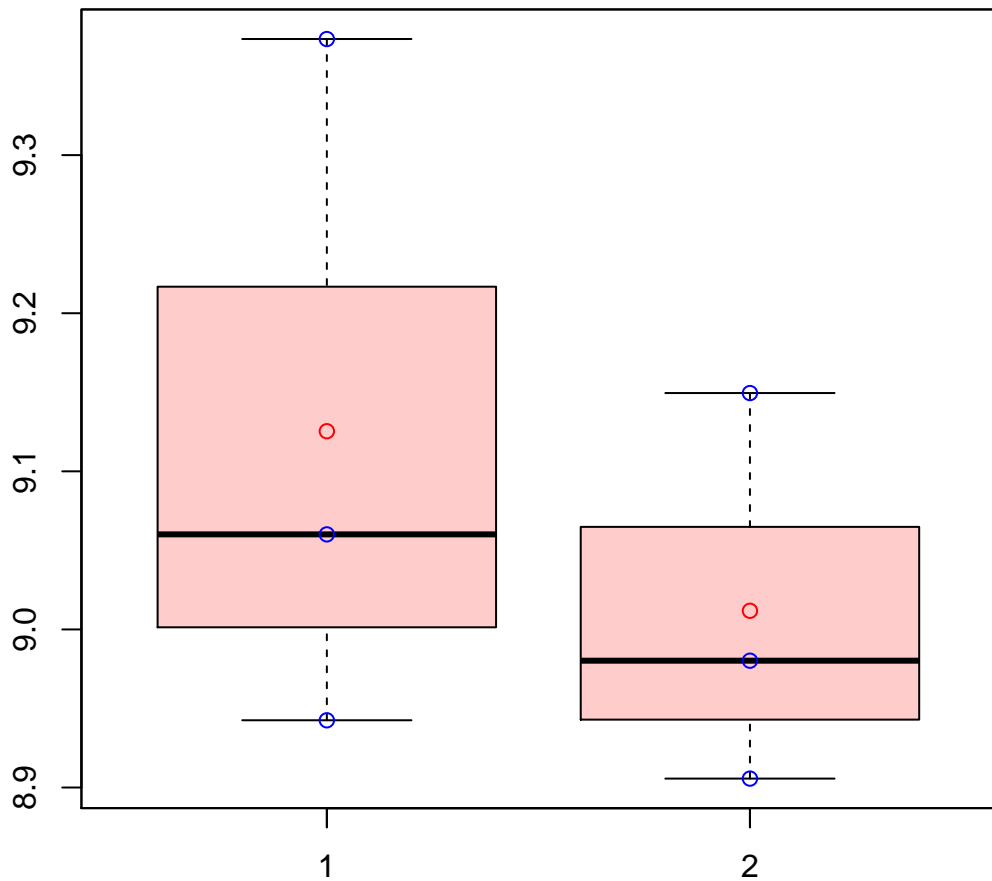

t-Test: p-value = 0.49

# I1H9M8|I1H9M8\_BRADI

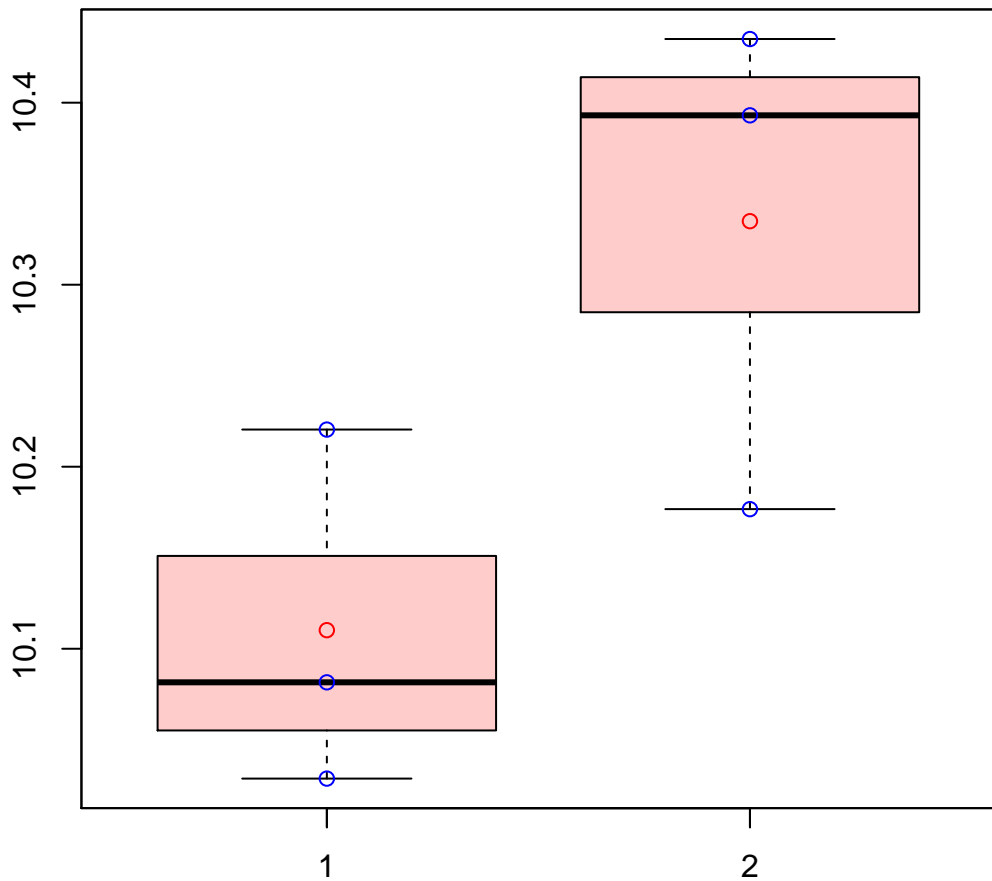

t-Test: p-value = 0.09

# I1H9M9|I1H9M9\_BRADI

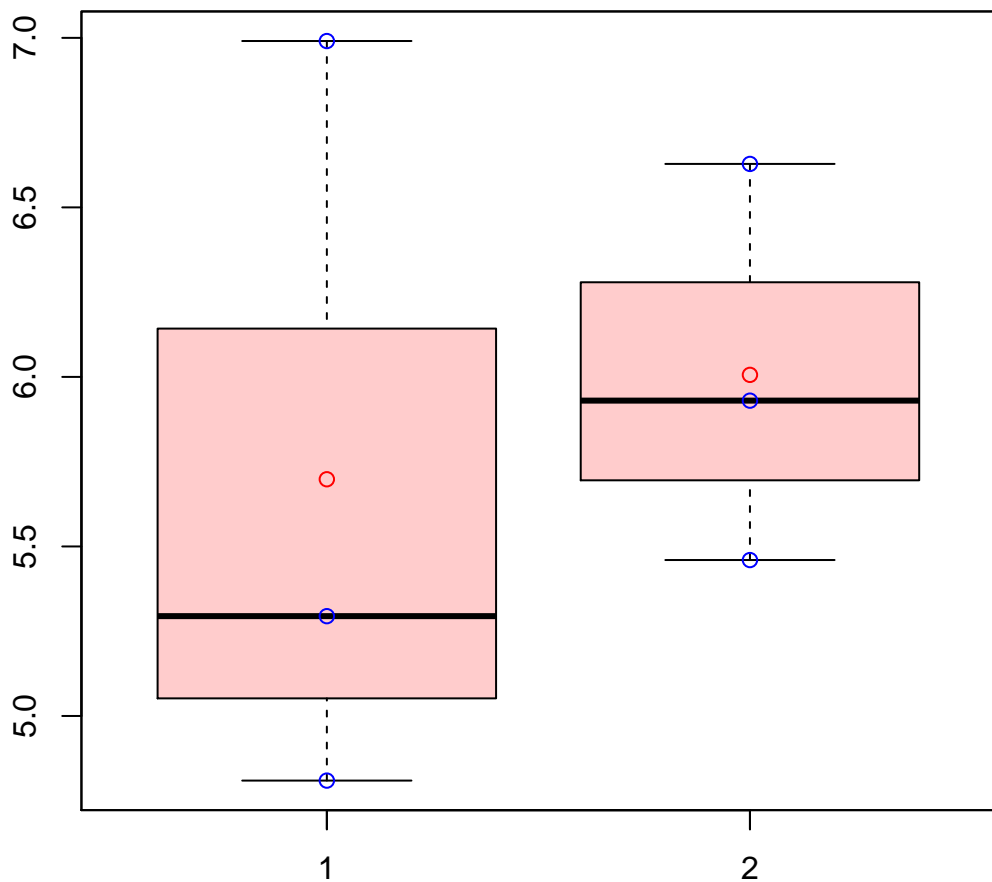

t-Test: p-value = 0.71

# I1H9V2|I1H9V2\_BRADI

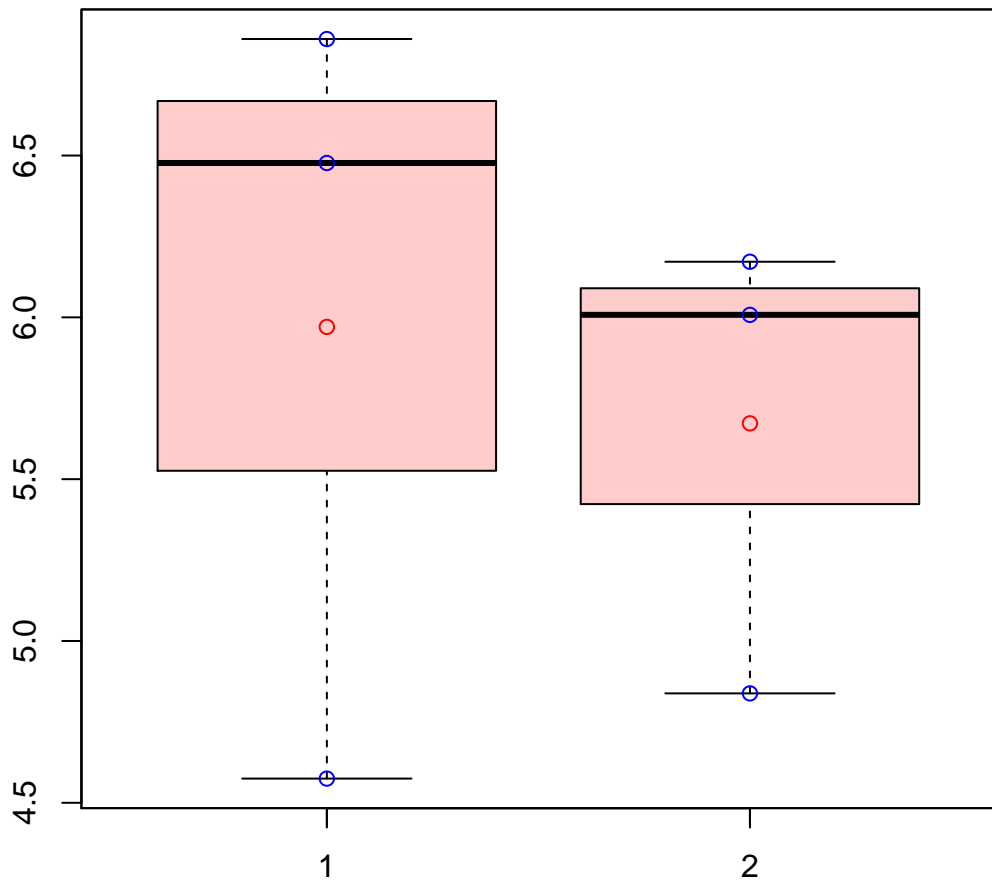

t-Test: p-value = 0.74

# I1HA01|I1HA01\_BRADI

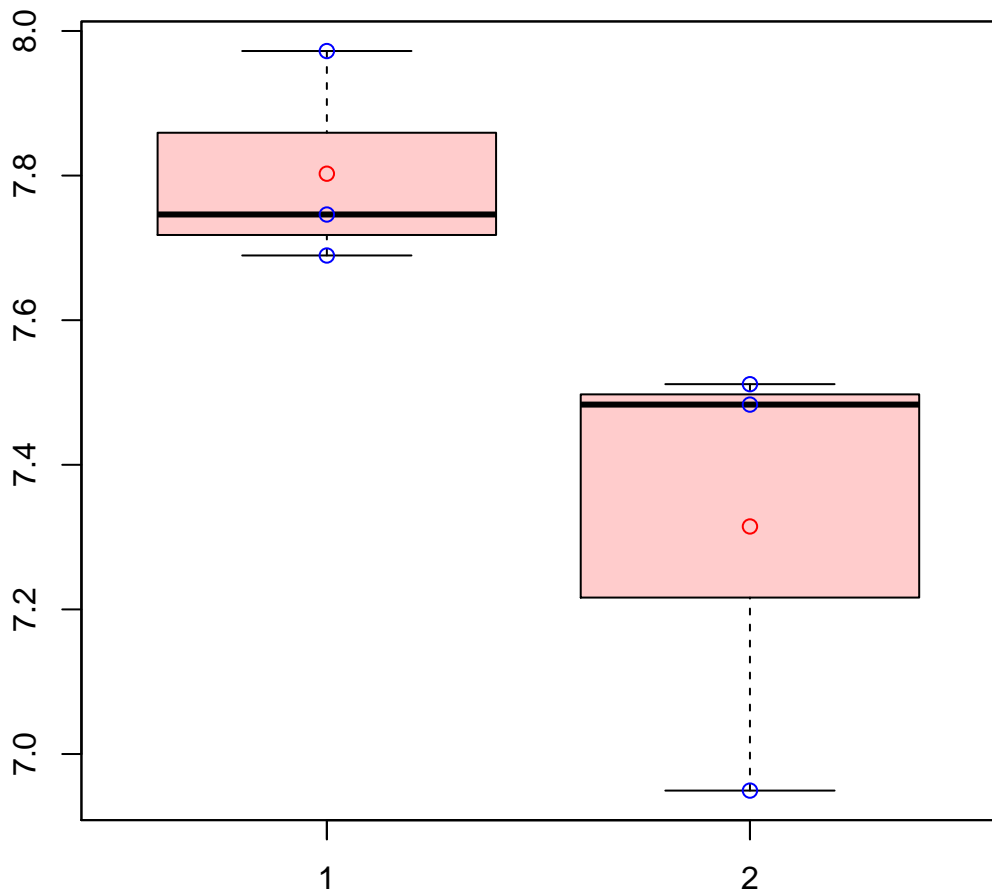

t-Test: p-value = 0.1

# I1HA11|I1HA11\_BRADI

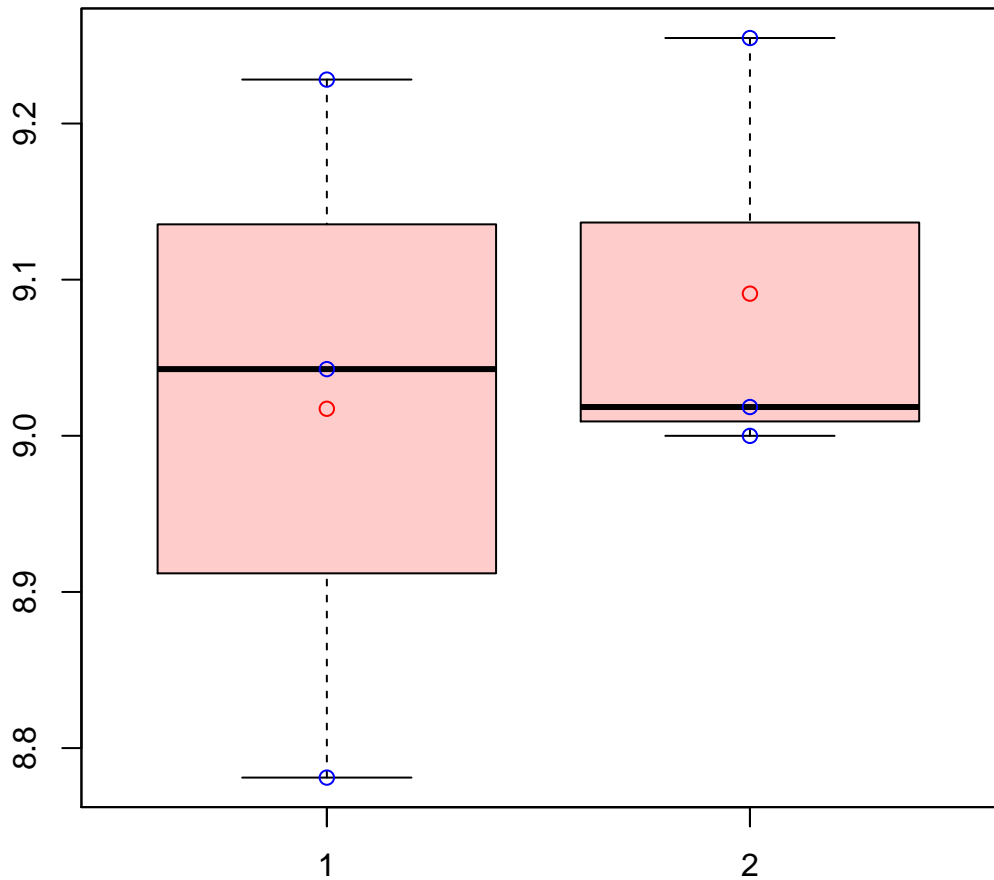

t-Test: p-value = 0.66

# I1HAB3|I1HAB3\_BRADI

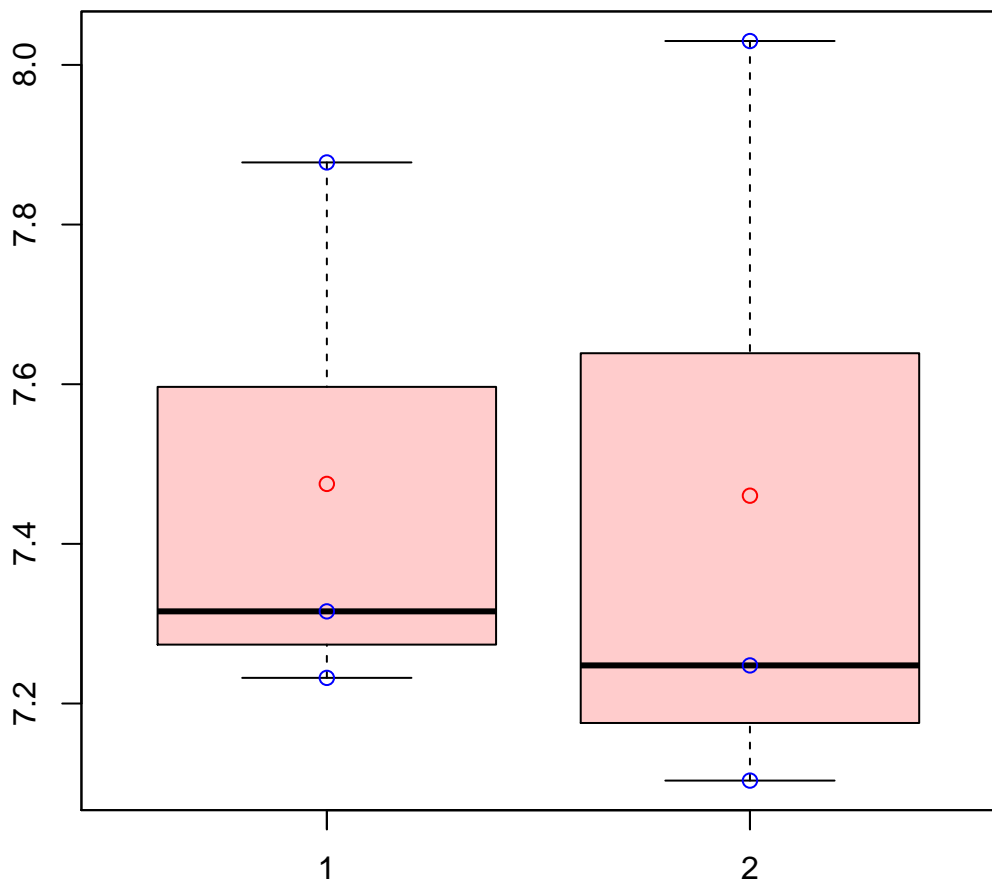

t-Test: p-value = 0.97



# I1HAK6|I1HAK6\_BRADI

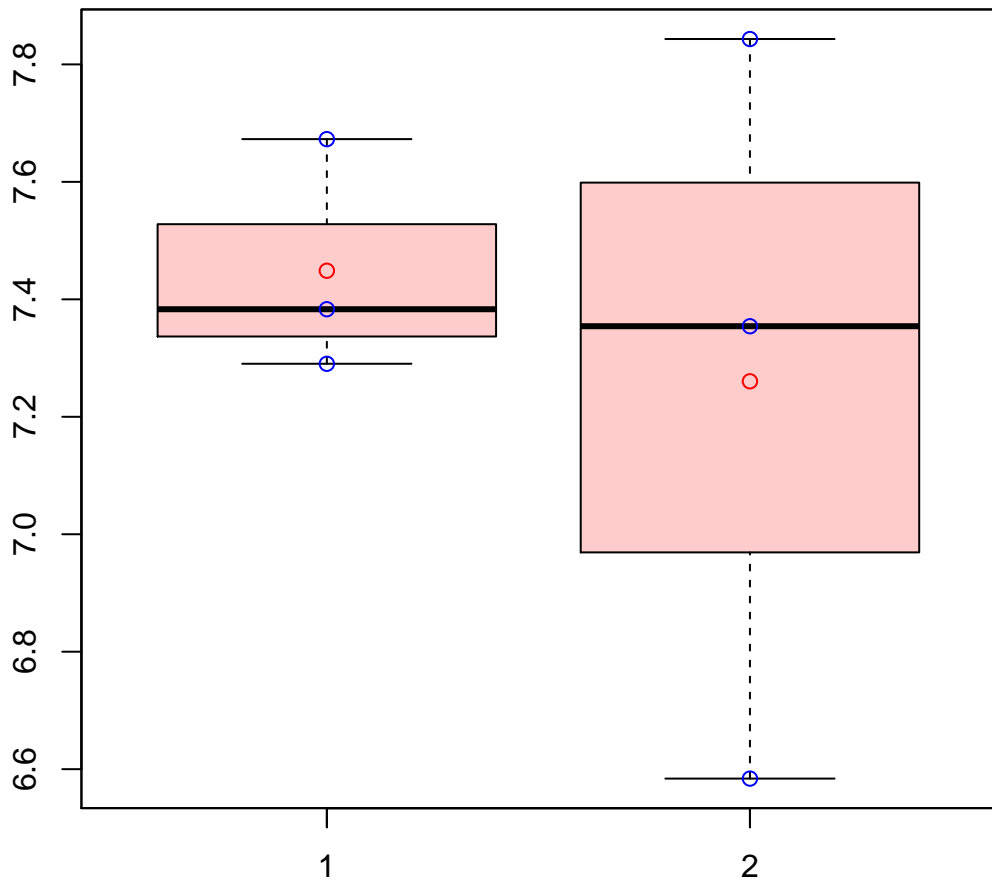

t-Test: p-value = 0.67

# I1HAL7|I1HAL7\_BRADI

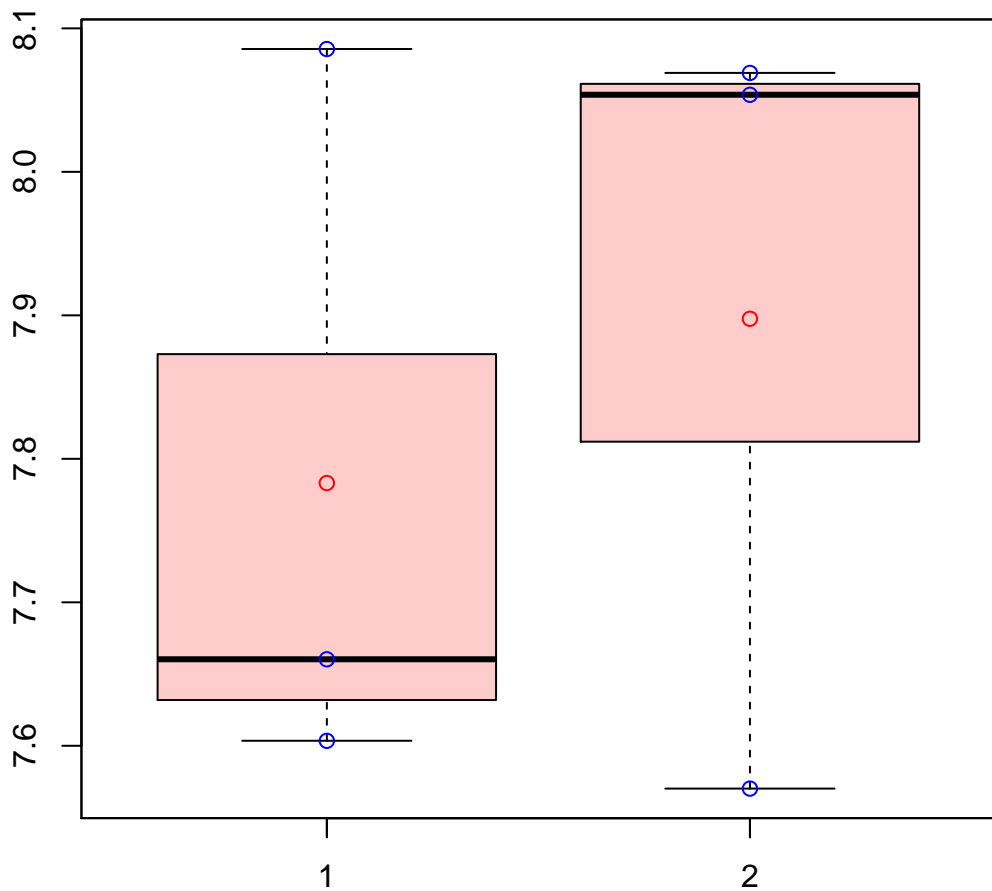

t-Test: p-value = 0.64

# I1HAX5|I1HAX5\_BRADI

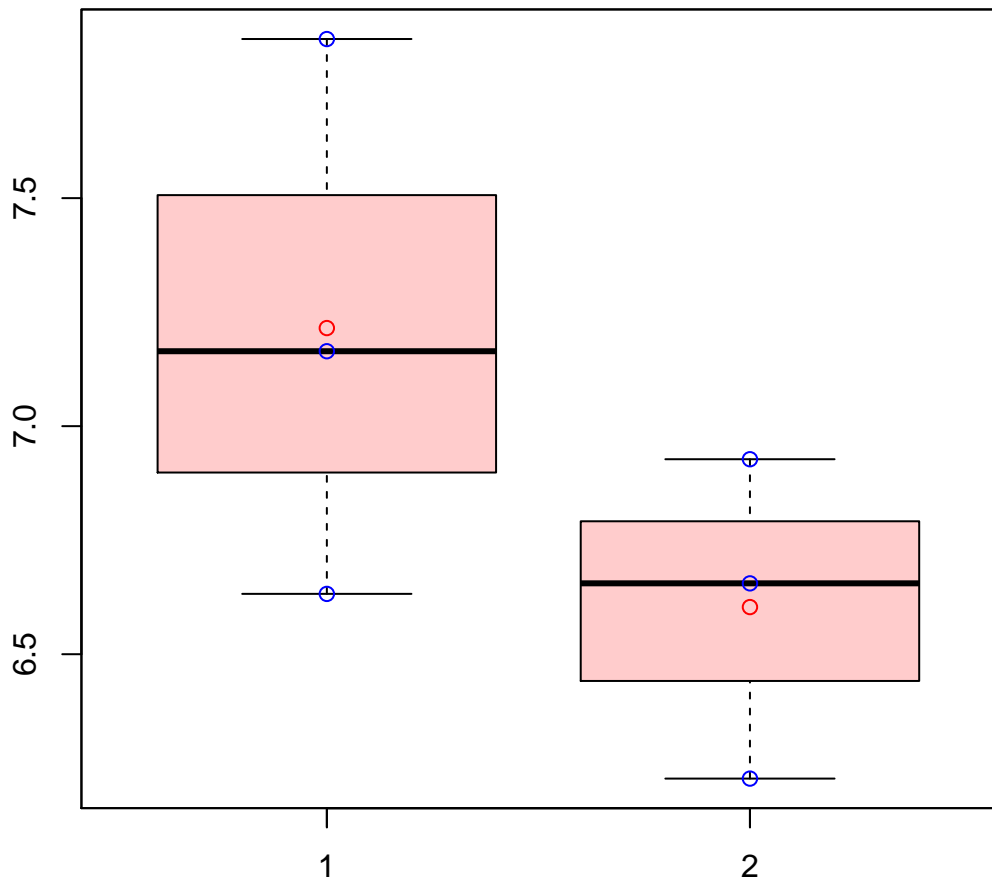

t-Test: p-value = 0.22

# I1HB43|I1HB43\_BRADI

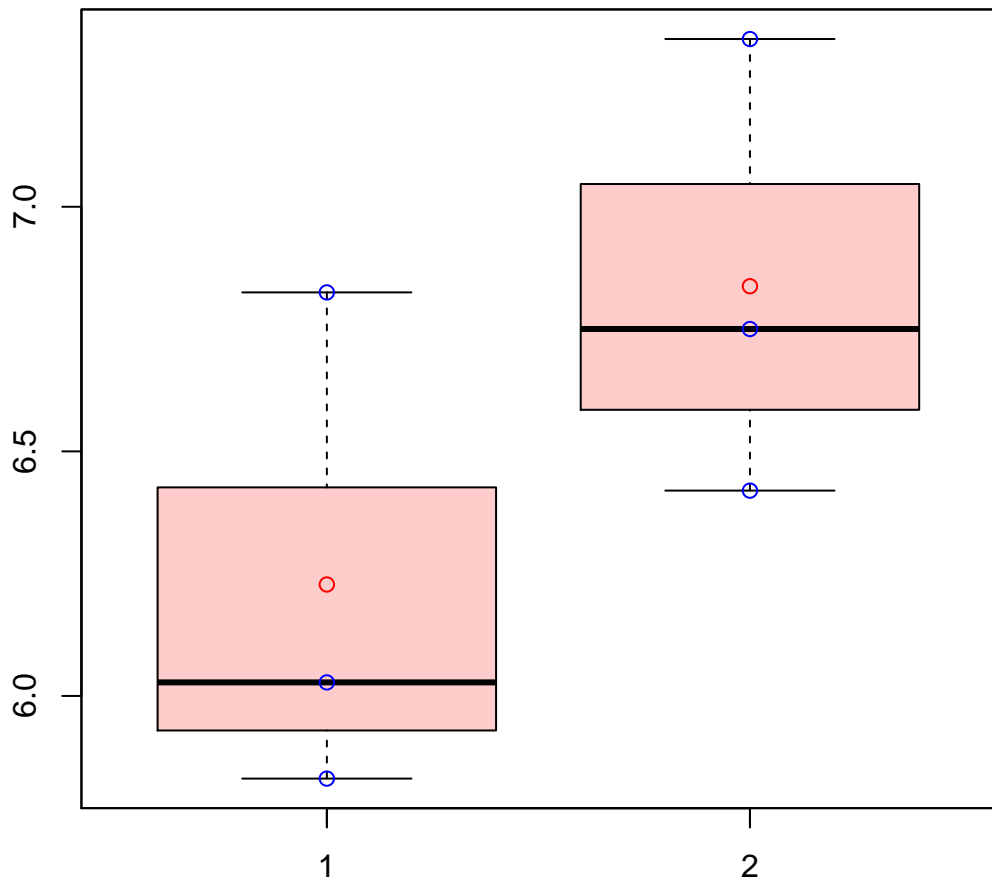

t-Test: p-value = 0.21

# I1HB58|I1HB58\_BRADI

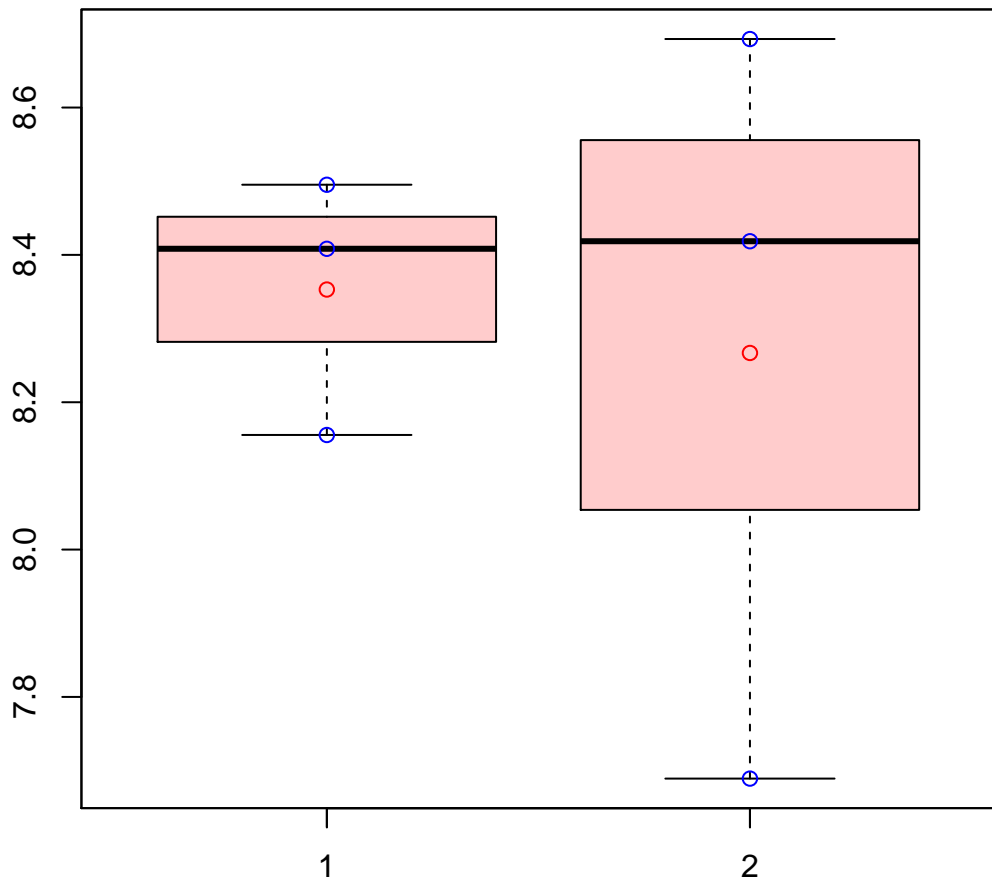

t-Test: p-value = 0.81

# I1HBF5|I1HBF5\_BRADI

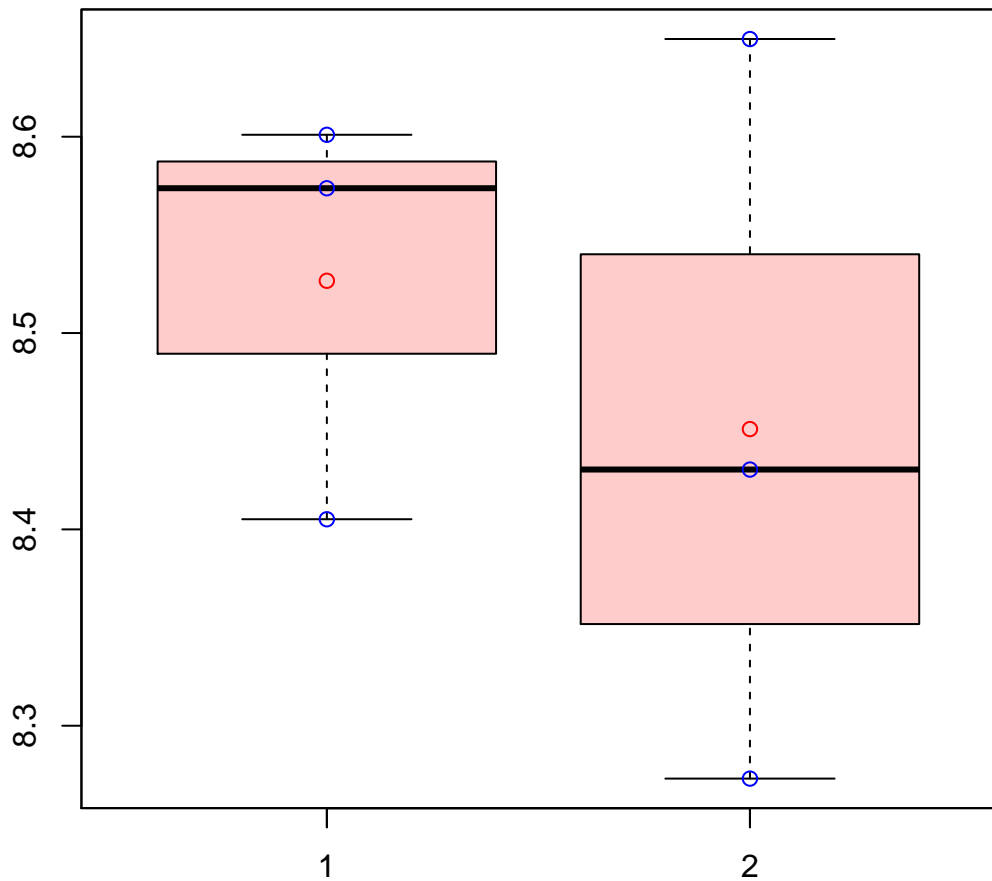

t-Test: p-value = 0.59

# I1HCH2|I1HCH2\_BRADI

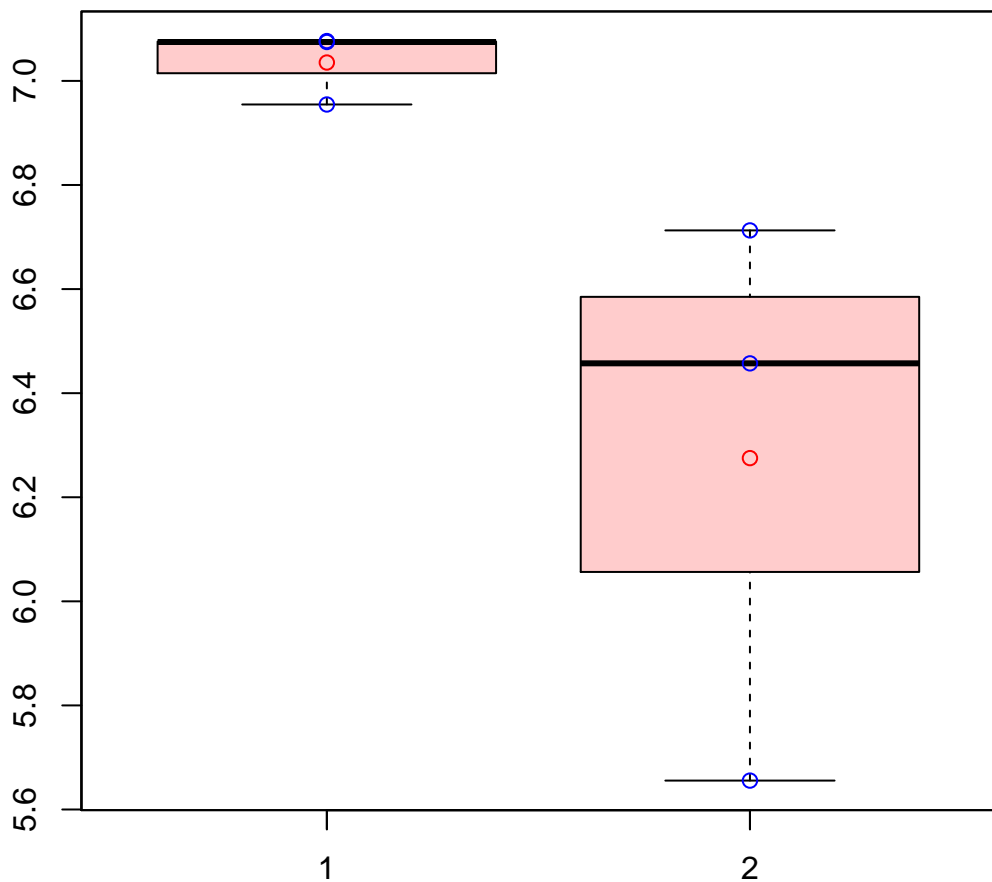

t-Test: p-value = 0.14

# I1HCZ8|I1HCZ8\_BRADI

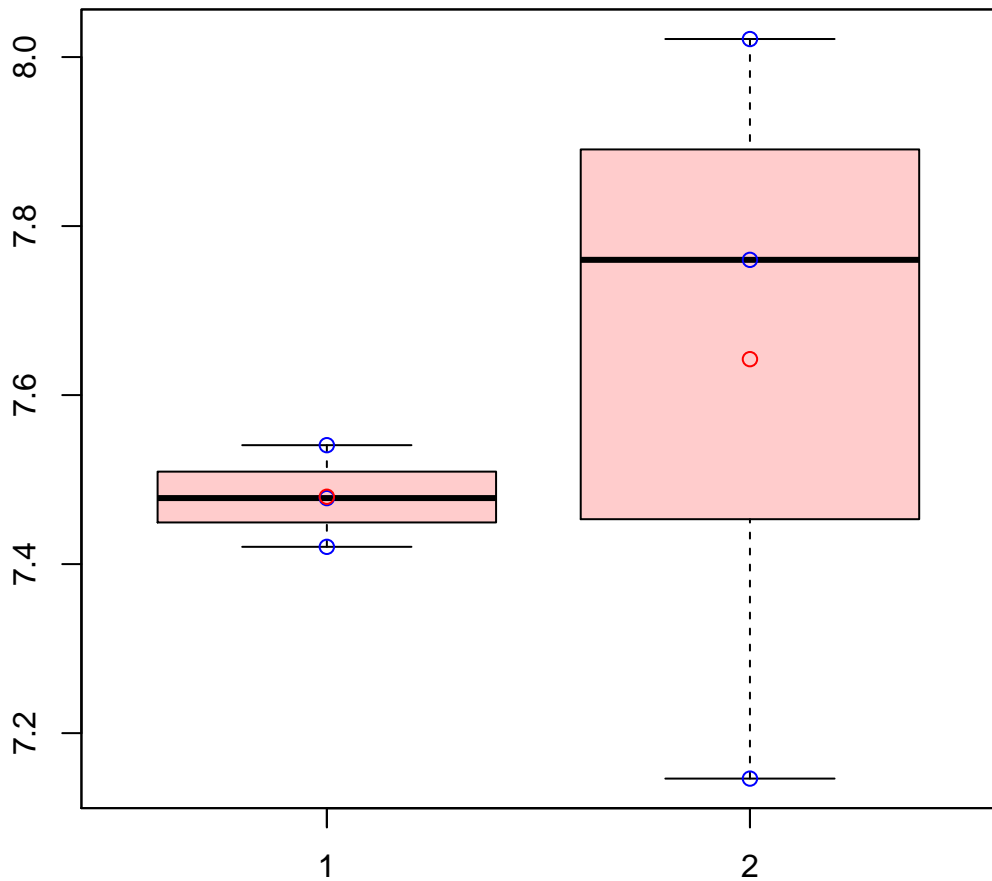

t-Test: p-value = 0.6



# I1HD61|I1HD61\_BRADI

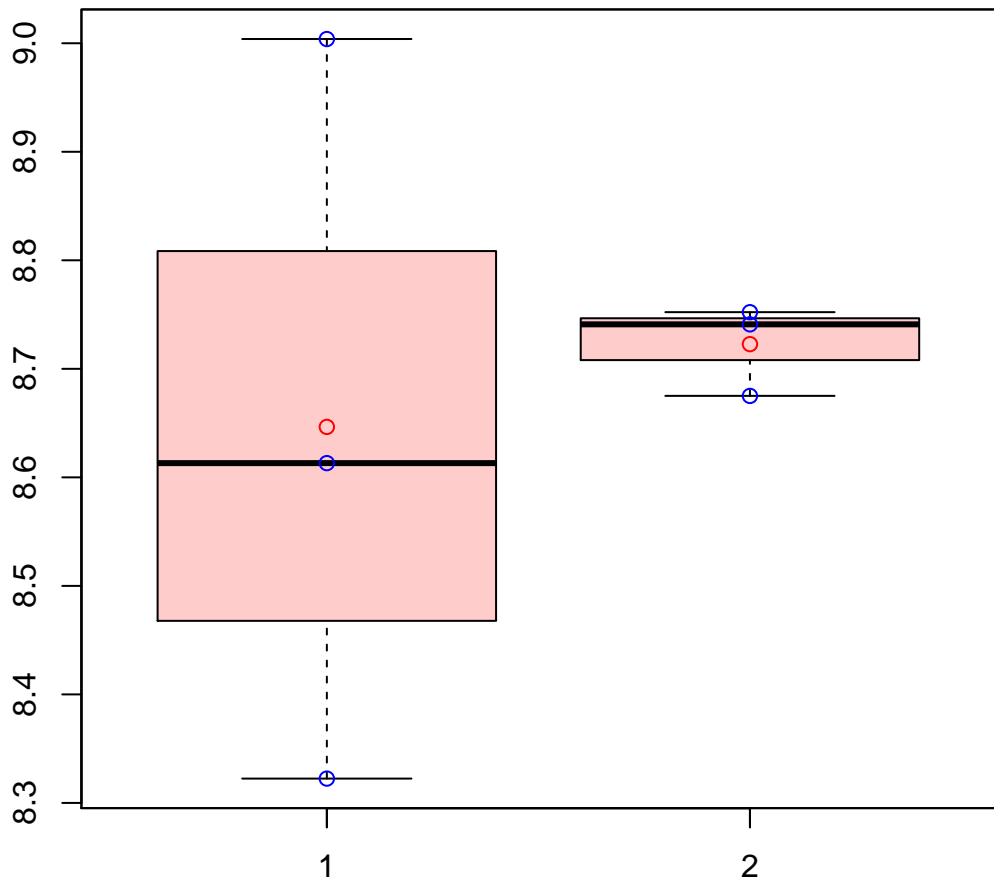

t-Test: p-value = 0.74

# I1HD76|I1HD76\_BRADI

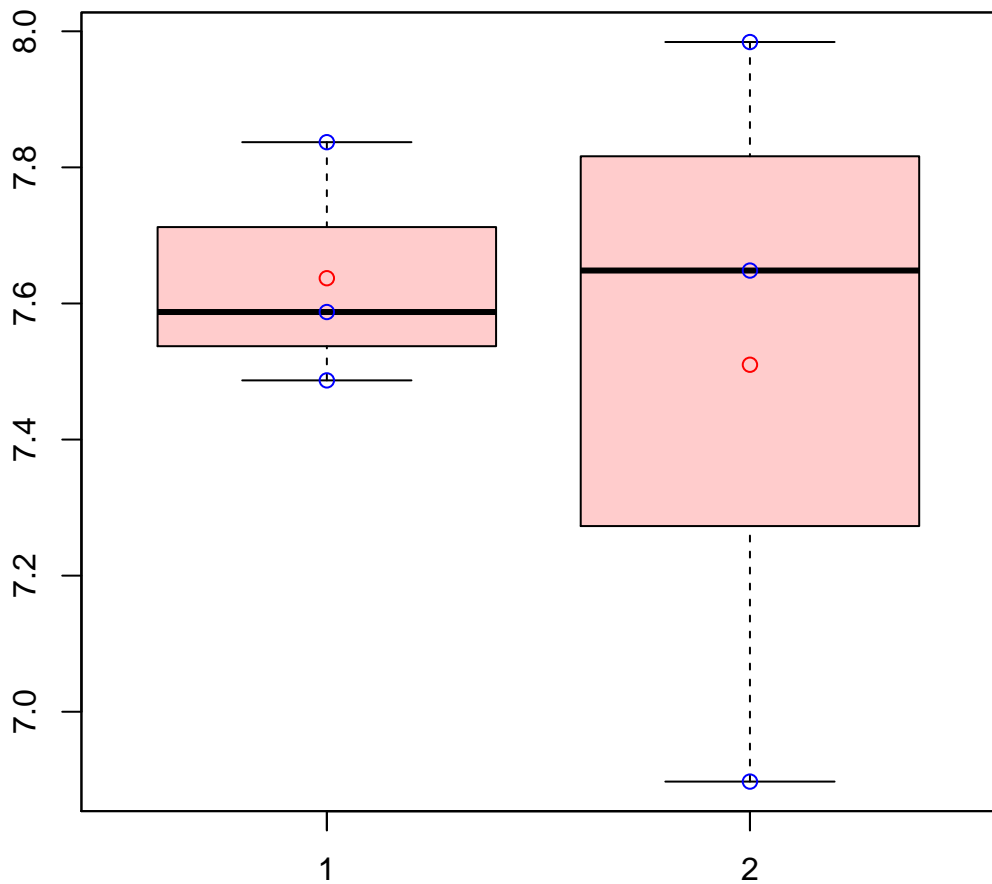

t-Test: p-value = 0.74

# I1HDI2|I1HDI2\_BRADI

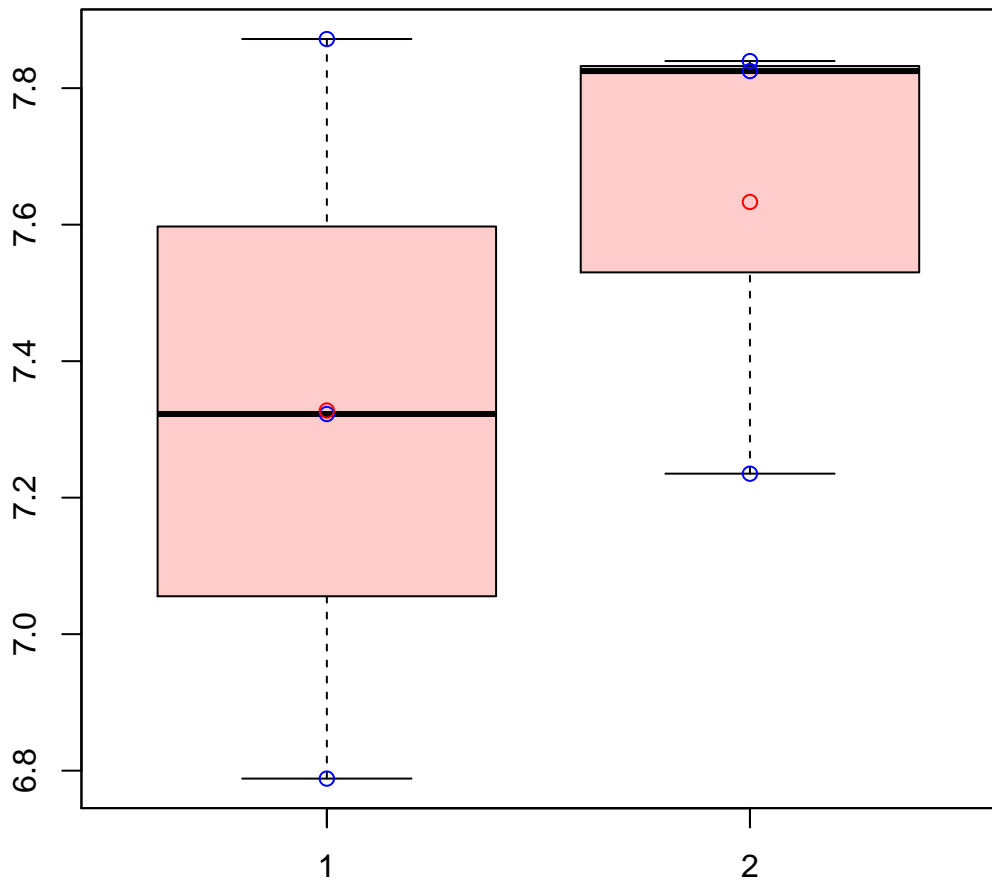

t-Test: p-value = 0.46

# I1HDL9|I1HDL9\_BRADI

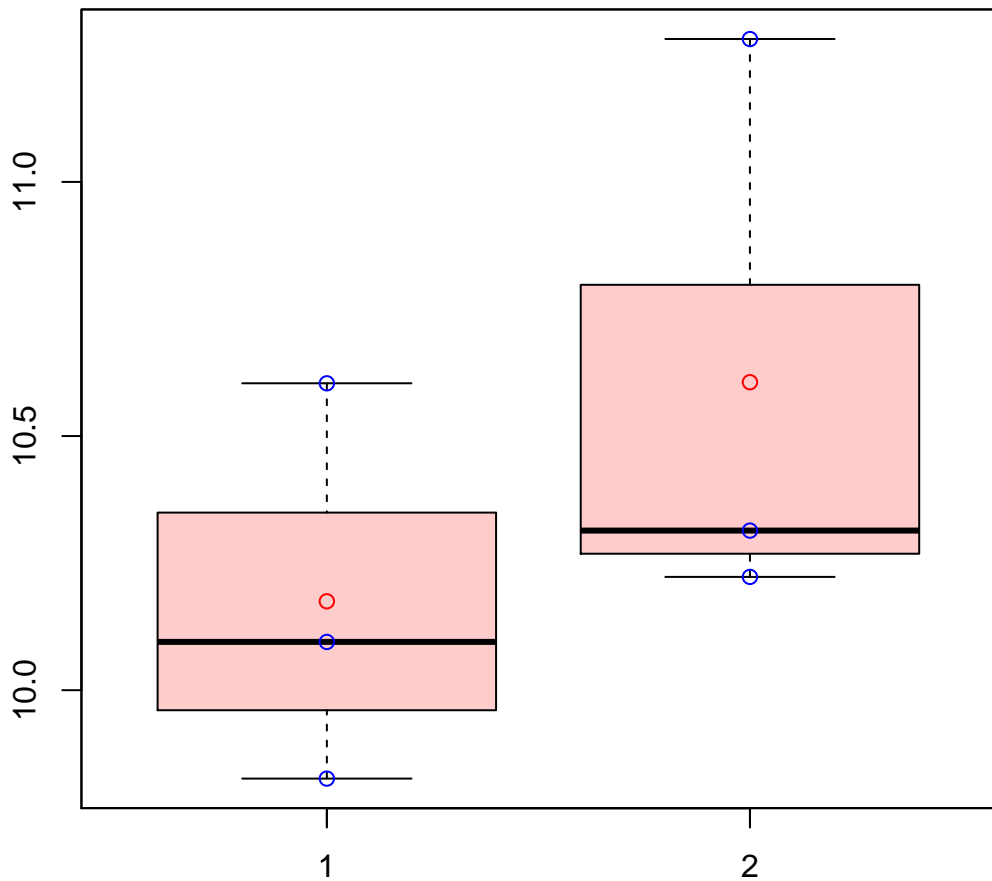

t-Test: p-value = 0.36

# I1HE93|I1HE93\_BRADI

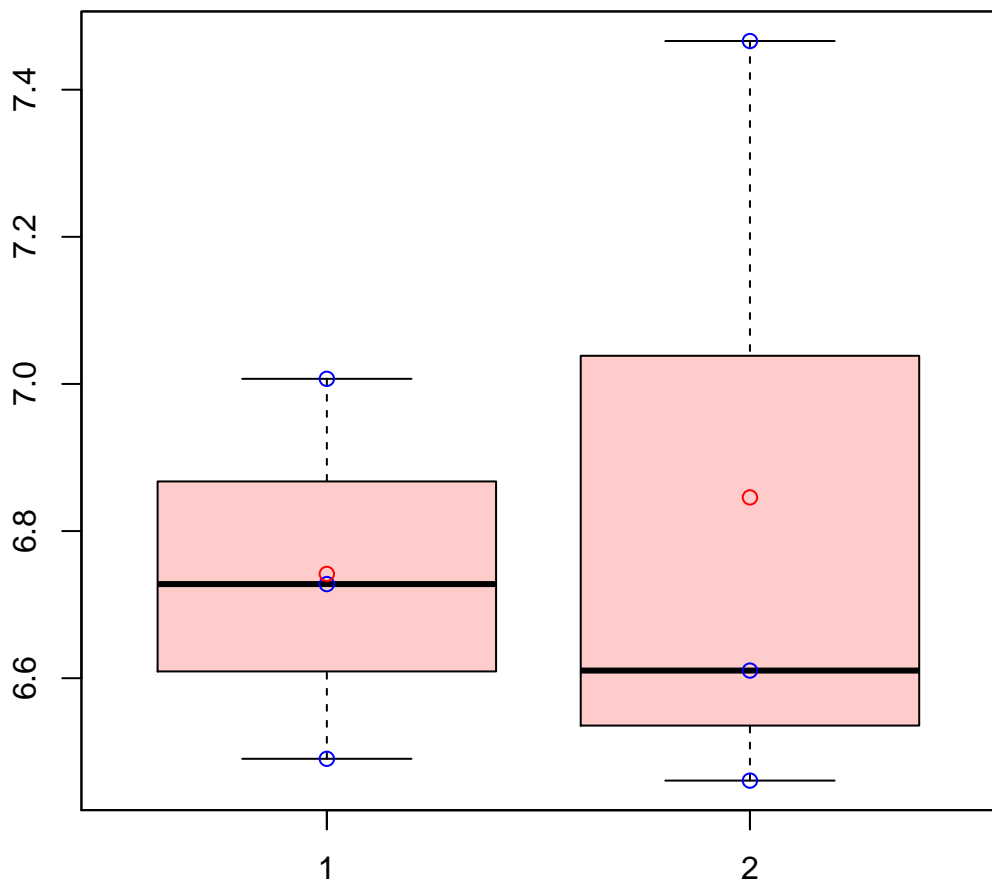

t-Test: p-value = 0.78

# I1HE99|I1HE99\_BRADI

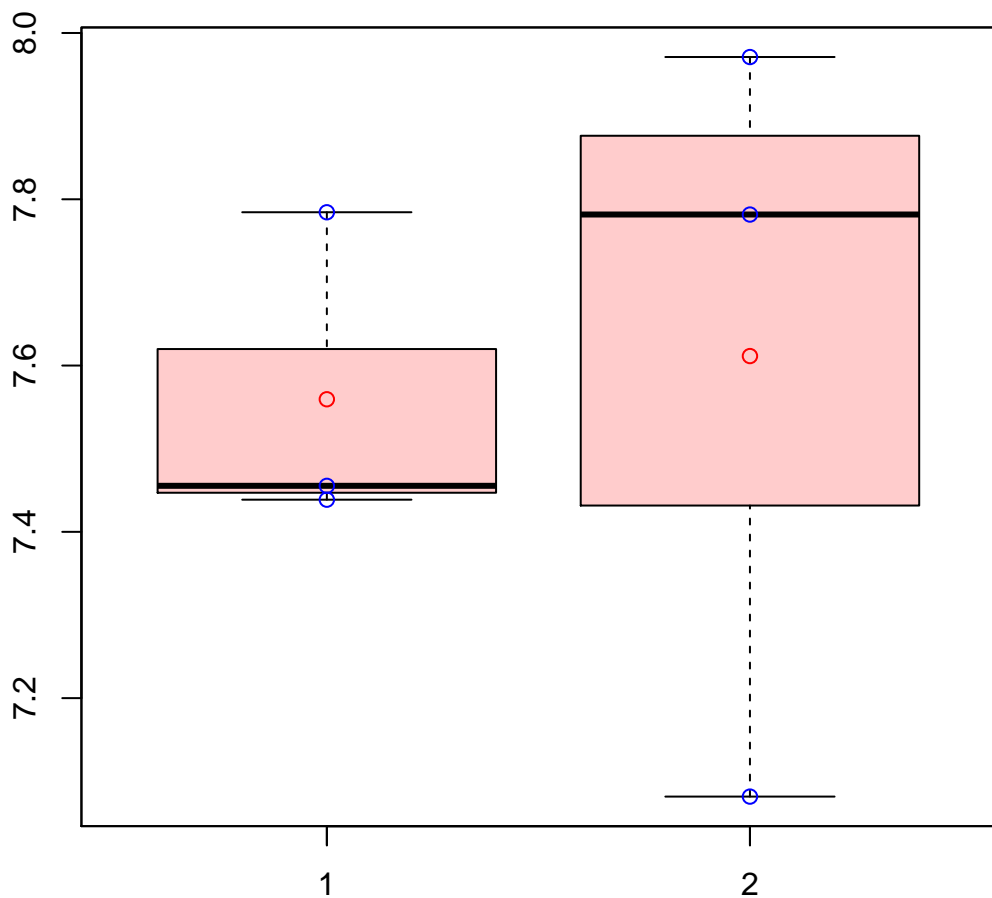

t-Test: p-value = 0.87

# I1HEG7|I1HEG7\_BRADI

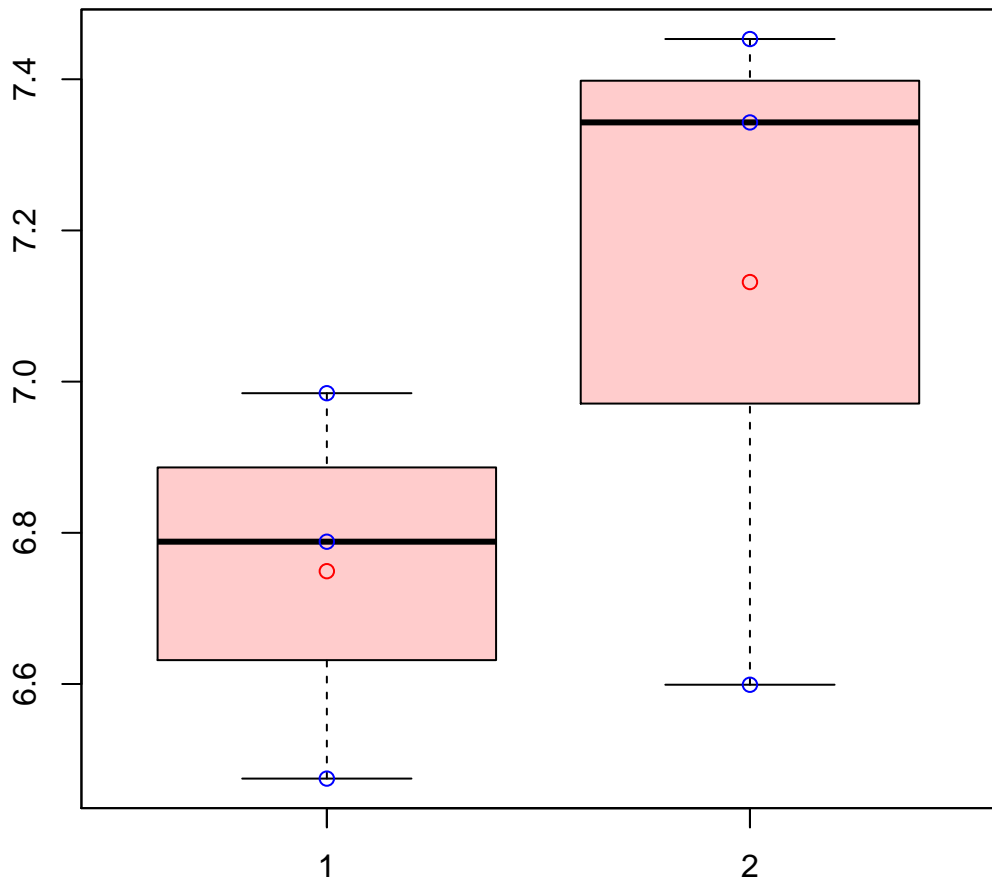

t-Test: p-value = 0.3

# I1EH4|I1EH4\_BRADI

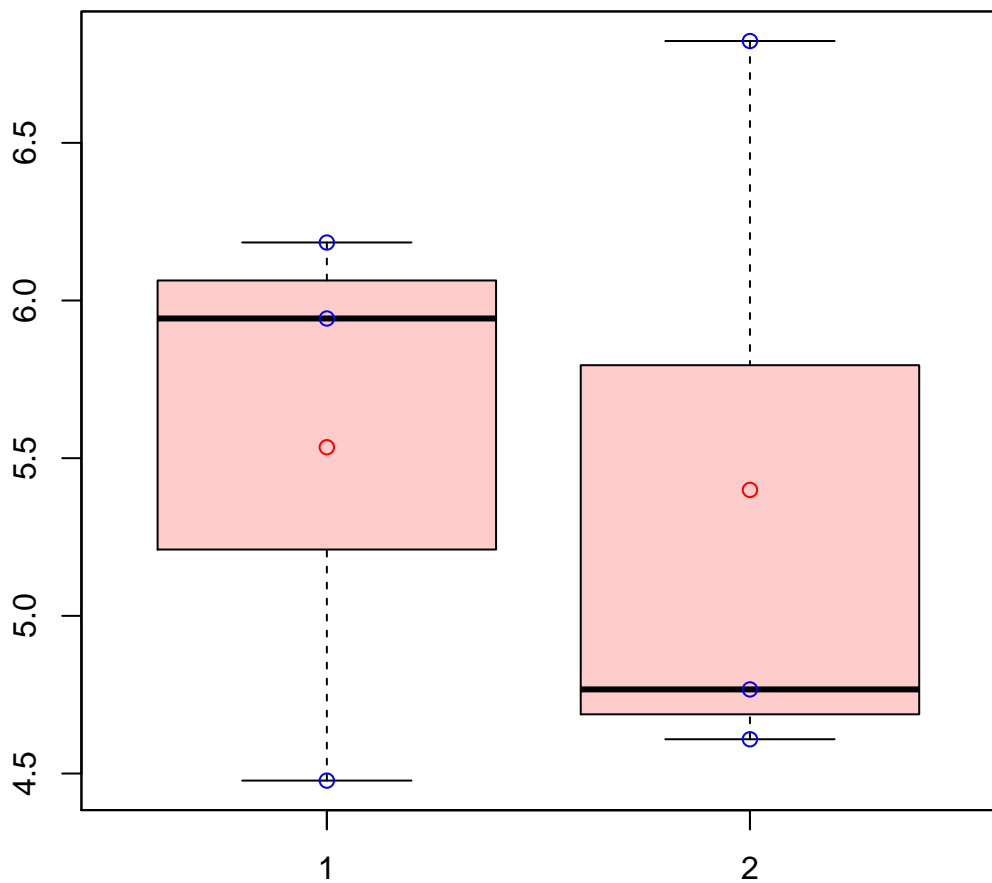

t-Test: p-value = 0.89



# I1HEM6|I1HEM6\_BRADI

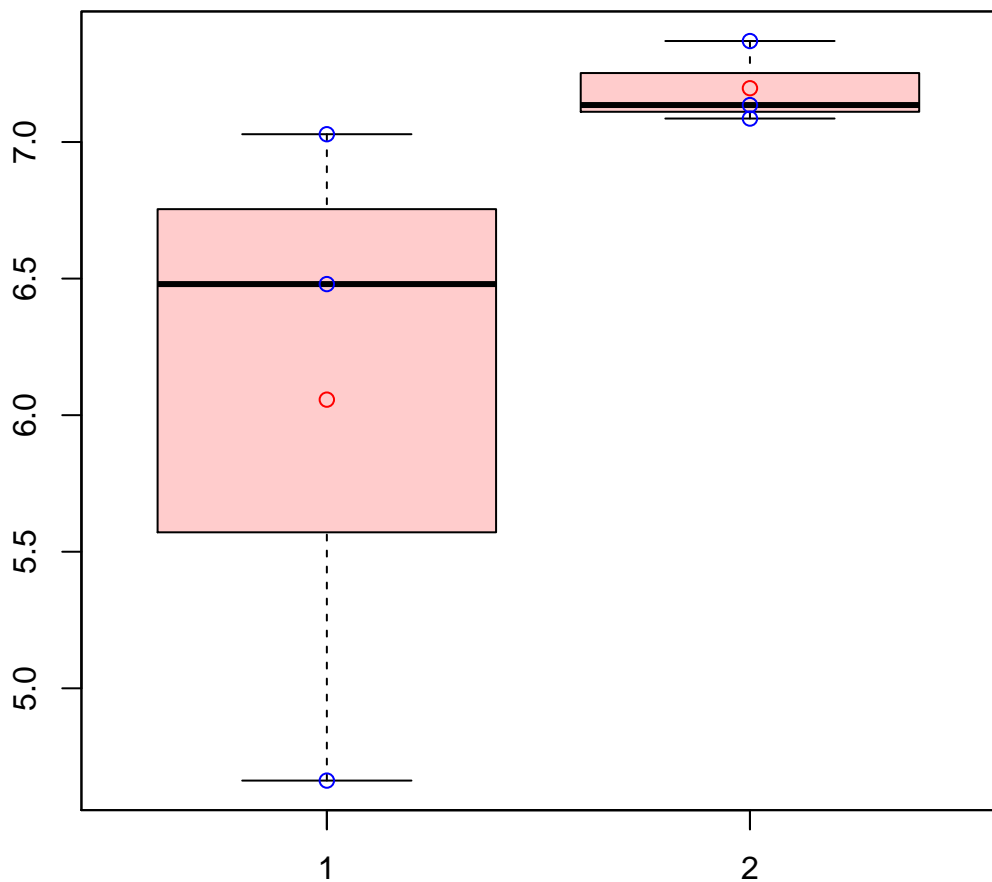

t-Test: p-value = 0.25

# I1HEP2|I1HEP2\_BRADI

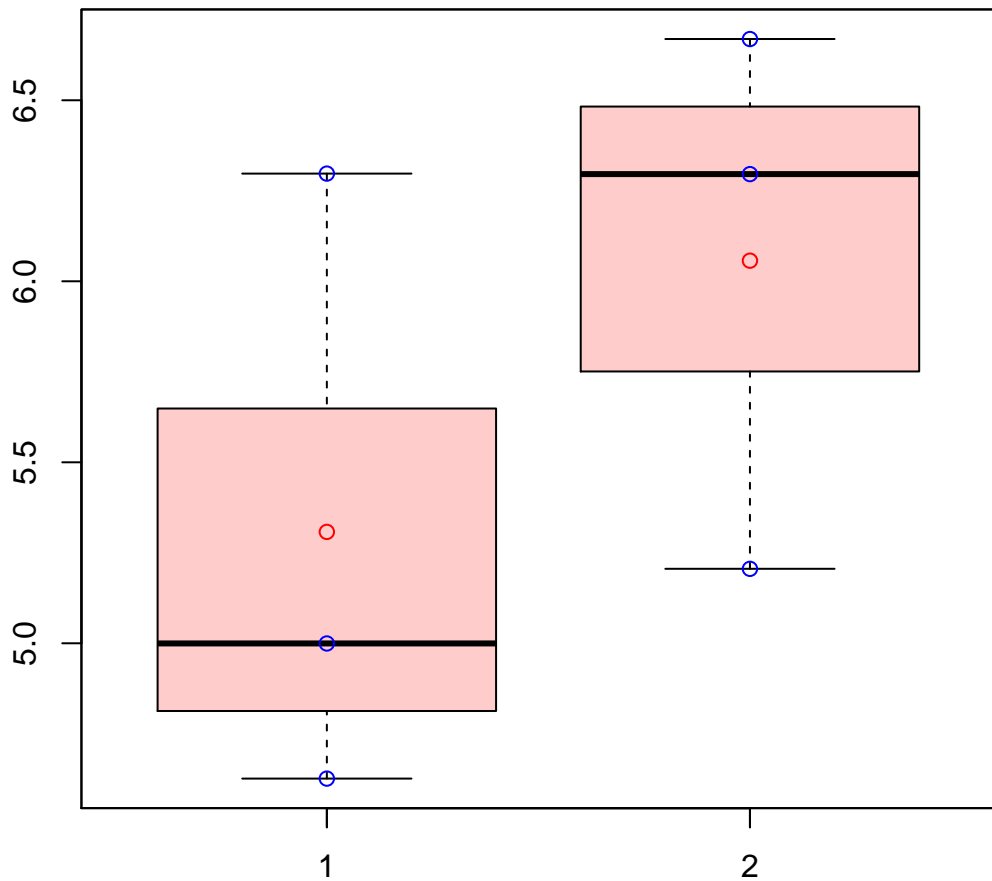

t-Test: p-value = 0.33

# I1HEQ2|I1HEQ2\_BRADI

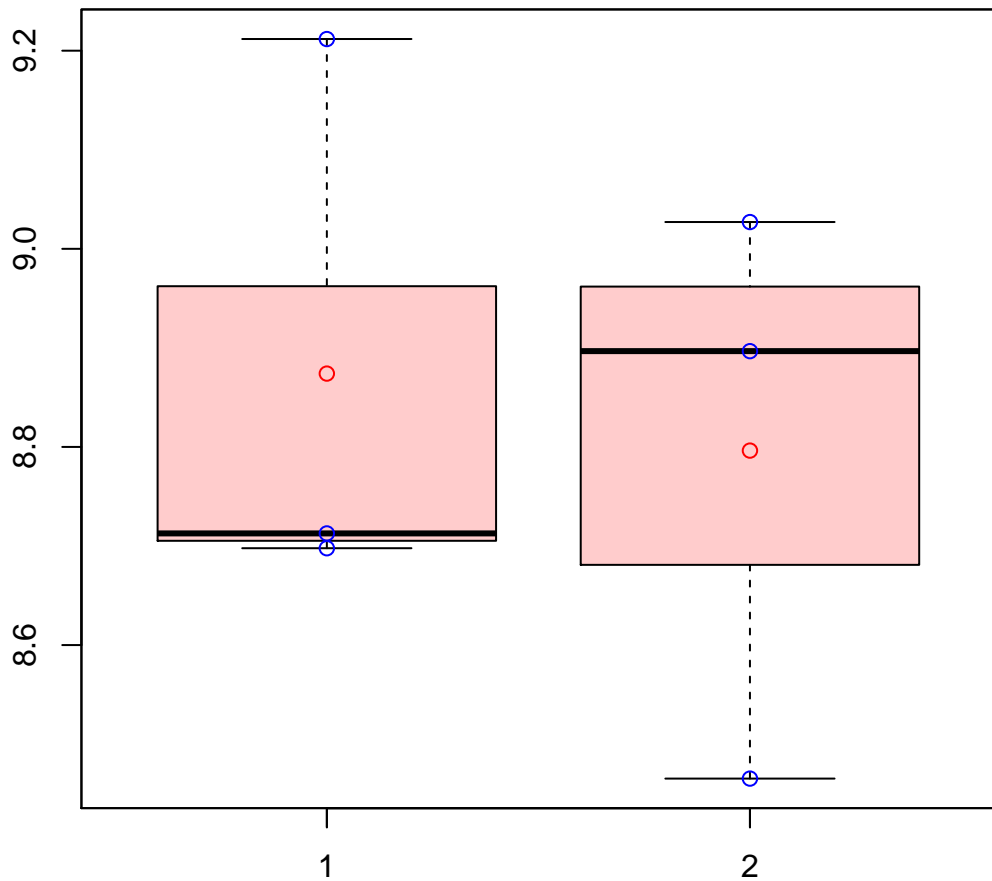

t-Test: p-value = 0.76

# I1HER4|I1HER4\_BRADI

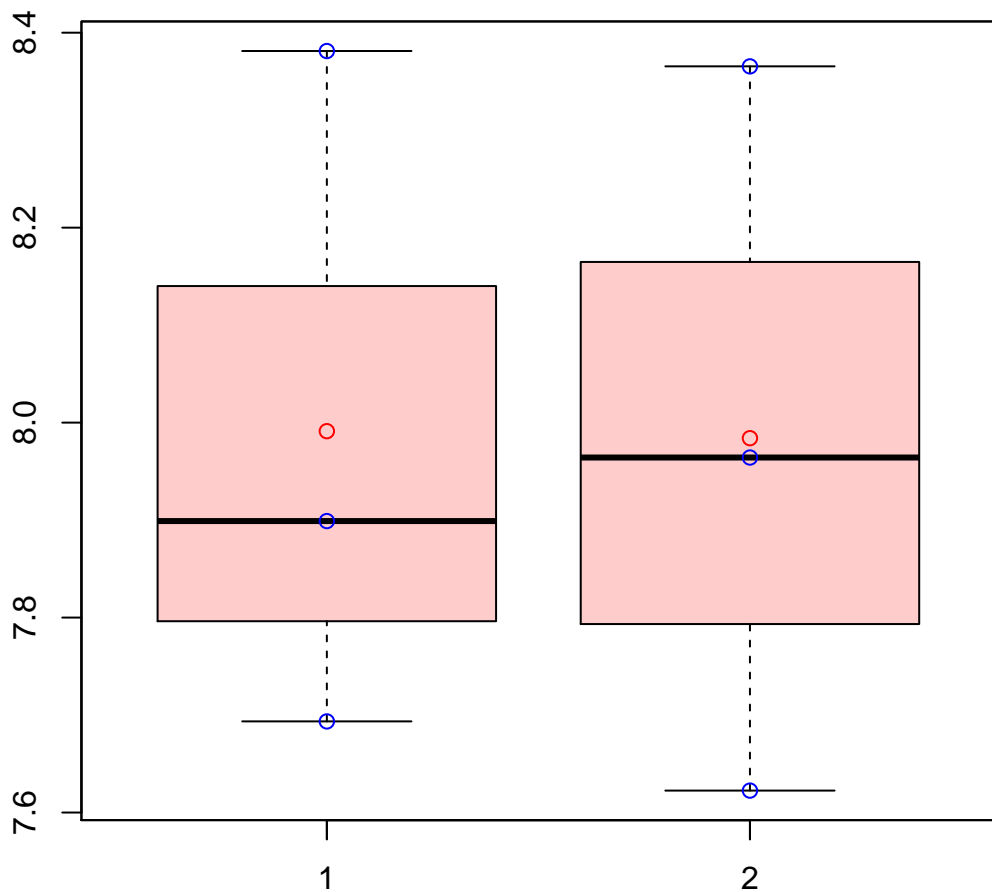

t-Test: p-value = 0.98

# I1HEX5|I1HEX5\_BRADI

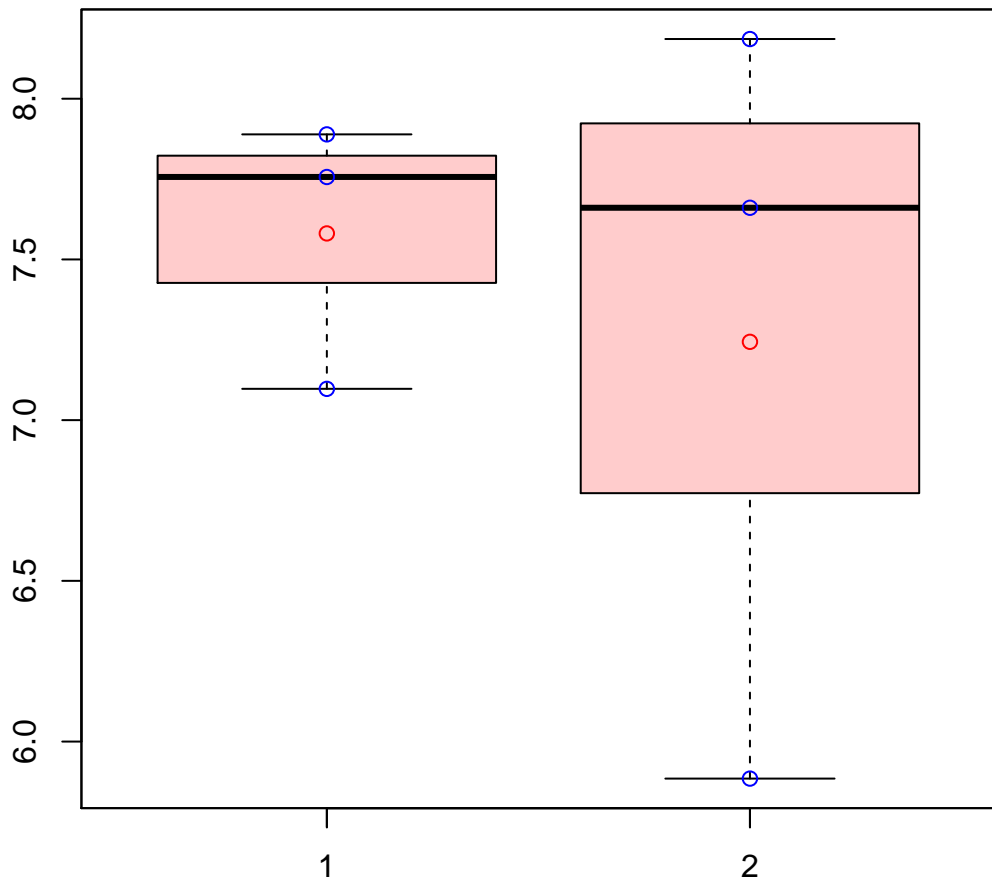

t-Test: p-value = 0.68

# I1HEZ1|I1HEZ1\_BRADI

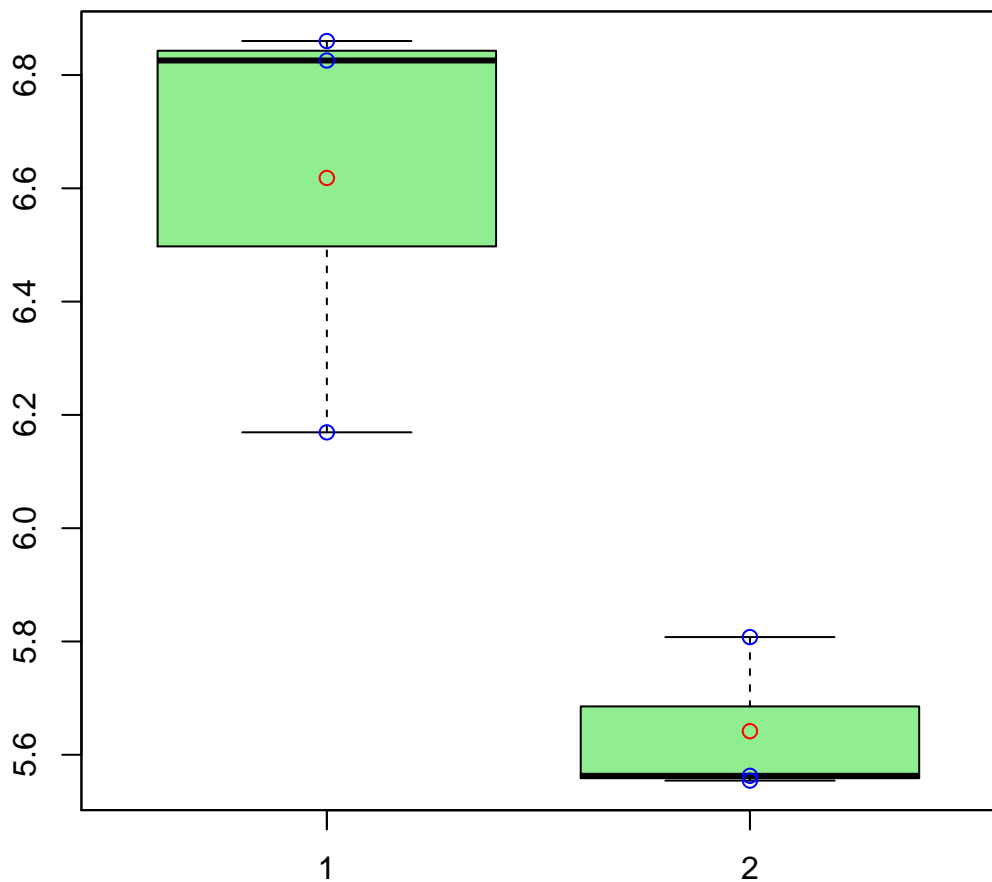

t-Test: p-value = 0.04

# I1HF19|I1HF19\_BRADI

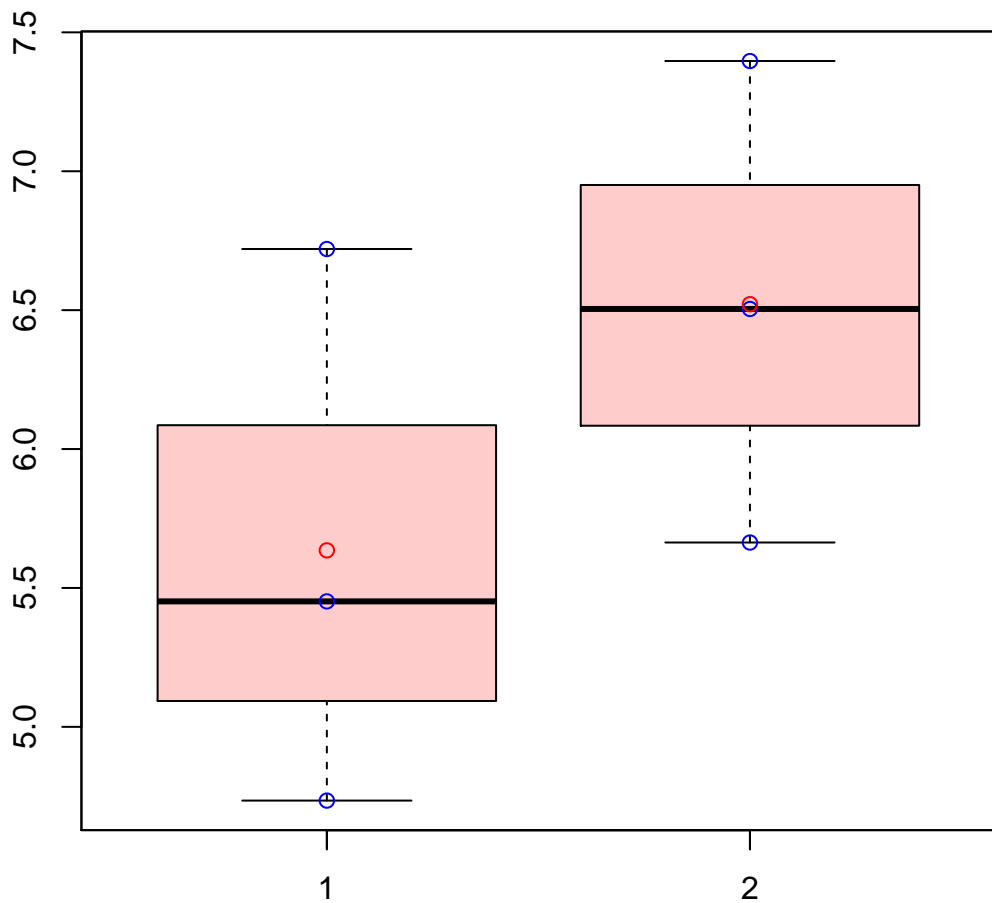

t-Test: p-value = 0.31

# I1HF20|I1HF20\_BRADI

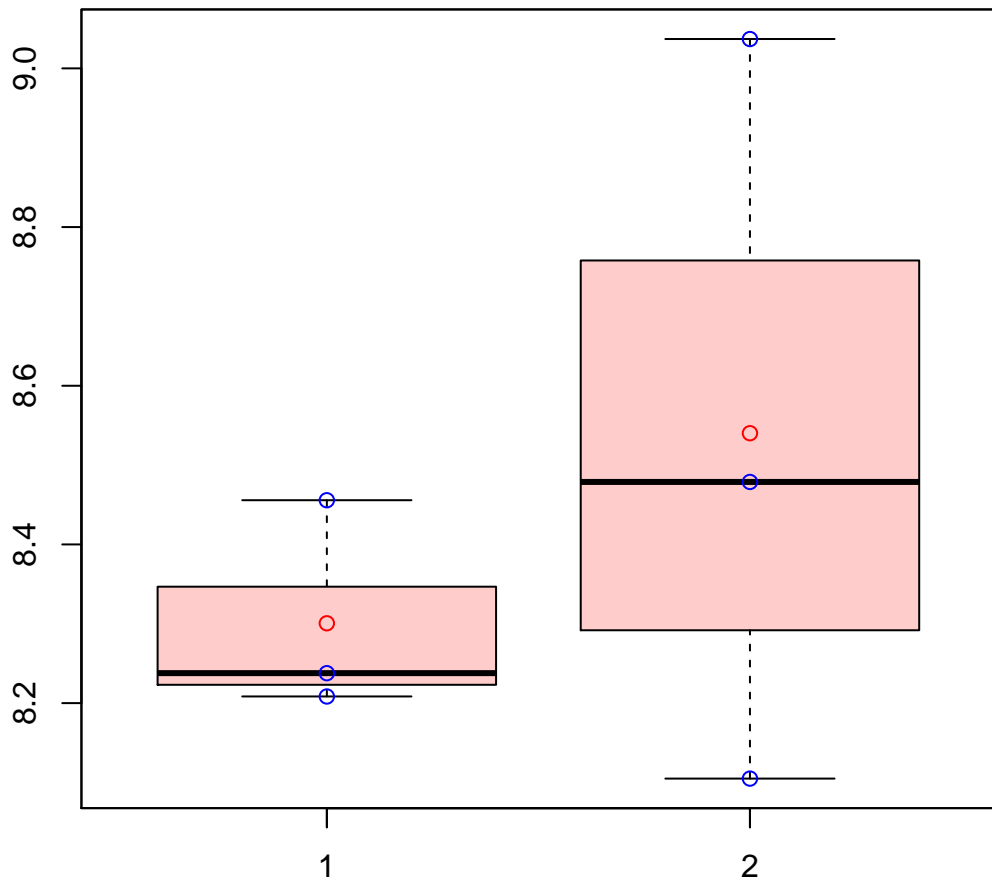

t-Test: p-value = 0.47



# I1HF24|I1HF24\_BRADI

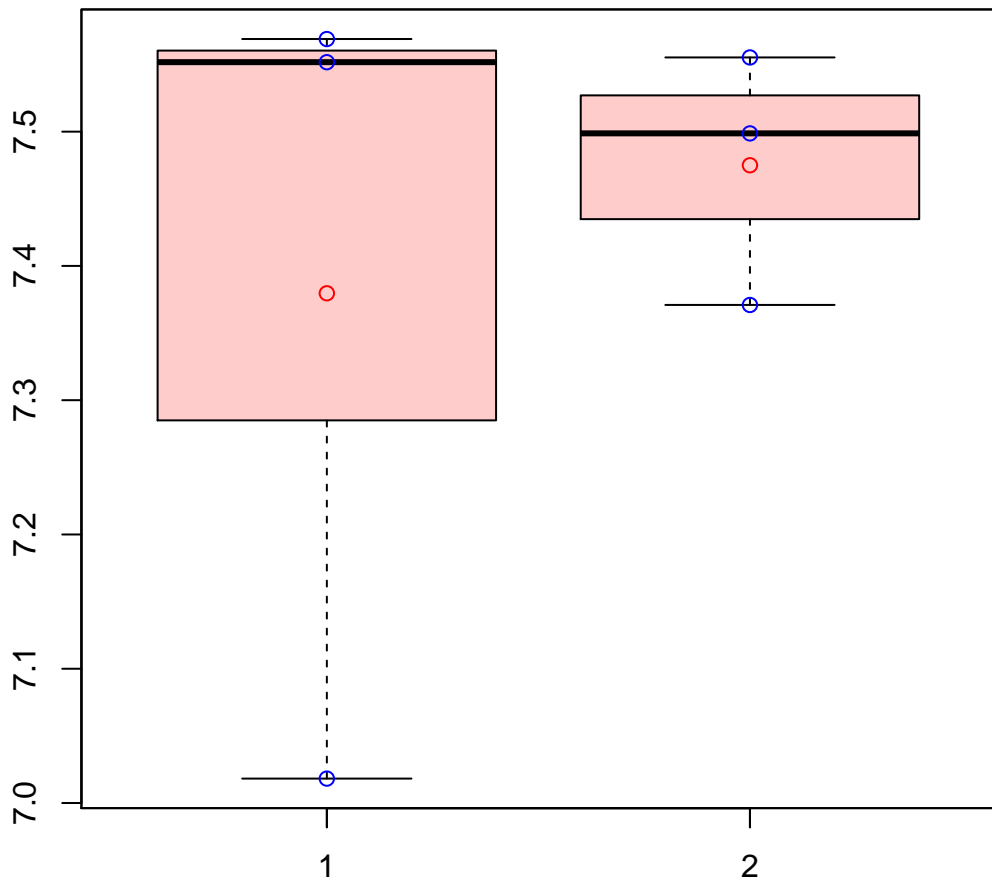

t-Test: p-value = 0.66

# I1HF32|I1HF32\_BRADI

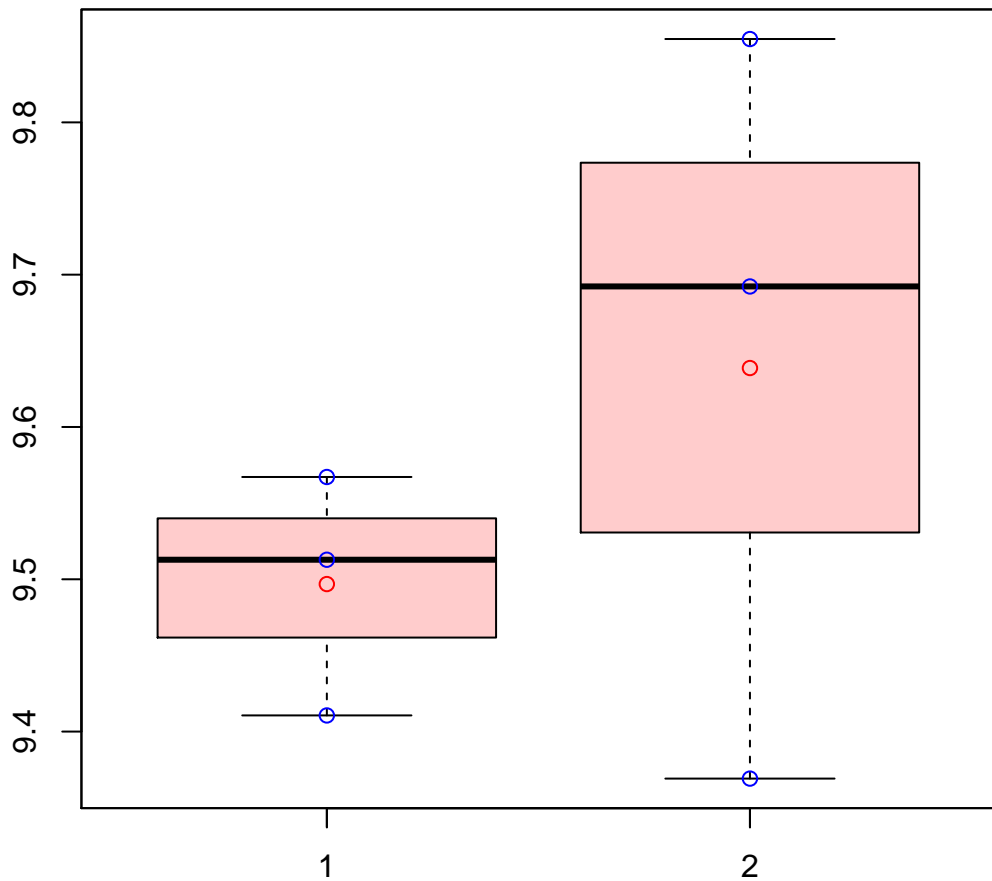

t-Test: p-value = 0.43

# I1HF60|I1HF60\_BRADI

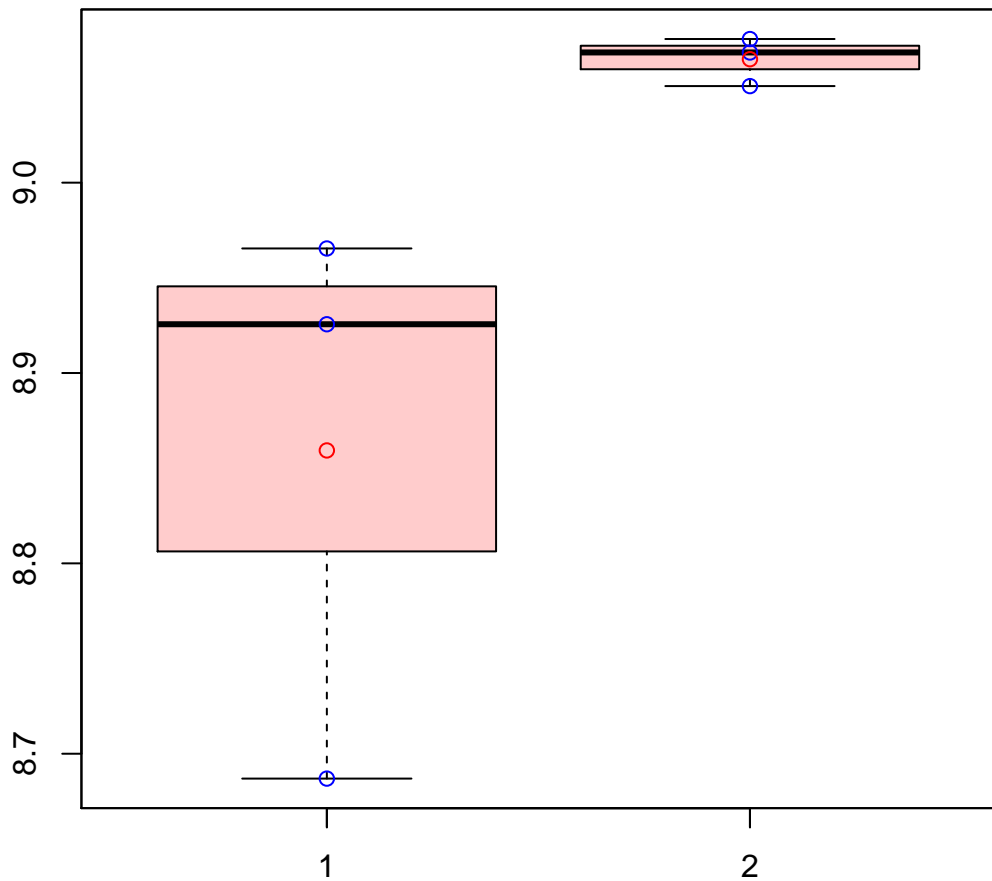

t-Test: p-value = 0.14

# I1HF62|I1HF62\_BRADI

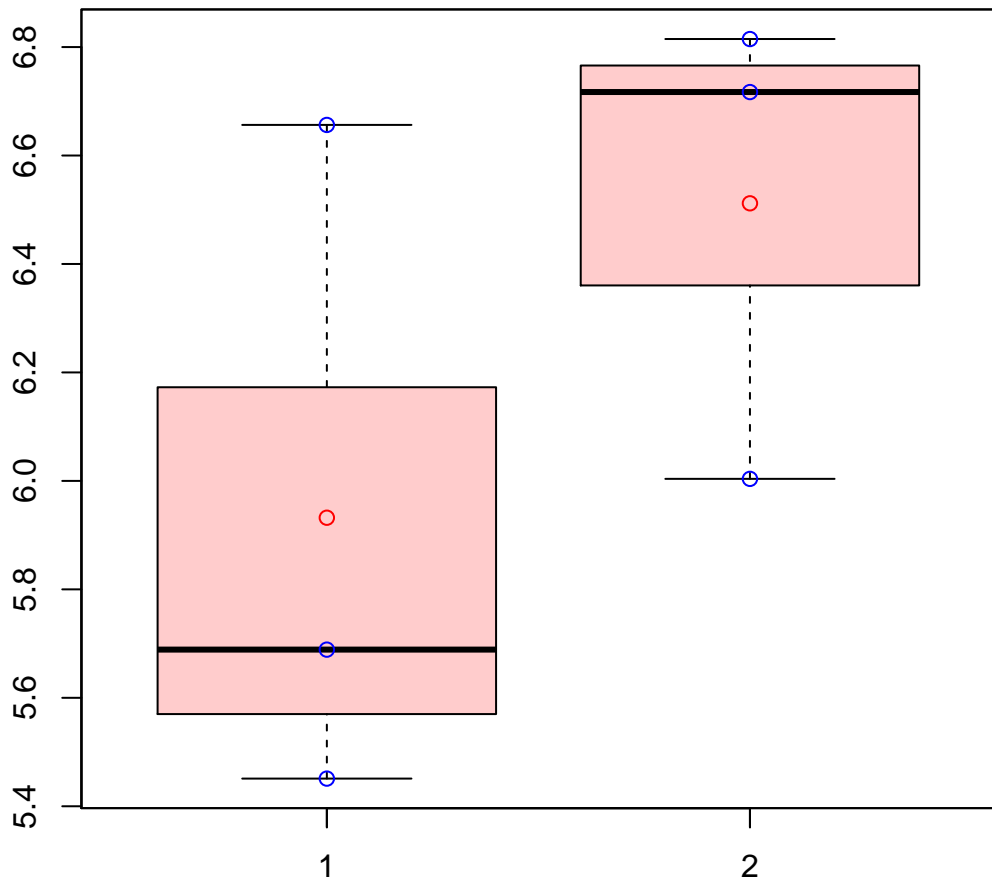

t-Test: p-value = 0.27

# I1HF84|I1HF84\_BRADI

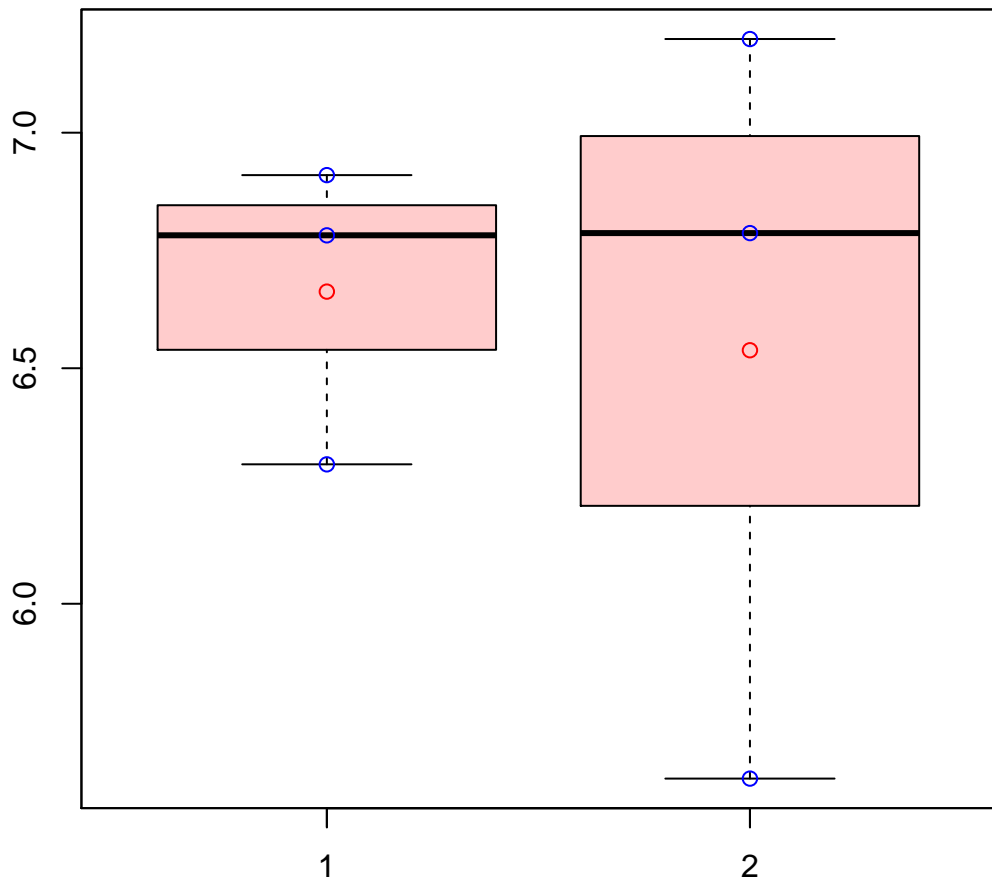

t-Test: p-value = 0.82

# I1HFD3|I1HFD3\_BRADI

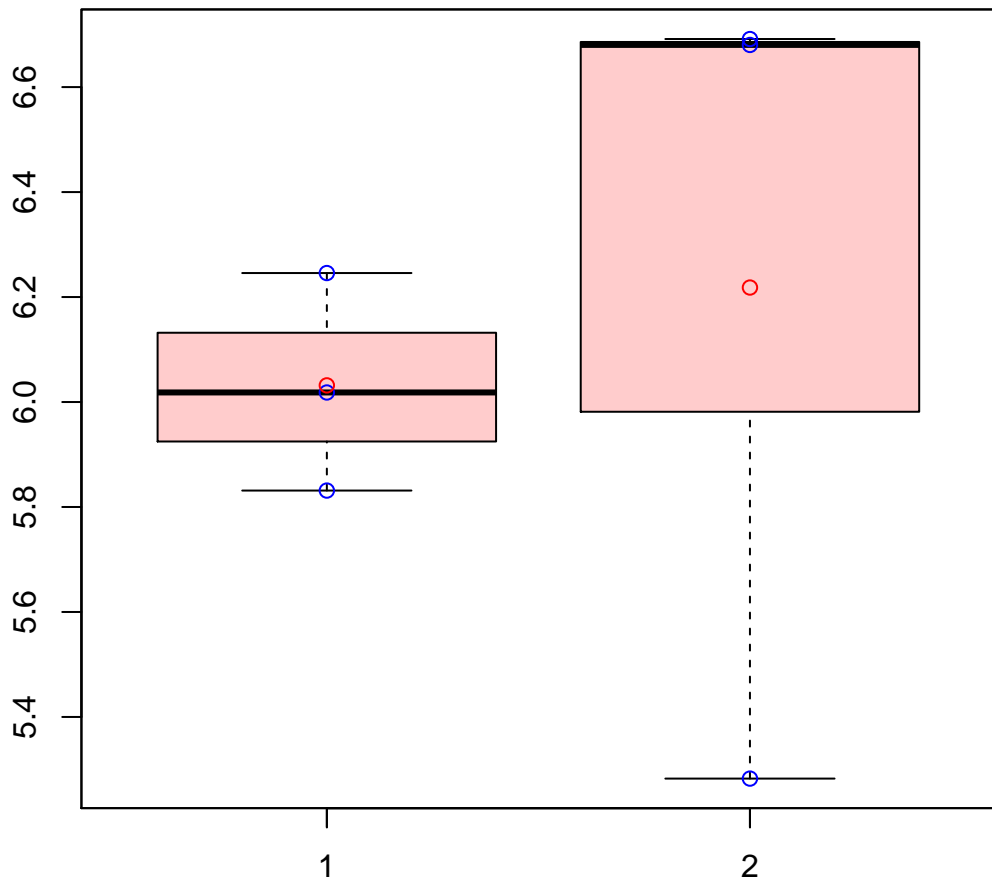

t-Test: p-value = 0.73

# I1HFU7|I1HFU7\_BRADI

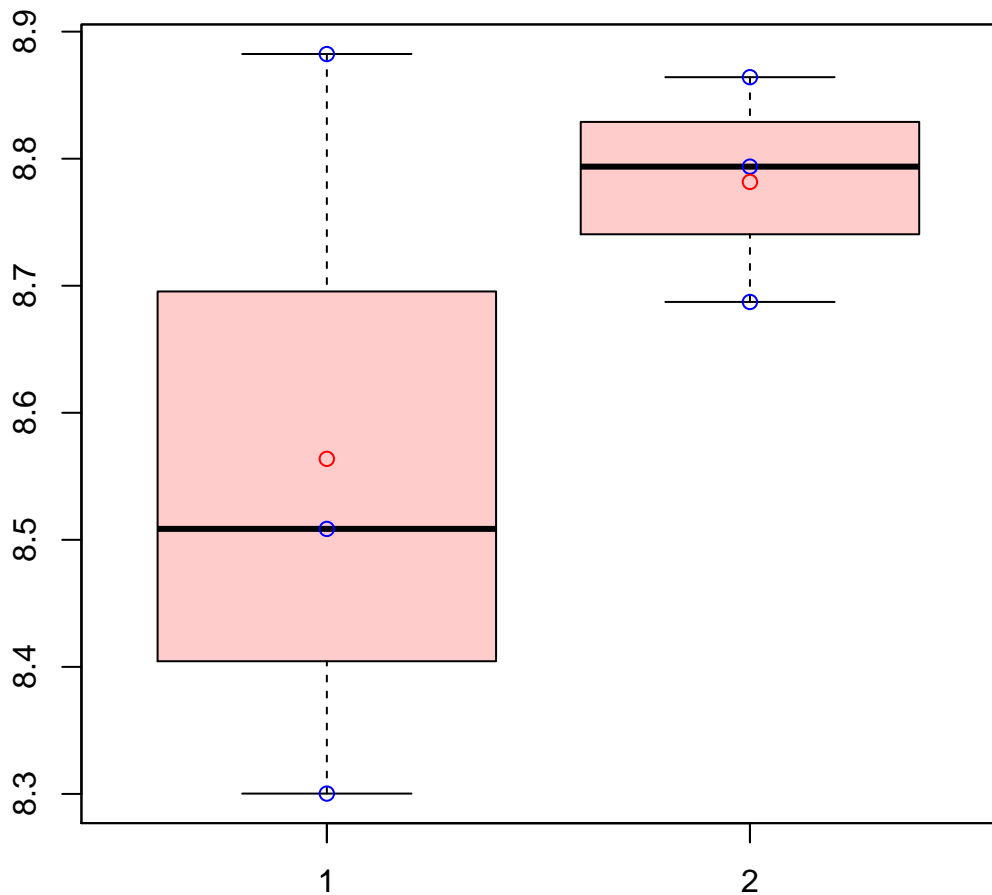

t-Test: p-value = 0.33

# I1HG63|I1HG63\_BRADI

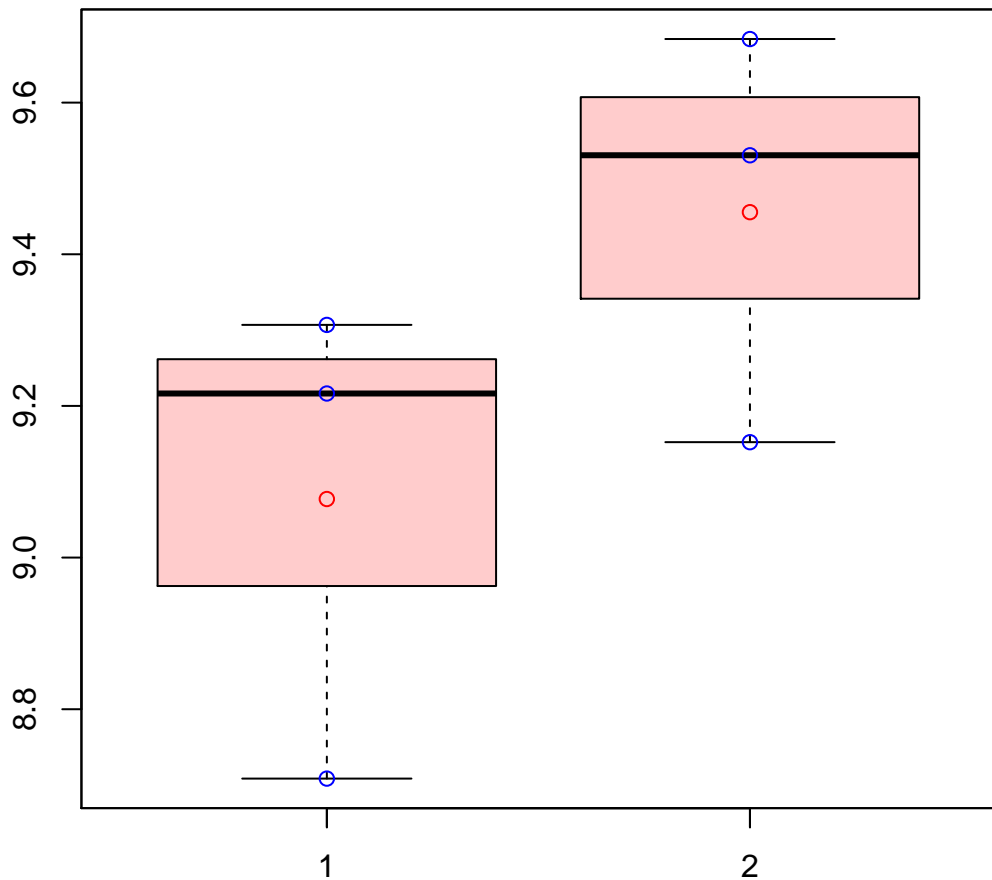

t-Test: p-value = 0.2



# I1HG64|I1HG64\_BRADI

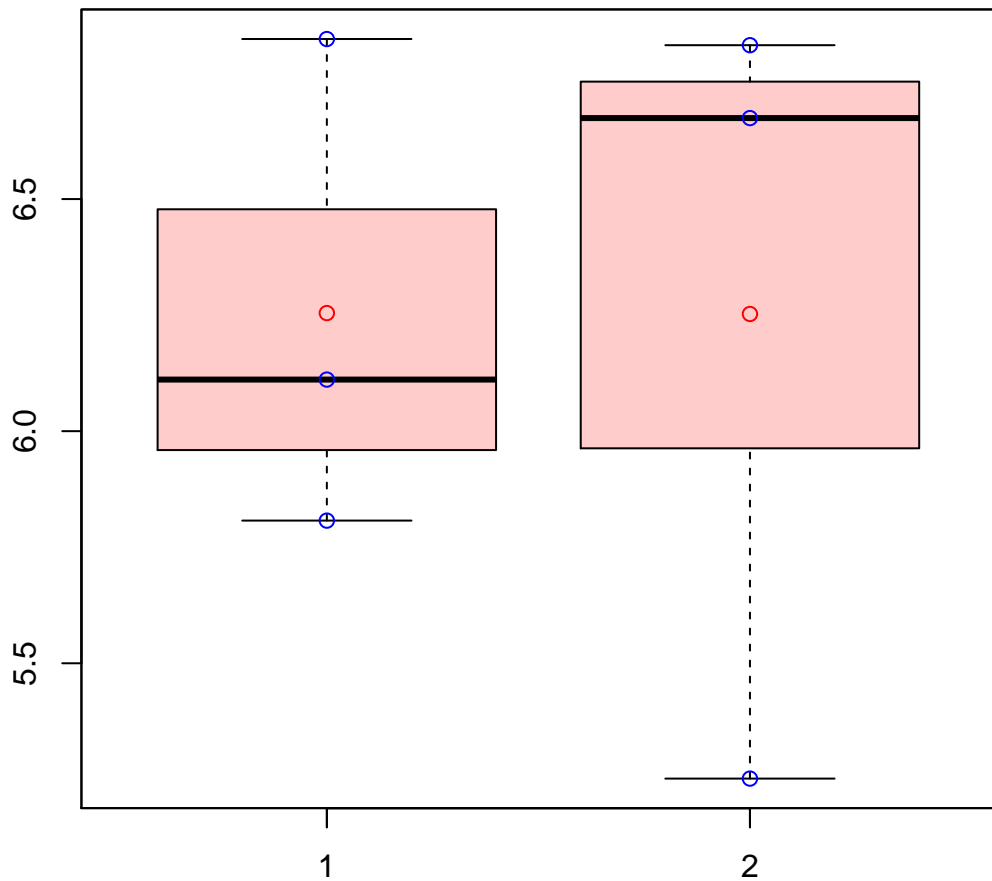

t-Test: p-value = 1

# I1HG80|I1HG80\_BRADI

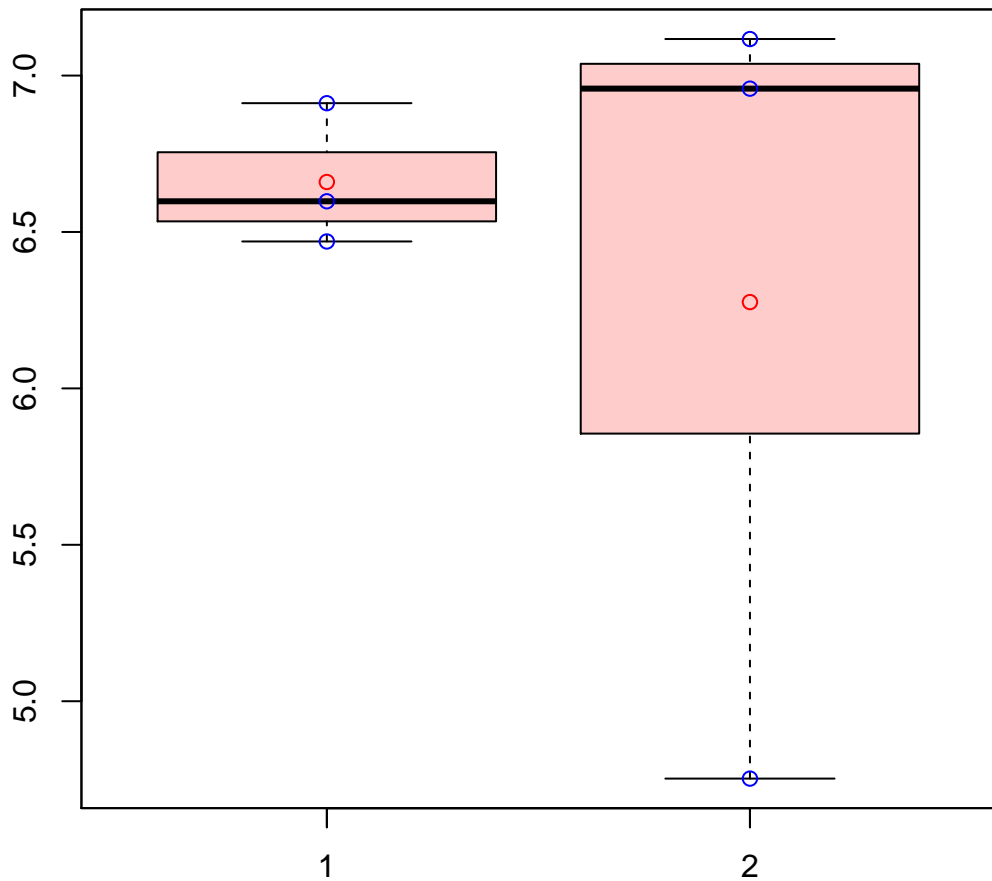

t-Test: p-value = 0.67

# I1HGQ8|I1HGQ8\_BRADI

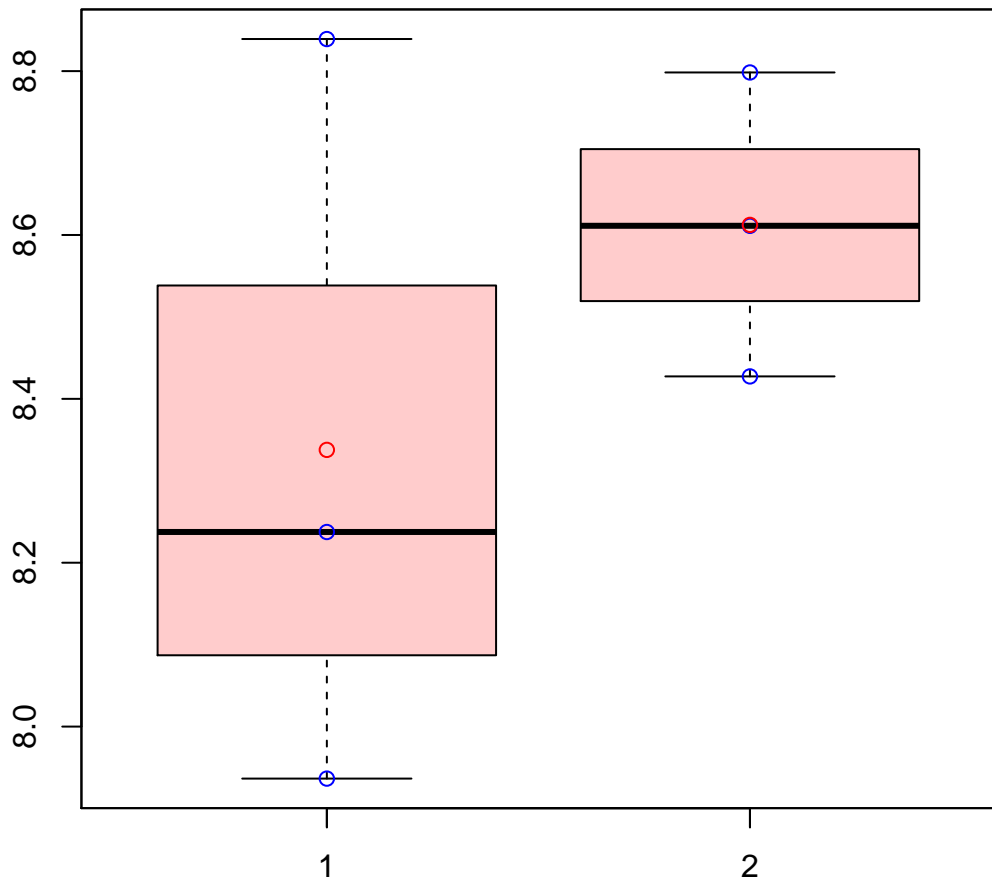

t-Test: p-value = 0.42

# I1HGV6|I1HGV6\_BRADI

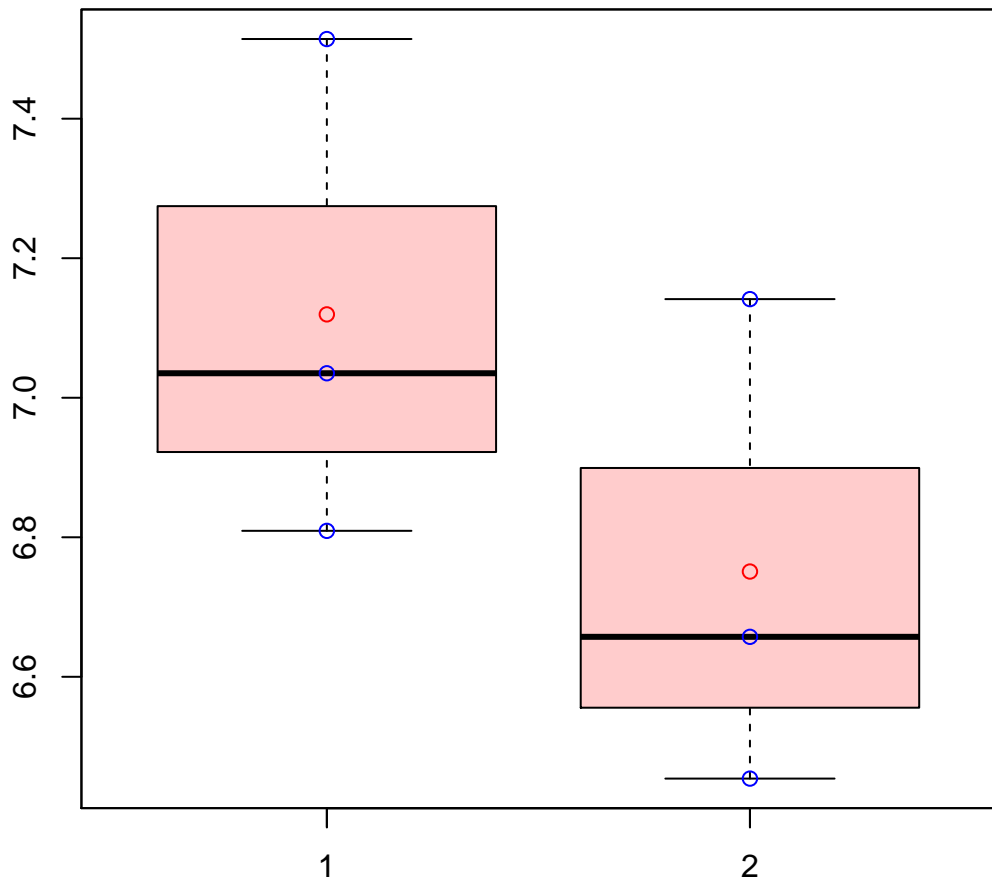

t-Test: p-value = 0.27

# I1HHE7|I1HHE7\_BRADI

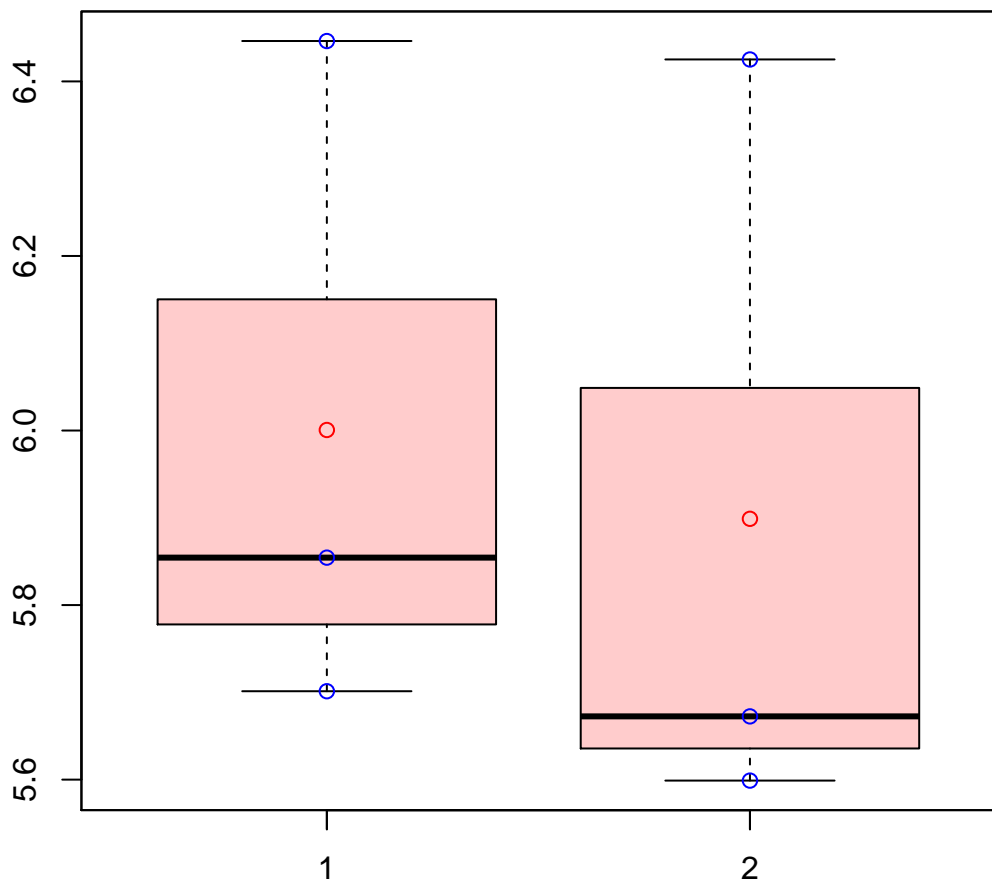

t-Test: p-value = 0.78

# I1HHL5|I1HHL5\_BRADI

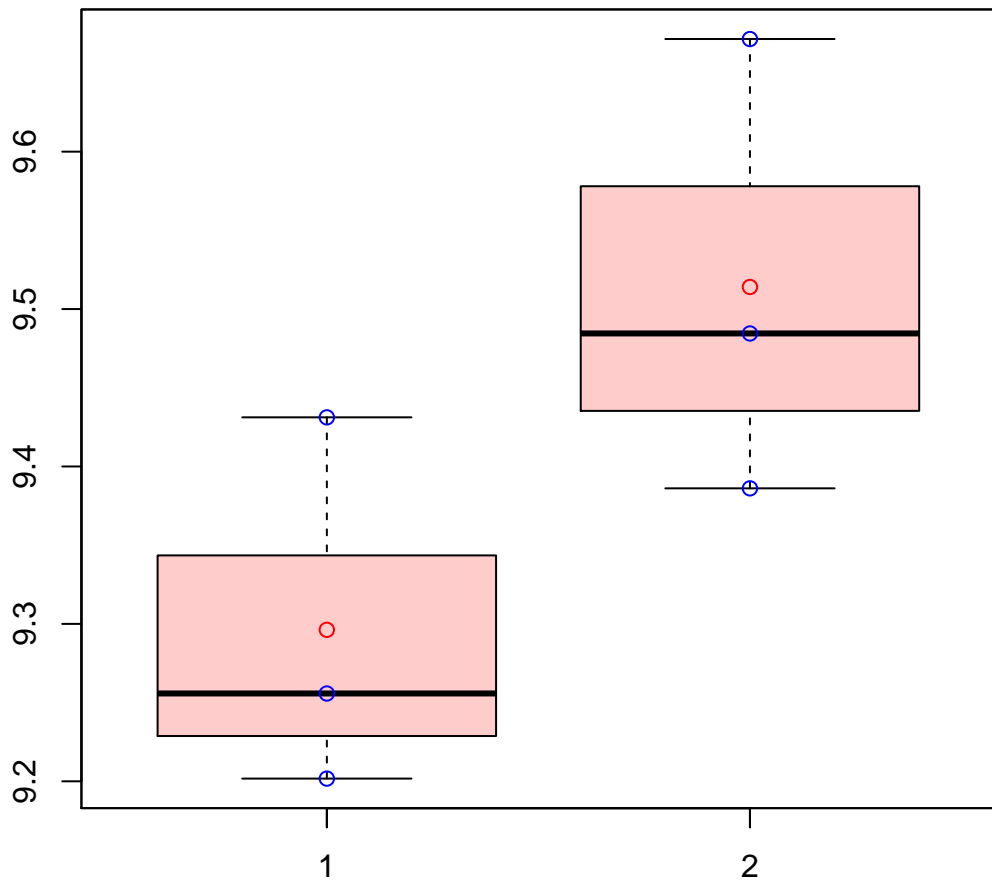

t-Test: p-value = 0.12

# I1HI06|I1HI06\_BRADI

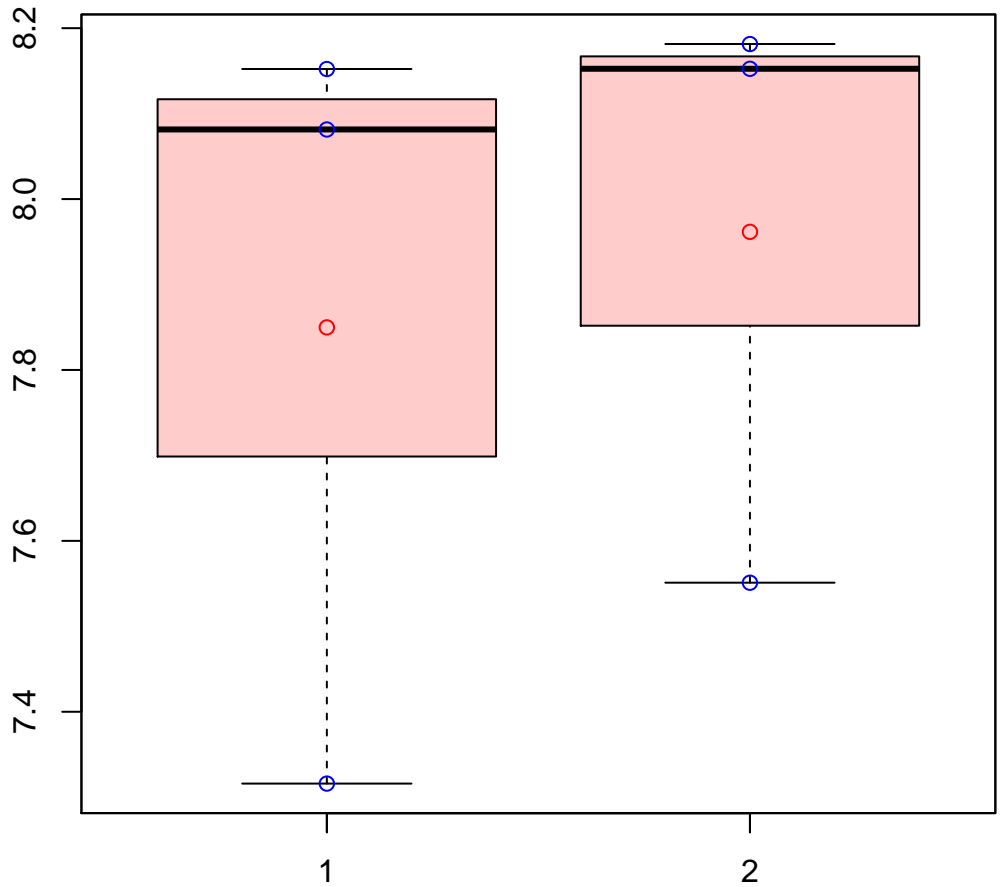

t-Test: p-value = 0.76

# I1HI26|I1HI26\_BRADI

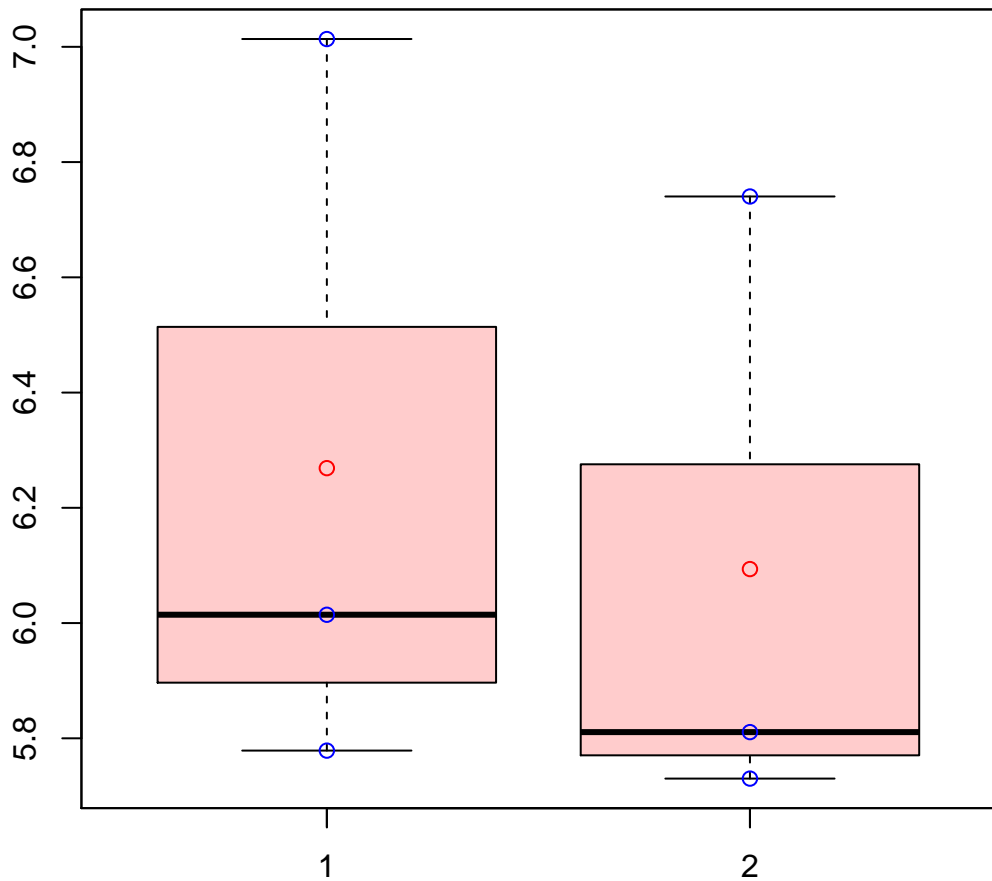

t-Test: p-value = 0.74



# I1HIB3|I1HIB3\_BRADI

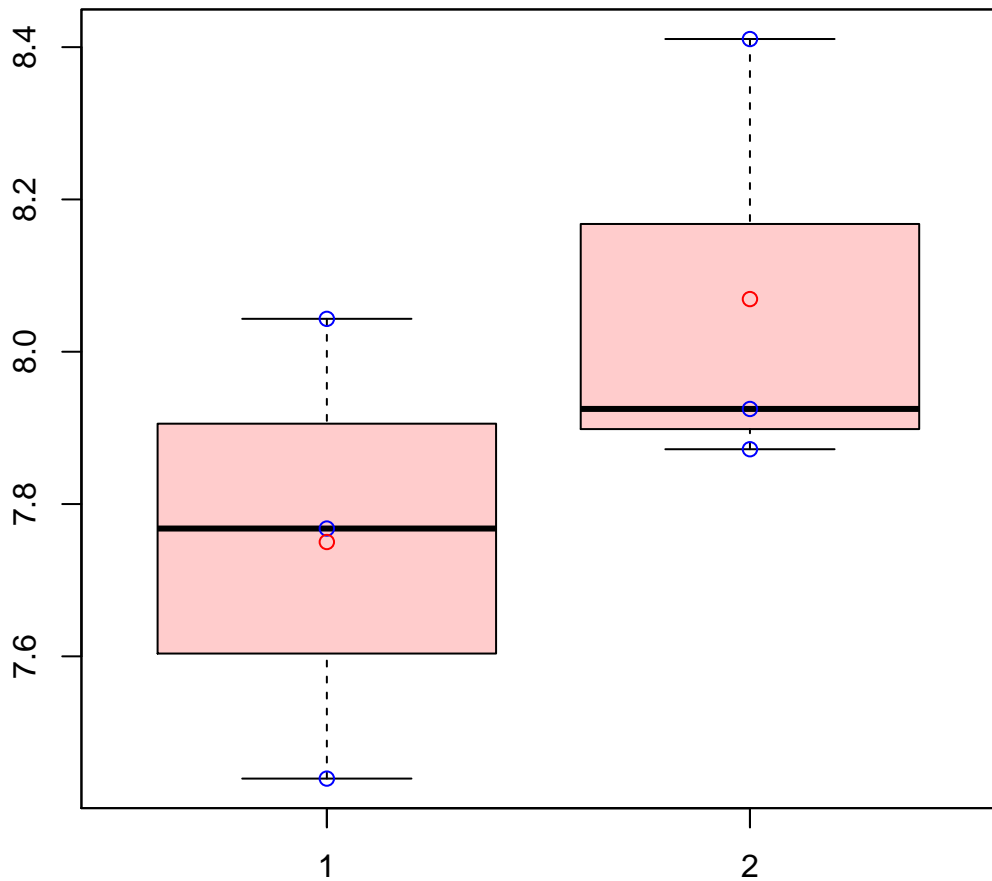

t-Test: p-value = 0.26

# I1HIL9|I1HIL9\_BRADI

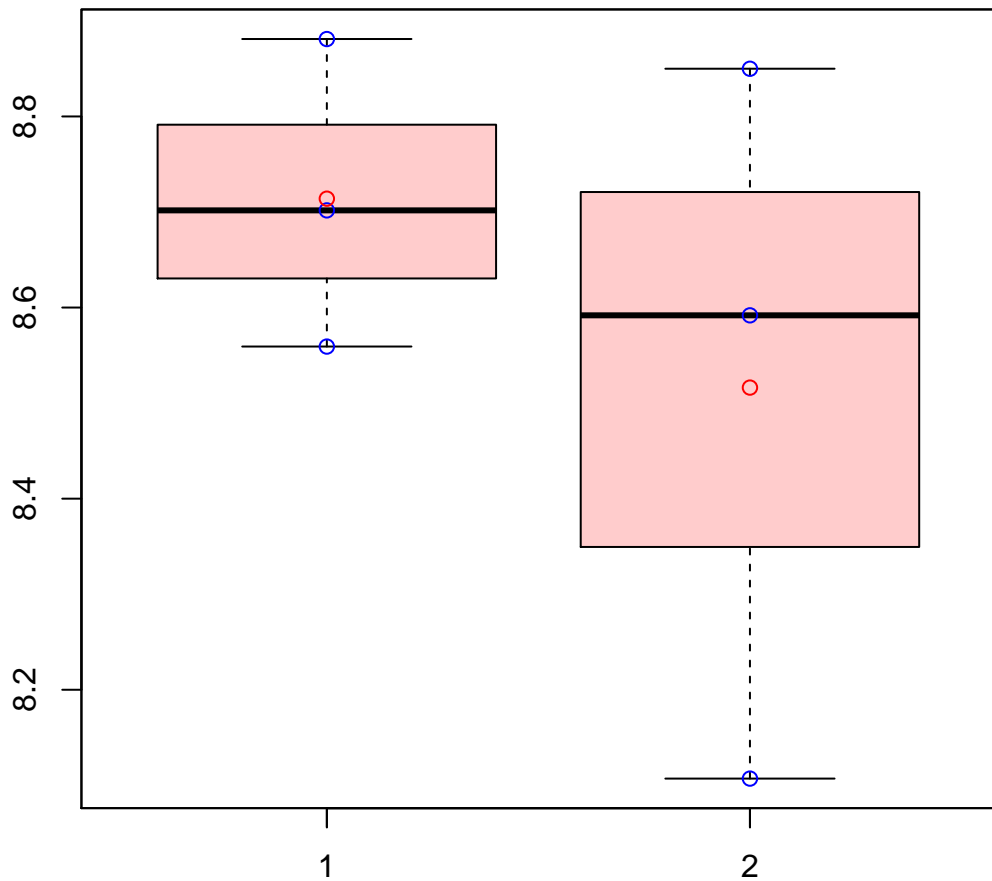

t-Test: p-value = 0.47

# I1HIS2|I1HIS2\_BRADI

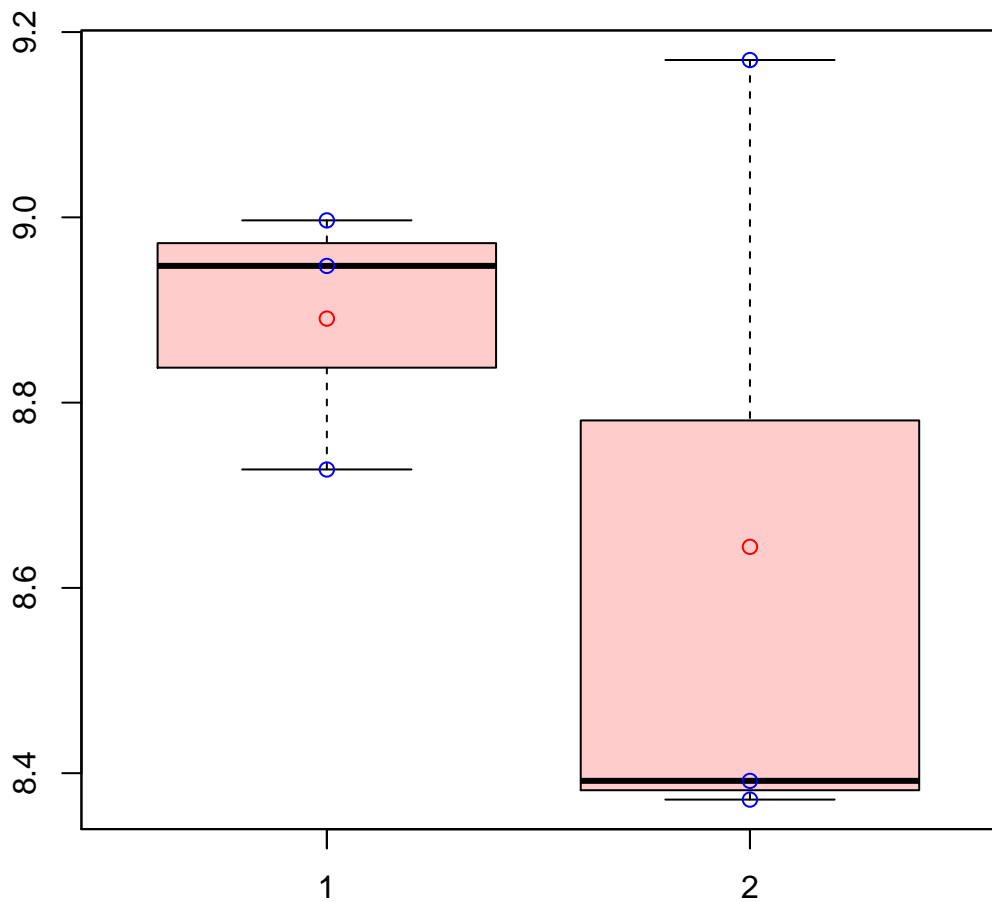

t-Test: p-value = 0.45

# I1HJ07|I1HJ07\_BRADI

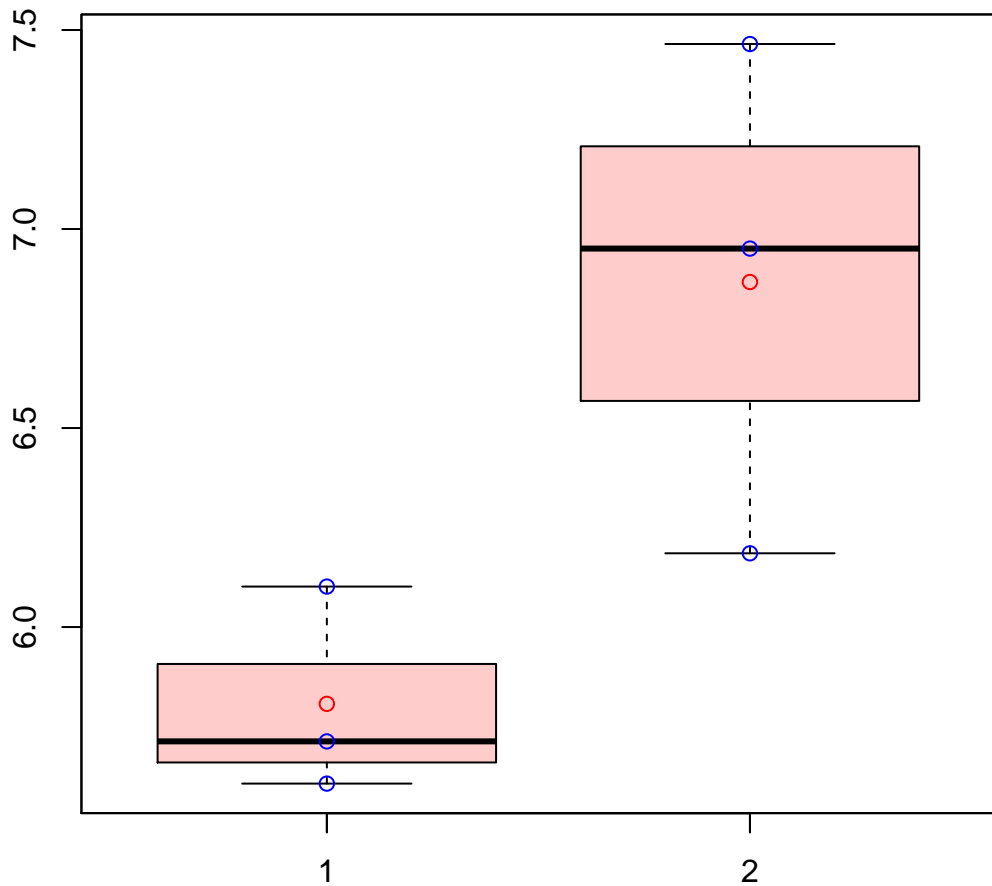

t-Test: p-value = 0.09

# I1HJJ6|I1HJJ6\_BRADI

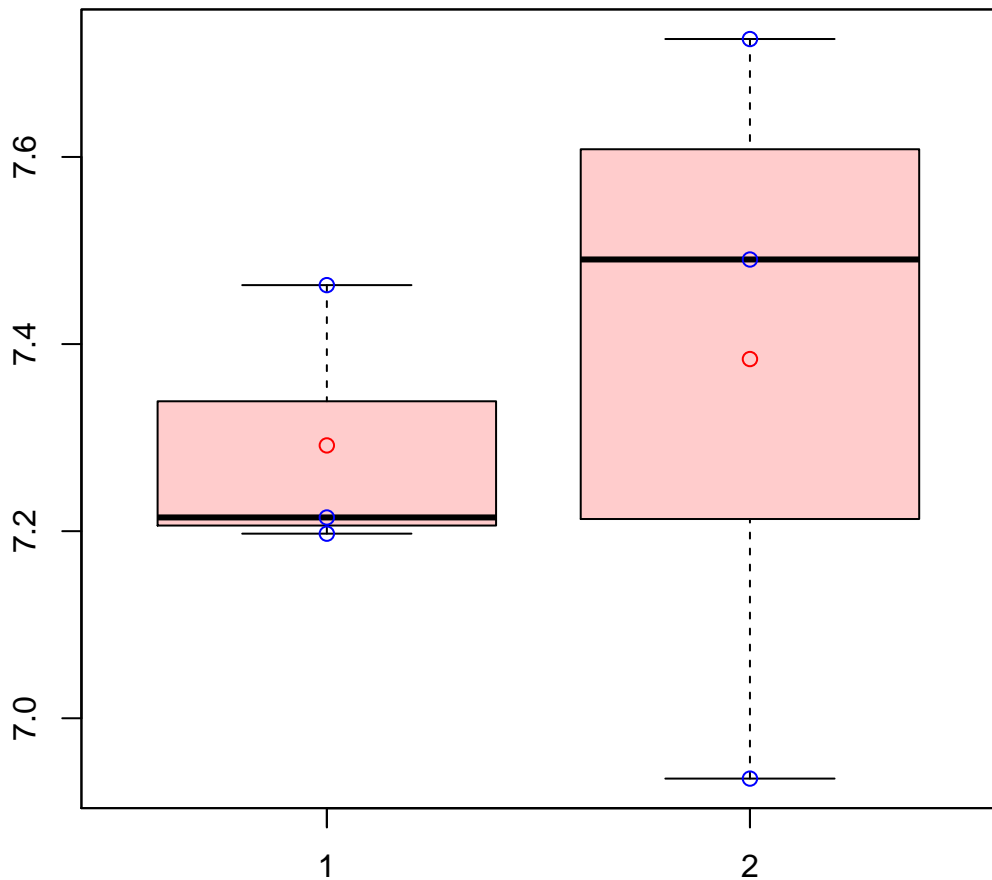

t-Test: p-value = 0.74

# I1HJR6|I1HJR6\_BRADI

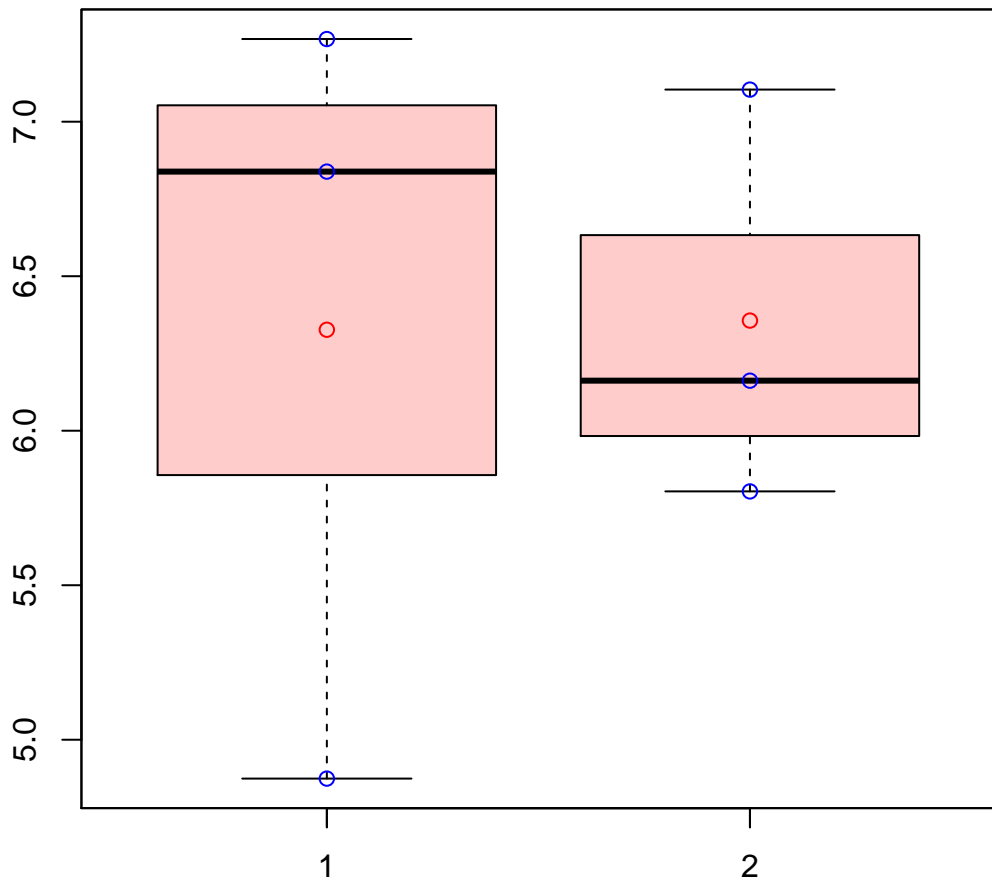

t-Test: p-value = 0.97

# I1HJW7|I1HJW7\_BRADI

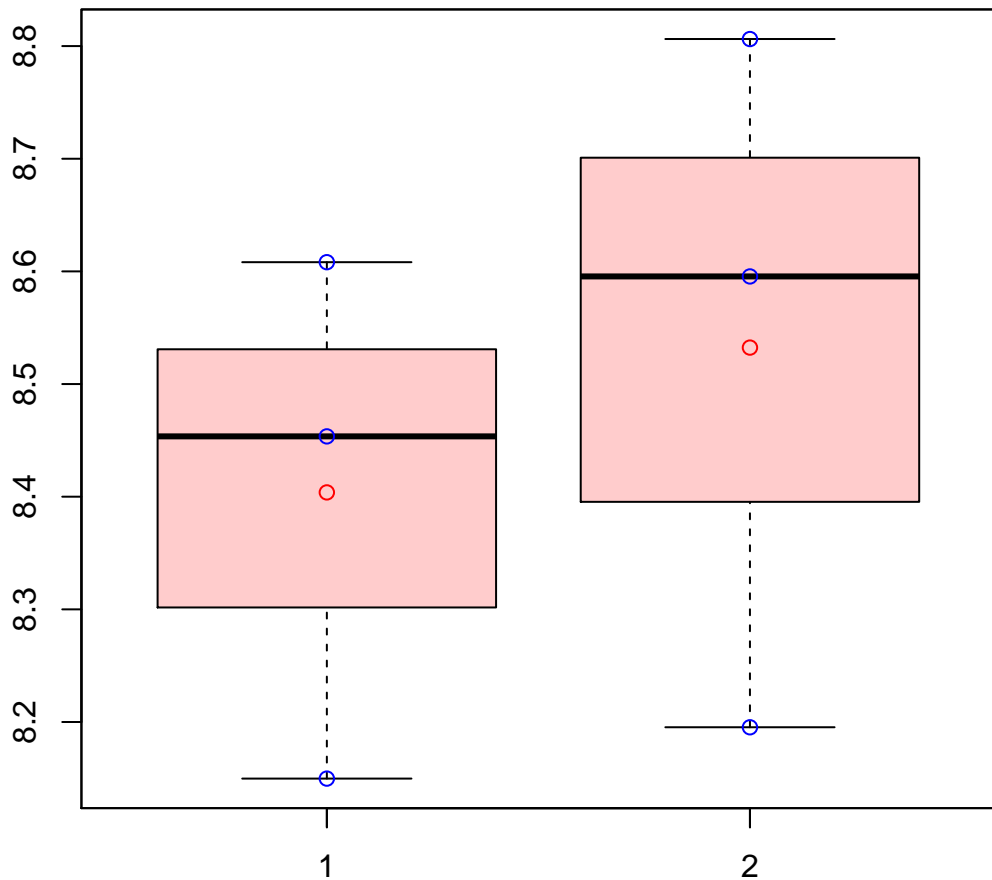

t-Test: p-value = 0.6

# I1HJY9|I1HJY9\_BRADI

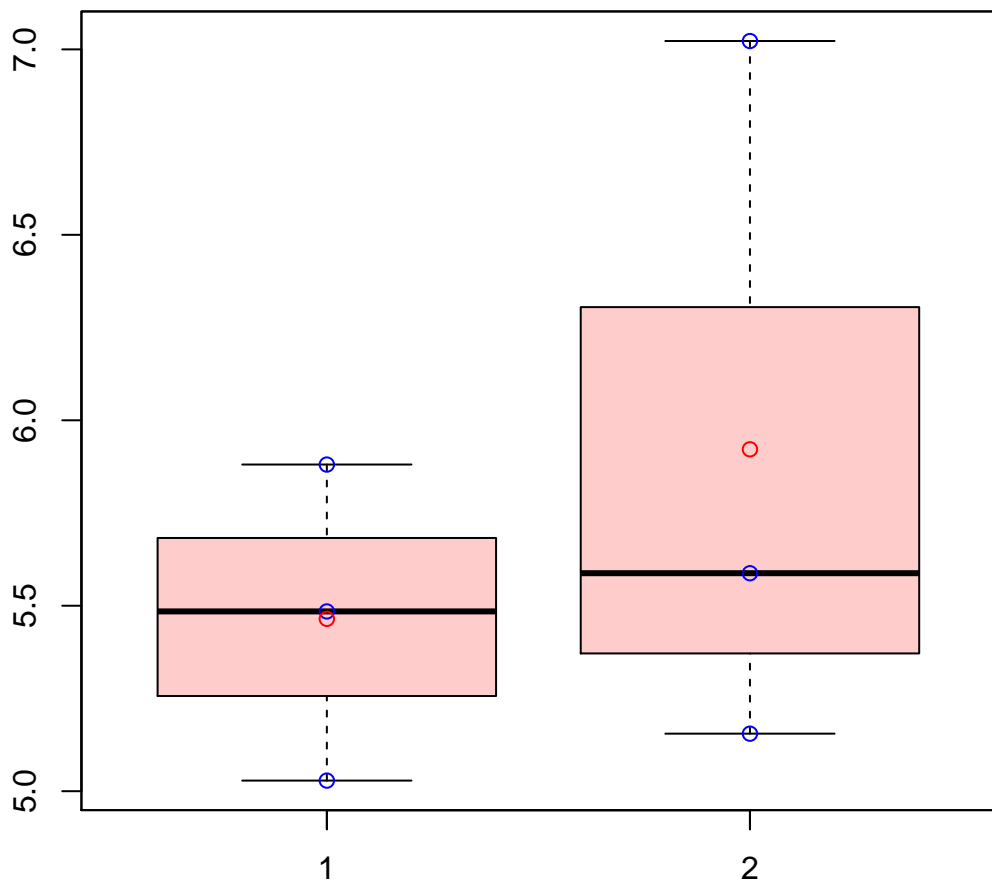

t-Test: p-value = 0.52



# I1HKI2|I1HKI2\_BRADI

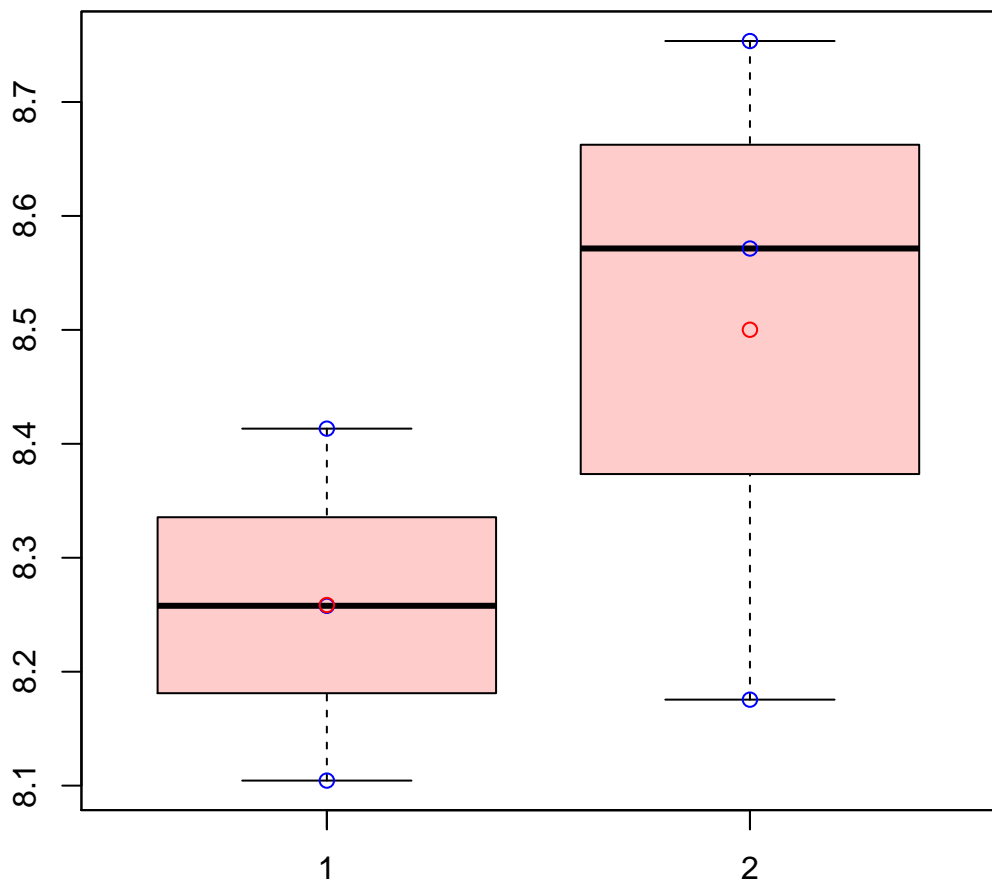

t-Test: p-value = 0.3

# I1HKJ4|I1HKJ4\_BRADI

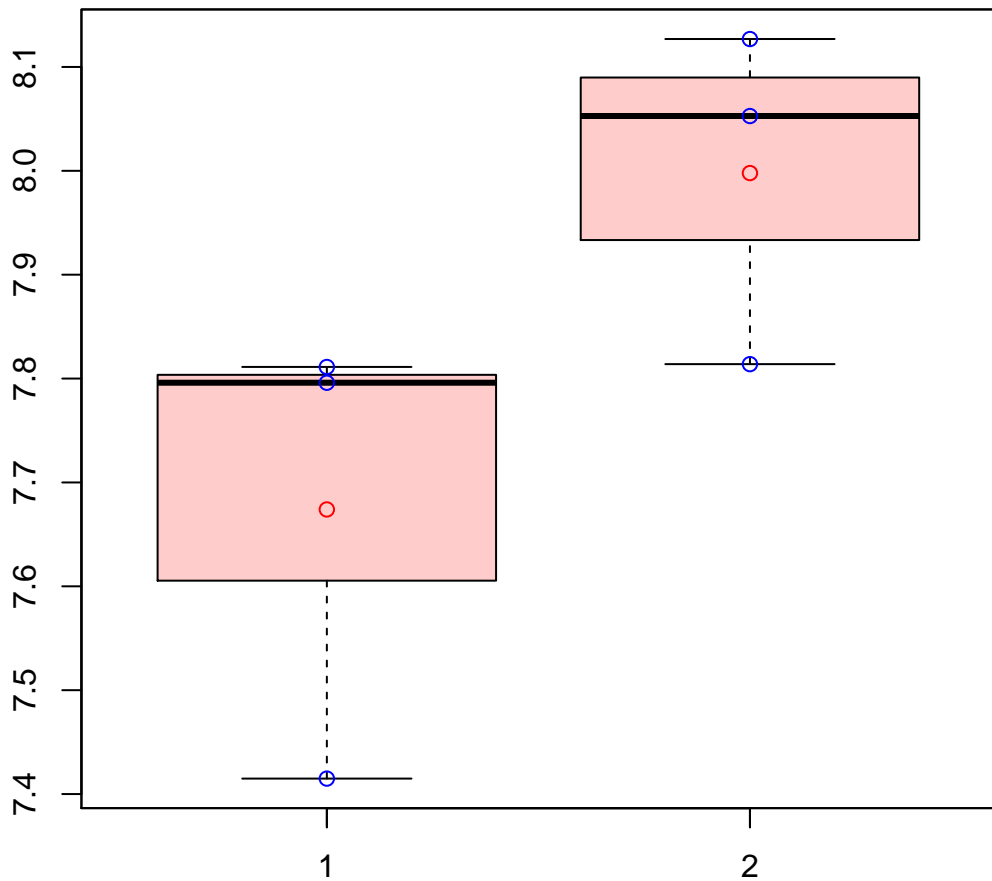

t-Test: p-value = 0.12

# I1HKJ9|I1HKJ9\_BRADI

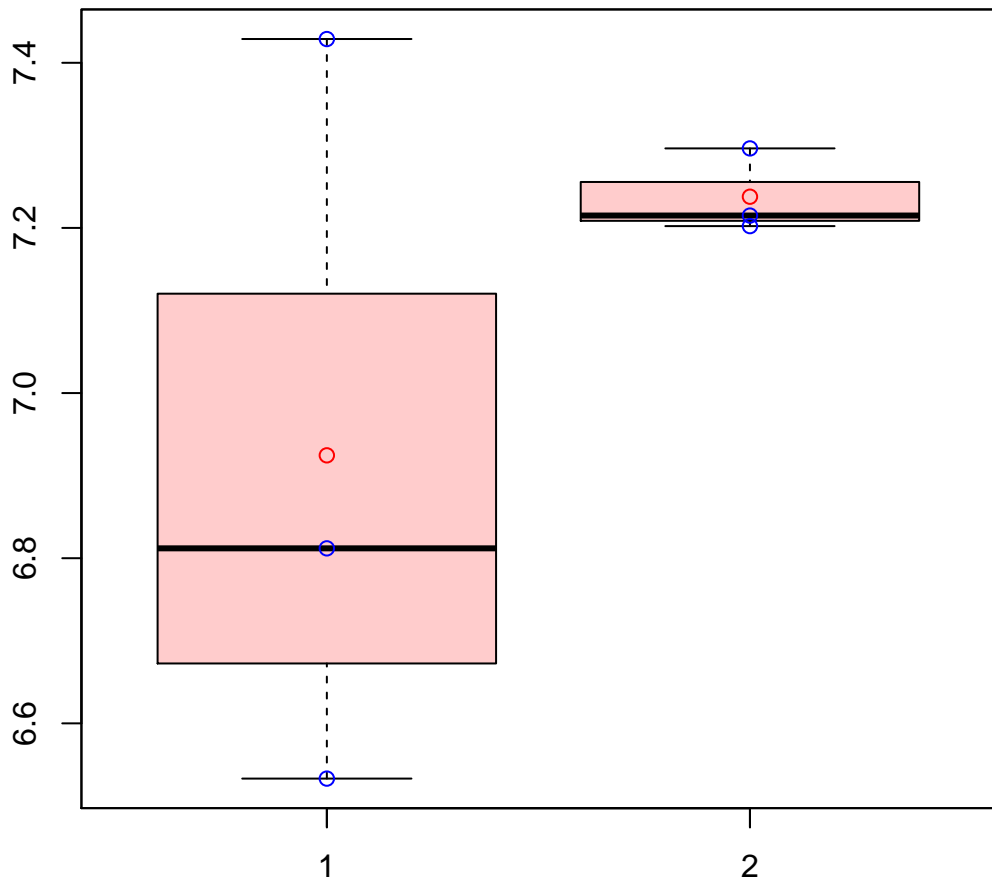

t-Test: p-value = 0.36

# I1HKT1|I1HKT1\_BRADI

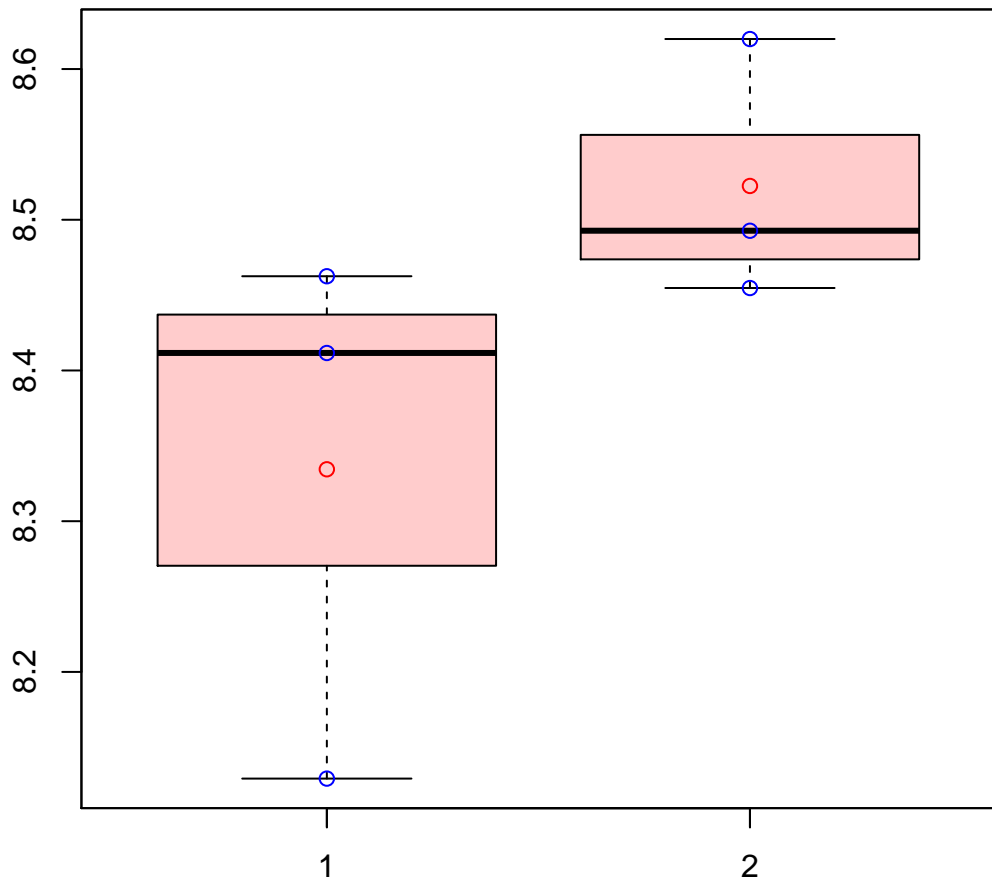

t-Test: p-value = 0.2

# I1HLM0|I1HLM0\_BRADI

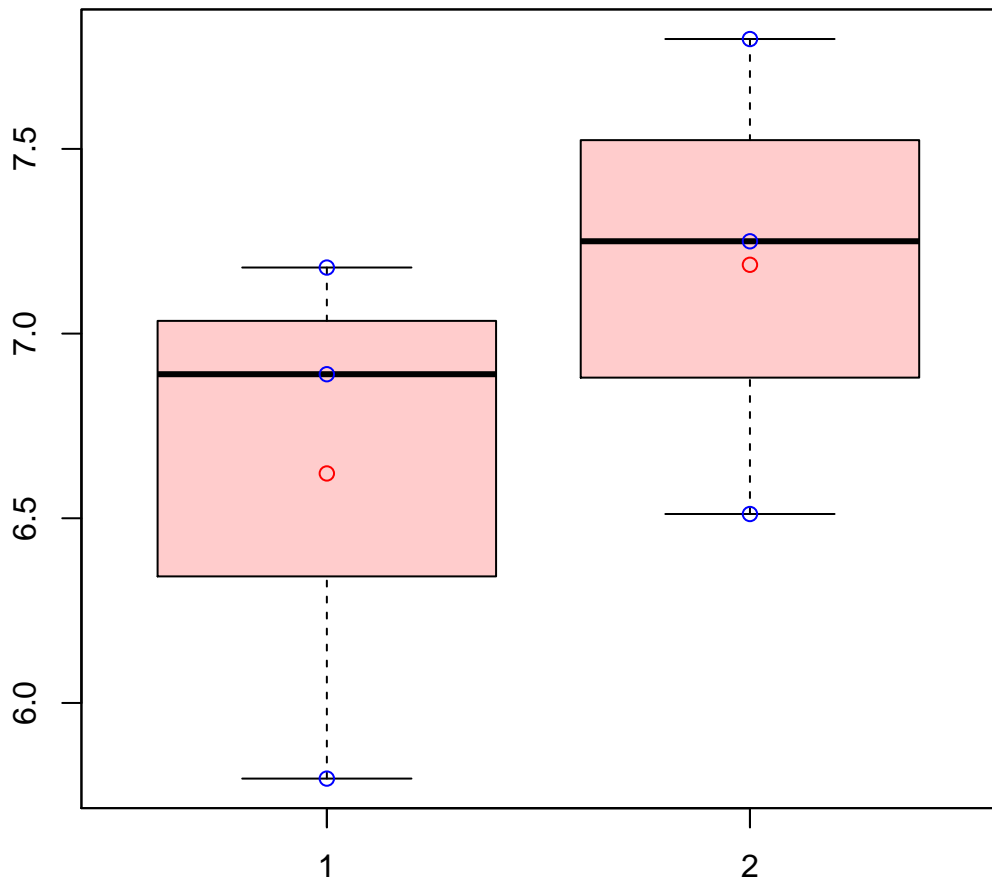

t-Test: p-value = 0.37

# I1HM78|I1HM78\_BRADI

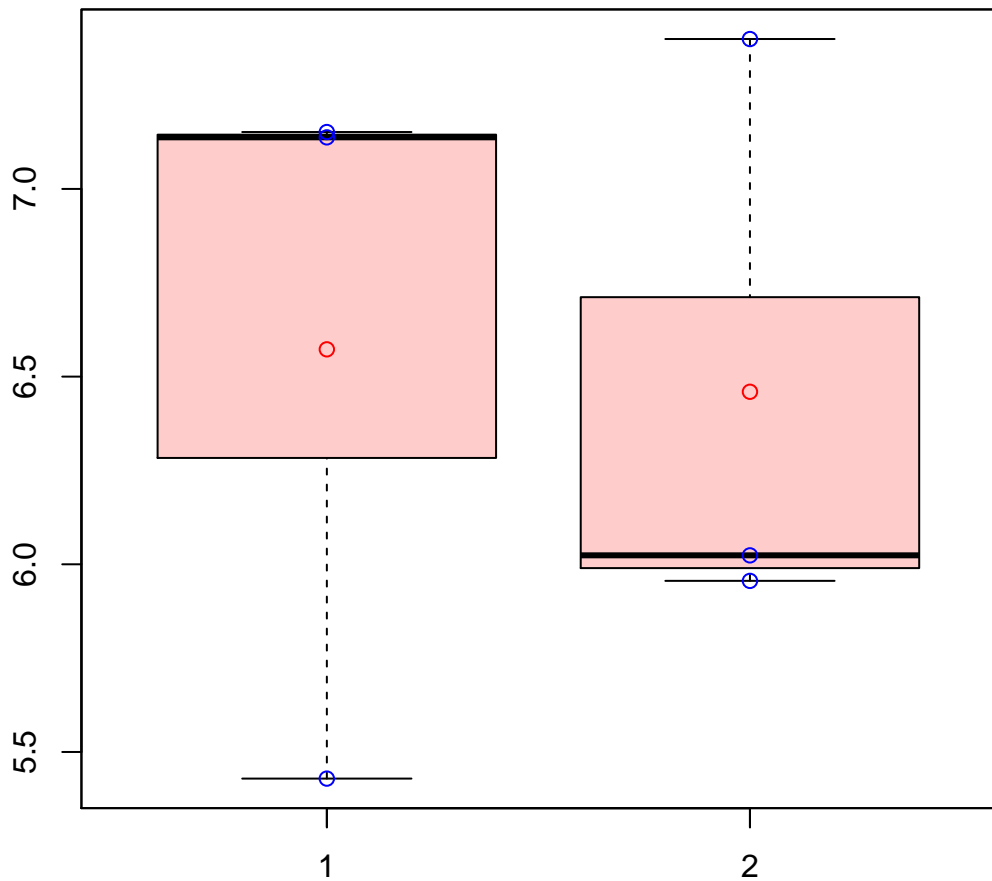

t-Test: p-value = 0.89

# I1HM81|I1HM81\_BRADI

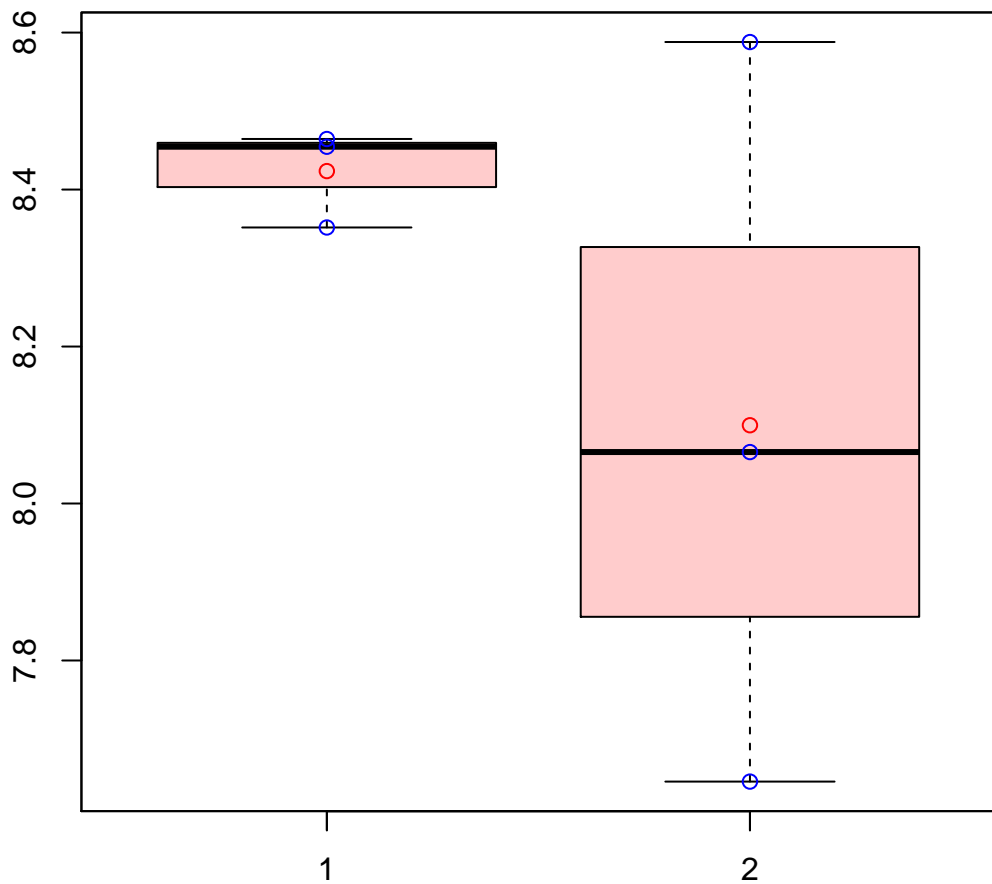

t-Test: p-value = 0.36

# I1HMD4|I1HMD4\_BRADI

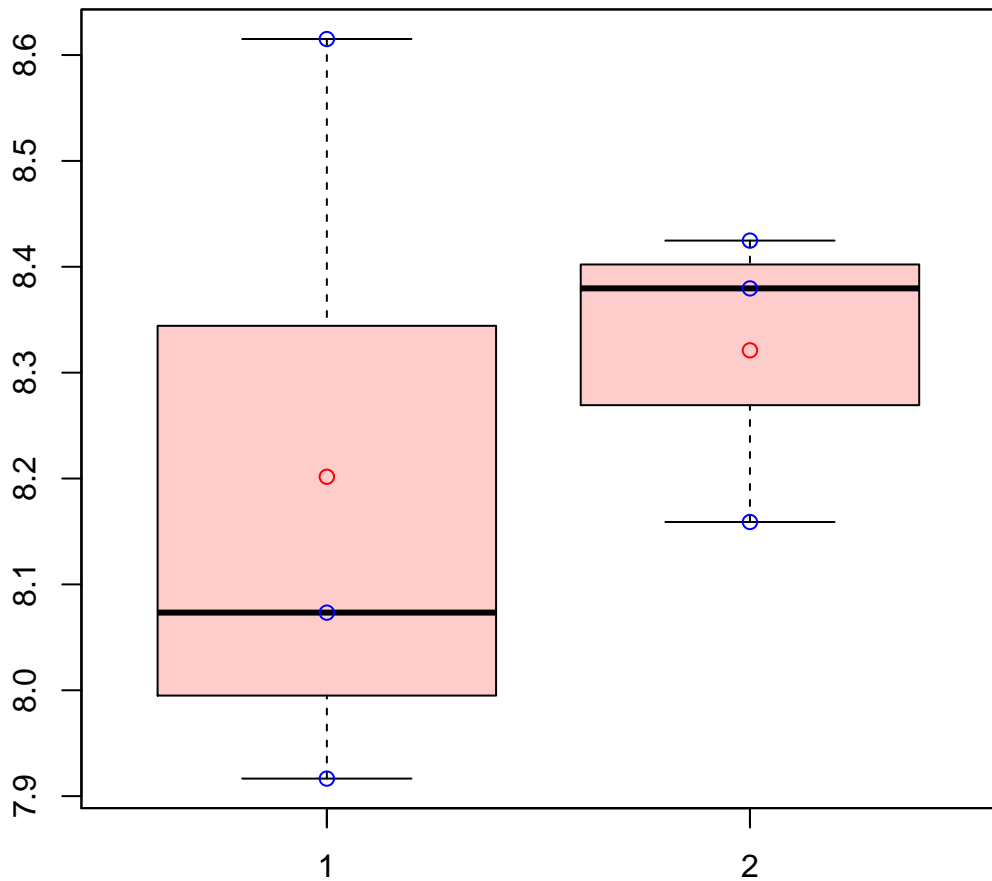

t-Test: p-value = 0.64



# I1HMD7|I1HMD7\_BRADI

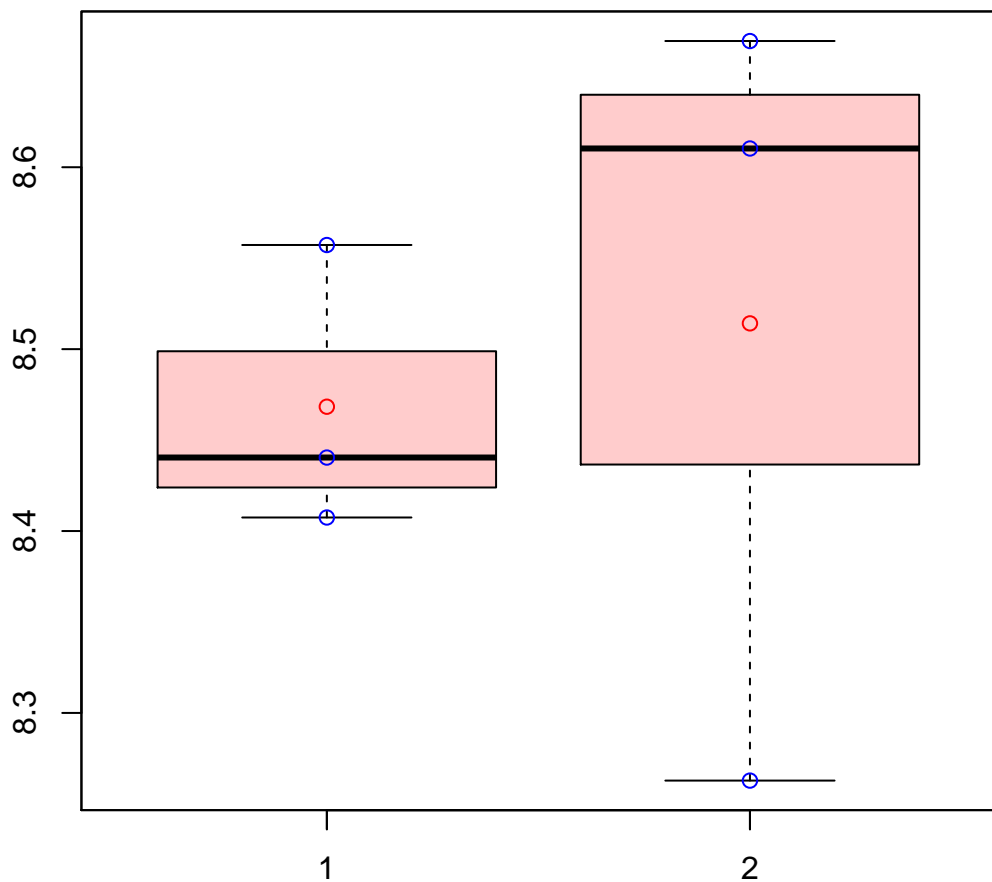

t-Test: p-value = 0.76

# I1HMN2|I1HMN2\_BRADI

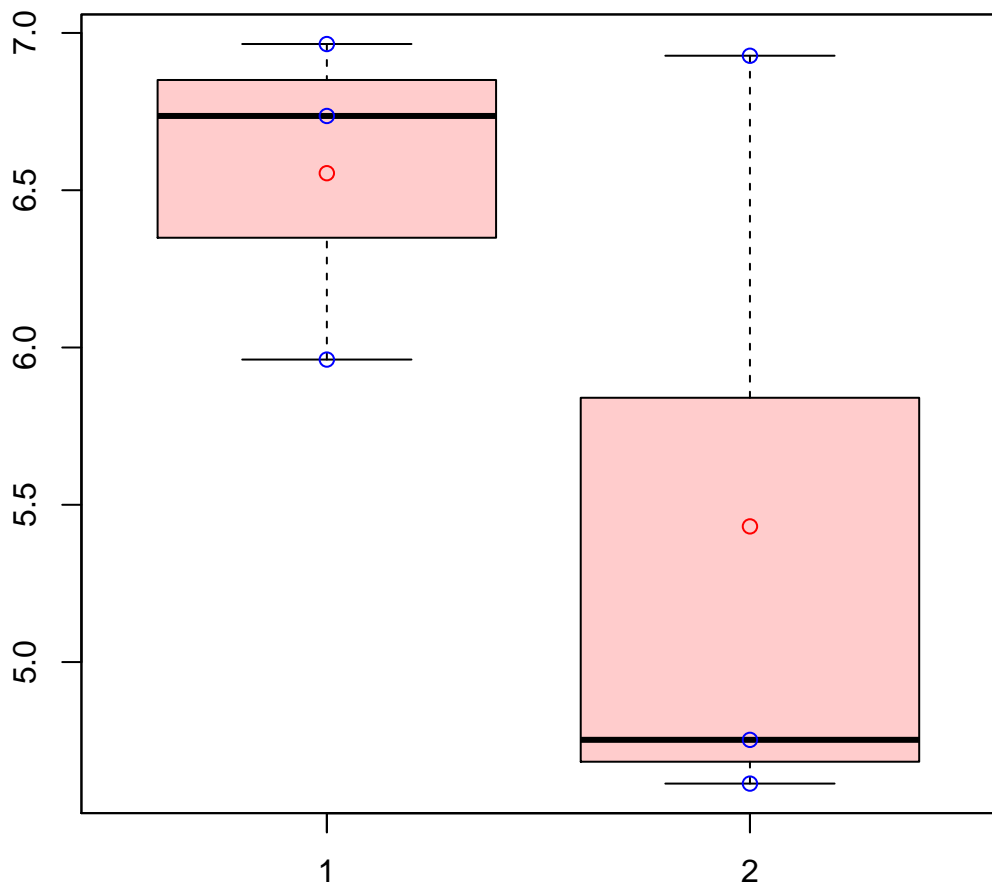

t-Test: p-value = 0.27

# I1HN82|I1HN82\_BRADI

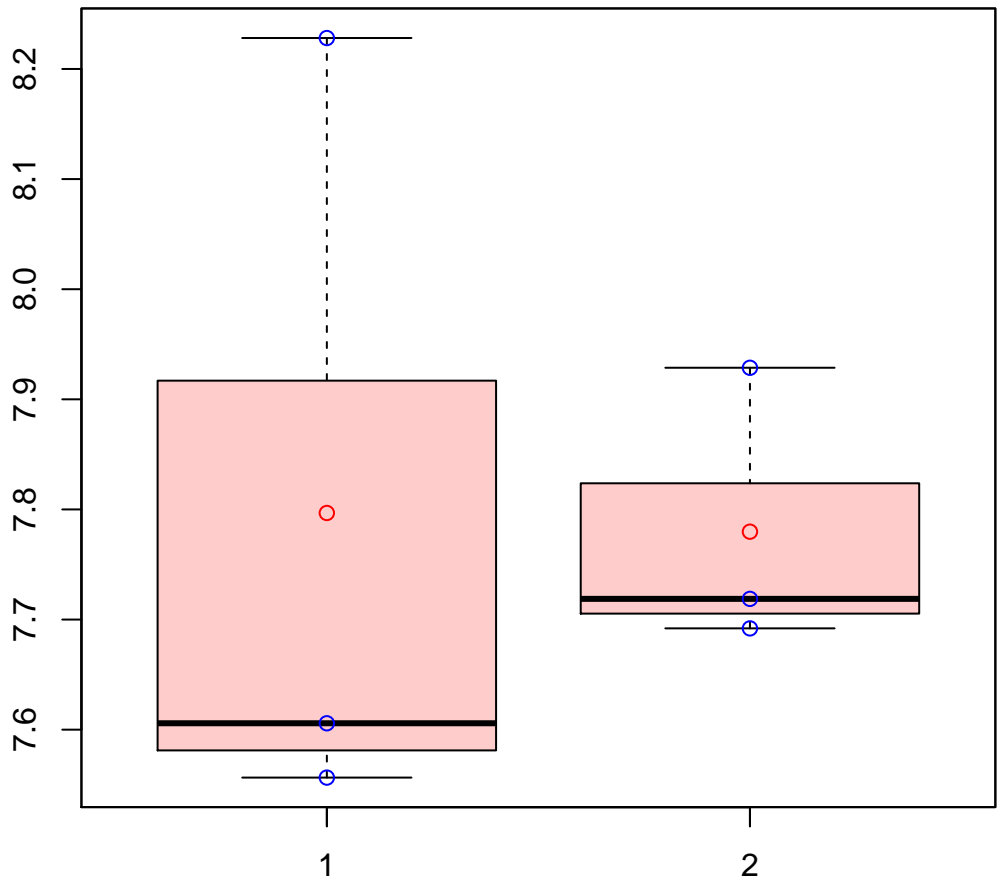

t-Test: p-value = 0.95

# I1HNP7|I1HNP7\_BRADI

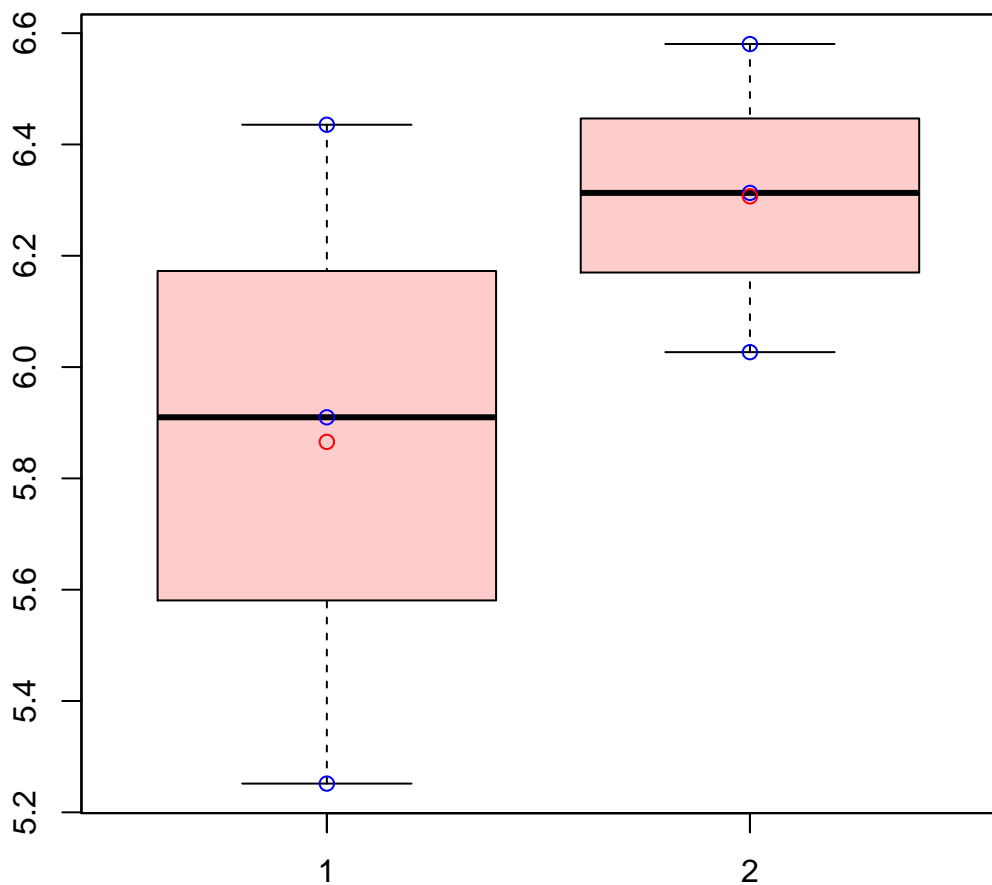

t-Test: p-value = 0.33

# I1HNX6|I1HNX6\_BRADI

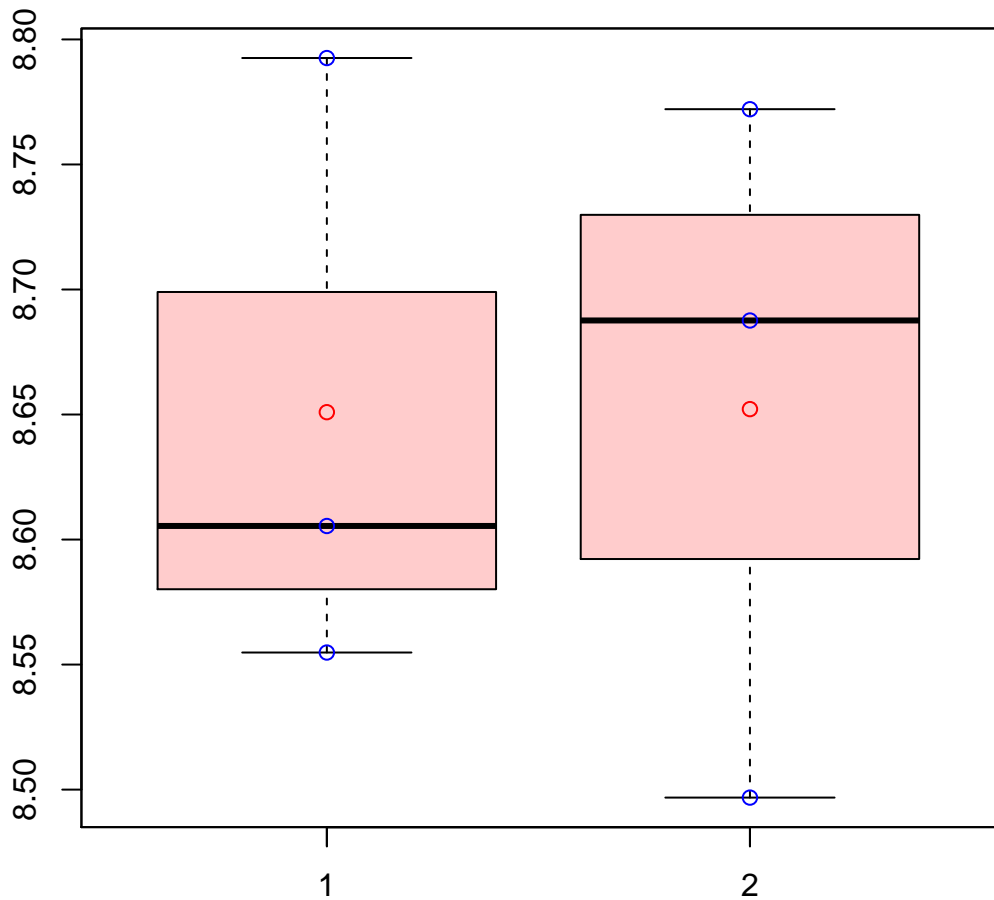

t-Test: p-value = 0.99

# I1HP17|I1HP17\_BRADI

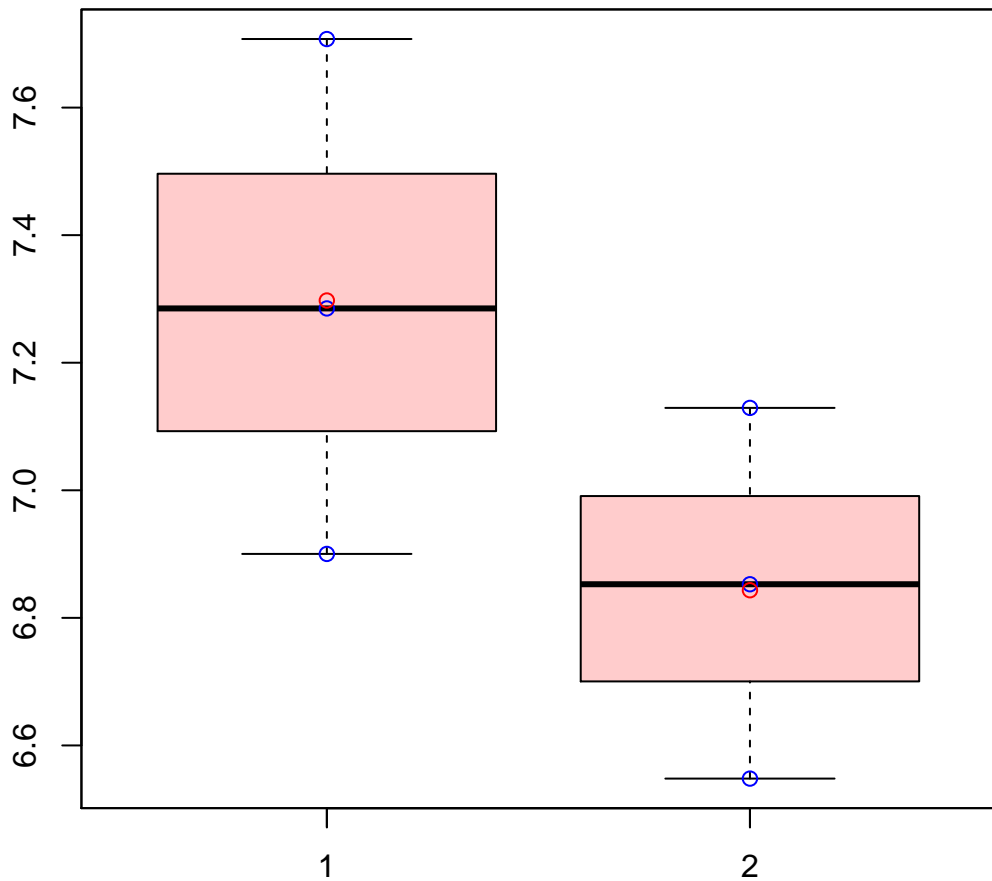

t-Test: p-value = 0.2

# I1HPT3|I1HPT3\_BRADI

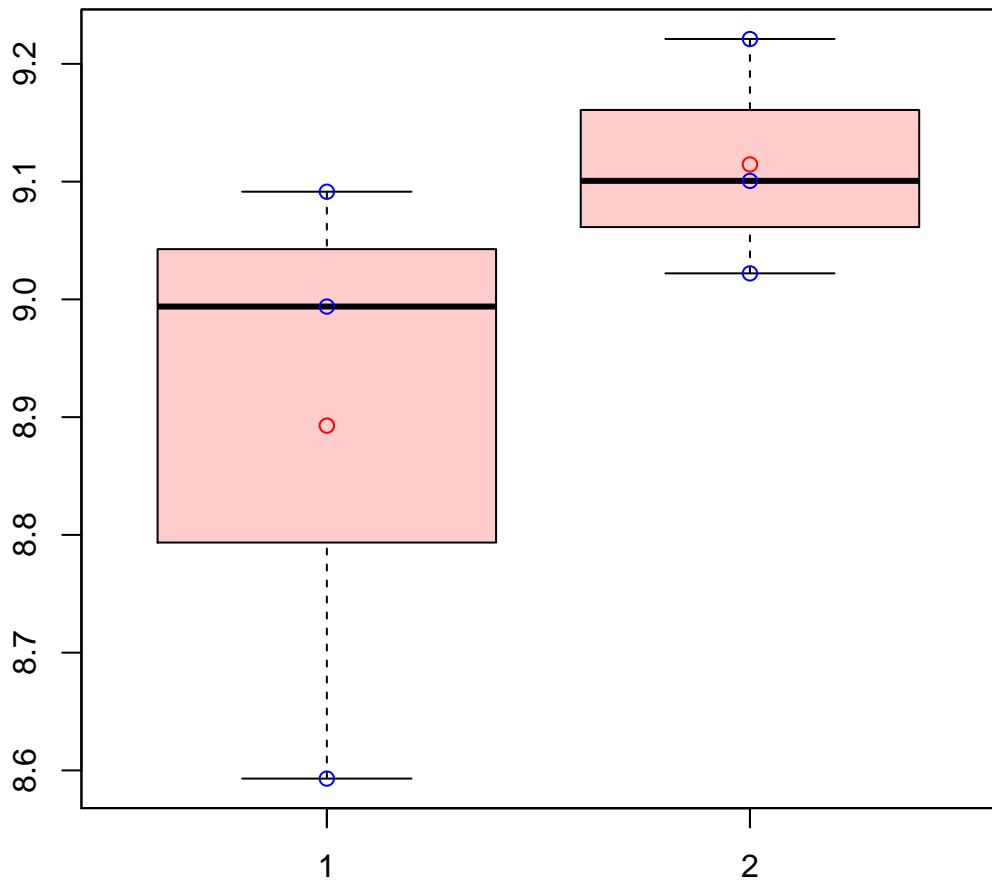

t-Test: p-value = 0.28

# I1HPZ3|I1HPZ3\_BRADI

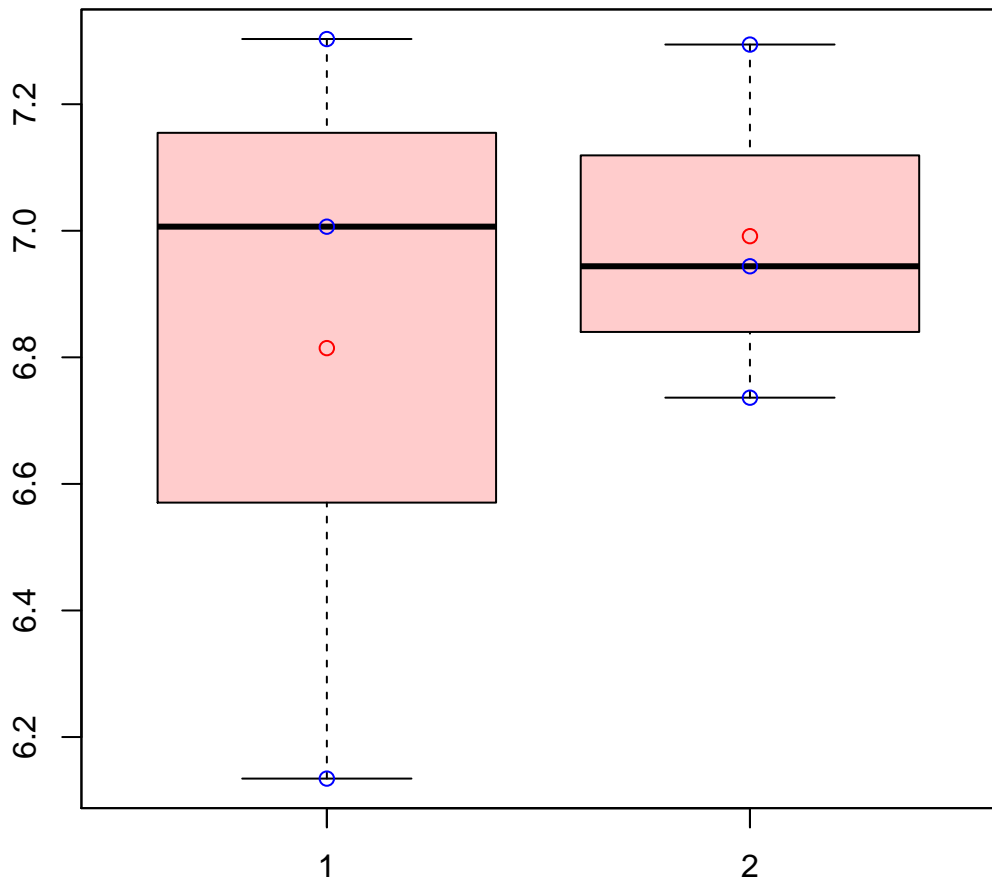

t-Test: p-value = 0.68



# I1HPZ8|I1HPZ8\_BRADI

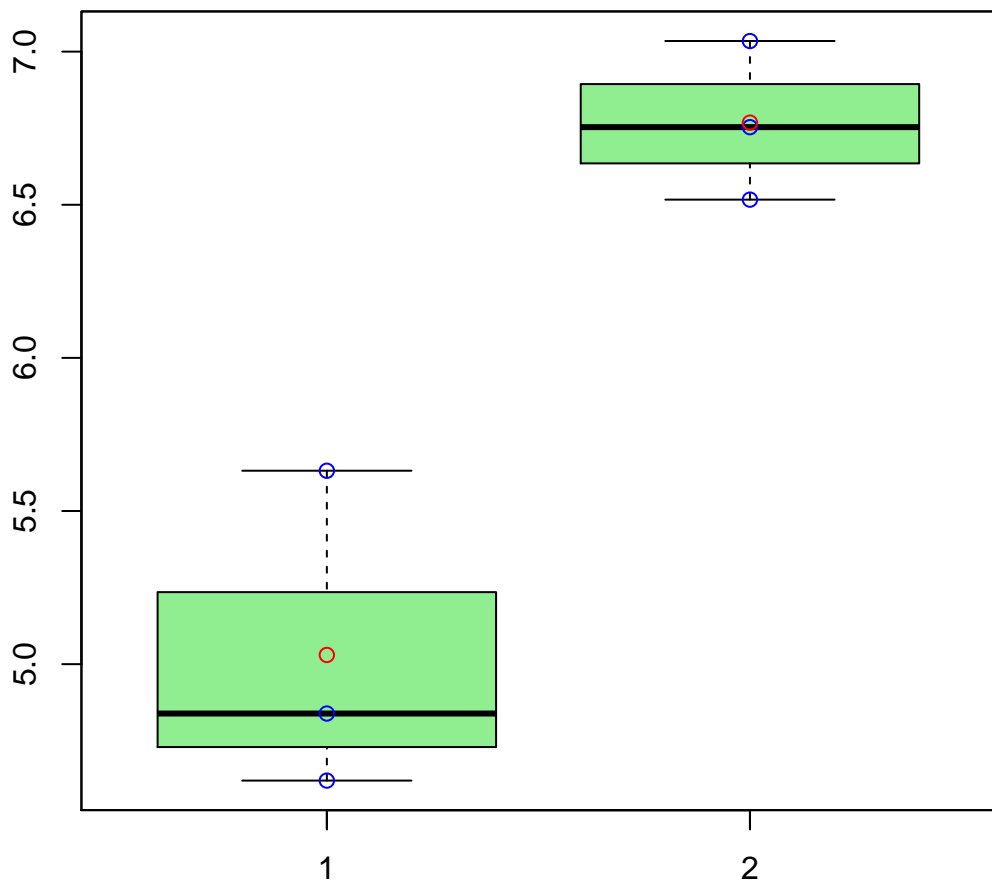

t-Test: p-value = 0.02

# I1HQI4|I1HQI4\_BRADI

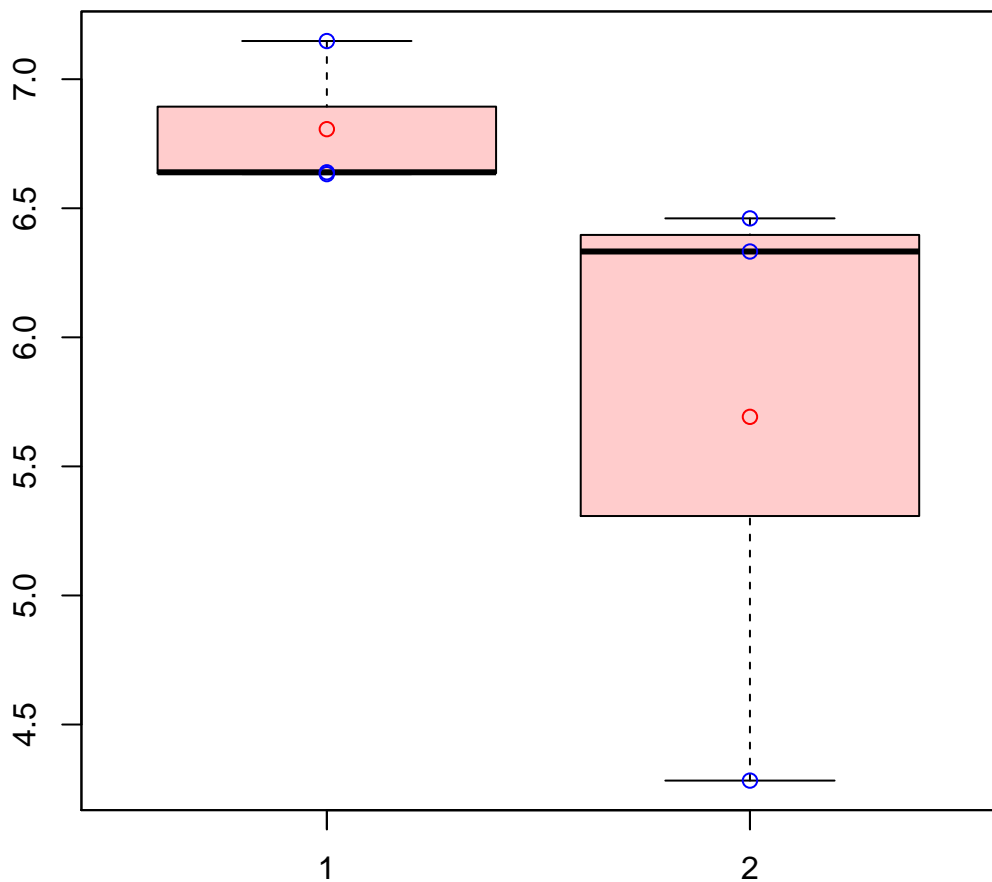

t-Test: p-value = 0.25

# I1HQV5|I1HQV5\_BRADI

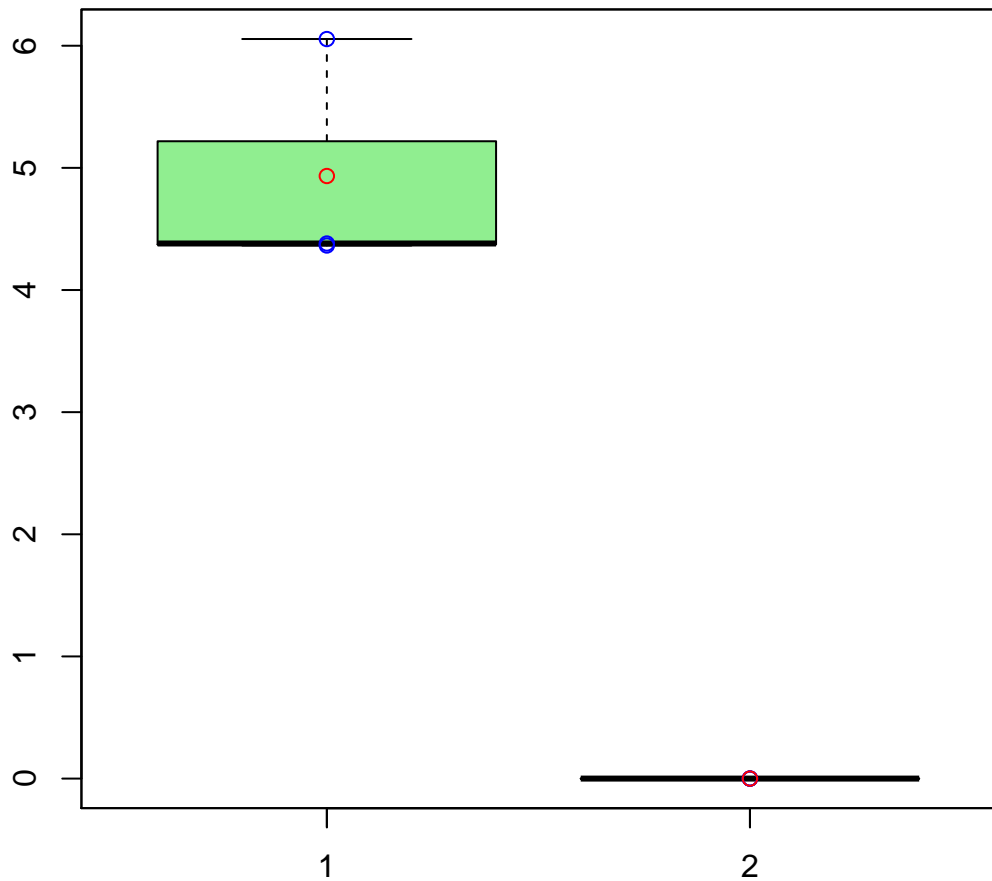

t-Test: p-value = 0.01

# I1HR90|I1HR90\_BRADI

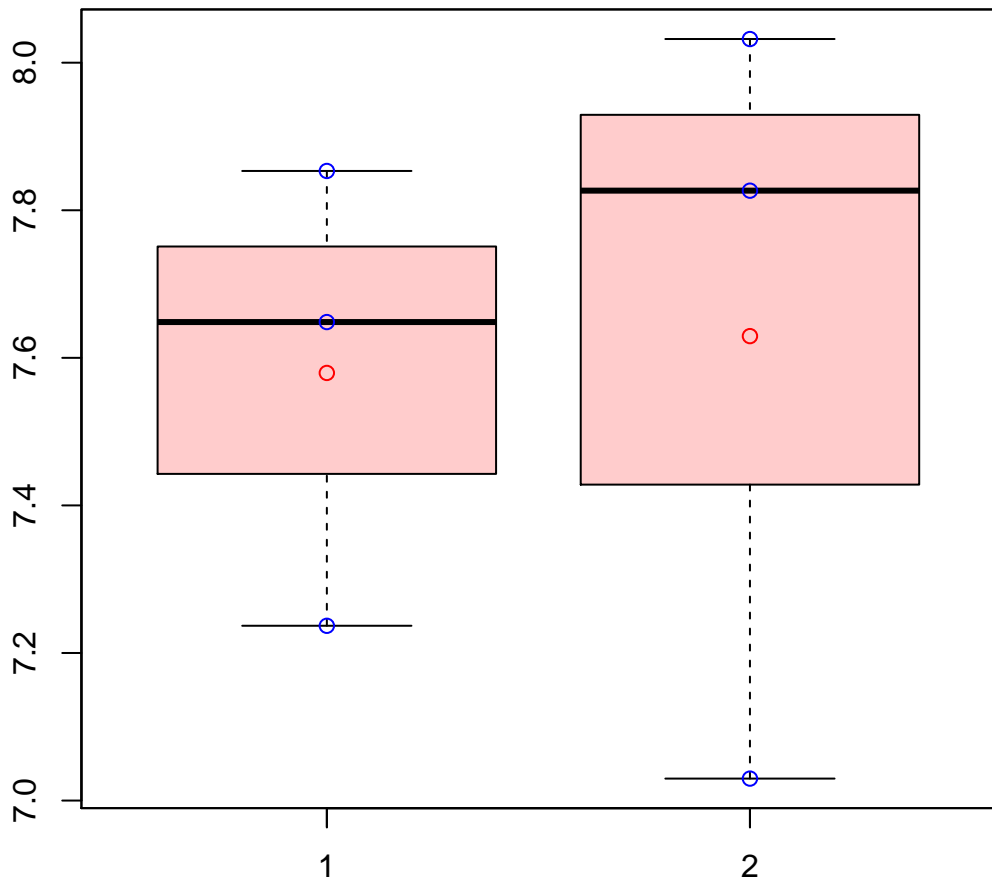

t-Test: p-value = 0.9

# I1HRJ6|I1HRJ6\_BRADI

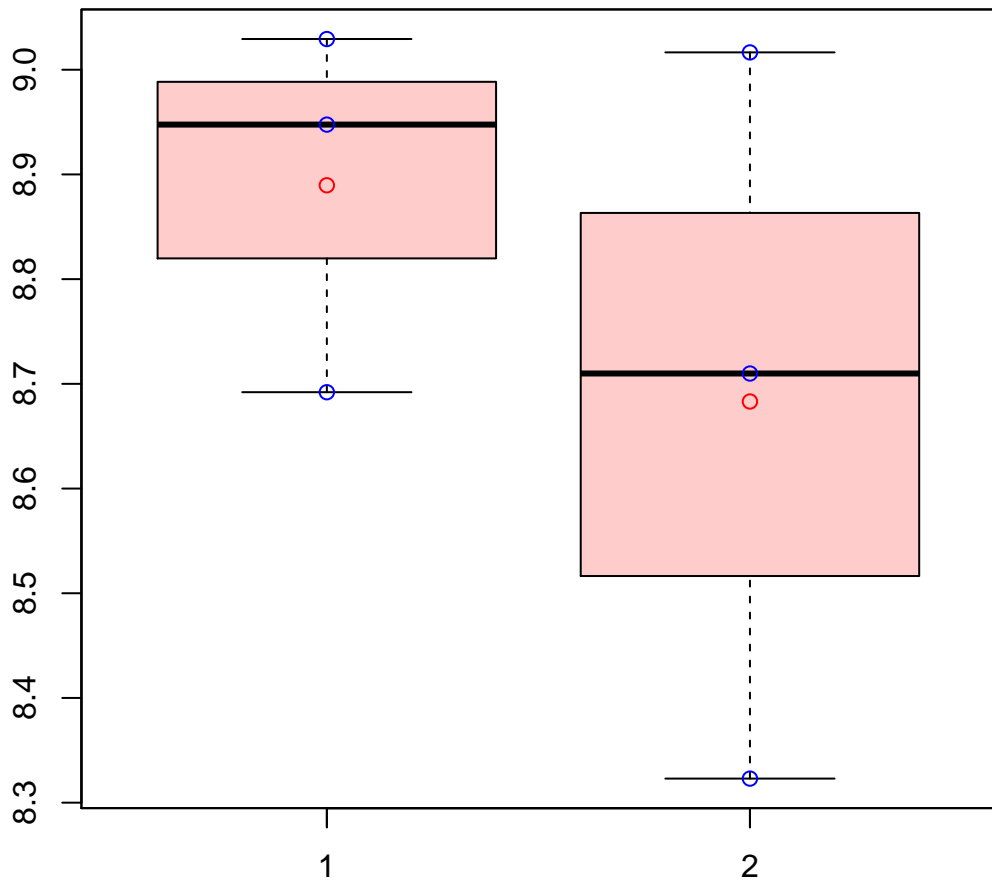

t-Test: p-value = 0.43

# I1HRR2|I1HRR2\_BRADI

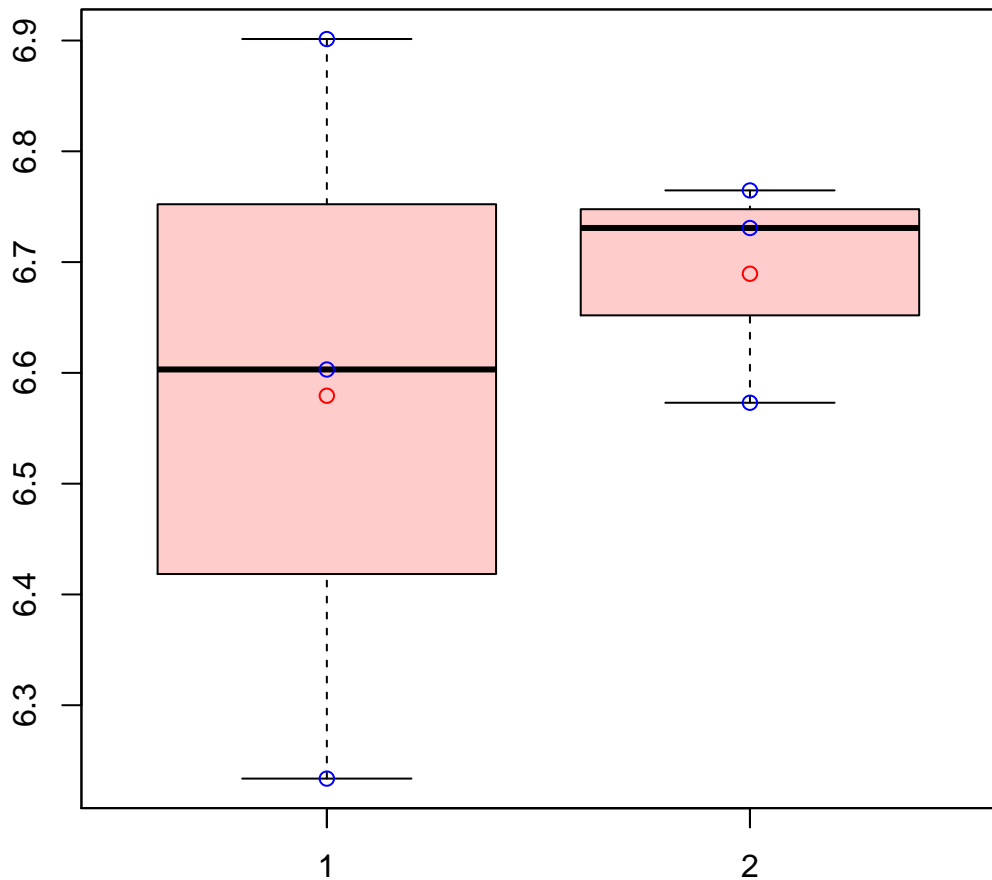

t-Test: p-value = 0.63

# I1HSL9|I1HSL9\_BRADI

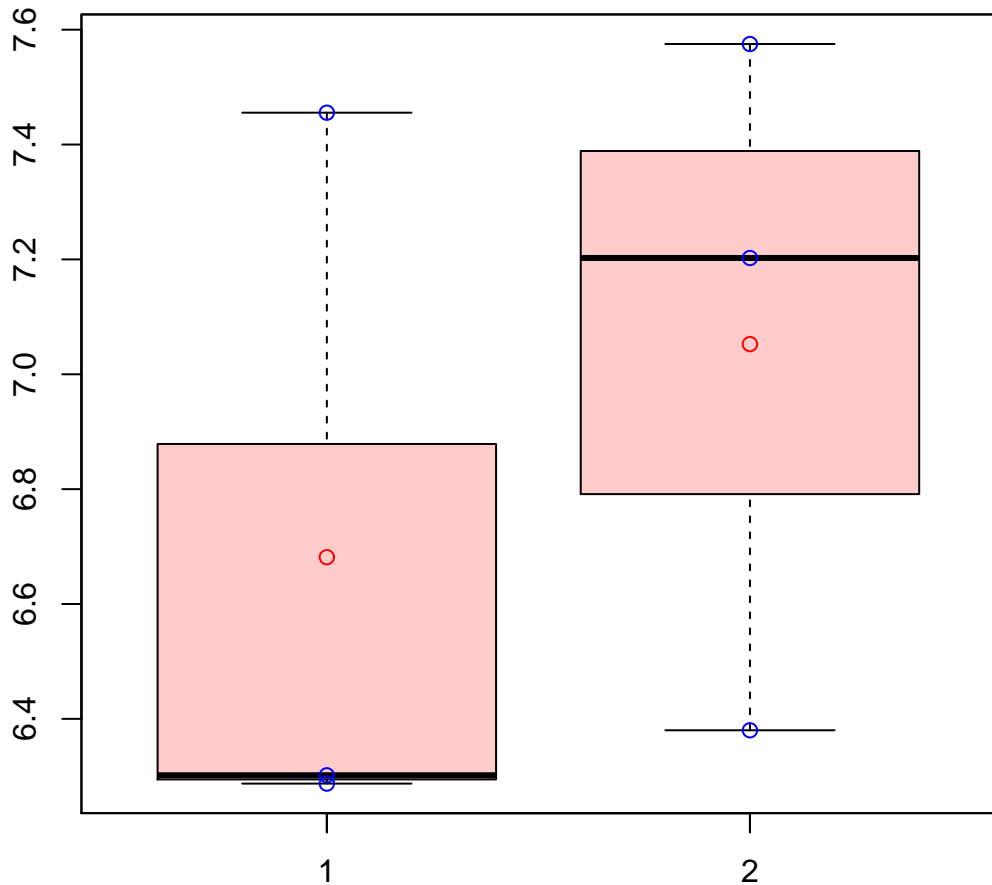

t-Test: p-value = 0.52

# I1HTF8|I1HTF8\_BRADI

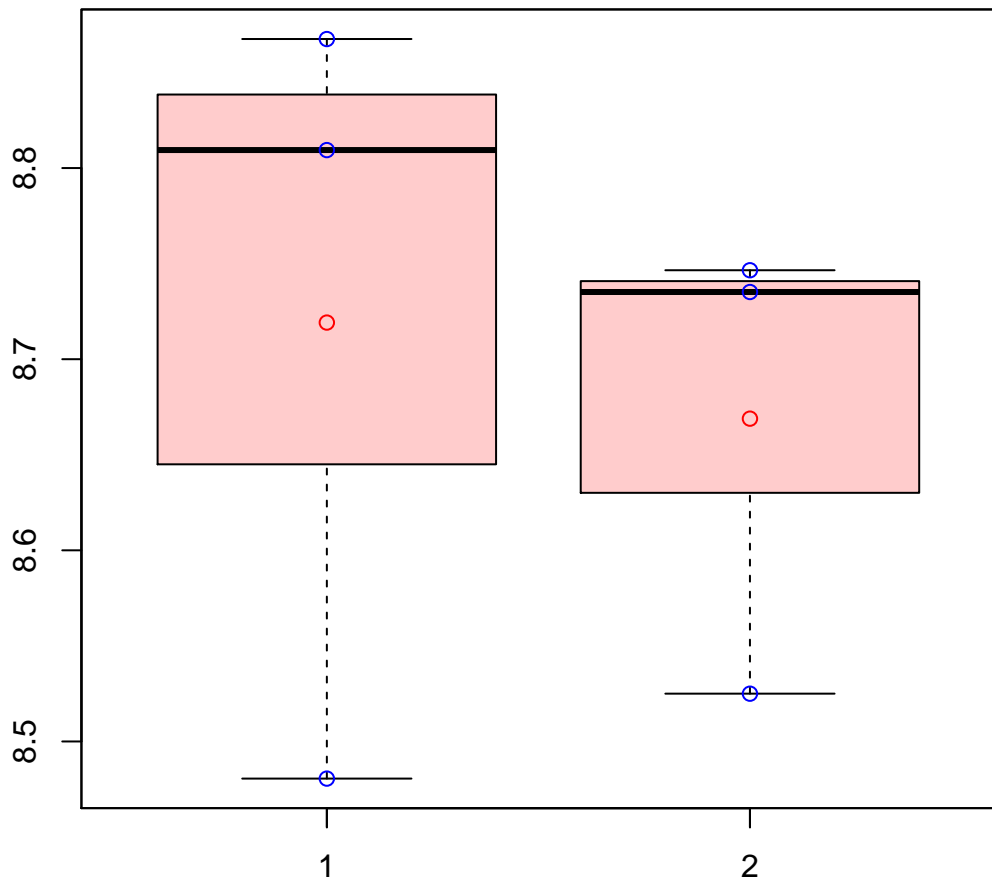

t-Test: p-value = 0.74



# I1HTG2|I1HTG2\_BRADI

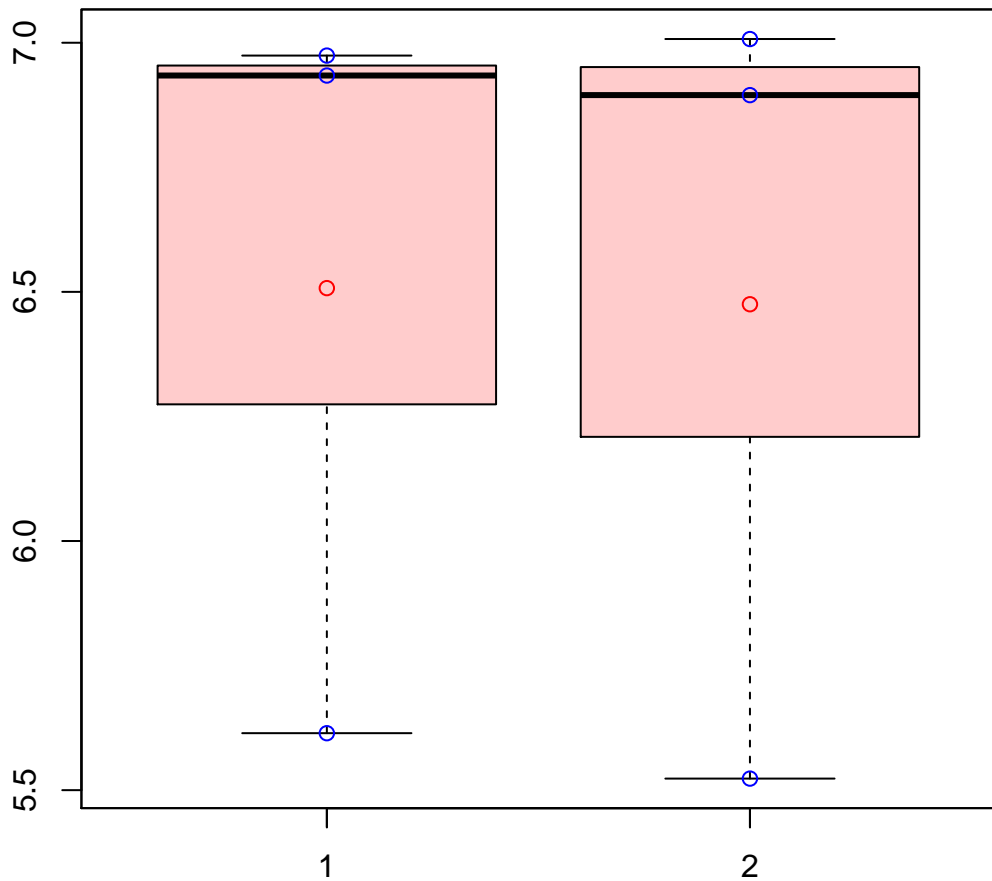

t-Test: p-value = 0.96

# I1HTQ8|I1HTQ8\_BRADI

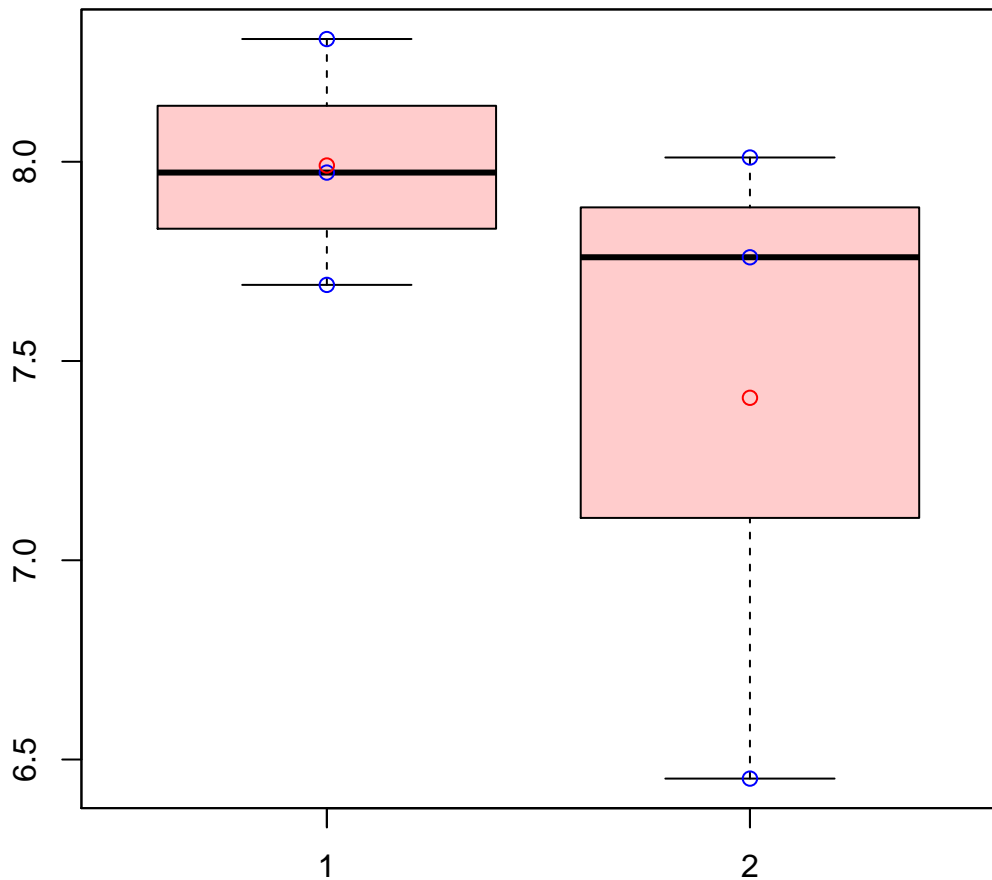

t-Test: p-value = 0.35

# I1HTT0|I1HTT0\_BRADI

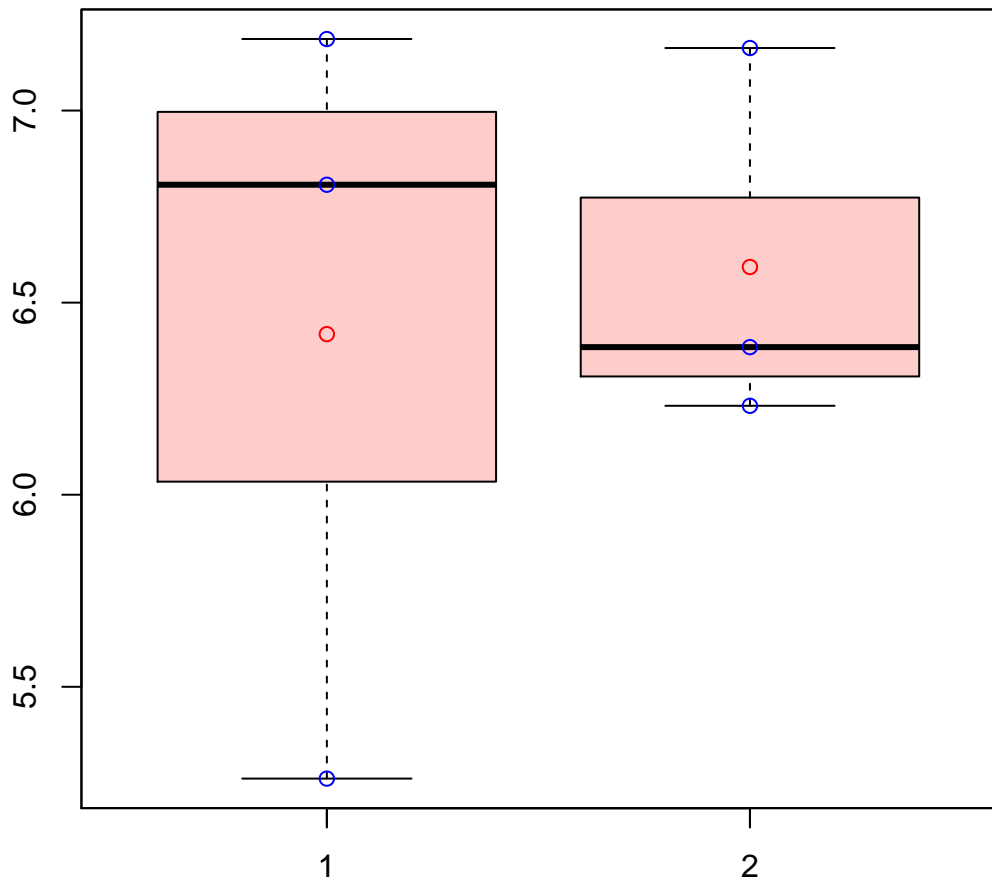

t-Test: p-value = 0.81

# I1HTW6|I1HTW6\_BRADI

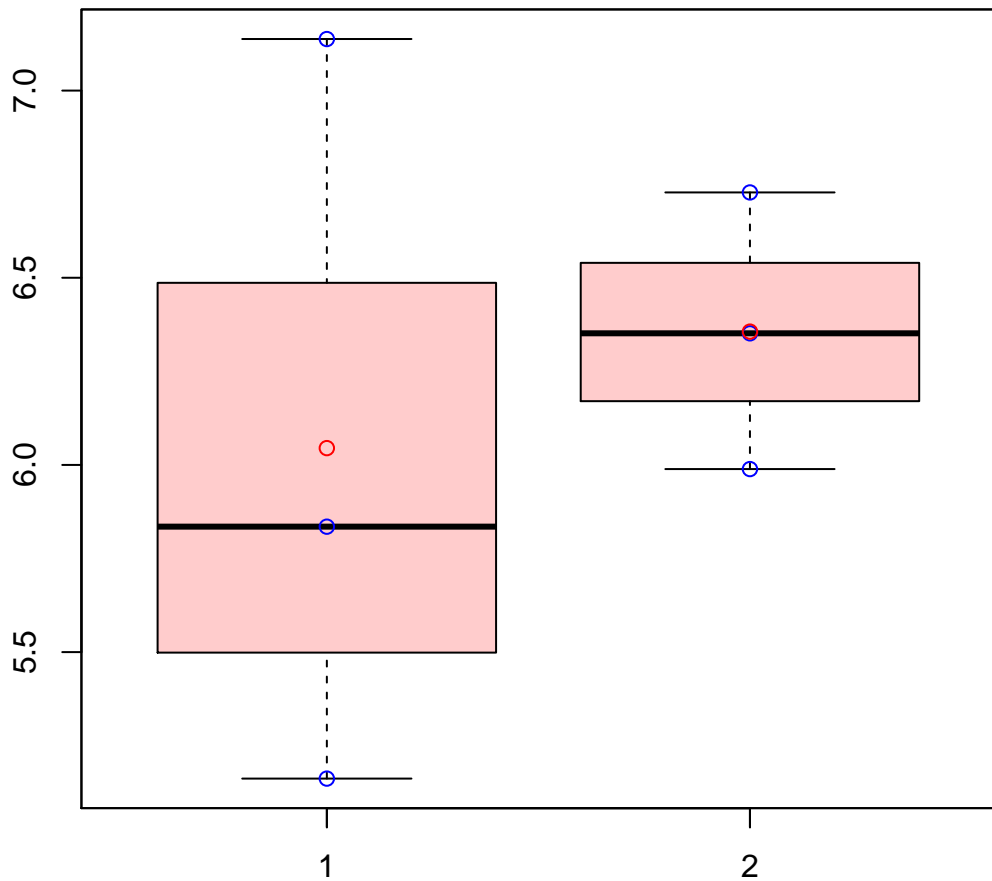

t-Test: p-value = 0.66

# I1HTZ7|I1HTZ7\_BRADI

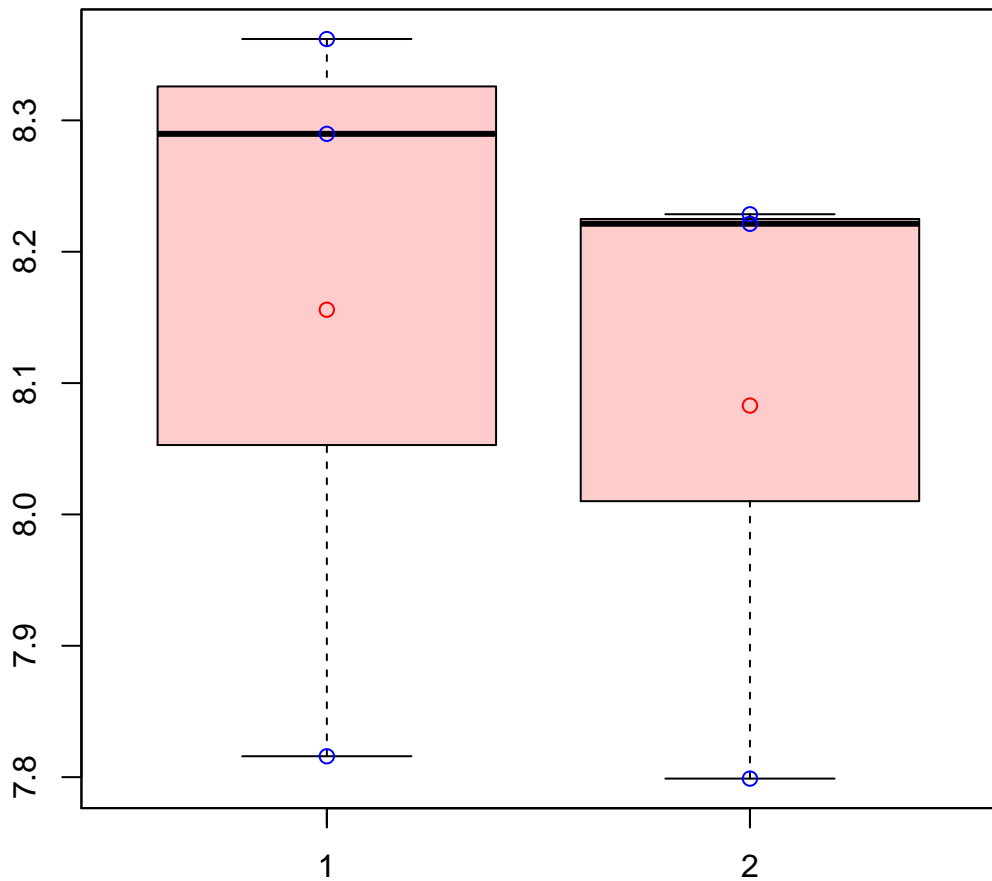

t-Test: p-value = 0.76

# I1HVC8|I1HVC8\_BRADI

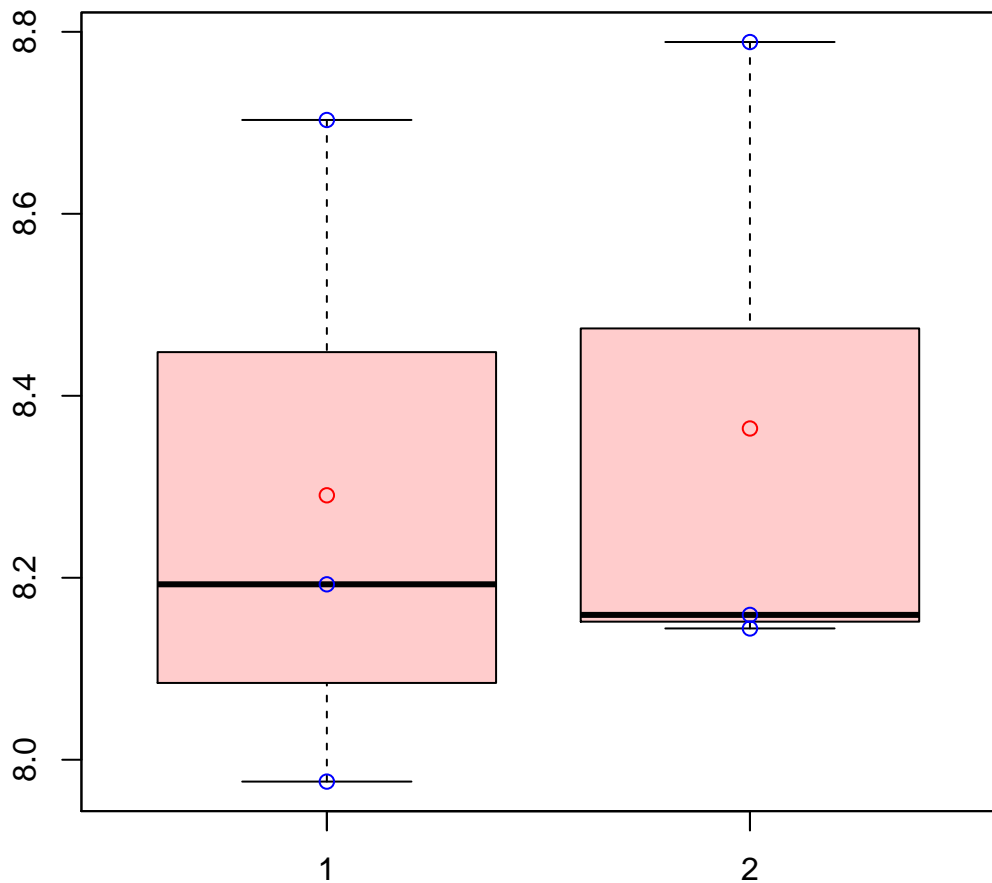

t-Test: p-value = 0.82

# I1HVV6|I1HVV6\_BRADI

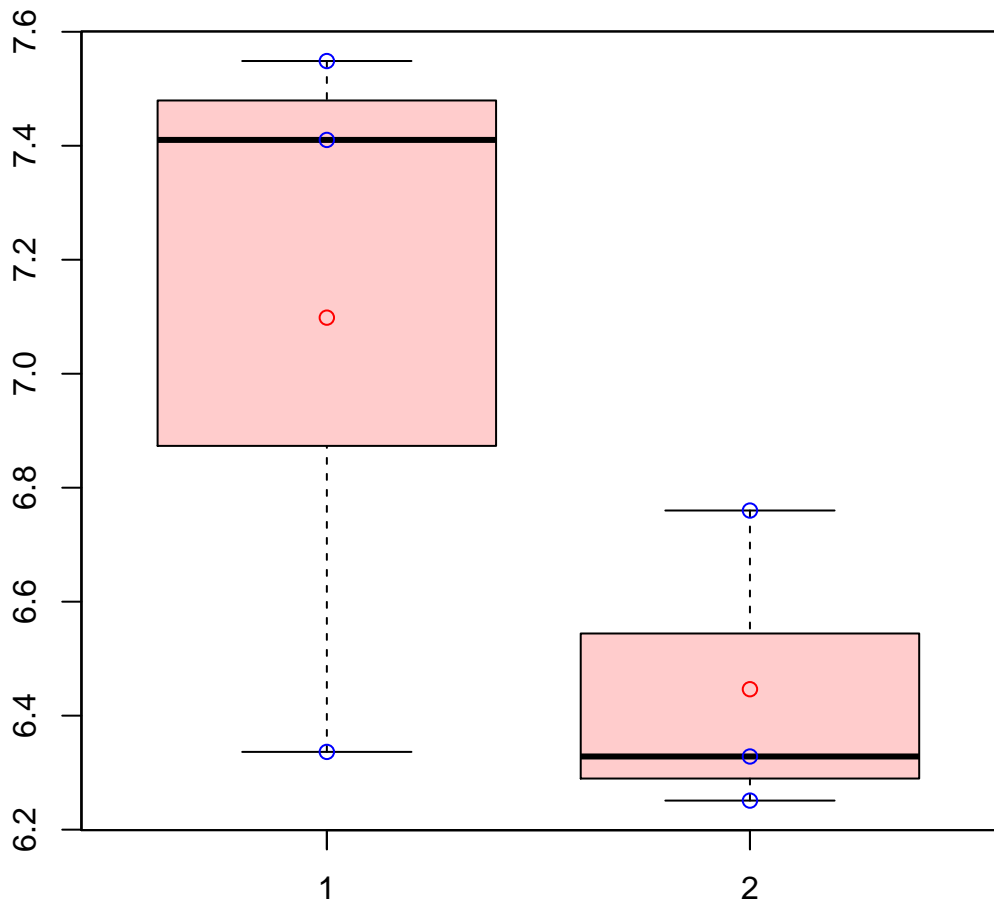

t-Test: p-value = 0.22

# I1HVV5|I1HVV5\_BRADI

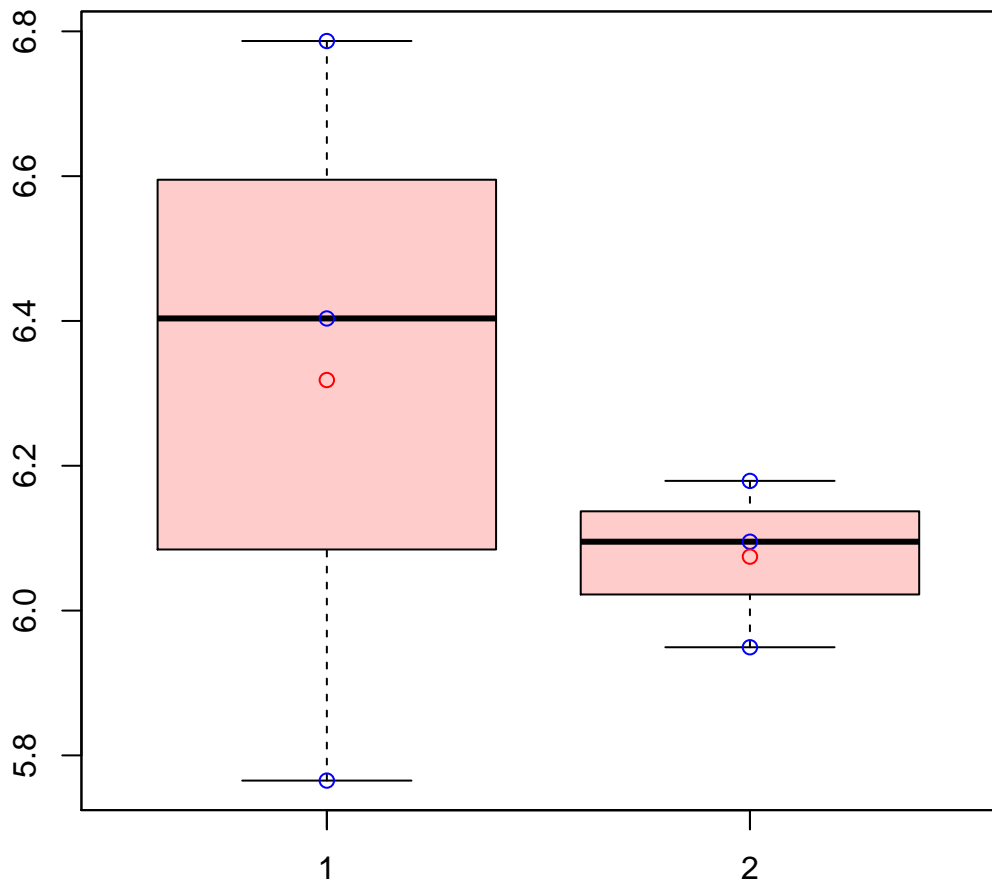

t-Test: p-value = 0.5



# I1HW10|I1HW10\_BRADI

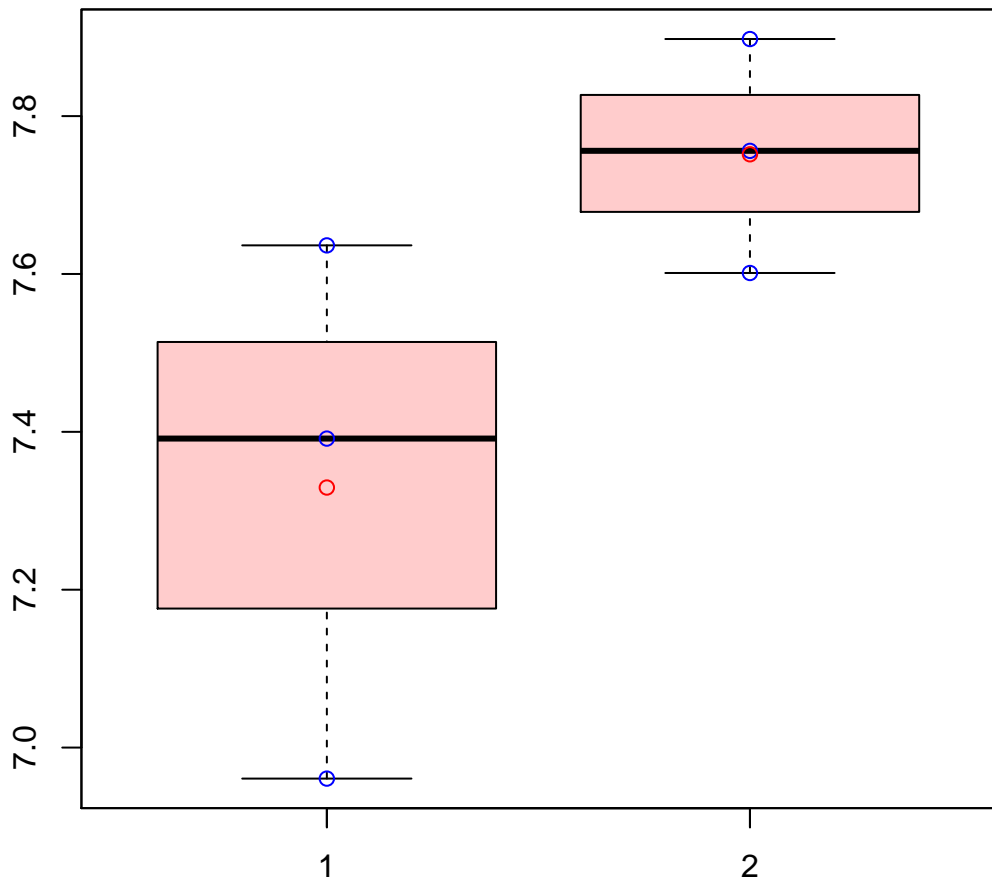

t-Test: p-value = 0.15

# I1HW30|I1HW30\_BRADI

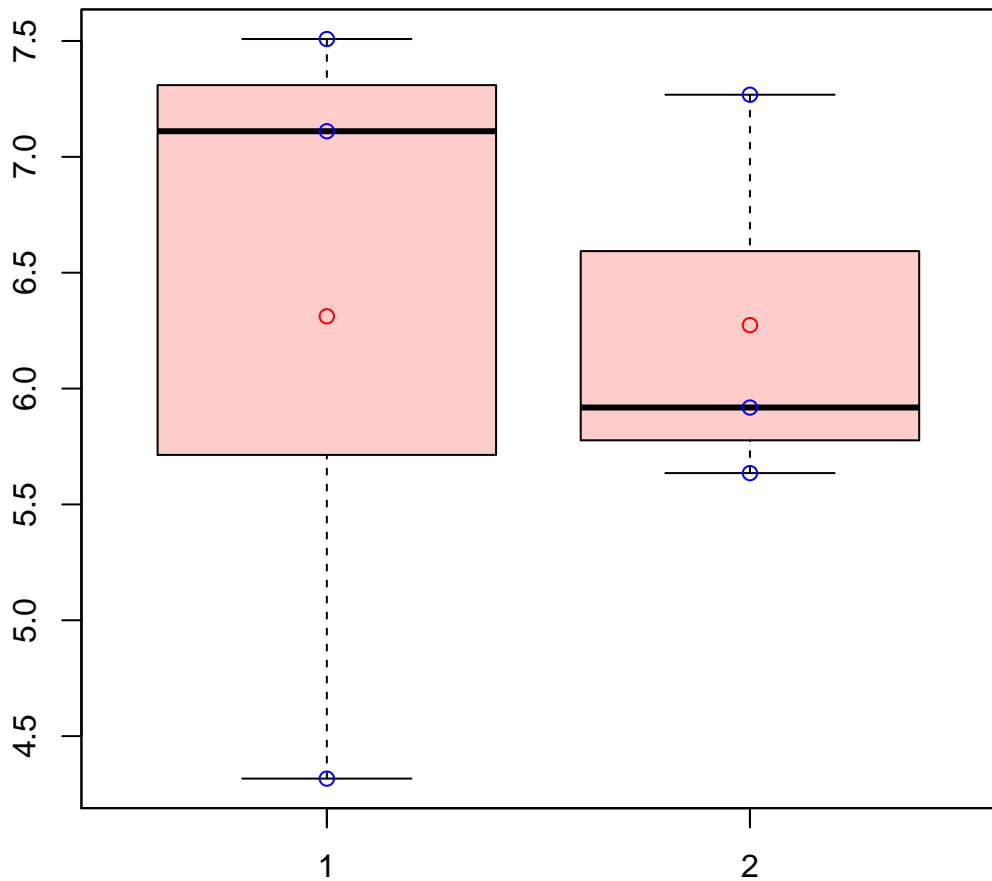

t-Test: p-value = 0.98

# I1HW51|I1HW51\_BRADI

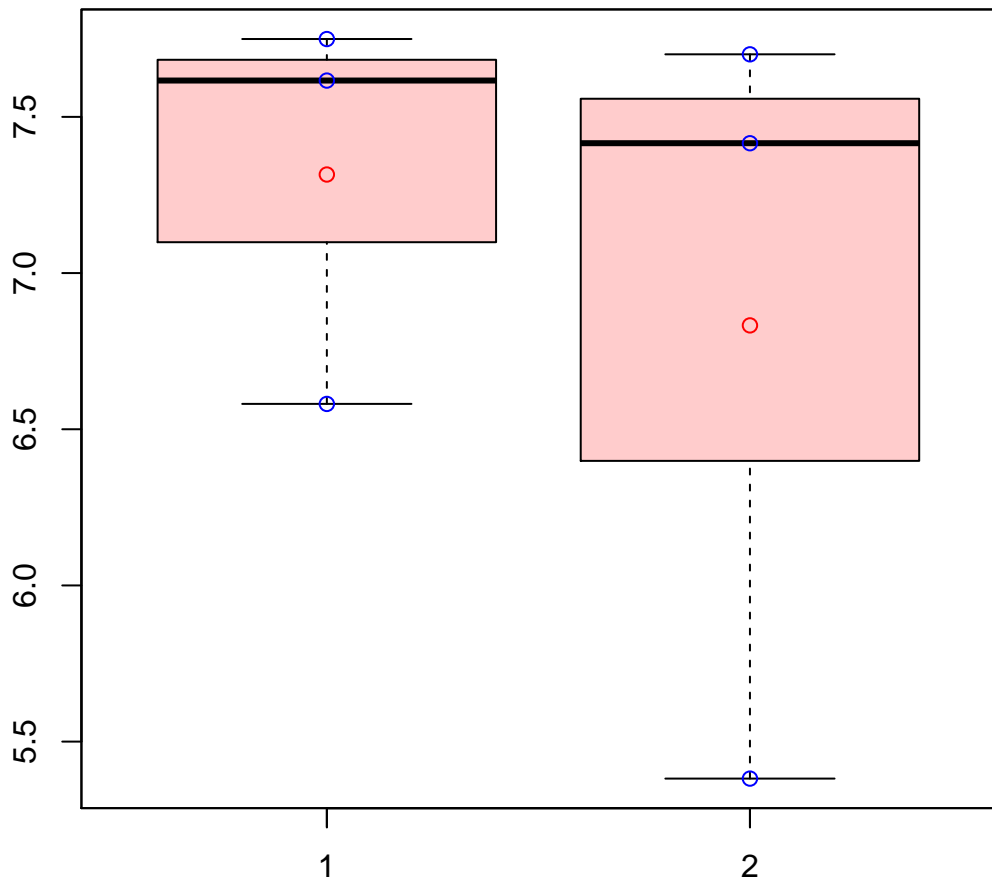

t-Test: p-value = 0.6

# I1HW58|I1HW58\_BRADI

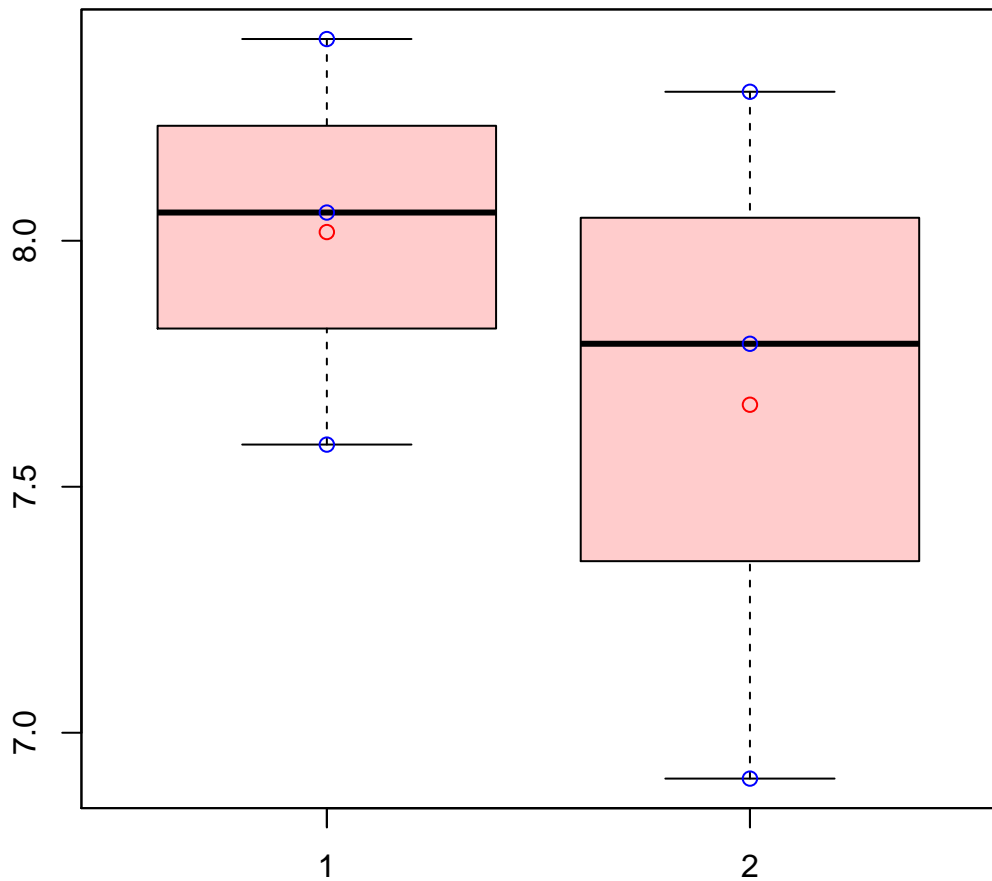

t-Test: p-value = 0.51

# I1HX14|I1HX14\_BRADI

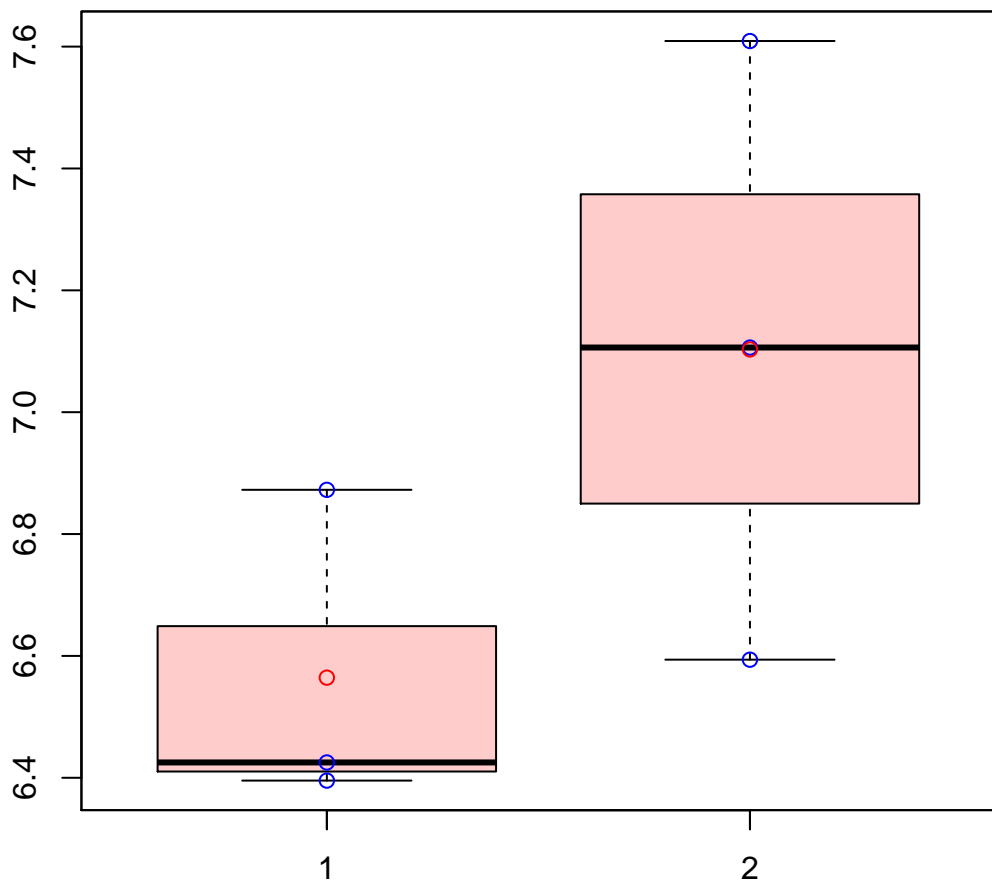

t-Test: p-value = 0.2

# I1HX56|I1HX56\_BRADI

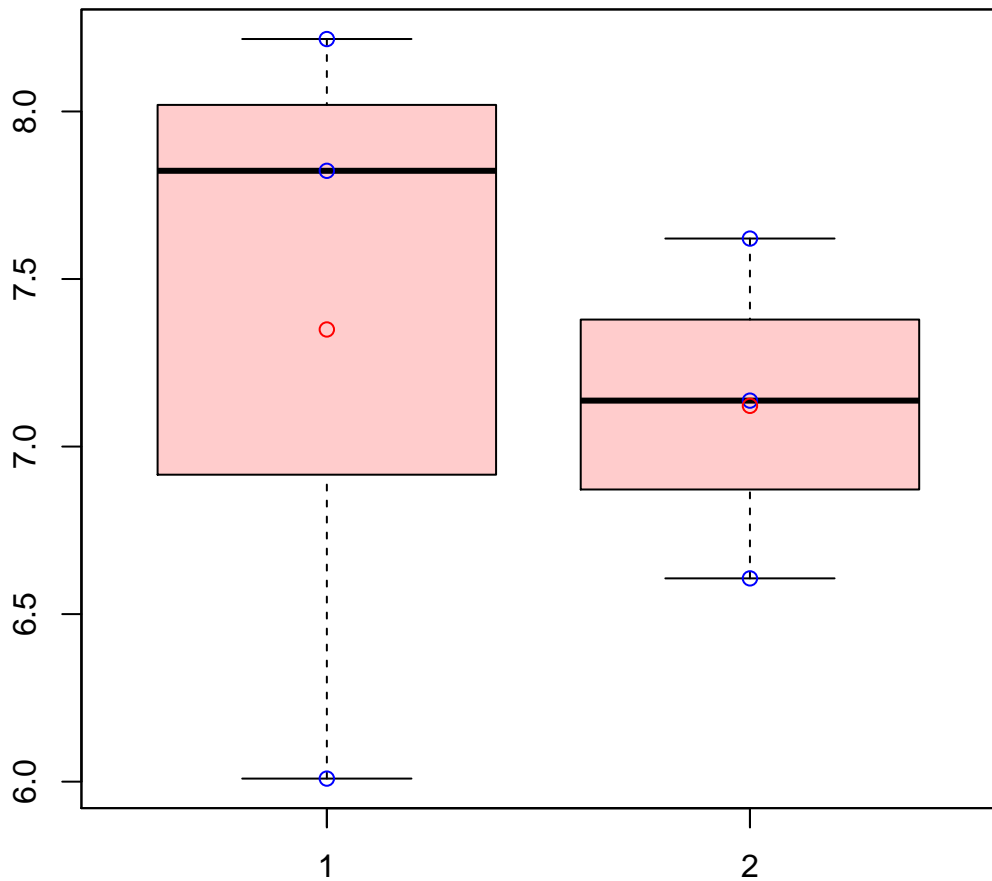

t-Test: p-value = 0.78

# I1HX67|I1HX67\_BRADI

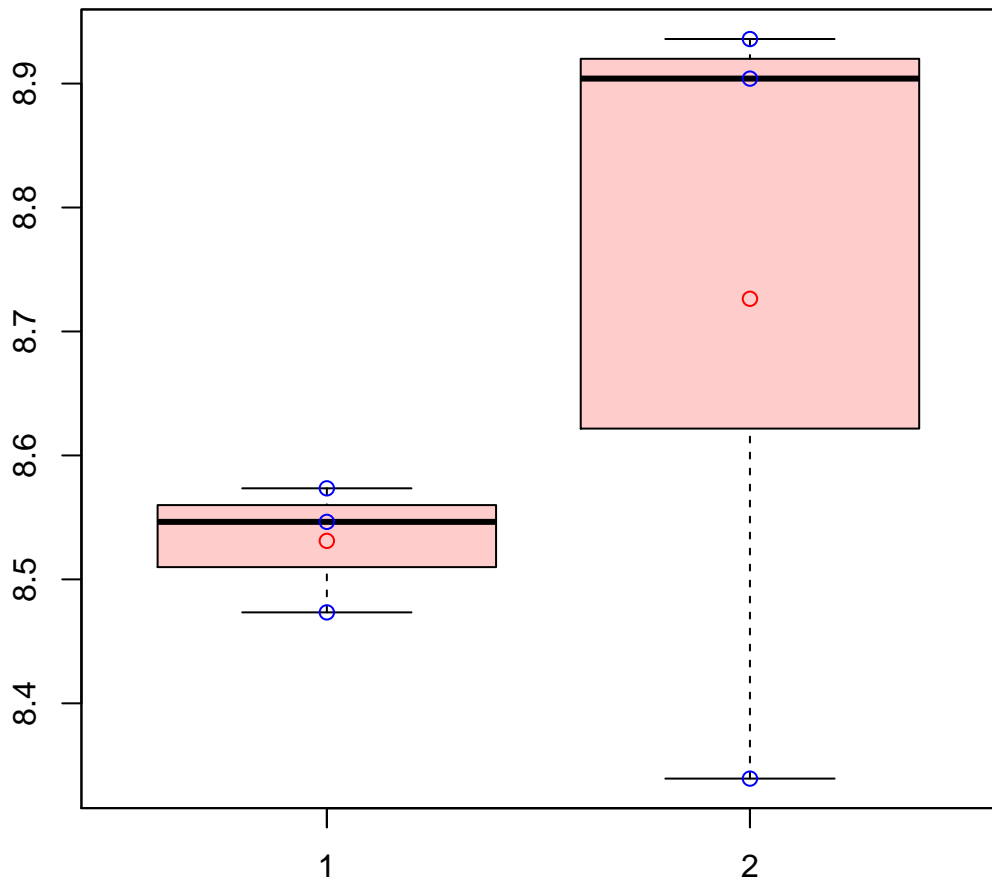

t-Test: p-value = 0.42

# I1HY72|I1HY72\_BRADI

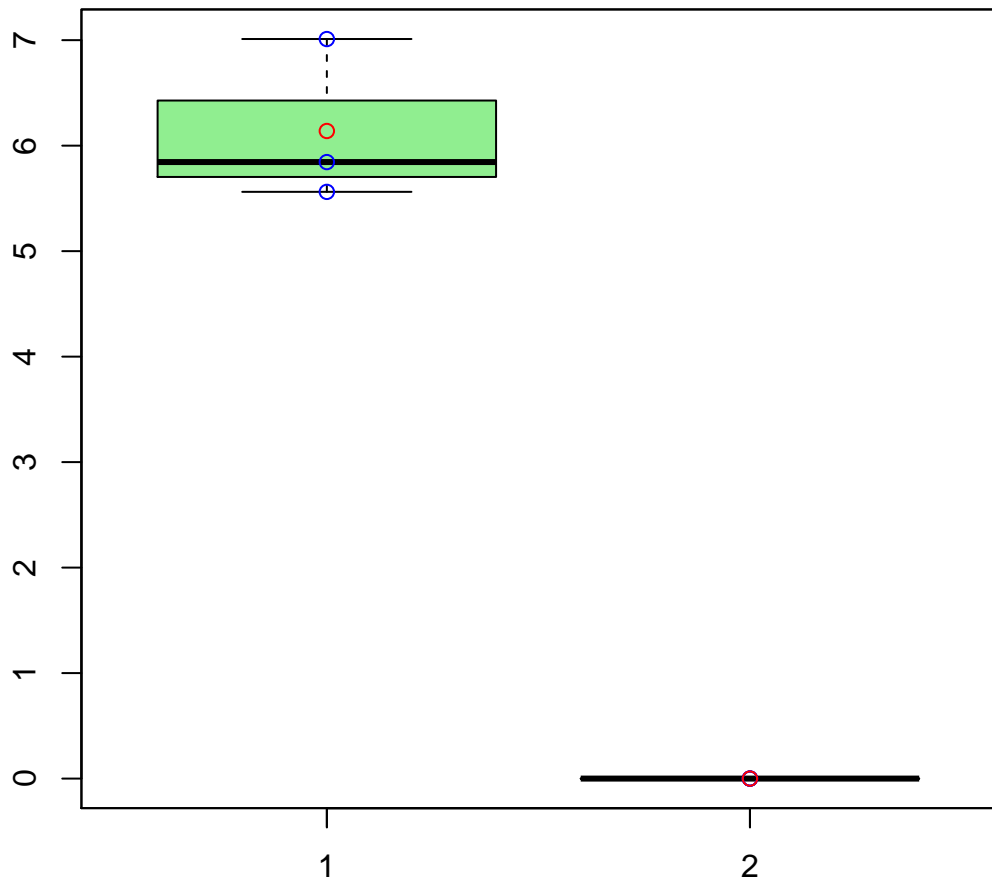

t-Test: p-value = 0.01



# I1HYA2|I1HYA2\_BRADI

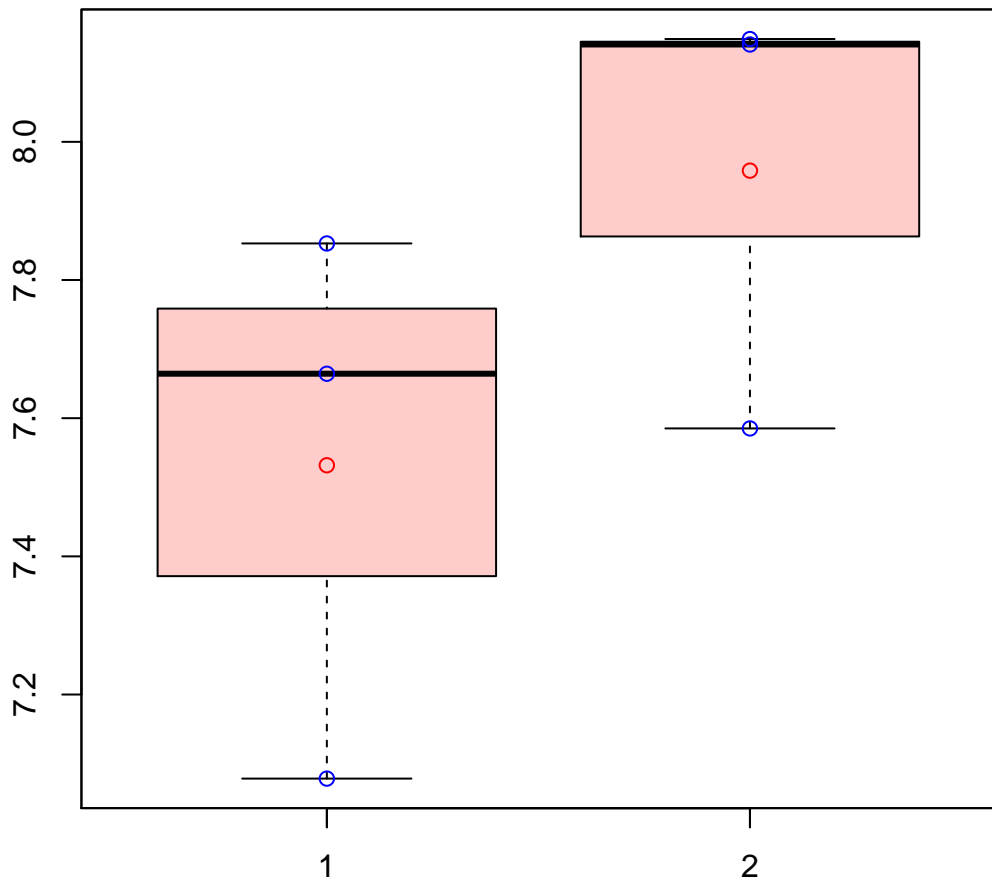

t-Test: p-value = 0.23

# I1HYD4|I1HYD4\_BRADI

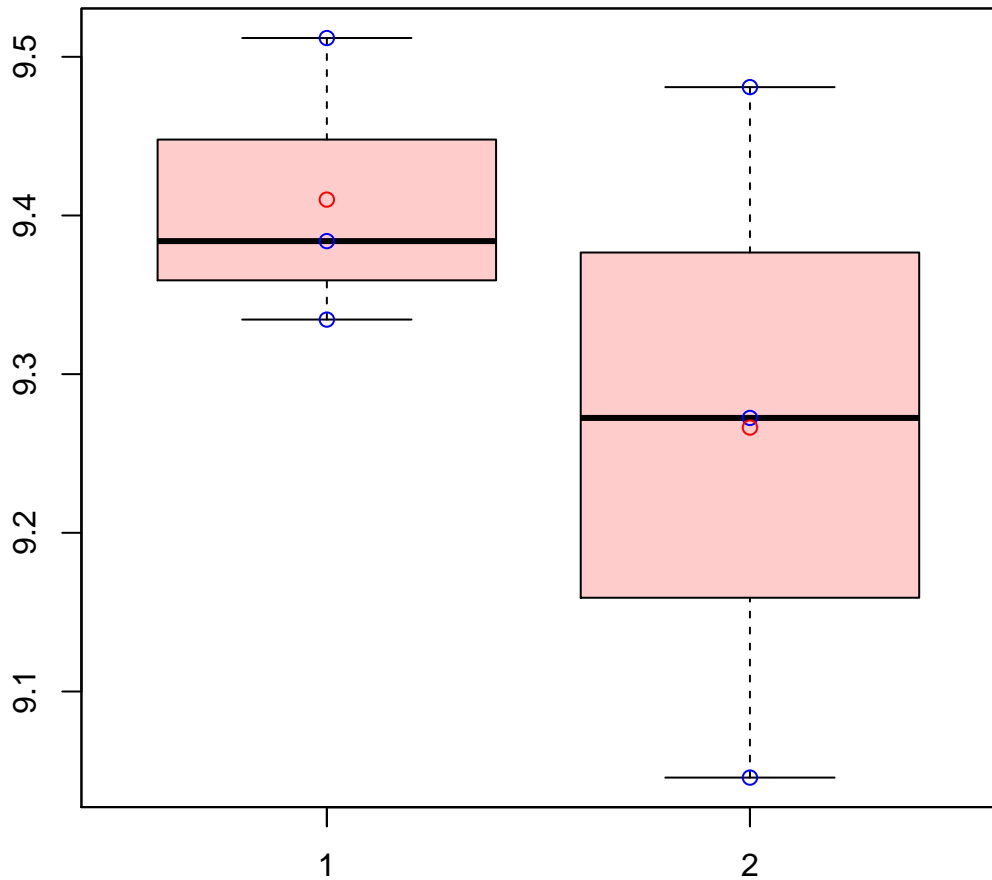

t-Test: p-value = 0.38

# I1HYG5|I1HYG5\_BRADI

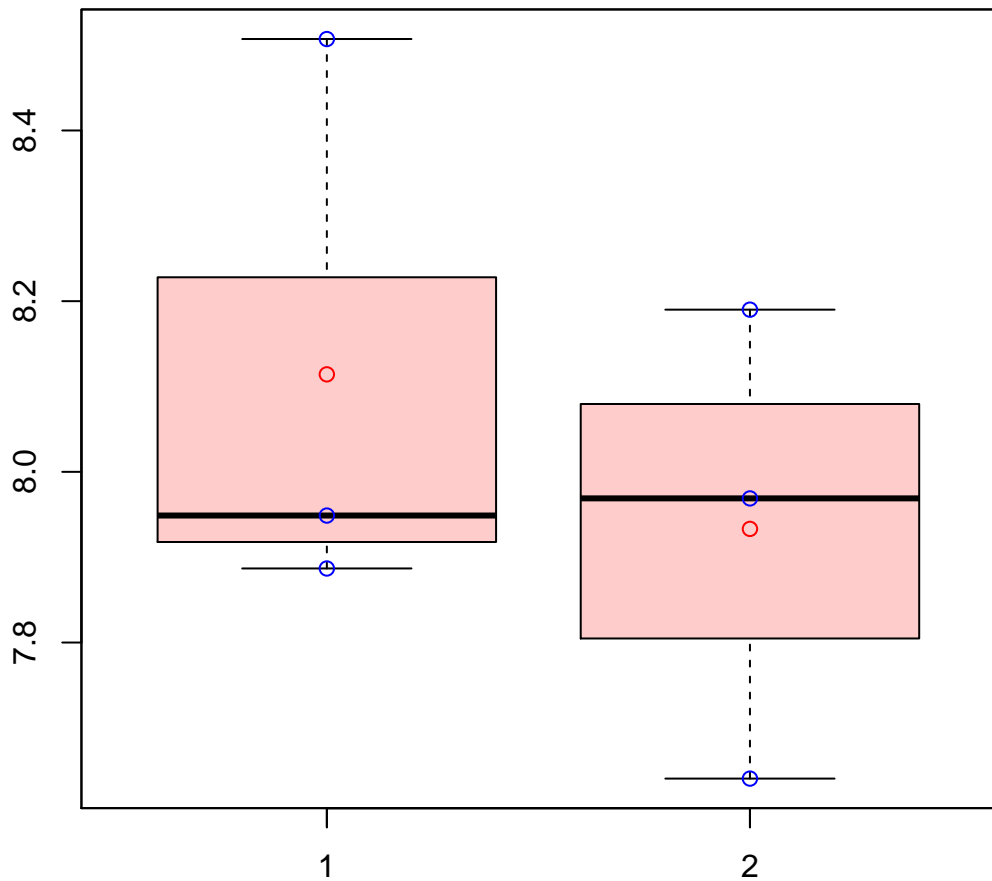

t-Test: p-value = 0.52

# I1HYK7|I1HYK7\_BRADI

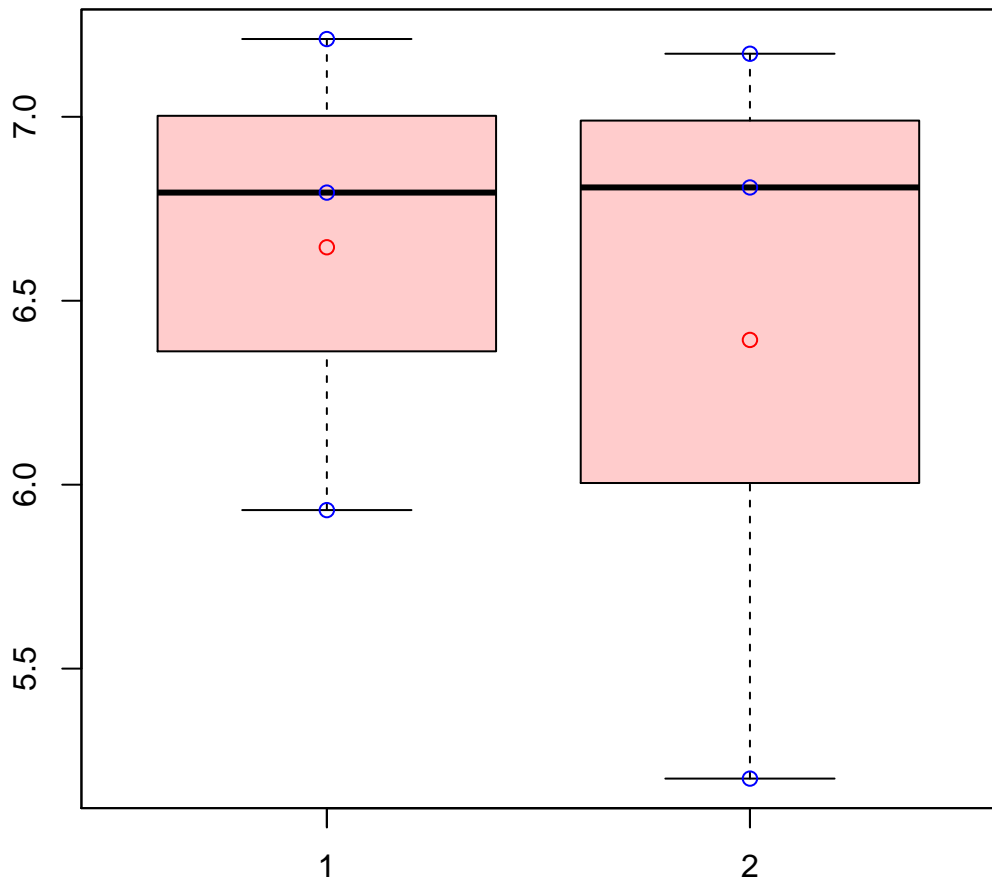

t-Test: p-value = 0.74

# I1HYL4|I1HYL4\_BRADI

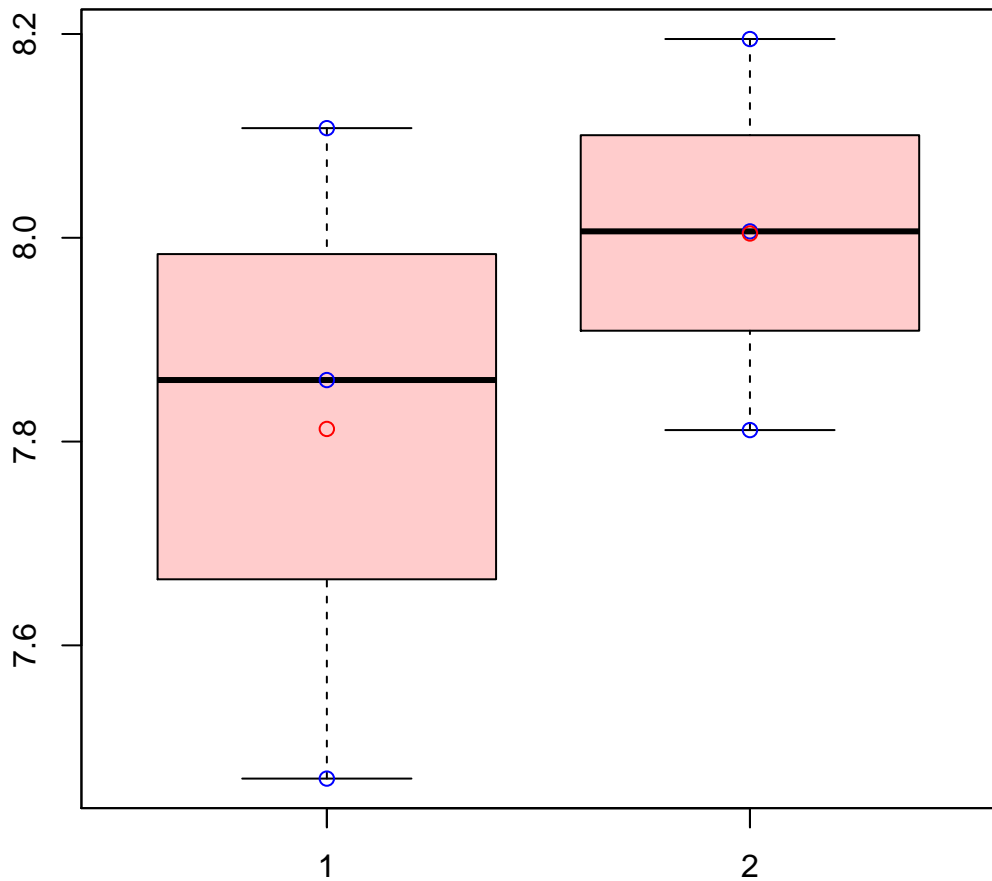

t-Test: p-value = 0.44

# I1HZ33|I1HZ33\_BRADI

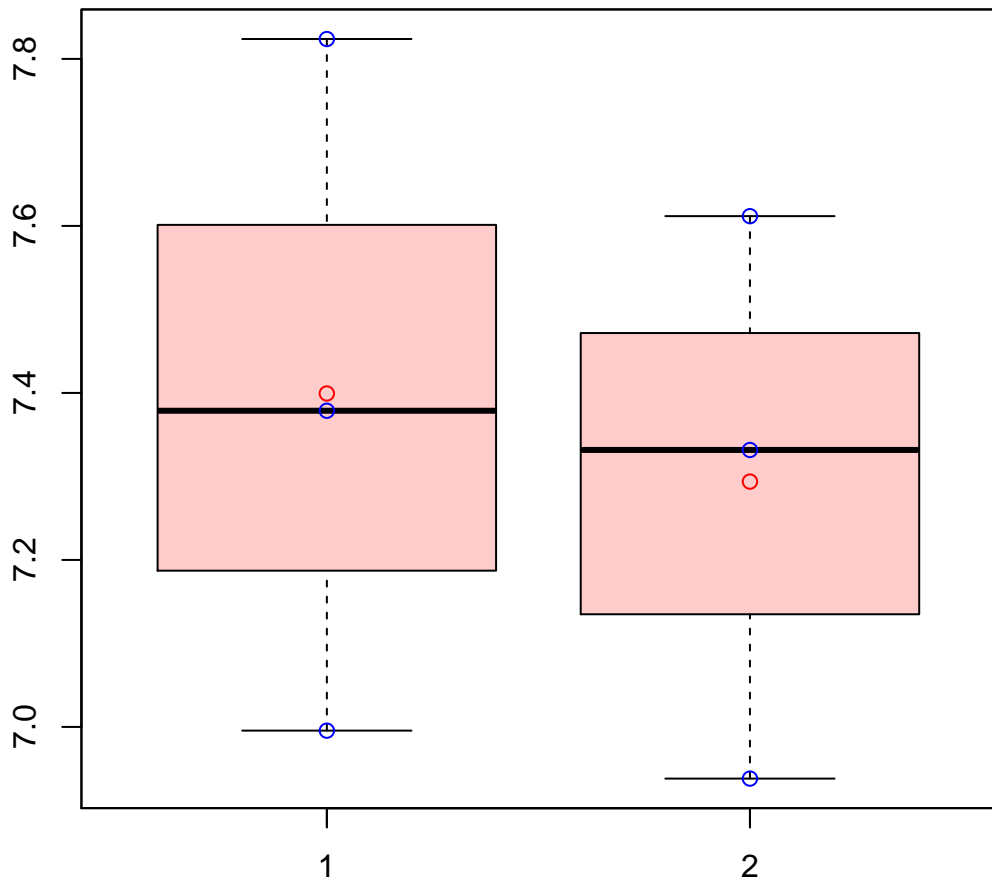

t-Test: p-value = 0.75

# I1HZ42|I1HZ42\_BRADI

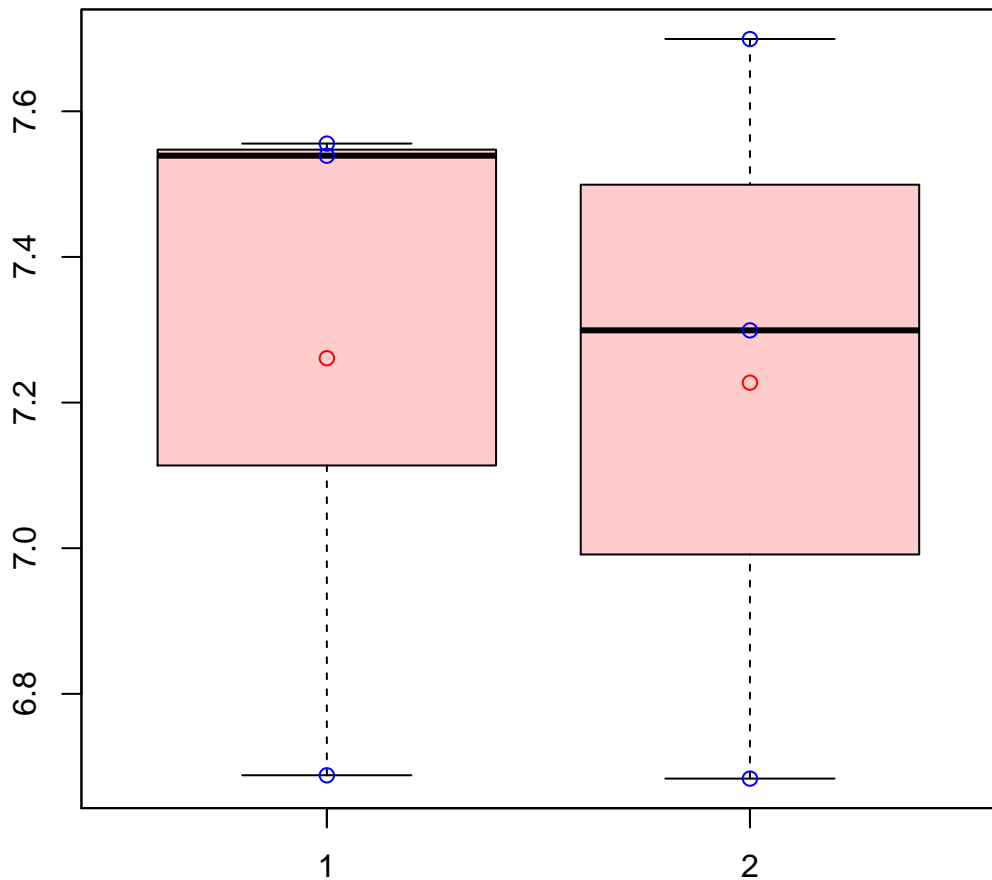

t-Test: p-value = 0.94

# I1HZ62|I1HZ62\_BRADI

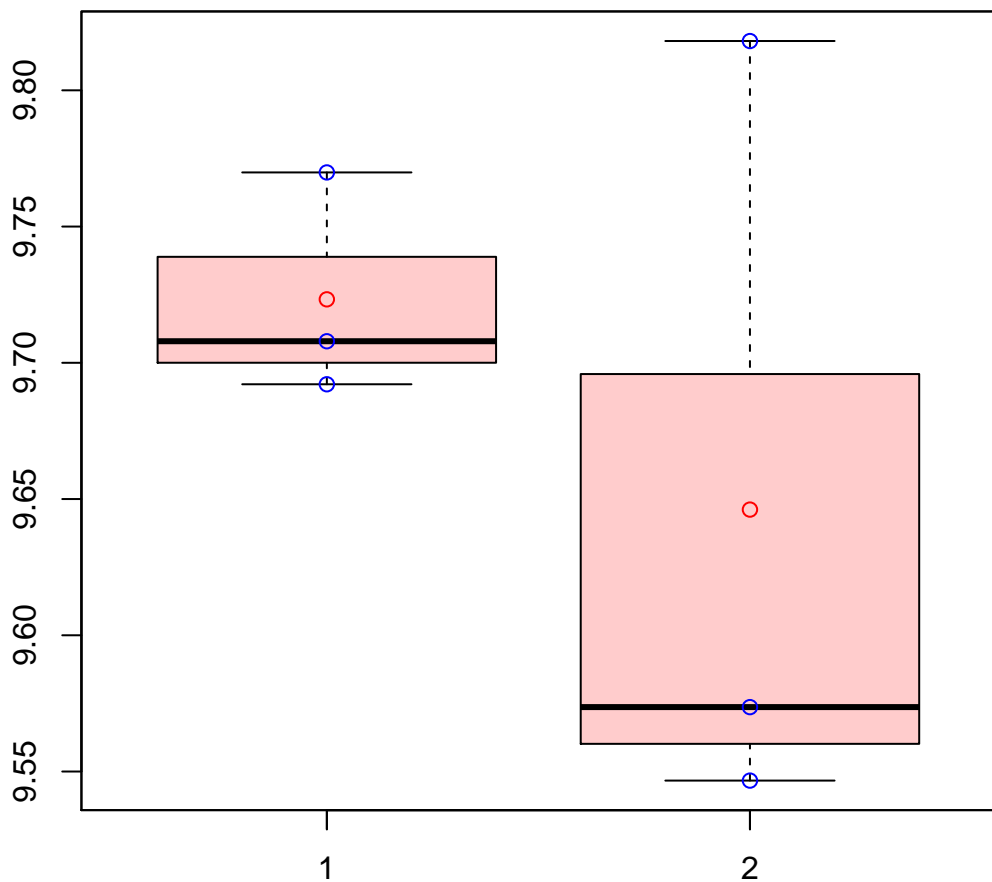

t-Test: p-value = 0.47



# I1HZJ4|I1HZJ4\_BRADI

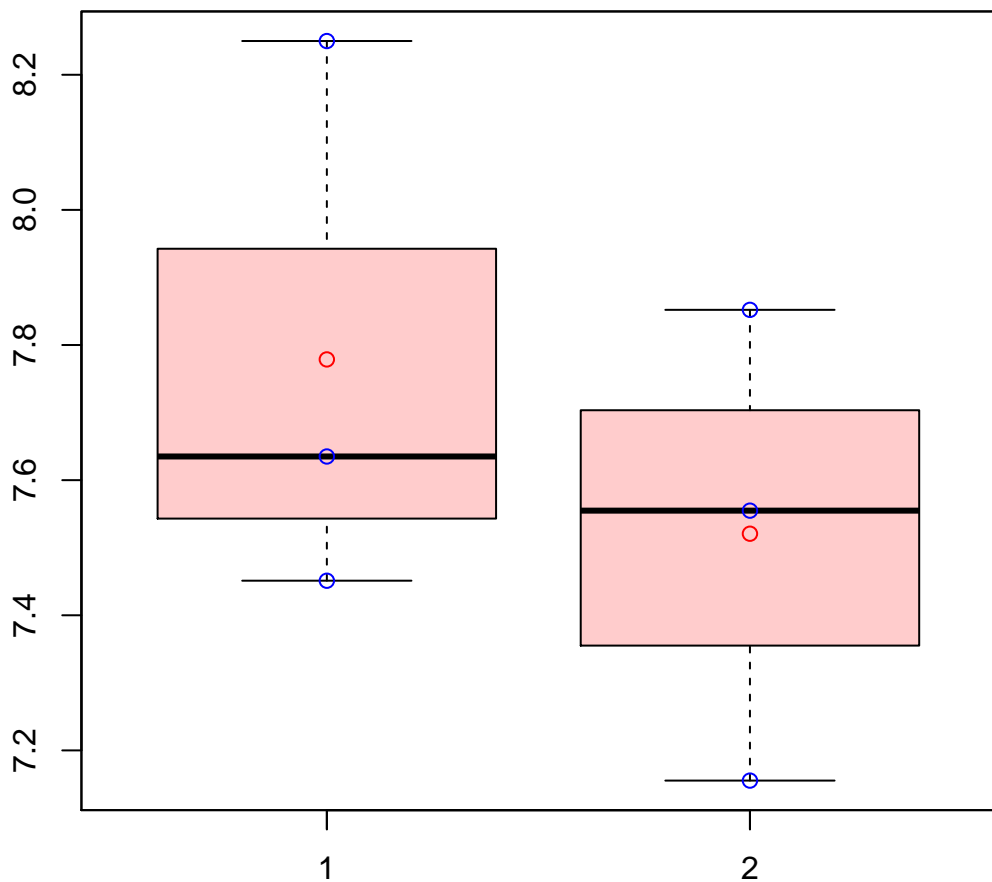

t-Test: p-value = 0.46

# I1HZN9|I1HZN9\_BRADI

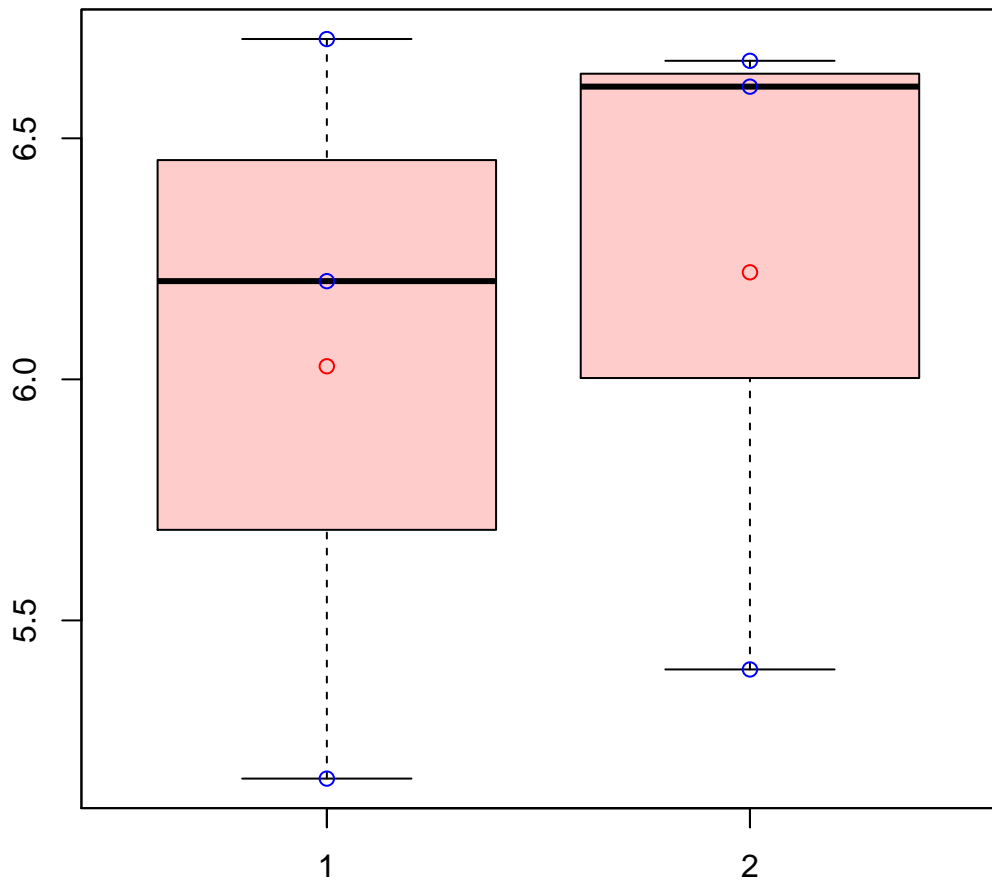

t-Test: p-value = 0.77

# I1HZX4|I1HZX4\_BRADI

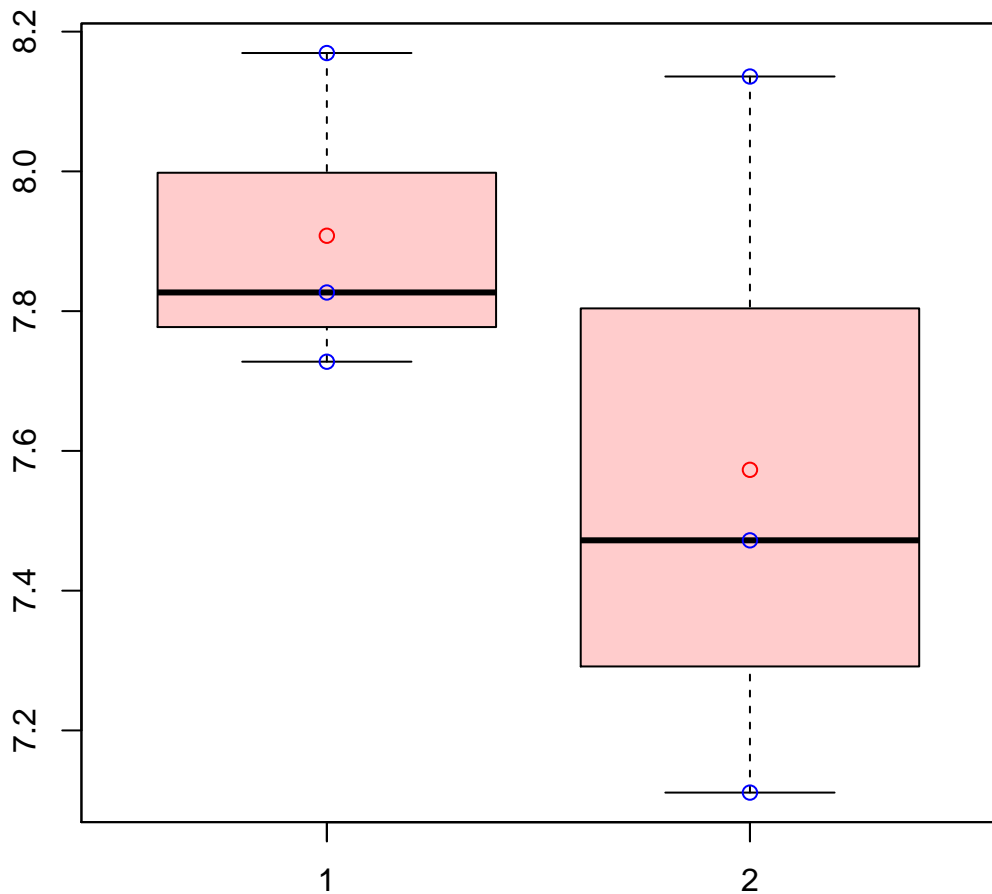

t-Test: p-value = 0.39

# I1I0C6|I1I0C6\_BRADI

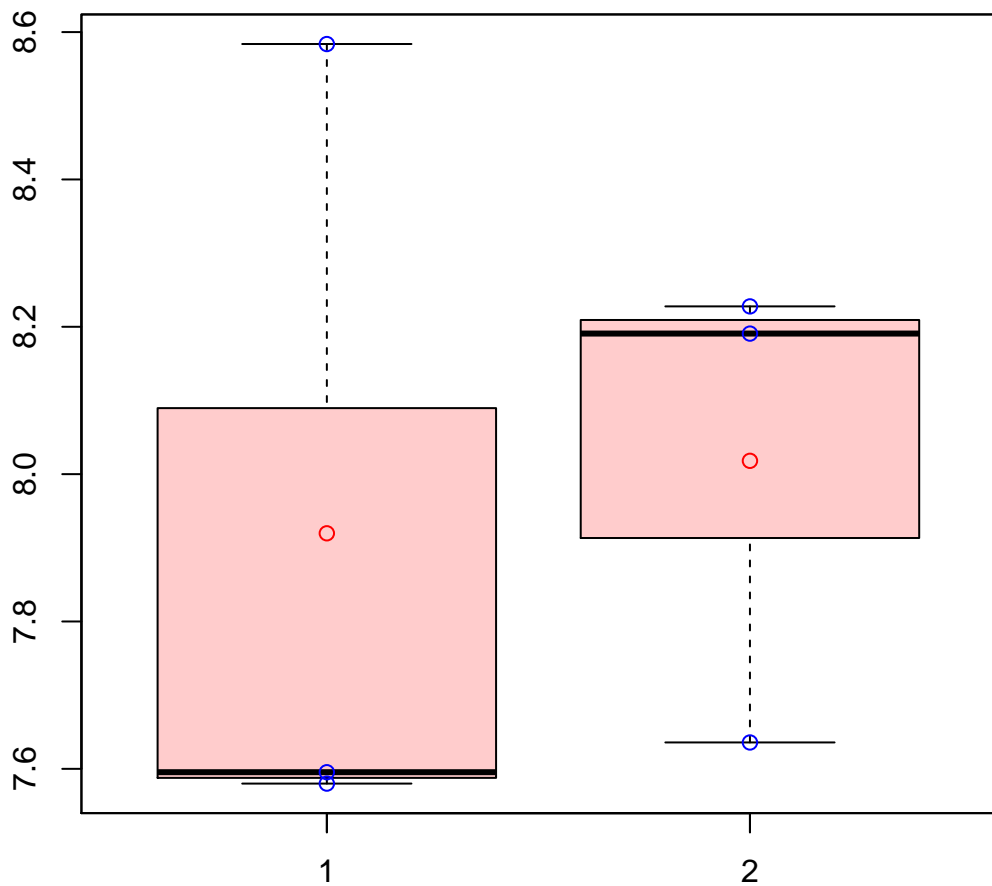

t-Test: p-value = 0.81

# I1I0D3|I1I0D3\_BRADI

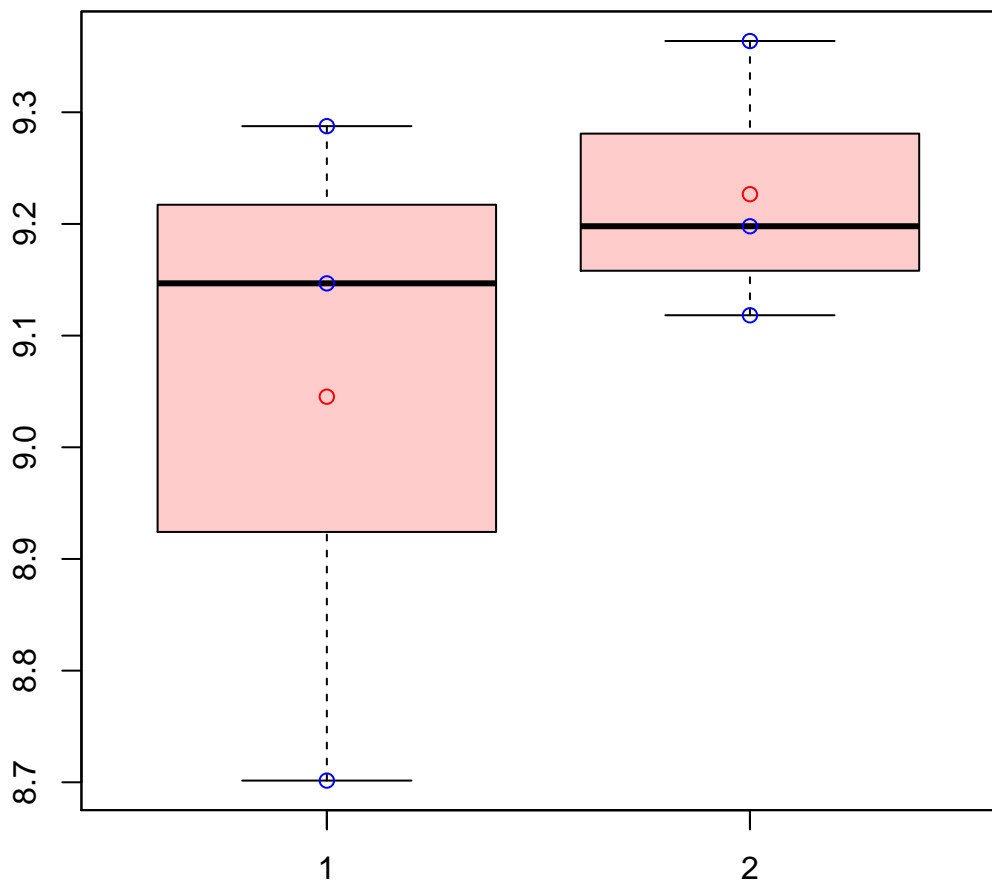

t-Test: p-value = 0.42

# I1I0J4|I1I0J4\_BRADI

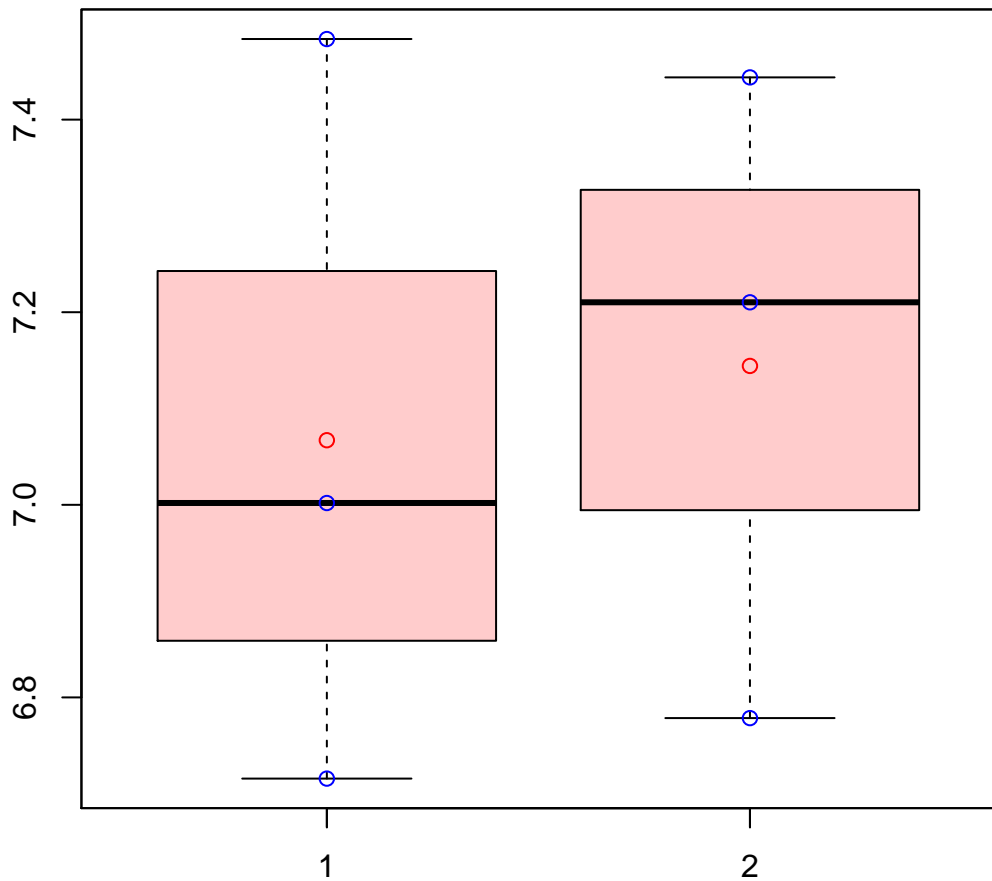

t-Test: p-value = 0.81

# I1I0K8|I1I0K8\_BRADI

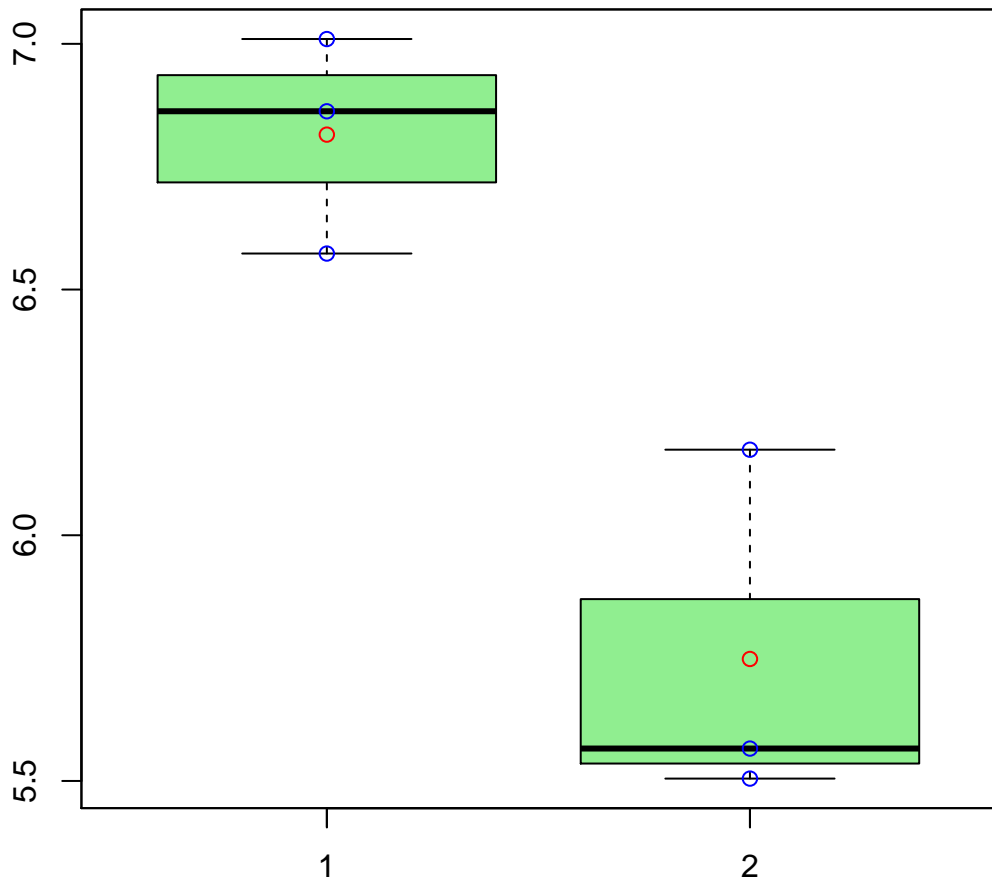

t-Test: p-value = 0.02

# I1I0L3|I1I0L3\_BRADI

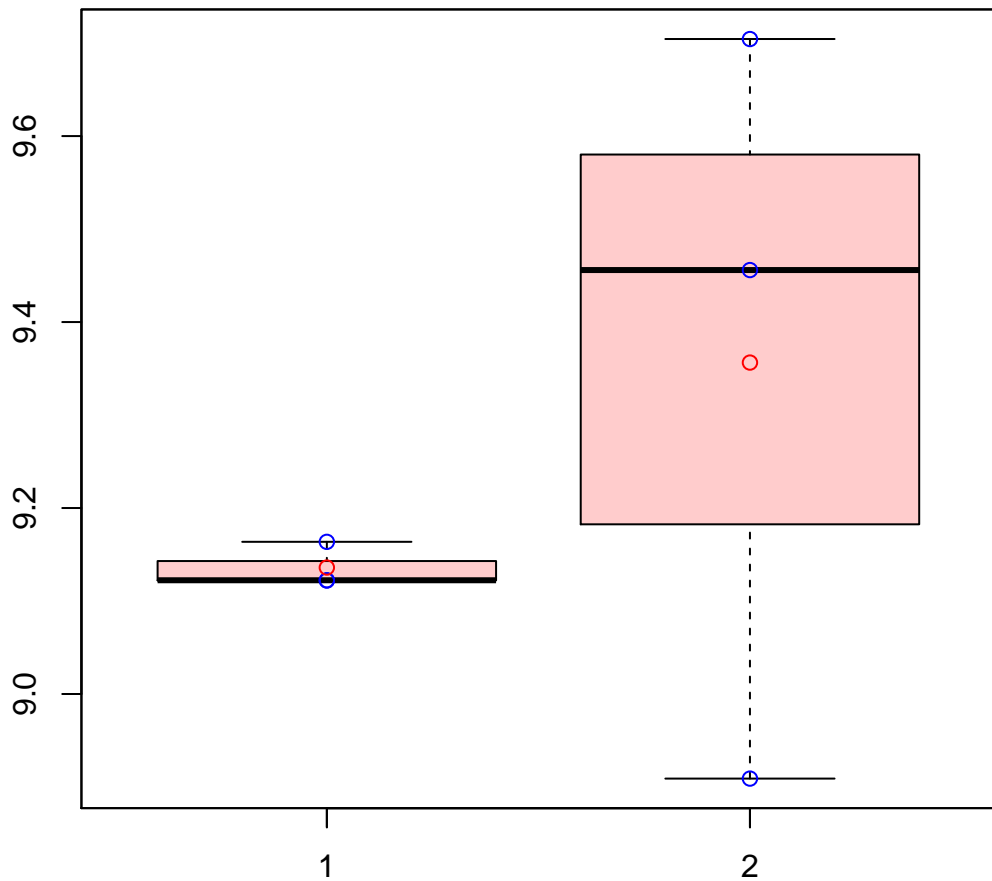

t-Test: p-value = 0.45



# I1I0Y4|I1I0Y4\_BRADI

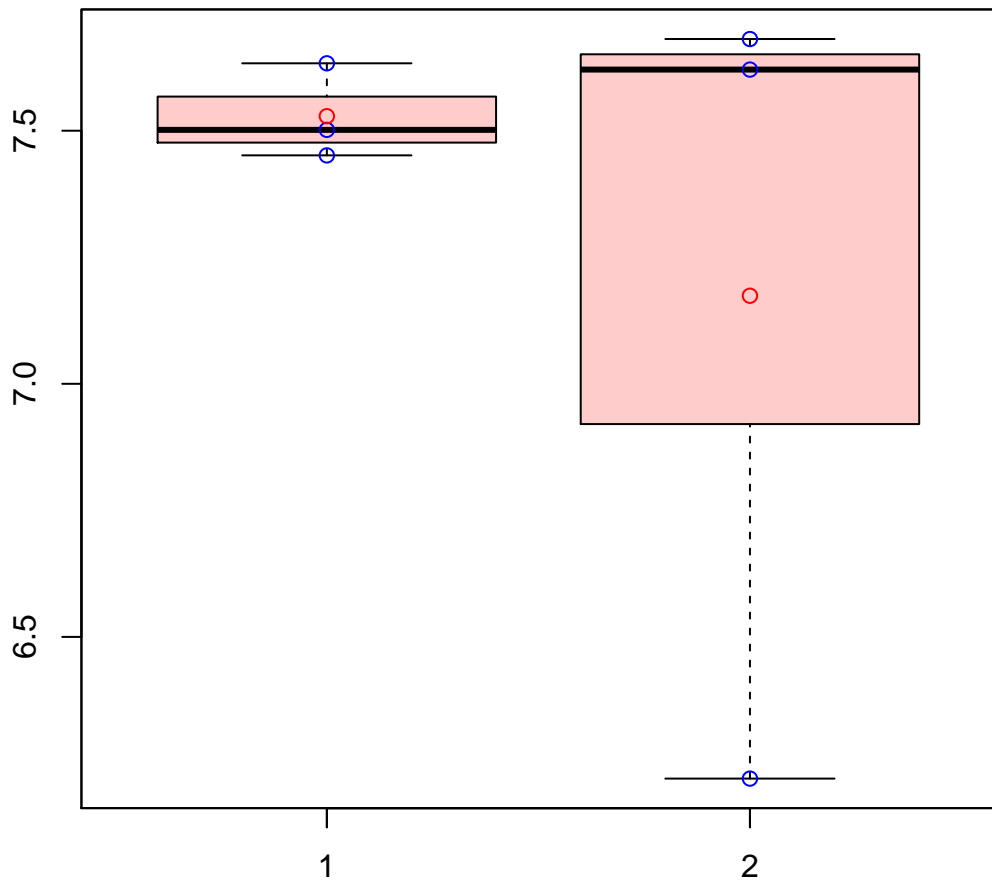

t-Test: p-value = 0.54

# I1153|I1153\_BRADI

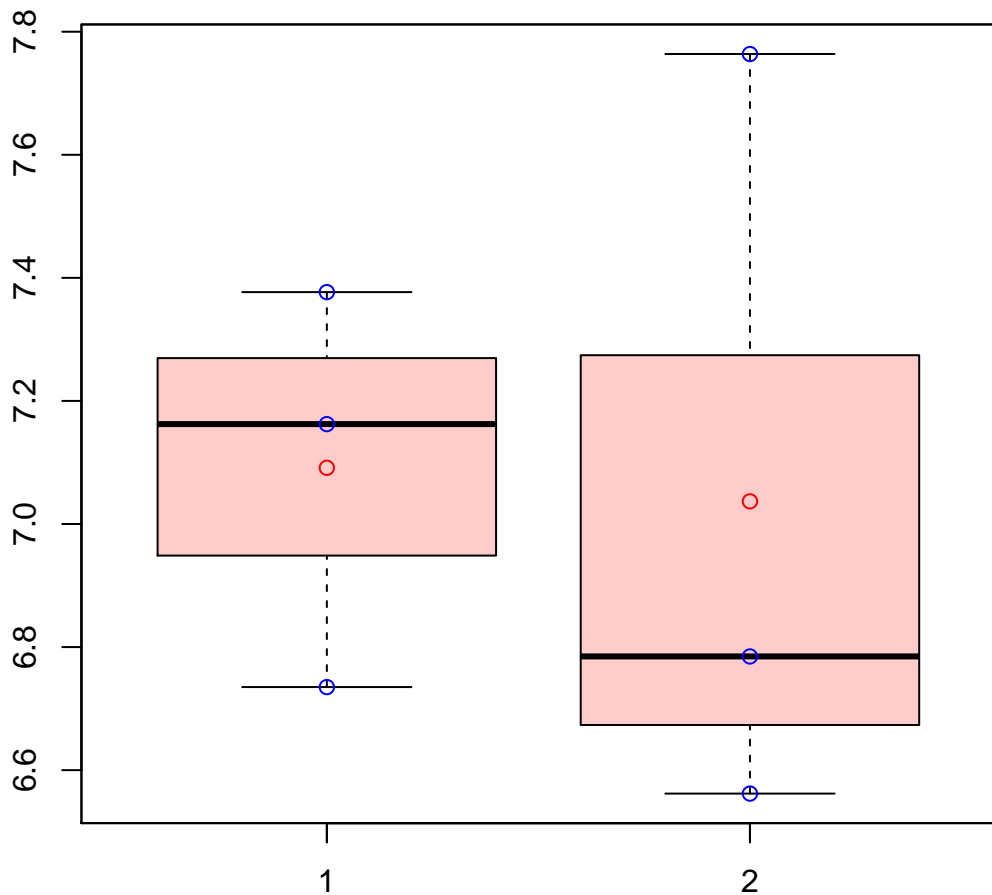

t-Test: p-value = 0.9

# I1I1M4|I1I1M4\_BRADI

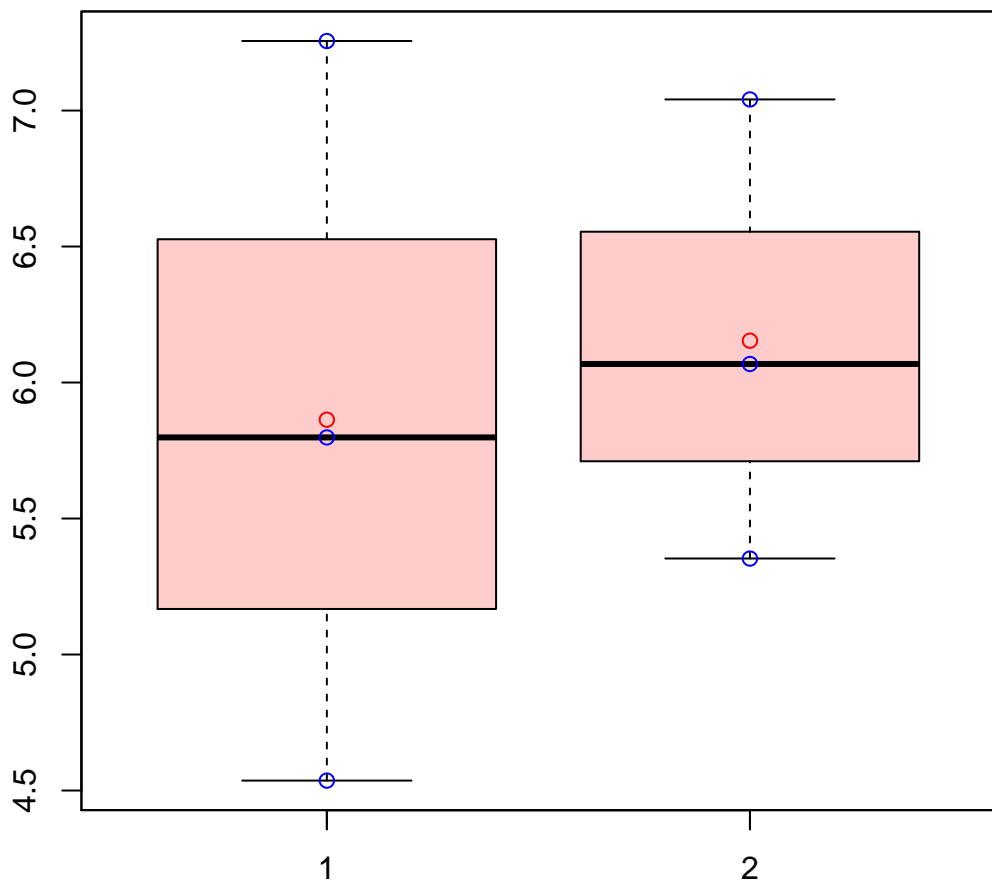

t-Test: p-value = 0.77

# I1I1N5|I1I1N5\_BRADI

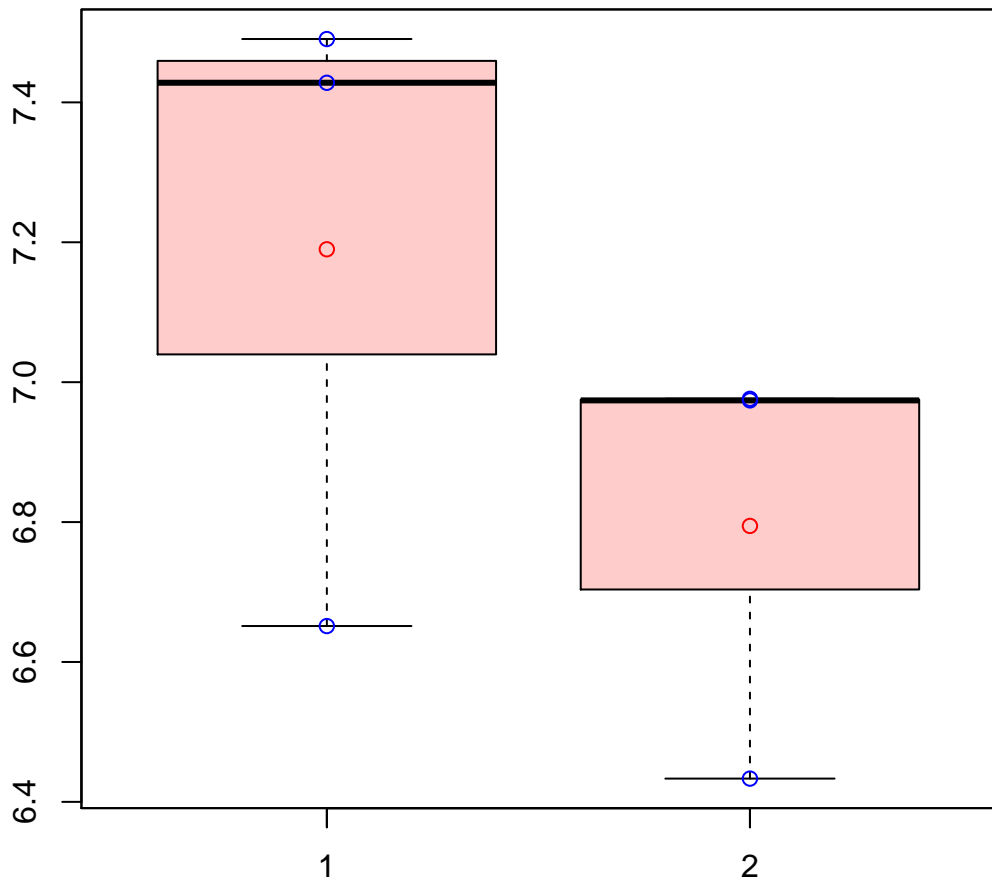

t-Test: p-value = 0.3

# I11U7|I11U7\_BRADI

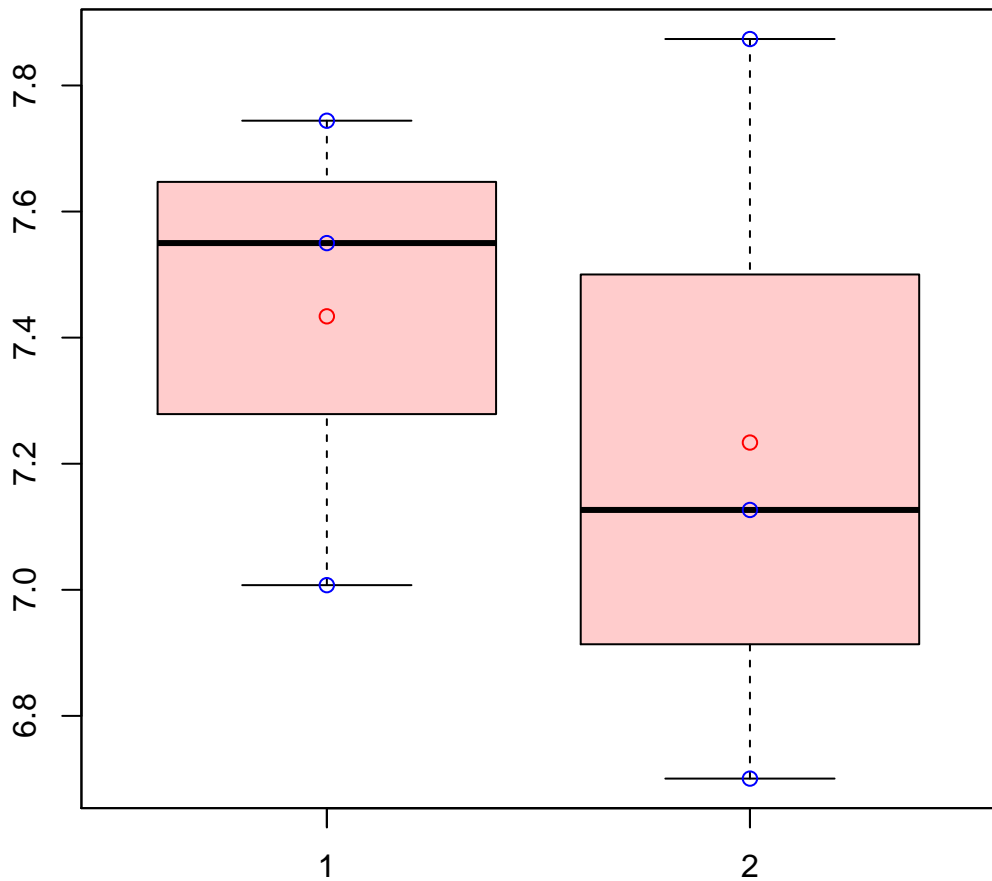

t-Test: p-value = 0.65

# I1I1X8|I1I1X8\_BRADI

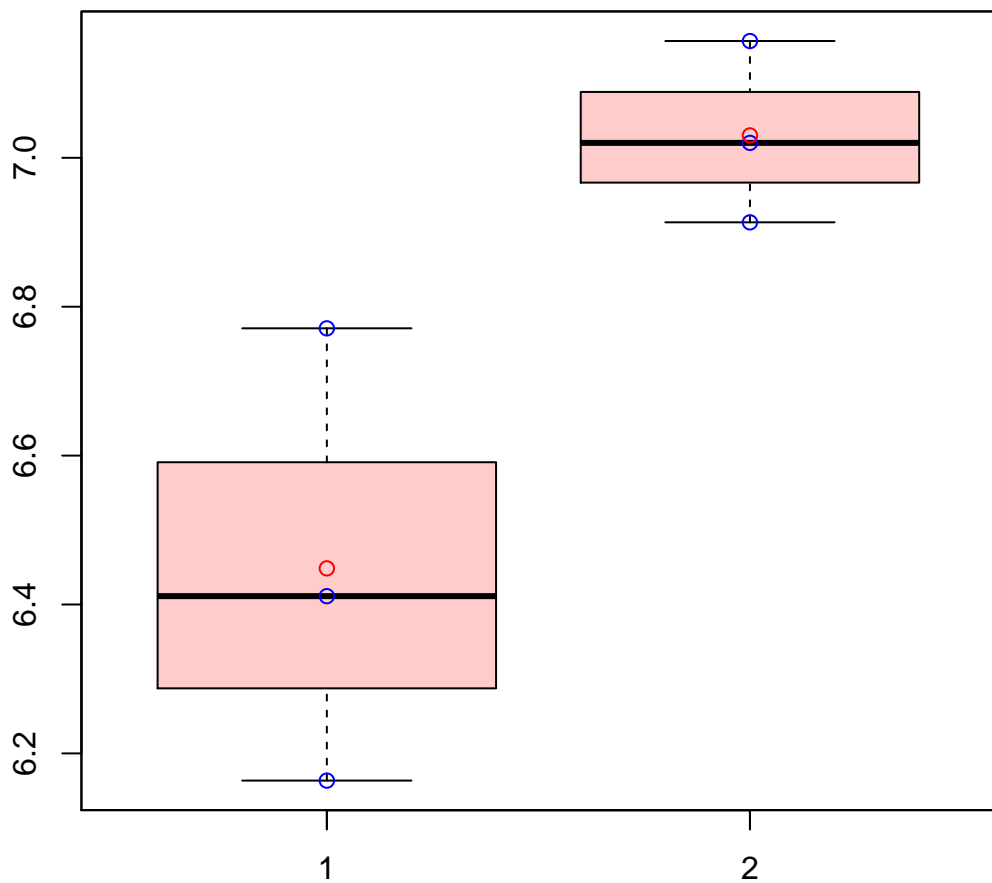

t-Test: p-value = 0.07

# I1I284|I1I284\_BRADI

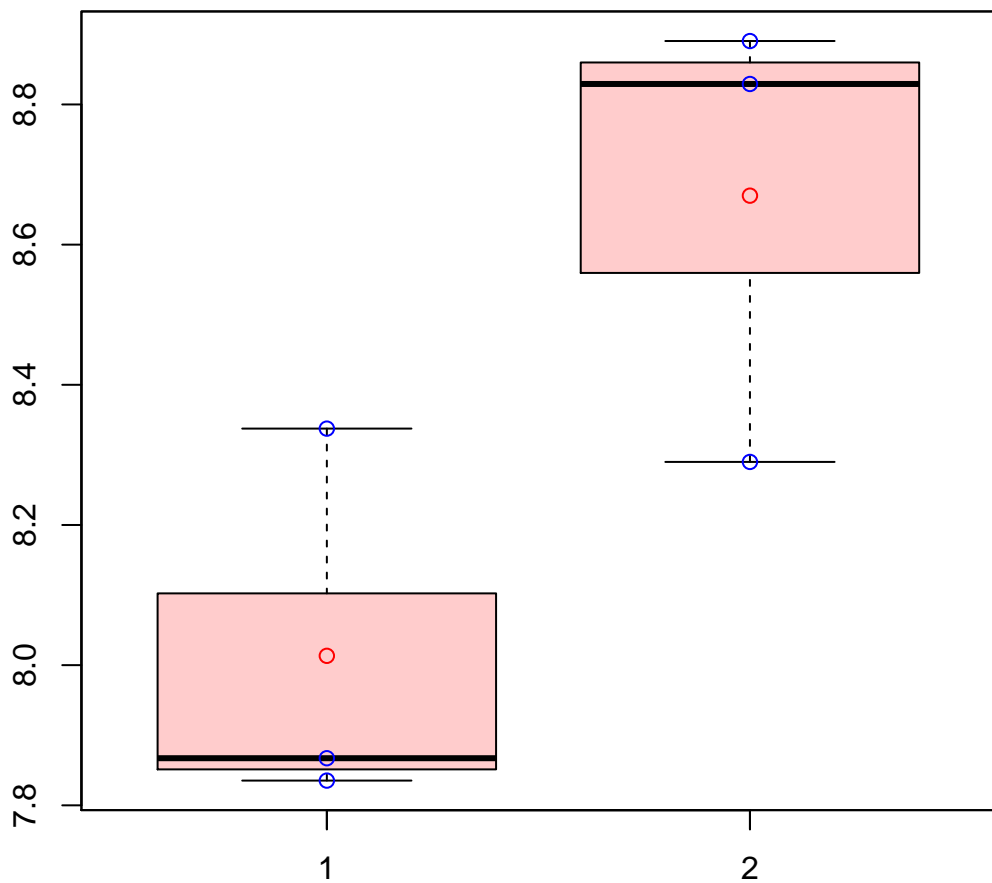

t-Test: p-value = 0.06

# I1I2I7|I1I2I7\_BRADI

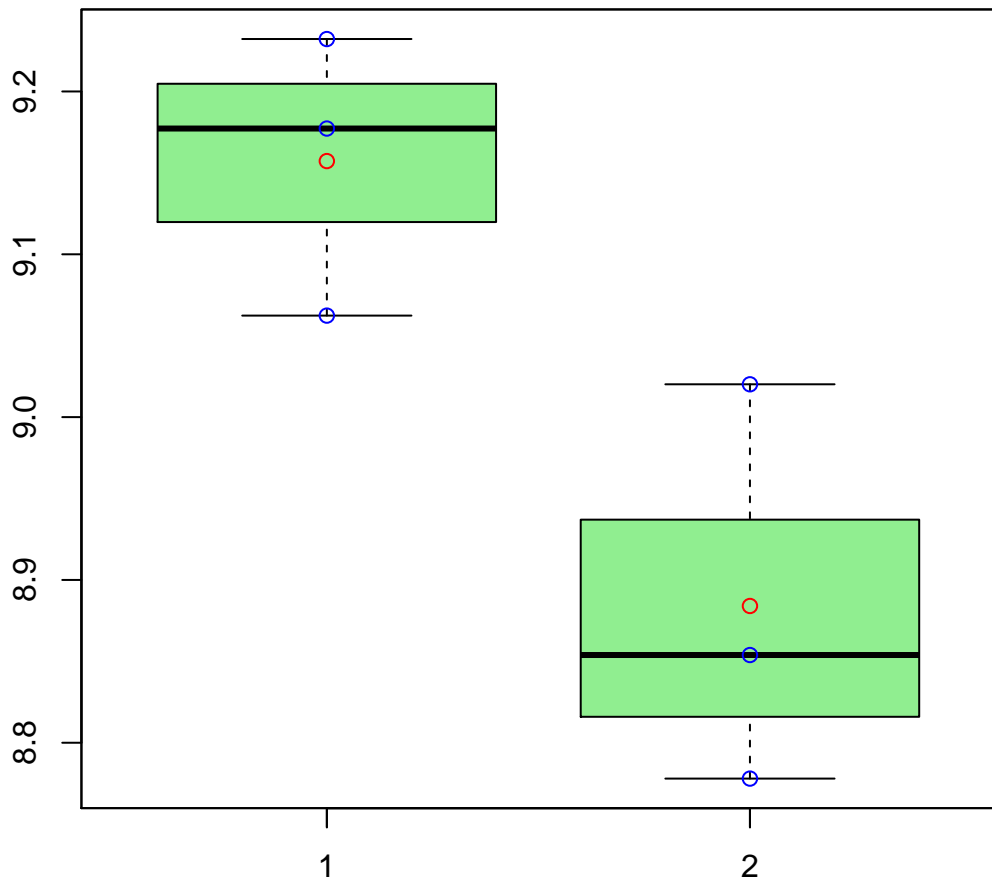

t-Test: p-value = 0.04



# I1I2L9|I1I2L9\_BRADI

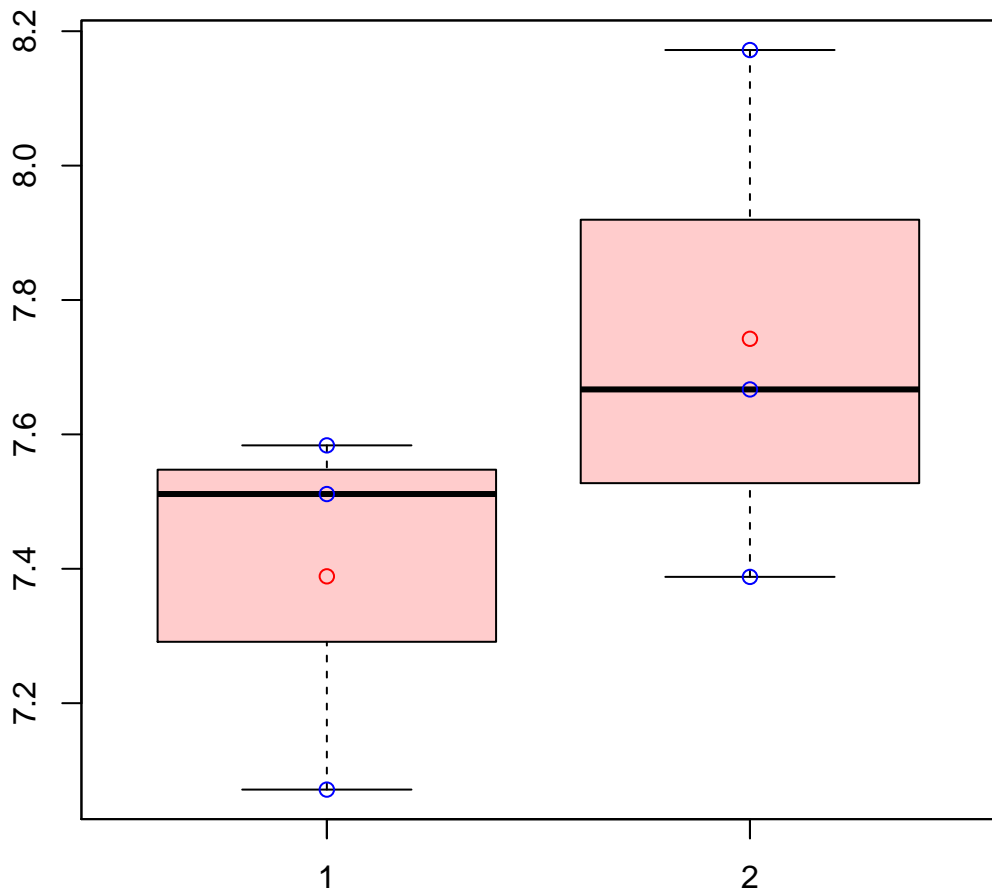

t-Test: p-value = 0.28

# I1I2U3|I1I2U3\_BRADI

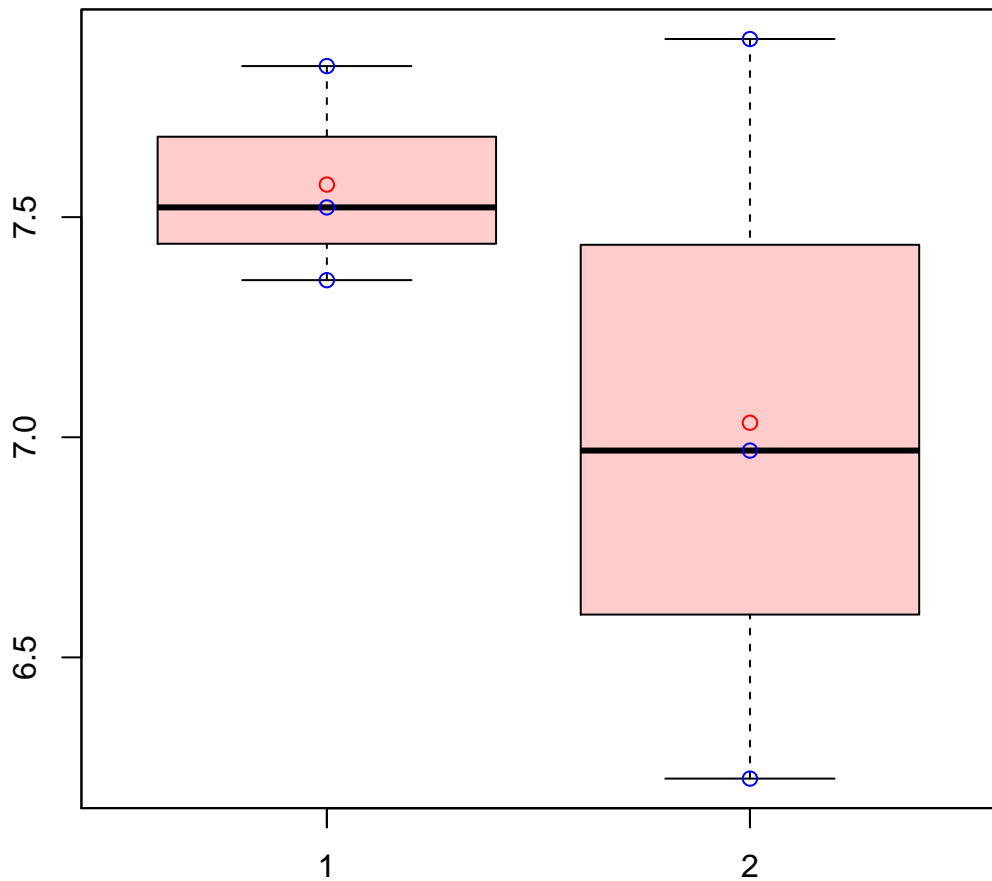

t-Test: p-value = 0.38

# I1I309|I1I309\_BRADI

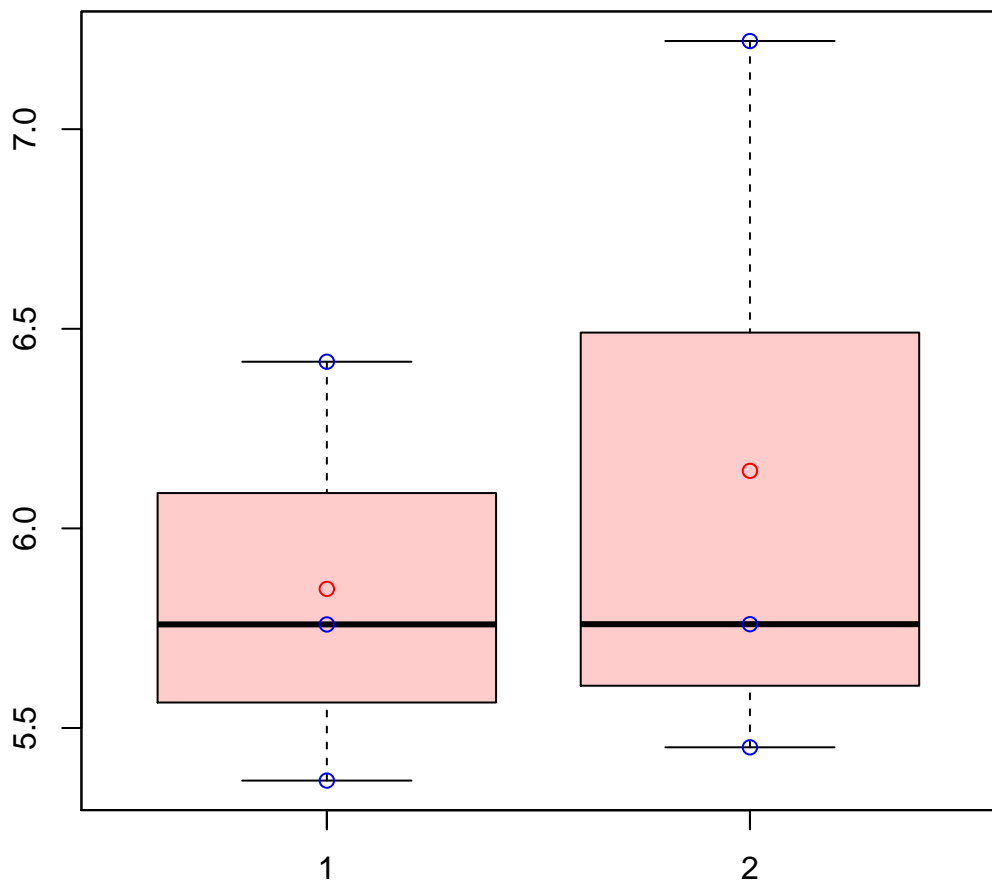

t-Test: p-value = 0.67

# I11399|I11399\_BRADI

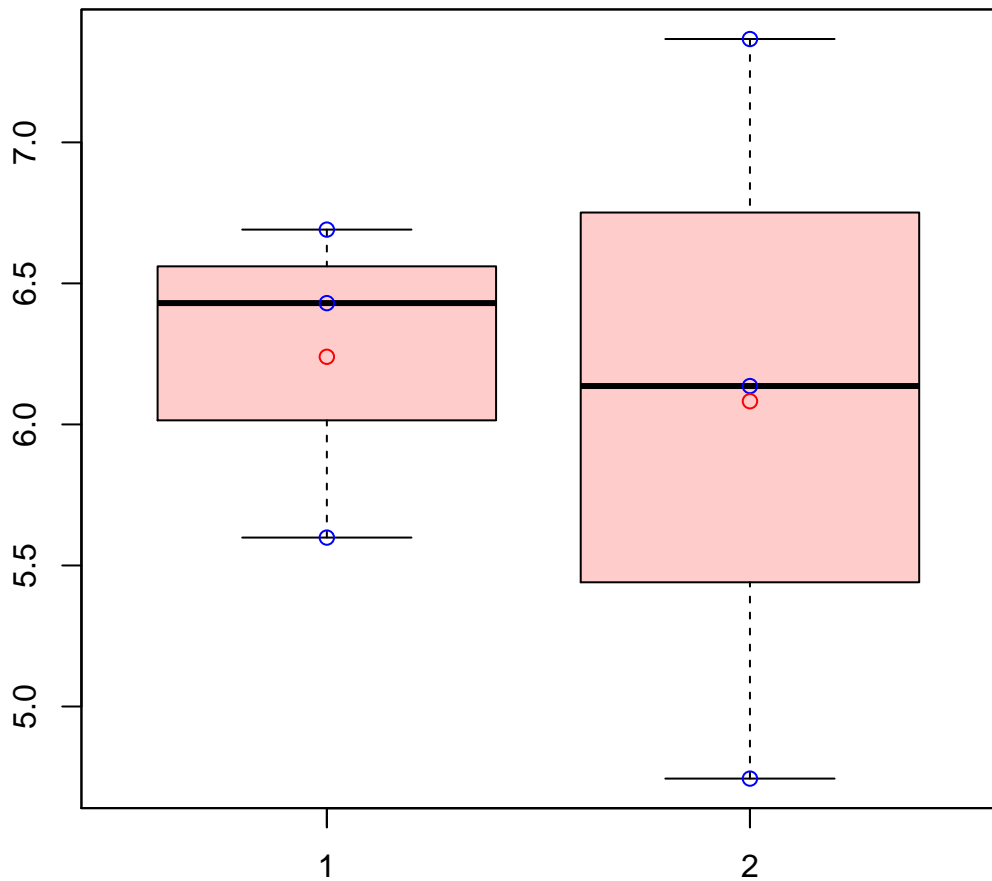

t-Test: p-value = 0.86

# I1I3D1|I1I3D1\_BRADI

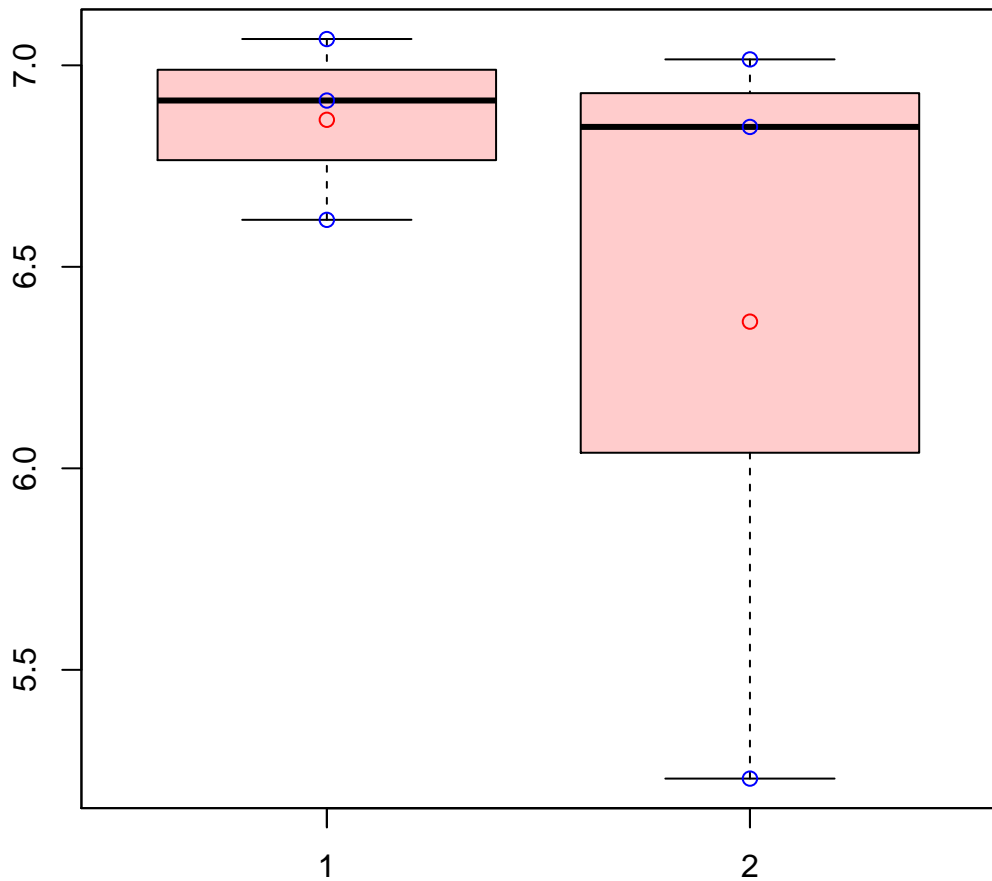

t-Test: p-value = 0.47

# I1I3H9|I1I3H9\_BRADI

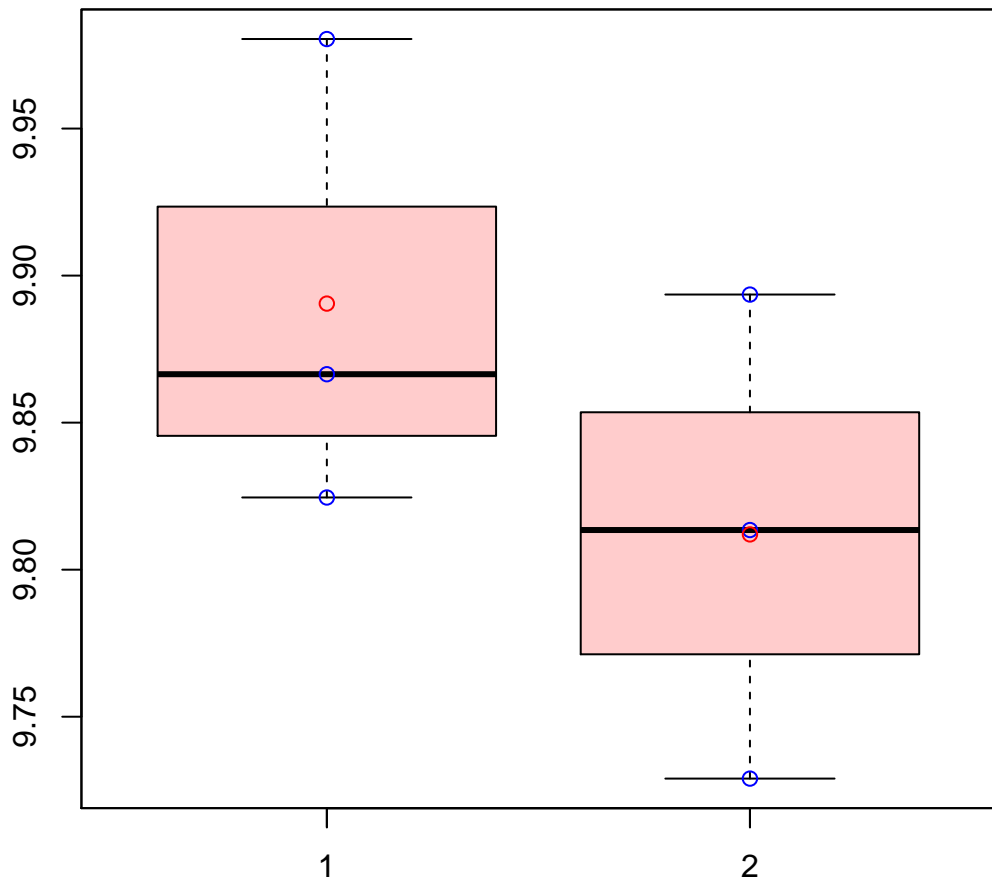

t-Test: p-value = 0.3

# I1I3L3|I1I3L3\_BRADI

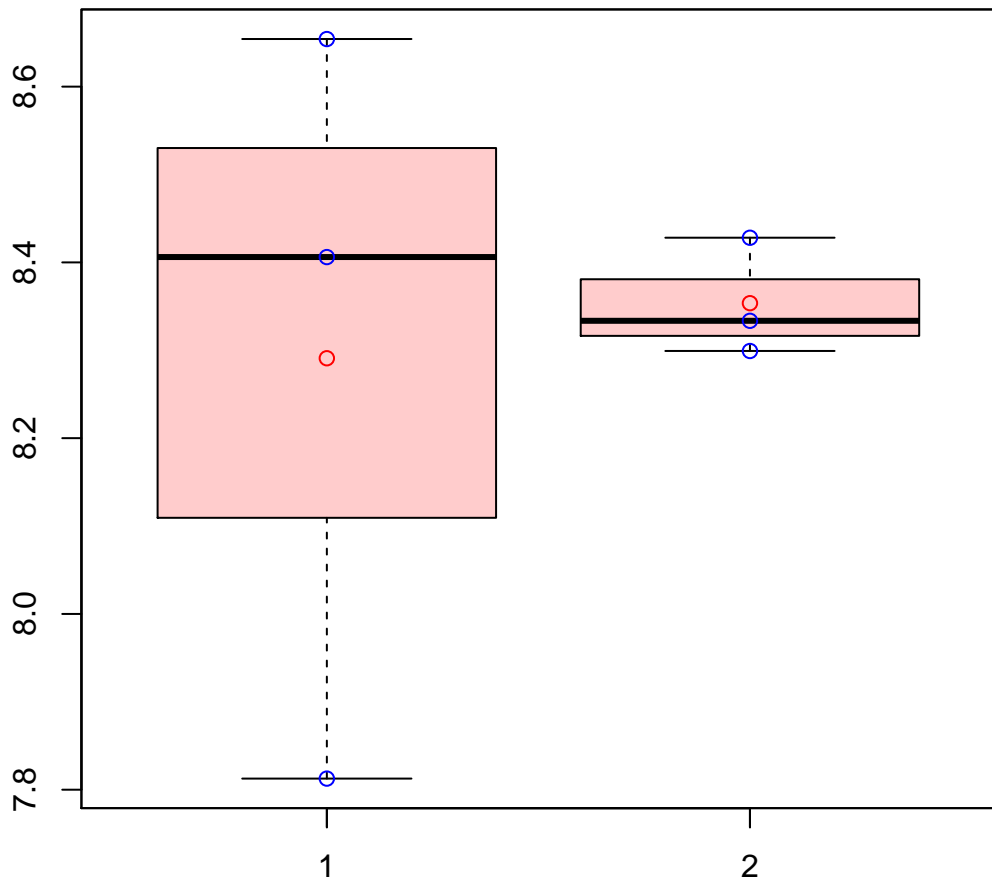

t-Test: p-value = 0.83

# I1I3T4|I1I3T4\_BRADI

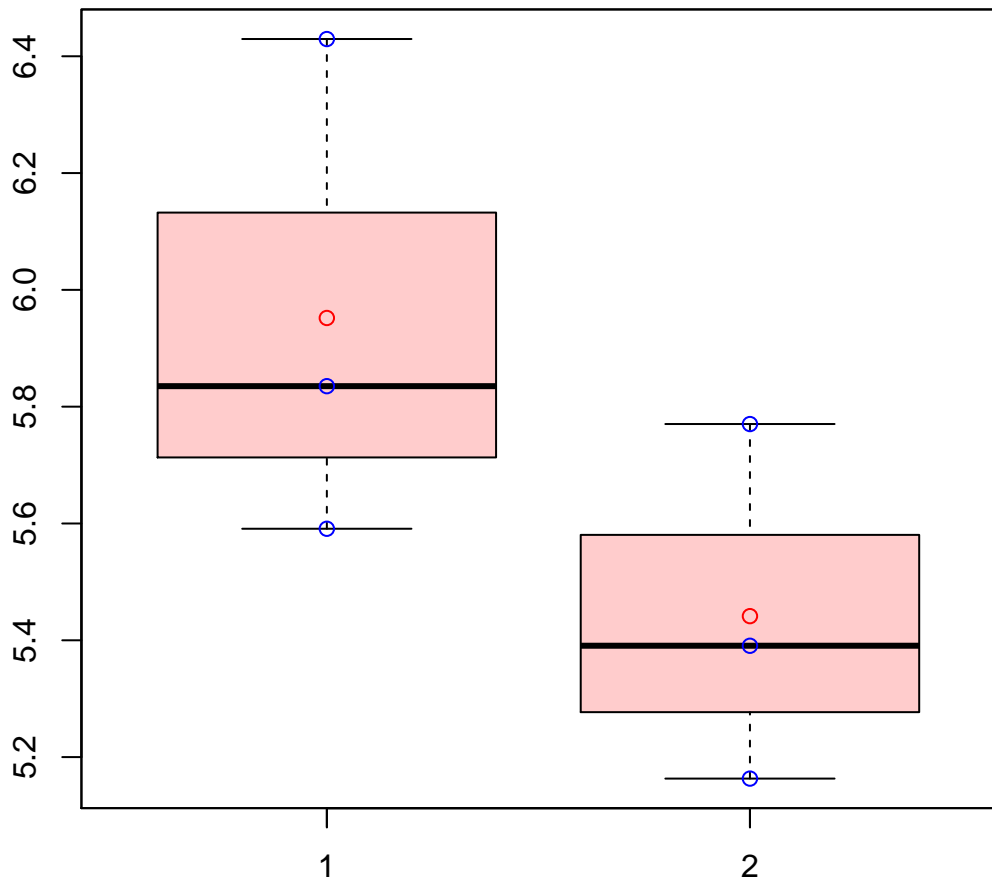

t-Test: p-value = 0.18



# I1I408|I1I408\_BRADI

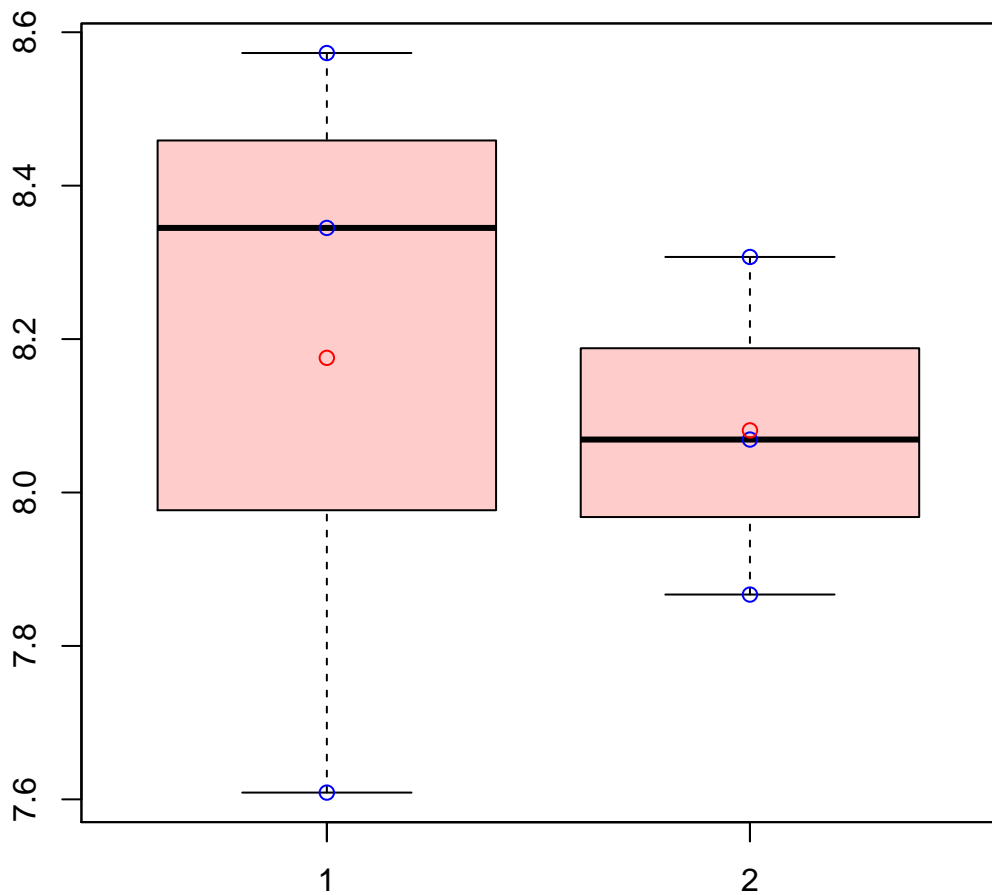

t-Test: p-value = 0.79

# I1I412|I1I412\_BRADI

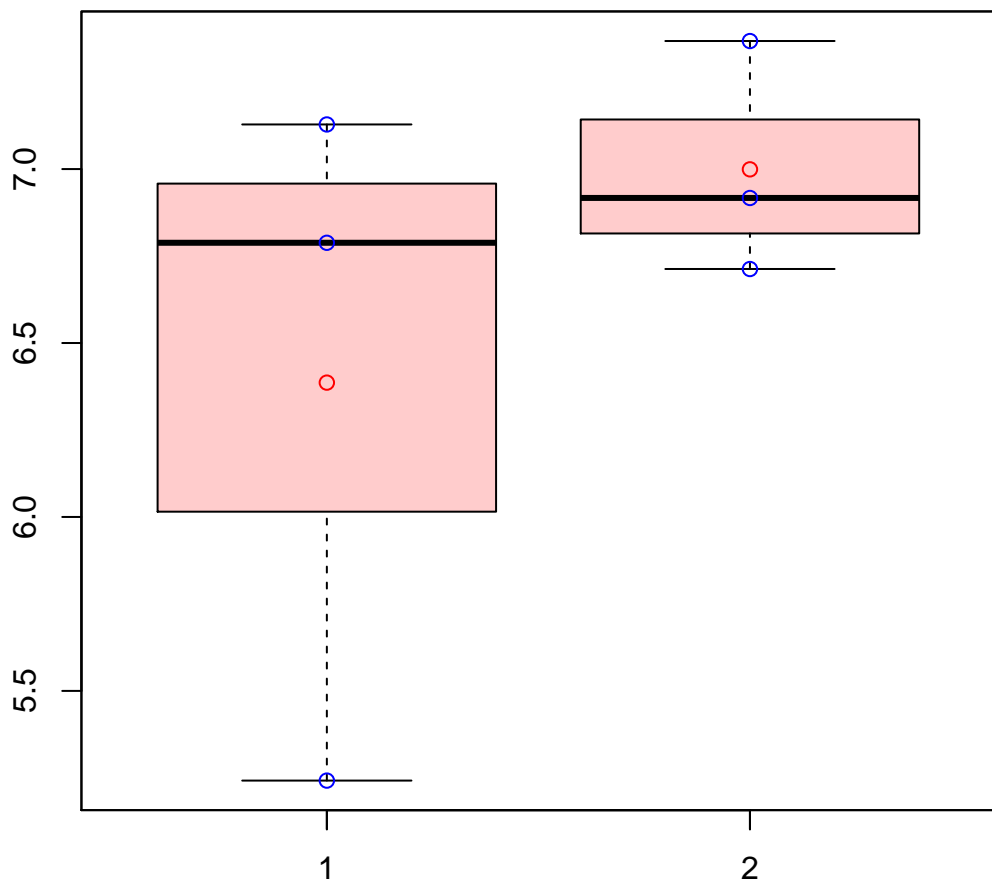

t-Test: p-value = 0.41

# I1I4G9|I1I4G9\_BRADI

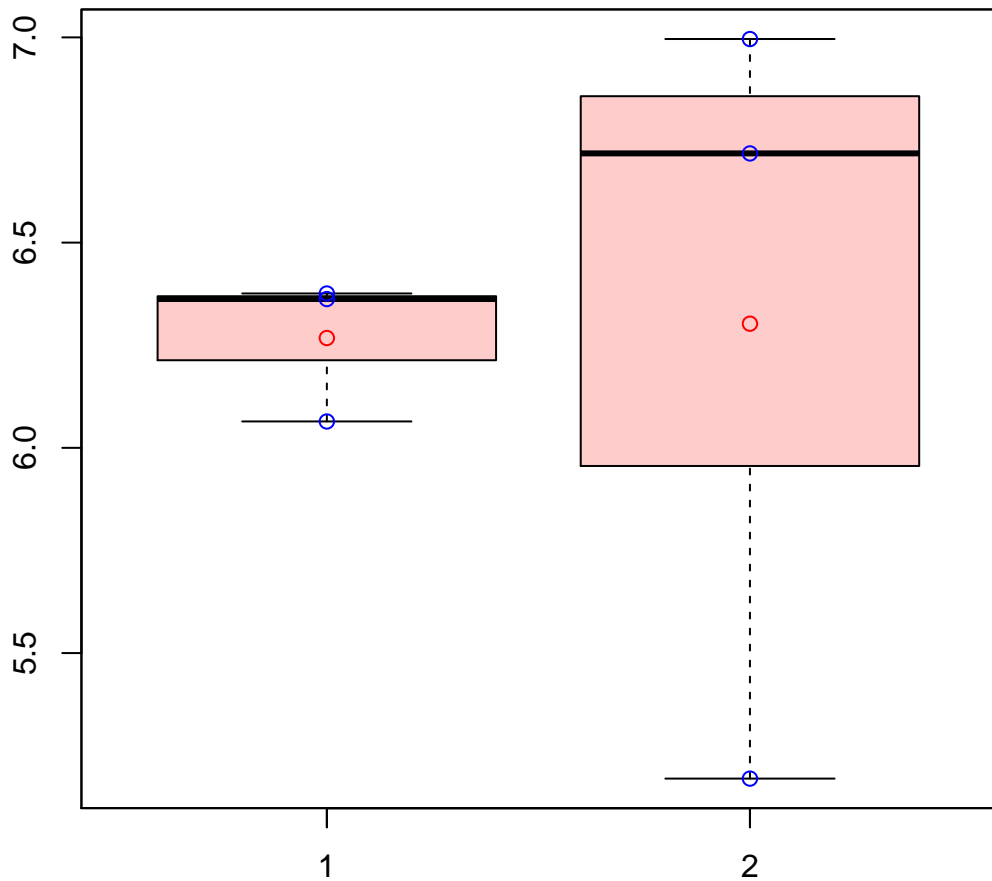

t-Test: p-value = 0.96

# I1I4R5|I1I4R5\_BRADI

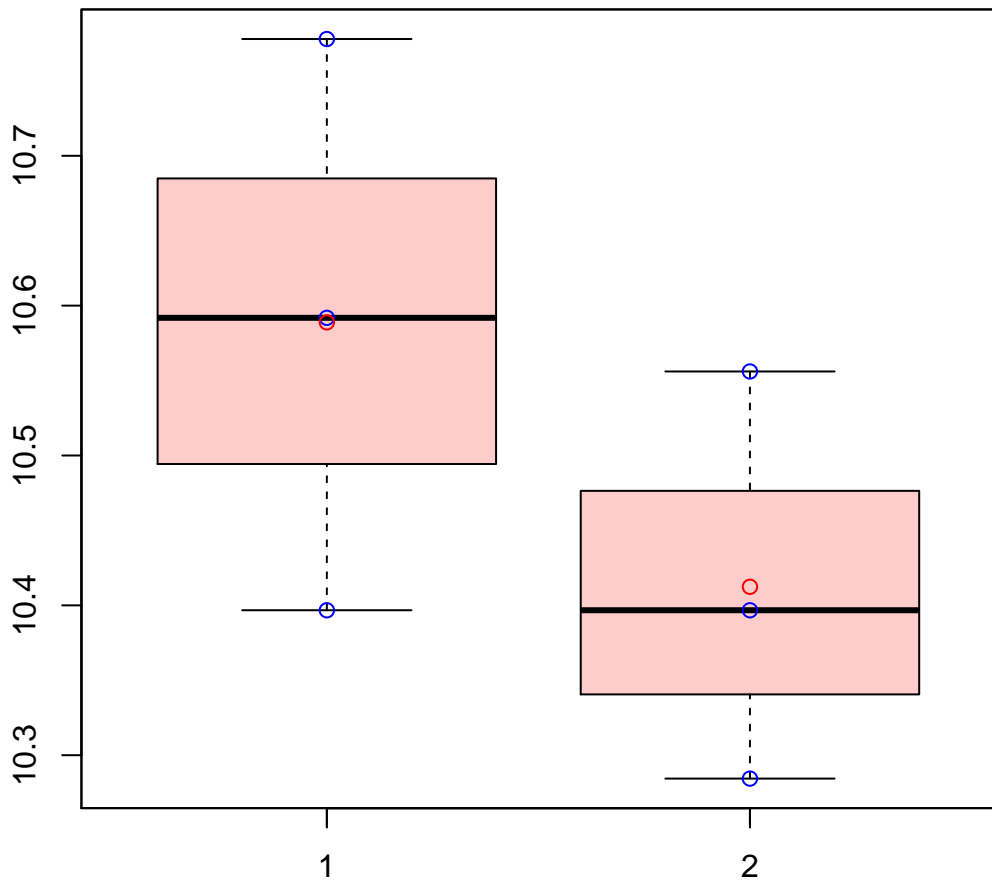

t-Test: p-value = 0.27

# I1I508|I1I508\_BRADI

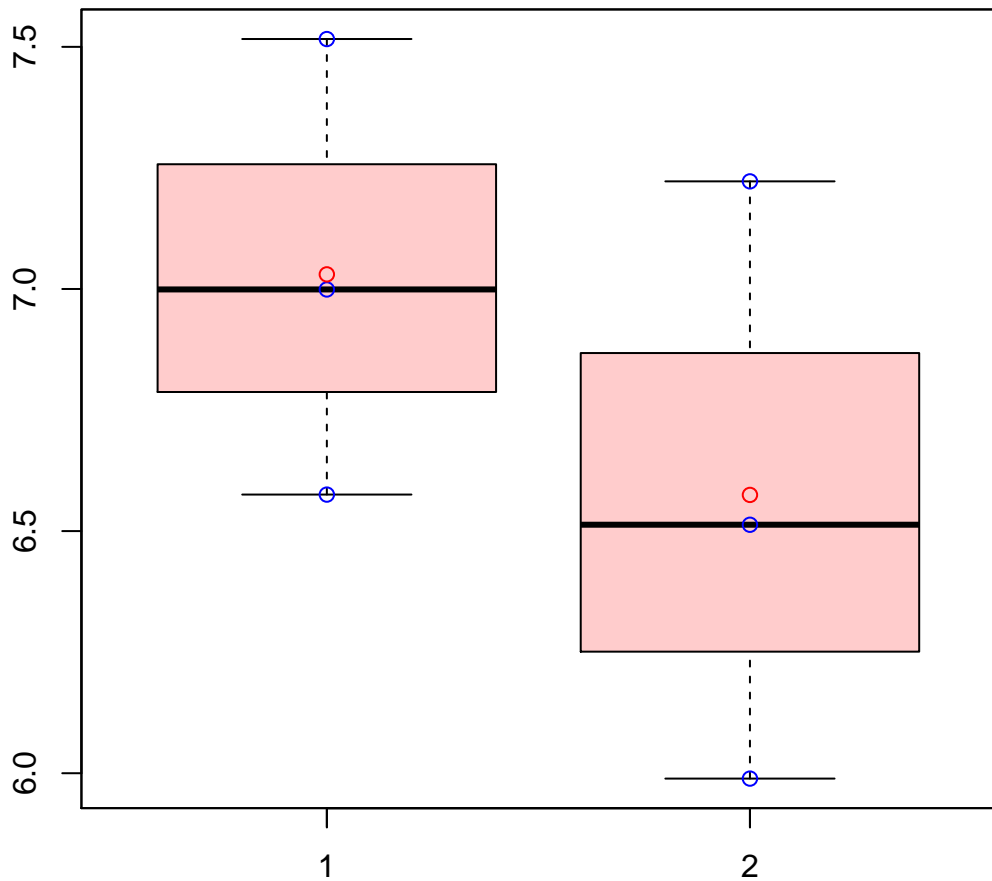

t-Test: p-value = 0.37

# I1I516|I1I516\_BRADI

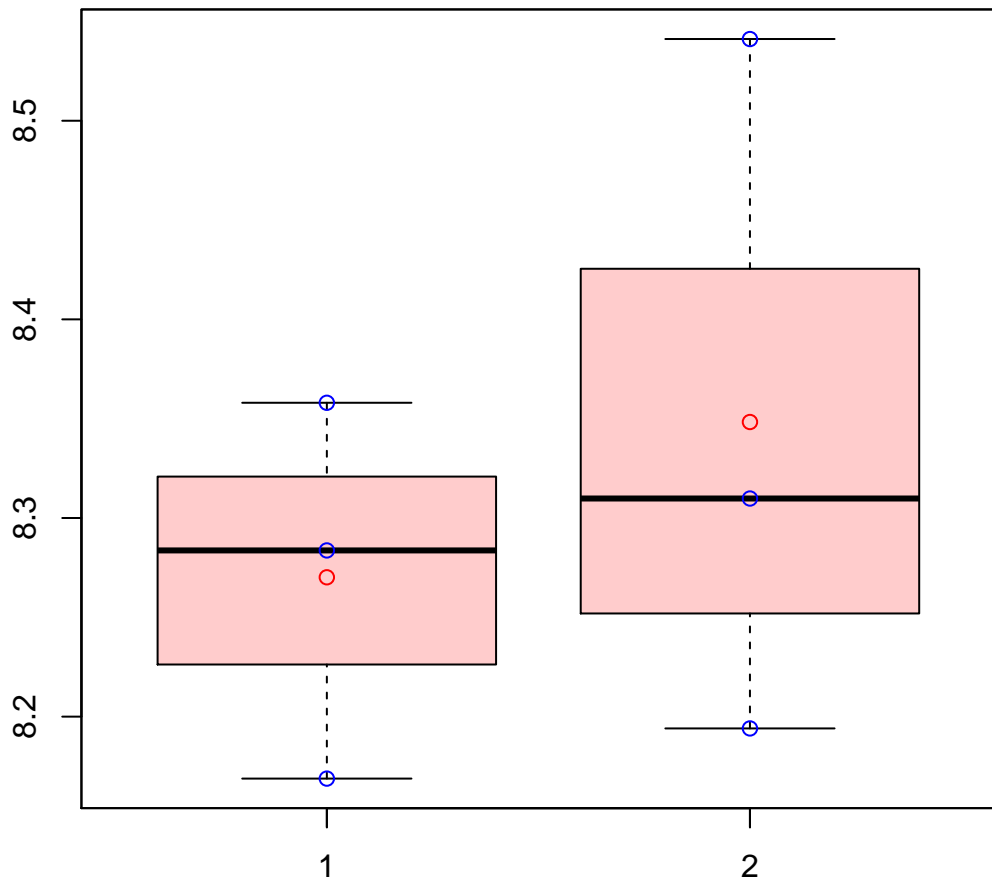

t-Test: p-value = 0.55

# I1I517|I1I517\_BRADI

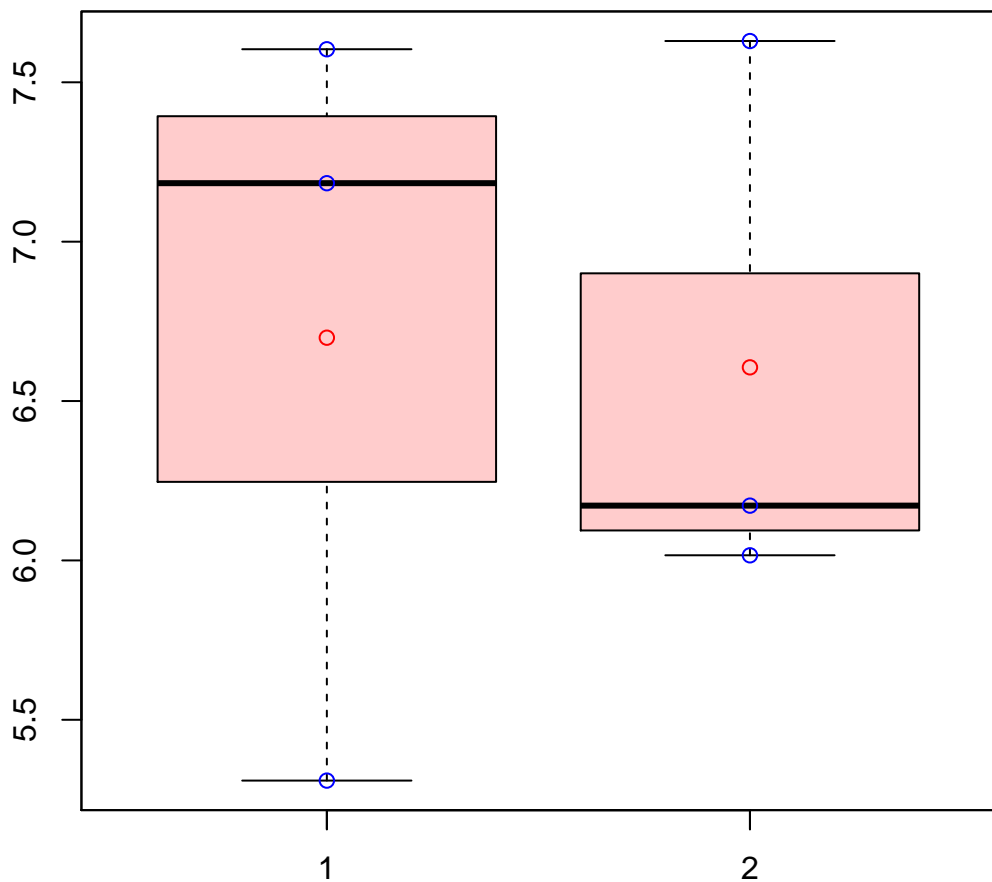

t-Test: p-value = 0.92

# I1I518|I1I518\_BRADI

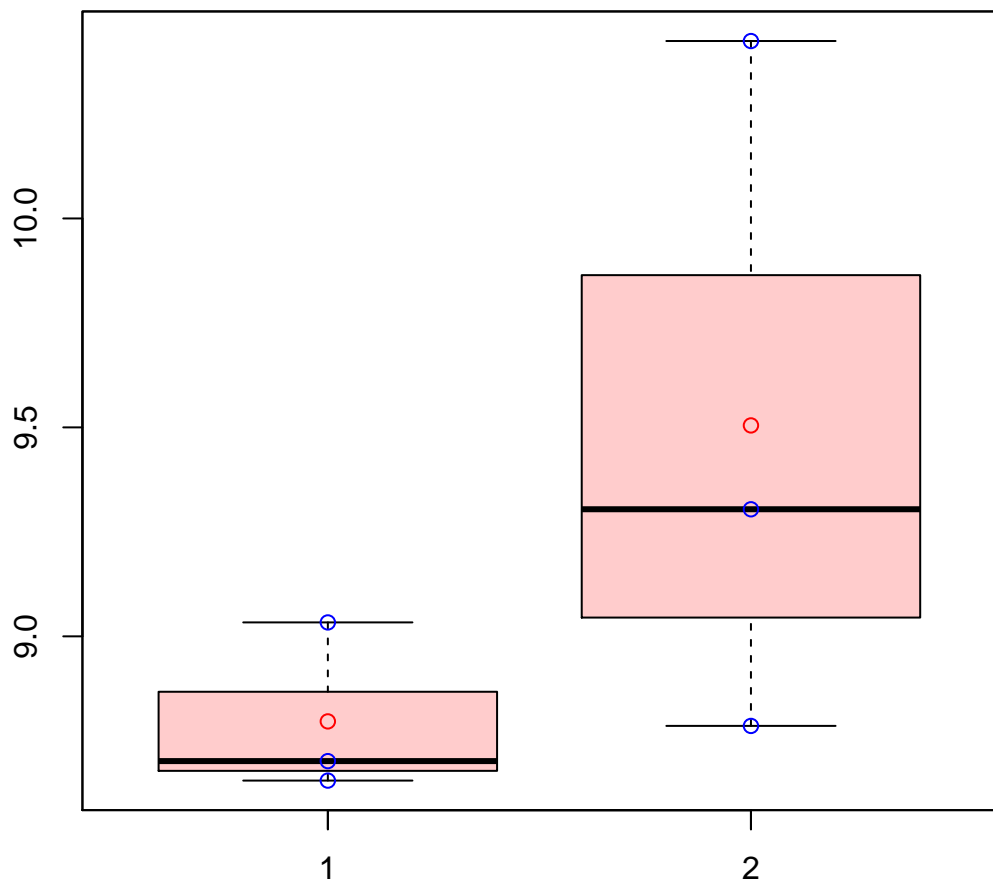

t-Test: p-value = 0.28



# I1I5R4|I1I5R4\_BRADI

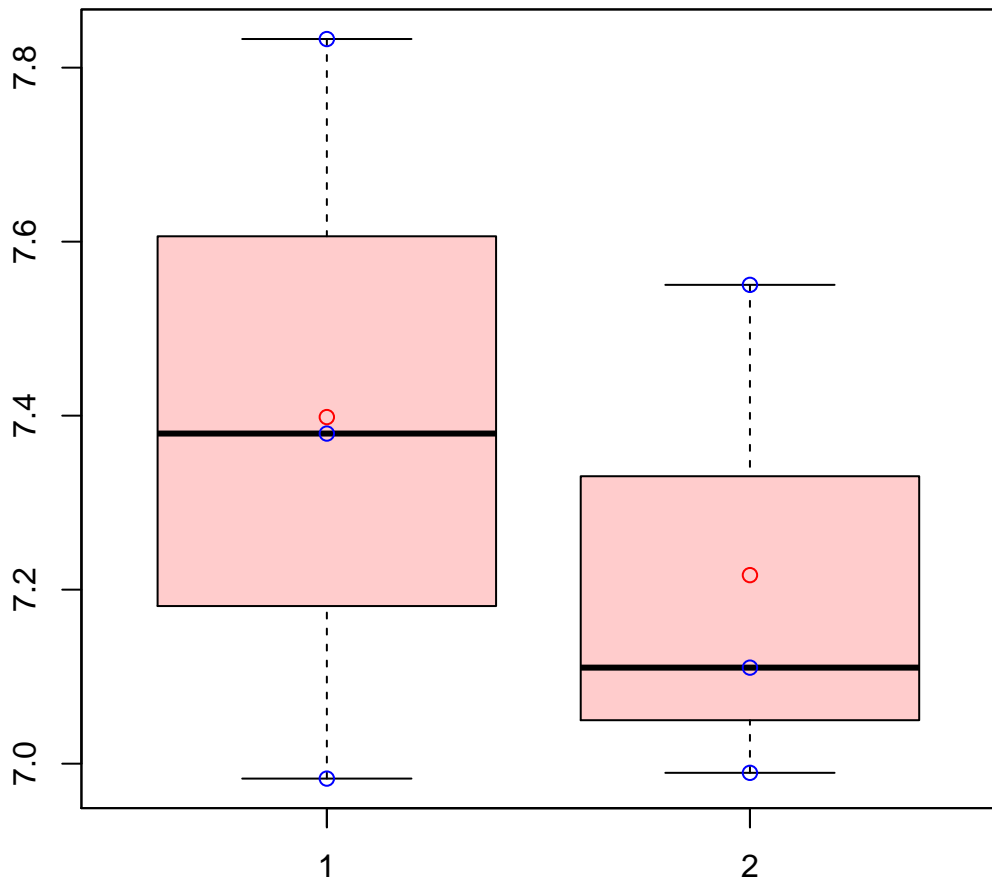

t-Test: p-value = 0.58

# I1I636|I1I636\_BRADI

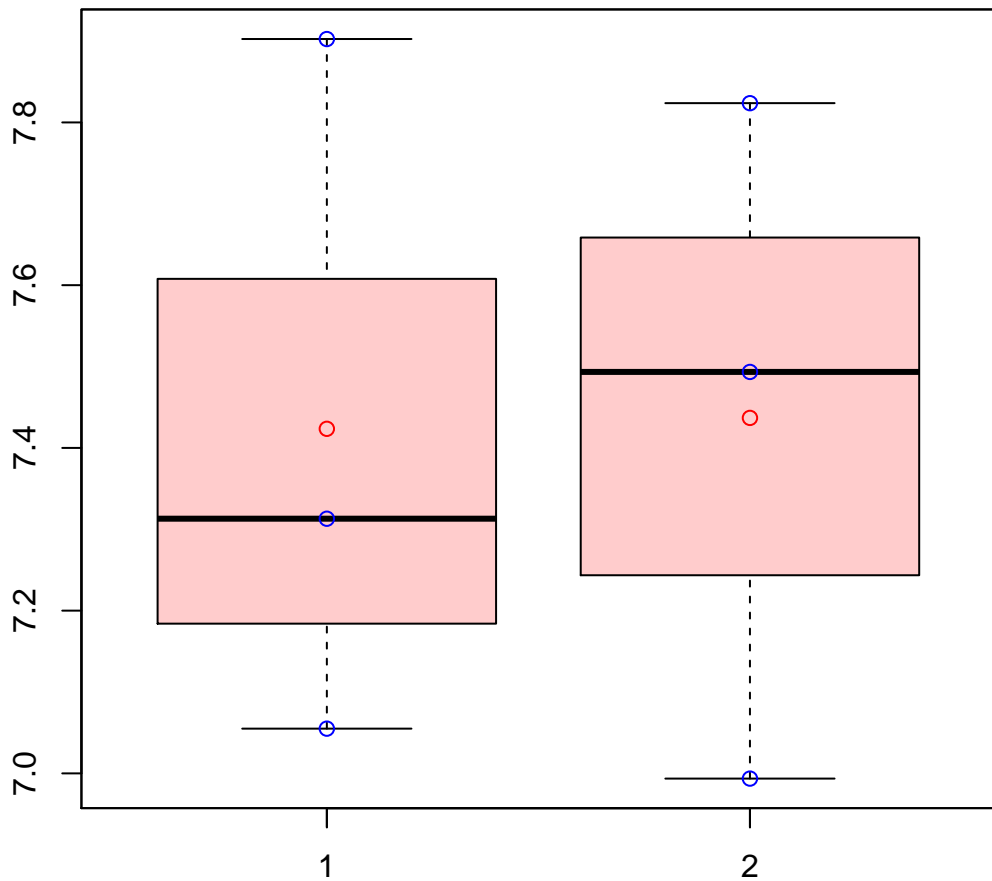

t-Test: p-value = 0.97

# I1I6E2|I1I6E2\_BRADI

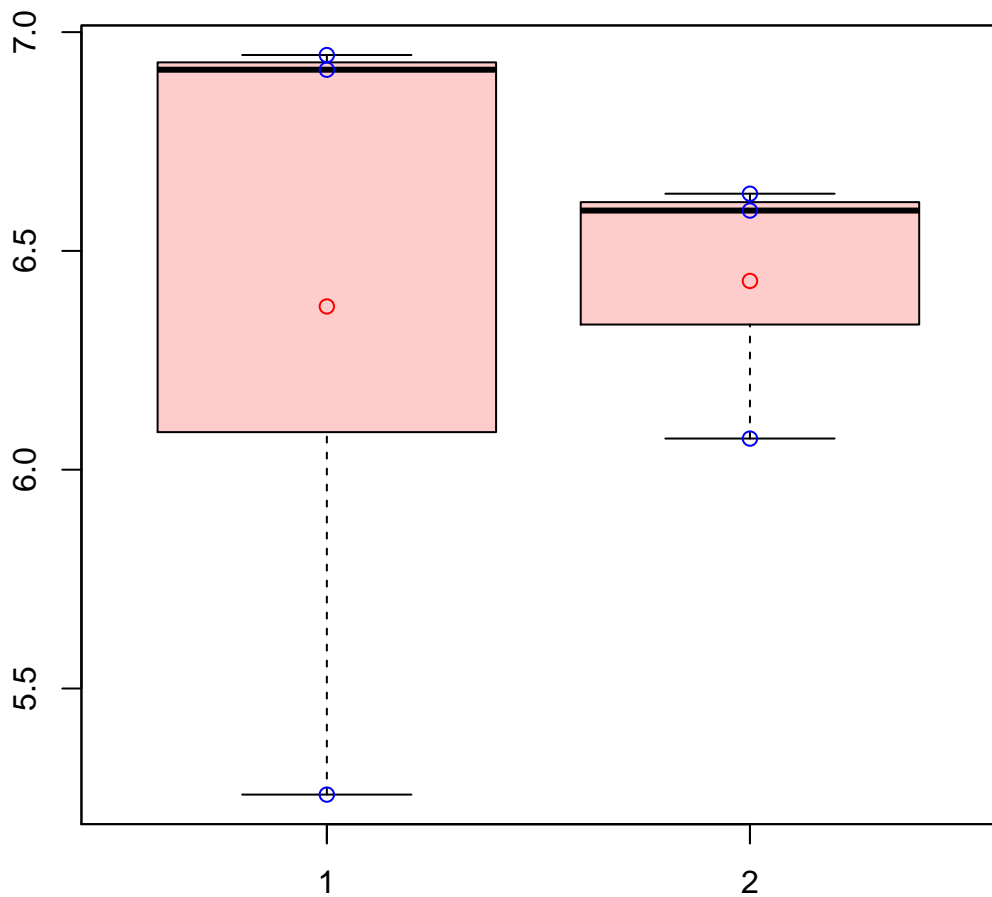

t-Test: p-value = 0.93

# I1I6I4|I1I6I4\_BRADI

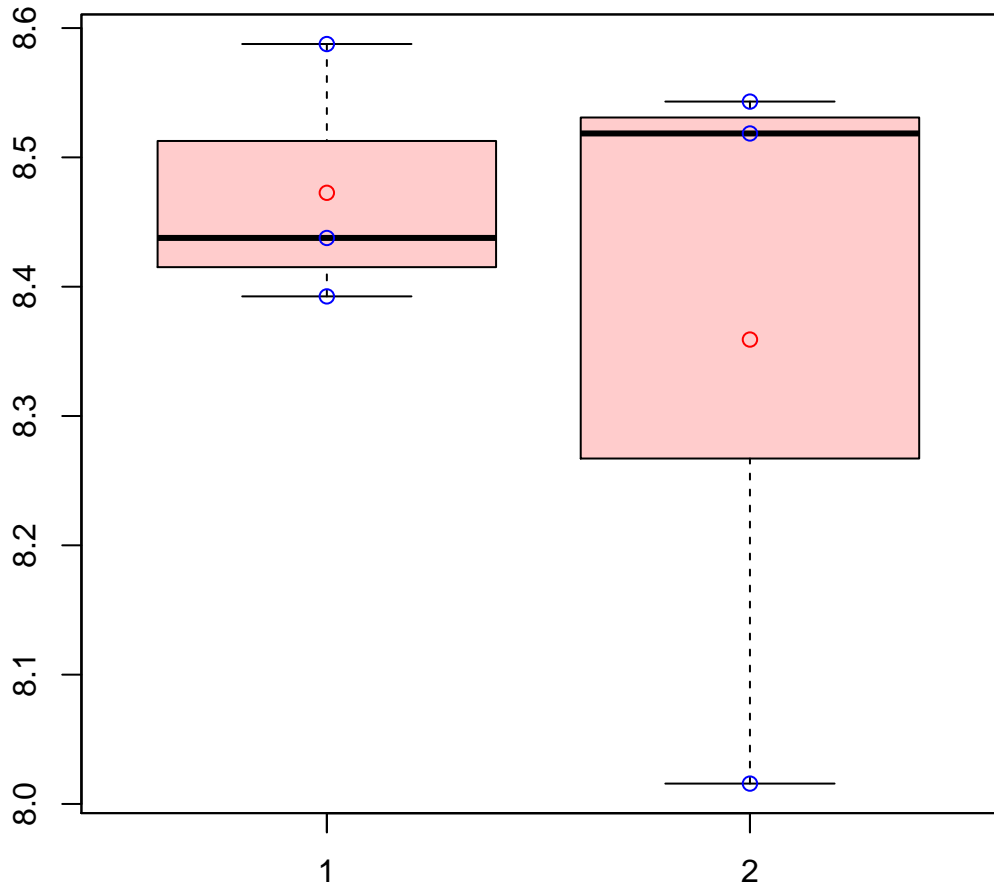

t-Test: p-value = 0.59

# I1I6Q4|I1I6Q4\_BRADI

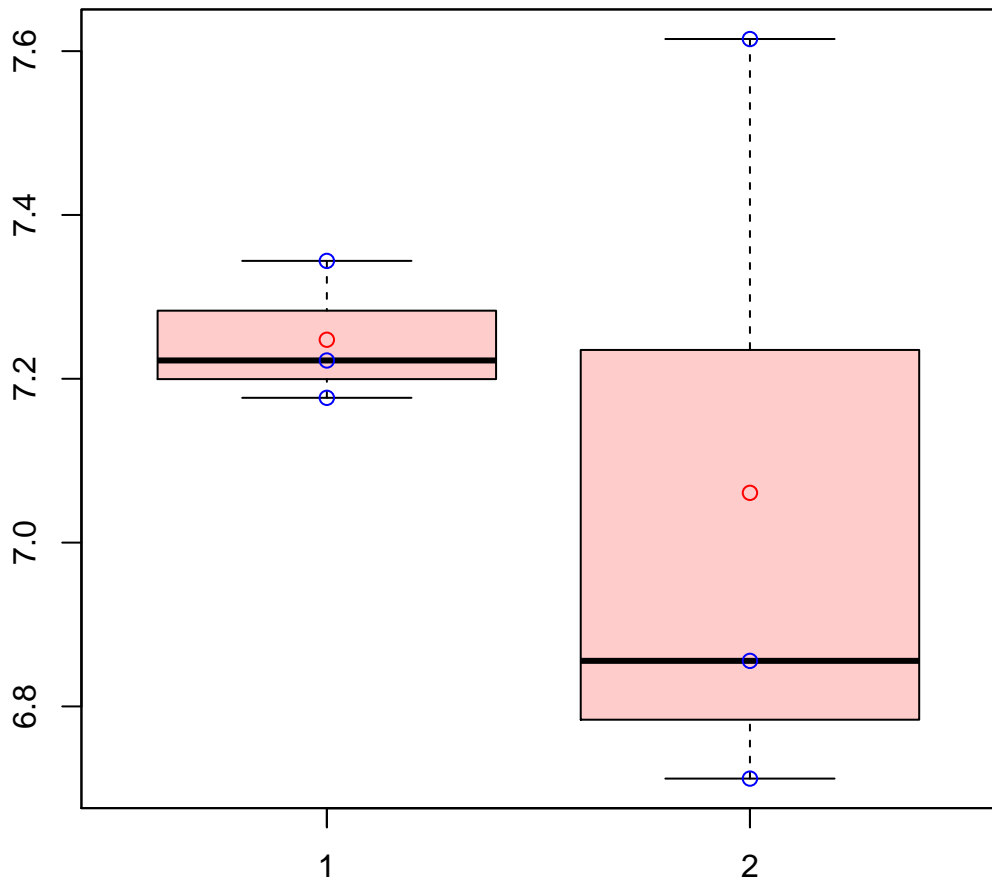

t-Test: p-value = 0.58

# I1I6Q9|I1I6Q9\_BRADI

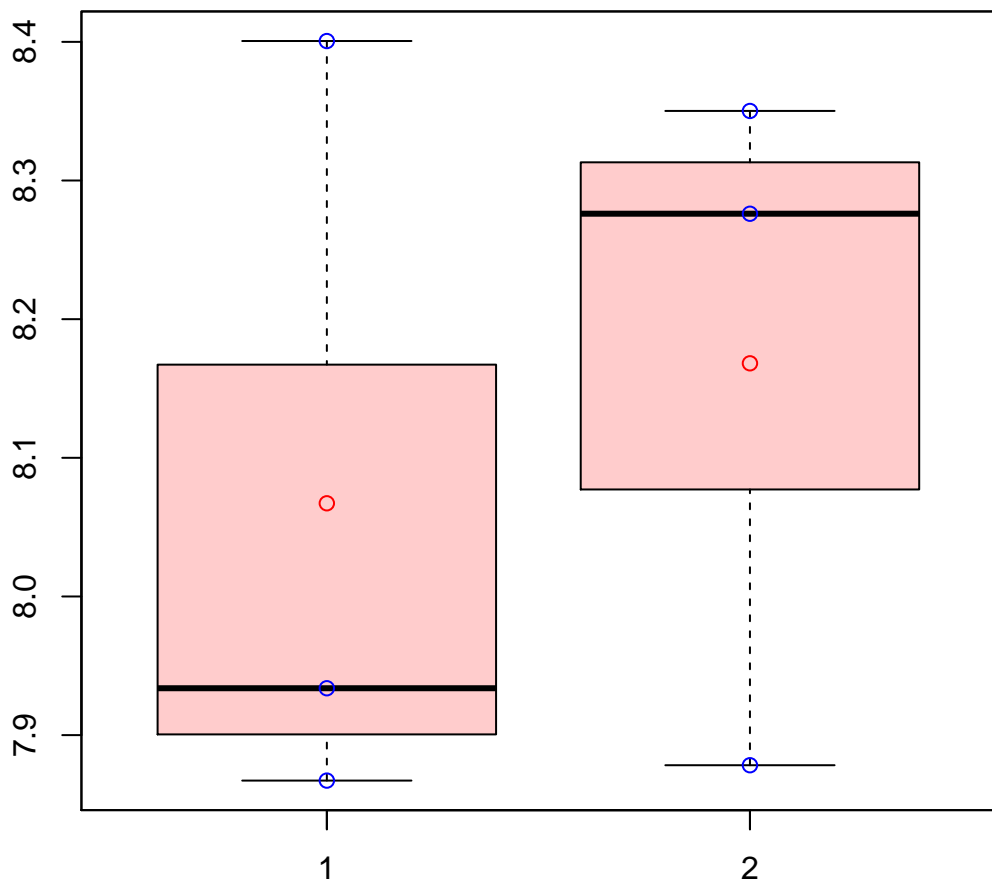

t-Test: p-value = 0.67

# I11780|I11780\_BRADI

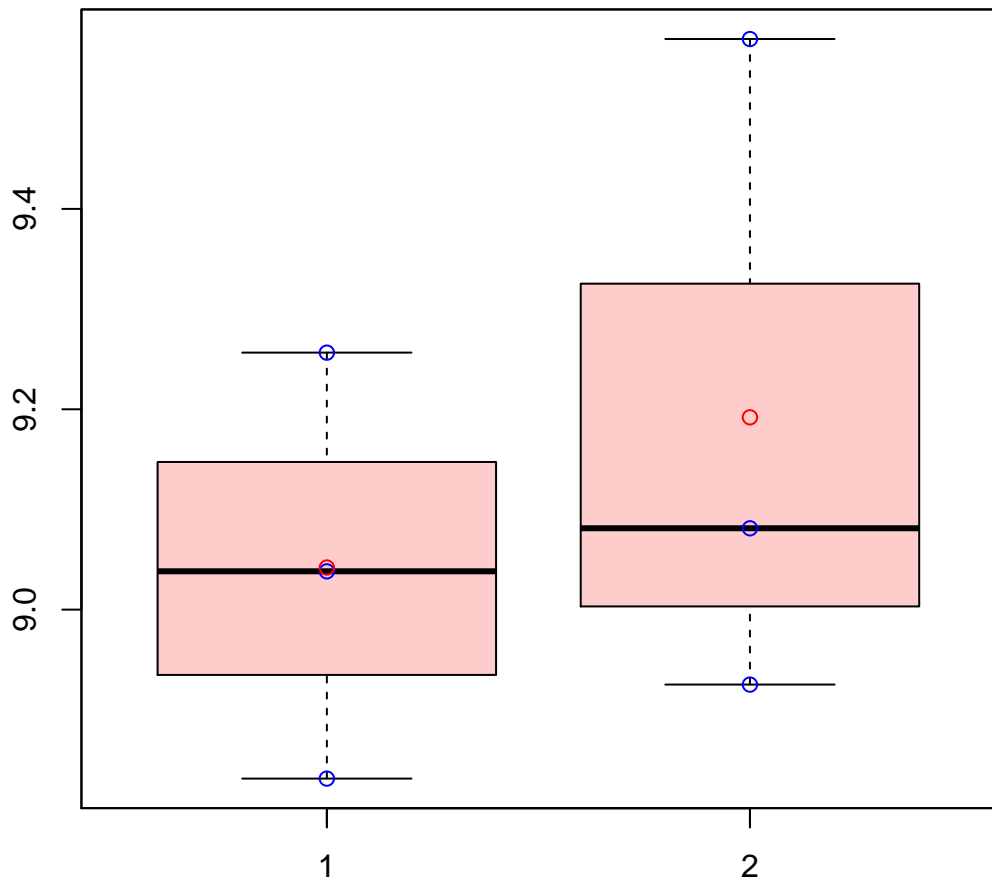

t-Test: p-value = 0.56

# I1I7G4|I1I7G4\_BRADI

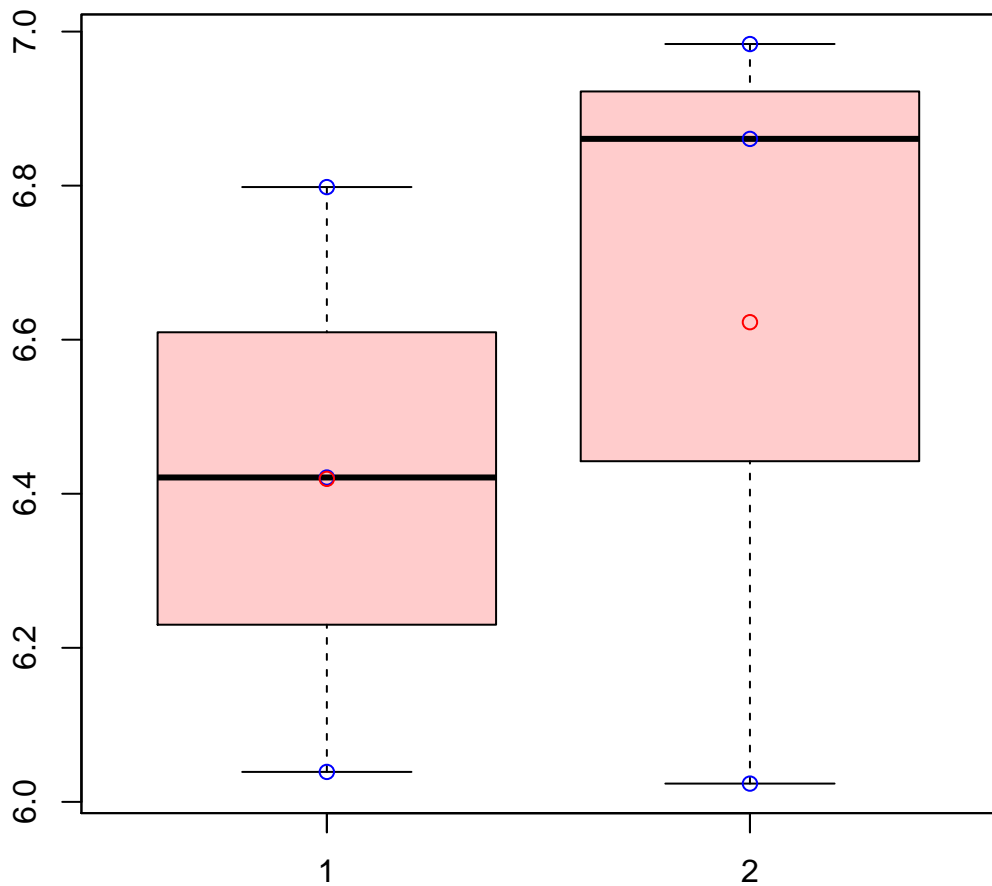

t-Test: p-value = 0.62



# I117K9|I117K9\_BRADI

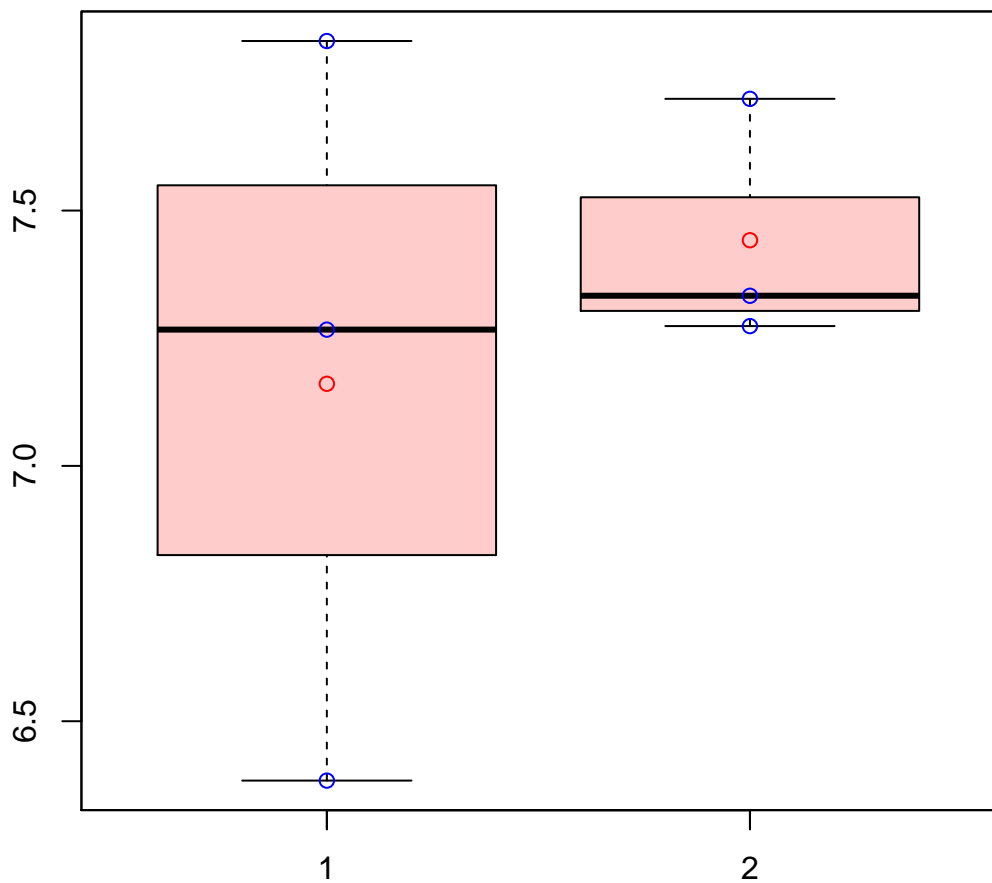

t-Test: p-value = 0.58

# I1I7T6|I1I7T6\_BRADI

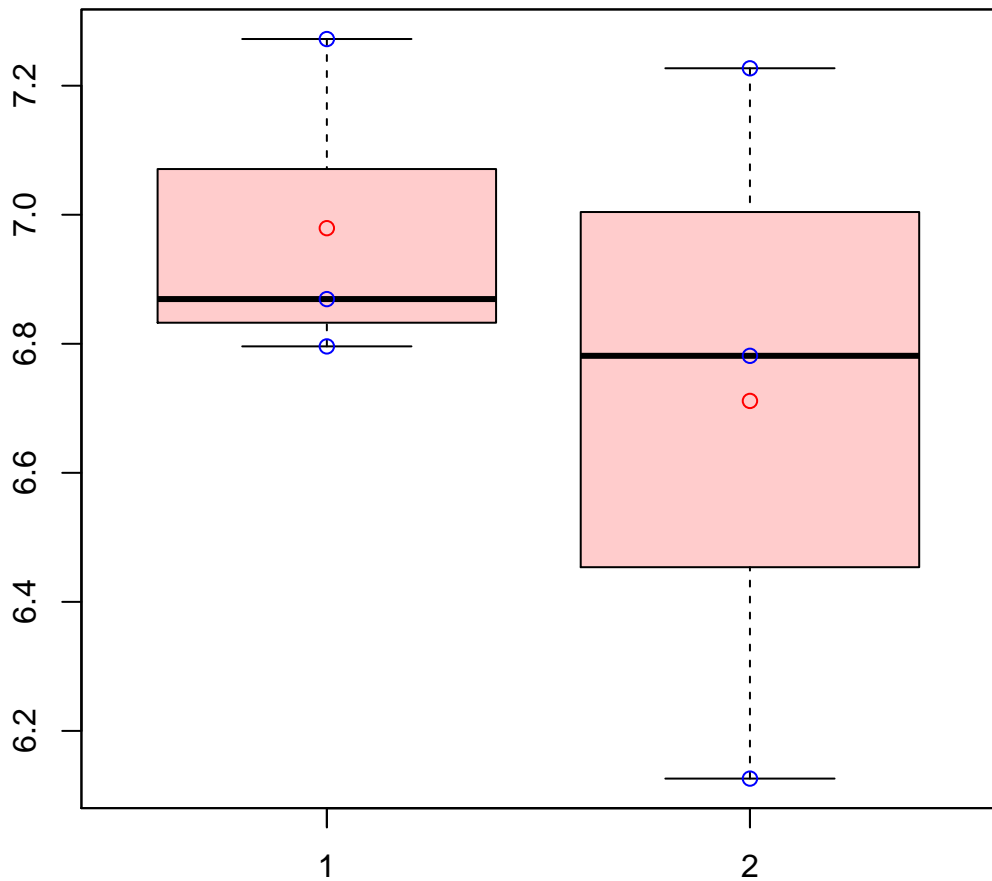

t-Test: p-value = 0.51

# I1I7Y1|I1I7Y1\_BRADI

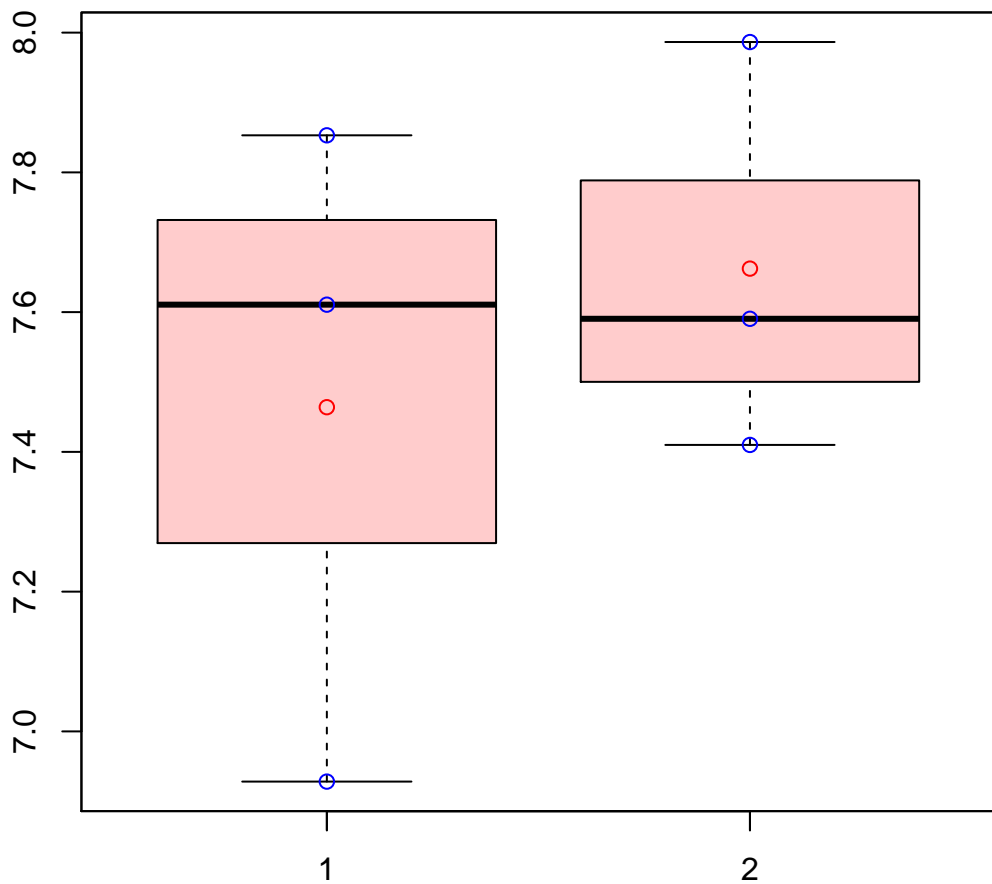

t-Test: p-value = 0.58

# I1I867|I1I867\_BRADI

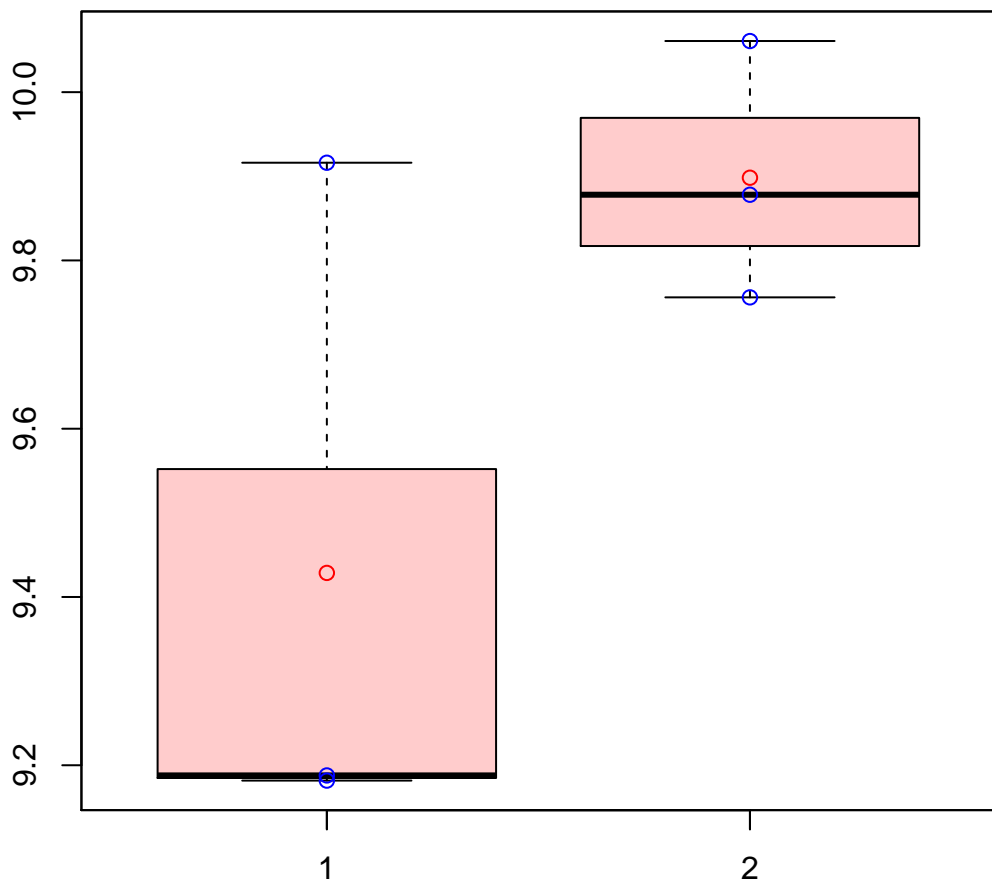

t-Test: p-value = 0.19

# I1I8C5|I1I8C5\_BRADI

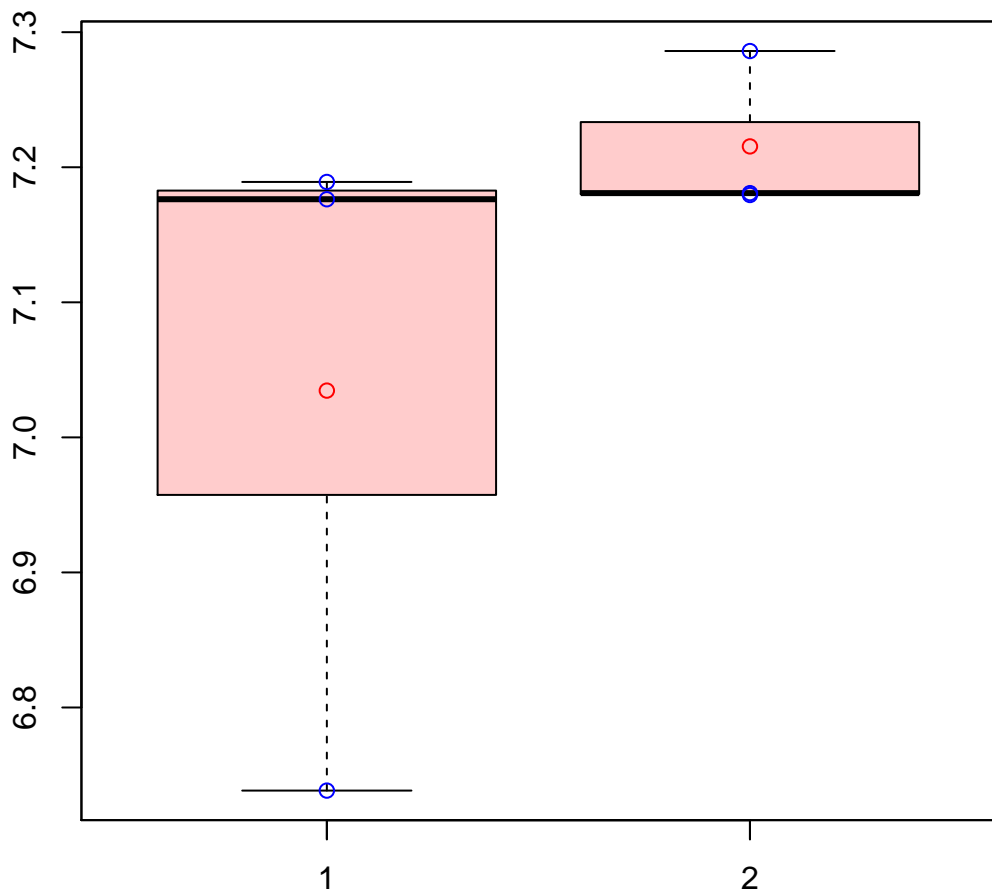

t-Test: p-value = 0.35

# I1I8D8|I1I8D8\_BRADI

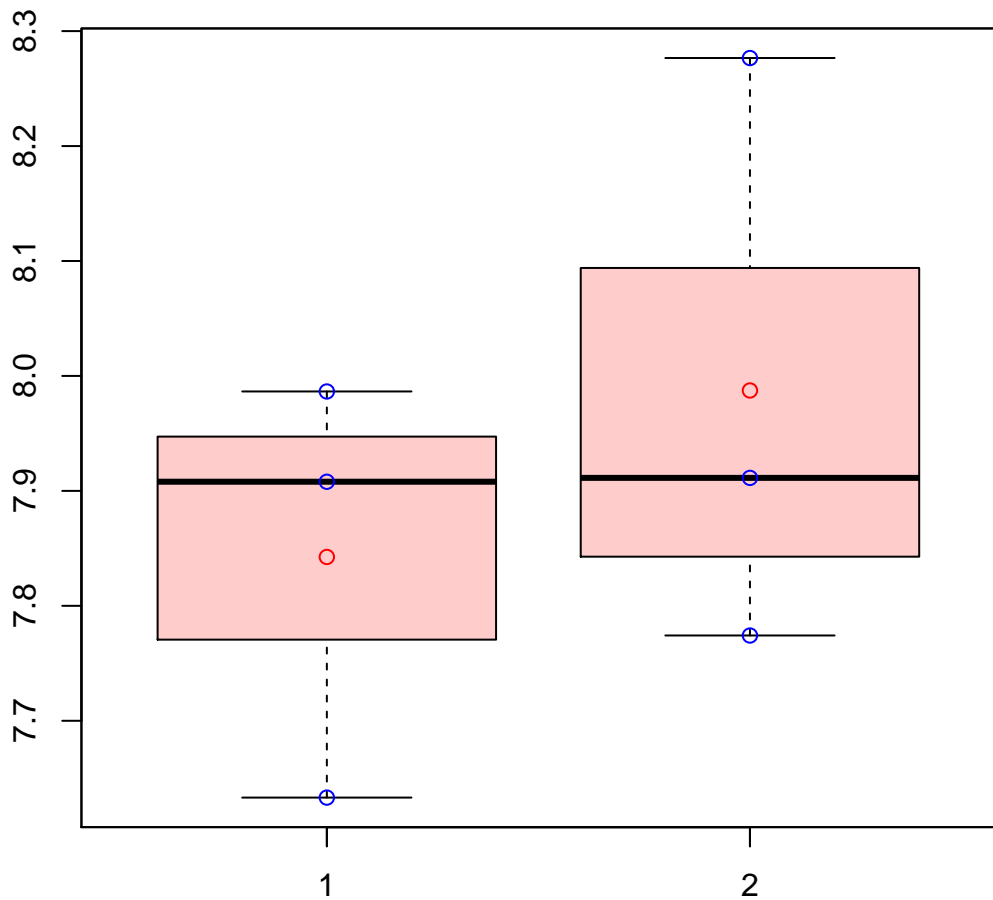

t-Test: p-value = 0.48

# I1I8T2|I1I8T2\_BRADI

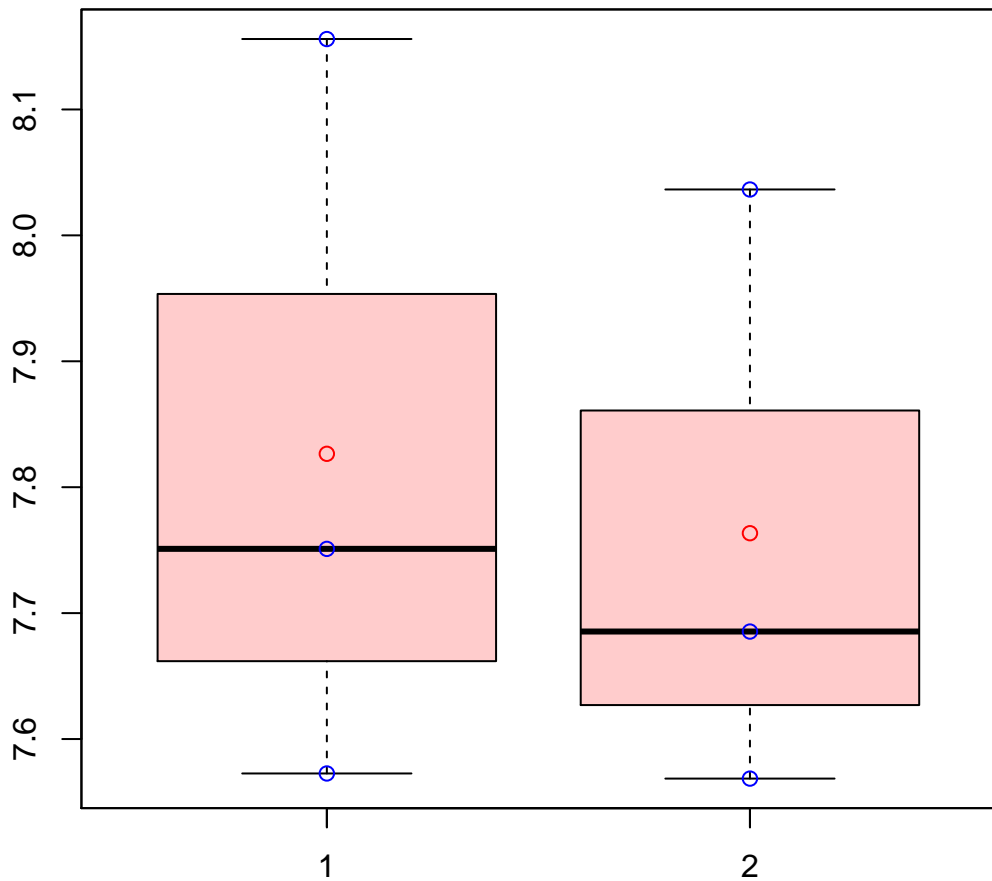

t-Test: p-value = 0.79

# I1I8W1|I1I8W1\_BRADI

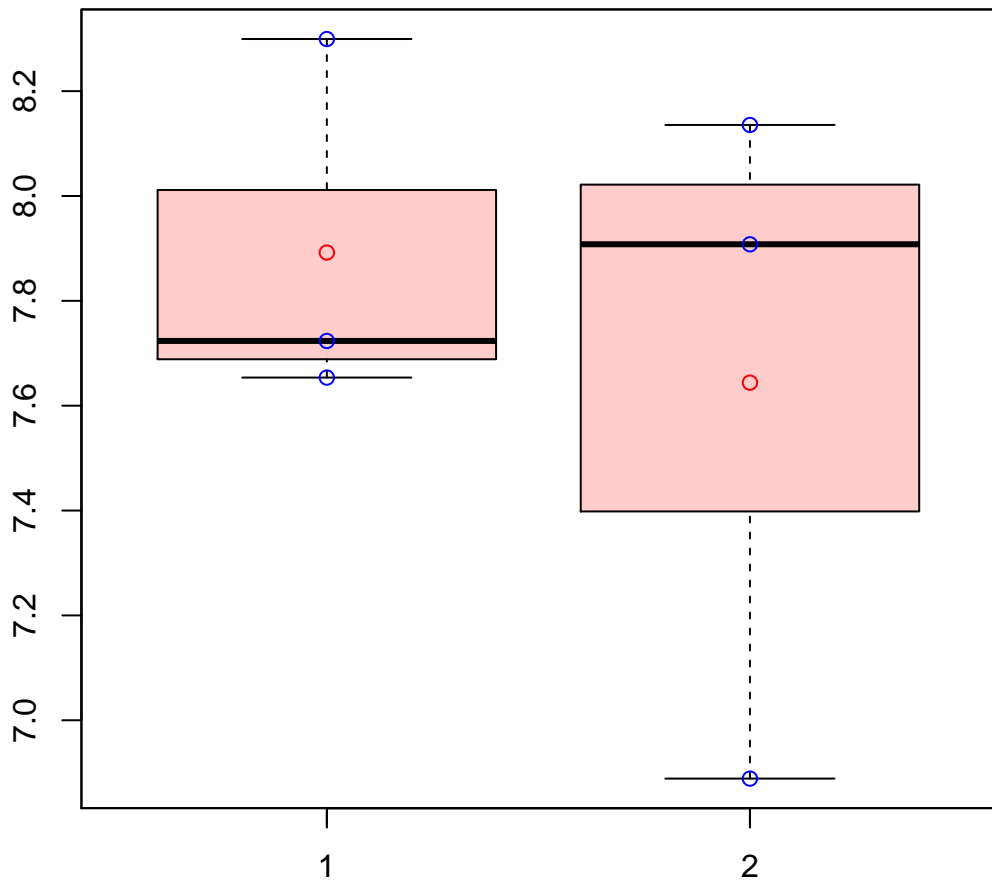

t-Test: p-value = 0.61



# I1I8X4|I1I8X4\_BRADI

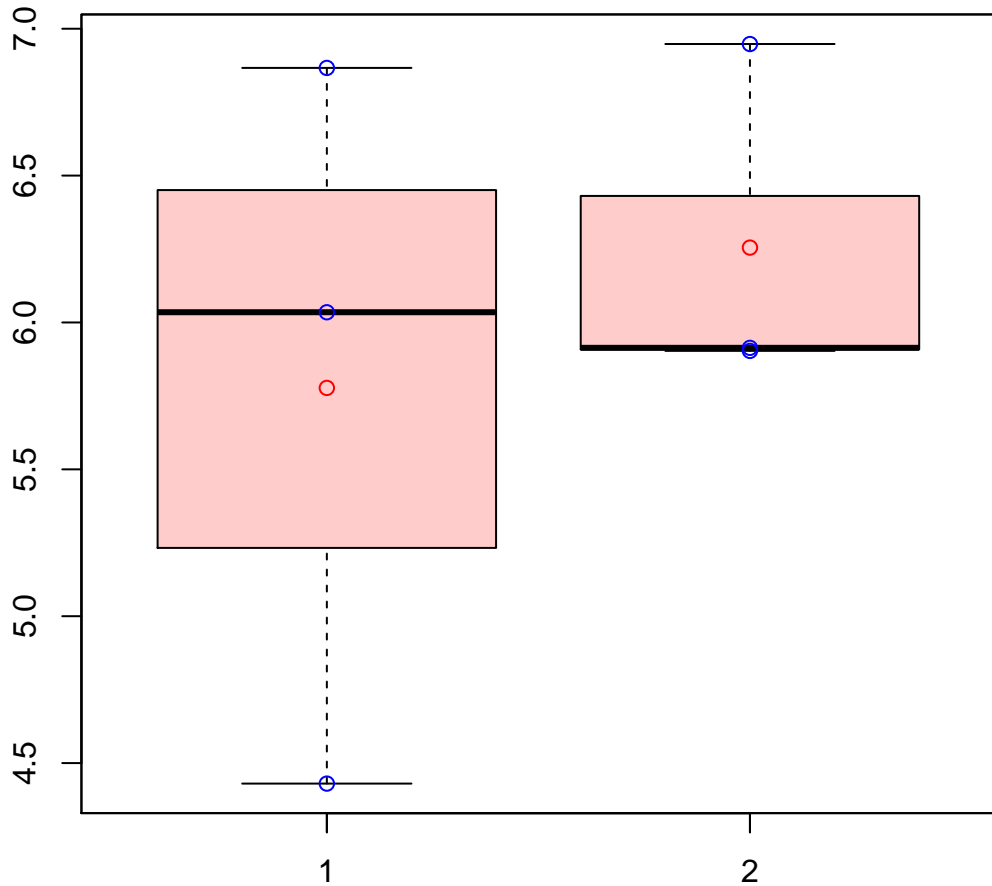

t-Test: p-value = 0.59

# I1I971|I1I971\_BRADI

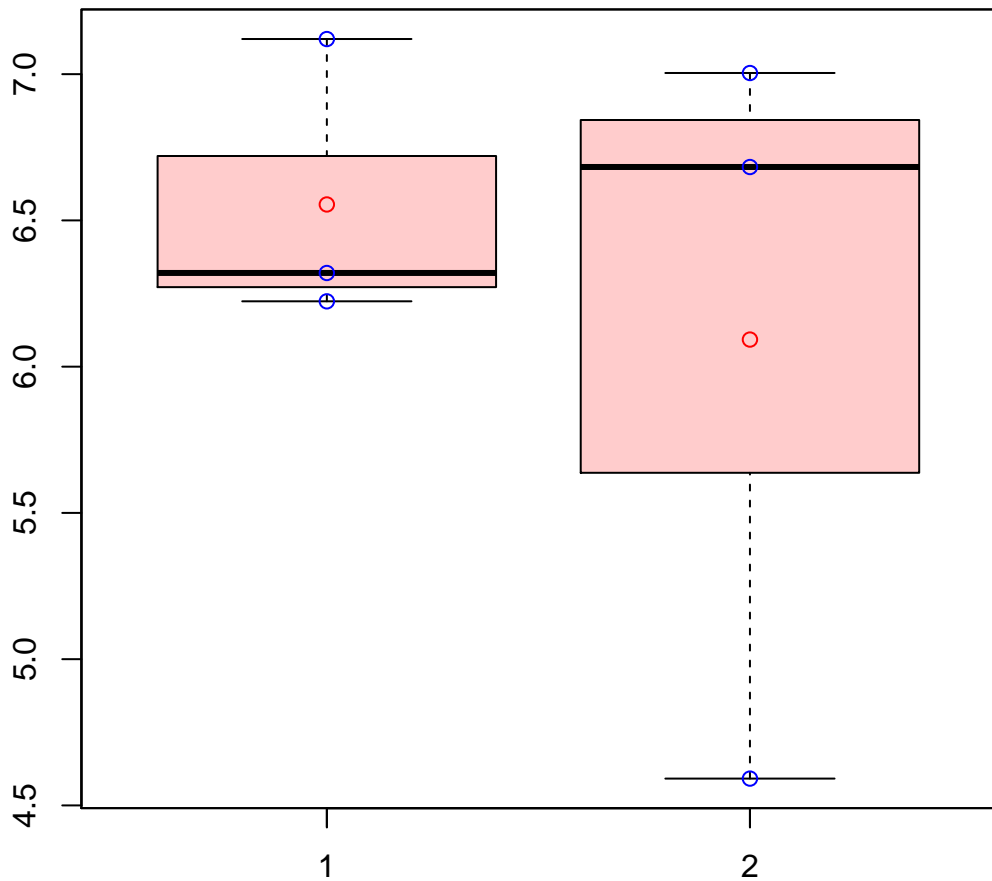

t-Test: p-value = 0.61

# I1I9T1|I1I9T1\_BRADI

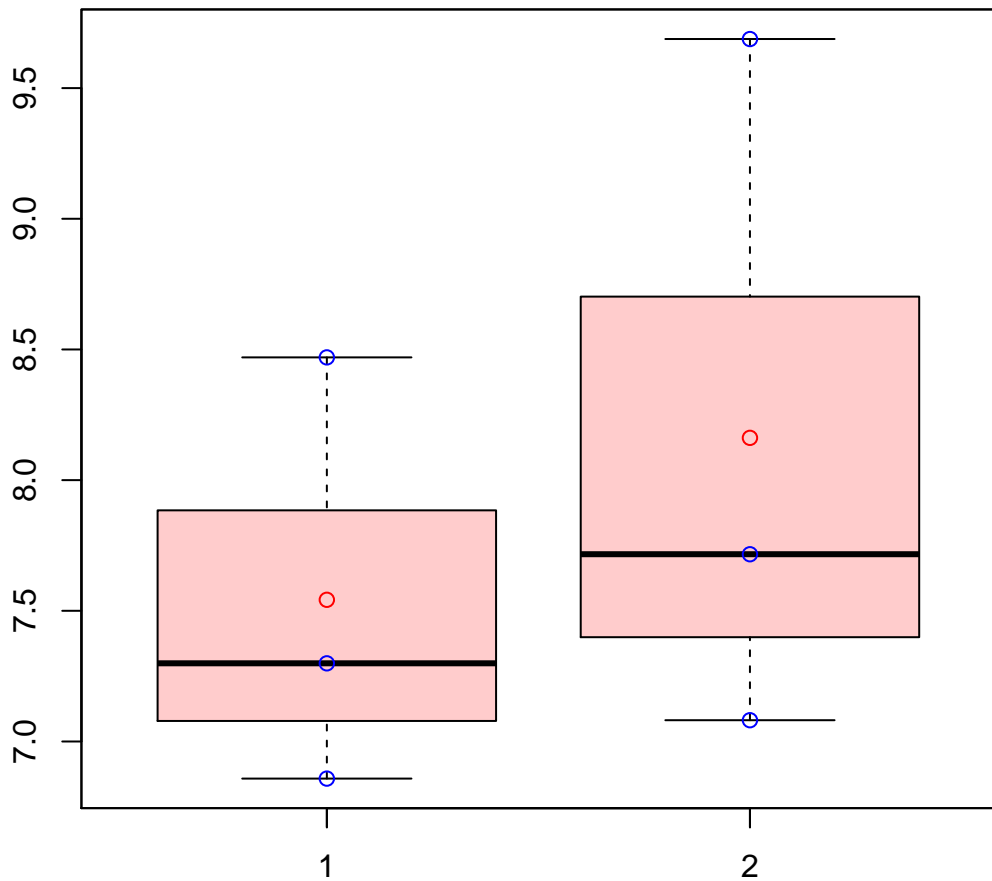

t-Test: p-value = 0.54

# I1I9Y4|I1I9Y4\_BRADI

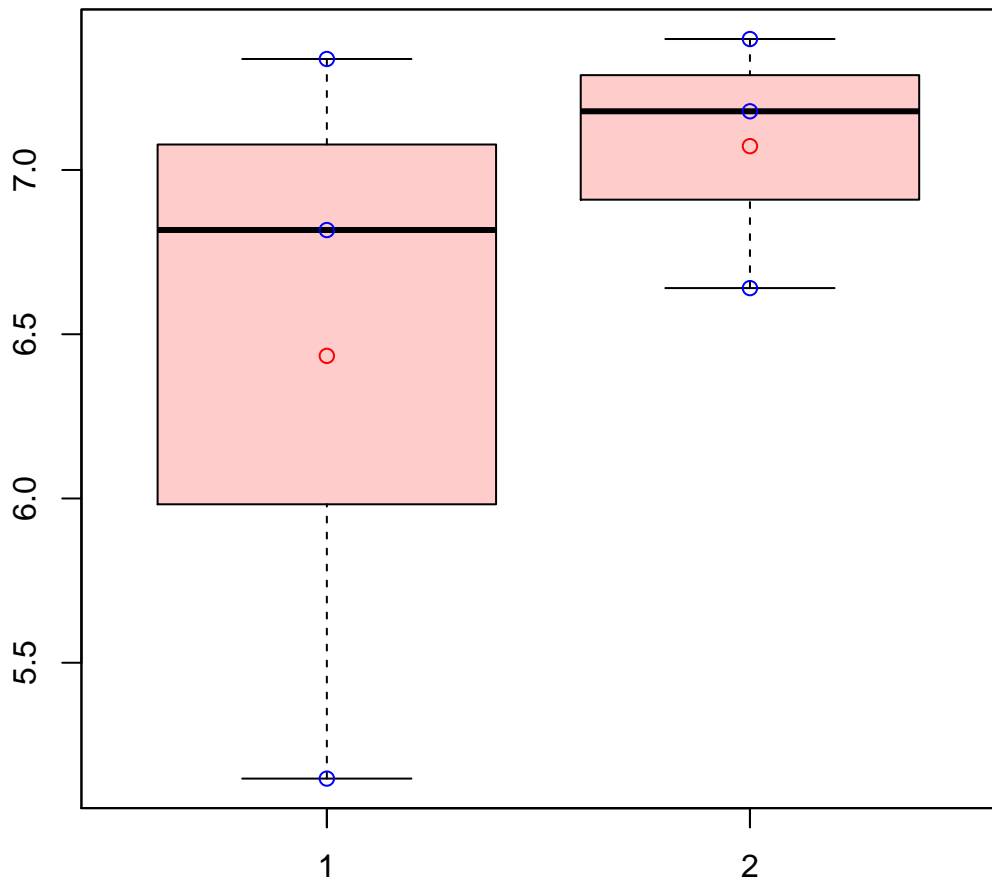

t-Test: p-value = 0.44

# I1IA21|I1IA21\_BRADI

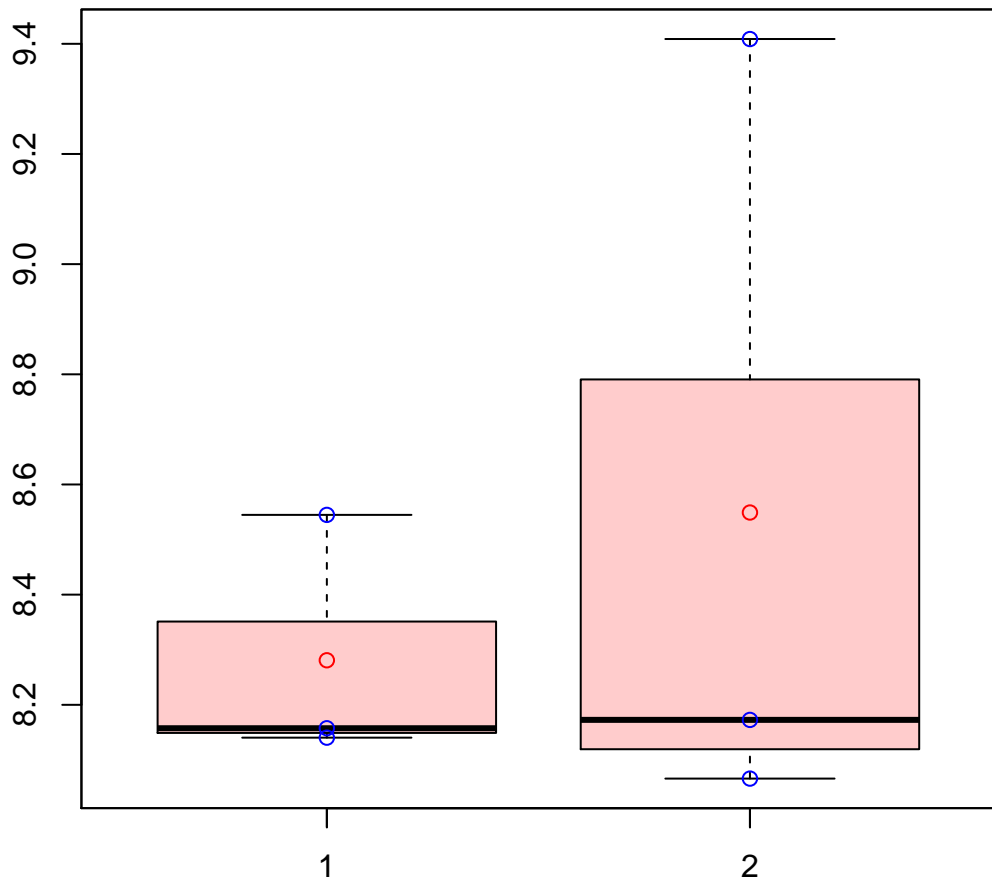

t-Test: p-value = 0.6

**I1IAA5|I1IAA5\_BRADI**

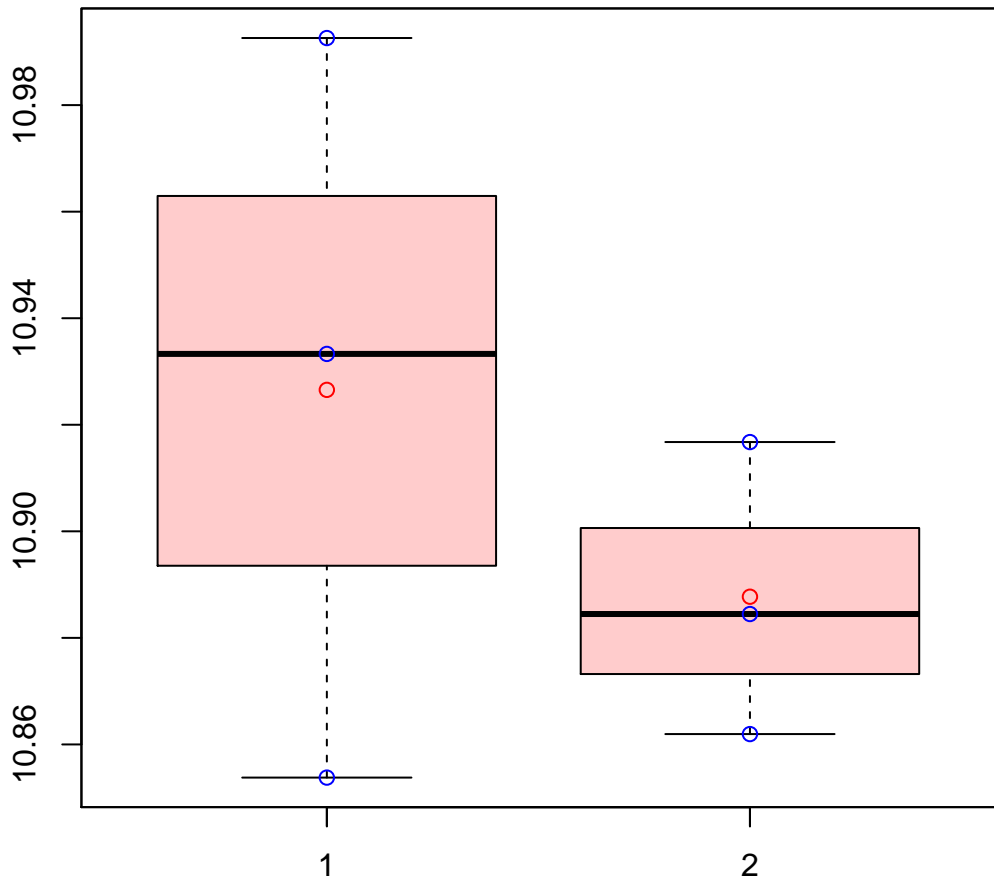

t-Test: p-value = 0.44

# I1IAB3|I1IAB3\_BRADI

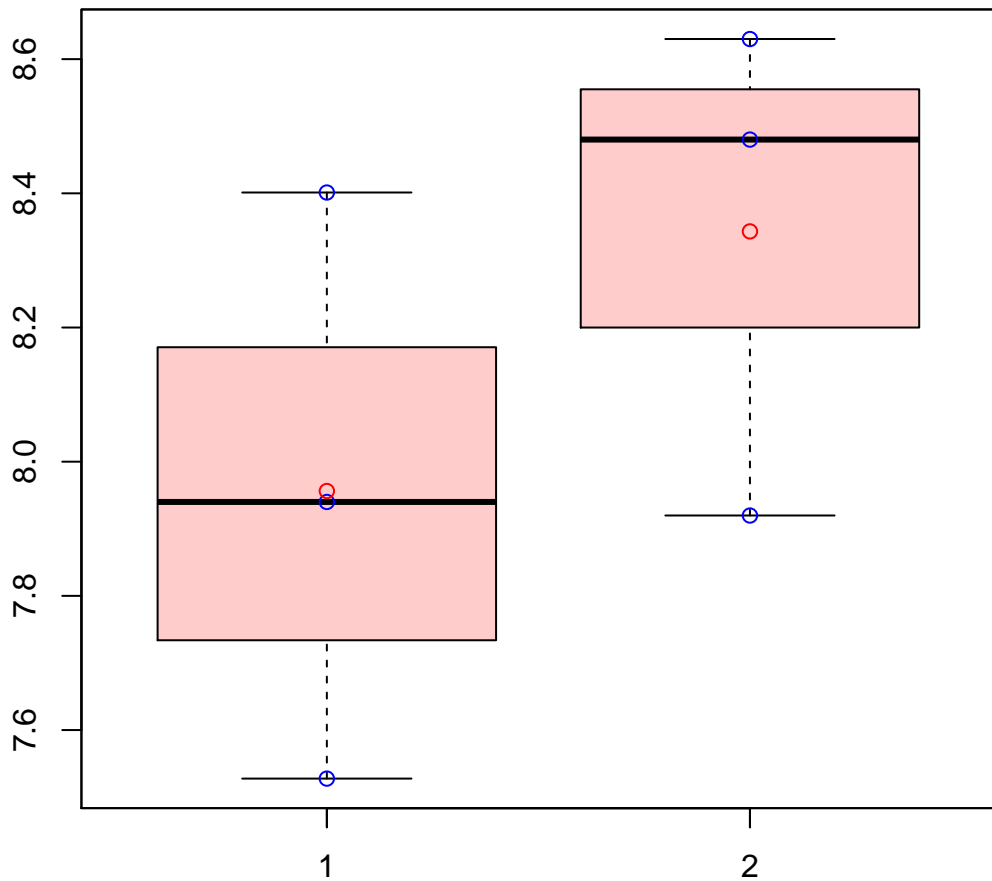

t-Test: p-value = 0.31

# I1IAG9|I1IAG9\_BRADI

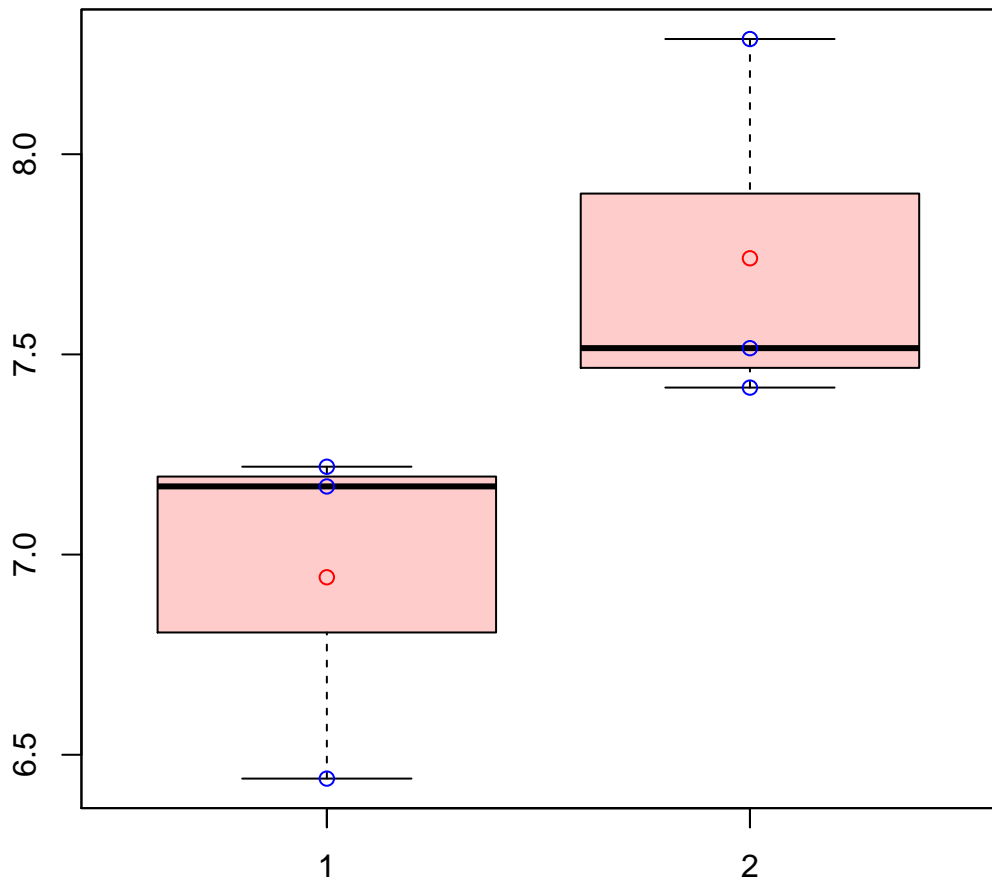

t-Test: p-value = 0.1



# I1IAW5|I1IAW5\_BRADI

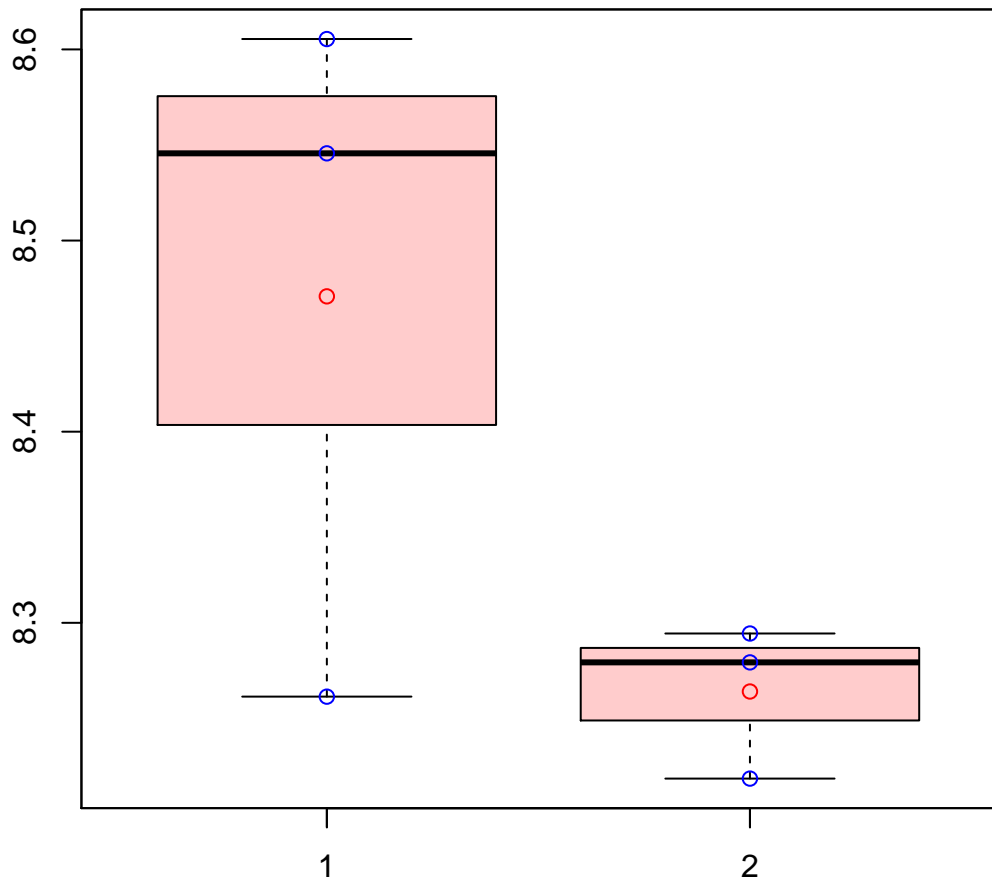

t-Test: p-value = 0.19

# I1IAX5|I1IAX5\_BRADI

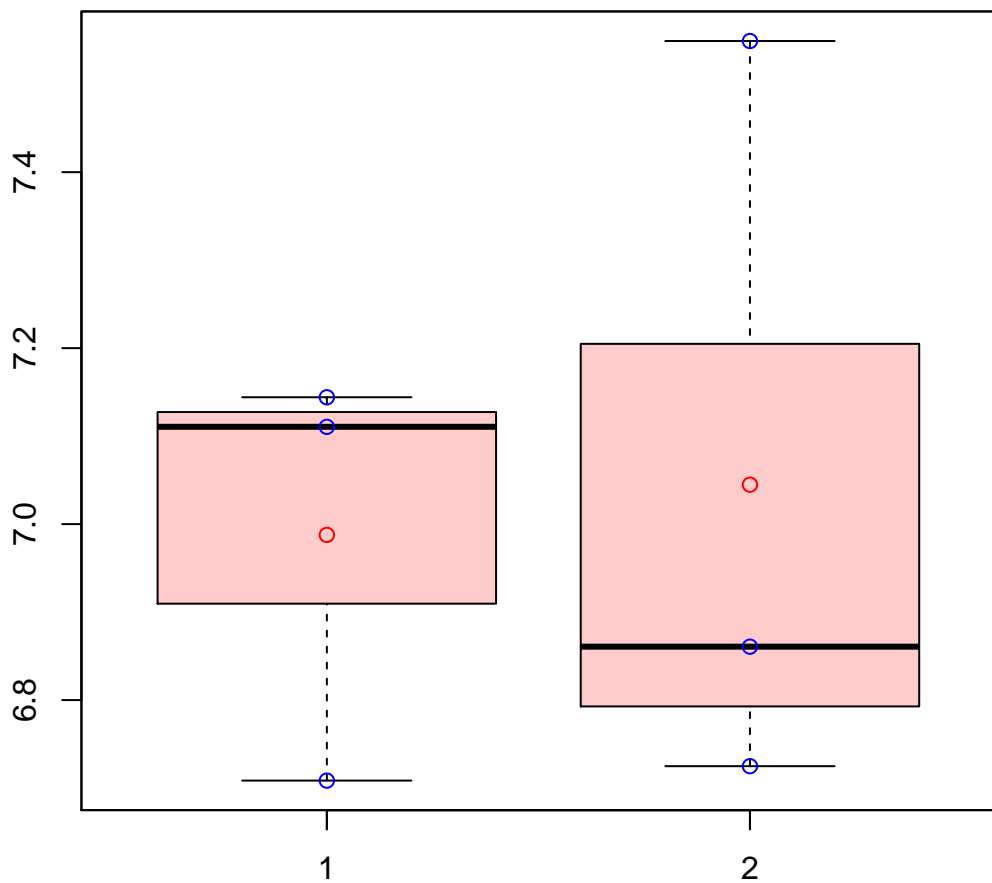

t-Test: p-value = 0.86

# I1IAY9|I1IAY9\_BRADI

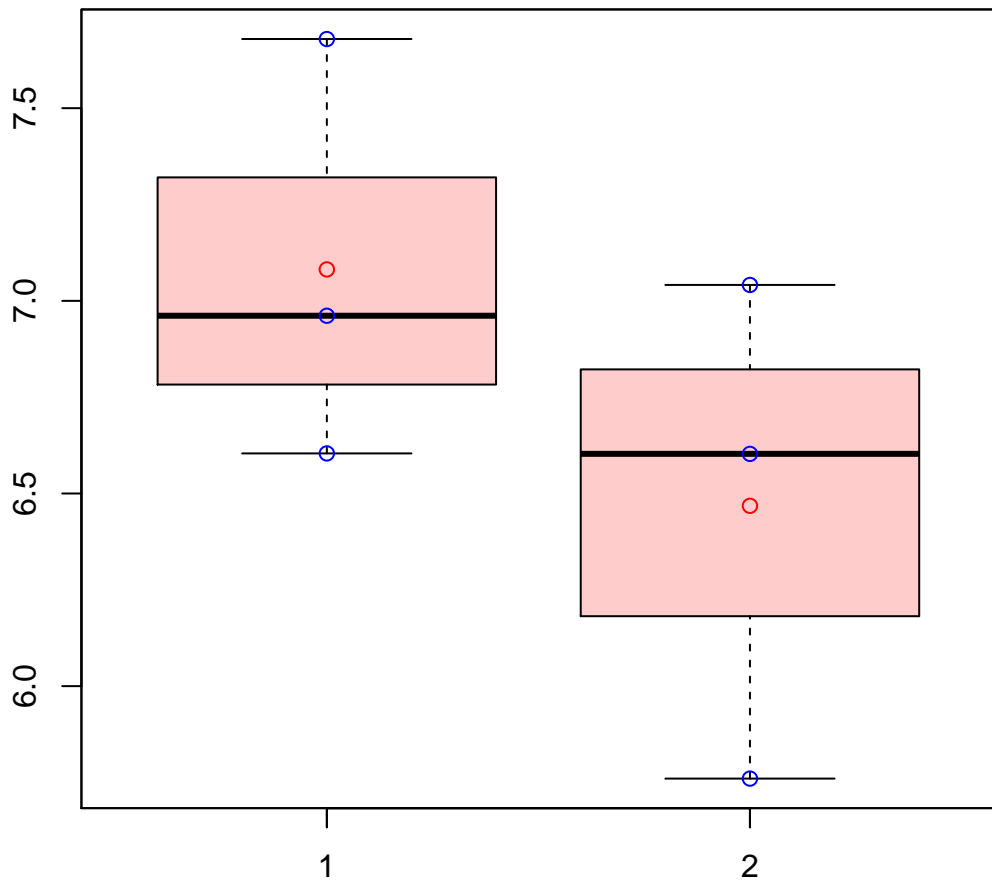

t-Test: p-value = 0.28

# I1IB68|I1IB68\_BRADI

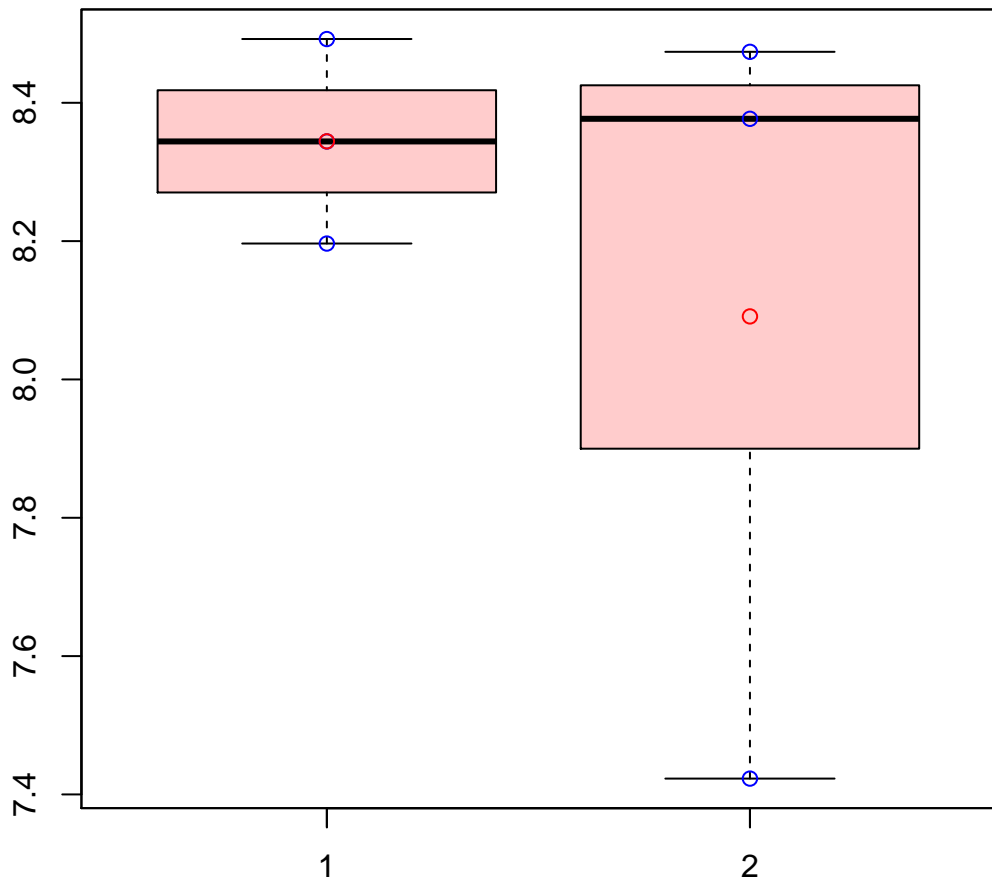

t-Test: p-value = 0.53

# I1B87|I1B87\_BRADI

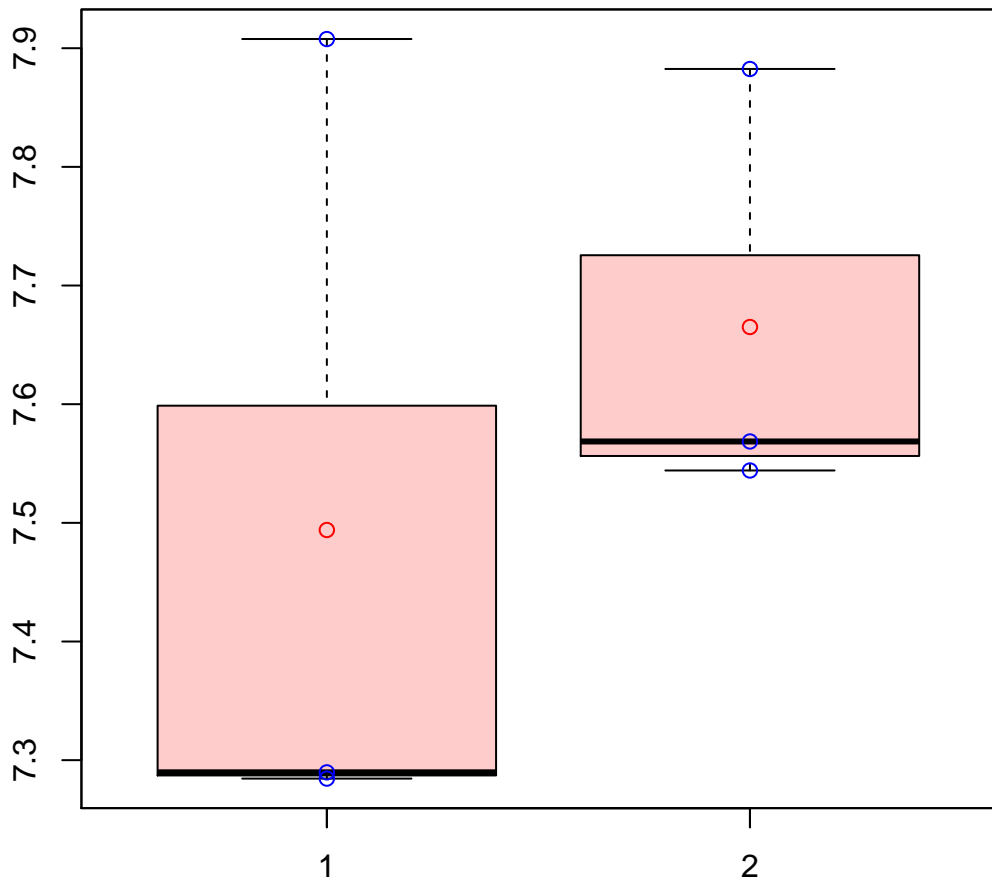

t-Test: p-value = 0.52

# I1BP6|I1BP6\_BRADI

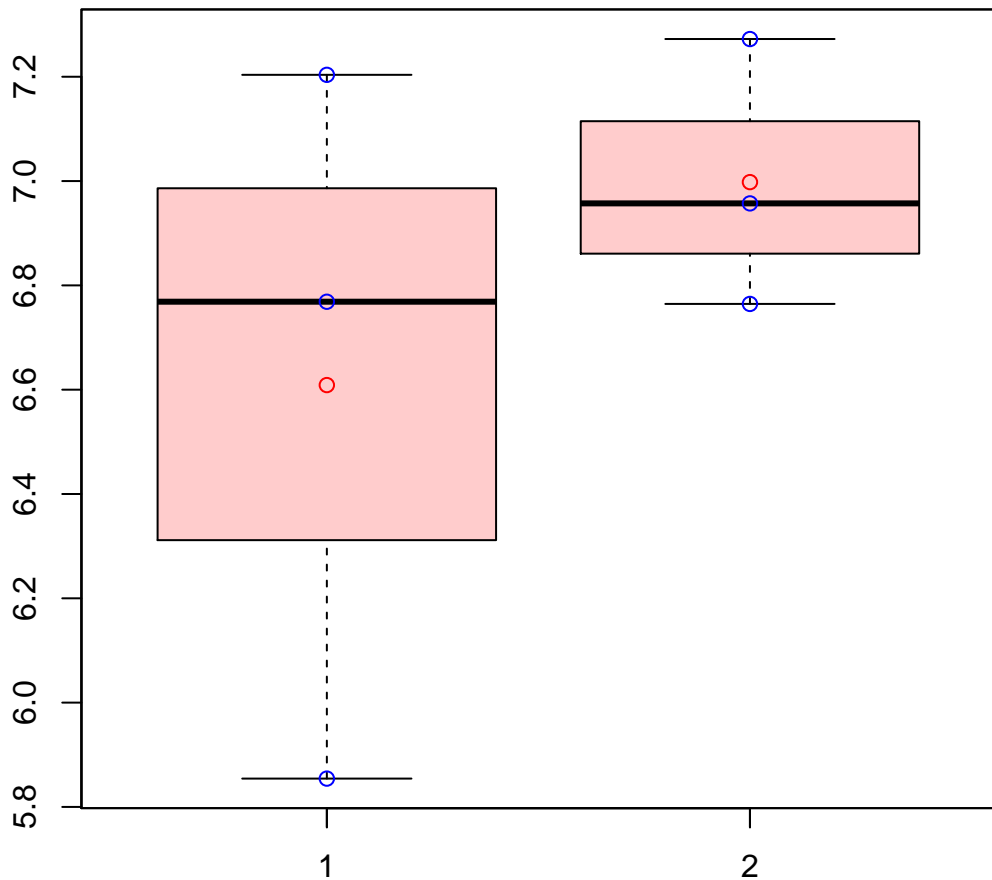

t-Test: p-value = 0.44

# I1IBR3|I1IBR3\_BRADI

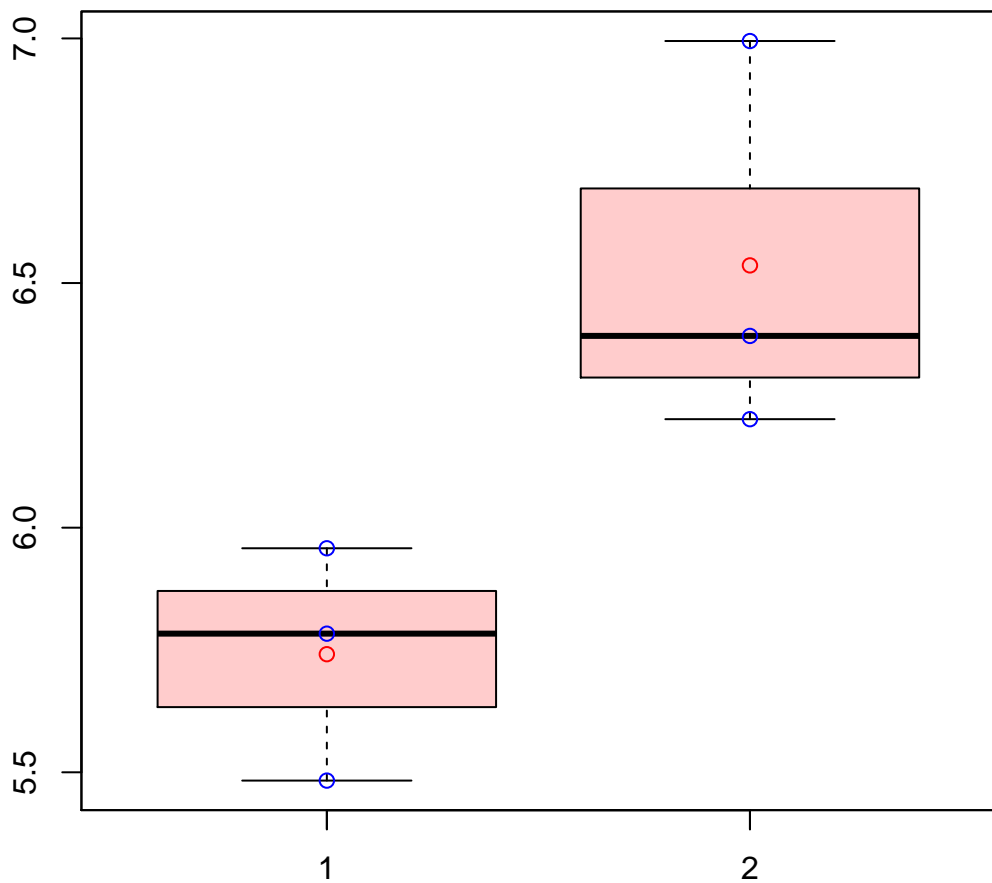

t-Test: p-value = 0.06

# I1C33|I1C33\_BRADI

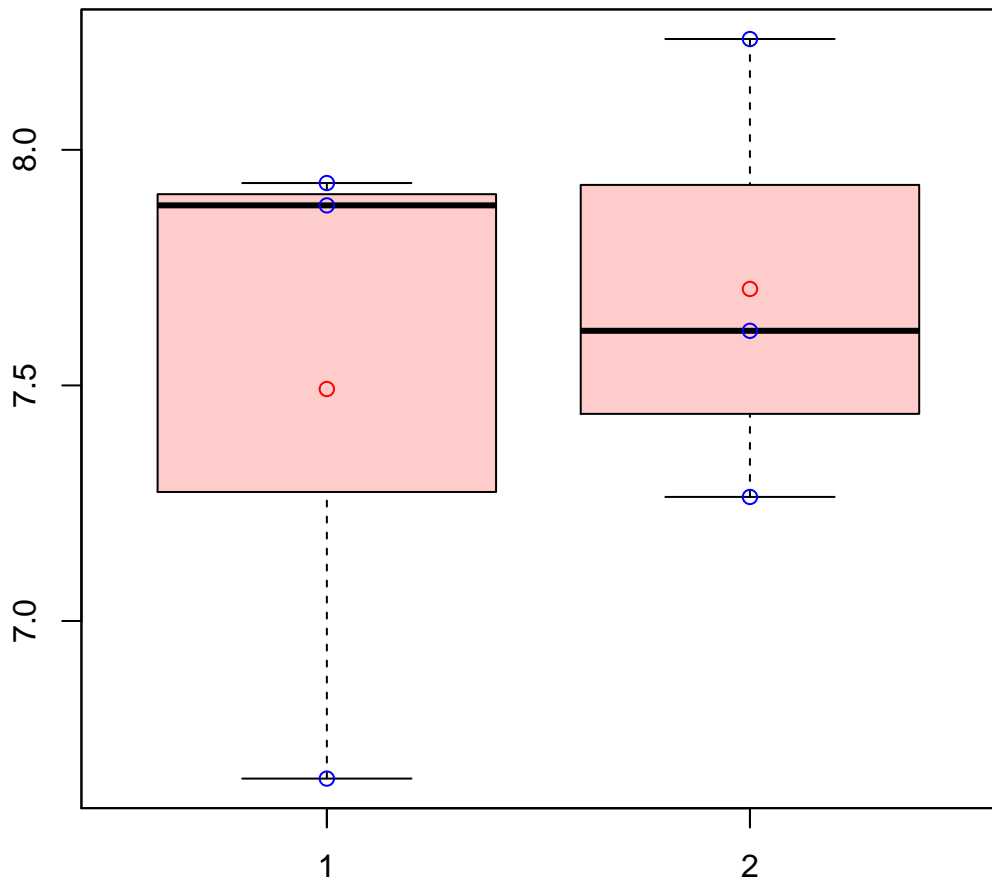

t-Test: p-value = 0.7



# I1ICV8|I1ICV8\_BRADI

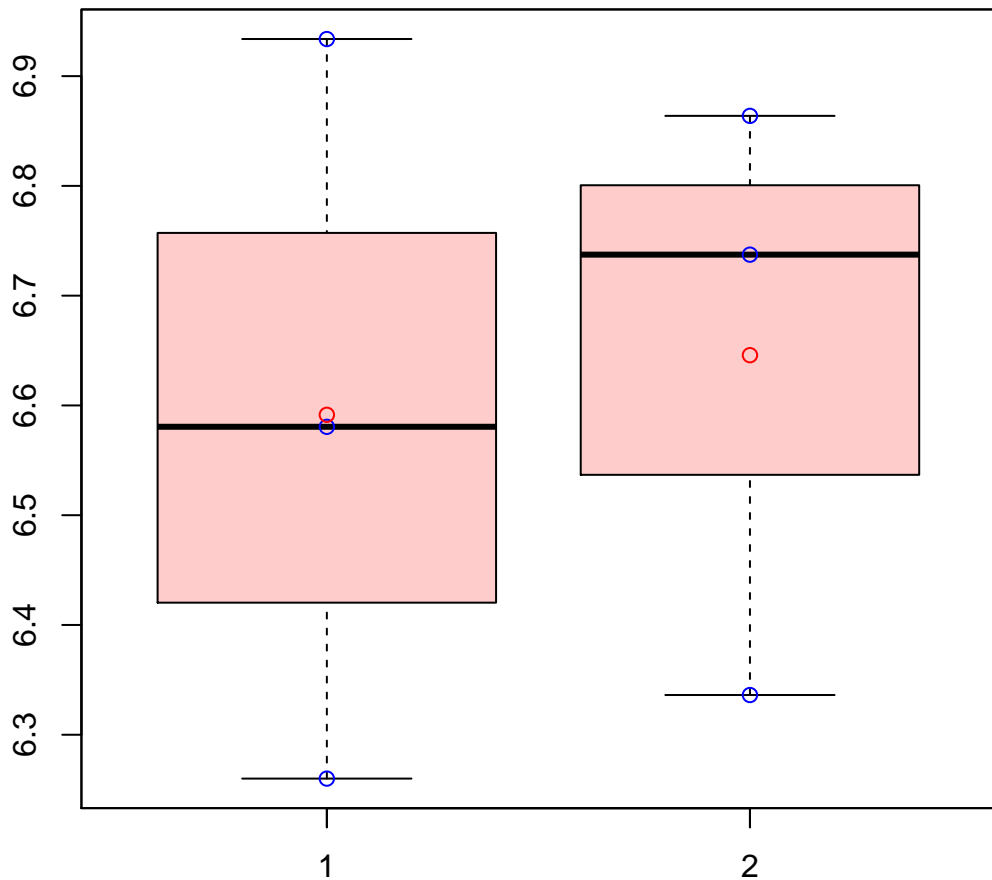

t-Test: p-value = 0.84

# I1ICW6|I1ICW6\_BRADI

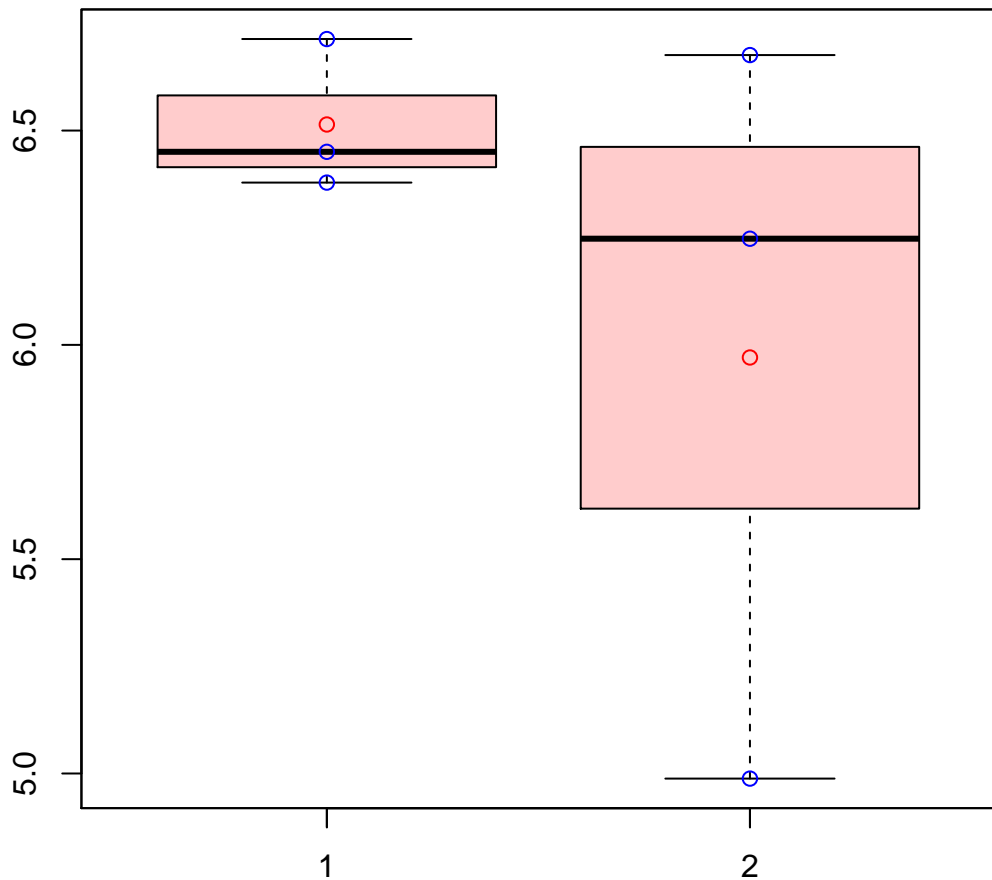

t-Test: p-value = 0.4

# I1IDD5|I1IDD5\_BRADI

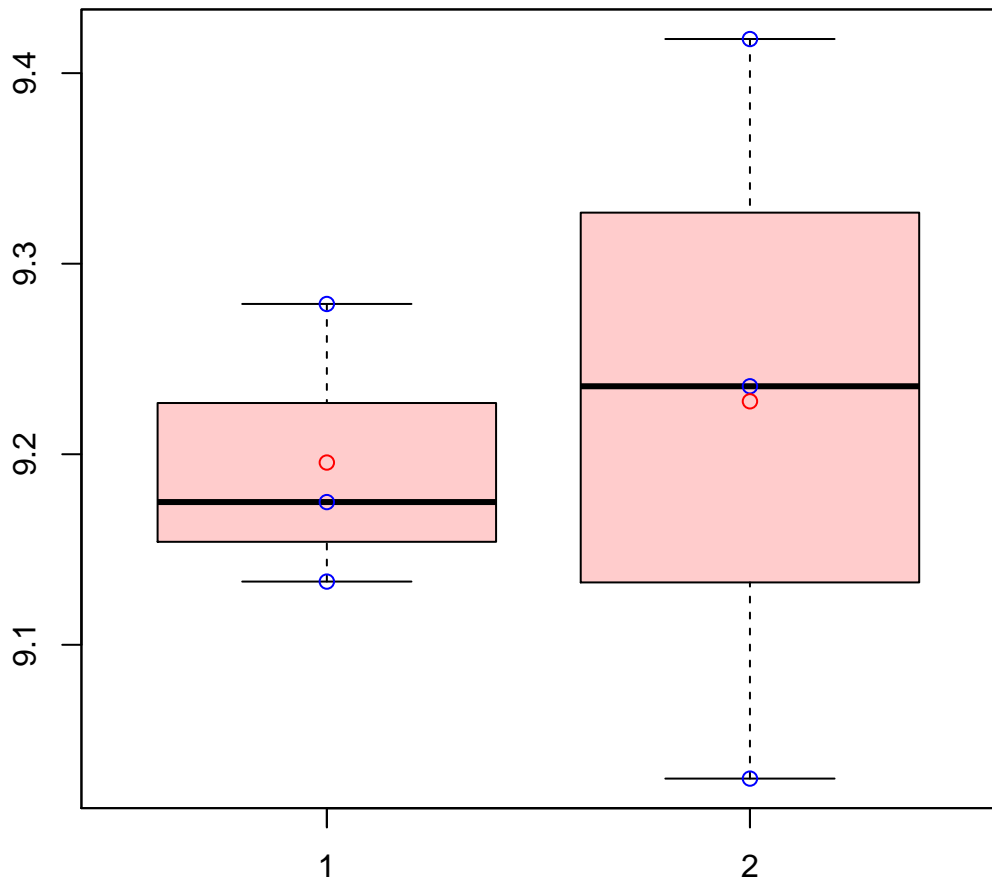

t-Test: p-value = 0.81

# I1IDH6|I1IDH6\_BRADI

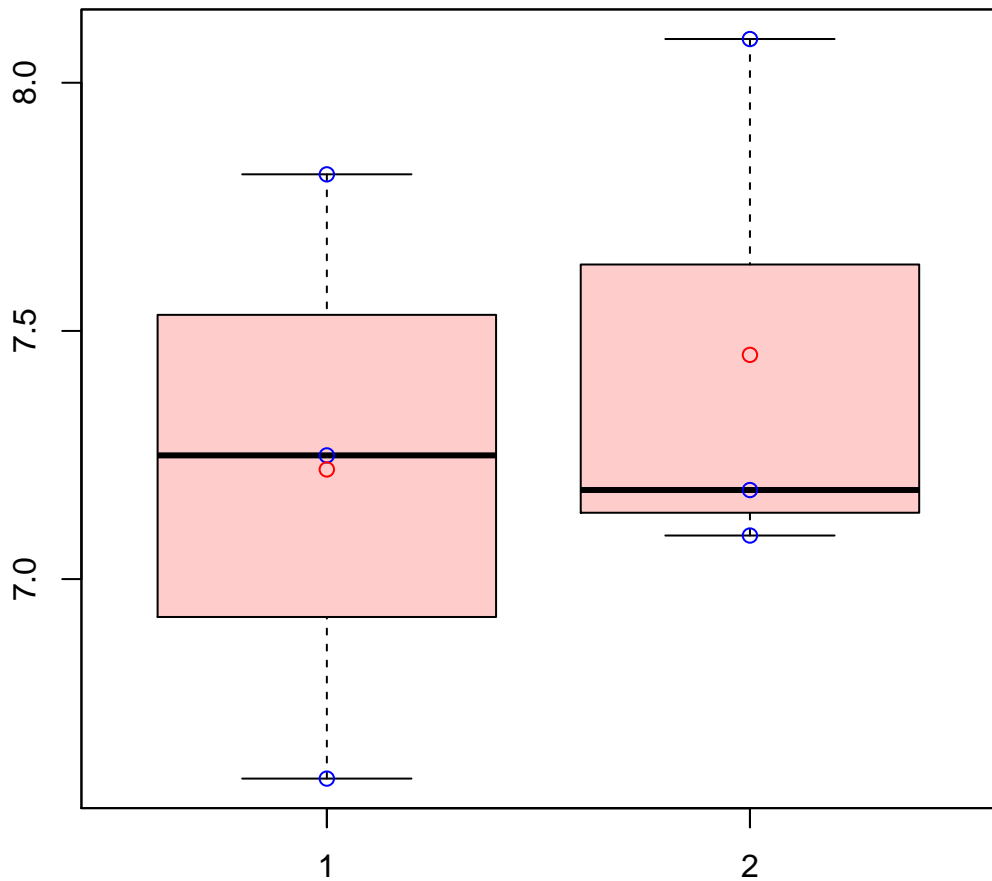

t-Test: p-value = 0.65

# I1IDX6|I1IDX6\_BRADI

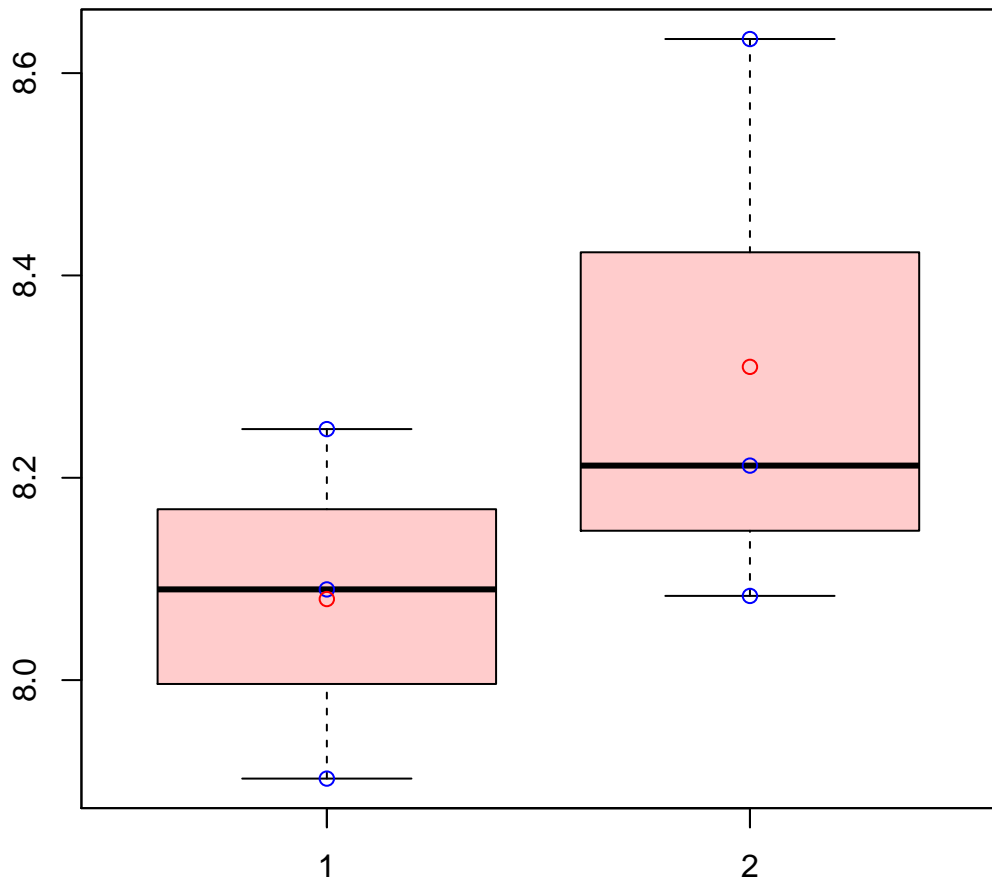

t-Test: p-value = 0.32

# I1IEA3|I1IEA3\_BRADI

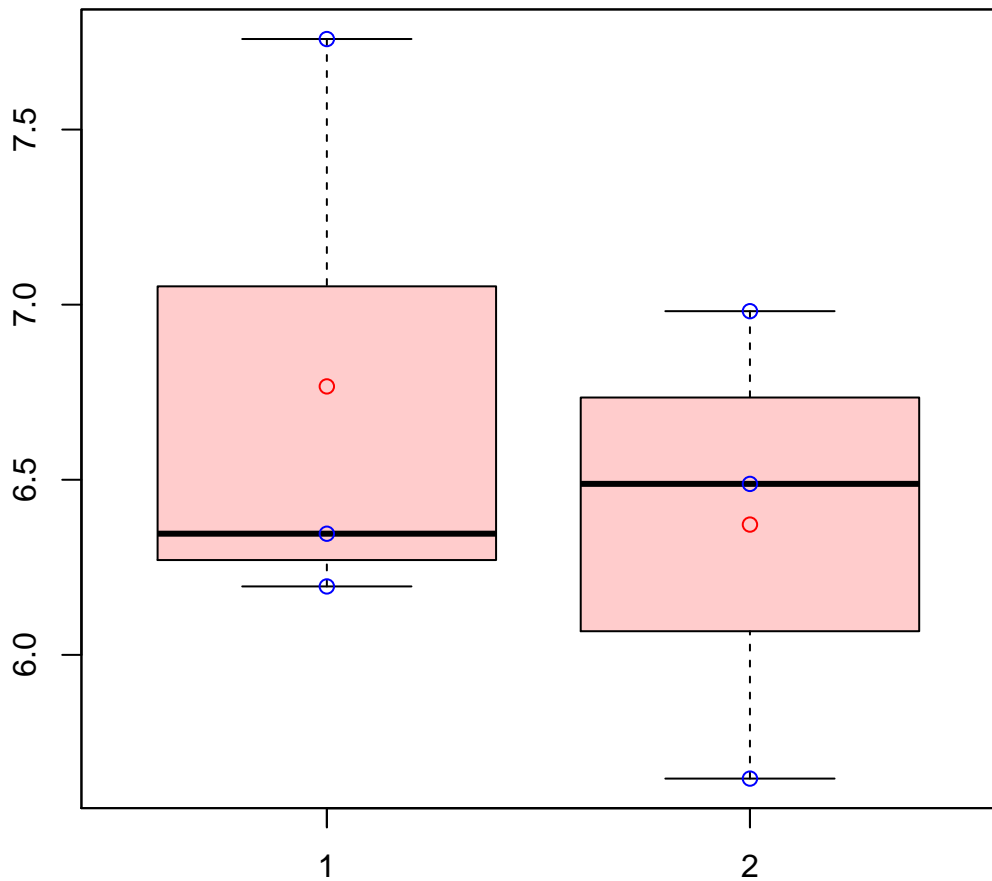

t-Test: p-value = 0.57

# I1IEK0|I1IEK0\_BRADI

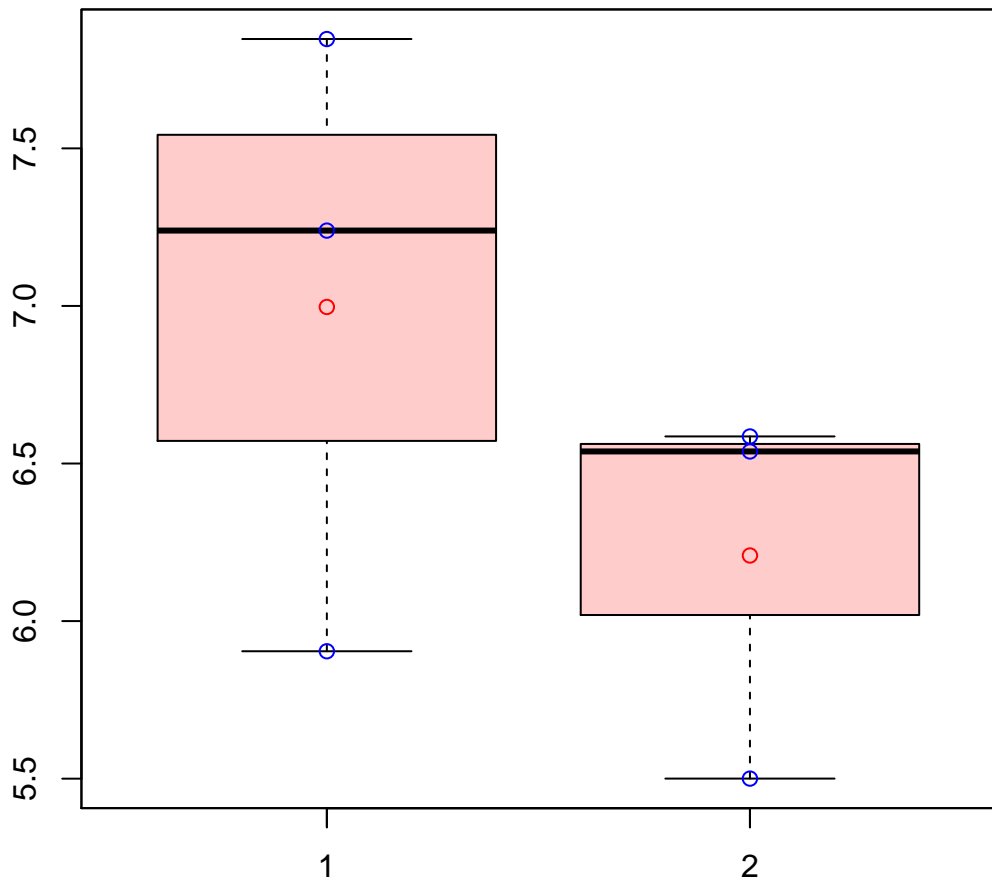

t-Test: p-value = 0.32

# I1IEN9|I1IEN9\_BRADI

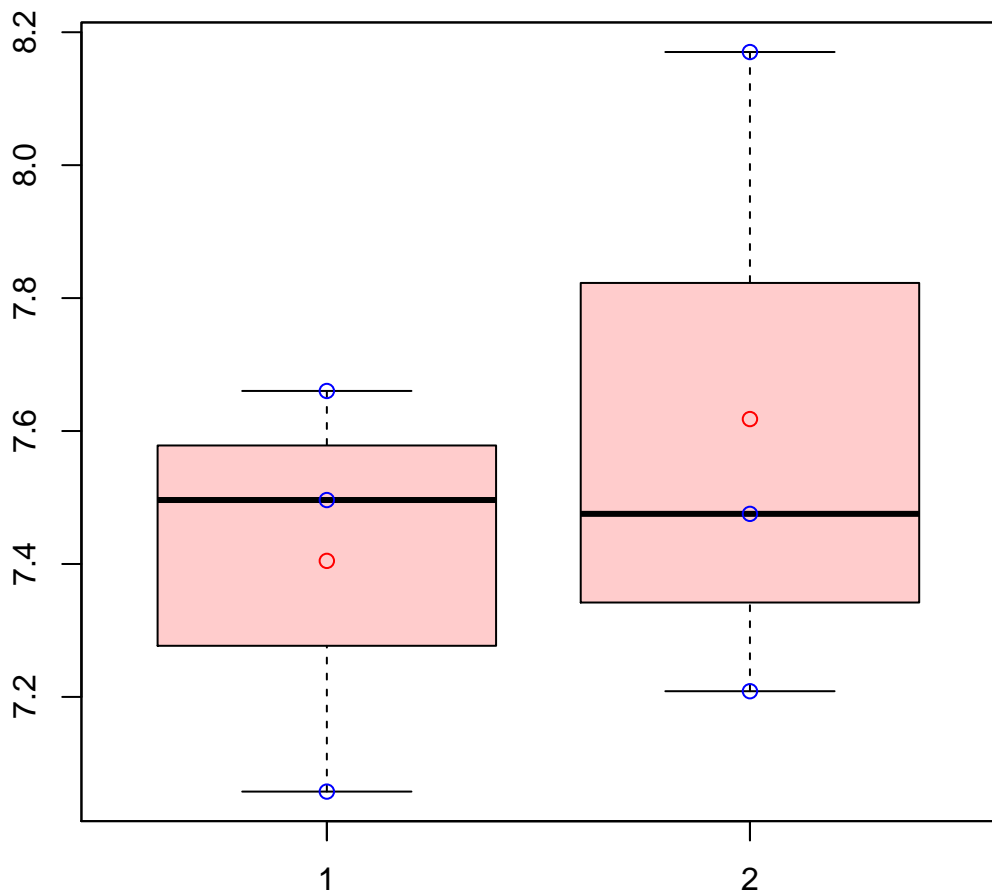

t-Test: p-value = 0.57



# I1IES0|I1IES0\_BRADI

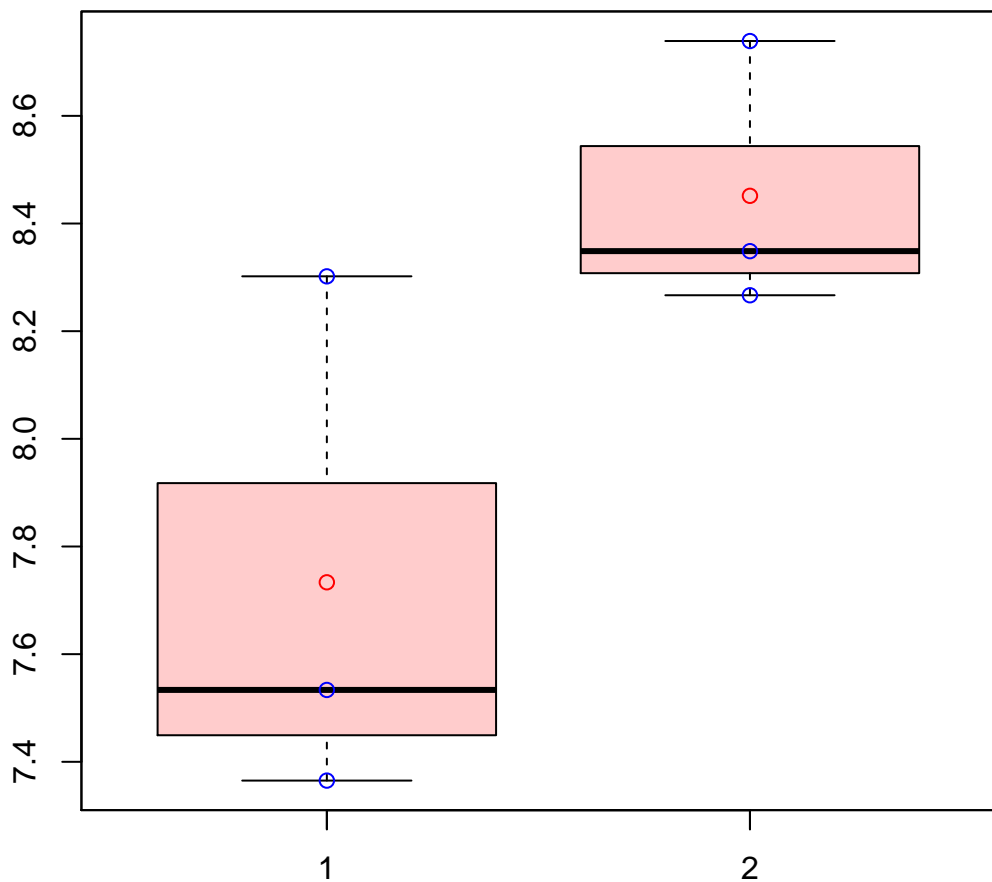

t-Test: p-value = 0.11

# 11ET3|11ET3\_BRADI

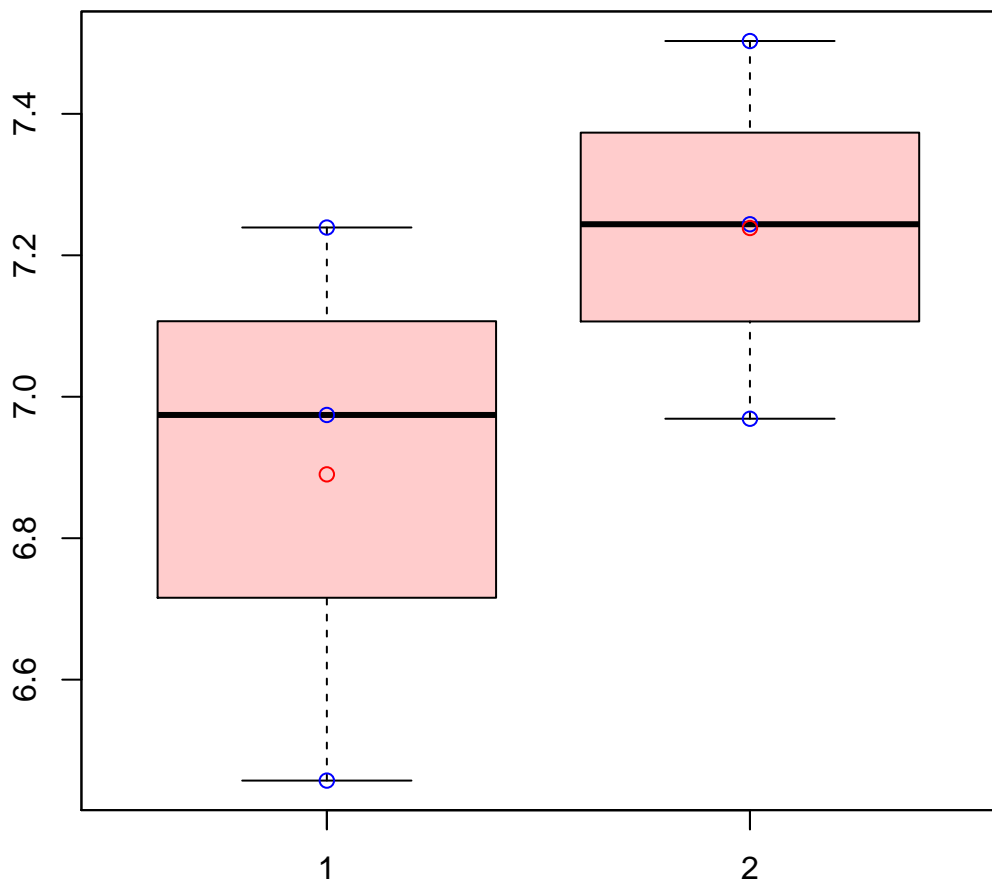

t-Test: p-value = 0.29

# IIEX1|IIEX1\_BRADI

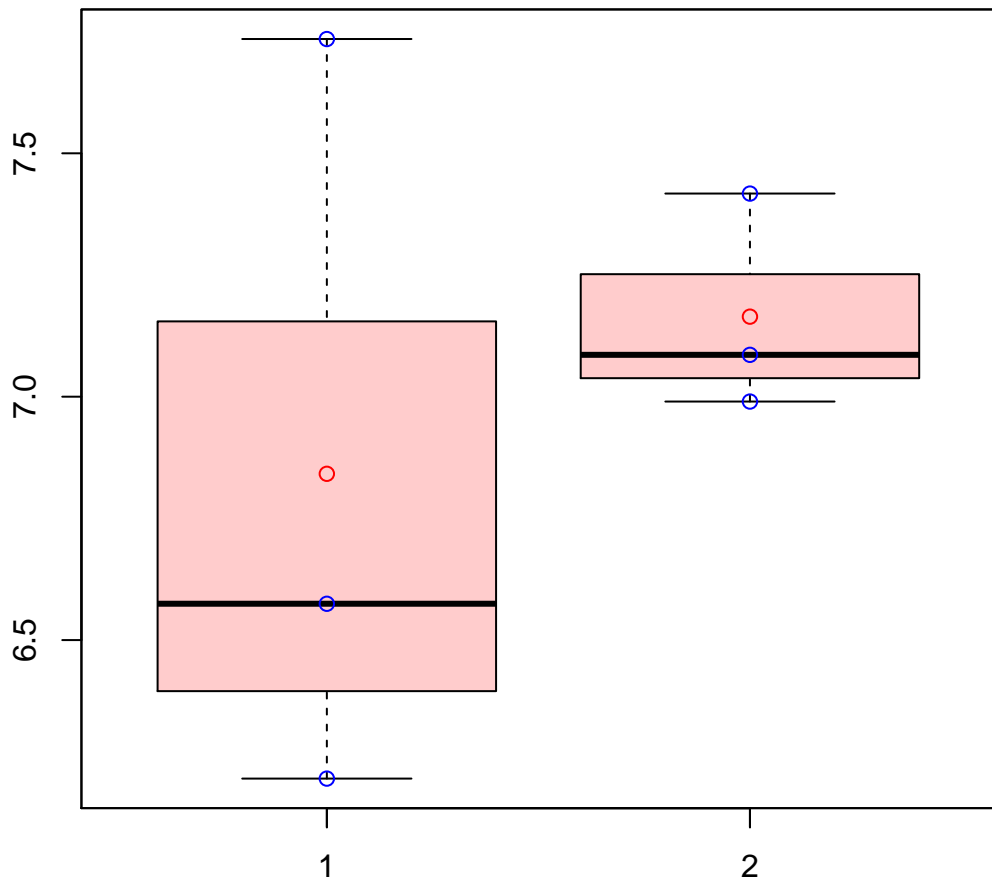

t-Test: p-value = 0.56

# I1IF76|I1IF76\_BRADI

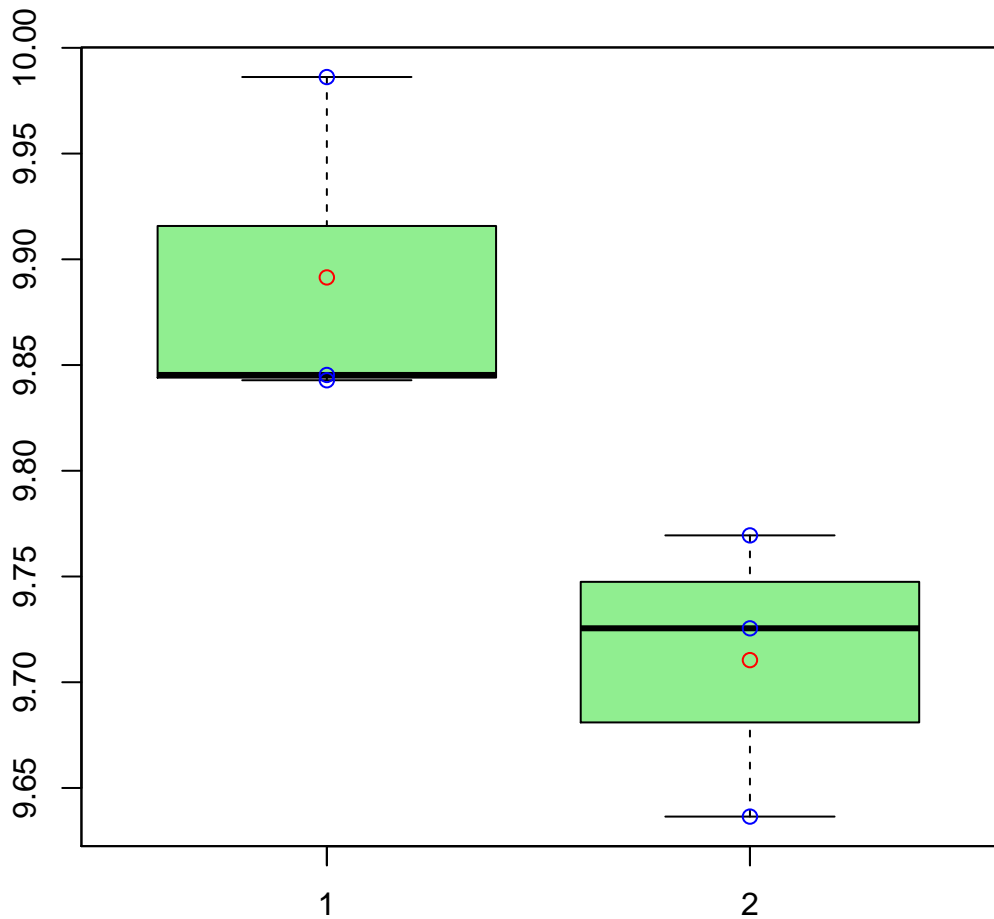

t-Test: p-value = 0.04

# I1IFG1|I1IFG1\_BRADI

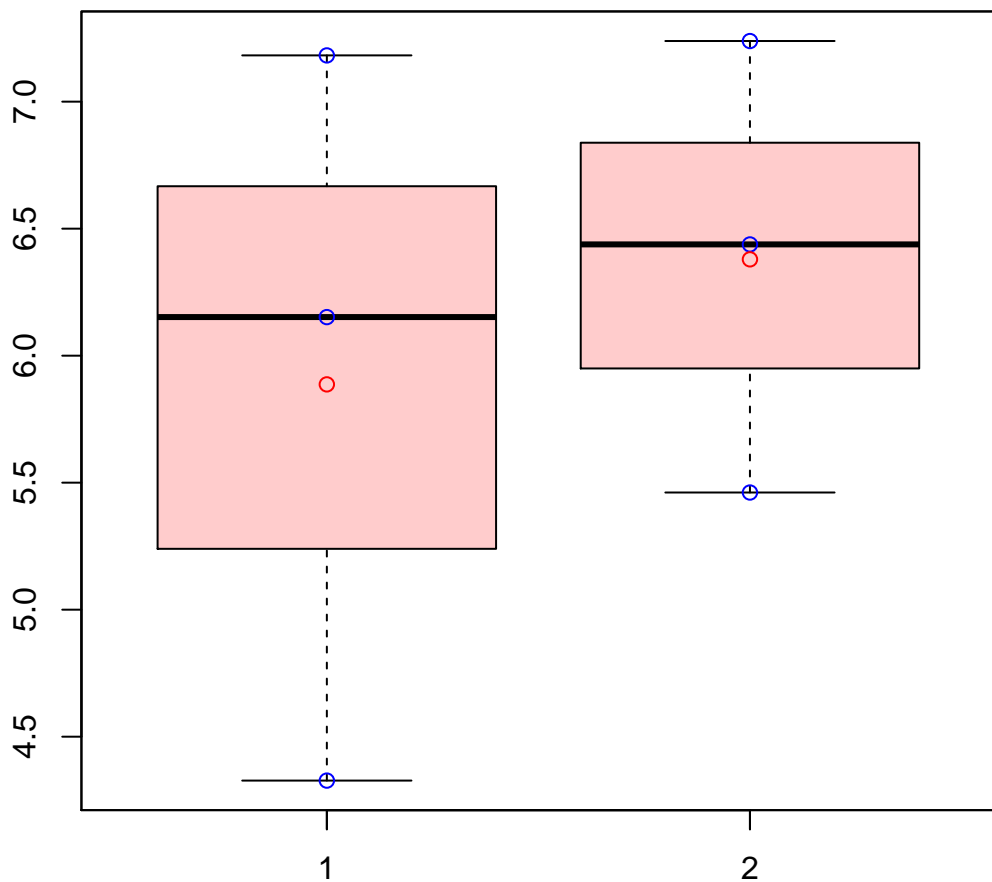

t-Test: p-value = 0.65

# I1IFG6|I1IFG6\_BRADI

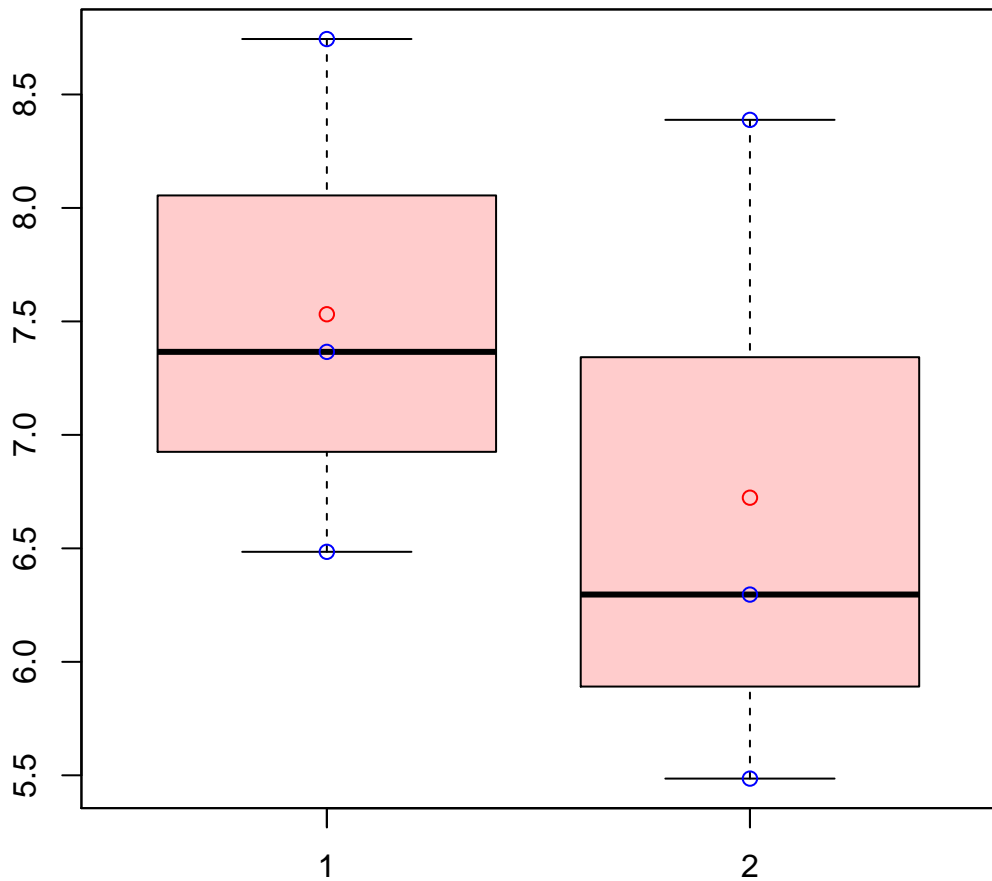

t-Test: p-value = 0.5

# I1IFJ9|I1IFJ9\_BRADI

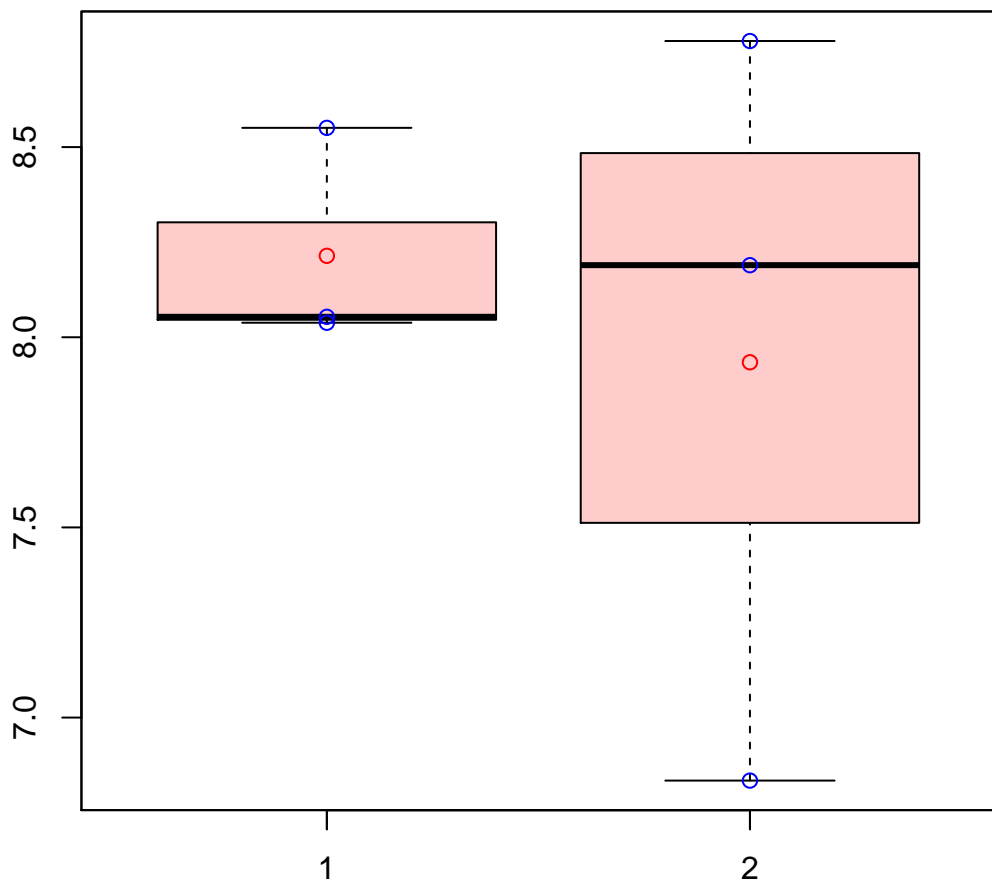

t-Test: p-value = 0.68

# I1IFK6|I1IFK6\_BRADI

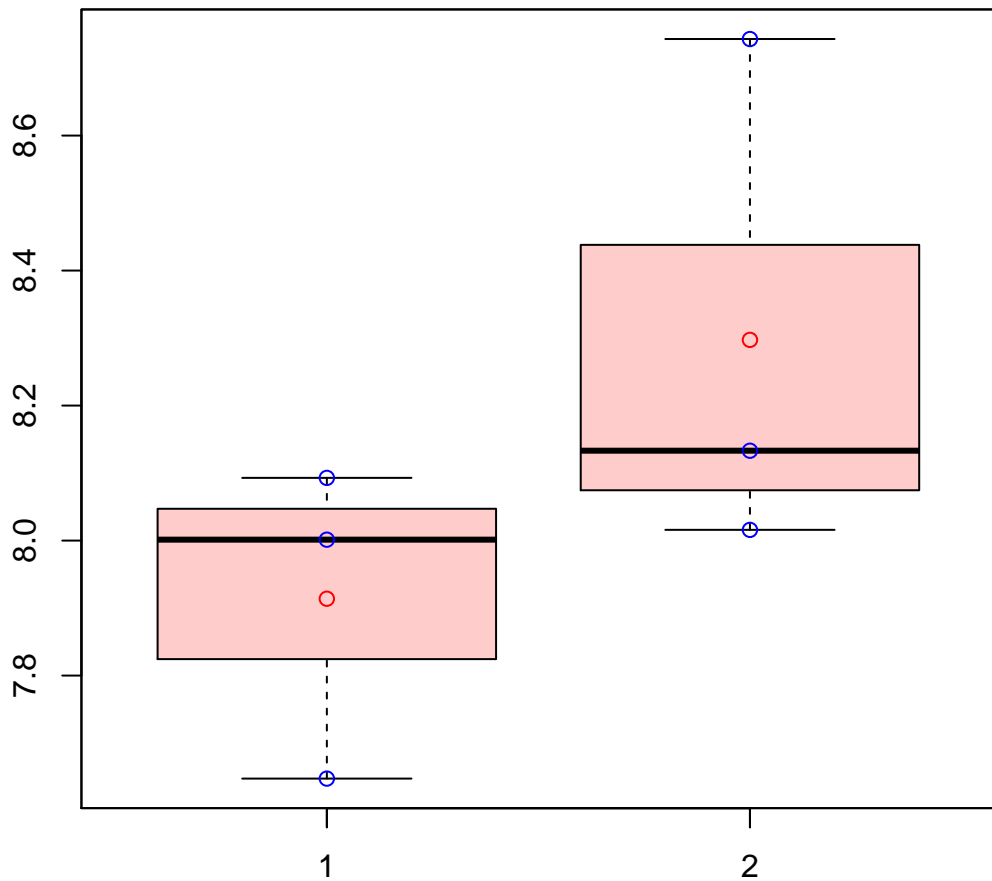

t-Test: p-value = 0.23



# I1IG21|I1IG21\_BRADI

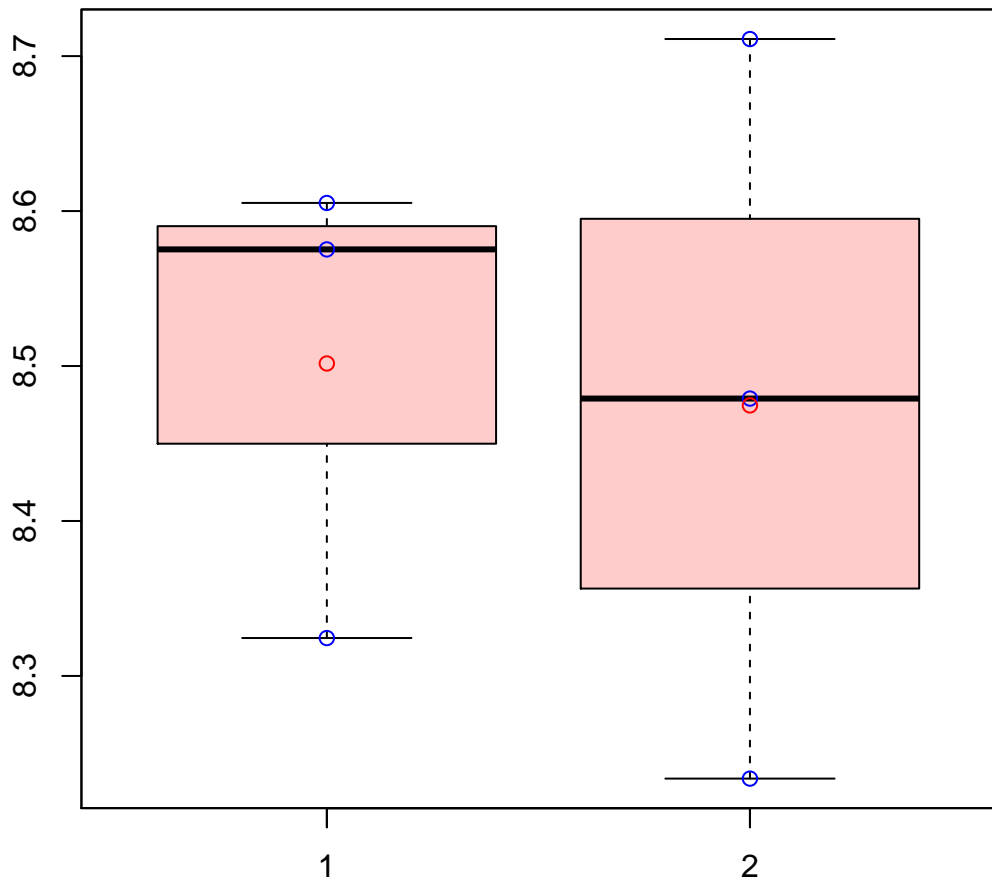

t-Test: p-value = 0.88

# I1IG93|I1IG93\_BRADI

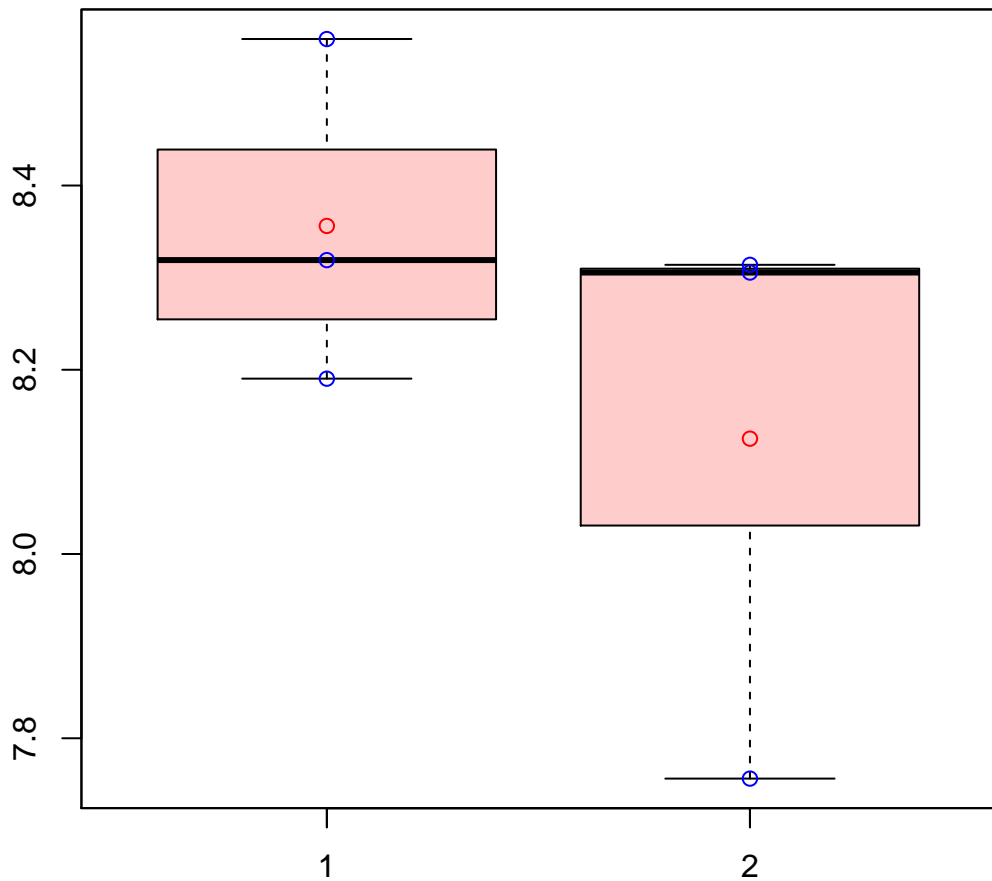

t-Test: p-value = 0.35

# I1IGY4|I1IGY4\_BRADI

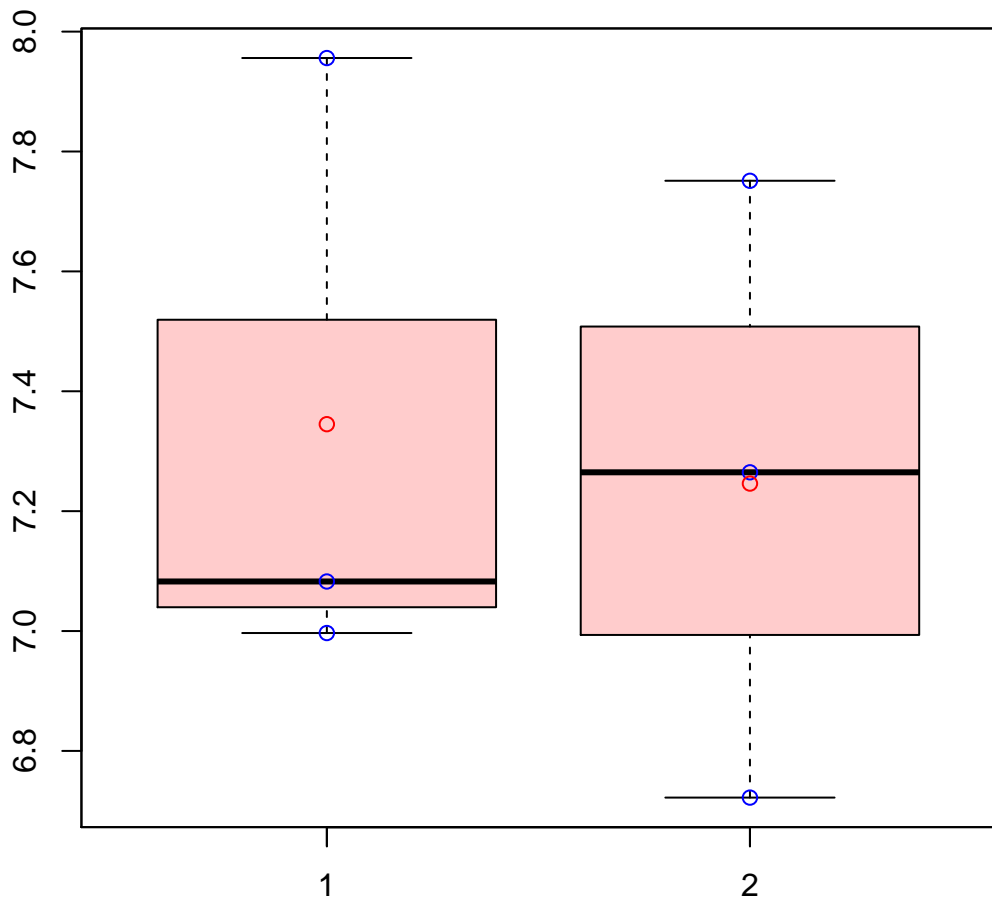

t-Test: p-value = 0.83

# I1IHD0|I1IHD0\_BRADI

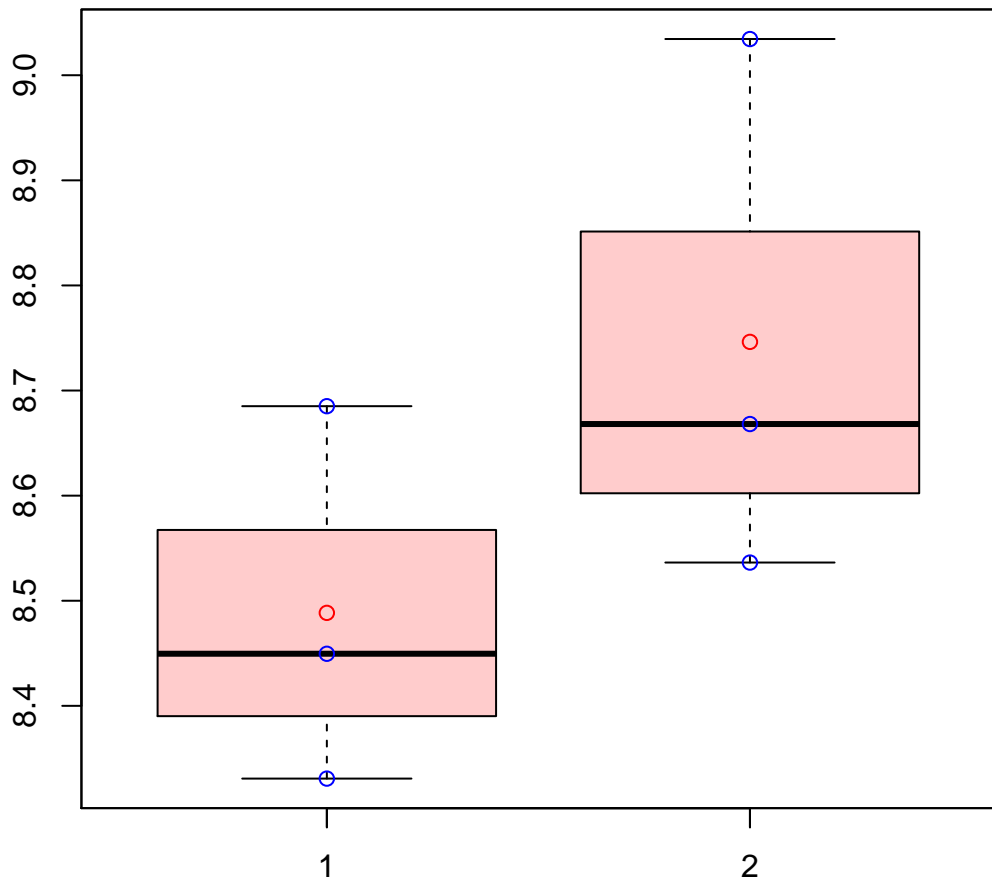

t-Test: p-value = 0.24

# I1IH6N6|I1IH6N6\_BRADI

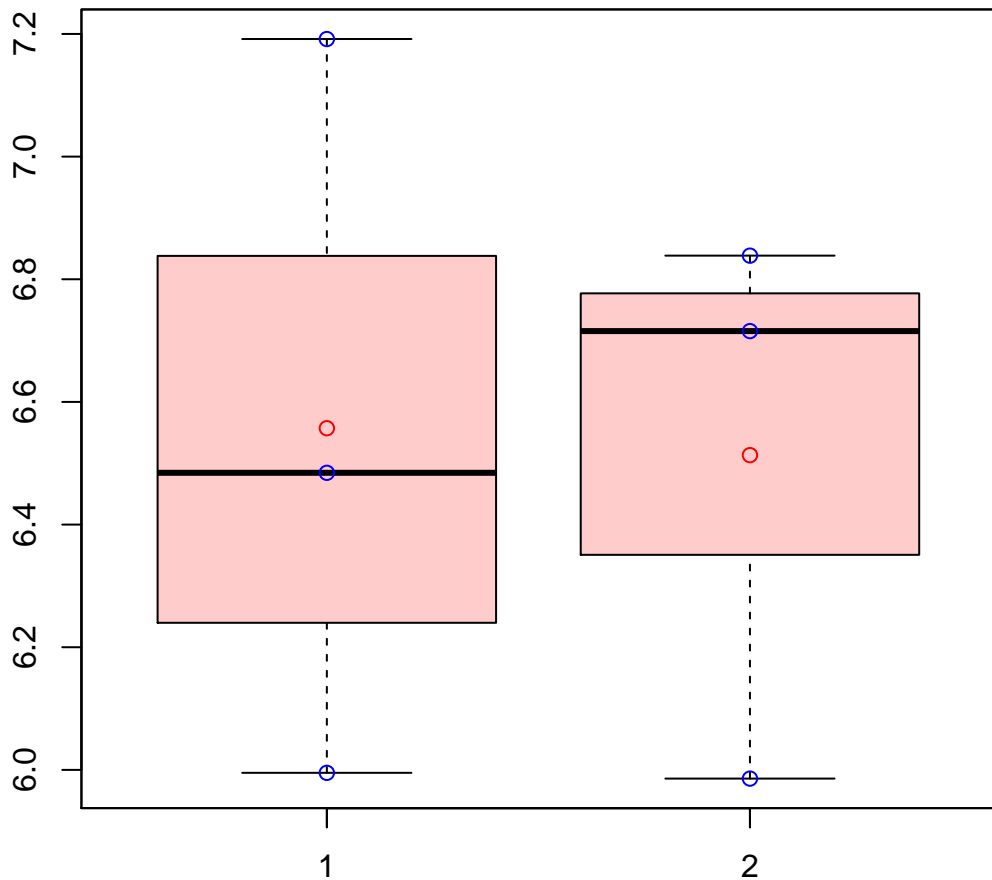

t-Test: p-value = 0.93

# I1HX5|I1HX5\_BRADI

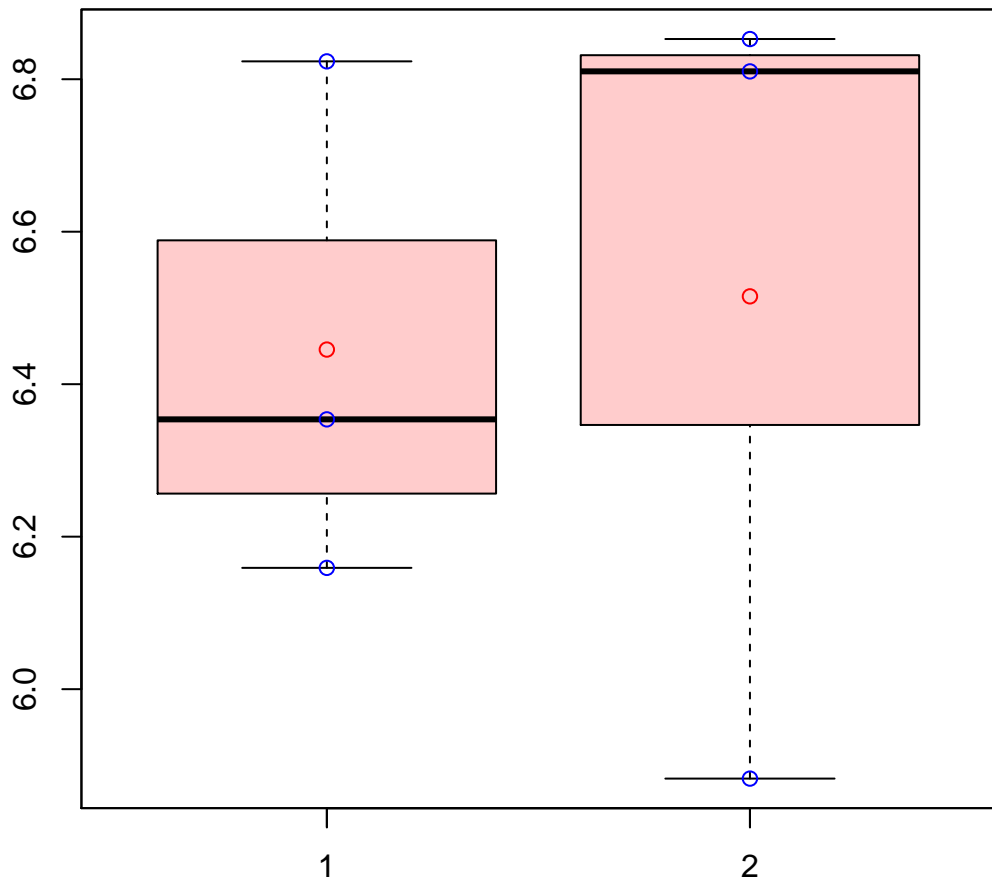

t-Test: p-value = 0.86

# I1IIN2|I1IIN2\_BRADI

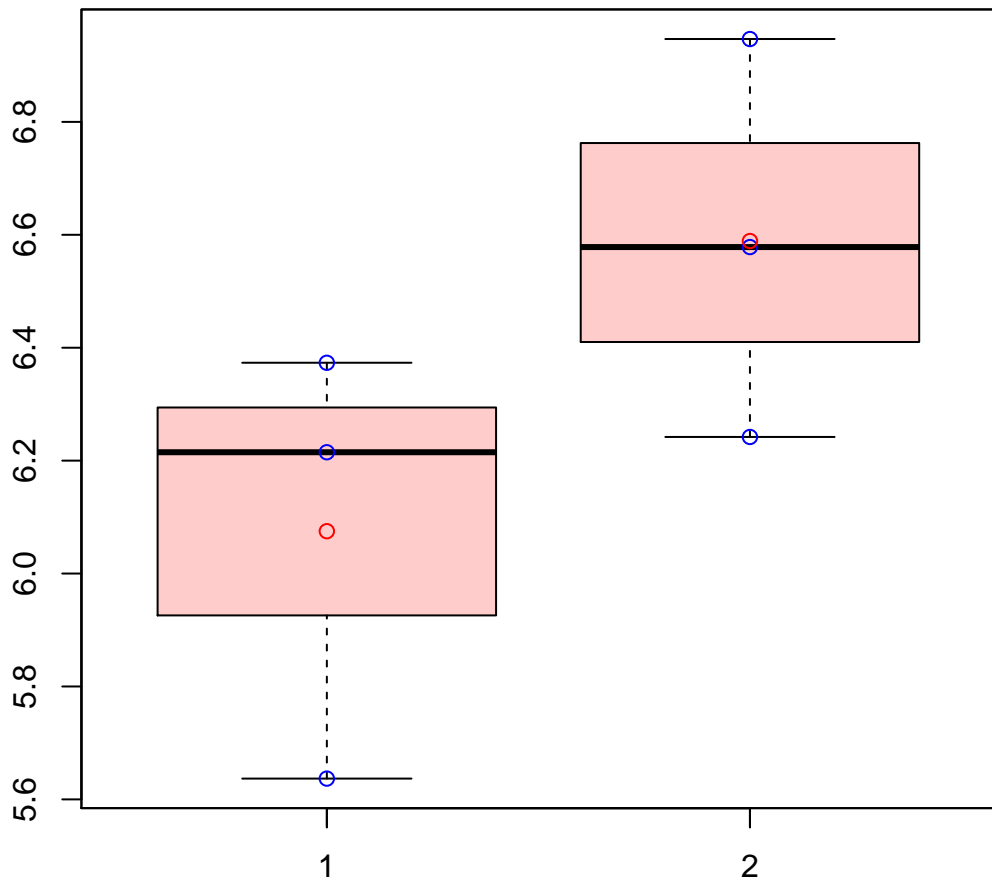

t-Test: p-value = 0.17

# I1IIQ9|I1IIQ9\_BRADI

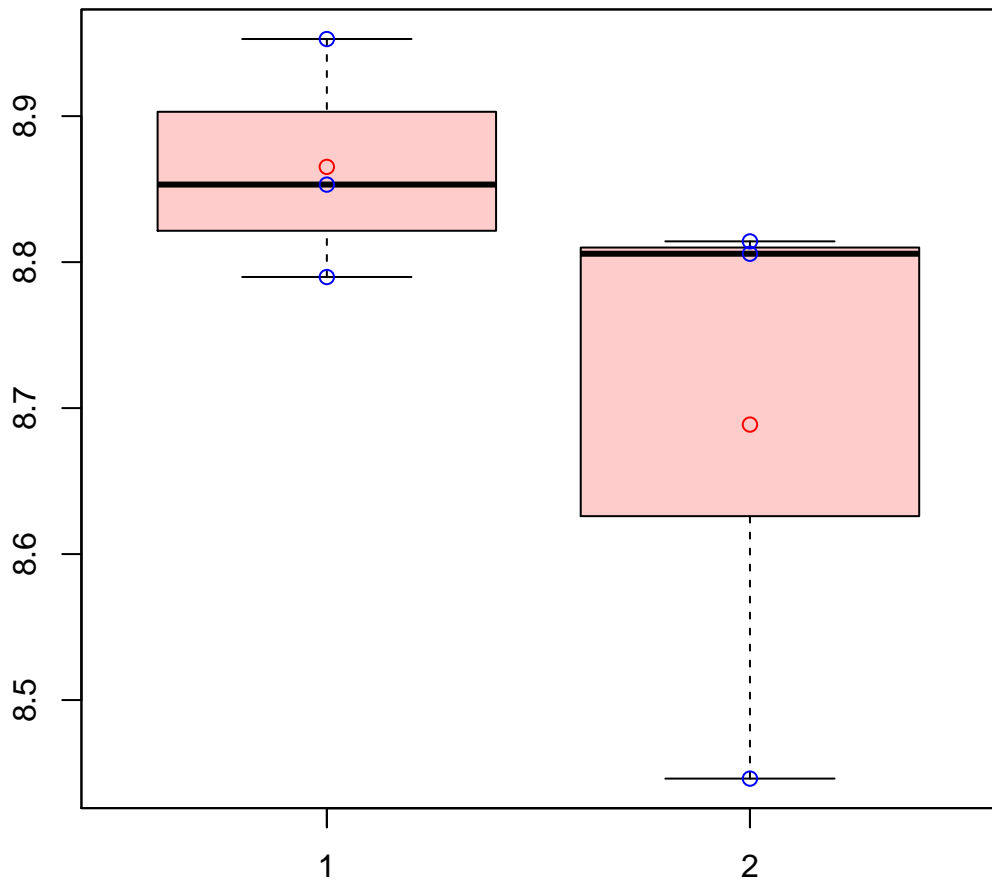

t-Test: p-value = 0.28



# I1IR9|I1IR9\_BRADI

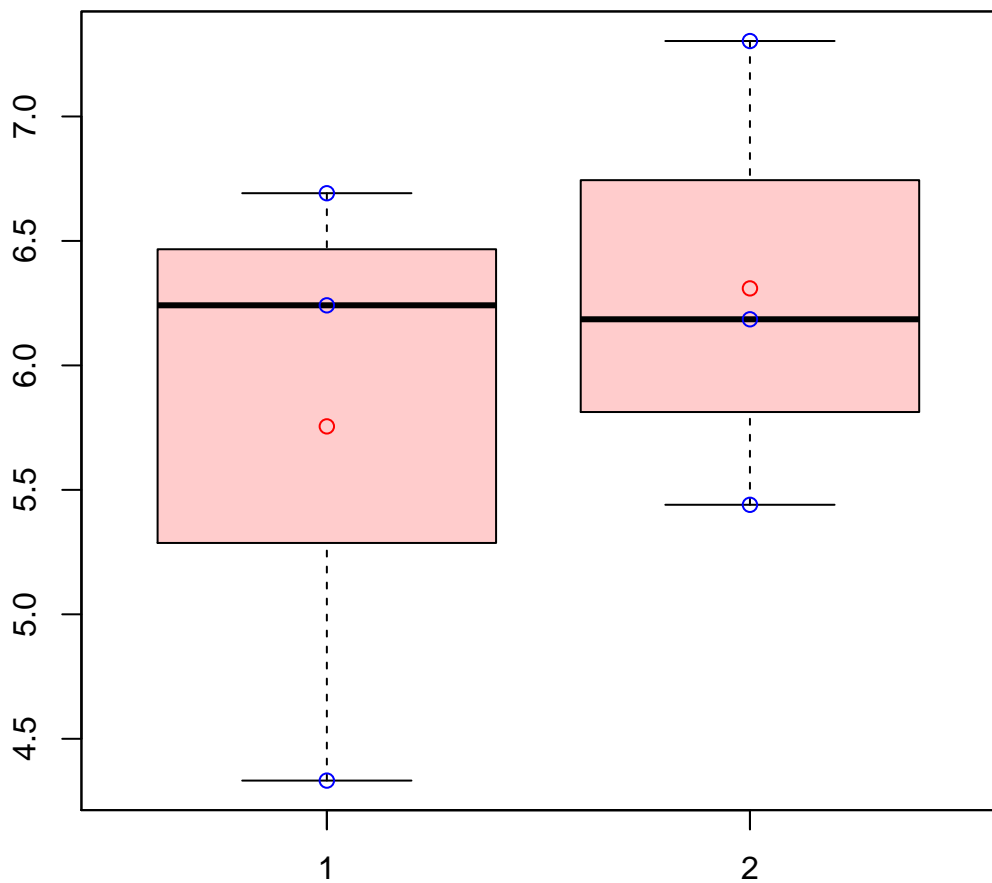

t-Test: p-value = 0.58

# I11IU6|I11IU6\_BRADI

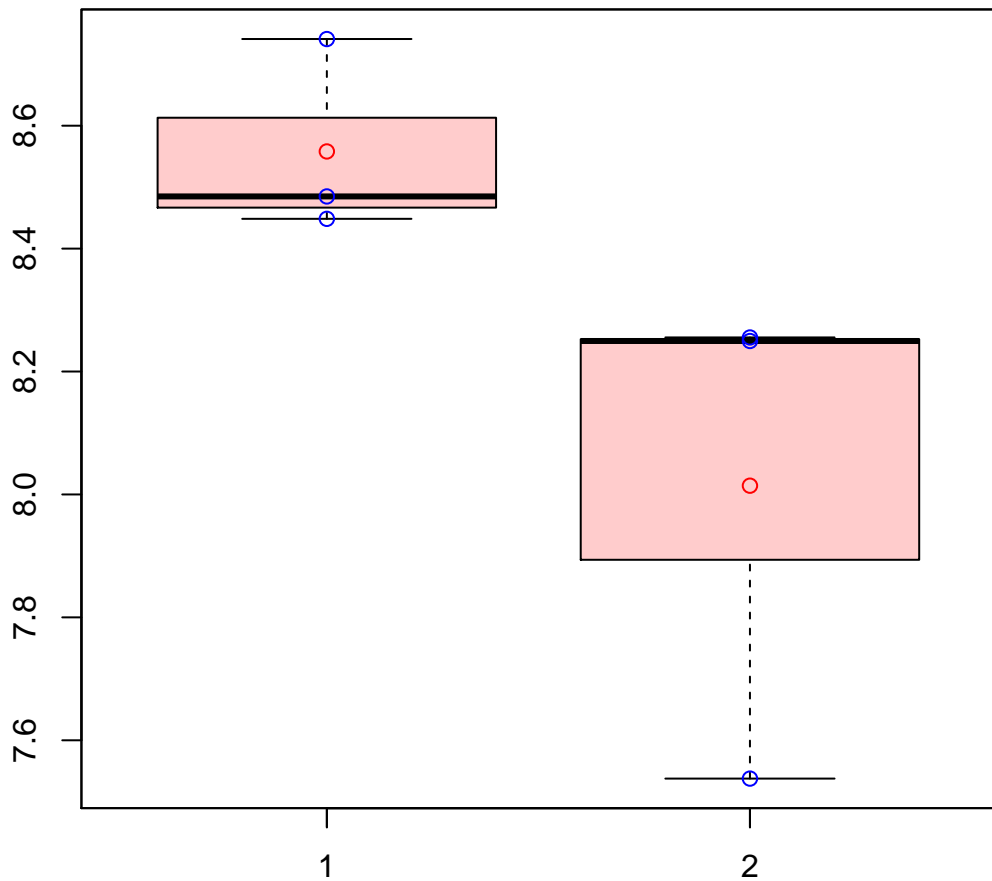

t-Test: p-value = 0.14

# I1IJ06|I1IJ06\_BRADI

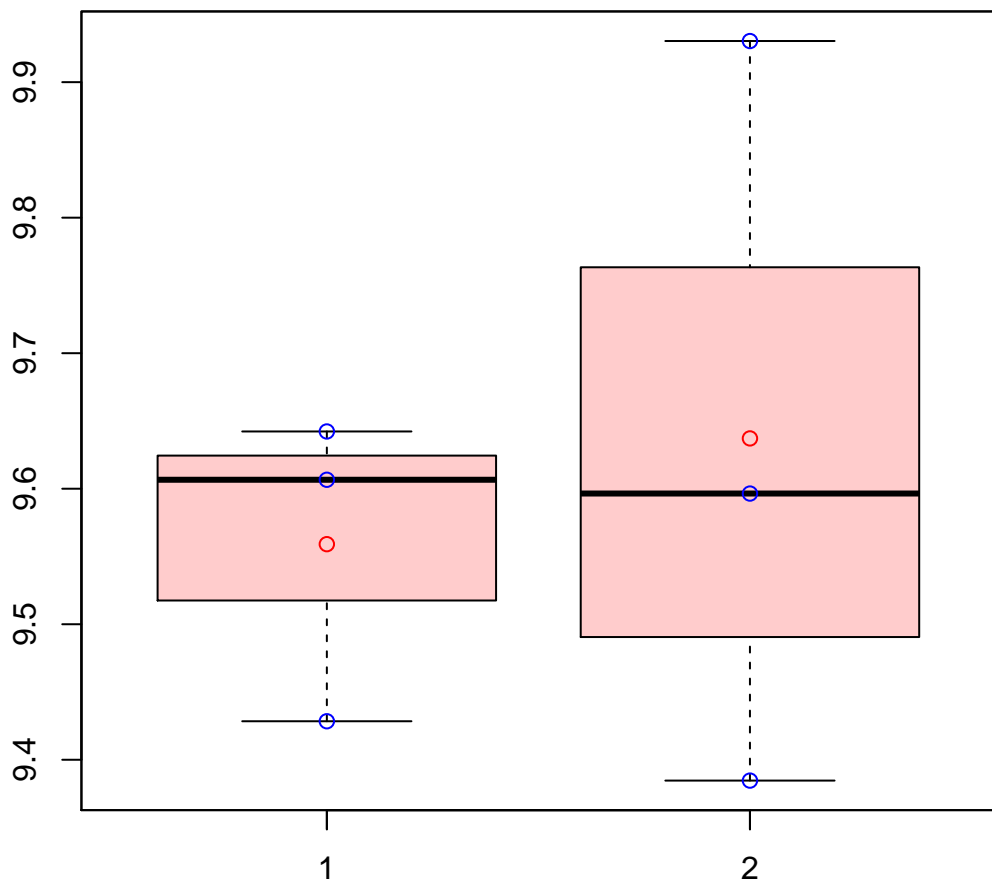

t-Test: p-value = 0.68

# I1JC8|I1JC8\_BRADI

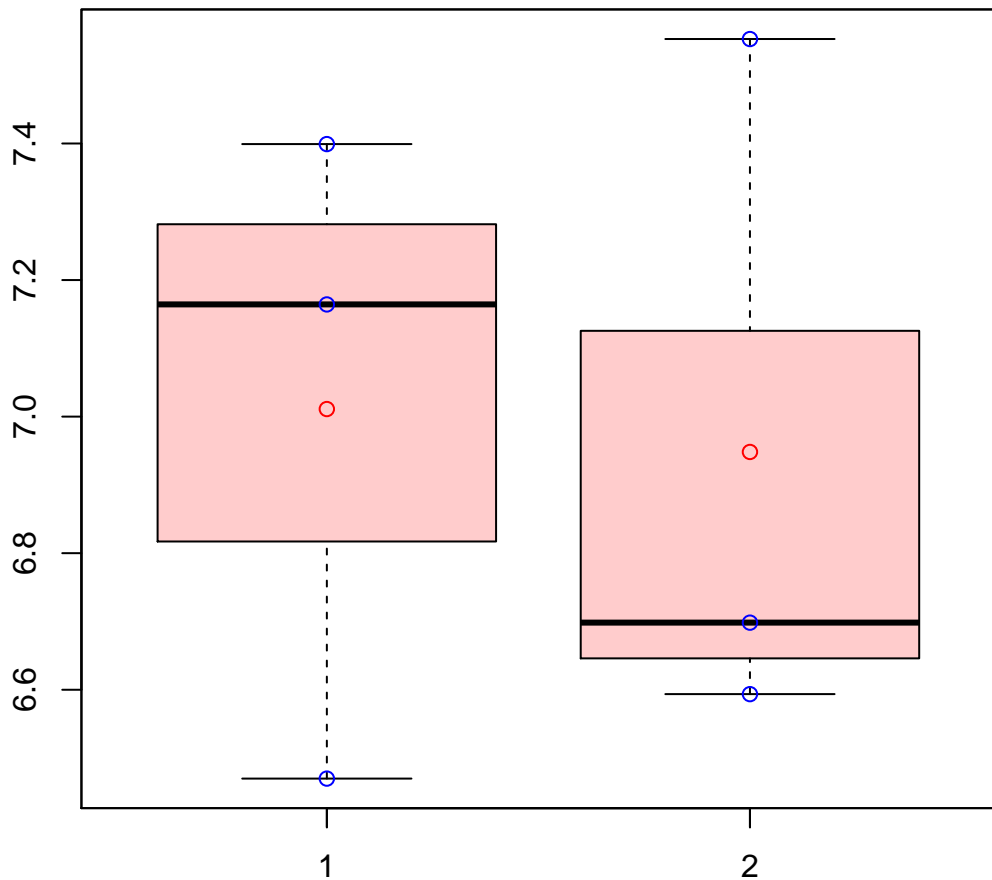

t-Test: p-value = 0.89

# I1IJF5|I1IJF5\_BRADI

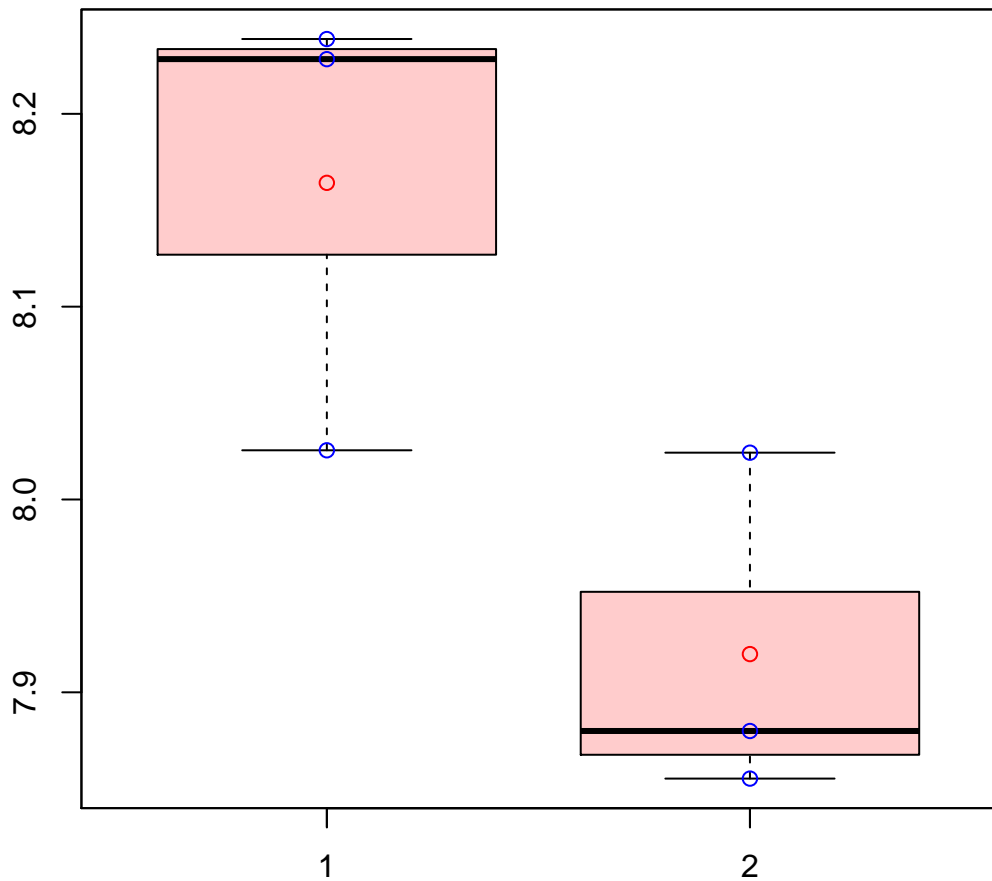

t-Test: p-value = 0.05

# I1IJL1|I1IJL1\_BRADI

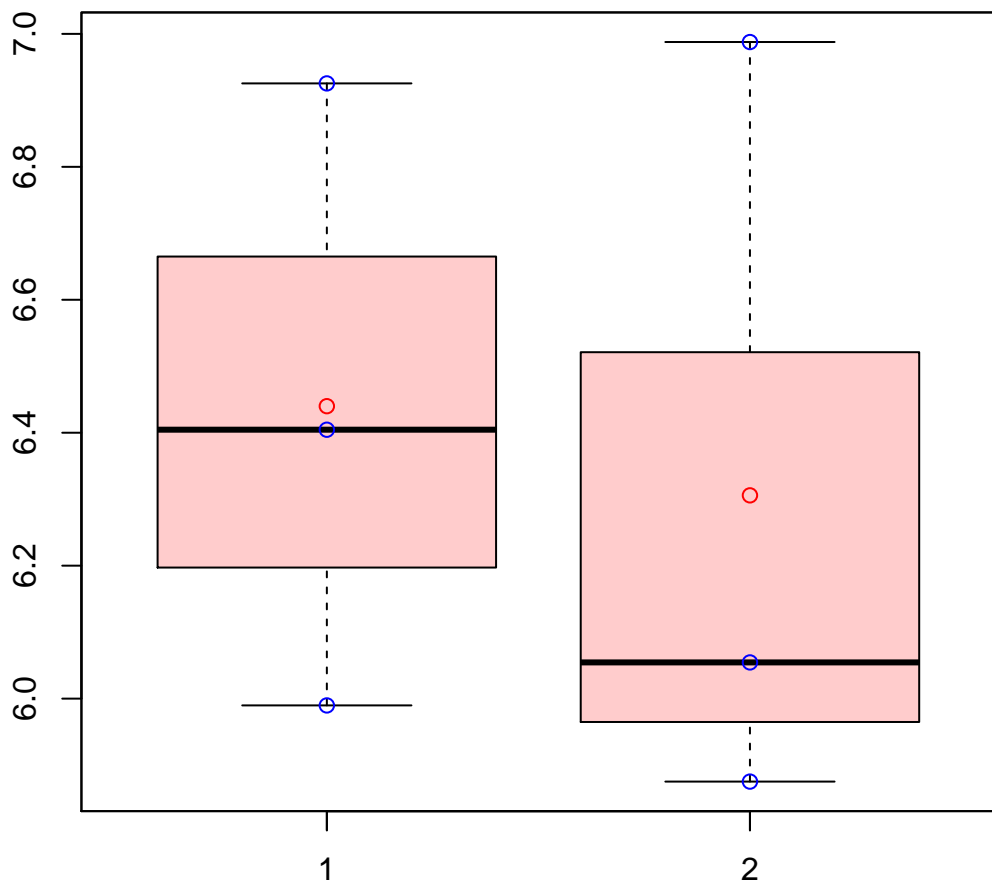

t-Test: p-value = 0.78

# I1IJW0|I1IJW0\_BRADI

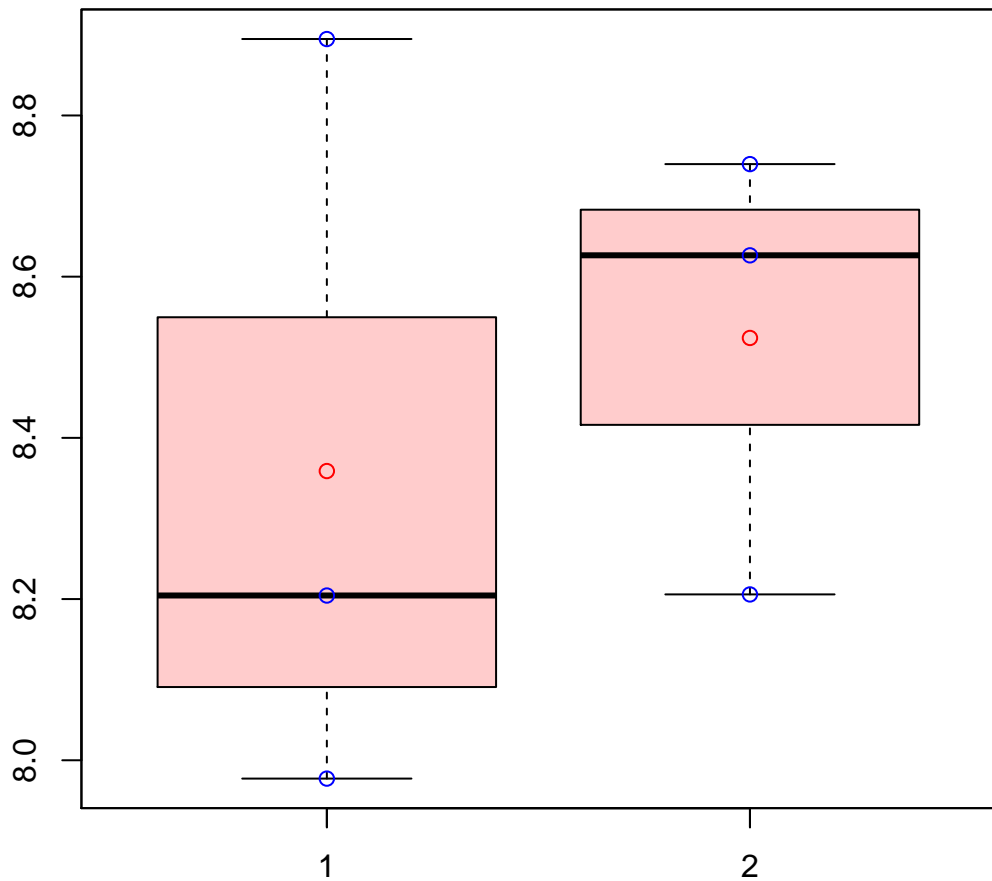

t-Test: p-value = 0.64

# I1IKN0|I1IKN0\_BRADI

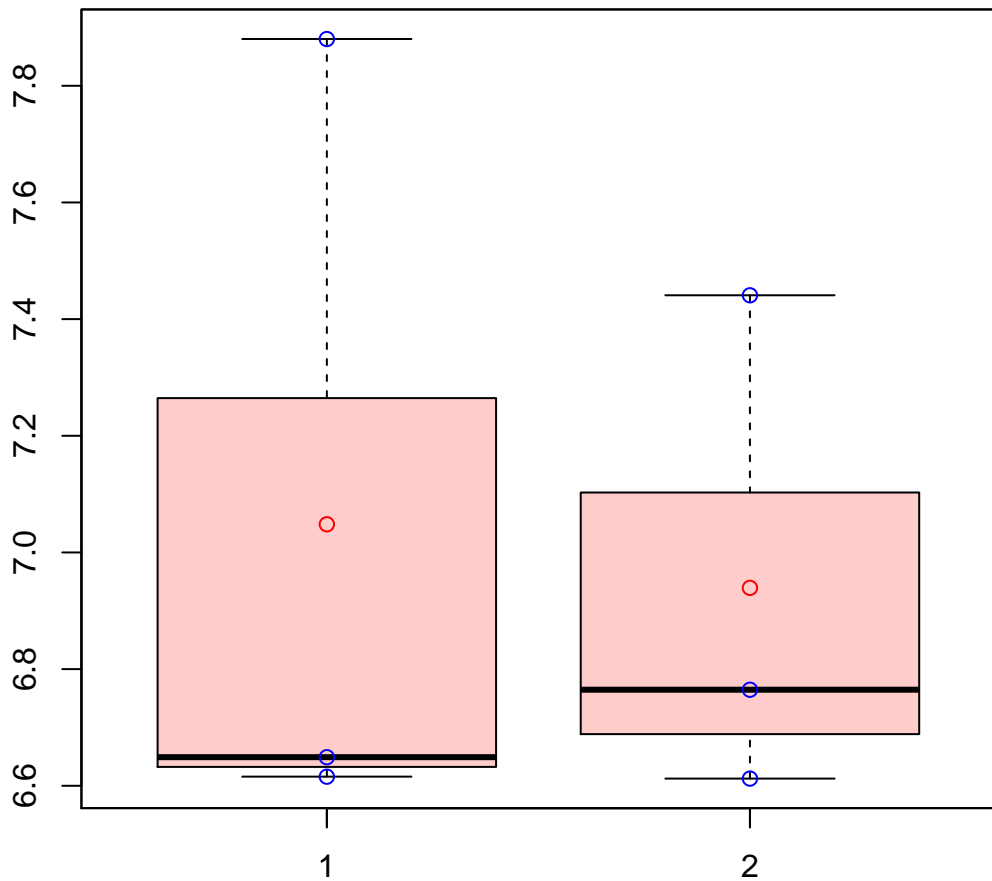

t-Test: p-value = 0.84



# I1IKR0|I1IKR0\_BRADI

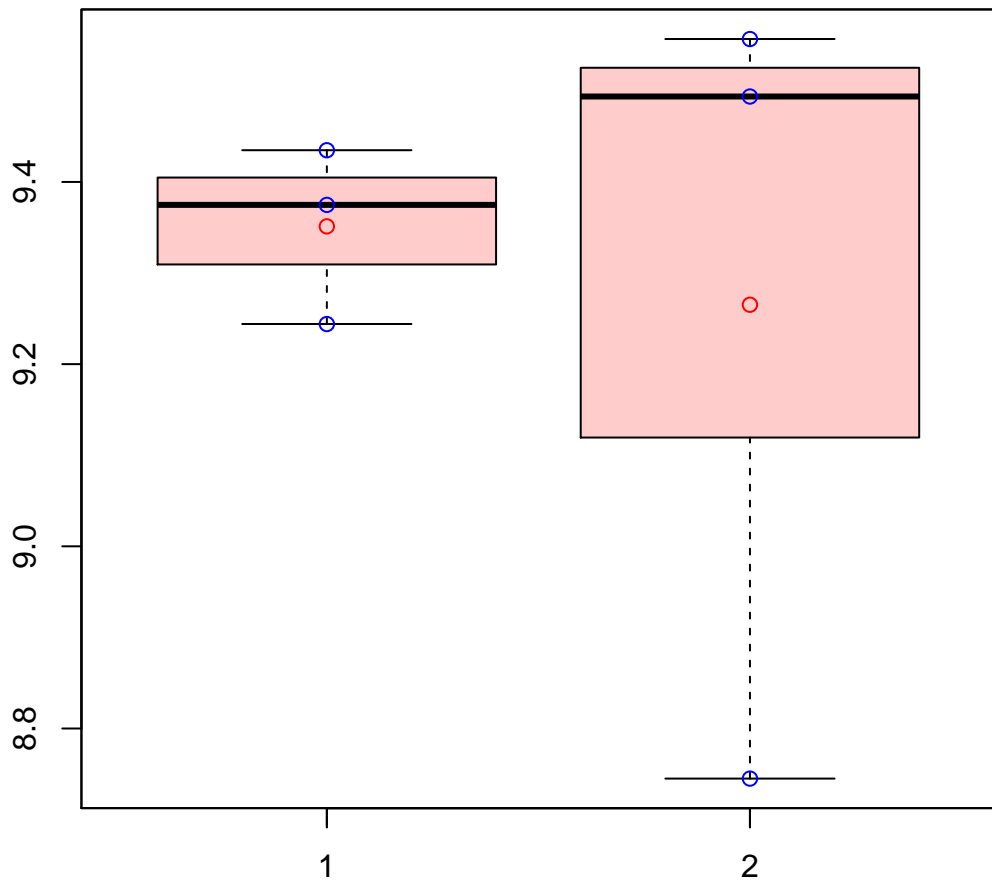

t-Test: p-value = 0.78

# I1IKT0|I1IKT0\_BRADI

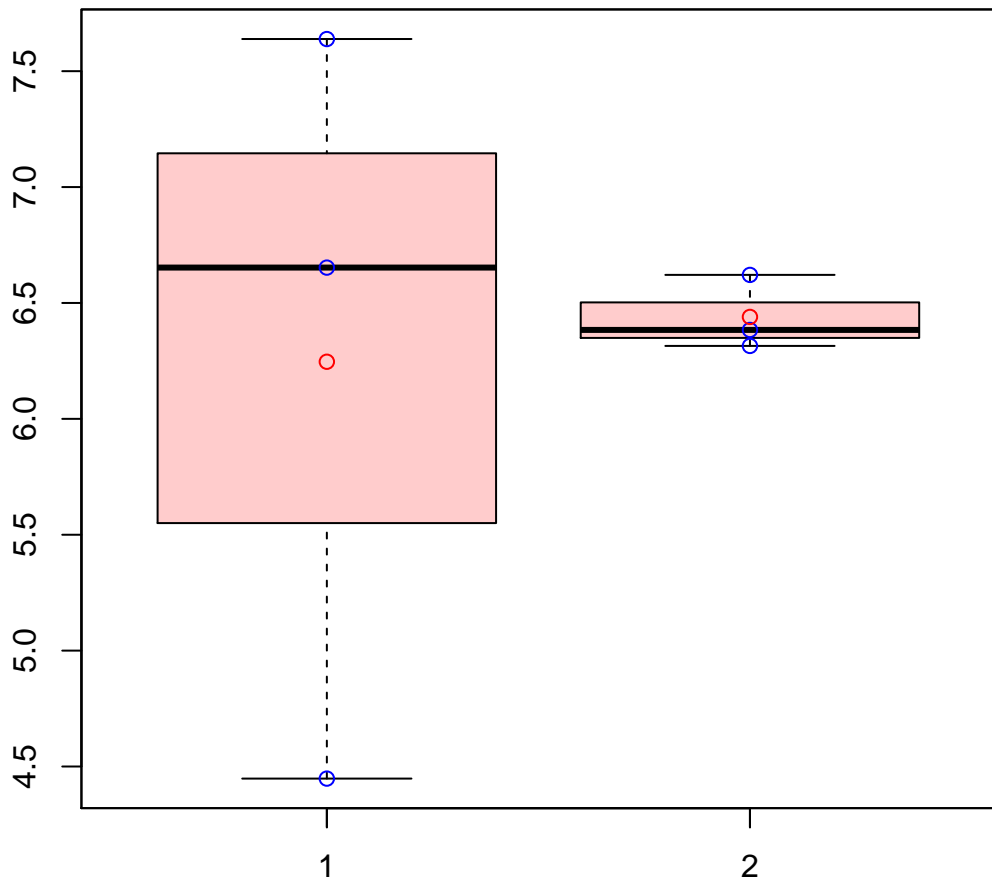

t-Test: p-value = 0.86

# I1IL19|I1IL19\_BRADI

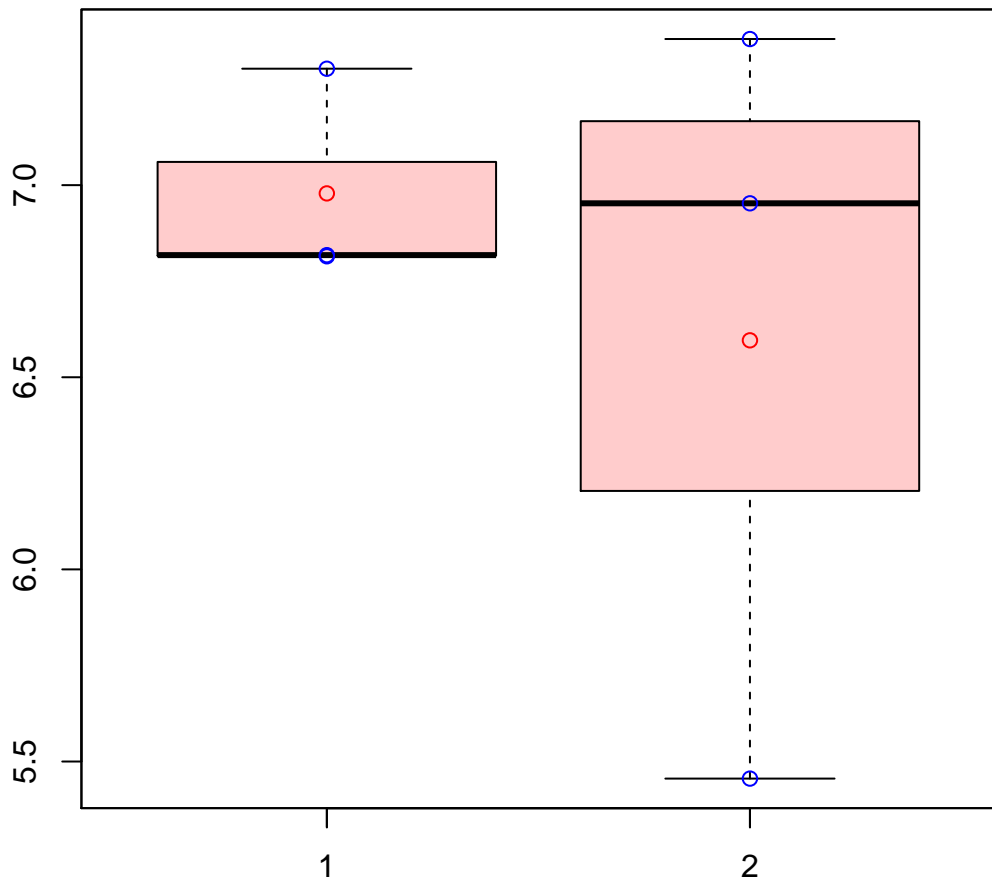

t-Test: p-value = 0.58

# I1IN75|I1IN75\_BRADI

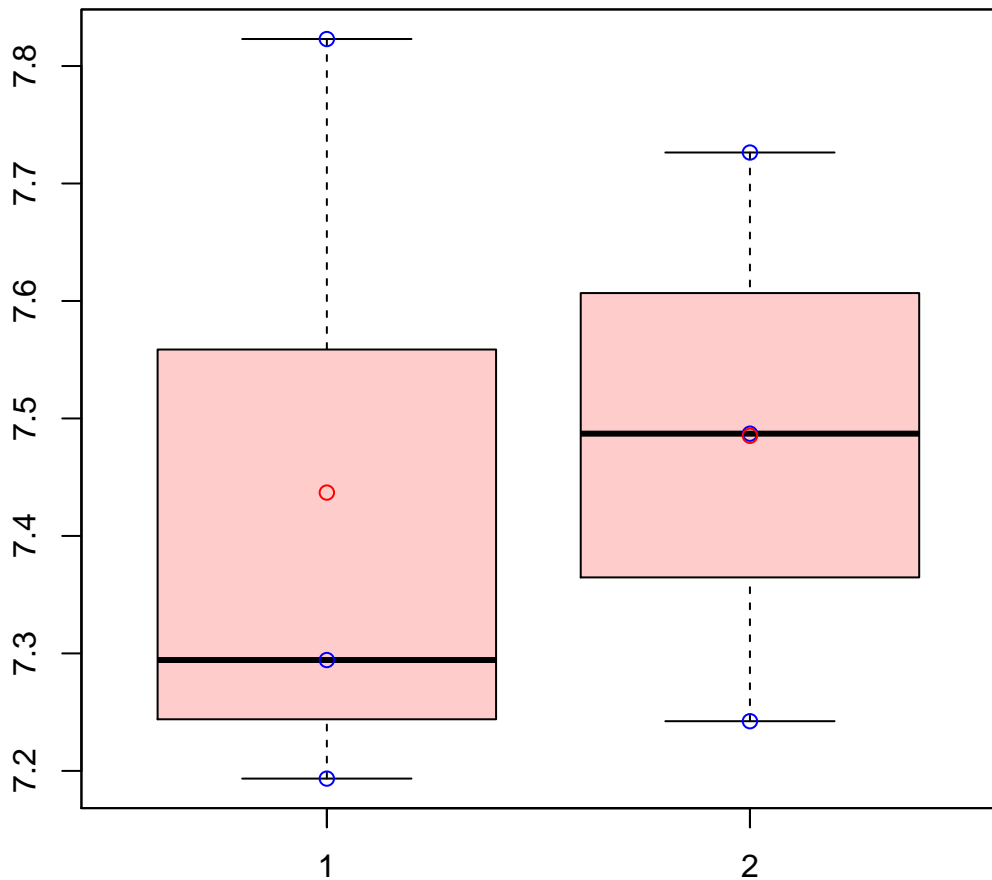

t-Test: p-value = 0.85

# I1INB4|I1INB4\_BRADI

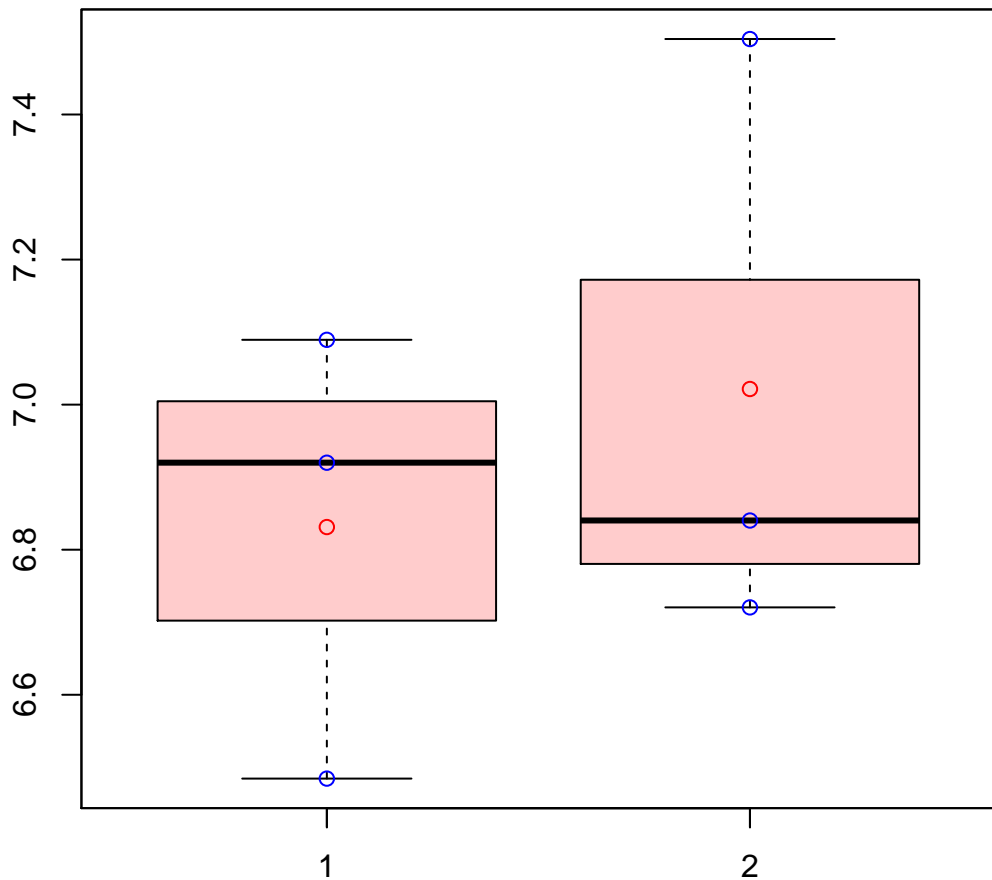

t-Test: p-value = 0.57

# I1P77|I1P77\_BRADI

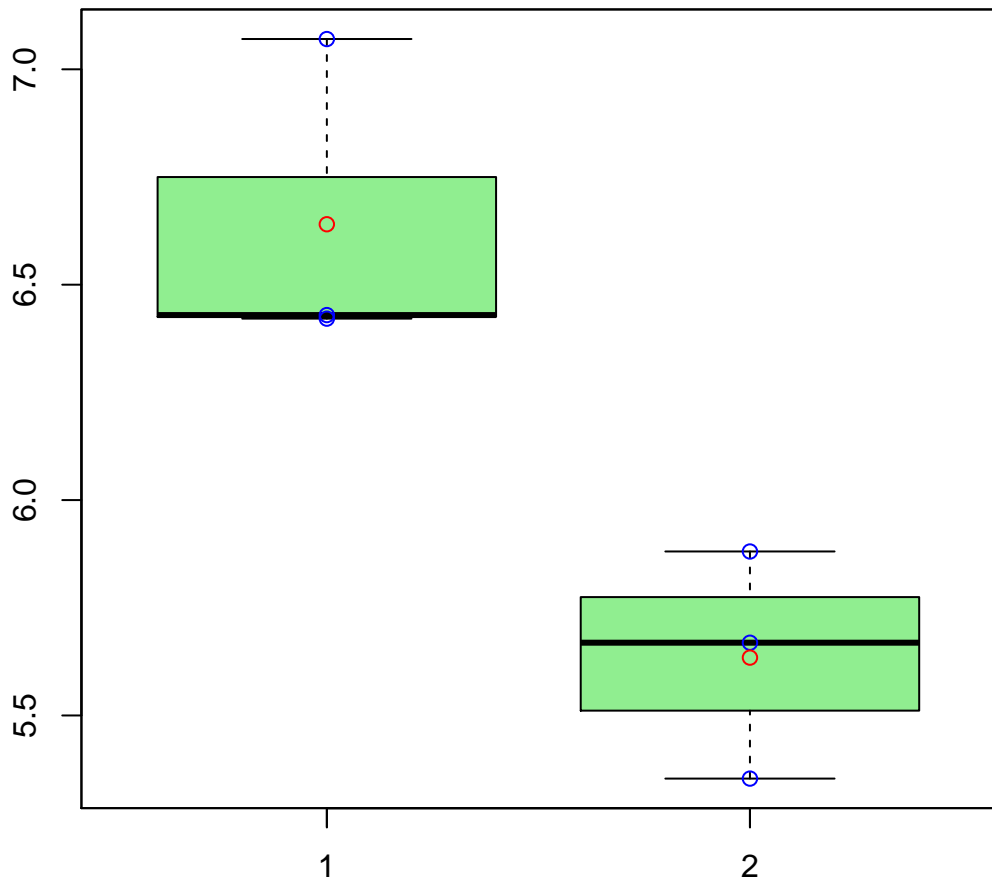

t-Test: p-value = 0.02

# I1IQ40|I1IQ40\_BRADI

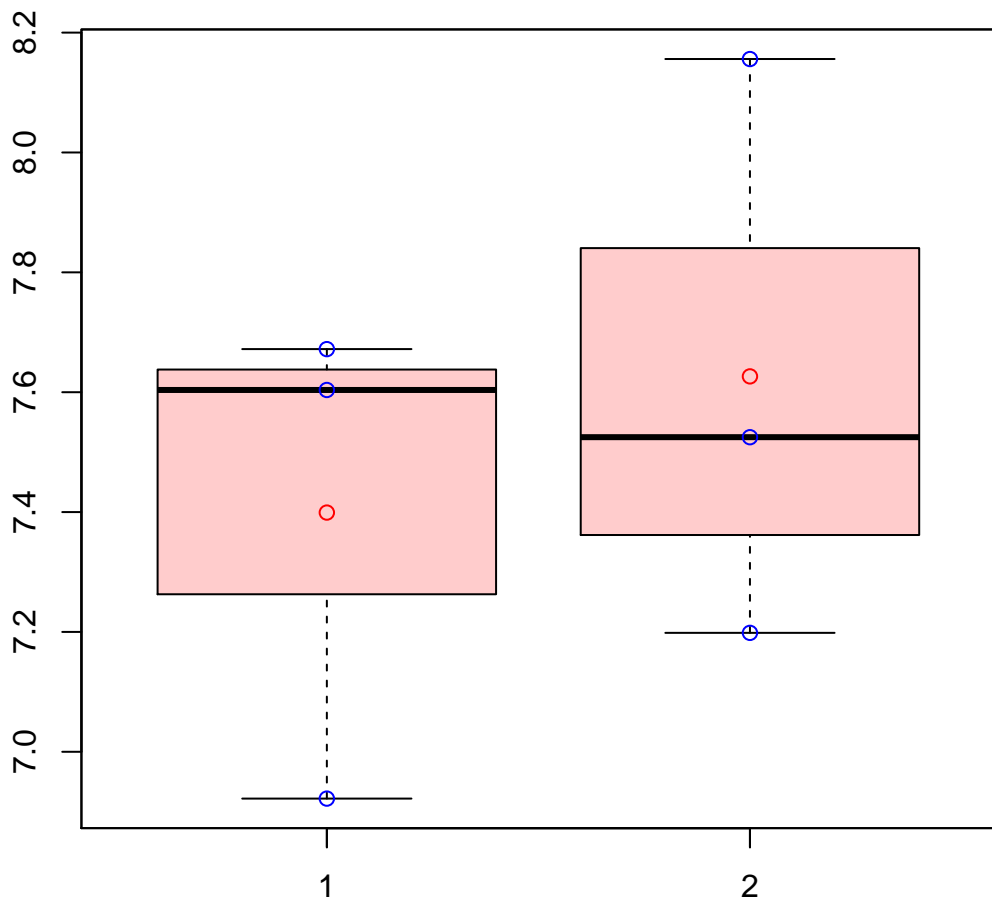

t-Test: p-value = 0.57

# I1IQE1|I1IQE1\_BRADI

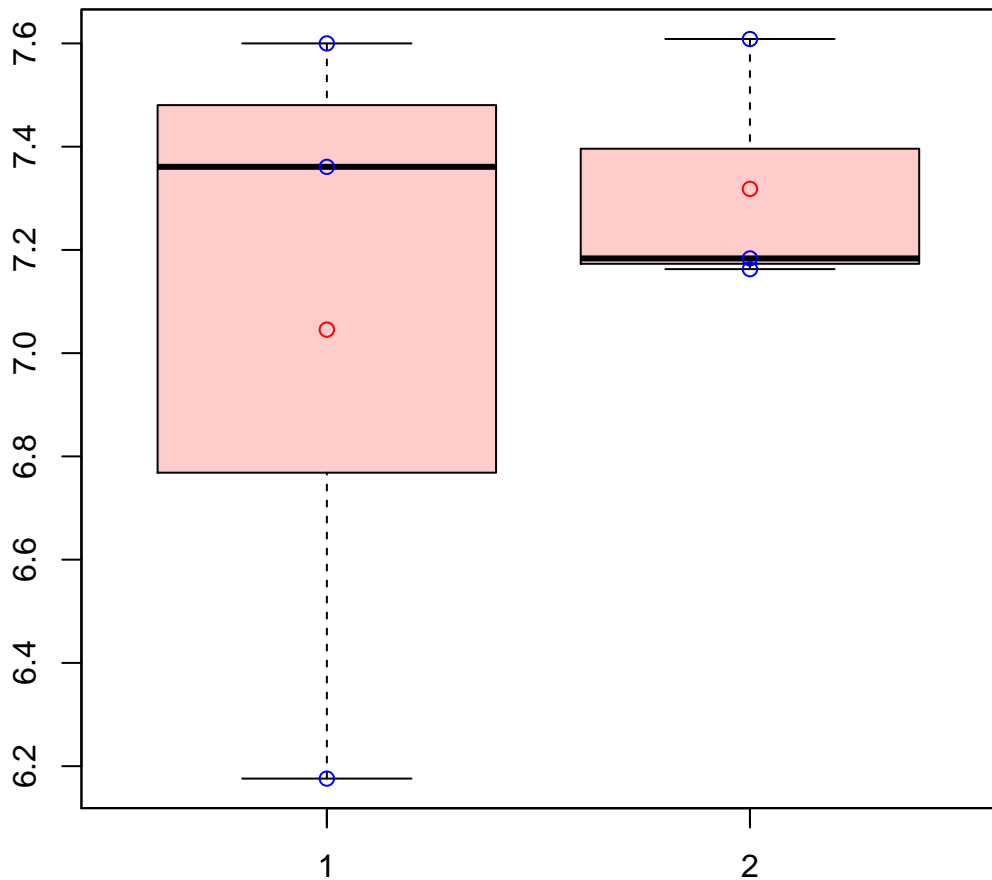

t-Test: p-value = 0.61



# IIR02 | IIR02\_BRADI

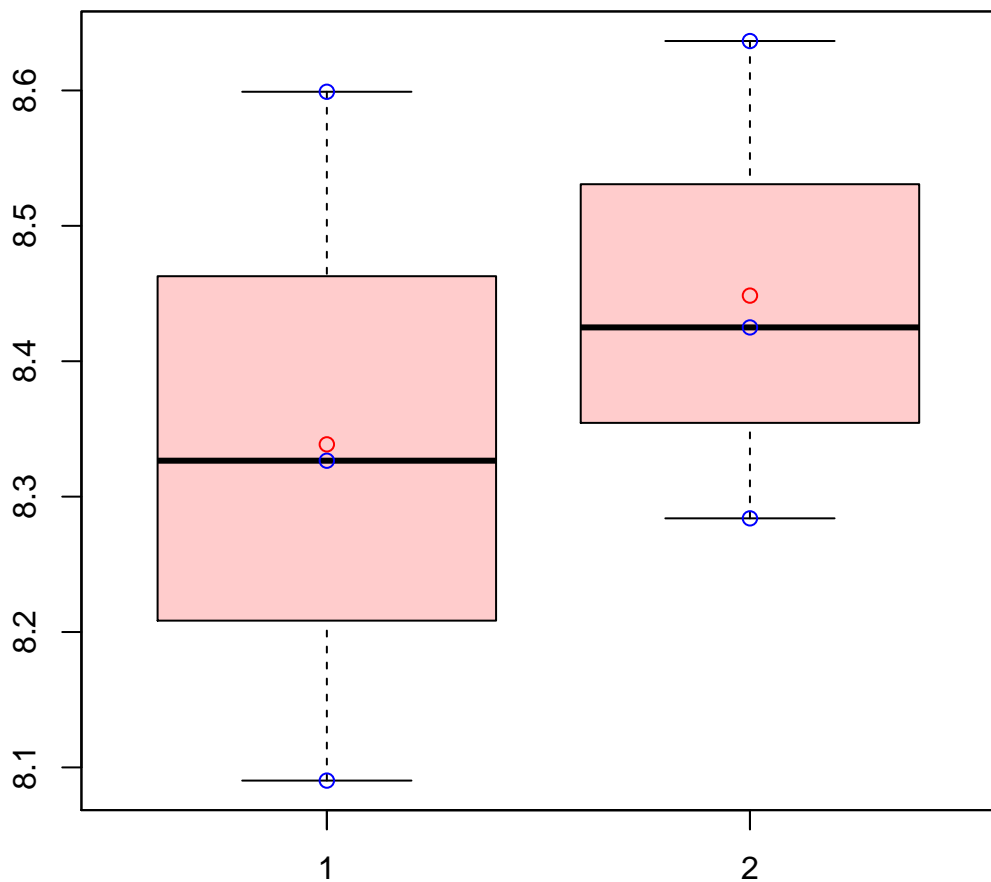

t-Test: p-value = 0.58

# I1IRB3|I1IRB3\_BRADI

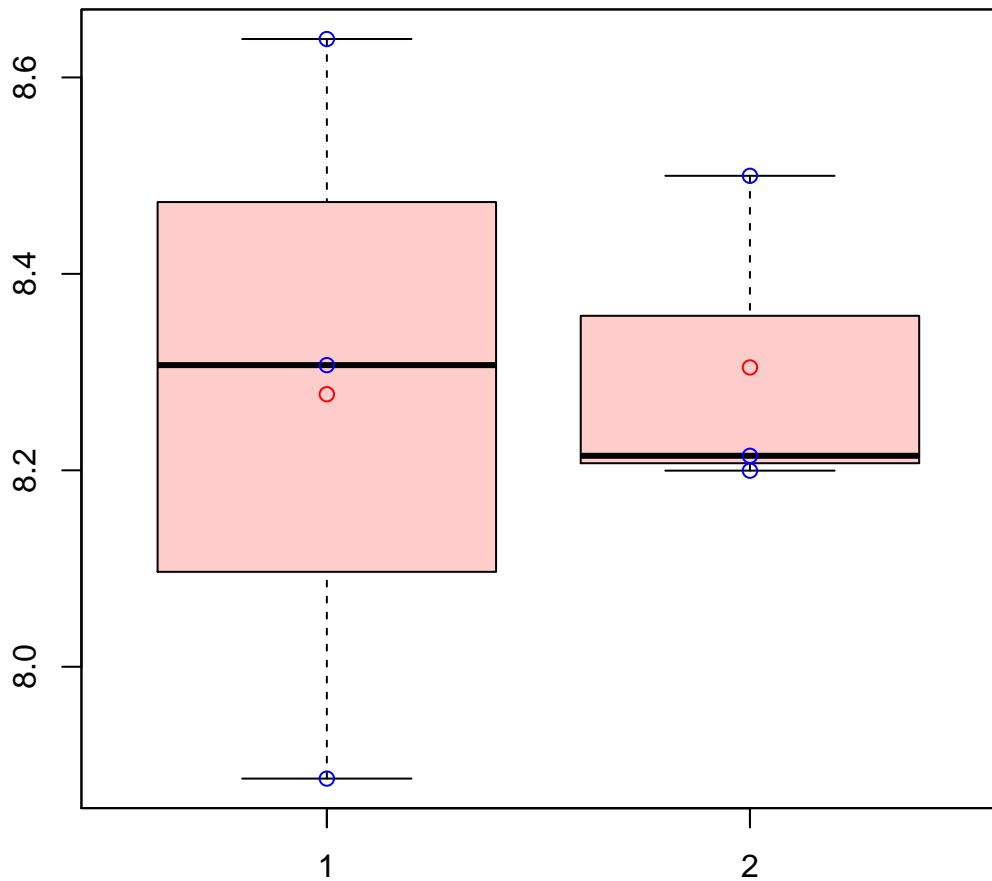

t-Test: p-value = 0.92

# IIRS6|IIRS6\_BRADI

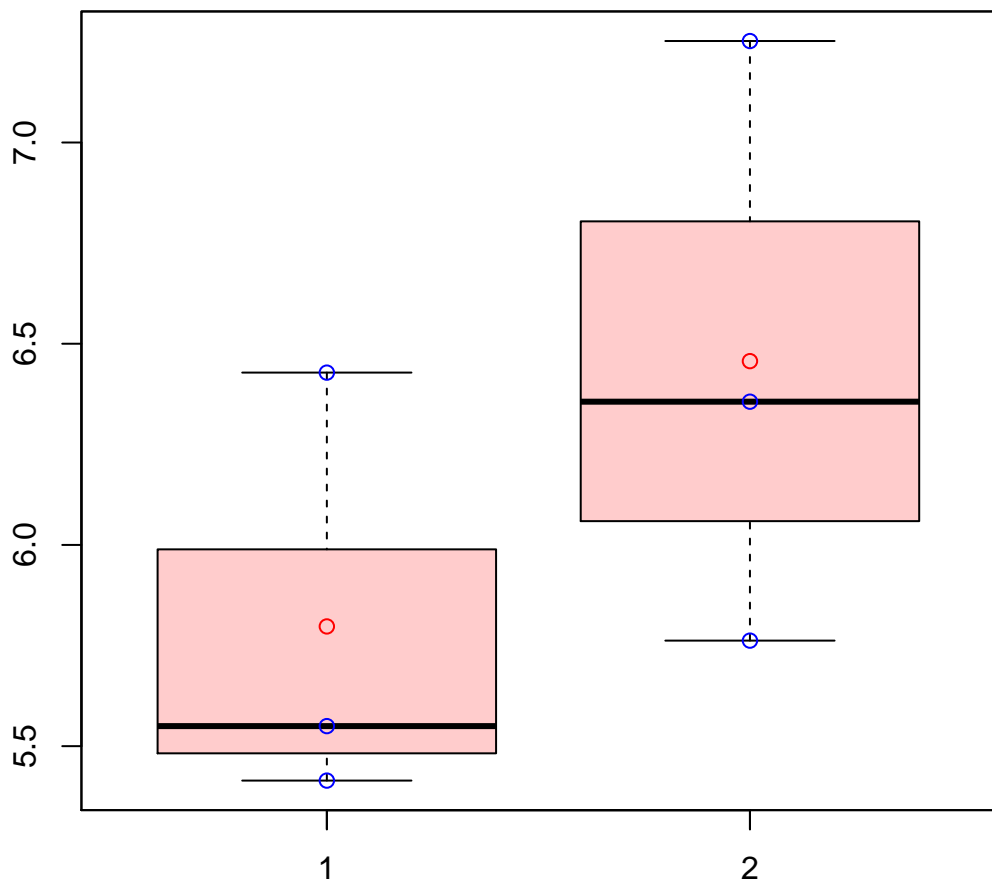

t-Test: p-value = 0.29

# I1IS83|I1IS83\_BRADI

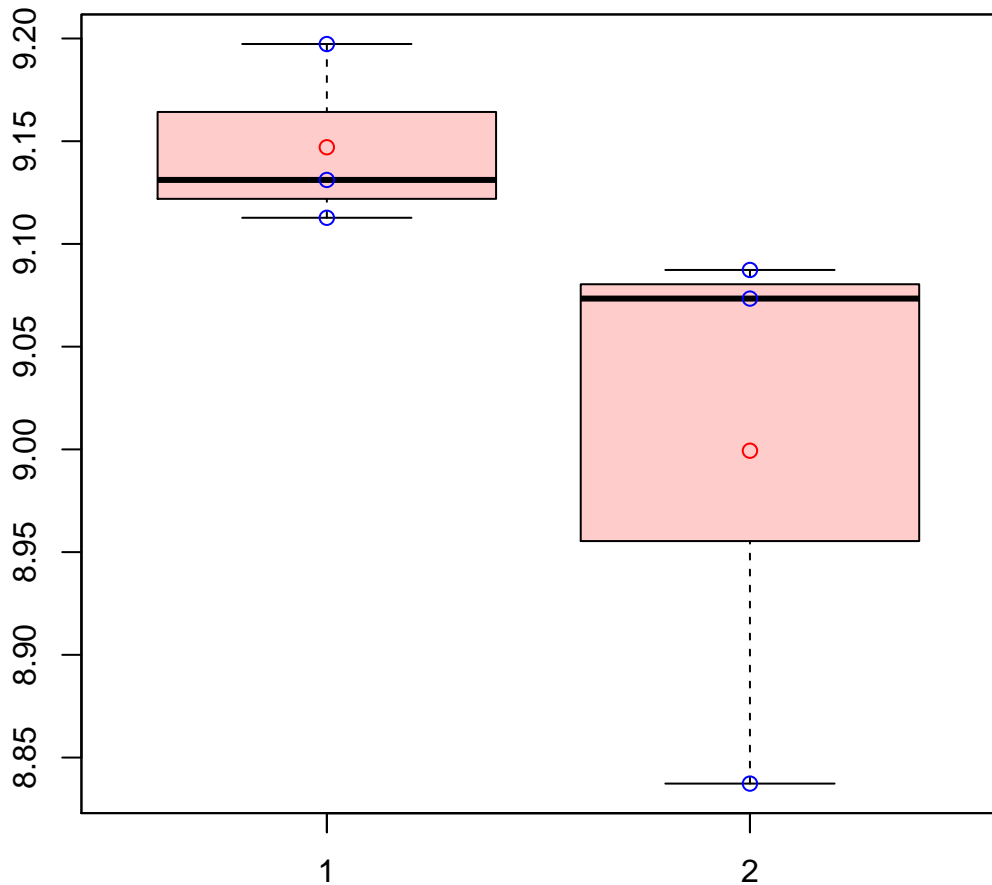

t-Test: p-value = 0.2

# I1ISA6|I1ISA6\_BRADI

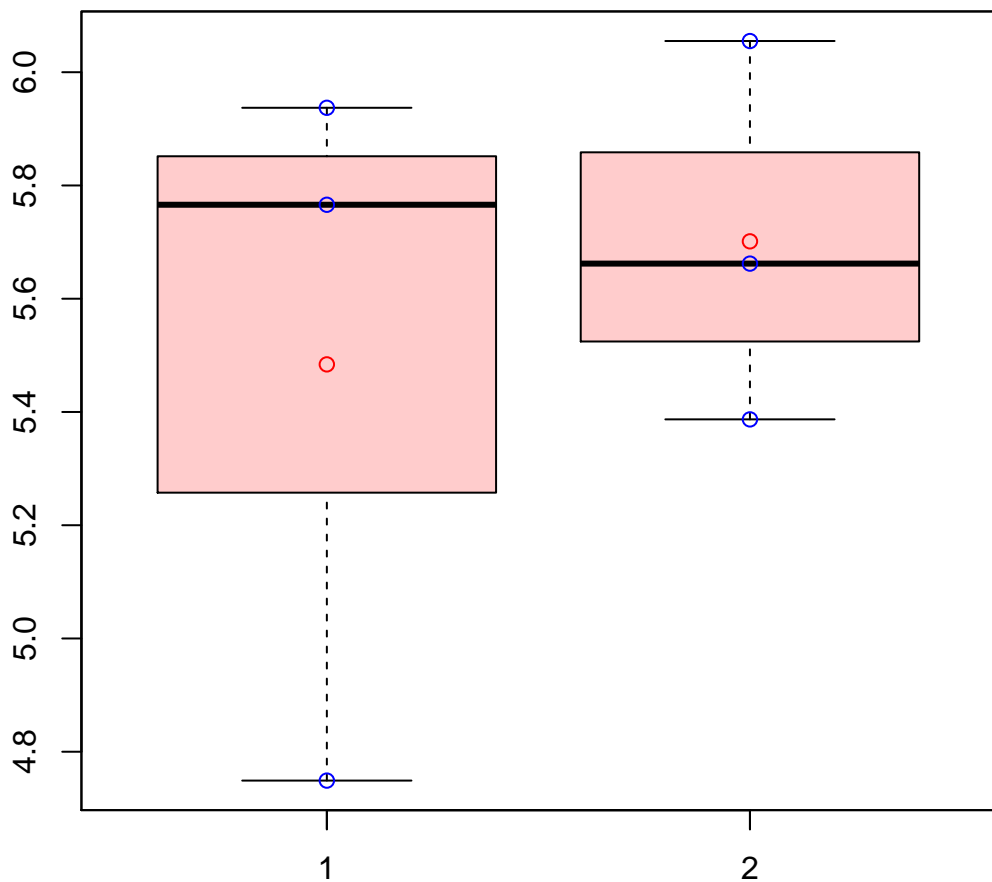

t-Test: p-value = 0.64

# I1SF4|I1SF4\_BRADI

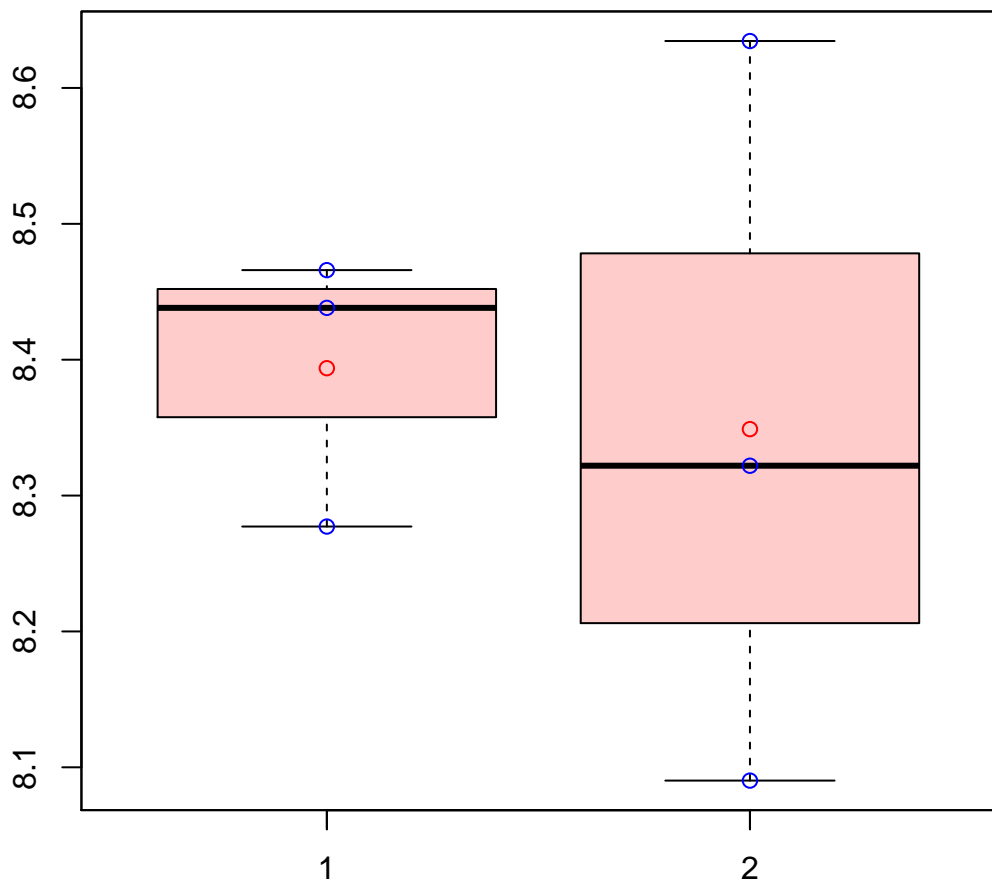

t-Test: p-value = 0.81

# I1ISL8|I1ISL8\_BRADI

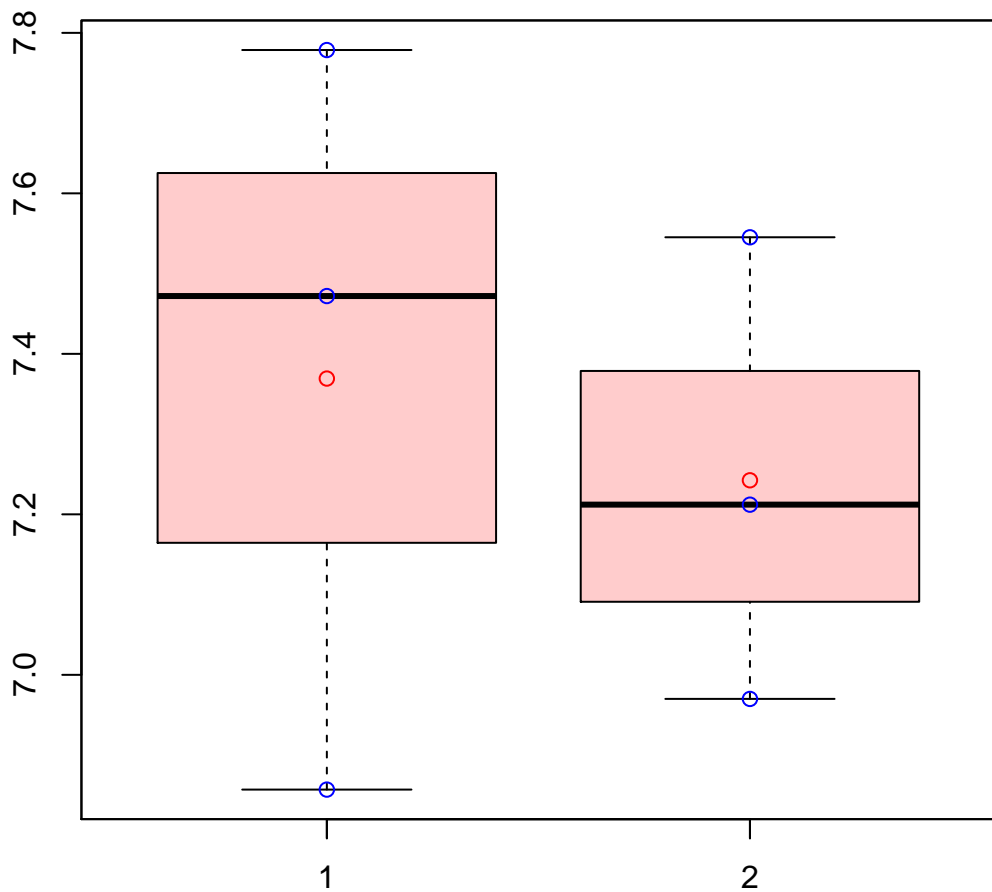

t-Test: p-value = 0.71

# I1IT98|I1IT98\_BRADI

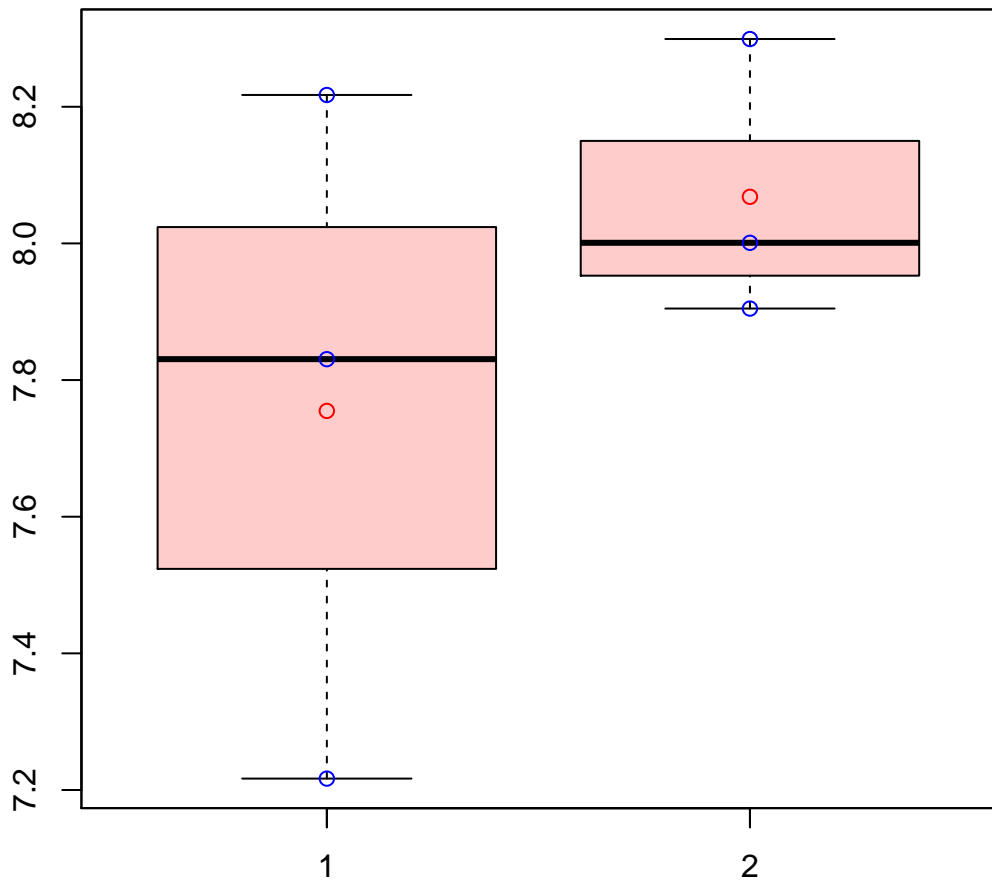

t-Test: p-value = 0.4



# I1ITB7|I1ITB7\_BRADI

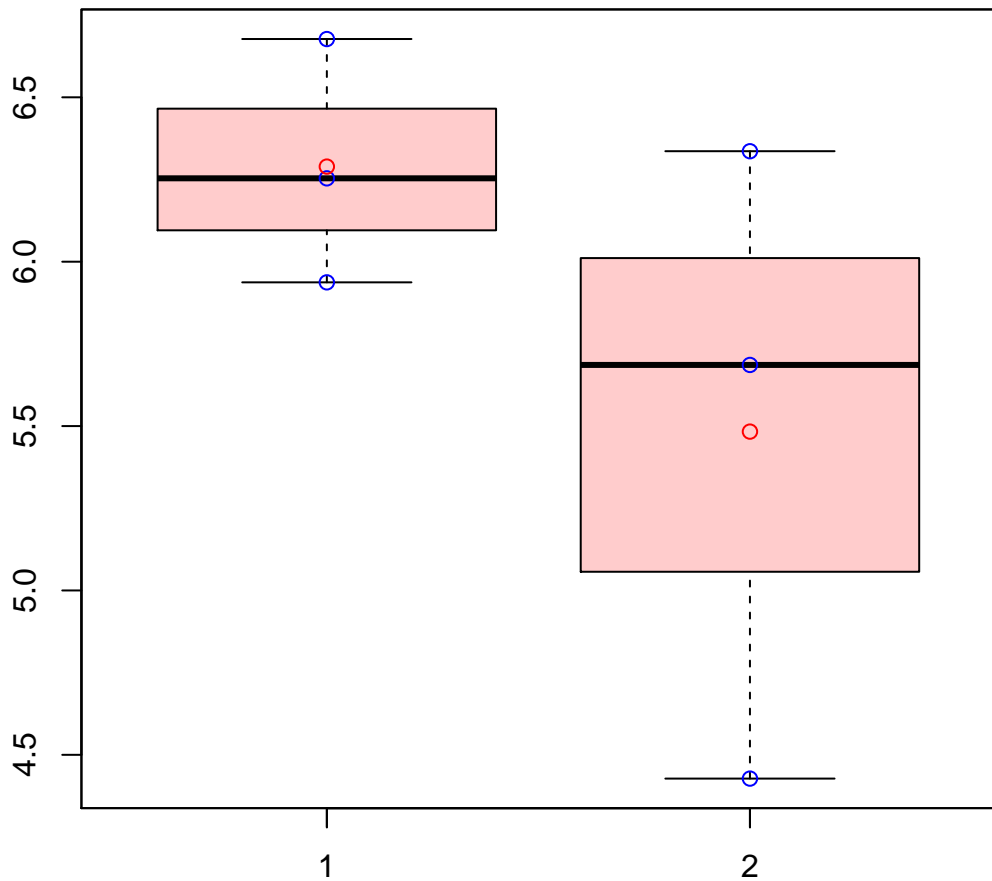

t-Test: p-value = 0.29

# I1ITD8|I1ITD8\_BRADI

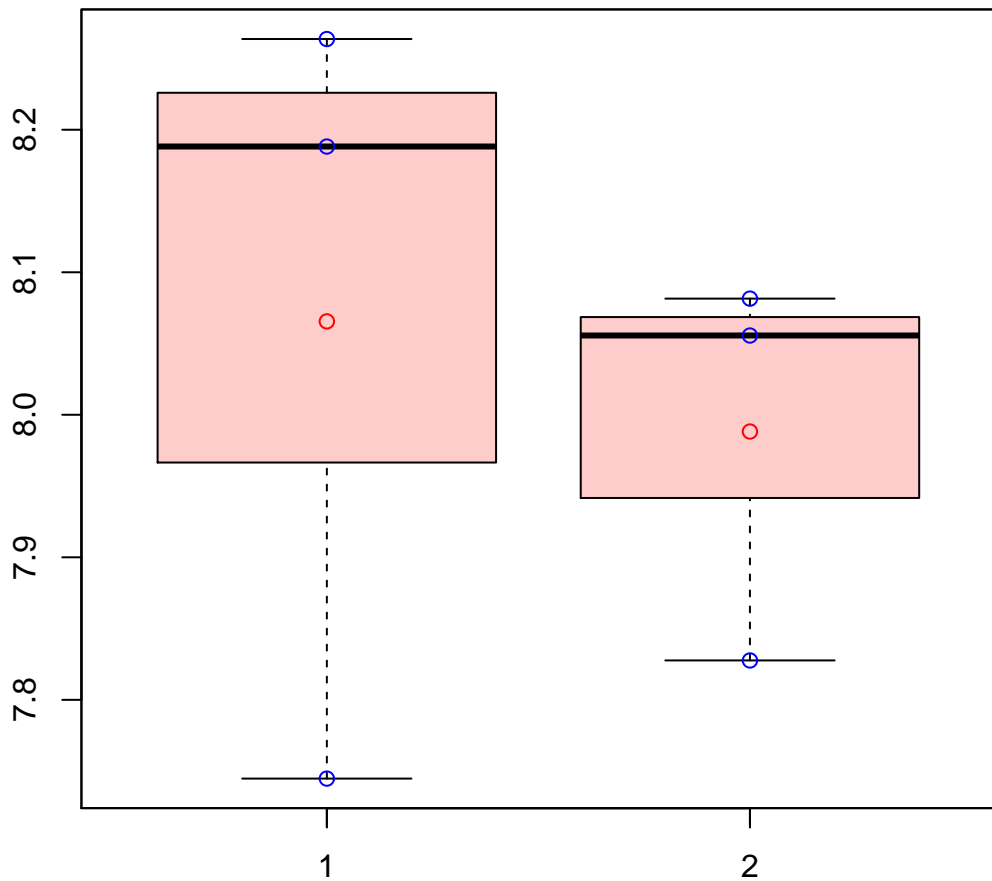

t-Test: p-value = 0.7

# $|IITE2|/|IITE2\_BRADI|$

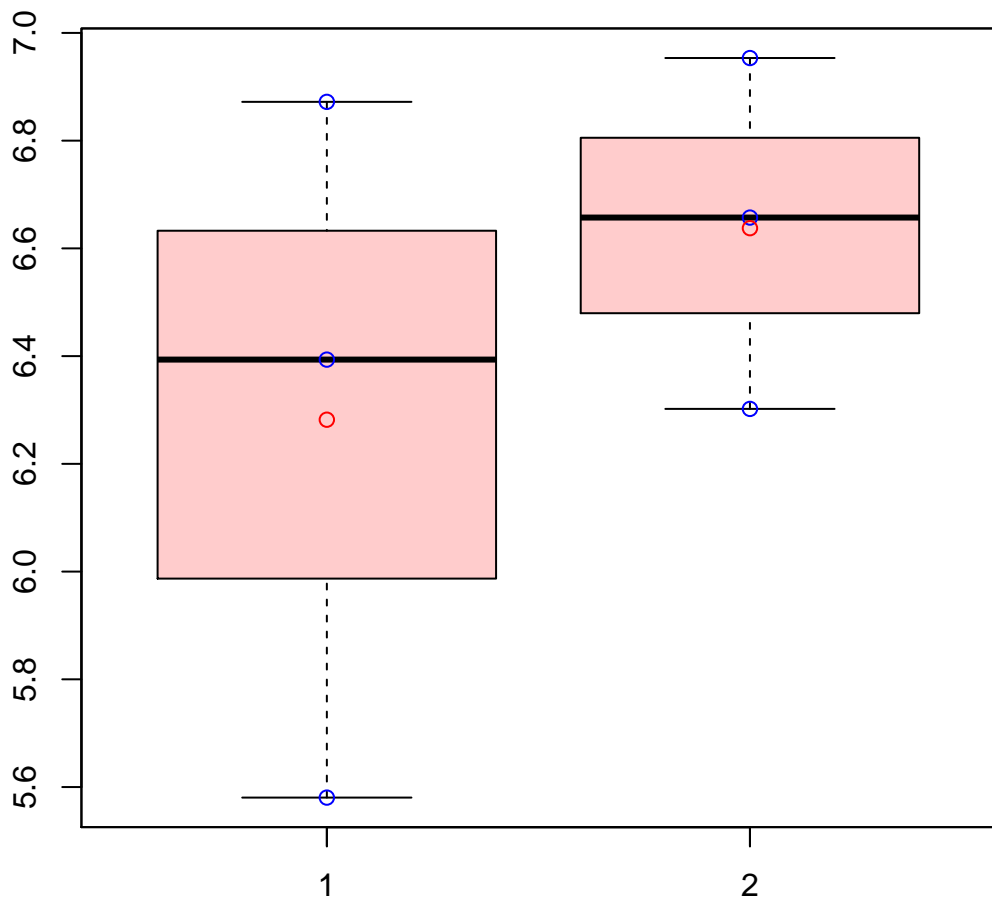

t-Test: p-value = 0.46

# I1ITH3|I1ITH3\_BRADI

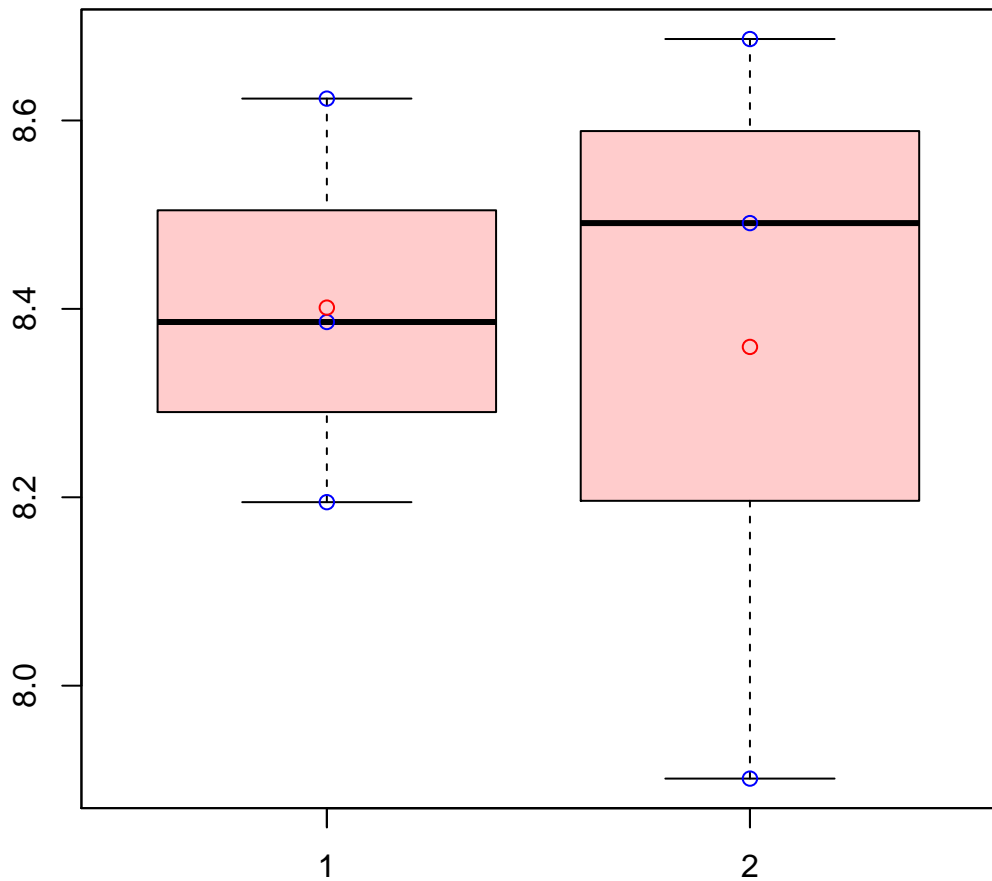

t-Test: p-value = 0.89

# I1IT19|I1IT19\_BRADI

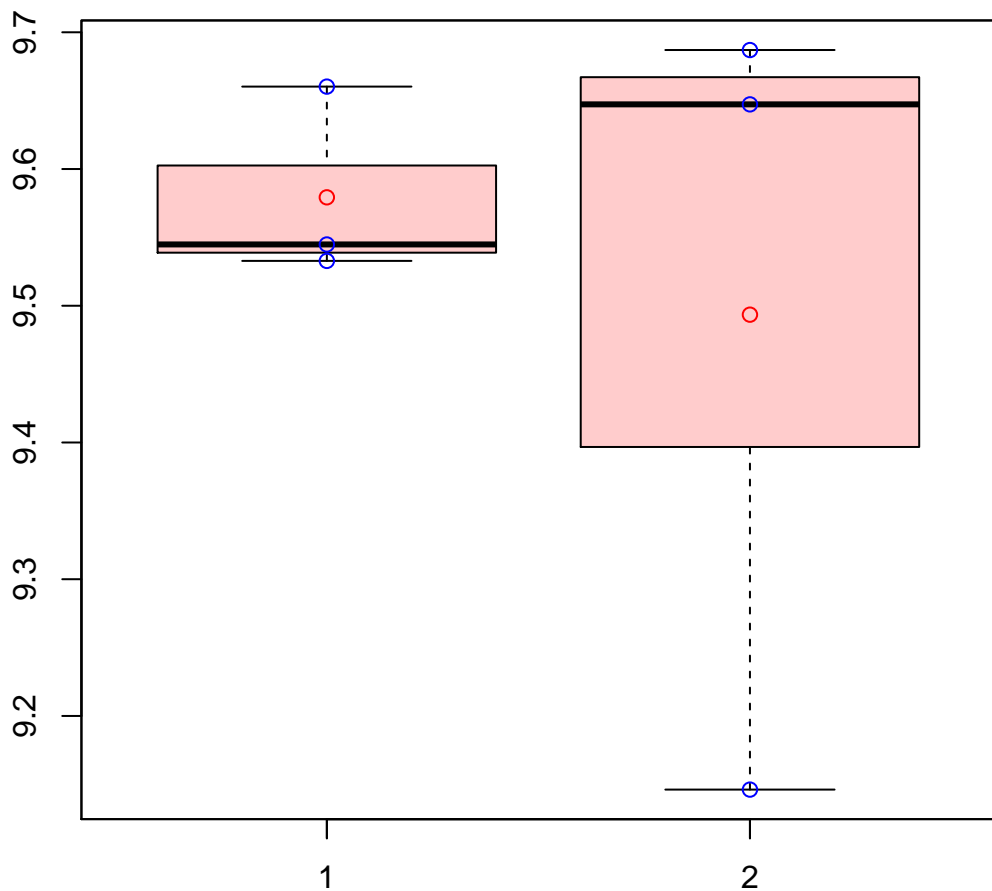

t-Test: p-value = 0.67

# I1ITJ3|I1ITJ3\_BRADI

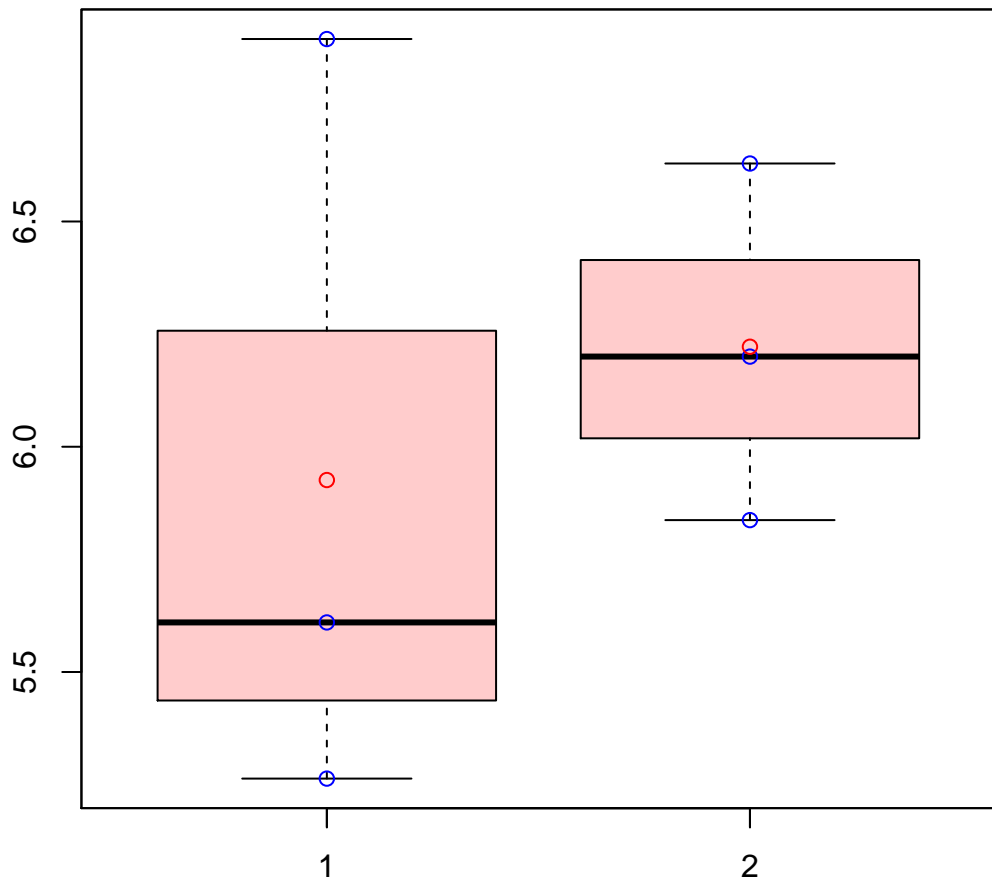

t-Test: p-value = 0.63

# I1ITQ5|I1ITQ5\_BRADI

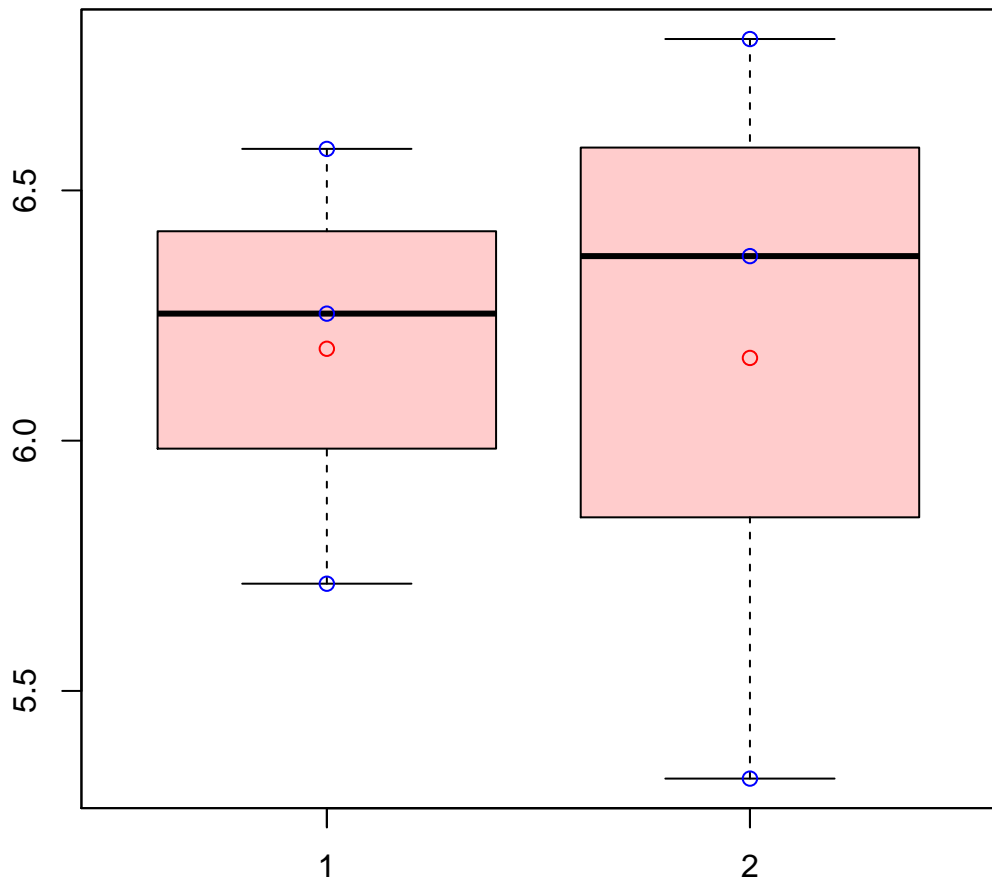

t-Test: p-value = 0.97

# lITS3|lITS3\_BRADI

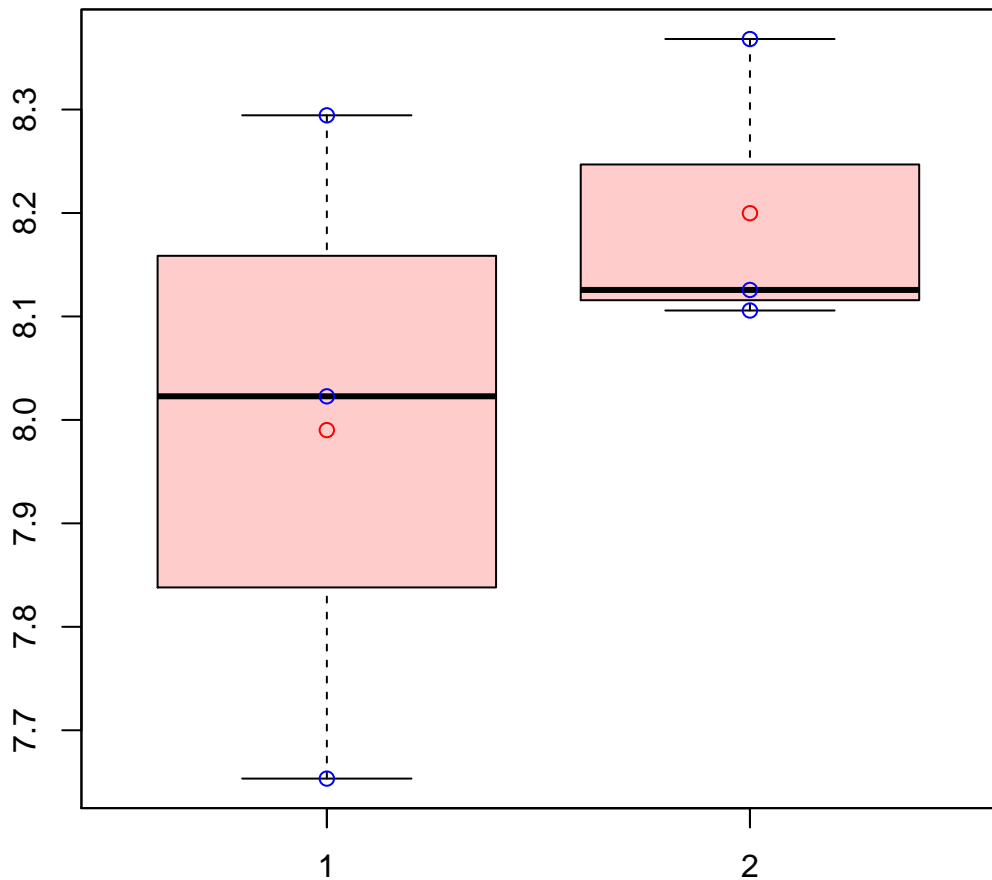

t-Test: p-value = 0.38



# I1U18|I1U18\_BRADI

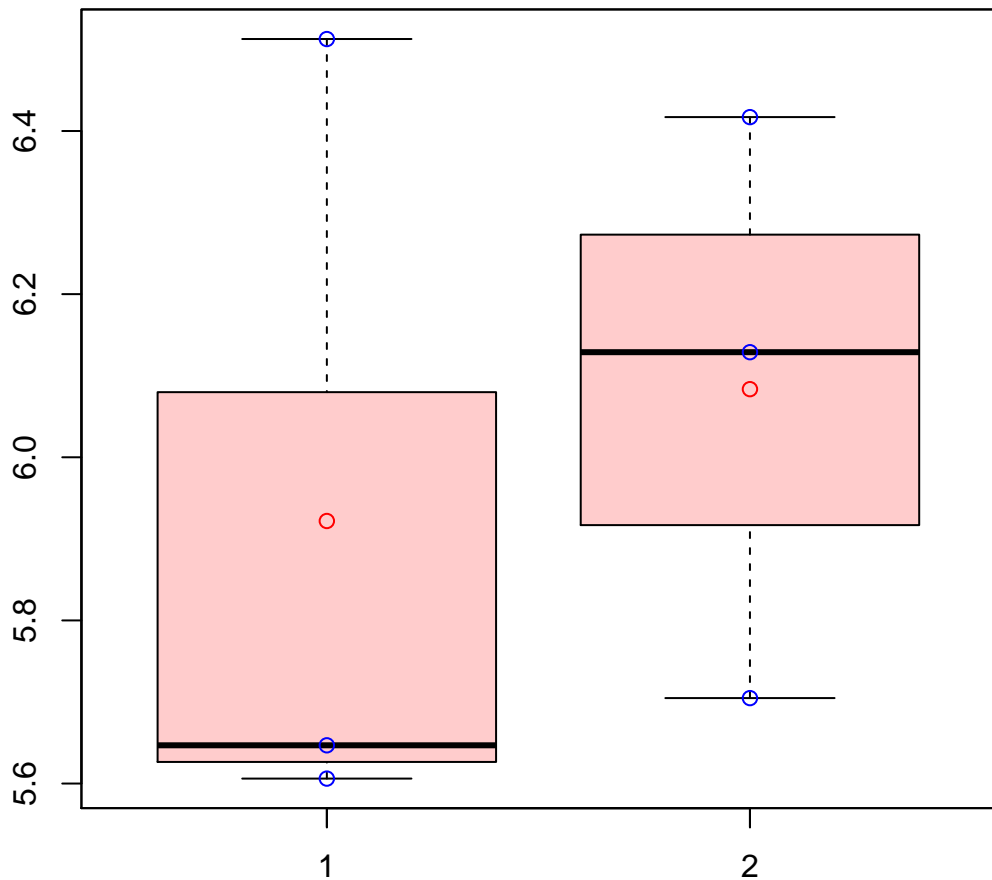

t-Test: p-value = 0.68

# I1IU33|I1IU33\_BRADI

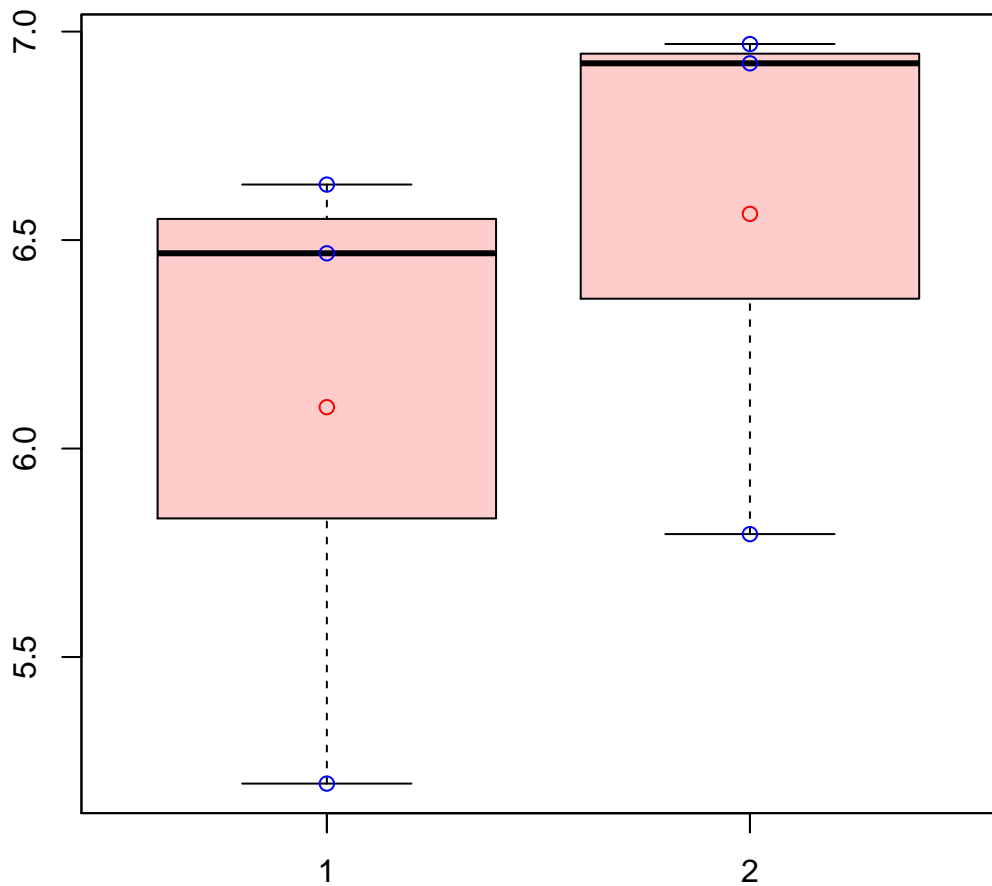

t-Test: p-value = 0.48

# I1IUQ5|I1IUQ5\_BRADI

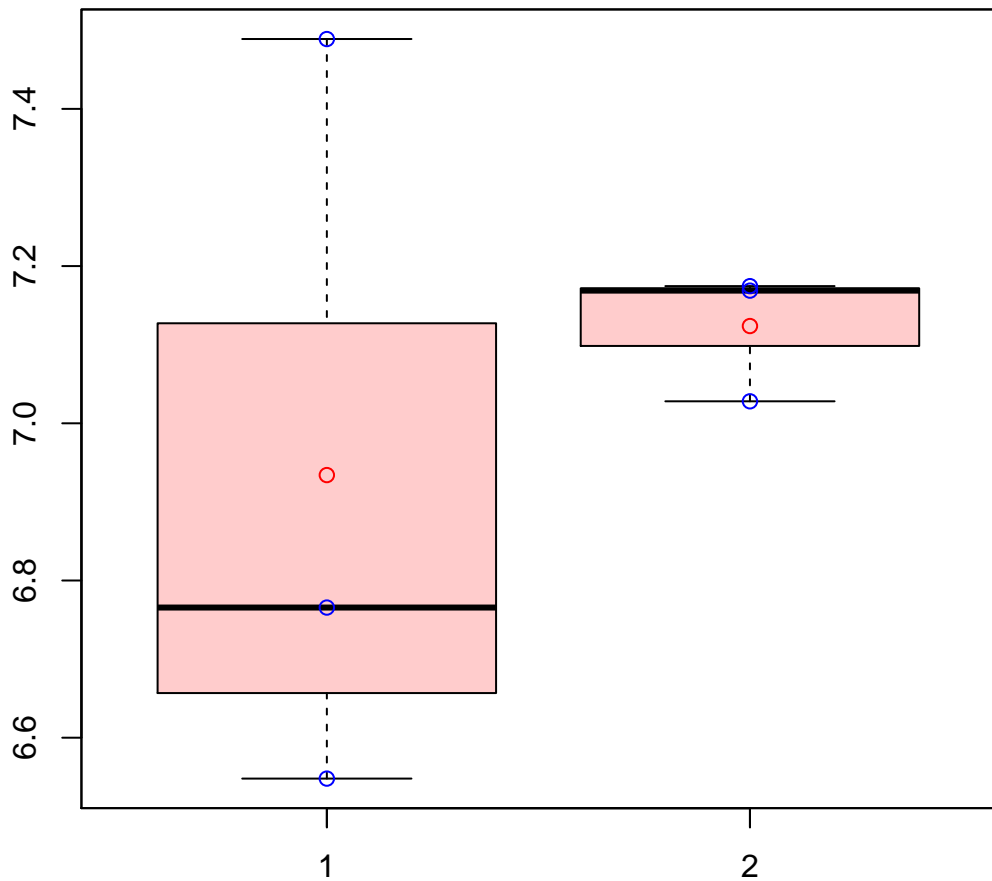

t-Test: p-value = 0.58

# I1IUV0|I1IUV0\_BRADI

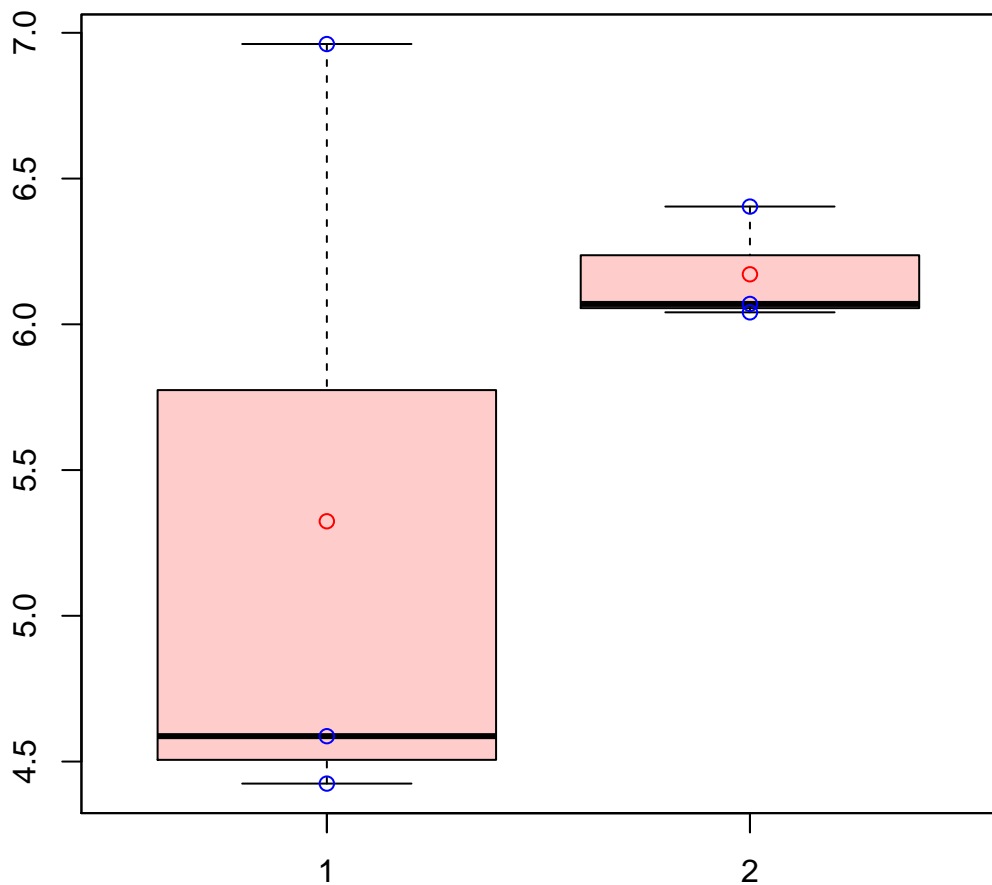

t-Test: p-value = 0.41

# I1IUW4|I1IUW4\_BRADI

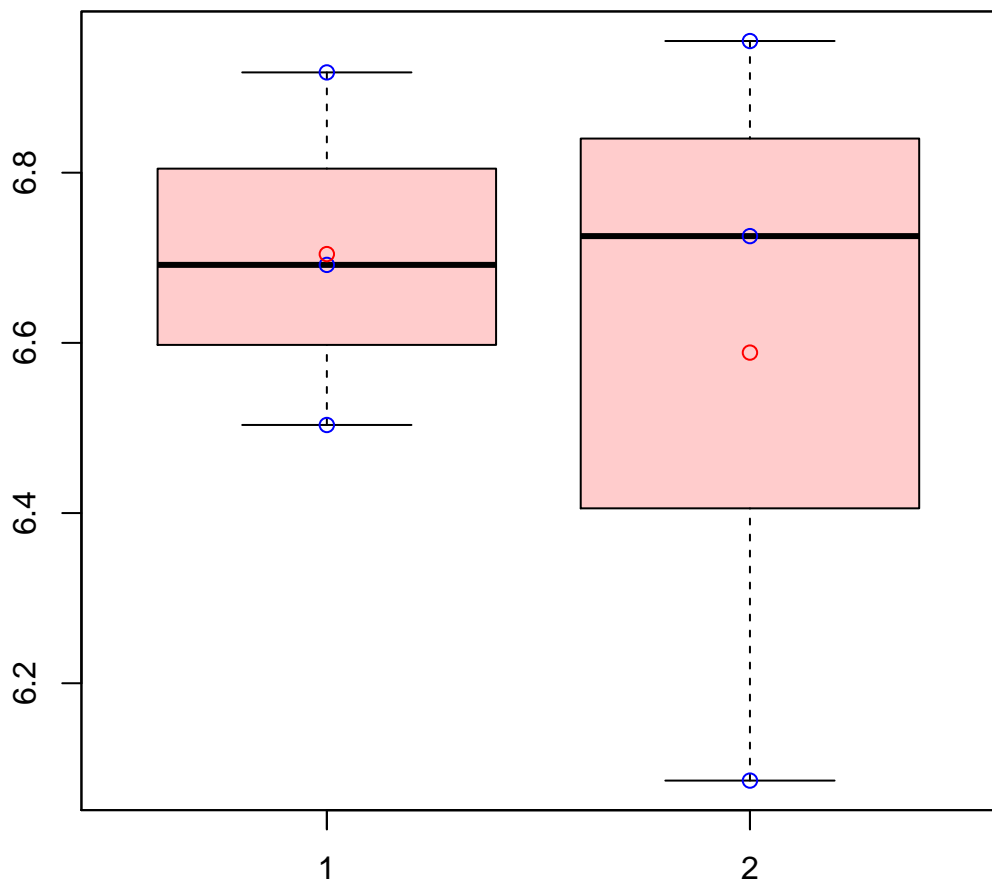

t-Test: p-value = 0.71

# I1IV81|I1IV81\_BRADI

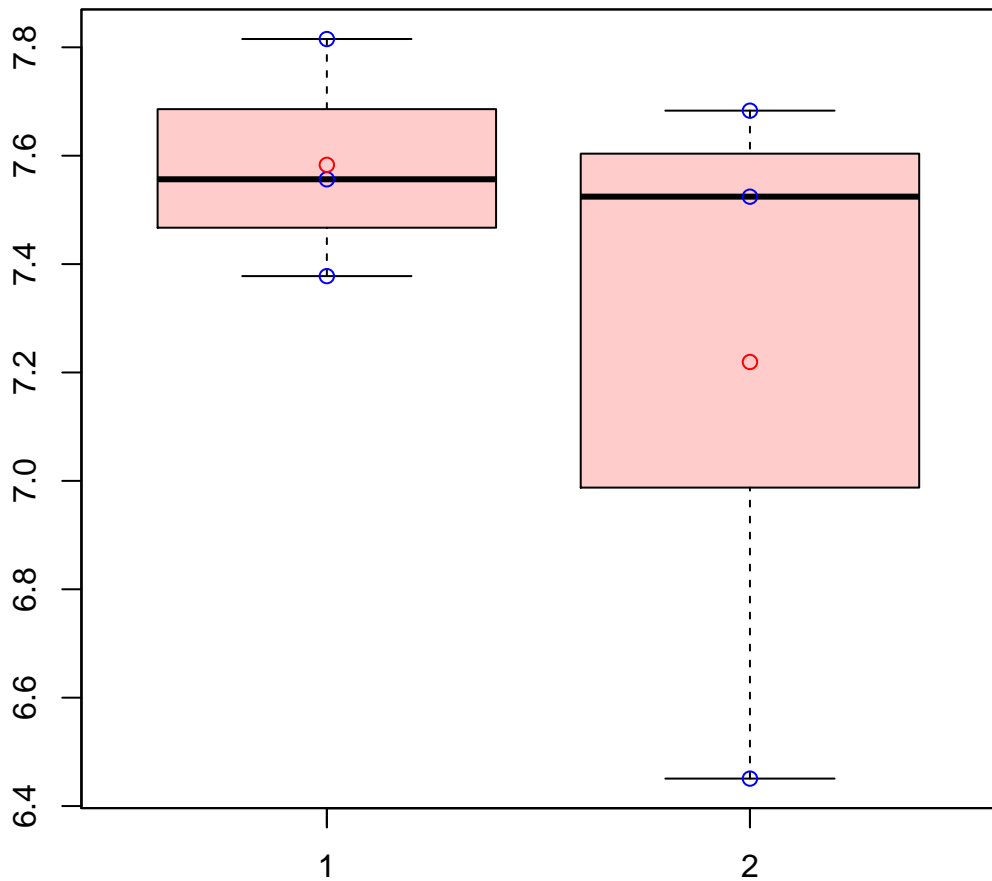

t-Test: p-value = 0.45

# I1IVH2|I1IVH2\_BRADI

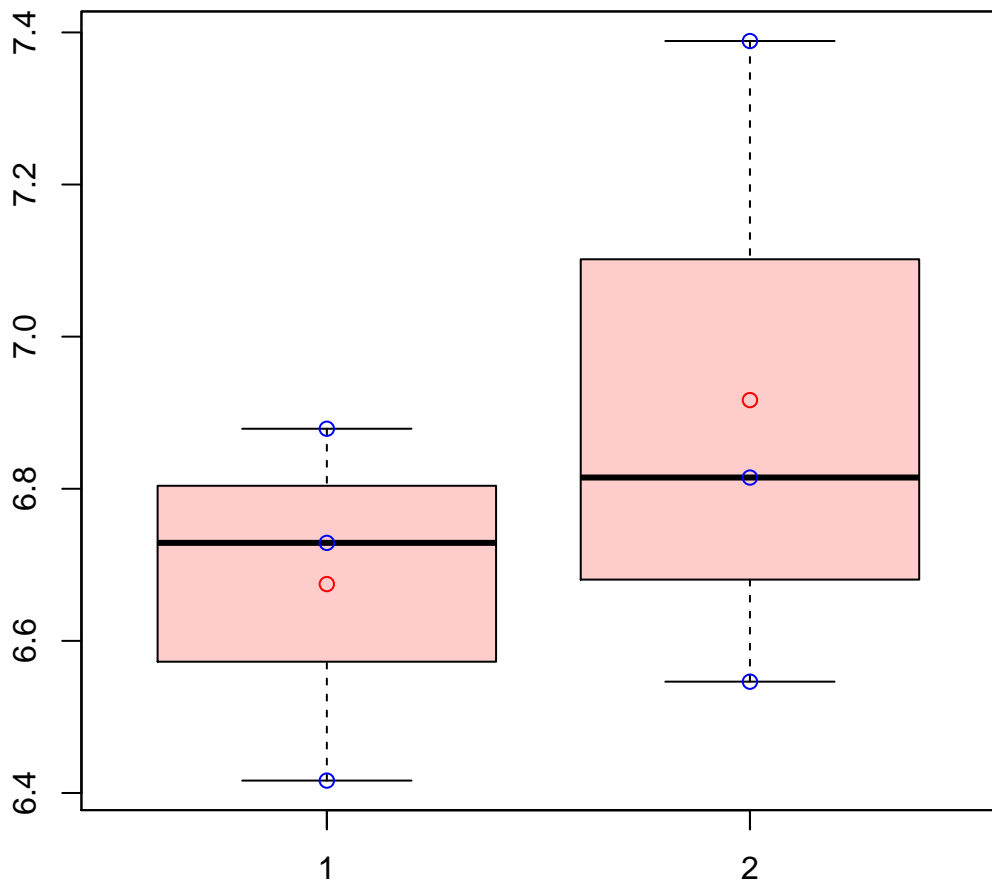

t-Test: p-value = 0.45

# I1IVV3|I1IVV3\_BRADI

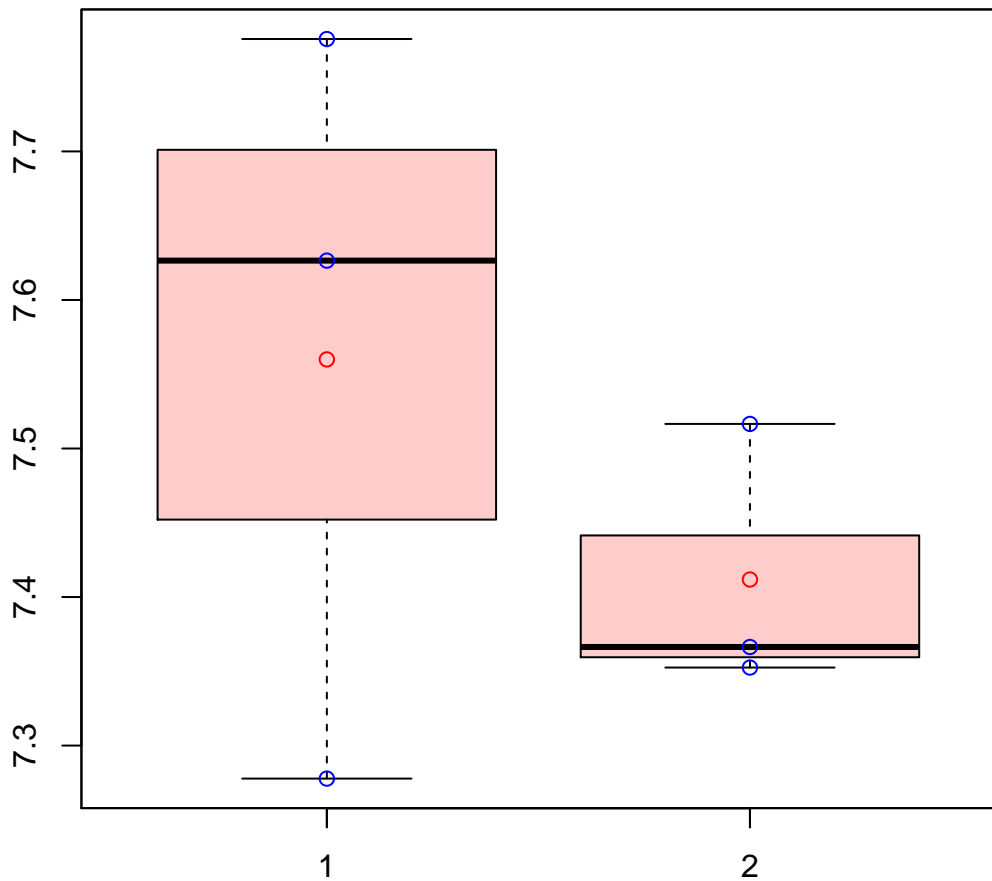

t-Test: p-value = 0.43



# I1IVW7|I1IVW7\_BRADI

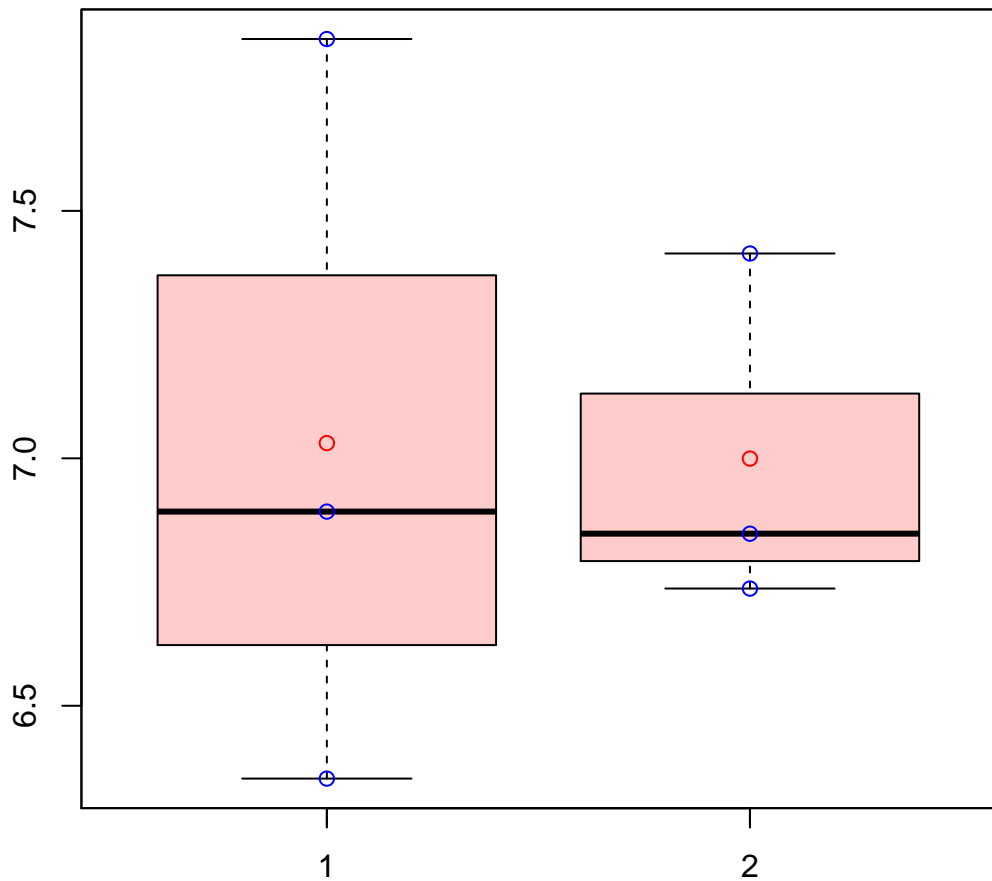

t-Test: p-value = 0.95

# I1IW97|I1IW97\_BRADI

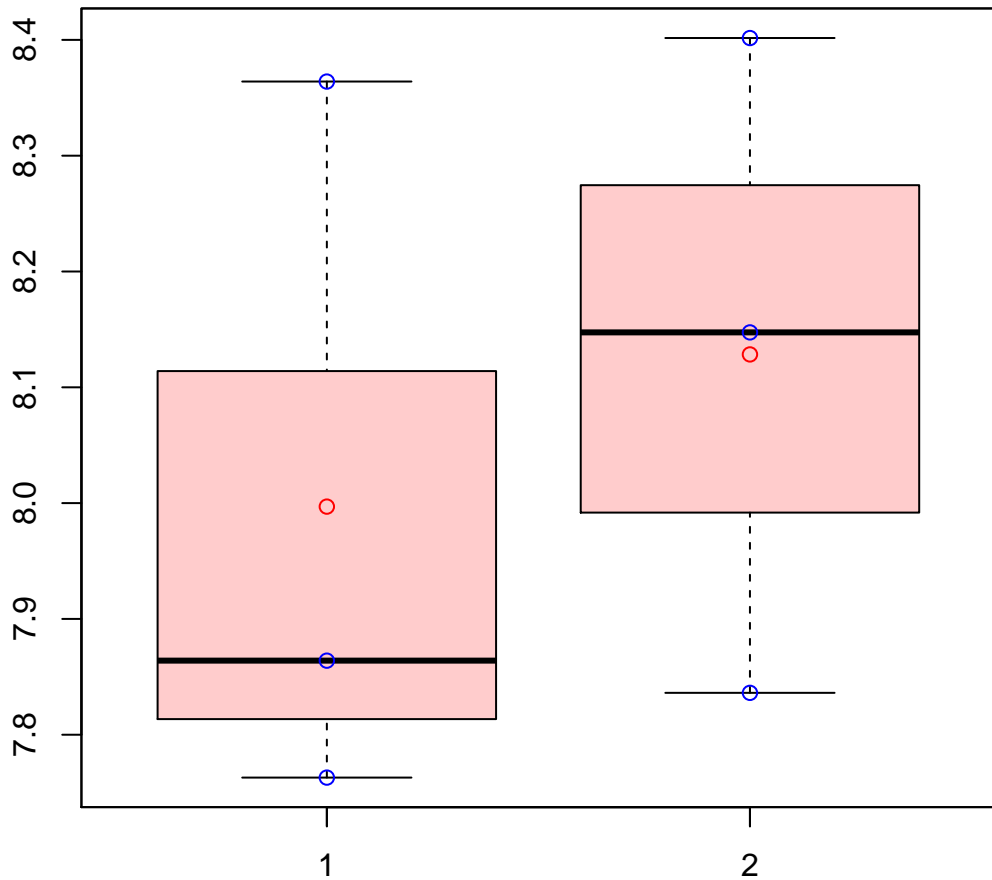

t-Test: p-value = 0.62

# I1IWF2|I1IWF2\_BRADI

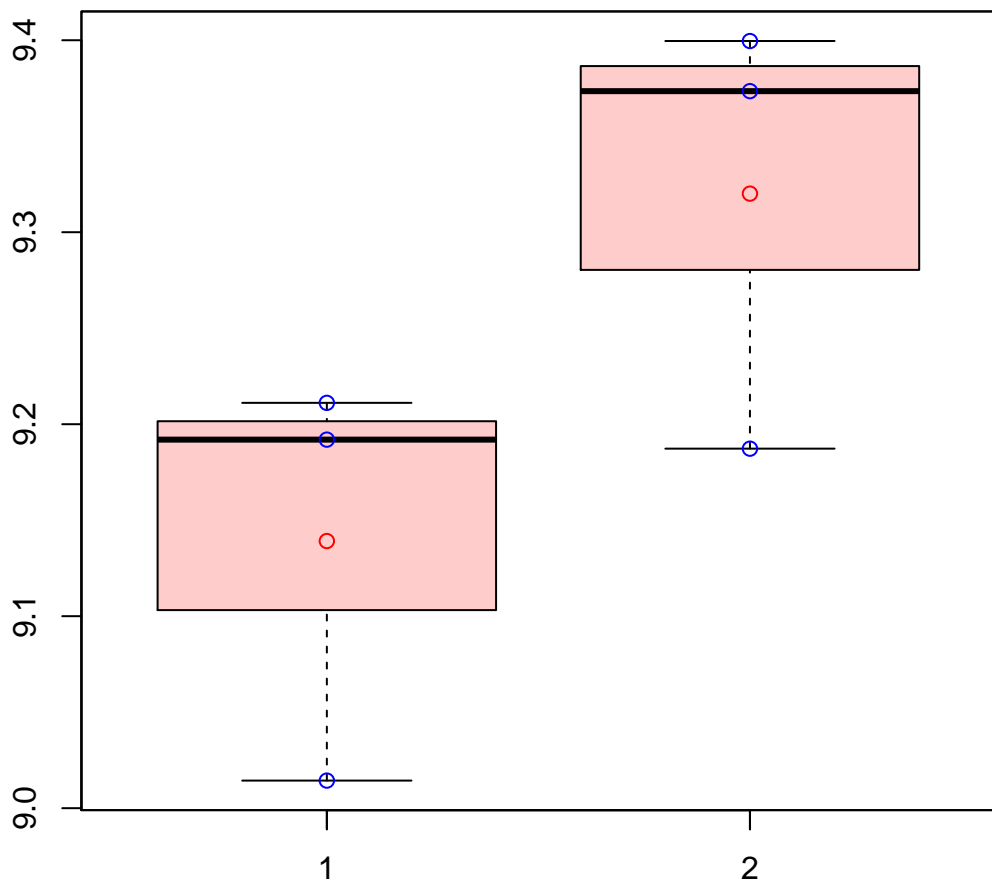

t-Test: p-value = 0.12

# I1IWH6|I1IWH6\_BRADI

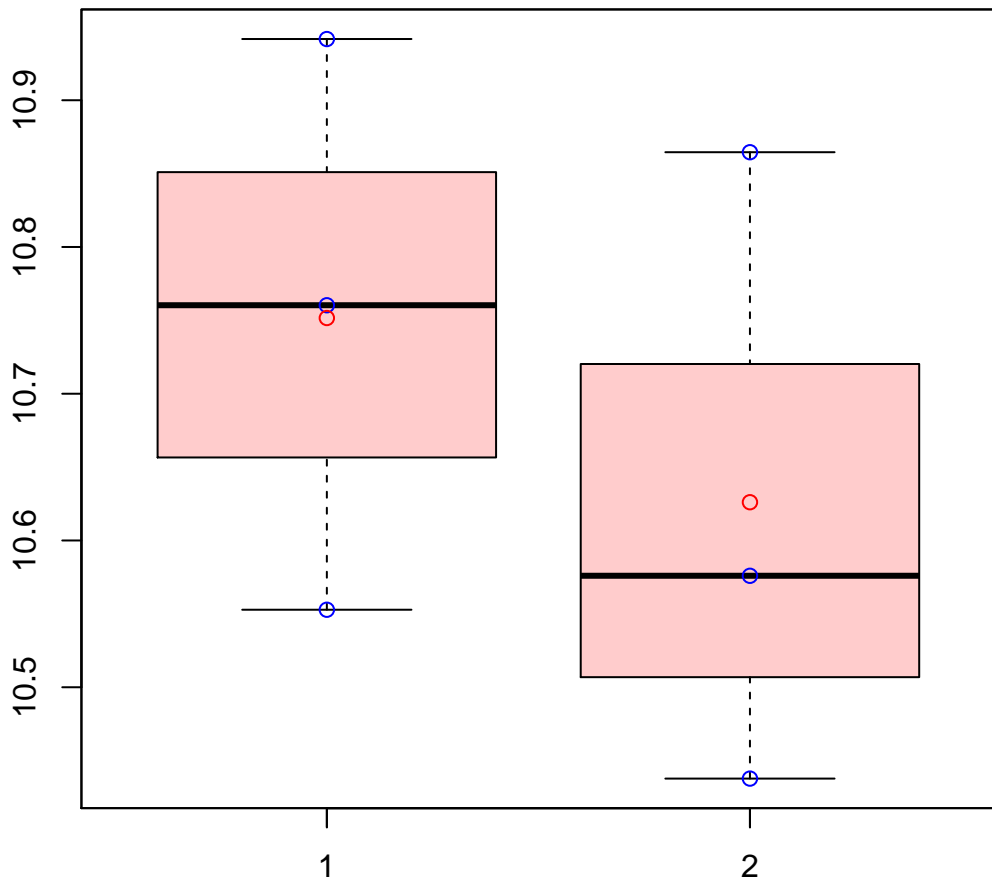

t-Test: p-value = 0.5

# I1IWP7|I1IWP7\_BRADI

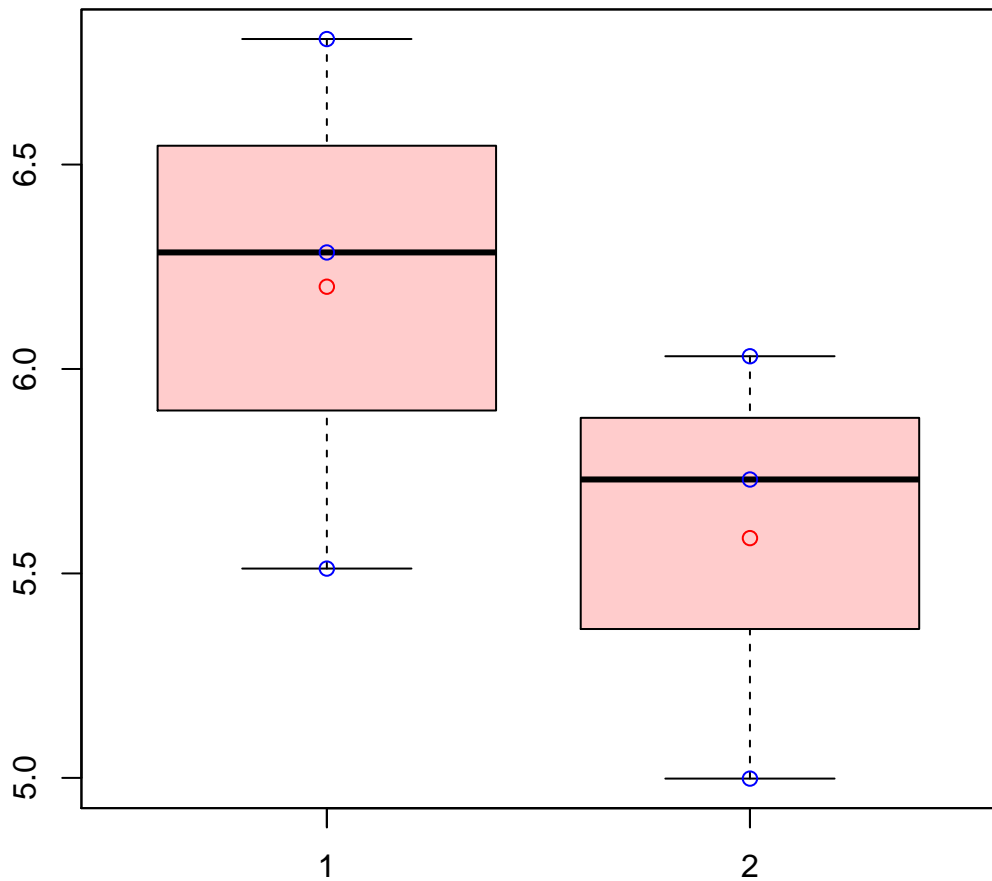

t-Test: p-value = 0.28

# I1IWT7|I1IWT7\_BRADI

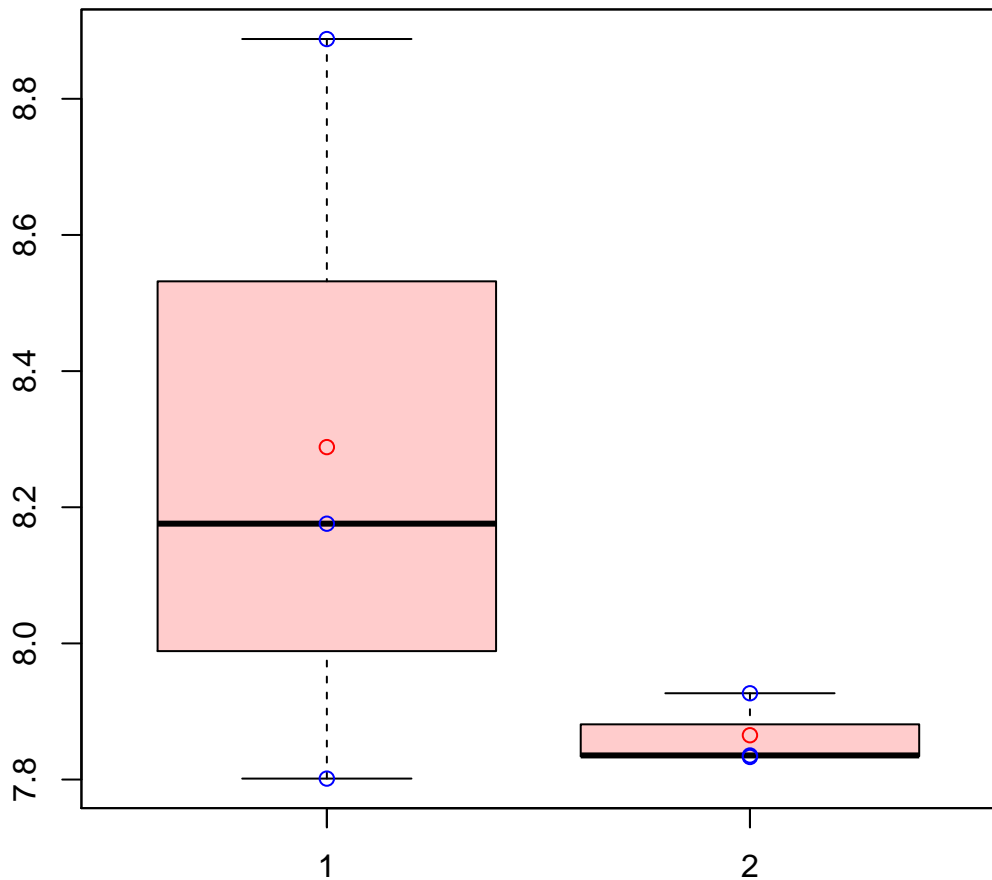

t-Test: p-value = 0.31

I1IWU5|I1IWU5\_BRADI

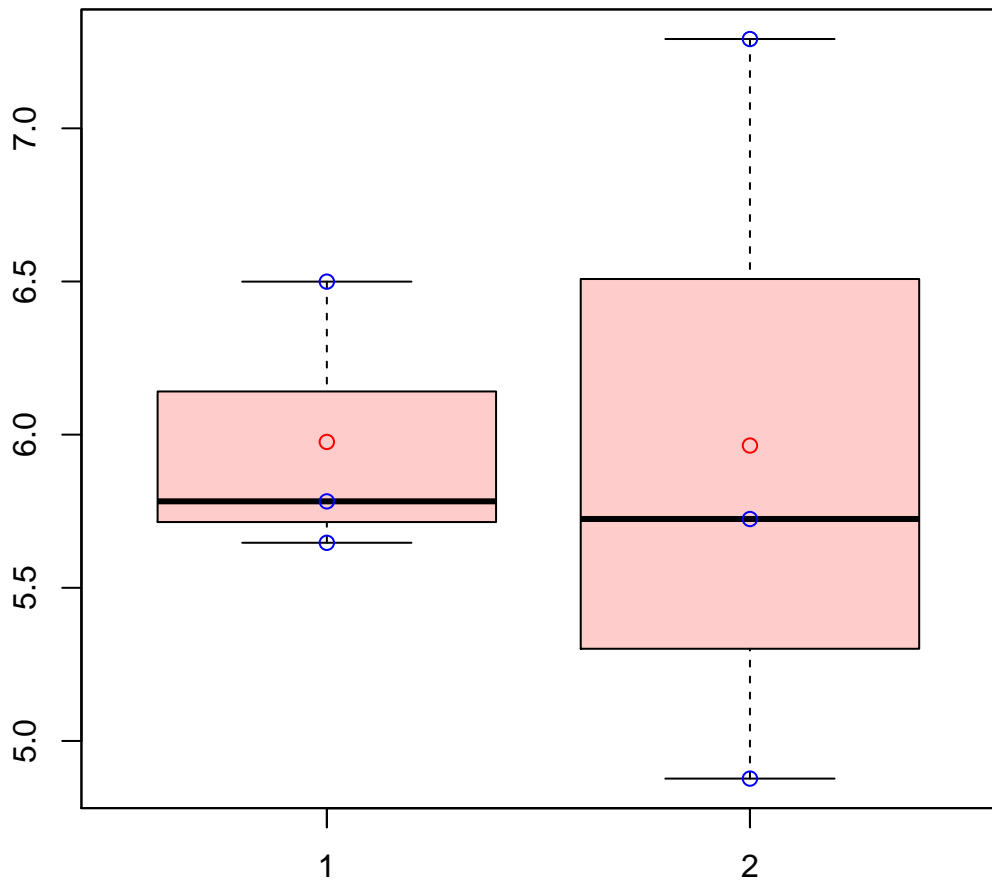

t-Test: p-value = 0.99

I1IWU7|I1IWU7\_BRADI

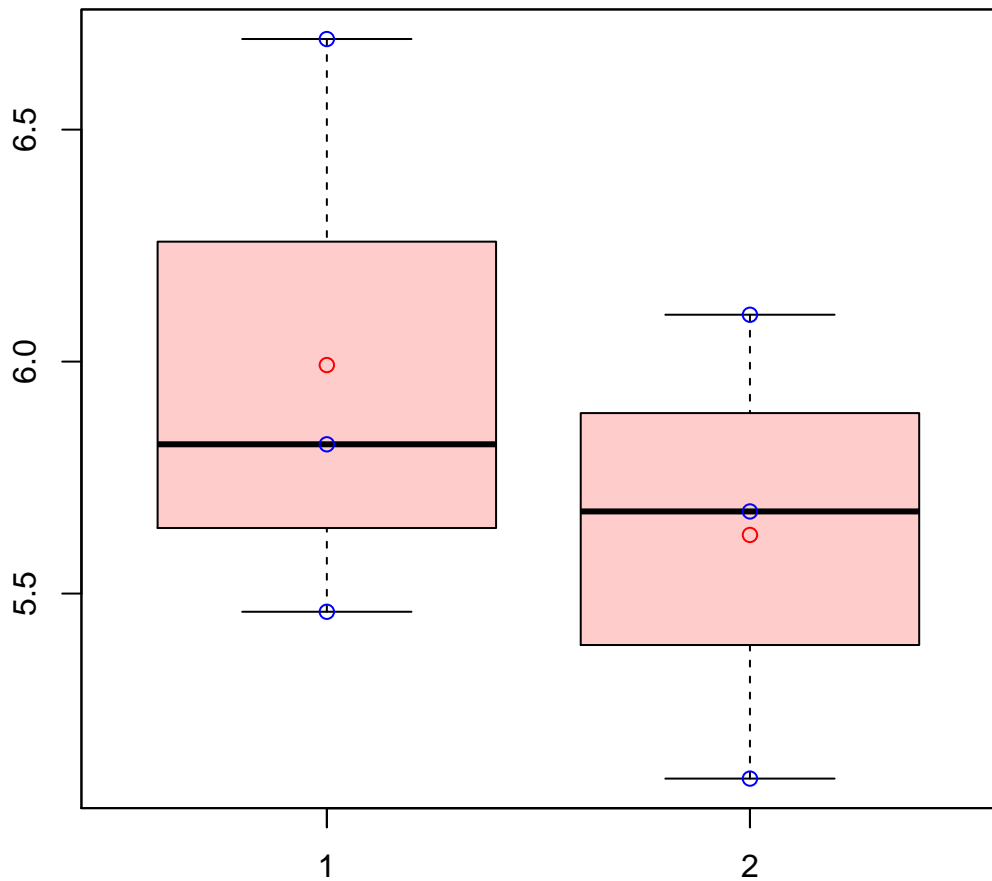

t-Test: p-value = 0.48



# I1IWW5|I1IWW5\_BRADI

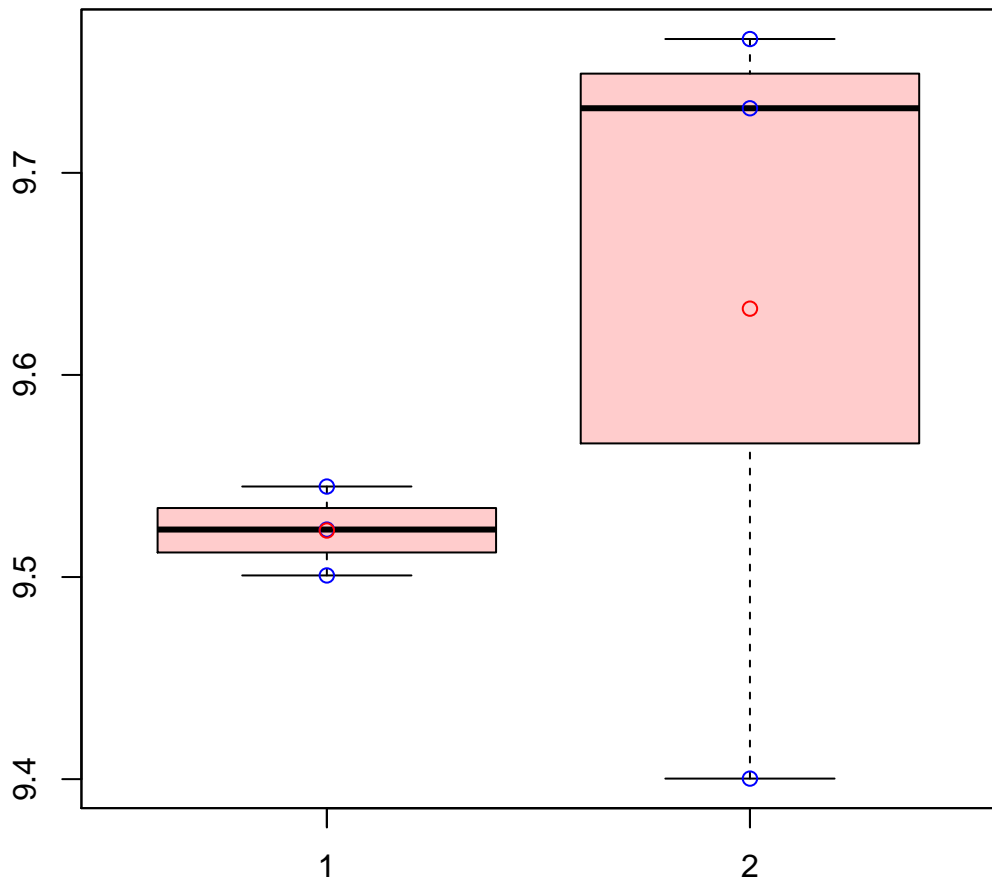

t-Test: p-value = 0.45

# I1IXJ2|I1IXJ2\_BRADI

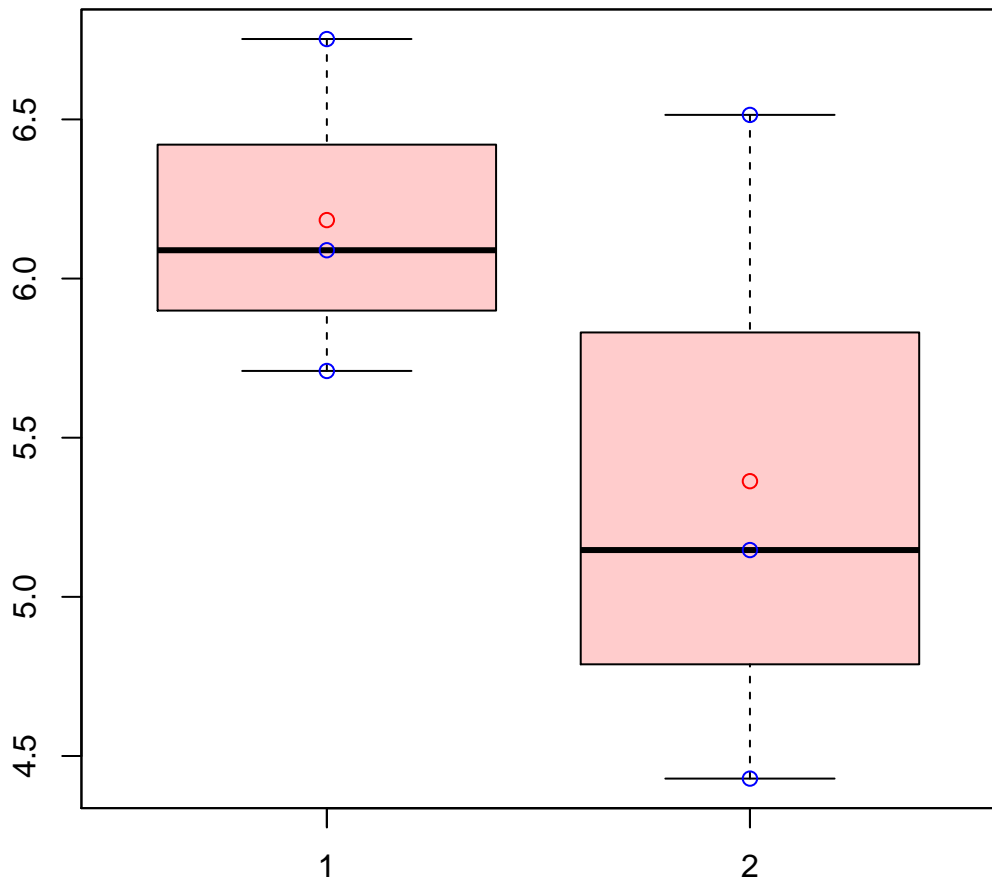

t-Test: p-value = 0.32

# I1IXS4|I1IXS4\_BRADI

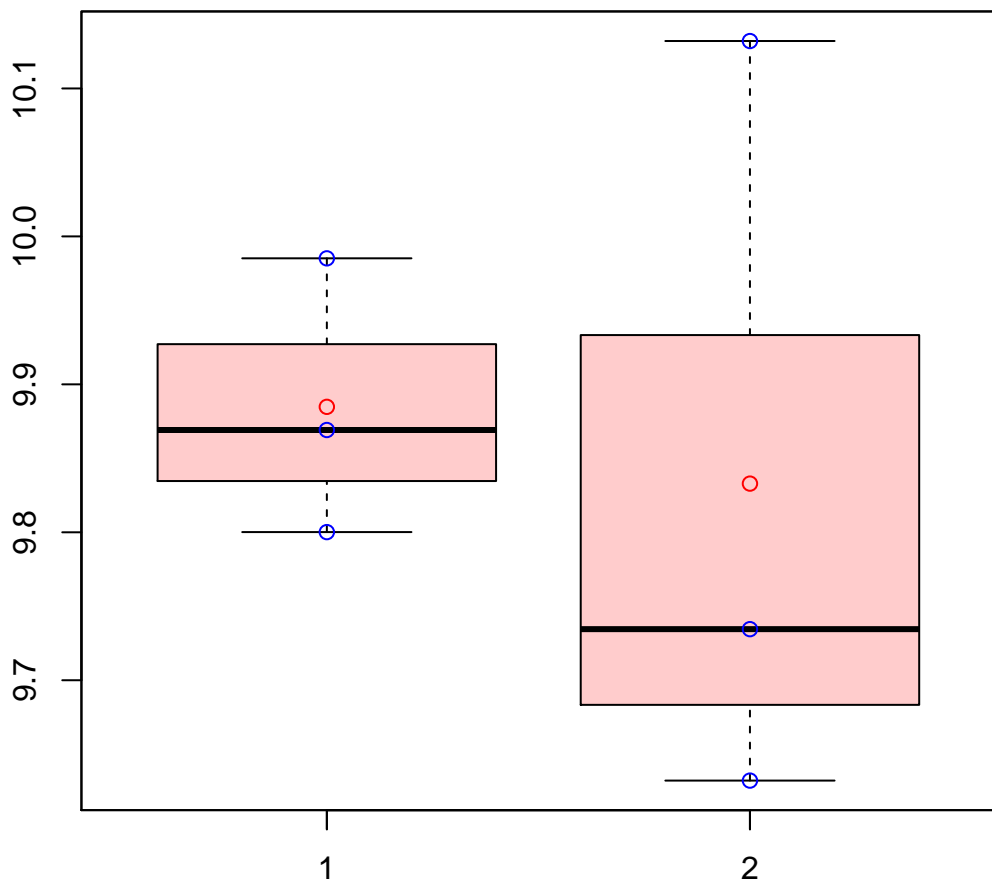

t-Test: p-value = 0.77

# I1XX4|I1XX4\_BRADI

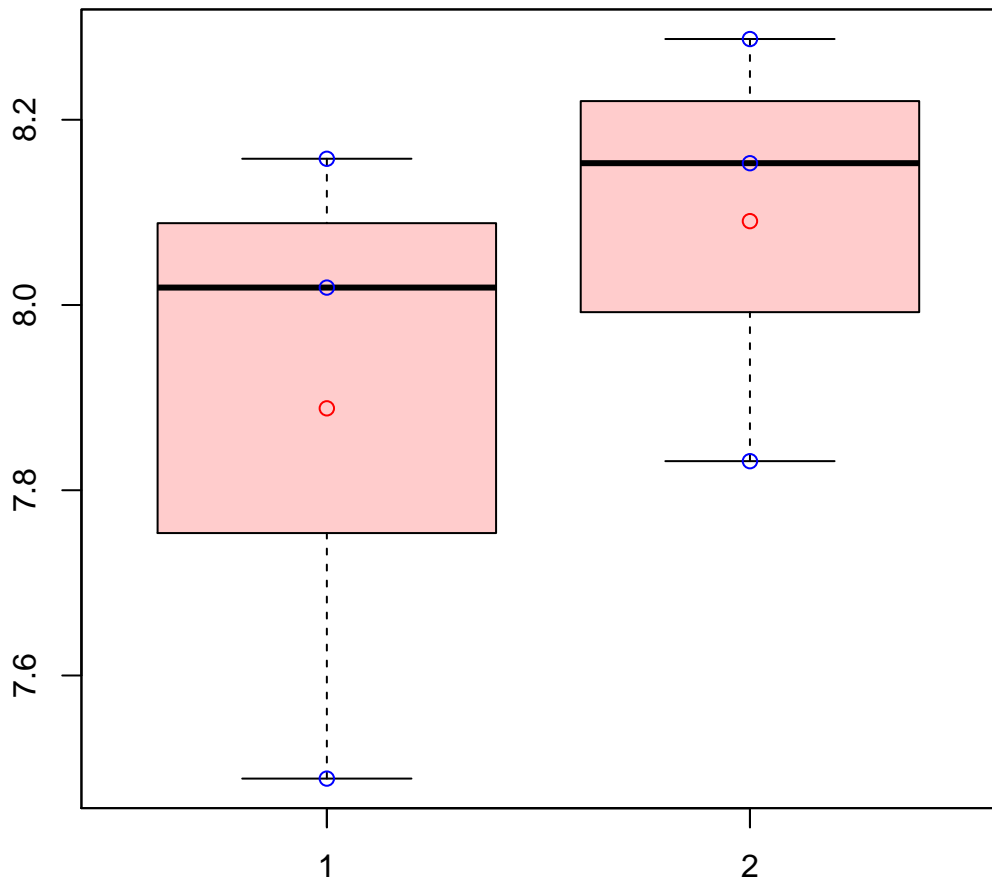

t-Test: p-value = 0.46

# I11Y80|I11Y80\_BRADI

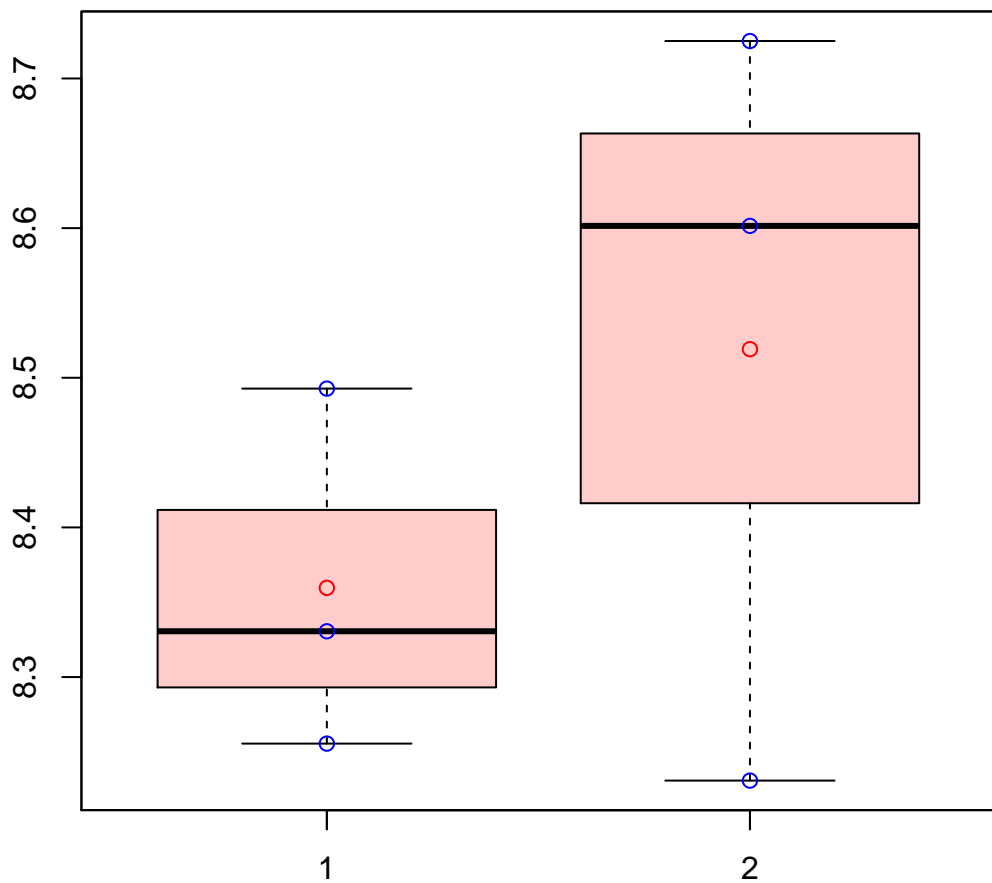

t-Test: p-value = 0.41

# I1IYM3|I1IYM3\_BRADI

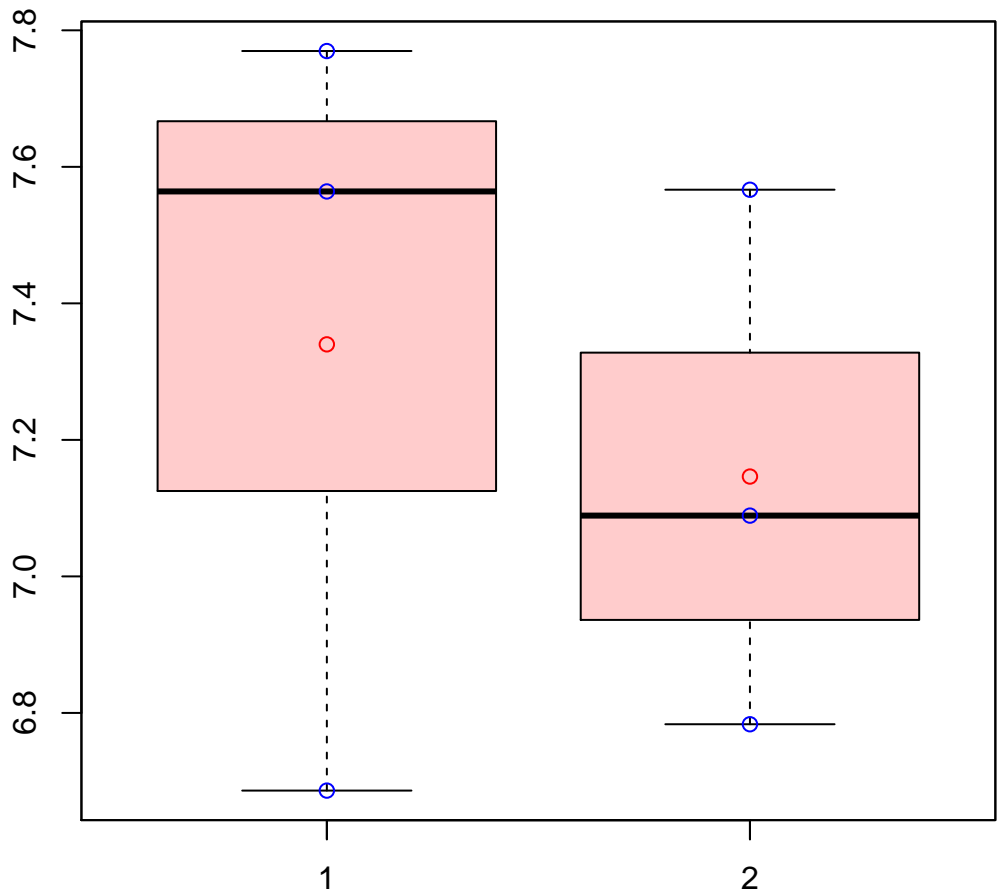

t-Test: p-value = 0.66

# I1IYR5|I1IYR5\_BRADI

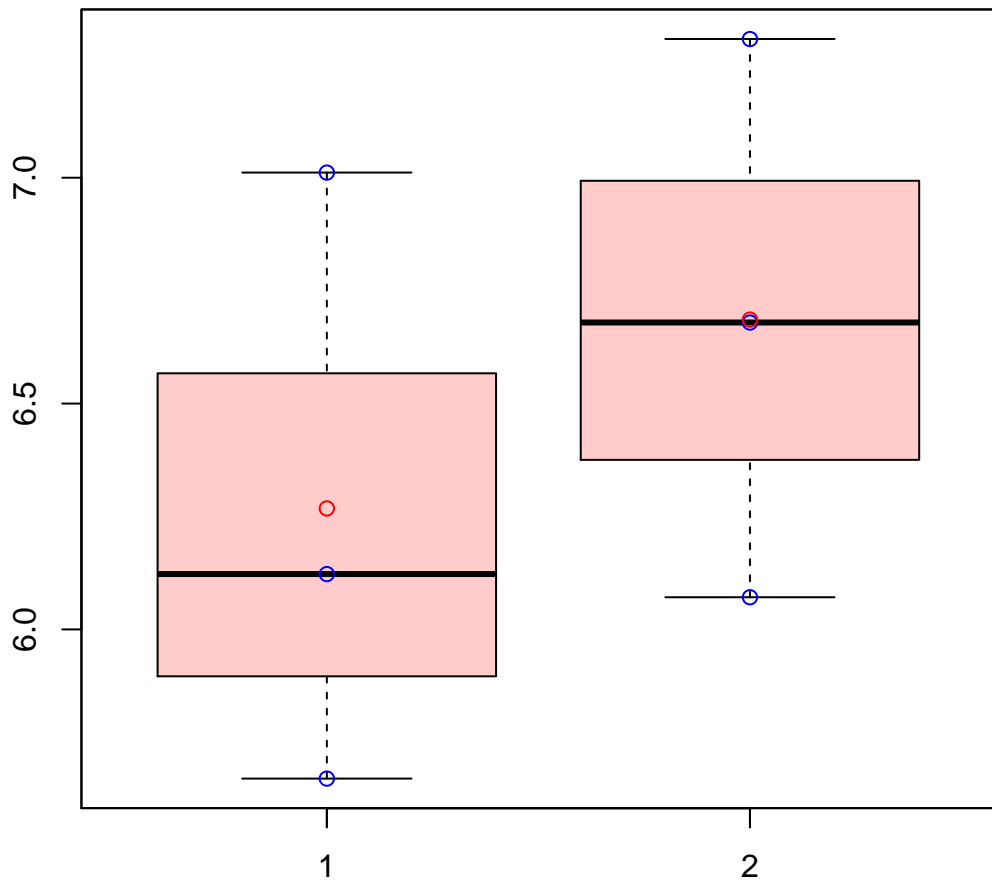

t-Test: p-value = 0.48

# I1IZ44|I1IZ44\_BRADI

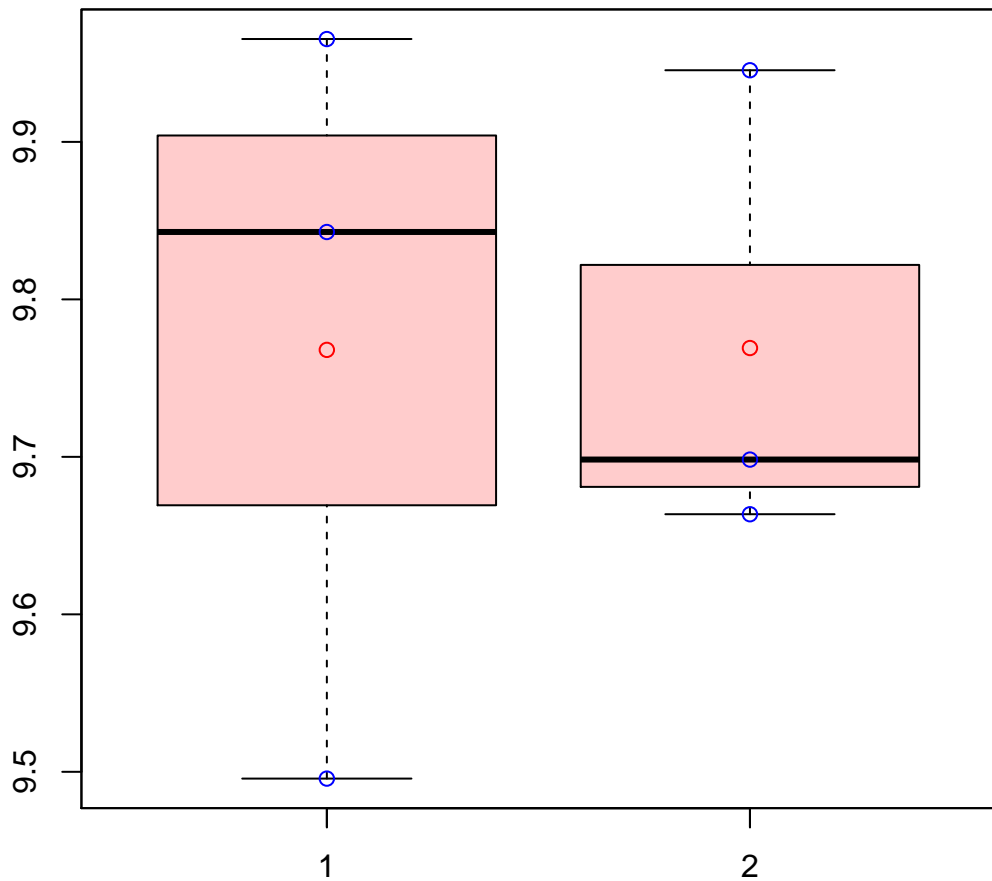

t-Test: p-value = 0.99



# I1ZF2|I1ZF2\_BRADI

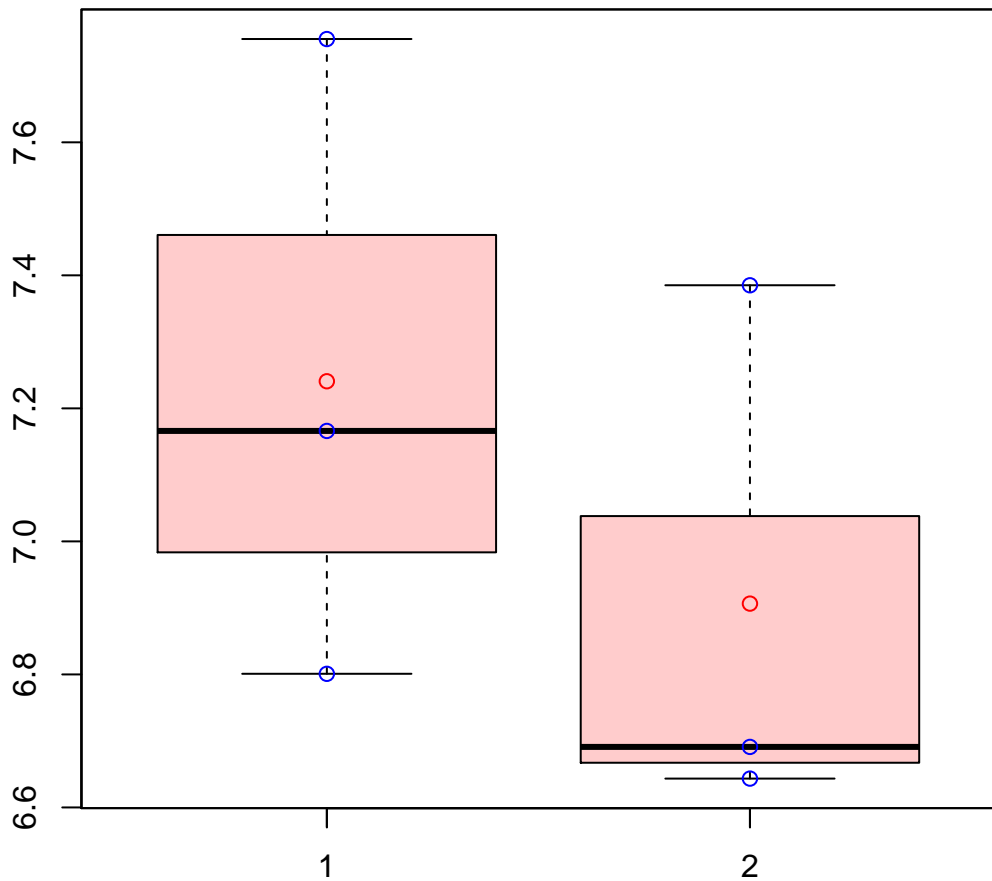

t-Test: p-value = 0.42

# I1IZH5|I1IZH5\_BRADI

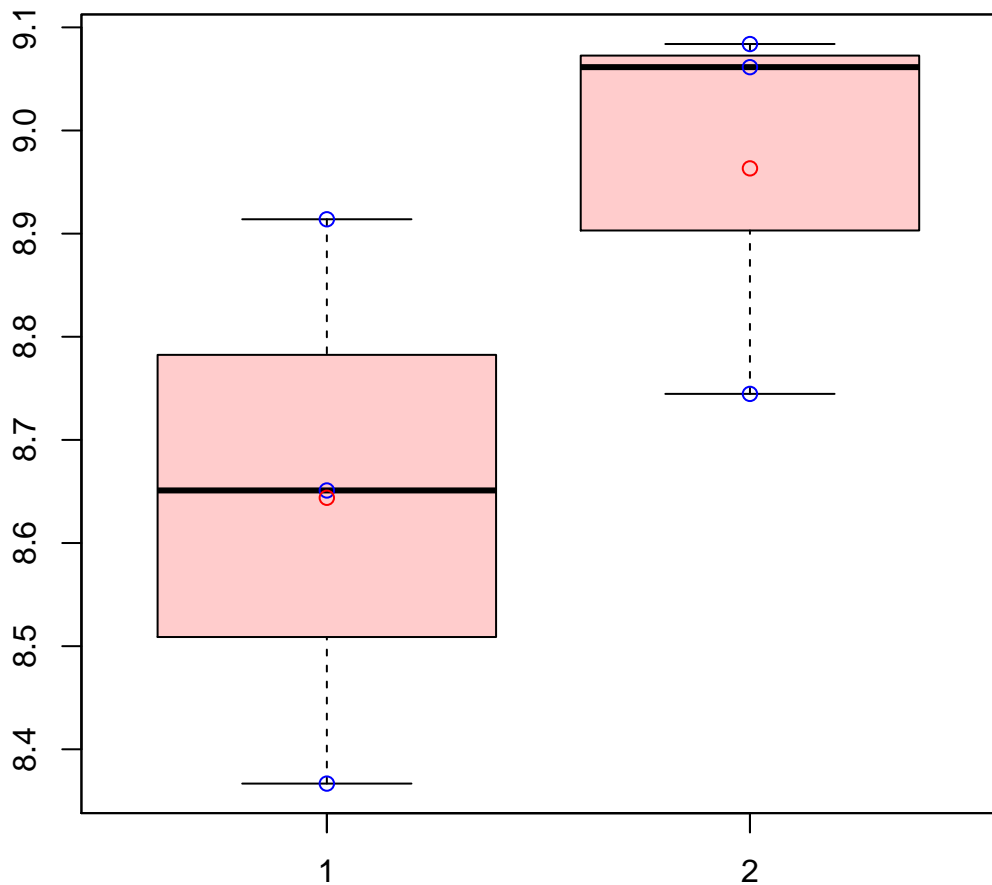

t-Test: p-value = 0.18

# I1IZP4|I1IZP4\_BRADI

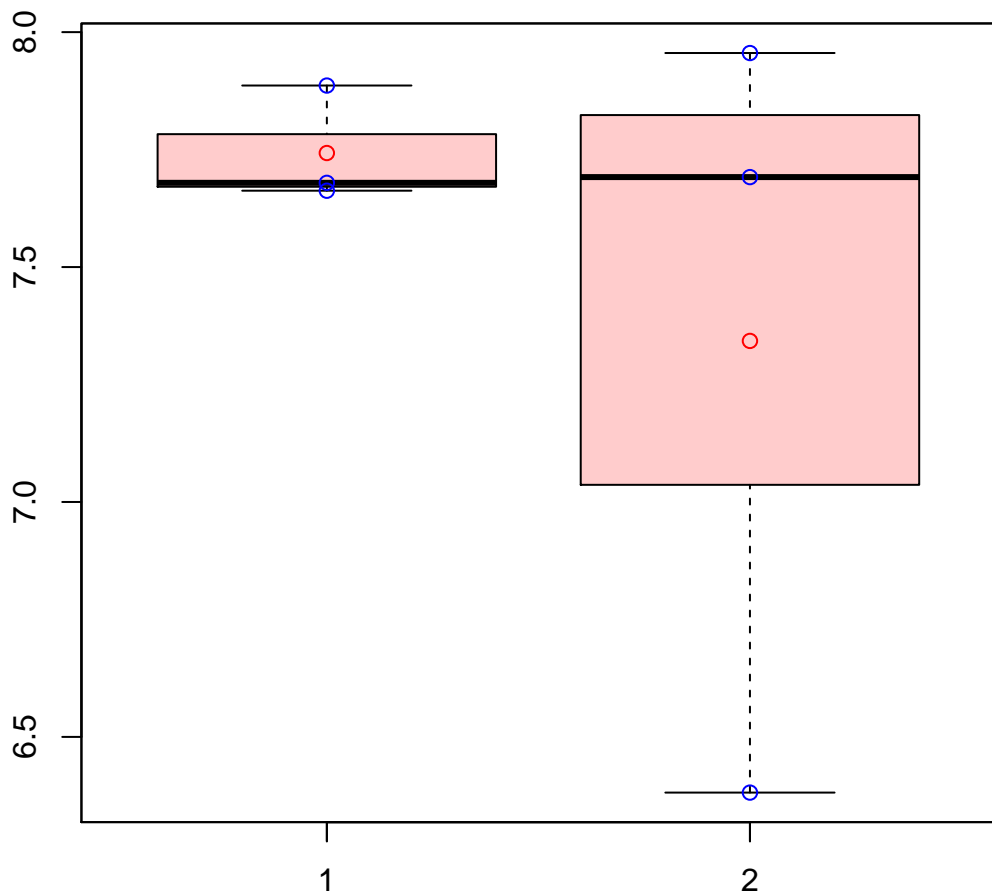

t-Test: p-value = 0.5

# I1IZU5|I1IZU5\_BRADI

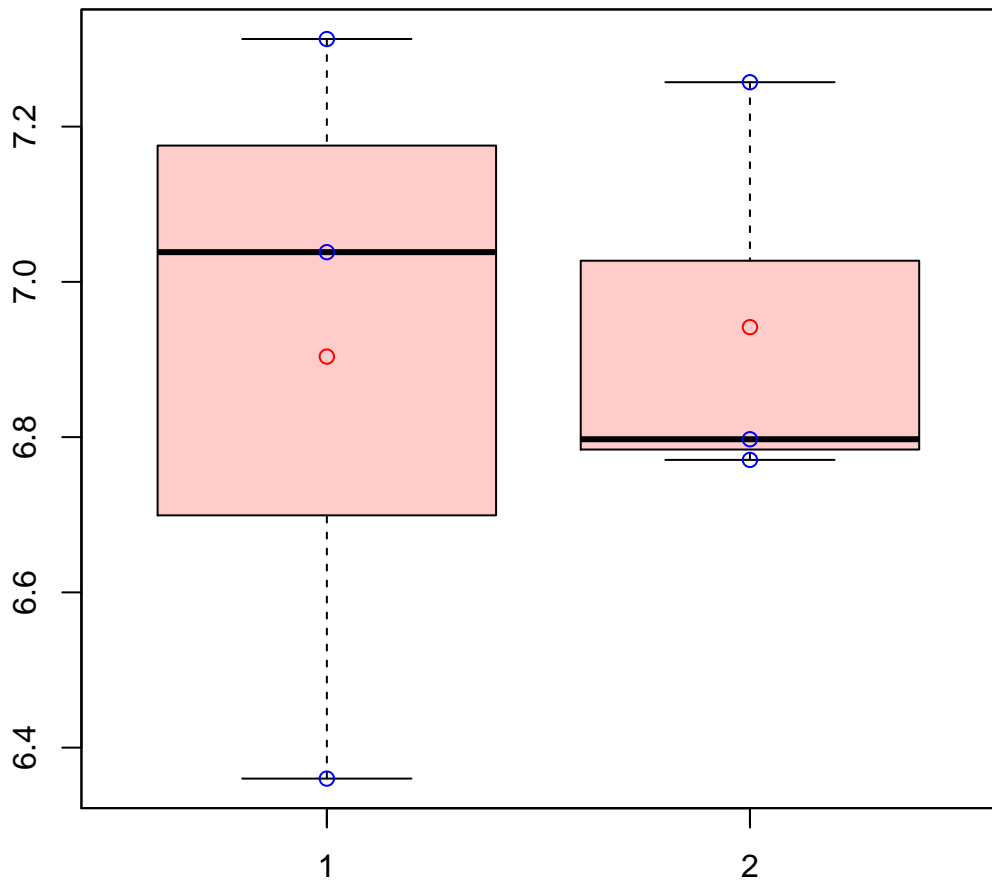

t-Test: p-value = 0.91

# I1IZW3|I1IZW3\_BRADI

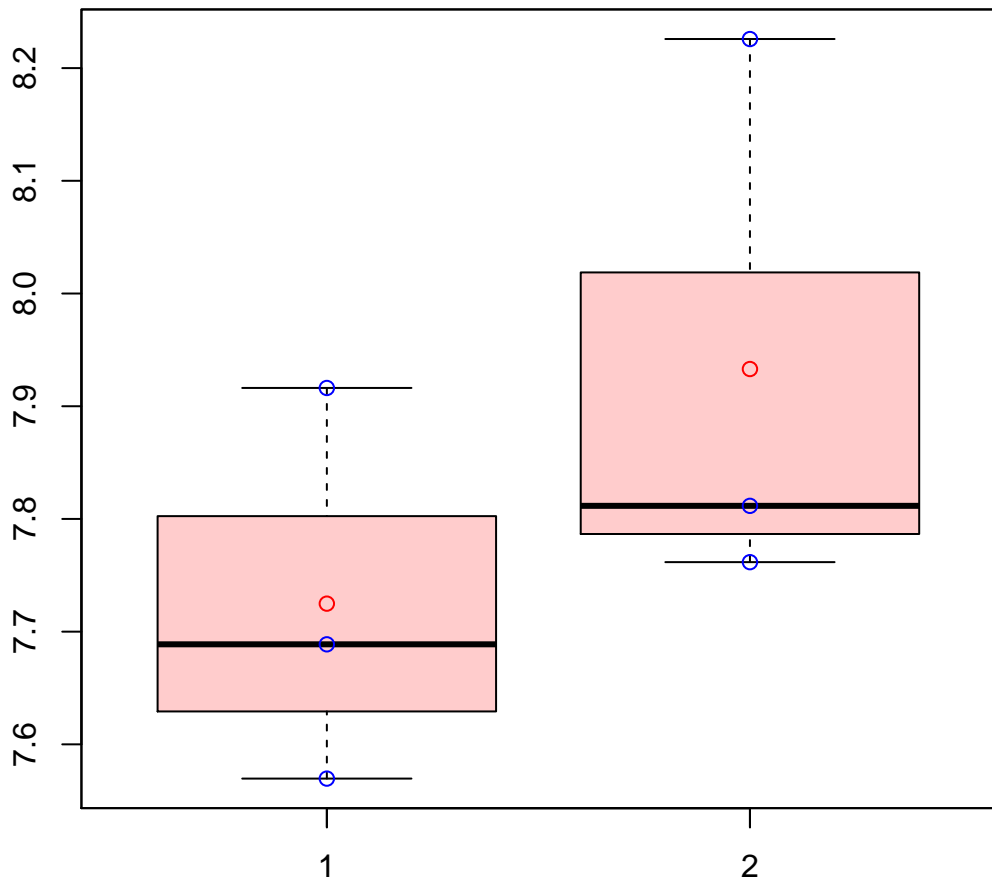

t-Test: p-value = 0.32

# I1J037|I1J037\_BRADI

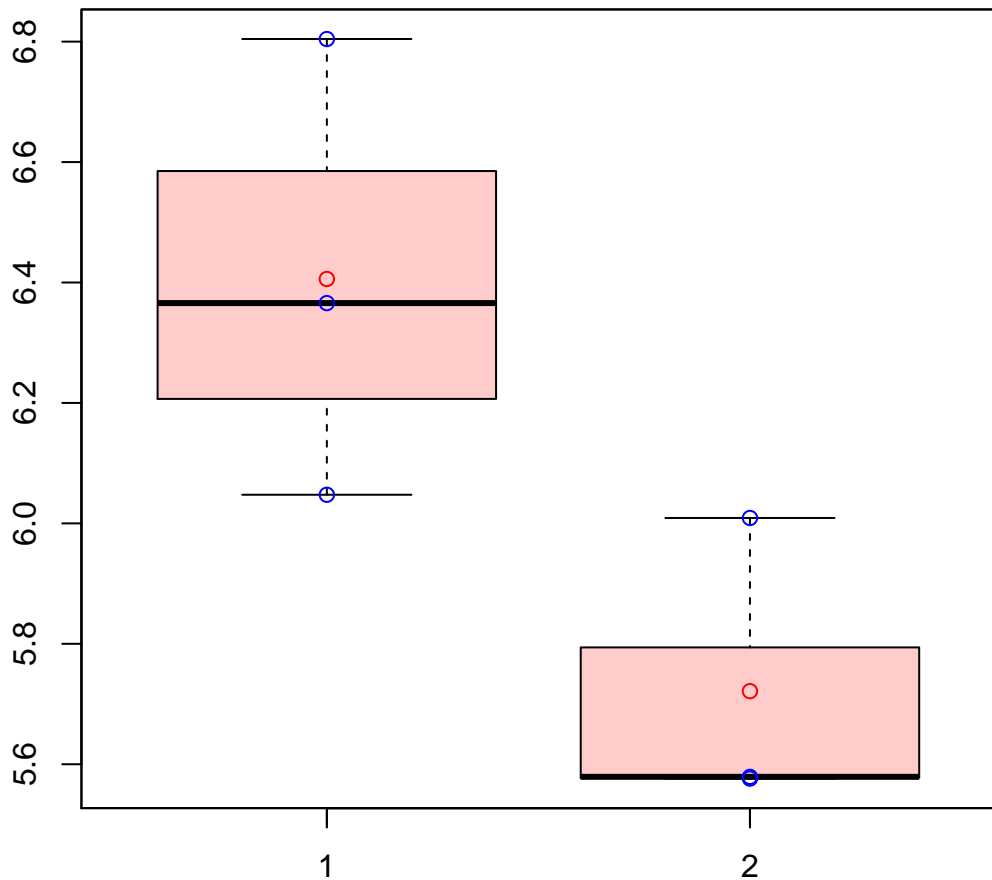

t-Test: p-value = 0.07

# I1J1G7|I1J1G7\_BRADI

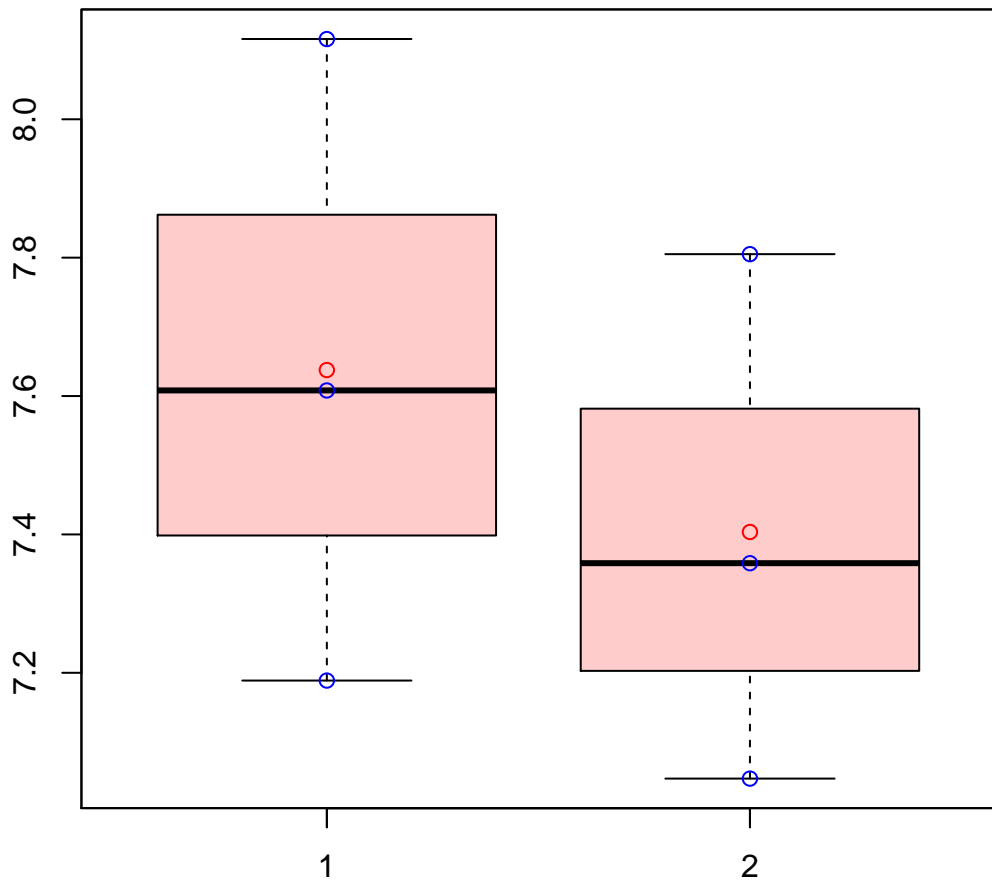

t-Test: p-value = 0.54

# I1J1I2|I1J1I2\_BRADI

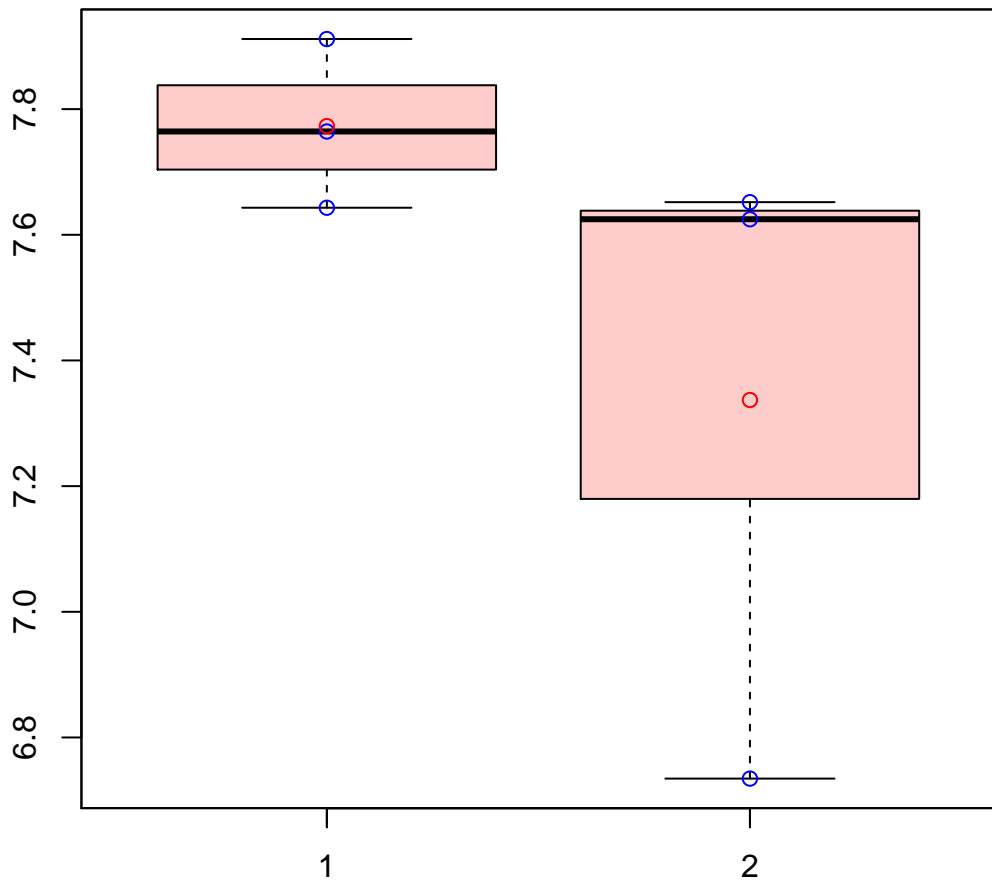

t-Test: p-value = 0.28



# I1J1T1|I1J1T1\_BRADI

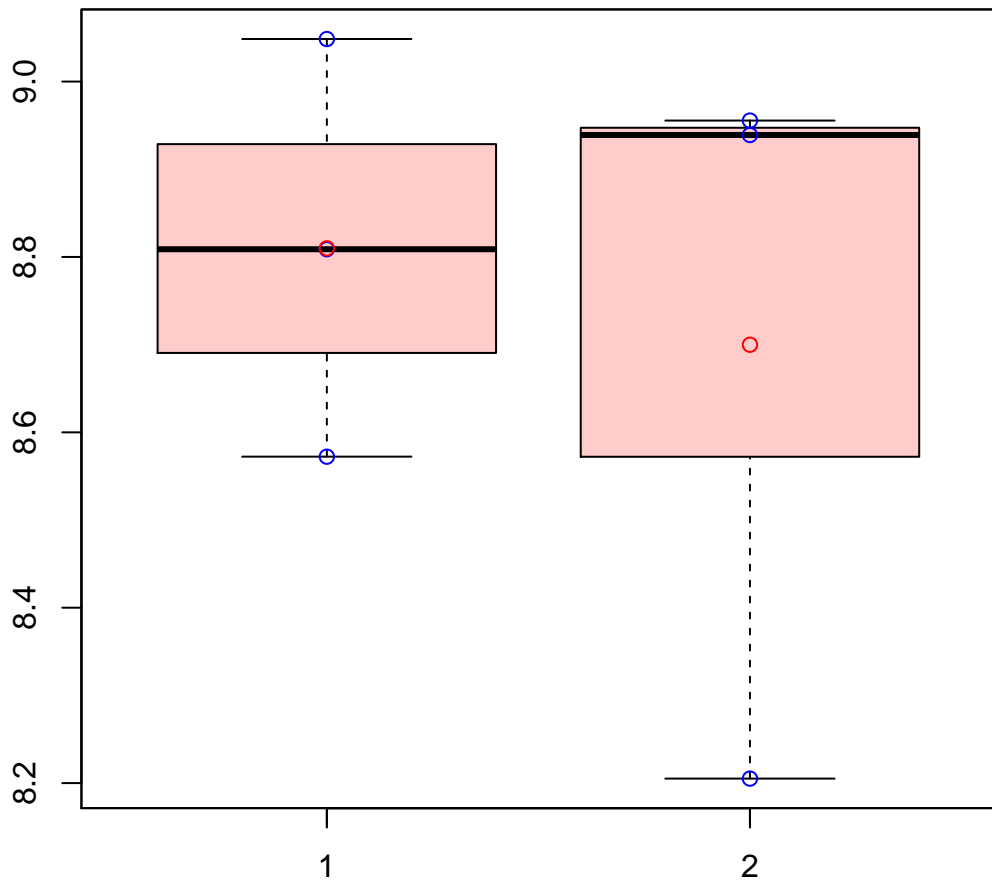

t-Test: p-value = 0.72

# I1J1V6|I1J1V6\_BRADI

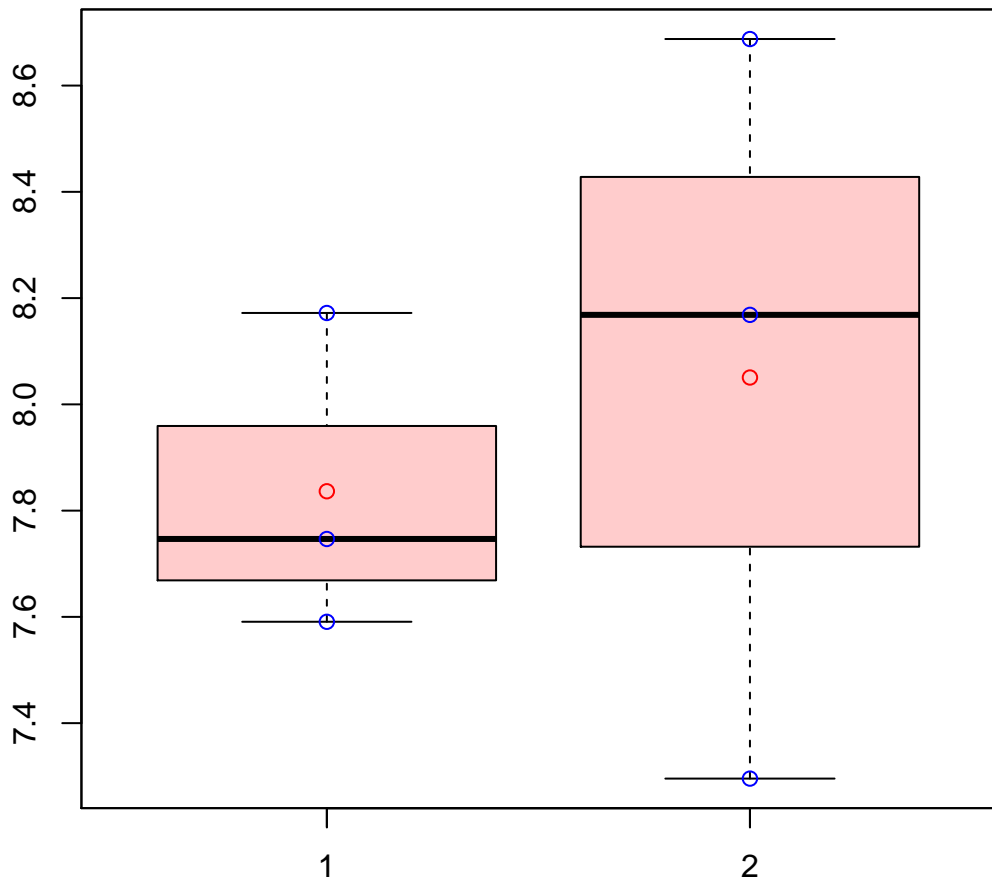

t-Test: p-value = 0.66

# I1J1Z7|I1J1Z7\_BRADI

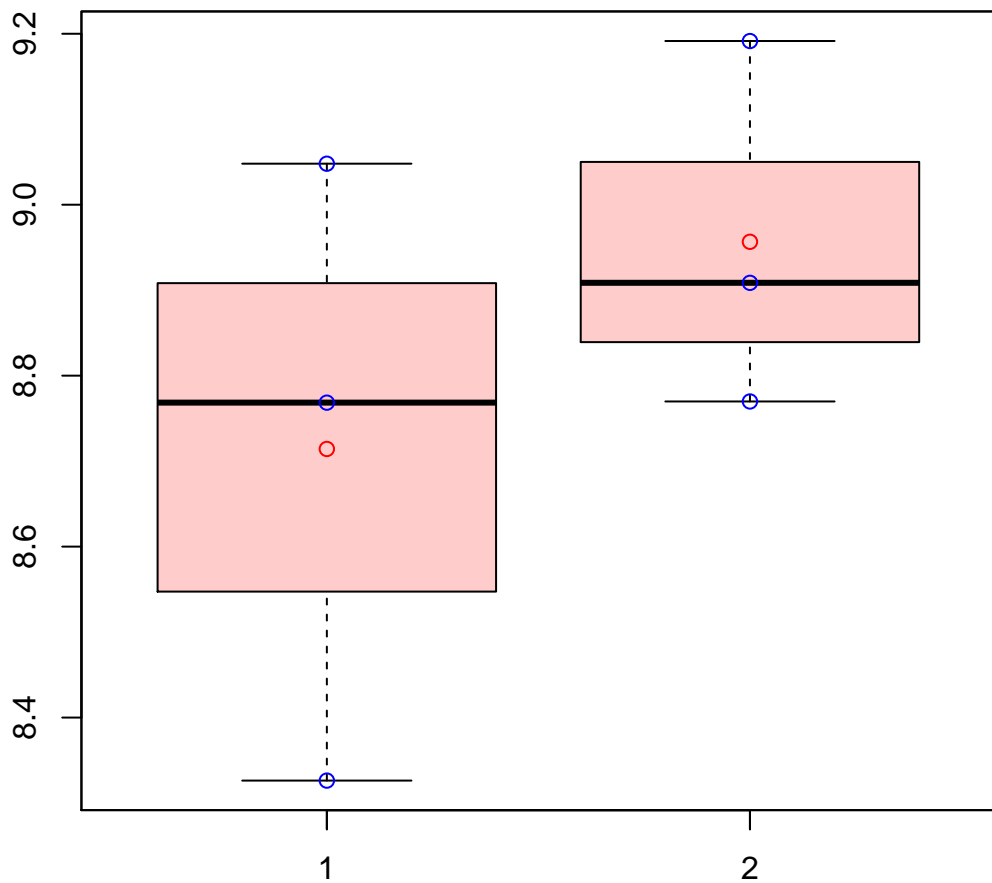

t-Test: p-value = 0.39

# I1J2I9|I1J2I9\_BRADI

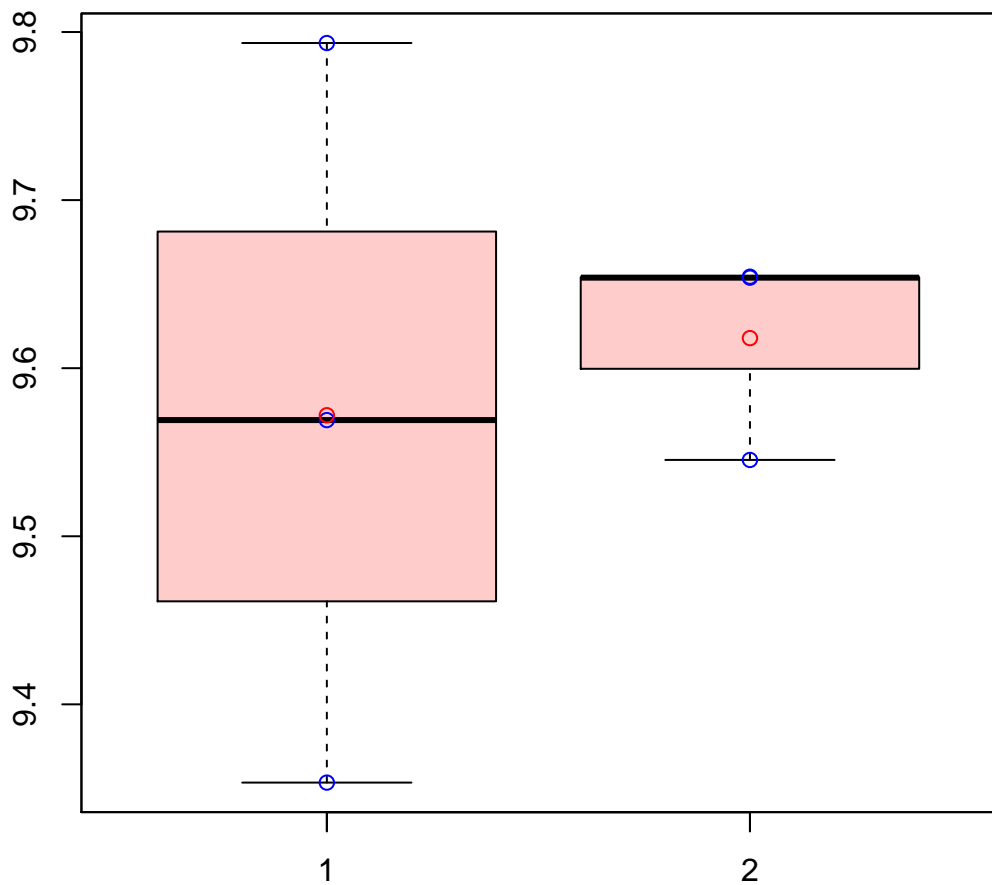

t-Test: p-value = 0.76

# I1J2T8|I1J2T8\_BRADI

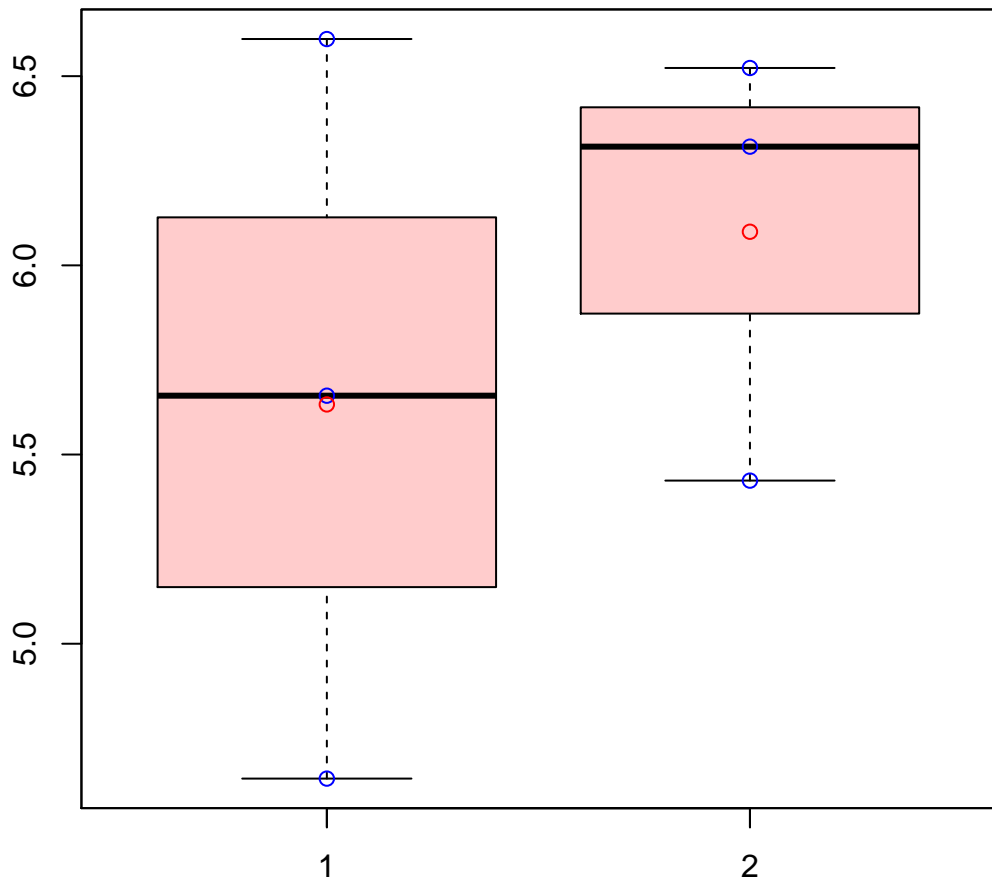

t-Test: p-value = 0.53

# I1J3K8|I1J3K8\_BRADI

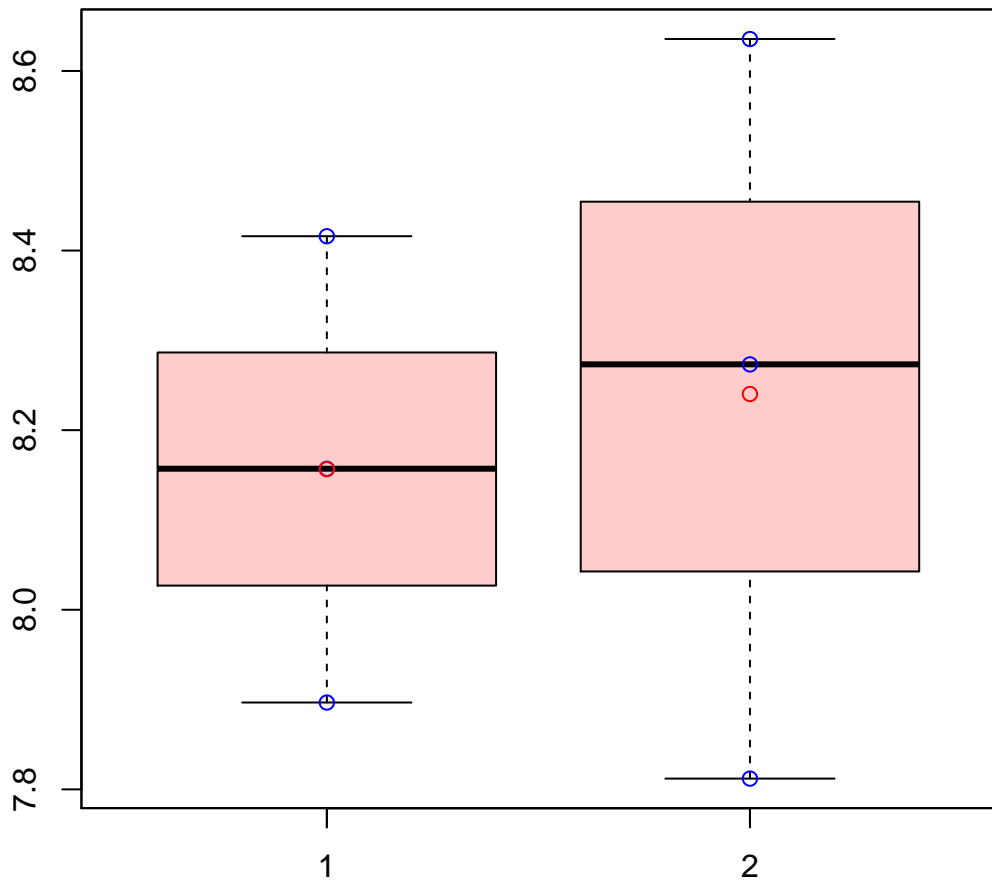

t-Test: p-value = 0.78

# I1NJT6|I1NJT6\_ORYGL

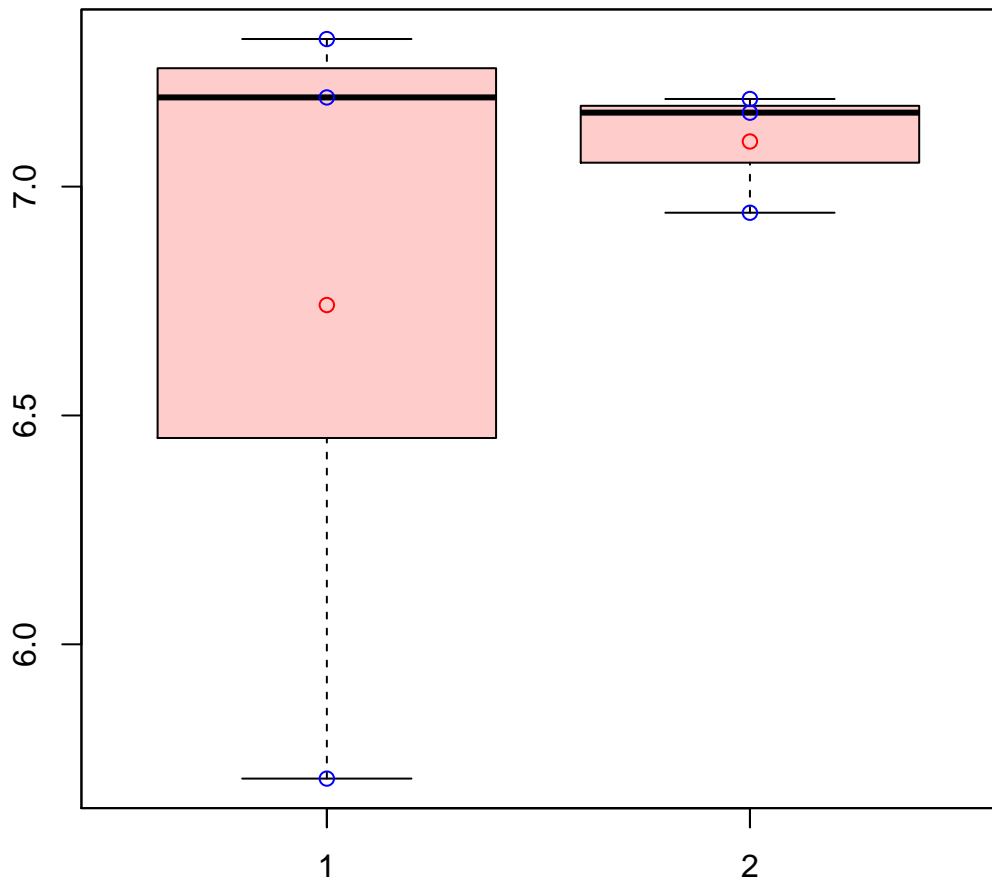

t-Test: p-value = 0.56

# I1NK74|I1NK74\_ORYGL

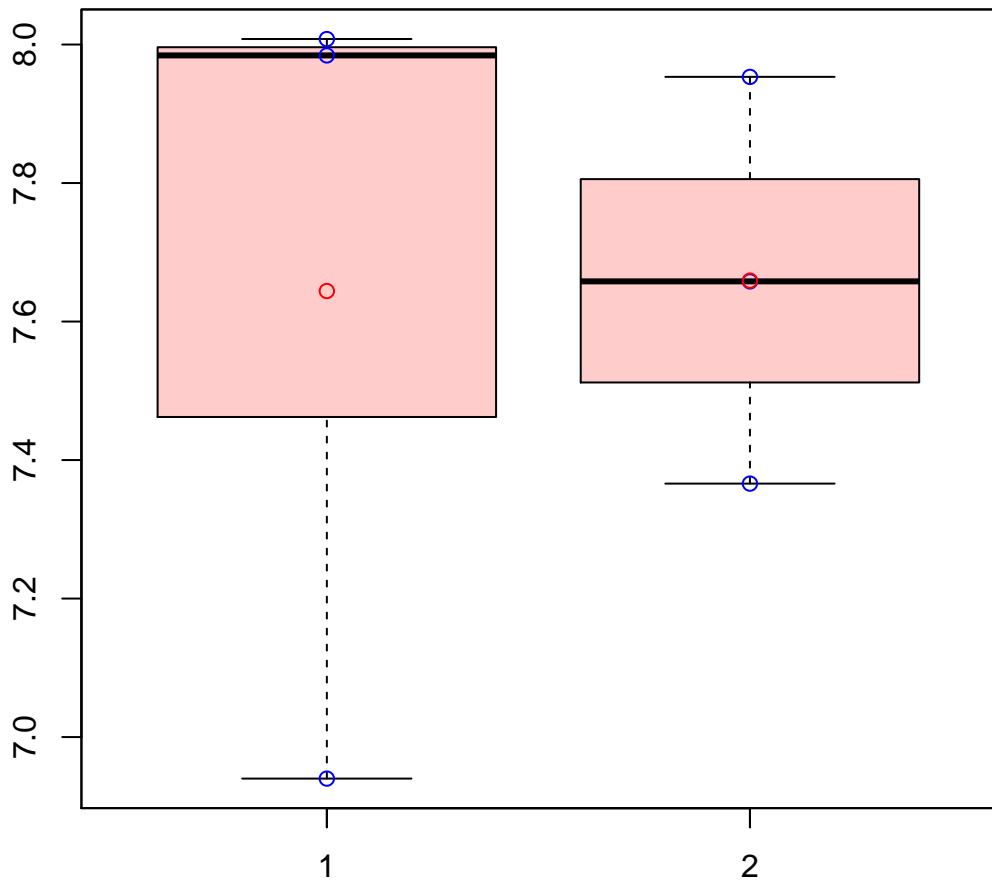

t-Test: p-value = 0.97



# I1NKA8|I1NKA8\_ORYGL

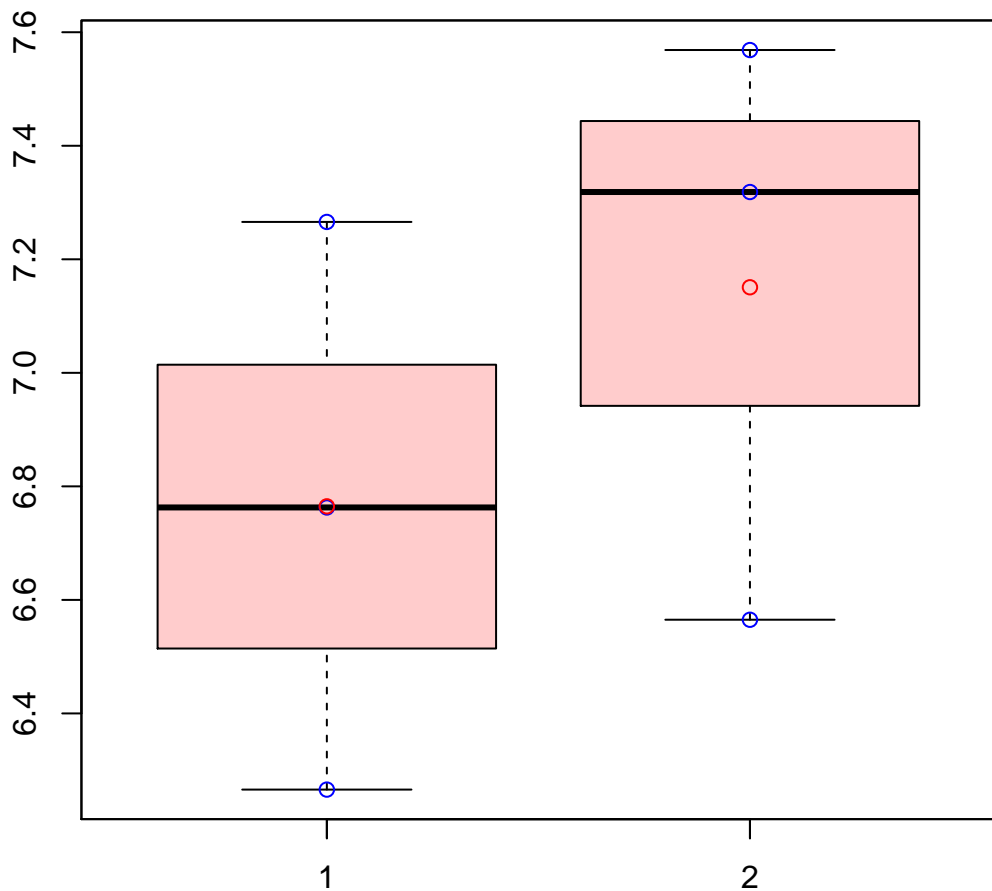

t-Test: p-value = 0.41

# I1NKE6|I1NKE6\_ORYGL

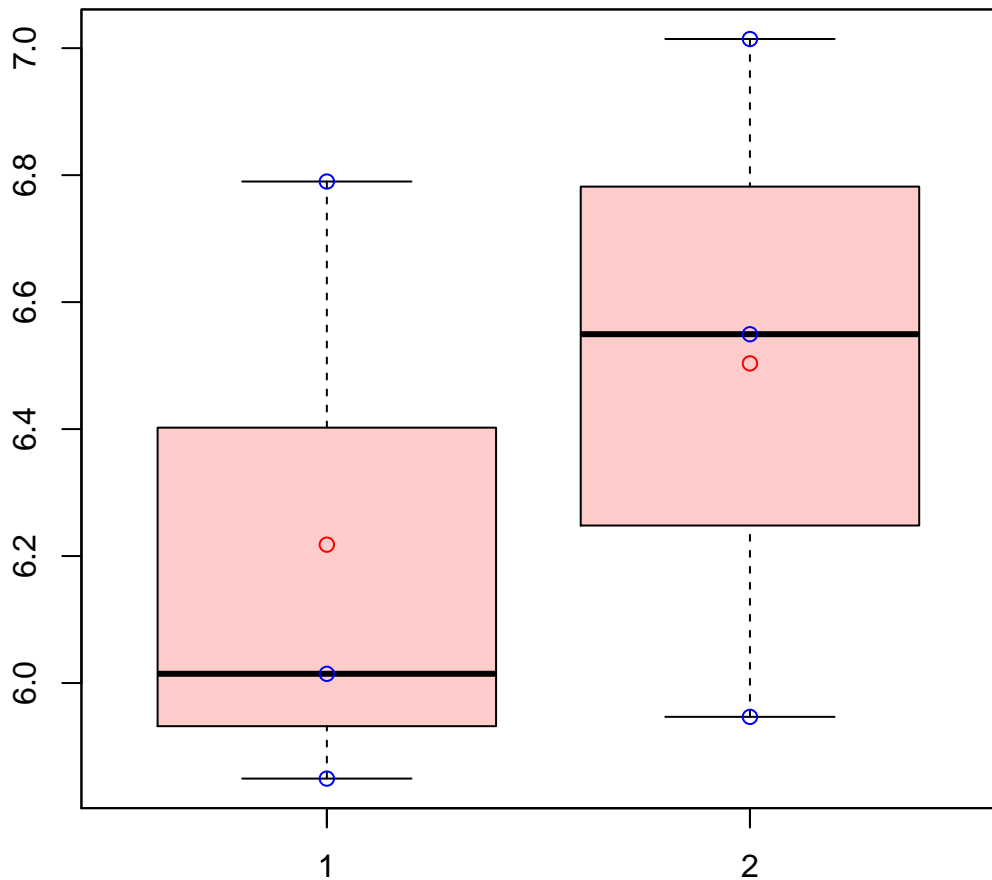

t-Test: p-value = 0.54

# I1NMD3|I1NMD3\_ORYGL

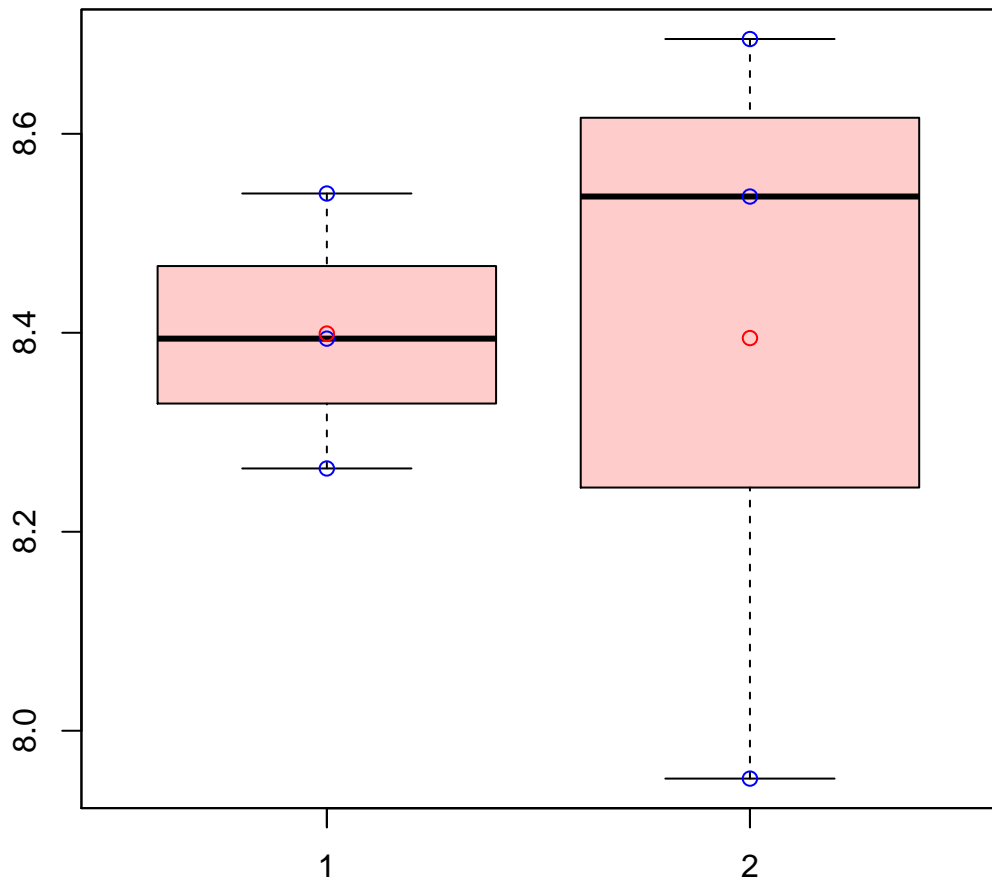

t-Test: p-value = 0.99

# I1NMG9|I1NMG9\_ORYGL

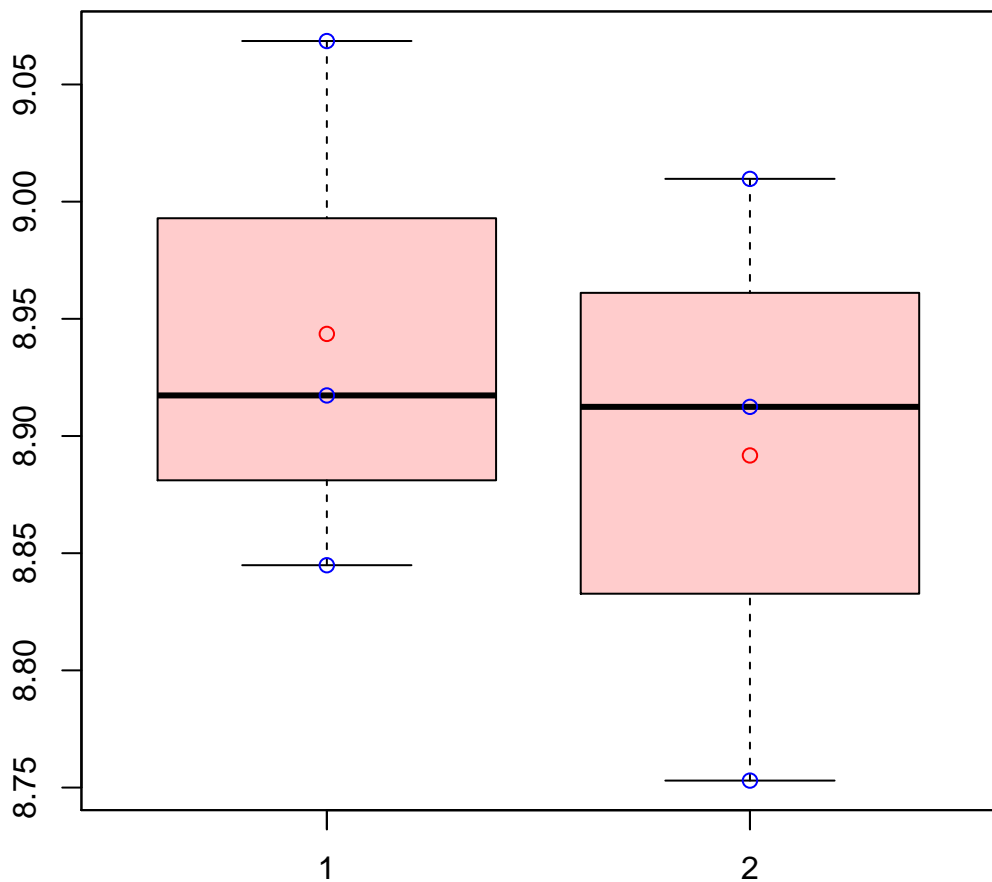

t-Test: p-value = 0.63

# I1NP13|I1NP13\_ORYGL

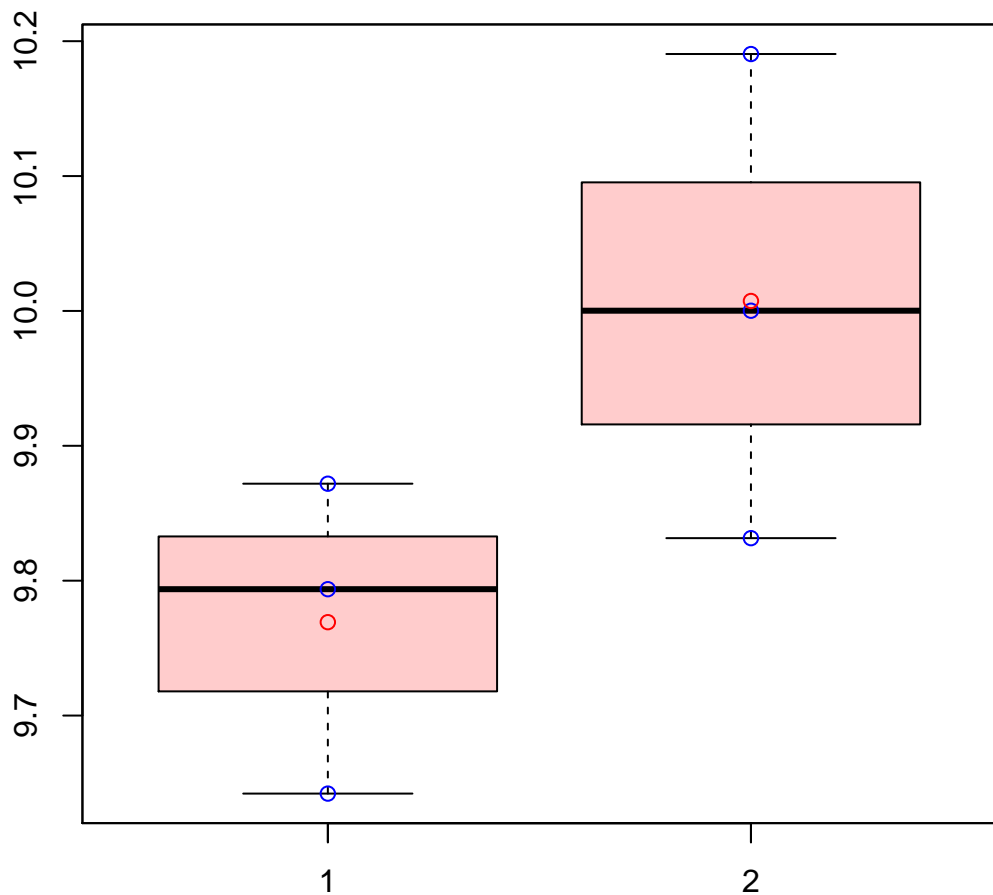

t-Test: p-value = 0.14

# I1NP22|I1NP22\_ORYGL

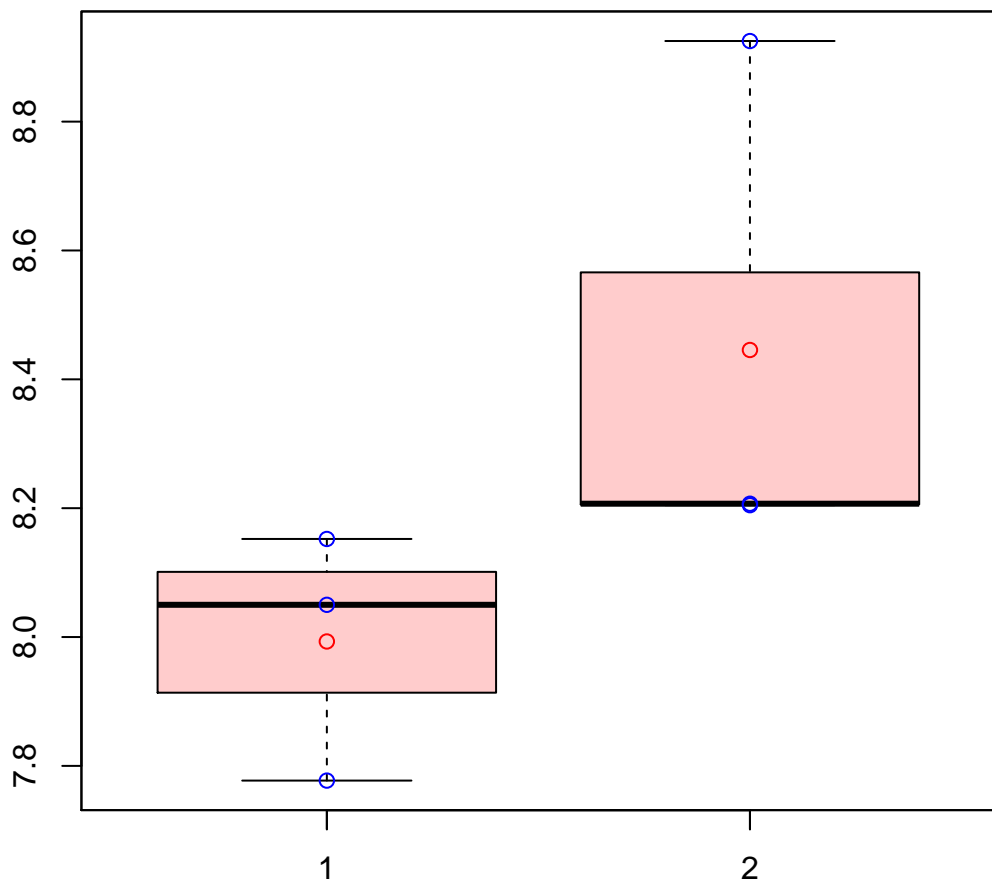

t-Test: p-value = 0.19

# I1NQX1|I1NQX1\_ORYGL

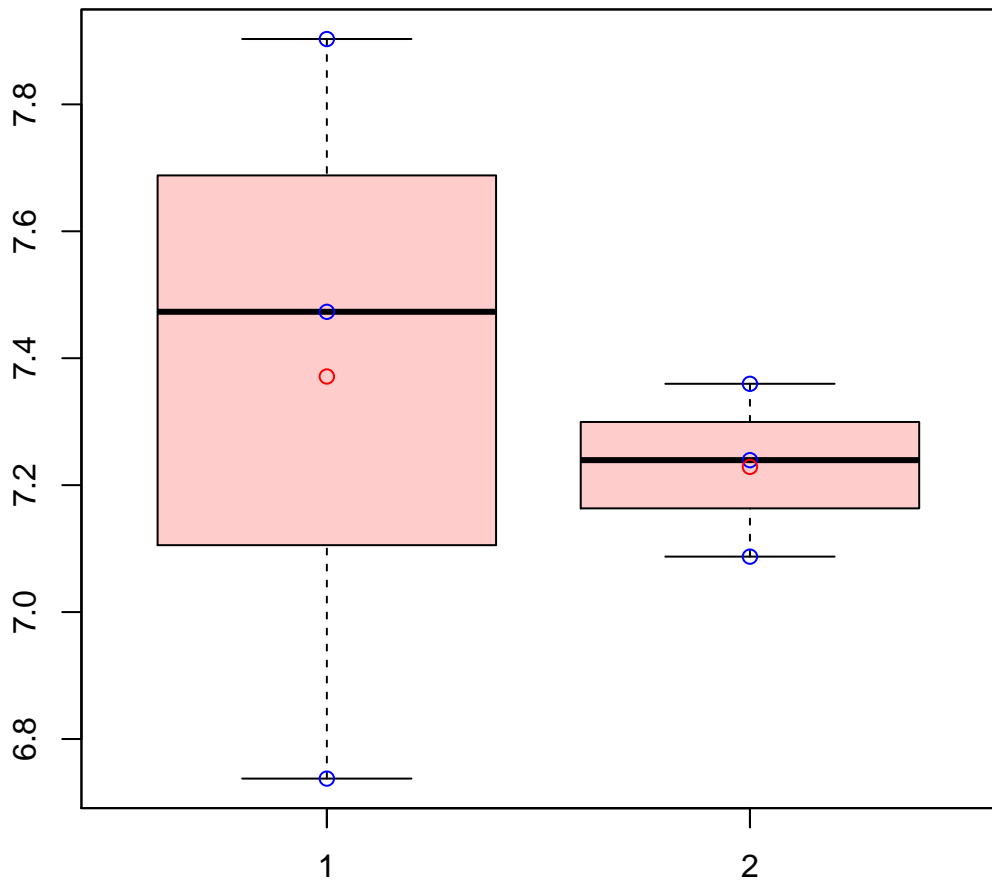

t-Test: p-value = 0.72

# I1NR66|I1NR66\_ORYGL

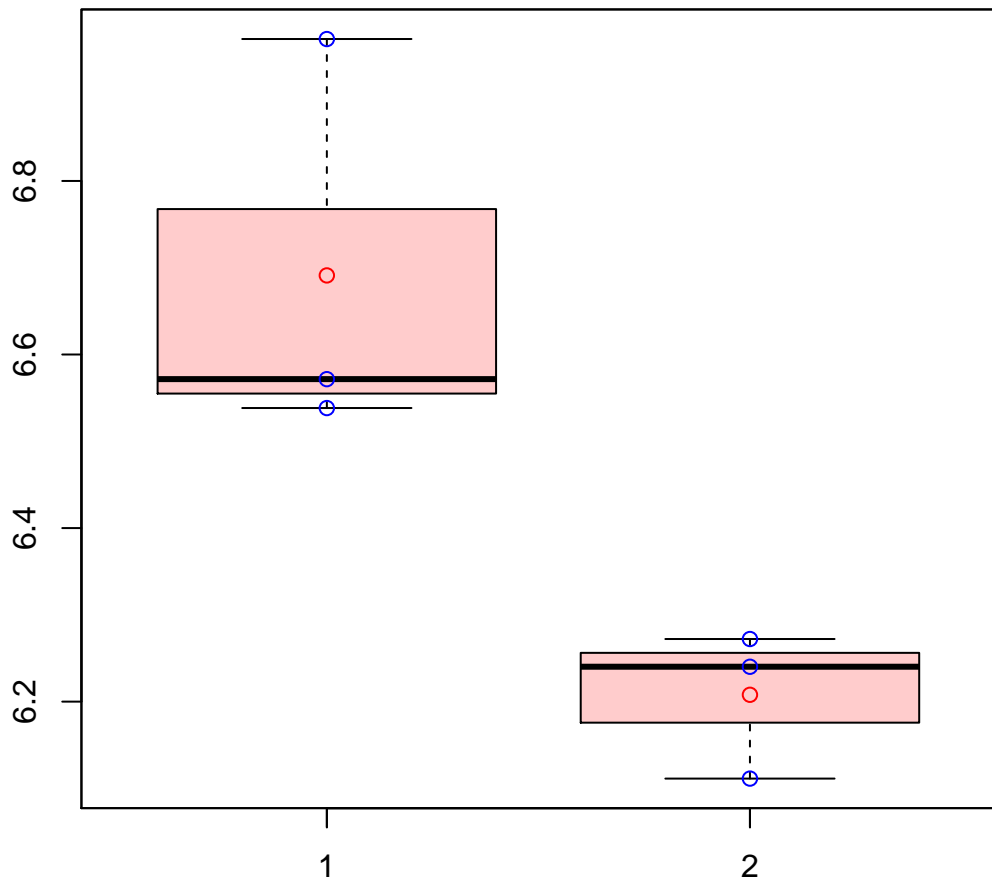

t-Test: p-value = 0.06



# I1NSA4|I1NSA4\_ORYGL

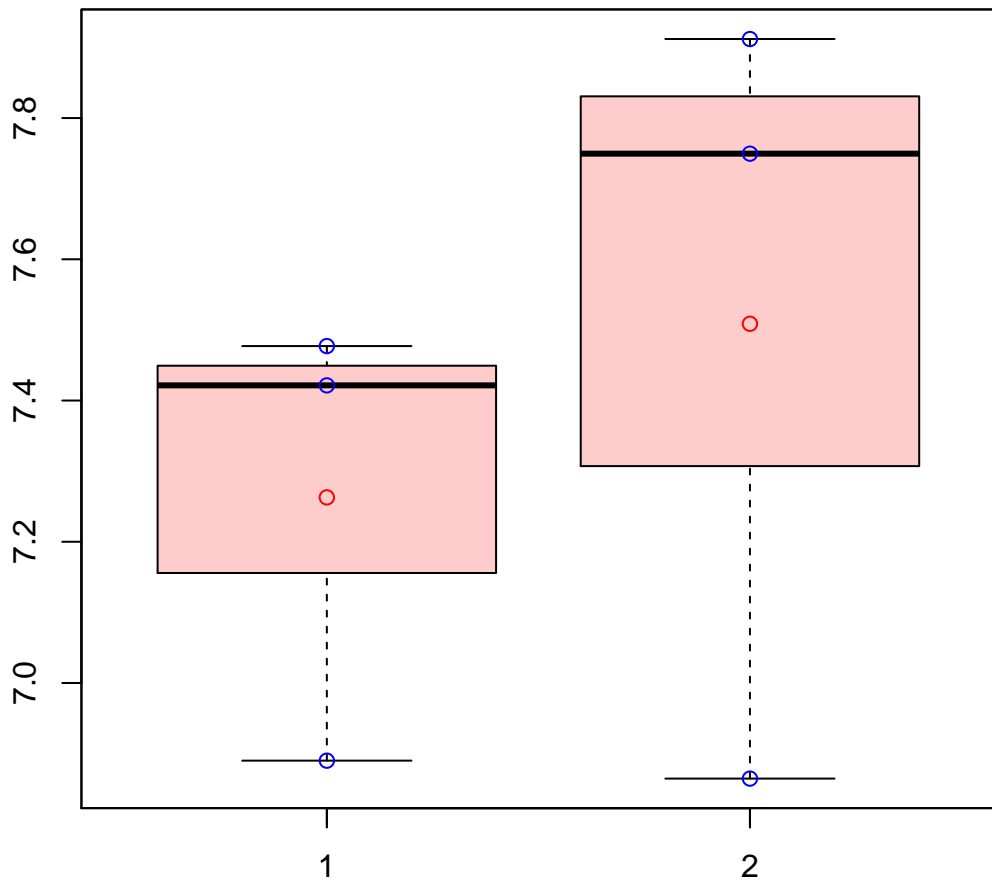

t-Test: p-value = 0.56

# I1NT64|I1NT64\_ORYGL

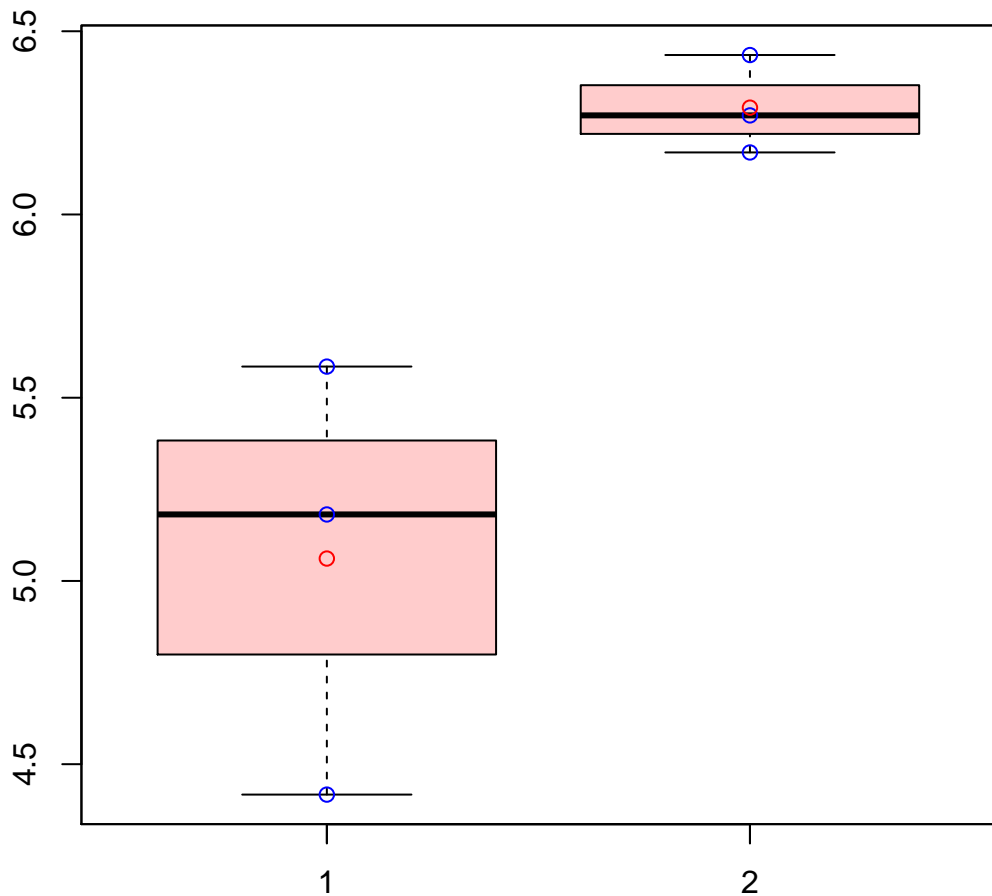

t-Test: p-value = 0.06

# I1NTT0|I1NTT0\_ORYGL

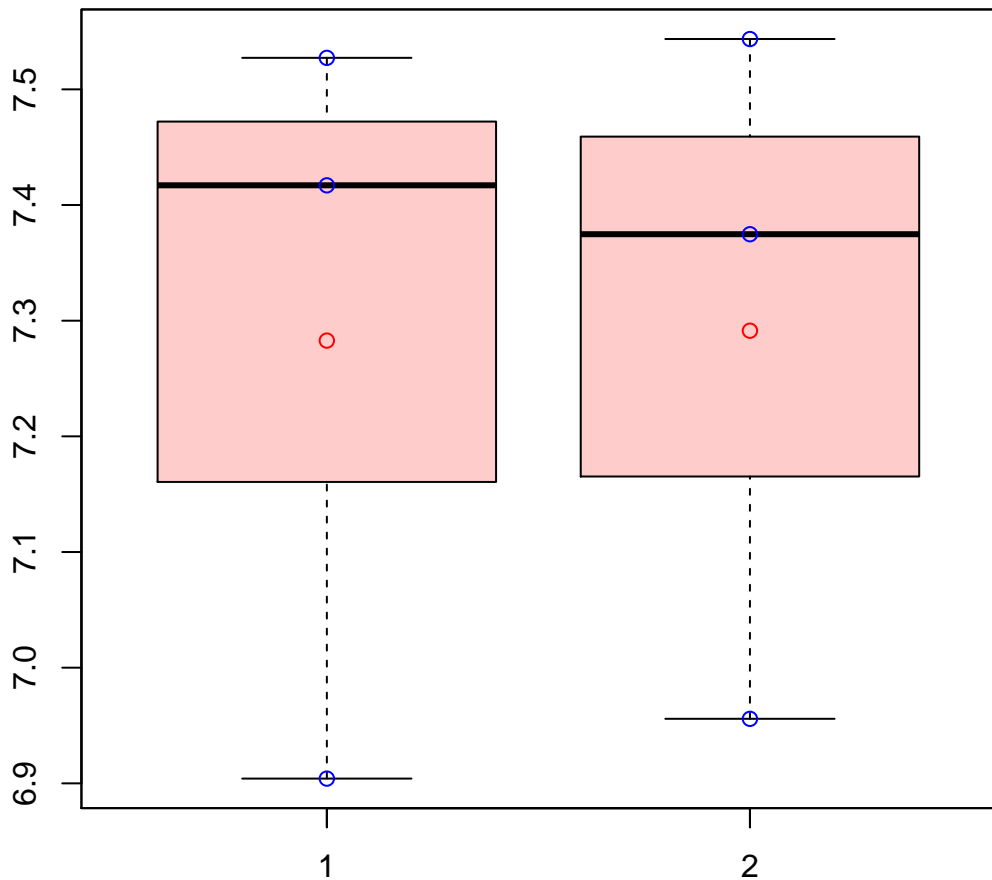

t-Test: p-value = 0.98

# I1NTW6|I1NTW6\_ORYGL

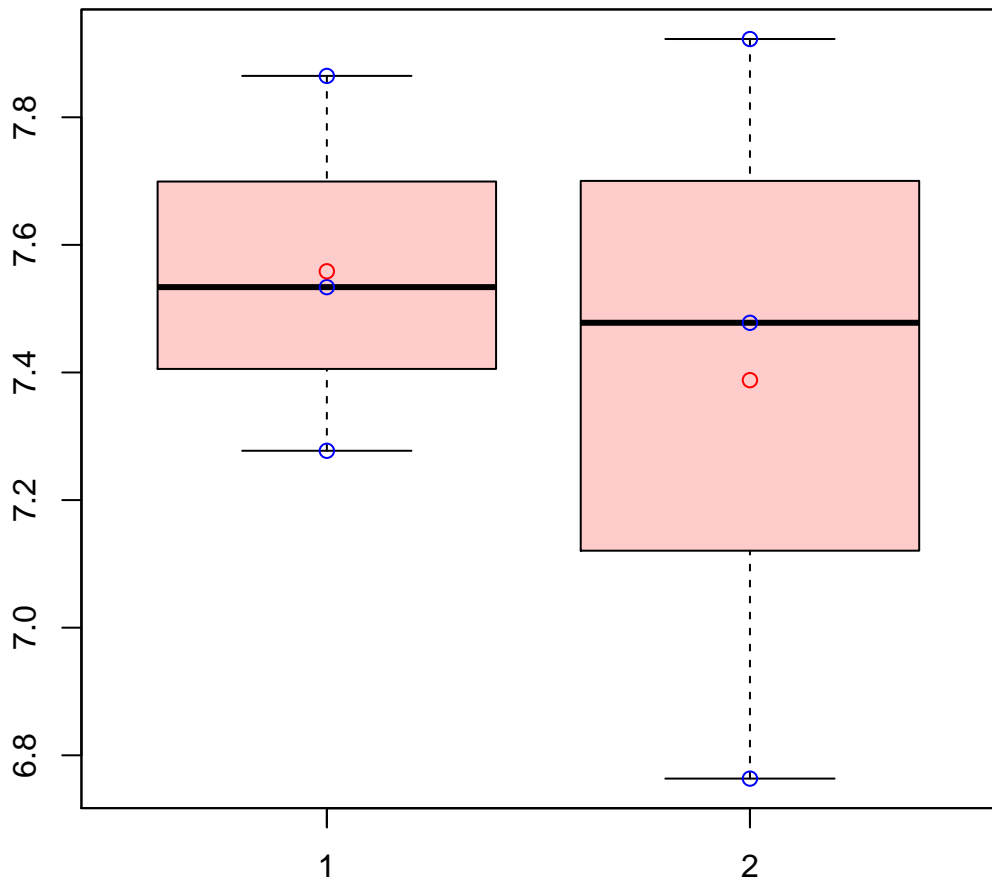

t-Test: p-value = 0.68

# I1NU41|I1NU41\_ORYGL

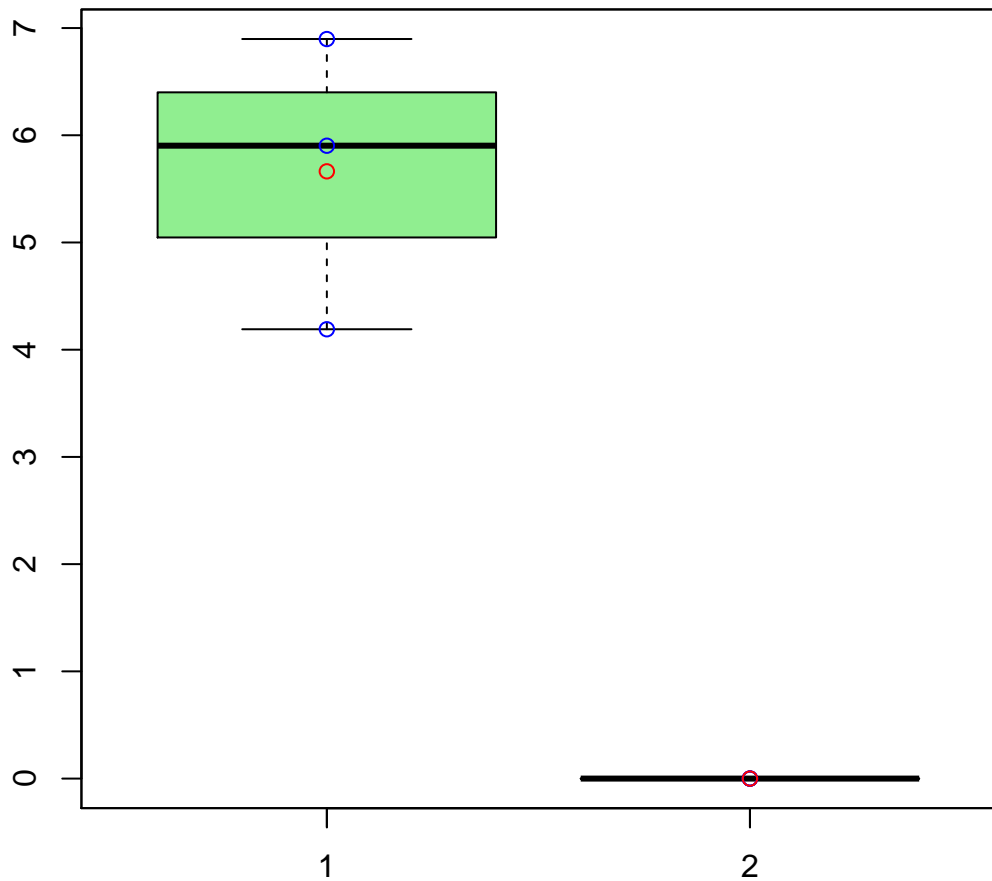

t-Test: p-value = 0.02

# I1NUL6|I1NUL6\_ORYGL

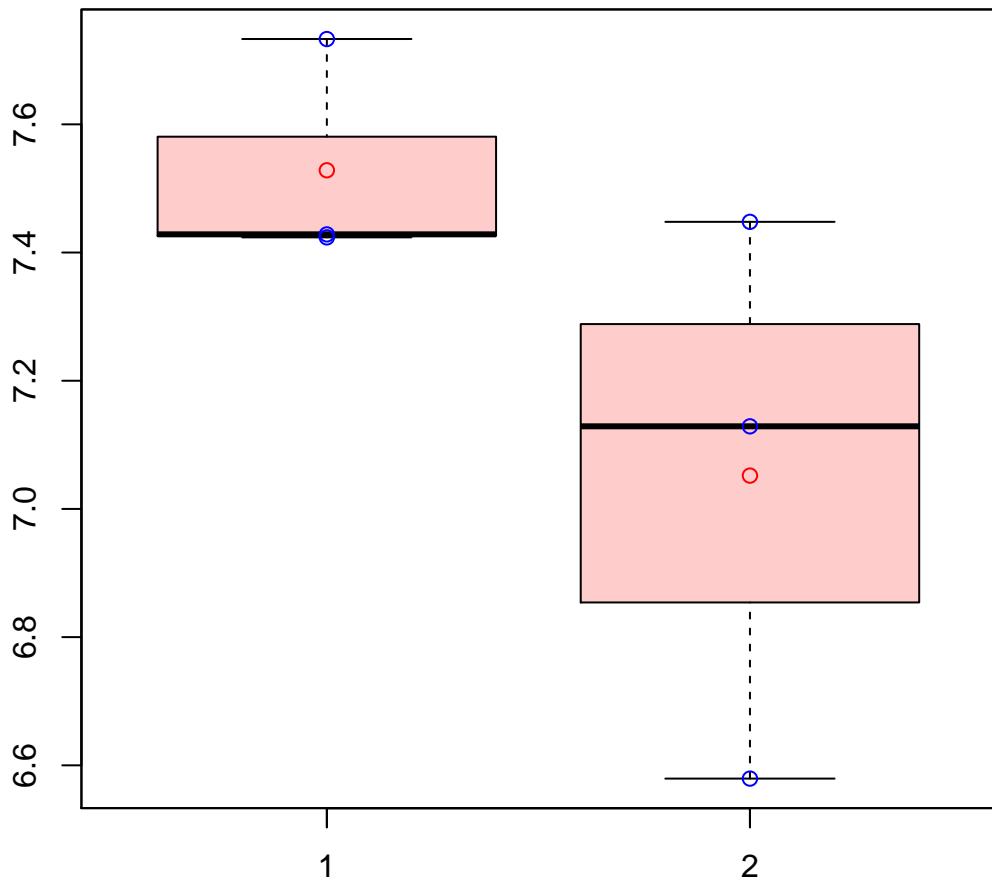

t-Test: p-value = 0.19

# I1NVG5|I1NVG5\_ORYGL

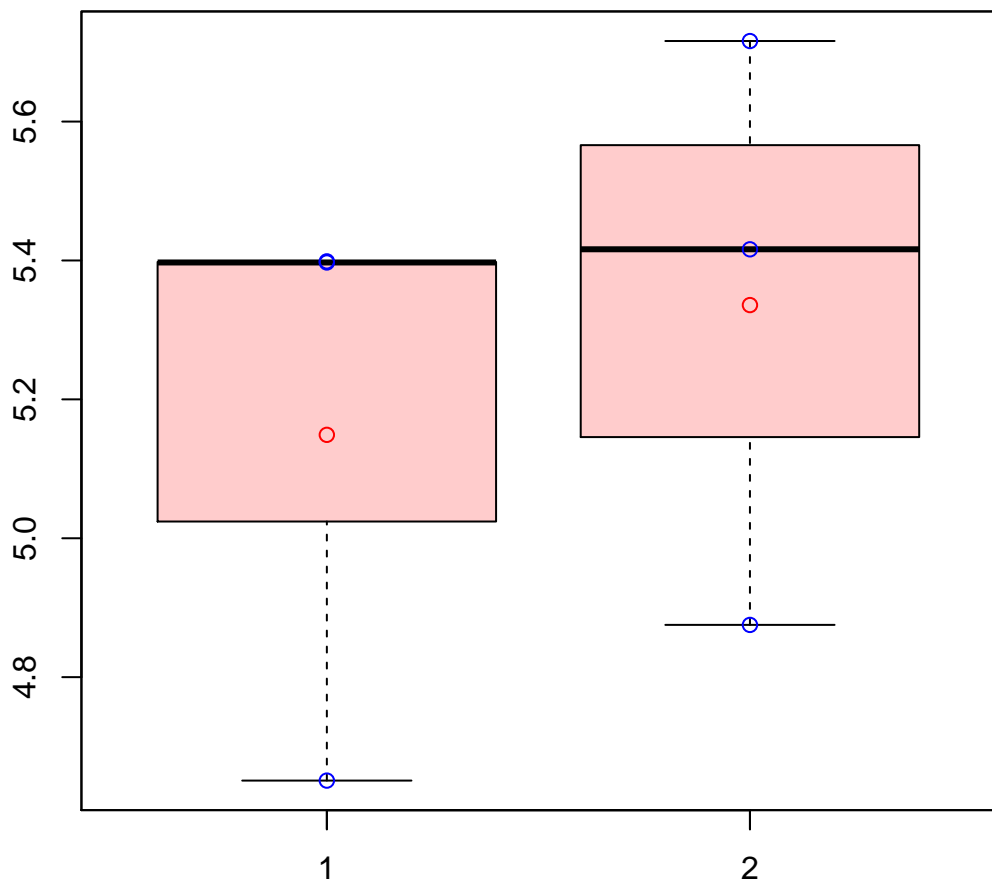

t-Test: p-value = 0.62

# I1NWA5|I1NWA5\_ORYGL

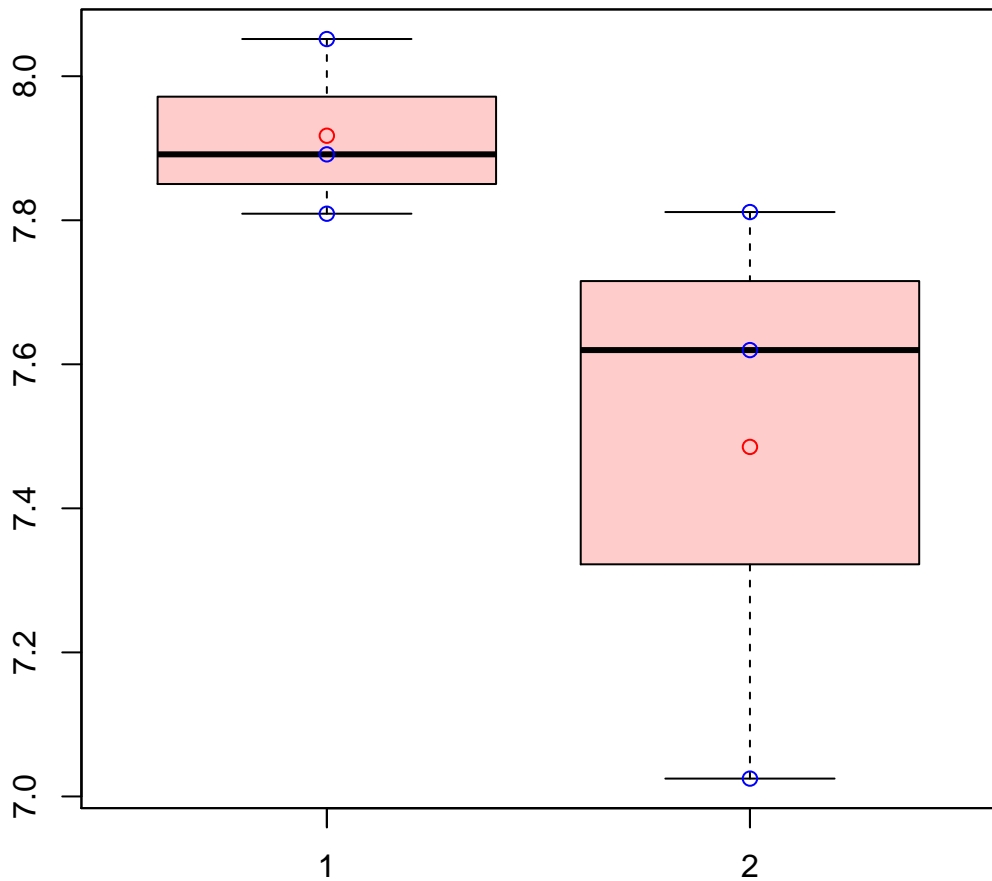

t-Test: p-value = 0.2



# I1NWG8|I1NWG8\_ORYGL

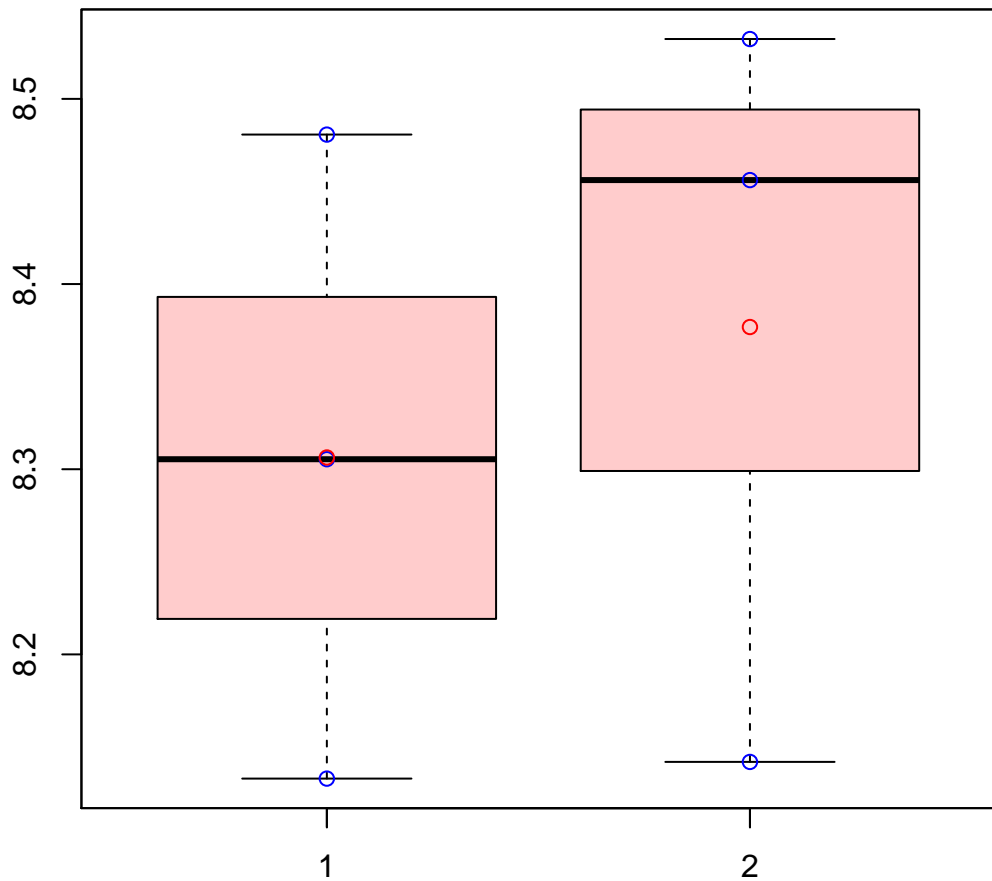

t-Test: p-value = 0.68

# I1NWJ9|I1NWJ9\_ORYGL

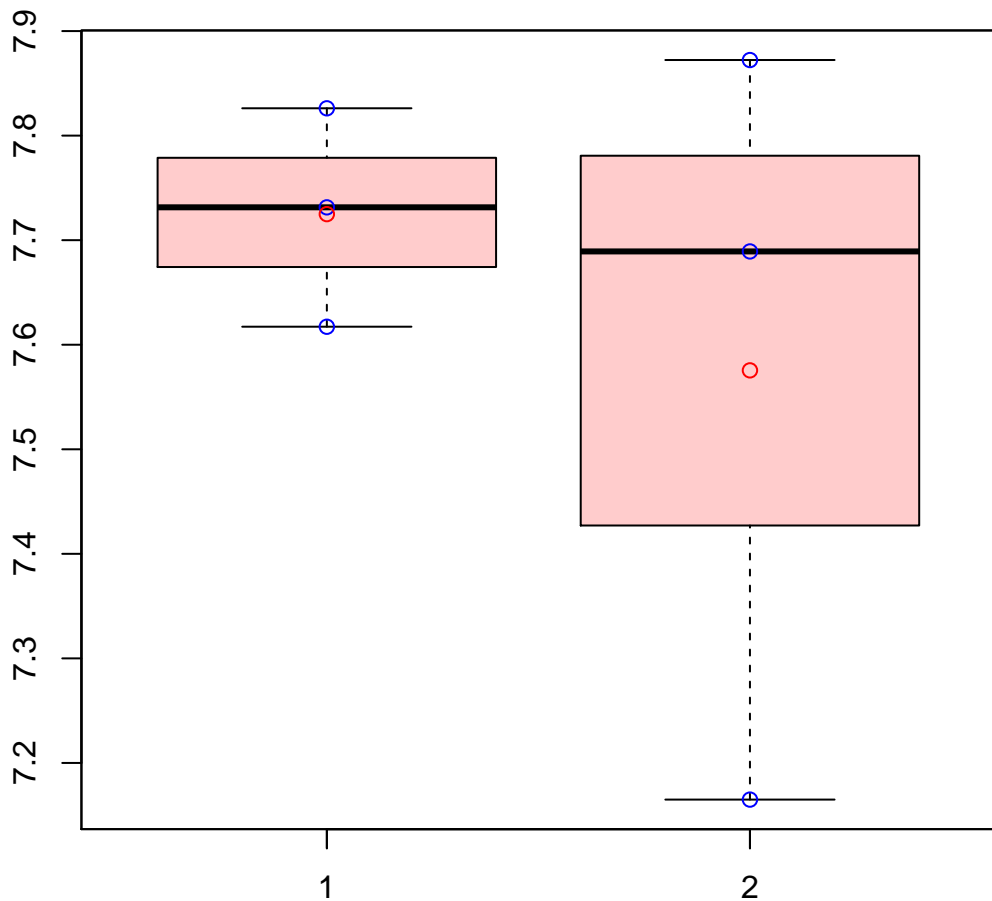

t-Test: p-value = 0.56

# I1NWQ5|I1NWQ5\_ORYGL

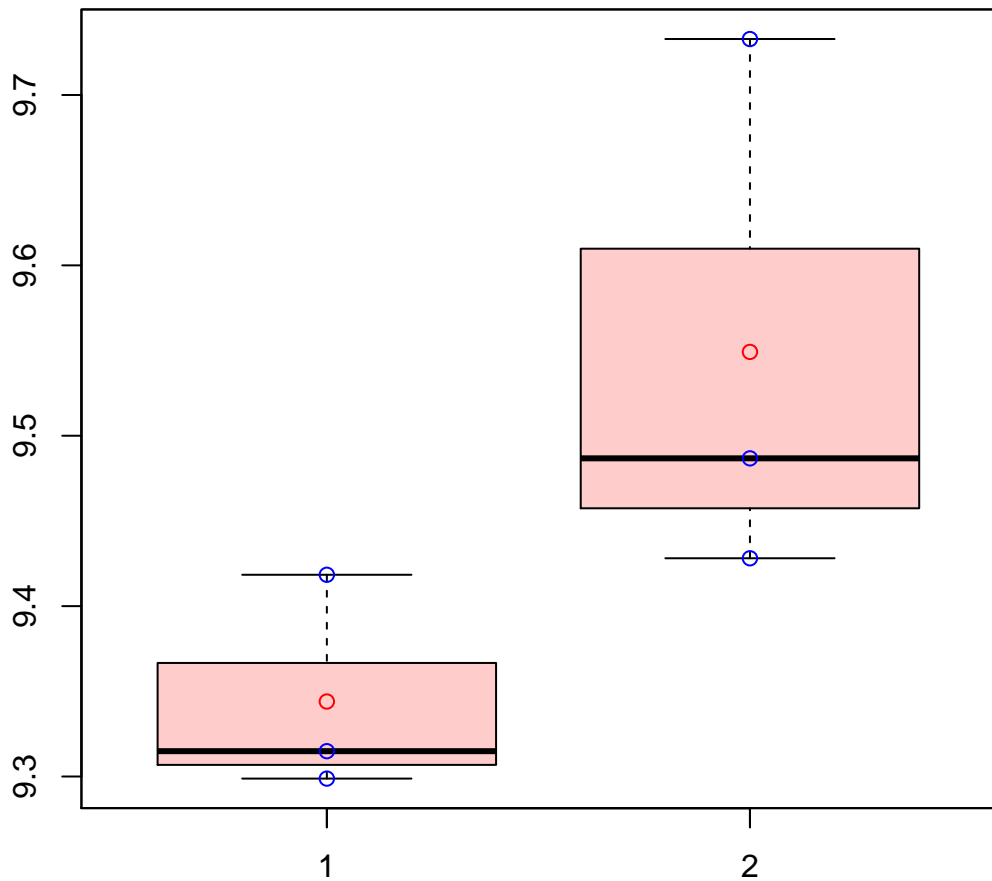

t-Test: p-value = 0.15

# I1NX34|I1NX34\_ORYGL

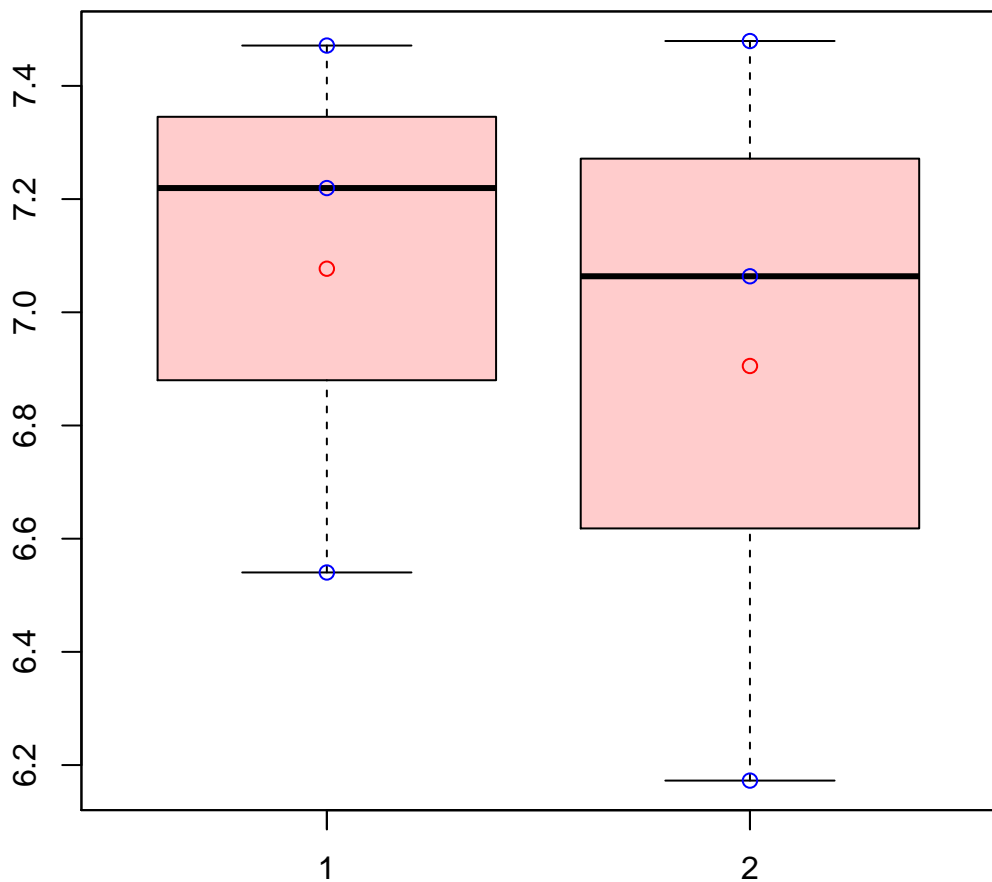

t-Test: p-value = 0.74

# I1NXC2|I1NXC2\_ORYGL

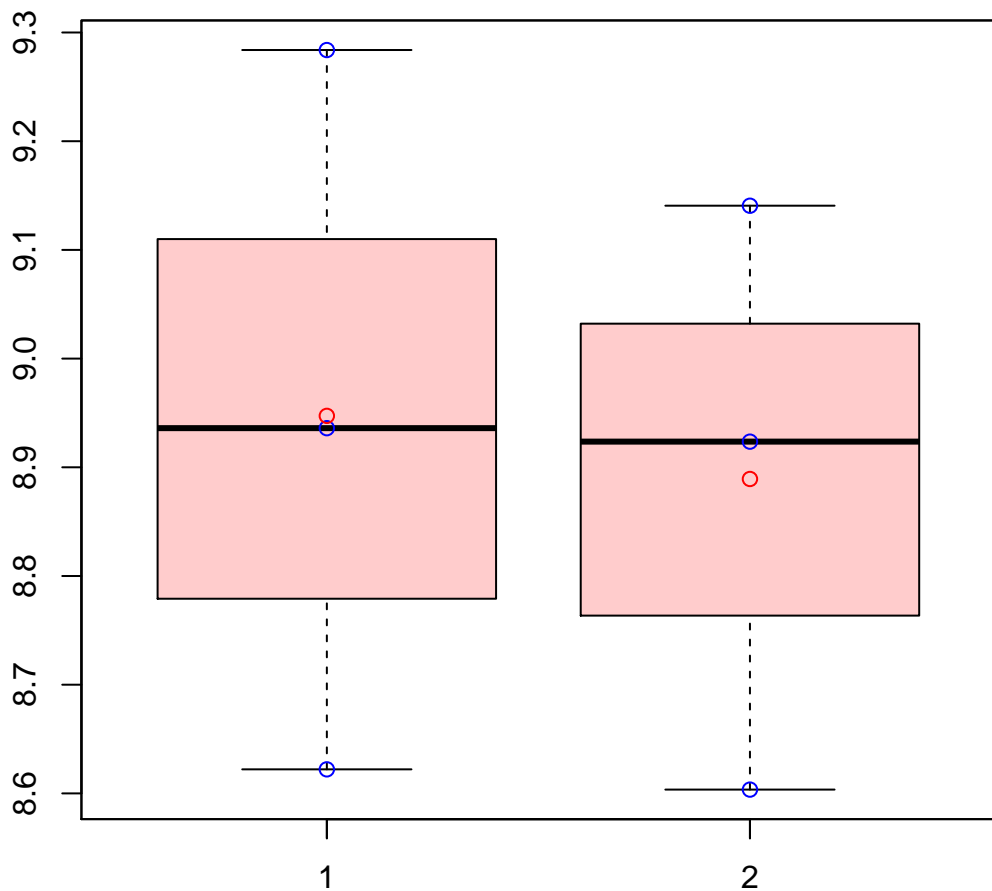

t-Test: p-value = 0.83

# I1NXV1|I1NXV1\_ORYGL

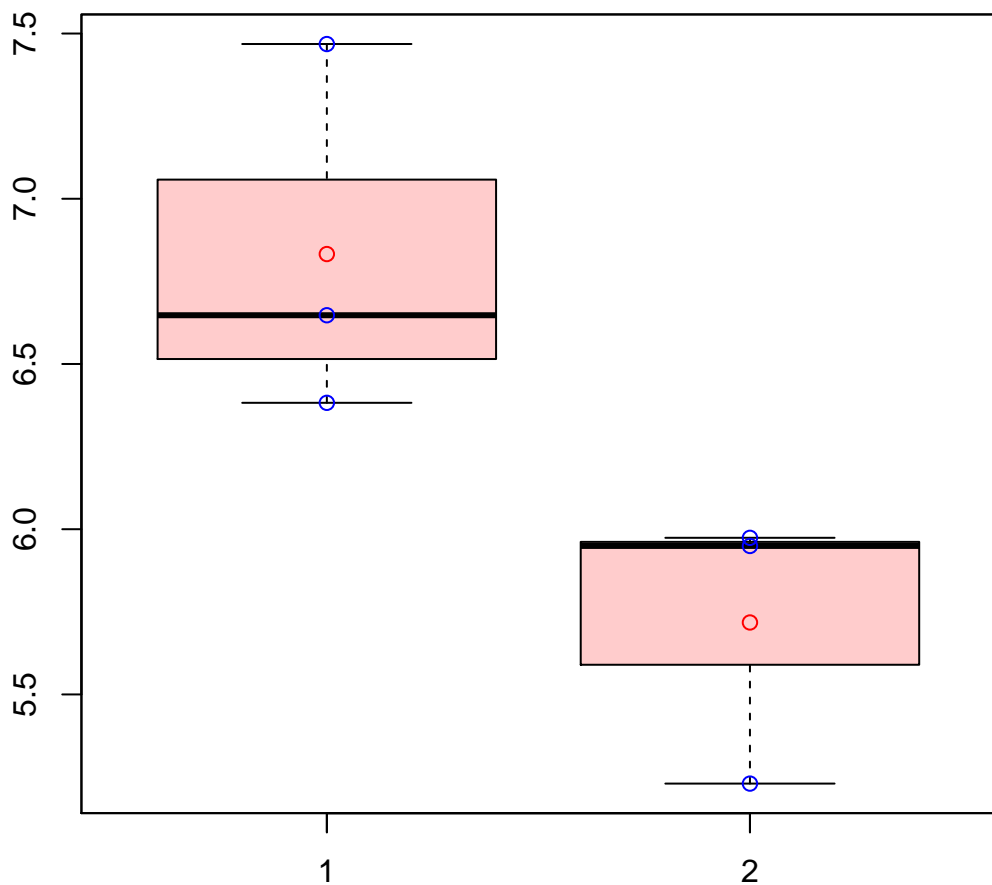

t-Test: p-value = 0.06

# I1NY63|I1NY63\_ORYGL

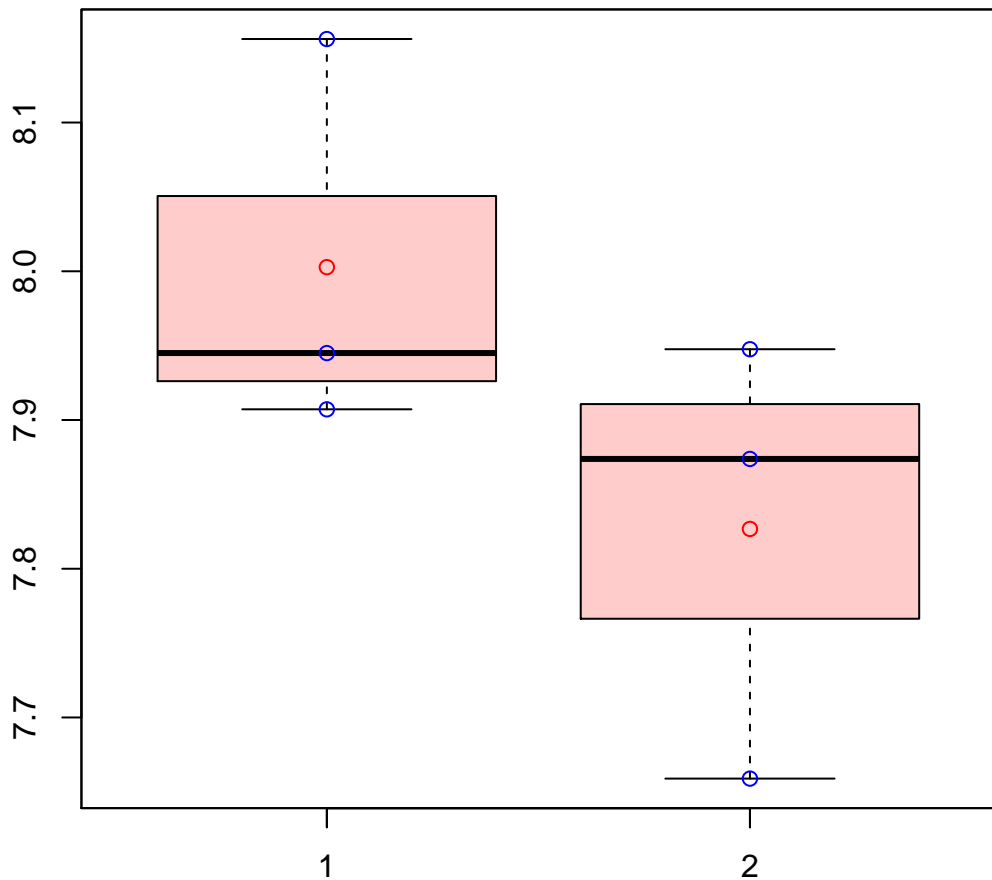

t-Test: p-value = 0.21

# I1NYQ5|I1NYQ5\_ORYGL

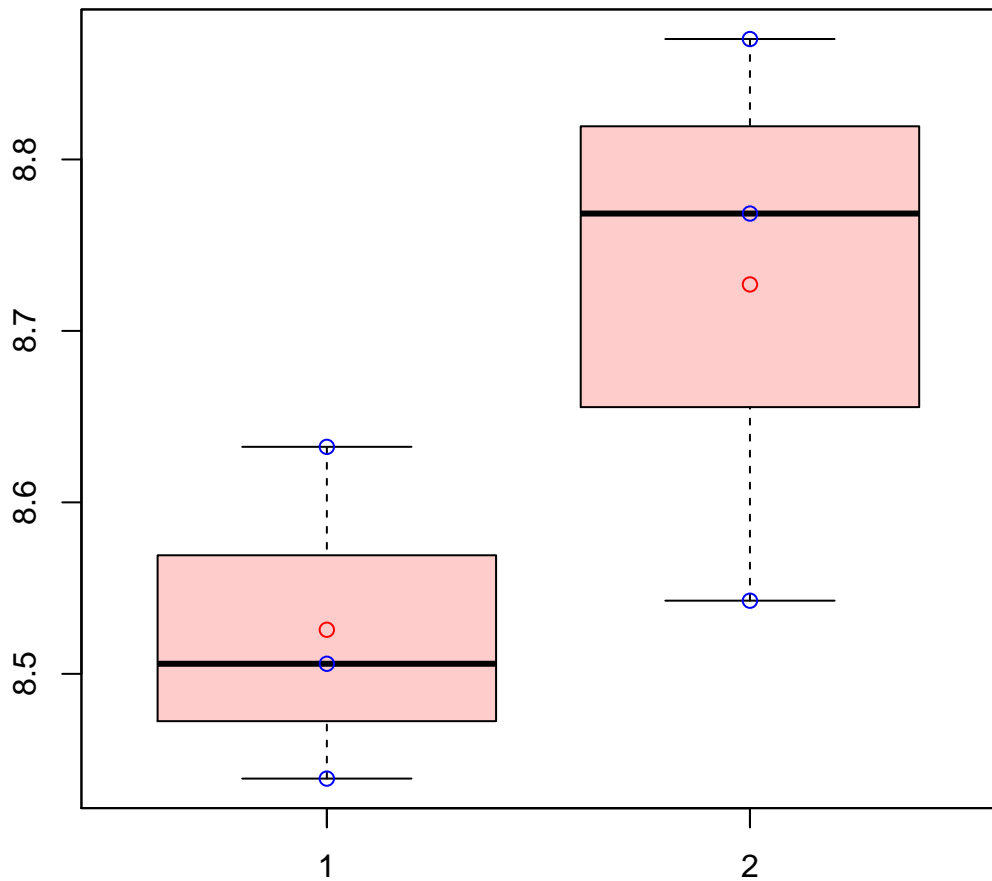

t-Test: p-value = 0.16



# I1NZ48|I1NZ48\_ORYGL

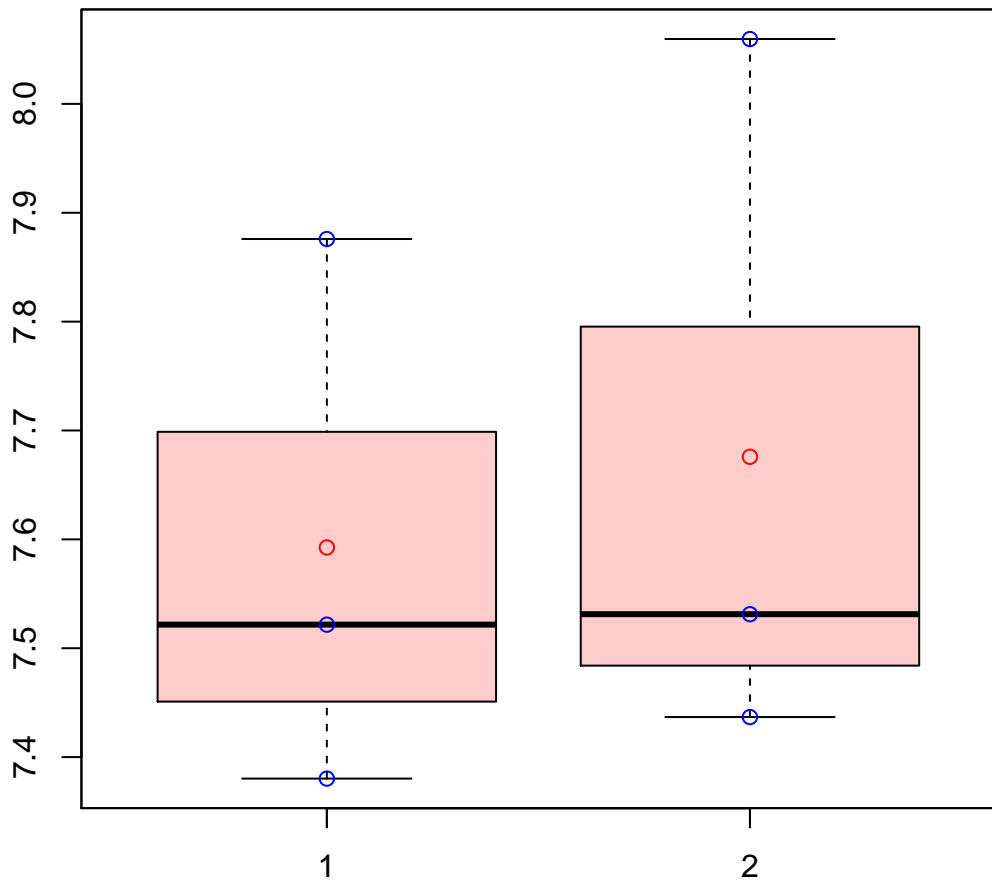

t-Test: p-value = 0.75

# I1NZ63|I1NZ63\_ORYGL

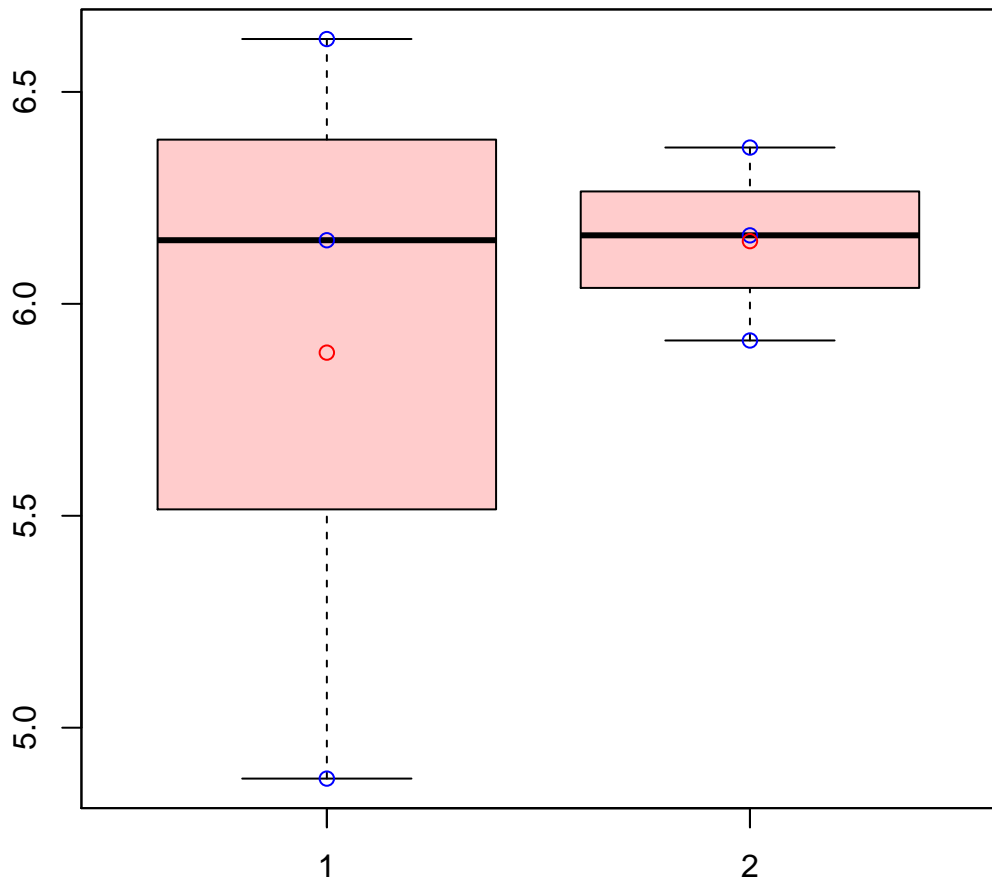

t-Test: p-value = 0.67

# I1NZI0|I1NZI0\_ORYGL

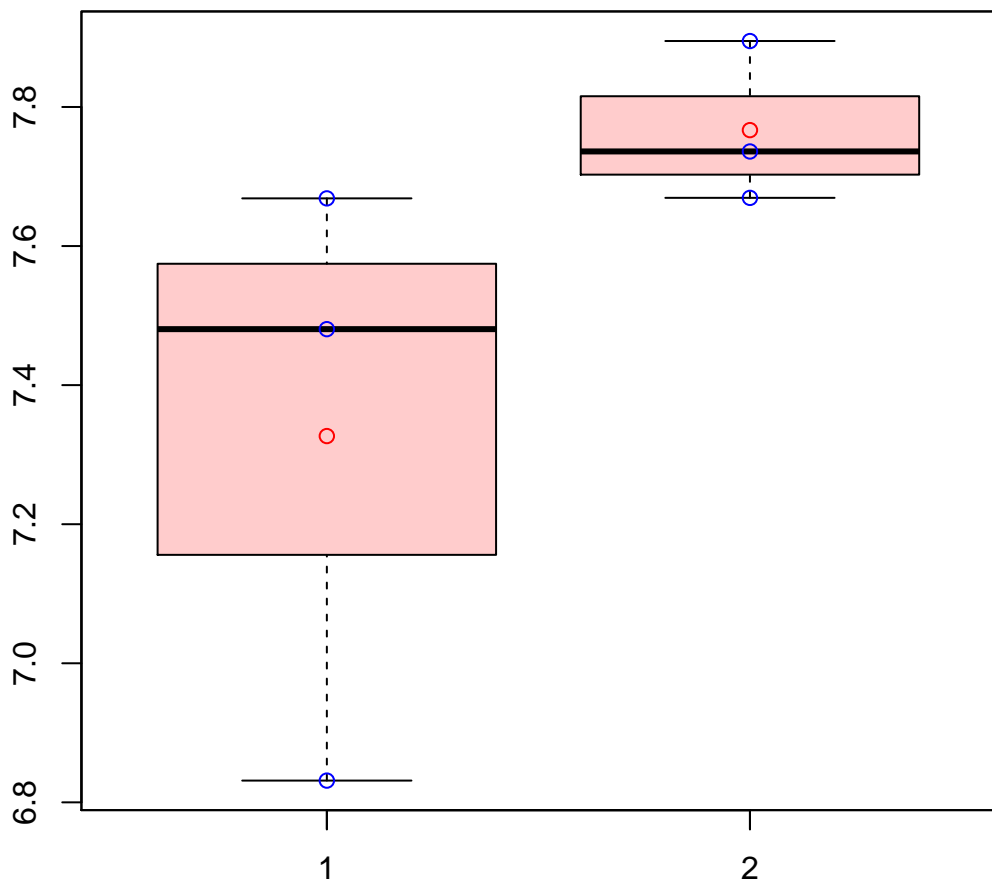

t-Test: p-value = 0.22

# I1P1A2|I1P1A2\_ORYGL

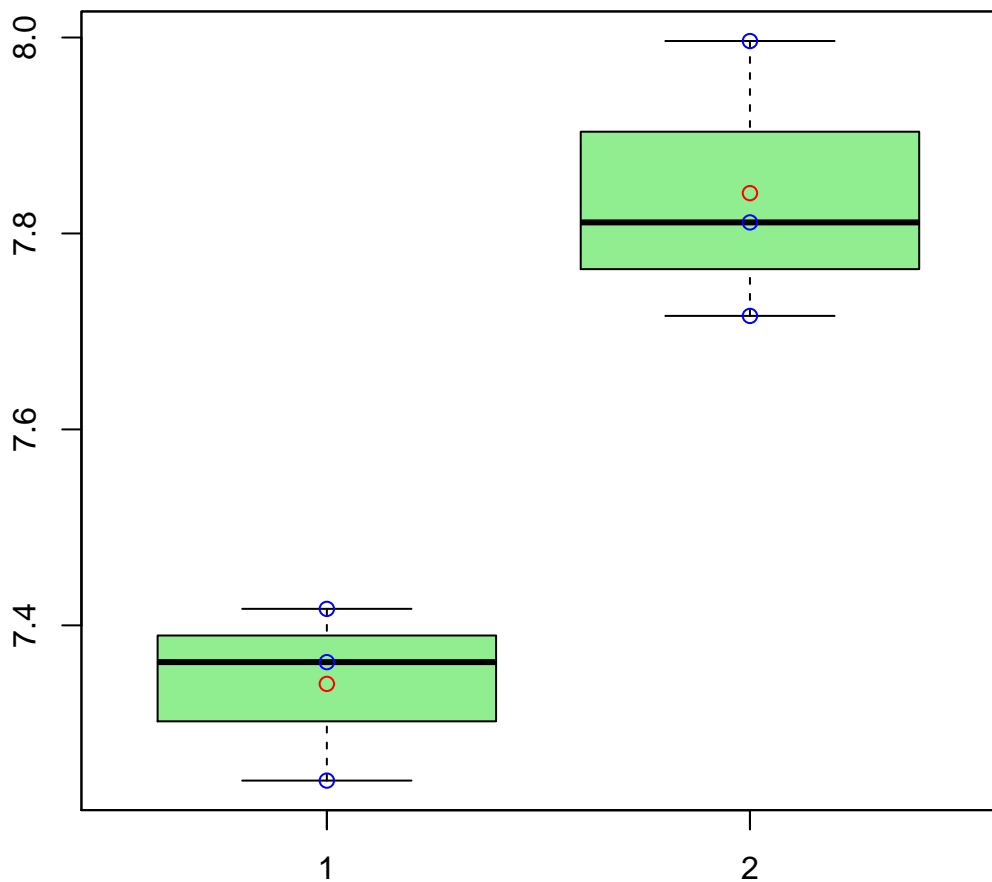

t-Test: p-value = 0.01

# I1P221|I1P221\_ORYGL

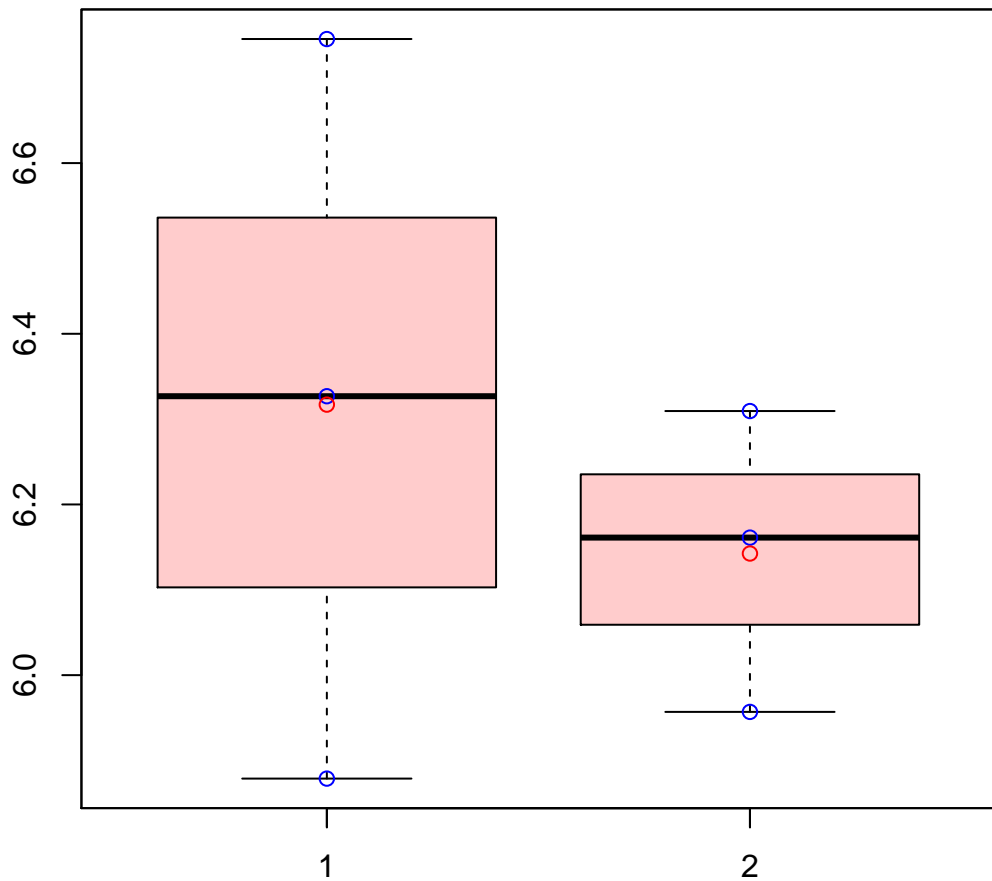

t-Test: p-value = 0.57

# I1P262|I1P262\_ORYGL

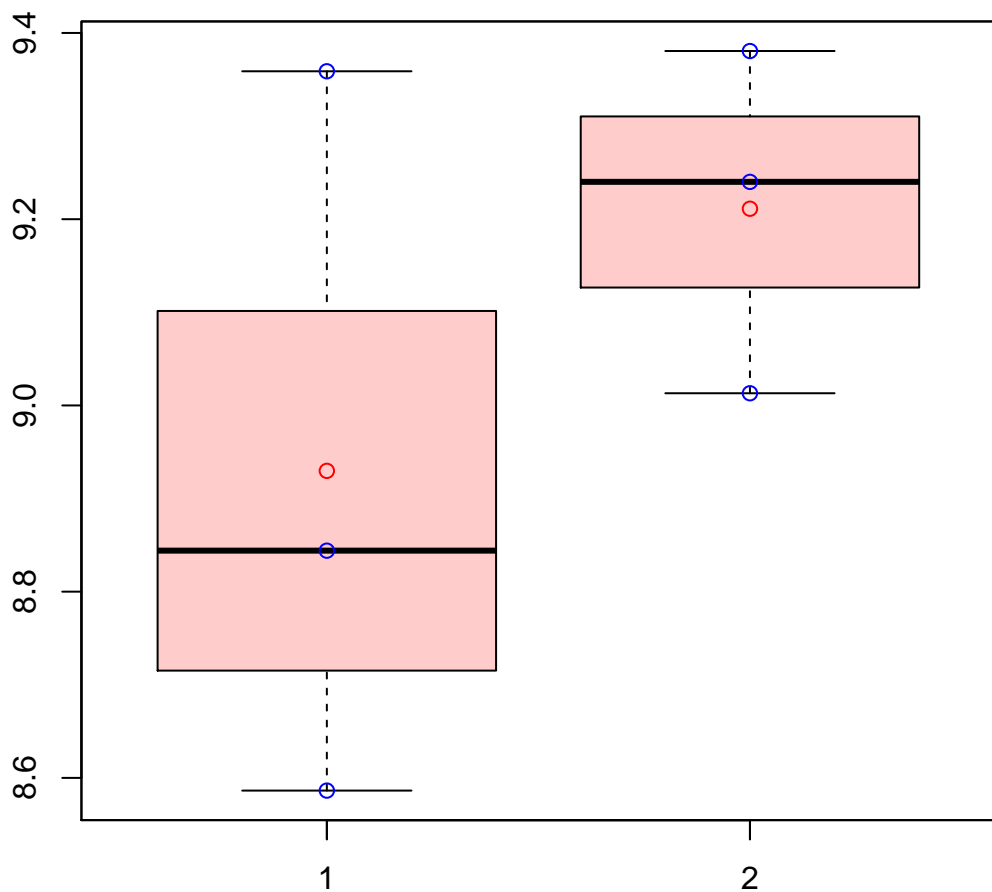

t-Test: p-value = 0.35

# I1P2X2|I1P2X2\_ORYGL

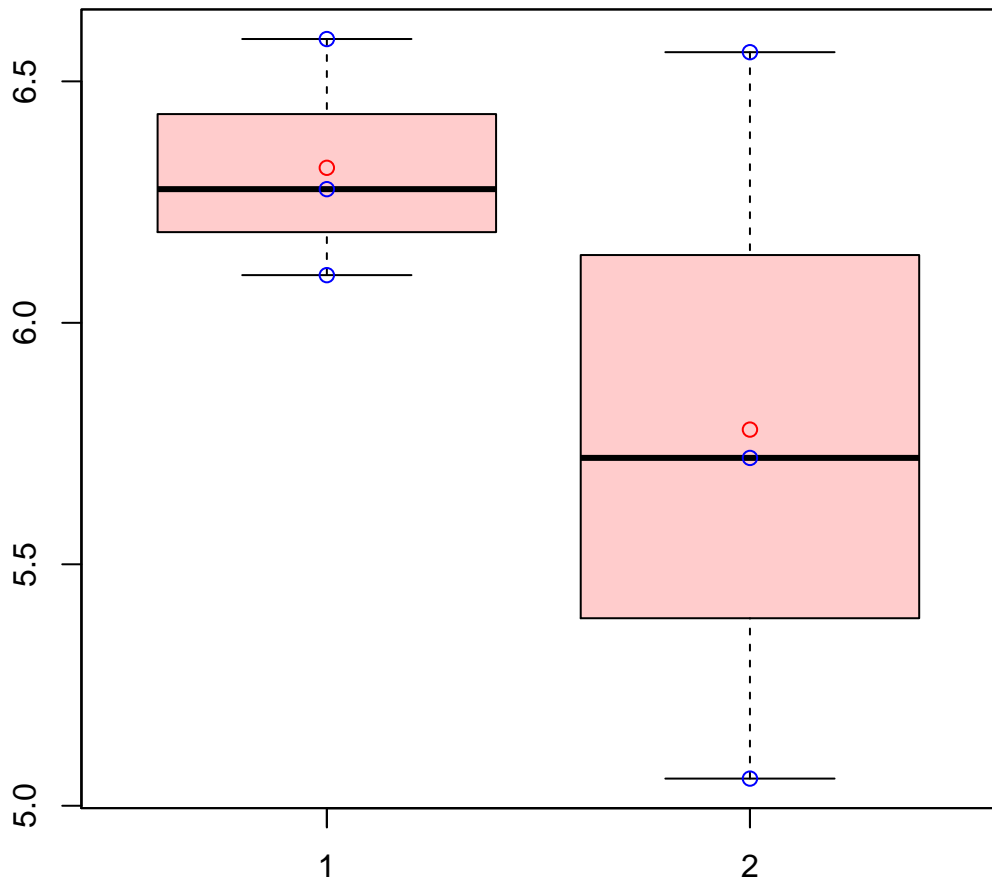

t-Test: p-value = 0.34

# I1P3C7|I1P3C7\_ORYGL

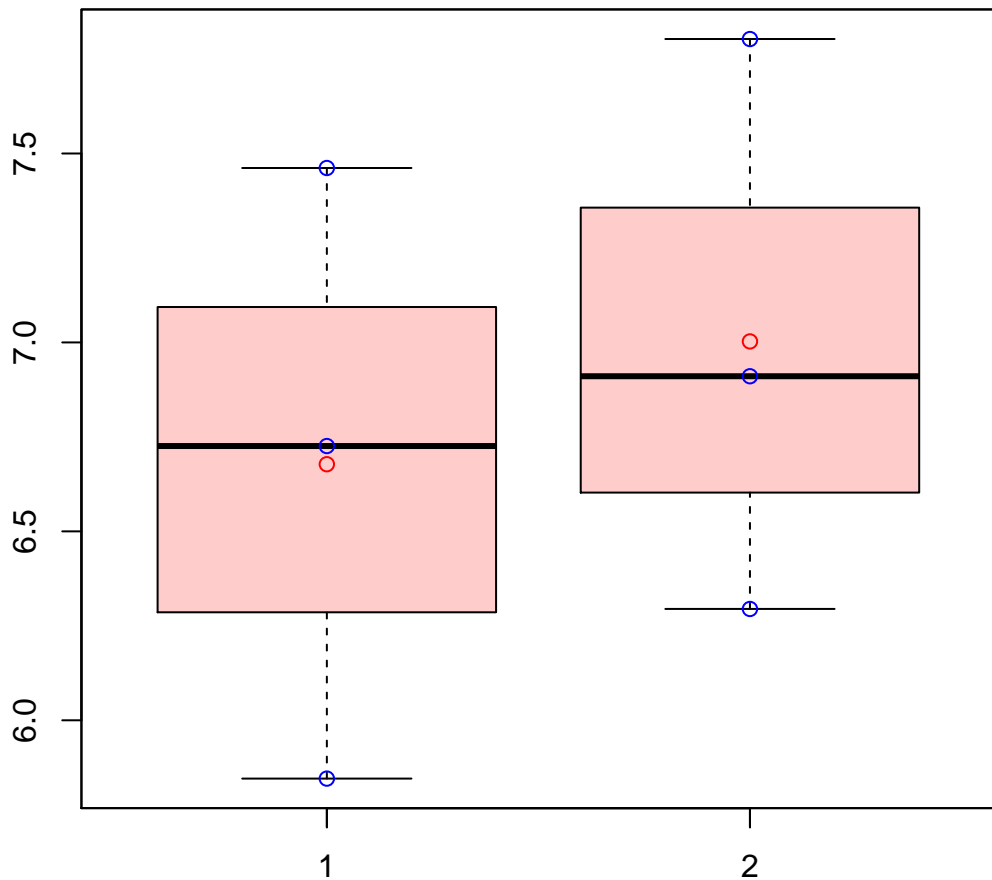

t-Test: p-value = 0.64



# I1P3U8|I1P3U8\_ORYGL

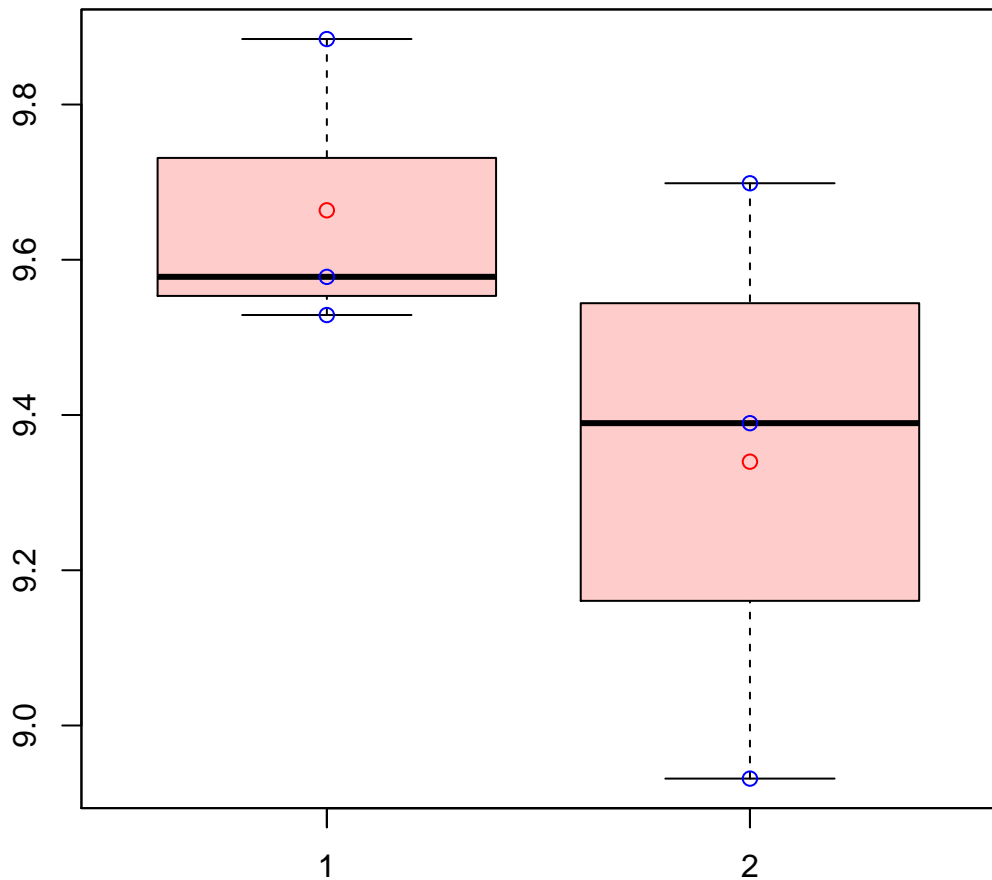

t-Test: p-value = 0.29

# I1P3V7|I1P3V7\_ORYGL

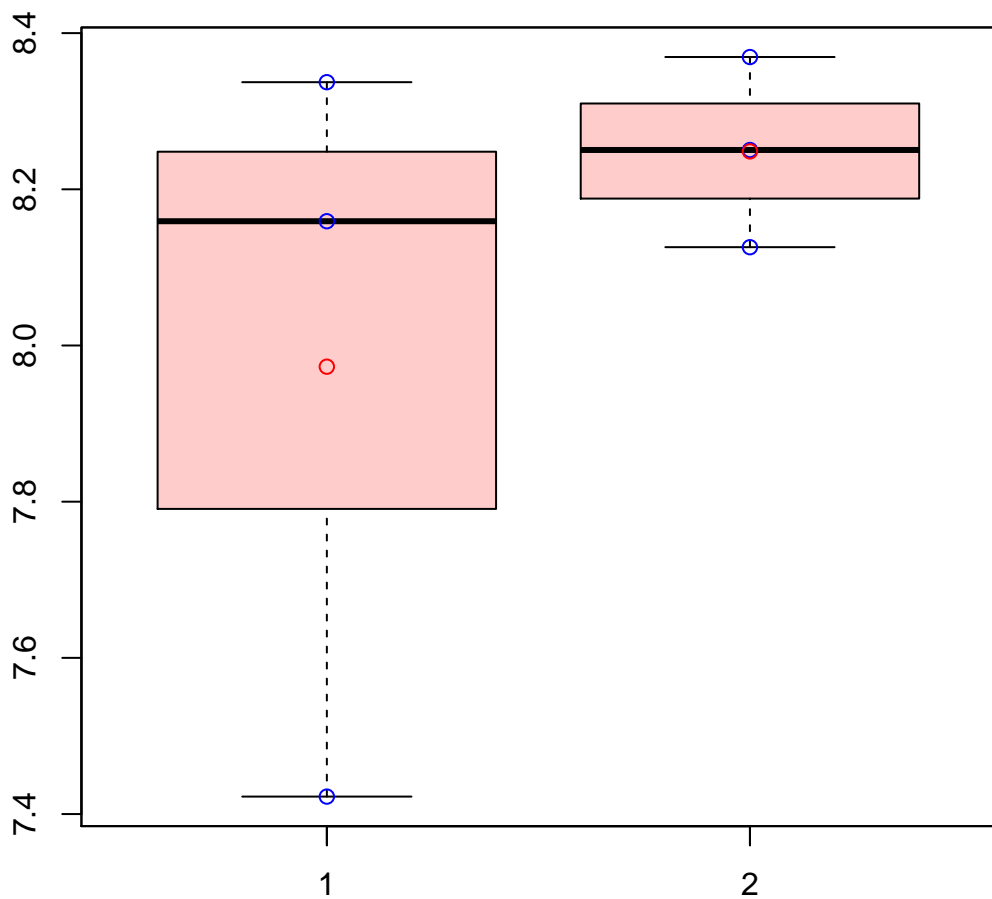

t-Test: p-value = 0.43

# I1P543|I1P543\_ORYGL

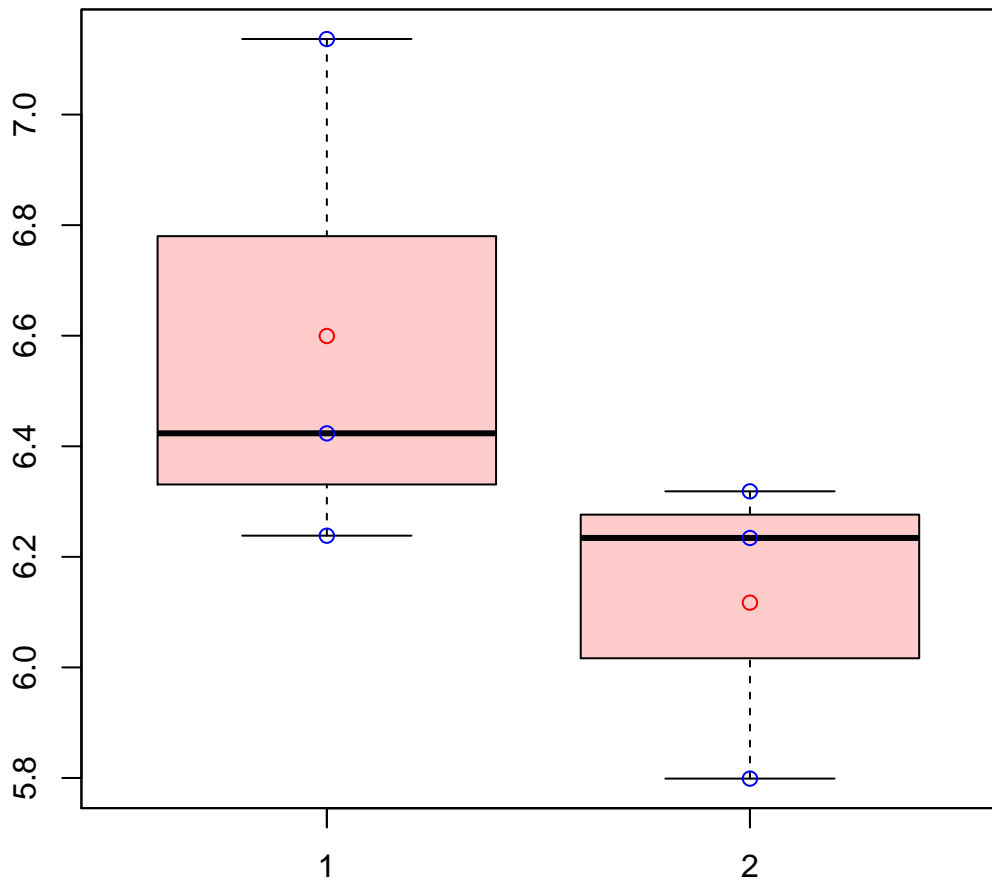

t-Test: p-value = 0.22

# I1P5C9|I1P5C9\_ORYGL

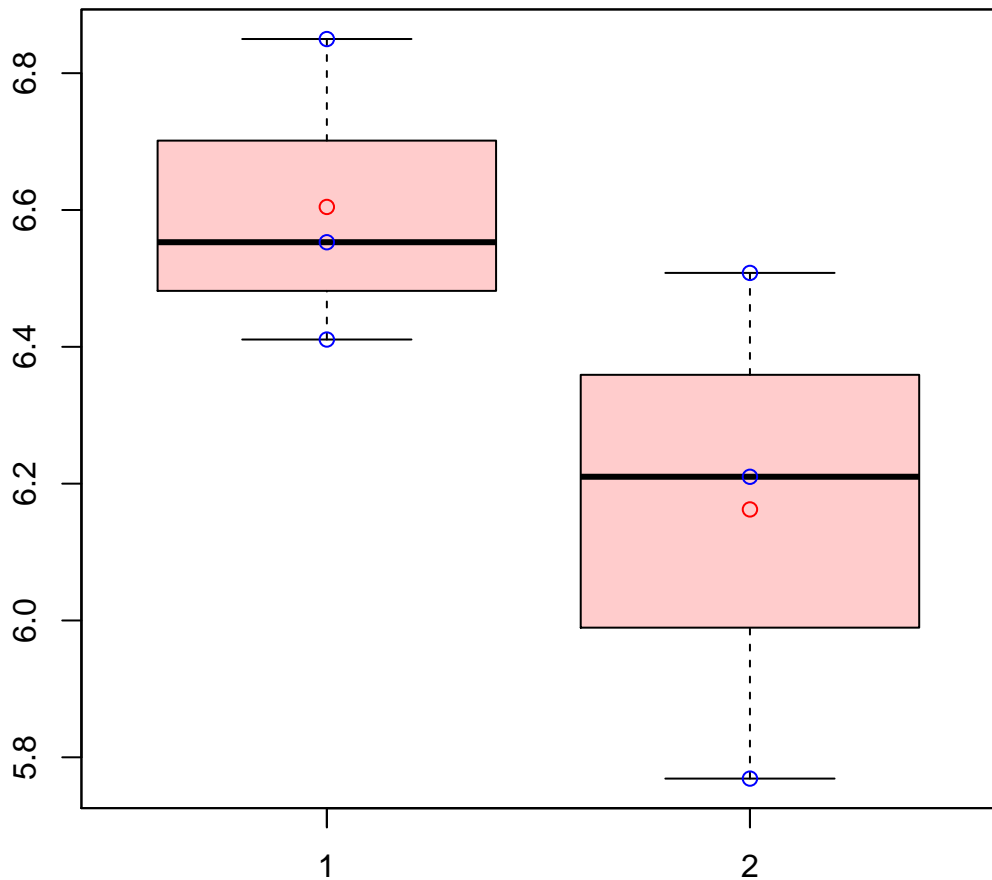

t-Test: p-value = 0.17

# I1P5Y9|I1P5Y9\_ORYGL

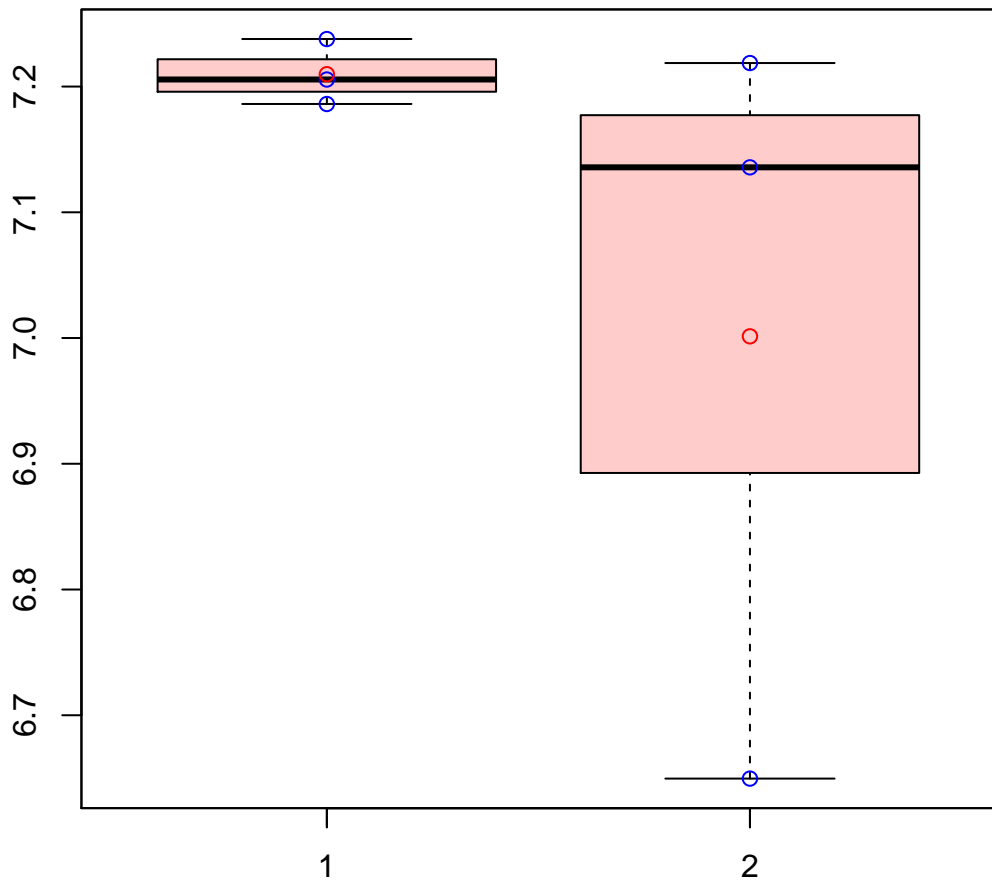

t-Test: p-value = 0.36

# I1P720|I1P720\_ORYGL

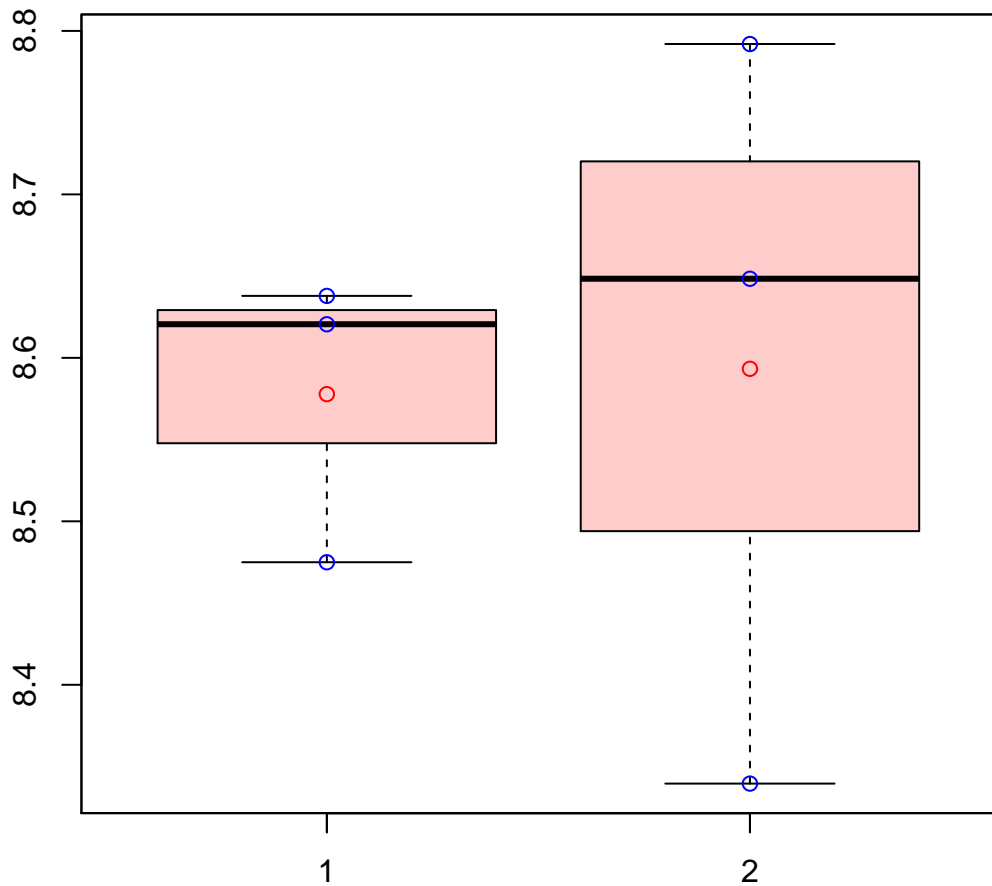

t-Test: p-value = 0.92

# I1P7F9|I1P7F9\_ORYGL

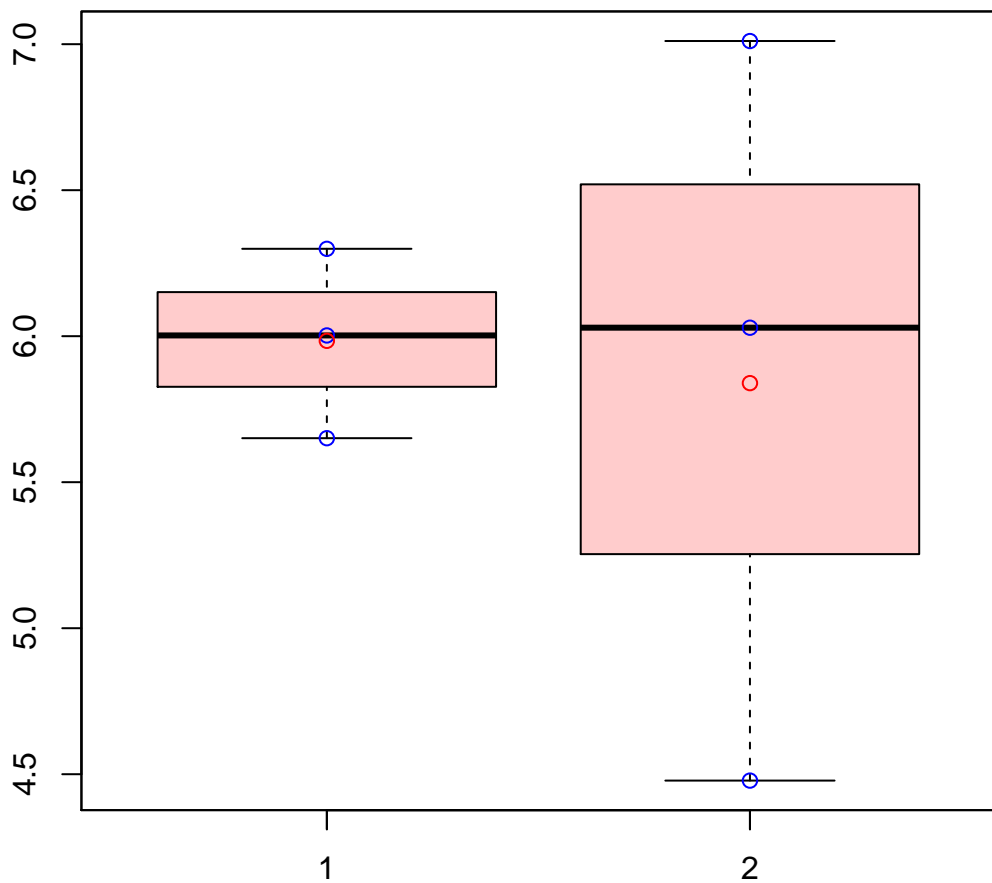

t-Test: p-value = 0.86

# I1P8M6|I1P8M6\_ORYGL

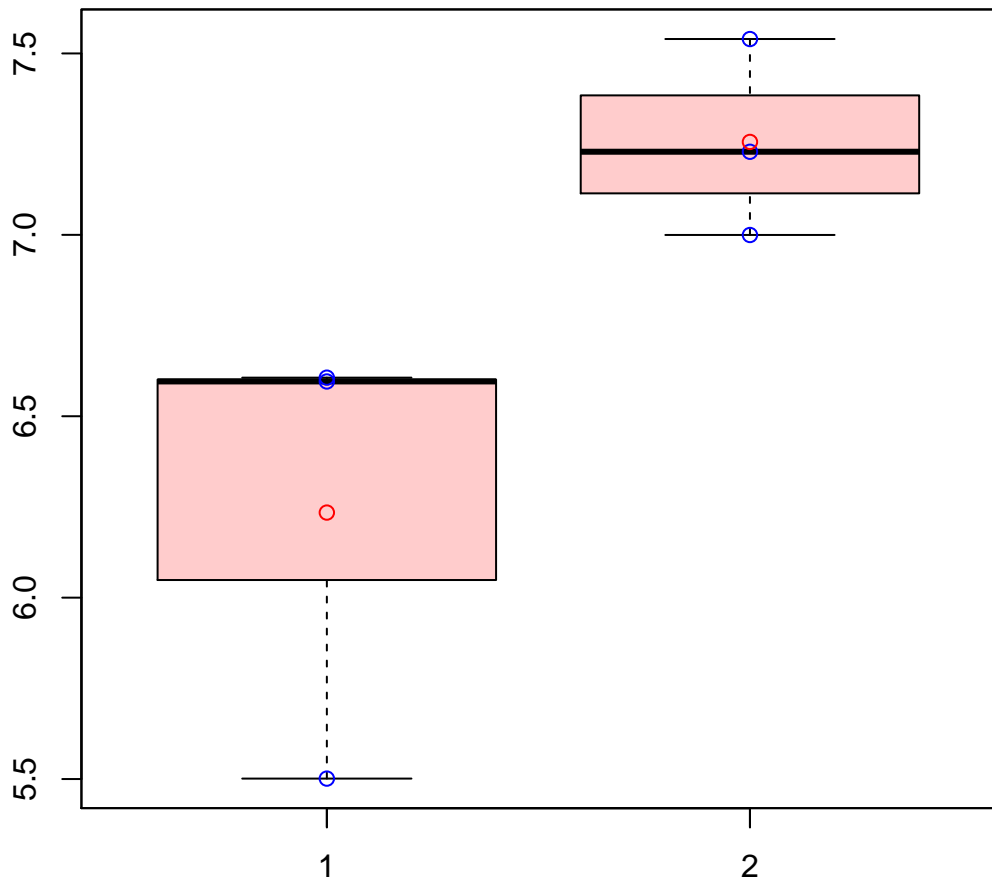

t-Test: p-value = 0.09



# I1P9C6|I1P9C6\_ORYGL

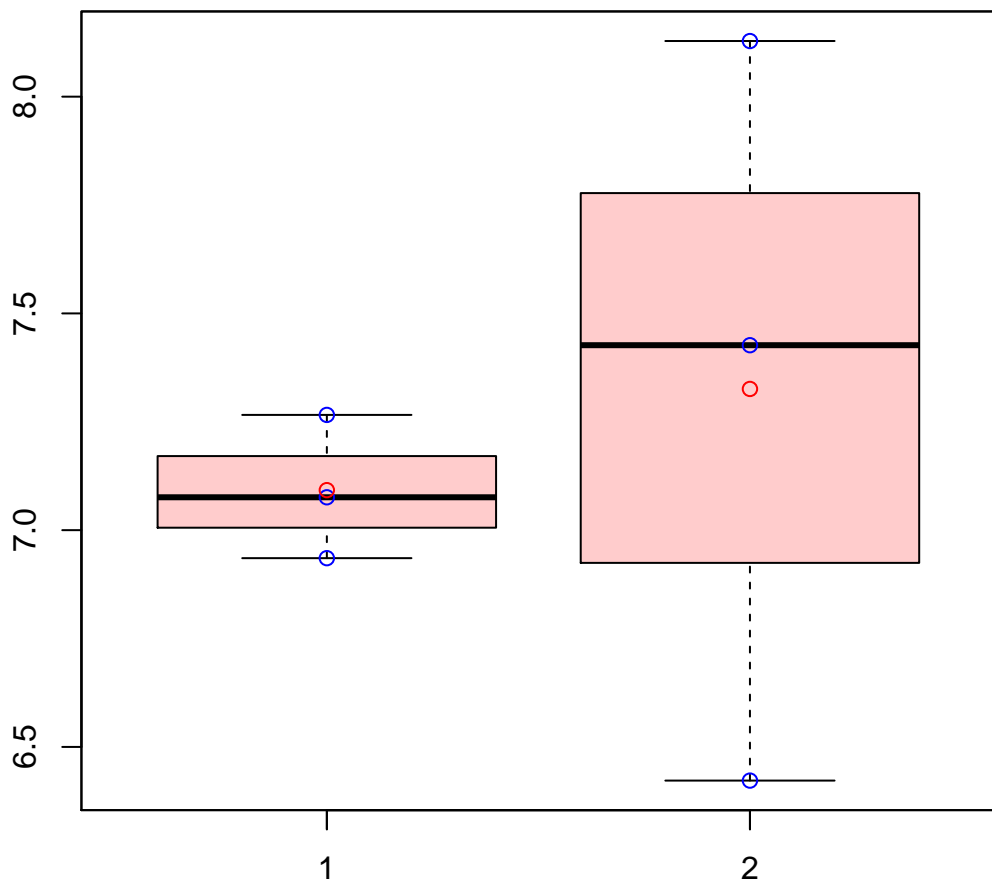

t-Test: p-value = 0.69

# I1P9K4|I1P9K4\_ORYGL

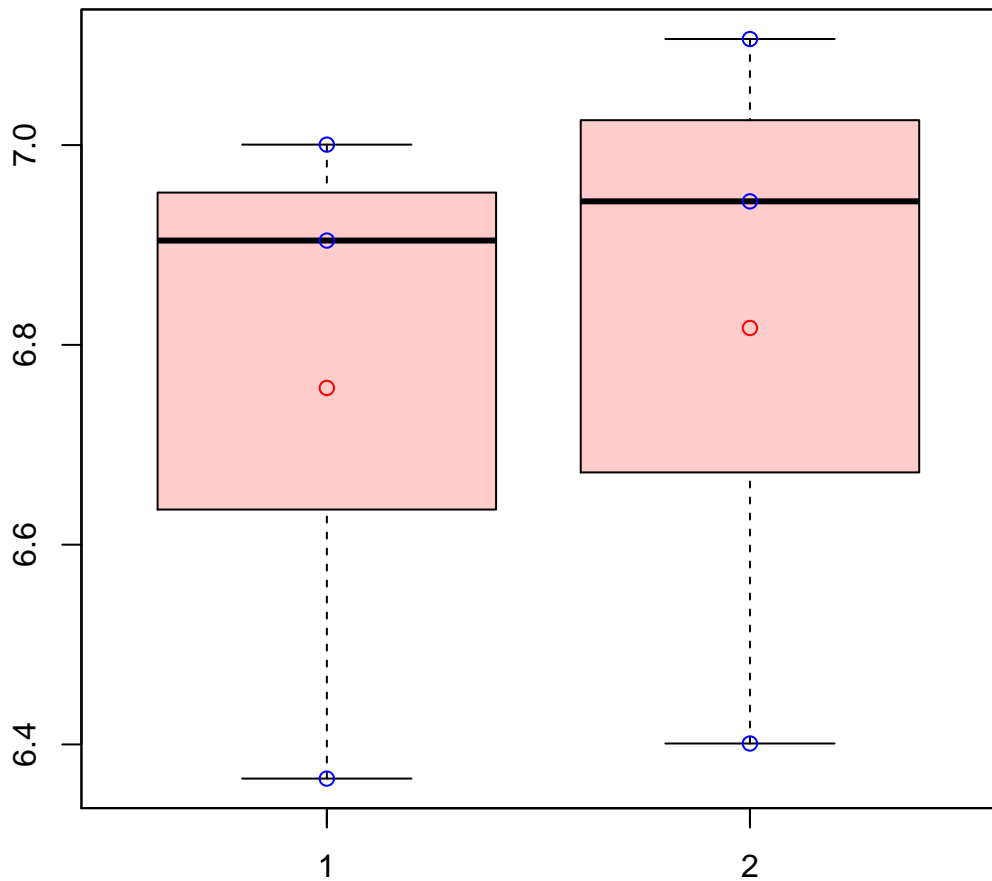

t-Test: p-value = 0.85

# I1P9K7|I1P9K7\_ORYGL

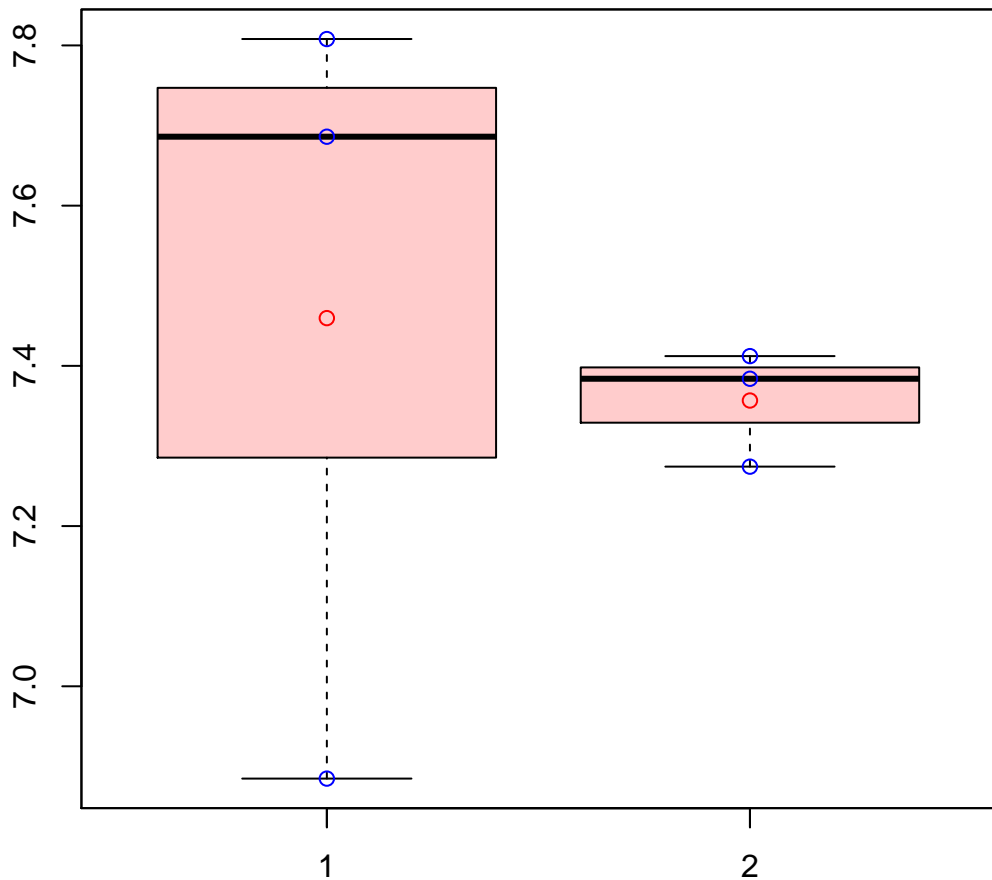

t-Test: p-value = 0.76

# I1PAZ6|I1PAZ6\_ORYGL

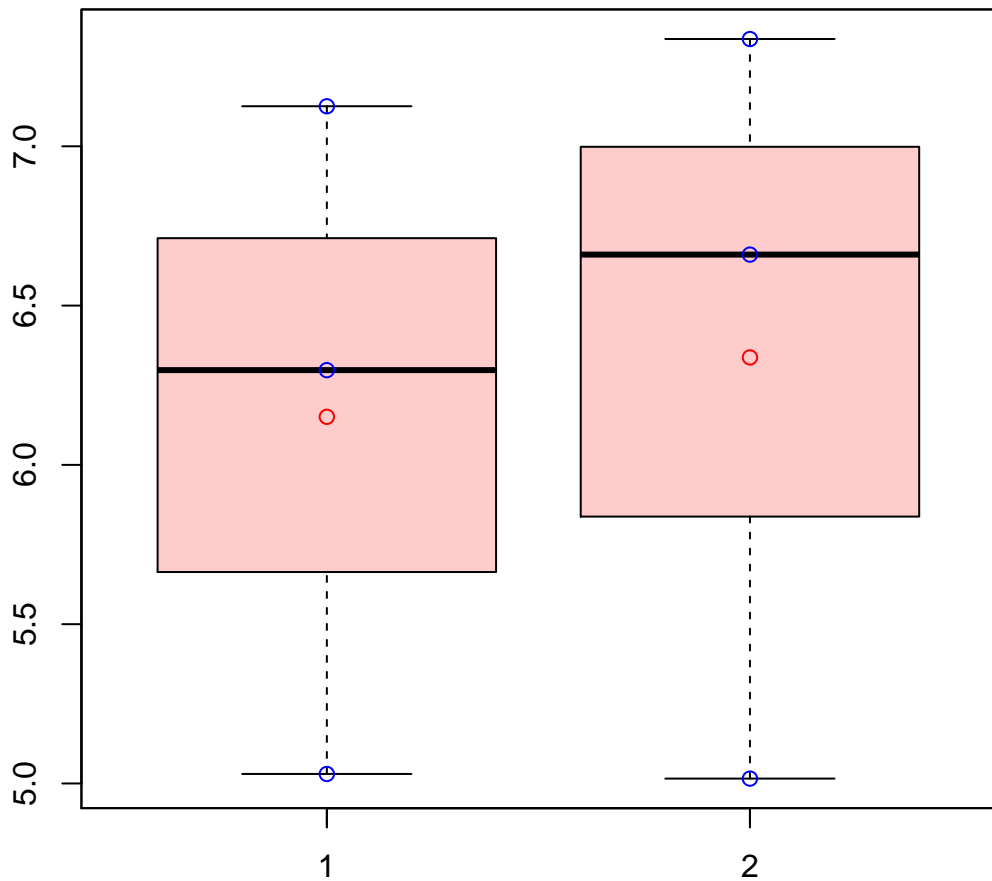

t-Test: p-value = 0.85

# I1PBF0|I1PBF0\_ORYGL

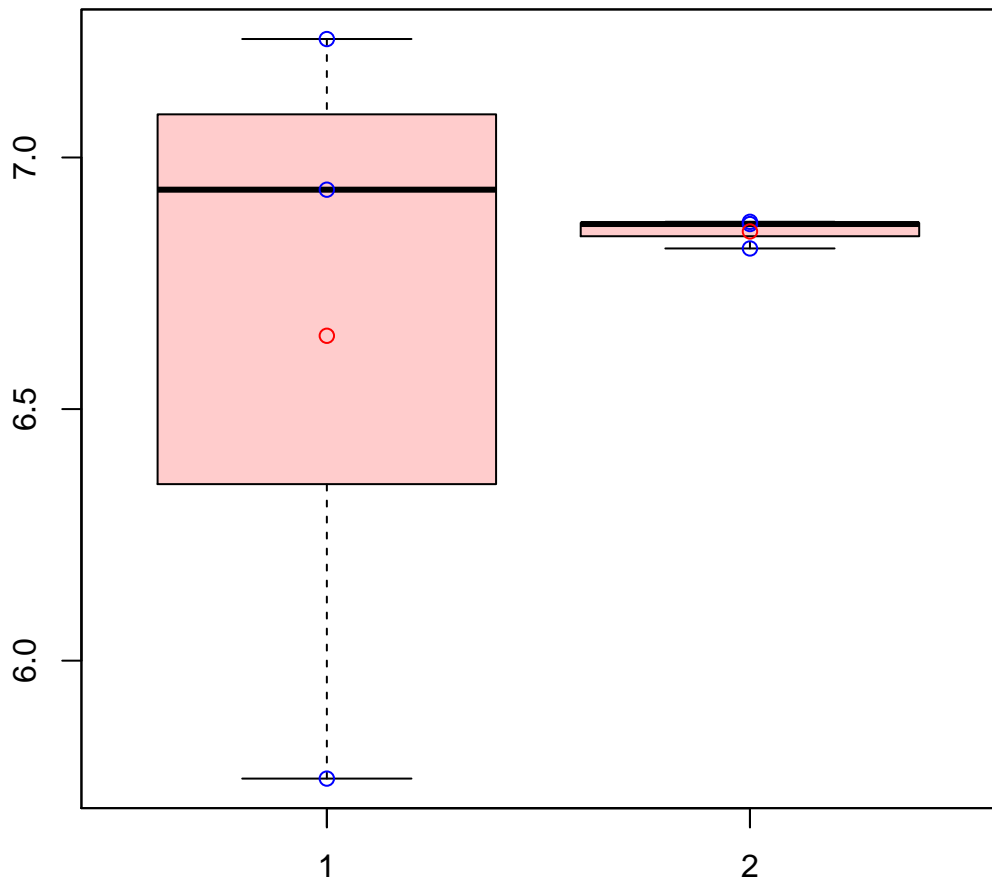

t-Test: p-value = 0.69

# I1PCJ8|I1PCJ8\_ORYGL

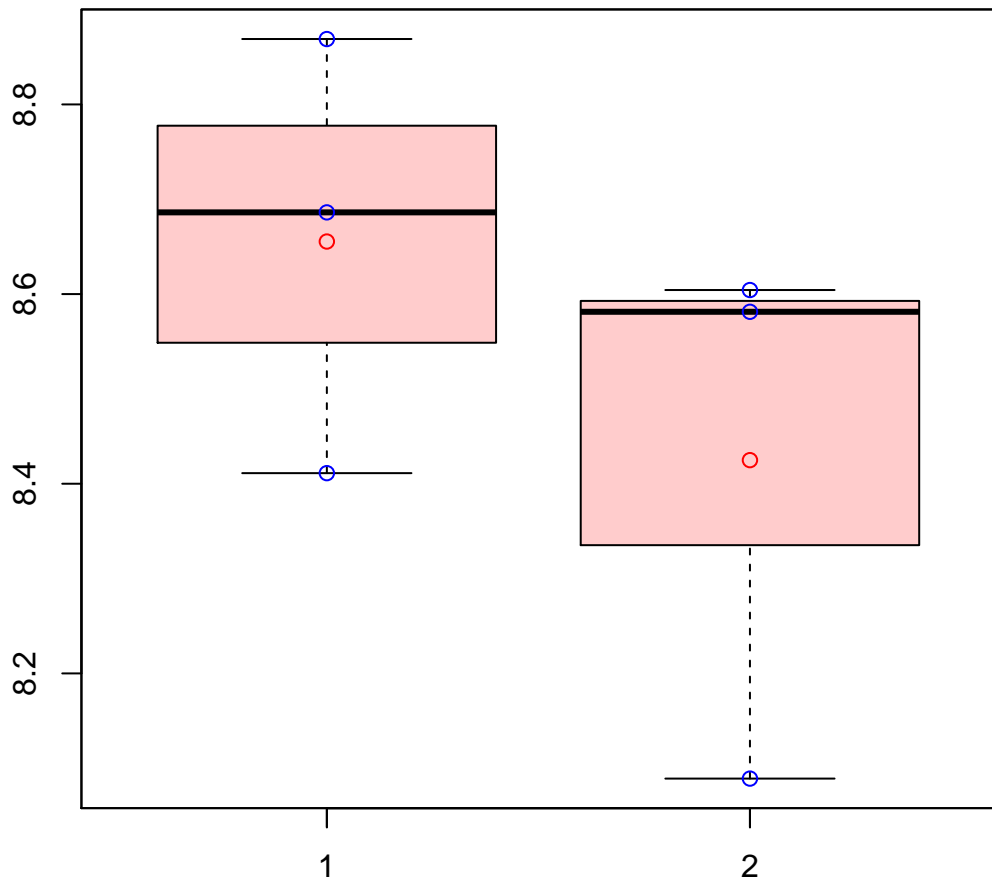

t-Test: p-value = 0.35

# I1PCX2|I1PCX2\_ORYGL

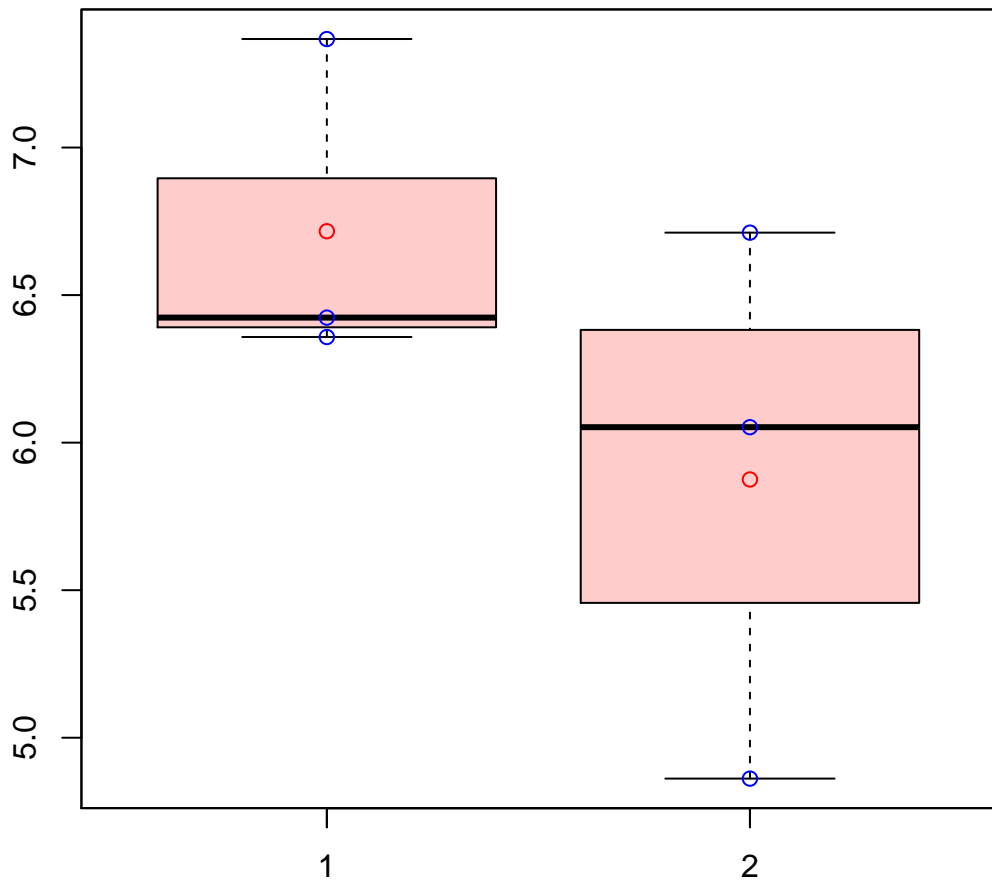

t-Test: p-value = 0.27

# I1PDS2|I1PDS2\_ORYGL

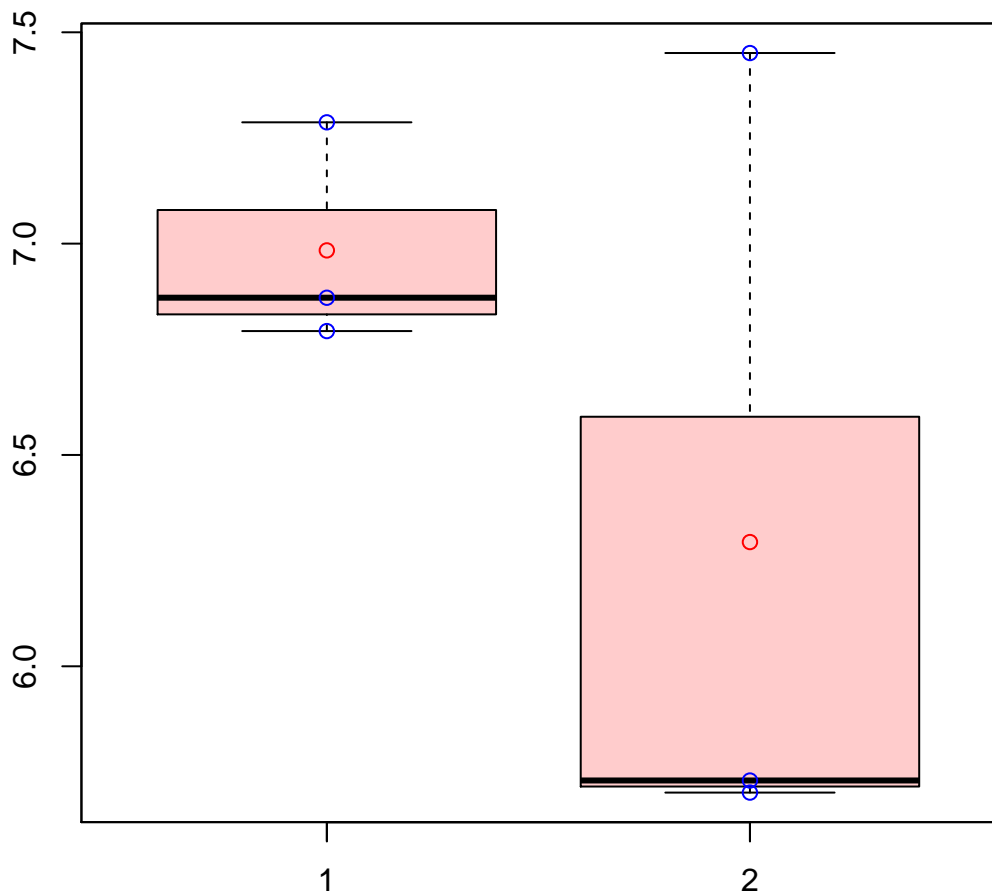

t-Test: p-value = 0.36



# I1PEK4|I1PEK4\_ORYGL

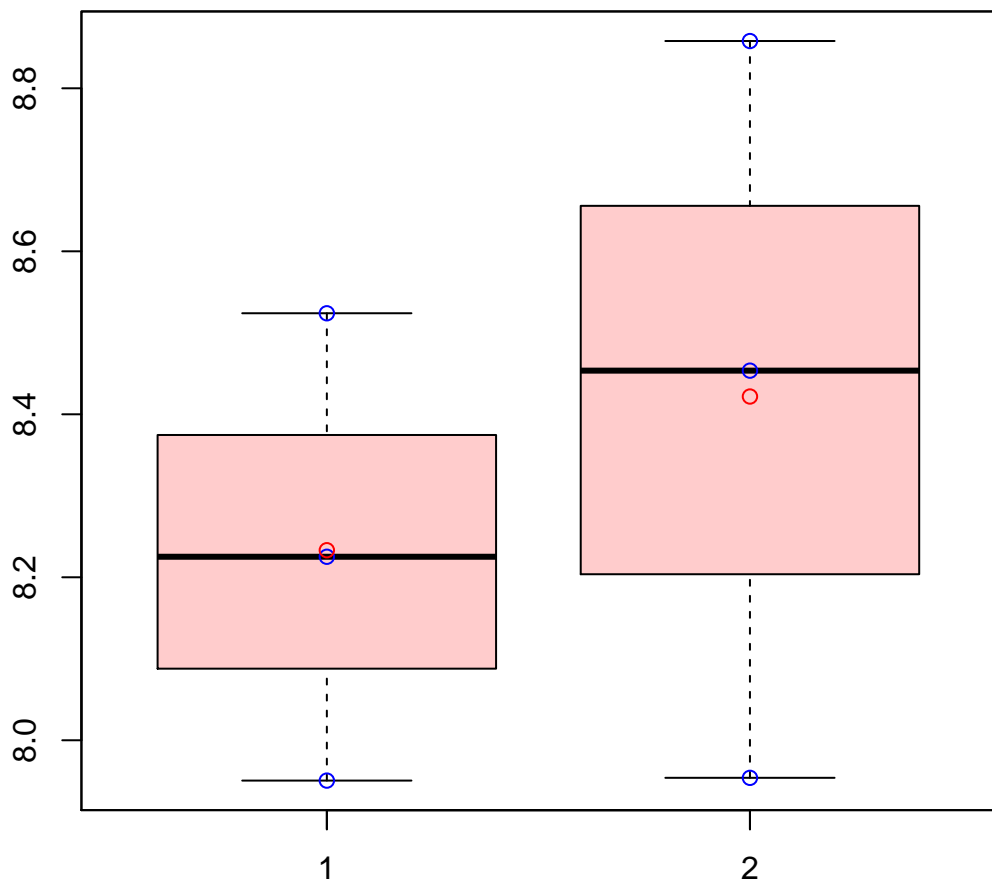

t-Test: p-value = 0.58

# I1PF60|I1PF60\_ORYGL

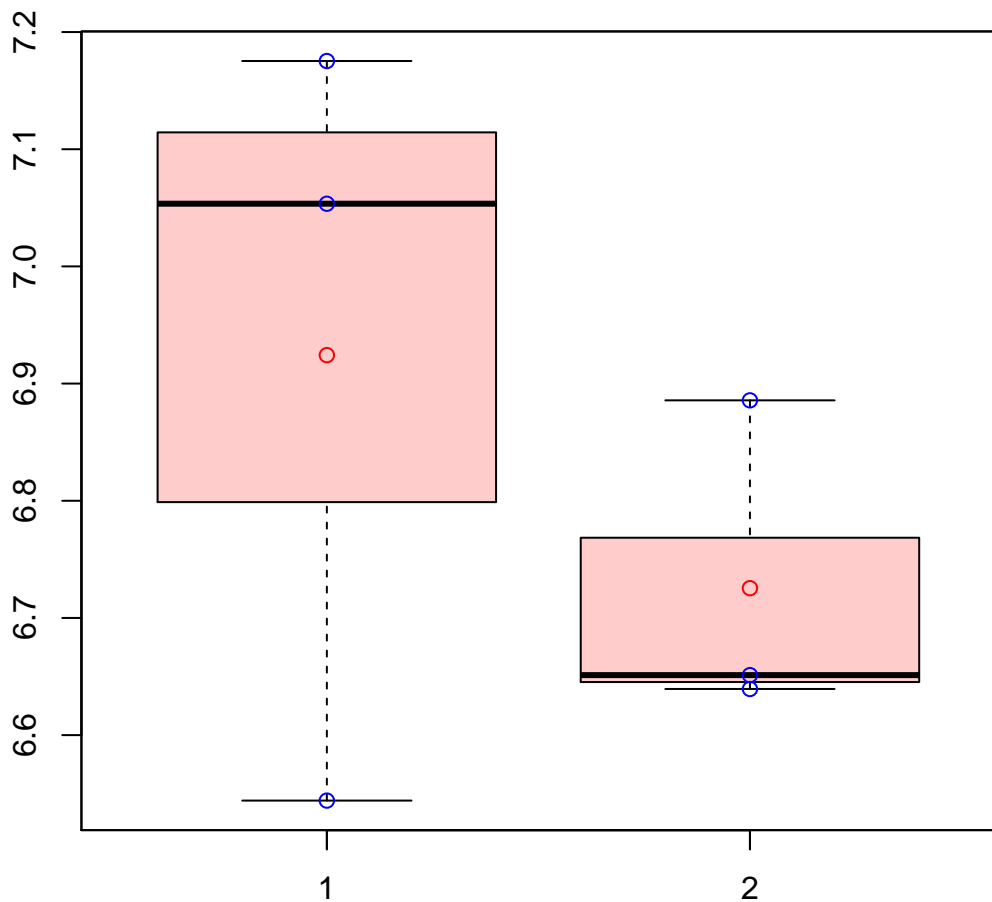

t-Test: p-value = 0.42

# I1PFC8|I1PFC8\_ORYGL

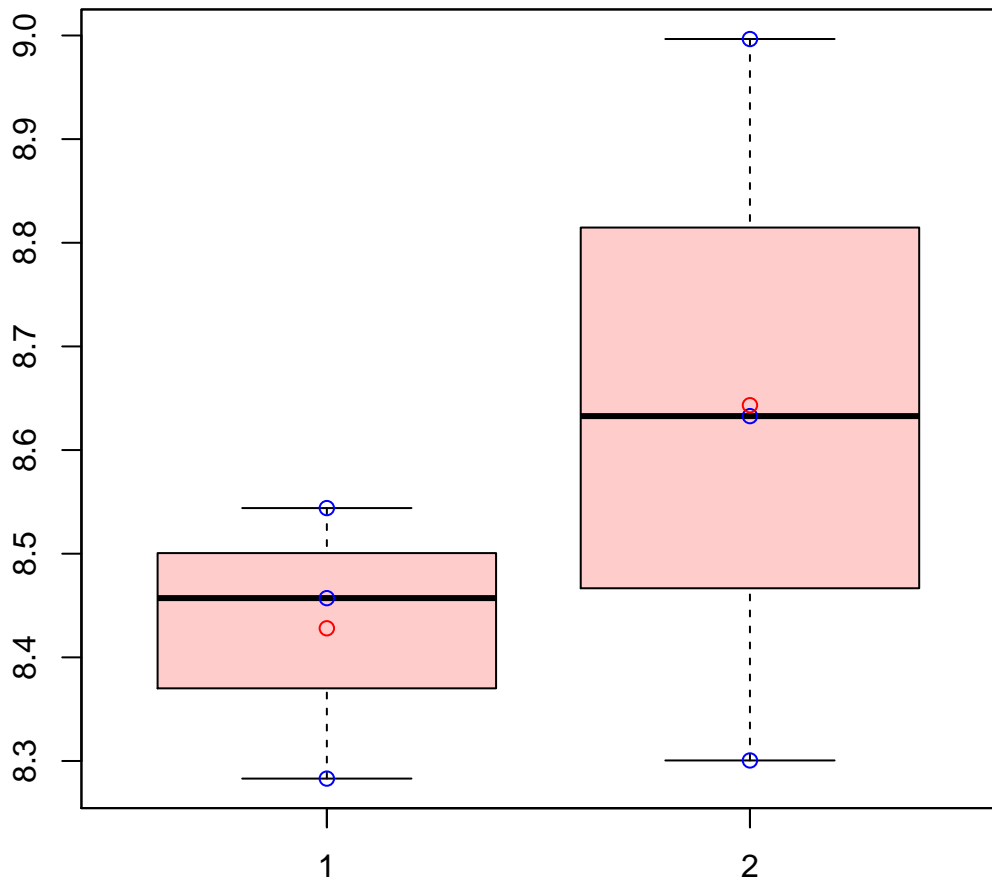

t-Test: p-value = 0.4

# I1PFR1||I1PFR1\_ORYGL

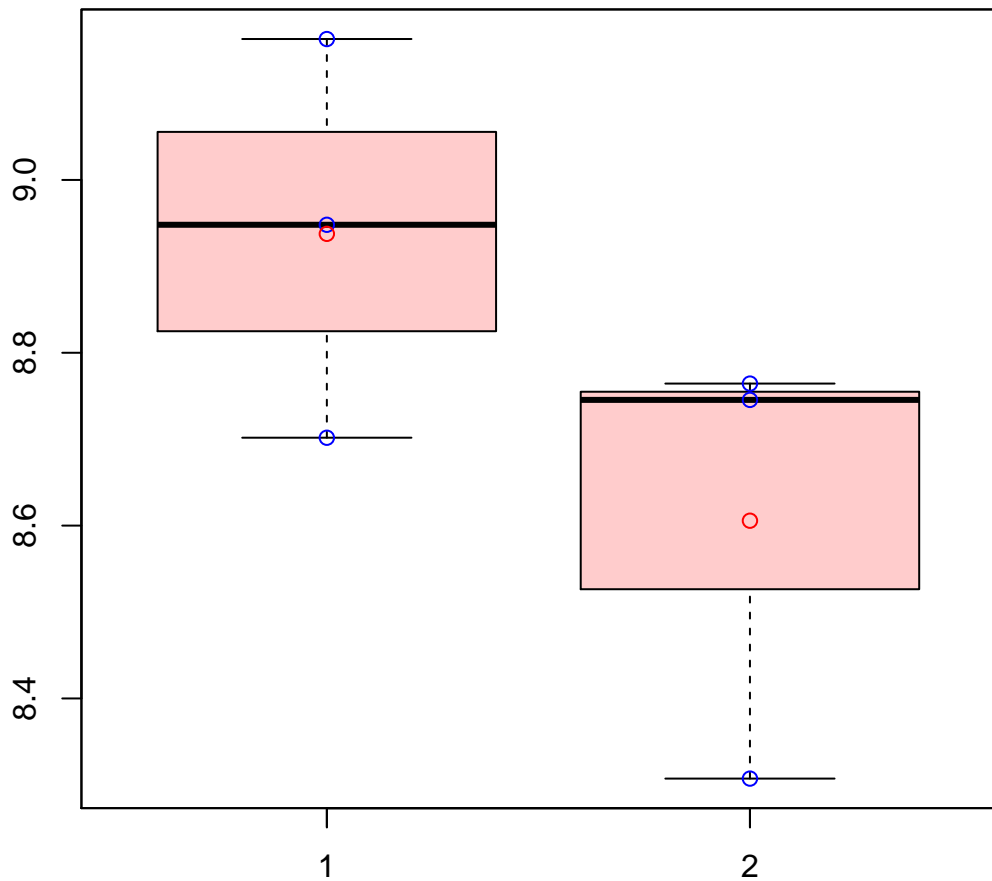

t-Test: p-value = 0.17

# I1PGJ3|I1PGJ3\_ORYGL

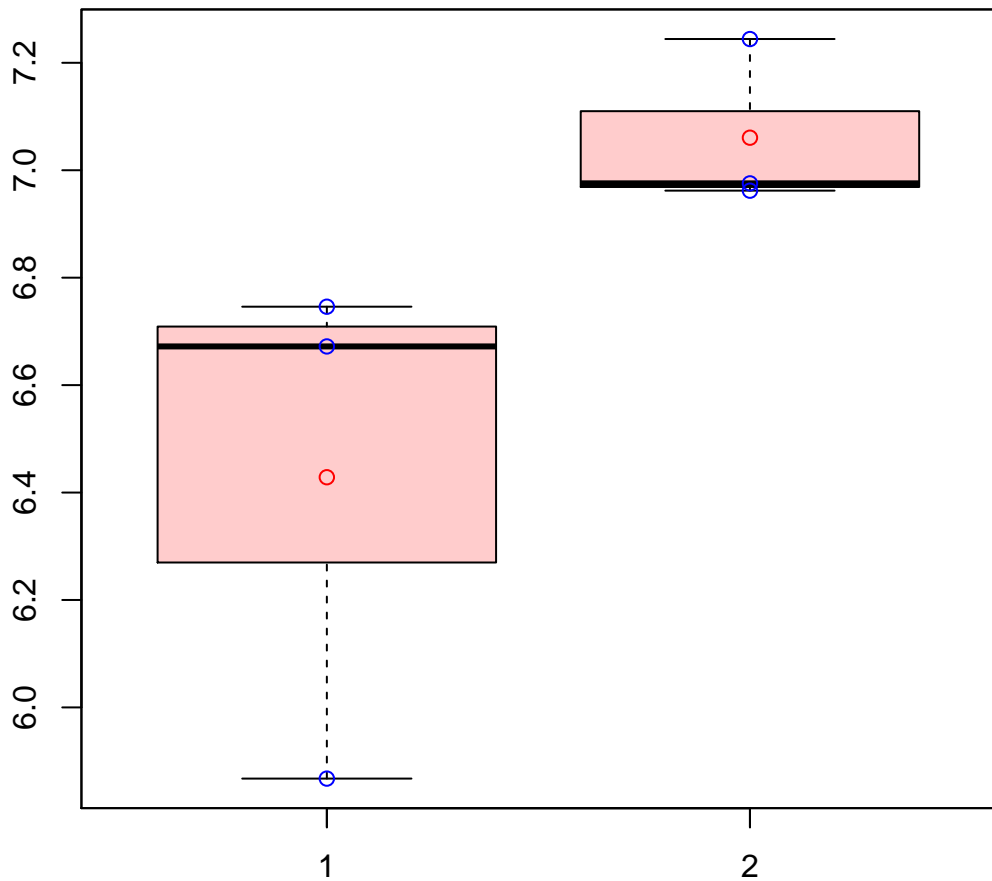

t-Test: p-value = 0.14

# I1PGT2|I1PGT2\_ORYGL

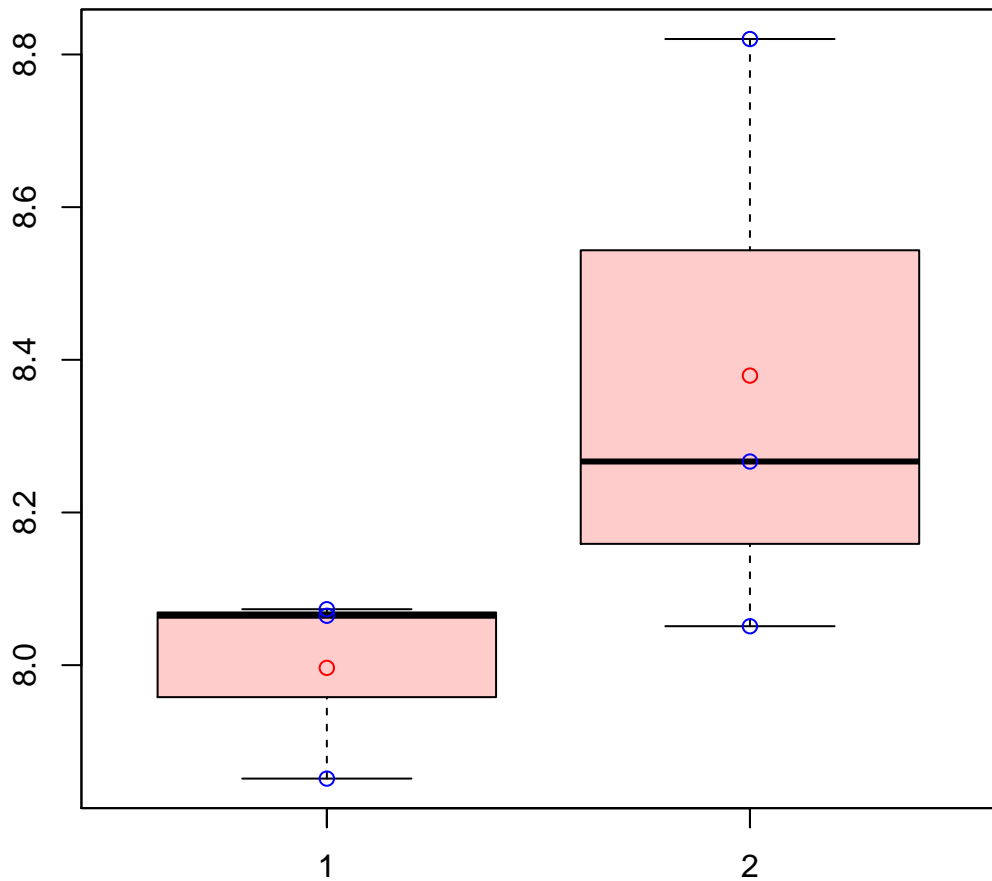

t-Test: p-value = 0.23

# I1PIC0|I1PIC0\_ORYGL

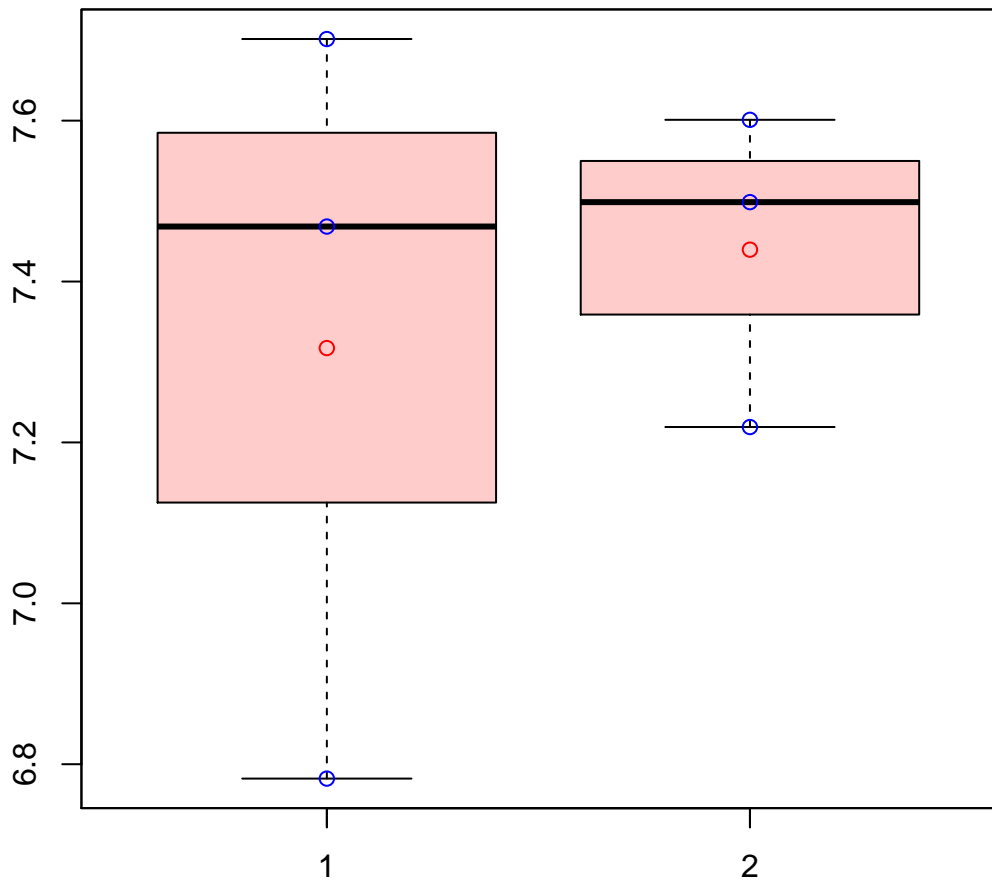

t-Test: p-value = 0.71

# I1PJ02|I1PJ02\_ORYGL

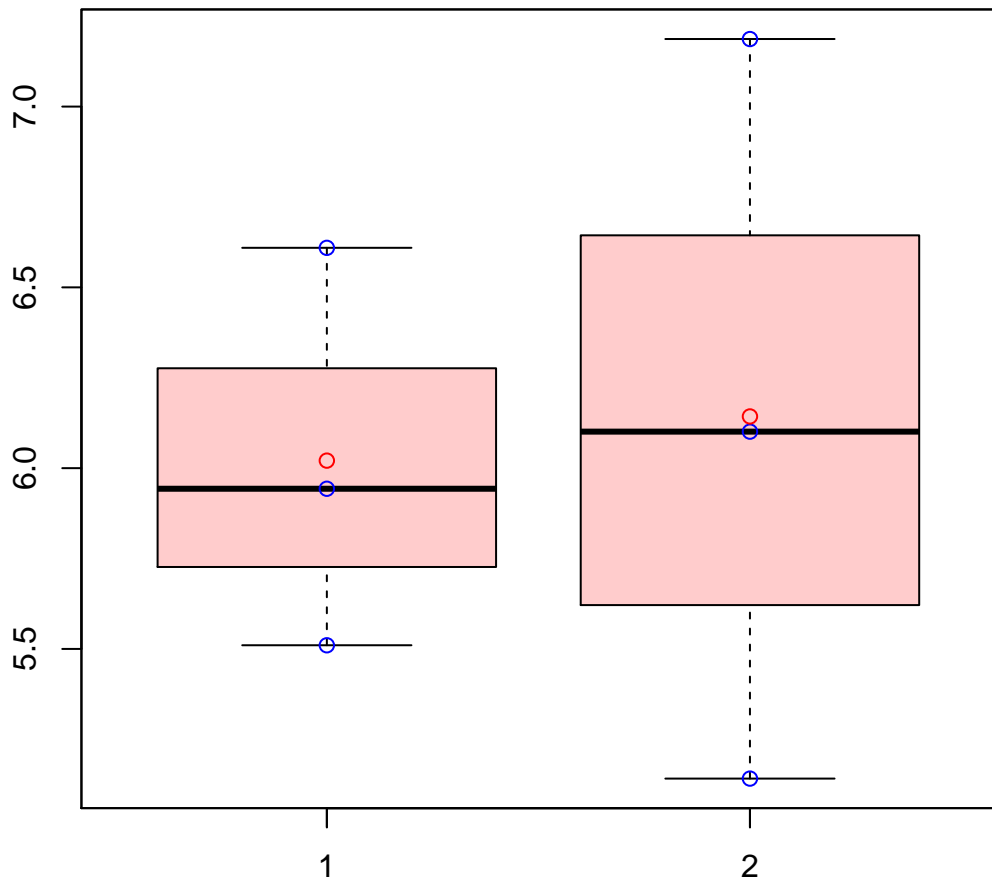

t-Test: p-value = 0.87



# I1PJ45|I1PJ45\_ORYGL

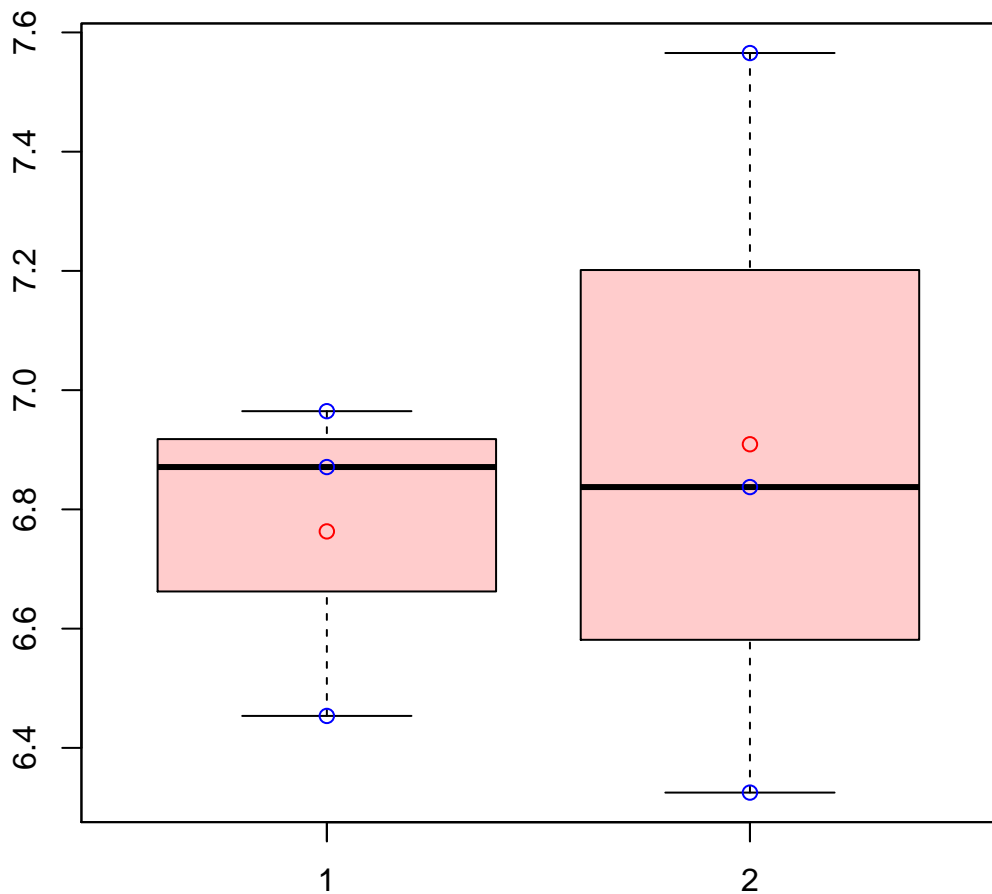

t-Test: p-value = 0.74

# I1PK82|I1PK82\_ORYGL

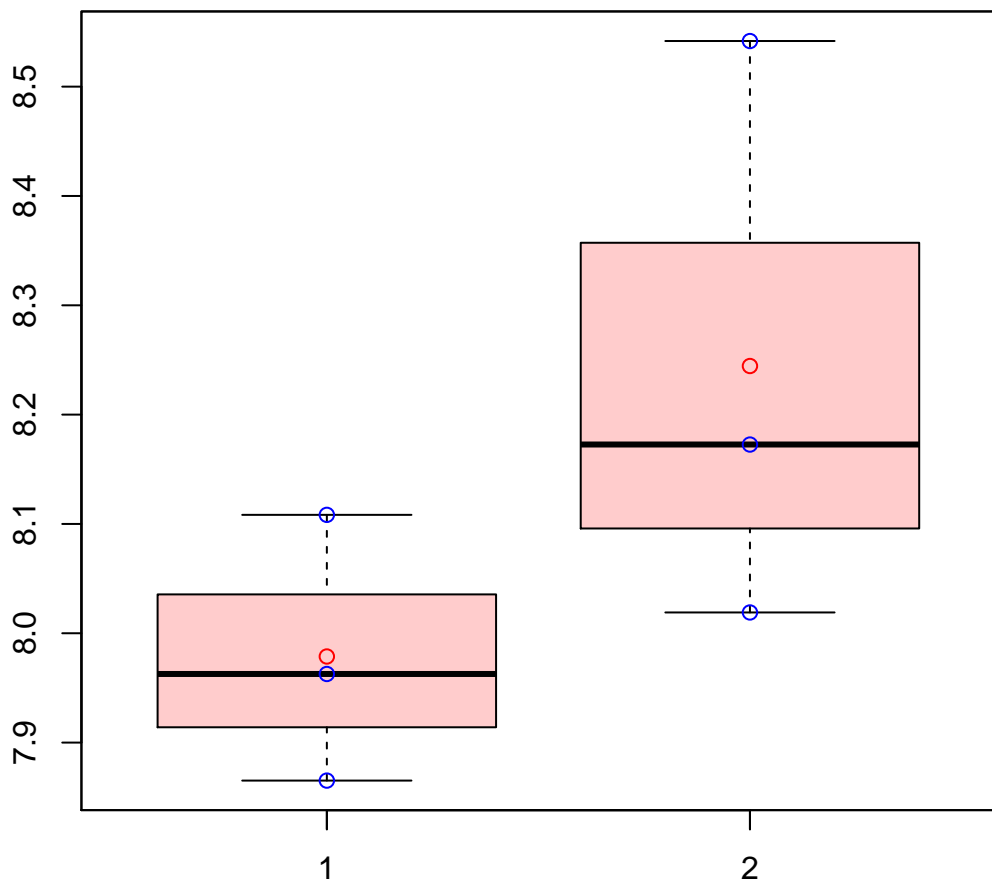

t-Test: p-value = 0.22

# I1PKA4|I1PKA4\_ORYGL

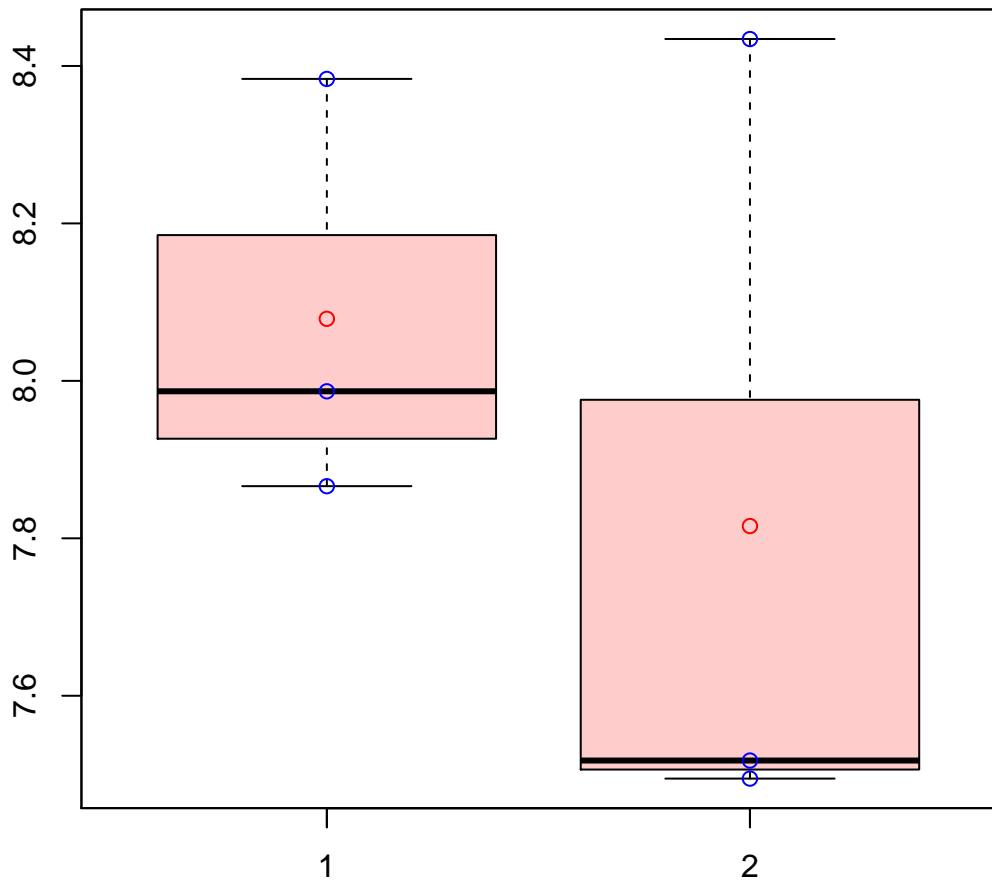

t-Test: p-value = 0.5

# I1PLF5|I1PLF5\_ORYGL

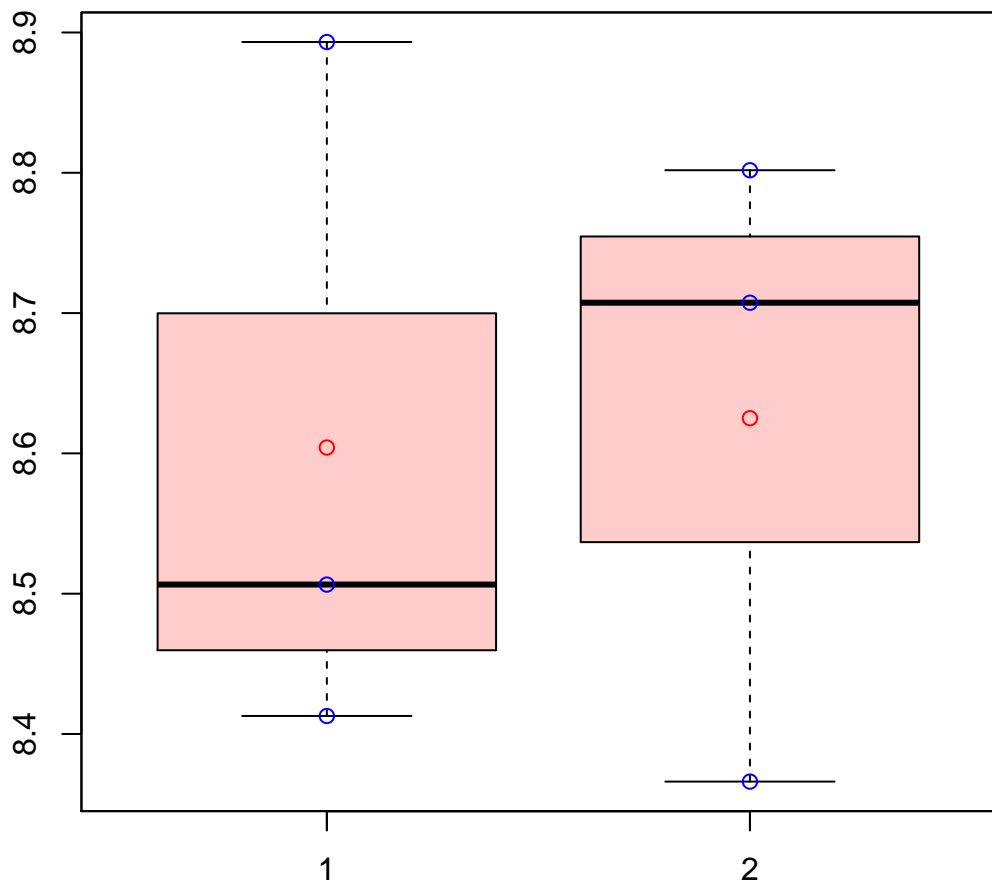

t-Test: p-value = 0.92

# I1PLG0|I1PLG0\_ORYGL

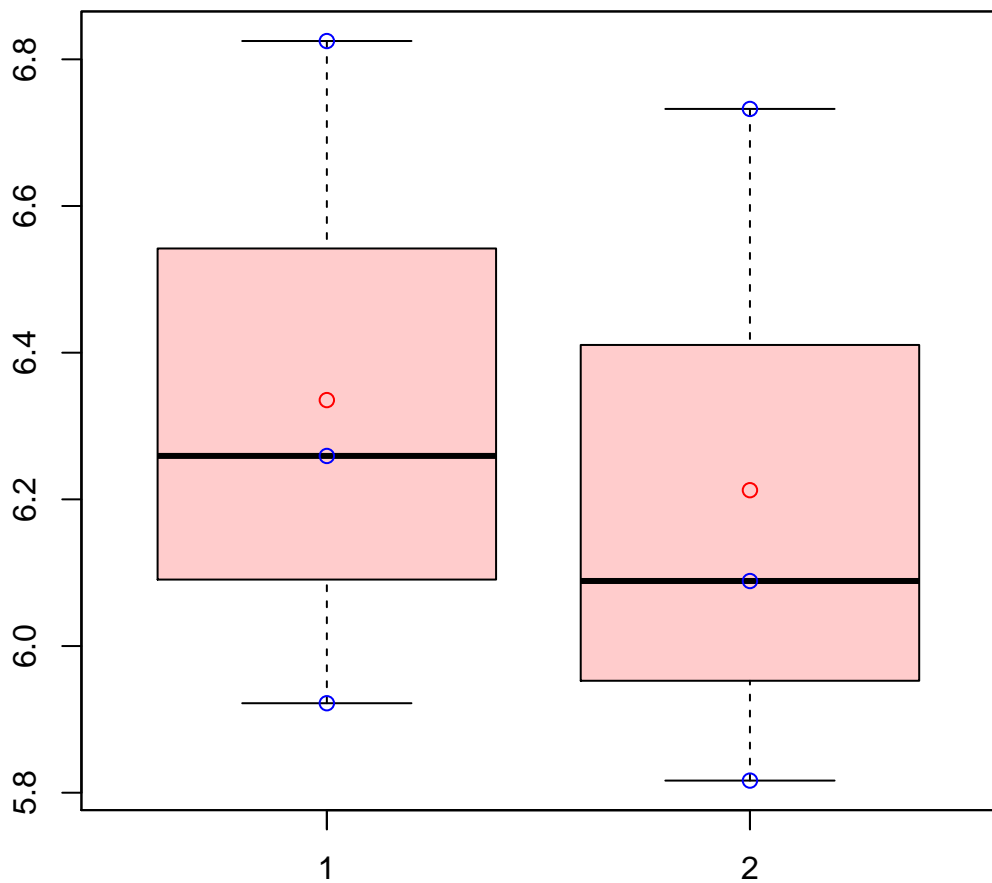

t-Test: p-value = 0.76

# I1PLP9|I1PLP9\_ORYGL

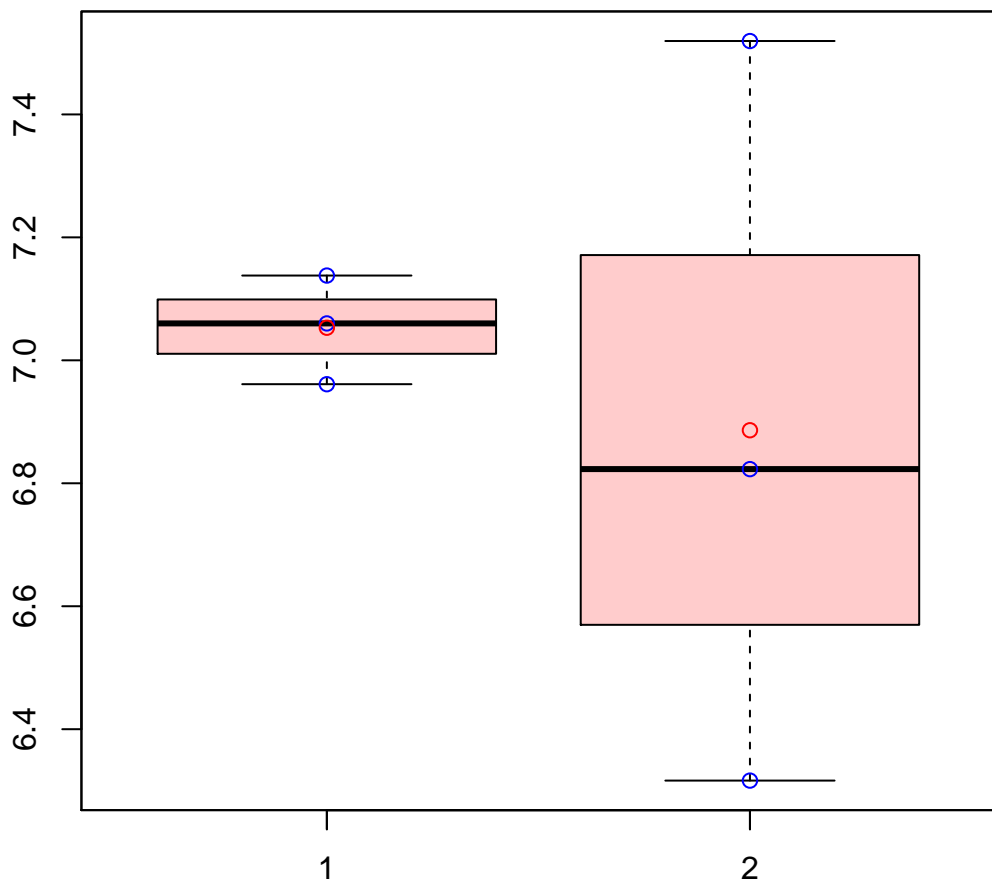

t-Test: p-value = 0.68

# I1PLW8|I1PLW8\_ORYGL

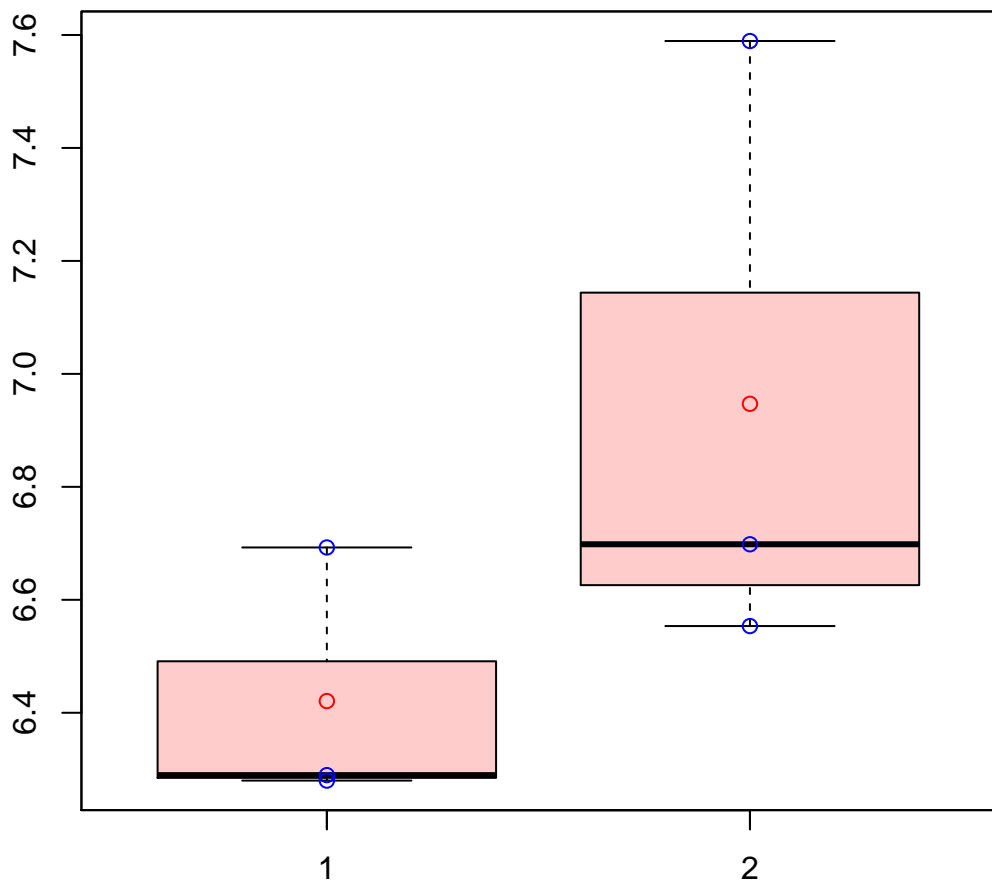

t-Test: p-value = 0.24

# I1PM02|I1PM02\_ORYGL

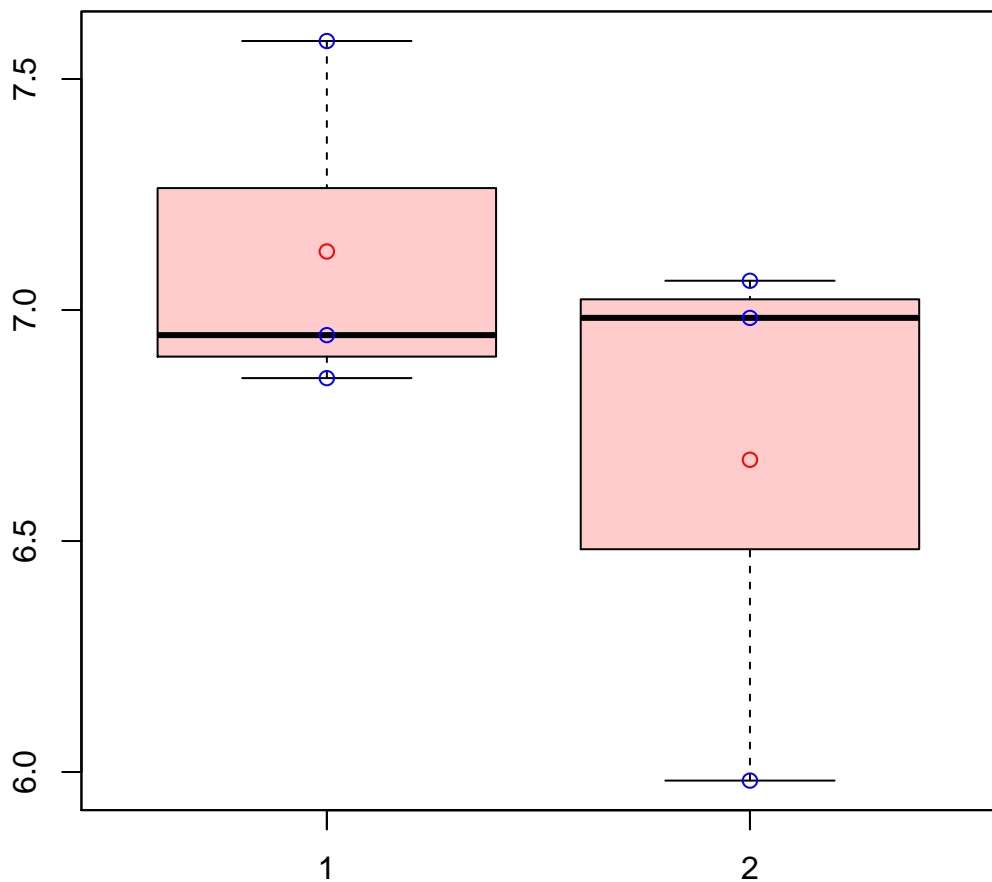

t-Test: p-value = 0.35



# I1PML1|I1PML1\_ORYGL

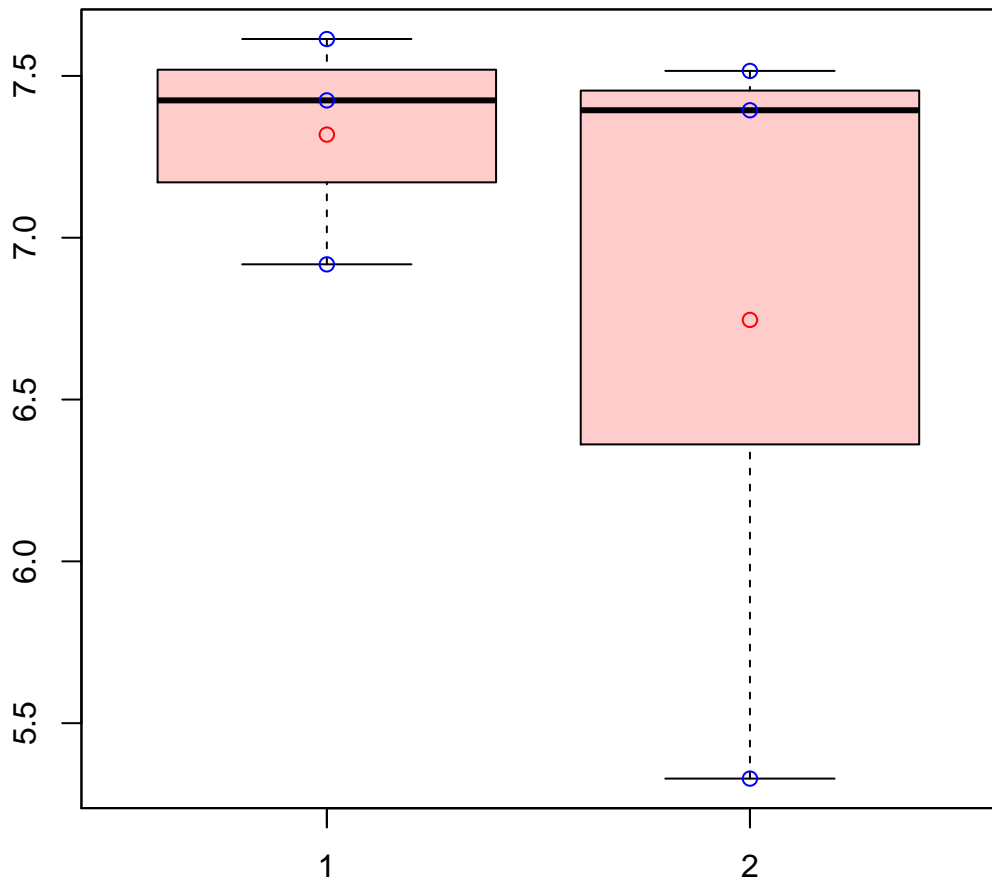

t-Test: p-value = 0.51

# I1PPD4|I1PPD4\_ORYGL

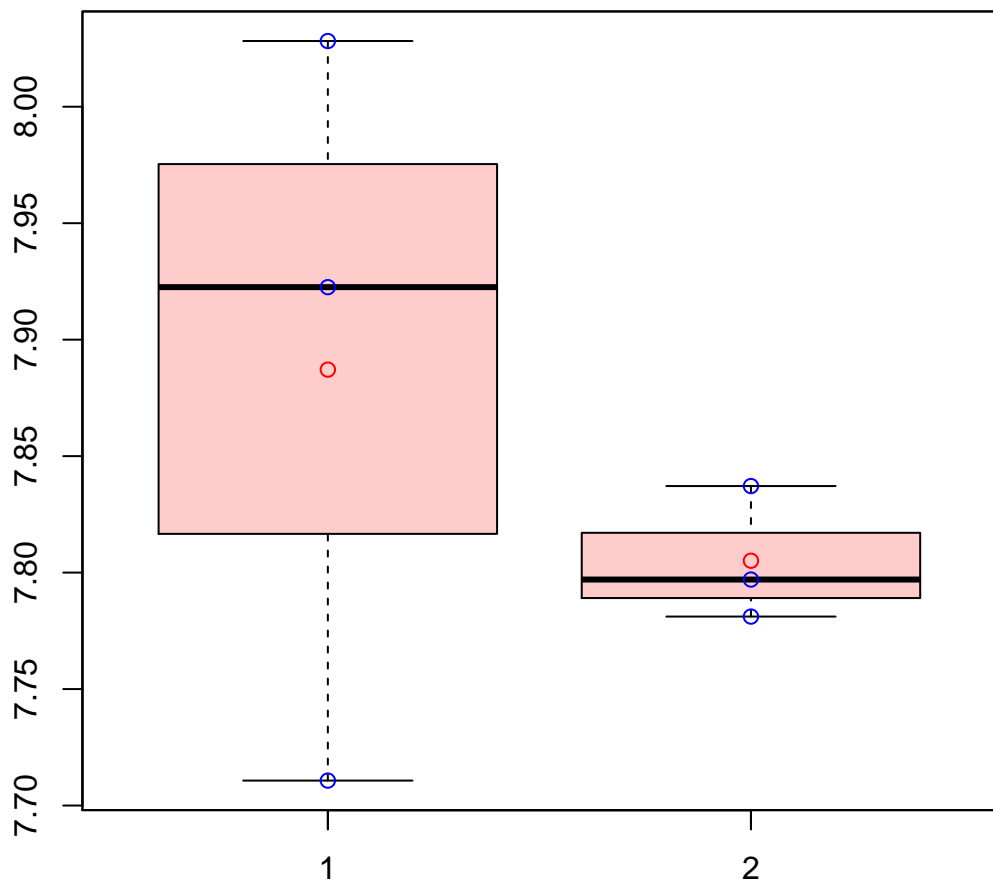

t-Test: p-value = 0.47

# I1PPD5|I1PPD5\_ORYGL

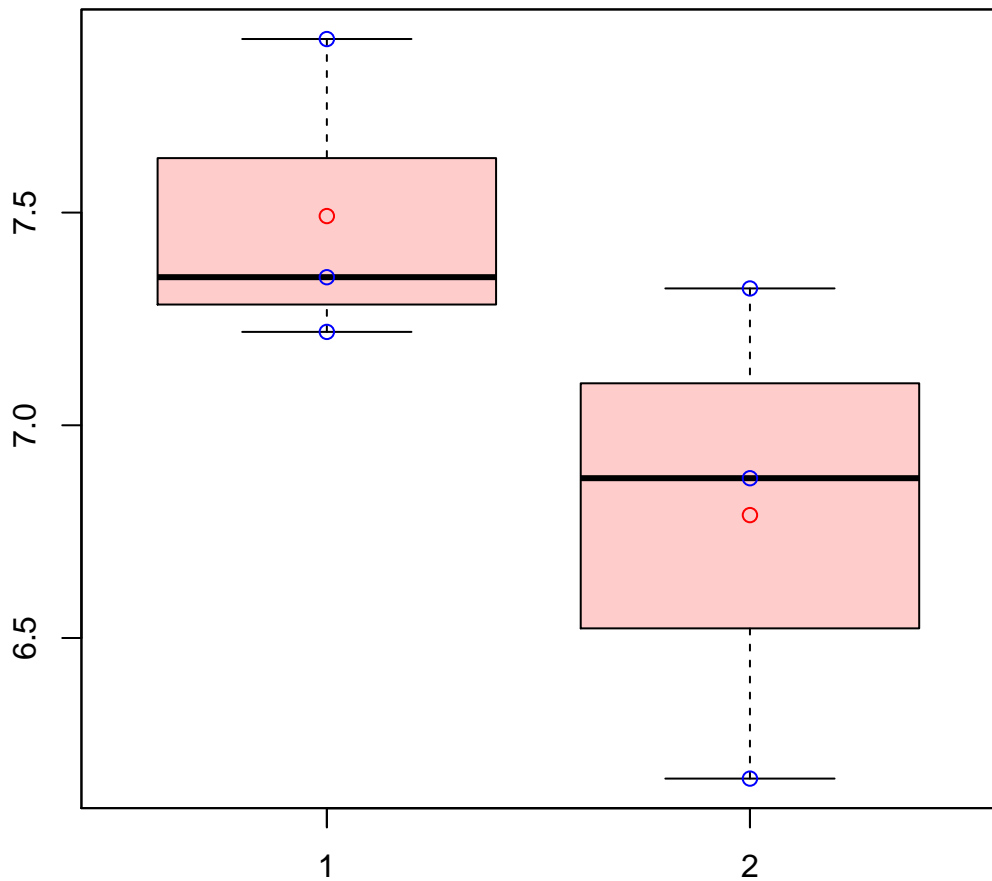

t-Test: p-value = 0.16

# I1PQB7|I1PQB7\_ORYGL

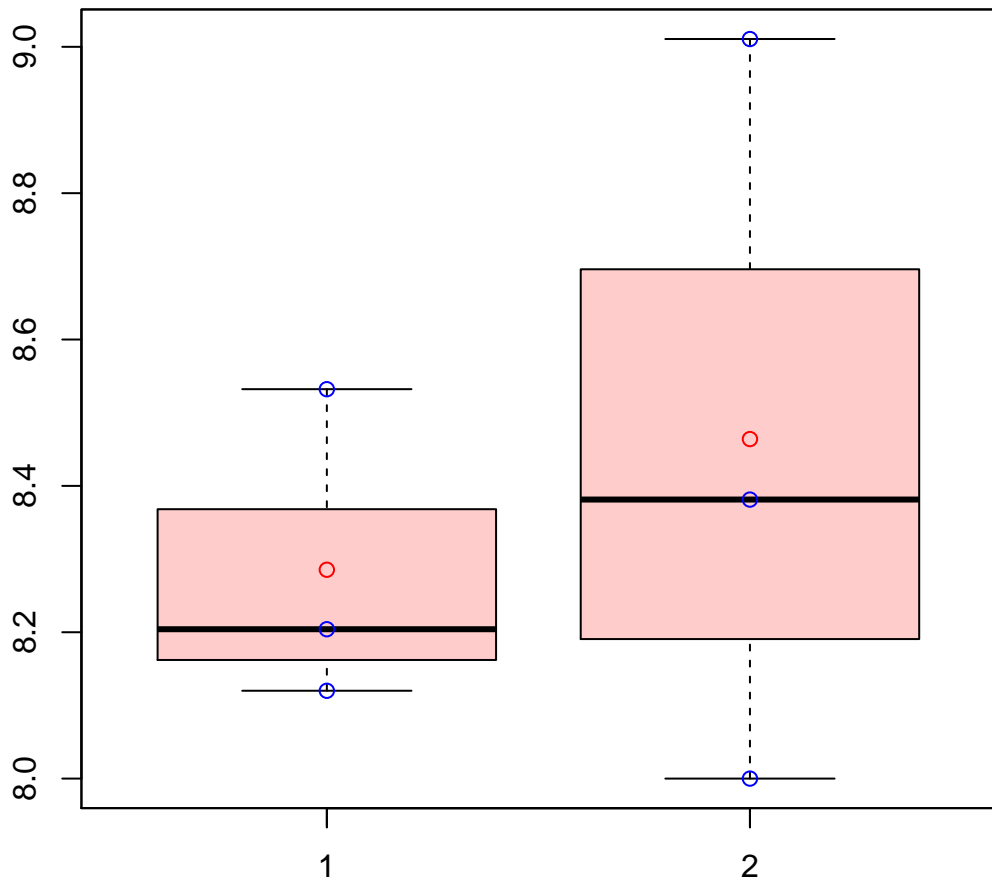

t-Test: p-value = 0.62

# I1PR89|I1PR89\_ORYGL

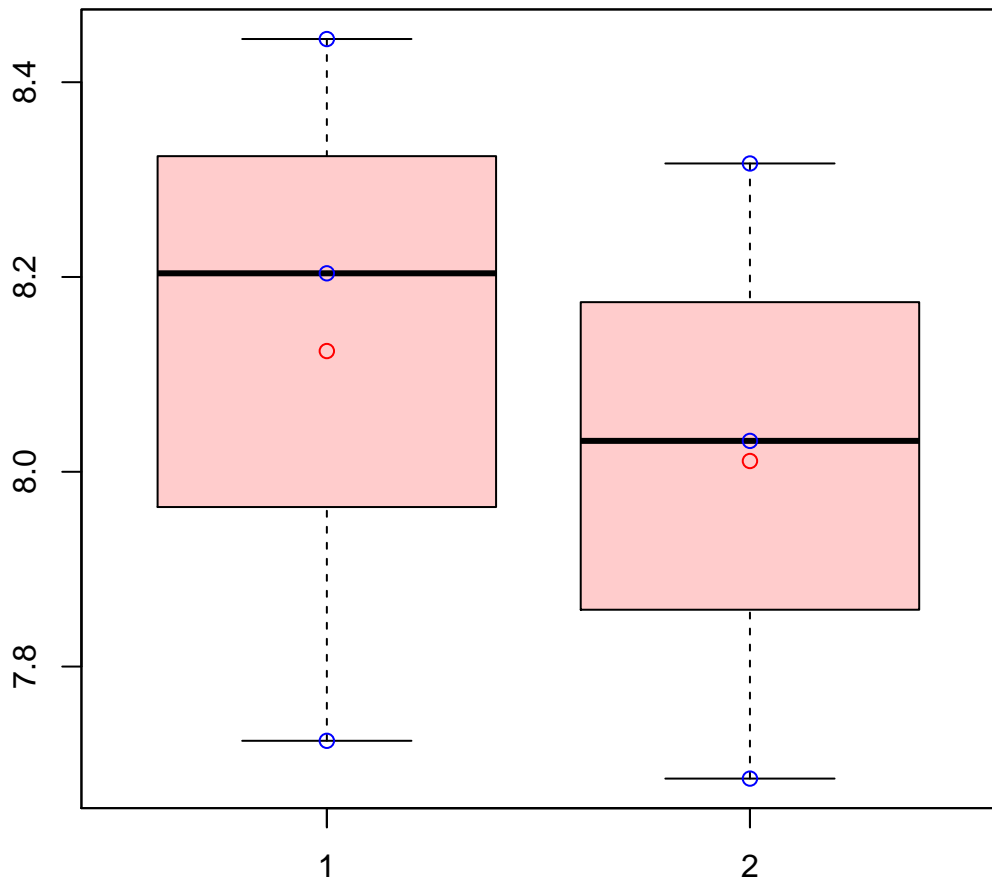

t-Test: p-value = 0.71

# I1PU52|I1PU52\_ORYGL

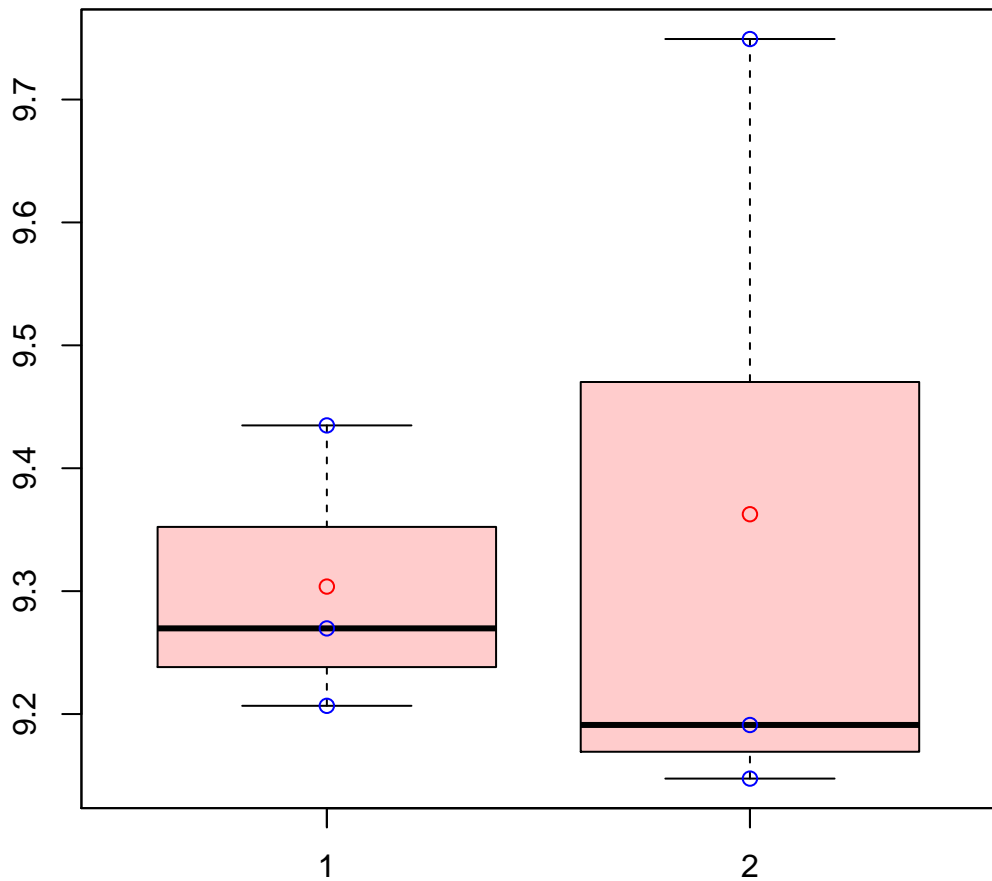

t-Test: p-value = 0.8

# I1PWC2|I1PWC2\_ORYGL

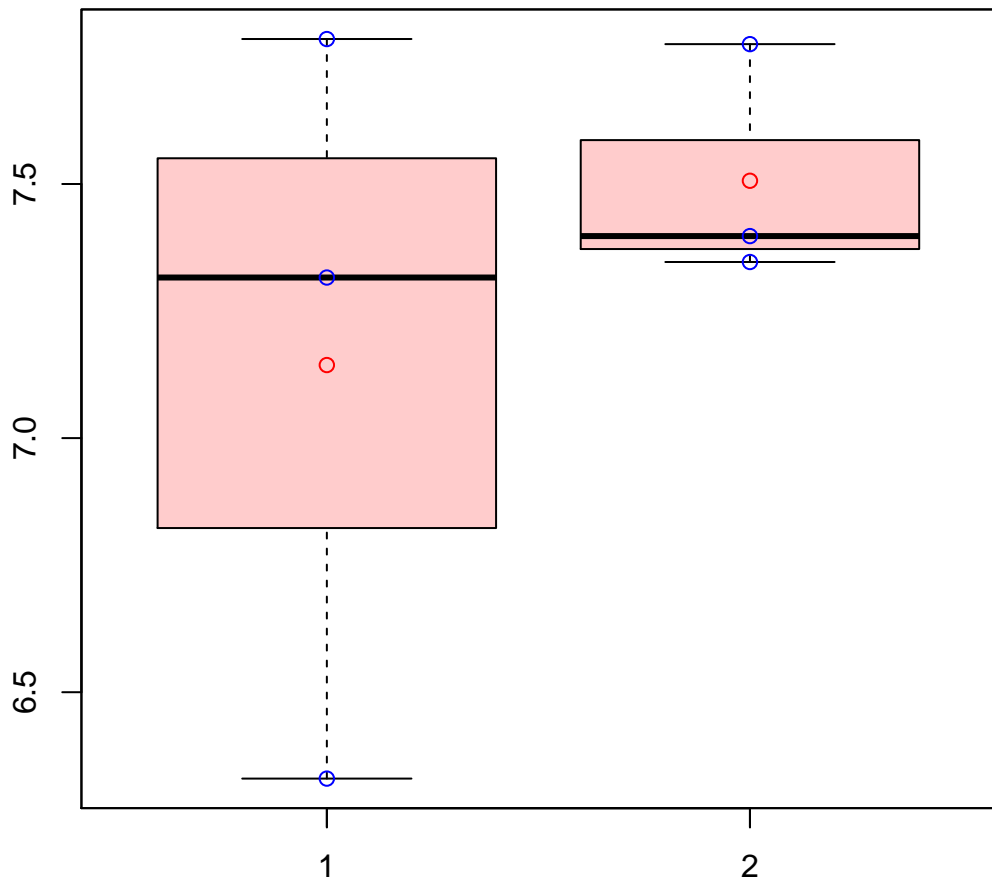

t-Test: p-value = 0.49

# I1PWN0|I1PWN0\_ORYGL

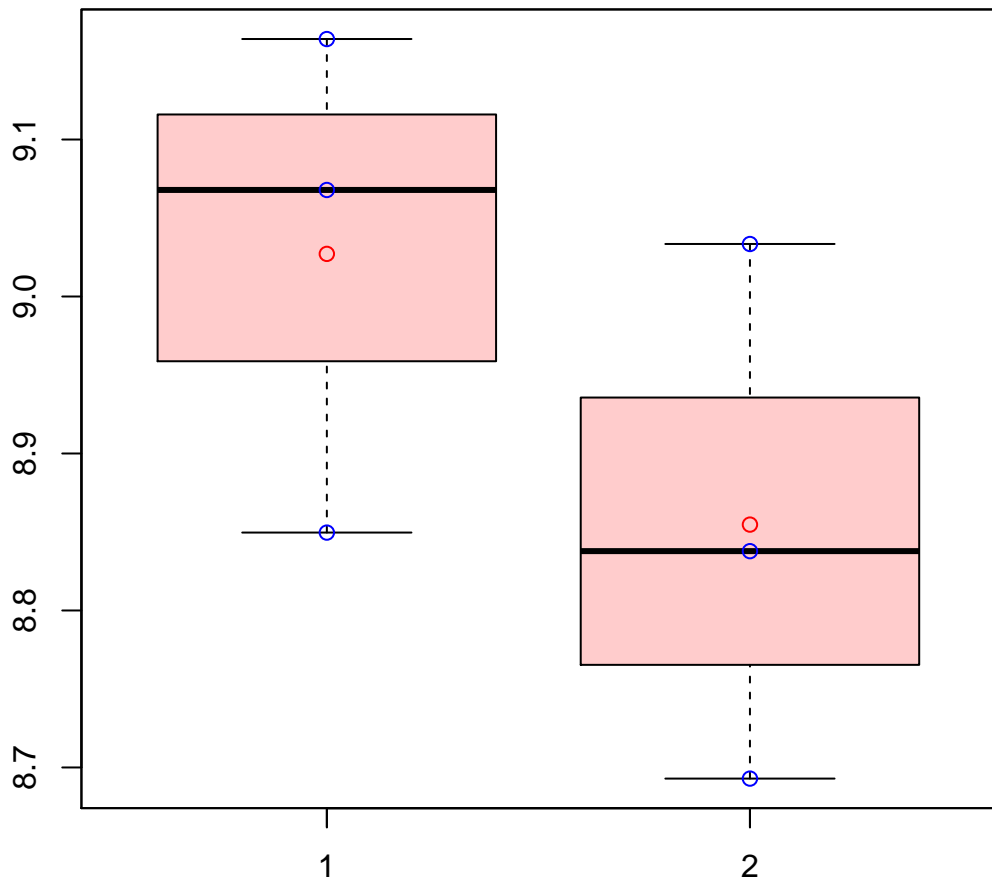

t-Test: p-value = 0.27



# I1PWQ2|I1PWQ2\_ORYGL

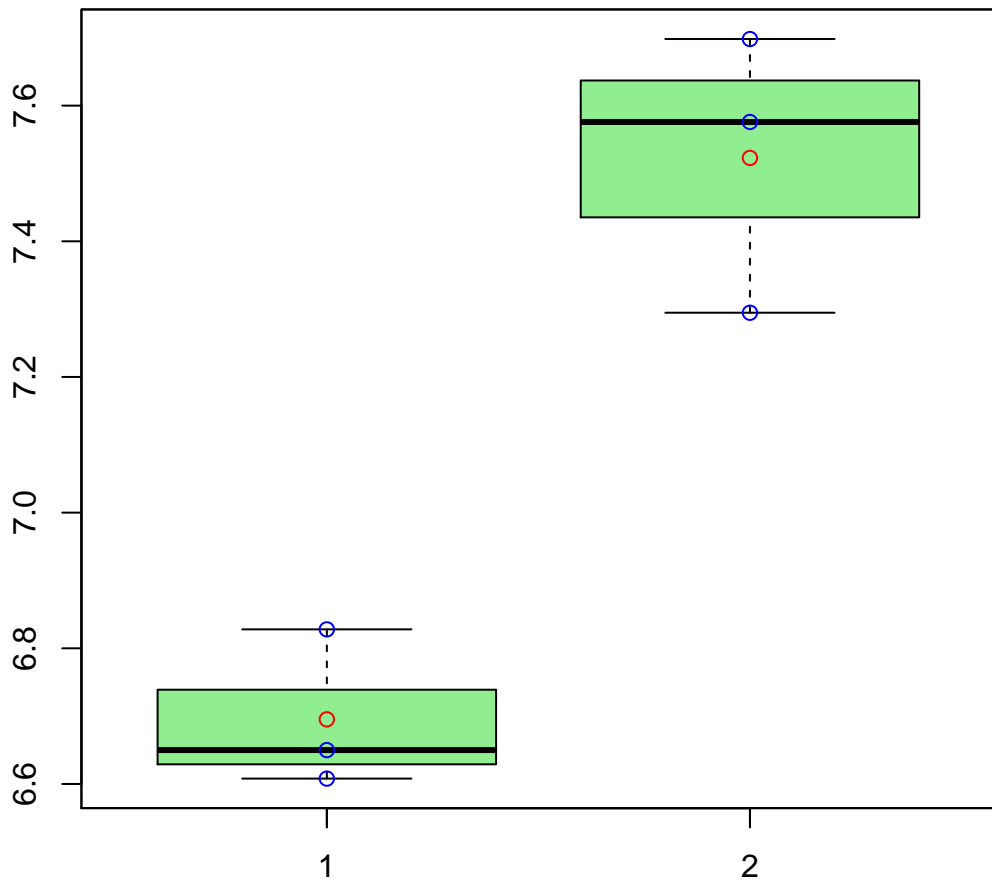

t-Test: p-value = 0.01

# I1PXN2|I1PXN2\_ORYGL

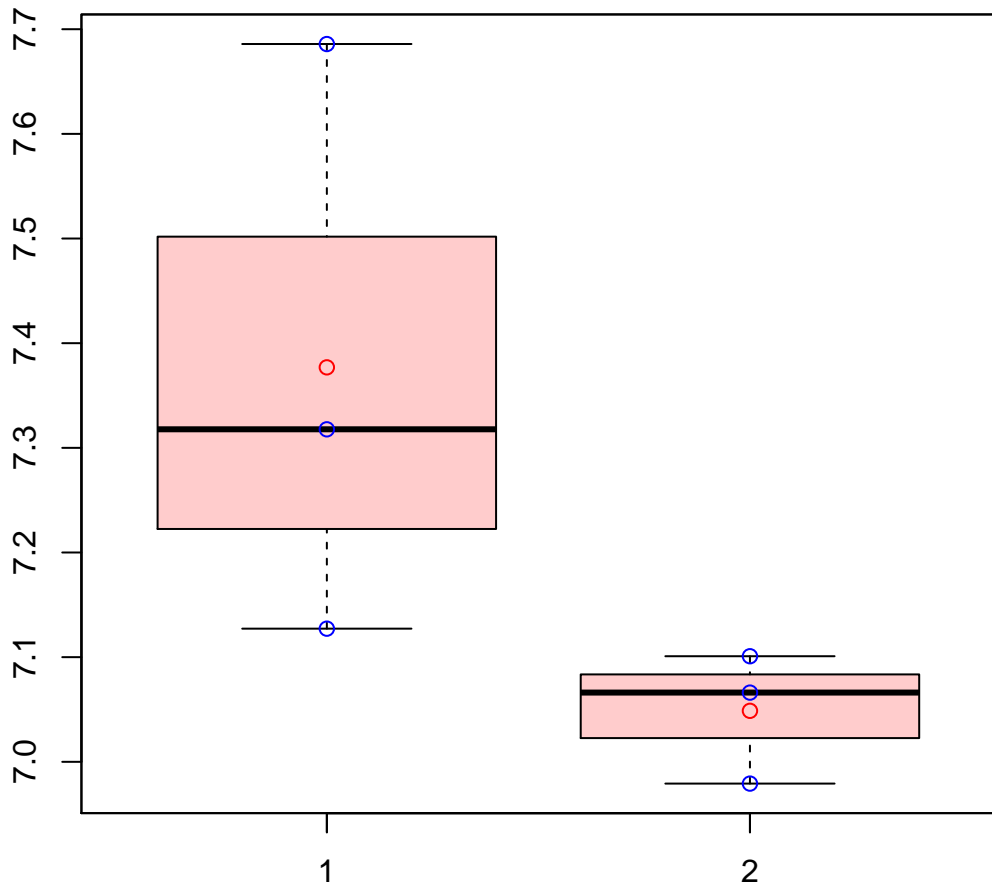

t-Test: p-value = 0.18

# I1PYI1|I1PYI1\_ORYGL

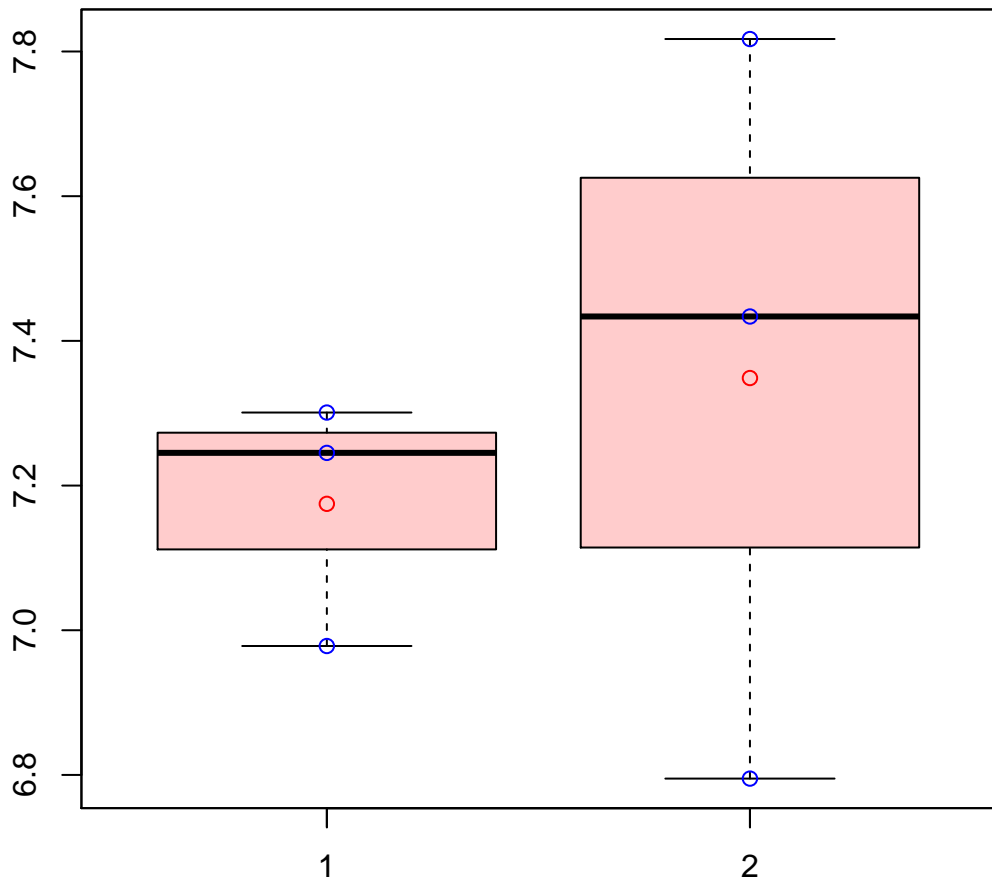

t-Test: p-value = 0.63

# I1PYX0|I1PYX0\_ORYGL

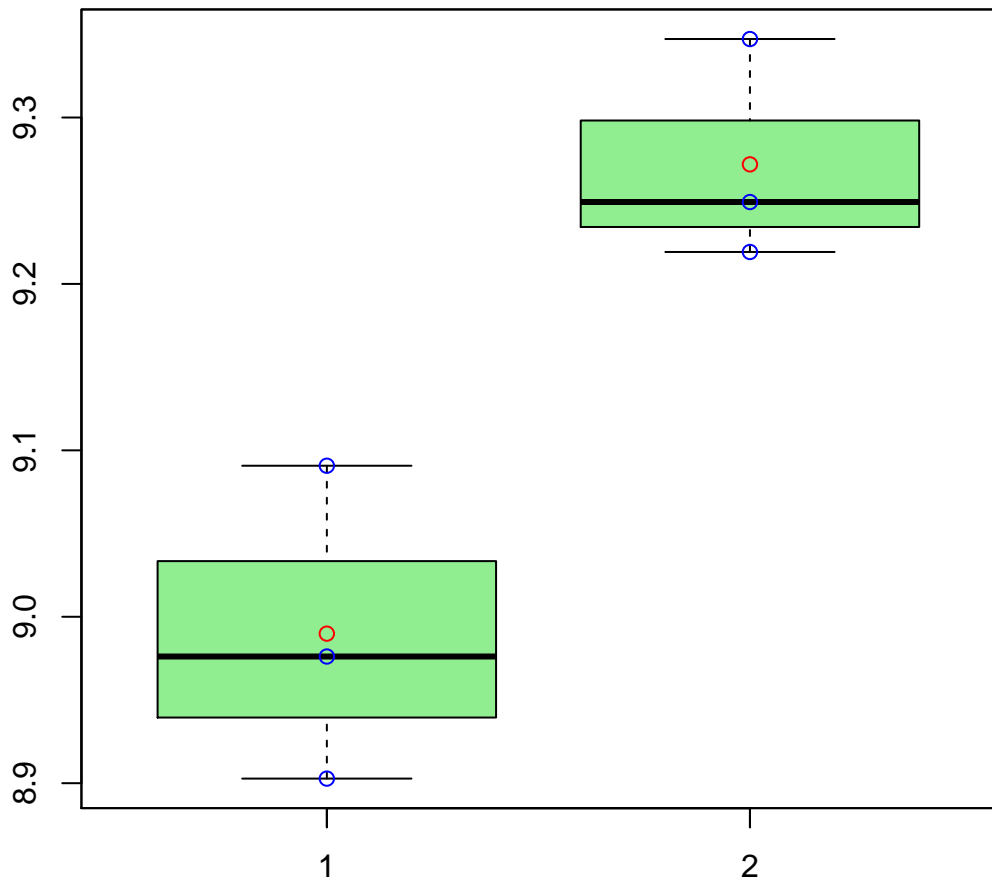

t-Test: p-value = 0.02

# I1PZQ3|I1PZQ3\_ORYGL

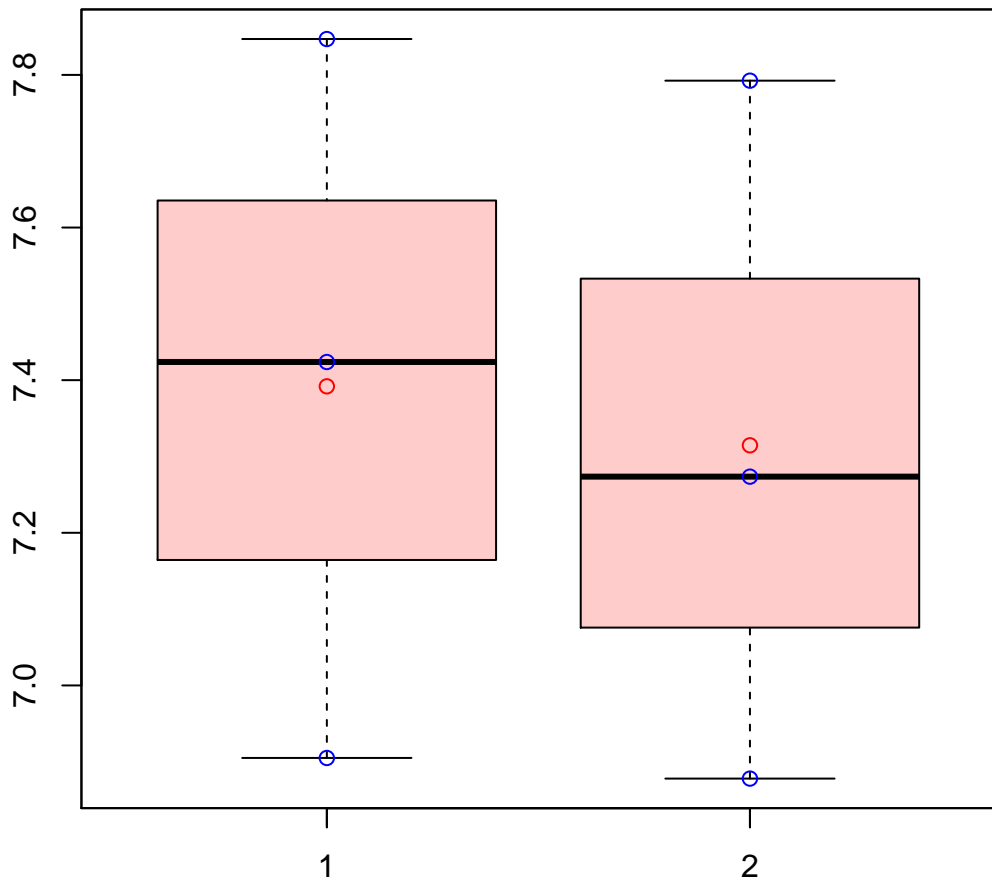

t-Test: p-value = 0.85

# I1Q048|I1Q048\_ORYGL

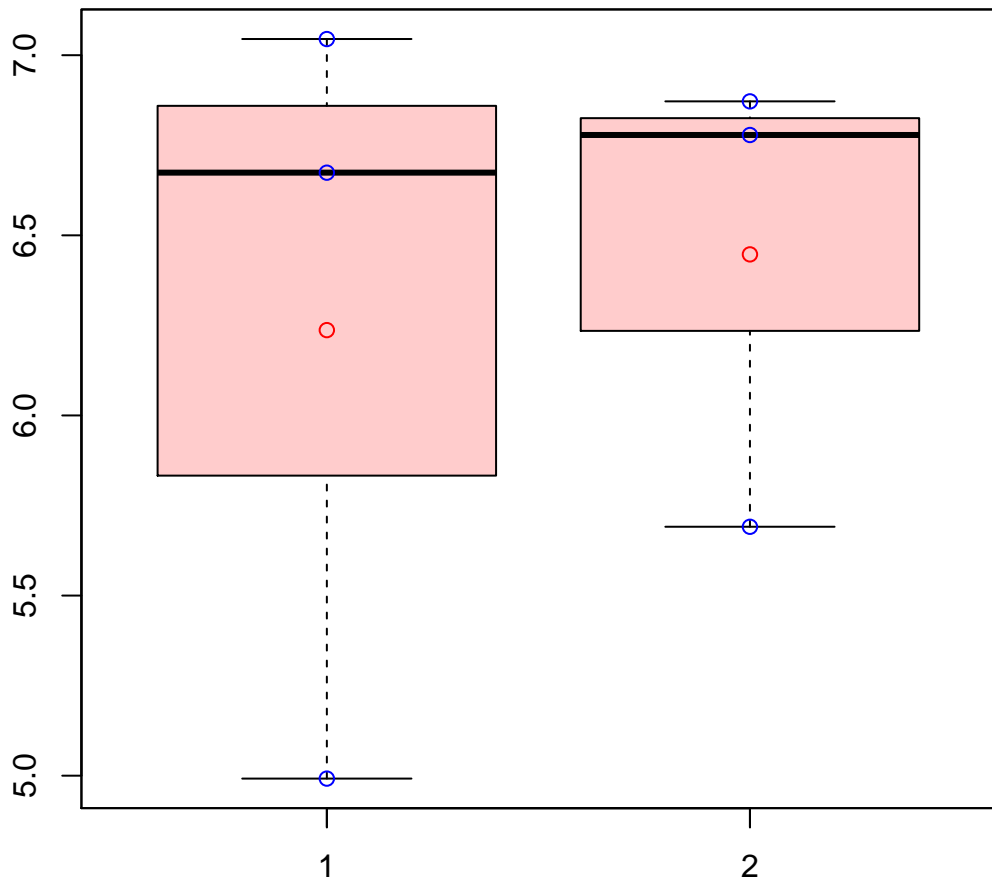

t-Test: p-value = 0.79

# I1Q0W5|I1Q0W5\_ORYGL

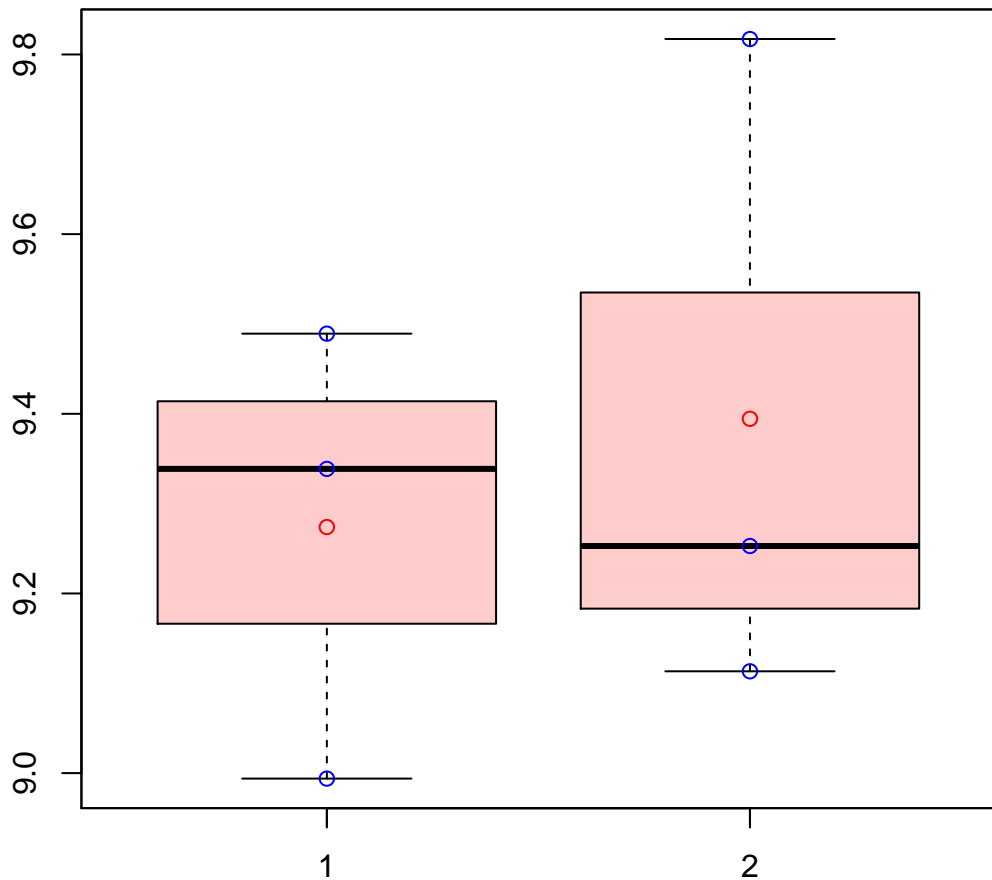

t-Test: p-value = 0.67

# I1Q1H7|I1Q1H7\_ORYGL

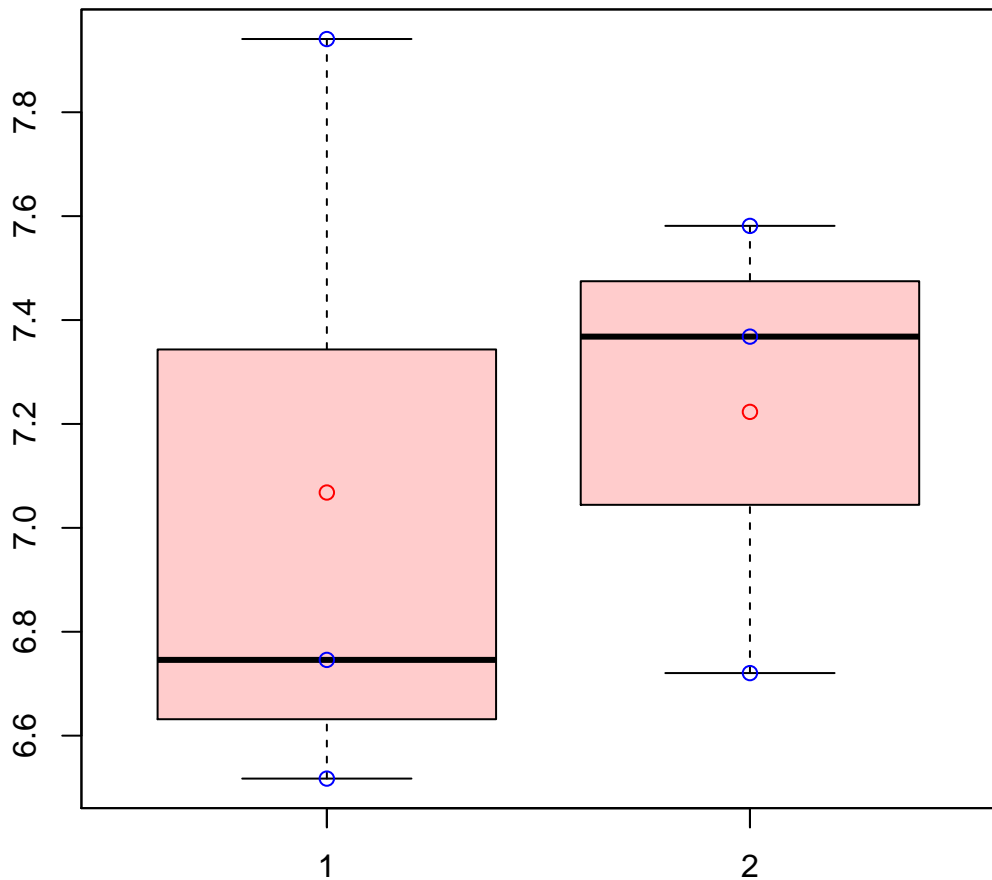

t-Test: p-value = 0.78



# I1Q2B1|I1Q2B1\_ORYGL

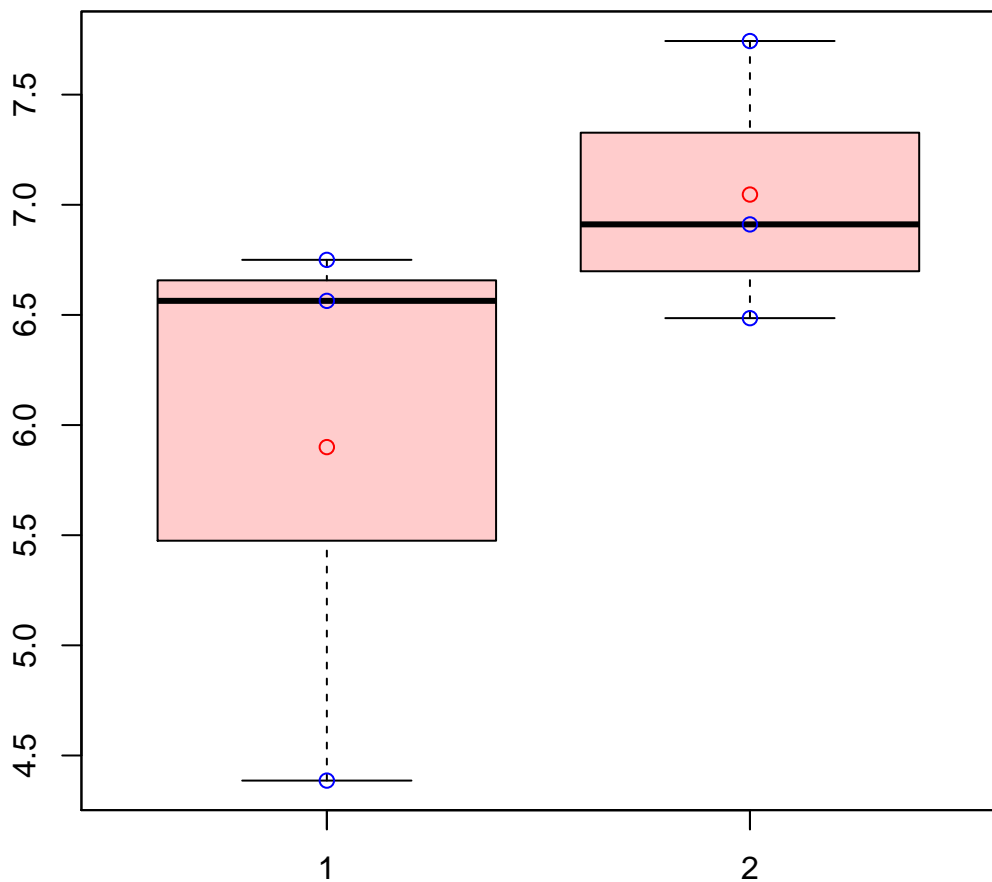

t-Test: p-value = 0.27

# I1Q2M1|I1Q2M1\_ORYGL

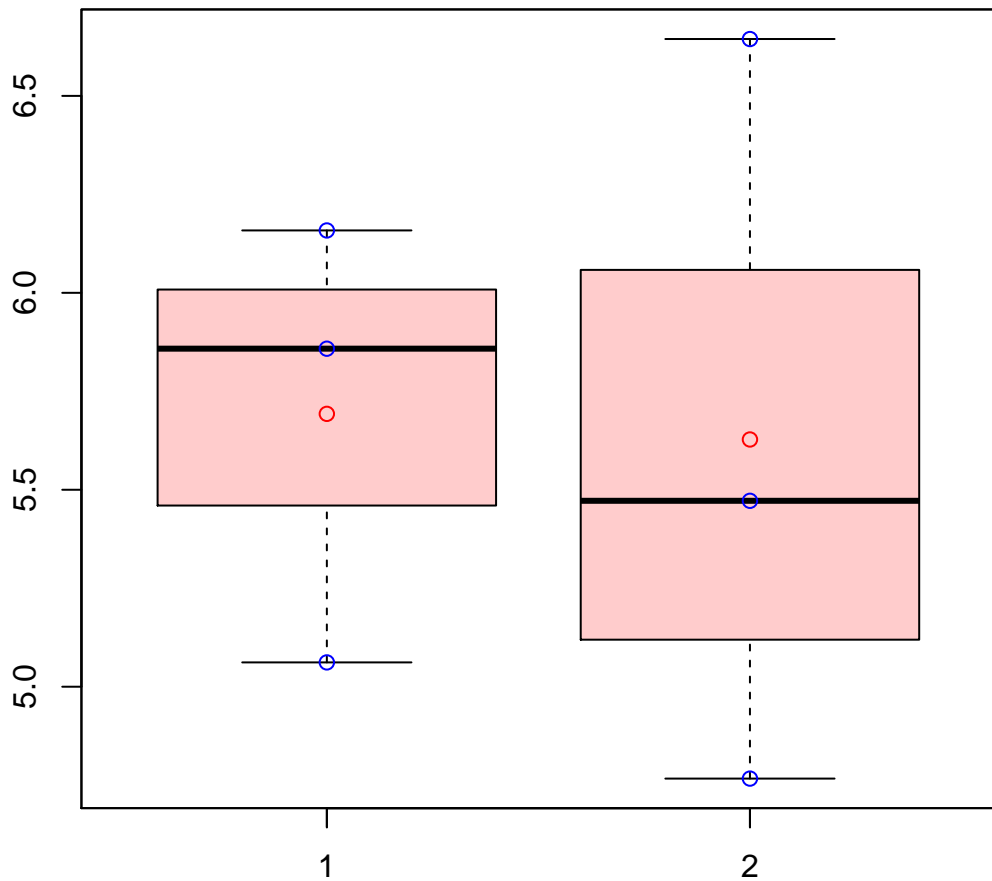

t-Test: p-value = 0.92

# I1Q436|I1Q436\_ORYGL

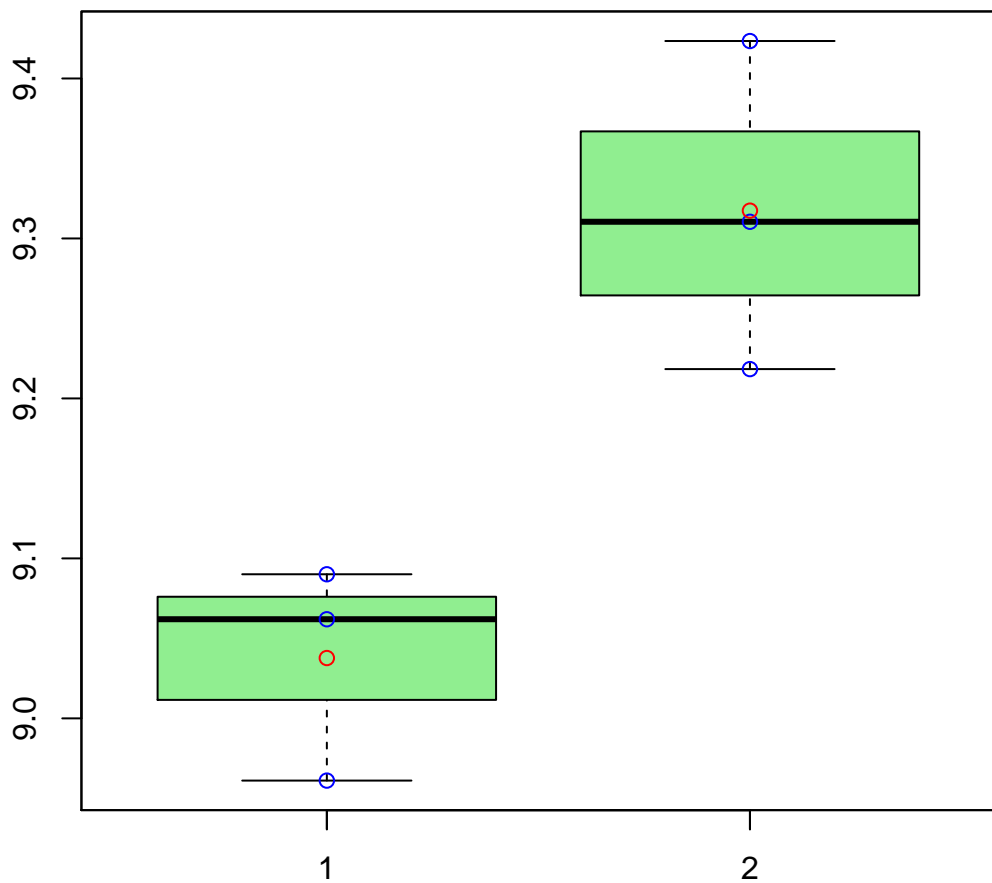

t-Test: p-value = 0.02

# I1Q4A0|I1Q4A0\_ORYGL

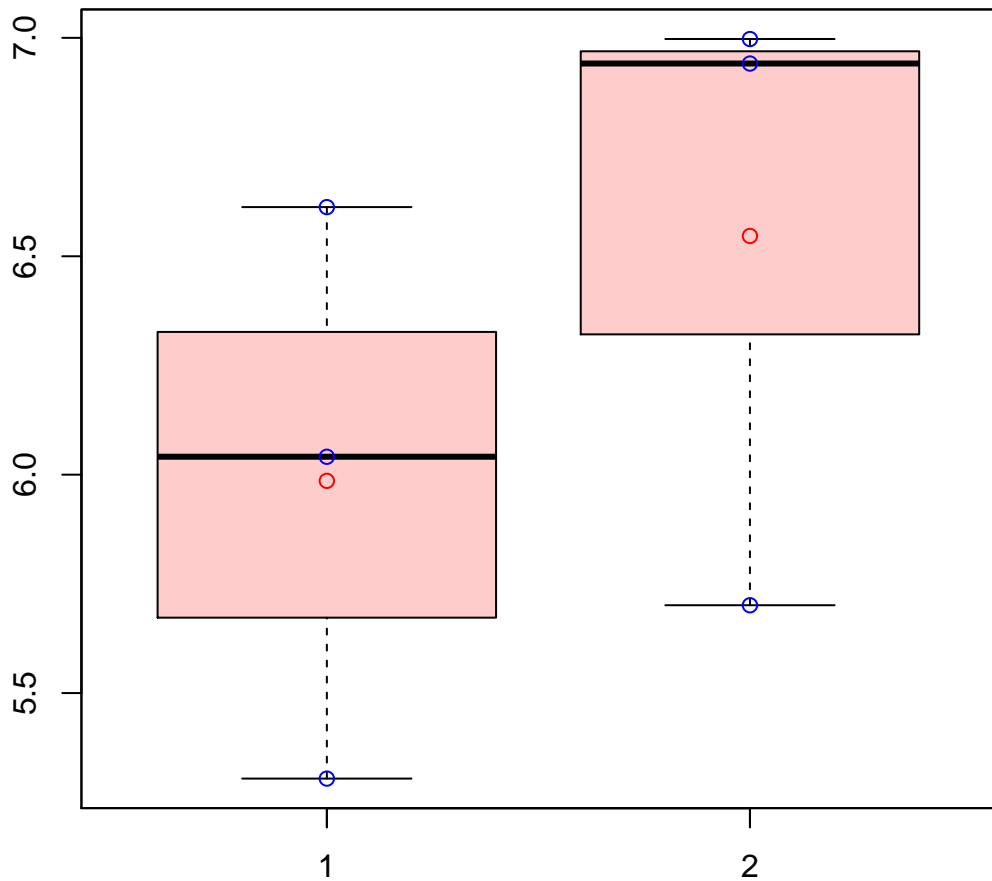

t-Test: p-value = 0.38

# I1Q4Z1|I1Q4Z1\_ORYGL

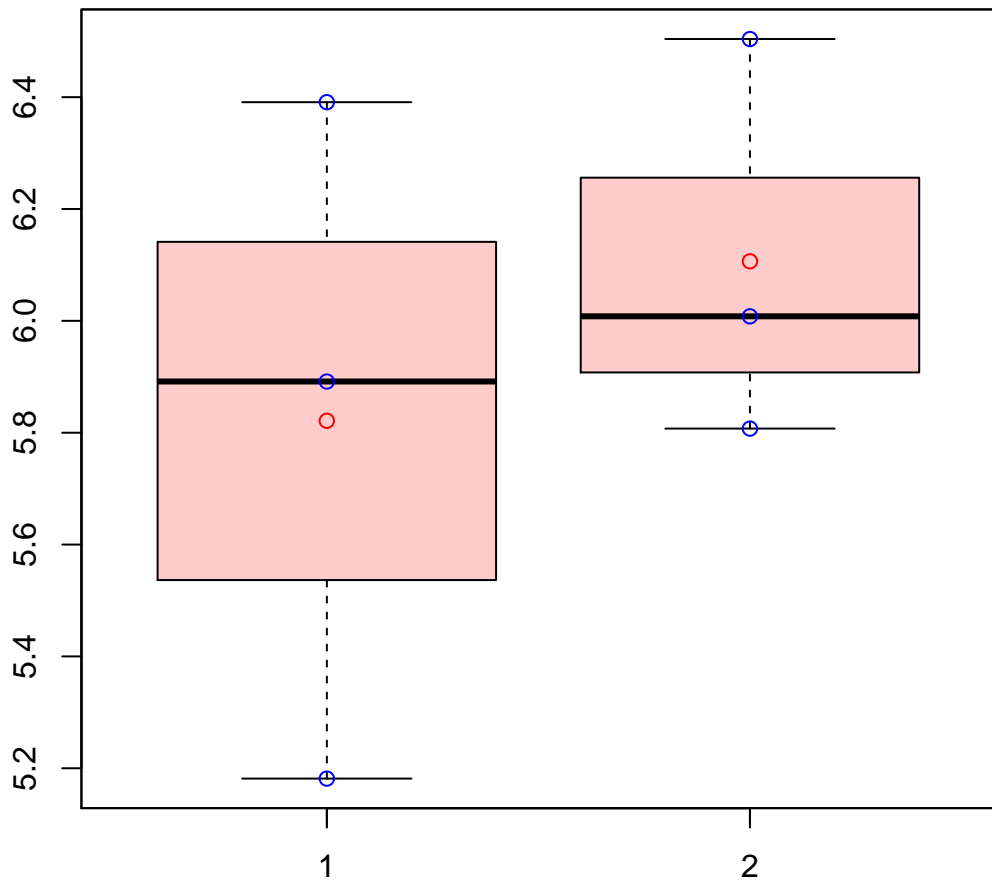

t-Test: p-value = 0.53

# I1Q526|I1Q526\_ORYGL

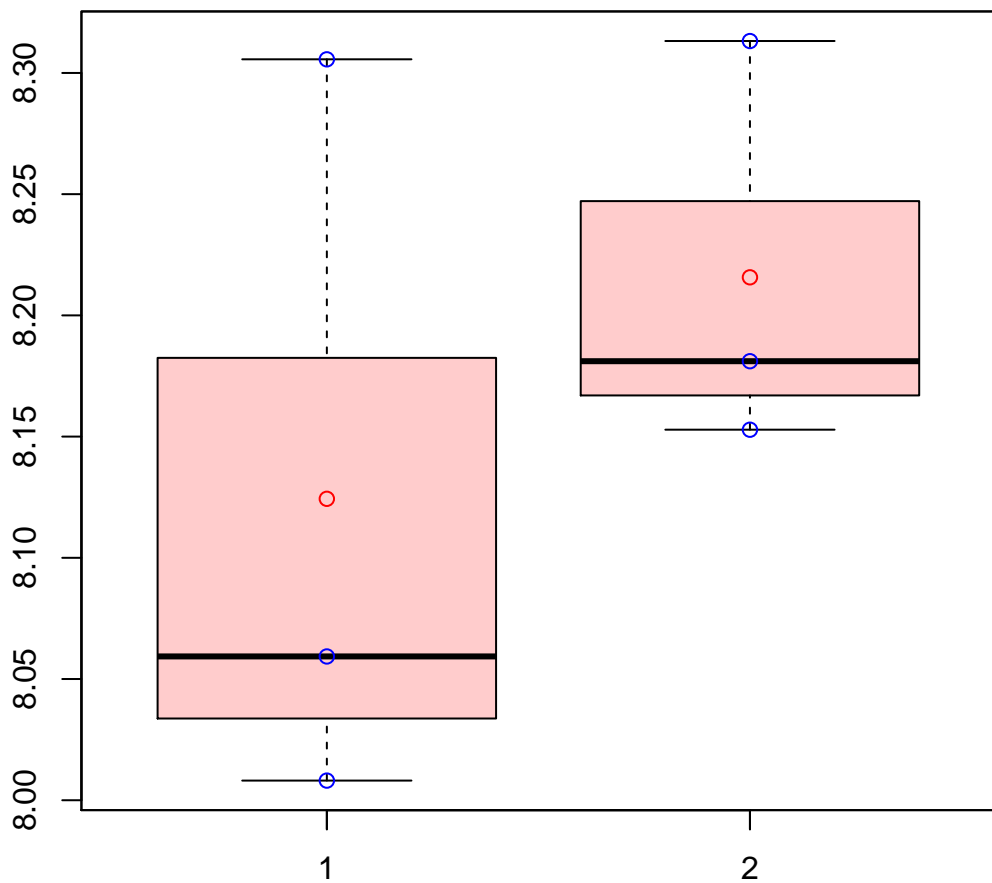

t-Test: p-value = 0.44

# I1Q7A9|I1Q7A9\_ORYGL

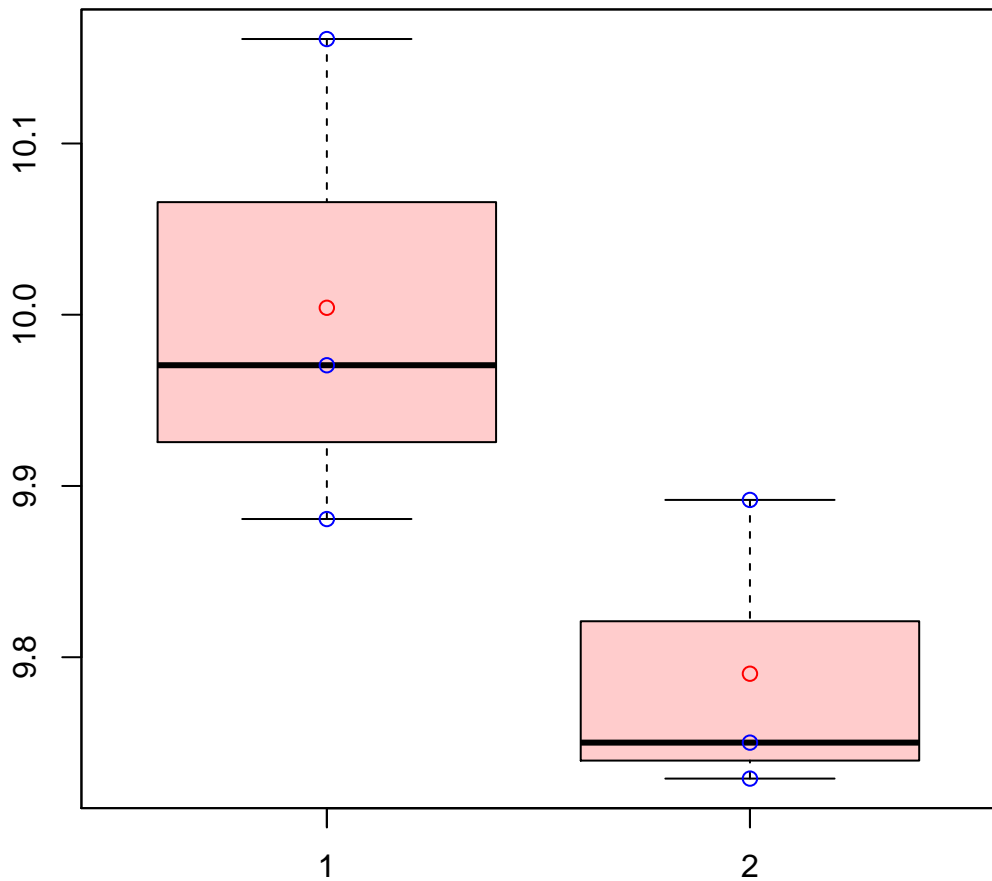

t-Test: p-value = 0.11

# I1Q7G2|I1Q7G2\_ORYGL

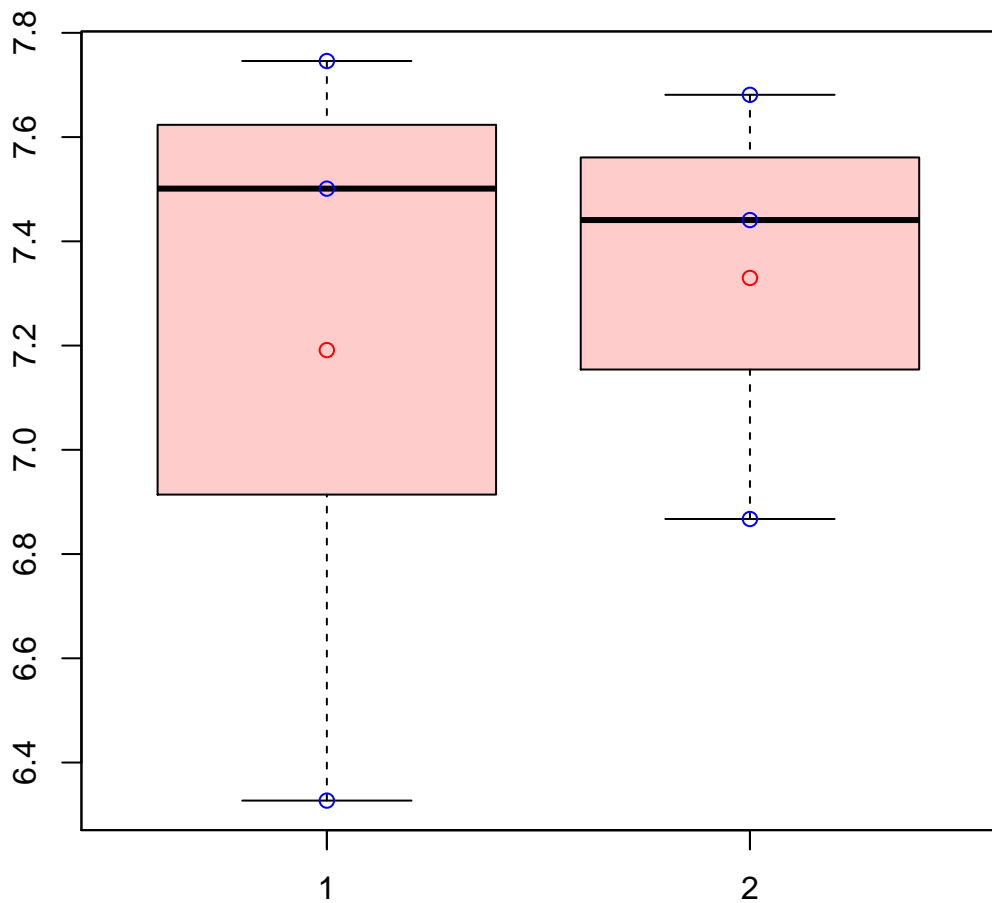

t-Test: p-value = 0.8



# I1Q7V9|I1Q7V9\_ORYGL

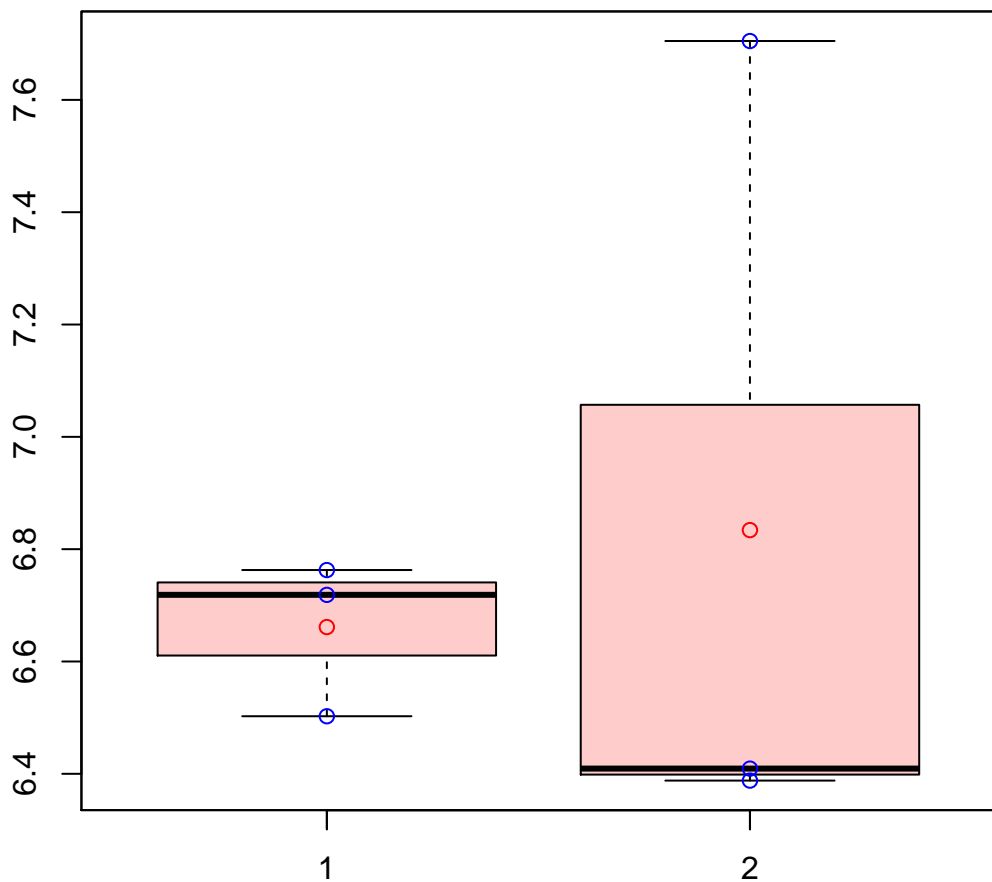

t-Test: p-value = 0.73

# I1Q7Z4|I1Q7Z4\_ORYGL

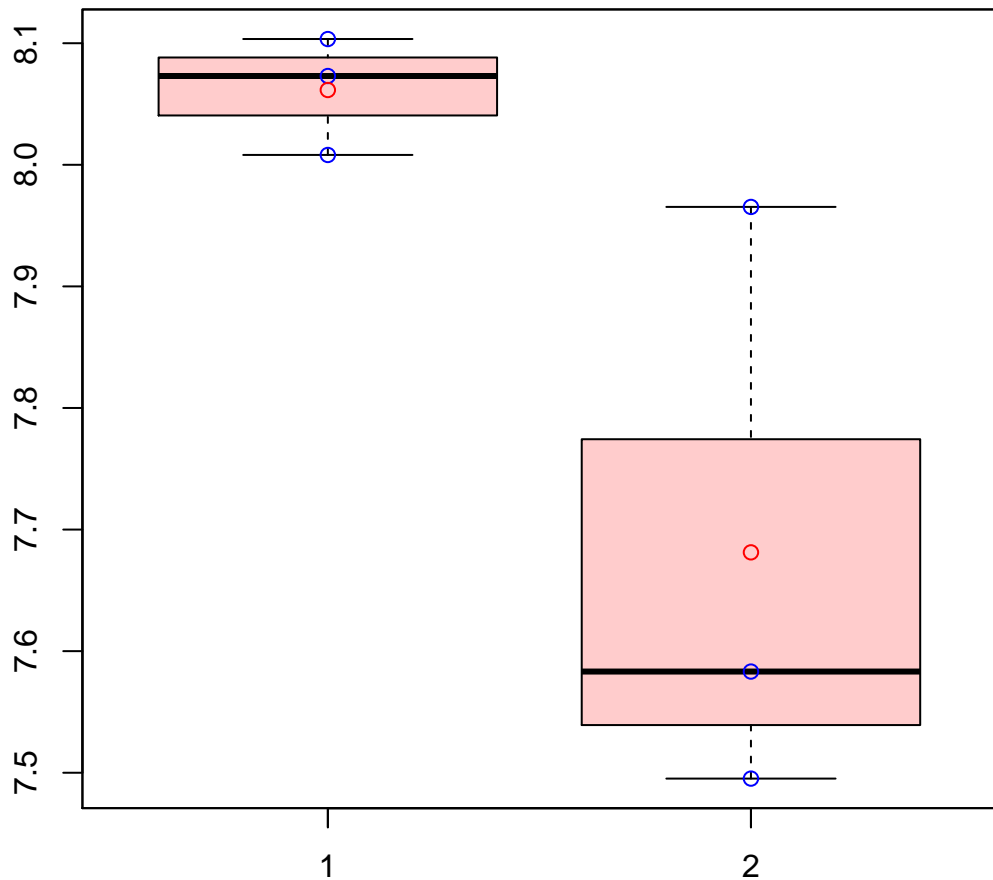

t-Test: p-value = 0.11

# I1Q8A1|I1Q8A1\_ORYGL

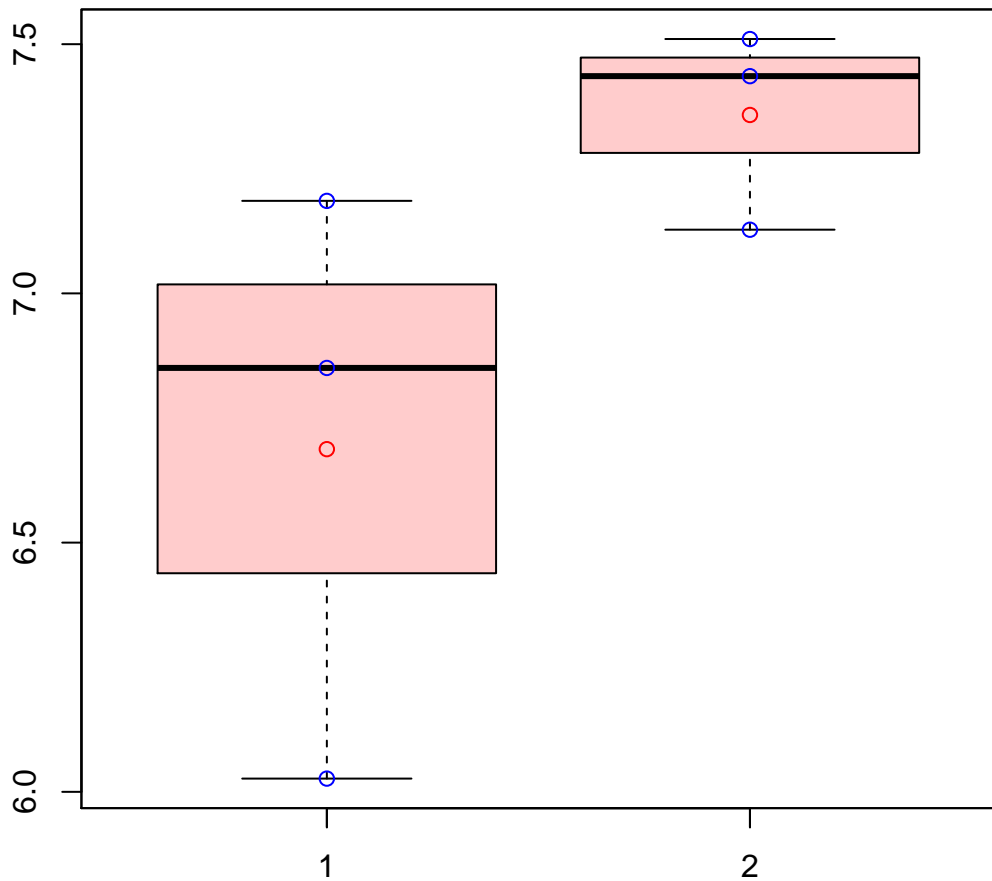

t-Test: p-value = 0.18

# I1Q8A3|I1Q8A3\_ORYGL

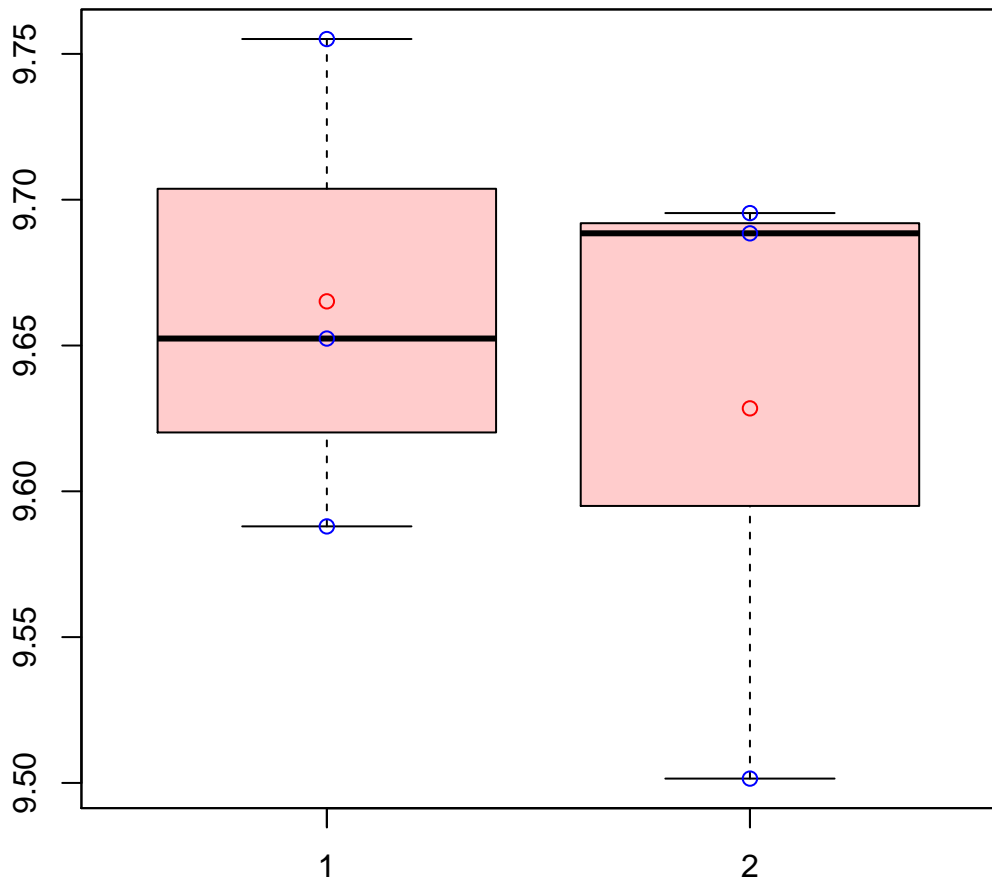

t-Test: p-value = 0.67

# I1Q8E7|I1Q8E7\_ORYGL

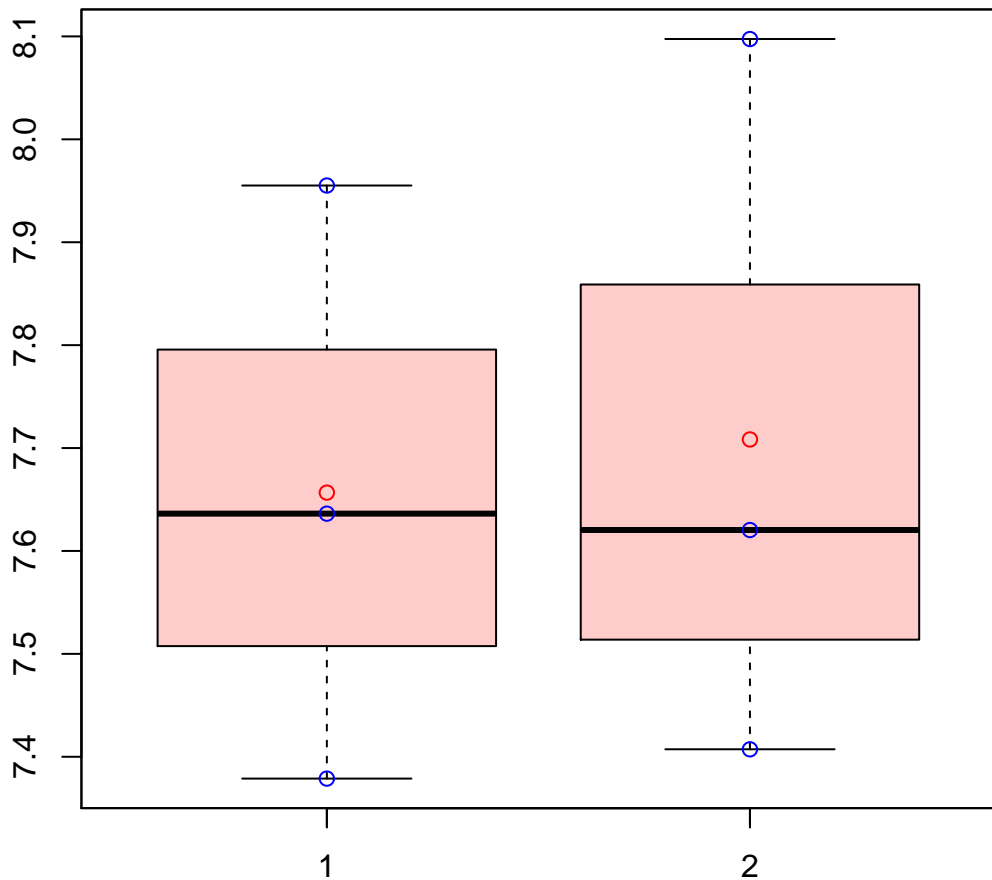

t-Test: p-value = 0.85

# I1Q8W4|I1Q8W4\_ORYGL

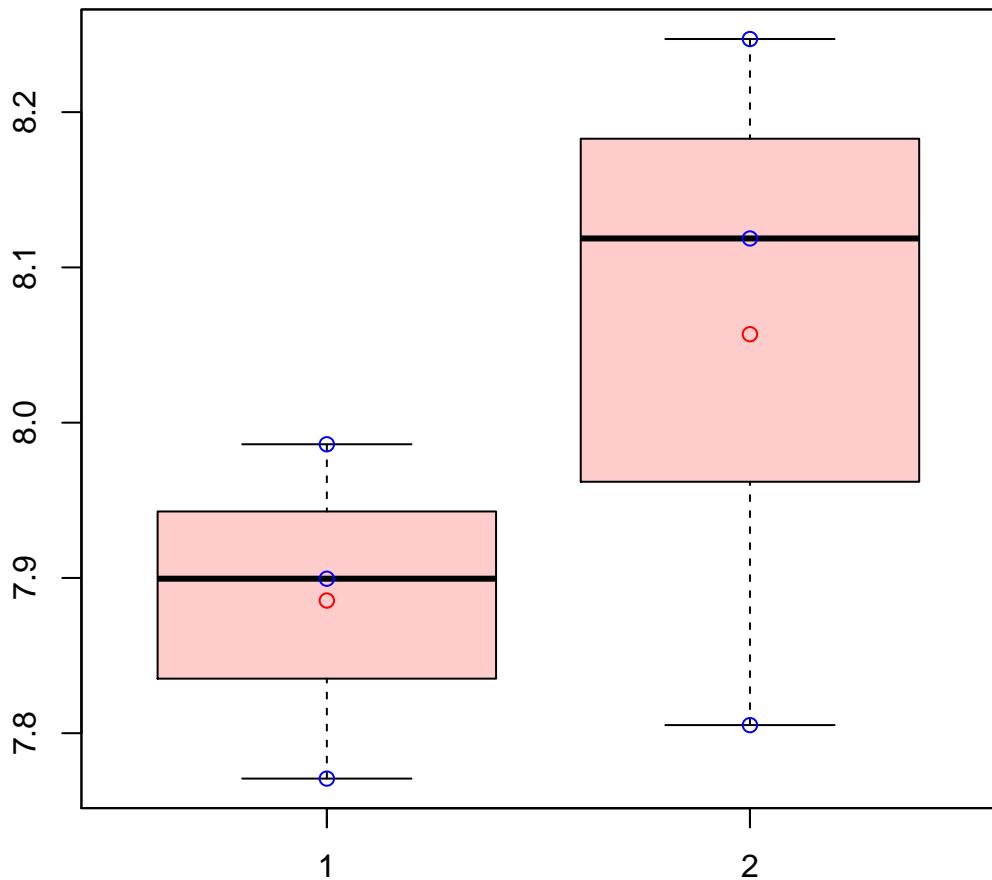

t-Test: p-value = 0.33

# I1Q915|I1Q915\_ORYGL

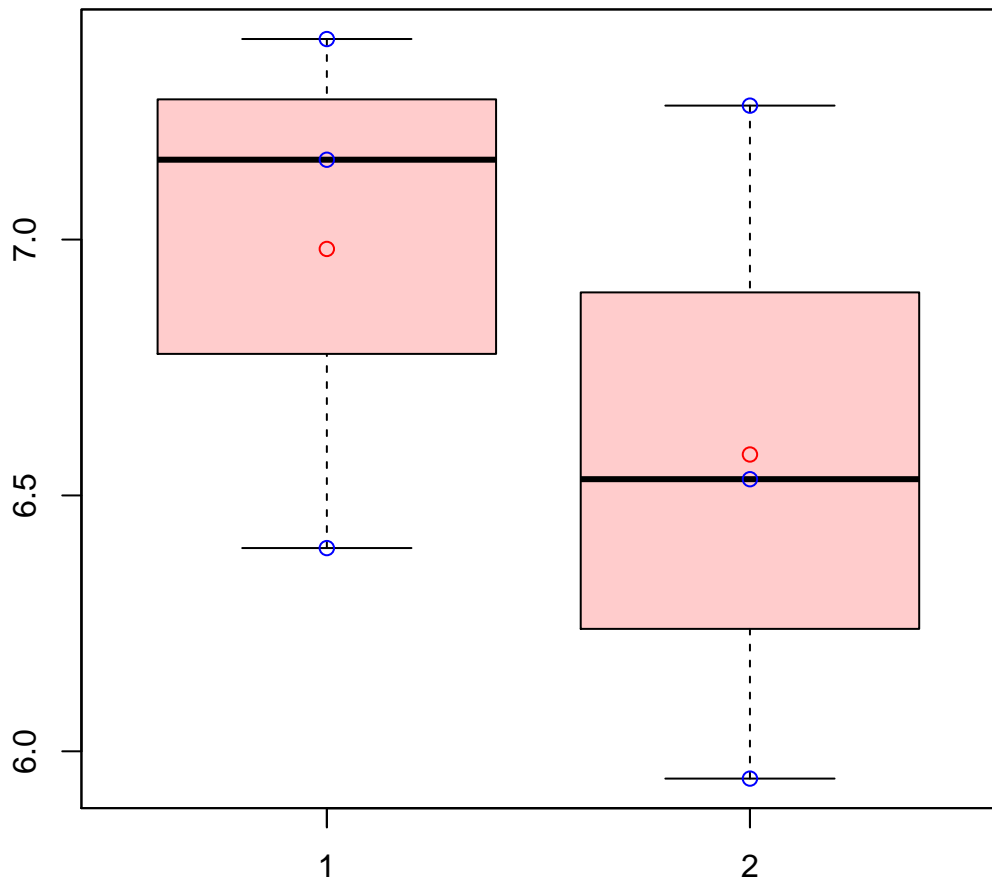

t-Test: p-value = 0.46

# I1Q9C2|I1Q9C2\_ORYGL

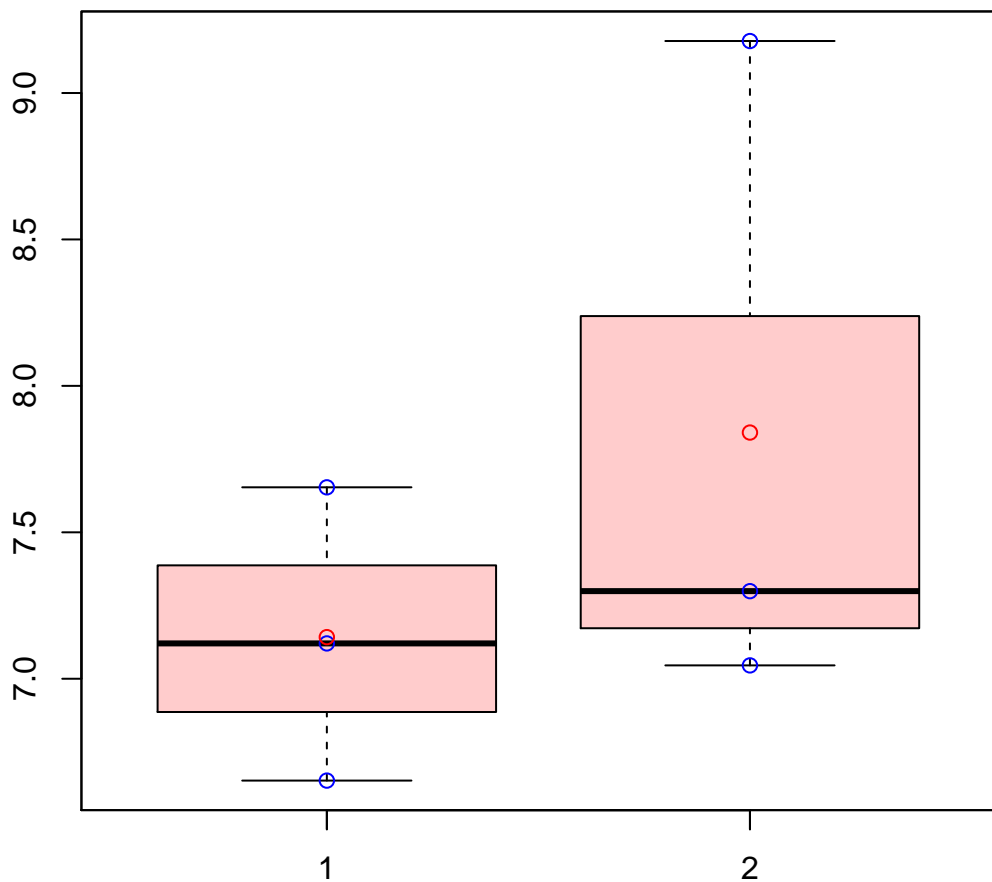

t-Test: p-value = 0.42



# I1QAQ8|I1QAQ8\_ORYGL

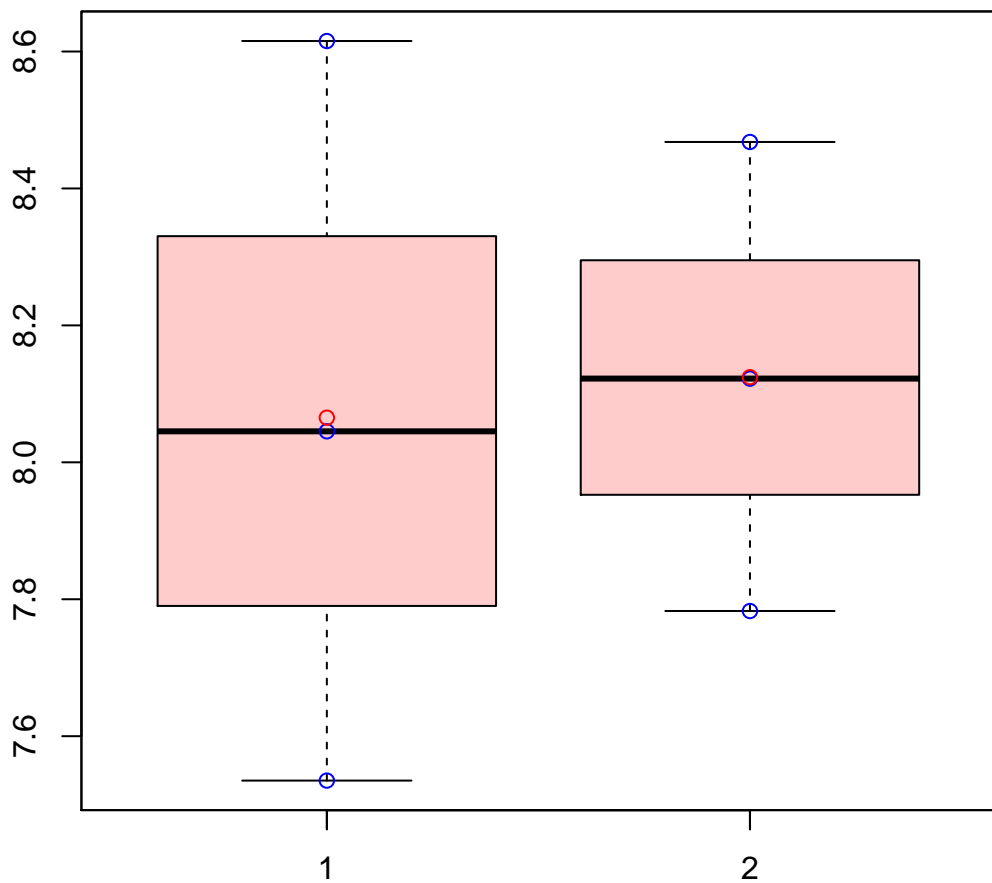

t-Test: p-value = 0.88

# I1QCU7|I1QCU7\_ORYGL

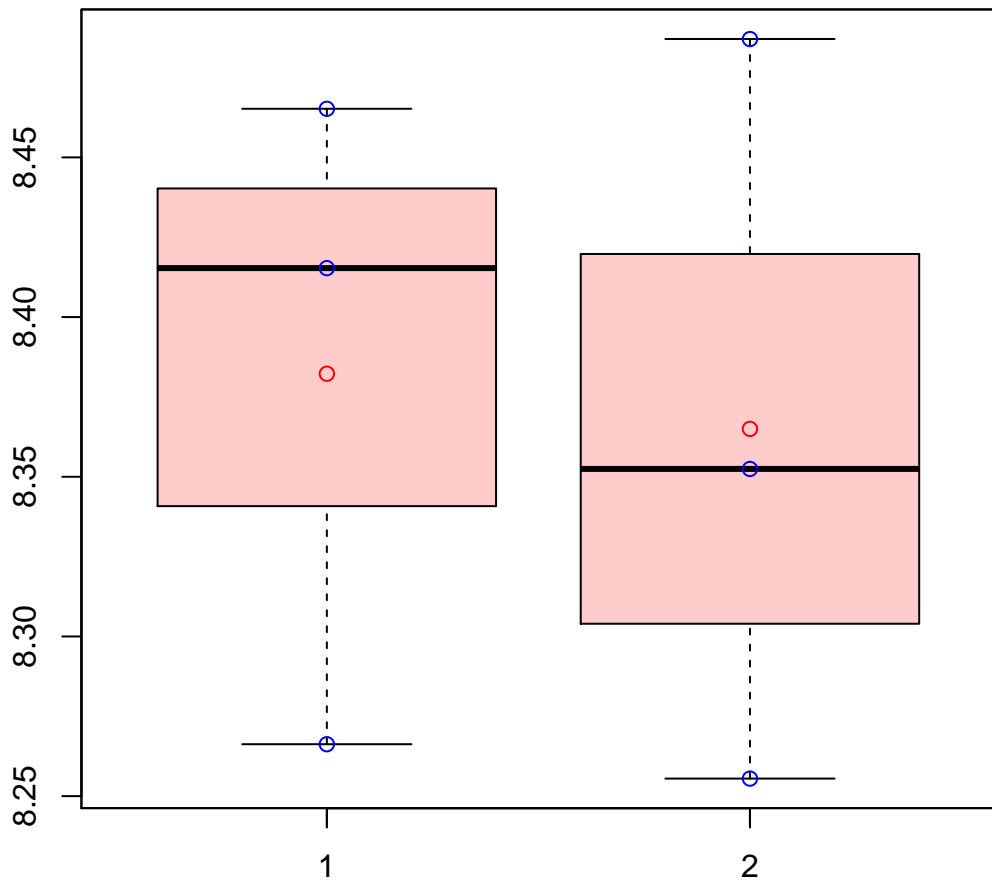

t-Test: p-value = 0.86

# I1QDK3|I1QDK3\_ORYGL

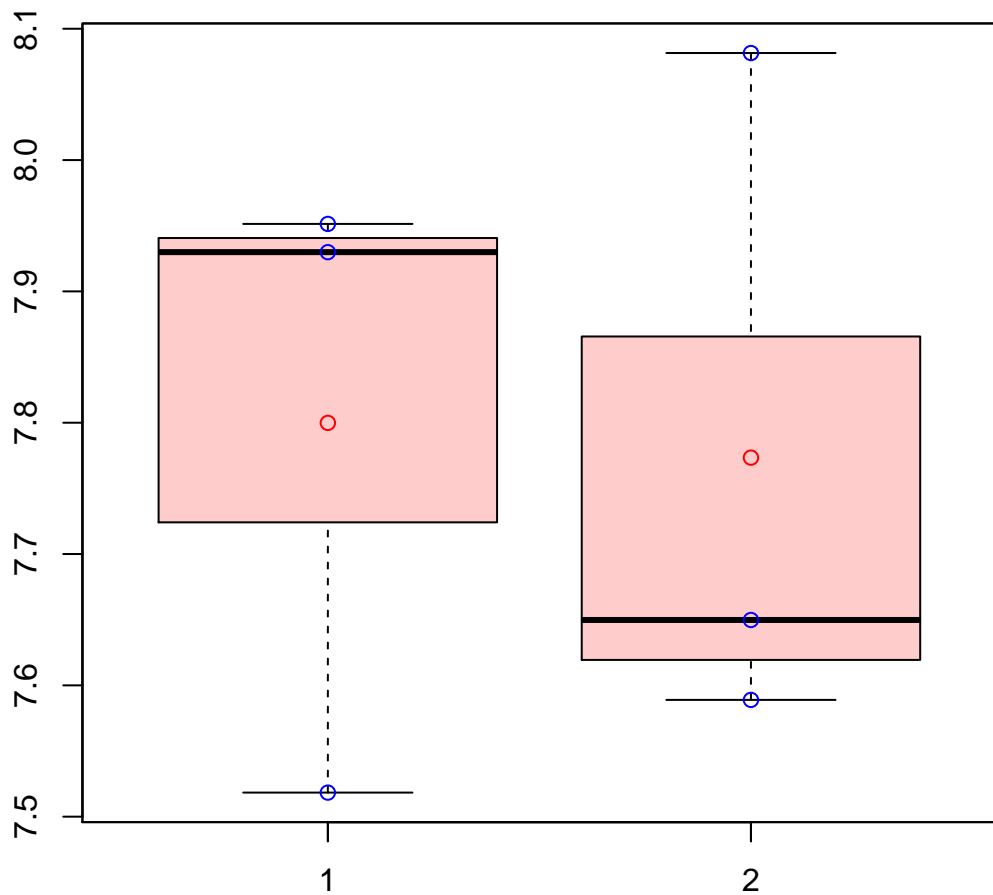

t-Test: p-value = 0.91

# I1QFV7|I1QFV7\_ORYGL

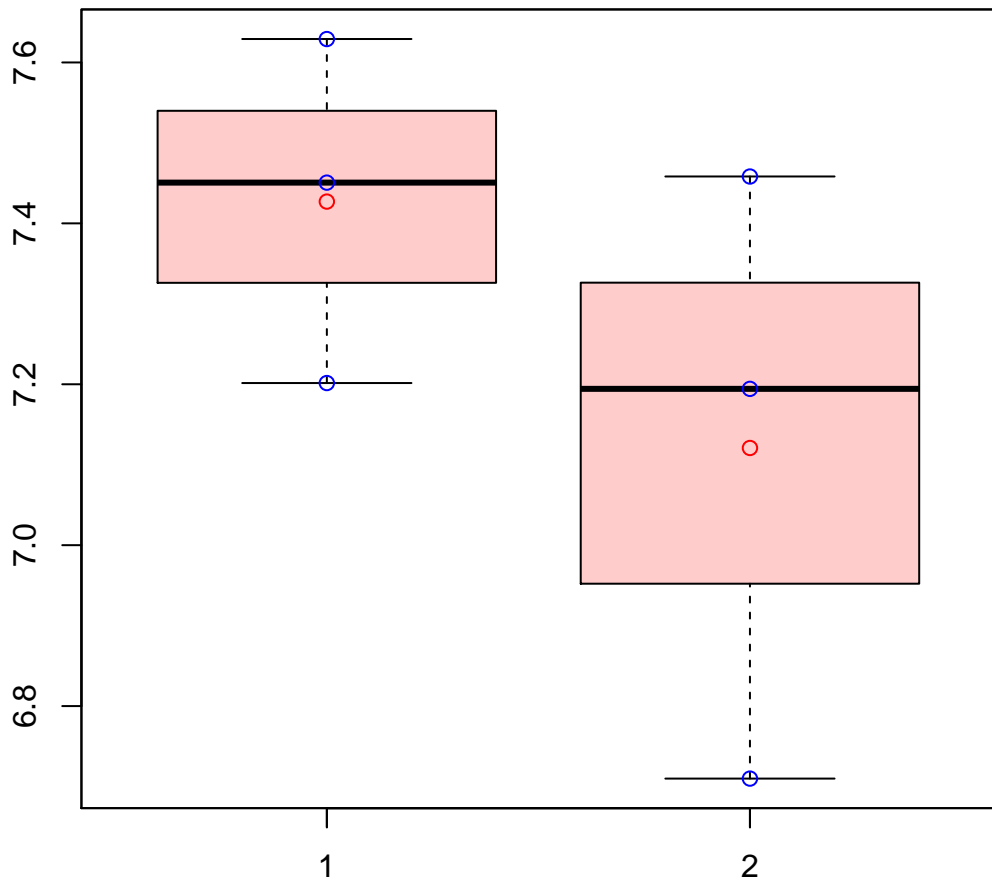

t-Test: p-value = 0.31

# I1QH88|I1QH88\_ORYGL

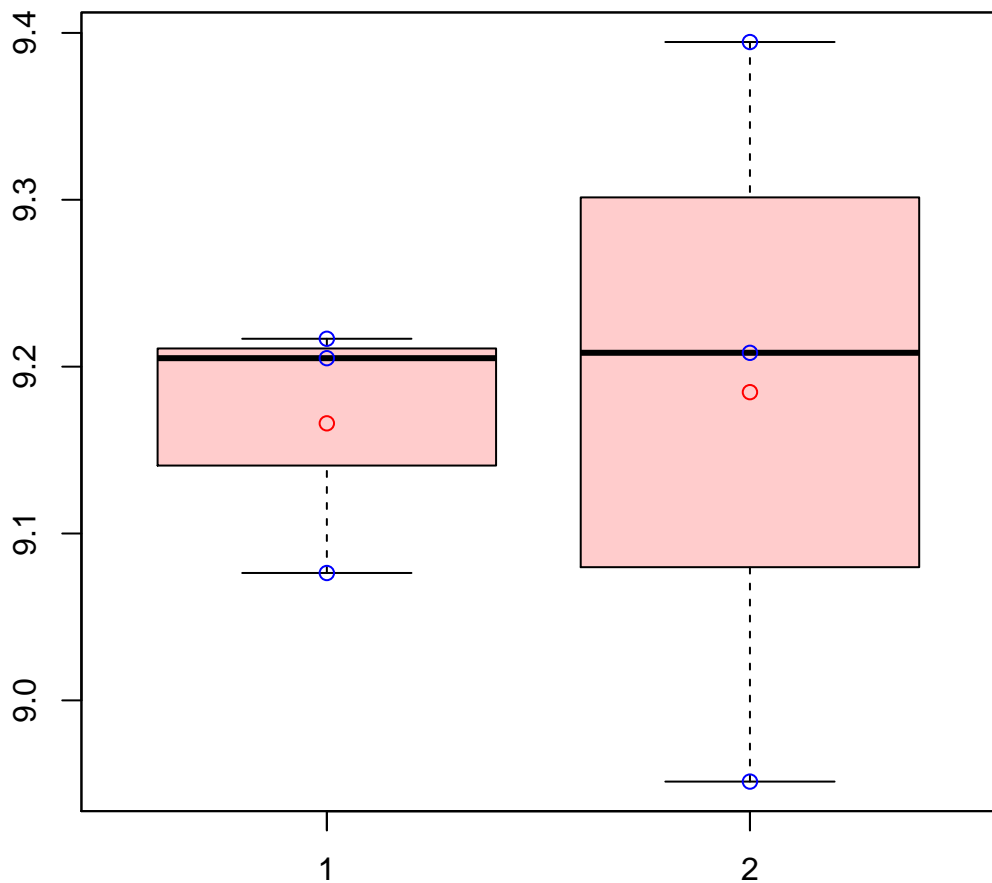

t-Test: p-value = 0.9

# I1QHR9|I1QHR9\_ORYGL

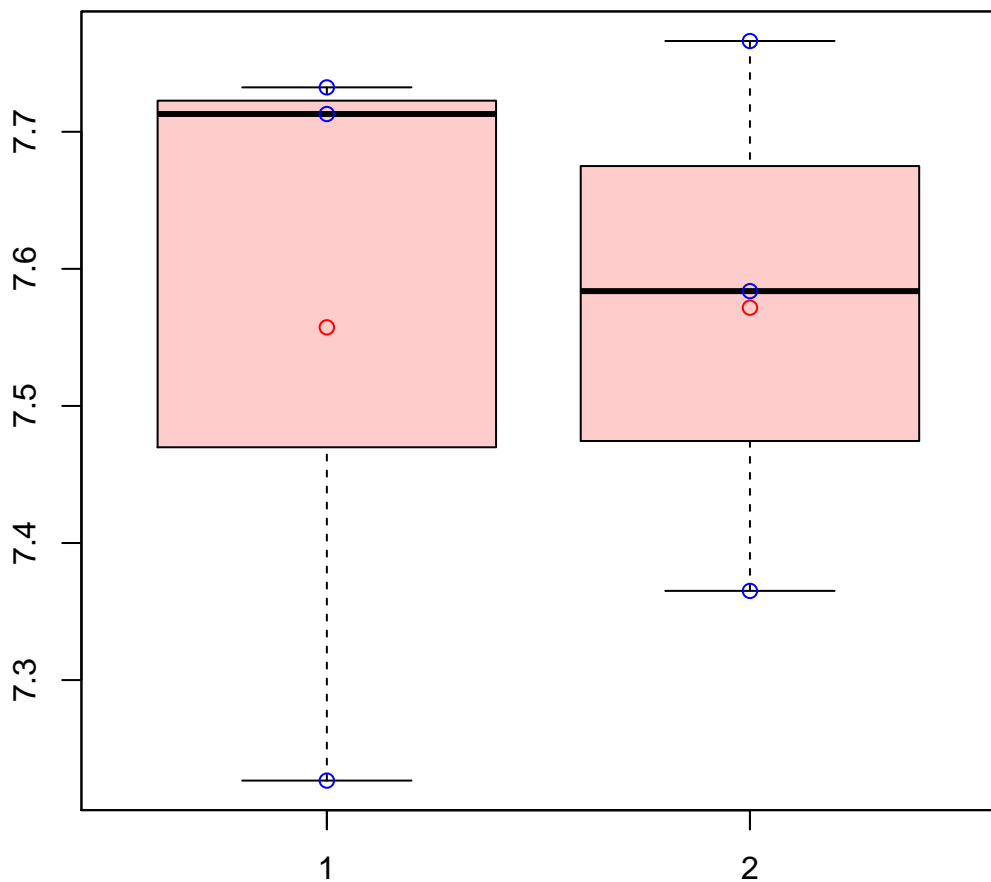

t-Test: p-value = 0.95

# I1QHY3|I1QHY3\_ORYGL

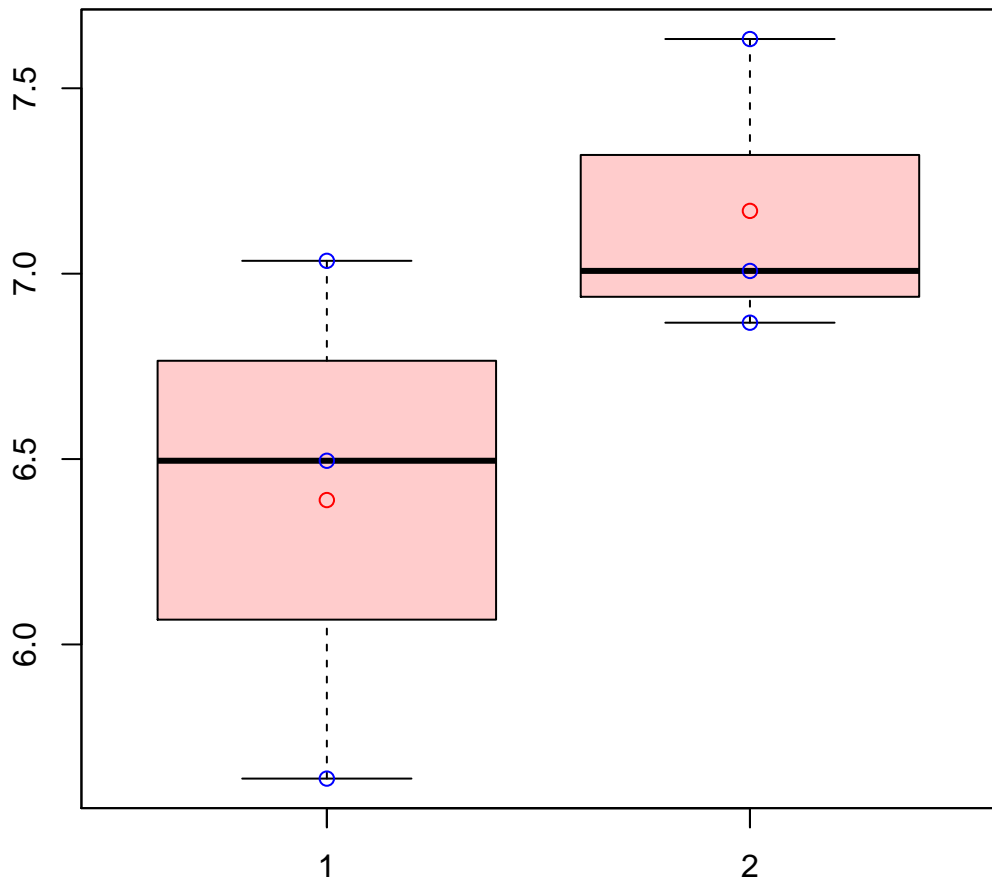

t-Test: p-value = 0.19

# I1QI08|I1QI08\_ORYGL

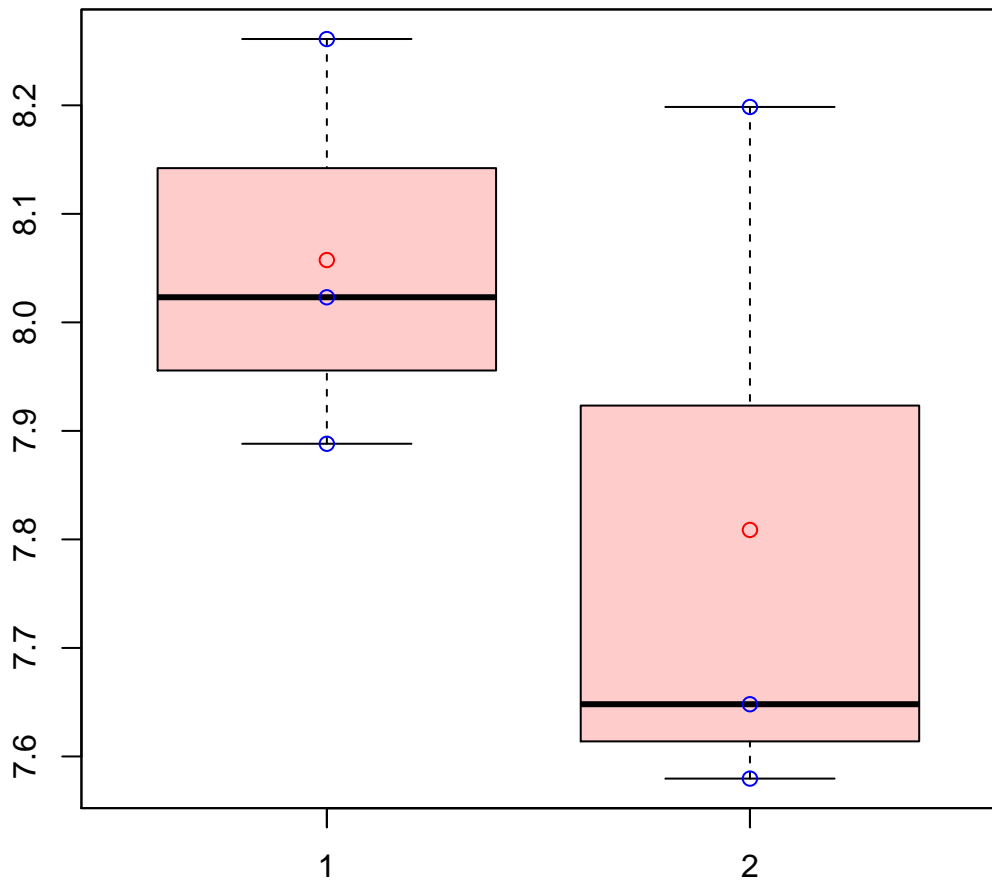

t-Test: p-value = 0.35



# I1QIU8|I1QIU8\_ORYGL

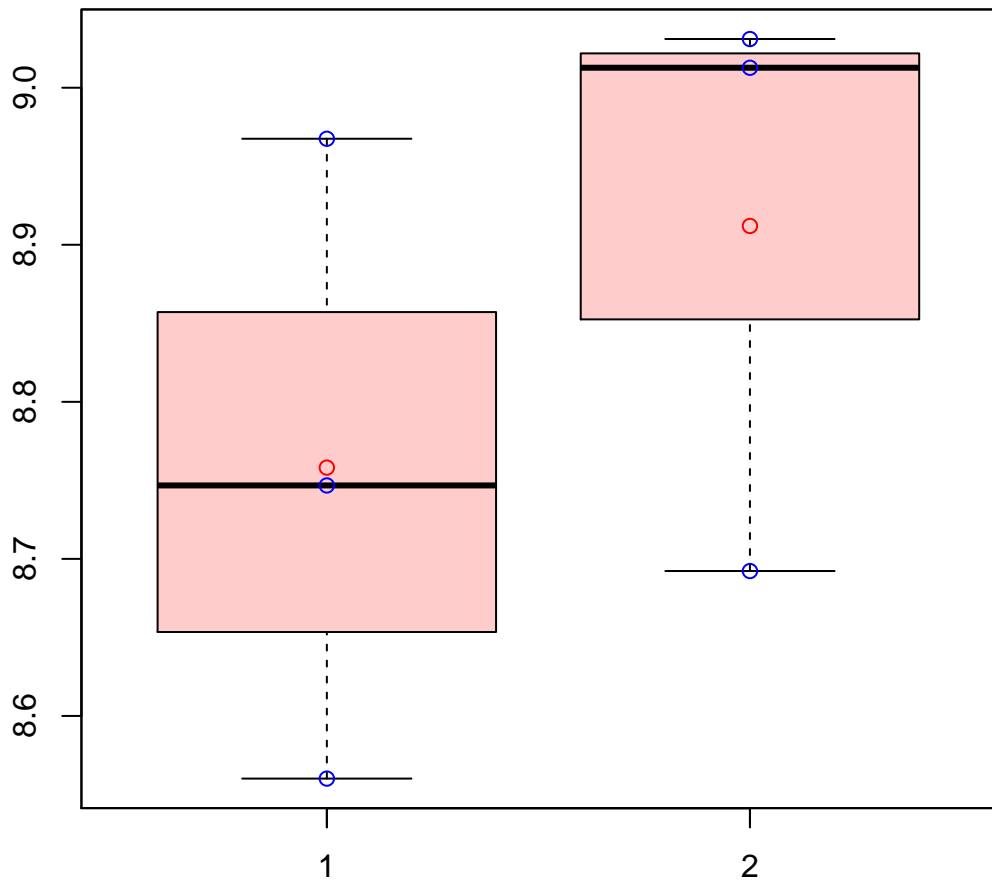

t-Test: p-value = 0.39

# I1QJH7|I1QJH7\_ORYGL

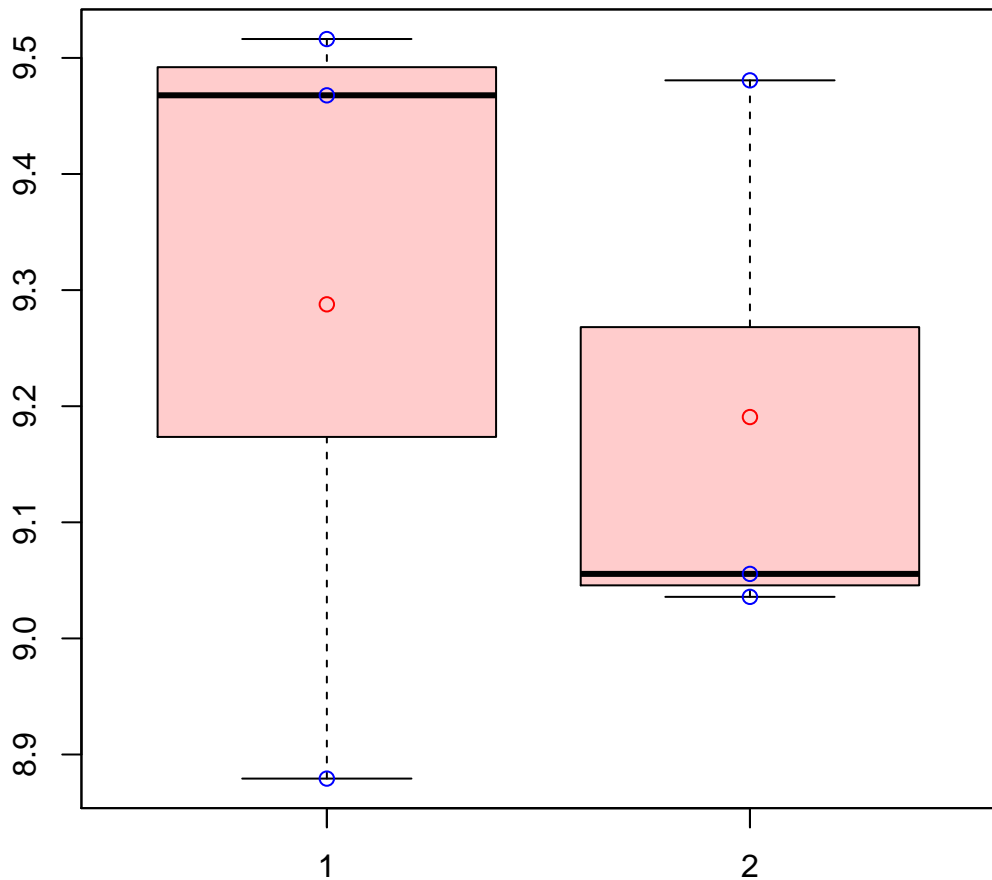

t-Test: p-value = 0.72

# I1QJN3|I1QJN3\_ORYGL

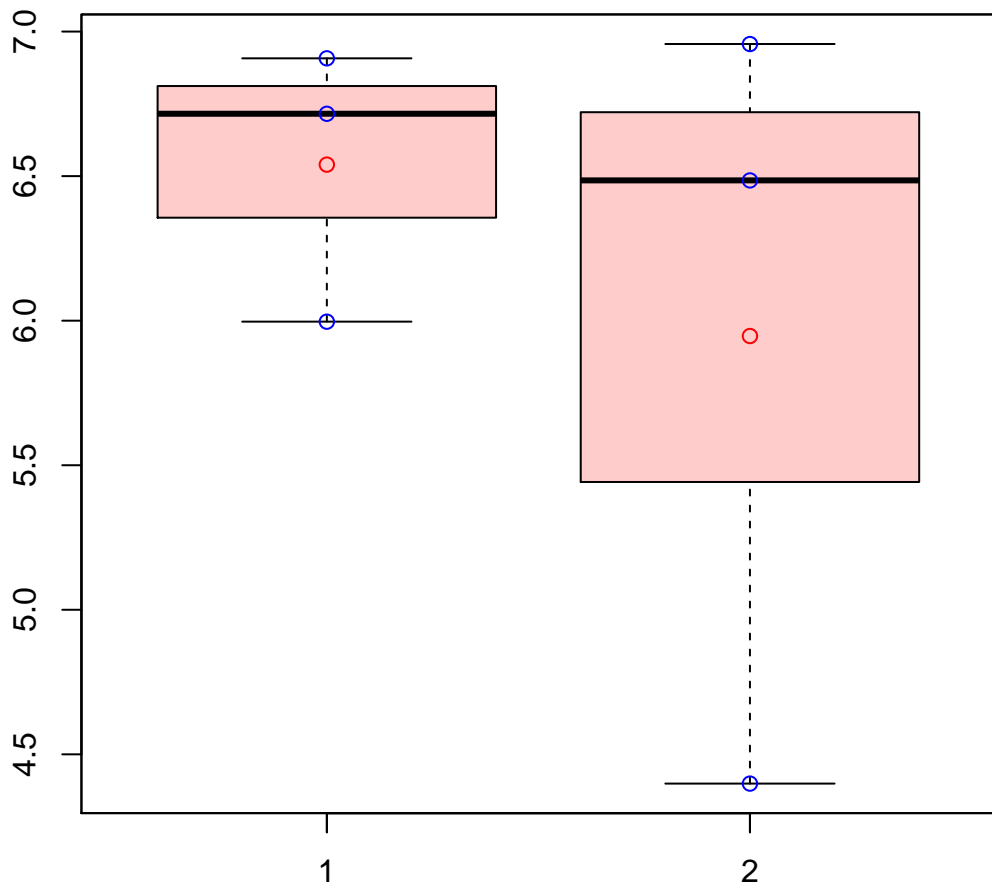

t-Test: p-value = 0.54

# I1QK62|I1QK62\_ORYGL

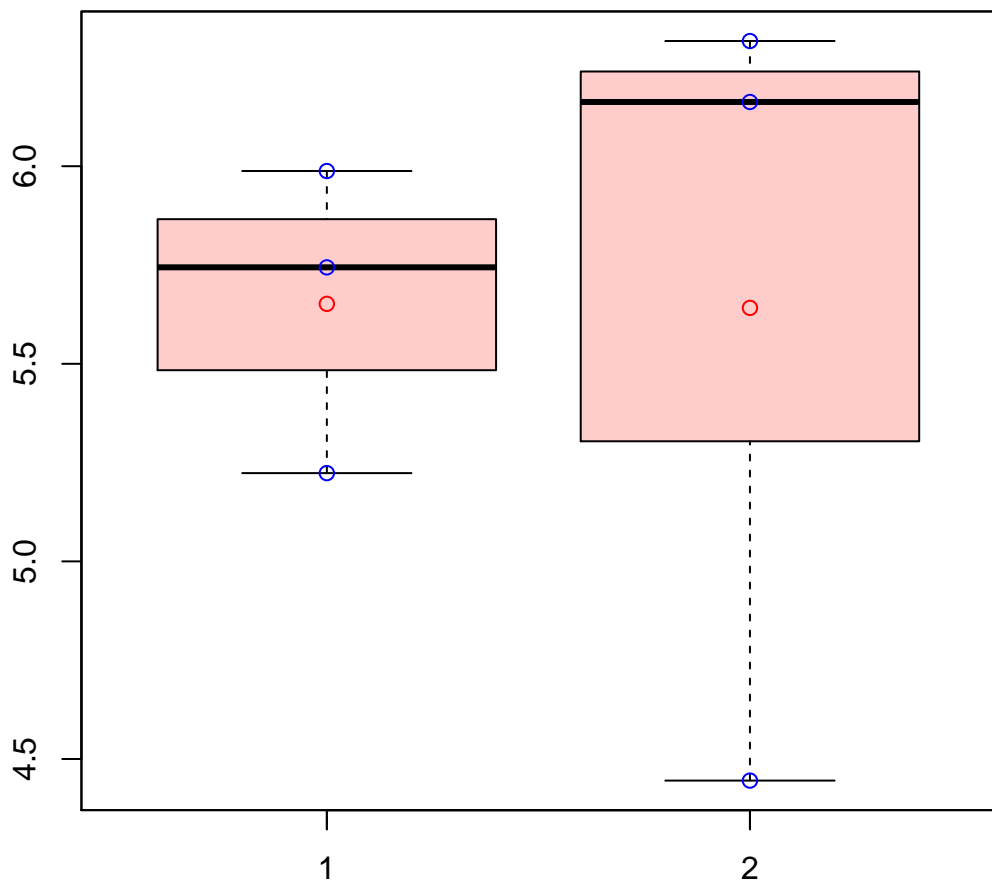

t-Test: p-value = 0.99

# I1QK81|I1QK81\_ORYGL

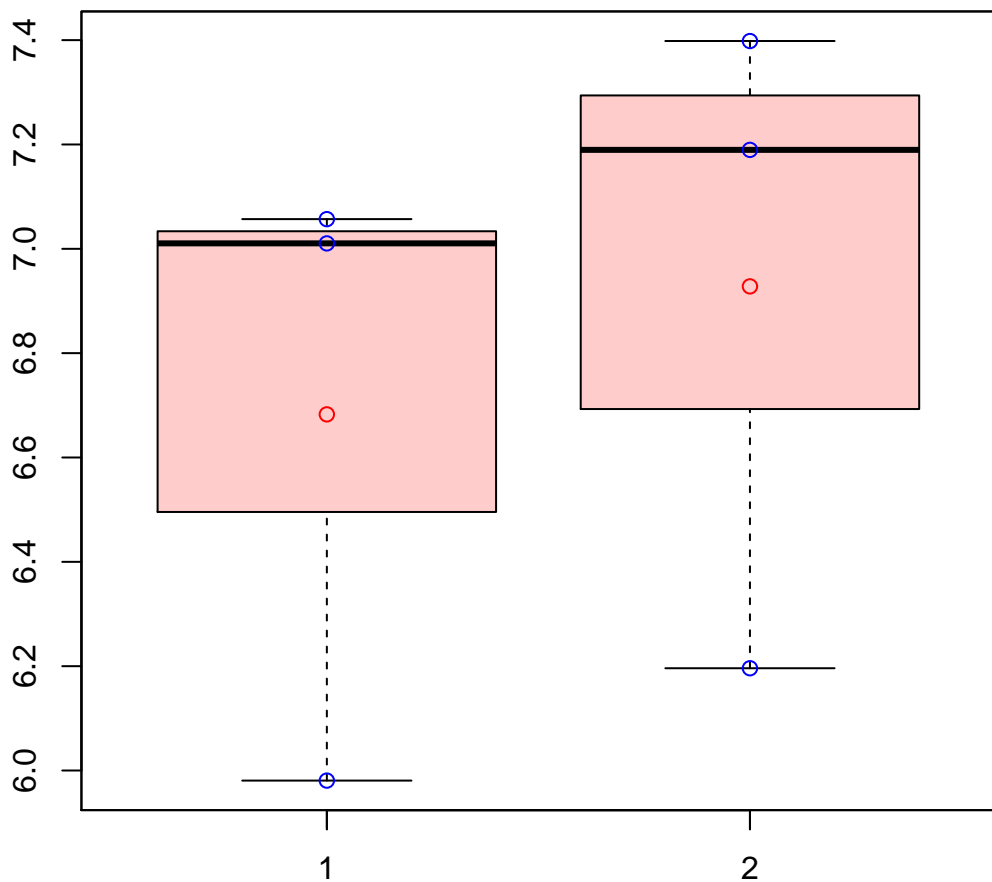

t-Test: p-value = 0.66

# I1QKC3|I1QKC3\_ORYGL

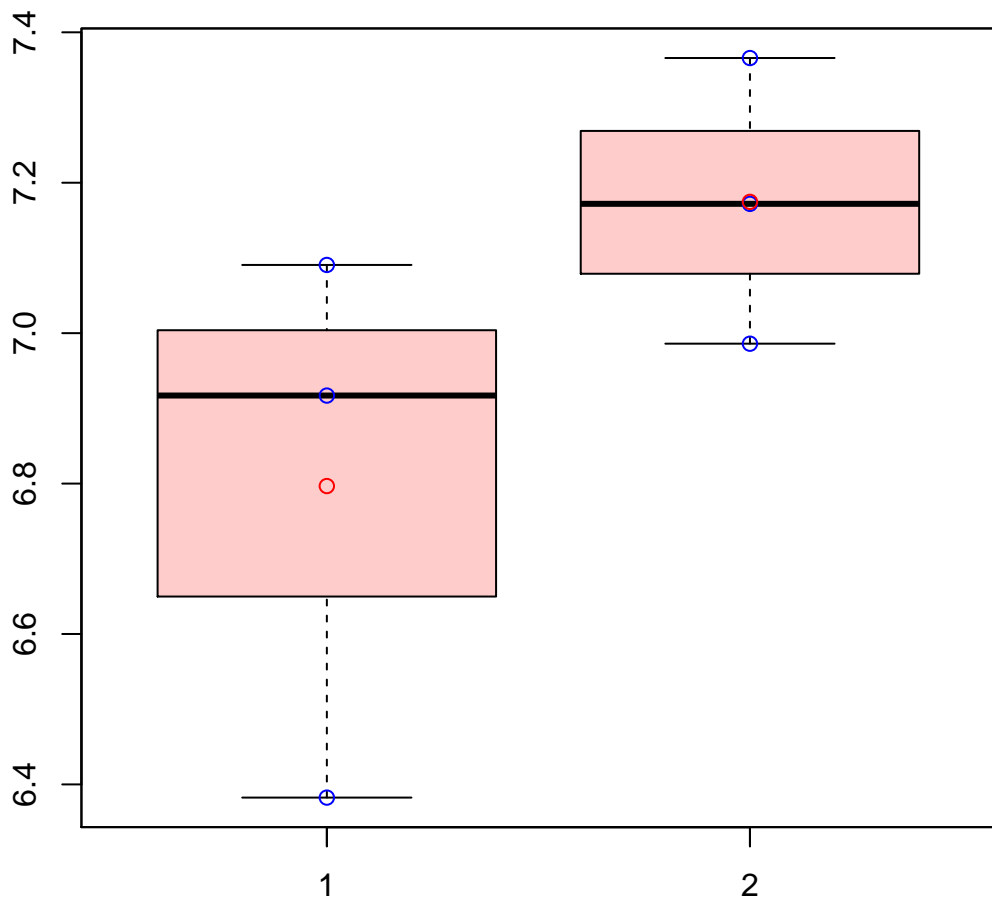

t-Test: p-value = 0.21

# I1QLF6|I1QLF6\_ORYGL

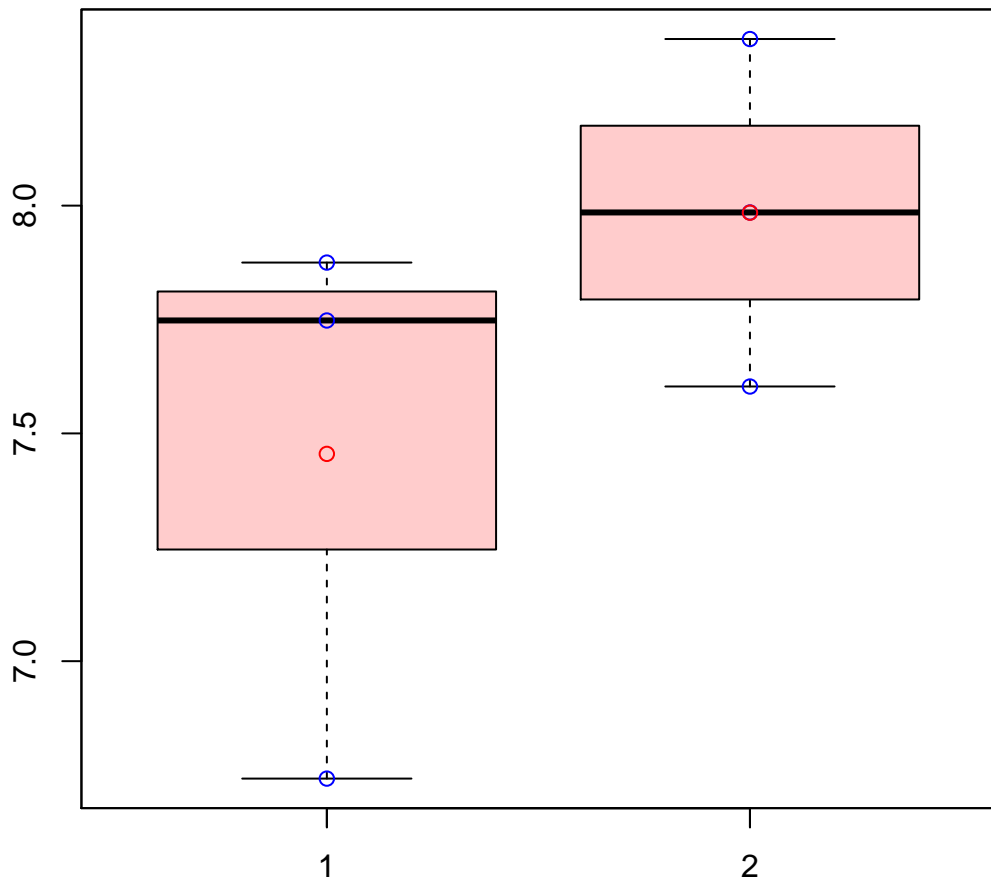

t-Test: p-value = 0.29

# I1QLJ6|I1QLJ6\_ORYGL

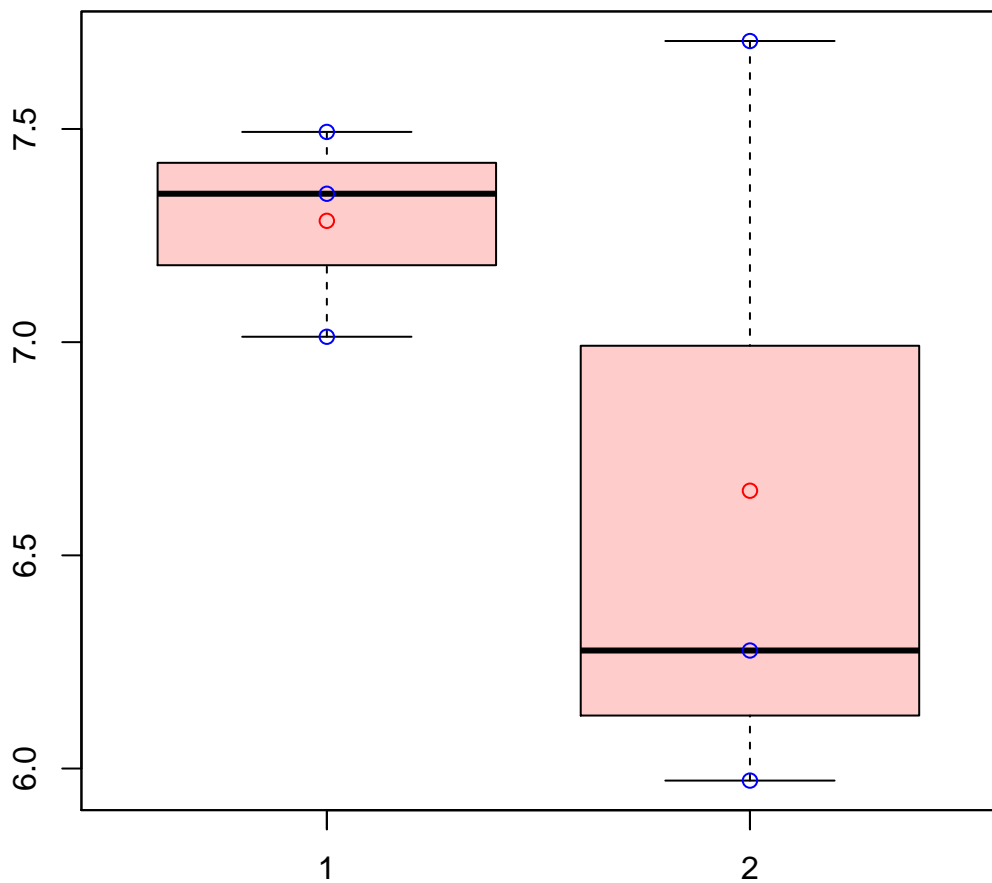

t-Test: p-value = 0.36



# I1QM94|I1QM94\_ORYGL

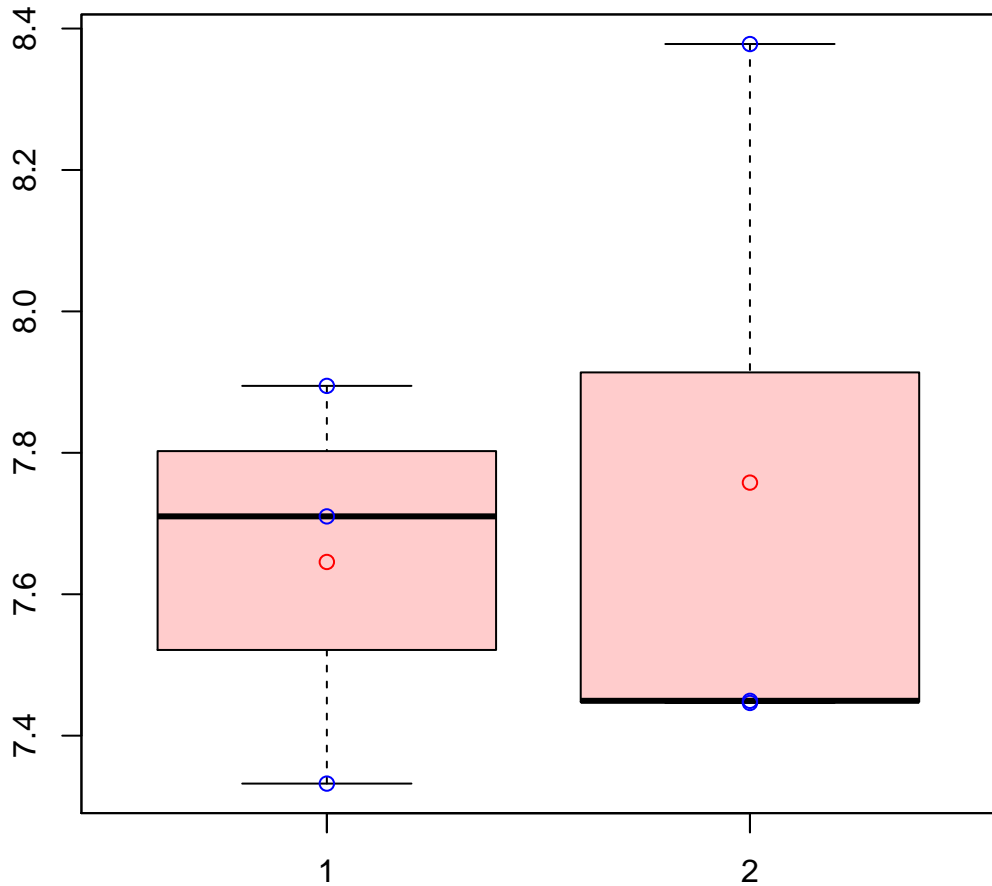

t-Test: p-value = 0.77

# I1QME8|I1QME8\_ORYGL

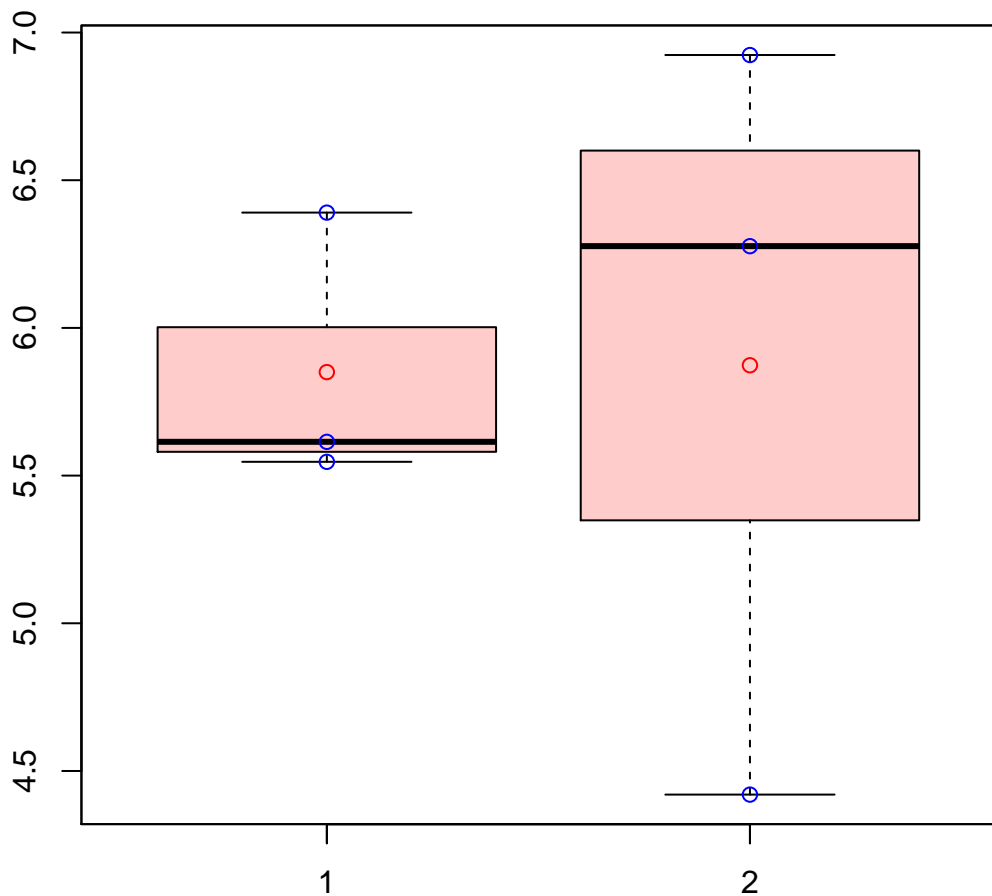

t-Test: p-value = 0.98

# I1QNA2|I1QNA2\_ORYGL

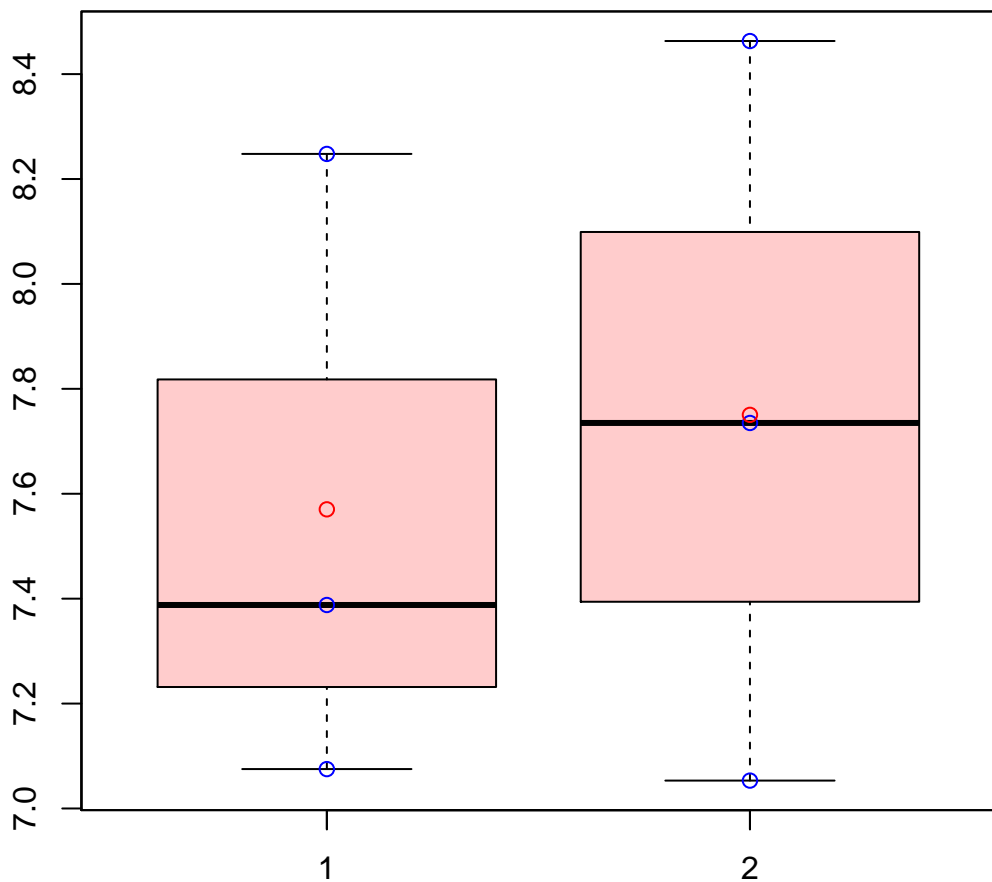

t-Test: p-value = 0.75

# I1QNM9|I1QNM9\_ORYGL

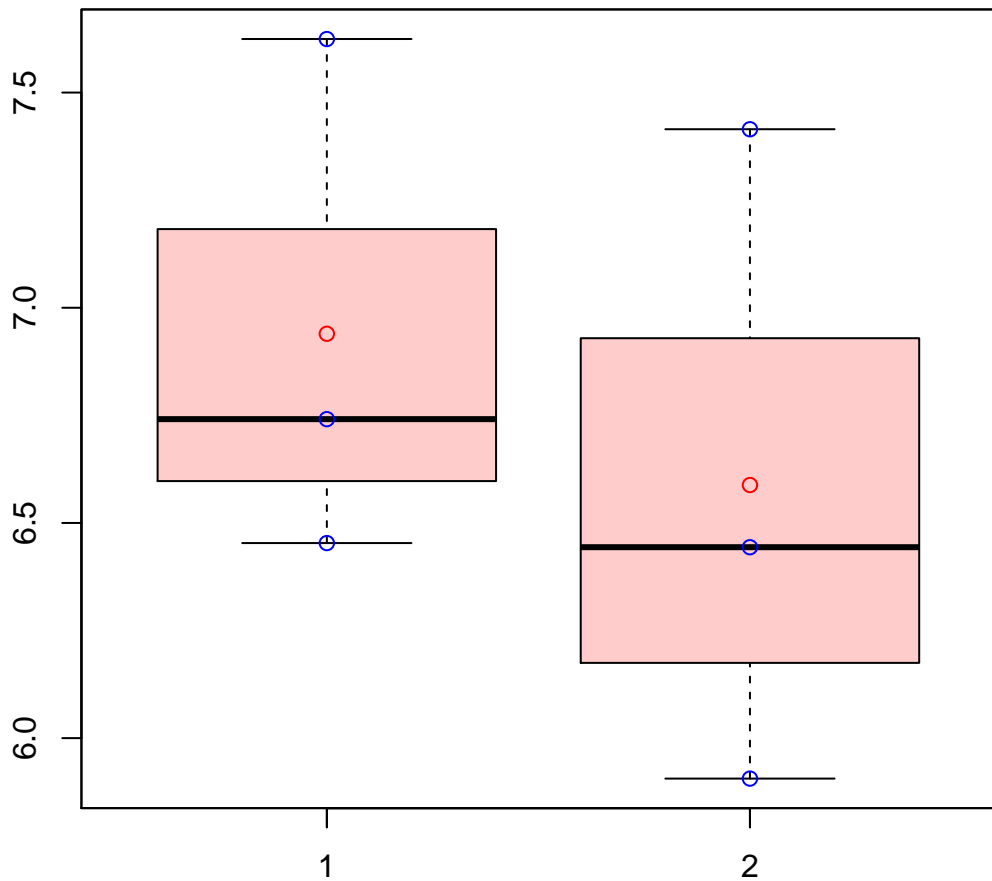

t-Test: p-value = 0.57

# I1QPI8|I1QPI8\_ORYGL

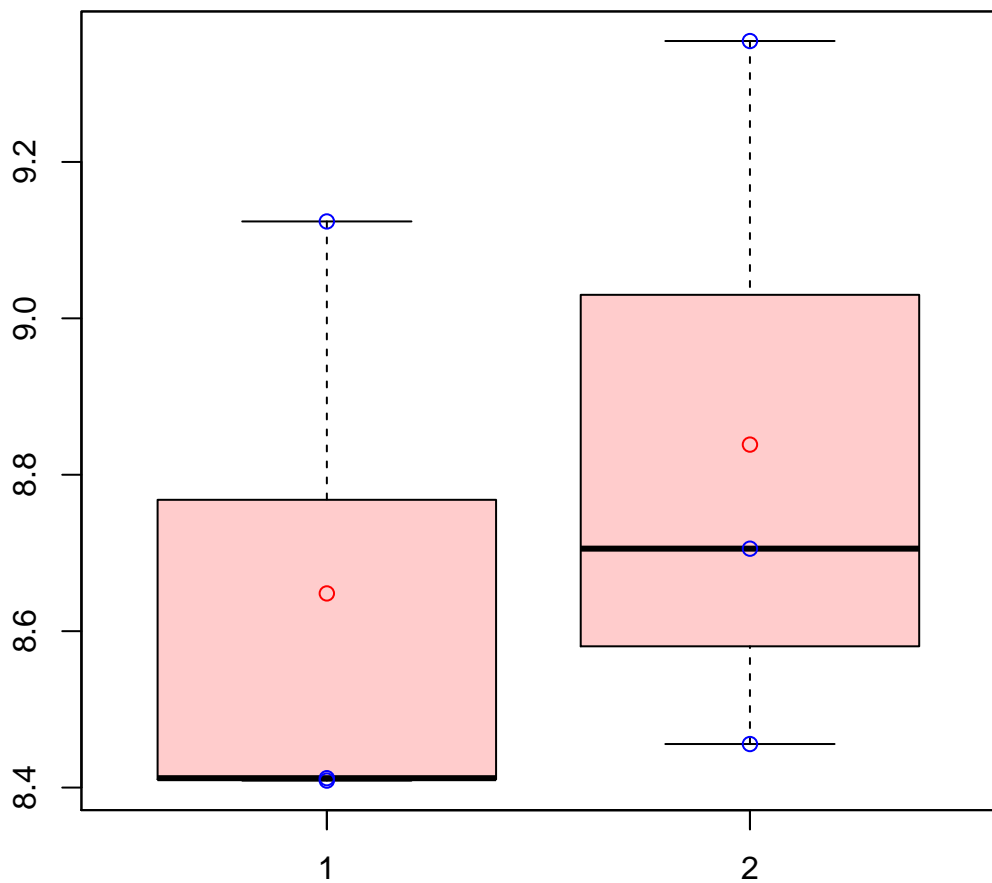

t-Test: p-value = 0.62

# I1QQA9|I1QQA9\_ORYGL

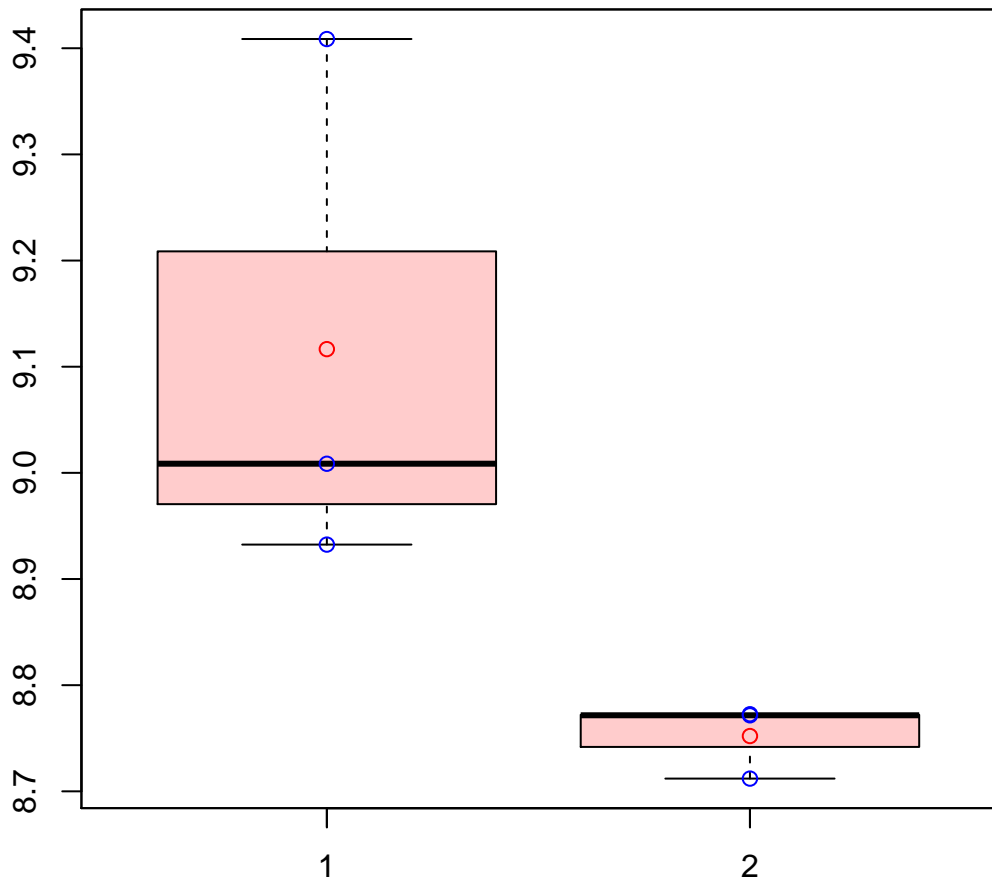

t-Test: p-value = 0.13

# I1QR41|I1QR41\_ORYGL

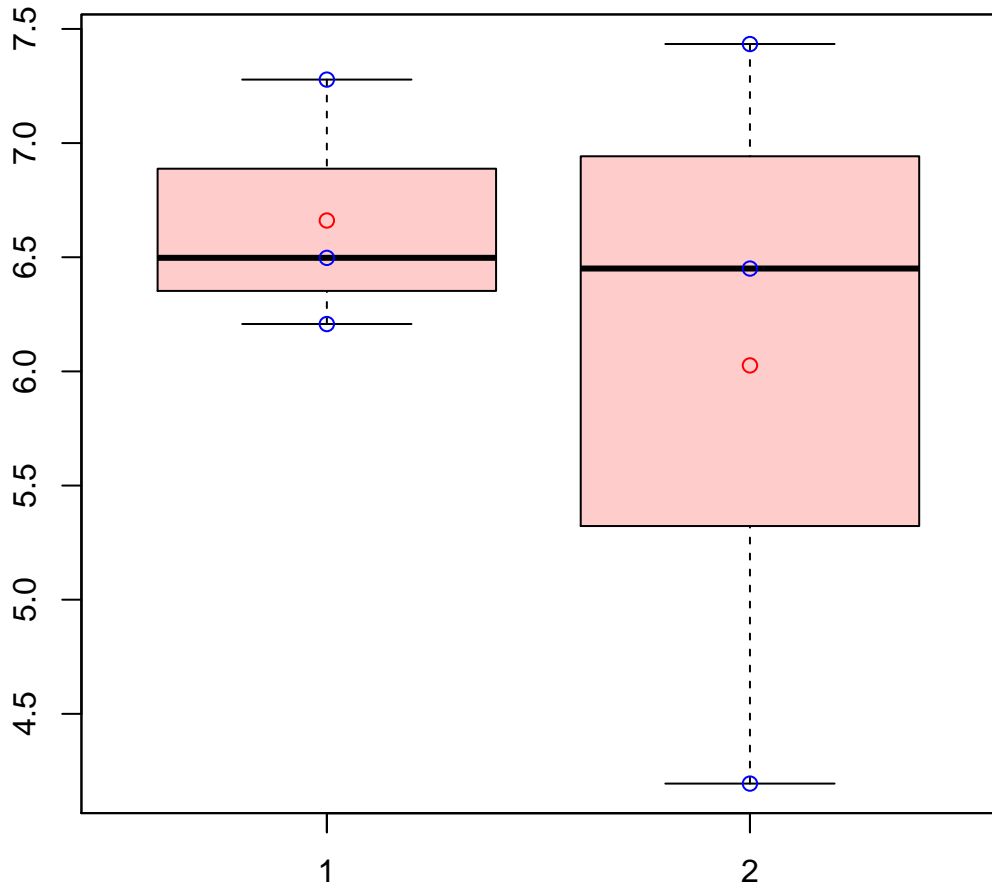

t-Test: p-value = 0.58

# I1QRD4|I1QRD4\_ORYGL

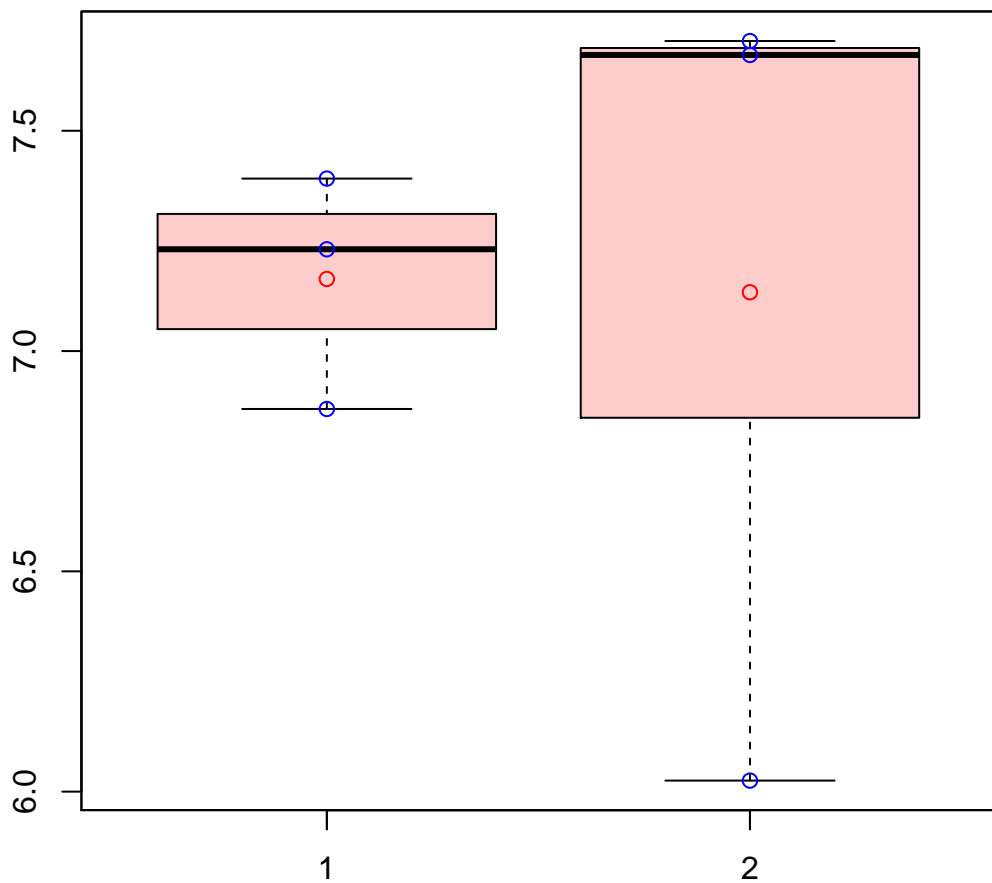

t-Test: p-value = 0.96



# I1QSF0|I1QSF0\_ORYGL

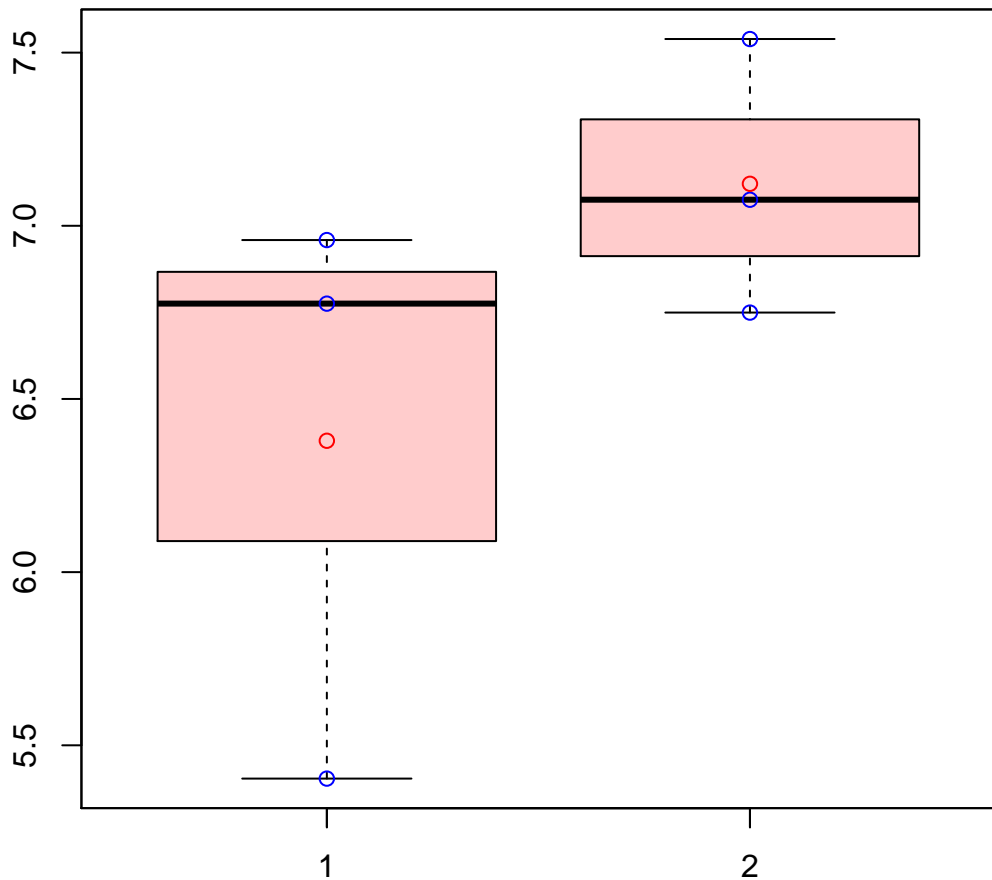

t-Test: p-value = 0.27

# I1QUF6|I1QUF6\_ORYGL

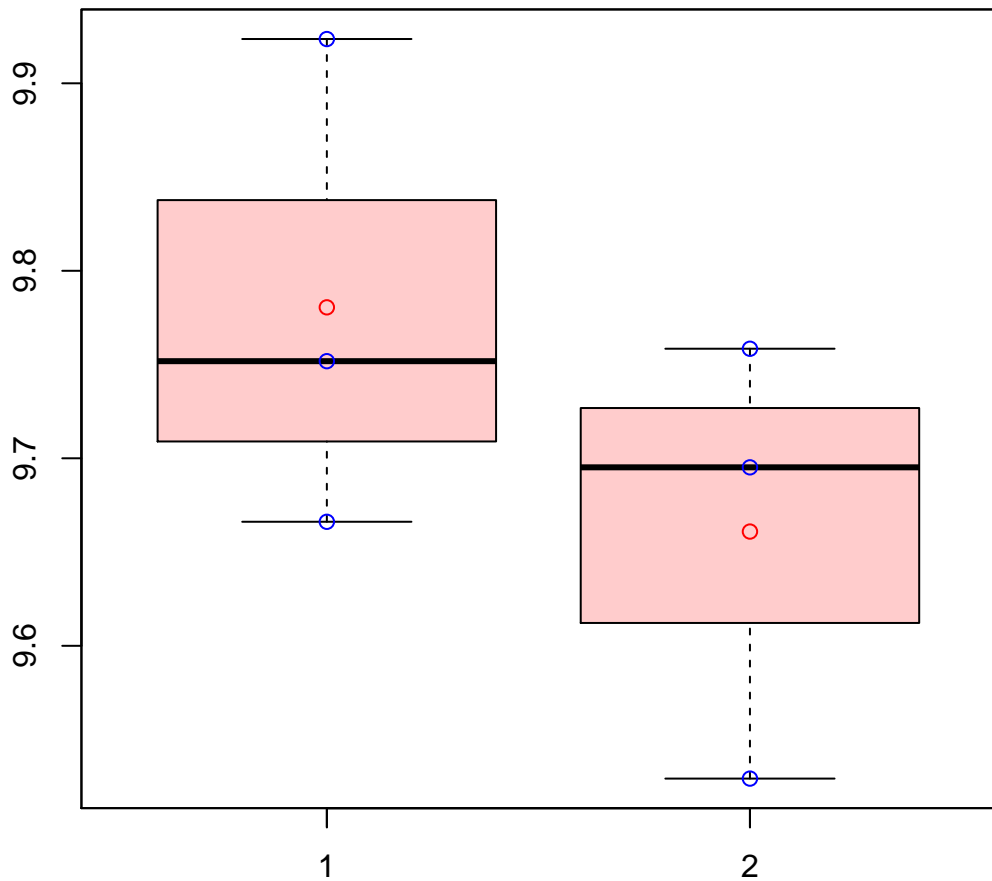

t-Test: p-value = 0.31

# I1QW04|I1QW04\_ORYGL

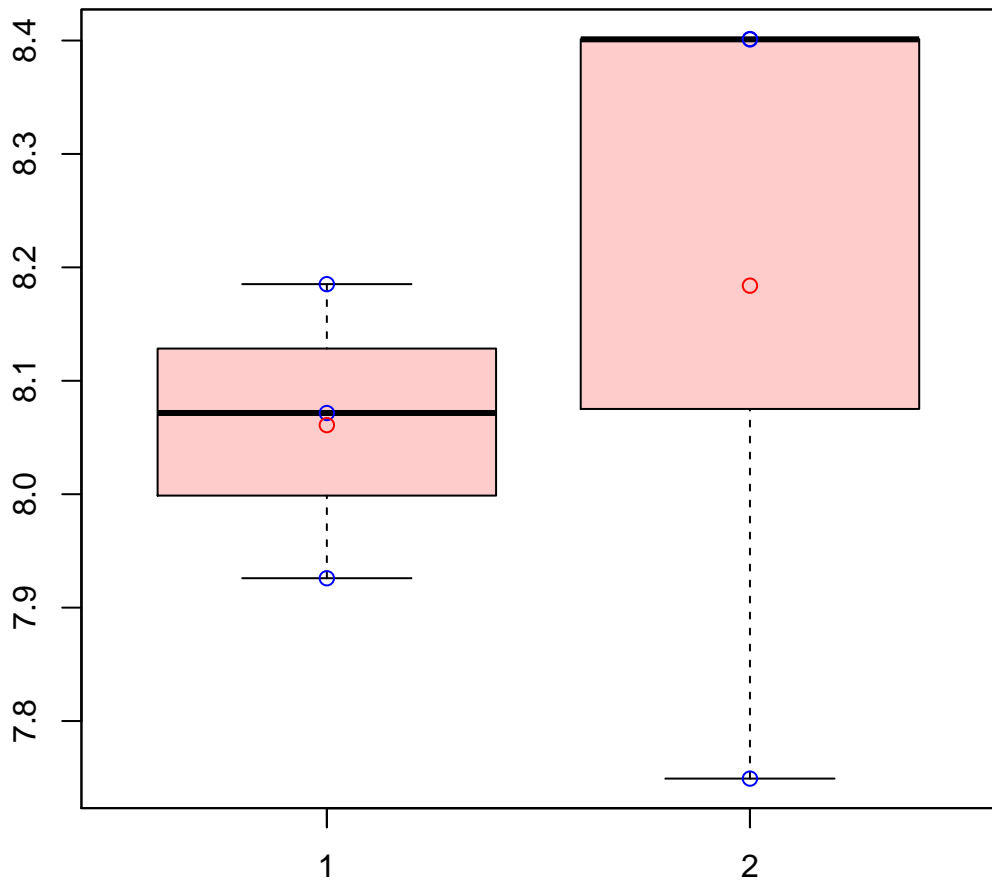

t-Test: p-value = 0.64

# I1QX03|I1QX03\_ORYGL

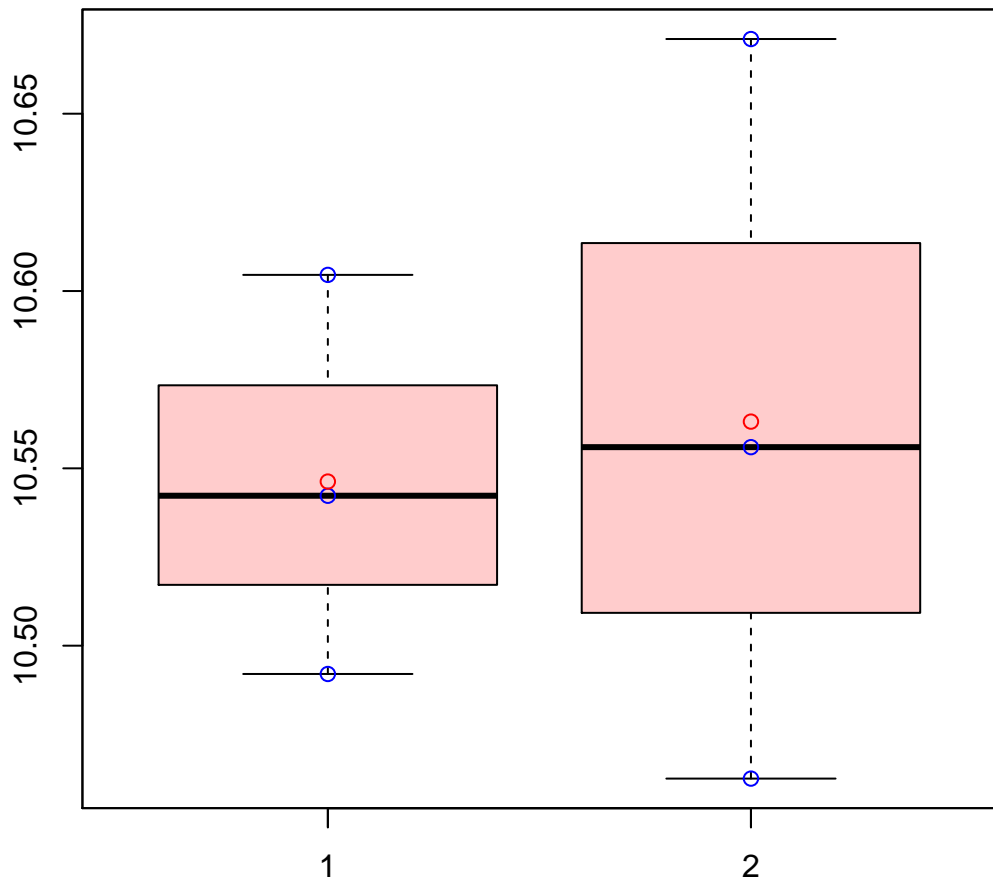

t-Test: p-value = 0.82

# I1QYP6|I1QYP6\_ORYGL

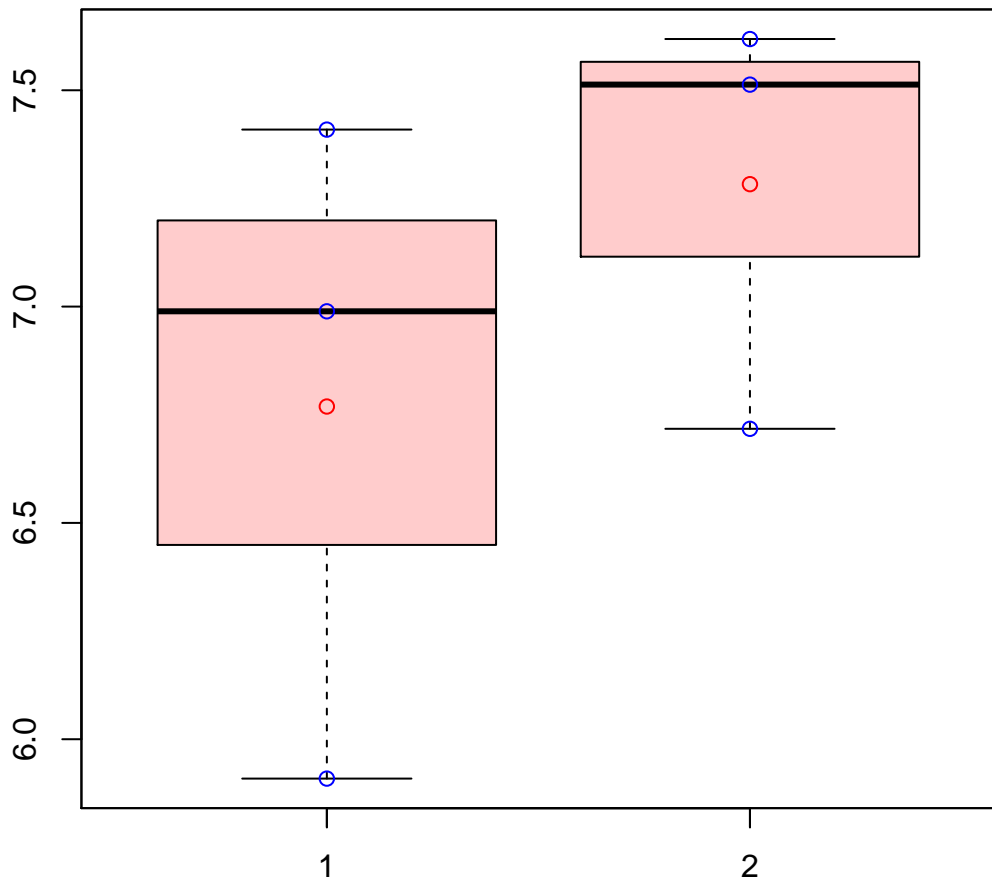

t-Test: p-value = 0.4

# I1QYZ0|I1QYZ0\_ORYGL

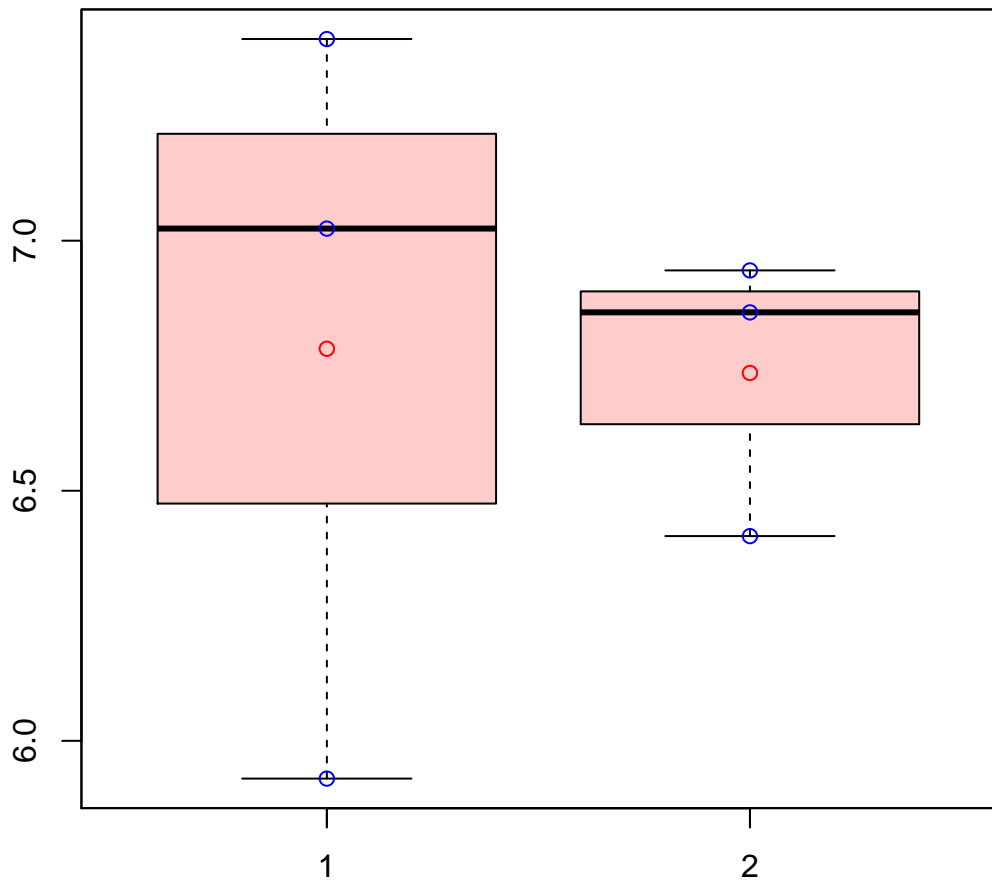

t-Test: p-value = 0.93

# I1QZ81|I1QZ81\_ORYGL

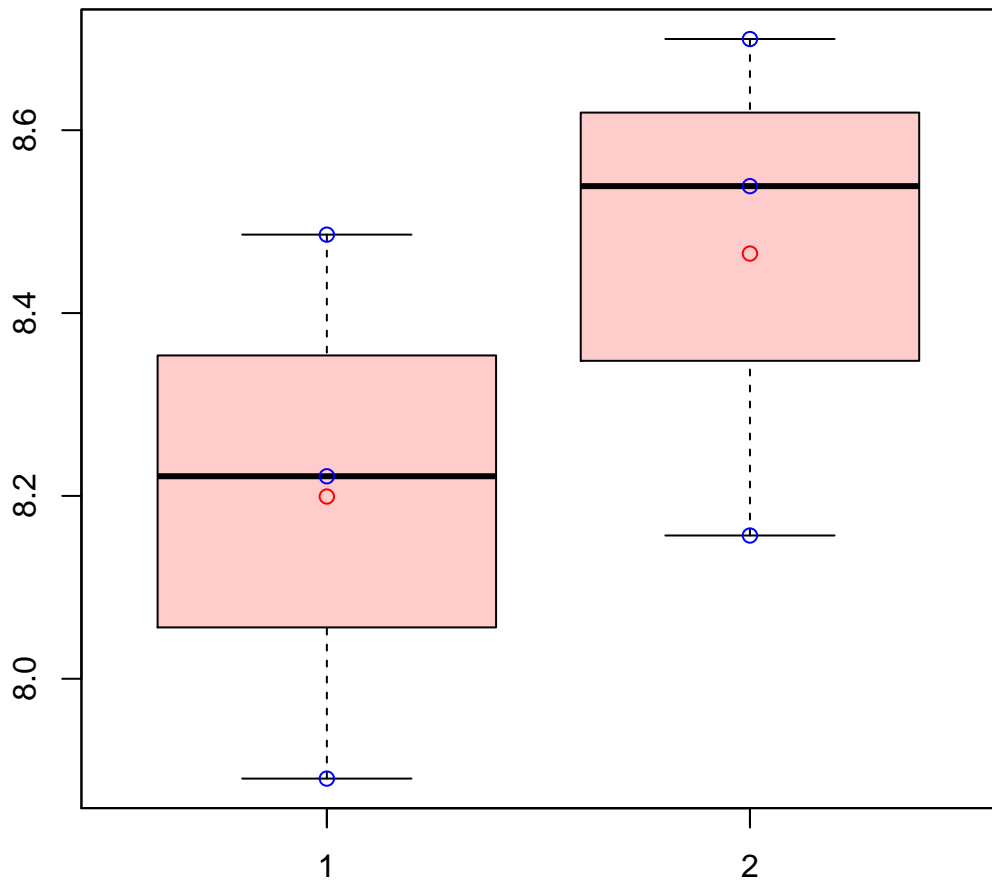

t-Test: p-value = 0.32

# I1R0S0|I1R0S0\_ORYGL

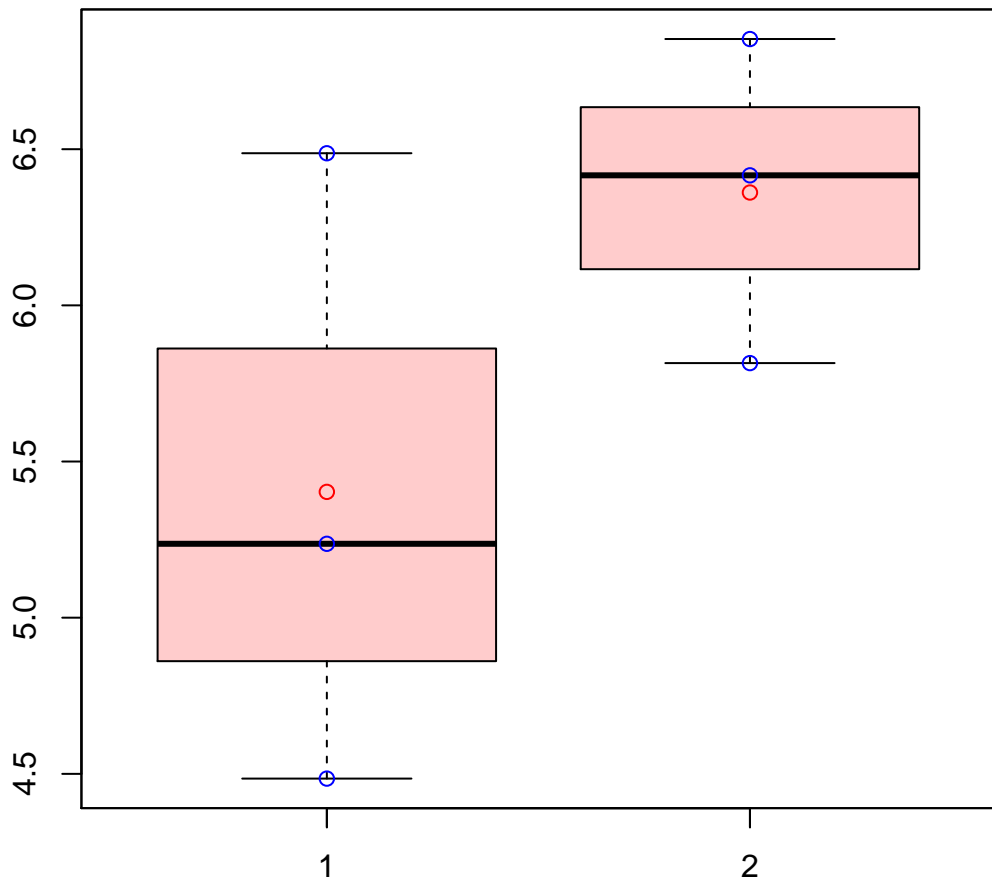

t-Test: p-value = 0.24



# I1R1A8|I1R1A8\_ORYGL

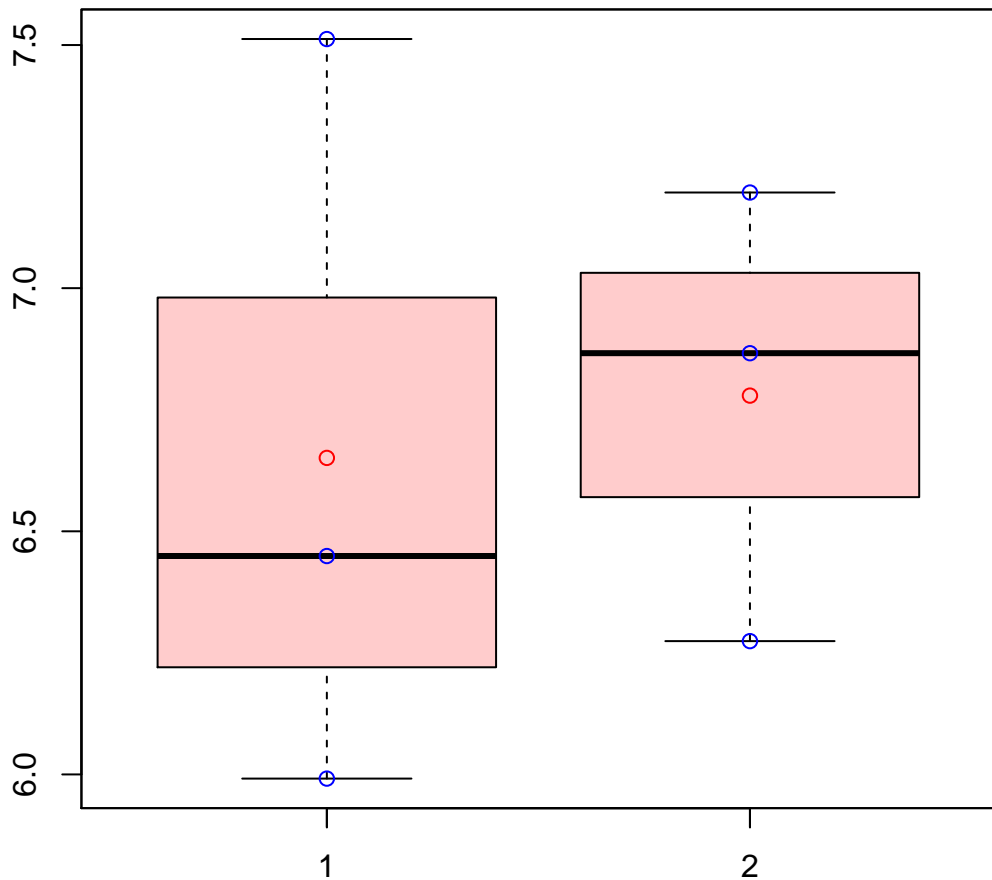

t-Test: p-value = 0.82

# I1R1T6|I1R1T6\_ORYGL

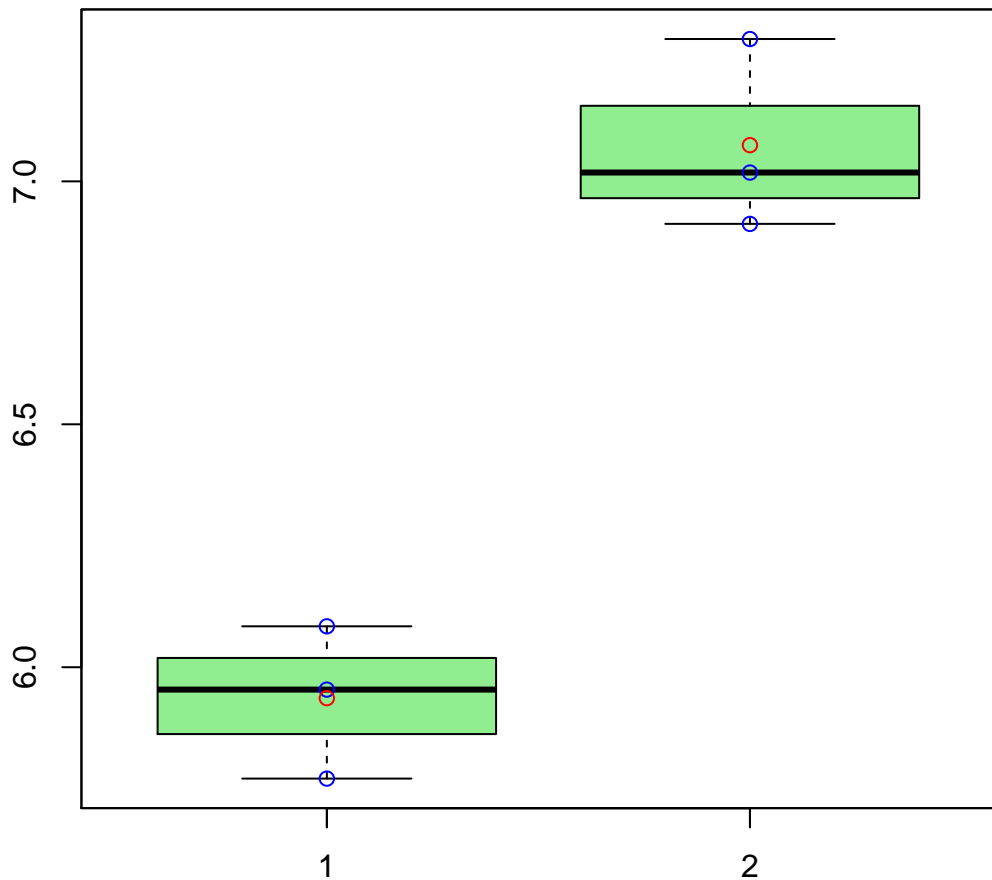

t-Test: p-value = 0

# I1R256|I1R256\_ORYGL

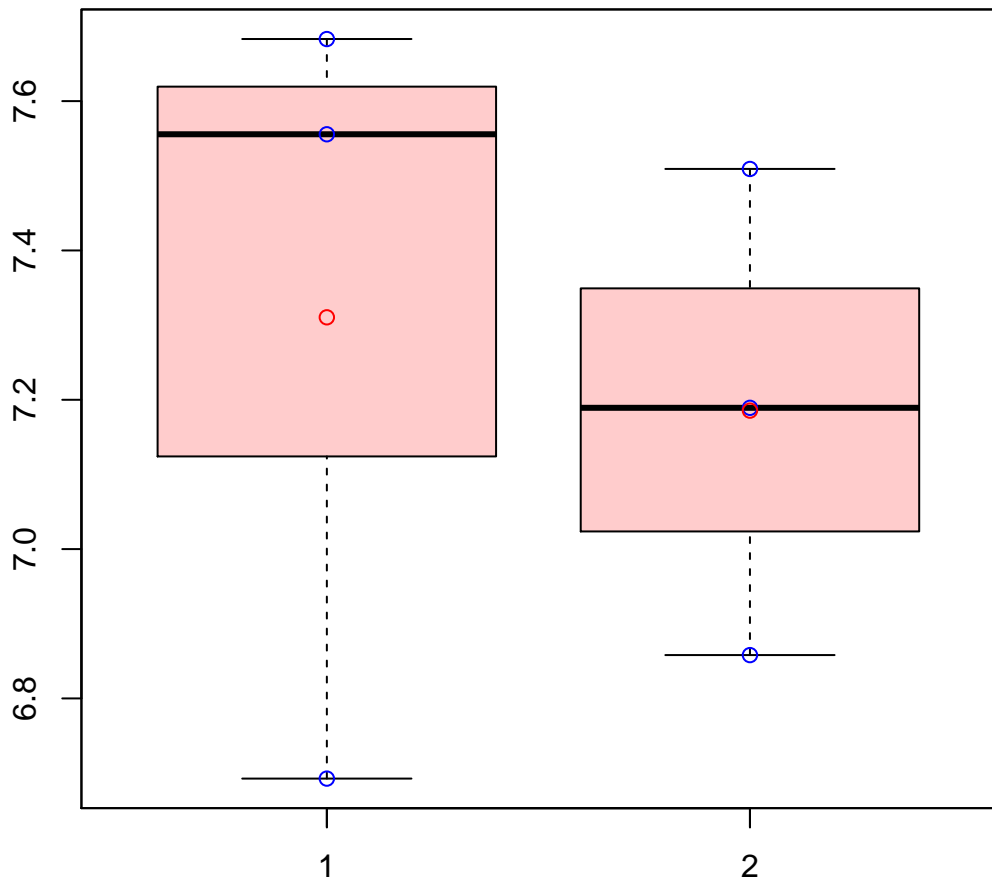

t-Test: p-value = 0.75

# I1R276|I1R276\_ORYGL

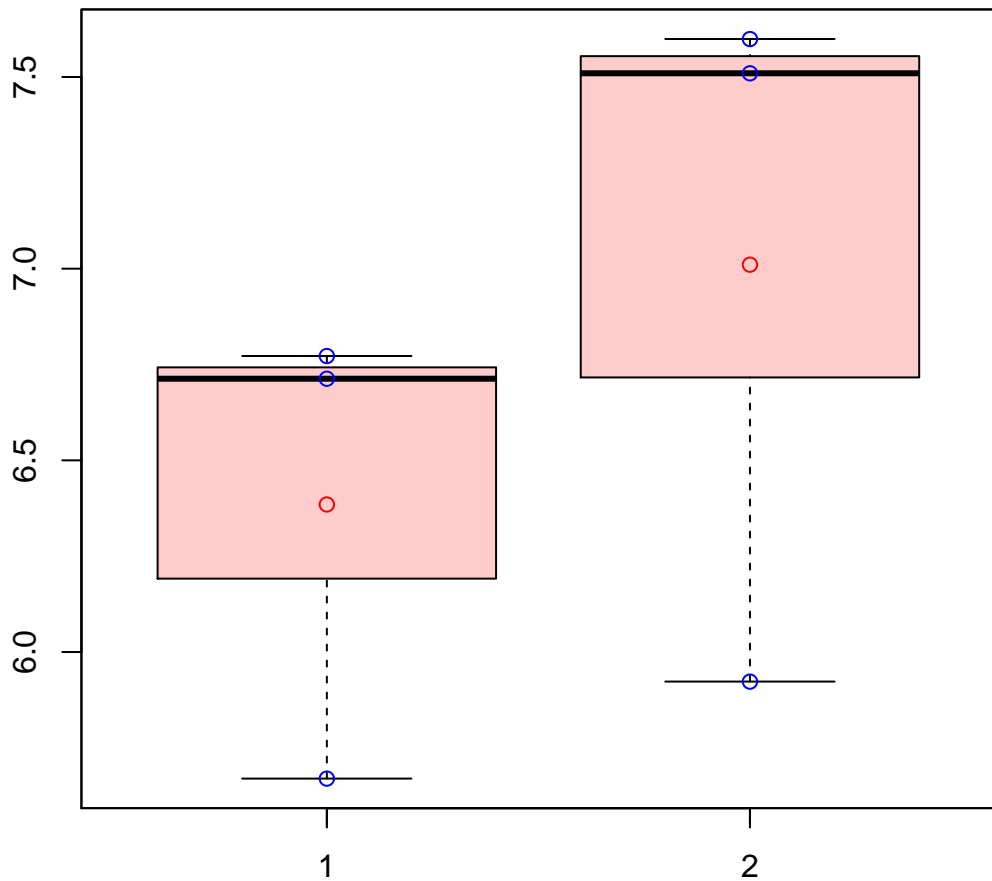

t-Test: p-value = 0.4

# I1R392|I1R392\_ORYGL

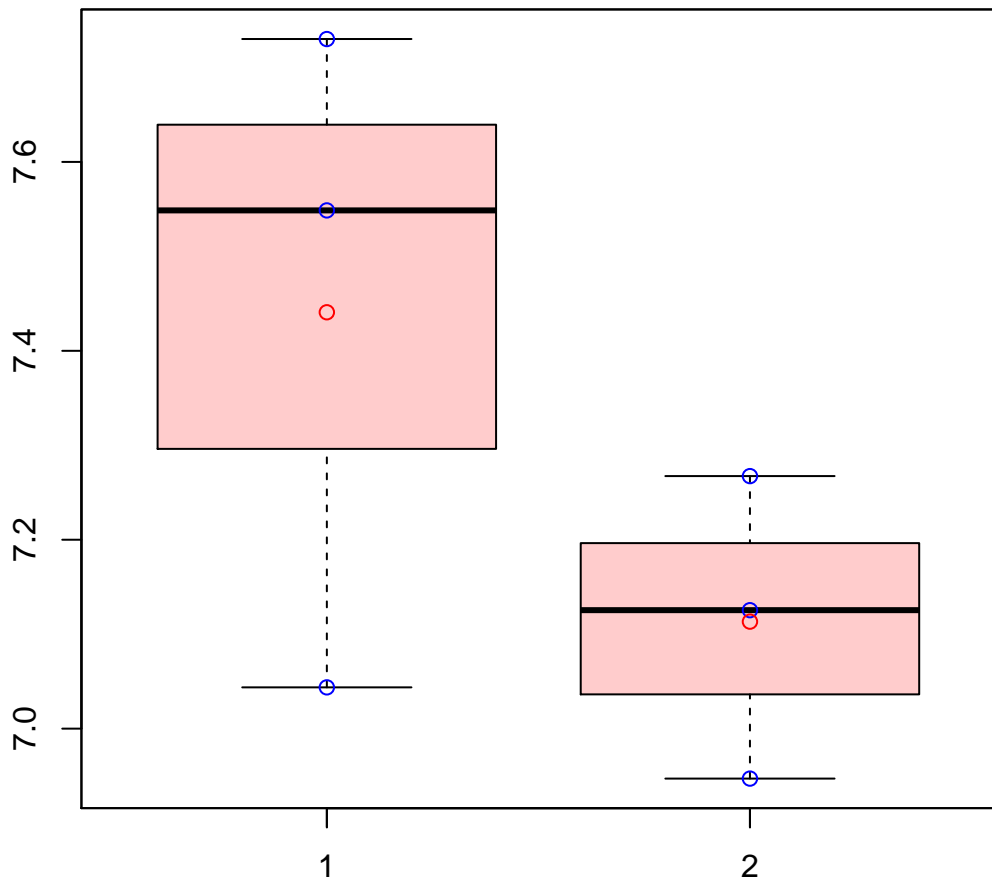

t-Test: p-value = 0.25

# I1R3F5|I1R3F5\_ORYGL

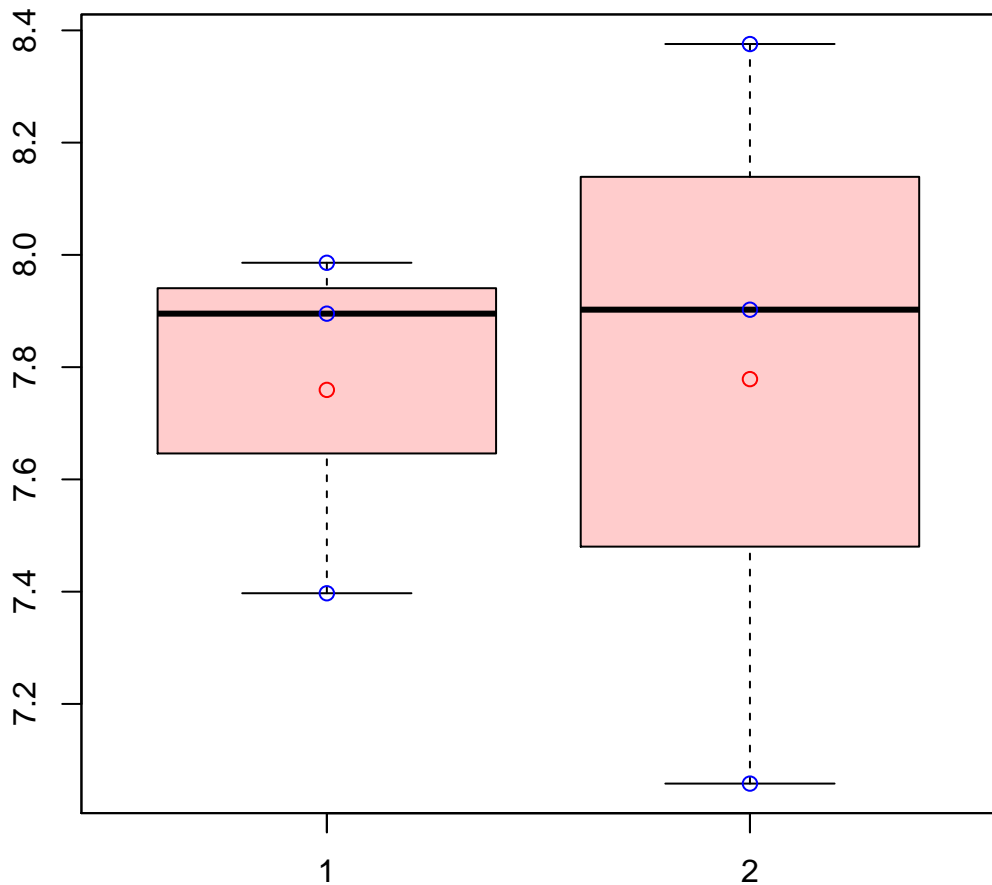

t-Test: p-value = 0.97

# I1R4S5|I1R4S5\_ORYGL

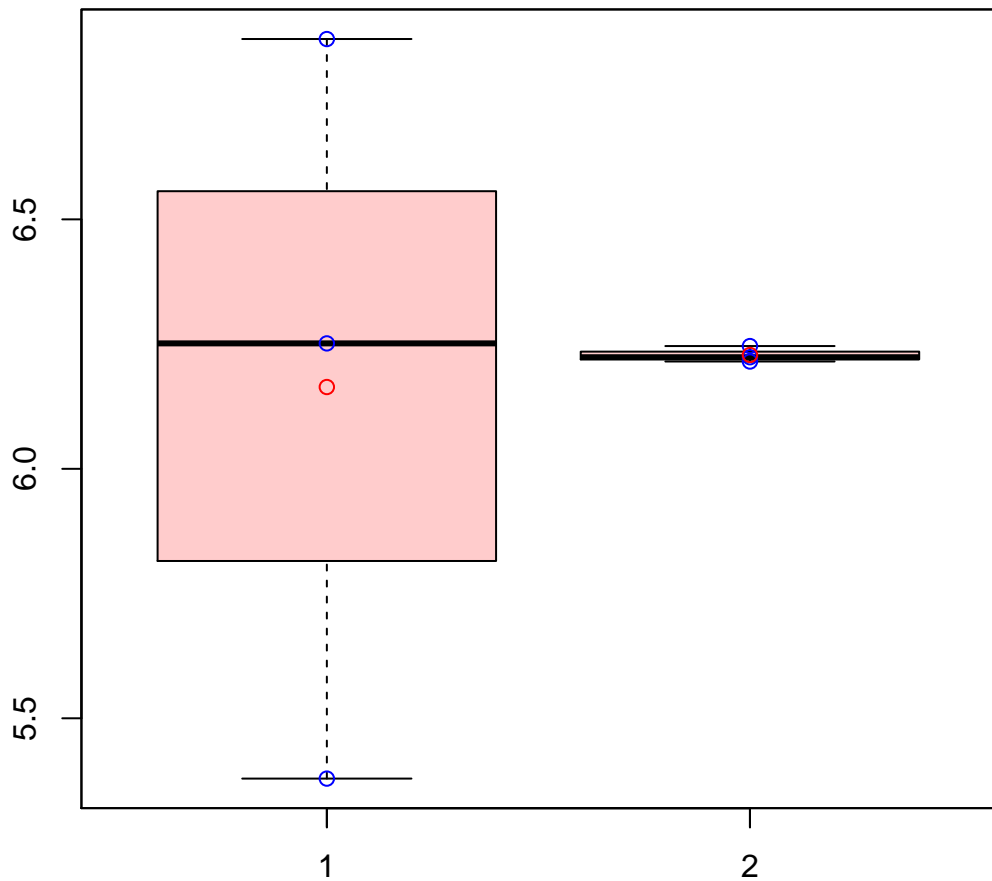

t-Test: p-value = 0.89

# I1R509|I1R509\_ORYGL

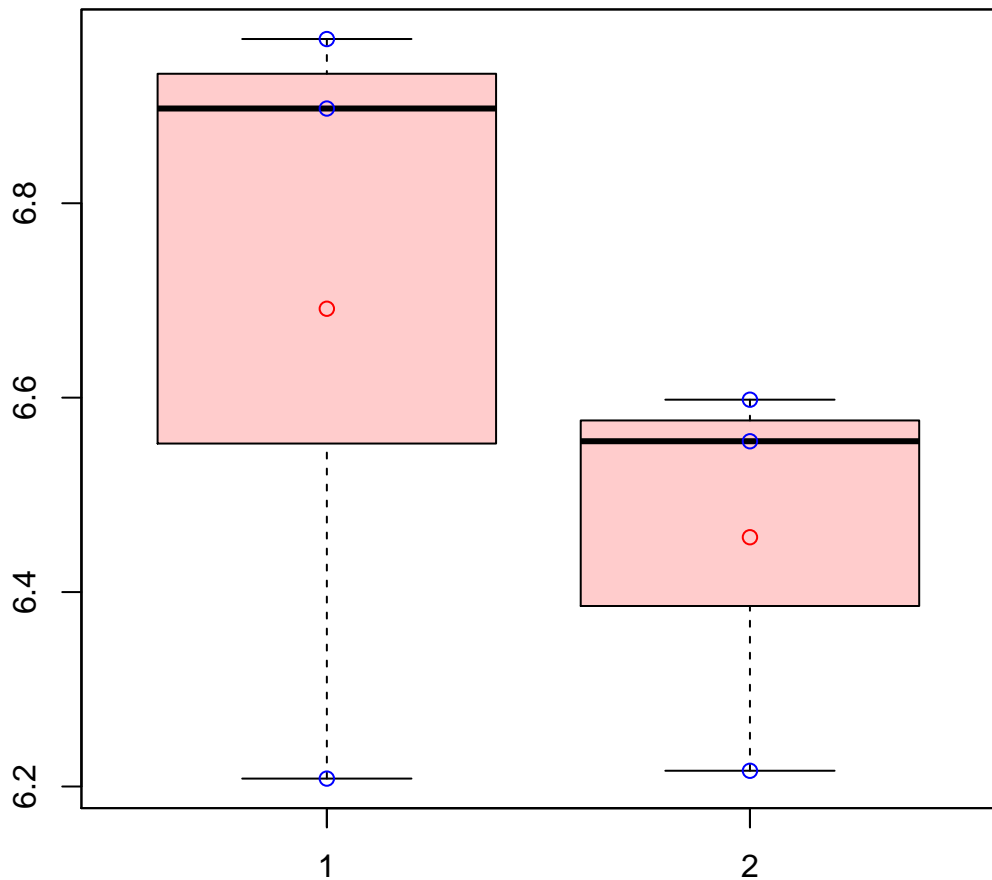

t-Test: p-value = 0.45



# I1R538|I1R538\_ORYGL

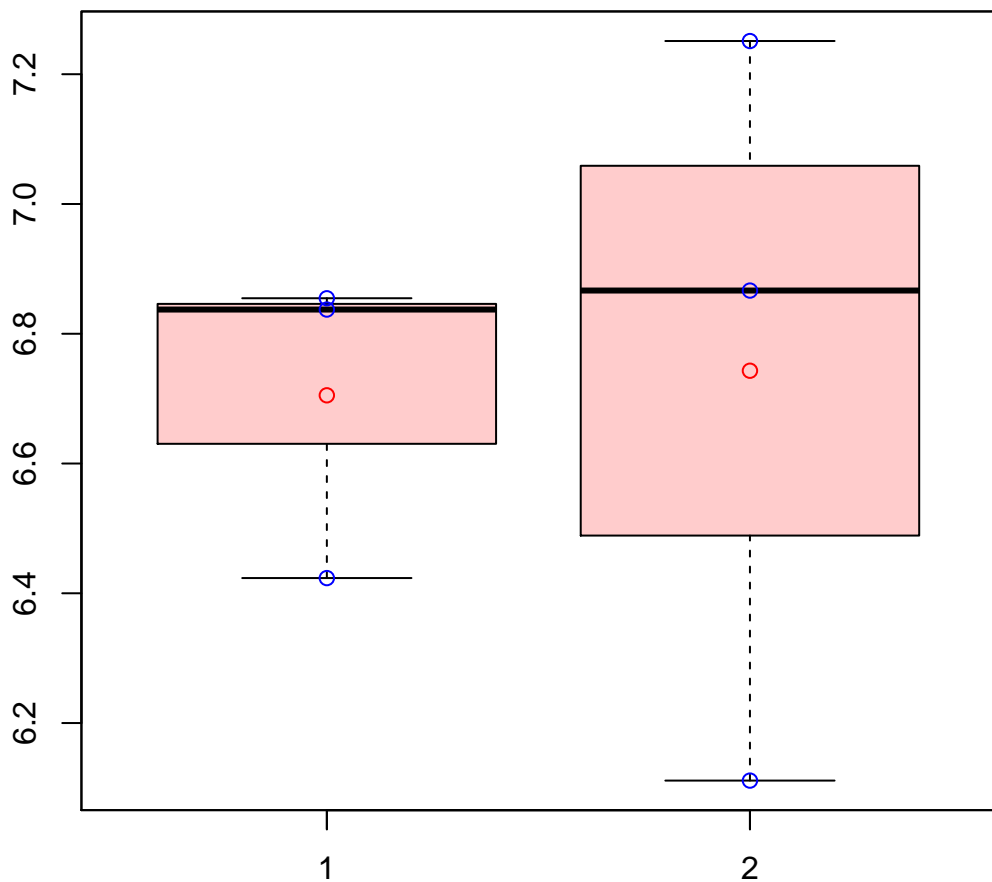

t-Test: p-value = 0.92

# I1R581|I1R581\_ORYGL

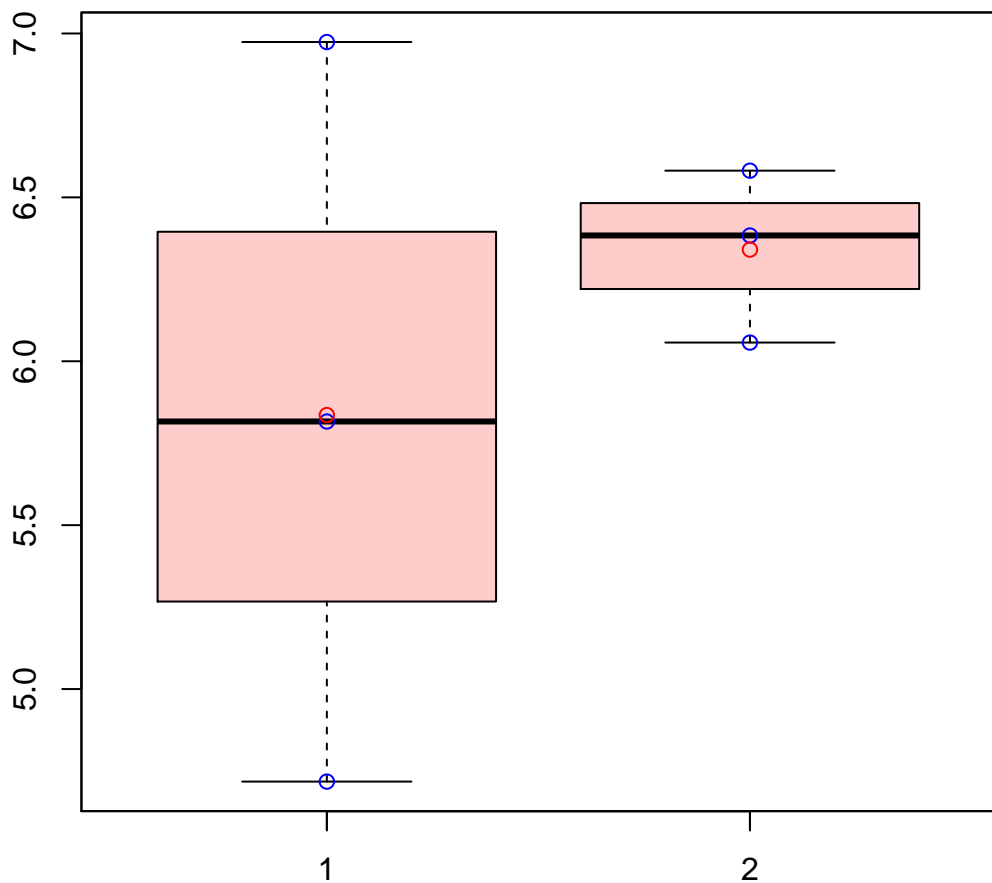

t-Test: p-value = 0.52

# I1R596|I1R596\_ORYGL

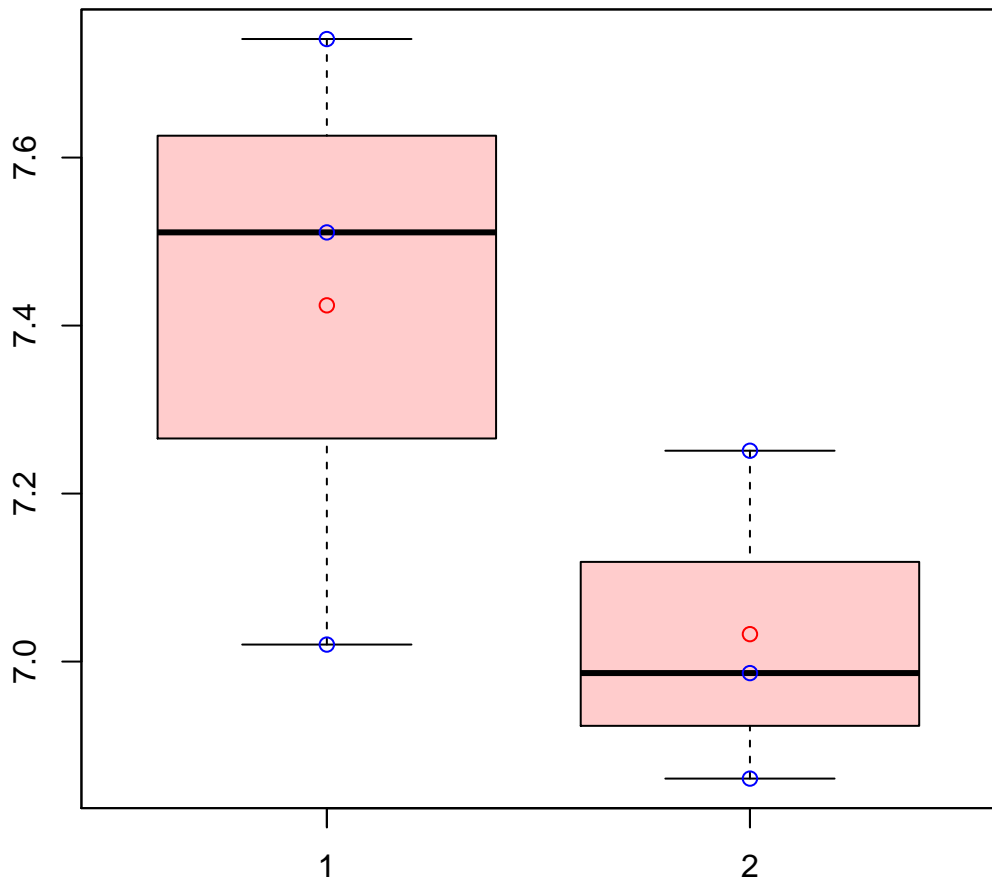

t-Test: p-value = 0.2

# I1R5D2|I1R5D2\_ORYGL

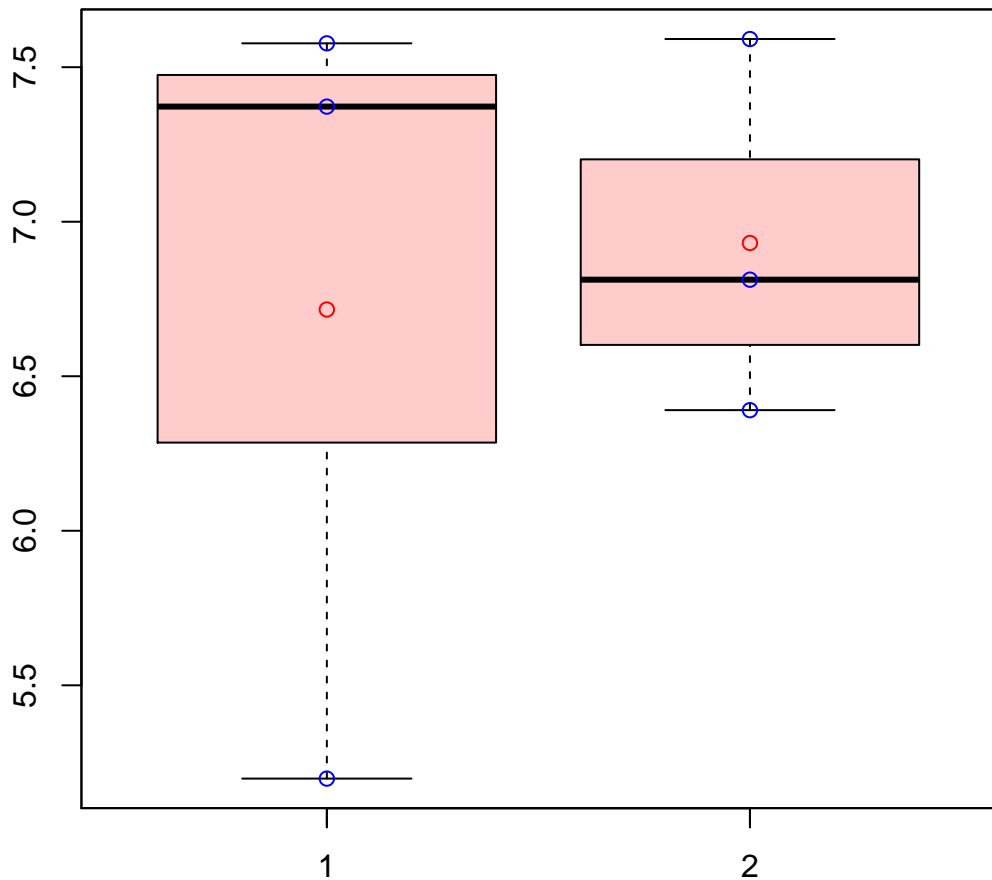

t-Test: p-value = 0.81

# I1R5I7|I1R5I7\_ORYGL

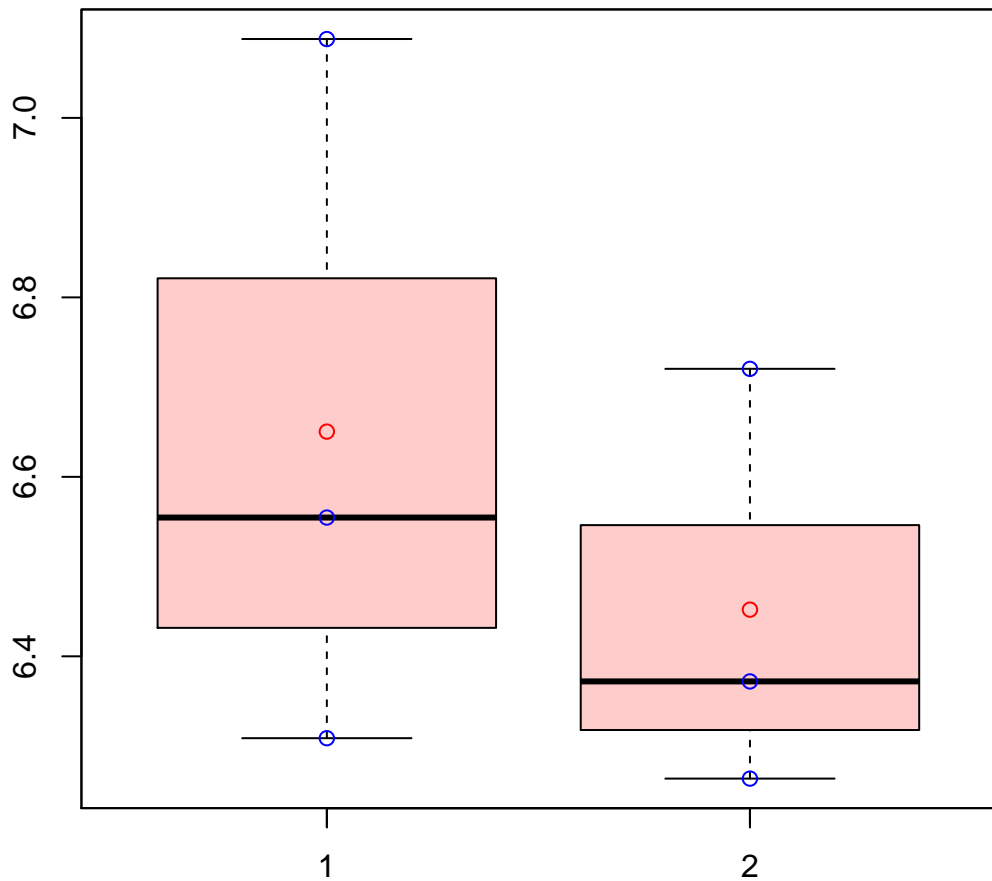

t-Test: p-value = 0.51

# I1R5M7|I1R5M7\_ORYGL

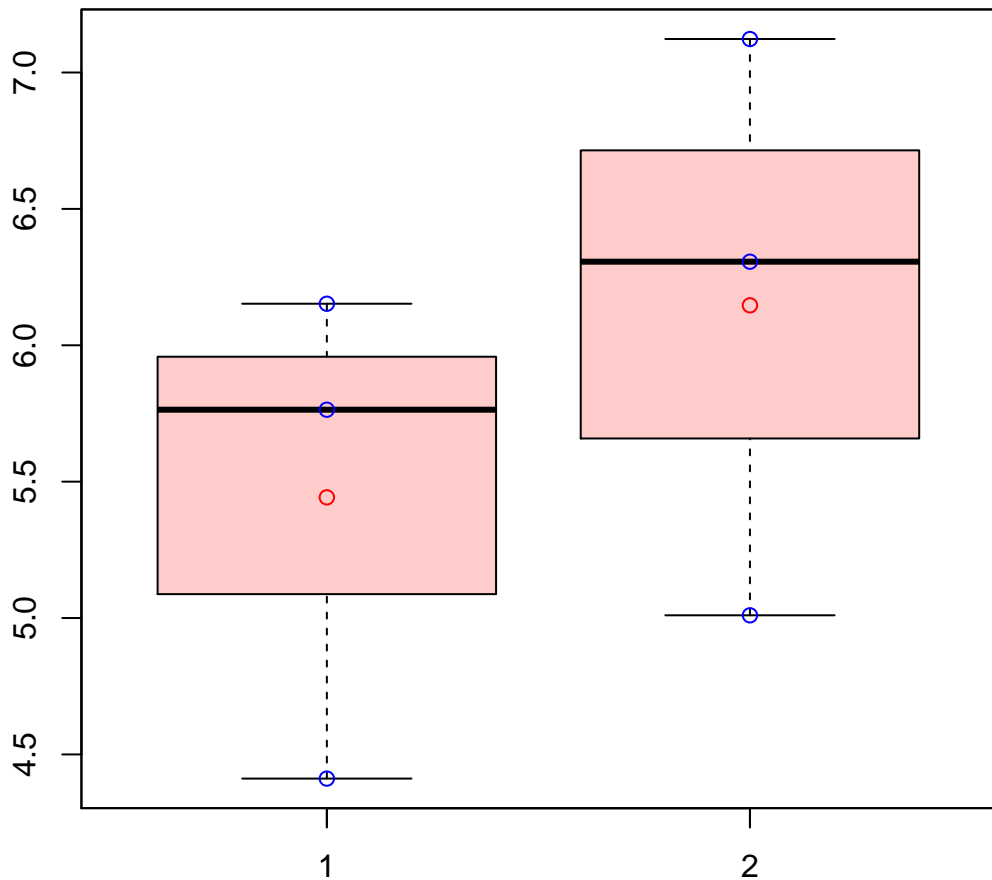

t-Test: p-value = 0.44

# I1R5Q0|I1R5Q0\_ORYGL

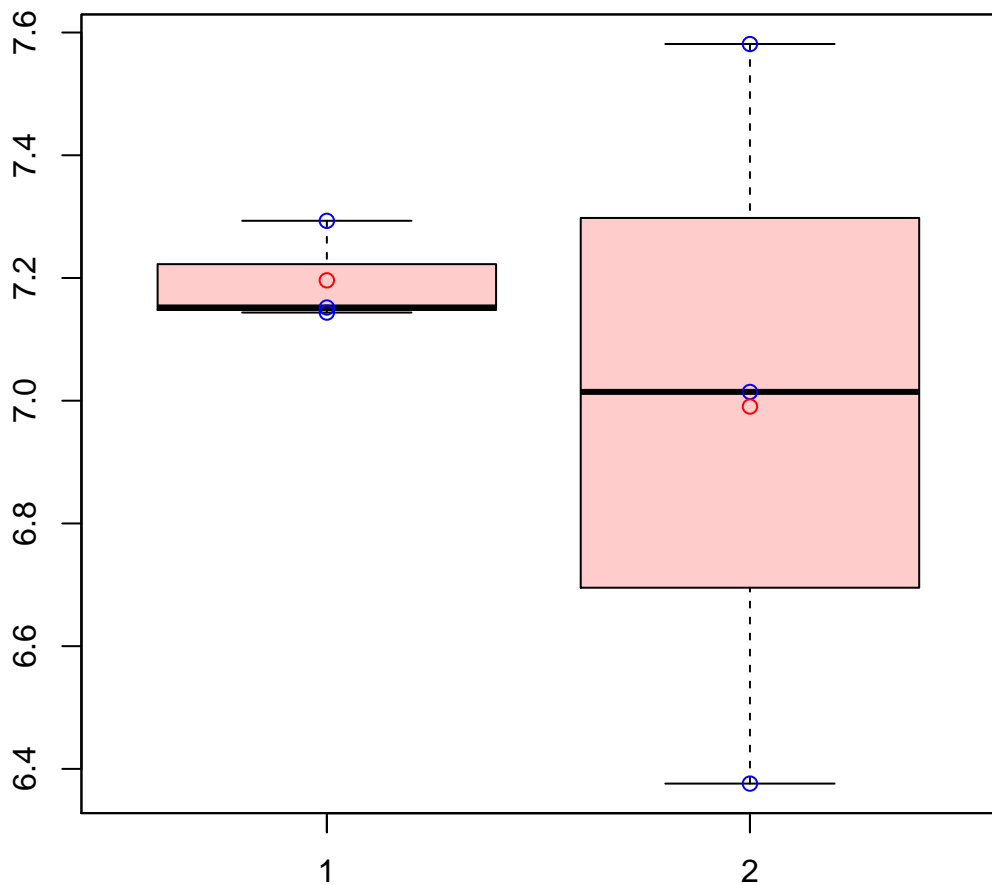

t-Test: p-value = 0.62

# I1R5X3|I1R5X3\_ORYGL

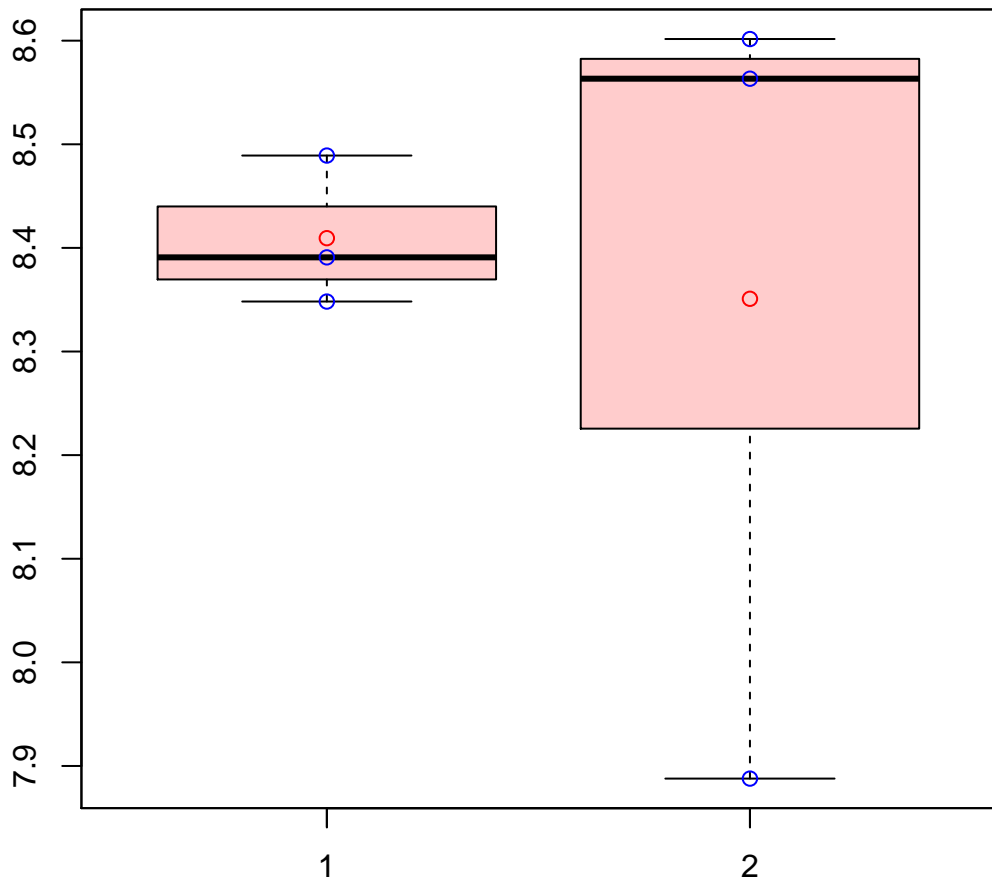

t-Test: p-value = 0.83



# I1VWL3|I1VWL3\_SPIPO

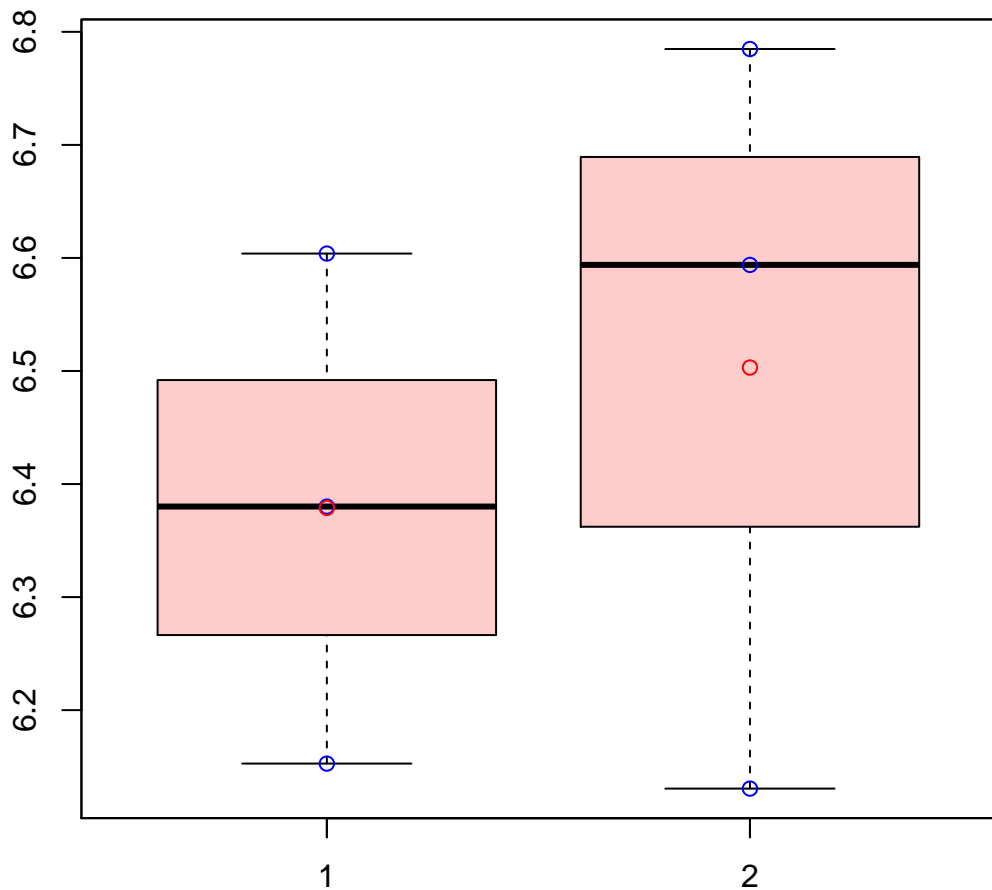

t-Test: p-value = 0.63

# I1ZBQ5|I1ZBQ5\_AGATE

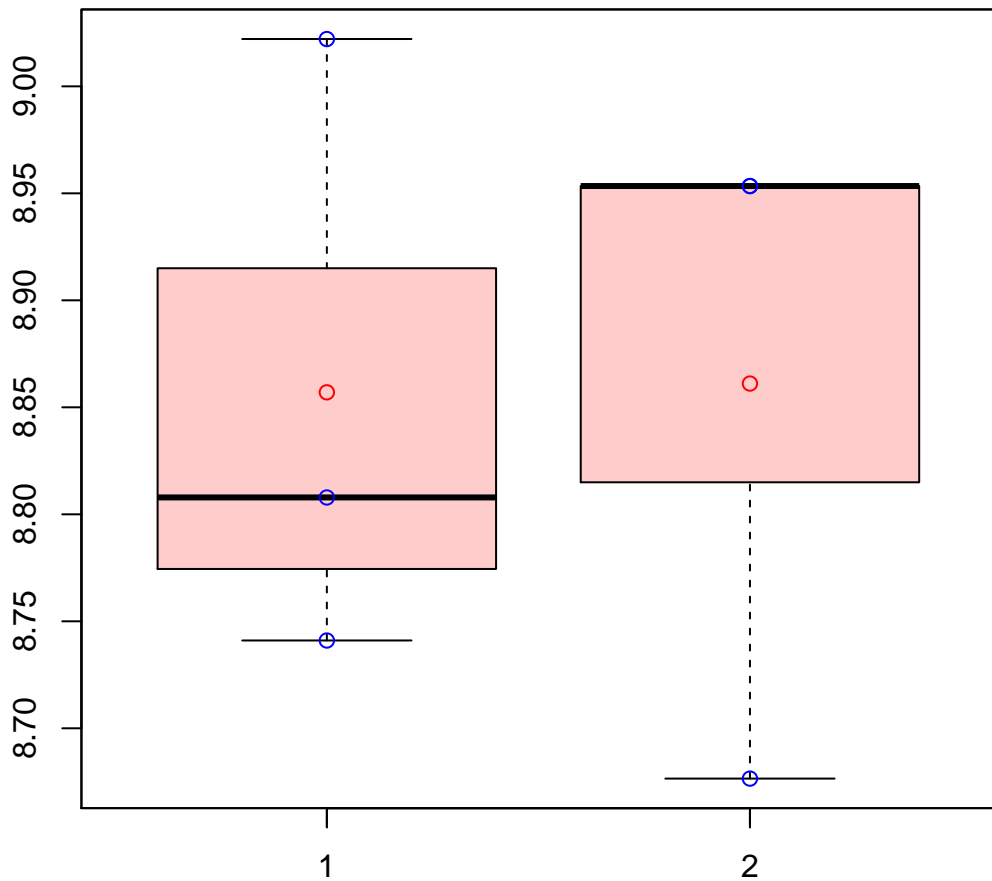

t-Test: p-value = 0.98

# I2DBG6|I2DBG6\_ORYSI

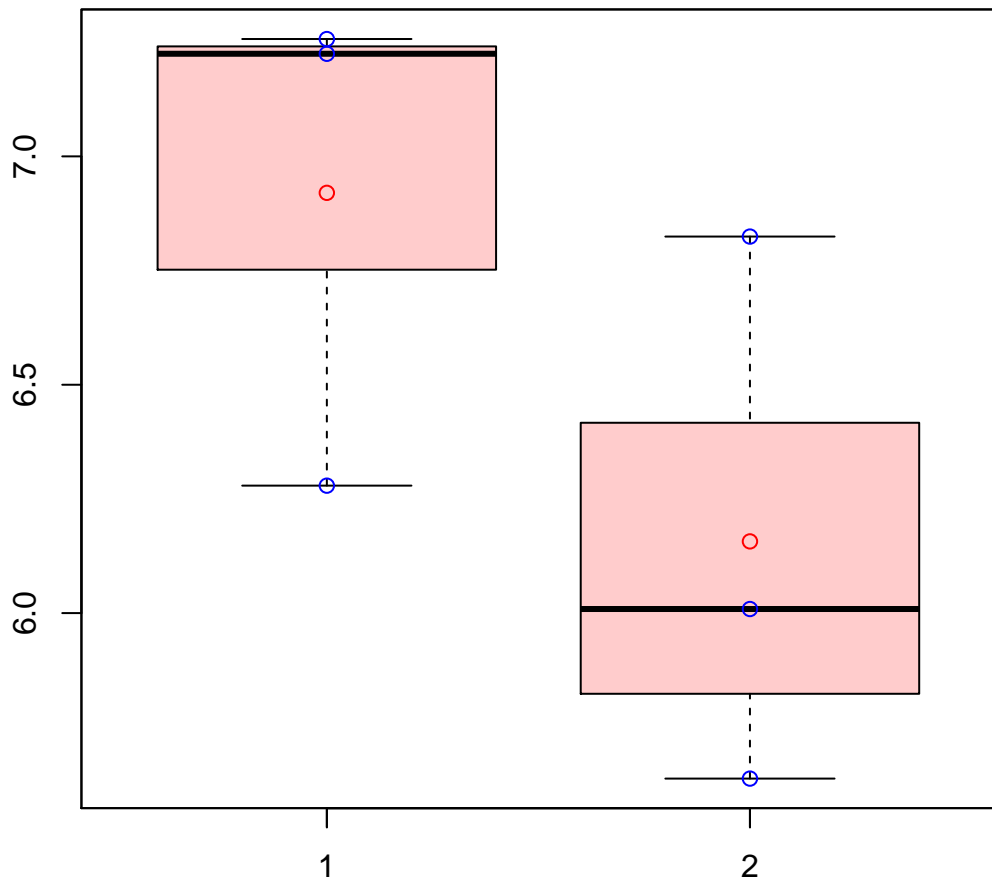

t-Test: p-value = 0.18

# I2FFU2|I2FFU2\_ARUMA

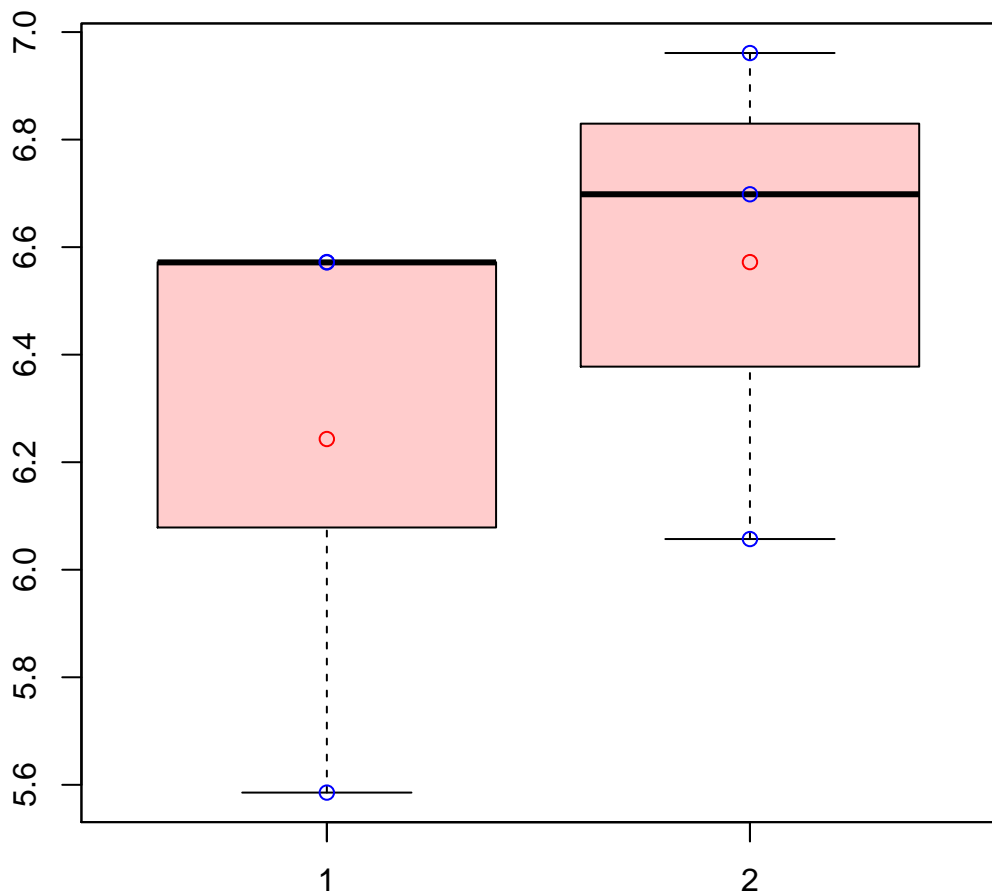

t-Test: p-value = 0.48

# I3WDN9|I3WDN9\_9POAL

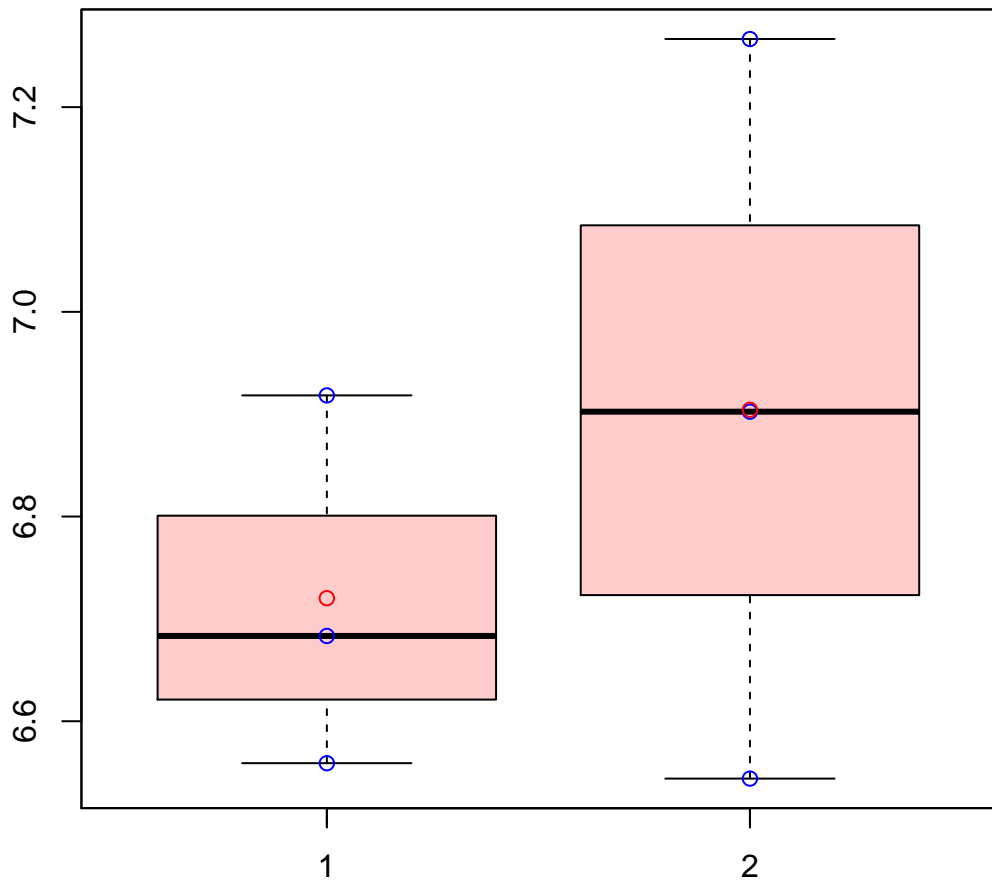

t-Test: p-value = 0.49

# I4E9R7|I4E9R7\_9POAL

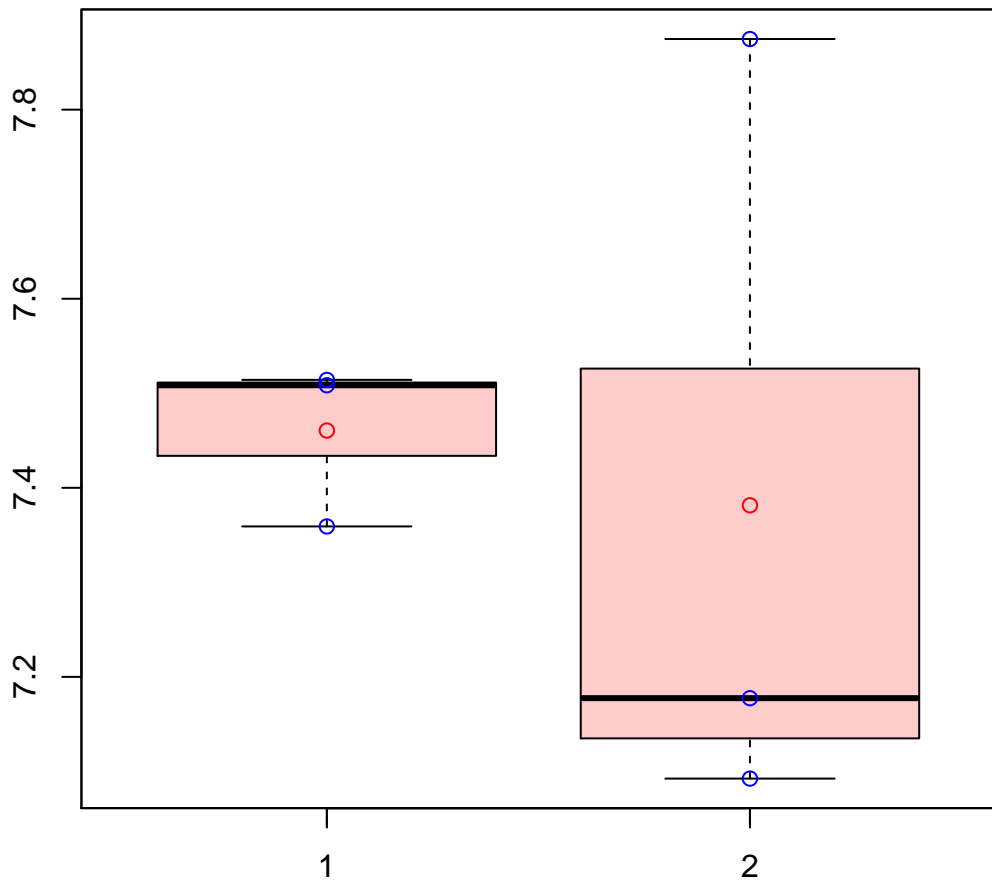

t-Test: p-value = 0.78

# I6QQ39|I6QQ39\_WHEAT

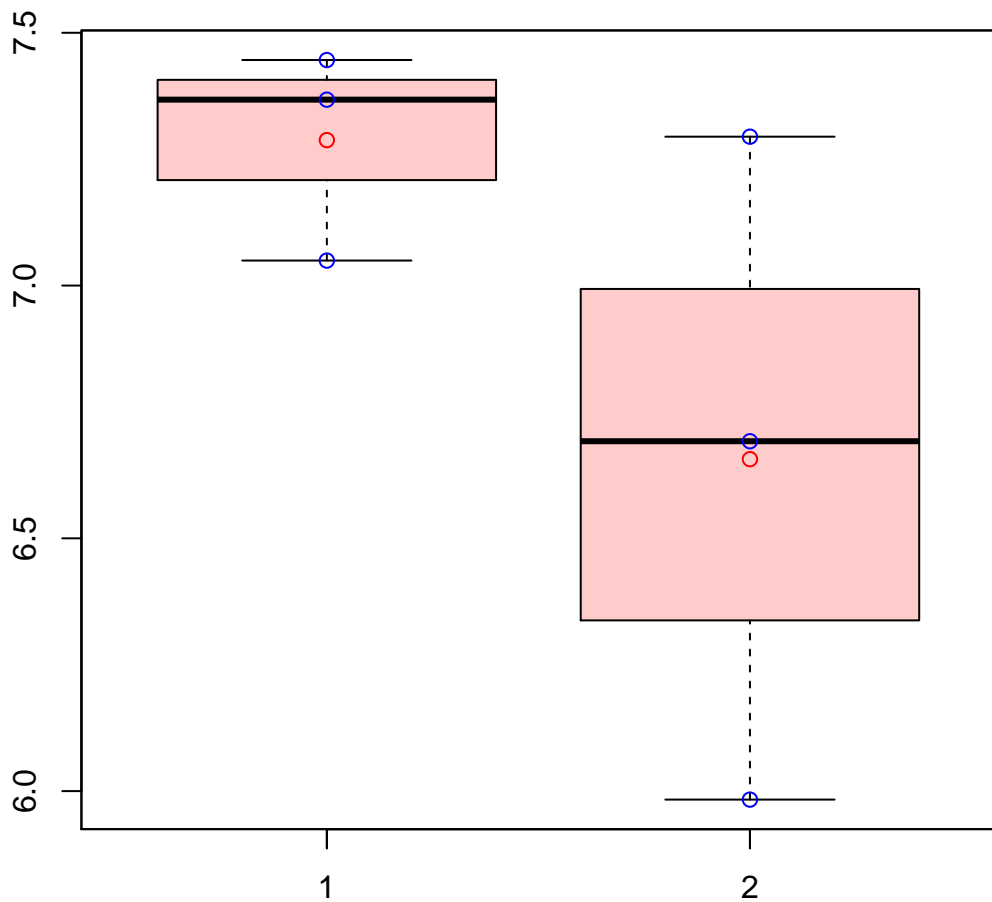

t-Test: p-value = 0.23

# I7D7M9|I7D7M9\_ALLCE

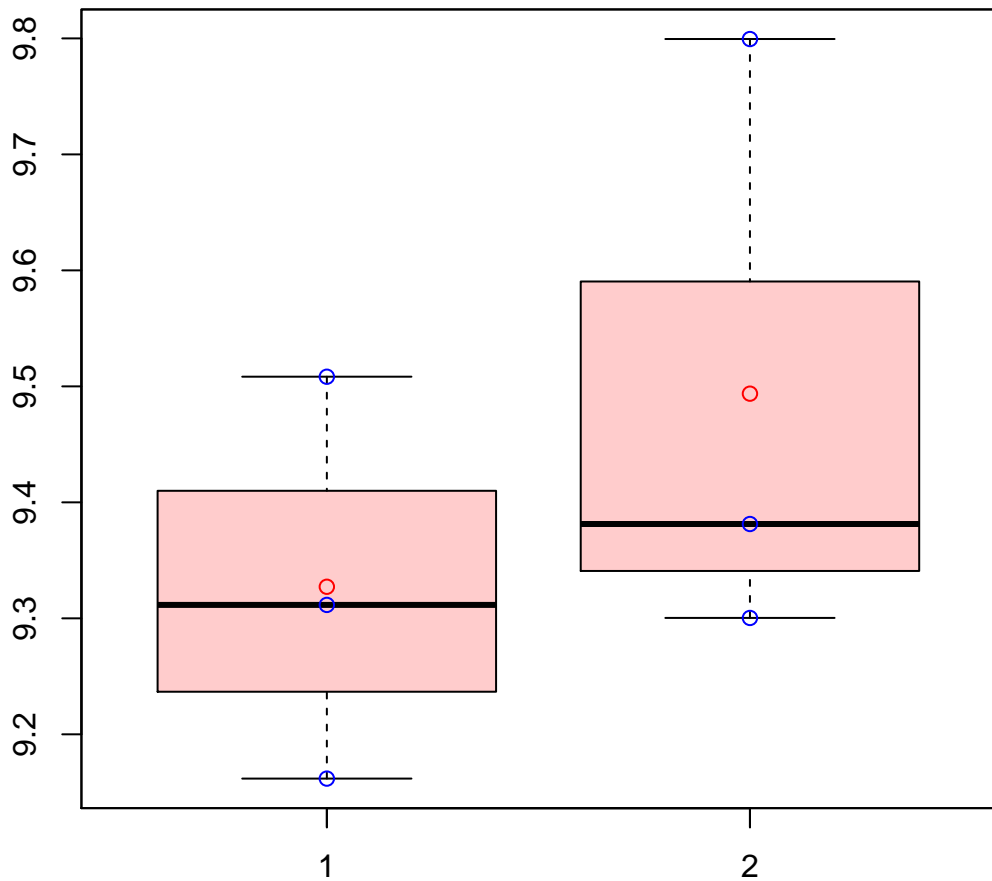

t-Test: p-value = 0.43



# I7HB64|I7HB64\_9LILI

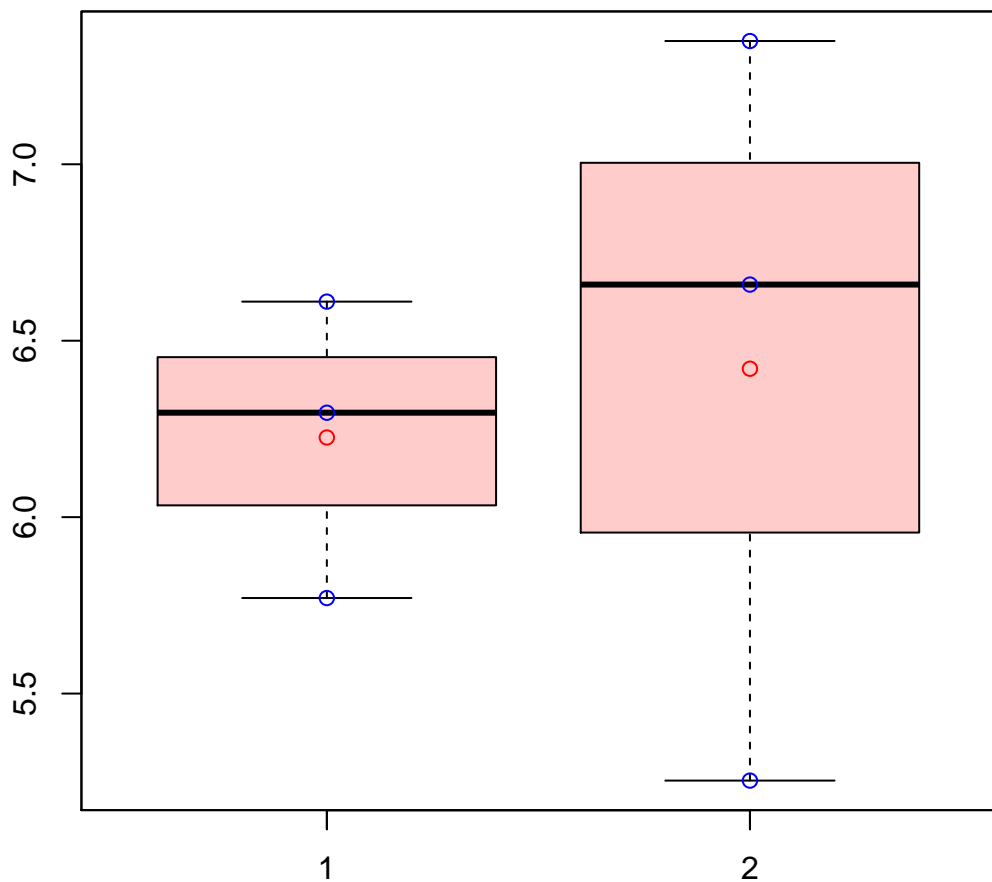

t-Test: p-value = 0.79

# I7HIR1|I7HIR1\_ORYSJ

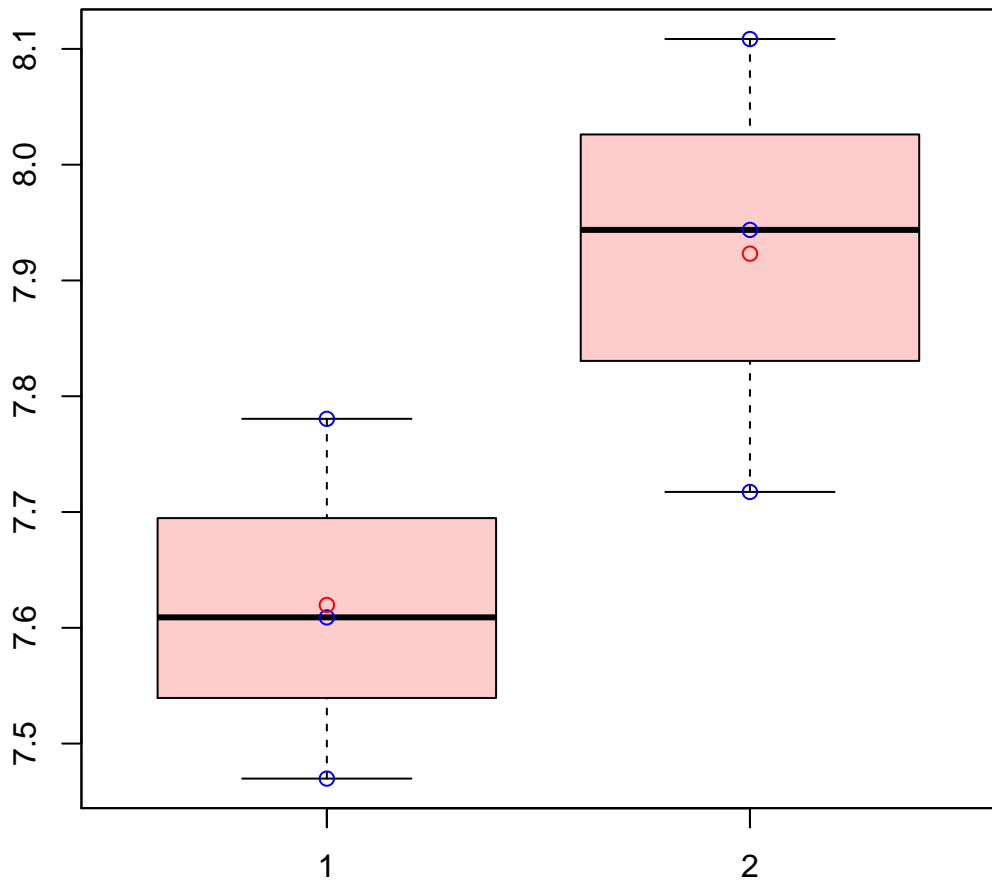

t-Test: p-value = 0.11

# J3KUW0|J3KUW0\_ORYBR

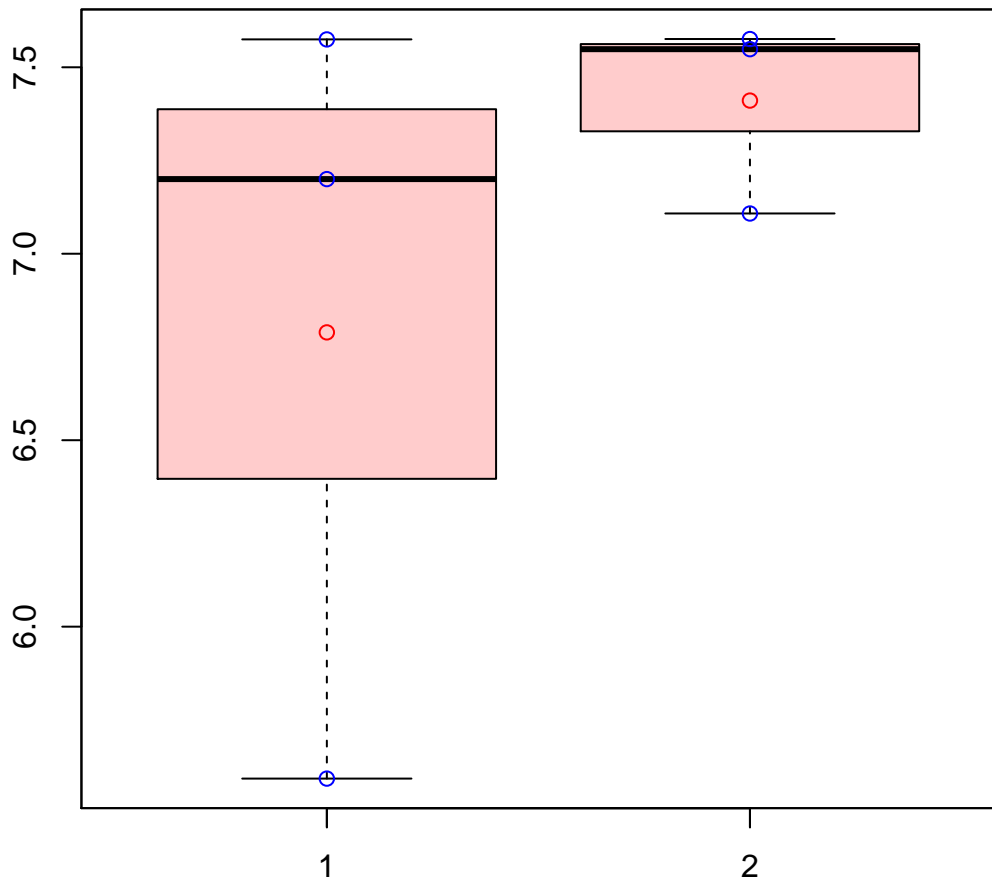

t-Test: p-value = 0.42

# J3KUY9|J3KUY9\_ORYBR

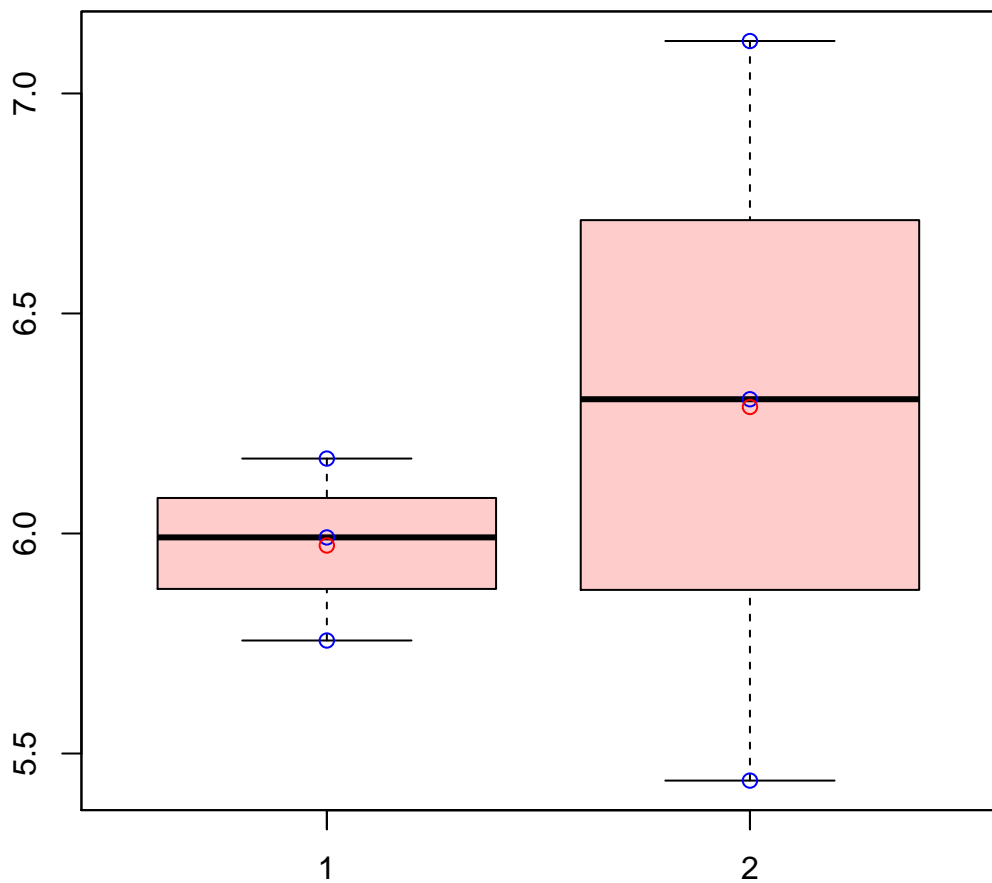

t-Test: p-value = 0.59

# J3KW91|J3KW91\_ORYBR

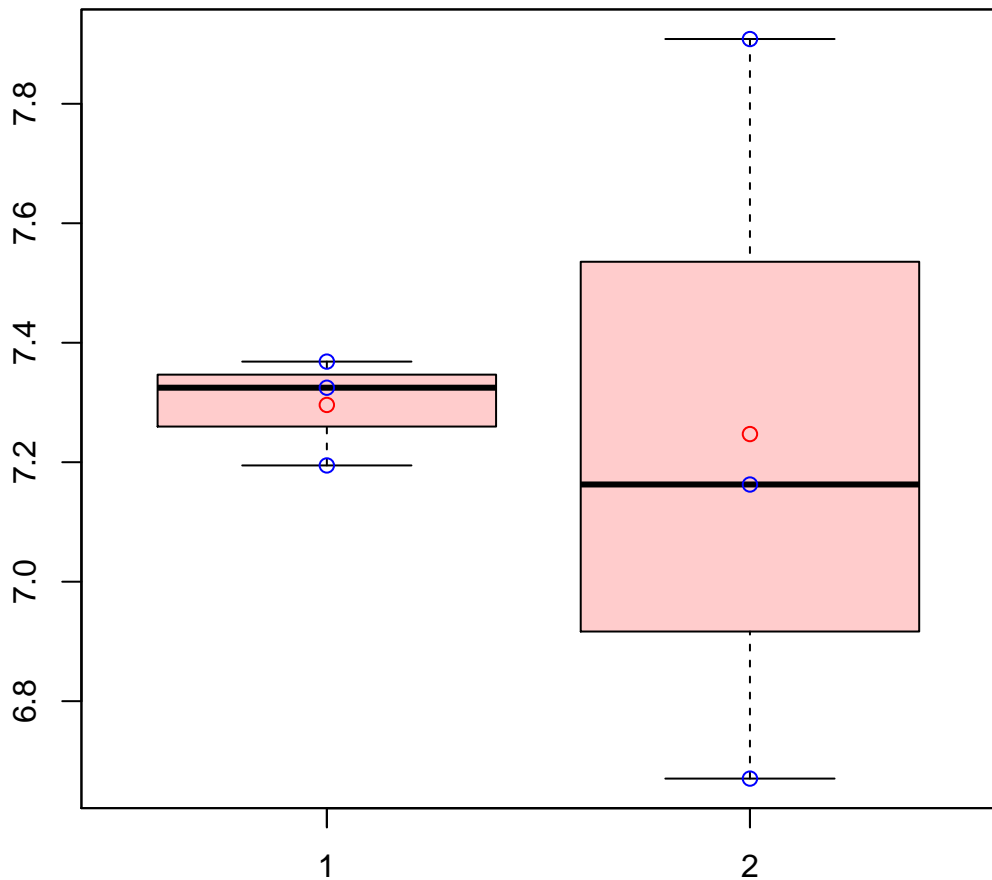

t-Test: p-value = 0.91

# J3KWS8|J3KWS8\_ORYBR

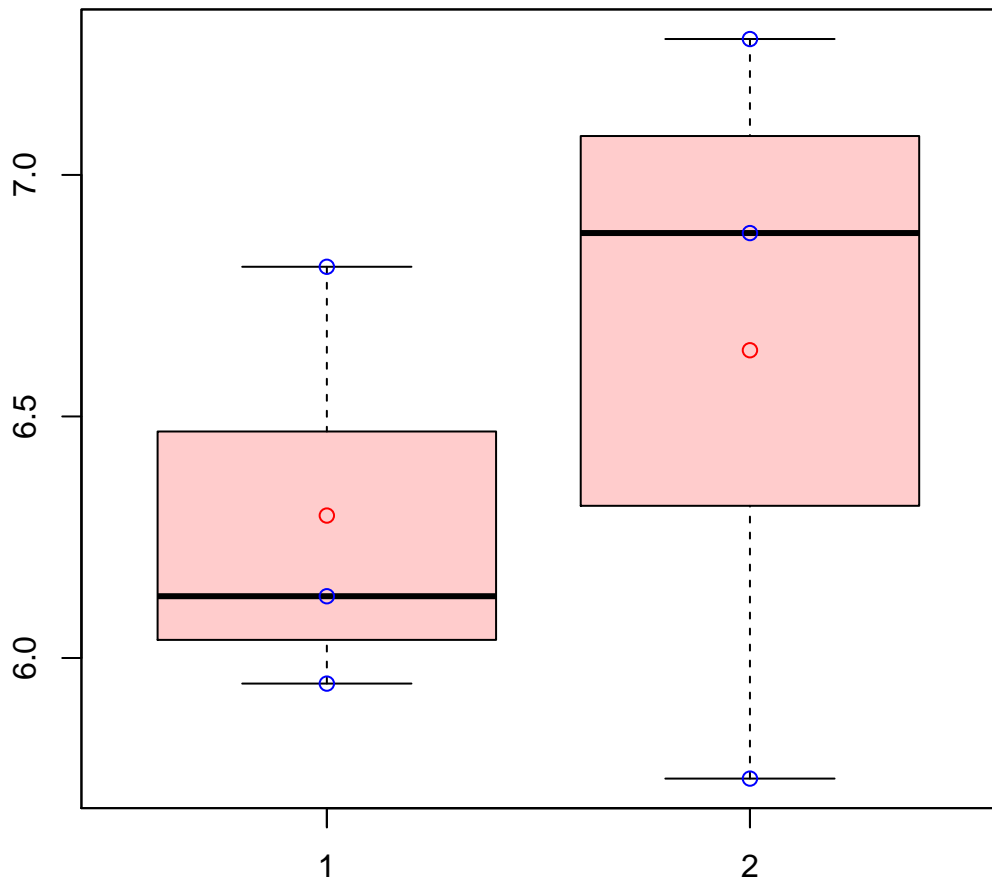

t-Test: p-value = 0.56

# J3KWU4|J3KWU4\_ORYBR

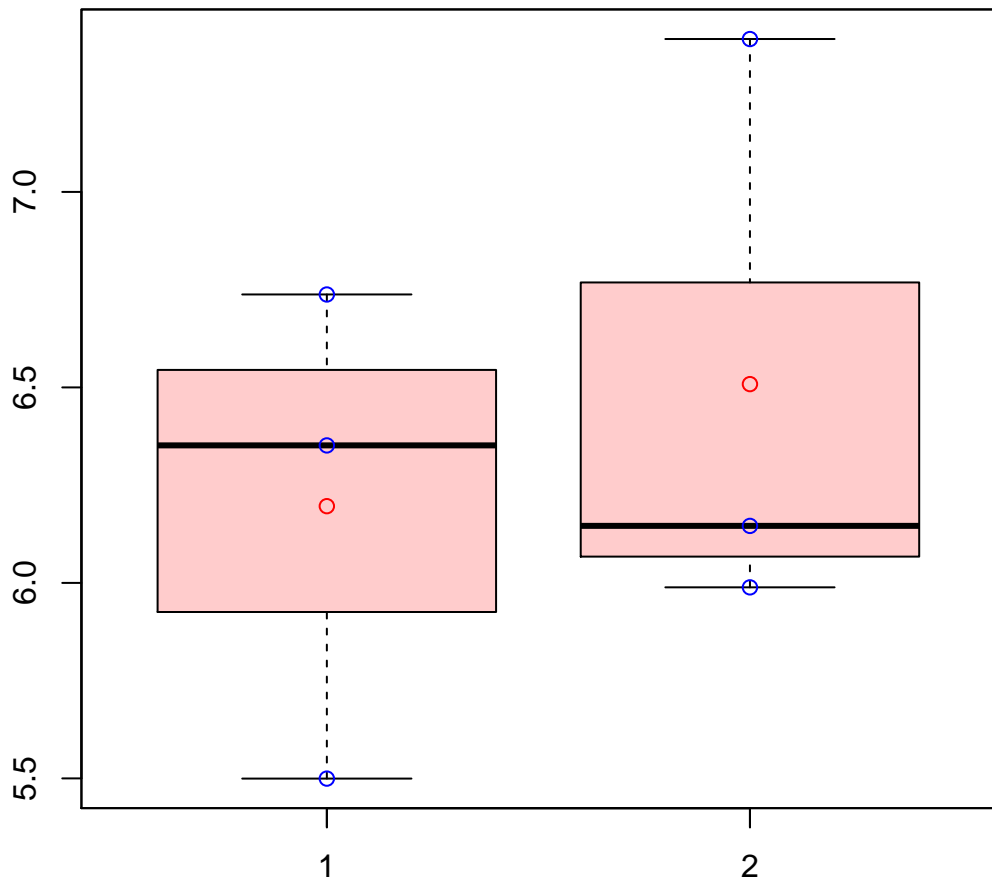

t-Test: p-value = 0.62

# J3KVV6|J3KVV6\_ORYBR

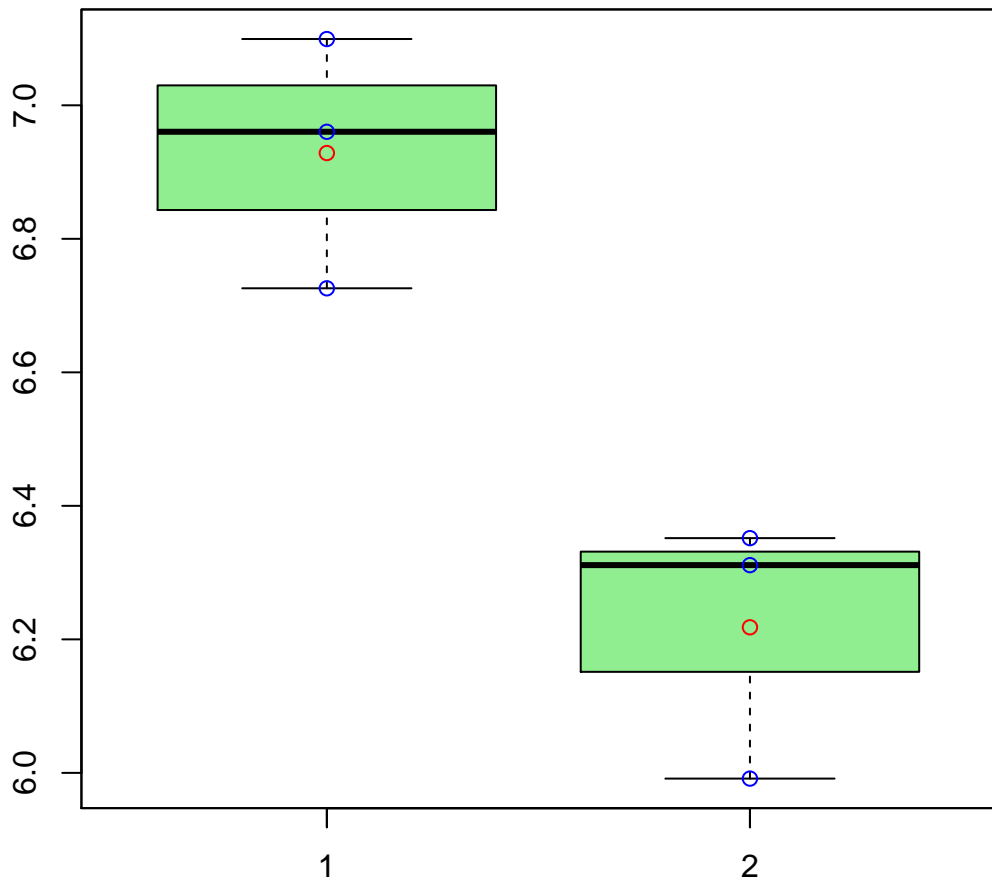

t-Test: p-value = 0.01



# J3KX42|J3KX42\_ORYBR

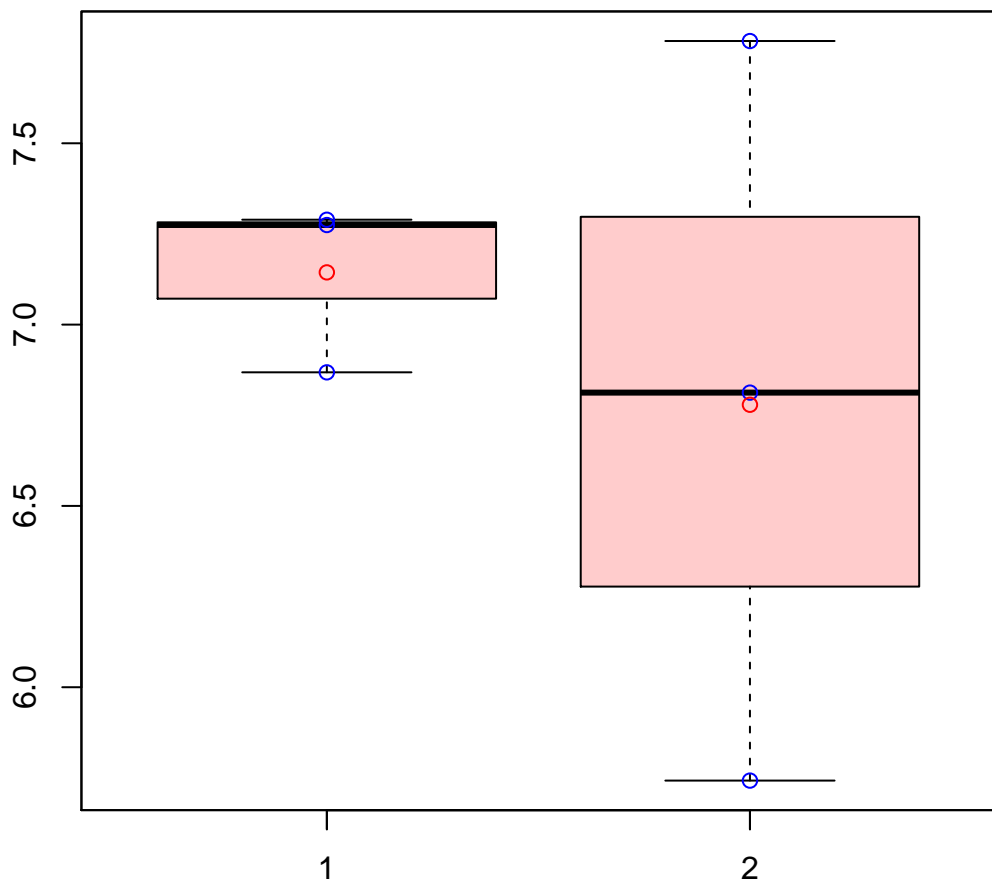

t-Test: p-value = 0.6

# J3KXI4|J3KXI4\_ORYBR

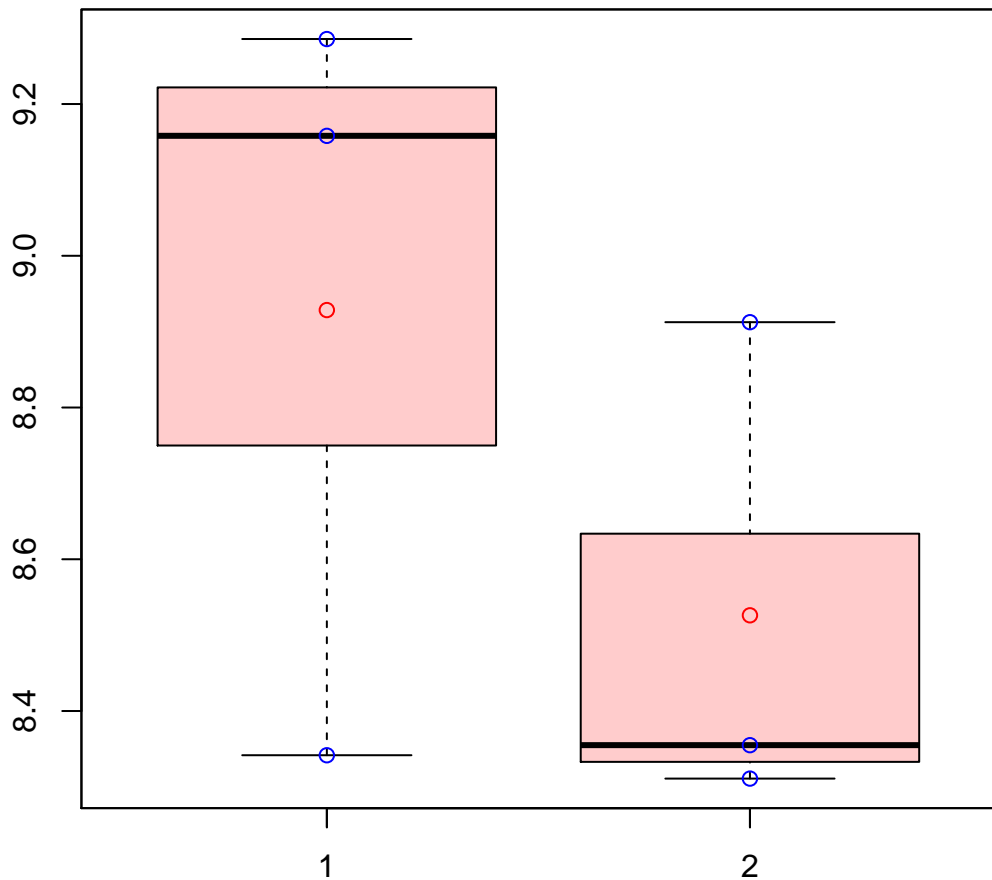

t-Test: p-value = 0.33

# J3KXX4|J3KXX4\_ORYBR

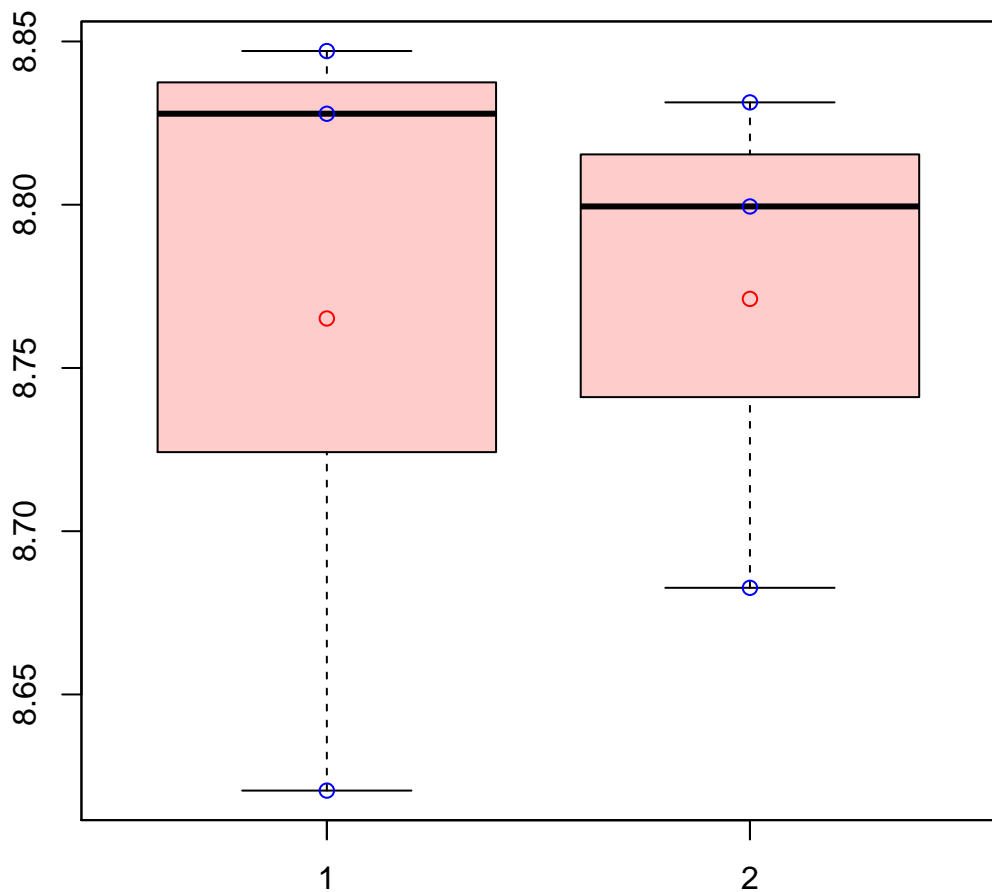

t-Test: p-value = 0.95

# J3KY89|J3KY89\_ORYBR

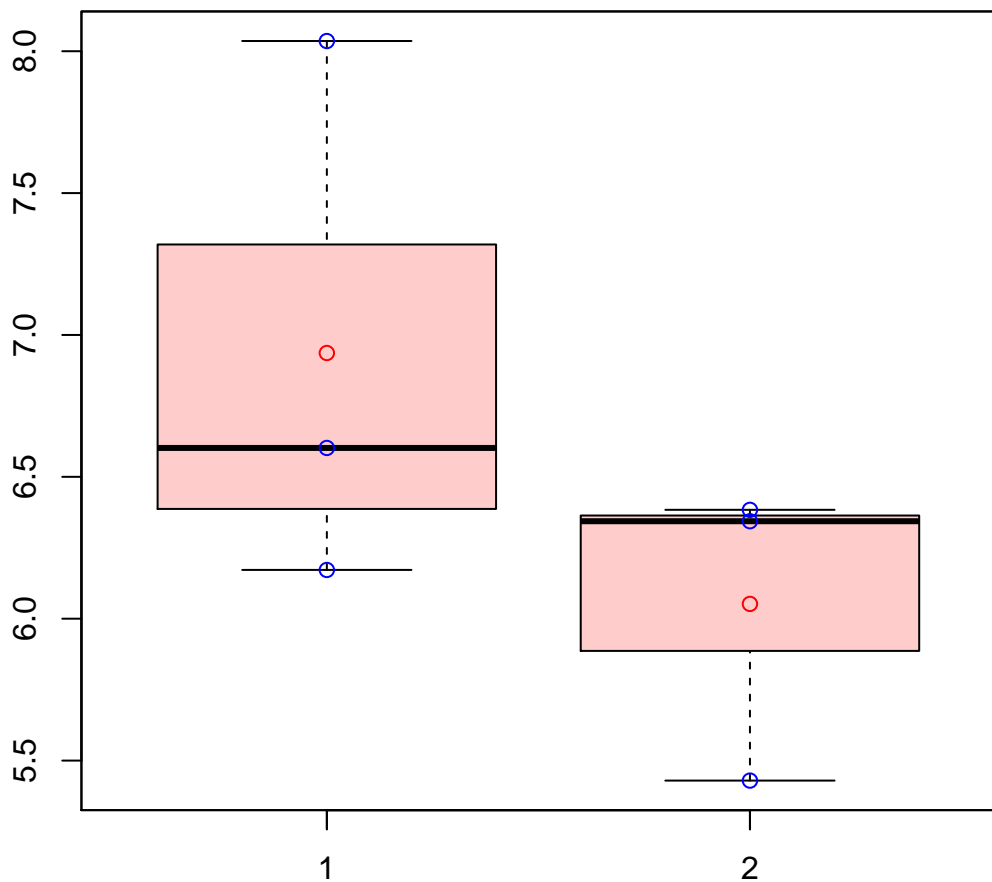

t-Test: p-value = 0.26

# J3KY93|J3KY93\_ORYBR

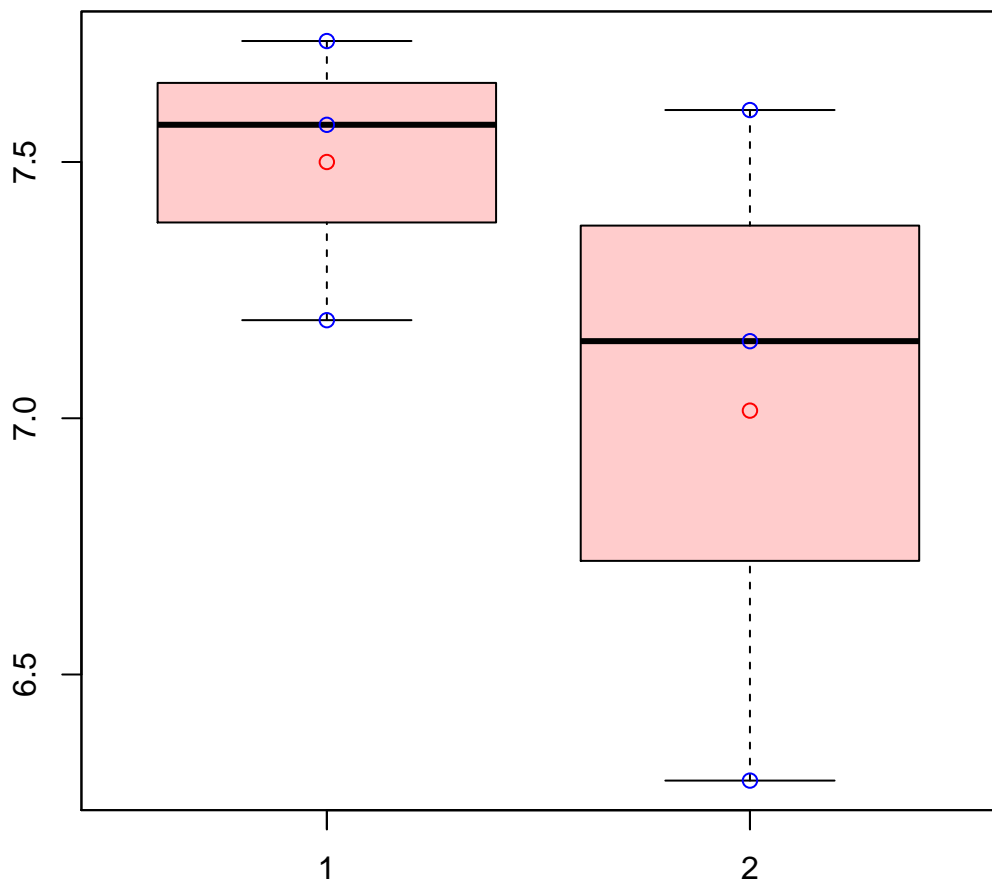

t-Test: p-value = 0.34

# J3KYT6|J3KYT6\_ORYBR

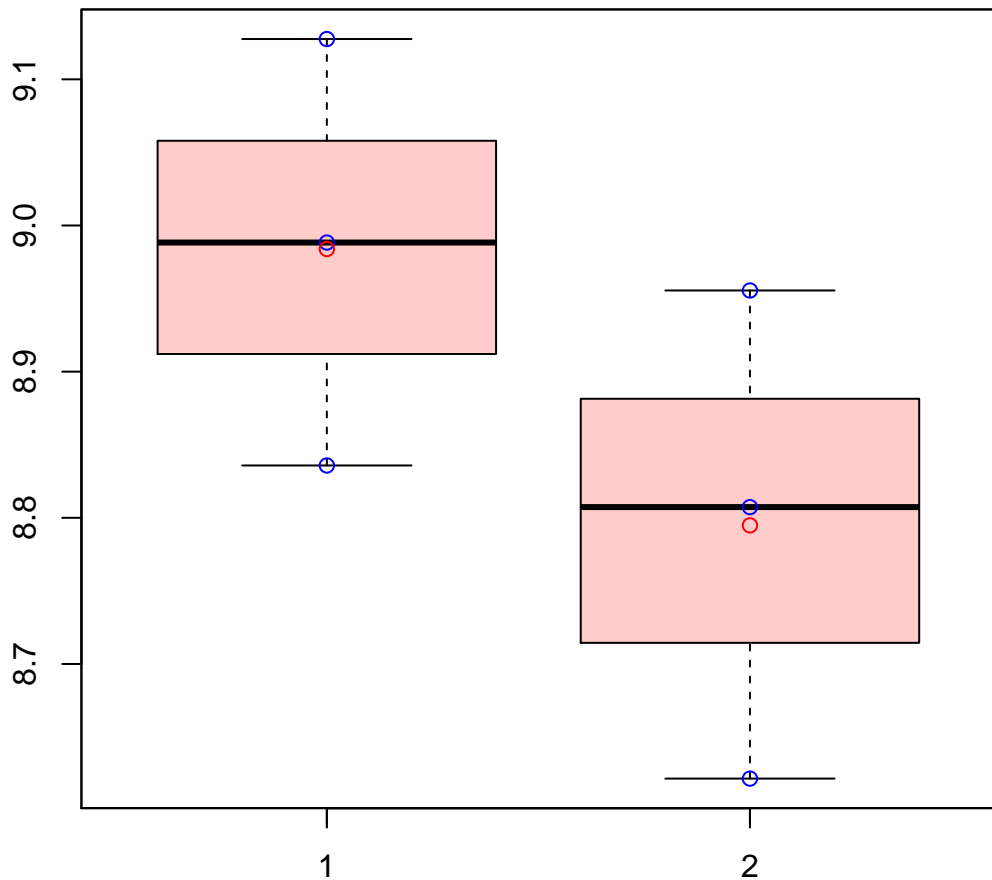

t-Test: p-value = 0.22

# J3KZC5|J3KZC5\_ORYBR

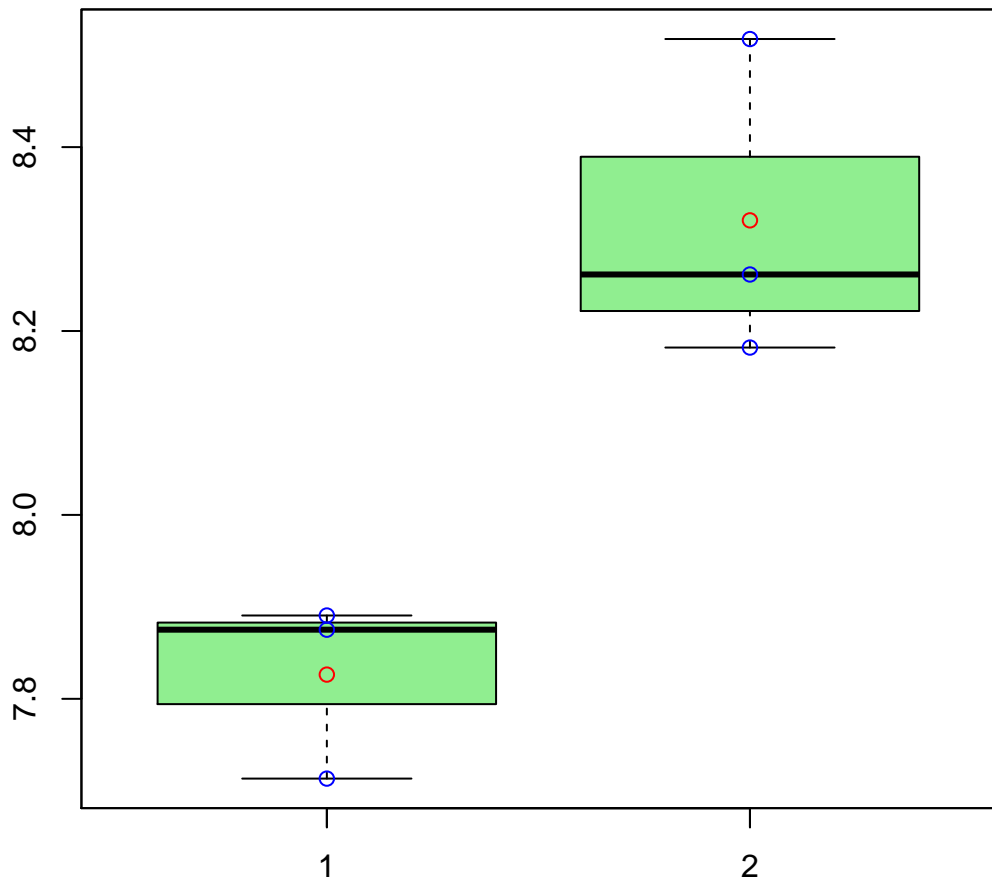

t-Test: p-value = 0.02

# J3KZJ0|J3KZJ0\_ORYBR

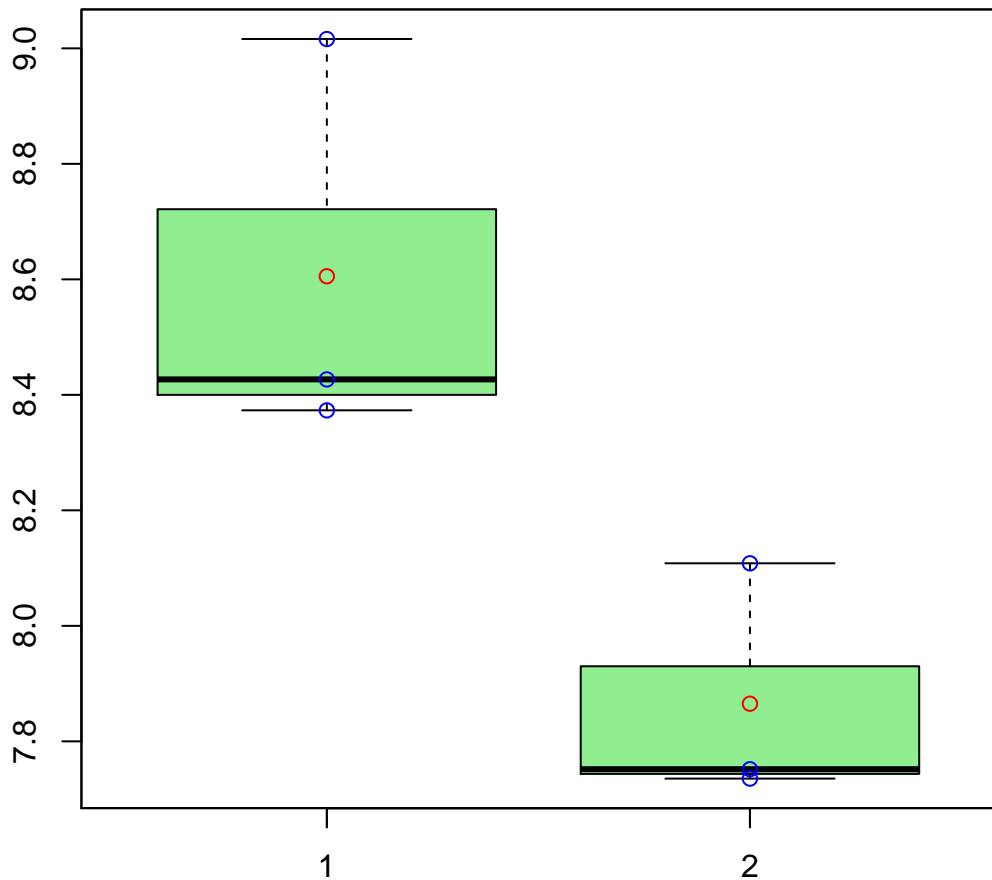

t-Test: p-value = 0.05



# J3KZR9|J3KZR9\_ORYBR

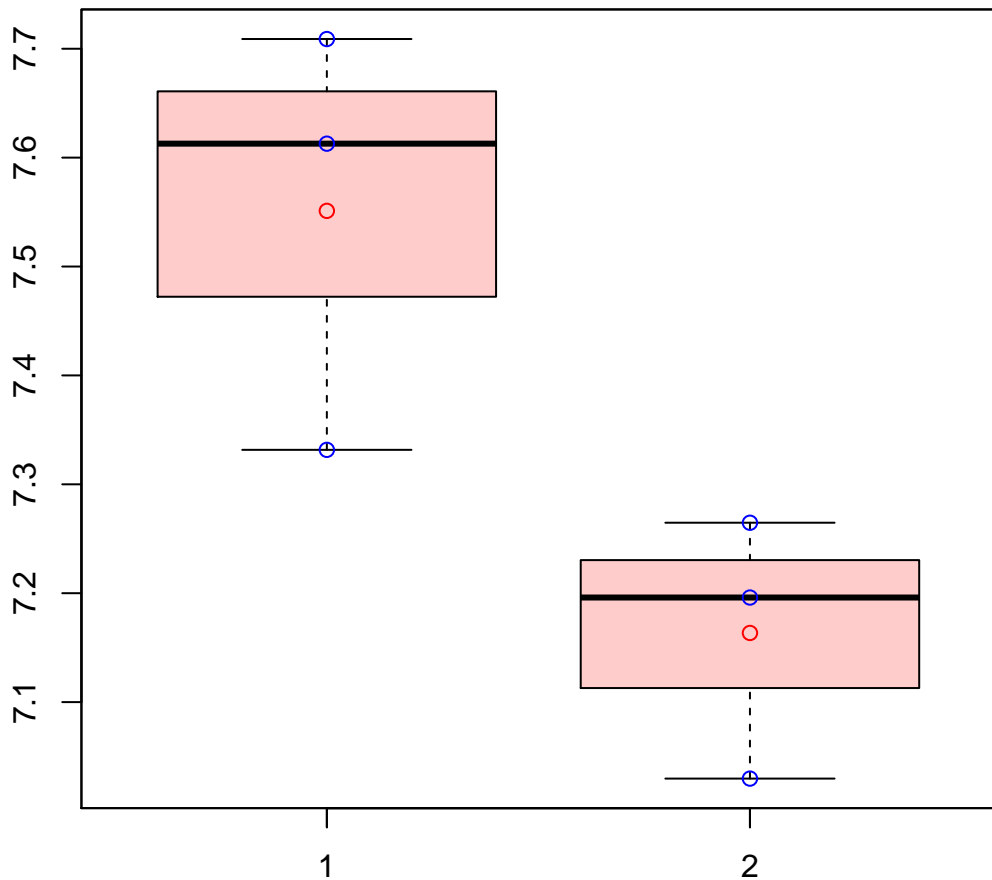

t-Test: p-value = 0.05

# J3L014|J3L014\_ORYBR

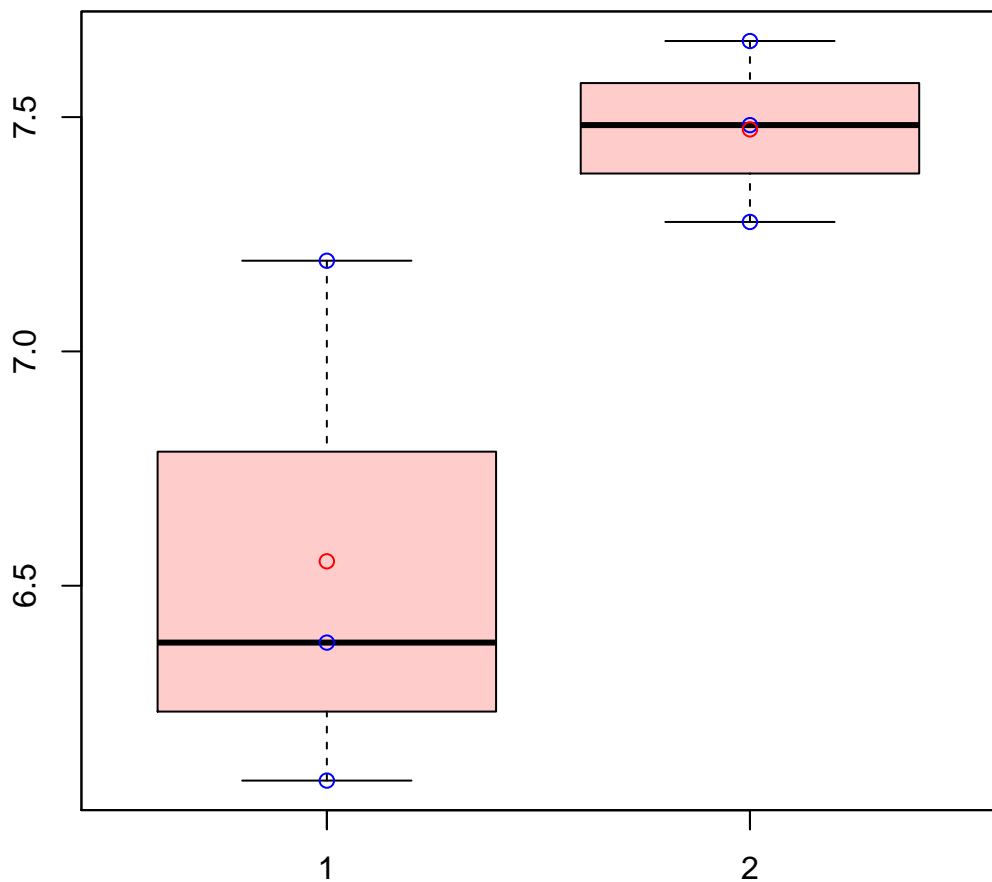

t-Test: p-value = 0.1

# J3L0A5|J3L0A5\_ORYBR

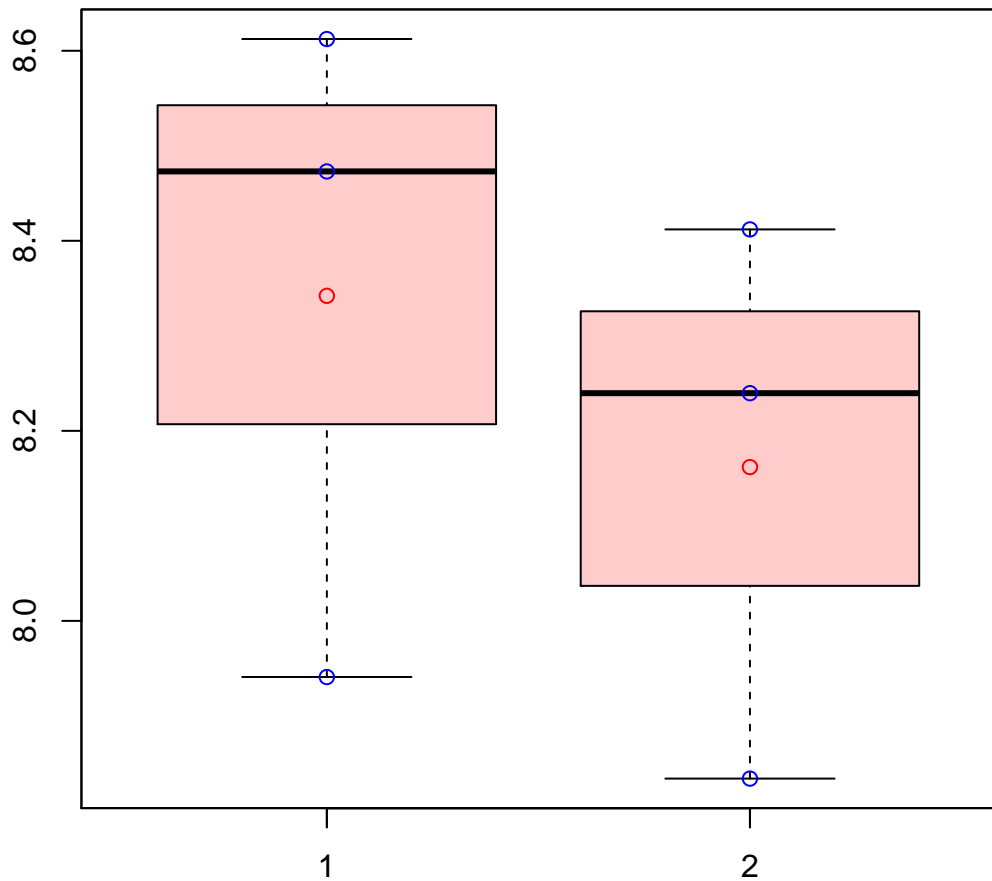

t-Test: p-value = 0.54

# J3L1I8|J3L1I8\_ORYBR

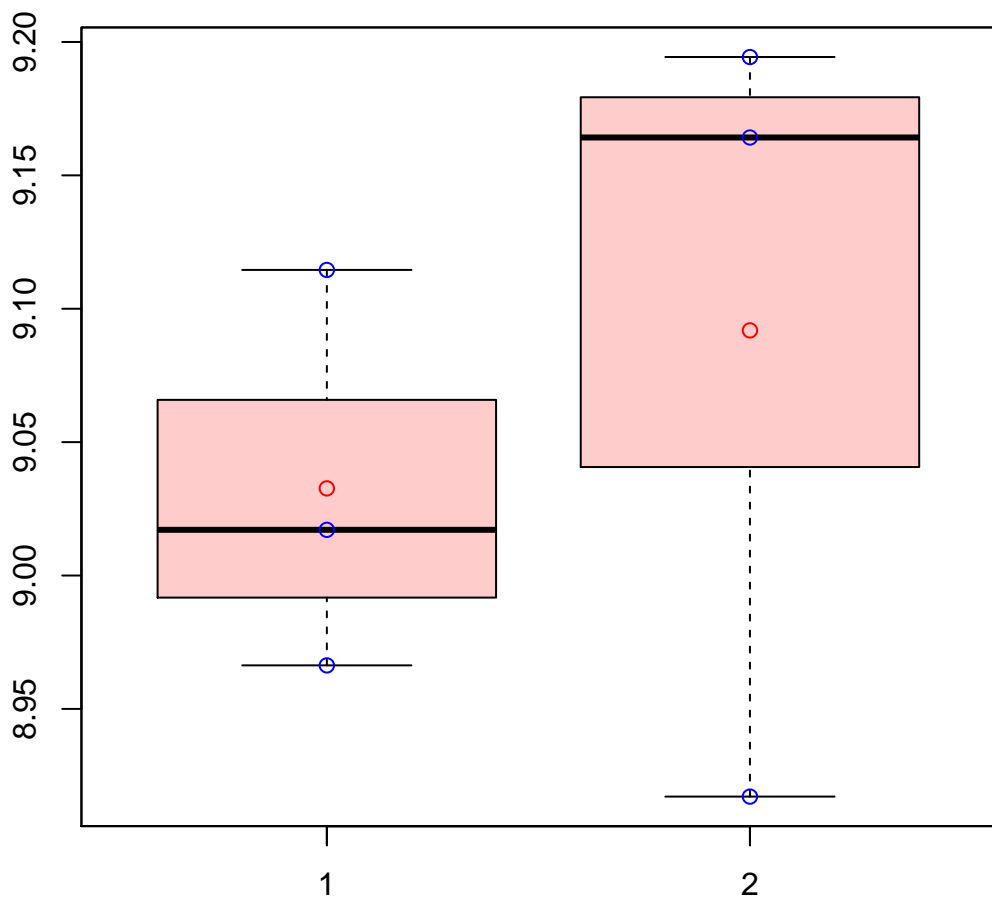

t-Test: p-value = 0.59

# J3L1L7|J3L1L7\_ORYBR

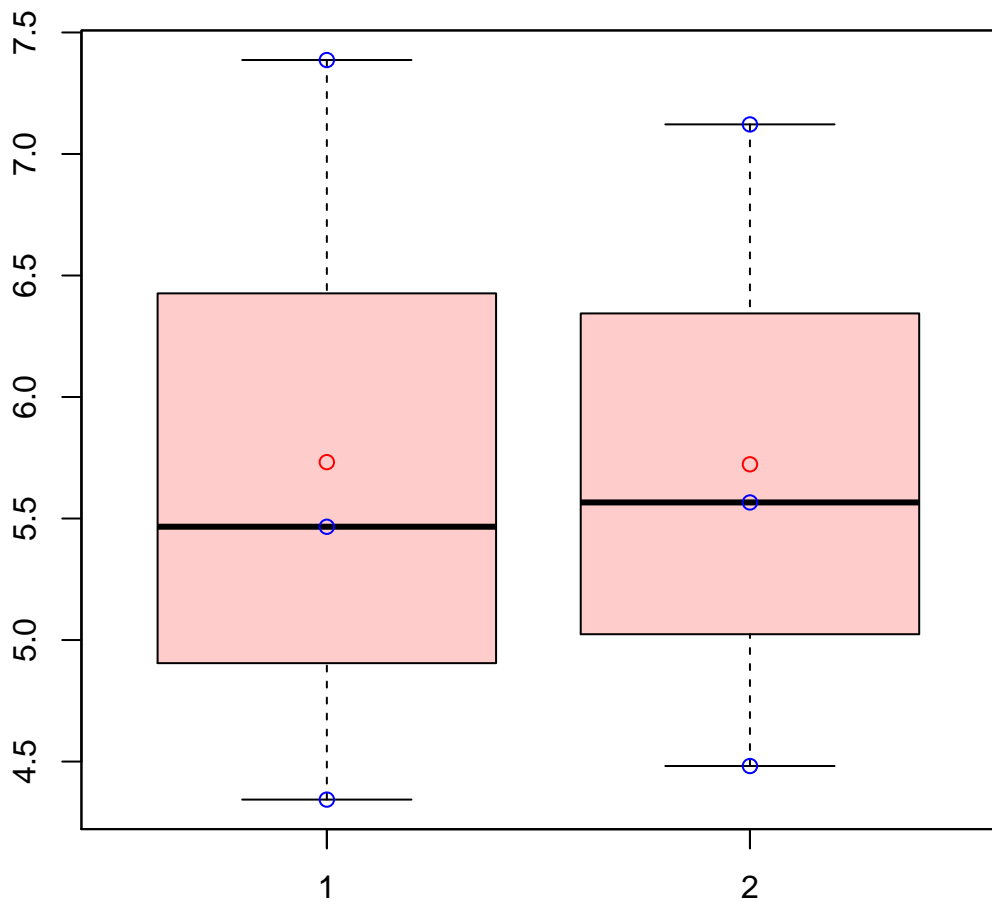

t-Test: p-value = 0.99

# J3L2W6|J3L2W6\_ORYBR

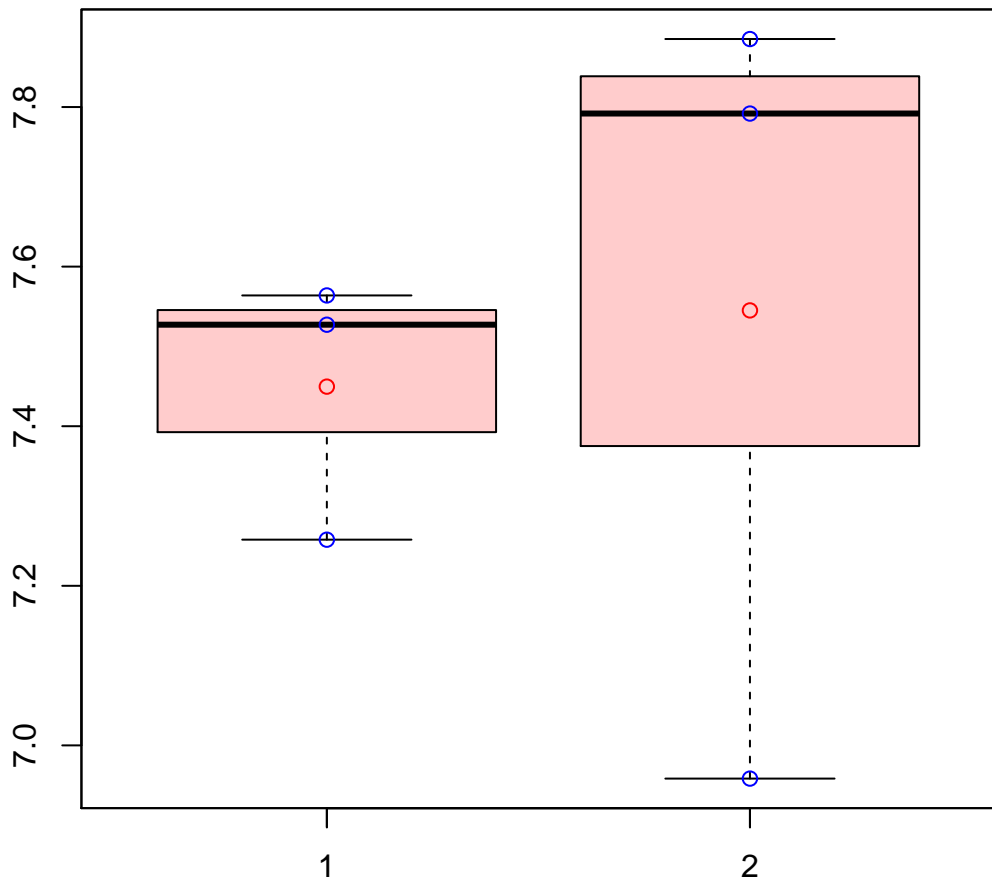

t-Test: p-value = 0.78

# J3L3E8|J3L3E8\_ORYBR

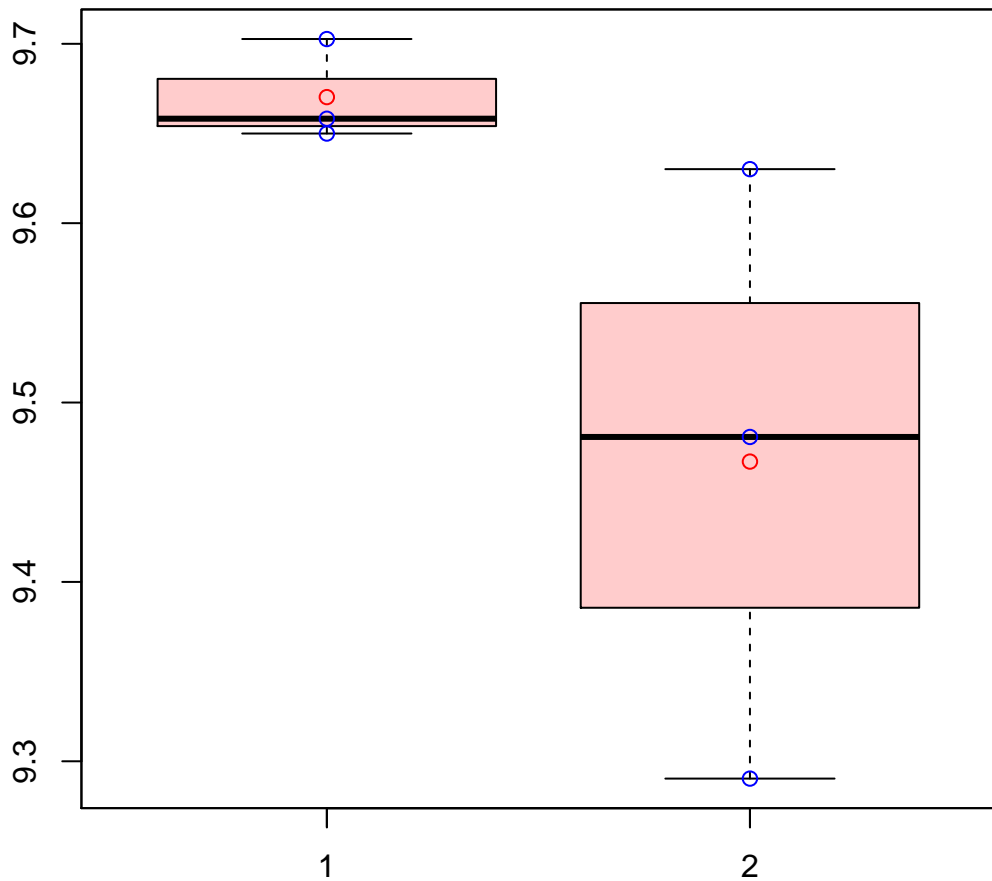

t-Test: p-value = 0.17

# J3L489|J3L489\_ORYBR

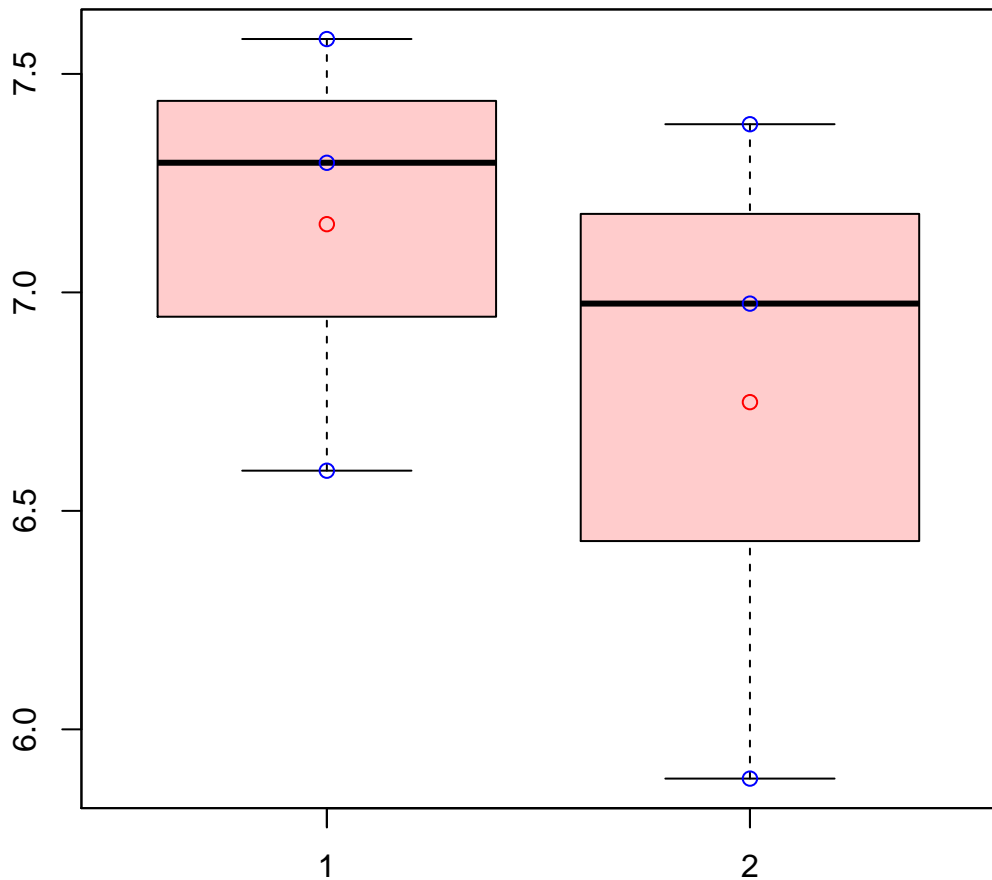

t-Test: p-value = 0.49



# J3L4A8|J3L4A8\_ORYBR

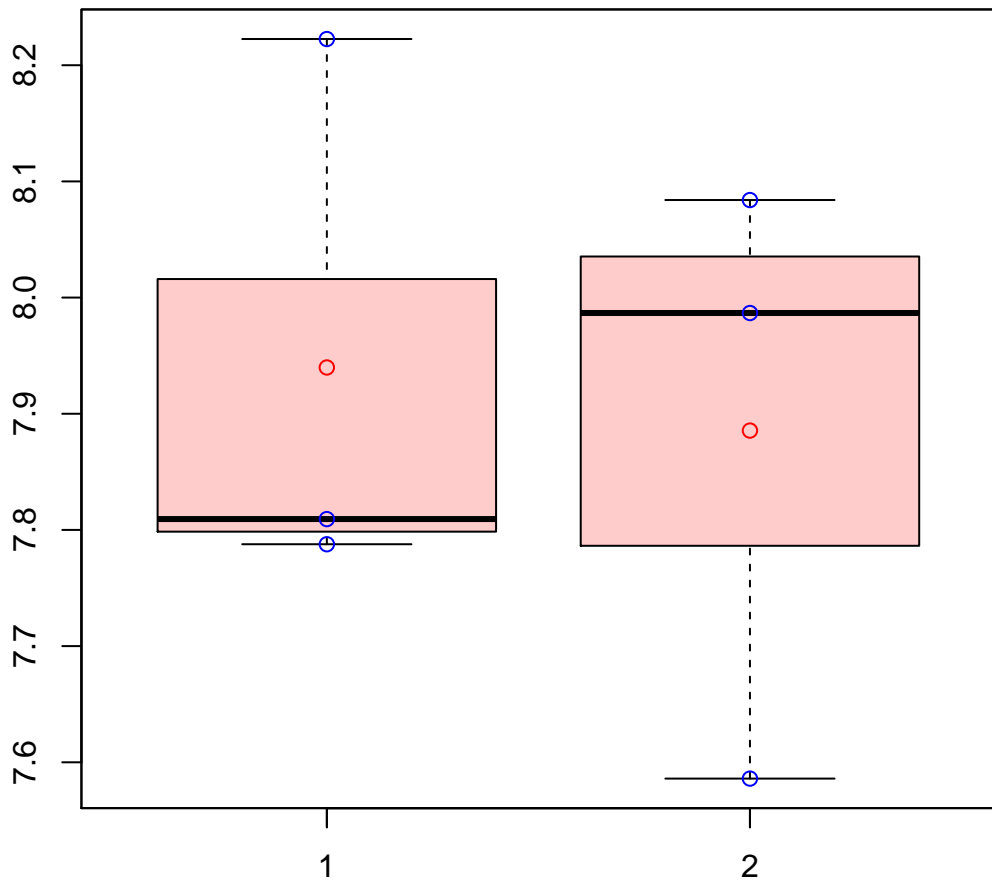

t-Test: p-value = 0.81

# J3L4R5|J3L4R5\_ORYBR

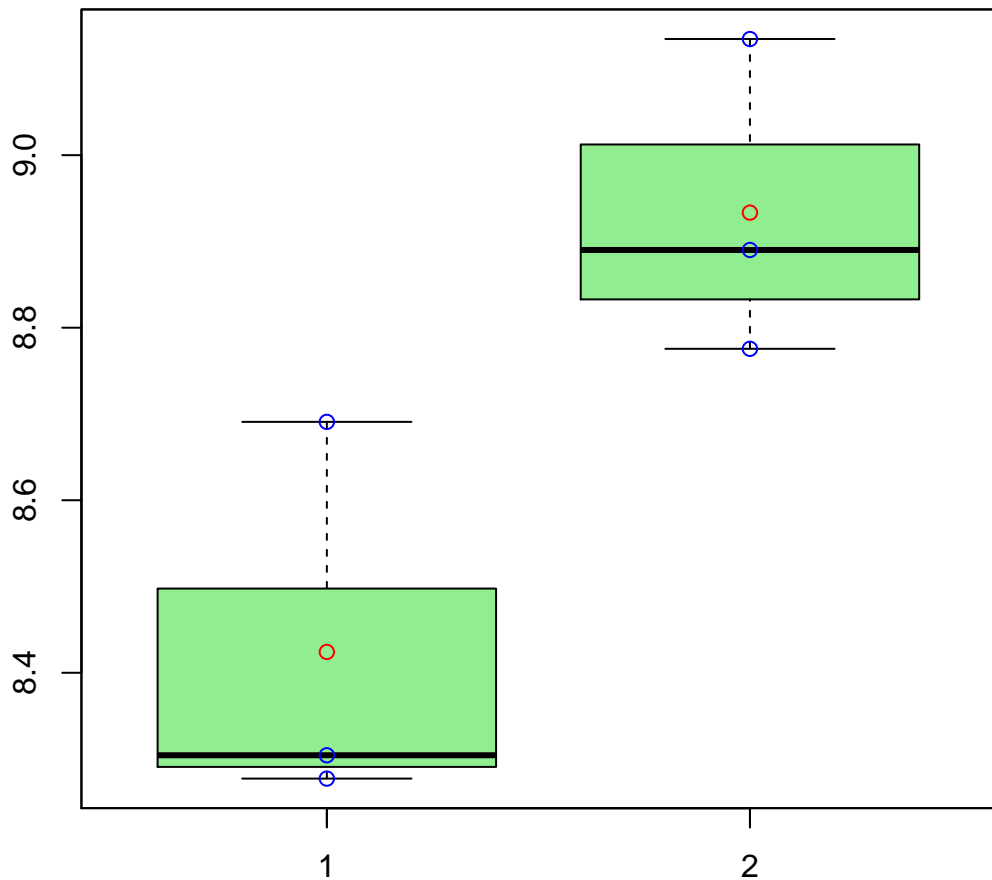

t-Test: p-value = 0.04

# J3L4S8|J3L4S8\_ORYBR

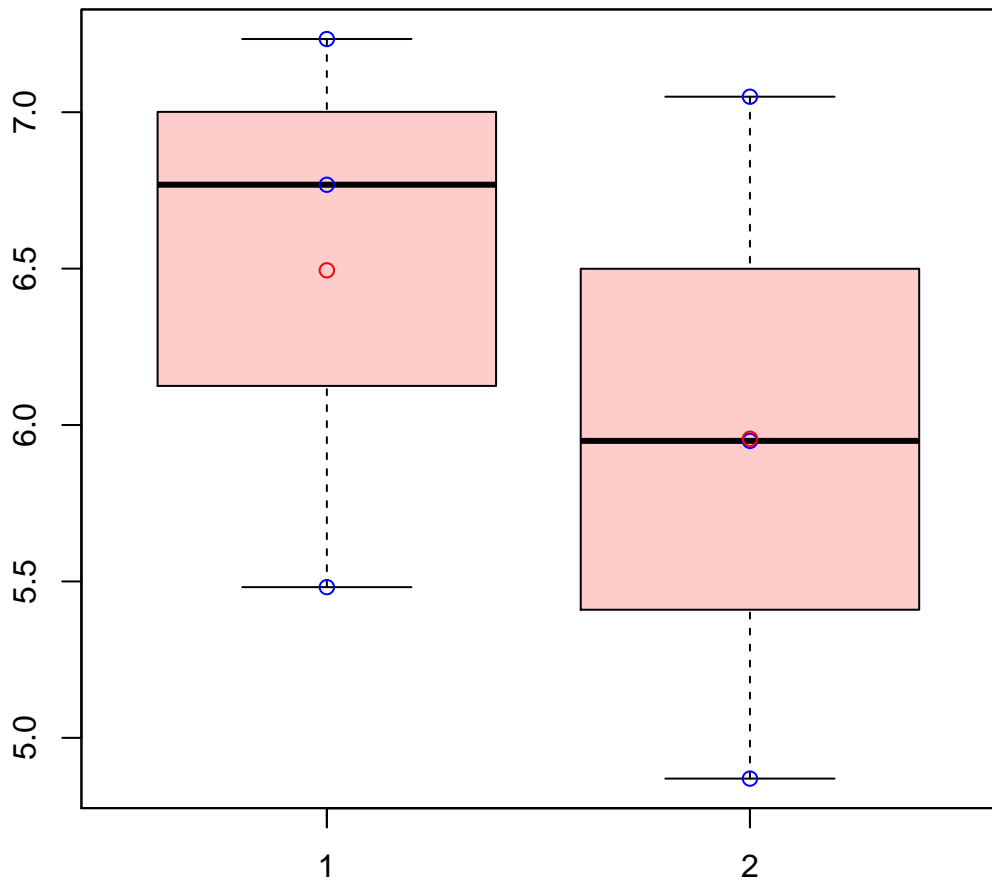

t-Test: p-value = 0.55

# J3L4S9|J3L4S9\_ORYBR

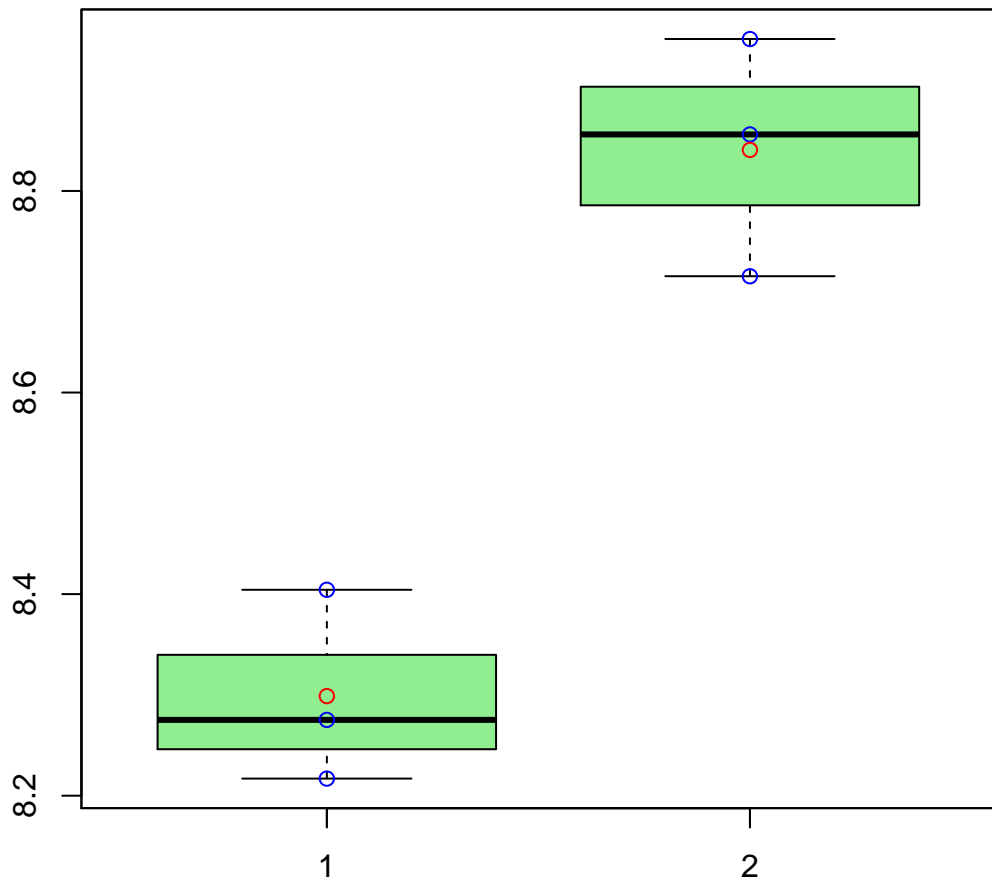

t-Test: p-value = 0

# J3L4T4|J3L4T4\_ORYBR

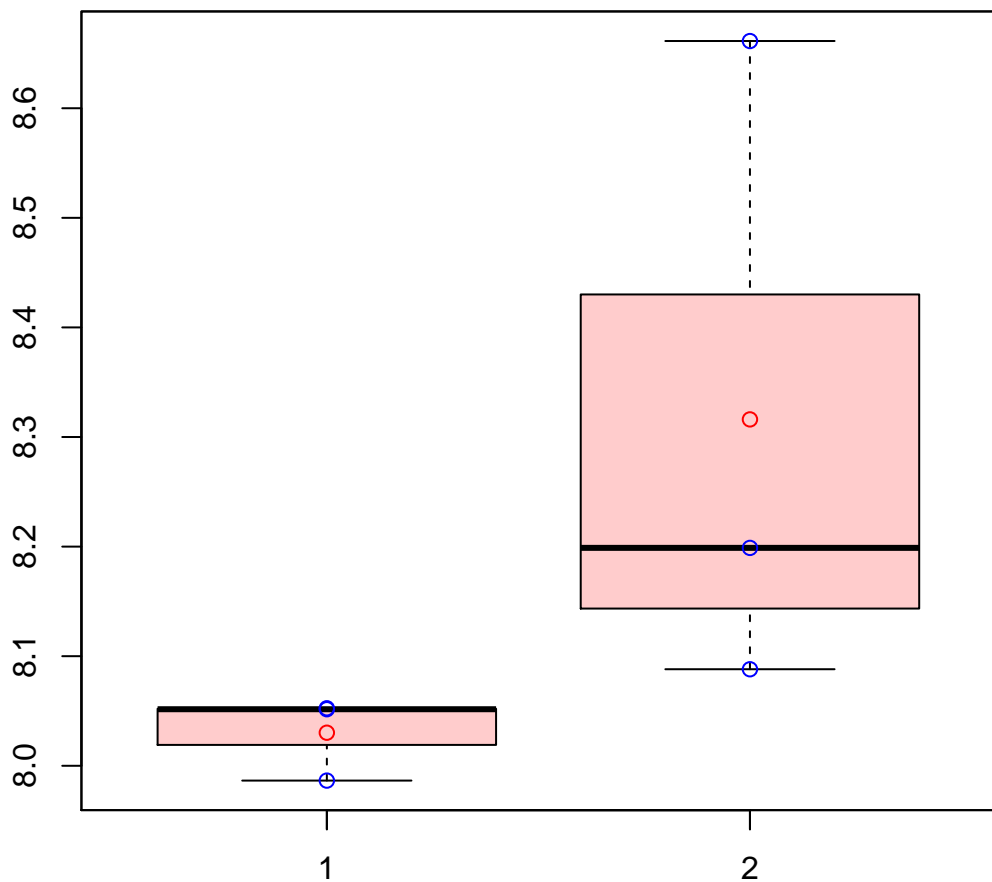

t-Test: p-value = 0.24

# J3L508|J3L508\_ORYBR

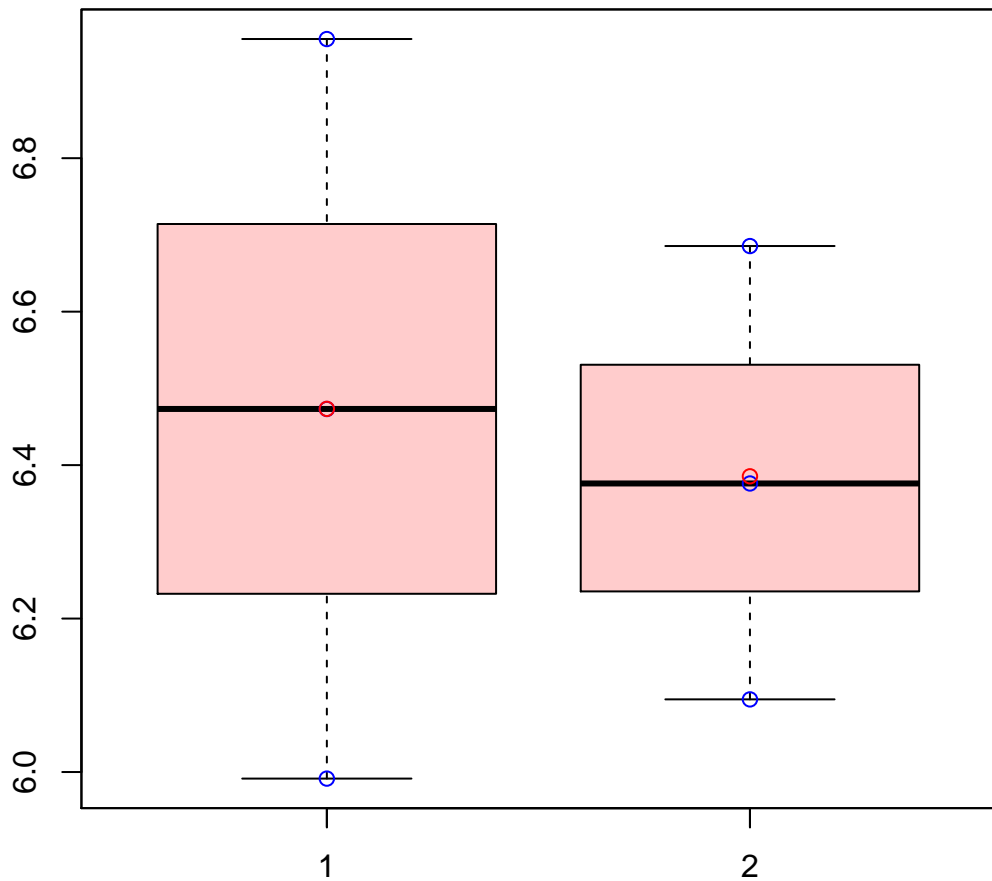

t-Test: p-value = 0.8

# J3L589|J3L589\_ORYBR

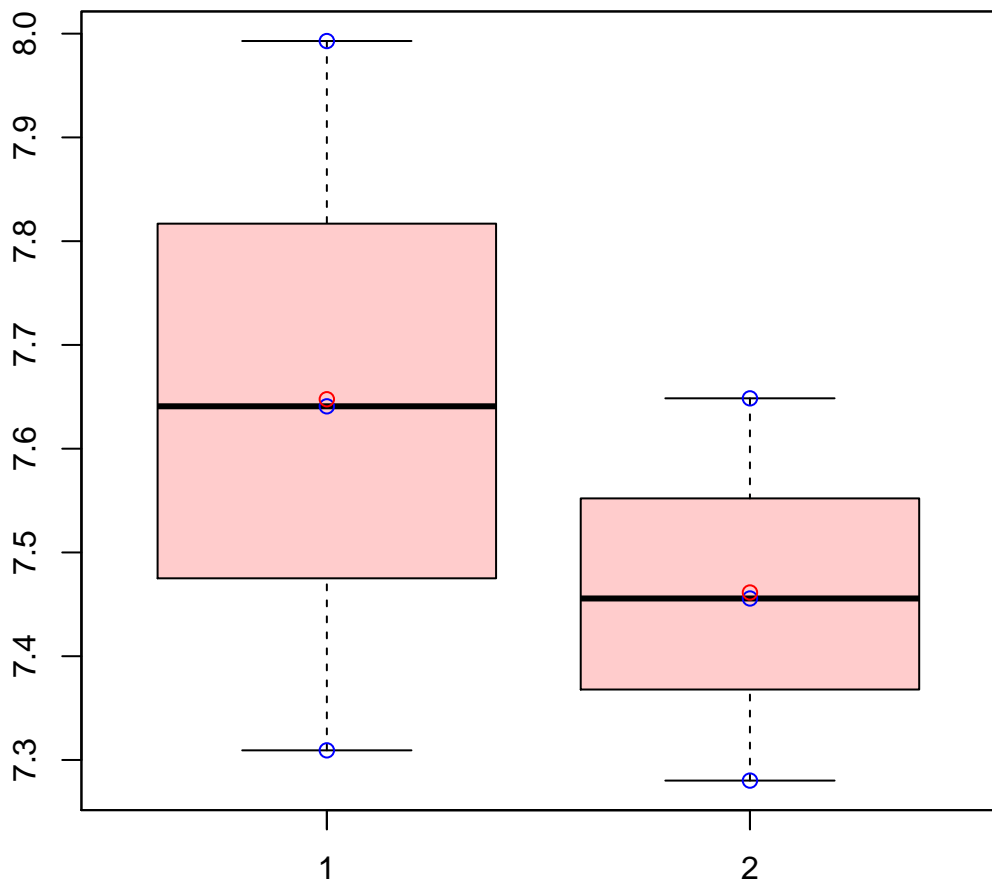

t-Test: p-value = 0.47

# J3L5G2|J3L5G2\_ORYBR

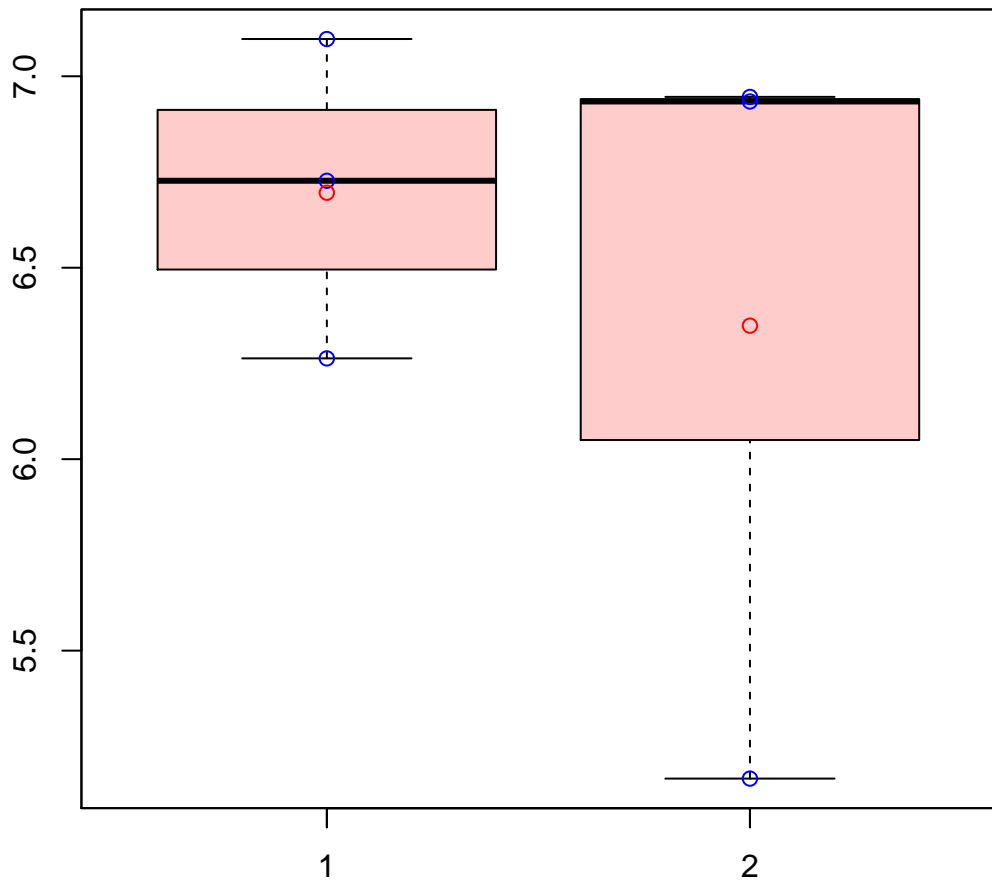

t-Test: p-value = 0.63



# J3L5W6|J3L5W6\_ORYBR

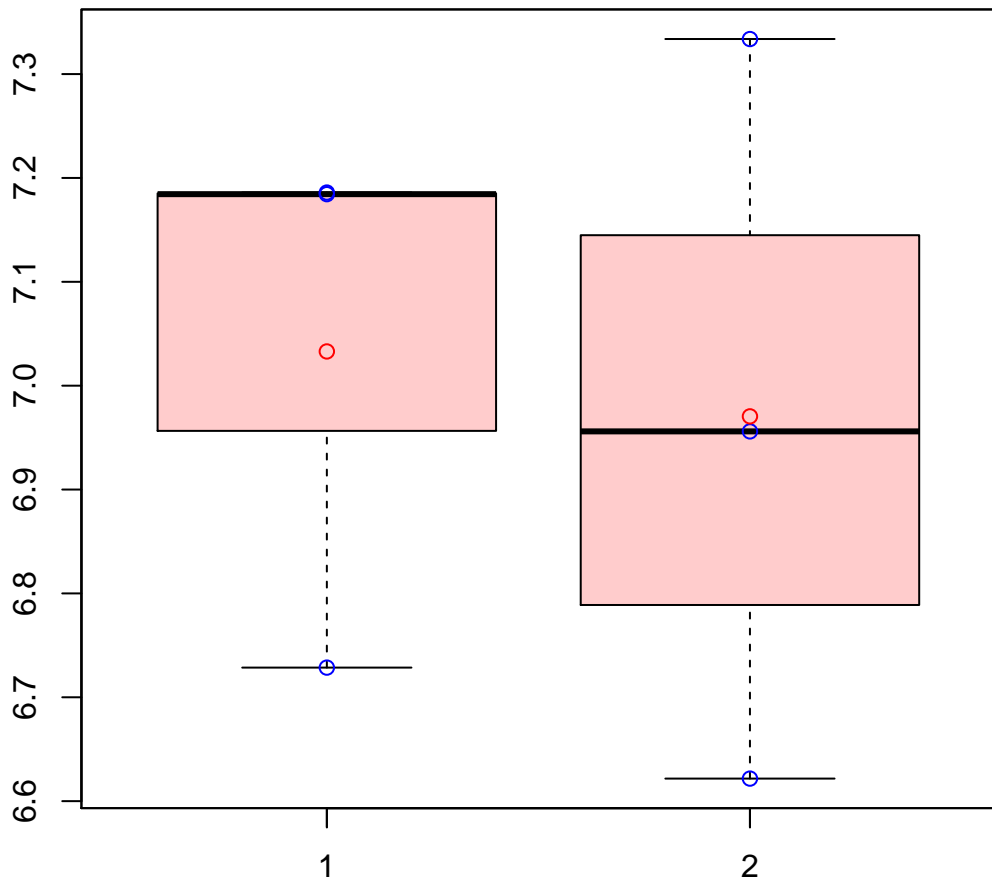

t-Test: p-value = 0.82

# J3L6P0|J3L6P0\_ORYBR

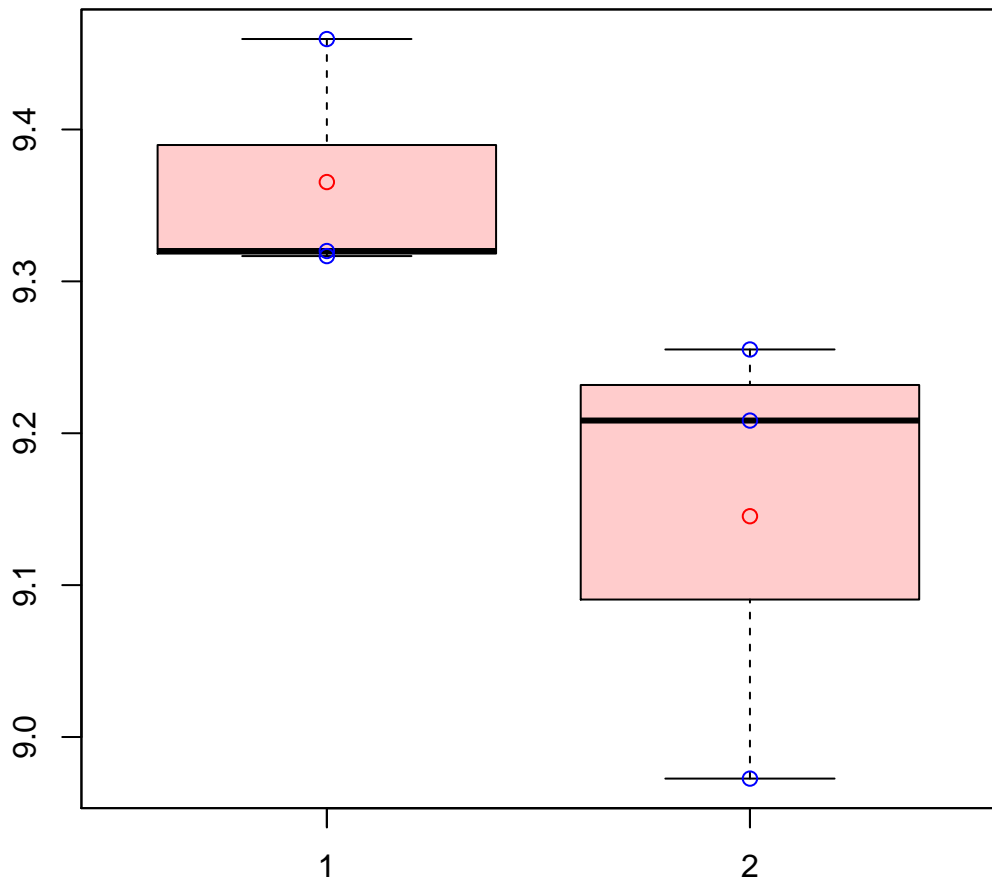

t-Test: p-value = 0.11

# J3L6Q0|J3L6Q0\_ORYBR

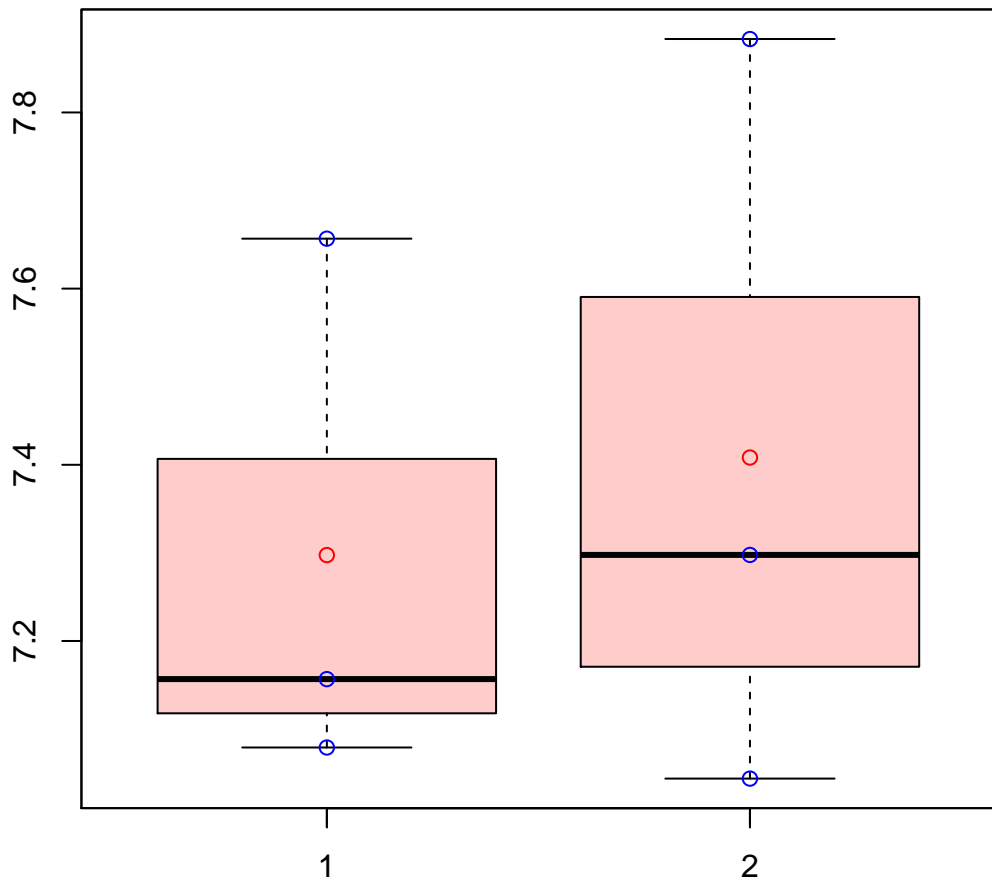

t-Test: p-value = 0.74

# J3L6W7|J3L6W7\_ORYBR

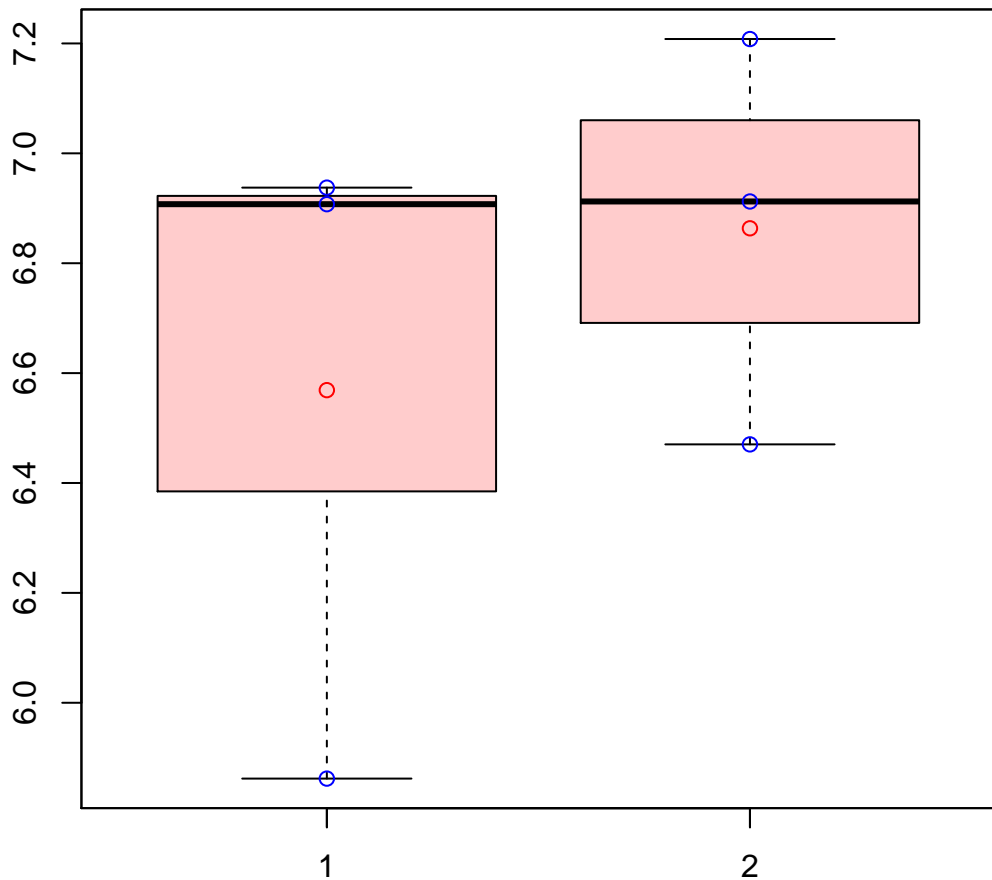

t-Test: p-value = 0.52

# J3L7P7|J3L7P7\_ORYBR

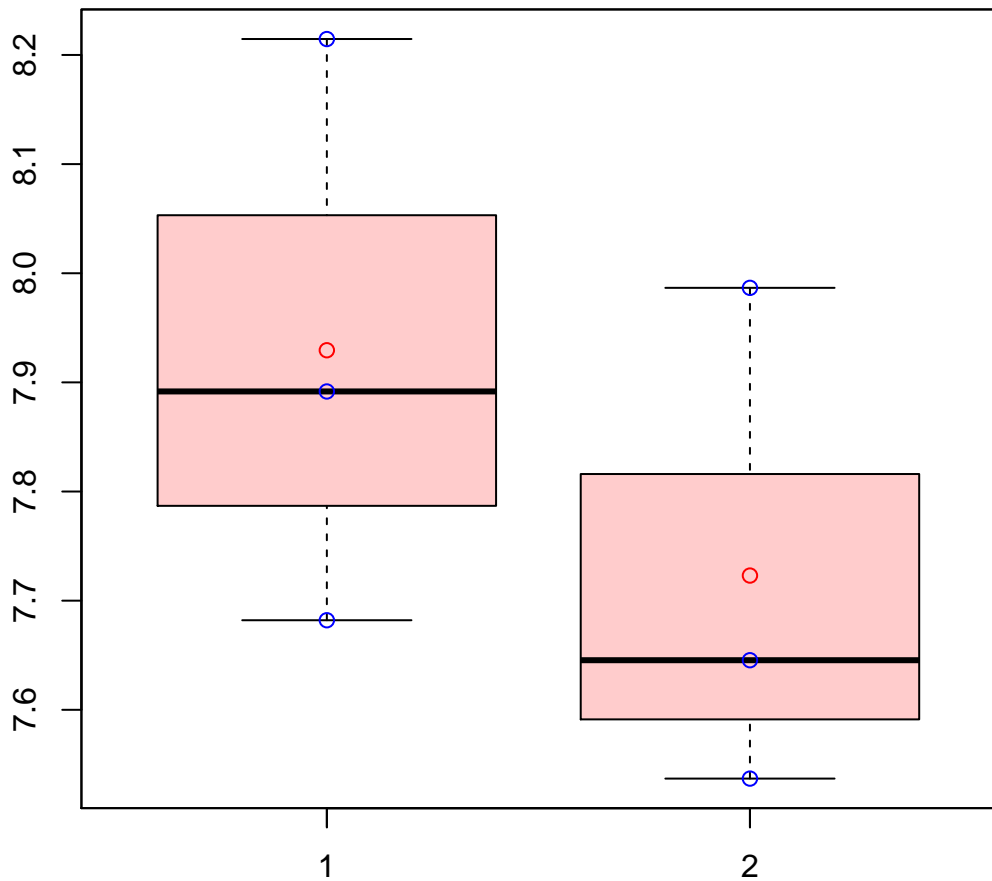

t-Test: p-value = 0.37

# J3L7S4|J3L7S4\_ORYBR

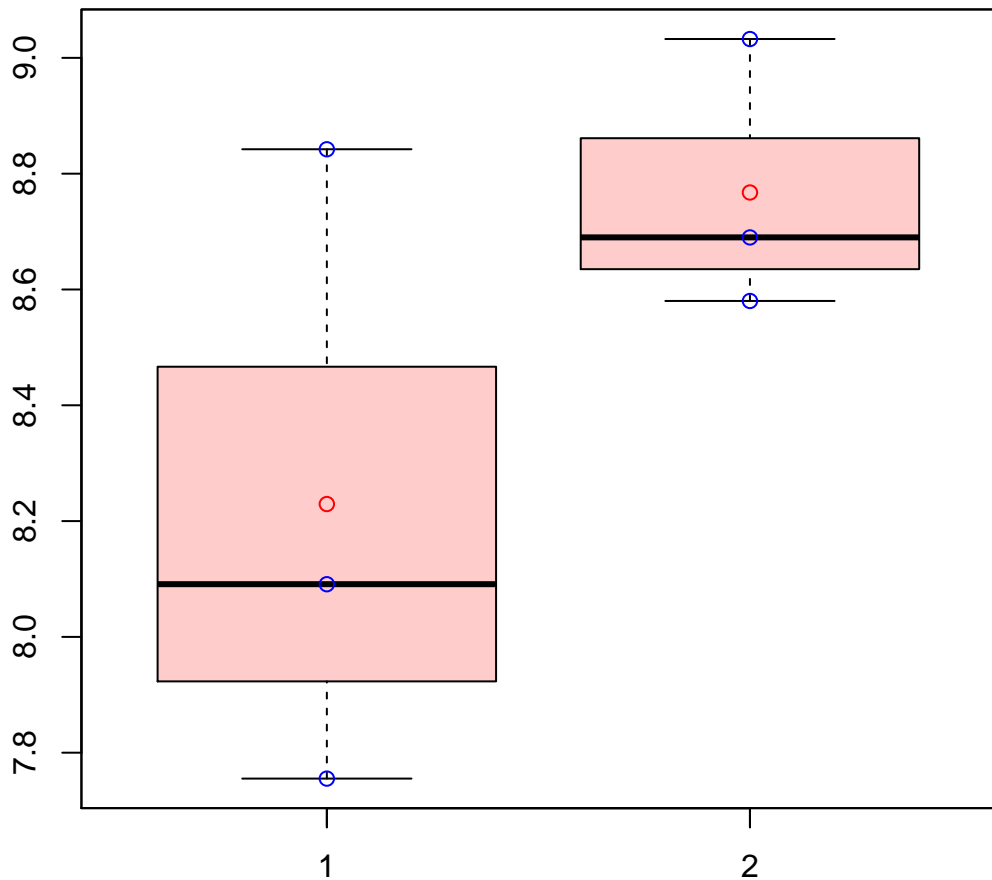

t-Test: p-value = 0.23

# J3L856|J3L856\_ORYBR

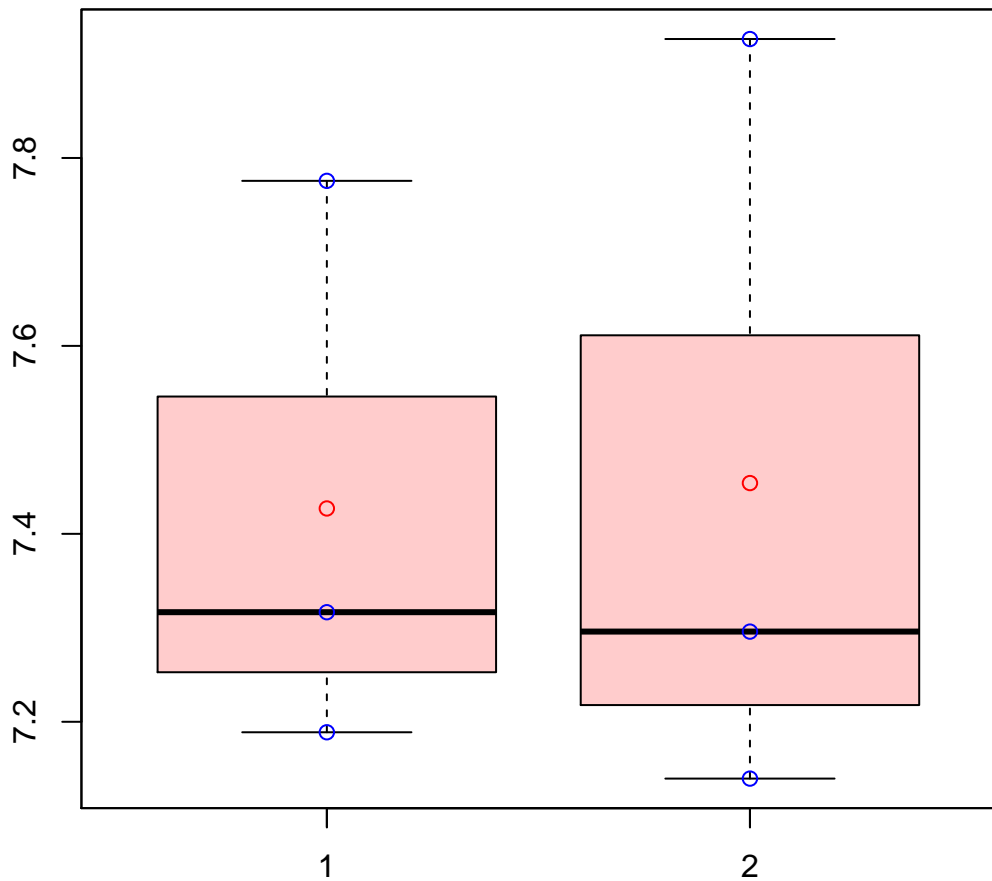

t-Test: p-value = 0.93

# J3L8F2|J3L8F2\_ORYBR

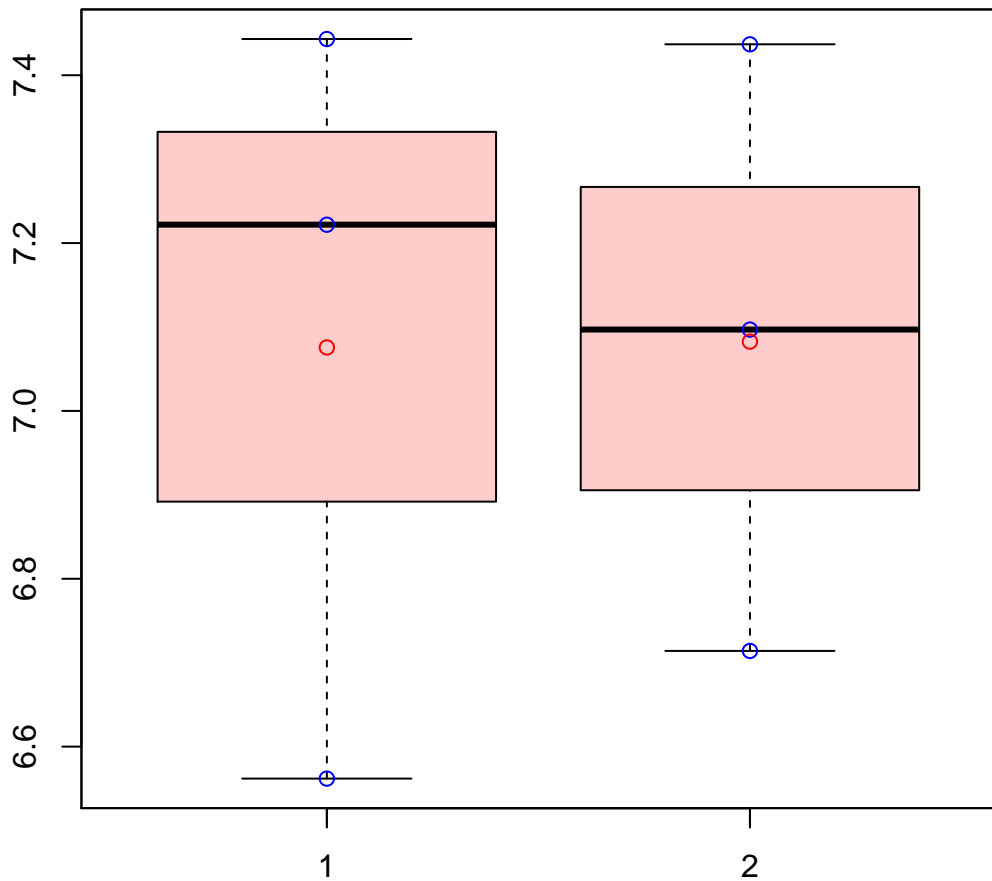

t-Test: p-value = 0.98



# J3L8I1|J3L8I1\_ORYBR

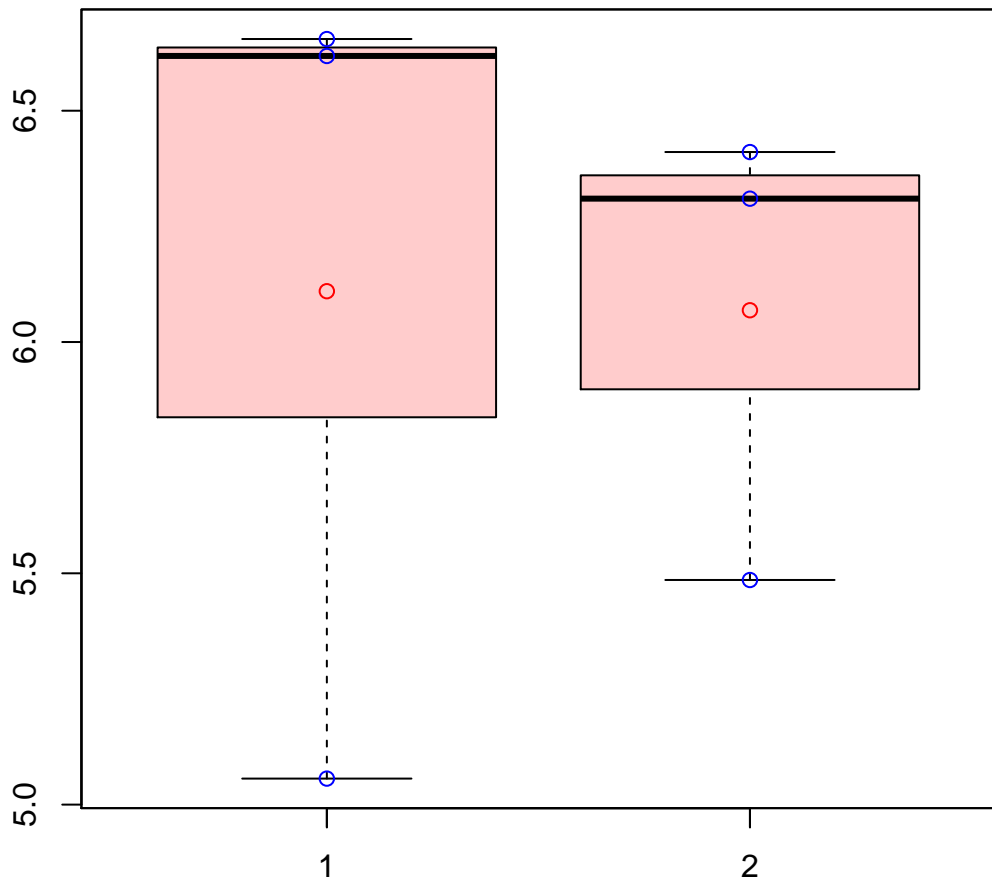

t-Test: p-value = 0.95

# J3L8Y0|J3L8Y0\_ORYBR

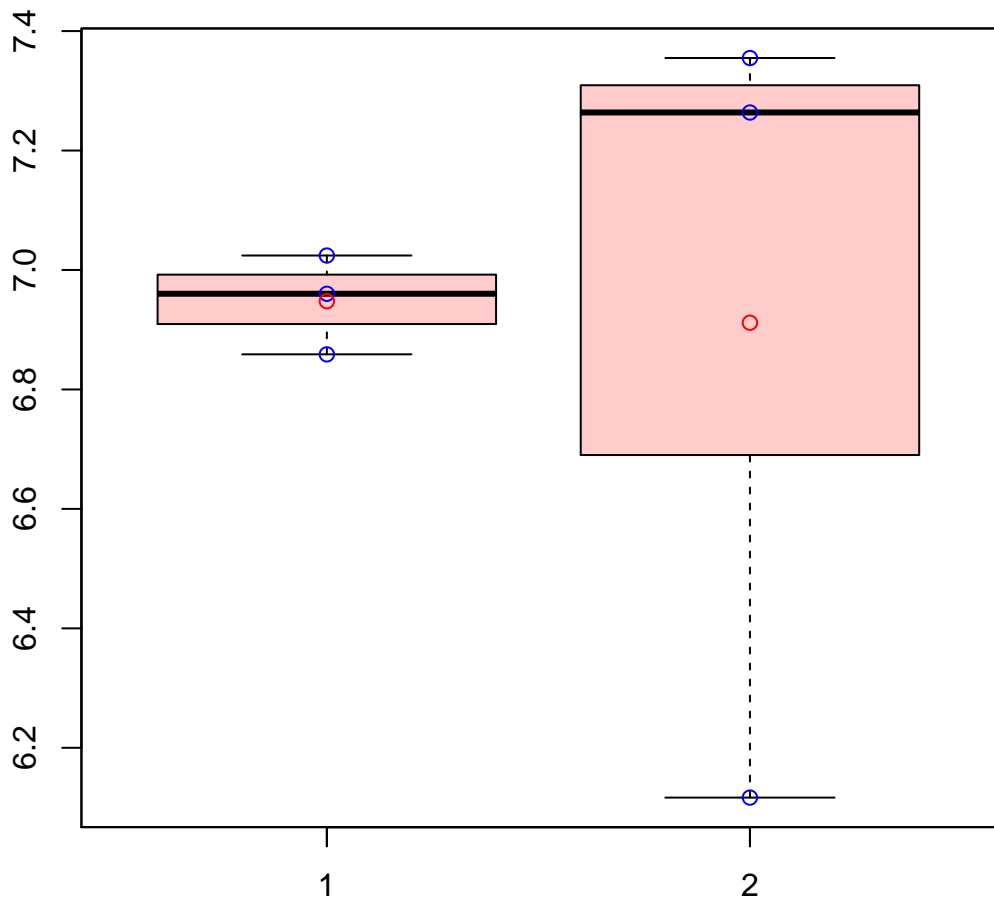

t-Test: p-value = 0.94

# J3L9E8|J3L9E8\_ORYBR

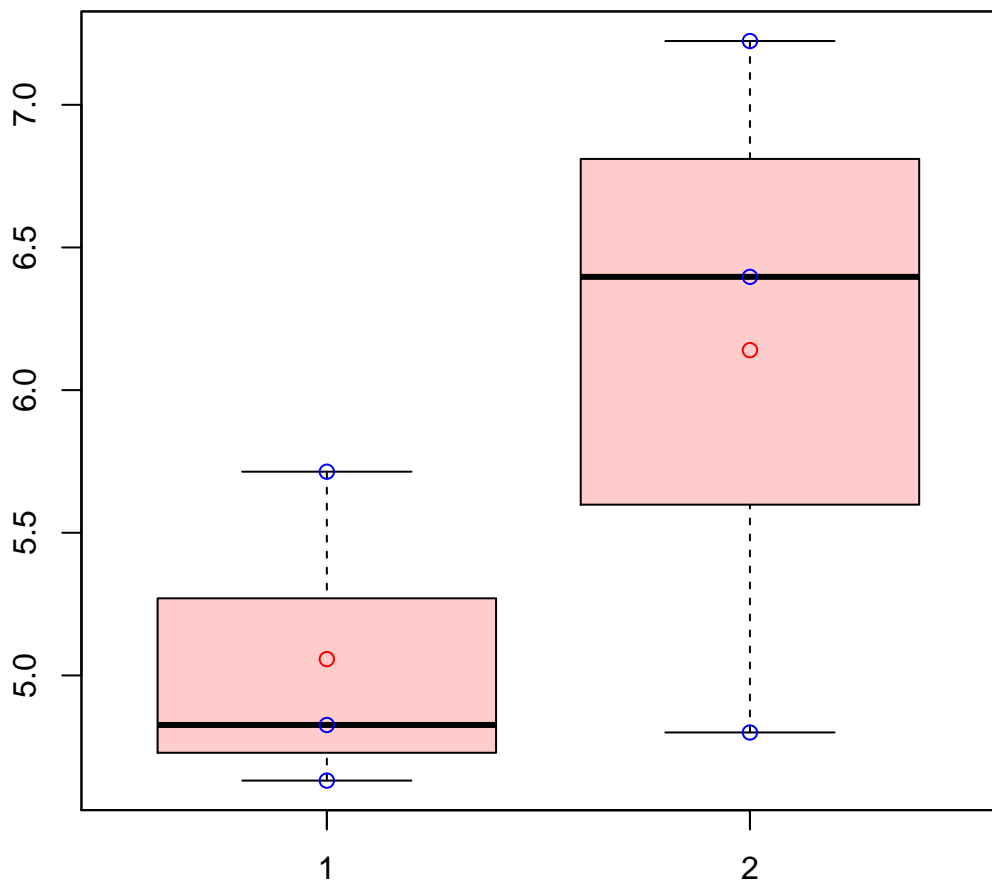

t-Test: p-value = 0.27

# J3L9R9|J3L9R9\_ORYBR

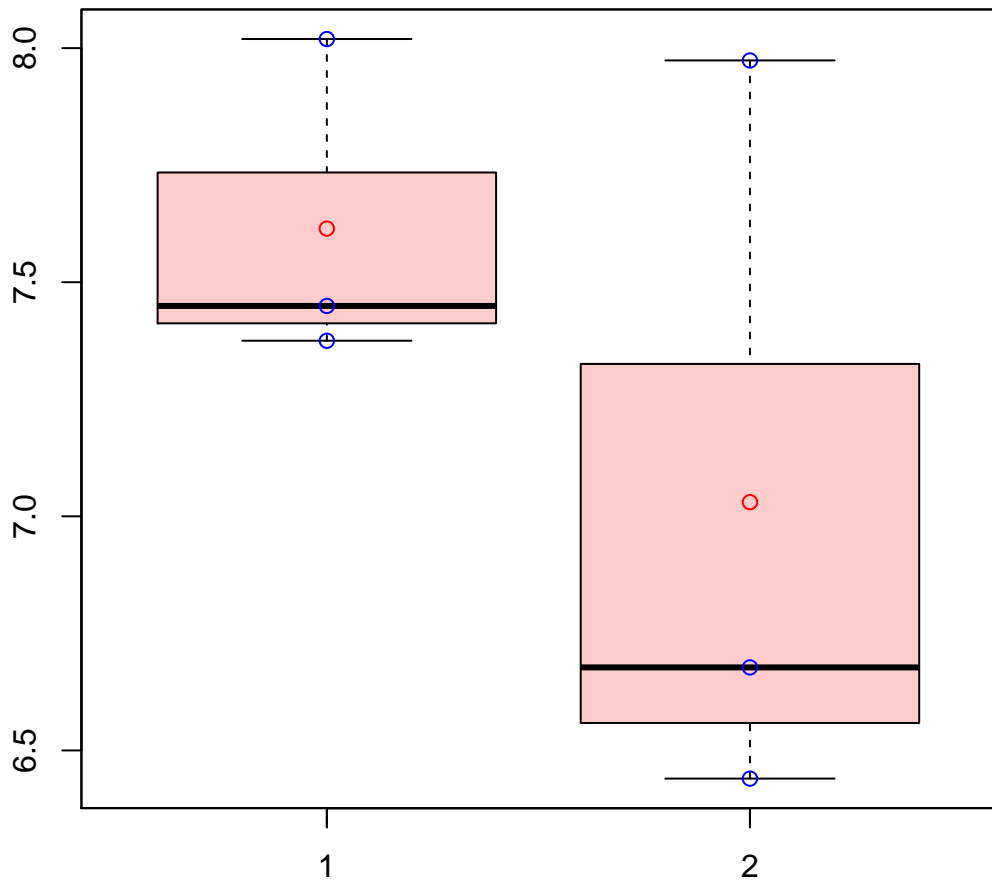

t-Test: p-value = 0.35

# J3LAG7|J3LAG7\_ORYBR

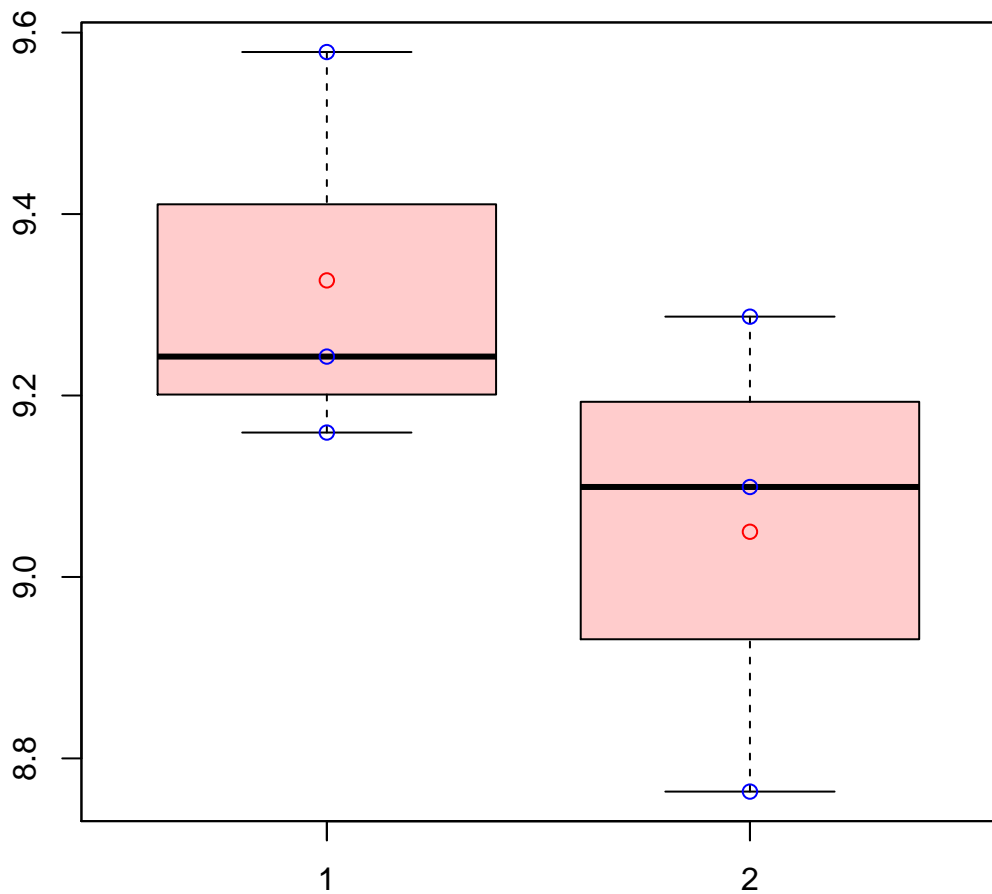

t-Test: p-value = 0.24

# J3LAH9|J3LAH9\_ORYBR

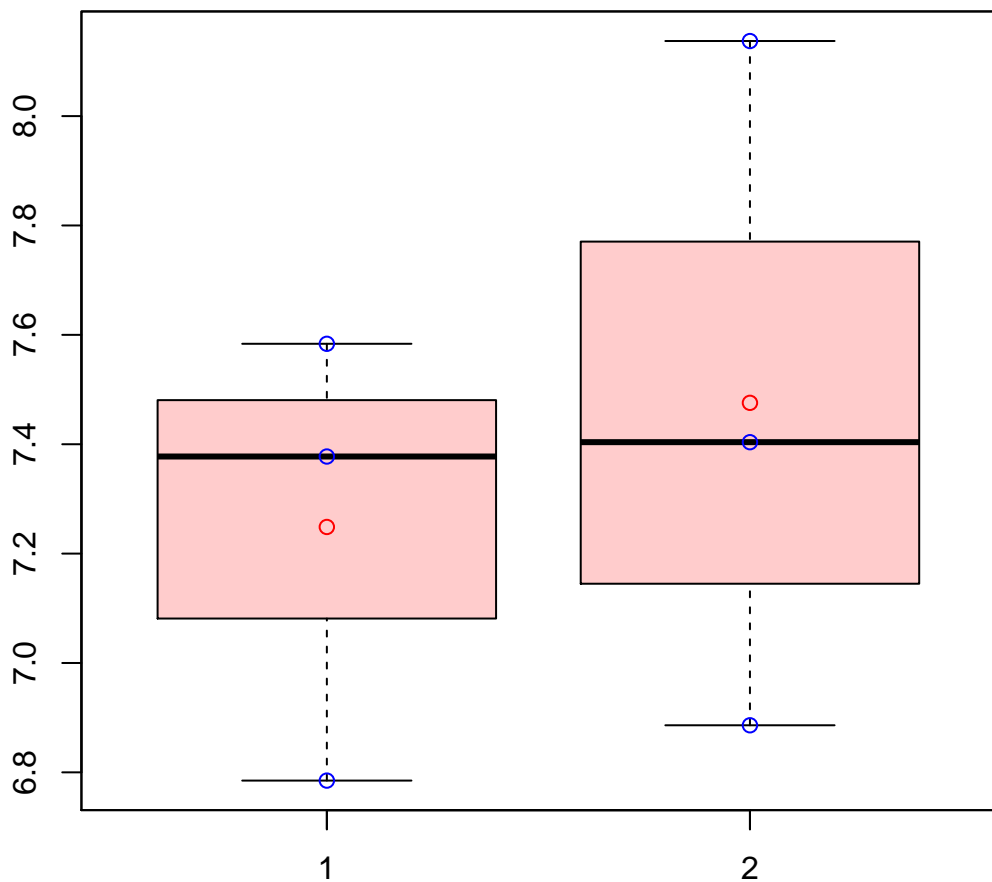

t-Test: p-value = 0.63

# J3LAI4|J3LAI4\_ORYBR

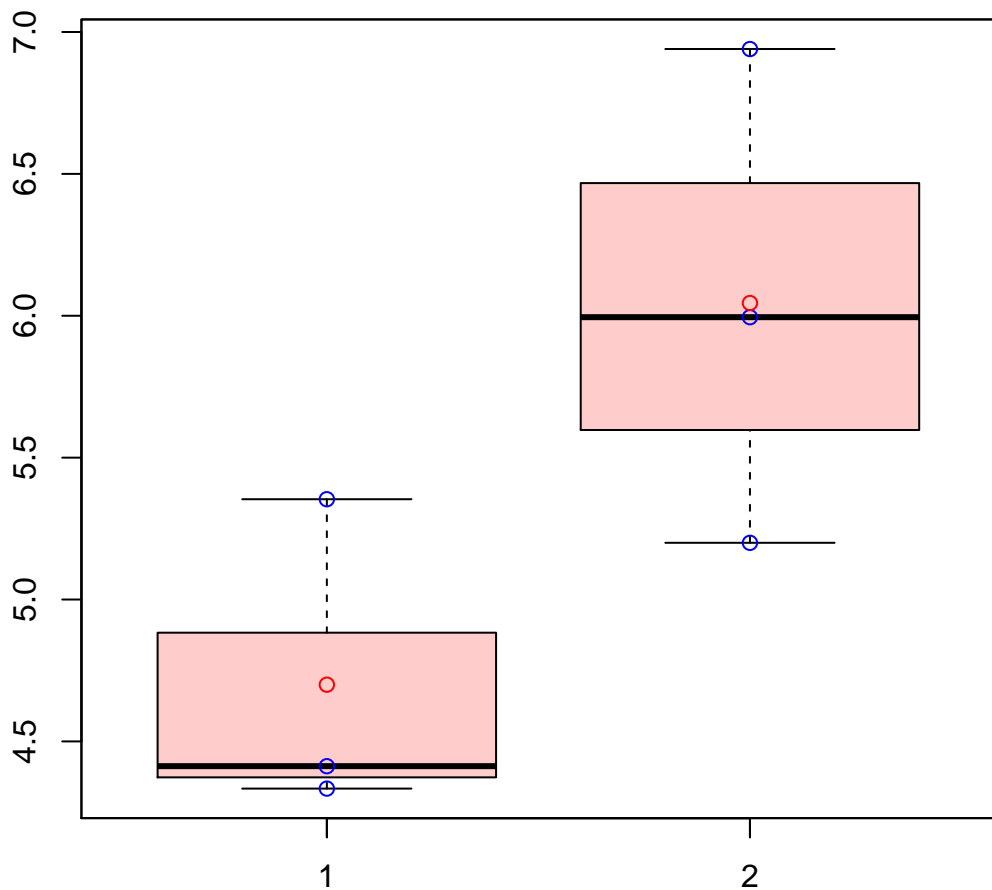

t-Test: p-value = 0.1

# J3LAT7|J3LAT7\_ORYBR

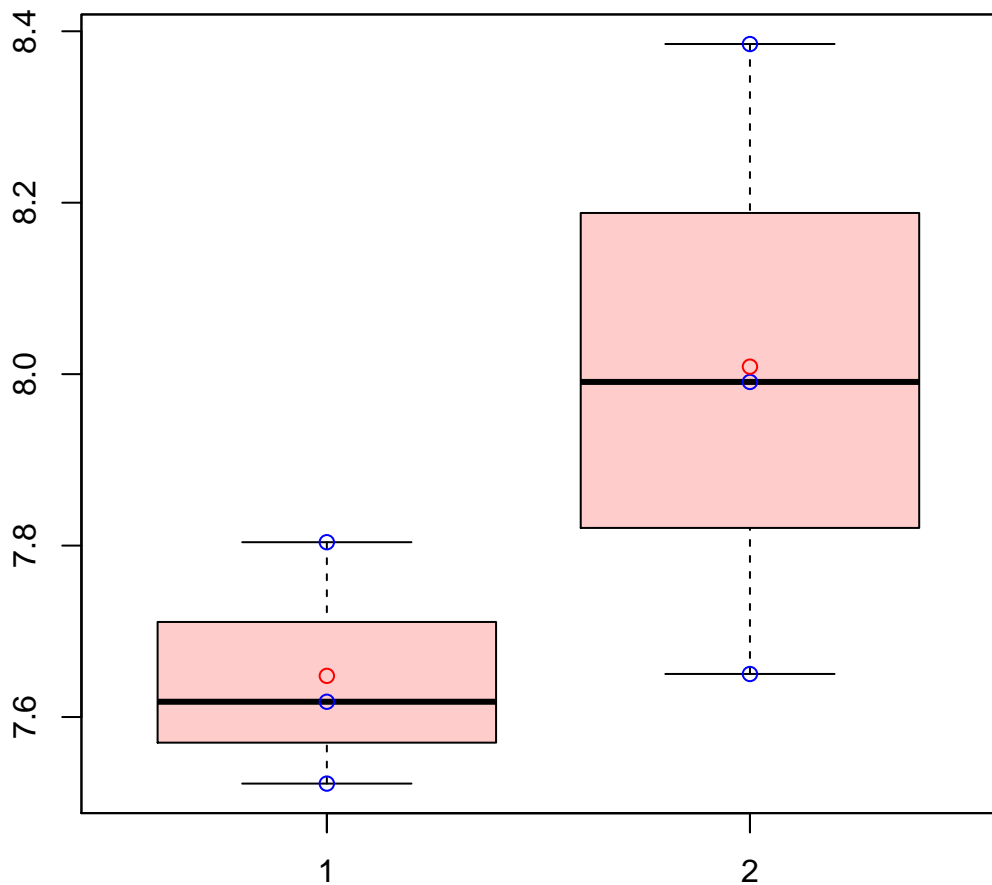

t-Test: p-value = 0.23



# J3LAY5|J3LAY5\_ORYBR

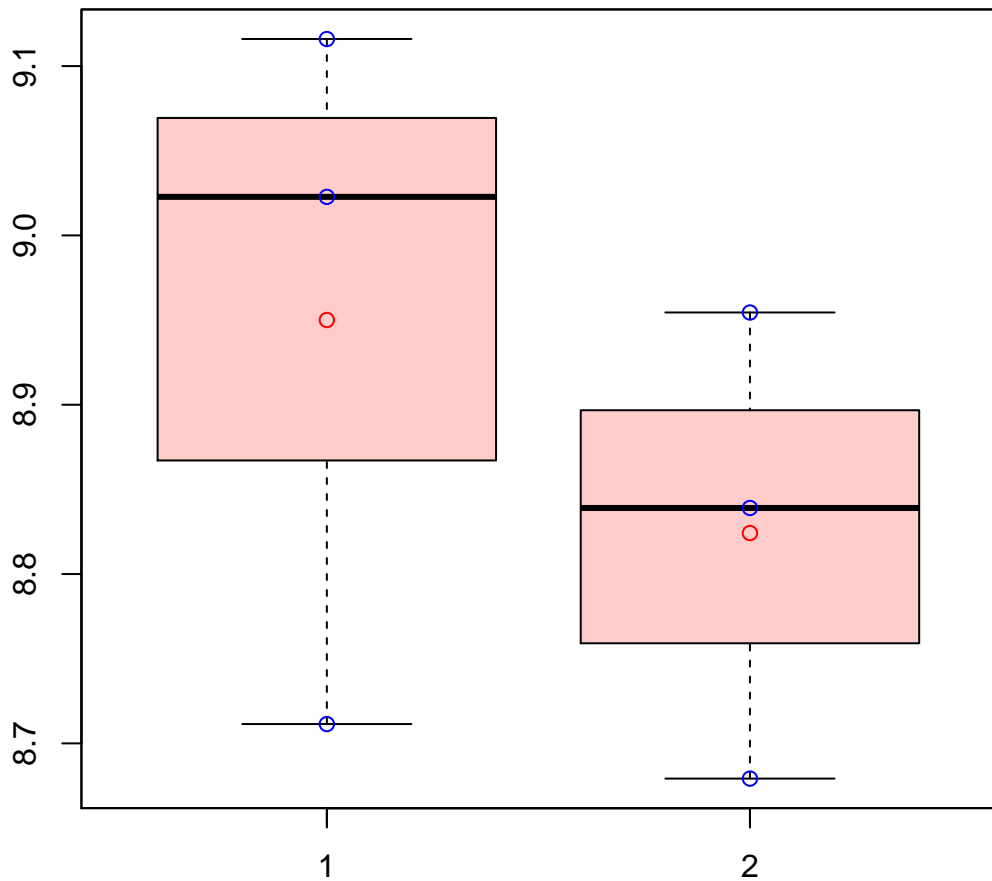

t-Test: p-value = 0.44

# J3LB65|J3LB65\_ORYBR

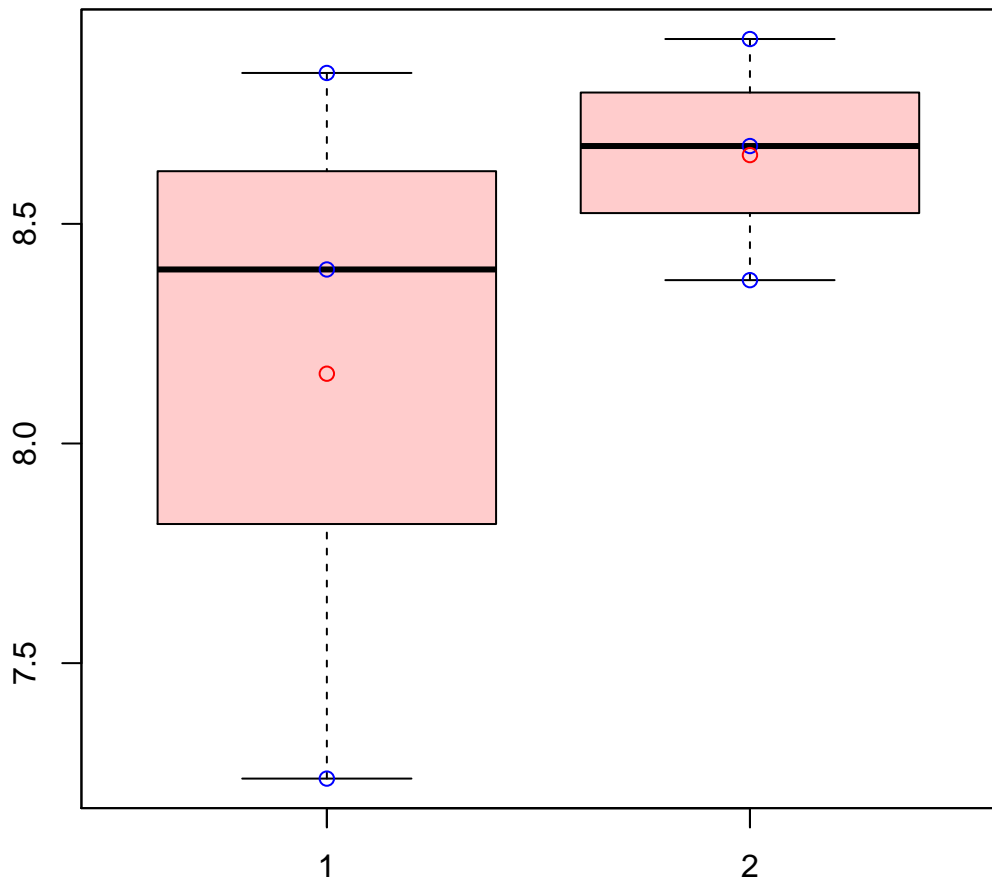

t-Test: p-value = 0.41

# J3LBA3|J3LBA3\_ORYBR

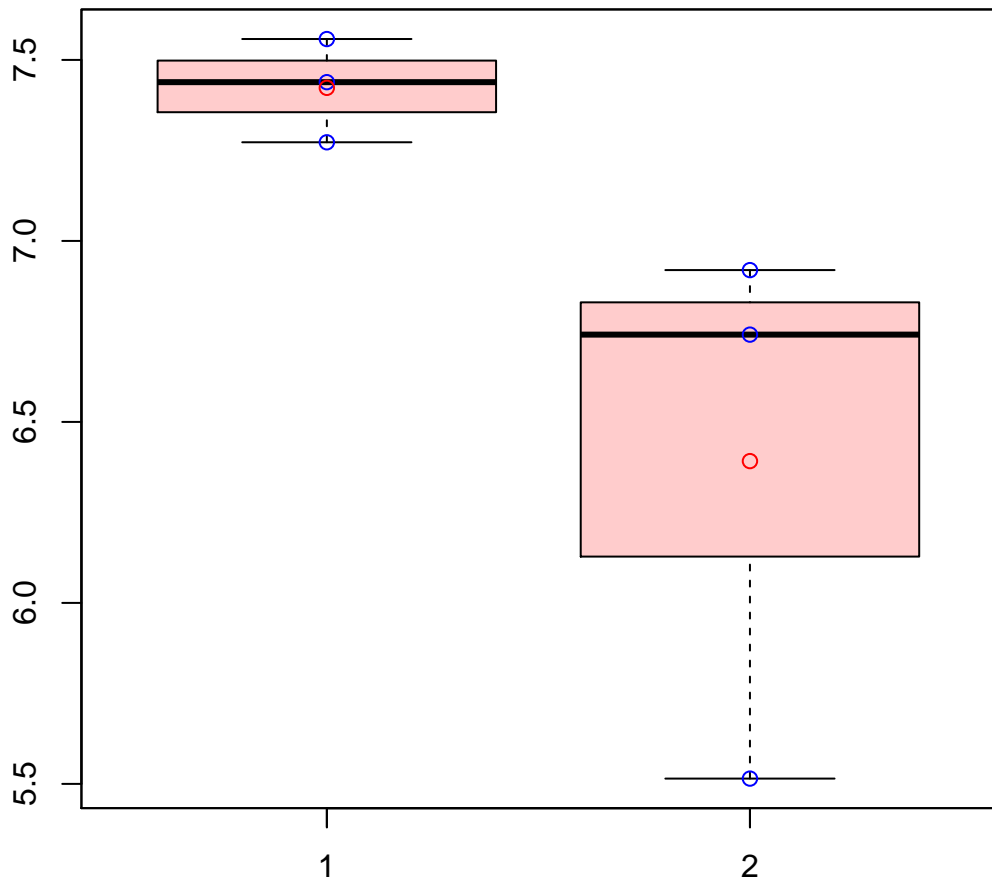

t-Test: p-value = 0.14

# J3LBF0|J3LBF0\_ORYBR

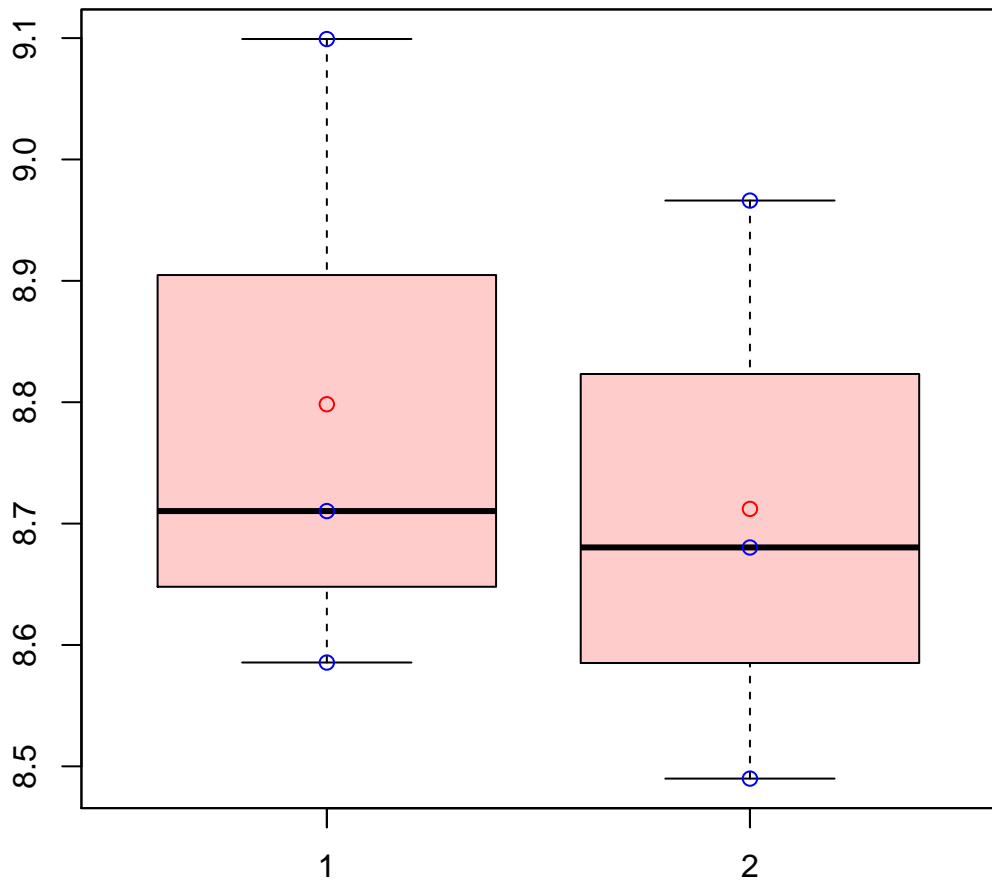

t-Test: p-value = 0.7

# J3LBH0|J3LBH0\_ORYBR

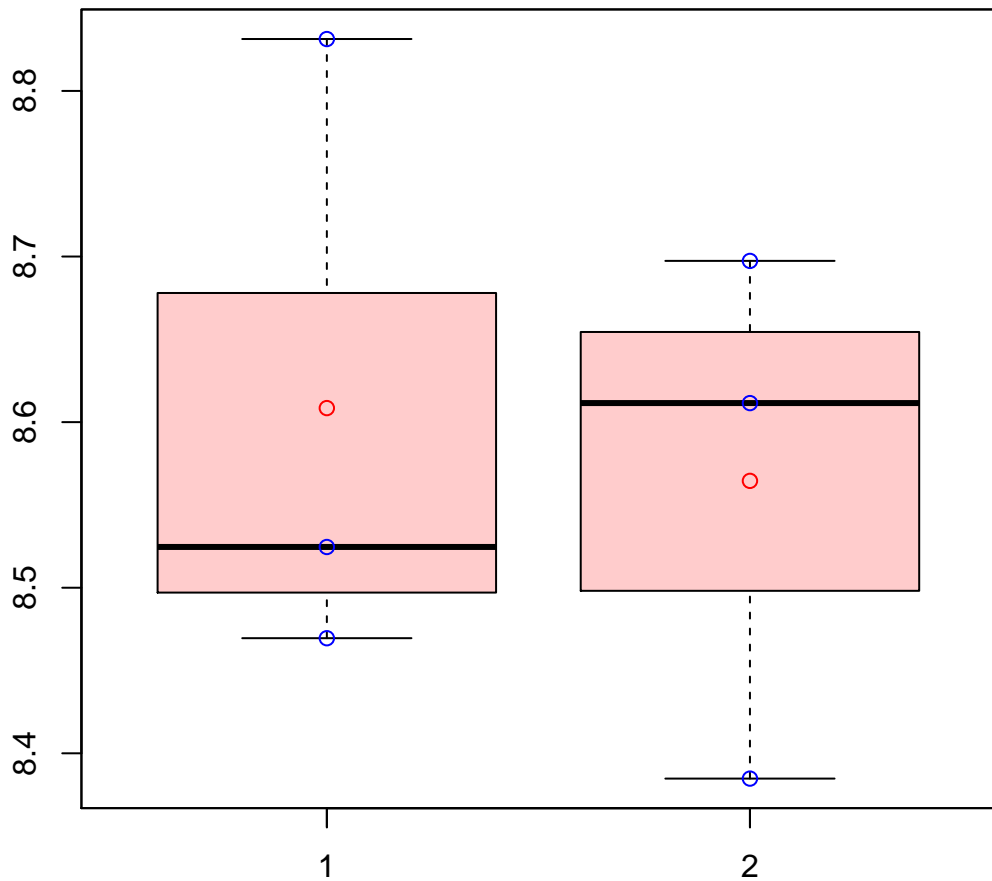

t-Test: p-value = 0.78

# J3LBU0|J3LBU0\_ORYBR

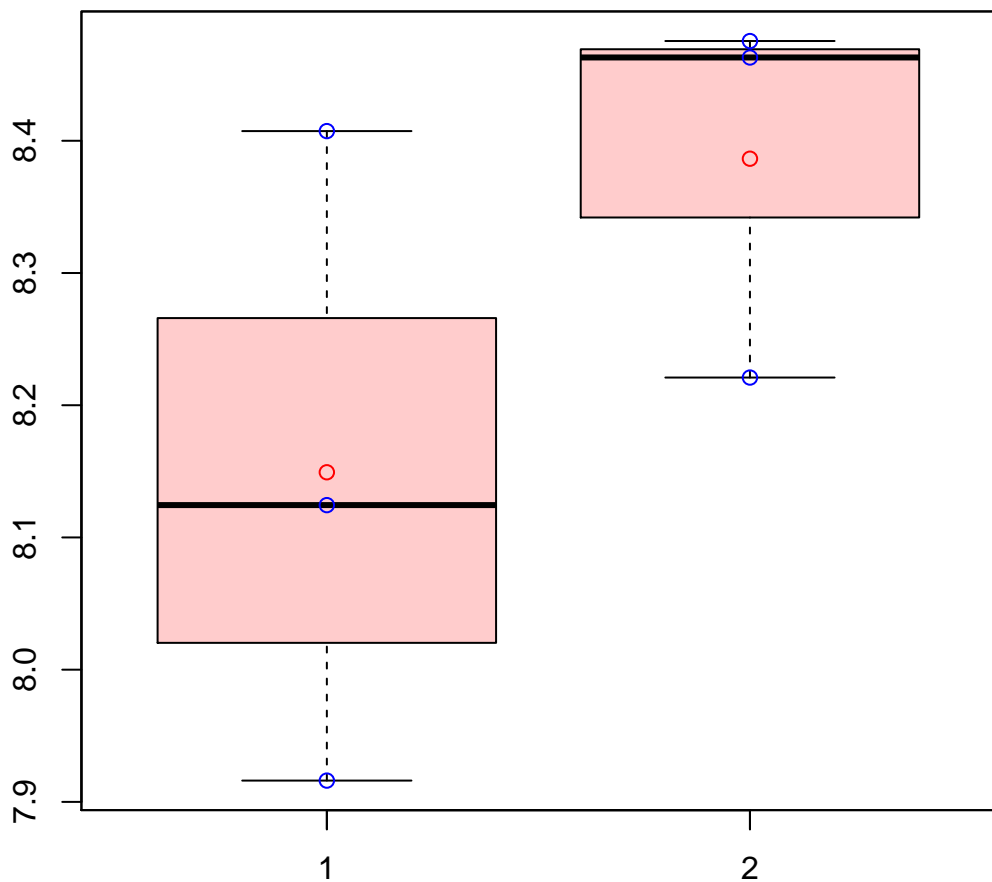

t-Test: p-value = 0.24

# J3LC90|J3LC90\_ORYBR

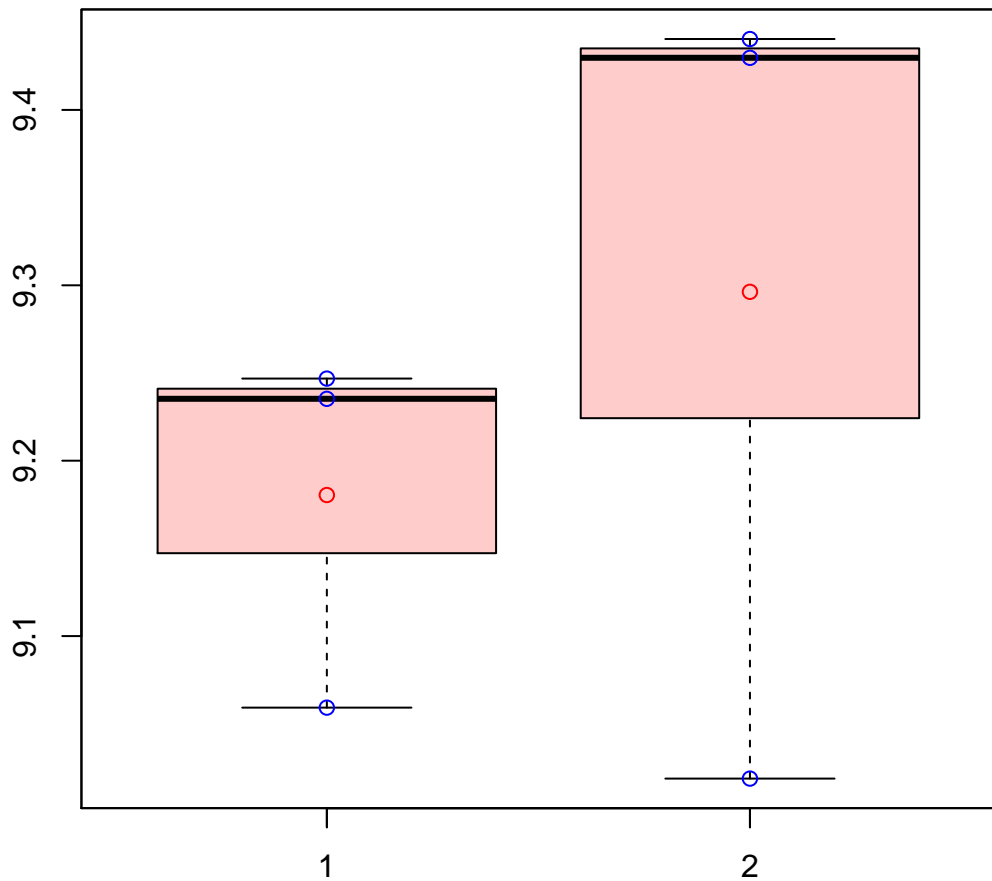

t-Test: p-value = 0.5

# J3LCC3|J3LCC3\_ORYBR

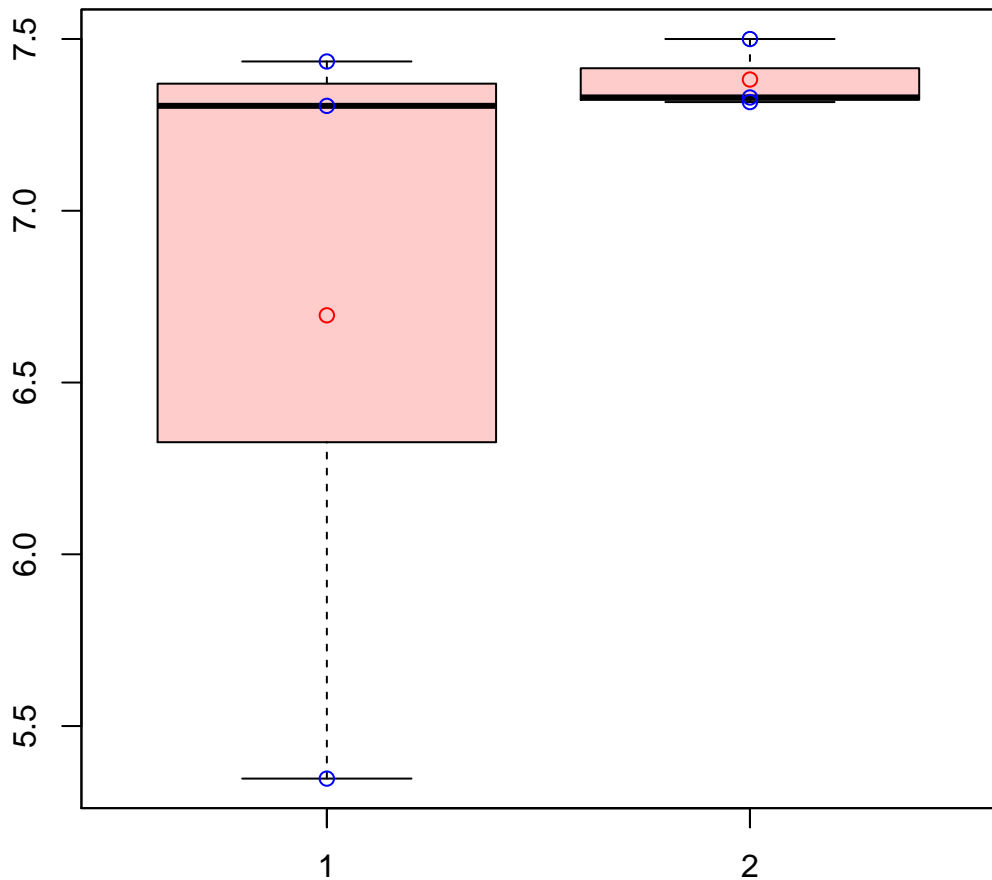

t-Test: p-value = 0.42



# J3LDI7|J3LDI7\_ORYBR

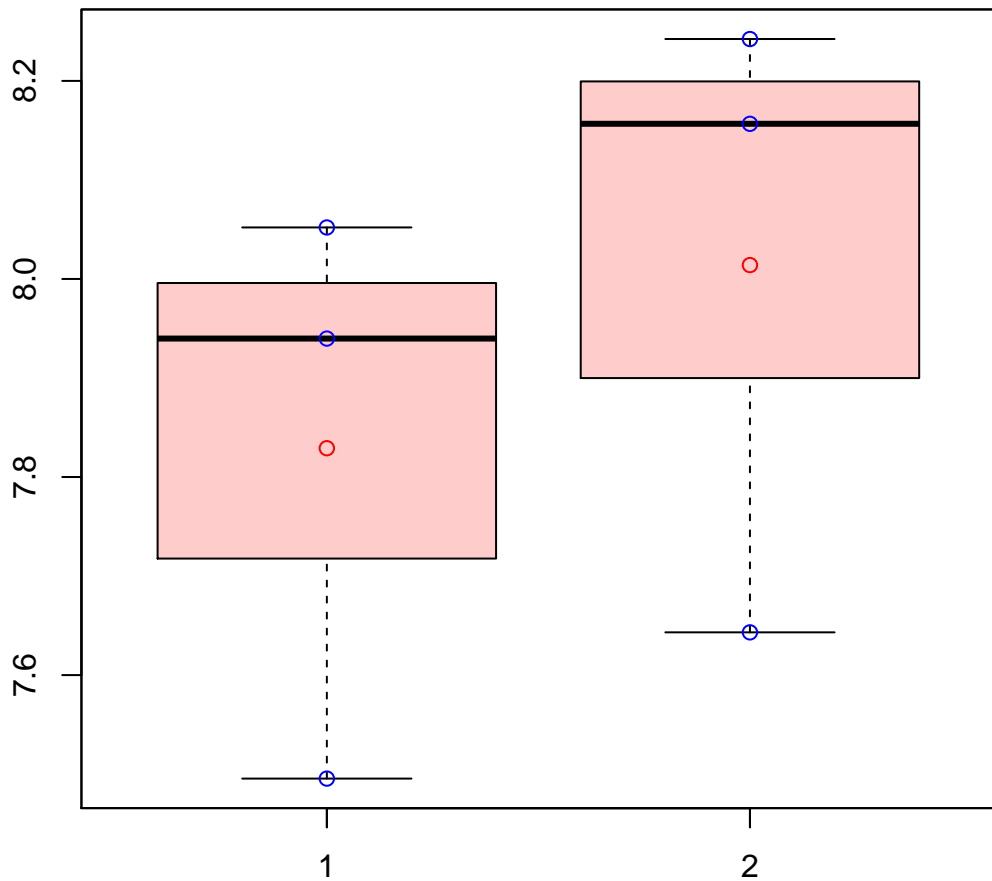

t-Test: p-value = 0.51

# J3LDJ4|J3LDJ4\_ORYBR

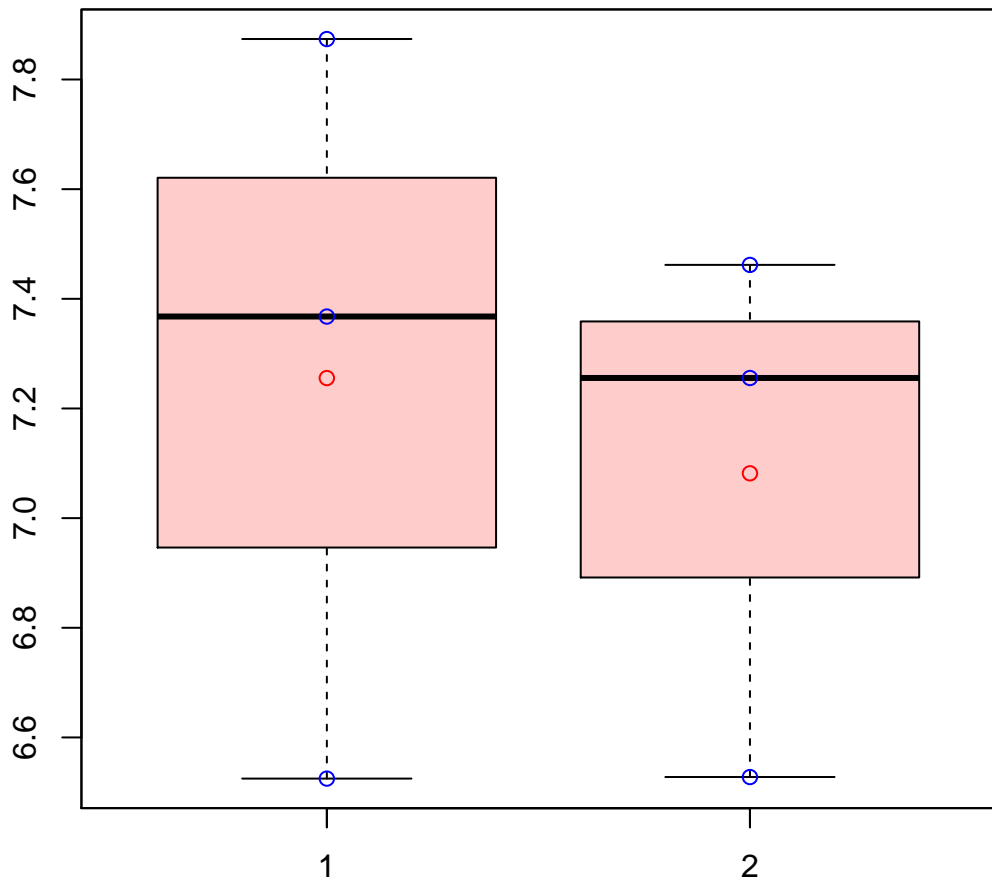

t-Test: p-value = 0.74

# J3LDR9|J3LDR9\_ORYBR

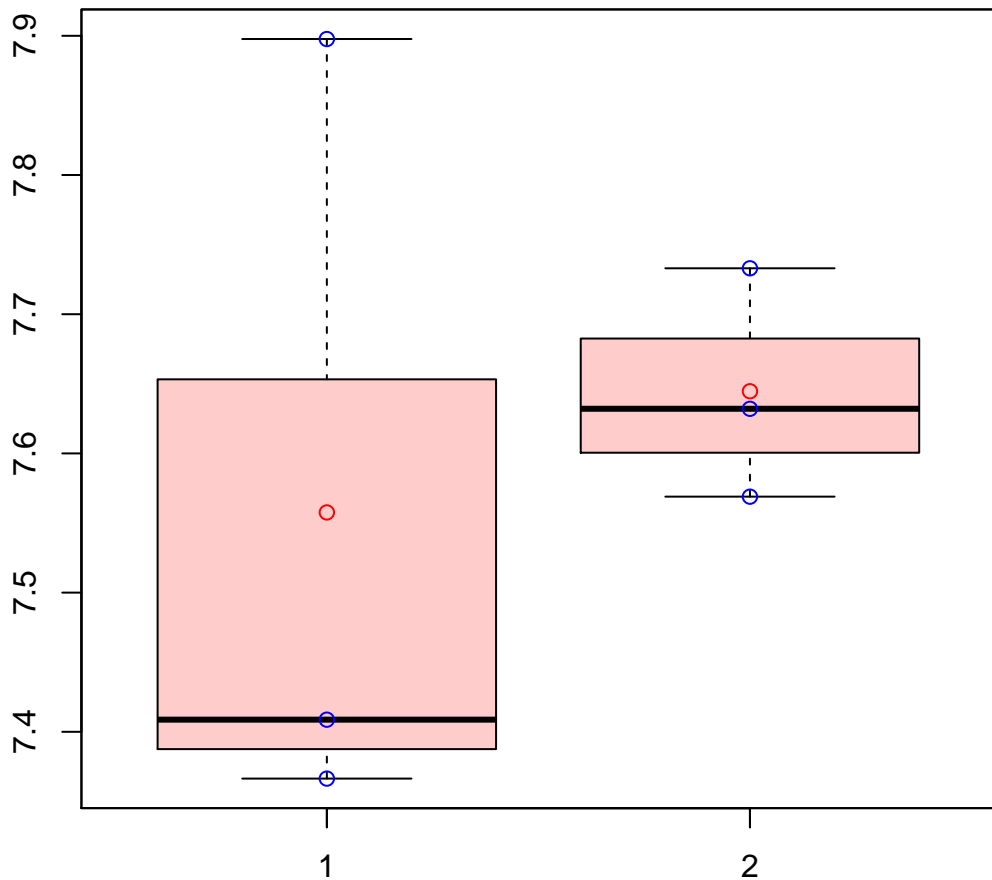

t-Test: p-value = 0.67

# J3LDS5|J3LDS5\_ORYBR

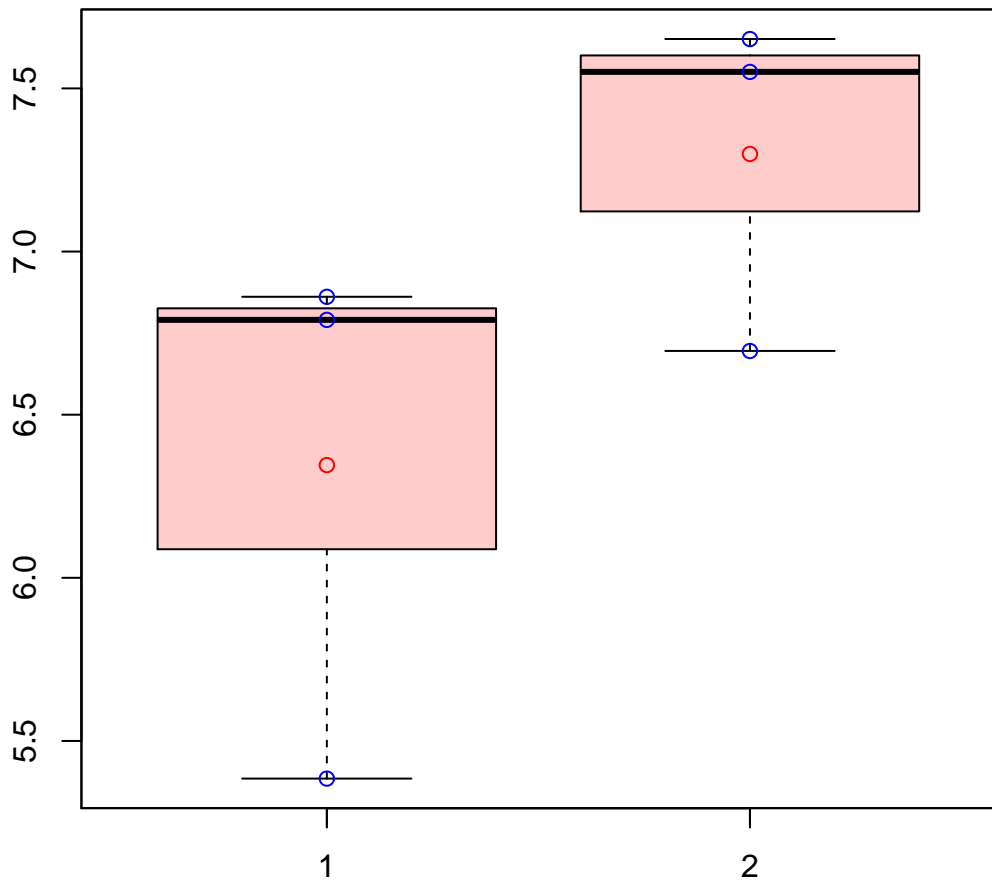

t-Test: p-value = 0.18

# J3LDT4|J3LDT4\_ORYBR

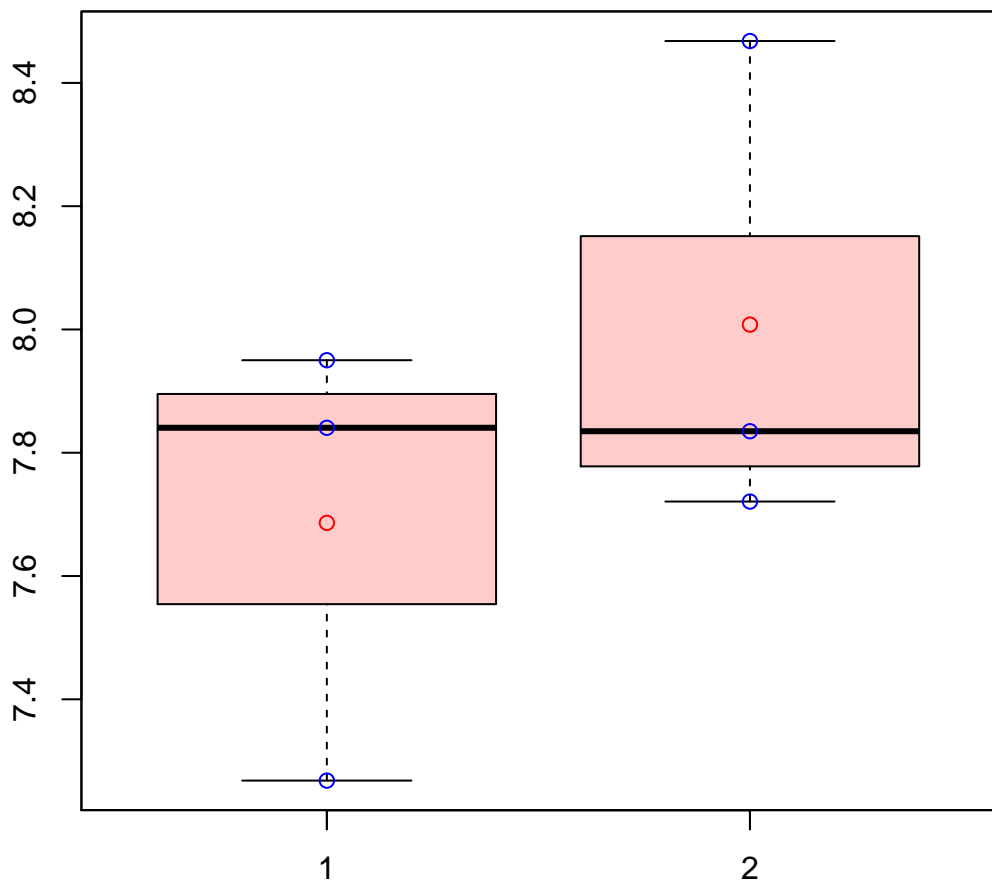

t-Test: p-value = 0.36

# J3LE59|J3LE59\_ORYBR

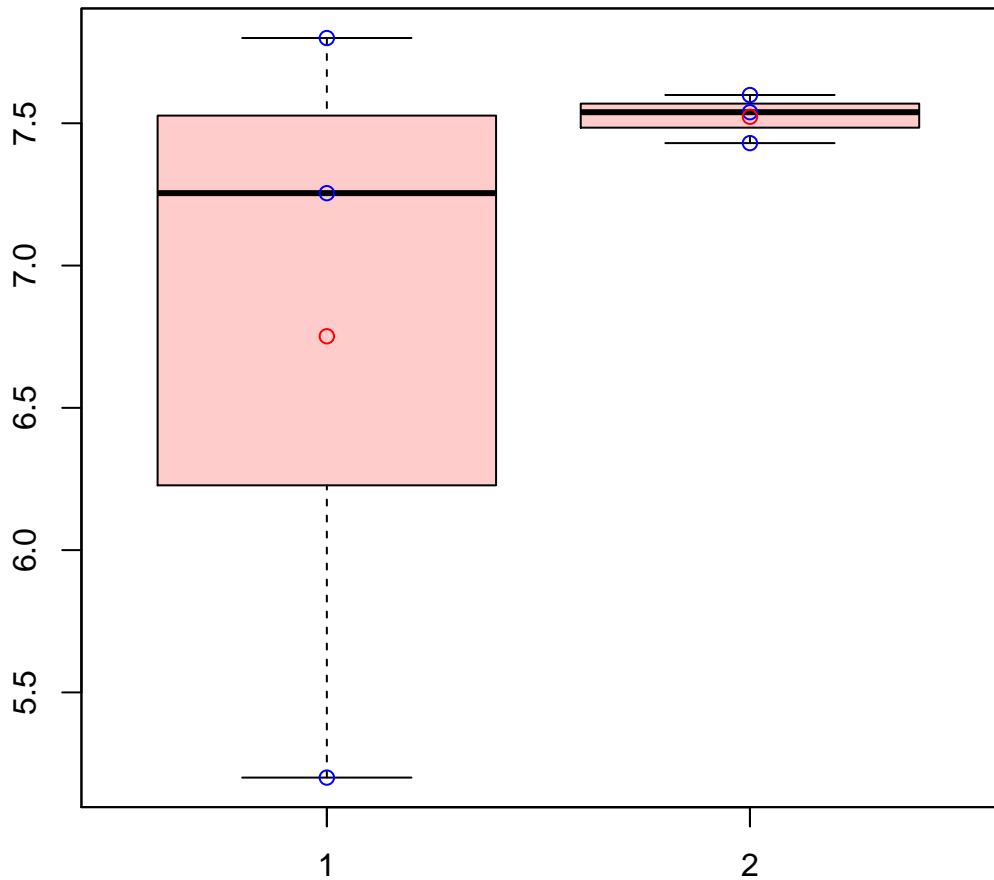

t-Test: p-value = 0.43

# J3LEE7|J3LEE7\_ORYBR

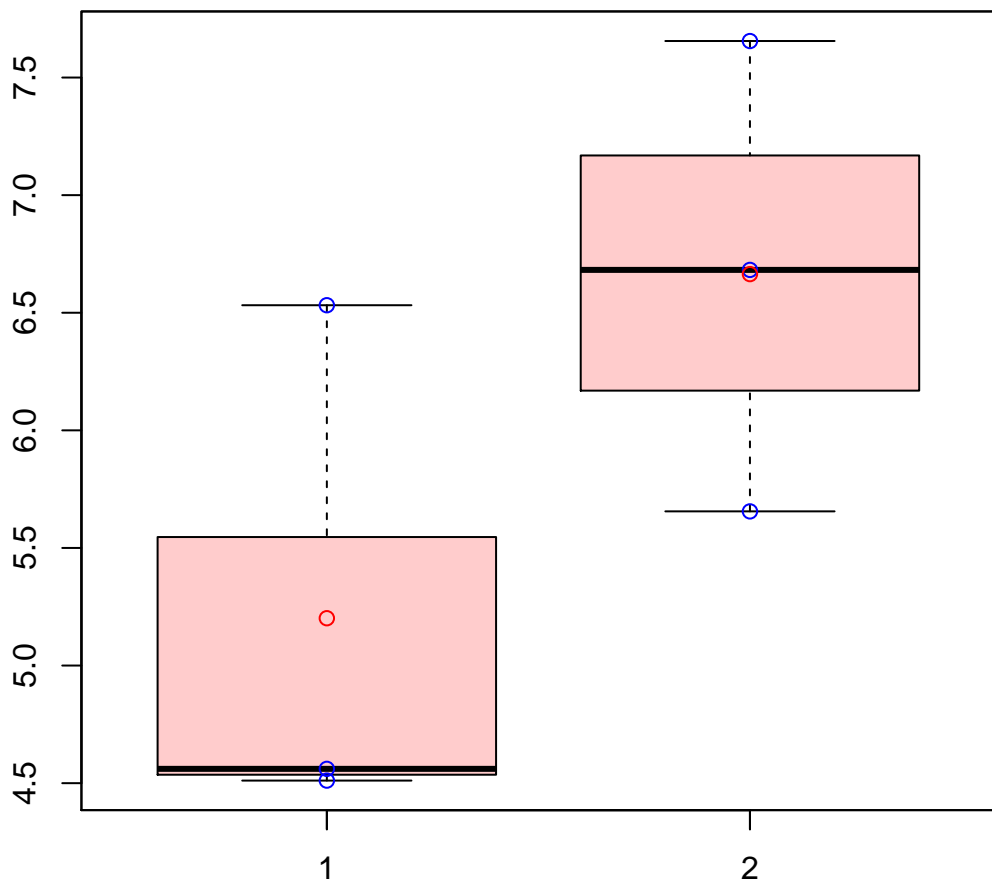

t-Test: p-value = 0.17

# J3LEH7|J3LEH7\_ORYBR

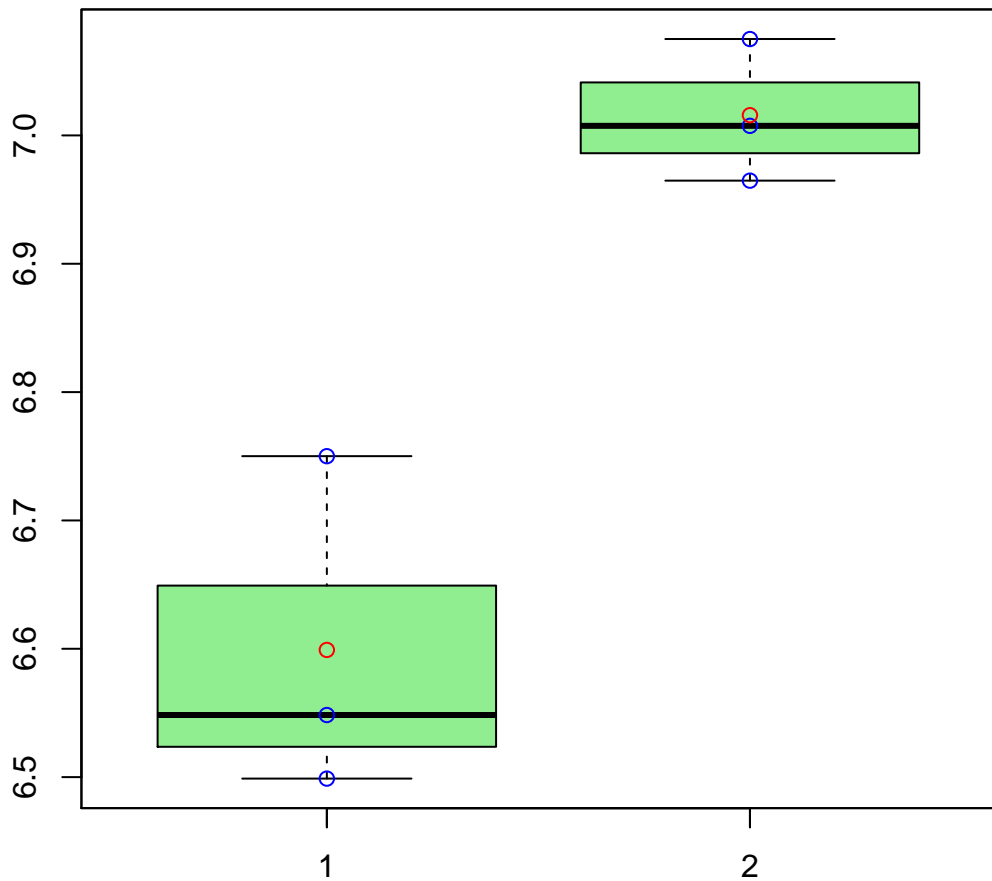

t-Test: p-value = 0.02



# J3LEX0|J3LEX0\_ORYBR

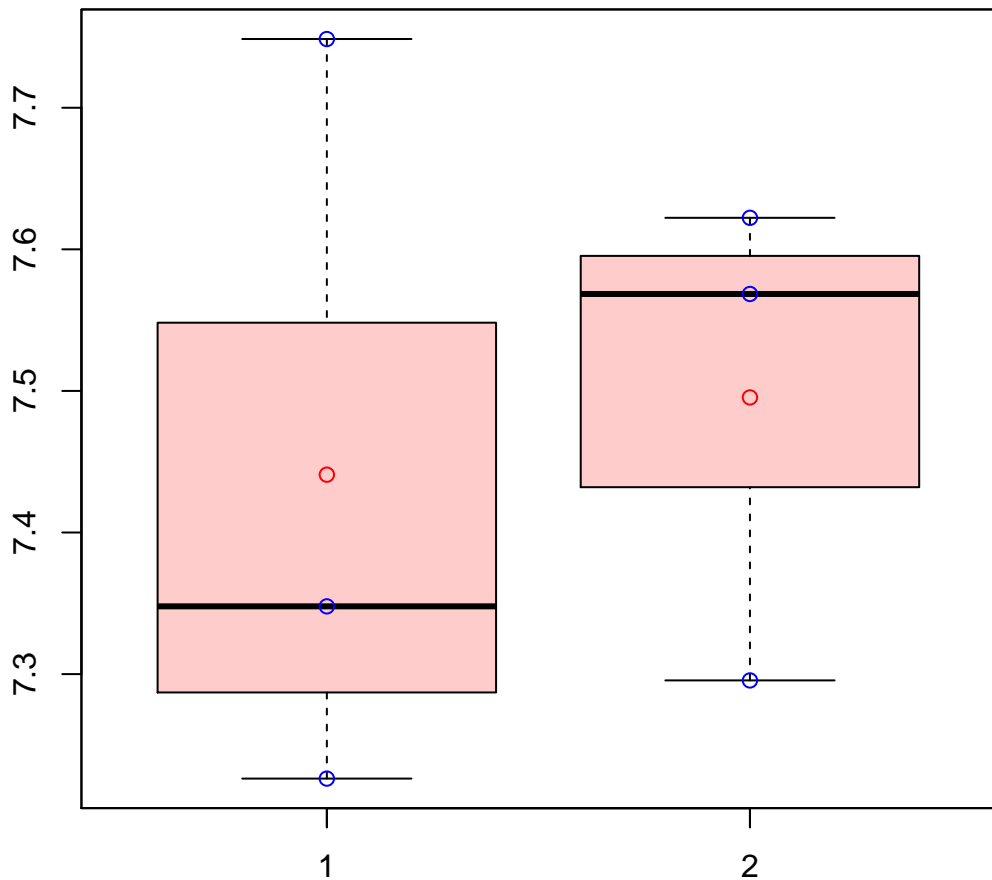

t-Test: p-value = 0.79

# J3LEY6|J3LEY6\_ORYBR

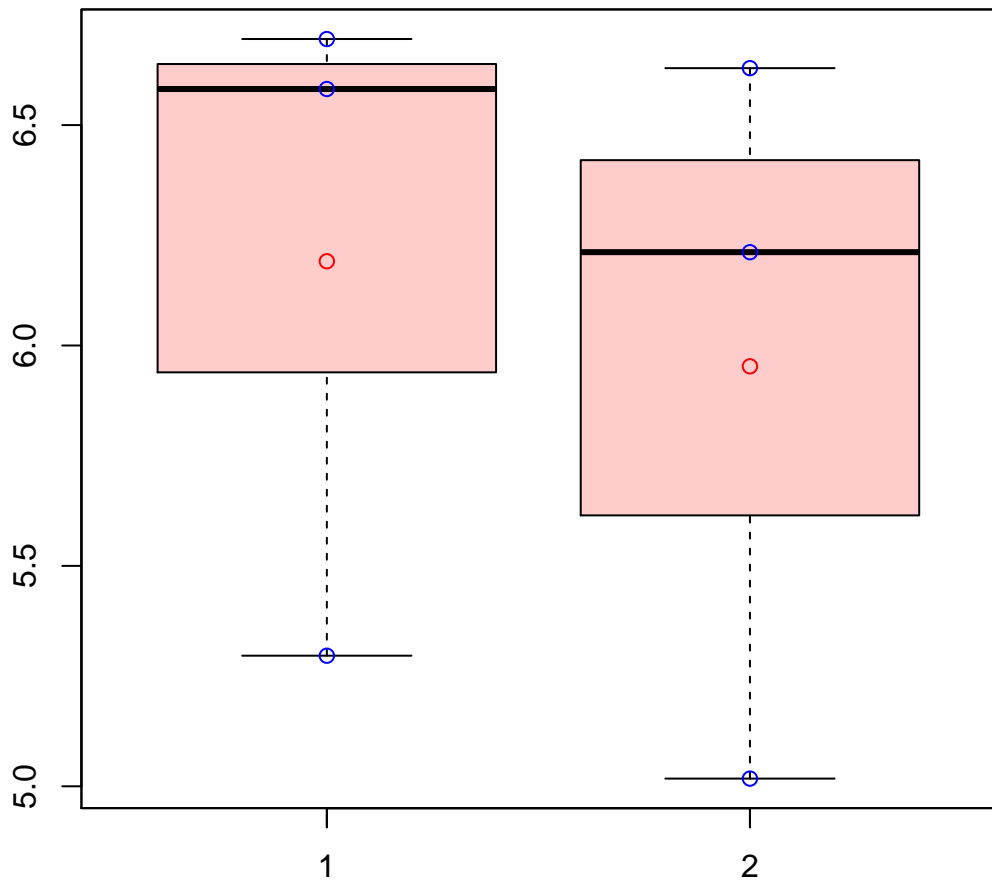

t-Test: p-value = 0.74

# J3LF31|J3LF31\_ORYBR

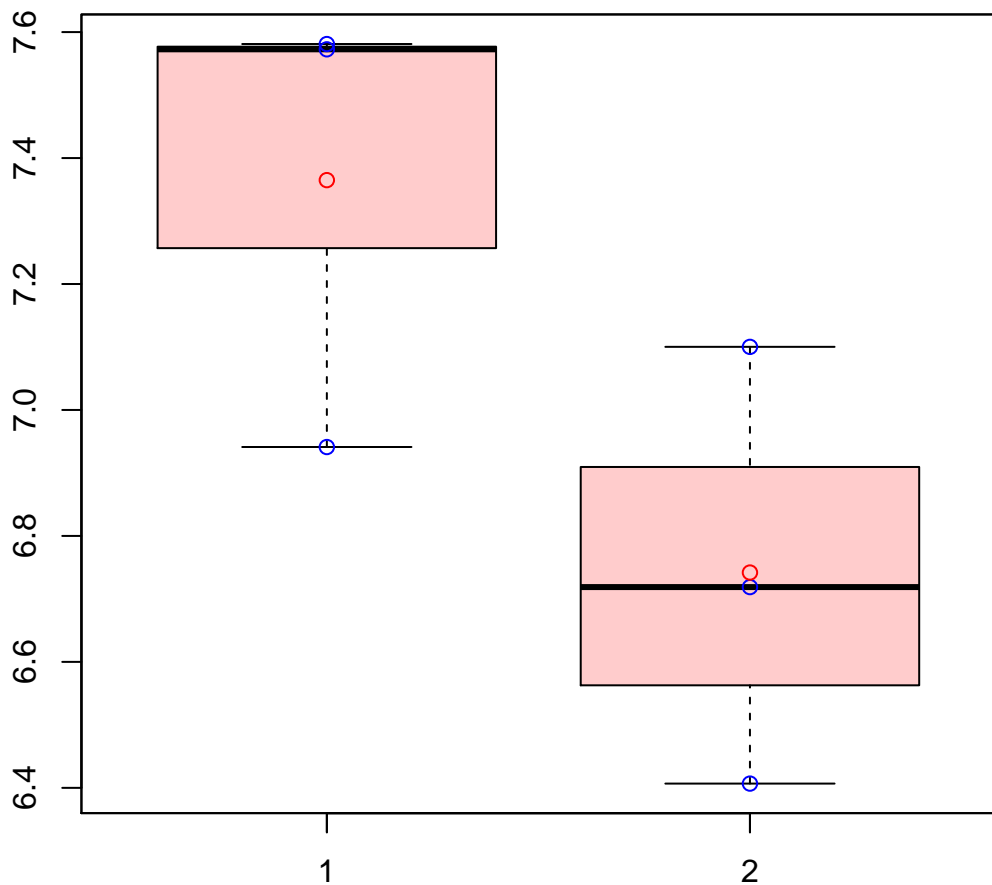

t-Test: p-value = 0.1

# J3LF68|J3LF68\_ORYBR

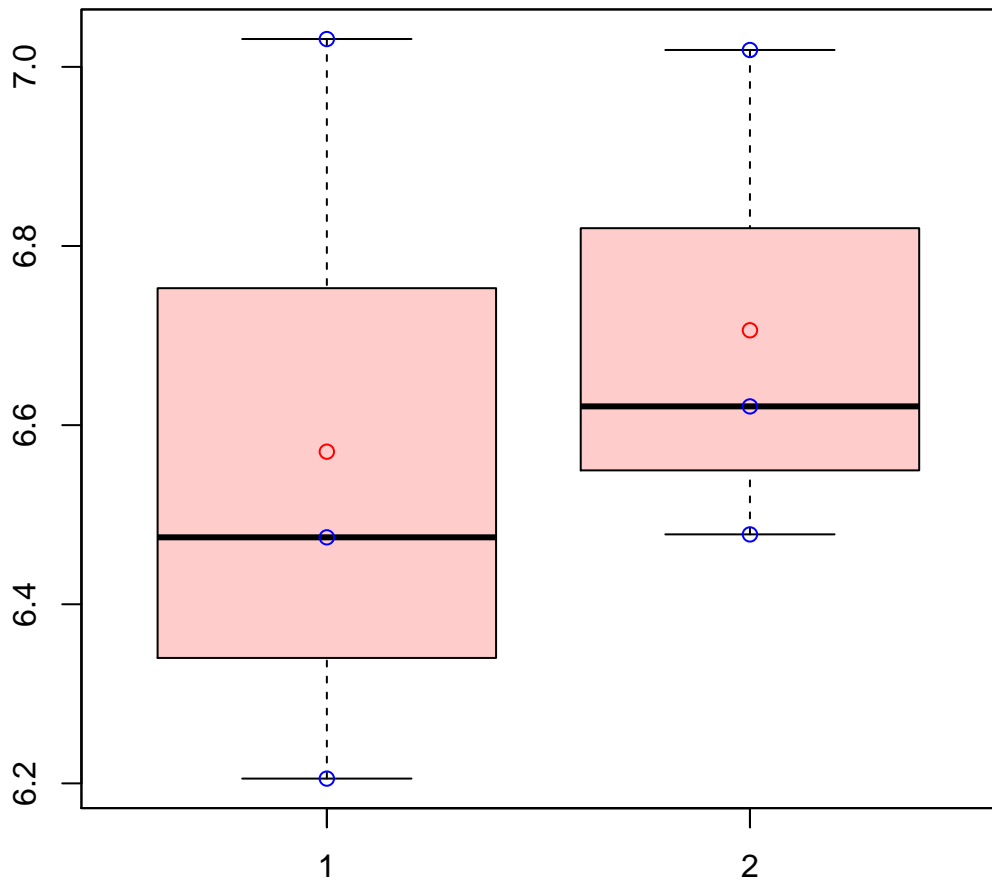

t-Test: p-value = 0.67

# J3LF89|J3LF89\_ORYBR

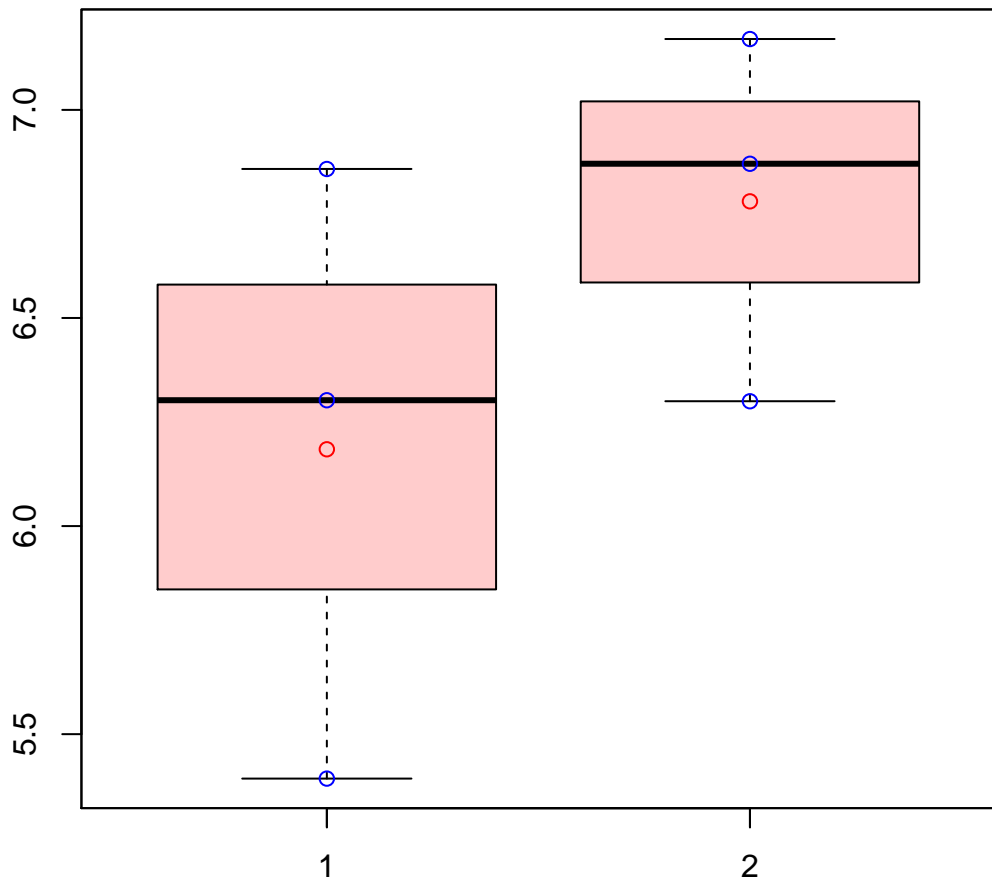

t-Test: p-value = 0.31

# J3LFK6|J3LFK6\_ORYBR

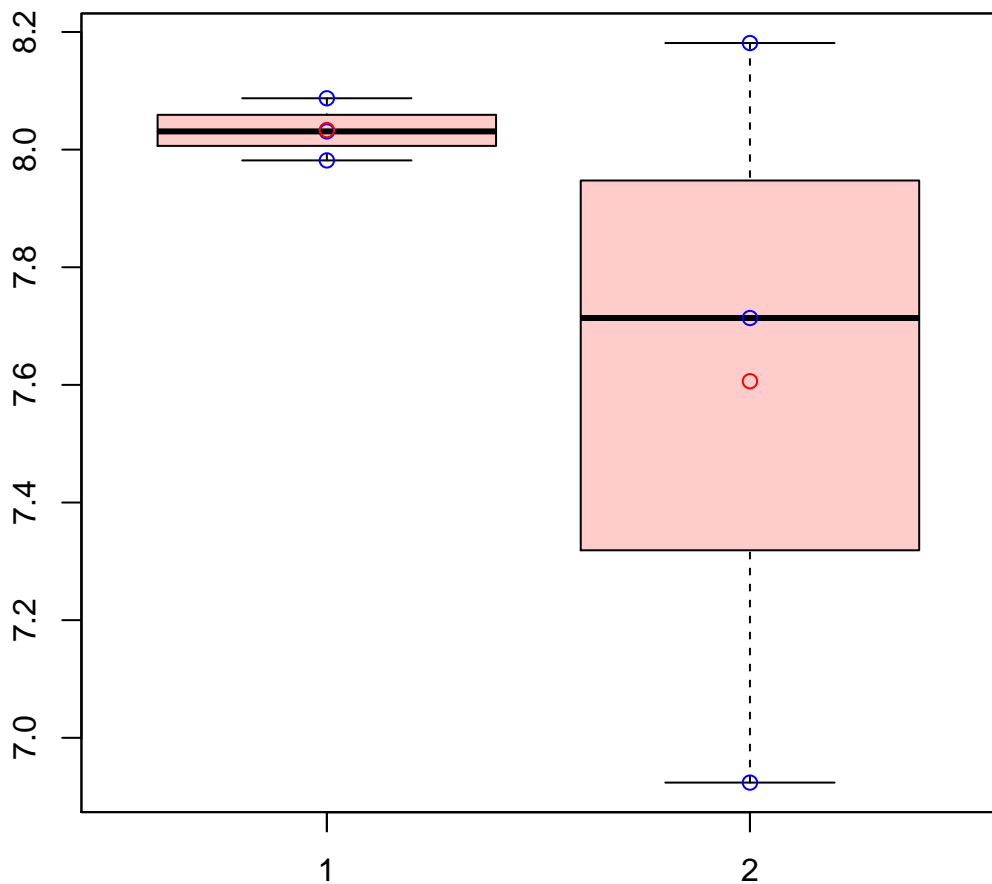

t-Test: p-value = 0.36

# J3LG45|J3LG45\_ORYBR

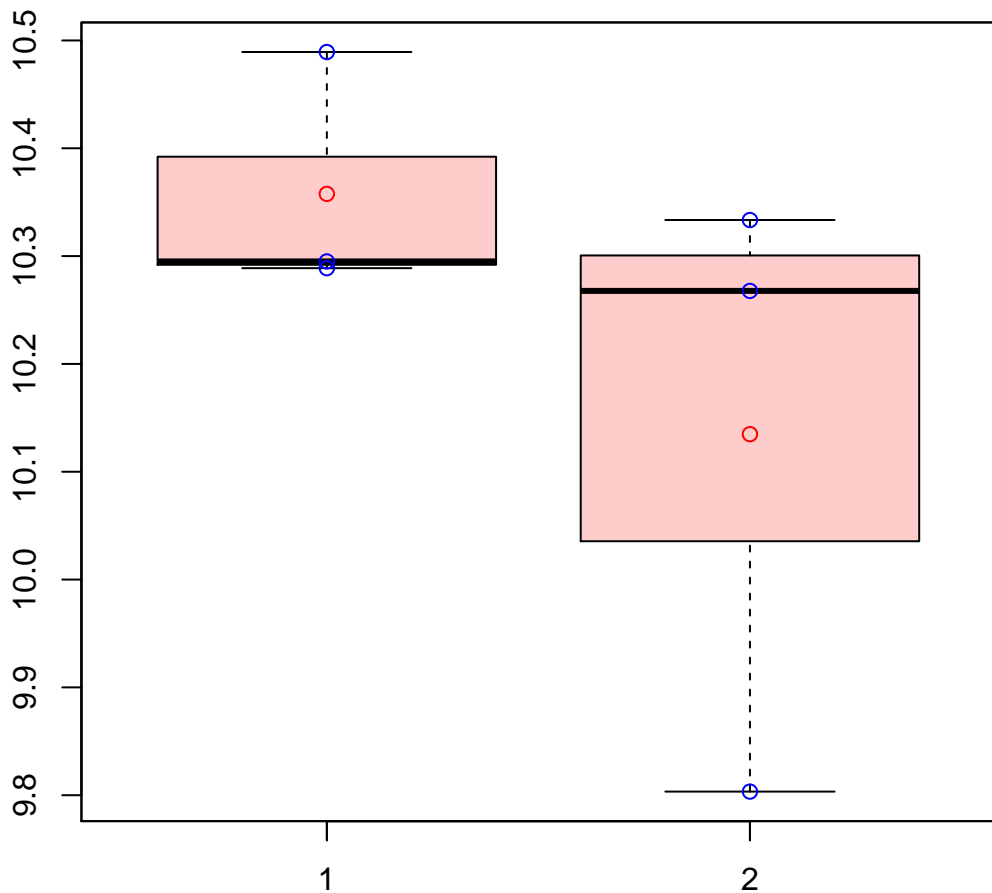

t-Test: p-value = 0.31

# J3LH12|J3LH12\_ORYBR

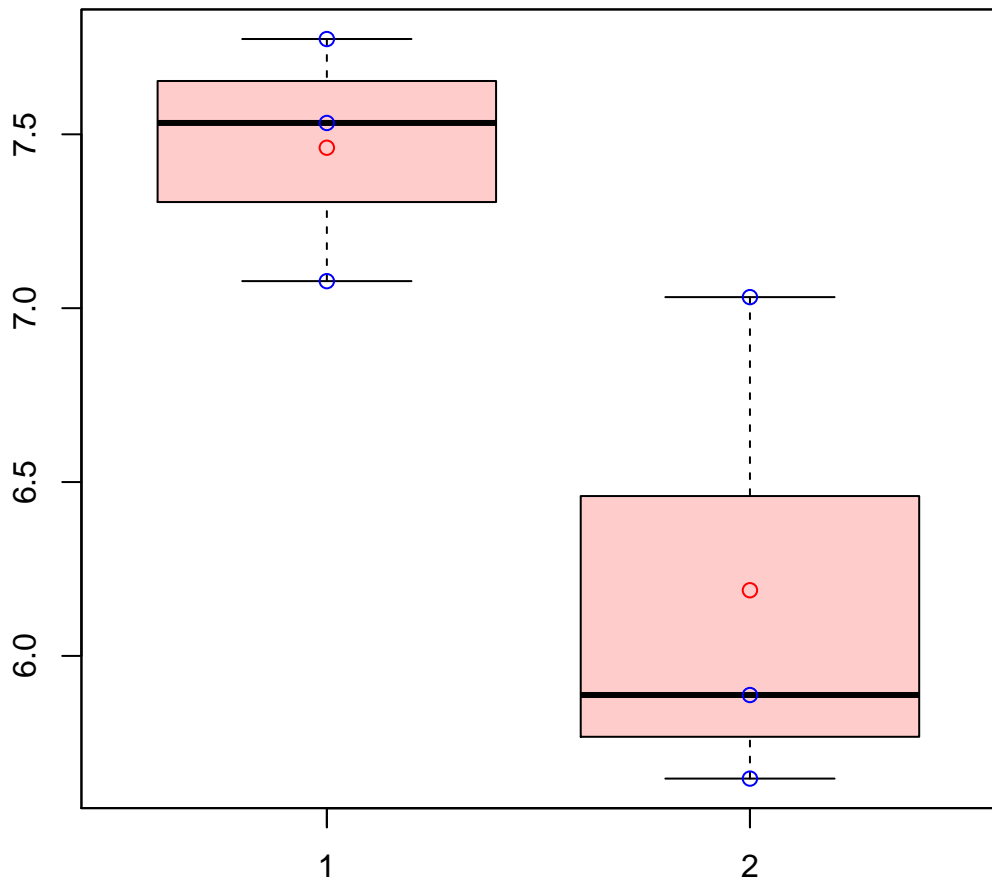

t-Test: p-value = 0.08



# J3LHG3|J3LHG3\_ORYBR

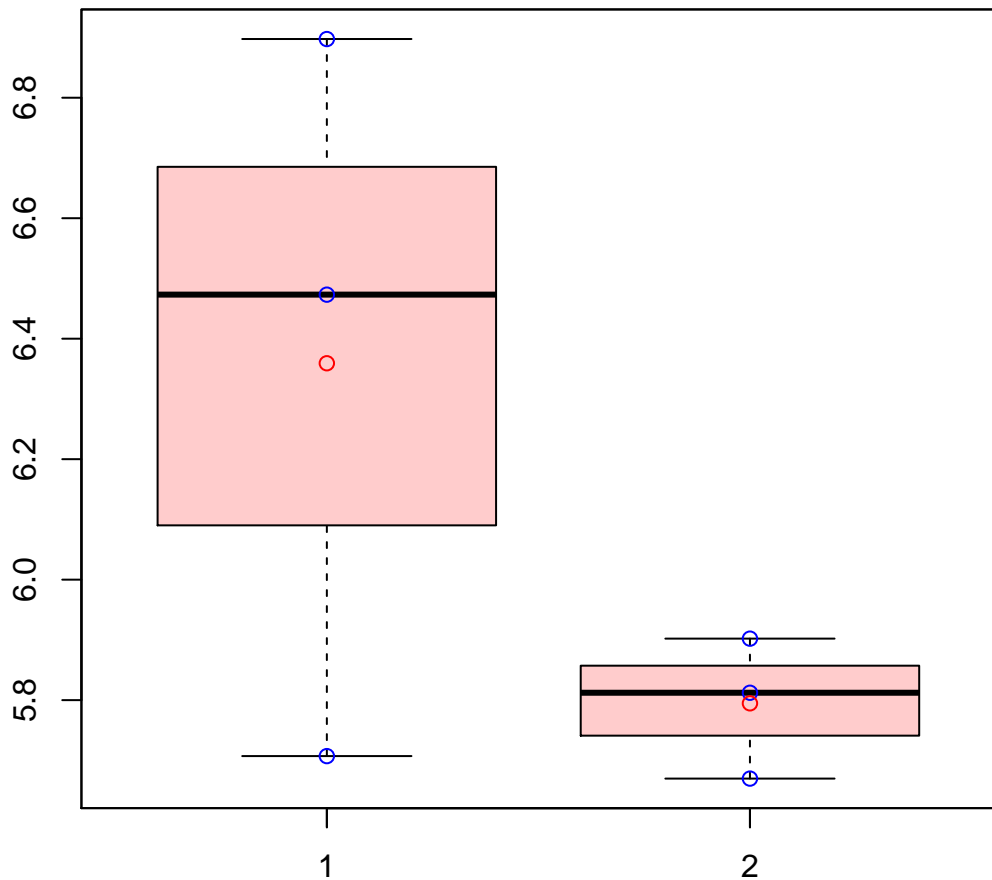

t-Test: p-value = 0.24

# J3LHX2|J3LHX2\_ORYBR

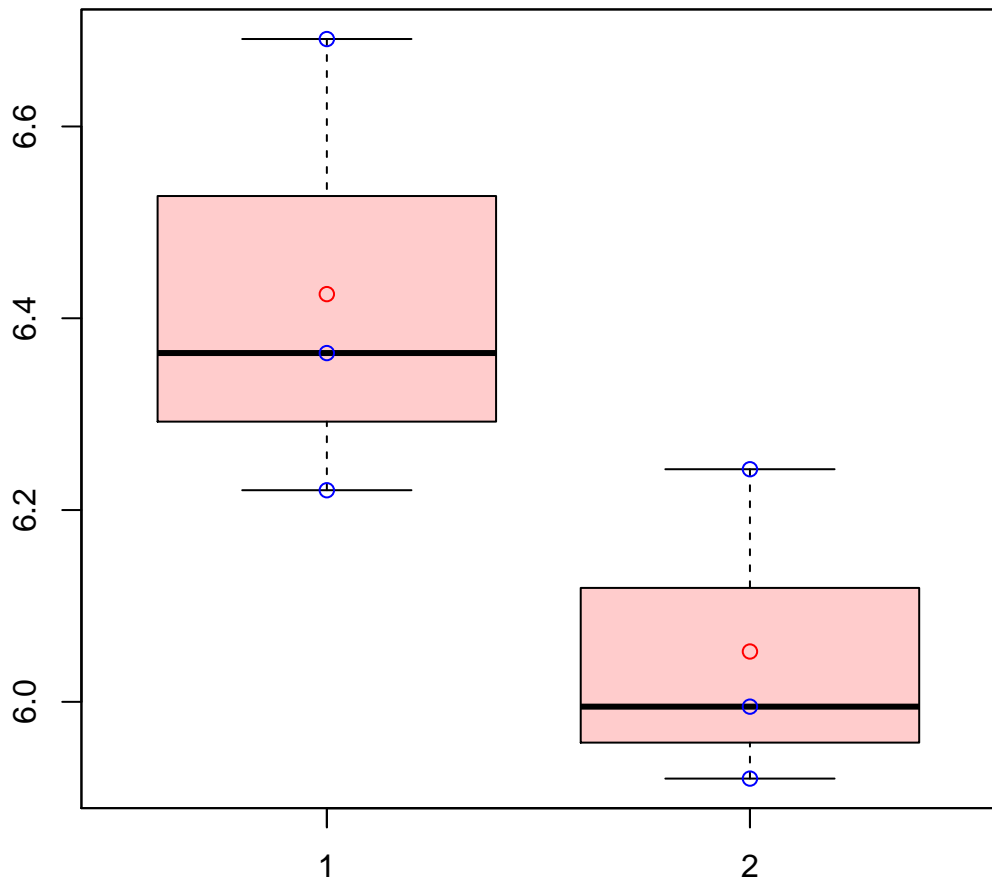

t-Test: p-value = 0.1

# J3LHZ1|J3LHZ1\_ORYBR

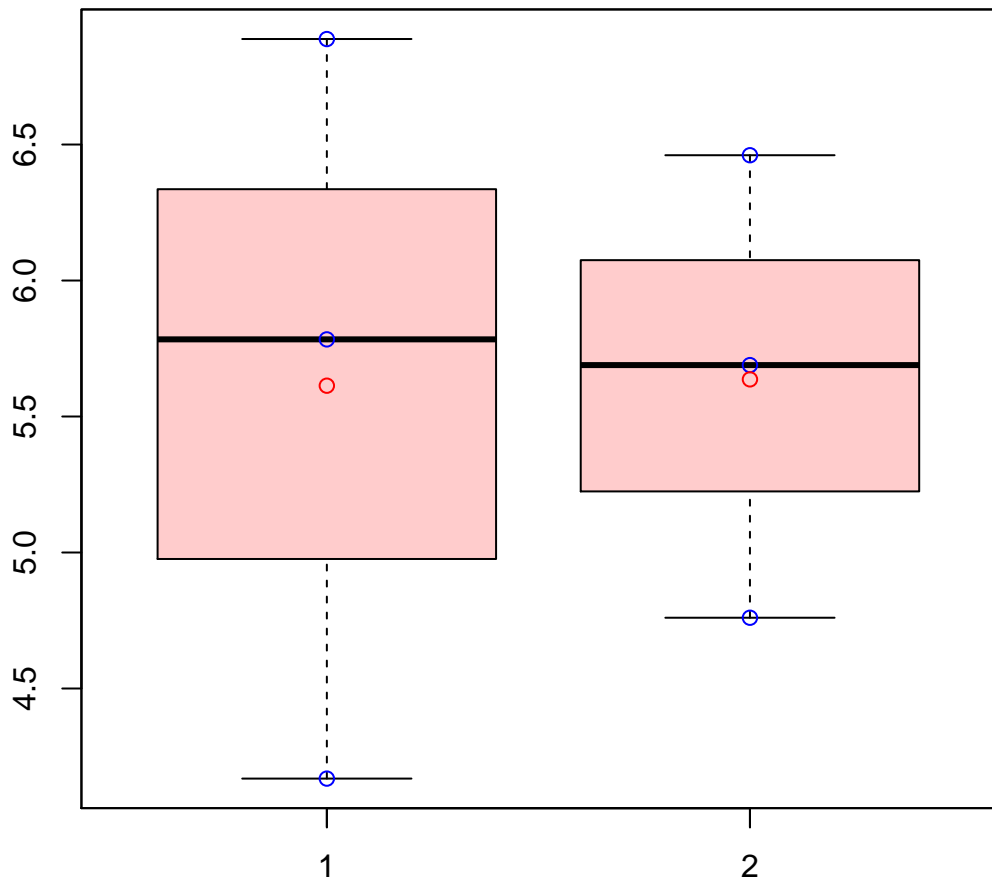

t-Test: p-value = 0.98

# J3LI24|J3LI24\_ORYBR

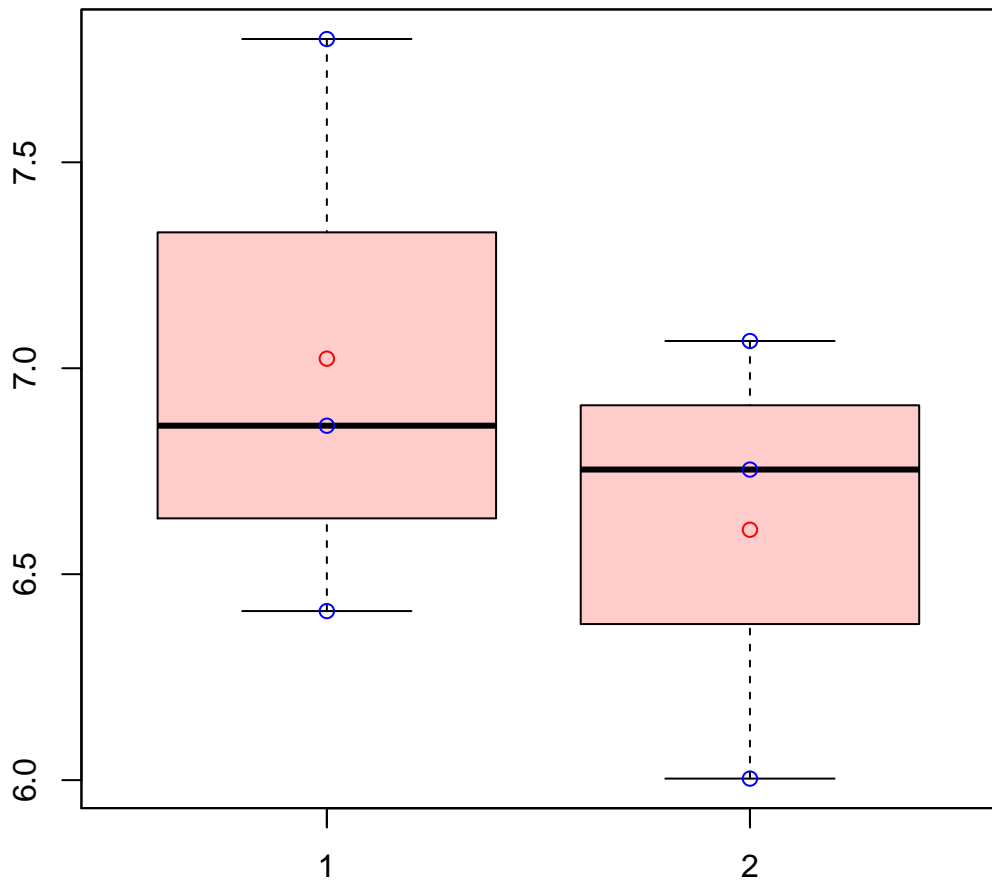

t-Test: p-value = 0.47

# J3LI56|J3LI56\_ORYBR

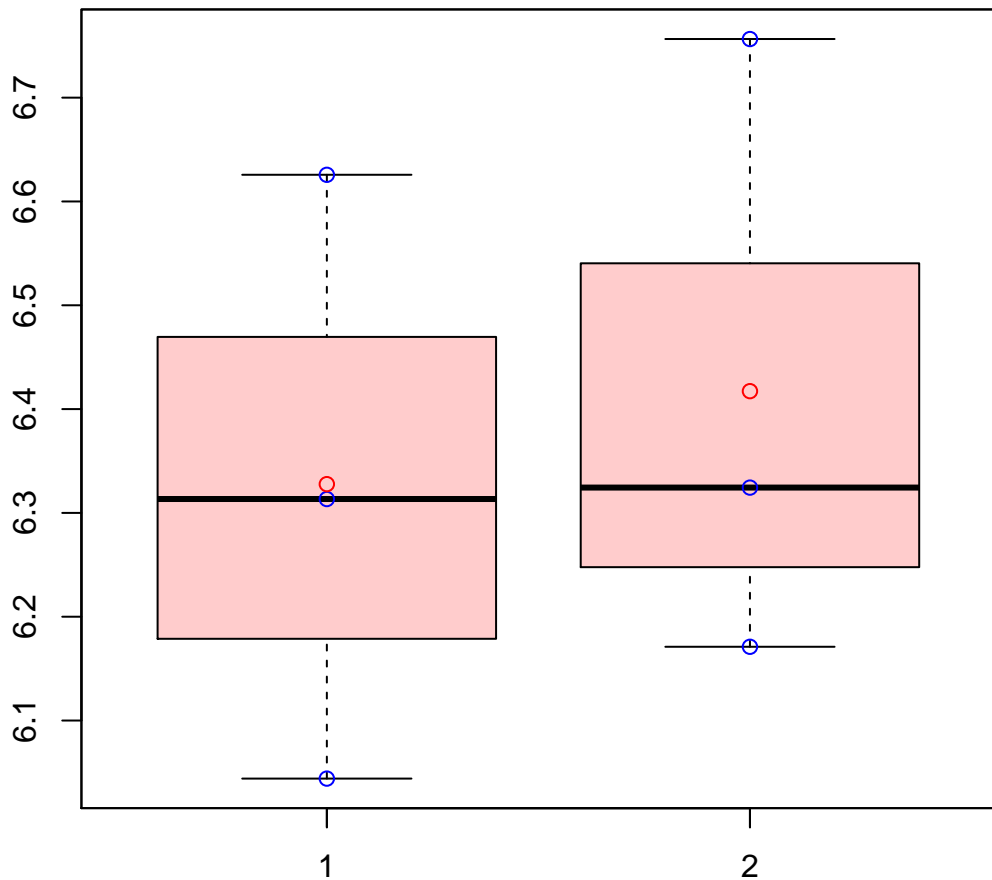

t-Test: p-value = 0.73

# J3LI94|J3LI94\_ORYBR

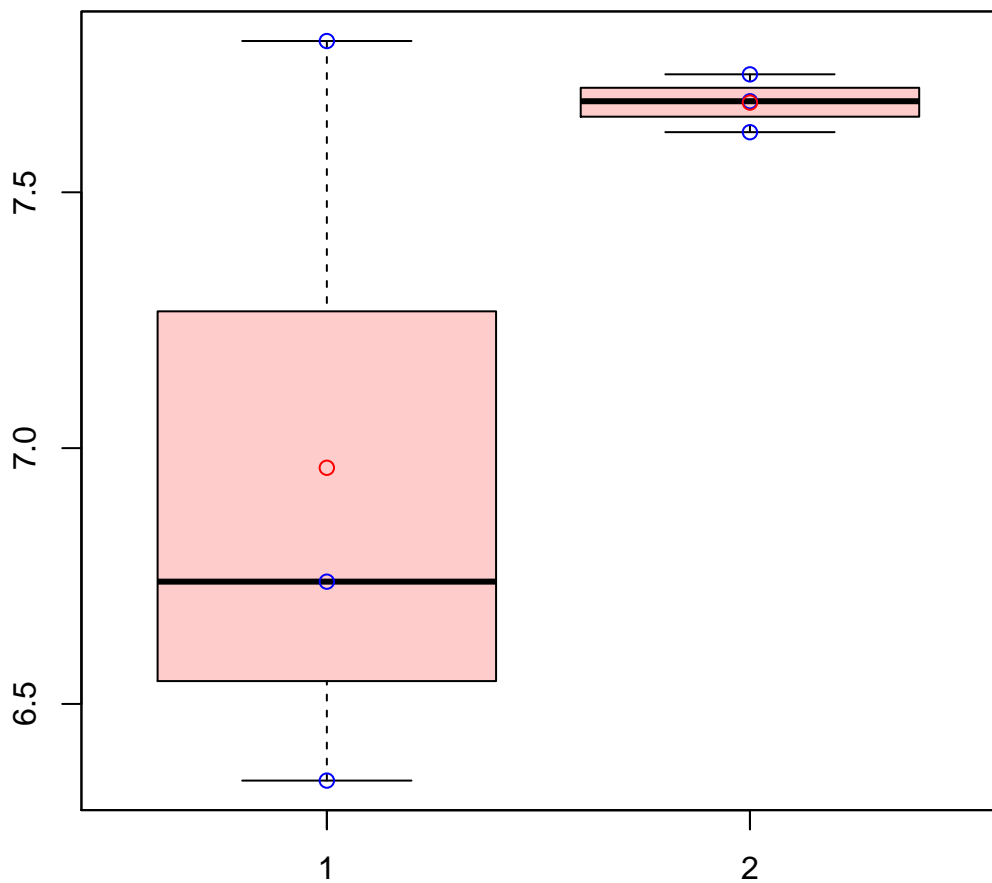

t-Test: p-value = 0.24

# J3LIB5|J3LIB5\_ORYBR

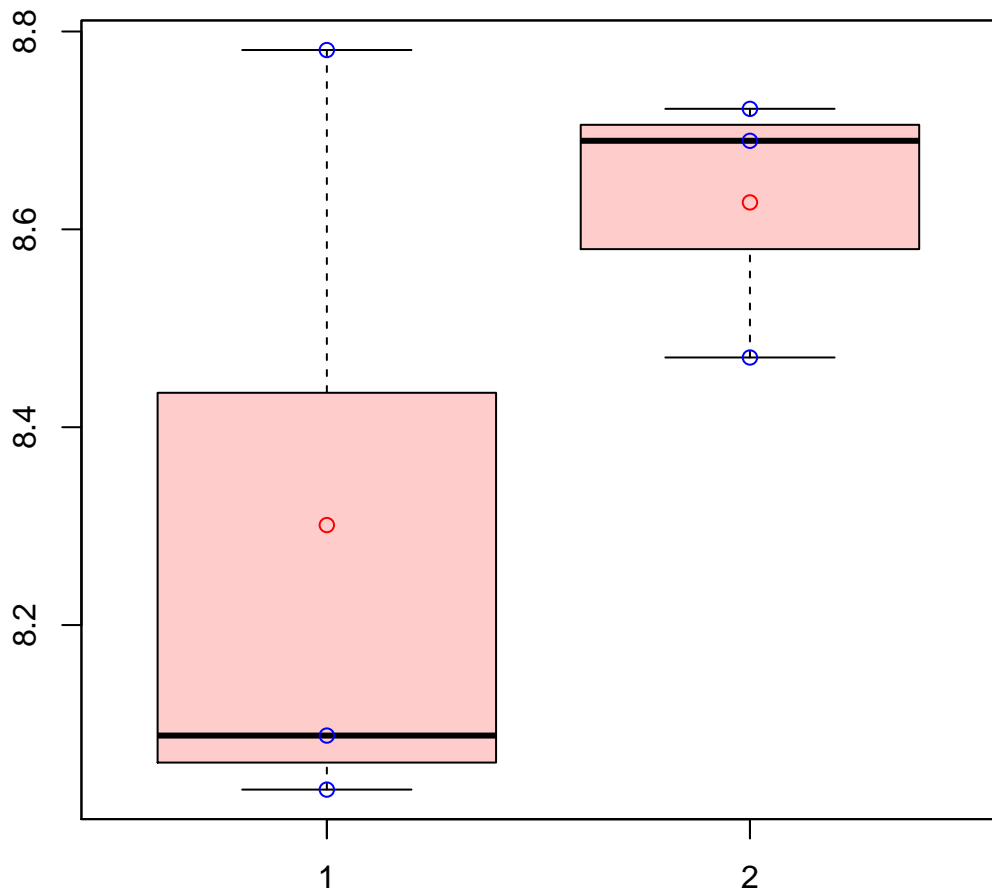

t-Test: p-value = 0.31

# J3LID2|J3LID2\_ORYBR

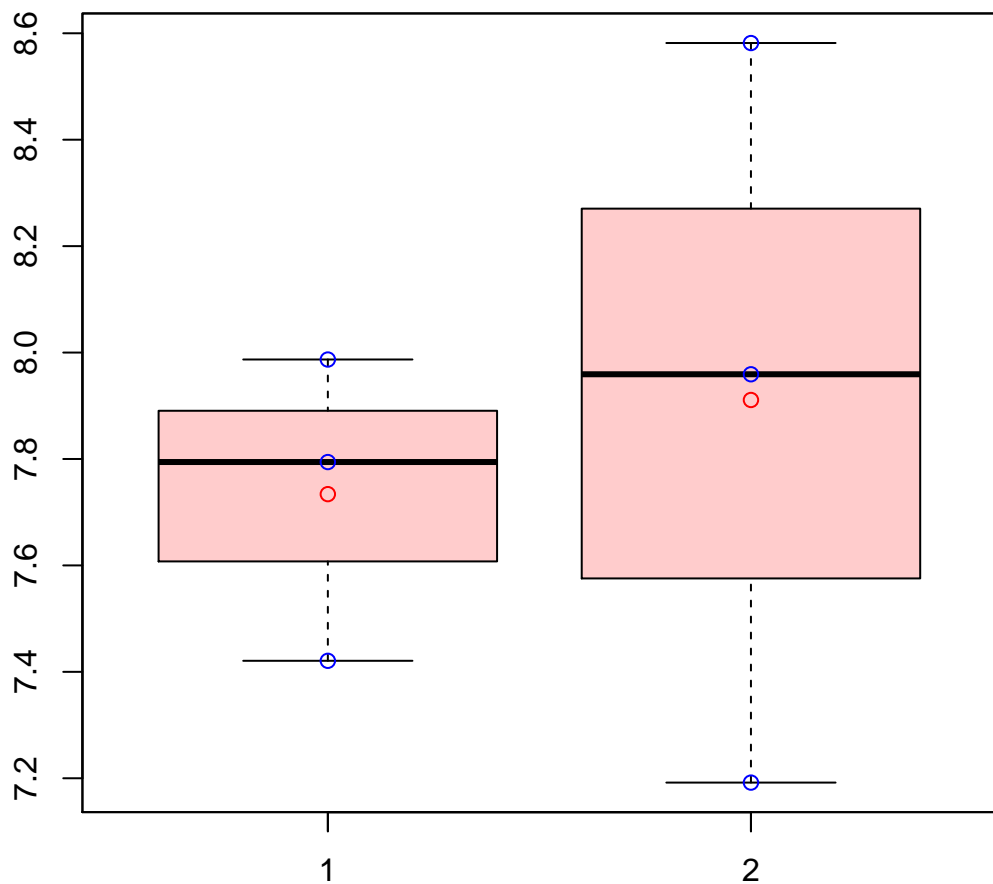

t-Test: p-value = 0.71



# J3LIJ0|J3LIJ0\_ORYBR

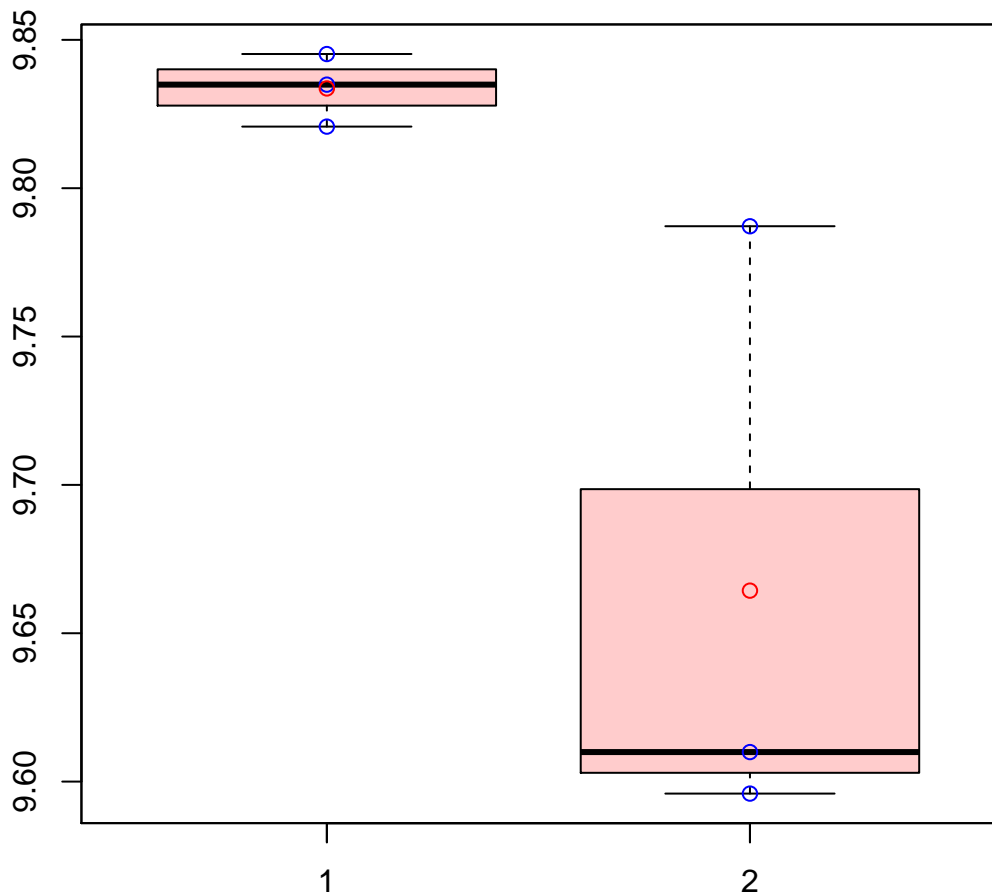

t-Test: p-value = 0.11

# J3LIP5|J3LIP5\_ORYBR

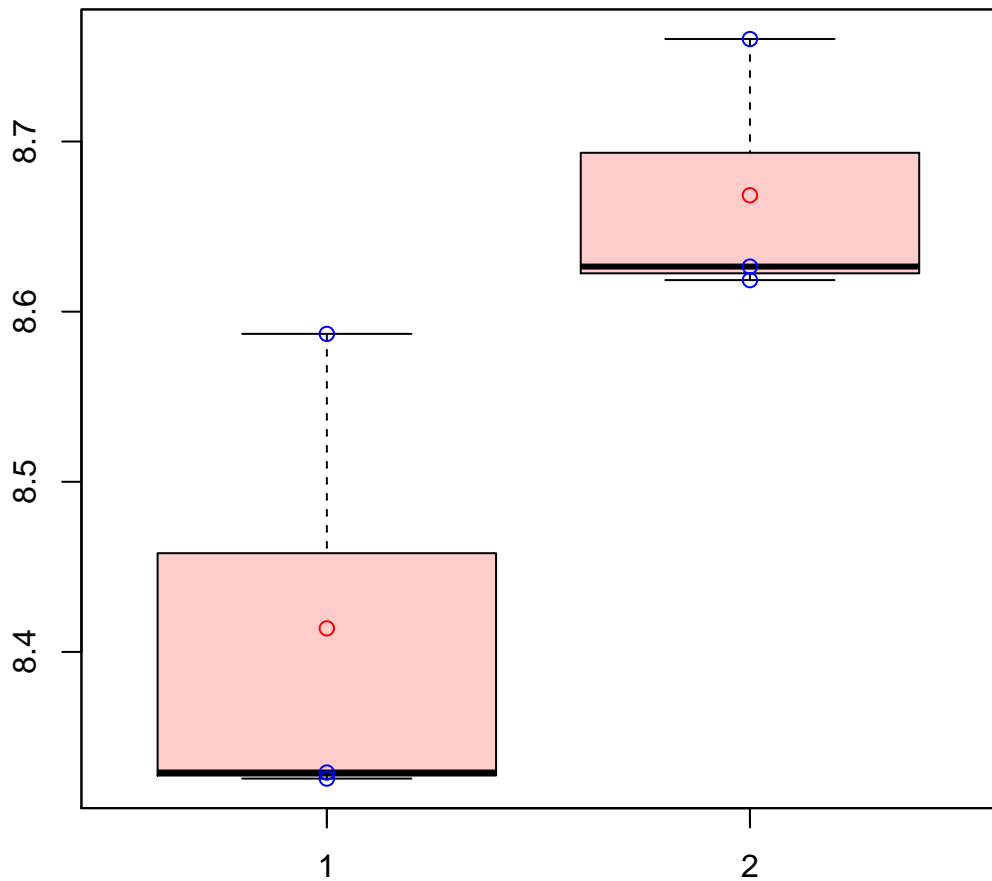

t-Test: p-value = 0.08

# J3LIP8|J3LIP8\_ORYBR

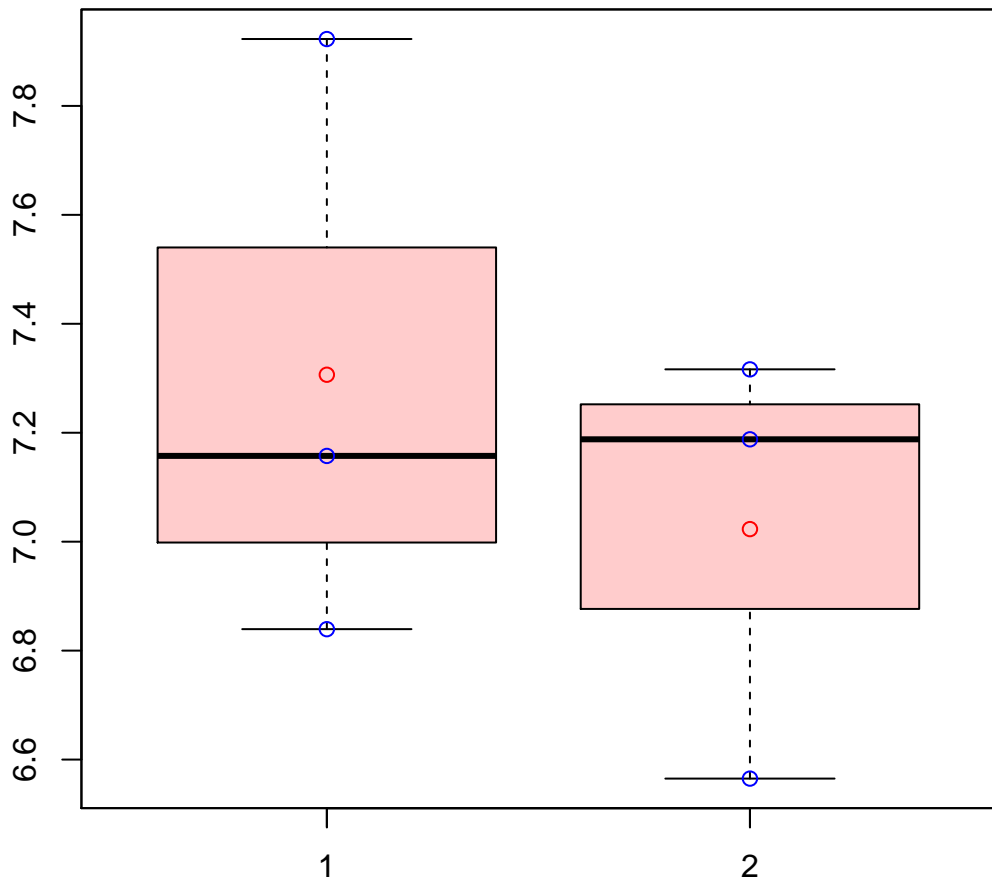

t-Test: p-value = 0.52

# J3LIS2|J3LIS2\_ORYBR

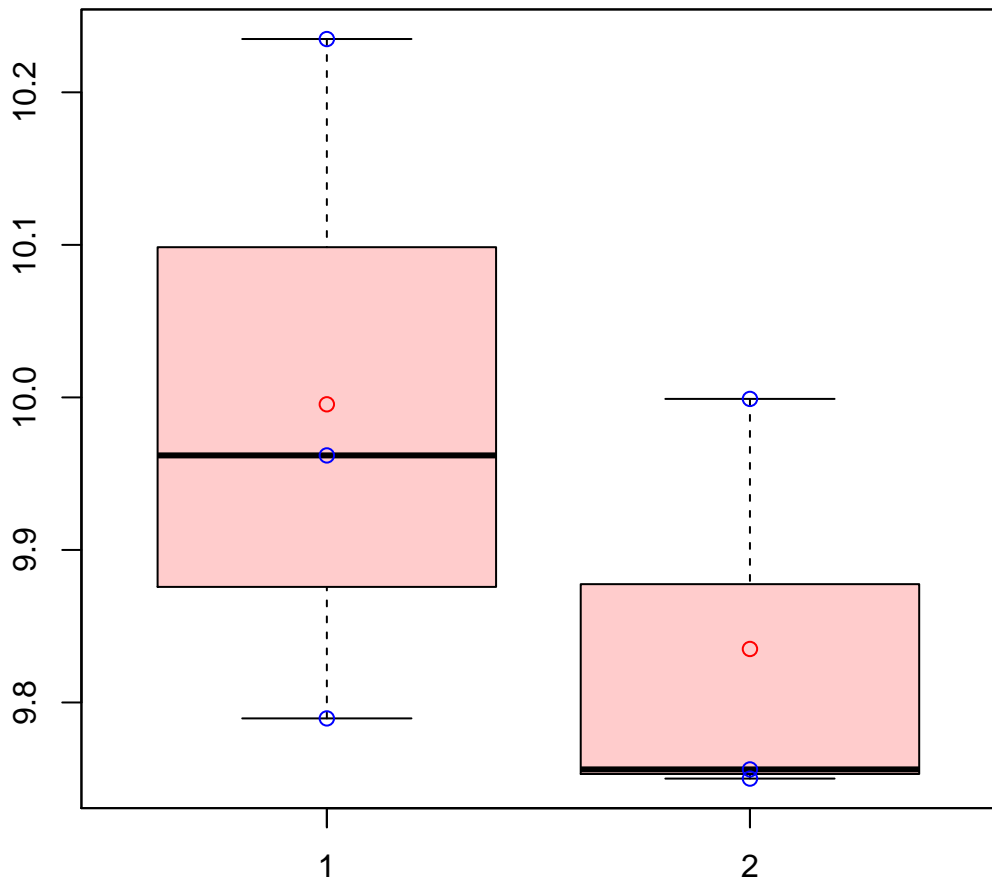

t-Test: p-value = 0.36

# J3LIT5|J3LIT5\_ORYBR

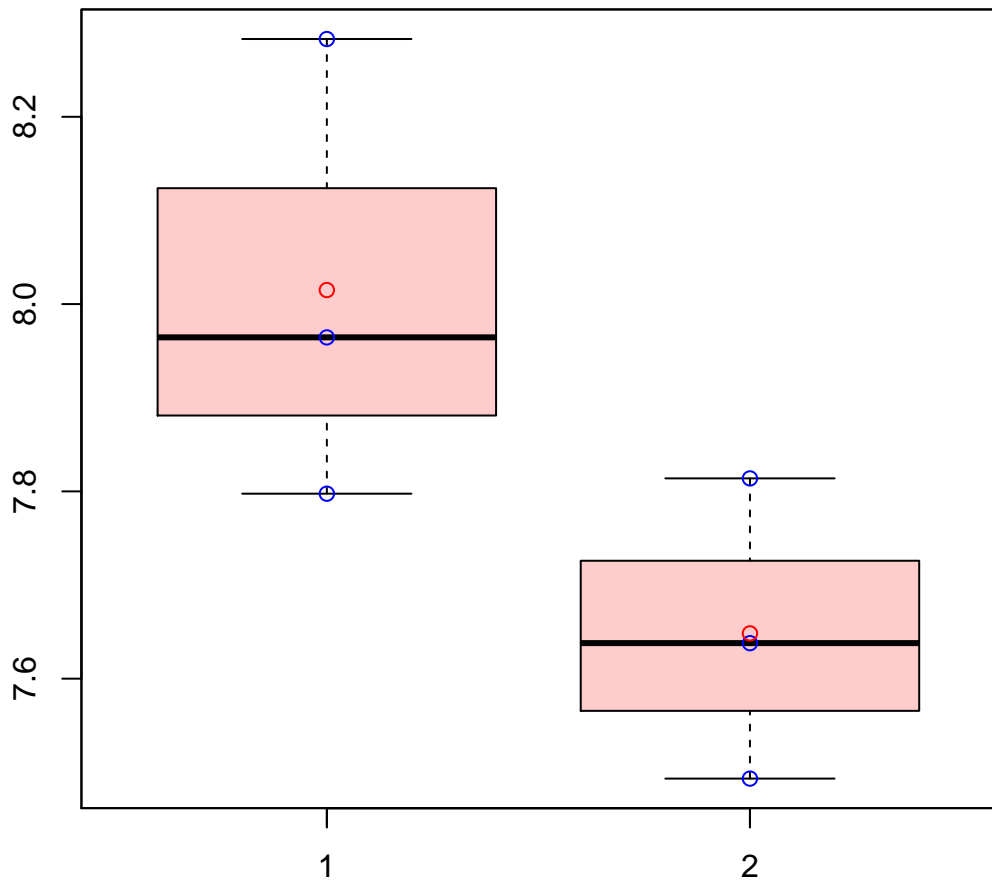

t-Test: p-value = 0.11

# J3LJK2|J3LJK2\_ORYBR

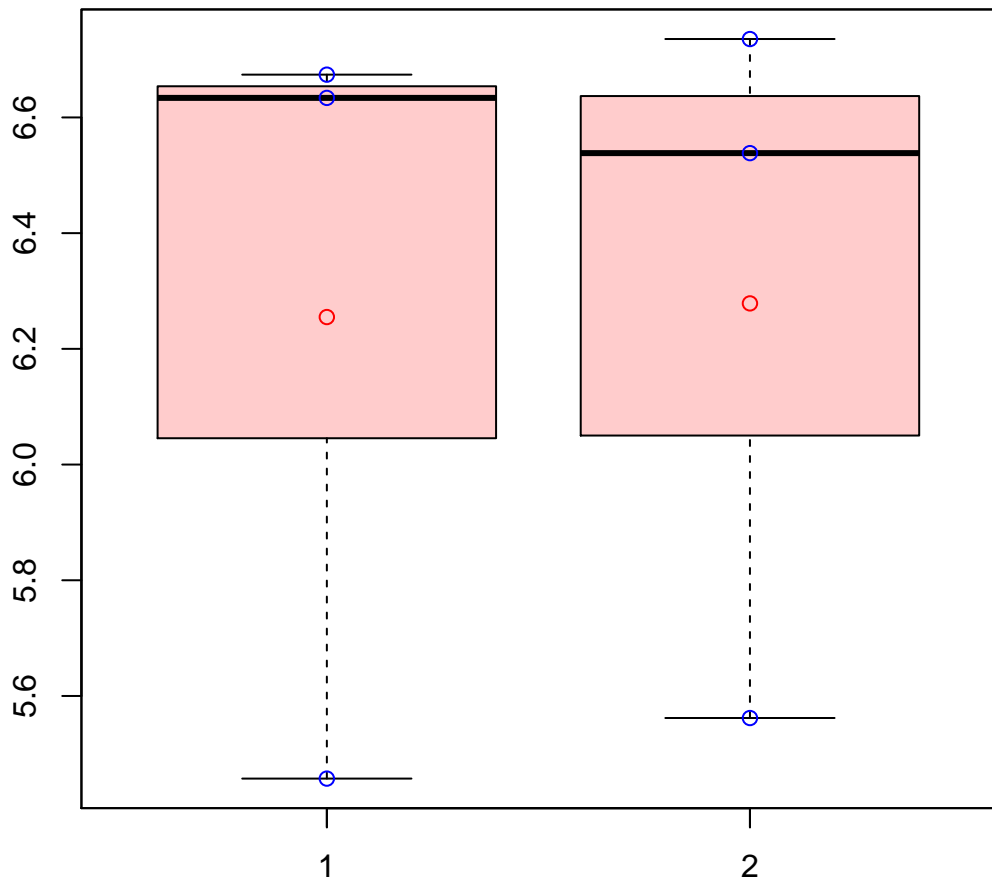

t-Test: p-value = 0.97

# J3LJM1|J3LJM1\_ORYBR

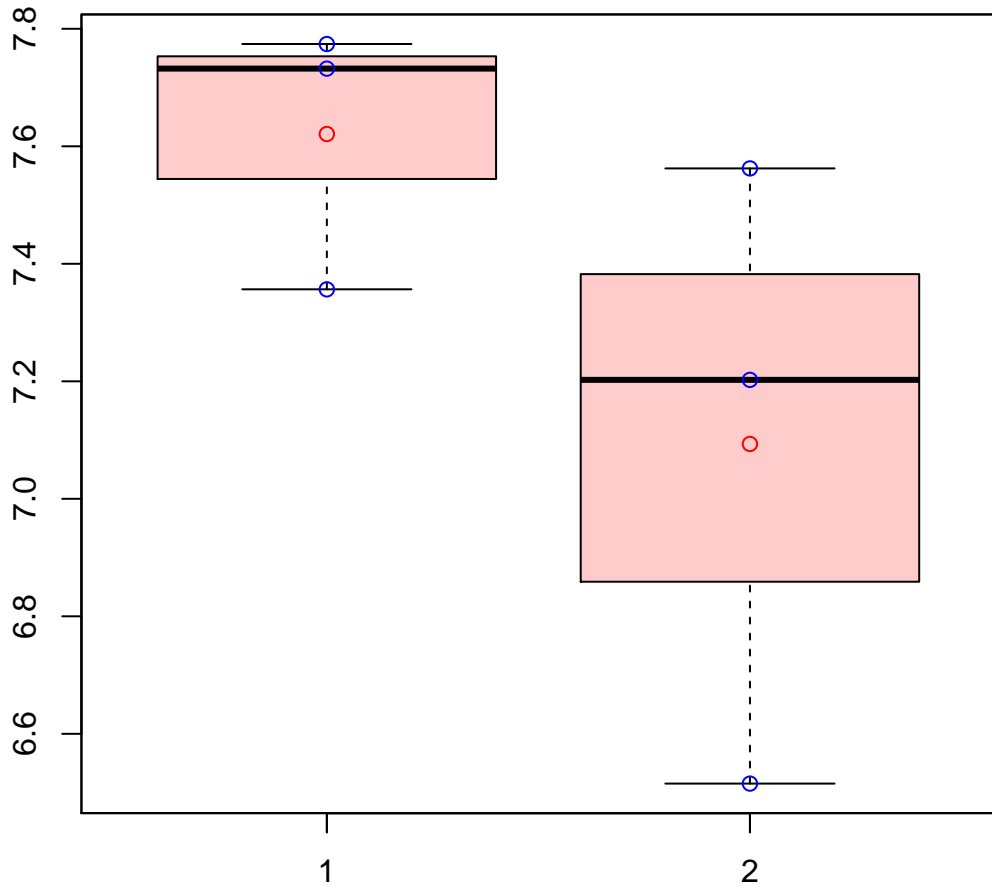

t-Test: p-value = 0.22

# J3LK32|J3LK32\_ORYBR

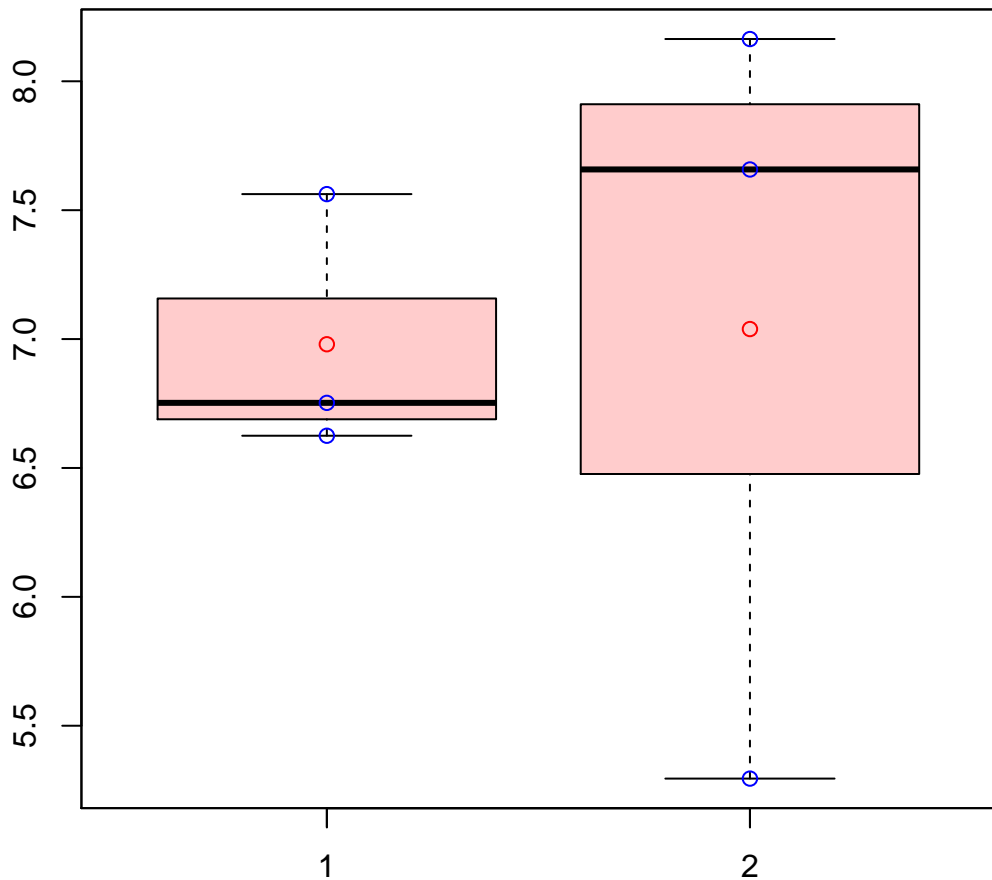

t-Test: p-value = 0.95



# J3LK85|J3LK85\_ORYBR

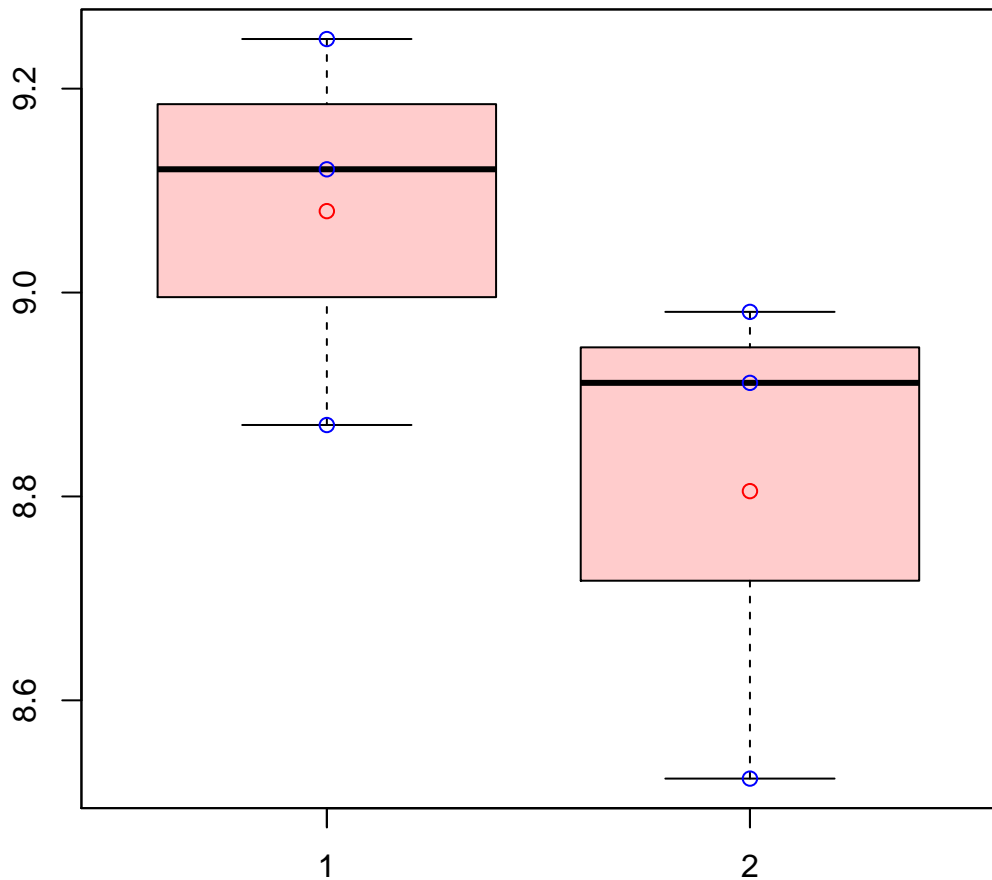

t-Test: p-value = 0.21

# J3LKP4|J3LKP4\_ORYBR

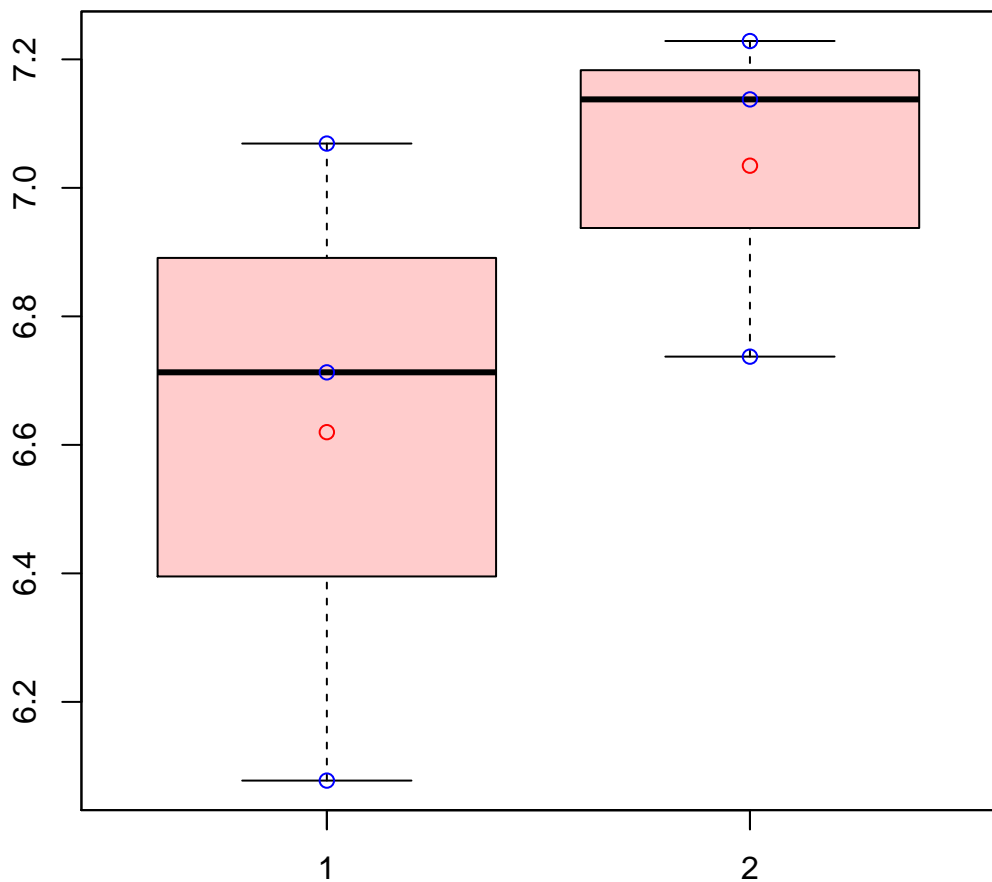

t-Test: p-value = 0.29

# J3LKR0|J3LKR0\_ORYBR

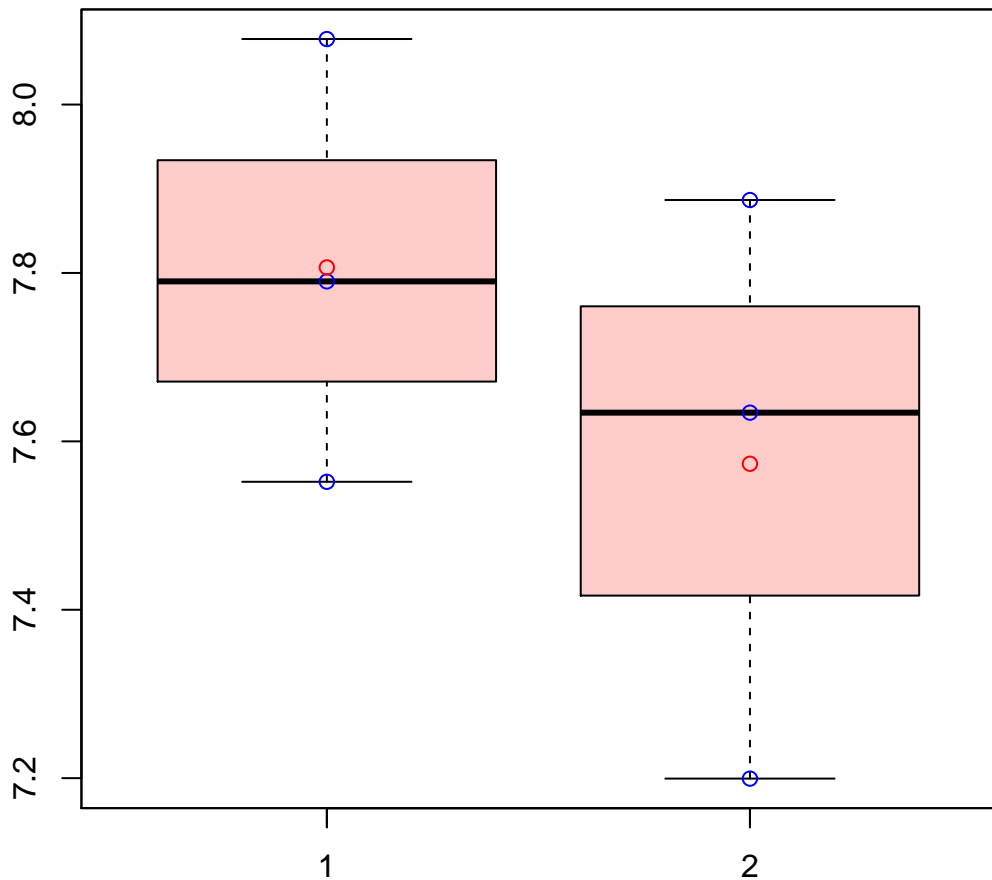

t-Test: p-value = 0.41

# J3LLC5|J3LLC5\_ORYBR

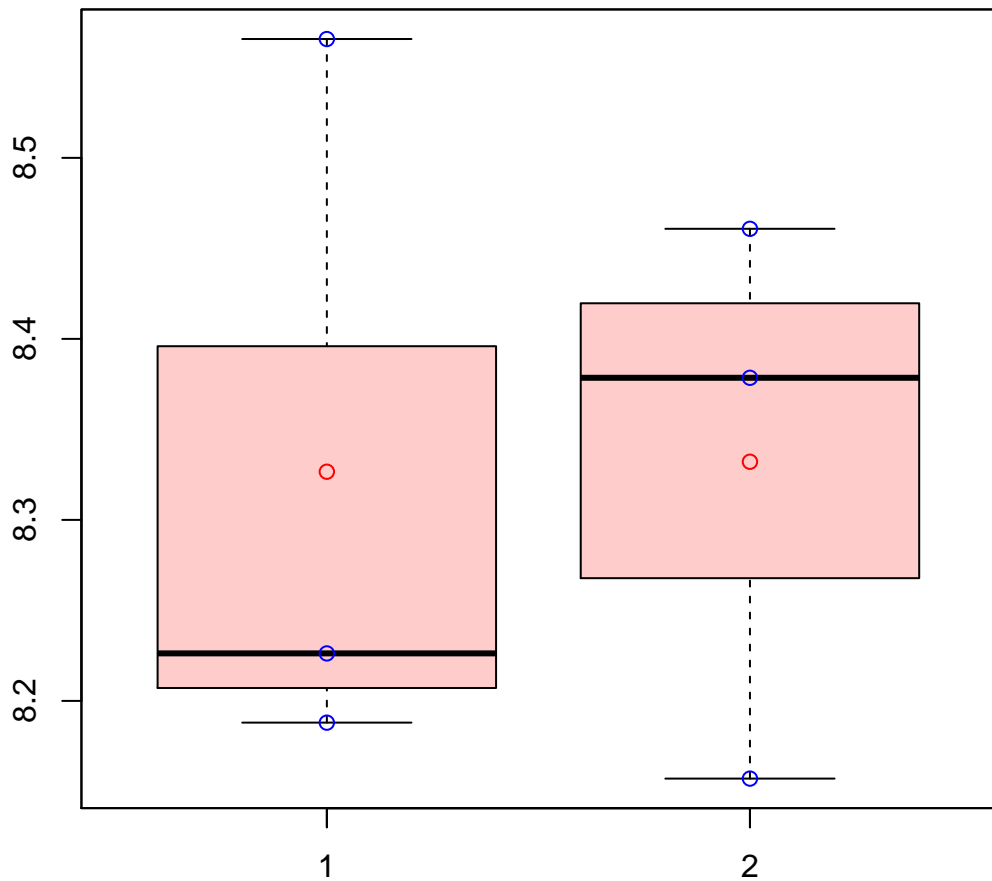

t-Test: p-value = 0.97

# J3LLG1|J3LLG1\_ORYBR

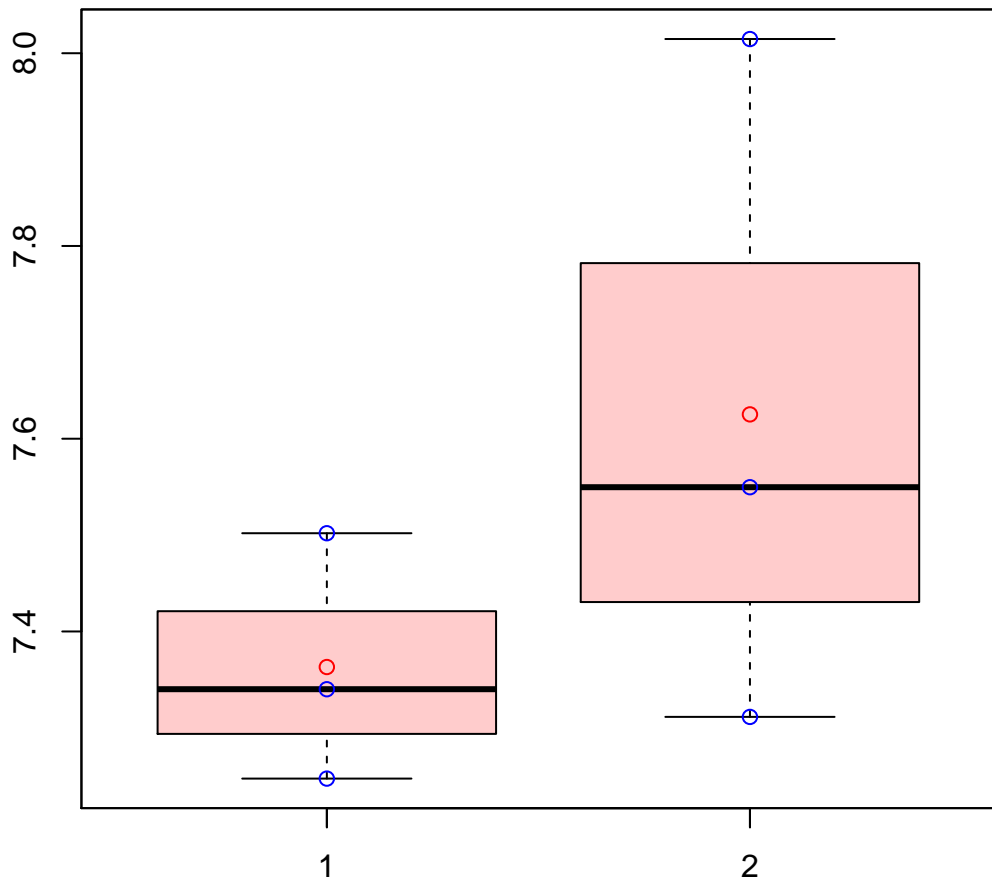

t-Test: p-value = 0.33

# J3LLI8|J3LLI8\_ORYBR

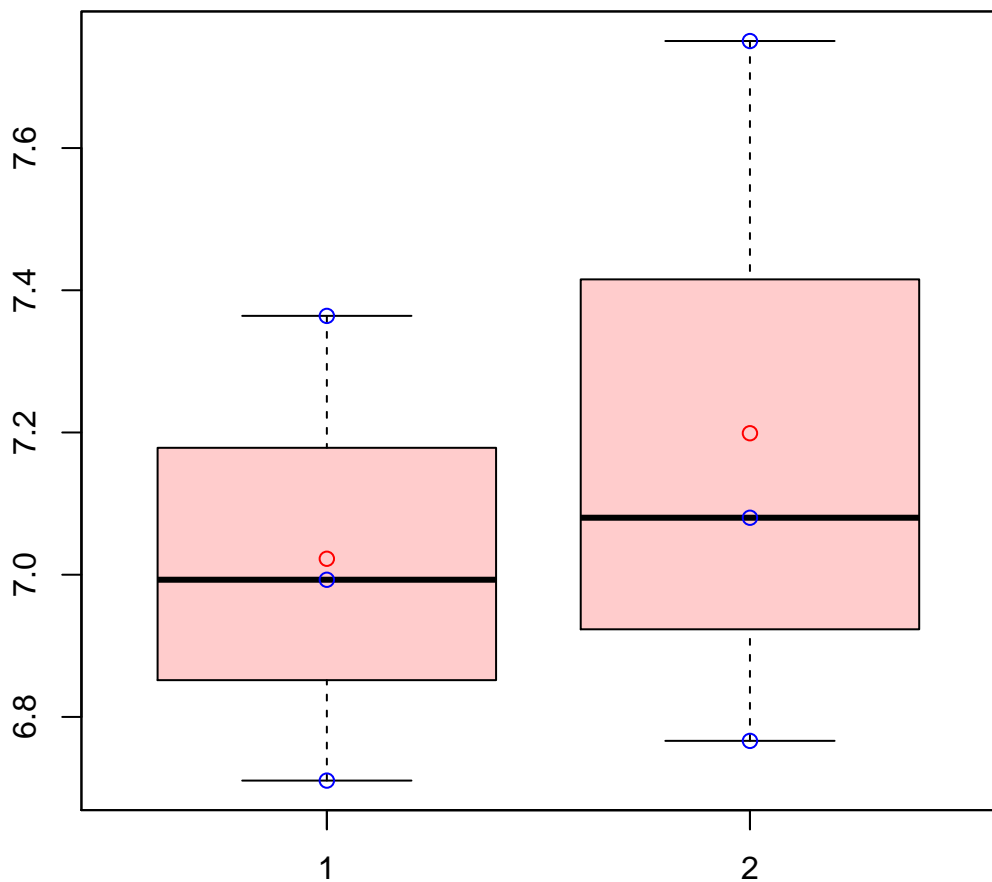

t-Test: p-value = 0.64

# J3LM63|J3LM63\_ORYBR

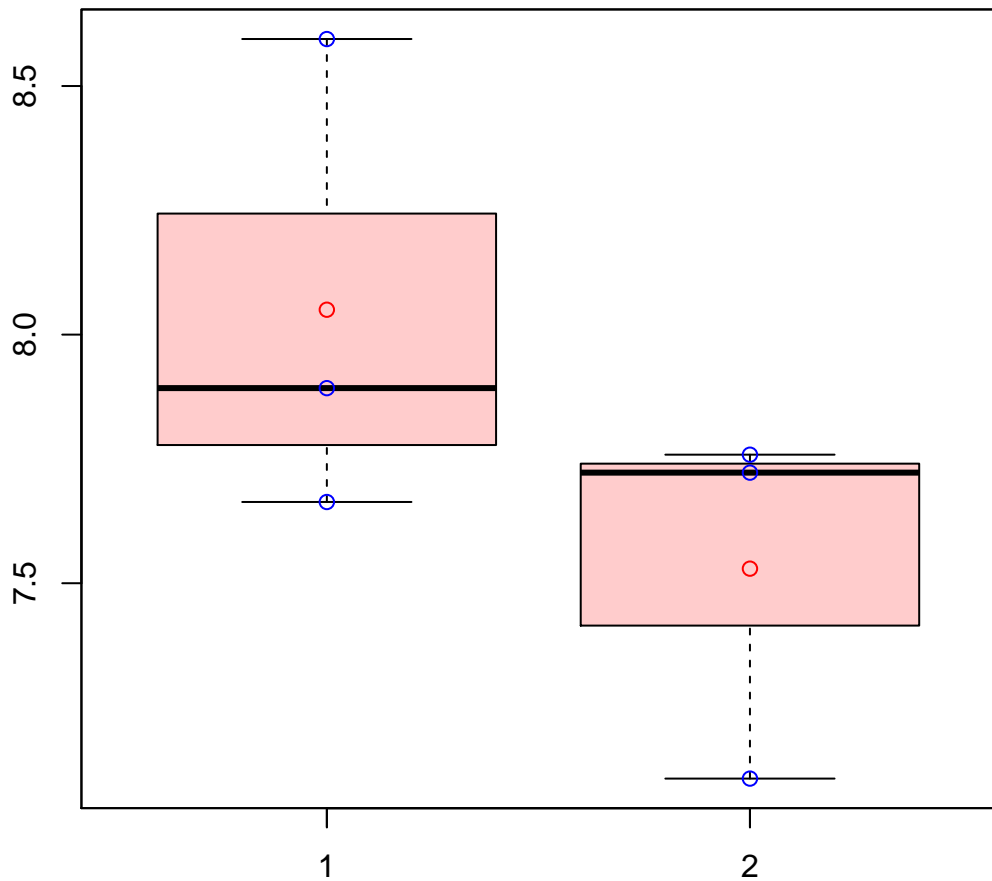

t-Test: p-value = 0.22

# J3LMB4|J3LMB4\_ORYBR

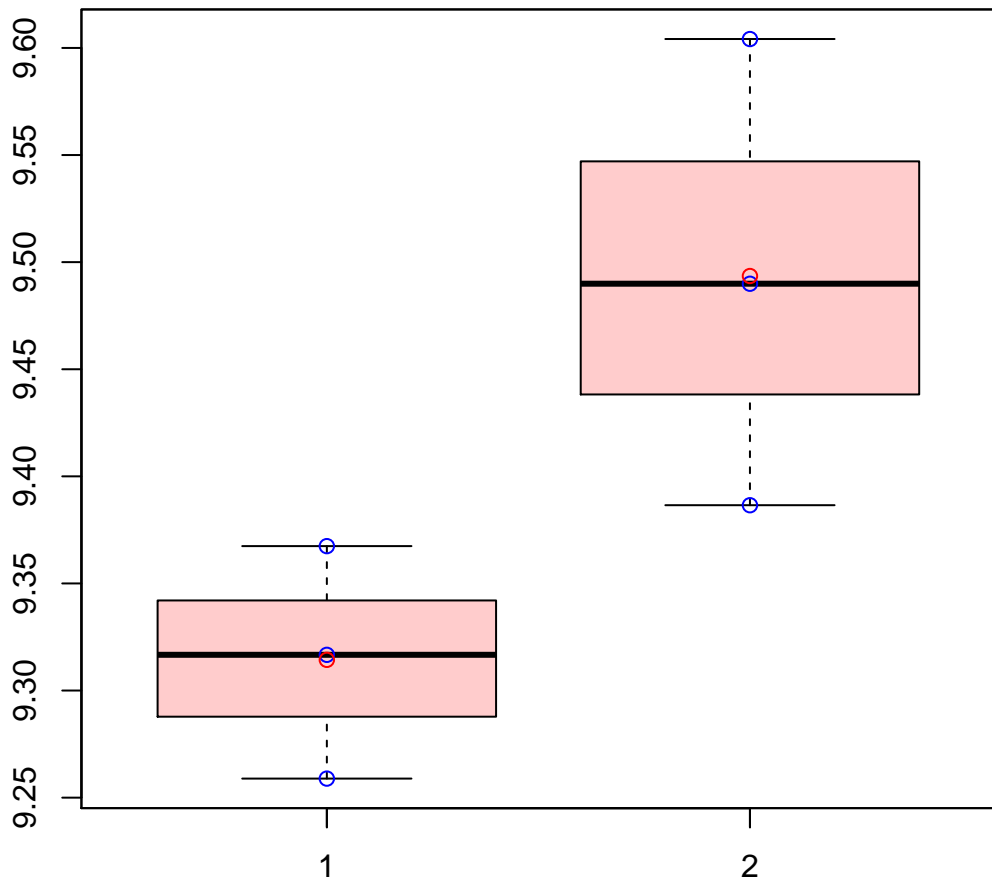

t-Test: p-value = 0.09



# J3LMC1|J3LMC1\_ORYBR

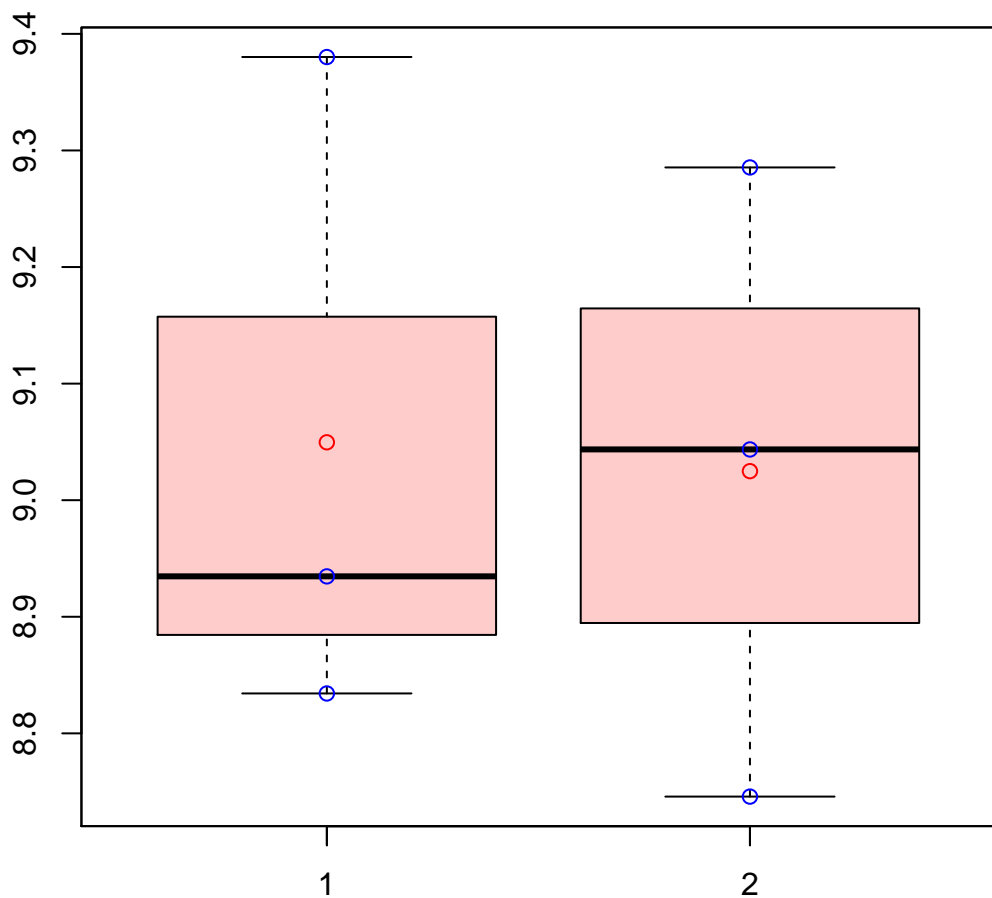

t-Test: p-value = 0.92

# J3LNL5|J3LNL5\_ORYBR

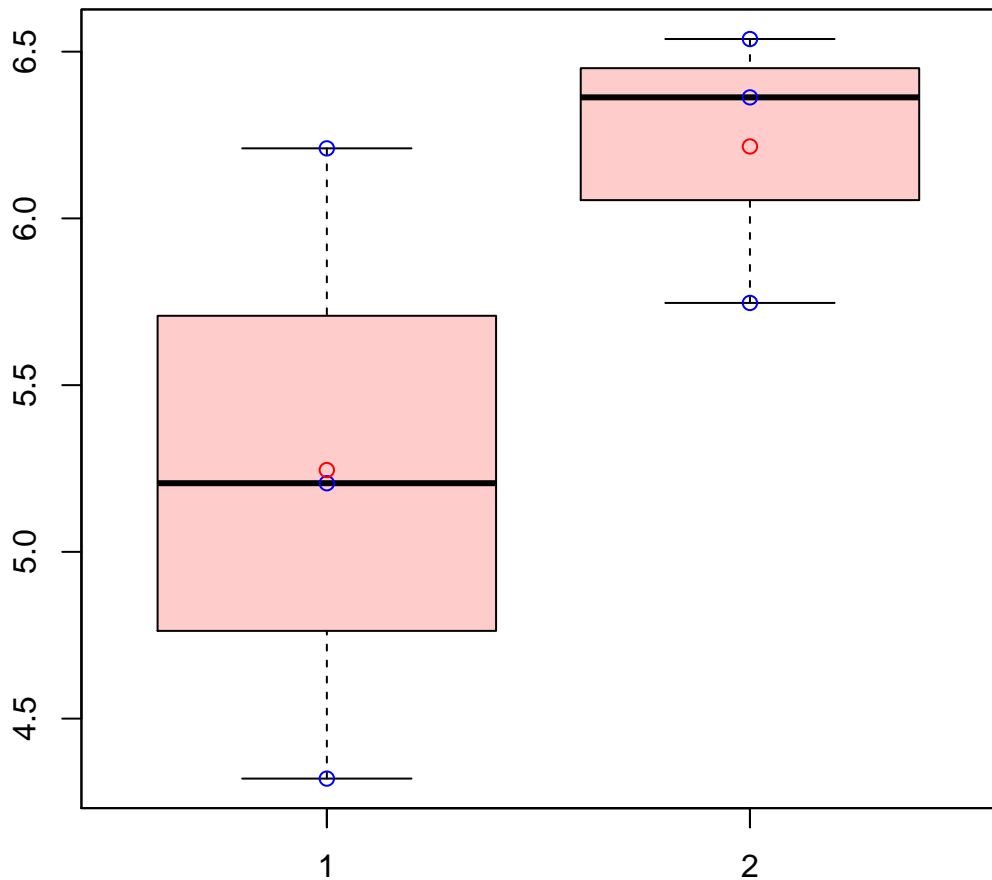

t-Test: p-value = 0.21

# J3LNW6|J3LNW6\_ORYBR

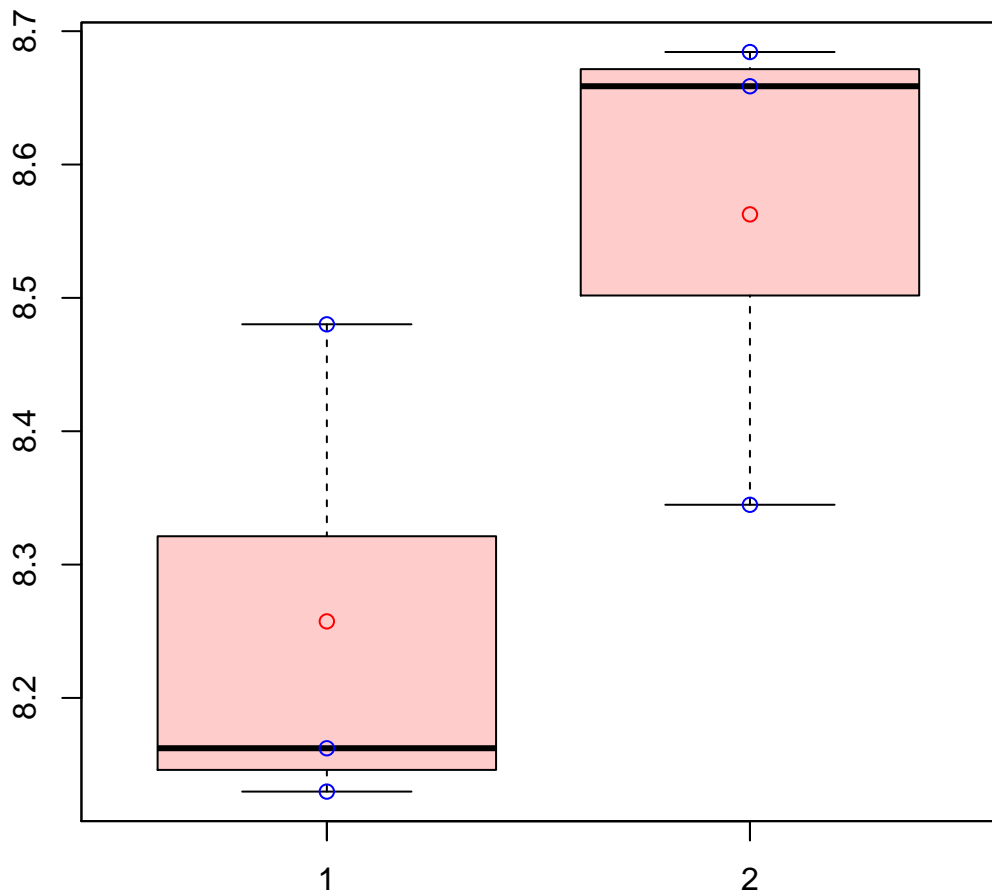

t-Test: p-value = 0.12

# J3LPD1|J3LPD1\_ORYBR

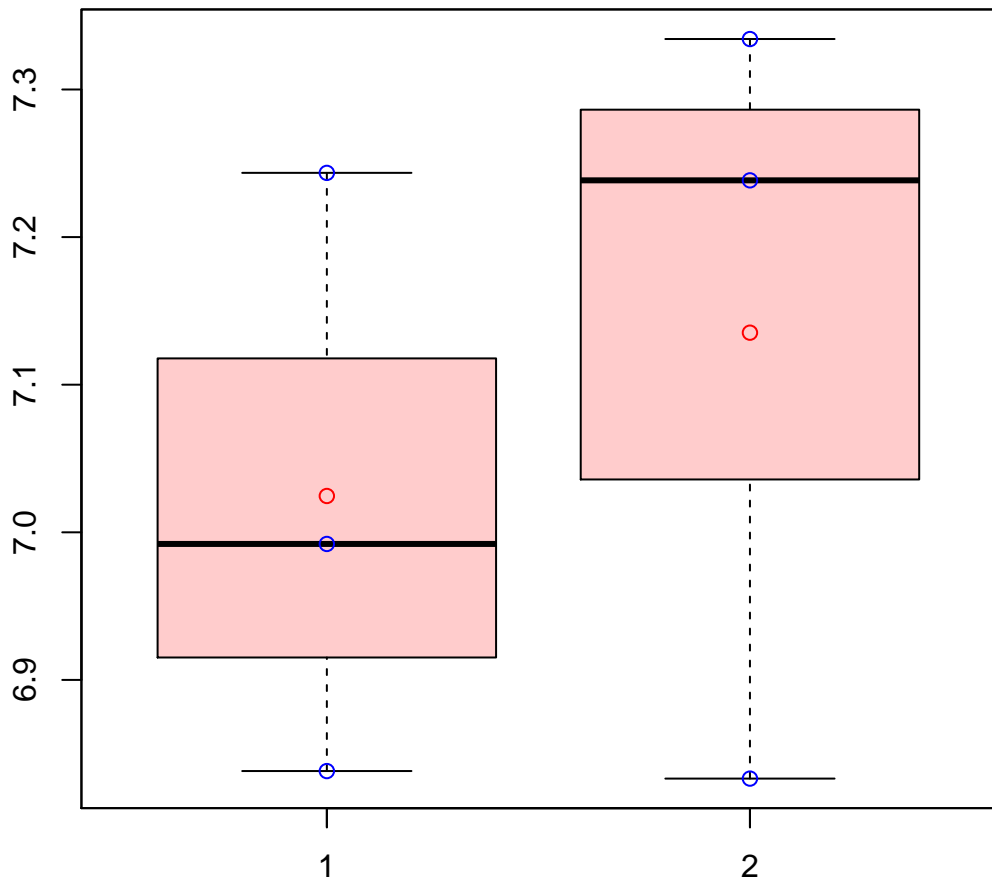

t-Test: p-value = 0.6

# J3LQ64|J3LQ64\_ORYBR

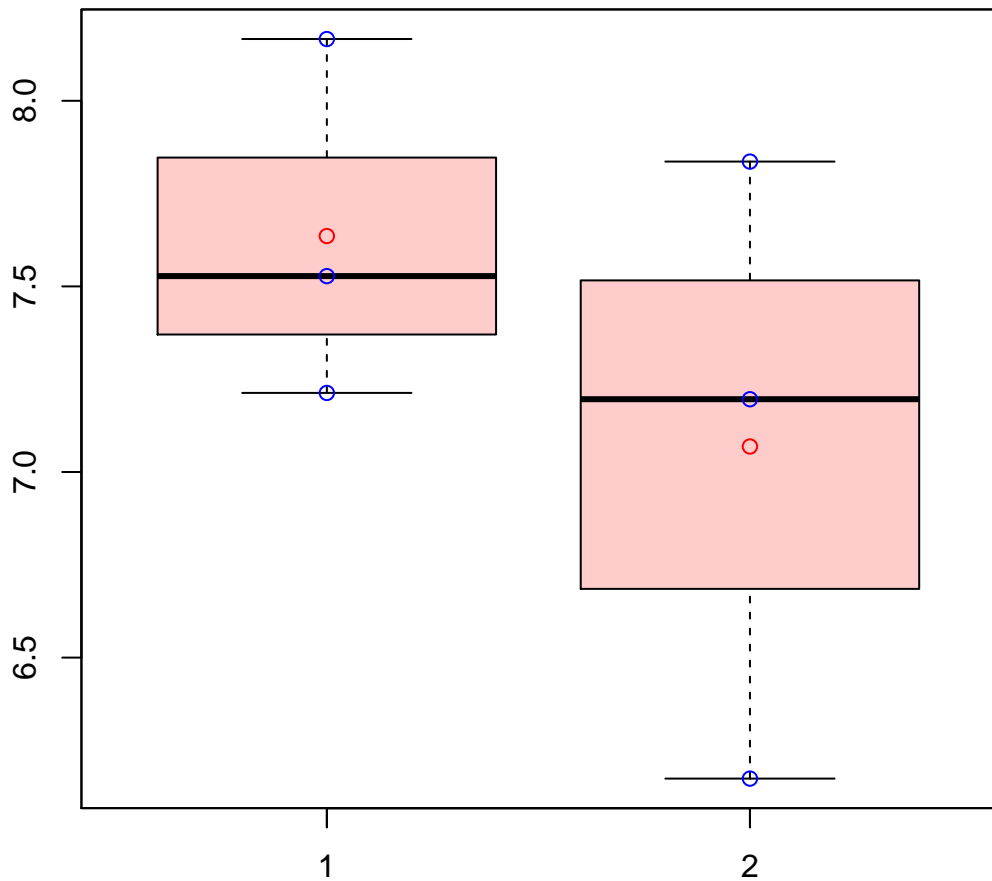

t-Test: p-value = 0.38

# J3LQB7|J3LQB7\_ORYBR

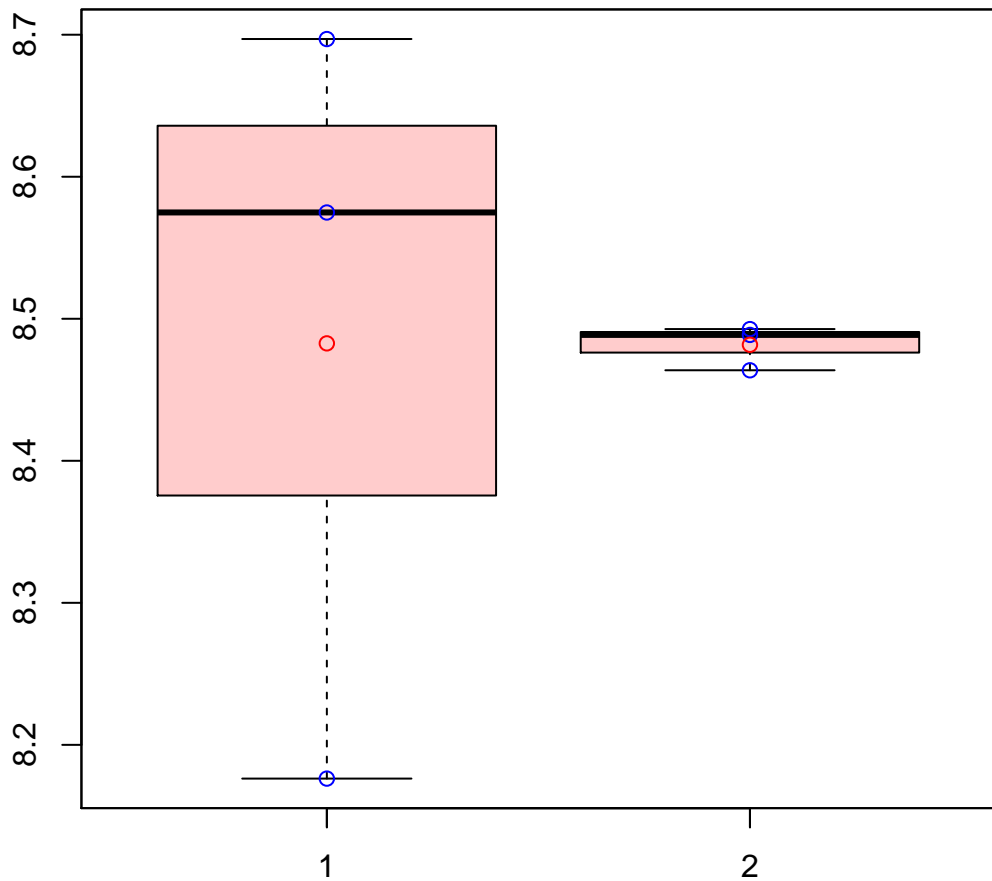

t-Test: p-value = 1

# J3LQE7|J3LQE7\_ORYBR

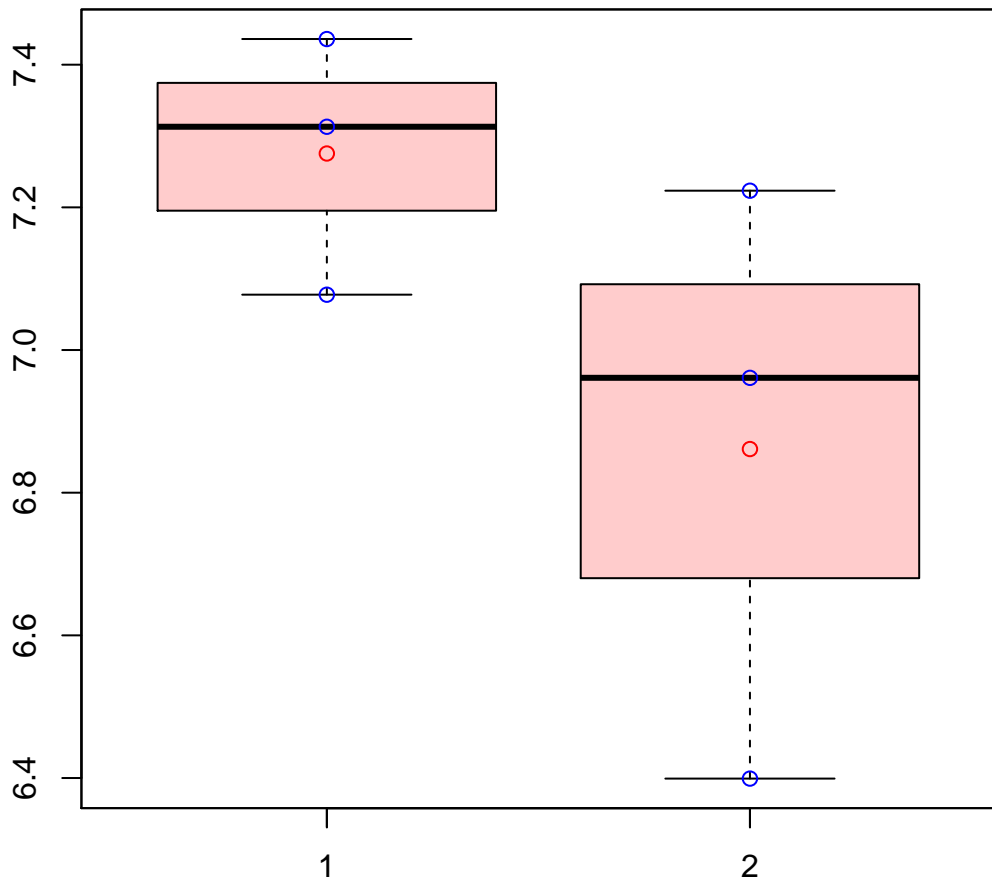

t-Test: p-value = 0.22

# J3LQG2|J3LQG2\_ORYBR

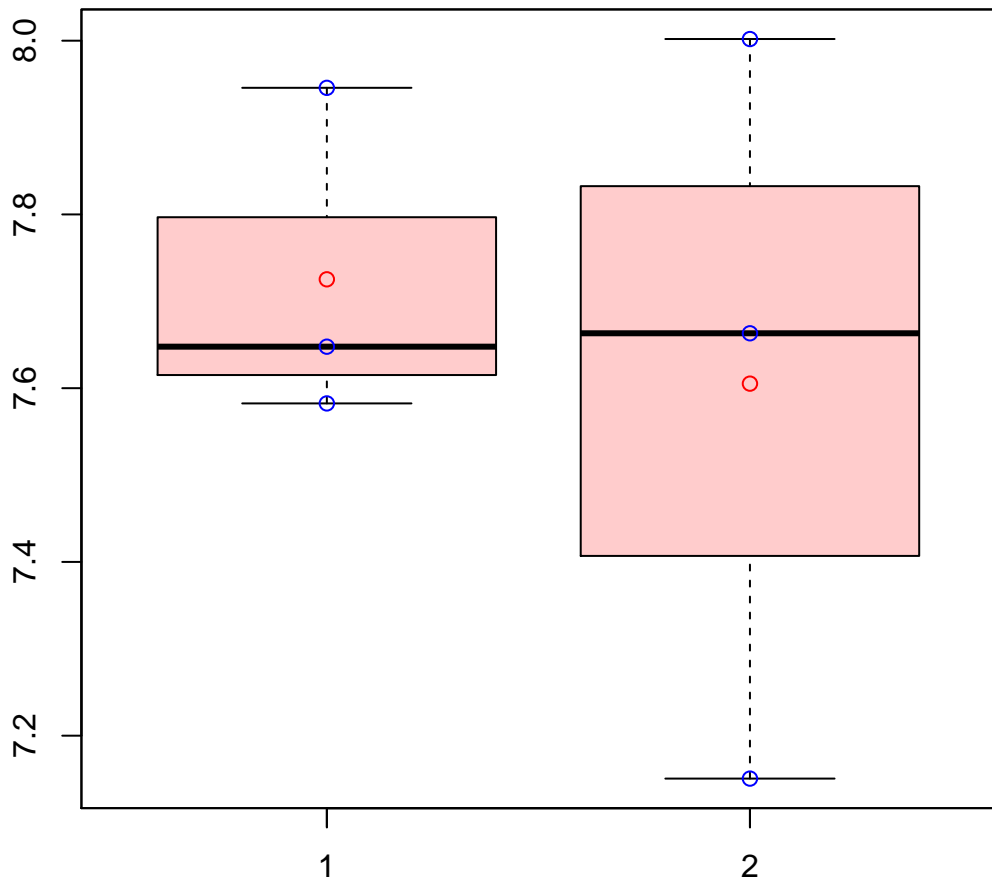

t-Test: p-value = 0.69



# J3LQJ1|J3LQJ1\_ORYBR

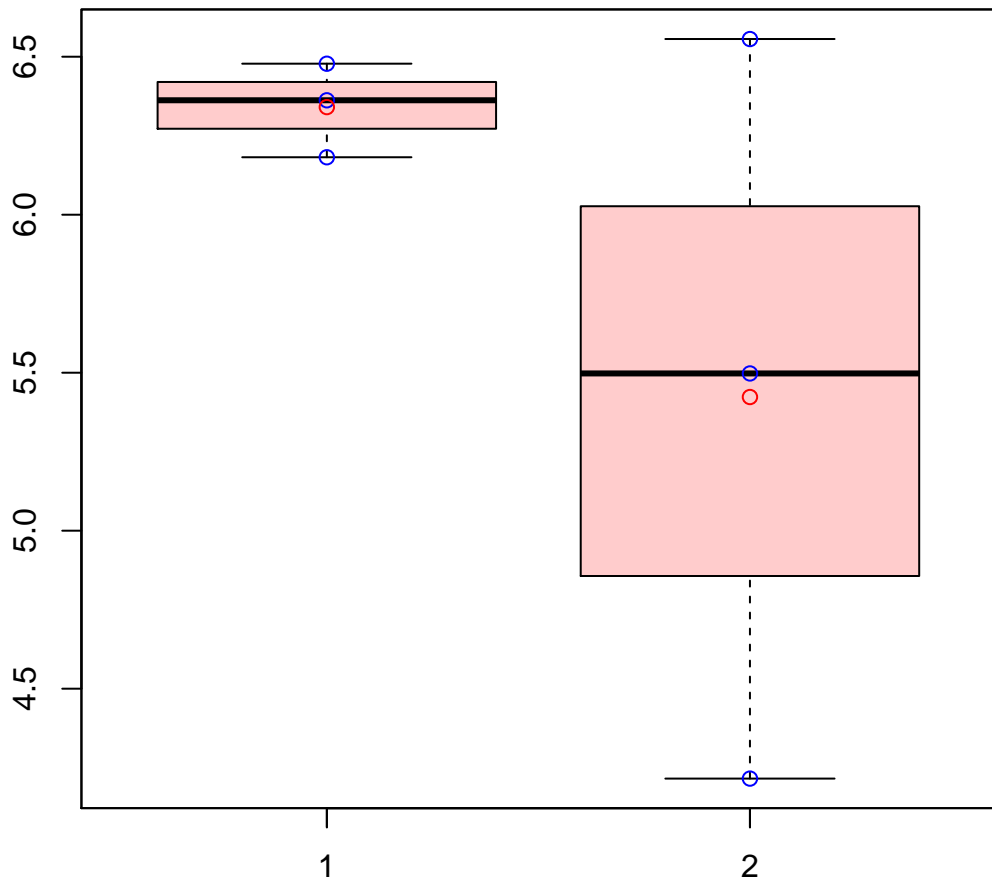

t-Test: p-value = 0.31

# J3LQV2|J3LQV2\_ORYBR

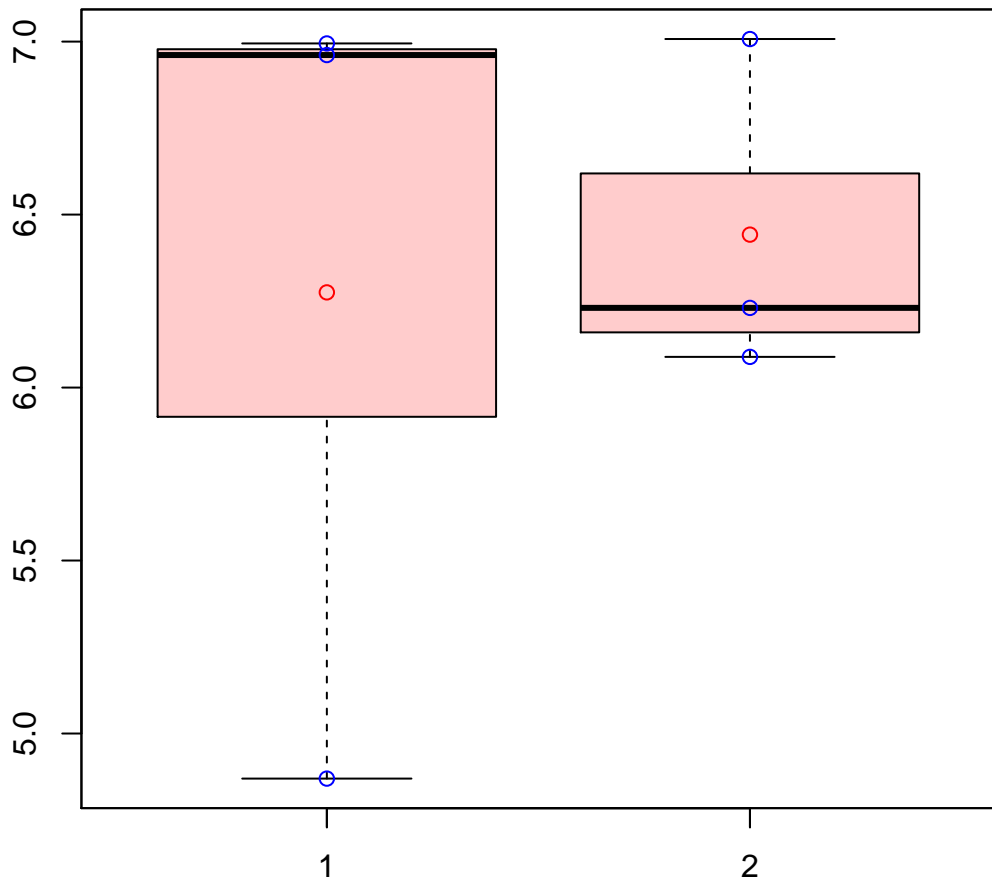

t-Test: p-value = 0.84

# J3LQZ7|J3LQZ7\_ORYBR

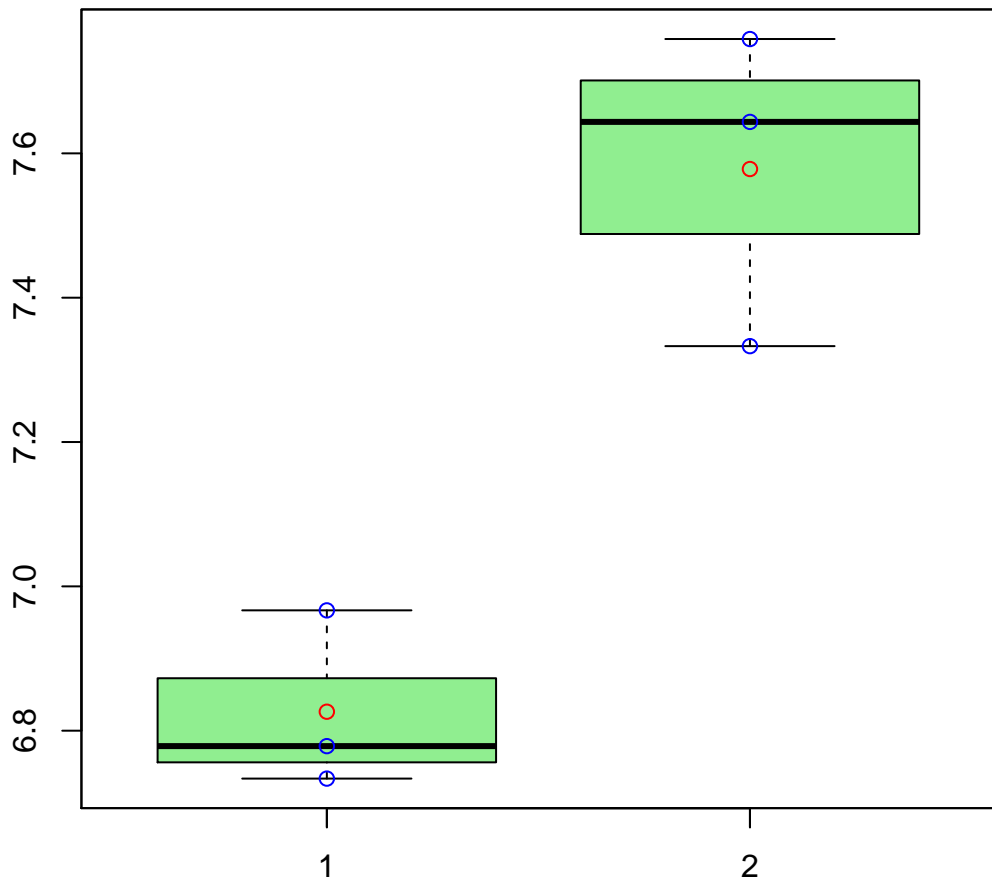

t-Test: p-value = 0.01

# J3LRL9|J3LRL9\_ORYBR

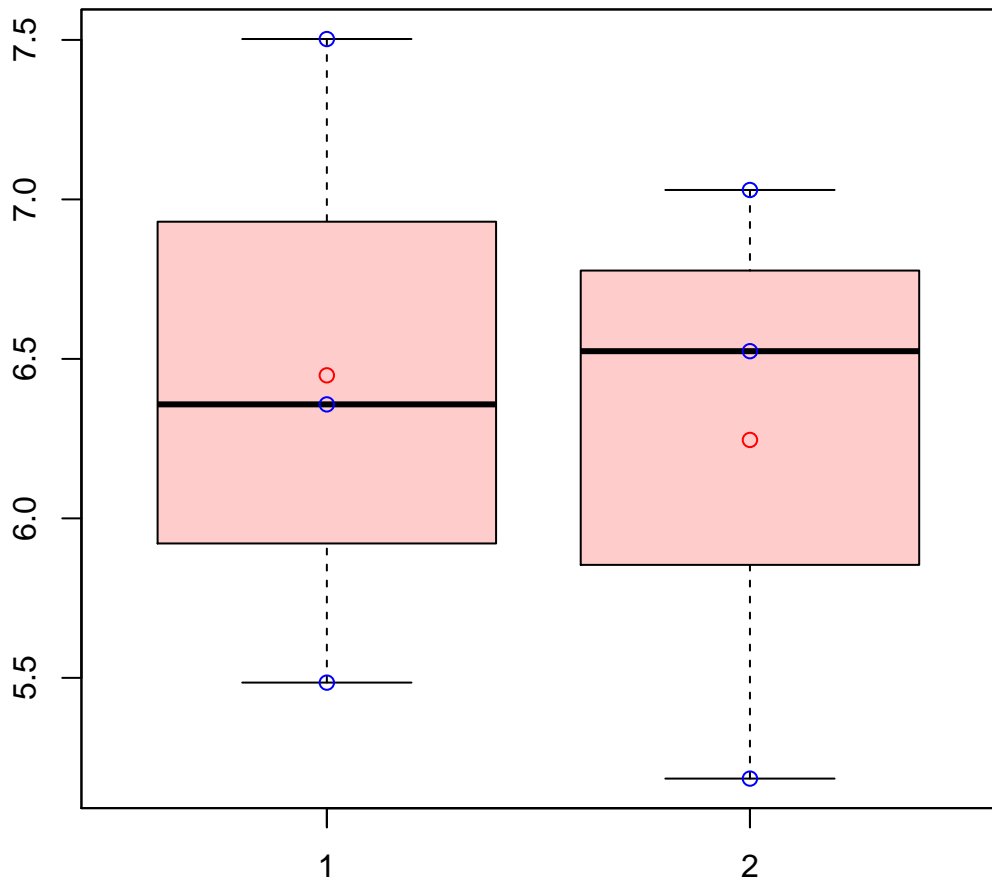

t-Test: p-value = 0.81

# J3LS55|J3LS55\_ORYBR

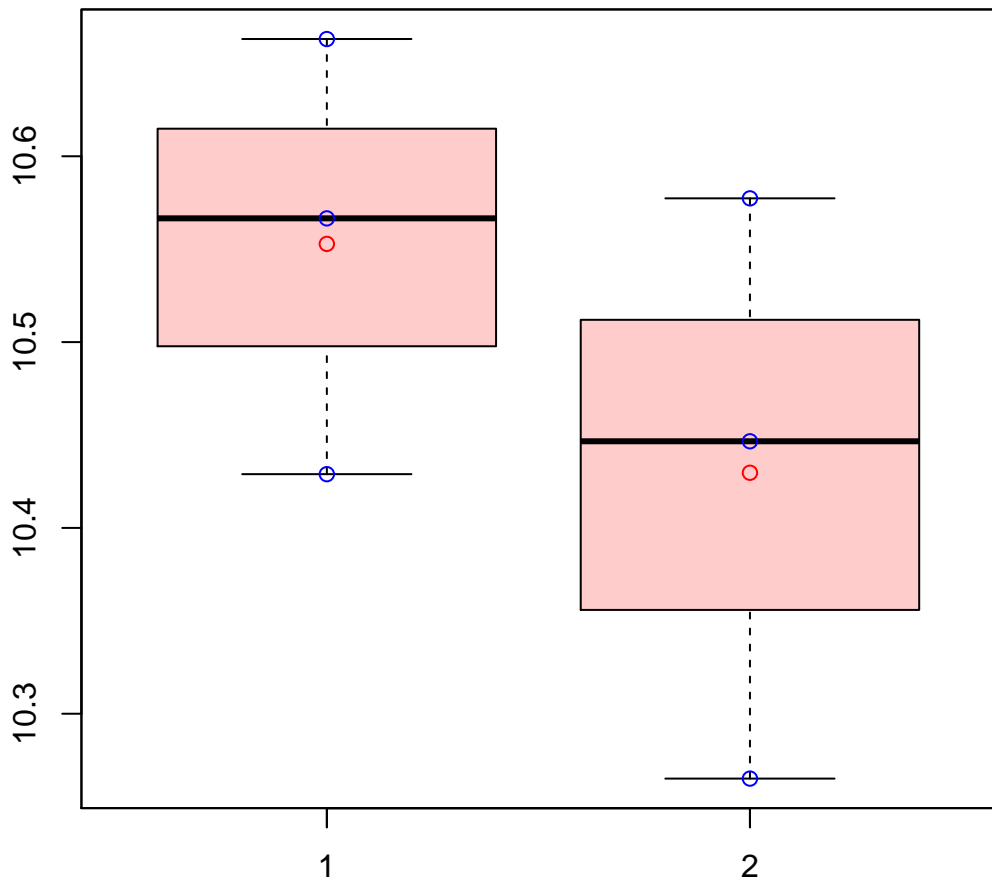

t-Test: p-value = 0.34

# J3LSJ3|J3LSJ3\_ORYBR

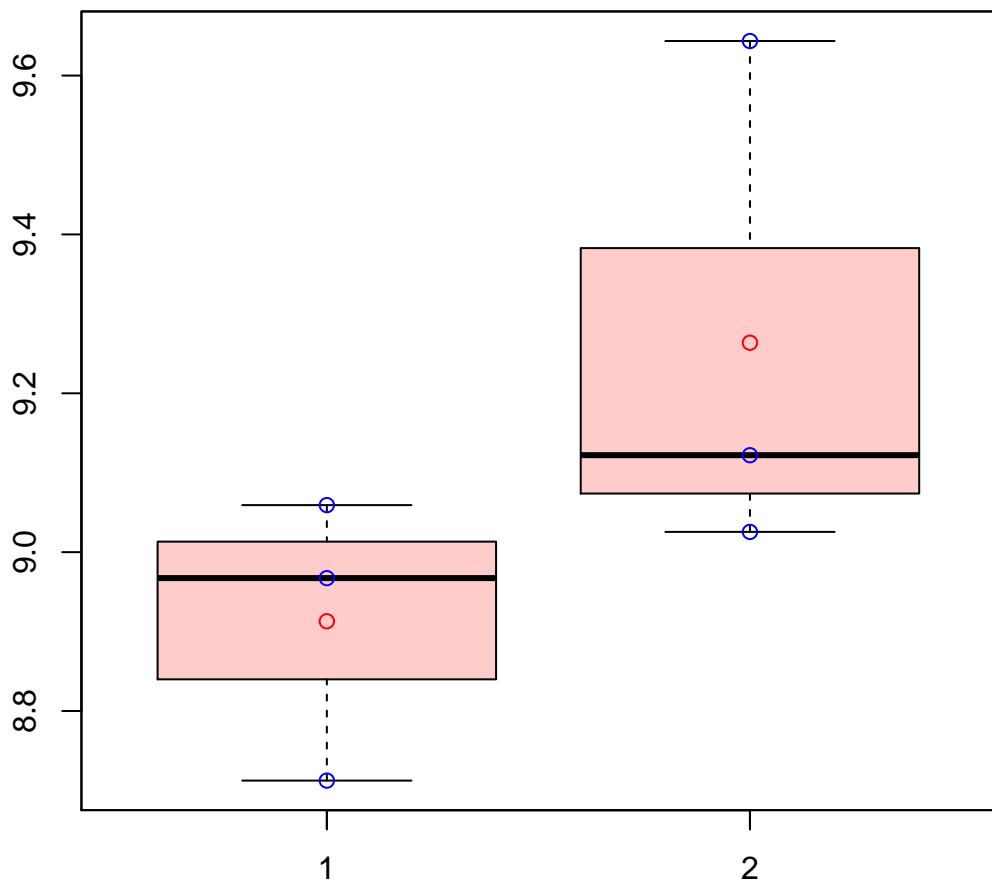

t-Test: p-value = 0.2

# J3LSN2|J3LSN2\_ORYBR

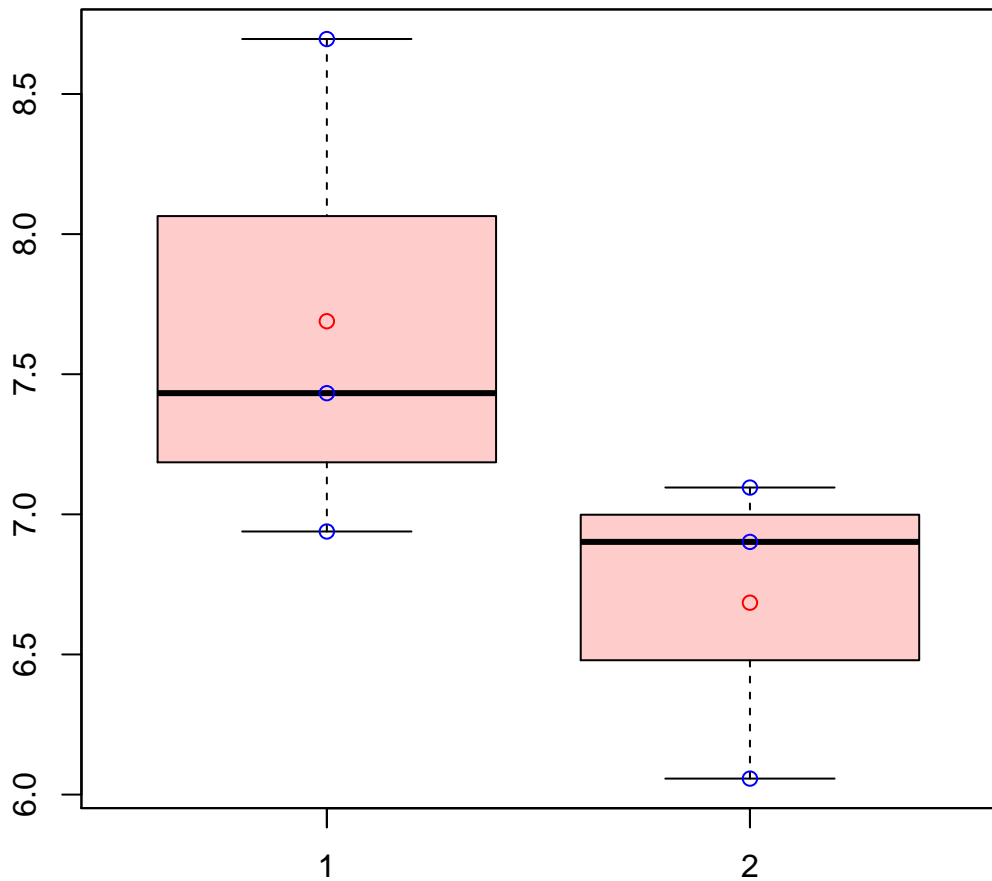

t-Test: p-value = 0.19

# J3LST2|J3LST2\_ORYBR

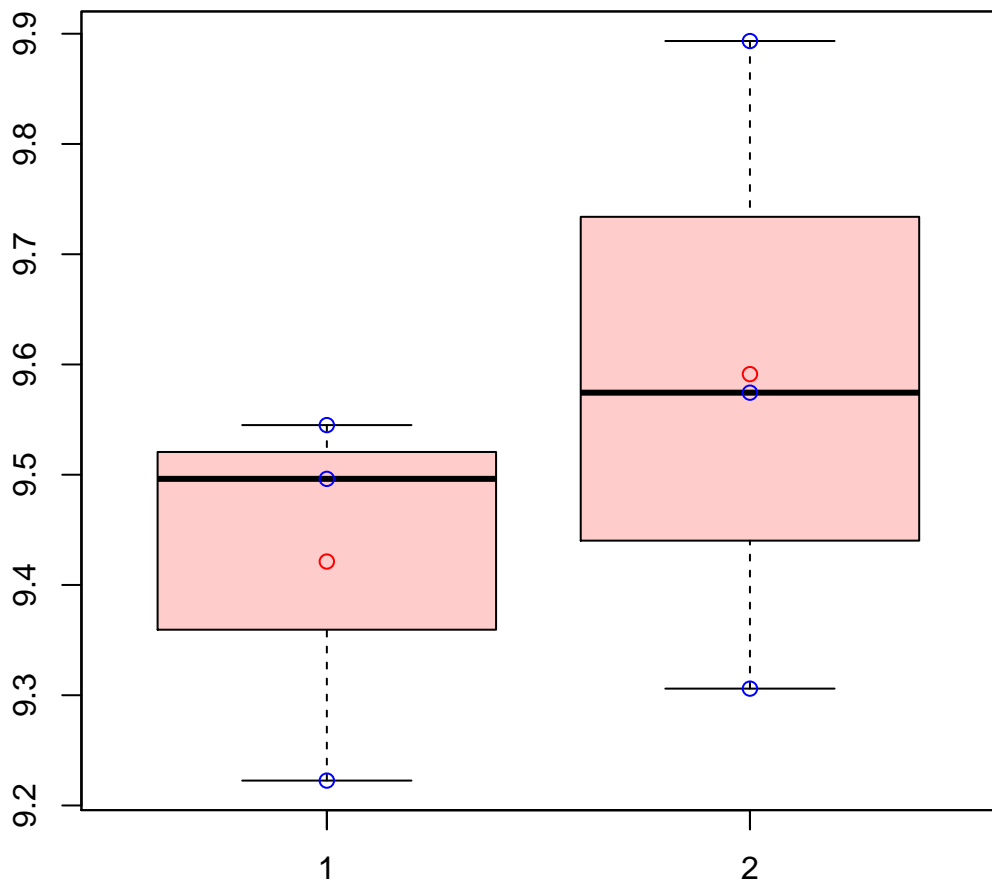

t-Test: p-value = 0.45



# J3LTH5|J3LTH5\_ORYBR

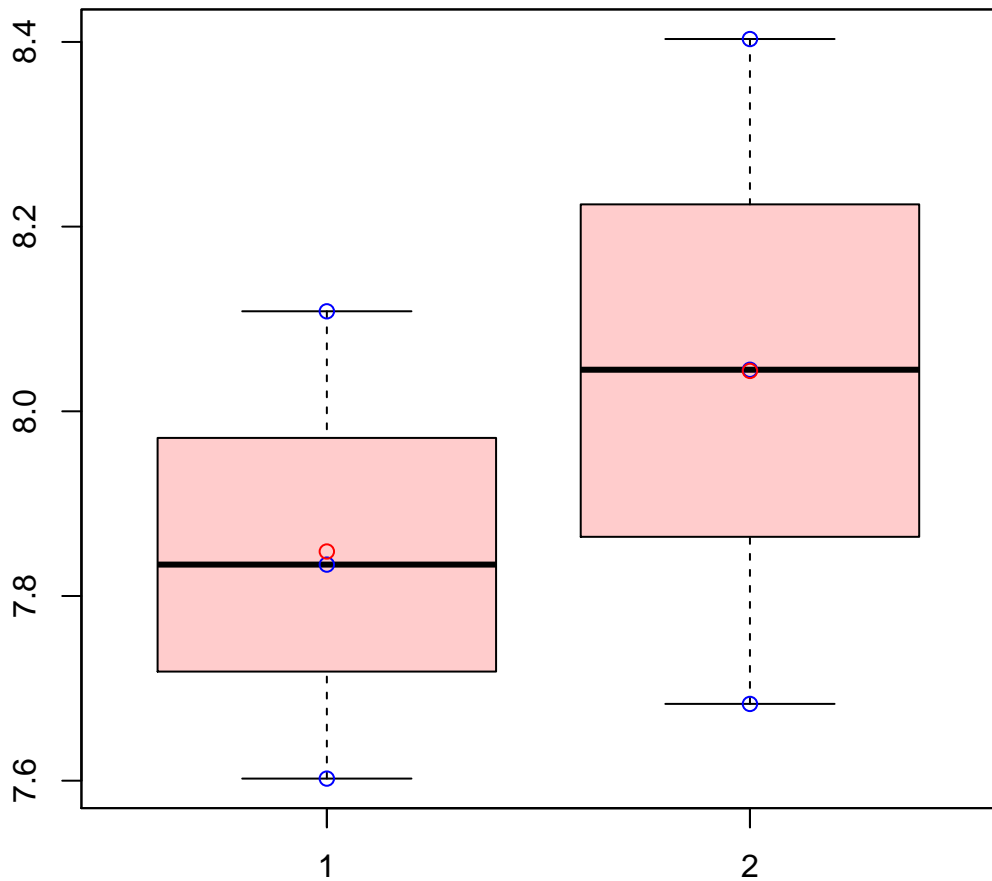

t-Test: p-value = 0.49

# J3LTP8|J3LTP8\_ORYBR

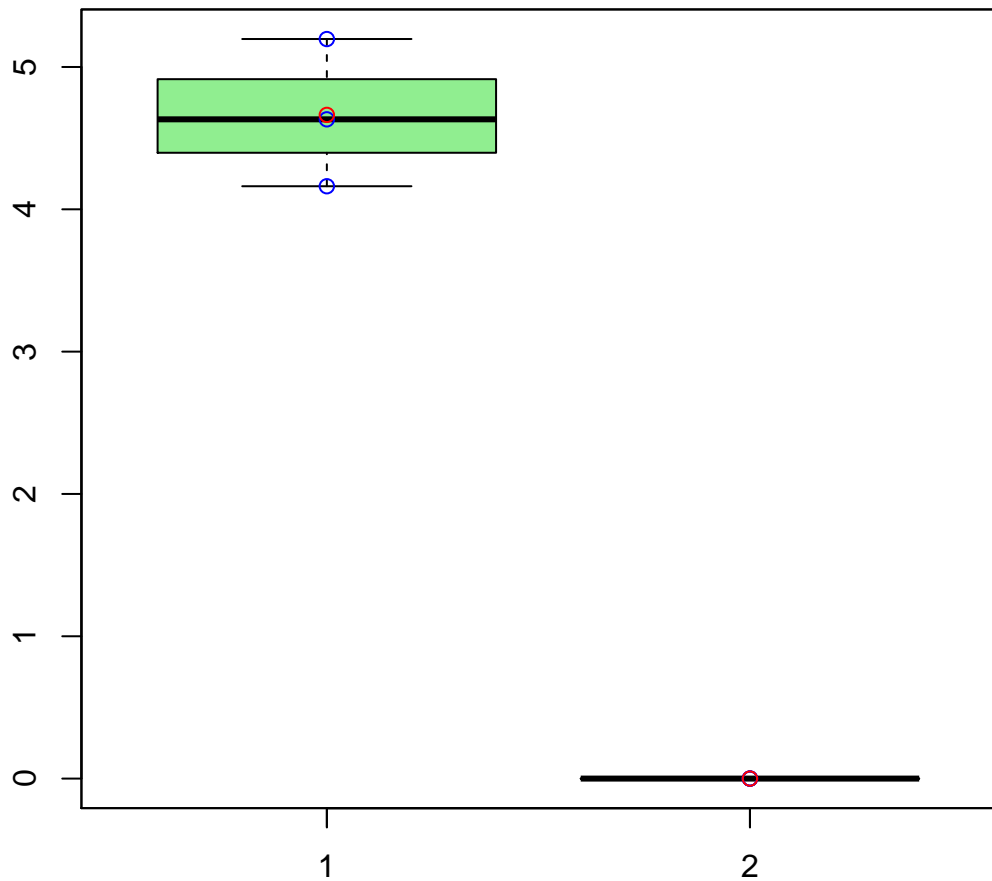

t-Test: p-value = 0

# J3LU48|J3LU48\_ORYBR

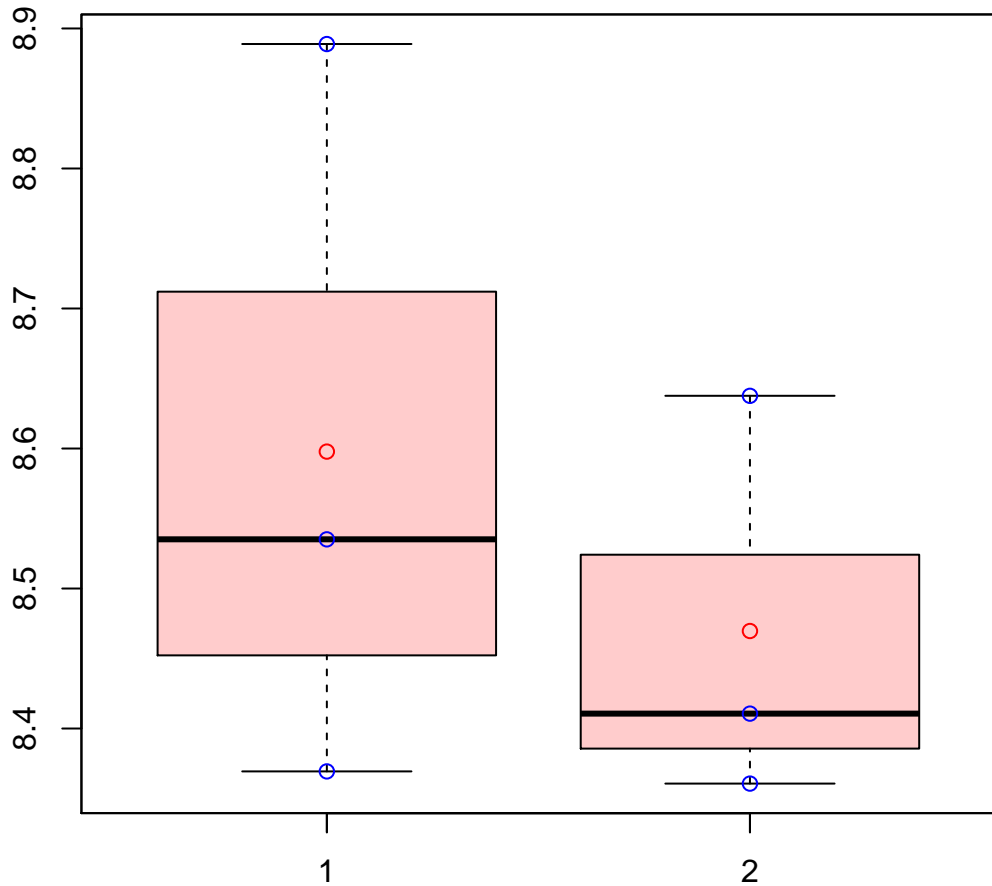

t-Test: p-value = 0.52

# J3LUA5|J3LUA5\_ORYBR

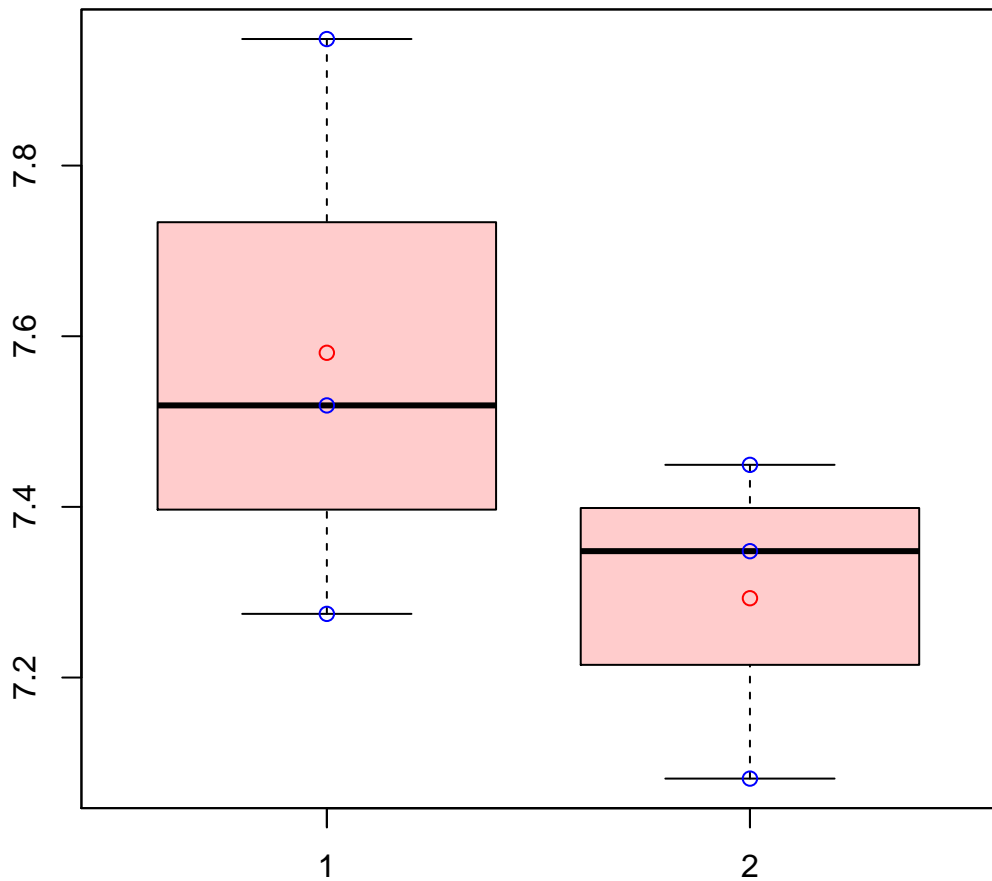

t-Test: p-value = 0.29

# J3LUT2|J3LUT2\_ORYBR

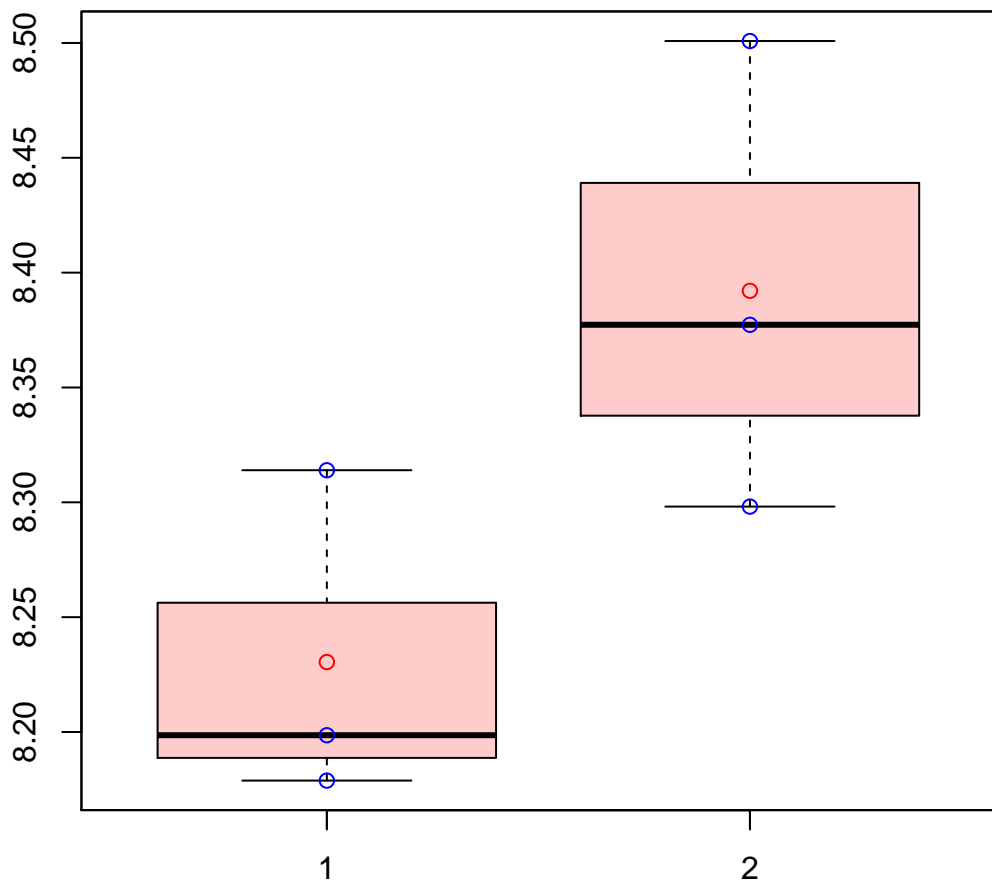

t-Test: p-value = 0.1

# J3LV03|J3LV03\_ORYBR

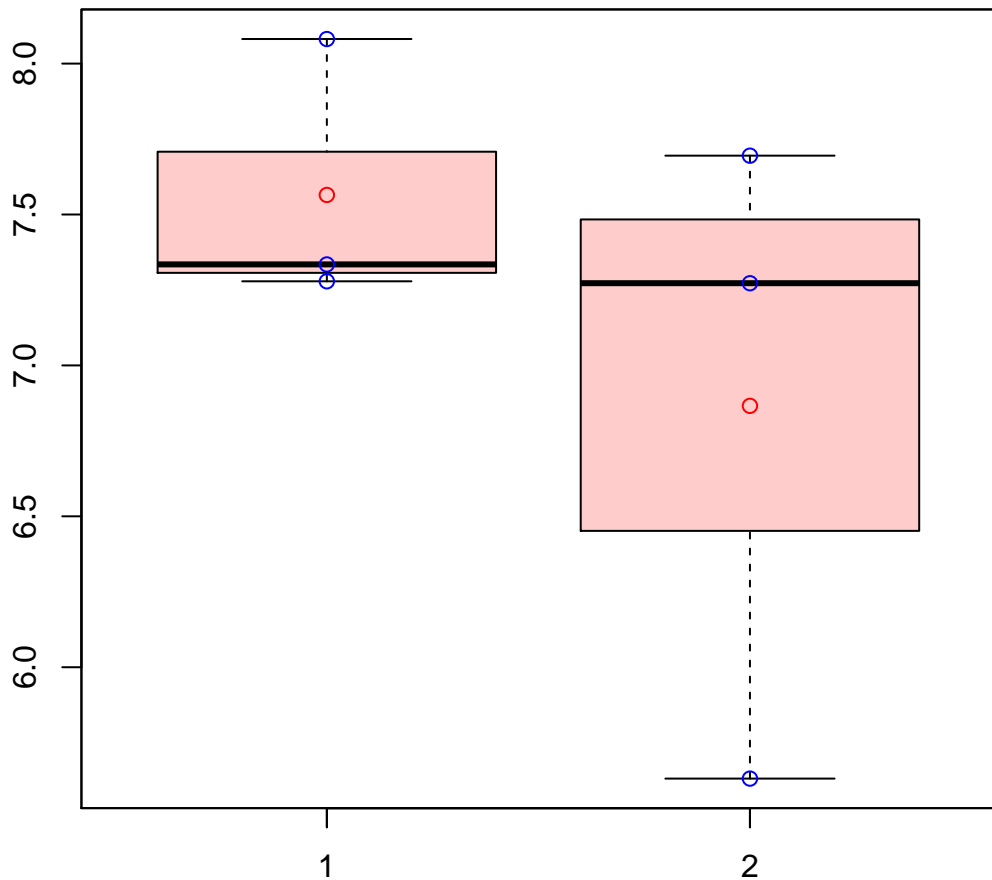

t-Test: p-value = 0.39

# J3LV15|J3LV15\_ORYBR

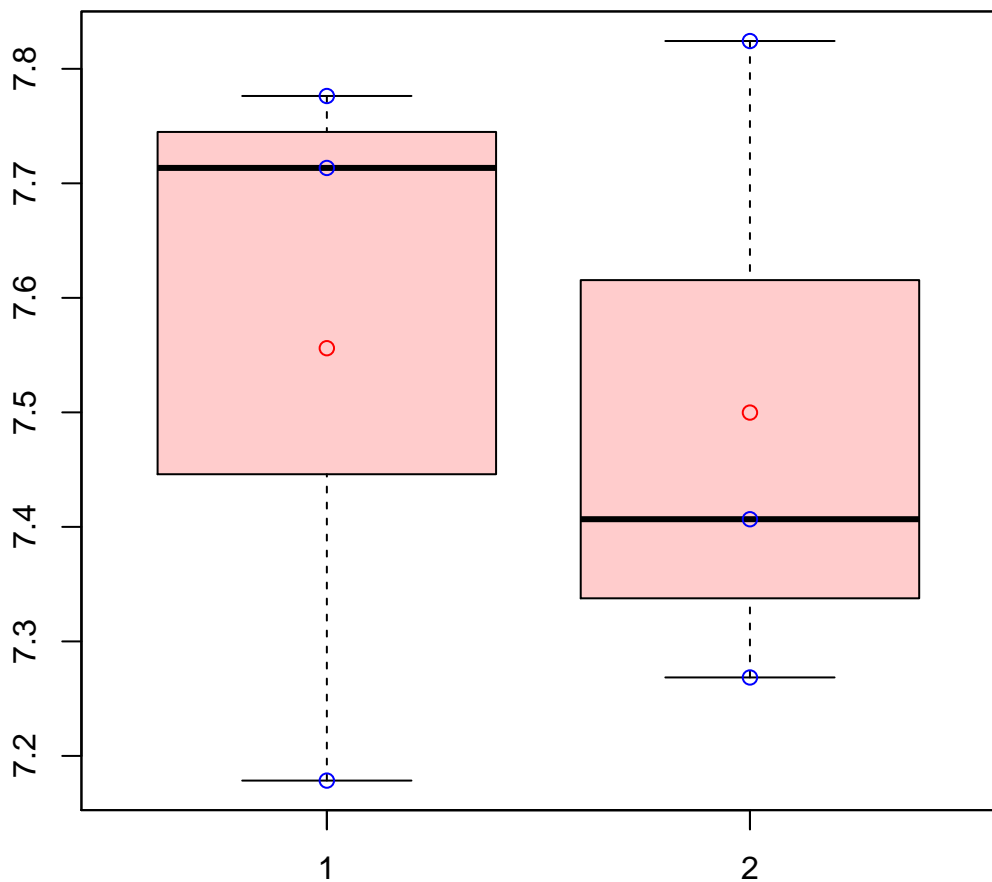

t-Test: p-value = 0.83

# J3LVB3|J3LVB3\_ORYBR

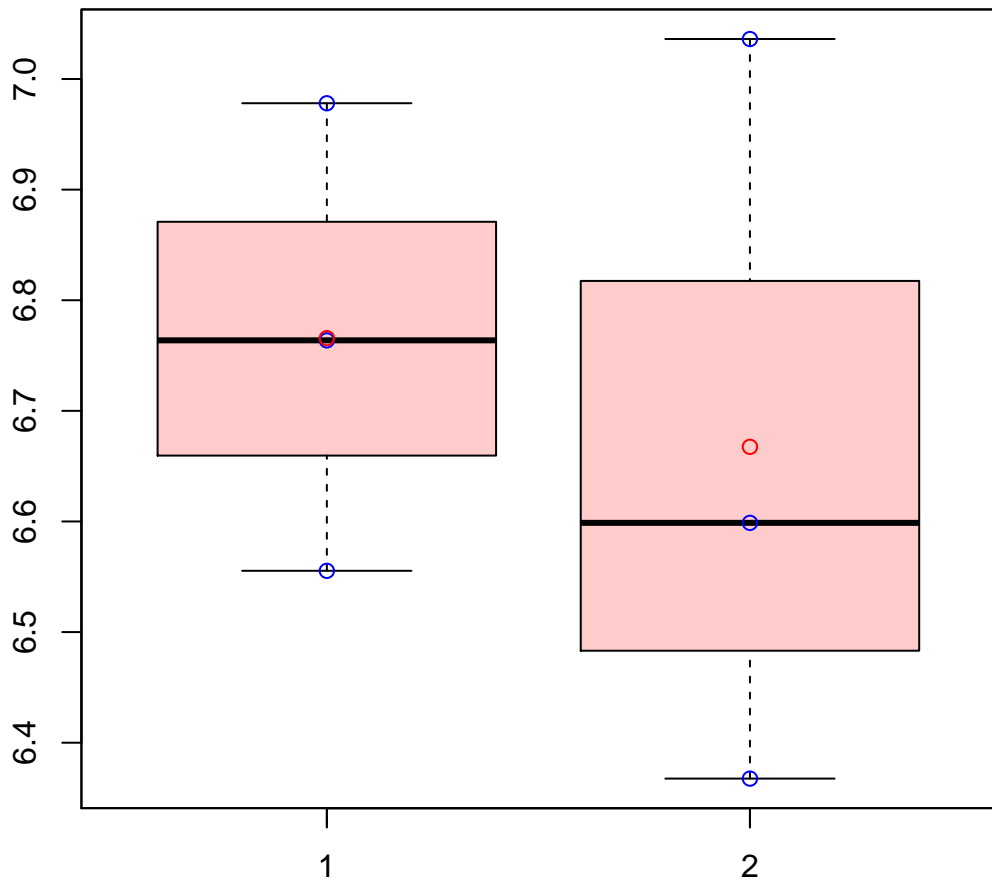

t-Test: p-value = 0.7



# J3LW12|J3LW12\_ORYBR

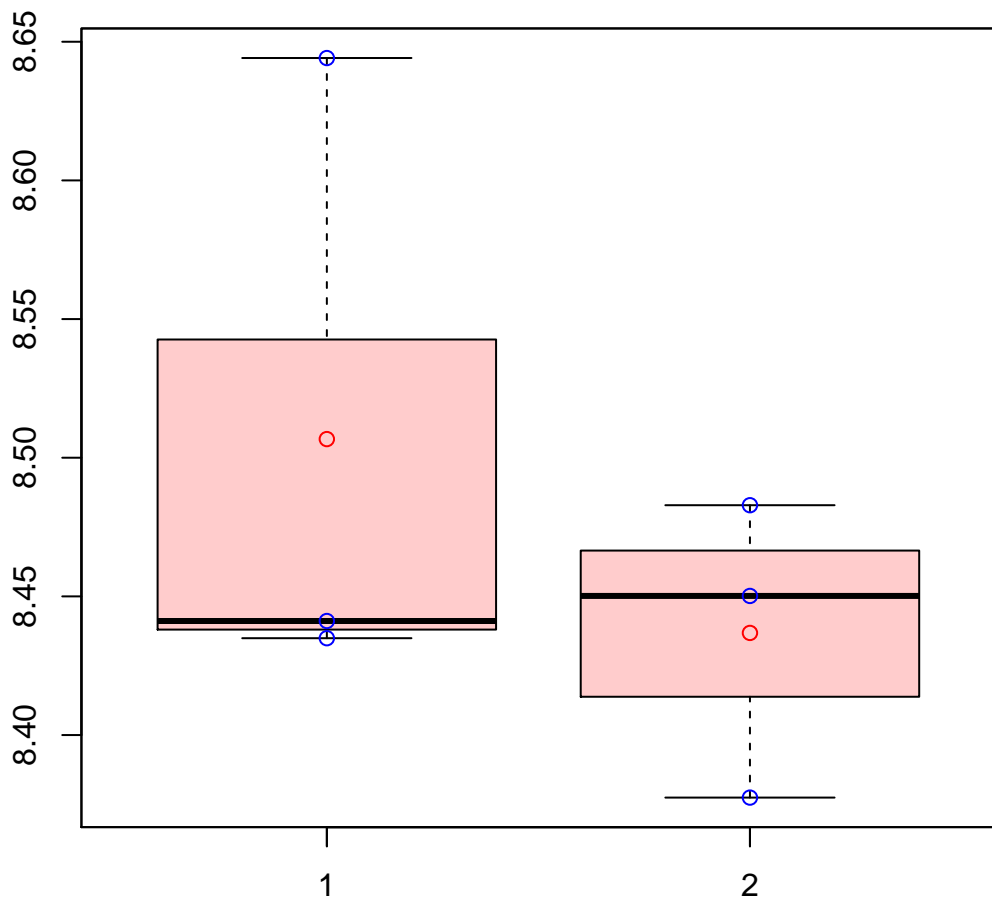

t-Test: p-value = 0.43

# J3LWB2|J3LWB2\_ORYBR

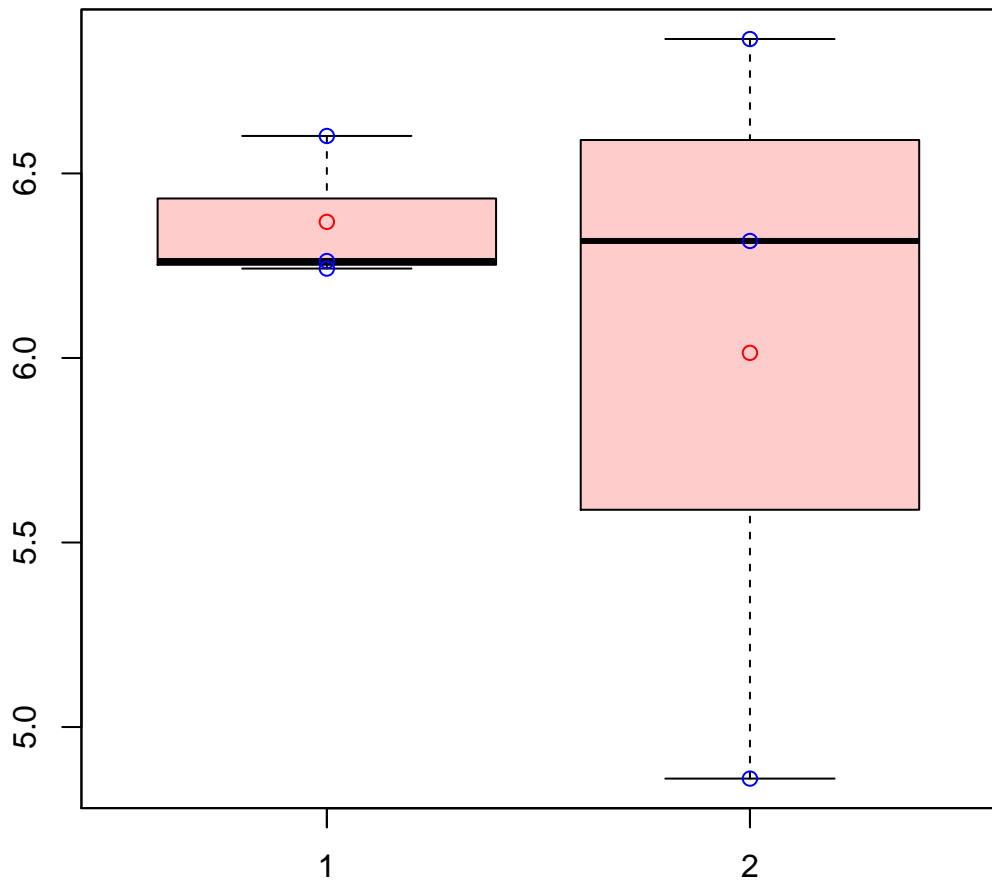

t-Test: p-value = 0.62

# J3LWQ2|J3LWQ2\_ORYBR

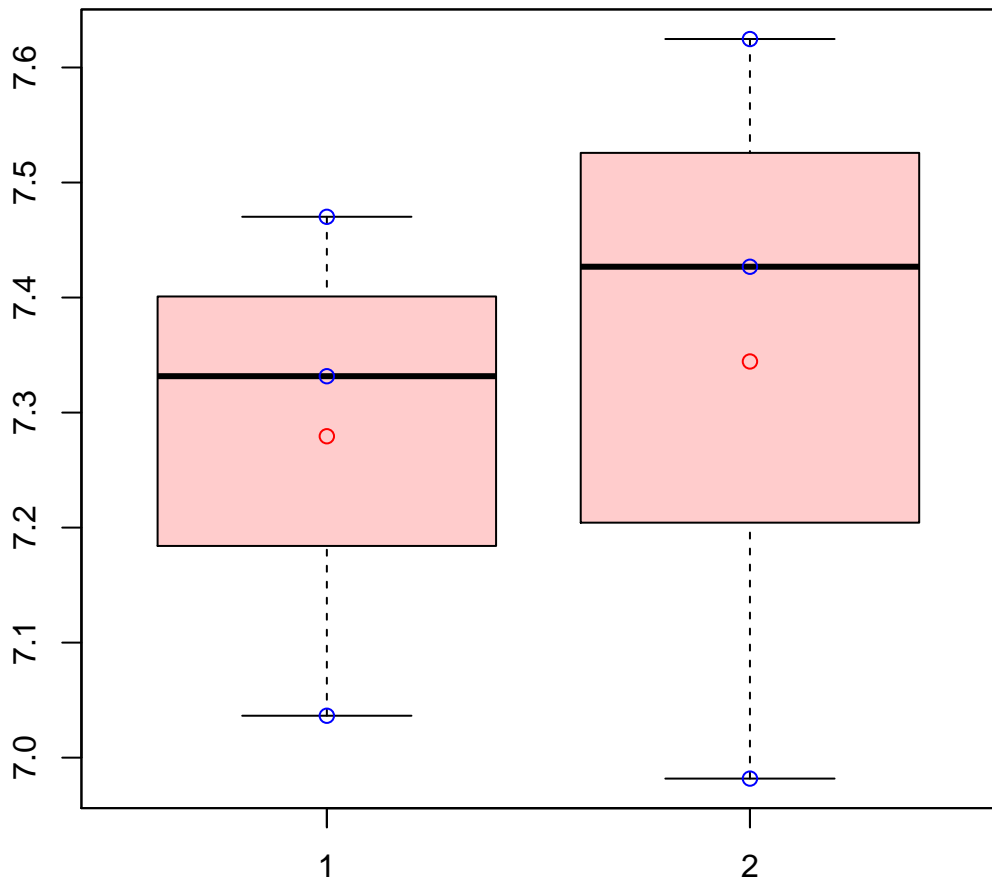

t-Test: p-value = 0.79

# J3LWU6|J3LWU6\_ORYBR

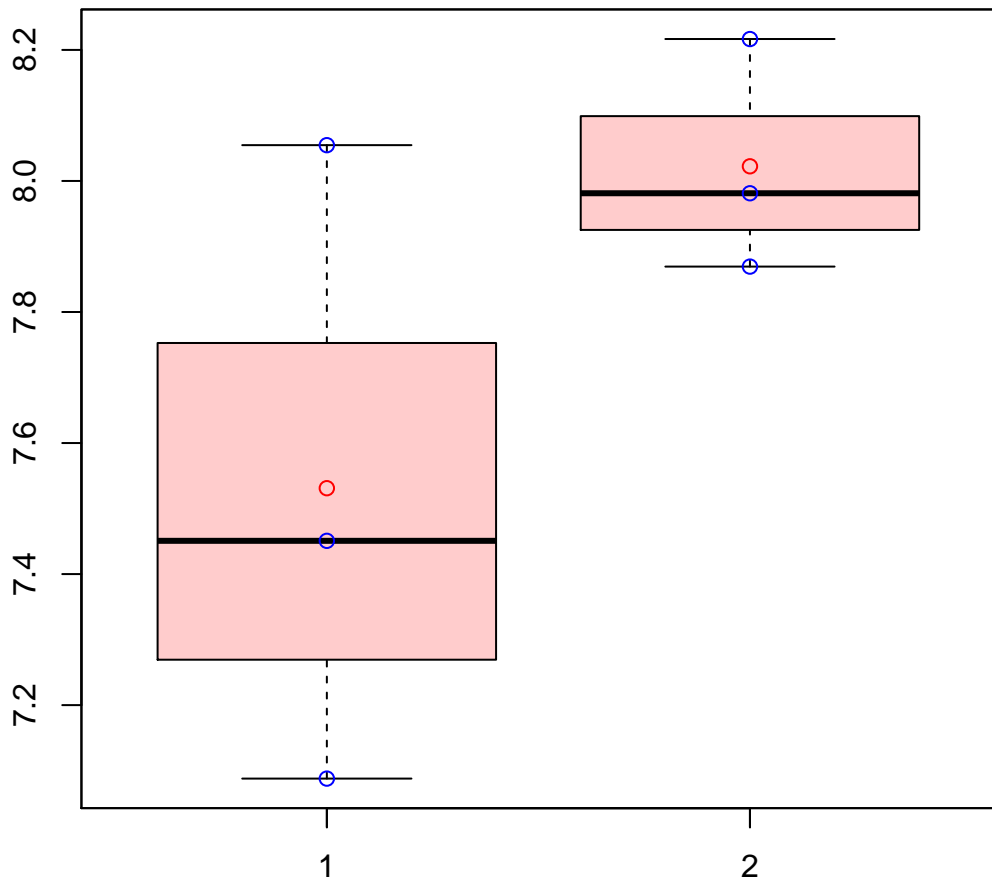

t-Test: p-value = 0.22

# J3LX36|J3LX36\_ORYBR

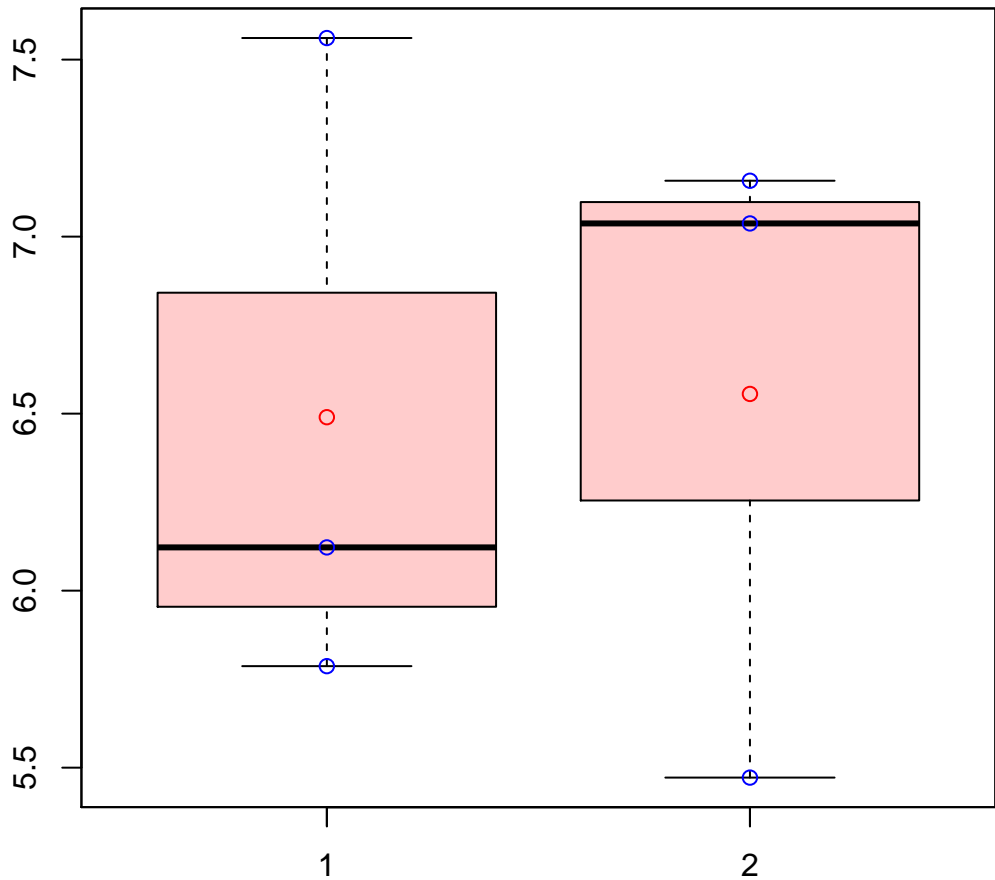

t-Test: p-value = 0.94

# J3LX53|J3LX53\_ORYBR

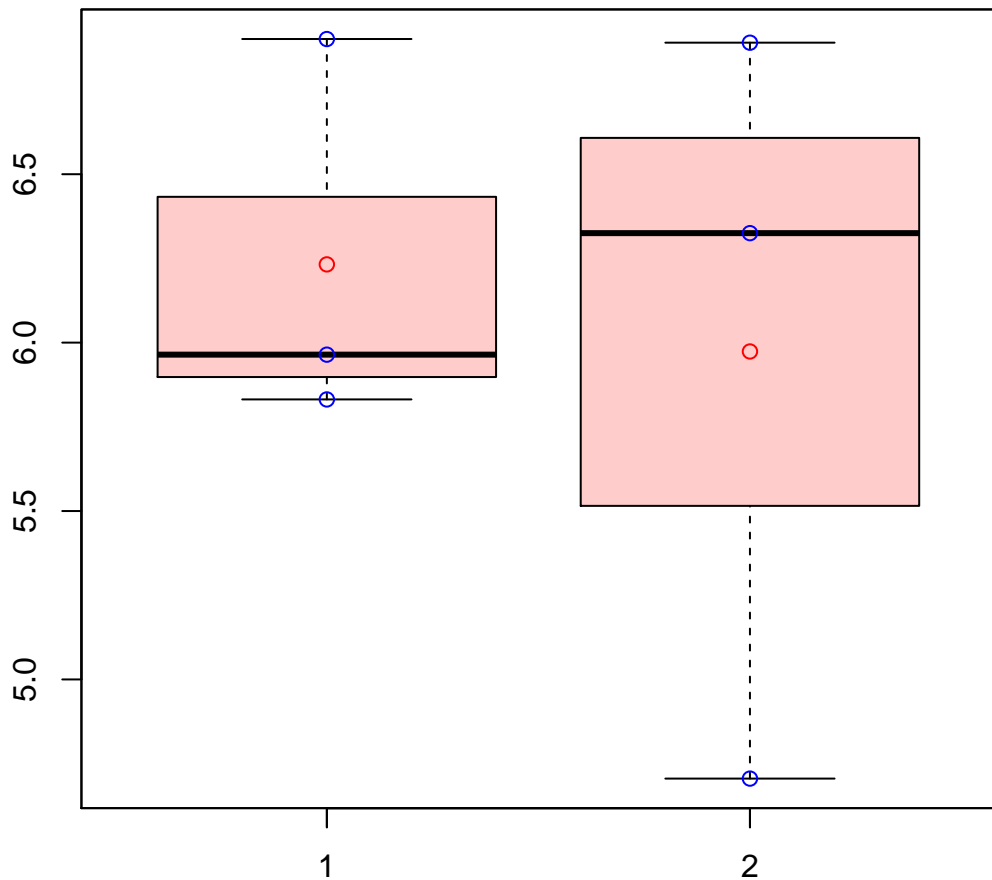

t-Test: p-value = 0.75

# J3LXA1|J3LXA1\_ORYBR

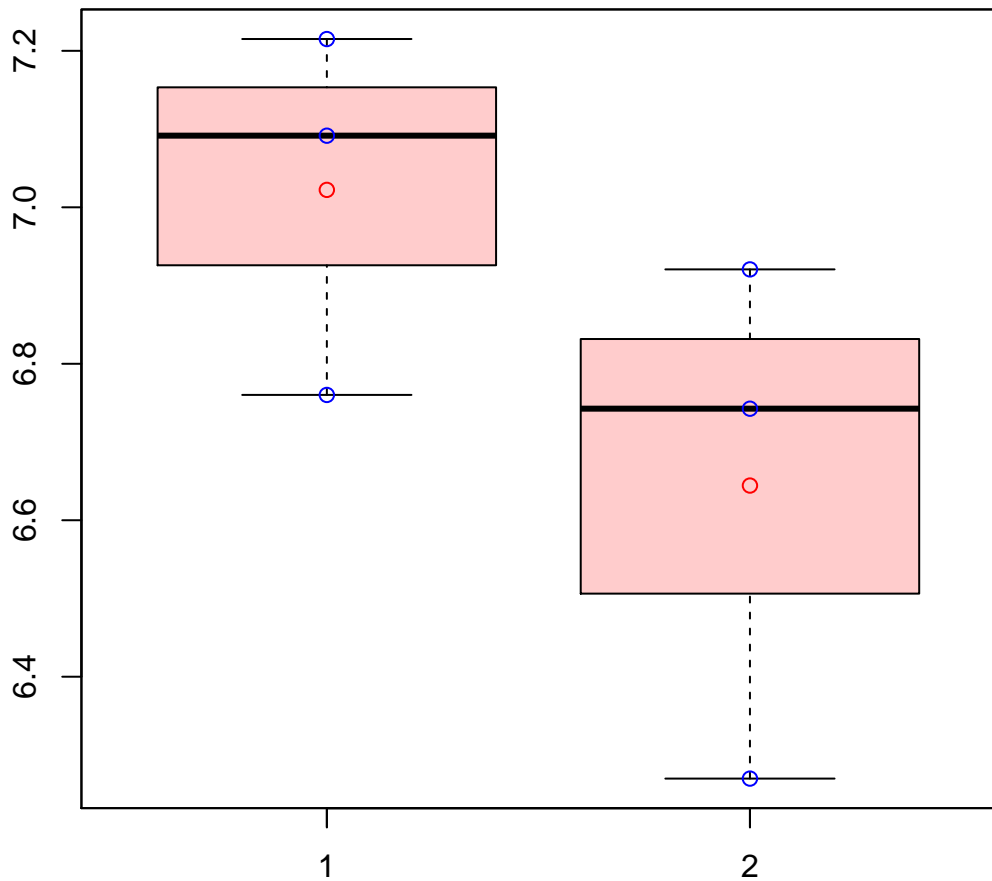

t-Test: p-value = 0.19

# J3LXD9|J3LXD9\_ORYBR

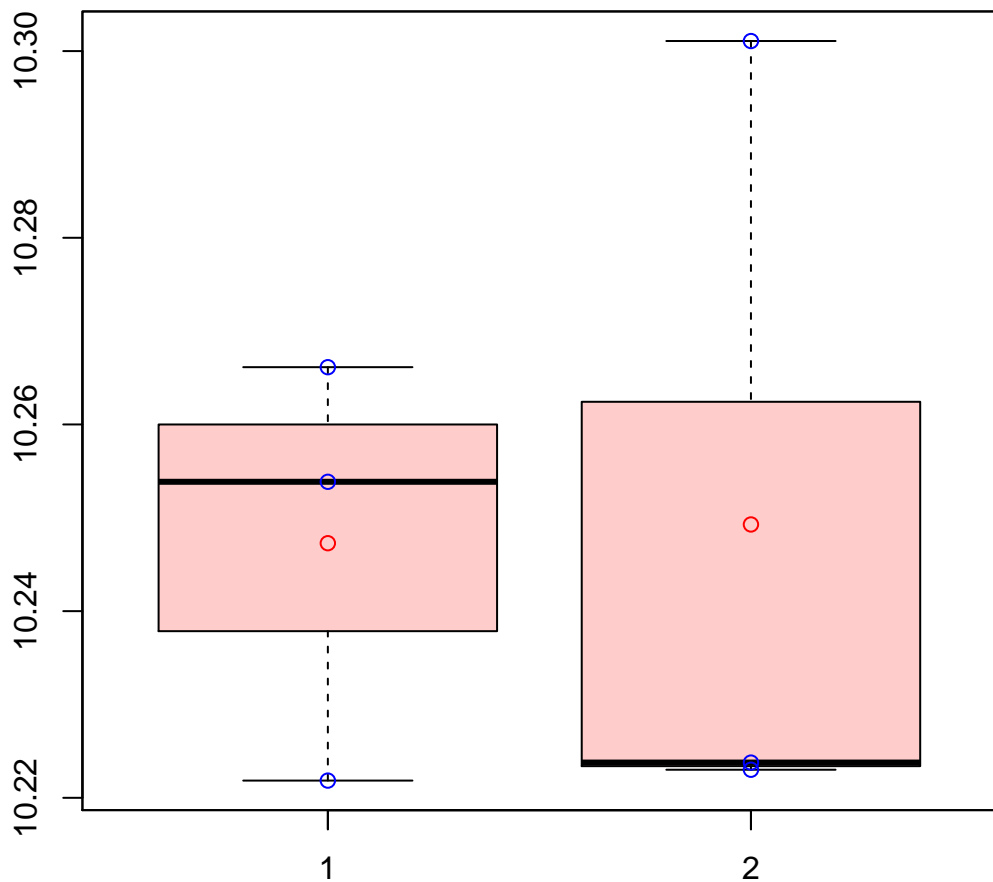

t-Test: p-value = 0.95



# J3LXK5|J3LXK5\_ORYBR

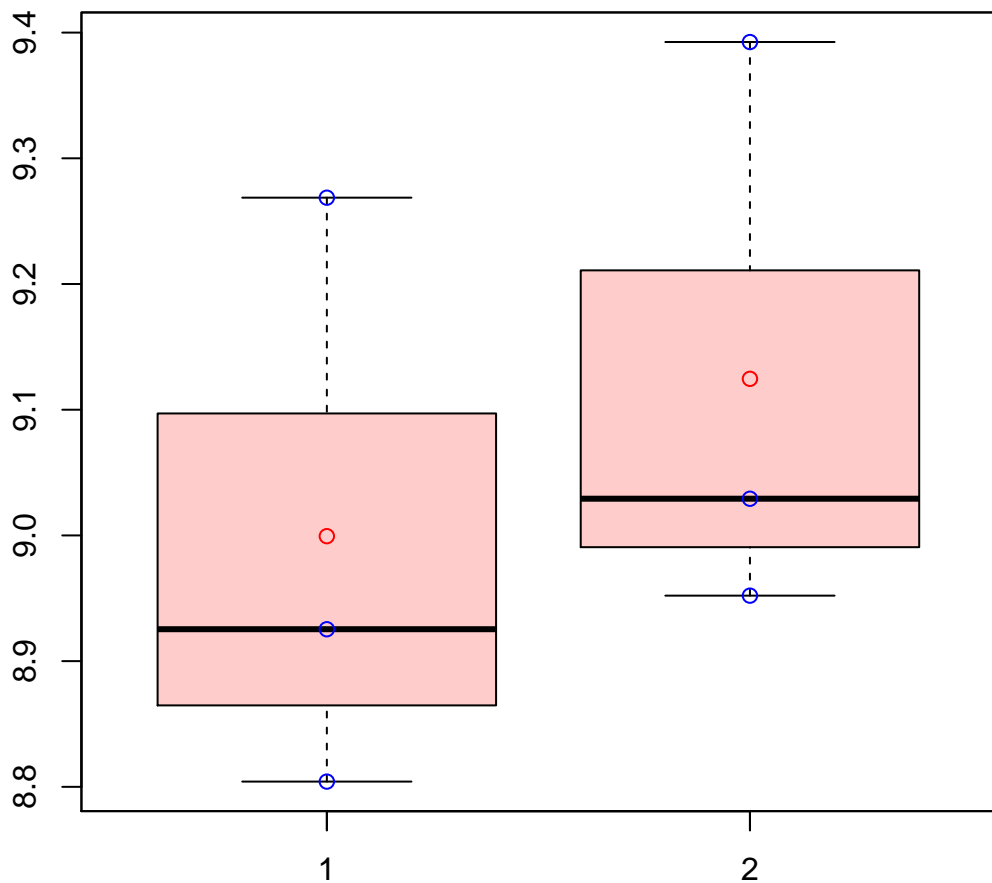

t-Test: p-value = 0.55

# J3LXQ8|J3LXQ8\_ORYBR

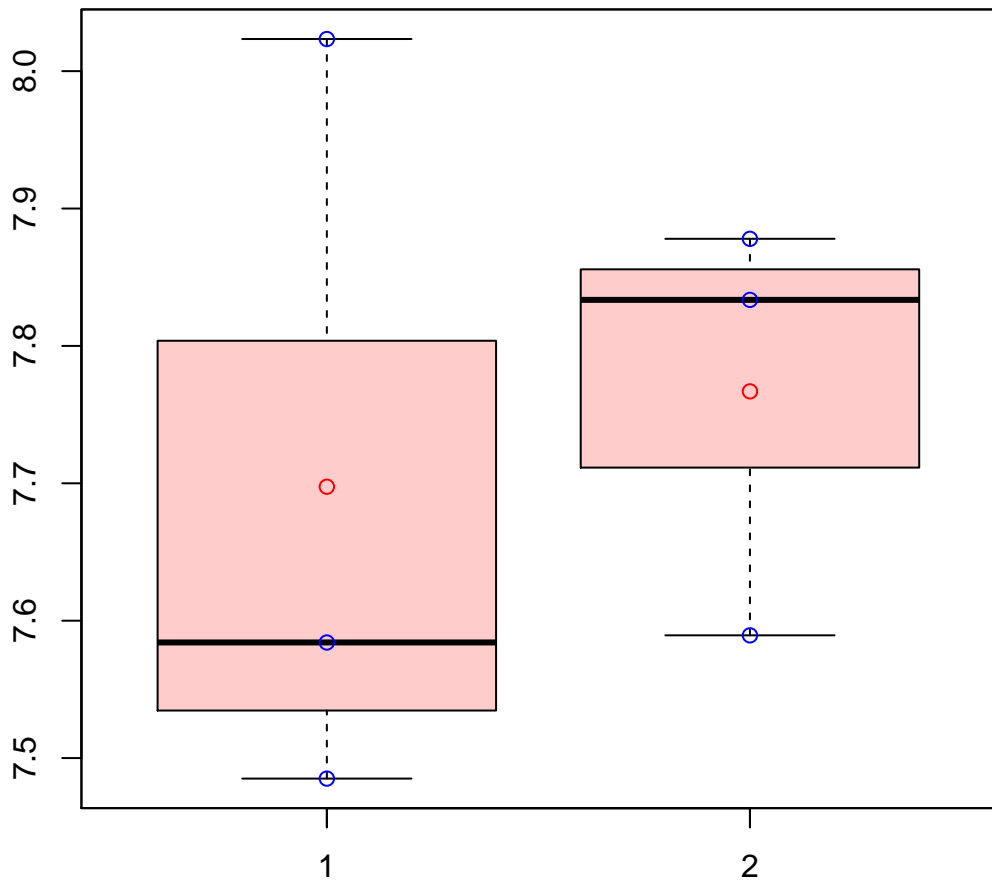

t-Test: p-value = 0.74

# J3LY95|J3LY95\_ORYBR

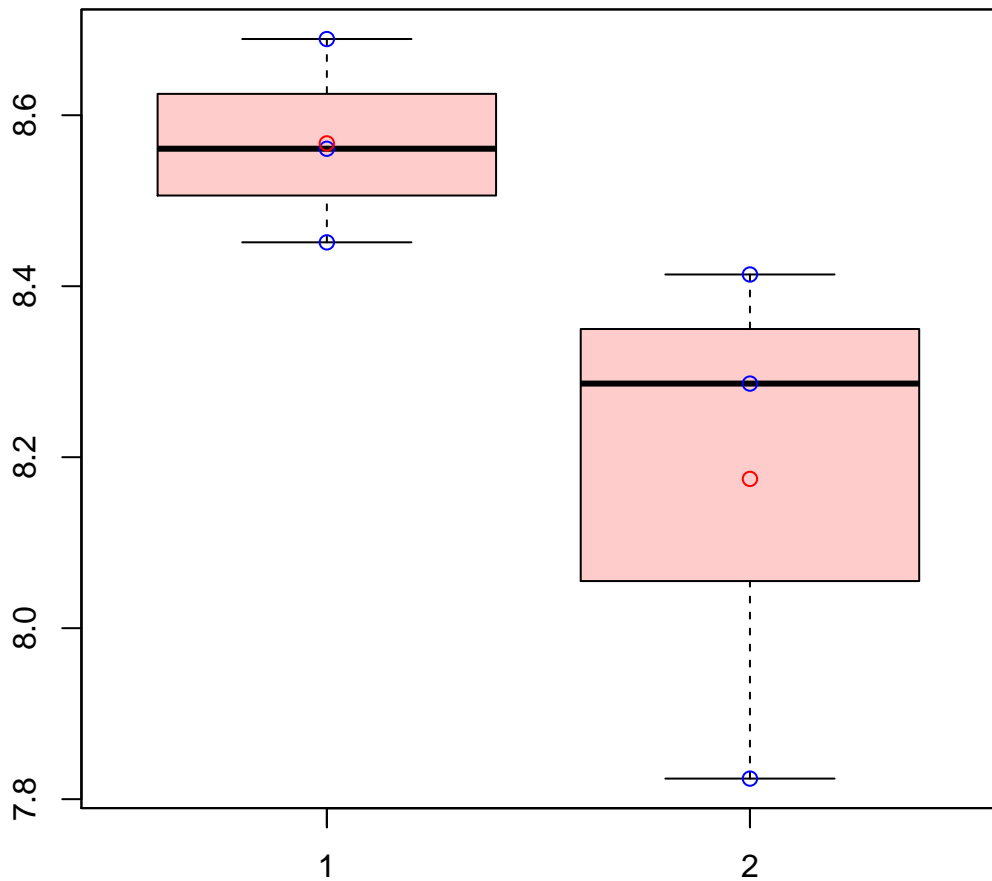

t-Test: p-value = 0.15

# J3LYC6|J3LYC6\_ORYBR

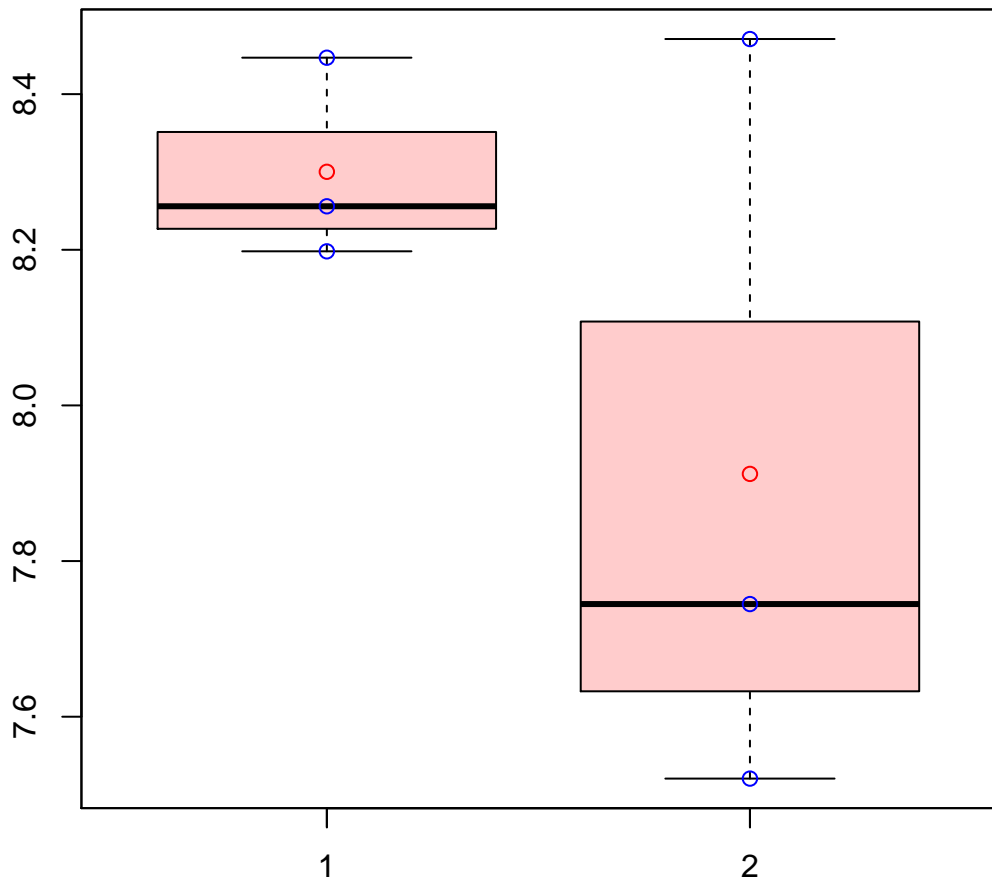

t-Test: p-value = 0.31

# J3LYY4|J3LYY4\_ORYBR

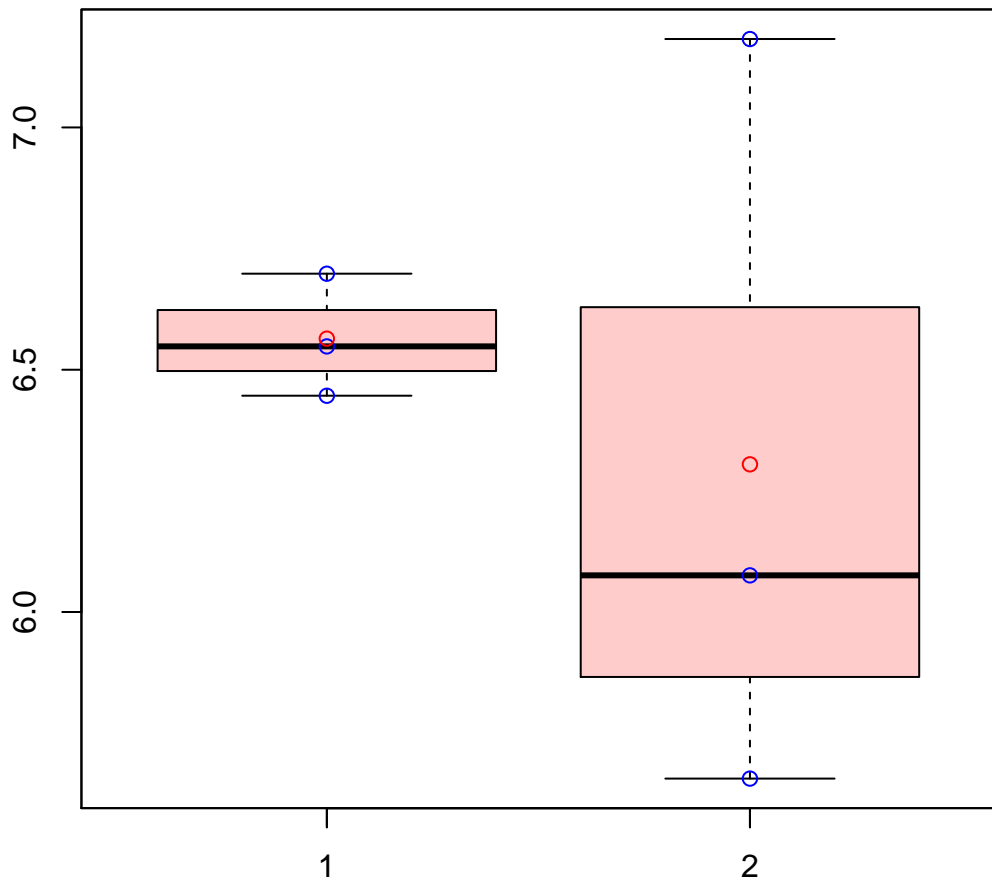

t-Test: p-value = 0.63

# J3LZ24|J3LZ24\_ORYBR

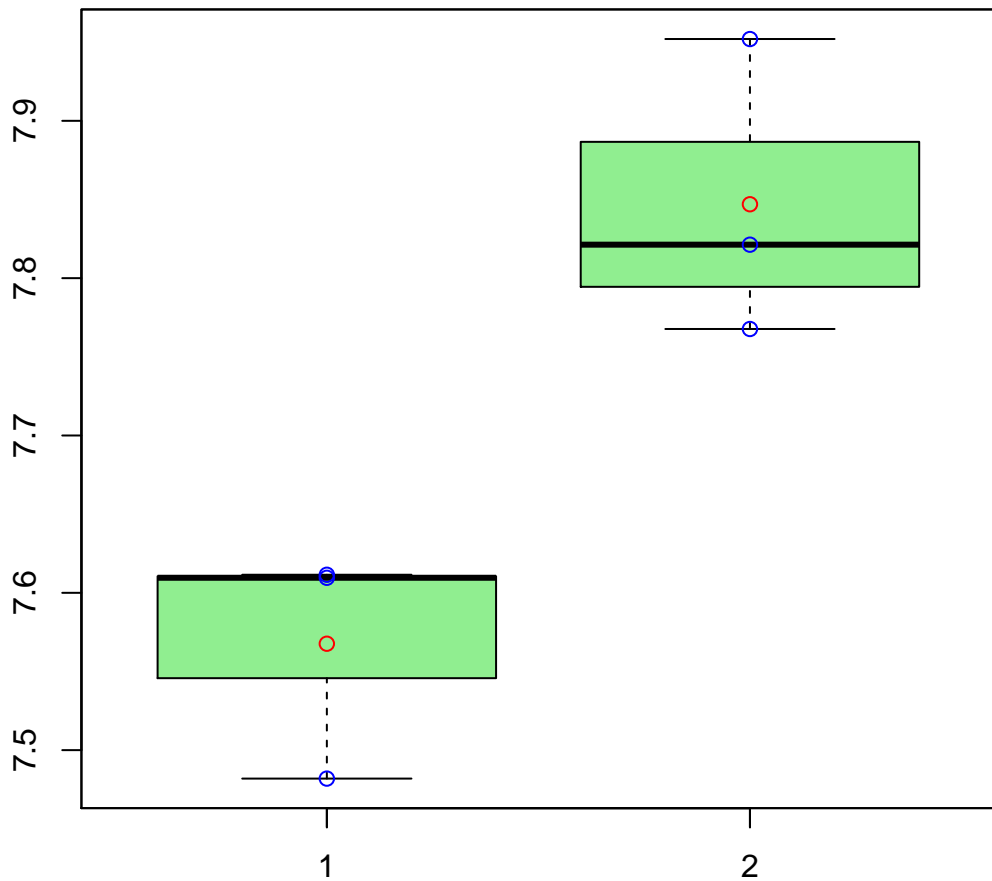

t-Test: p-value = 0.02

# J3LZF9|J3LZF9\_ORYBR

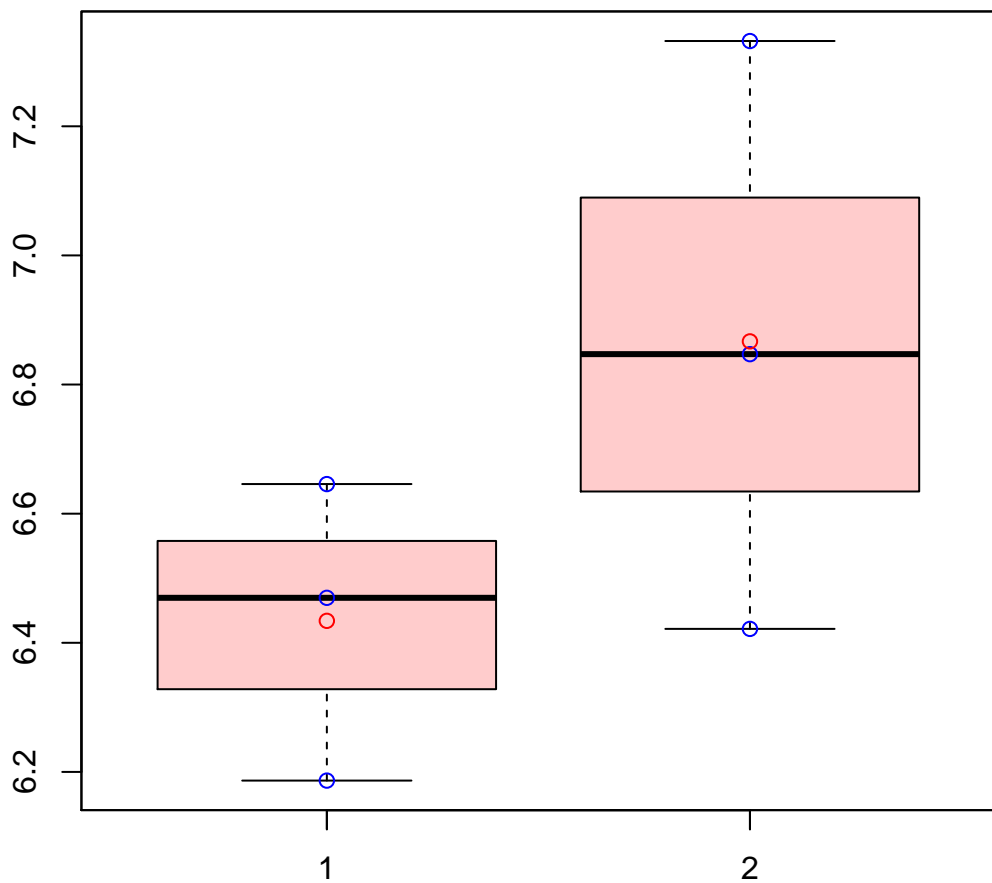

t-Test: p-value = 0.24

# J3LZU2|J3LZU2\_ORYBR

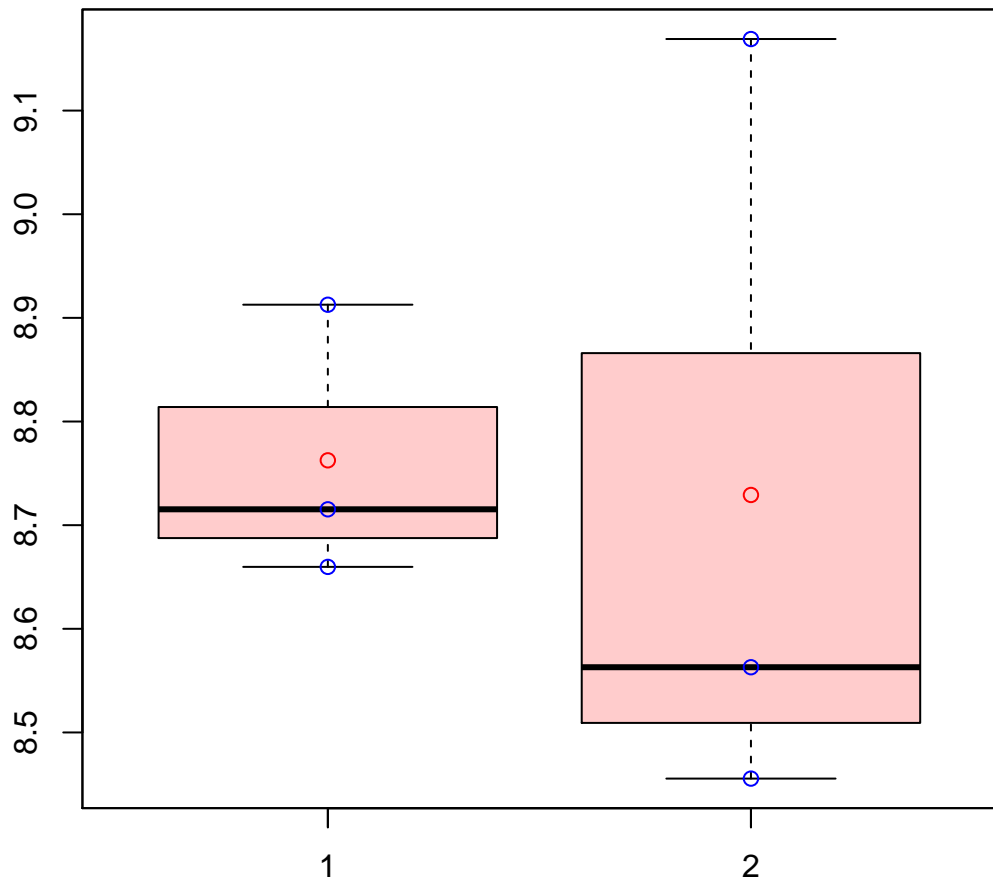

t-Test: p-value = 0.9



# J3LZW2|J3LZW2\_ORYBR

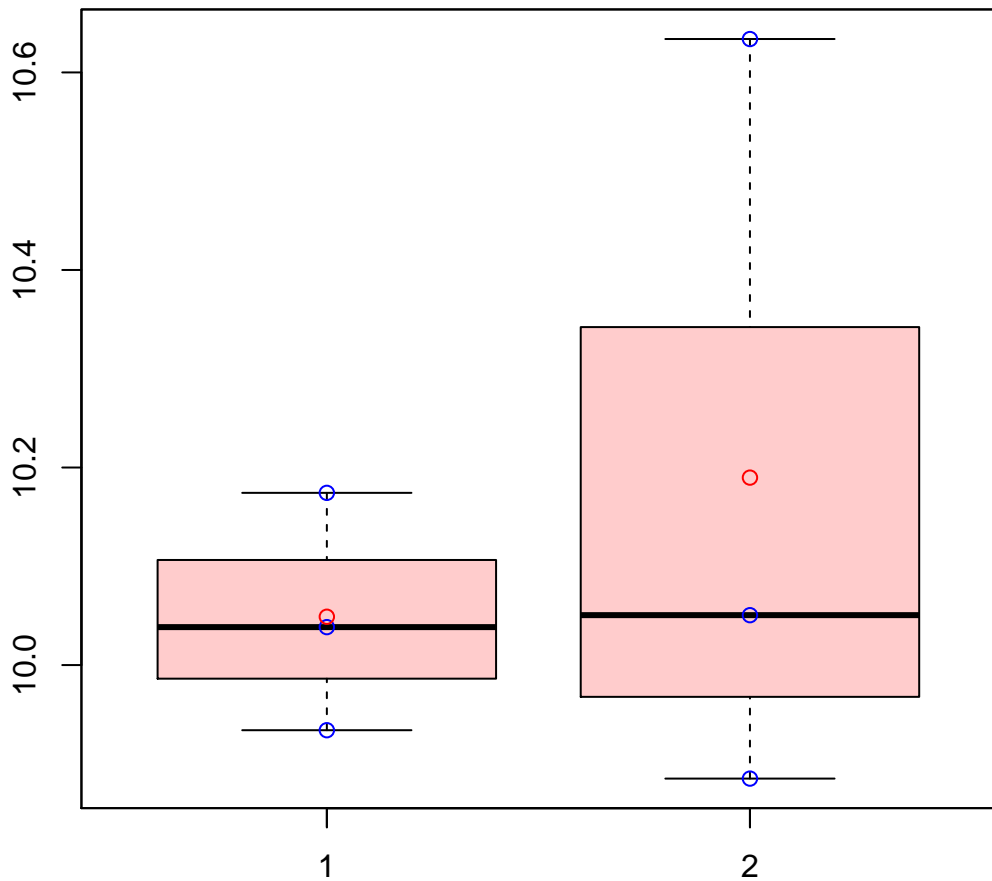

t-Test: p-value = 0.6

# J3M019|J3M019\_ORYBR

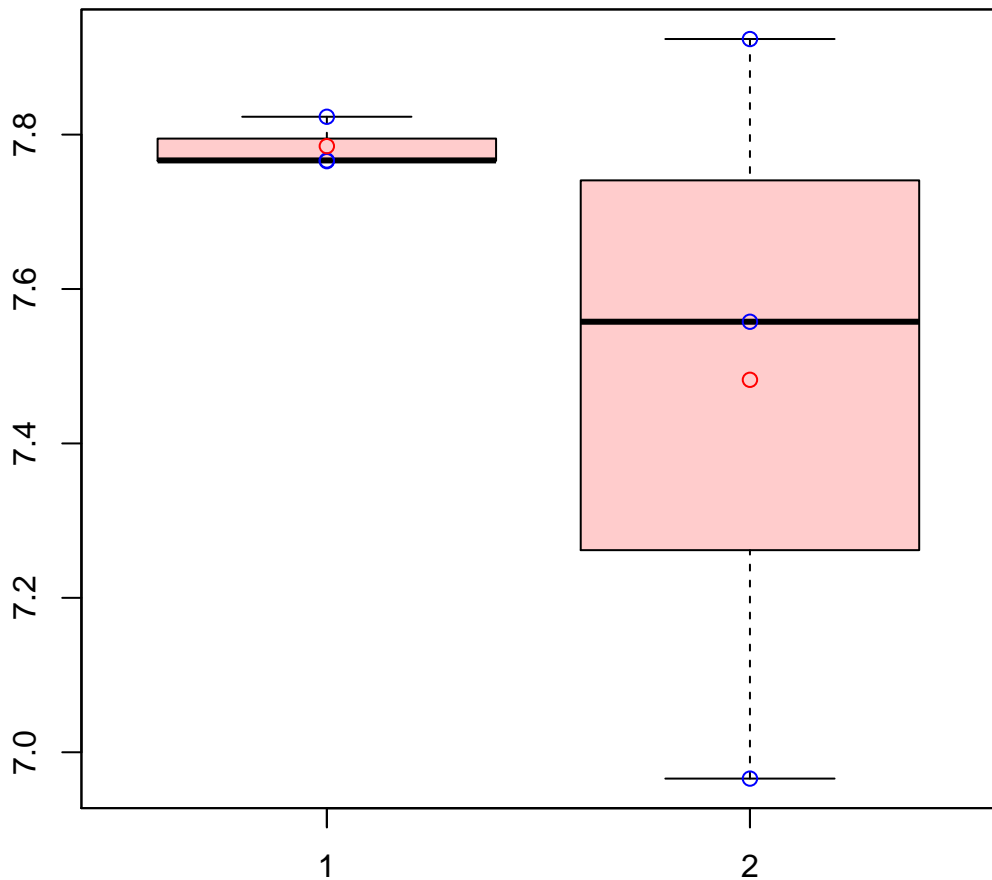

t-Test: p-value = 0.39

# J3M024|J3M024\_ORYBR

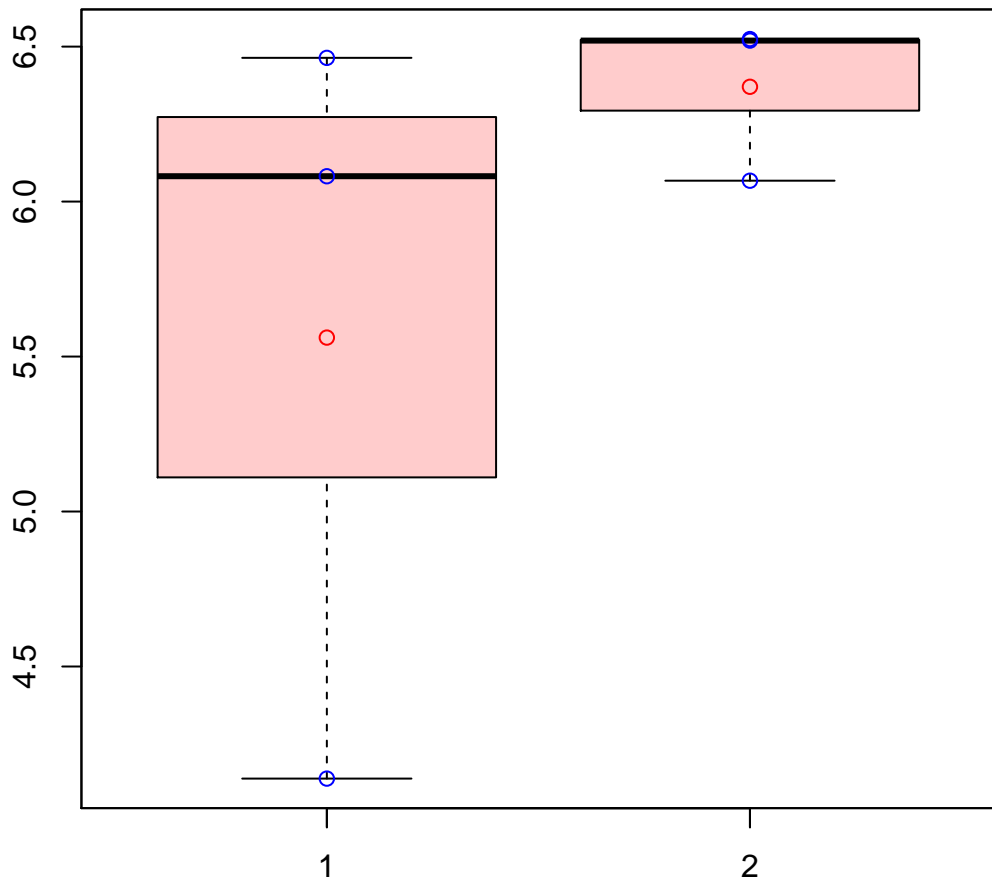

t-Test: p-value = 0.38

# J3M0Z3|J3M0Z3\_ORYBR

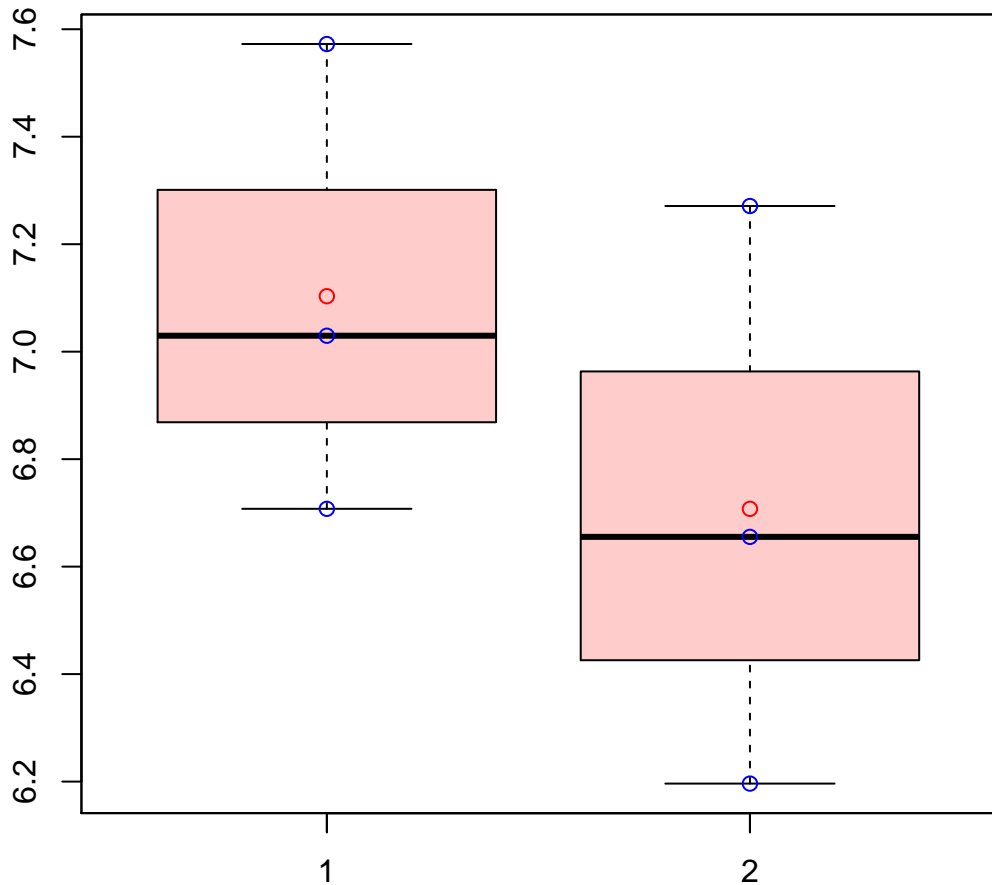

t-Test: p-value = 0.38

# J3M103|J3M103\_ORYBR

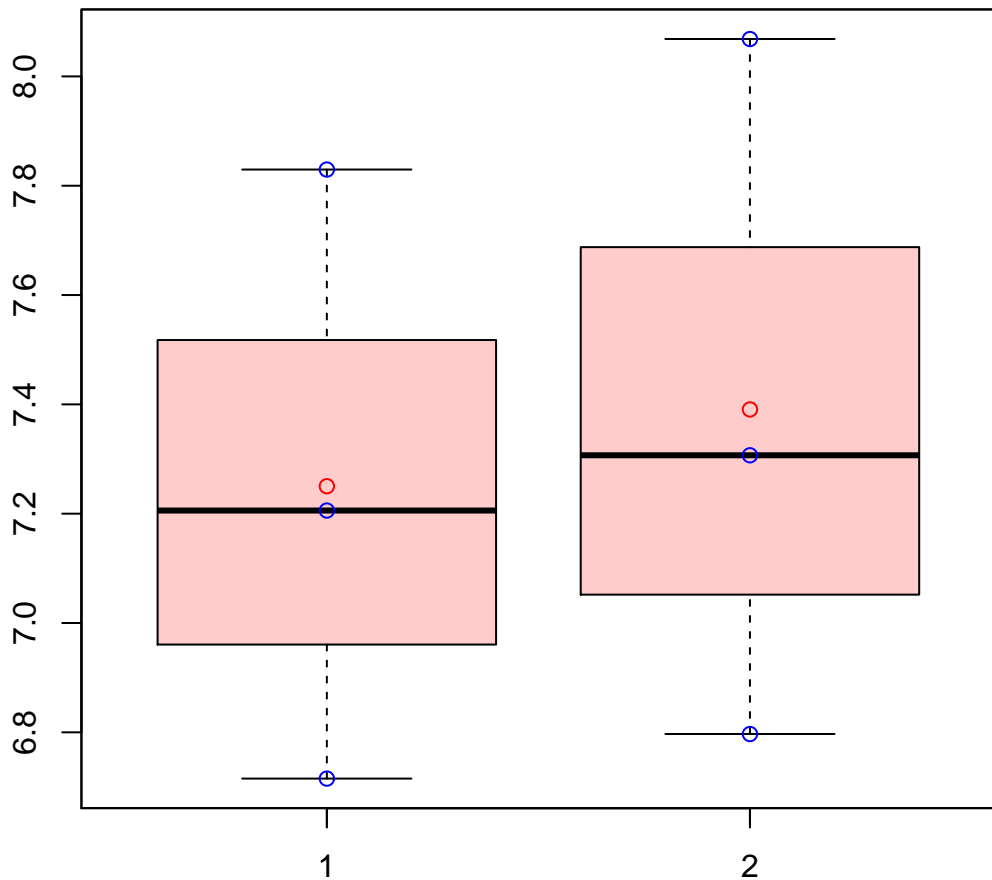

t-Test: p-value = 0.79

# J3M133|J3M133\_ORYBR

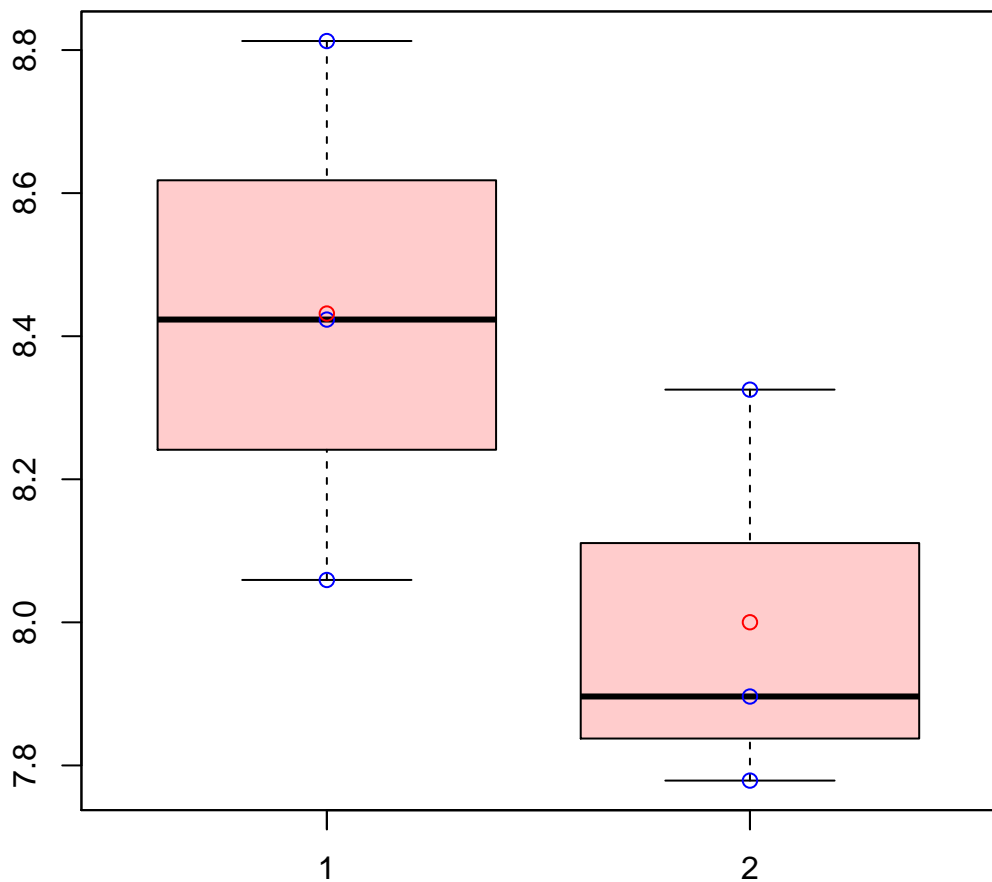

t-Test: p-value = 0.19

# J3M1K1|J3M1K1\_ORYBR

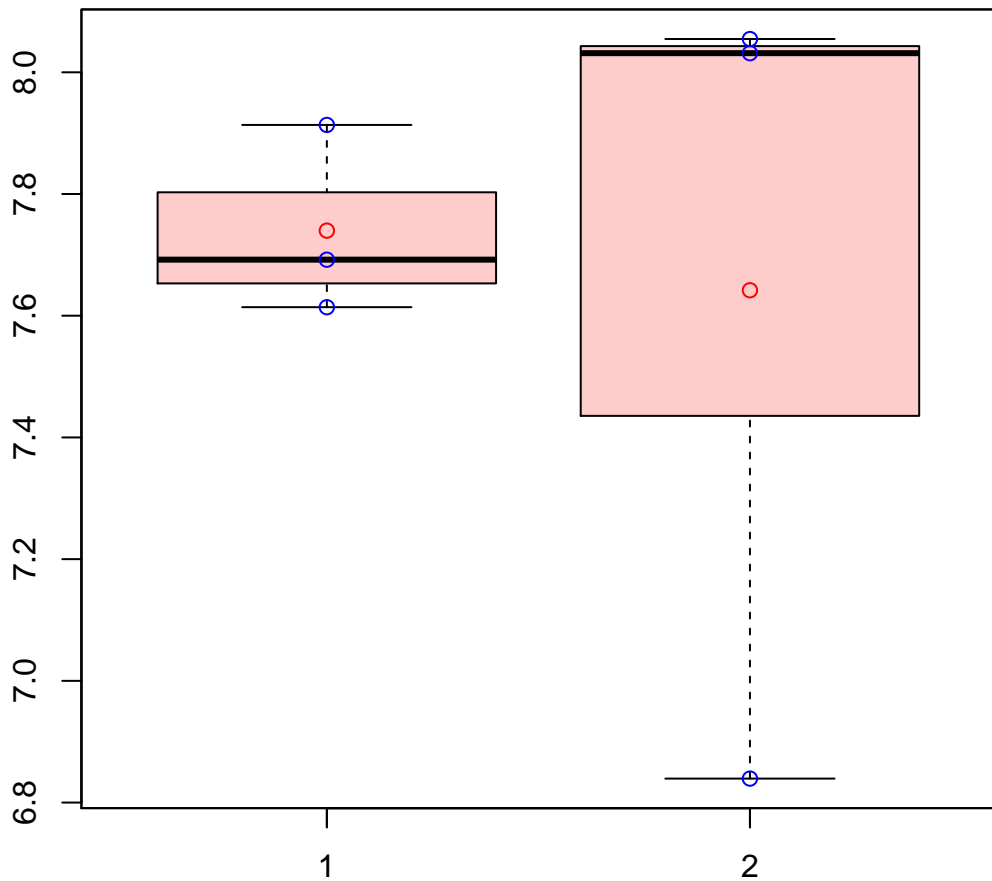

t-Test: p-value = 0.83

# J3M1V0|J3M1V0\_ORYBR

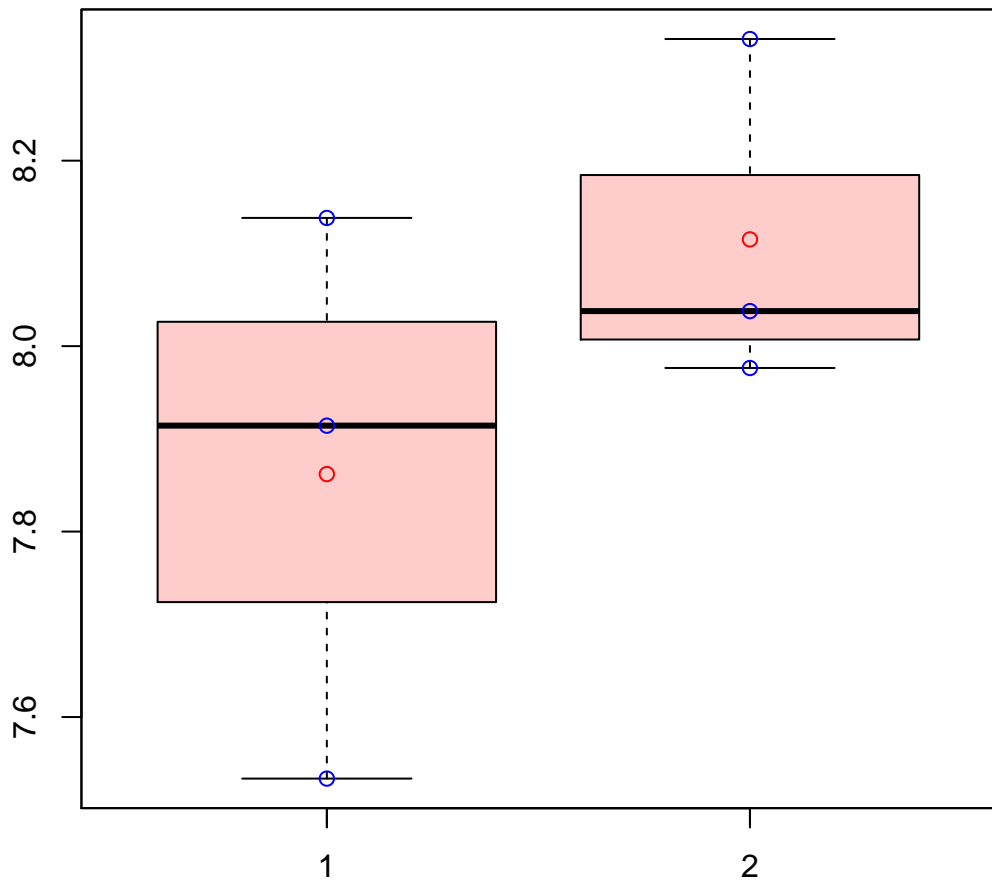

t-Test: p-value = 0.3



# J3M226|J3M226\_ORYBR

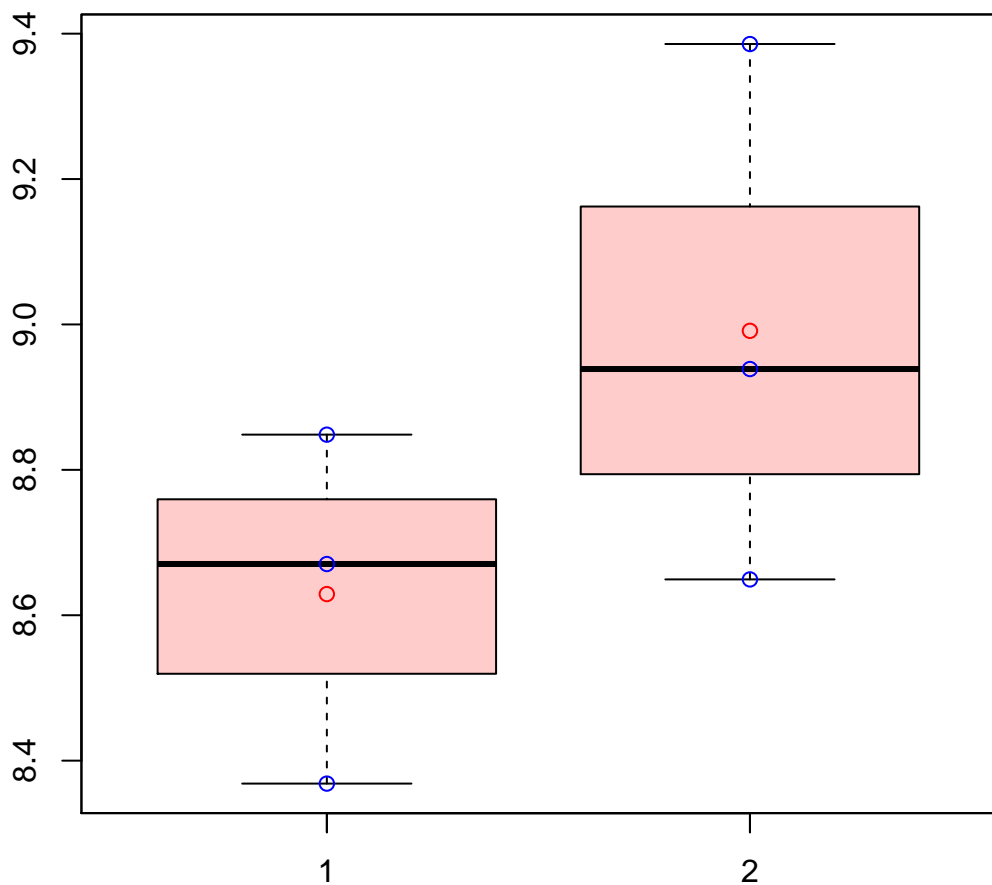

t-Test: p-value = 0.24

# J3M272|J3M272\_ORYBR

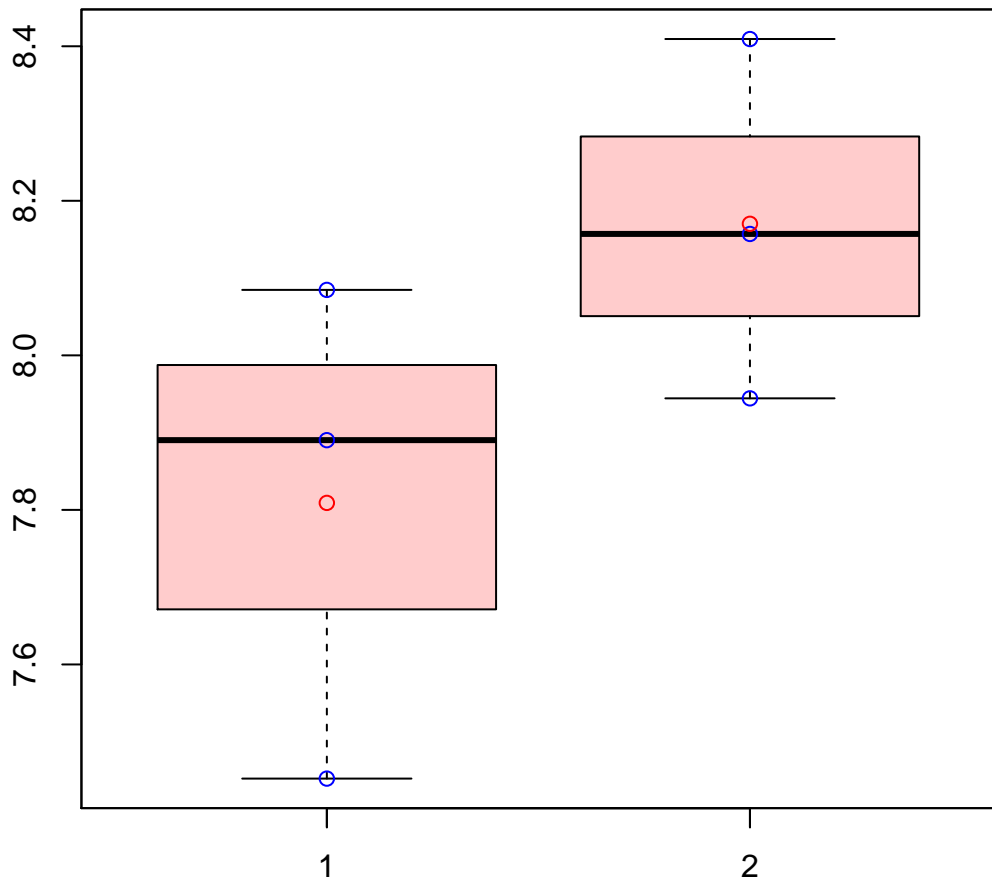

t-Test: p-value = 0.2

# J3M3E1|J3M3E1\_ORYBR

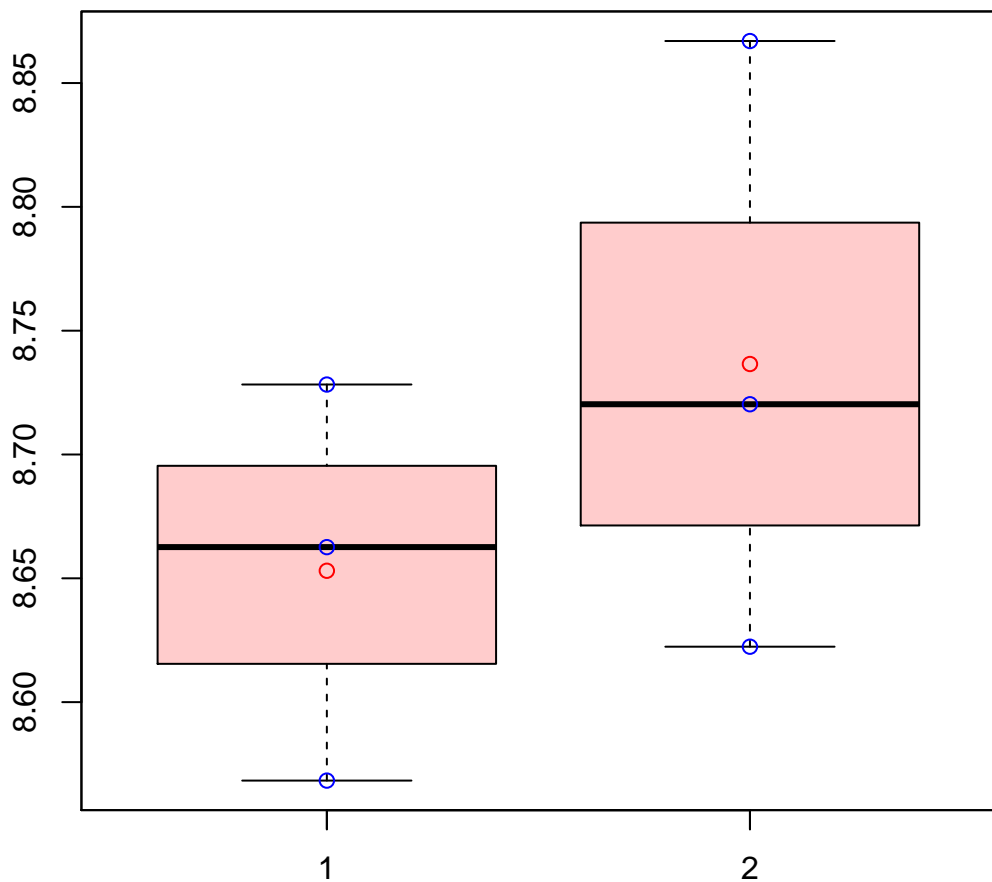

t-Test: p-value = 0.39

# J3M442|J3M442\_ORYBR

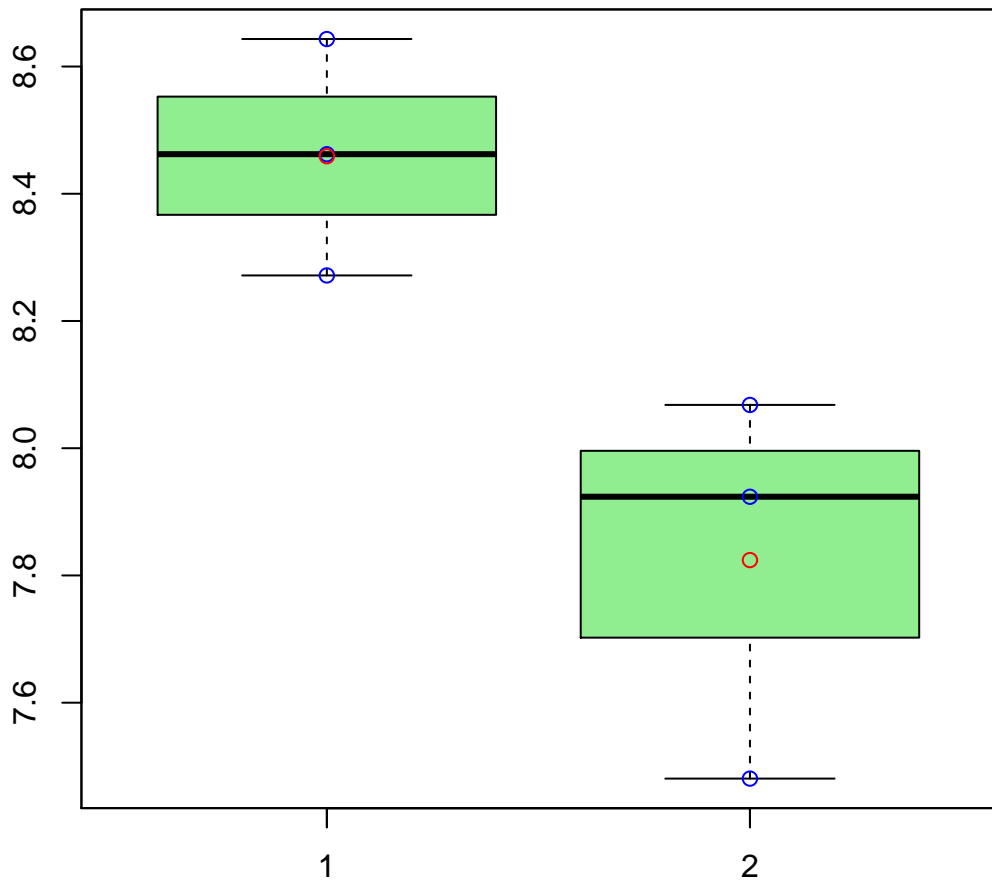

t-Test: p-value = 0.05

# J3M4D6|J3M4D6\_ORYBR

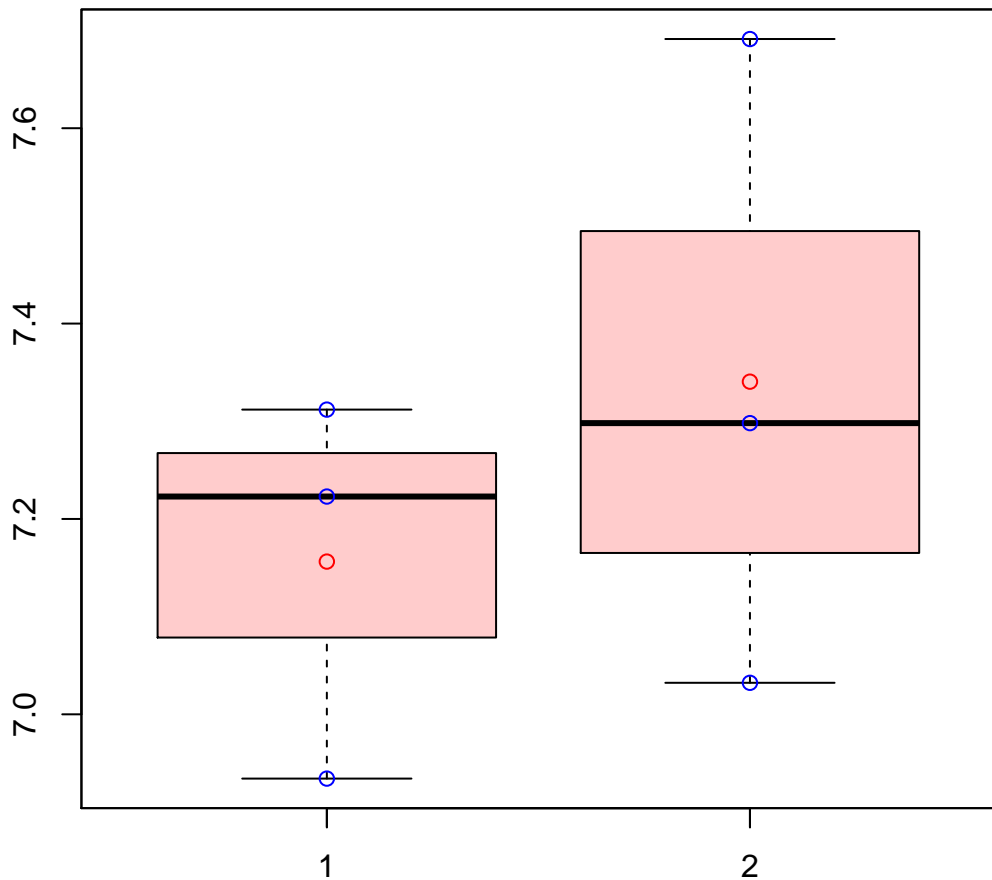

t-Test: p-value = 0.46

# J3M5P3|J3M5P3\_ORYBR

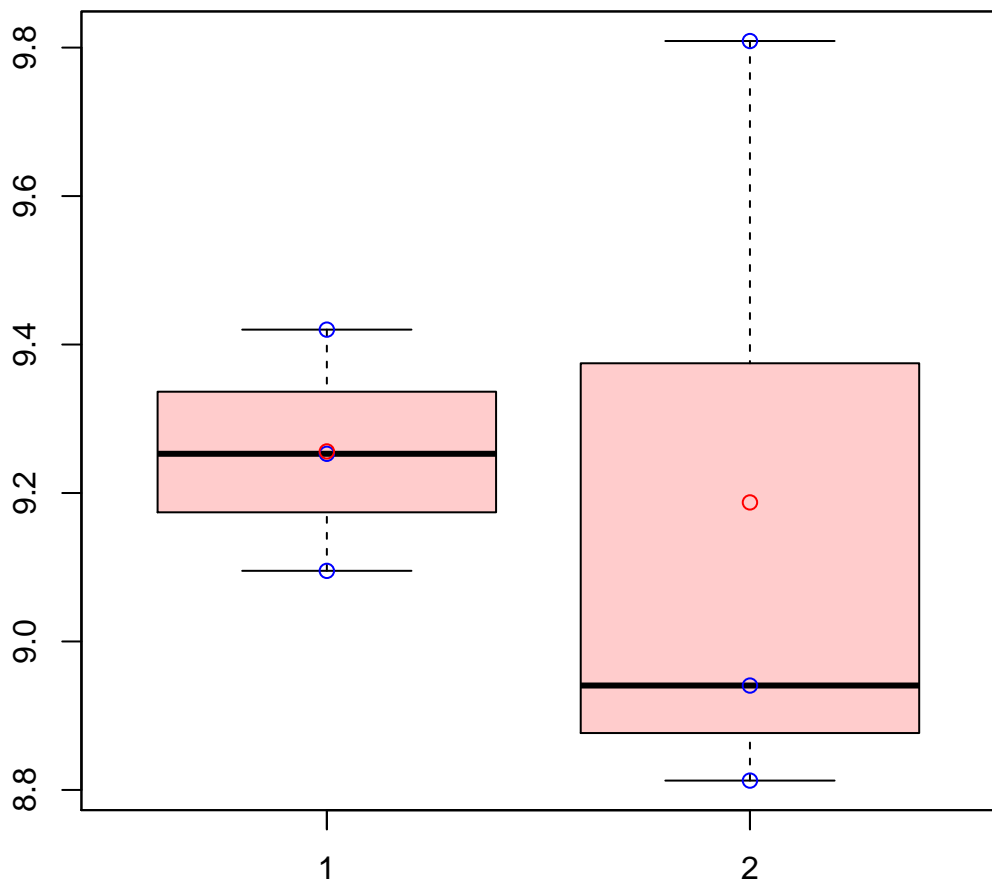

t-Test: p-value = 0.85

# J3M5V2|J3M5V2\_ORYBR

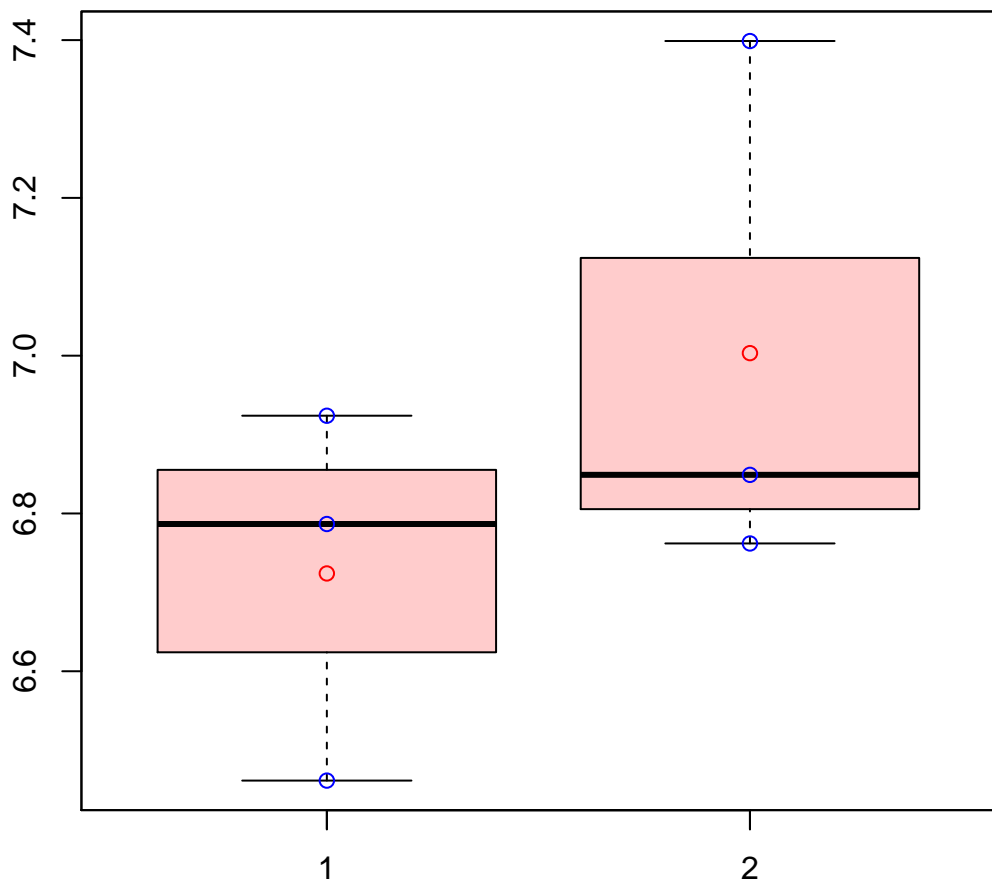

t-Test: p-value = 0.32

# J3M6R7|J3M6R7\_ORYBR

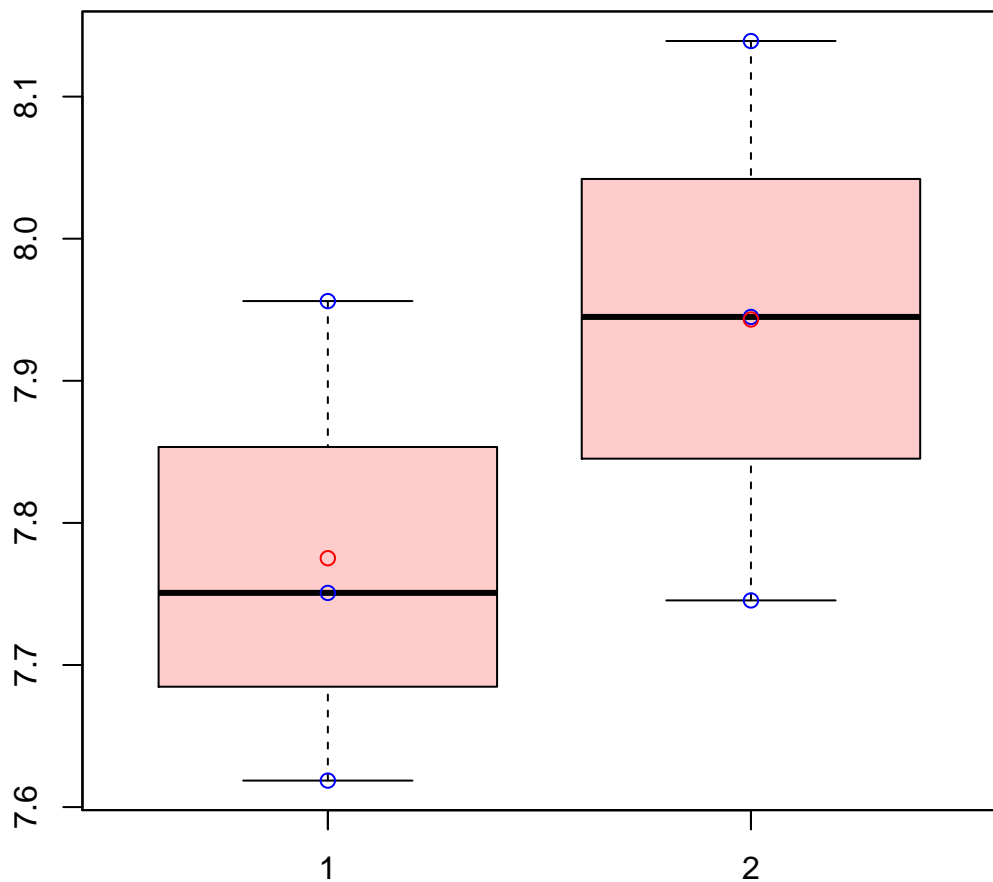

t-Test: p-value = 0.33



# J3M702|J3M702\_ORYBR

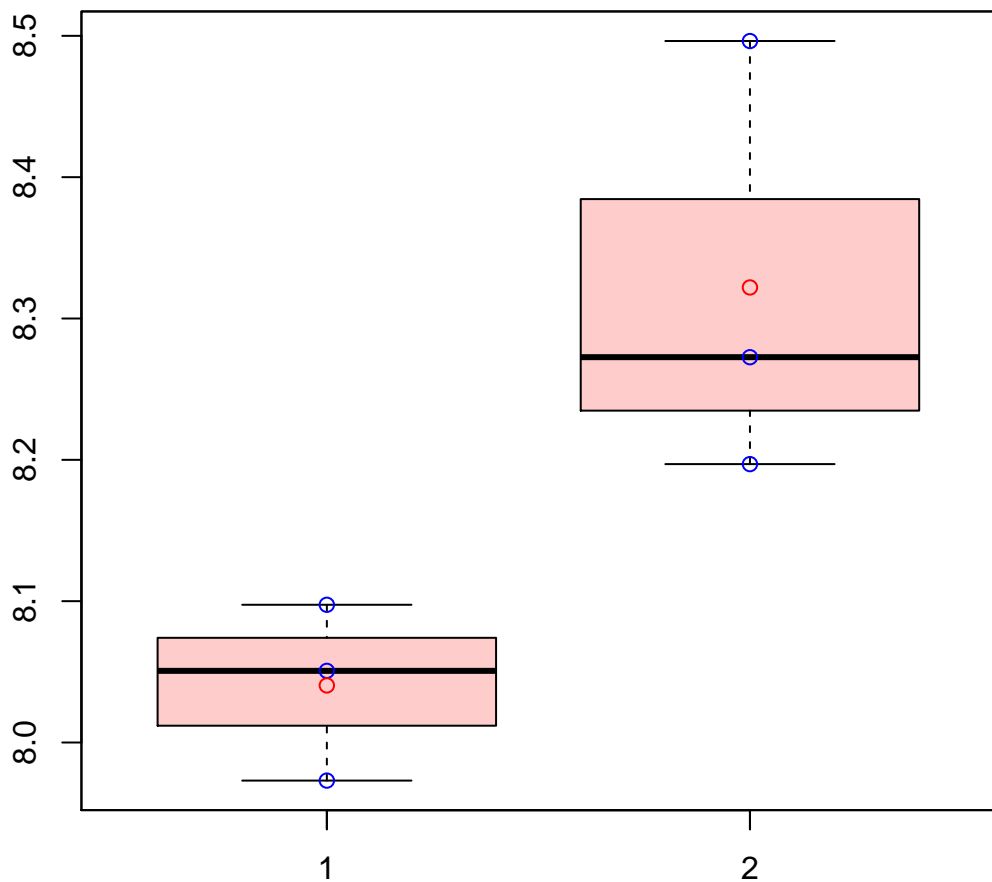

t-Test: p-value = 0.07

# J3M7F0|J3M7F0\_ORYBR

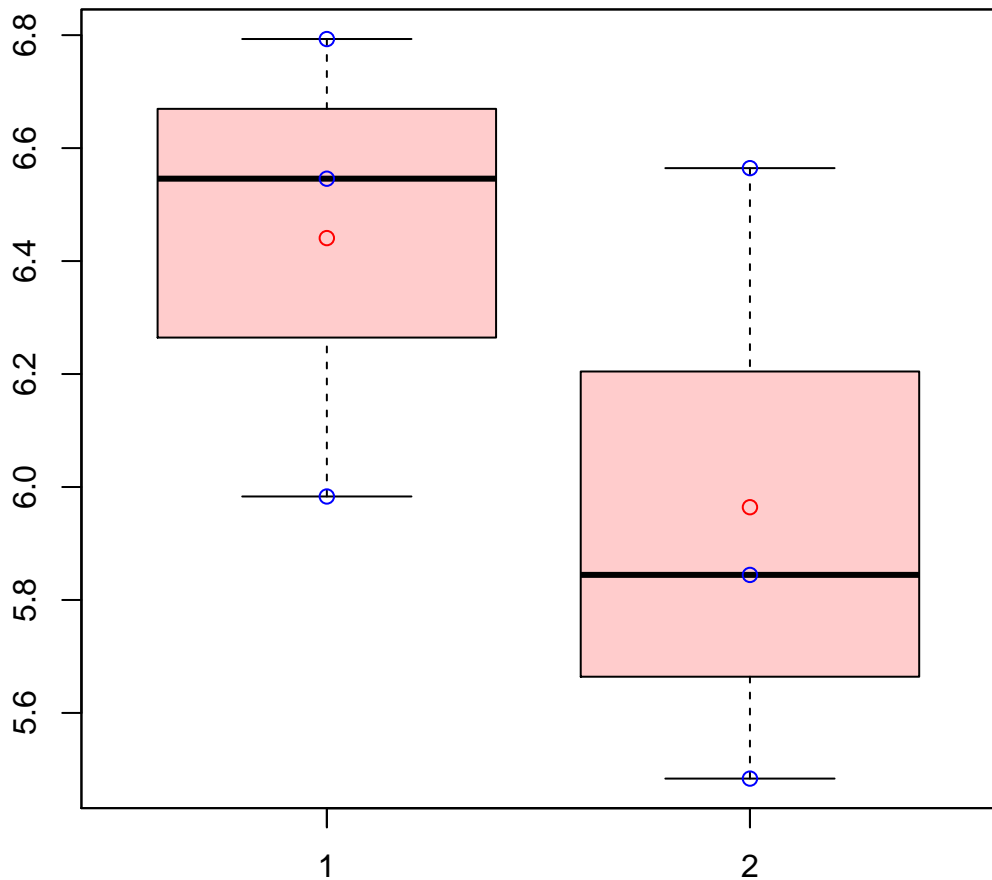

t-Test: p-value = 0.3

# J3M881|J3M881\_ORYBR

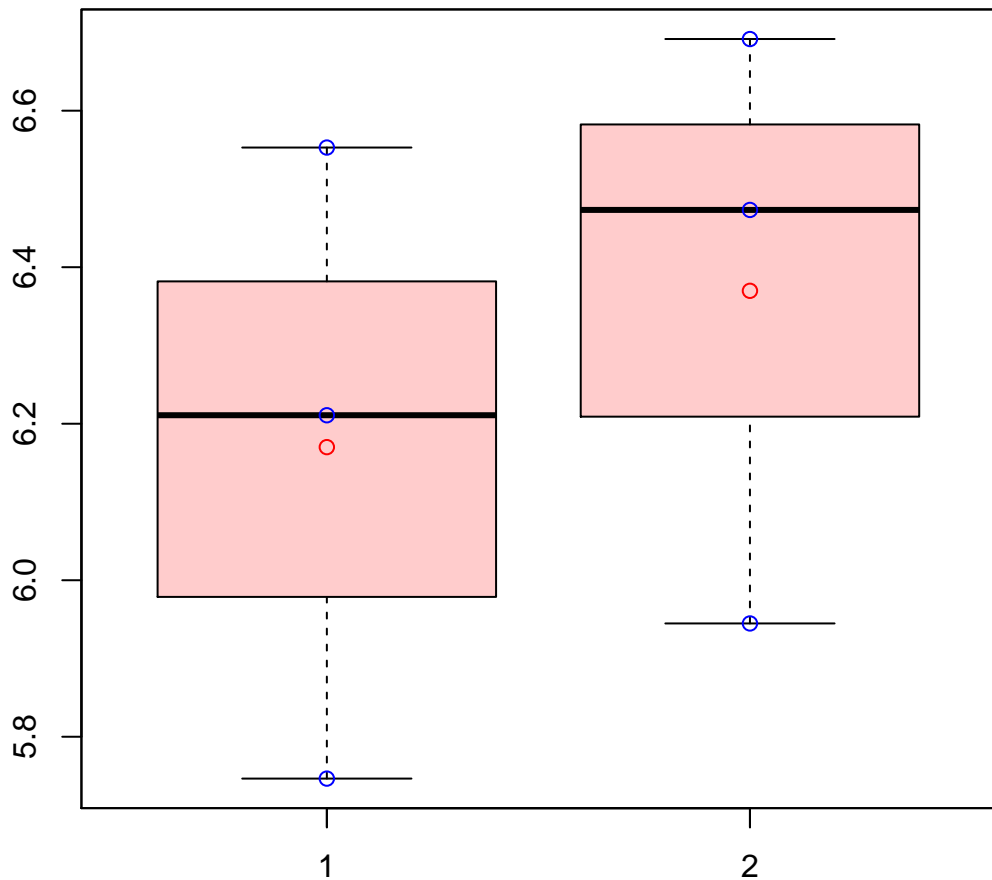

t-Test: p-value = 0.57

# J3M8D4|J3M8D4\_ORYBR

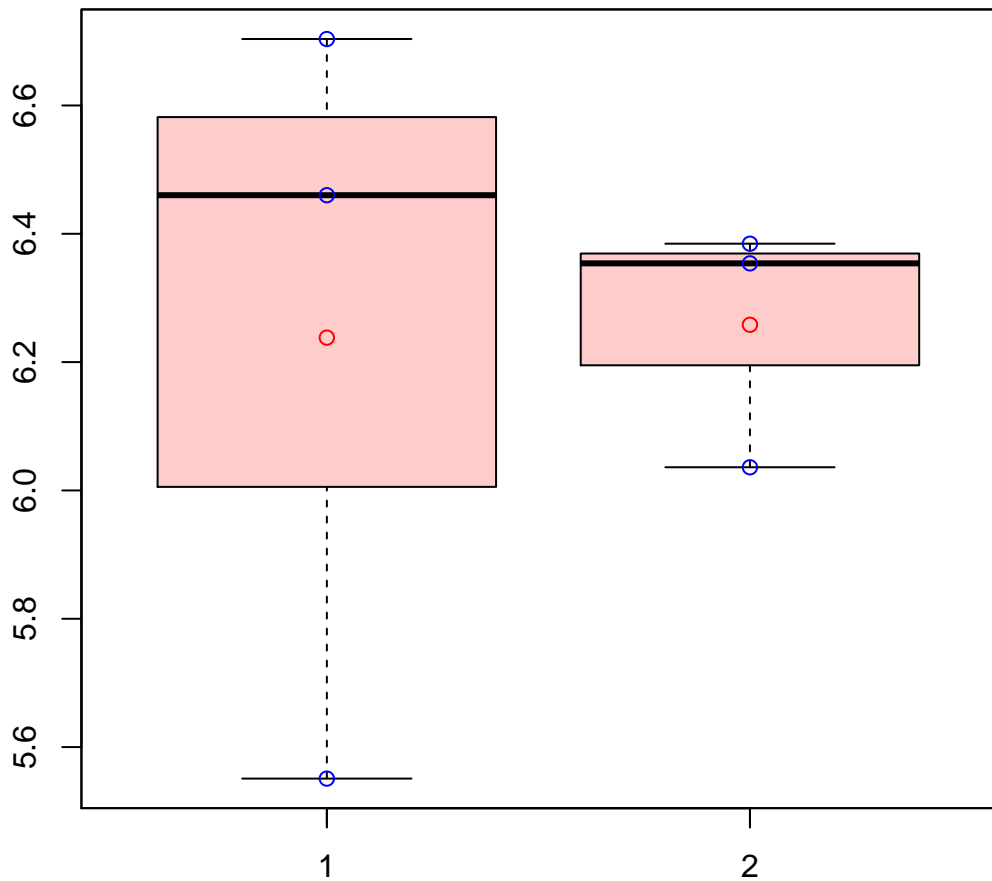

t-Test: p-value = 0.96

# J3M8Y7|J3M8Y7\_ORYBR

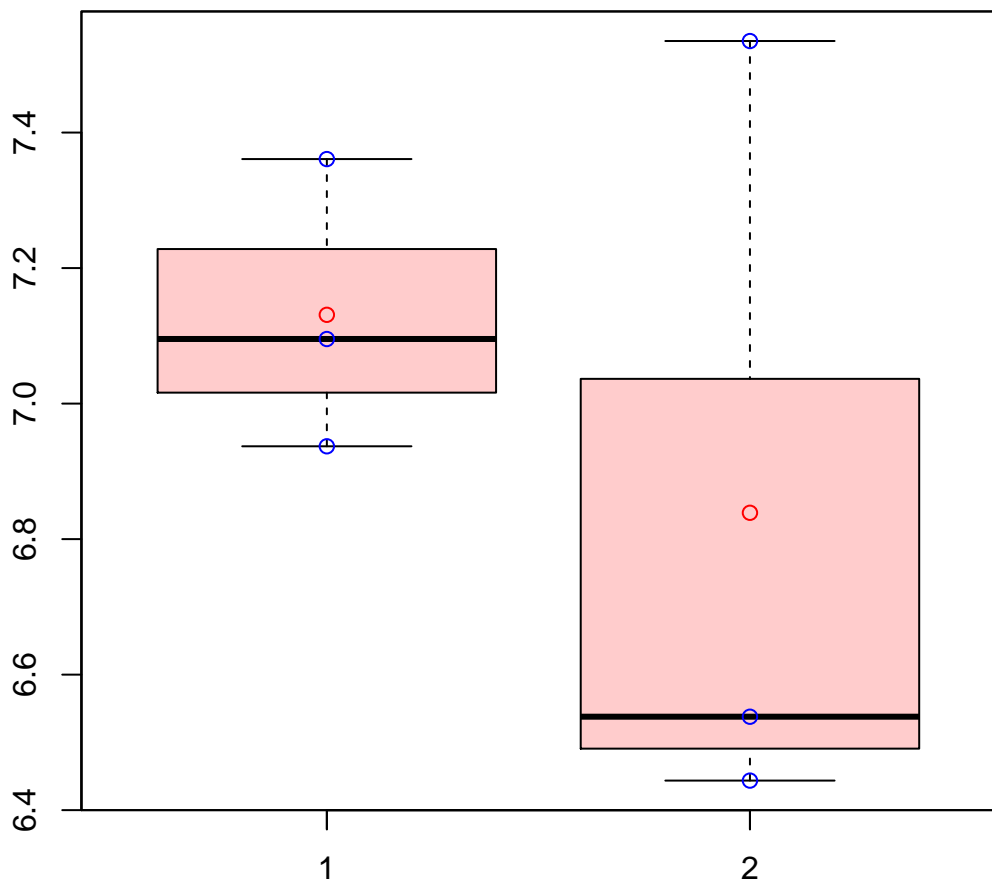

t-Test: p-value = 0.5

# J3M9U9|J3M9U9\_ORYBR

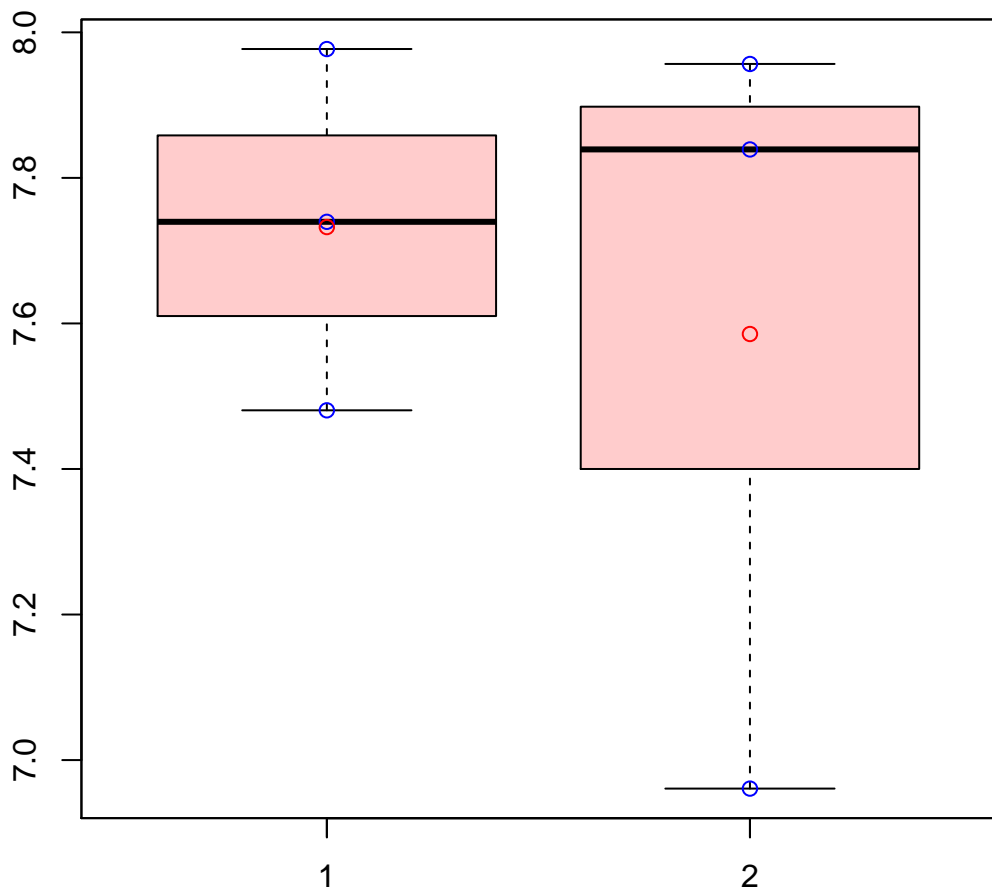

t-Test: p-value = 0.7

# J3M9Z0|J3M9Z0\_ORYBR

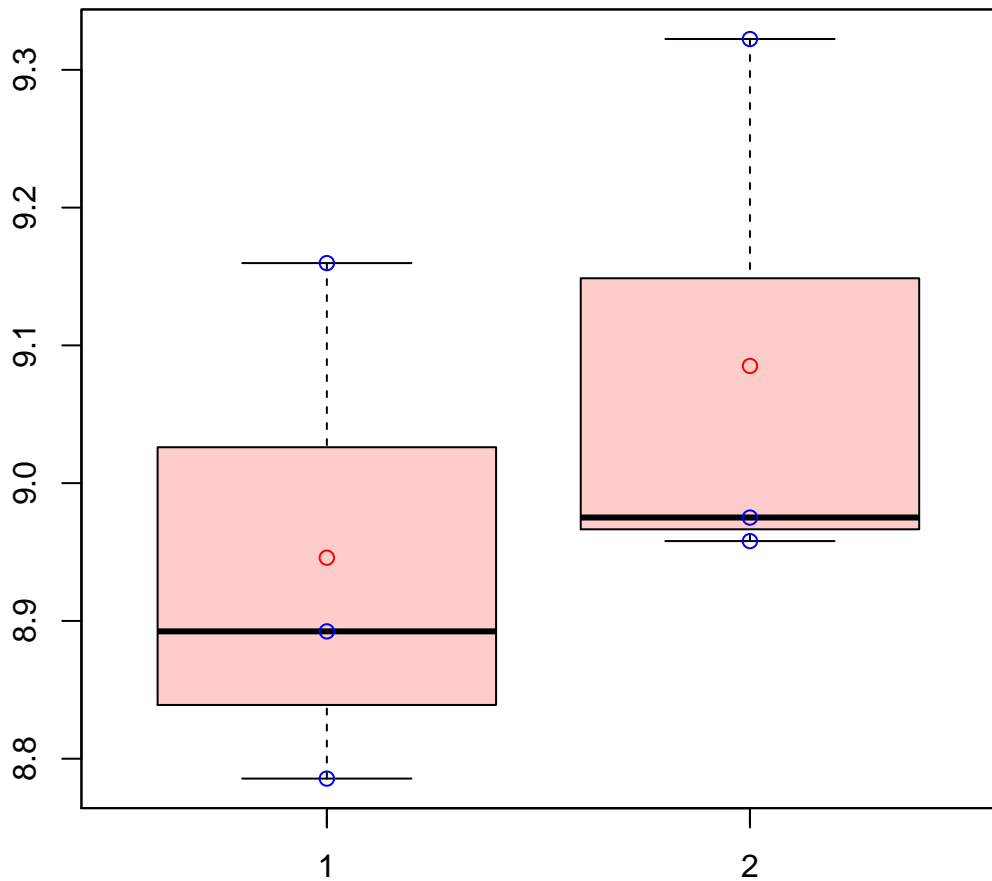

t-Test: p-value = 0.44

# J3M9Z5|J3M9Z5\_ORYBR

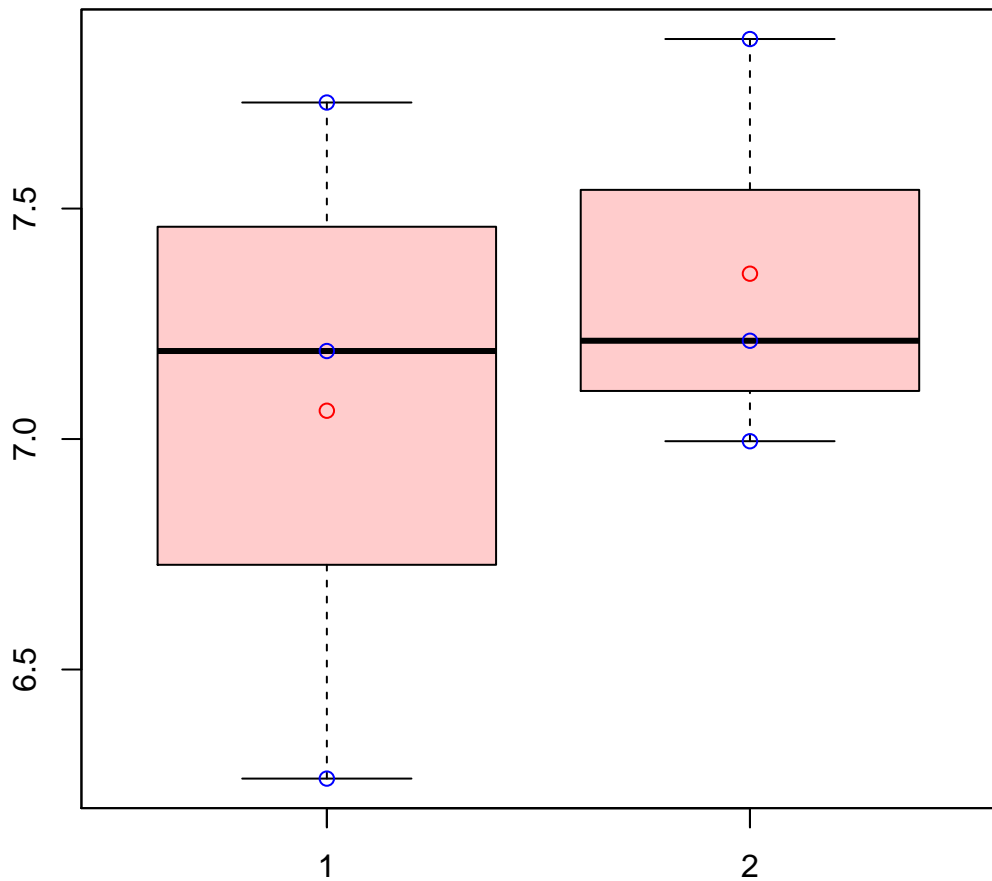

t-Test: p-value = 0.59



# J3MAH0|J3MAH0\_ORYBR

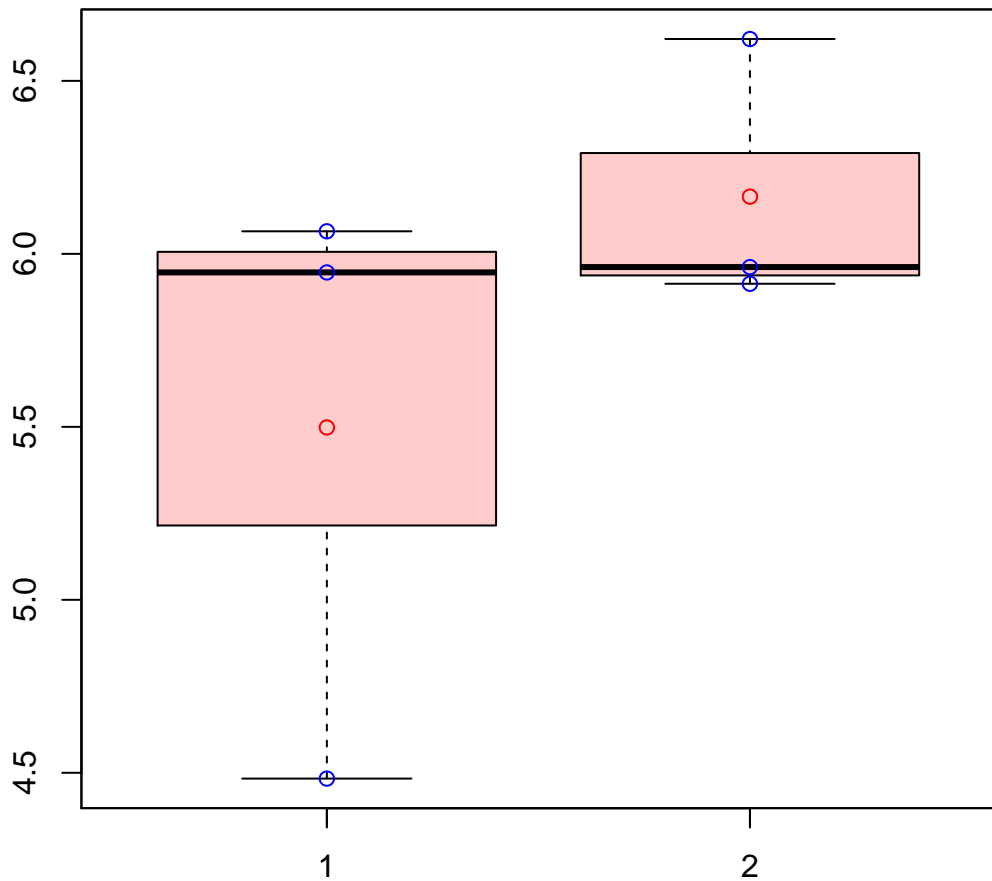

t-Test: p-value = 0.32

# J3MAL0|J3MAL0\_ORYBR

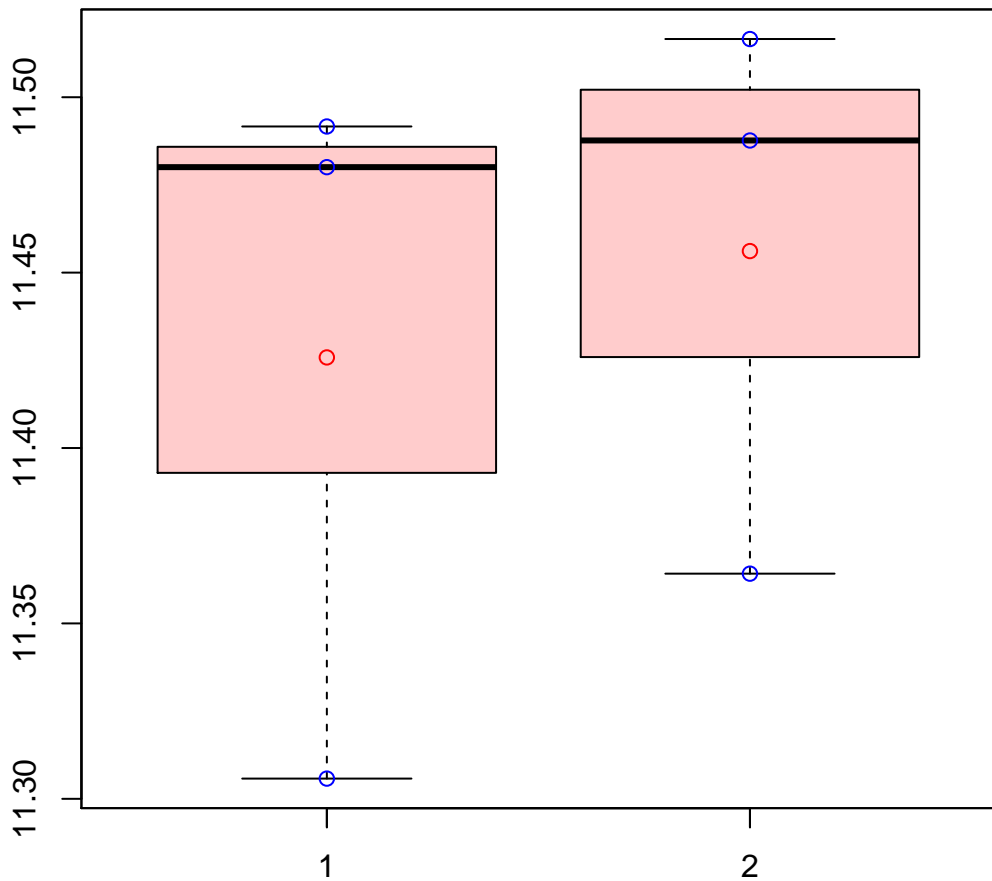

t-Test: p-value = 0.71

# J3MB11|J3MB11\_ORYBR

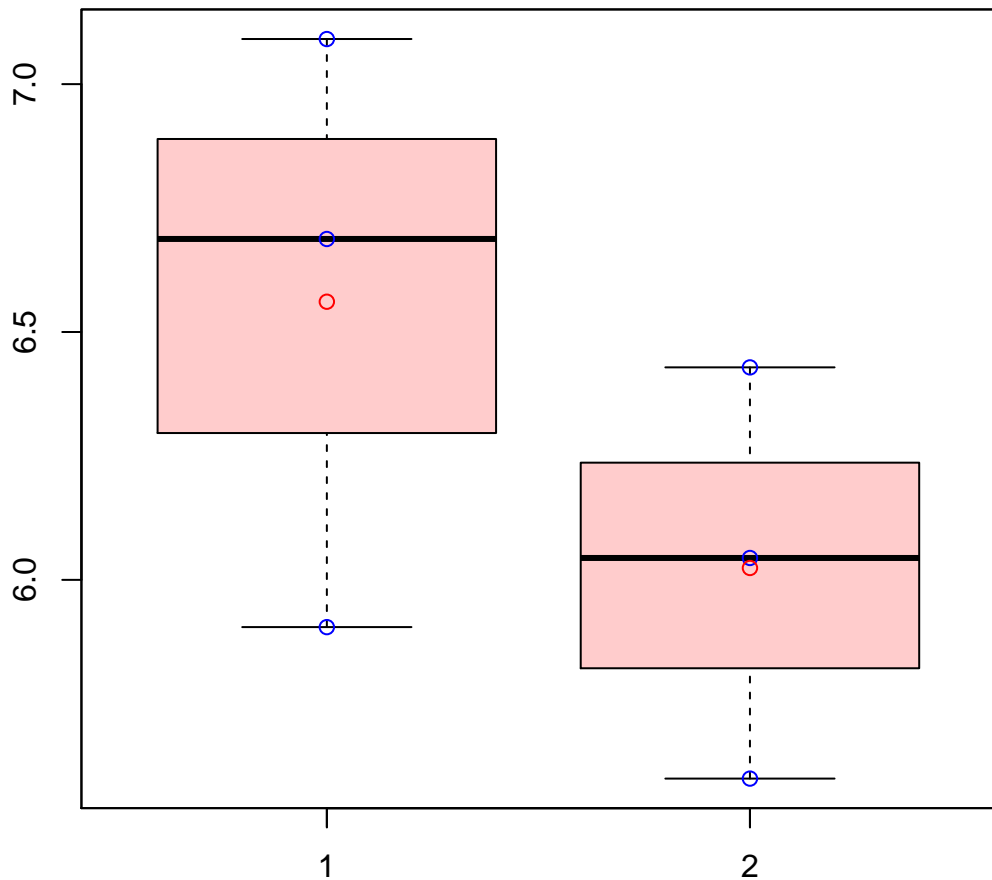

t-Test: p-value = 0.28

# J3MB20|J3MB20\_ORYBR

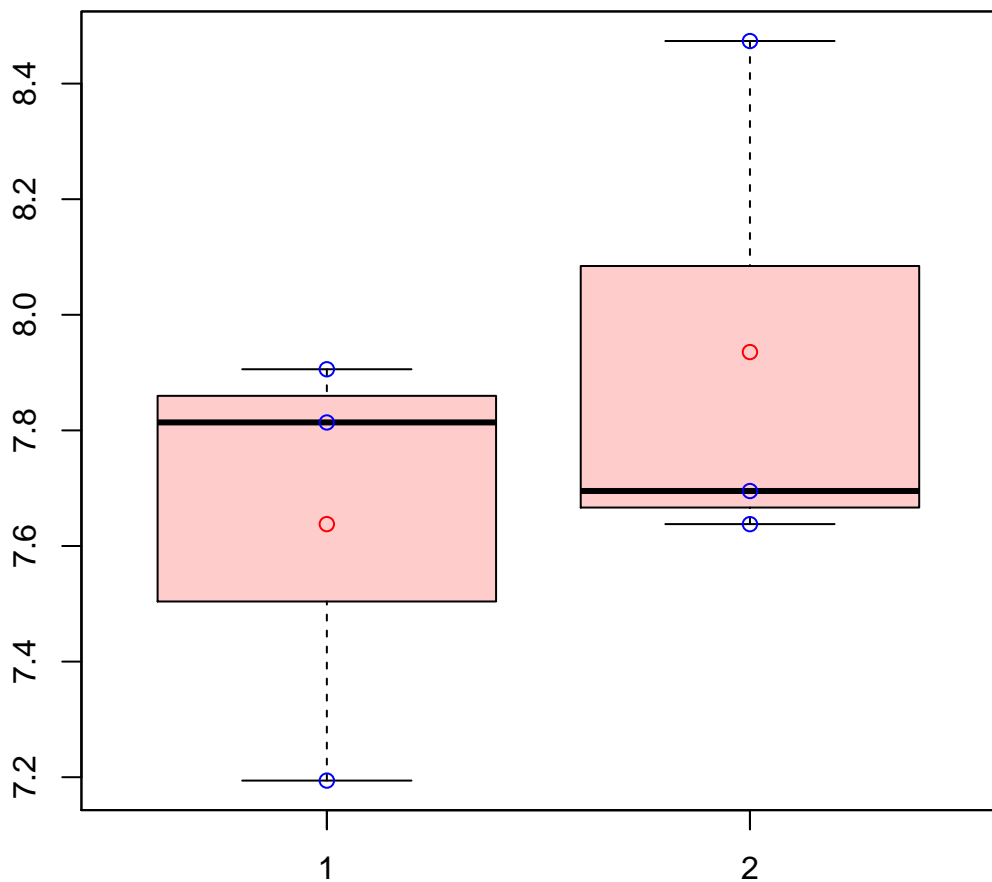

t-Test: p-value = 0.44

# J3MBG7|J3MBG7\_ORYBR

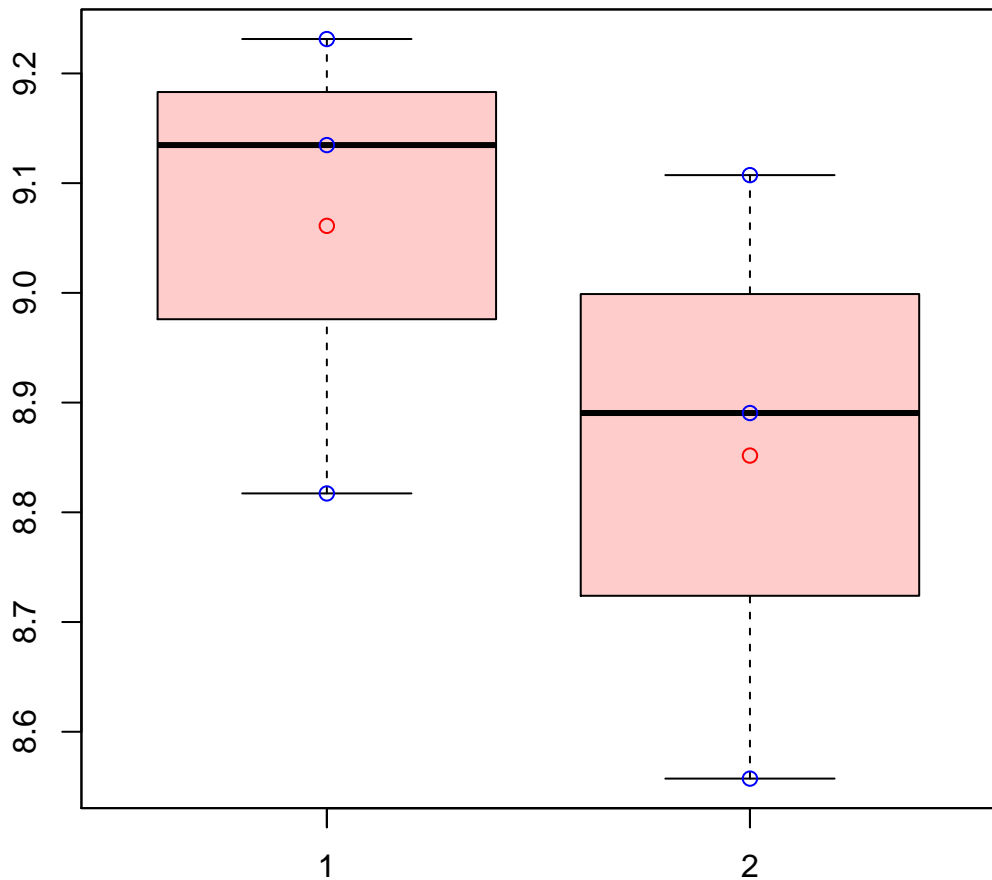

t-Test: p-value = 0.36

# J3MCA8|J3MCA8\_ORYBR

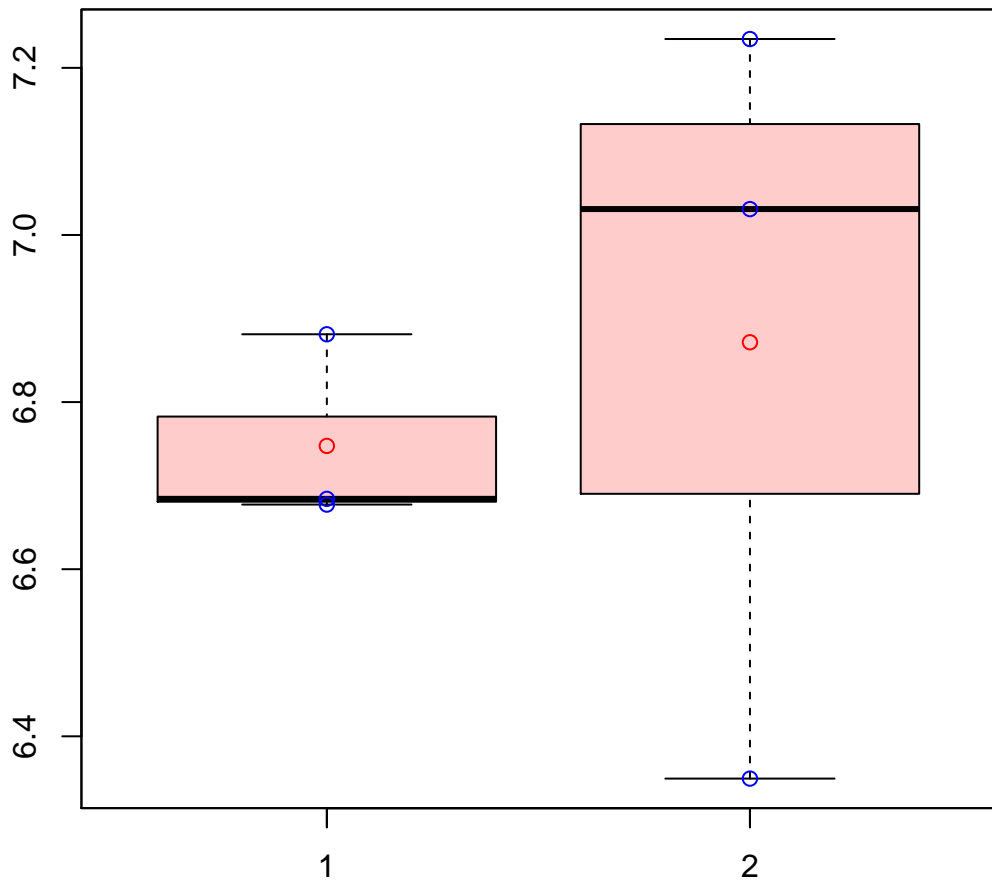

t-Test: p-value = 0.69

# J3MD61|J3MD61\_ORYBR

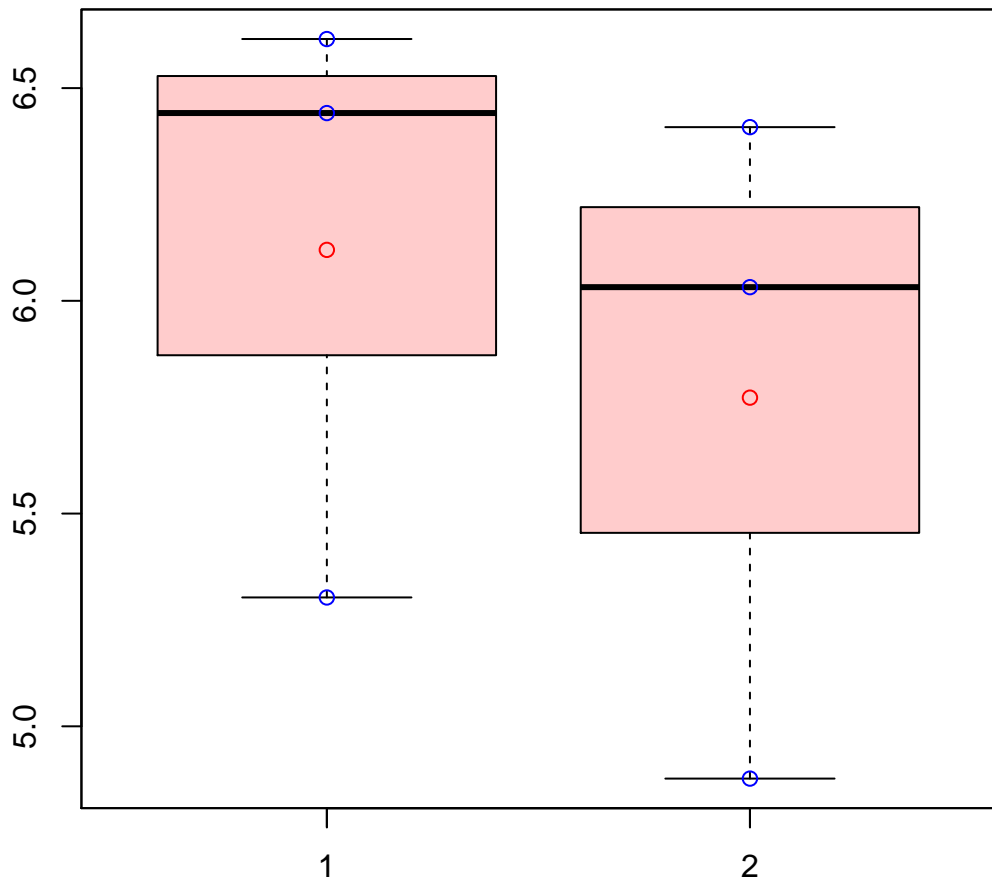

t-Test: p-value = 0.6

# J3MDF3|J3MDF3\_ORYBR

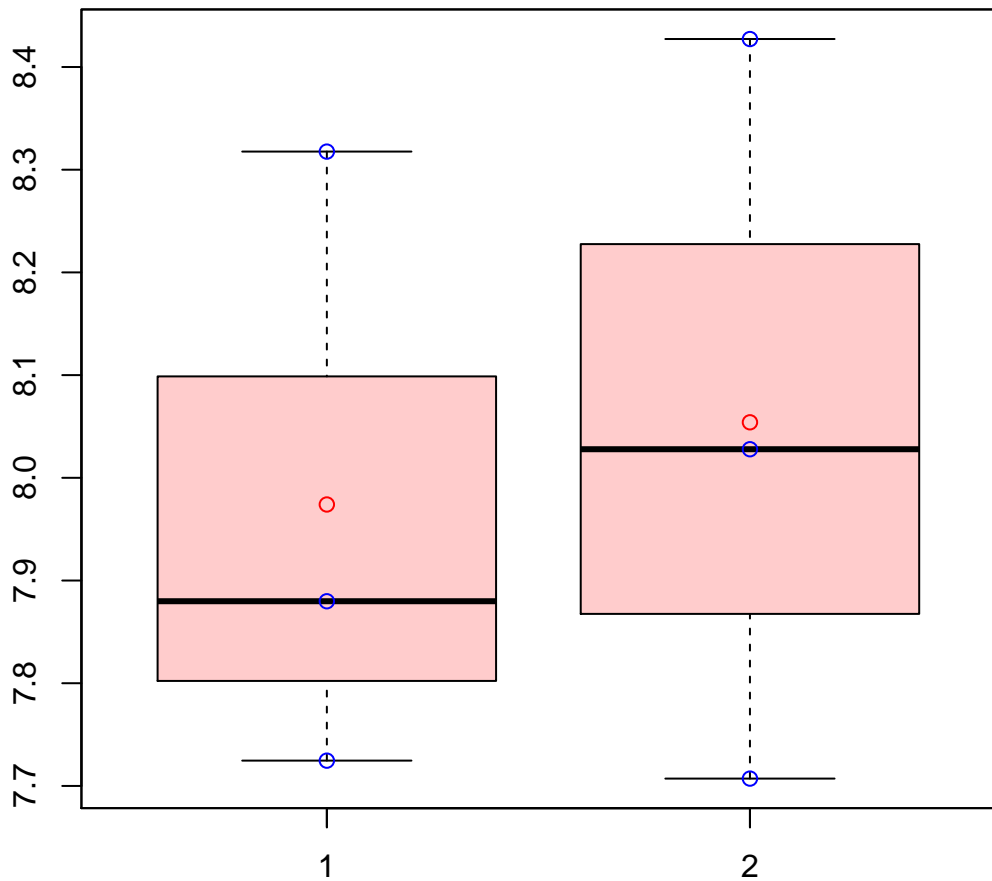

t-Test: p-value = 0.78



# J3MDN2|J3MDN2\_ORYBR

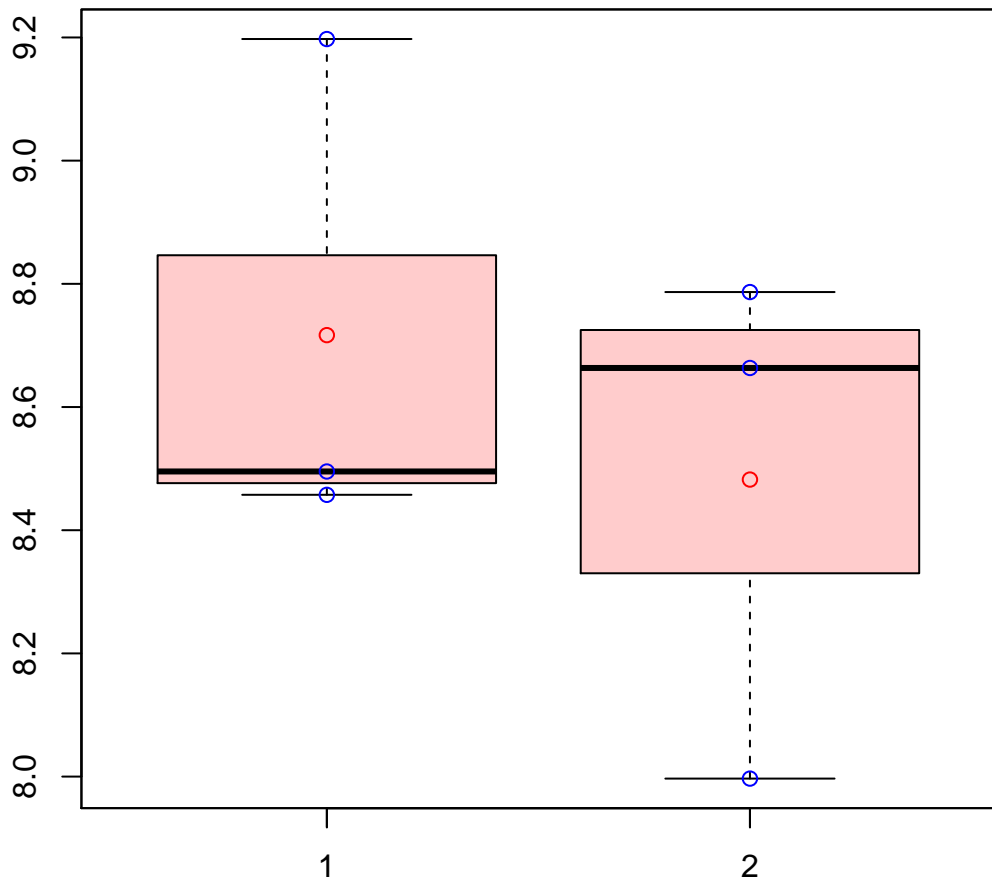

t-Test: p-value = 0.53

# J3ME94|J3ME94\_ORYBR

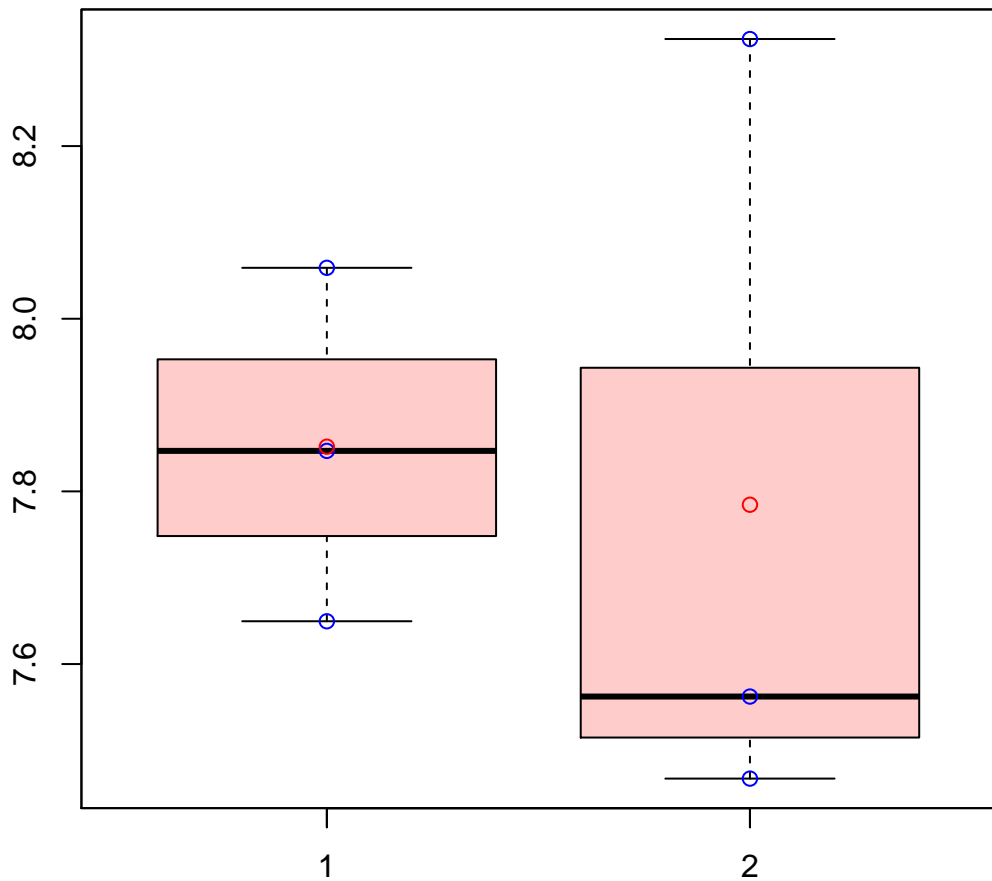

t-Test: p-value = 0.84

# J3MEP9|J3MEP9\_ORYBR

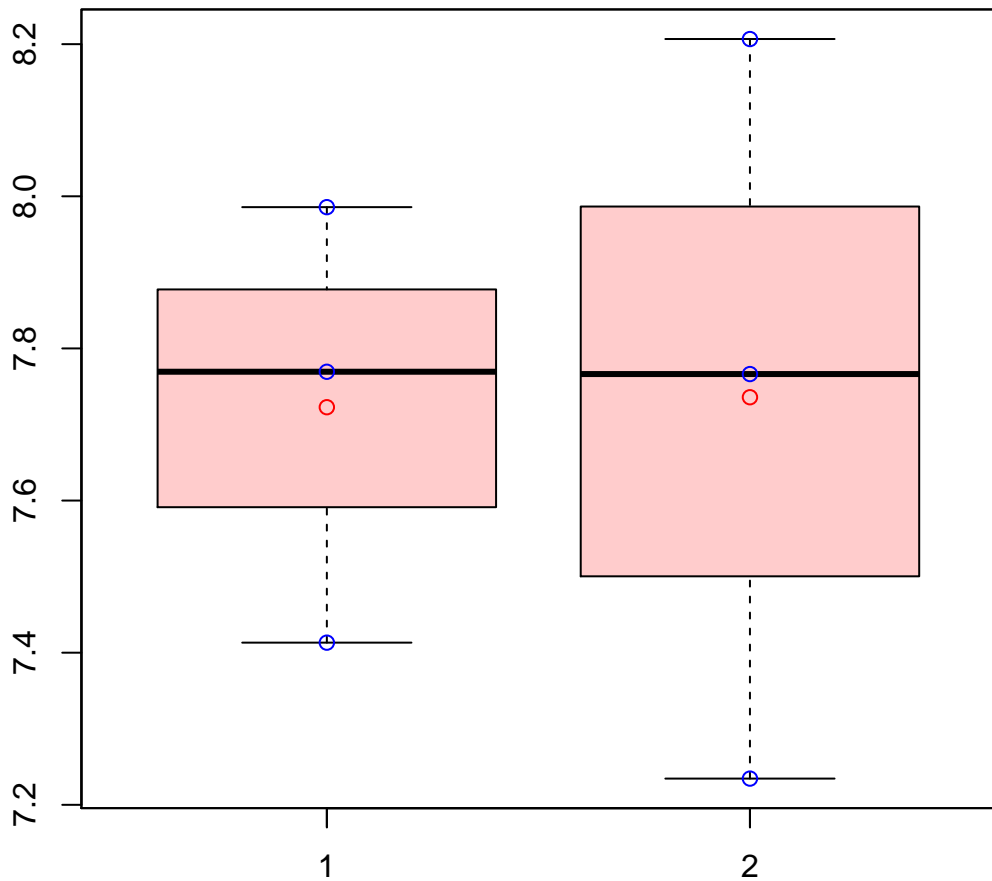

t-Test: p-value = 0.97

# J3MES7|J3MES7\_ORYBR

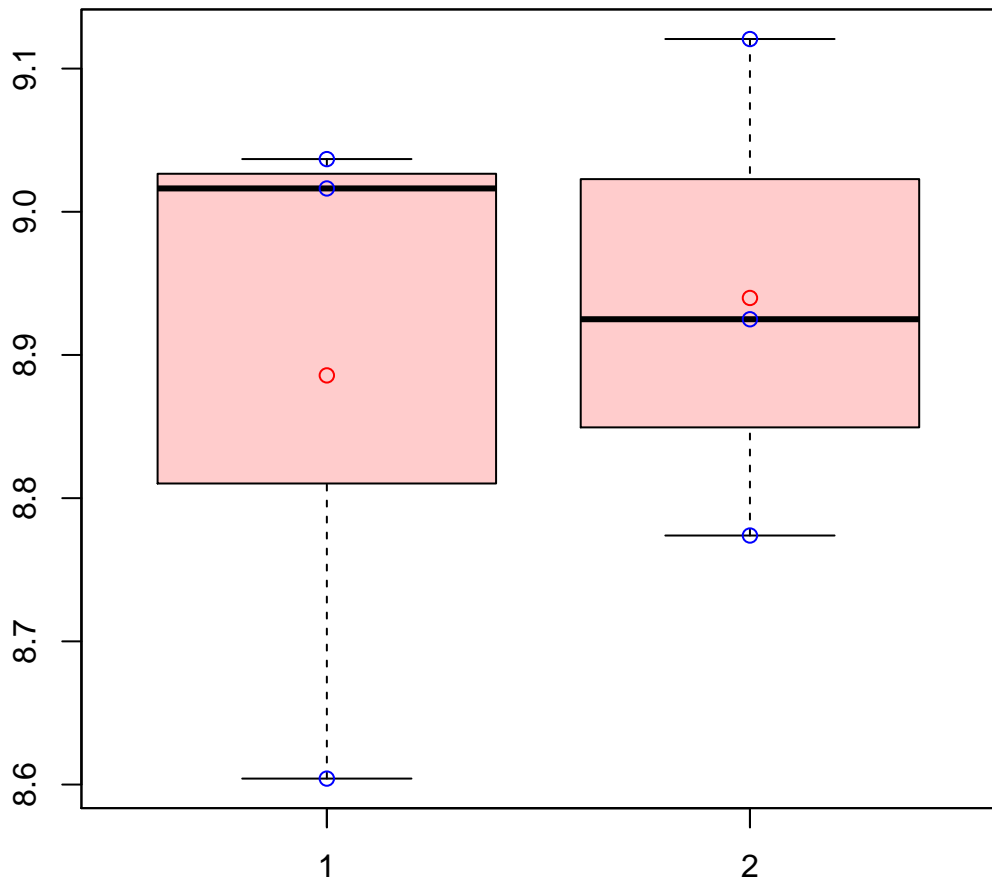

t-Test: p-value = 0.77

# J3MF00|J3MF00\_ORYBR

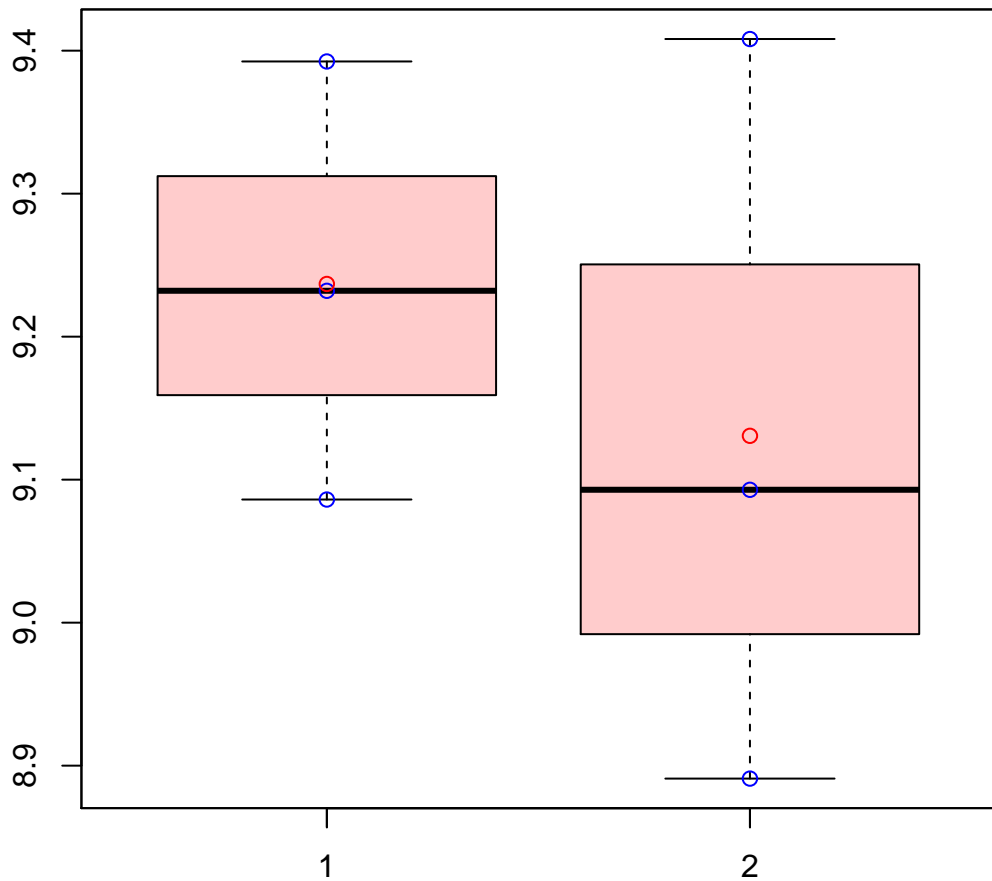

t-Test: p-value = 0.58

# J3MFM1|J3MFM1\_ORYBR

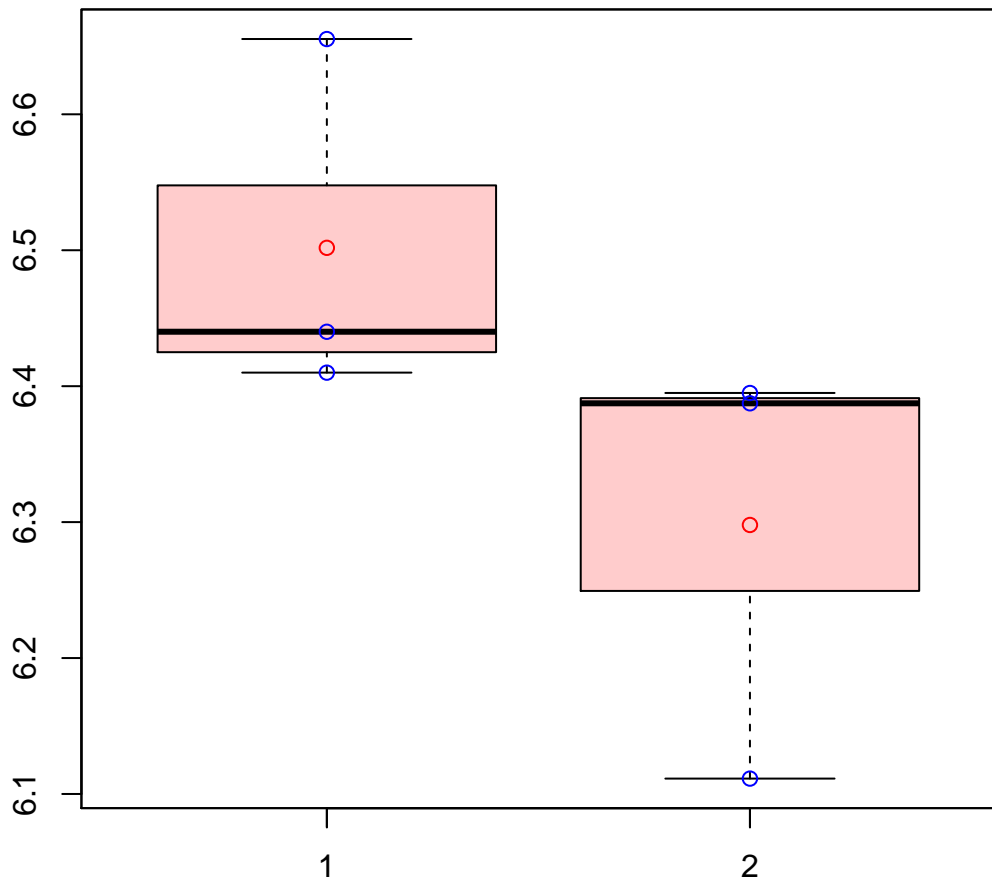

t-Test: p-value = 0.17

# J3MFW6|J3MFW6\_ORYBR

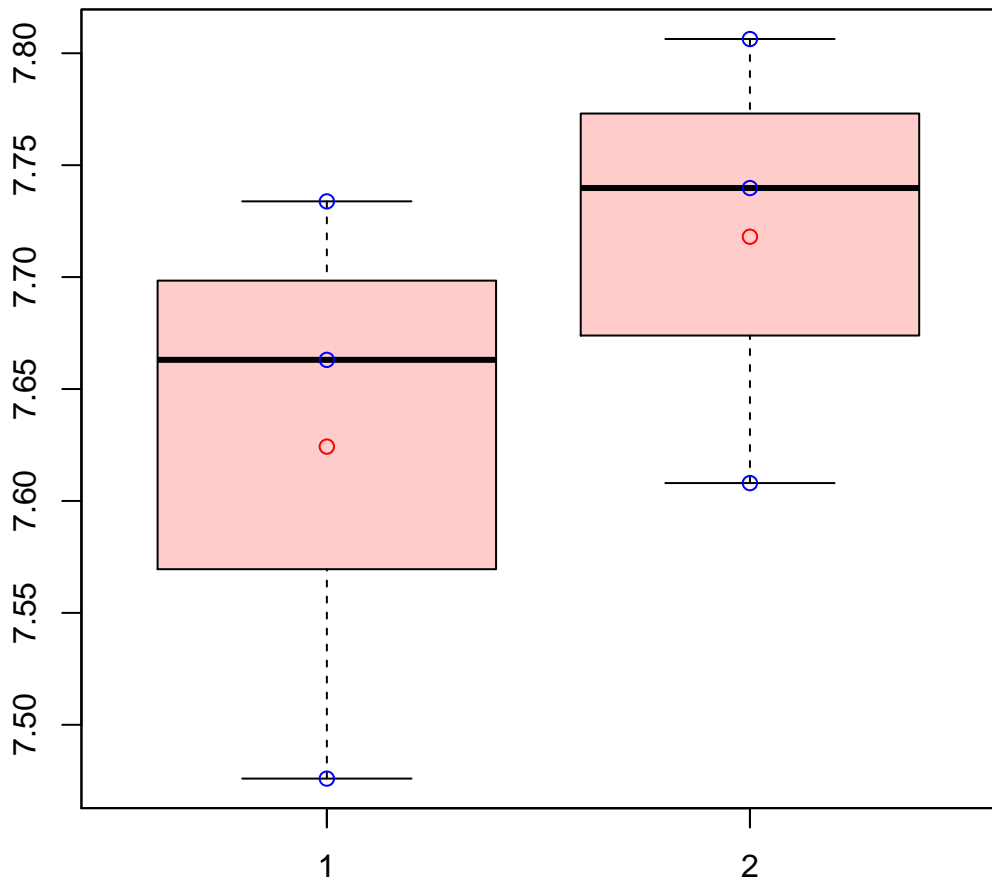

t-Test: p-value = 0.39

# J3MGF6|J3MGF6\_ORYBR

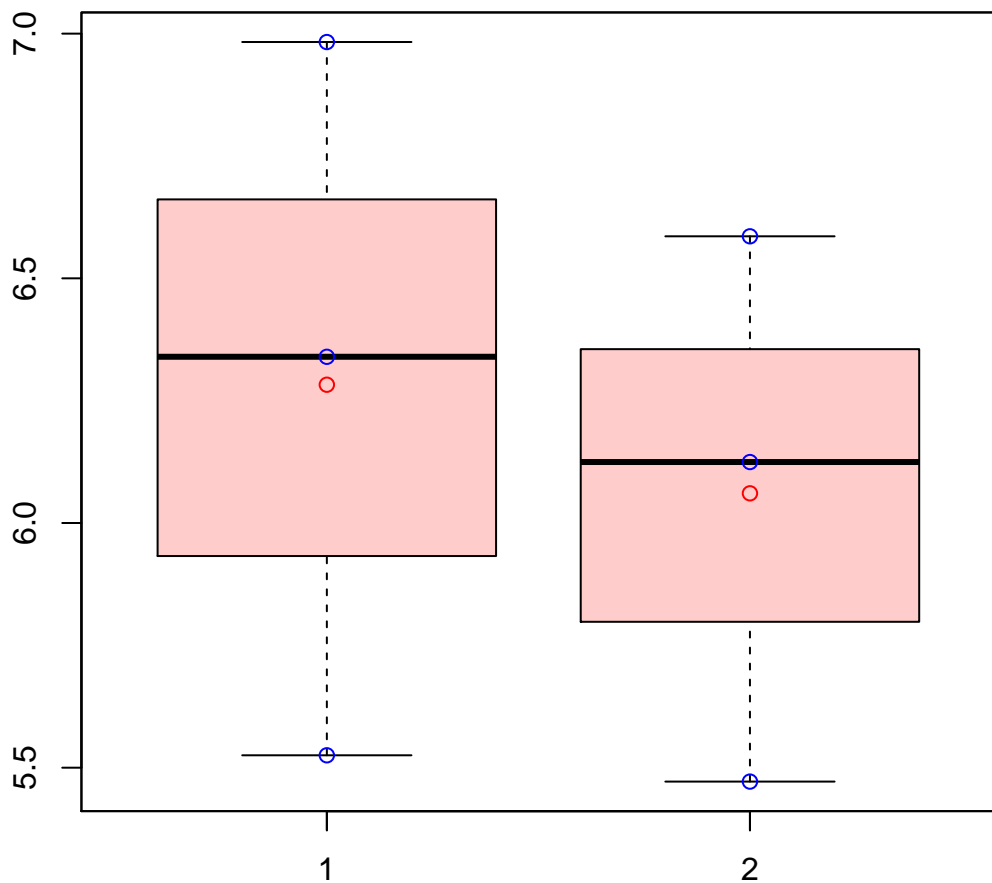

t-Test: p-value = 0.7



# J3MGJ5|J3MGJ5\_ORYBR

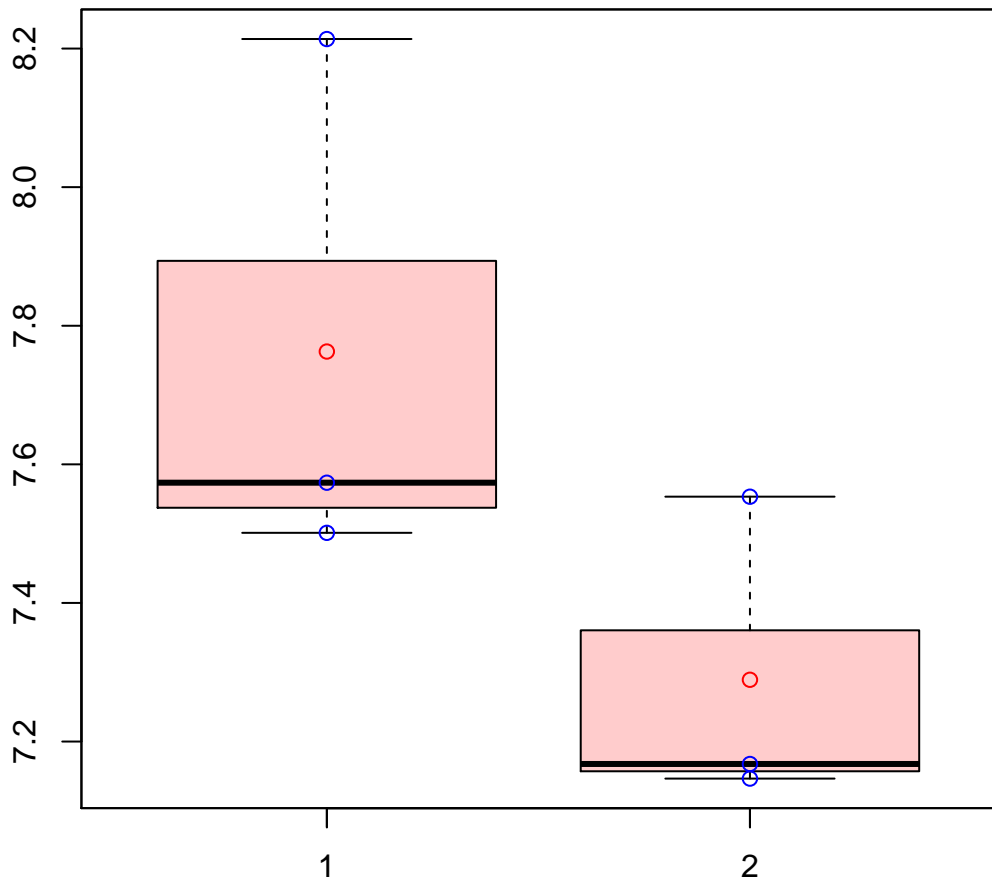

t-Test: p-value = 0.16

# J3MGQ3|J3MGQ3\_ORYBR

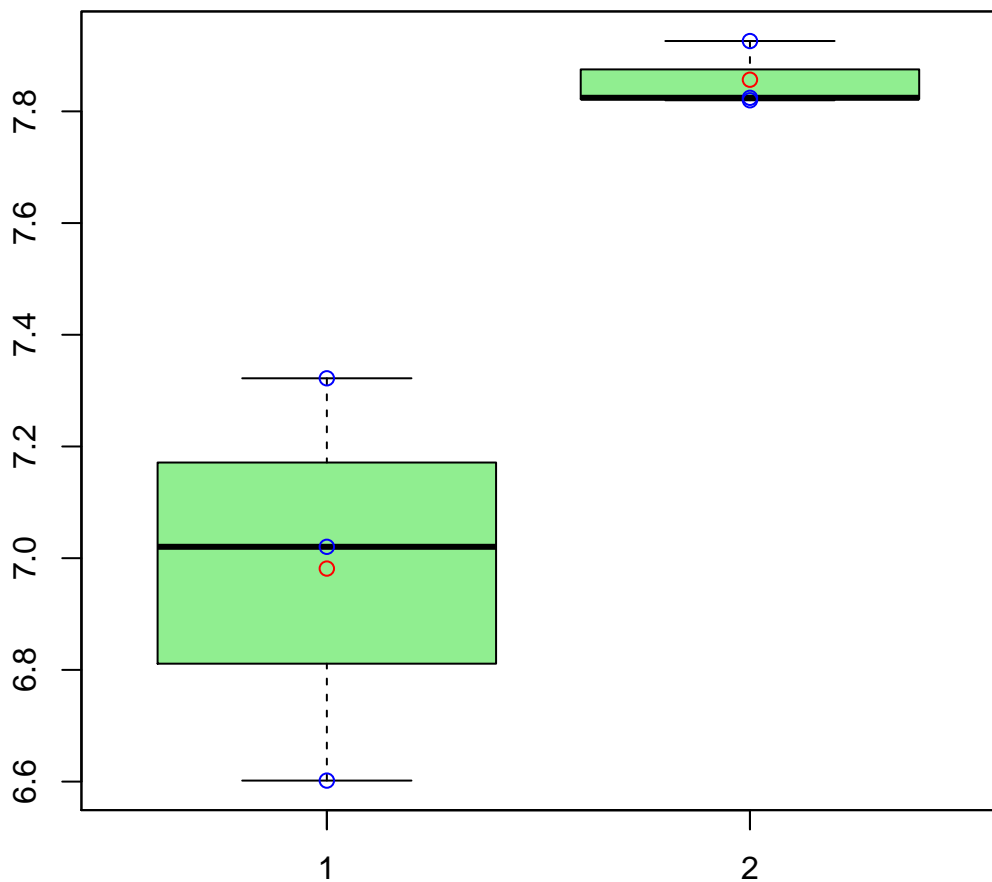

t-Test: p-value = 0.05

# J3MH95|J3MH95\_ORYBR

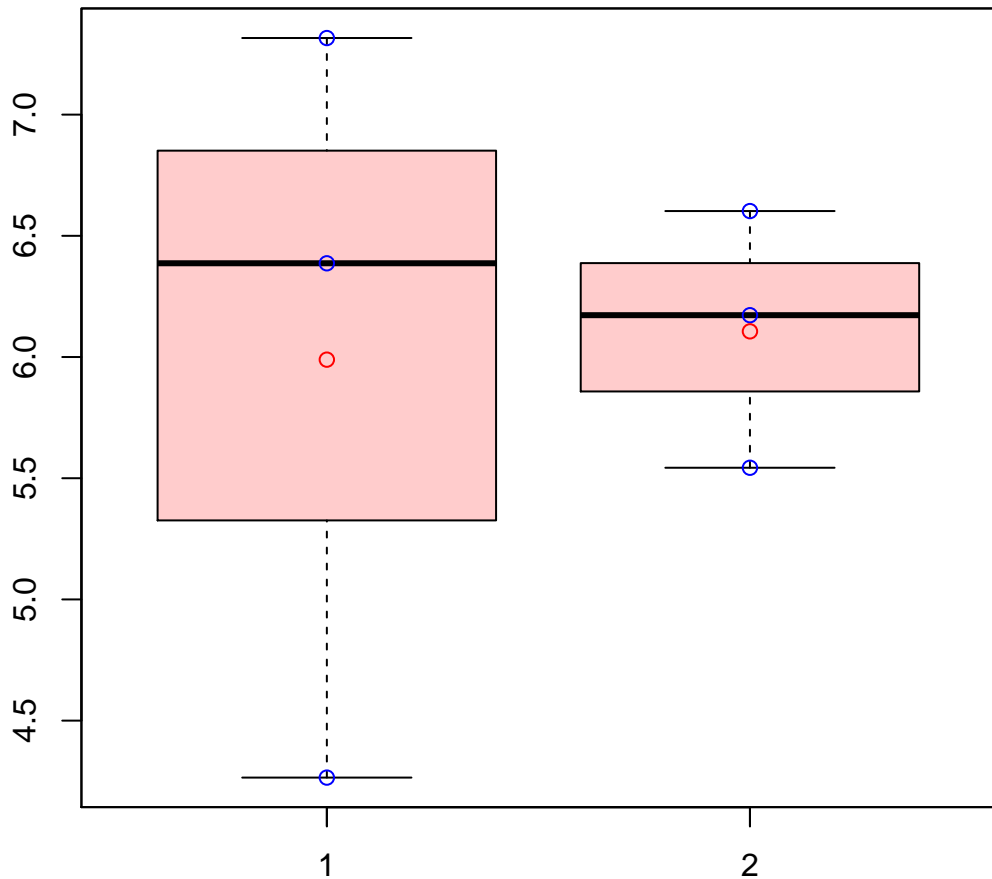

t-Test: p-value = 0.91

# J3MHA1|J3MHA1\_ORYBR

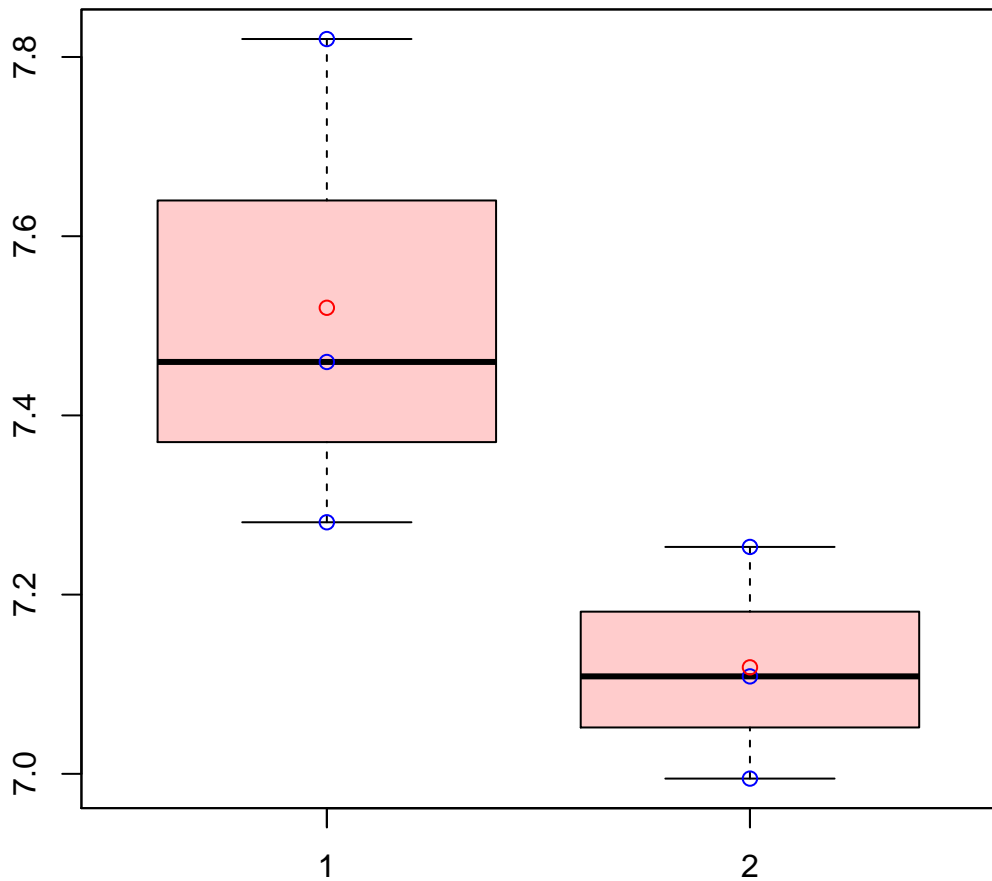

t-Test: p-value = 0.11

# J3MHP1|J3MHP1\_ORYBR

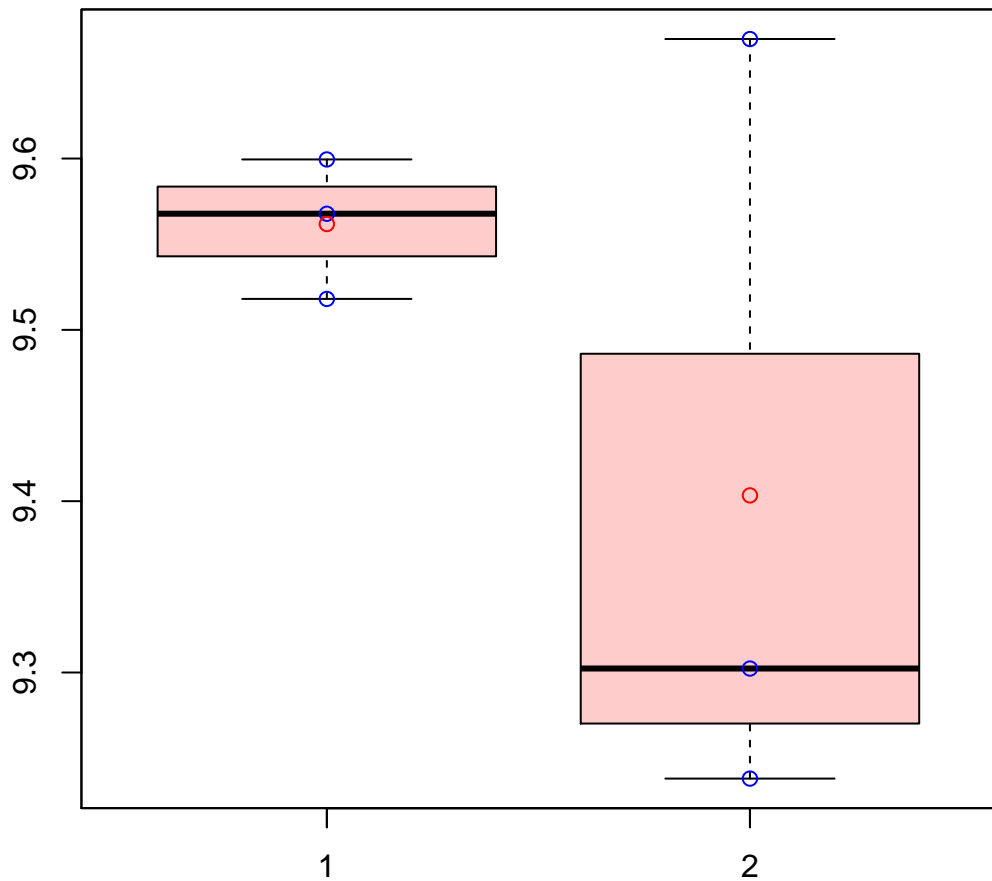

t-Test: p-value = 0.36

# J3MHP2|J3MHP2\_ORYBR

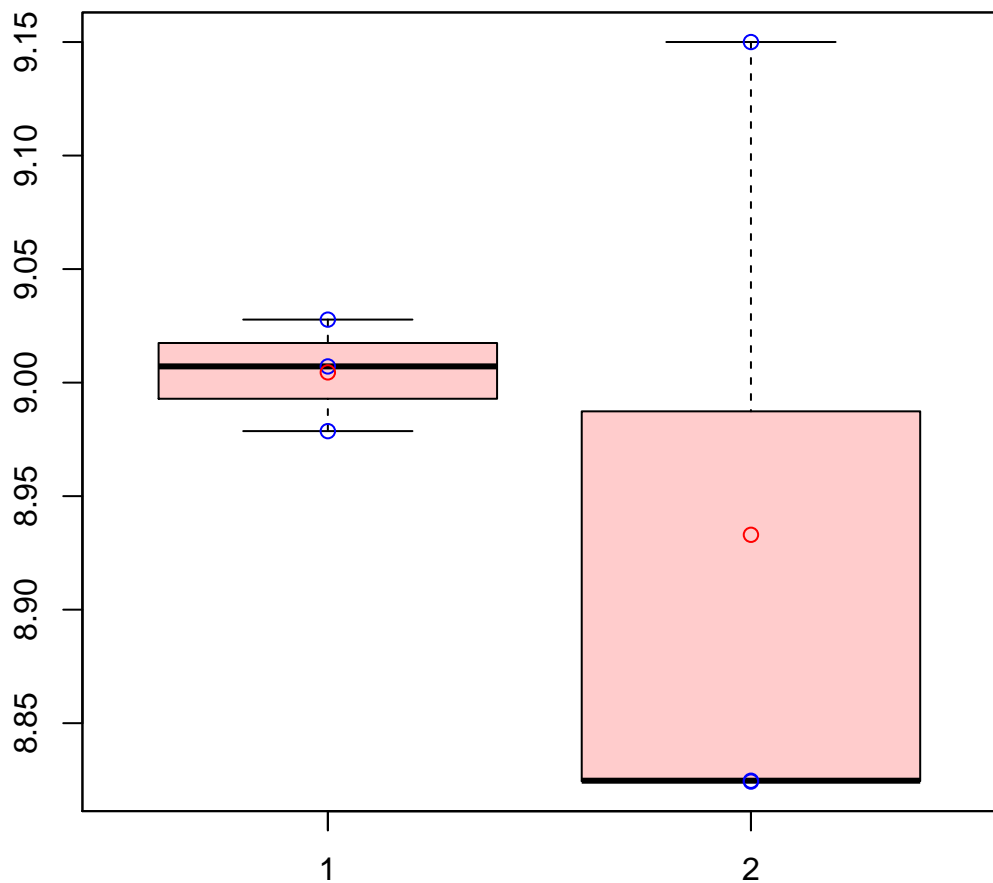

t-Test: p-value = 0.58

# J3MI27|J3MI27\_ORYBR

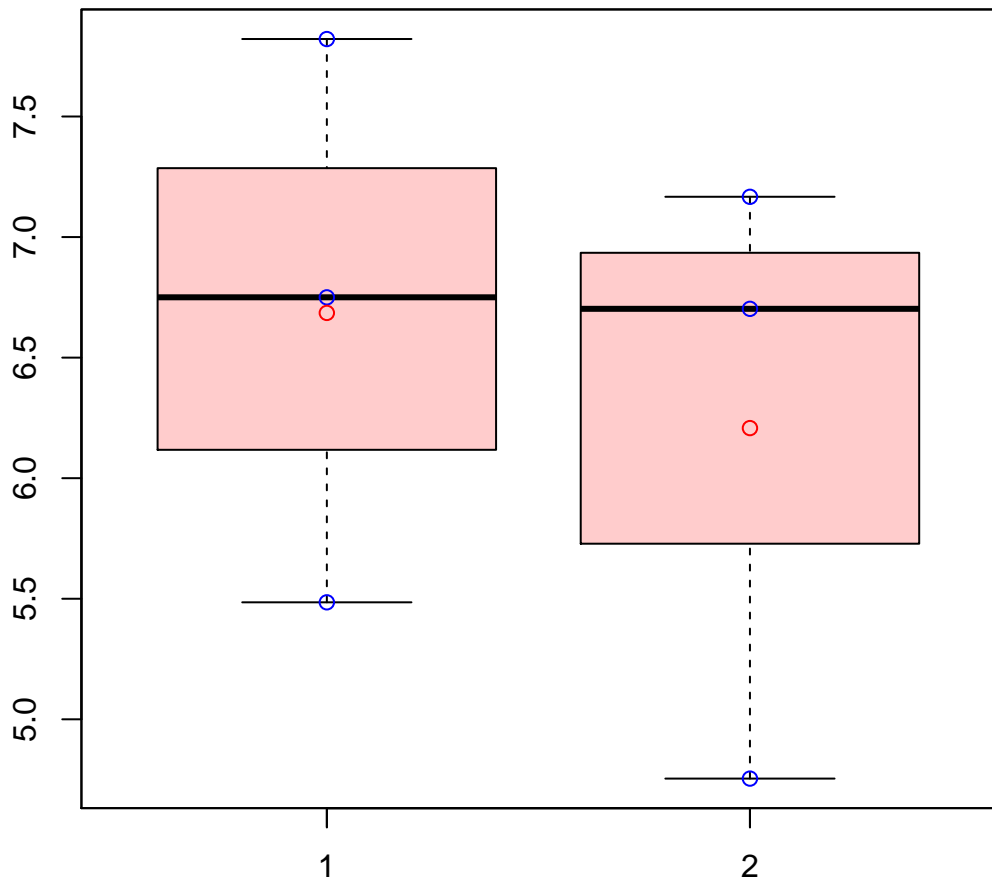

t-Test: p-value = 0.66

# J3MI85|J3MI85\_ORYBR

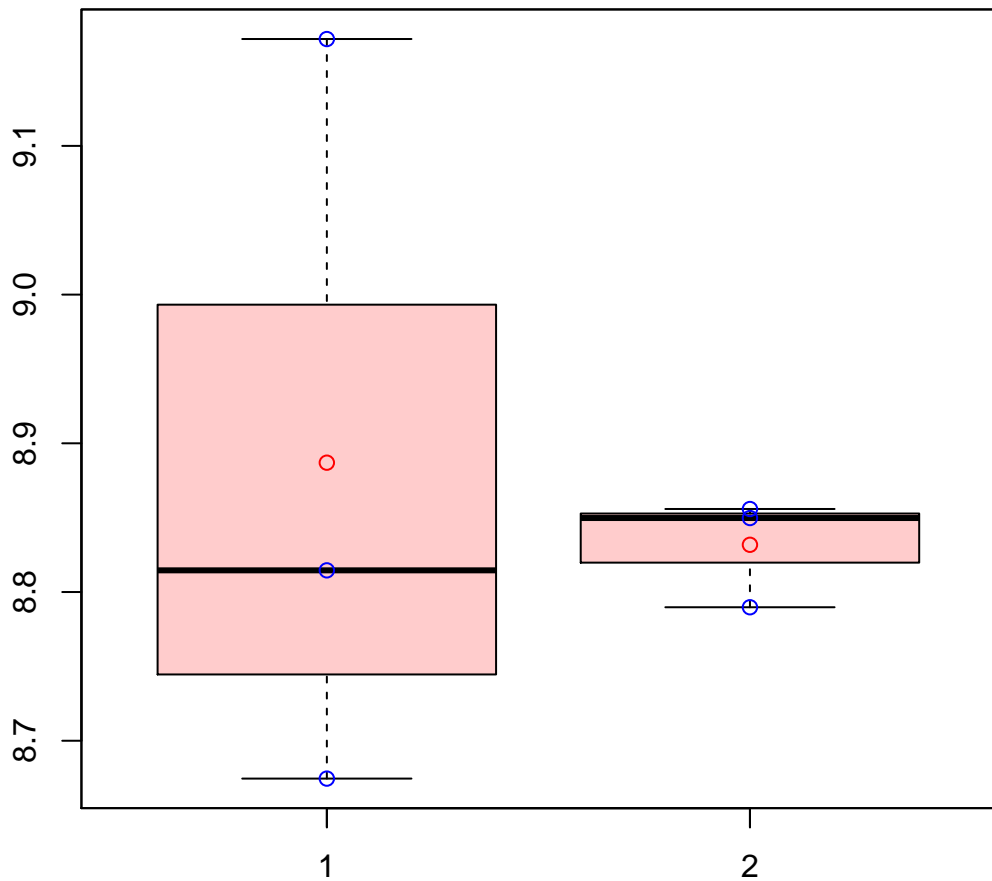

t-Test: p-value = 0.75



# J3MIH6|J3MIH6\_ORYBR

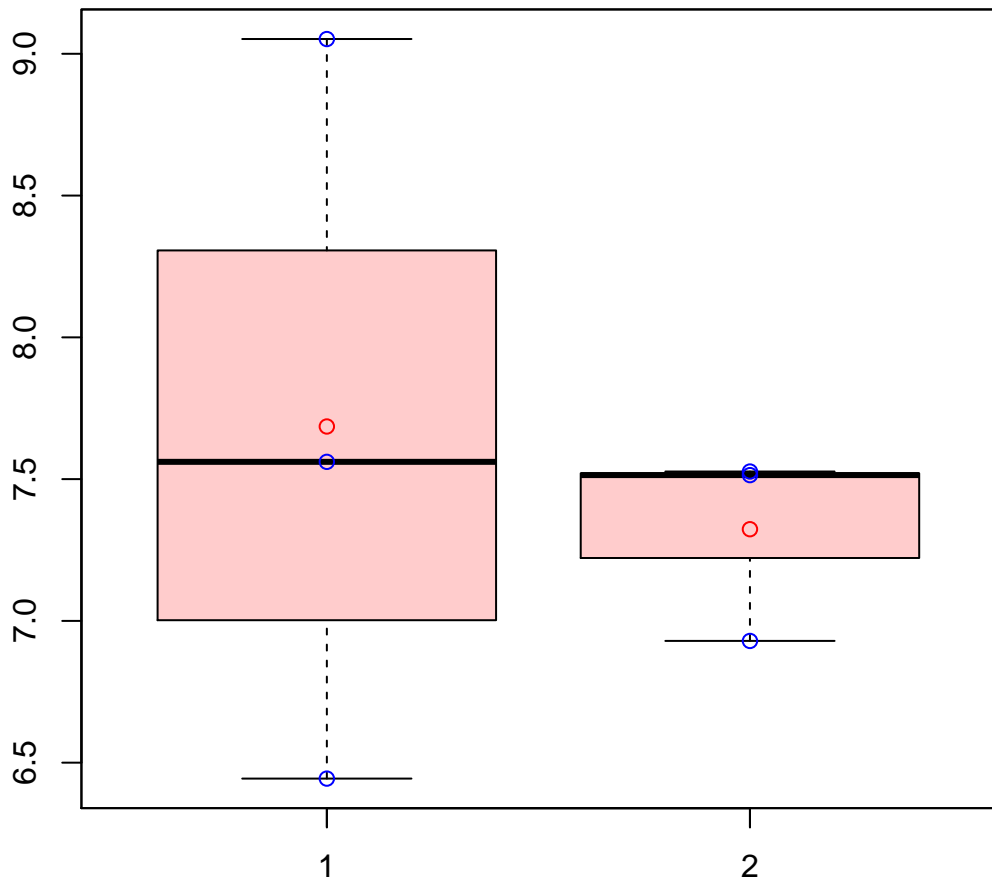

t-Test: p-value = 0.68

# J3MIJ1|J3MIJ1\_ORYBR

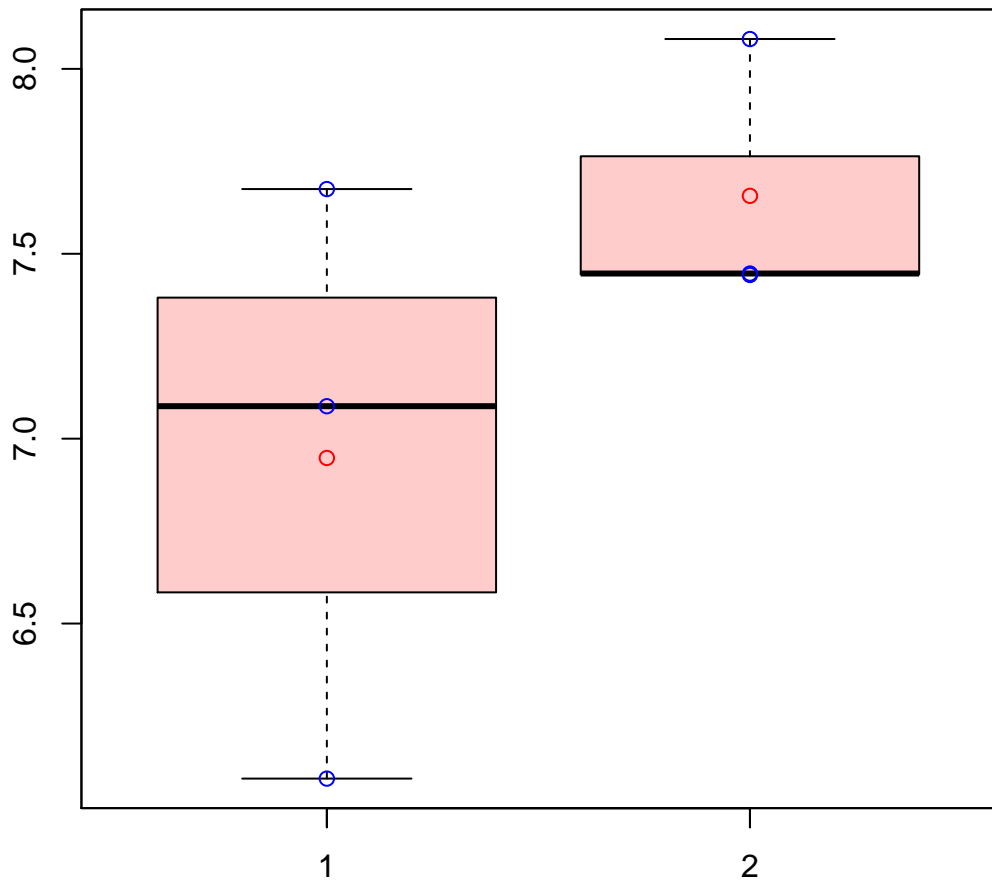

t-Test: p-value = 0.27

# J3MIL5|J3MIL5\_ORYBR

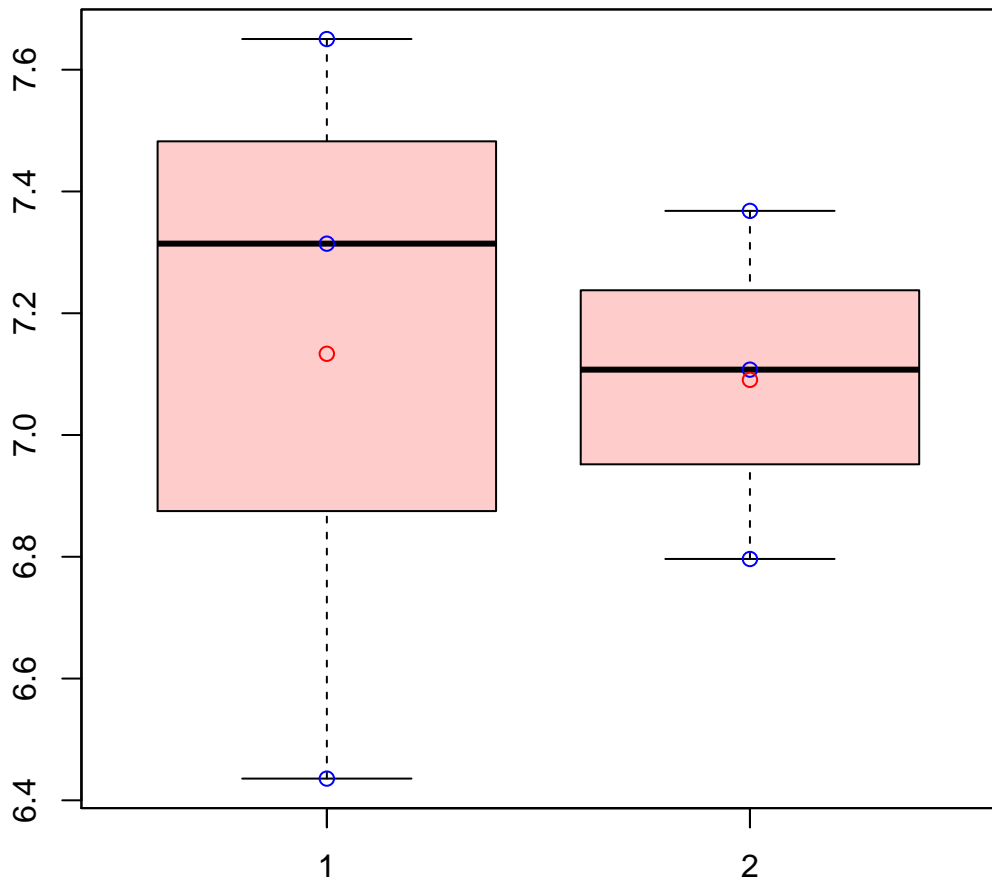

t-Test: p-value = 0.92

# J3MIM1|J3MIM1\_ORYBR

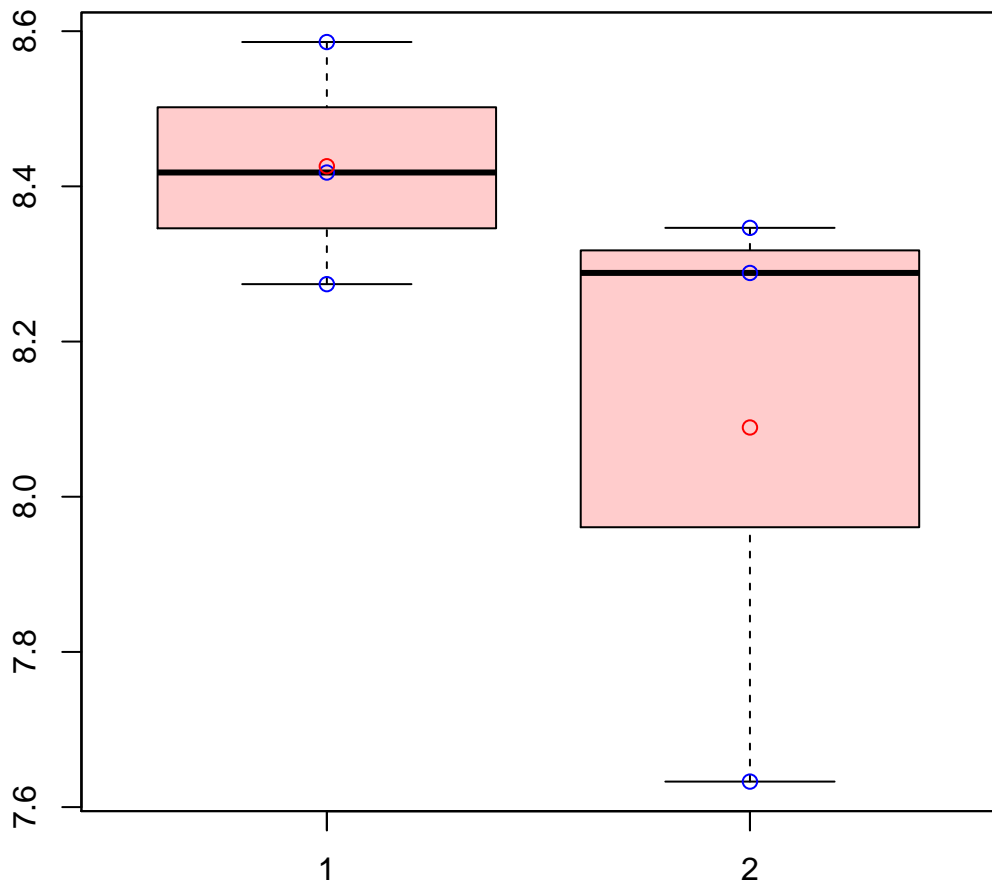

t-Test: p-value = 0.28

# J3MIZ4|J3MIZ4\_ORYBR

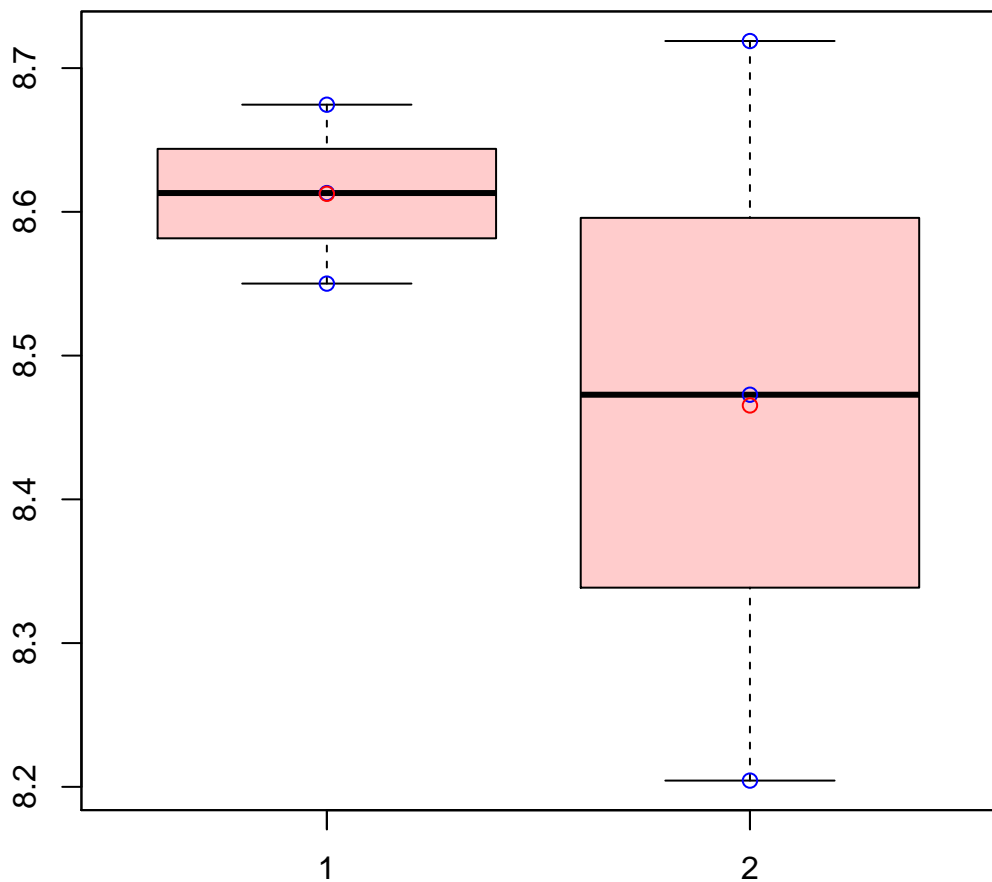

t-Test: p-value = 0.43

# J3MJU1|J3MJU1\_ORYBR

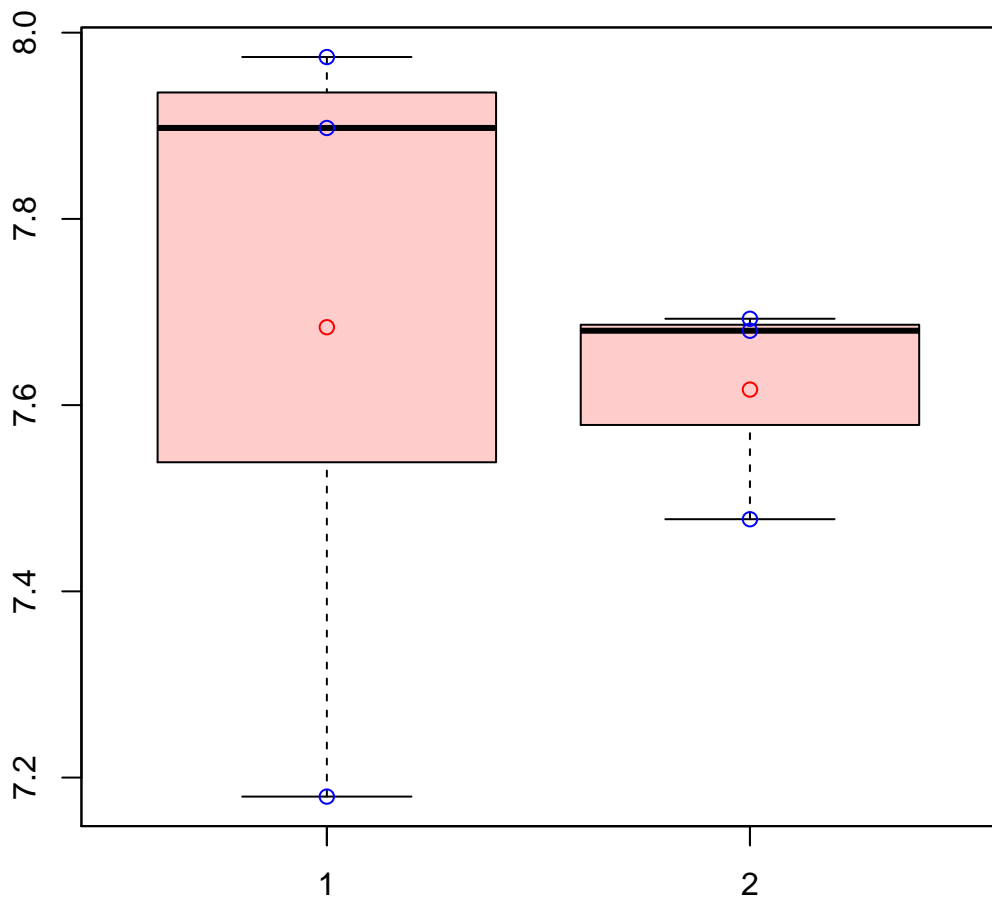

t-Test: p-value = 0.82

# J3MJV7|J3MJV7\_ORYBR

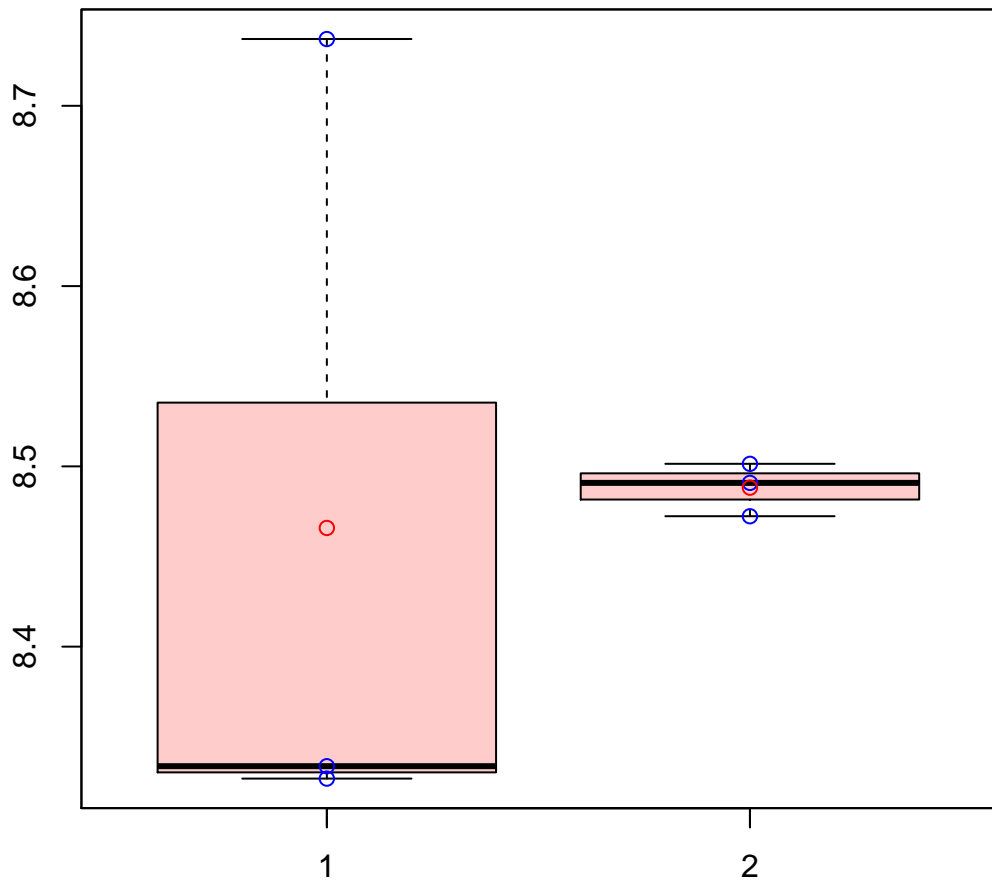

t-Test: p-value = 0.88

# J3MK27|J3MK27\_ORYBR

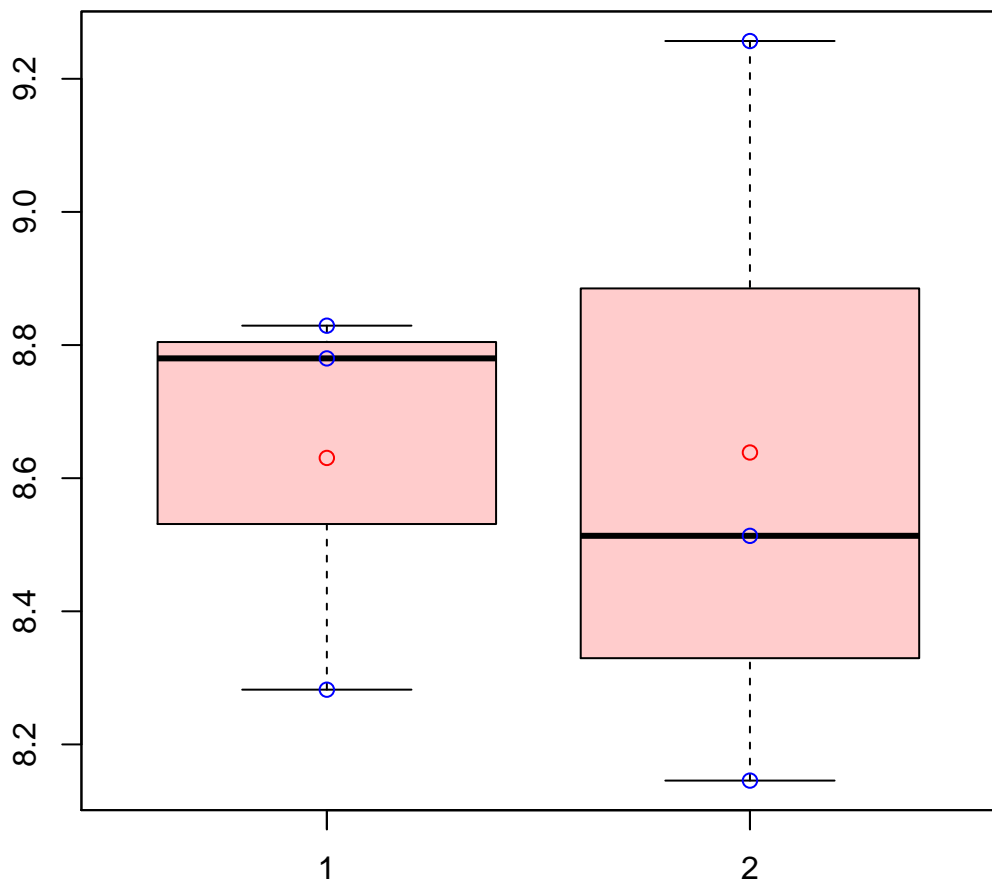

t-Test: p-value = 0.98



# J3MKT6|J3MKT6\_ORYBR

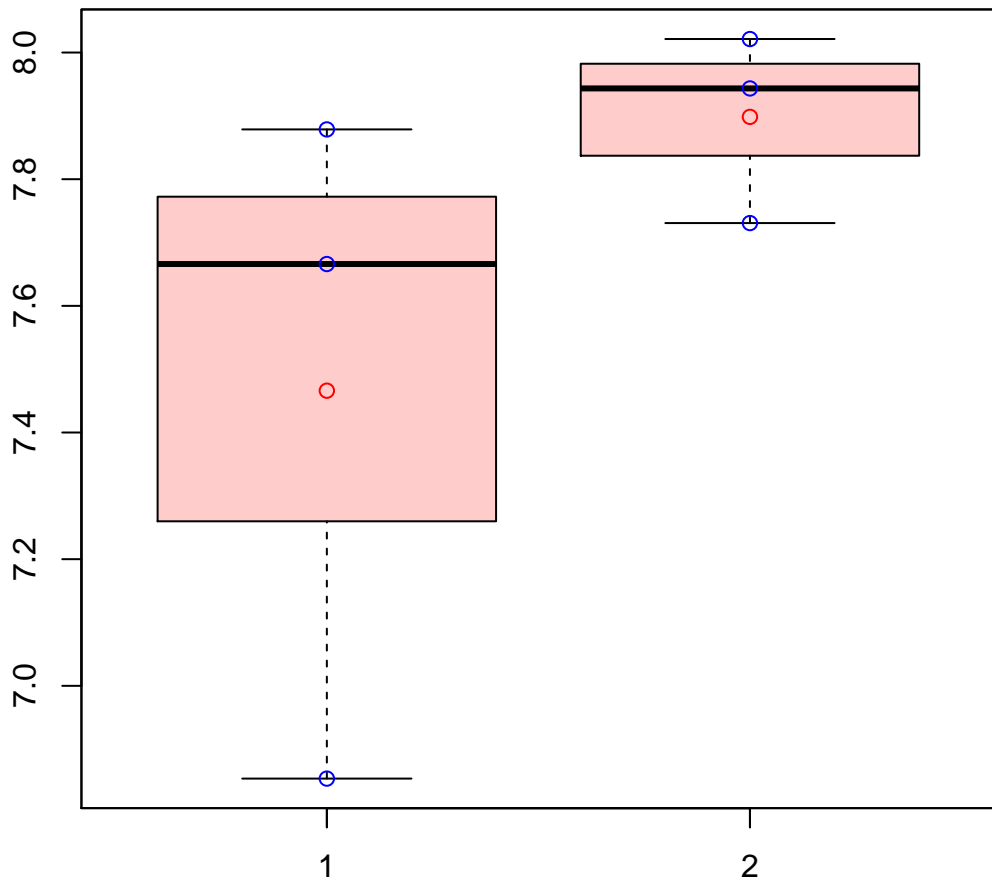

t-Test: p-value = 0.3

# J3ML16|J3ML16\_ORYBR

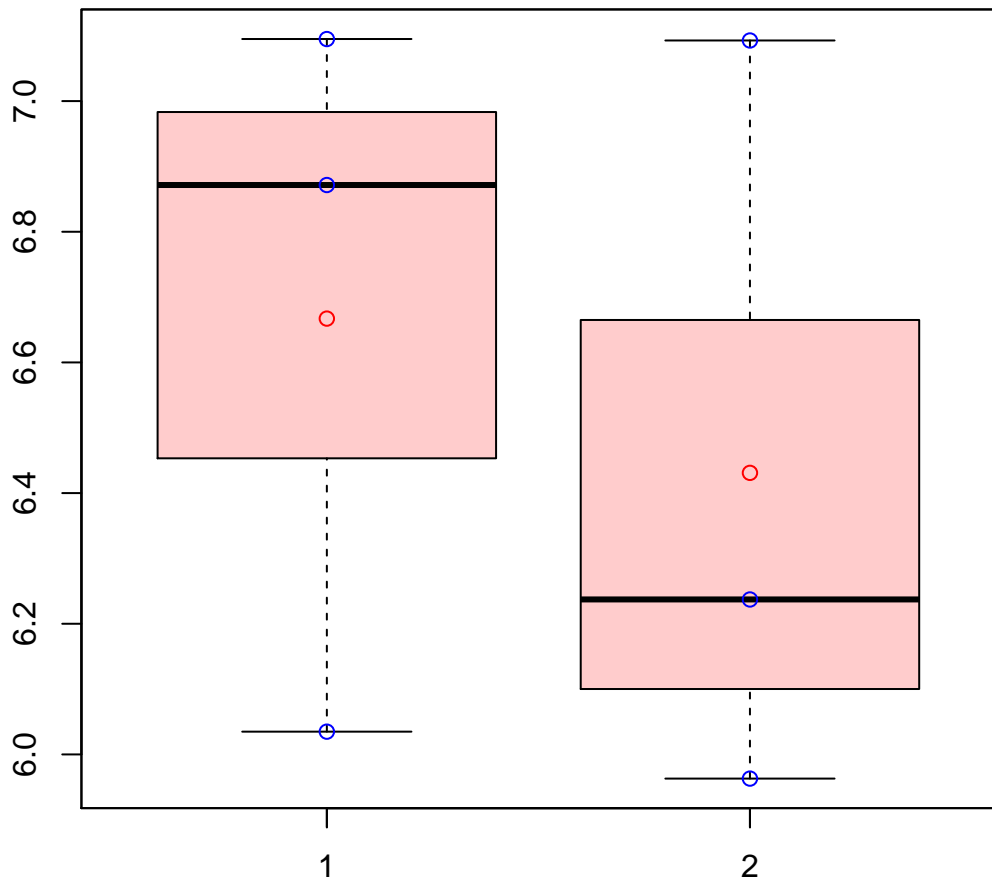

t-Test: p-value = 0.64

# J3MLE3|J3MLE3\_ORYBR

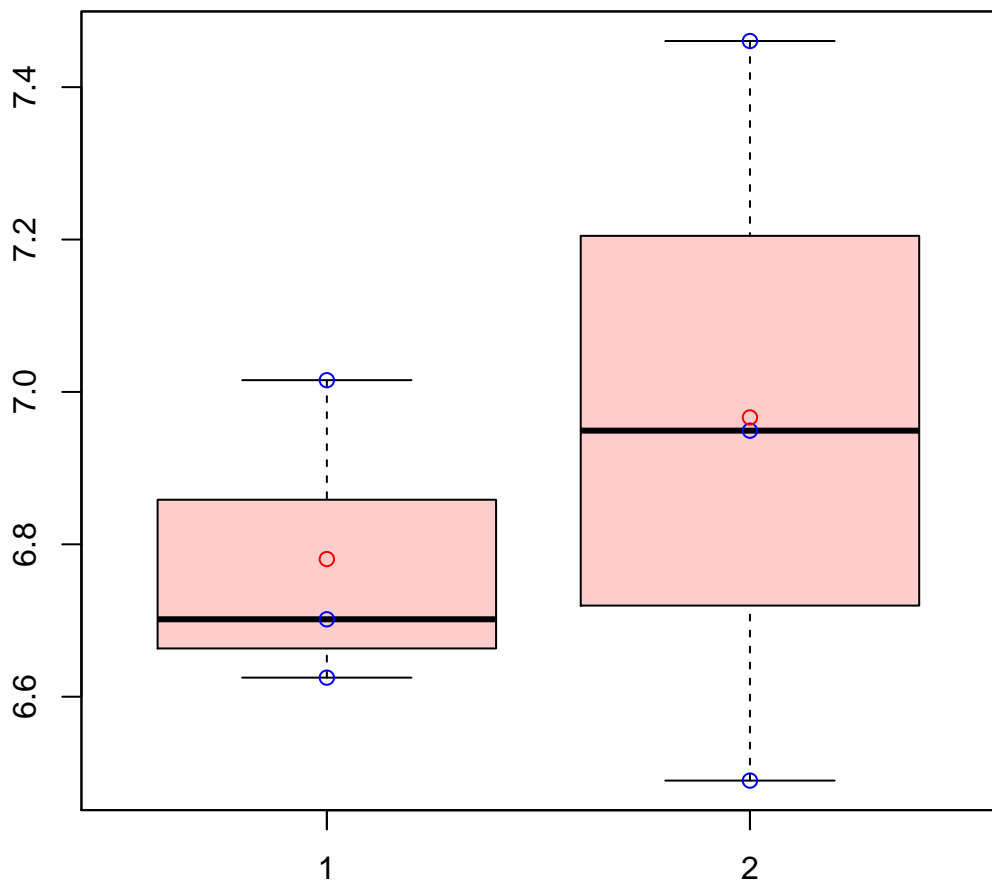

t-Test: p-value = 0.59

# J3MLI7|J3MLI7\_ORYBR

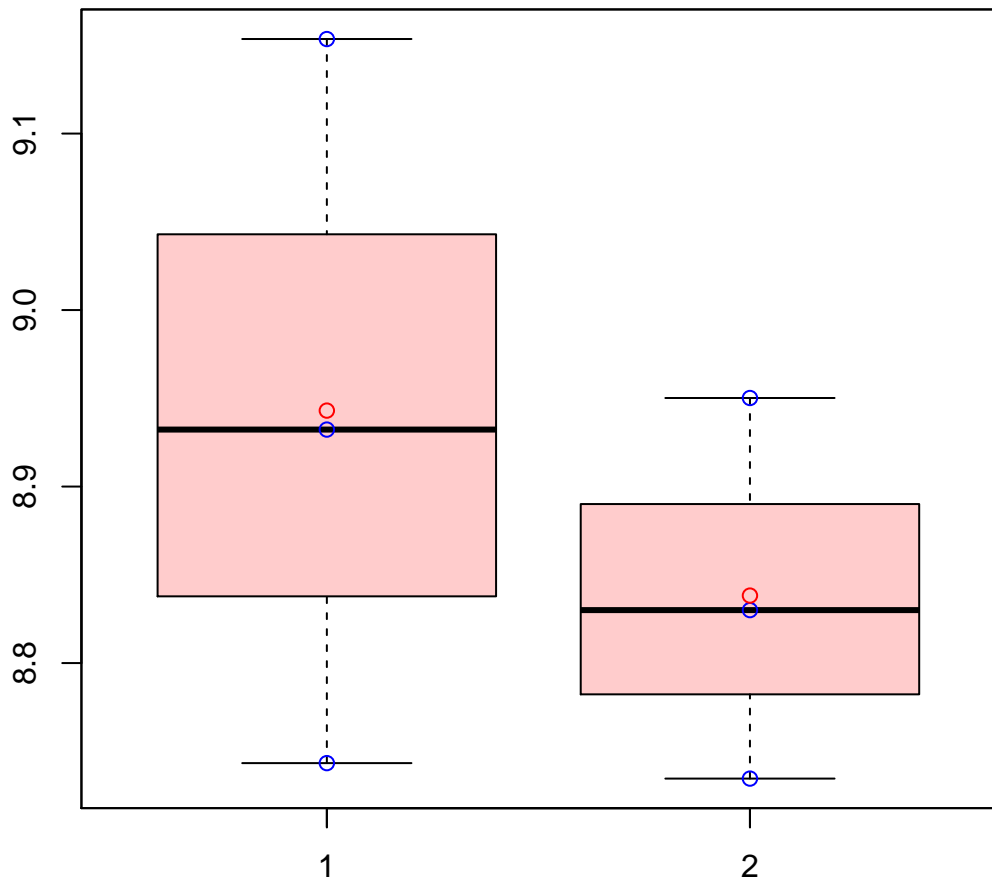

t-Test: p-value = 0.49

# J3MLN2|J3MLN2\_ORYBR

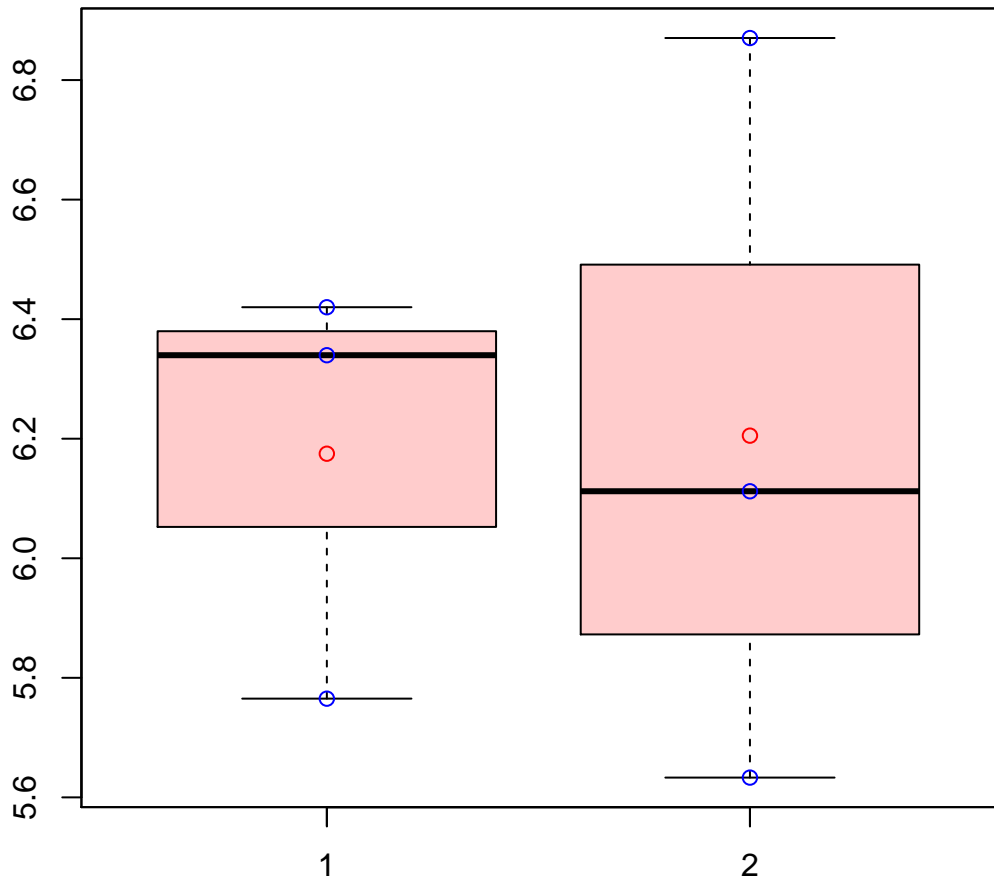

t-Test: p-value = 0.95

# J3MLQ1|J3MLQ1\_ORYBR

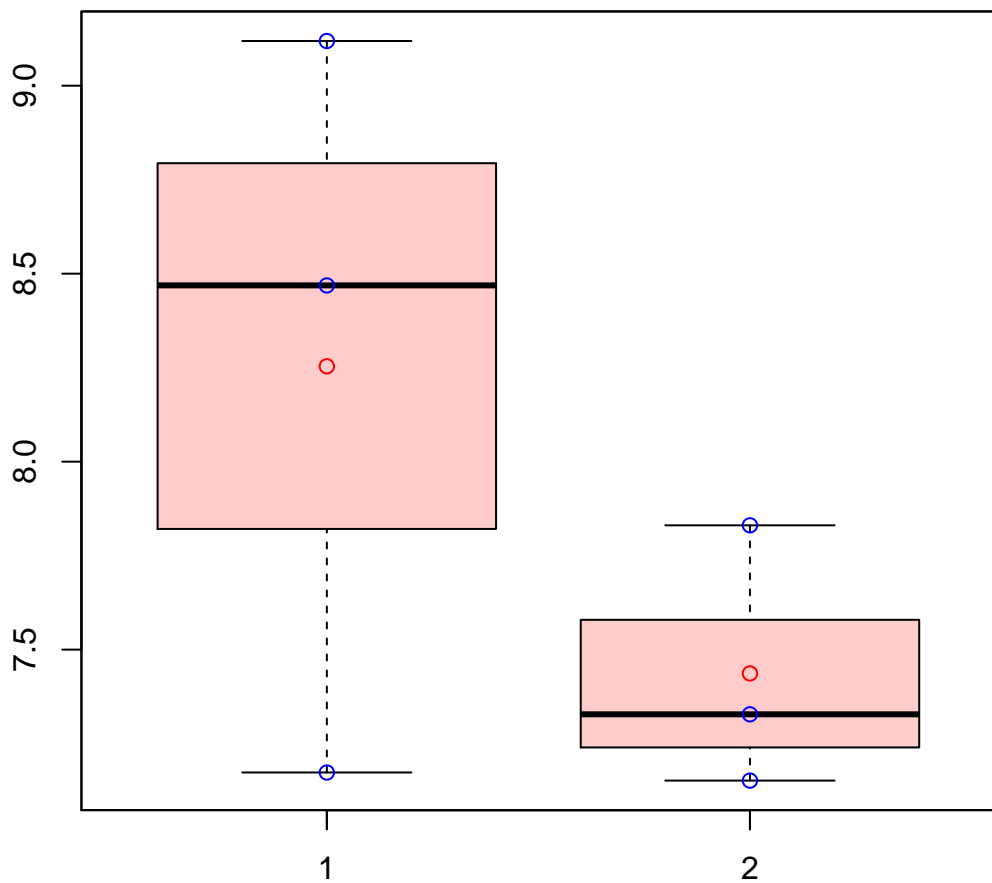

t-Test: p-value = 0.29

# J3MLY0|J3MLY0\_ORYBR

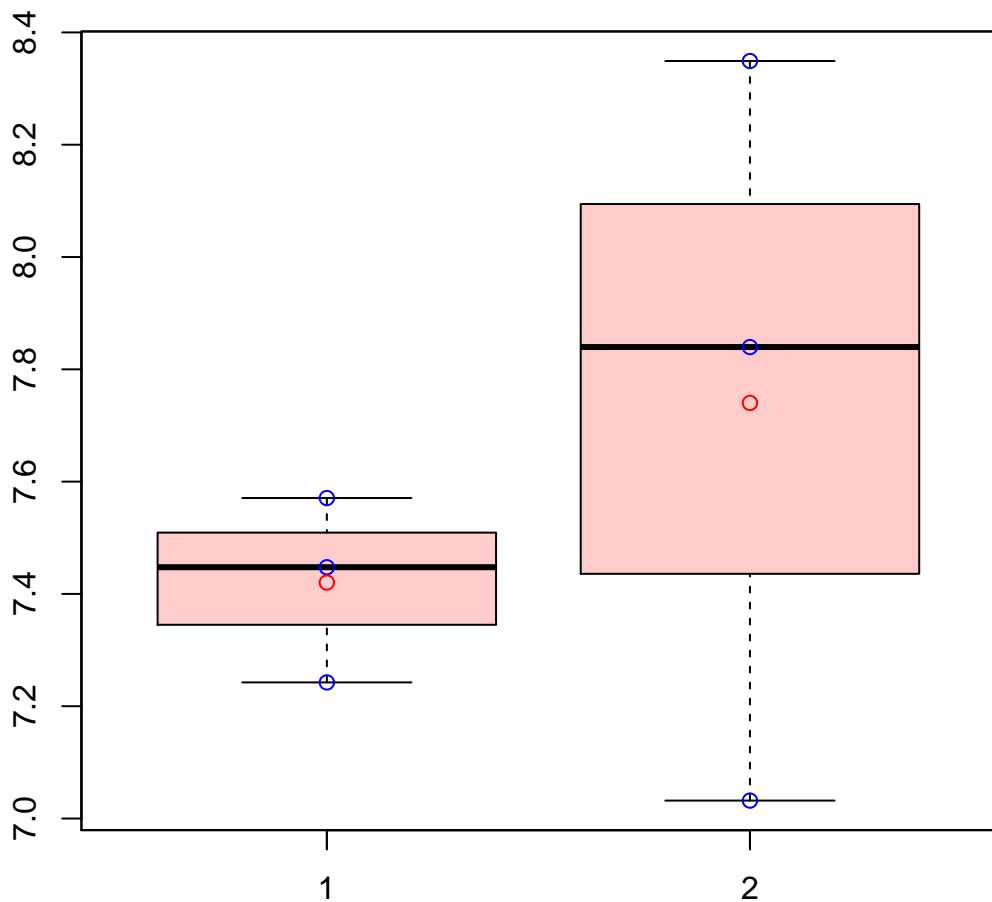

t-Test: p-value = 0.49

# J3MLZ6|J3MLZ6\_ORYBR

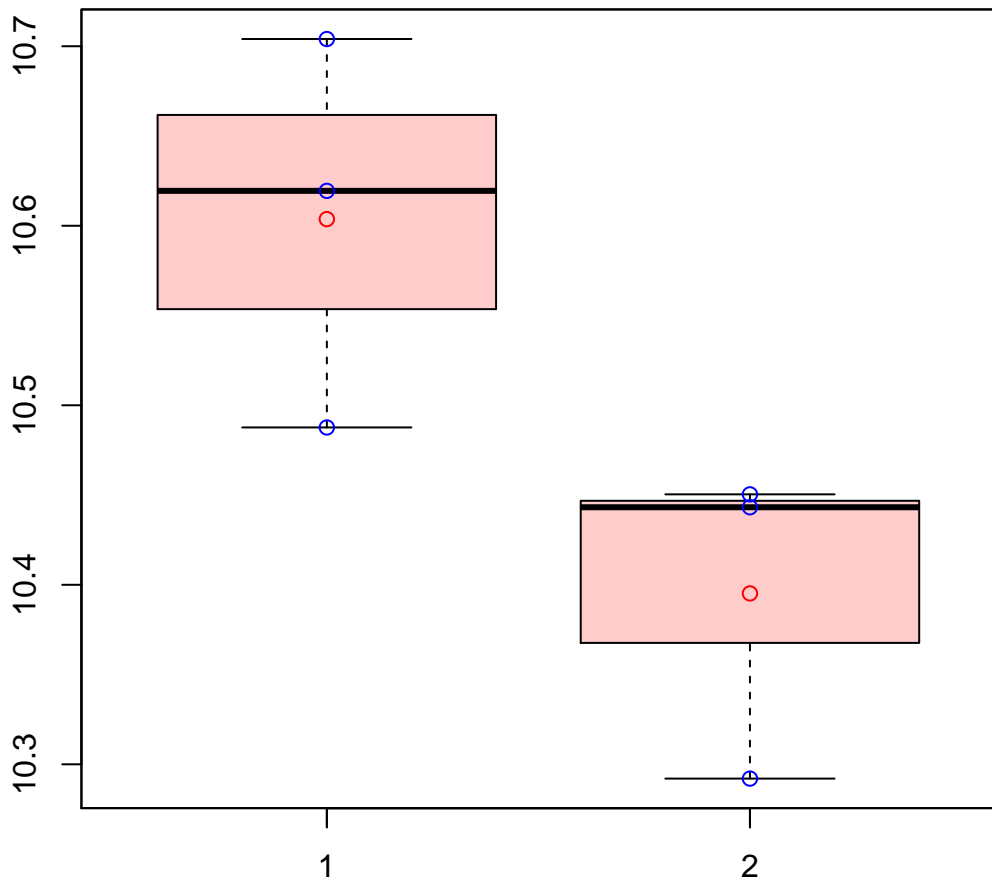

t-Test: p-value = 0.06



# J3MLZ7|J3MLZ7\_ORYBR

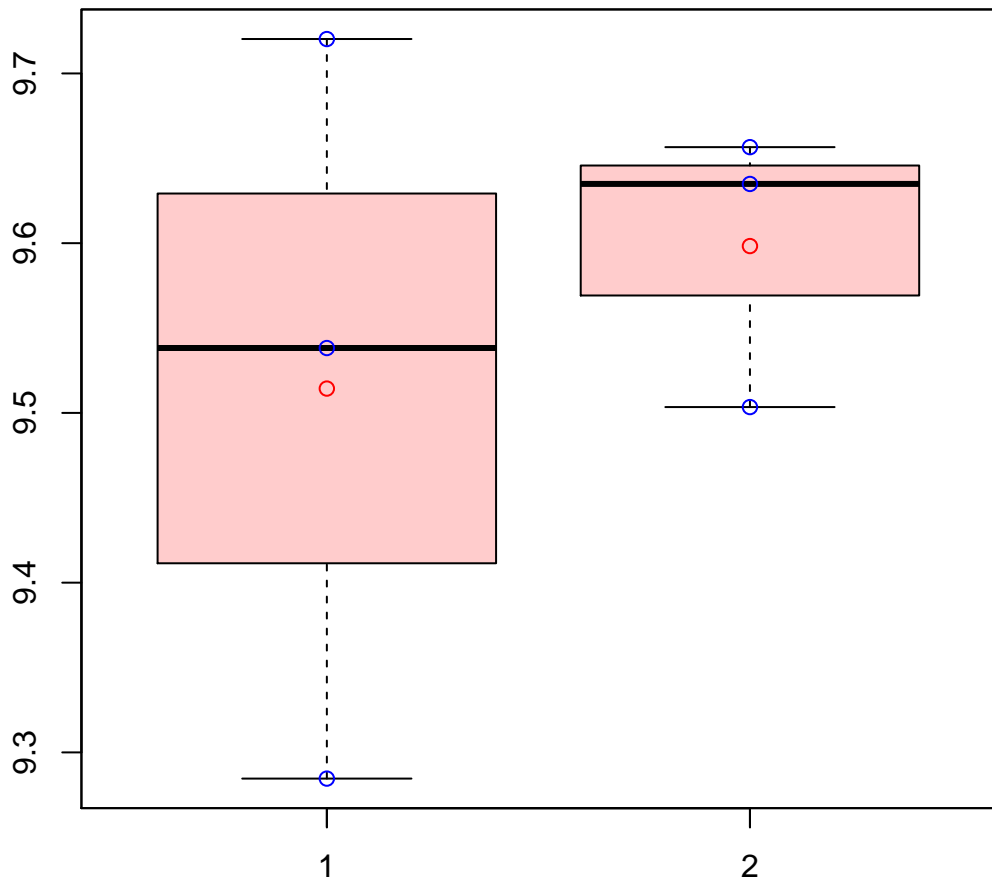

t-Test: p-value = 0.59

# J3MM13|J3MM13\_ORYBR

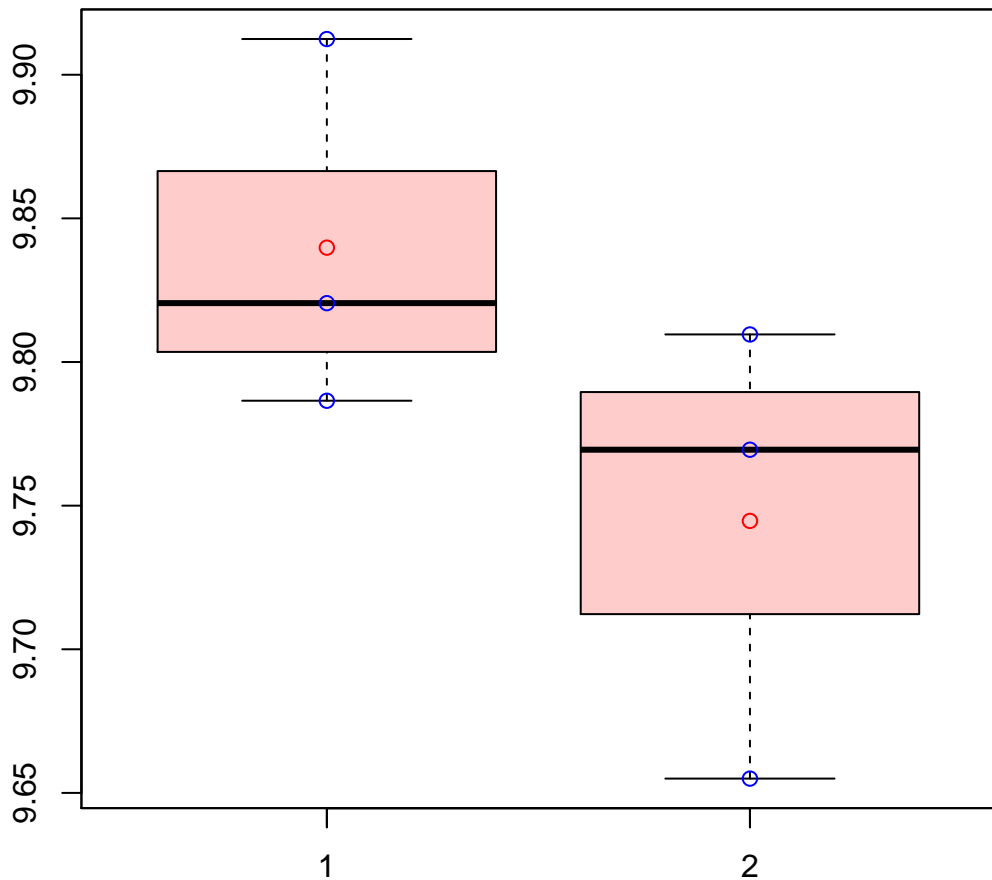

t-Test: p-value = 0.19

# J3MN04|J3MN04\_ORYBR

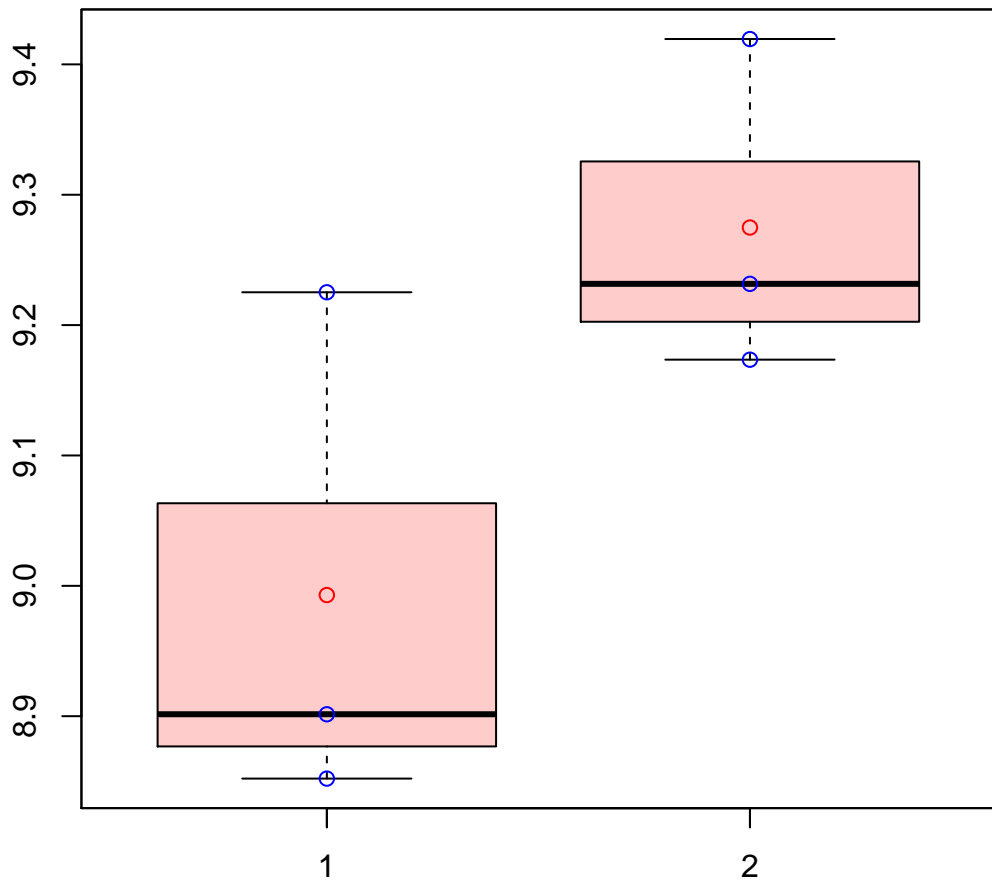

t-Test: p-value = 0.12

# J3MN27|J3MN27\_ORYBR

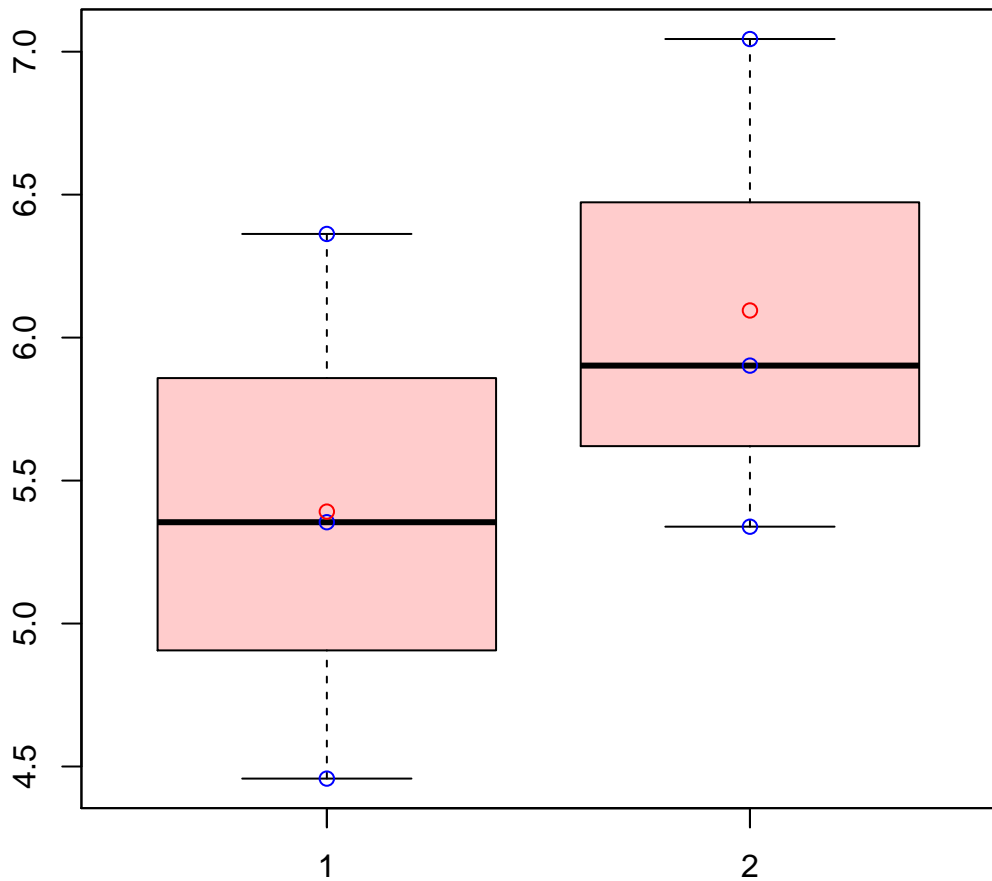

t-Test: p-value = 0.4

# J3MNA4|J3MNA4\_ORYBR

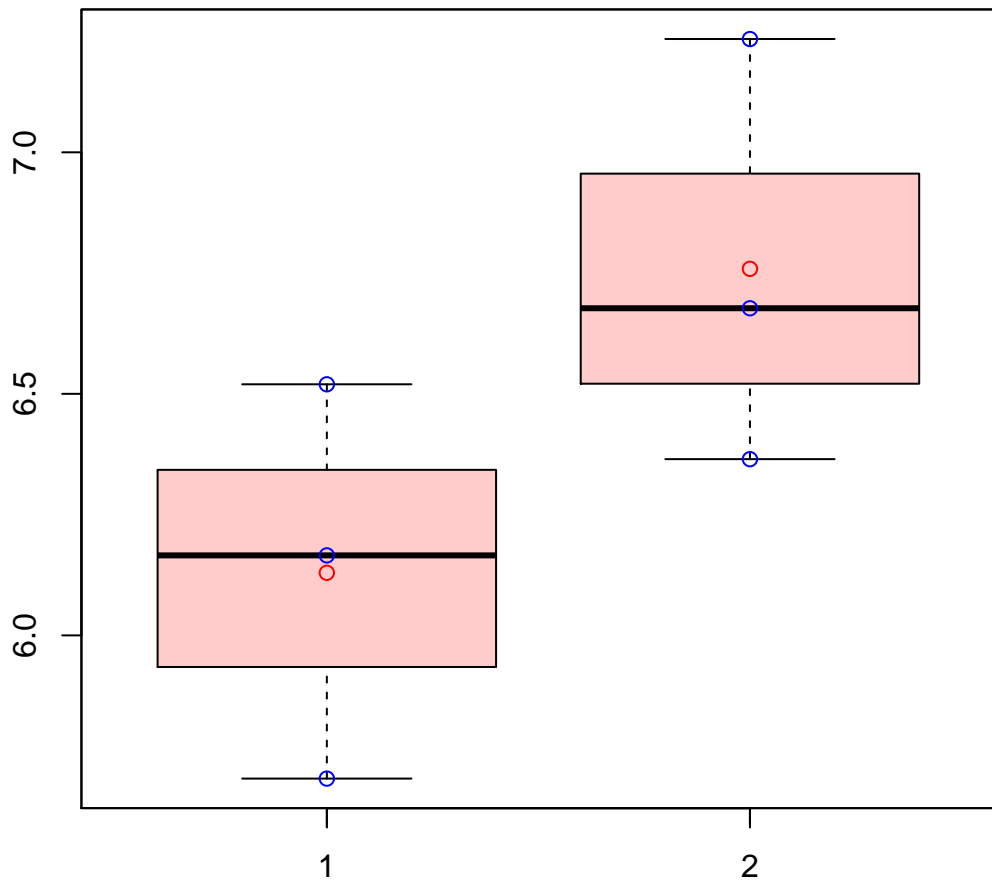

t-Test: p-value = 0.14

# J3MNE1|J3MNE1\_ORYBR

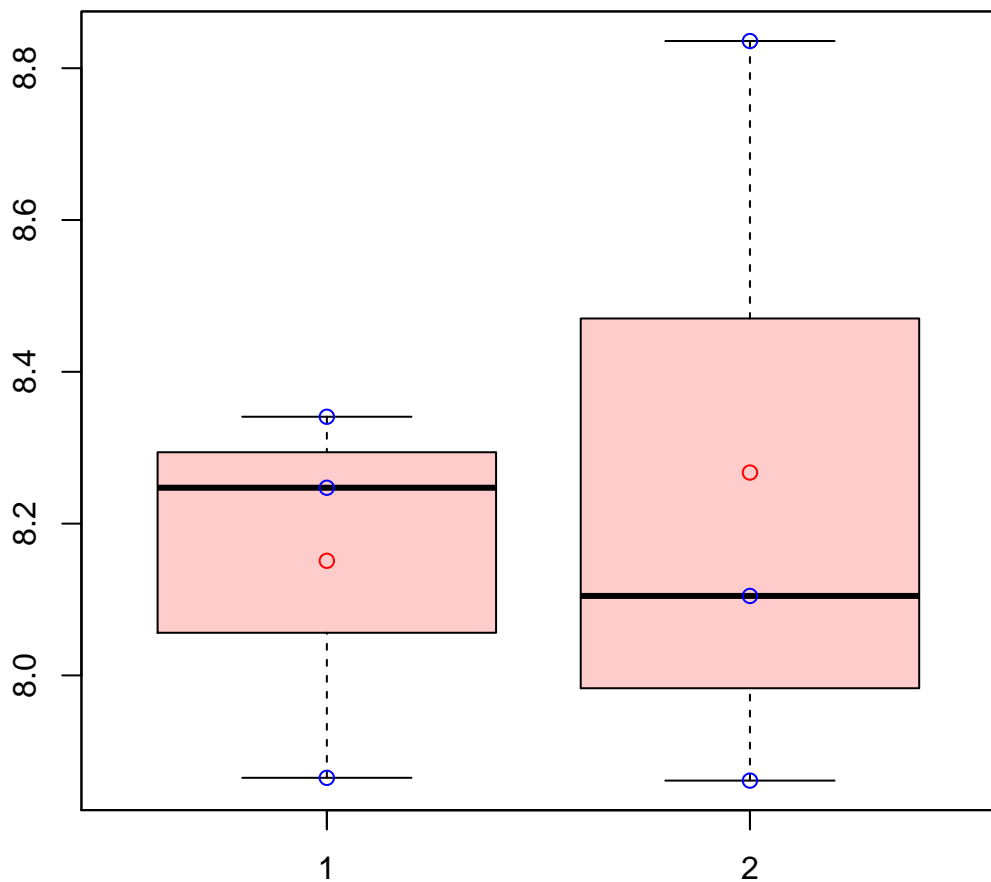

t-Test: p-value = 0.75

# J3MNQ0|J3MNQ0\_ORYBR

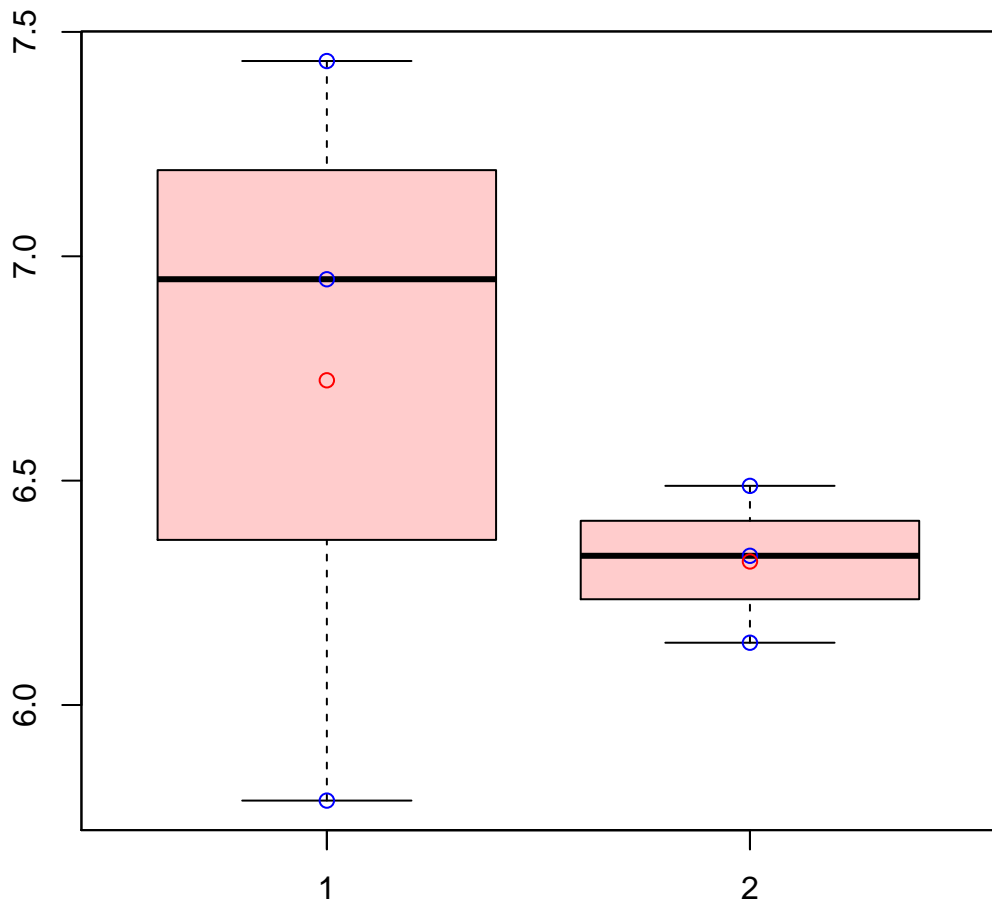

t-Test: p-value = 0.5

# J3MPC4|J3MPC4\_ORYBR

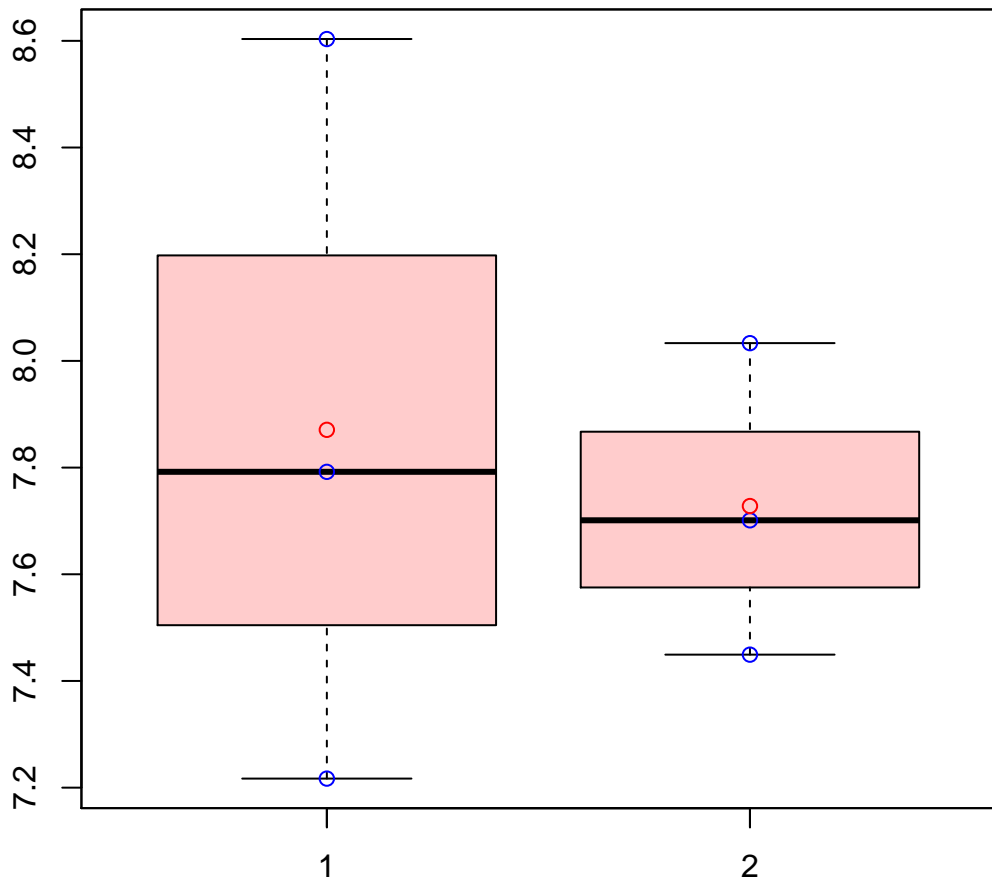

t-Test: p-value = 0.77



# J3MPF6|J3MPF6\_ORYBR

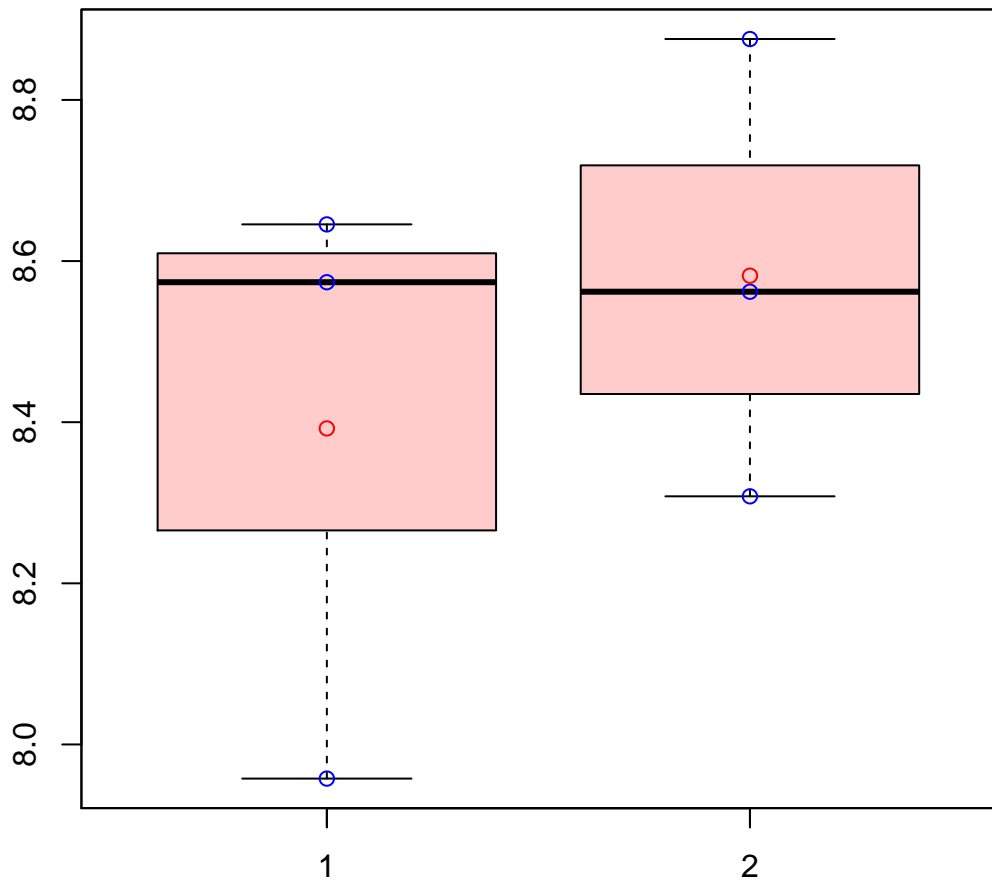

t-Test: p-value = 0.53

# J3MR12|J3MR12\_ORYBR

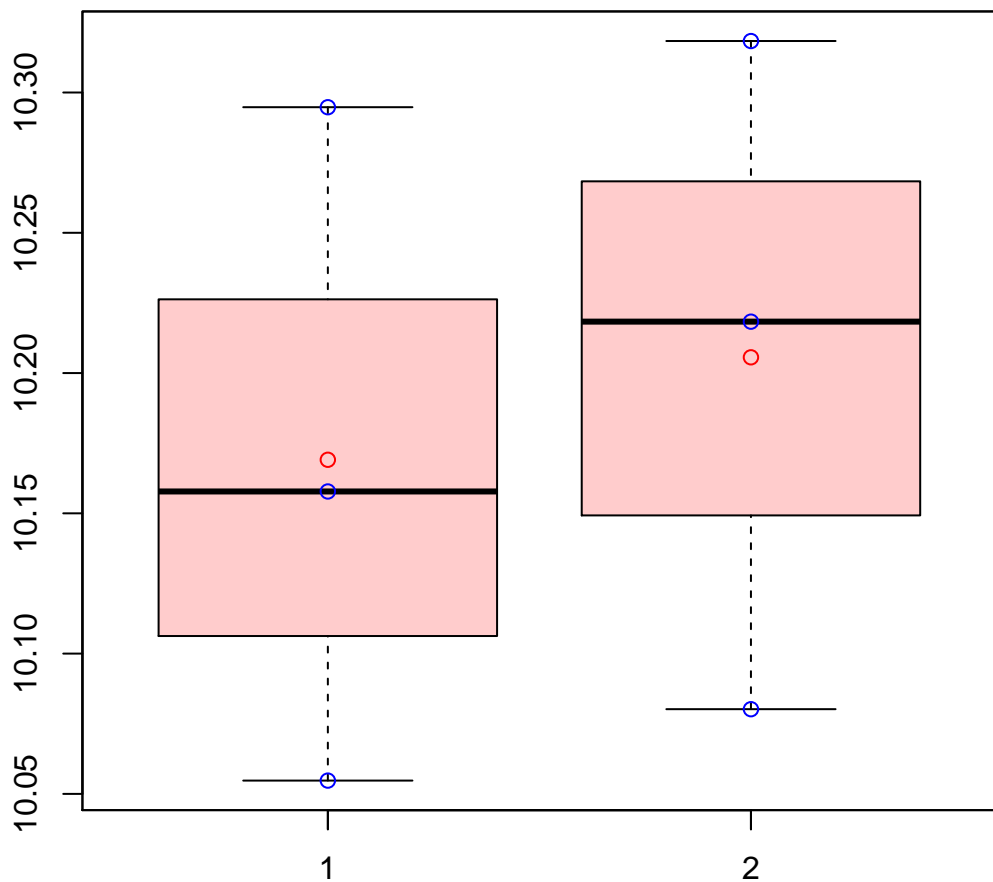

t-Test: p-value = 0.73

# J3MR16|J3MR16\_ORYBR

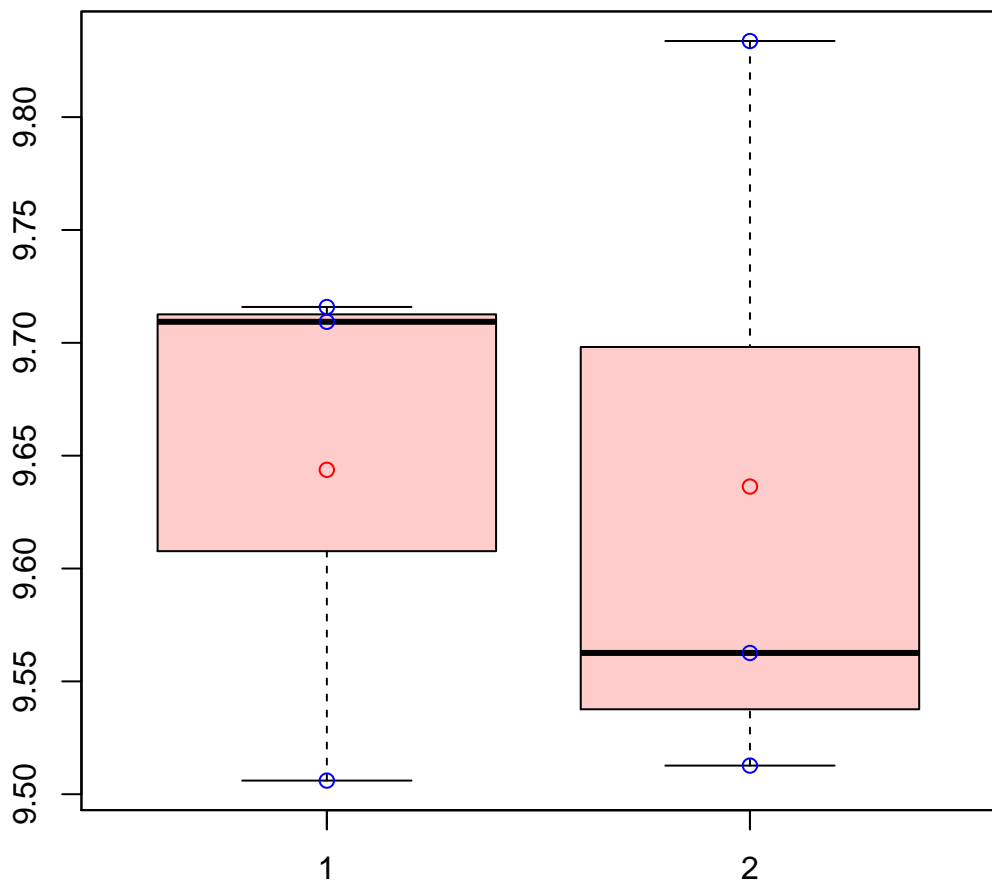

t-Test: p-value = 0.95

# J3MR49|J3MR49\_ORYBR

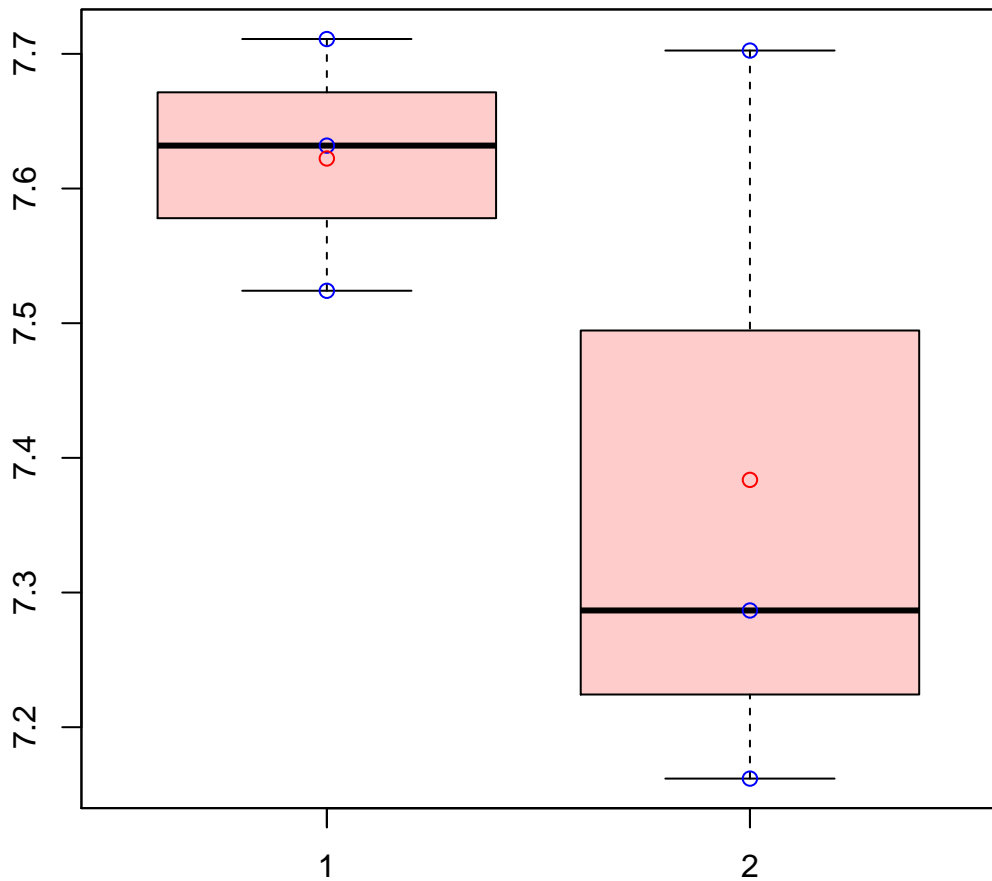

t-Test: p-value = 0.28

# J3MRH2|J3MRH2\_ORYBR

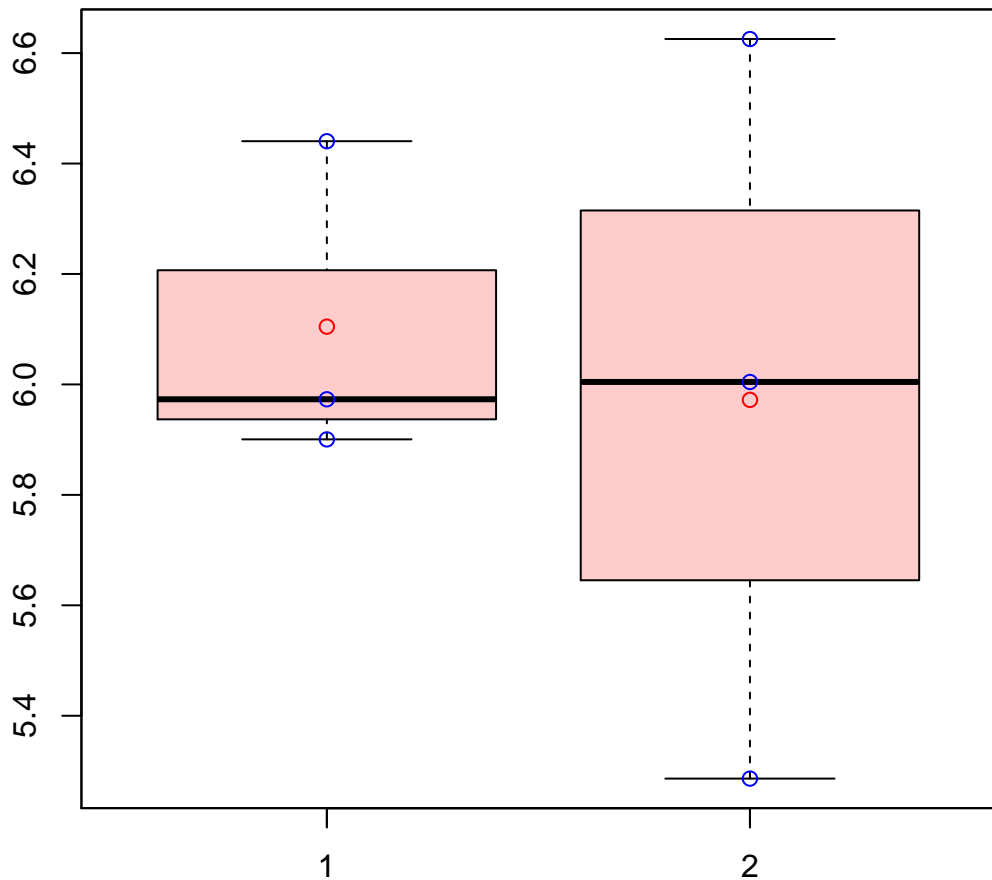

t-Test: p-value = 0.78

# J3MS74|J3MS74\_ORYBR

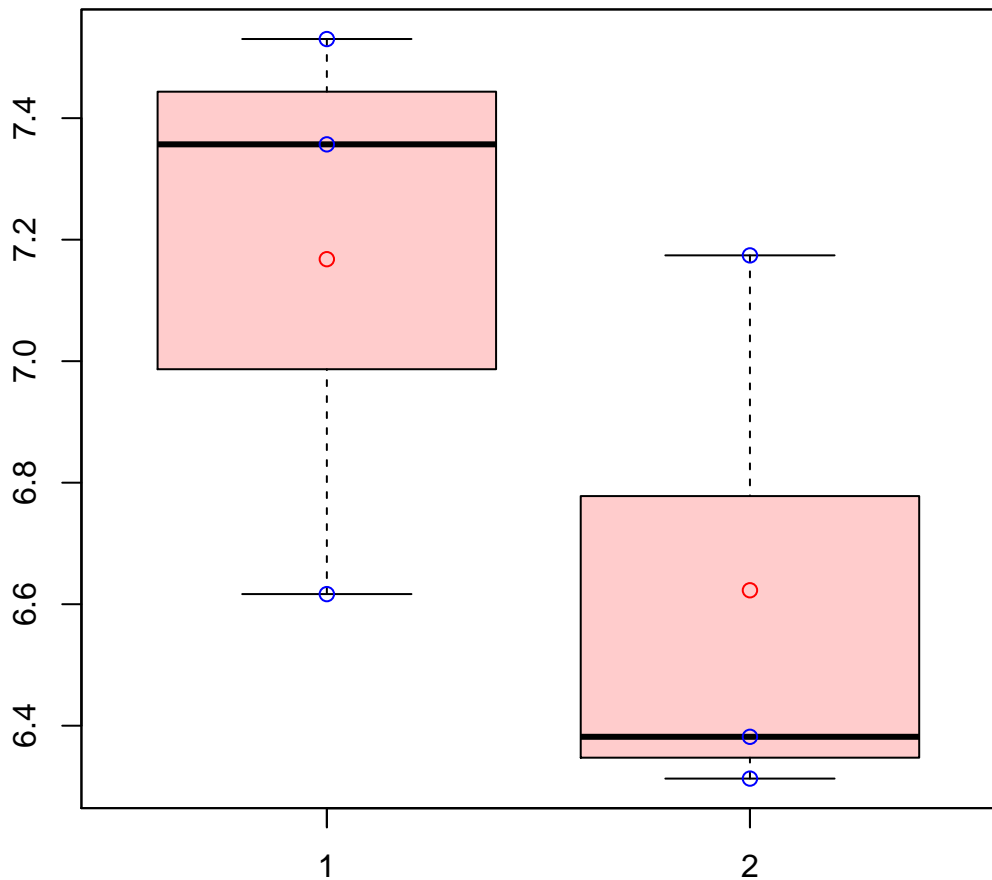

t-Test: p-value = 0.24

# J3MSC5|J3MSC5\_ORYBR

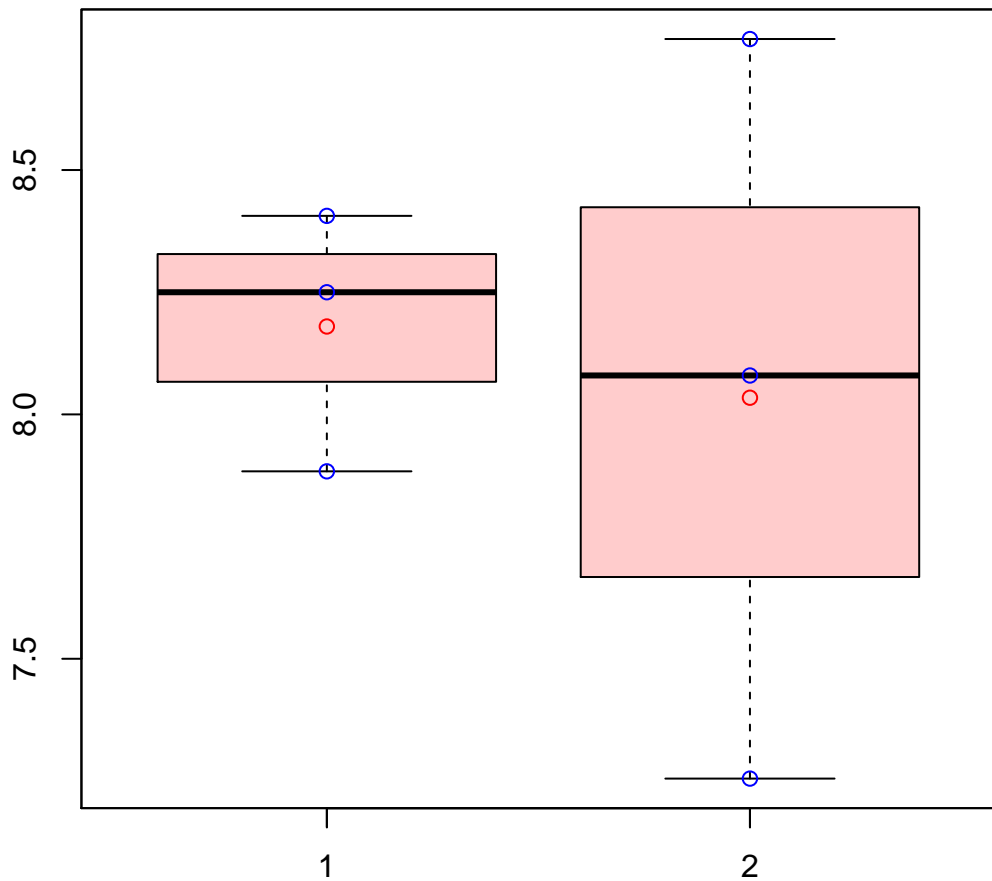

t-Test: p-value = 0.78

# J3MSE0|J3MSE0\_ORYBR

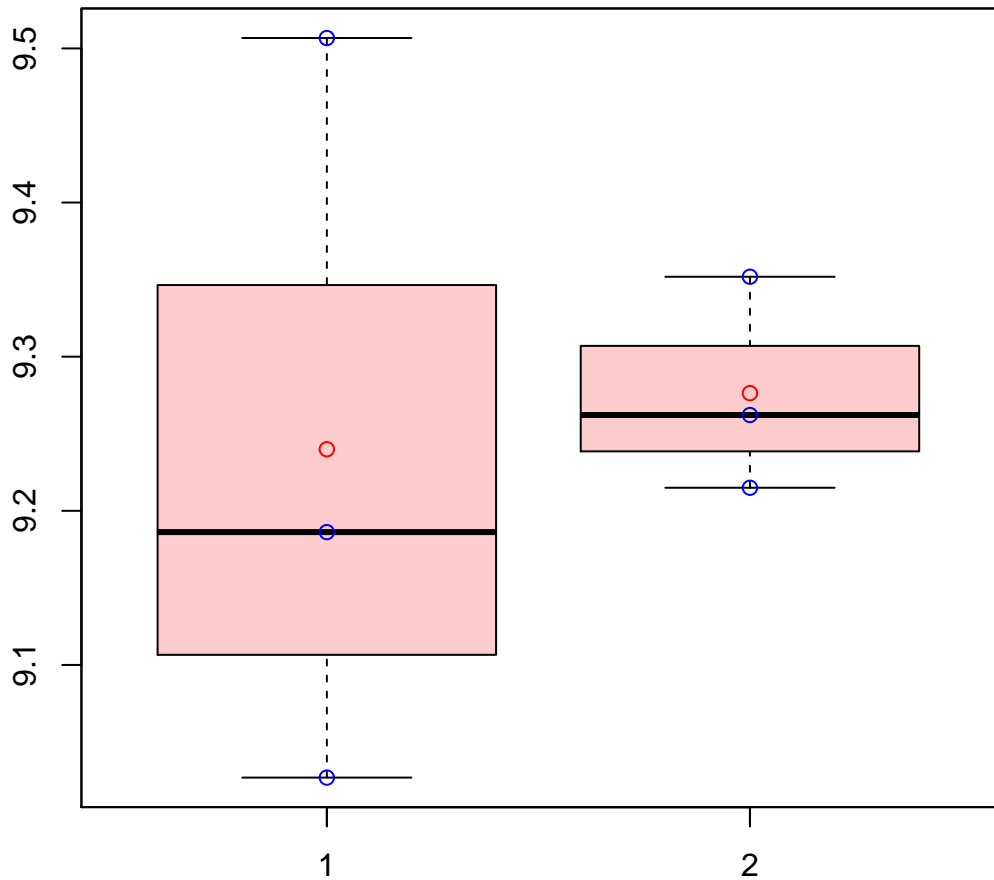

t-Test: p-value = 0.82



# J3MSP3|J3MSP3\_ORYBR

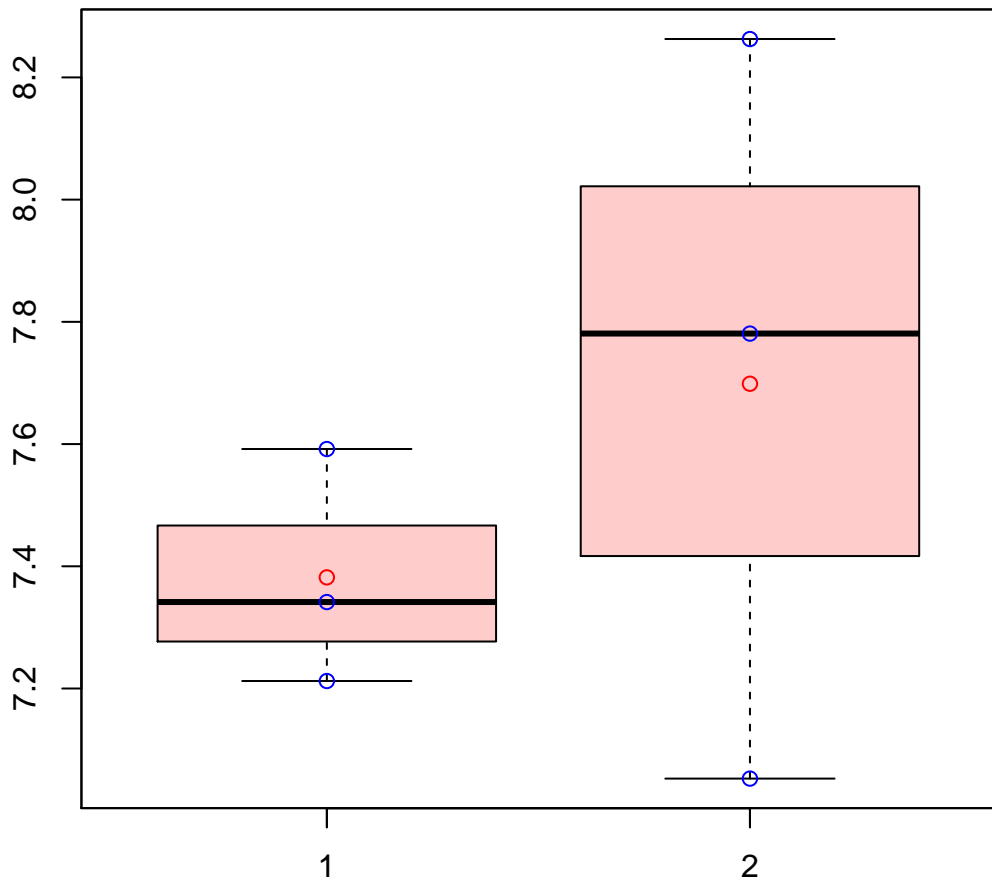

t-Test: p-value = 0.47

# J3MST2|J3MST2\_ORYBR

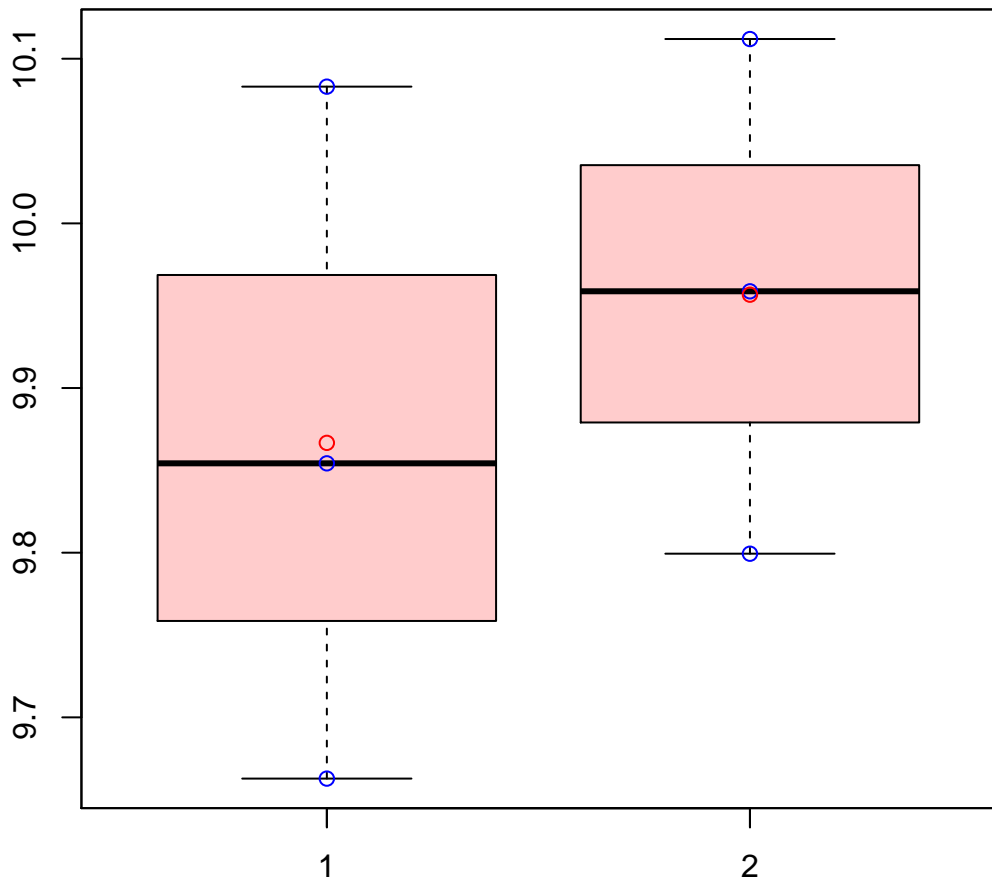

t-Test: p-value = 0.59

# J3MSX1|J3MSX1\_ORYBR

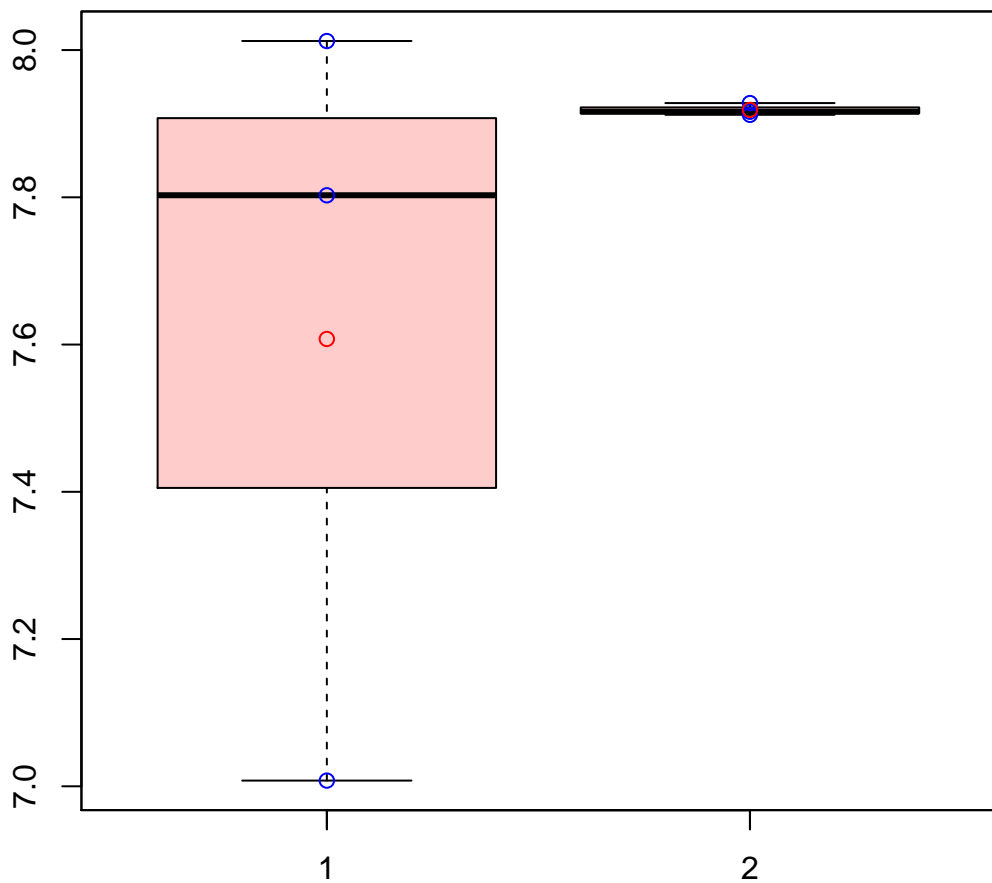

t-Test: p-value = 0.42

# J3MT92|J3MT92\_ORYBR

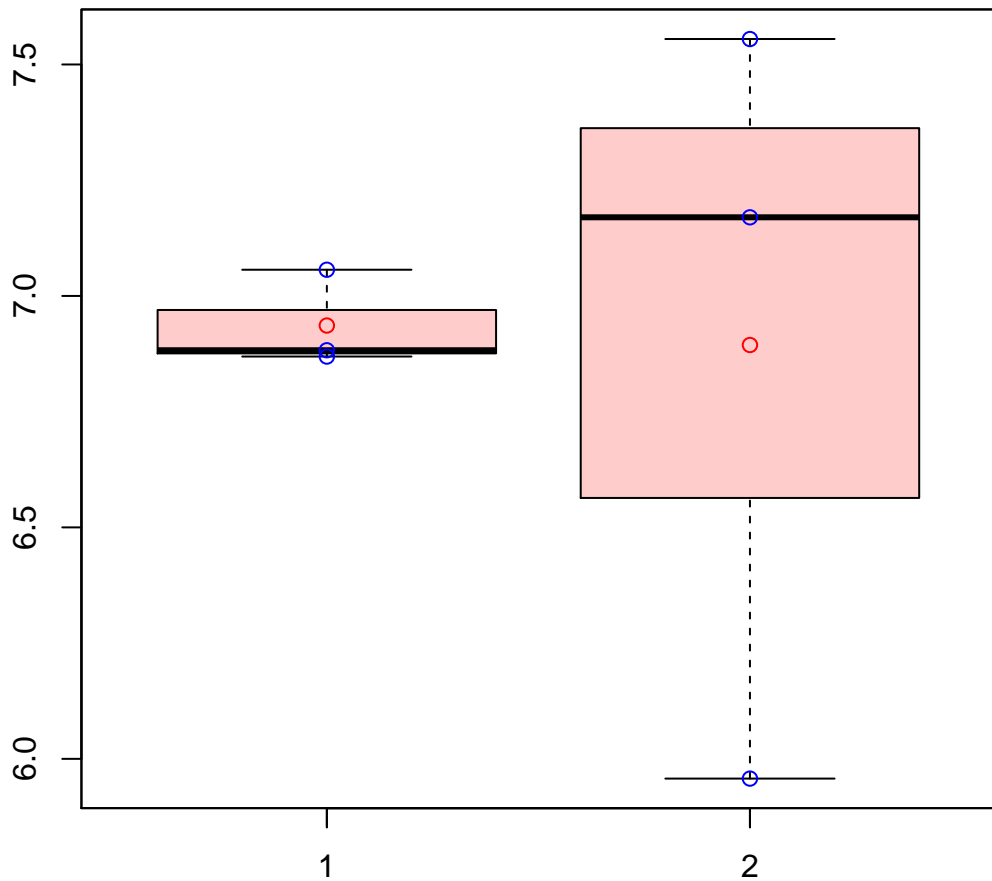

t-Test: p-value = 0.94

# J3MTC7|J3MTC7\_ORYBR

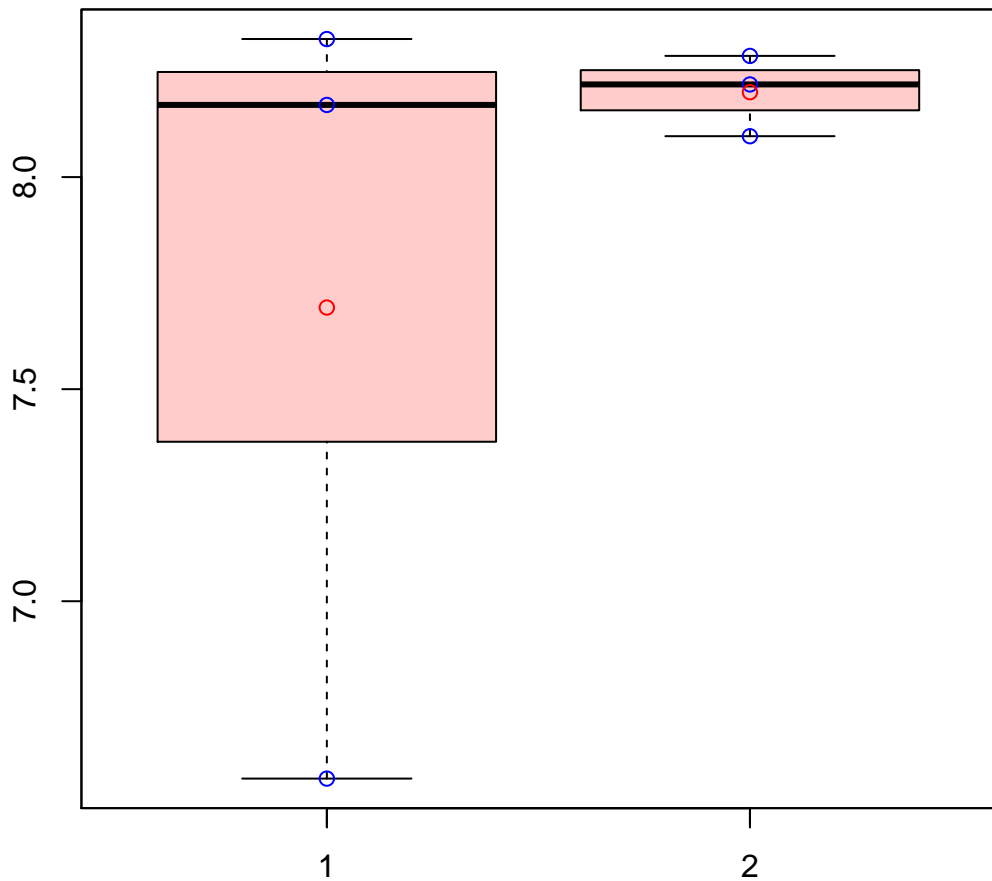

t-Test: p-value = 0.46

# J3MTN5|J3MTN5\_ORYBR

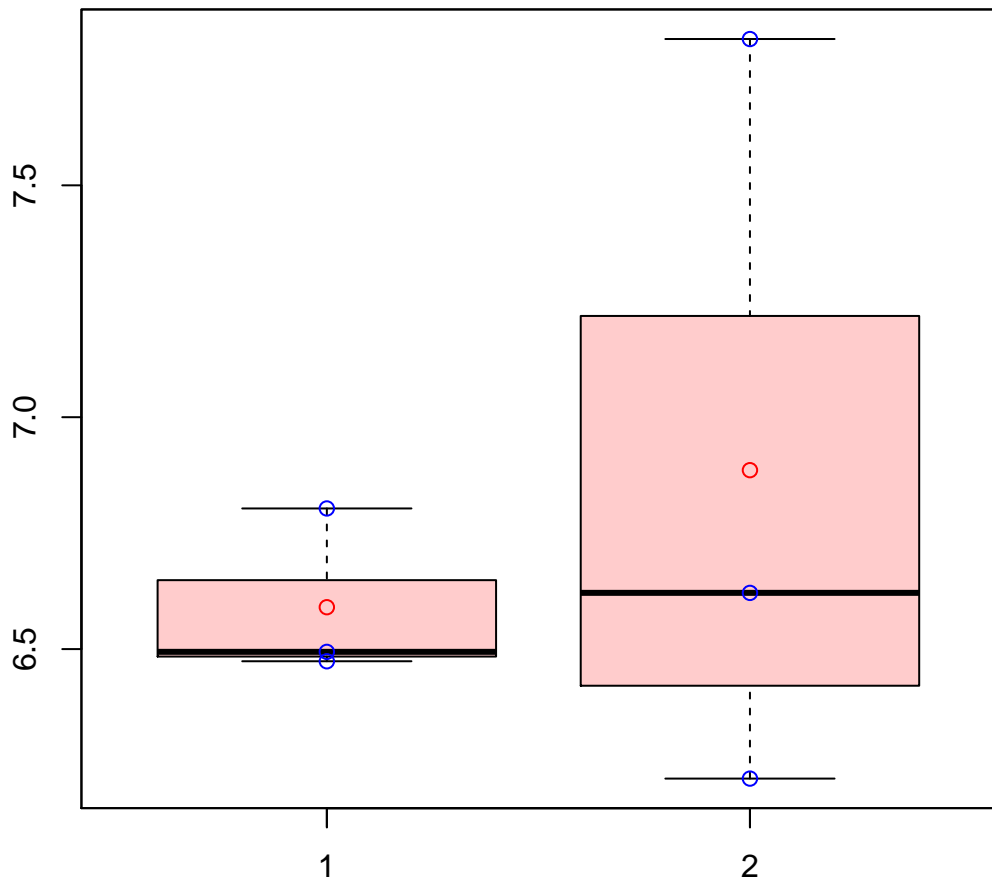

t-Test: p-value = 0.6

# J3MU66|J3MU66\_ORYBR

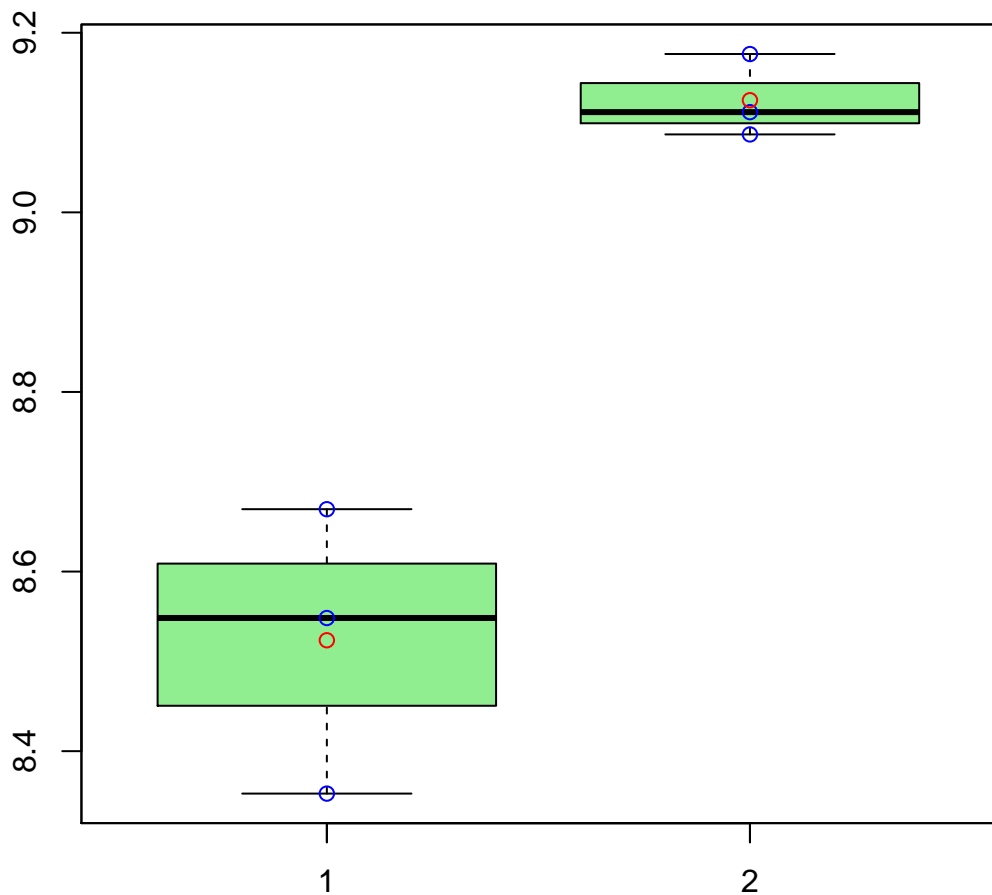

t-Test: p-value = 0.02

# J3MU75|J3MU75\_ORYBR

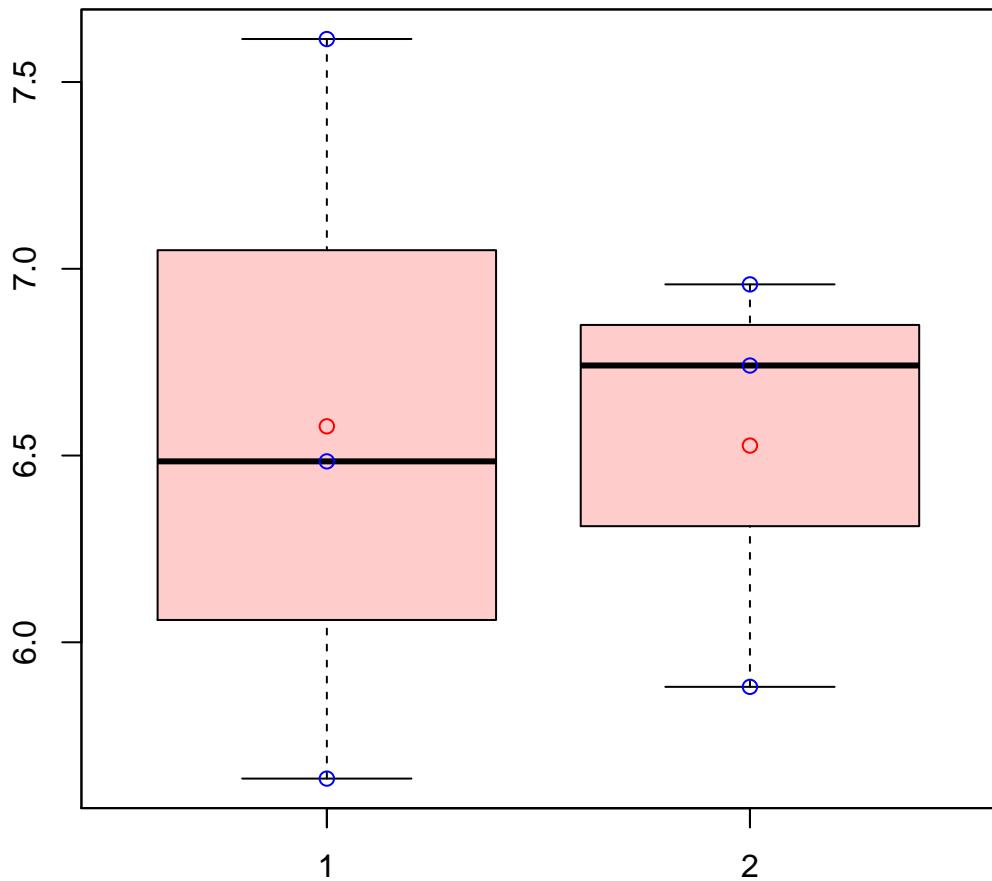

t-Test: p-value = 0.94



# J3MUS5|J3MUS5\_ORYBR

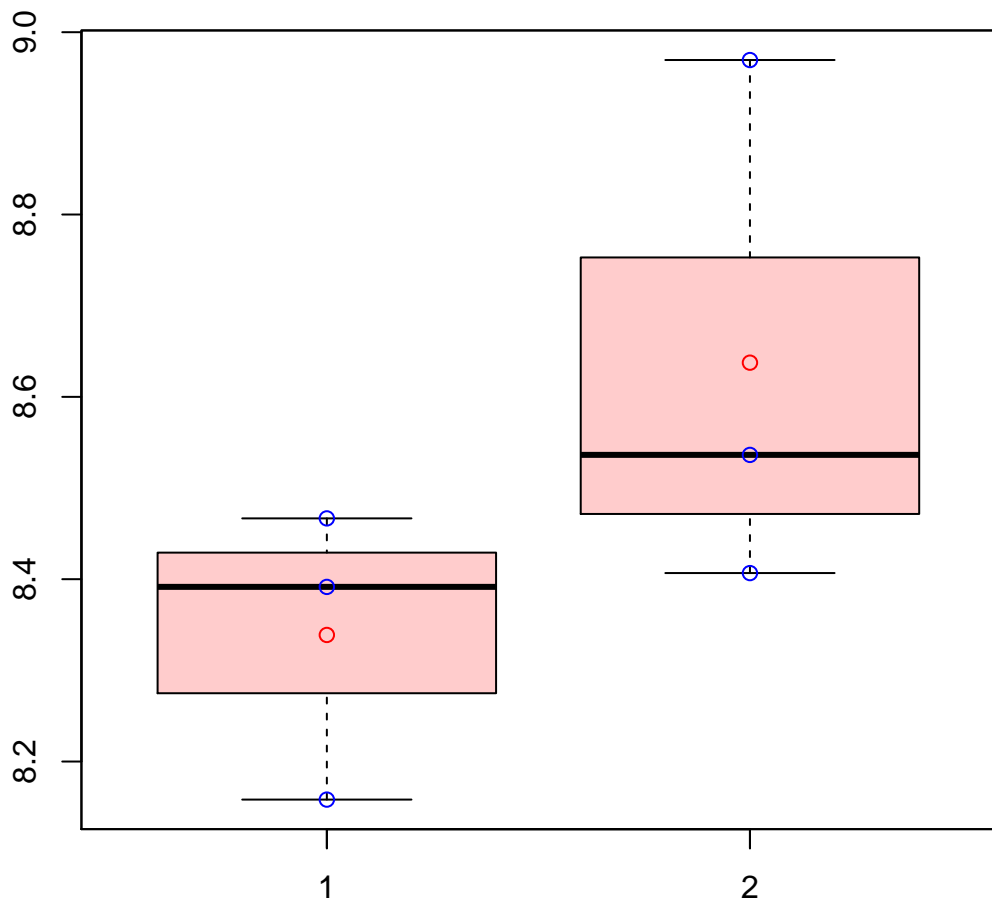

t-Test: p-value = 0.22

# J3MV86|J3MV86\_ORYBR

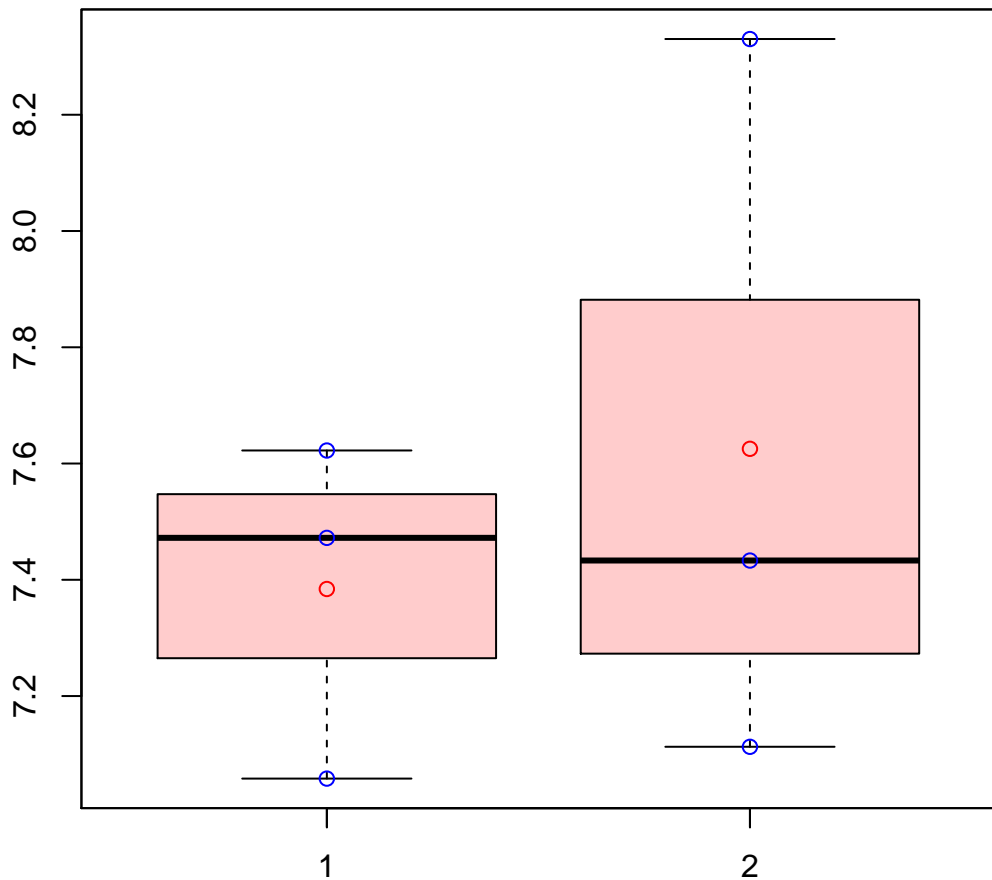

t-Test: p-value = 0.59

# J3MV6|J3MV6\_ORYBR

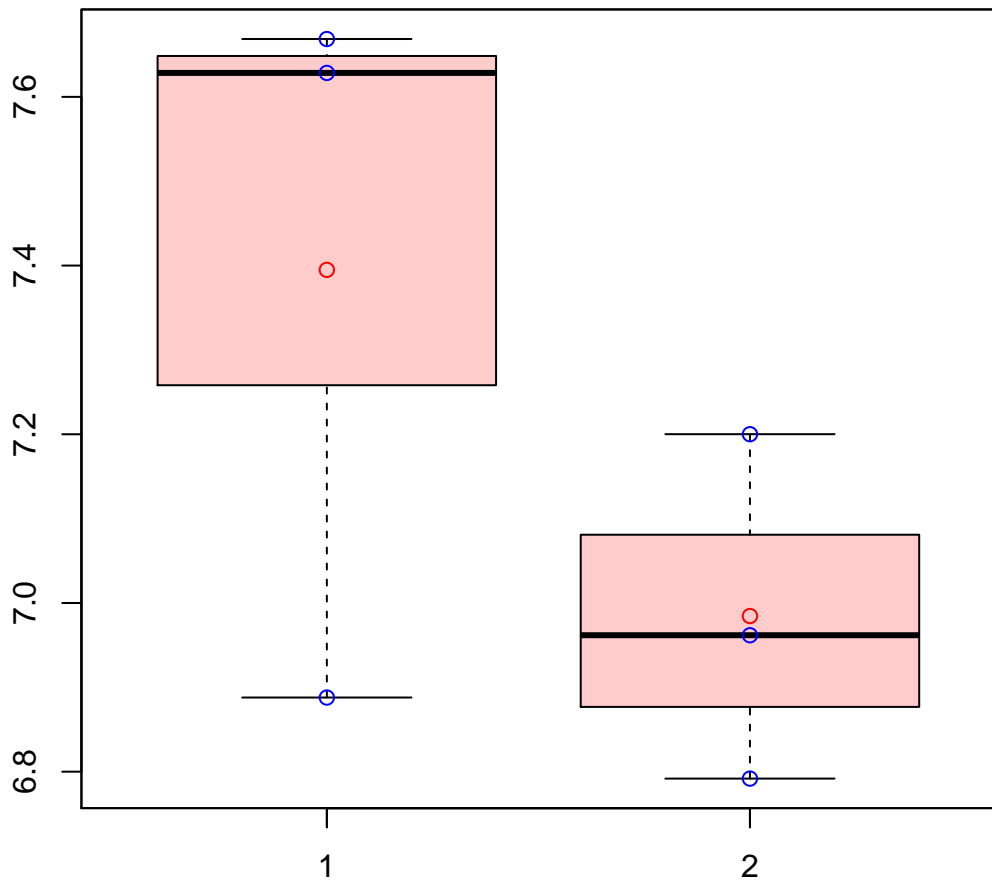

t-Test: p-value = 0.24

# J3MVK1|J3MVK1\_ORYBR

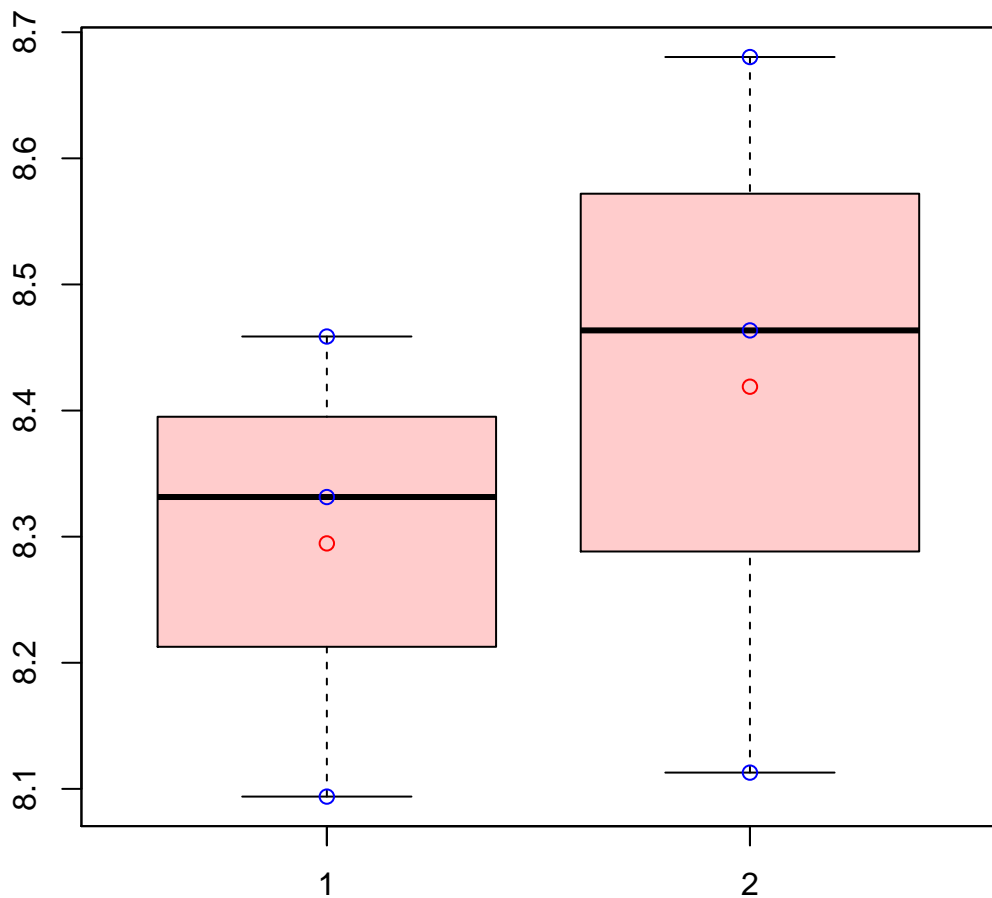

t-Test: p-value = 0.57

# J3MVR9|J3MVR9\_ORYBR

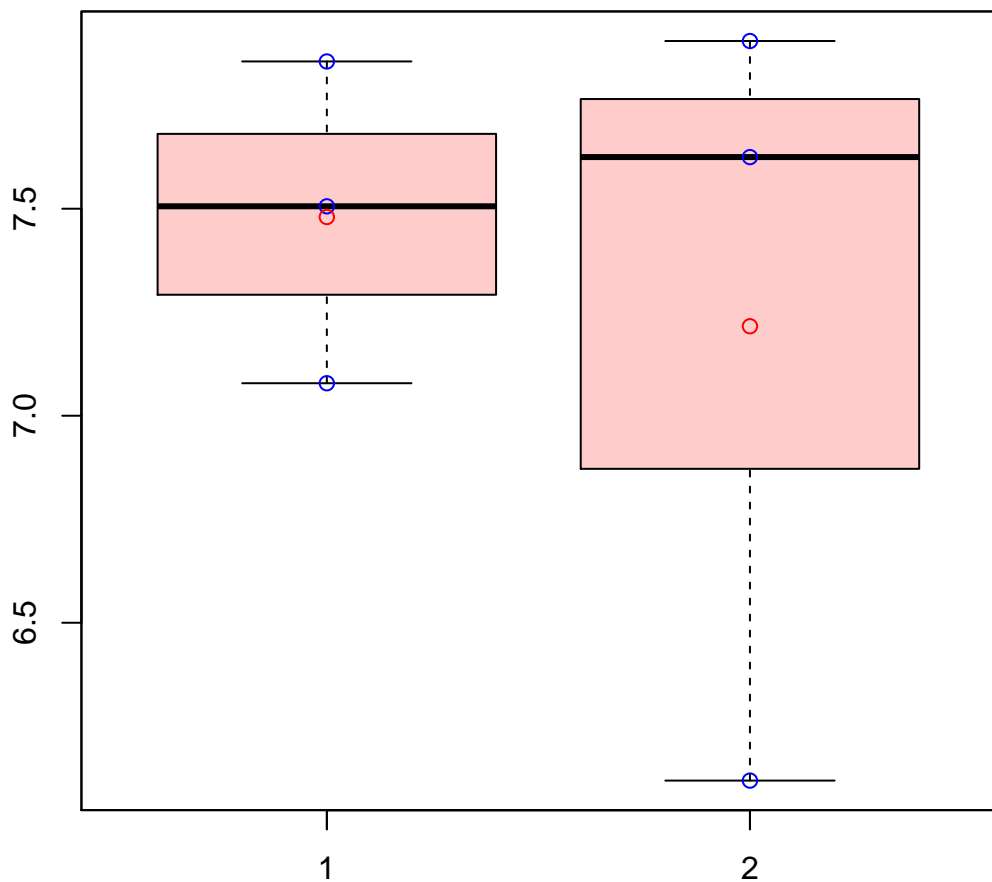

t-Test: p-value = 0.69

# J3MW45|J3MW45\_ORYBR

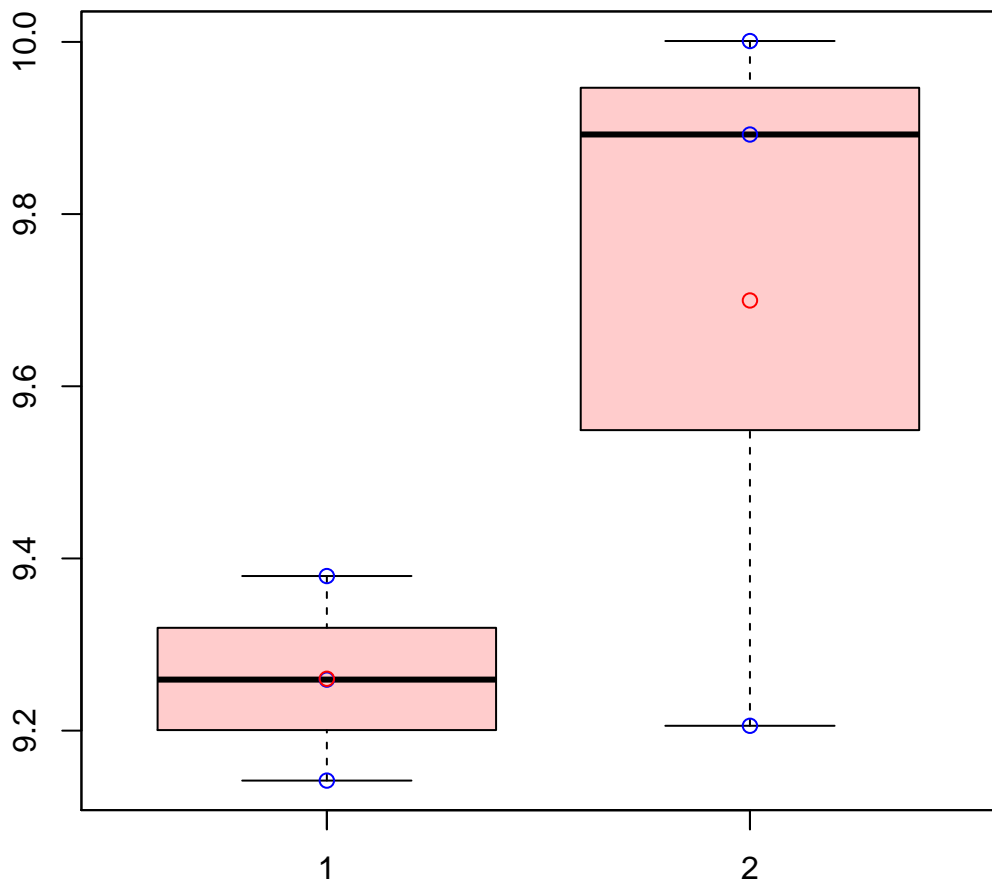

t-Test: p-value = 0.21

# J3MXR3|J3MXR3\_ORYBR

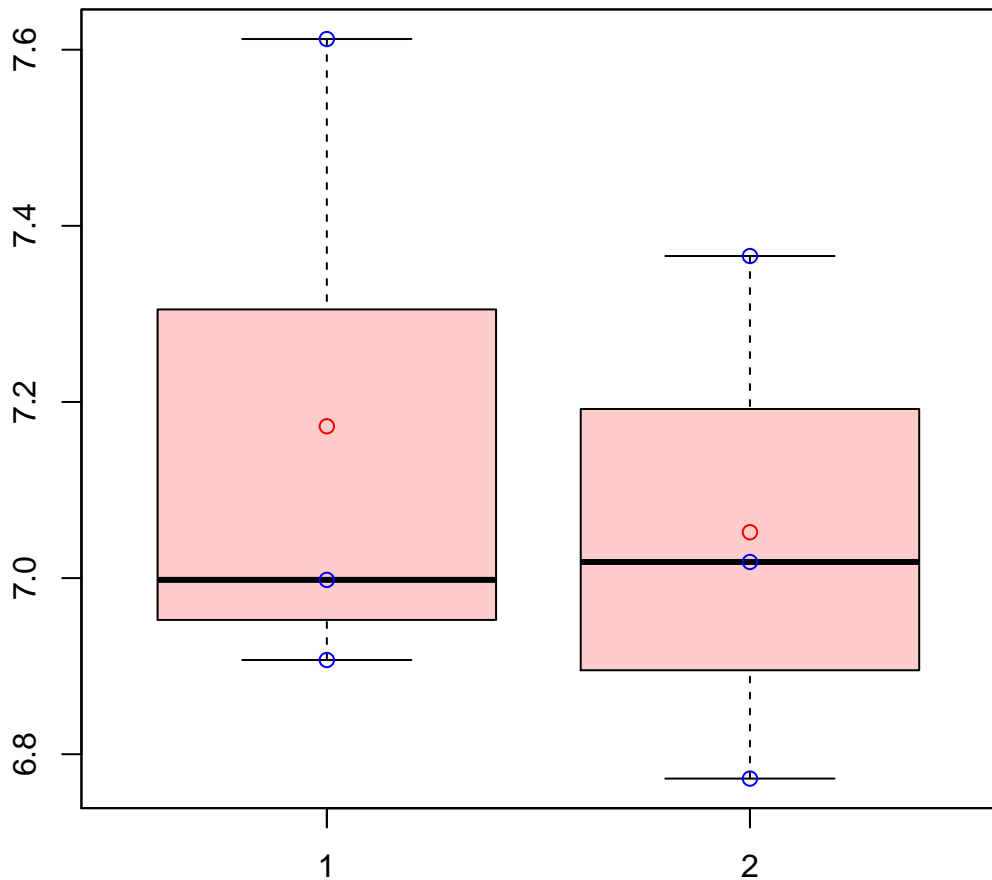

t-Test: p-value = 0.69

# J3MXZ6|J3MXZ6\_ORYBR

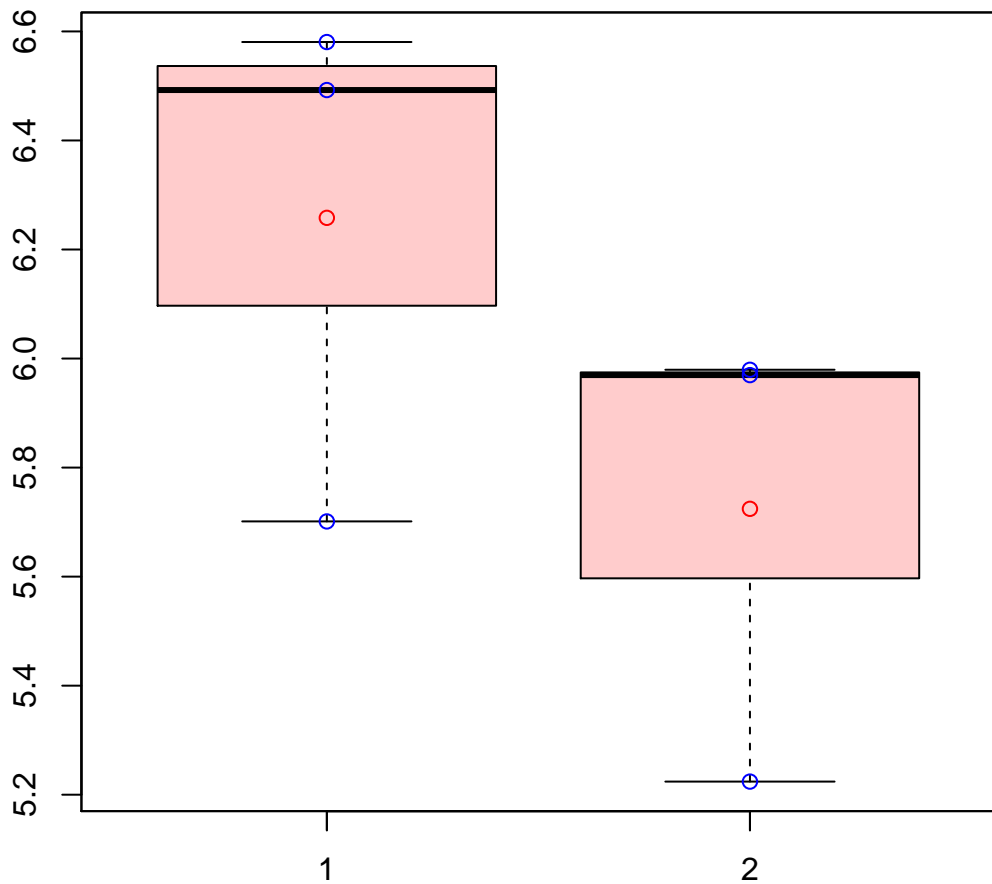

t-Test: p-value = 0.23



# J3MYE2|J3MYE2\_ORYBR

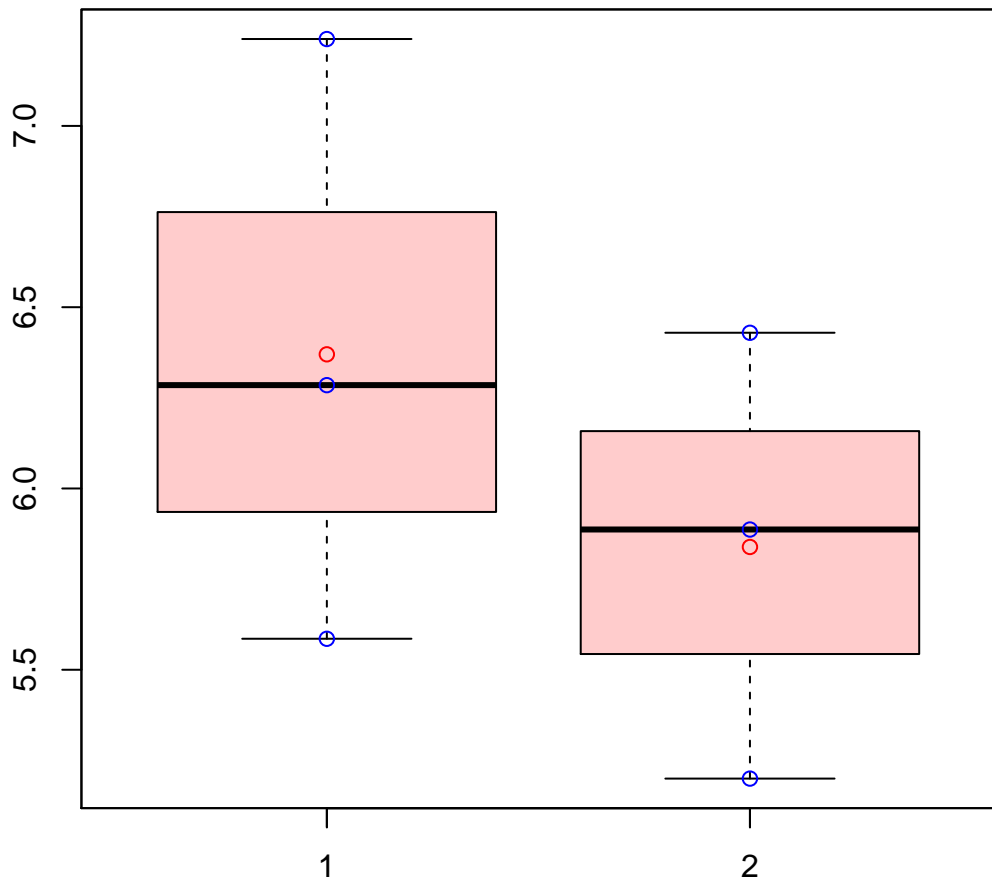

t-Test: p-value = 0.43

# J3MYH1|J3MYH1\_ORYBR

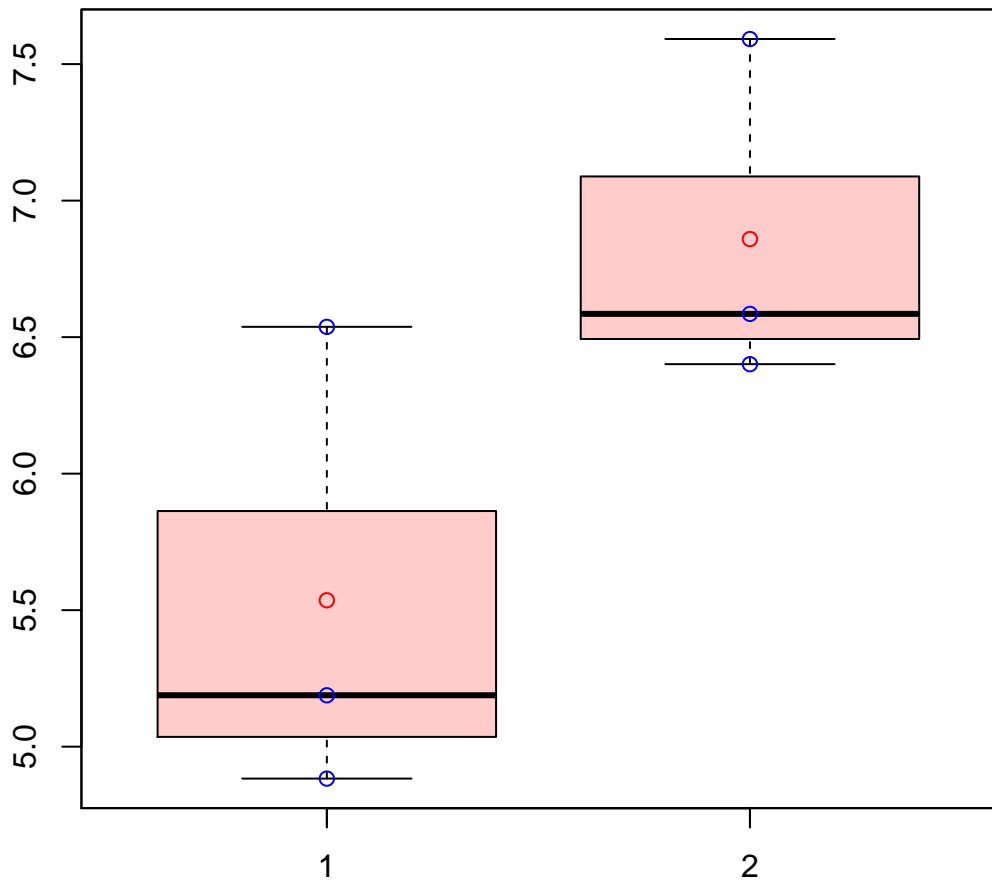

t-Test: p-value = 0.11

# J3MZ59|J3MZ59\_ORYBR

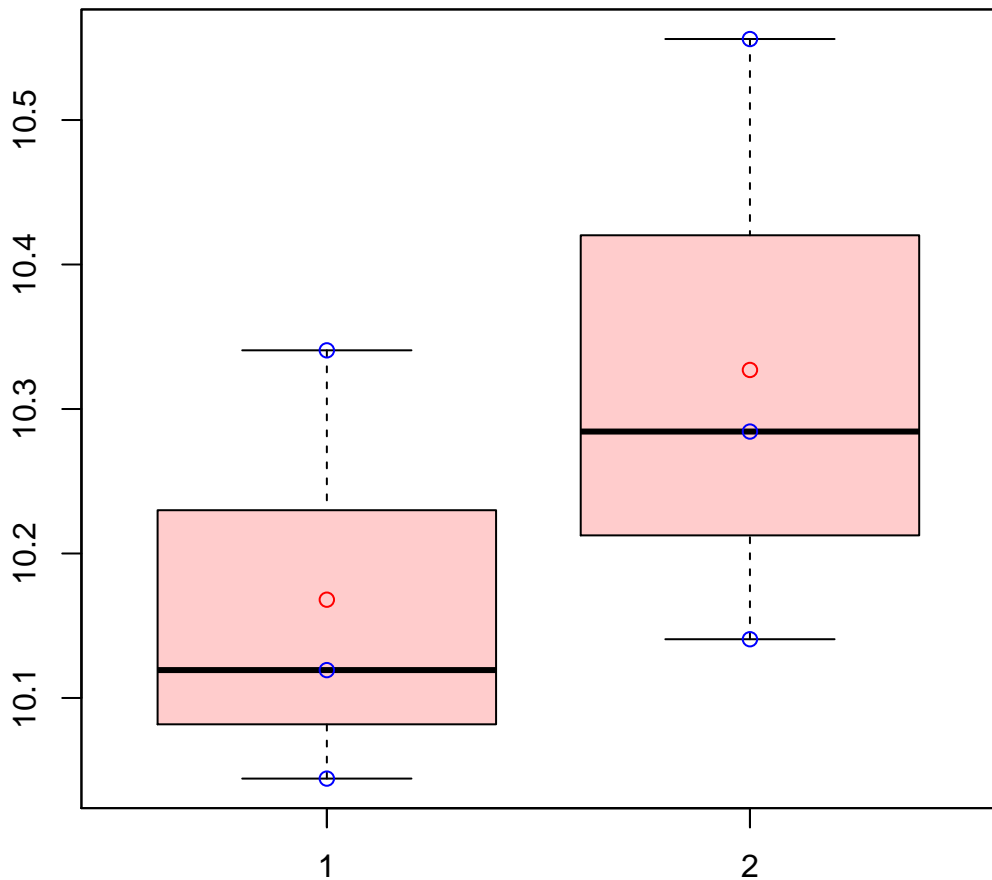

t-Test: p-value = 0.36

# J3MZJ1|J3MZJ1\_ORYBR

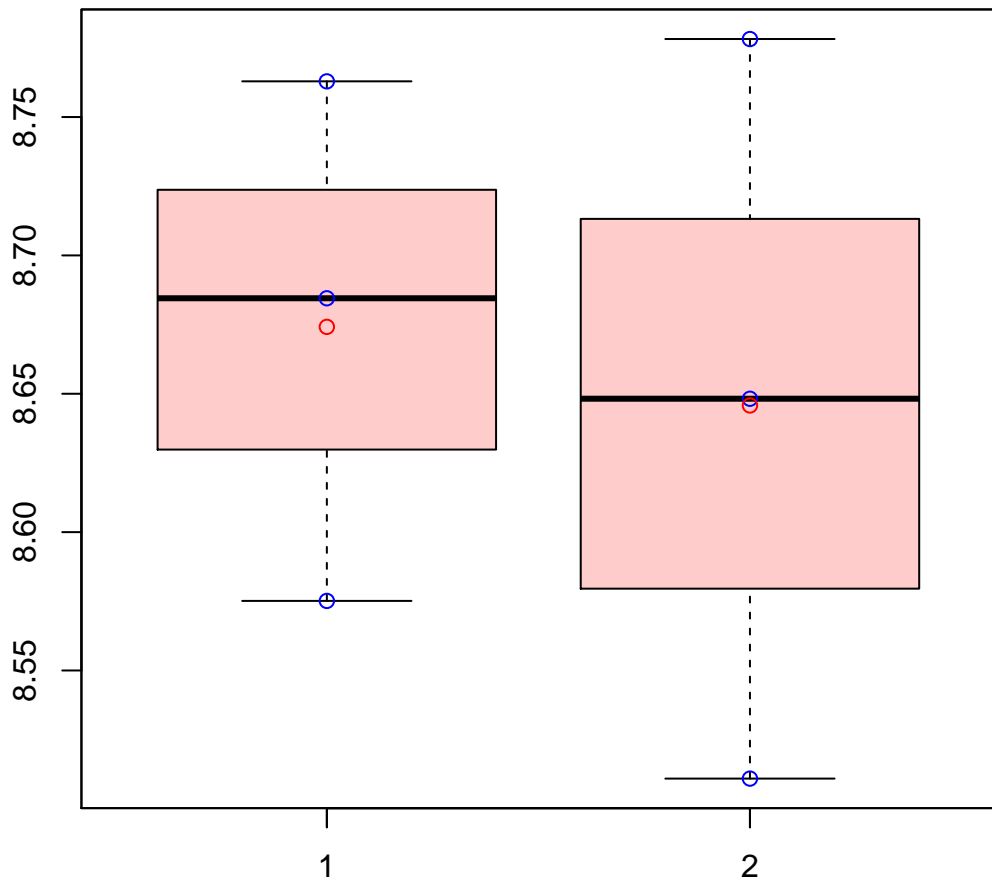

t-Test: p-value = 0.78

# J3MZK9|J3MZK9\_ORYBR

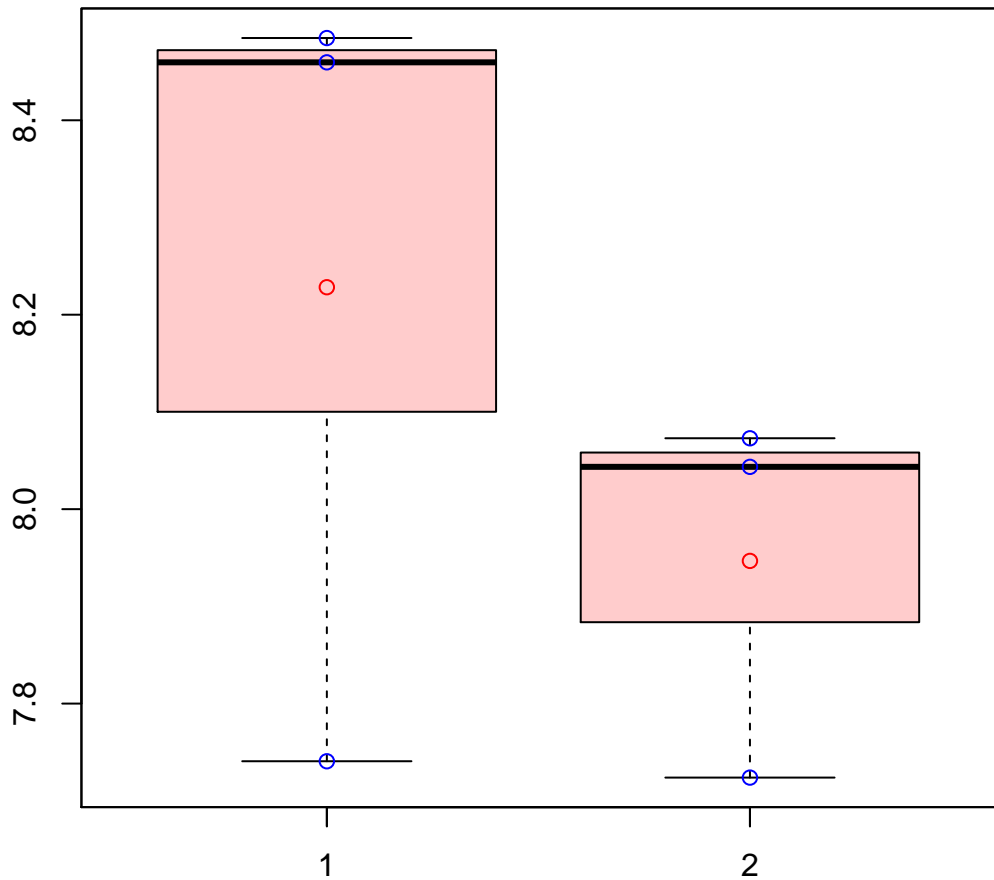

t-Test: p-value = 0.38

# J3MZL9|J3MZL9\_ORYBR

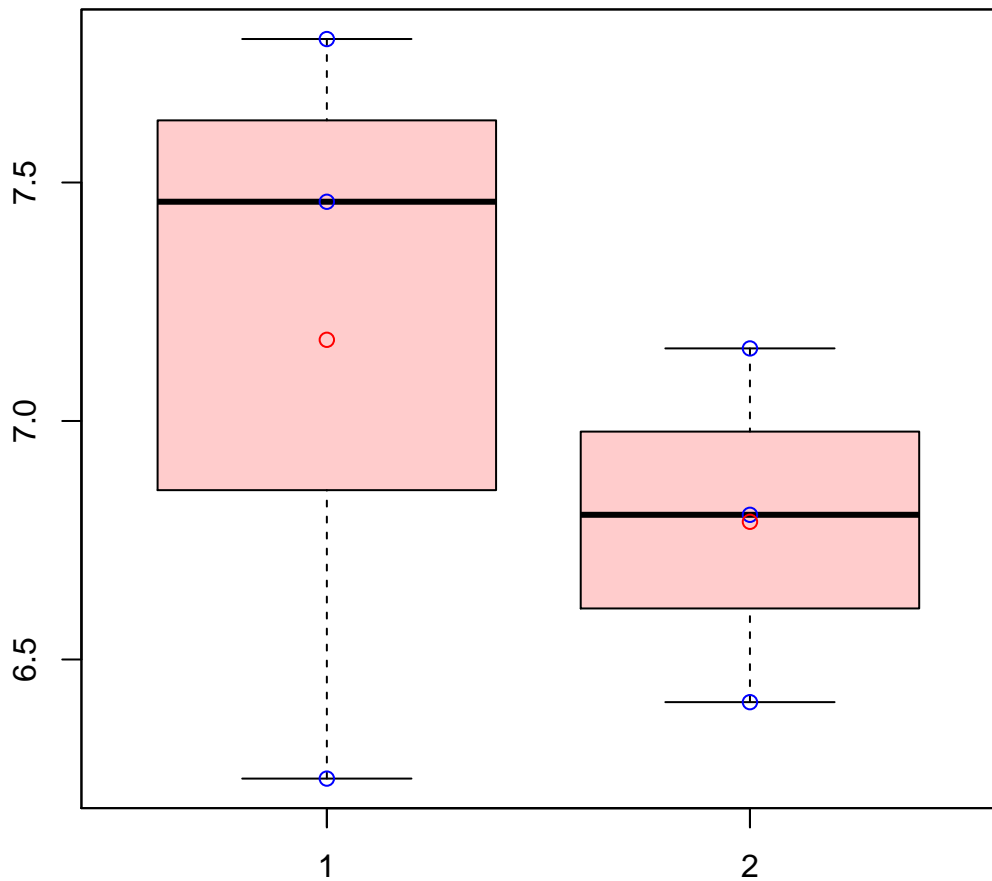

t-Test: p-value = 0.52

# J3N004|J3N004\_ORYBR

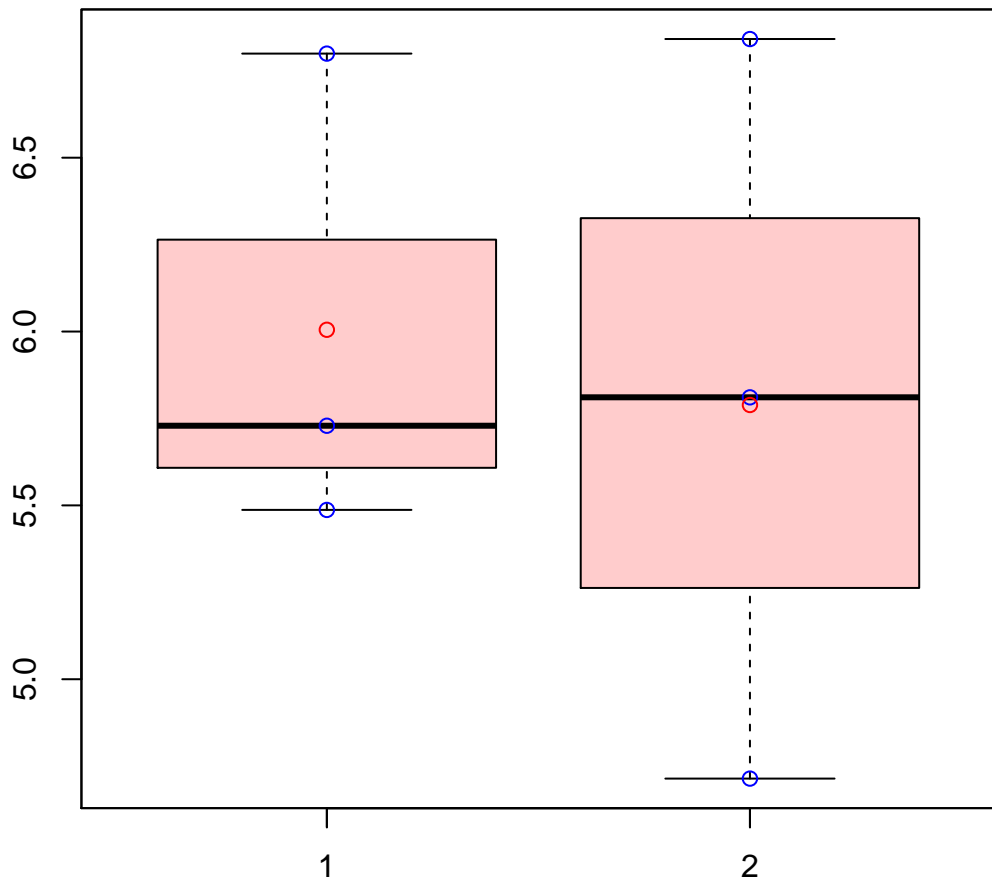

t-Test: p-value = 0.79

# J3N008|J3N008\_ORYBR

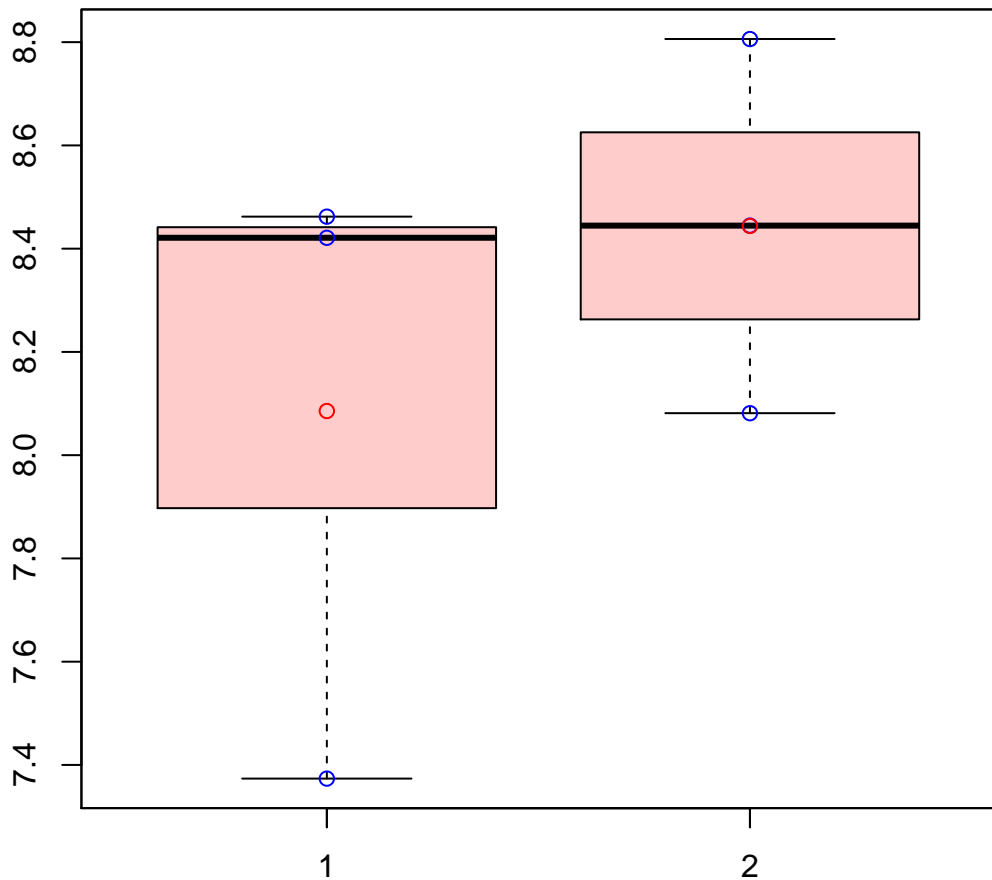

t-Test: p-value = 0.45



# J3N075|J3N075\_ORYBR

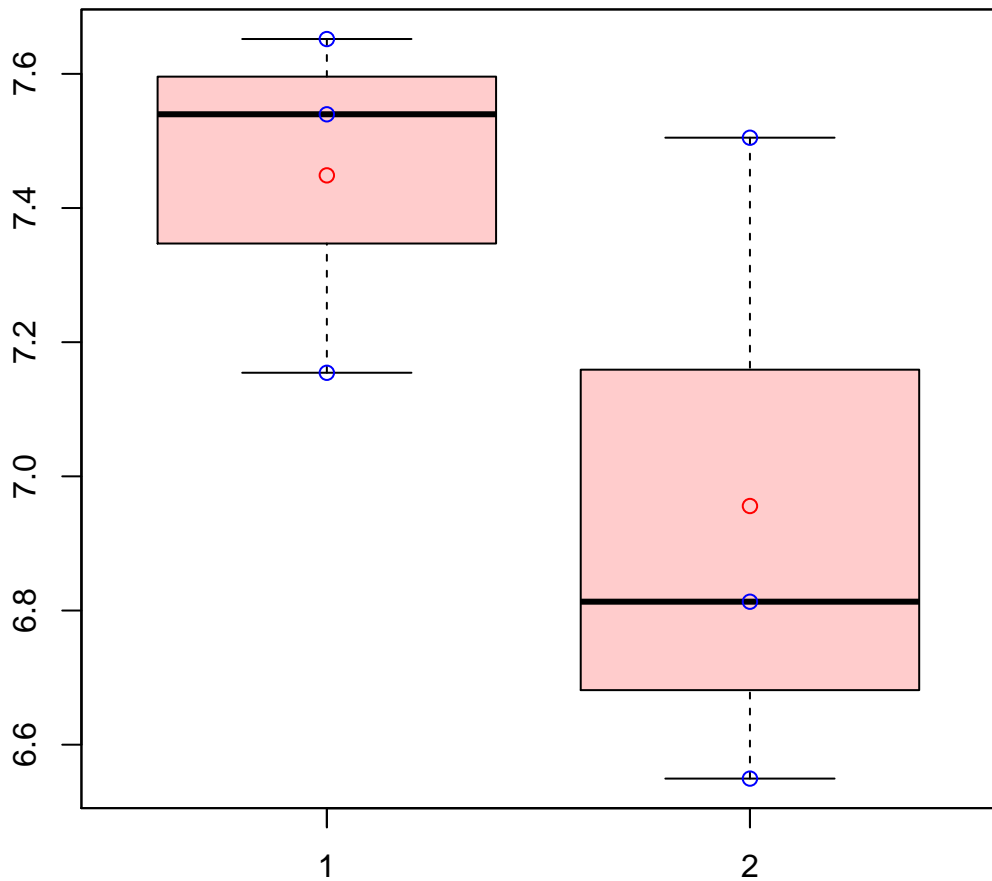

t-Test: p-value = 0.22

# J3N219|J3N219\_ORYBR

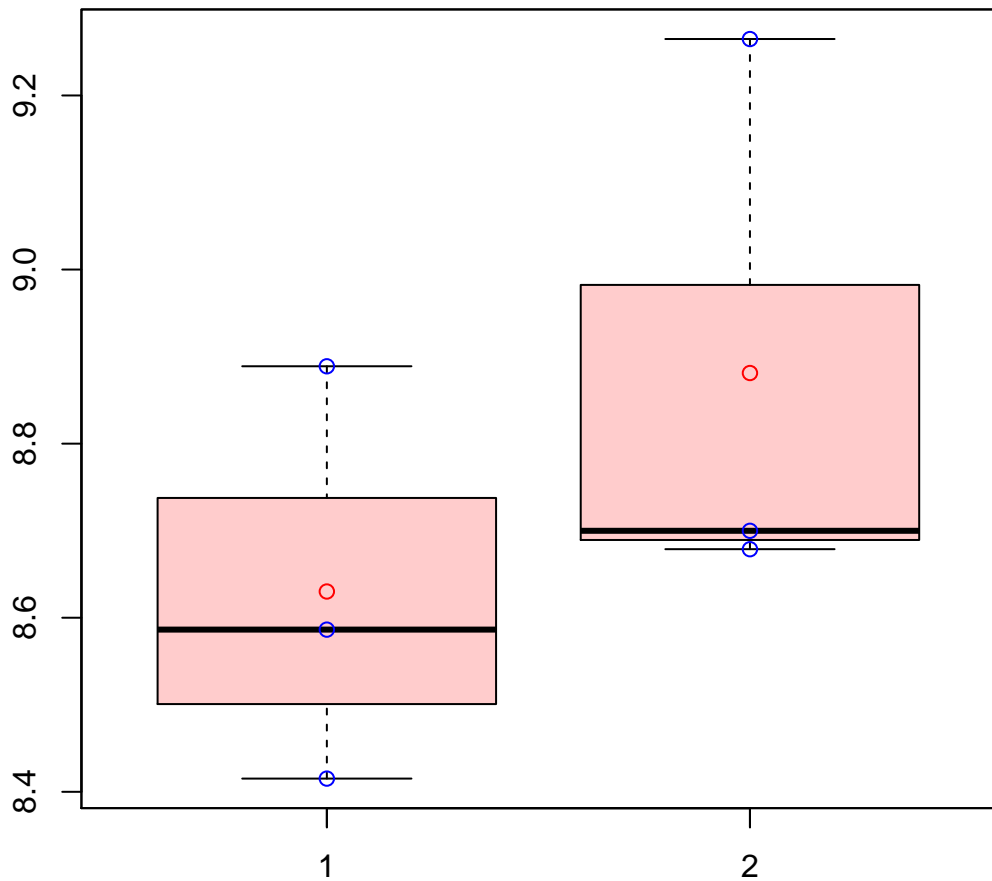

t-Test: p-value = 0.35

# J3N279|J3N279\_ORYBR

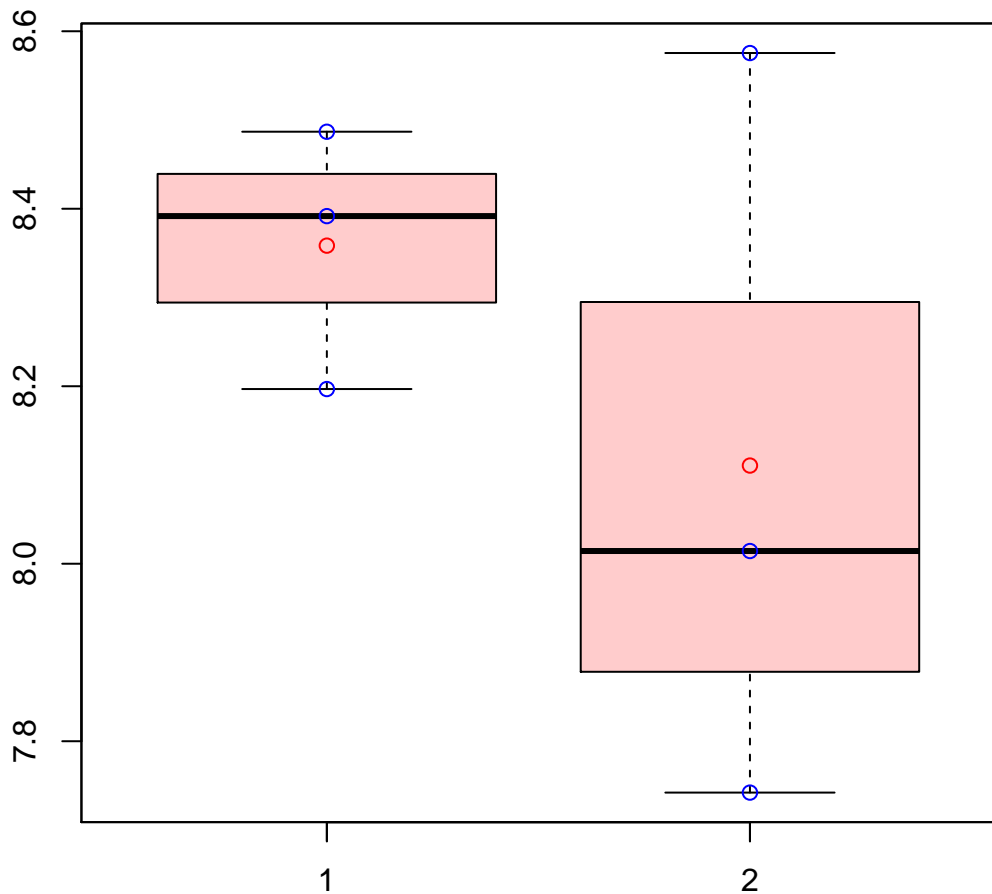

t-Test: p-value = 0.42

# J3N359|J3N359\_ORYBR

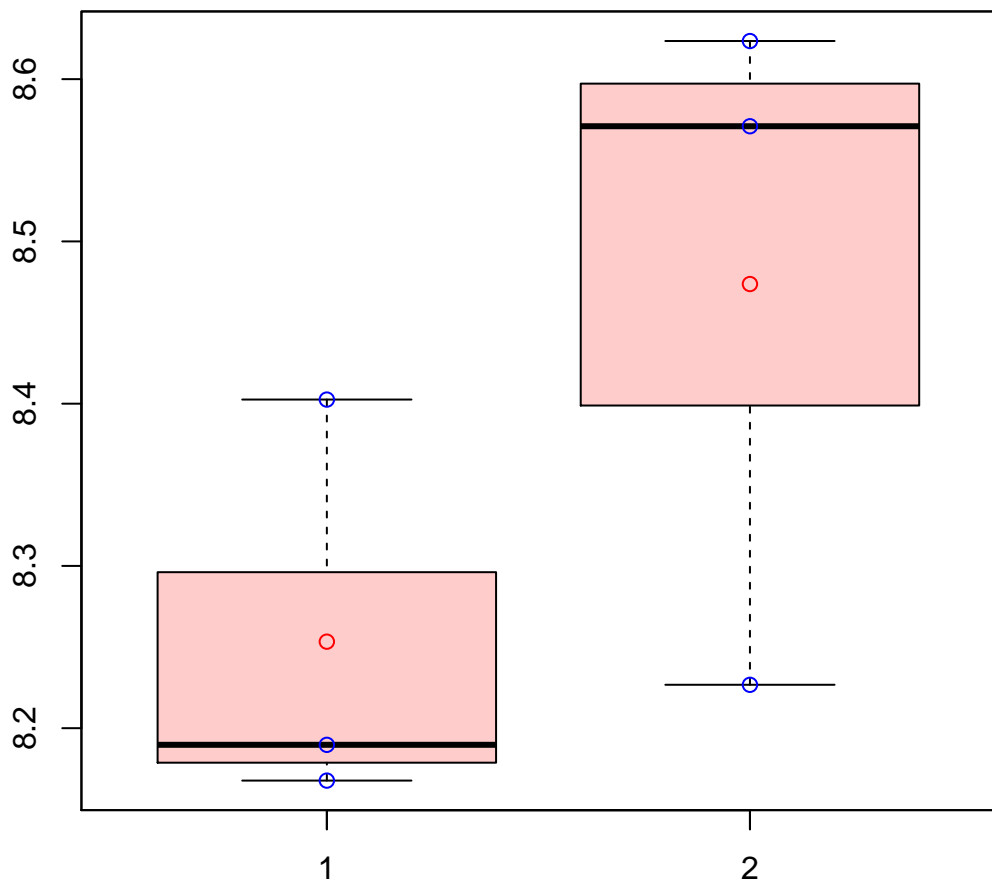

t-Test: p-value = 0.22

# J3N3N2|J3N3N2\_ORYBR

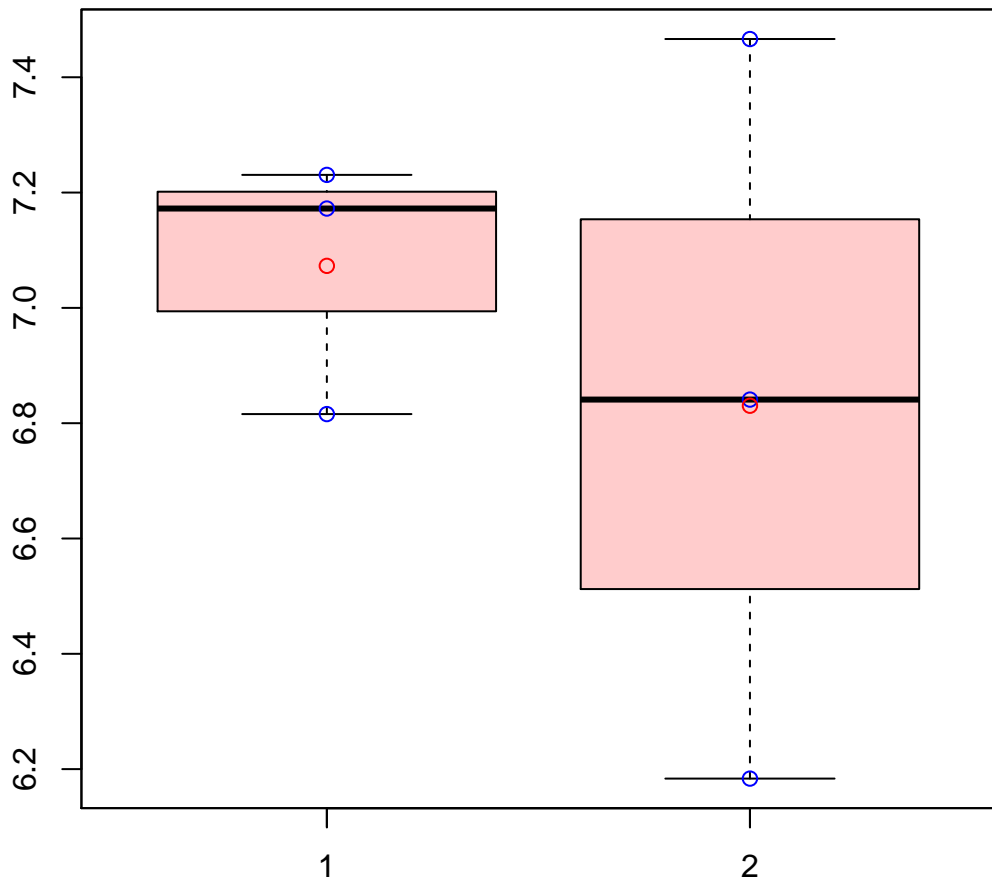

t-Test: p-value = 0.59

# J3N3W6|J3N3W6\_ORYBR

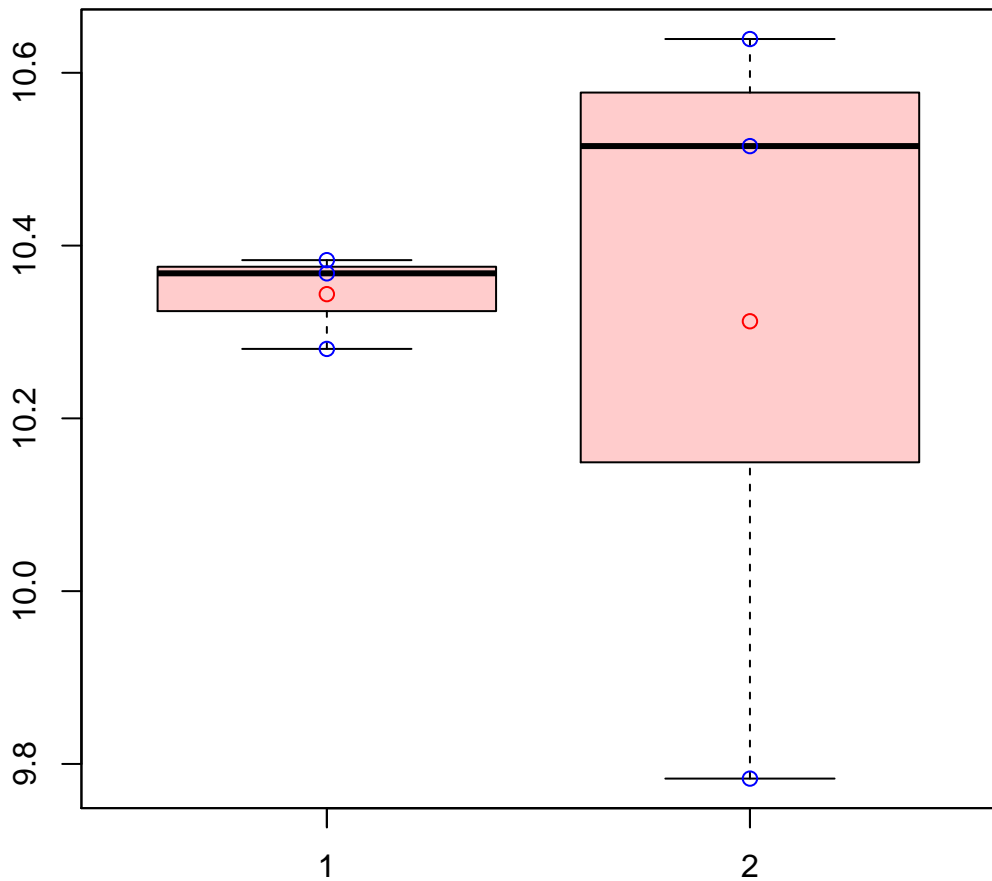

t-Test: p-value = 0.92

# J3N4I0|J3N4I0\_ORYBR

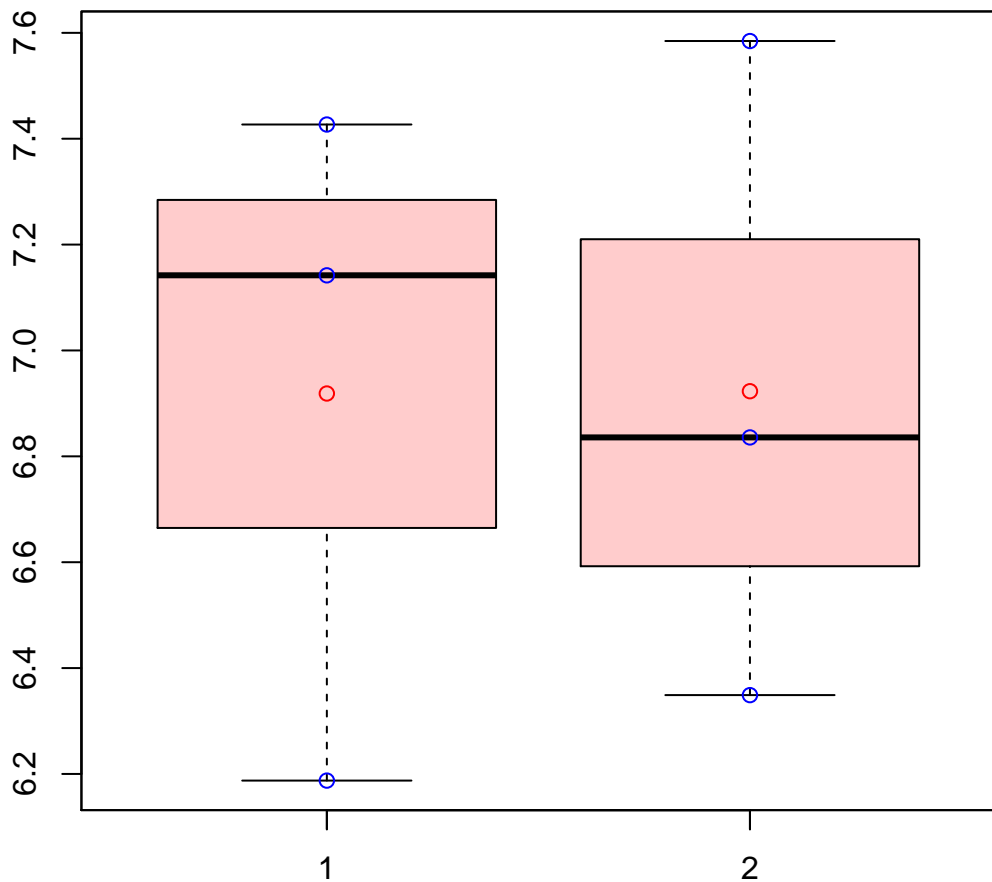

t-Test: p-value = 0.99

# J3N4U9|J3N4U9\_ORYBR

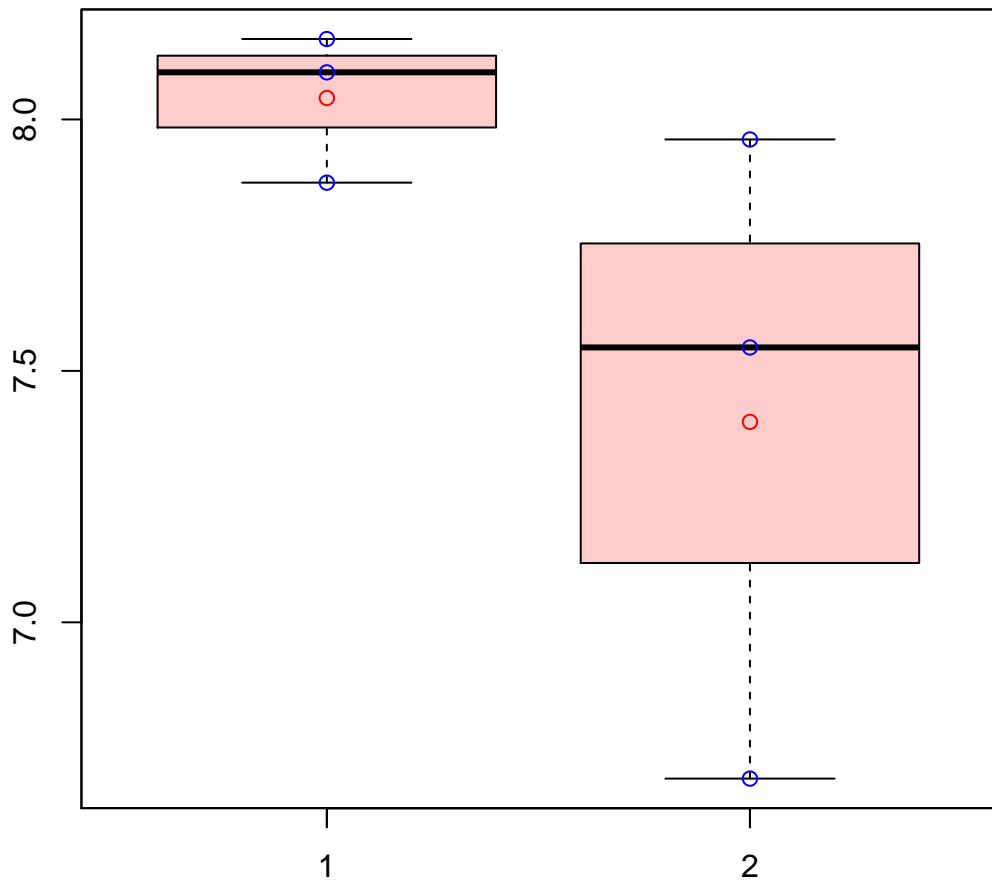

t-Test: p-value = 0.22



# J3N551|J3N551\_ORYBR

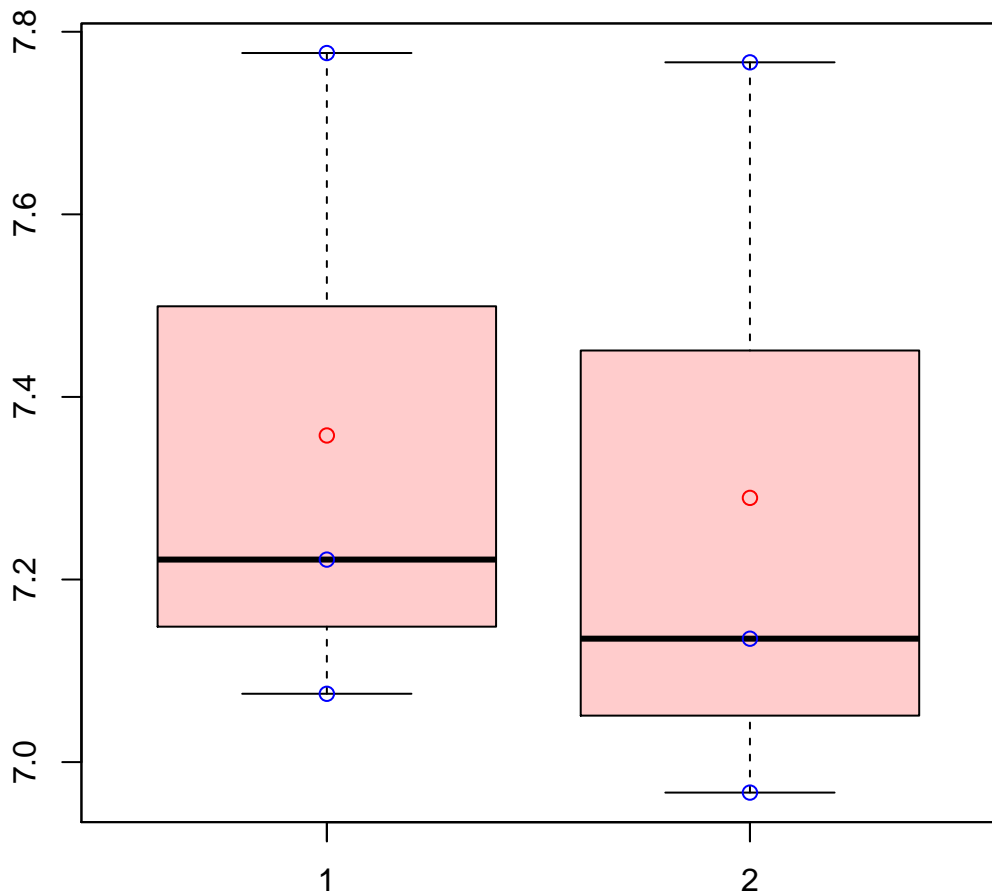

t-Test: p-value = 0.84

# J3N642|J3N642\_ORYBR

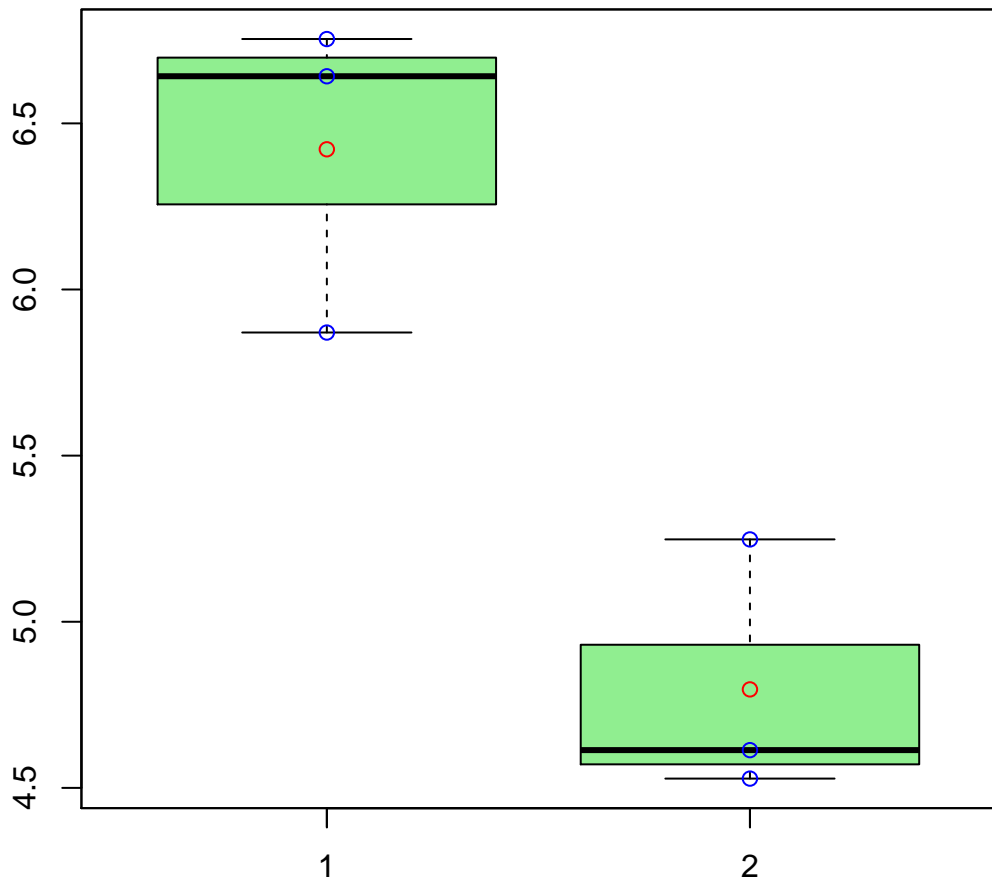

t-Test: p-value = 0.01

# J3N643|J3N643\_ORYBR

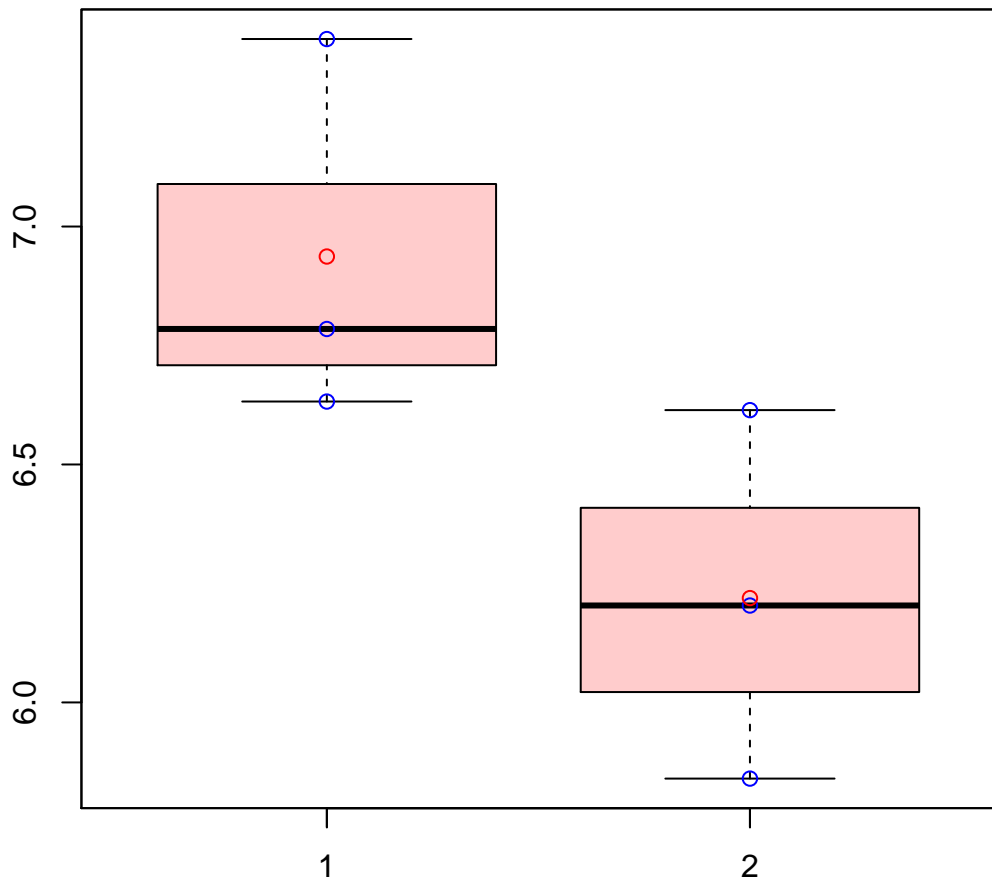

t-Test: p-value = 0.09

# J3N6E7|J3N6E7\_ORYBR

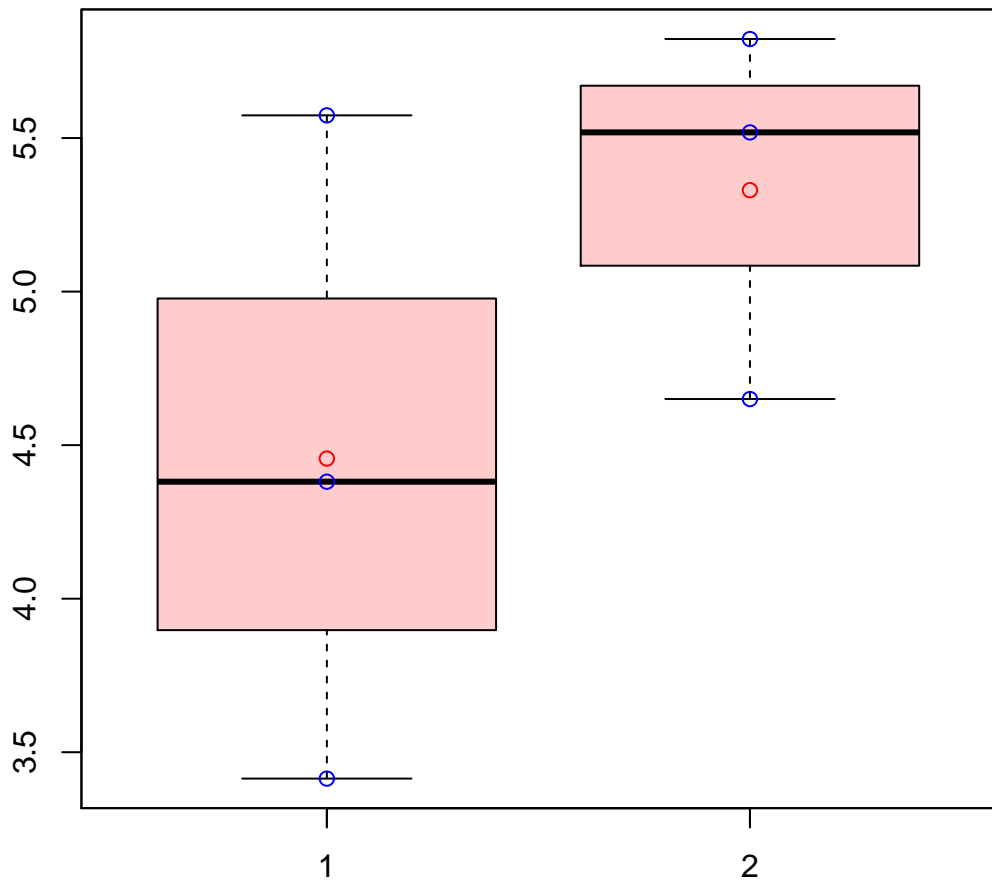

t-Test: p-value = 0.31

# J3N6N4|J3N6N4\_ORYBR

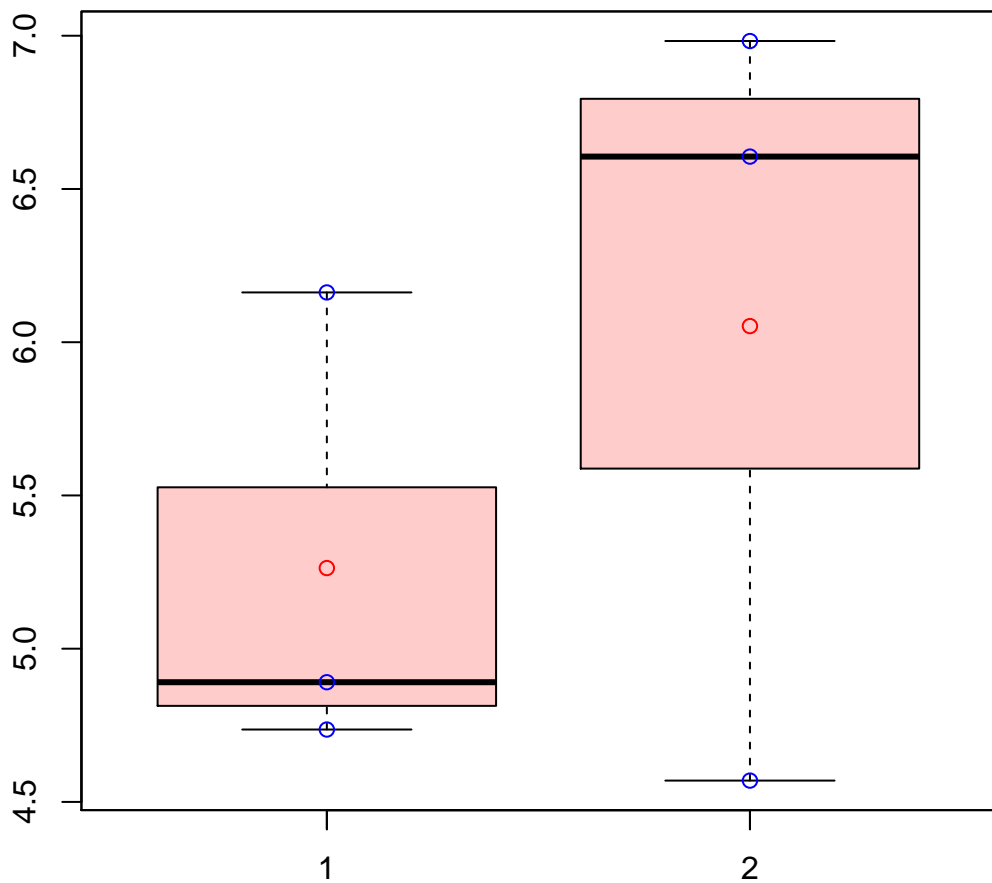

t-Test: p-value = 0.43

# J3N750|J3N750\_ORYBR

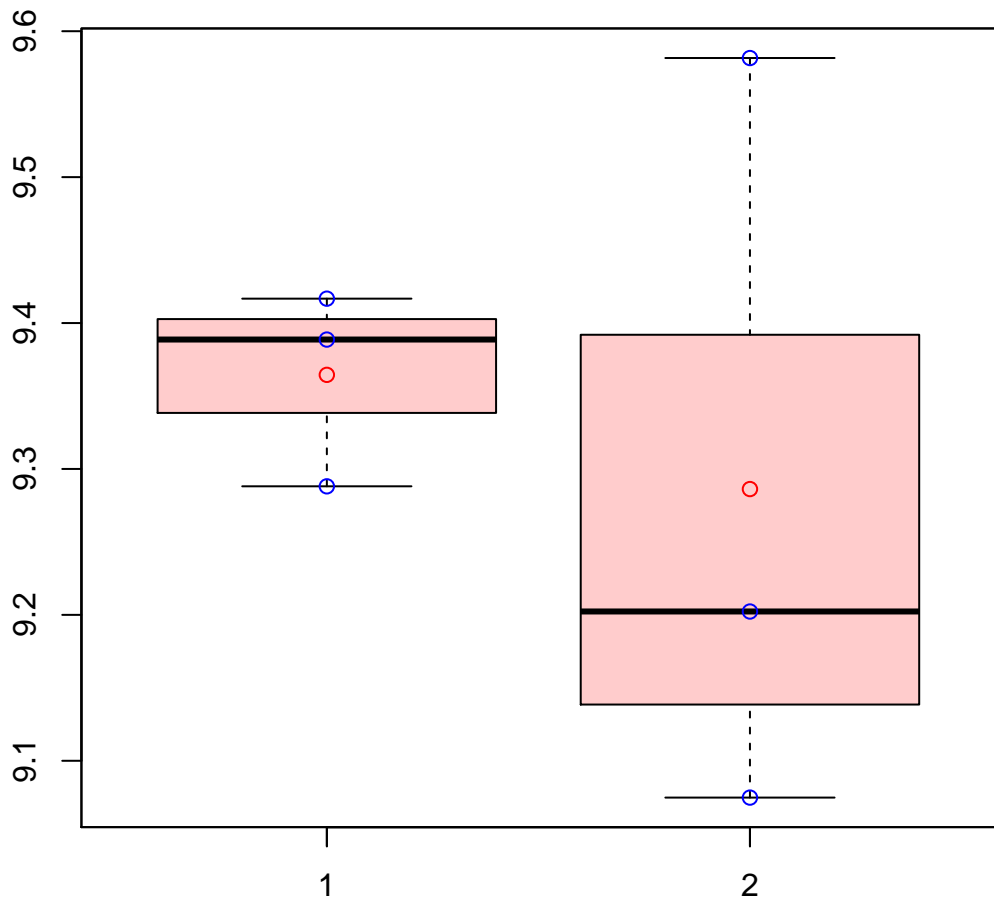

t-Test: p-value = 0.66

# J3N8N8|J3N8N8\_ORYBR

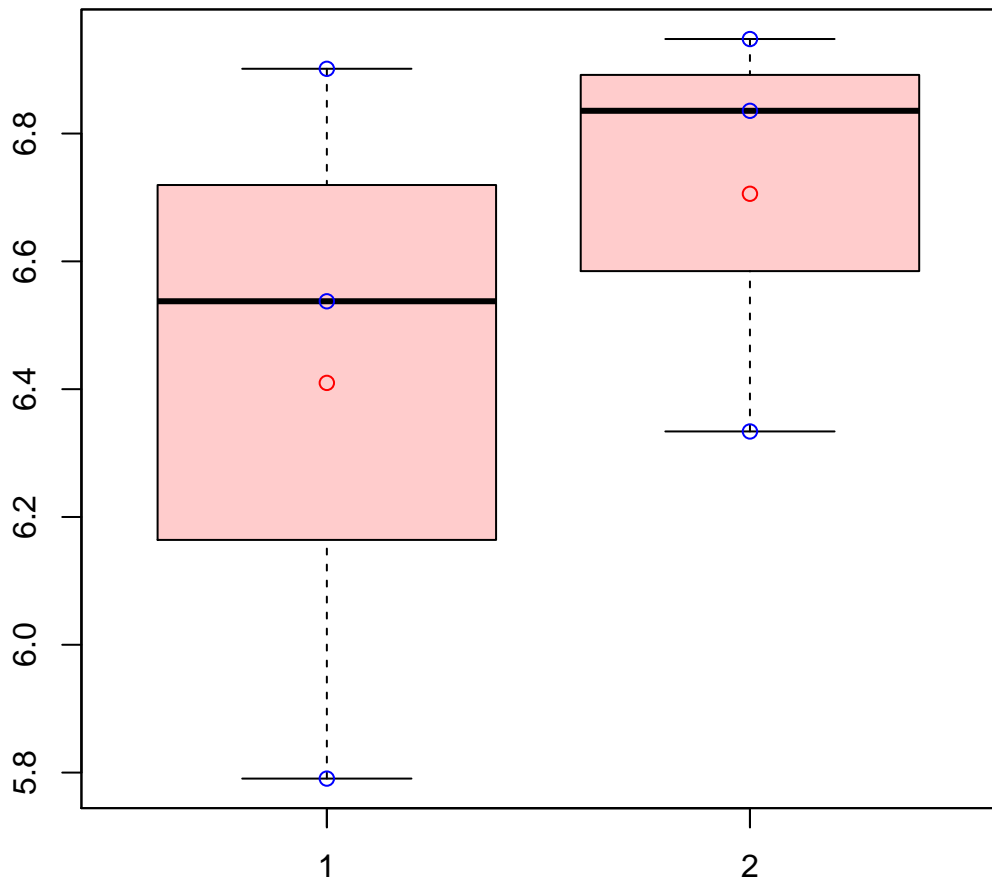

t-Test: p-value = 0.49

# J3N938|J3N938\_ORYBR

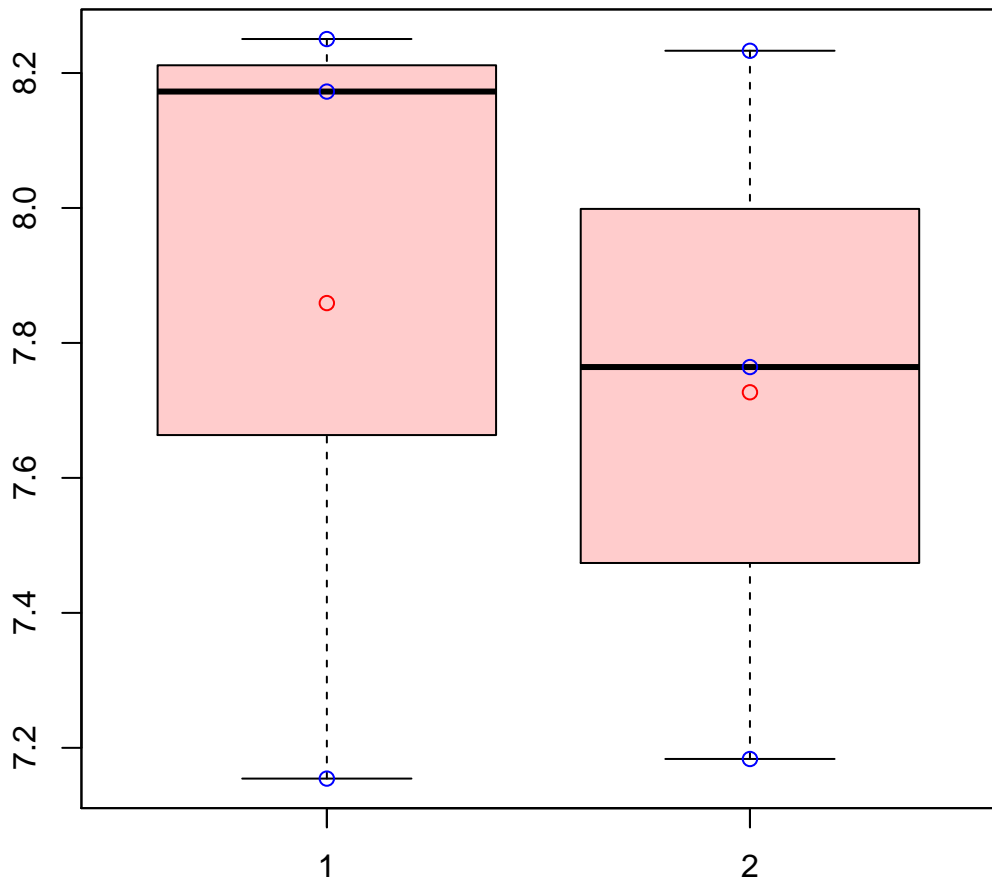

t-Test: p-value = 0.79



# J3N960|J3N960\_ORYBR

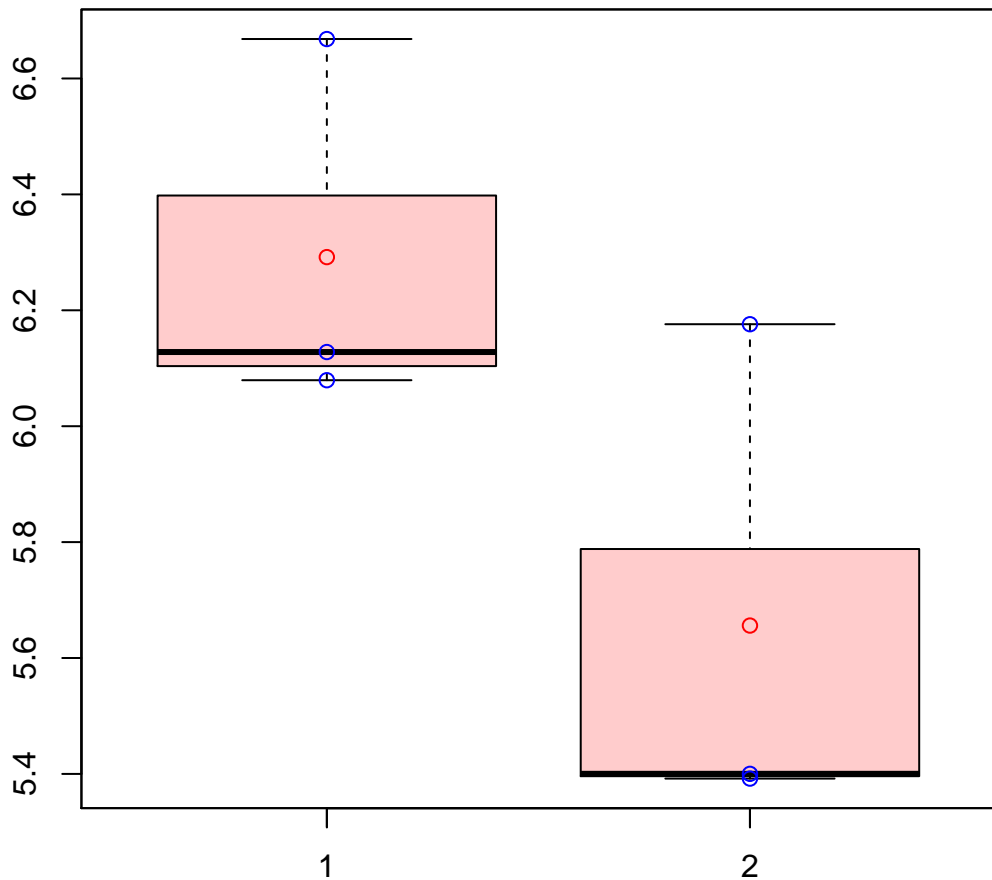

t-Test: p-value = 0.13

# J3N987|J3N987\_ORYBR

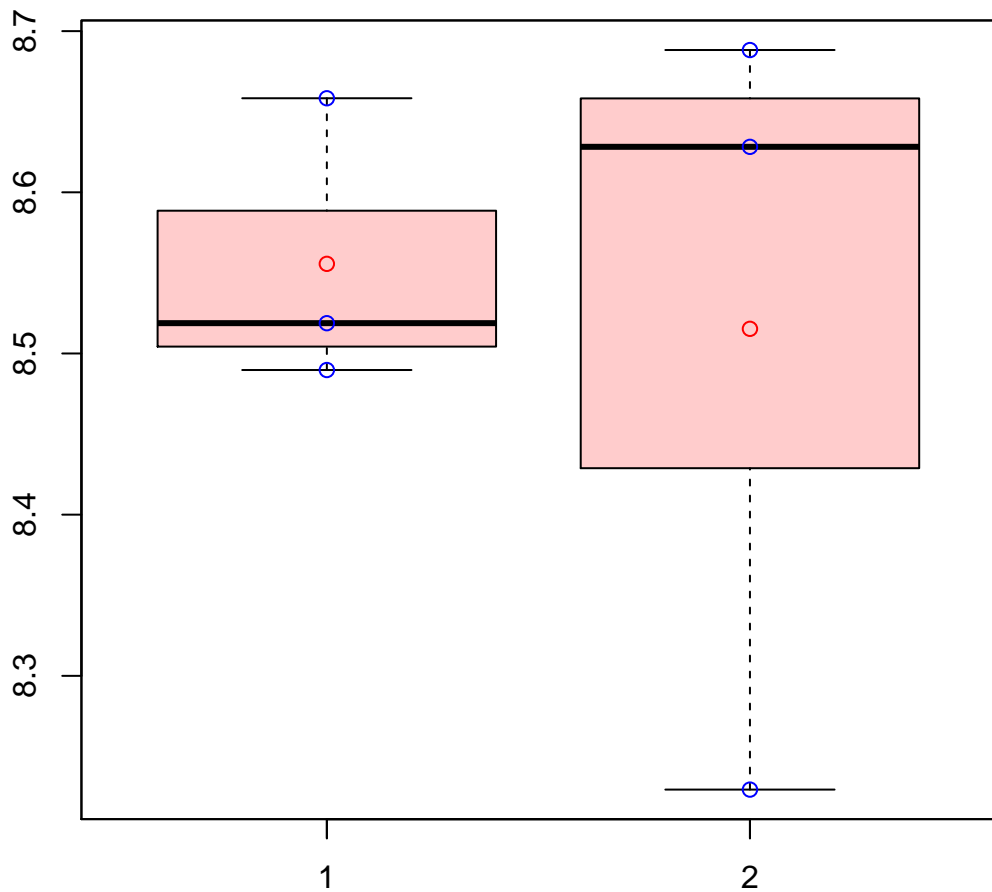

t-Test: p-value = 0.81

# J3N9B0|J3N9B0\_ORYBR

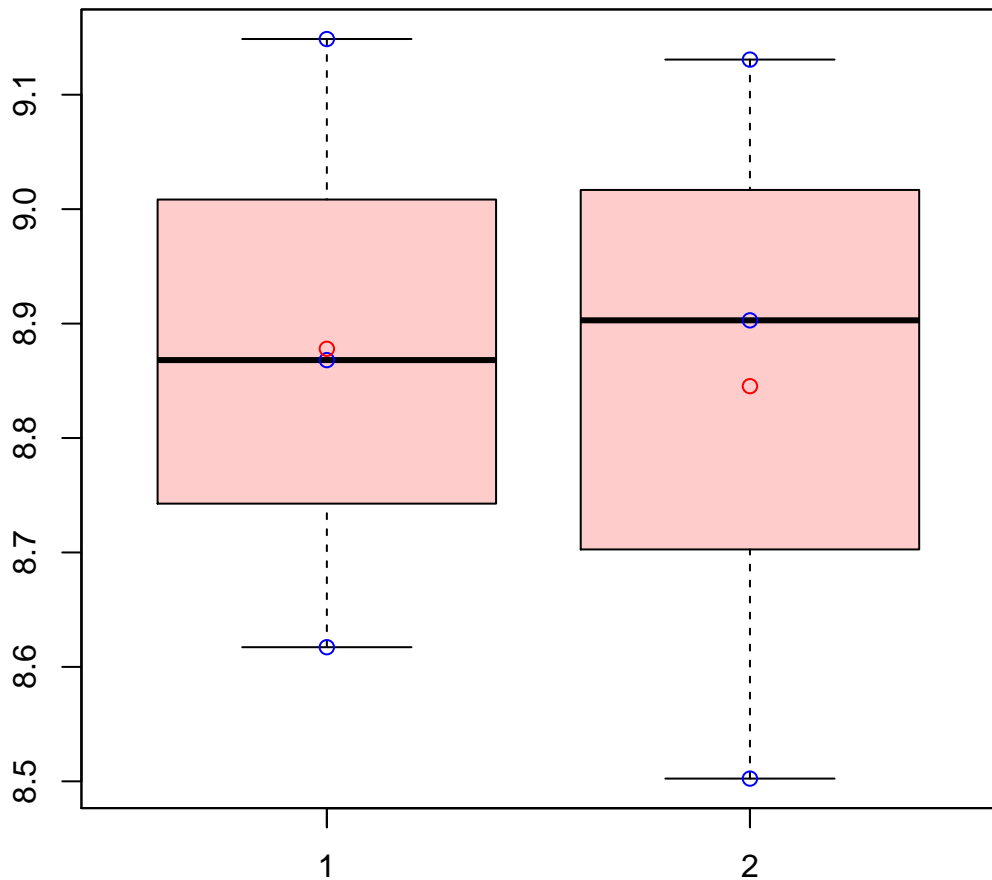

t-Test: p-value = 0.9

# J3NA21|J3NA21\_ORYBR

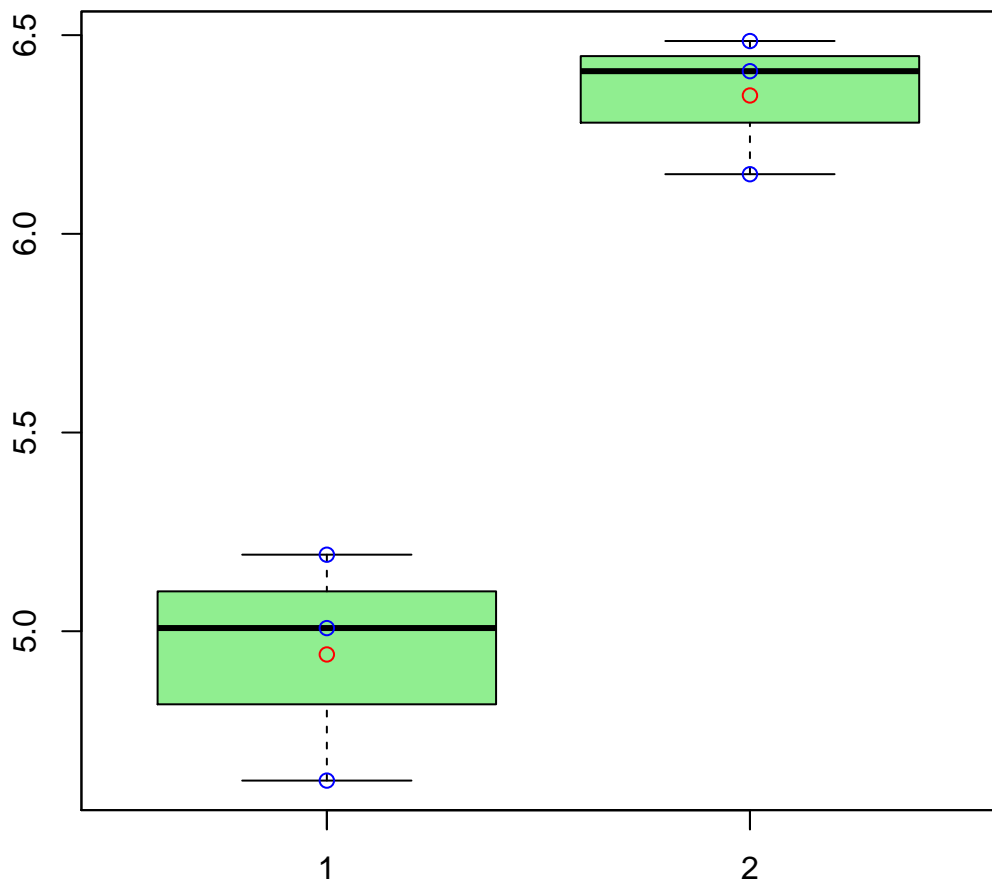

t-Test: p-value = 0

# J3NA27|J3NA27\_ORYBR

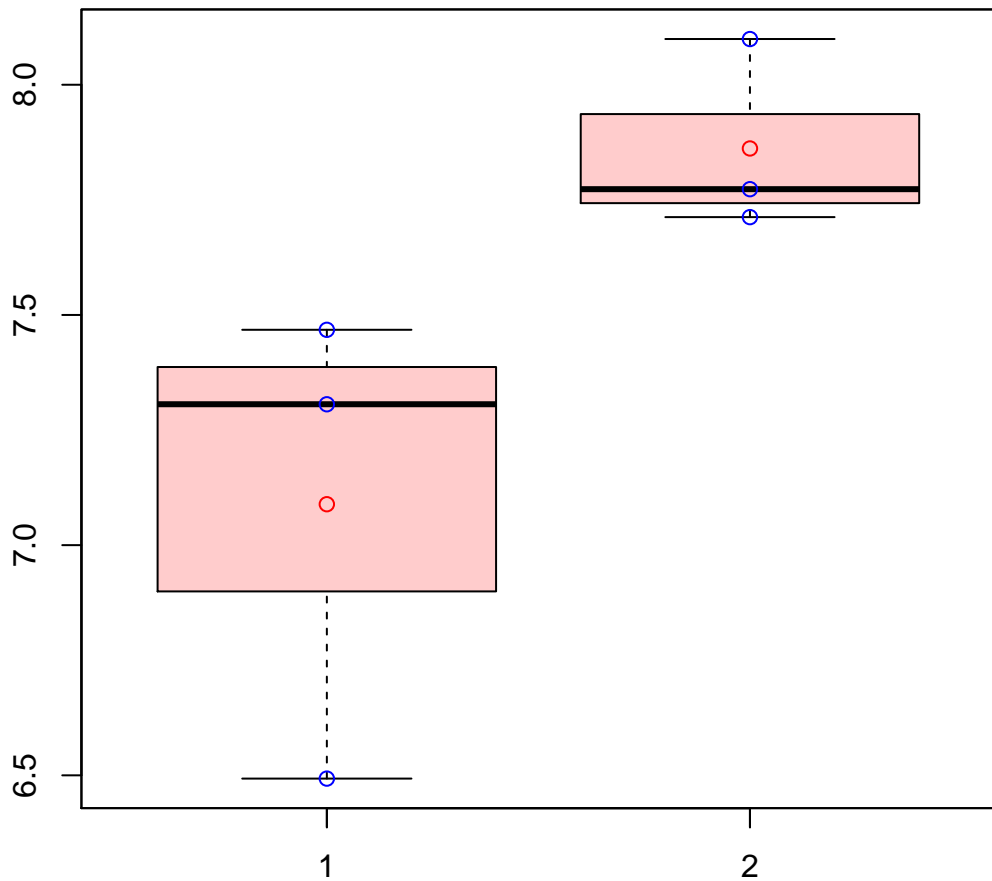

t-Test: p-value = 0.11

# J3NA34|J3NA34\_ORYBR

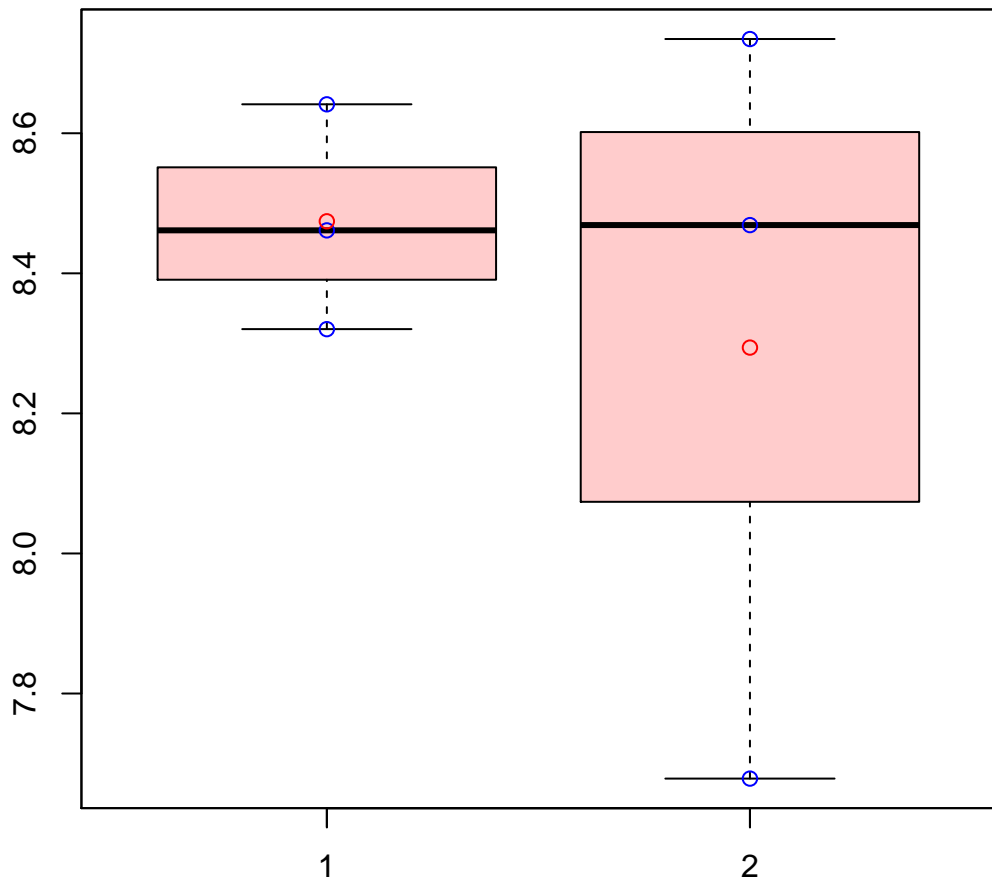

t-Test: p-value = 0.63

# J3NA78|J3NA78\_ORYBR

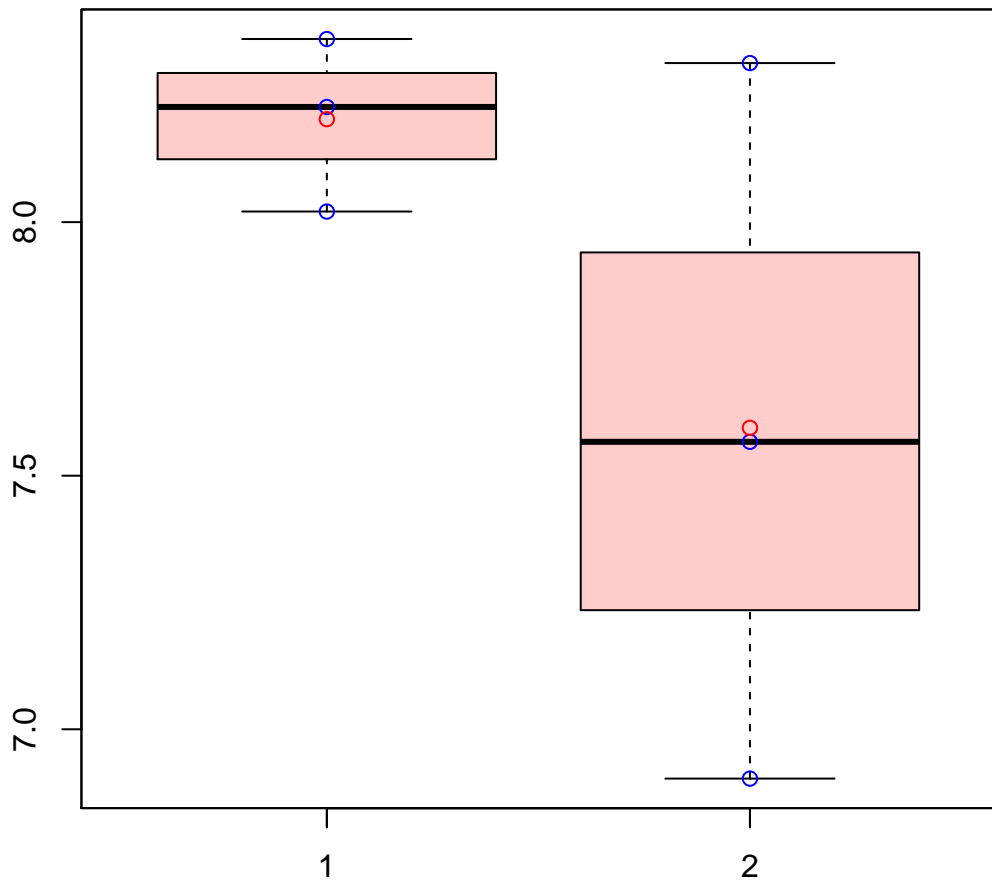

t-Test: p-value = 0.27

# J3NAA0|J3NAA0\_ORYBR

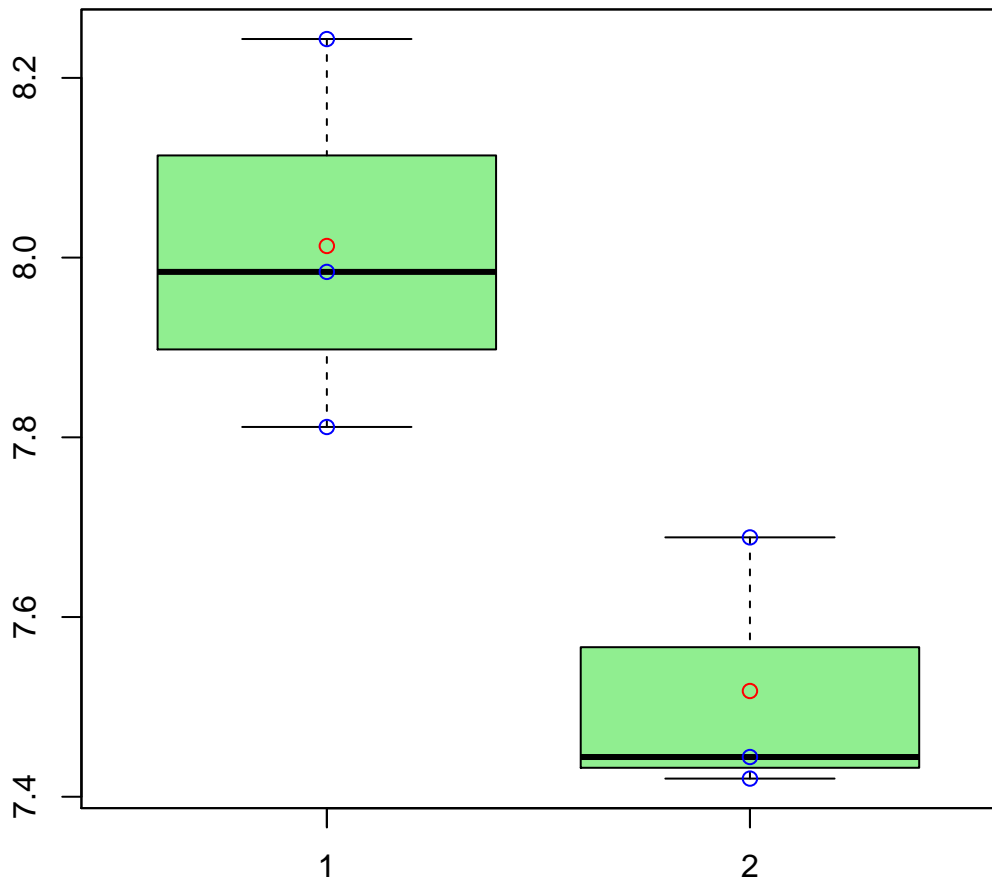

t-Test: p-value = 0.04



# J3NAI4|J3NAI4\_ORYBR

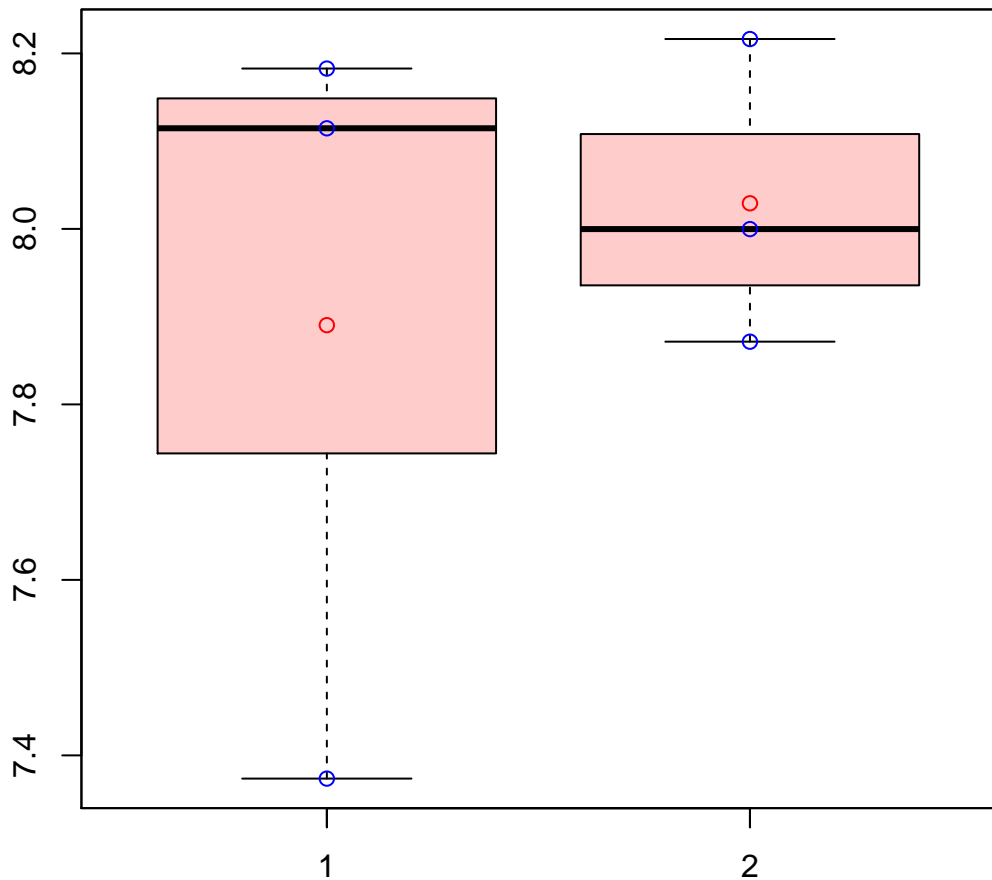

t-Test: p-value = 0.66

# J3NAI9|J3NAI9\_ORYBR

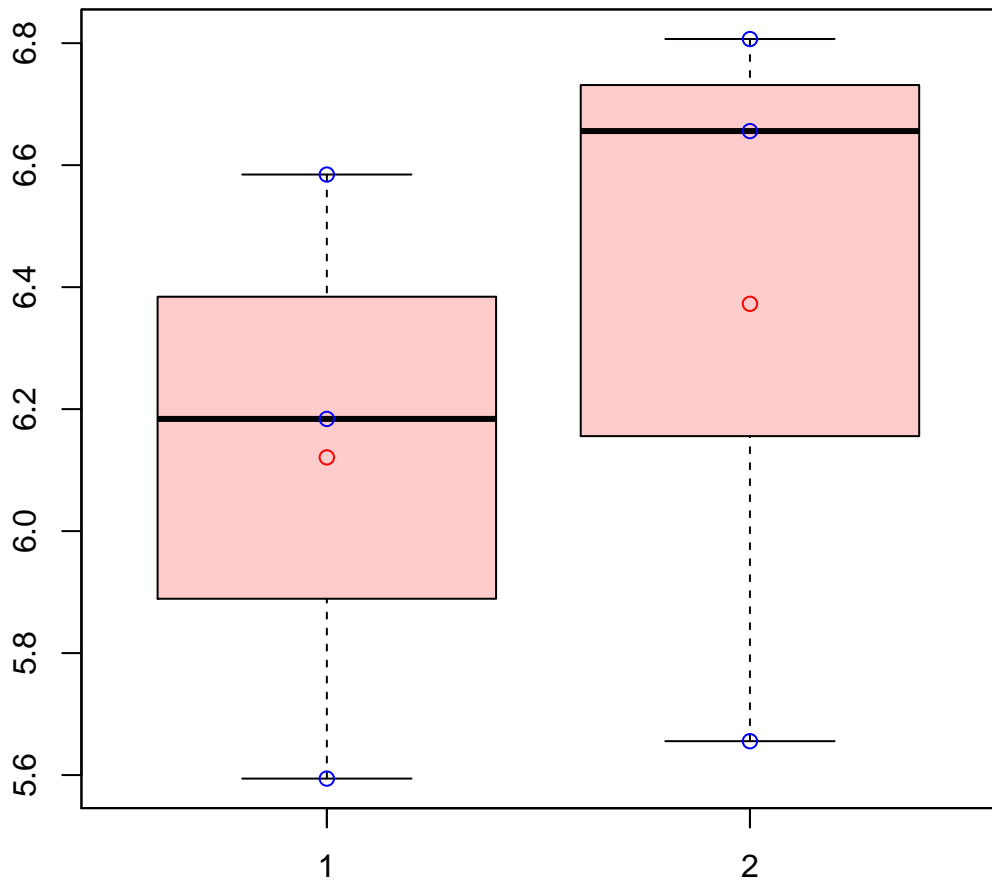

t-Test: p-value = 0.62

# J3NBZ0|J3NBZ0\_ORYBR

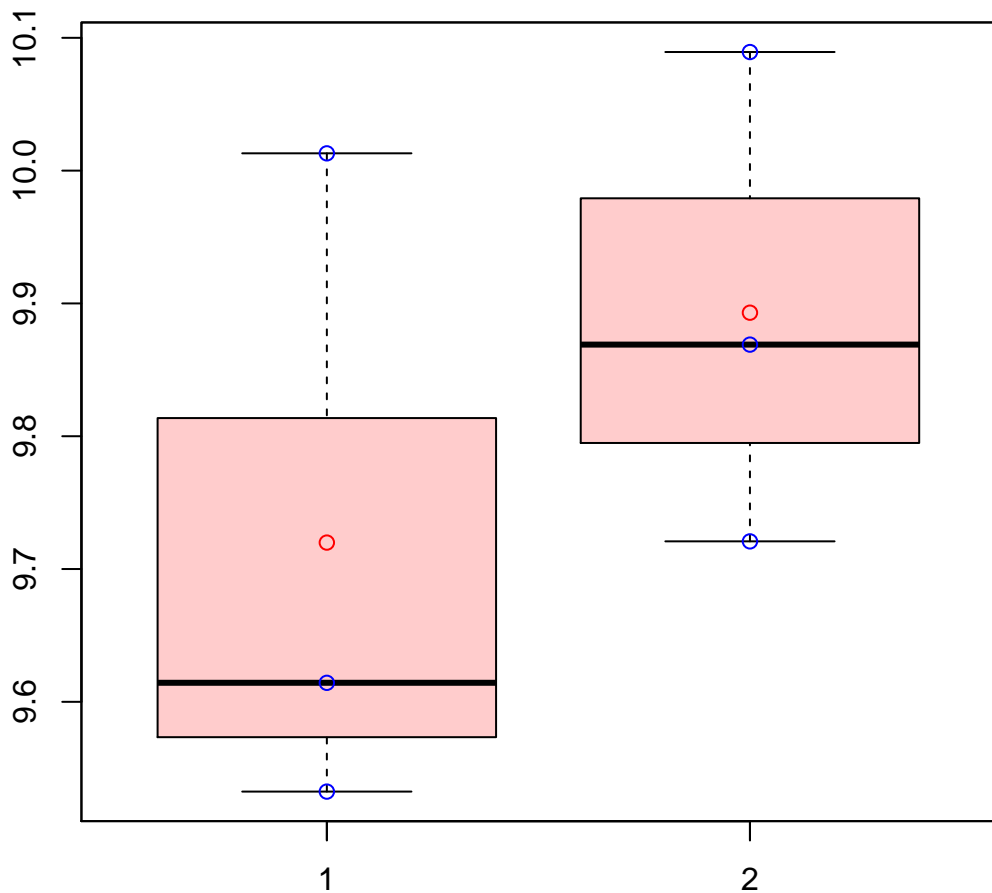

t-Test: p-value = 0.4

# J3NCA7|J3NCA7\_ORYBR

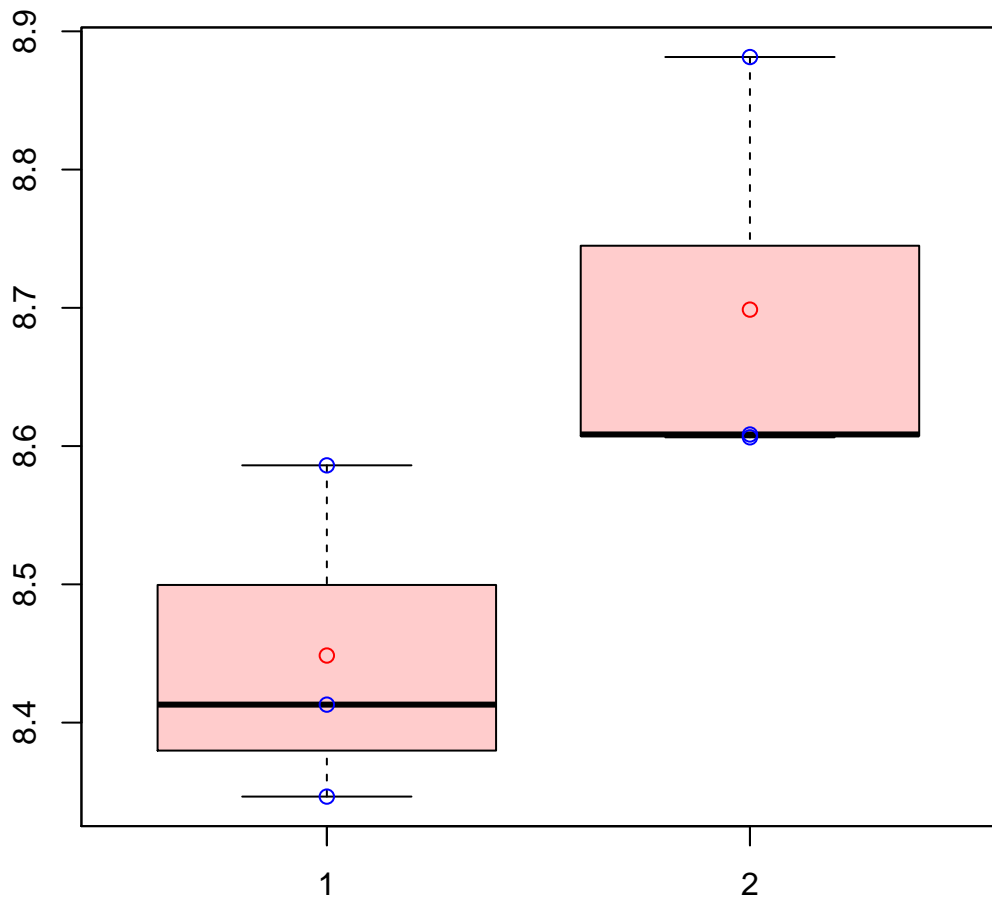

t-Test: p-value = 0.1

# J3NCC7|J3NCC7\_ORYBR

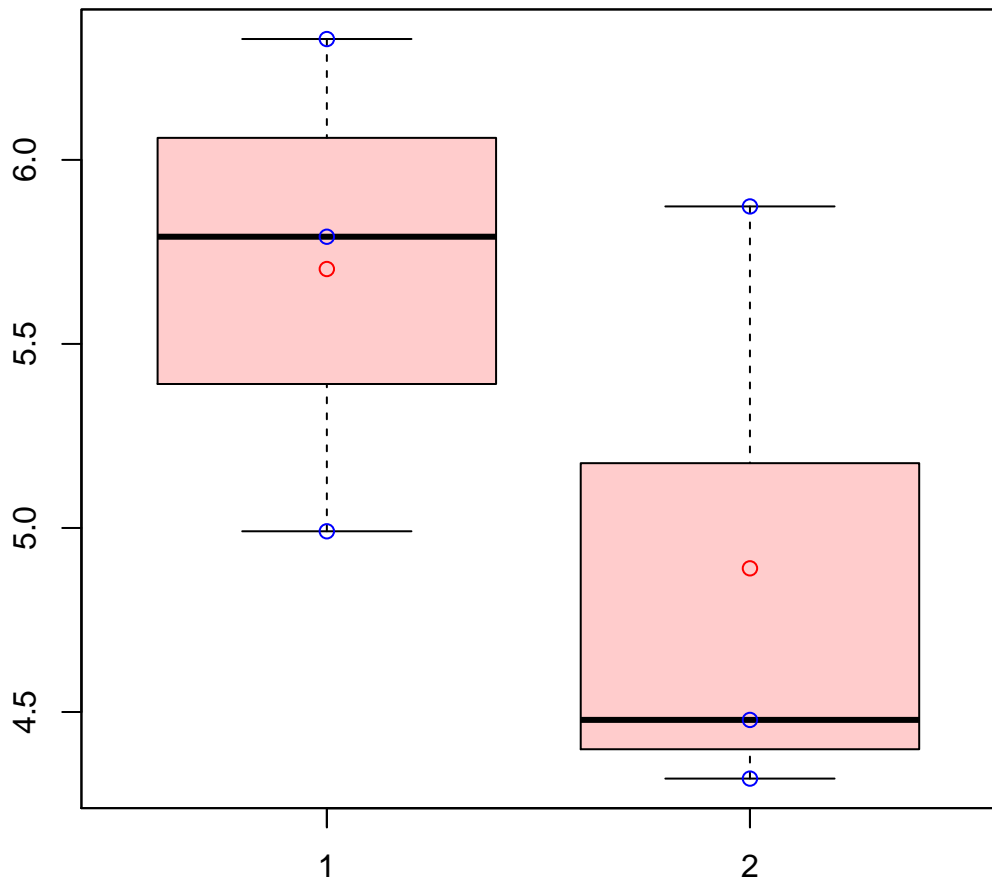

t-Test: p-value = 0.27

# J3NCD2|J3NCD2\_ORYBR

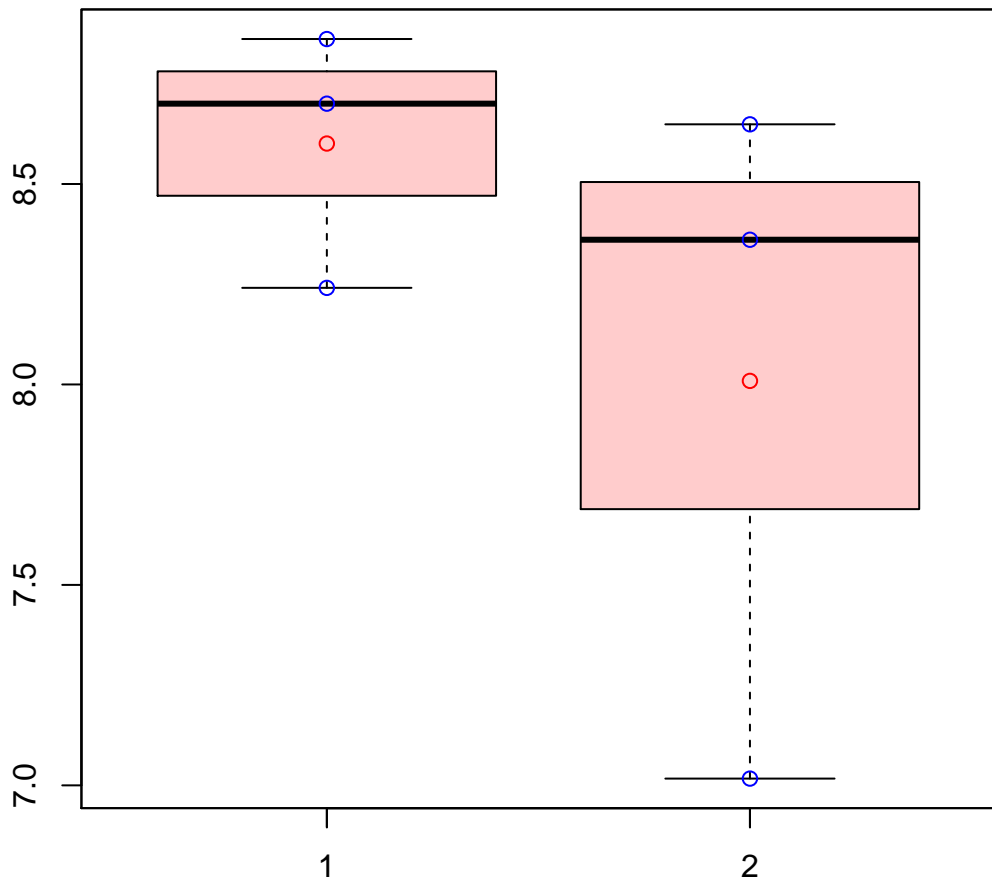

t-Test: p-value = 0.36

# J3NCI1|J3NCI1\_ORYBR

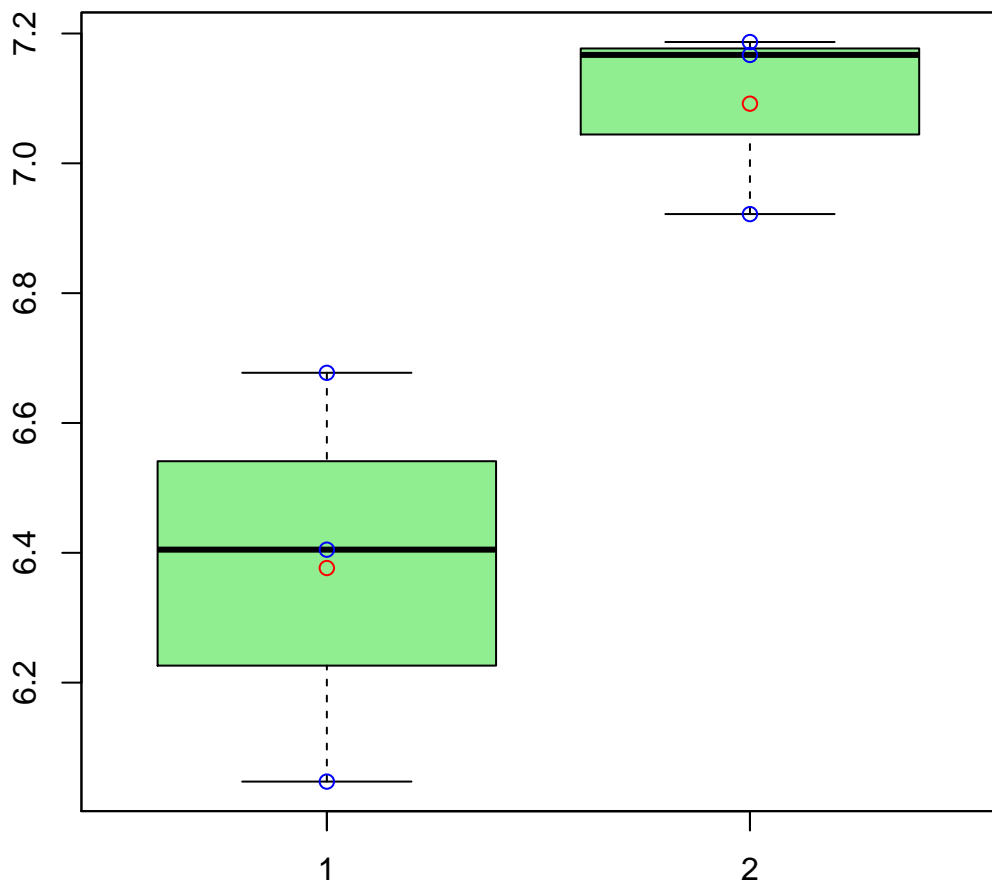

t-Test: p-value = 0.04

# J3NCL3|J3NCL3\_ORYBR

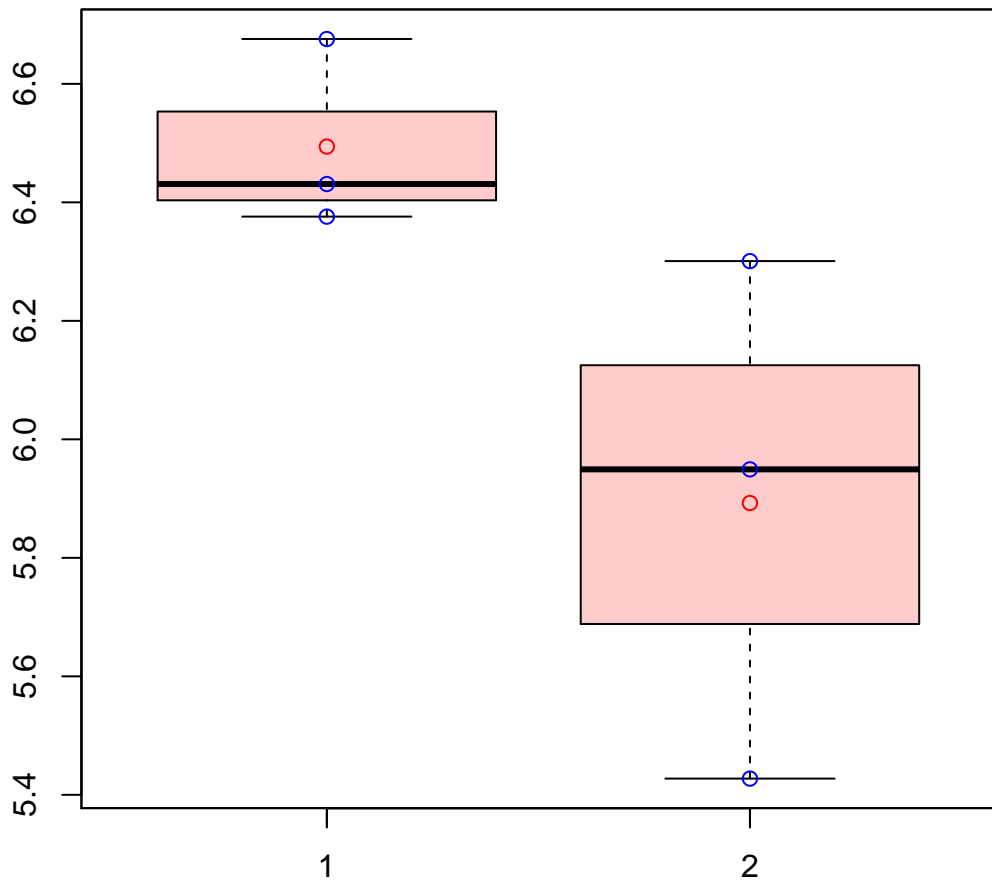

t-Test: p-value = 0.13



# J3NCQ0|J3NCQ0\_ORYBR

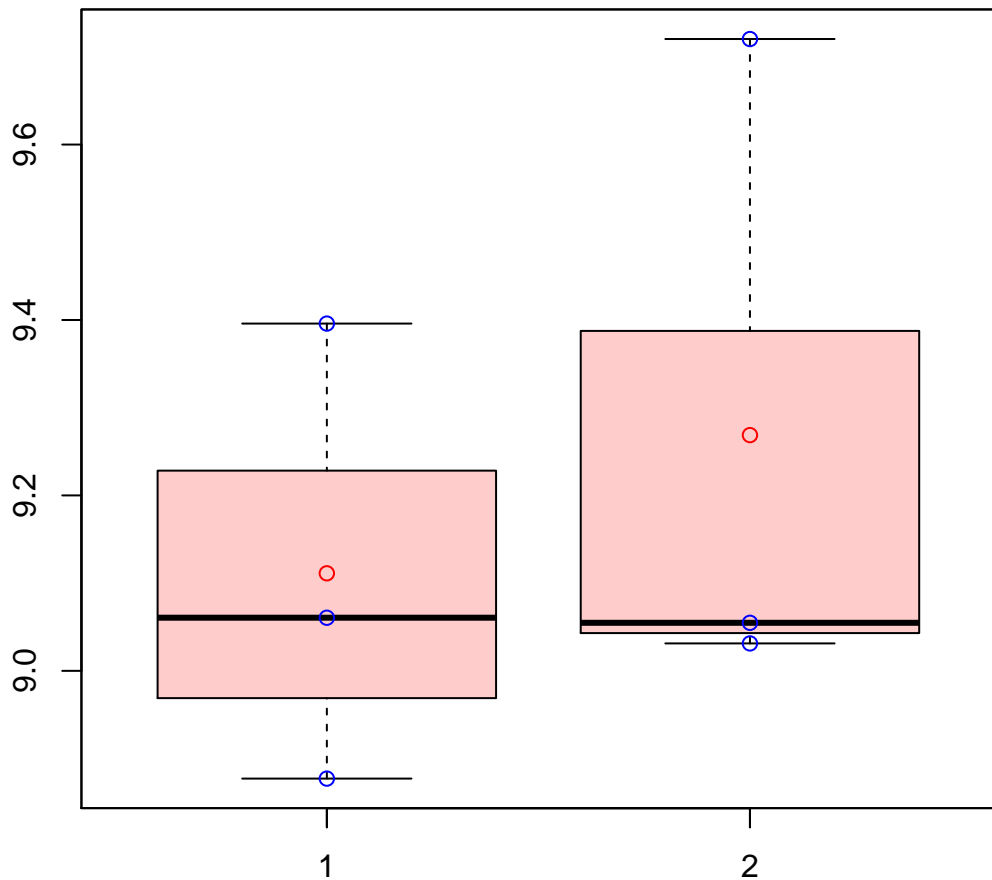

t-Test: p-value = 0.6

# J3NCR4|J3NCR4\_ORYBR

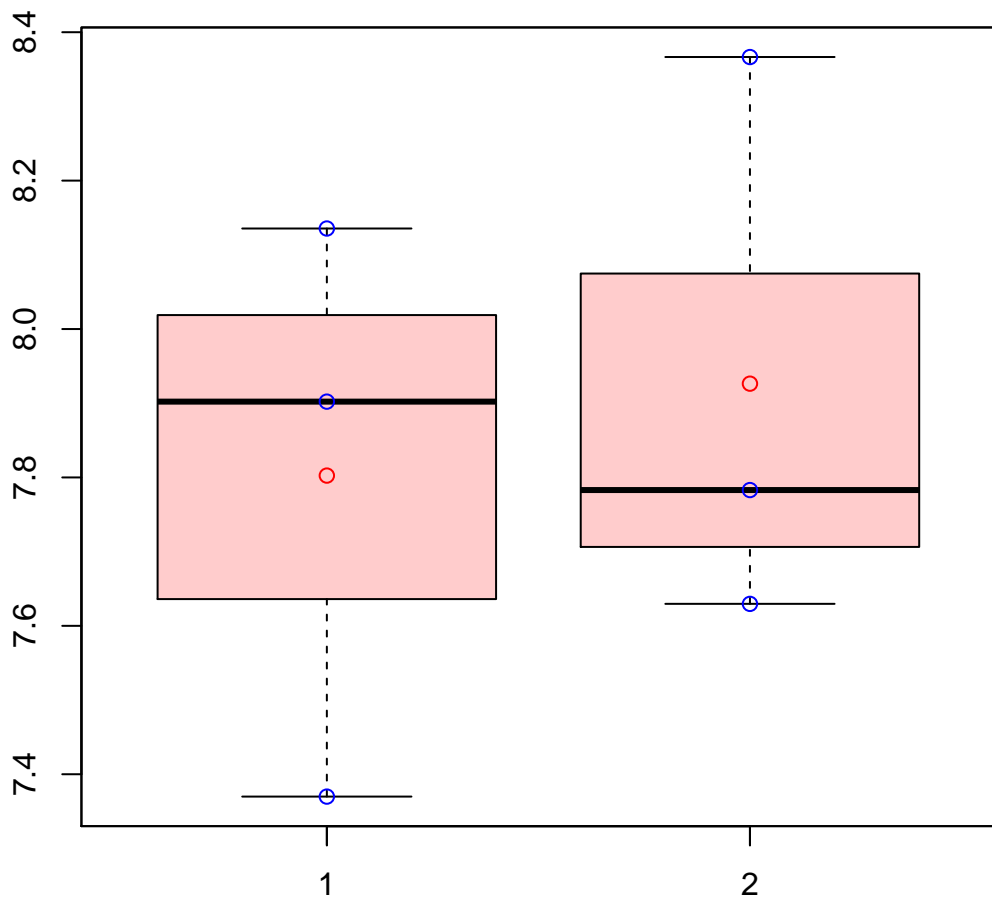

t-Test: p-value = 0.72

# J3ND71|J3ND71\_ORYBR

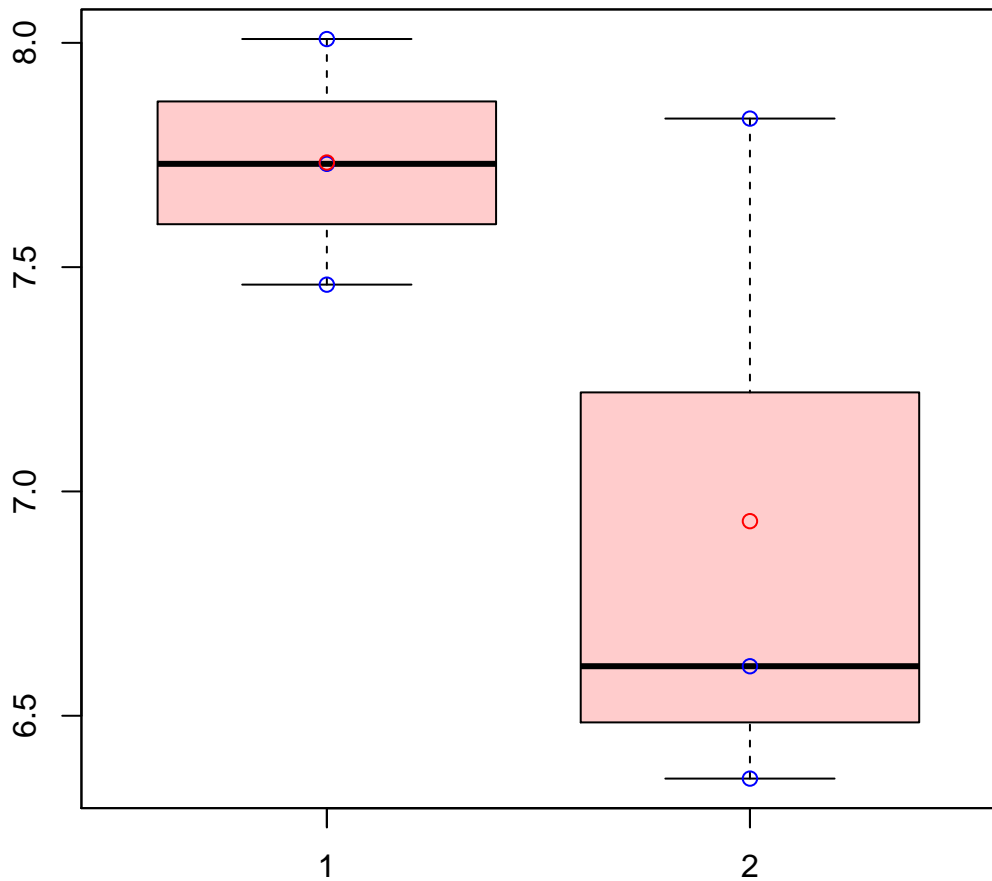

t-Test: p-value = 0.21

# J3ND99|J3ND99\_ORYBR

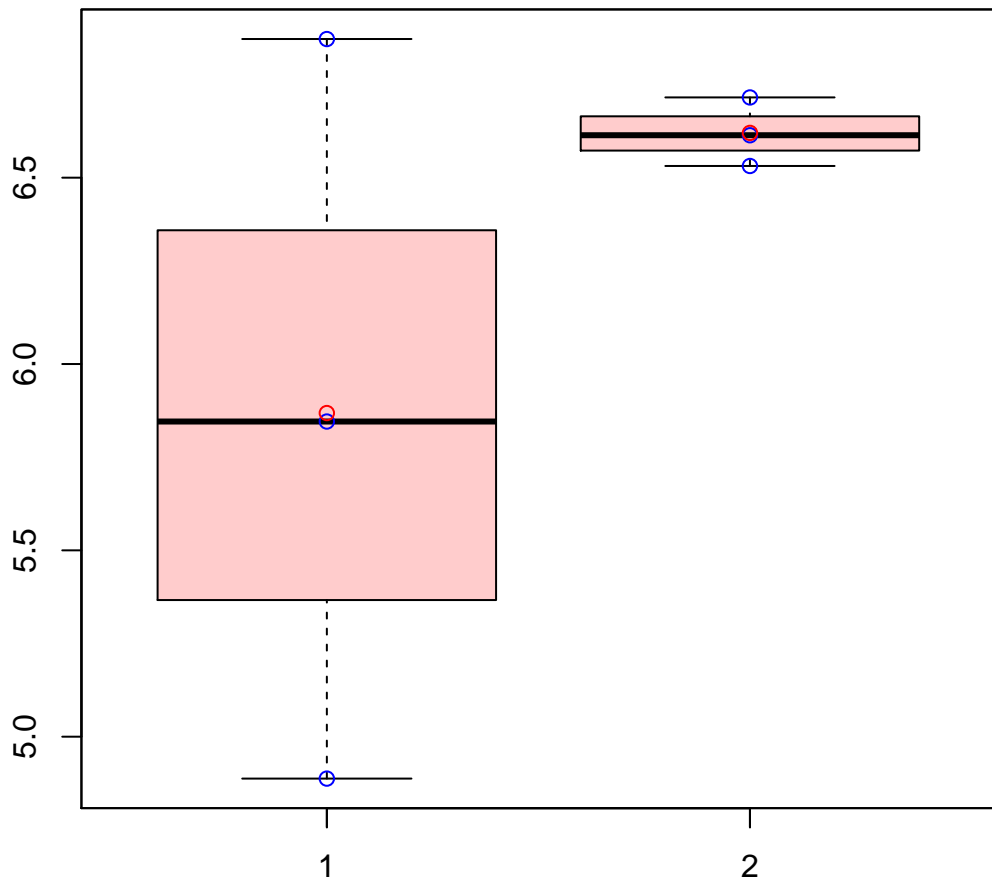

t-Test: p-value = 0.32

# J3NDJ0|J3NDJ0\_ORYBR

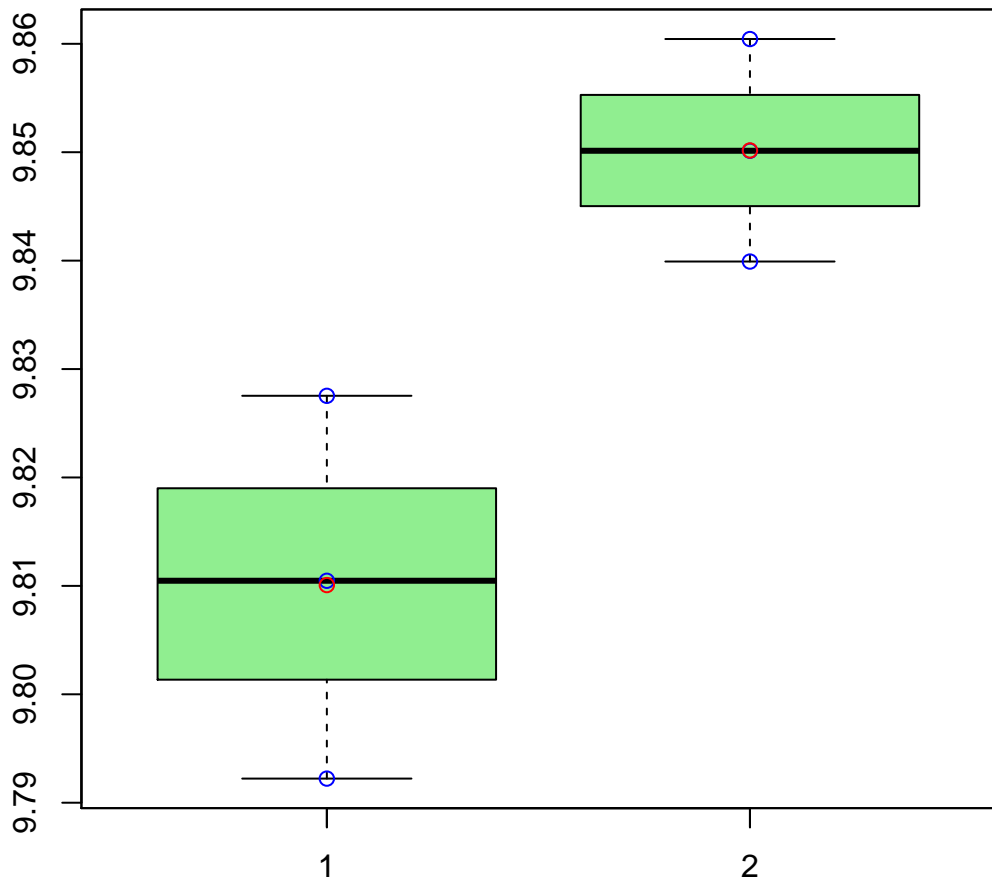

t-Test: p-value = 0.04

# J3NDZ3|J3NDZ3\_ORYBR

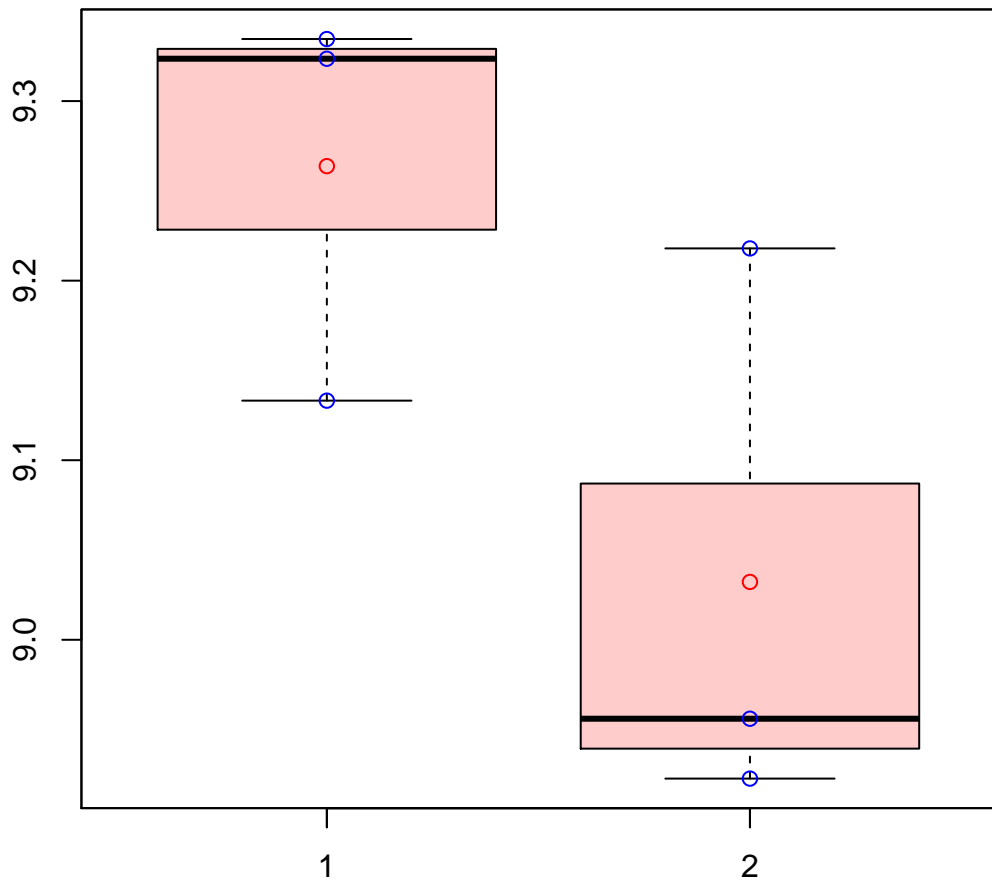

t-Test: p-value = 0.12

# J3NEZ1|J3NEZ1\_ORYBR

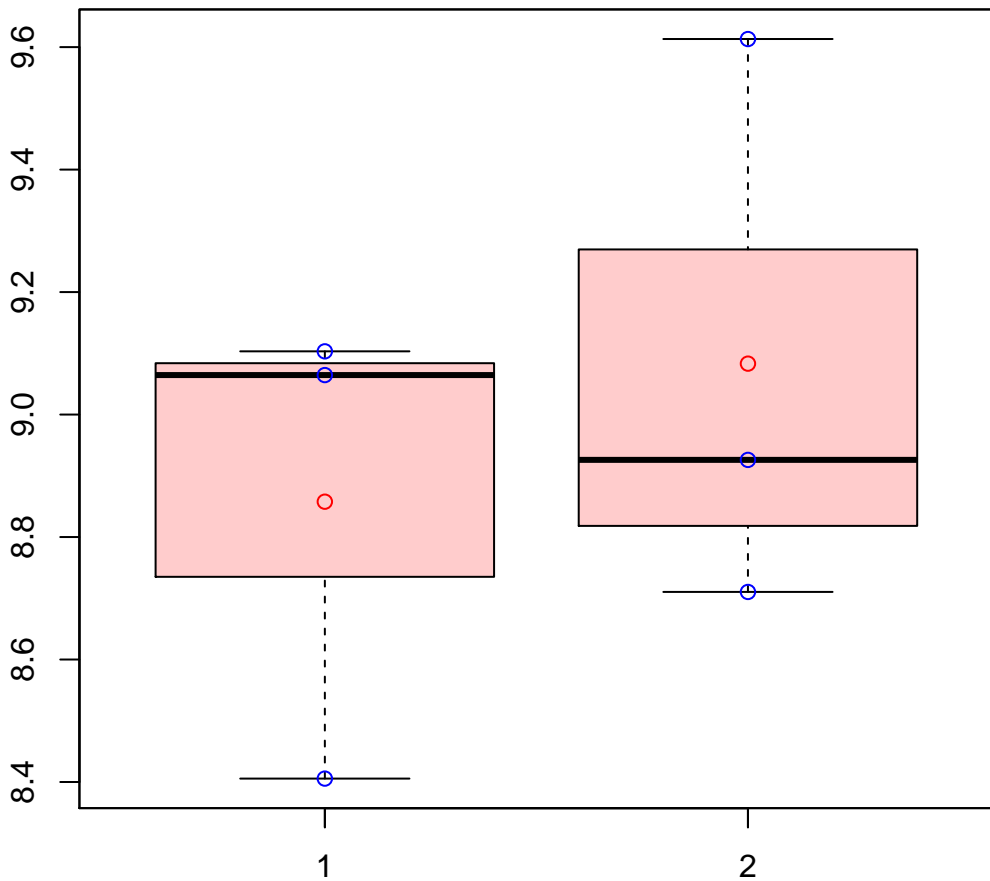

t-Test: p-value = 0.56

# J3NF62|J3NF62\_ORYBR

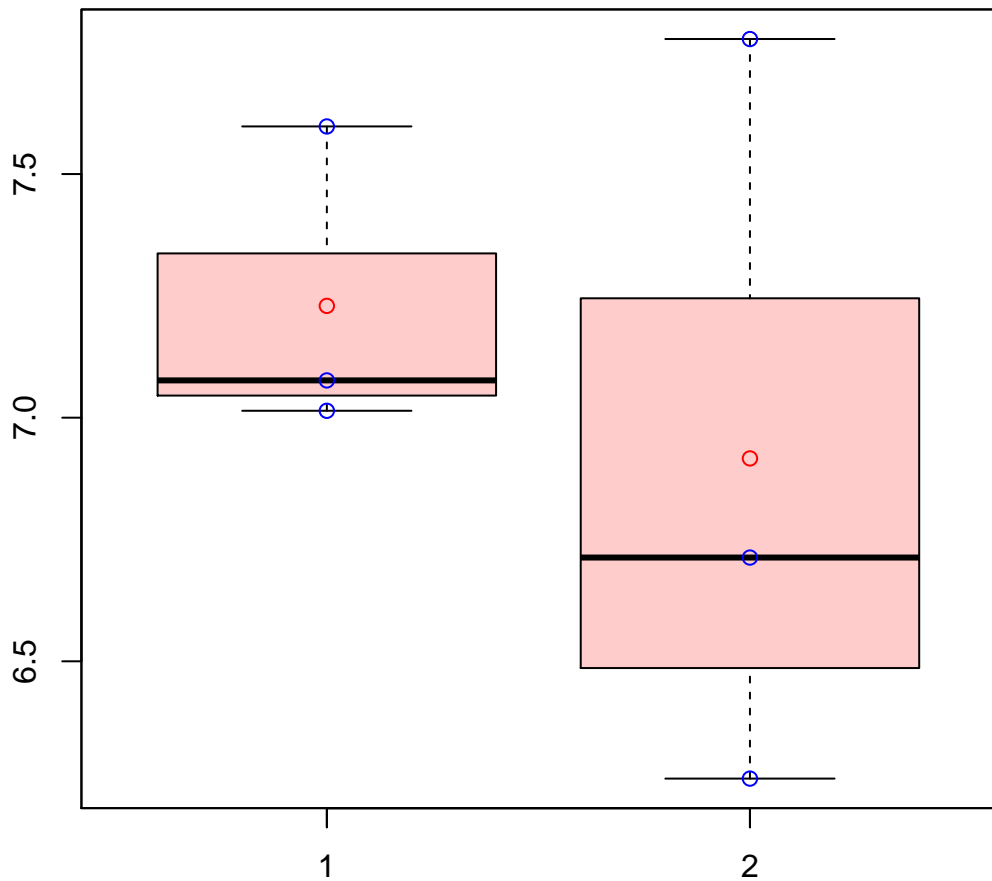

t-Test: p-value = 0.57



# J3NFE1|J3NFE1\_ORYBR

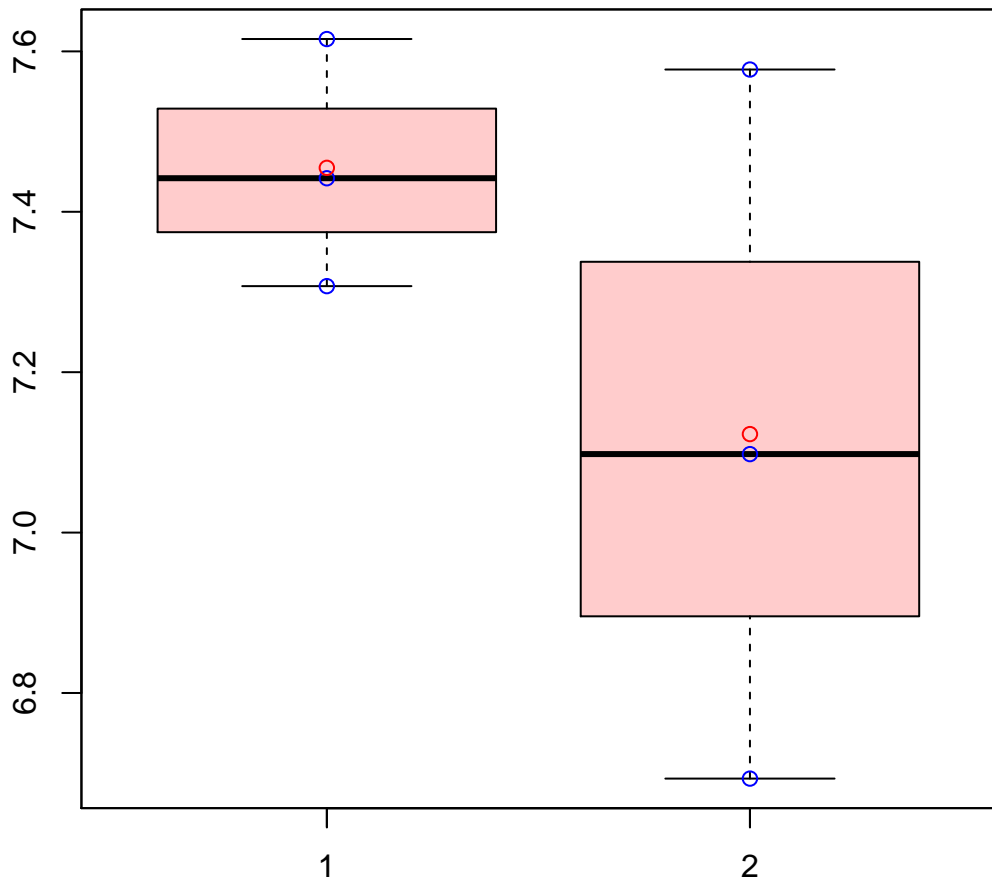

t-Test: p-value = 0.32

# J3XLN1|J3XLN1\_9ASPA

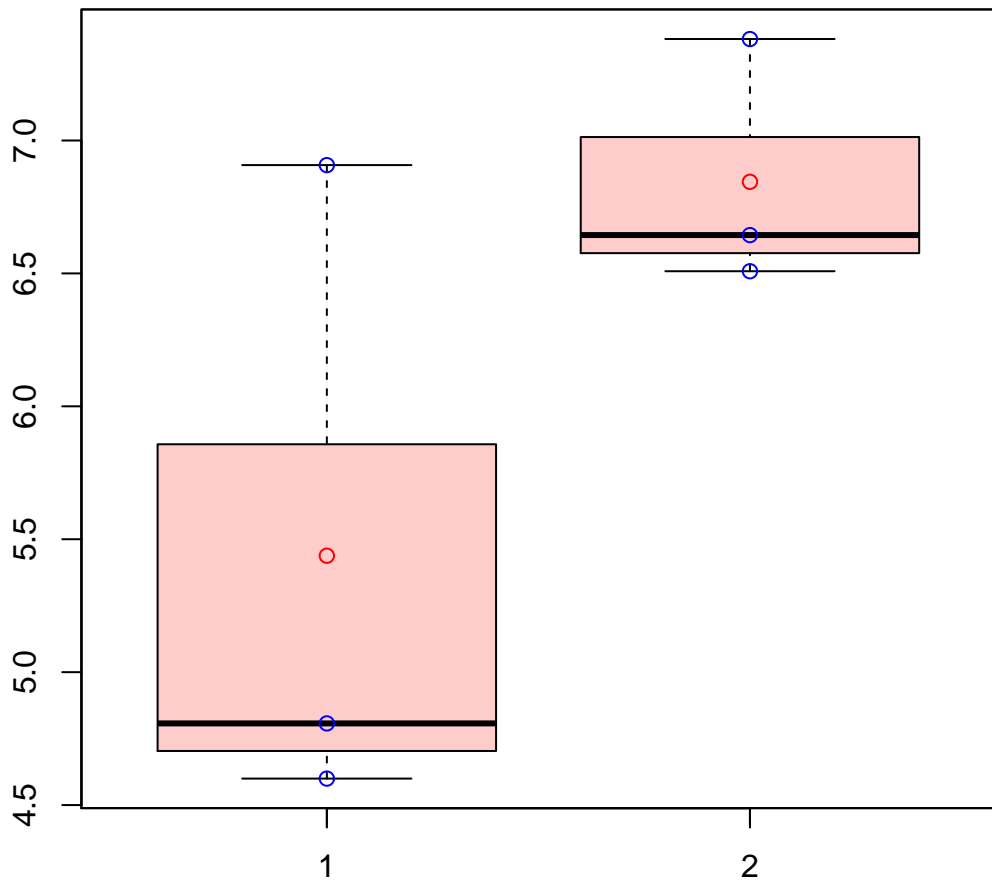

t-Test: p-value = 0.19

# J7F224|J7F224\_ORYSI

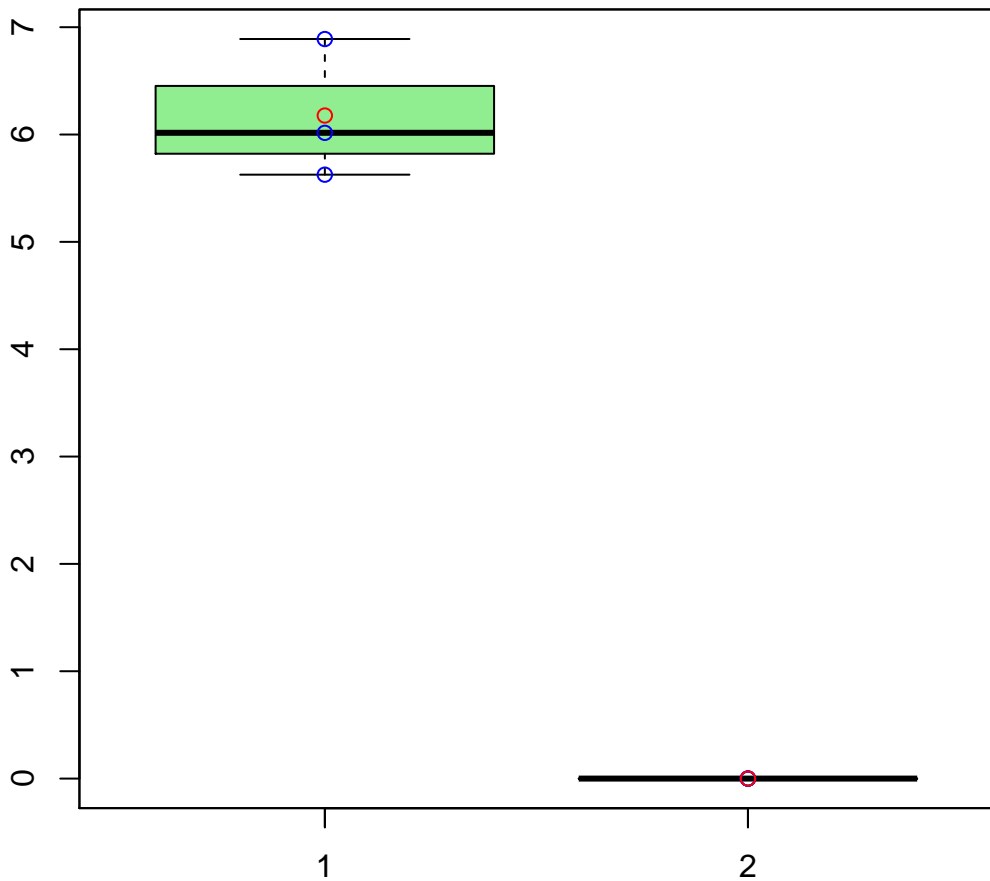

t-Test: p-value = 0

# J7FTL2|J7FTL2\_9LILI

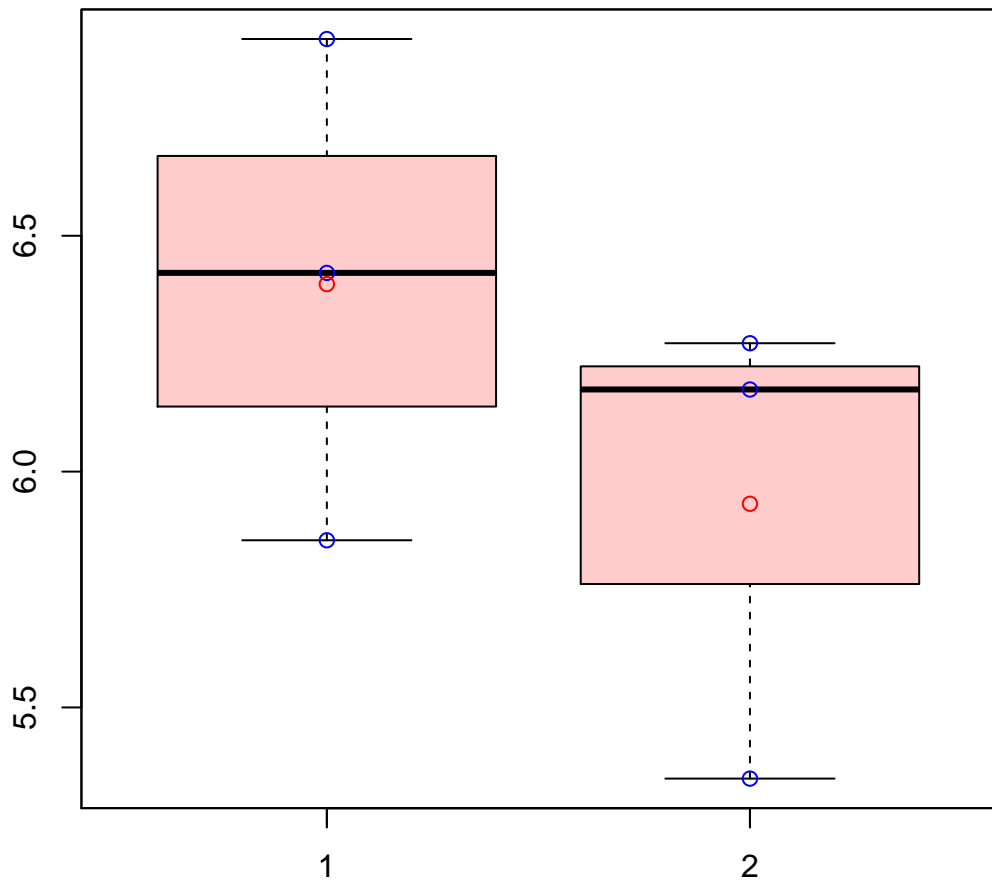

t-Test: p-value = 0.33

# J7FXA9|J7FXA9\_ALLTU

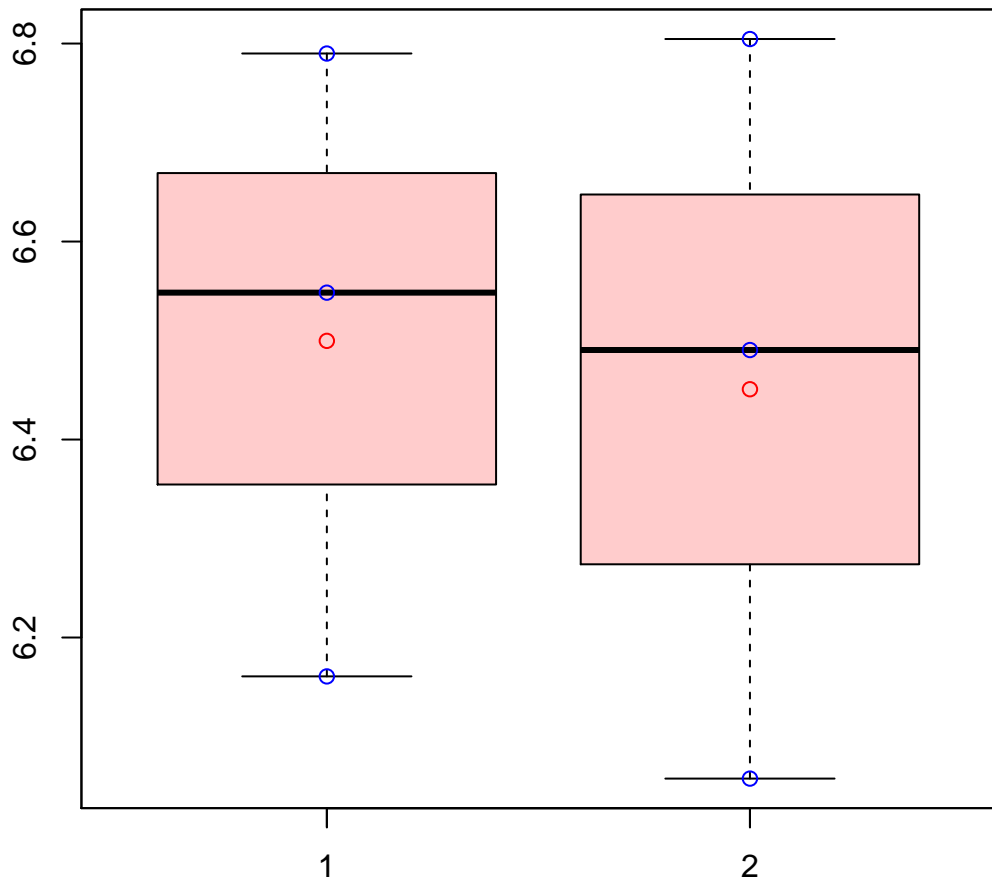

t-Test: p-value = 0.87

# J7GM45|J7GM45\_HORVD

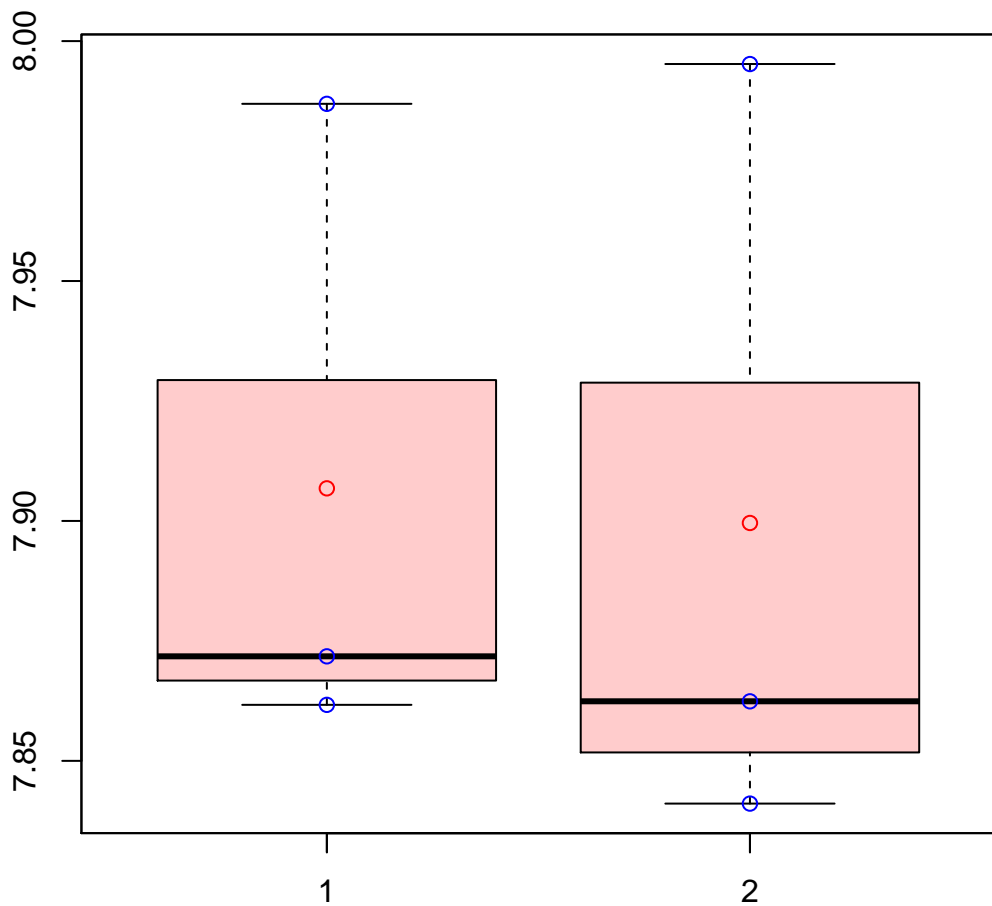

t-Test: p-value = 0.91

# J7I008|J7I008\_9POAL

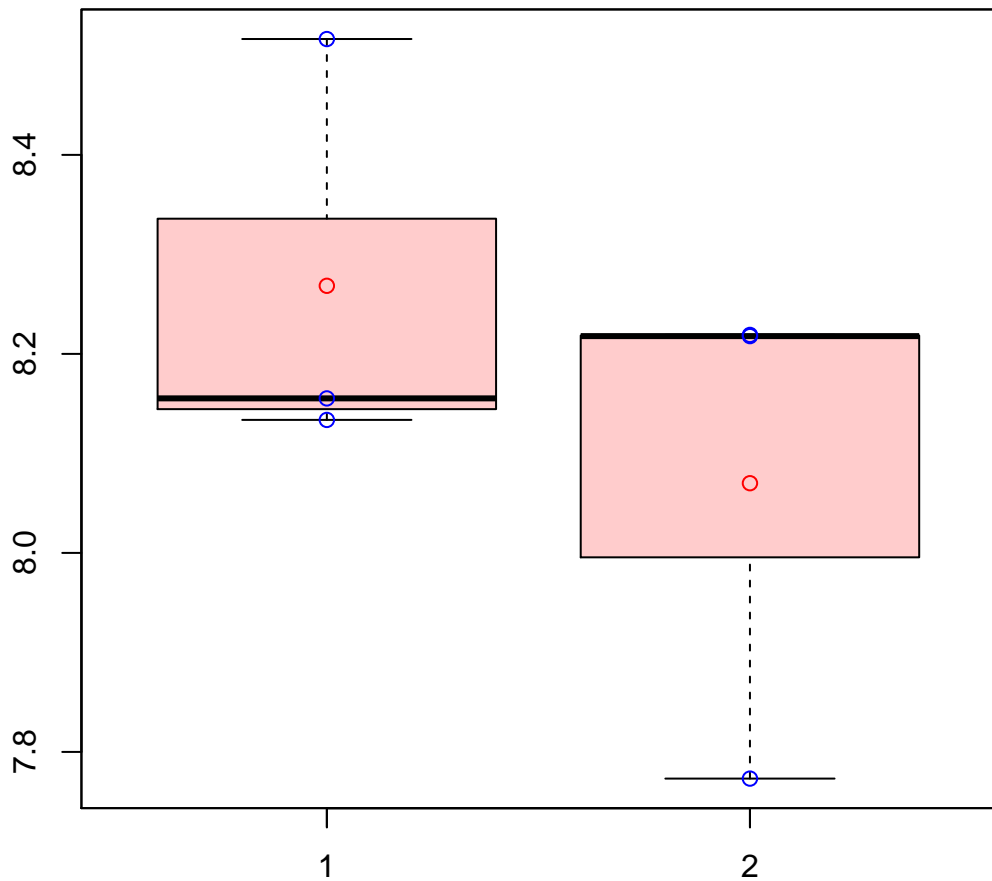

t-Test: p-value = 0.36

# J7IBM0|J7IBM0\_TRAPA

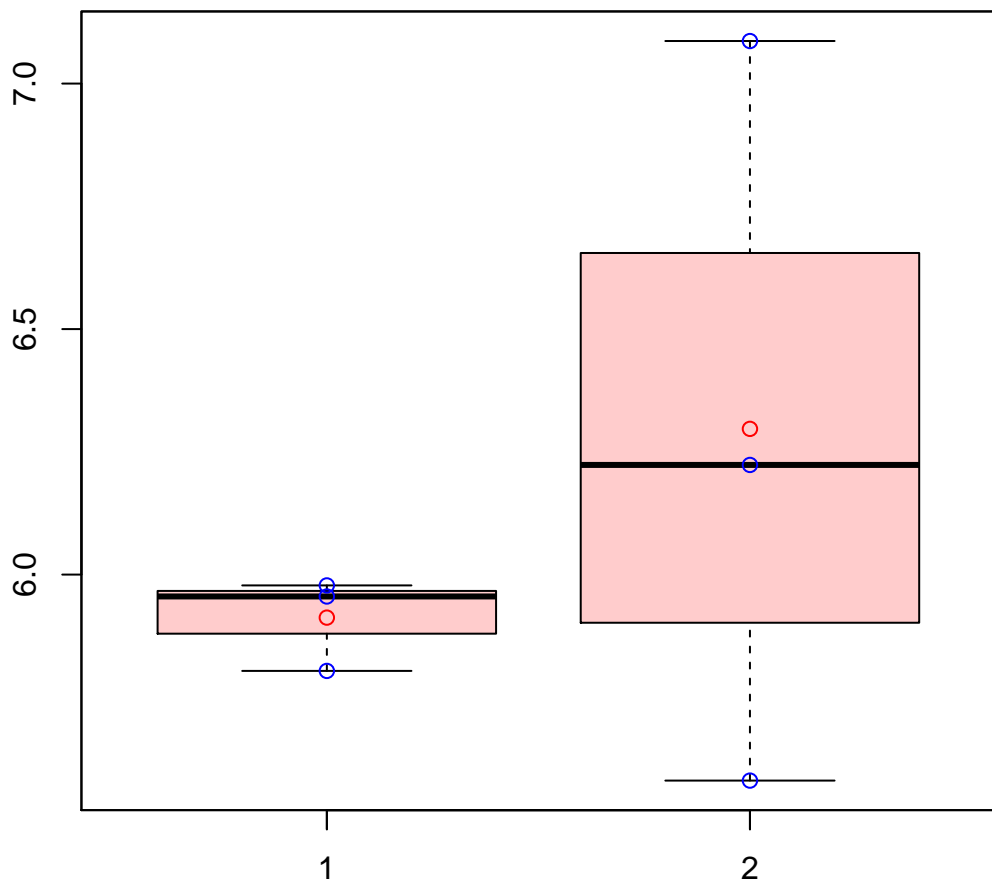

t-Test: p-value = 0.47



# J9QCY8|J9QCY8\_9POAL

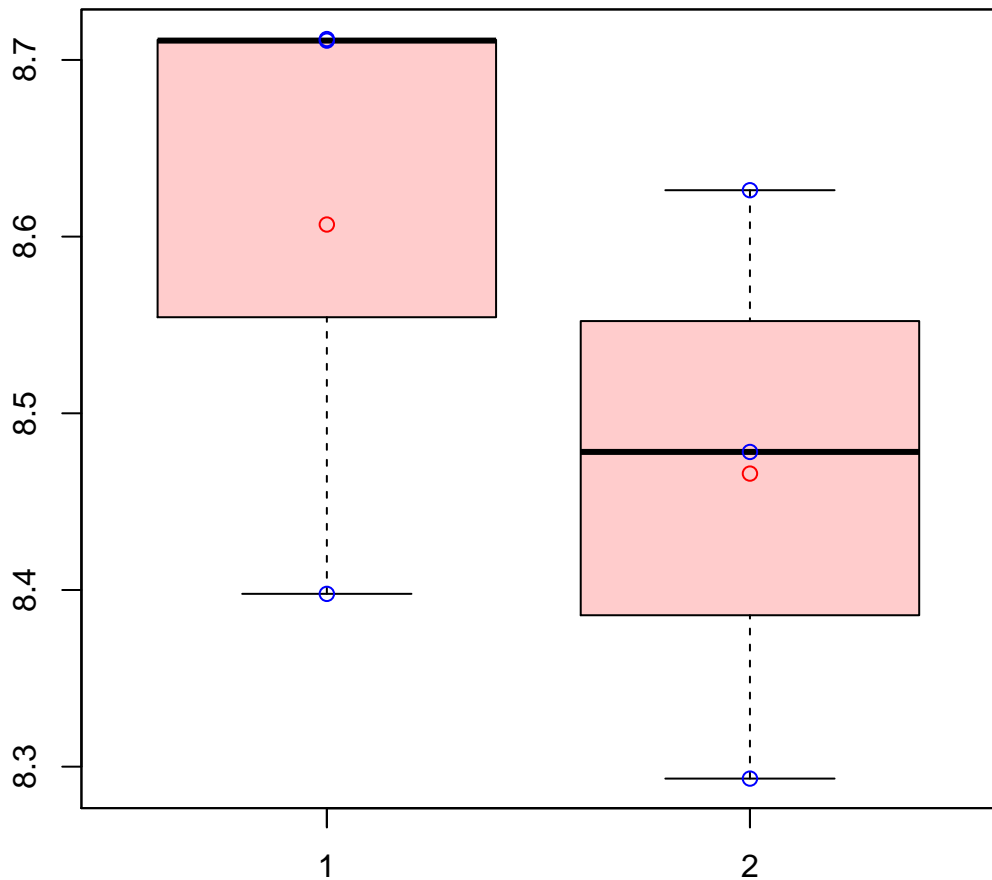

t-Test: p-value = 0.38

# J9QDZ6|J9QDZ6\_9POAL

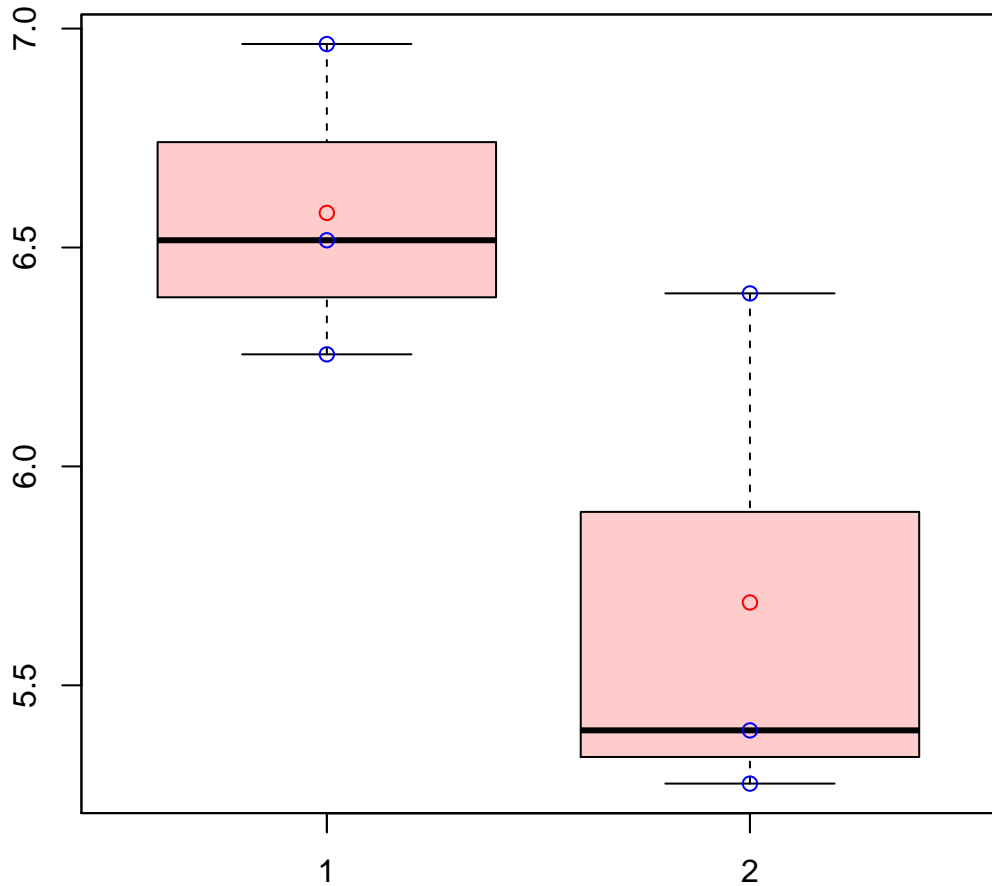

t-Test: p-value = 0.11

# J9SY84|J9SY84\_ANTAD

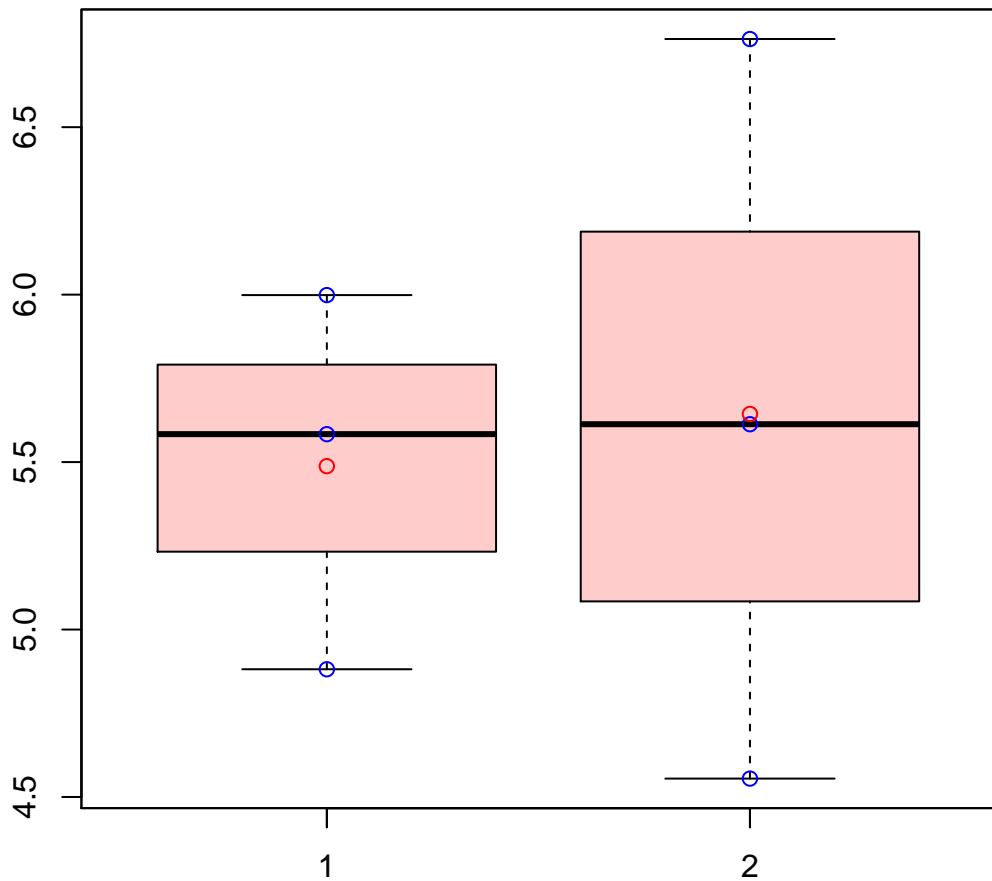

t-Test: p-value = 0.84

# J9WR50|J9WR50\_9POAL

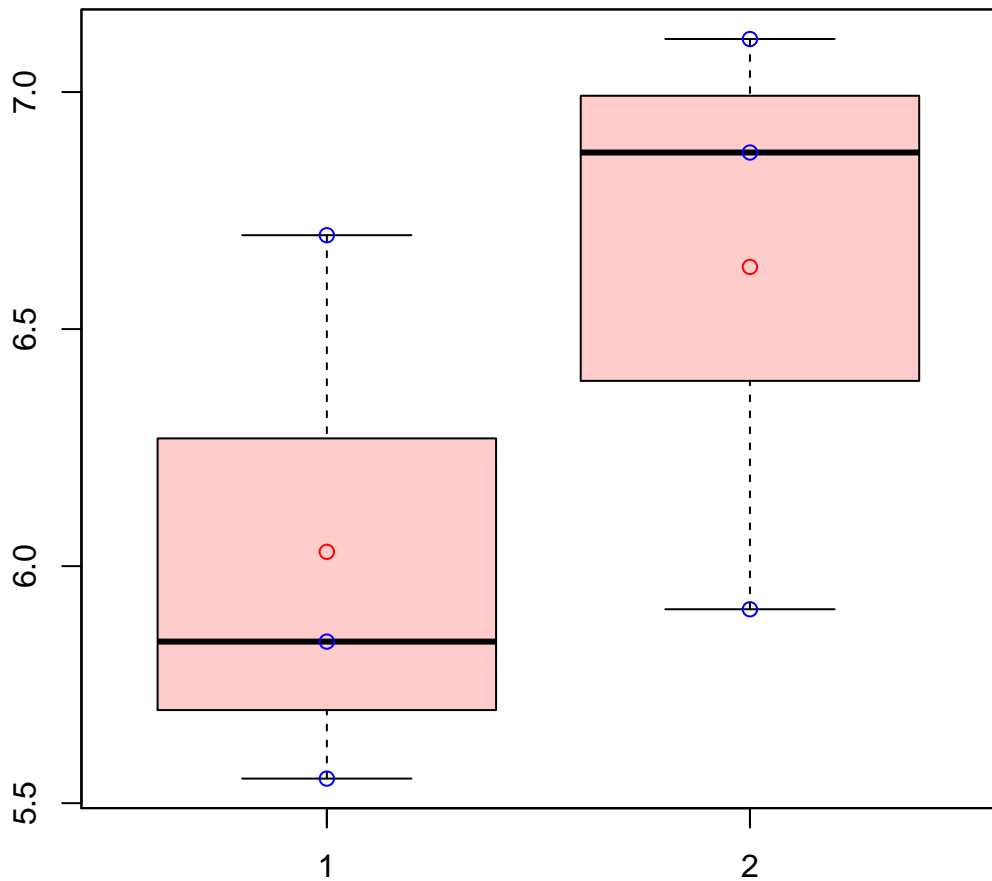

t-Test: p-value = 0.3

# K0JAY2|K0JAY2\_9POAL

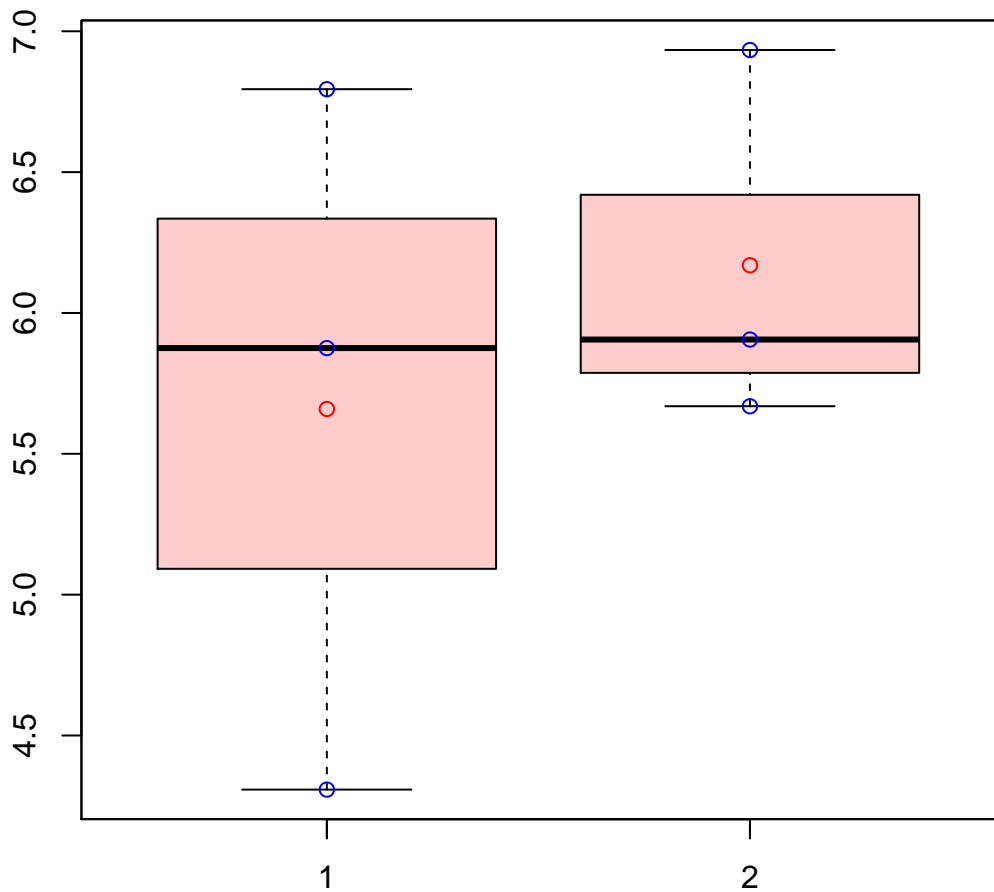

t-Test: p-value = 0.58

# K0JBJ0|K0JBJ0\_ERATE

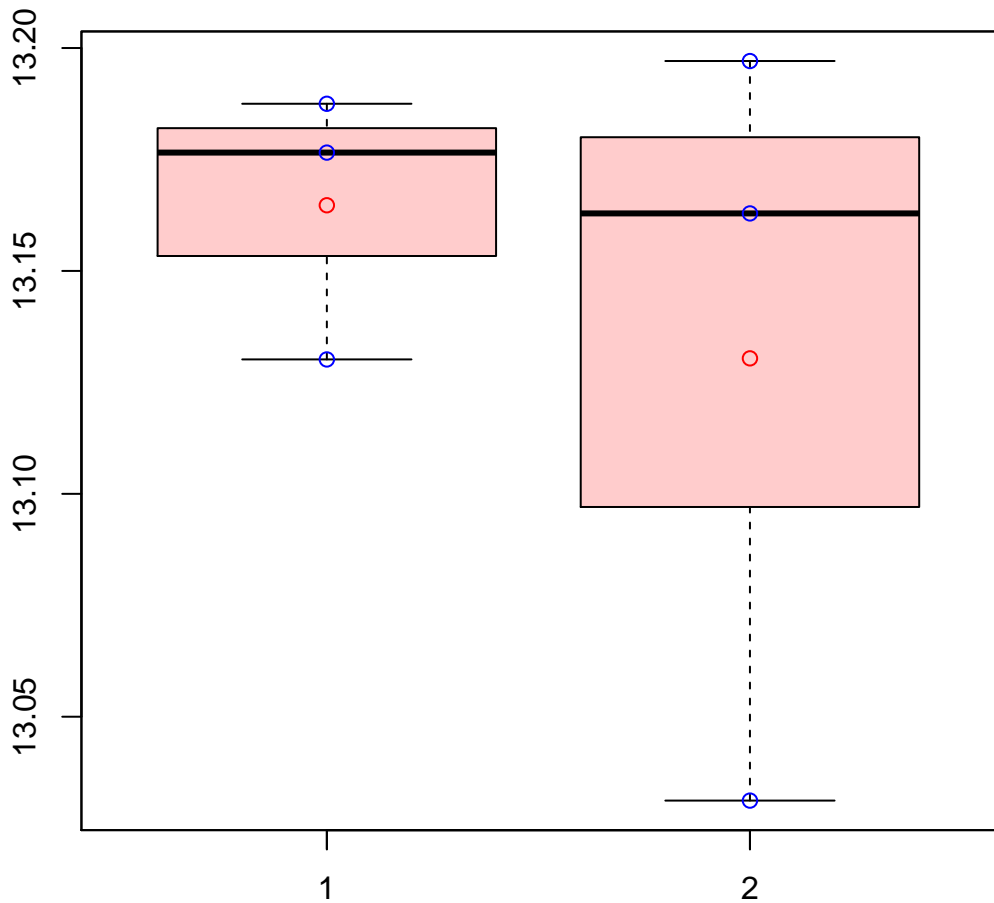

t-Test: p-value = 0.58

# K0JBS6|K0JBS6\_9POAL

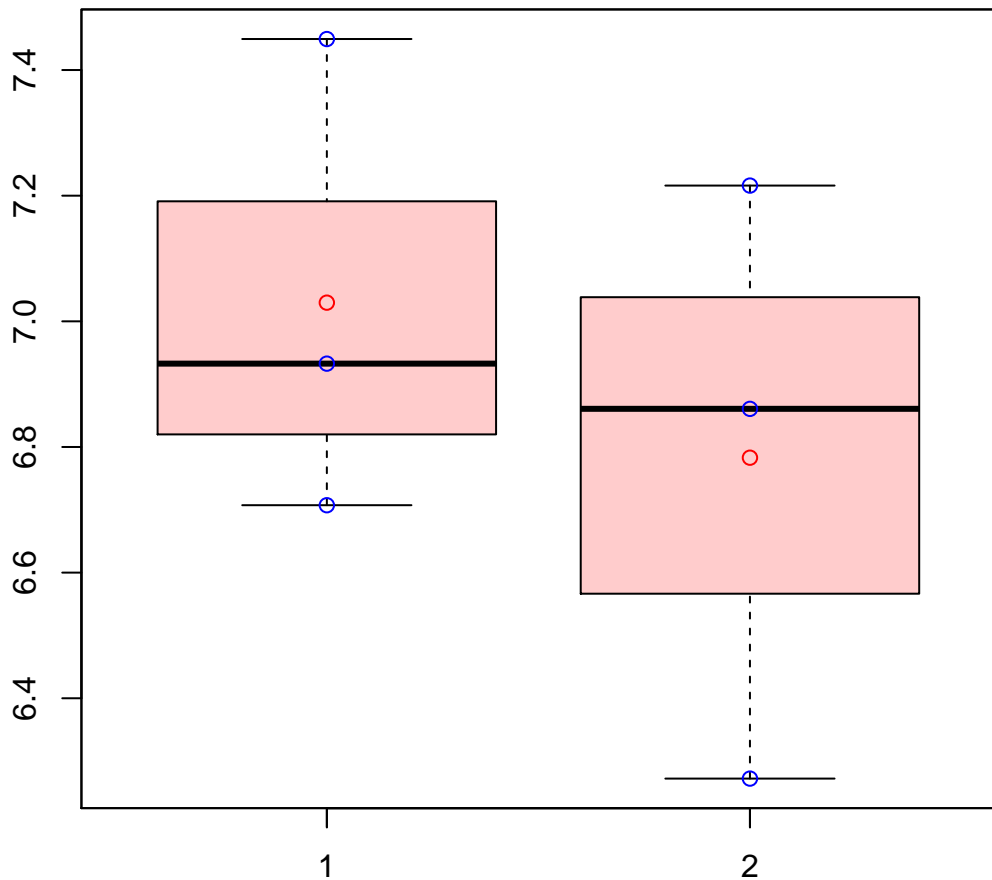

t-Test: p-value = 0.52

# K3XDN5|K3XDN5\_SETIT

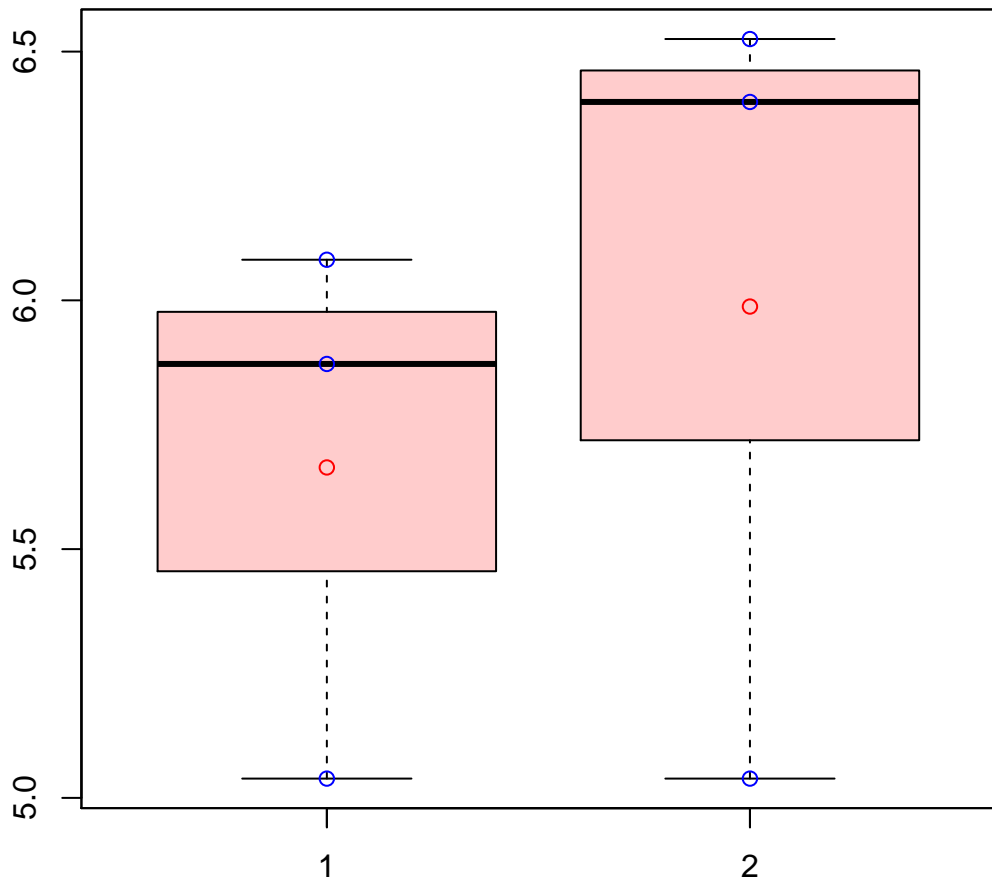

t-Test: p-value = 0.61



# K3XDN7|K3XDN7\_SETIT

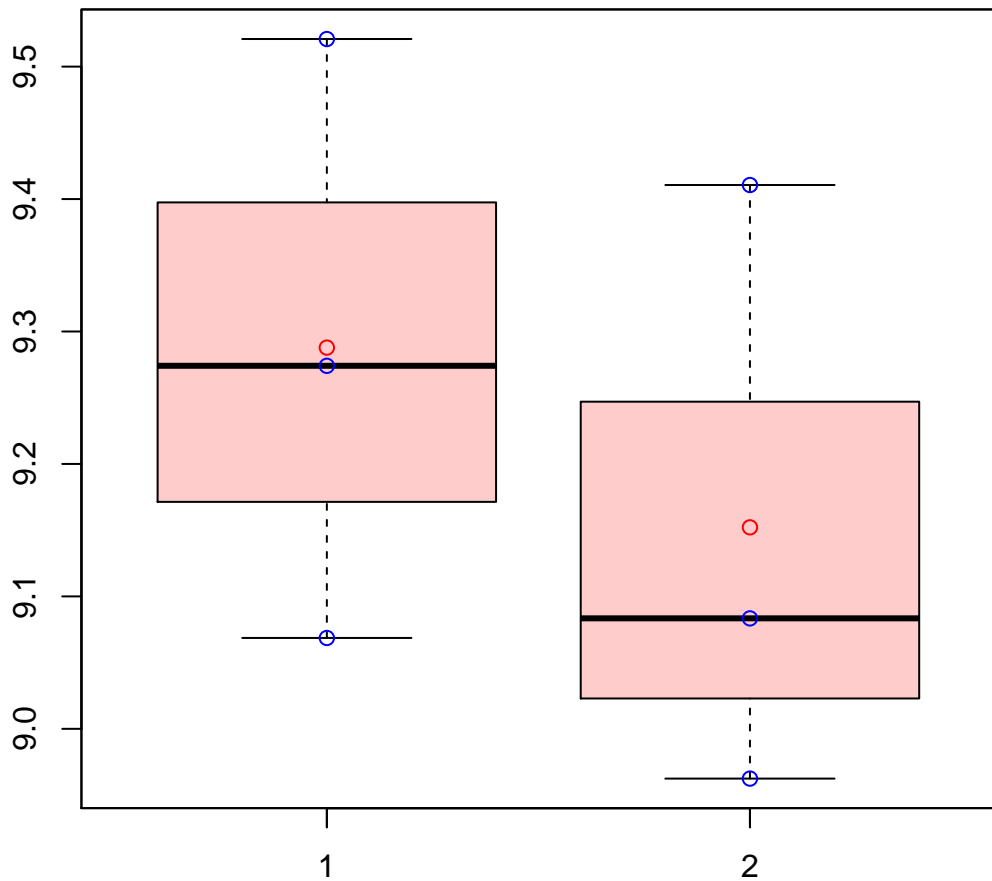

t-Test: p-value = 0.51

# K3XDR1|K3XDR1\_SETIT

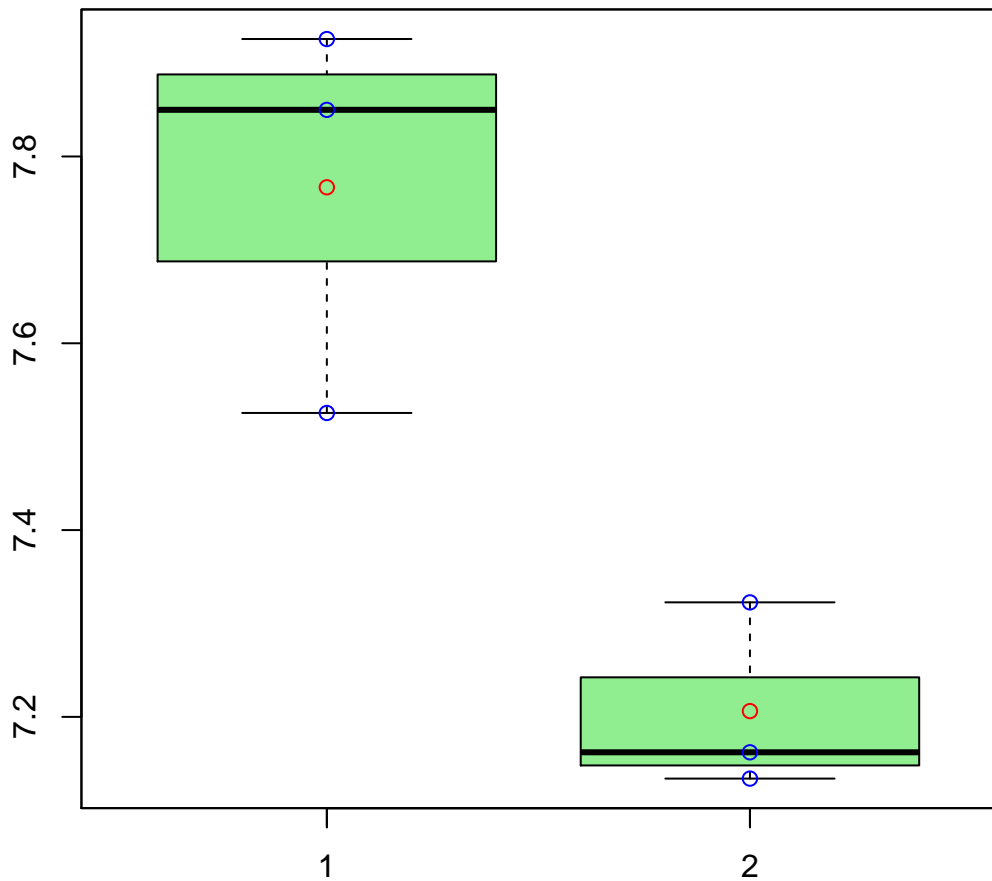

t-Test: p-value = 0.03

# K3XDS5|K3XDS5\_SETIT

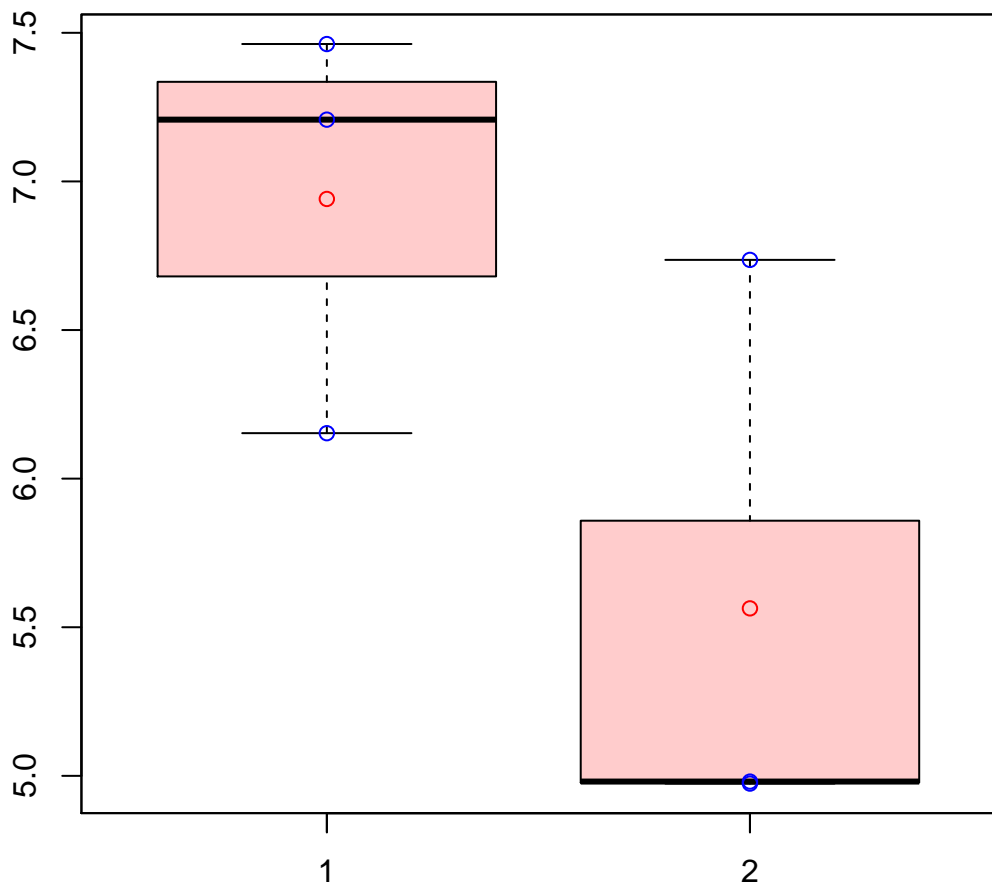

t-Test: p-value = 0.13

# K3XDX9|K3XDX9\_SETIT

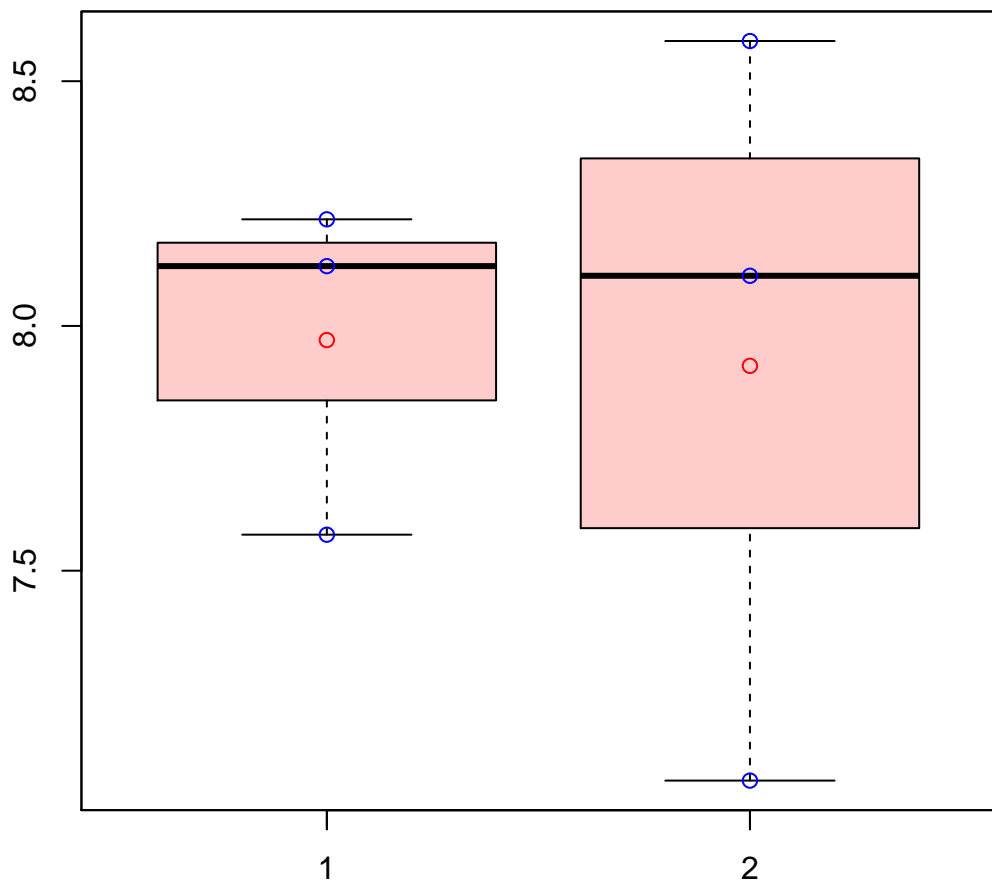

t-Test: p-value = 0.92

# K3XE49|K3XE49\_SETIT

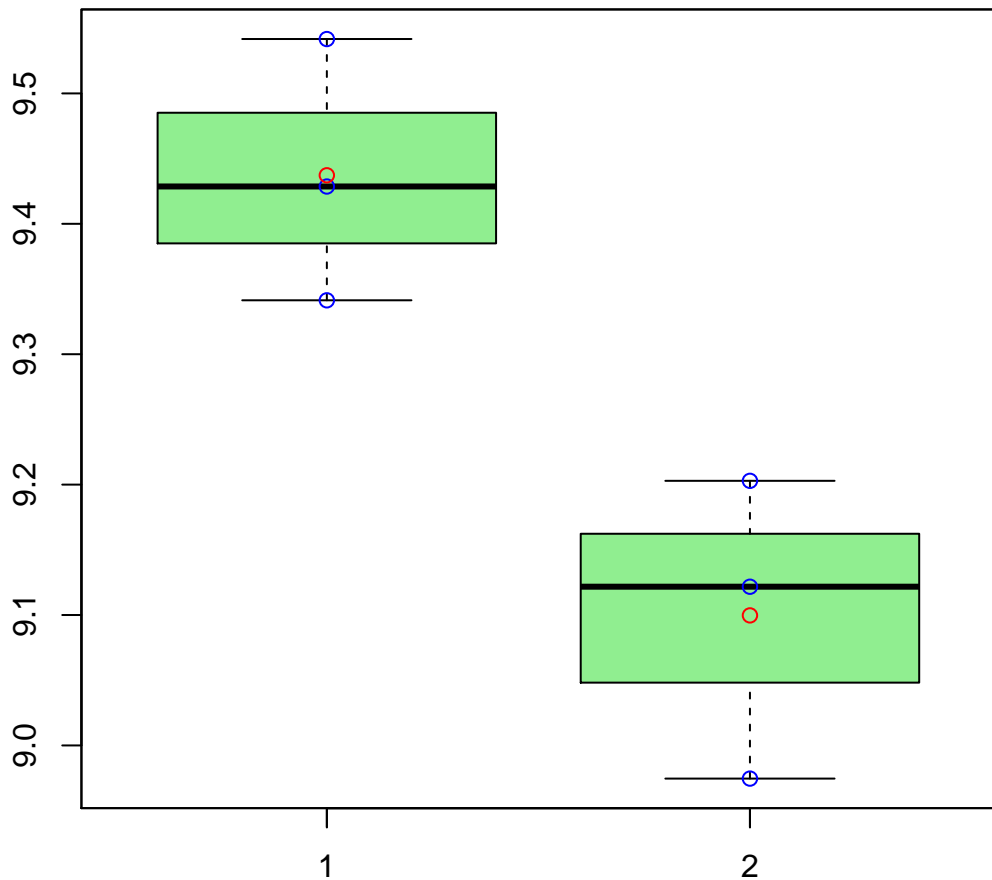

t-Test: p-value = 0.02

# K3XEC2|K3XEC2\_SETIT

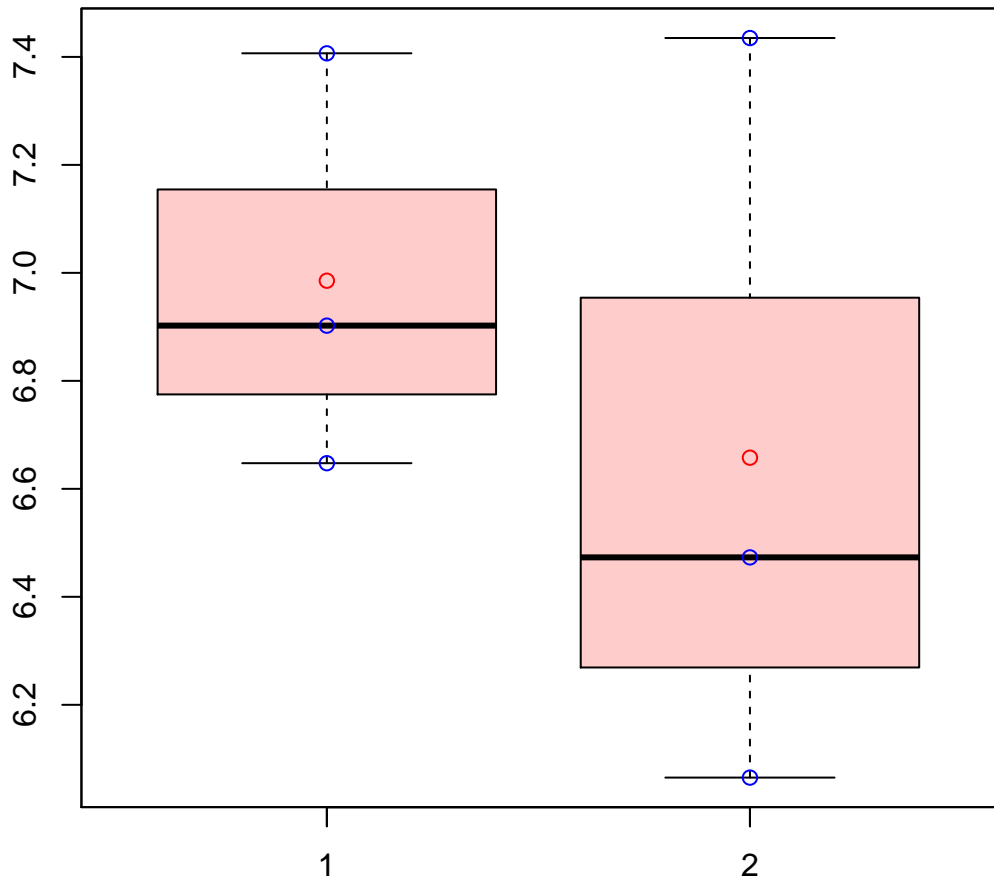

t-Test: p-value = 0.53

# K3XEI1|K3XEI1\_SETIT

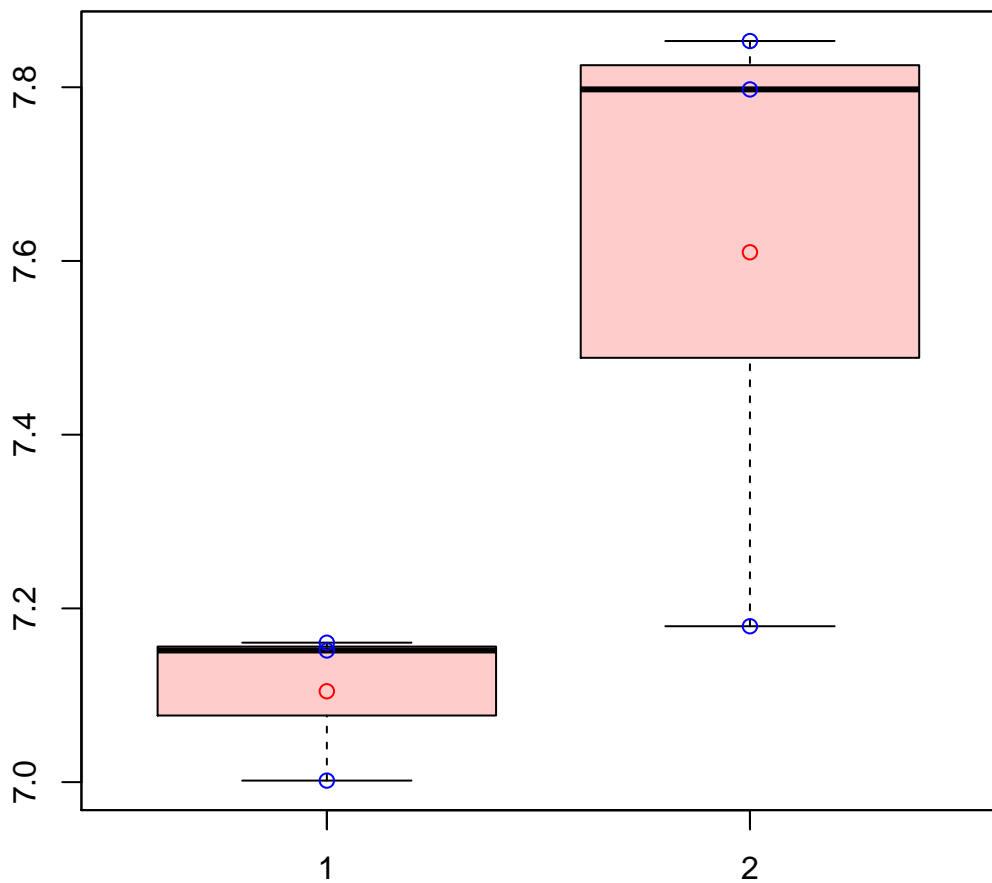

t-Test: p-value = 0.14

# K3XEI9|K3XEI9\_SETIT

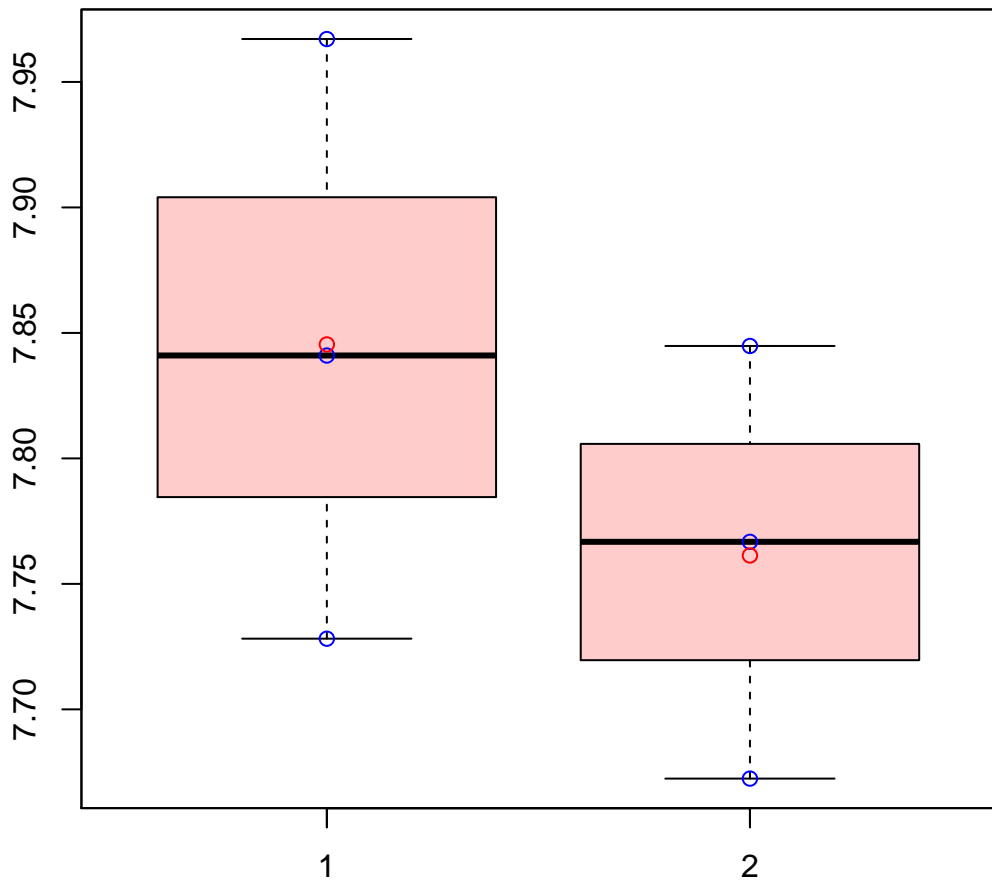

t-Test: p-value = 0.38



# K3XEW6|K3XEW6\_SETIT

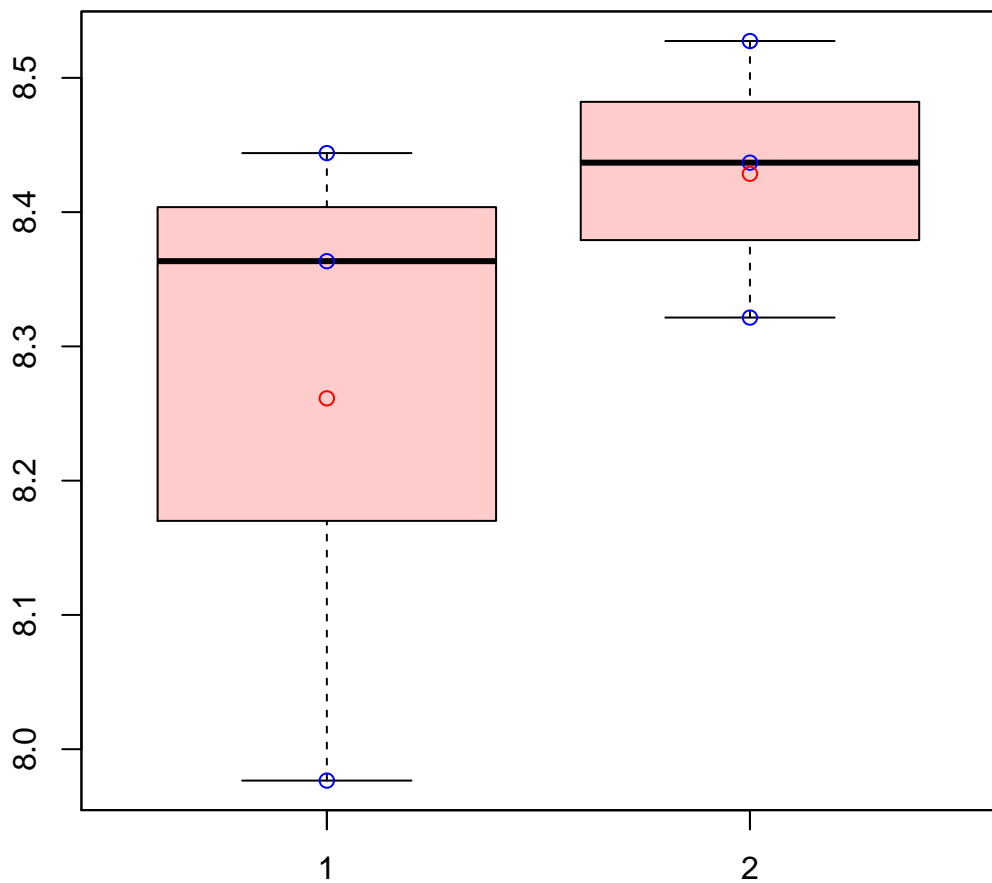

t-Test: p-value = 0.37

# K3XEZ2|K3XEZ2\_SETIT

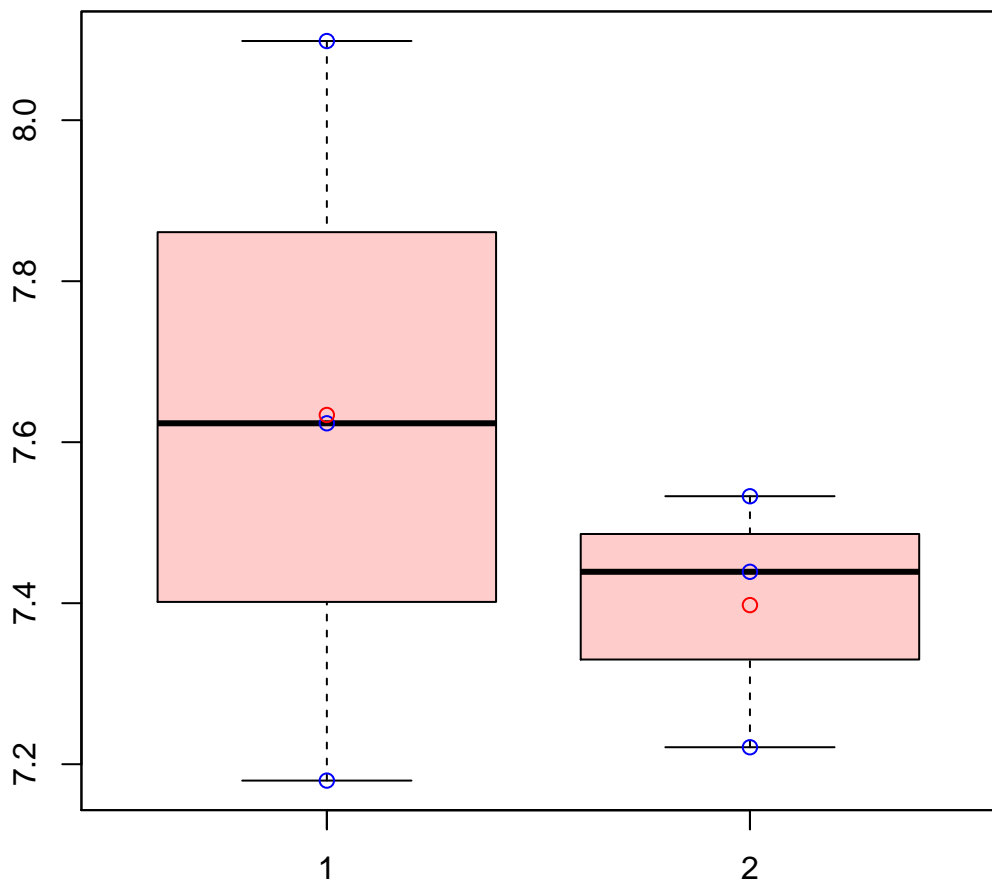

t-Test: p-value = 0.47

# K3XF05|K3XF05\_SETIT

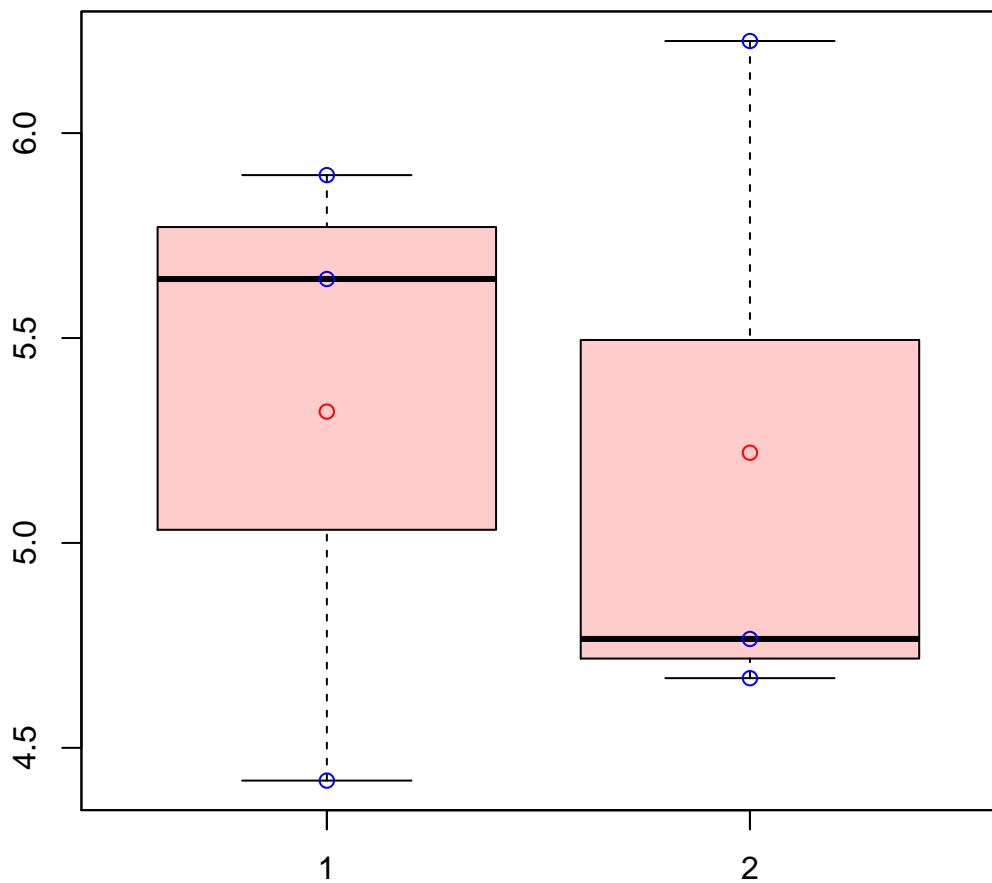

t-Test: p-value = 0.89

# K3XF66|K3XF66\_SETIT

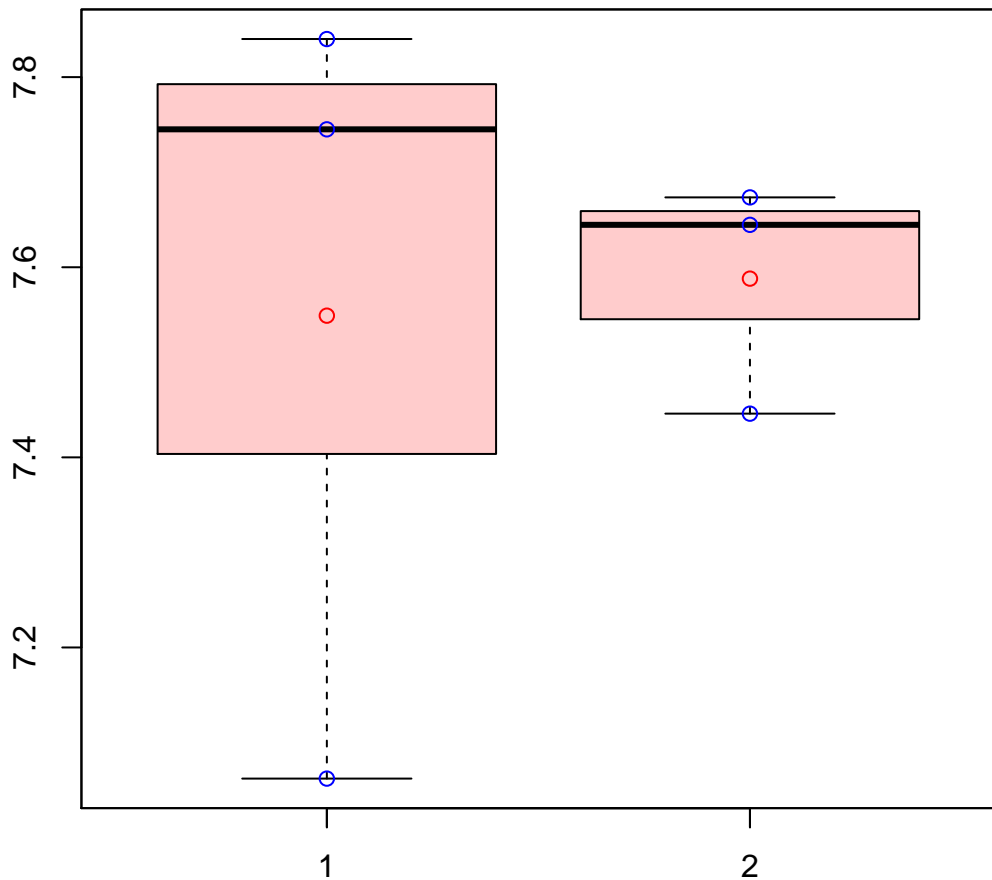

t-Test: p-value = 0.89

# K3XFD3|K3XFD3\_SETIT

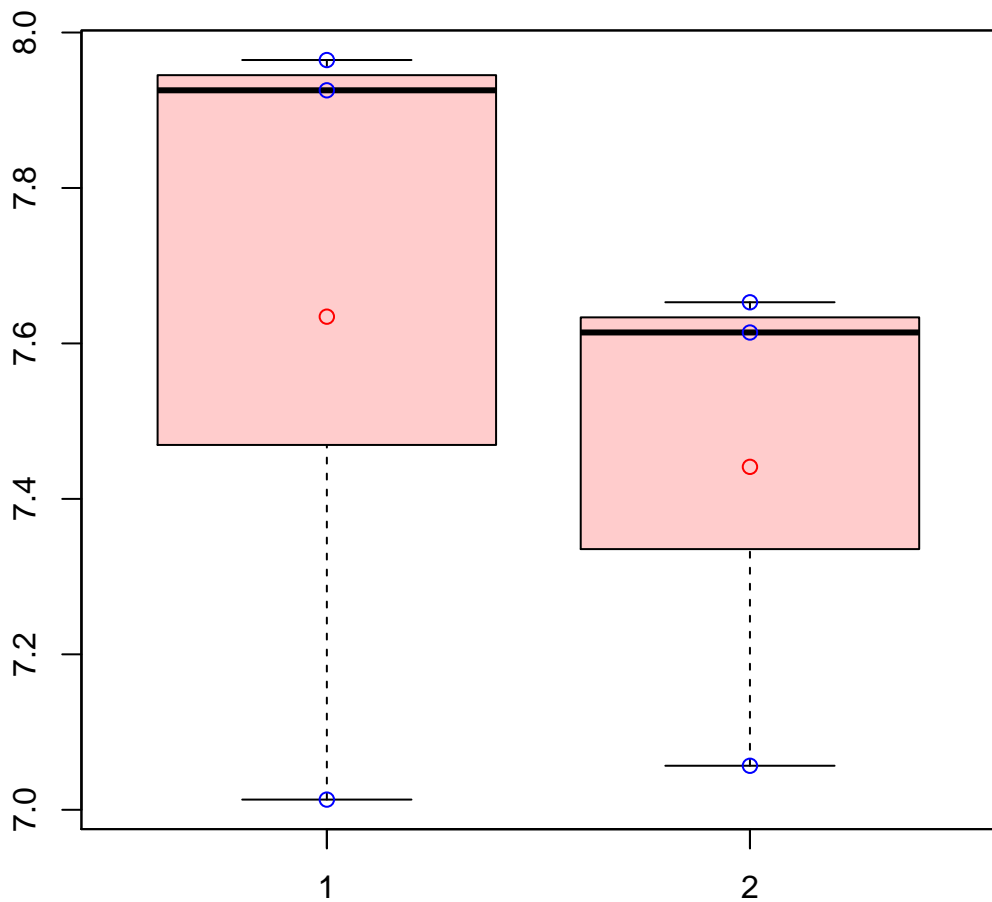

t-Test: p-value = 0.63

# K3XFF0|K3XFF0\_SETIT

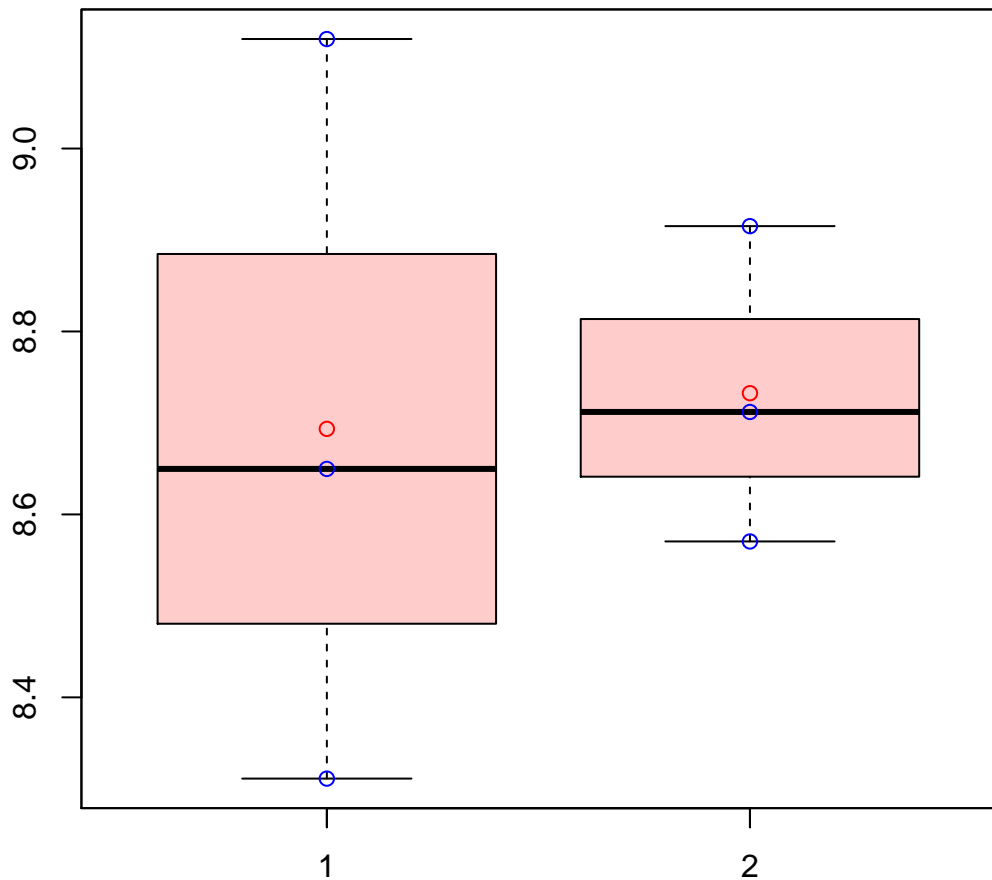

t-Test: p-value = 0.89

# K3XFF2|K3XFF2\_SETIT

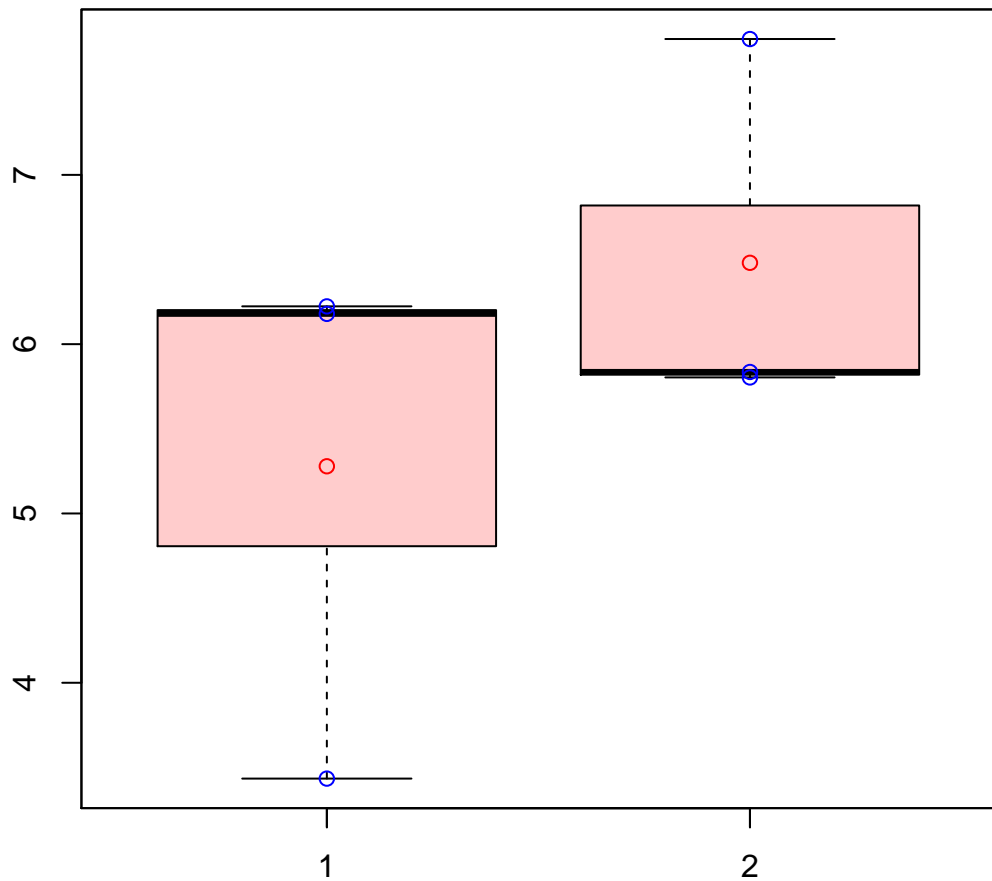

t-Test: p-value = 0.35

# K3XFL3|K3XFL3\_SETIT

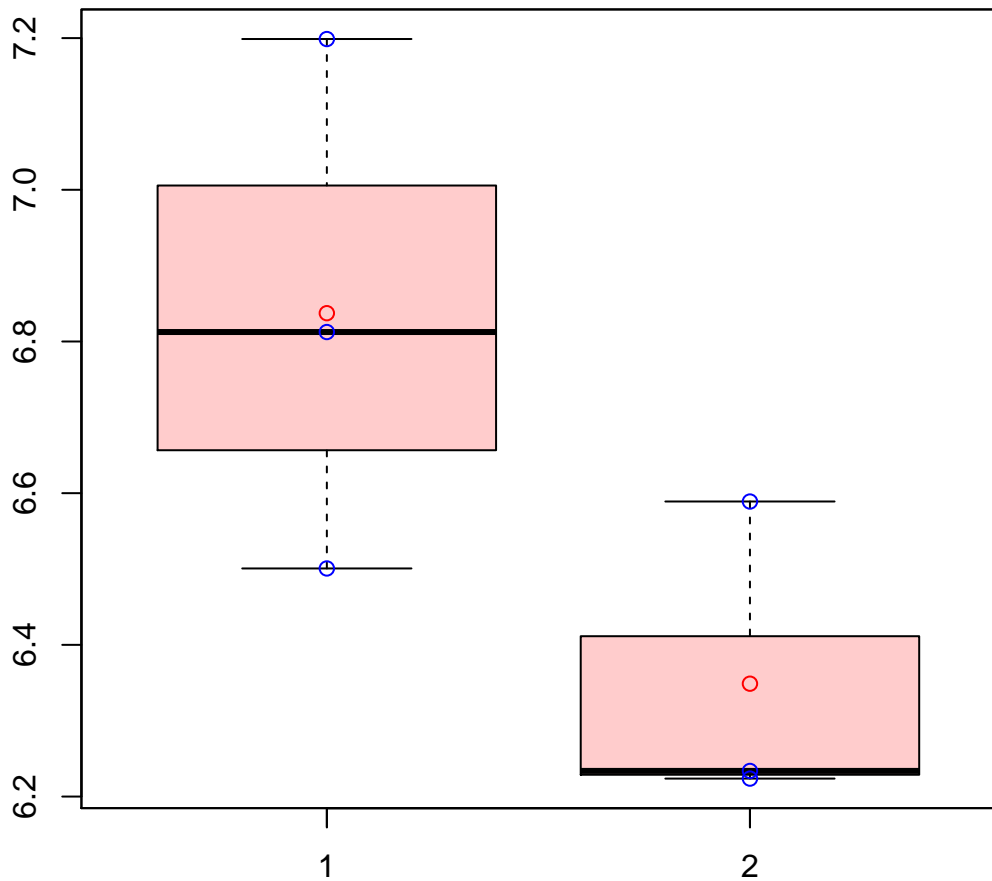

t-Test: p-value = 0.12



# K3XFT3|K3XFT3\_SETIT

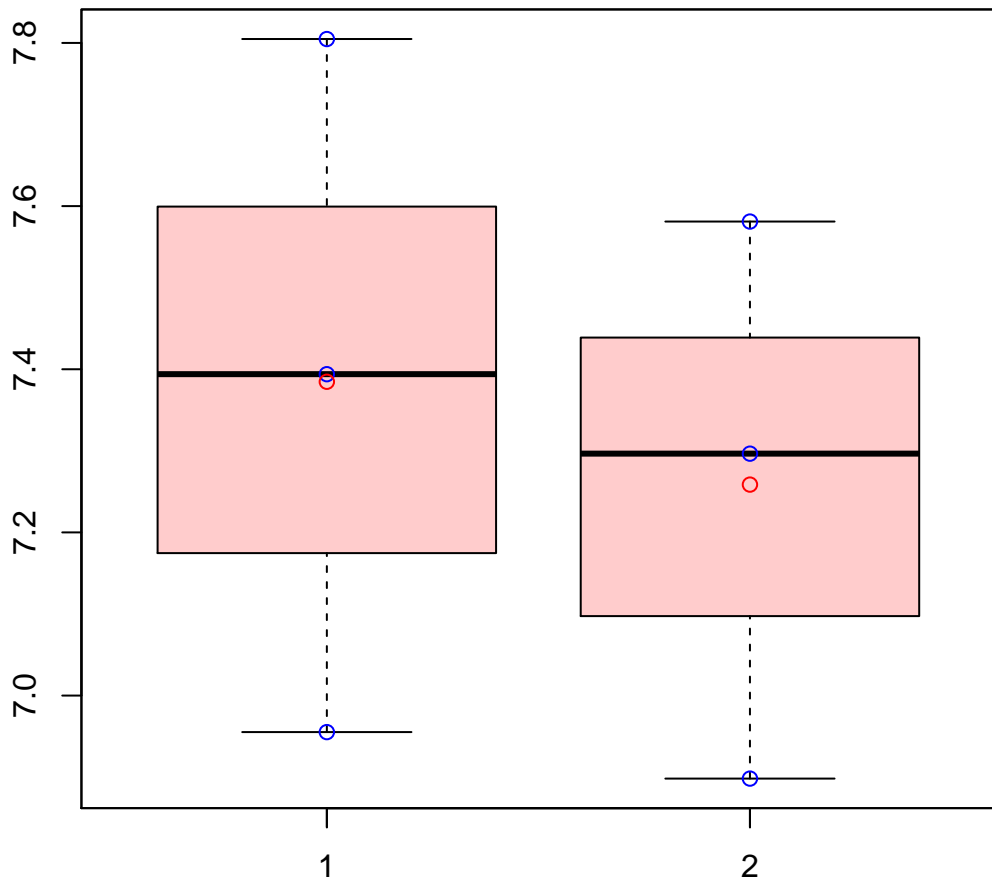

t-Test: p-value = 0.71

# K3XFZ2|K3XFZ2\_SETIT

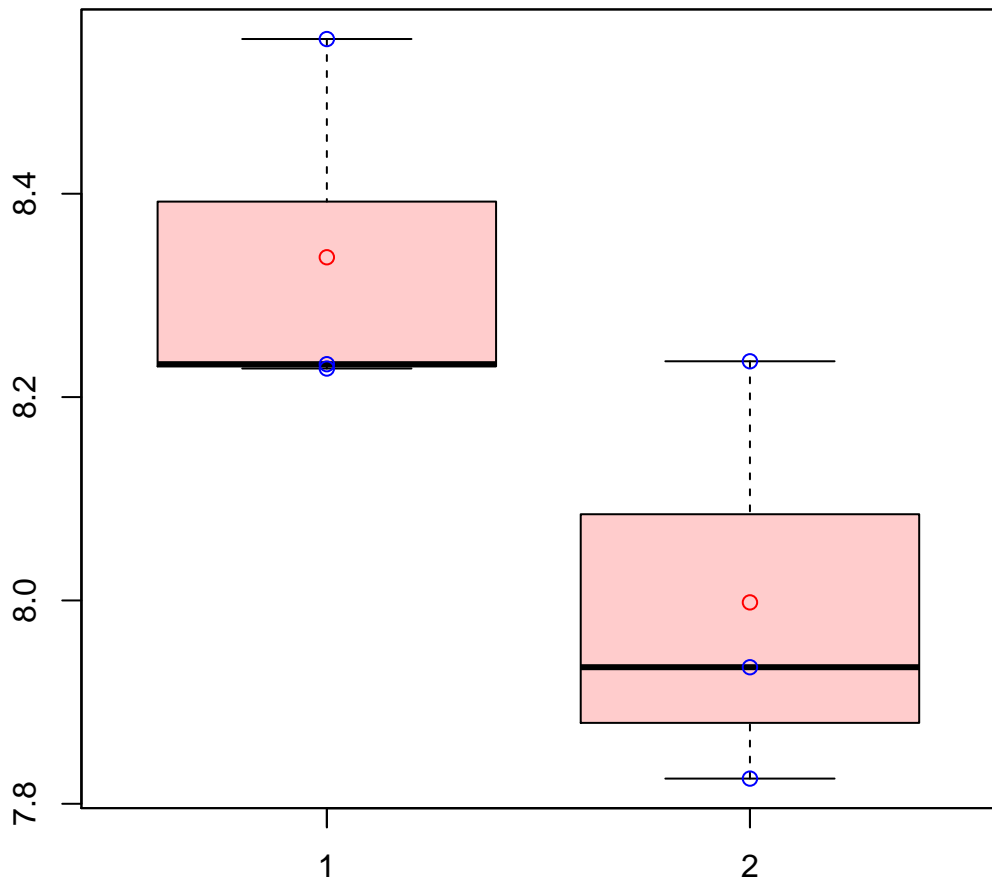

t-Test: p-value = 0.11

# K3XG18|K3XG18\_SETIT

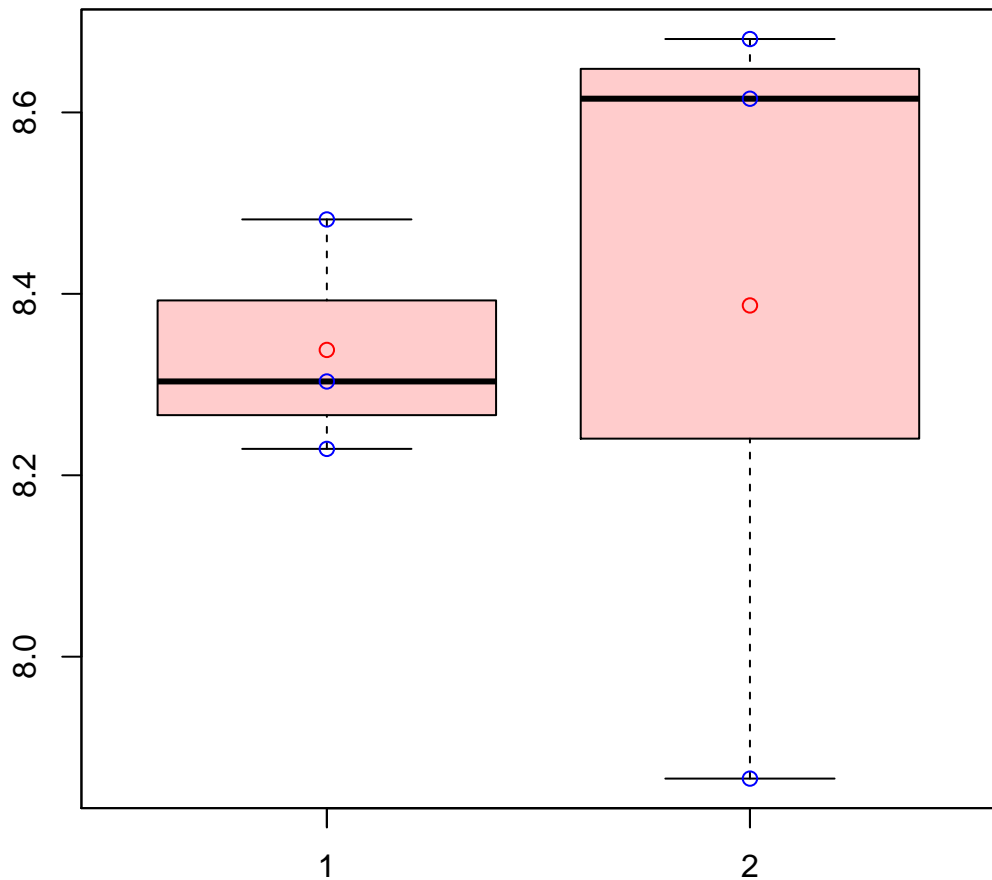

t-Test: p-value = 0.87

# K3XG60|K3XG60\_SETIT

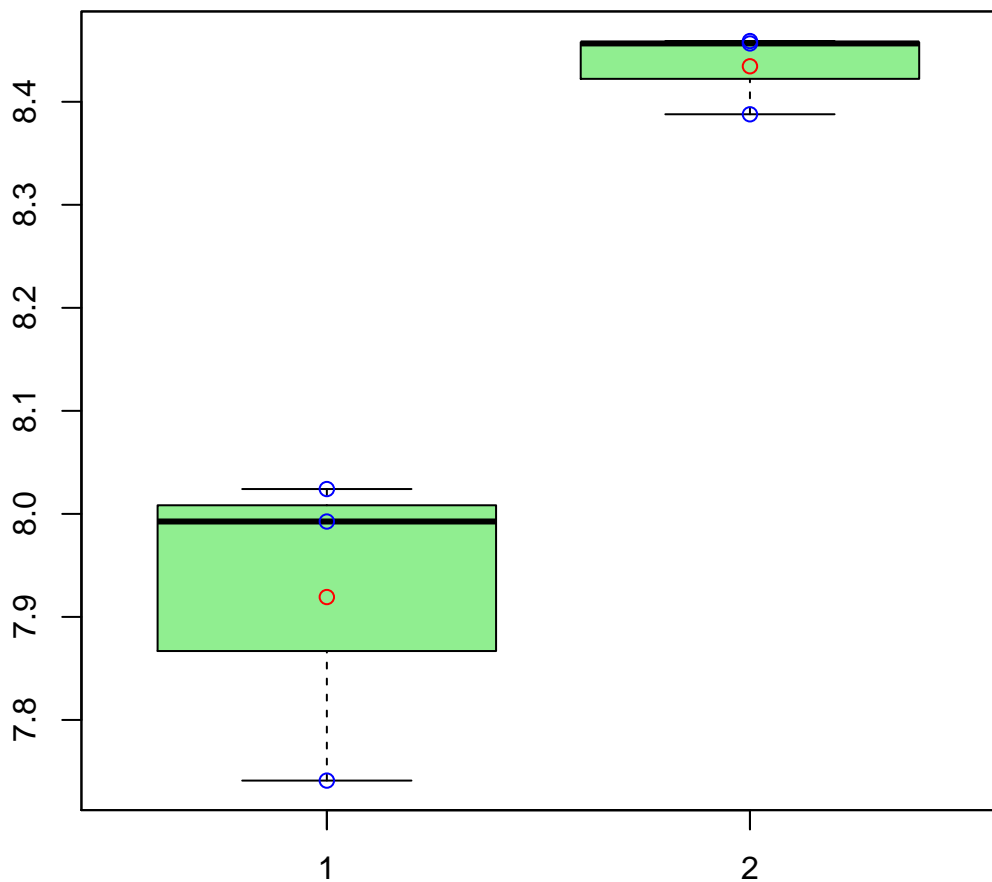

t-Test: p-value = 0.02

# K3XG76|K3XG76\_SETIT

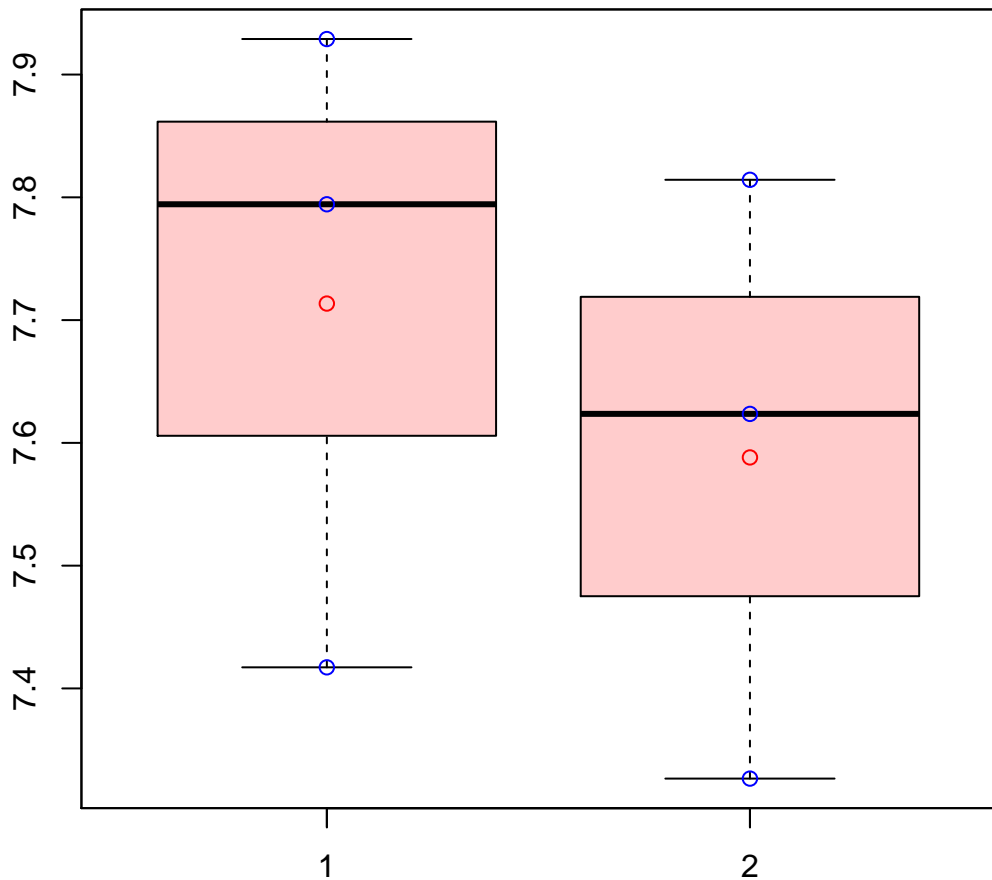

t-Test: p-value = 0.58

# K3XG96|K3XG96\_SETIT

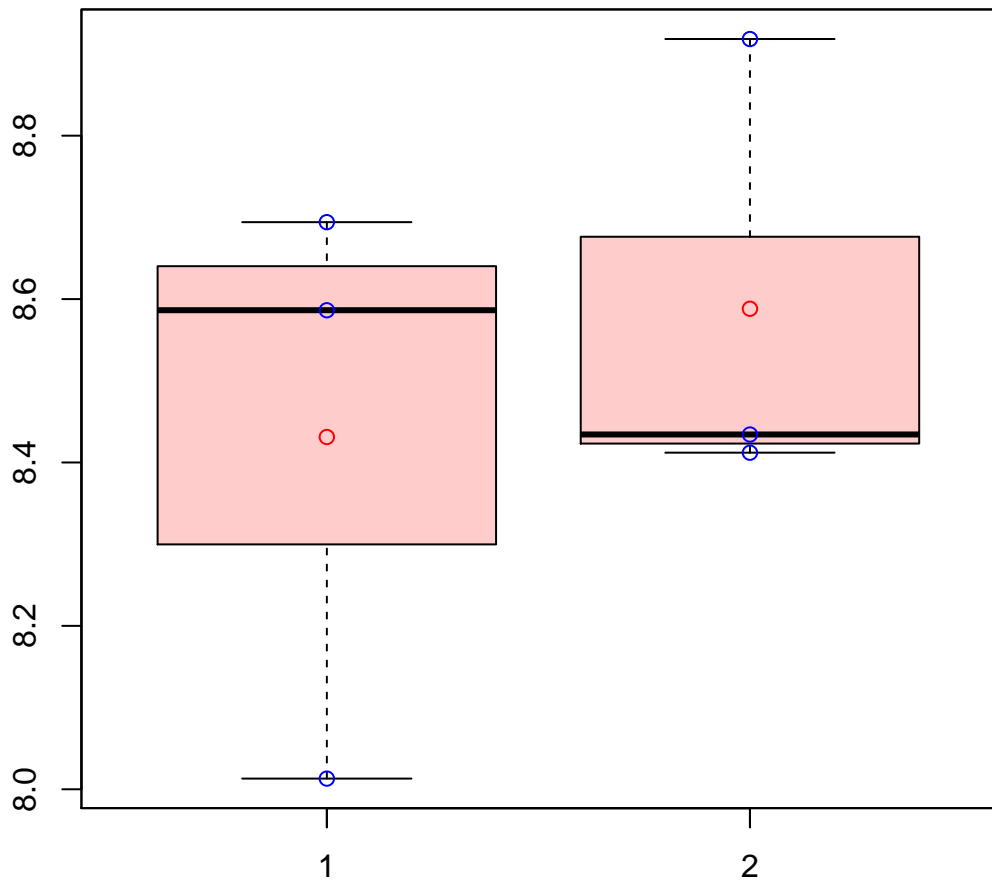

t-Test: p-value = 0.59

# K3XGC3|K3XGC3\_SETIT

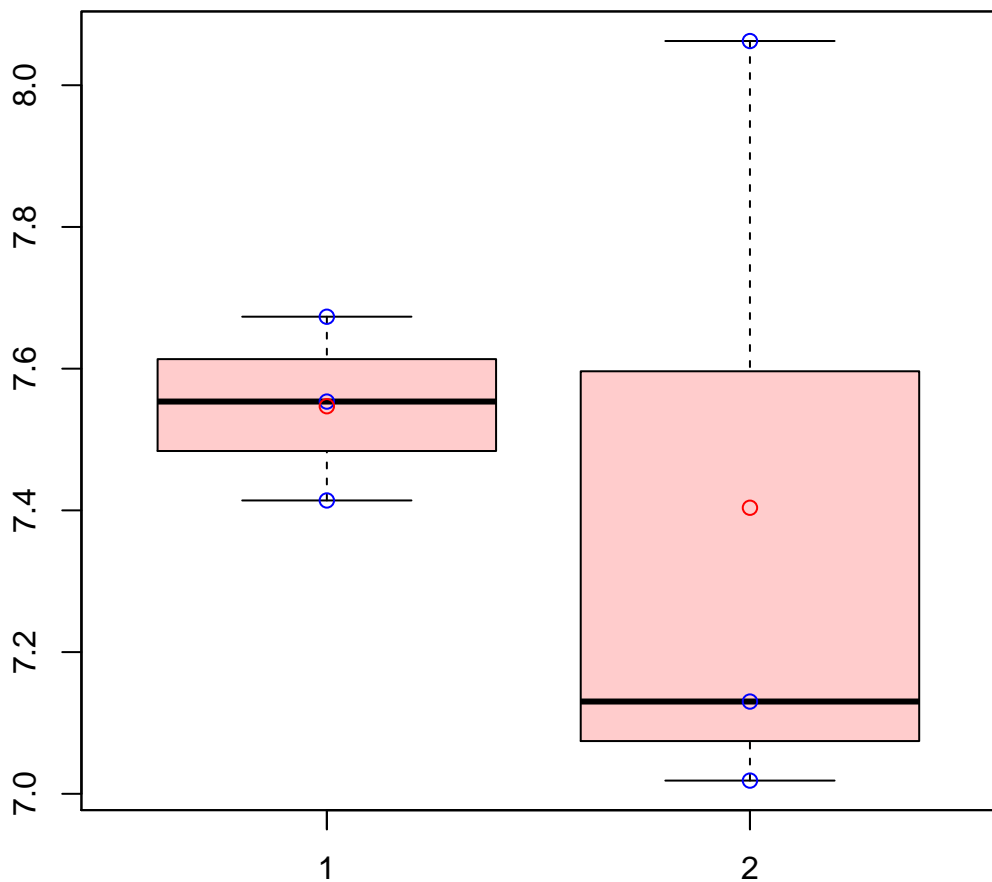

t-Test: p-value = 0.71

# K3XGC7|K3XGC7\_SETIT

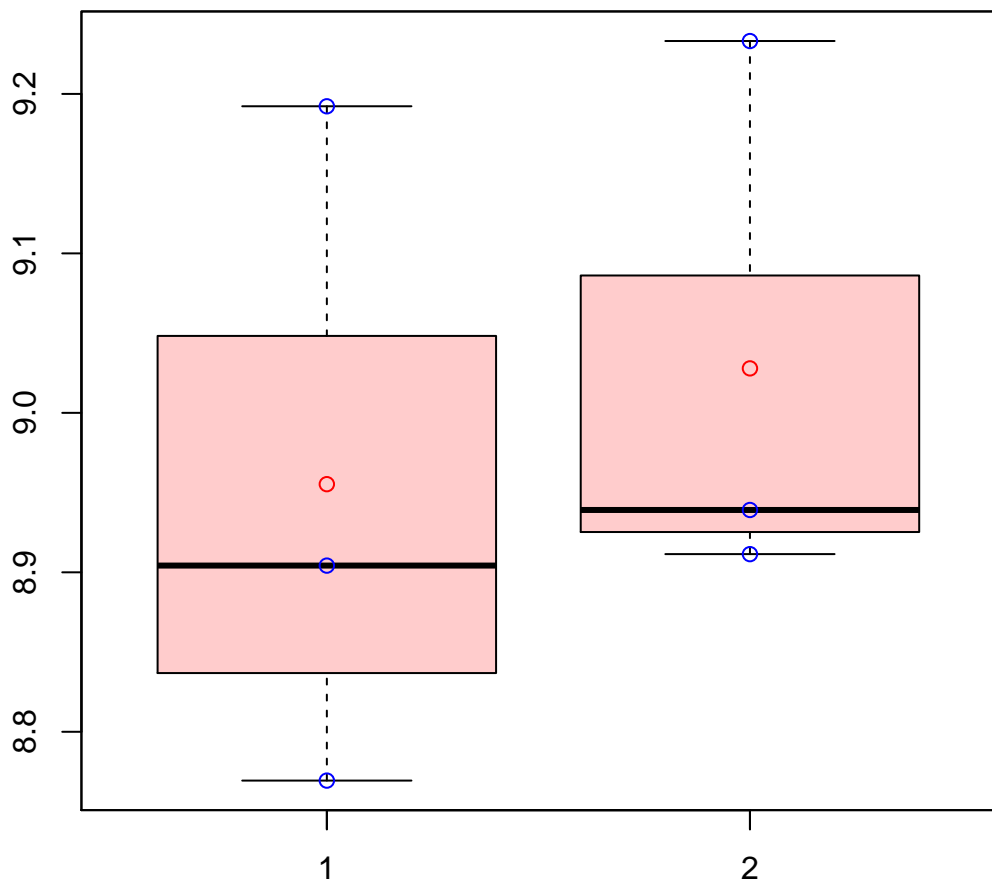

t-Test: p-value = 0.68



# K3XGD3|K3XGD3\_SETIT

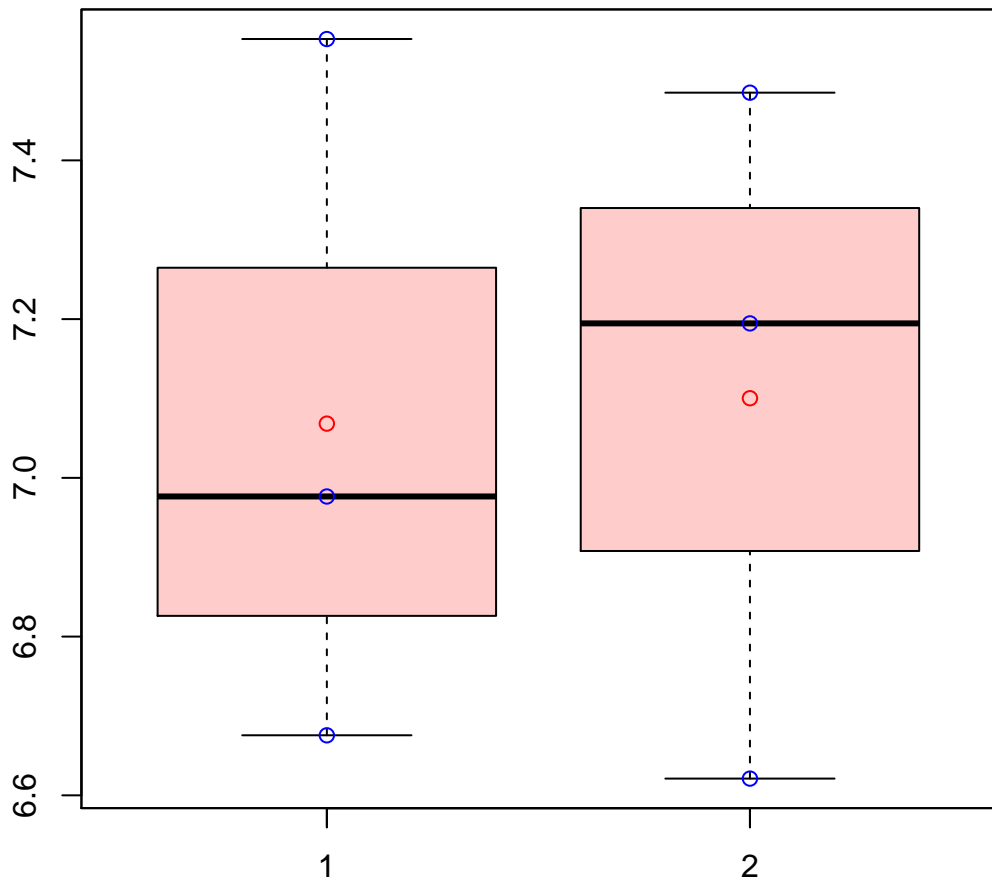

t-Test: p-value = 0.93

# K3XGN3|K3XGN3\_SETIT

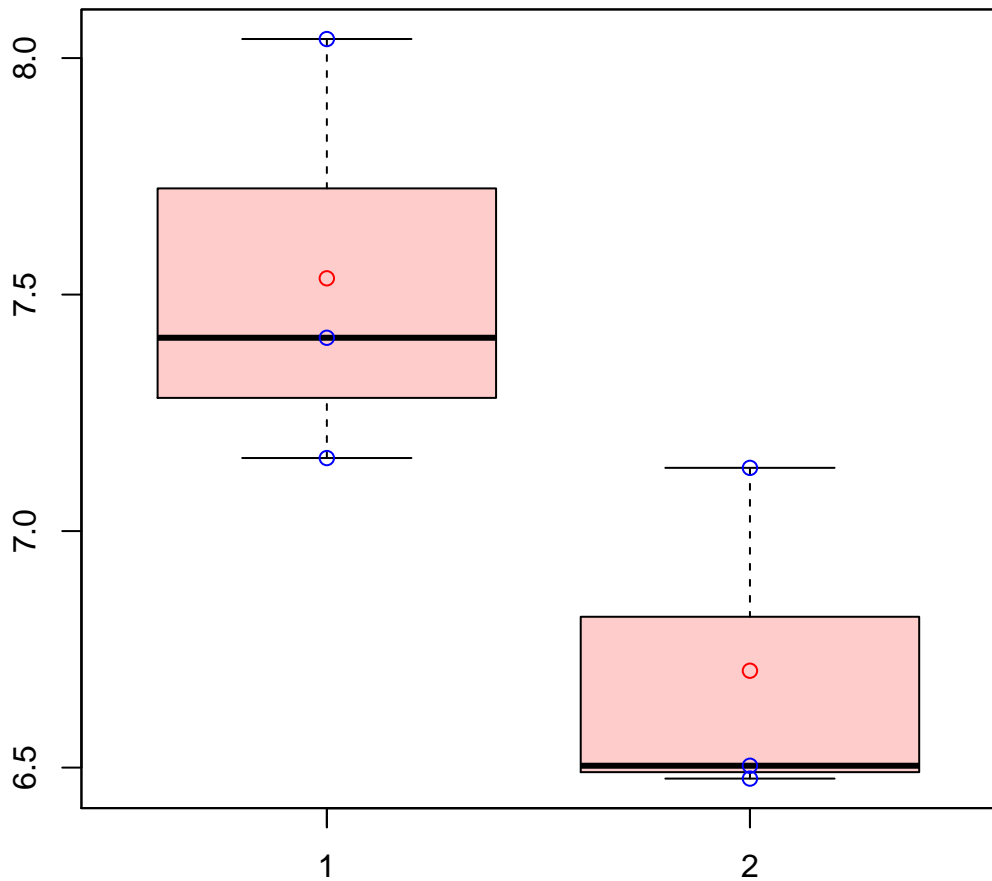

t-Test: p-value = 0.07

# K3XGQ9|K3XGQ9\_SETIT

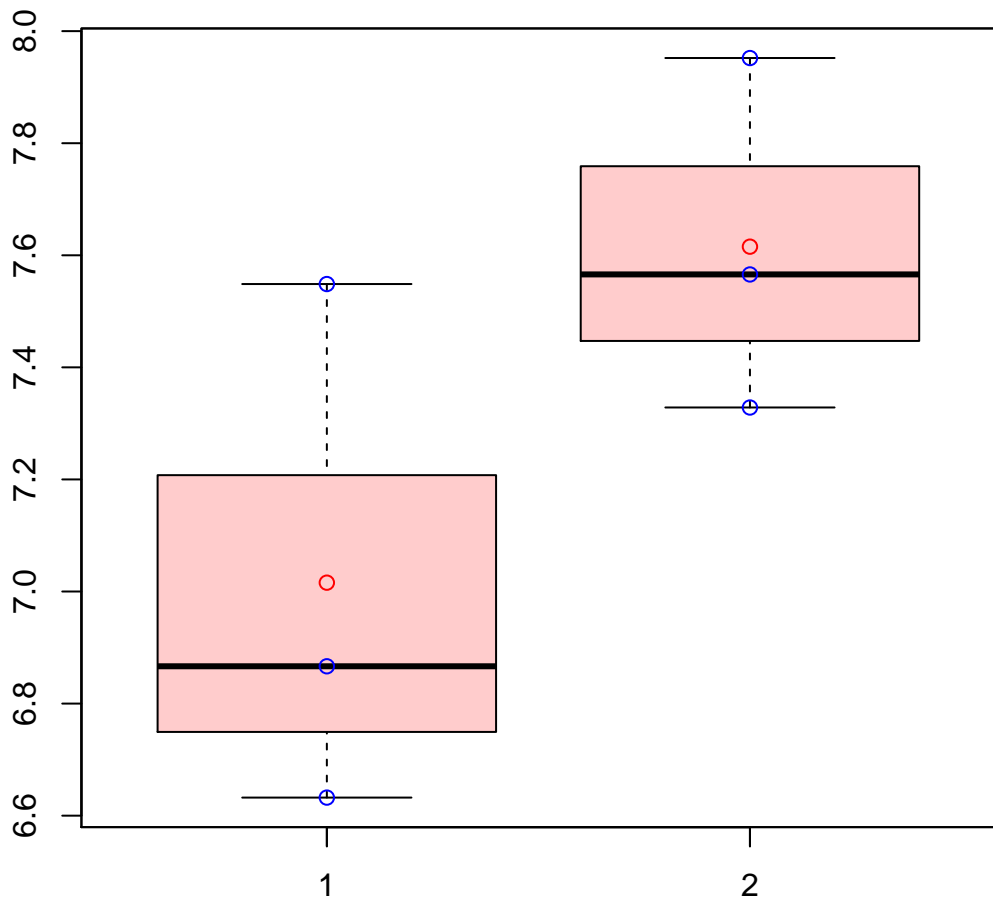

t-Test: p-value = 0.15

# K3XGX7|K3XGX7\_SETIT

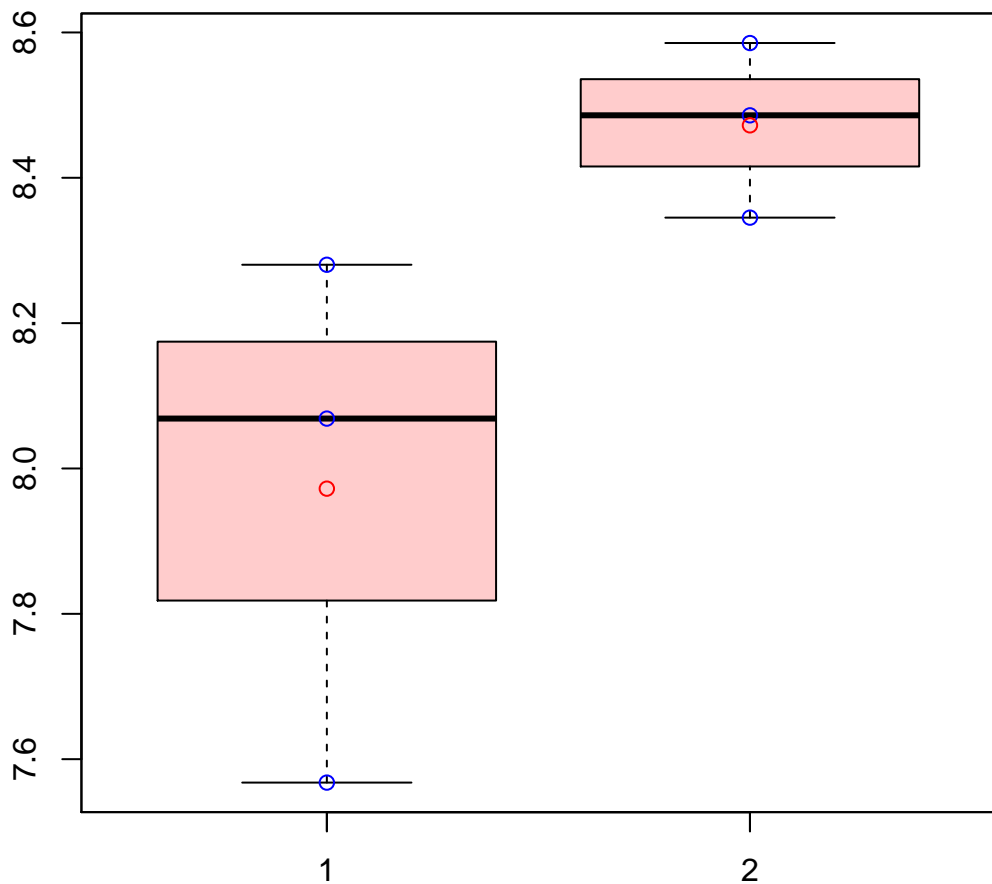

t-Test: p-value = 0.13

# K3XH82|K3XH82\_SETIT

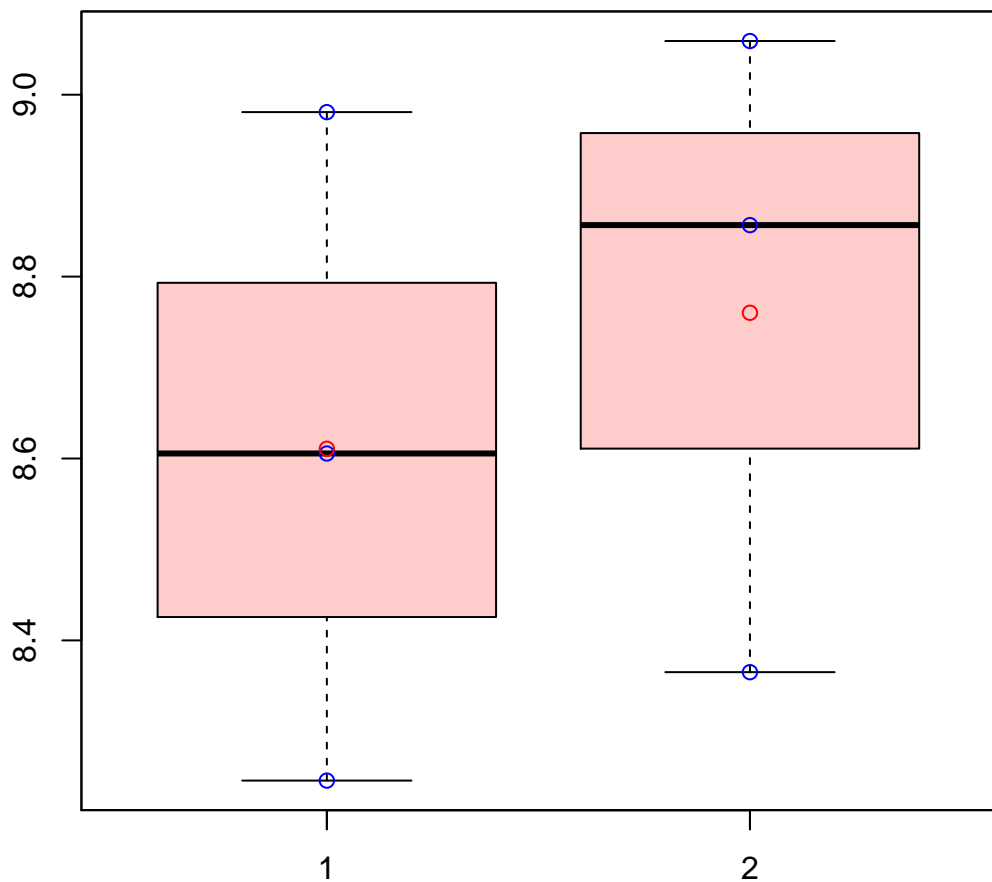

t-Test: p-value = 0.64

# K3XHD8|K3XHD8\_SETIT

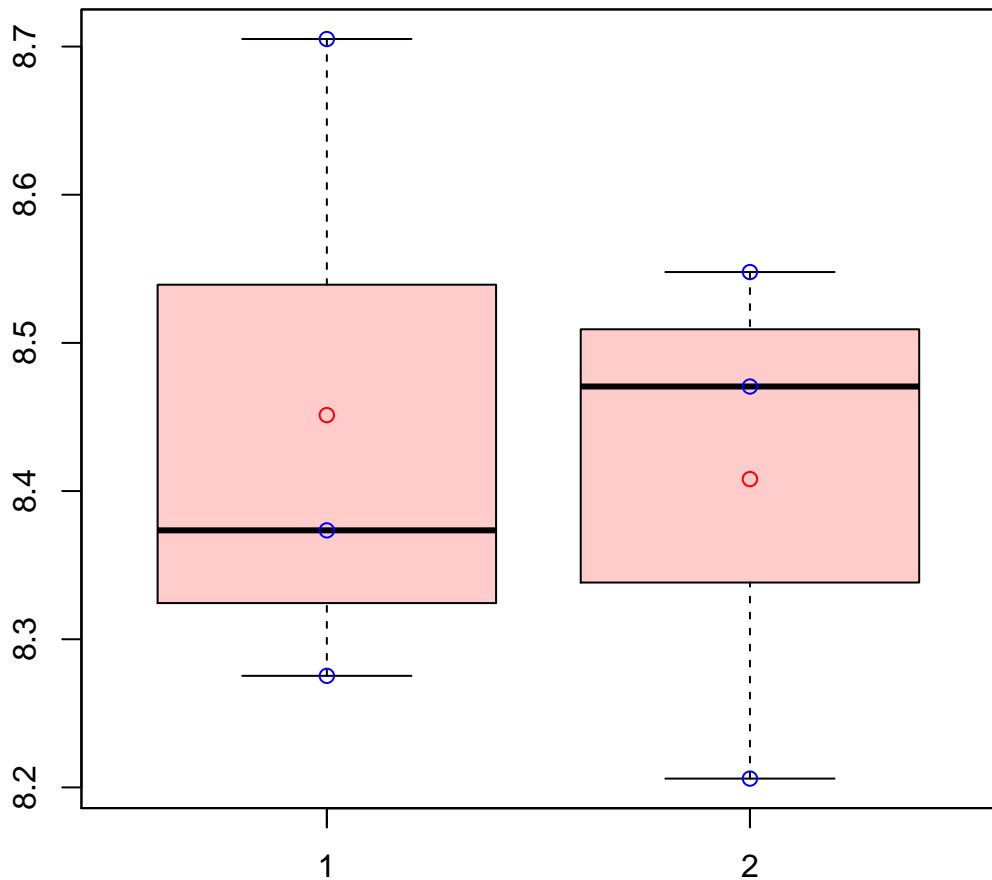

t-Test: p-value = 0.81

# K3XHJ0|K3XHJ0\_SETIT

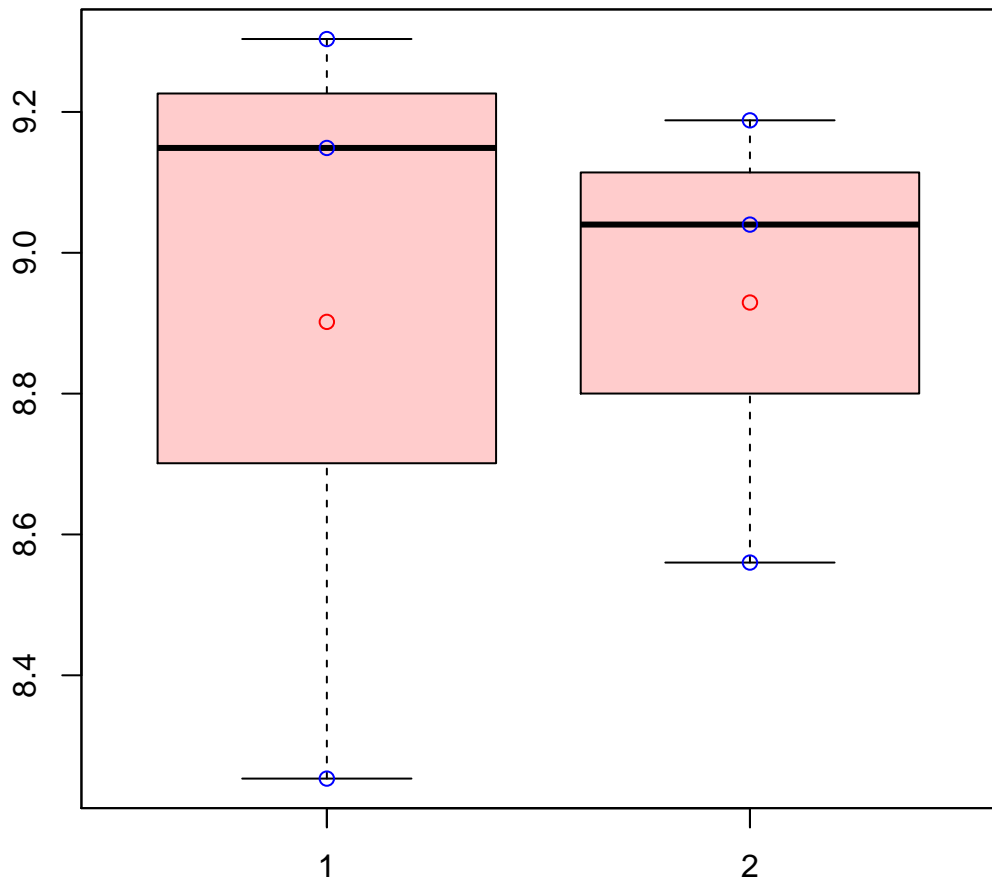

t-Test: p-value = 0.95

# K3XHR6|K3XHR6\_SETIT

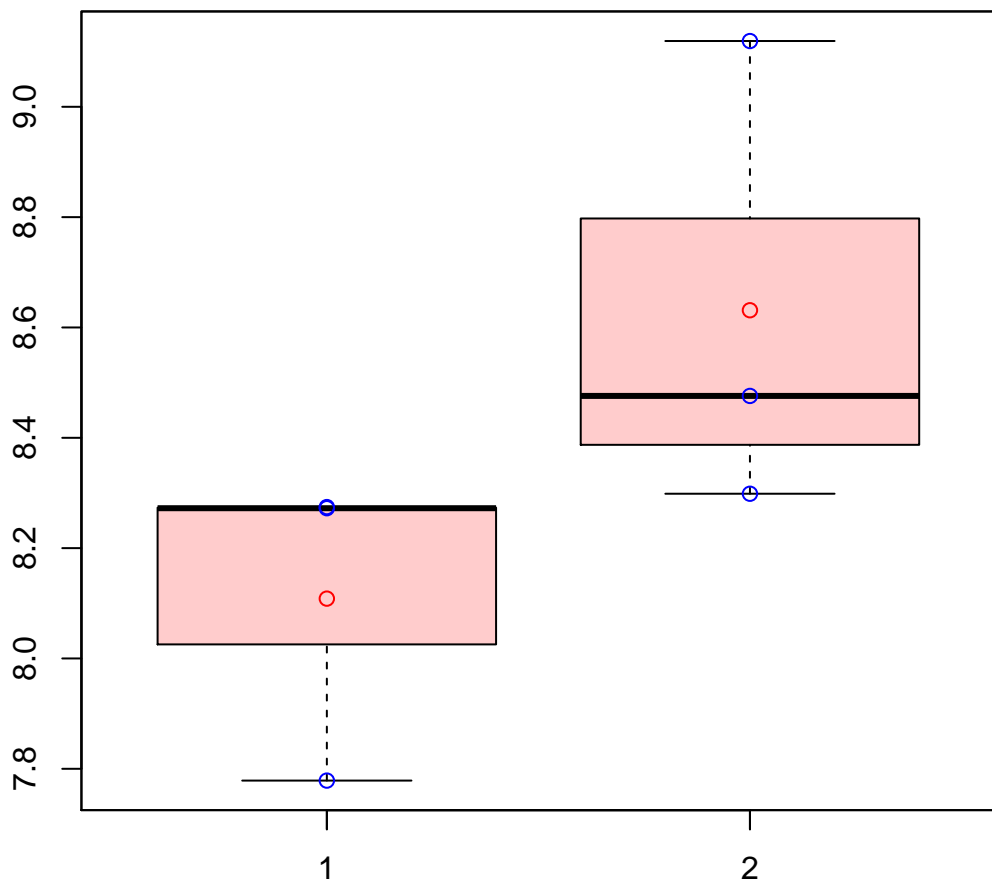

t-Test: p-value = 0.17



# K3XI94|K3XI94\_SETIT

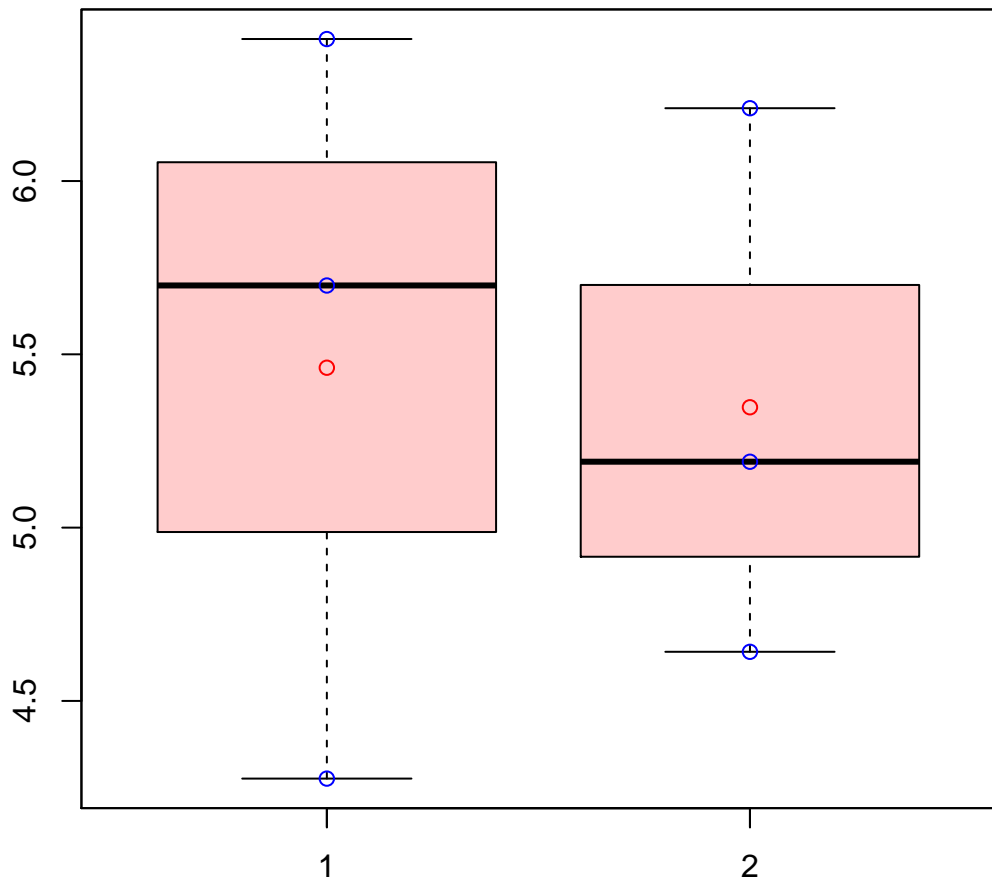

t-Test: p-value = 0.89

# K3XIC0|K3XIC0\_SETIT

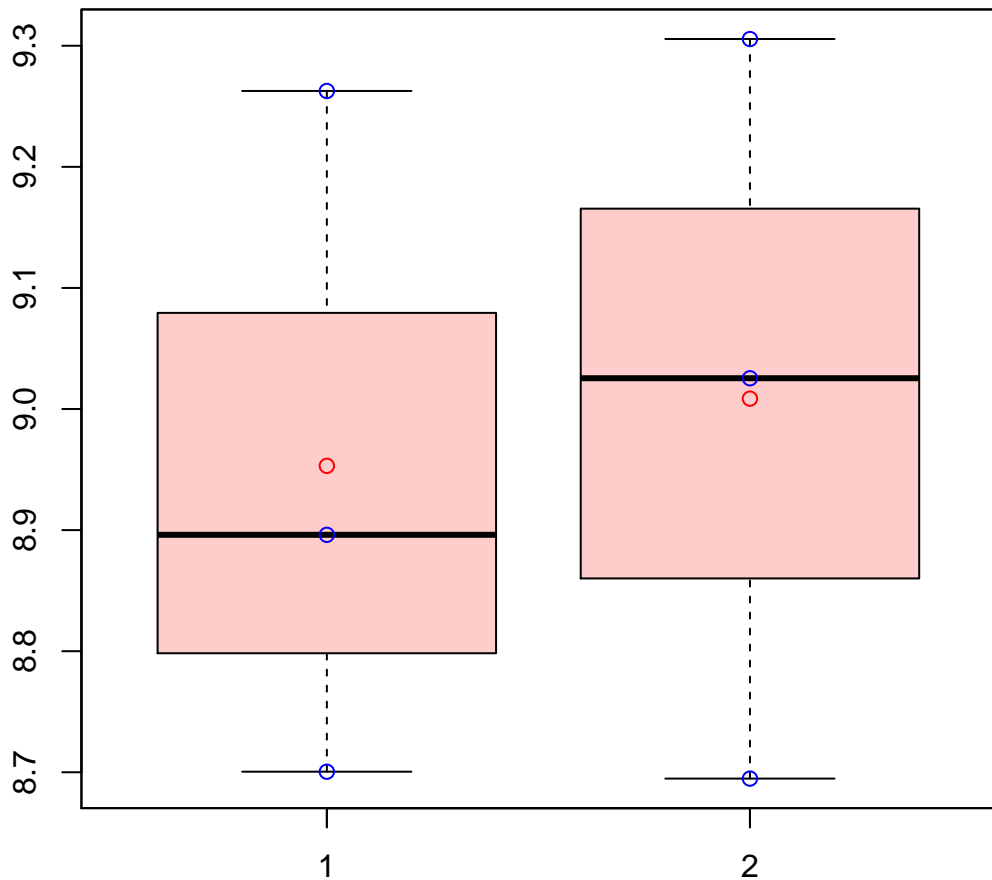

t-Test: p-value = 0.83

# K3XID0|K3XID0\_SETIT

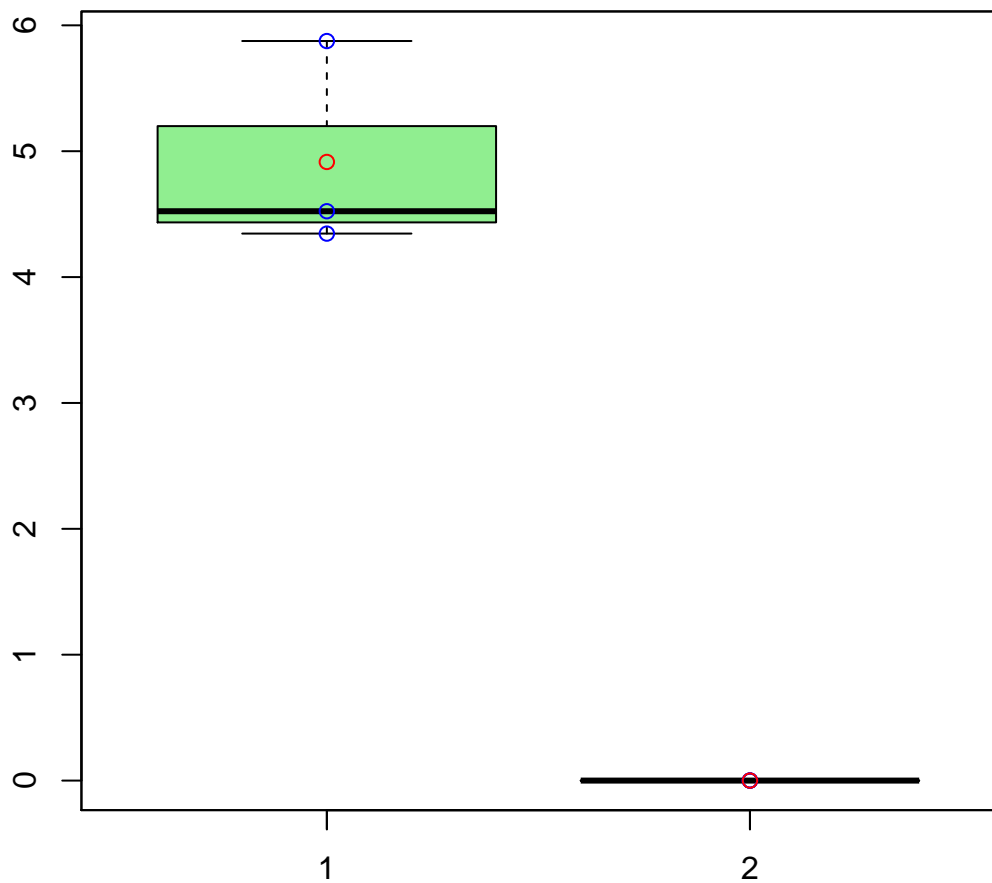

t-Test: p-value = 0.01

# K3XIE6|K3XIE6\_SETIT

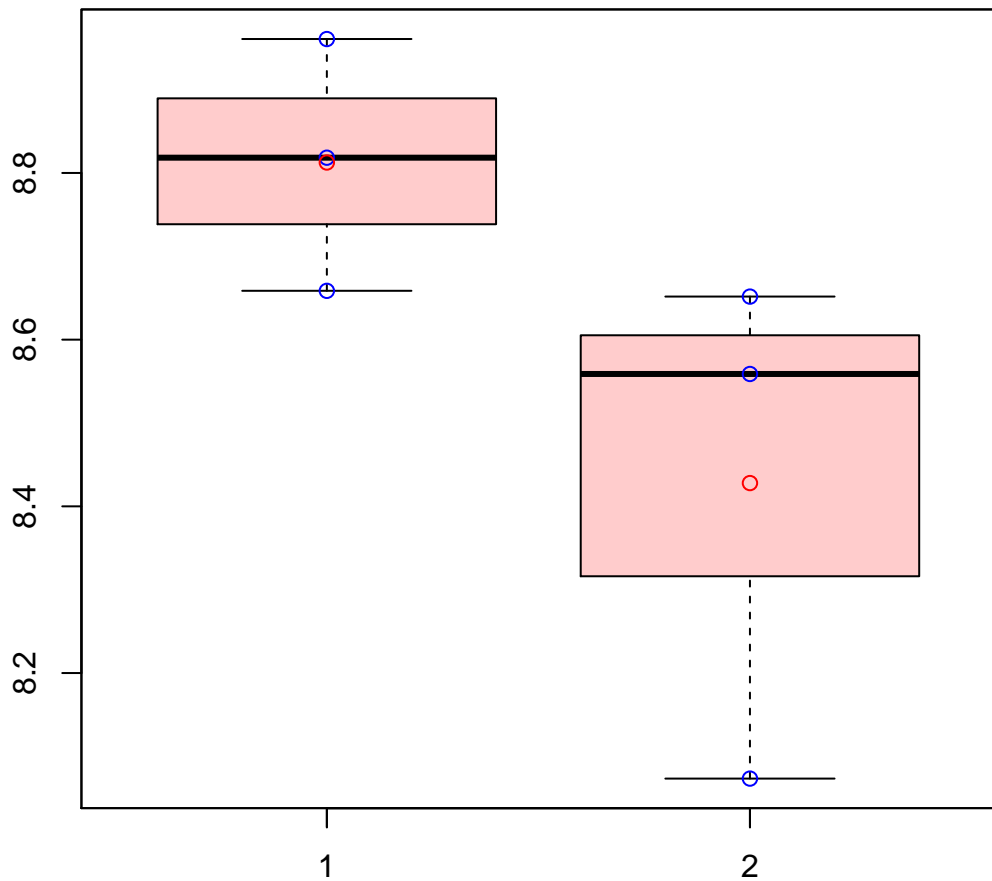

t-Test: p-value = 0.15

# K3XIH1|K3XIH1\_SETIT

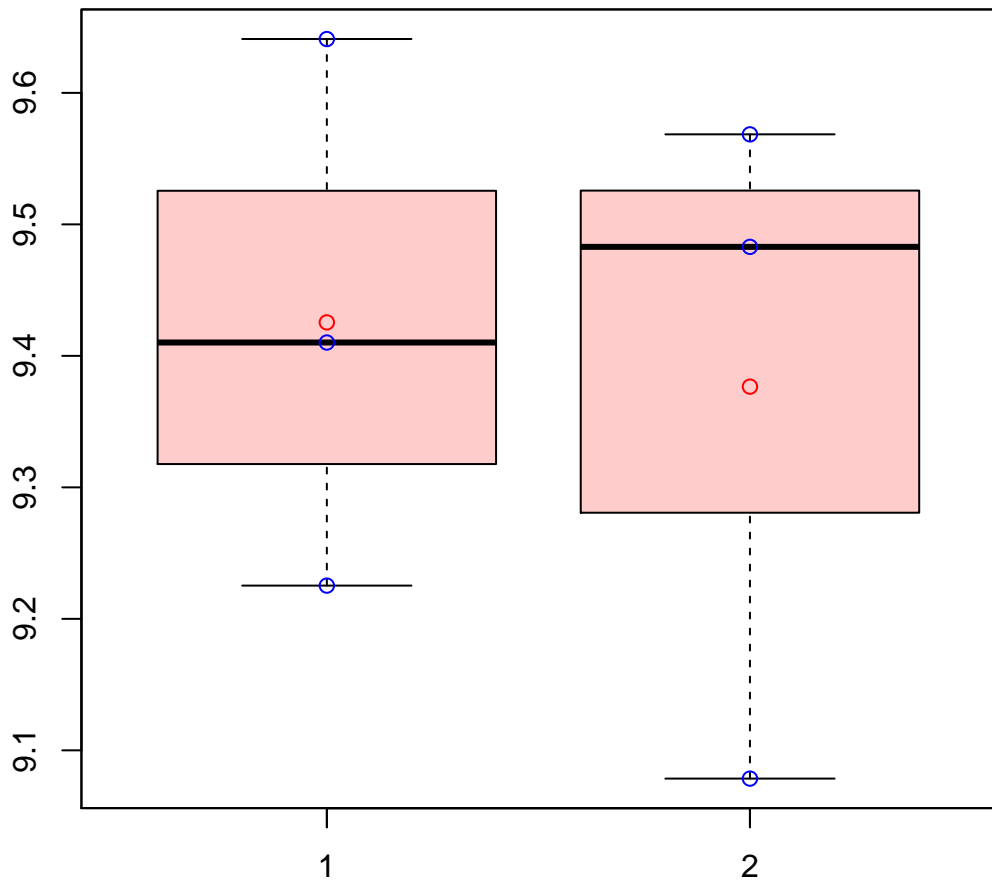

t-Test: p-value = 0.81

# K3XIJ1|K3XIJ1\_SETIT

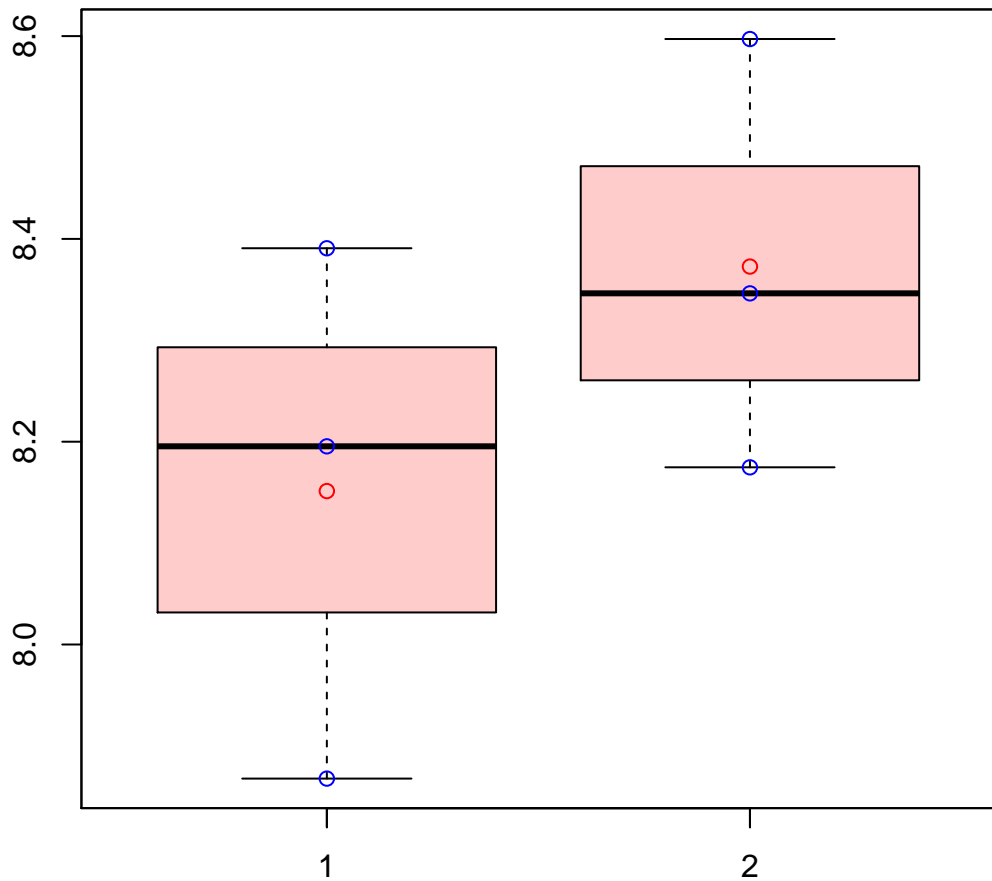

t-Test: p-value = 0.32

# K3XIJ3|K3XIJ3\_SETIT

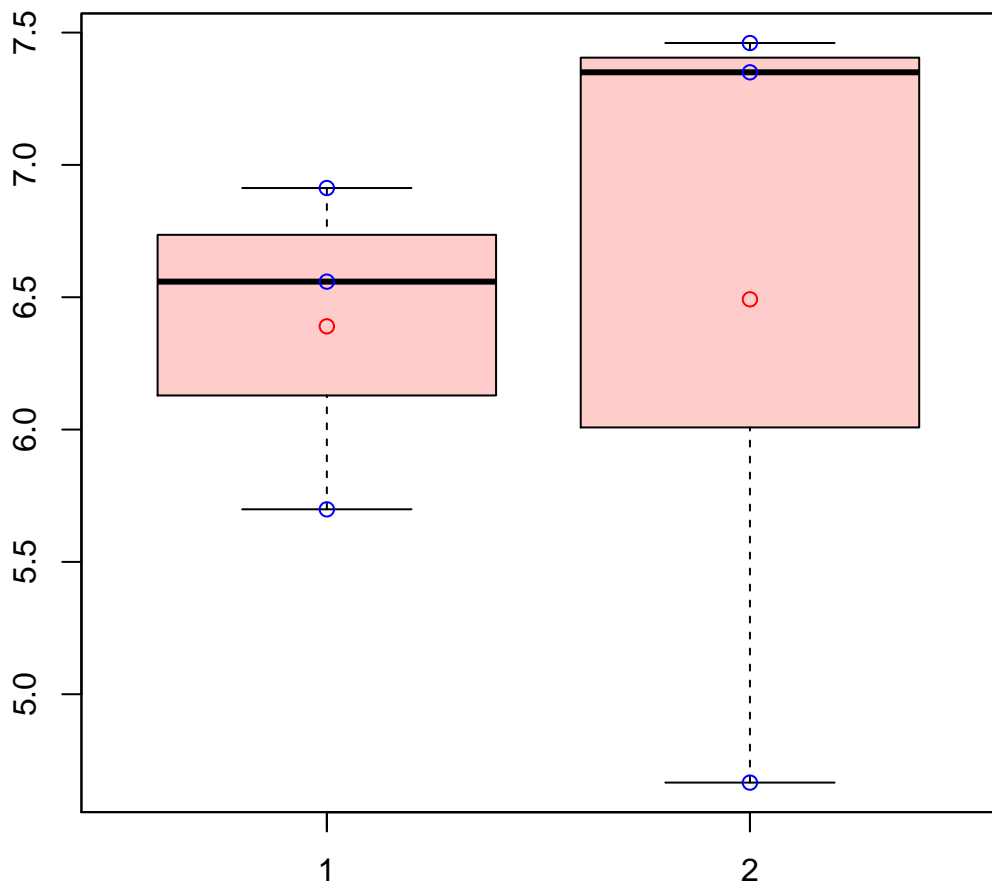

t-Test: p-value = 0.92

# K3XIN8|K3XIN8\_SETIT

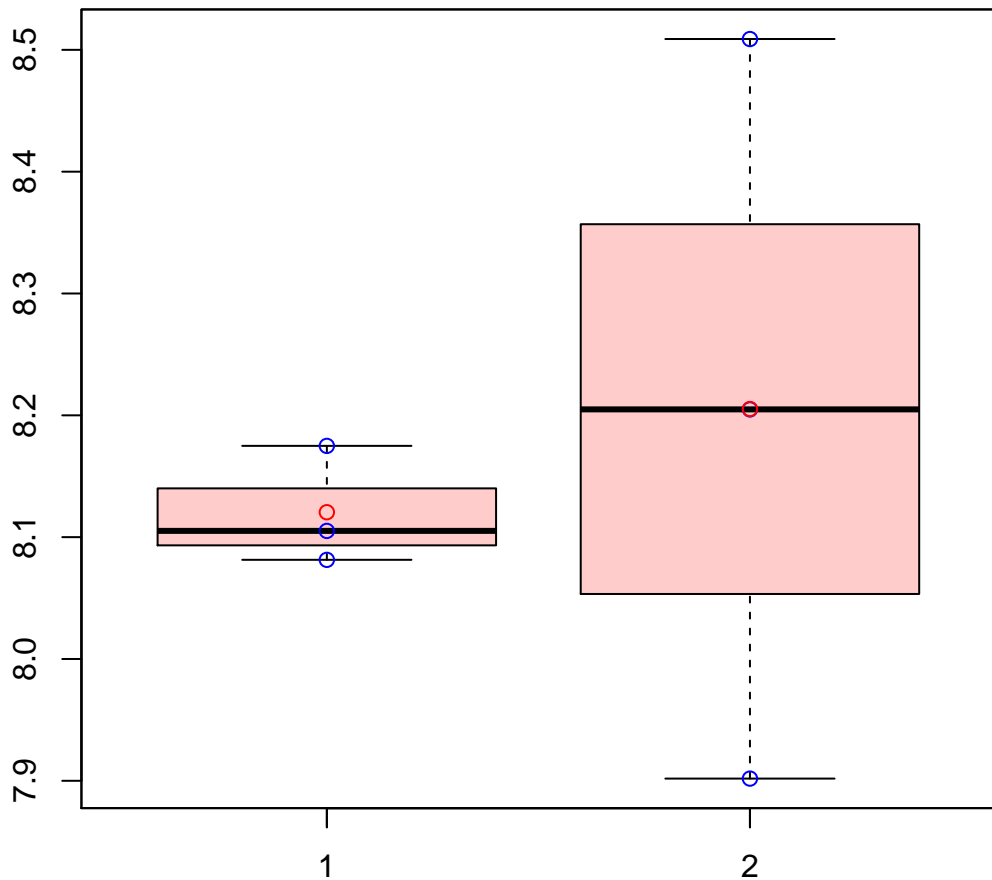

t-Test: p-value = 0.68



# K3XIQ2|K3XIQ2\_SETIT

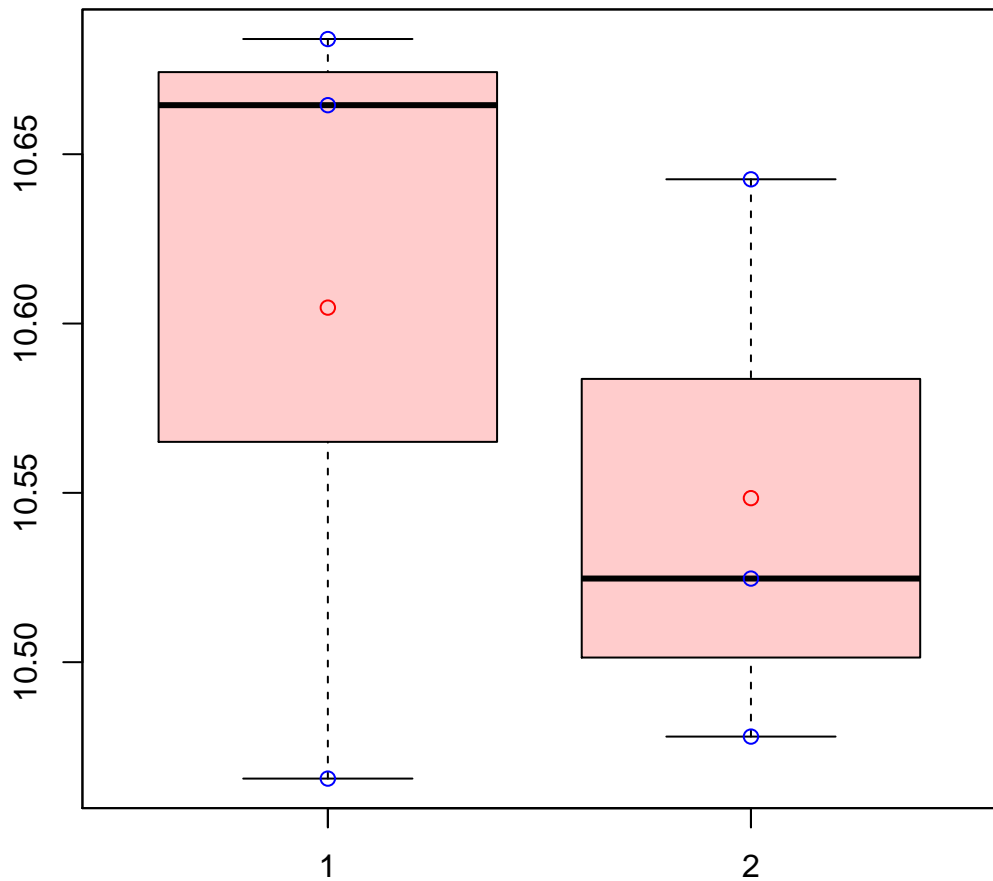

t-Test: p-value = 0.55

# K3XIT0|K3XIT0\_SETIT

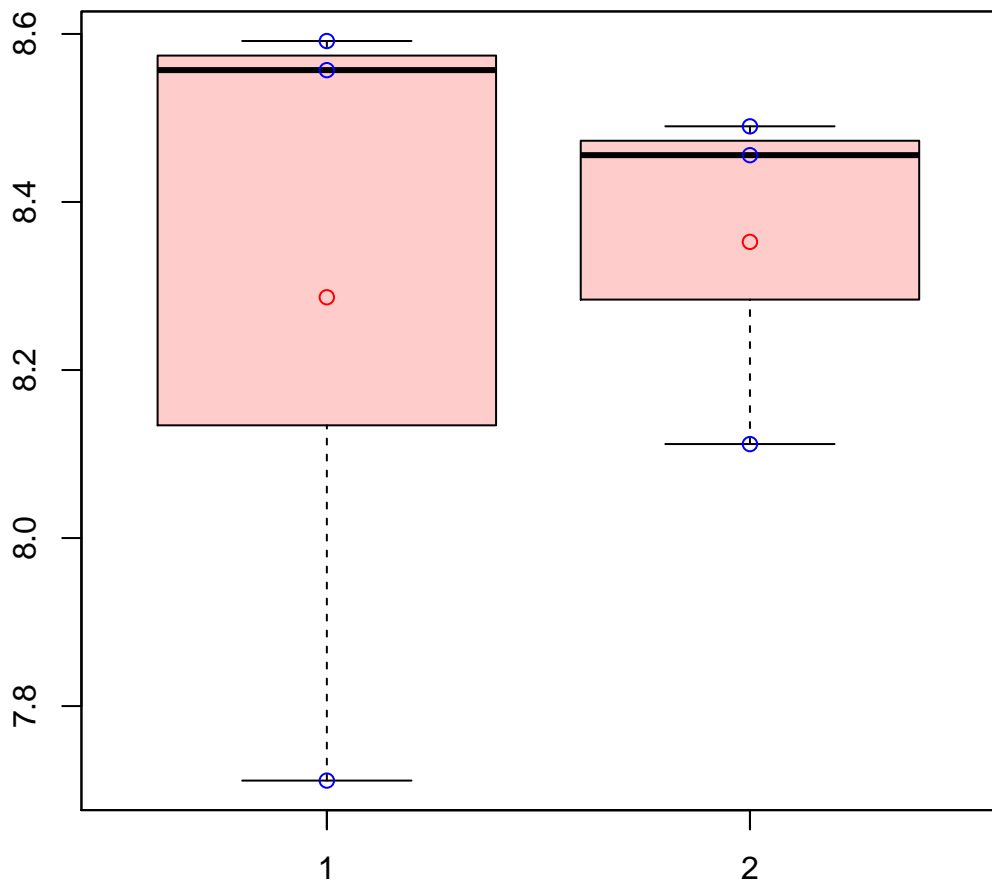

t-Test: p-value = 0.85

# K3XJ75|K3XJ75\_SETIT

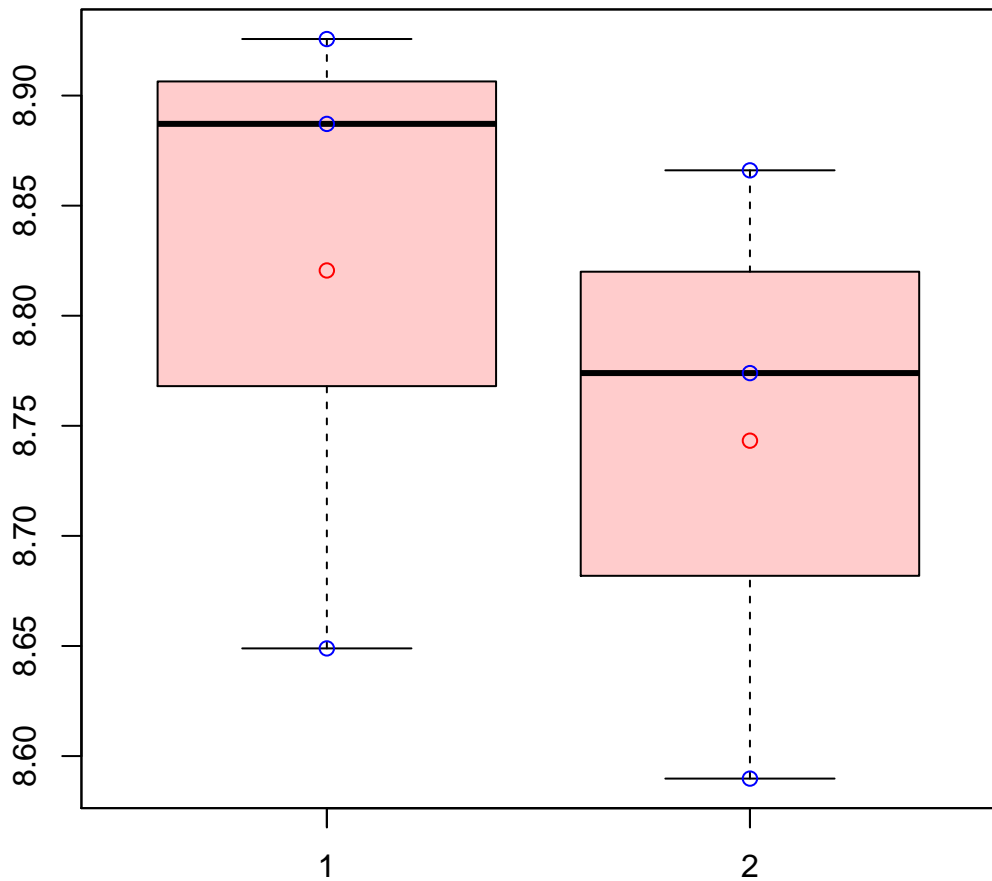

t-Test: p-value = 0.55

# K3XJ85|K3XJ85\_SETIT

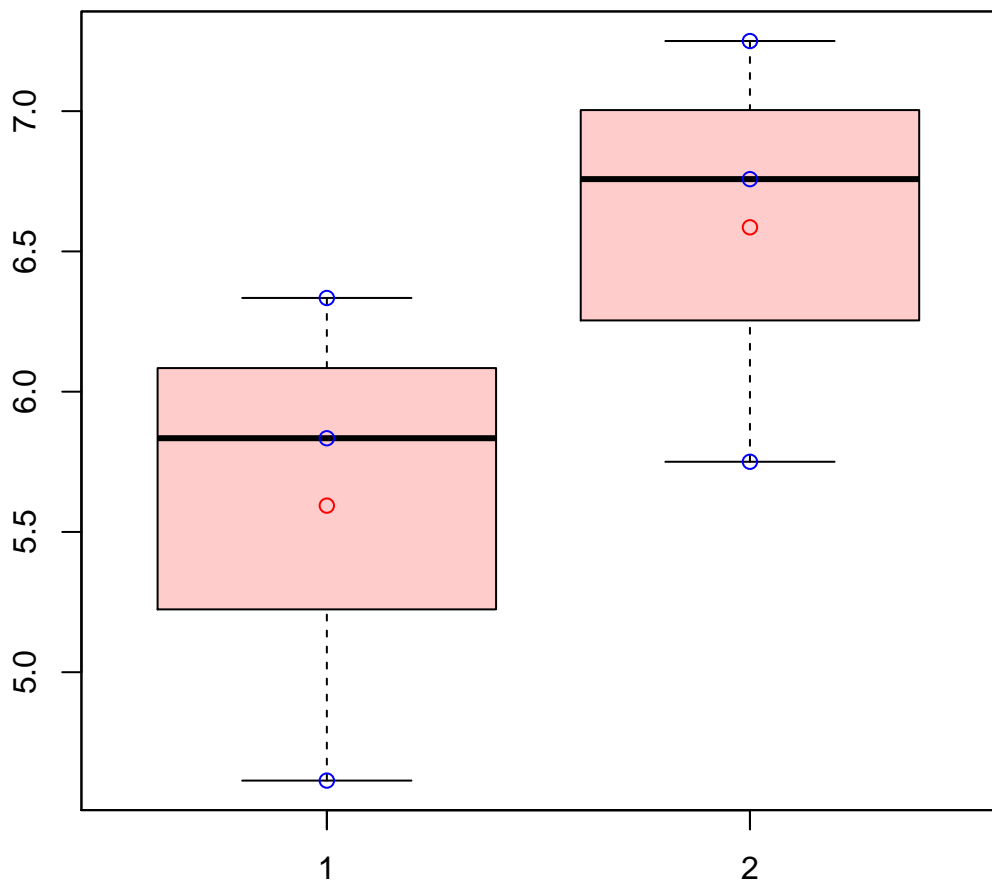

t-Test: p-value = 0.22

# K3XJE1|K3XJE1\_SETIT

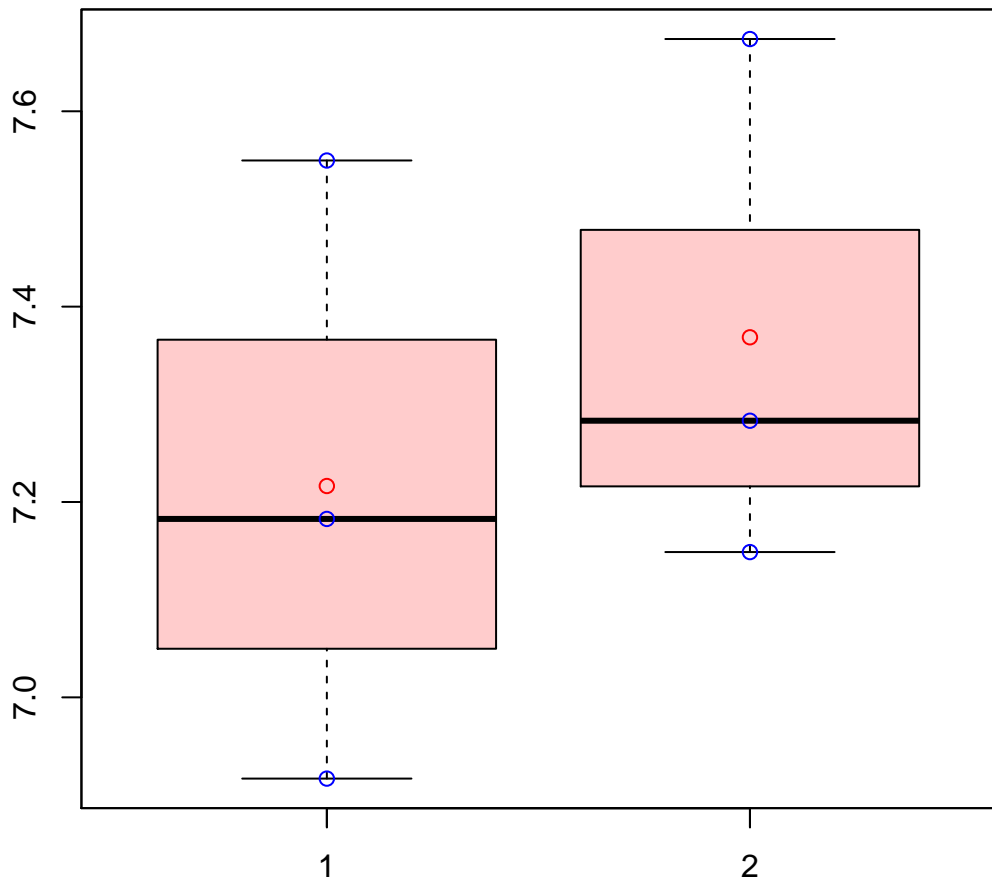

t-Test: p-value = 0.56

# K3XJL5|K3XJL5\_SETIT

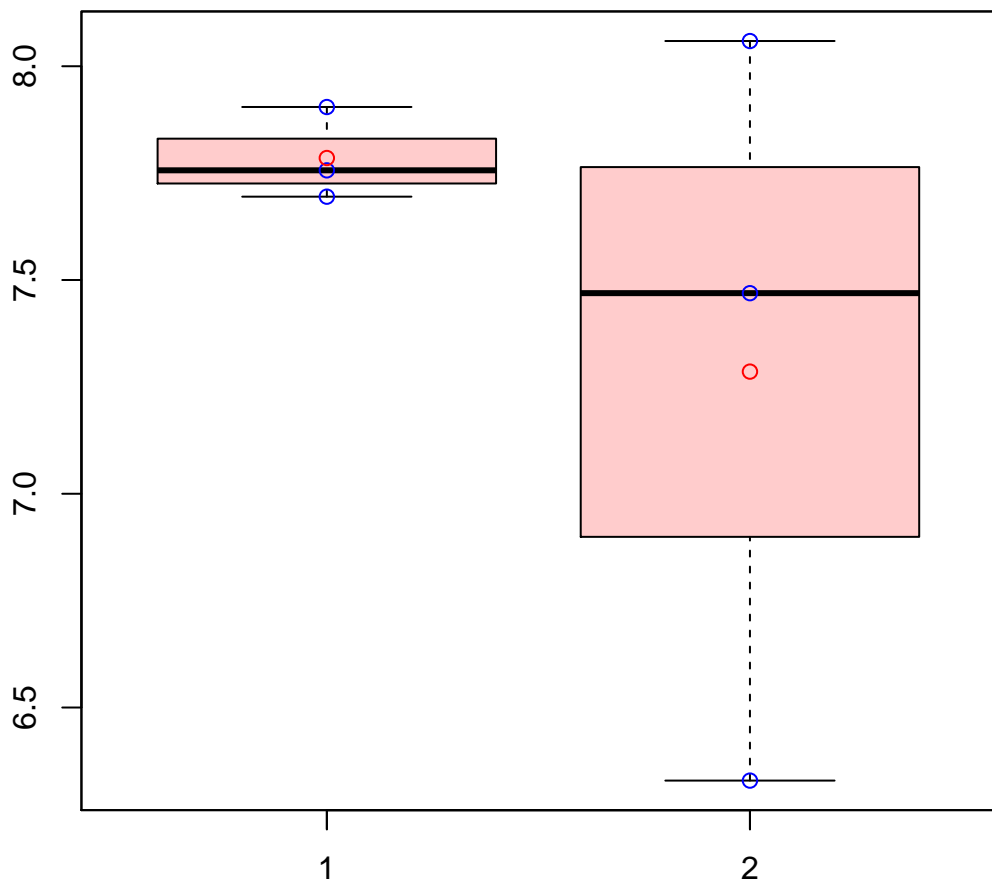

t-Test: p-value = 0.43

# K3XJN7|K3XJN7\_SETIT

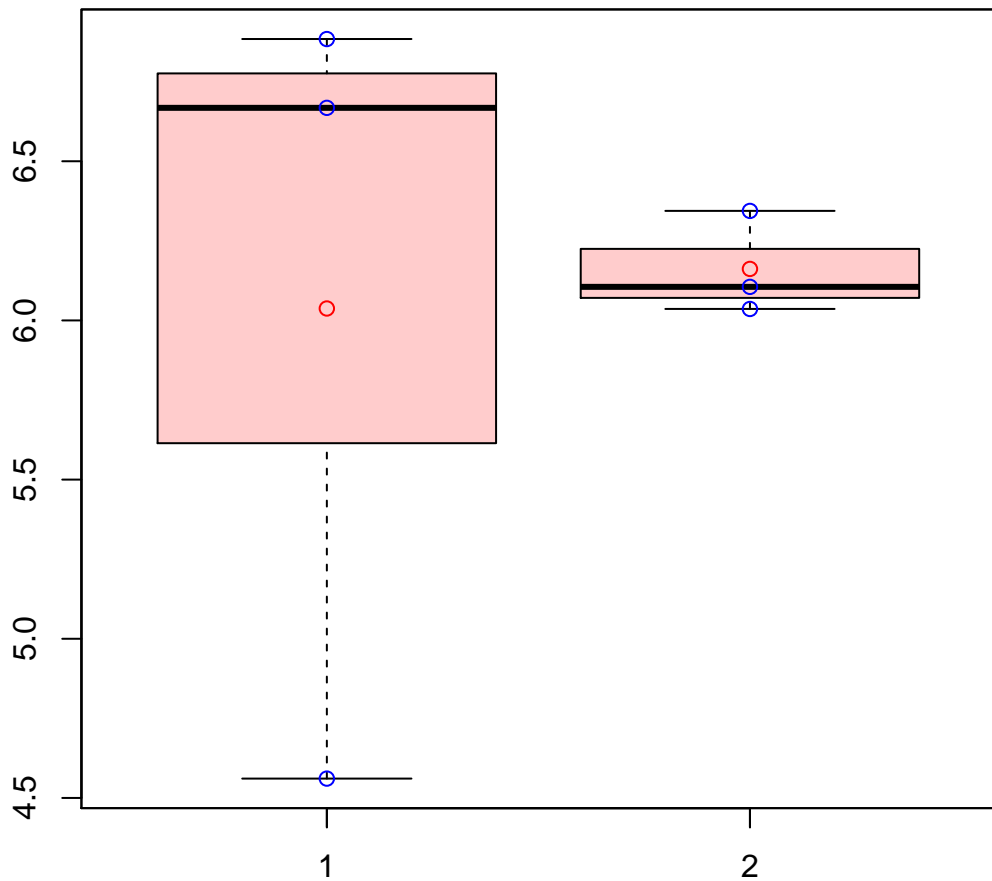

t-Test: p-value = 0.88

# K3XJR1|K3XJR1\_SETIT

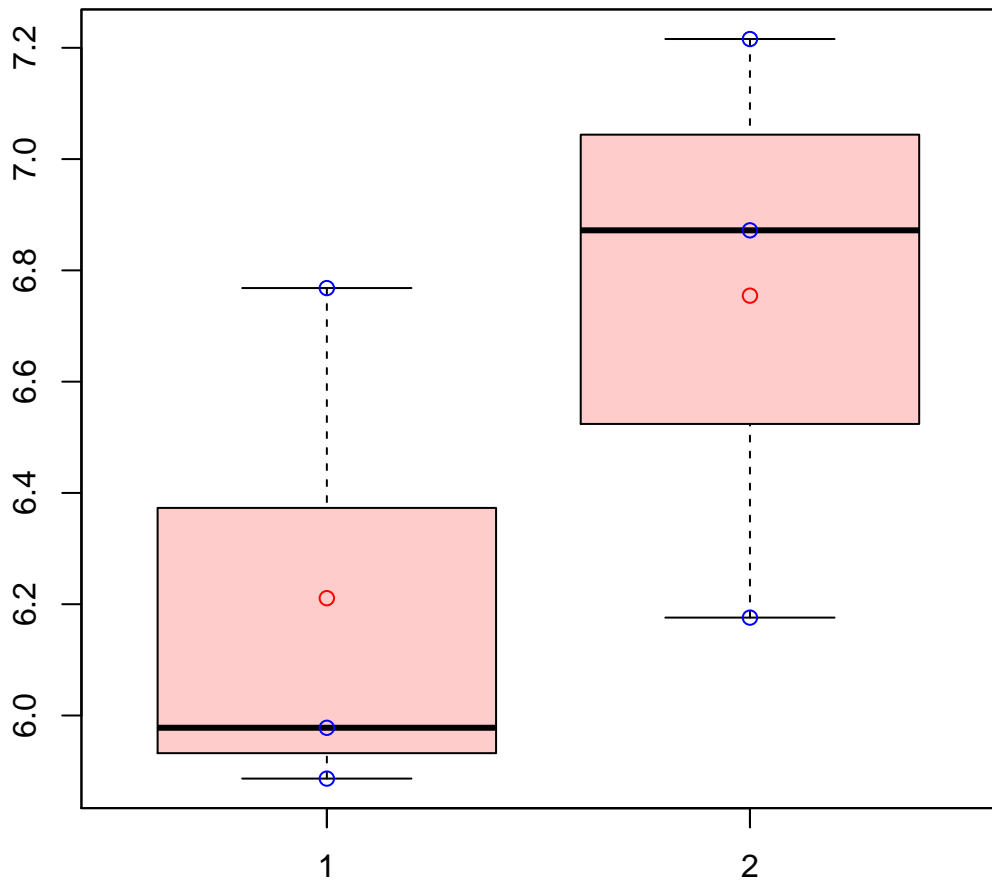

t-Test: p-value = 0.26



# K3XJS5|K3XJS5\_SETIT

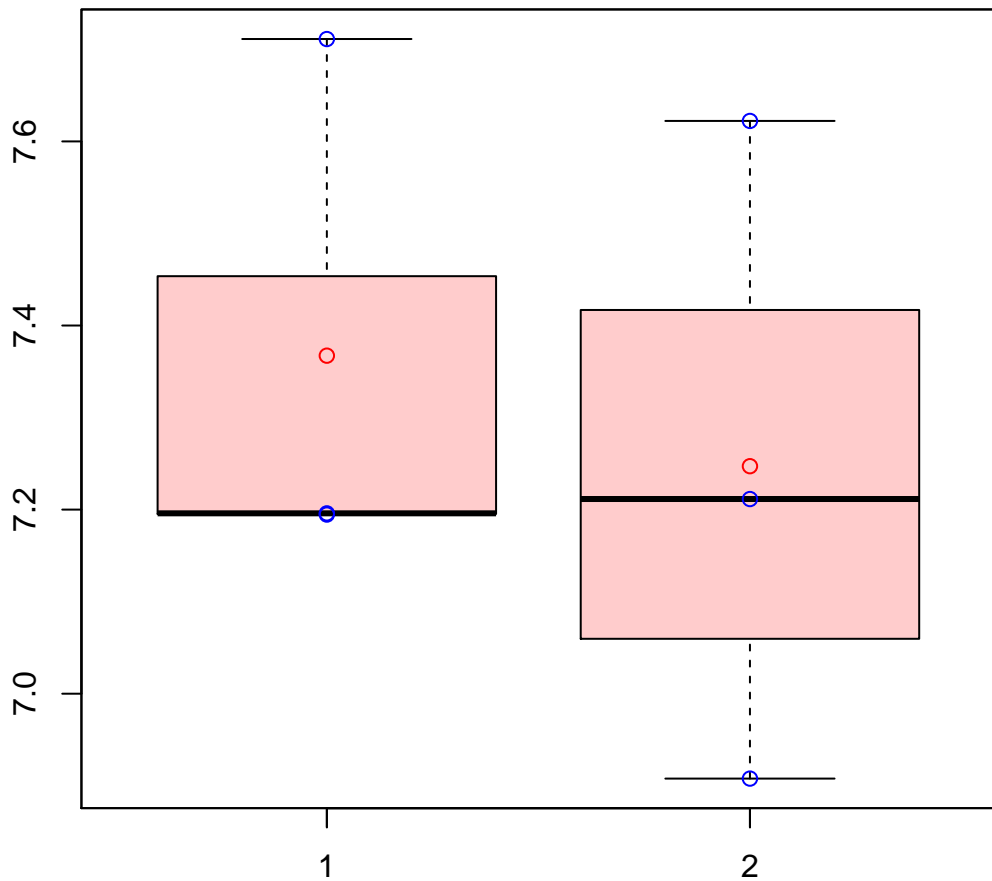

t-Test: p-value = 0.68

# K3XJV1|K3XJV1\_SETIT

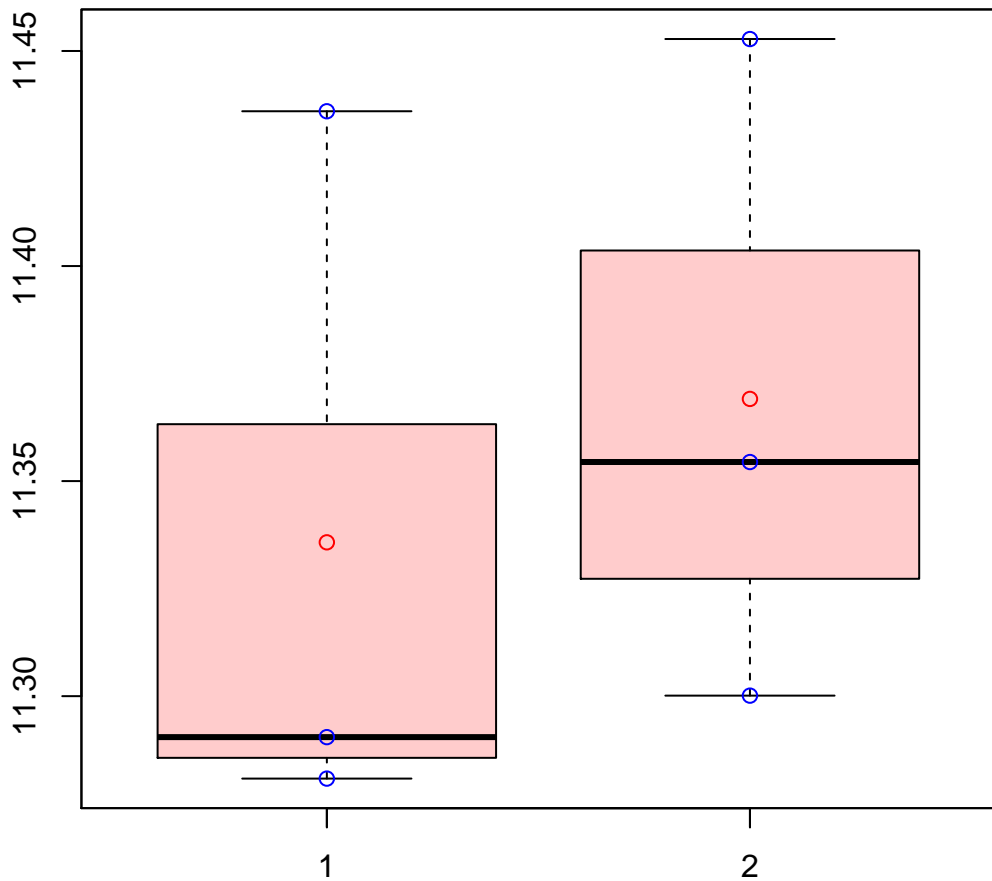

t-Test: p-value = 0.65

# K3XJY6|K3XJY6\_SETIT

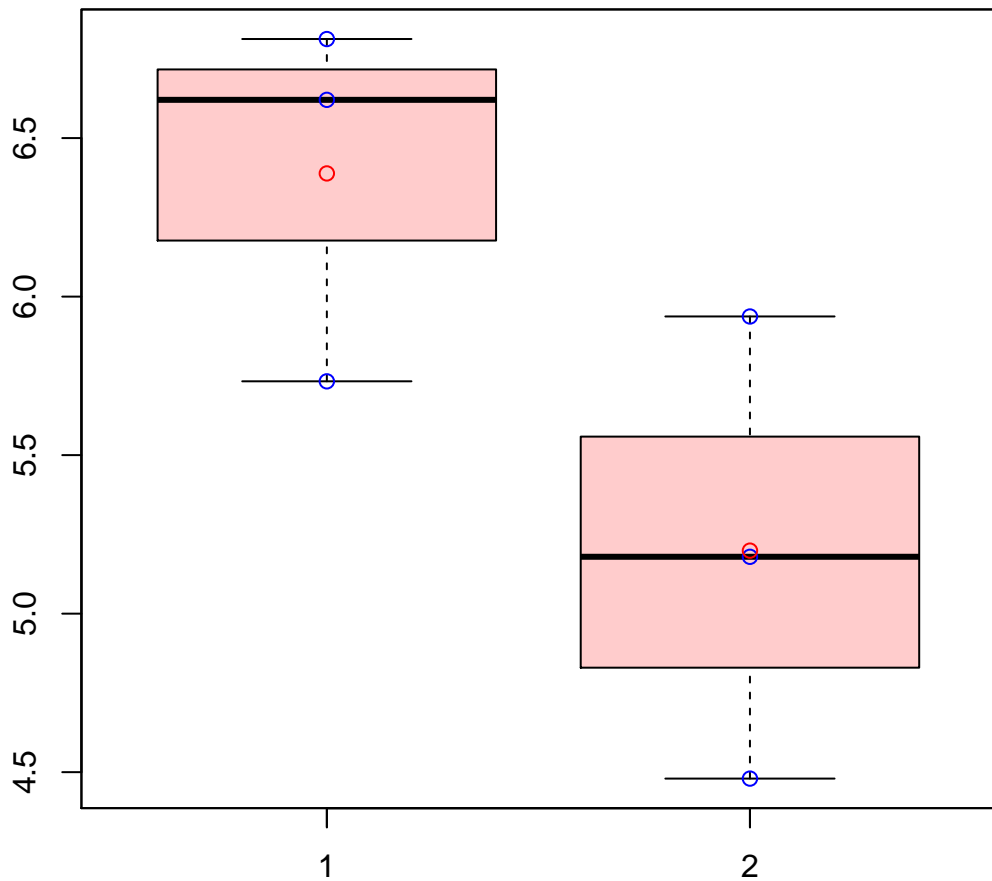

t-Test: p-value = 0.09

# K3XK17|K3XK17\_SETIT

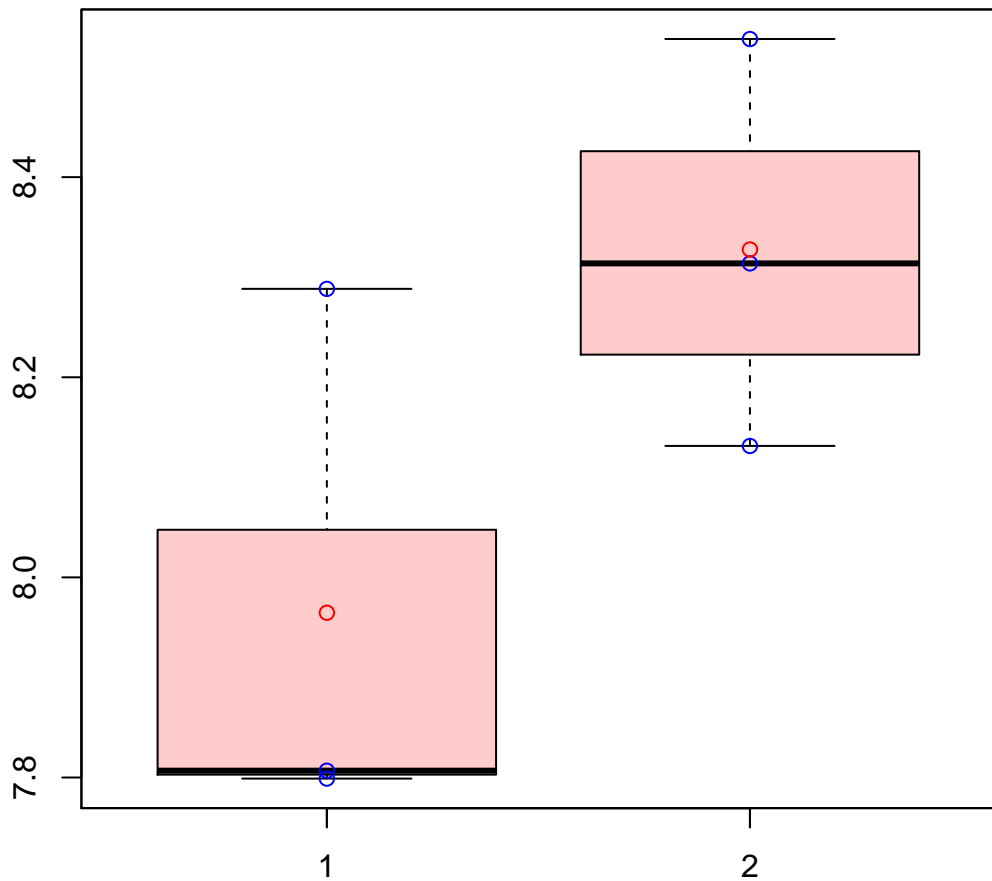

t-Test: p-value = 0.15

# K3XKA7|K3XKA7\_SETIT

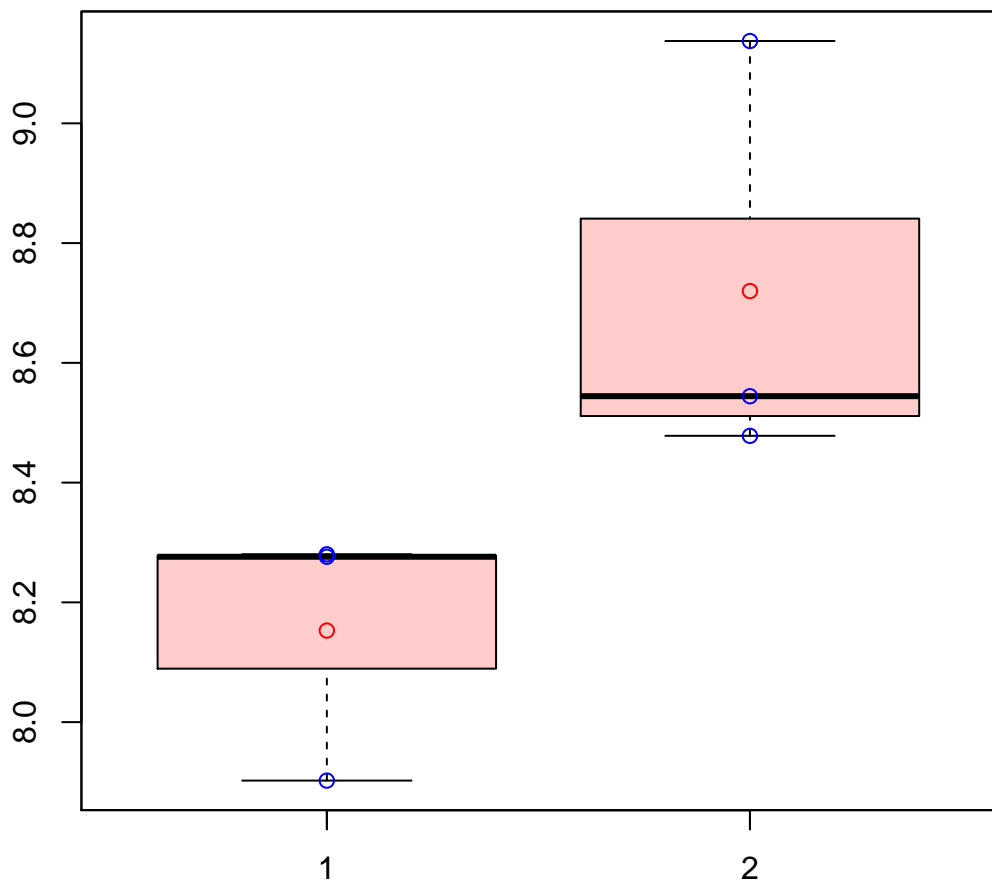

t-Test: p-value = 0.1

# K3XKG7|K3XKG7\_SETIT

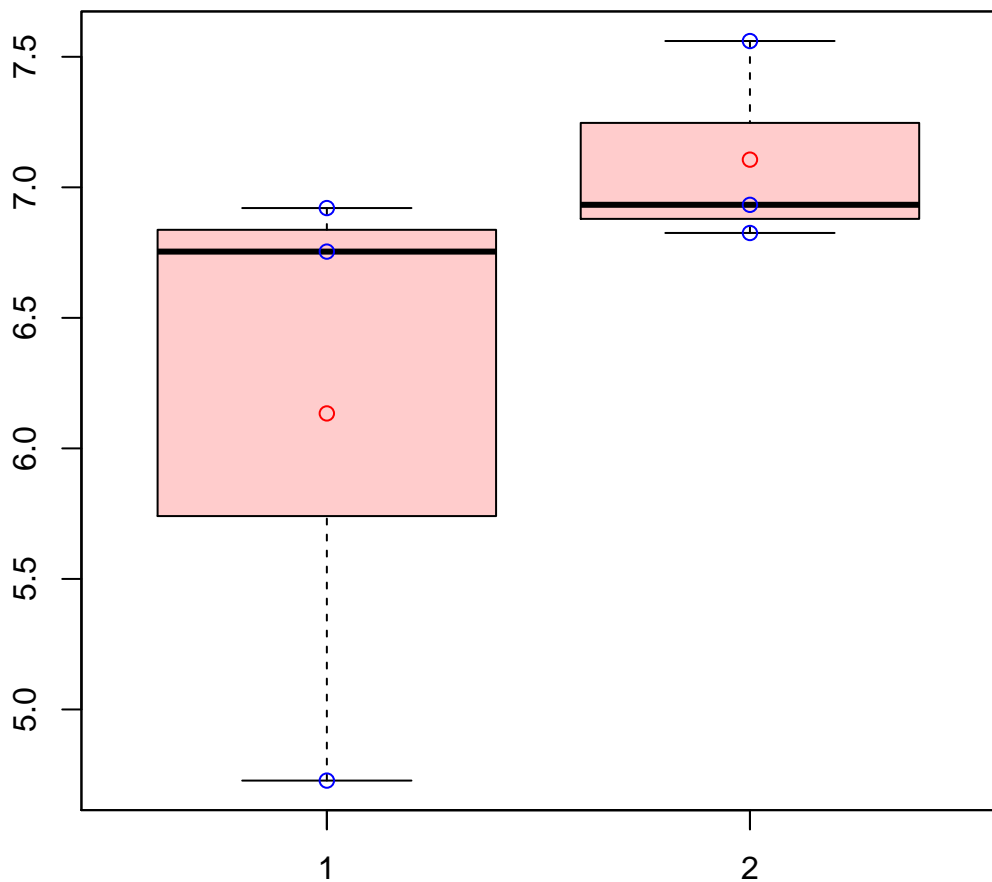

t-Test: p-value = 0.3

# K3XL01|K3XL01\_SETIT

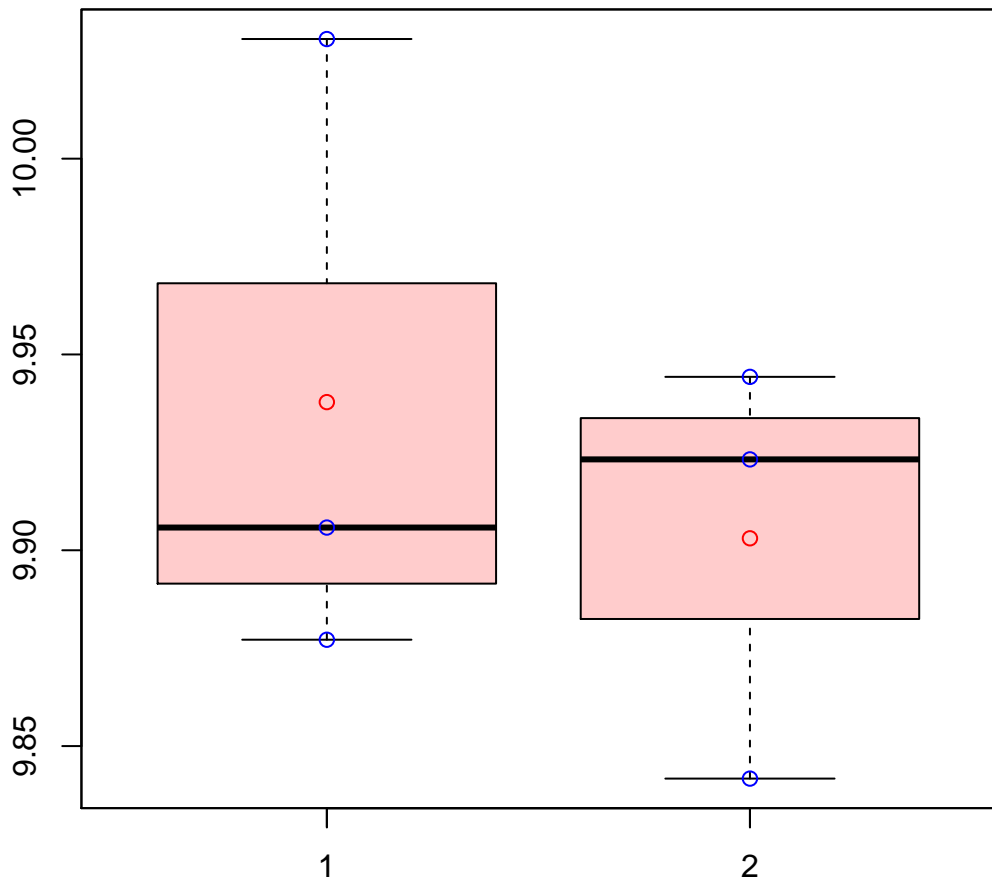

t-Test: p-value = 0.58

# K3XL87|K3XL87\_SETIT

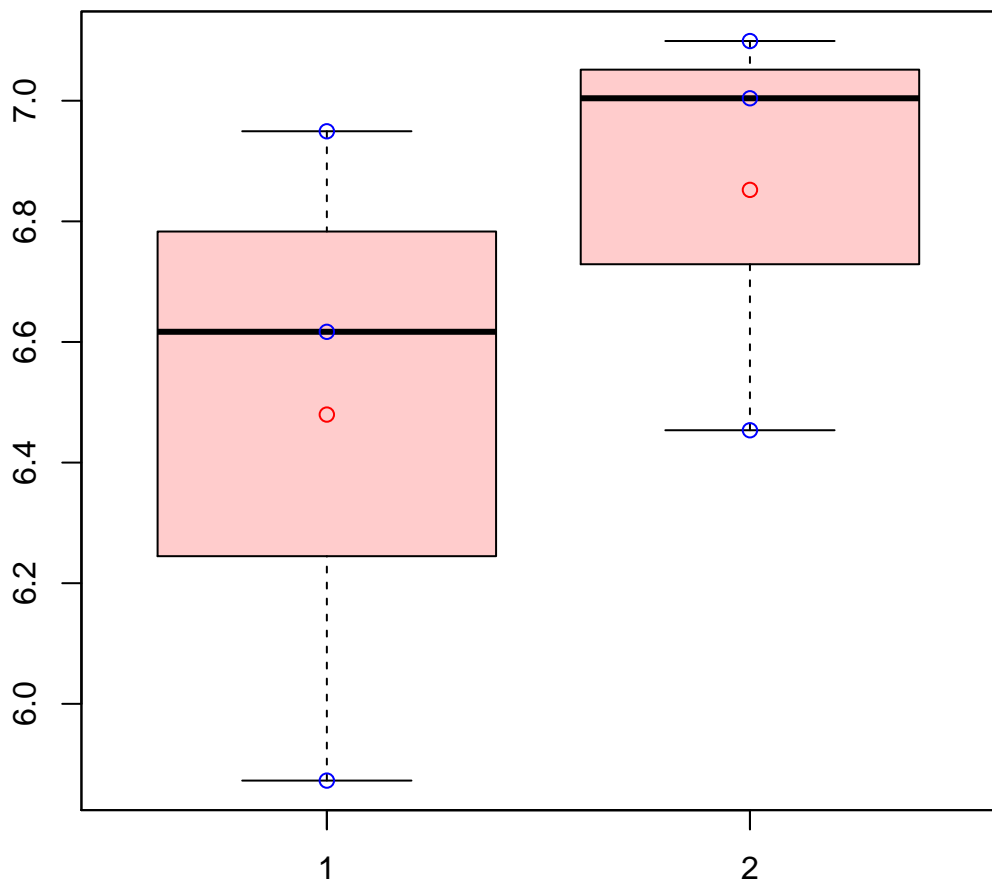

t-Test: p-value = 0.39



# K3XLN8|K3XLN8\_SETIT

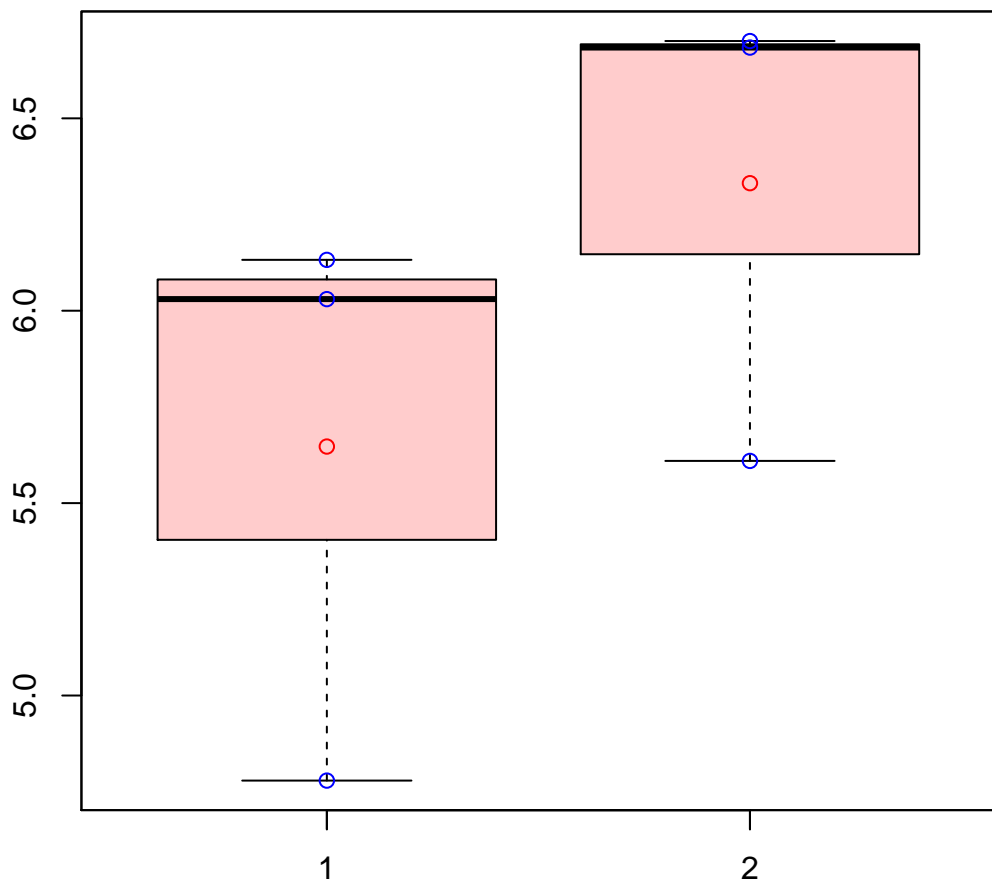

t-Test: p-value = 0.29

# K3XLR4|K3XLR4\_SETIT

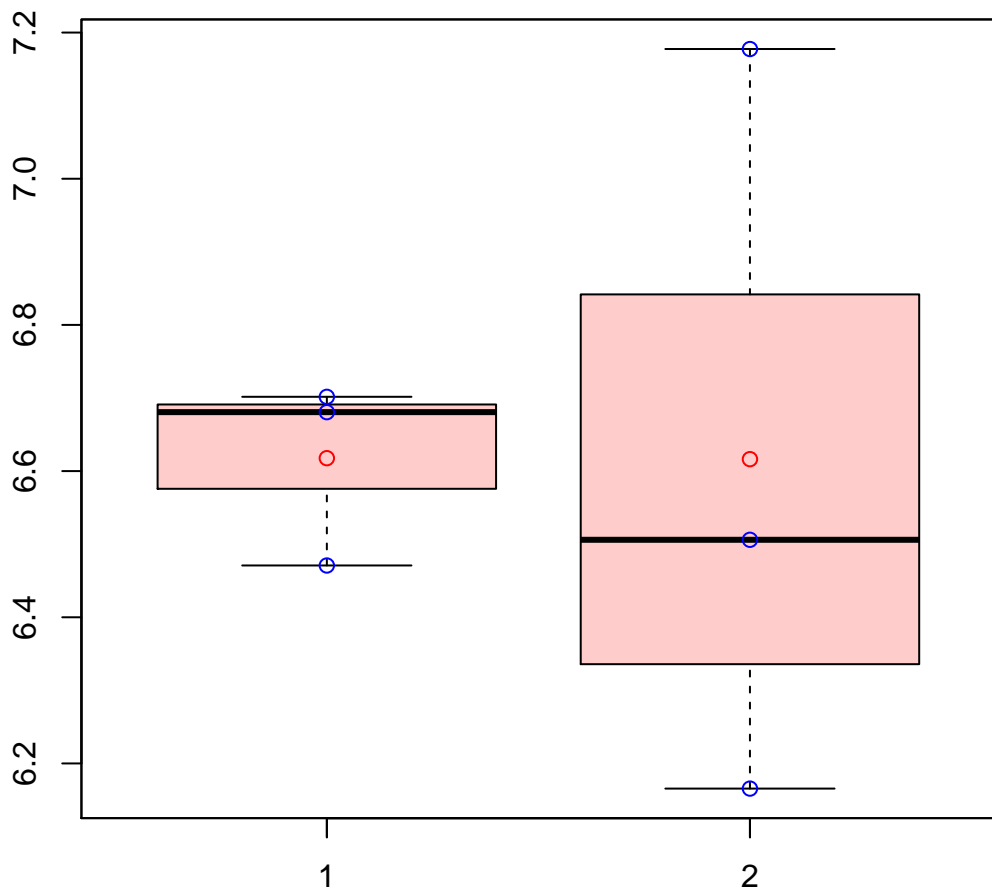

t-Test: p-value = 1

# K3XLW2|K3XLW2\_SETIT

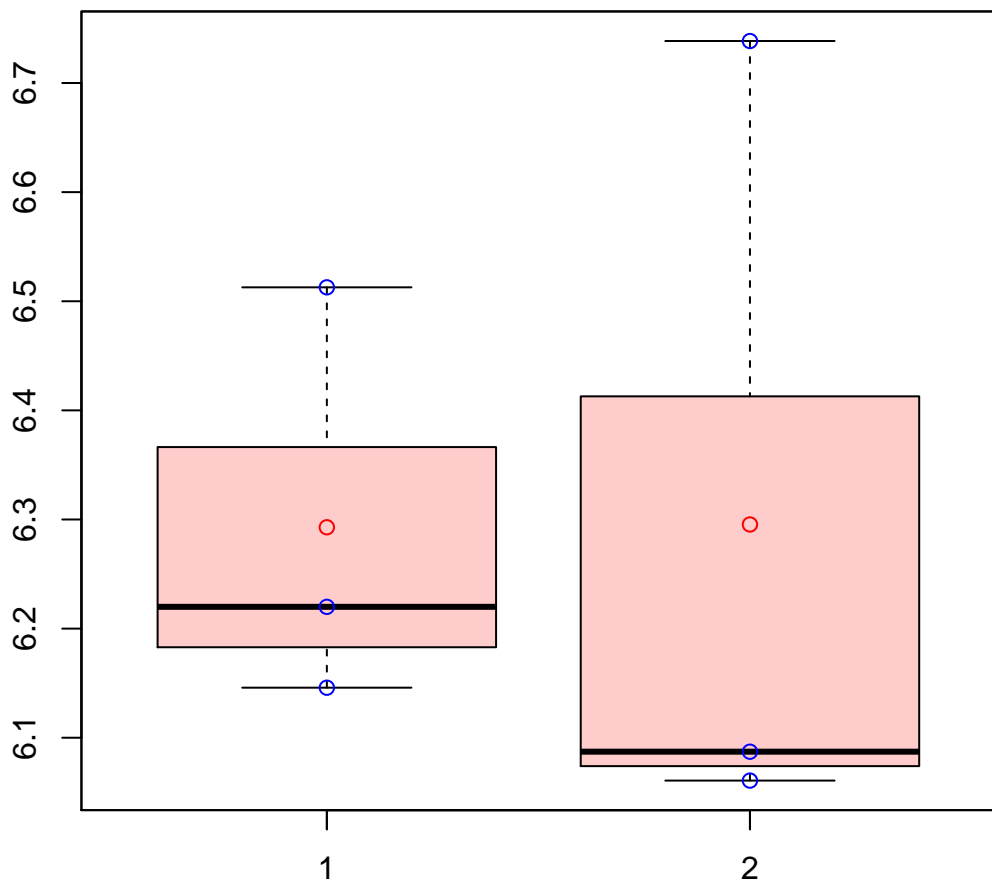

t-Test: p-value = 0.99

# K3XLX3|K3XLX3\_SETIT

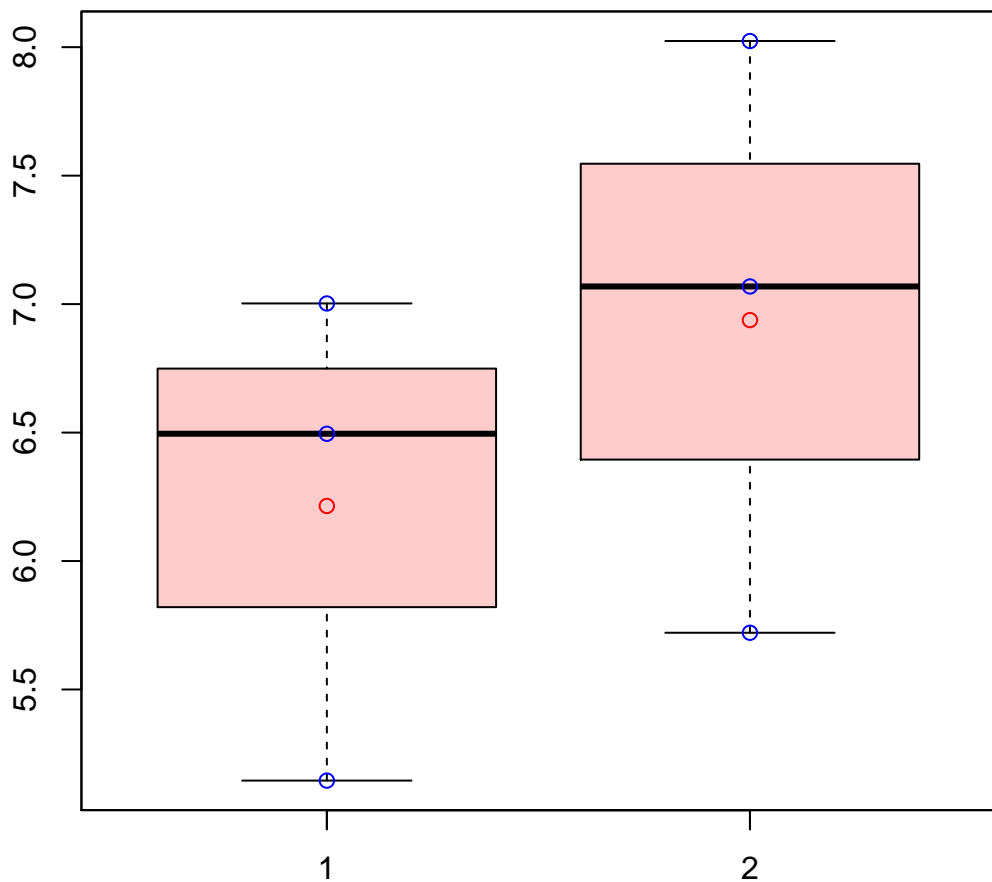

t-Test: p-value = 0.45

# K3XLZ7|K3XLZ7\_SETIT

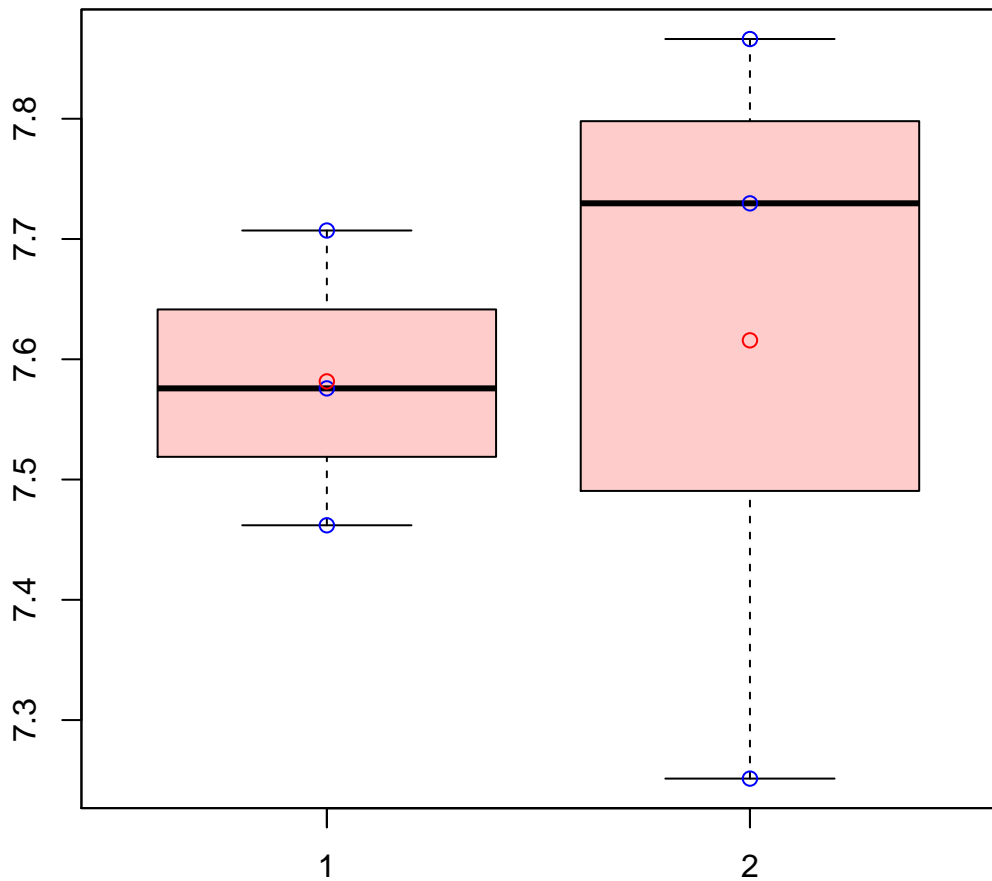

t-Test: p-value = 0.88

# K3XM31|K3XM31\_SETIT

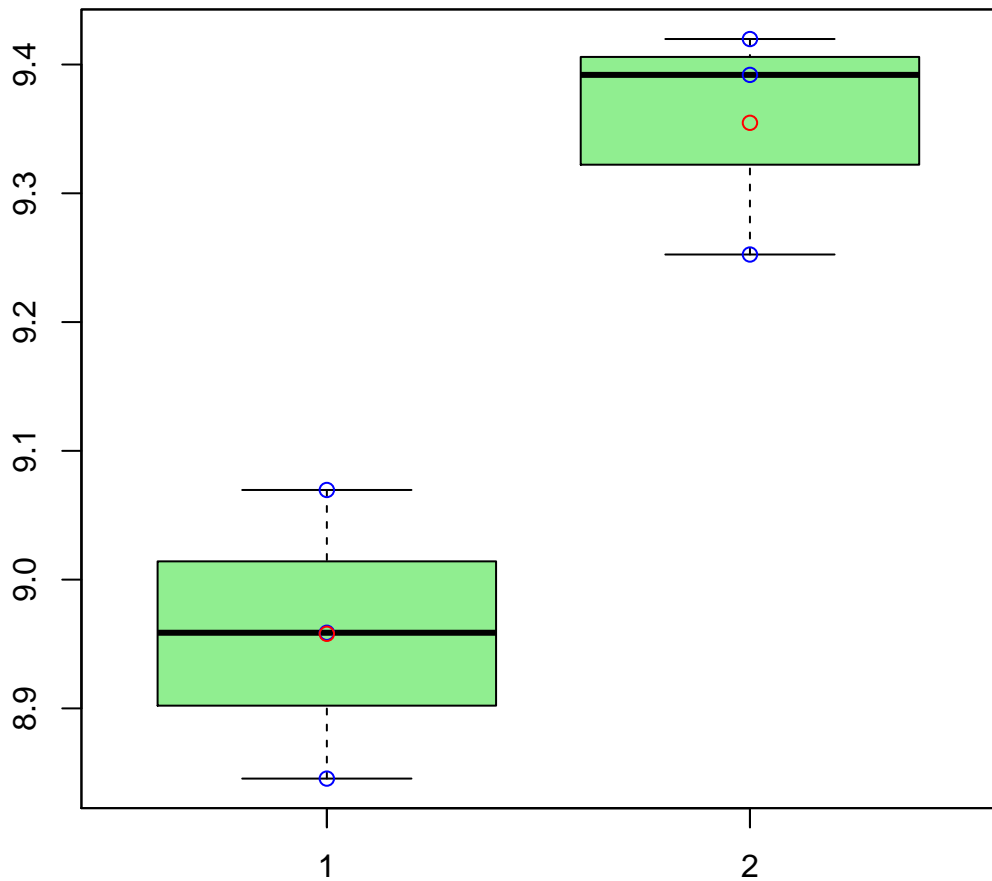

t-Test: p-value = 0.01

# K3XME8|K3XME8\_SETIT

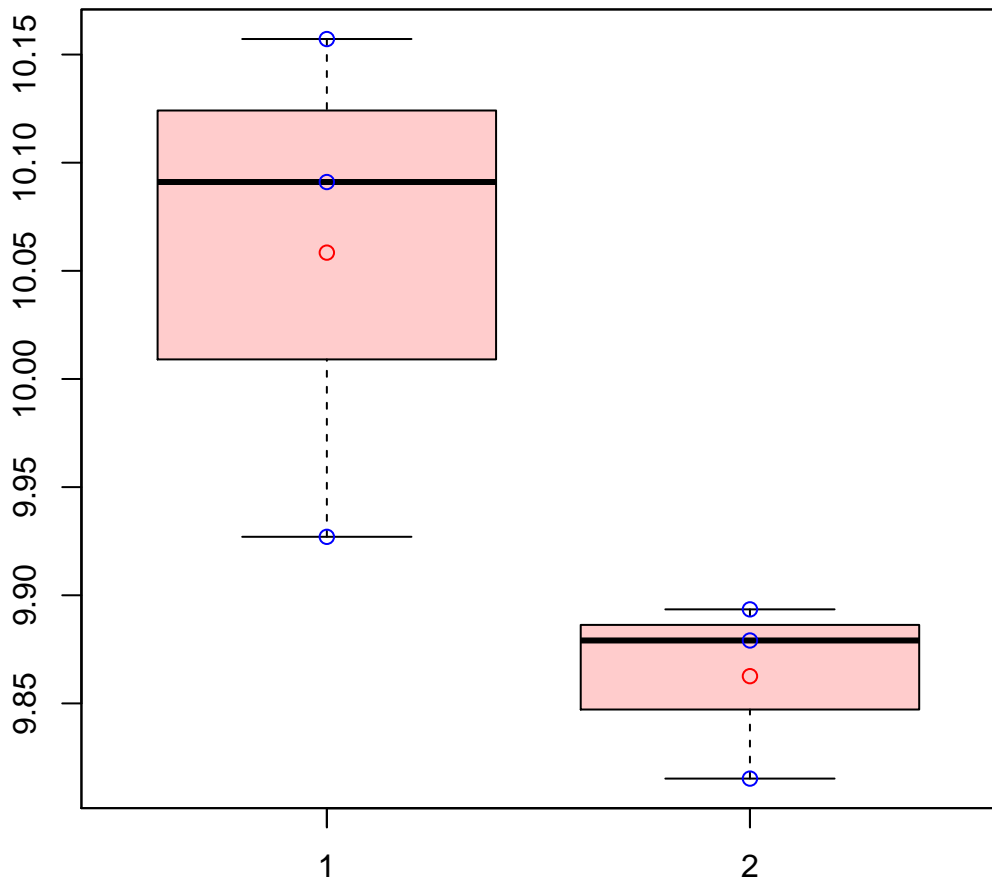

t-Test: p-value = 0.09

# K3XMP0|K3XMP0\_SETIT

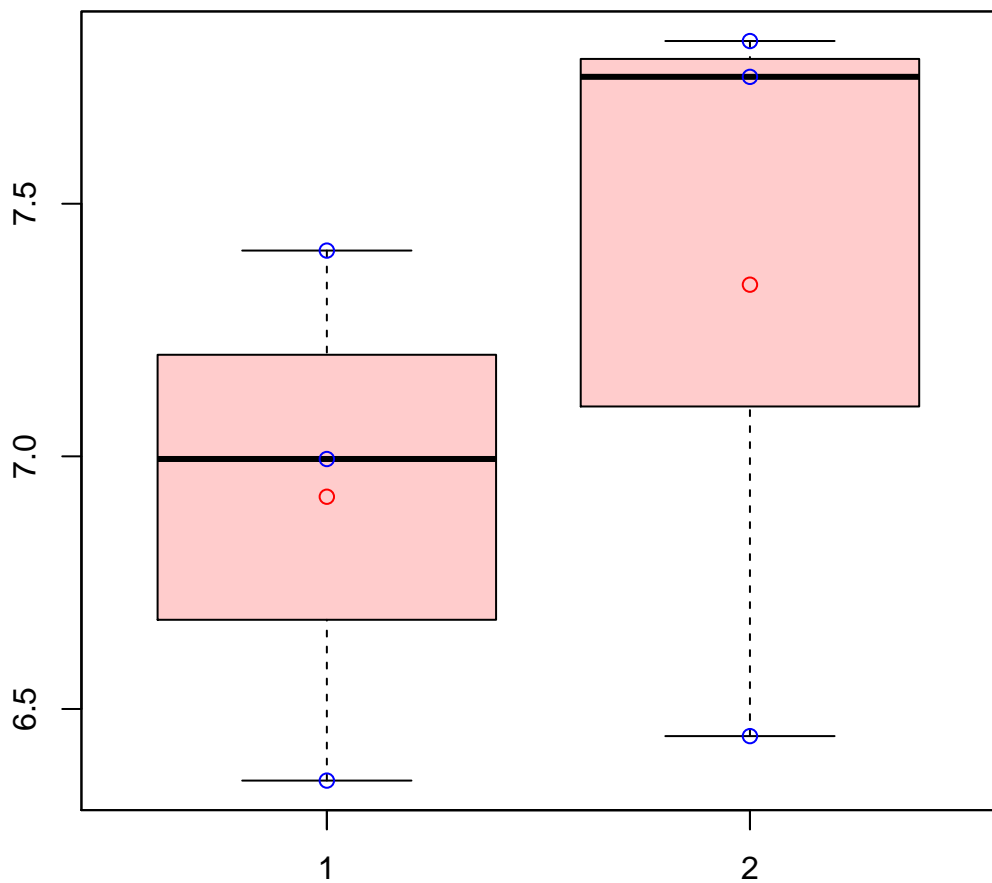

t-Test: p-value = 0.49



# K3XN85|K3XN85\_SETIT

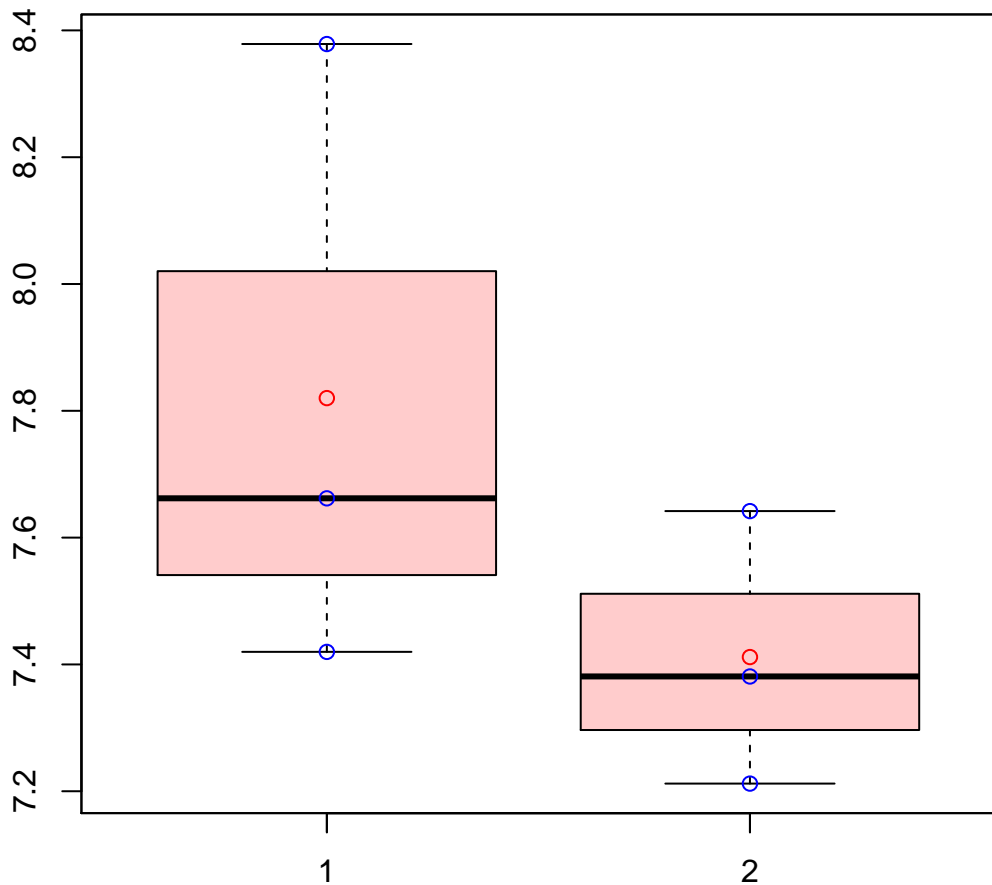

t-Test: p-value = 0.29

# K3XPJ1|K3XPJ1\_SETIT

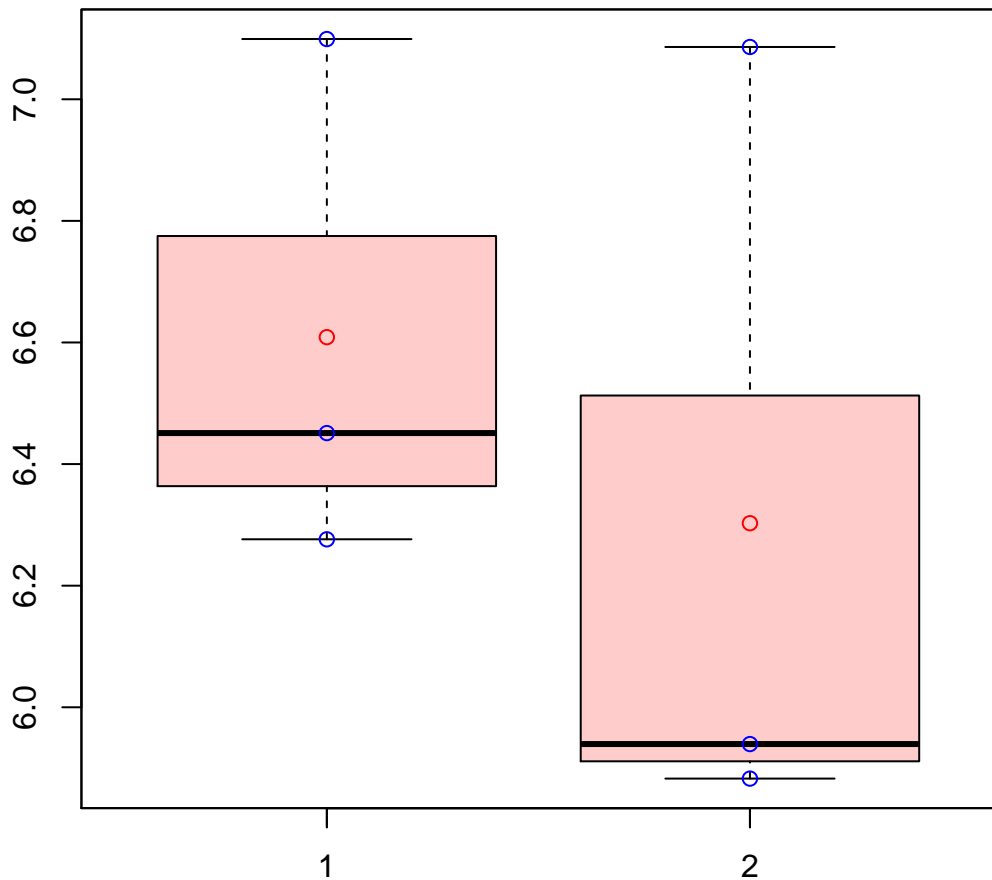

t-Test: p-value = 0.55

# K3XPK7|K3XPK7\_SETIT

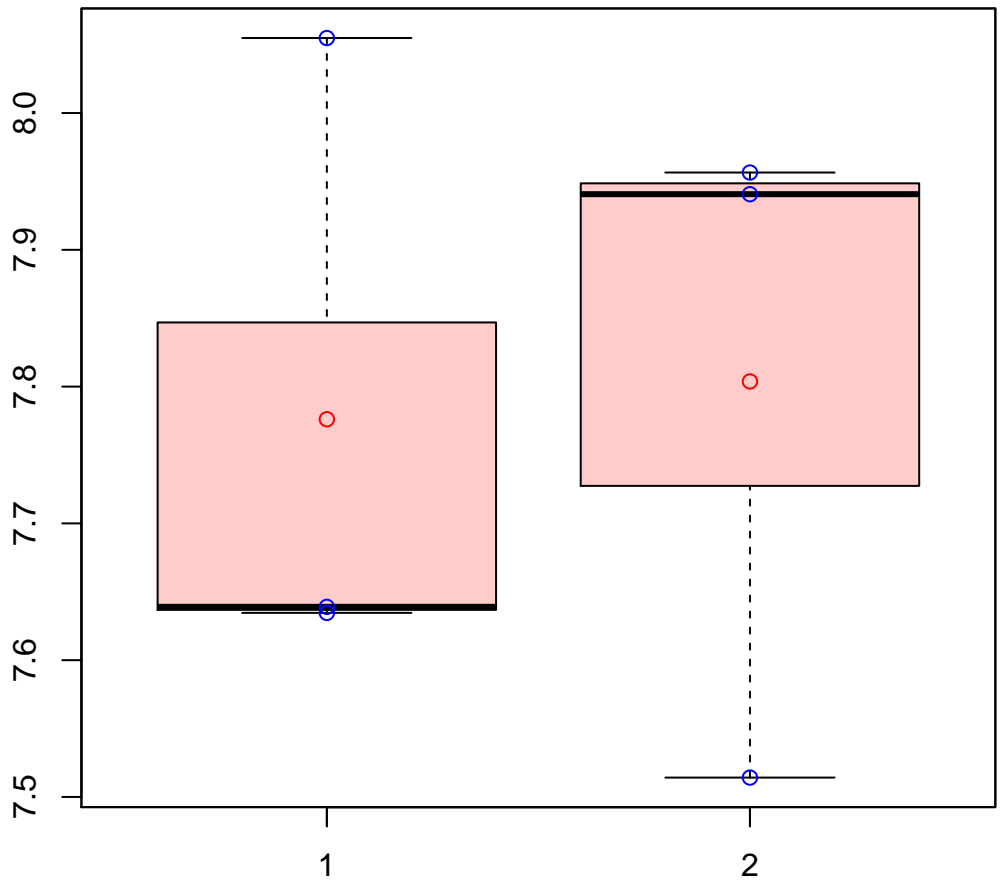

t-Test: p-value = 0.9

# K3XPQ3|K3XPQ3\_SETIT

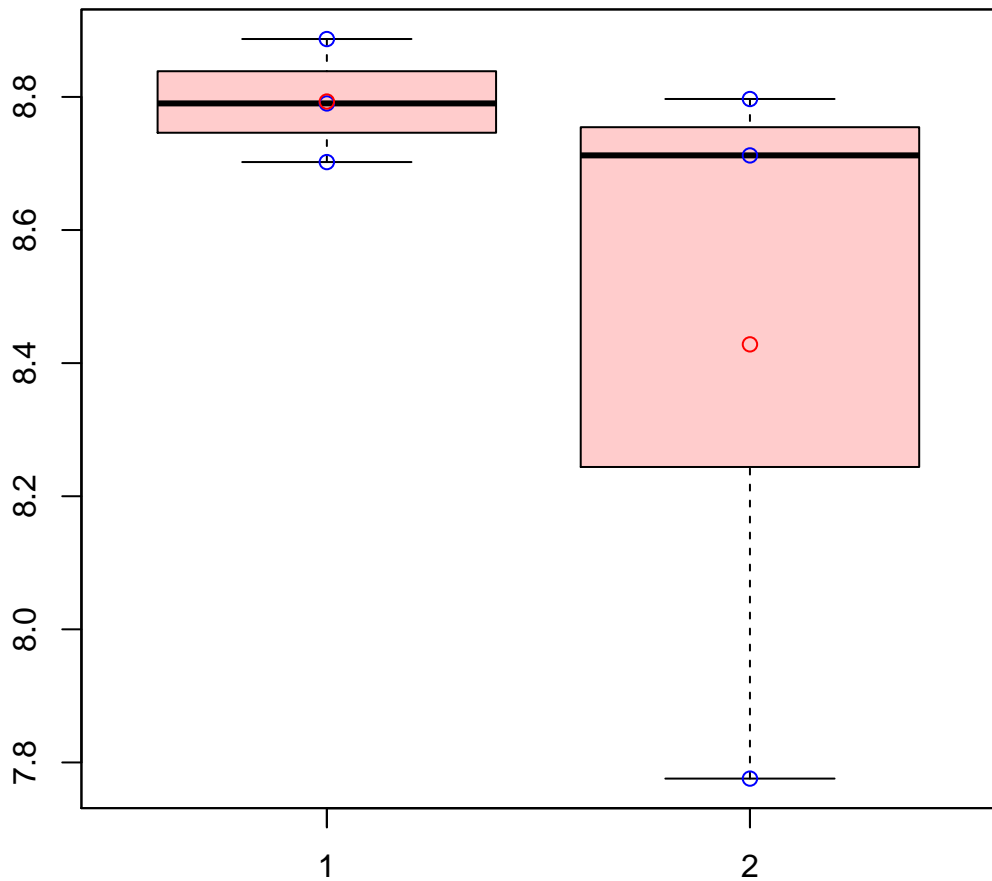

t-Test: p-value = 0.38

# K3XQD0|K3XQD0\_SETIT

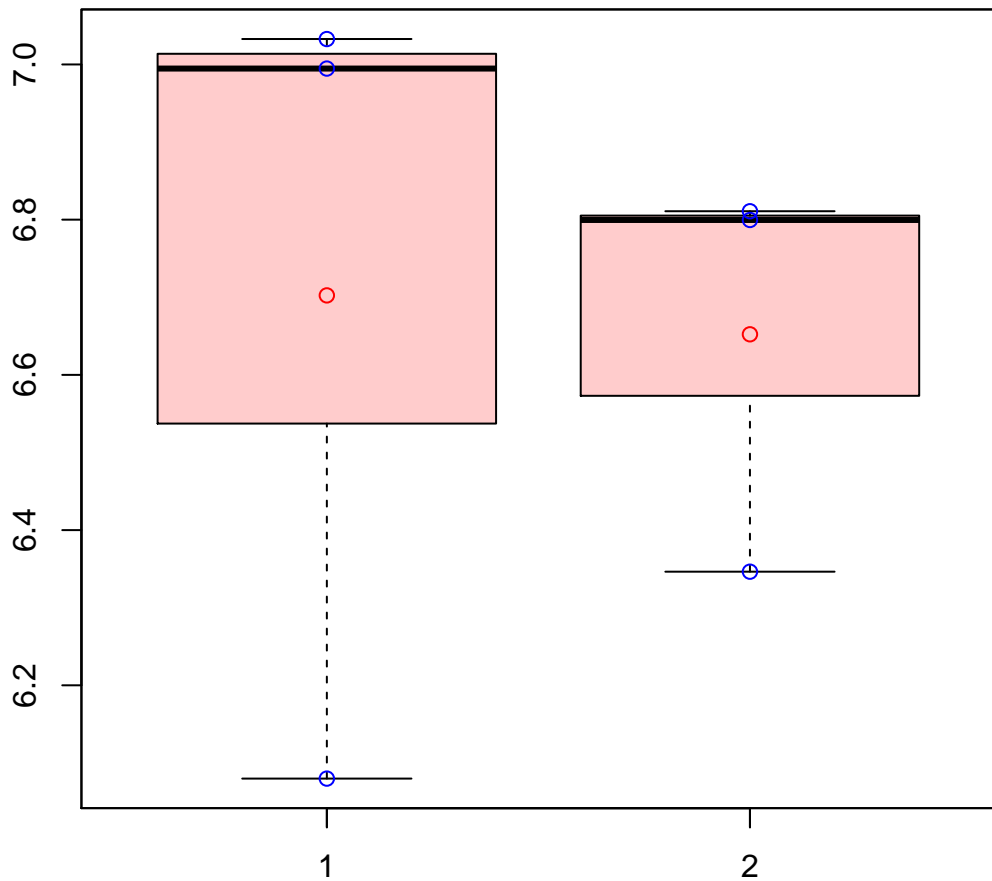

t-Test: p-value = 0.89

# K3XQS2|K3XQS2\_SETIT

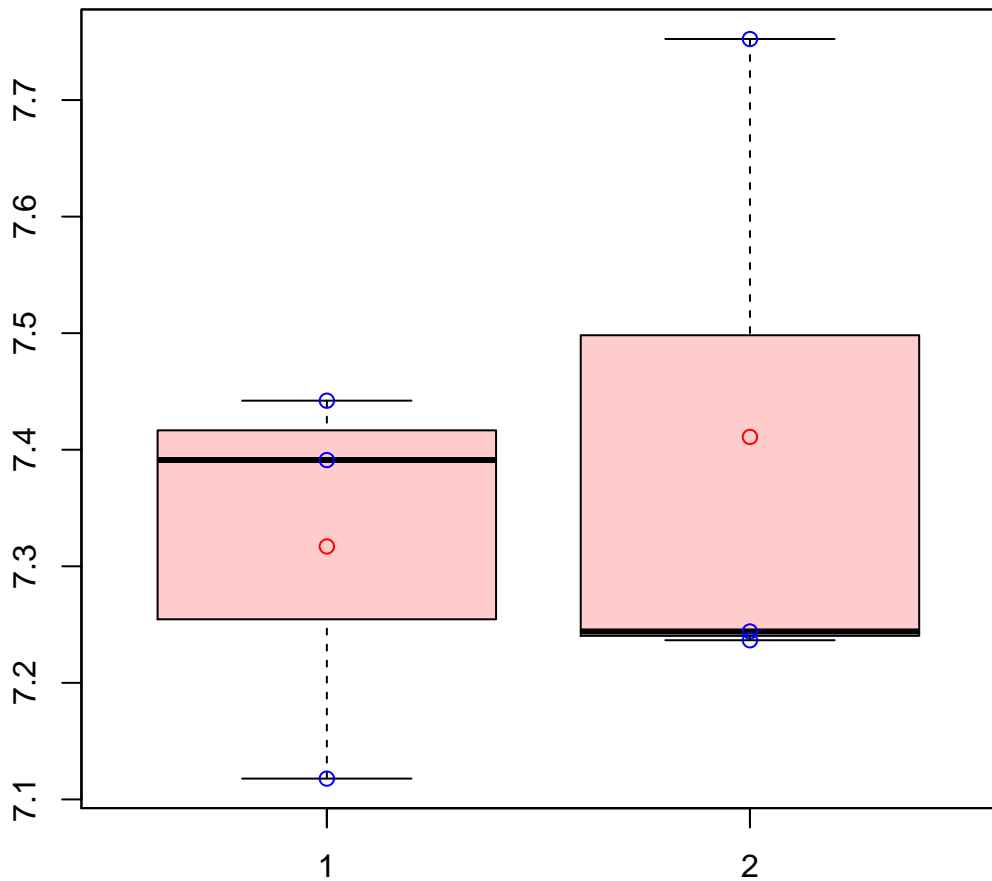

t-Test: p-value = 0.67

# K3XQY1|K3XQY1\_SETIT

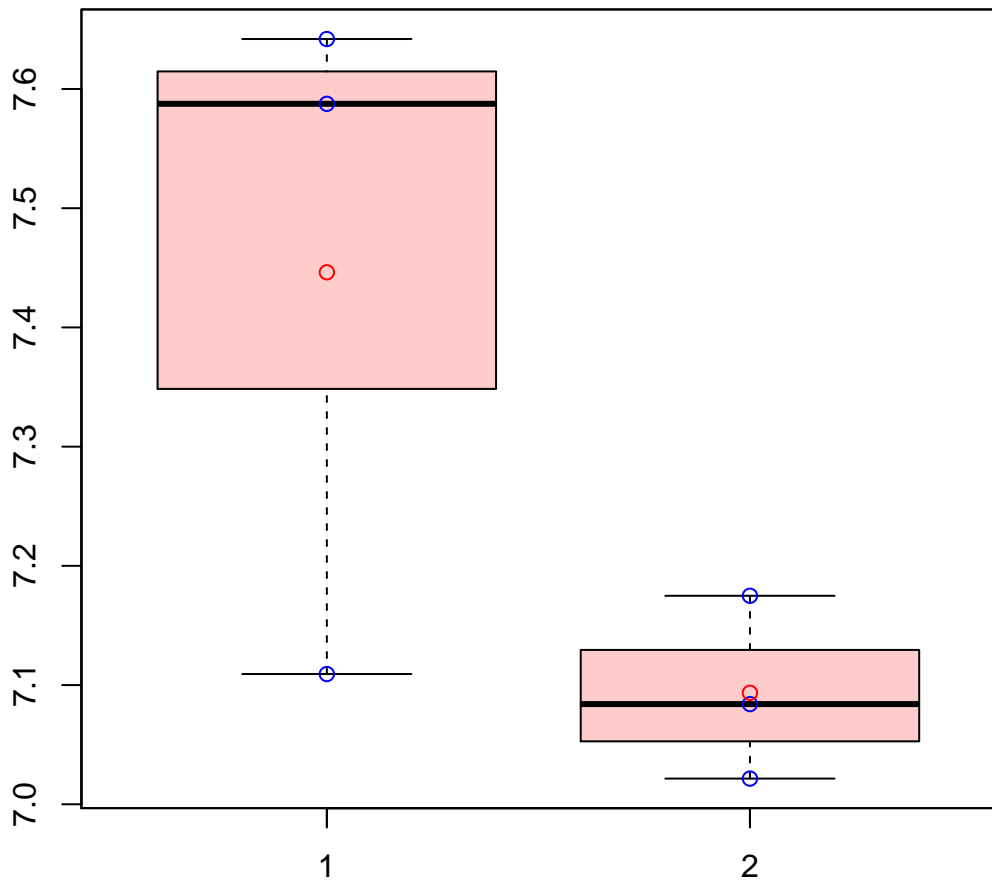

t-Test: p-value = 0.17

# K3XQZ1|K3XQZ1\_SETIT

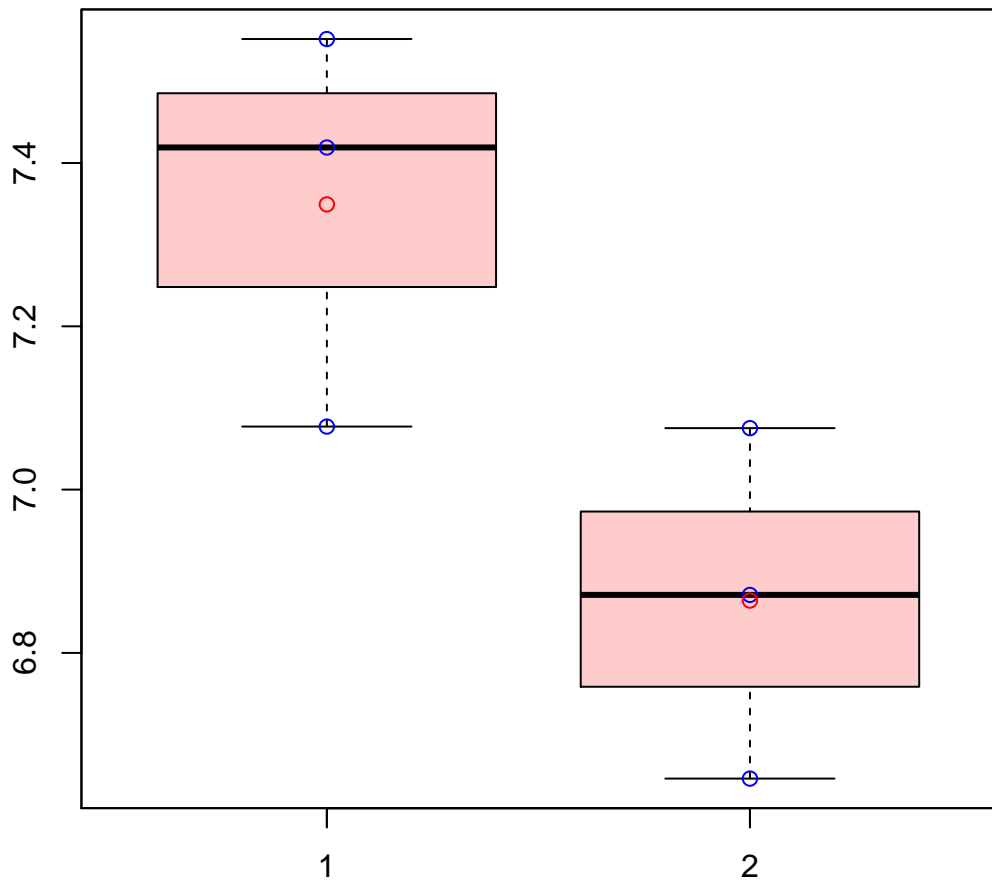

t-Test: p-value = 0.06



# K3XRL7|K3XRL7\_SETIT

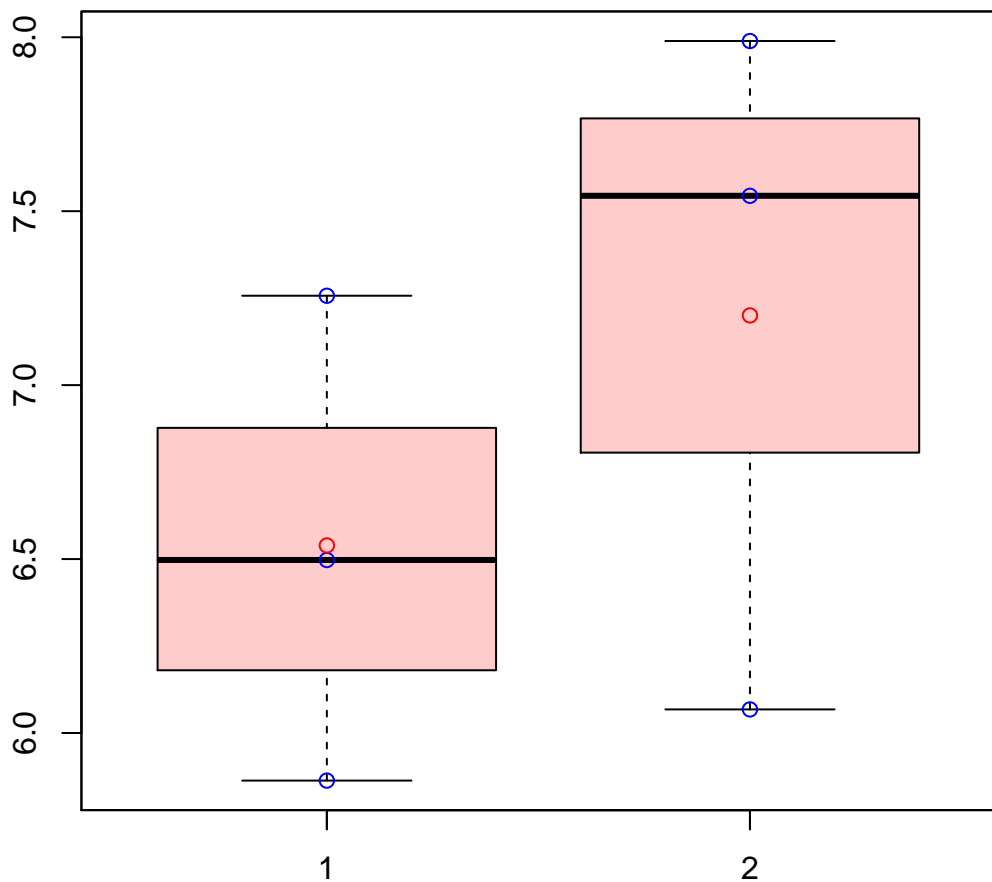

t-Test: p-value = 0.41

# K3XRY7|K3XRY7\_SETIT

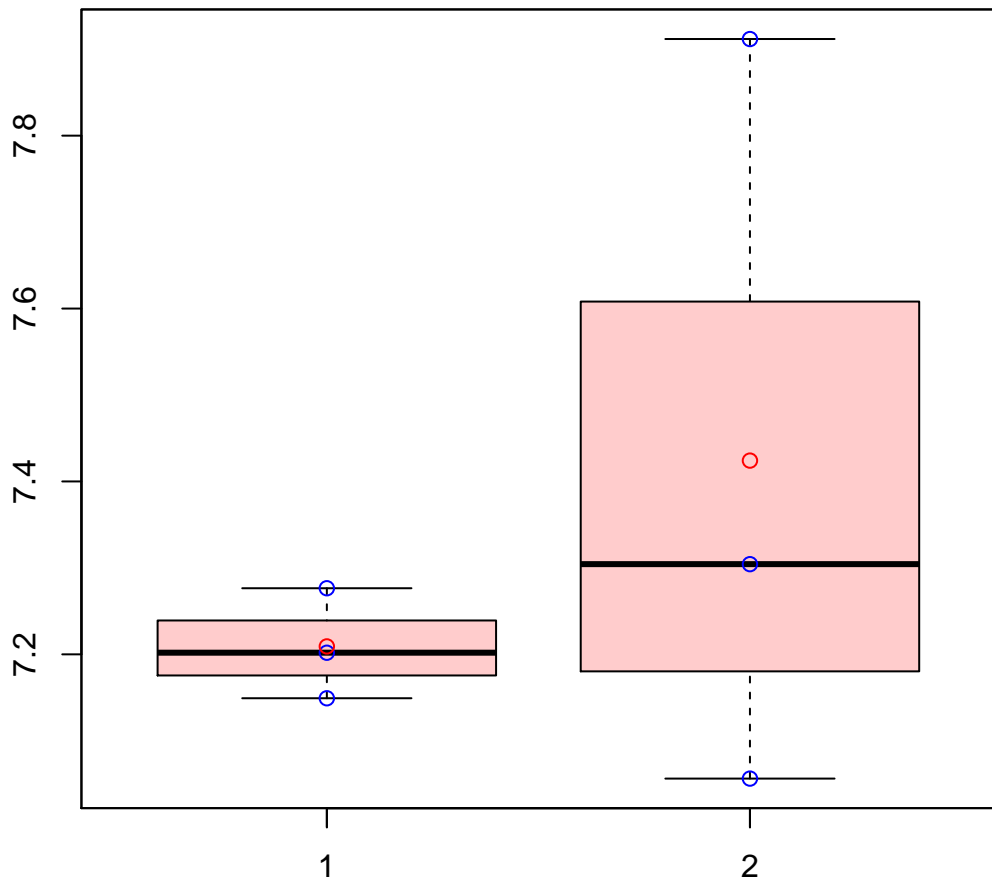

t-Test: p-value = 0.49

# K3XS36|K3XS36\_SETIT

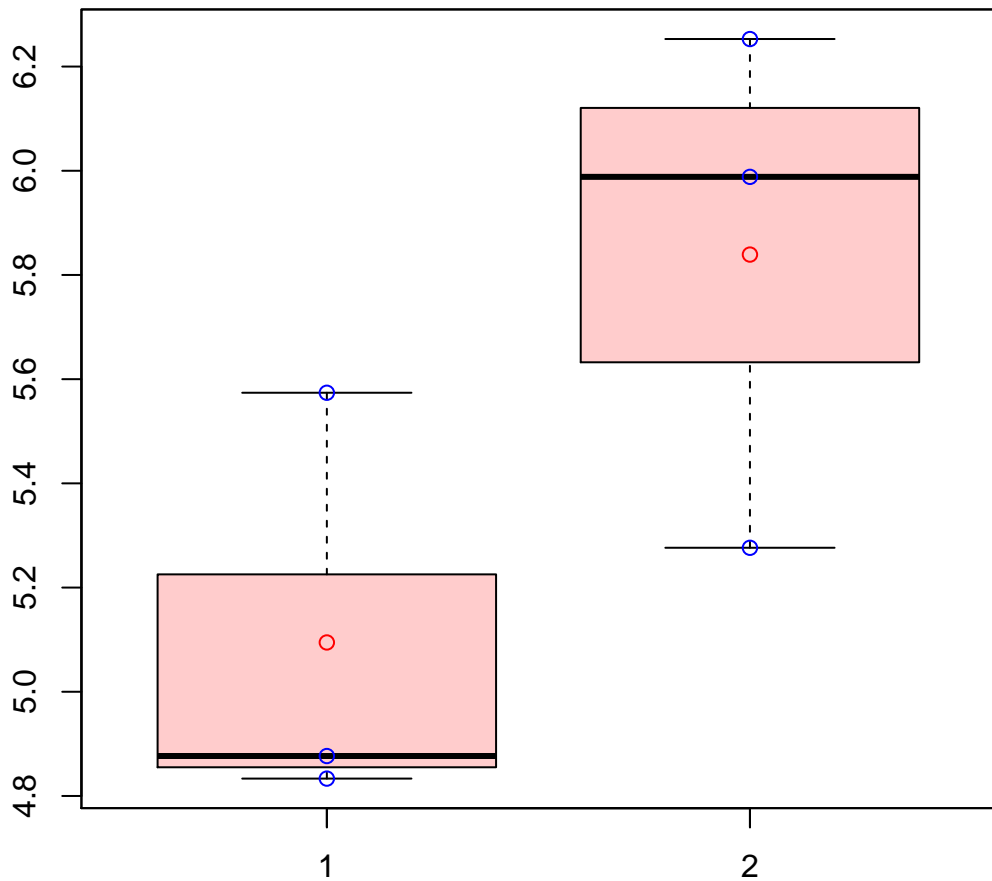

t-Test: p-value = 0.12

# K3XSP4|K3XSP4\_SETIT

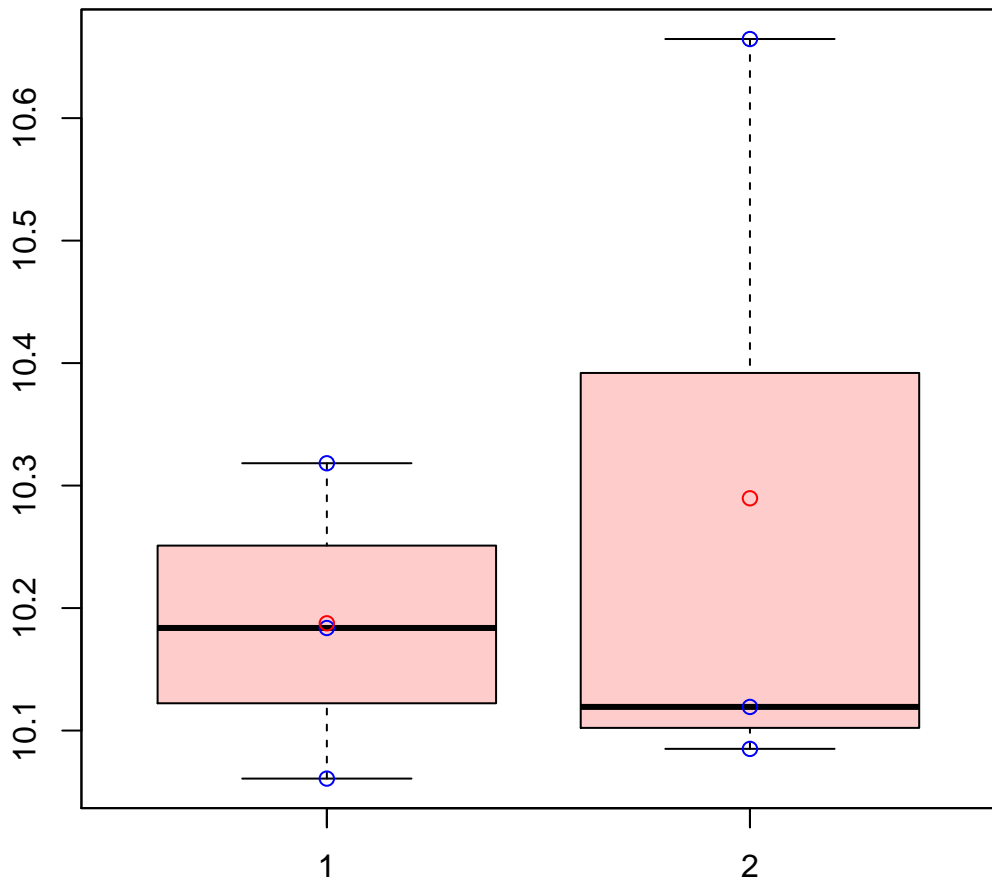

t-Test: p-value = 0.65

# K3XT03|K3XT03\_SETIT

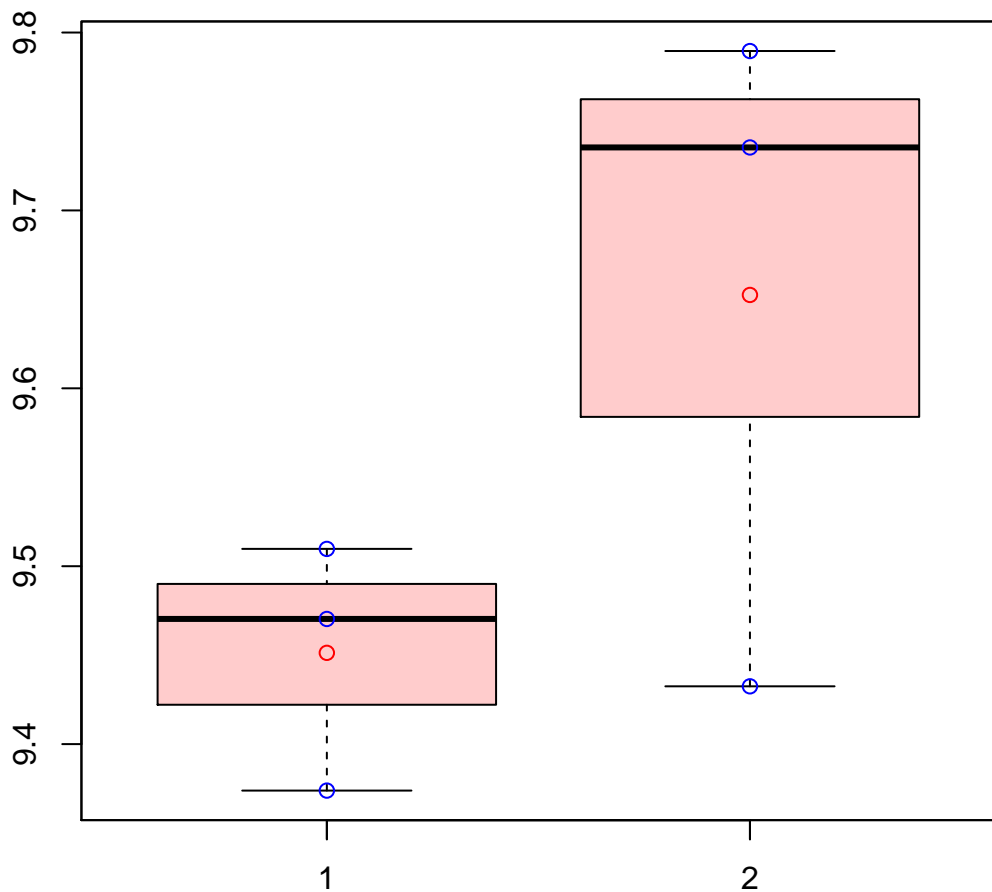

t-Test: p-value = 0.2

# K3XTZ7|K3XTZ7\_SETIT

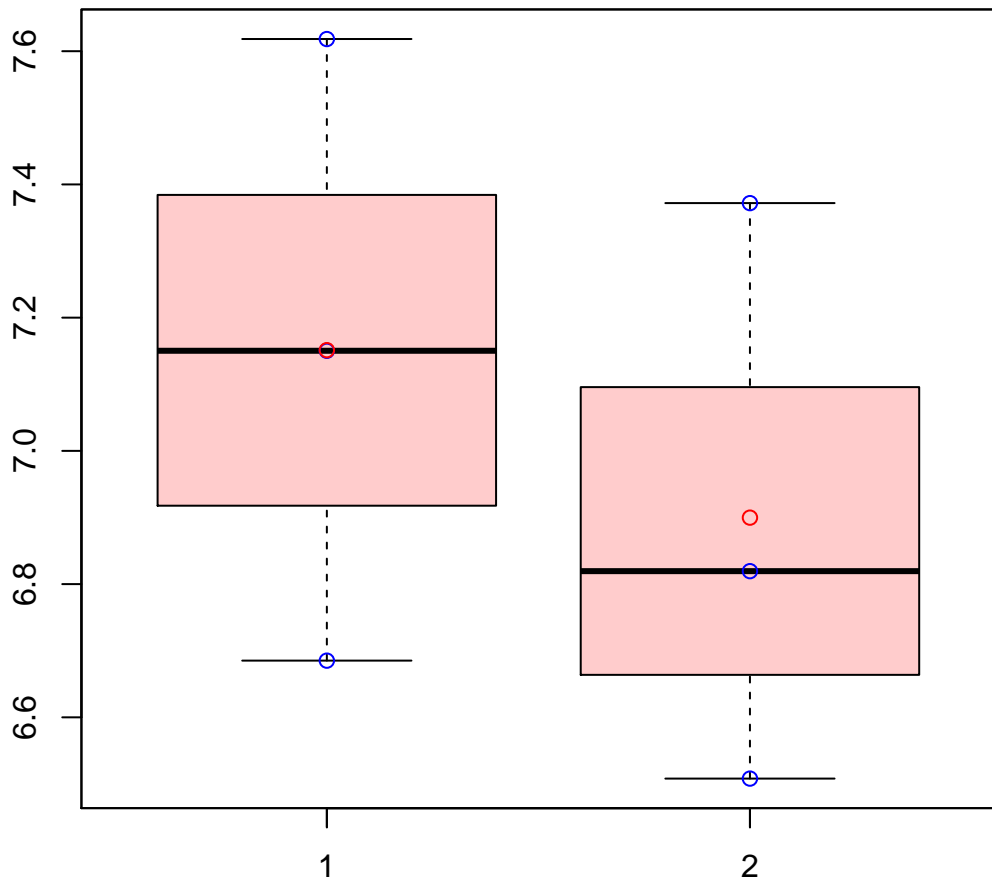

t-Test: p-value = 0.53

# K3XUT7|K3XUT7\_SETIT

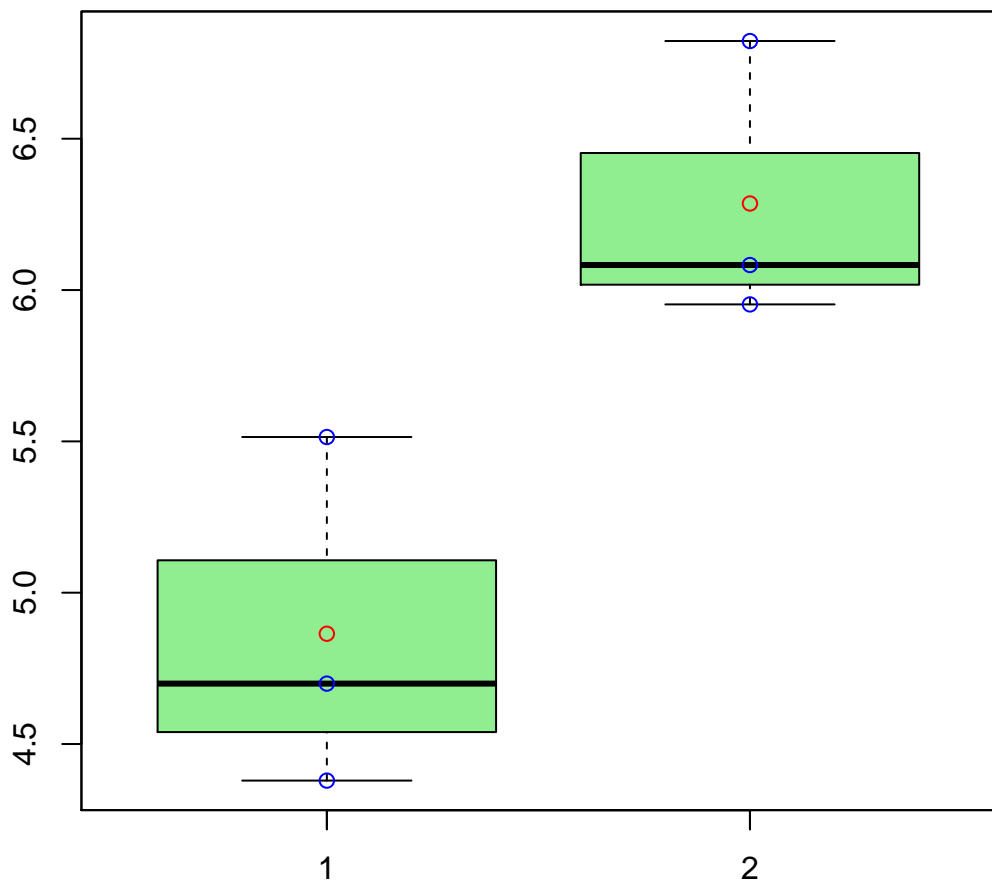

t-Test: p-value = 0.03

# K3XUU2|K3XUU2\_SETIT

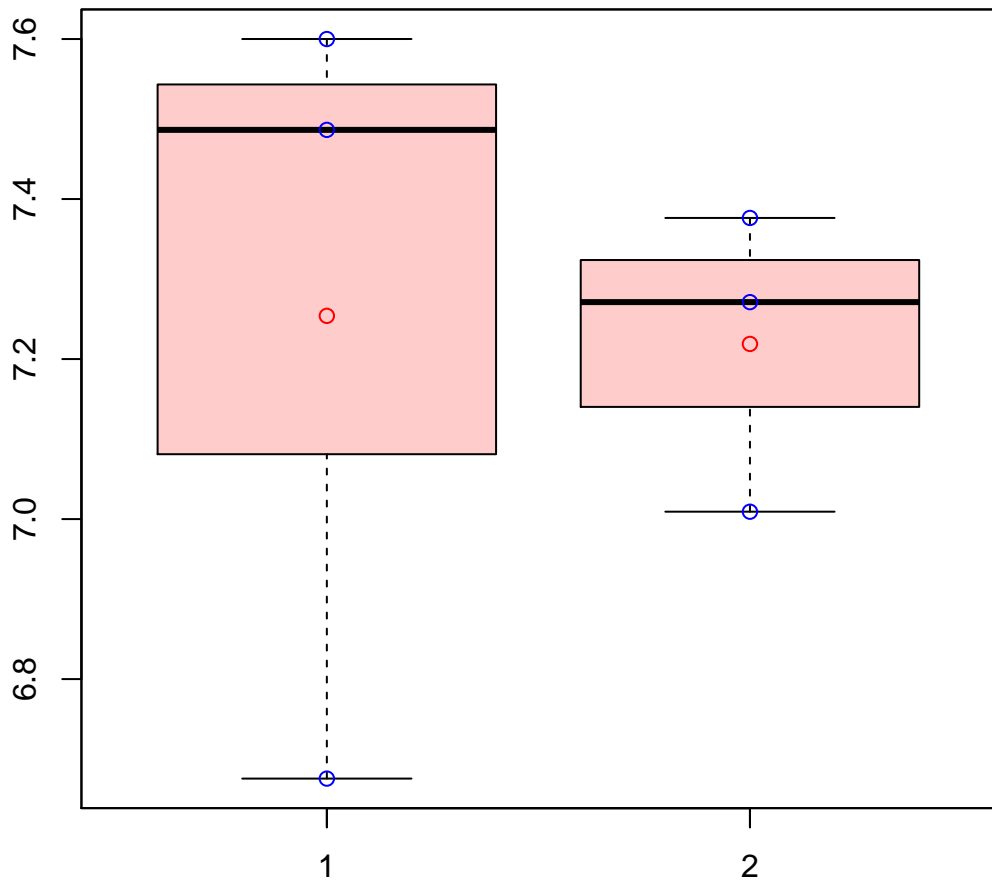

t-Test: p-value = 0.92



# K3XUU5|K3XUU5\_SETIT

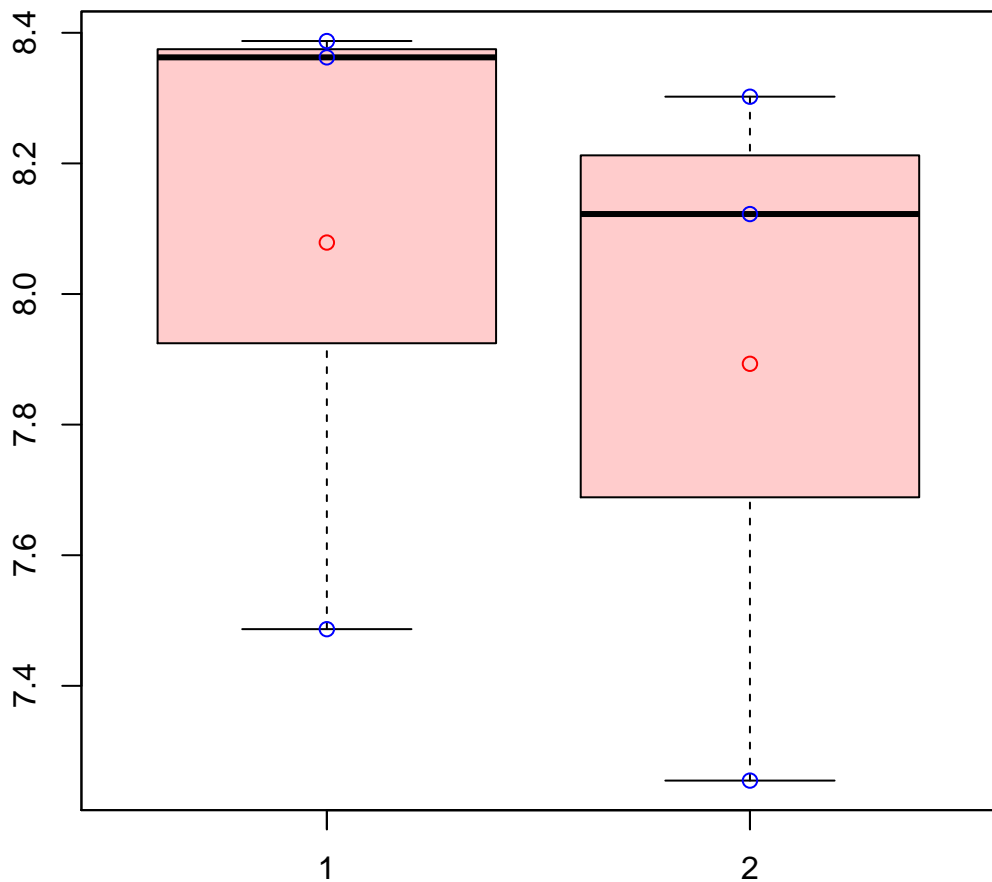

t-Test: p-value = 0.69

# K3XUY8|K3XUY8\_SETIT

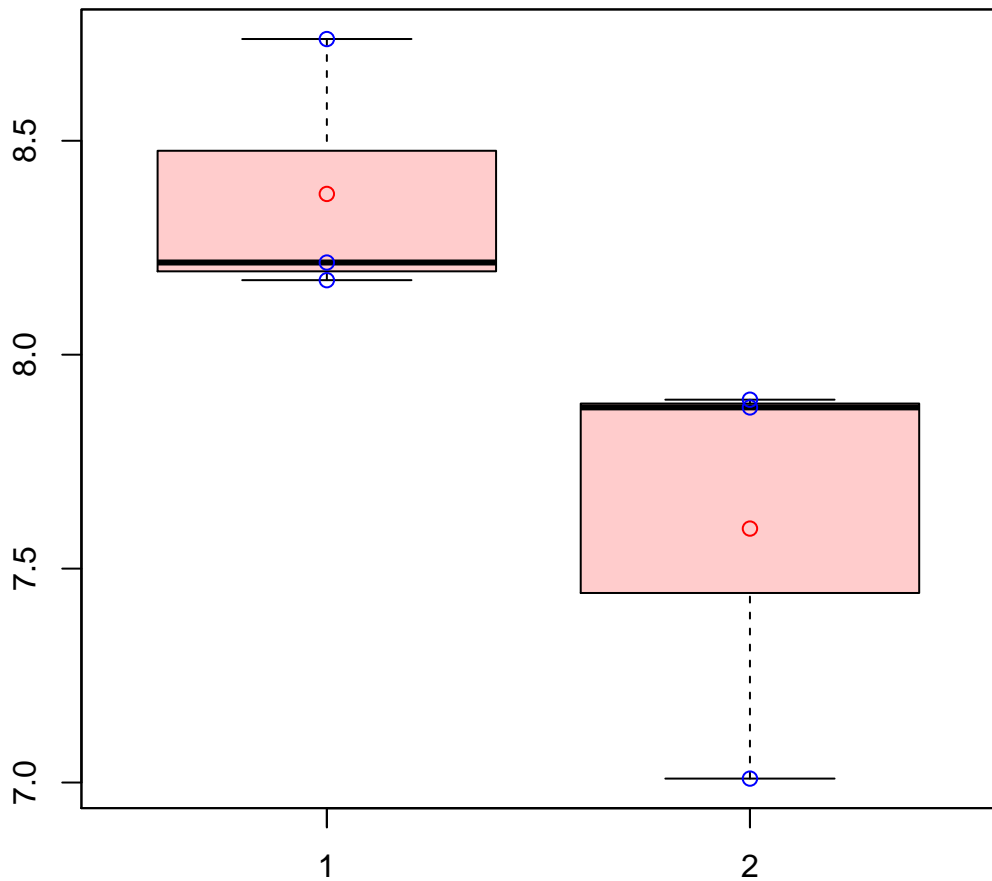

t-Test: p-value = 0.1

# K3XV15|K3XV15\_SETIT

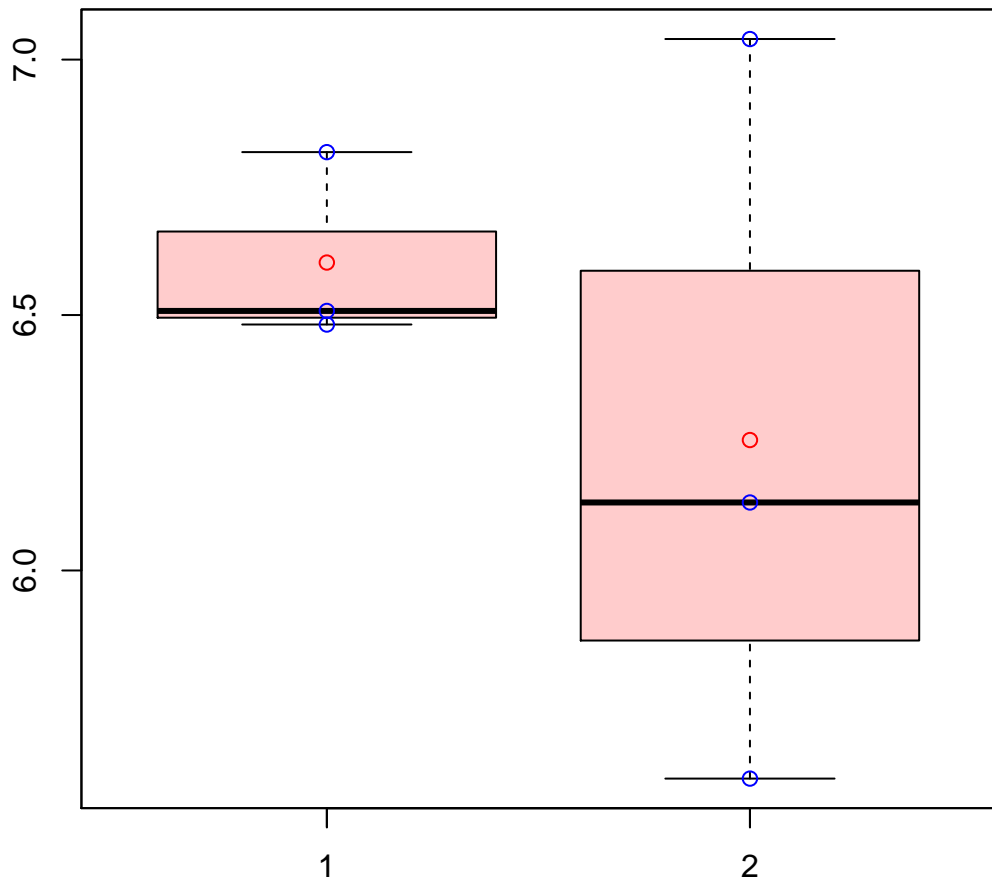

t-Test: p-value = 0.5

# K3XV20|K3XV20\_SETIT

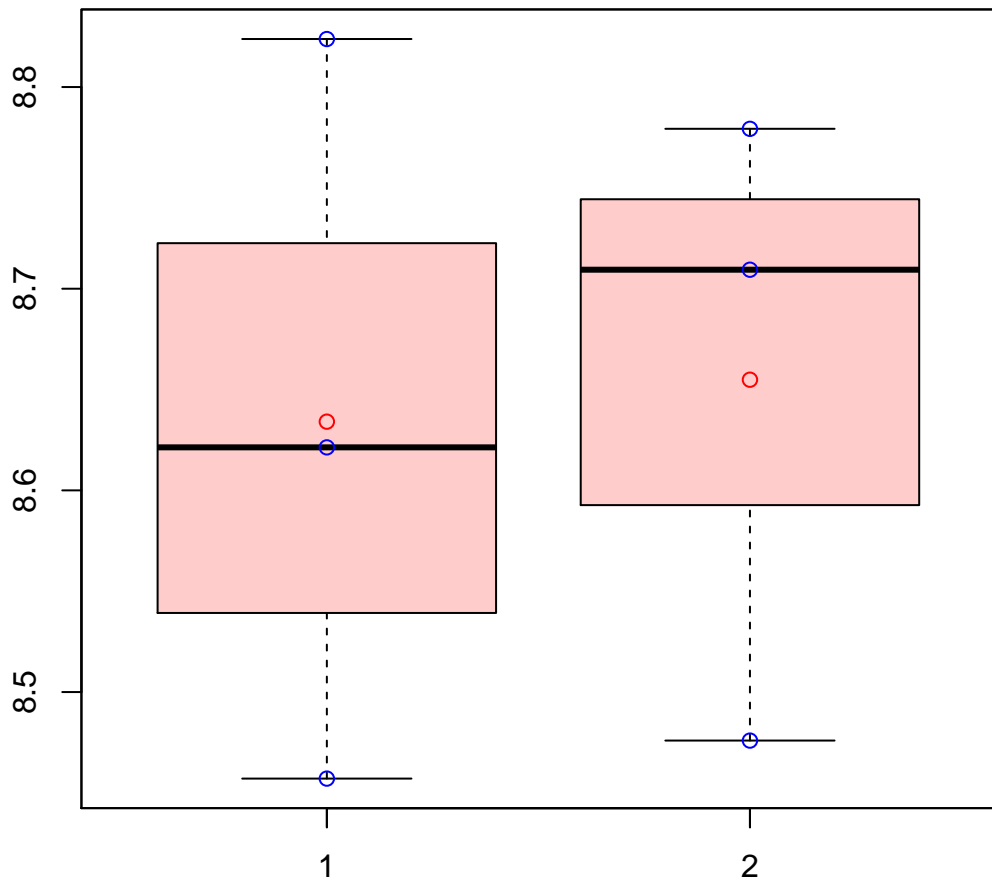

t-Test: p-value = 0.89

# K3XV32|K3XV32\_SETIT

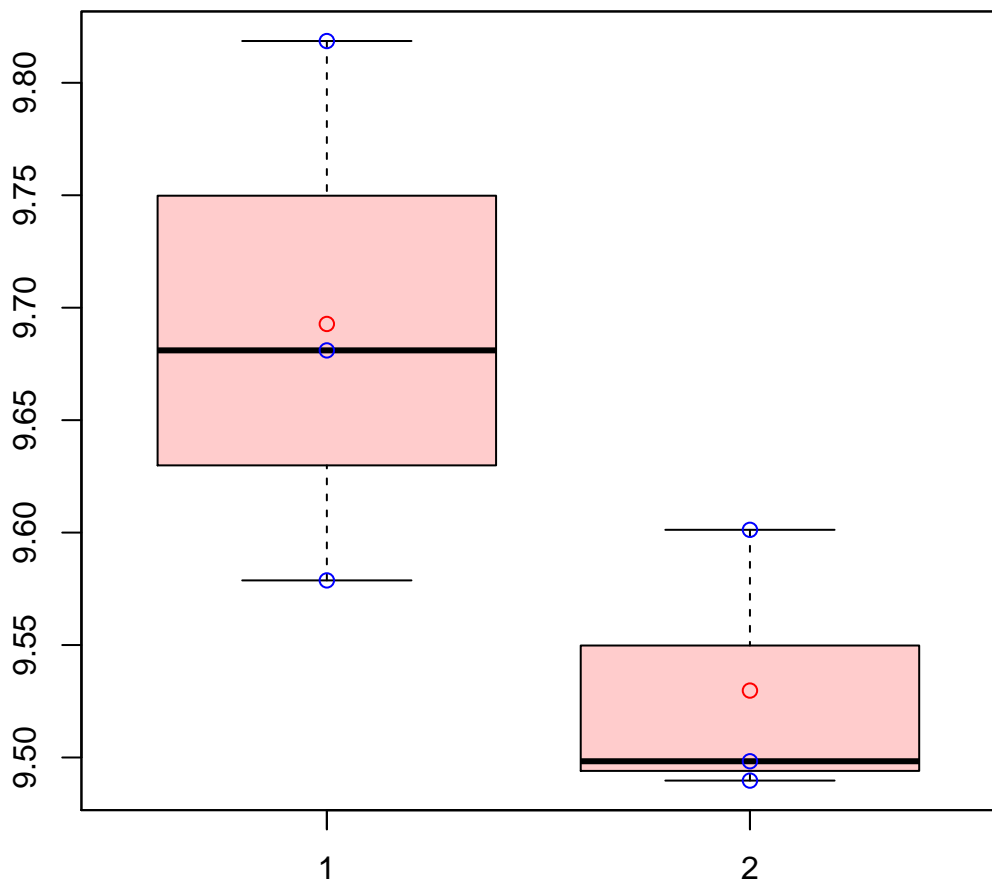

t-Test: p-value = 0.13

# K3XV77|K3XV77\_SETIT

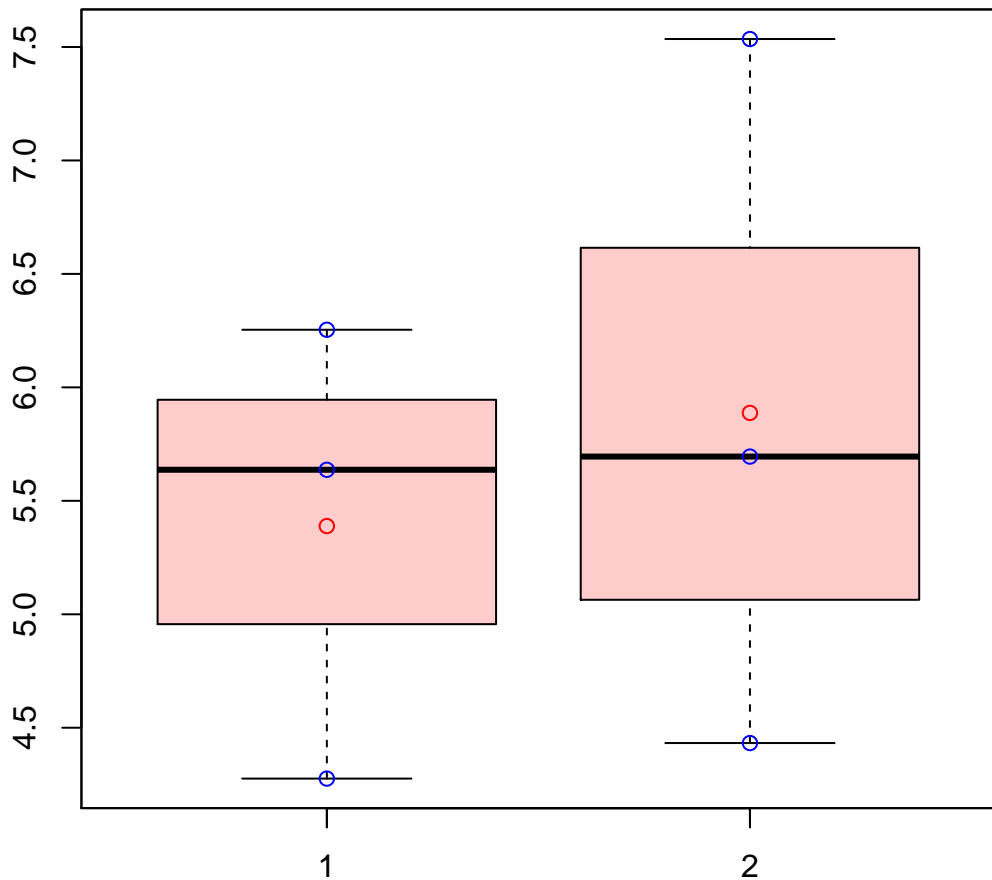

t-Test: p-value = 0.67

# K3XVH0|K3XVH0\_SETIT

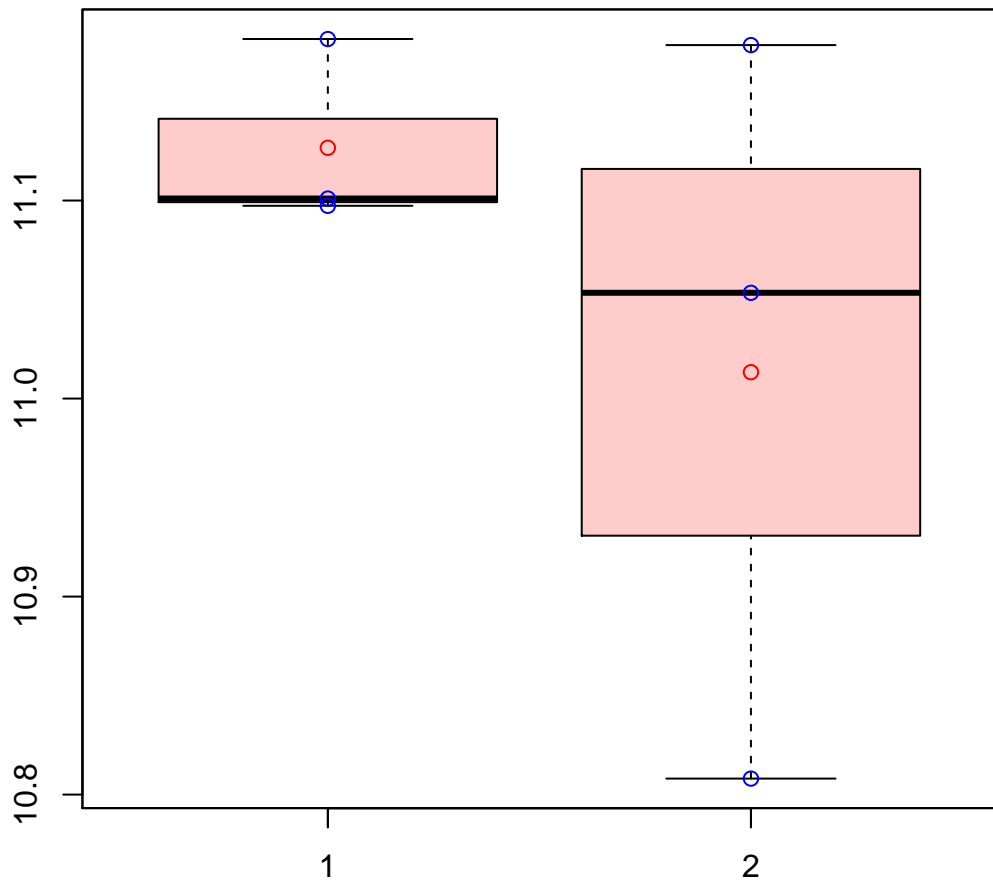

t-Test: p-value = 0.41

# K3XVN4|K3XVN4\_SETIT

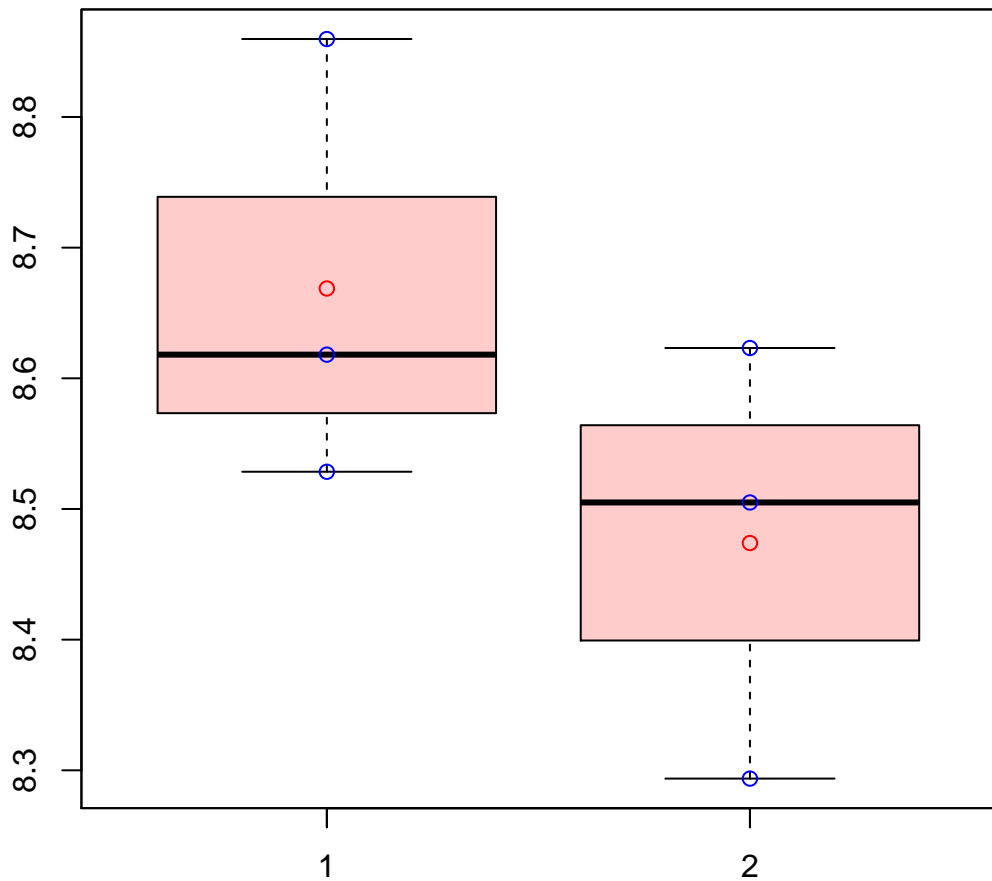

t-Test: p-value = 0.23



# K3XVP0|K3XVP0\_SETIT

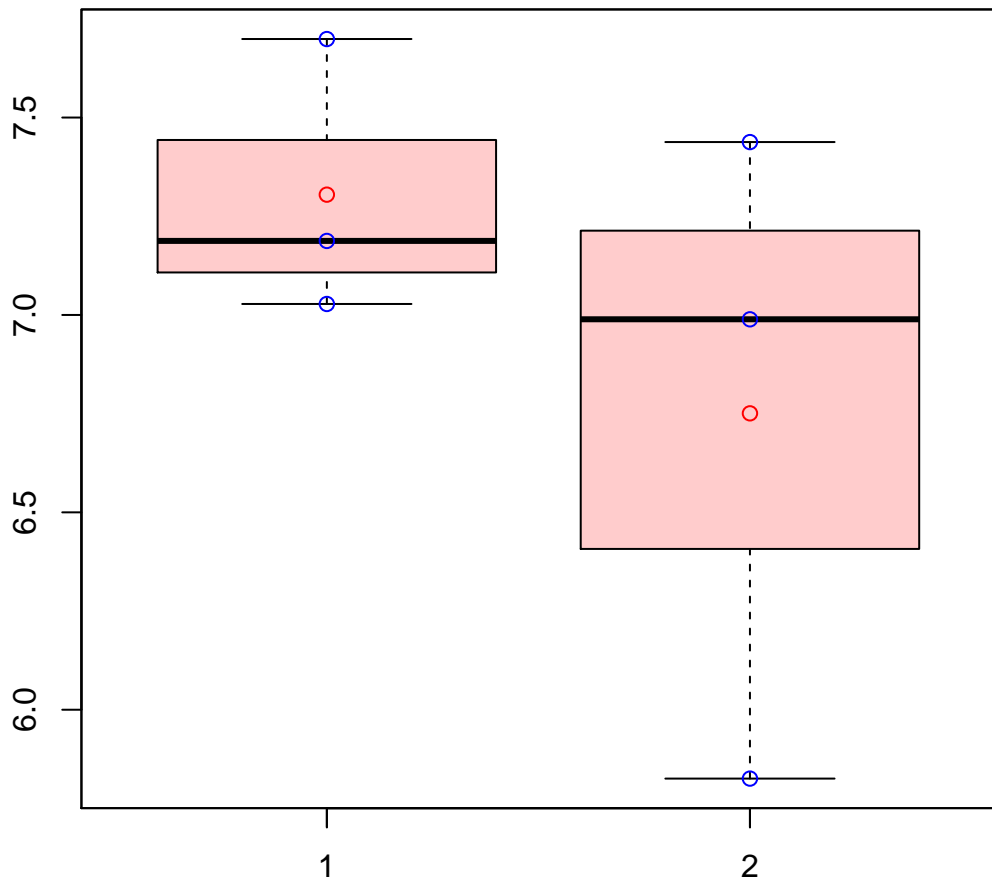

t-Test: p-value = 0.37

# K3XVR5|K3XVR5\_SETIT

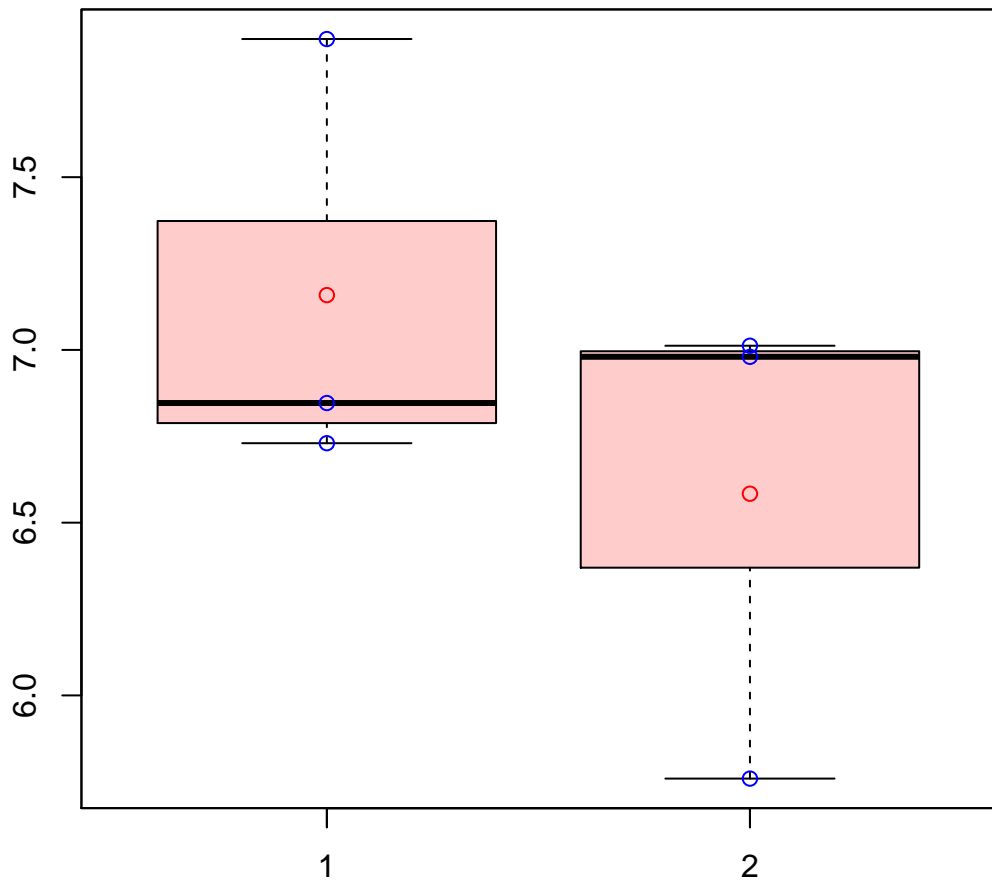

t-Test: p-value = 0.36

# K3XVT0|K3XVT0\_SETIT

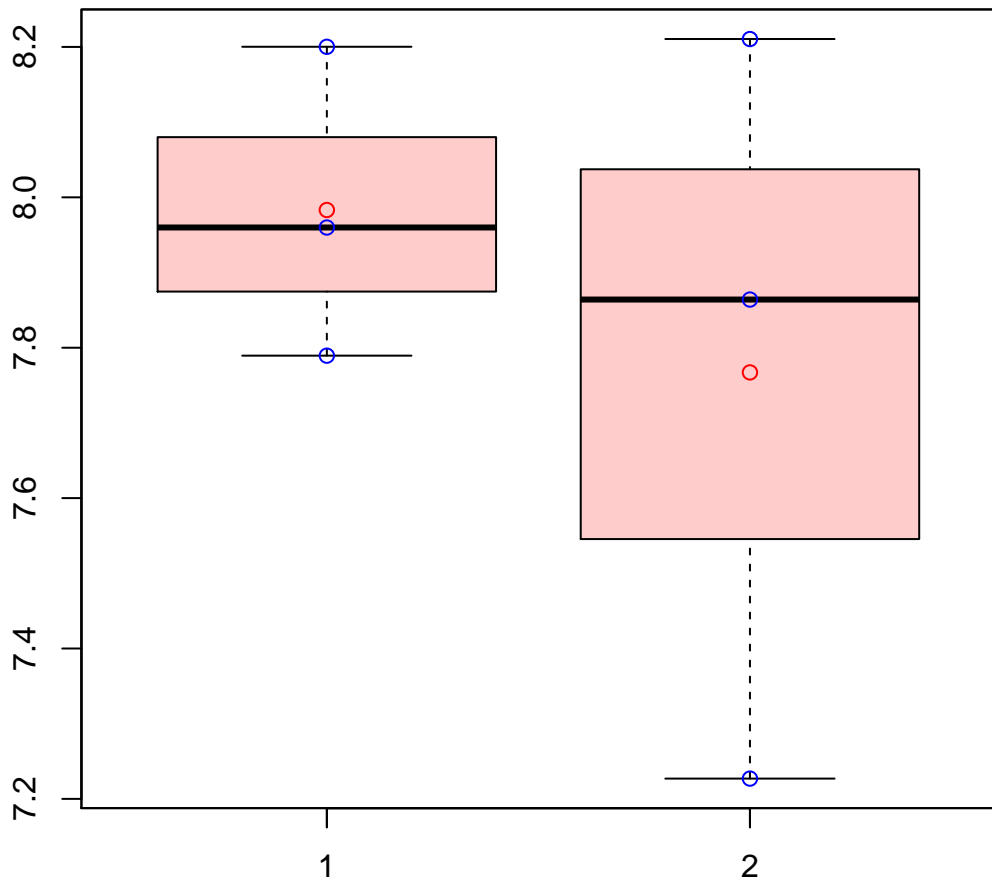

t-Test: p-value = 0.54

# K3XVV4|K3XVV4\_SETIT

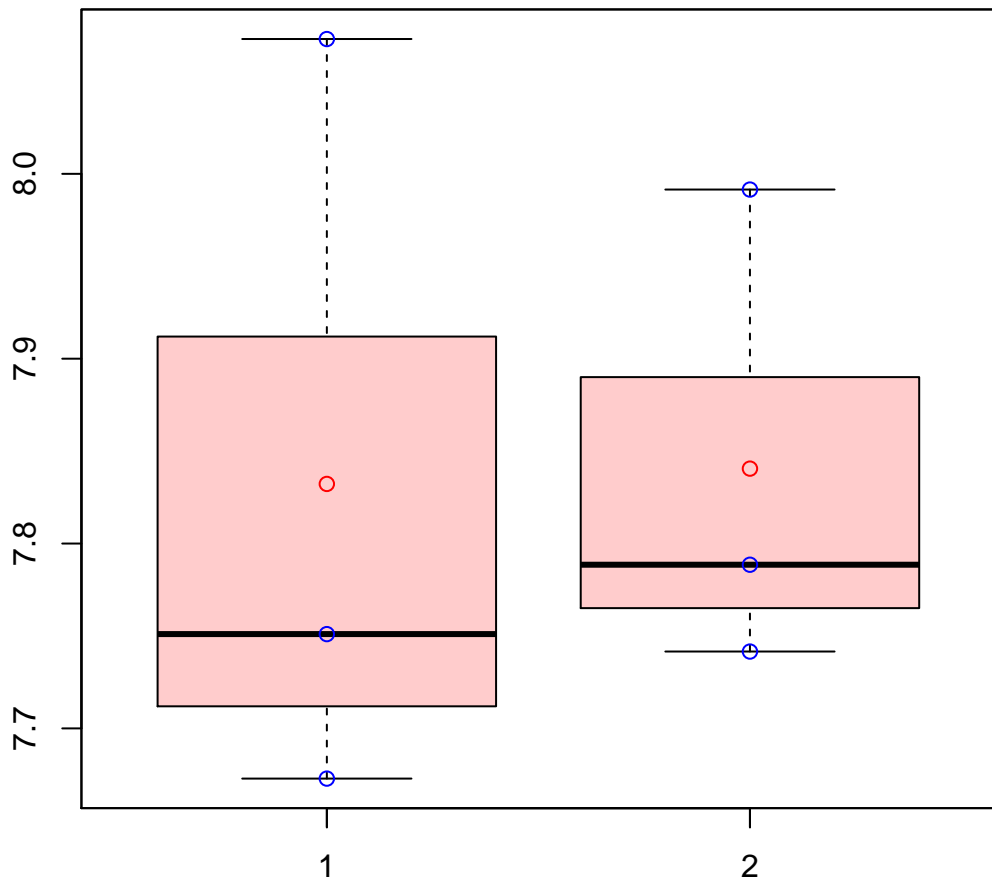

t-Test: p-value = 0.96

# K3XW27|K3XW27\_SETIT

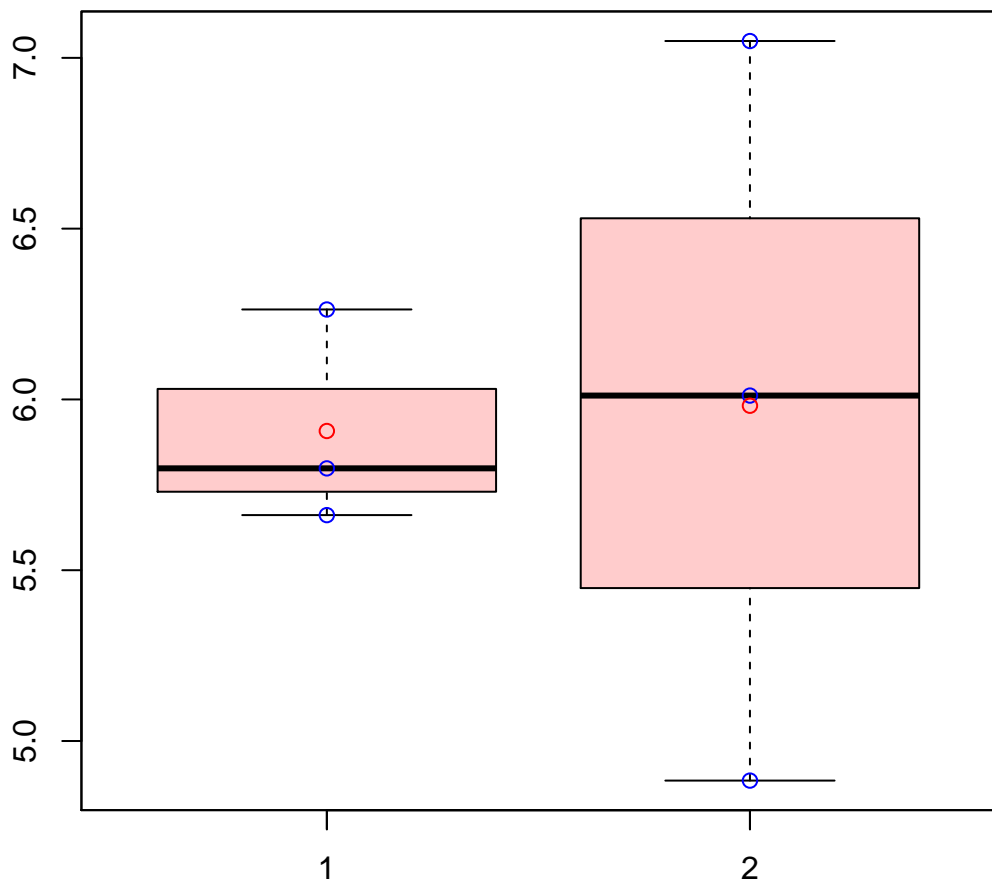

t-Test: p-value = 0.92

# K3XW75|K3XW75\_SETIT

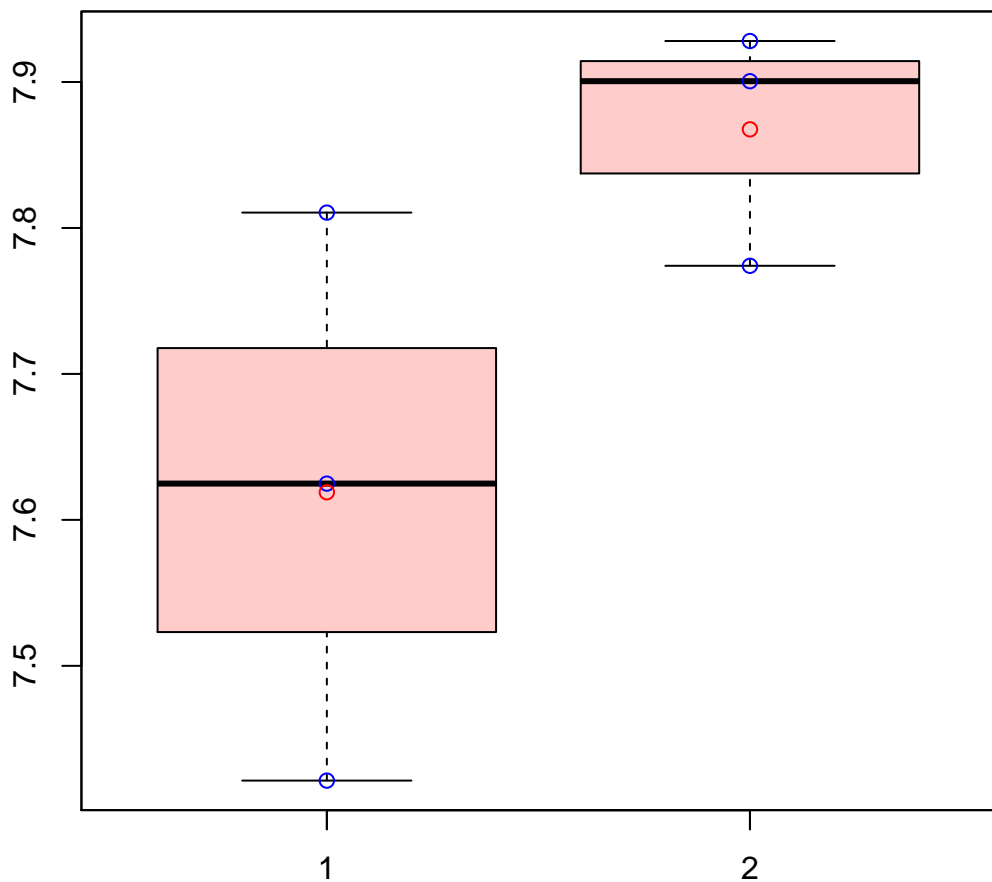

t-Test: p-value = 0.14

# K3XWS2|K3XWS2\_SETIT

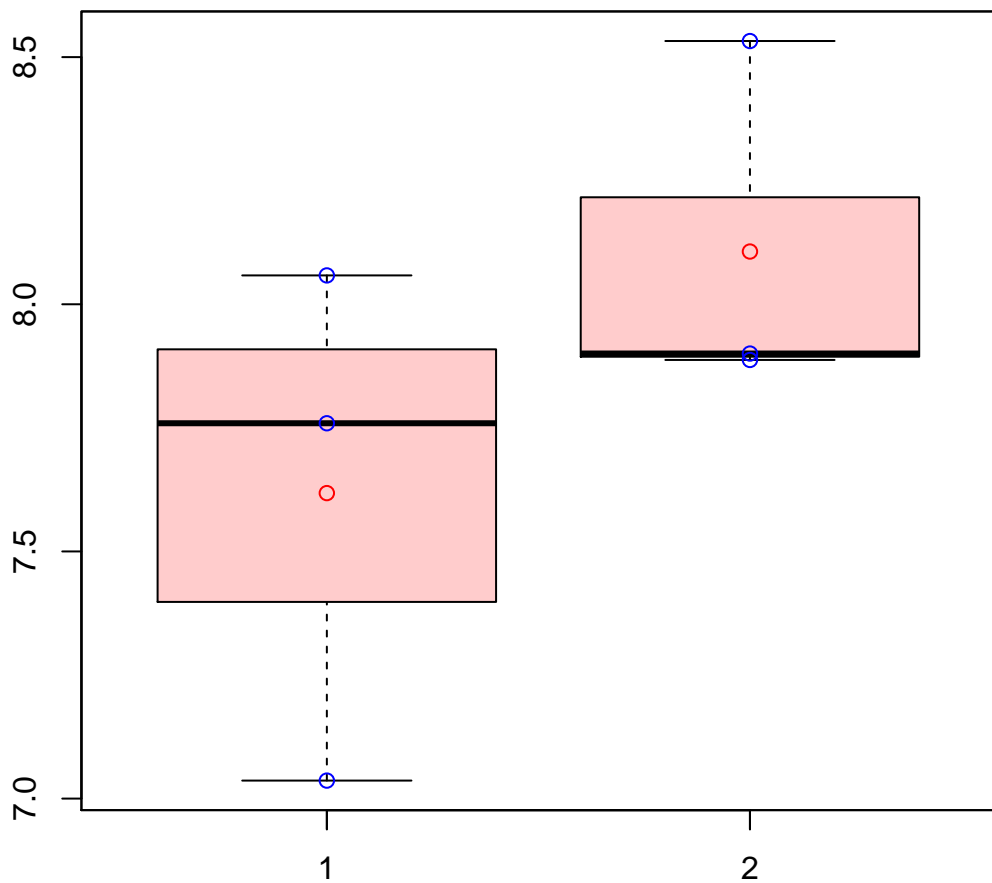

t-Test: p-value = 0.27

# K3XWW9|K3XWW9\_SETIT

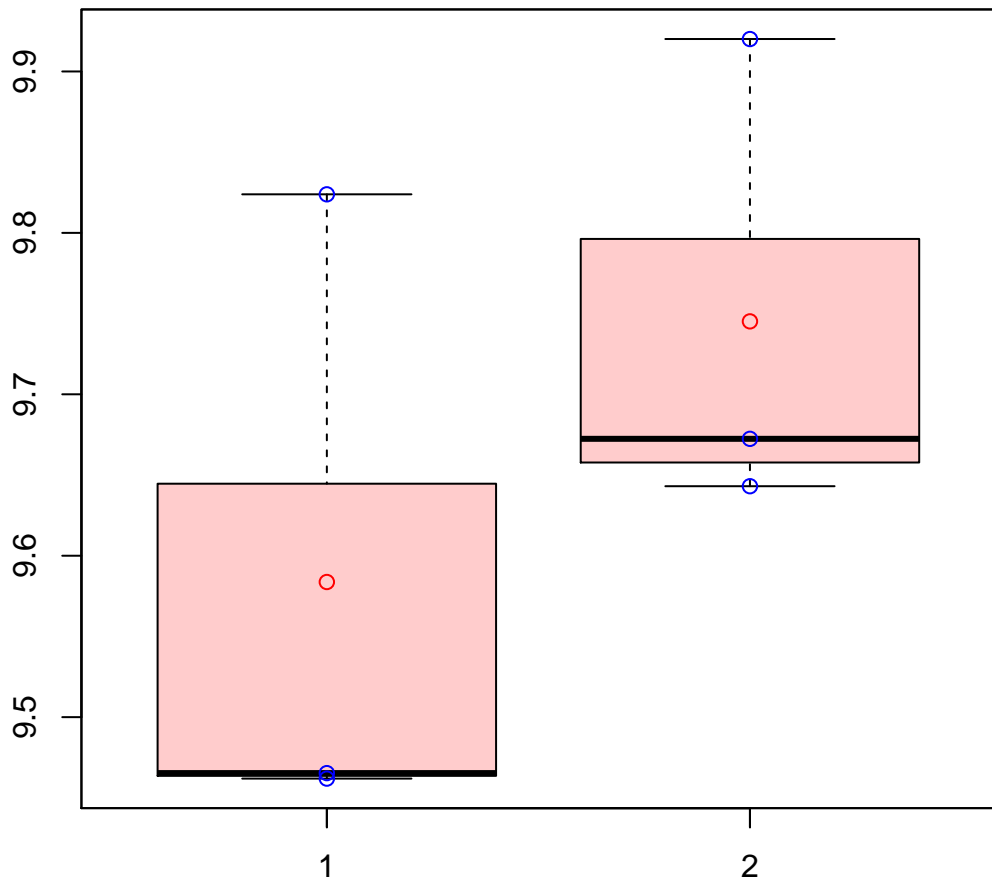

t-Test: p-value = 0.34



# K3XX32|K3XX32\_SETIT

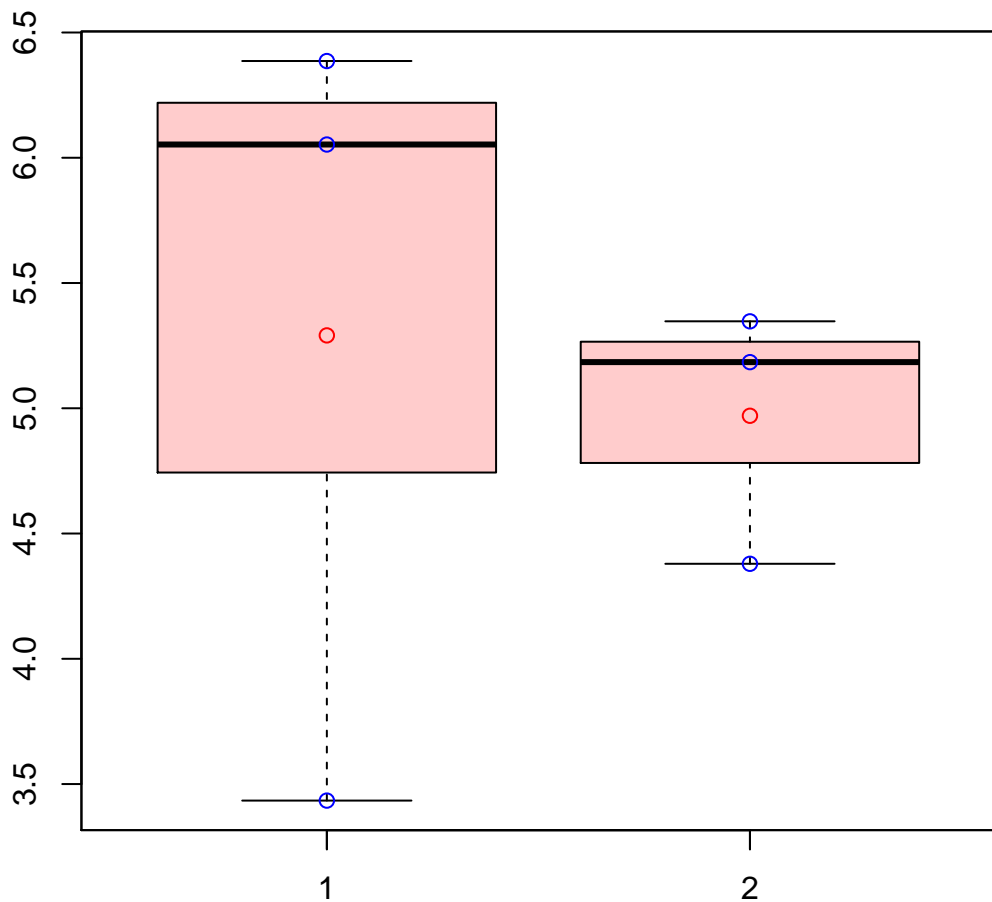

t-Test: p-value = 0.77

# K3XX34|K3XX34\_SETIT

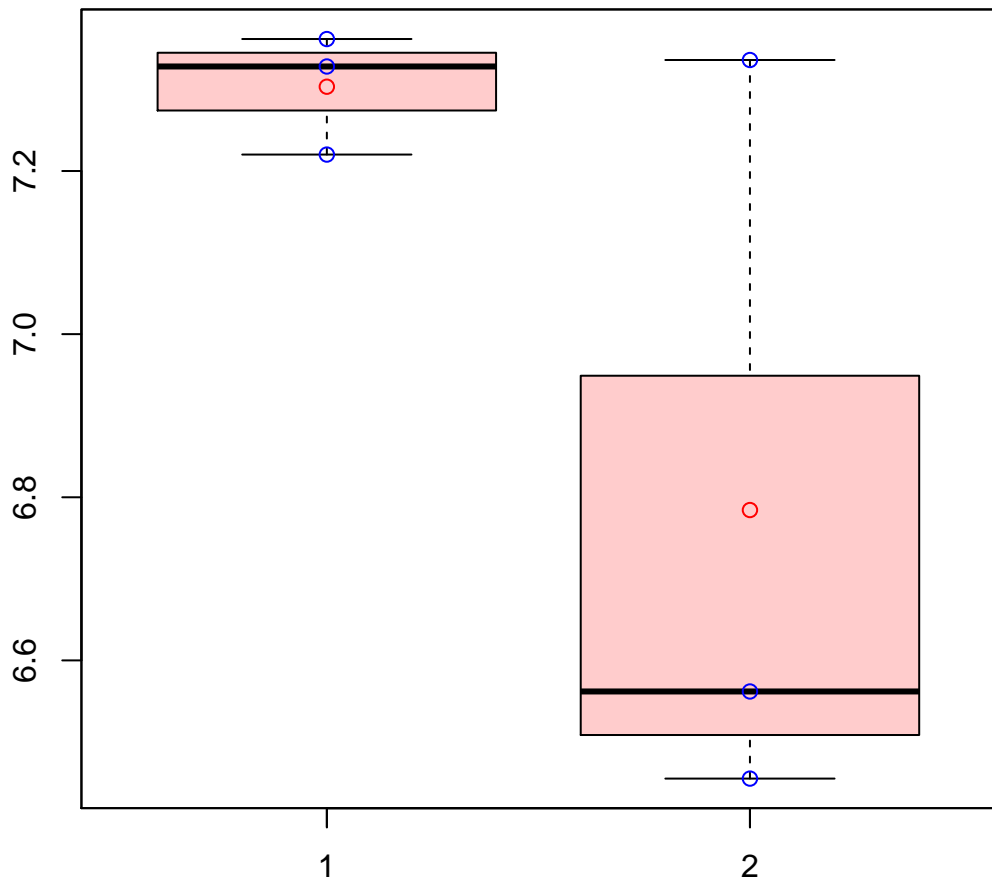

t-Test: p-value = 0.2

# K3XX84|K3XX84\_SETIT

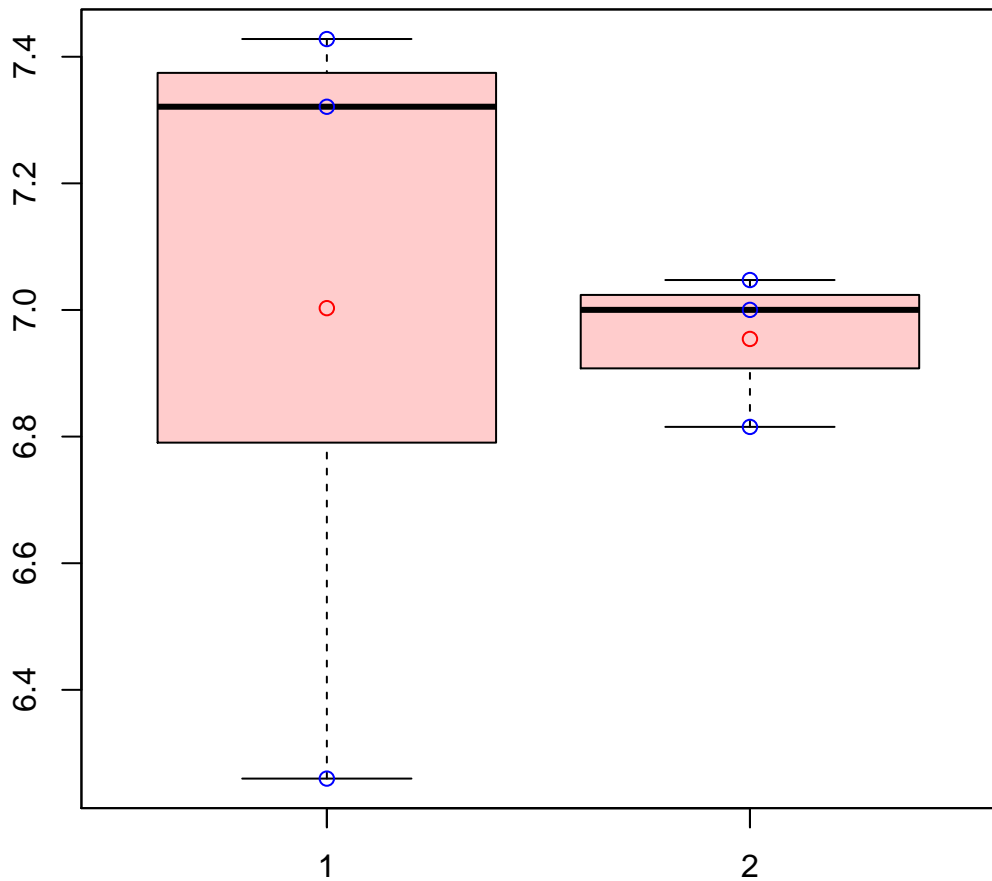

t-Test: p-value = 0.91

# K3XX87|K3XX87\_SETIT

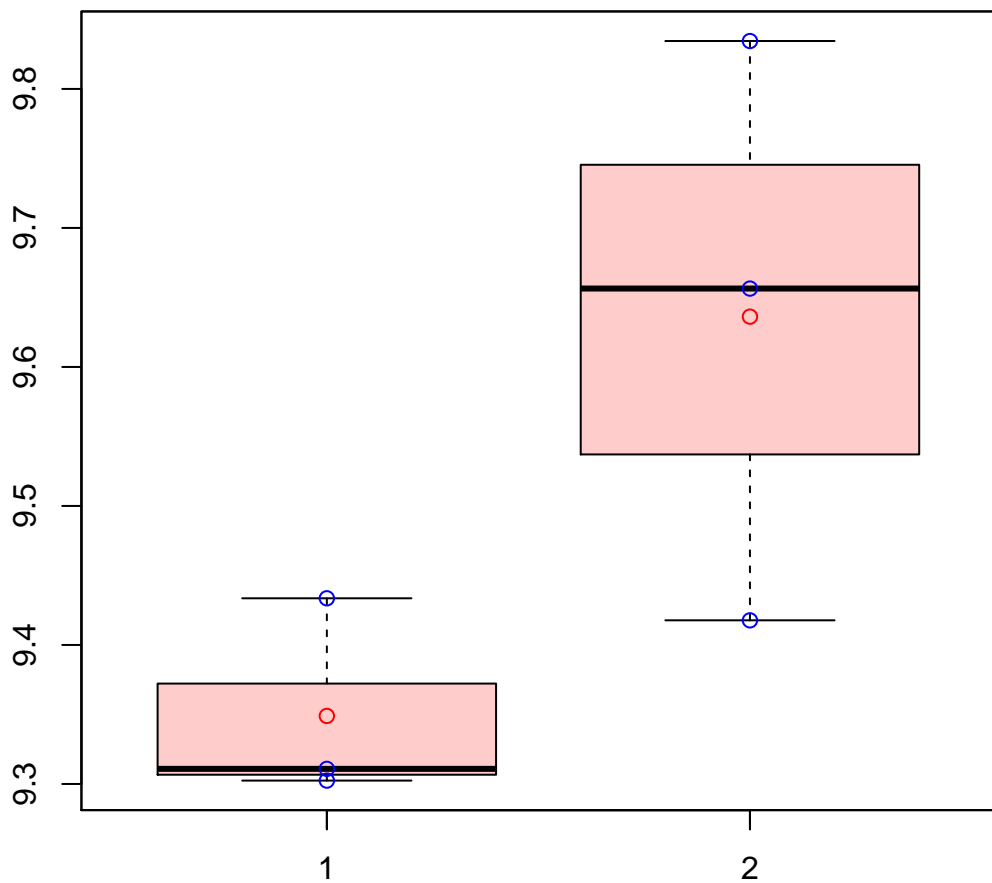

t-Test: p-value = 0.13

# K3XXC0|K3XXC0\_SETIT

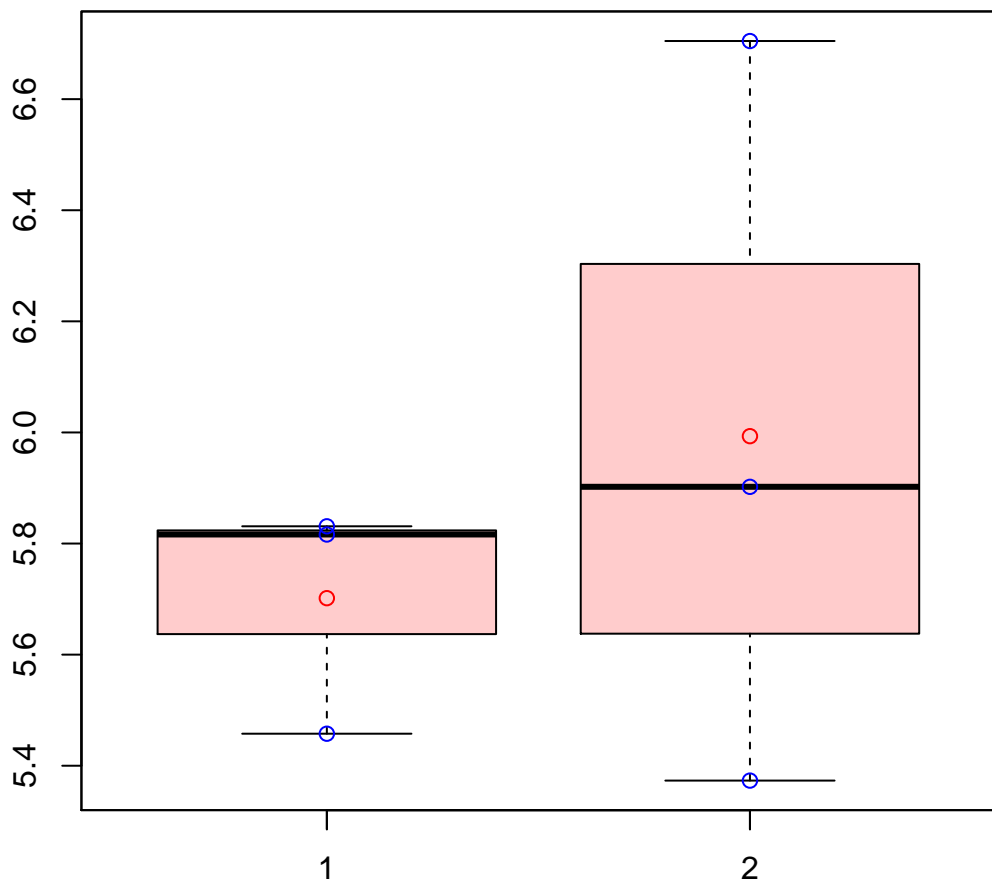

t-Test: p-value = 0.54

# K3XXE5|K3XXE5\_SETIT

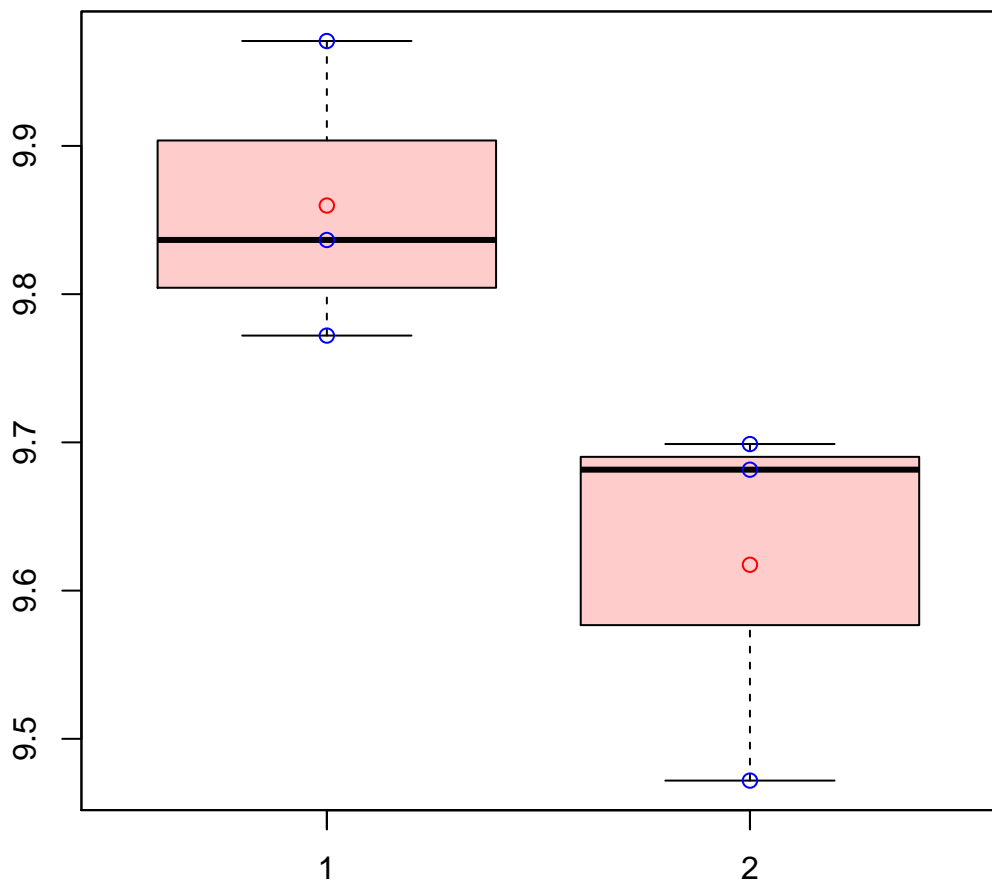

t-Test: p-value = 0.06

# K3XXF5|K3XXF5\_SETIT

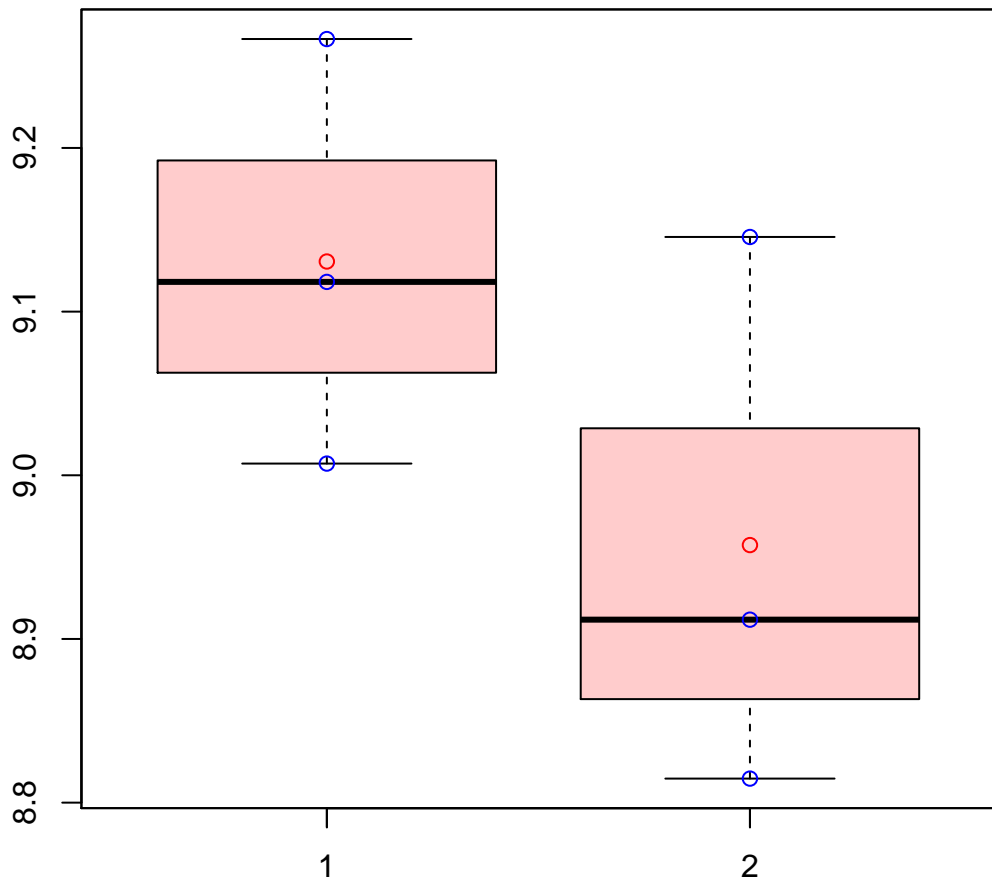

t-Test: p-value = 0.24

# K3XXN9|K3XXN9\_SETIT

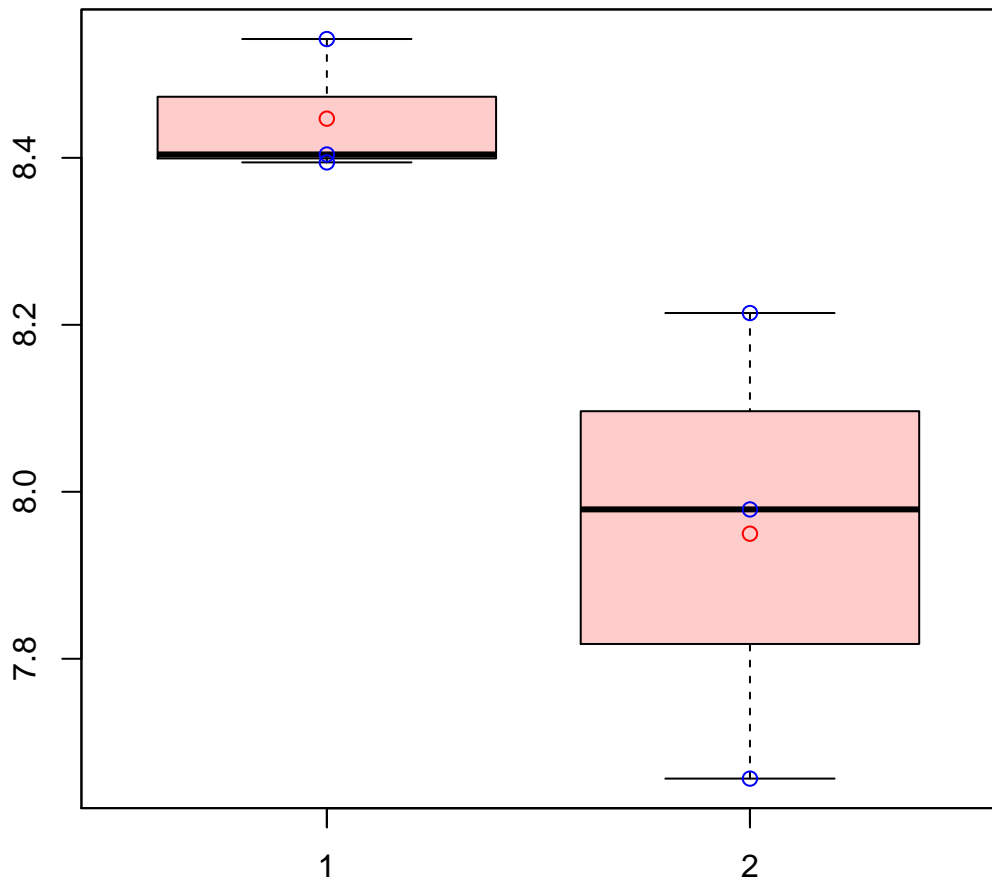

t-Test: p-value = 0.08



# K3XXR2|K3XXR2\_SETIT

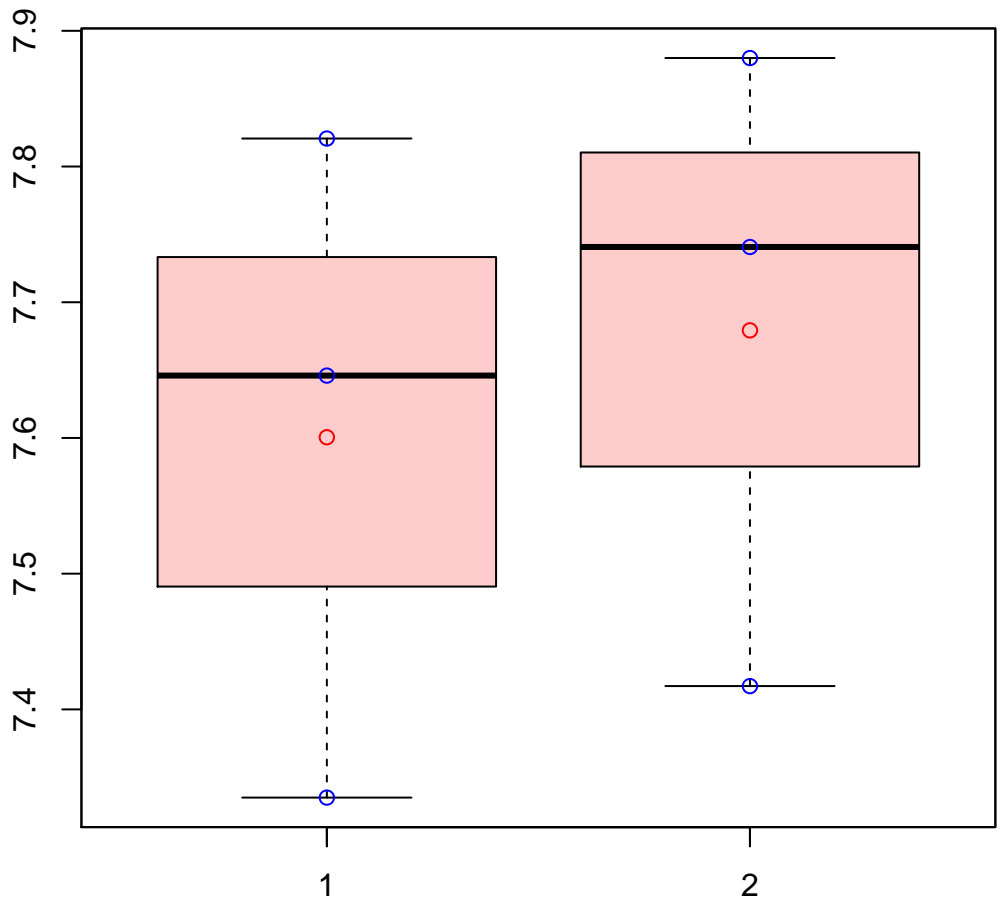

t-Test: p-value = 0.71

# K3XXT7|K3XXT7\_SETIT

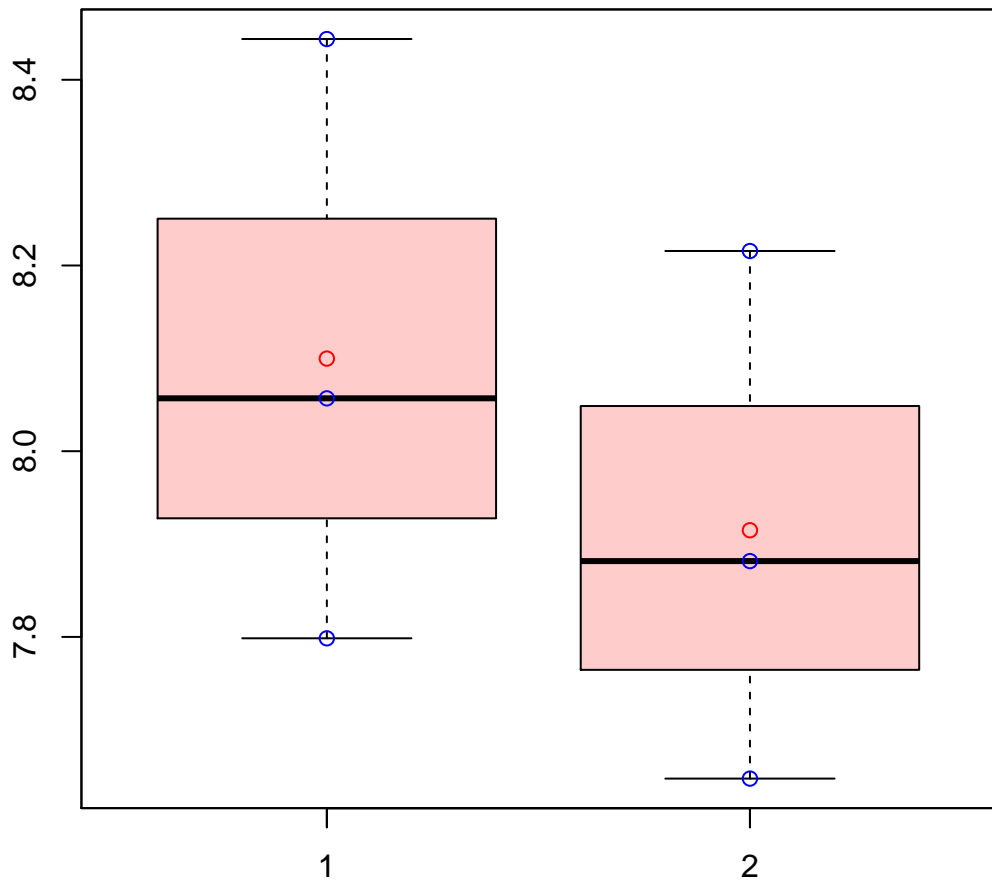

t-Test: p-value = 0.5

# K3XYT9|K3XYT9\_SETIT

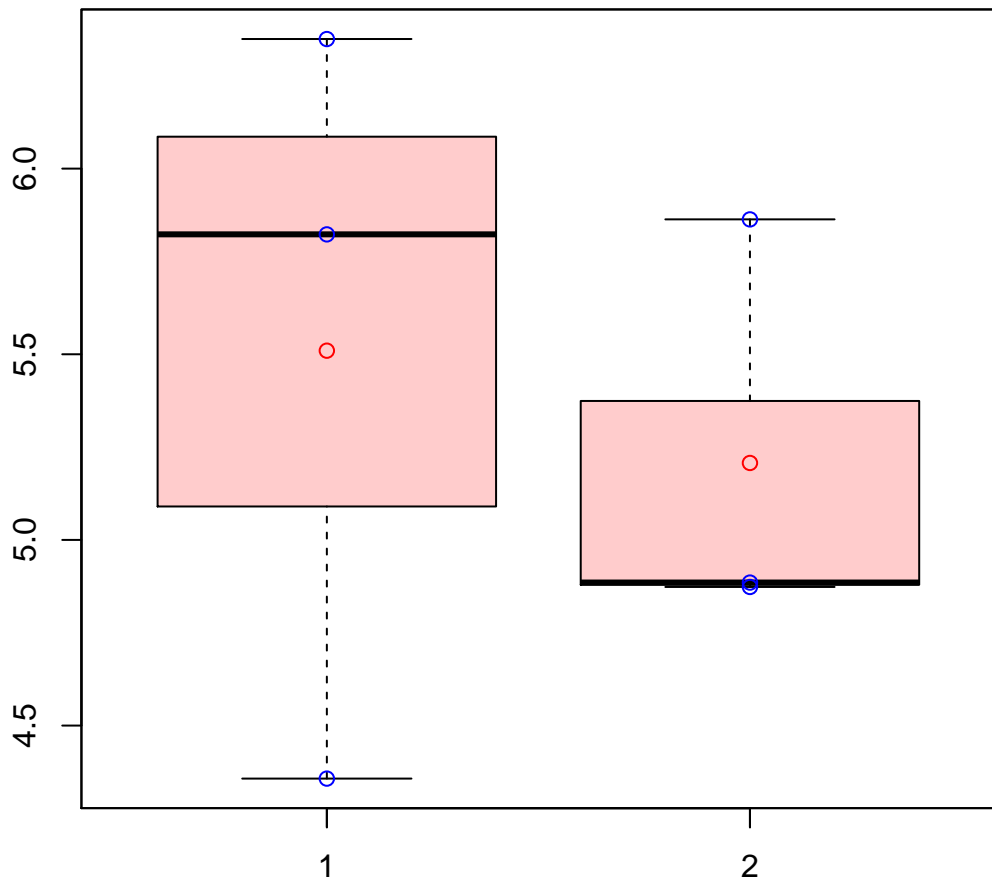

t-Test: p-value = 0.69

# K3XYV6|K3XYV6\_SETIT

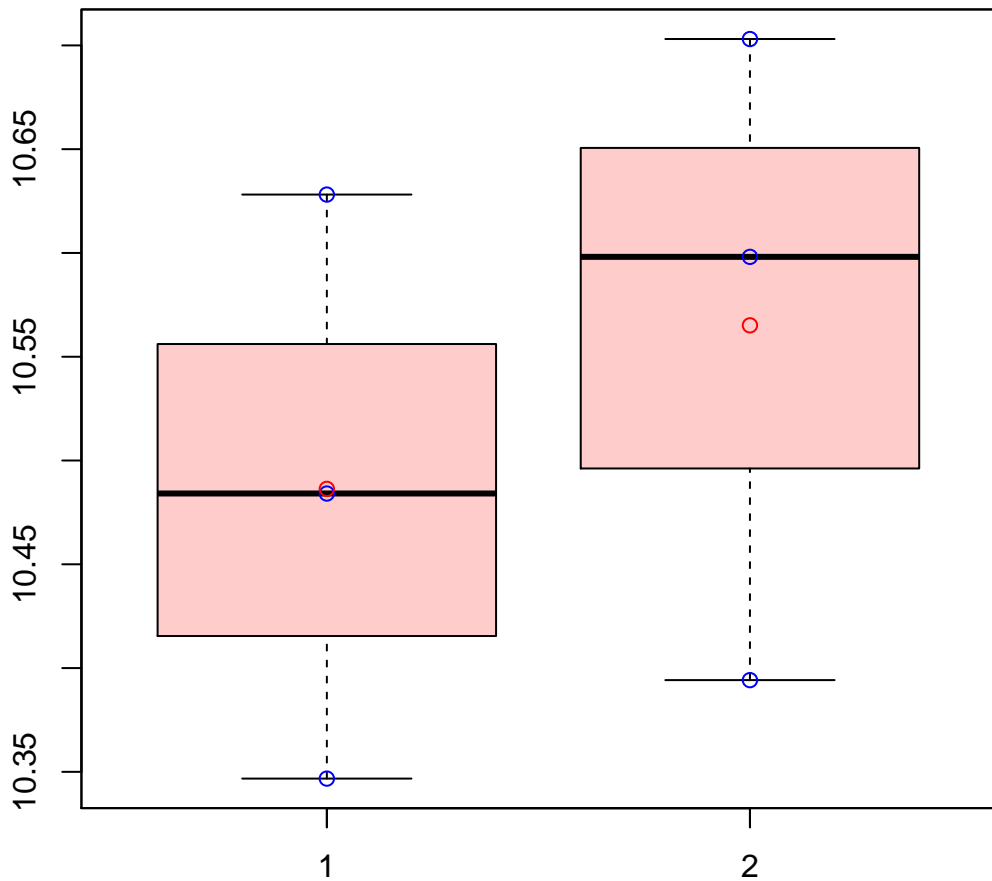

t-Test: p-value = 0.55

# K3XZ58|K3XZ58\_SETIT

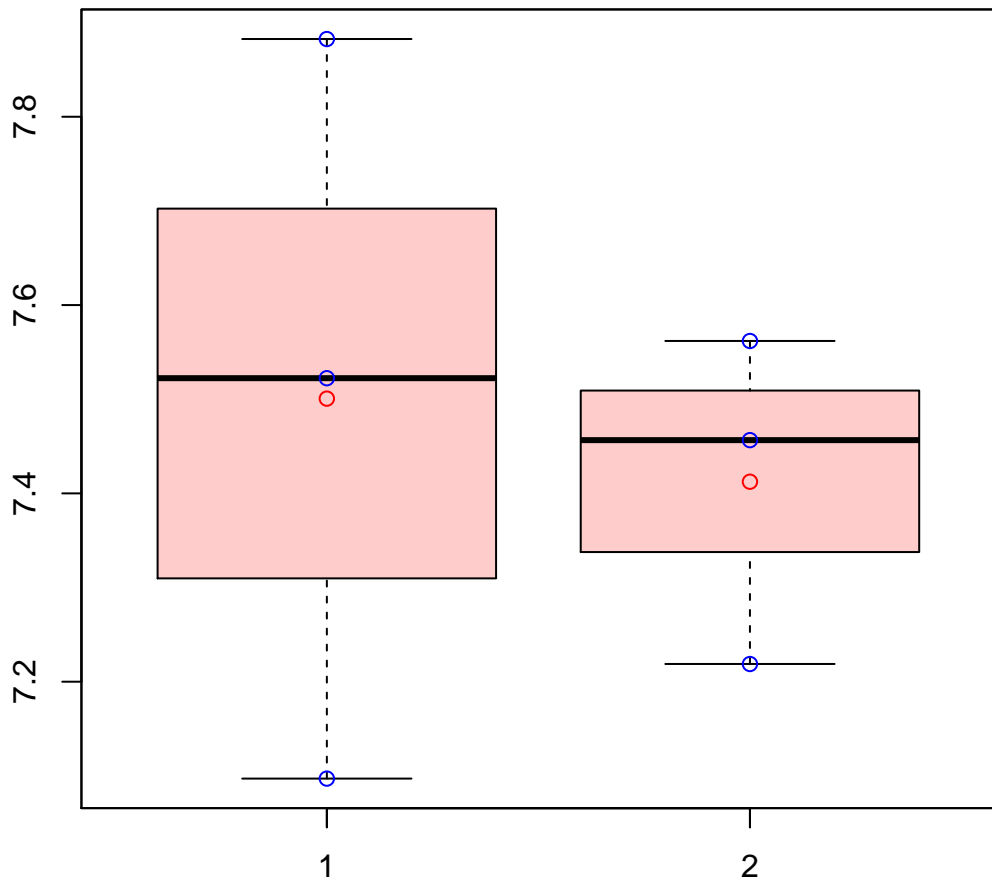

t-Test: p-value = 0.75

# K3XZ93|K3XZ93\_SETIT

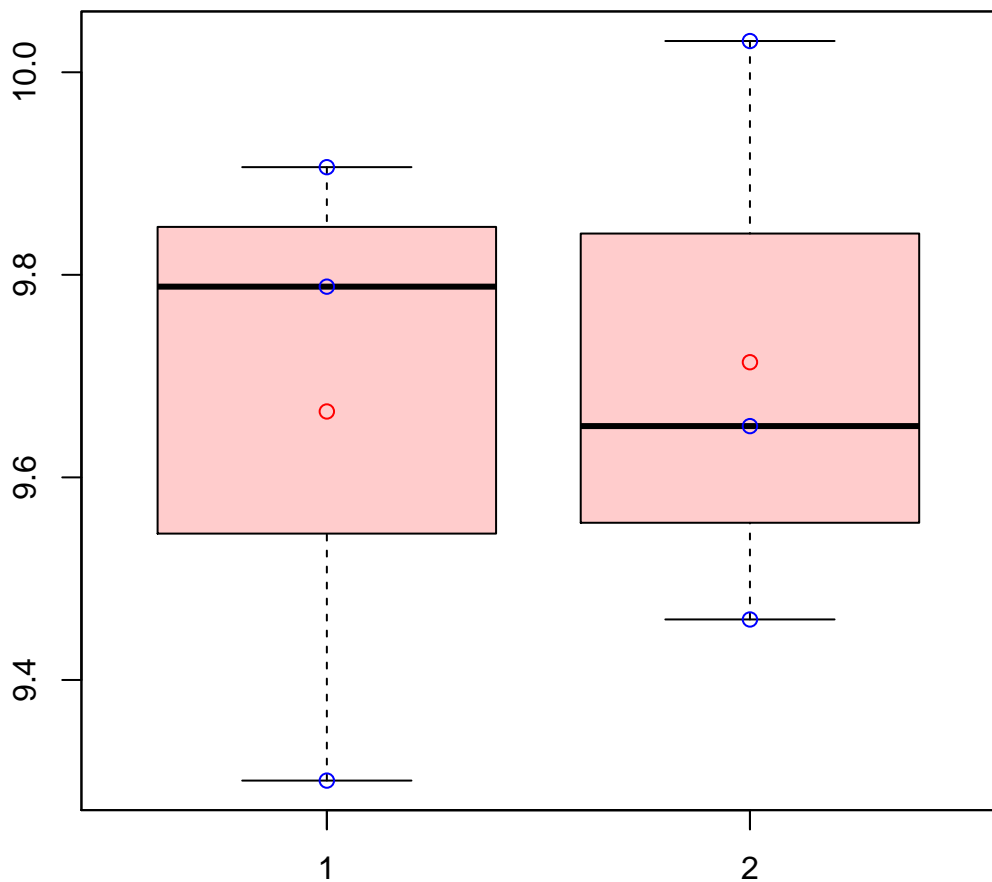

t-Test: p-value = 0.86

# K3Y157|K3Y157\_SETIT

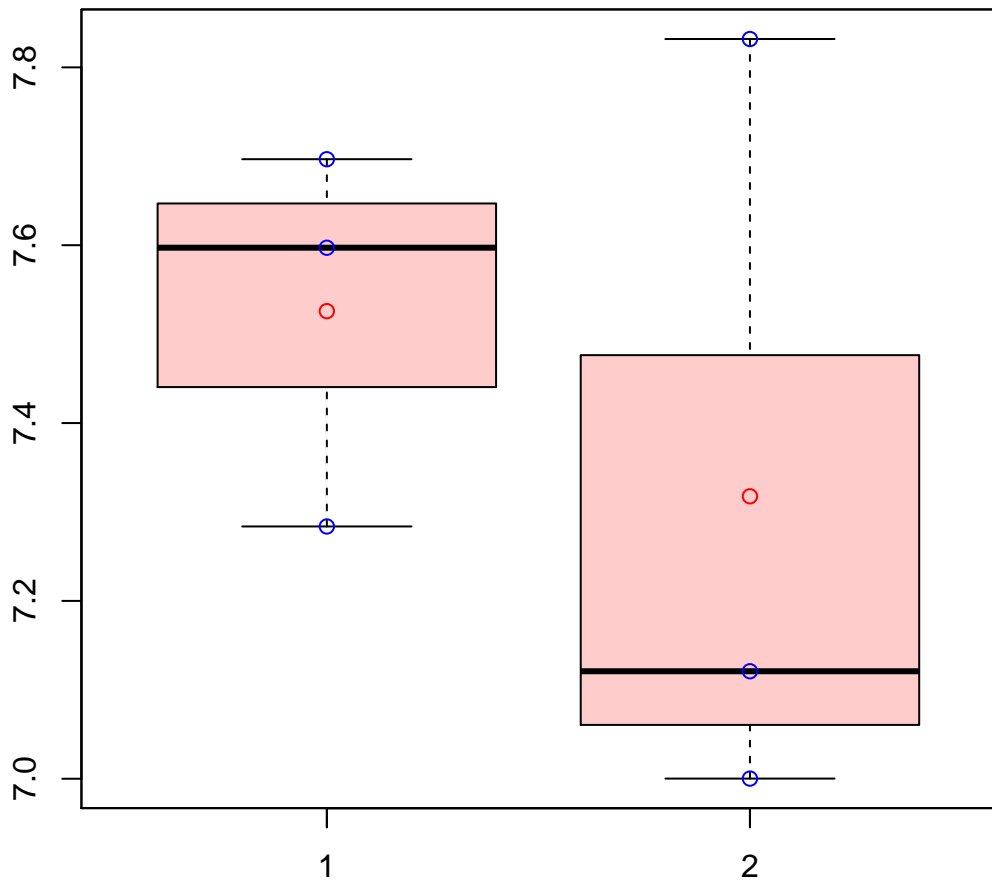

t-Test: p-value = 0.52

# K3Y249|K3Y249\_SETIT

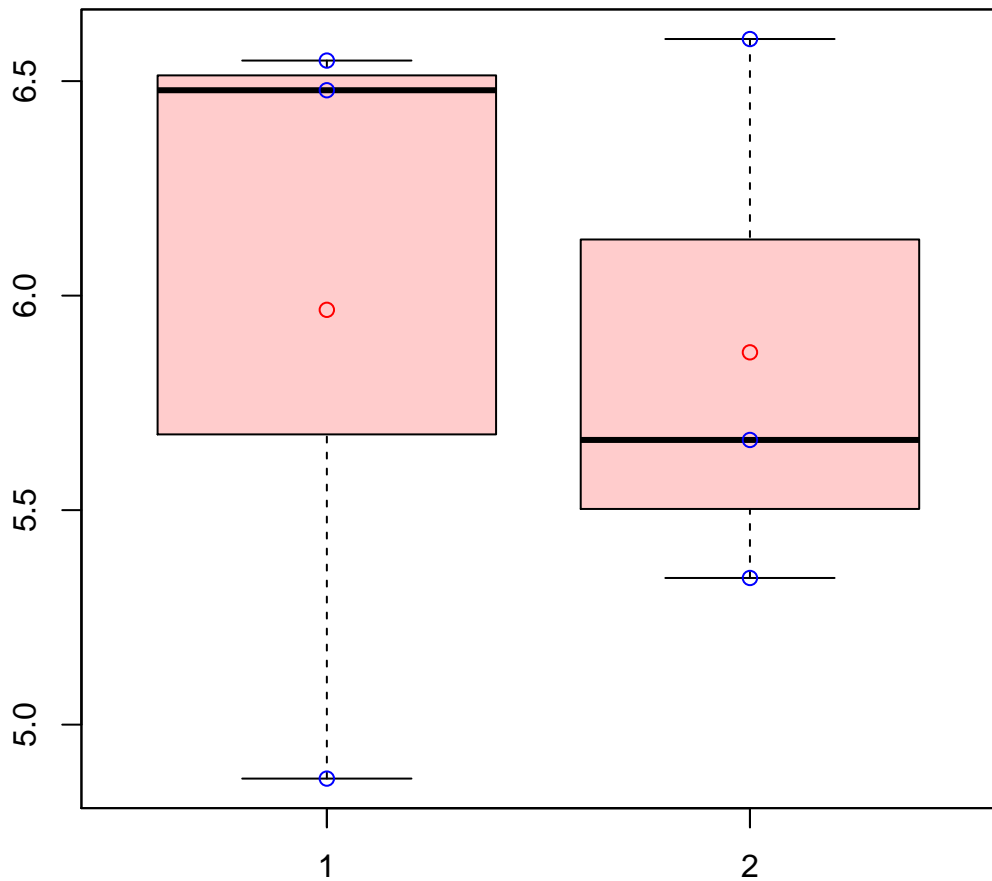

t-Test: p-value = 0.89



# K3Y2F6|K3Y2F6\_SETIT

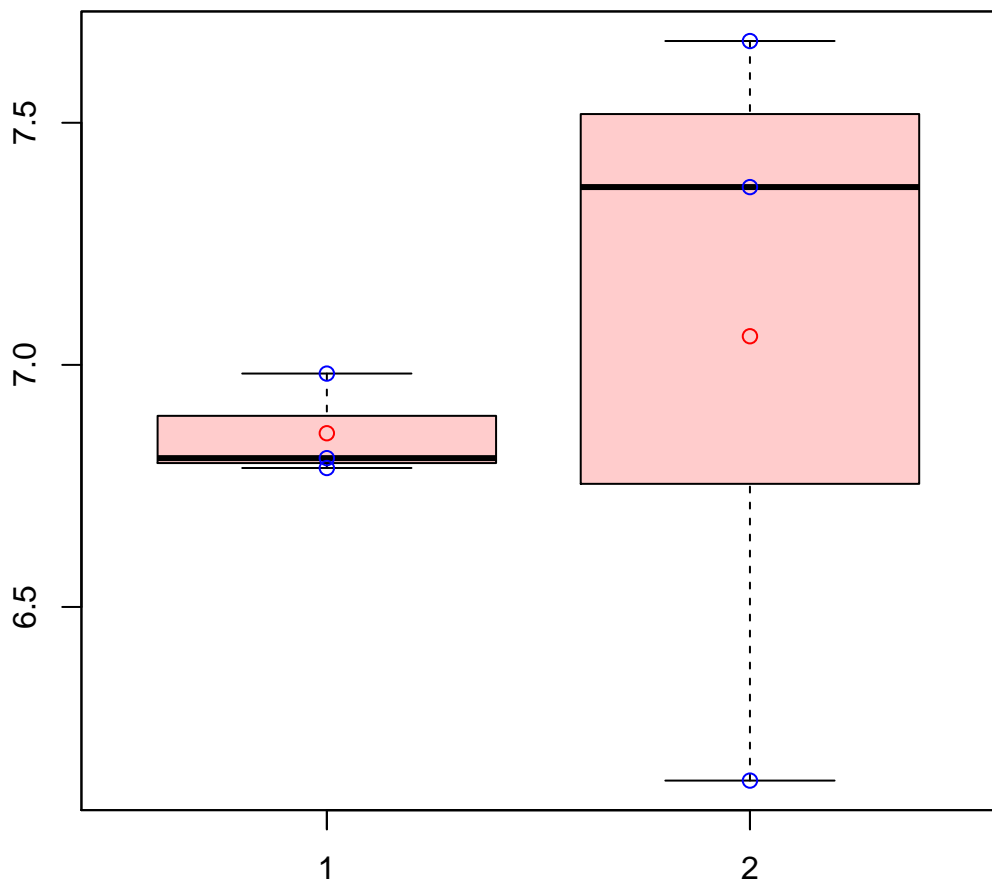

t-Test: p-value = 0.71

# K3Y2G0|K3Y2G0\_SETIT

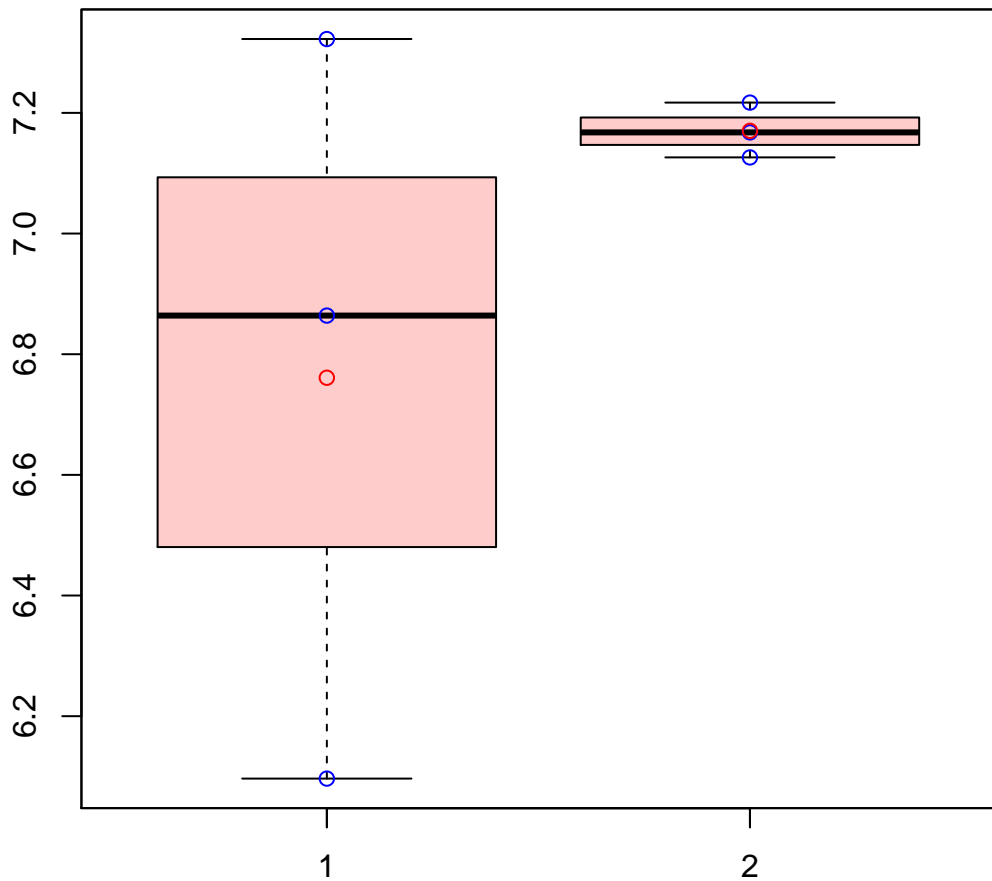

t-Test: p-value = 0.37

# K3Y3N4|K3Y3N4\_SETIT

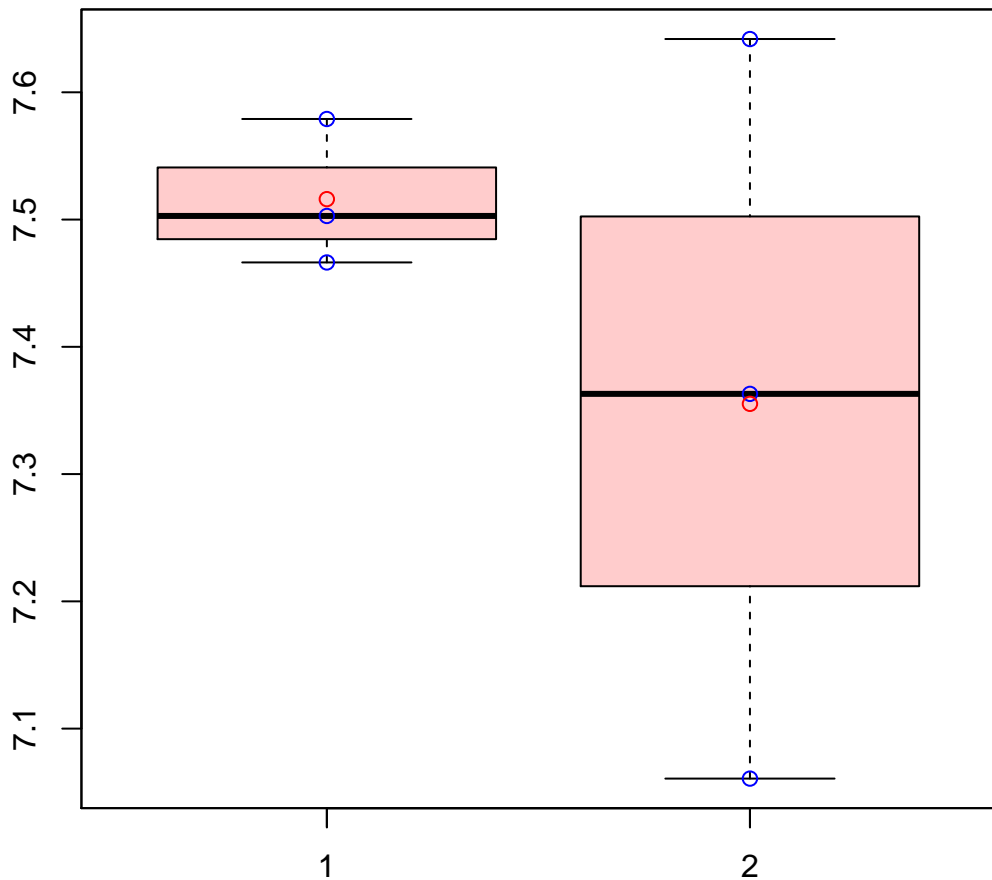

t-Test: p-value = 0.44

# K3Y4N3|K3Y4N3\_SETIT

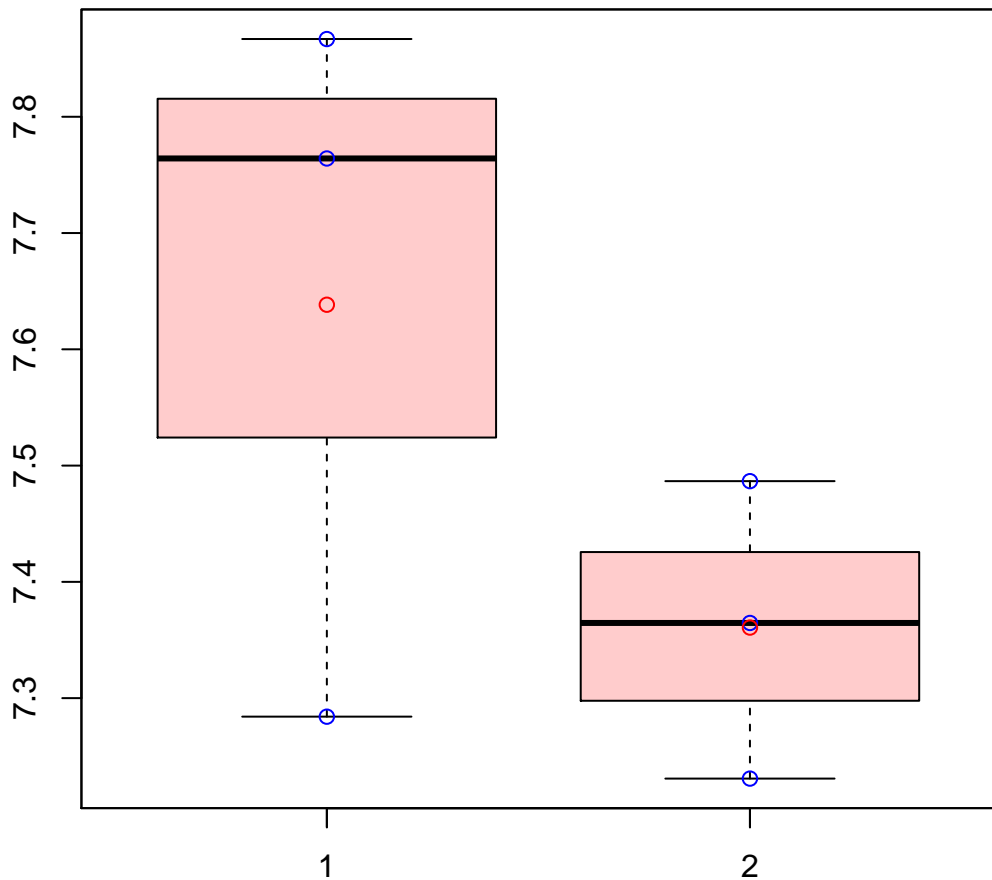

t-Test: p-value = 0.26

# K3Y4U1|K3Y4U1\_SETIT

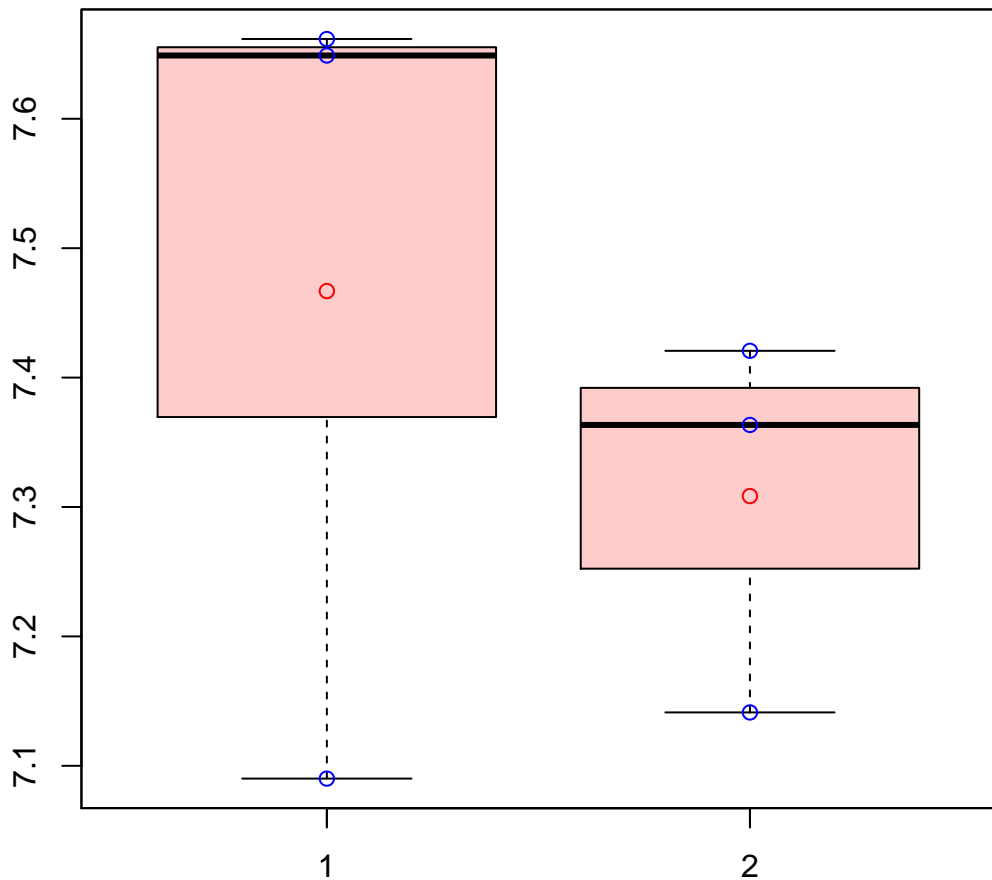

t-Test: p-value = 0.5

# K3Y4Z5|K3Y4Z5\_SETIT

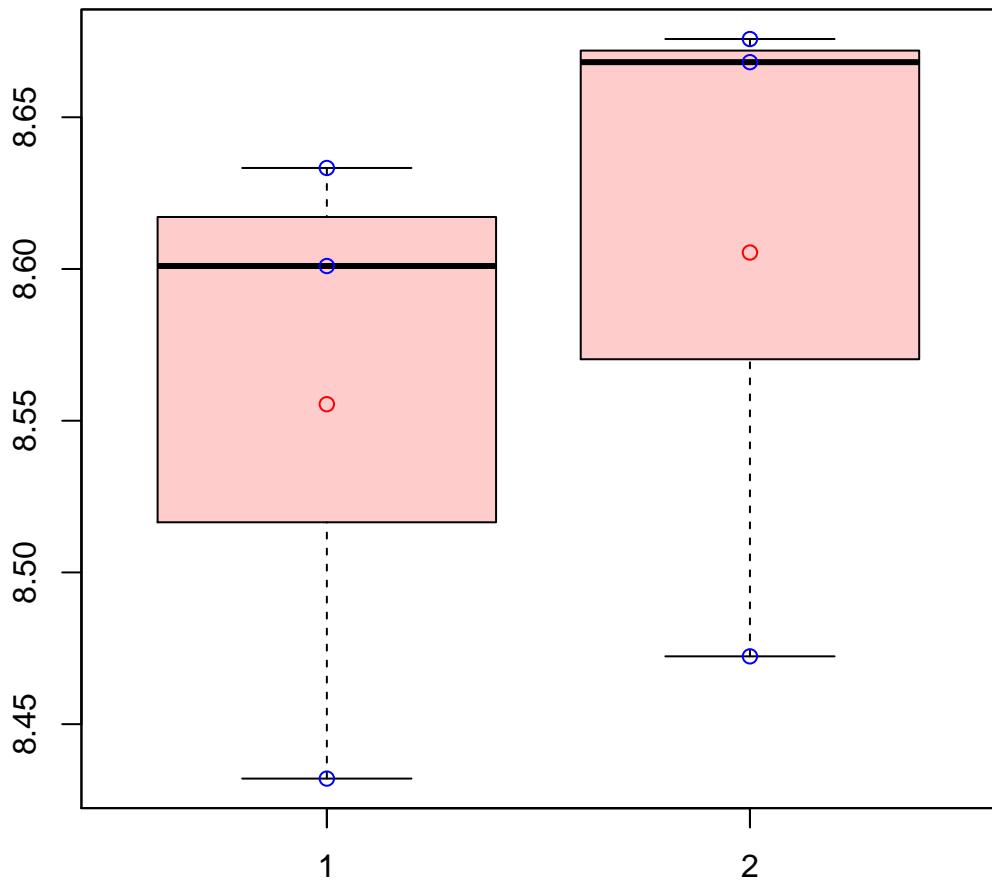

t-Test: p-value = 0.61

# K3Y4Z7|K3Y4Z7\_SETIT

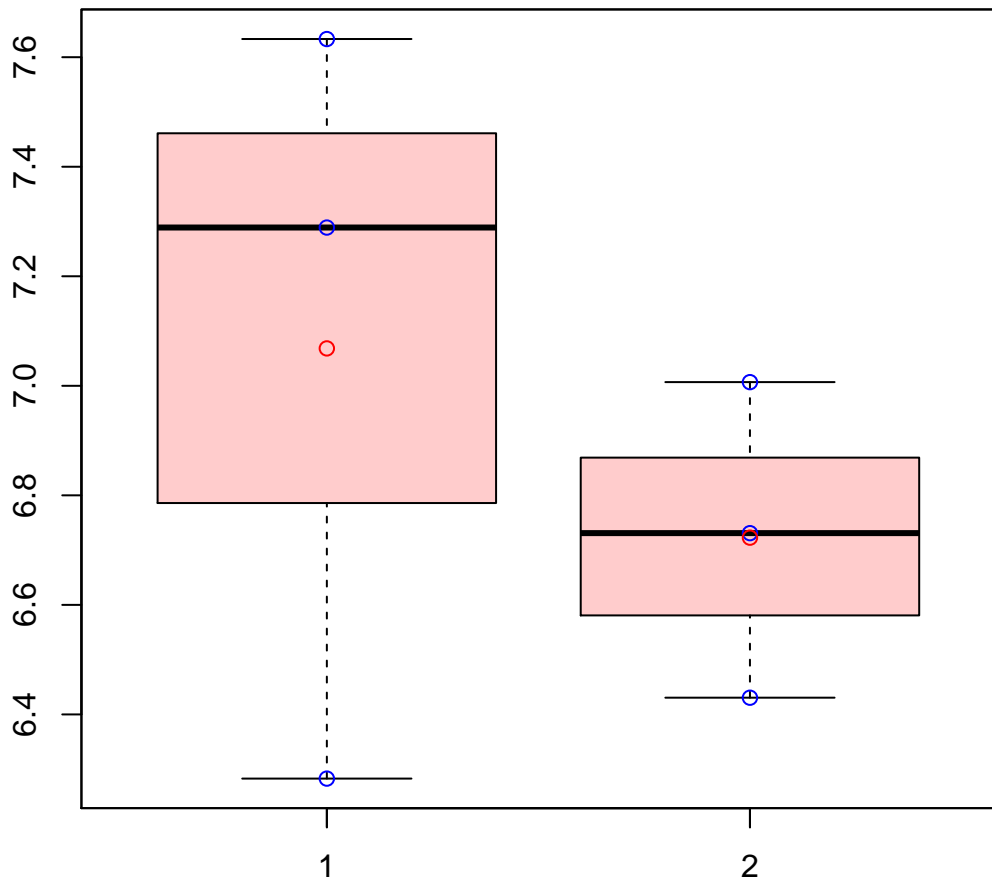

t-Test: p-value = 0.49

# K3Y518|K3Y518\_SETIT

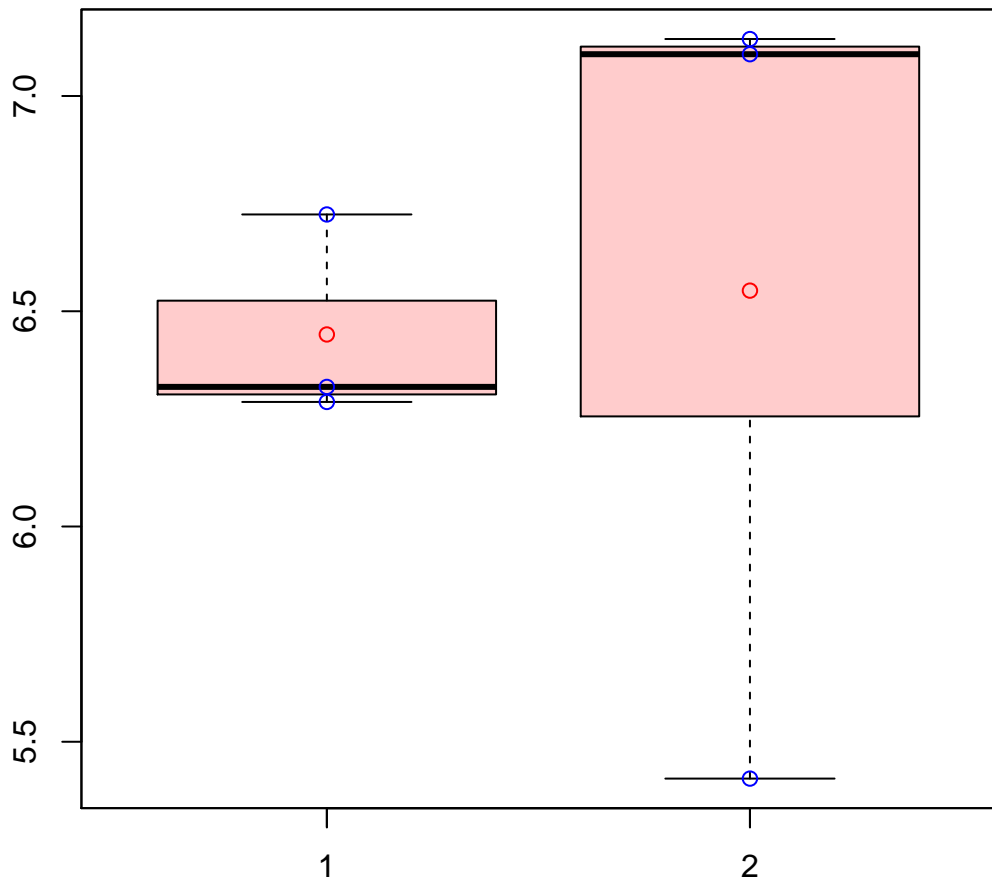

t-Test: p-value = 0.88



# K3Y569|K3Y569\_SETIT

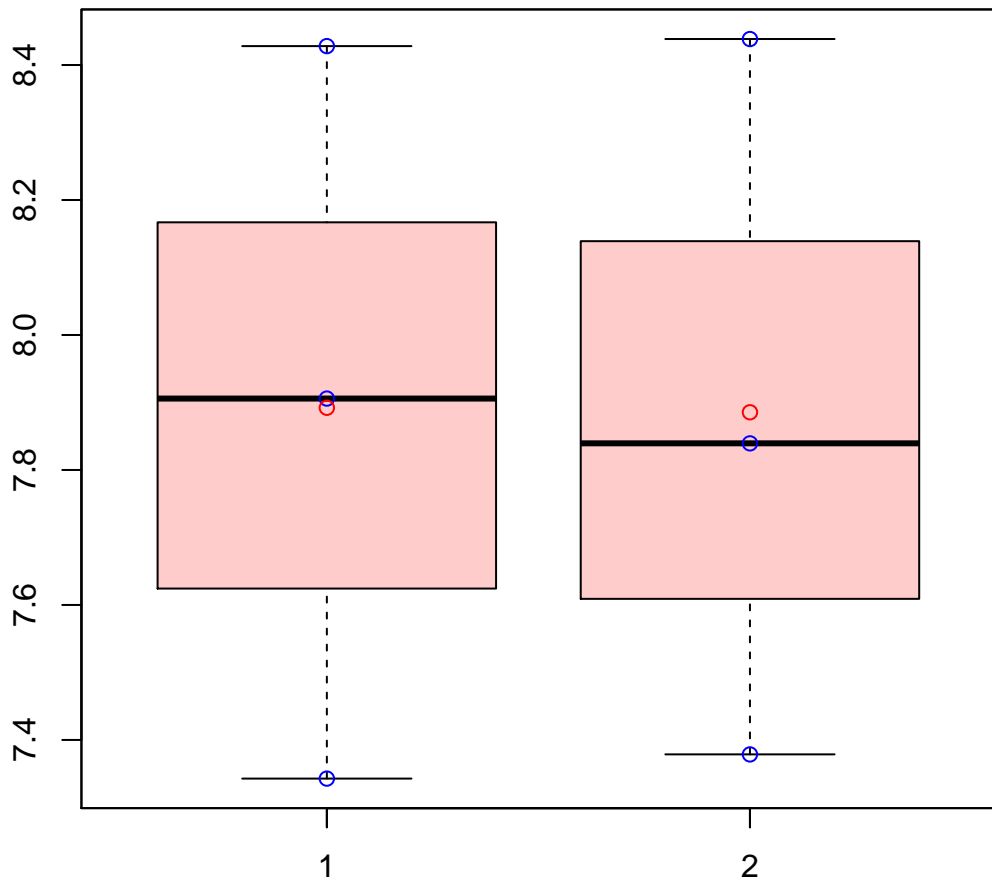

t-Test: p-value = 0.99

# K3Y598|K3Y598\_SETIT

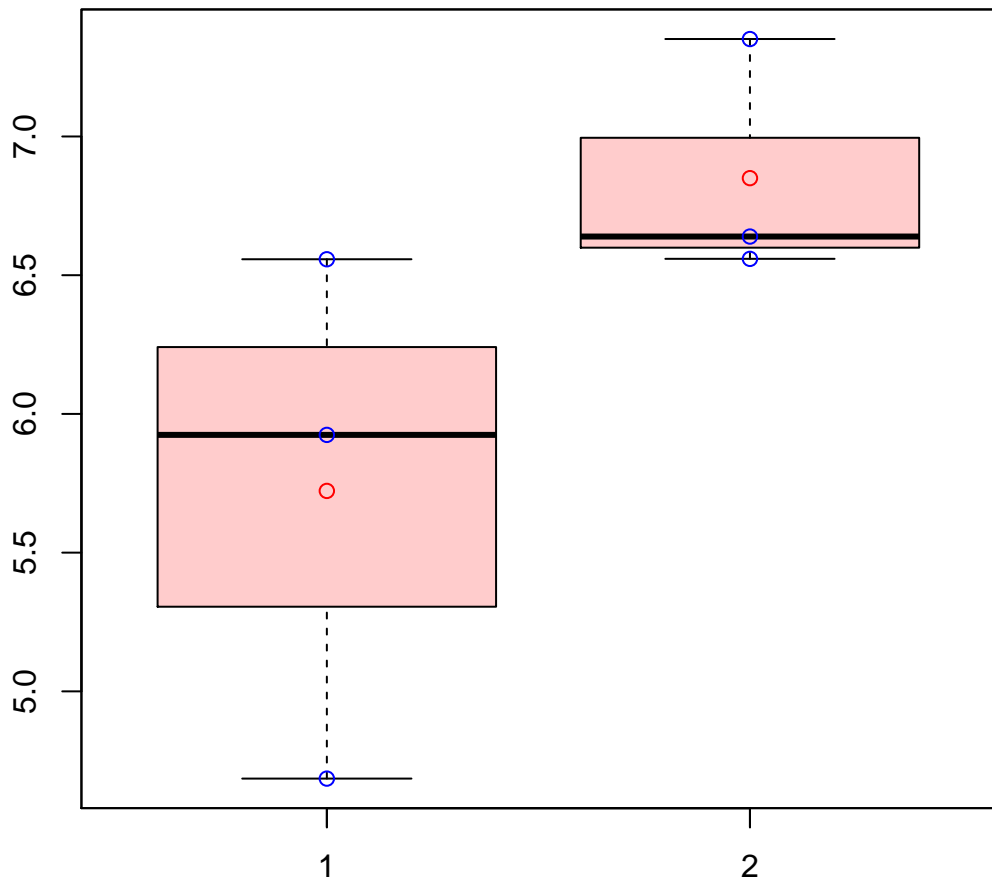

t-Test: p-value = 0.17

# K3Y5A6|K3Y5A6\_SETIT

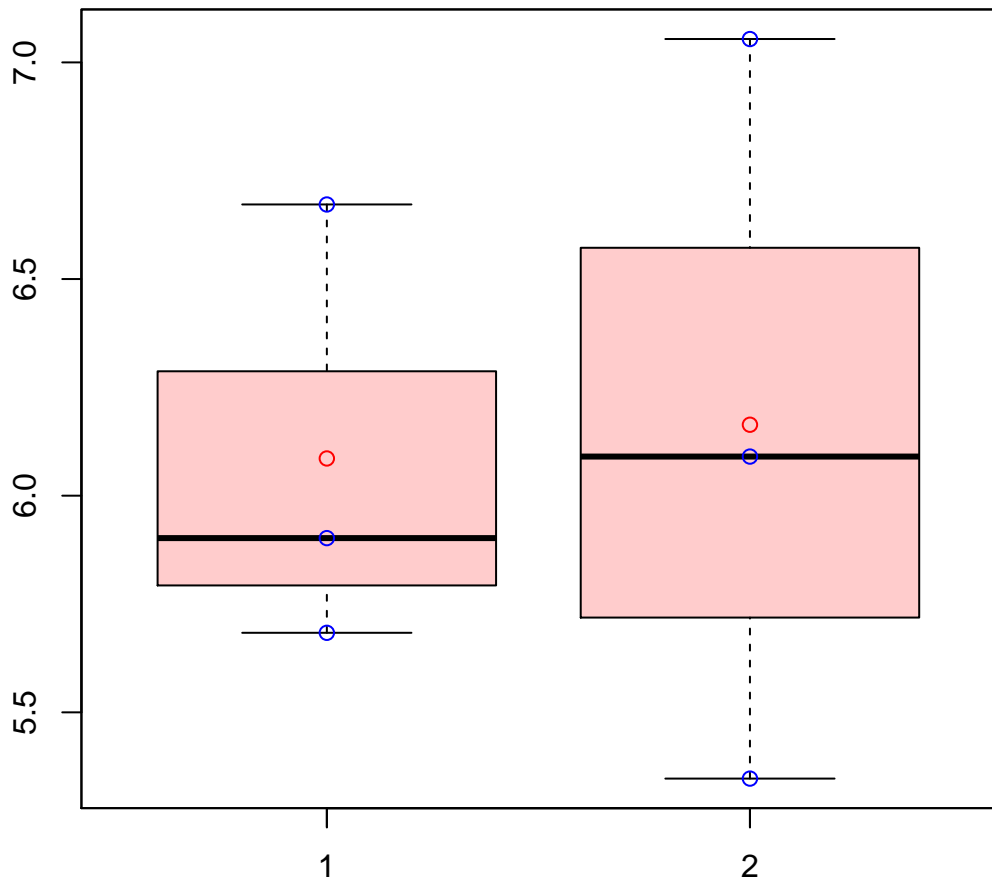

t-Test: p-value = 0.9

# K3Y5B2|K3Y5B2\_SETIT

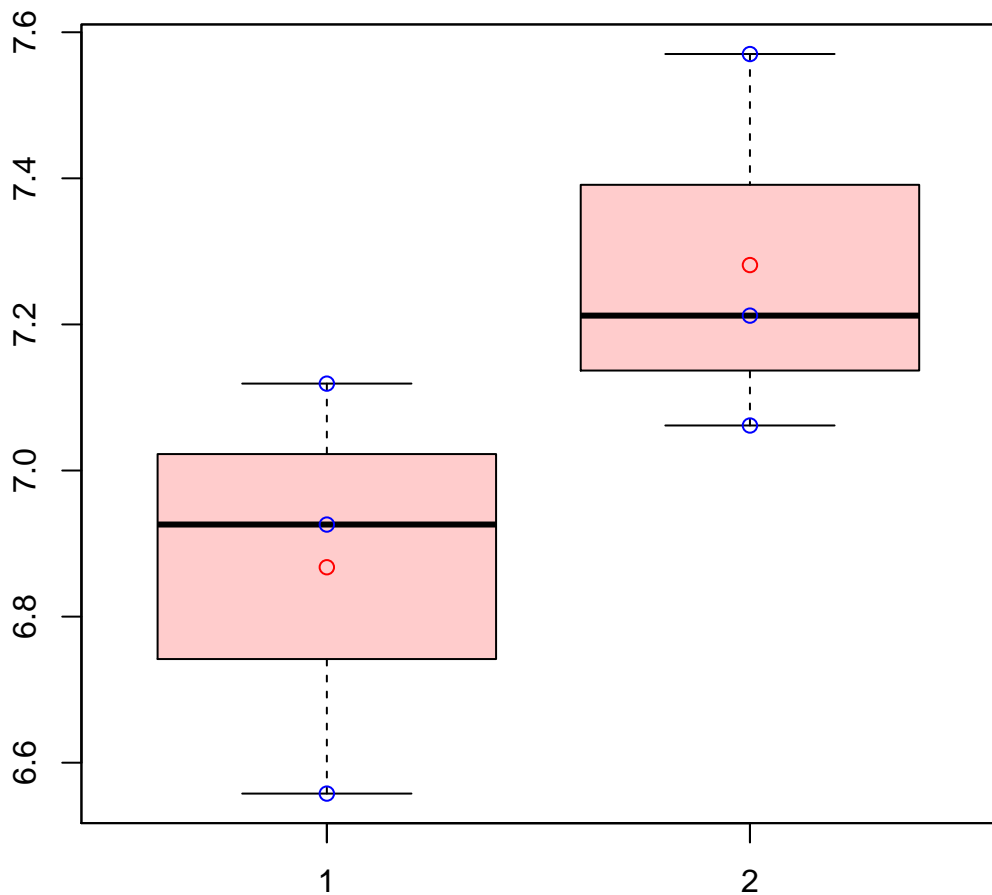

t-Test: p-value = 0.14

# K3Y5D4|K3Y5D4\_SETIT

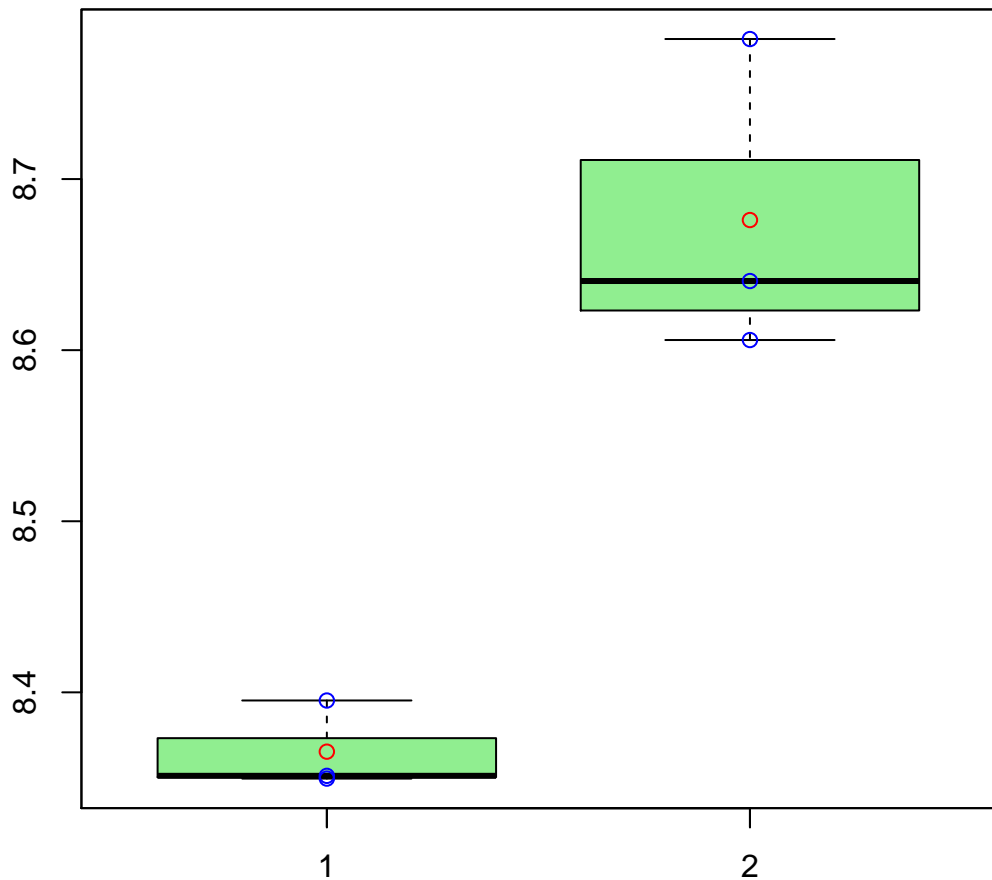

t-Test: p-value = 0.02

# K3Y5R7|K3Y5R7\_SETIT

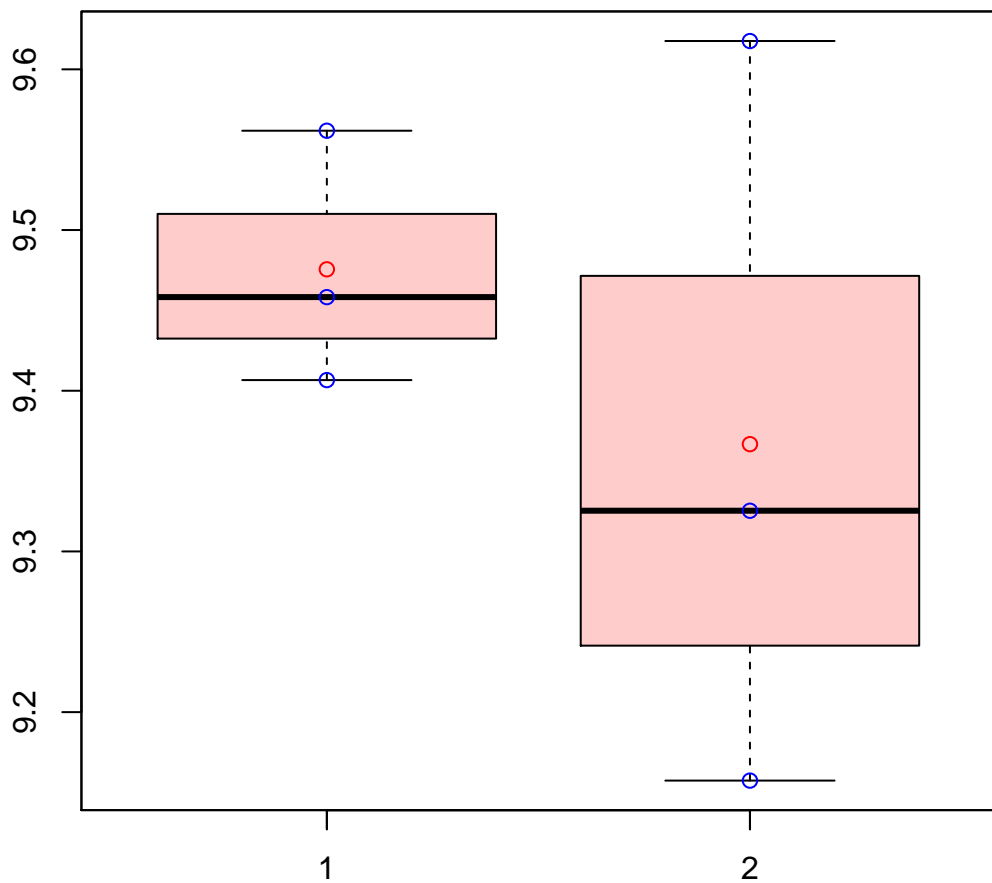

t-Test: p-value = 0.51

# K3Y6A9|K3Y6A9\_SETIT

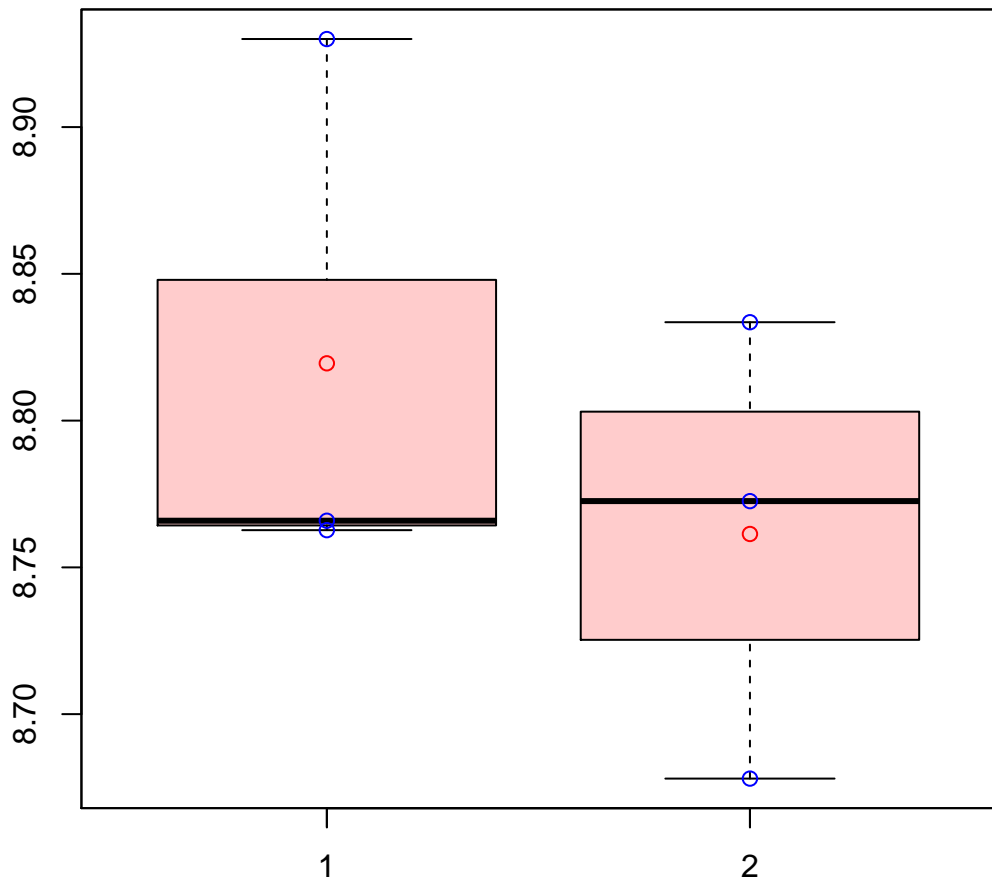

t-Test: p-value = 0.46

# K3Y6H7|K3Y6H7\_SETIT

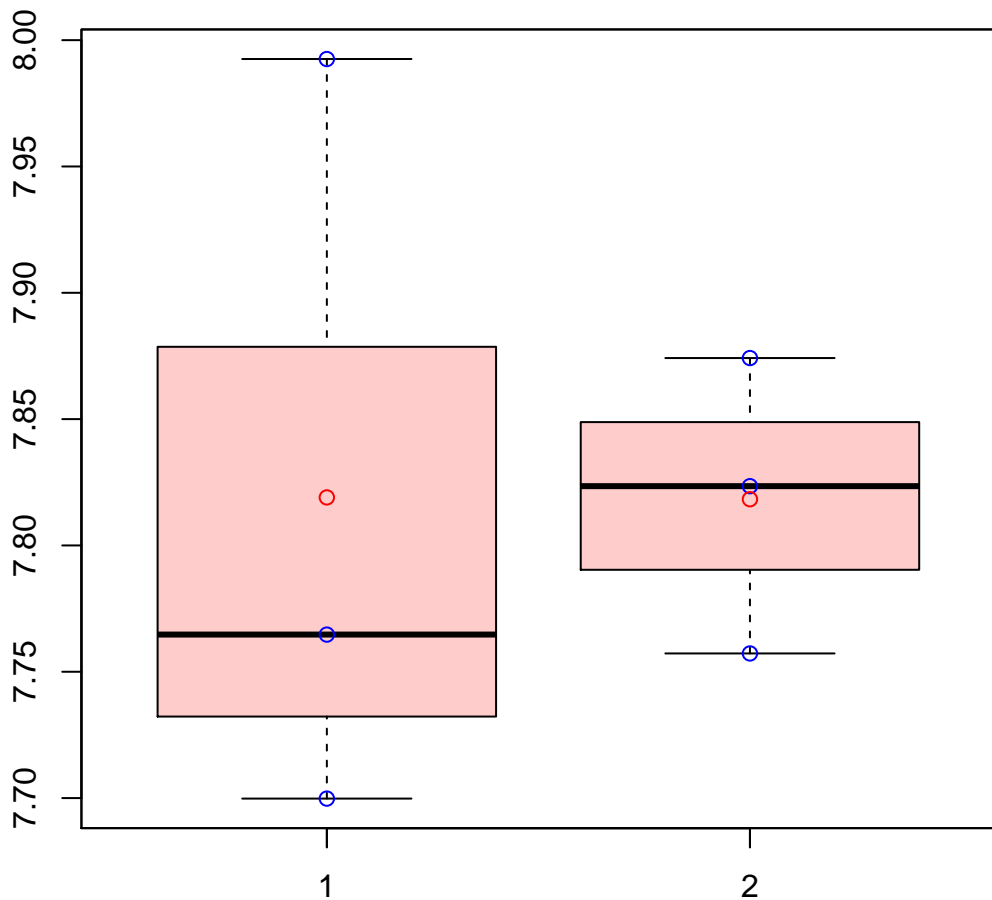

t-Test: p-value = 0.99



# K3Y6Q3|K3Y6Q3\_SETIT

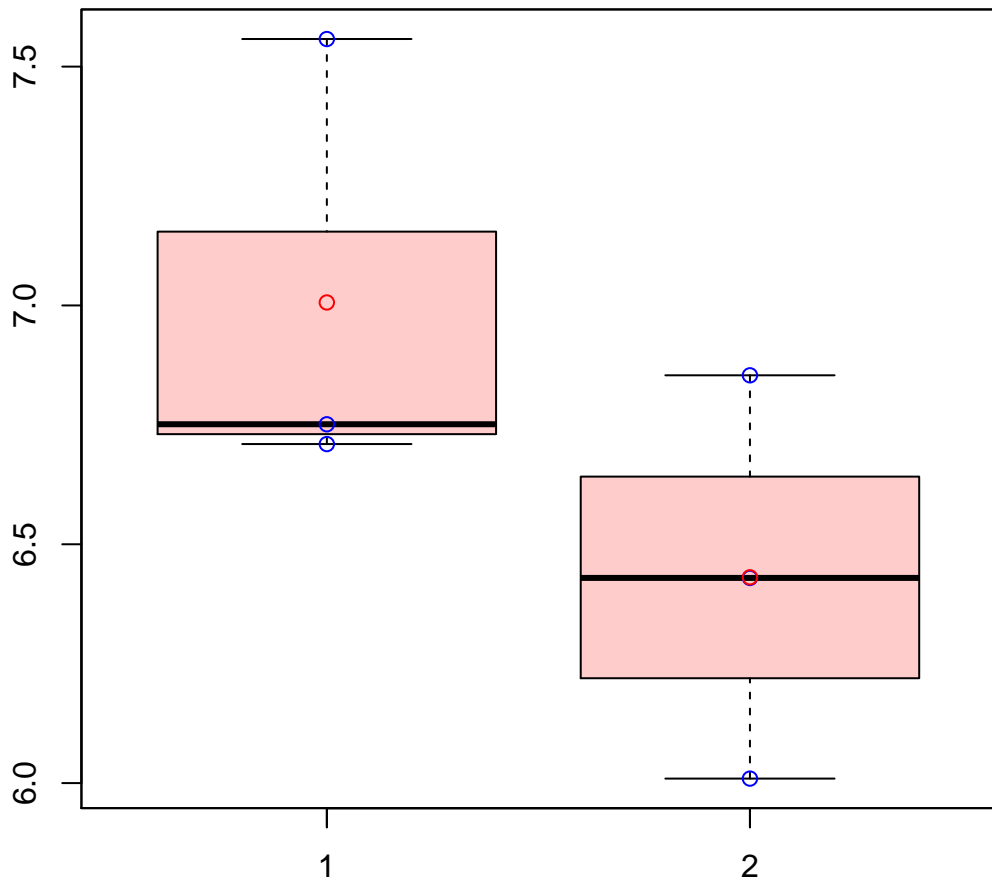

t-Test: p-value = 0.19

# K3Y6S4|K3Y6S4\_SETIT

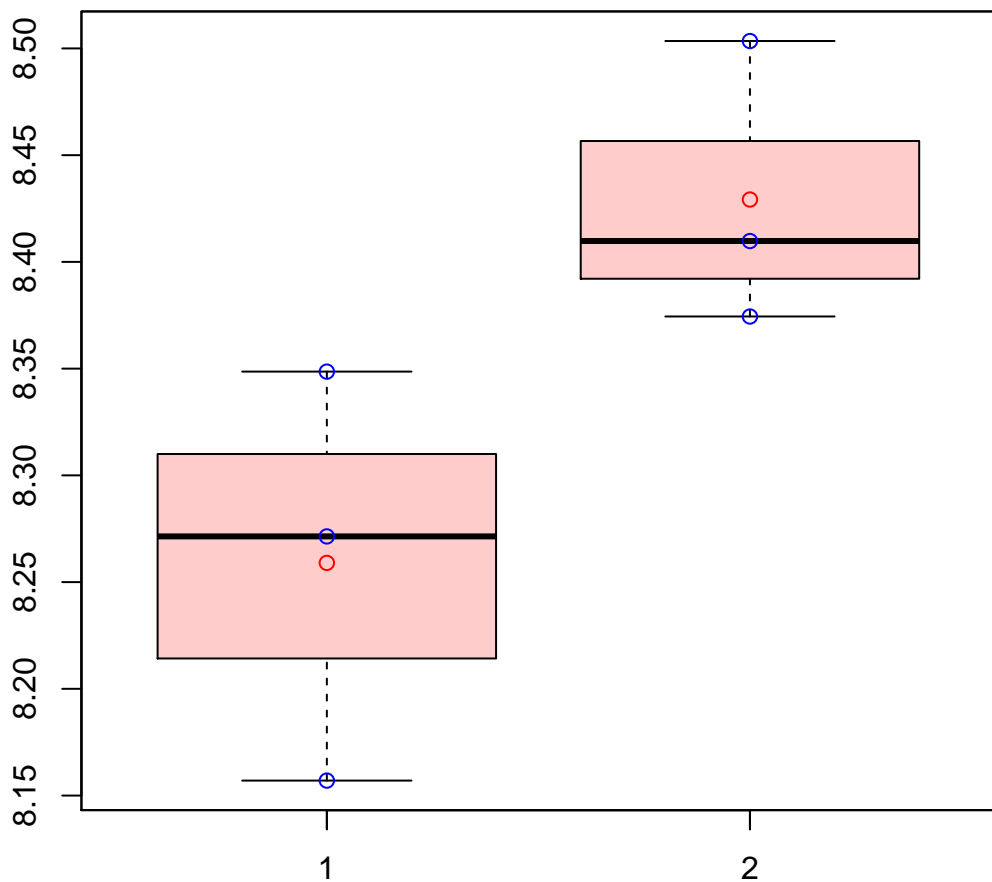

t-Test: p-value = 0.07

# K3Y6V4|K3Y6V4\_SETIT

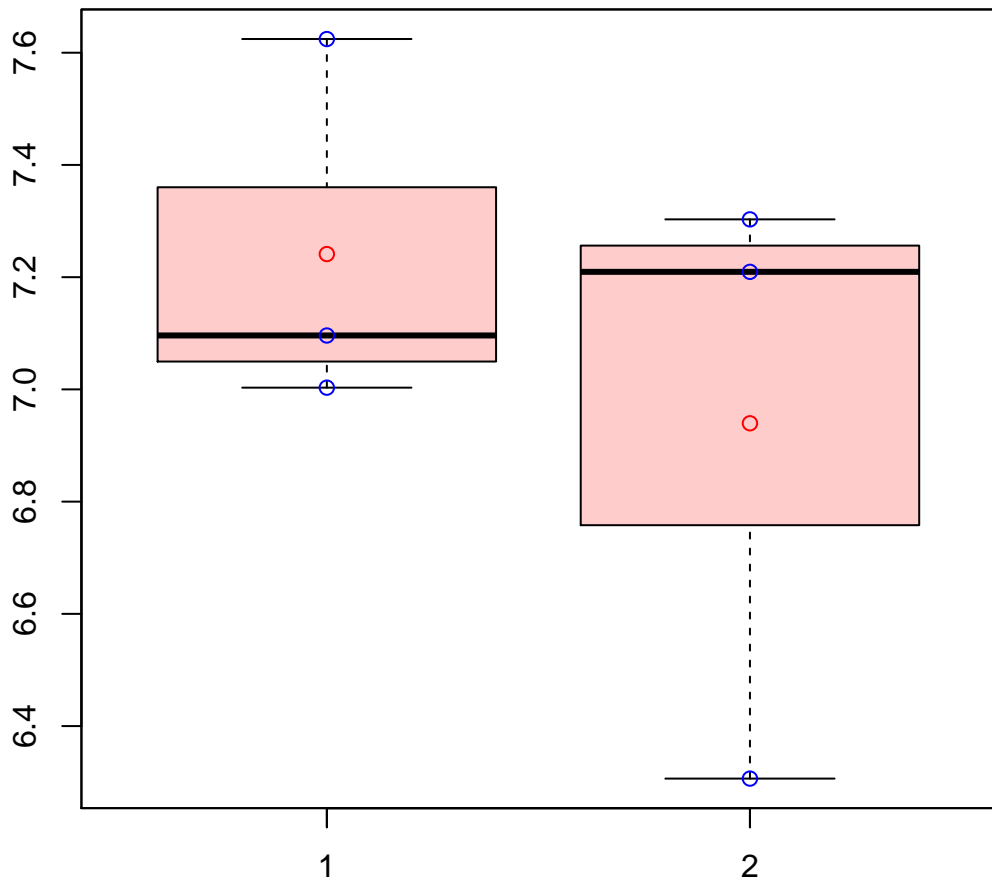

t-Test: p-value = 0.47

# K3Y6V9|K3Y6V9\_SETIT

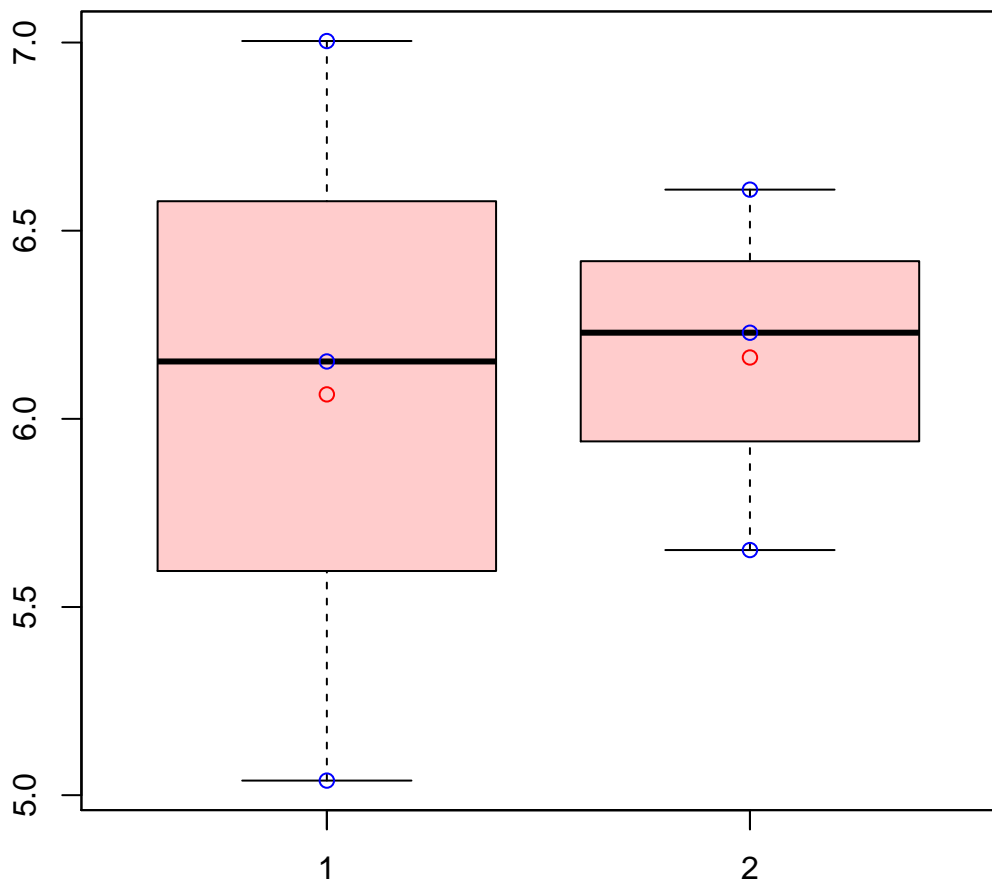

t-Test: p-value = 0.89

# K3Y757|K3Y757\_SETIT

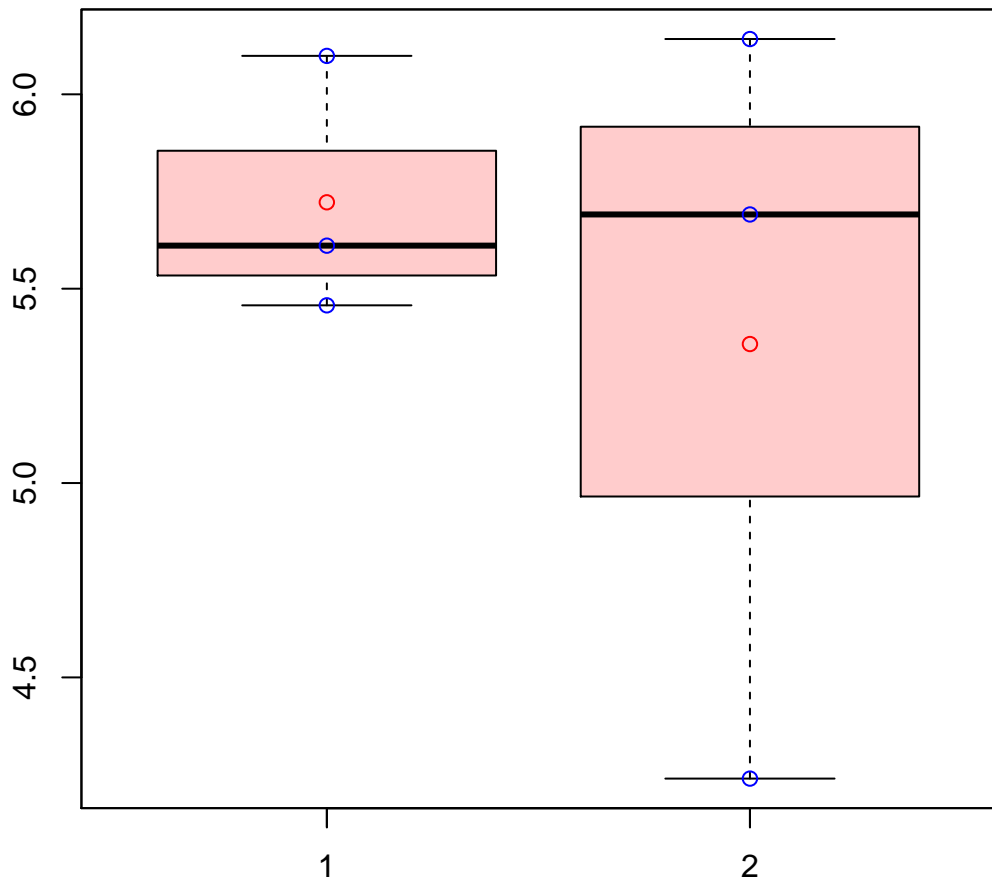

t-Test: p-value = 0.6

# K3Y7D2|K3Y7D2\_SETIT

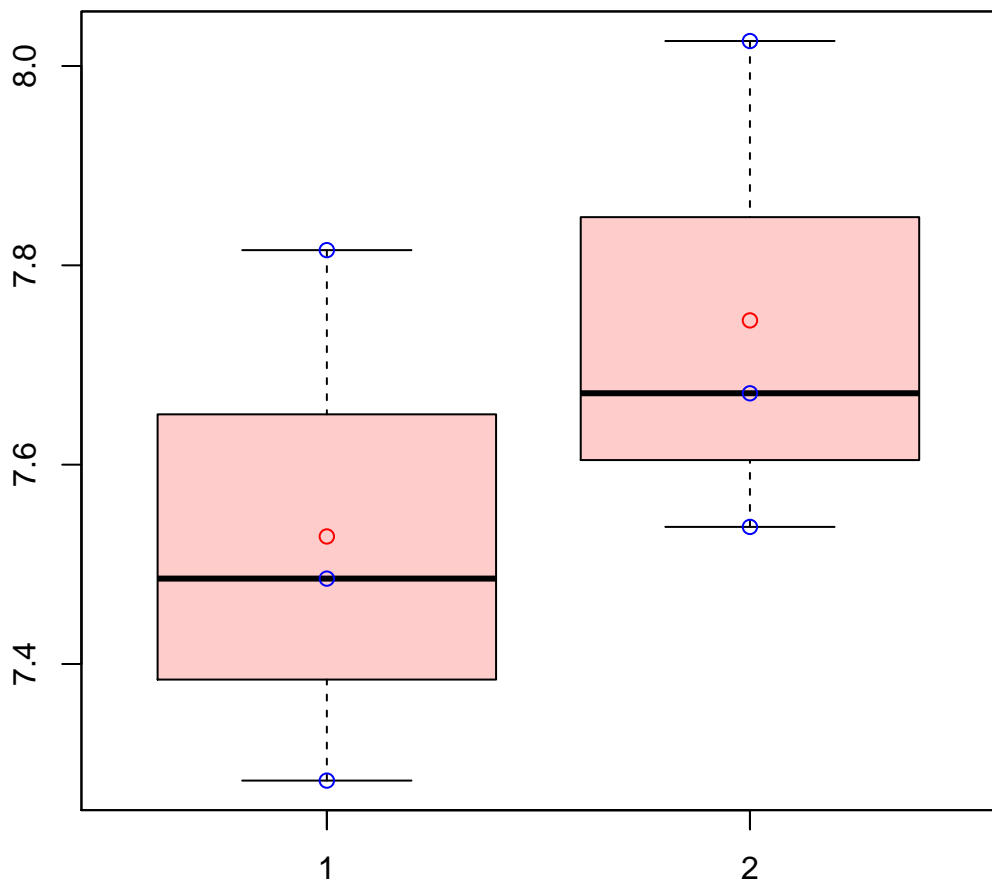

t-Test: p-value = 0.37

# K3Y7D3|K3Y7D3\_SETIT

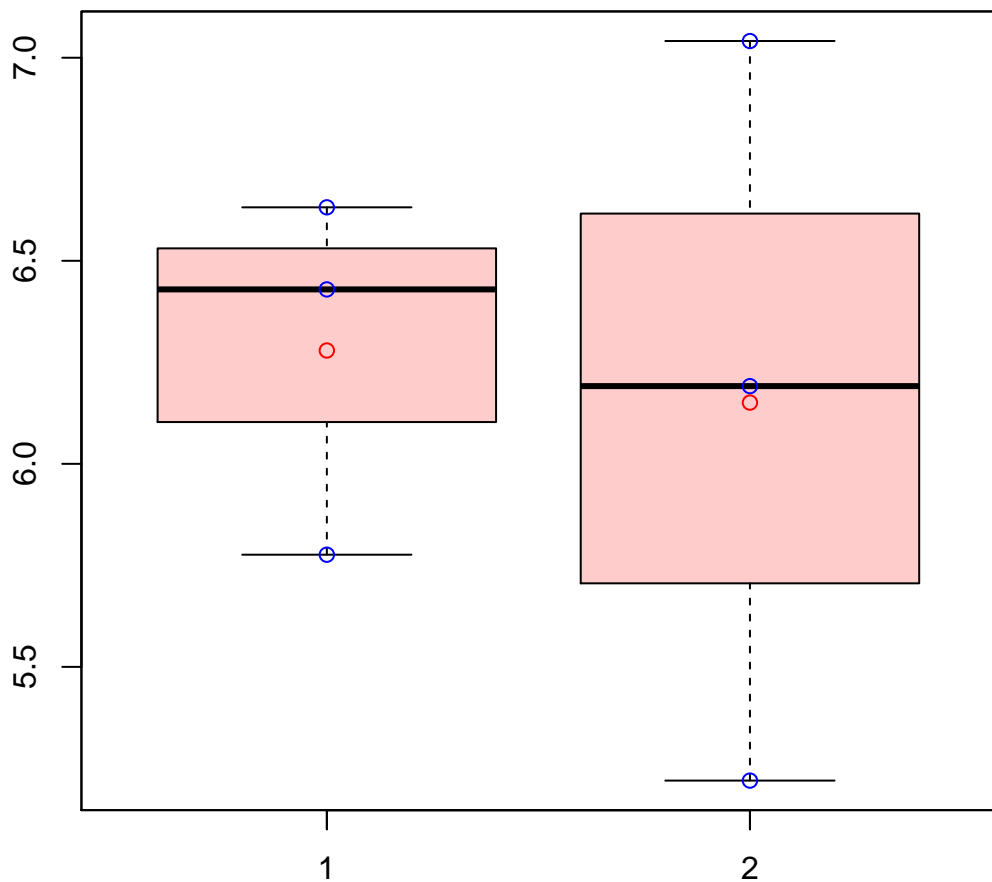

t-Test: p-value = 0.84

# K3Y7M0|K3Y7M0\_SETIT

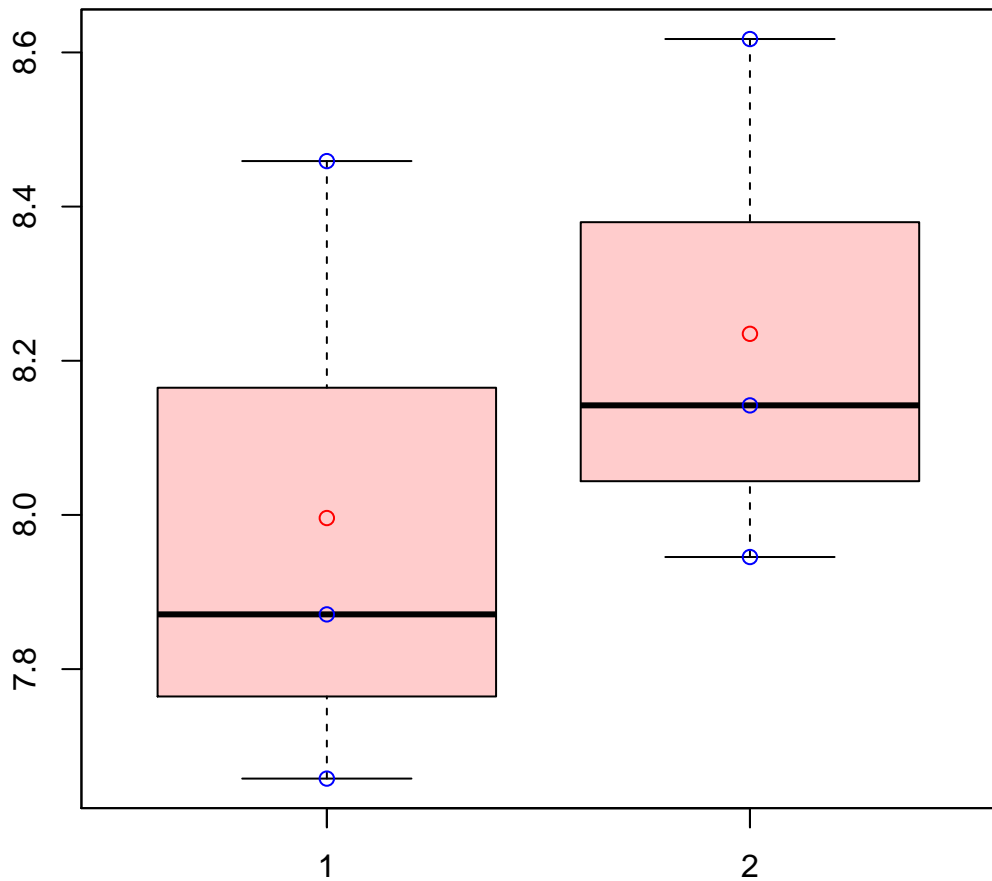

t-Test: p-value = 0.49



# K3Y7N9|K3Y7N9\_SETIT

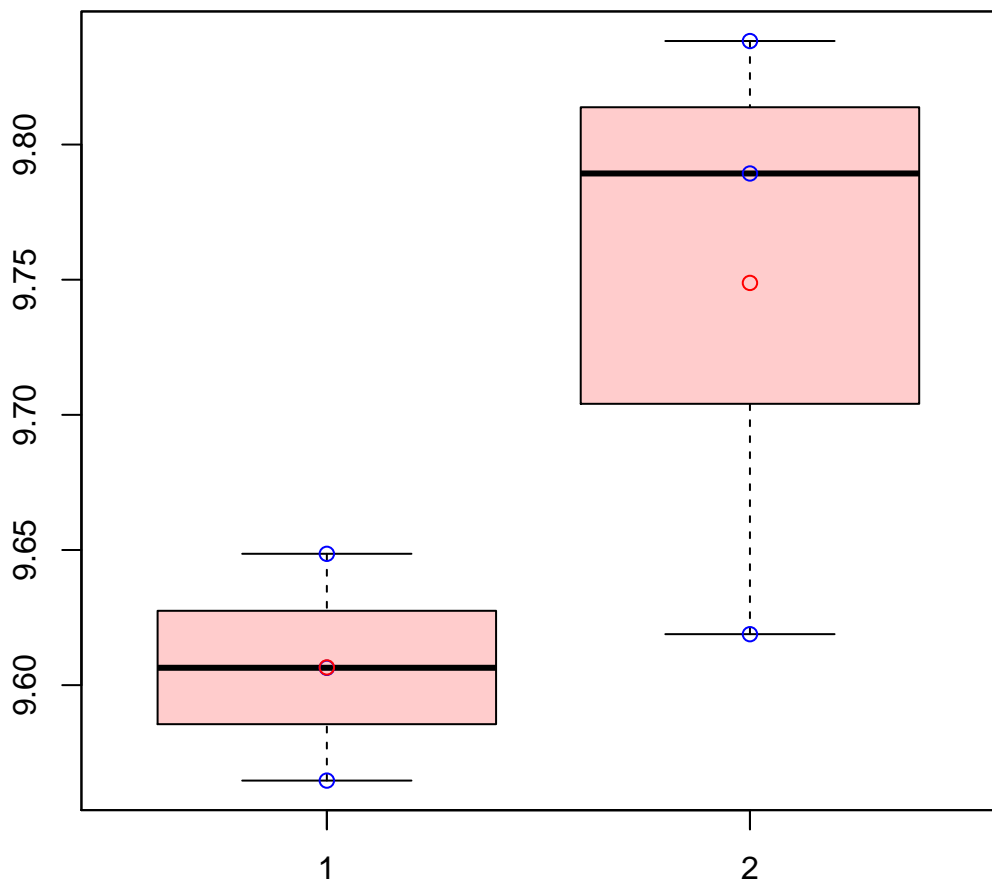

t-Test: p-value = 0.16

# K3Y7S0|K3Y7S0\_SETIT

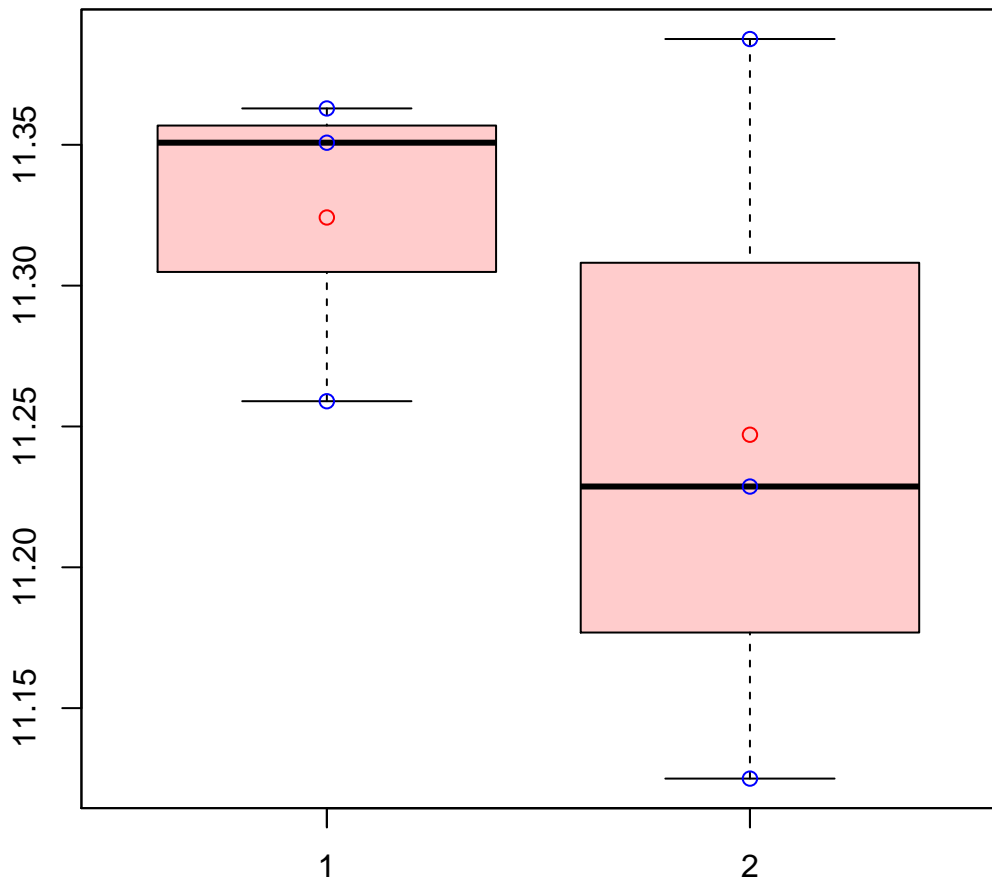

t-Test: p-value = 0.43

# K3Y7U6|K3Y7U6\_SETIT

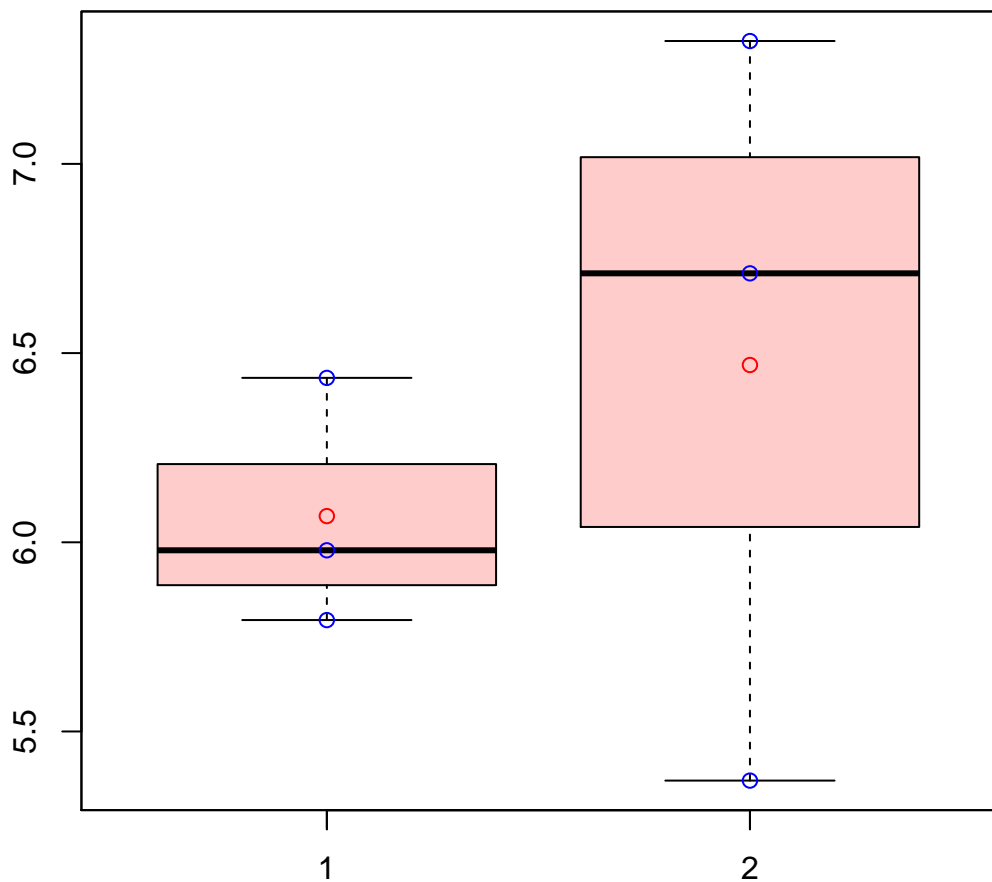

t-Test: p-value = 0.57

# K3Y7W6|K3Y7W6\_SETIT

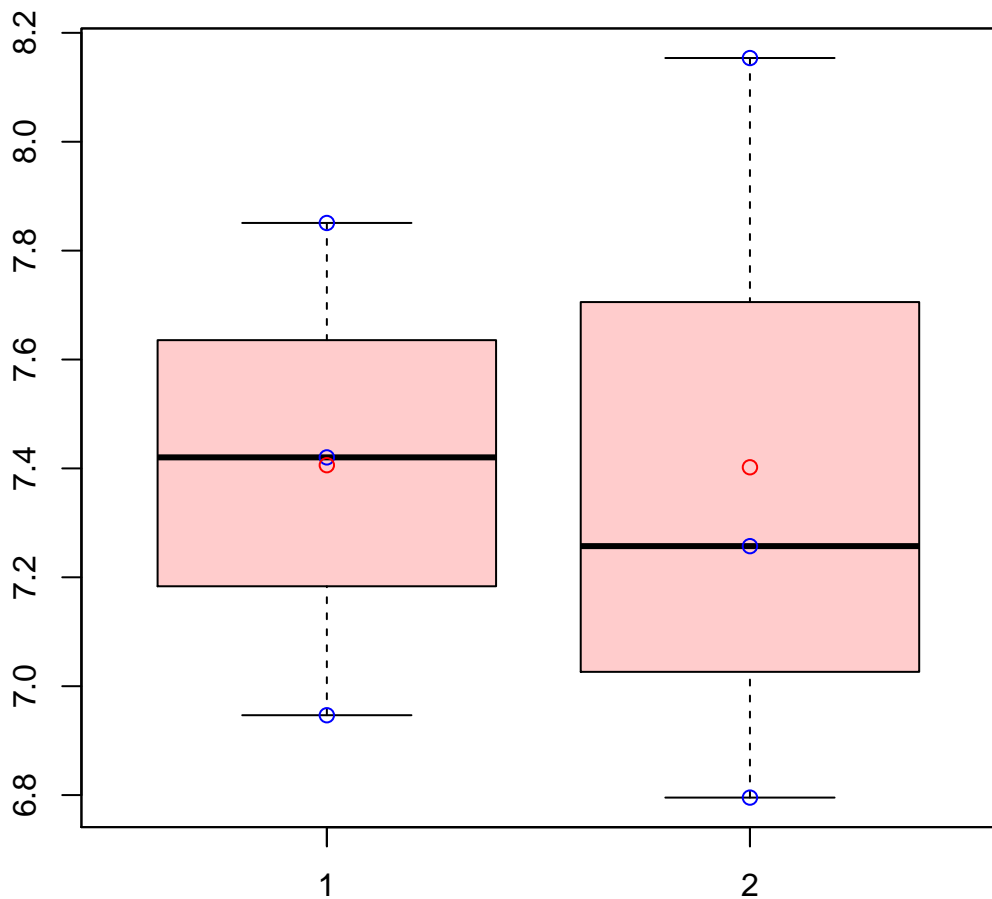

t-Test: p-value = 0.99

# K3Y7X1|K3Y7X1\_SETIT

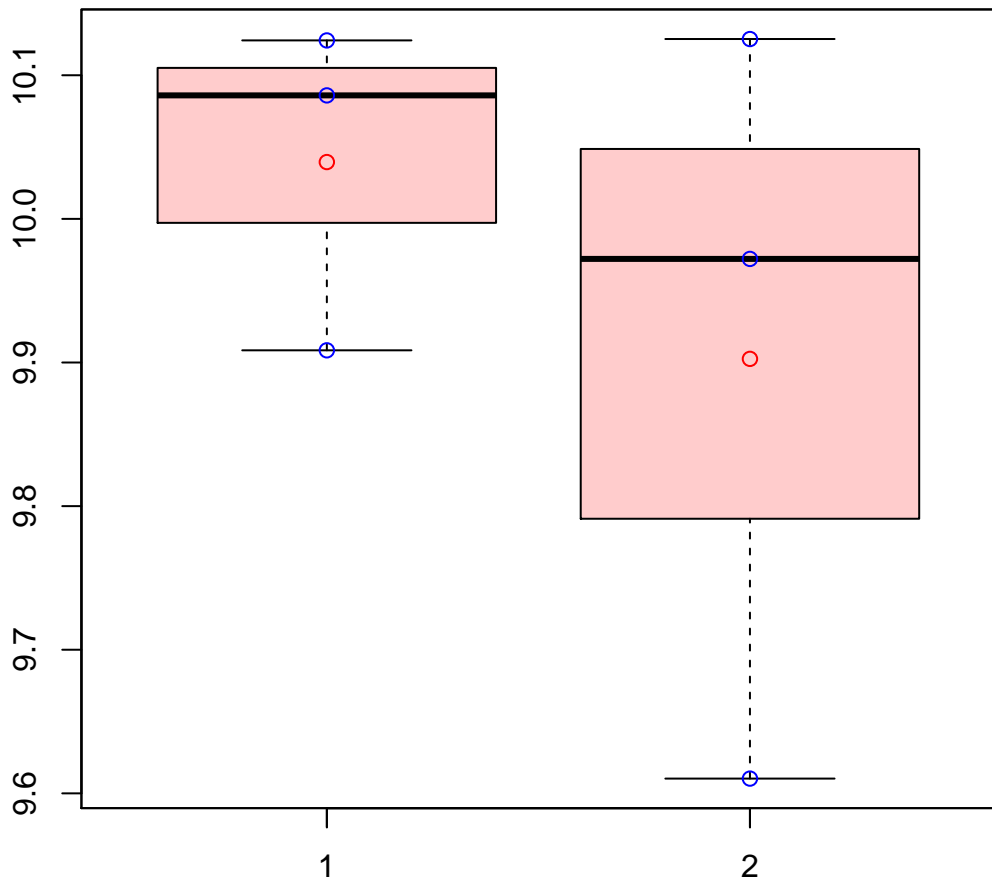

t-Test: p-value = 0.48

# K3Y887|K3Y887\_SETIT

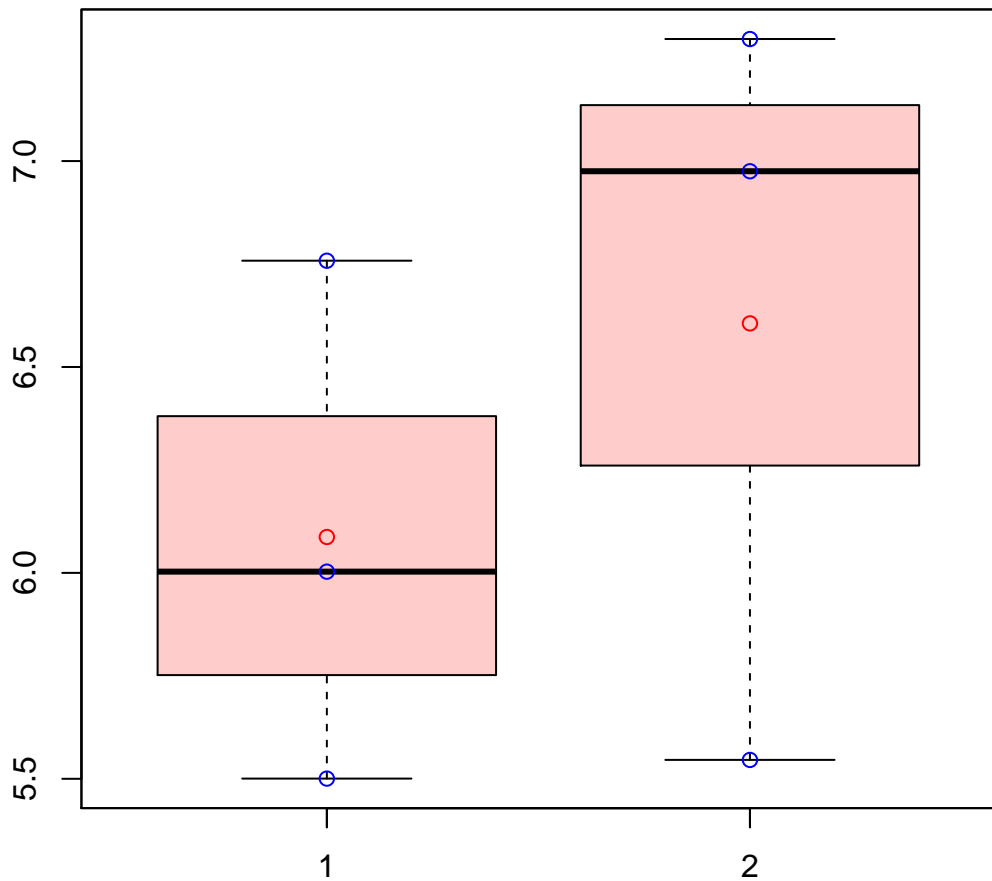

t-Test: p-value = 0.48

# K3Y8C6|K3Y8C6\_SETIT

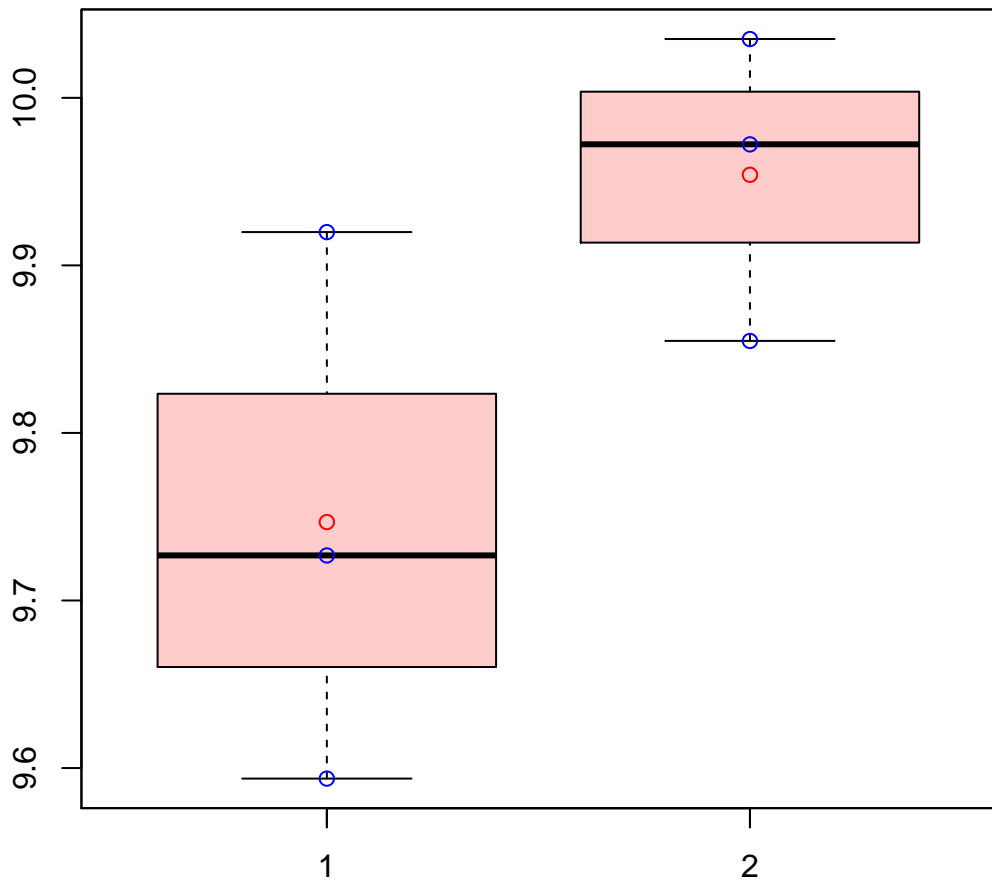

t-Test: p-value = 0.15

# K3Y8D6|K3Y8D6\_SETIT

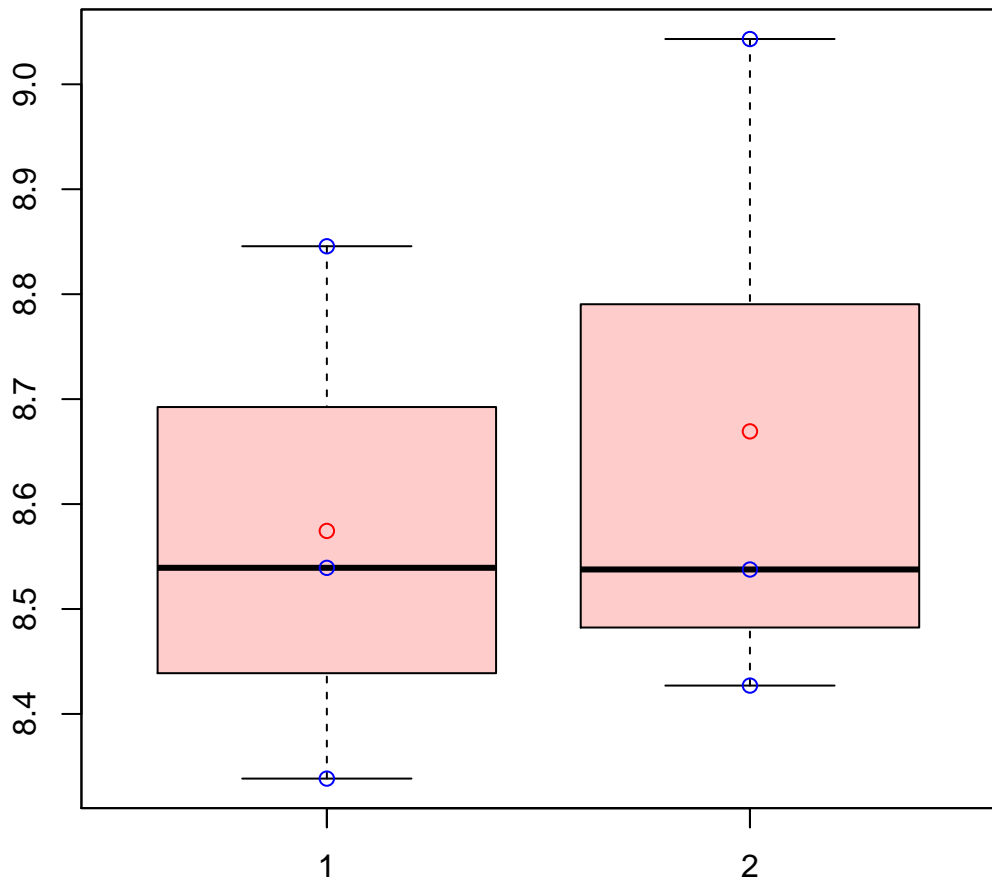

t-Test: p-value = 0.71



# K3Y9D3|K3Y9D3\_SETIT

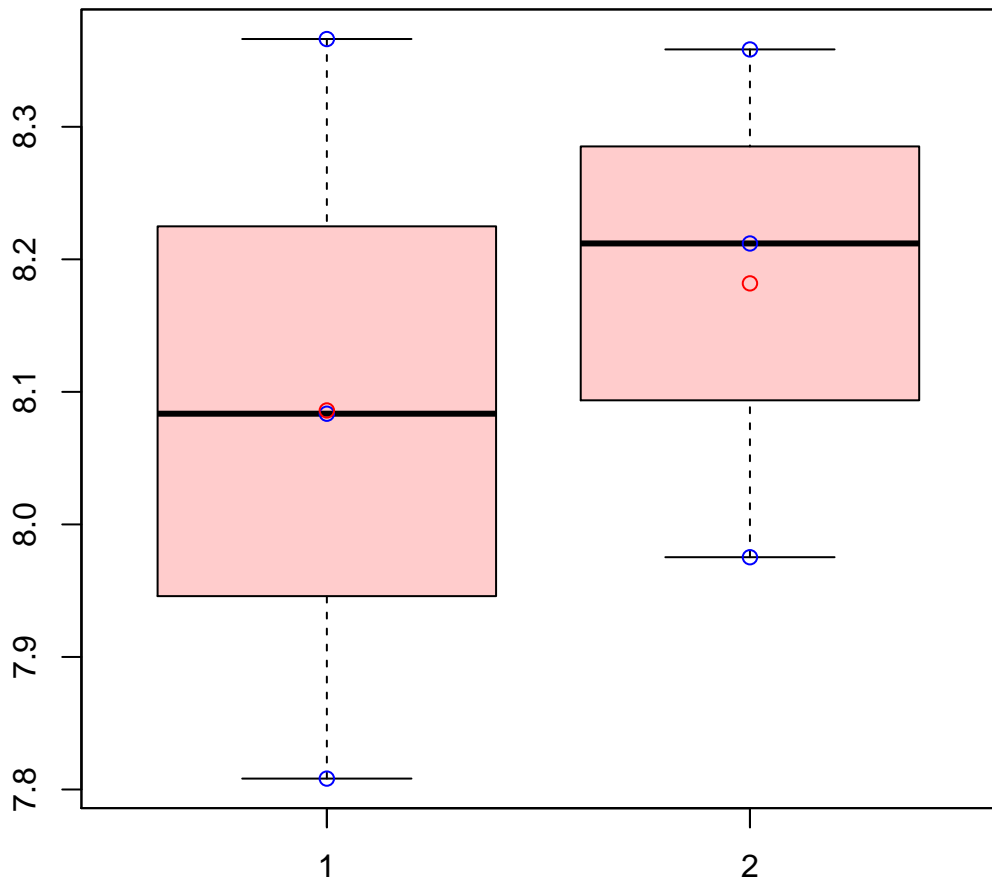

t-Test: p-value = 0.65

# K3Y9L1|K3Y9L1\_SETIT

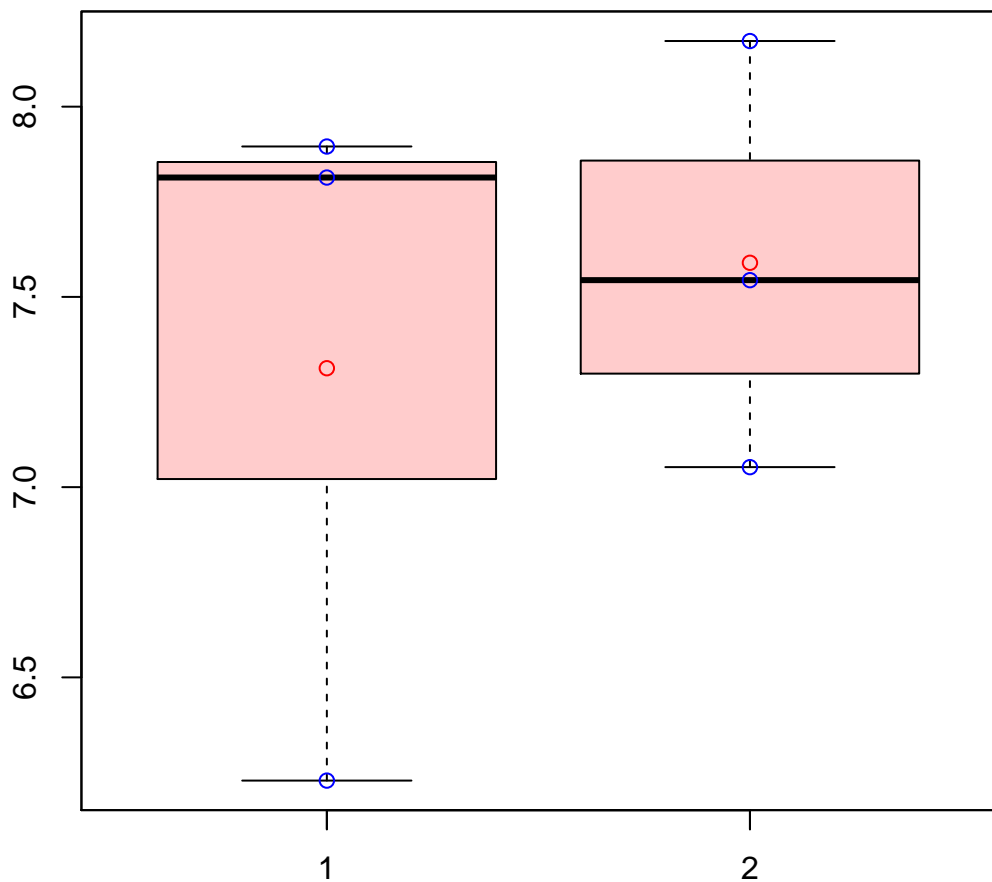

t-Test: p-value = 0.69

# K3Y9L3|K3Y9L3\_SETIT

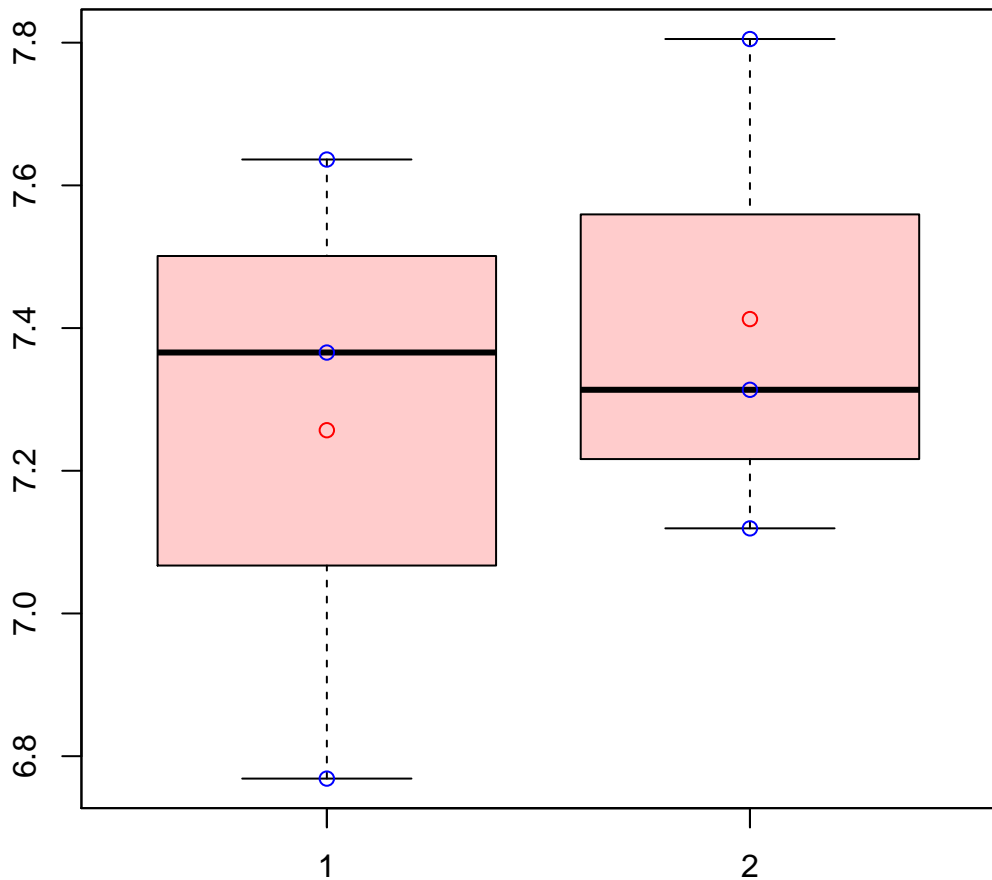

t-Test: p-value = 0.66

# K3Y9R7|K3Y9R7\_SETIT

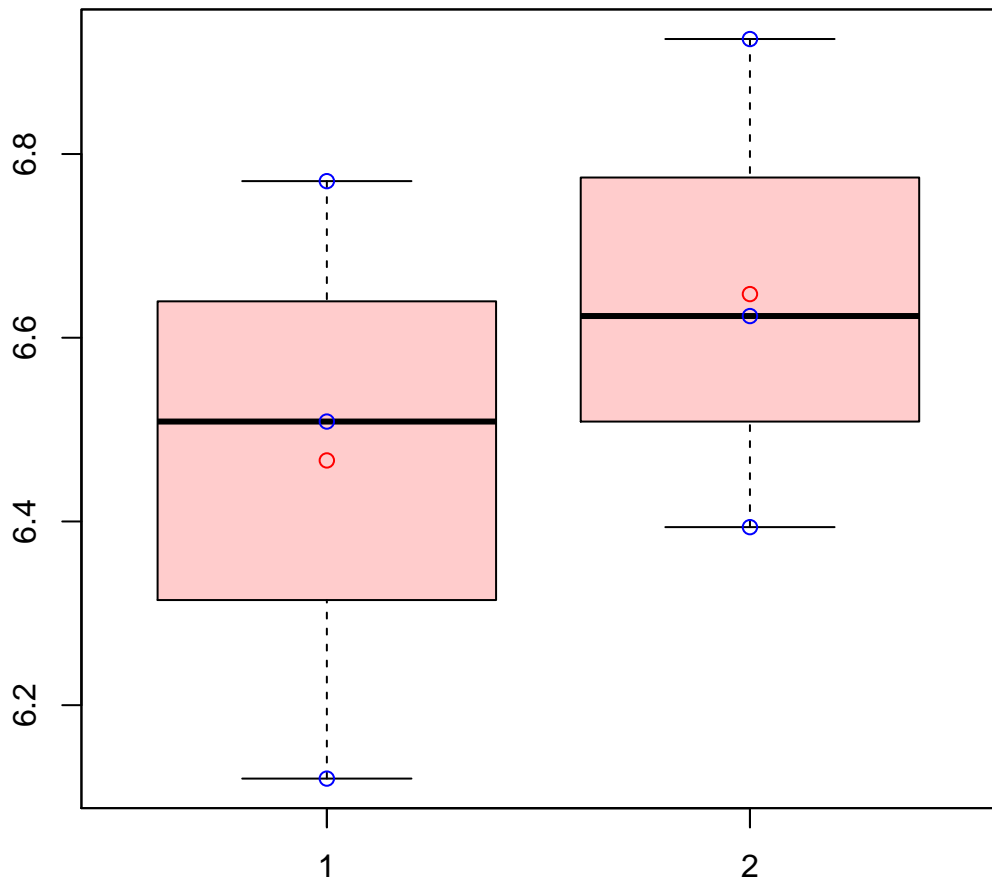

t-Test: p-value = 0.5

# K3Y9X7|K3Y9X7\_SETIT

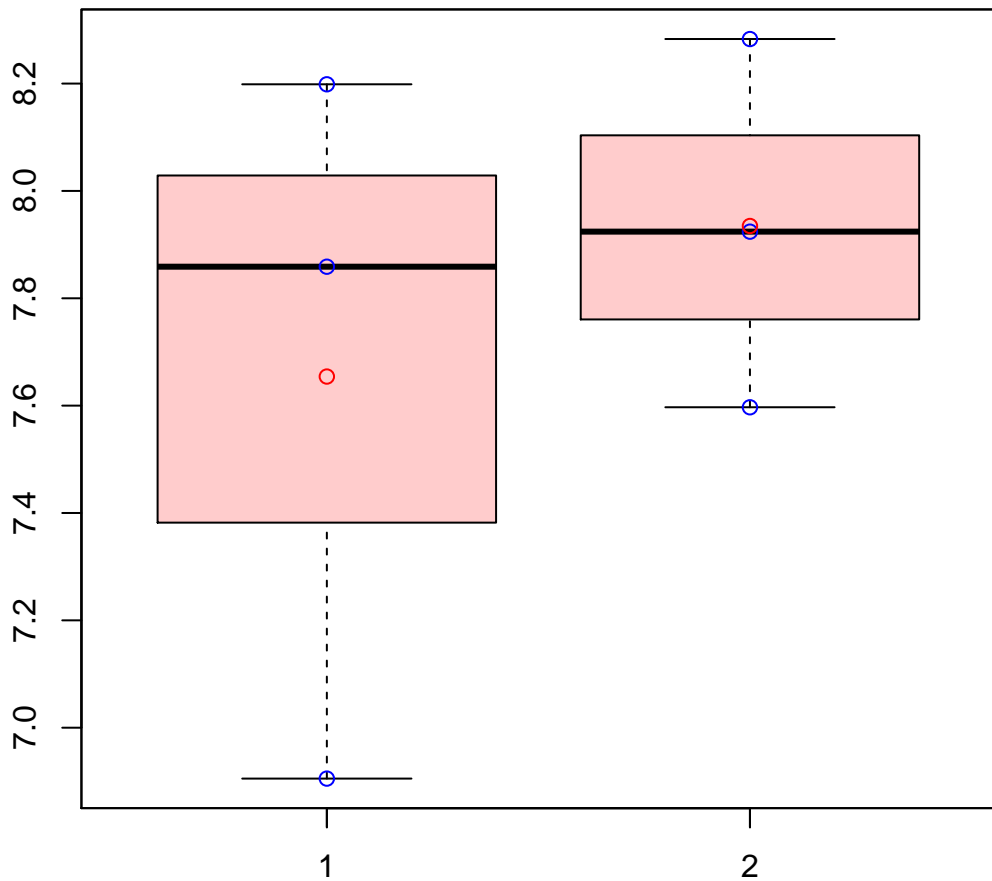

t-Test: p-value = 0.57

# K3YA07|K3YA07\_SETIT

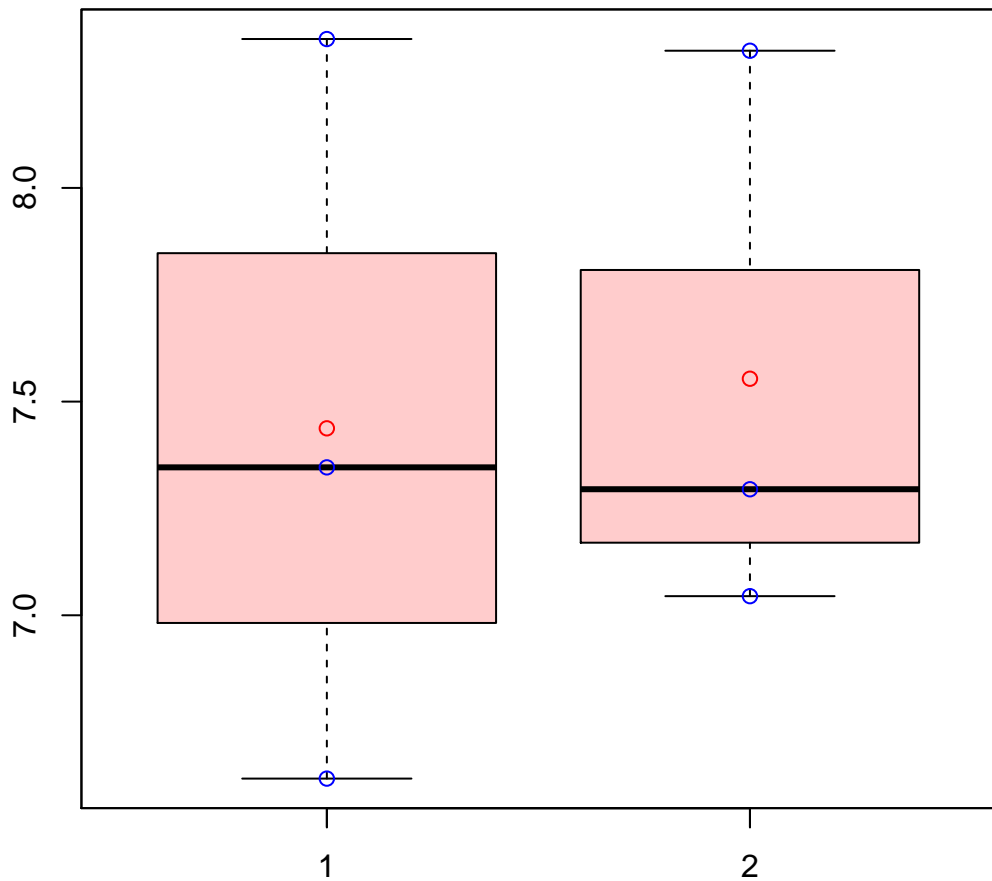

t-Test: p-value = 0.86

# K3YA08|K3YA08\_SETIT

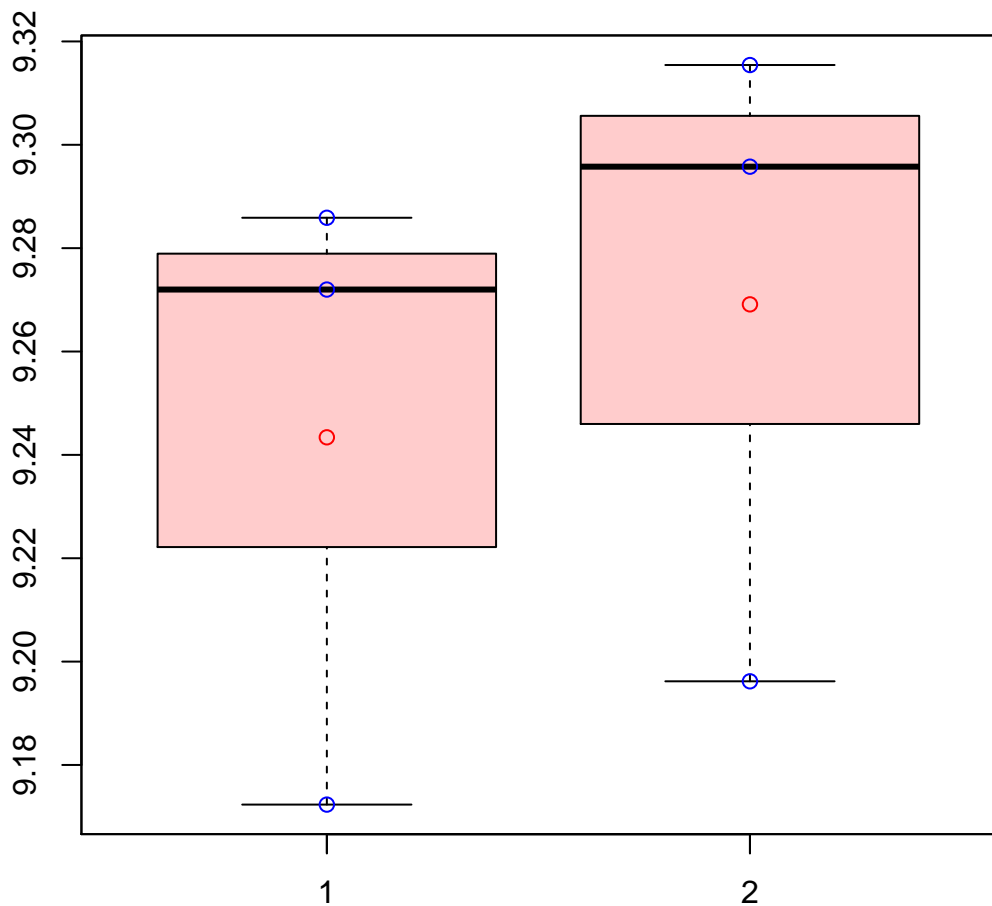

t-Test: p-value = 0.64

# K3YA18|K3YA18\_SETIT

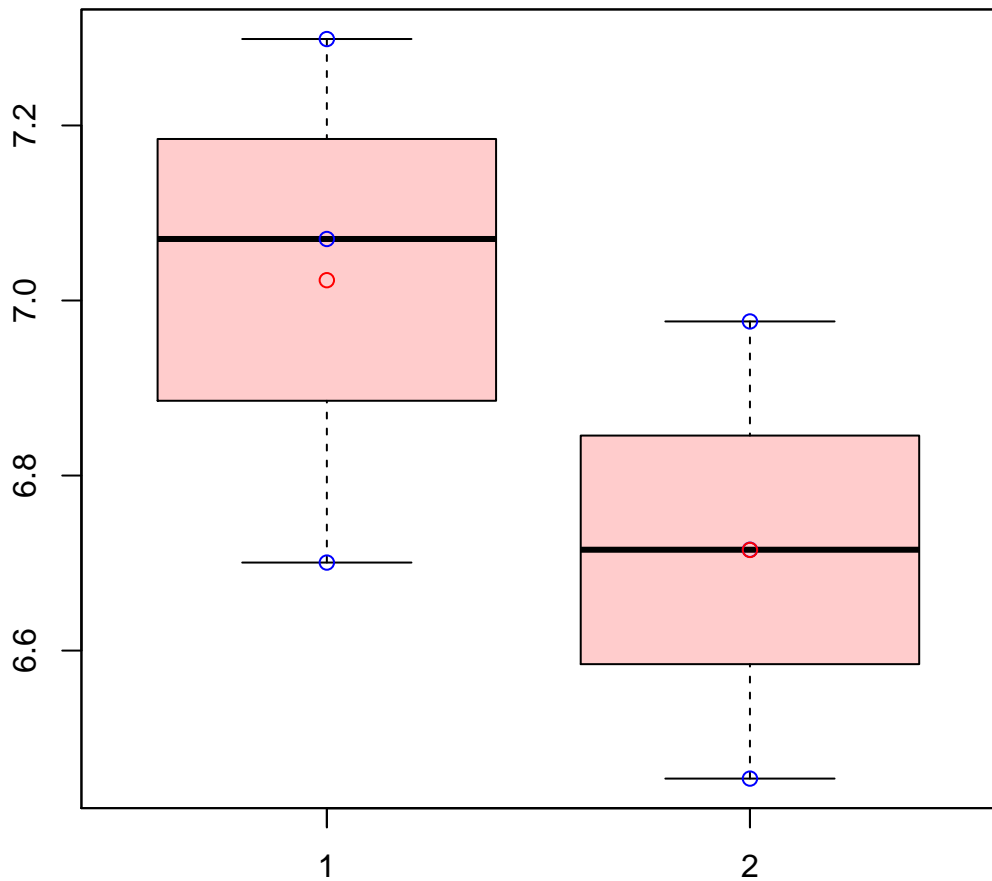

t-Test: p-value = 0.25



# K3YAD3|K3YAD3\_SETIT

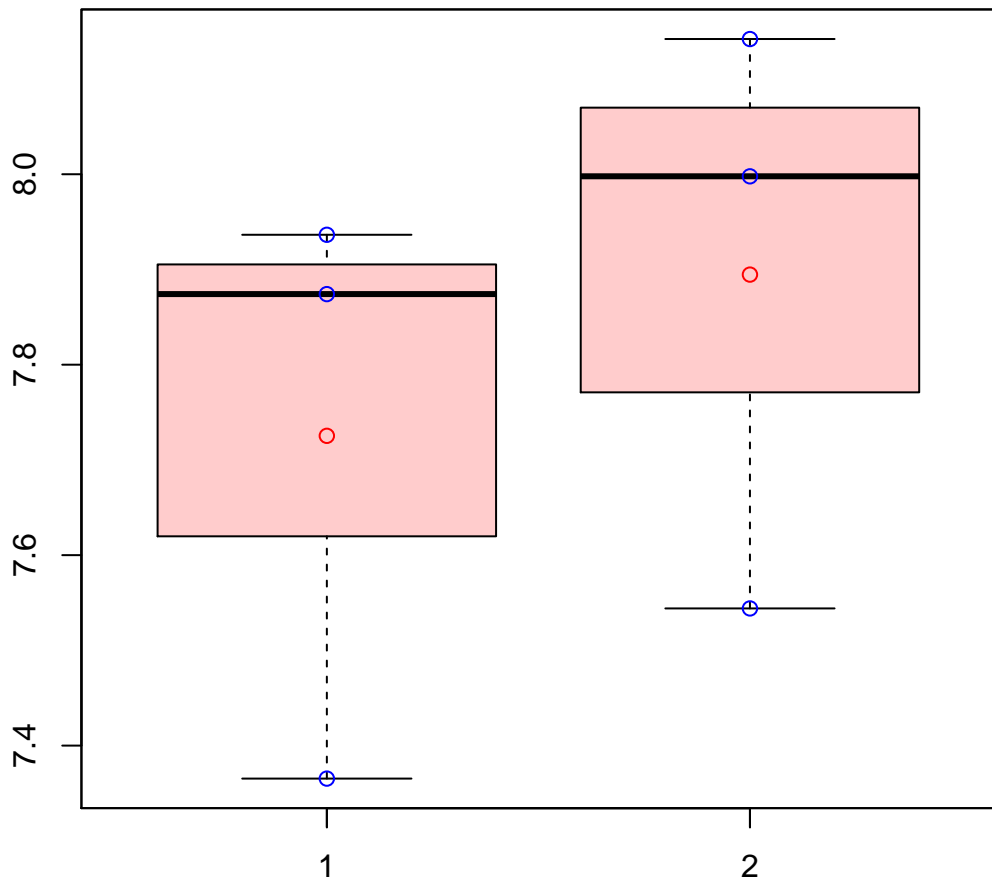

t-Test: p-value = 0.54

# K3YAJ2|K3YAJ2\_SETIT

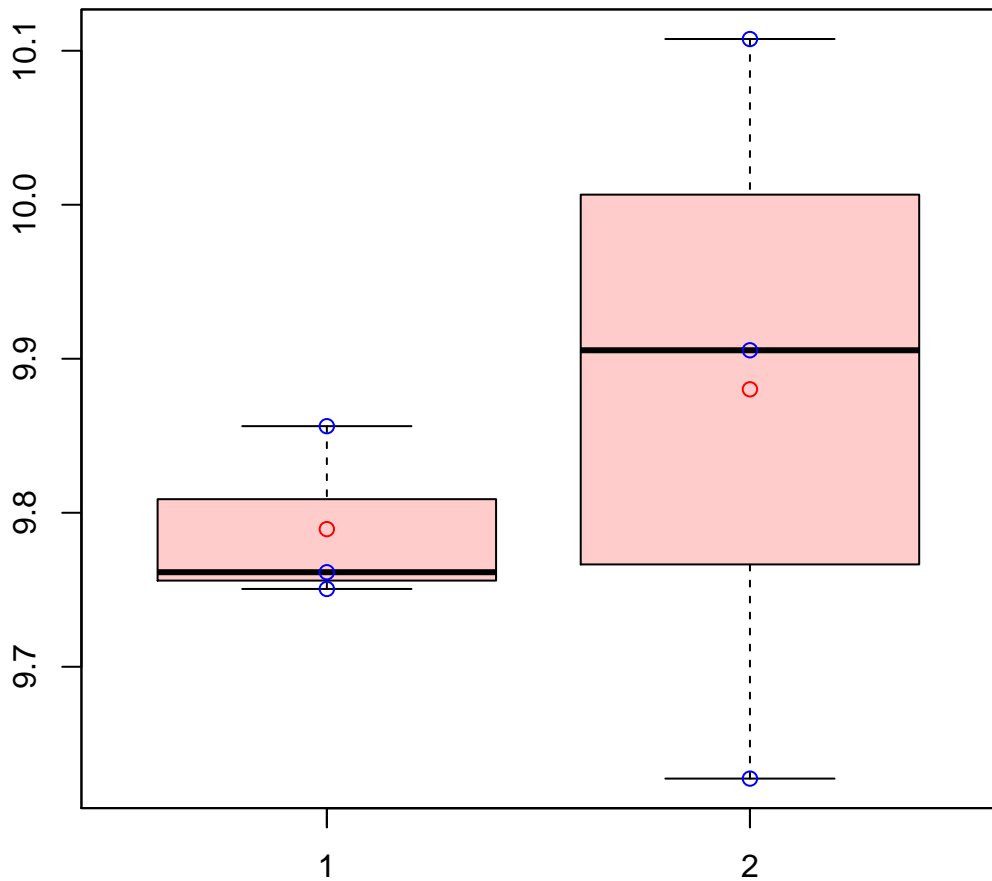

t-Test: p-value = 0.58

# K3YAJ8|K3YAJ8\_SETIT

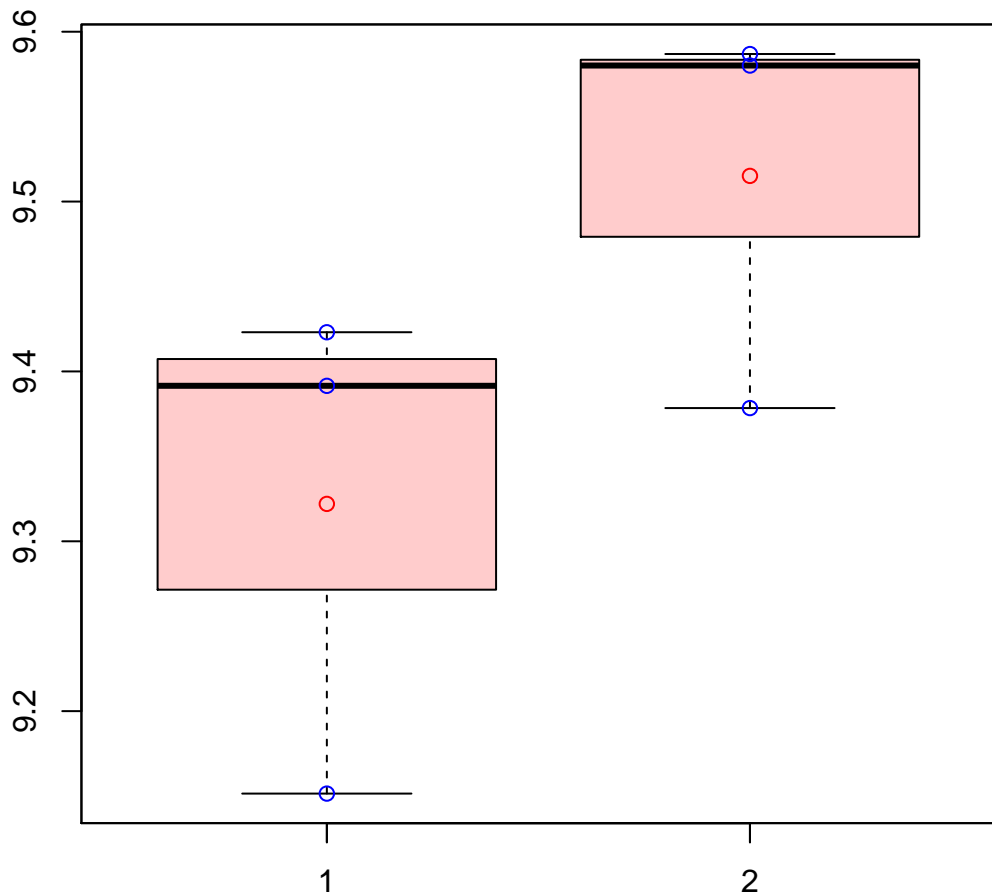

t-Test: p-value = 0.16

# K3YAR4|K3YAR4\_SETIT

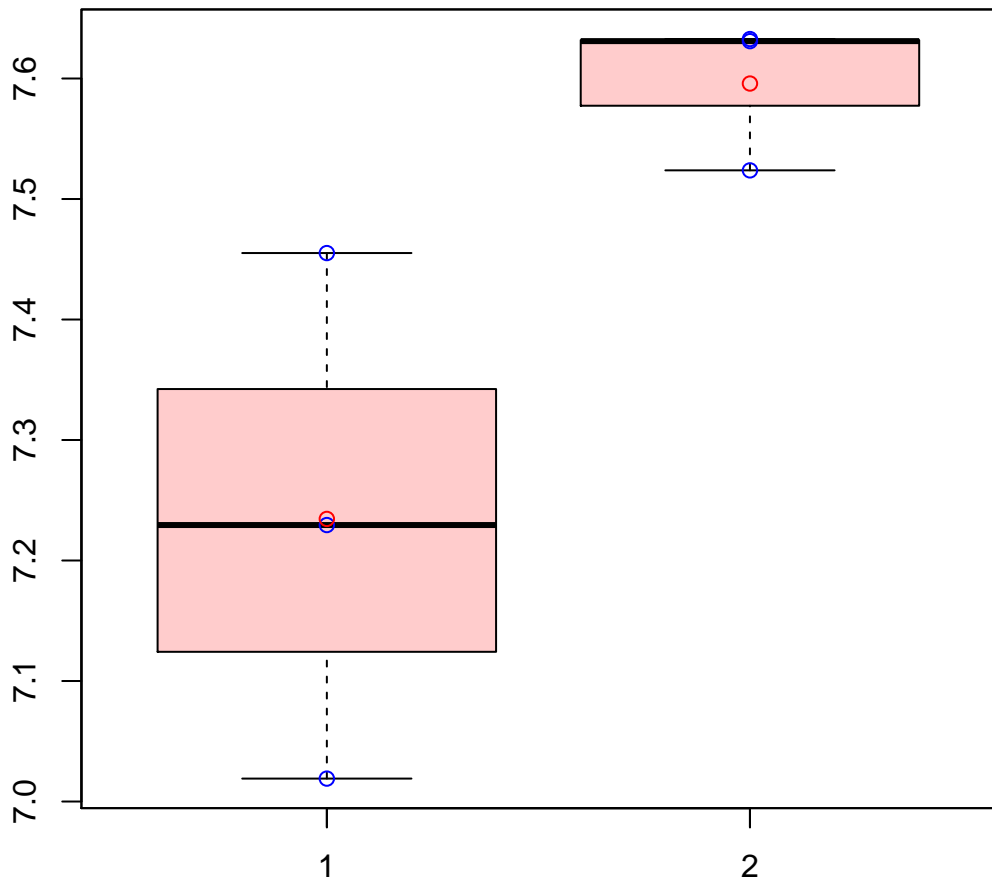

t-Test: p-value = 0.09

# K3YBT5|K3YBT5\_SETIT

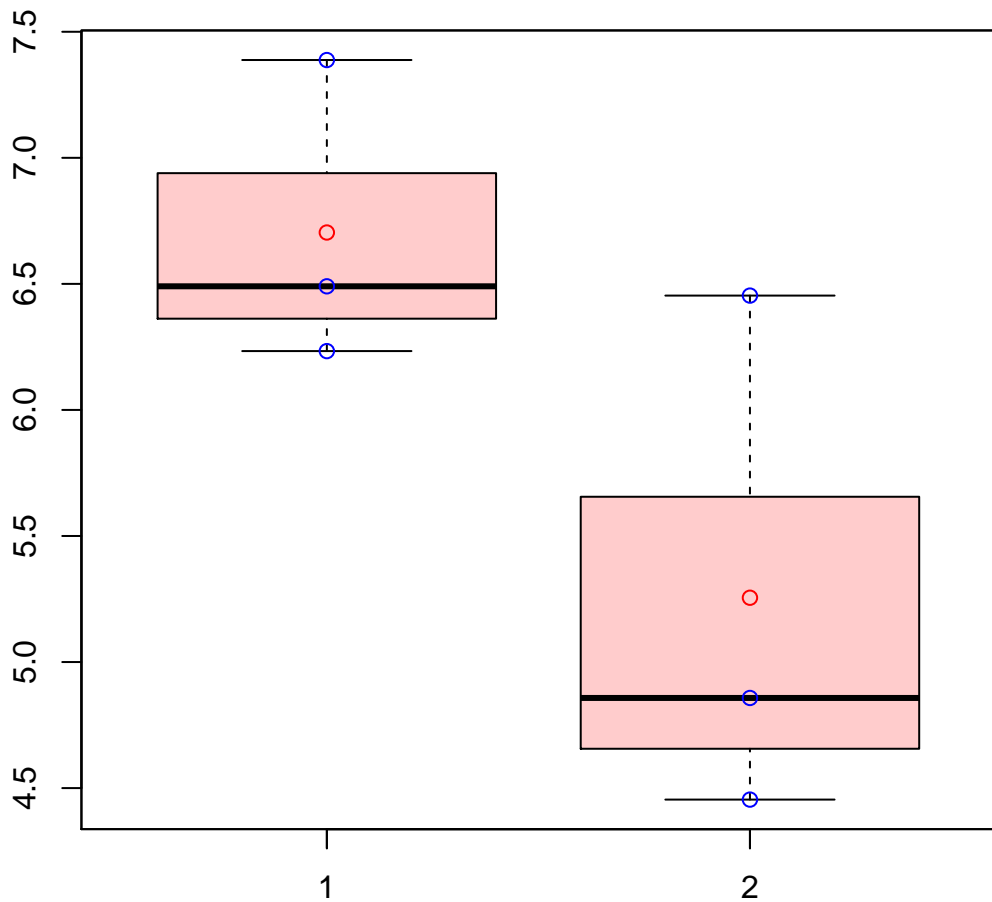

t-Test: p-value = 0.13

# K3YBW9|K3YBW9\_SETIT

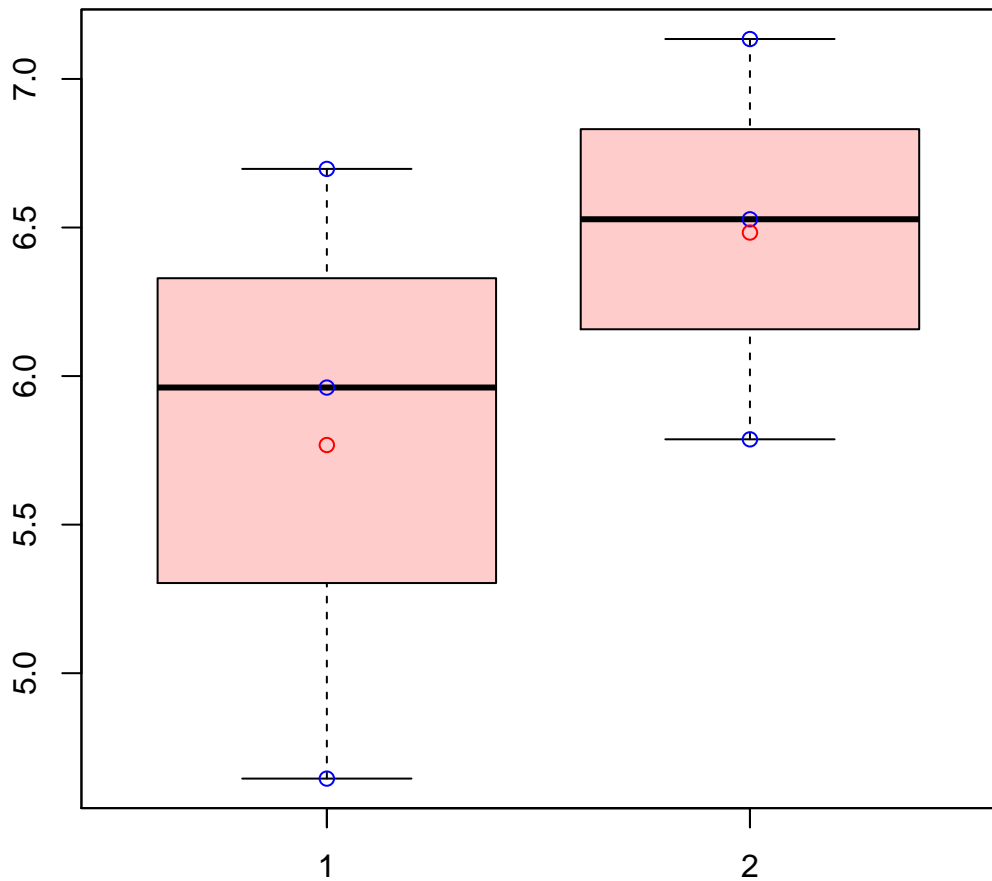

t-Test: p-value = 0.38

# K3YC41|K3YC41\_SETIT

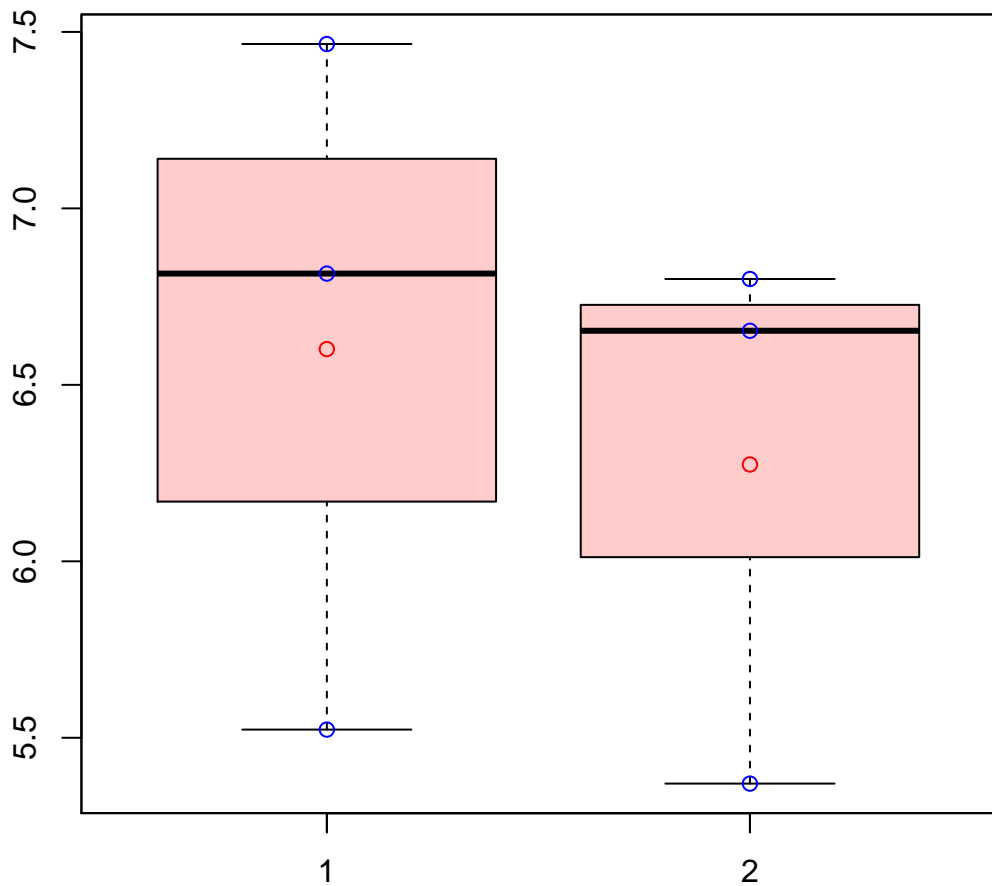

t-Test: p-value = 0.68

# K3YCK5|K3YCK5\_SETIT

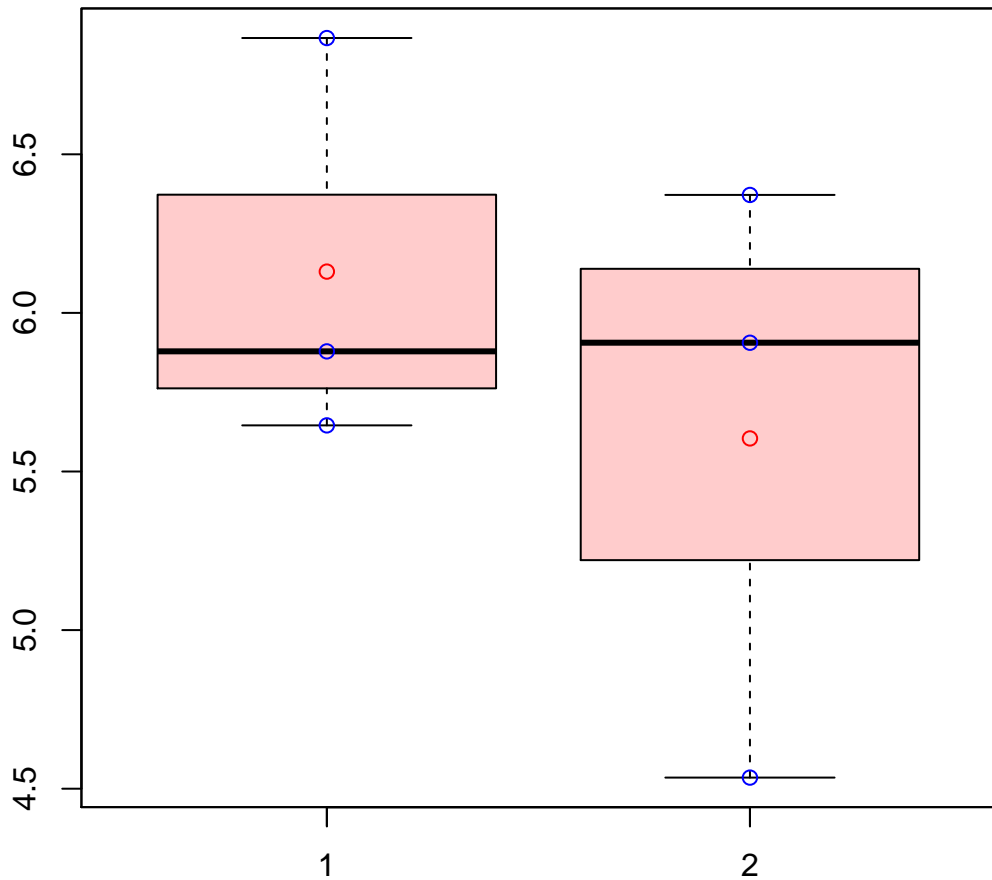

t-Test: p-value = 0.48



# K3YEI2|K3YEI2\_SETIT

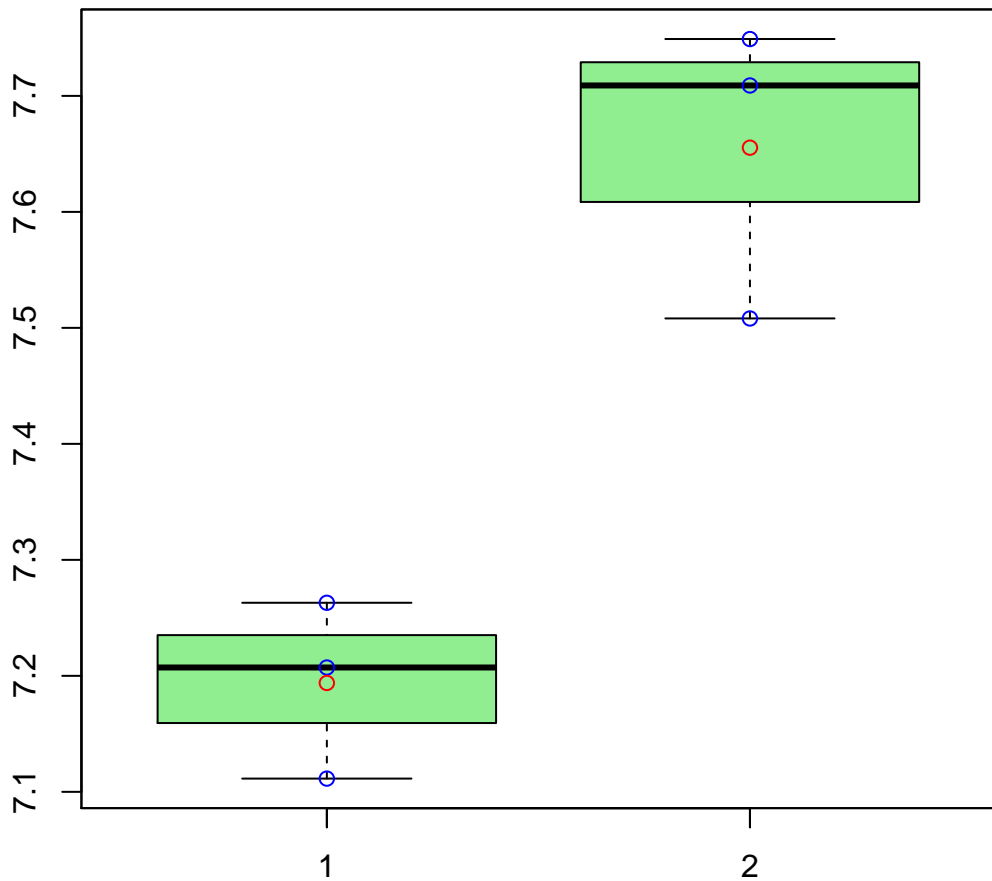

t-Test: p-value = 0.01

# K3YEX4|K3YEX4\_SETIT

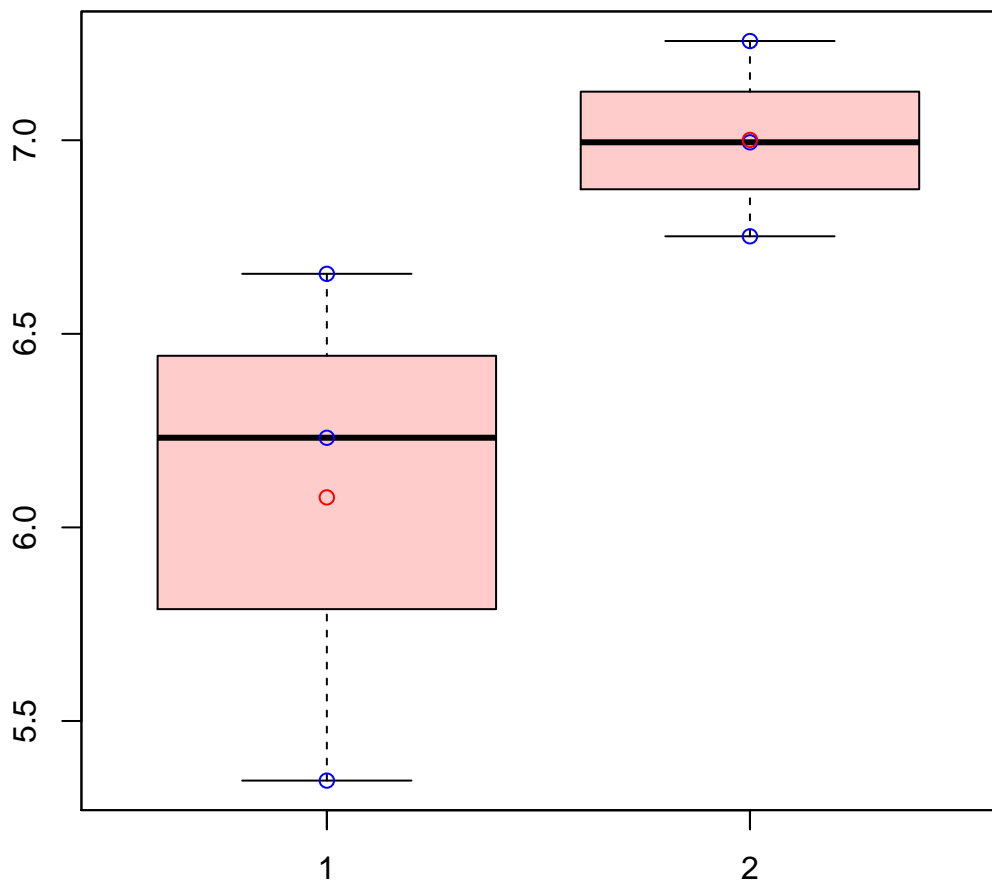

t-Test: p-value = 0.13

# K3YG24|K3YG24\_SETIT

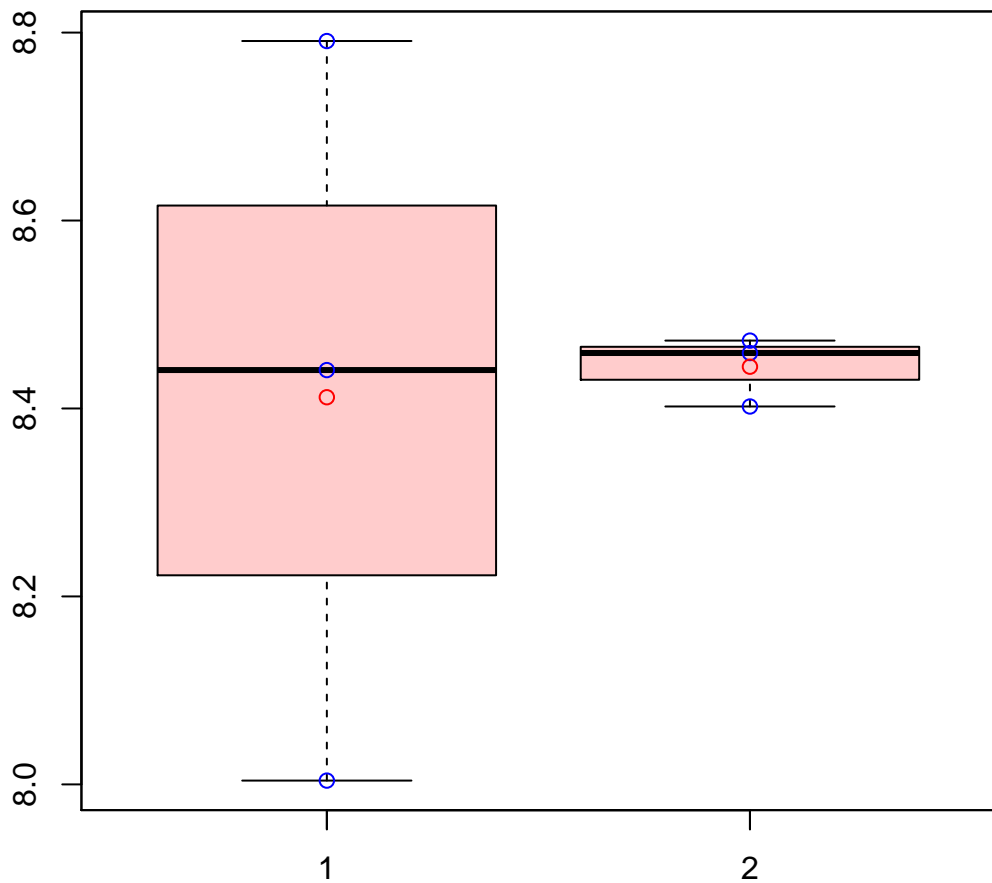

t-Test: p-value = 0.9

# K3YG40|K3YG40\_SETIT

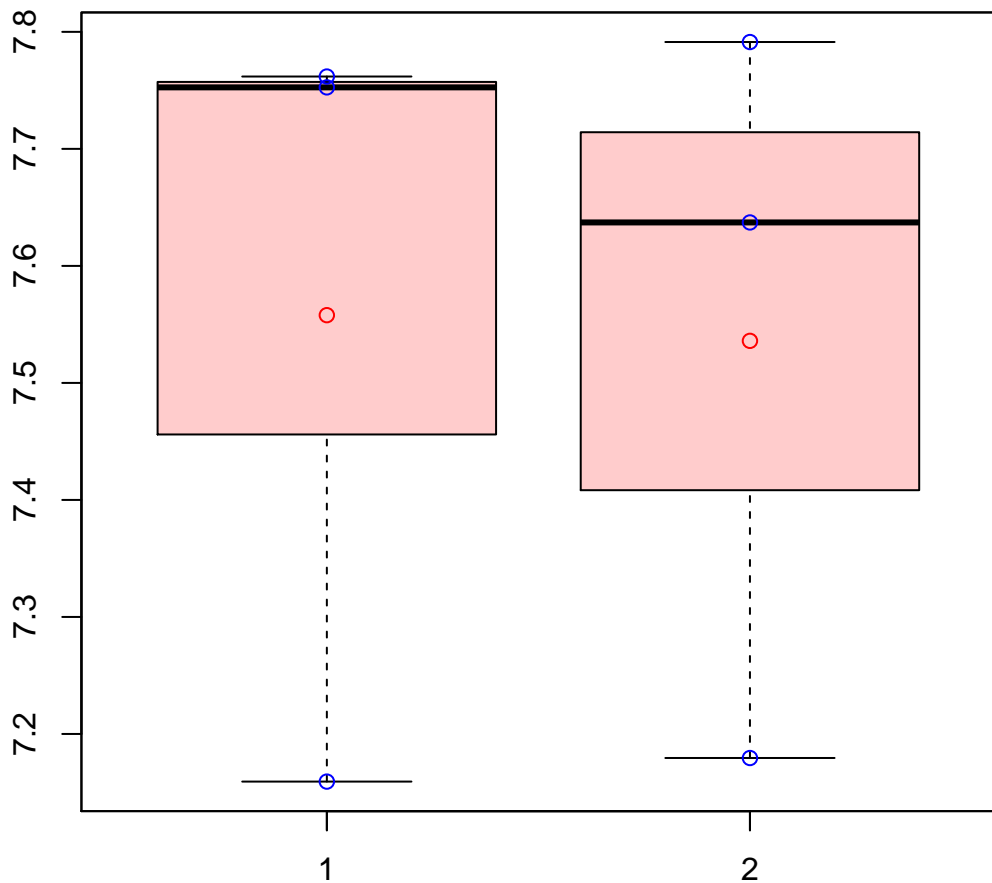

t-Test: p-value = 0.94

# K3YGB5|K3YGB5\_SETIT

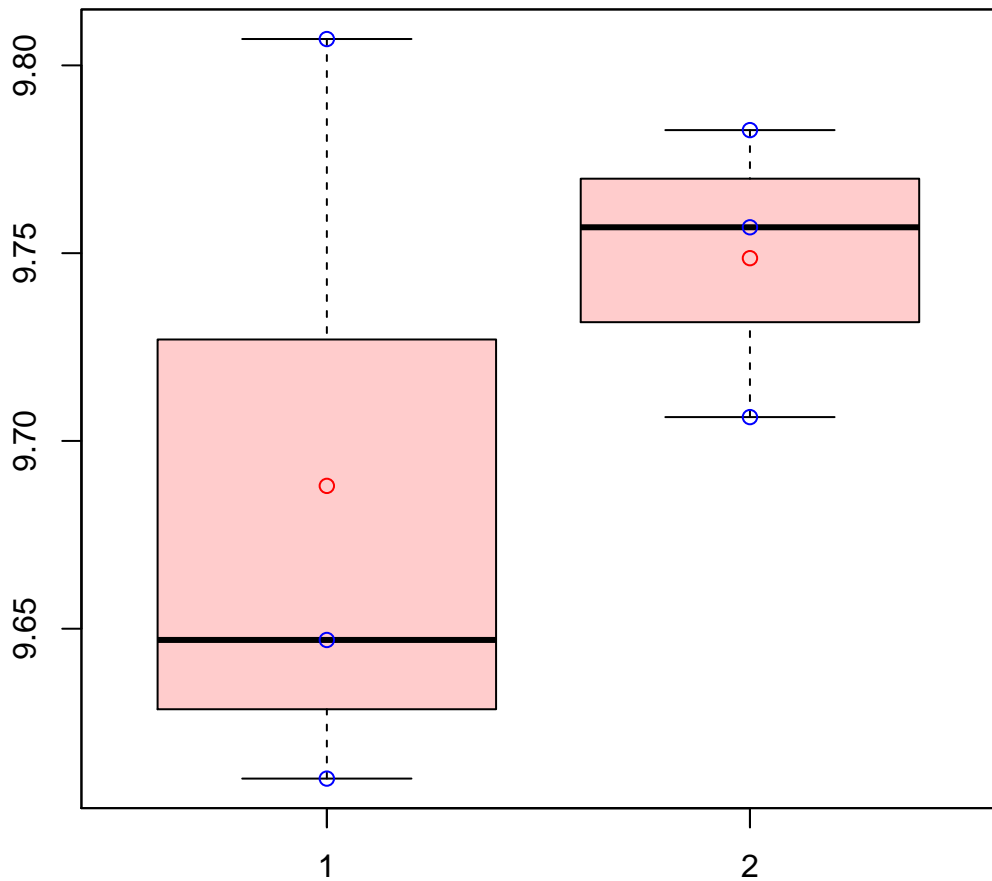

t-Test: p-value = 0.43

# K3YGH9|K3YGH9\_SETIT

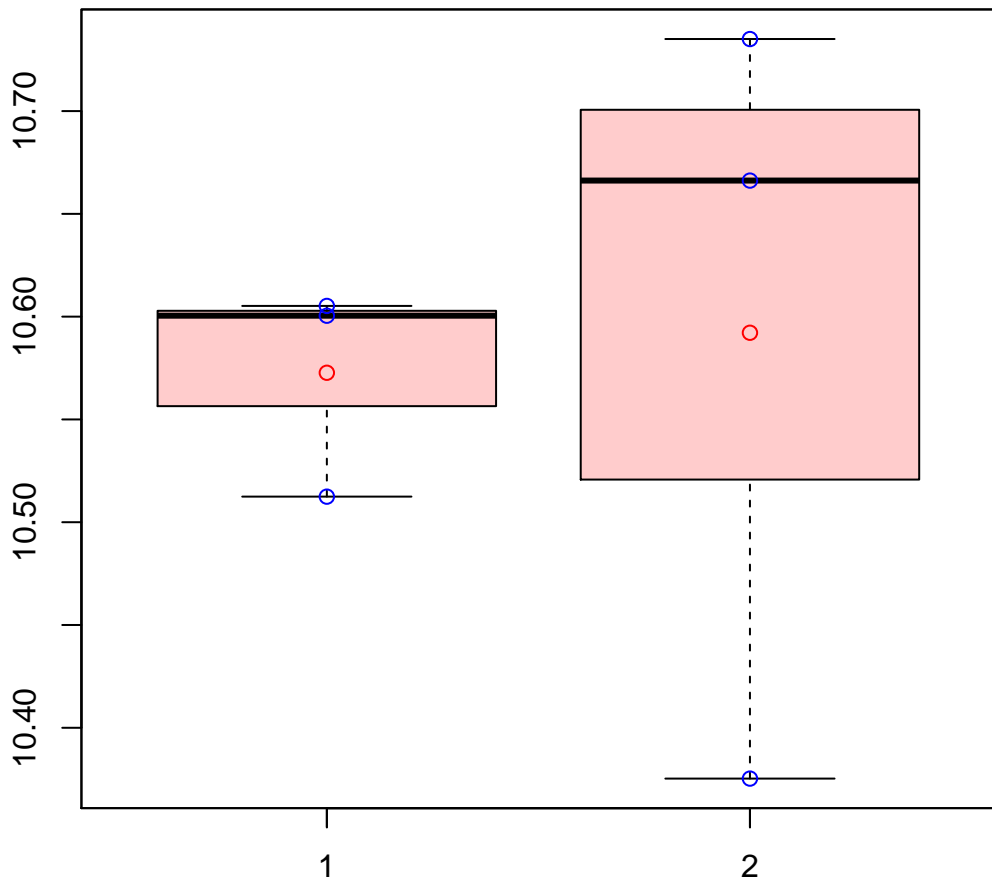

t-Test: p-value = 0.88

# K3YGL2|K3YGL2\_SETIT

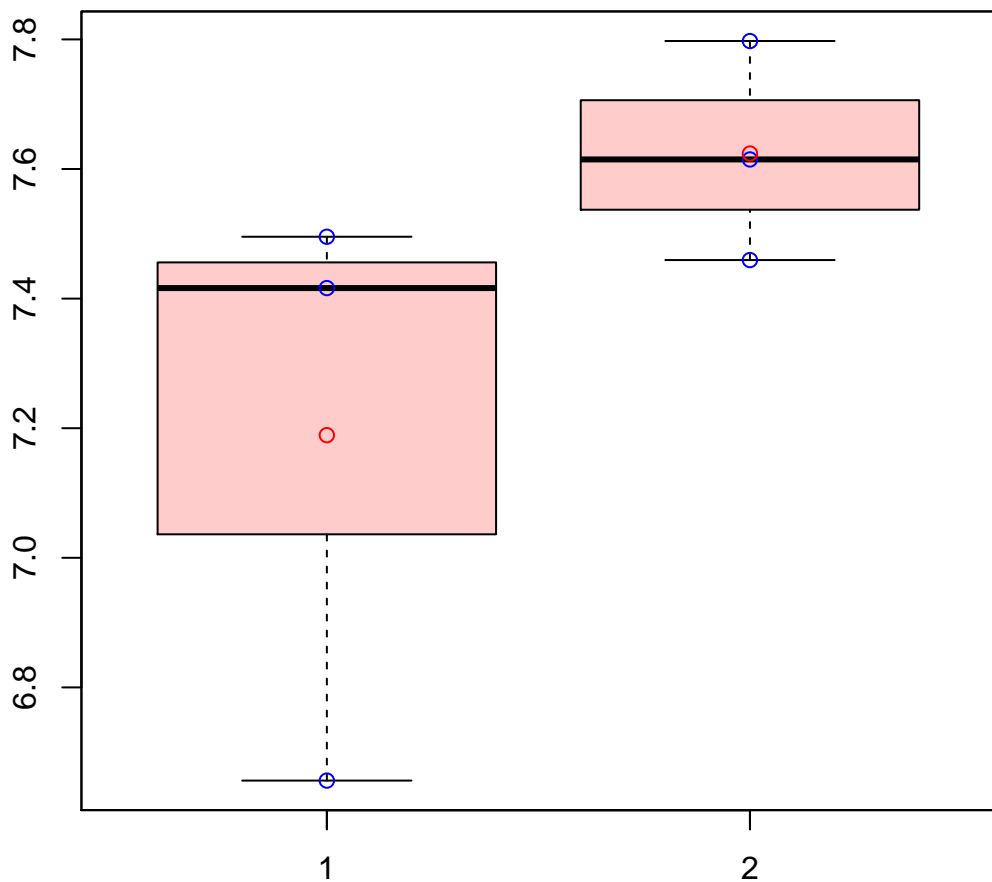

t-Test: p-value = 0.24

# K3YHA5|K3YHA5\_SETIT

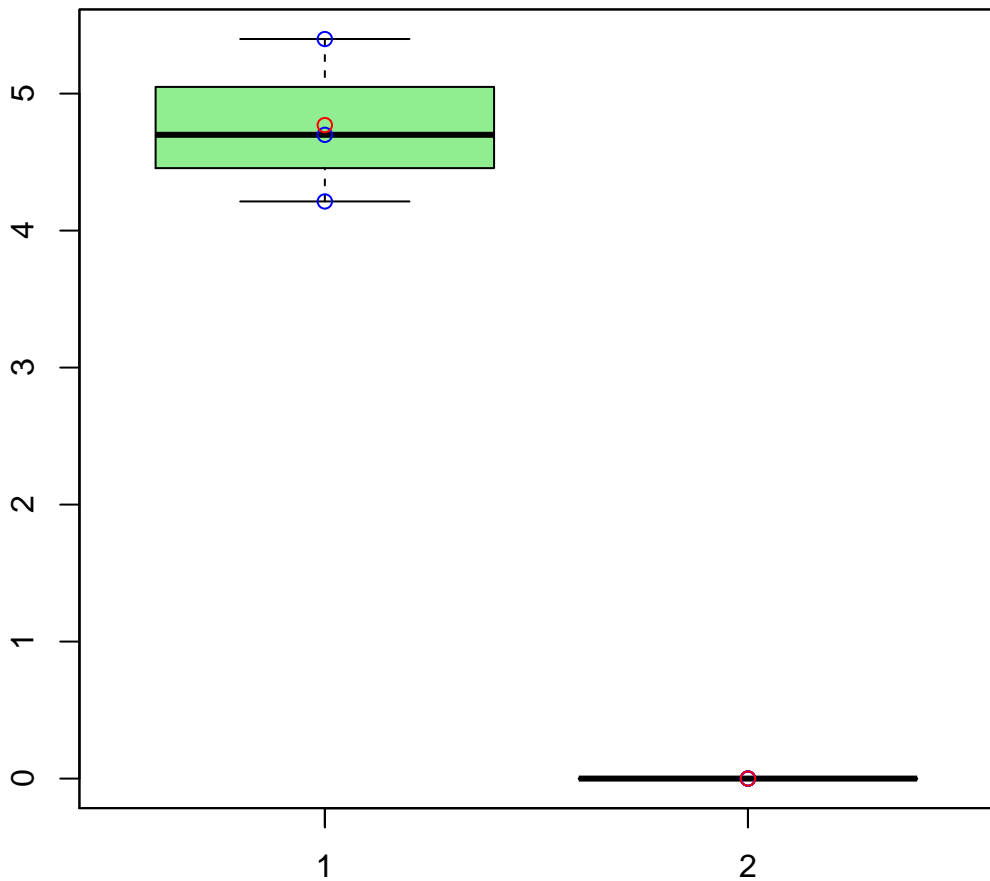

t-Test: p-value = 0.01



# K3YHF4|K3YHF4\_SETIT

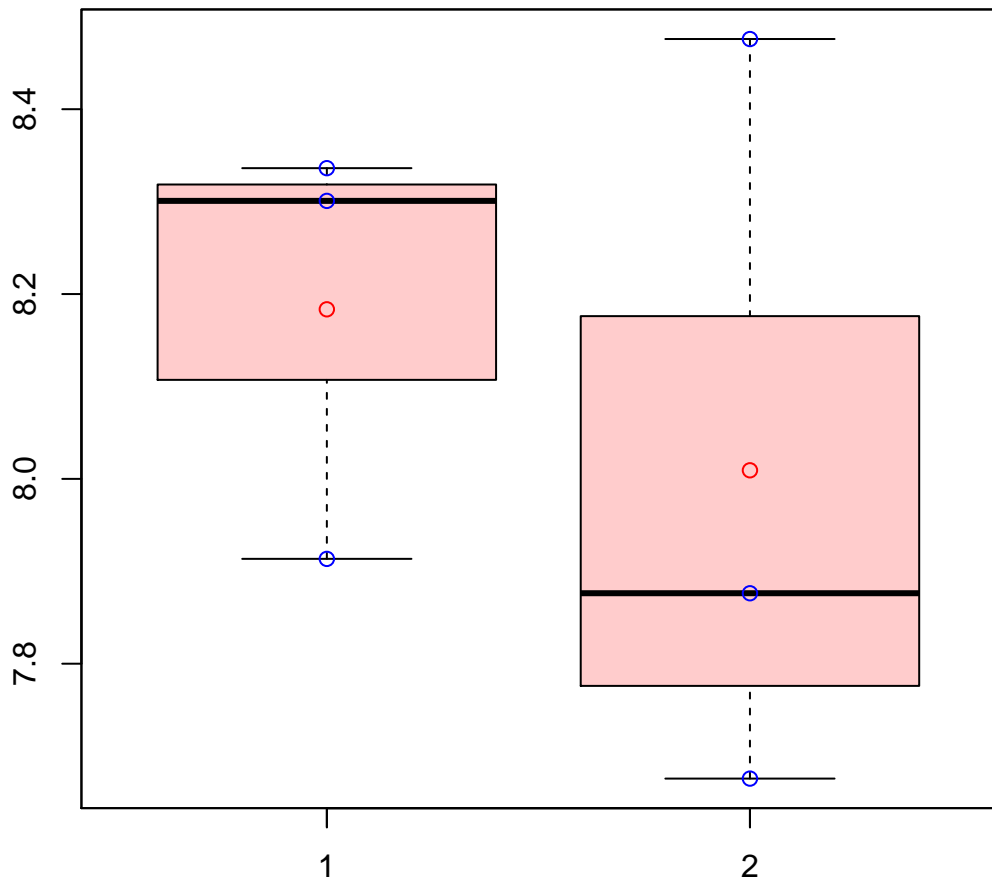

t-Test: p-value = 0.57

# K3YHF9|K3YHF9\_SETIT

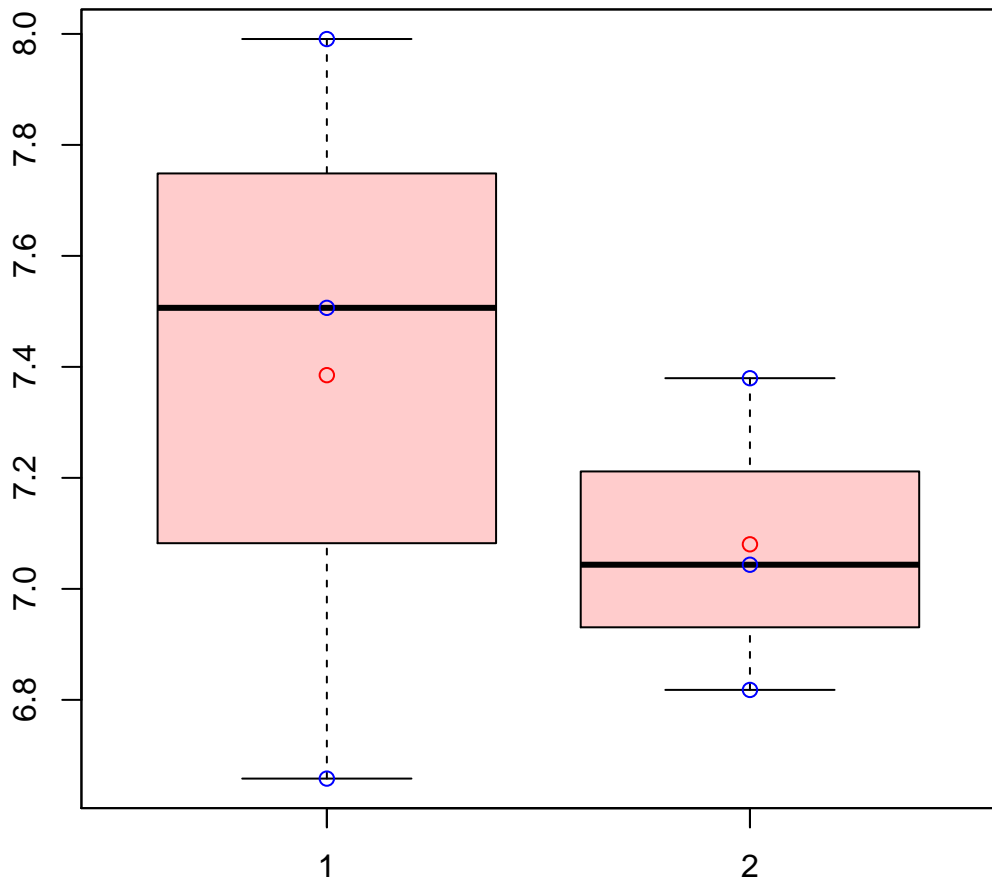

t-Test: p-value = 0.53

# K3YHJ0|K3YHJ0\_SETIT

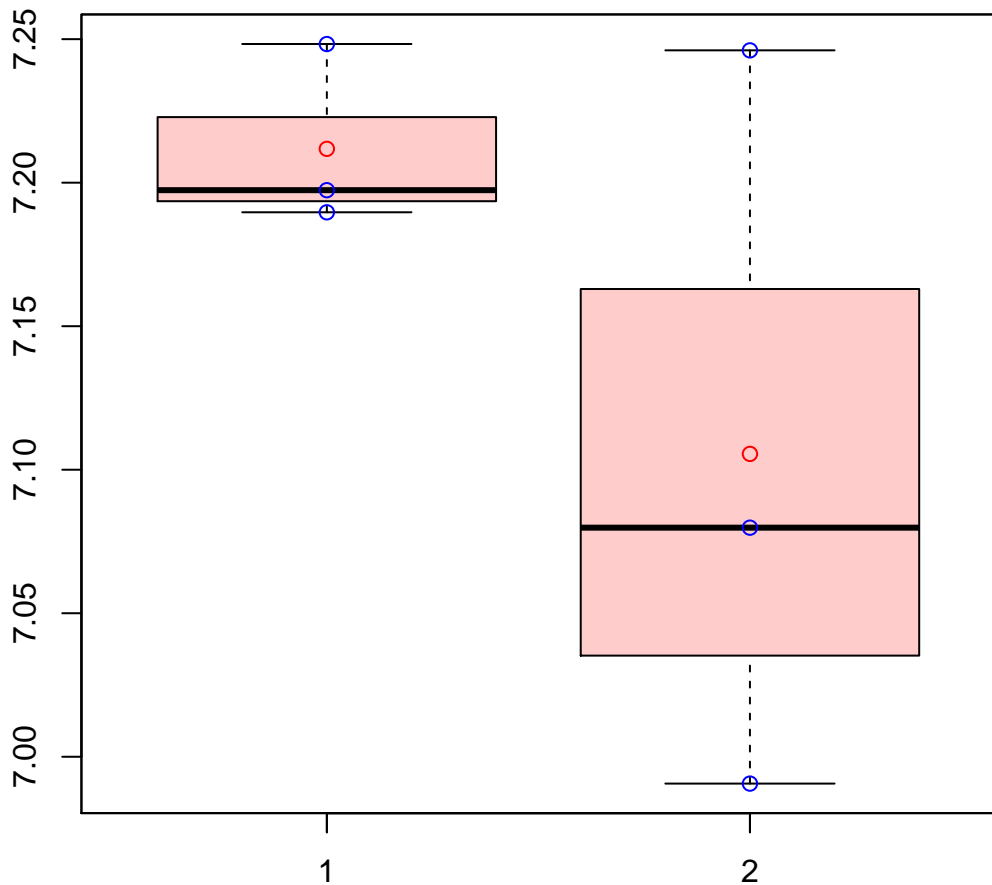

t-Test: p-value = 0.29

# K3YHS8|K3YHS8\_SETIT

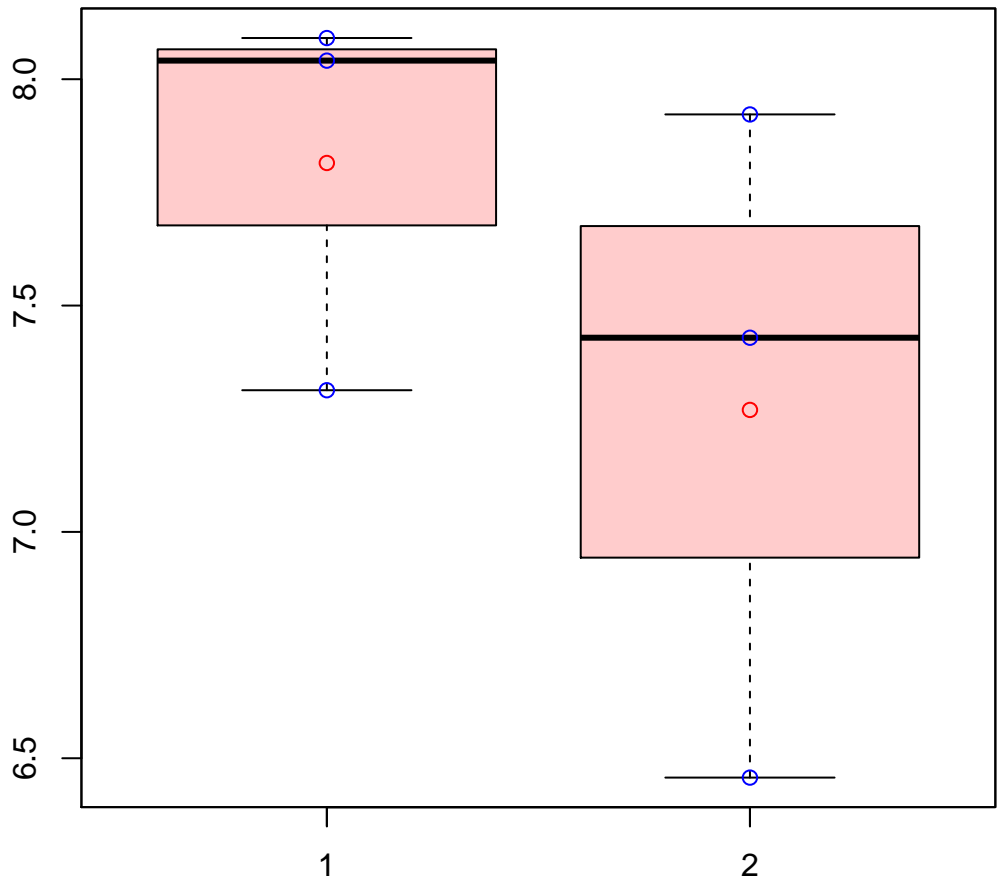

t-Test: p-value = 0.35

# K3YHZ4|K3YHZ4\_SETIT

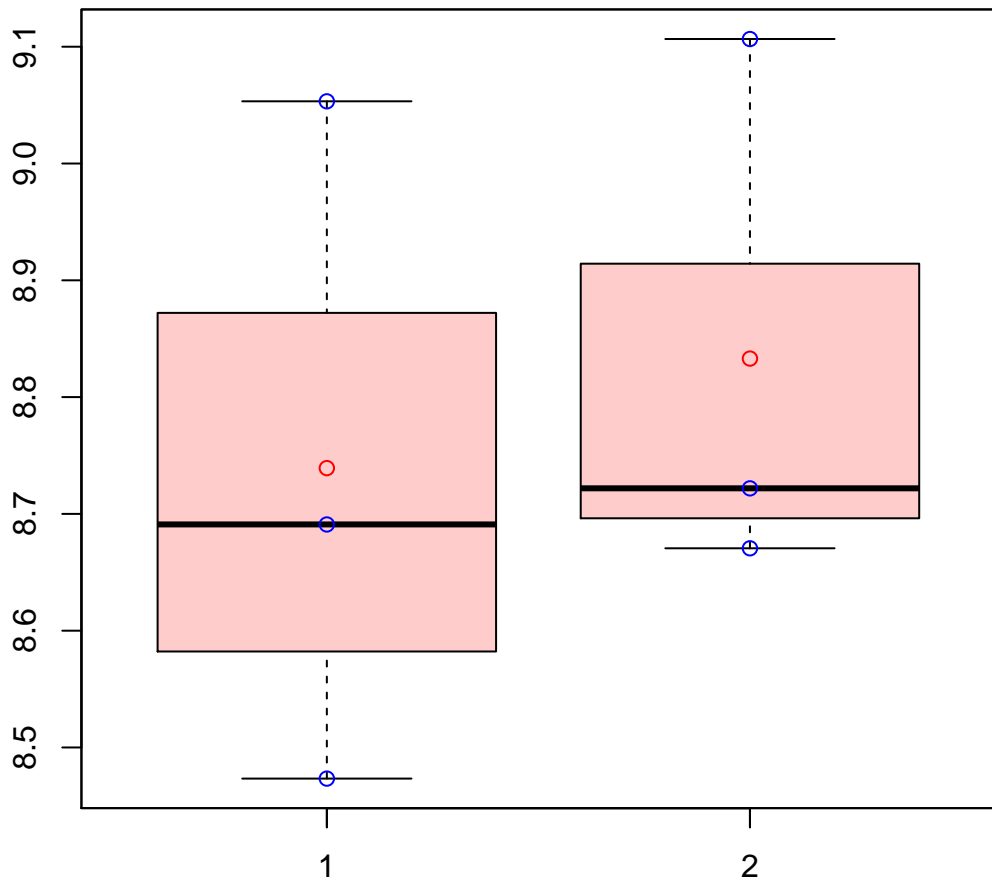

t-Test: p-value = 0.69

# K3YI45|K3YI45\_SETIT

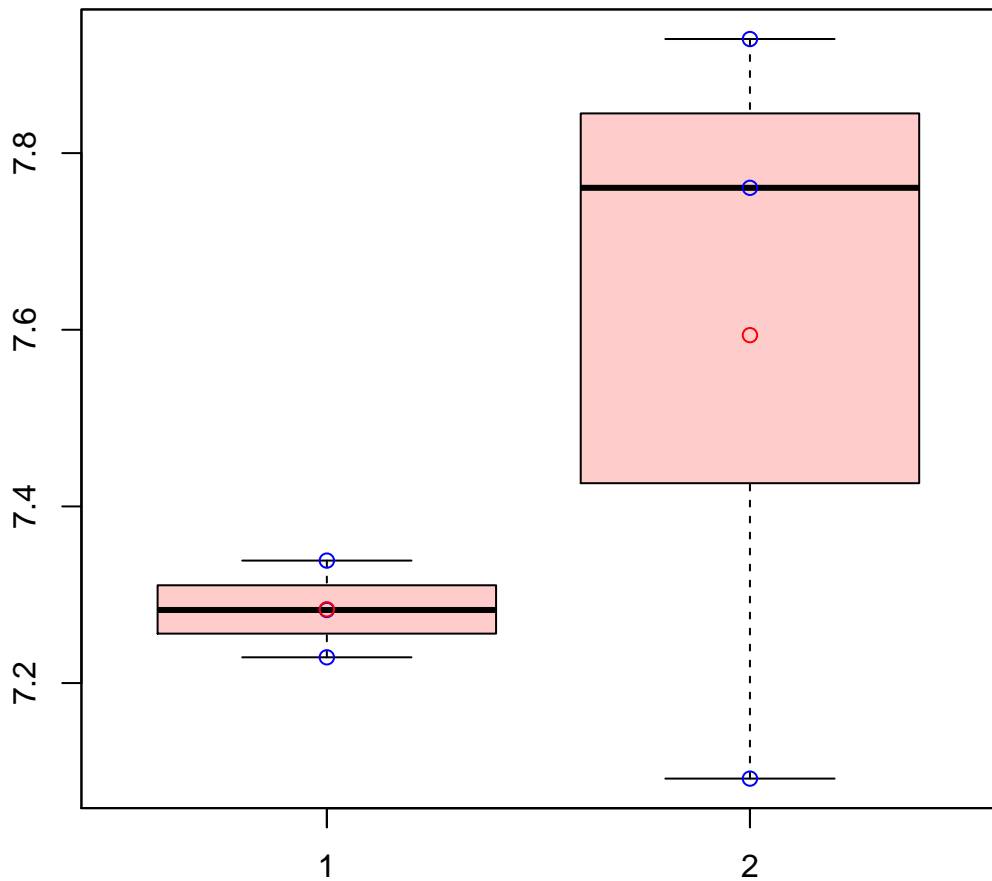

t-Test: p-value = 0.35

# K3YI82|K3YI82\_SETIT

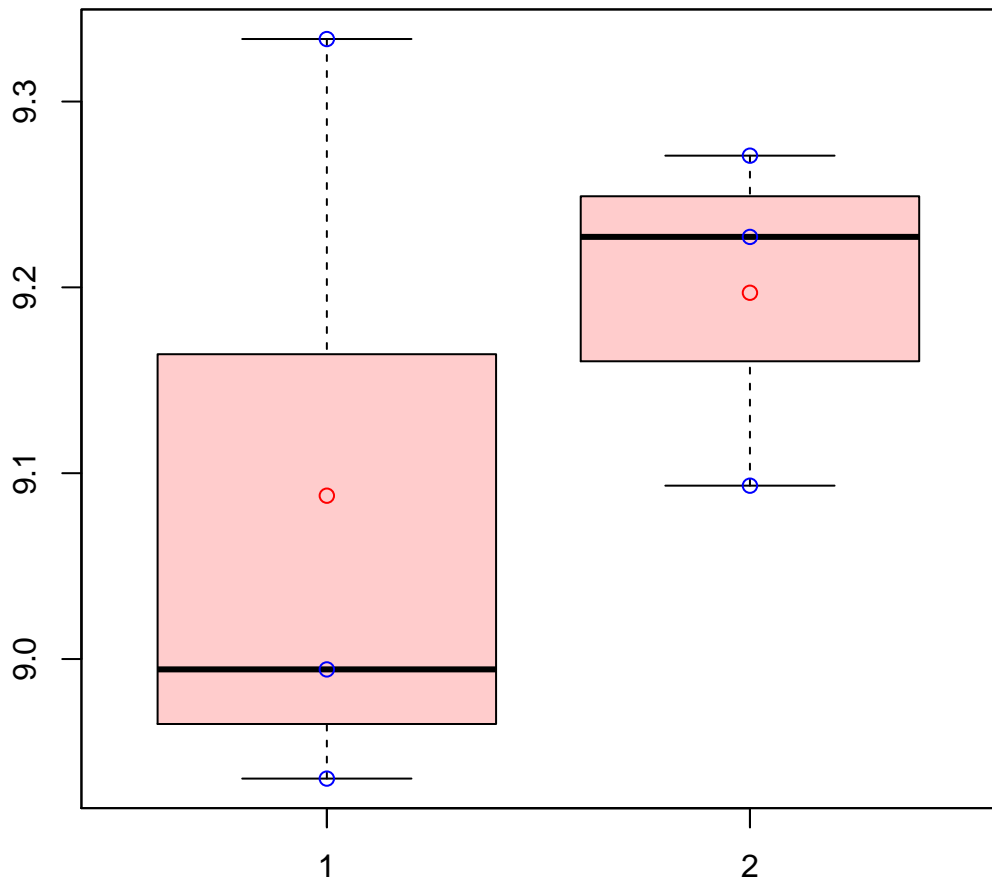

t-Test: p-value = 0.48

# K3YID5|K3YID5\_SETIT

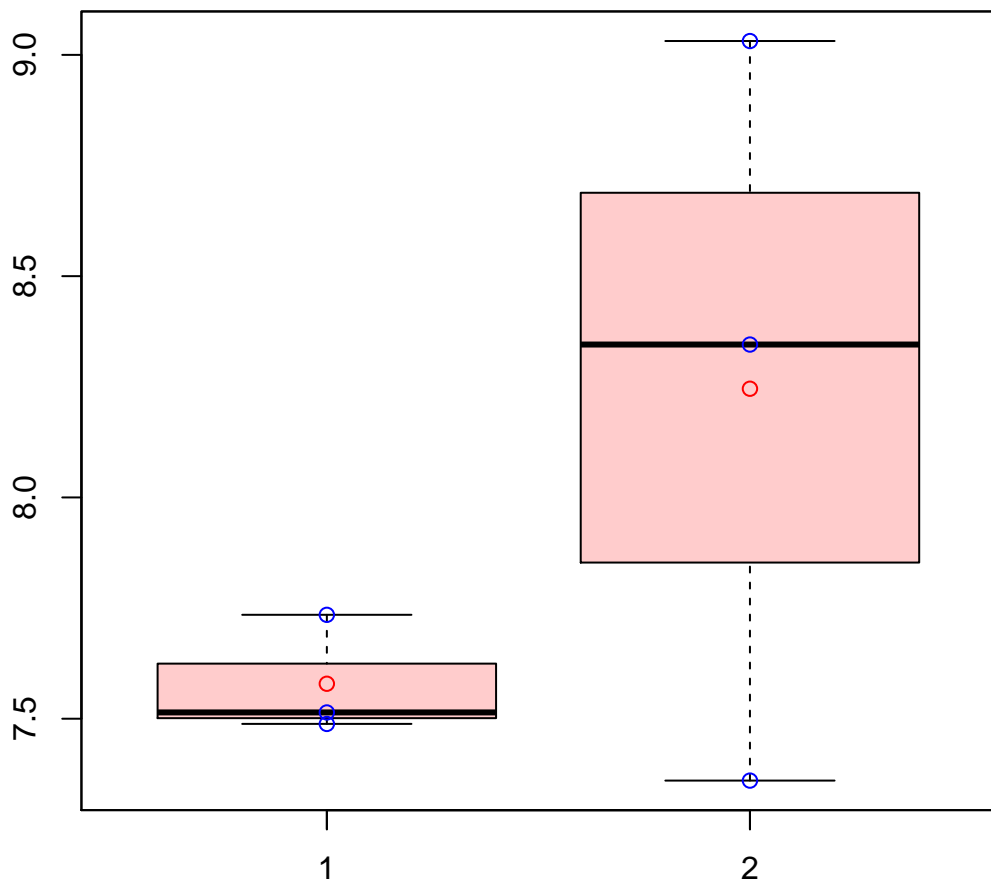

t-Test: p-value = 0.3



# K3YIH0|K3YIH0\_SETIT

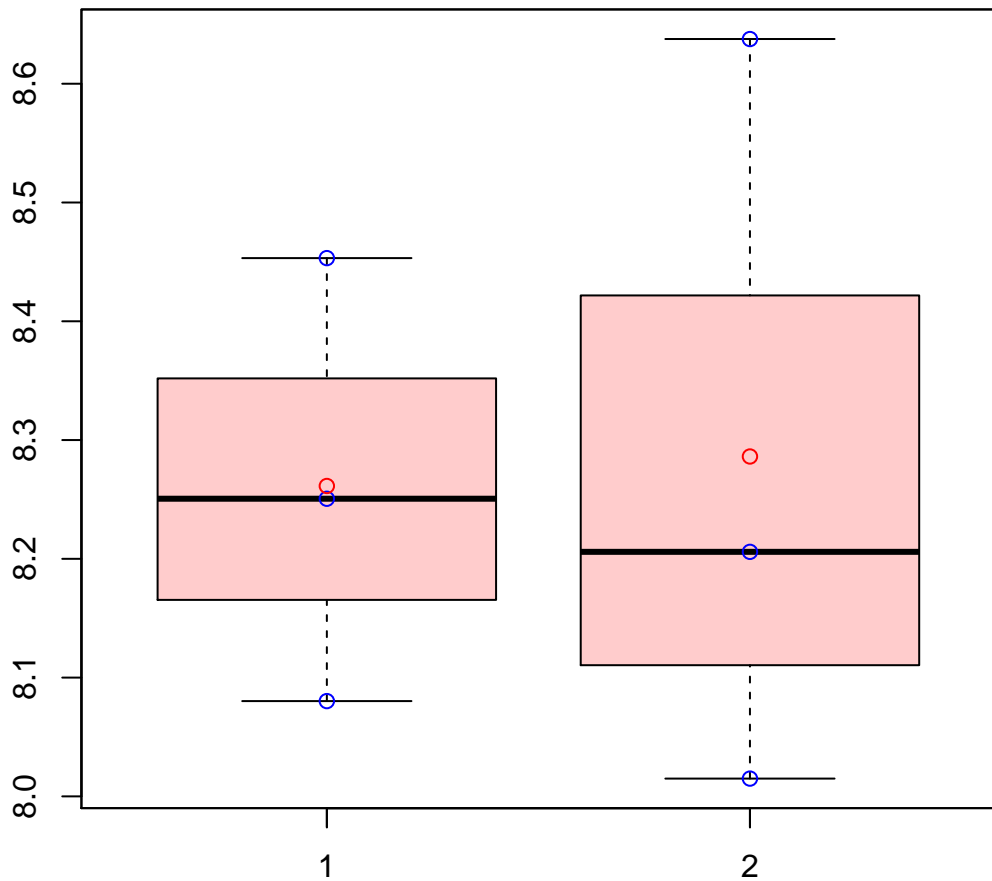

t-Test: p-value = 0.91

# K3YIQ0|K3YIQ0\_SETIT

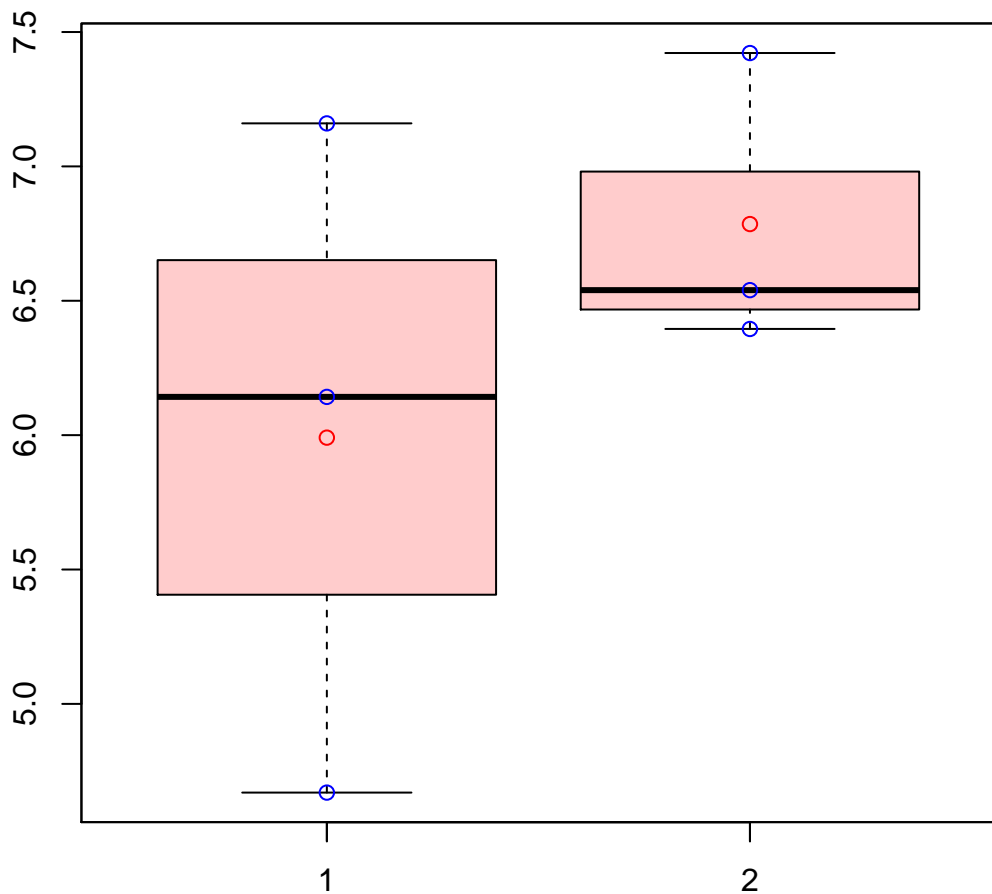

t-Test: p-value = 0.39

# K3YIU7|K3YIU7\_SETIT

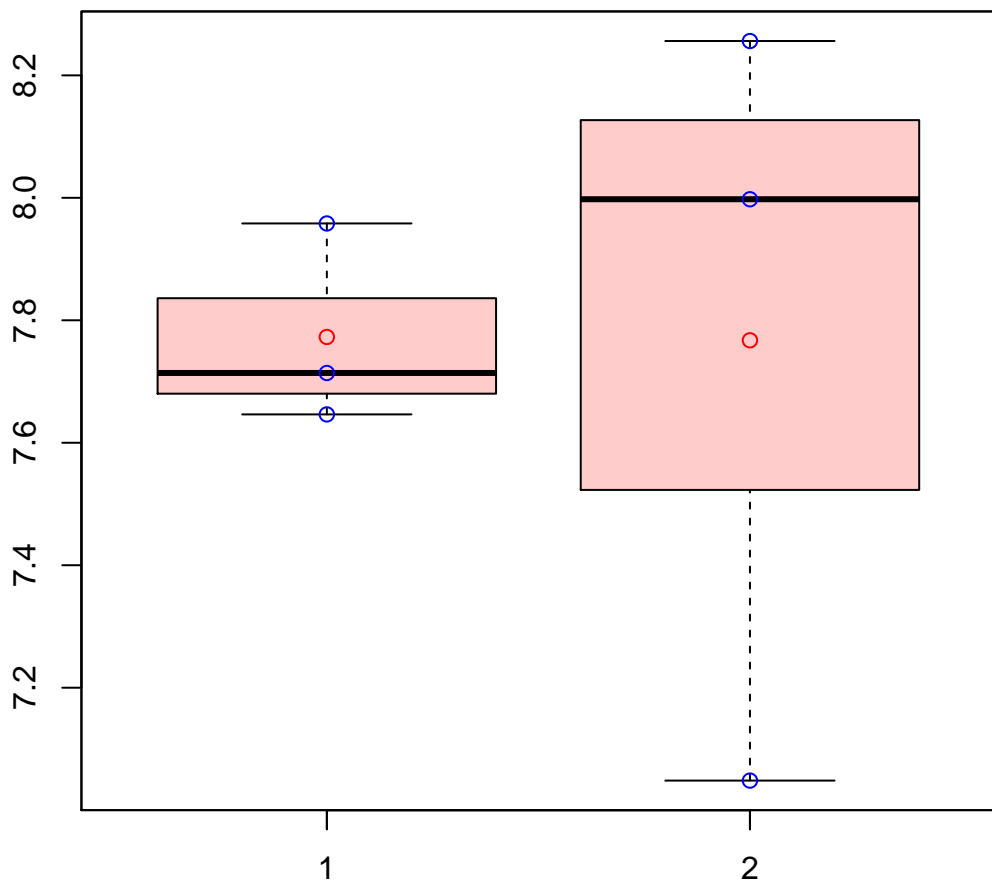

t-Test: p-value = 0.99

# K3YIW7|K3YIW7\_SETIT

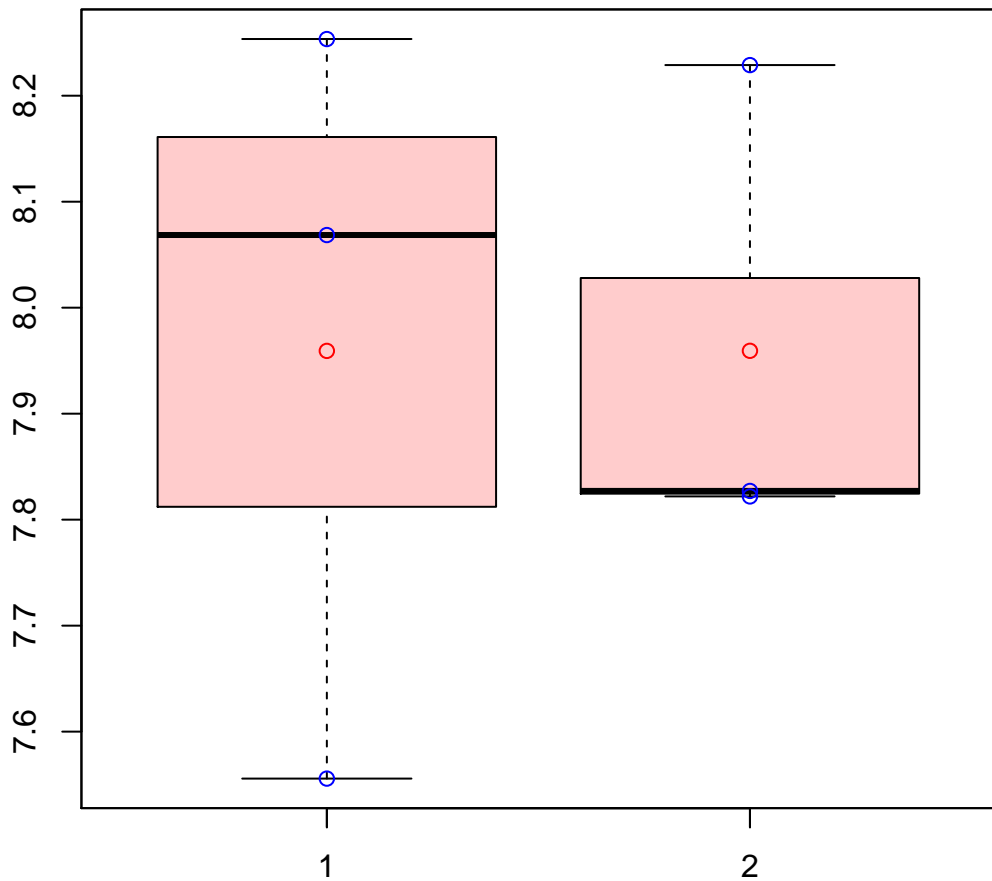

t-Test: p-value = 1

# K3YJ28|K3YJ28\_SETIT

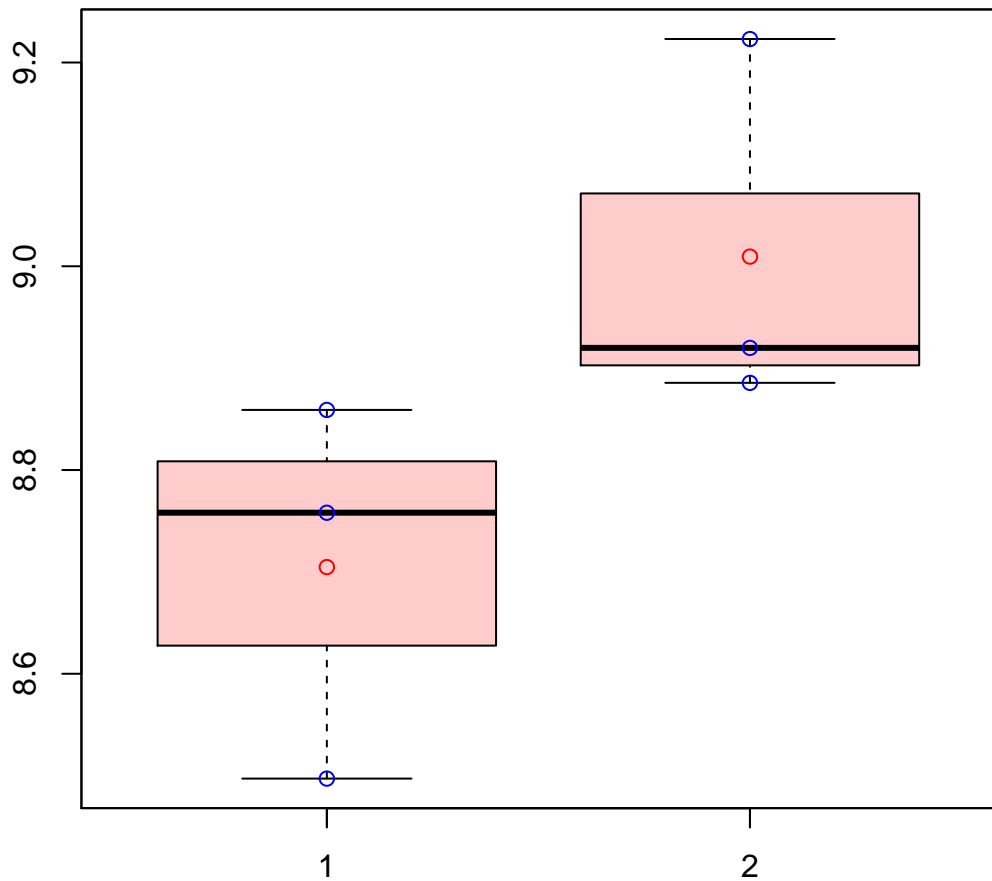

t-Test: p-value = 0.12

# K3YJ57|K3YJ57\_SETIT

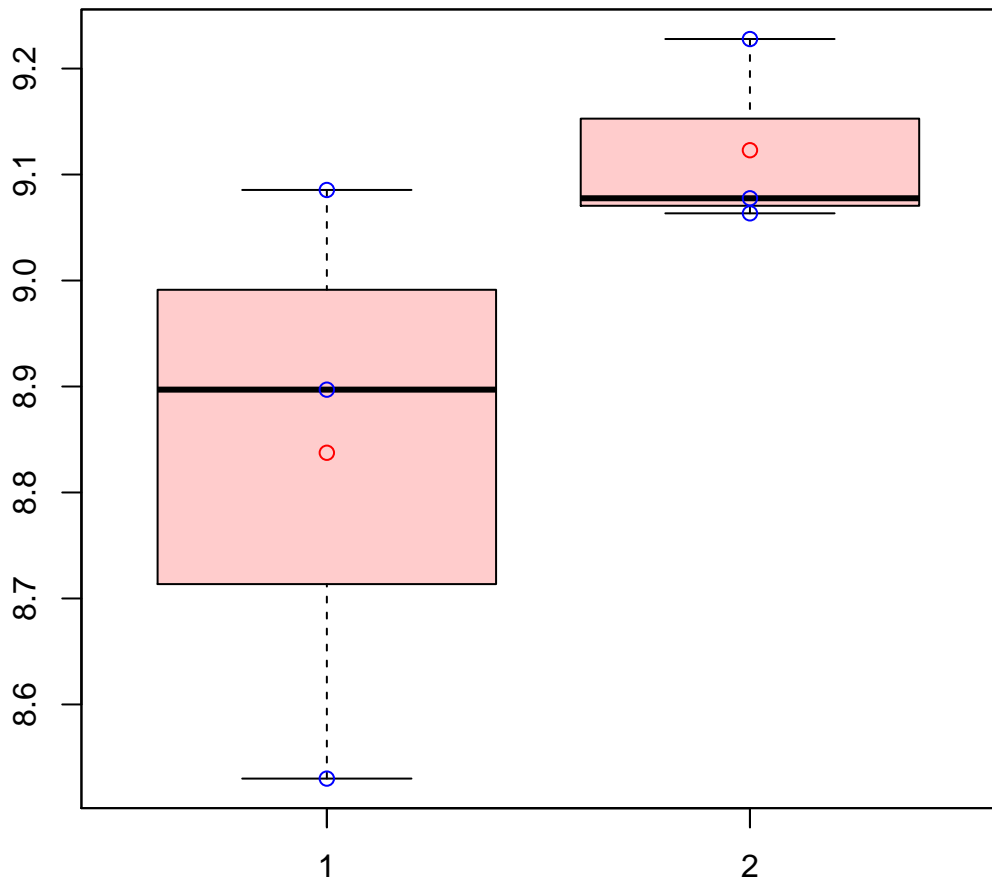

t-Test: p-value = 0.22

# K3YJ82|K3YJ82\_SETIT

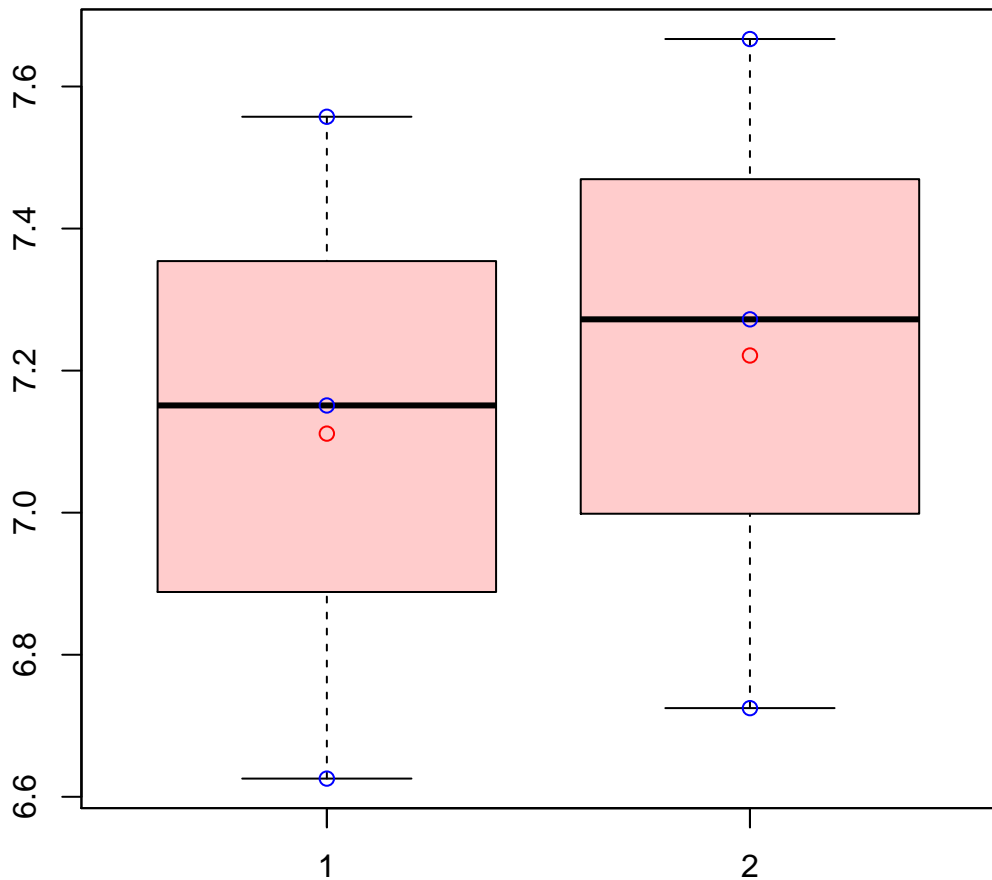

t-Test: p-value = 0.79

# K3YJ89|K3YJ89\_SETIT

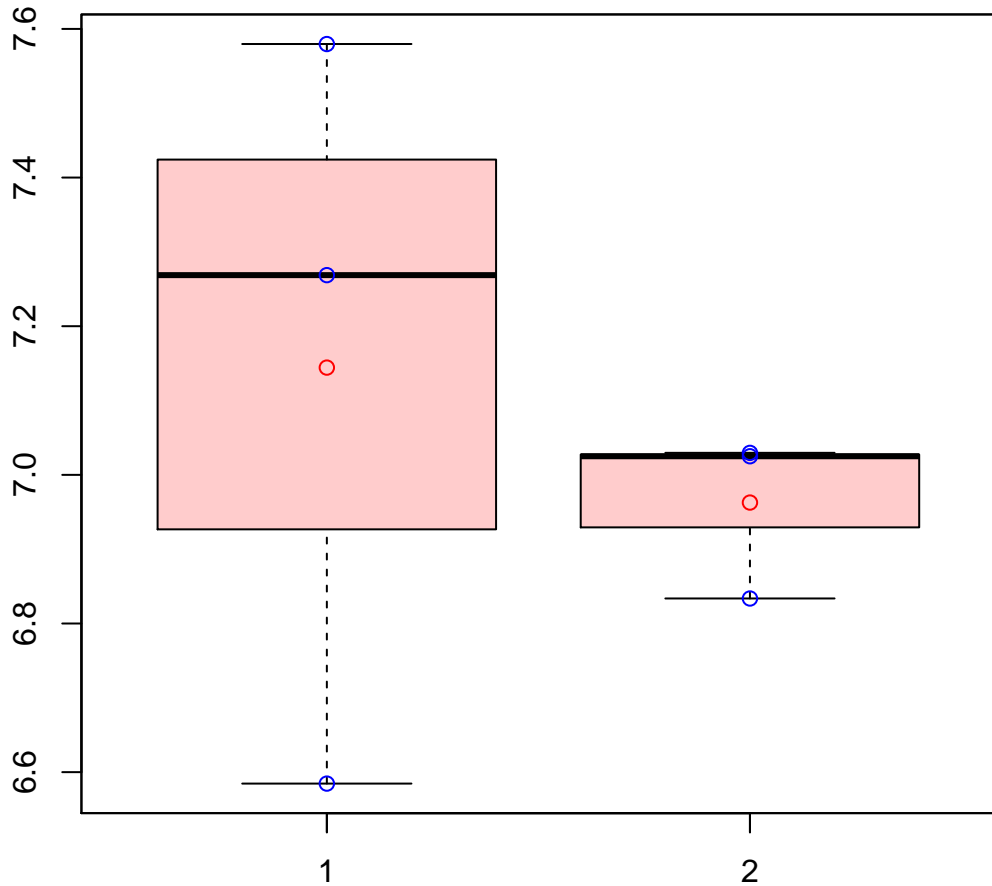

t-Test: p-value = 0.6



# K3YJA1|K3YJA1\_SETIT

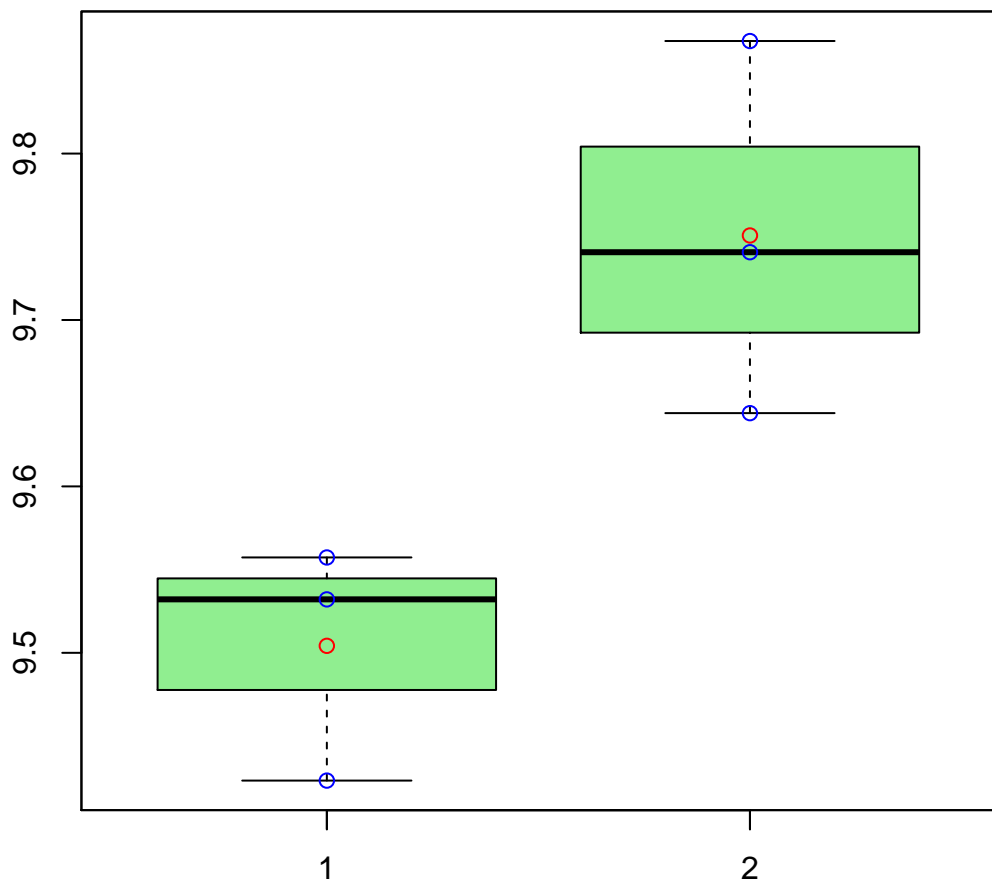

t-Test: p-value = 0.04

# K3YJN1|K3YJN1\_SETIT

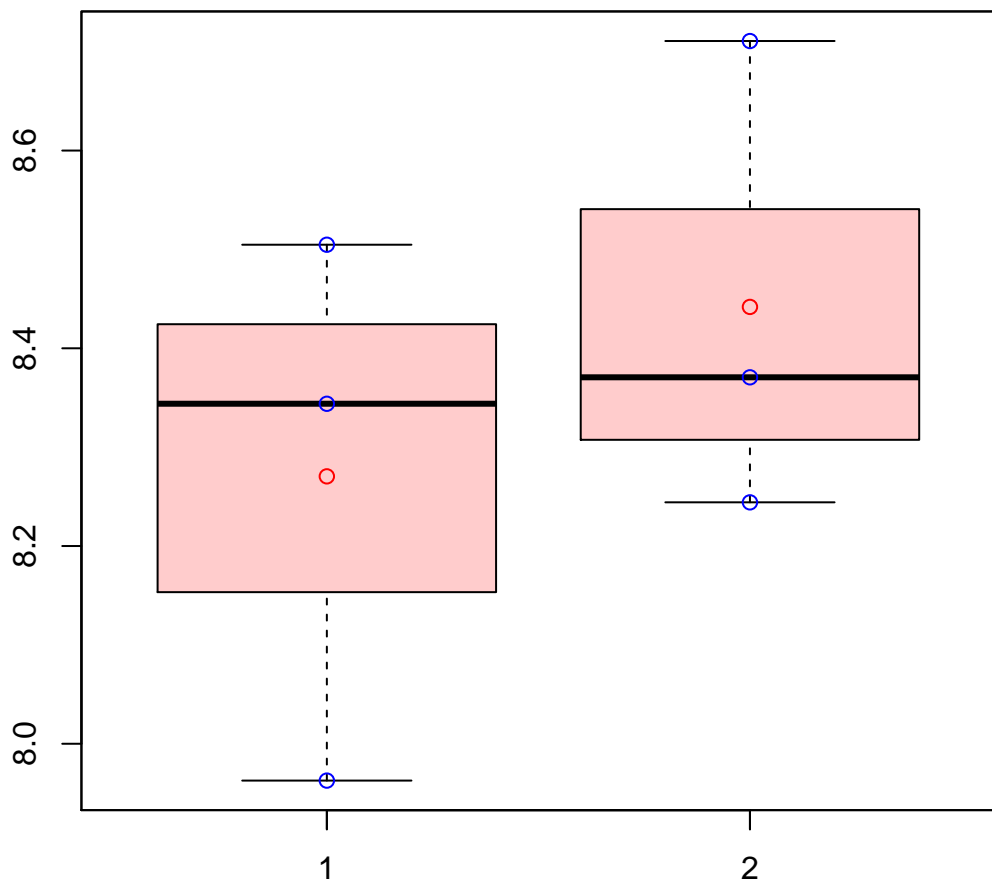

t-Test: p-value = 0.47

# K3YJP2|K3YJP2\_SETIT

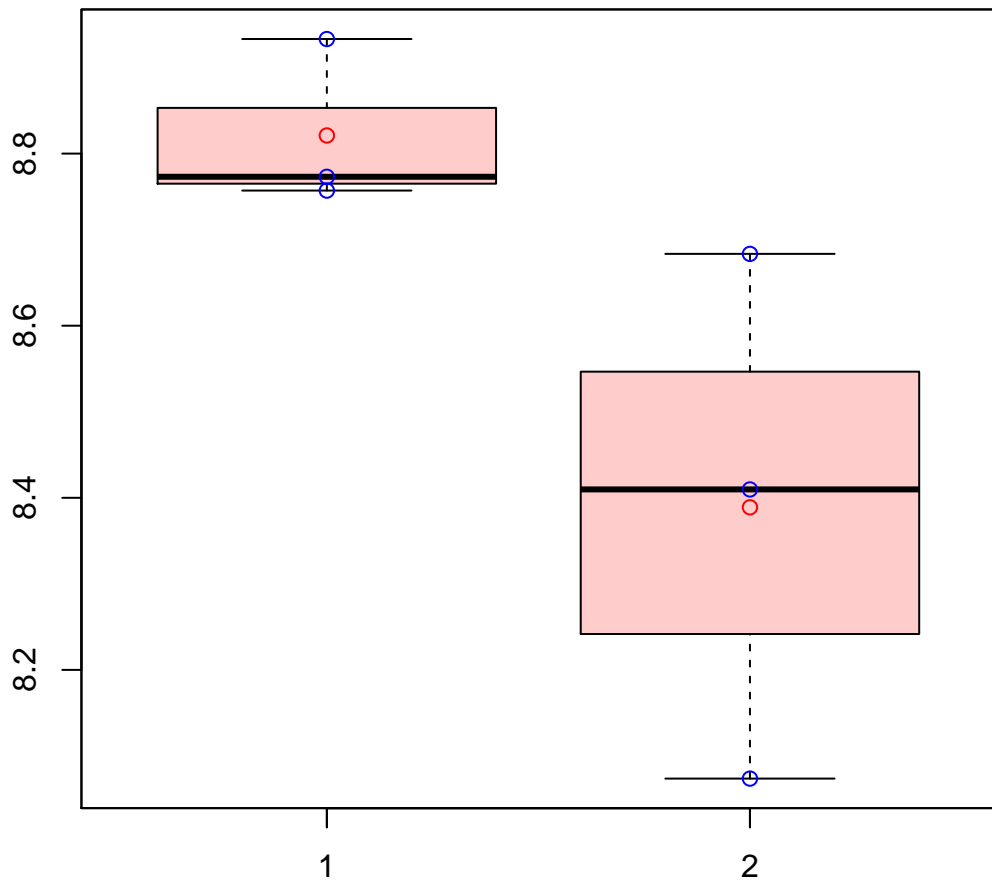

t-Test: p-value = 0.12

# K3YKE6|K3YKE6\_SETIT

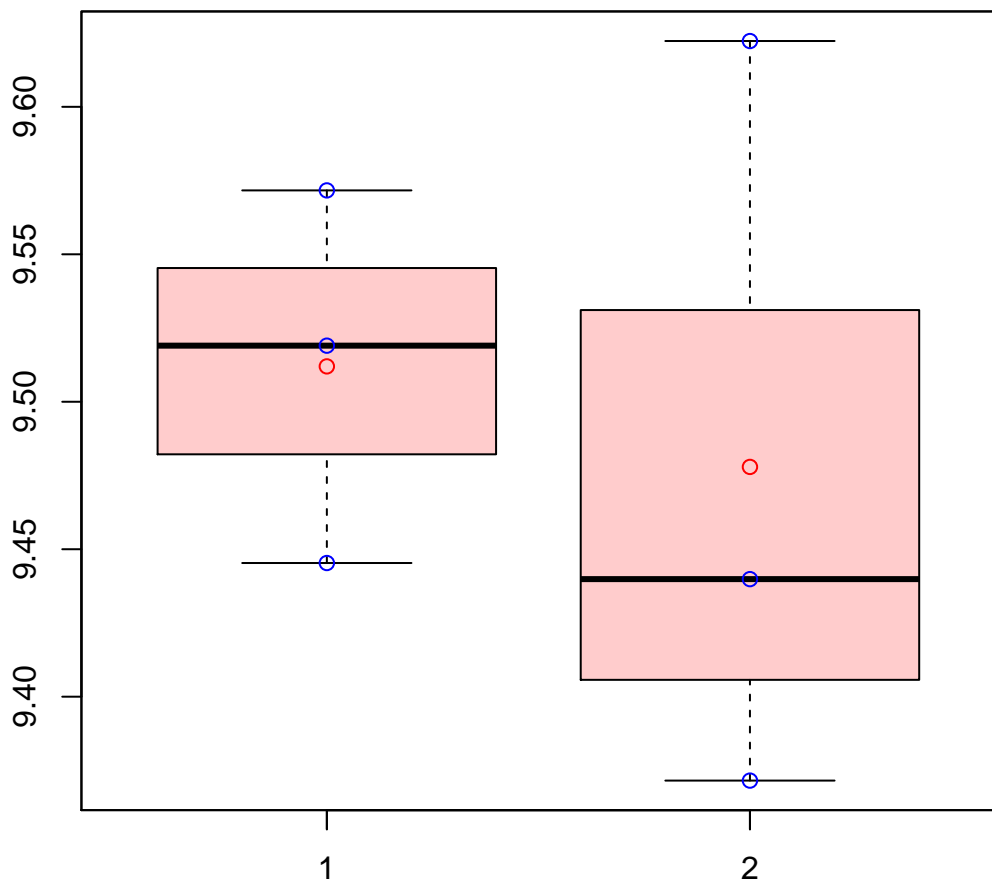

t-Test: p-value = 0.71

# K3YL45|K3YL45\_SETIT

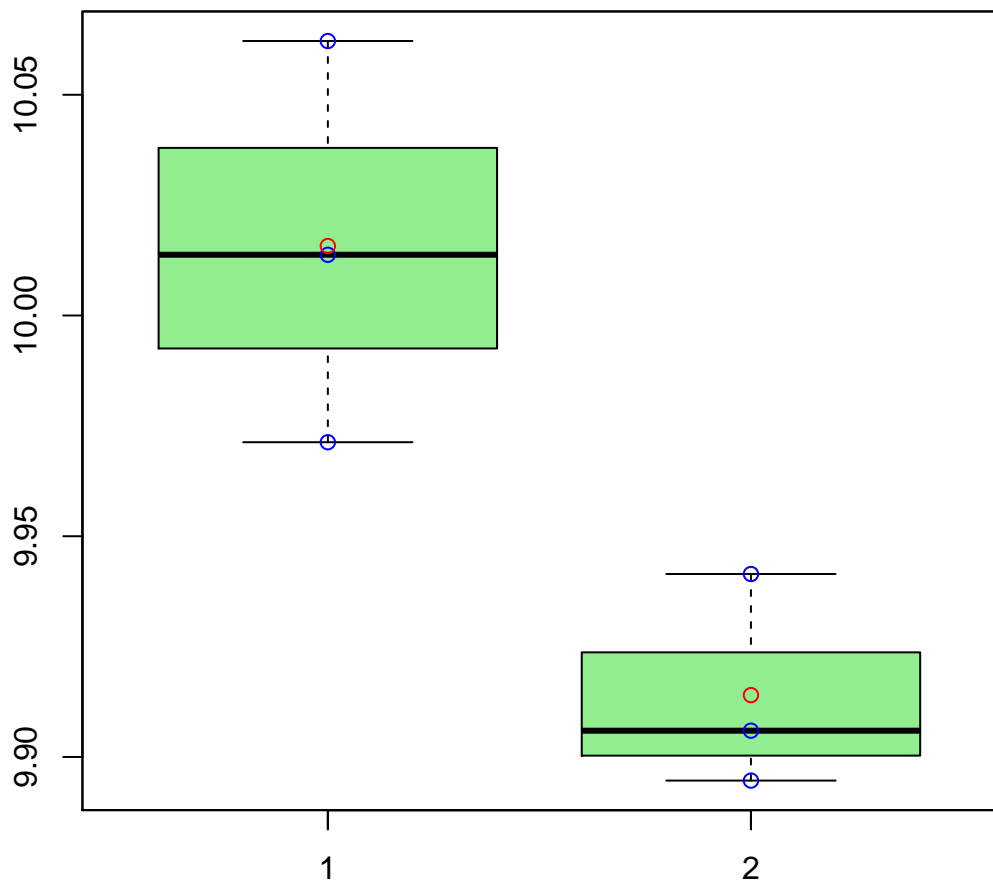

t-Test: p-value = 0.04

# K3YL88|K3YL88\_SETIT

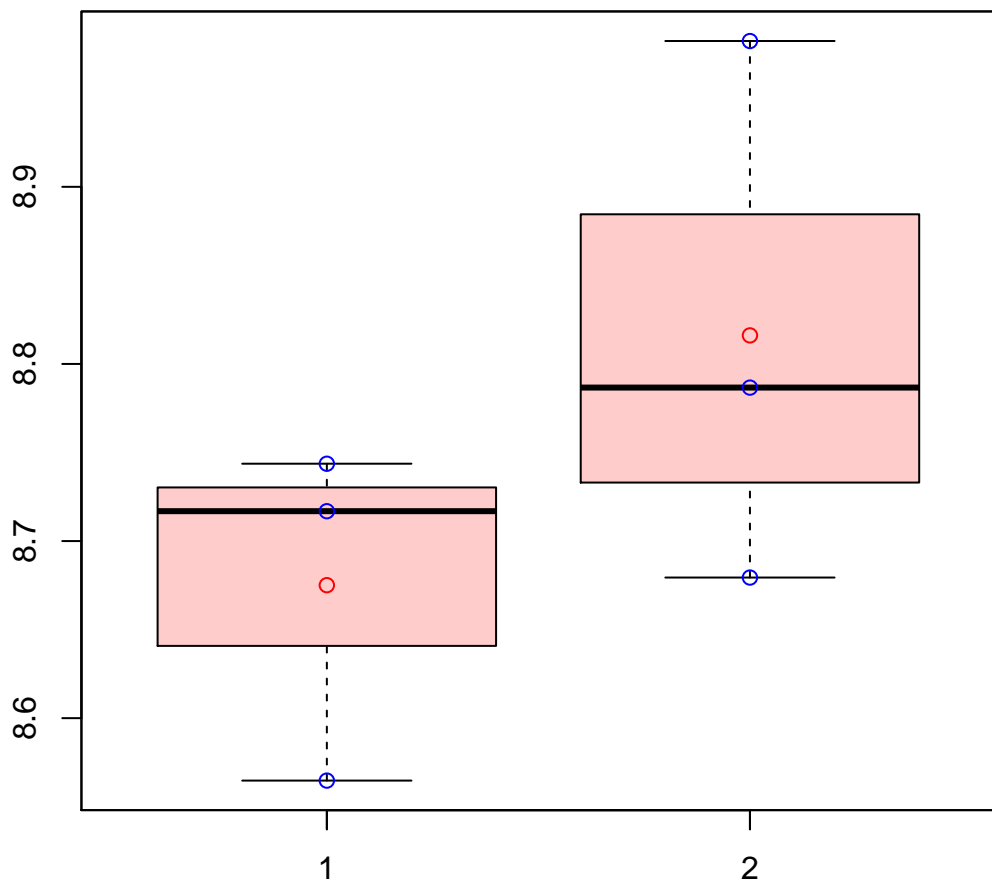

t-Test: p-value = 0.26

# K3YLC2|K3YLC2\_SETIT

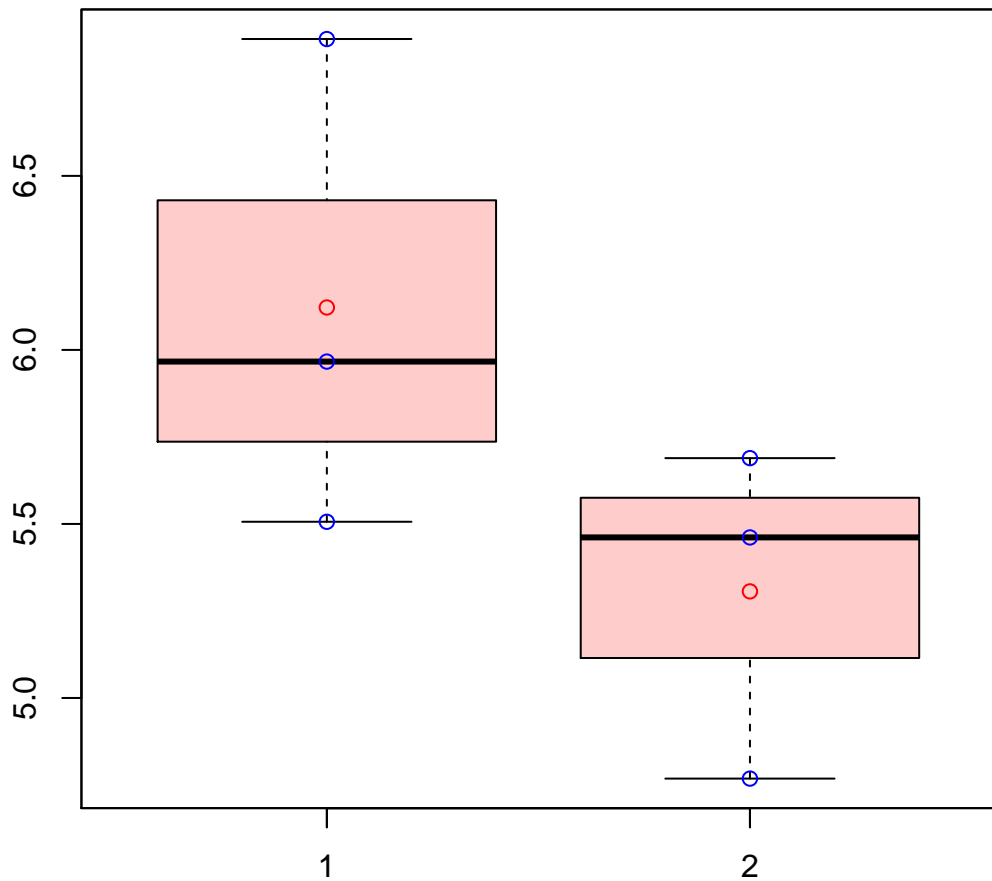

t-Test: p-value = 0.18

# K3YM92|K3YM92\_SETIT

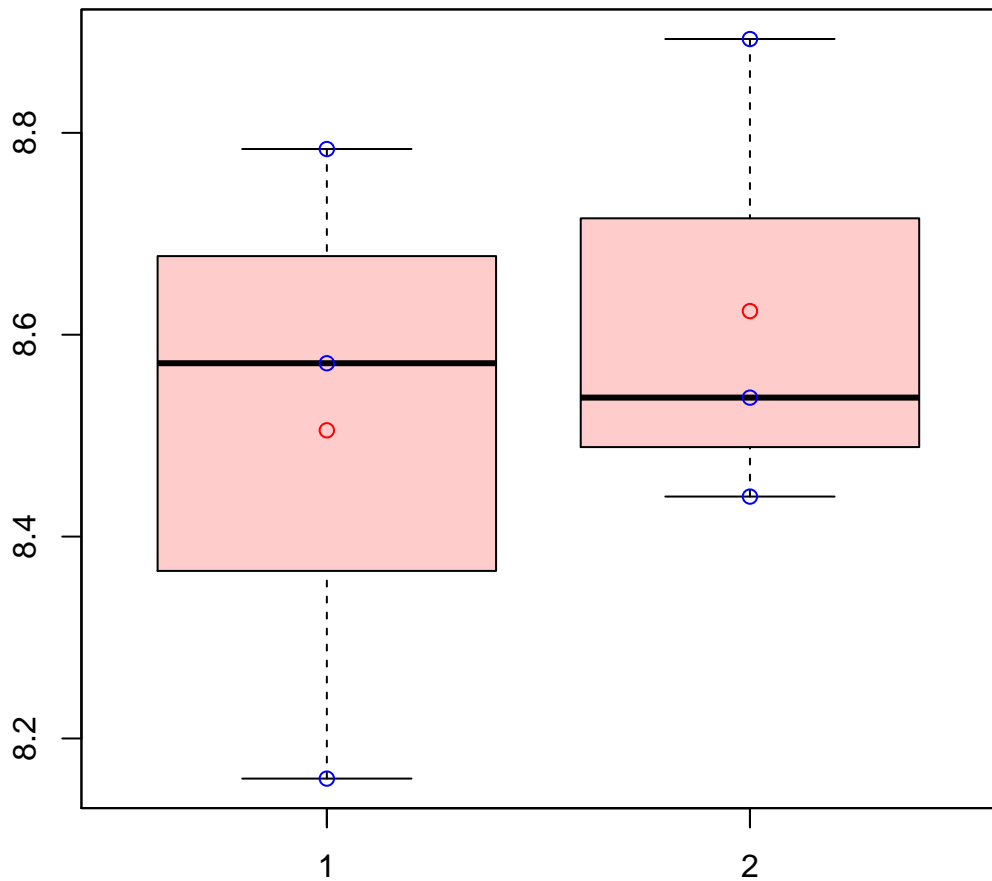

t-Test: p-value = 0.64



# K3YMA8|K3YMA8\_SETIT

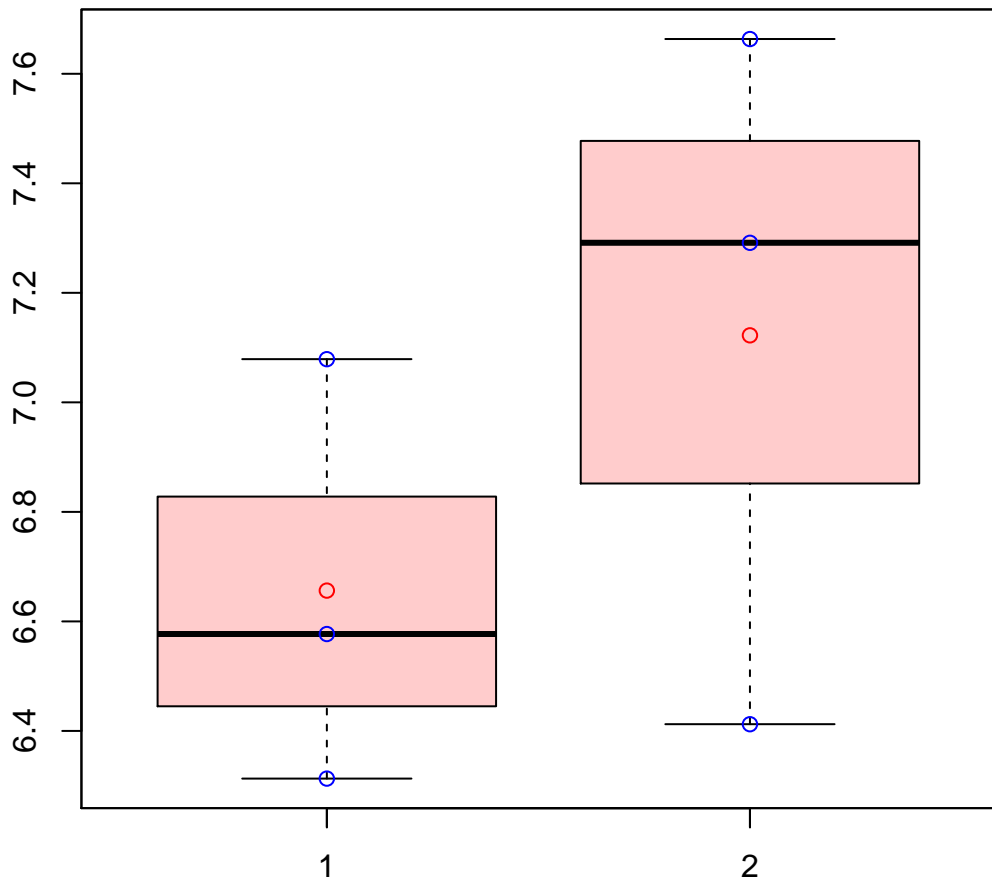

t-Test: p-value = 0.35

# K3YMI4|K3YMI4\_SETIT

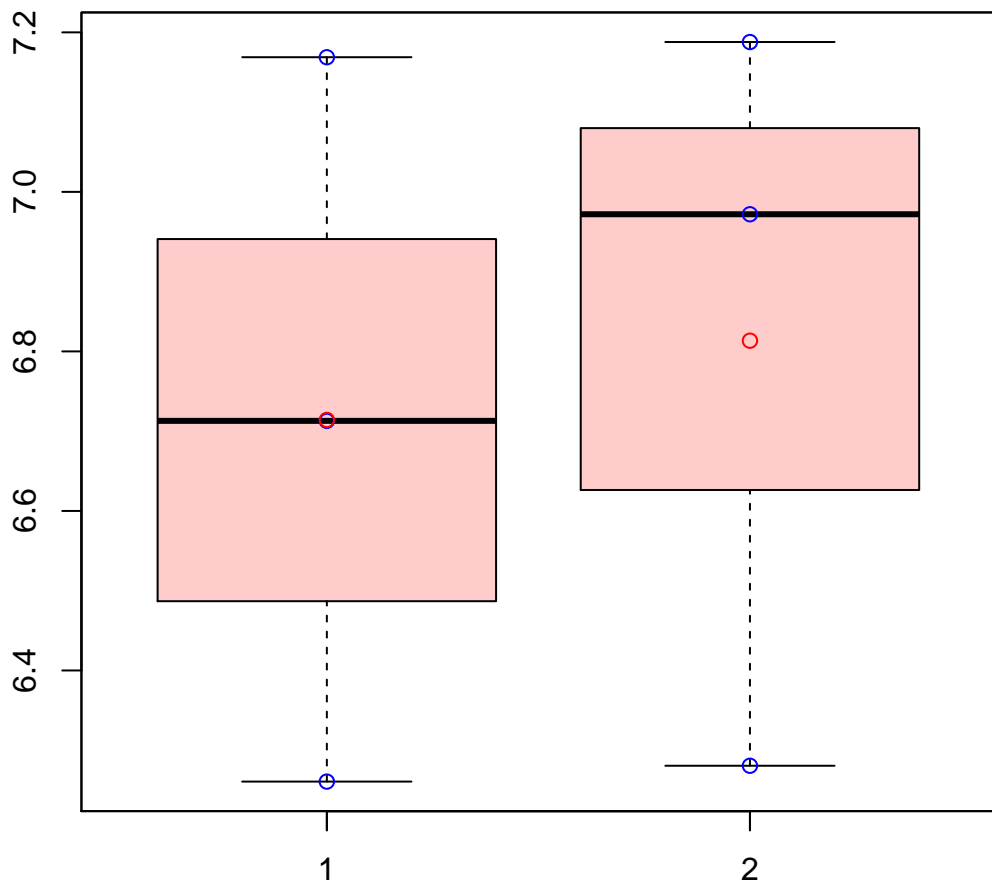

t-Test: p-value = 0.81

# K3YNI6|K3YNI6\_SETIT

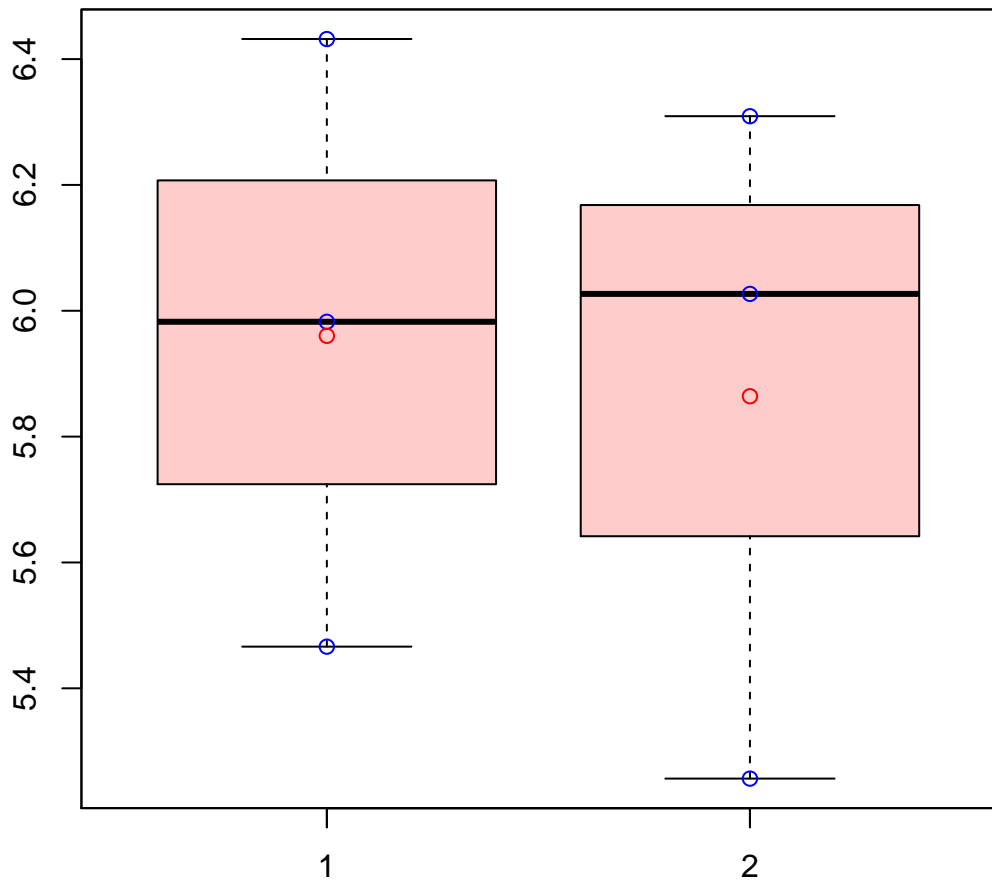

t-Test: p-value = 0.83

# K3YNU4|K3YNU4\_SETIT

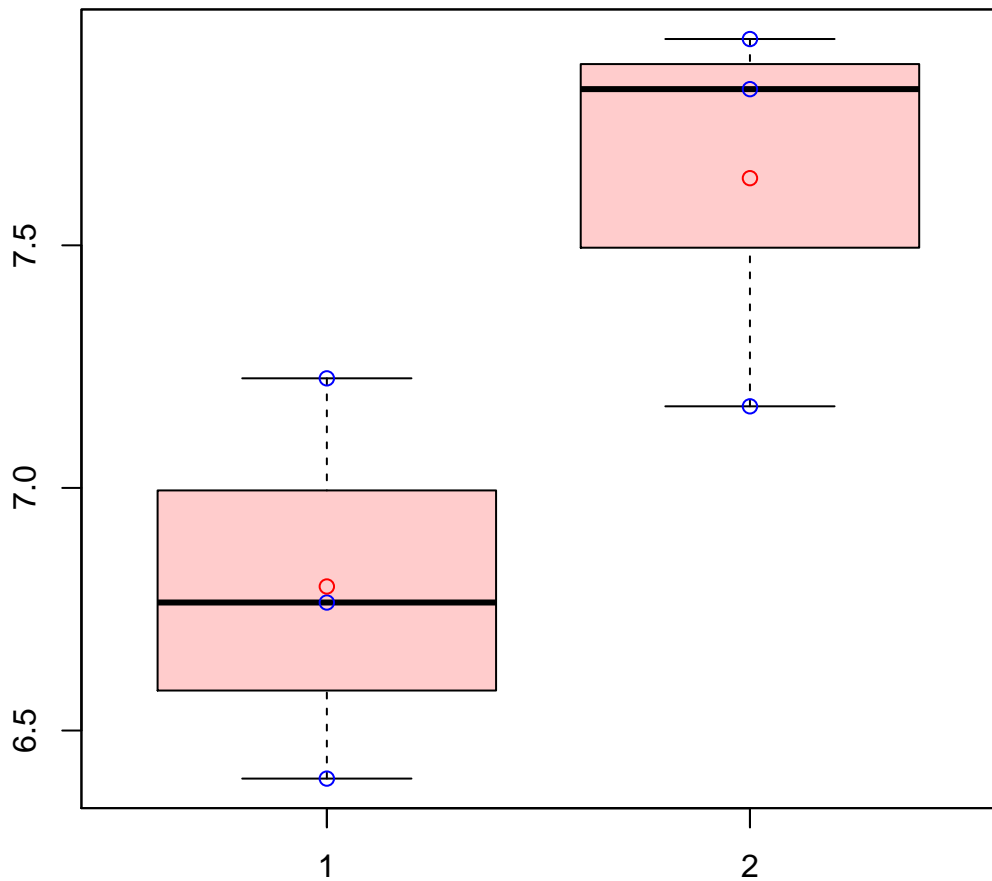

t-Test: p-value = 0.07

# K3YP74|K3YP74\_SETIT

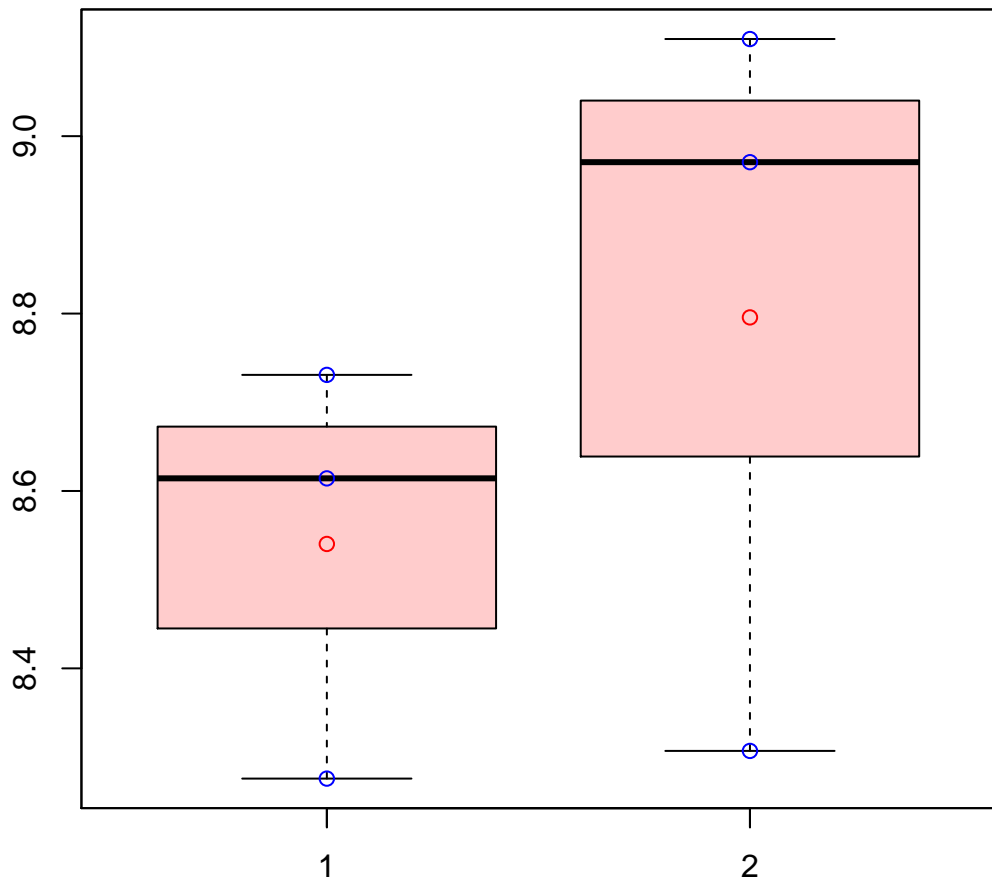

t-Test: p-value = 0.43

# K3YP82|K3YP82\_SETIT

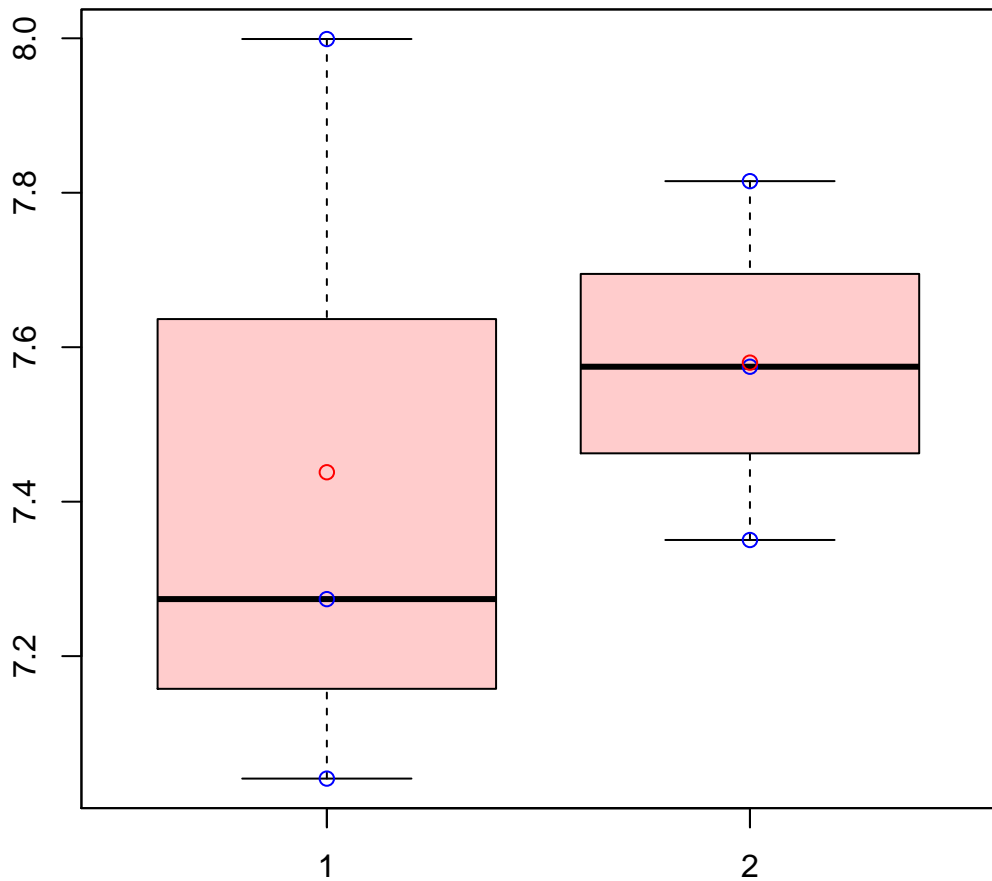

t-Test: p-value = 0.69

# K3YPB4|K3YPB4\_SETIT

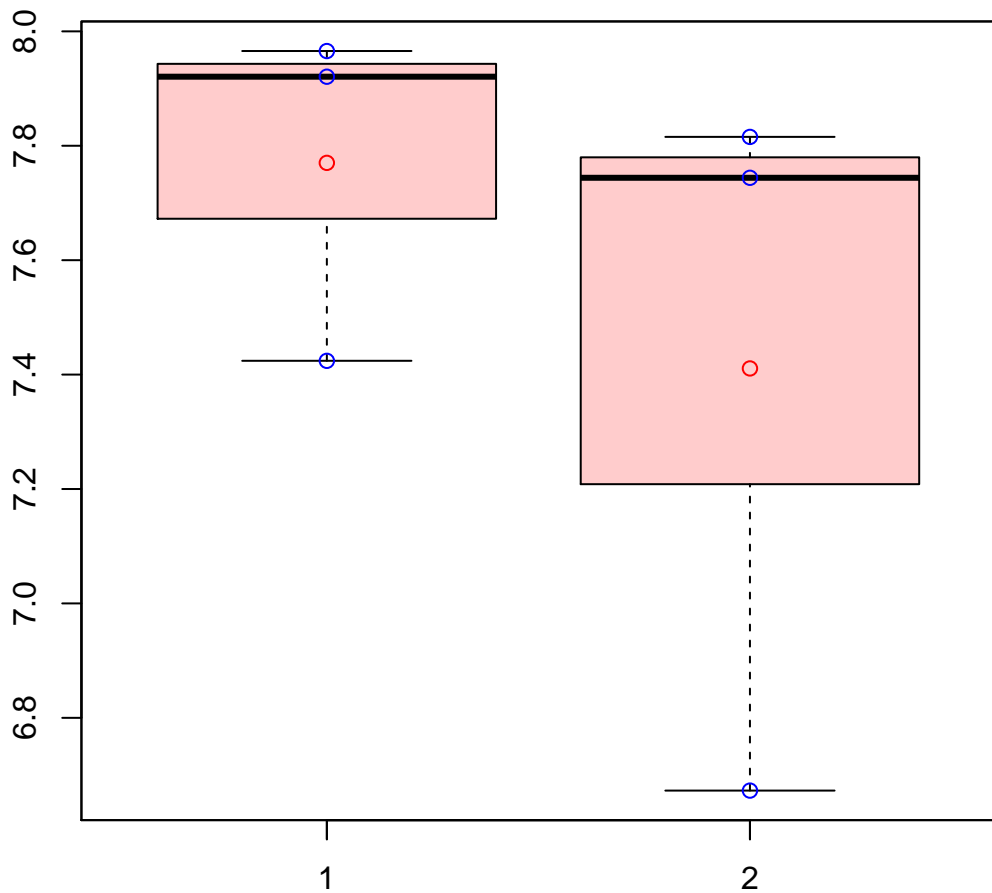

t-Test: p-value = 0.45

# K3YPC2|K3YPC2\_SETIT

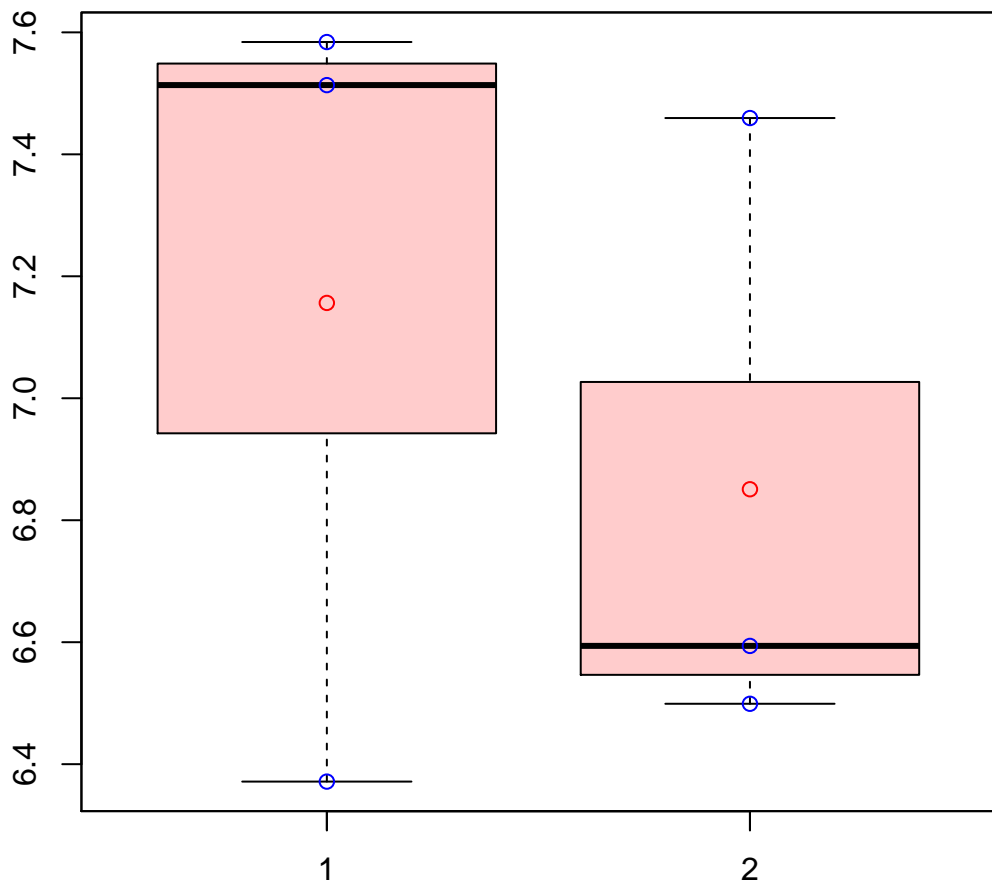

t-Test: p-value = 0.57



# K3YPH1|K3YPH1\_SETIT

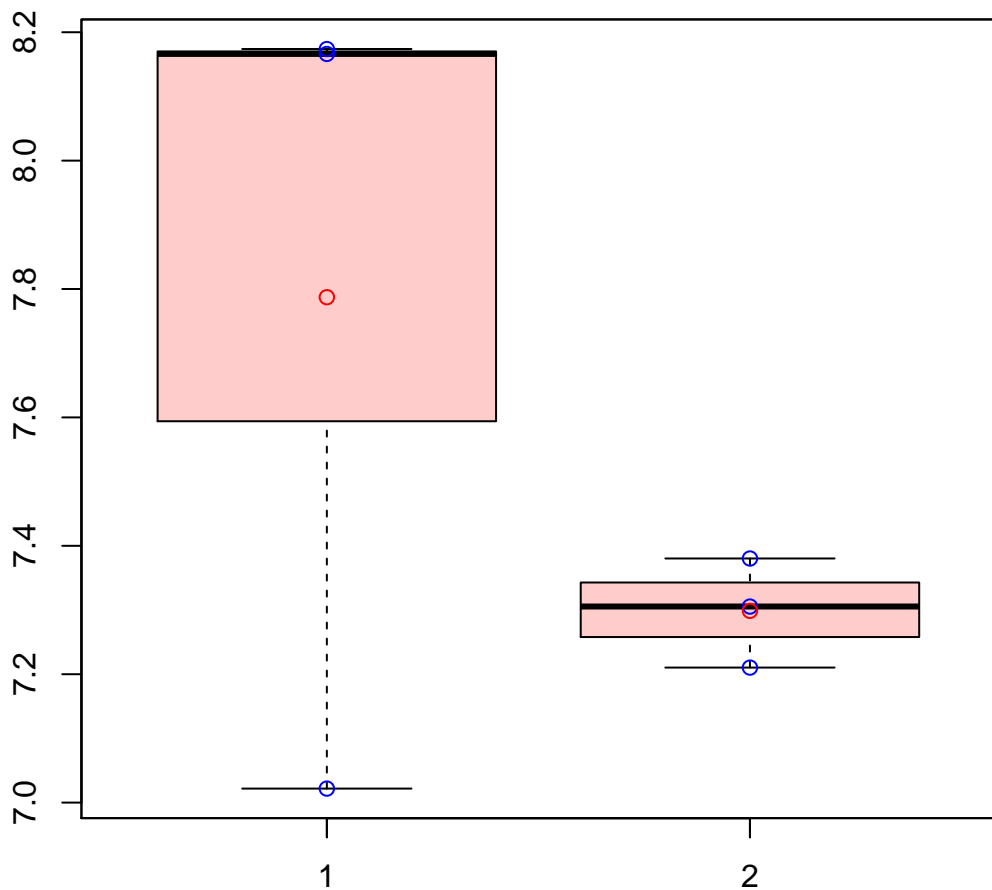

t-Test: p-value = 0.33

# K3YPL5|K3YPL5\_SETIT

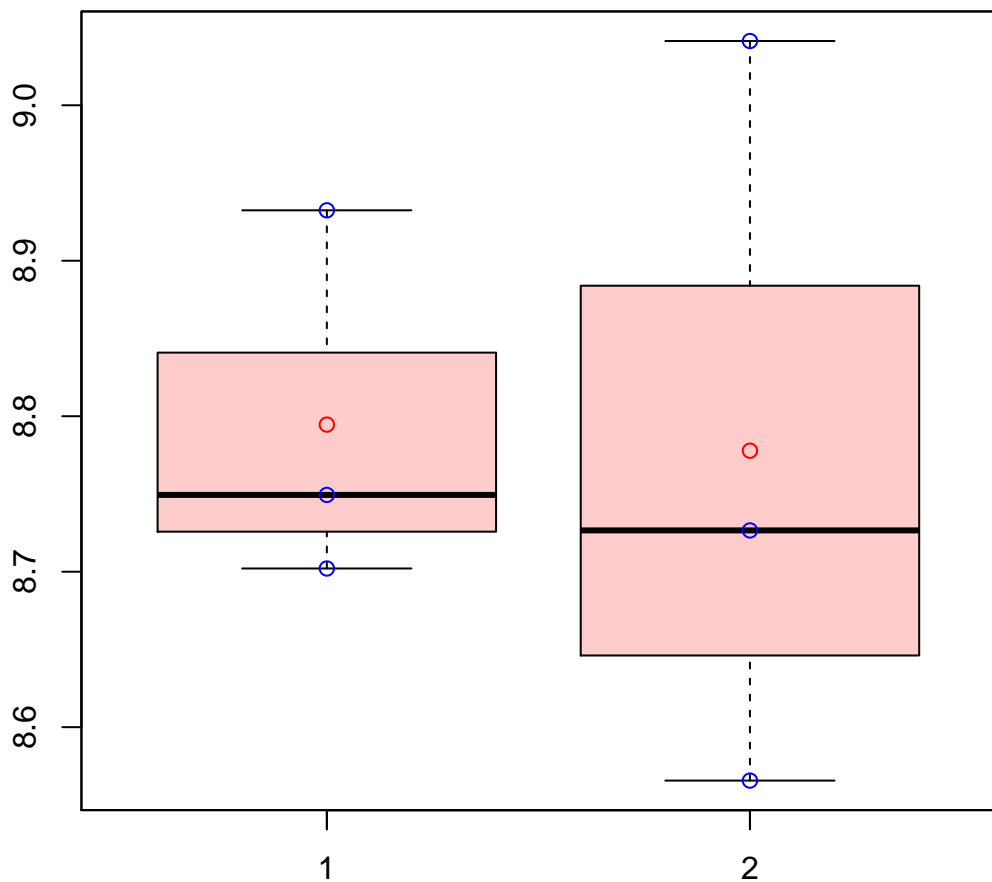

t-Test: p-value = 0.92

# K3YPP4|K3YPP4\_SETIT

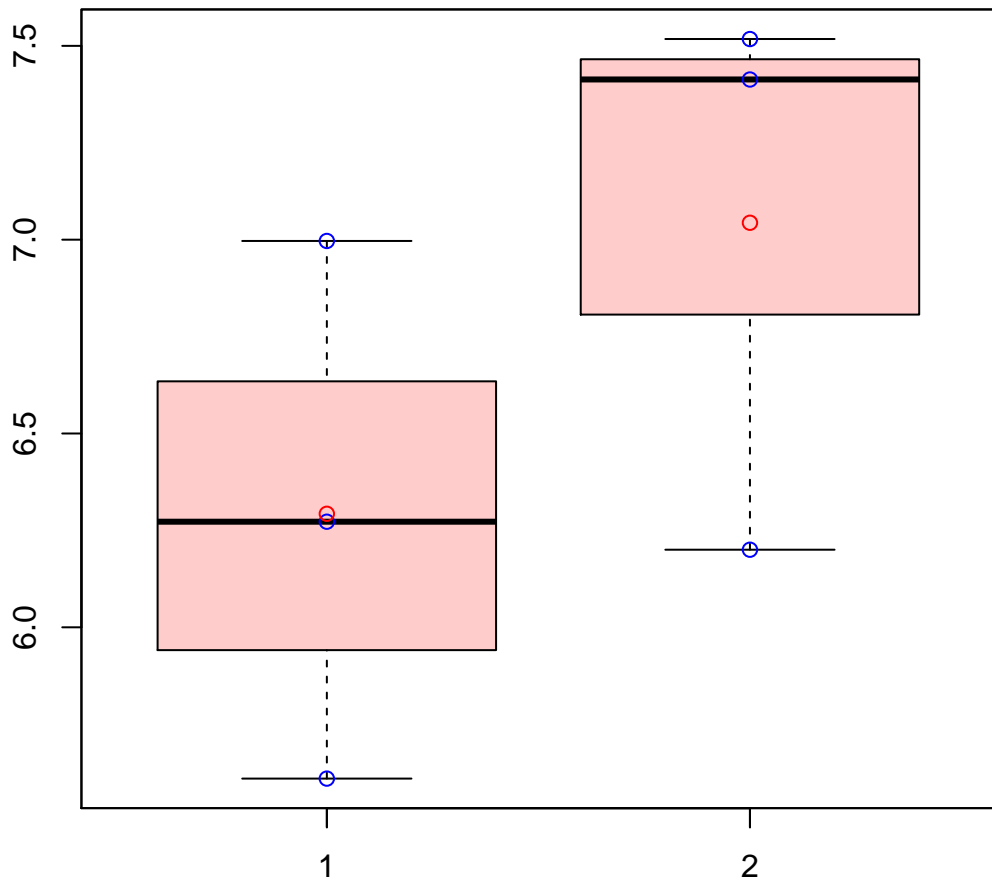

t-Test: p-value = 0.27

# K3YPQ4|K3YPQ4\_SETIT

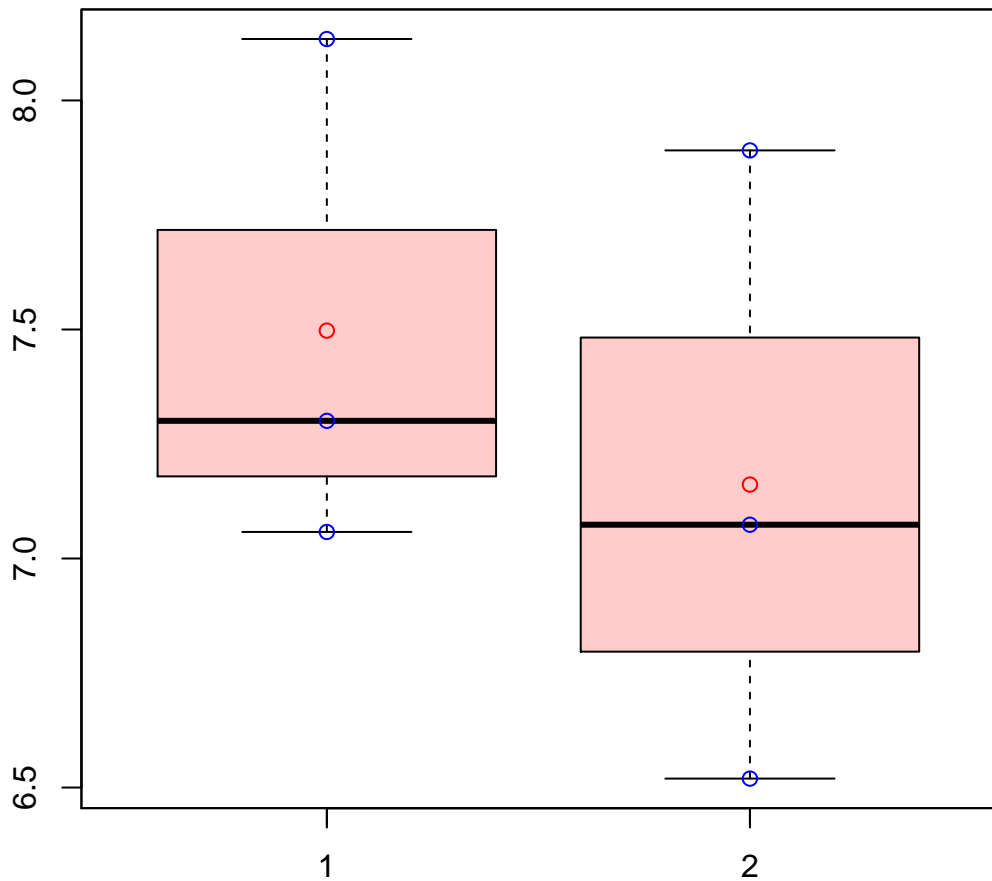

t-Test: p-value = 0.55

# K3YPS7|K3YPS7\_SETIT

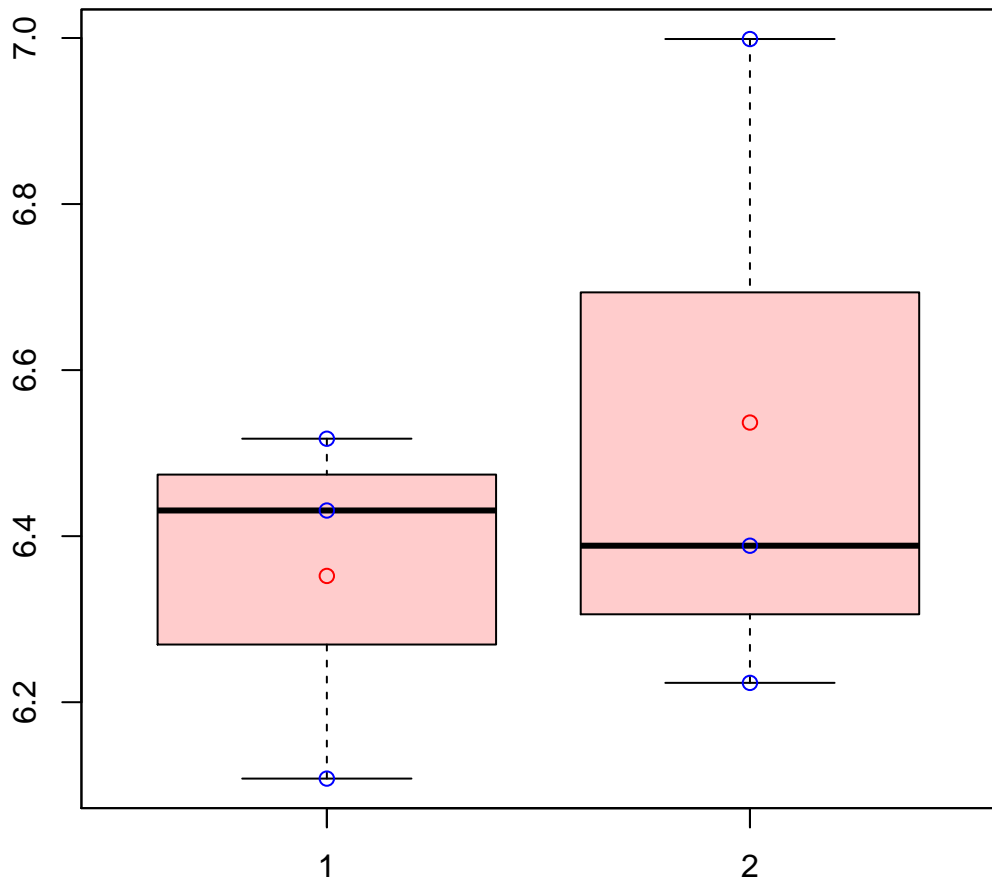

t-Test: p-value = 0.54

# K3YPS9|K3YPS9\_SETIT

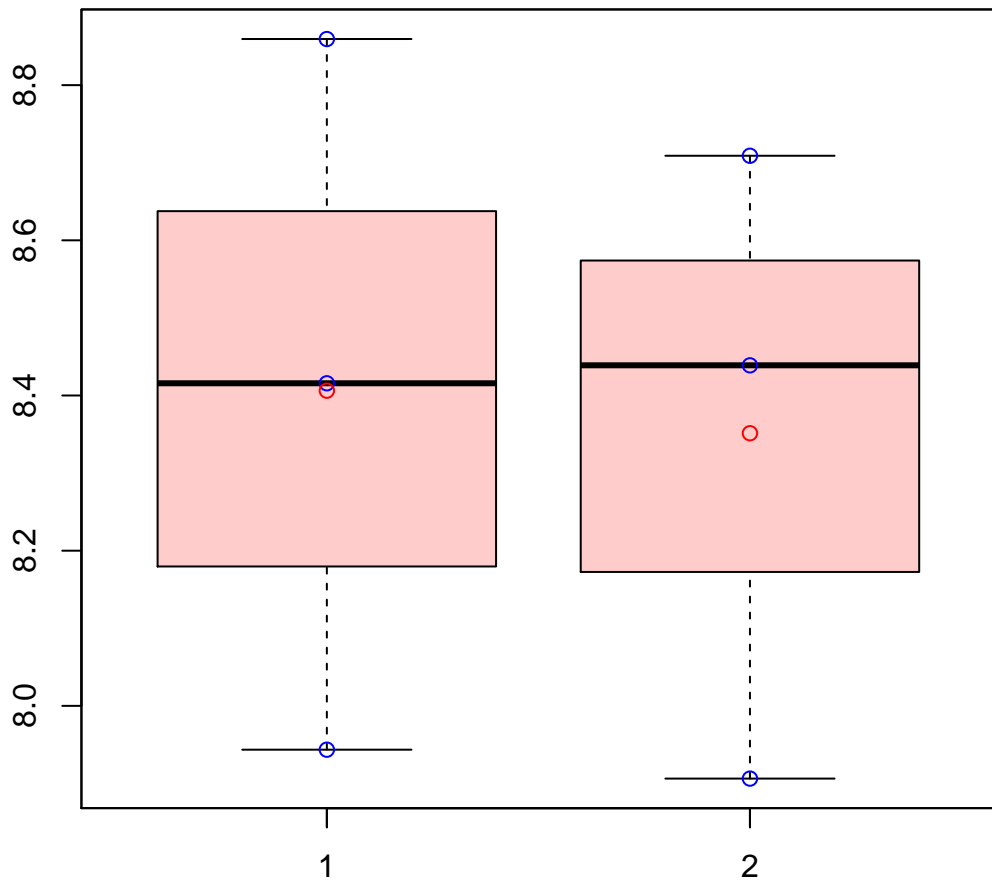

t-Test: p-value = 0.88

# K3YPV9|K3YPV9\_SETIT

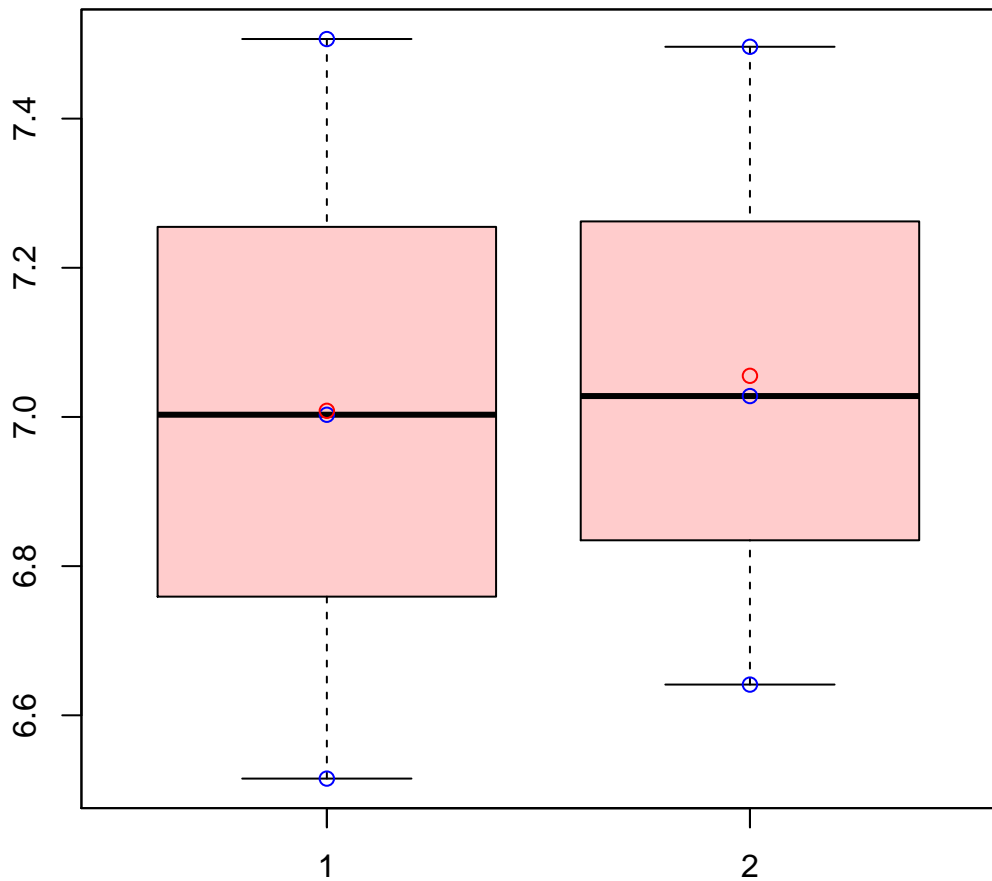

t-Test: p-value = 0.91

# K3YQ03|K3YQ03\_SETIT

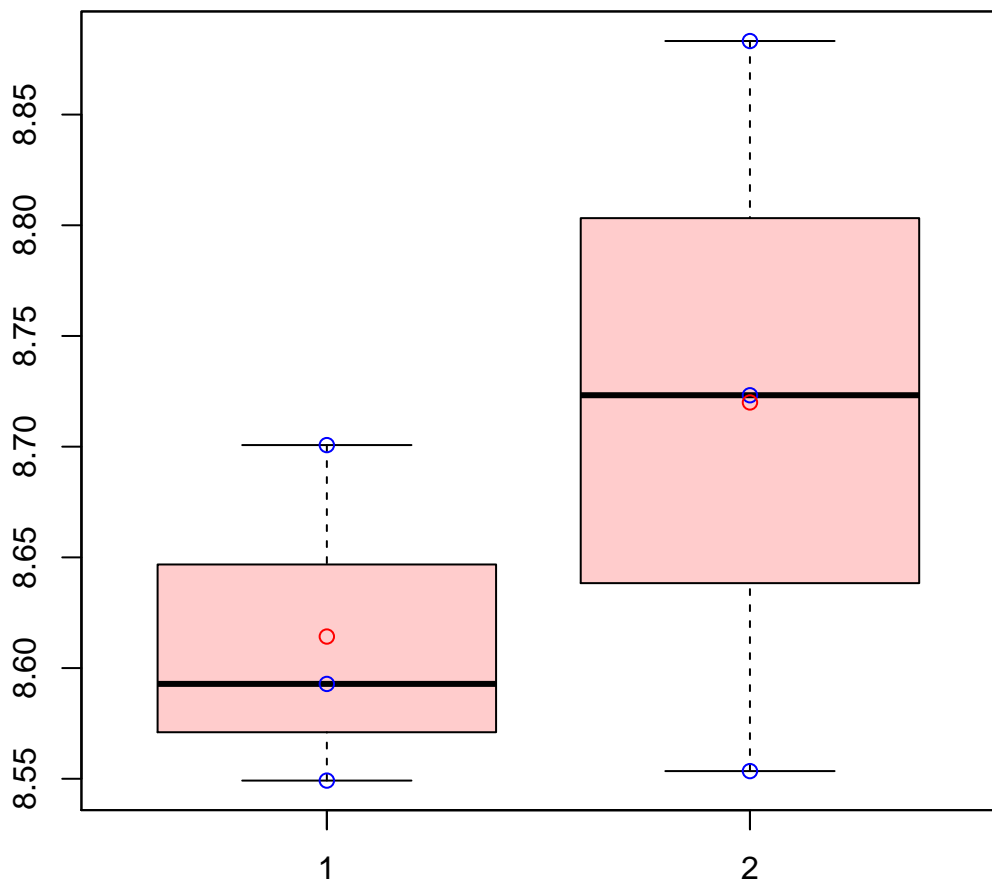

t-Test: p-value = 0.39



# K3YQ53|K3YQ53\_SETIT

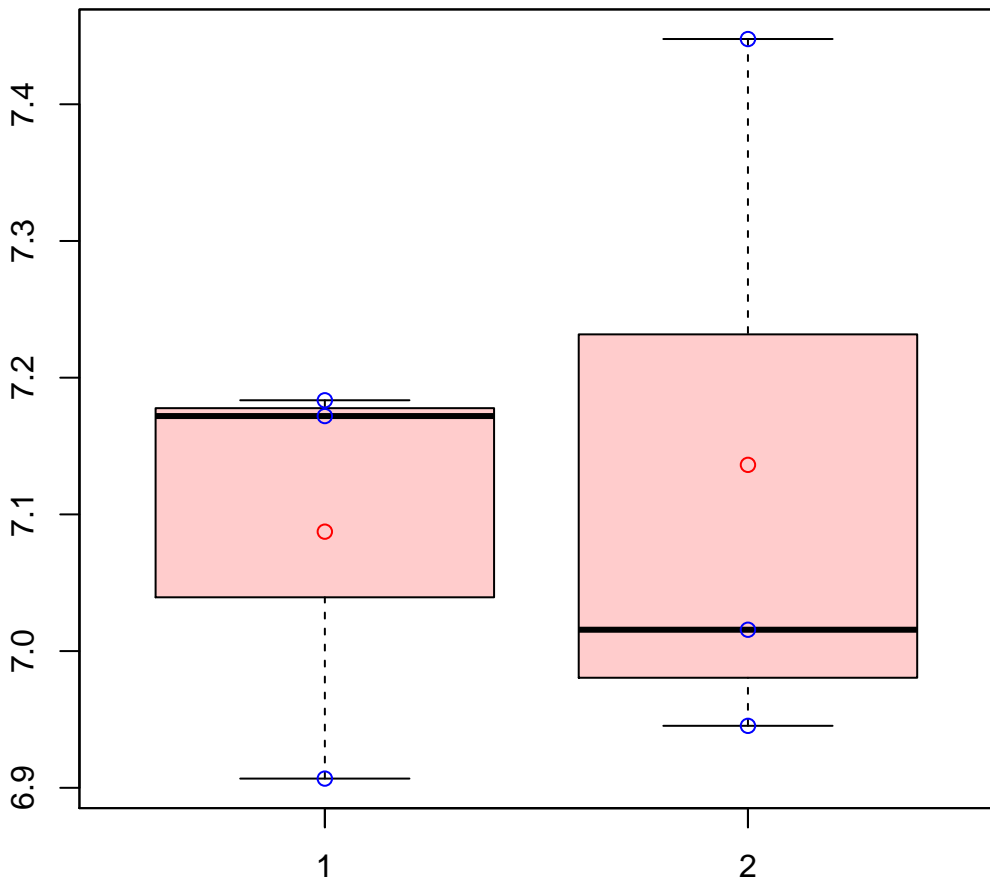

t-Test: p-value = 0.8

# K3YQ63|K3YQ63\_SETIT

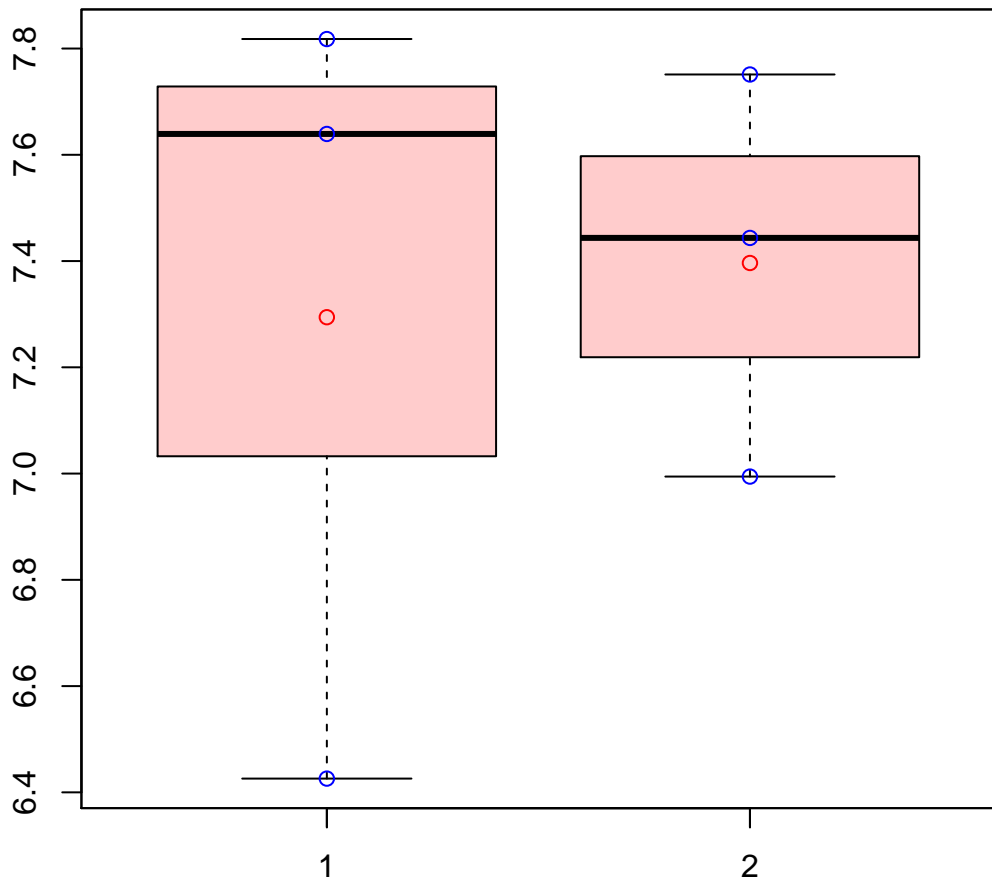

t-Test: p-value = 0.85

# K3YQ87|K3YQ87\_SETIT

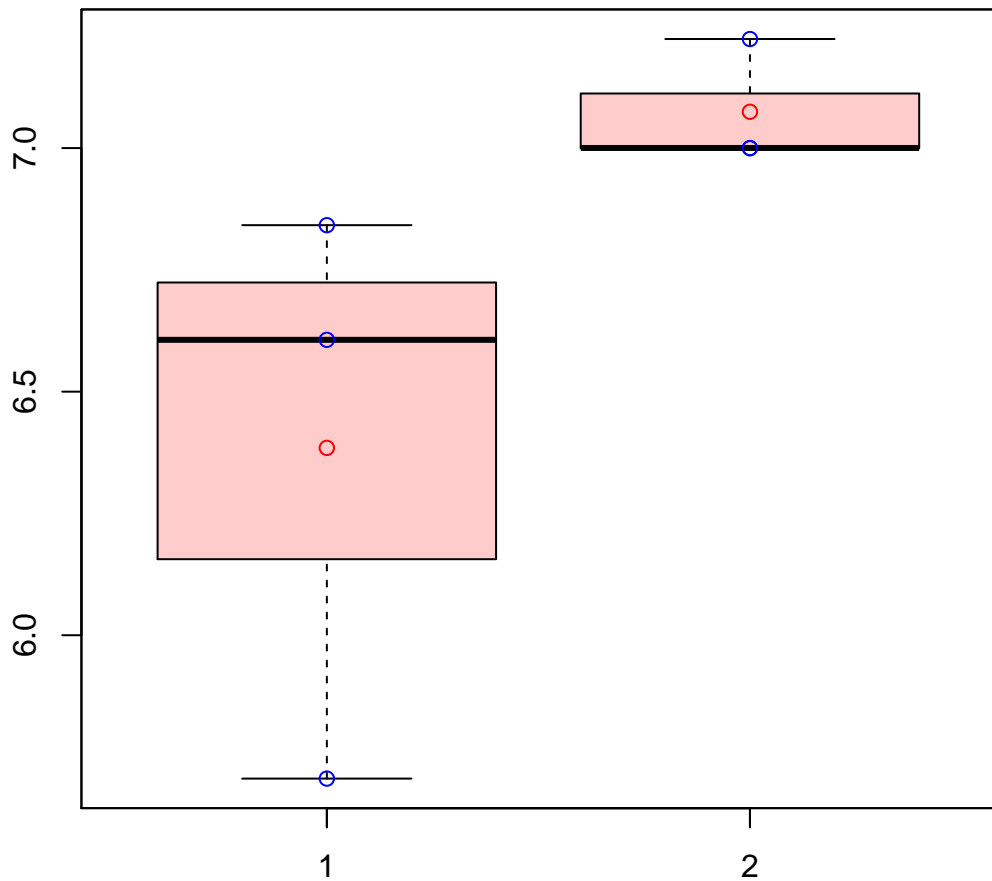

t-Test: p-value = 0.18

# K3YQA0|K3YQA0\_SETIT

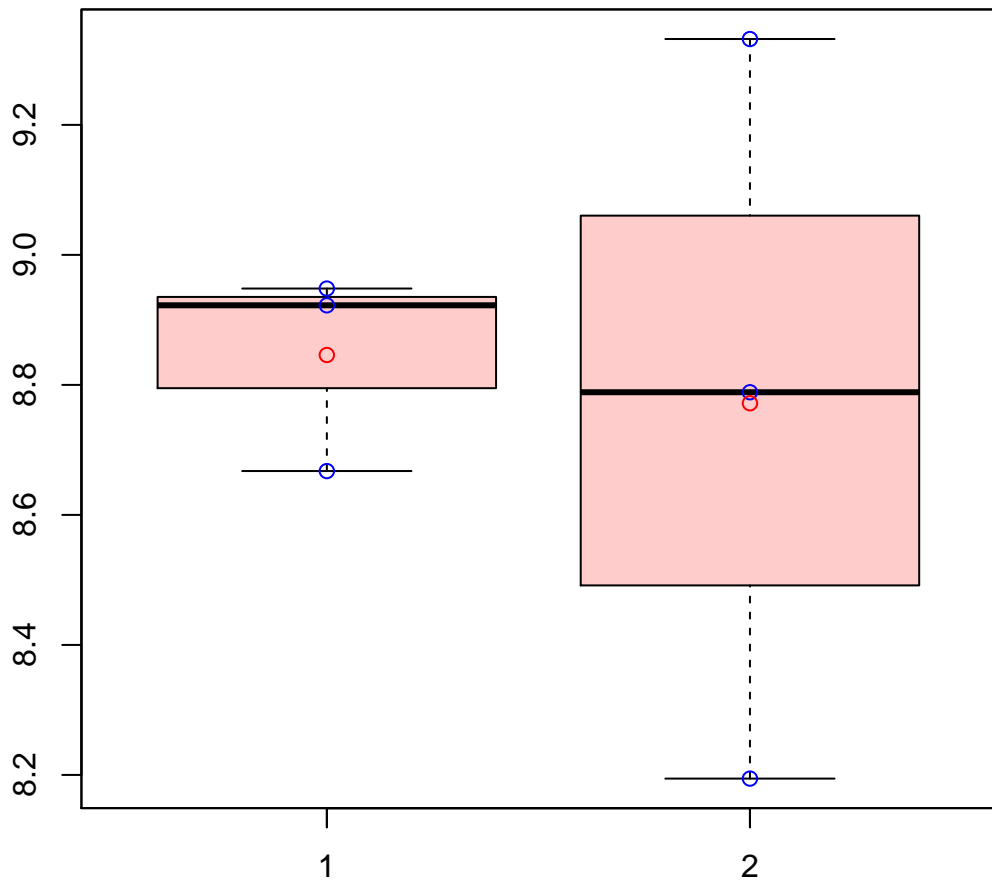

t-Test: p-value = 0.85

# K3YQG1|K3YQG1\_SETIT

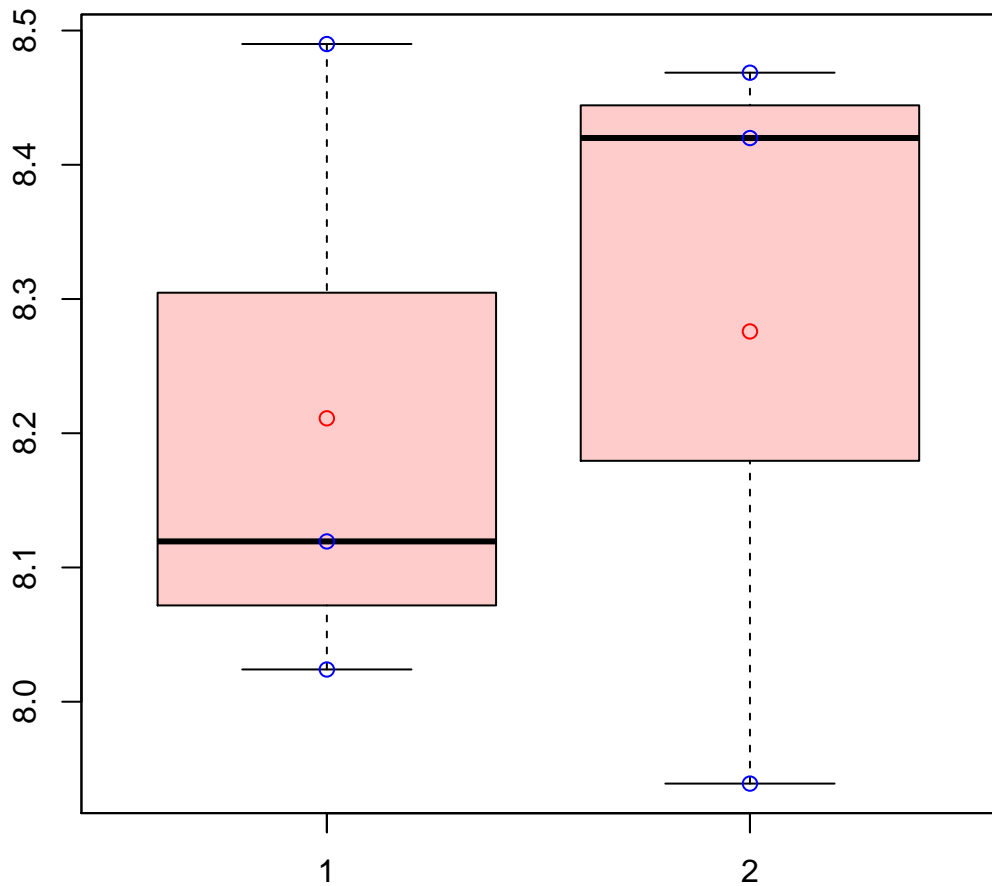

t-Test: p-value = 0.78

# K3YQN8|K3YQN8\_SETIT

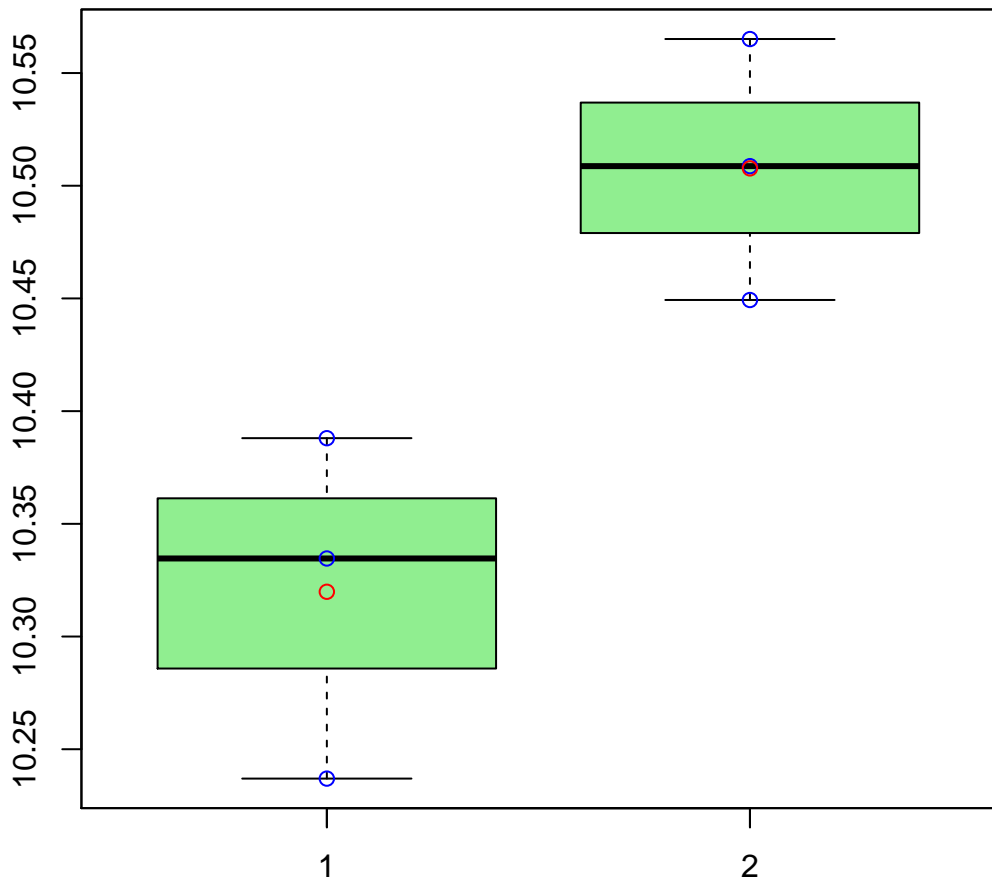

t-Test: p-value = 0.03

# K3YQW4|K3YQW4\_SETIT

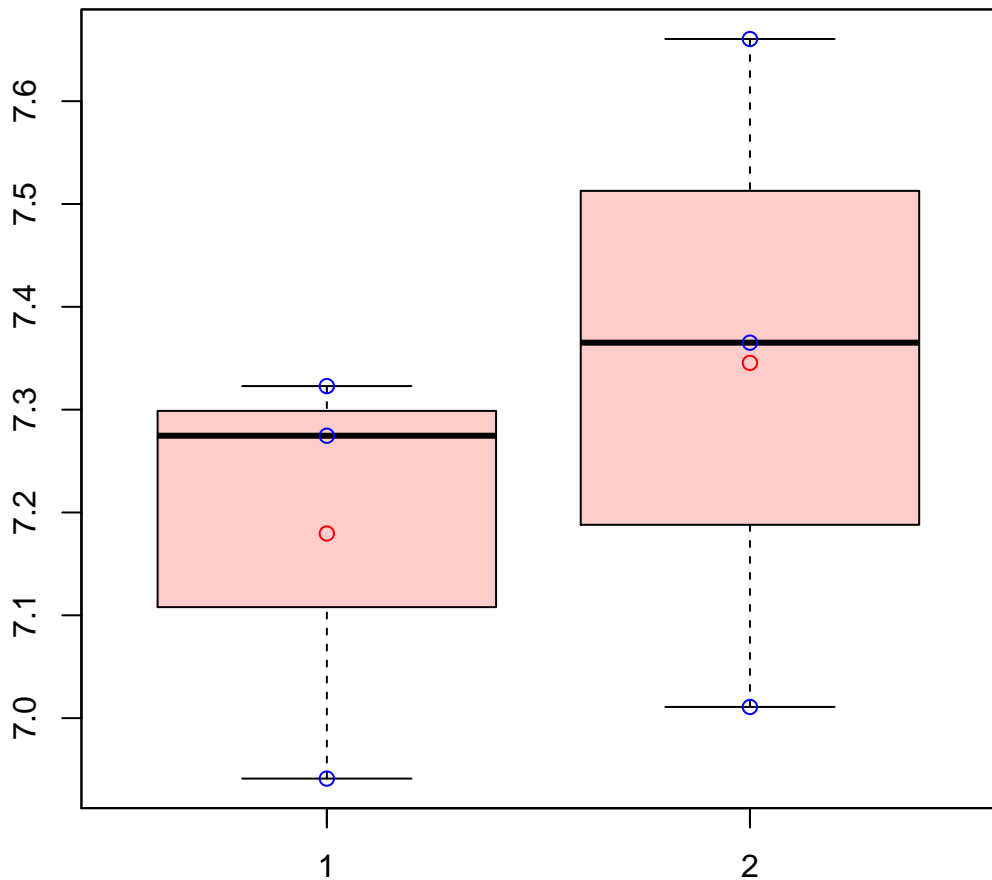

t-Test: p-value = 0.5

# K3YR24|K3YR24\_SETIT

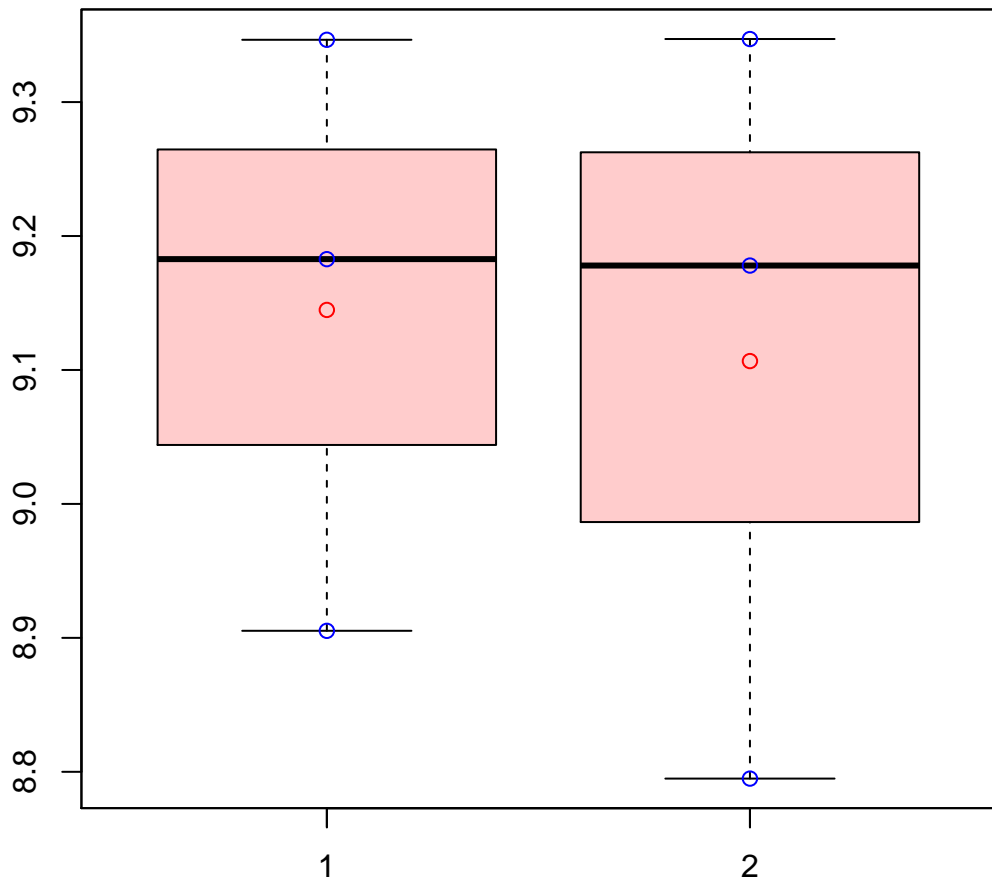

t-Test: p-value = 0.86



# K3YR29|K3YR29\_SETIT

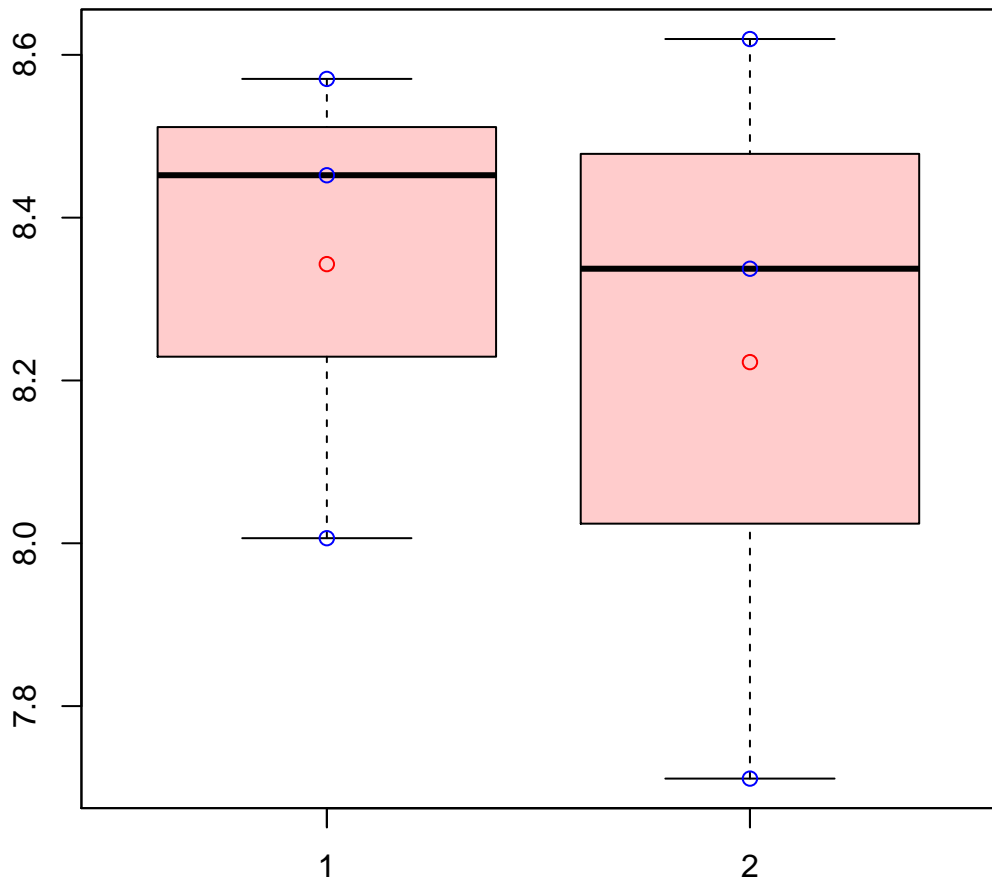

t-Test: p-value = 0.73

# K3YR77|K3YR77\_SETIT

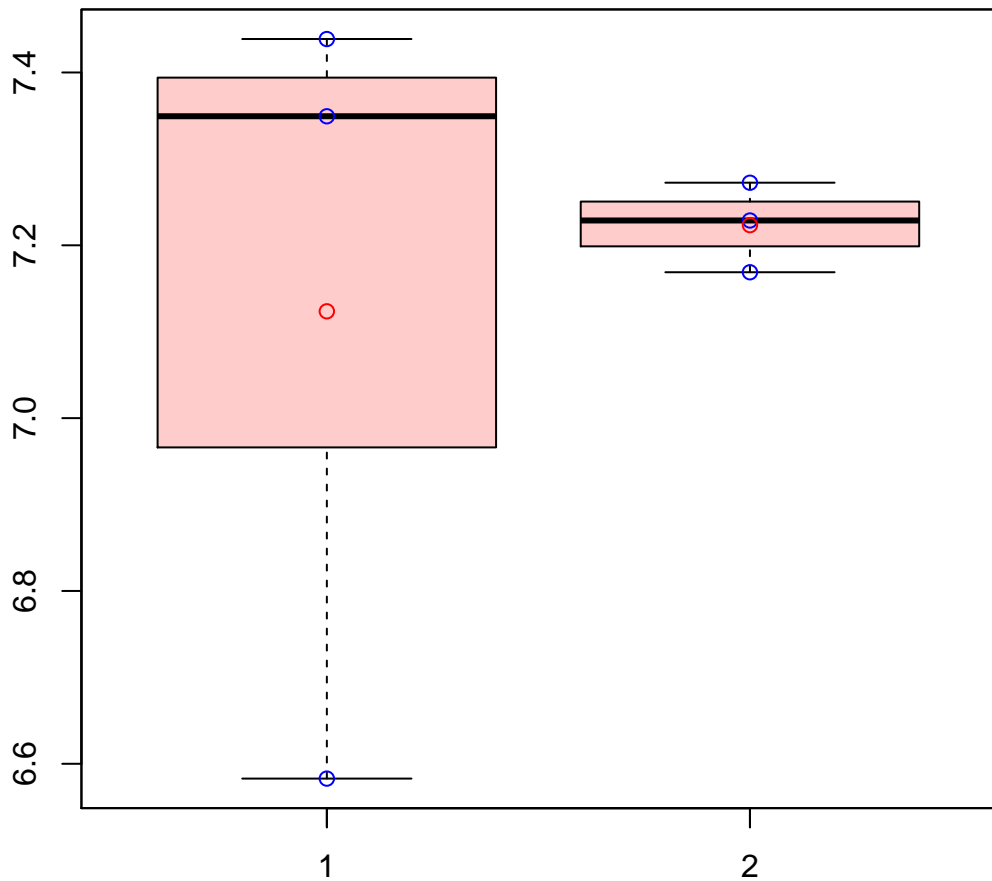

t-Test: p-value = 0.75

# K3YRA7|K3YRA7\_SETIT

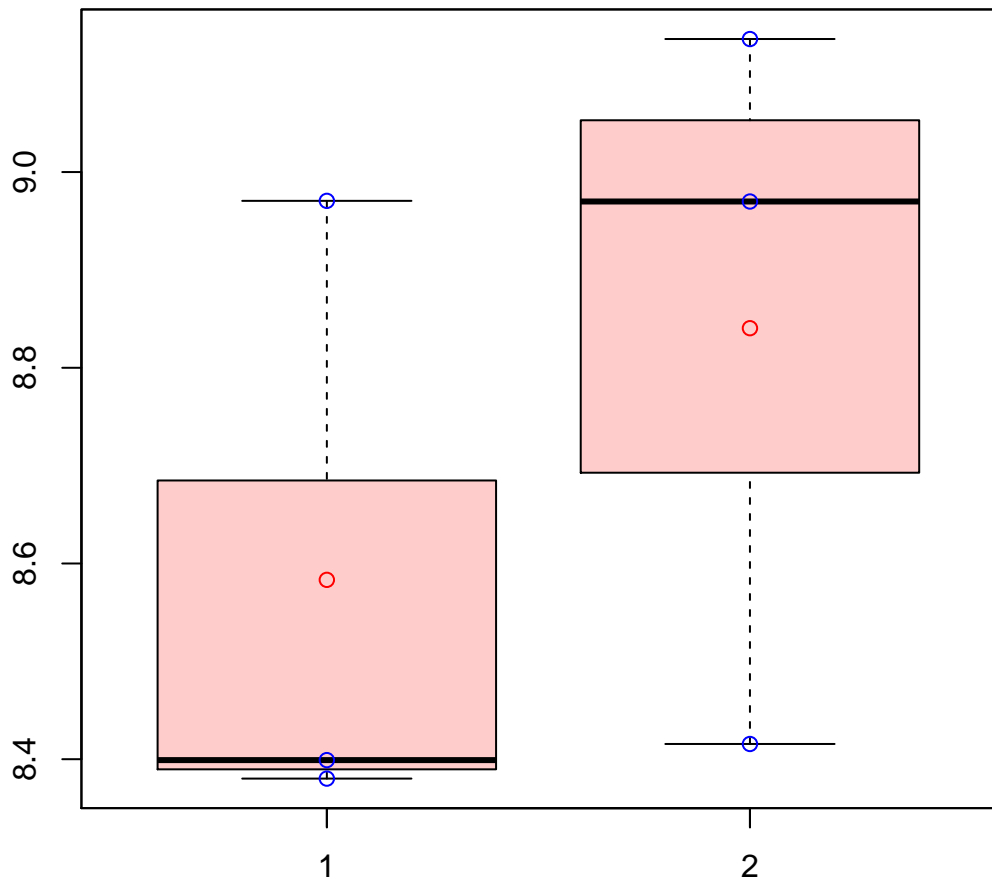

t-Test: p-value = 0.43

# K3YRC2|K3YRC2\_SETIT

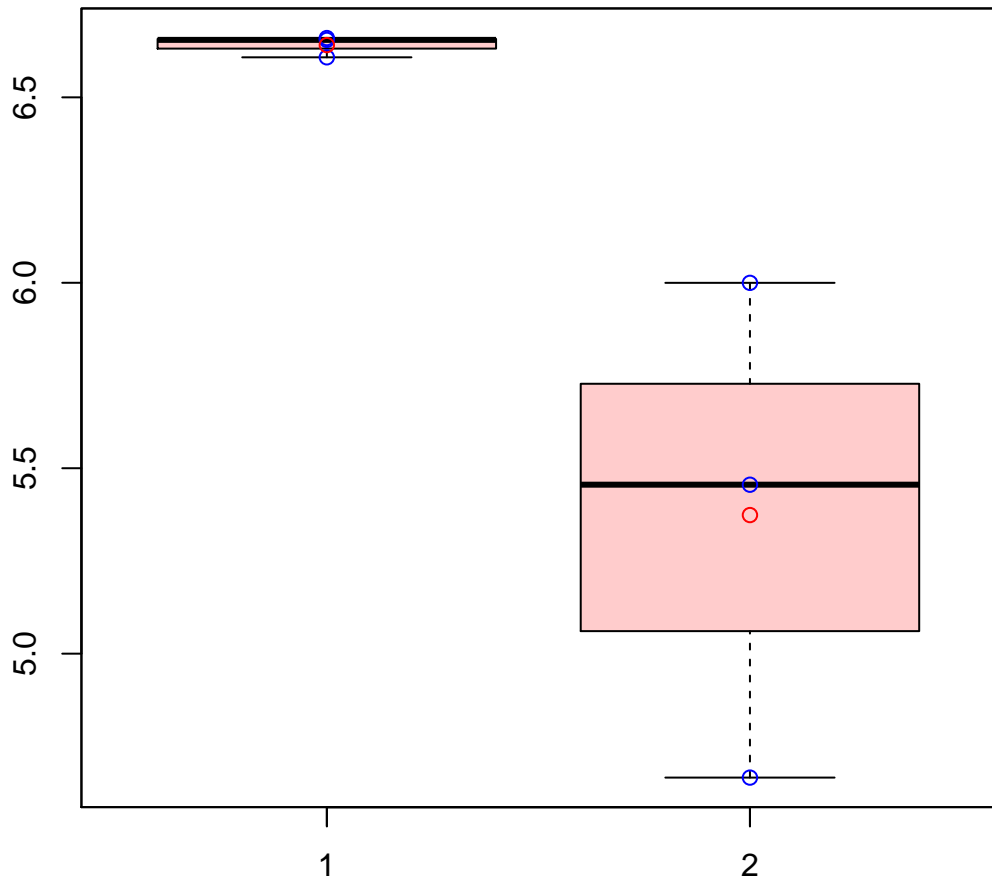

t-Test: p-value = 0.08

# K3YRS9|K3YRS9\_SETIT

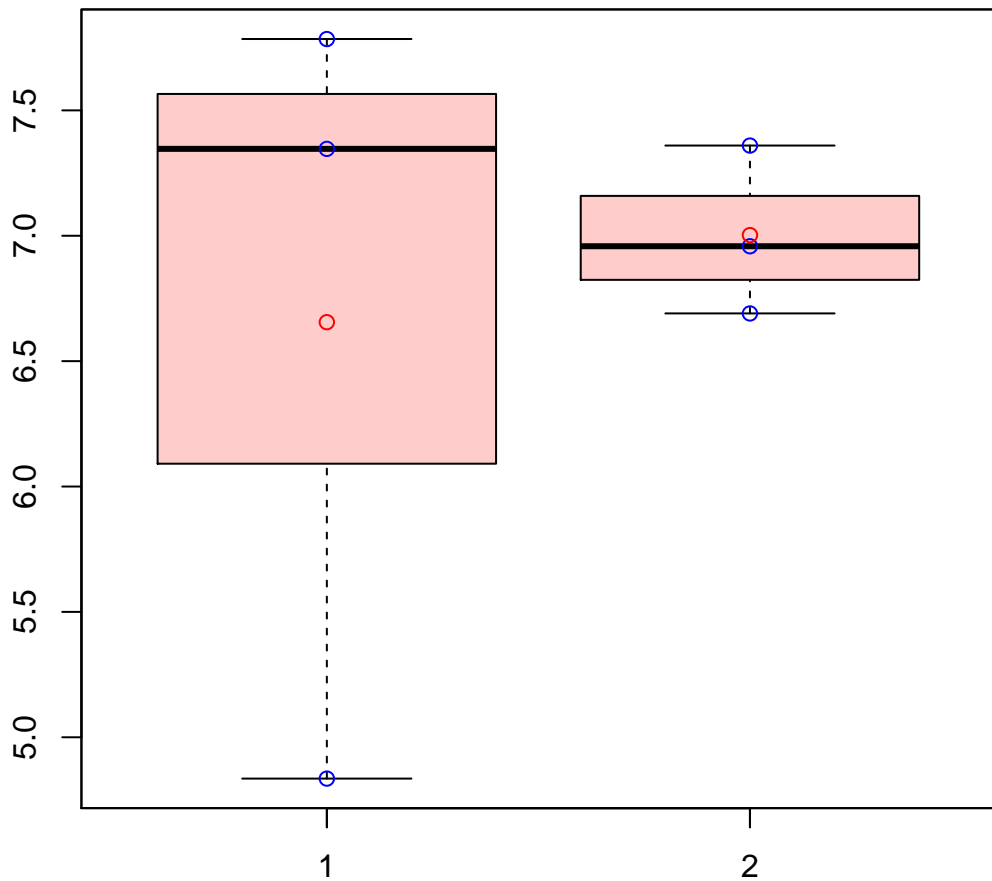

t-Test: p-value = 0.74

# K3YRV5|K3YRV5\_SETIT

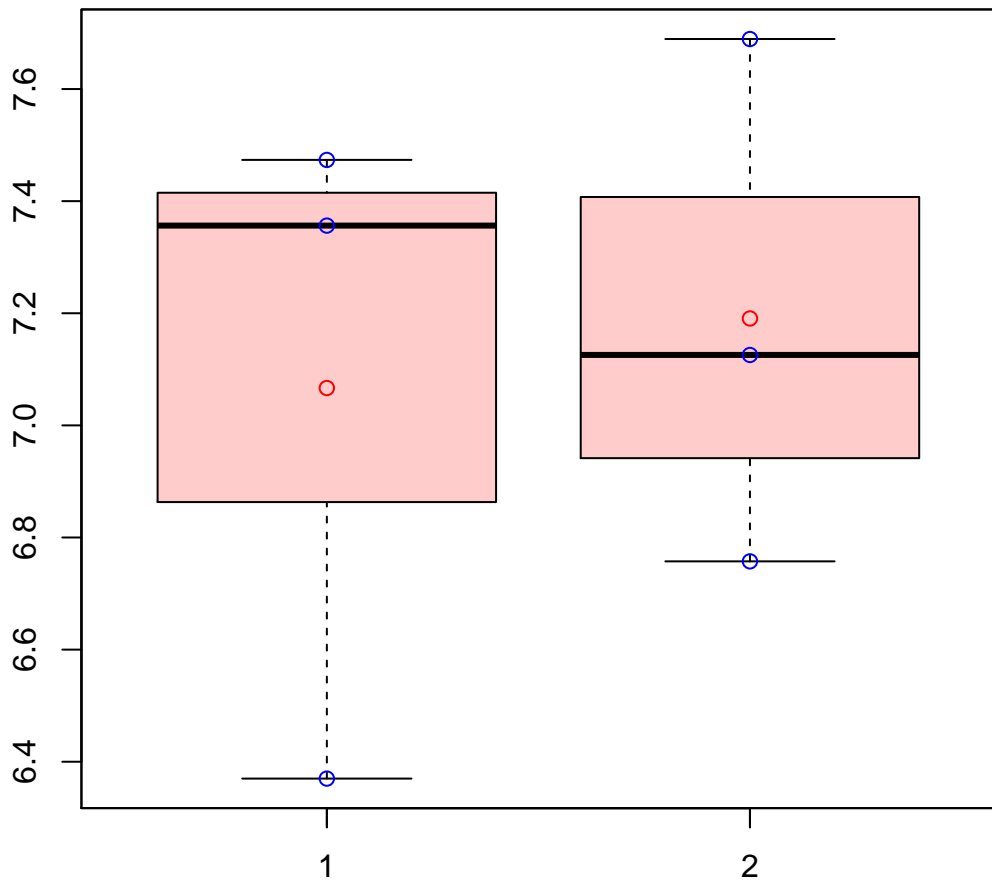

t-Test: p-value = 0.79

# K3YS33|K3YS33\_SETIT

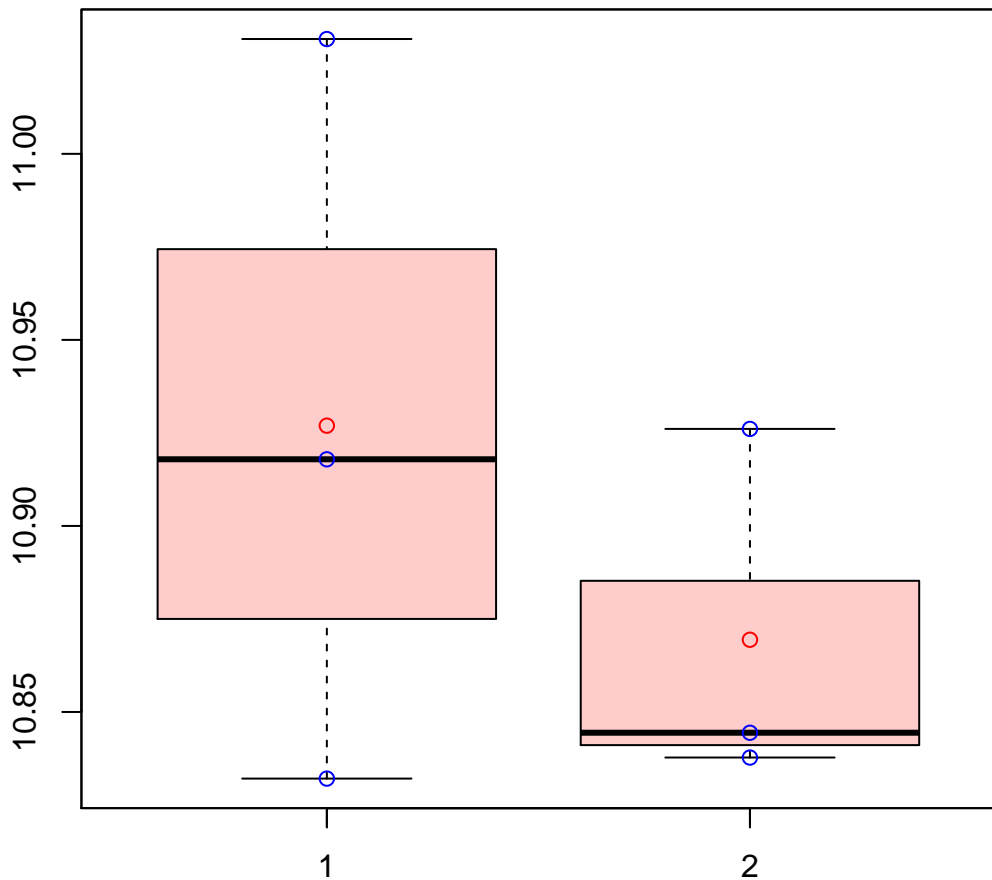

t-Test: p-value = 0.44

# K3YS38|K3YS38\_SETIT

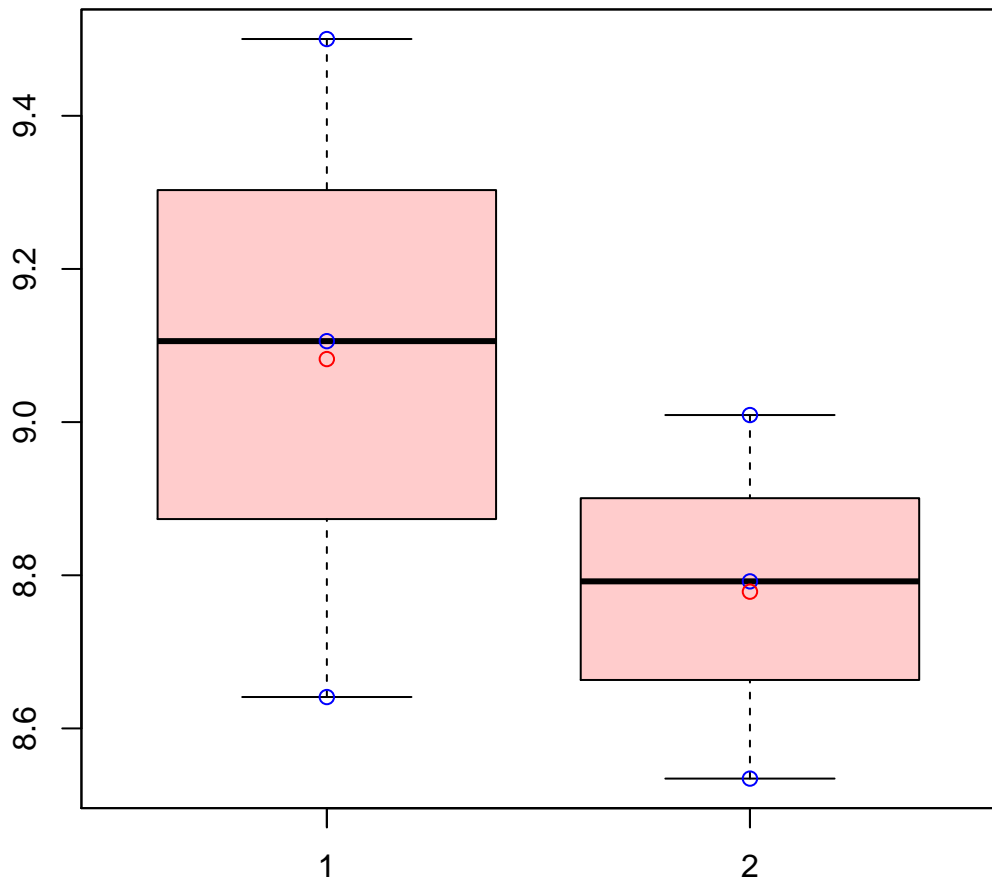

t-Test: p-value = 0.36



# K3YS71|K3YS71\_SETIT

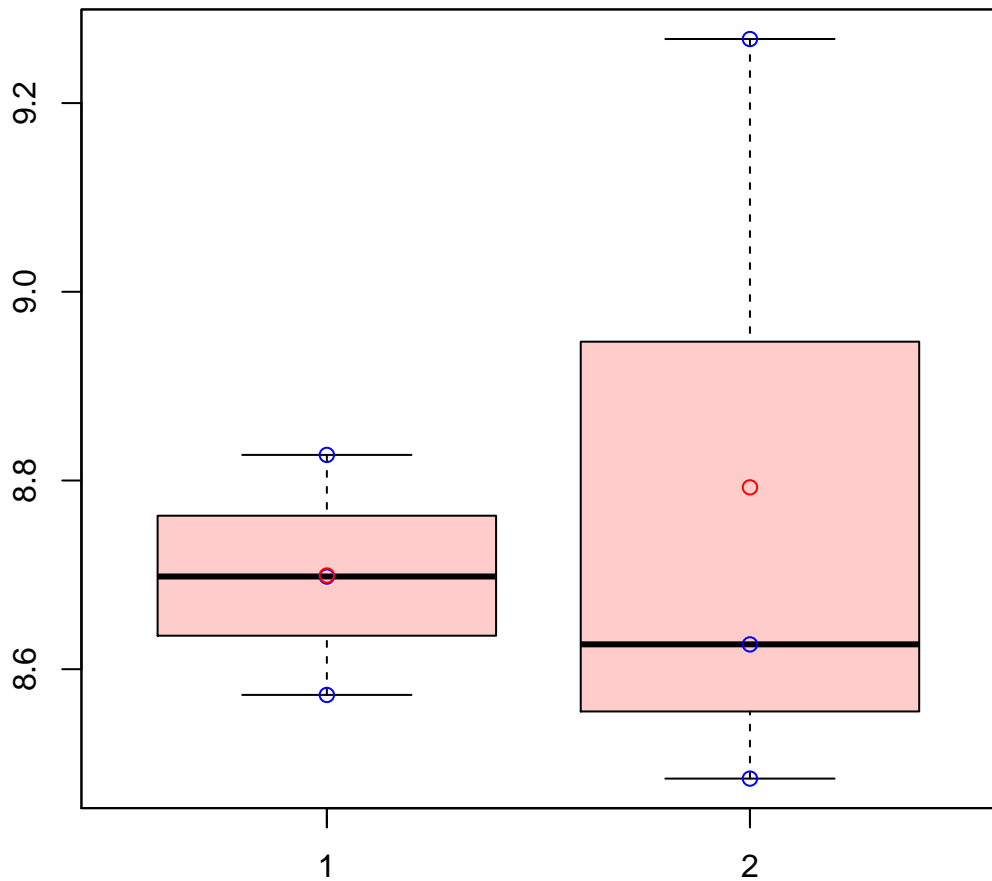

t-Test: p-value = 0.74

# K3YS75|K3YS75\_SETIT

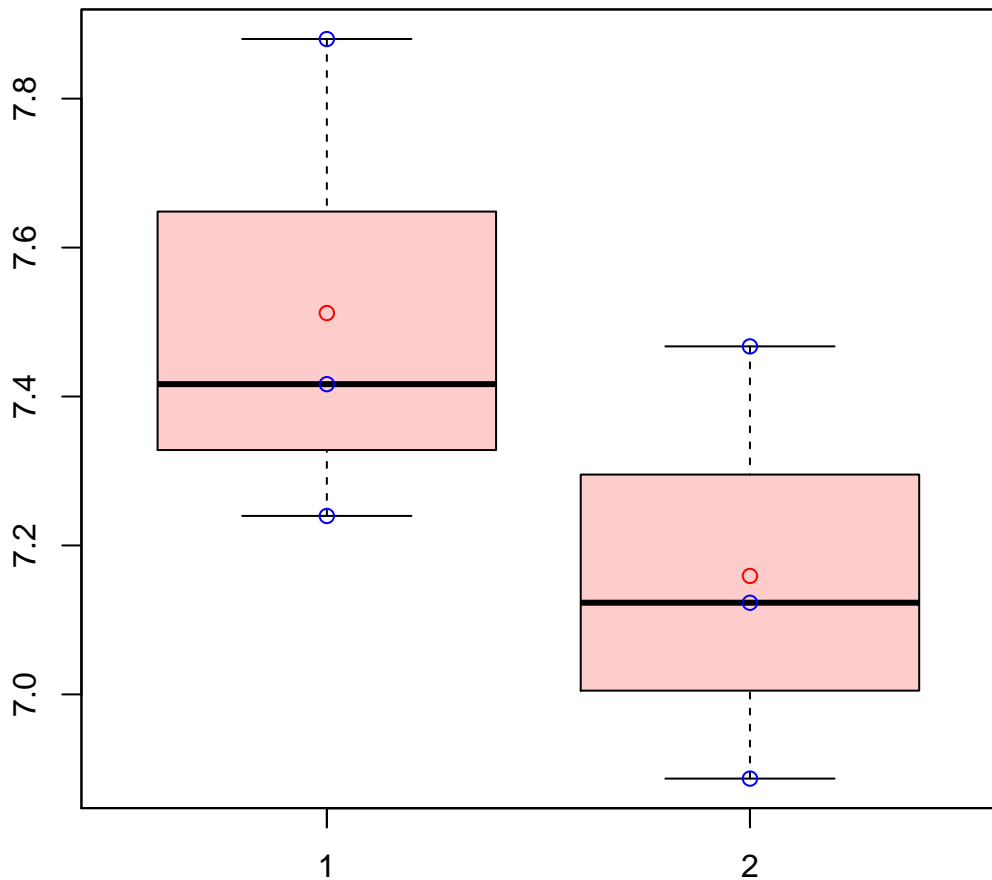

t-Test: p-value = 0.24

# K3YSK5|K3YSK5\_SETIT

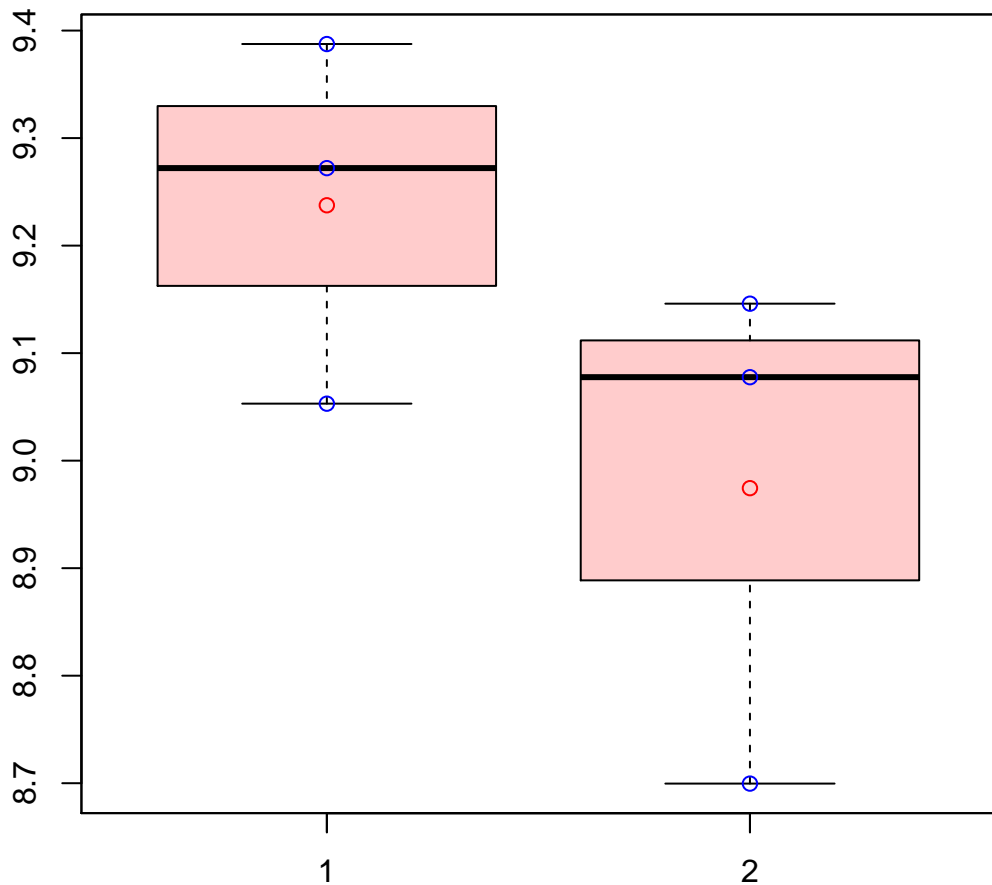

t-Test: p-value = 0.2

# K3YT19|K3YT19\_SETIT

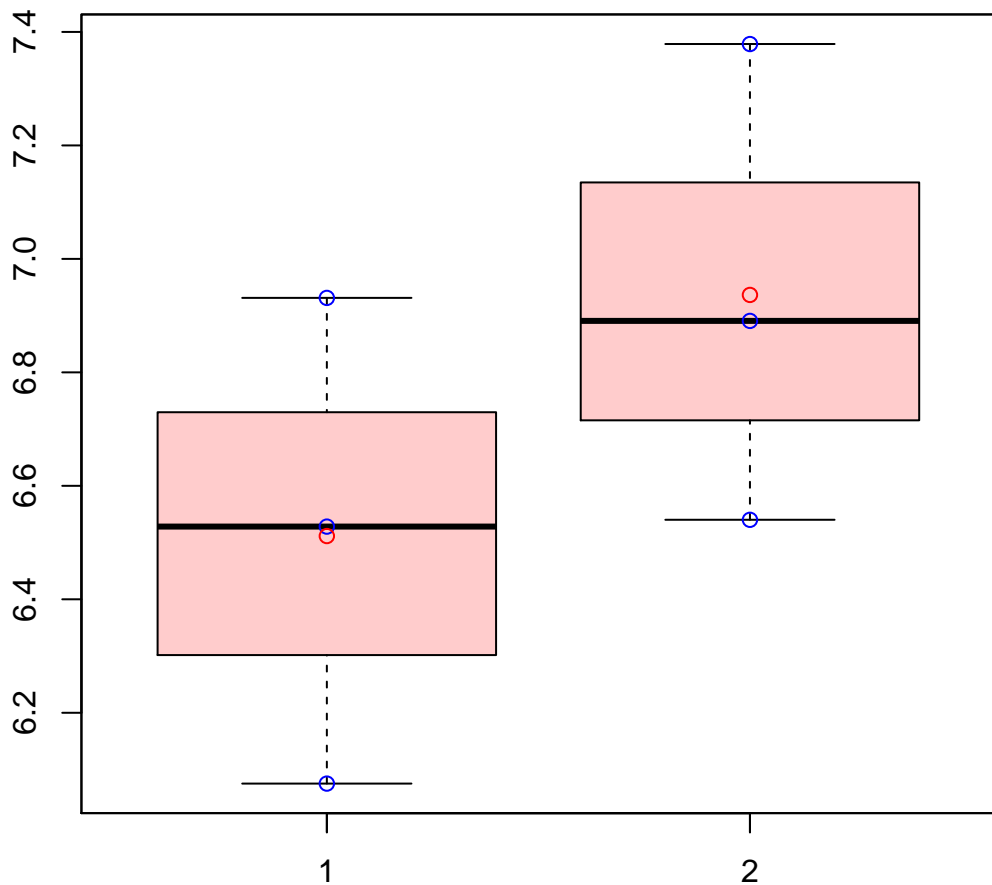

t-Test: p-value = 0.29

# K3YT73|K3YT73\_SETIT

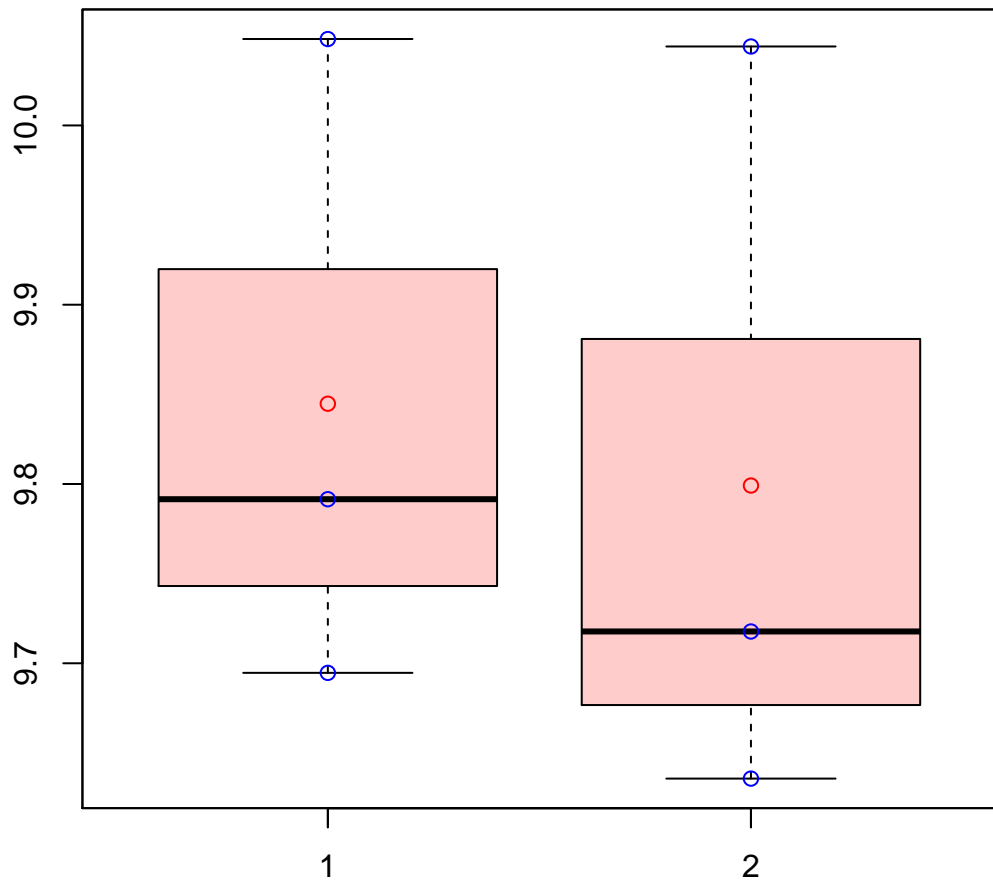

t-Test: p-value = 0.79

# K3YT74|K3YT74\_SETIT

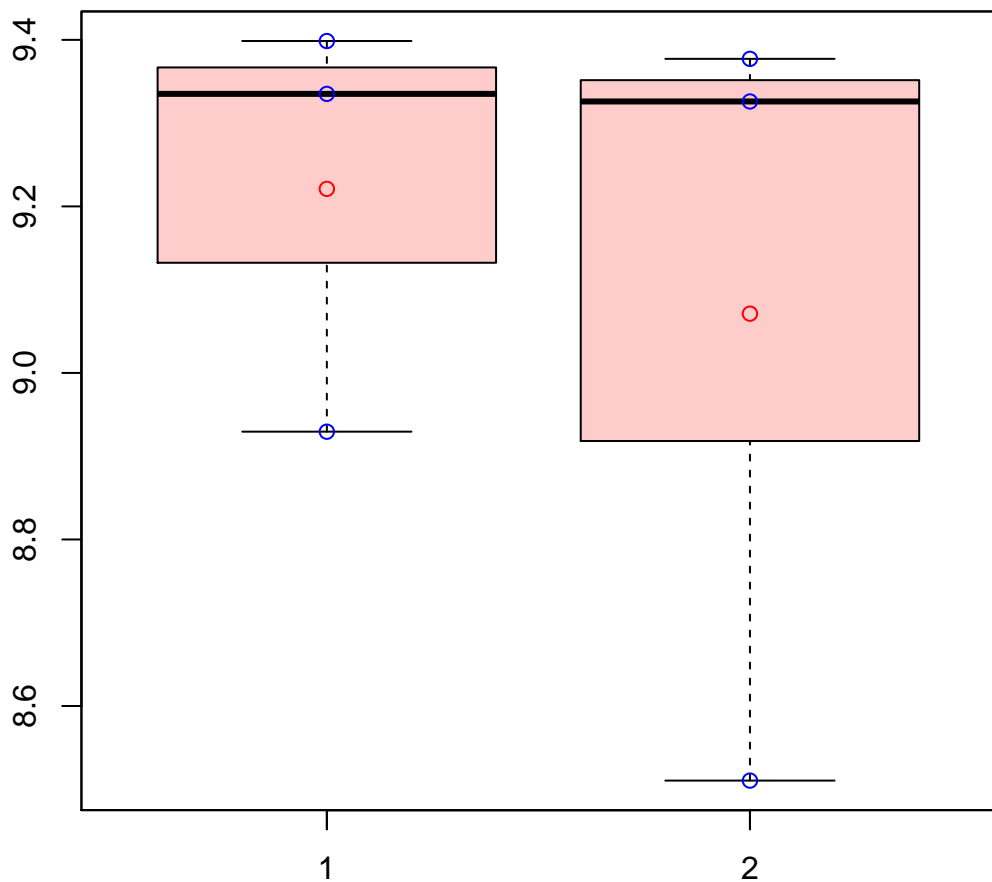

t-Test: p-value = 0.67

# K3YT79|K3YT79\_SETIT

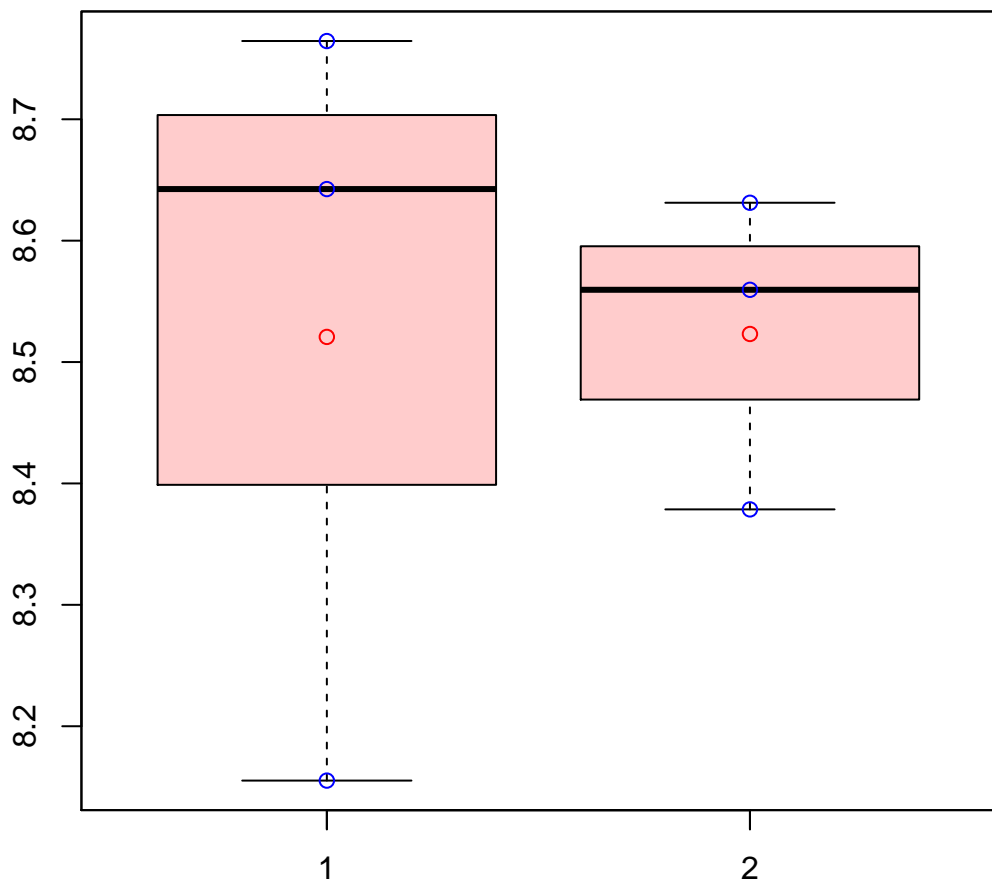

t-Test: p-value = 0.99

# K3YTB0|K3YTB0\_SETIT

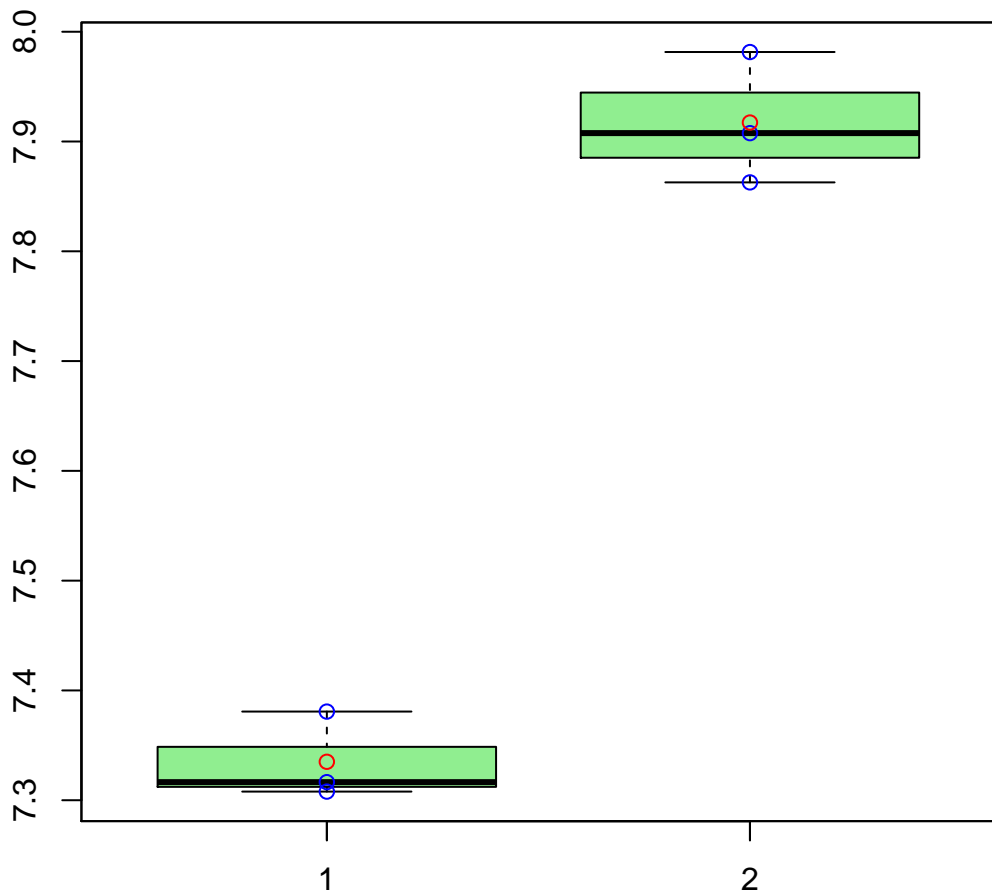

t-Test: p-value = 0



# K3YTJ5|K3YTJ5\_SETIT

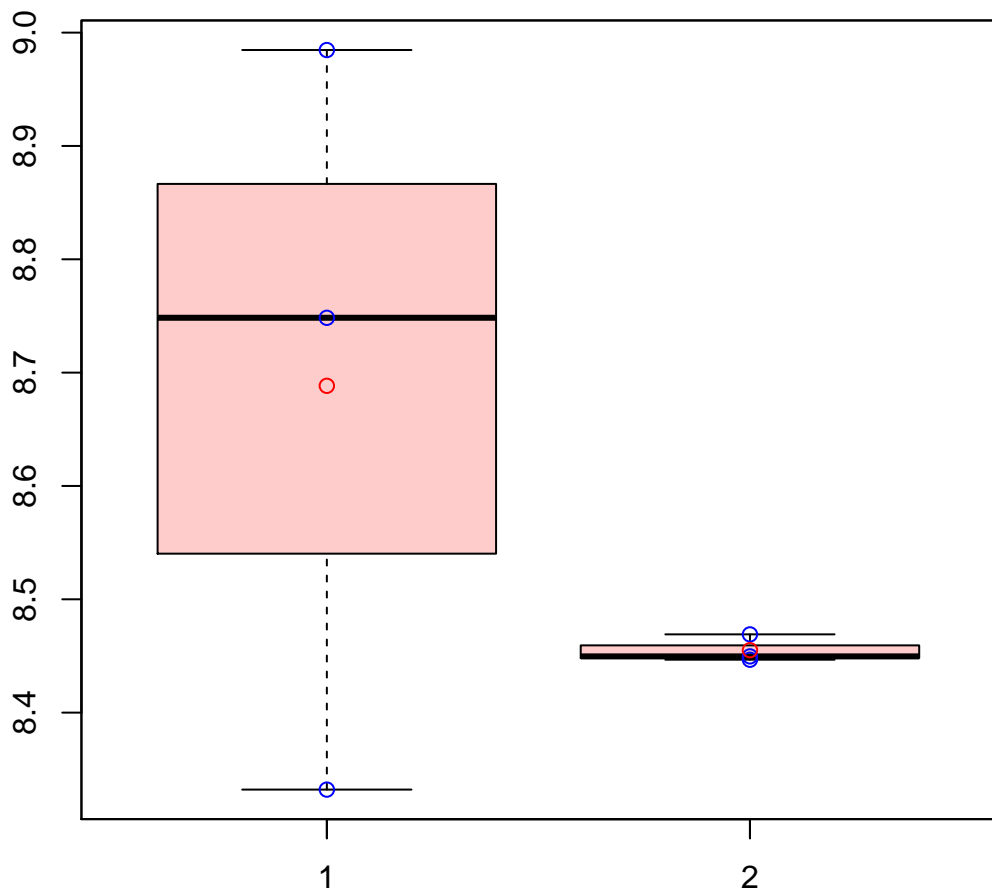

t-Test: p-value = 0.35

# K3YTJ9|K3YTJ9\_SETIT

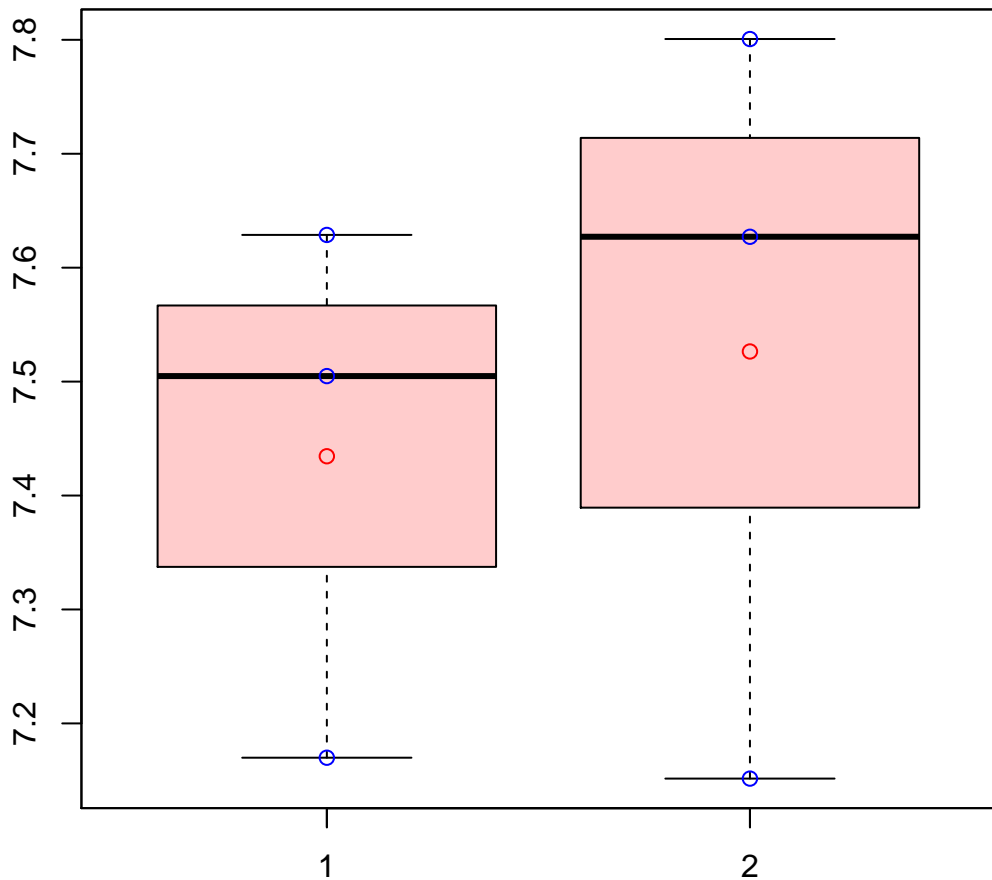

t-Test: p-value = 0.72

# K3YTN2|K3YTN2\_SETIT

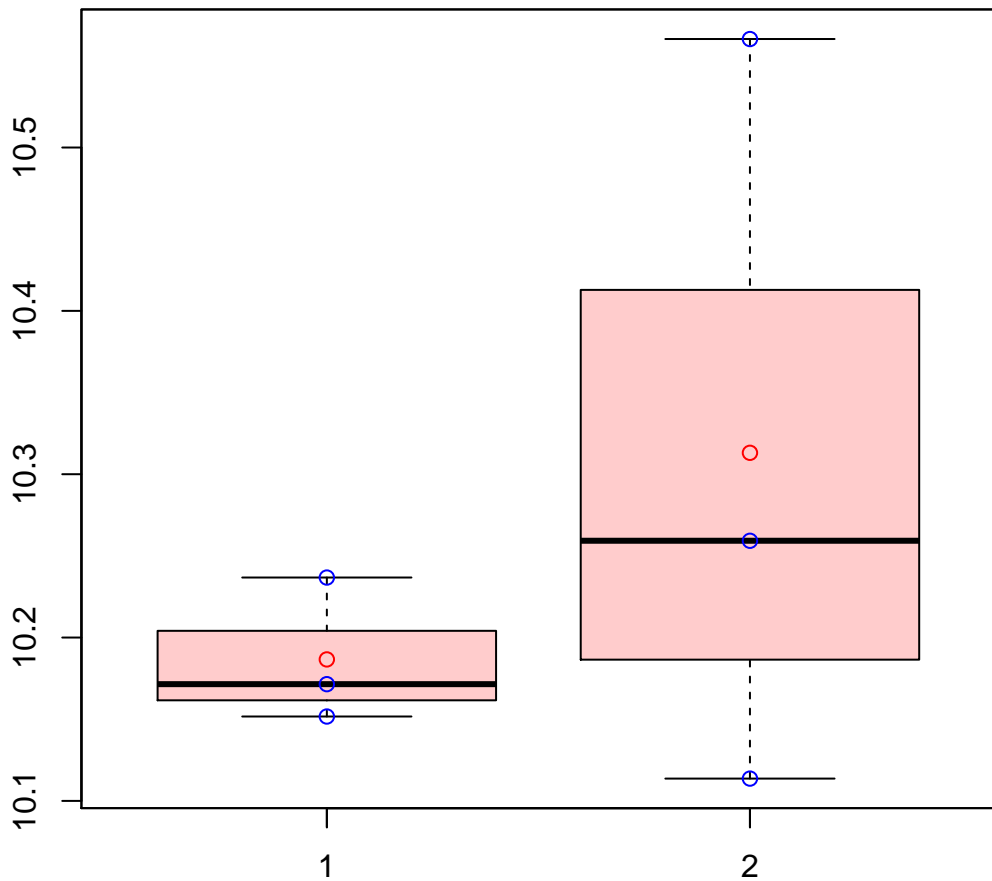

t-Test: p-value = 0.44

# K3YTN3|K3YTN3\_SETIT

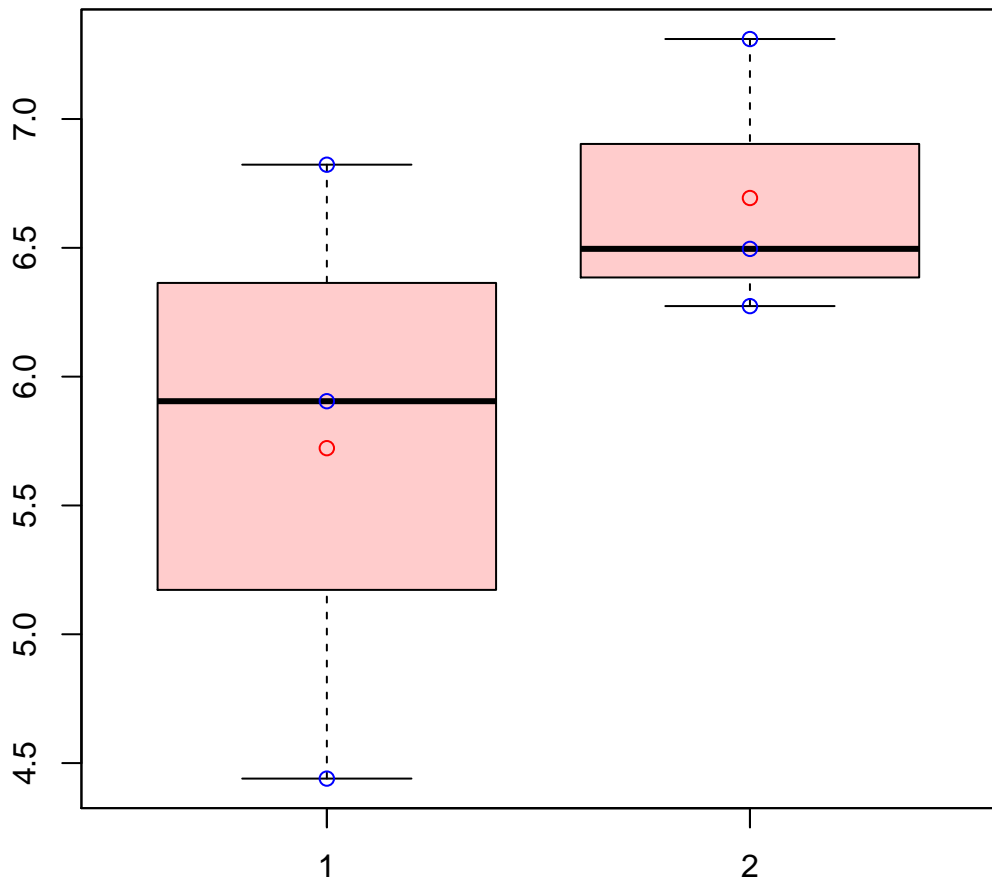

t-Test: p-value = 0.3

# K3YTT8|K3YTT8\_SETIT

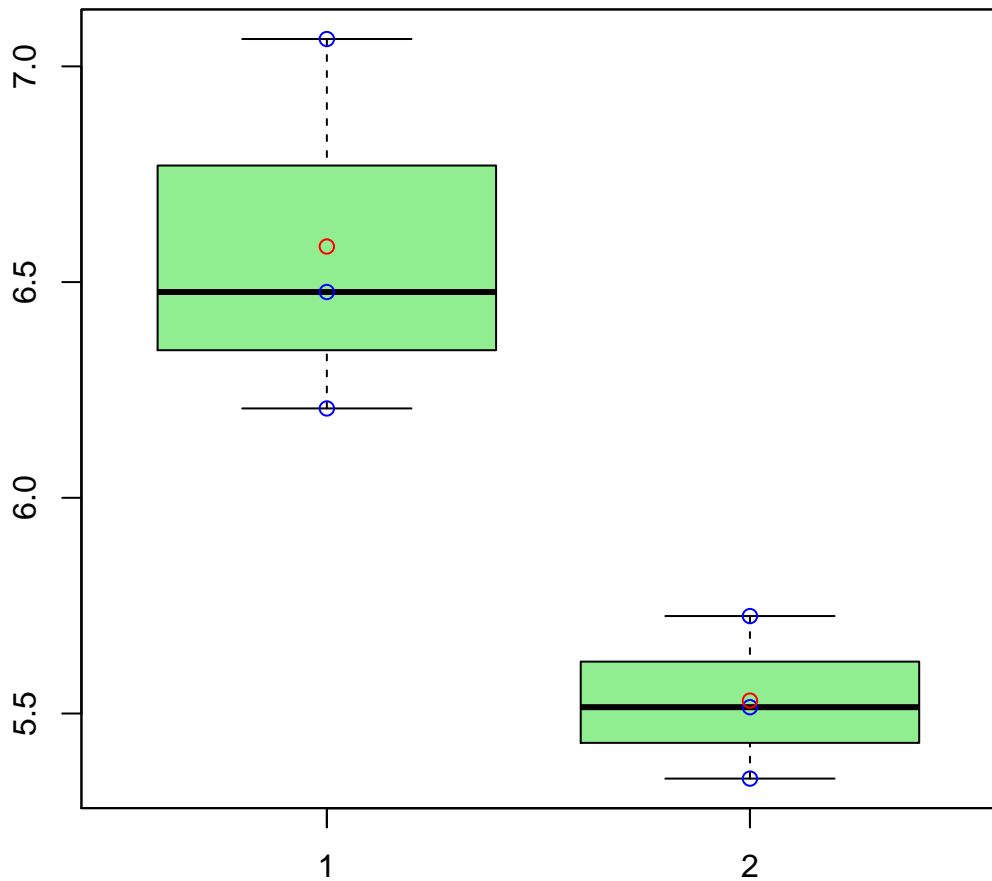

t-Test: p-value = 0.04

# K3YUK4|K3YUK4\_SETIT

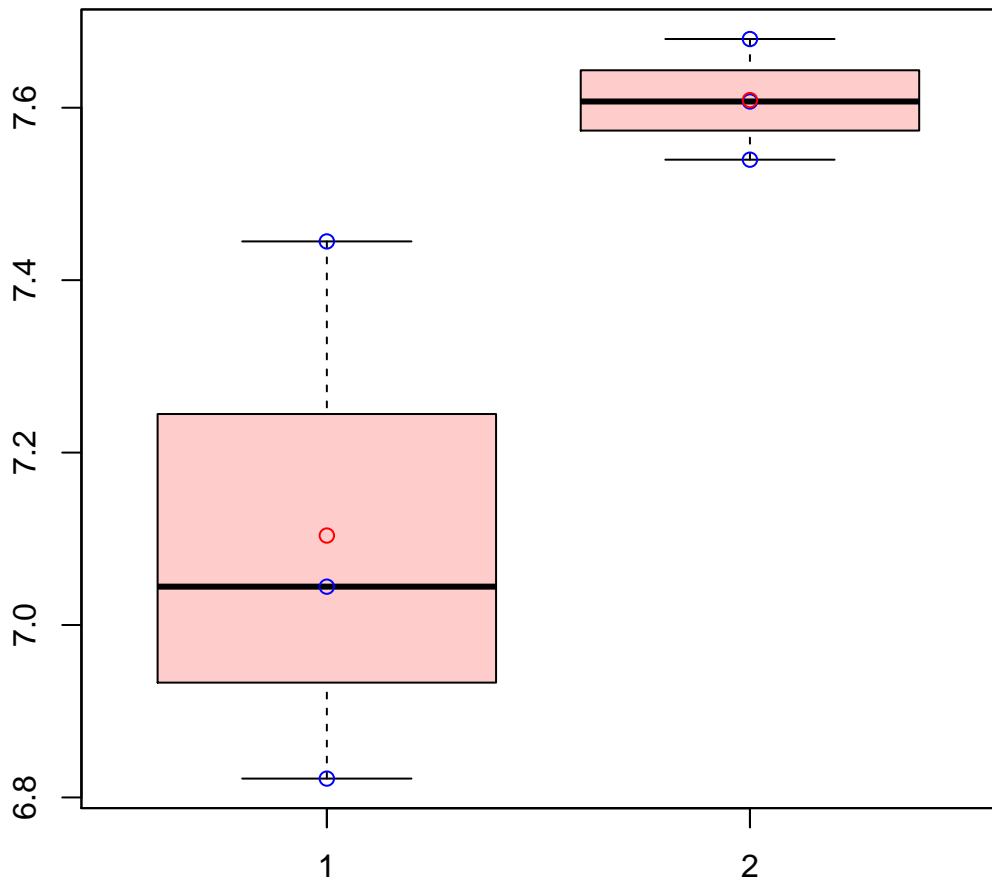

t-Test: p-value = 0.1

# K3YUP7|K3YUP7\_SETIT

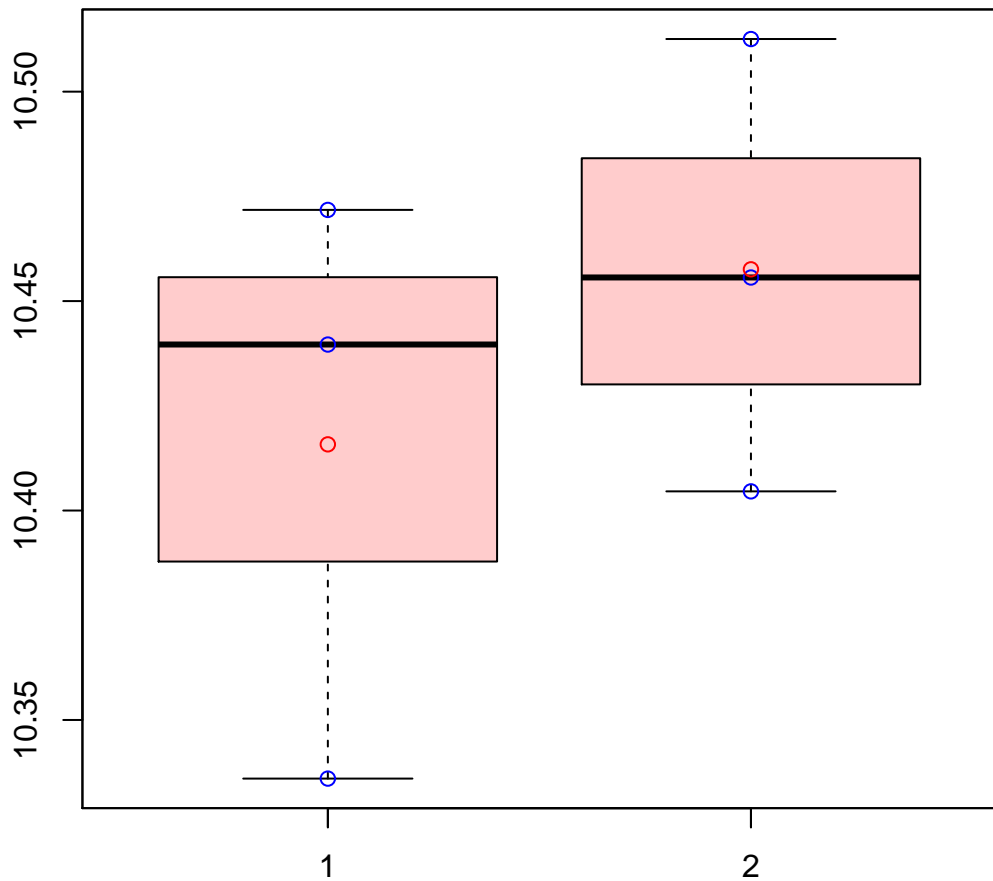

t-Test: p-value = 0.47

# K3YUS1|K3YUS1\_SETIT

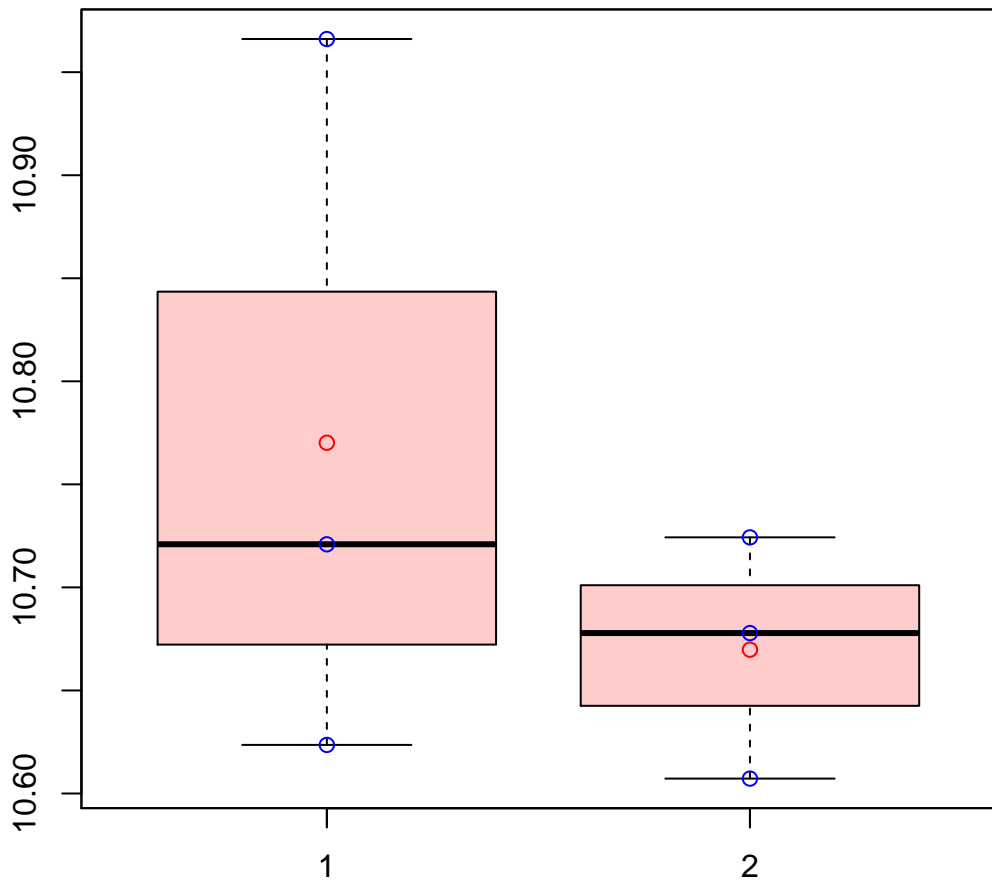

t-Test: p-value = 0.43



# K3YUT7|K3YUT7\_SETIT

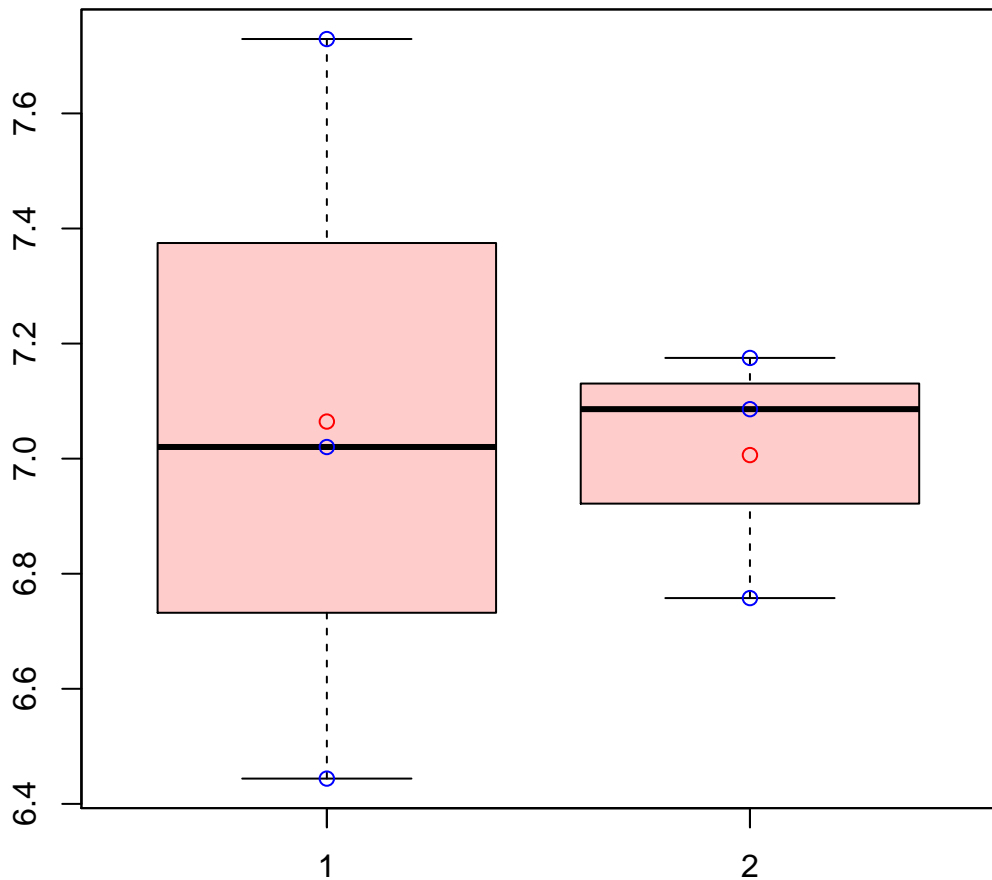

t-Test: p-value = 0.89

# K3YV03|K3YV03\_SETIT

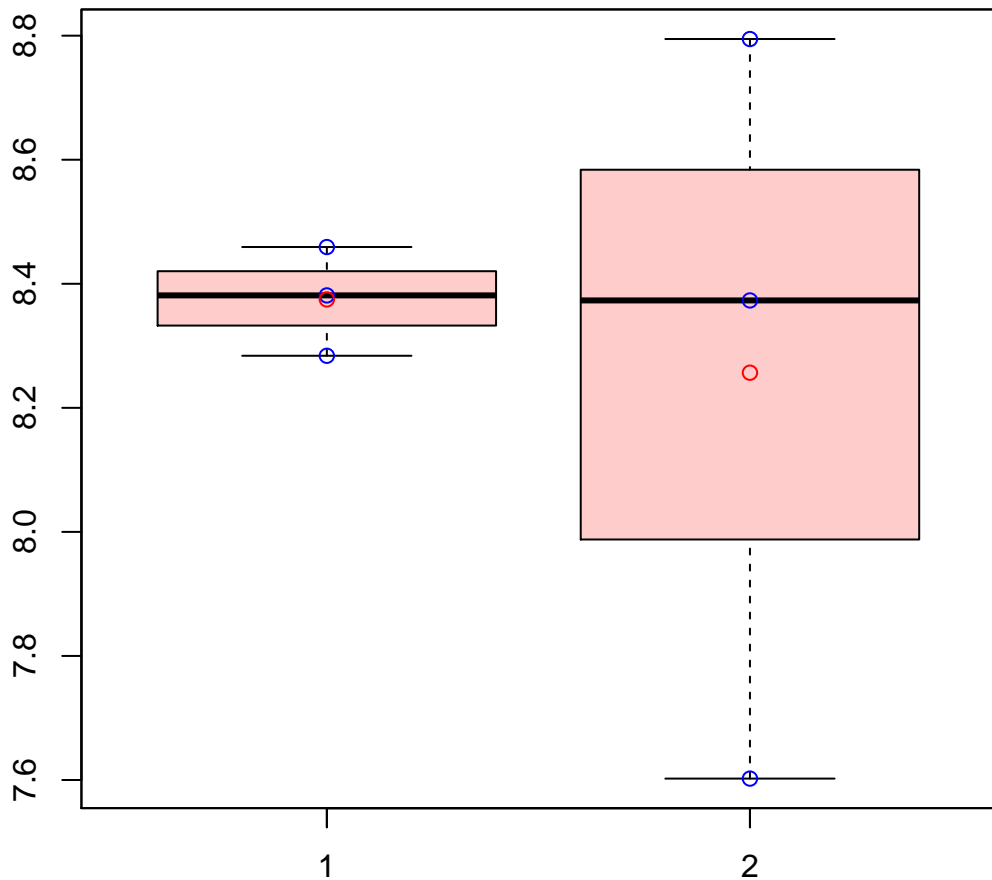

t-Test: p-value = 0.77

# K3YV06|K3YV06\_SETIT

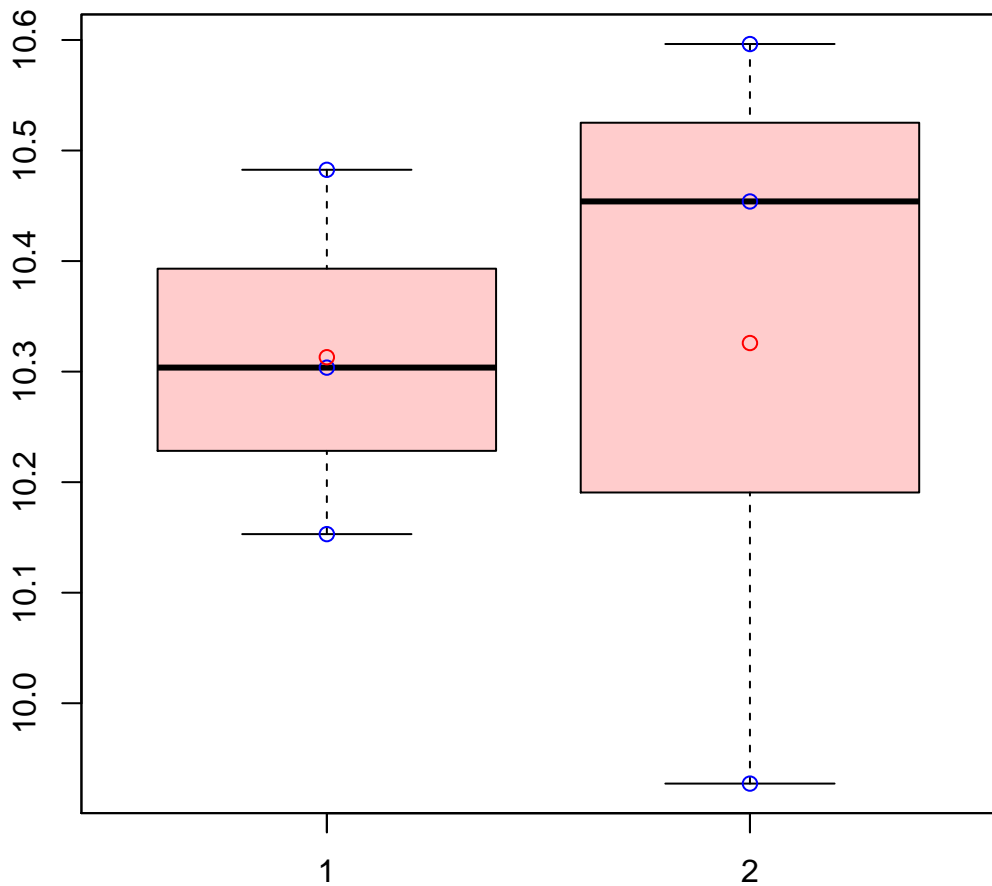

t-Test: p-value = 0.96

# K3YVA3|K3YVA3\_SETIT

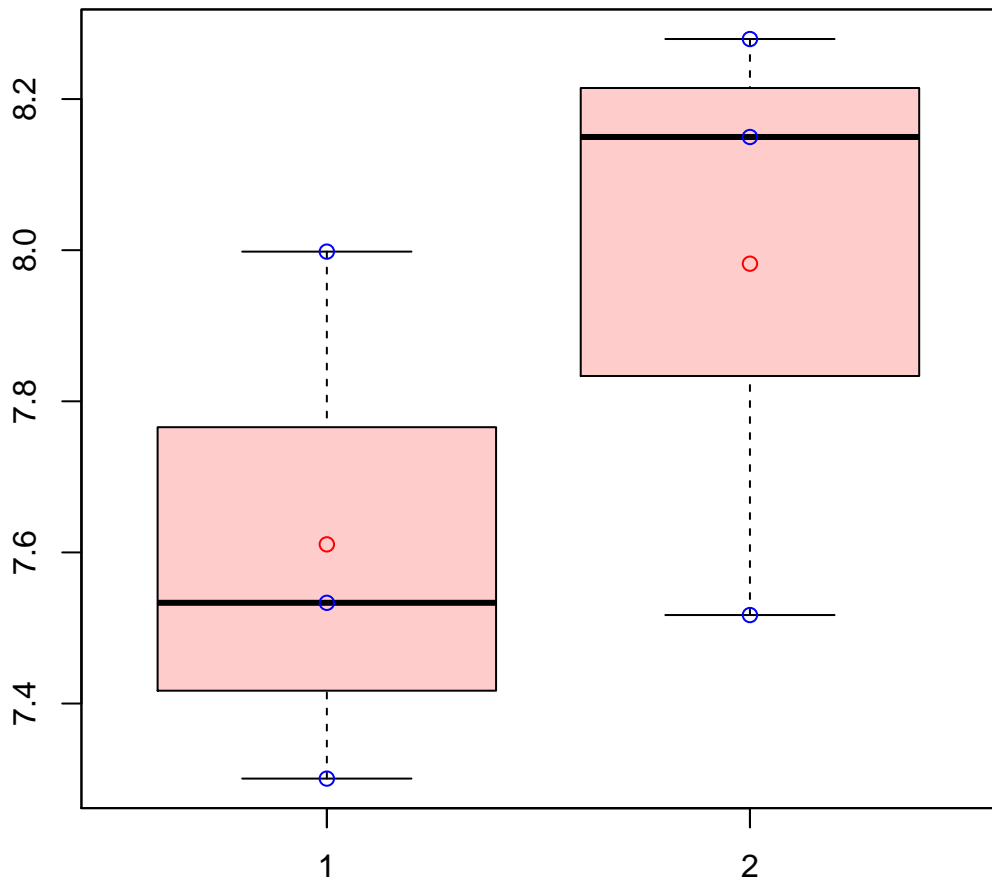

t-Test: p-value = 0.3

# K3YVF1|K3YVF1\_SETIT

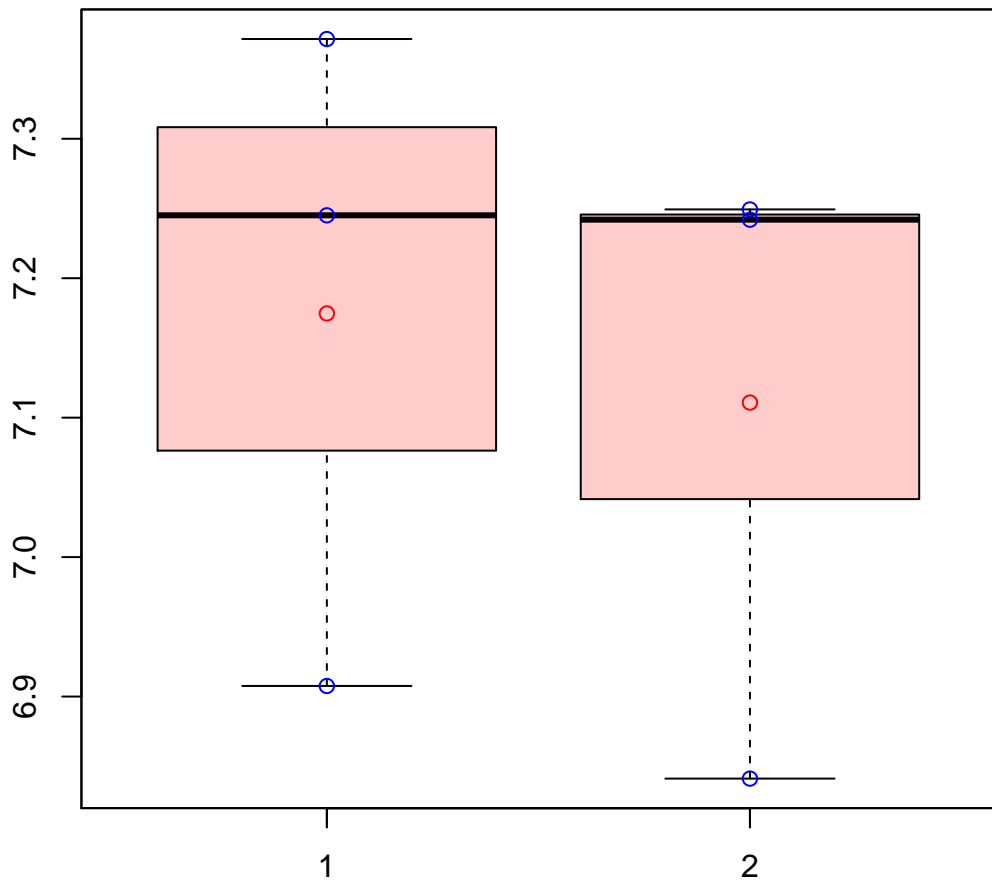

t-Test: p-value = 0.76

# K3YVK1|K3YVK1\_SETIT

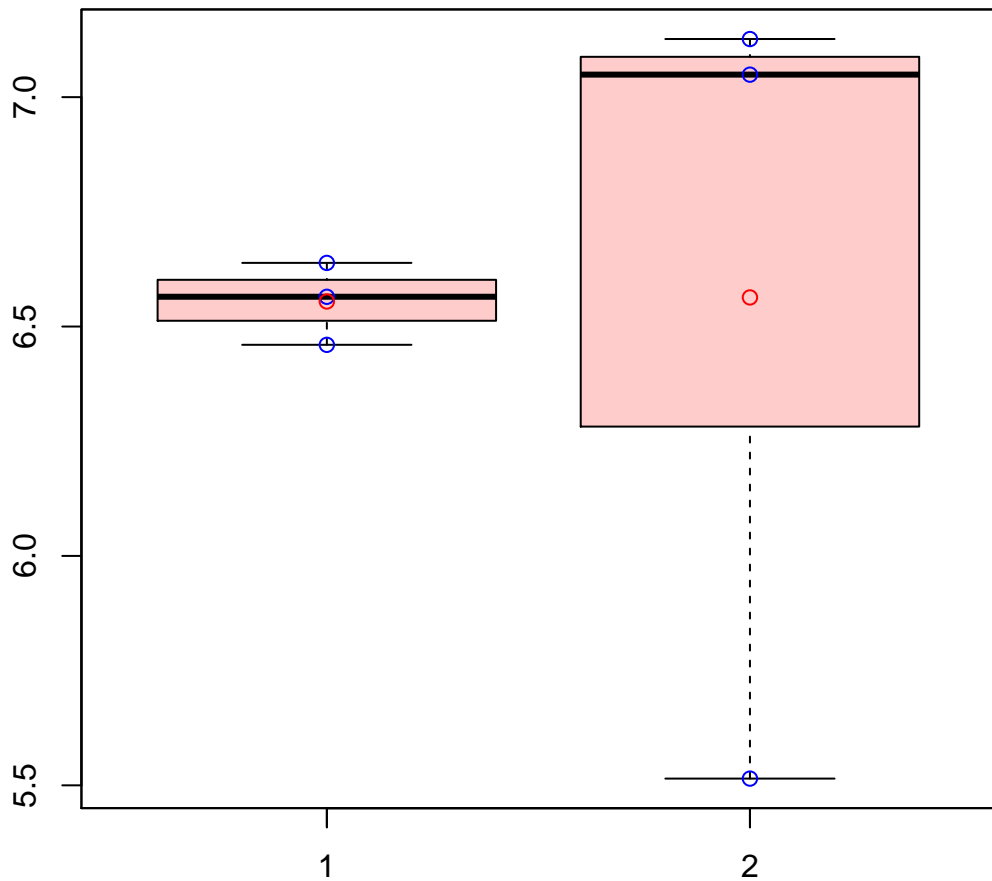

t-Test: p-value = 0.99

# K3YVL3|K3YVL3\_SETIT

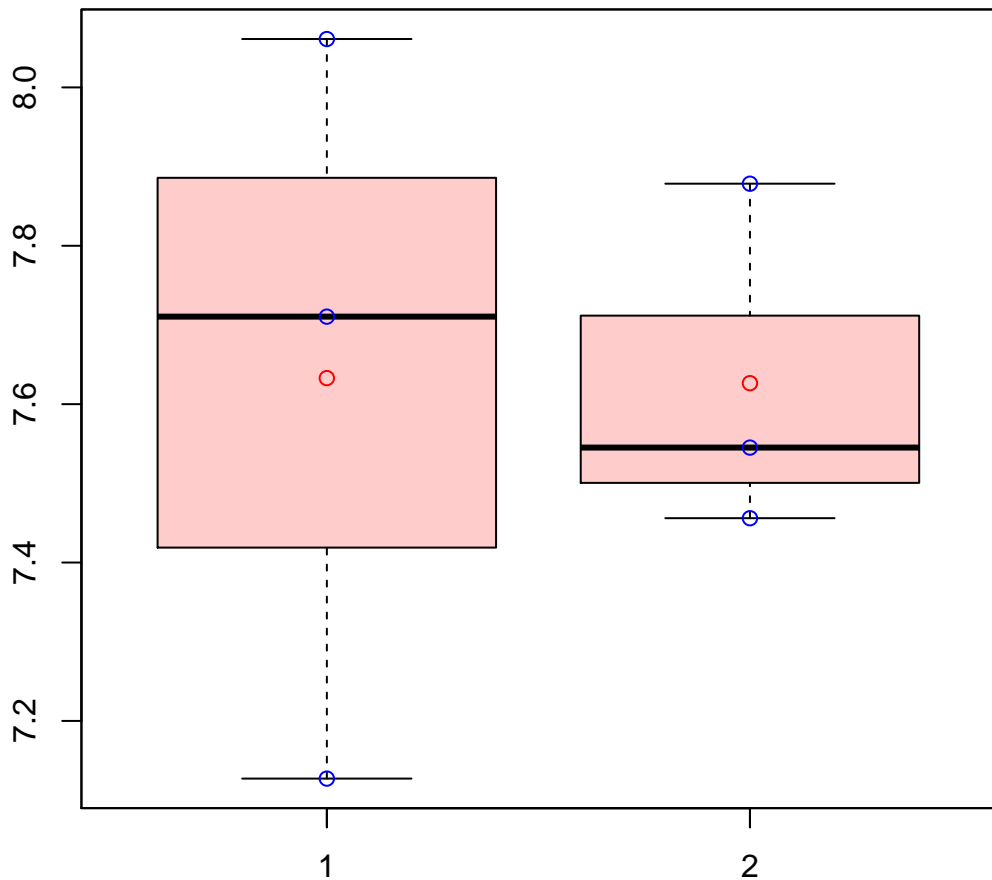

t-Test: p-value = 0.98

# K3YVN2|K3YVN2\_SETIT

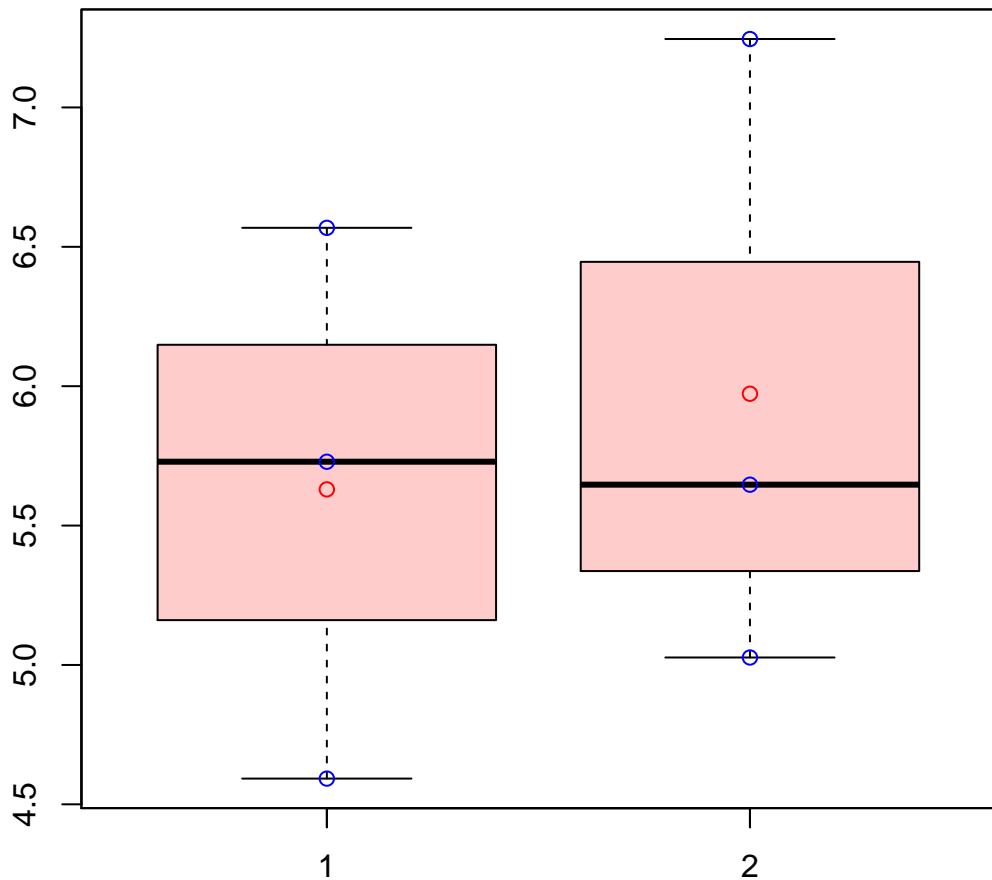

t-Test: p-value = 0.72



# K3YWM5|K3YWM5\_SETIT

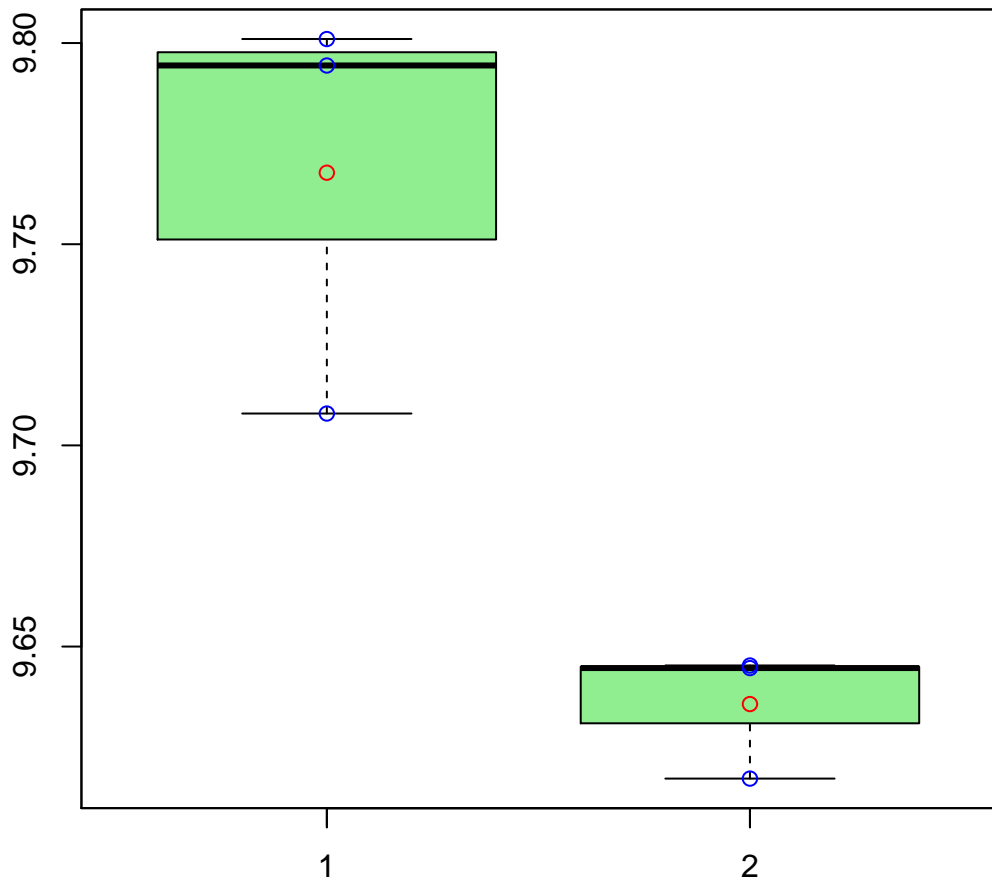

t-Test: p-value = 0.04

# K3YWR3|K3YWR3\_SETIT

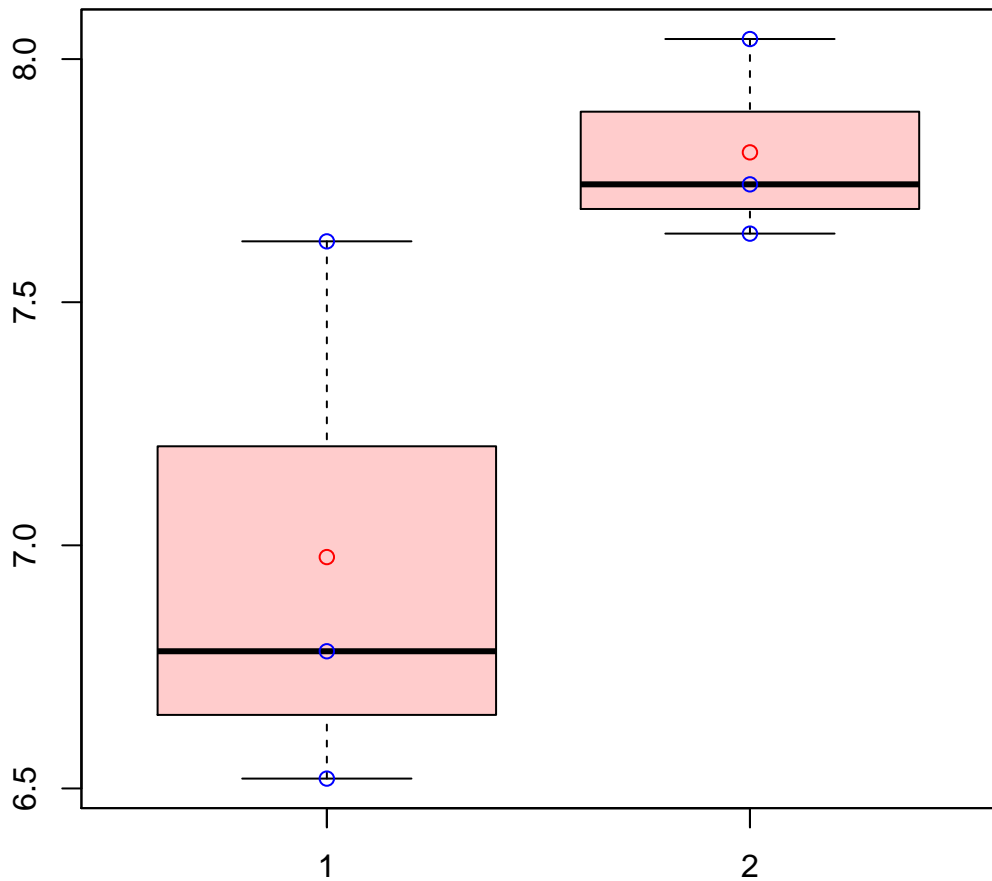

t-Test: p-value = 0.12

# K3YXY5|K3YXY5\_SETIT

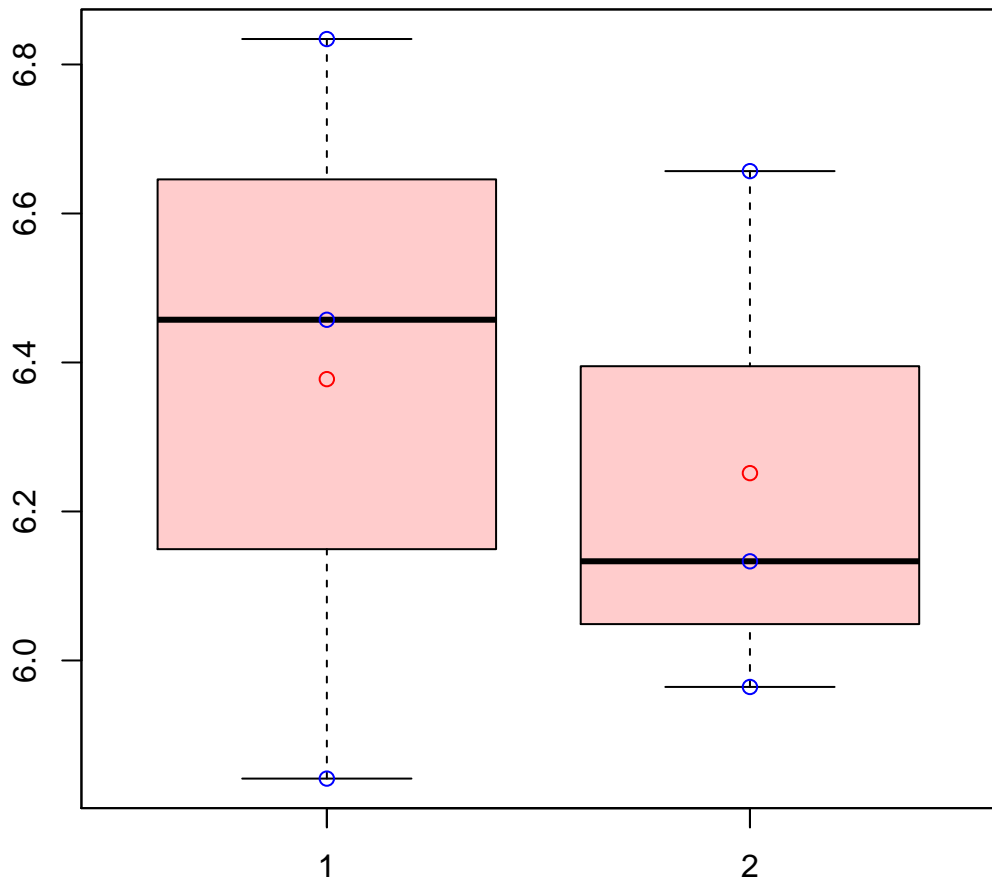

t-Test: p-value = 0.74

# K3YYJ7|K3YYJ7\_SETIT

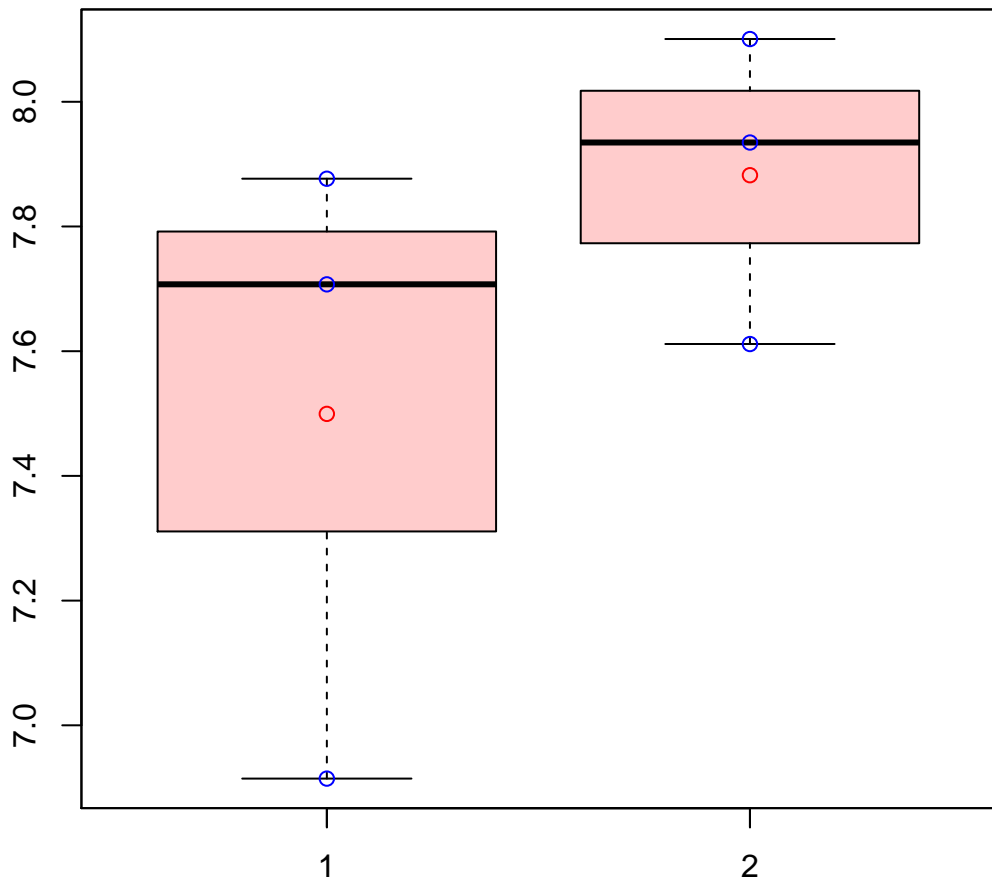

t-Test: p-value = 0.33

# K3YZ41|K3YZ41\_SETIT

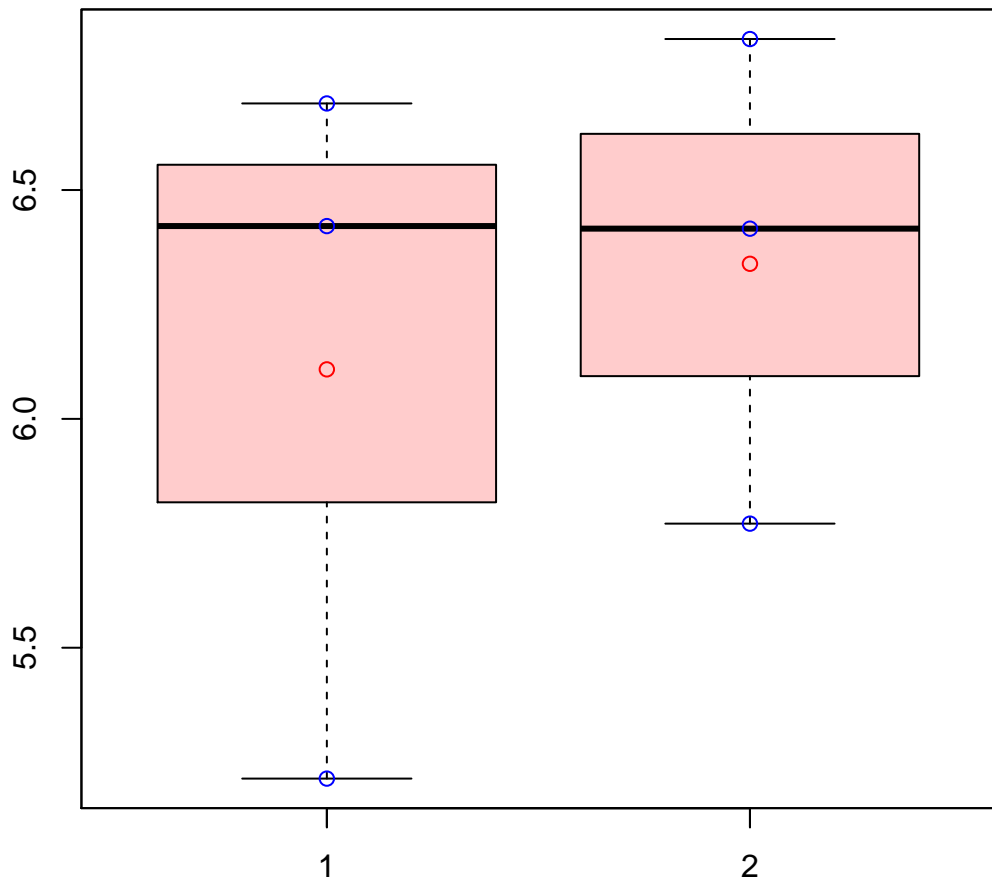

t-Test: p-value = 0.7

# K3YZ47|K3YZ47\_SETIT

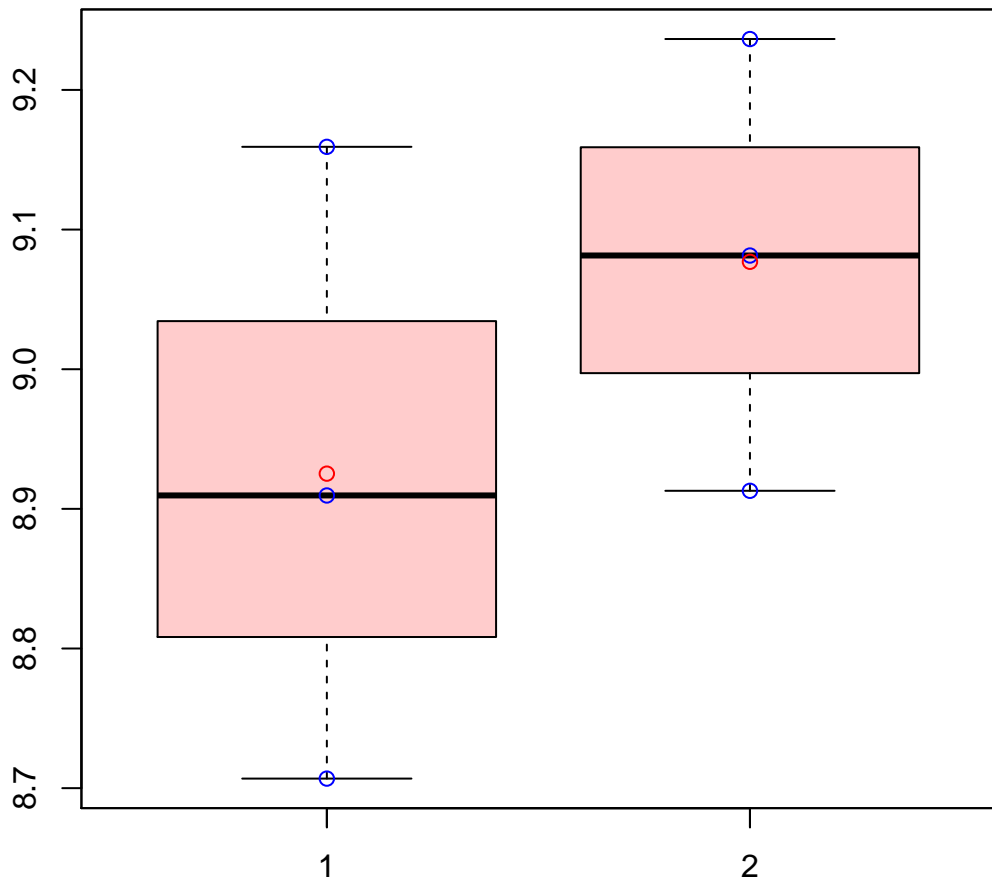

t-Test: p-value = 0.4

# K3YZE3|K3YZE3\_SETIT

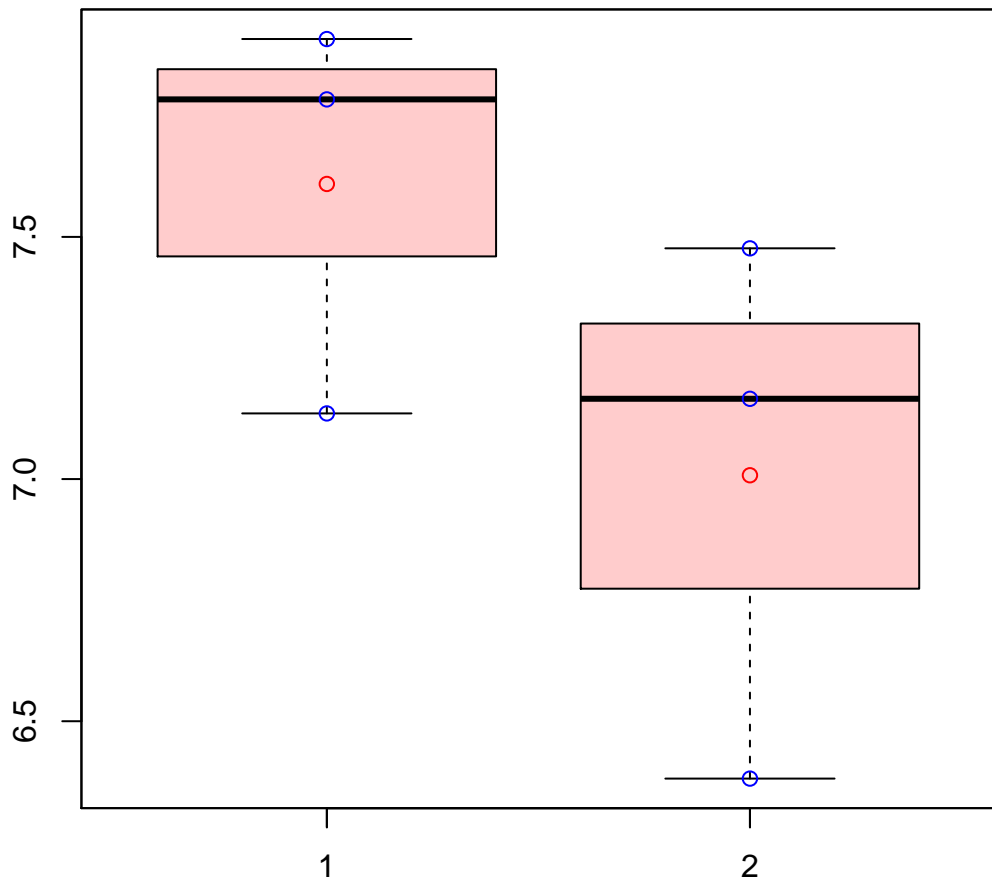

t-Test: p-value = 0.22

# K3Z076|K3Z076\_SETIT

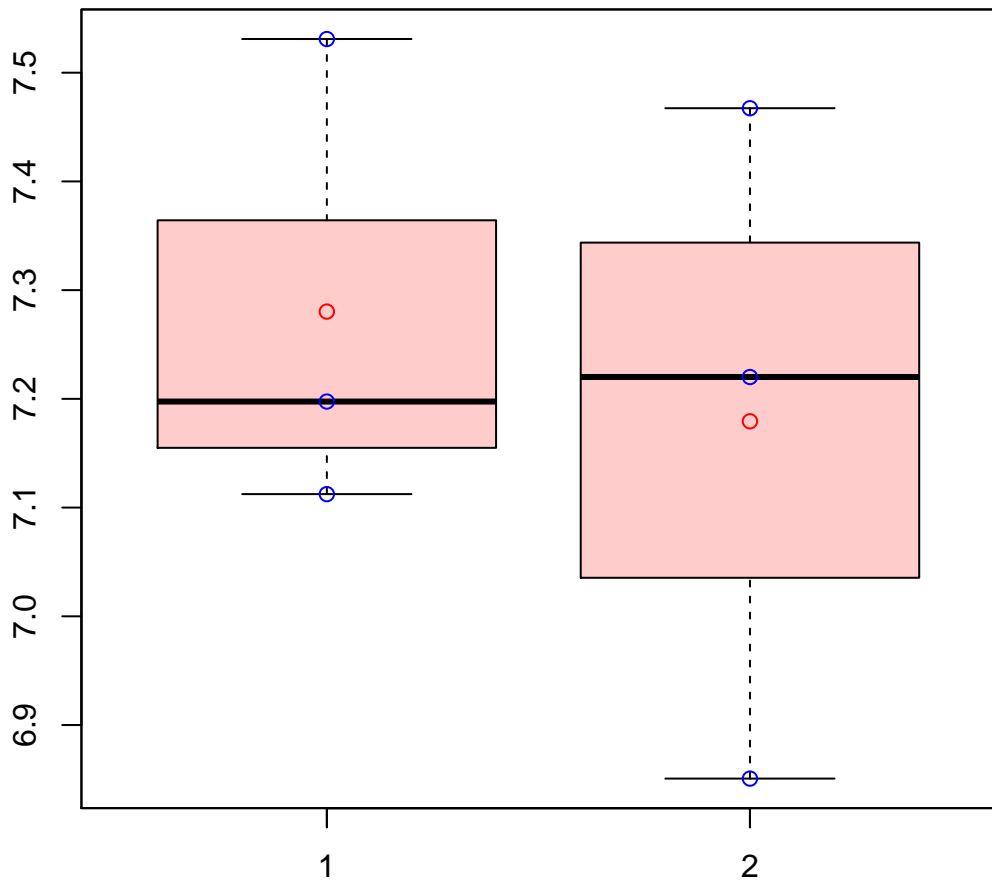

t-Test: p-value = 0.67



# K3Z133|K3Z133\_SETIT

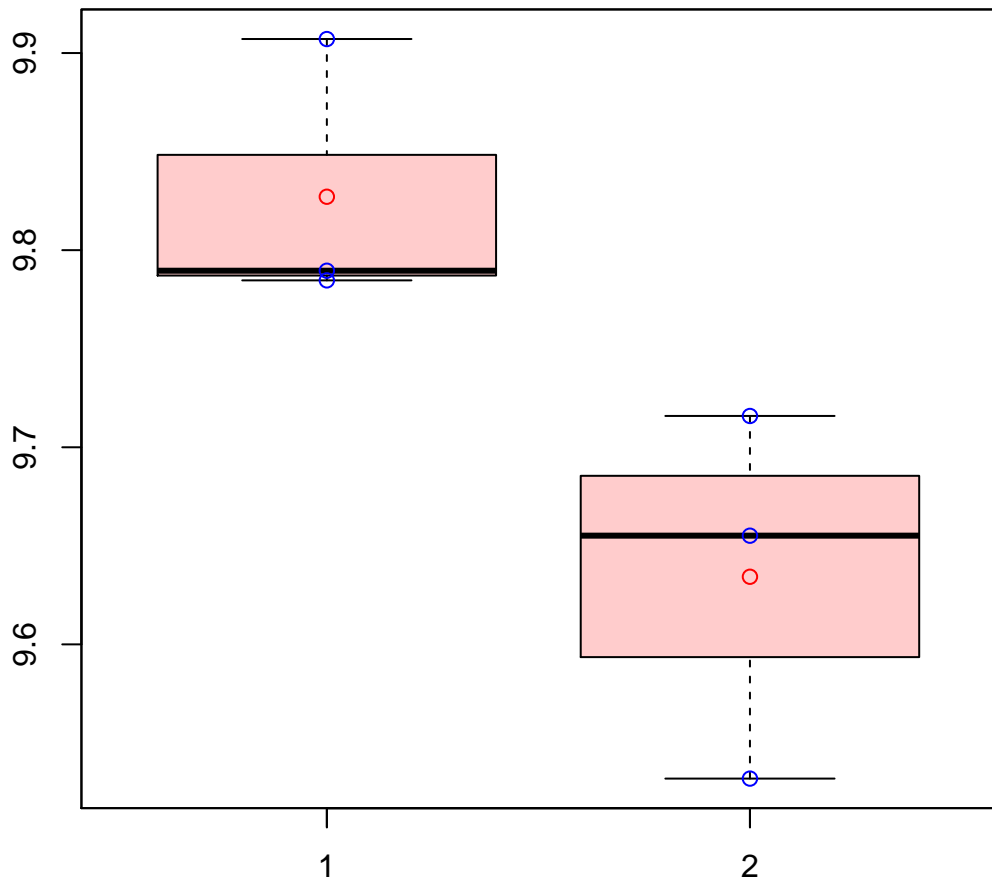

t-Test: p-value = 0.05

# K3Z2D3|K3Z2D3\_SETIT

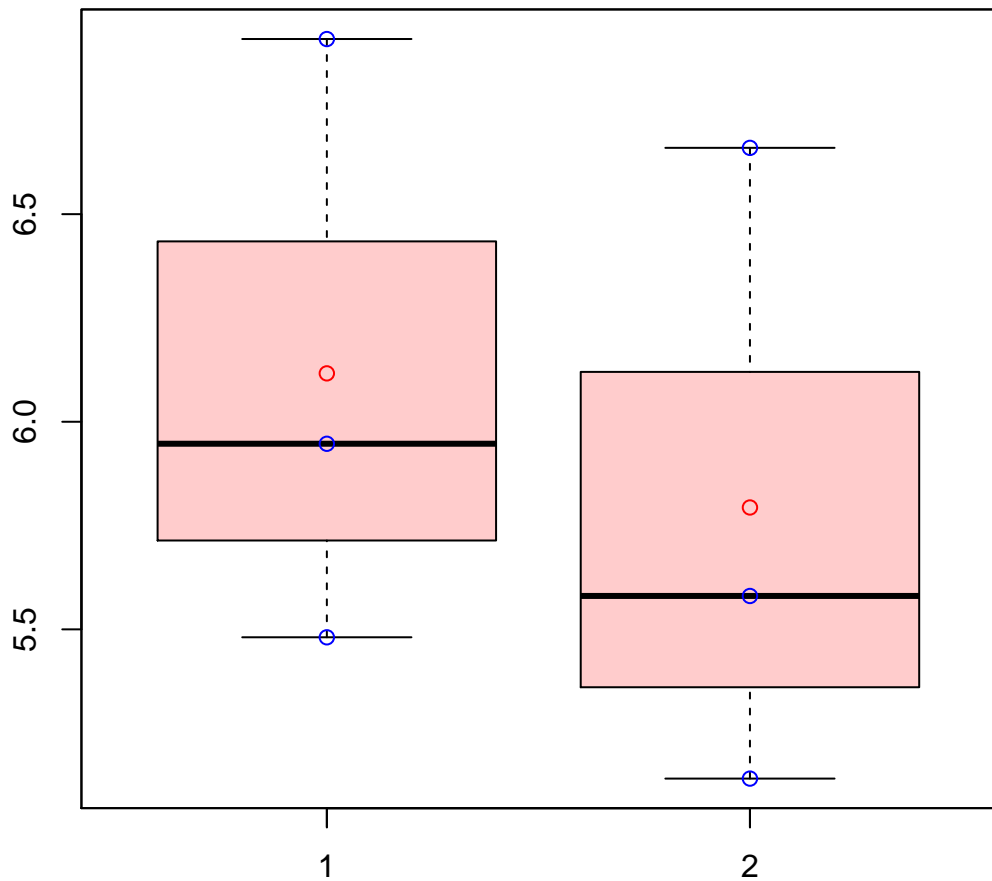

t-Test: p-value = 0.63

# K3Z2G6|K3Z2G6\_SETIT

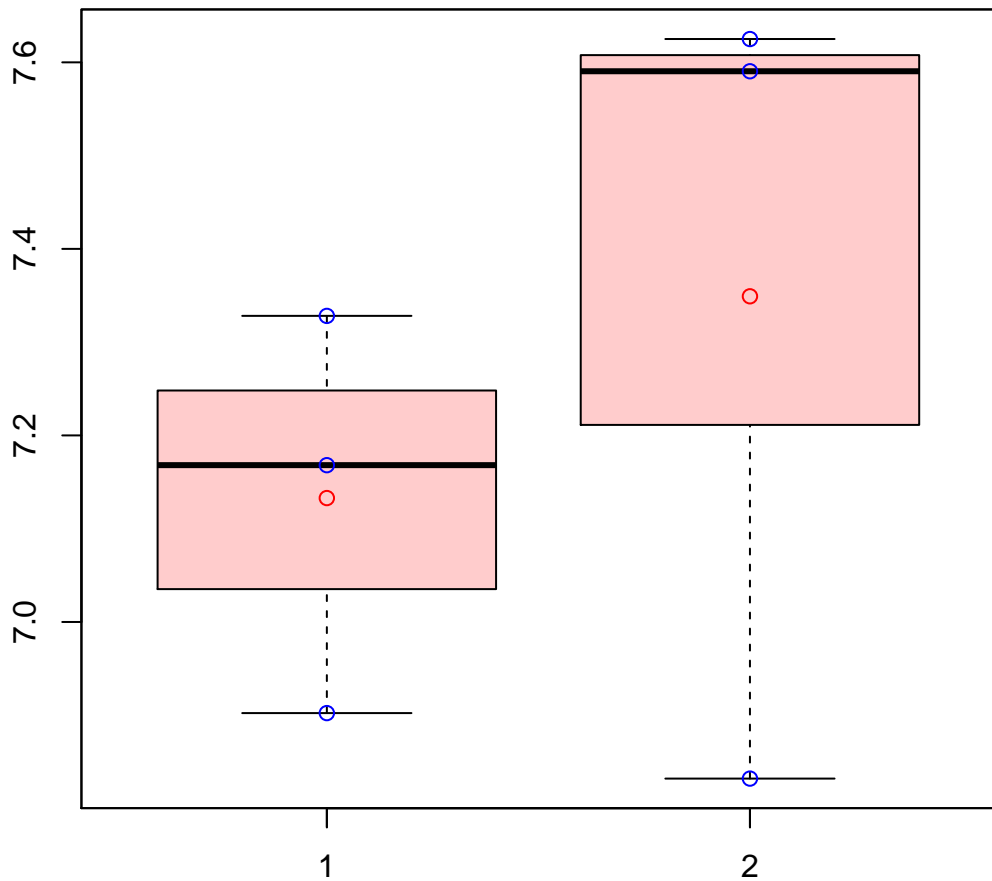

t-Test: p-value = 0.51

# K3Z2Q9|K3Z2Q9\_SETIT

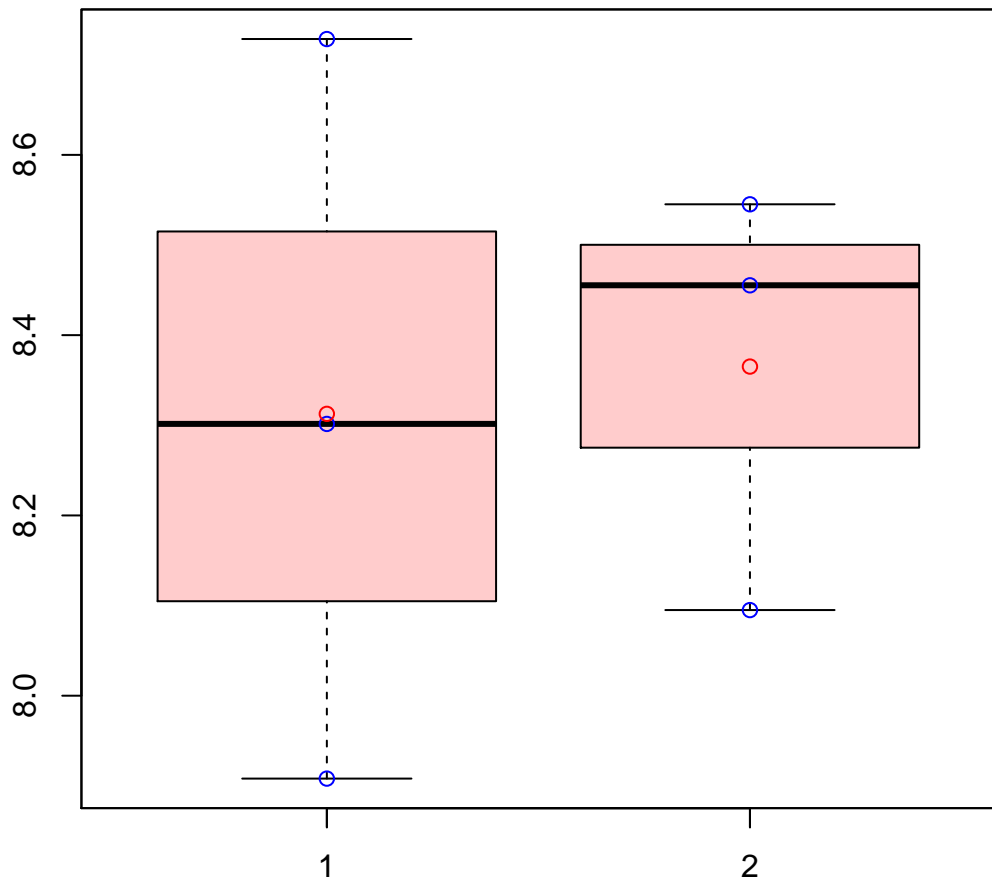

t-Test: p-value = 0.86

# K3Z2R6|K3Z2R6\_SETIT

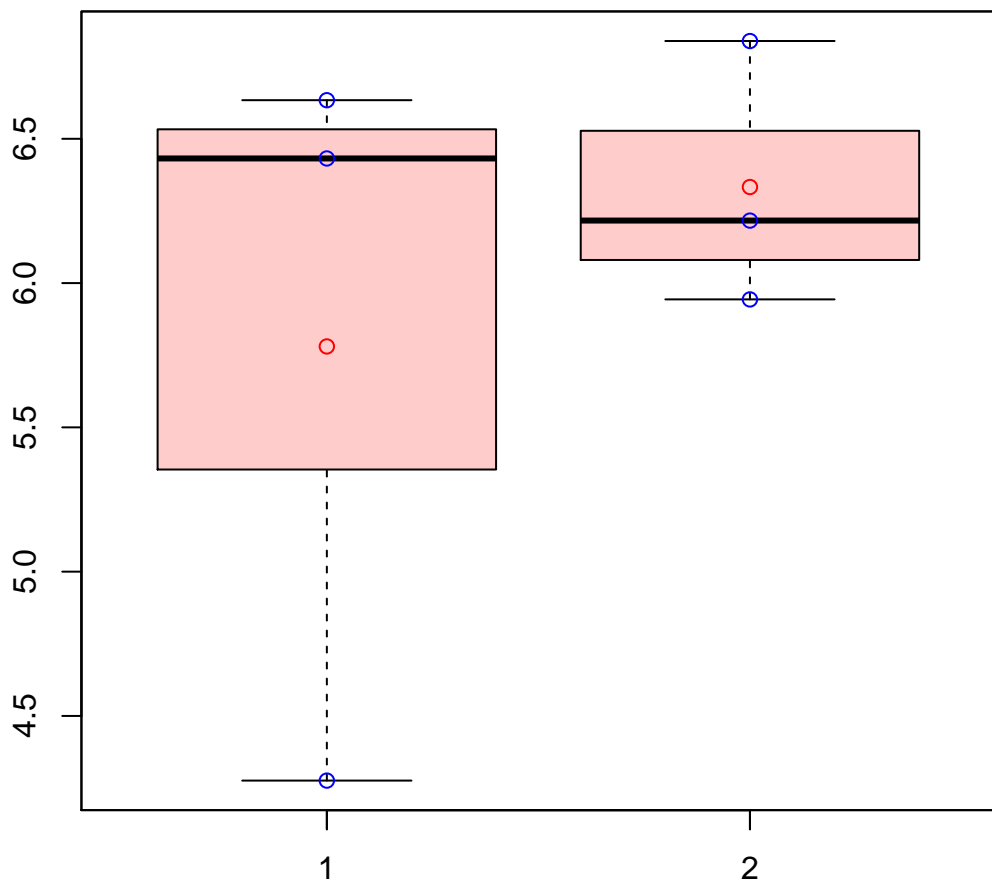

t-Test: p-value = 0.55

# K3Z2R8|K3Z2R8\_SETIT

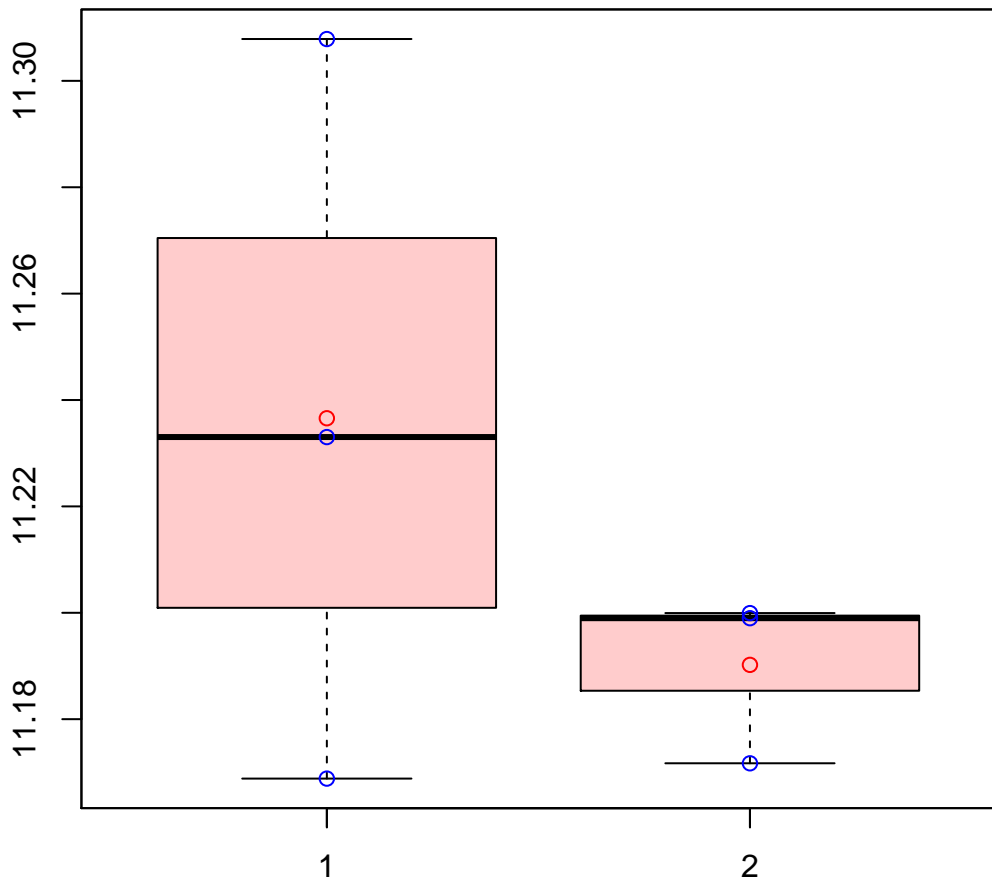

t-Test: p-value = 0.37

# K3Z2T6|K3Z2T6\_SETIT

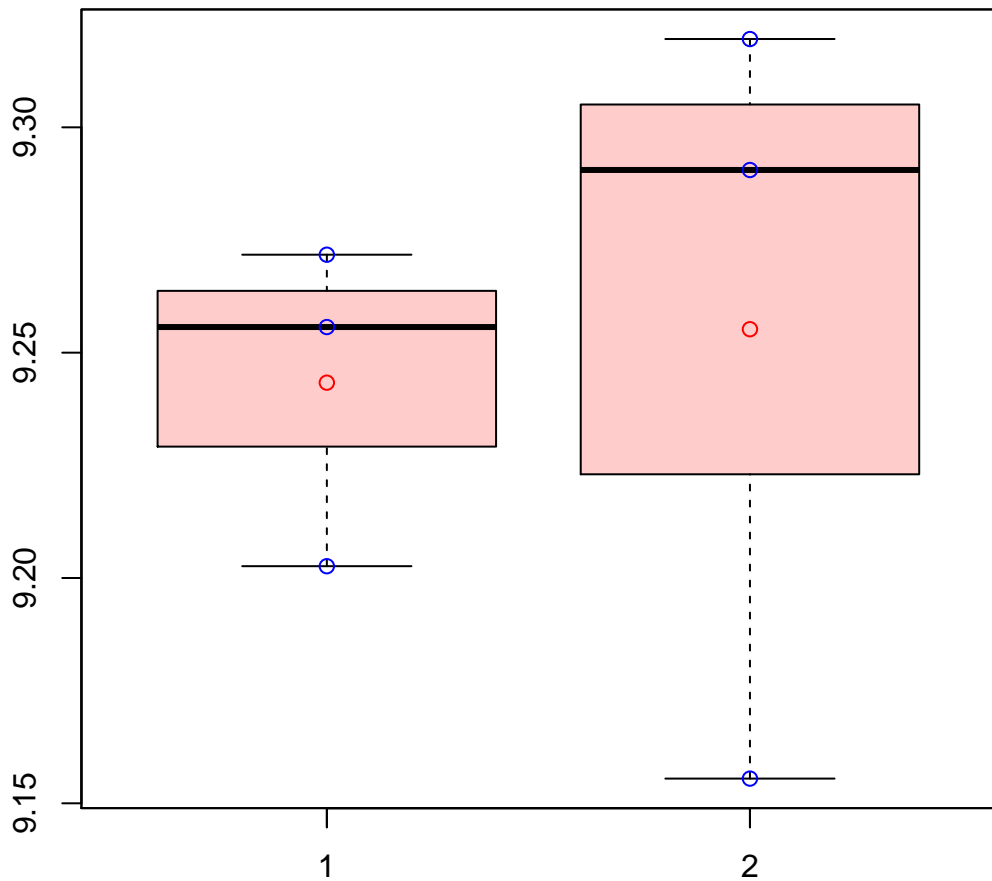

t-Test: p-value = 0.84

# K3Z2U2|K3Z2U2\_SETIT

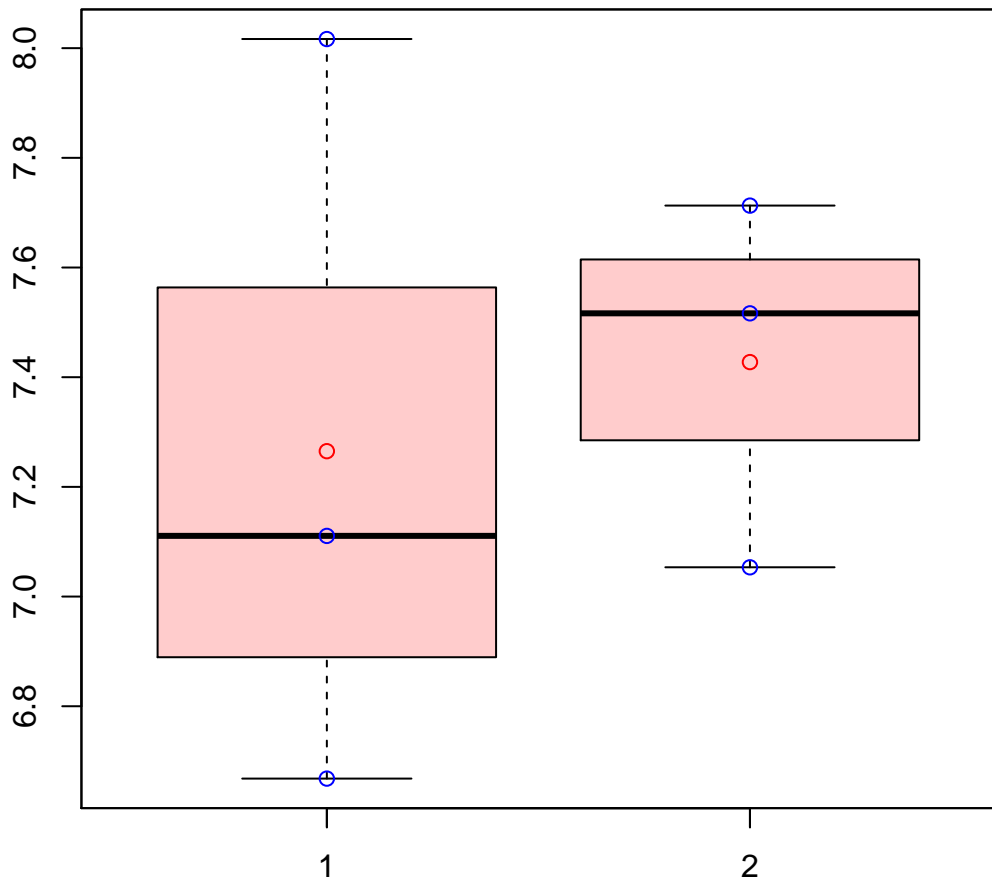

t-Test: p-value = 0.74



# K3Z345|K3Z345\_SETIT

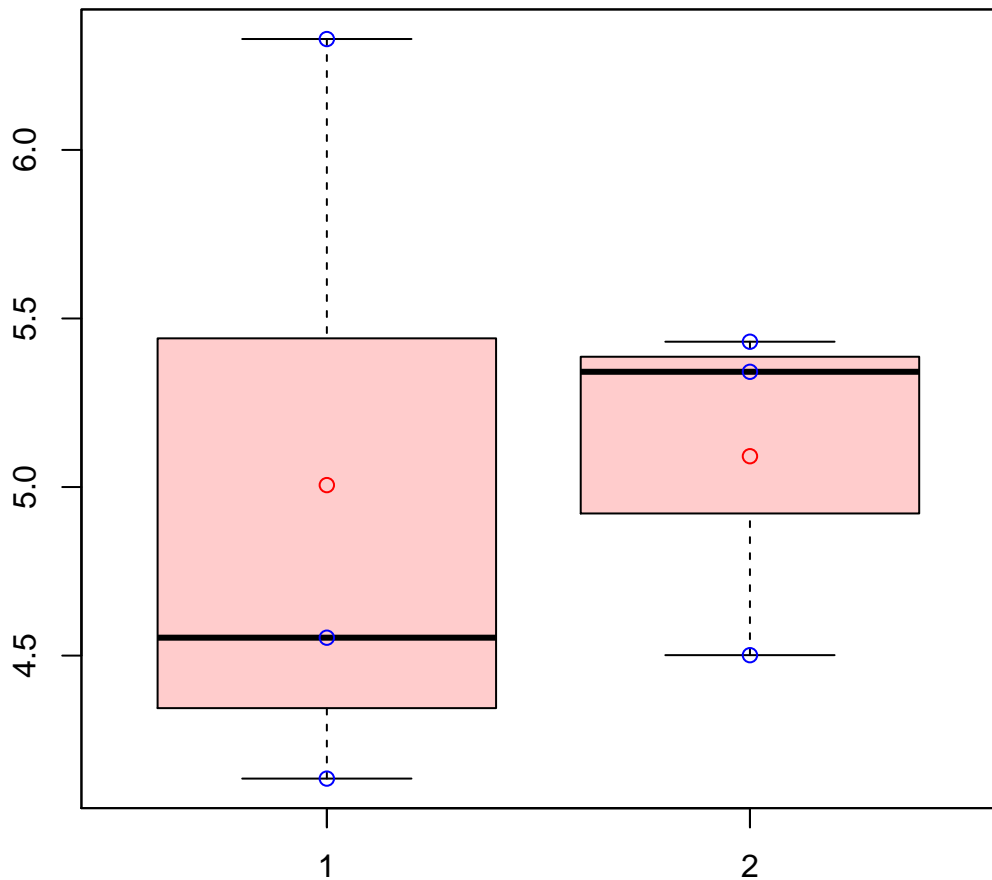

t-Test: p-value = 0.92

# K3Z362|K3Z362\_SETIT

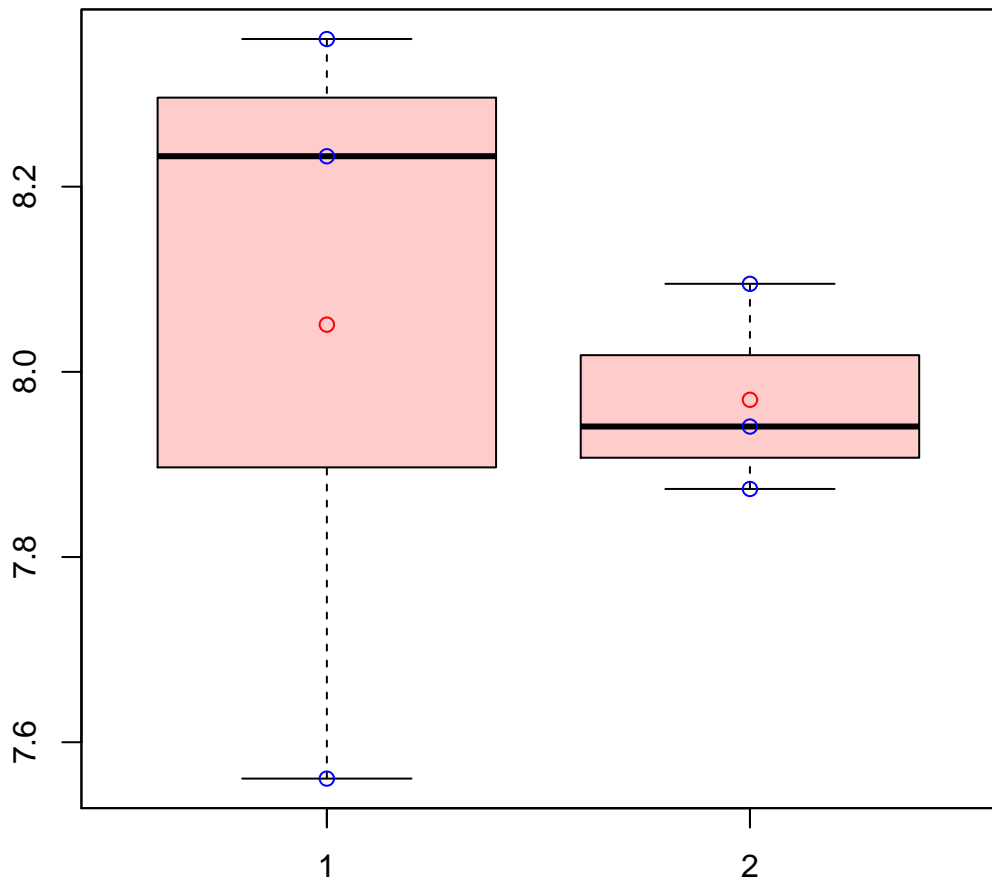

t-Test: p-value = 0.78

# K3Z3A2|K3Z3A2\_SETIT

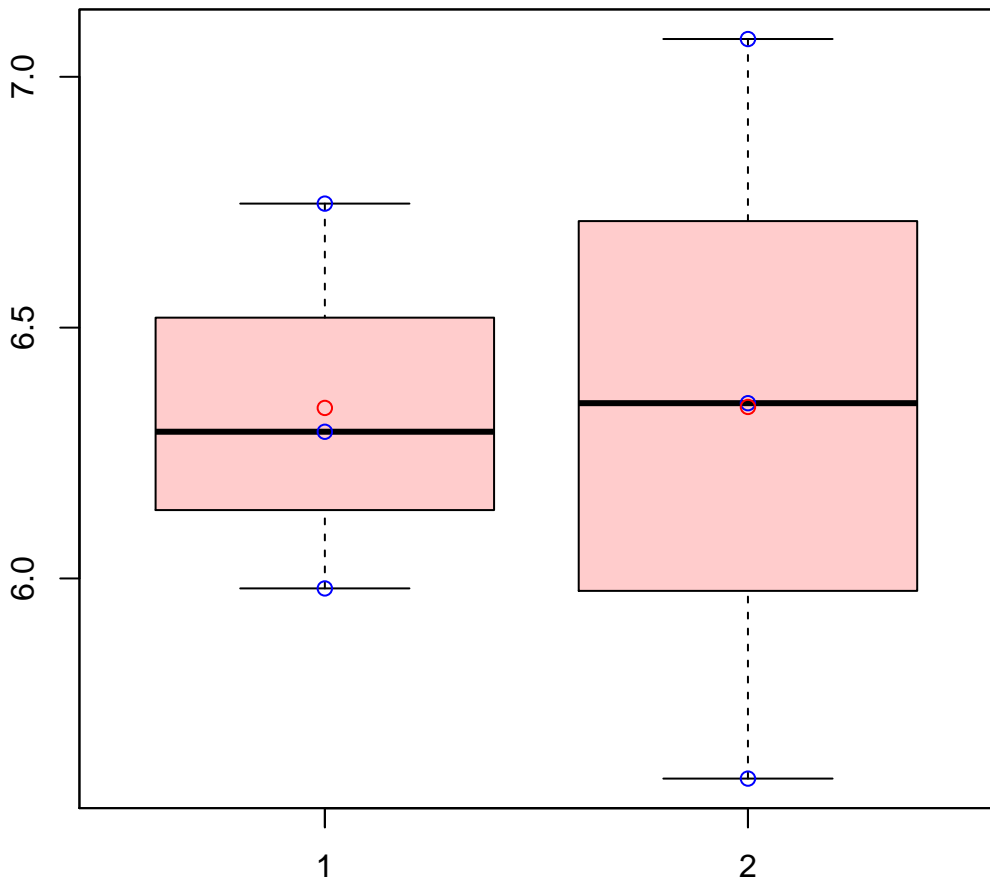

t-Test: p-value = 1

# K3Z3H4|K3Z3H4\_SETIT

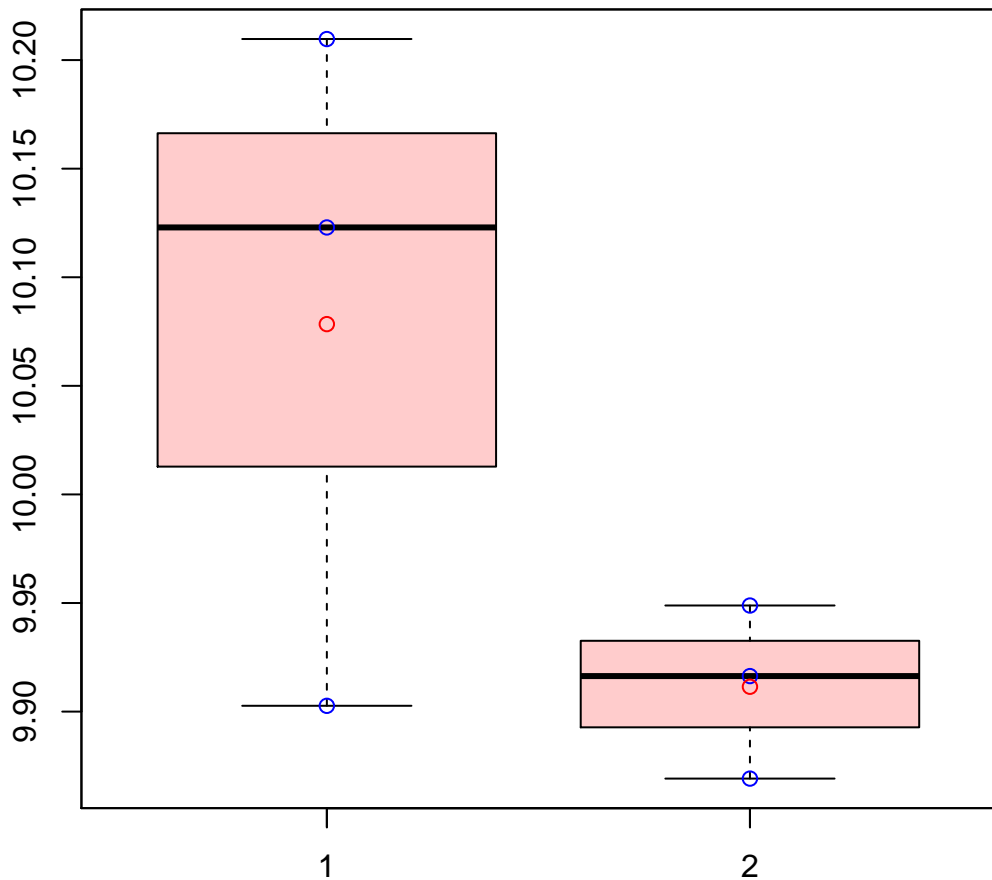

t-Test: p-value = 0.2

# K3Z3I6|K3Z3I6\_SETIT

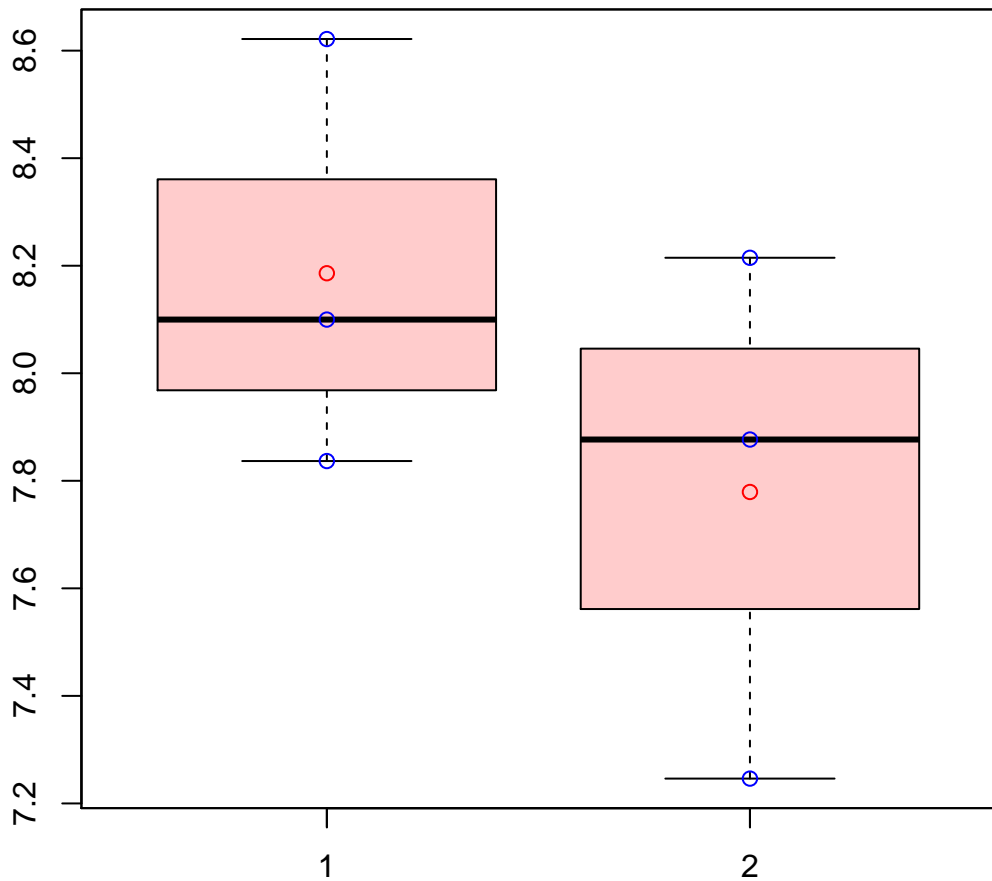

t-Test: p-value = 0.33

# K3Z3N3|K3Z3N3\_SETIT

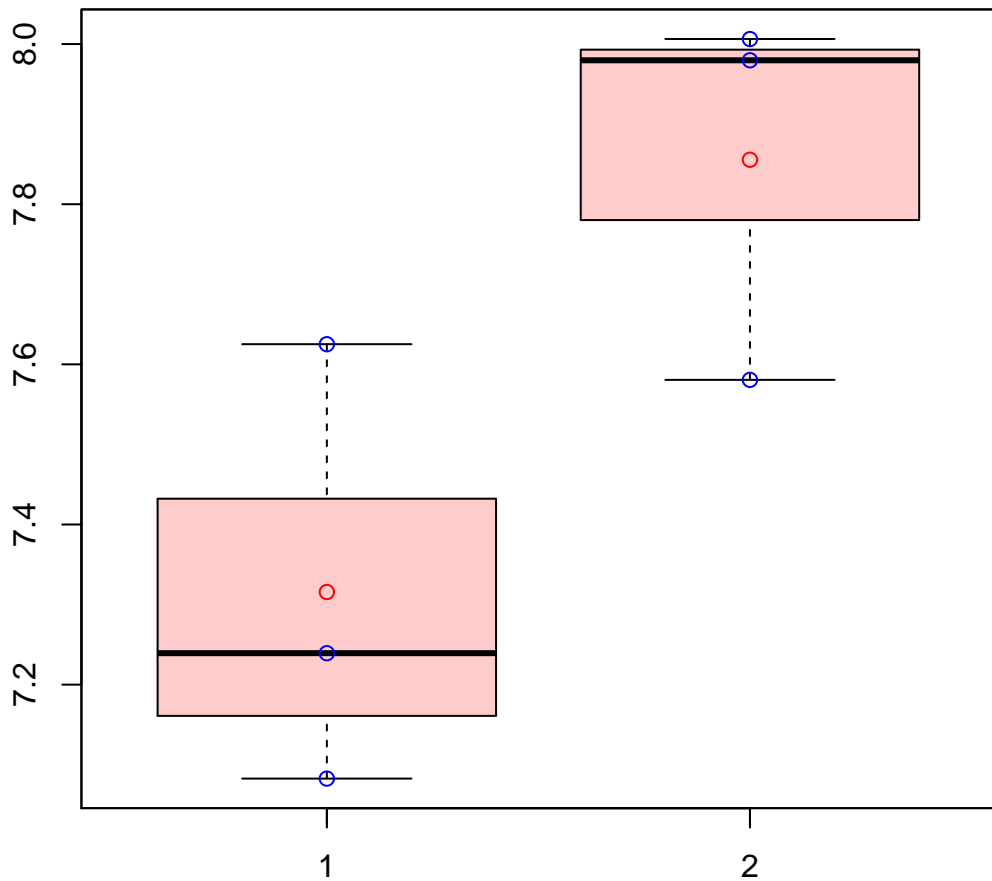

t-Test: p-value = 0.07

# K3Z3T6|K3Z3T6\_SETIT

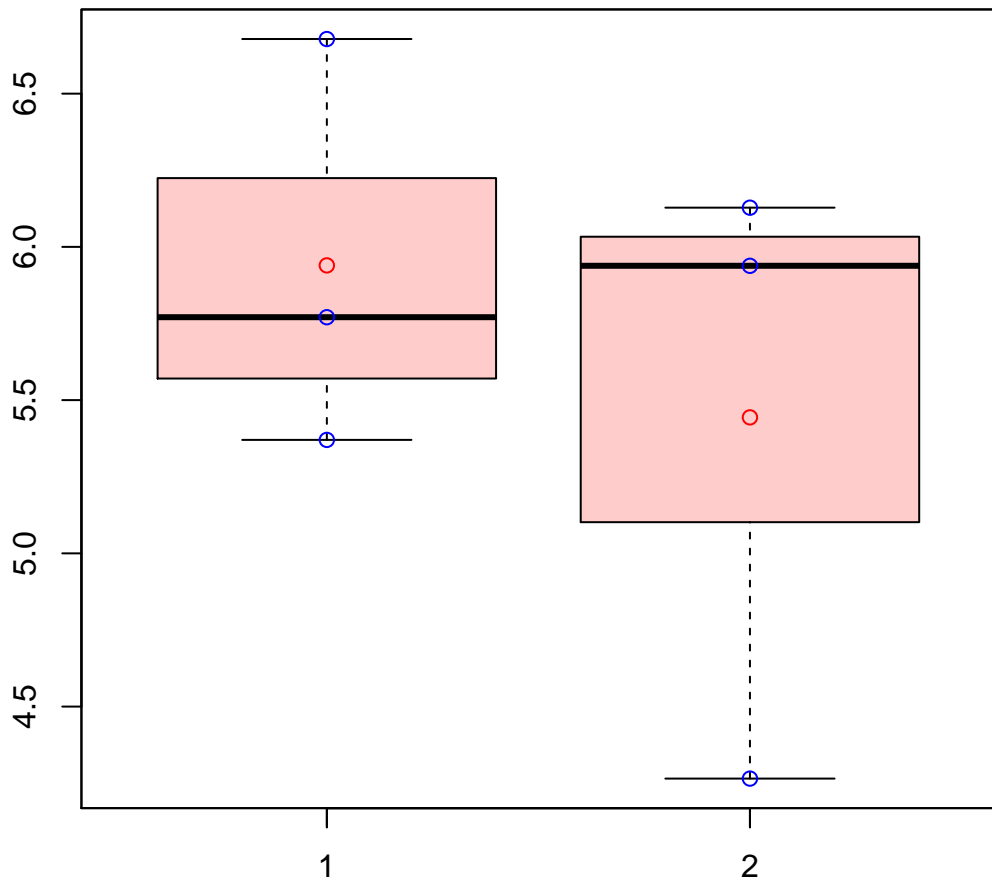

t-Test: p-value = 0.53

# K3Z3W9|K3Z3W9\_SETIT

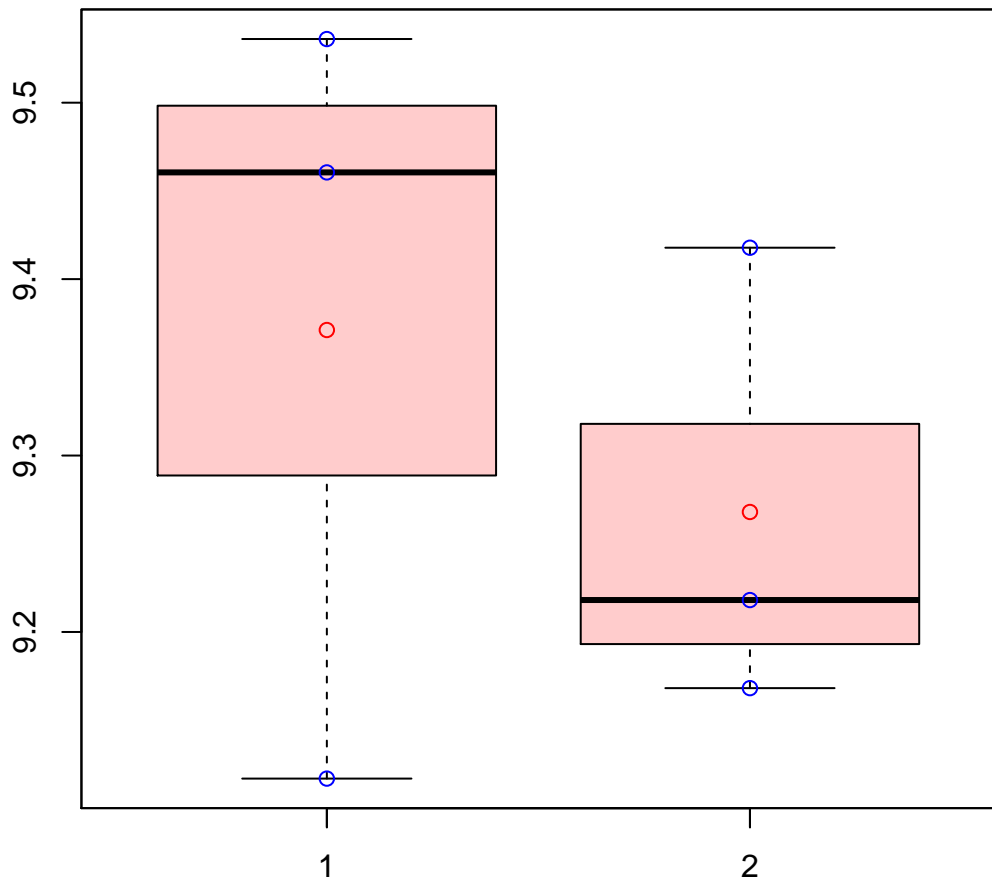

t-Test: p-value = 0.54



# K3Z414|K3Z414\_SETIT

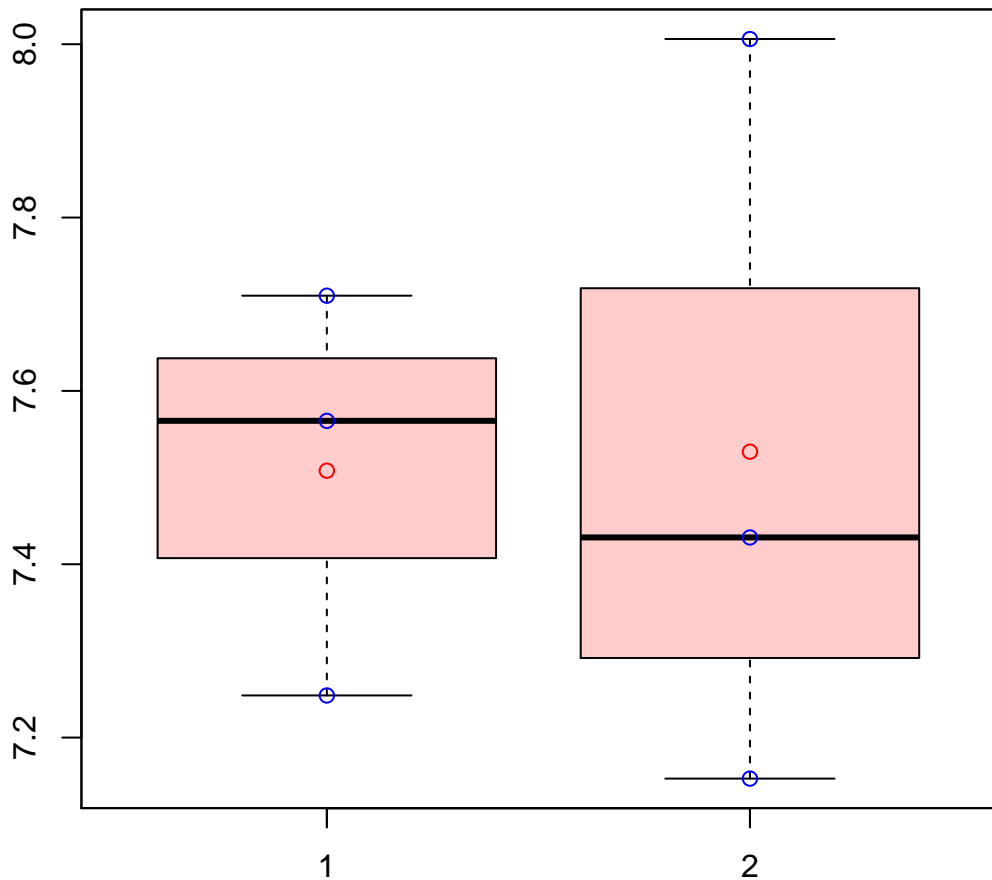

t-Test: p-value = 0.94

# K3Z448|K3Z448\_SETIT

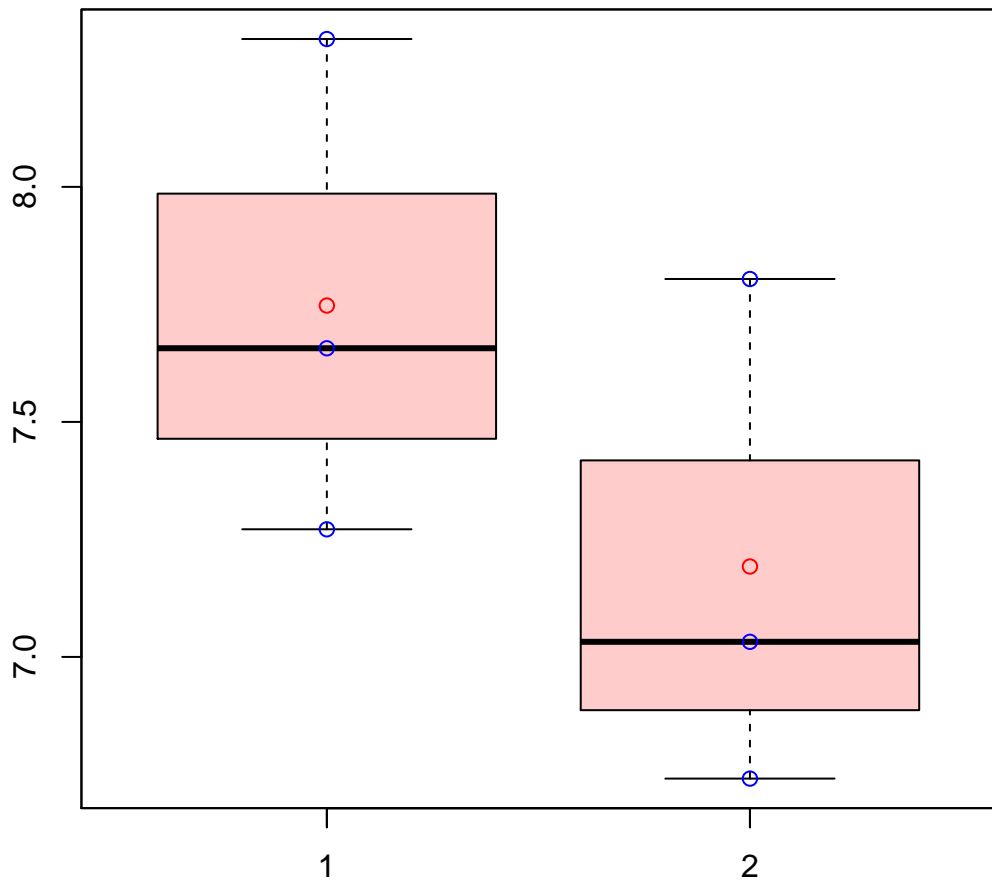

t-Test: p-value = 0.28

# K3Z472|K3Z472\_SETIT

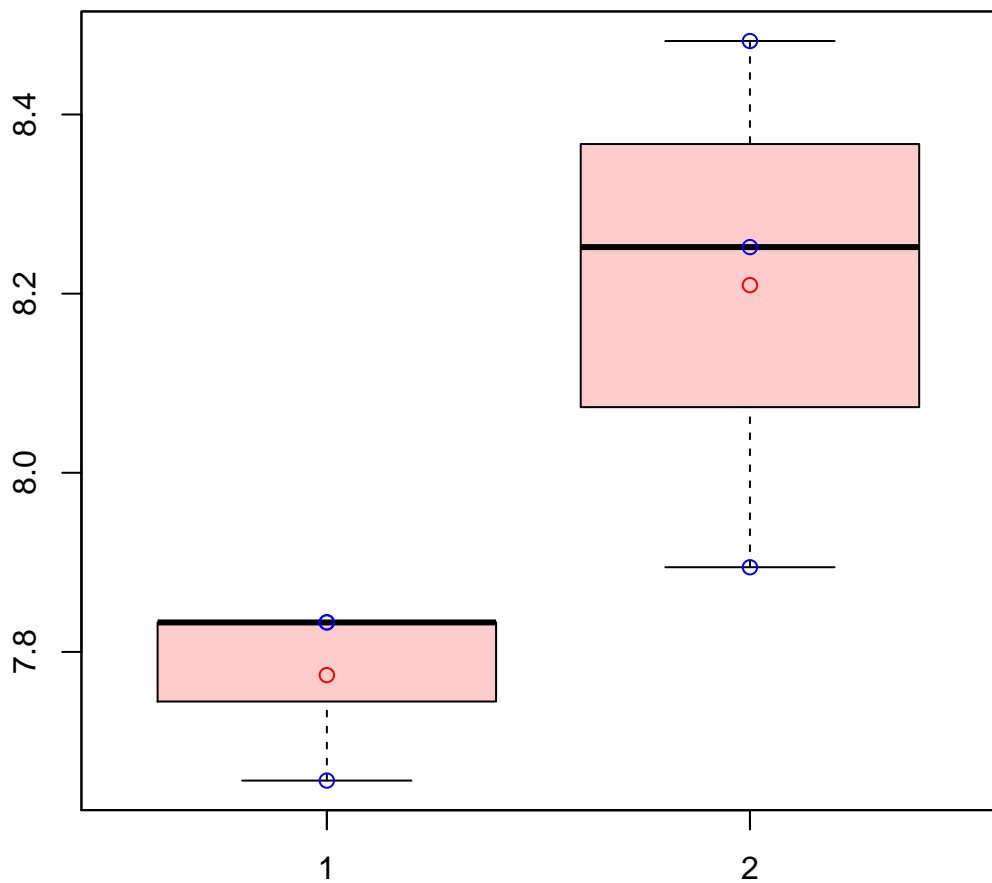

t-Test: p-value = 0.11

# K3Z4C1|K3Z4C1\_SETIT

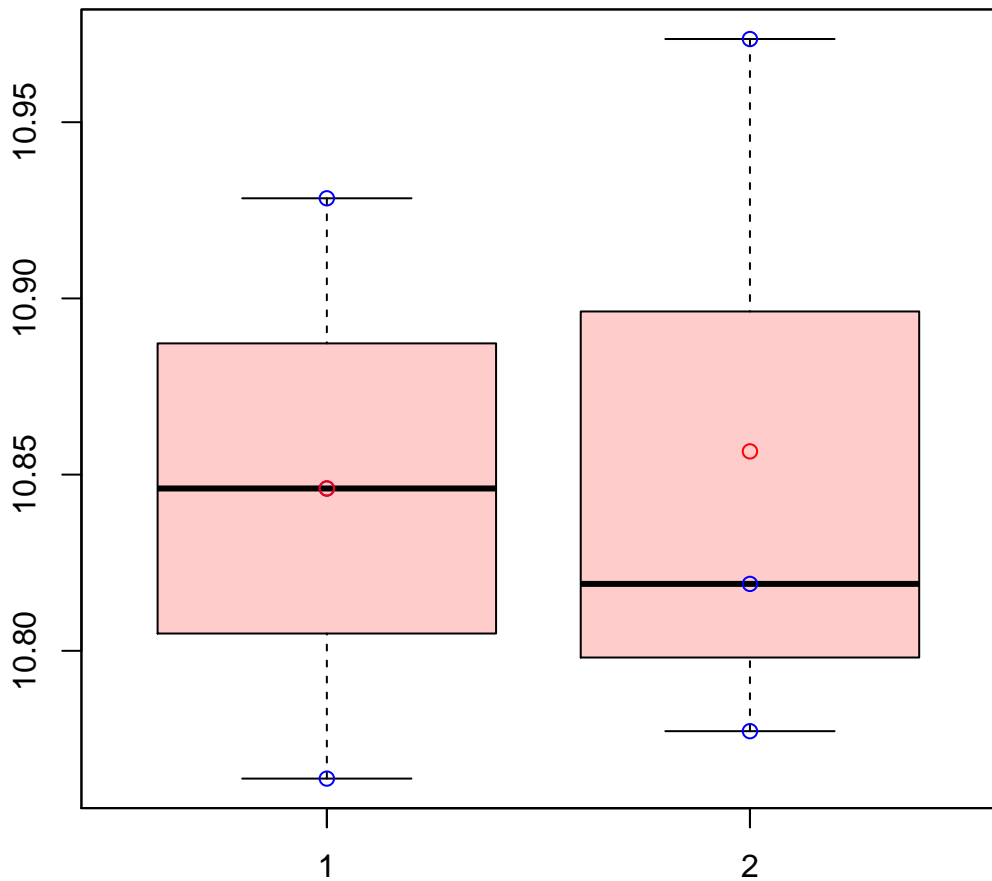

t-Test: p-value = 0.9

# K3Z4G5|K3Z4G5\_SETIT

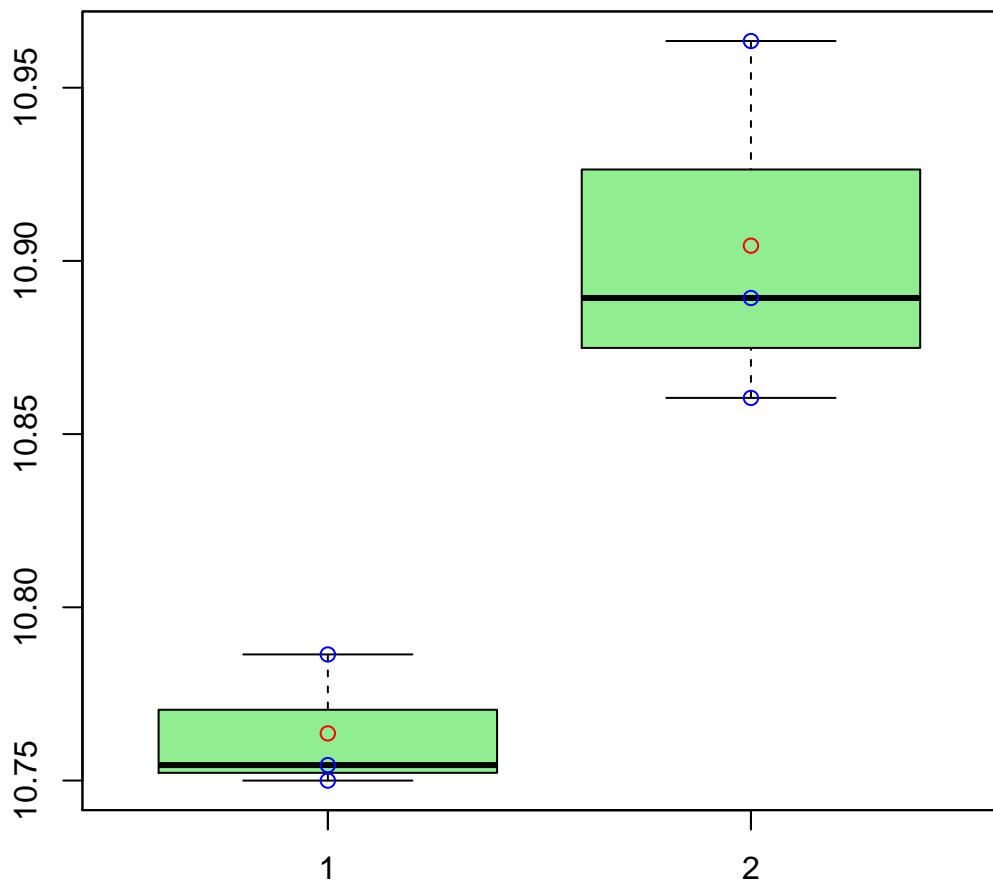

t-Test: p-value = 0.03

# K3Z4H5|K3Z4H5\_SETIT

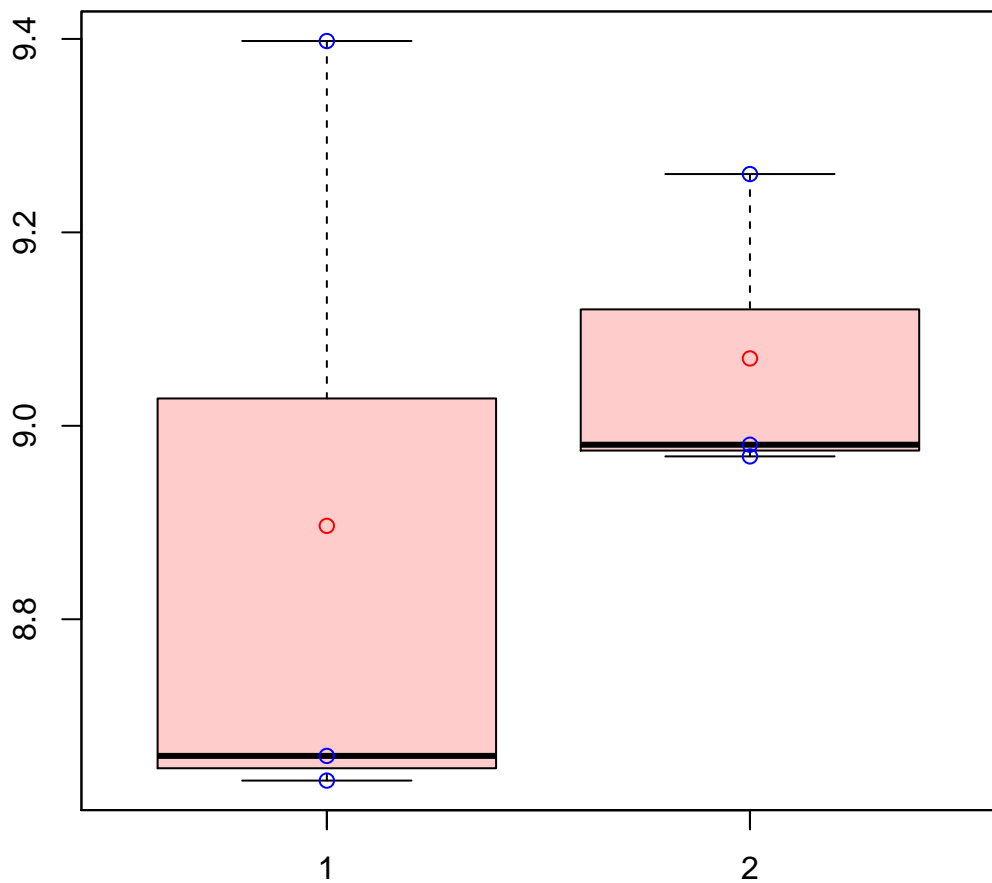

t-Test: p-value = 0.57

# K3Z4J6|K3Z4J6\_SETIT

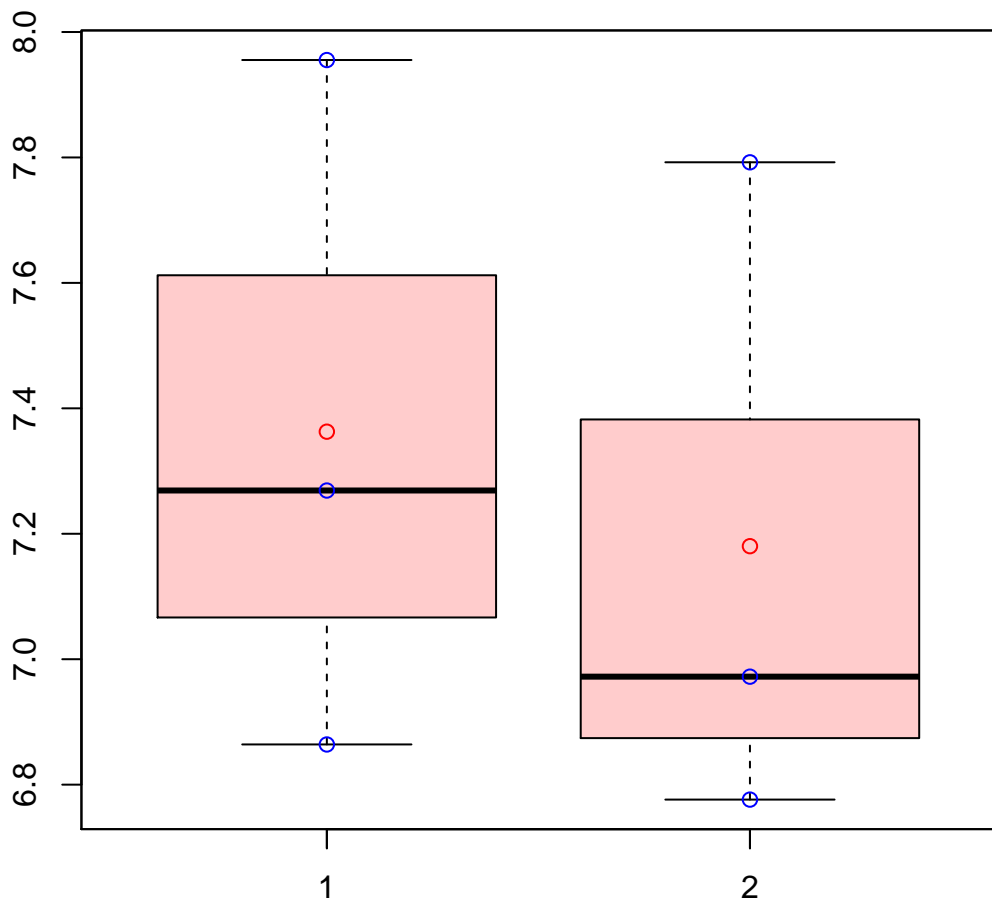

t-Test: p-value = 0.7

# K3Z4X2|K3Z4X2\_SETIT

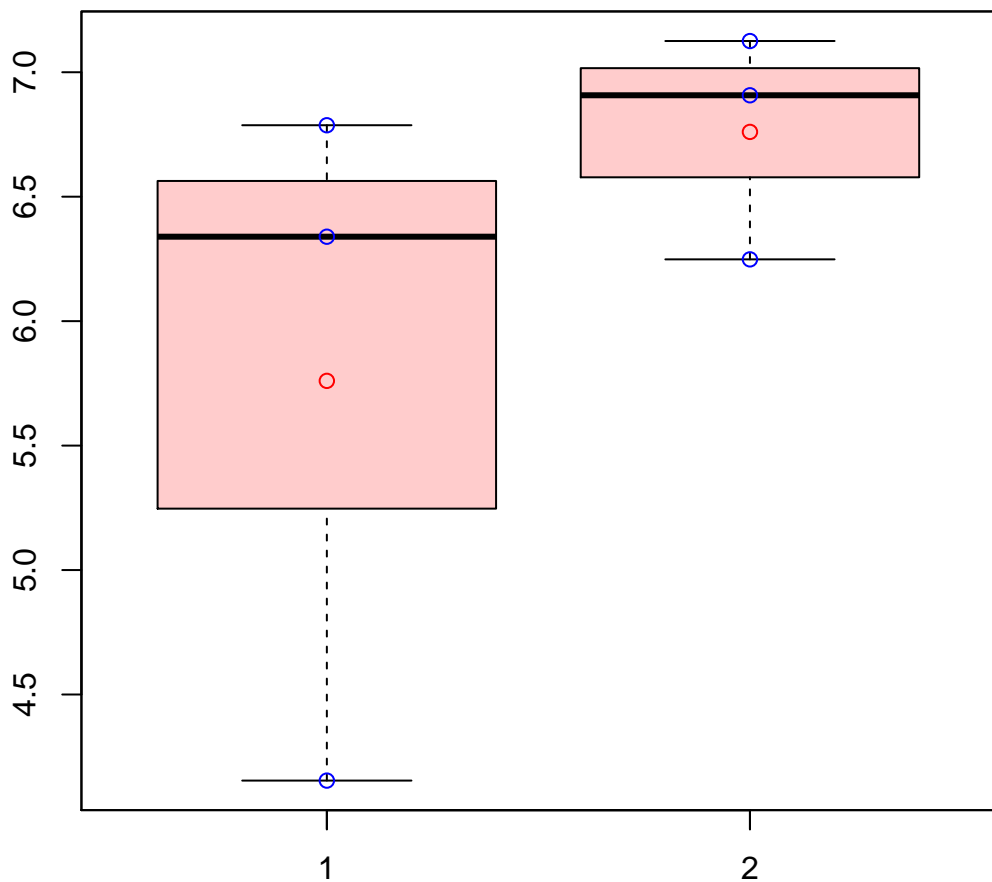

t-Test: p-value = 0.34



# K3Z4Y8|K3Z4Y8\_SETIT

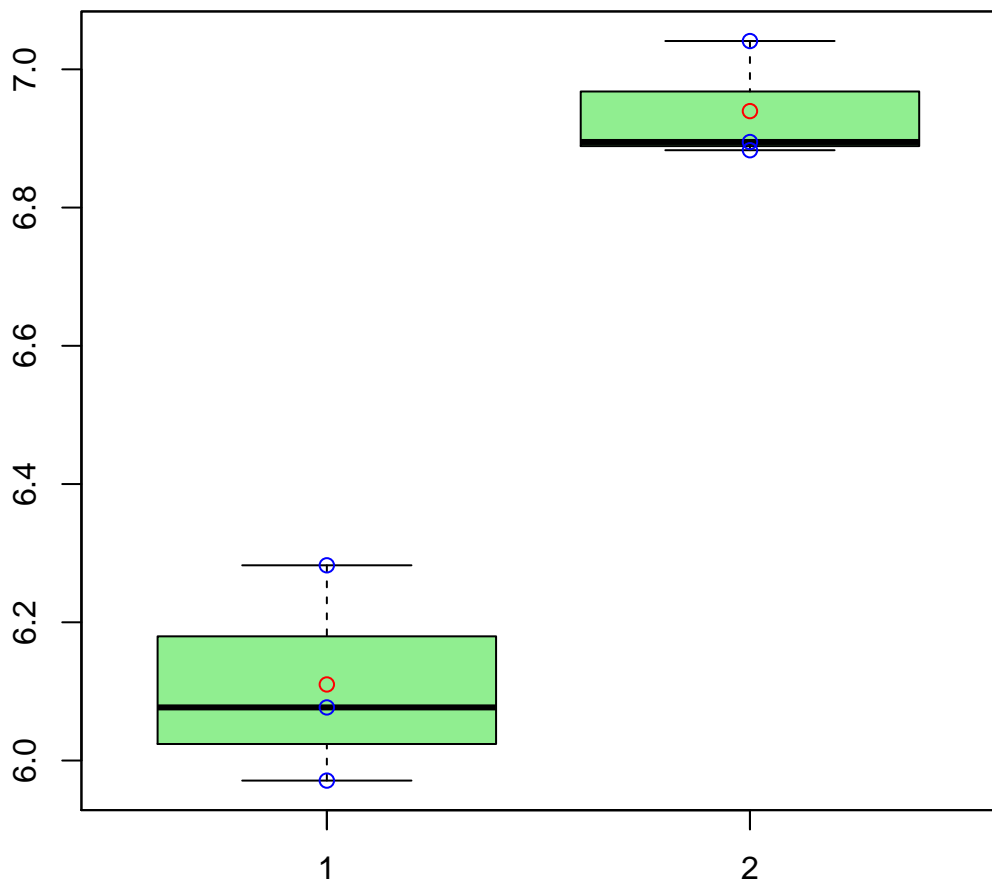

t-Test: p-value = 0

# K3Z512|K3Z512\_SETIT

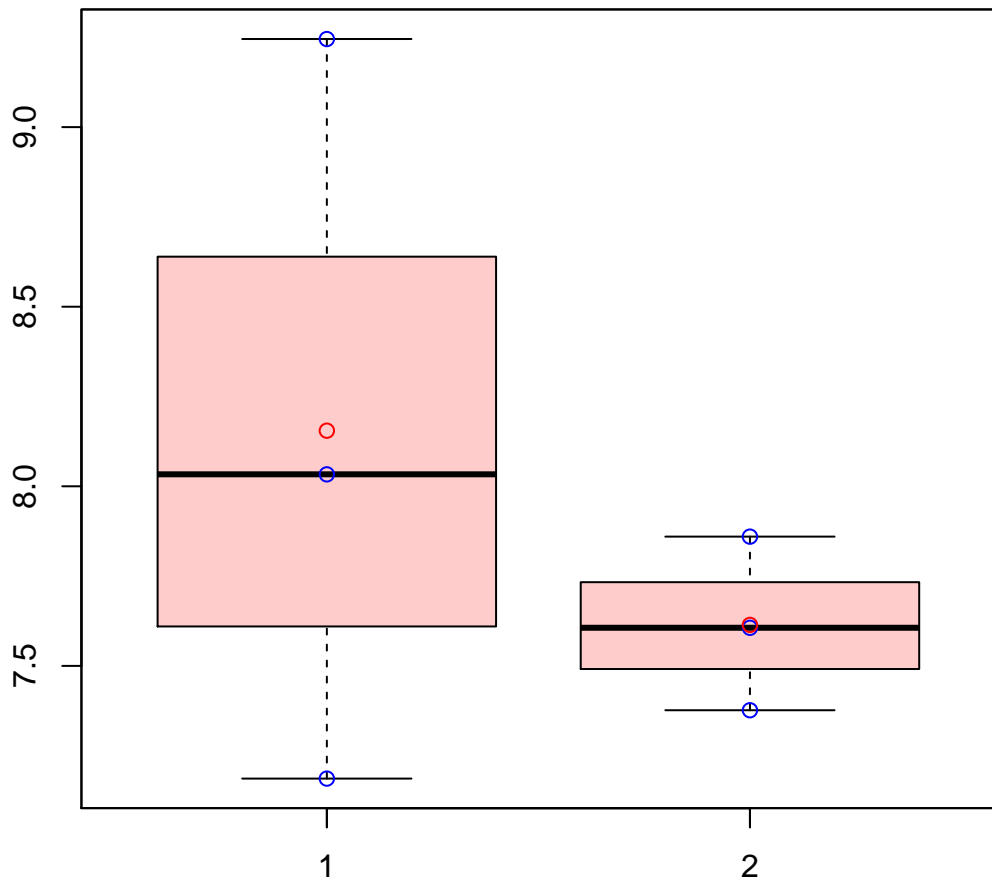

t-Test: p-value = 0.46

# K3Z567|K3Z567\_SETIT

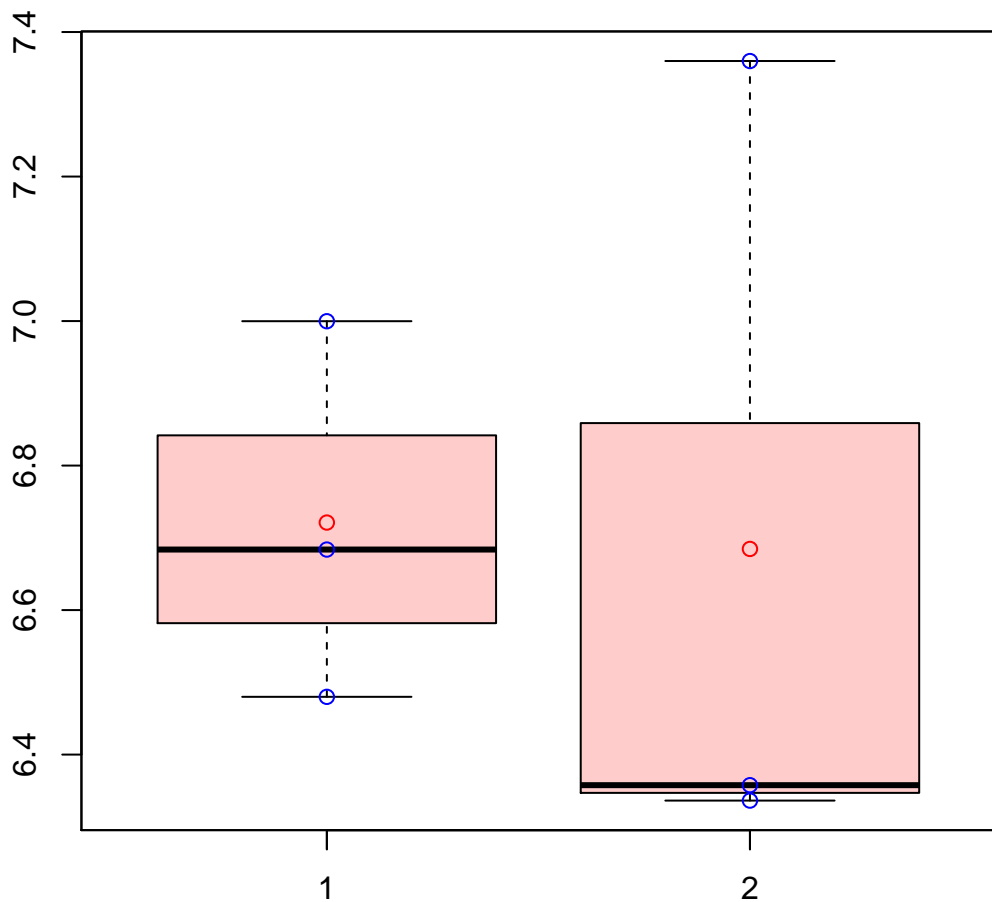

t-Test: p-value = 0.93

# K3Z593|K3Z593\_SETIT

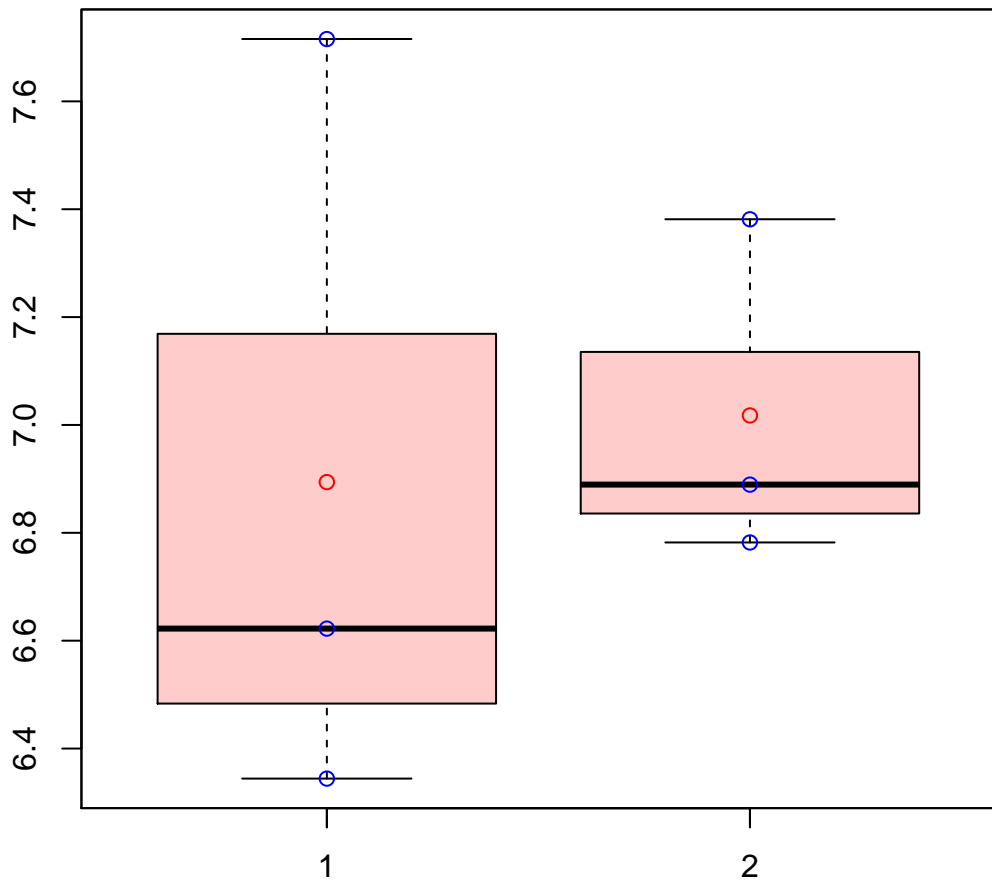

t-Test: p-value = 0.81

# K3Z5G6|K3Z5G6\_SETIT

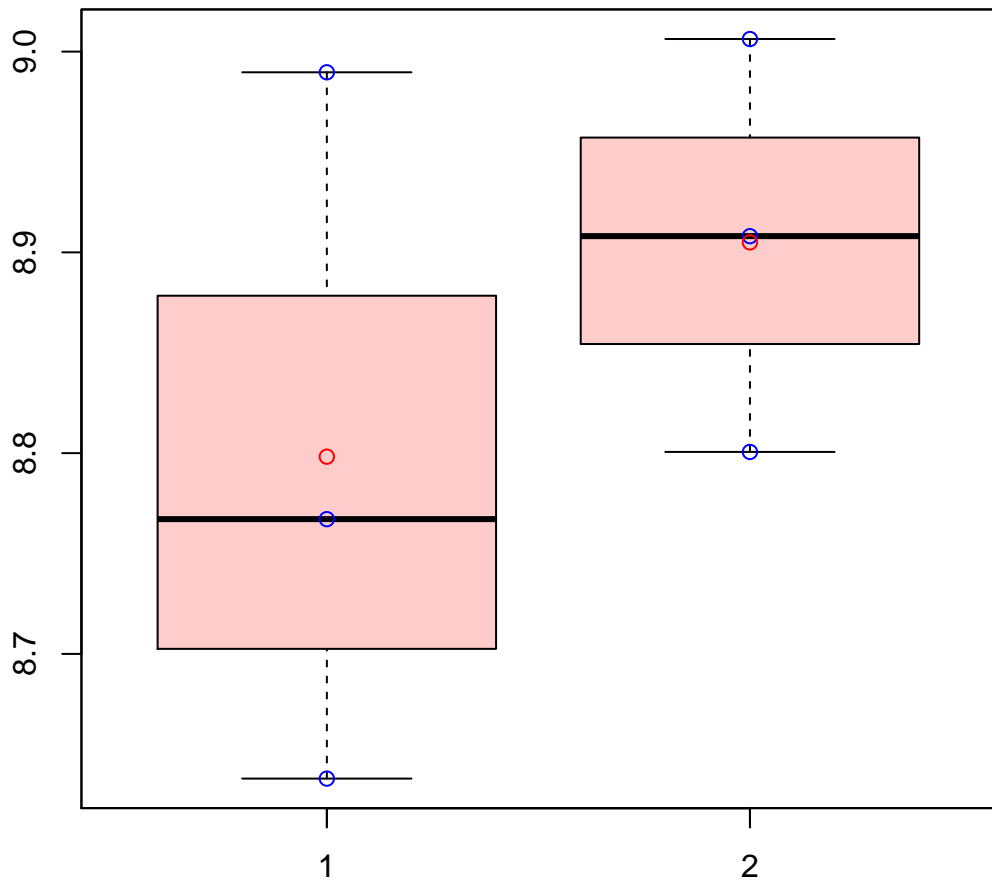

t-Test: p-value = 0.43

# K3Z5J1|K3Z5J1\_SETIT

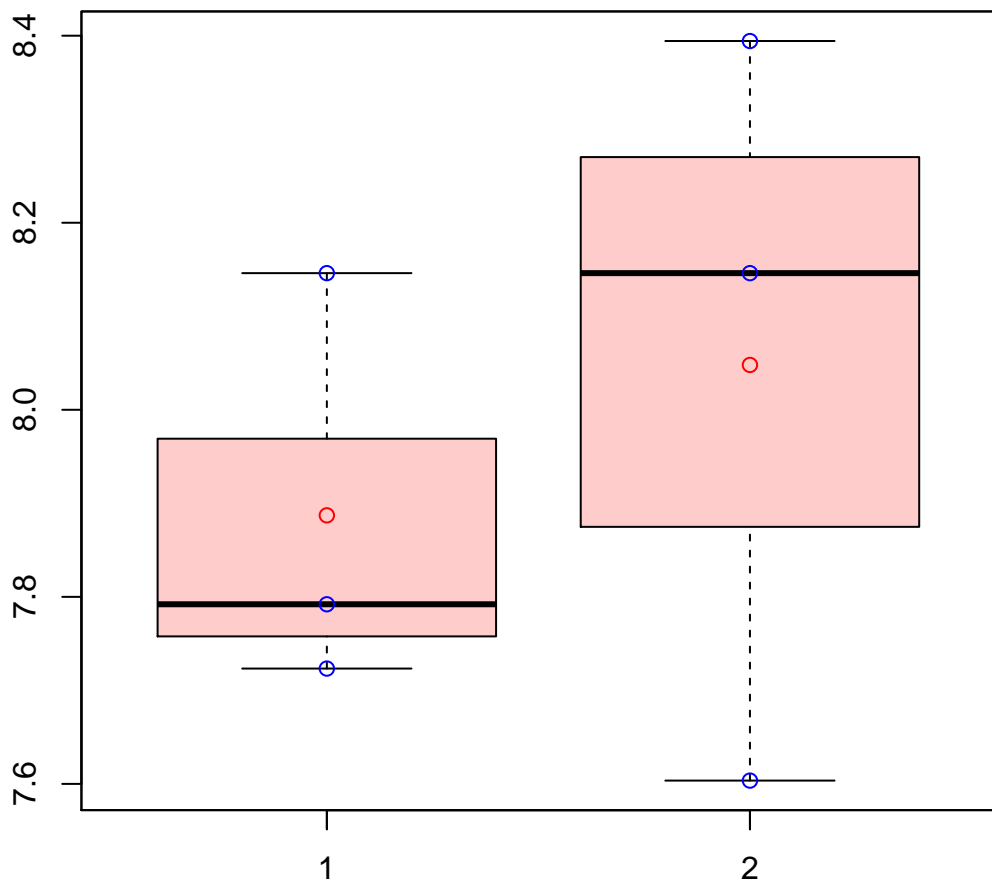

t-Test: p-value = 0.59

# K3Z5K2|K3Z5K2\_SETIT

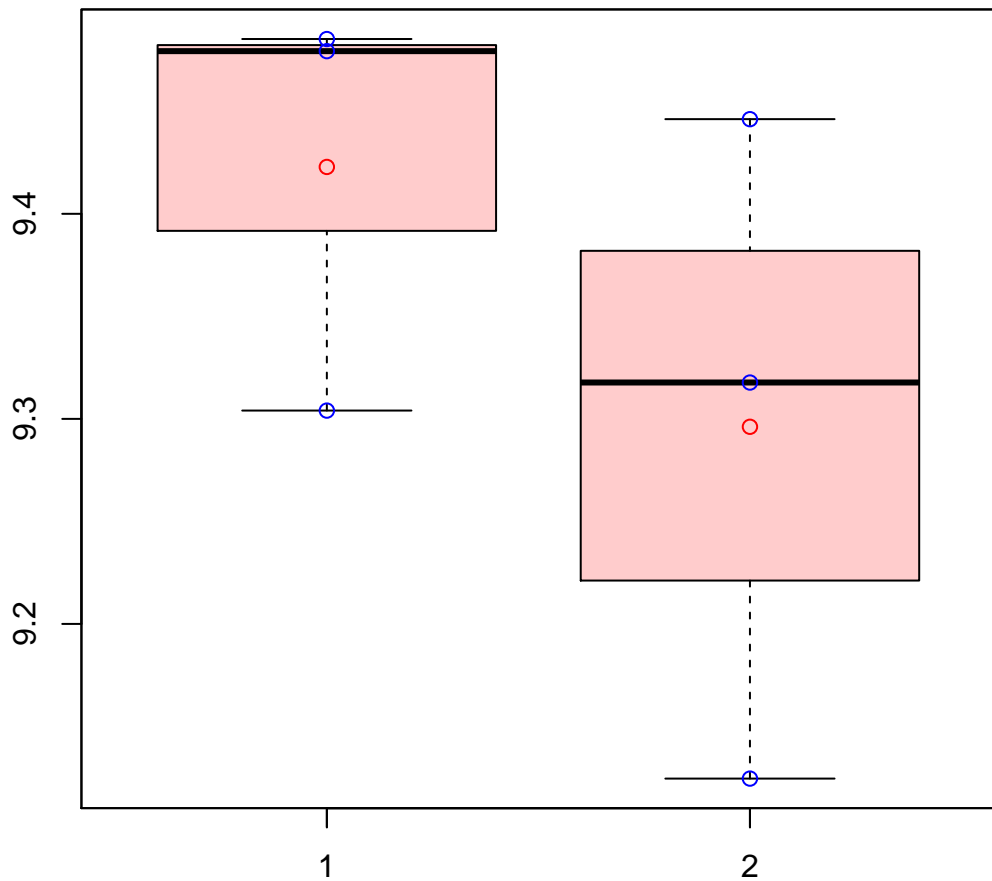

t-Test: p-value = 0.33

# K3Z5T8|K3Z5T8\_SETIT

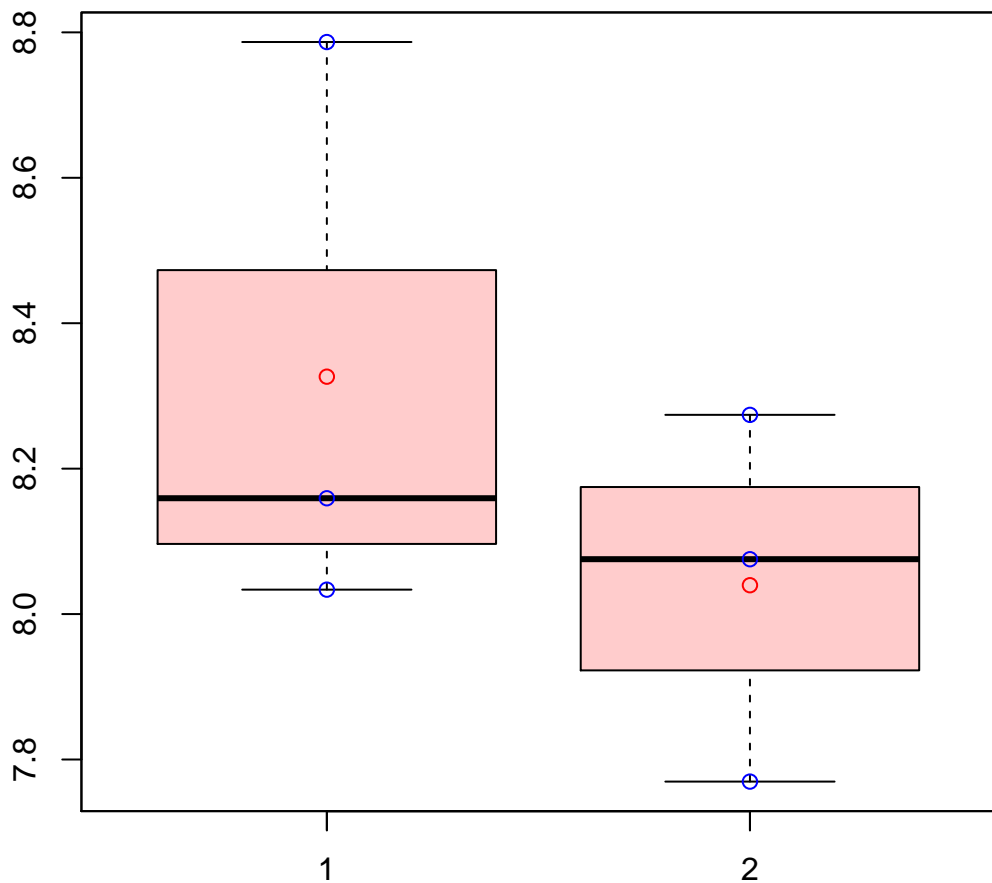

t-Test: p-value = 0.37



# K3Z5U9|K3Z5U9\_SETIT

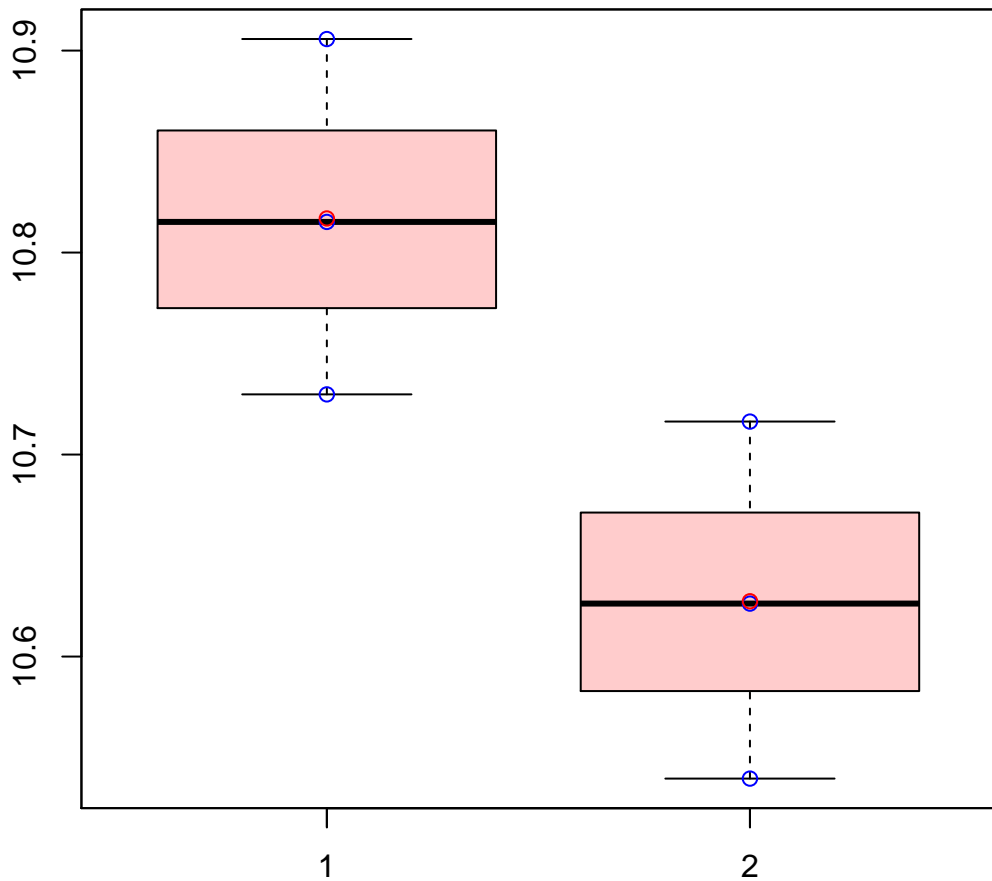

t-Test: p-value = 0.06

# K3Z686|K3Z686\_SETIT

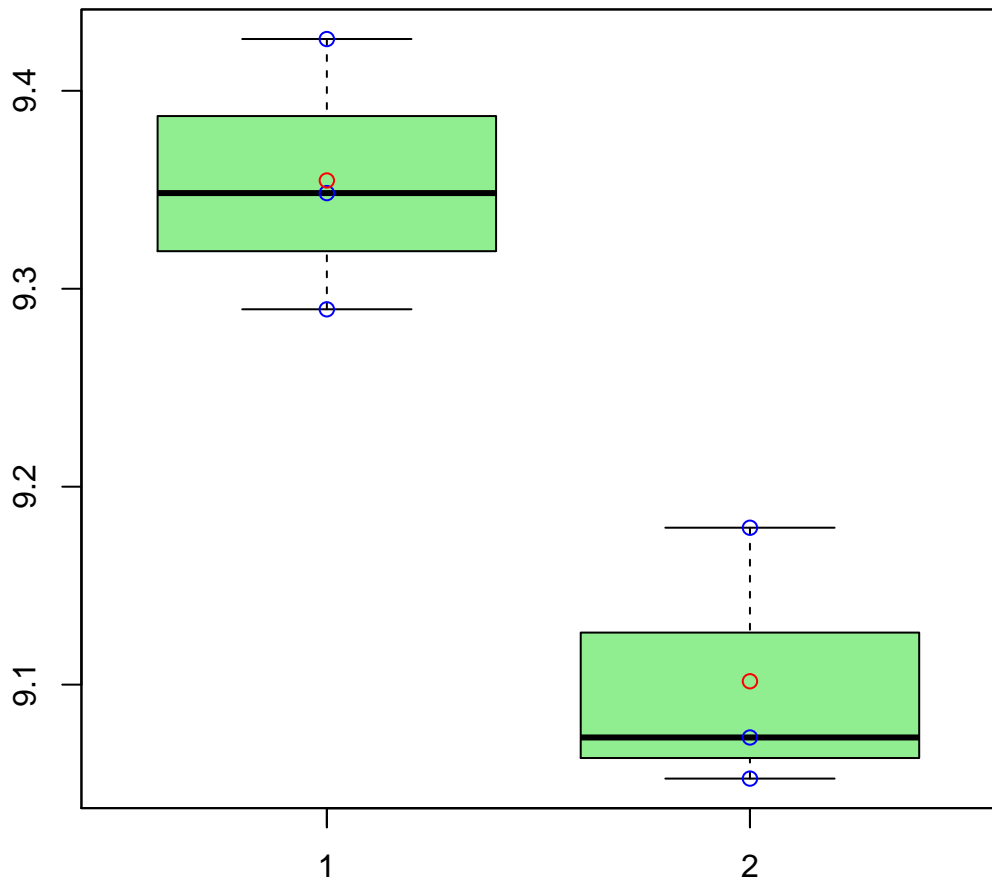

t-Test: p-value = 0.01

# K3Z6F2|K3Z6F2\_SETIT

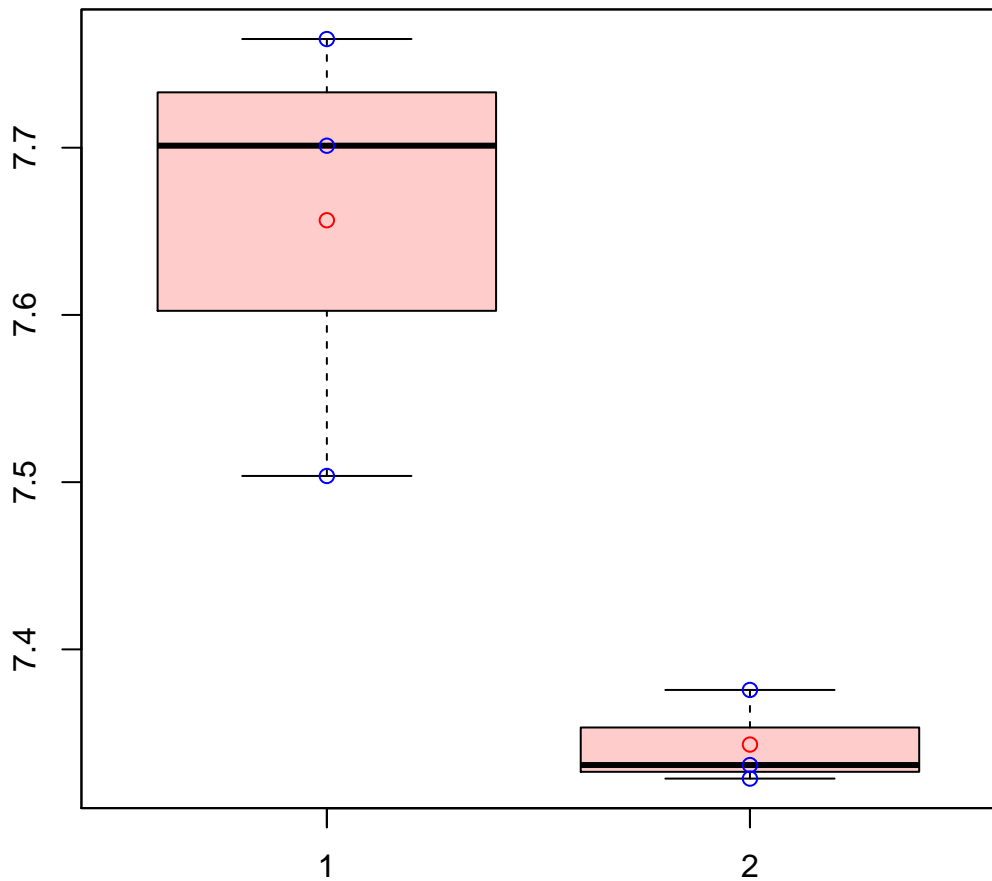

t-Test: p-value = 0.05

# K3Z6K9|K3Z6K9\_SETIT

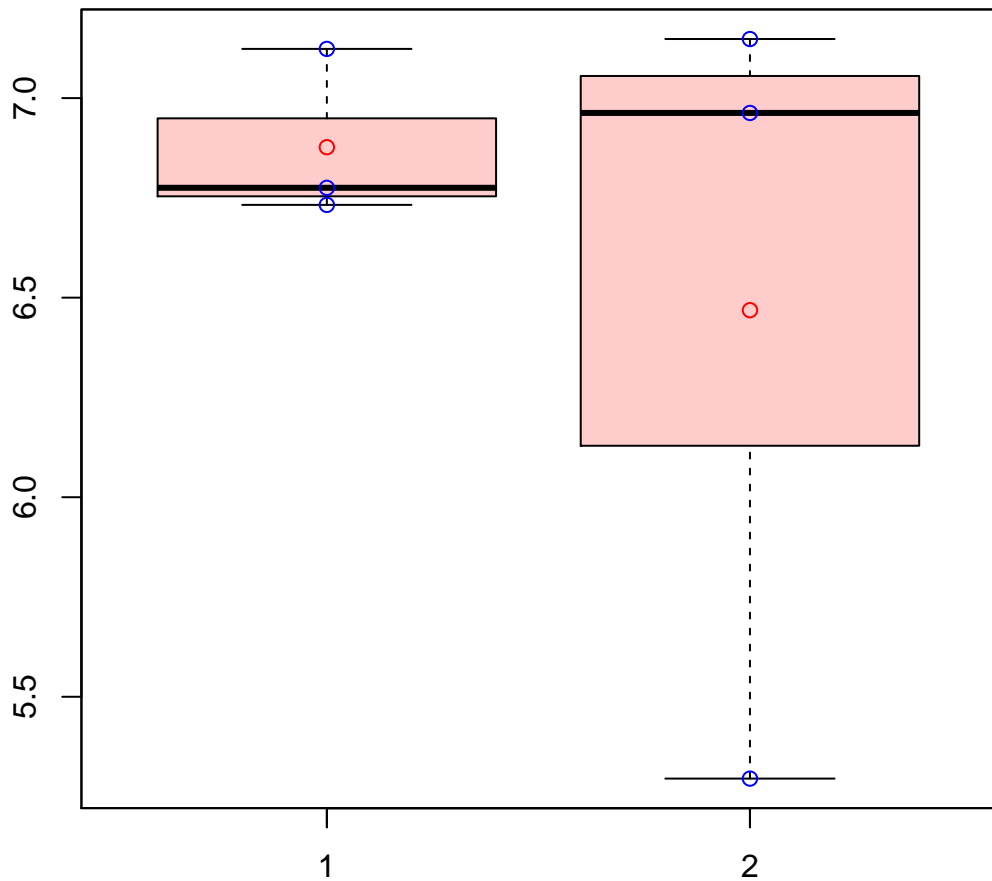

t-Test: p-value = 0.56

# K3Z6P5|K3Z6P5\_SETIT

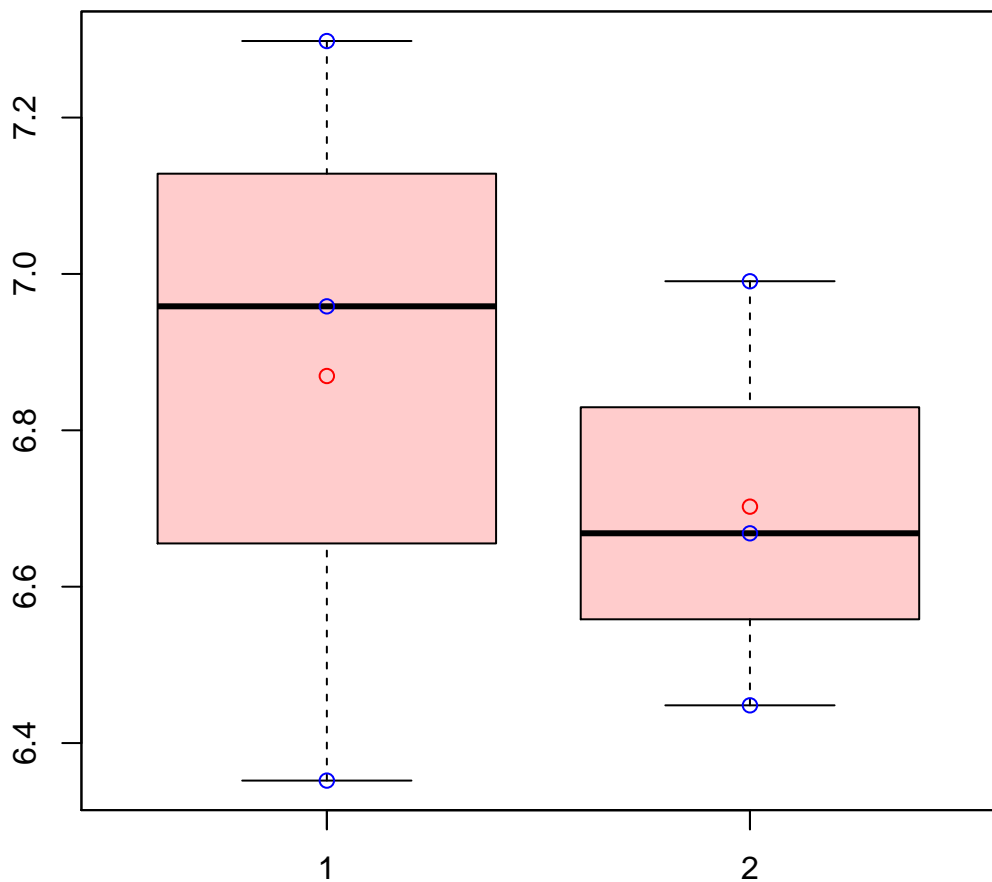

t-Test: p-value = 0.63

# K3Z6T3|K3Z6T3\_SETIT

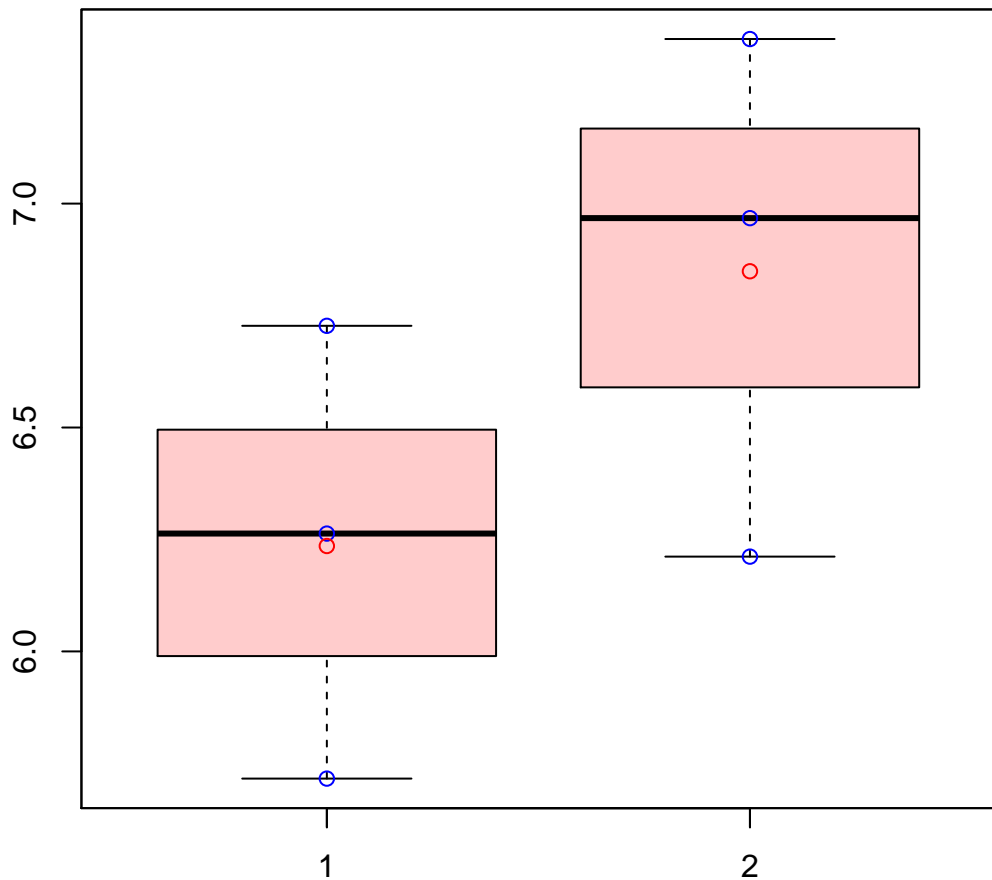

t-Test: p-value = 0.24

# K3Z753|K3Z753\_SETIT

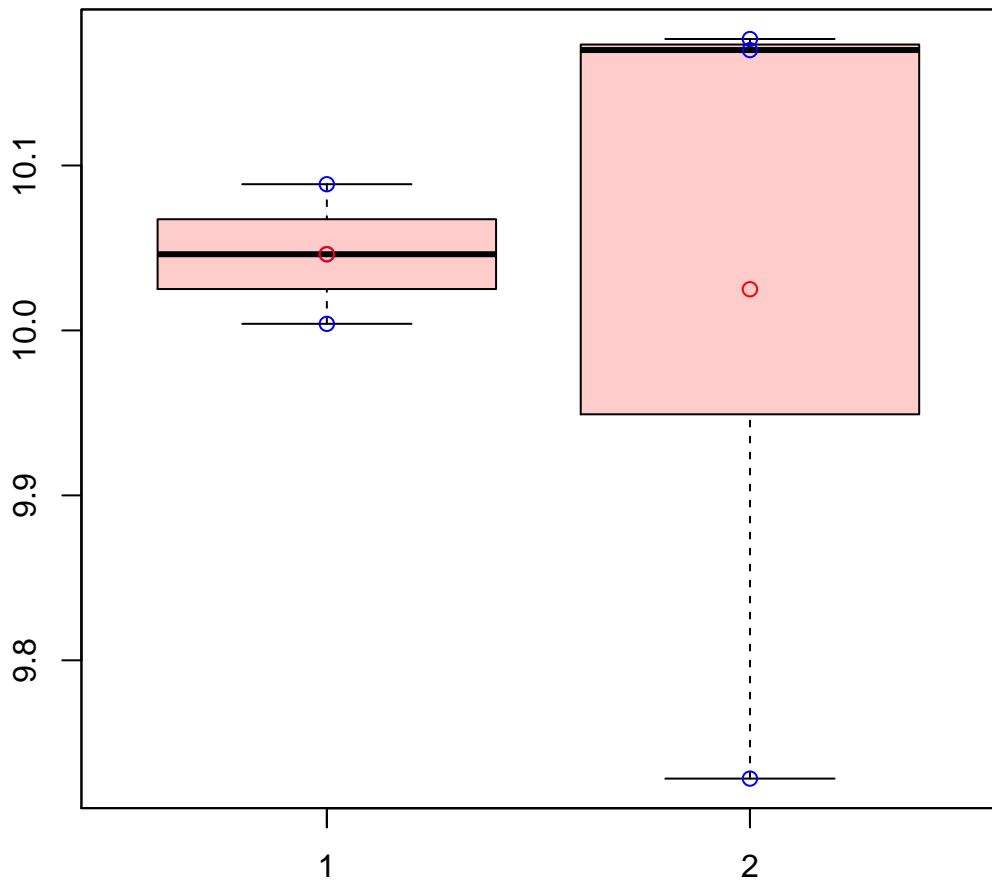

t-Test: p-value = 0.9

# K3Z7A5|K3Z7A5\_SETIT

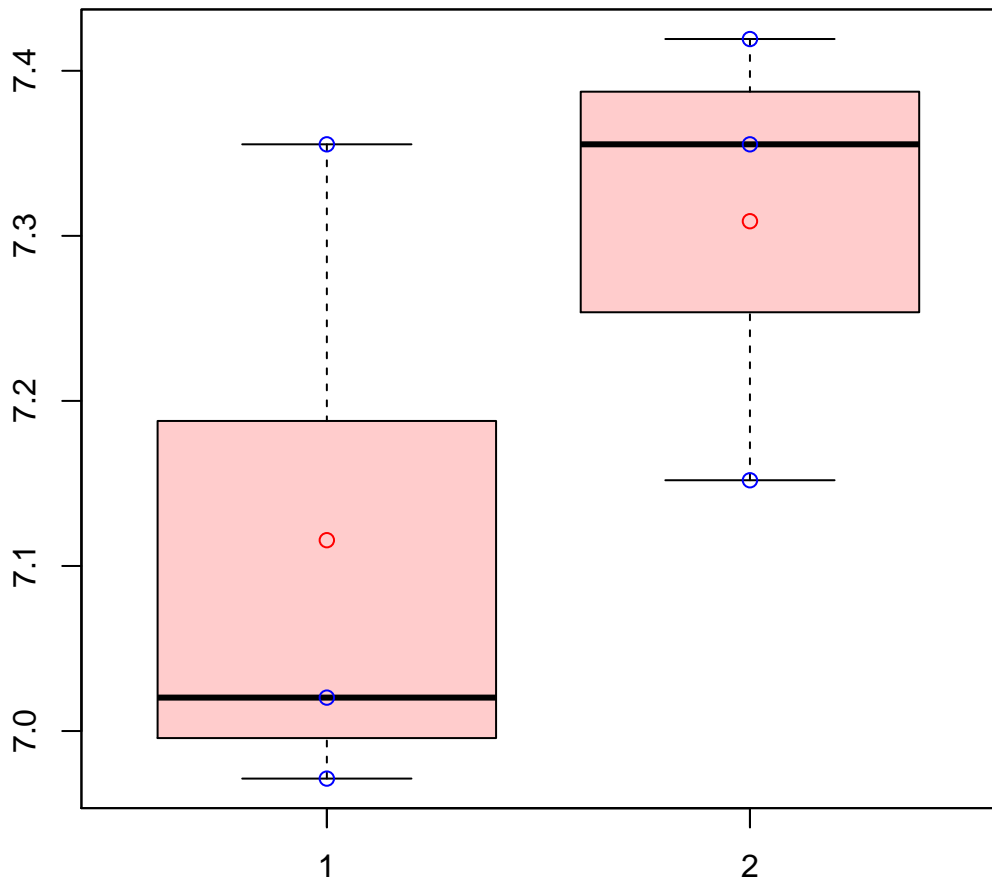

t-Test: p-value = 0.26



# K3Z7G1|K3Z7G1\_SETIT

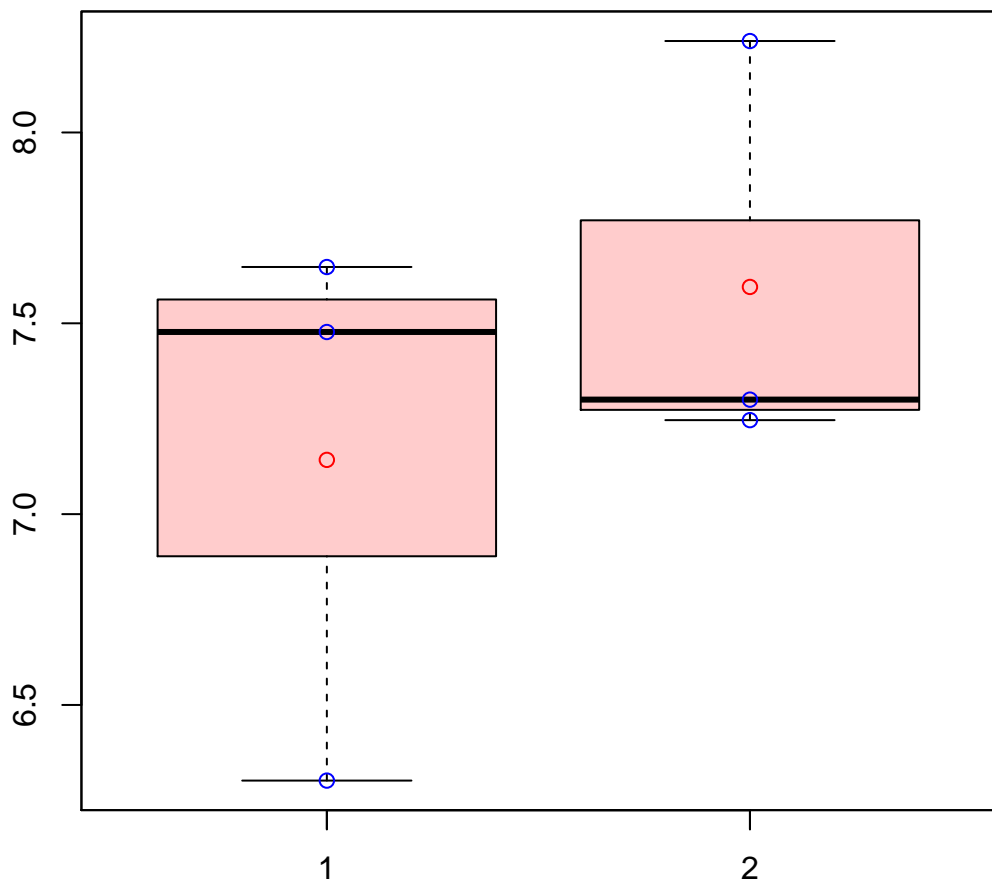

t-Test: p-value = 0.45

# K3Z7L3|K3Z7L3\_SETIT

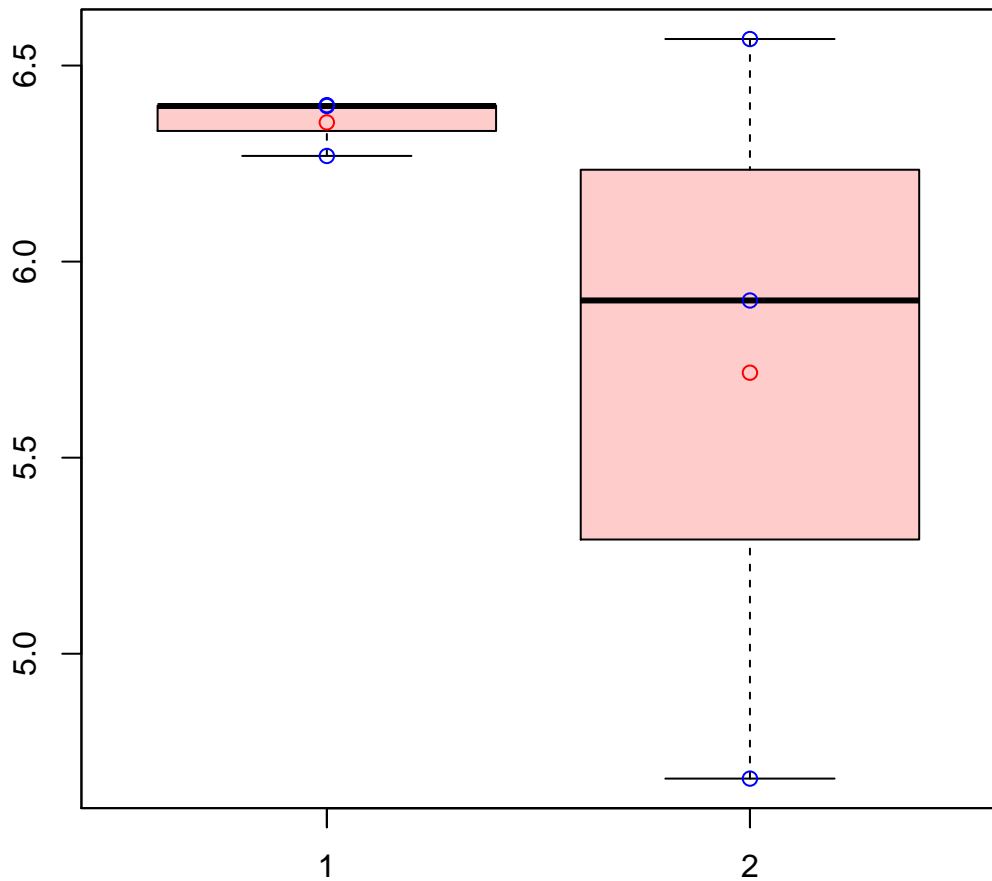

t-Test: p-value = 0.37

# K3Z7Q4|K3Z7Q4\_SETIT

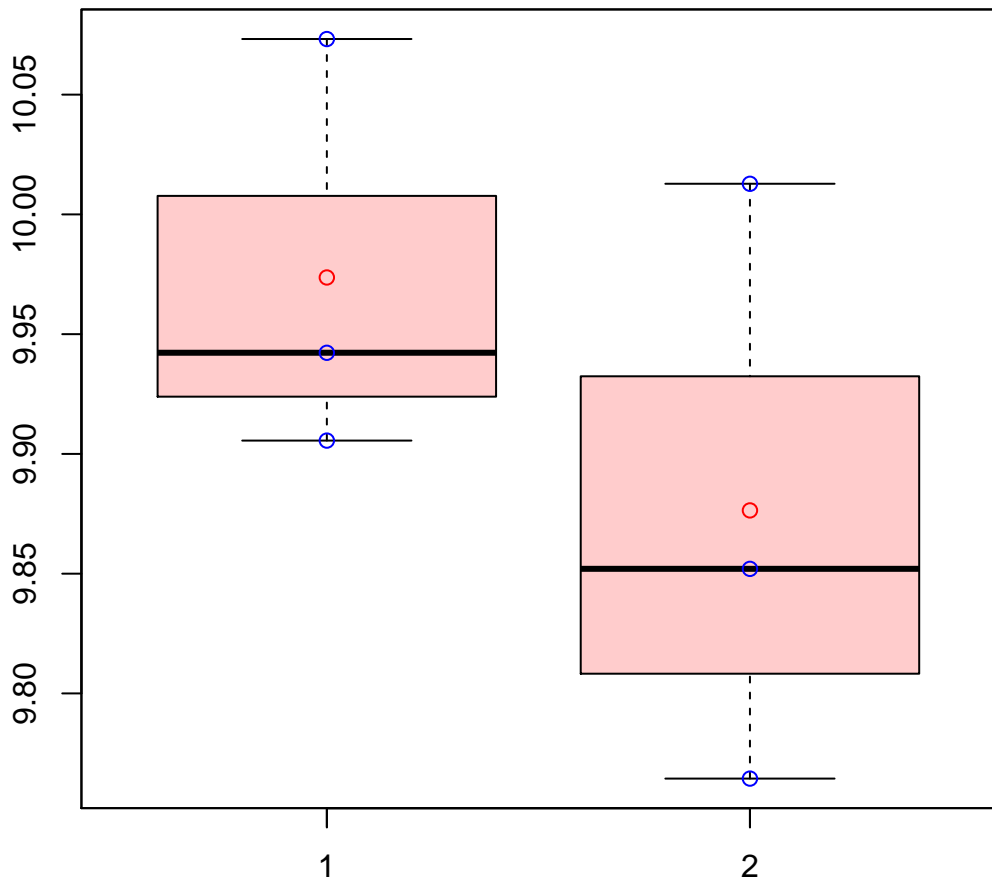

t-Test: p-value = 0.34

# K3Z7T1|K3Z7T1\_SETIT

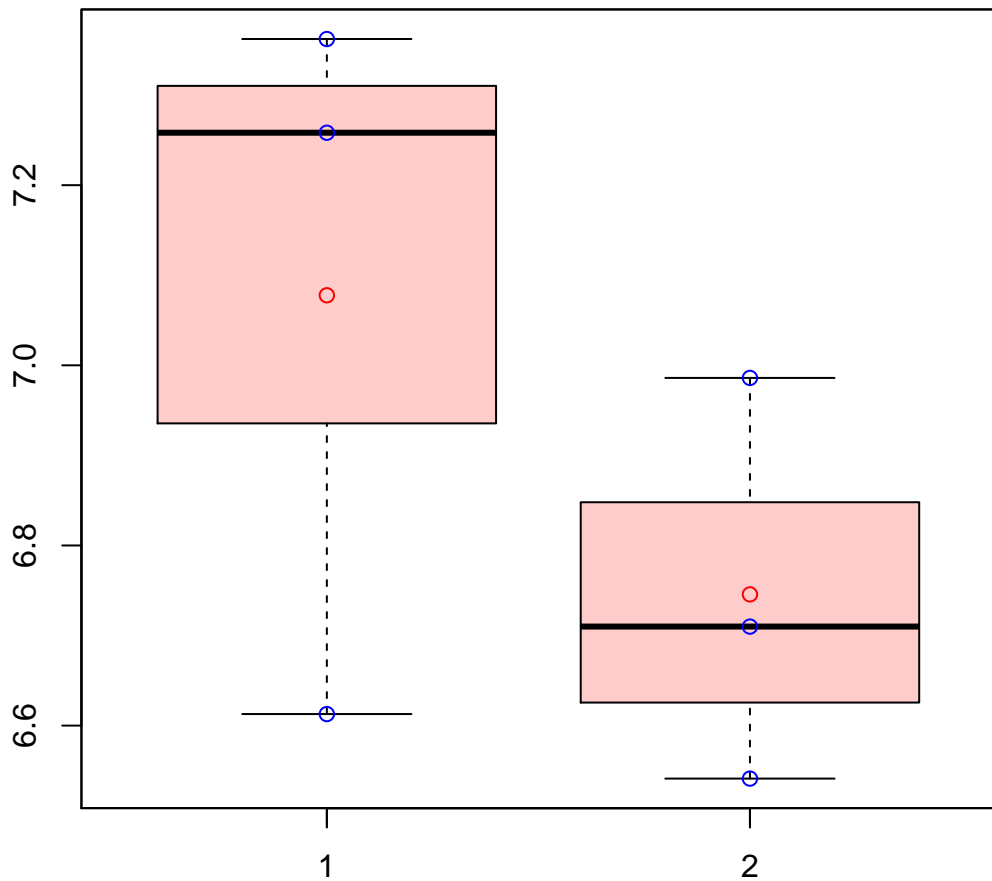

t-Test: p-value = 0.3

# K3Z7Y4|K3Z7Y4\_SETIT

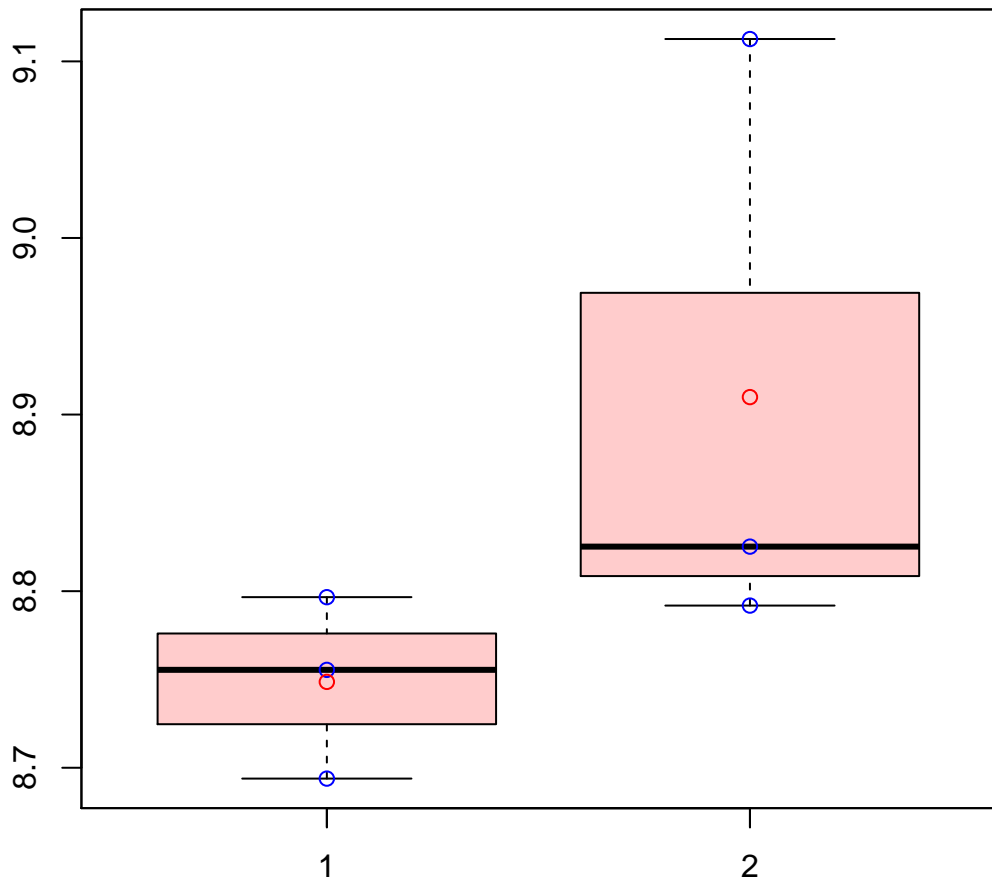

t-Test: p-value = 0.25

# K3Z812|K3Z812\_SETIT

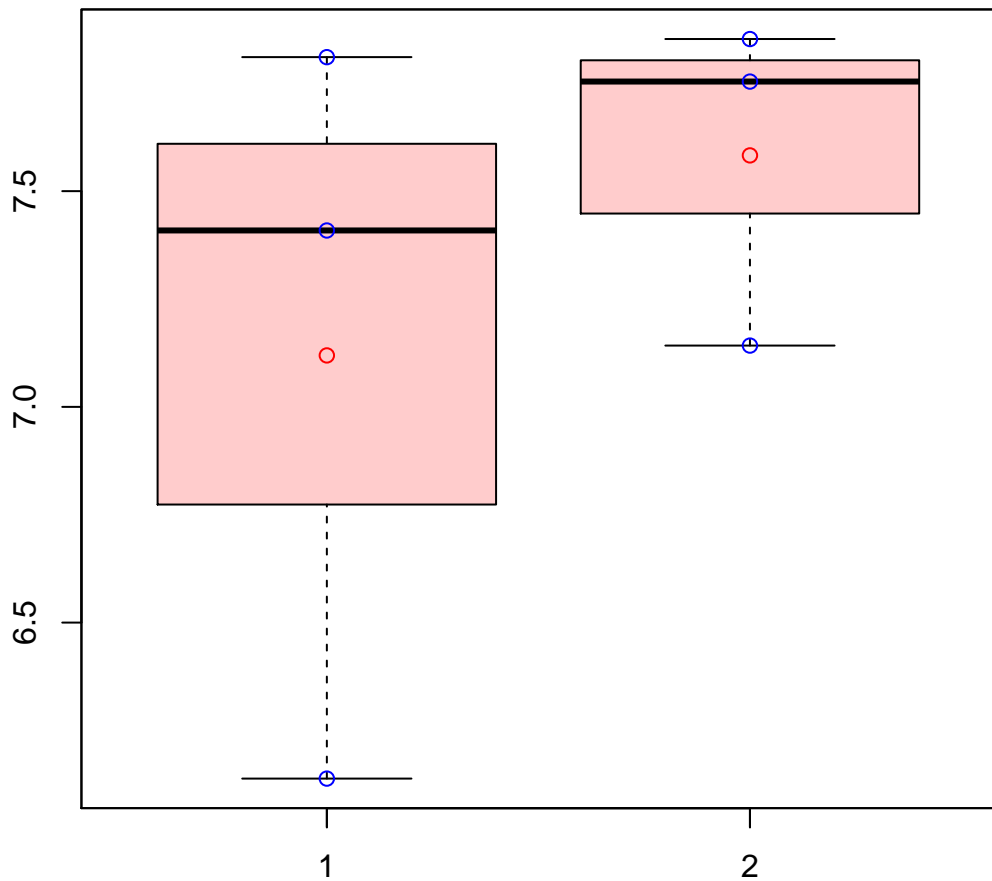

t-Test: p-value = 0.47

# K3Z8B7|K3Z8B7\_SETIT

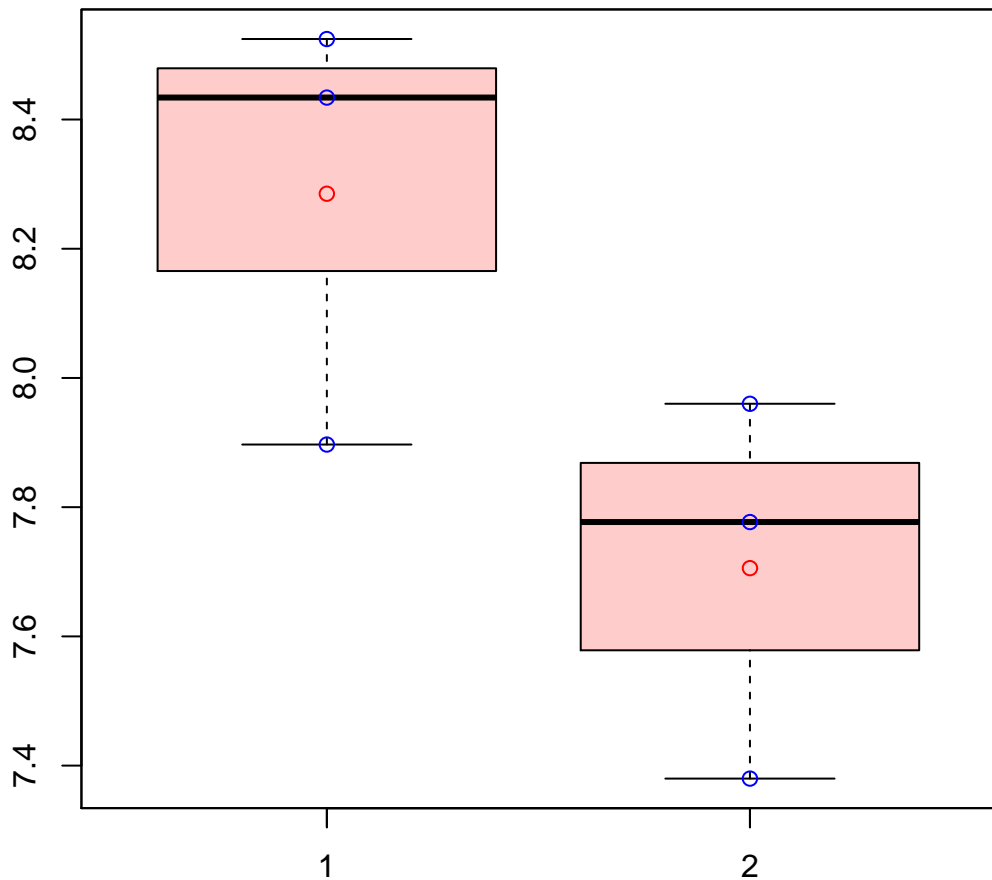

t-Test: p-value = 0.09

# K3Z8F7|K3Z8F7\_SETIT

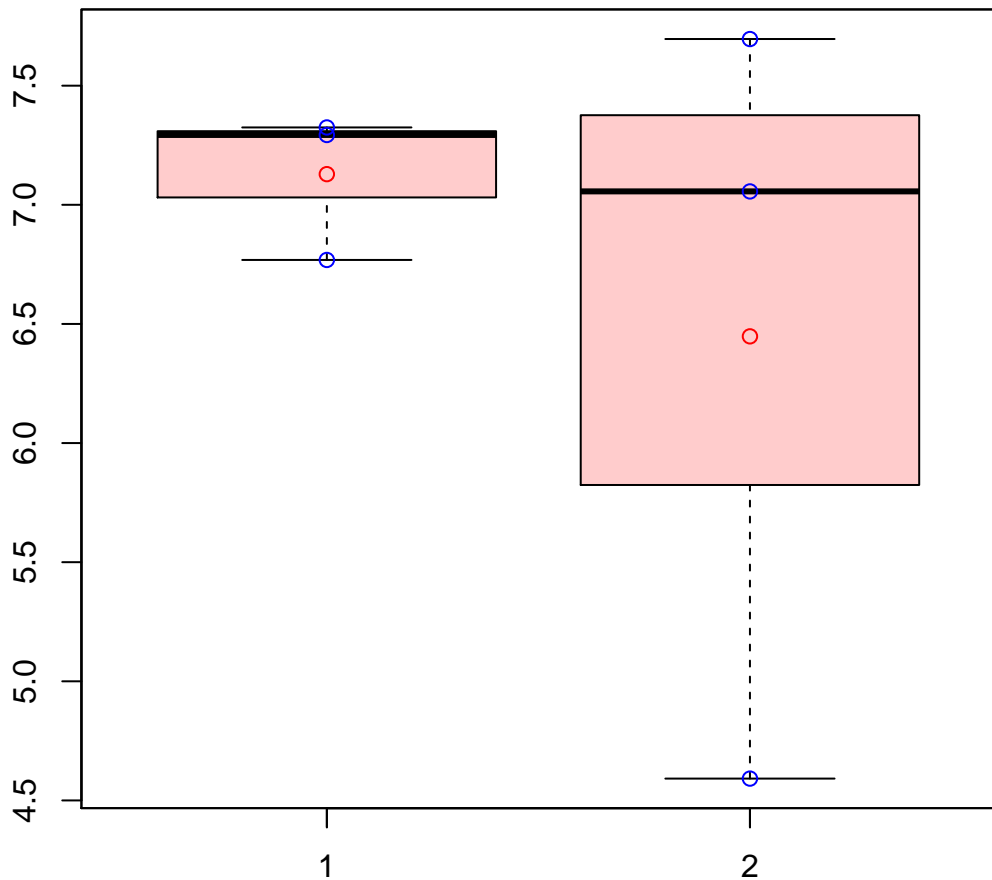

t-Test: p-value = 0.55



# K3Z8K0|K3Z8K0\_SETIT

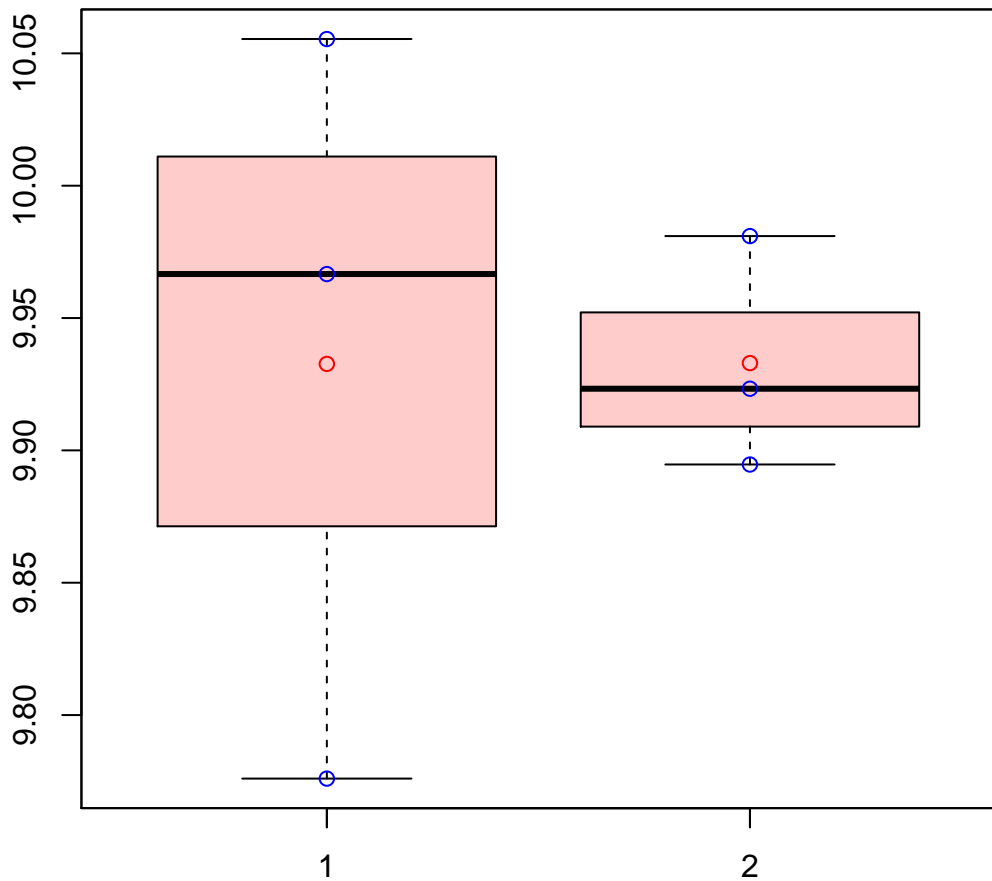

t-Test: p-value = 1

# K3Z8N9|K3Z8N9\_SETIT

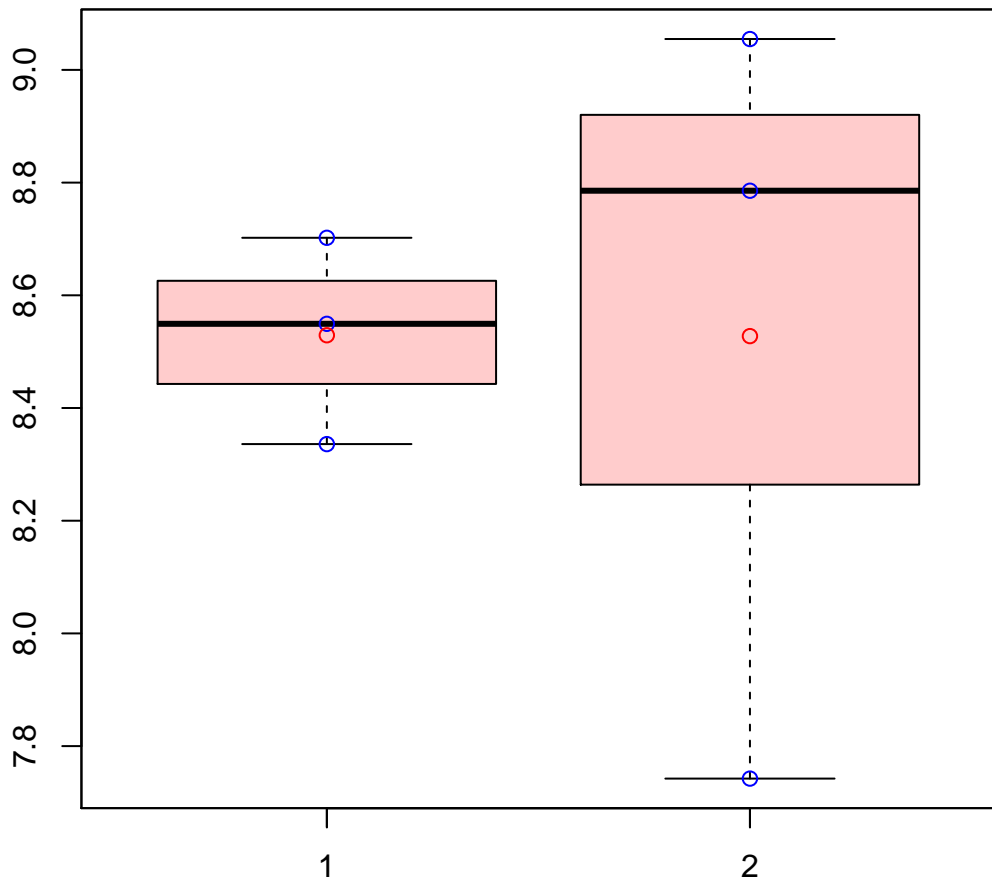

t-Test: p-value = 1

# K3Z8Q5|K3Z8Q5\_SETIT

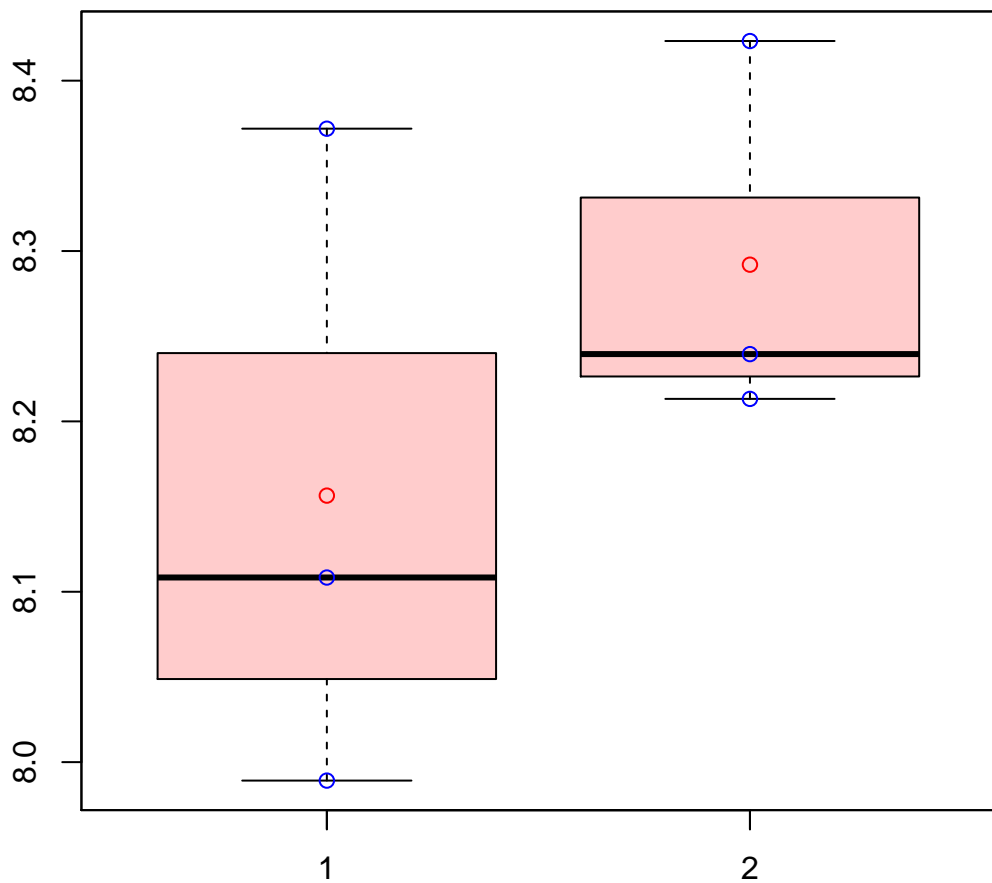

t-Test: p-value = 0.37

# K3Z913|K3Z913\_SETIT

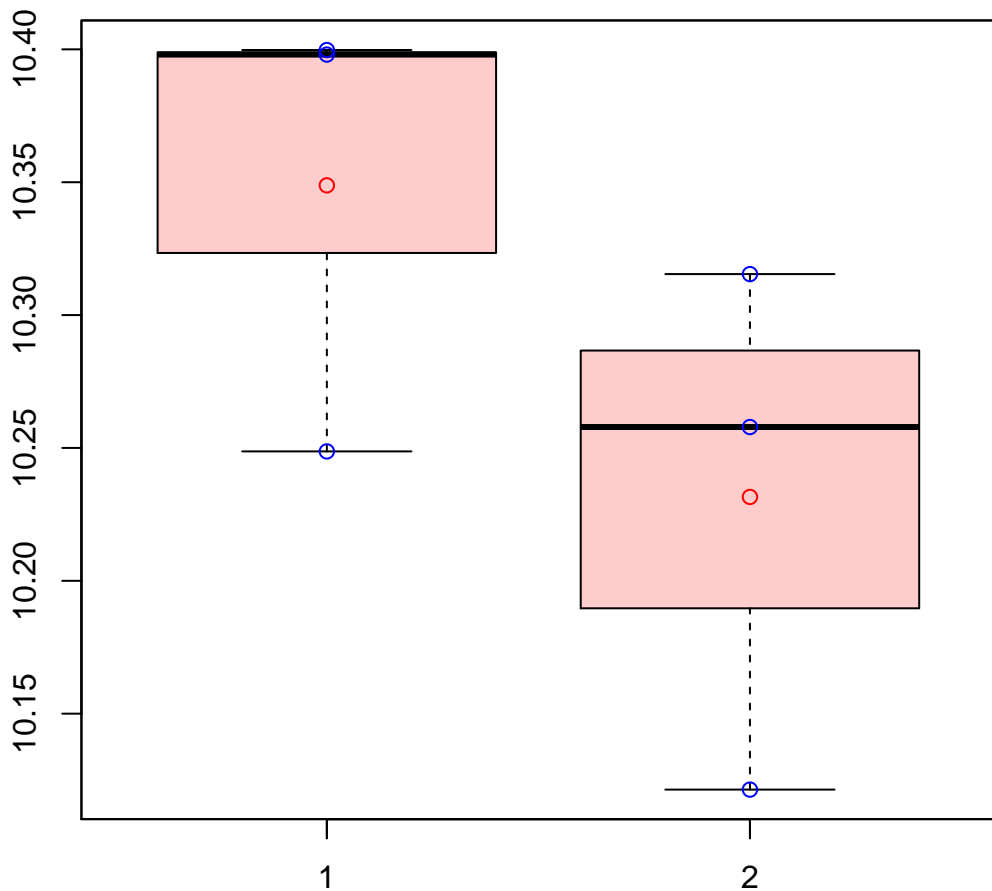

t-Test: p-value = 0.2

# K3ZA66|K3ZA66\_SETIT

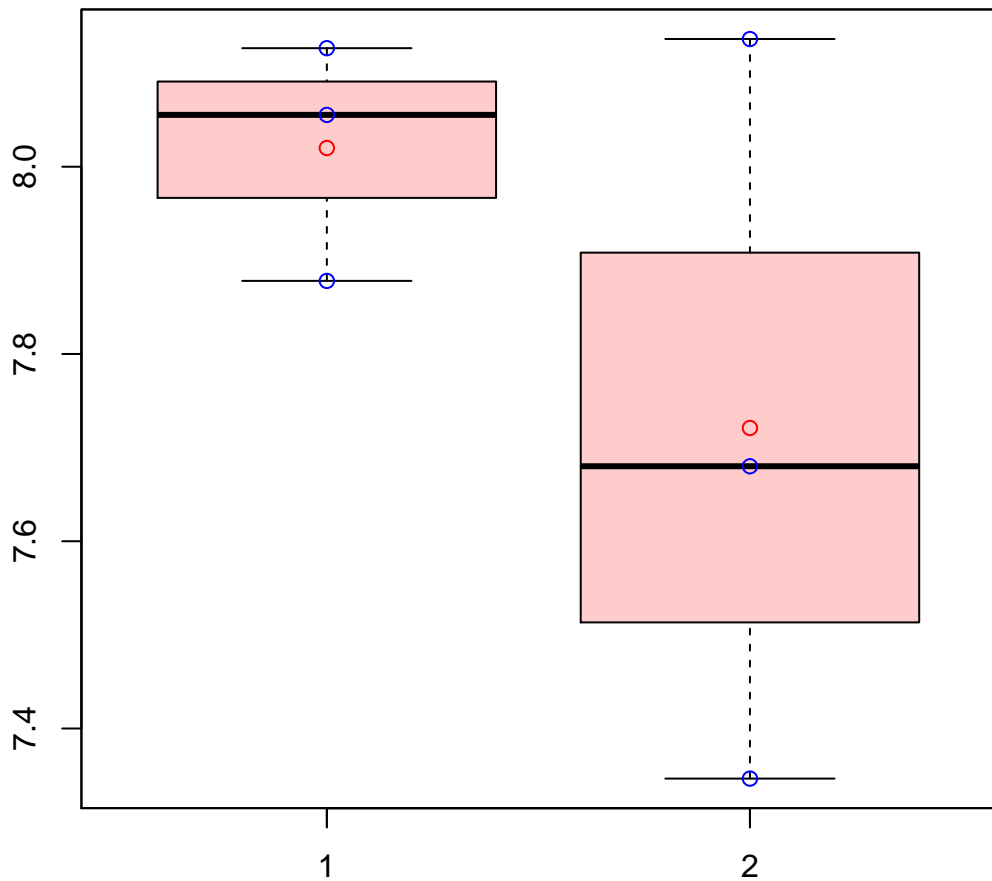

t-Test: p-value = 0.32

# K3ZAJ9|K3ZAJ9\_SETIT

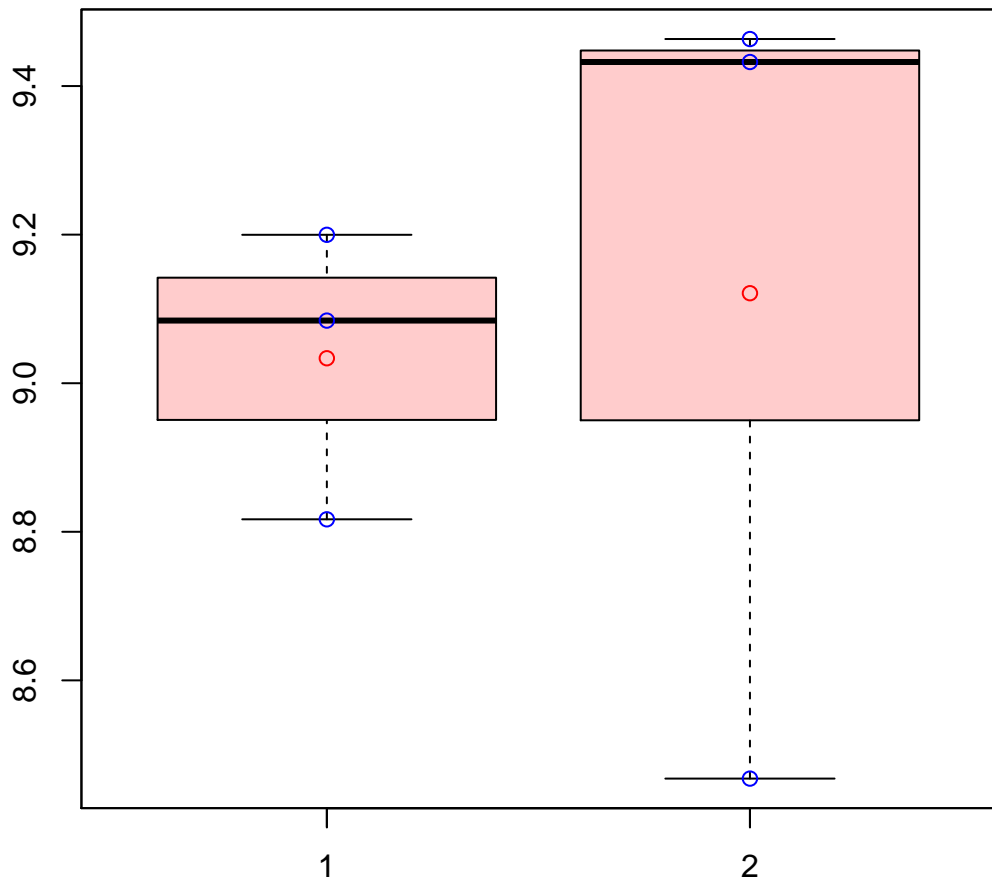

t-Test: p-value = 0.82

# K3ZAL8|K3ZAL8\_SETIT

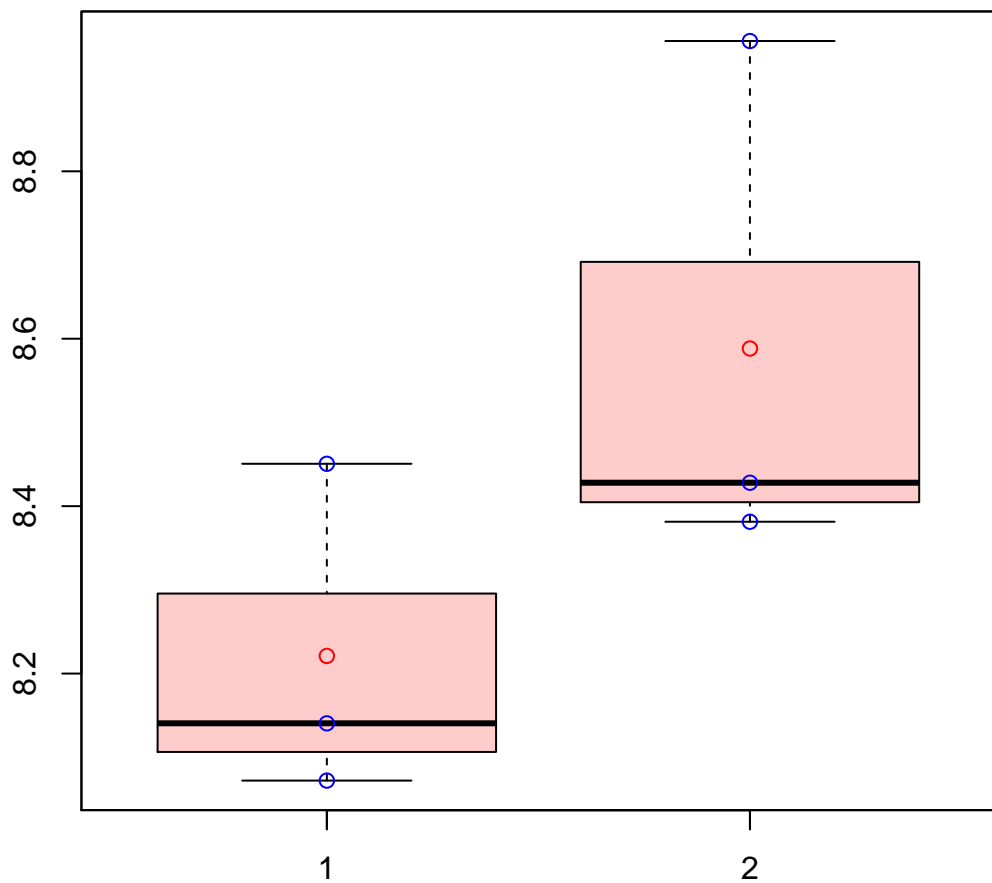

t-Test: p-value = 0.18

# K3ZAR0|K3ZAR0\_SETIT

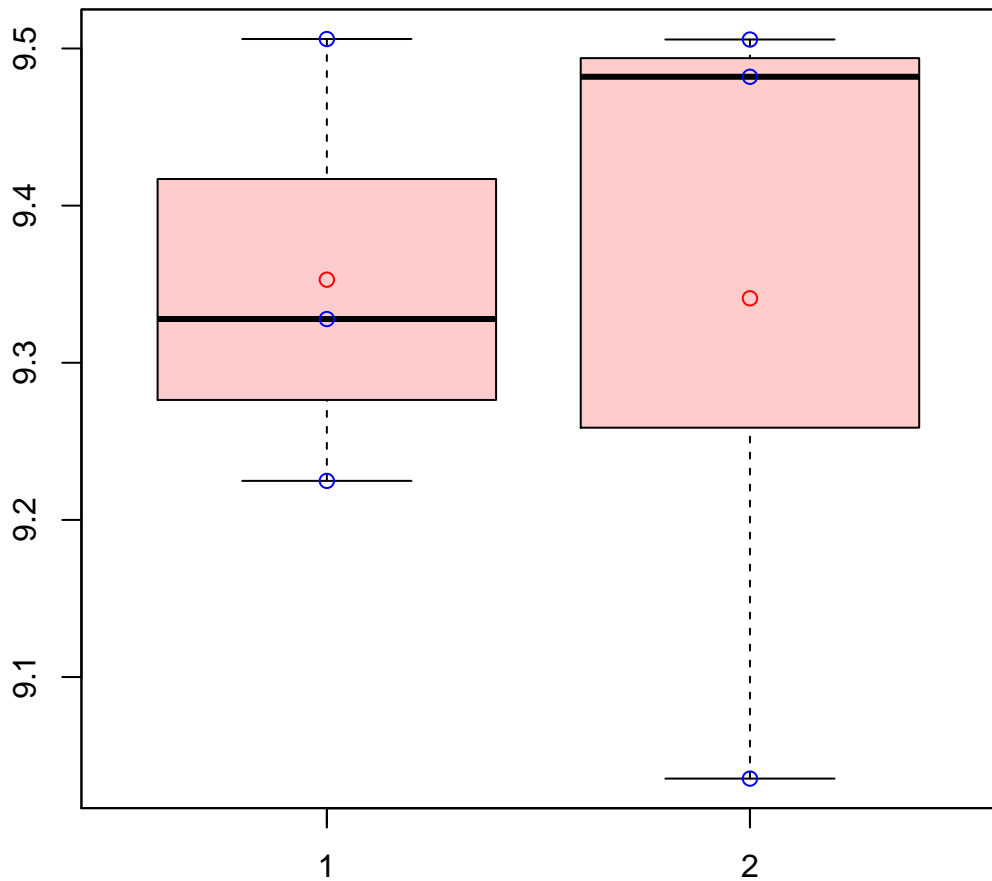

t-Test: p-value = 0.95



# K3ZAW7|K3ZAW7\_SETIT

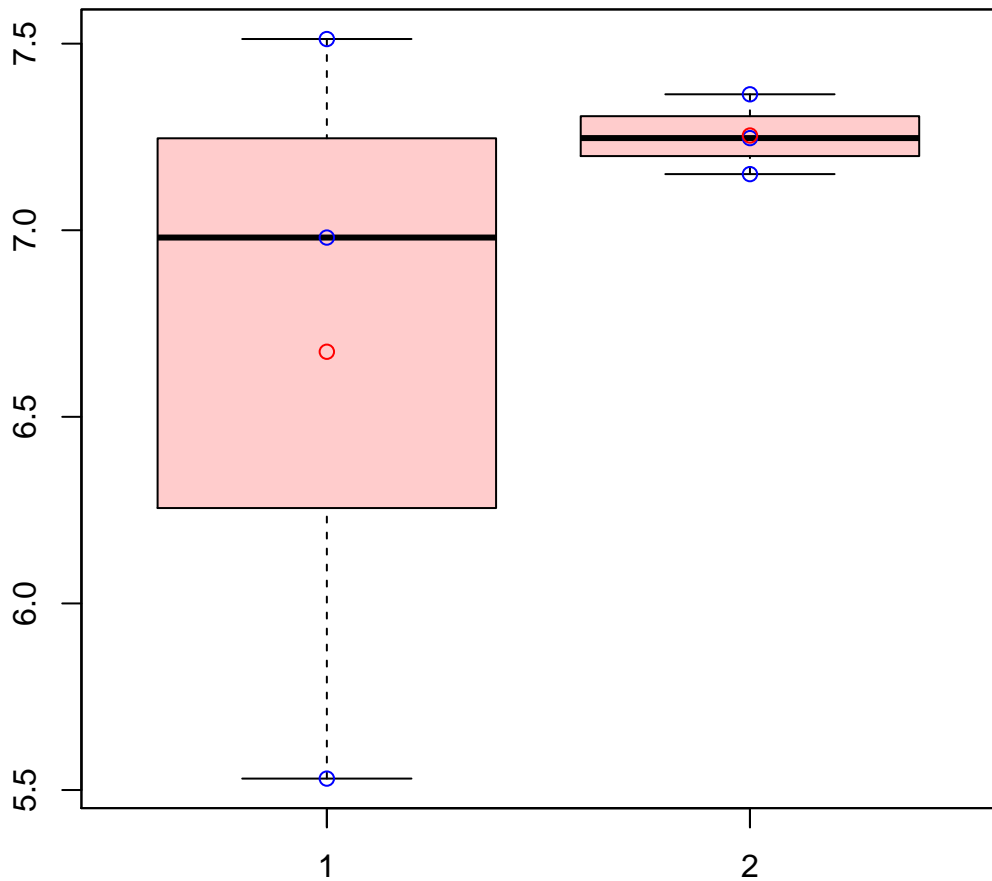

t-Test: p-value = 0.43

# K3ZBZ4|K3ZBZ4\_SETIT

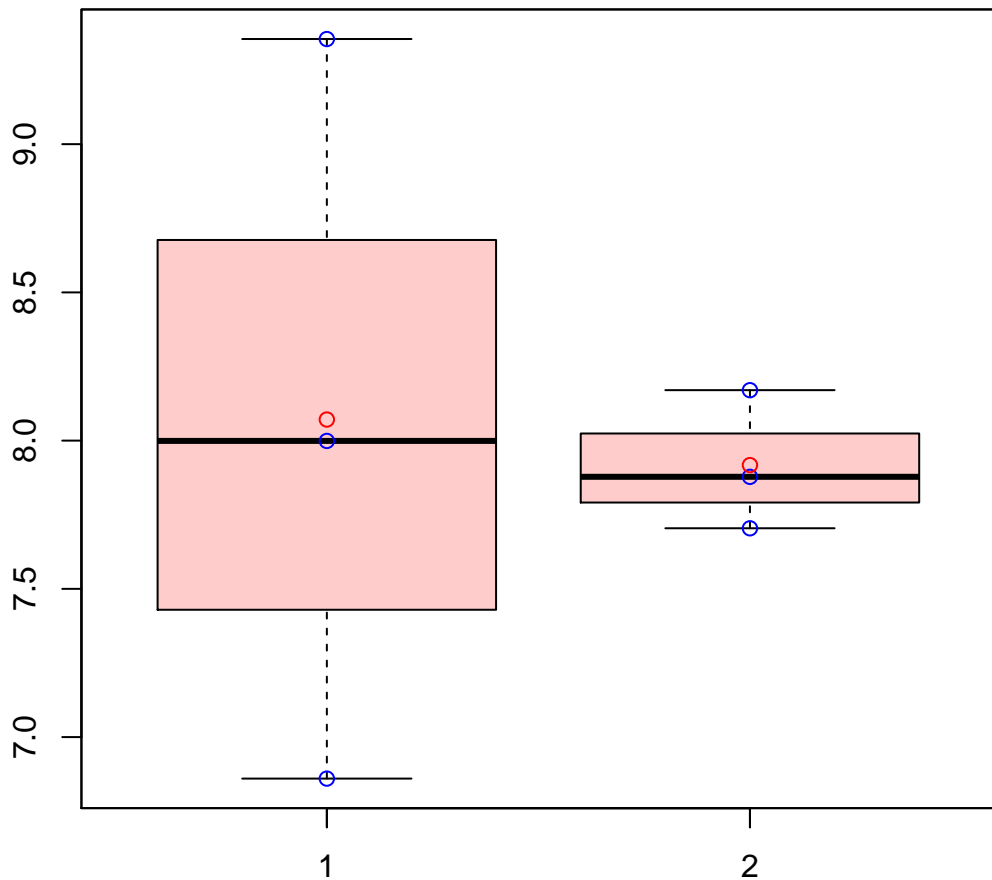

t-Test: p-value = 0.85

# K3ZCM5|K3ZCM5\_SETIT

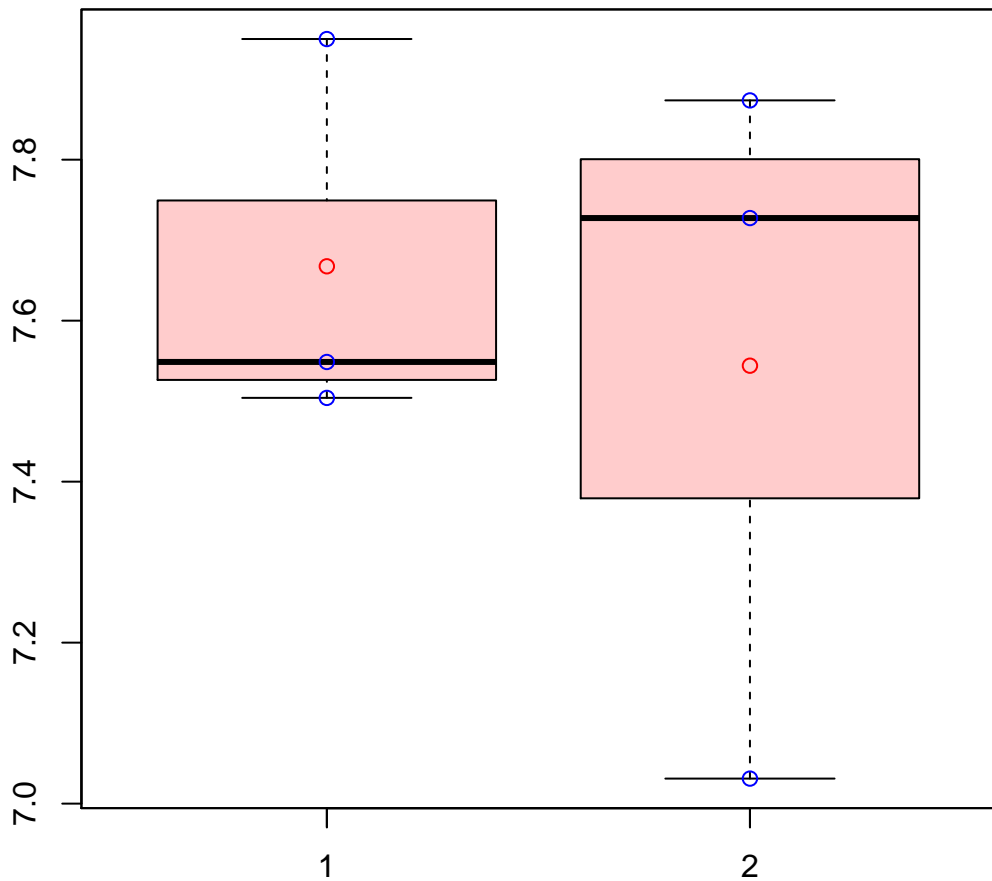

t-Test: p-value = 0.7

# K3ZCN8|K3ZCN8\_SETIT

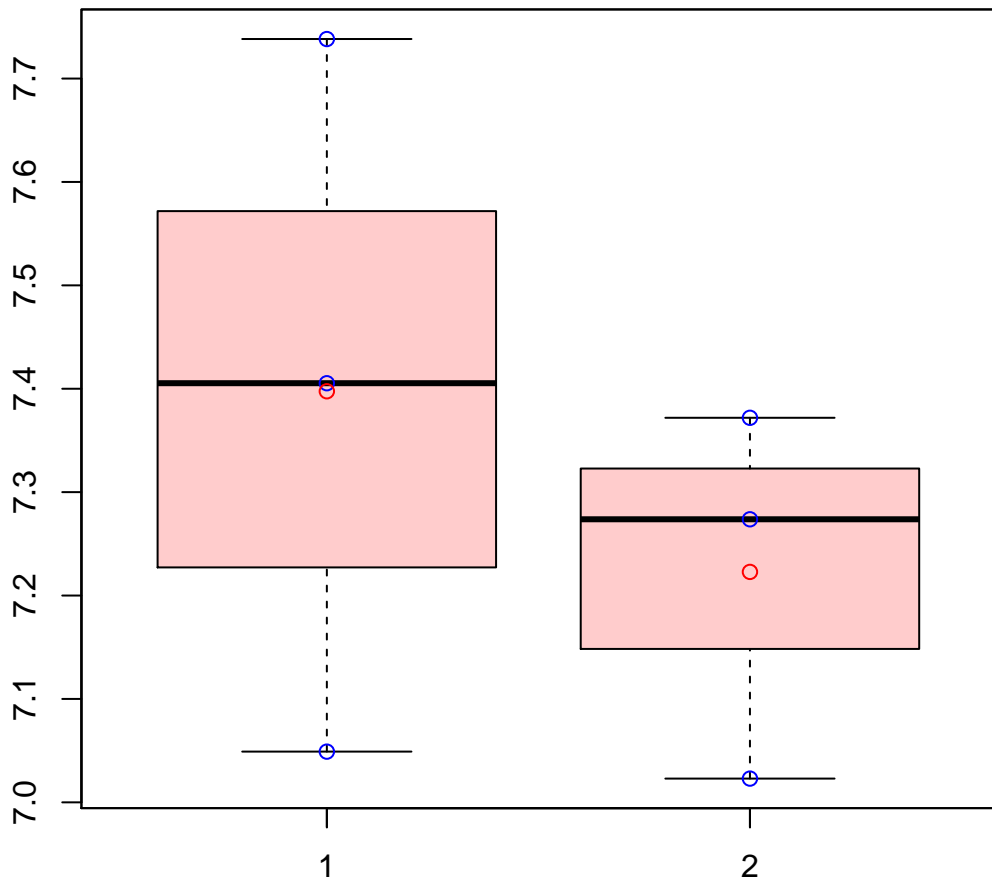

t-Test: p-value = 0.49

# K3ZDA7|K3ZDA7\_SETIT

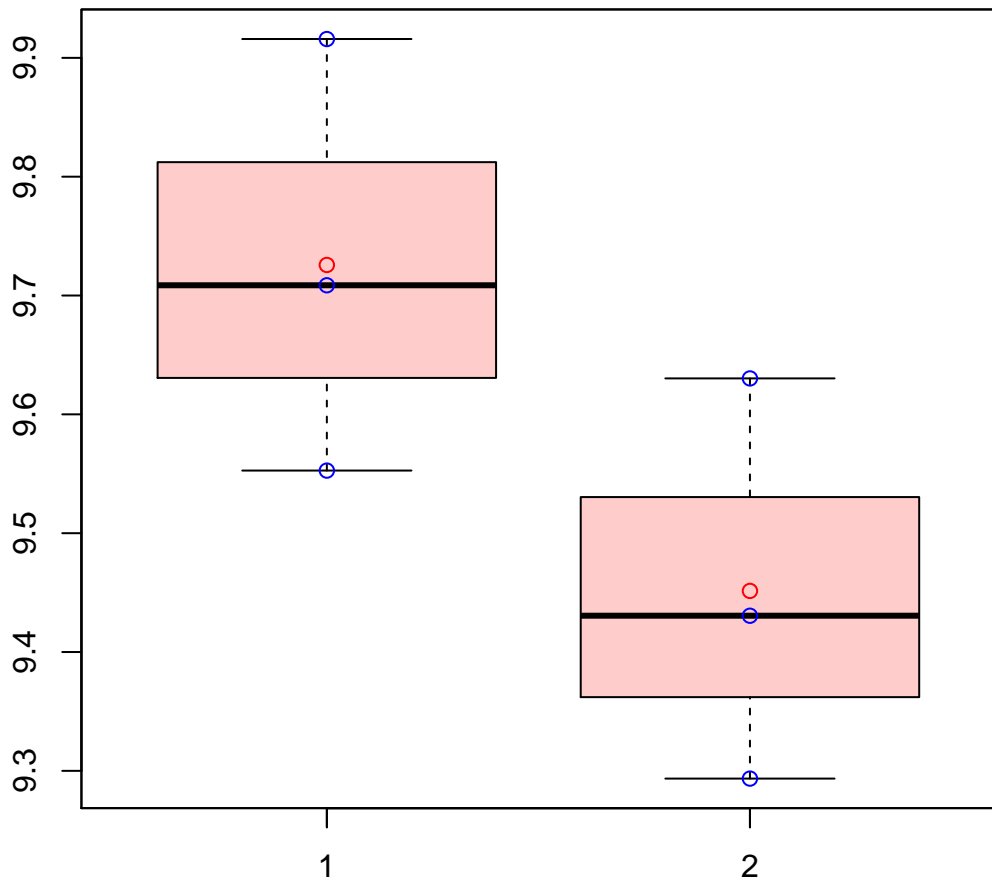

t-Test: p-value = 0.13

# K3ZDE2|K3ZDE2\_SETIT

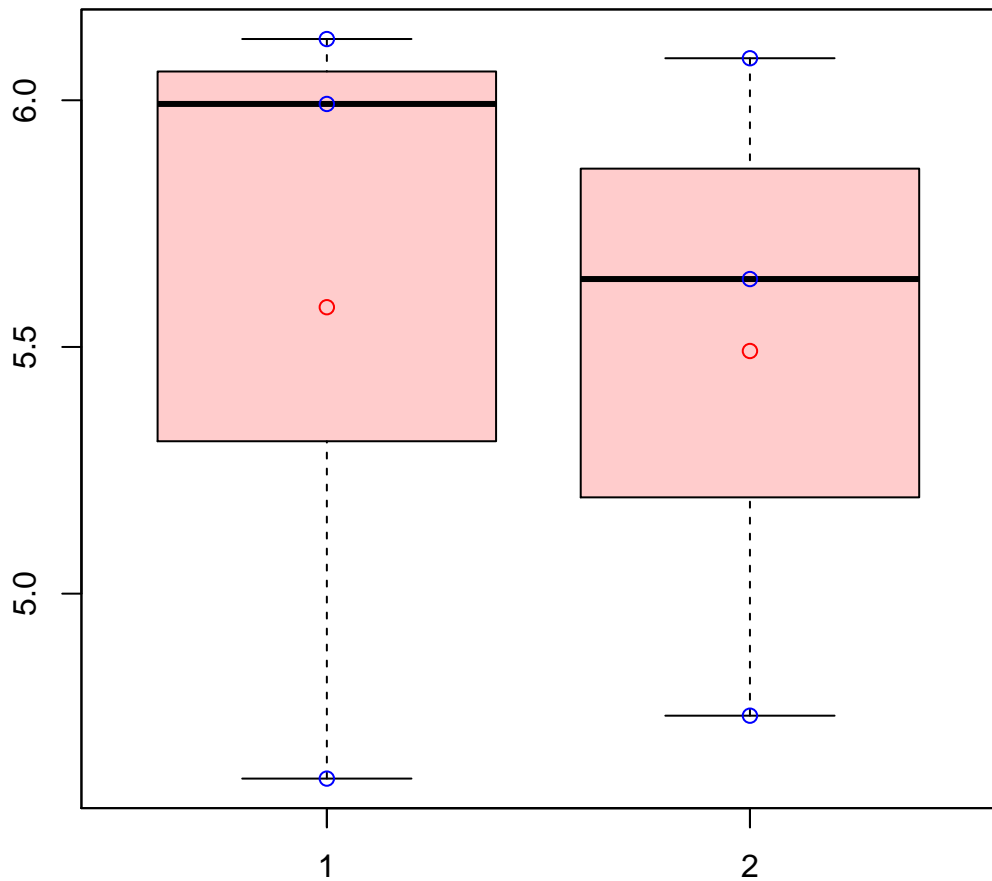

t-Test: p-value = 0.89

# K3ZDL0|K3ZDL0\_SETIT

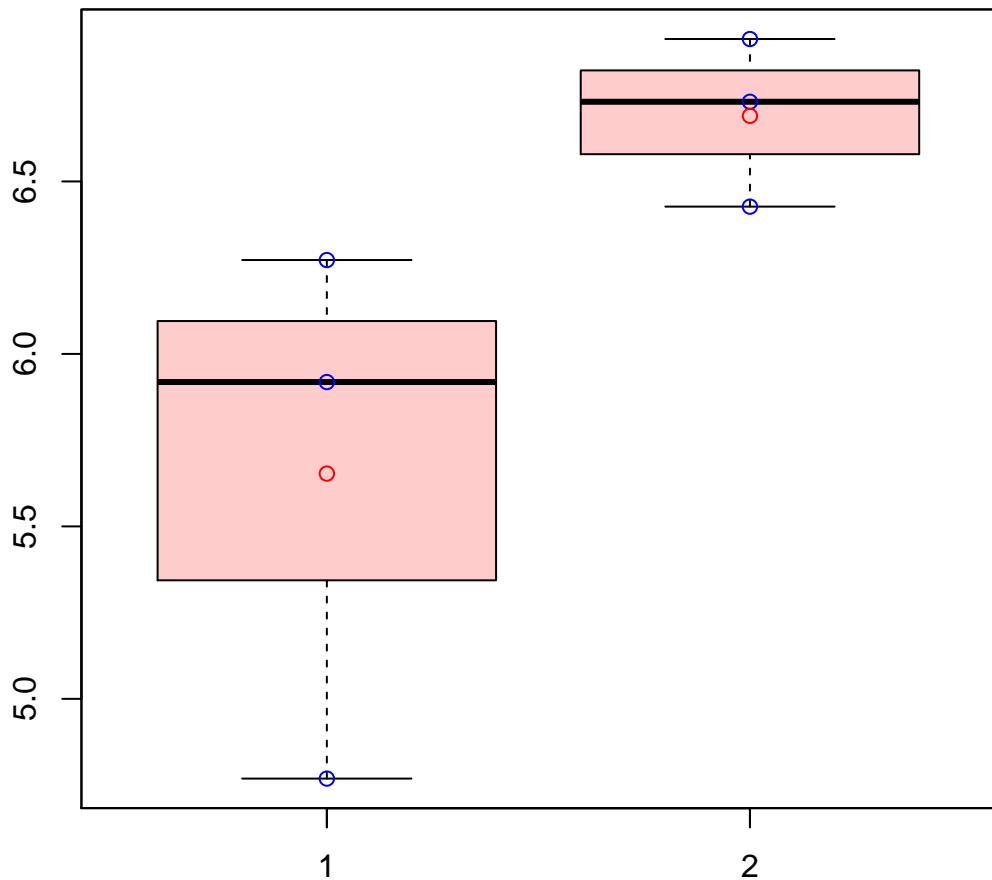

t-Test: p-value = 0.14

# K3ZDL5|K3ZDL5\_SETIT

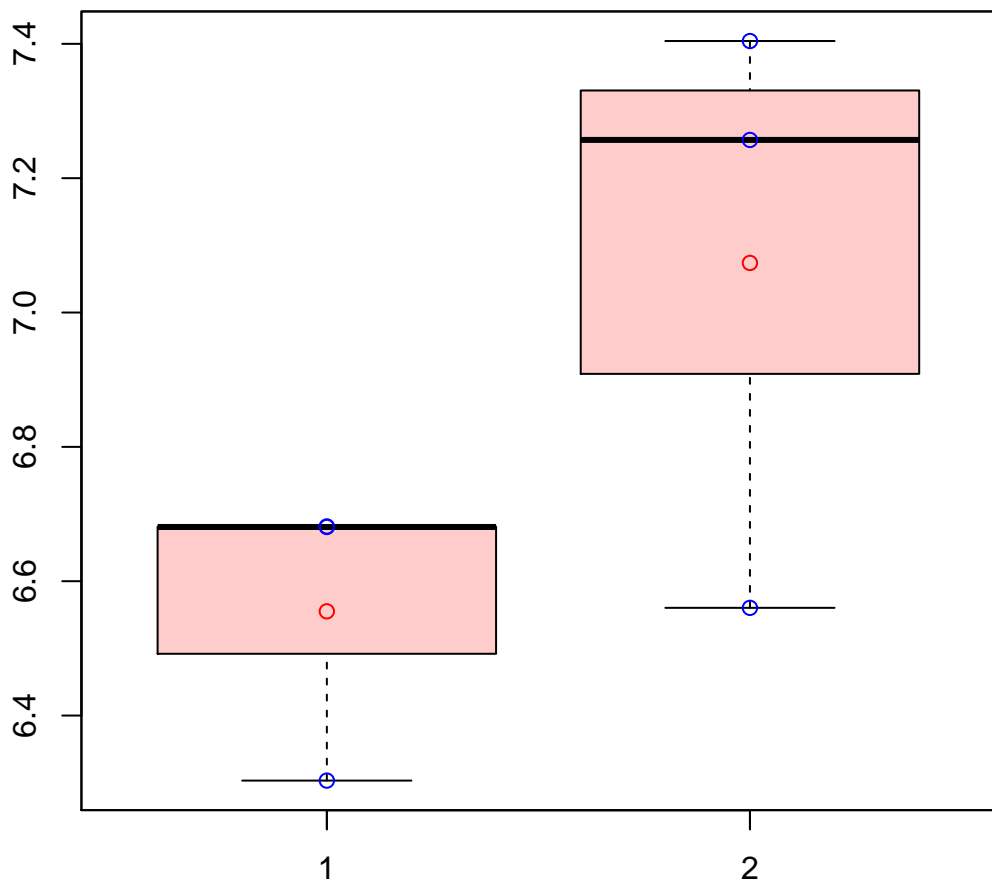

t-Test: p-value = 0.17



# K3ZEQ6|K3ZEQ6\_SETIT

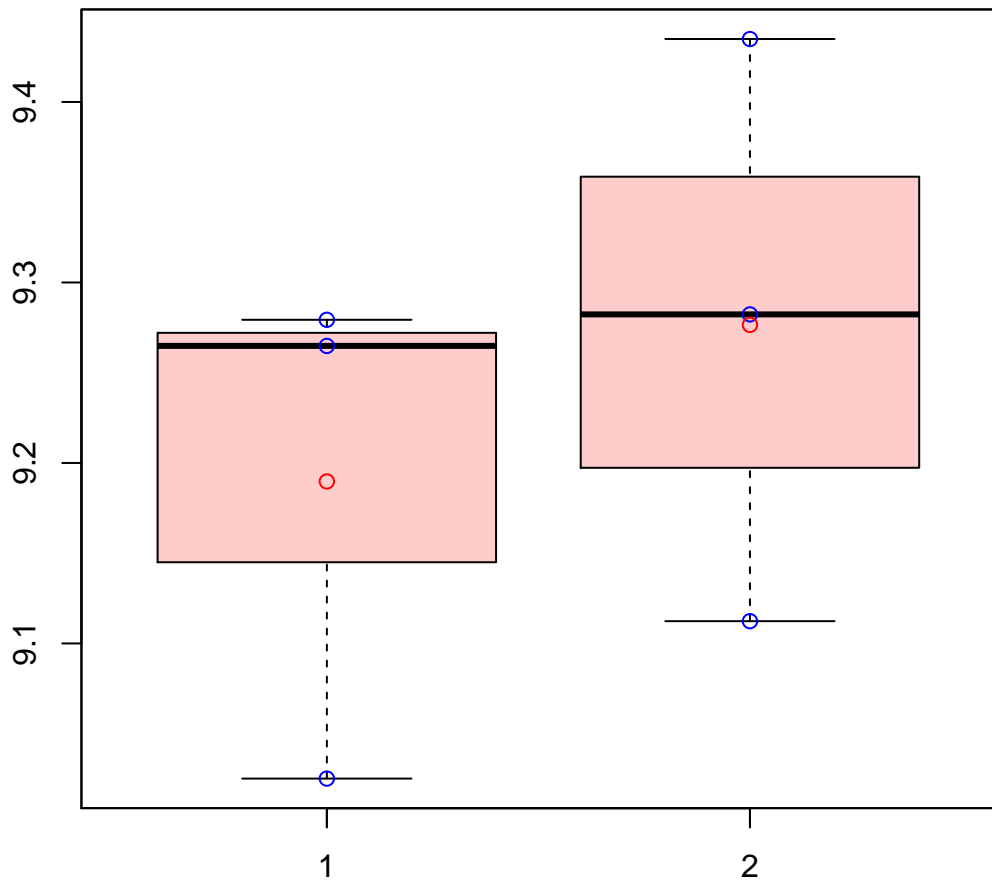

t-Test: p-value = 0.52

# K3ZF05|K3ZF05\_SETIT

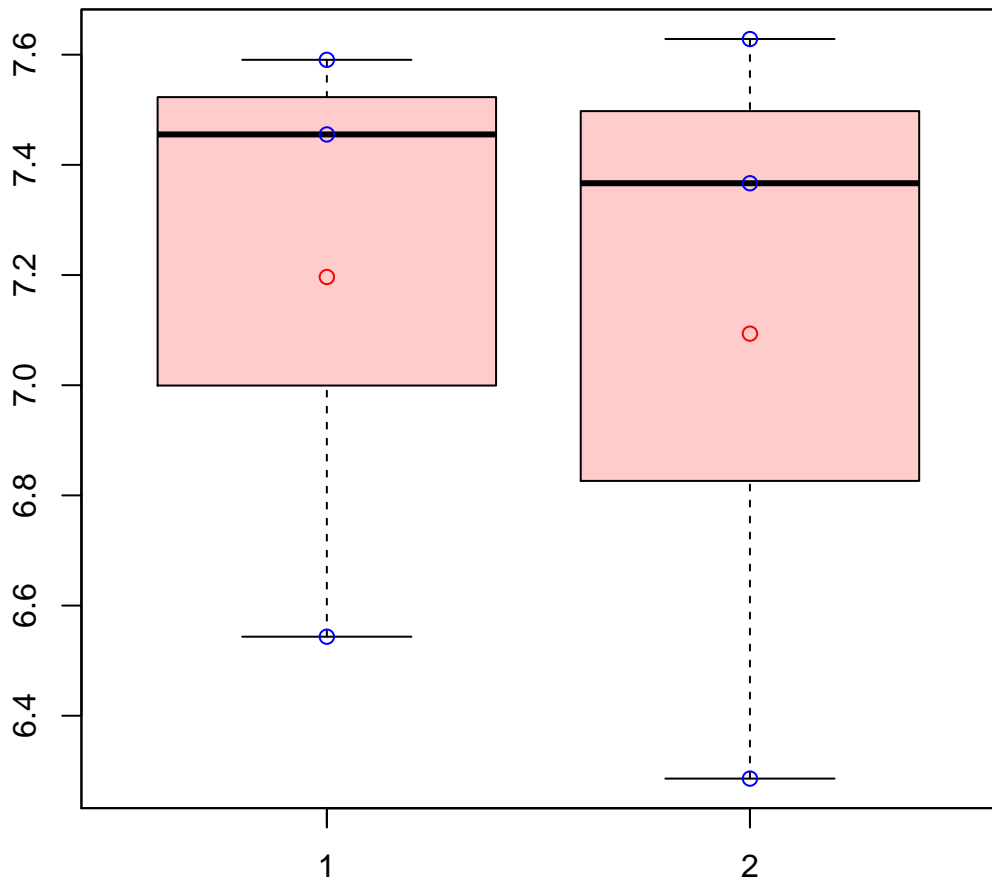

t-Test: p-value = 0.86

# K3ZFK1|K3ZFK1\_SETIT

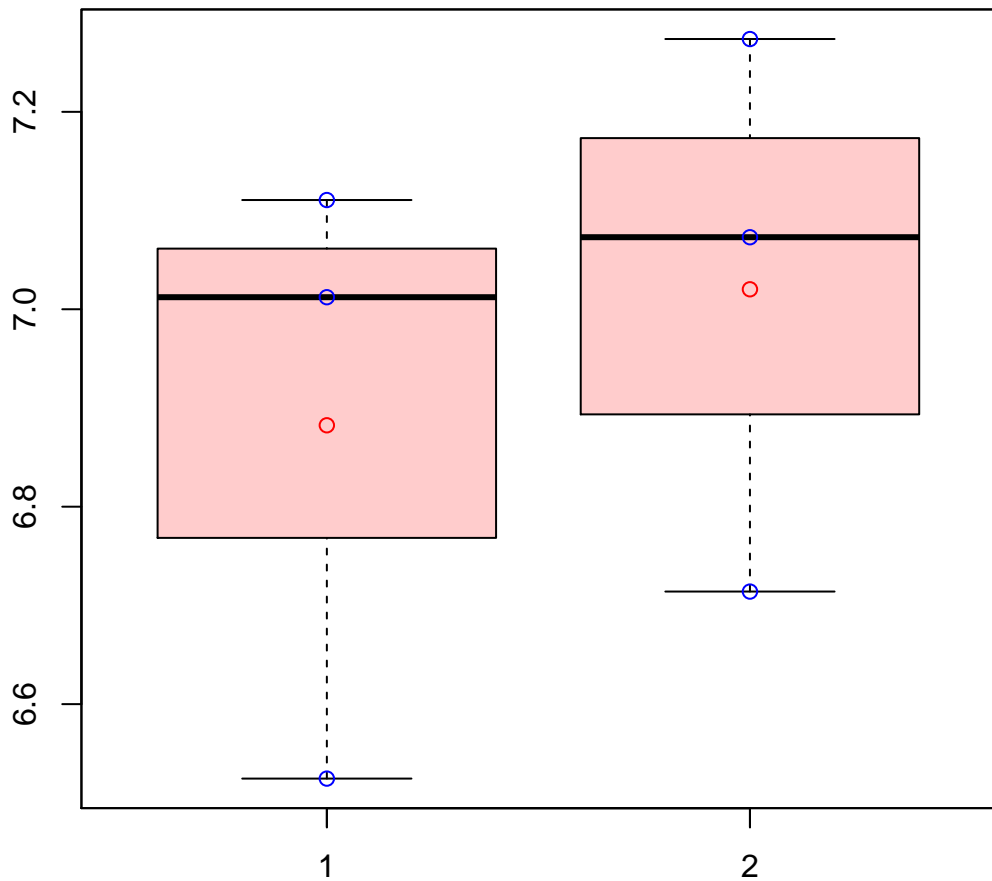

t-Test: p-value = 0.6

# K3ZGW7|K3ZGW7\_SETIT

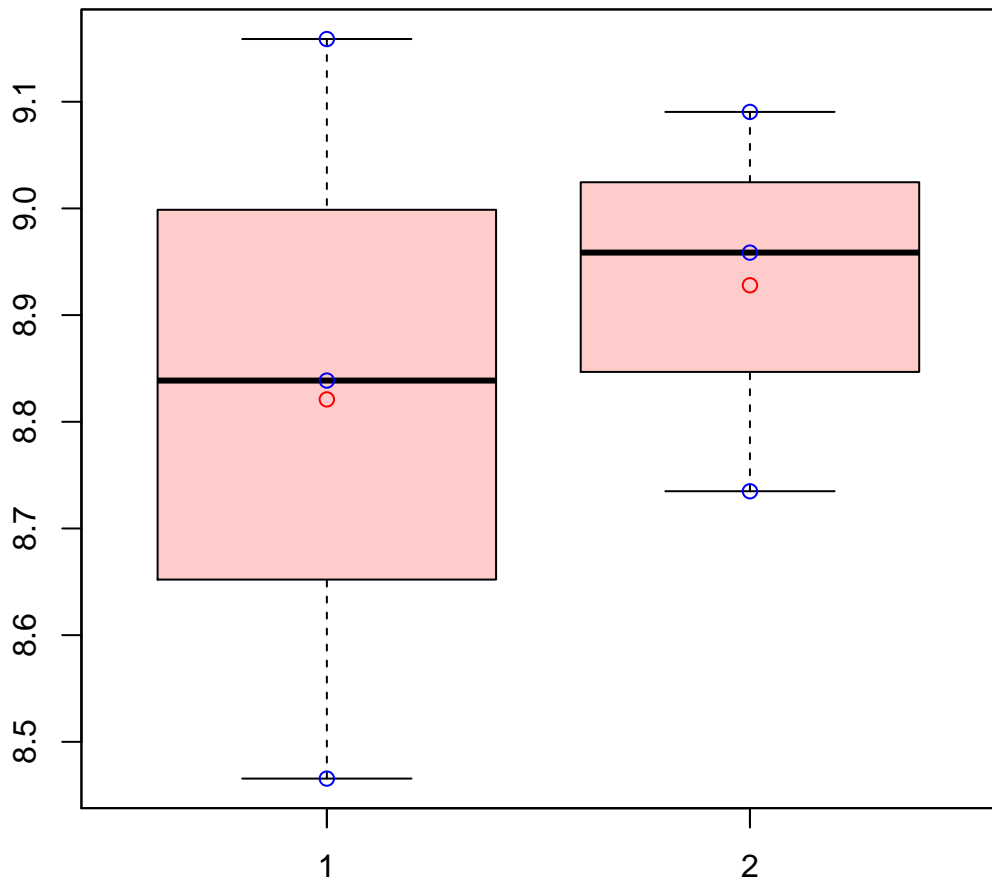

t-Test: p-value = 0.67

# K3ZGX7|K3ZGX7\_SETIT

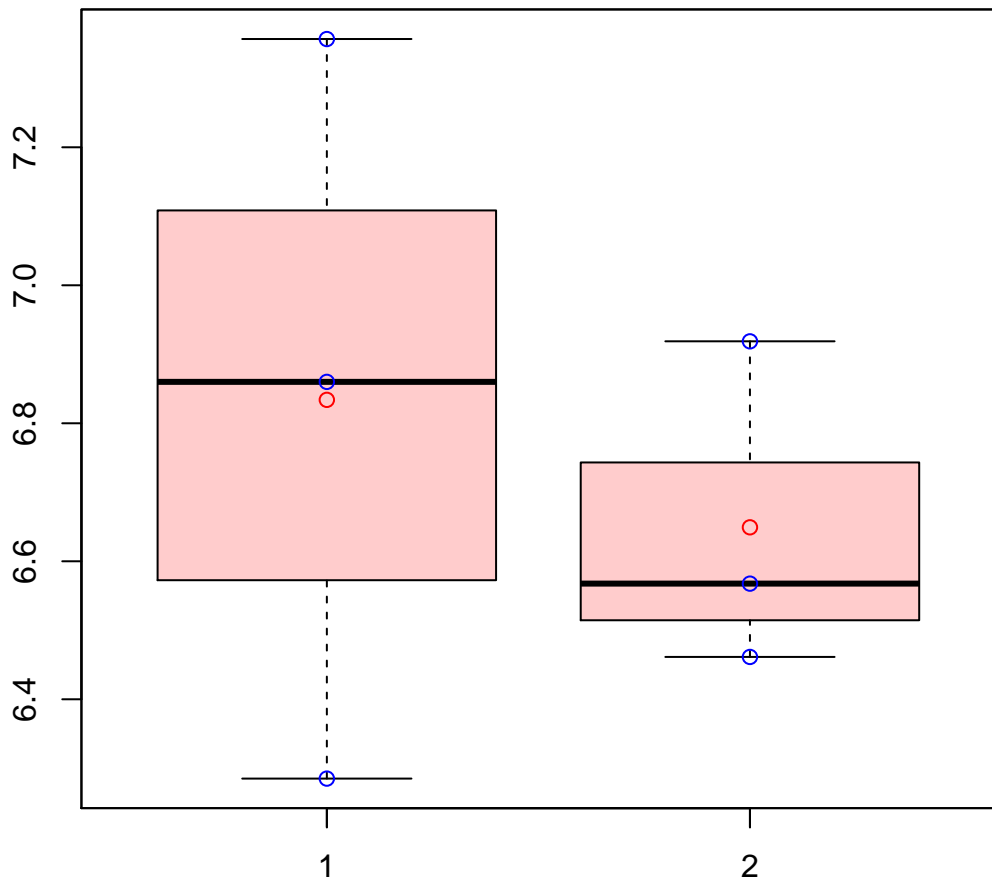

t-Test: p-value = 0.63

# K3ZH13|K3ZH13\_SETIT

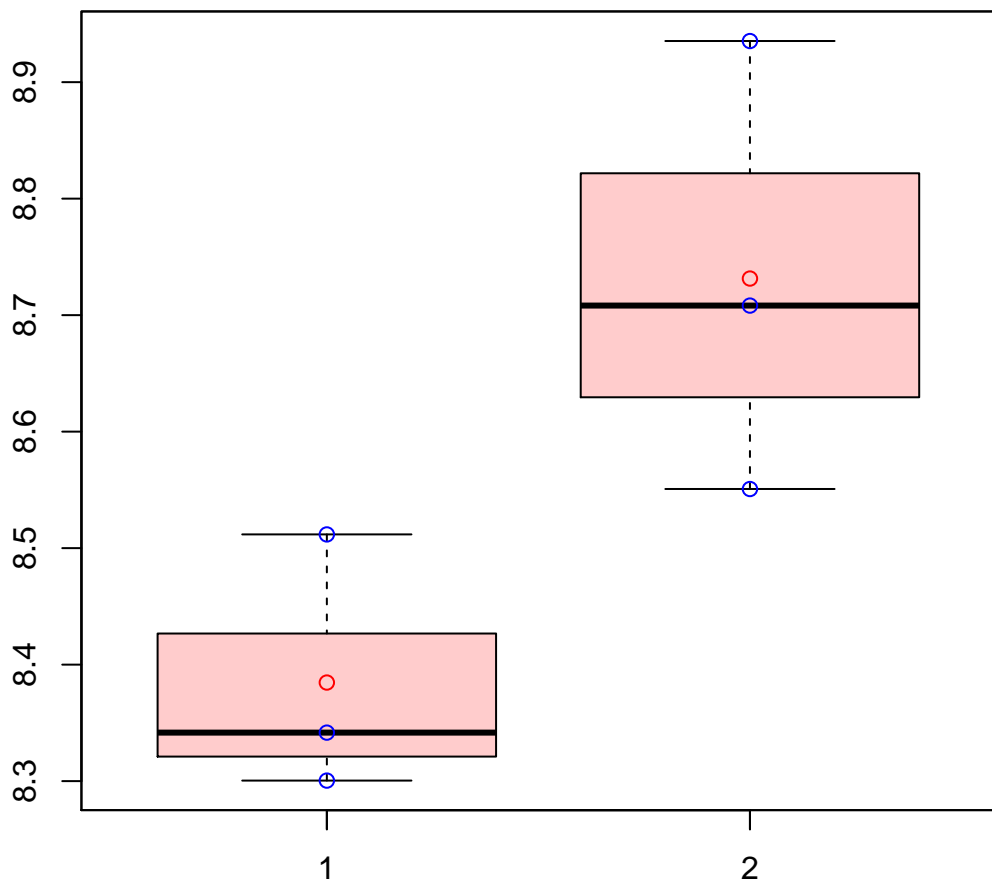

t-Test: p-value = 0.07

# K3ZH29|K3ZH29\_SETIT

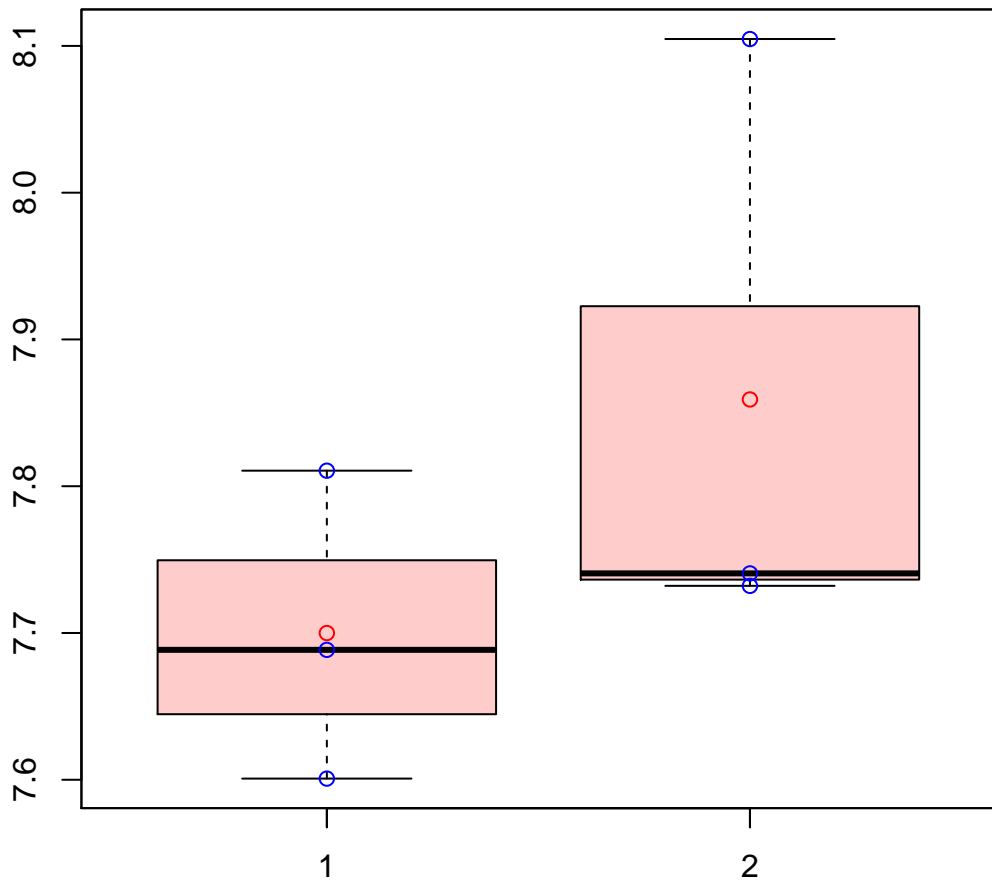

t-Test: p-value = 0.33

# K3ZH50|K3ZH50\_SETIT

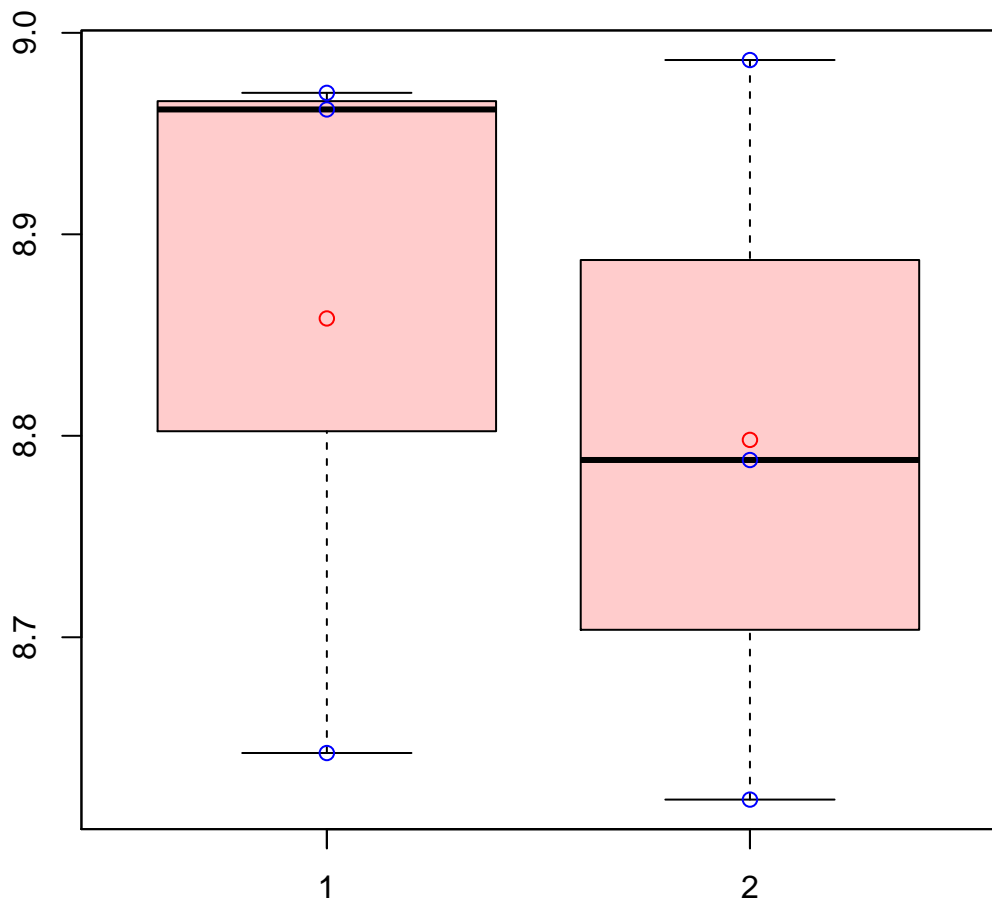

t-Test: p-value = 0.71



# K3ZHI1|K3ZHI1\_SETIT

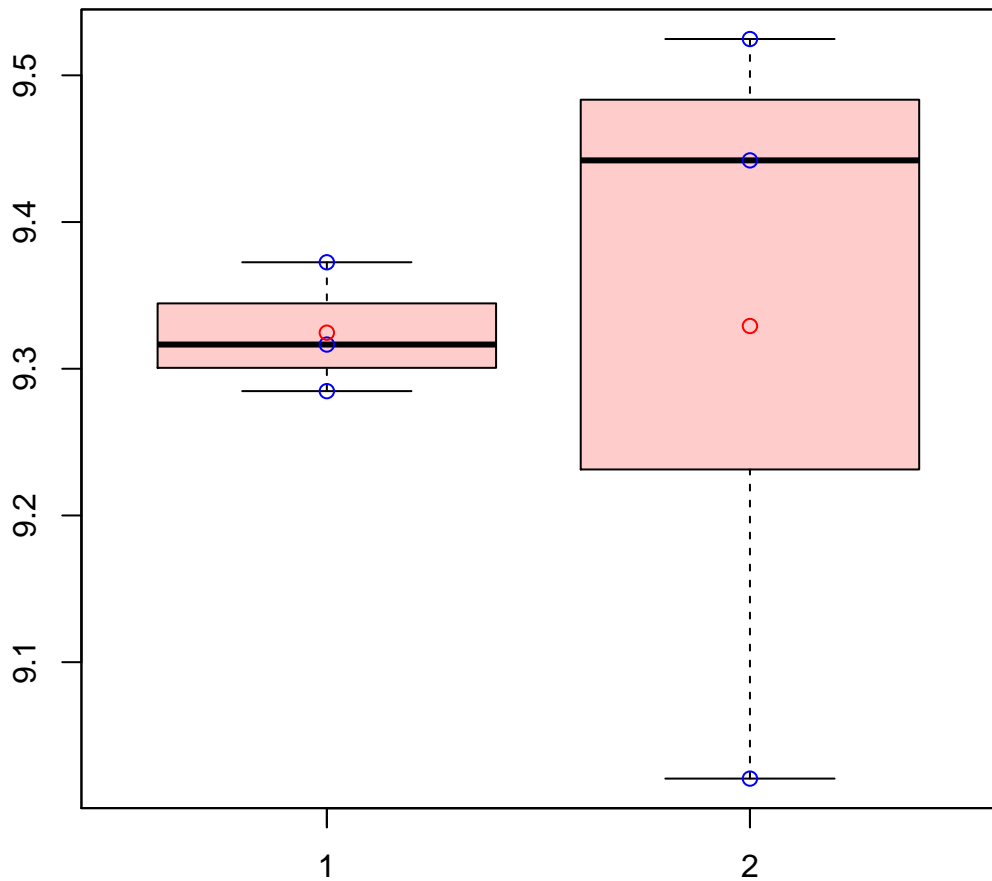

t-Test: p-value = 0.98

# K3ZHQ6|K3ZHQ6\_SETIT

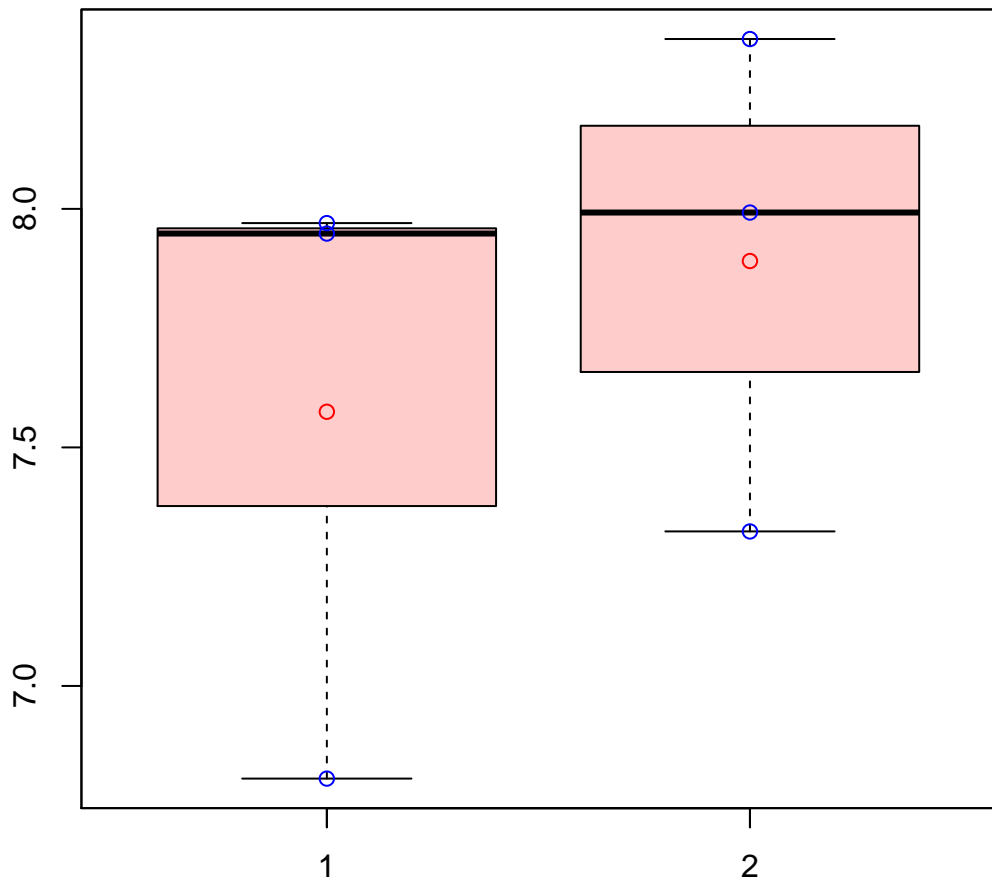

t-Test: p-value = 0.56

# K3ZHV8|K3ZHV8\_SETIT

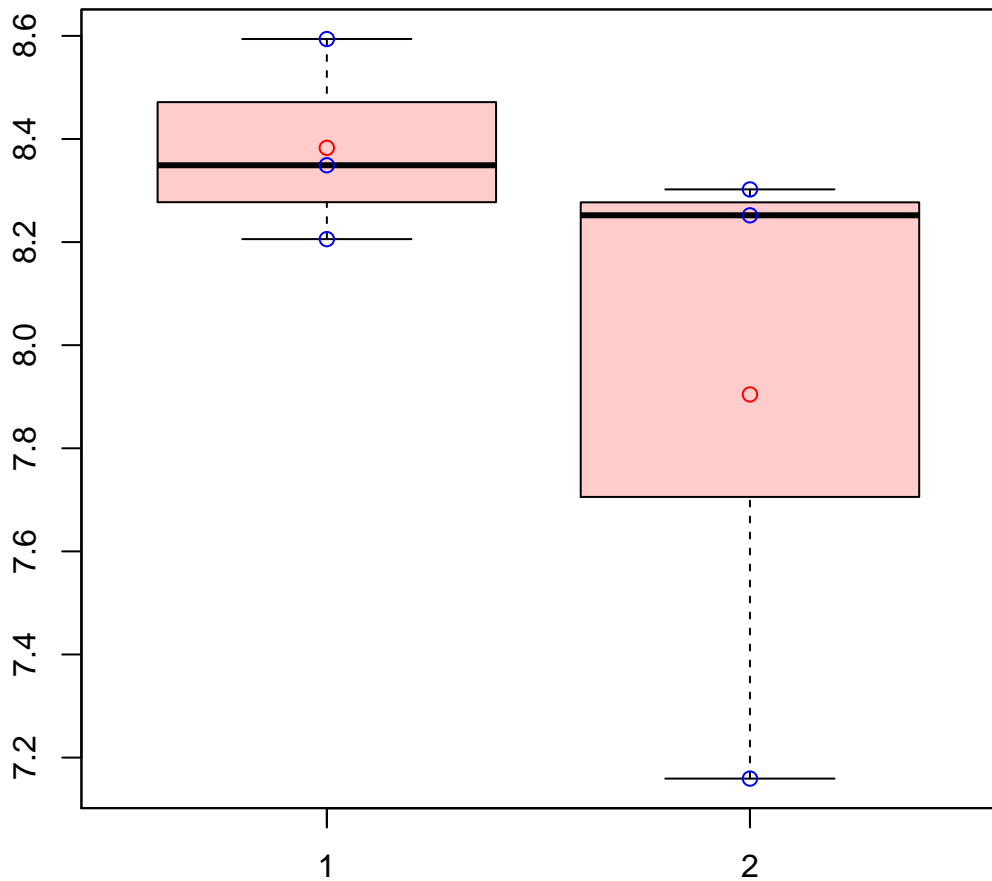

t-Test: p-value = 0.33

# K3ZI33|K3ZI33\_SETIT

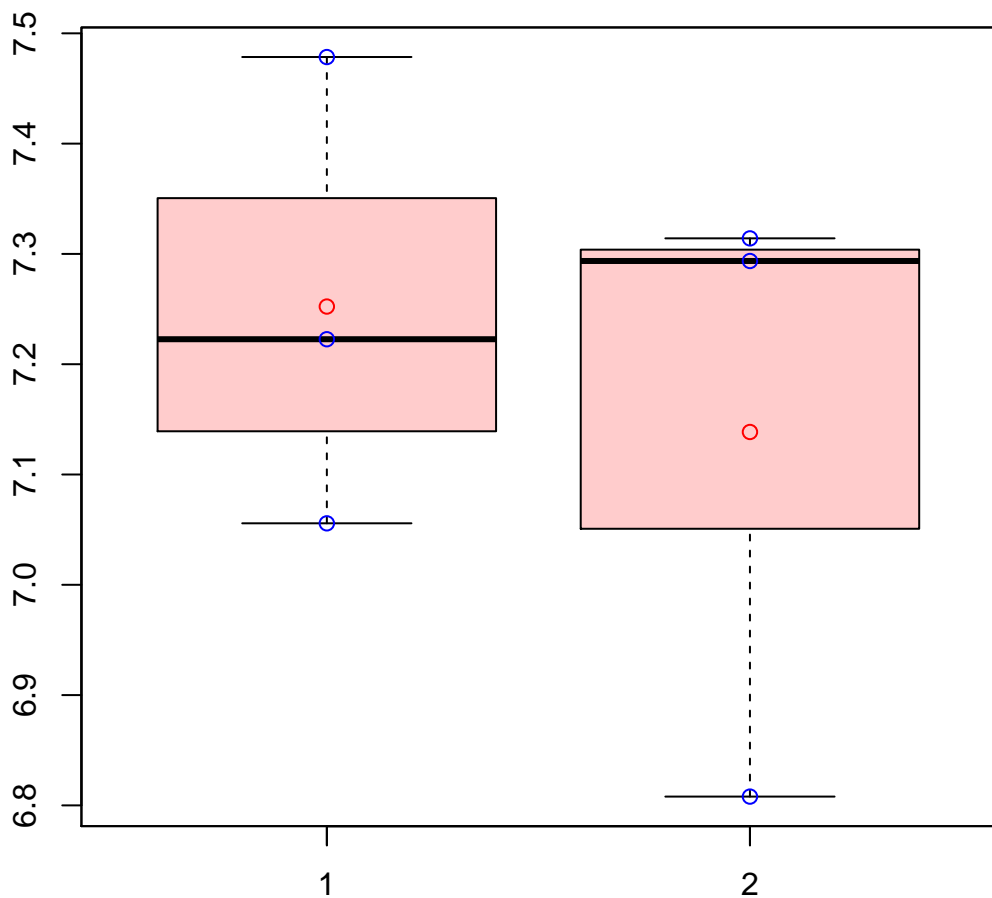

t-Test: p-value = 0.61

# K3ZI56|K3ZI56\_SETIT

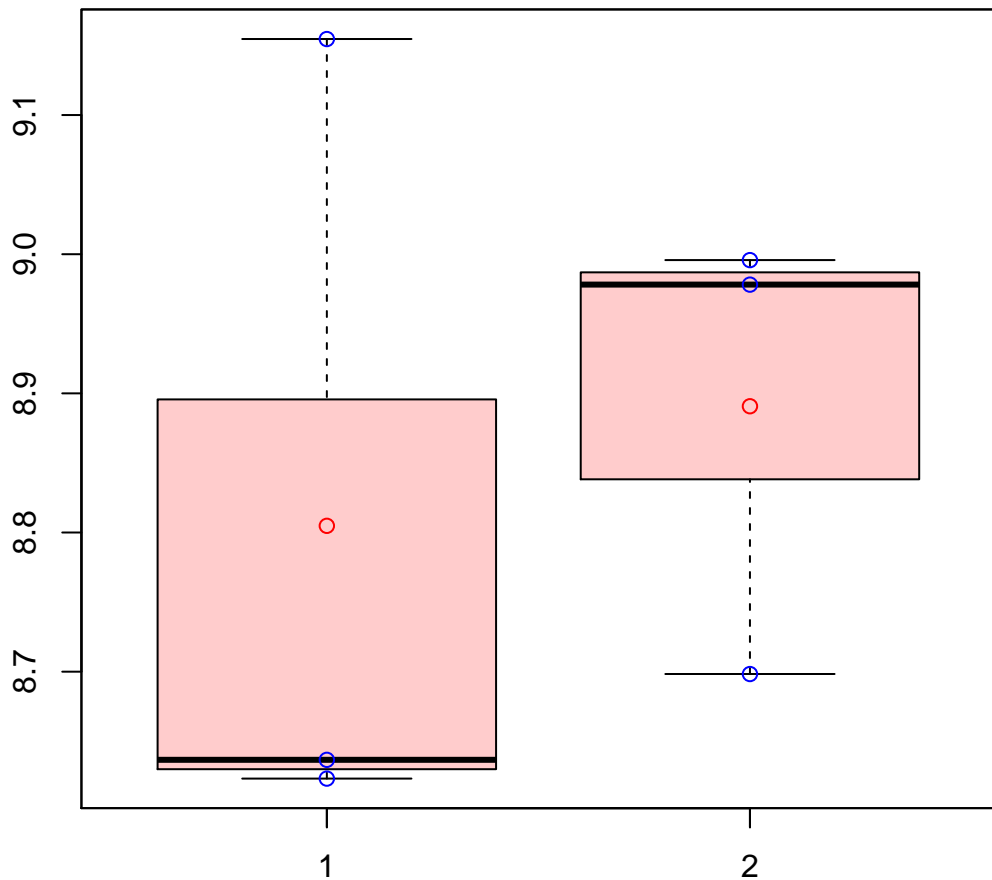

t-Test: p-value = 0.7

# K3ZI87|K3ZI87\_SETIT

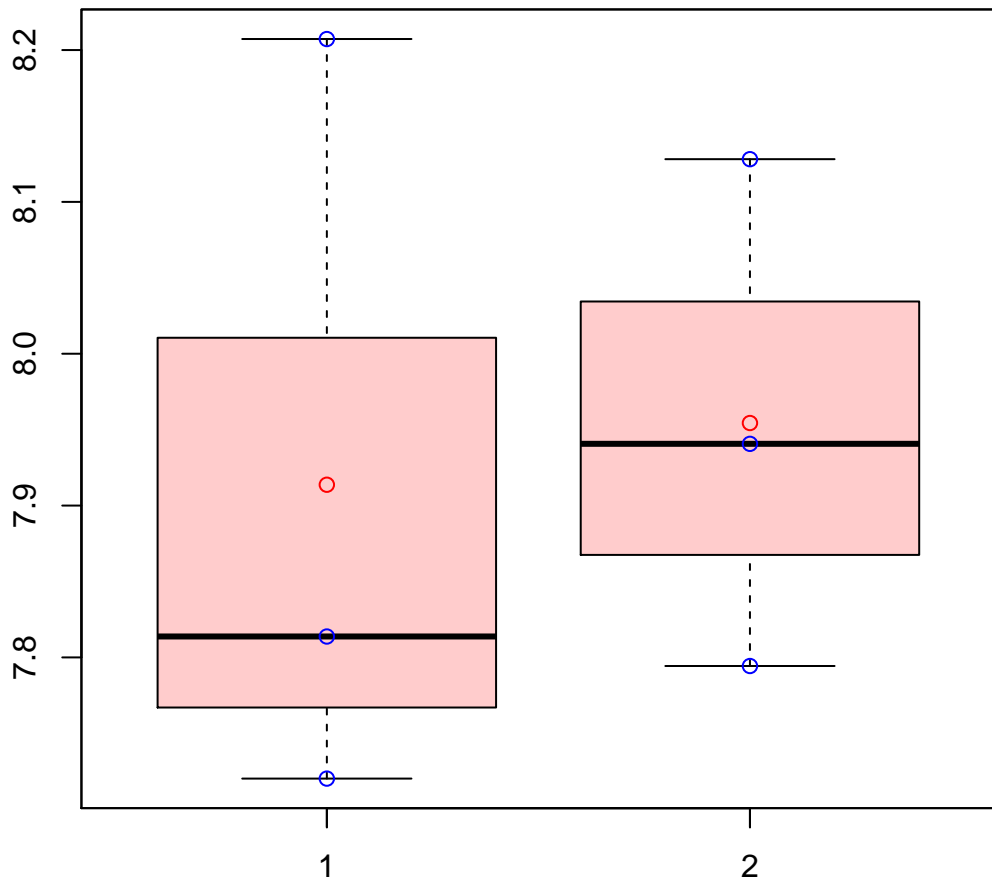

t-Test: p-value = 0.83

# K3ZII1|K3ZII1\_SETIT

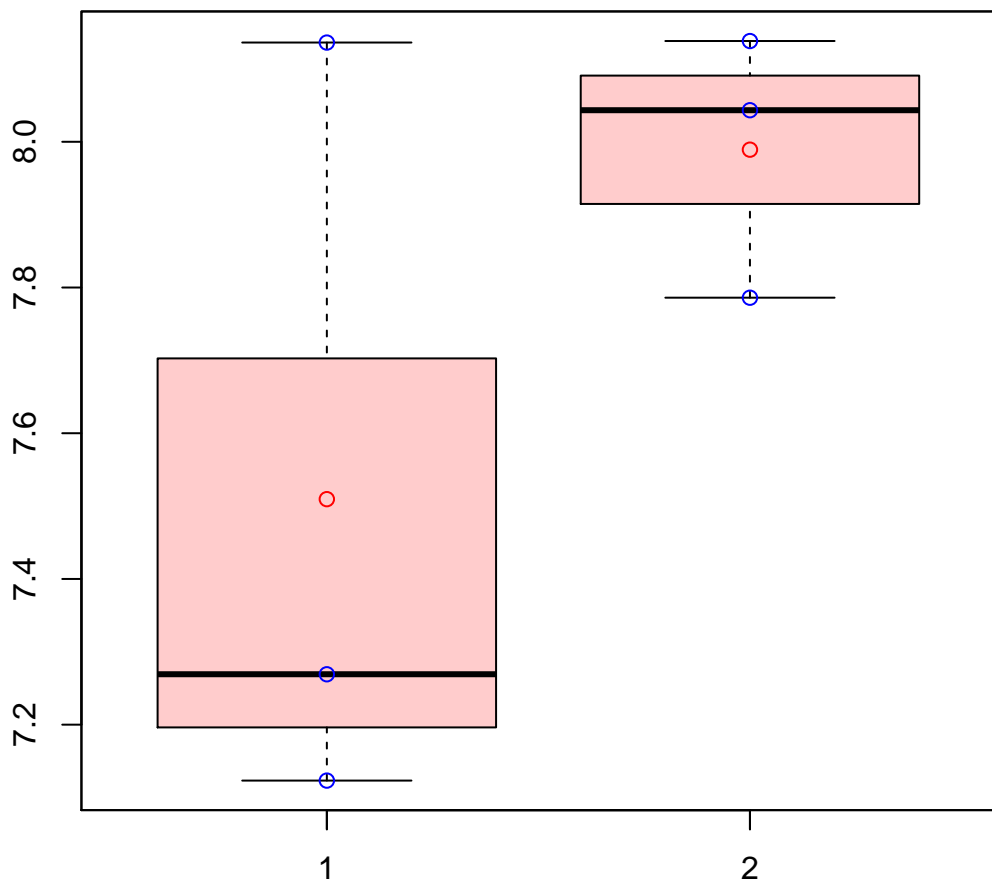

t-Test: p-value = 0.27

# K3ZIK0|K3ZIK0\_SETIT

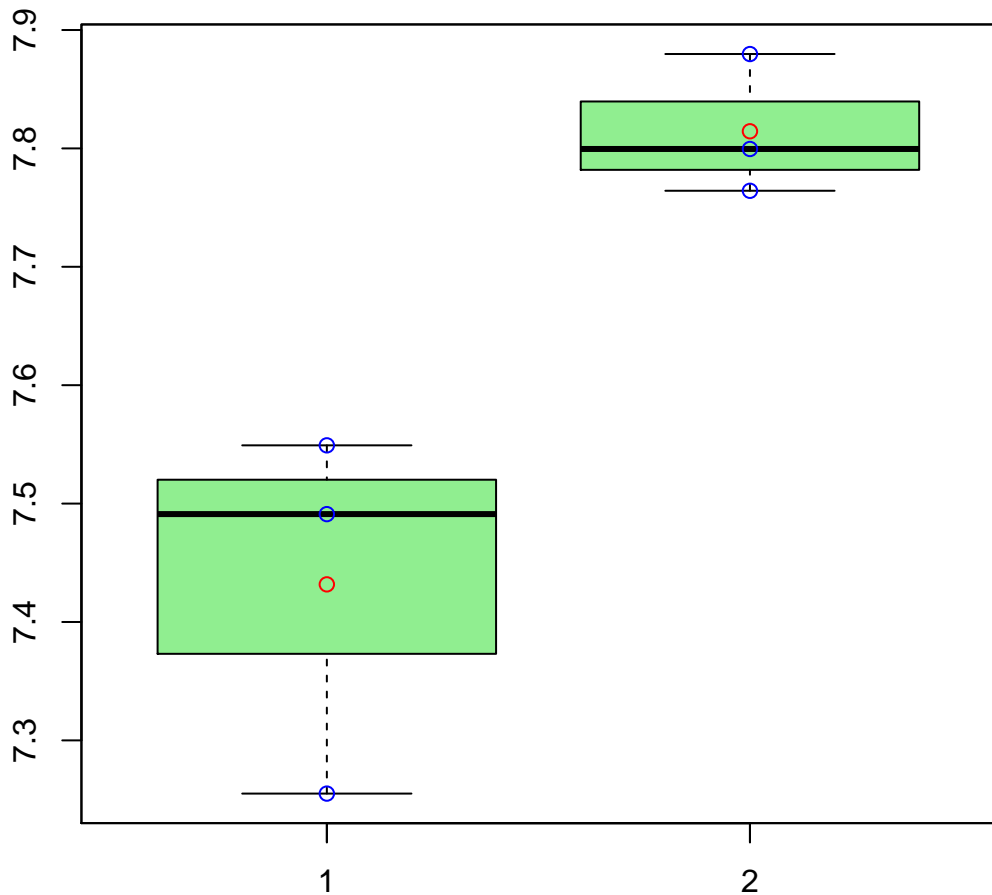

t-Test: p-value = 0.04



# K3ZIP7|K3ZIP7\_SETIT

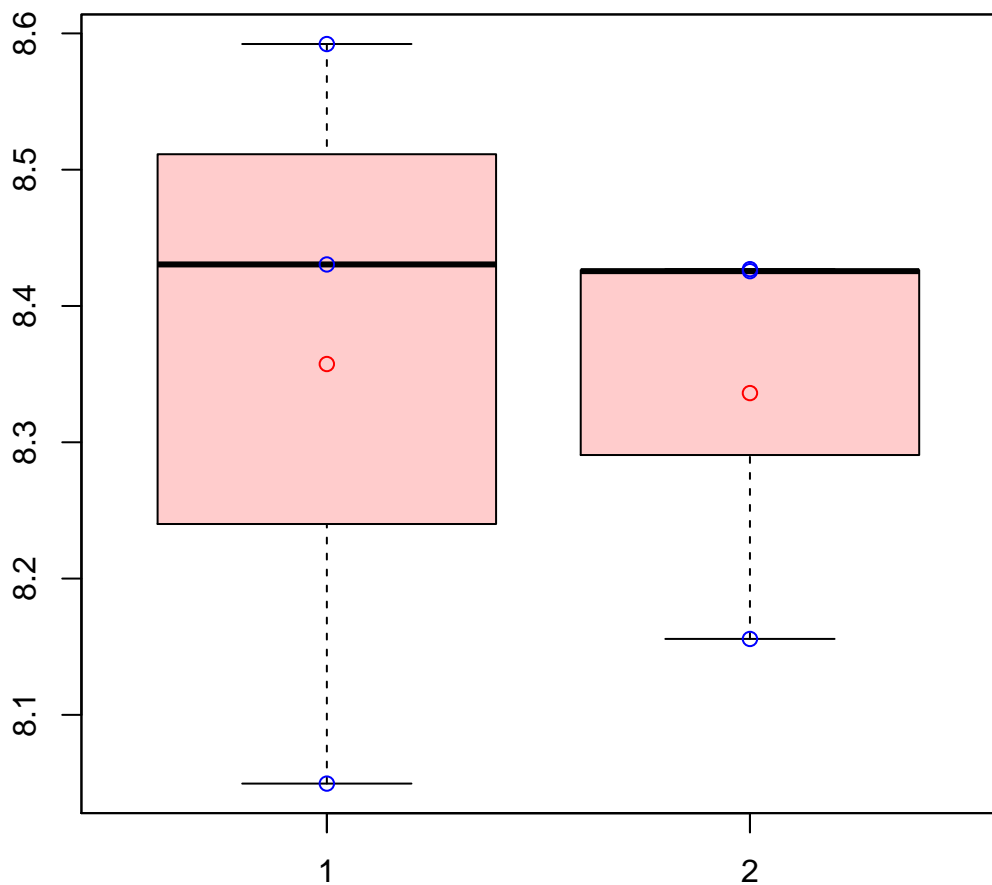

t-Test: p-value = 0.91

# K3ZIS5|K3ZIS5\_SETIT

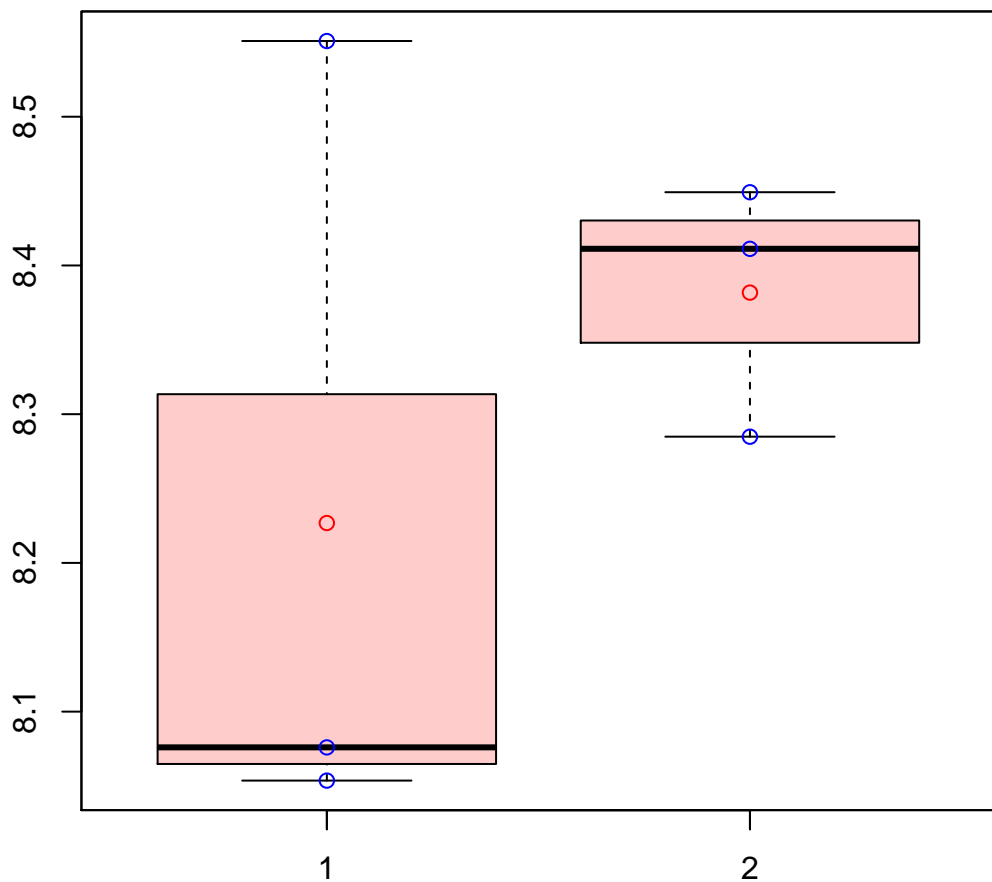

t-Test: p-value = 0.44

# K3ZIS7|K3ZIS7\_SETIT

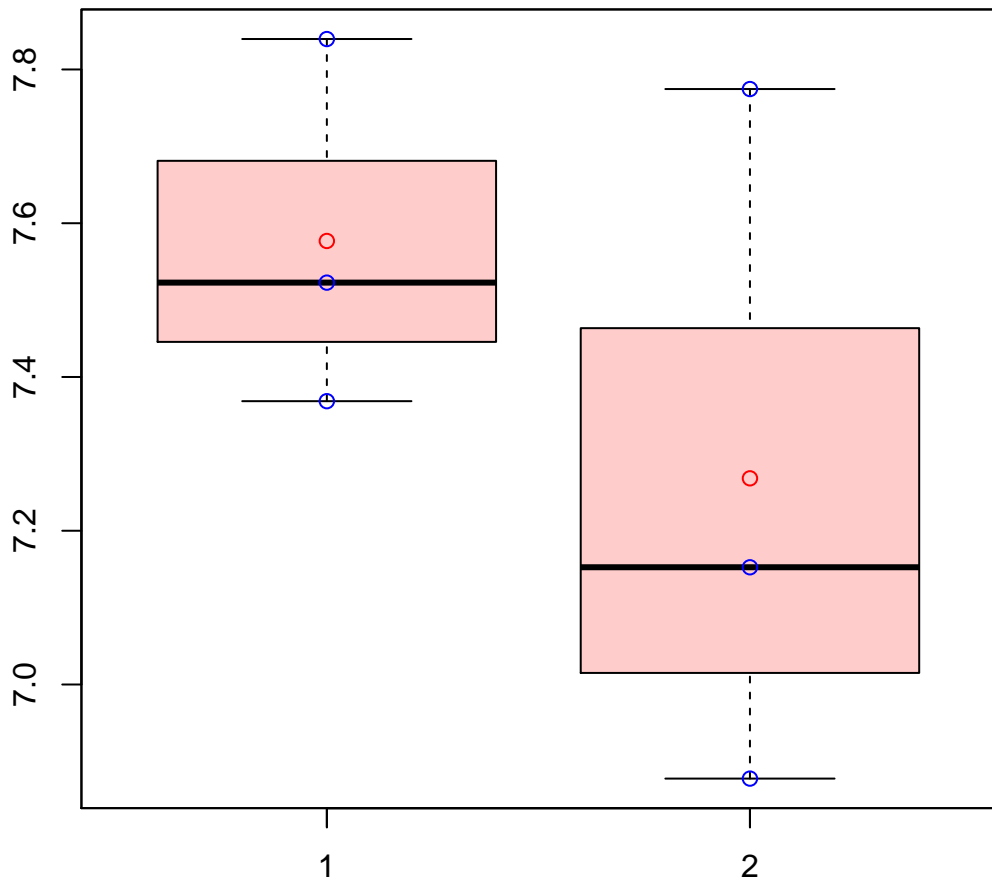

t-Test: p-value = 0.38

# K3ZJ12|K3ZJ12\_SETIT

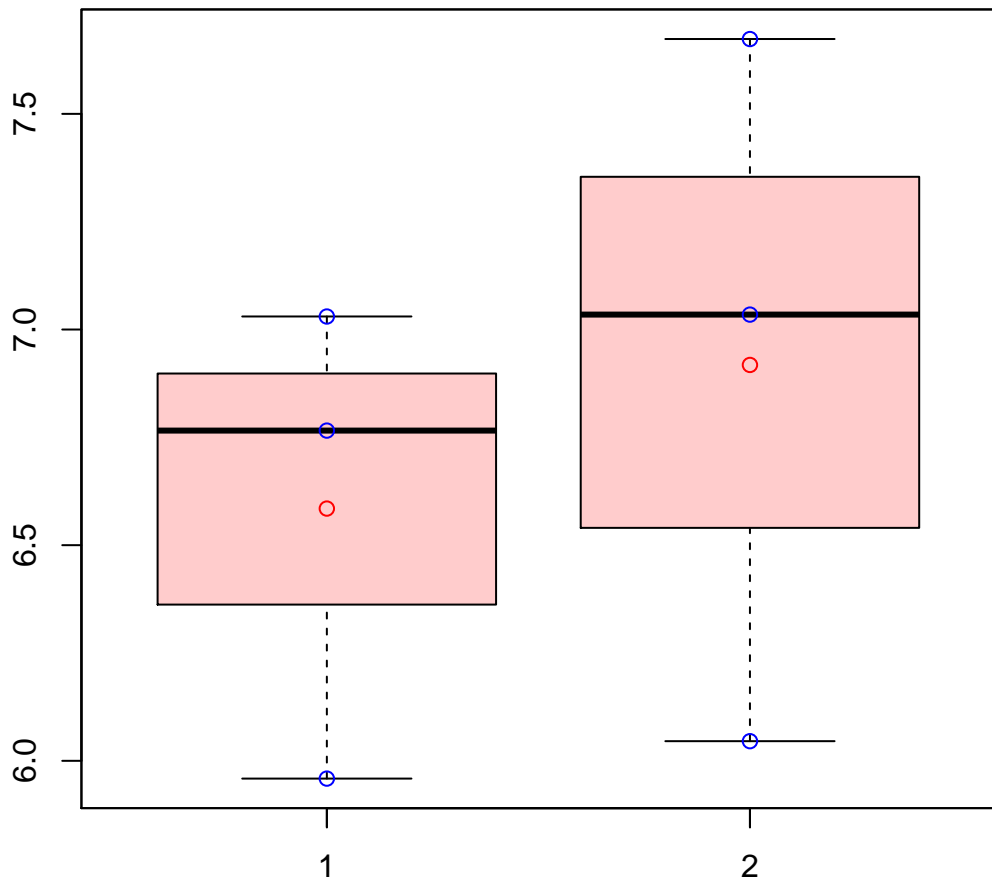

t-Test: p-value = 0.6

# K3ZJ13|K3ZJ13\_SETIT

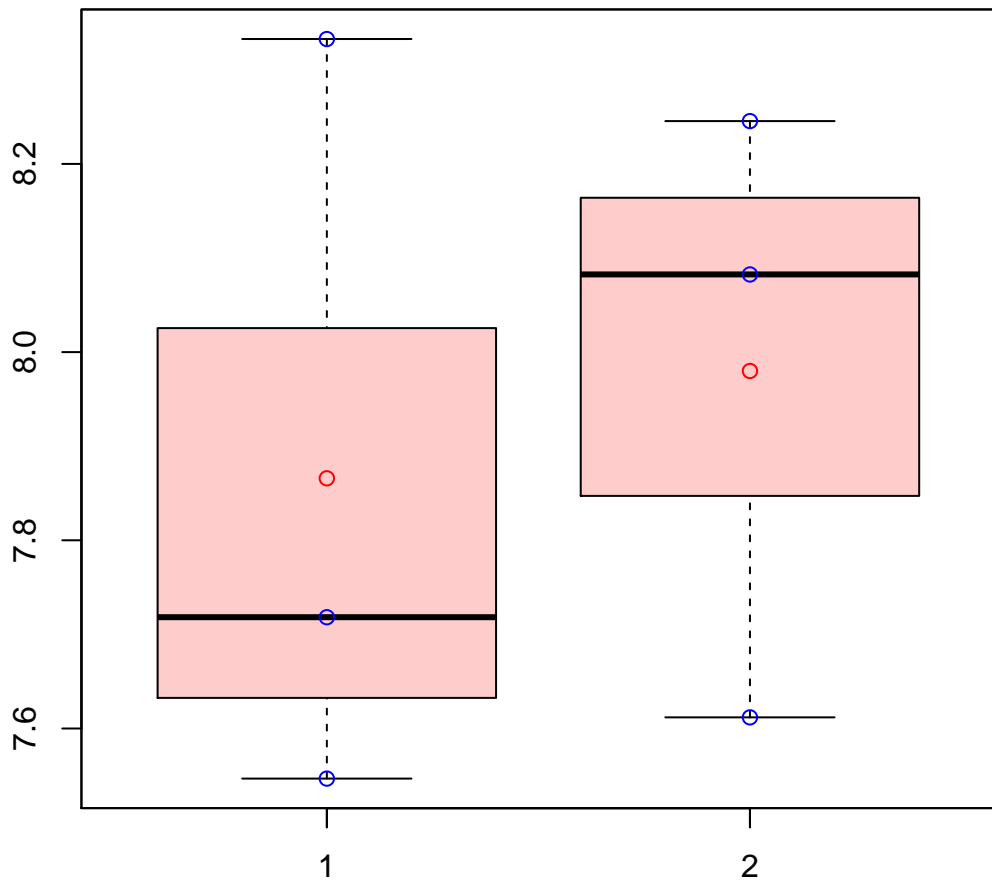

t-Test: p-value = 0.73

# K3ZJ82|K3ZJ82\_SETIT

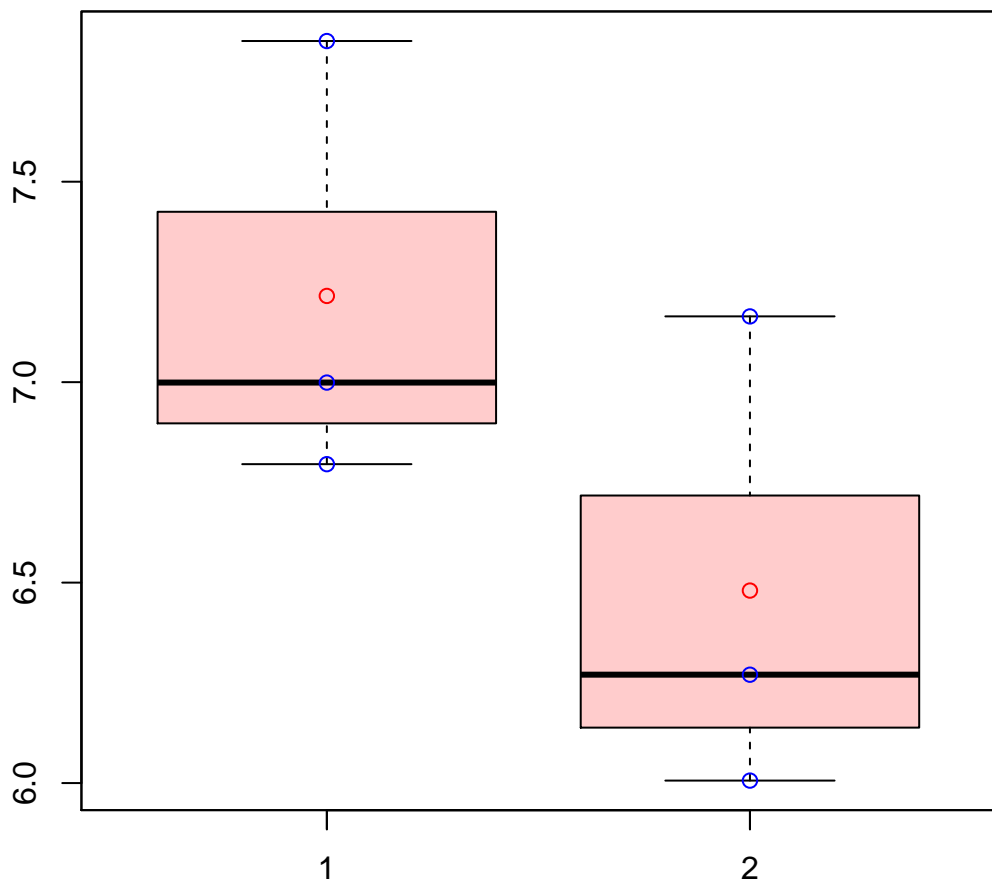

t-Test: p-value = 0.2

# K3ZJH6|K3ZJH6\_SETIT

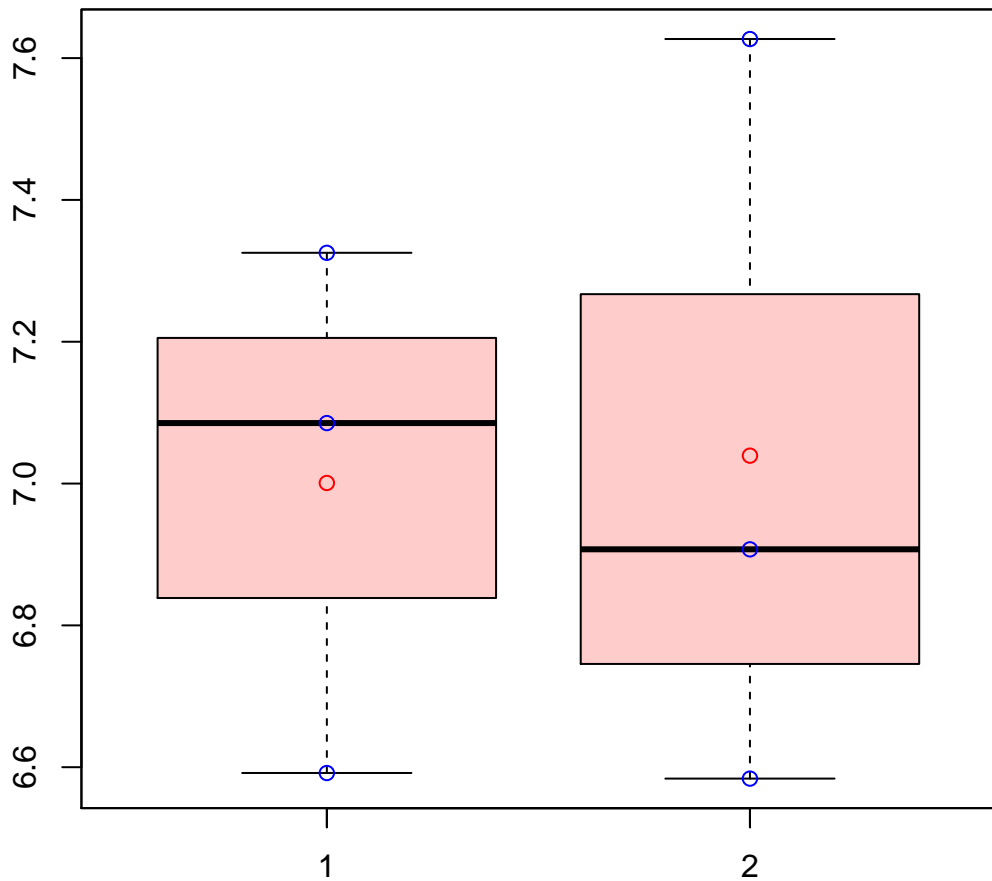

t-Test: p-value = 0.92

# K3ZJP1|K3ZJP1\_SETIT

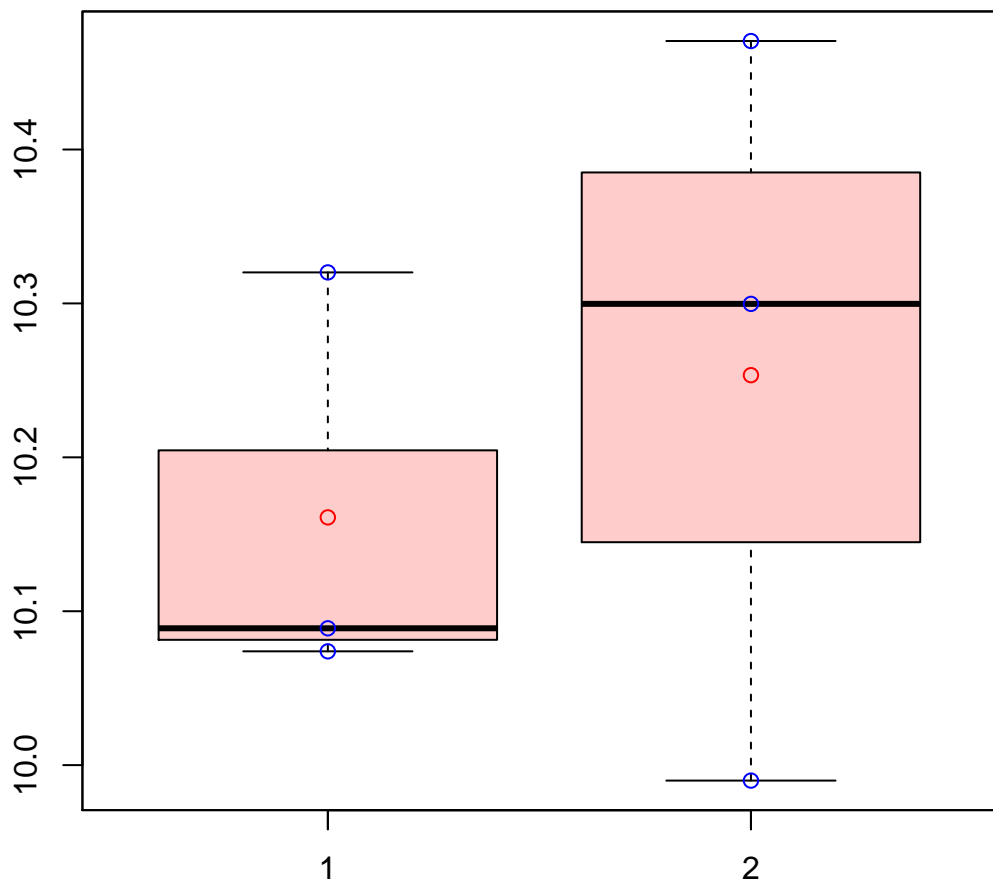

t-Test: p-value = 0.61



# K3ZJT4|K3ZJT4\_SETIT

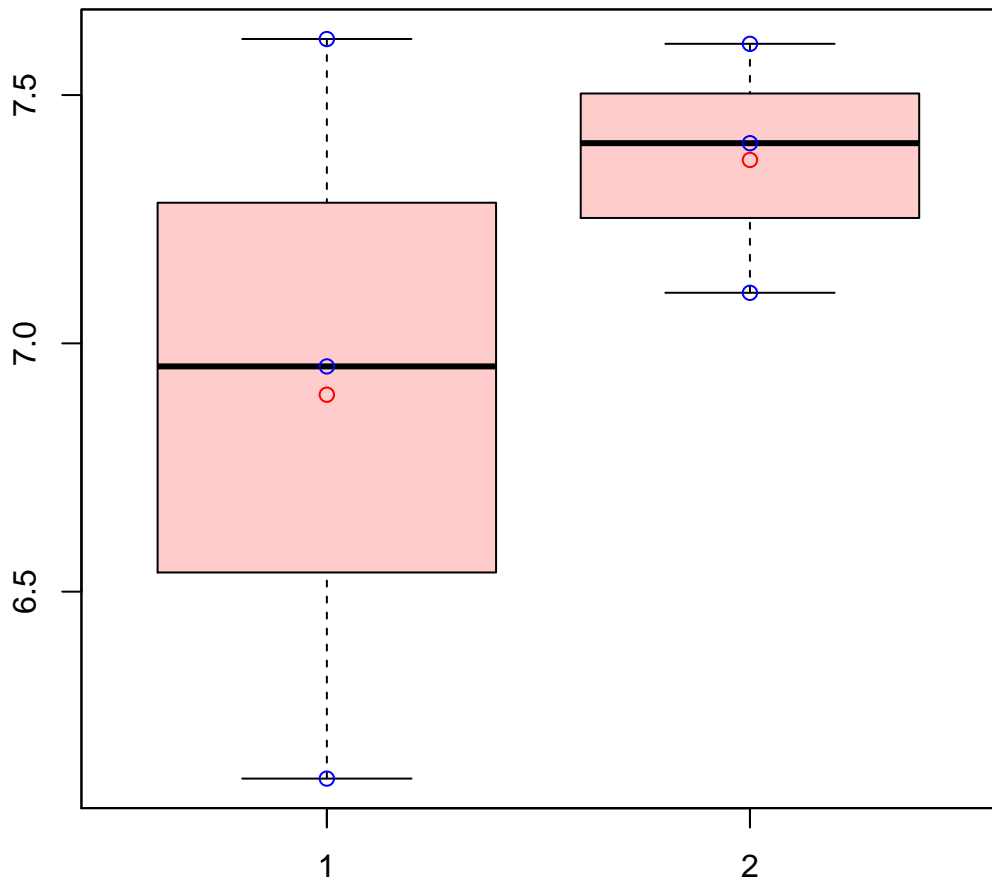

t-Test: p-value = 0.39

# K3ZN23|K3ZN23\_SETIT

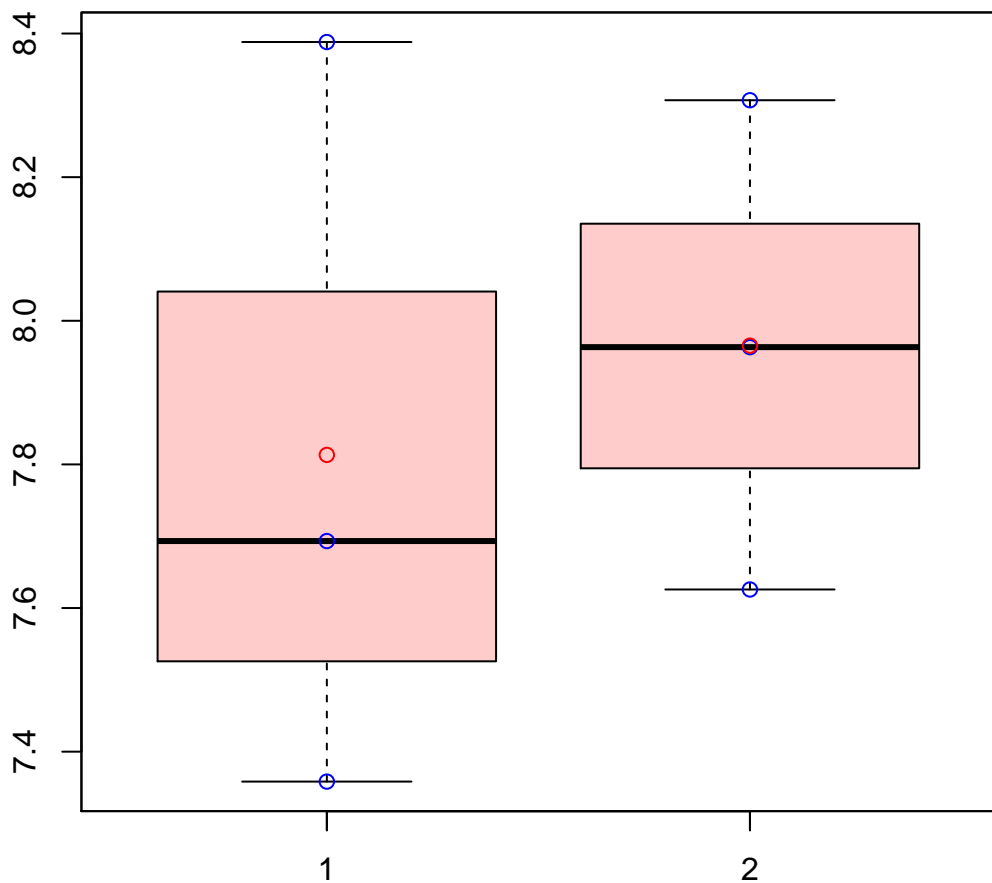

t-Test: p-value = 0.7

# K3ZNE8|K3ZNE8\_SETIT

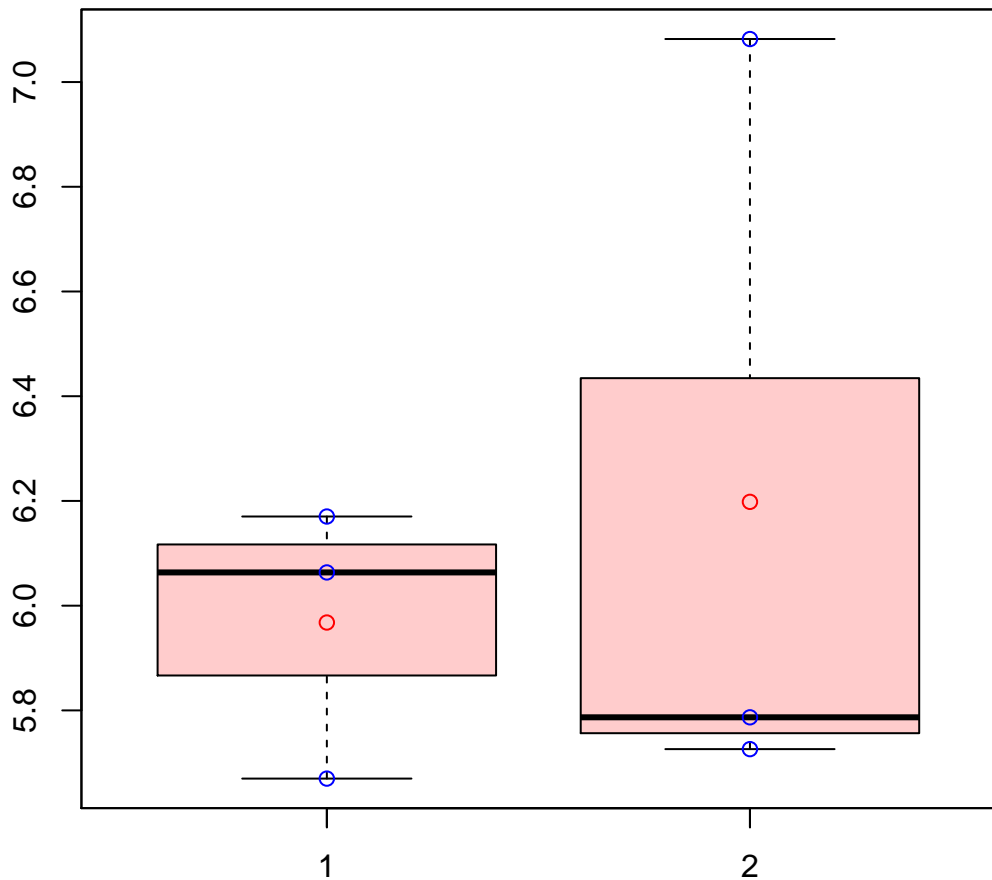

t-Test: p-value = 0.66

# K3ZP26|K3ZP26\_SETIT

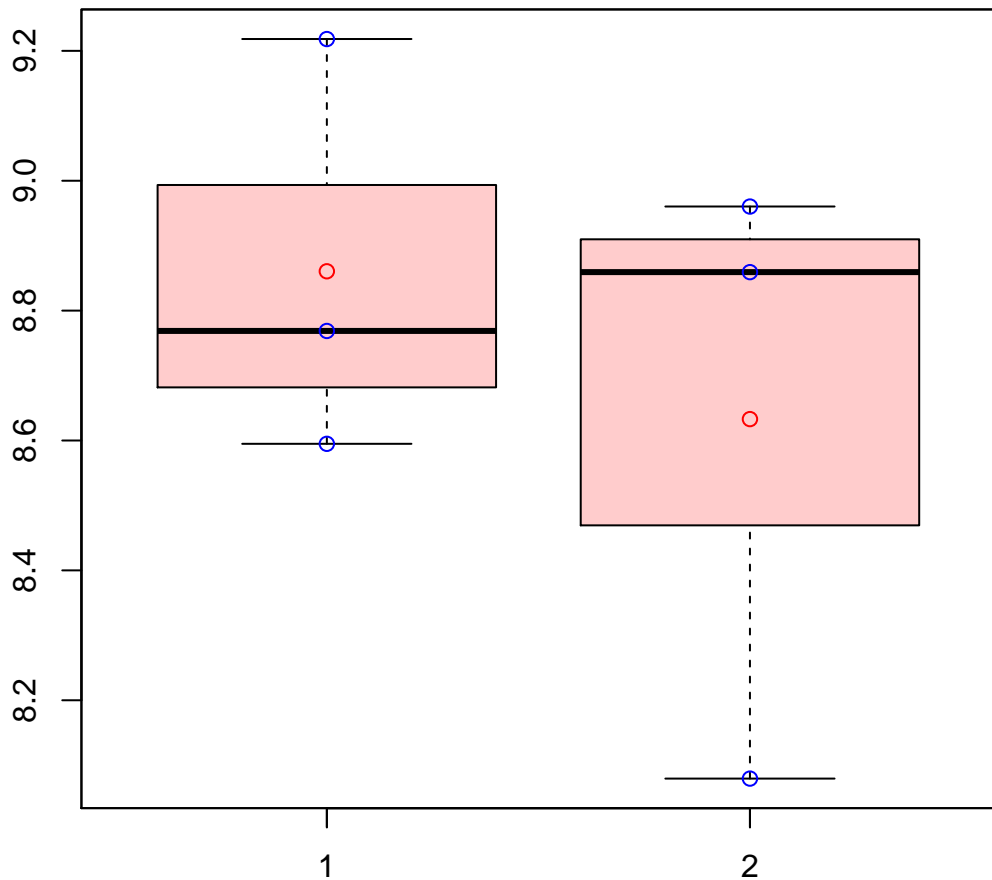

t-Test: p-value = 0.54

# K3ZP32|K3ZP32\_SETIT

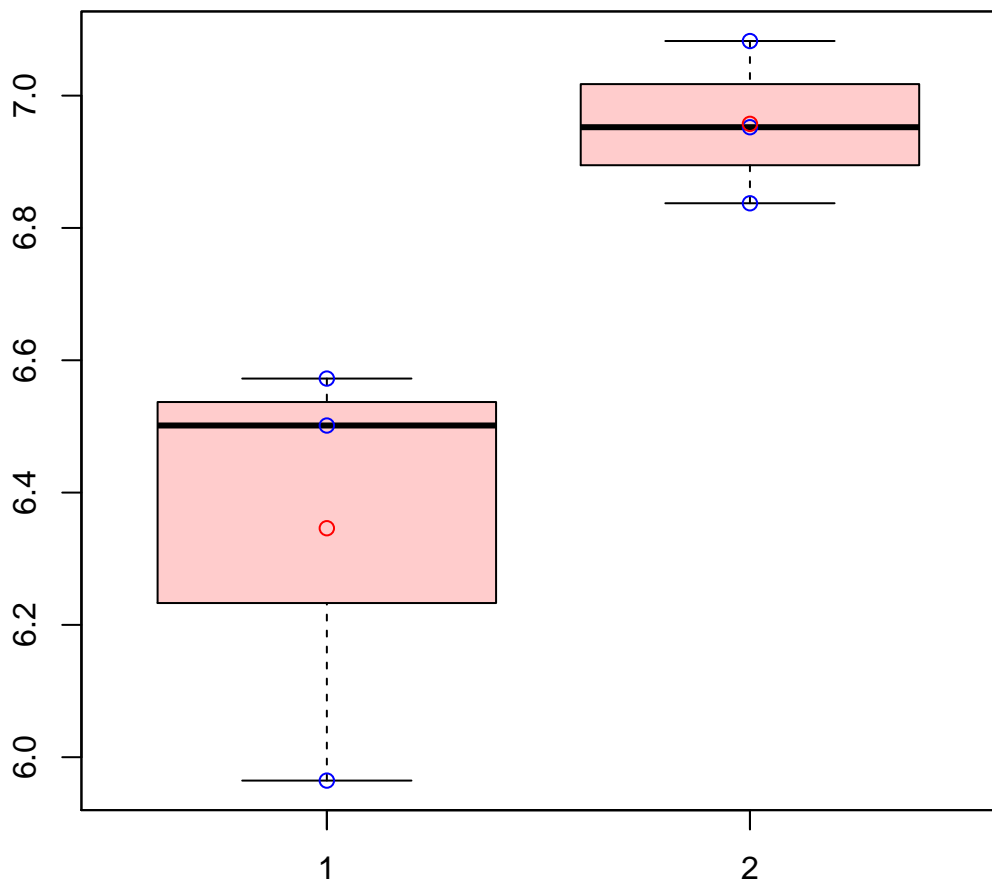

t-Test: p-value = 0.07

# K3ZPW5|K3ZPW5\_SETIT

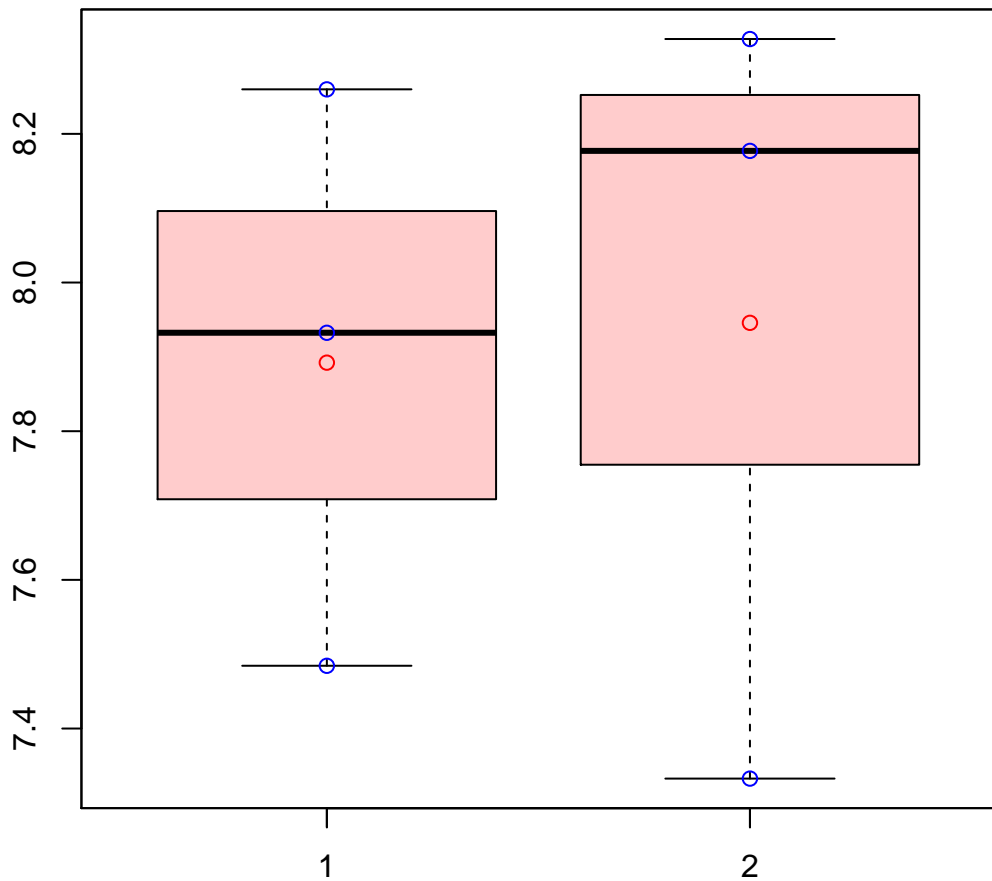

t-Test: p-value = 0.9

# K3ZPX7|K3ZPX7\_SETIT

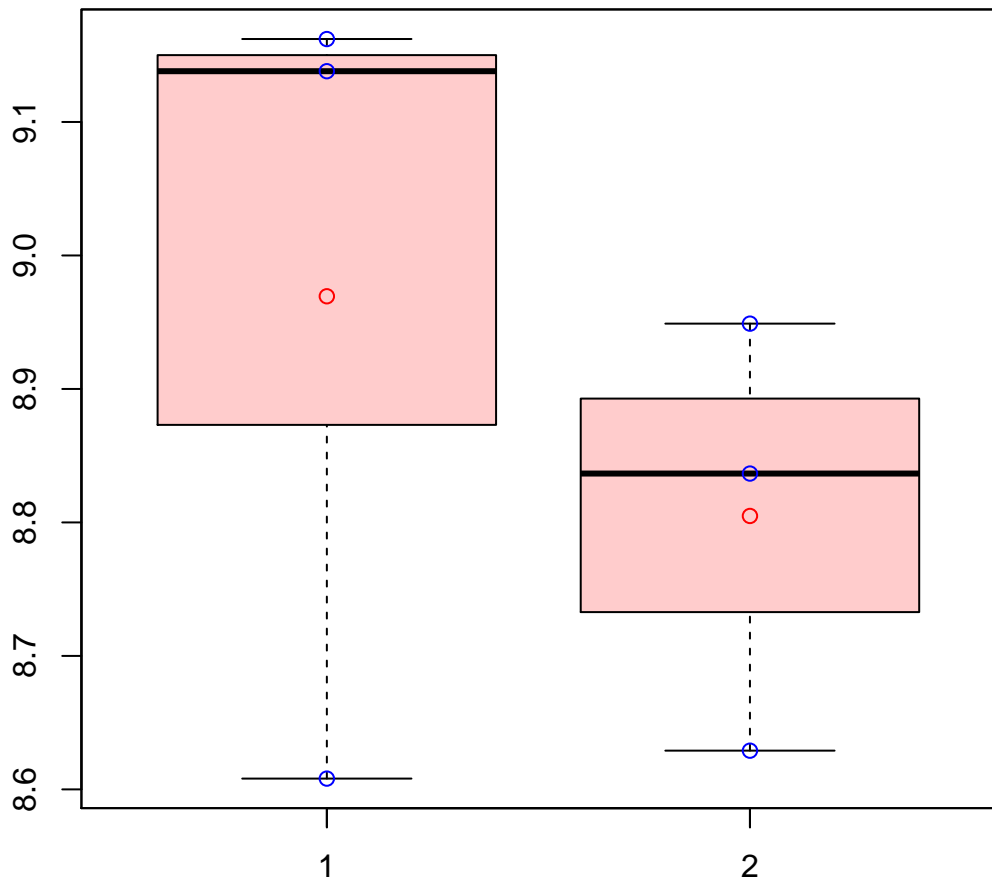

t-Test: p-value = 0.48

# K3ZPZ7|K3ZPZ7\_SETIT

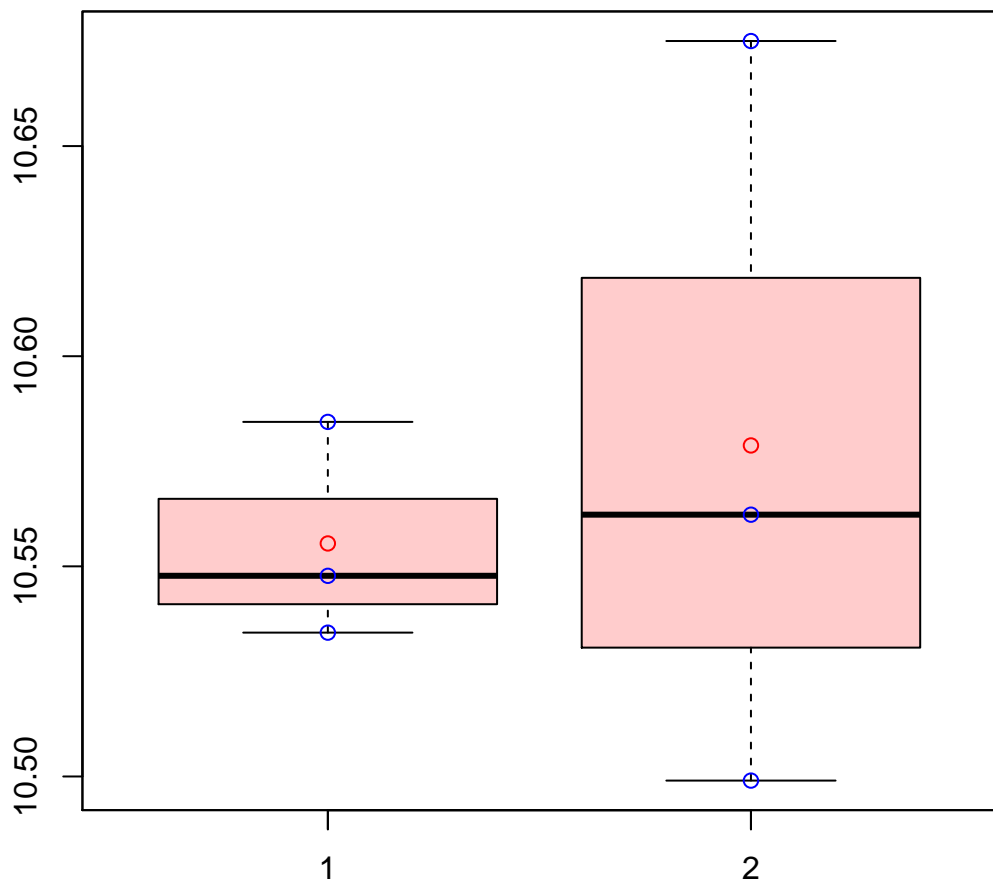

t-Test: p-value = 0.7



# K3ZQ57|K3ZQ57\_SETIT

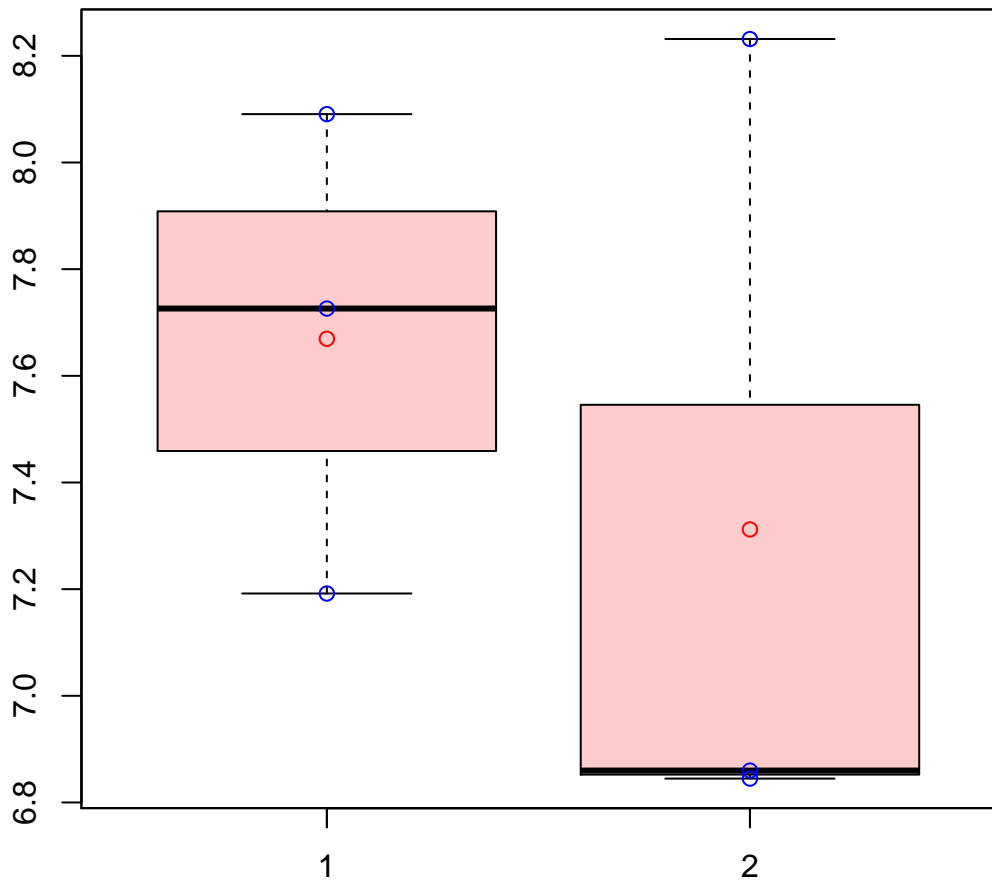

t-Test: p-value = 0.54

# K3ZQ78|K3ZQ78\_SETIT

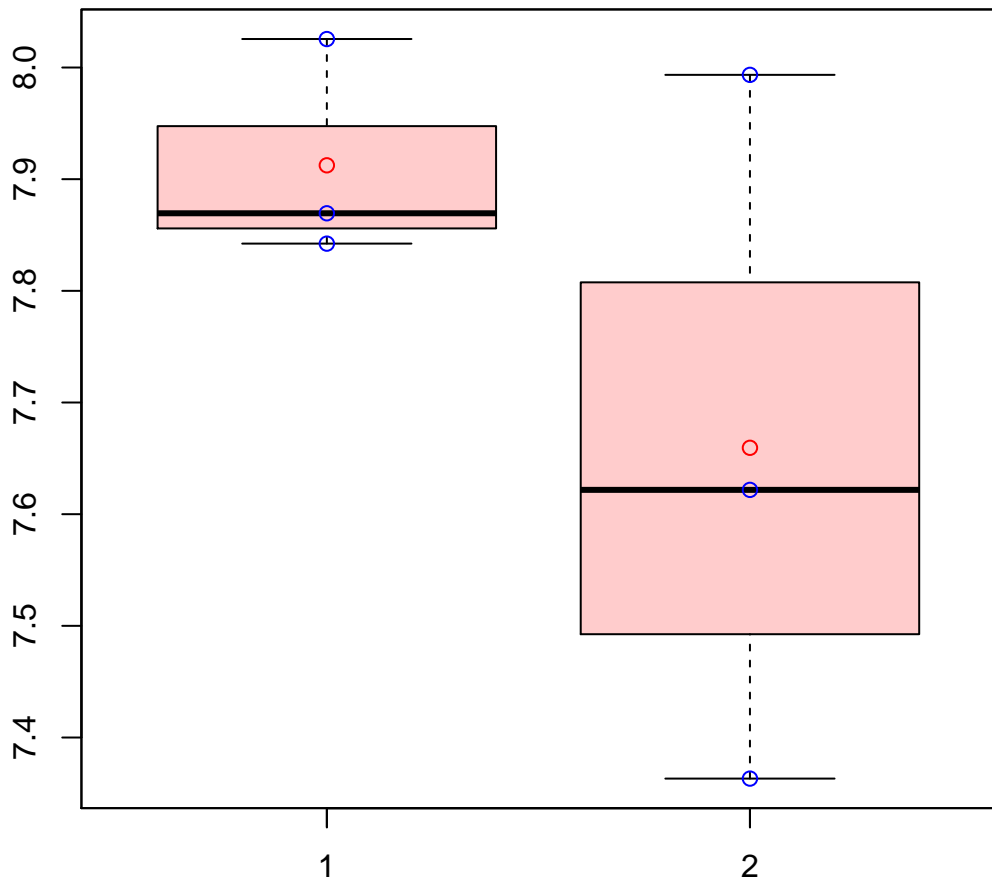

t-Test: p-value = 0.3

# K3ZQ96|K3ZQ96\_SETIT

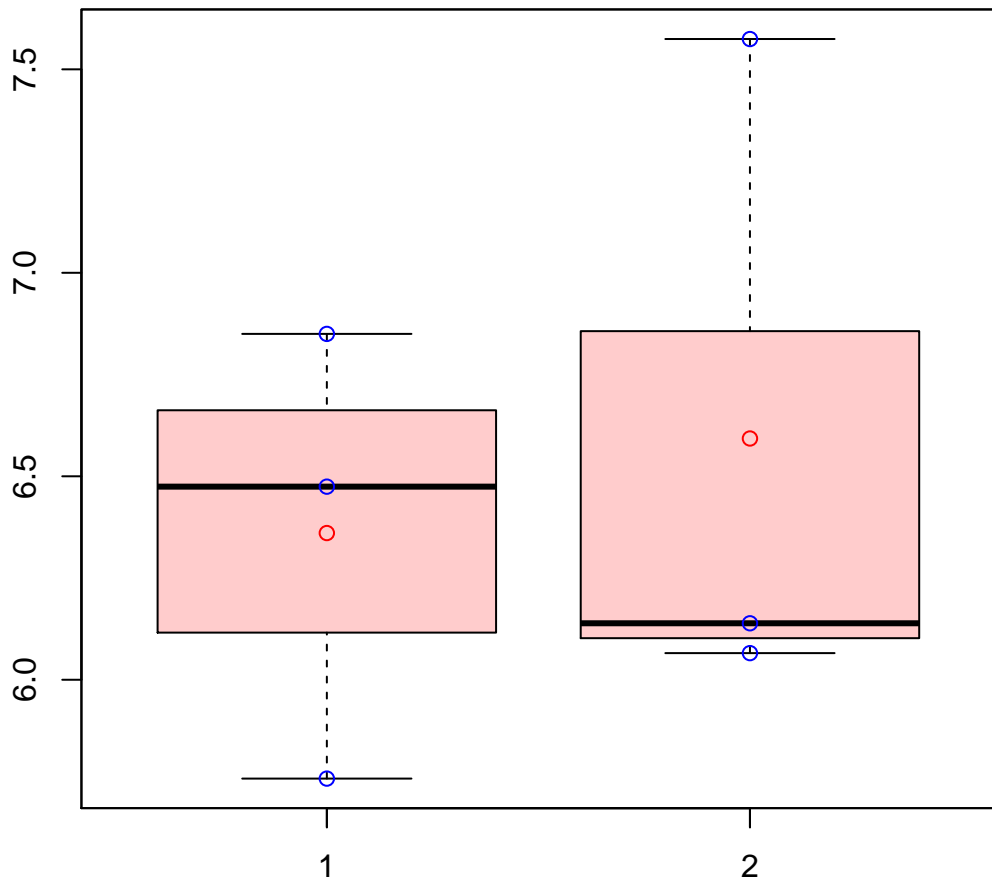

t-Test: p-value = 0.72

# K3ZQA7|K3ZQA7\_SETIT

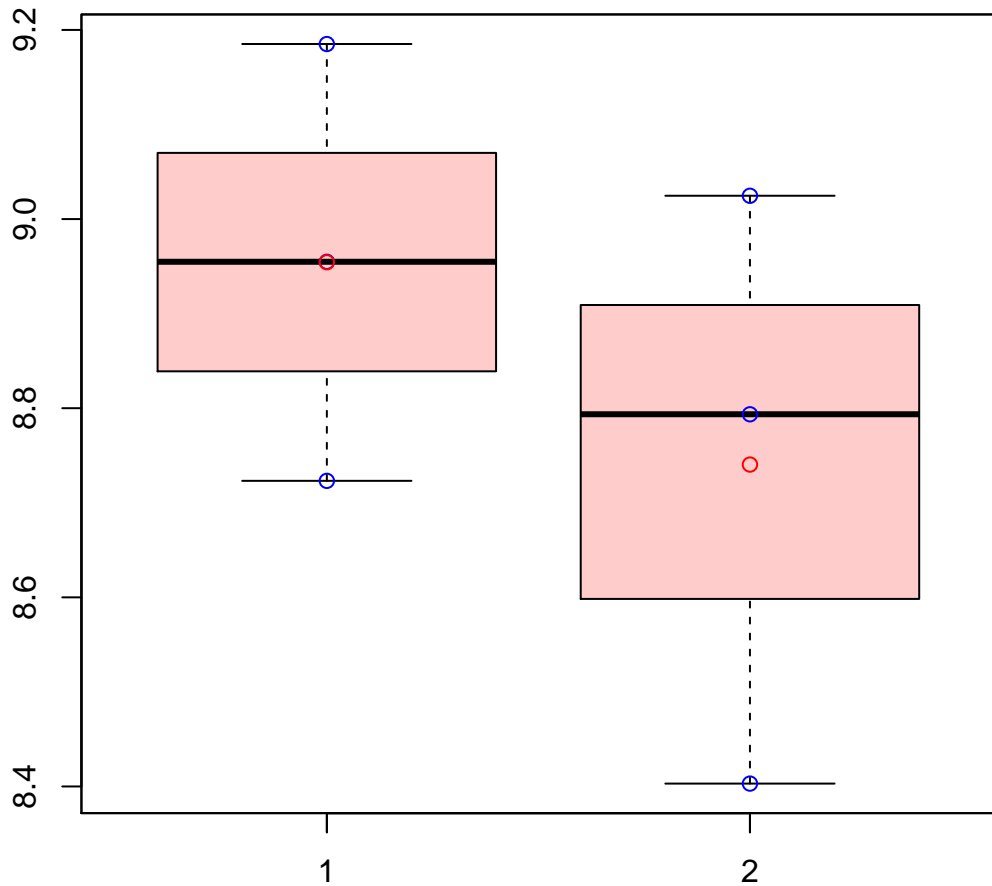

t-Test: p-value = 0.4

# K3ZQC3|K3ZQC3\_SETIT

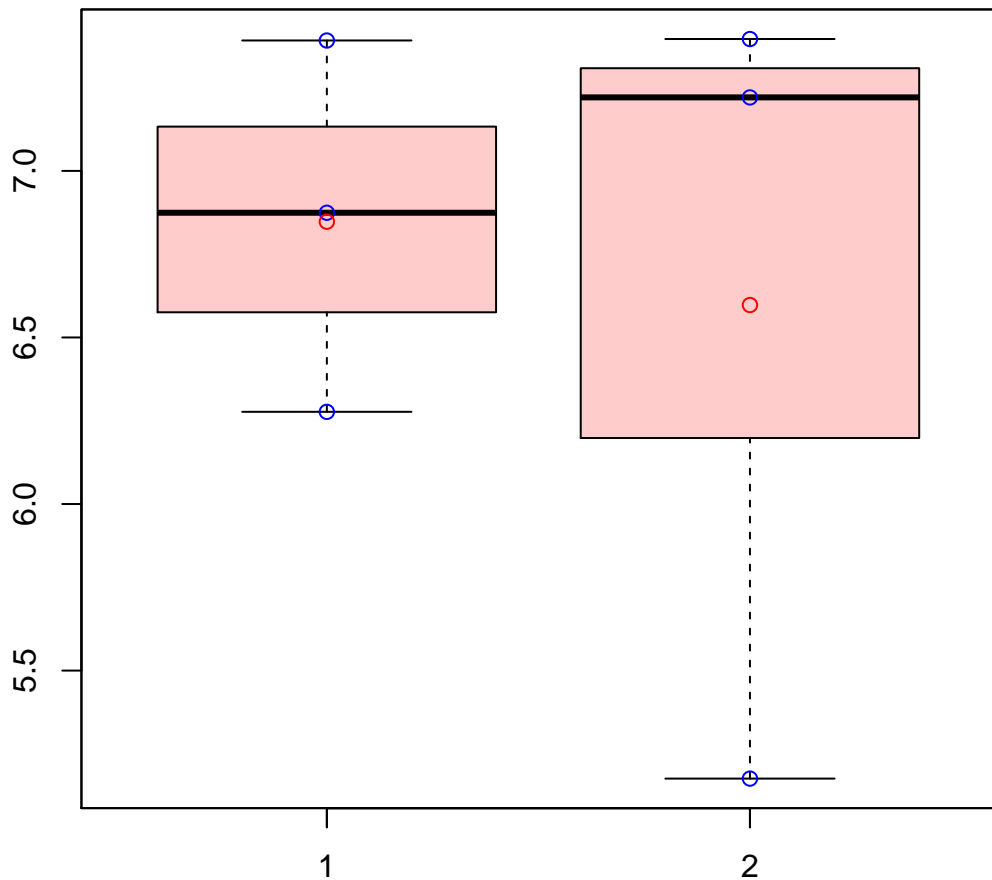

t-Test: p-value = 0.77

# K3ZQE6|K3ZQE6\_SETIT

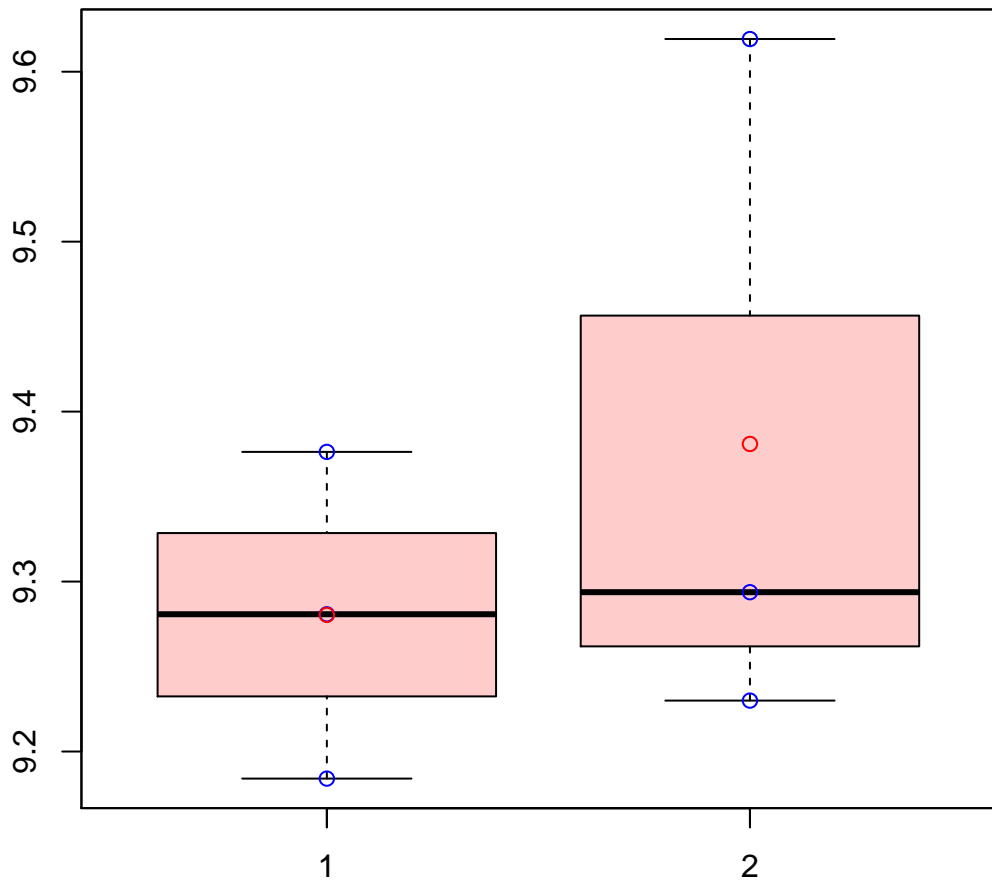

t-Test: p-value = 0.51

# K3ZQV5|K3ZQV5\_SETIT

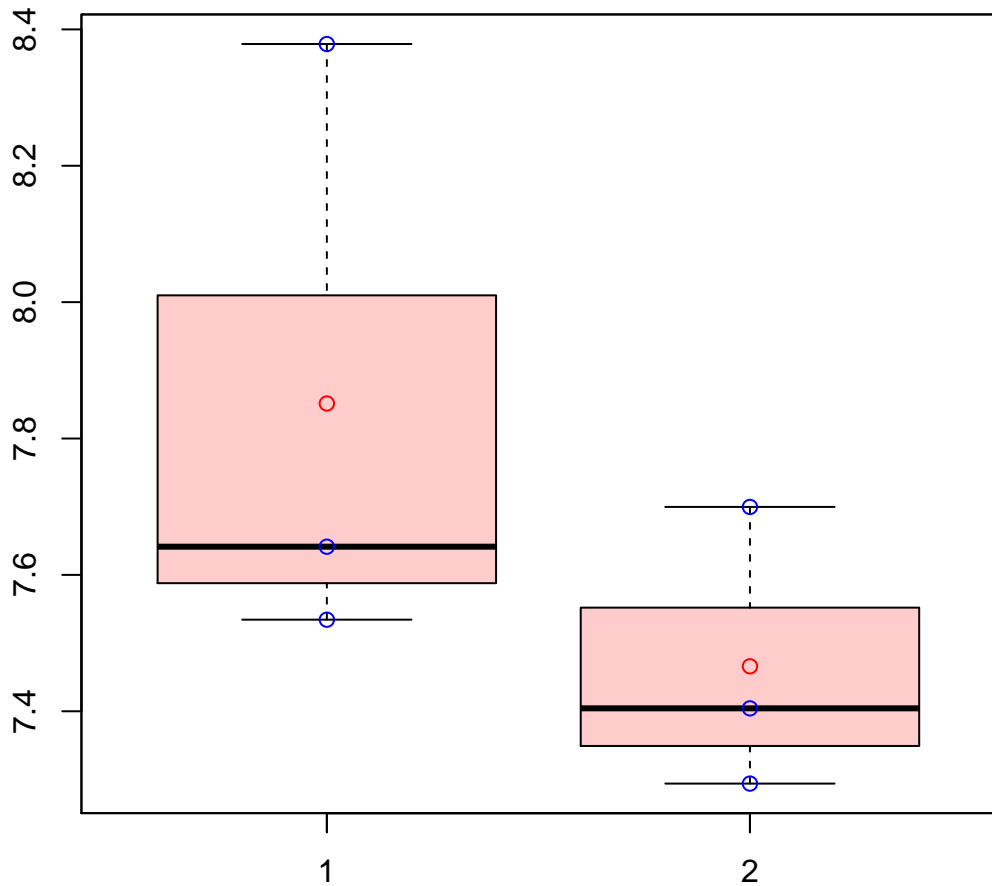

t-Test: p-value = 0.28

# K3ZQY2|K3ZQY2\_SETIT

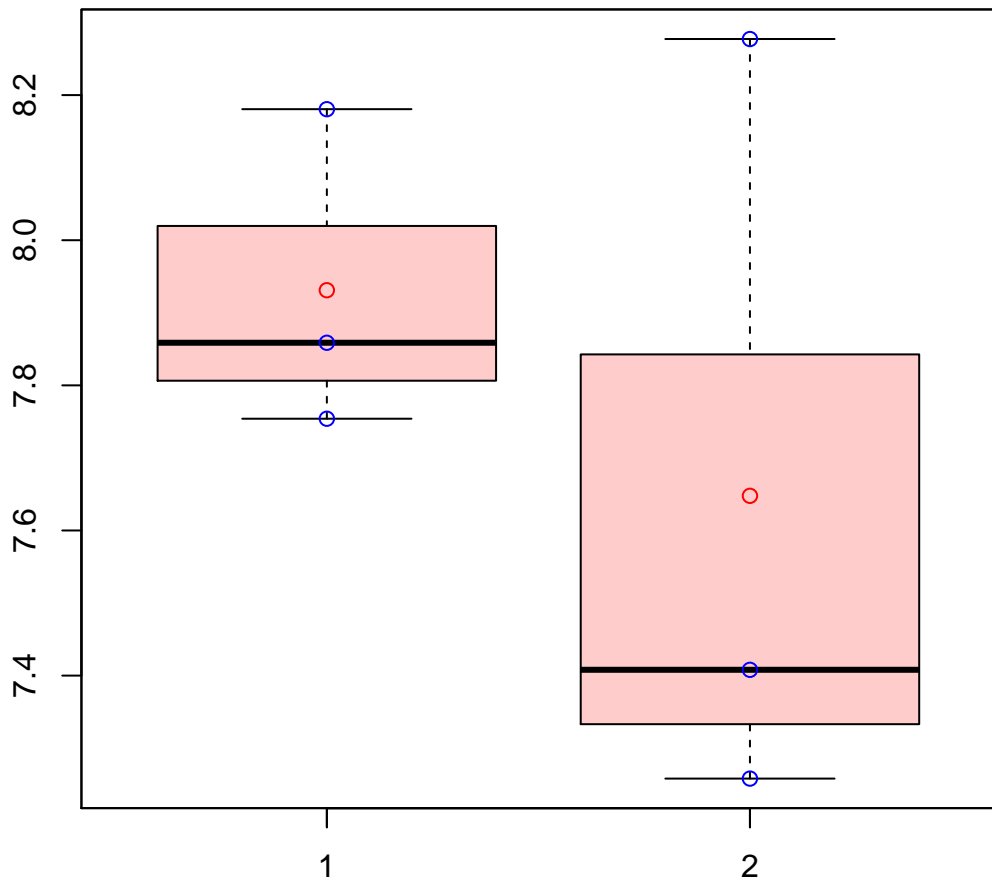

t-Test: p-value = 0.48



# K3ZQY6|K3ZQY6\_SETIT

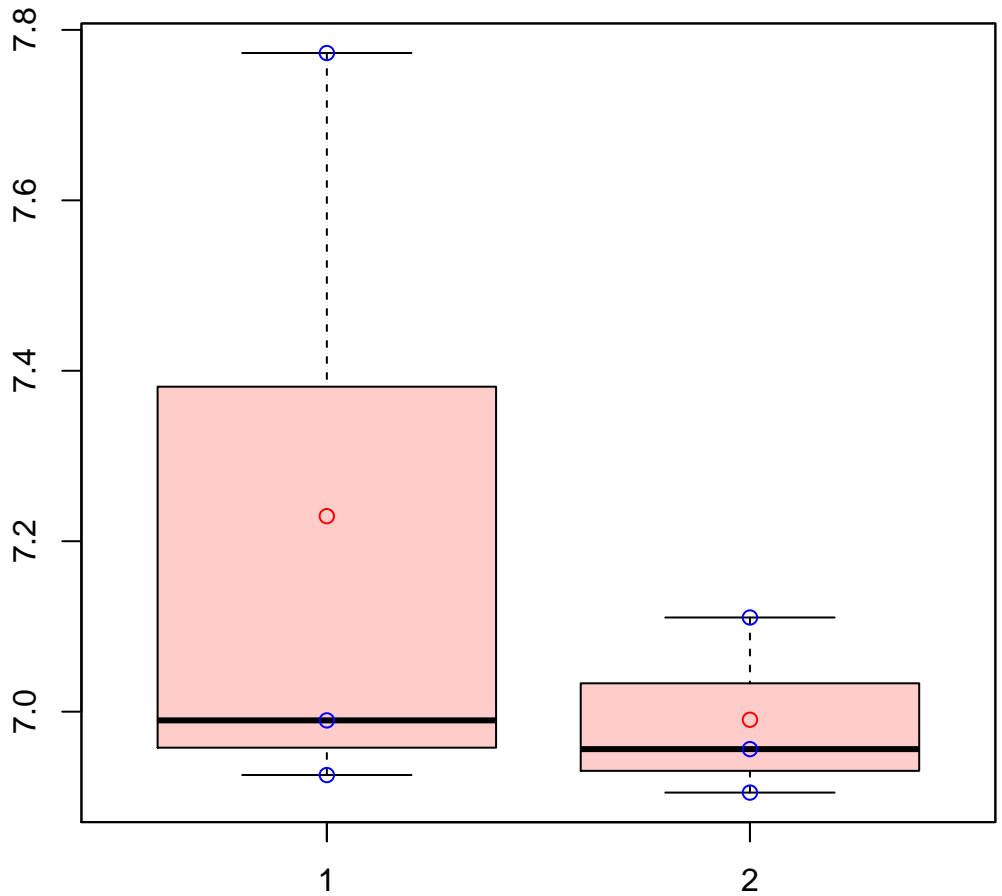

t-Test: p-value = 0.48

# K3ZR11|K3ZR11\_SETIT

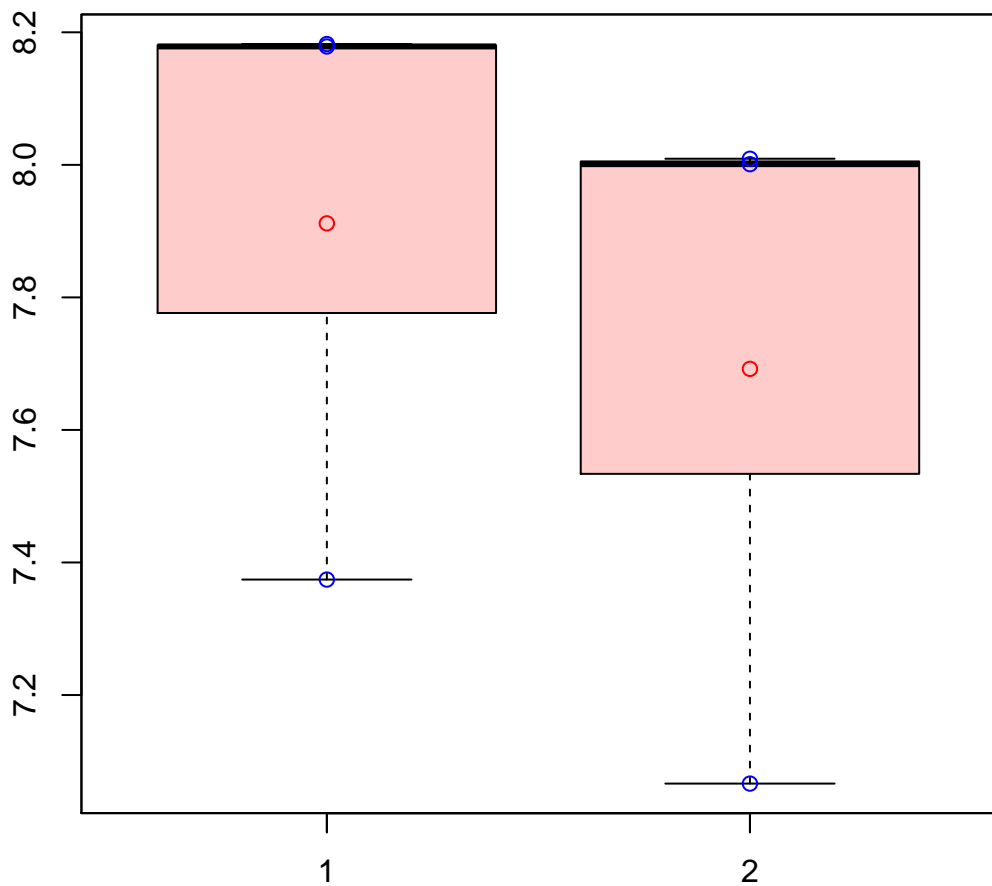

t-Test: p-value = 0.62

# K3ZR52|K3ZR52\_SETIT

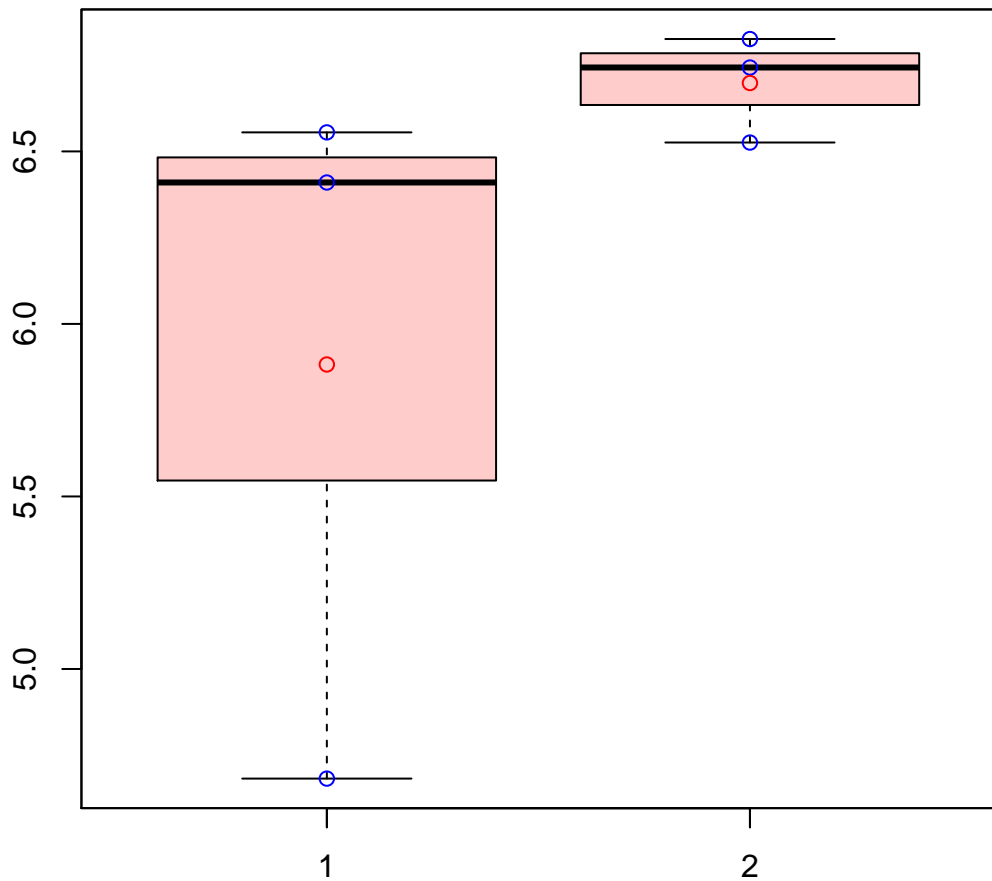

t-Test: p-value = 0.31

# K3ZR74|K3ZR74\_SETIT

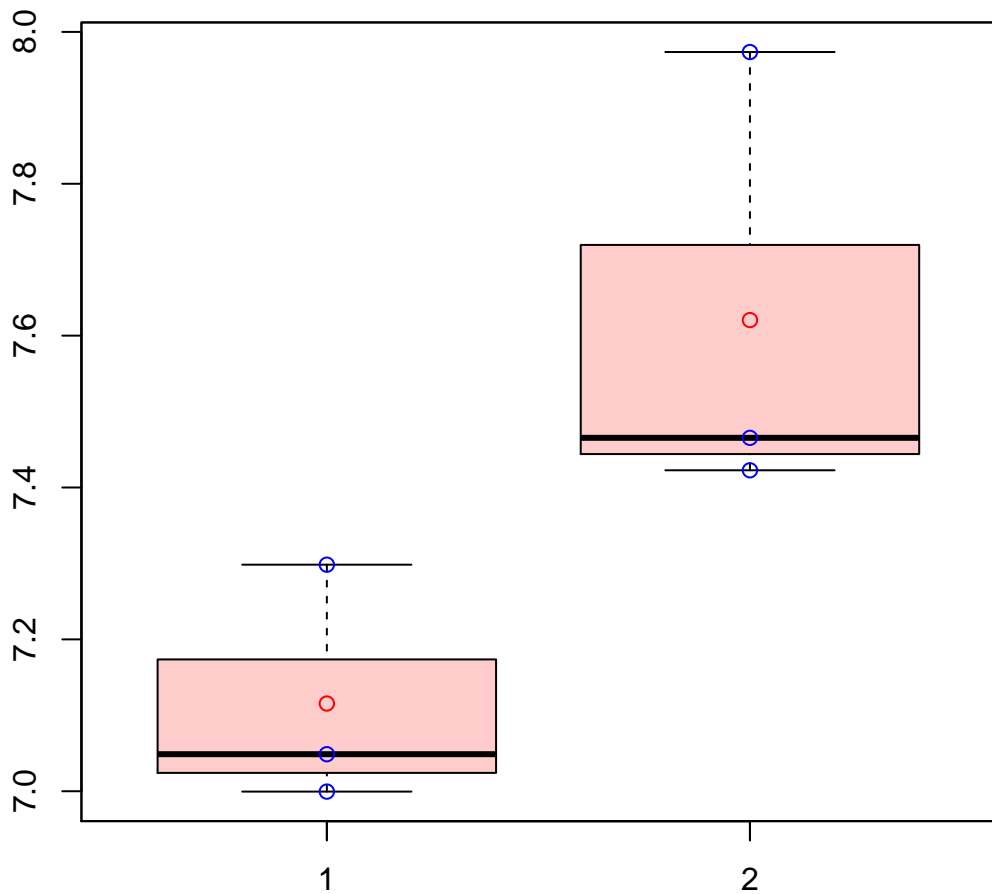

t-Test: p-value = 0.08

# K3ZRI5|K3ZRI5\_SETIT

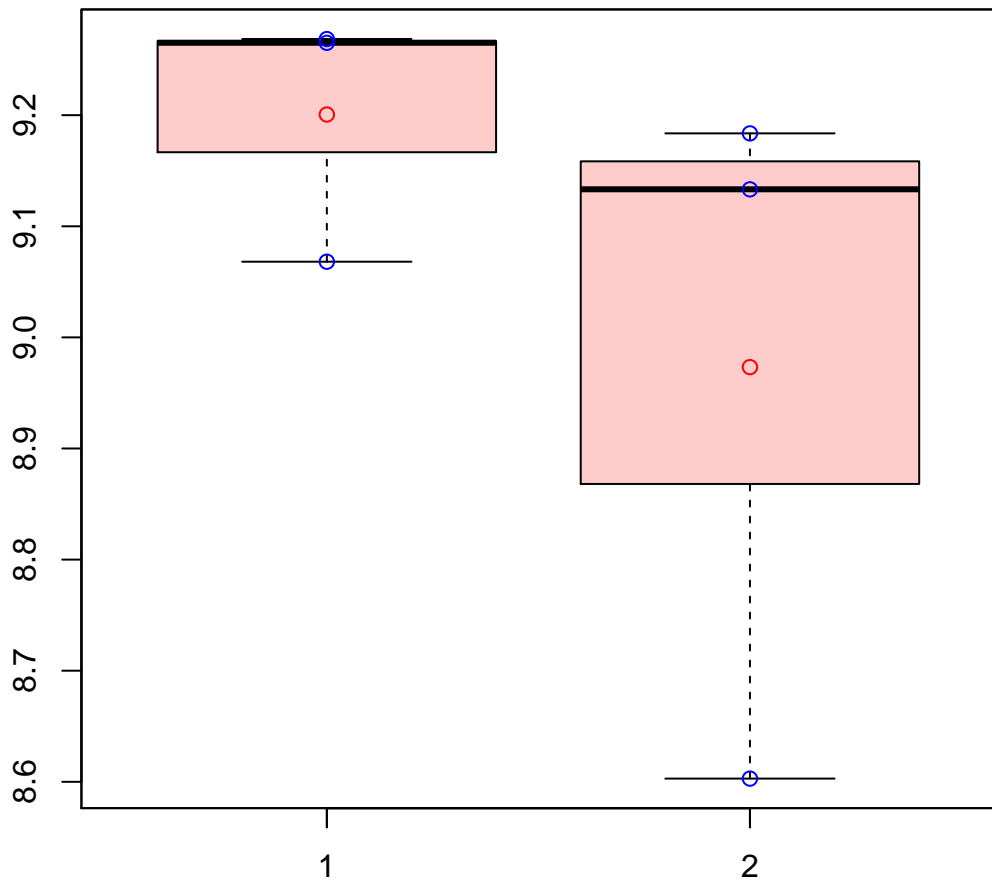

t-Test: p-value = 0.35

# K3ZRY2|K3ZRY2\_SETIT

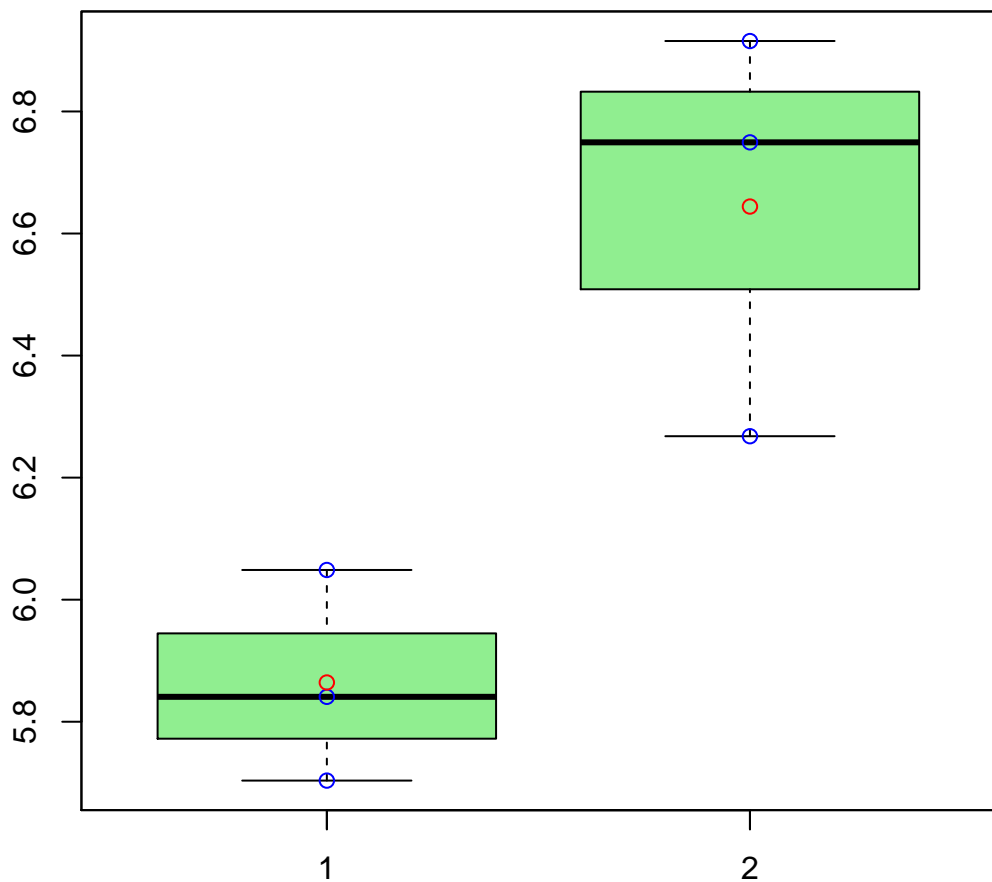

t-Test: p-value = 0.04

# K3ZSG5|K3ZSG5\_SETIT

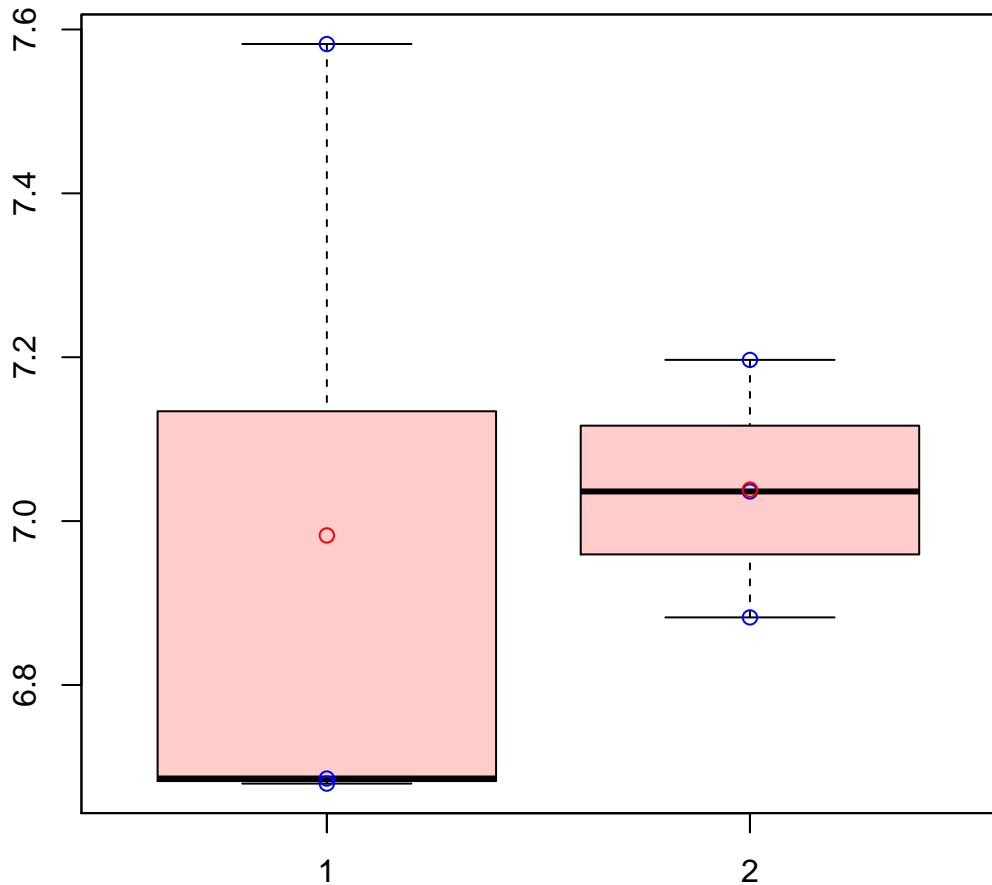

t-Test: p-value = 0.87

# K3ZSU9|K3ZSU9\_SETIT

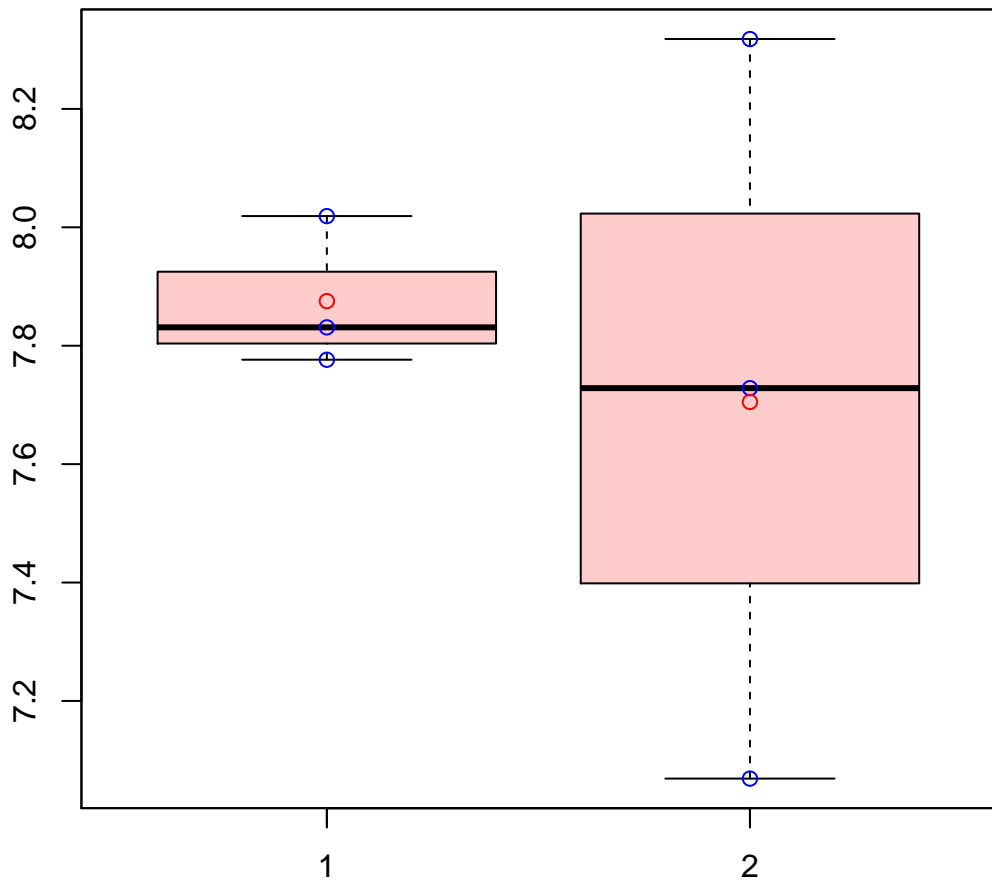

t-Test: p-value = 0.69



# K3ZSW6|K3ZSW6\_SETIT

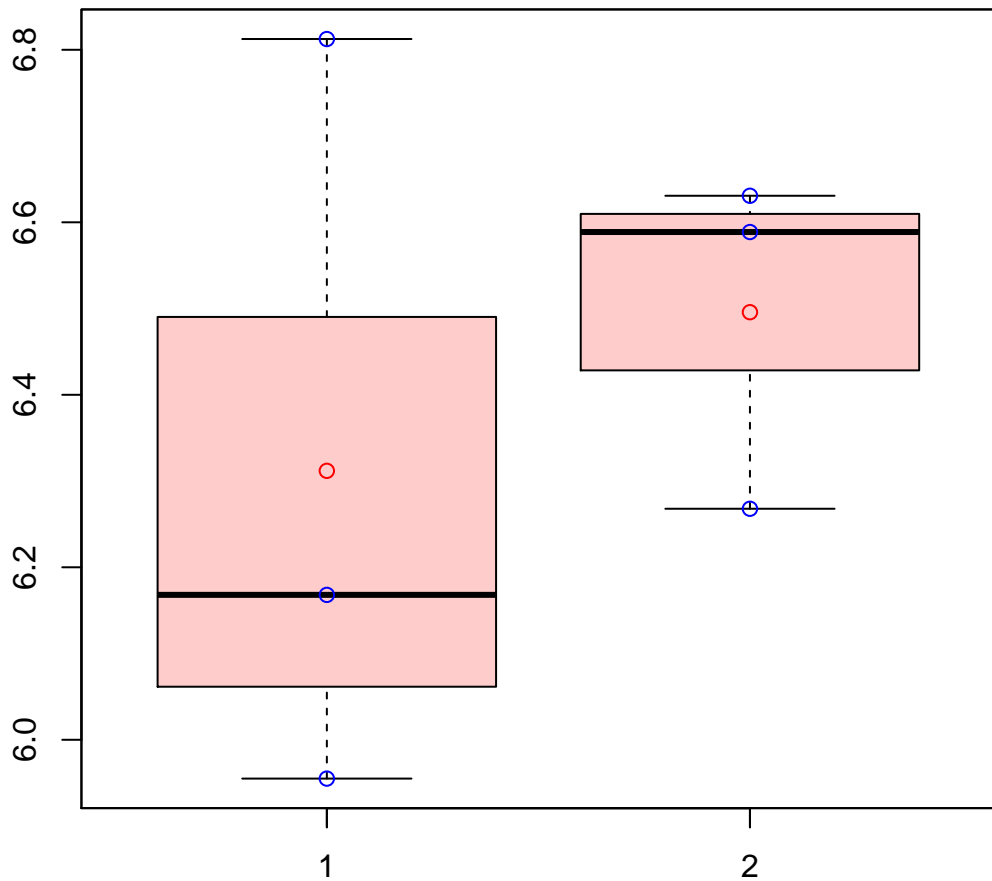

t-Test: p-value = 0.56

# K3ZSX0|K3ZSX0\_SETIT

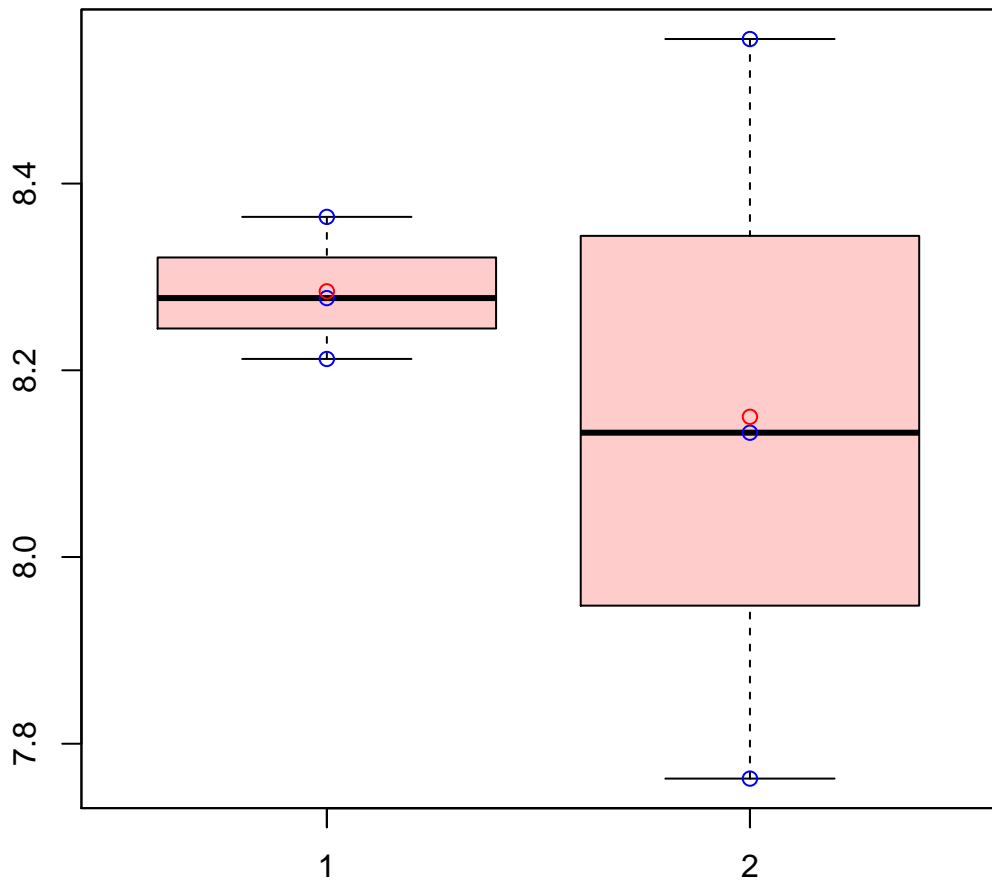

t-Test: p-value = 0.62

# K3ZTD5|K3ZTD5\_SETIT

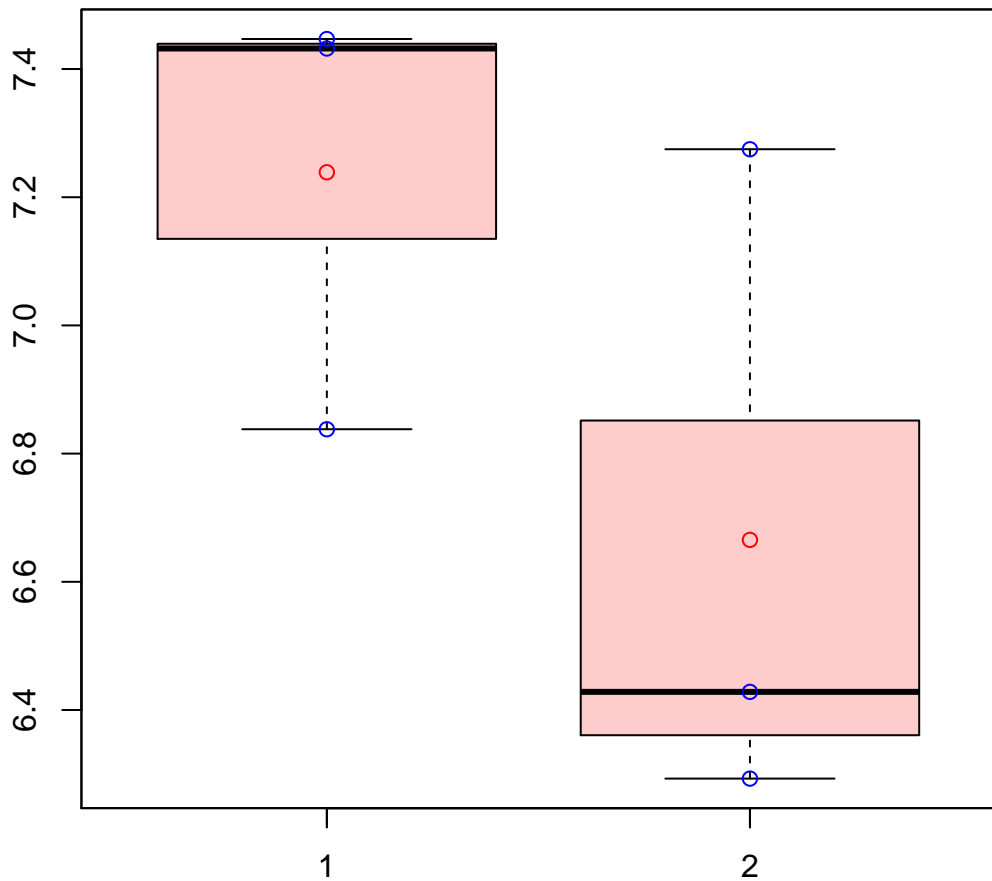

t-Test: p-value = 0.2

# K3ZTF4|K3ZTF4\_SETIT

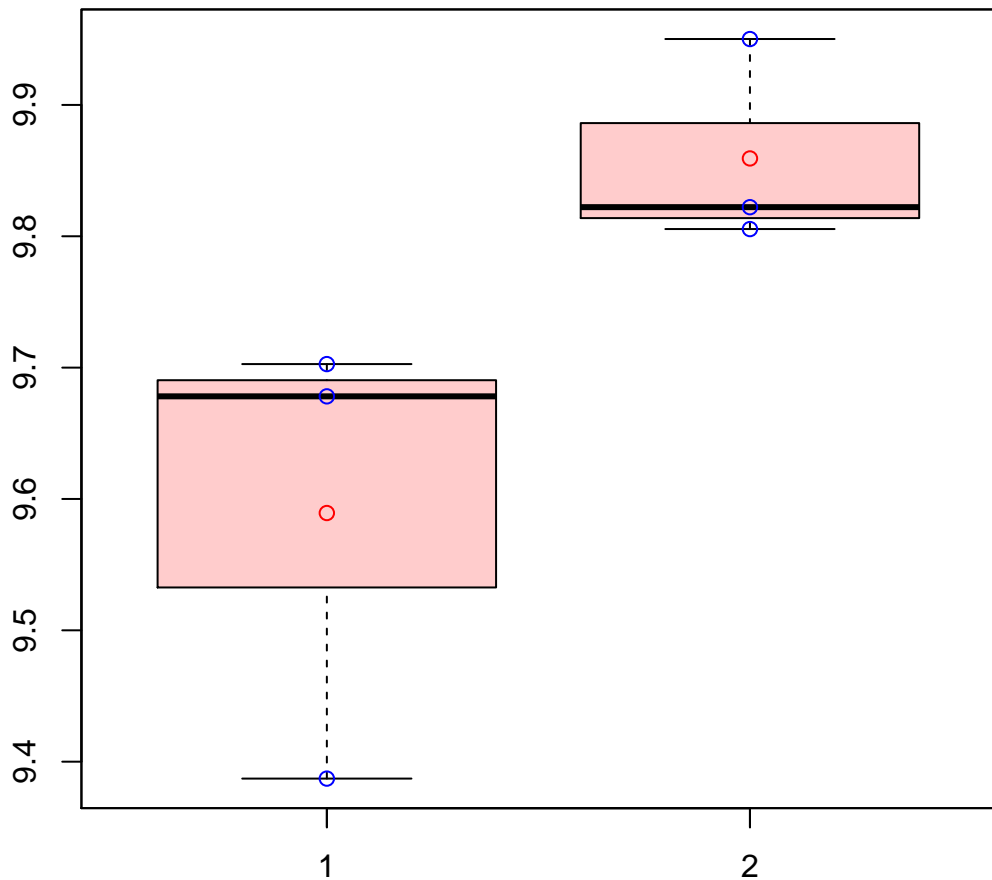

t-Test: p-value = 0.1

# K3ZTG0|K3ZTG0\_SETIT

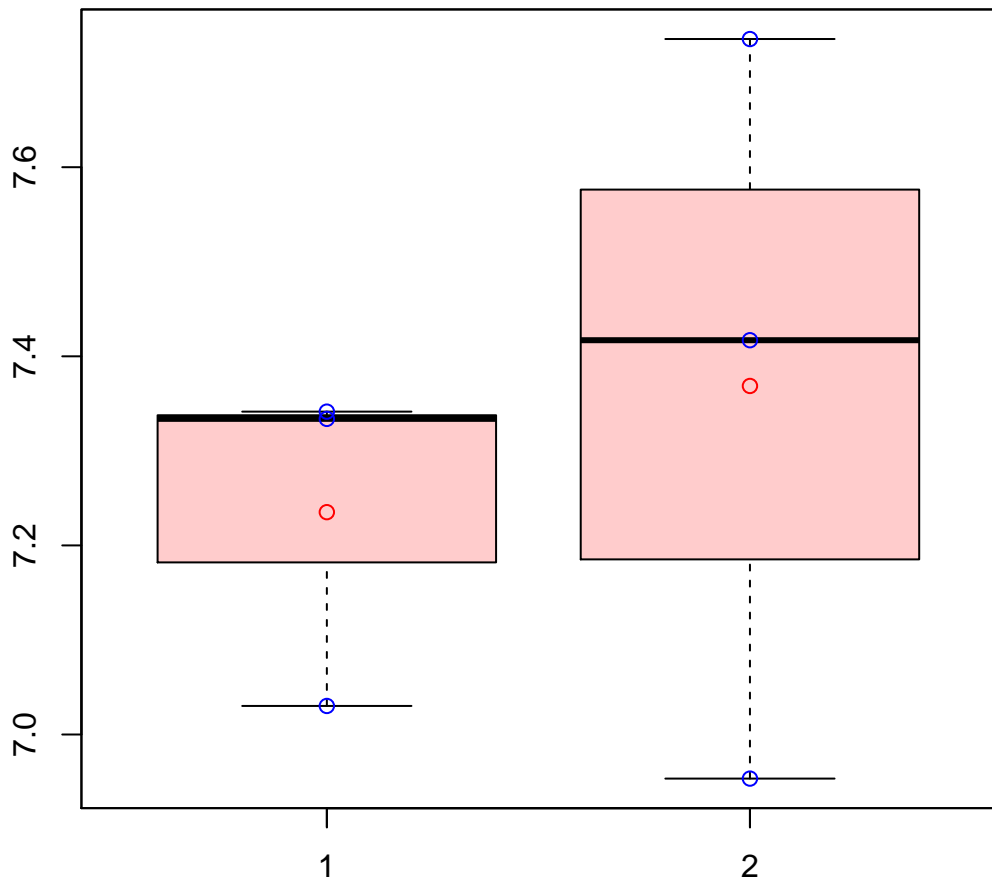

t-Test: p-value = 0.63

# K3ZTH9|K3ZTH9\_SETIT

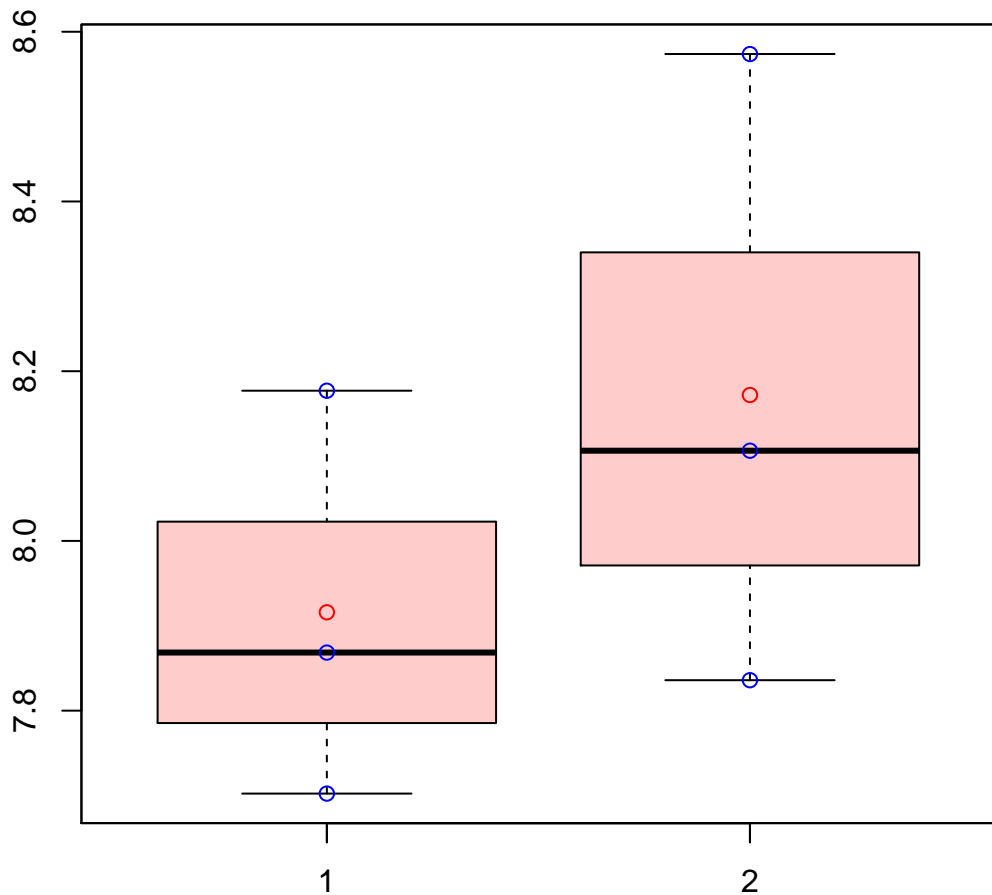

t-Test: p-value = 0.38

# K3ZTJ3|K3ZTJ3\_SETIT

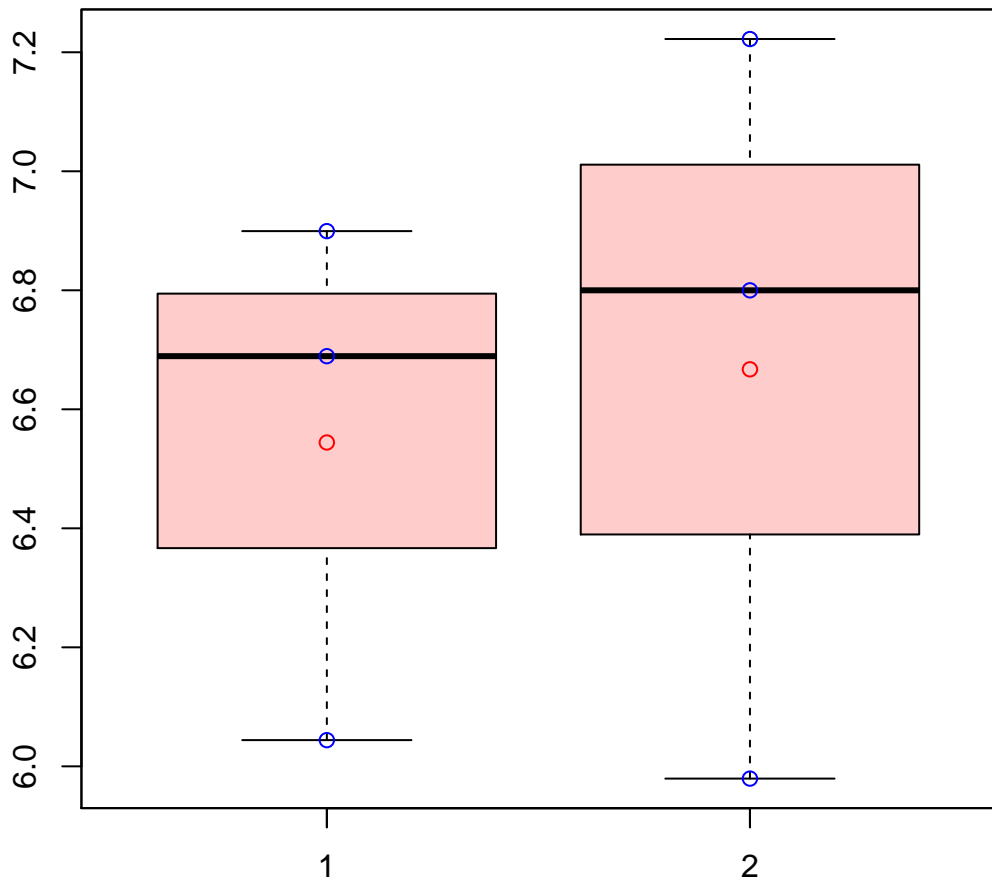

t-Test: p-value = 0.8

# K3ZTK0|K3ZTK0\_SETIT

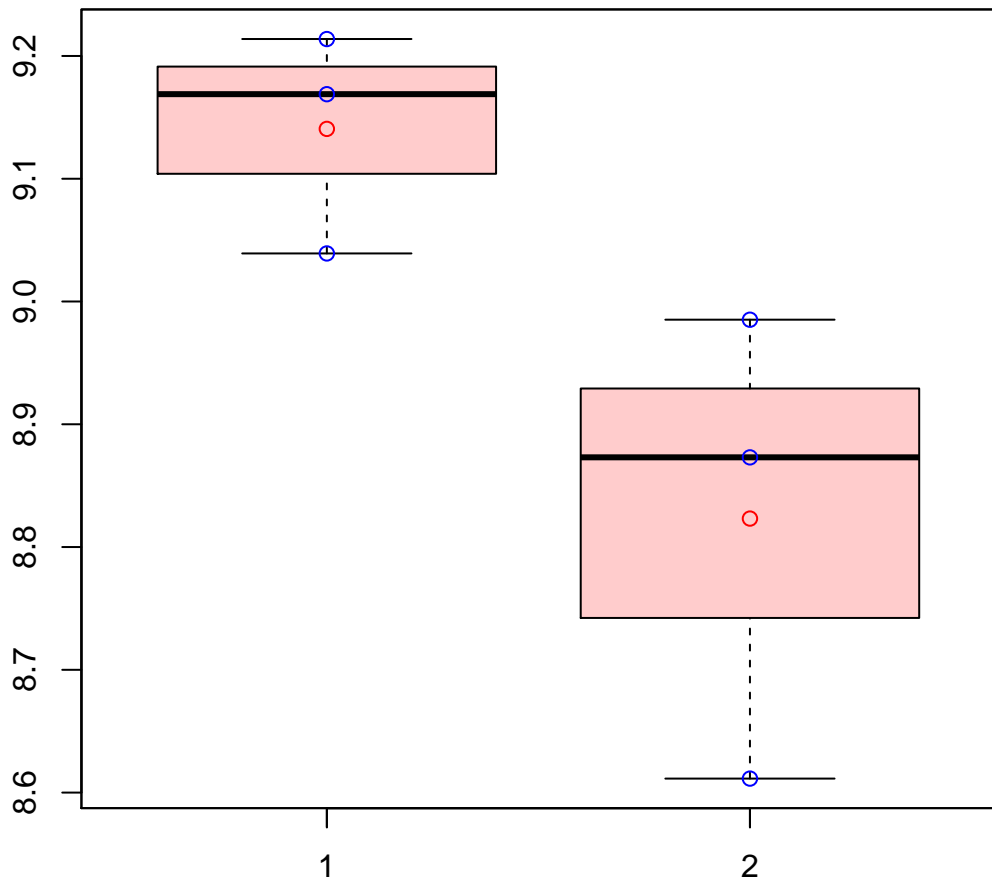

t-Test: p-value = 0.09



# K3ZTV9|K3ZTV9\_SETIT

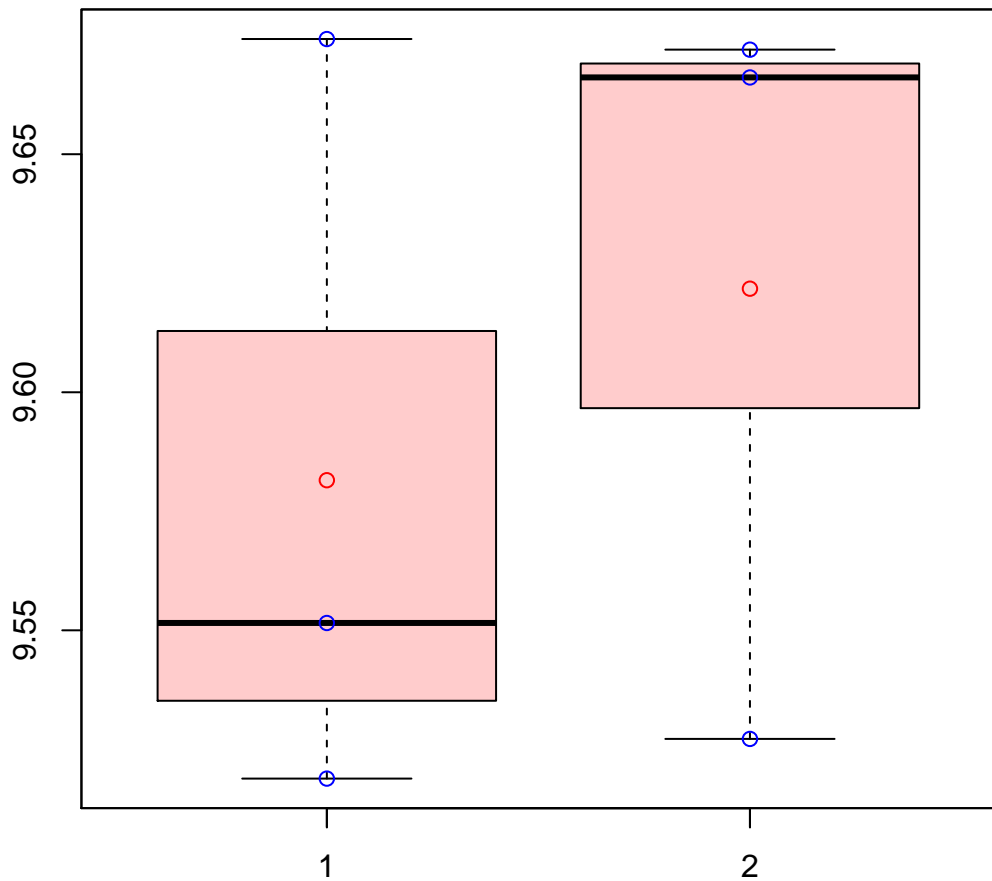

t-Test: p-value = 0.58

# K3ZU92|K3ZU92\_SETIT

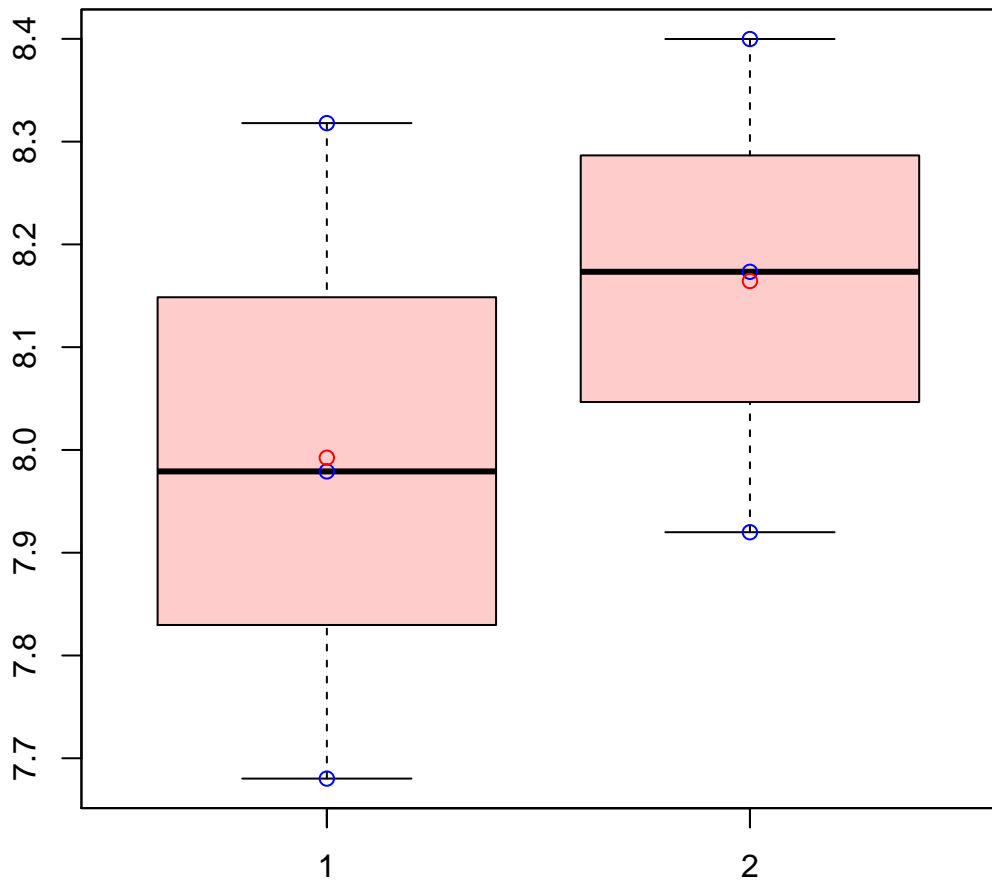

t-Test: p-value = 0.5

# K3ZUG2|K3ZUG2\_SETIT

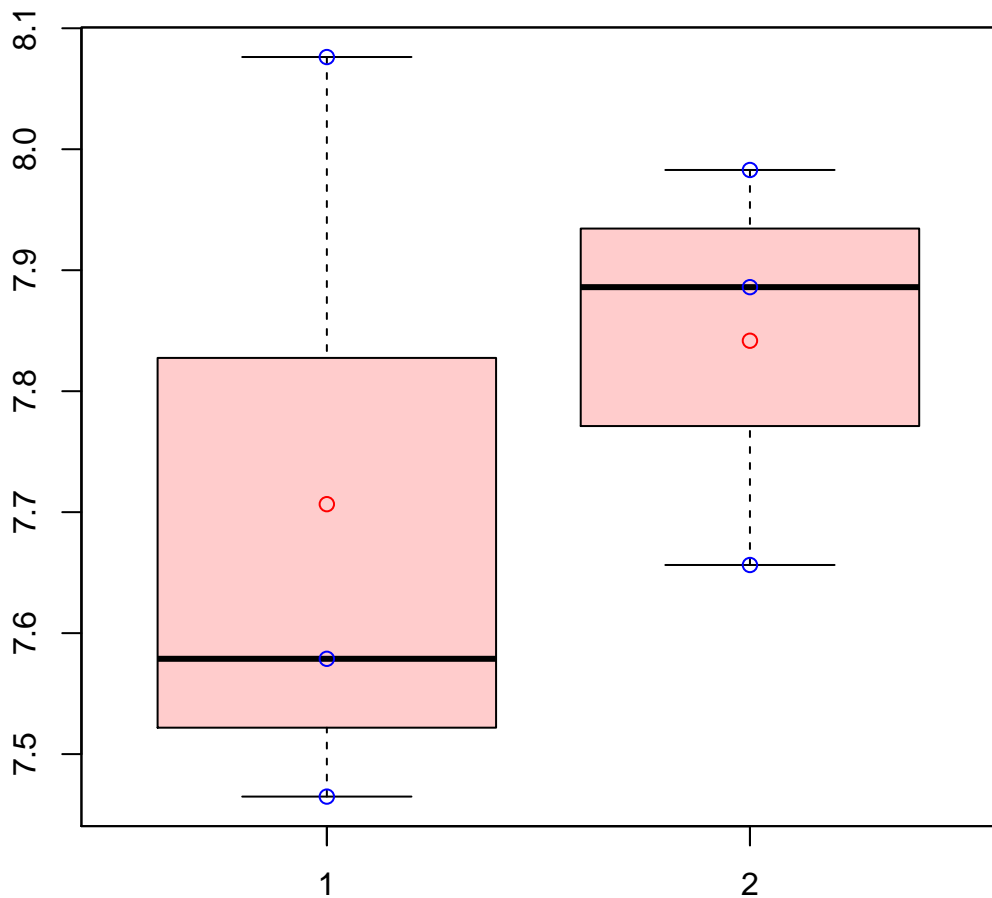

t-Test: p-value = 0.57

# K3ZUL5|K3ZUL5\_SETIT

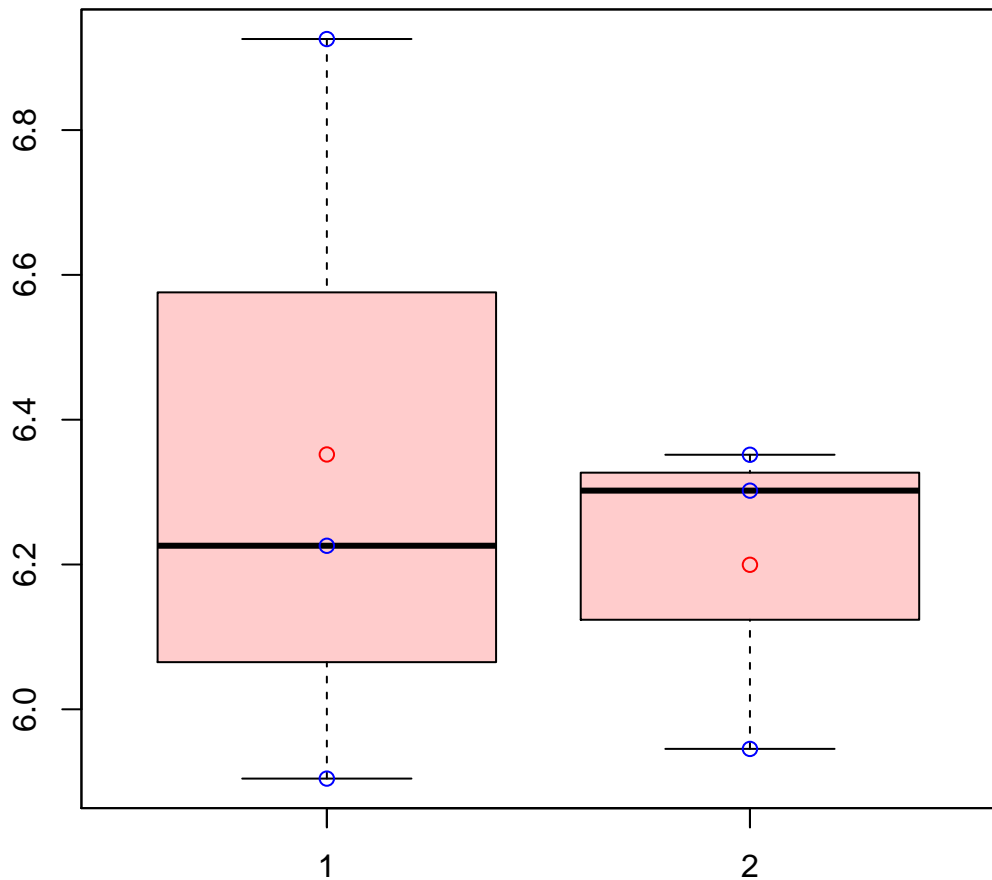

t-Test: p-value = 0.68

# K3ZV26|K3ZV26\_SETIT

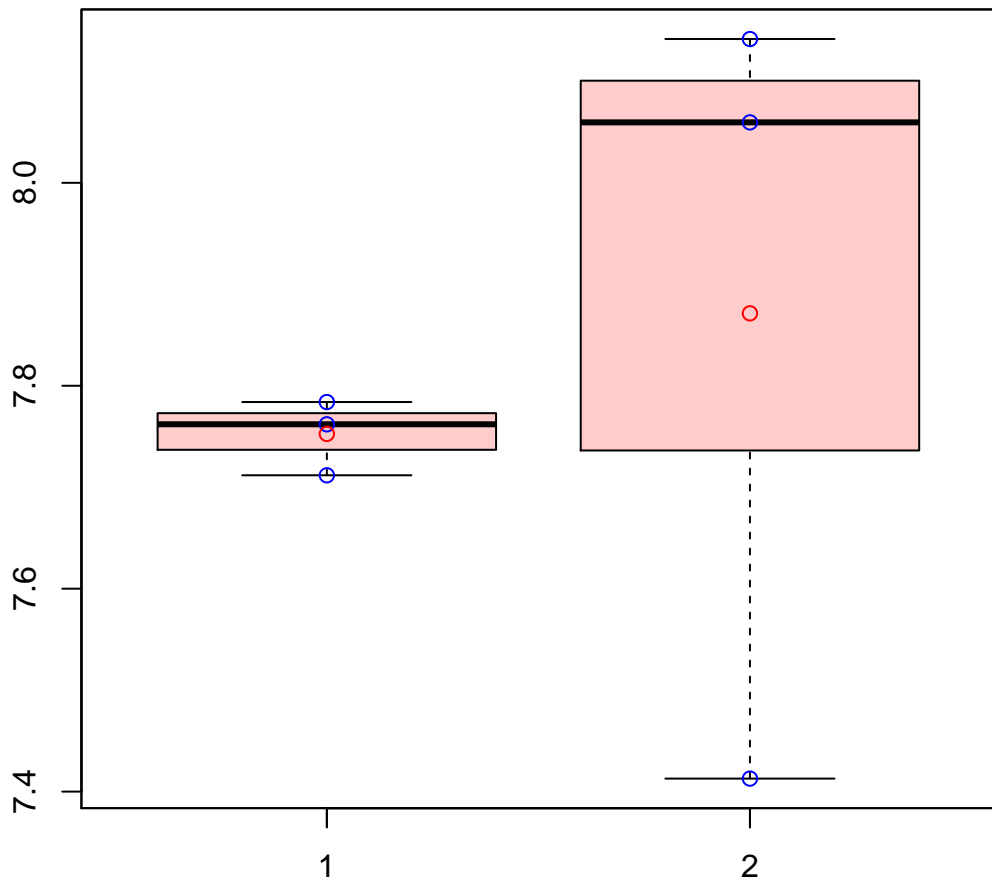

t-Test: p-value = 0.66

# K3ZV34|K3ZV34\_SETIT

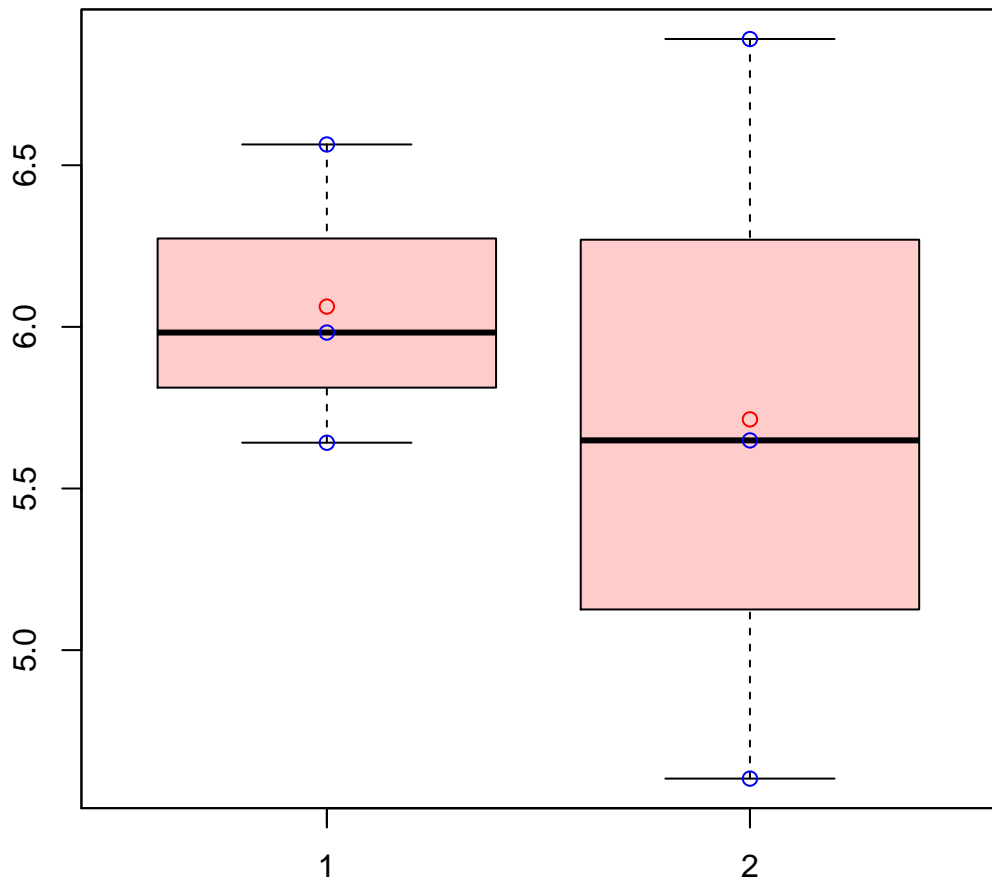

t-Test: p-value = 0.66

# K3ZV86|K3ZV86\_SETIT

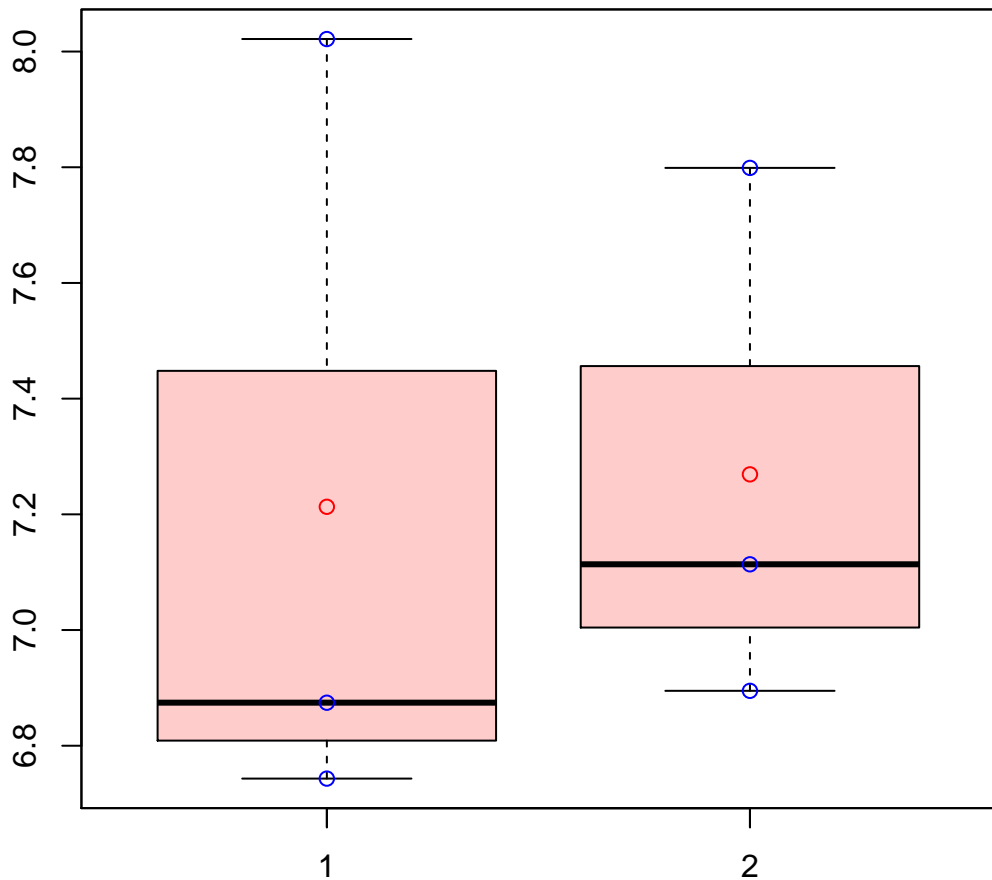

t-Test: p-value = 0.91

# K3ZVC0|K3ZVC0\_SETIT

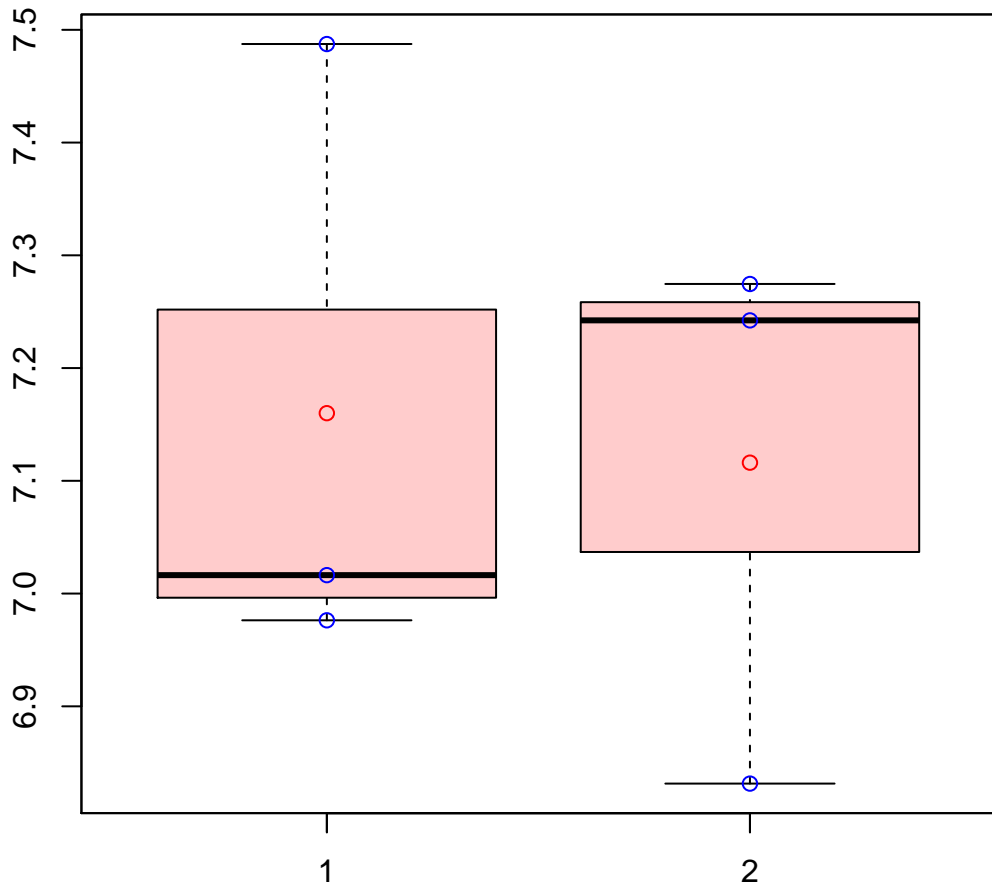

t-Test: p-value = 0.85



# K3ZVC8|K3ZVC8\_SETIT

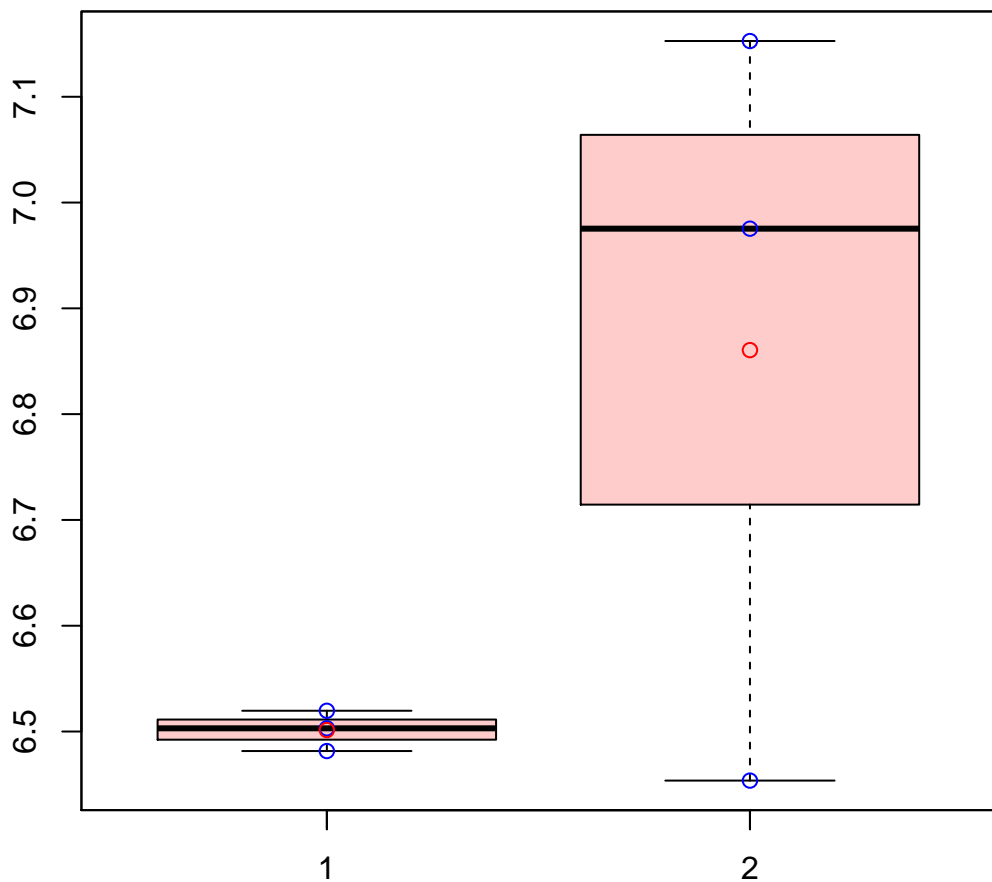

t-Test: p-value = 0.23

# K3ZVD1|K3ZVD1\_SETIT

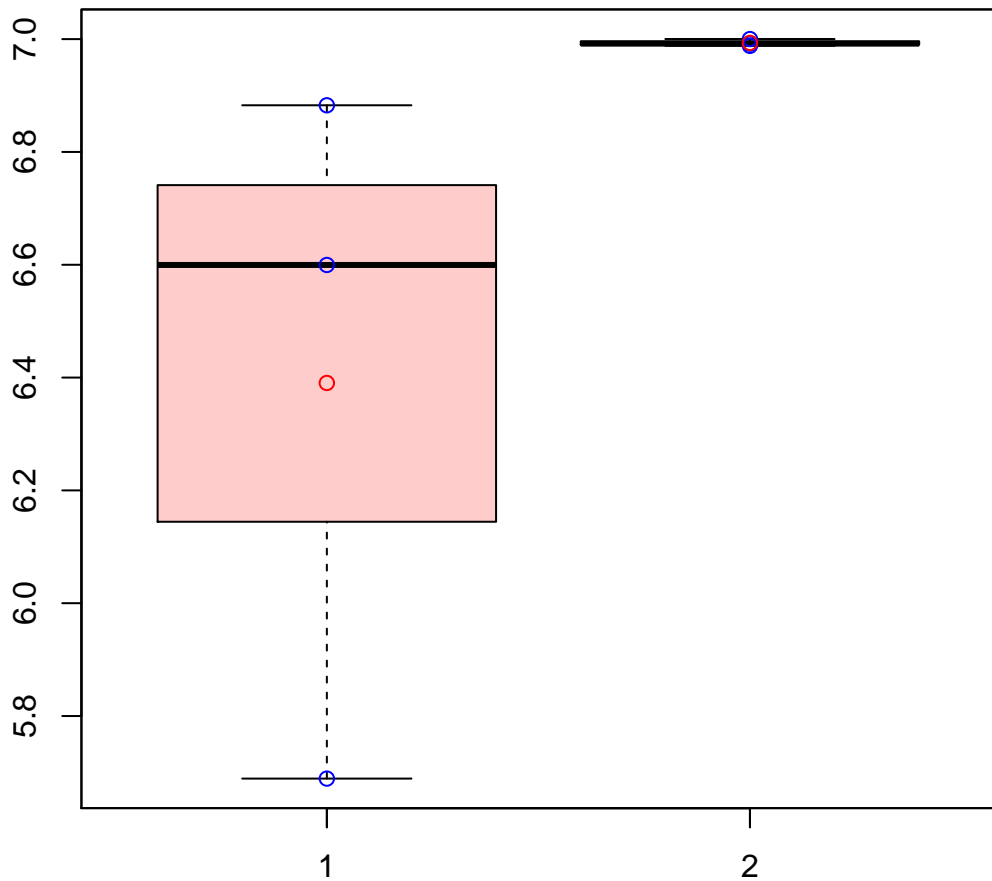

t-Test: p-value = 0.24

# K3ZVI3|K3ZVI3\_SETIT

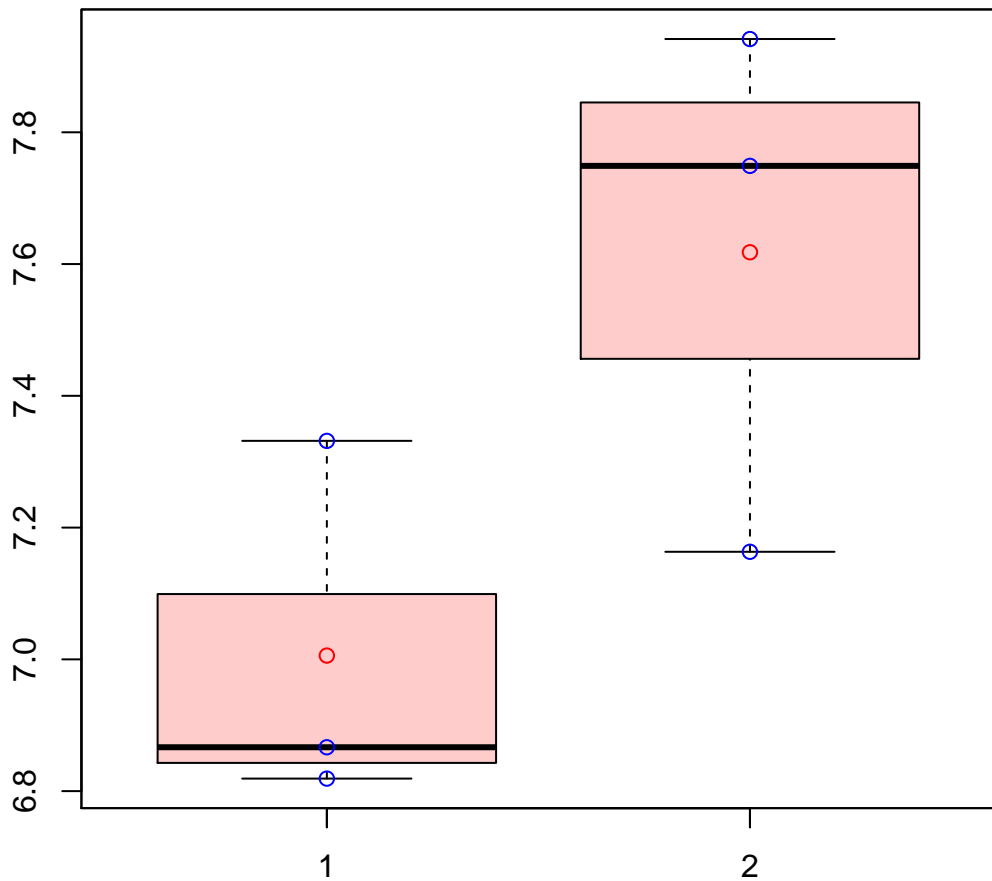

t-Test: p-value = 0.11

# K3ZVK5|K3ZVK5\_SETIT

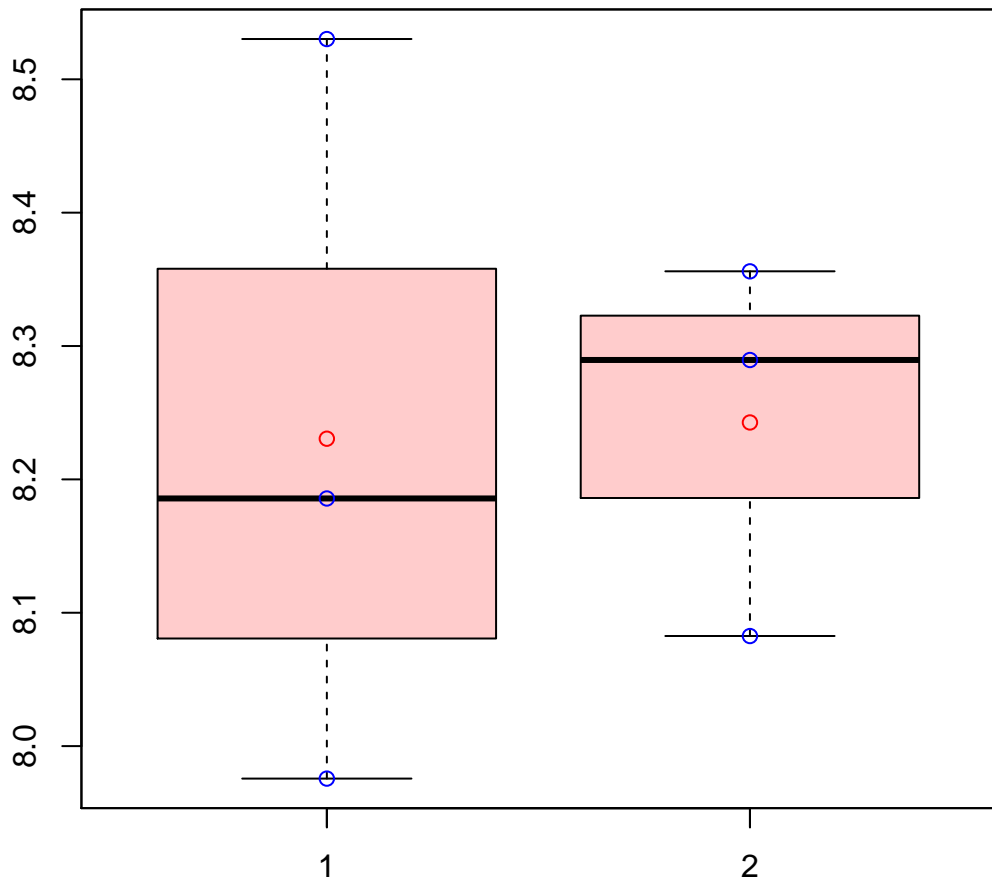

t-Test: p-value = 0.95

# K3ZVP6|K3ZVP6\_SETIT

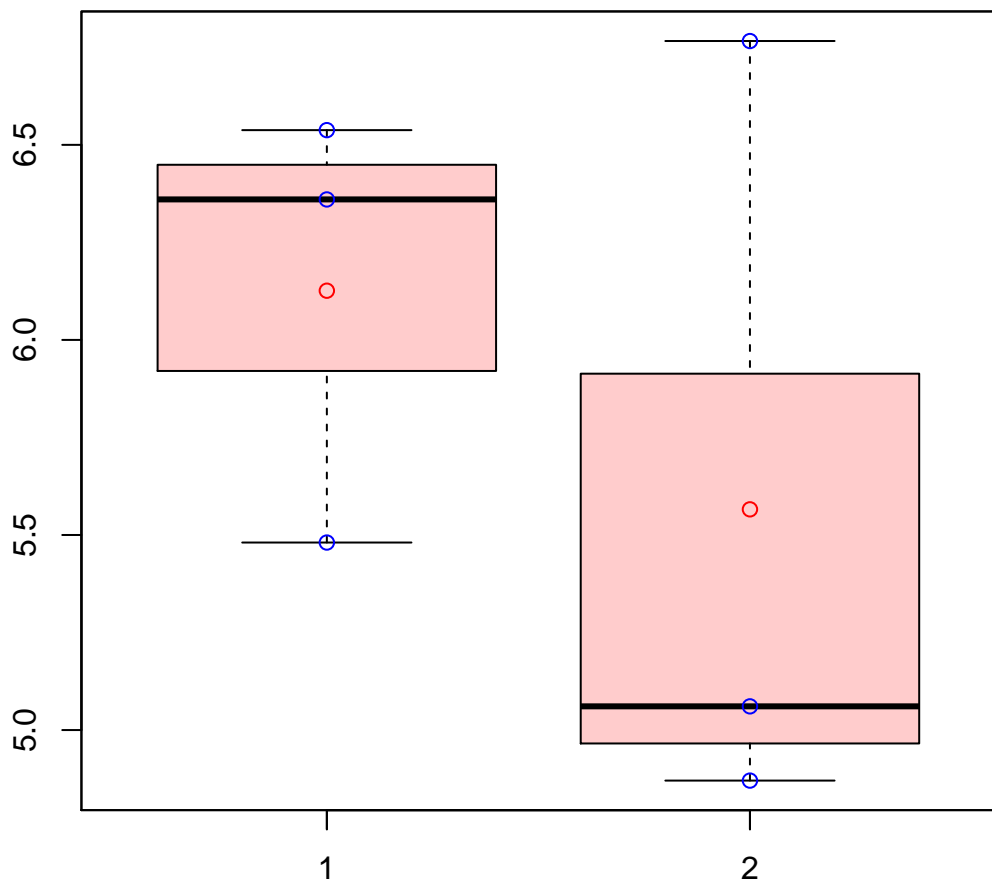

t-Test: p-value = 0.47

# K3ZVS1|K3ZVS1\_SETIT

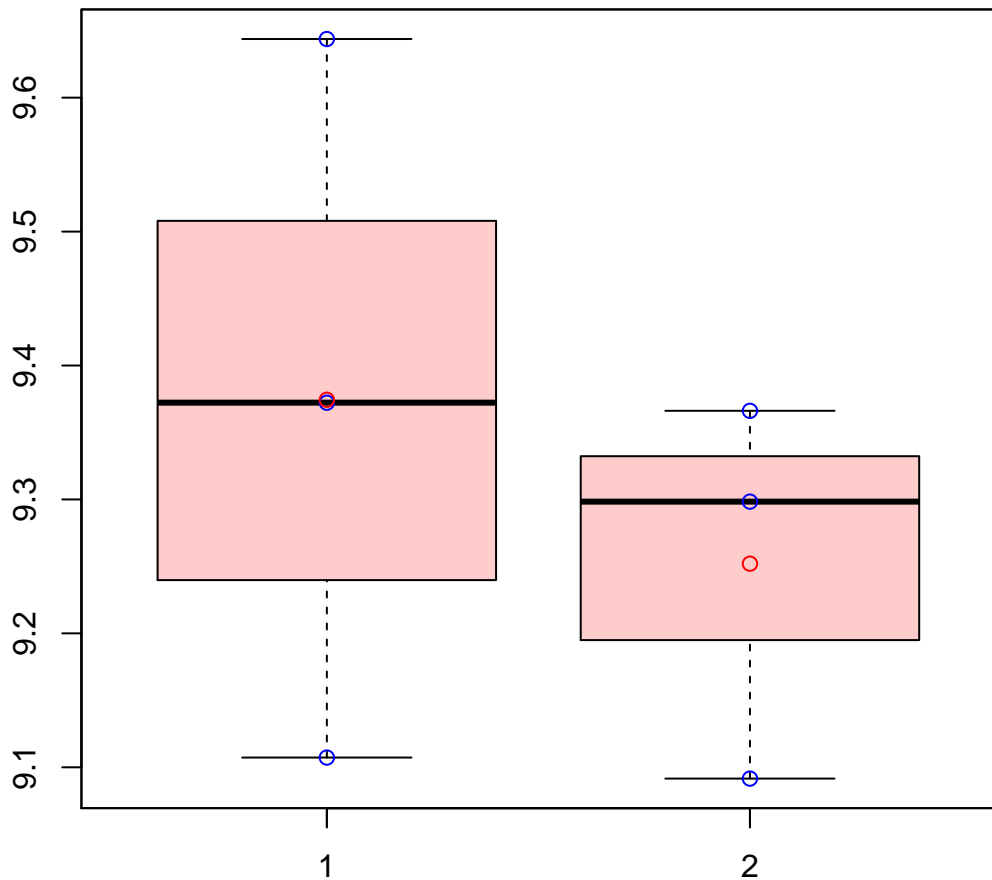

t-Test: p-value = 0.53

# K3ZVW2|K3ZVW2\_SETIT

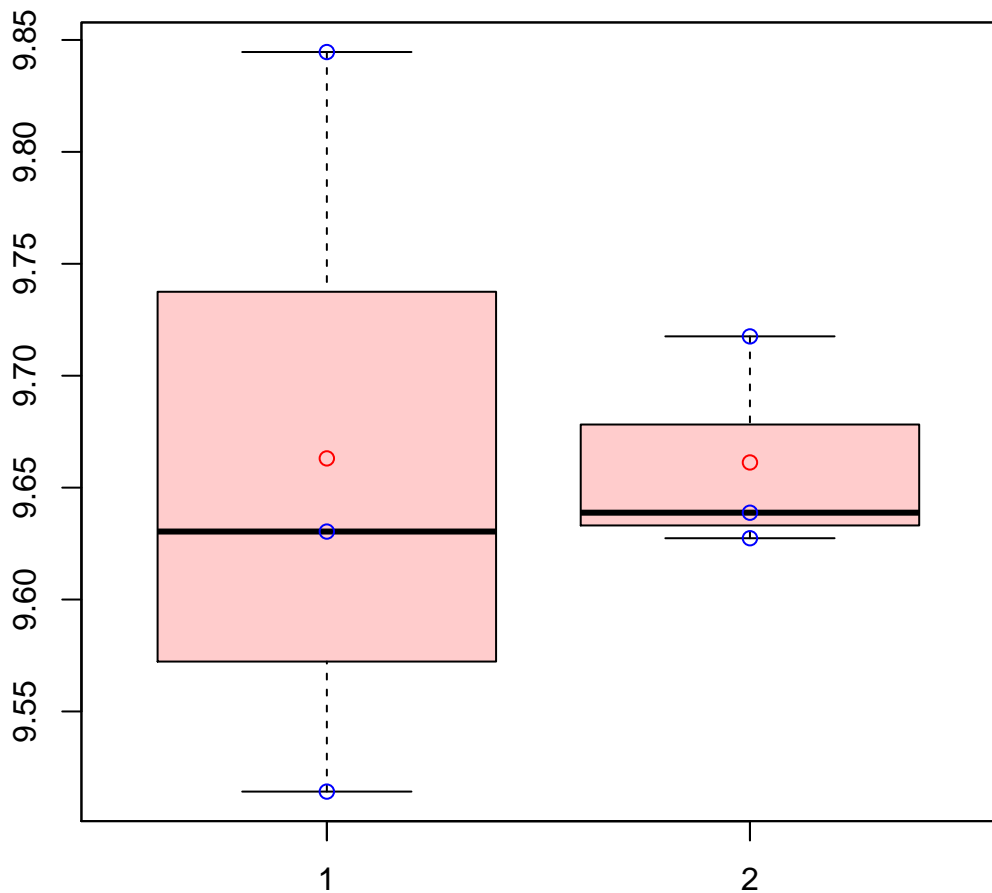

t-Test: p-value = 0.99

# K3ZVZ9|K3ZVZ9\_SETIT

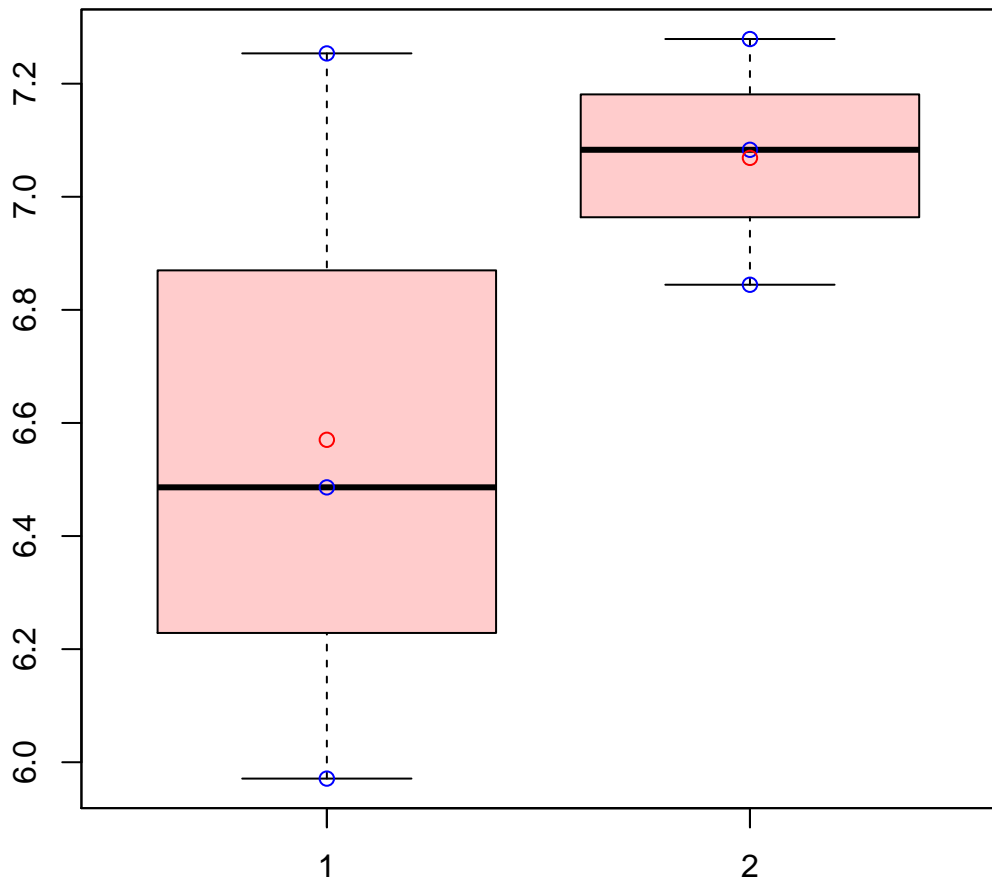

t-Test: p-value = 0.31



# K3ZW27|K3ZW27\_SETIT

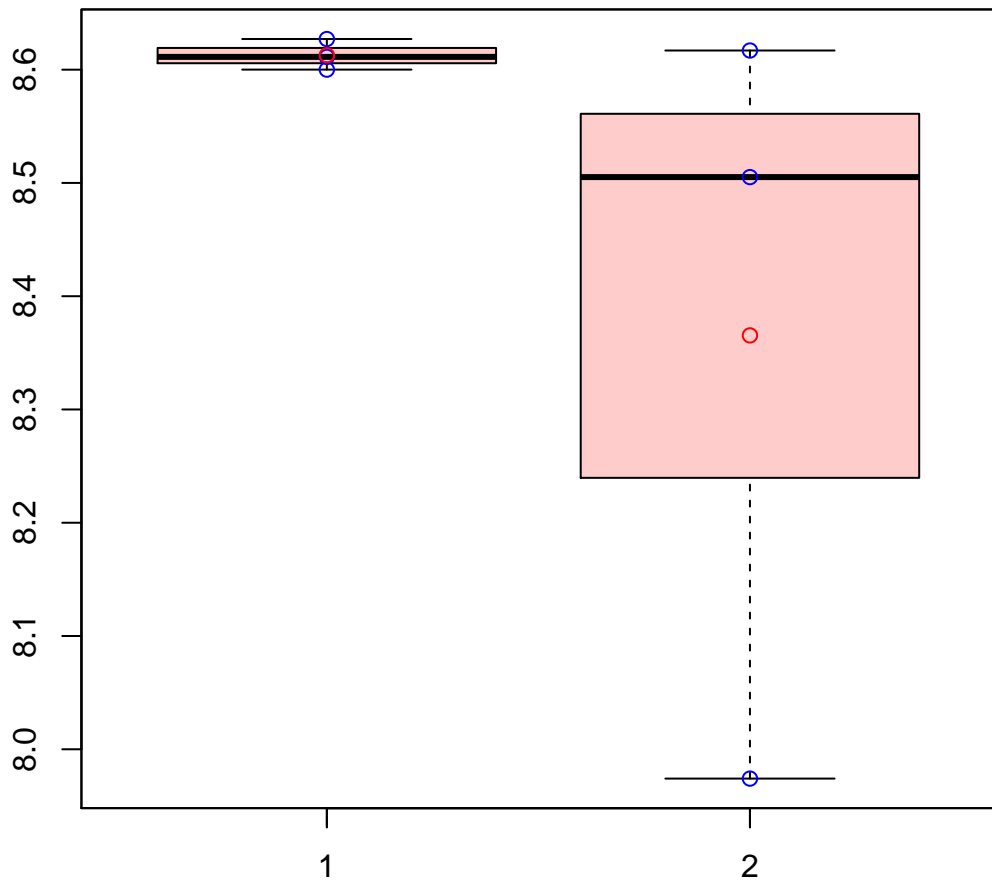

t-Test: p-value = 0.34

# K3ZW37|K3ZW37\_SETIT

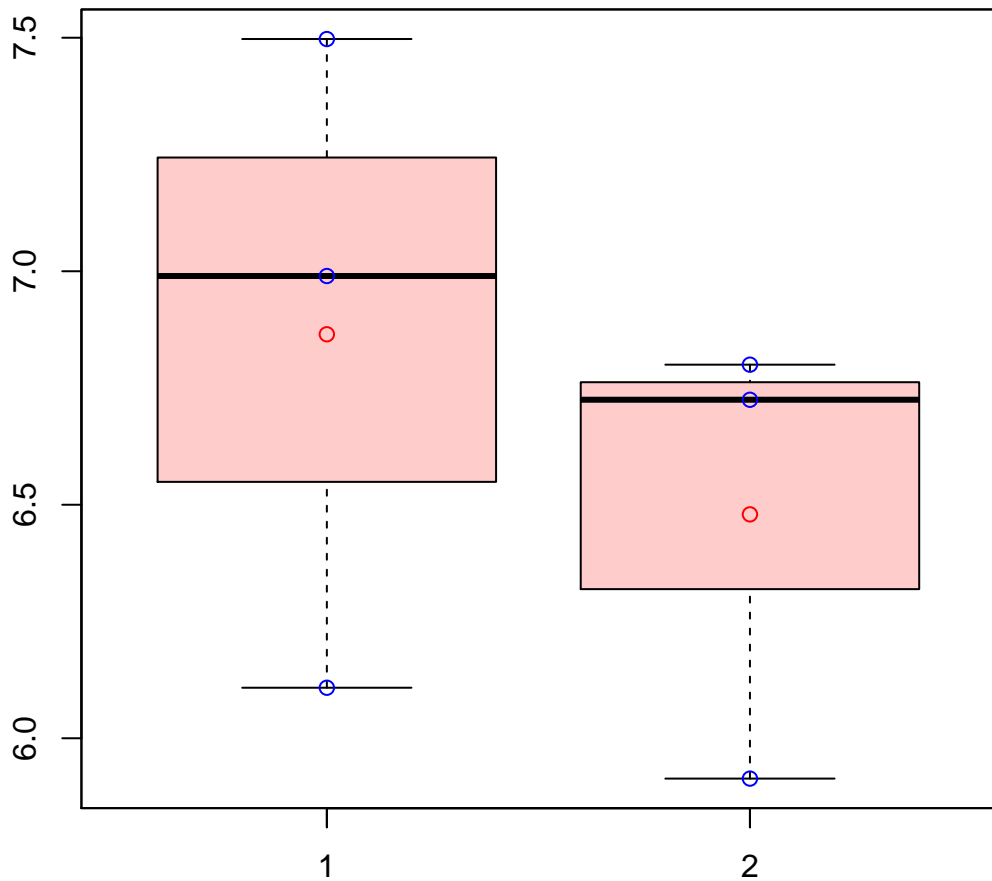

t-Test: p-value = 0.48

# K3ZW63|K3ZW63\_SETIT

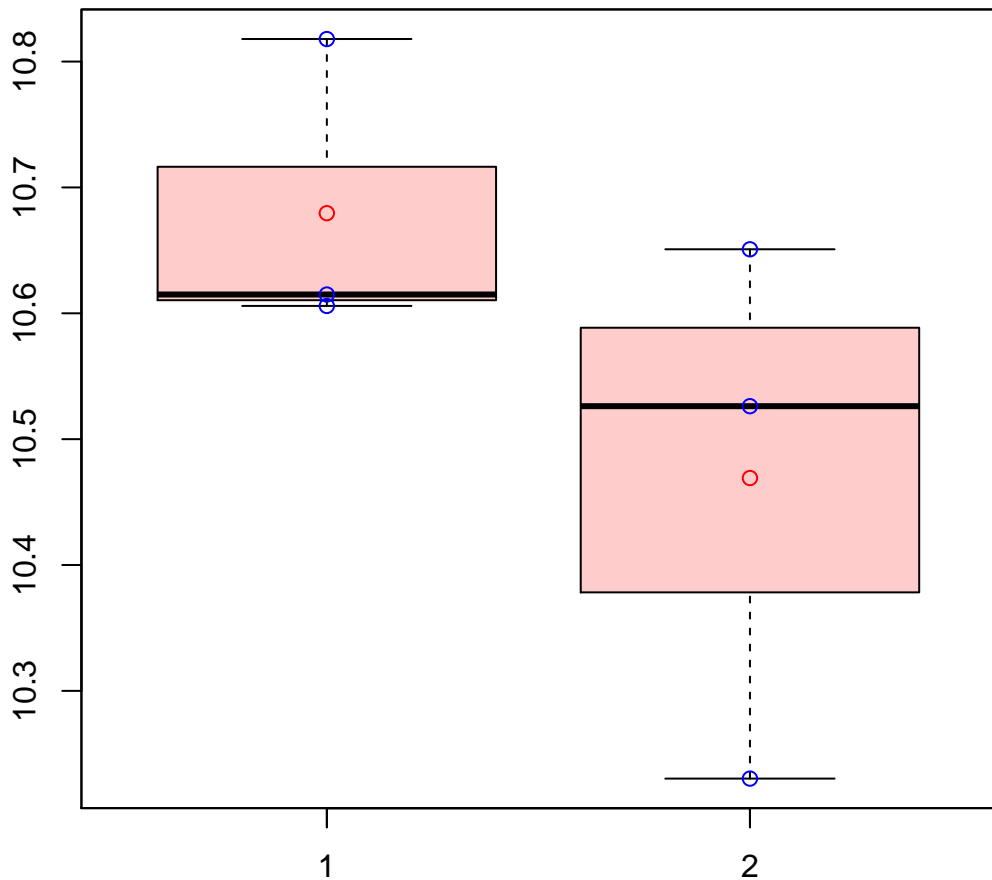

t-Test: p-value = 0.23

# K3ZW88|K3ZW88\_SETIT

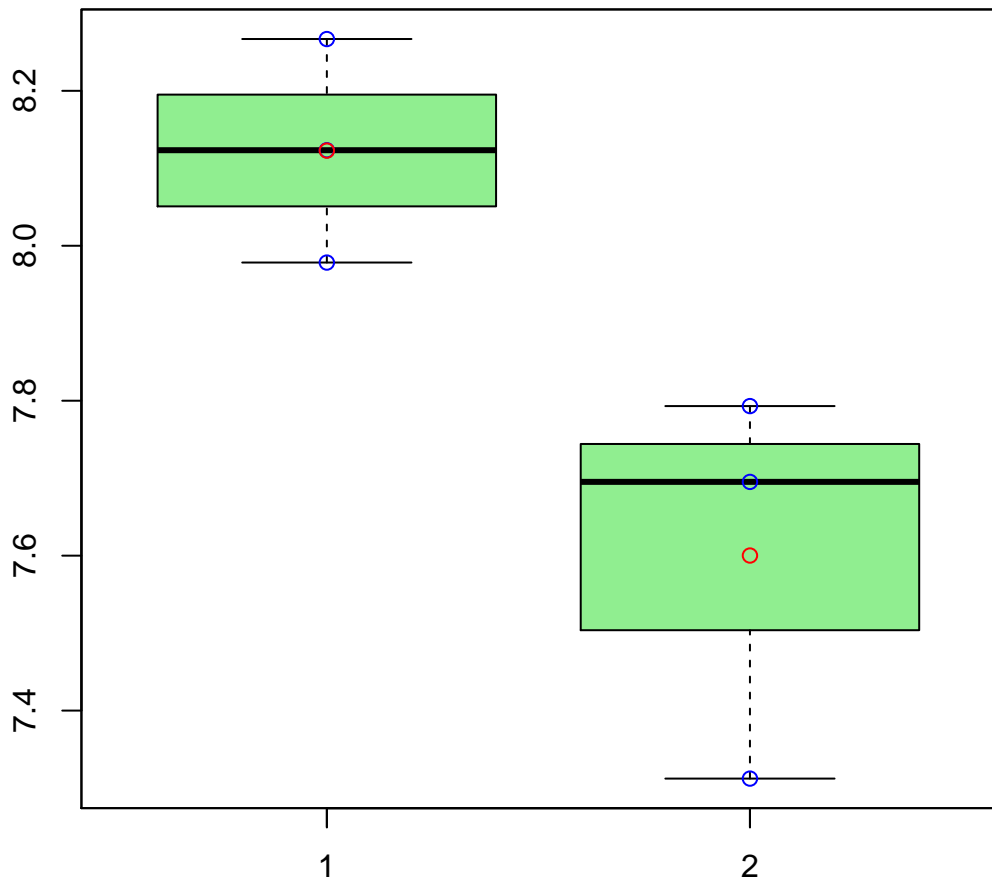

t-Test: p-value = 0.05

# K3ZWD0|K3ZWD0\_SETIT

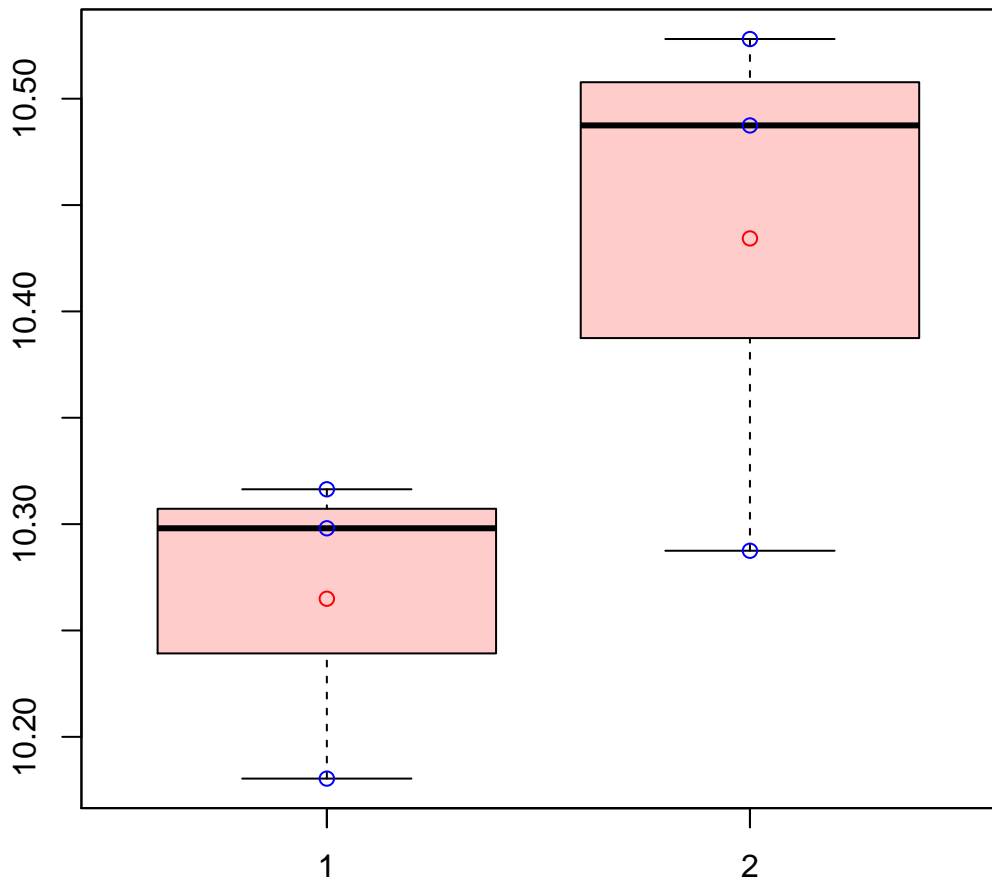

t-Test: p-value = 0.14

# K3ZWN9|K3ZWN9\_SETIT

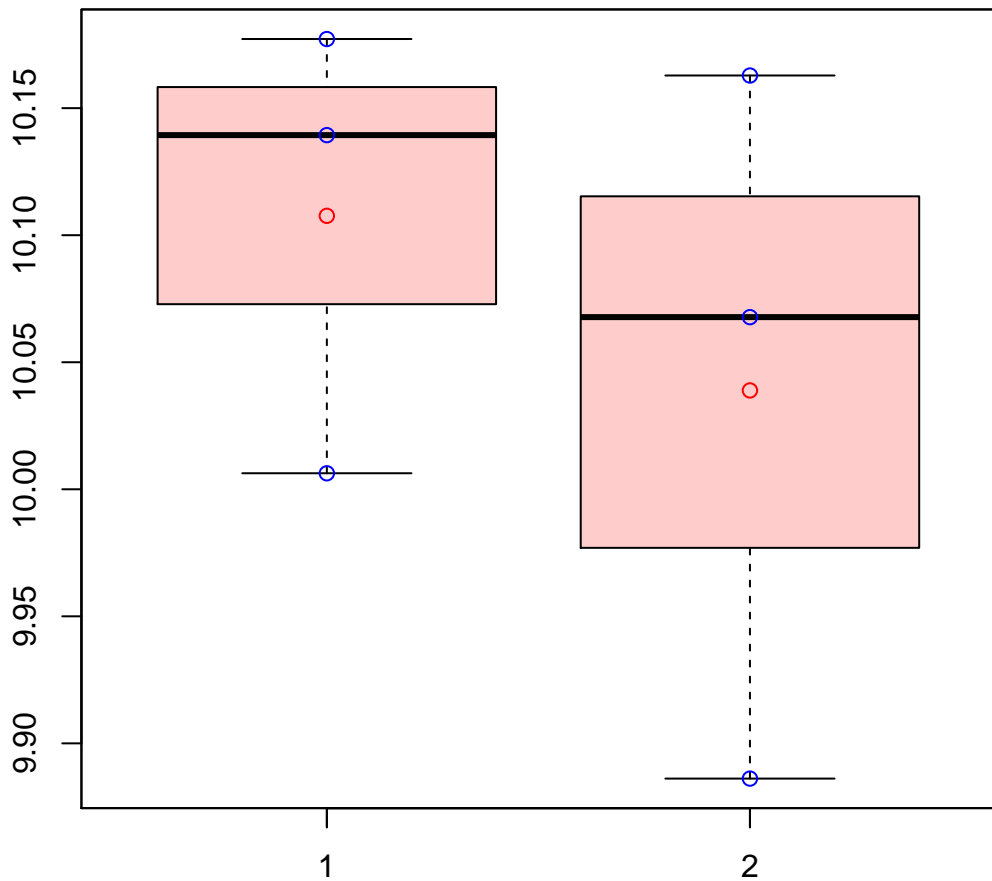

t-Test: p-value = 0.52

# K3ZWQ4|K3ZWQ4\_SETIT

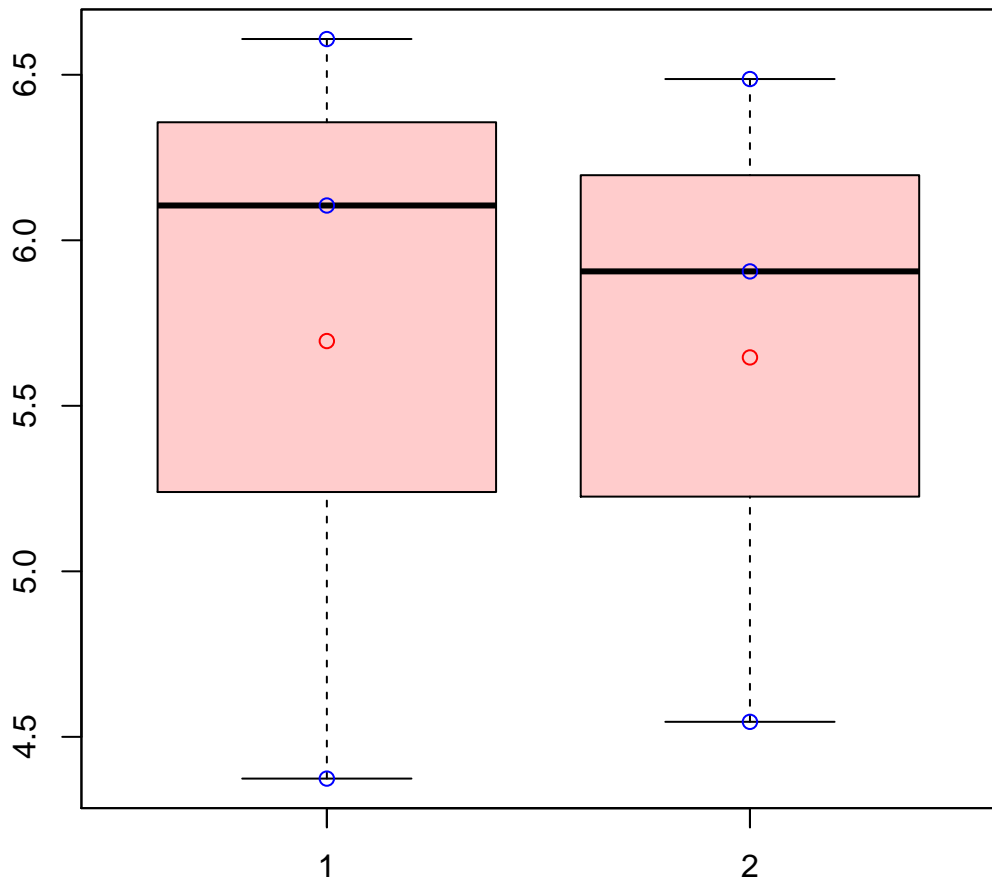

t-Test: p-value = 0.96

# K3ZWW9|K3ZWW9\_SETIT

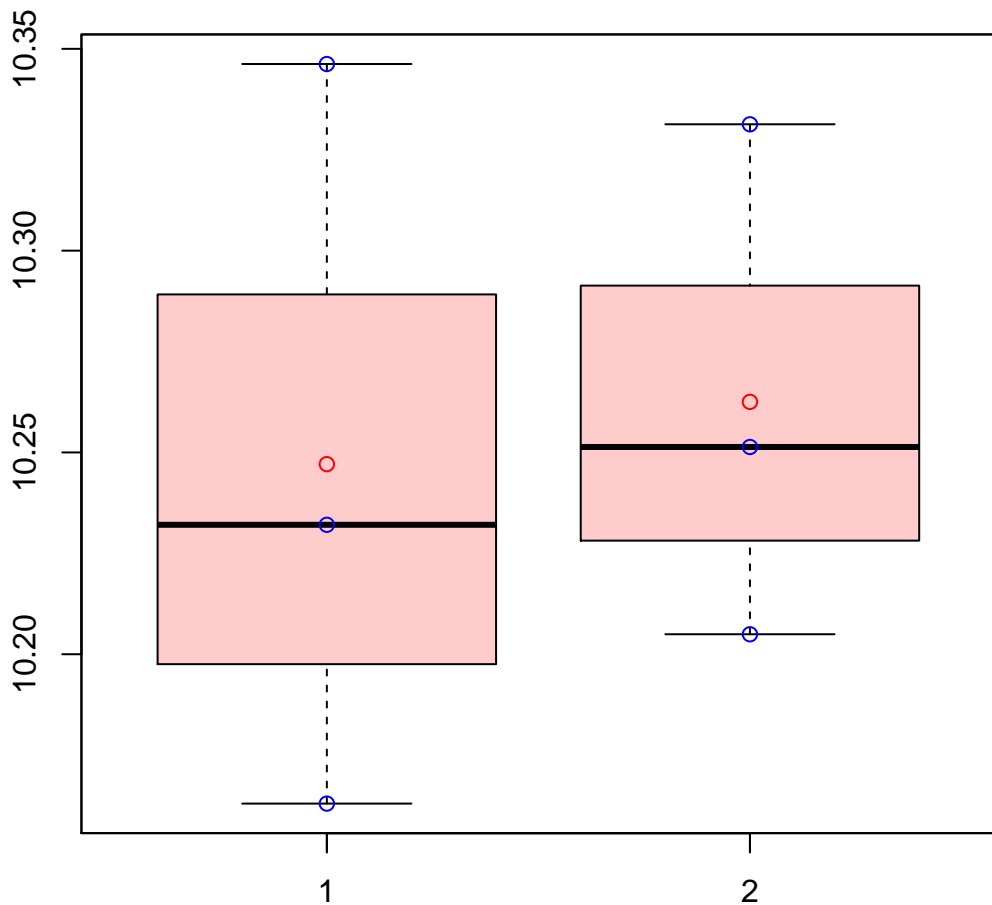

t-Test: p-value = 0.83



# K3ZXD9|K3ZXD9\_SETIT

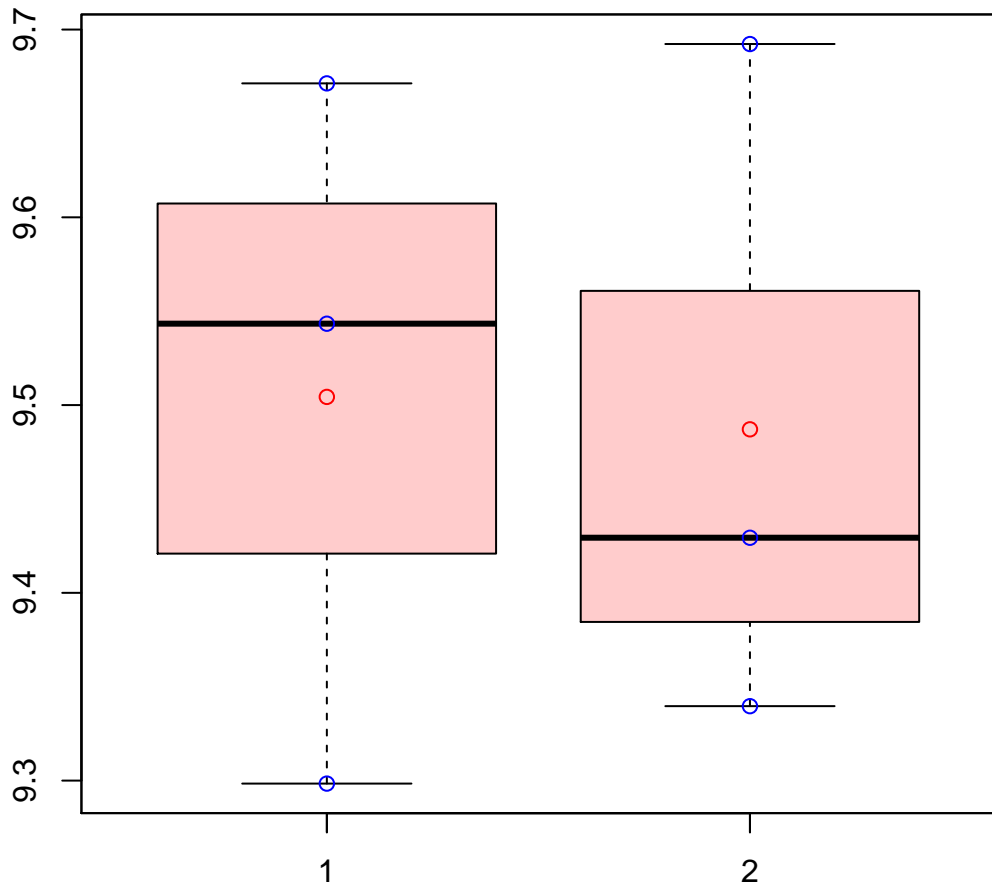

t-Test: p-value = 0.92

# K3ZXK6|K3ZXK6\_SETIT

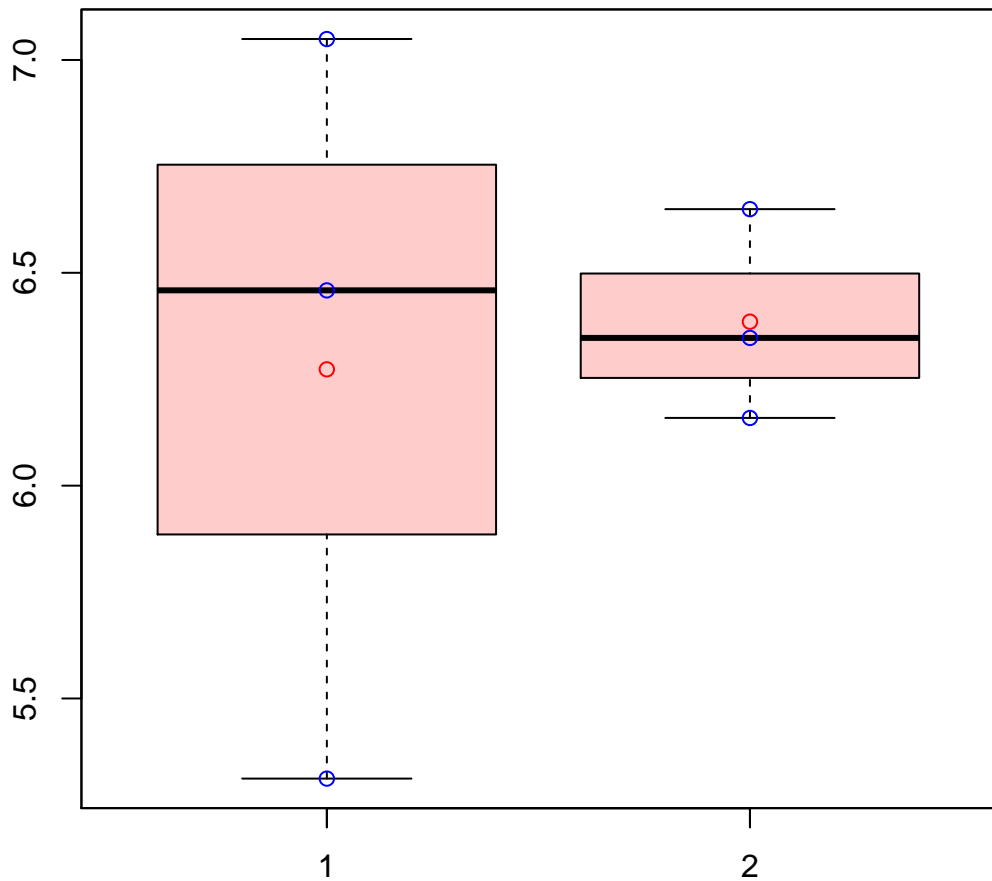

t-Test: p-value = 0.85

# K3ZXQ0|K3ZXQ0\_SETIT

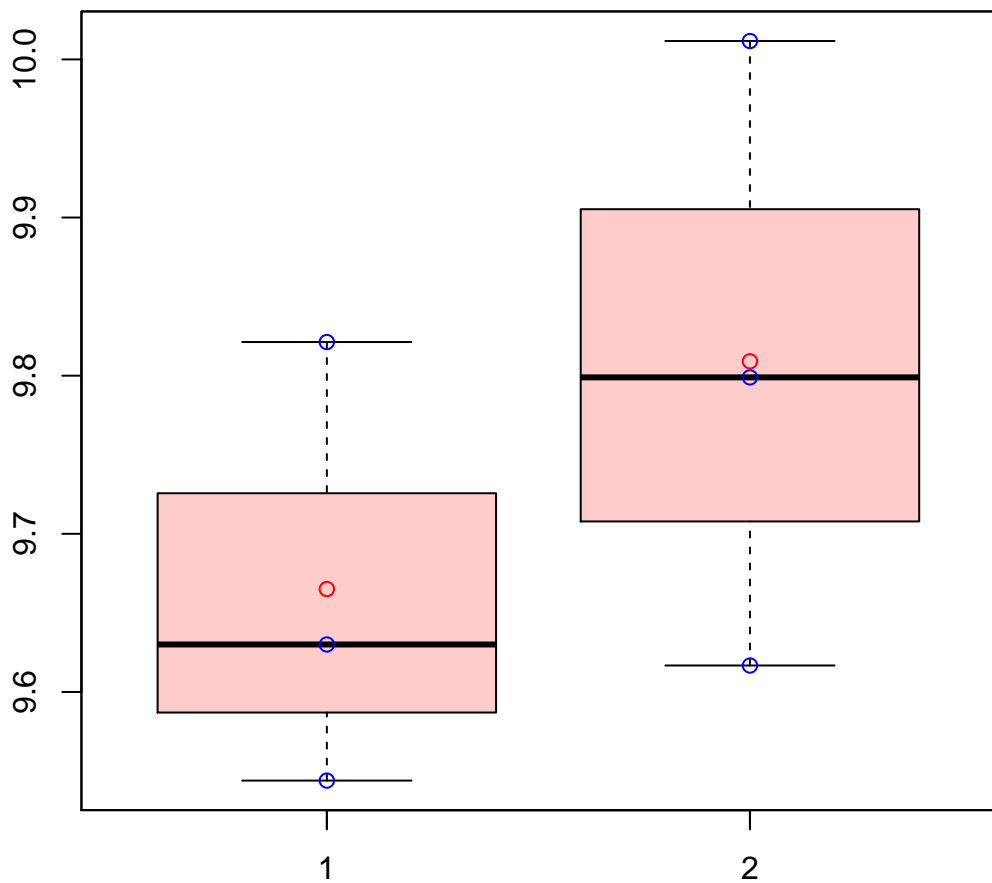

t-Test: p-value = 0.37

# K3ZXU6|K3ZXU6\_SETIT

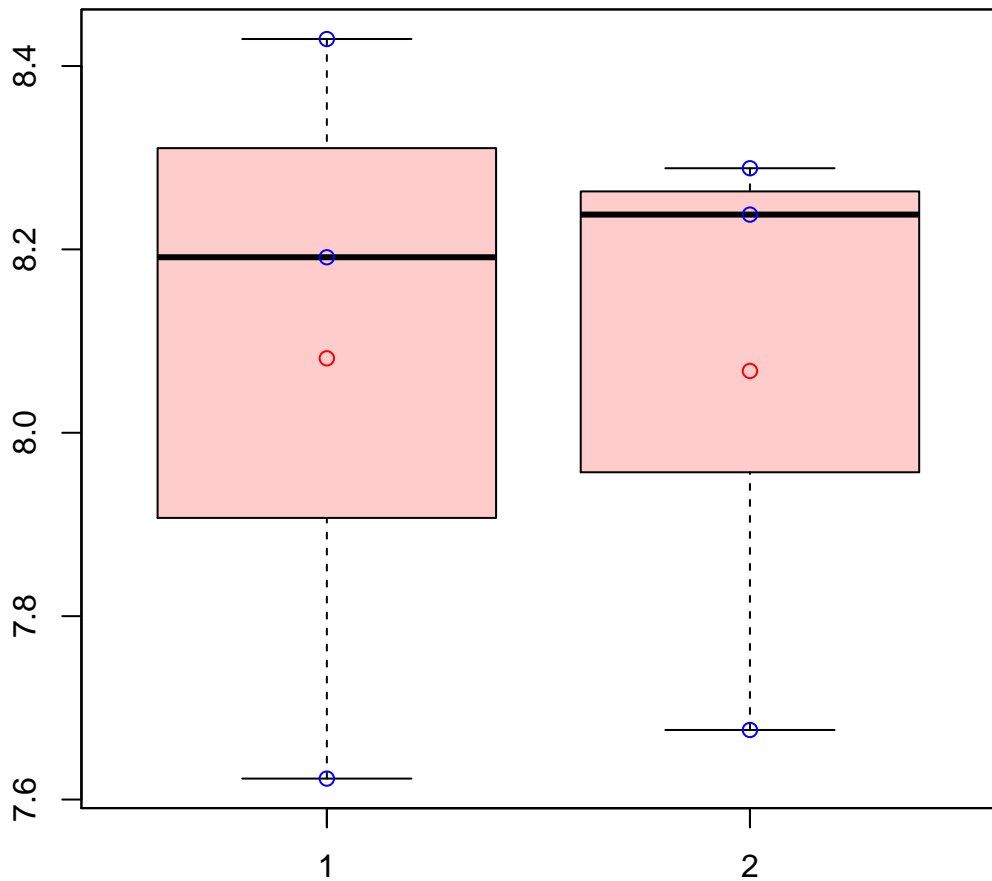

t-Test: p-value = 0.97

# K3ZXX1|K3ZXX1\_SETIT

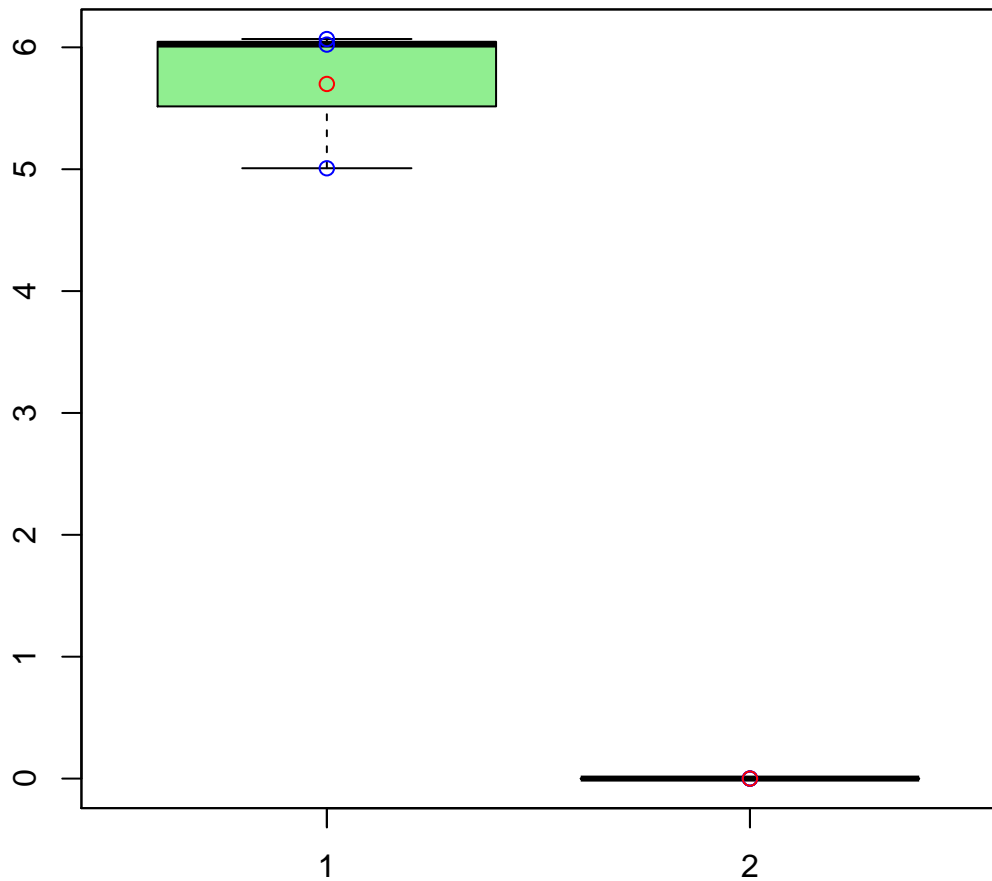

t-Test: p-value = 0

# K3ZY79|K3ZY79\_SETIT

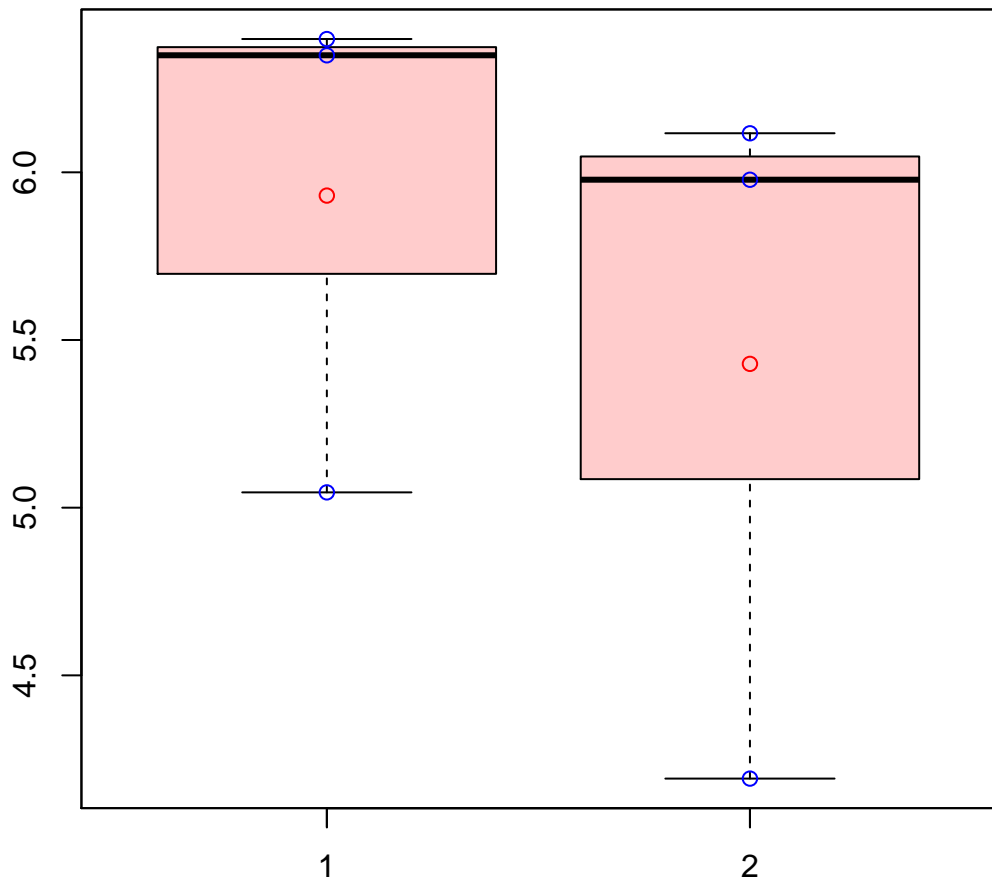

t-Test: p-value = 0.55

# K3ZZ46|K3ZZ46\_SETIT

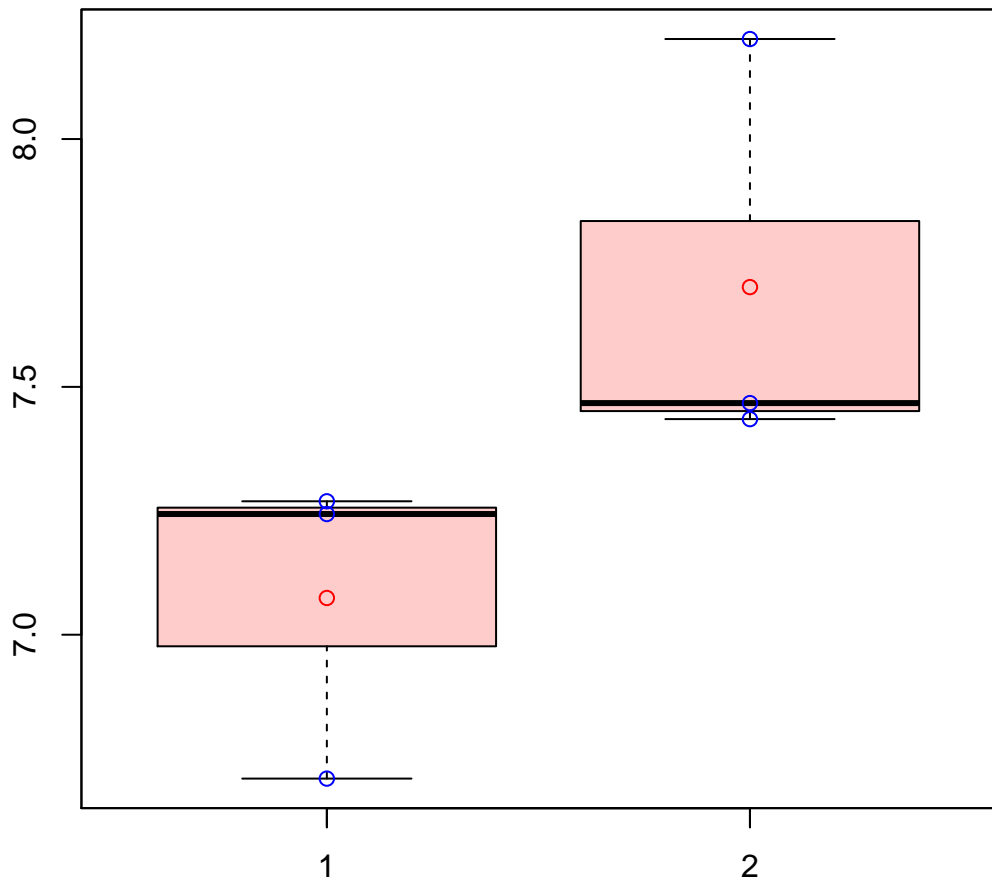

t-Test: p-value = 0.12

# K4A024|K4A024\_SETIT

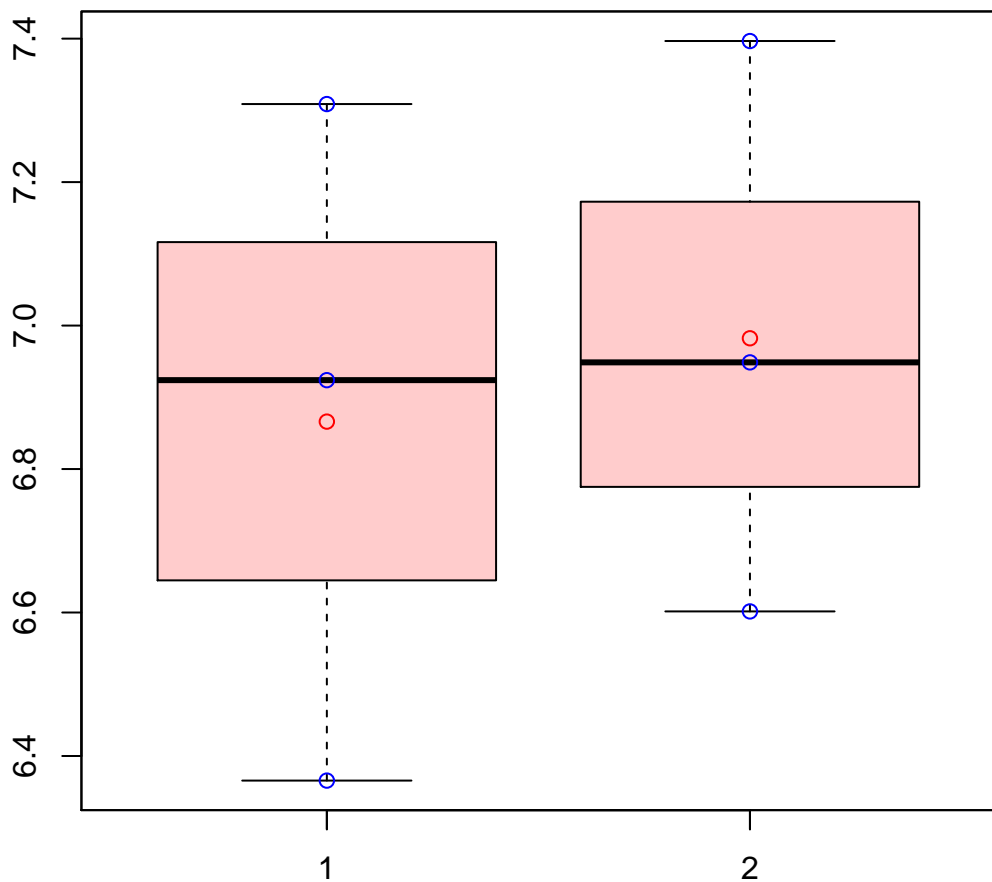

t-Test: p-value = 0.76



# K4A0E3|K4A0E3\_SETIT

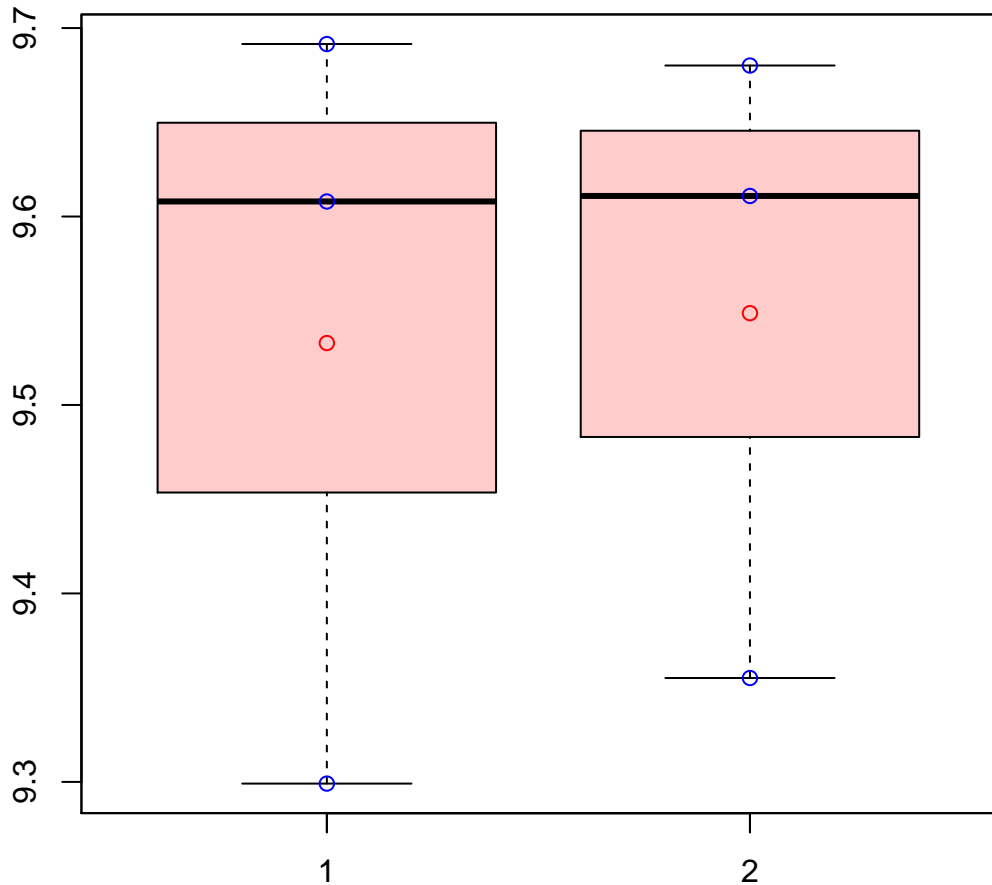

t-Test: p-value = 0.92

# K4A0W7|K4A0W7\_SETIT

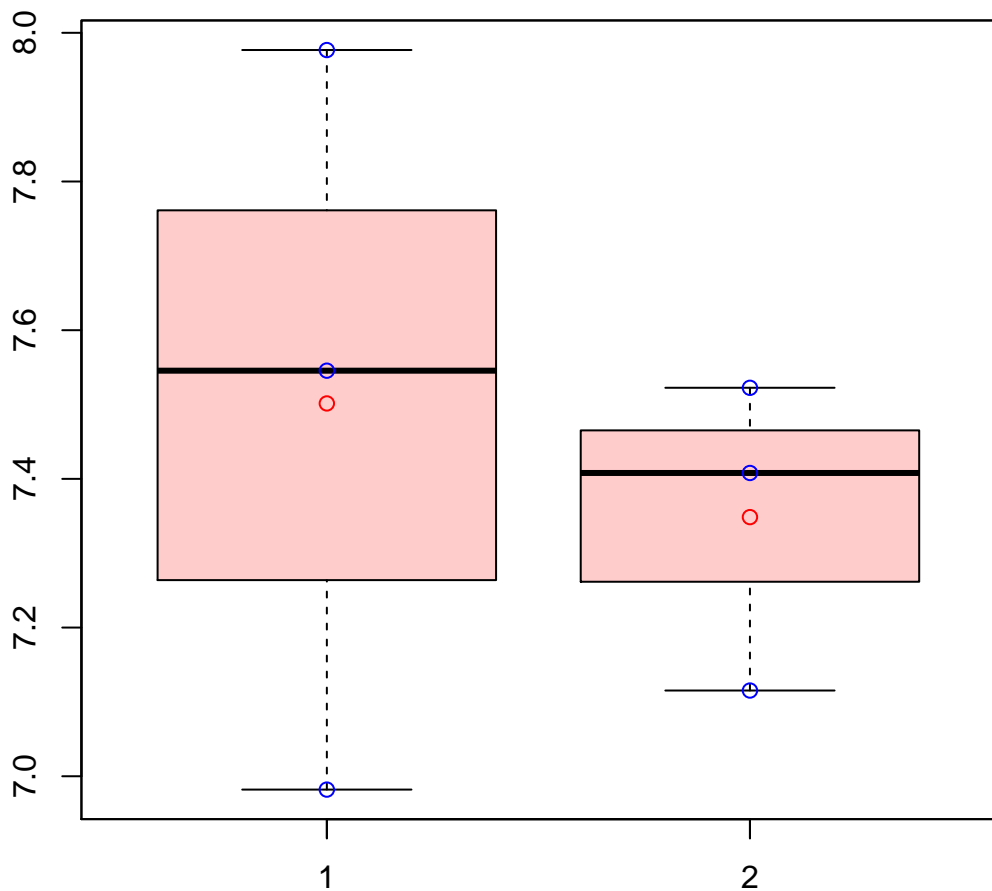

t-Test: p-value = 0.66

# K4A1C4|K4A1C4\_SETIT

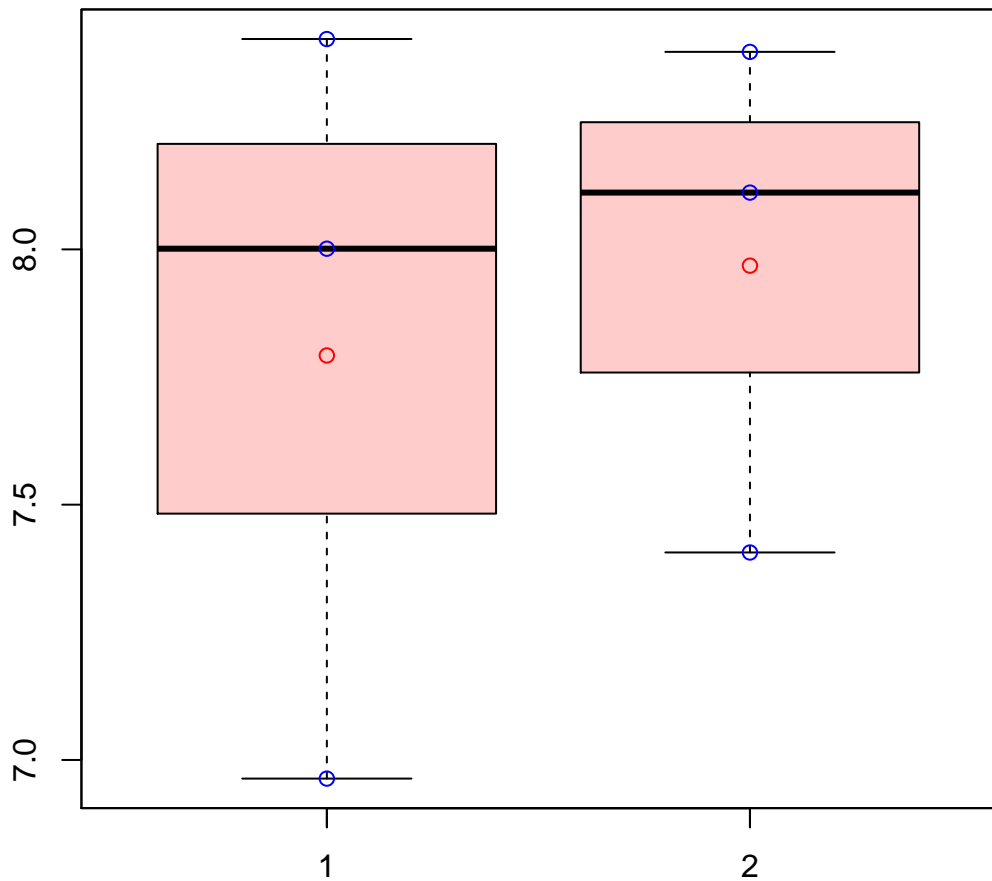

t-Test: p-value = 0.75

# K4A220|K4A220\_SETIT

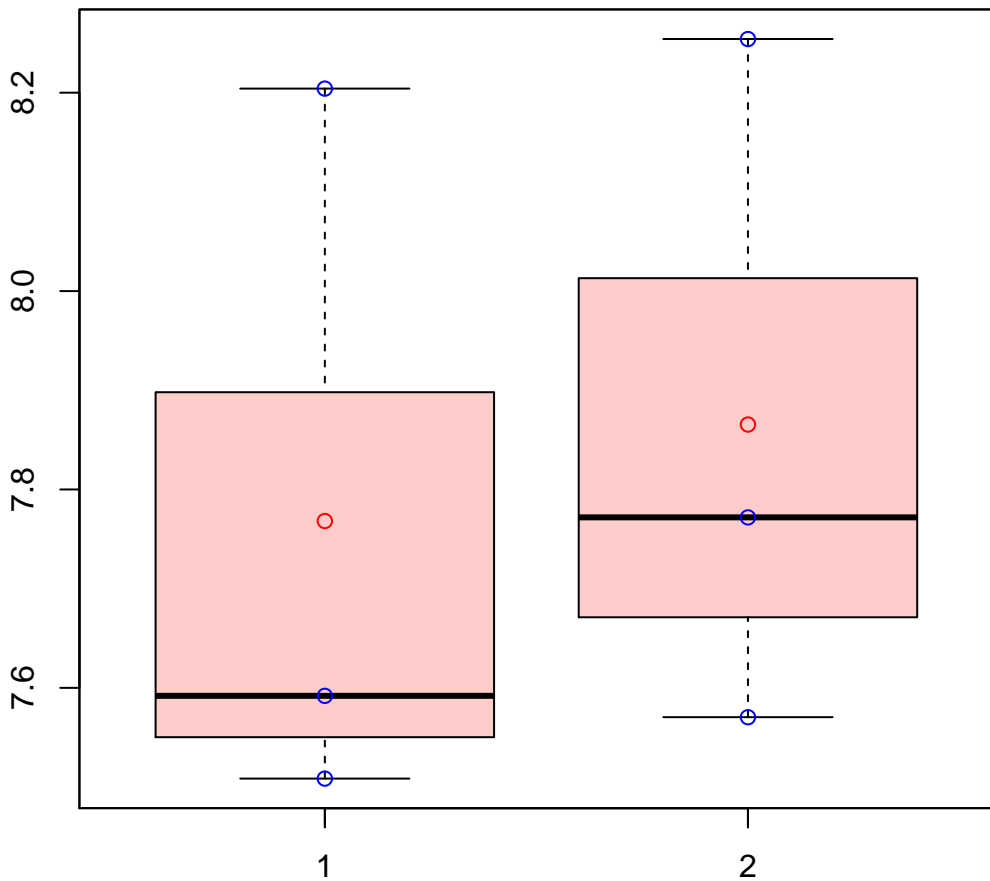

t-Test: p-value = 0.76

# K4A4M0|K4A4M0\_SETIT

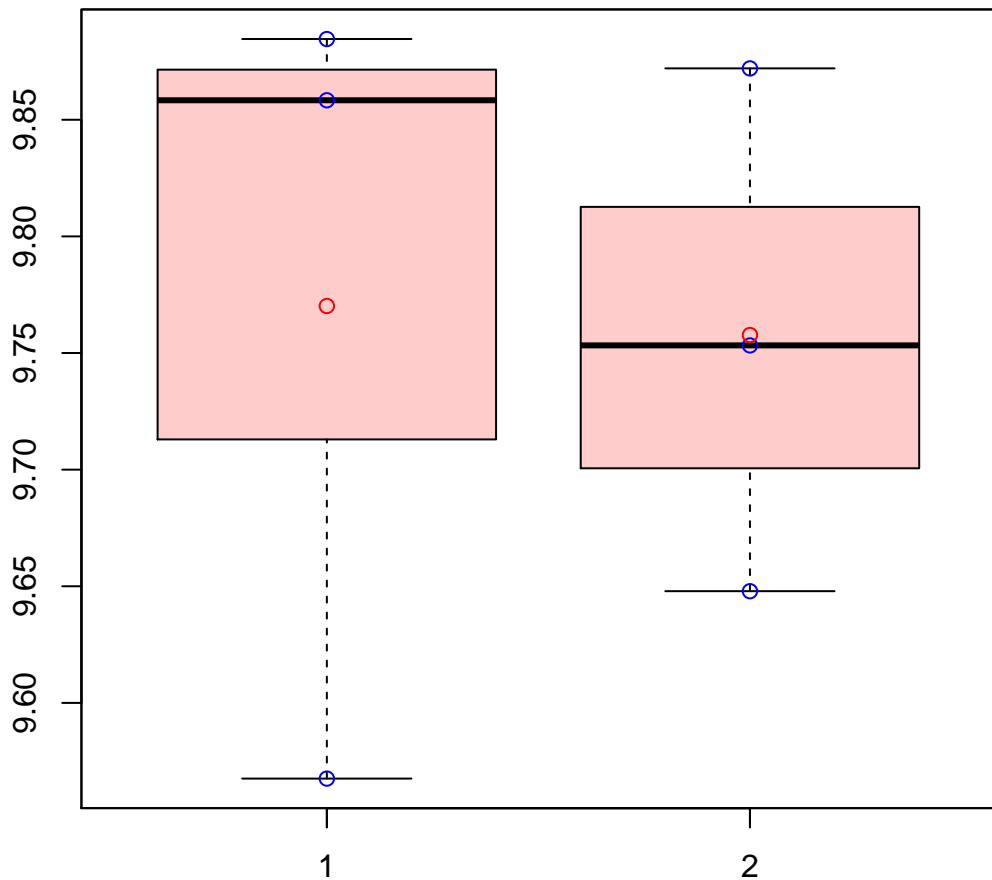

t-Test: p-value = 0.92

# K4A4N3|K4A4N3\_SETIT

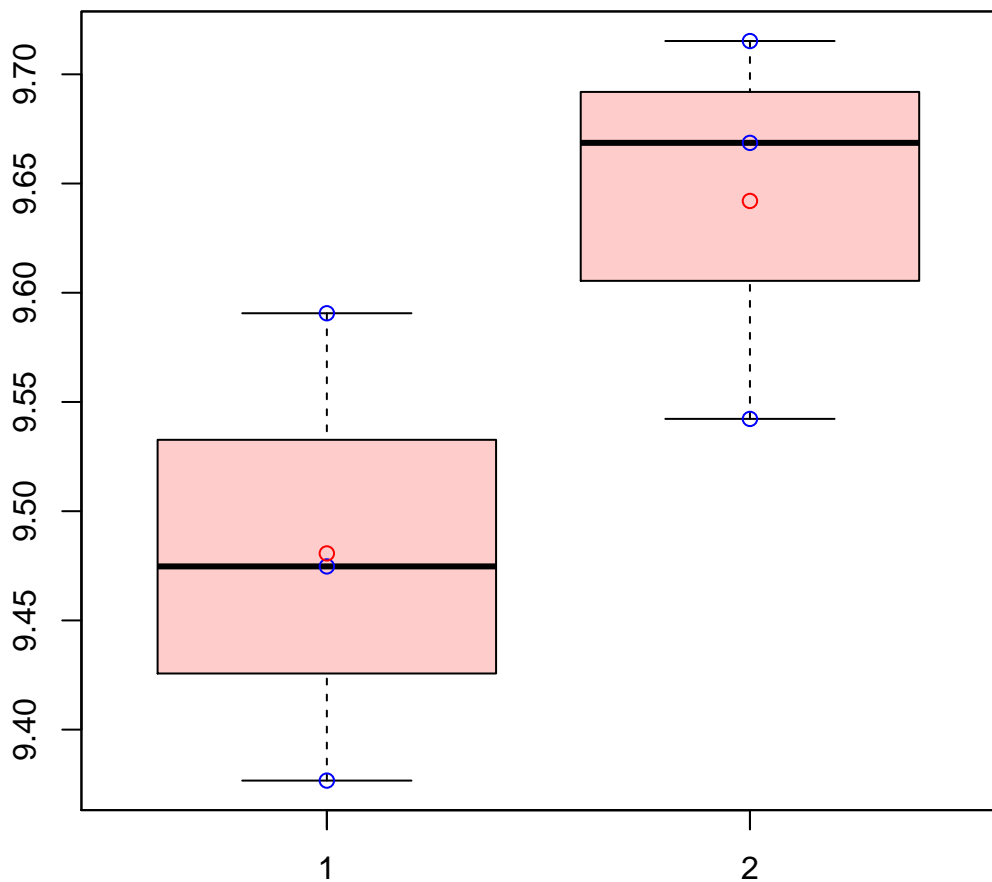

t-Test: p-value = 0.12

# K4A4N4|K4A4N4\_SETIT

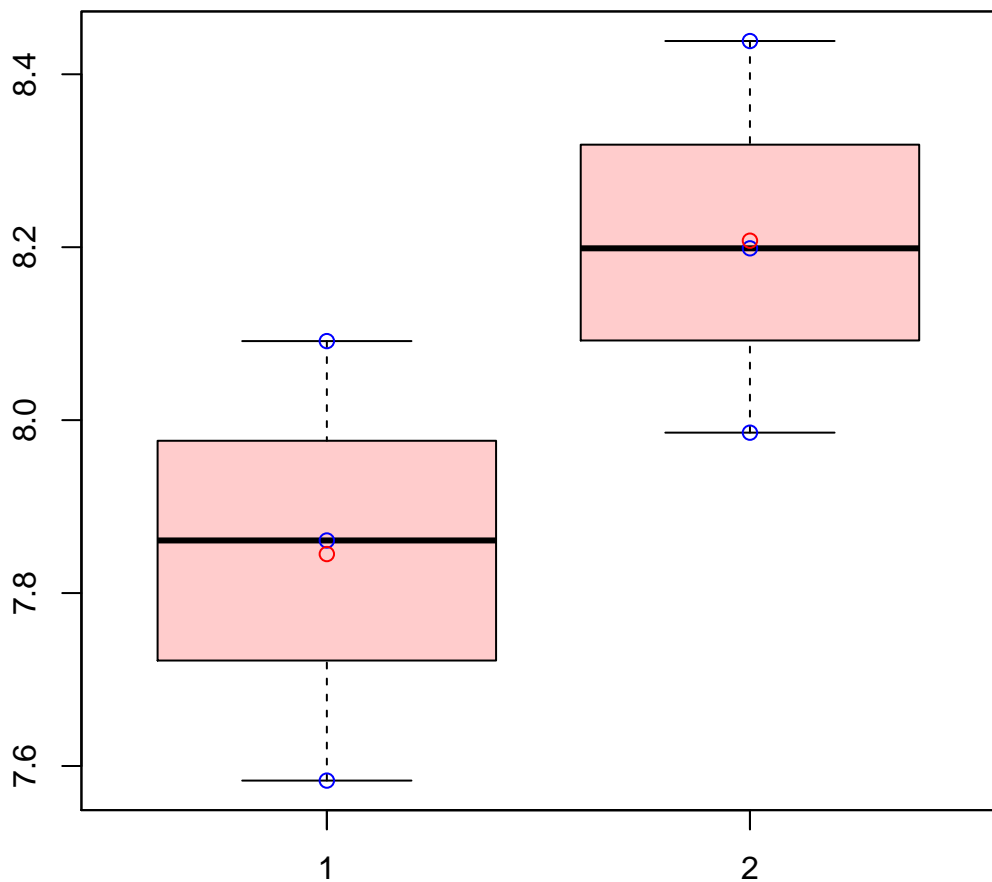

t-Test: p-value = 0.14

# K4A4R1|K4A4R1\_SETIT

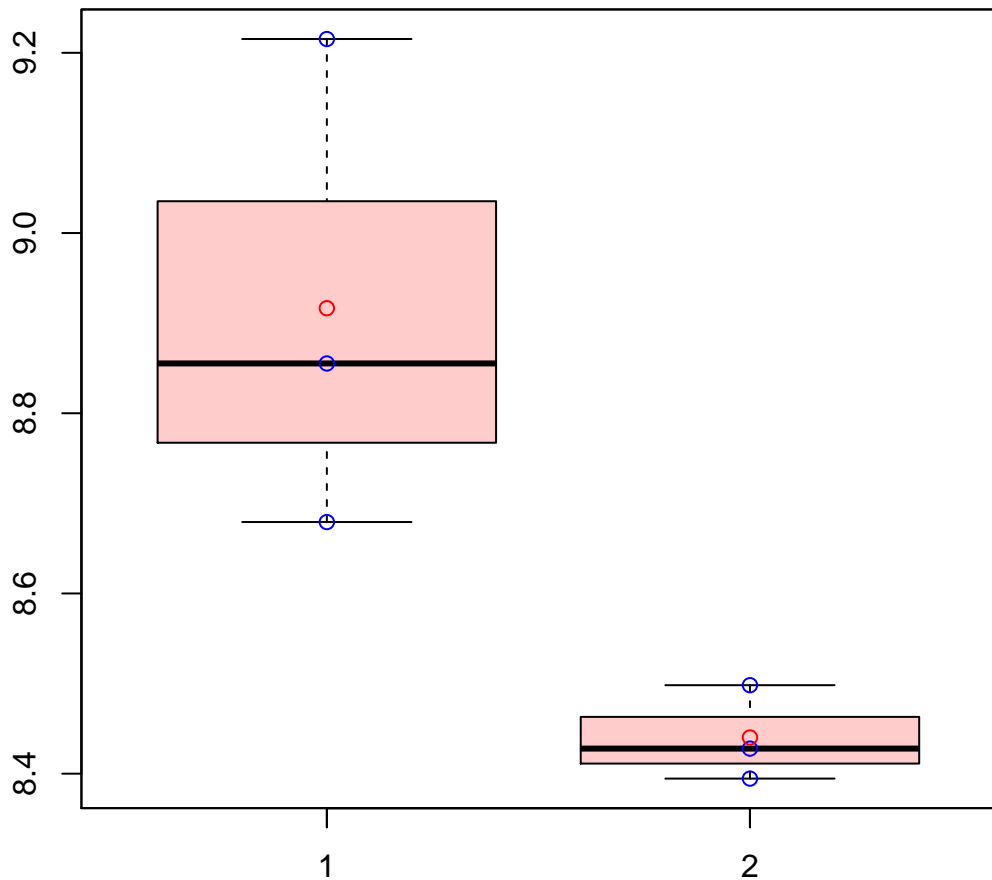

t-Test: p-value = 0.09



# K4A4T4|K4A4T4\_SETIT

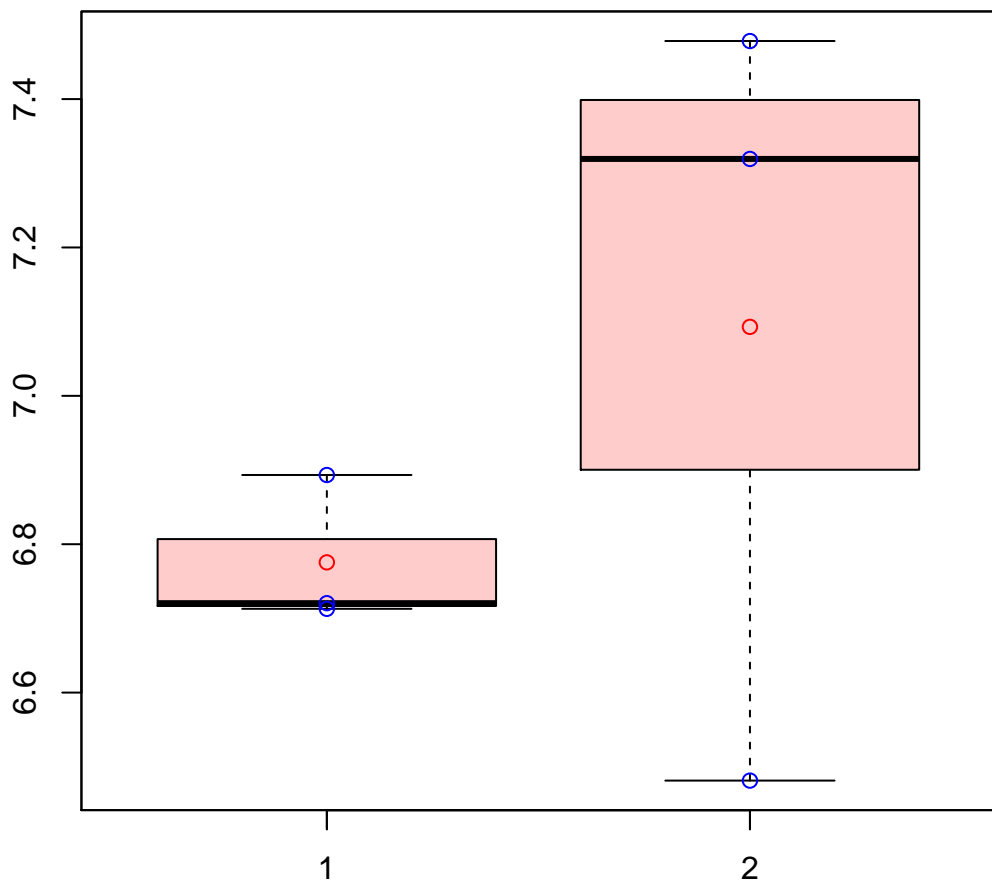

t-Test: p-value = 0.41

# K4A4V3|K4A4V3\_SETIT

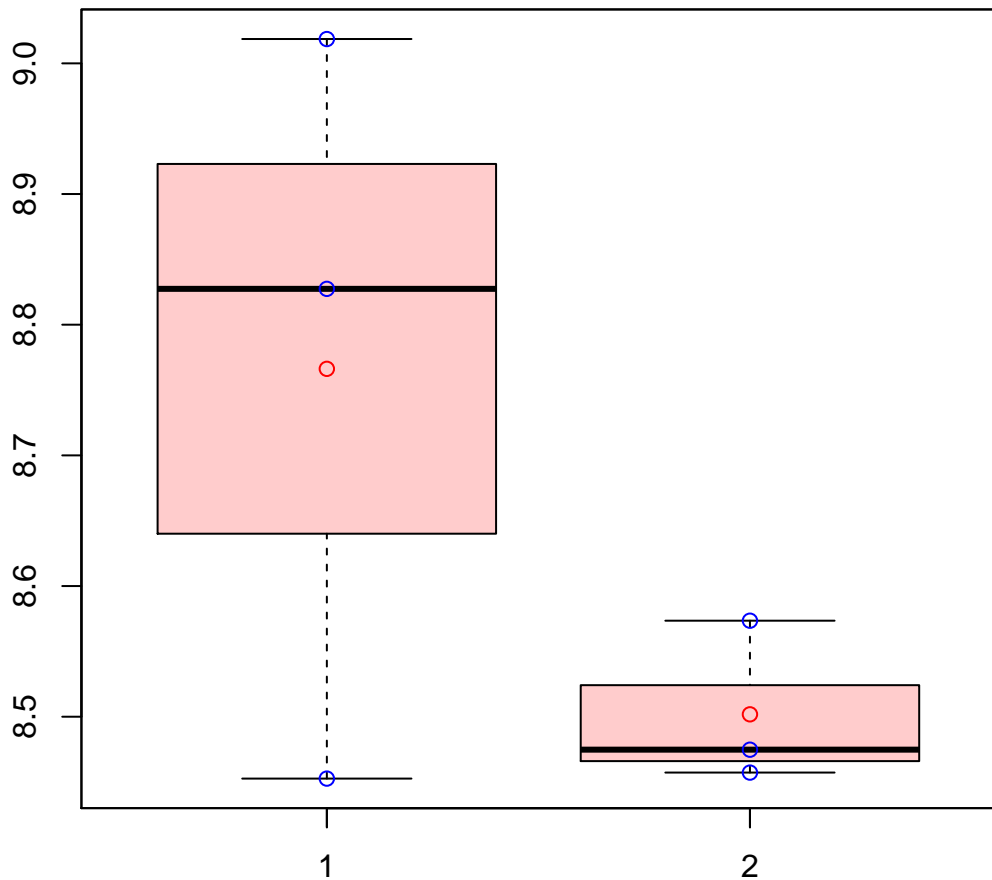

t-Test: p-value = 0.25

# K4A4Y6|K4A4Y6\_SETIT

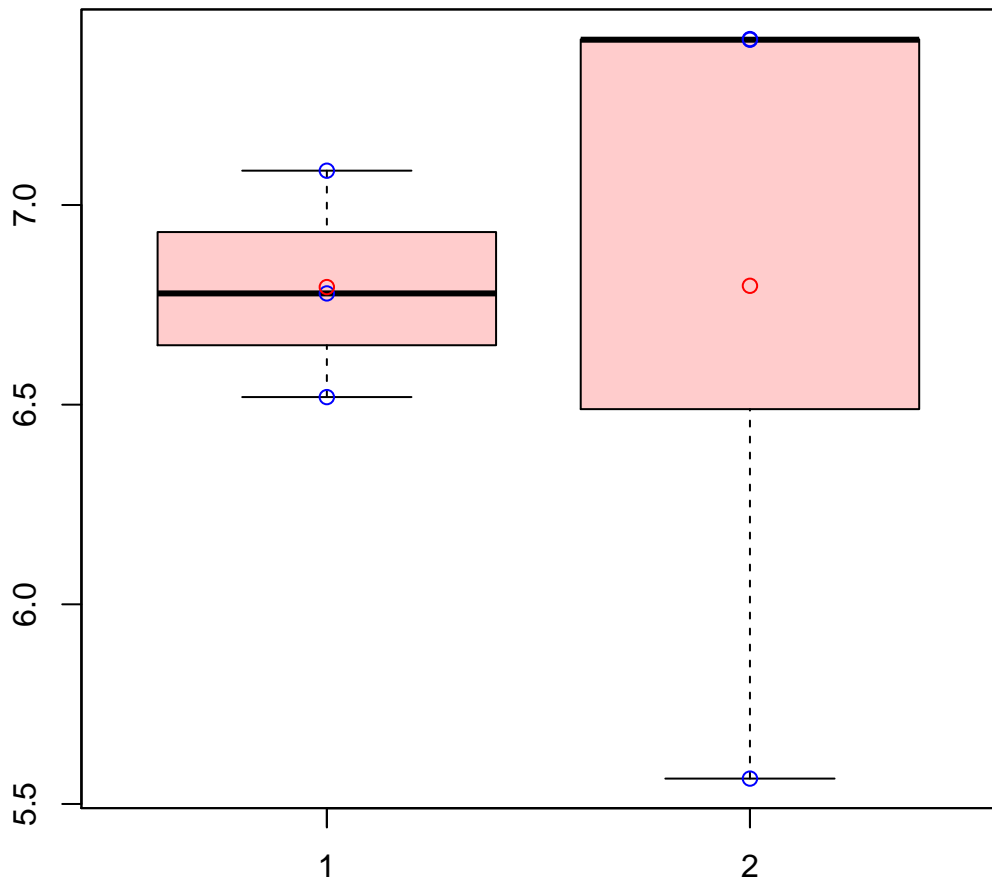

t-Test: p-value = 1

# K4A515|K4A515\_SETIT

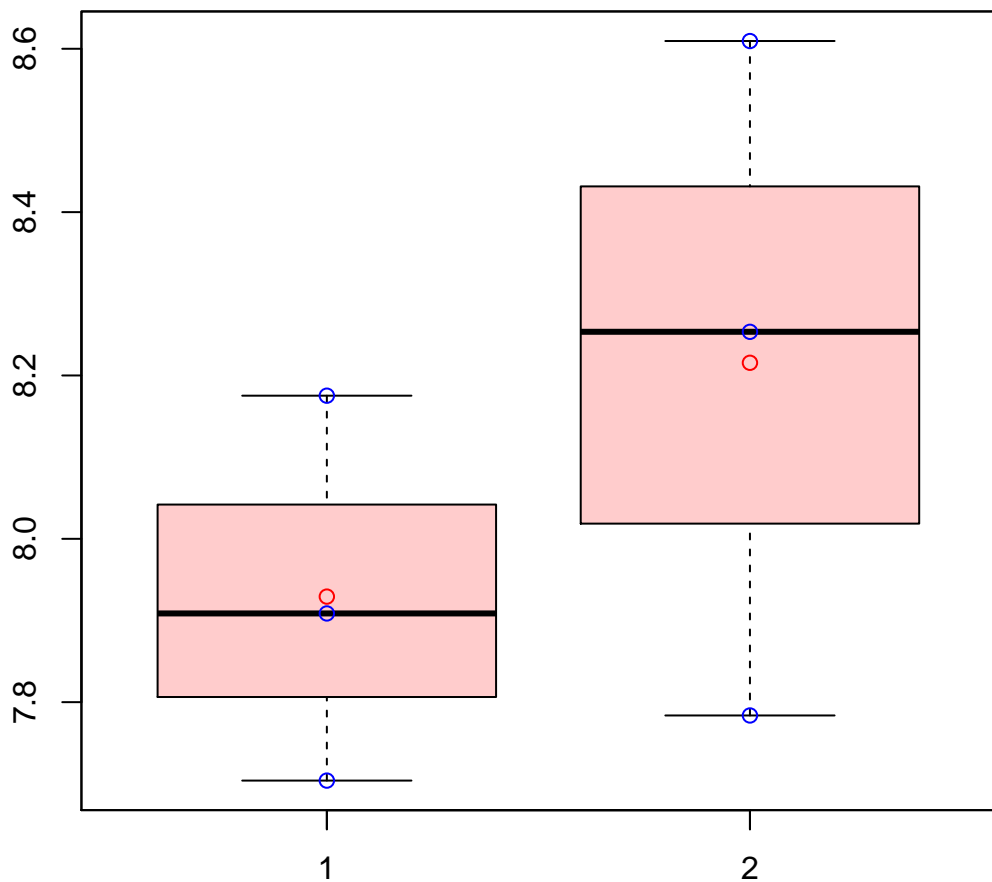

t-Test: p-value = 0.37

# K4A5A5|K4A5A5\_SETIT

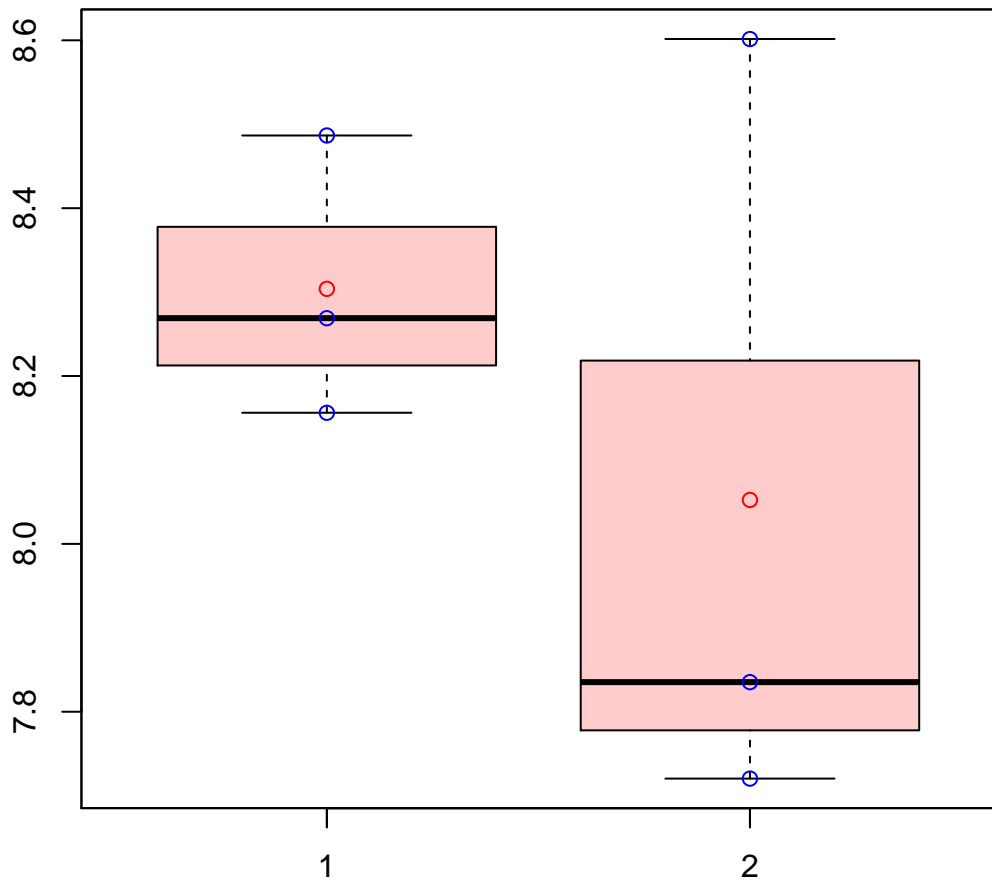

t-Test: p-value = 0.47

# K4A5C8|K4A5C8\_SETIT

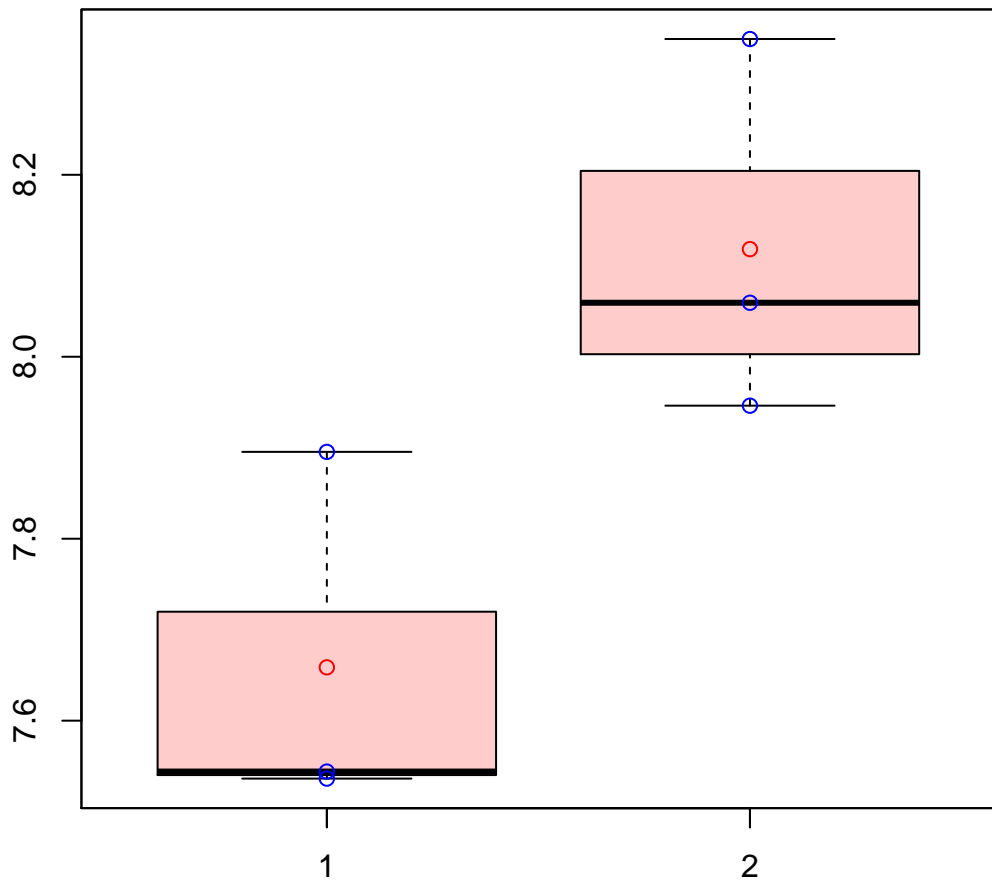

t-Test: p-value = 0.05

# K4A5E0|K4A5E0\_SETIT

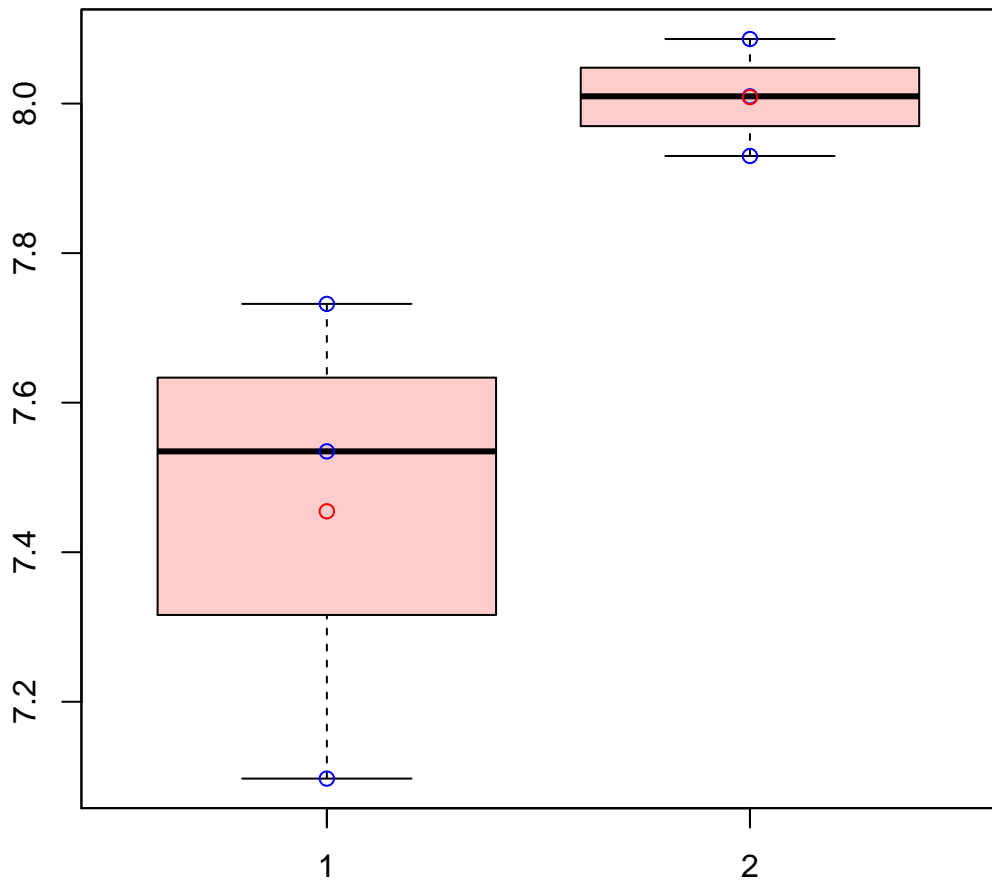

t-Test: p-value = 0.09

# K4A5F5|K4A5F5\_SETIT

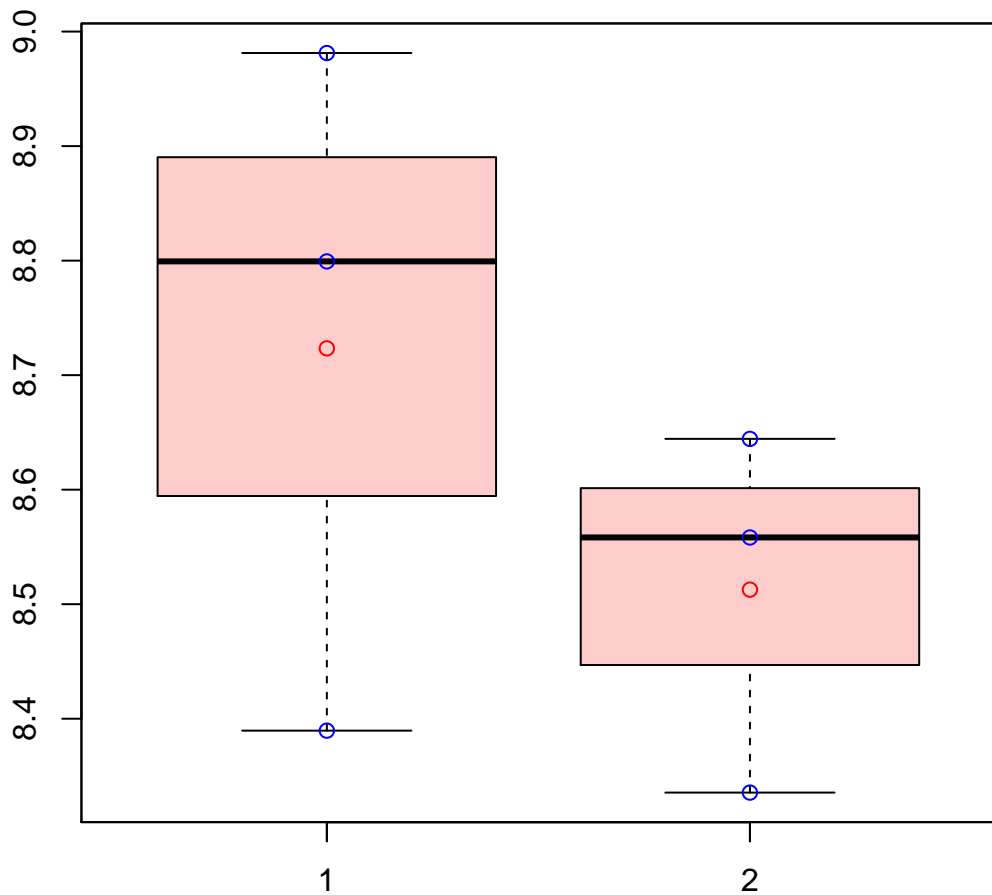

t-Test: p-value = 0.36



# K4A5I5|K4A5I5\_SETIT

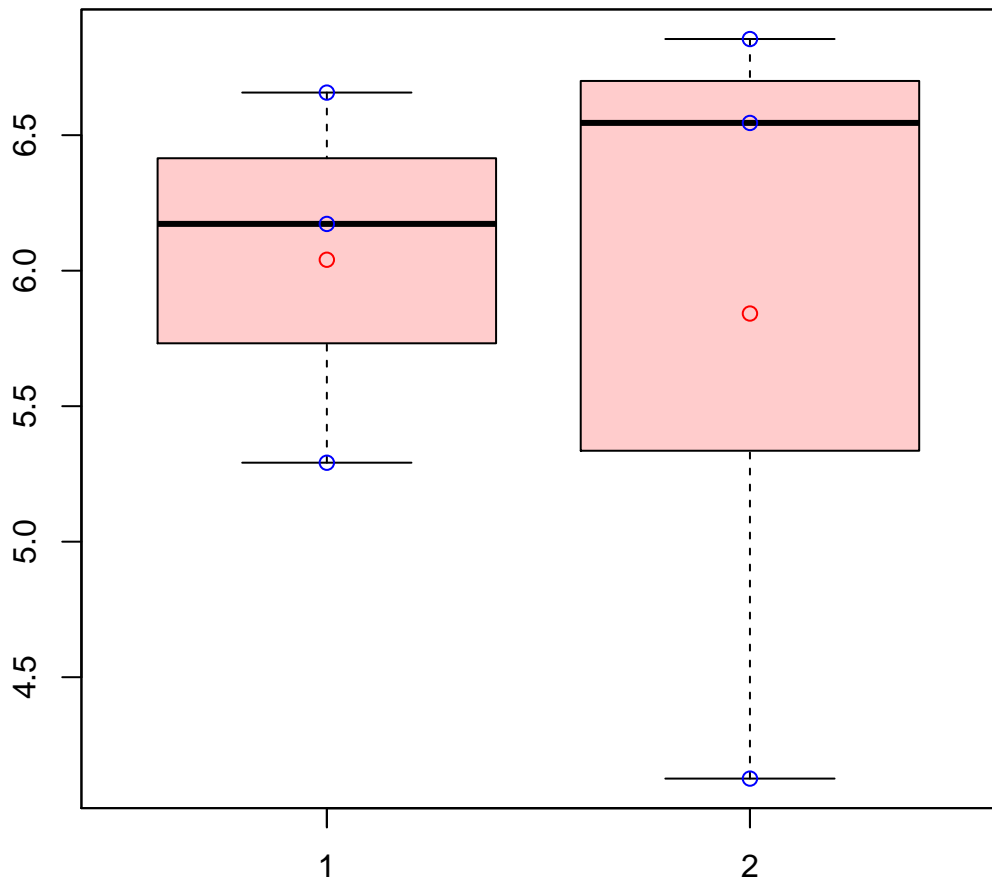

t-Test: p-value = 0.85

# K4A5J0|K4A5J0\_SETIT

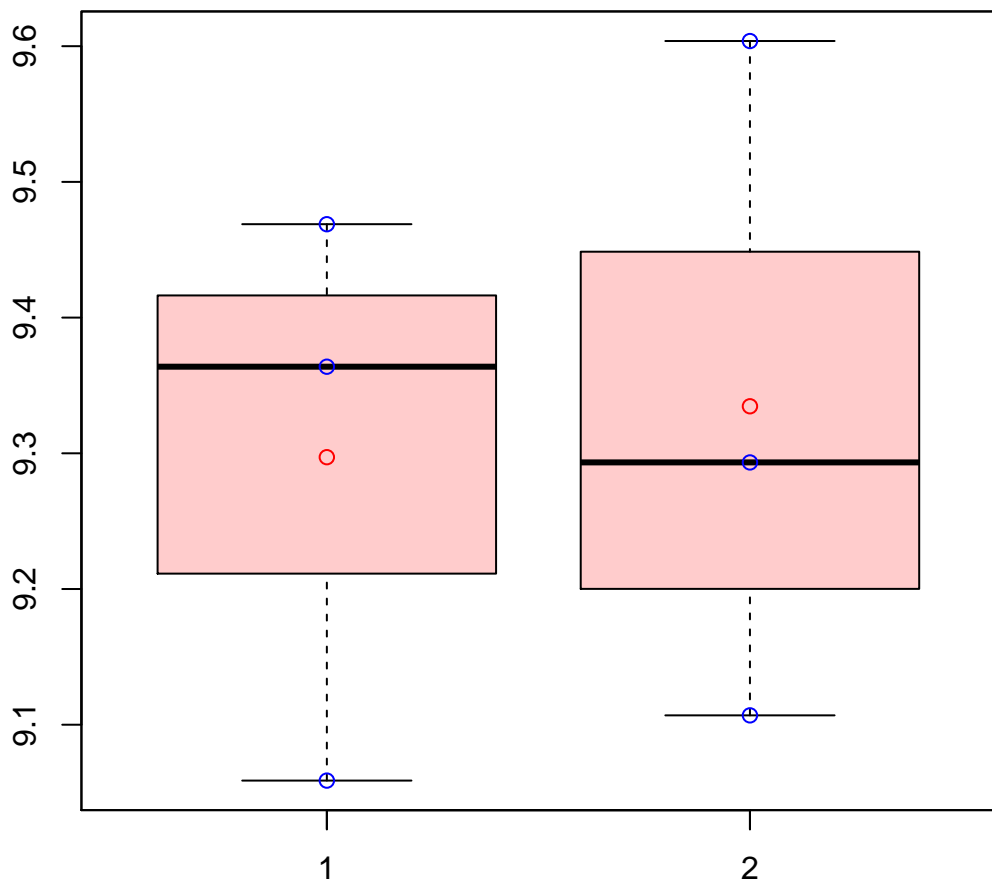

t-Test: p-value = 0.85

# K4A5K2|K4A5K2\_SETIT

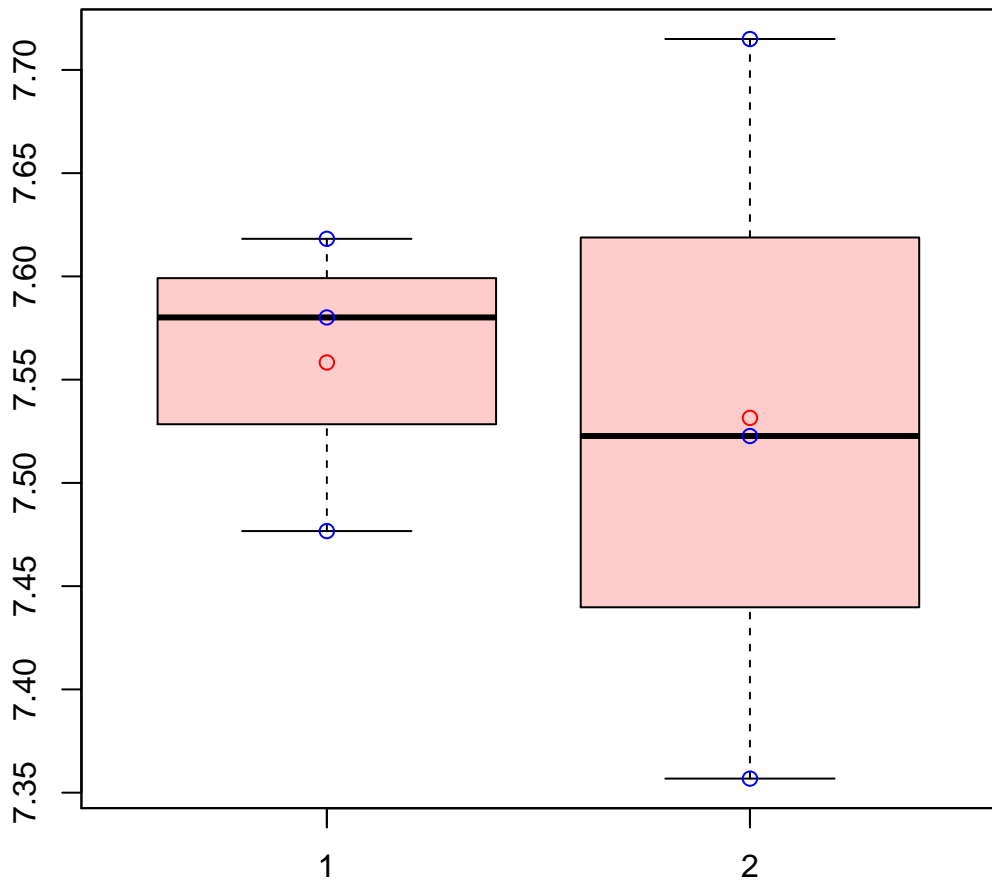

t-Test: p-value = 0.83

# K4A5K9|K4A5K9\_SETIT

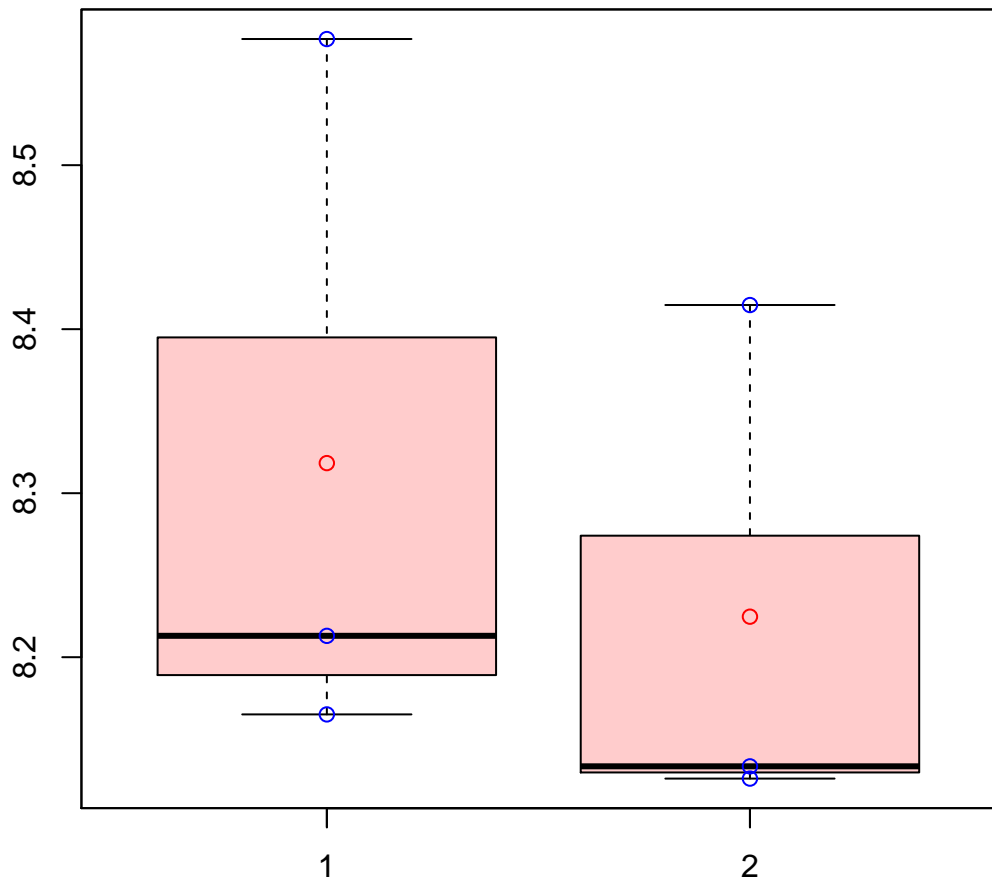

t-Test: p-value = 0.59

# K4A5L2|K4A5L2\_SETIT

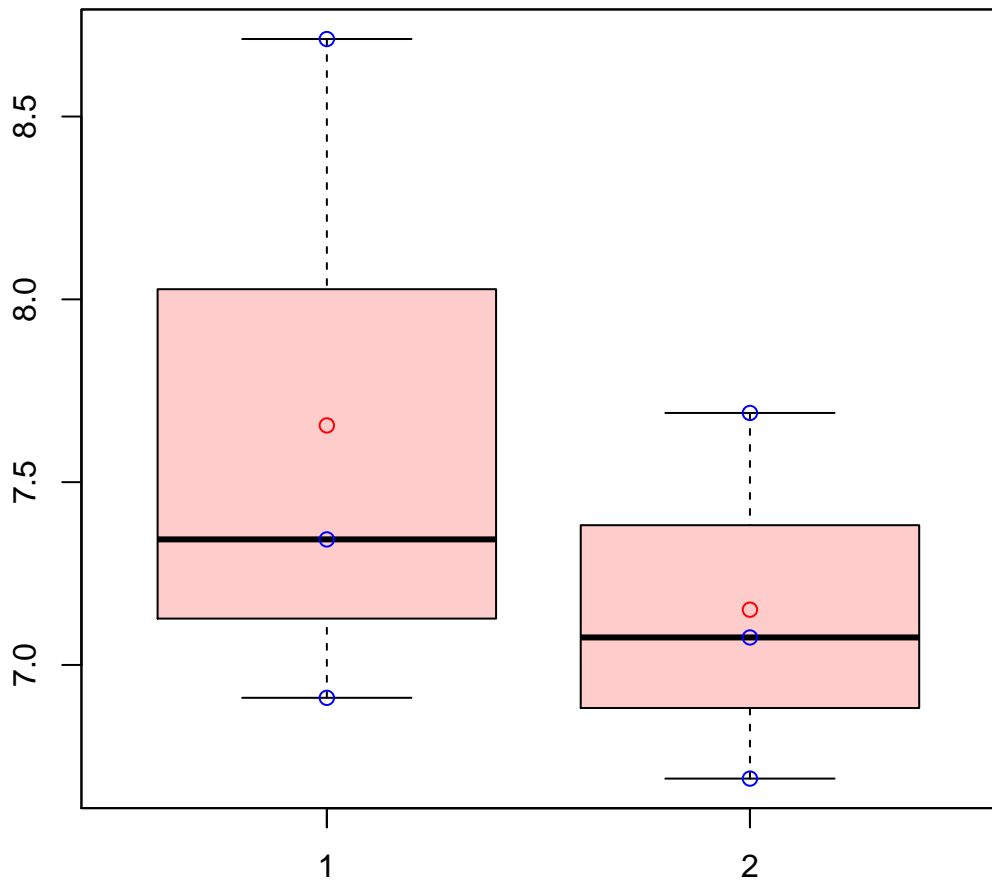

t-Test: p-value = 0.47

# K4A5M6|K4A5M6\_SETIT

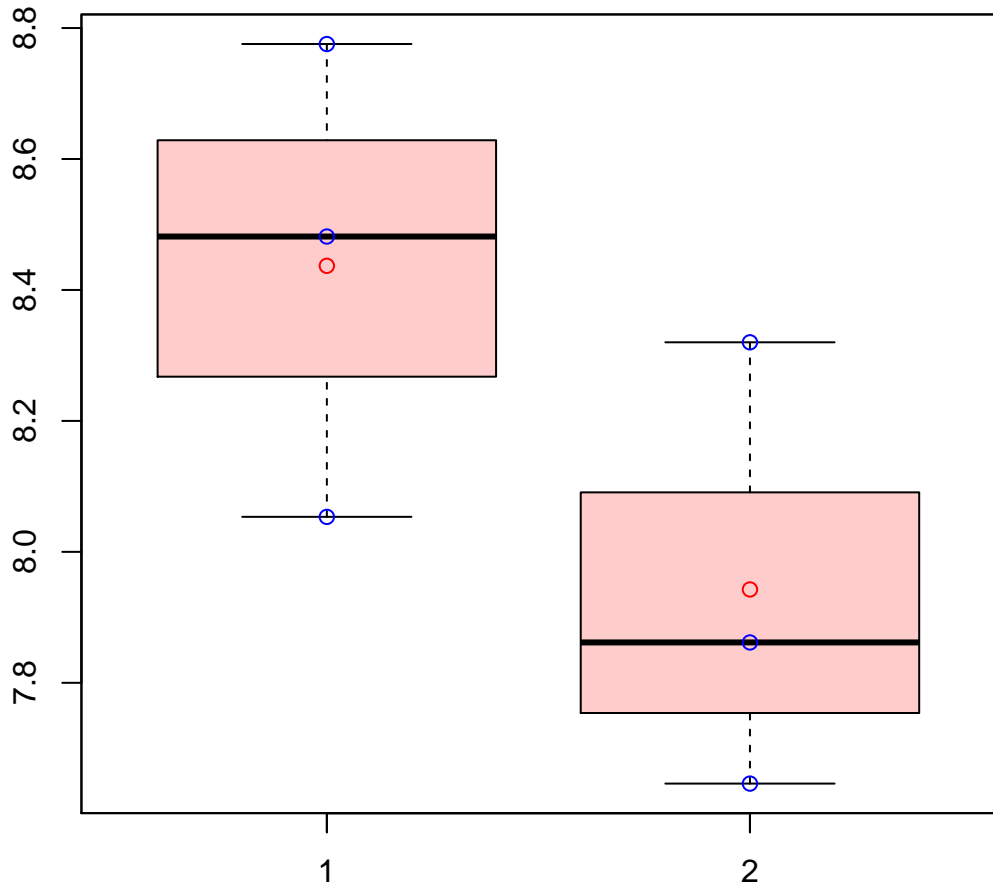

t-Test: p-value = 0.16

# K4A5P3|K4A5P3\_SETIT

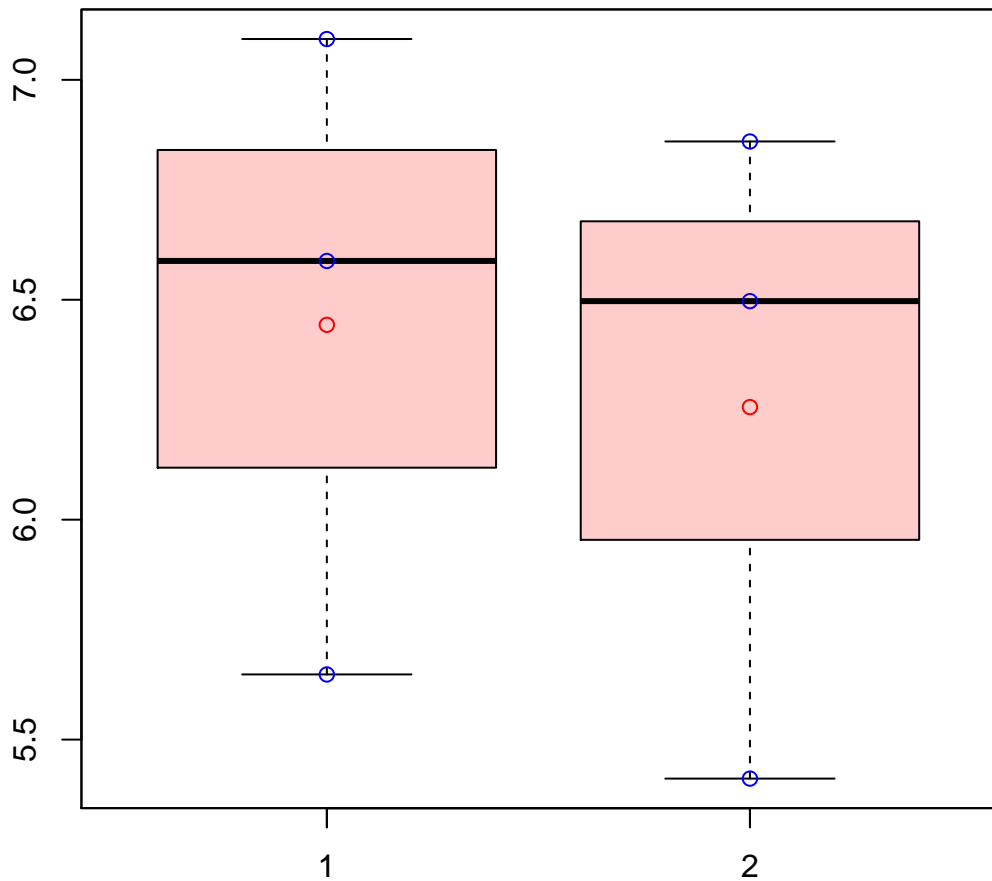

t-Test: p-value = 0.77

# K4A5S7|K4A5S7\_SETIT

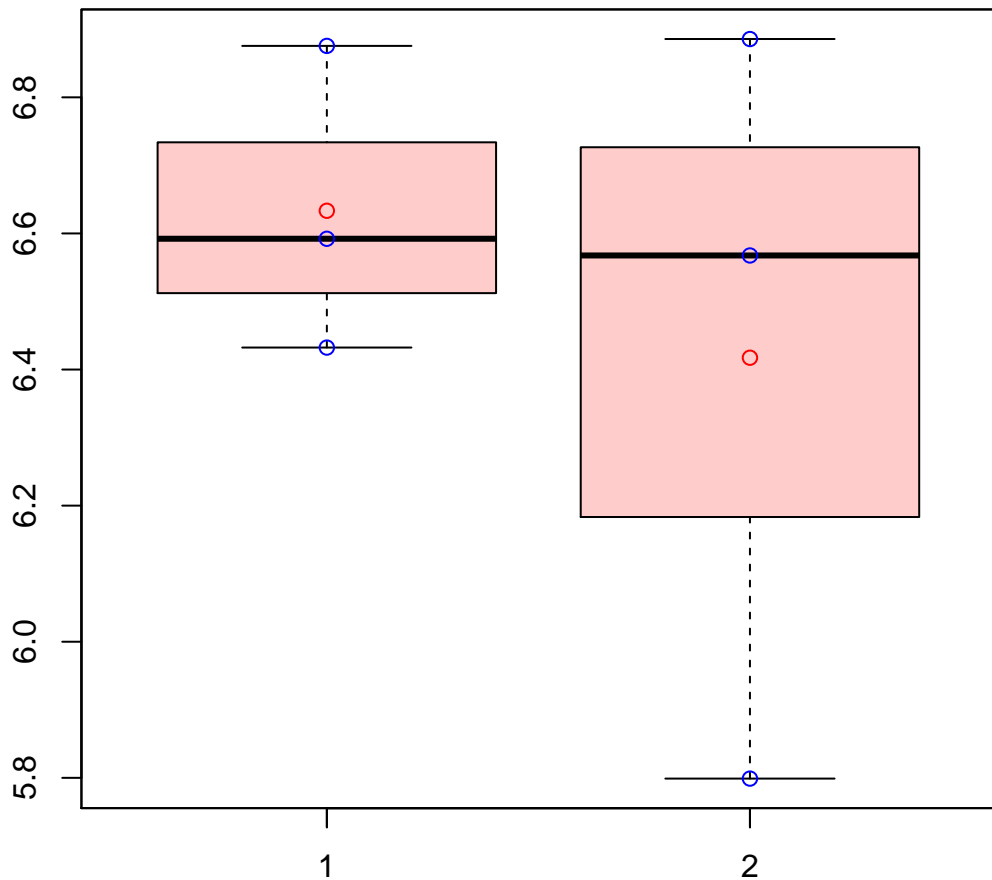

t-Test: p-value = 0.58



# K4A5Y9|K4A5Y9\_SETIT

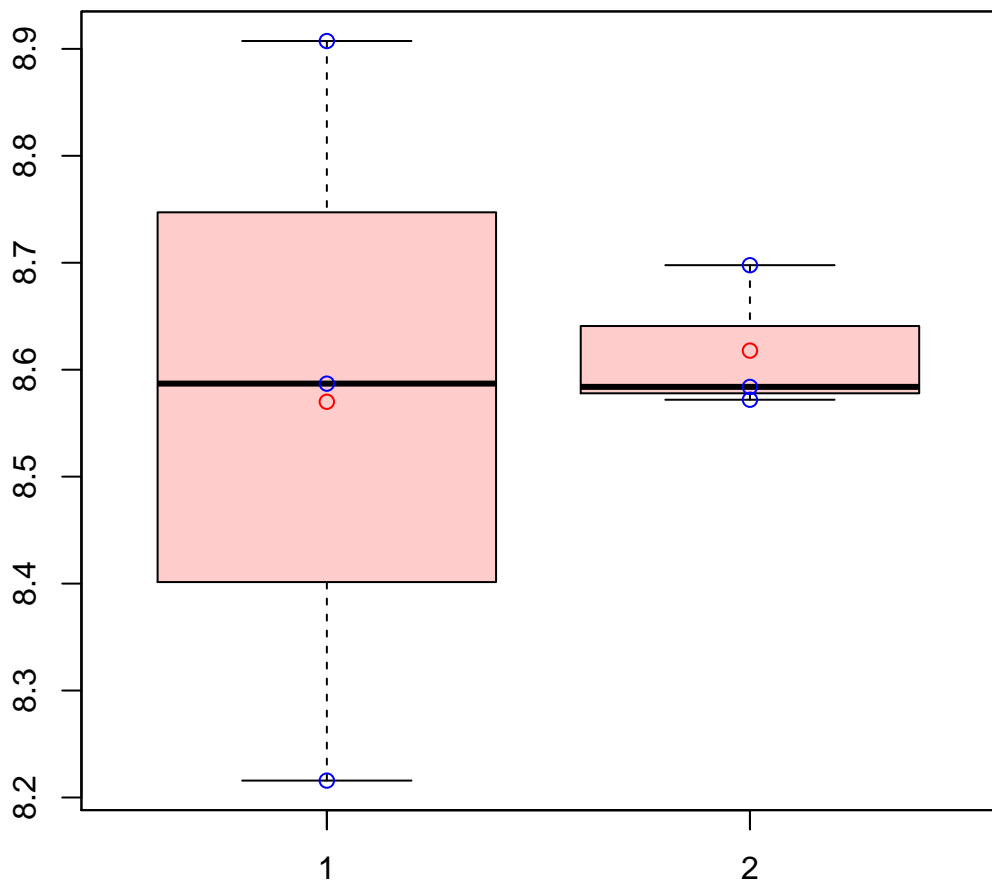

t-Test: p-value = 0.83

# K4A676|K4A676\_SETIT

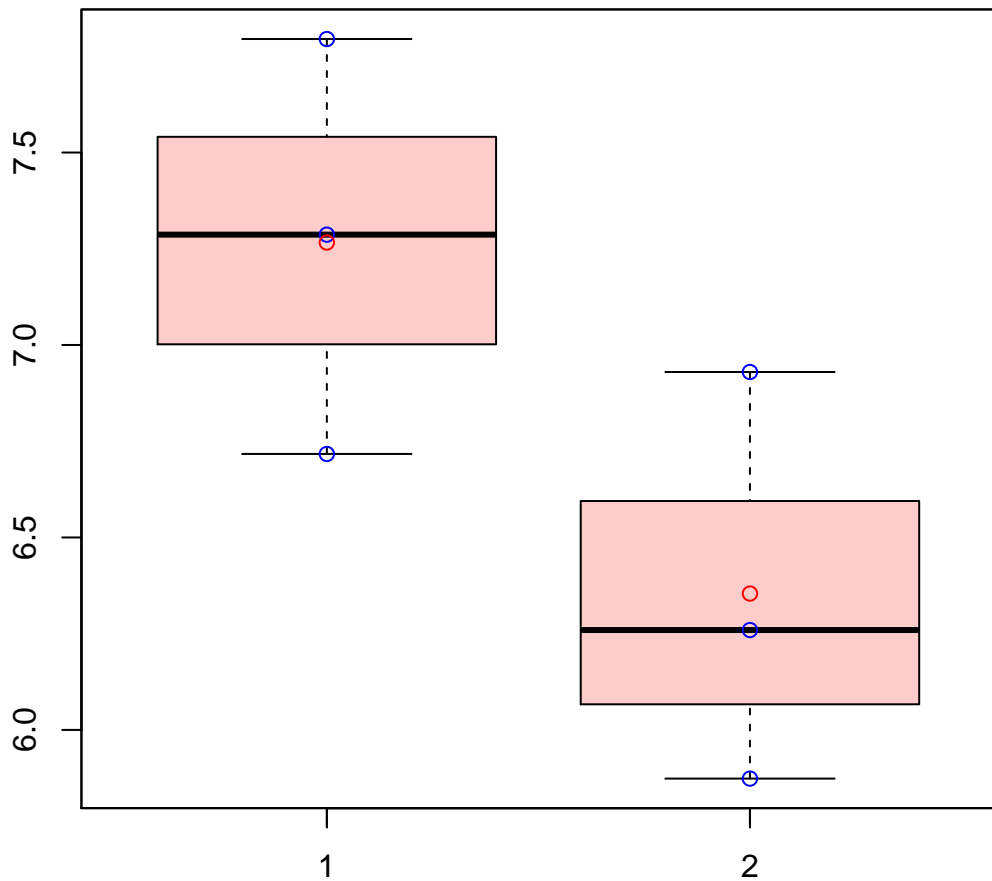

t-Test: p-value = 0.11

# K4A699|K4A699\_SETIT

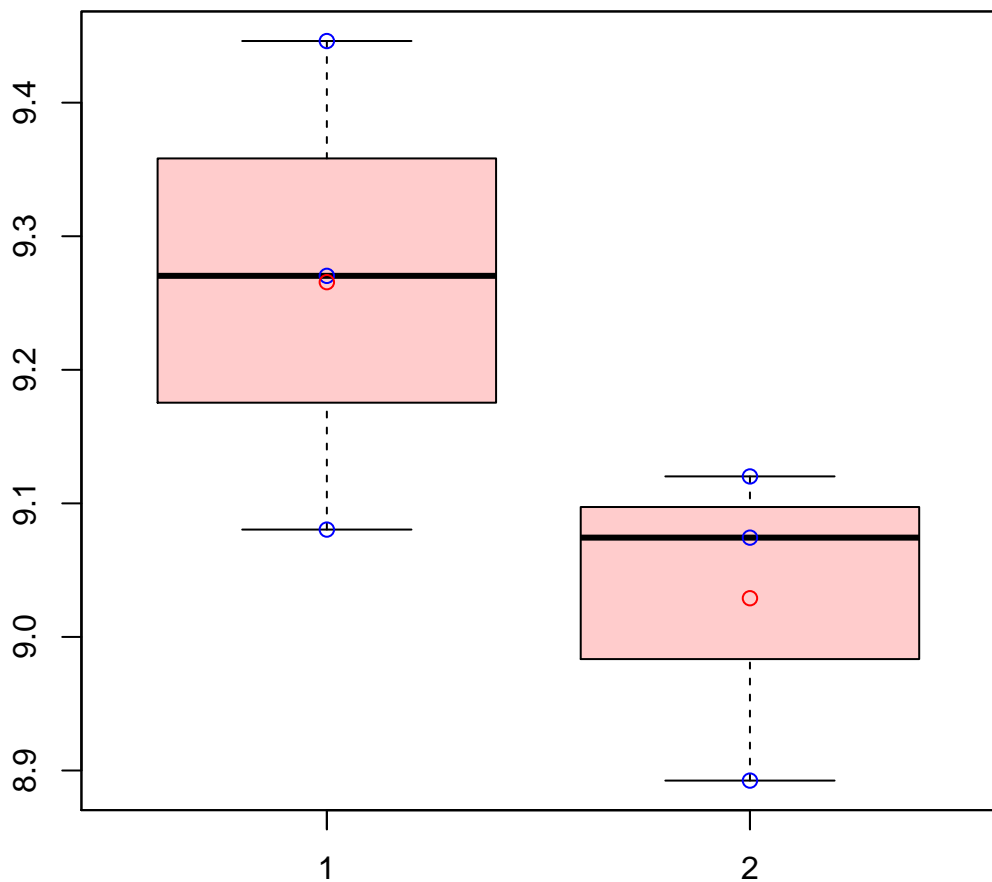

t-Test: p-value = 0.15

# K4A6A7|K4A6A7\_SETIT

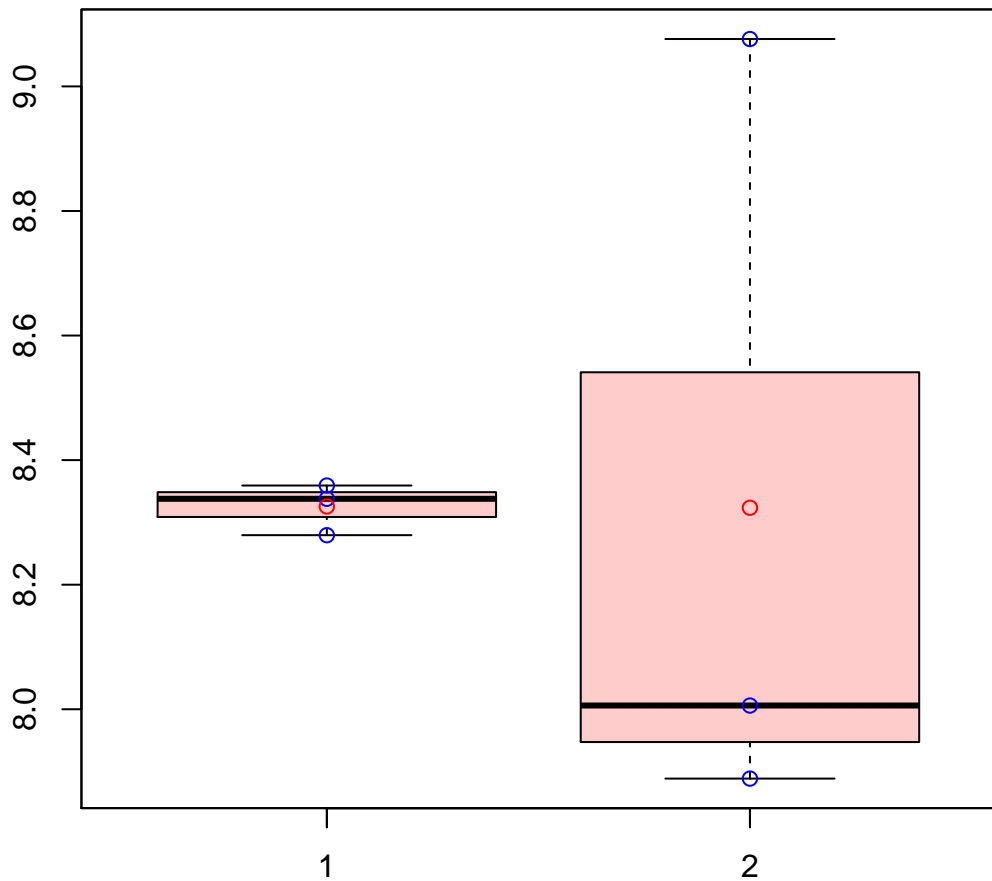

t-Test: p-value = 1

# K4A6E4|K4A6E4\_SETIT

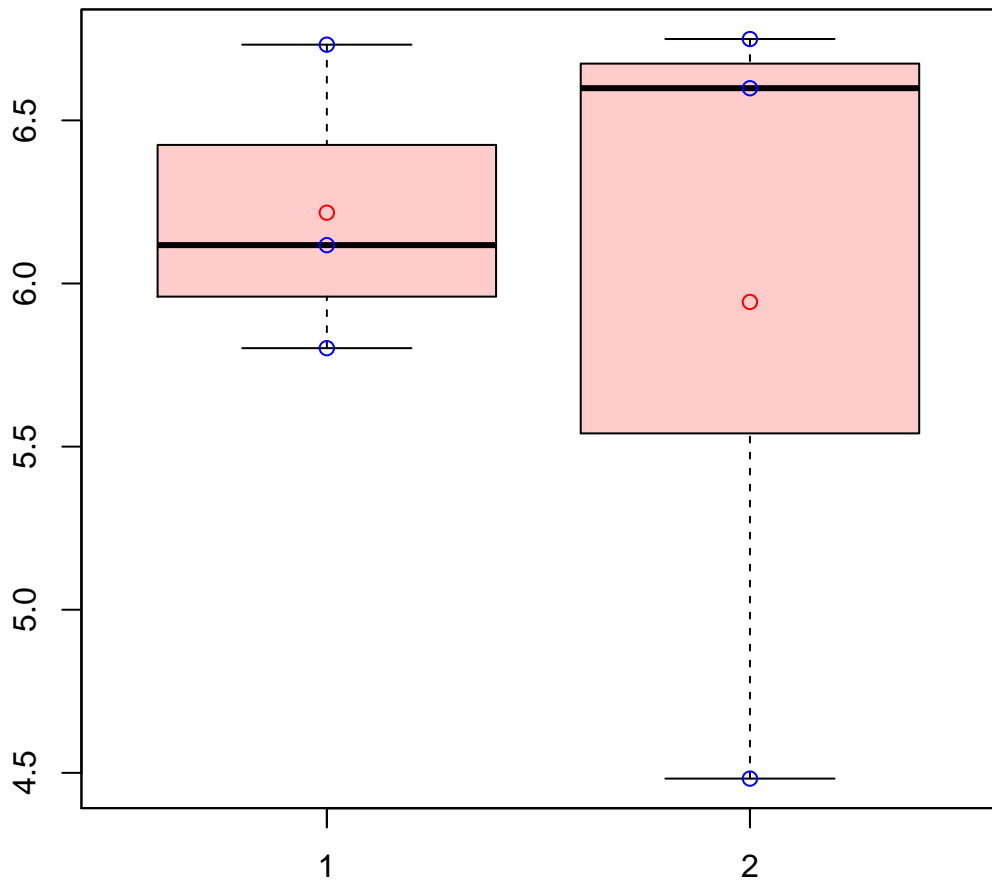

t-Test: p-value = 0.75

# K4A6N2|K4A6N2\_SETIT

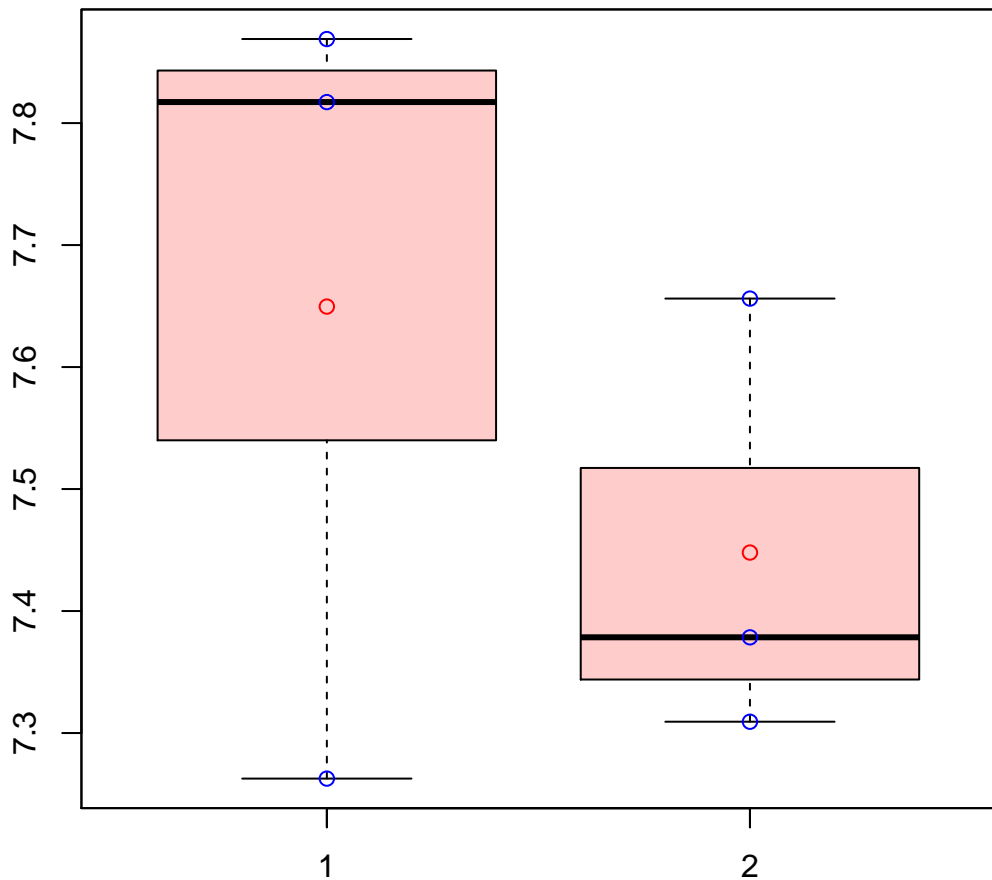

t-Test: p-value = 0.43

# K4A6U9|K4A6U9\_SETIT

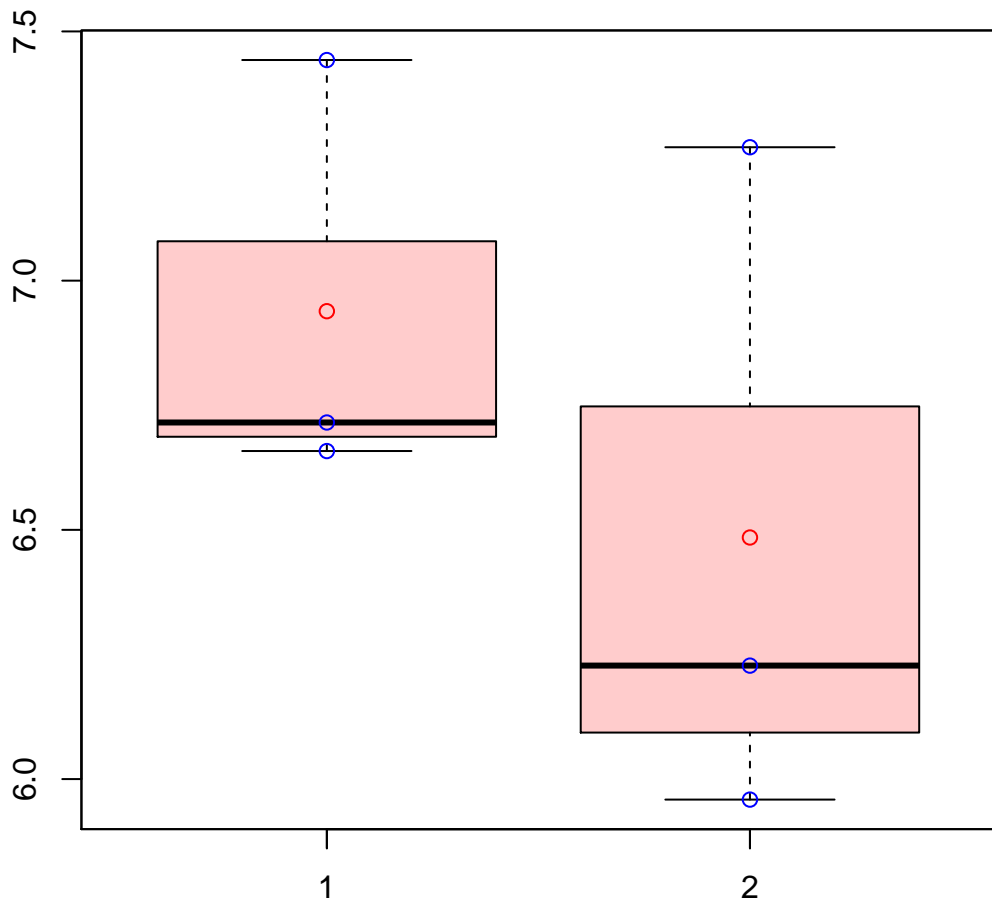

t-Test: p-value = 0.4

# K4A6V8|K4A6V8\_SETIT

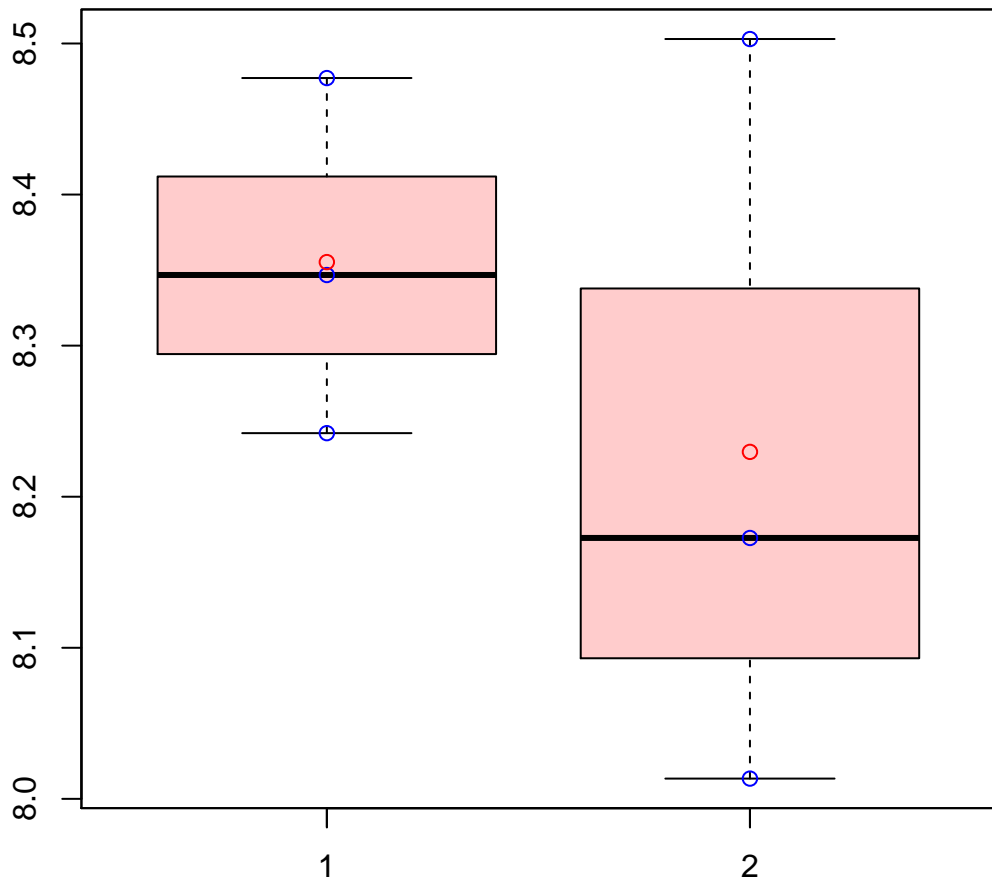

t-Test: p-value = 0.49



# K4A6W3|K4A6W3\_SETIT

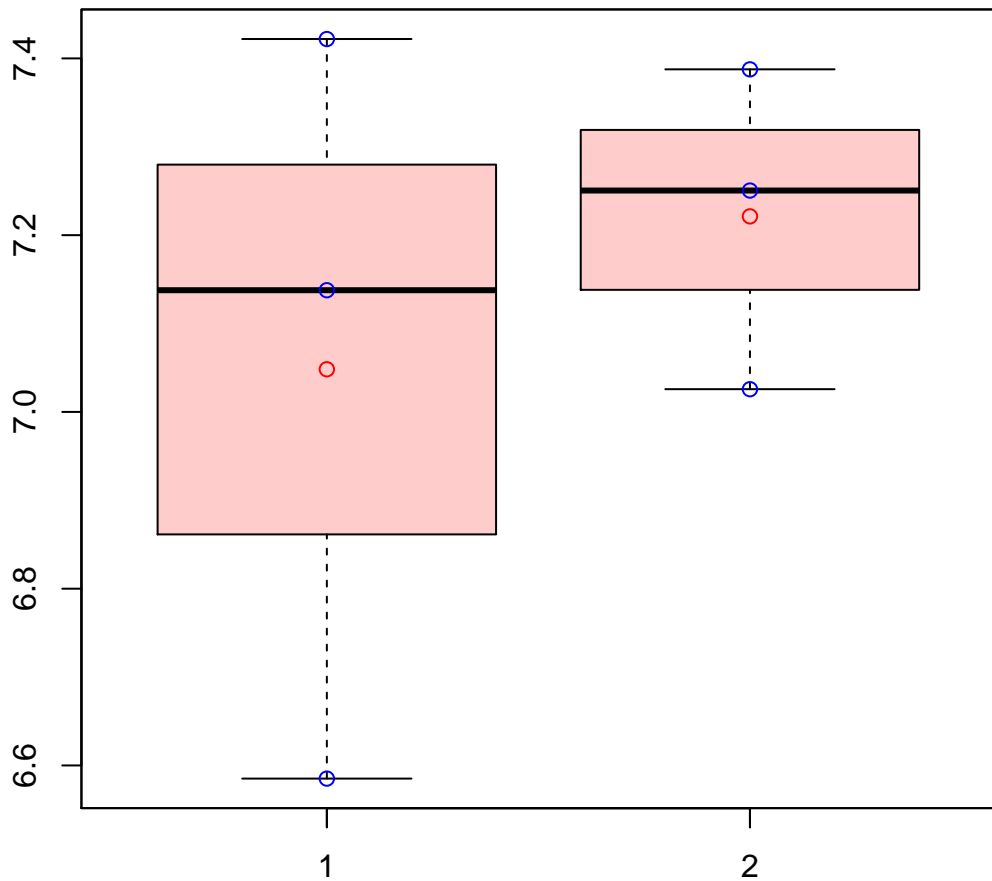

t-Test: p-value = 0.57

# K4A762|K4A762\_SETIT

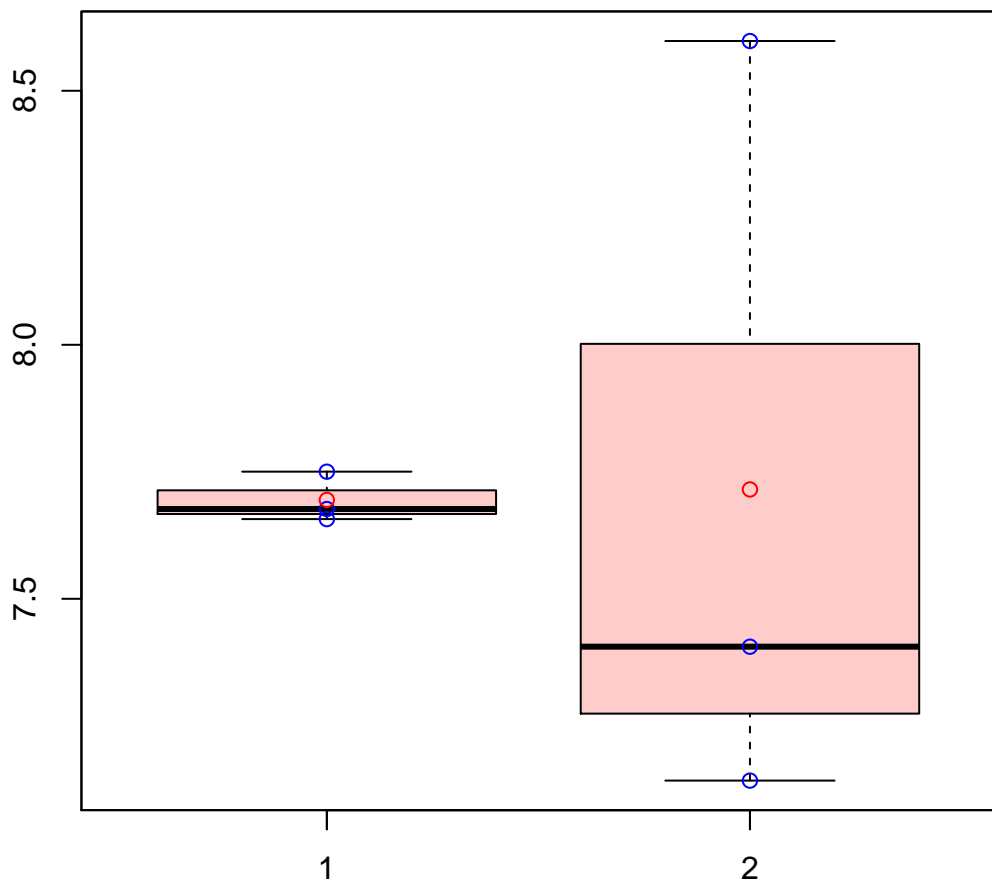

t-Test: p-value = 0.97

# K4A791|K4A791\_SETIT

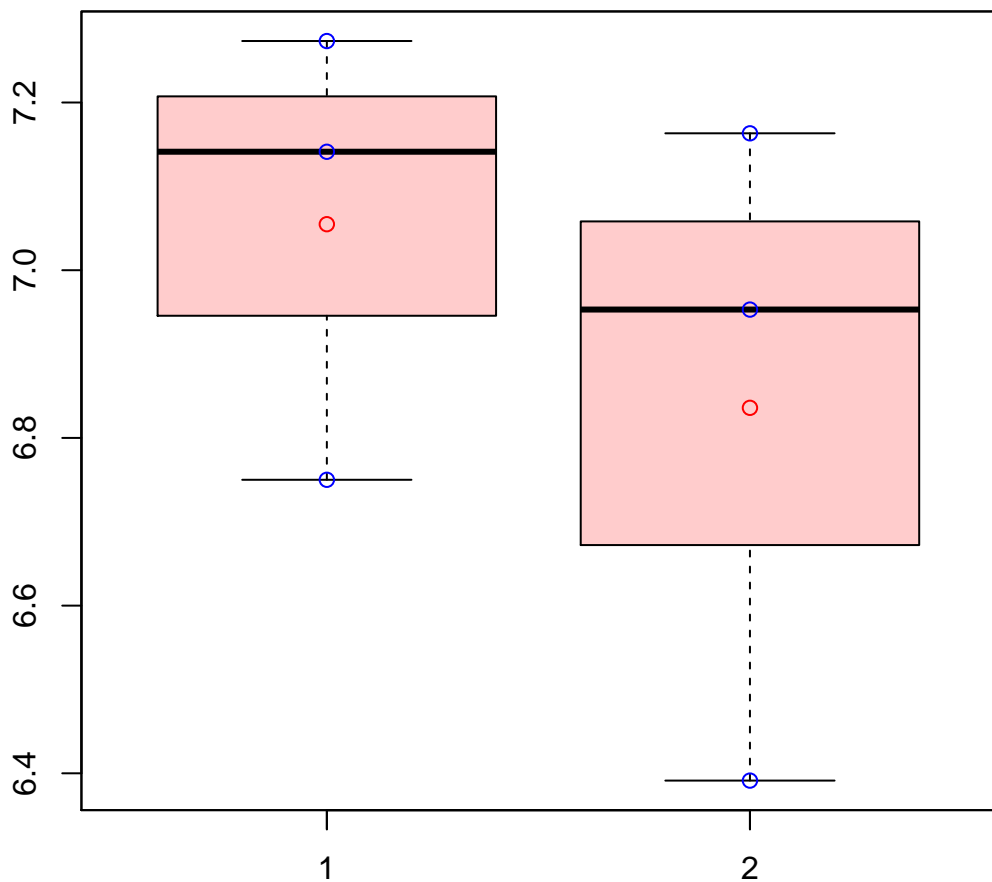

t-Test: p-value = 0.48

# K4A7B1|K4A7B1\_SETIT

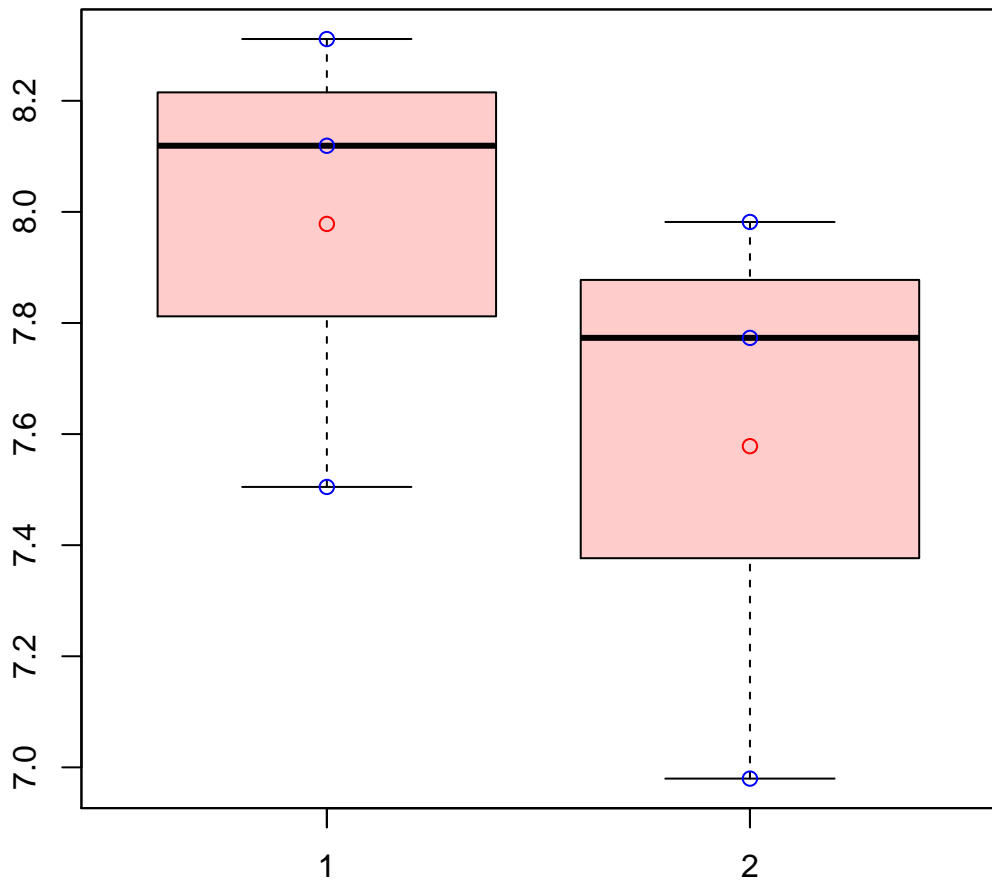

t-Test: p-value = 0.37

# K4A7B2|K4A7B2\_SETIT

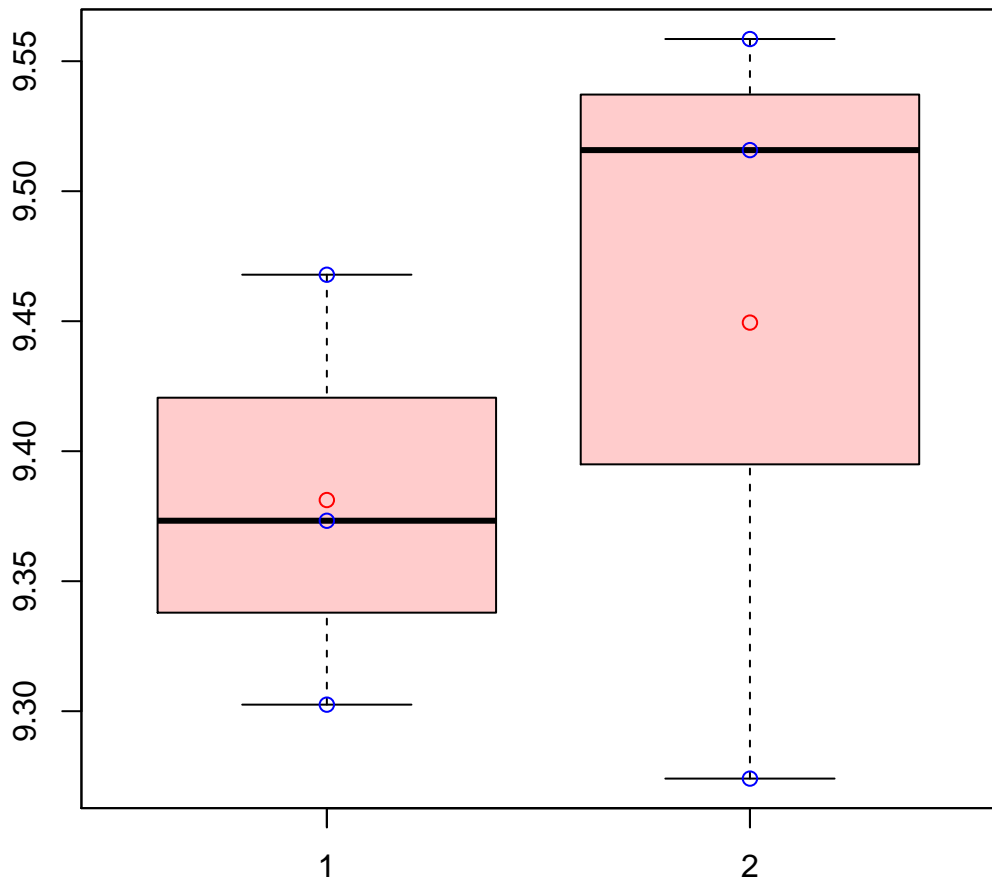

t-Test: p-value = 0.55

# K4A7I4|K4A7I4\_SETIT

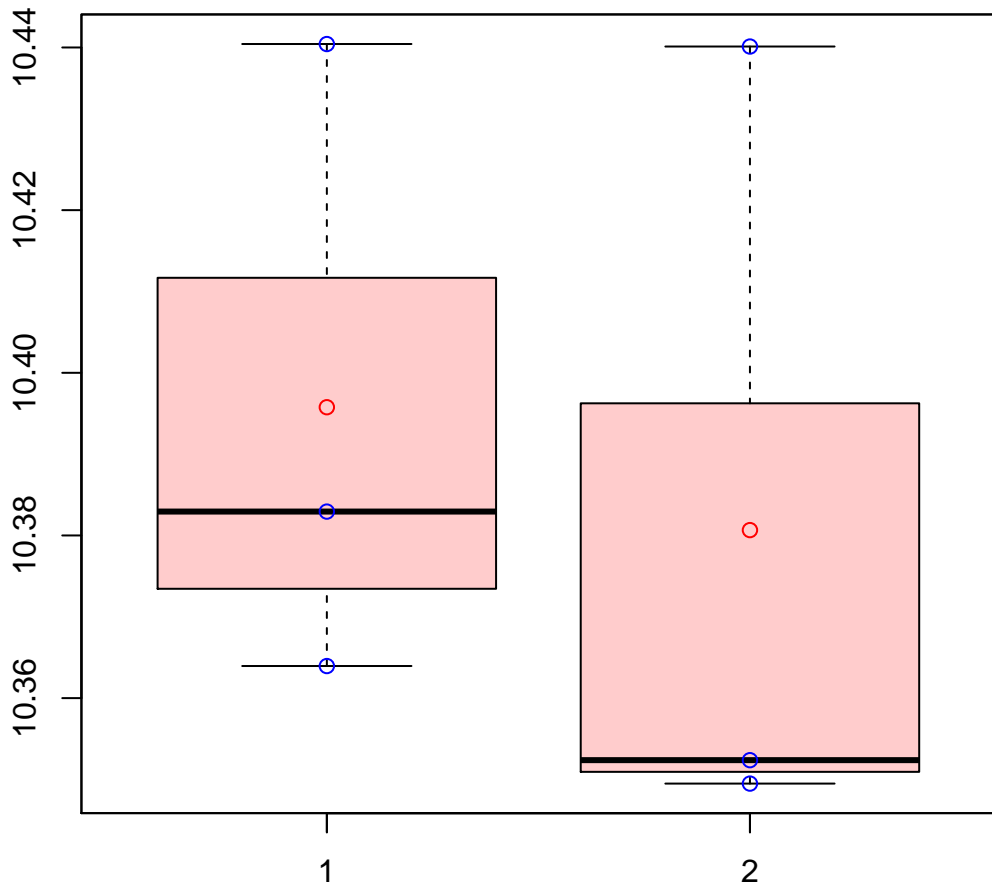

t-Test: p-value = 0.71

# K4A7L4|K4A7L4\_SETIT

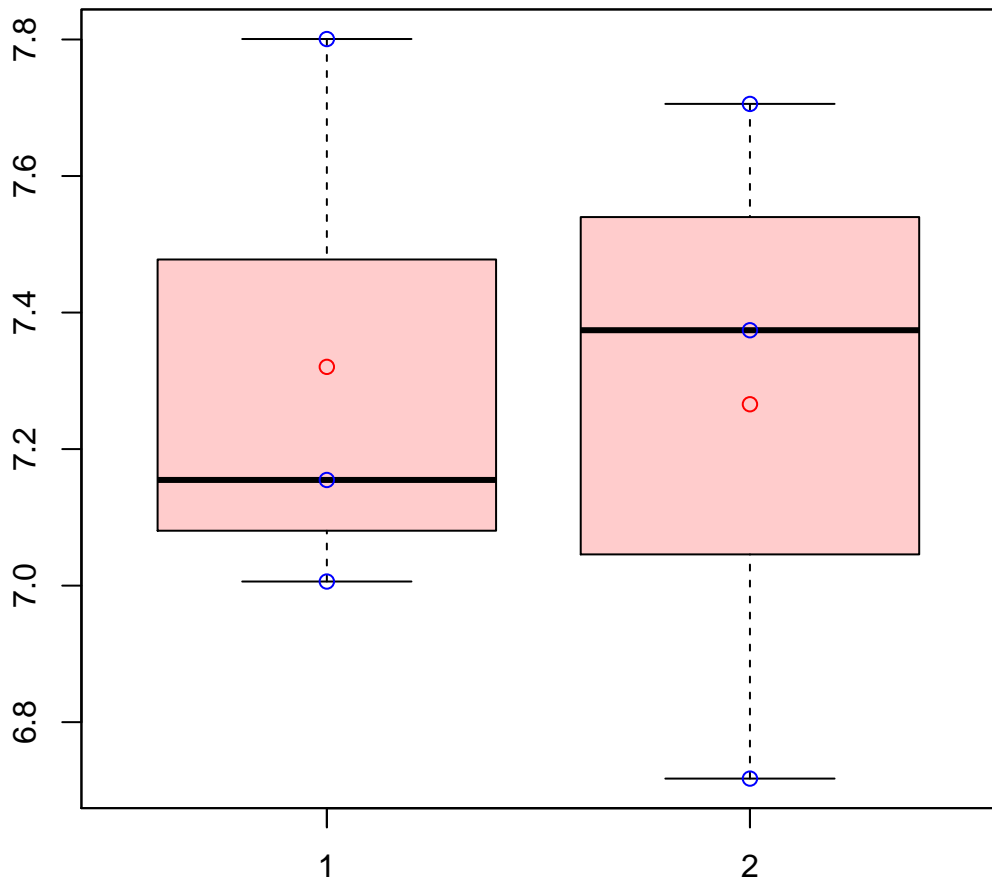

t-Test: p-value = 0.89

# K4A7W7|K4A7W7\_SETIT

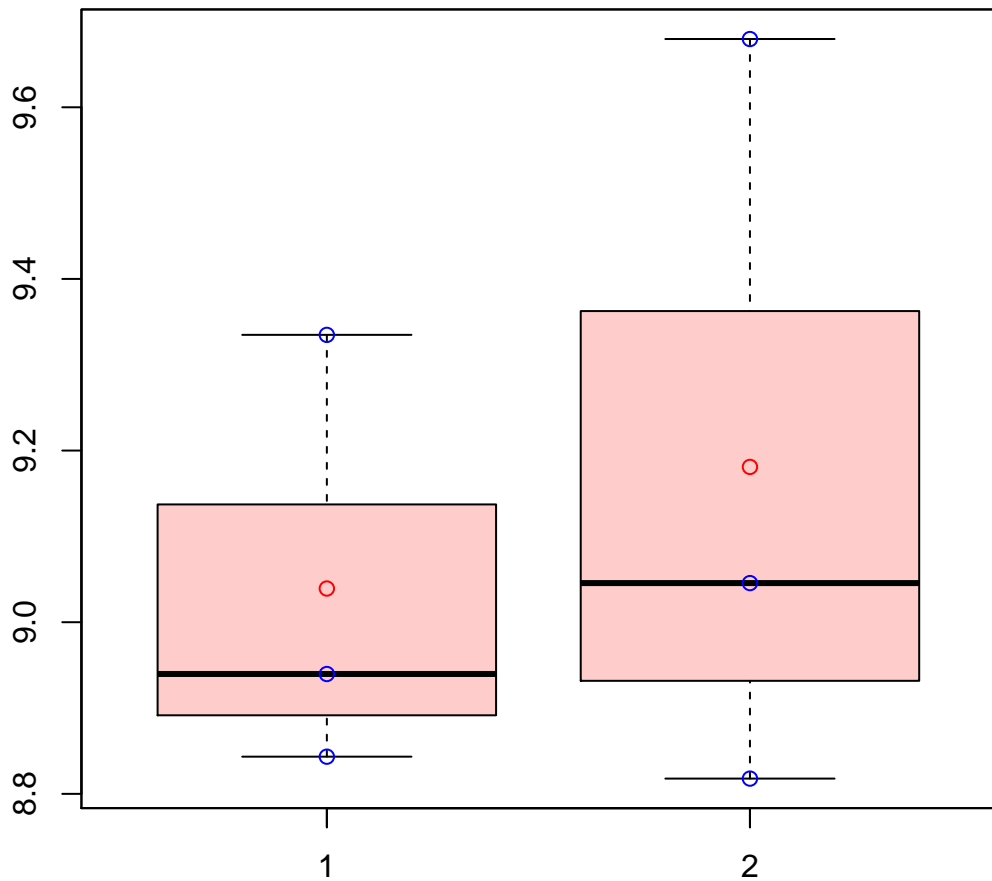

t-Test: p-value = 0.67



# K4A868|K4A868\_SETIT

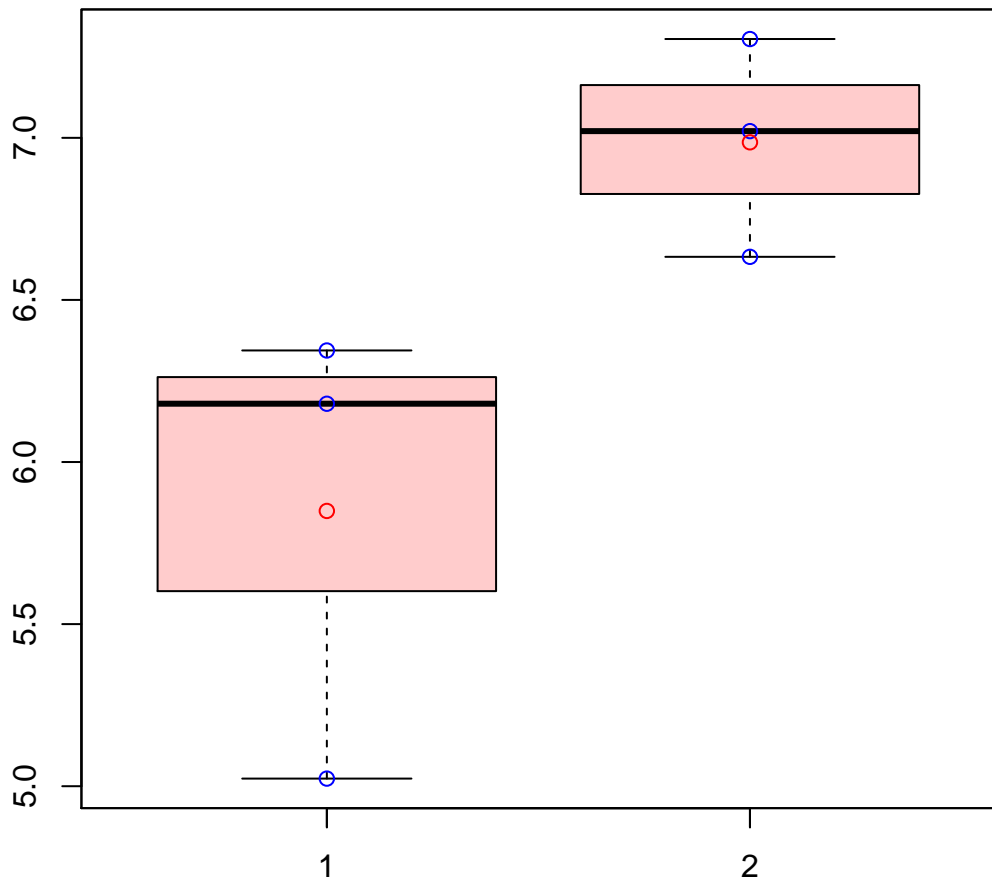

t-Test: p-value = 0.09

# K4A875|K4A875\_SETIT

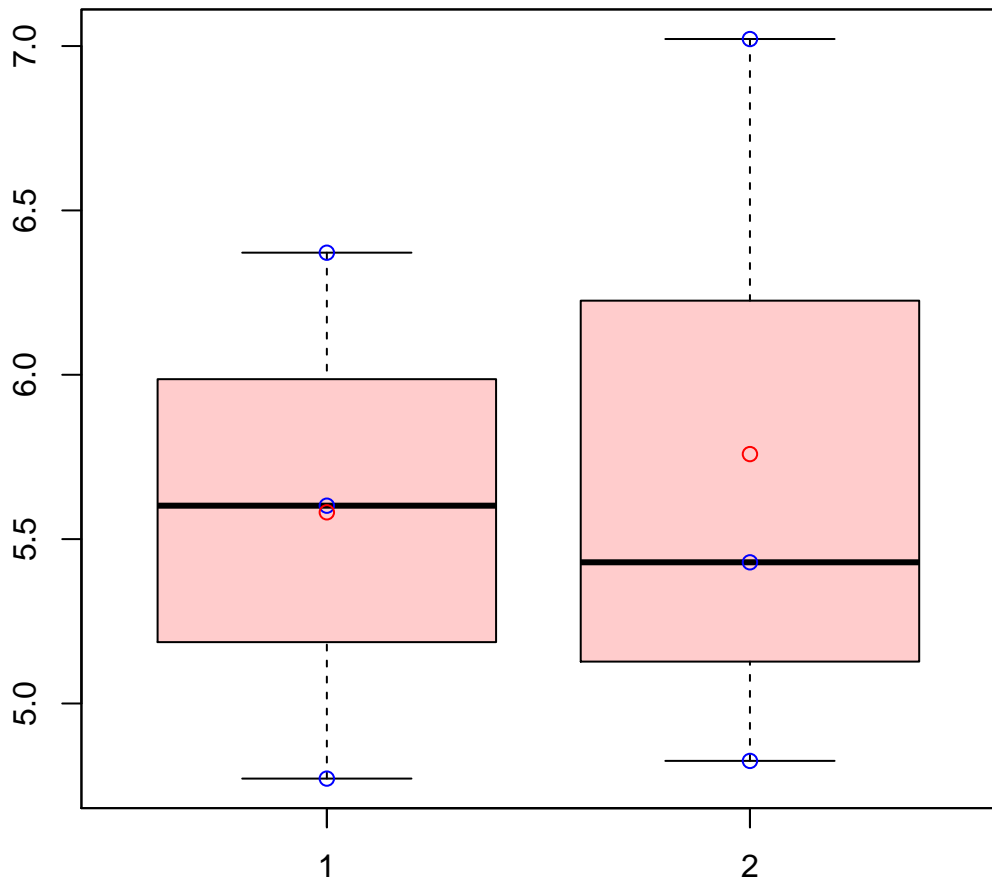

t-Test: p-value = 0.84

# K4A8N1|K4A8N1\_SETIT

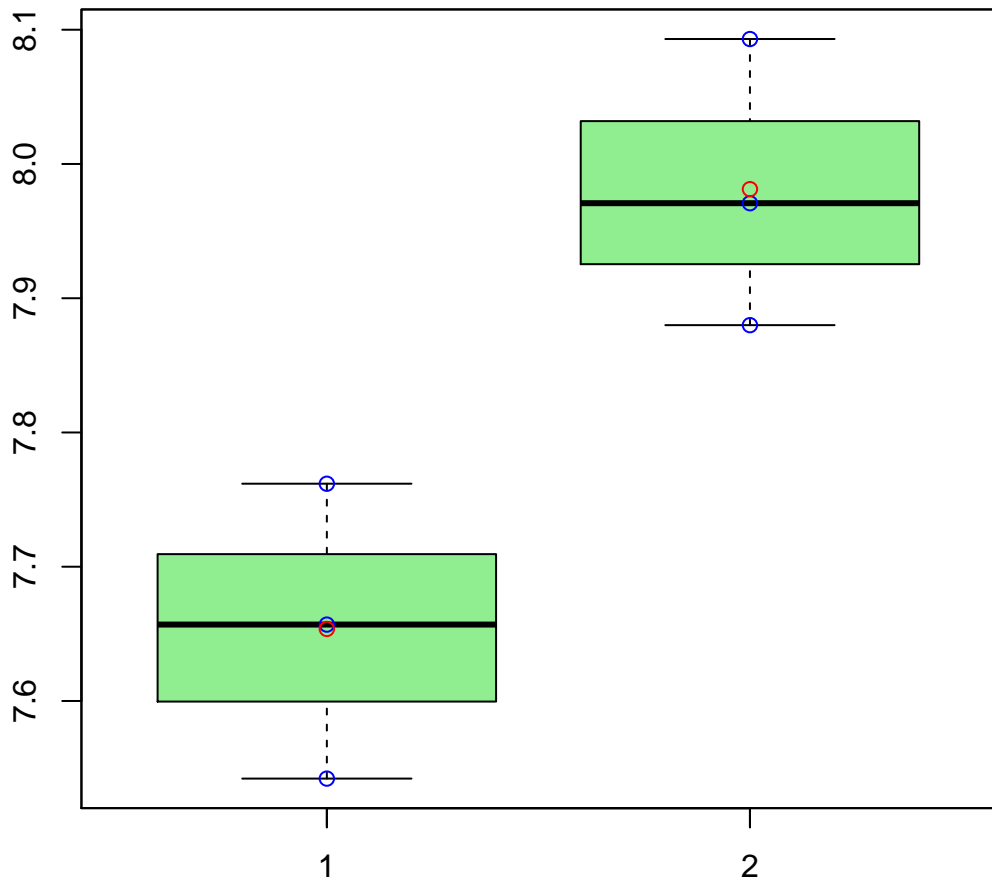

t-Test: p-value = 0.02

# K4A8P9|K4A8P9\_SETIT

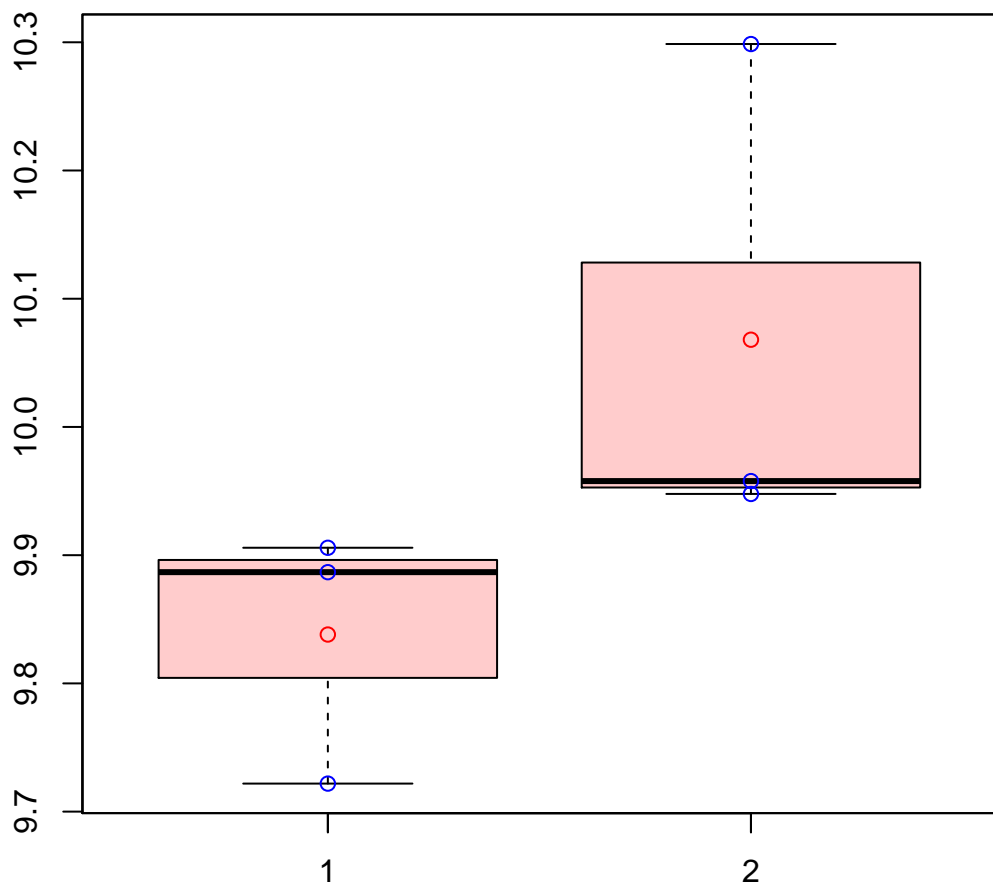

t-Test: p-value = 0.17

# K4A901|K4A901\_SETIT

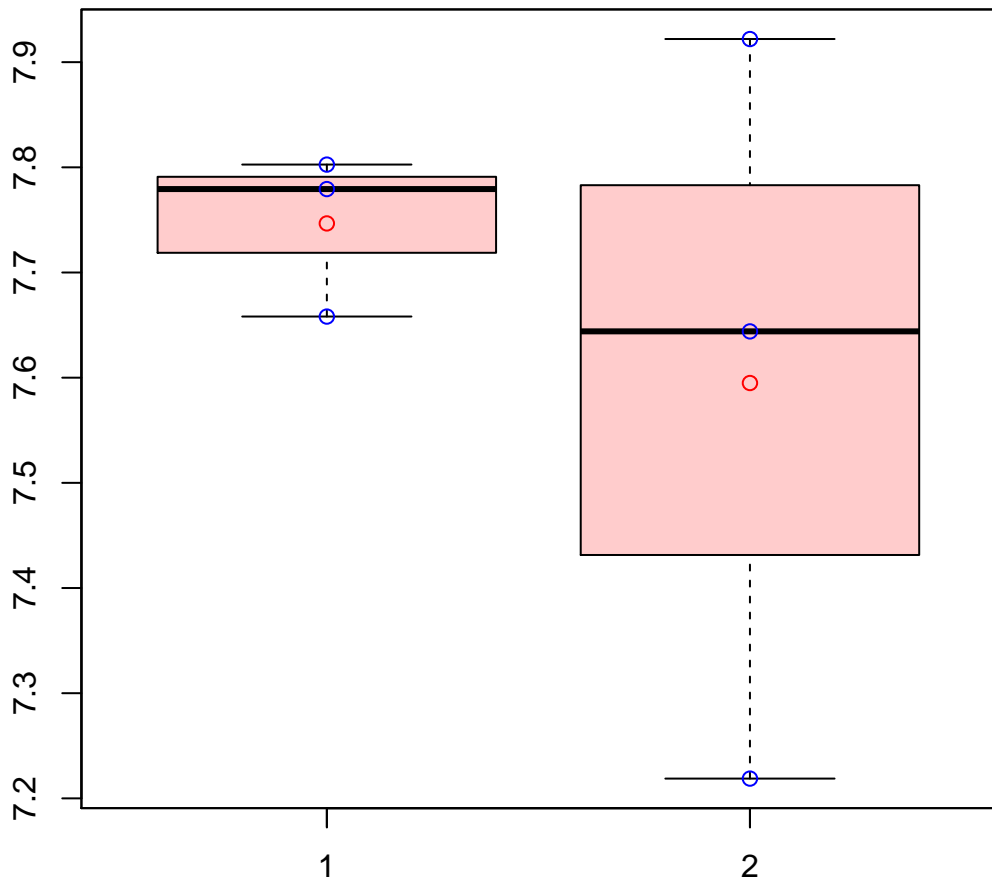

t-Test: p-value = 0.54

# K4A939|K4A939\_SETIT

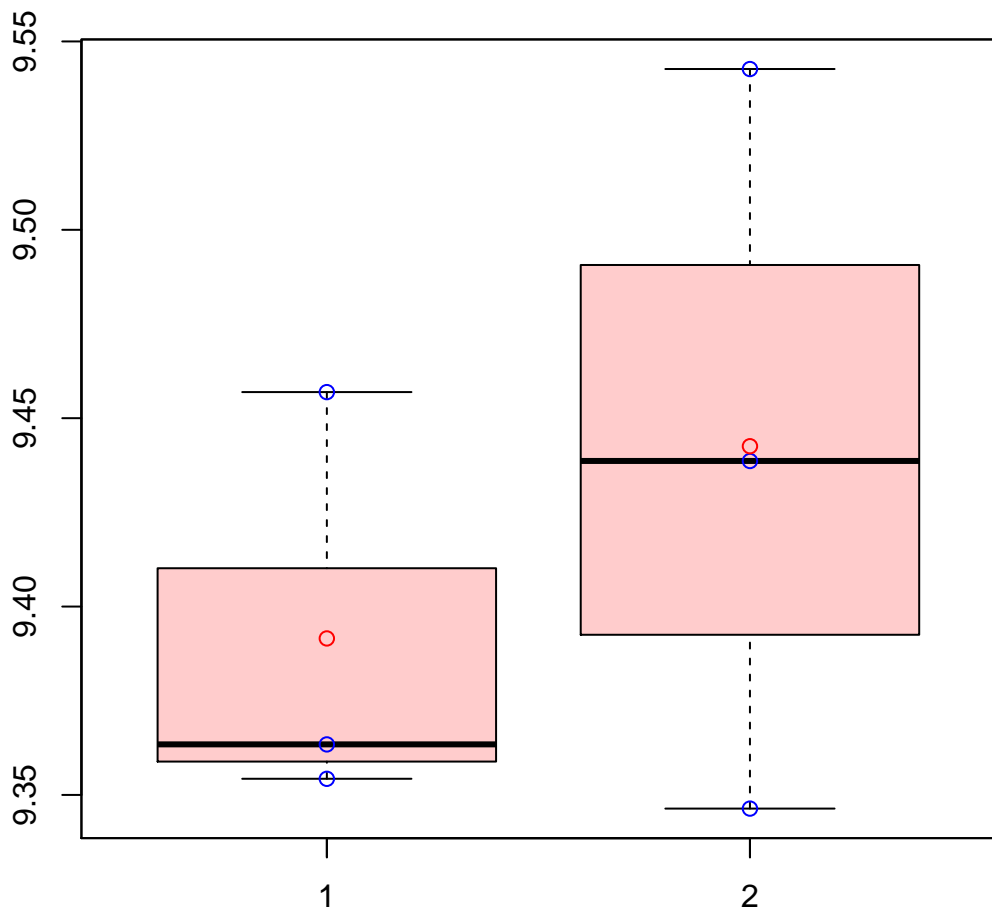

t-Test: p-value = 0.49

# K4A9G0|K4A9G0\_SETIT

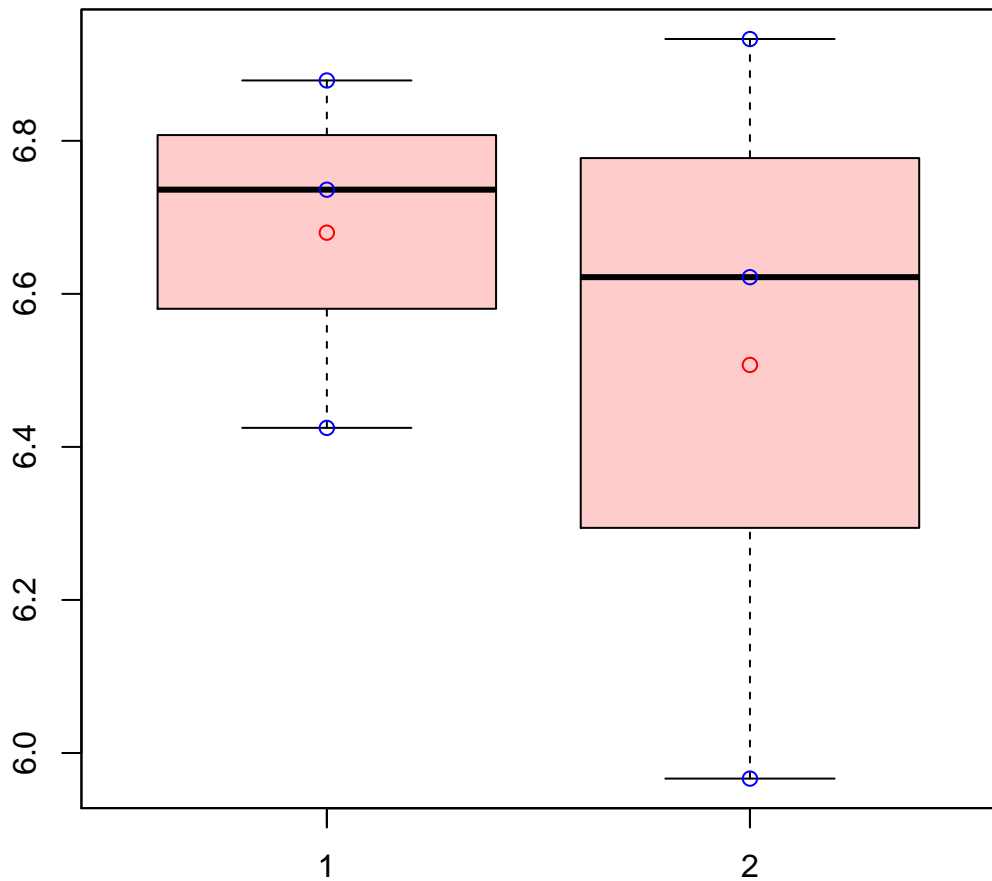

t-Test: p-value = 0.62

# K4A9L7|K4A9L7\_SETIT

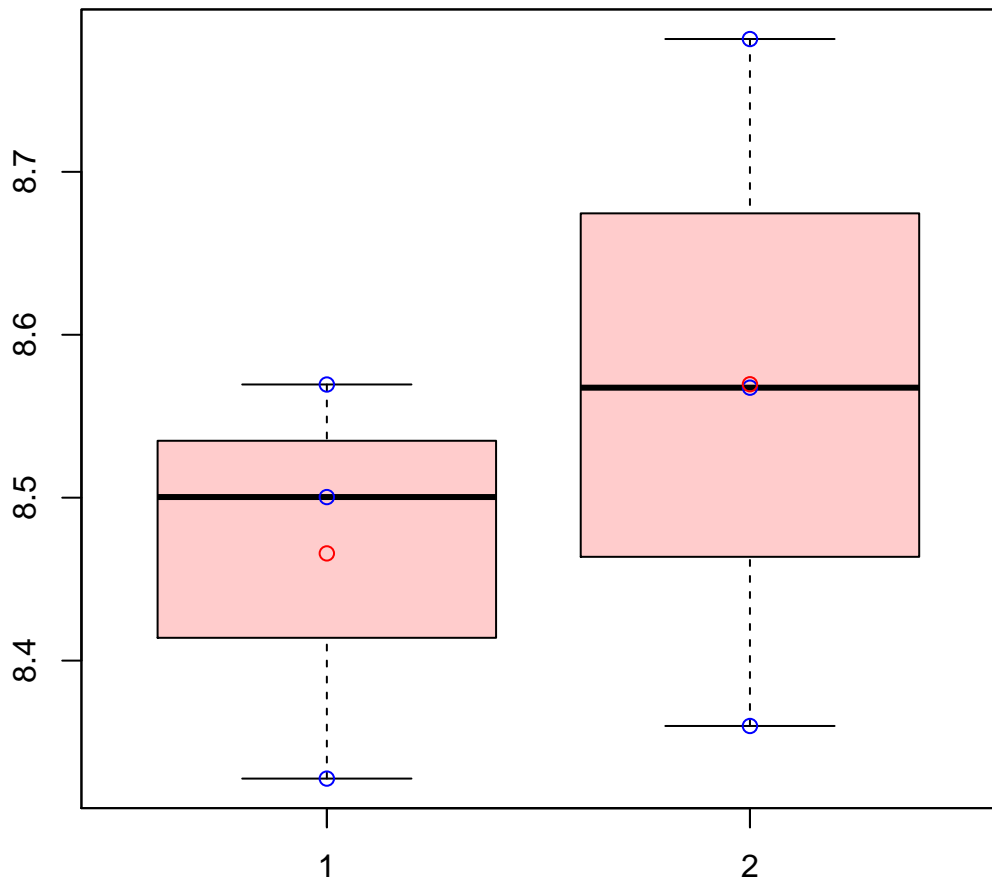

t-Test: p-value = 0.51



# K4A9N1|K4A9N1\_SETIT

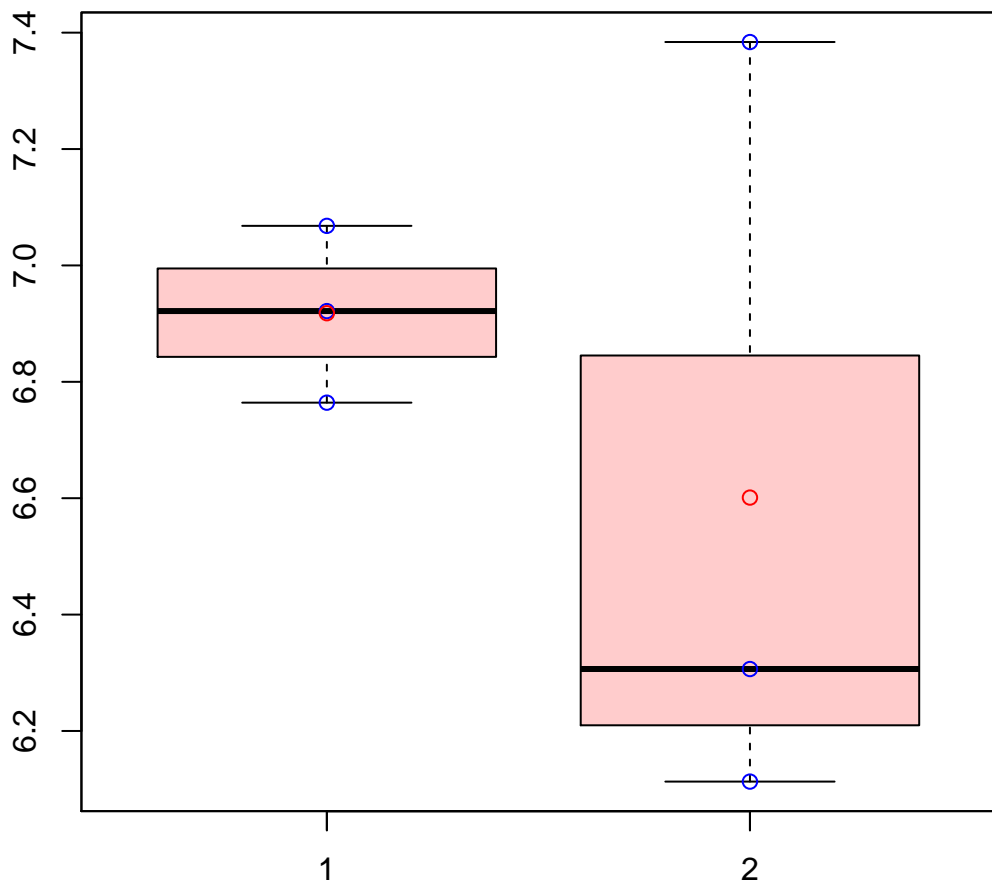

t-Test: p-value = 0.51

# K4A9V6|K4A9V6\_SETIT

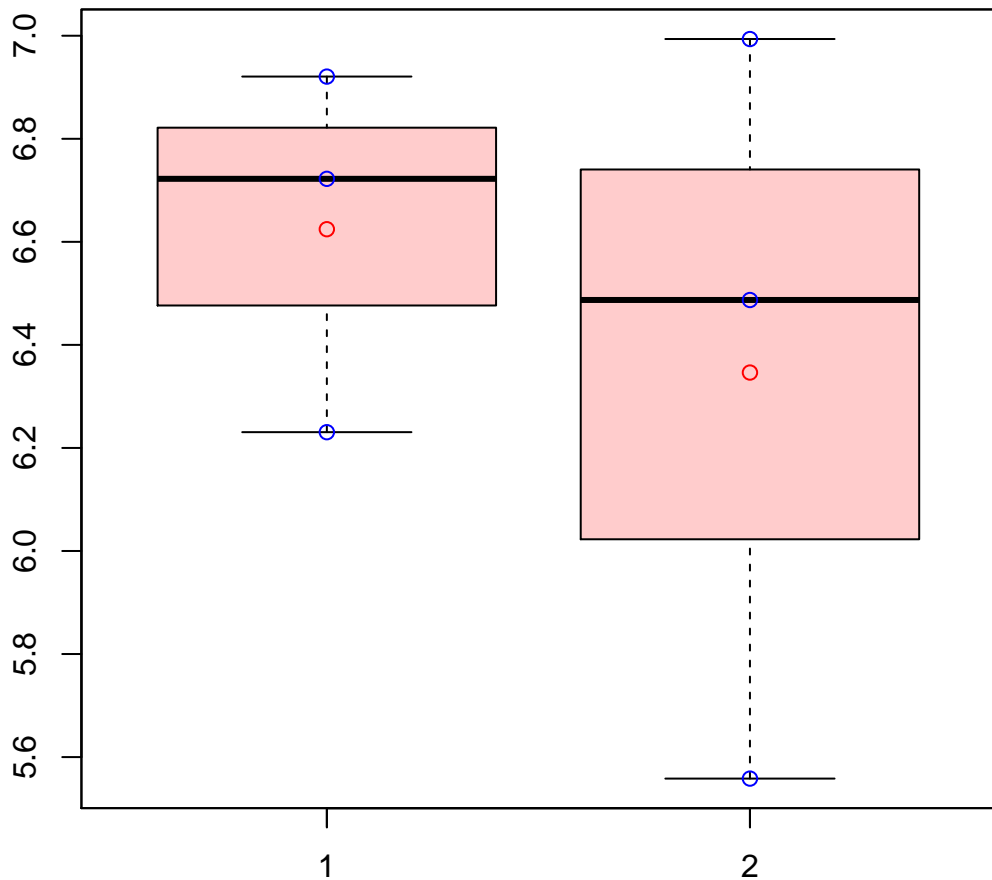

t-Test: p-value = 0.6

# K4A9Y4|K4A9Y4\_SETIT

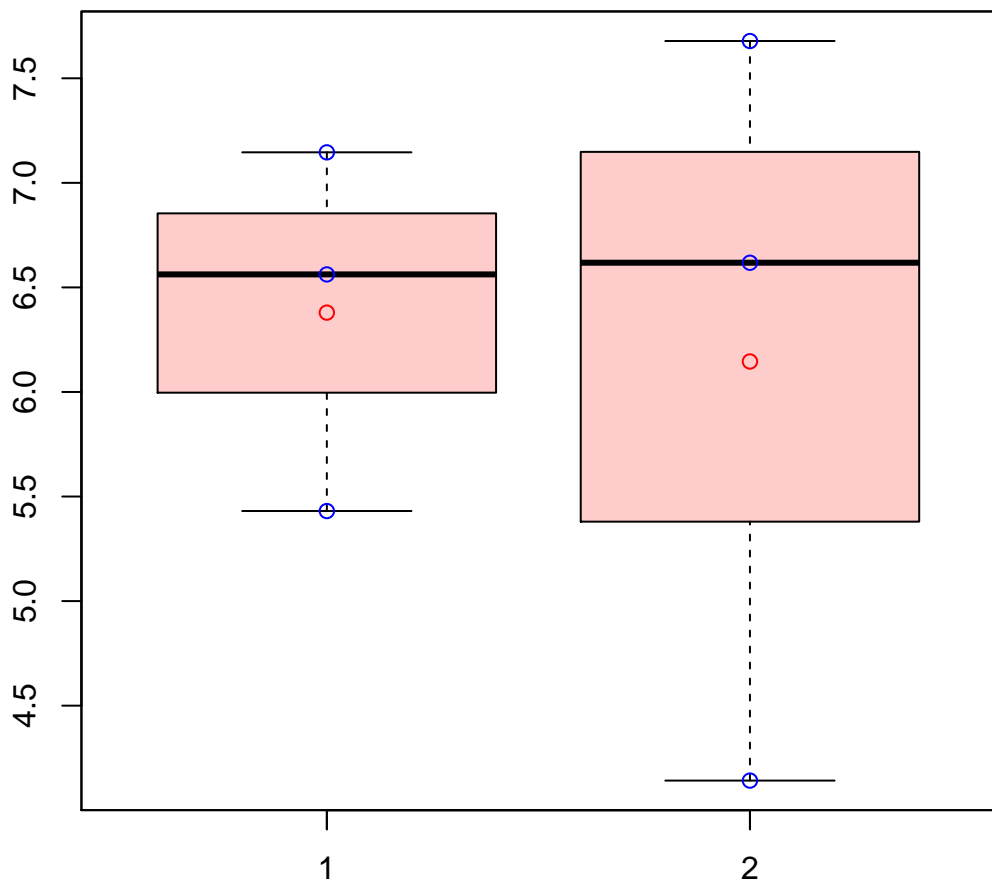

t-Test: p-value = 0.85

# K4AA01|K4AA01\_SETIT

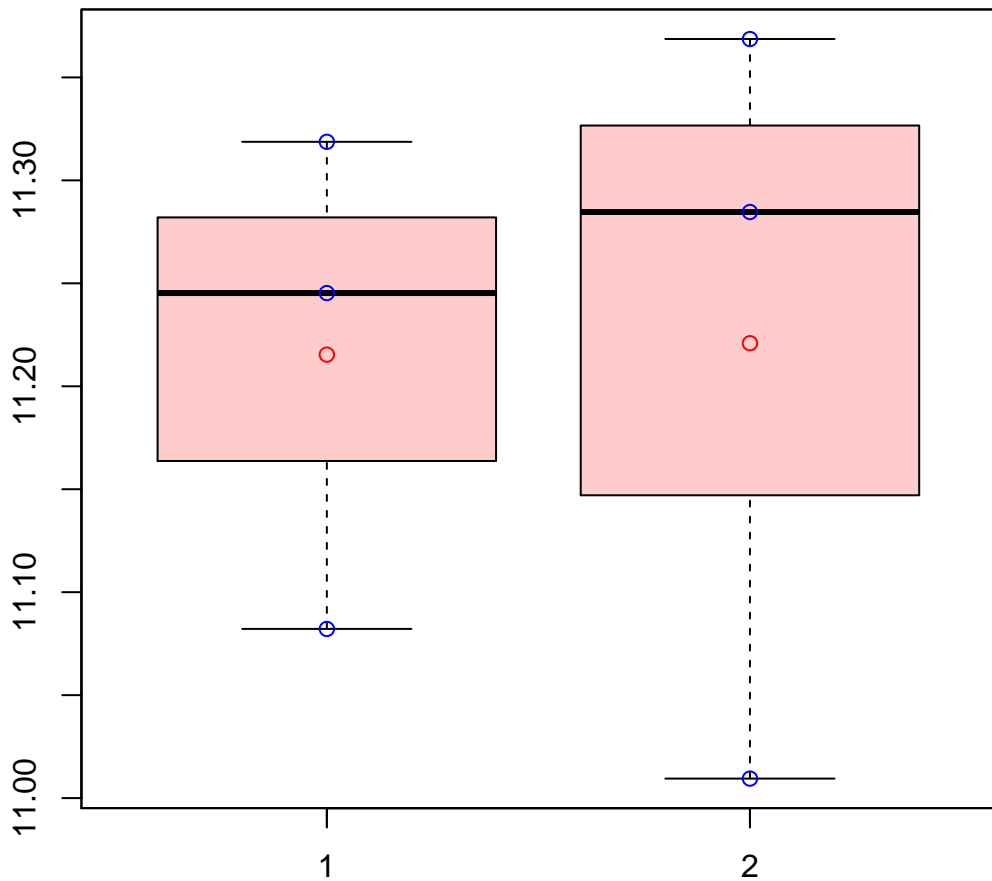

t-Test: p-value = 0.97

# K4AA05|K4AA05\_SETIT

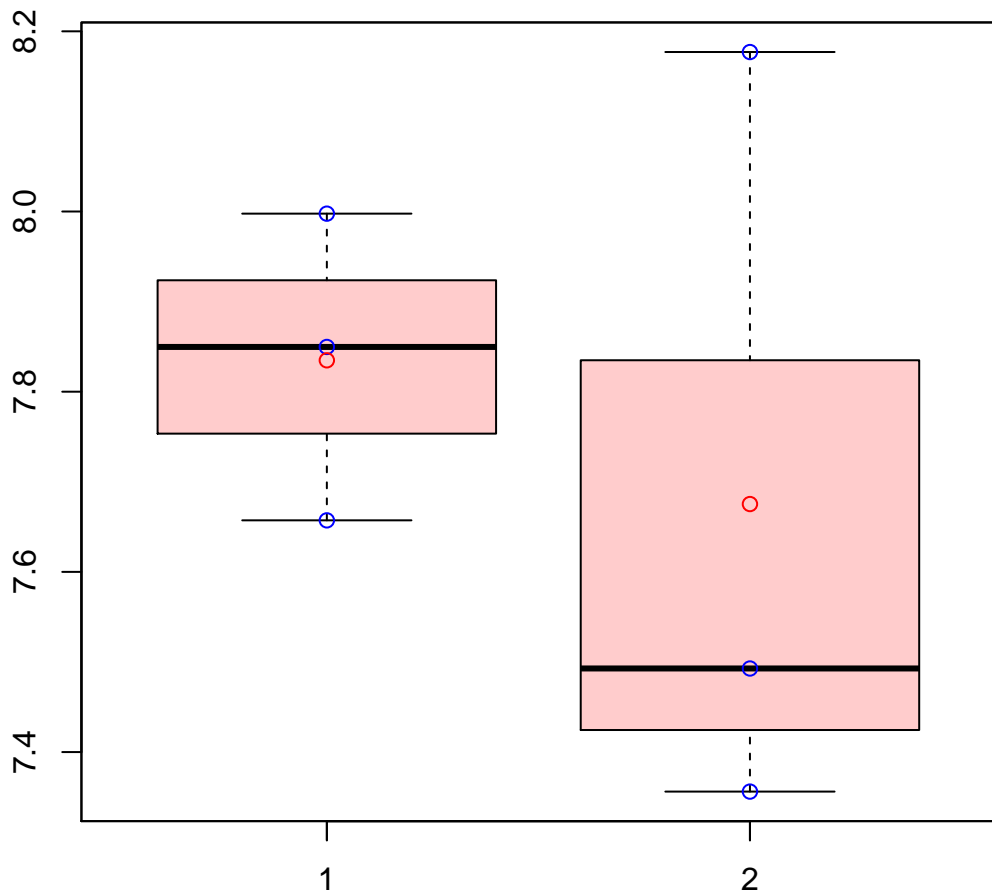

t-Test: p-value = 0.61

# K4AA31|K4AA31\_SETIT

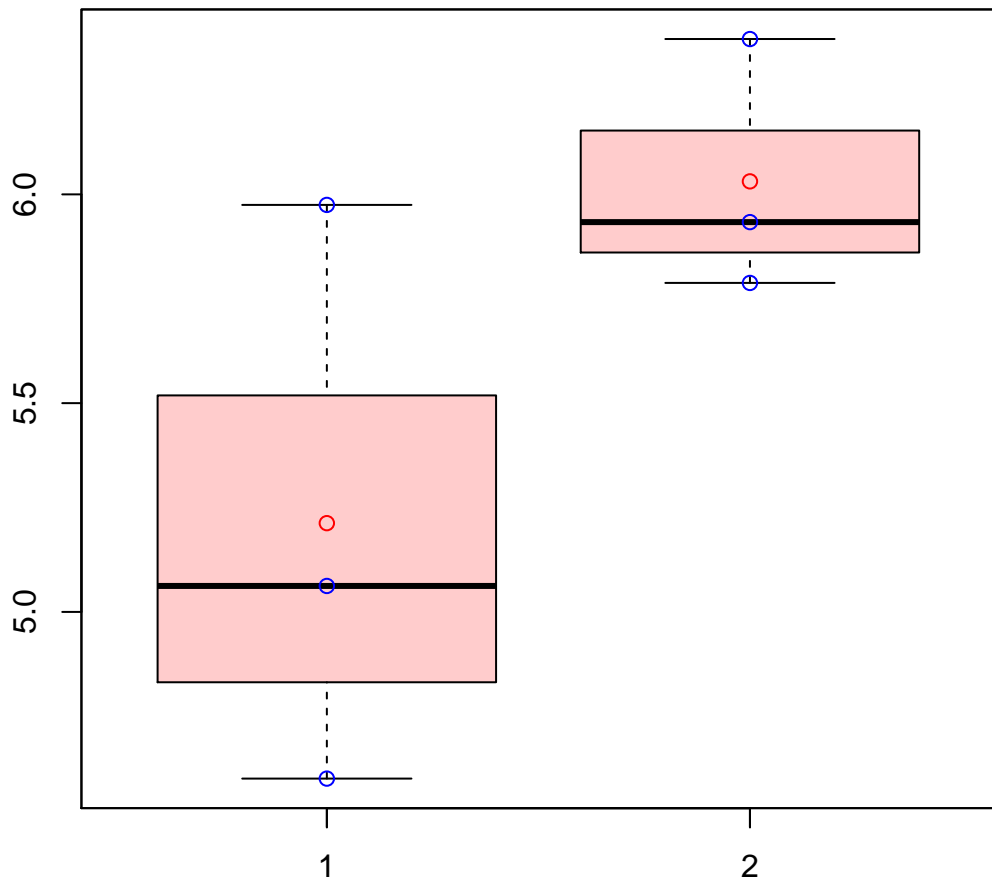

t-Test: p-value = 0.17

# K4AA60|K4AA60\_SETIT

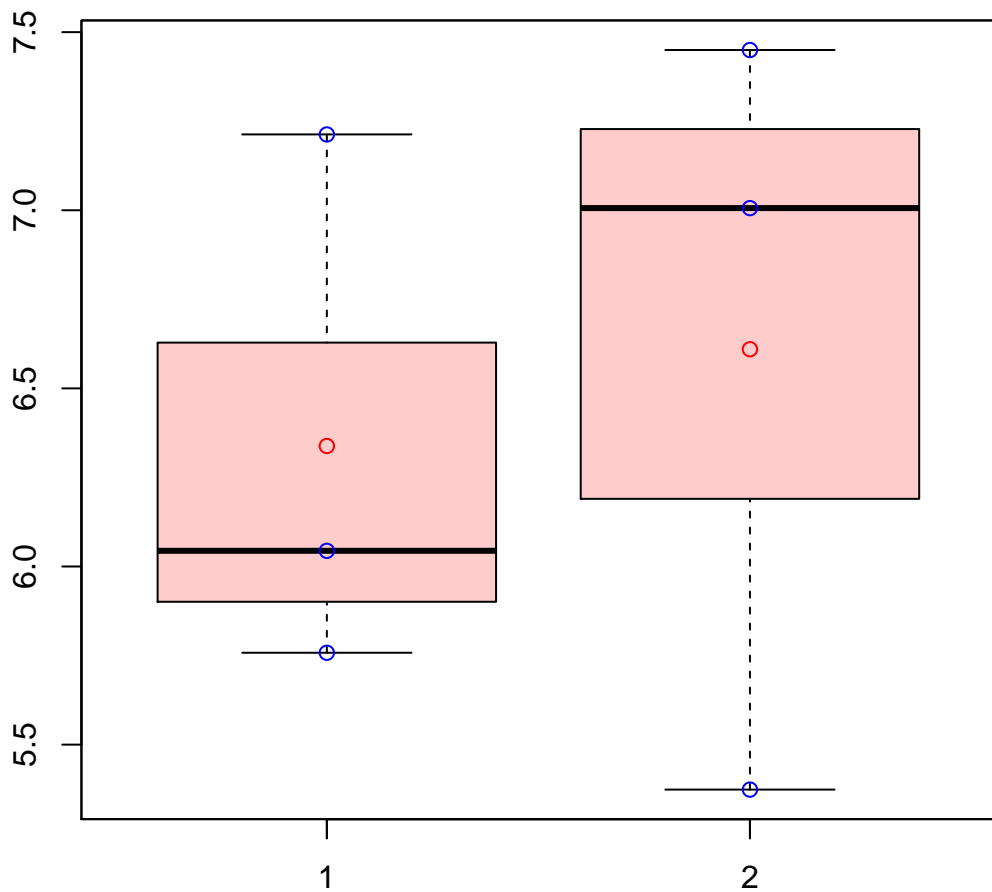

t-Test: p-value = 0.74

# K4AAE2|K4AAE2\_SETIT

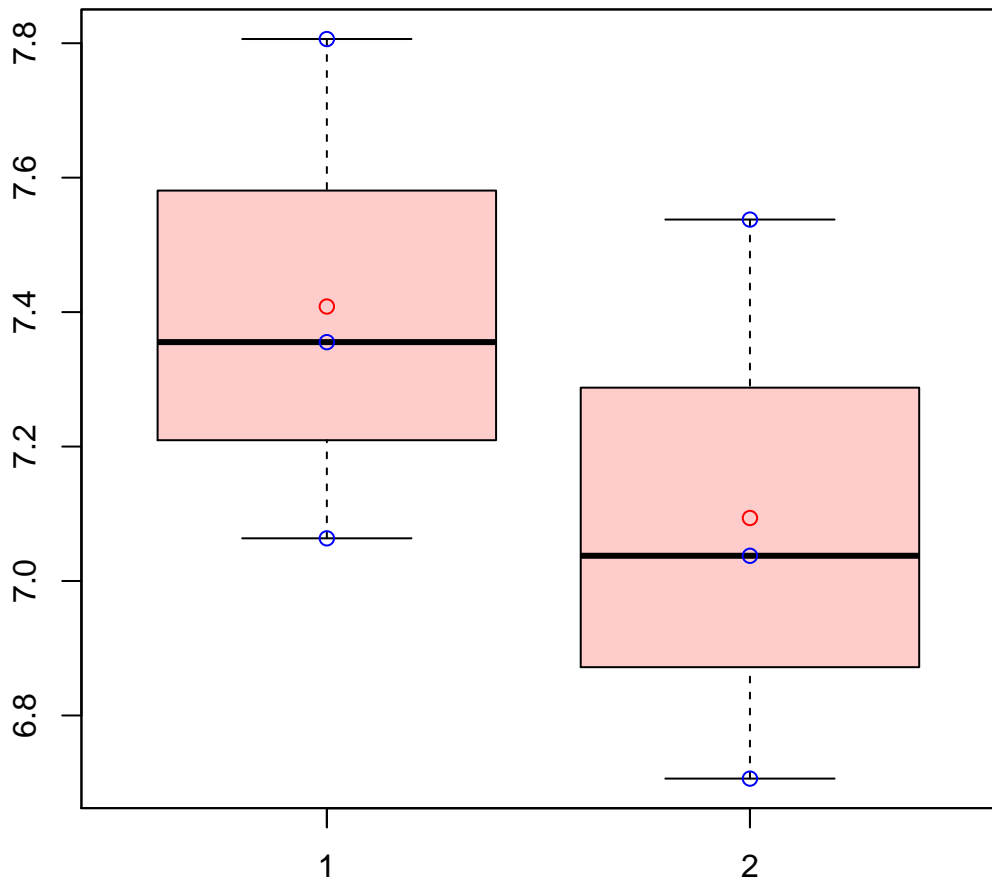

t-Test: p-value = 0.39



# K4AAG2|K4AAG2\_SETIT

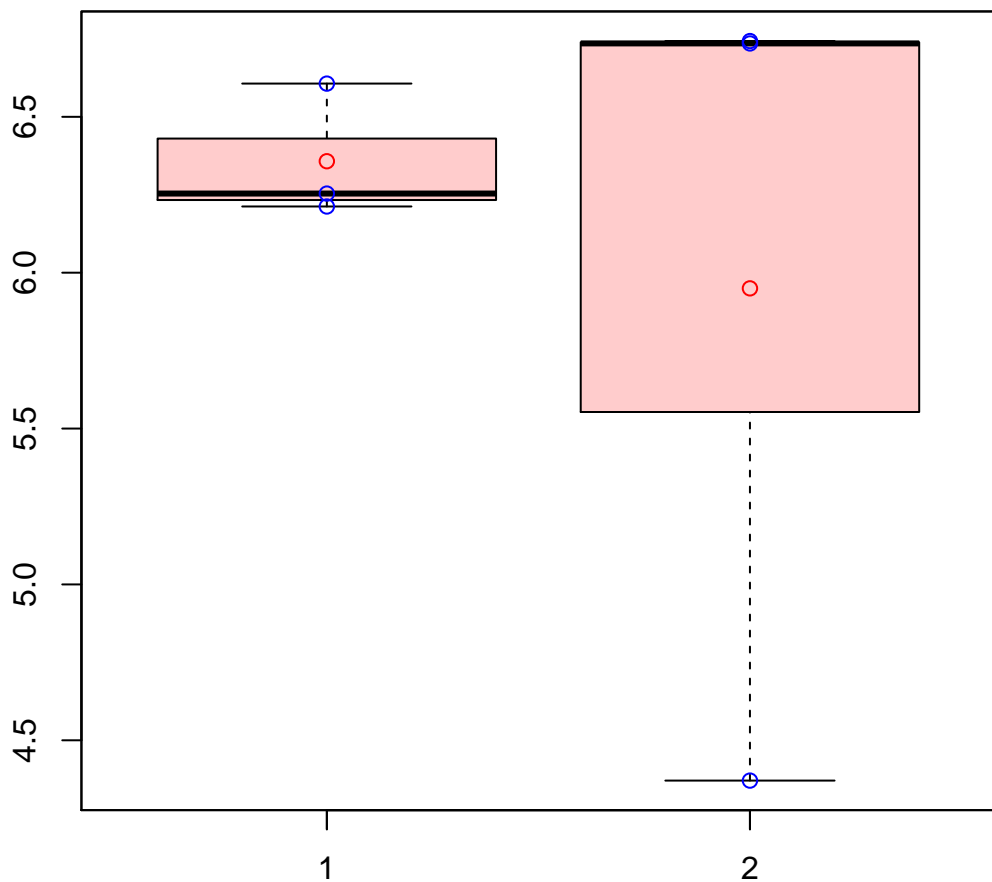

t-Test: p-value = 0.66

# K4AAI3|K4AAI3\_SETIT

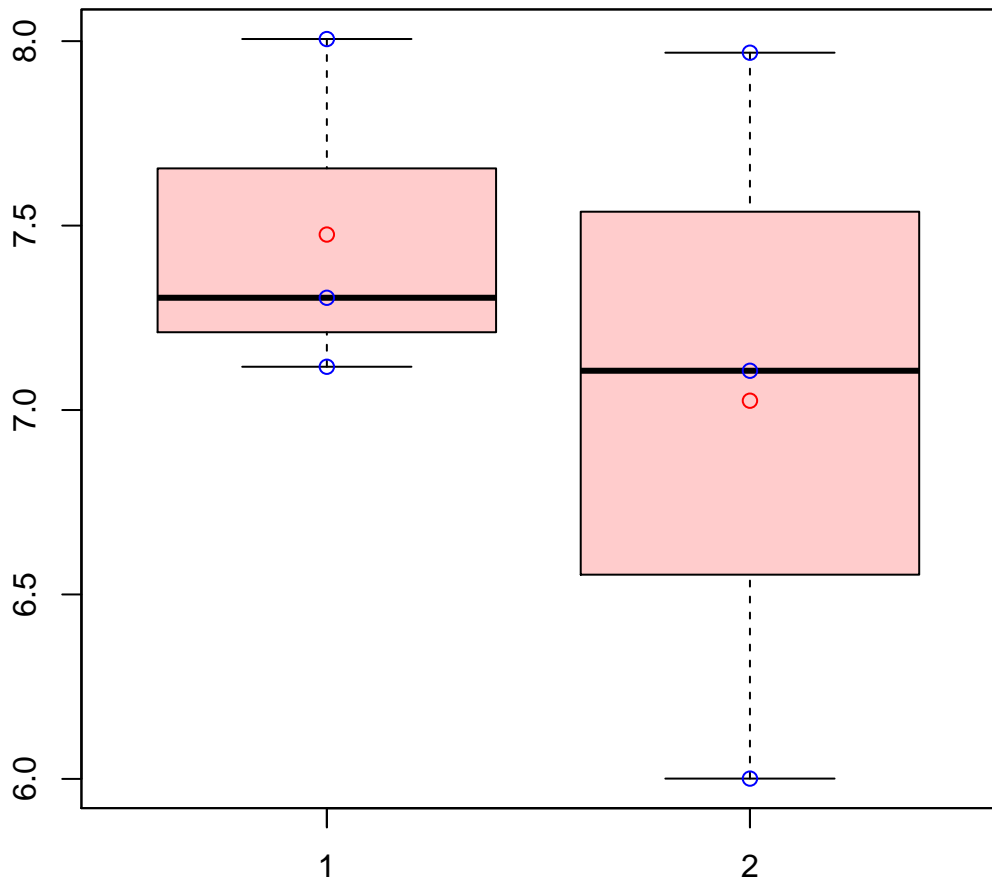

t-Test: p-value = 0.53

# K4AAJ8|K4AAJ8\_SETIT

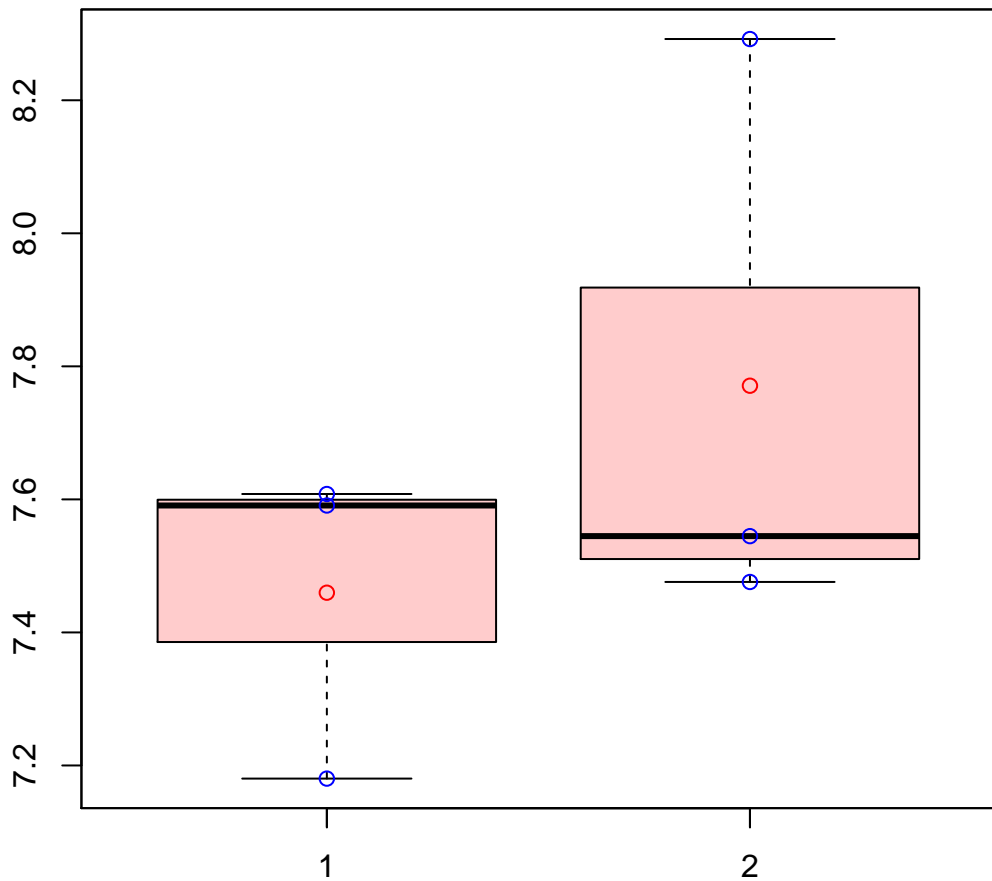

t-Test: p-value = 0.37

# K4AAP3|K4AAP3\_SETIT

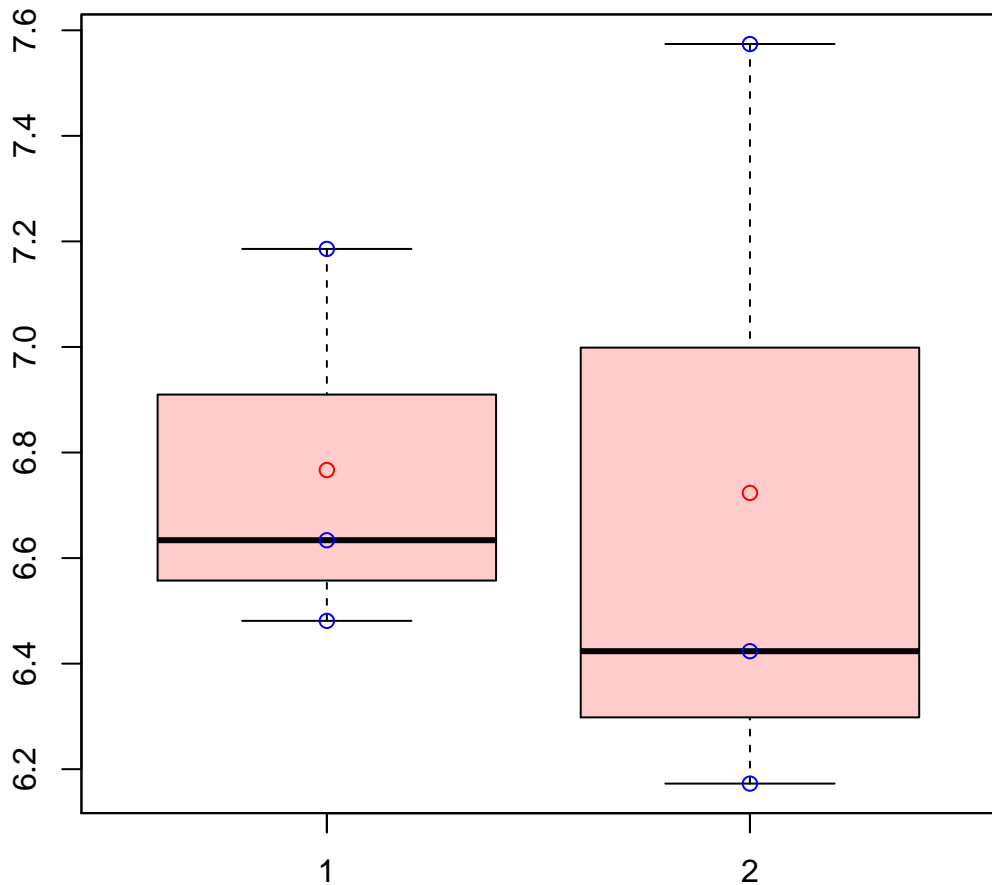

t-Test: p-value = 0.93

# K4AAS7|K4AAS7\_SETIT

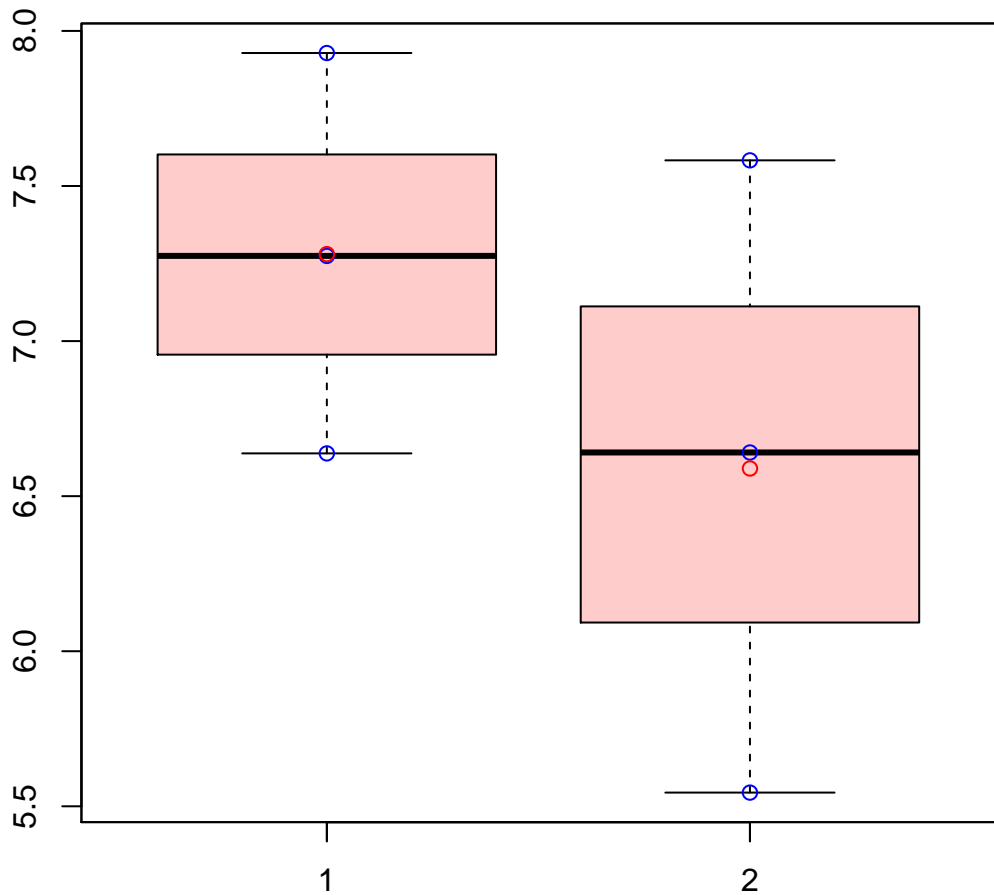

t-Test: p-value = 0.39

# K4AAT2|K4AAT2\_SETIT

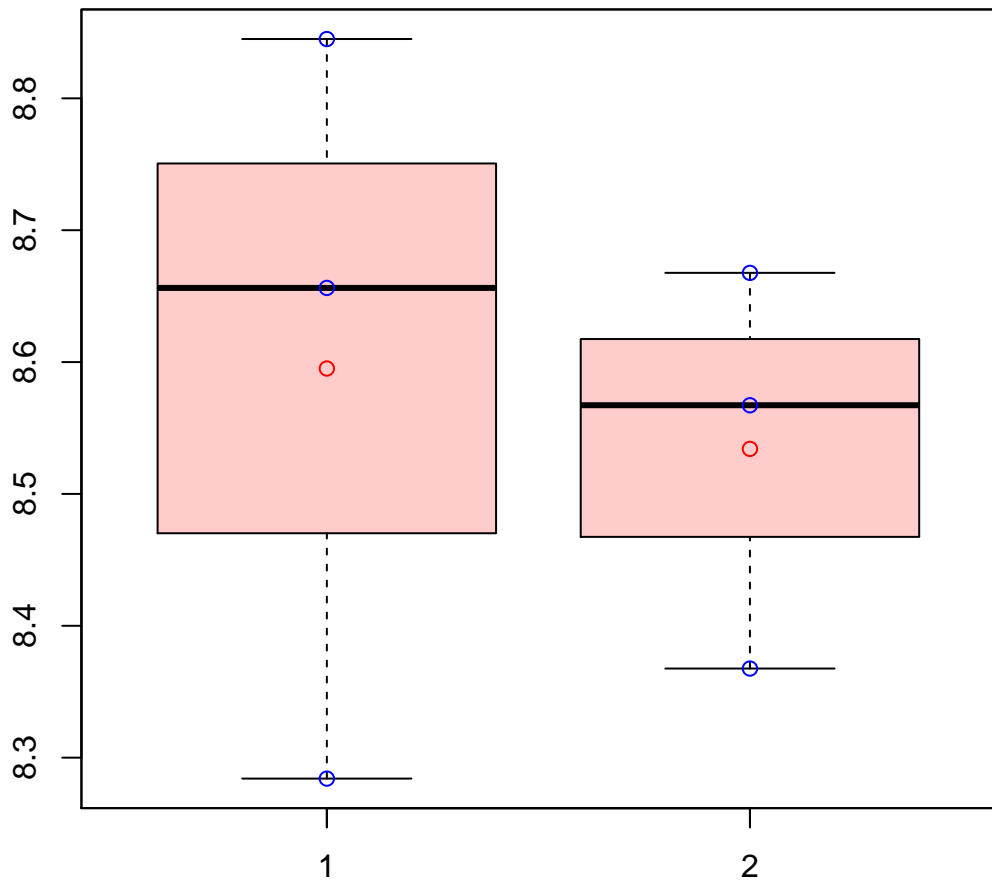

t-Test: p-value = 0.77

# K4AAV6|K4AAV6\_SETIT

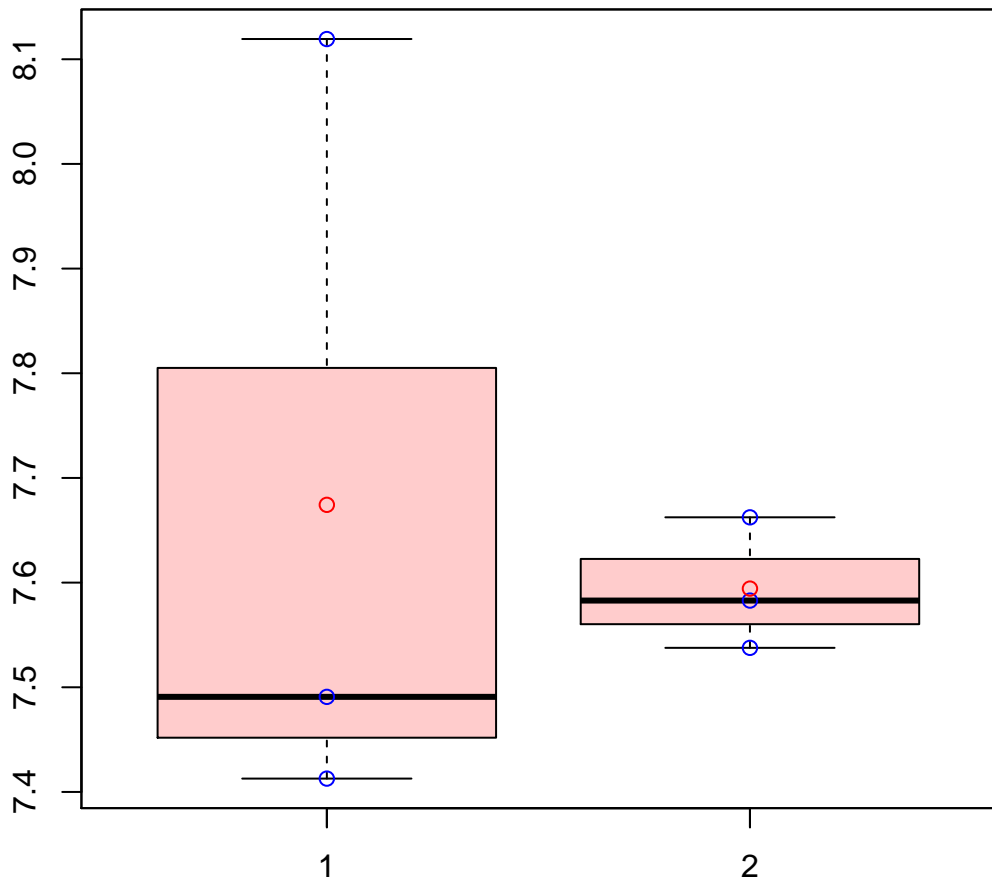

t-Test: p-value = 0.76

# K4AB63|K4AB63\_SETIT

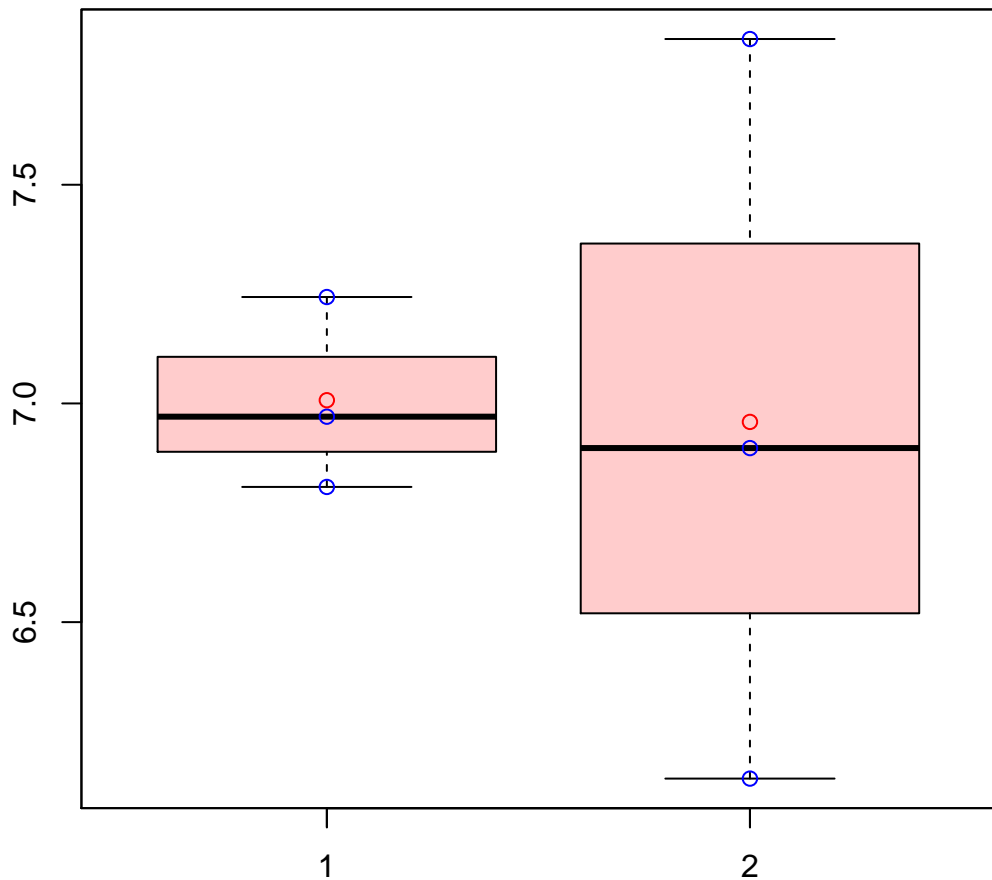

t-Test: p-value = 0.93



# K4ABL8|K4ABL8\_SETIT

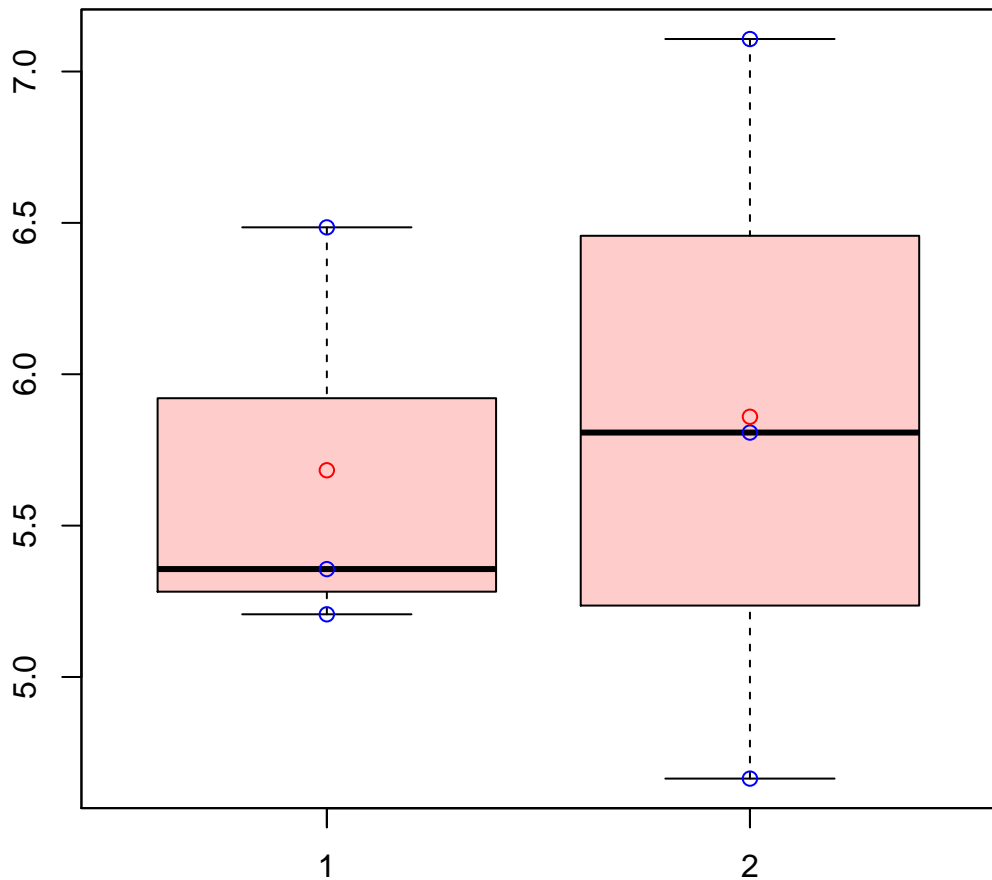

t-Test: p-value = 0.84

# K4ABP3|K4ABP3\_SETIT

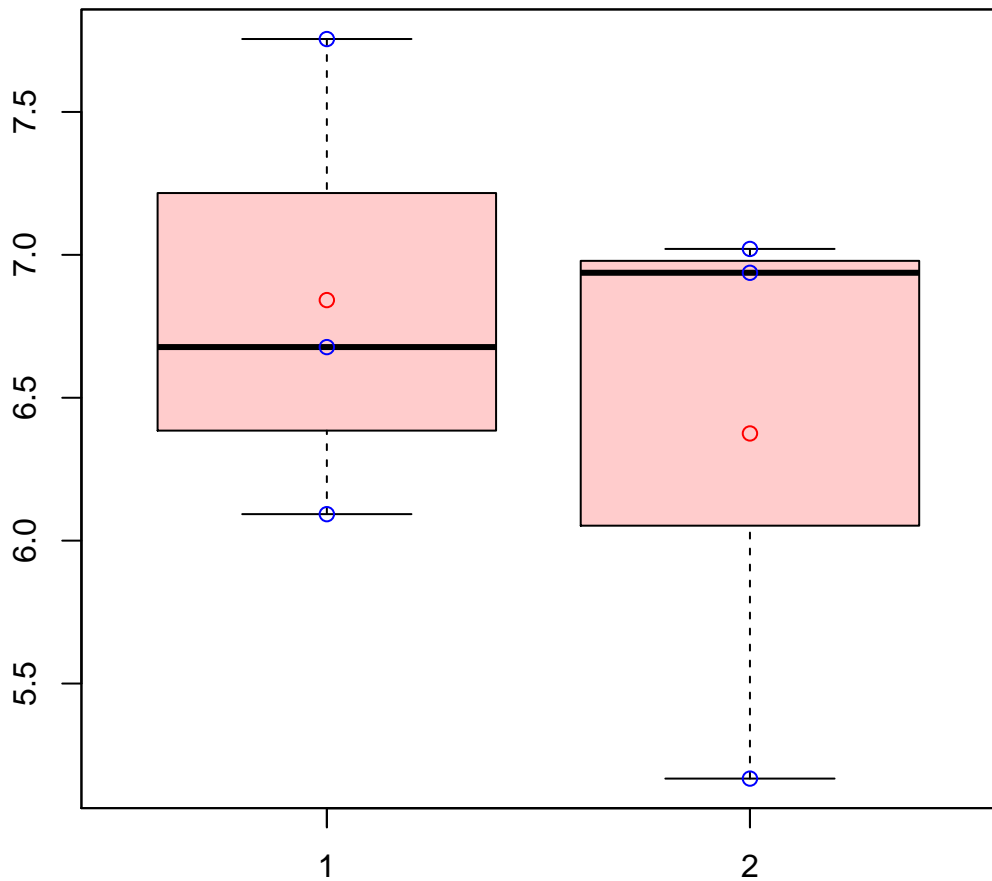

t-Test: p-value = 0.58

# K4ABT3|K4ABT3\_SETIT

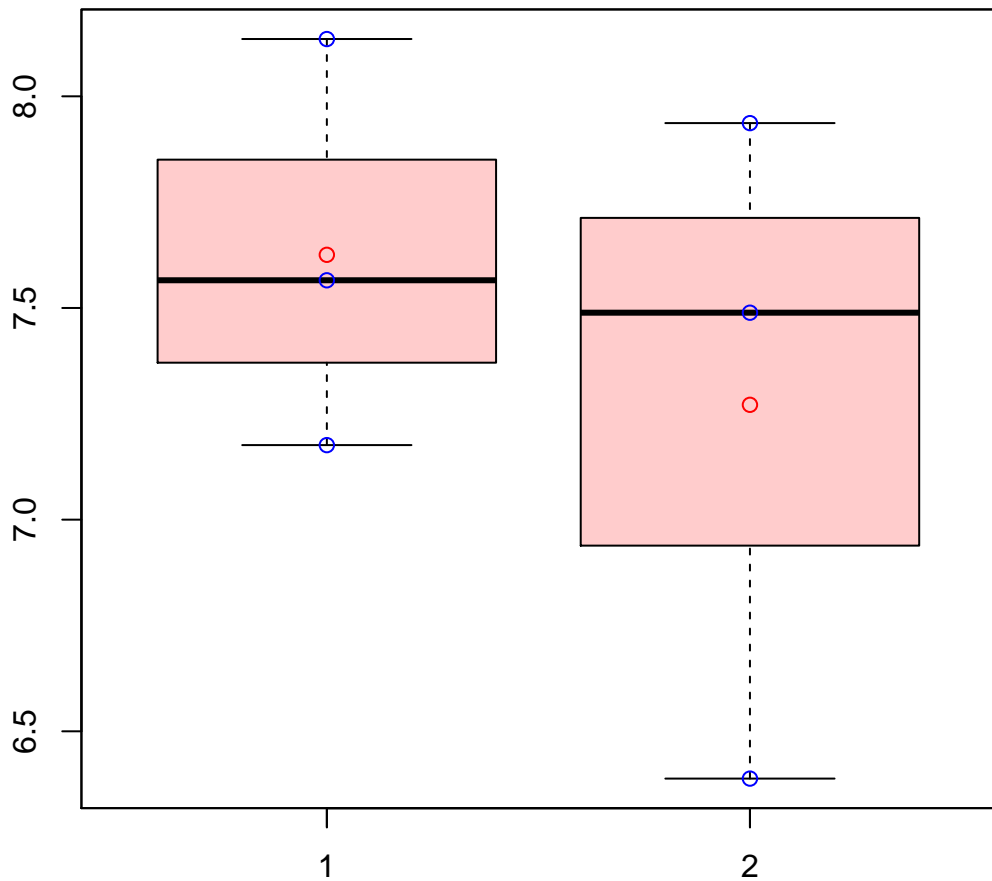

t-Test: p-value = 0.55

# K4ABV8|K4ABV8\_SETIT

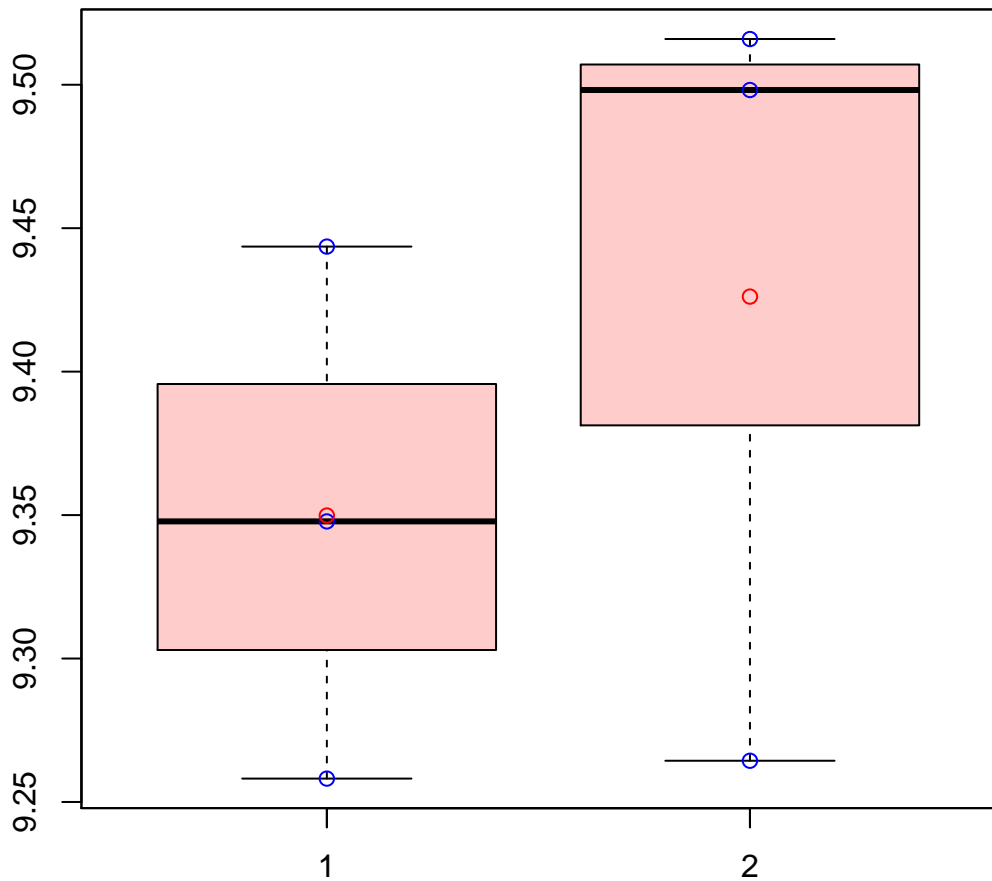

t-Test: p-value = 0.48

# K4ACF0|K4ACF0\_SETIT

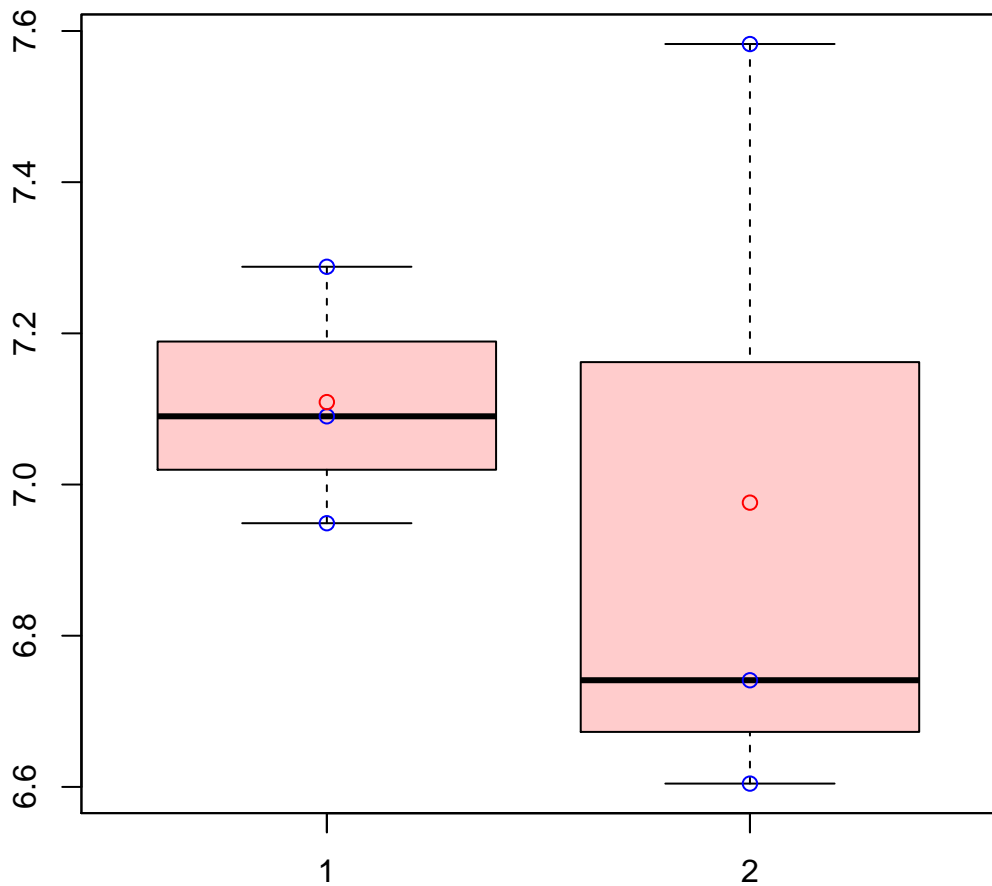

t-Test: p-value = 0.71

# K4ACP0|K4ACP0\_SETIT

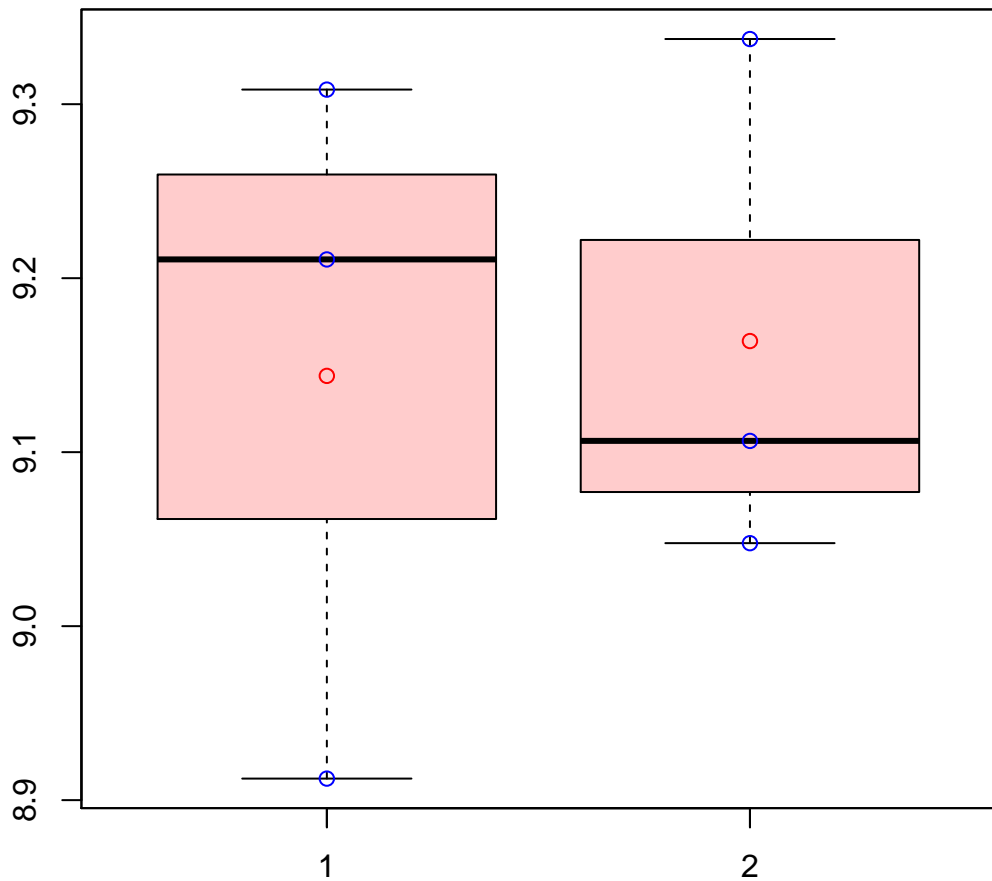

t-Test: p-value = 0.9

# K4ACR1|K4ACR1\_SETIT

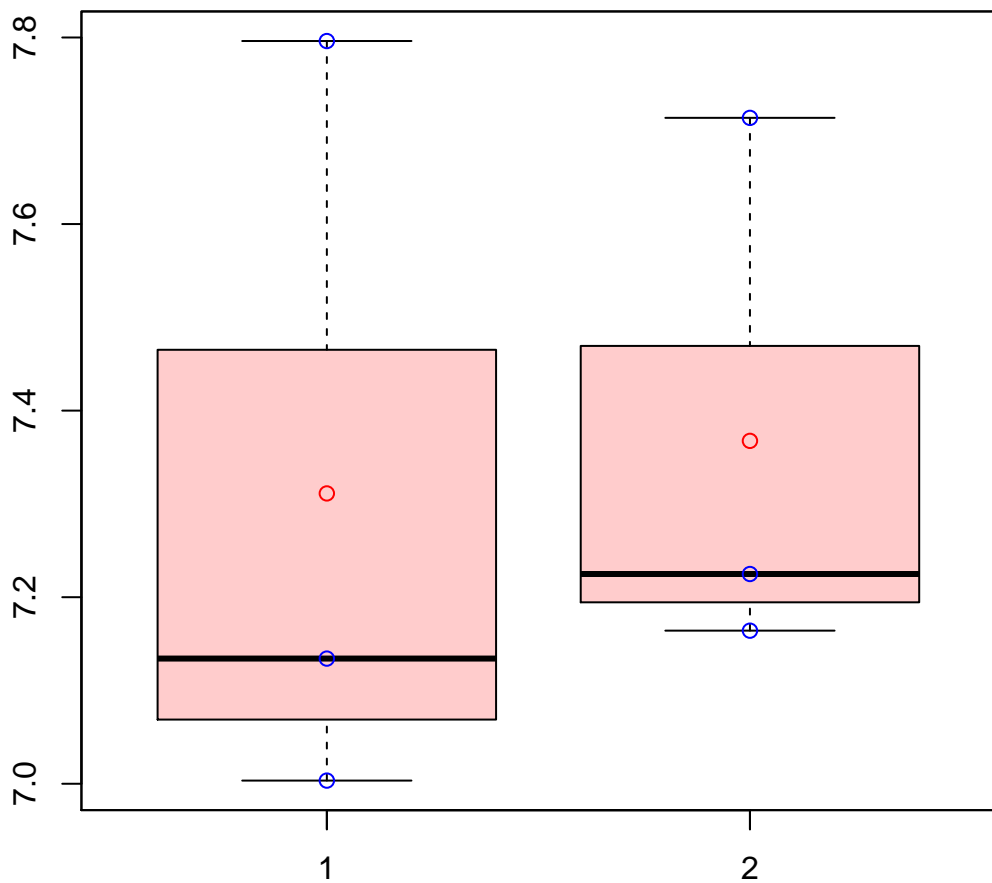

t-Test: p-value = 0.86

# K4ACY8|K4ACY8\_SETIT

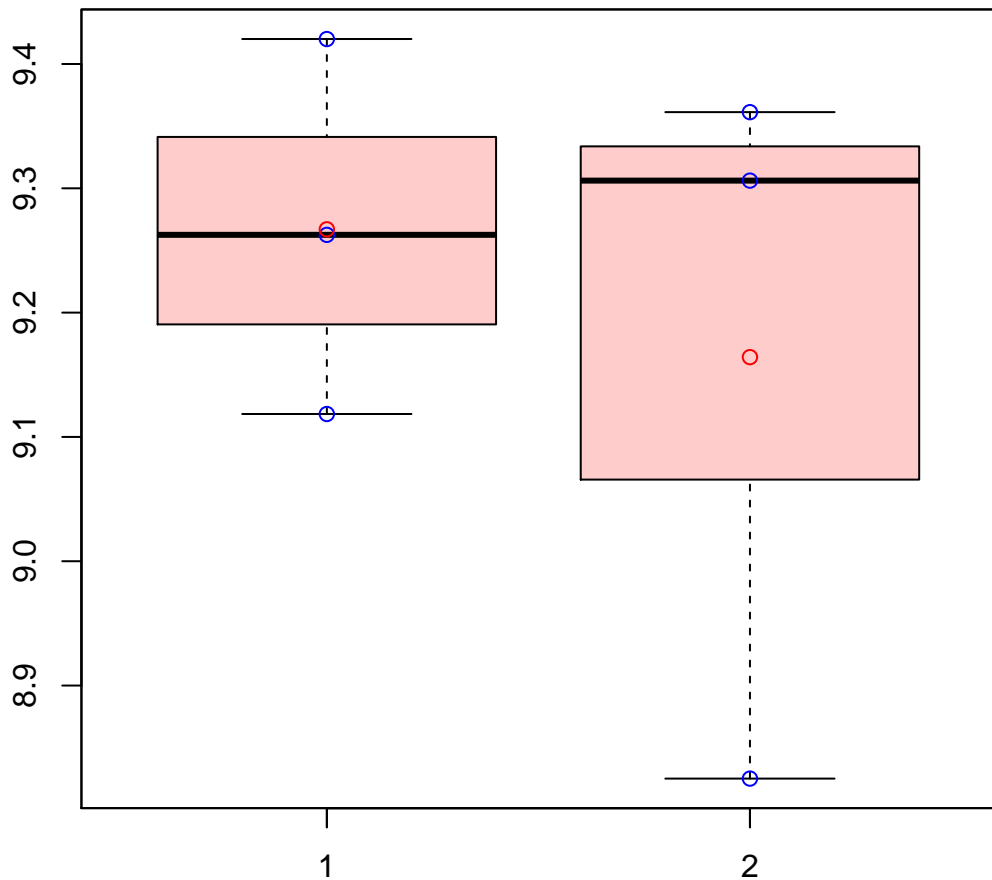

t-Test: p-value = 0.63



# K4ACZ1|K4ACZ1\_SETIT

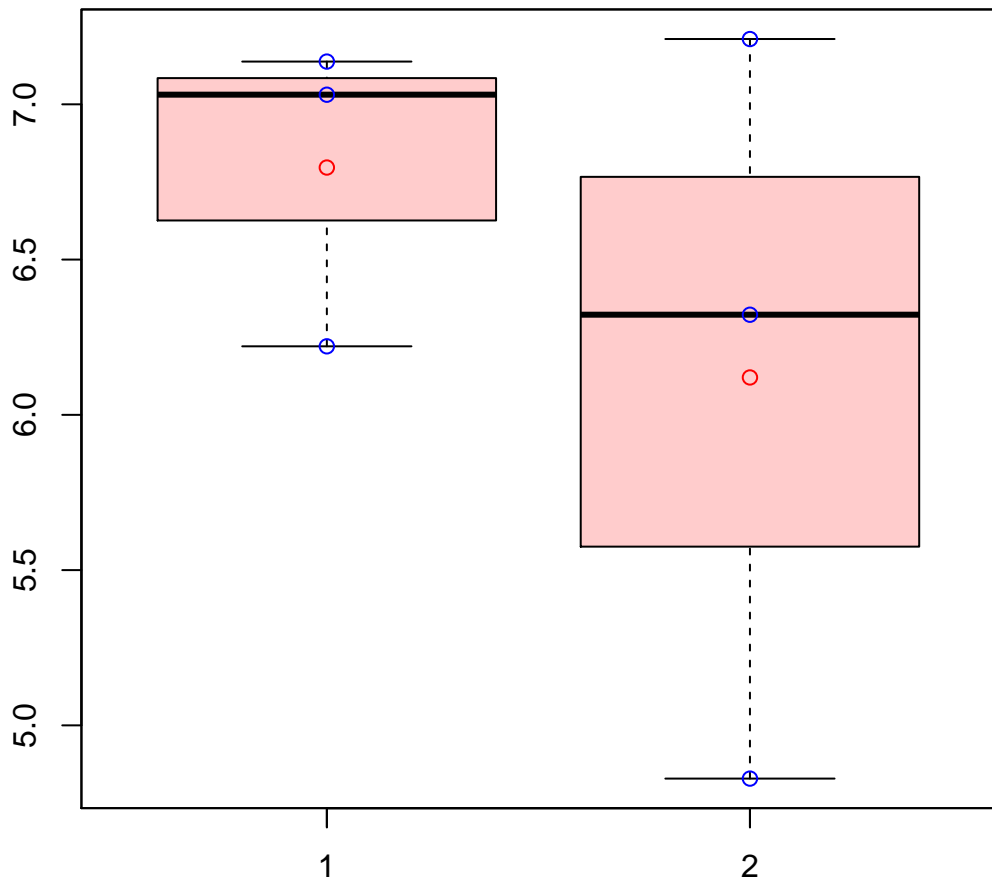

t-Test: p-value = 0.44

# K4AD01|K4AD01\_SETIT

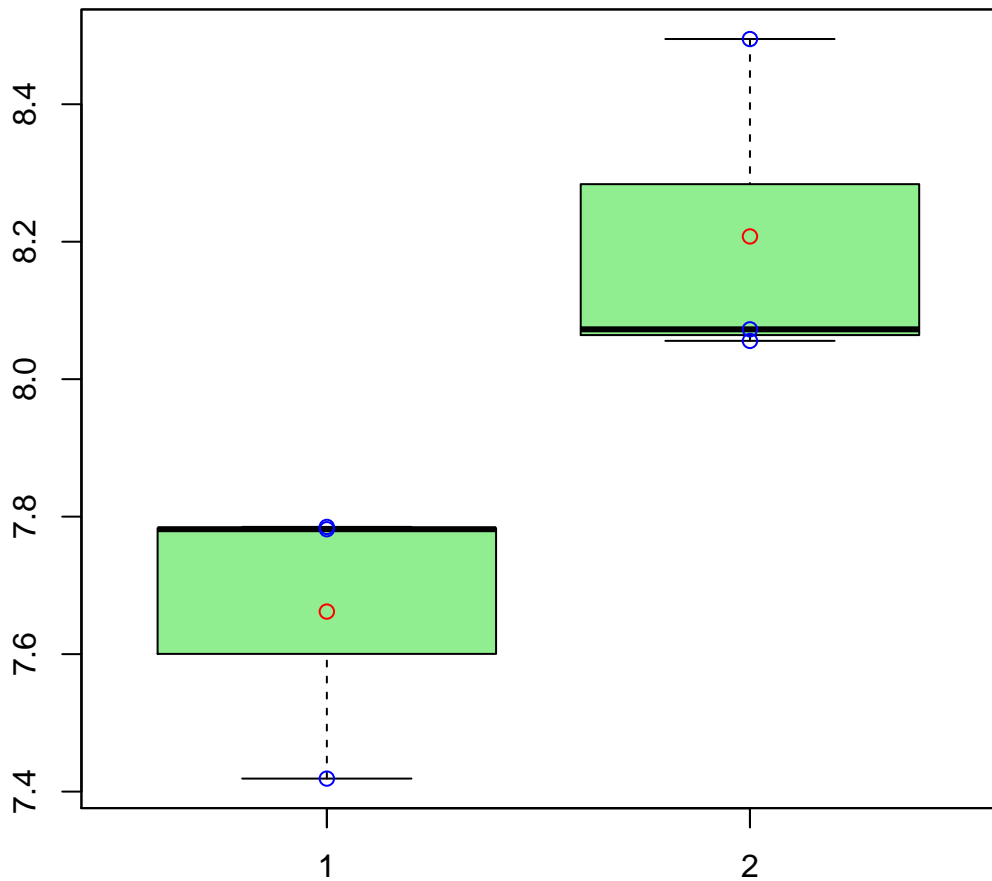

t-Test: p-value = 0.05

# K4AD25|K4AD25\_SETIT

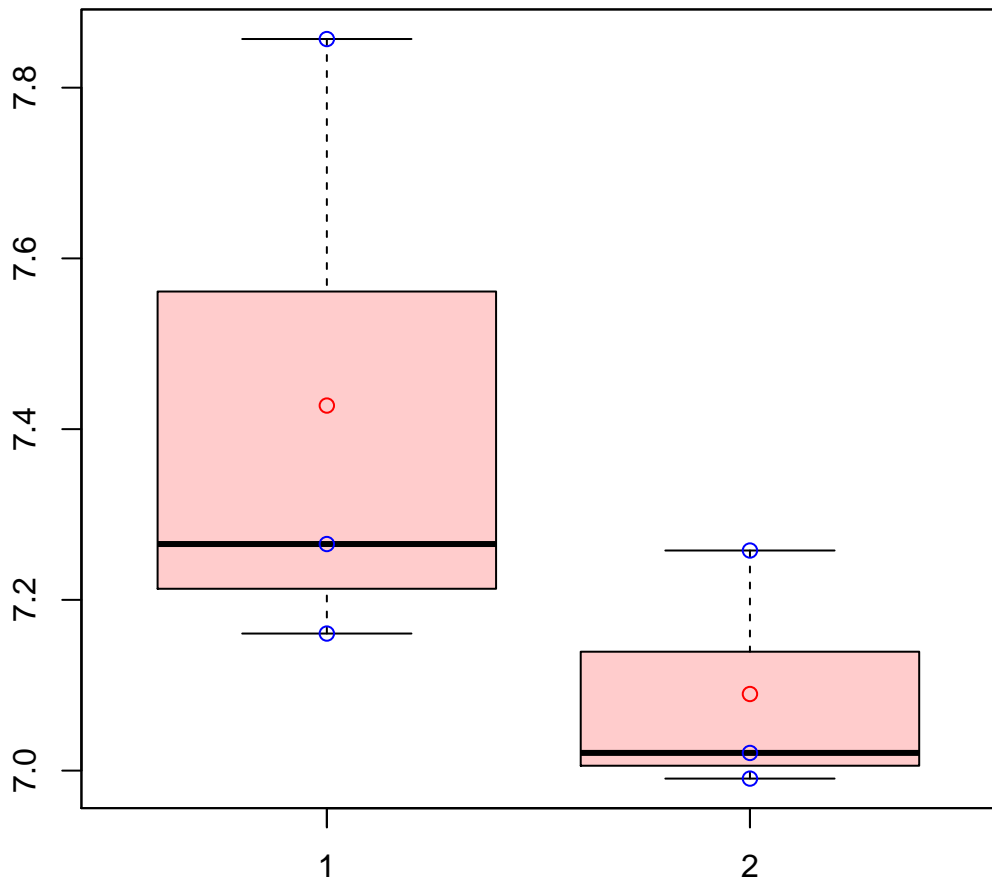

t-Test: p-value = 0.26

# K4AD35|K4AD35\_SETIT

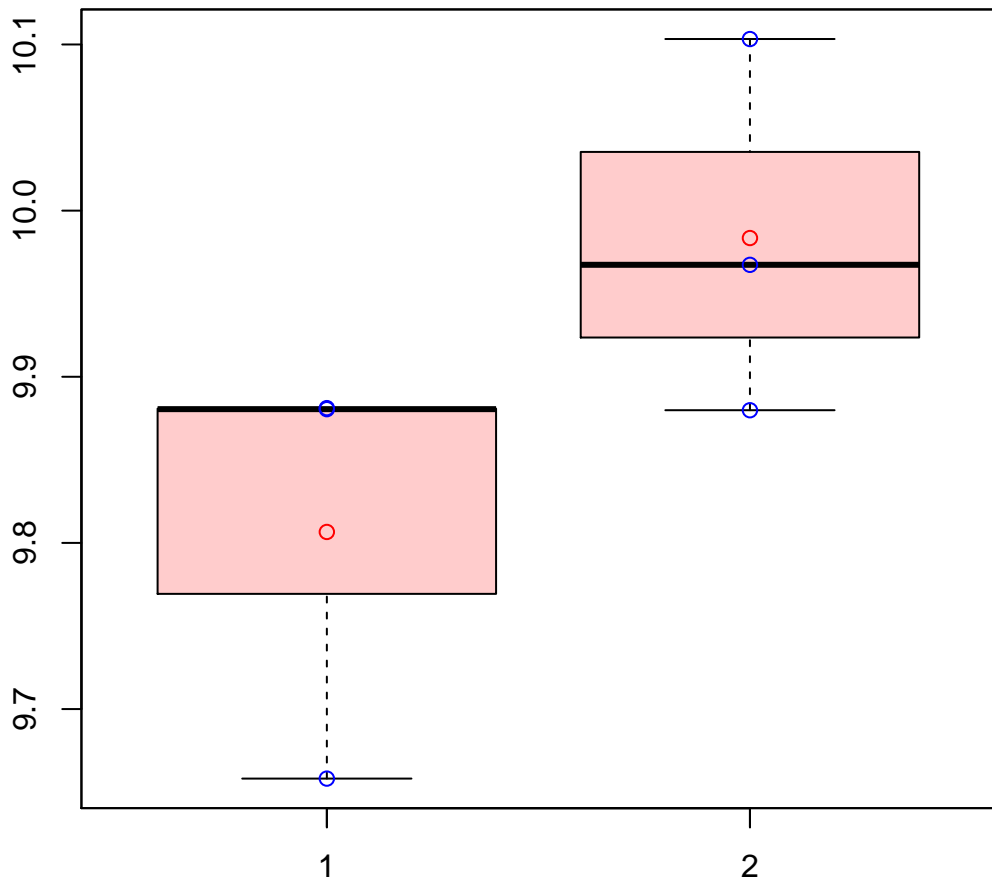

t-Test: p-value = 0.15

# K4ADA3|K4ADA3\_SETIT

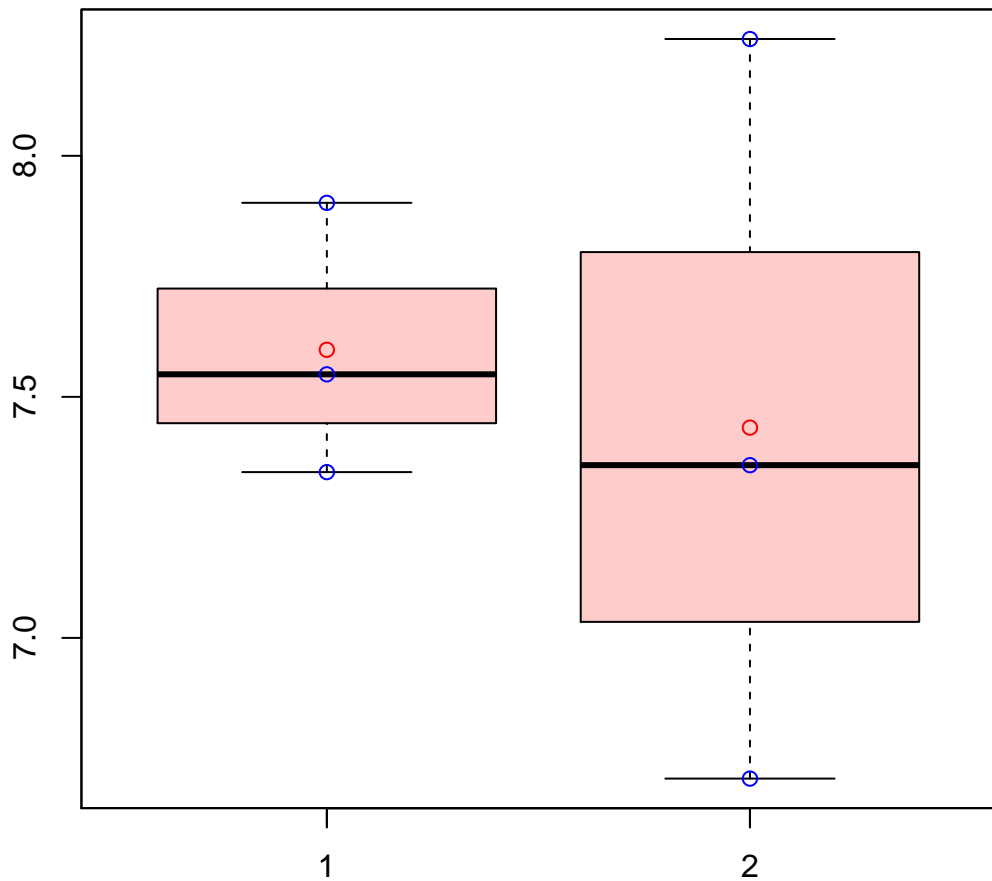

t-Test: p-value = 0.76

# K4ADJ4|K4ADJ4\_SETIT

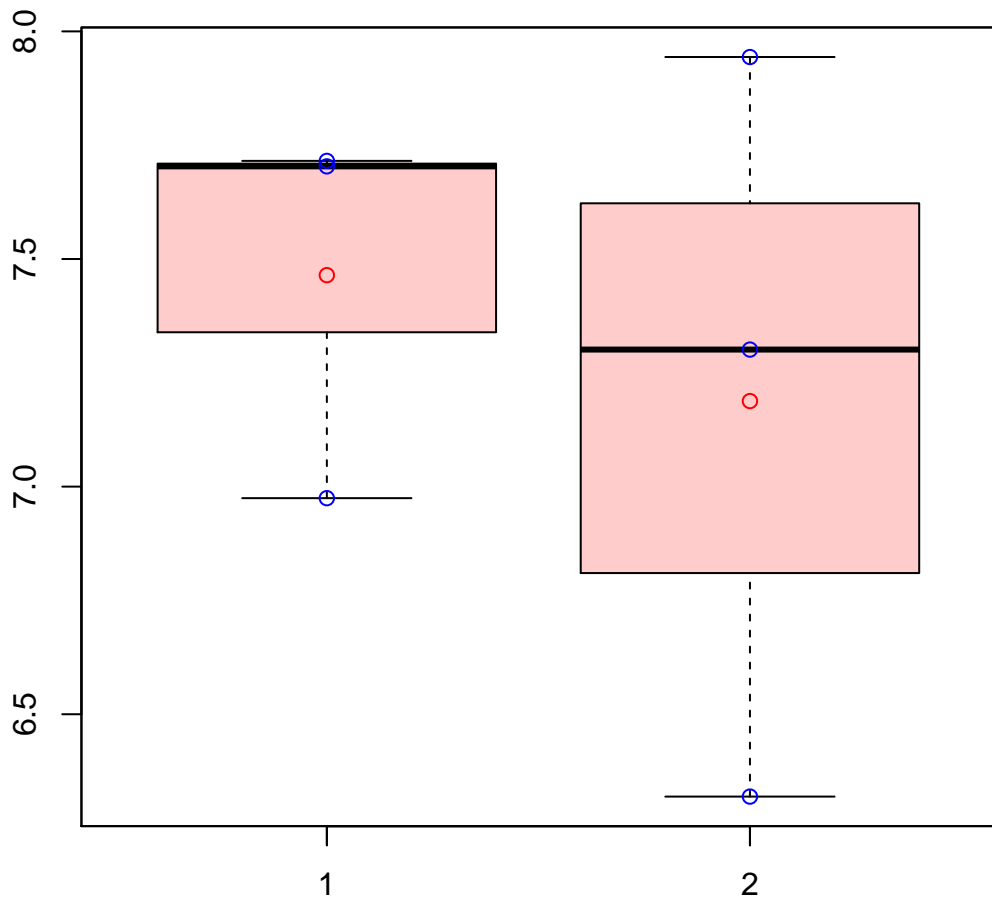

t-Test: p-value = 0.64

# K4ADN7|K4ADN7\_SETIT

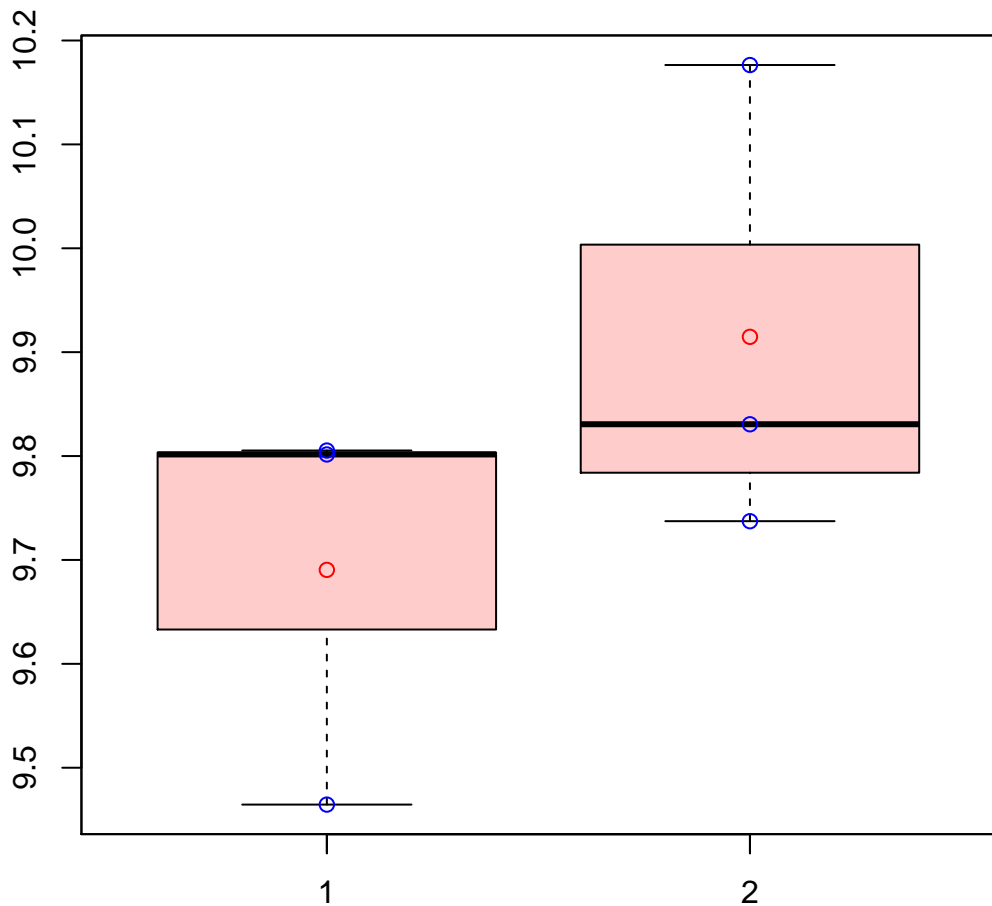

t-Test: p-value = 0.27

# K4ADP9|K4ADP9\_SETIT

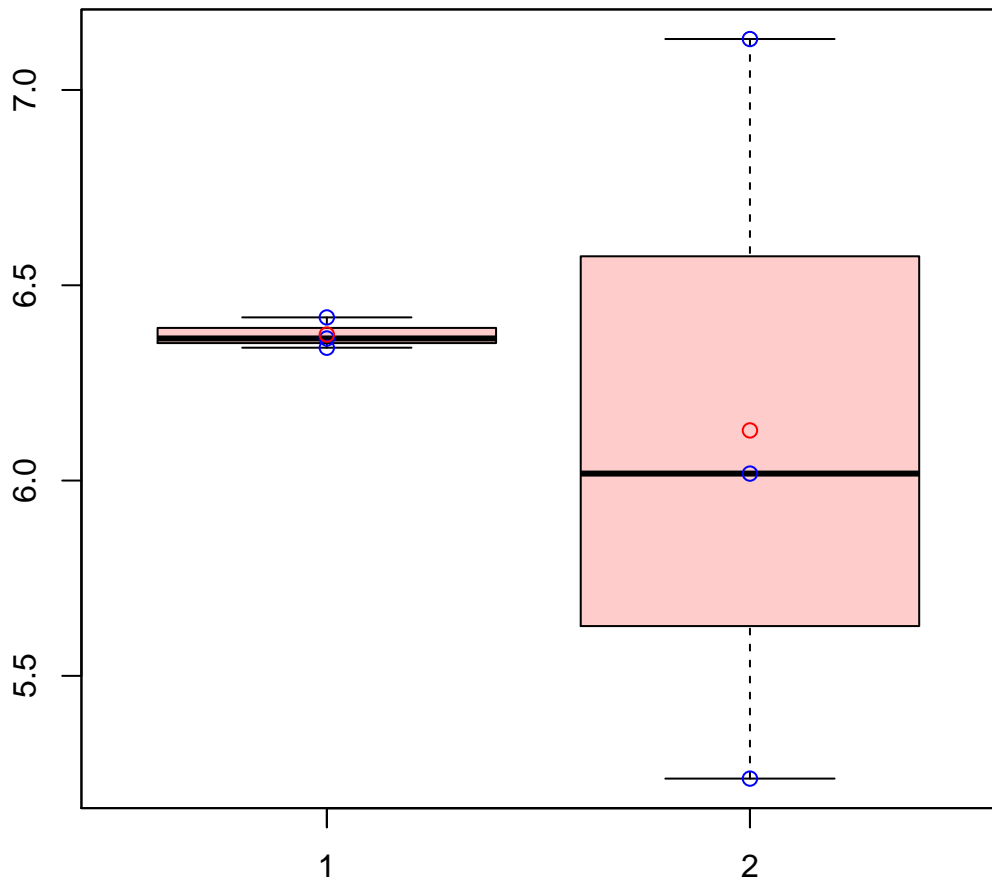

t-Test: p-value = 0.7



# K4ADY4|K4ADY4\_SETIT

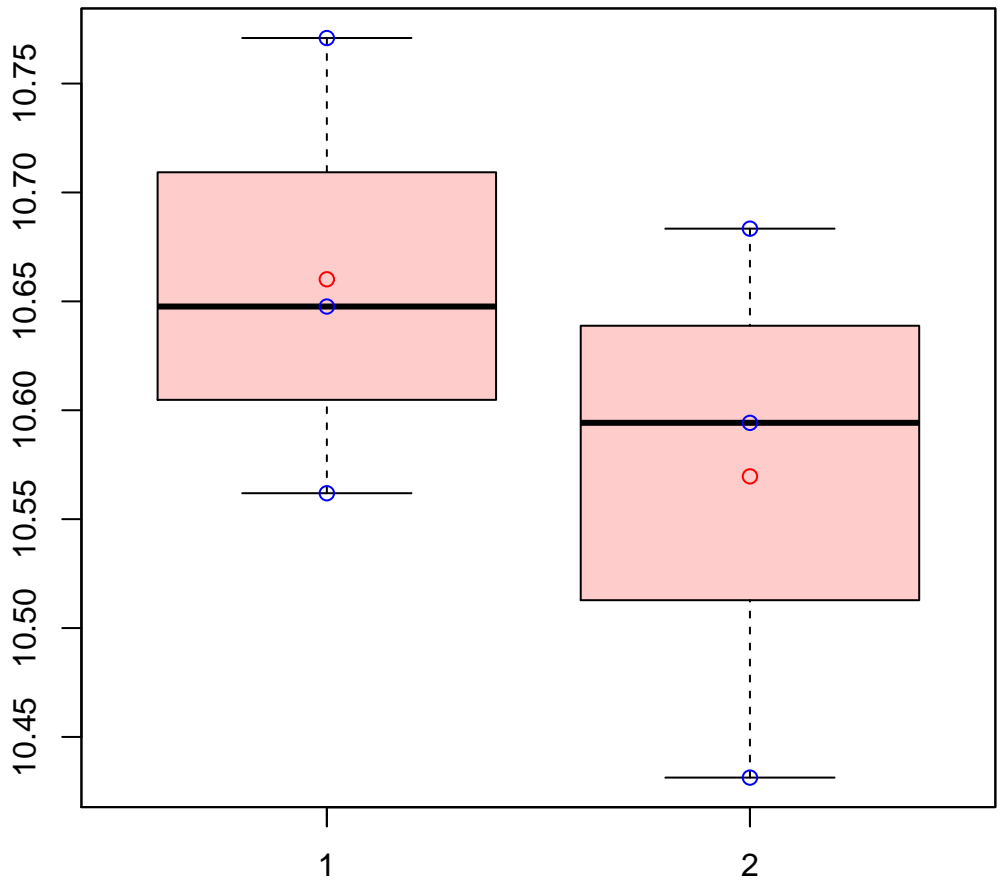

t-Test: p-value = 0.4

# K4AE99|K4AE99\_SETIT

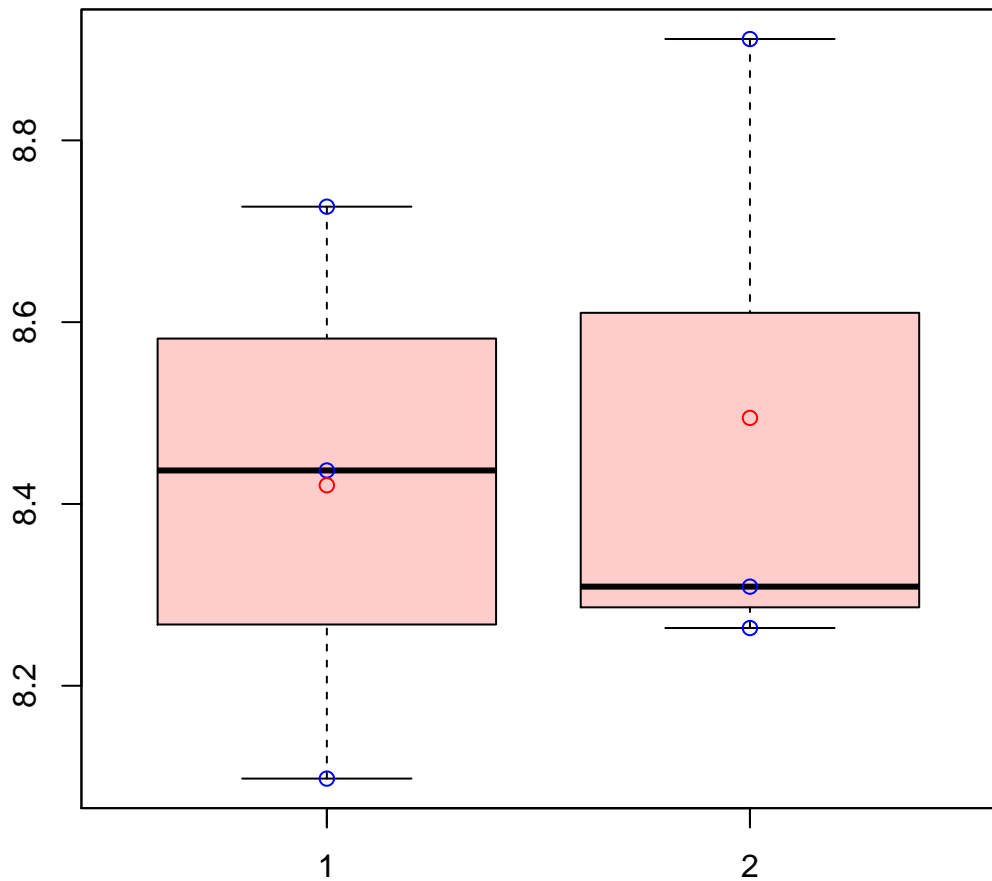

t-Test: p-value = 0.8

# K4AEB2|K4AEB2\_SETIT

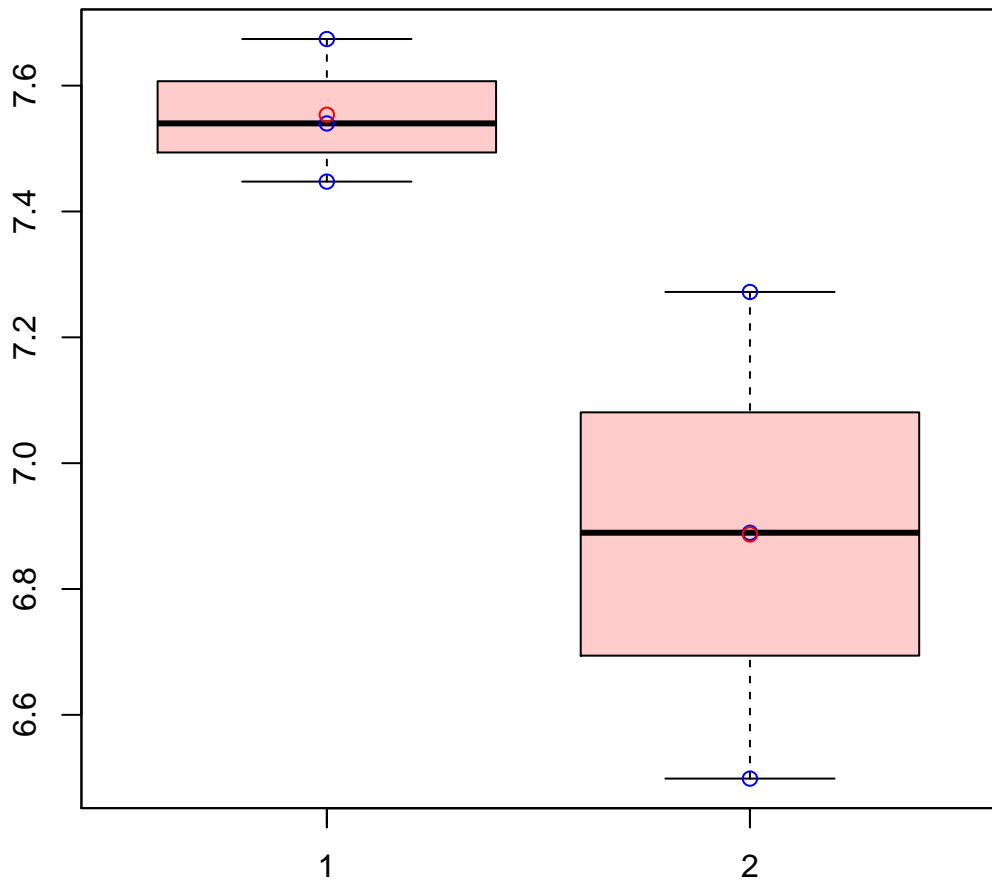

t-Test: p-value = 0.09

# K4AER4|K4AER4\_SETIT

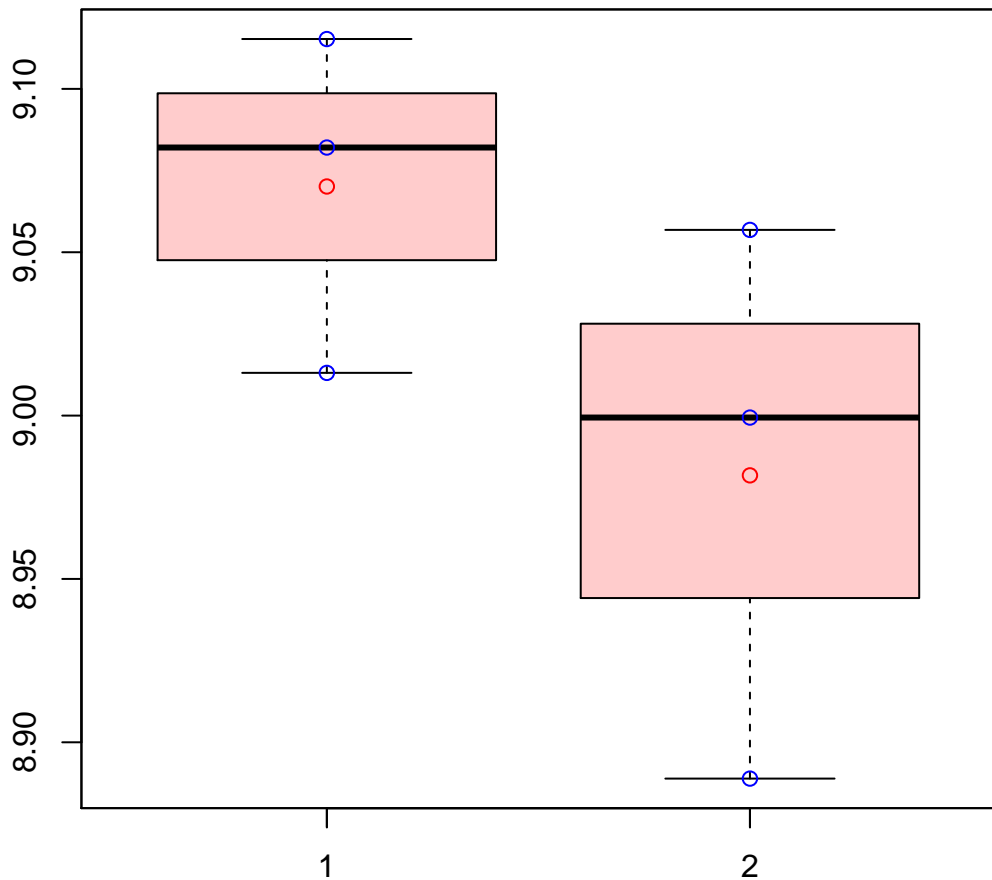

t-Test: p-value = 0.21

# K4AEU5|K4AEU5\_SETIT

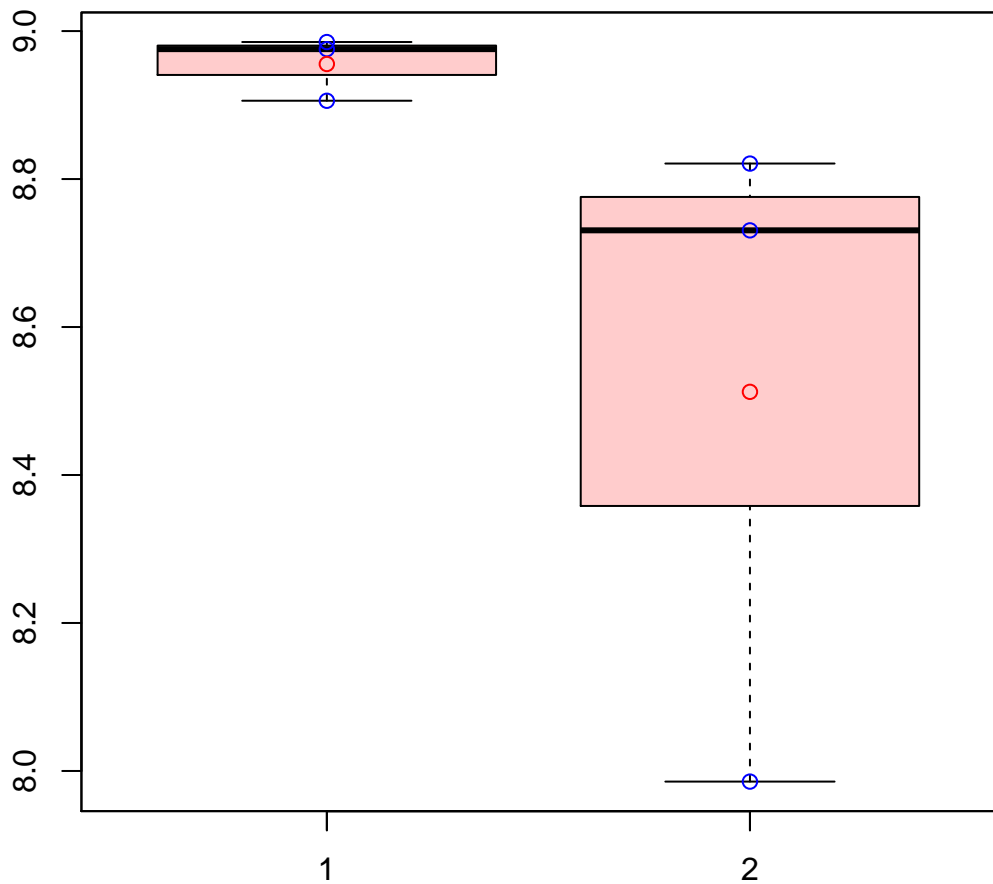

t-Test: p-value = 0.24

# K4AF25|K4AF25\_SETIT

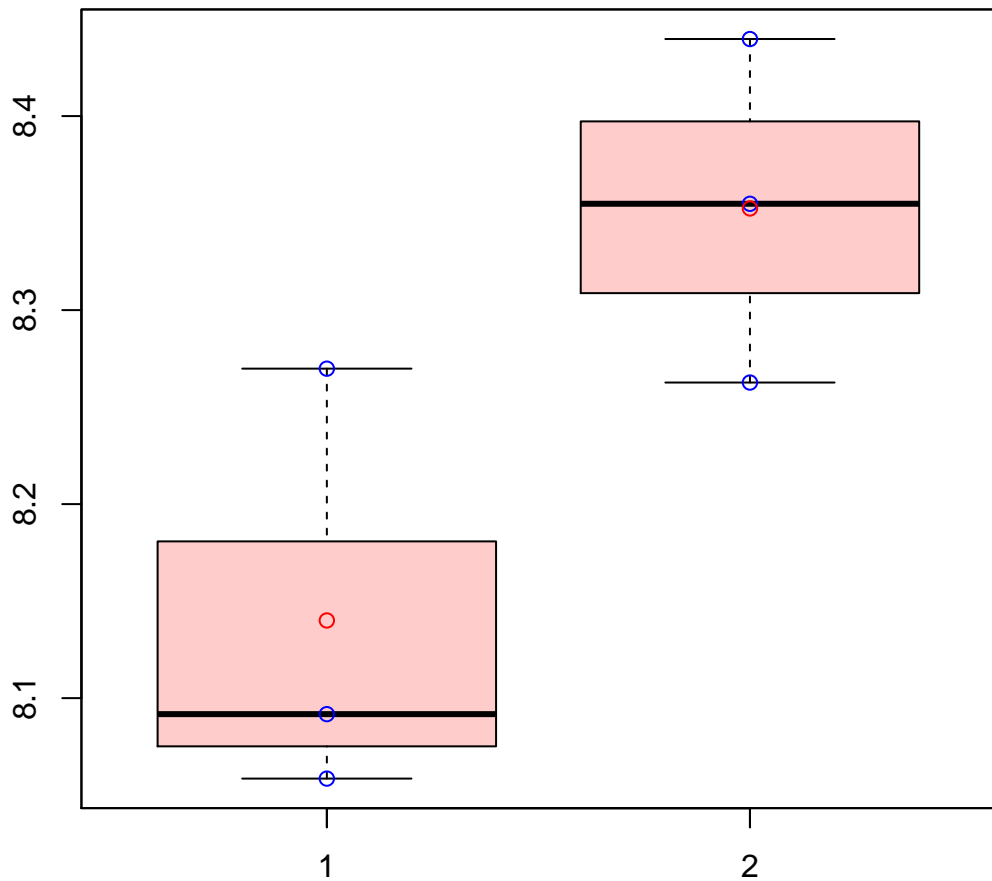

t-Test: p-value = 0.07

# K4AF28|K4AF28\_SETIT

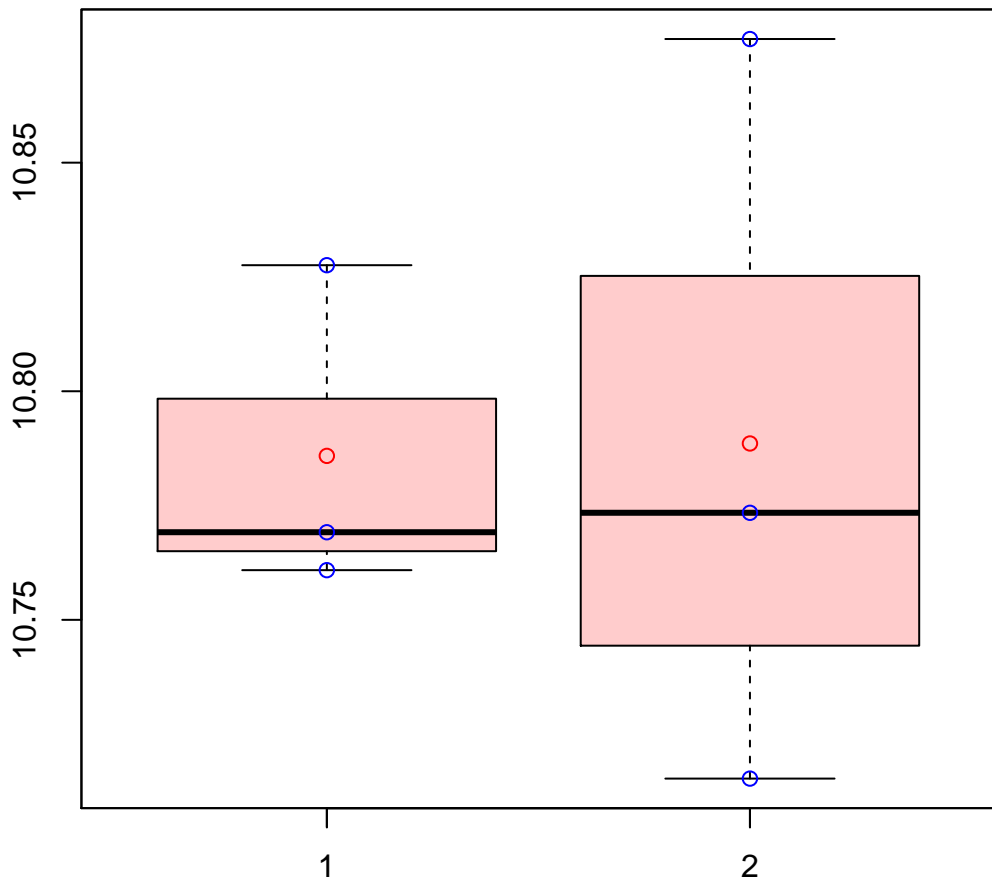

t-Test: p-value = 0.96

# K4AF31|K4AF31\_SETIT

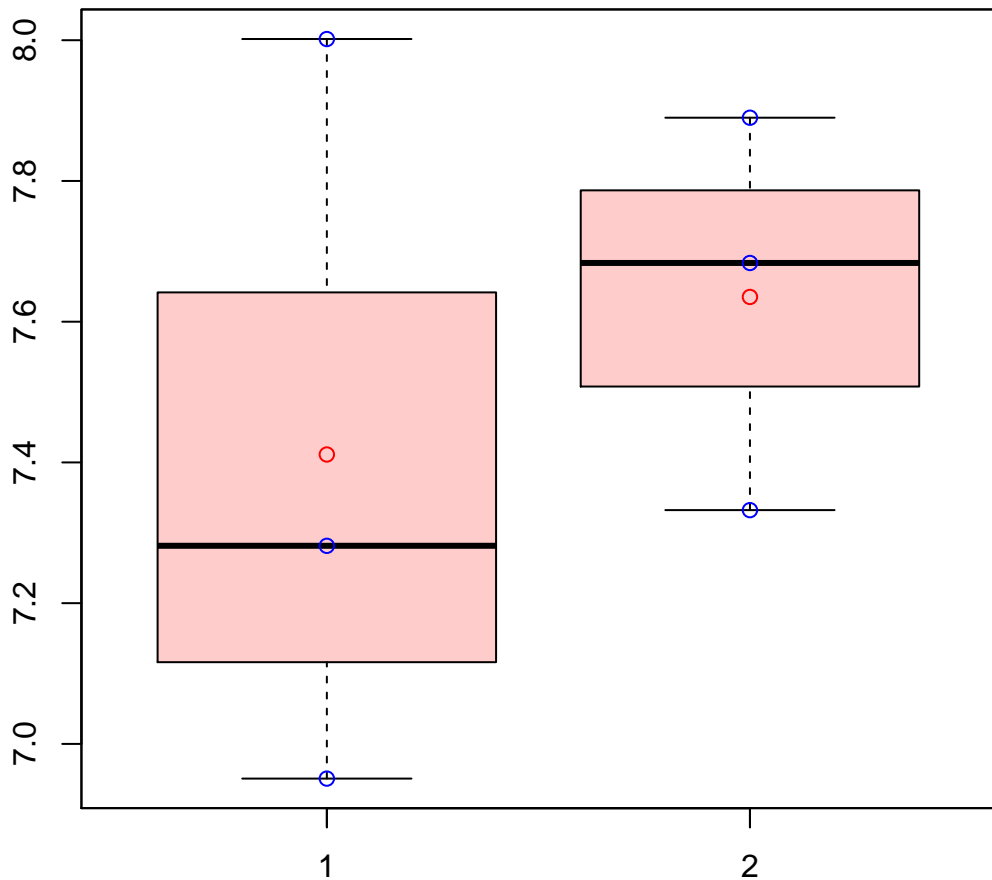

t-Test: p-value = 0.57



# K4AF75|K4AF75\_SETIT

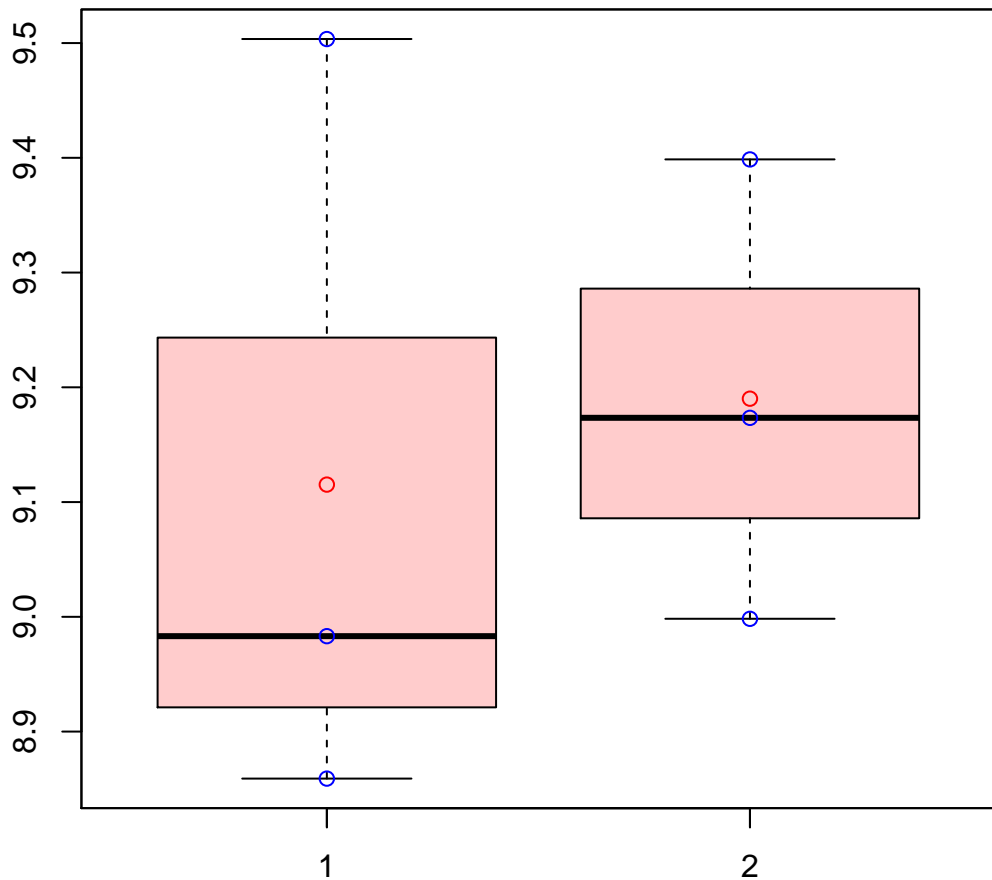

t-Test: p-value = 0.76

# K4AF78|K4AF78\_SETIT

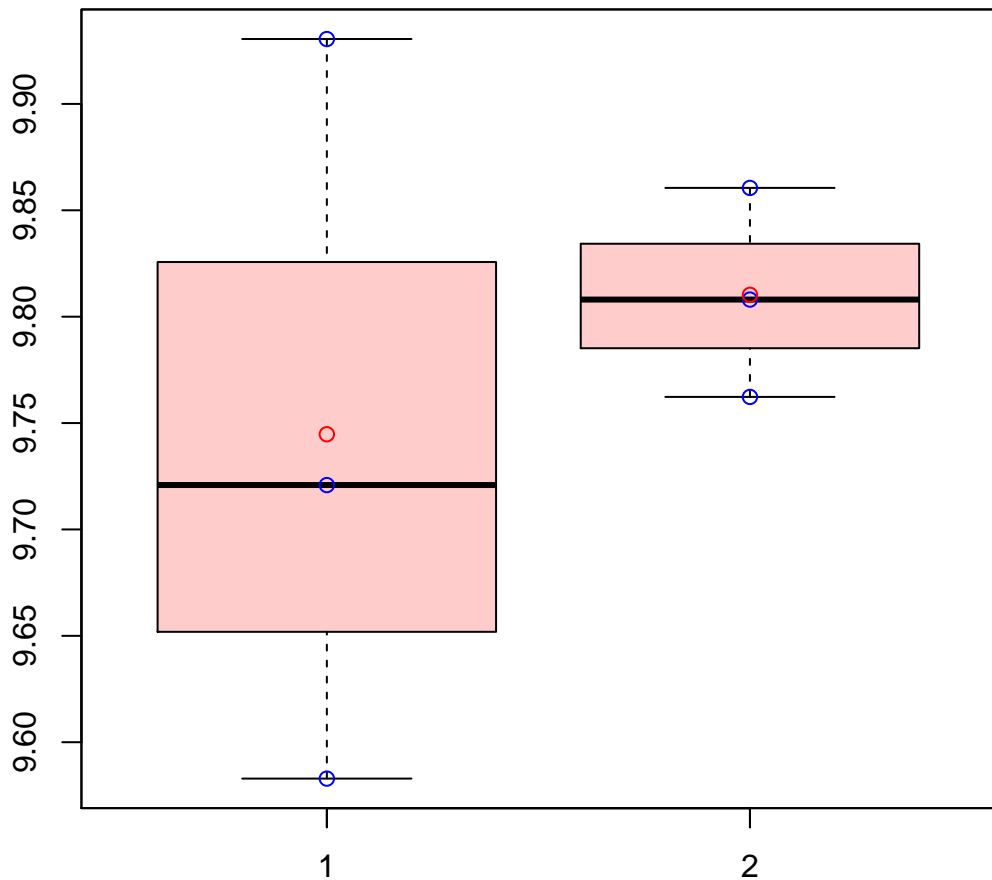

t-Test: p-value = 0.59

# K4AFG0|K4AFG0\_SETIT

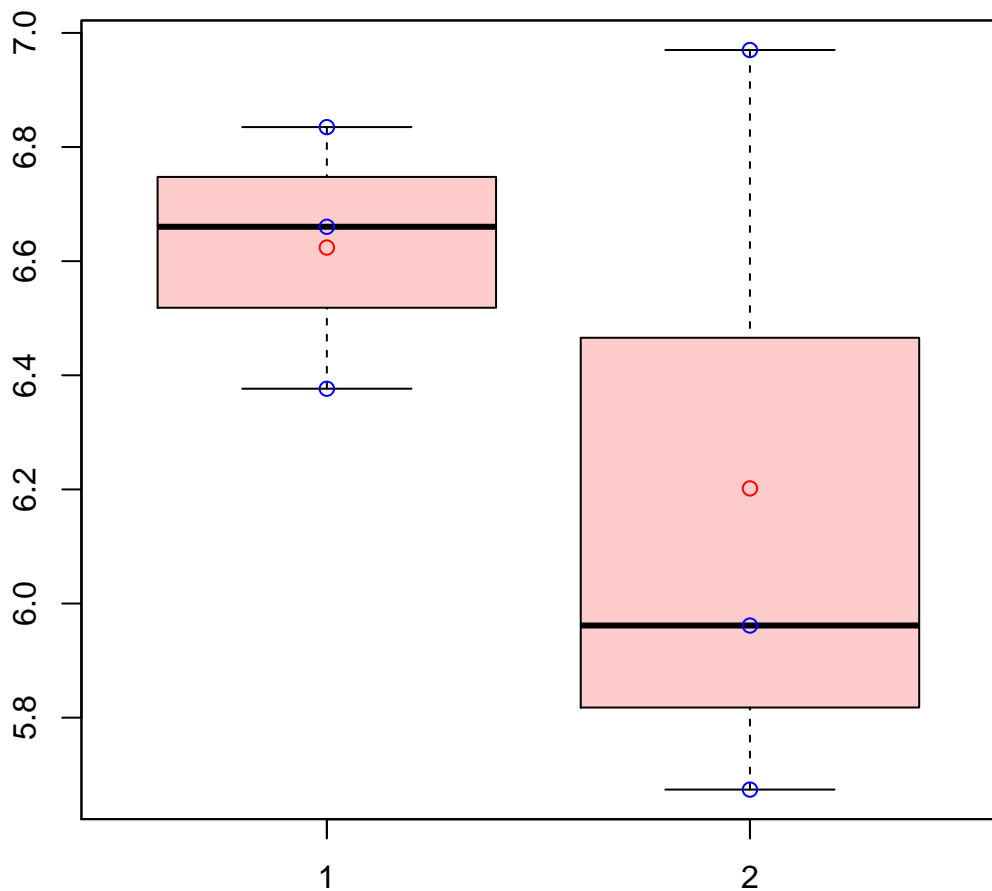

t-Test: p-value = 0.4

# K4AFN8|K4AFN8\_SETIT

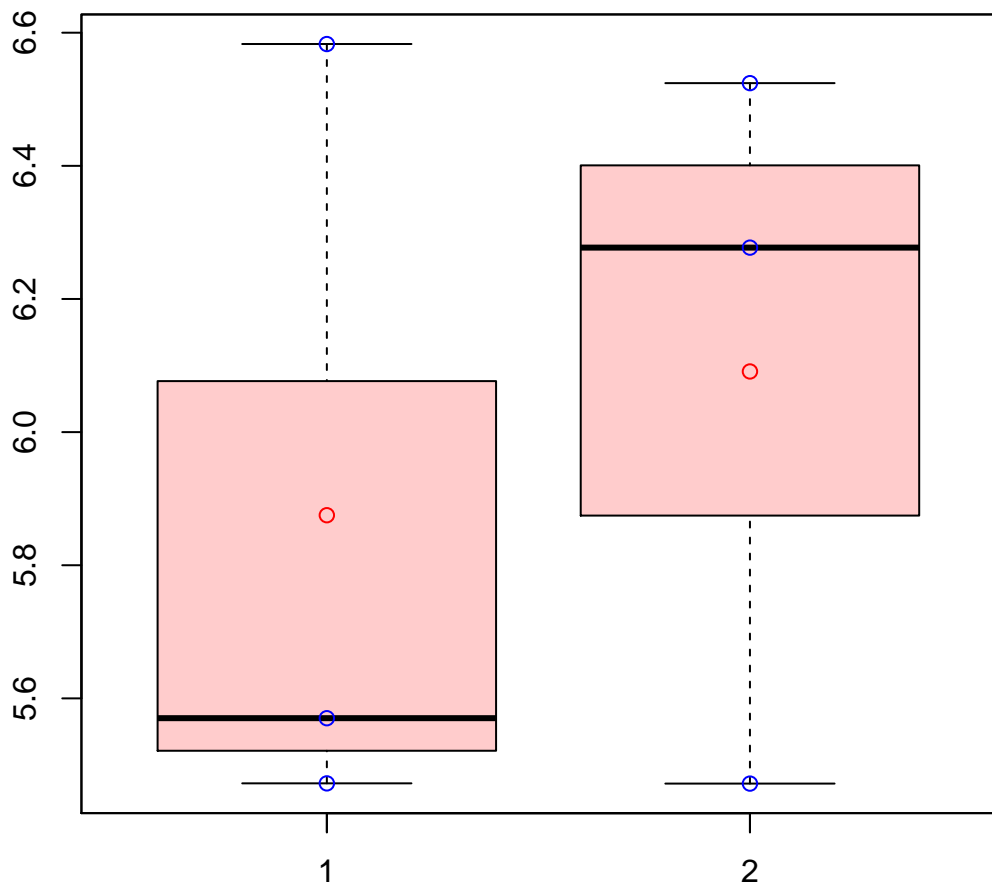

t-Test: p-value = 0.67

# K4AGK9|K4AGK9\_SETIT

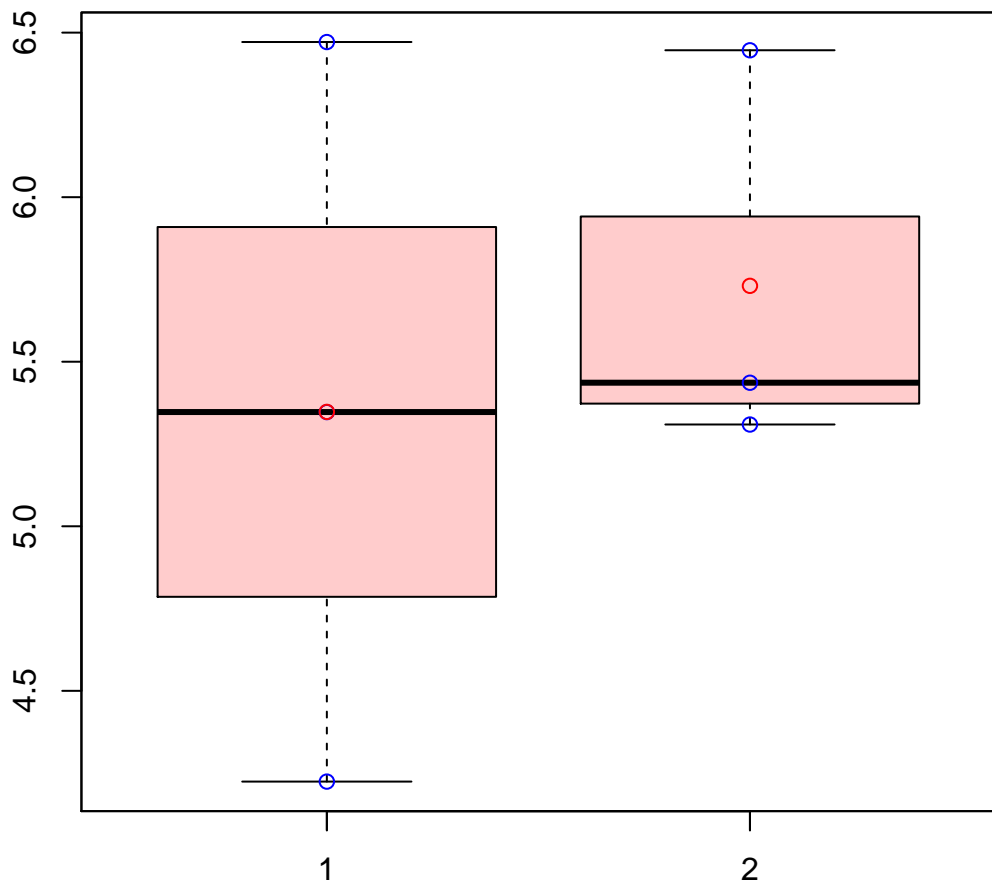

t-Test: p-value = 0.64

# K4AH52|K4AH52\_SETIT

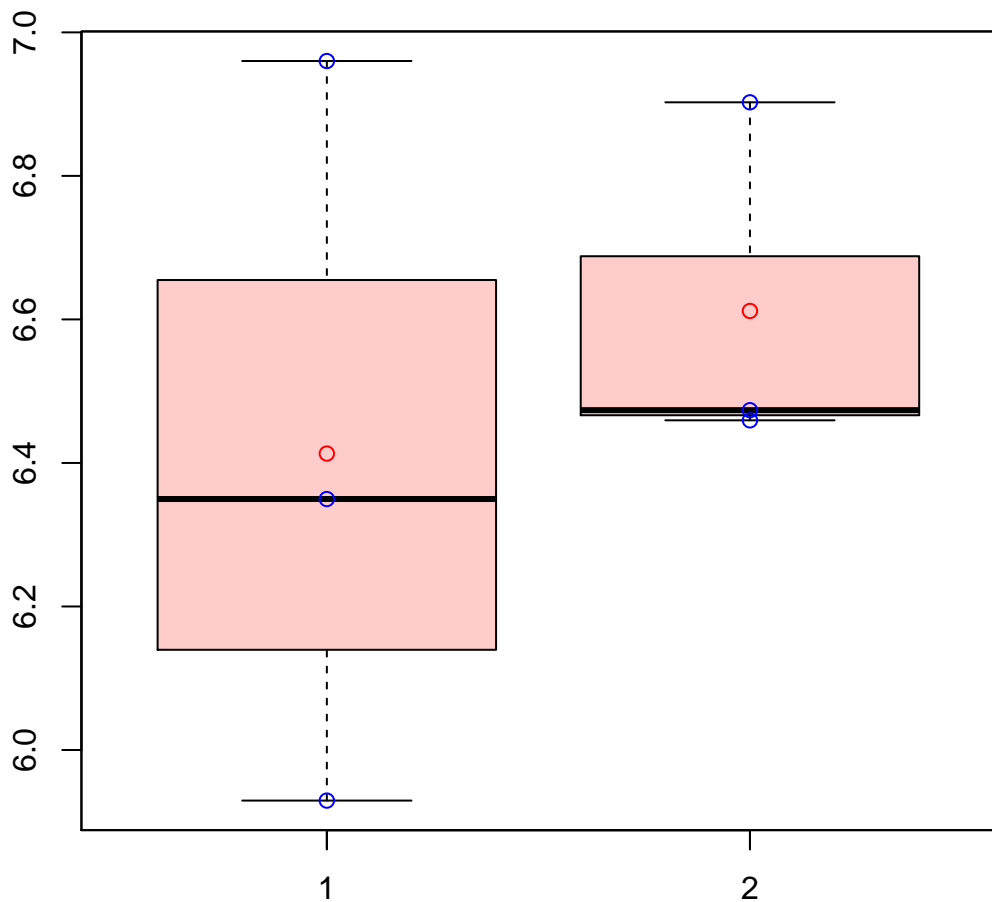

t-Test: p-value = 0.59

# K4AI98|K4AI98\_SETIT

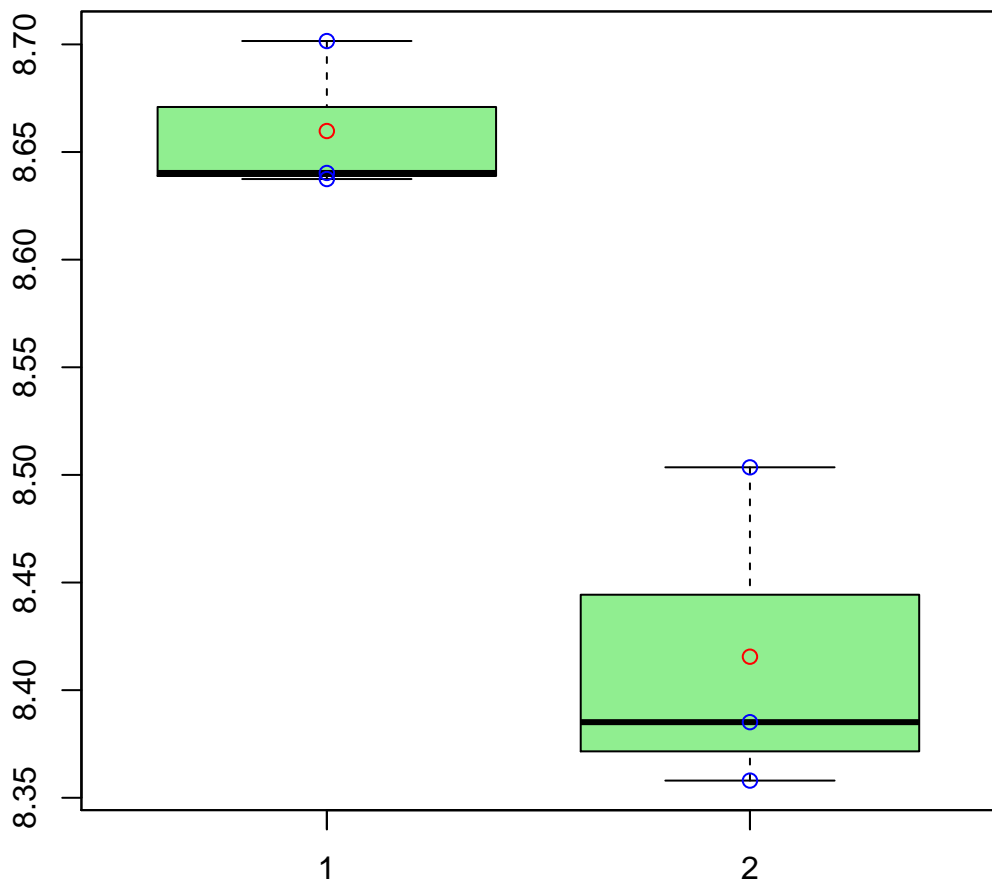

t-Test: p-value = 0.02

# K4AJN9|K4AJN9\_SETIT

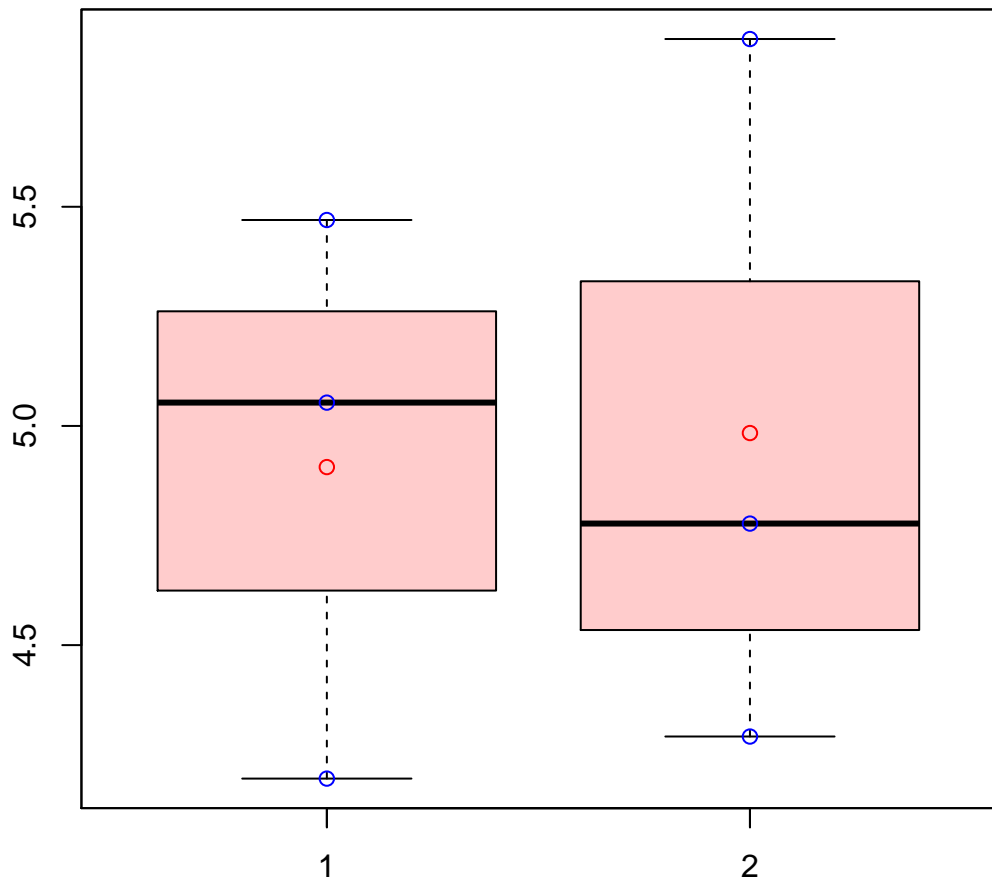

t-Test: p-value = 0.9



# K4AJY2|K4AJY2\_SETIT

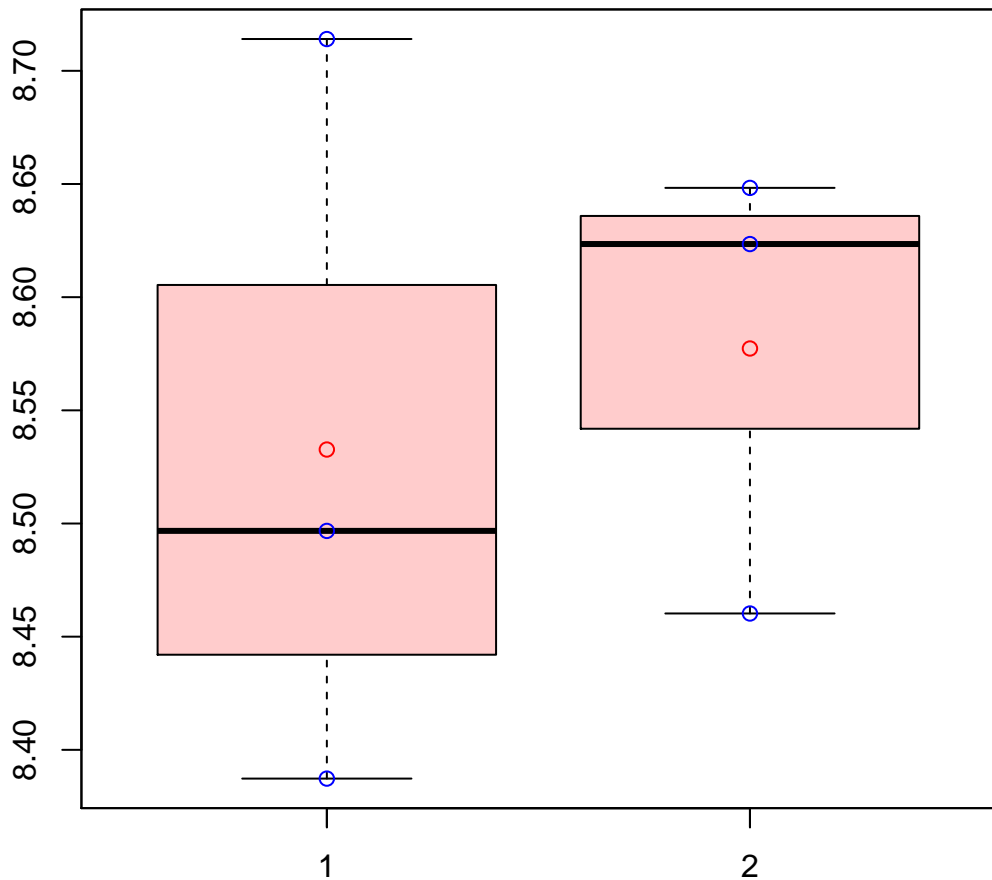

t-Test: p-value = 0.72

# K4AKE6|K4AKE6\_SETIT

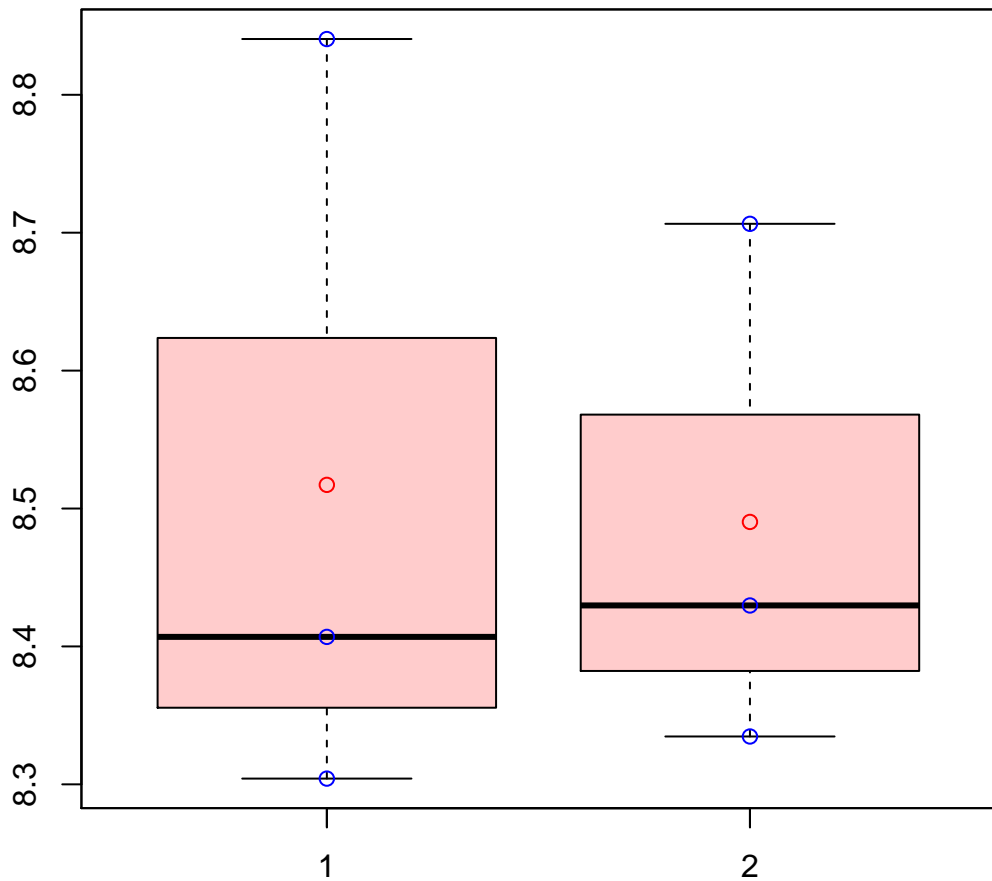

t-Test: p-value = 0.9

# K4ALC6|K4ALC6\_SETIT

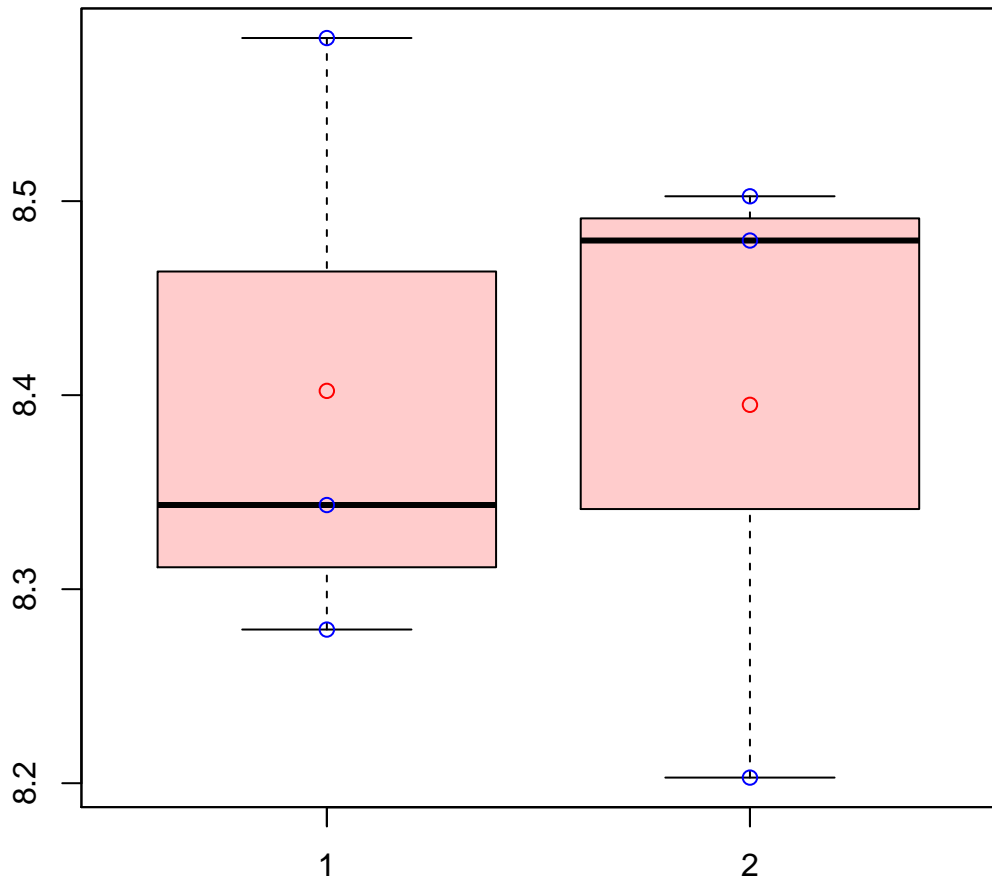

t-Test: p-value = 0.96

# K4ALQ0|K4ALQ0\_SETIT

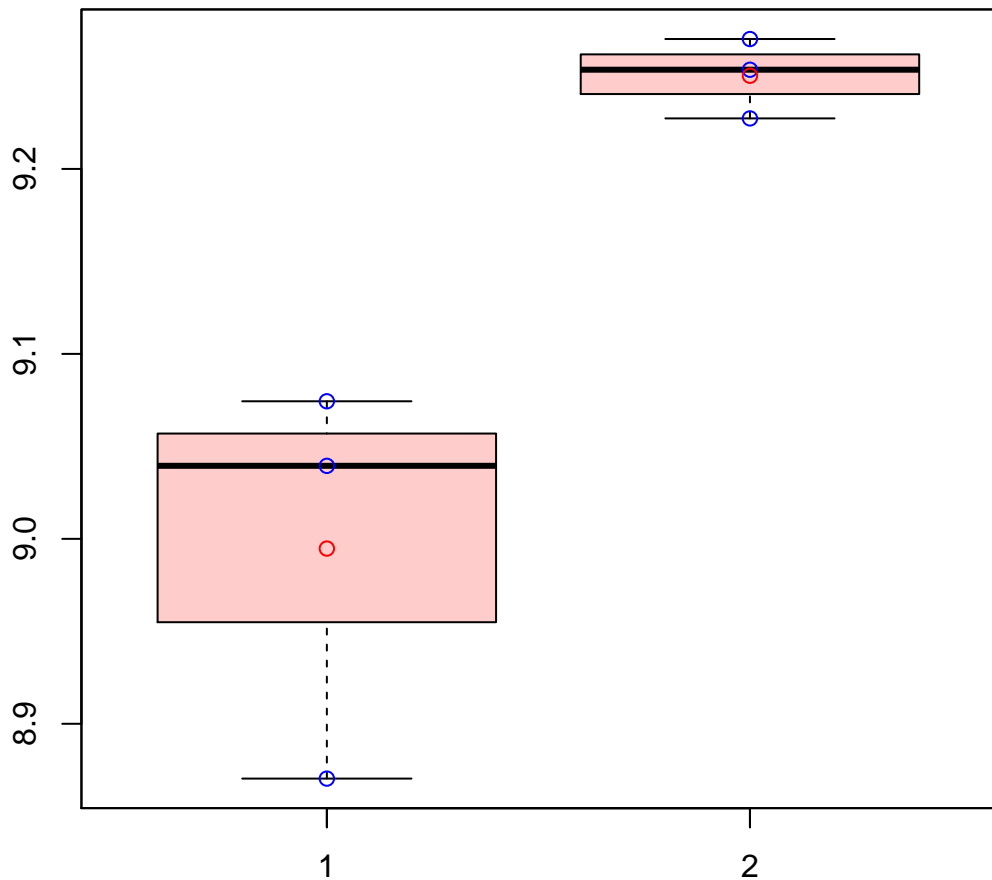

t-Test: p-value = 0.05

# K4AMD1|K4AMD1\_SETIT

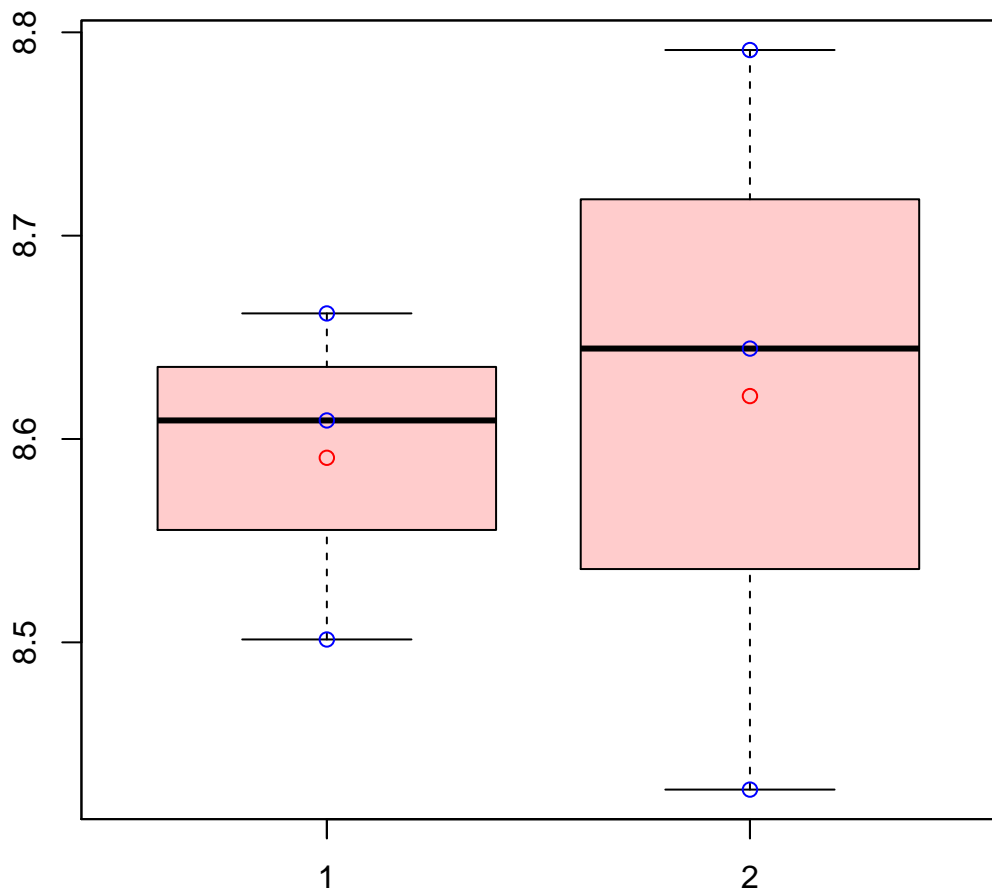

t-Test: p-value = 0.81

# K4AMW7|K4AMW7\_SETIT

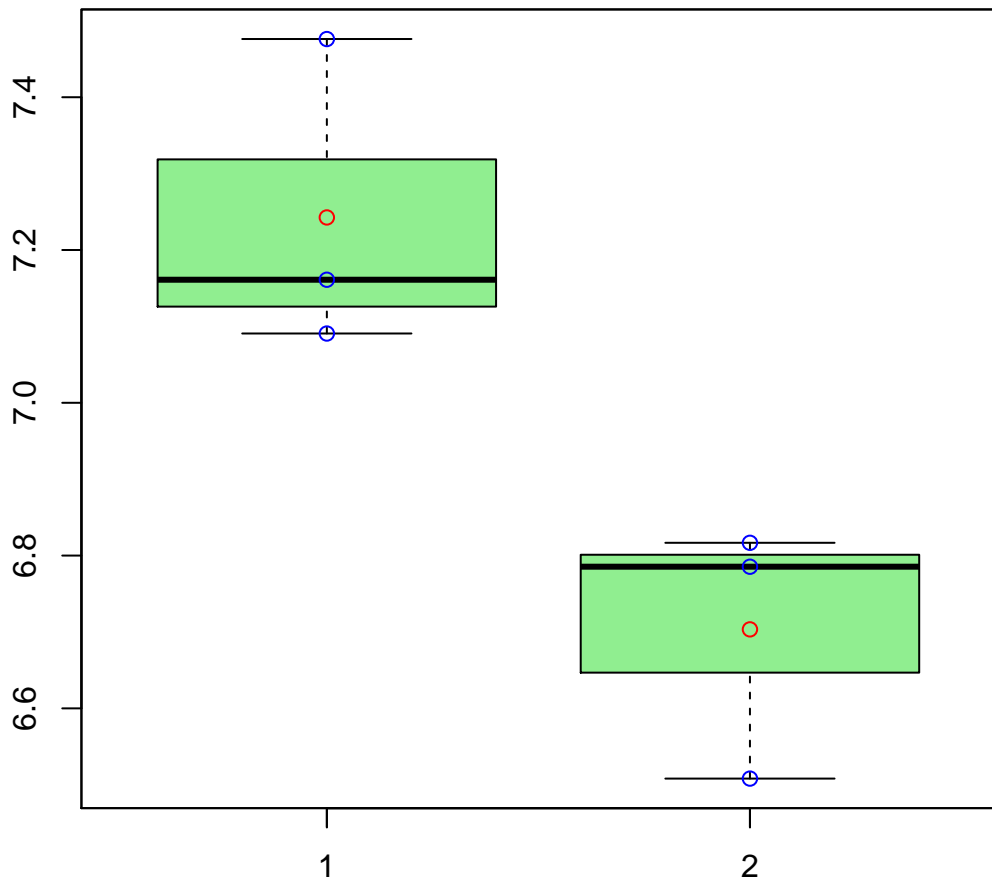

t-Test: p-value = 0.03

# K4APG4|K4APG4\_SETIT

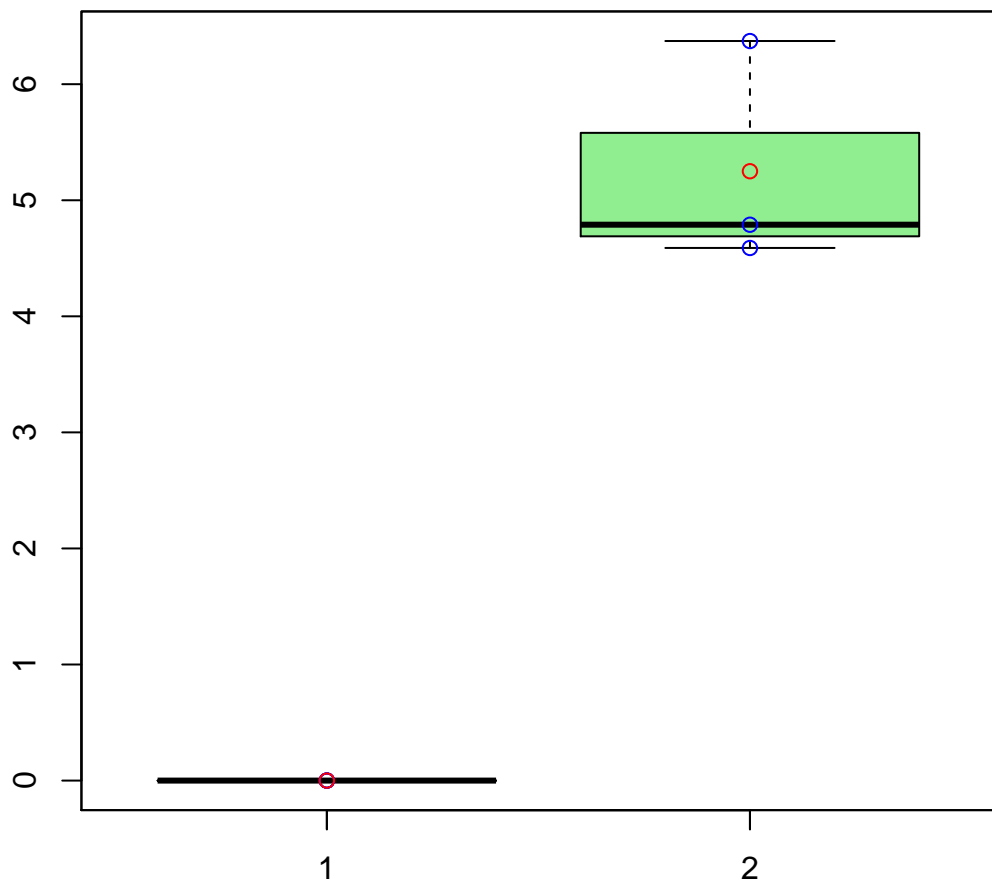

t-Test: p-value = 0.01

# K4PMB8|K4PMB8\_9POAL

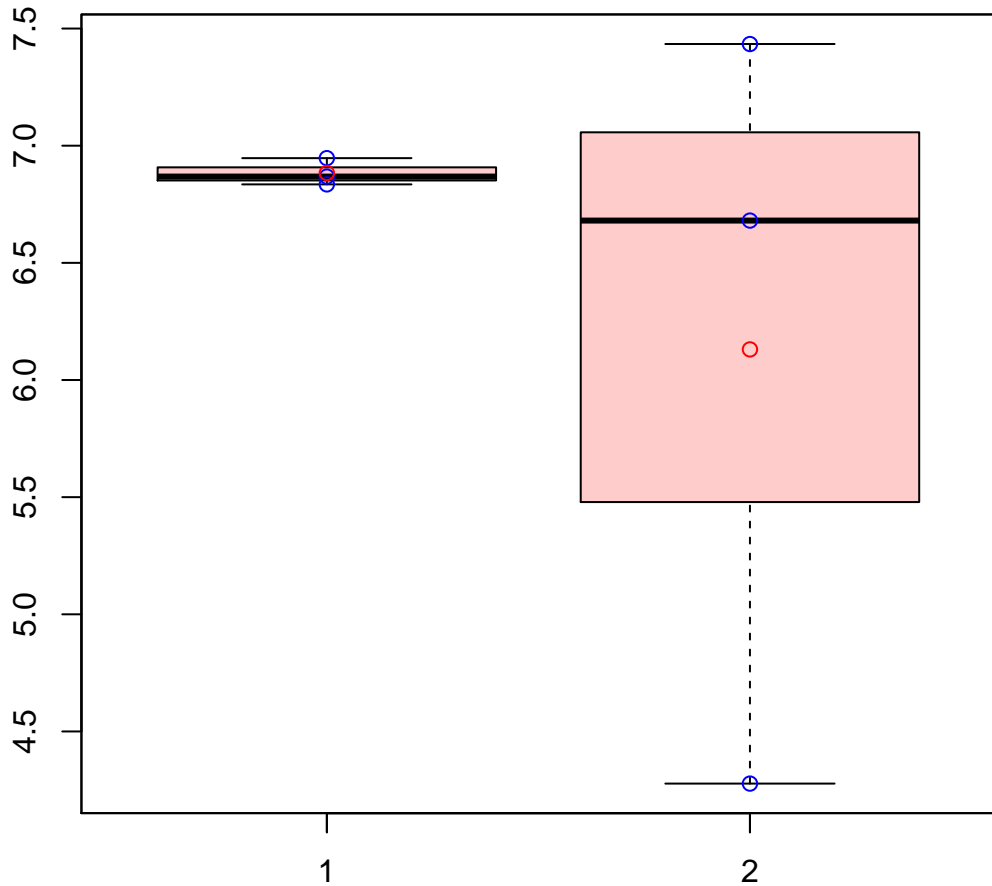

t-Test: p-value = 0.51



# K4QSB8|K4QSB8\_9POAL

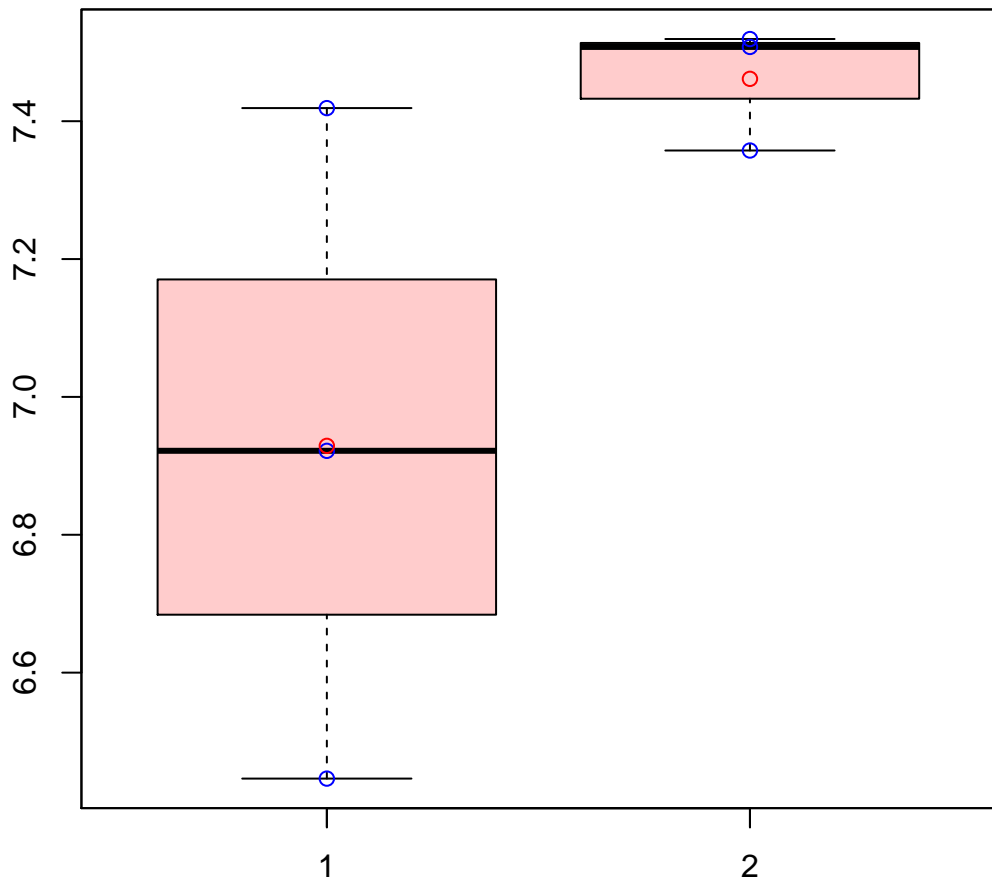

t-Test: p-value = 0.2

# K6Z6J1|K6Z6J1\_PHLPR

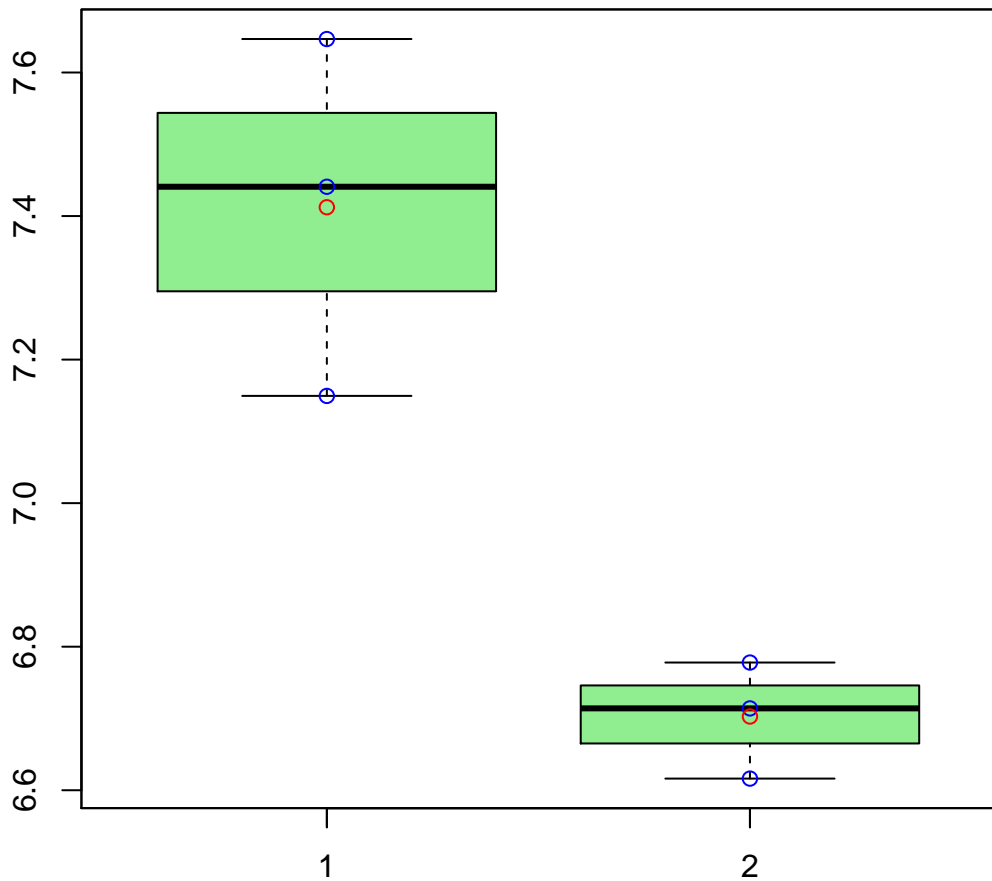

t-Test: p-value = 0.03

# K6Z775|K6Z775\_PHLPR

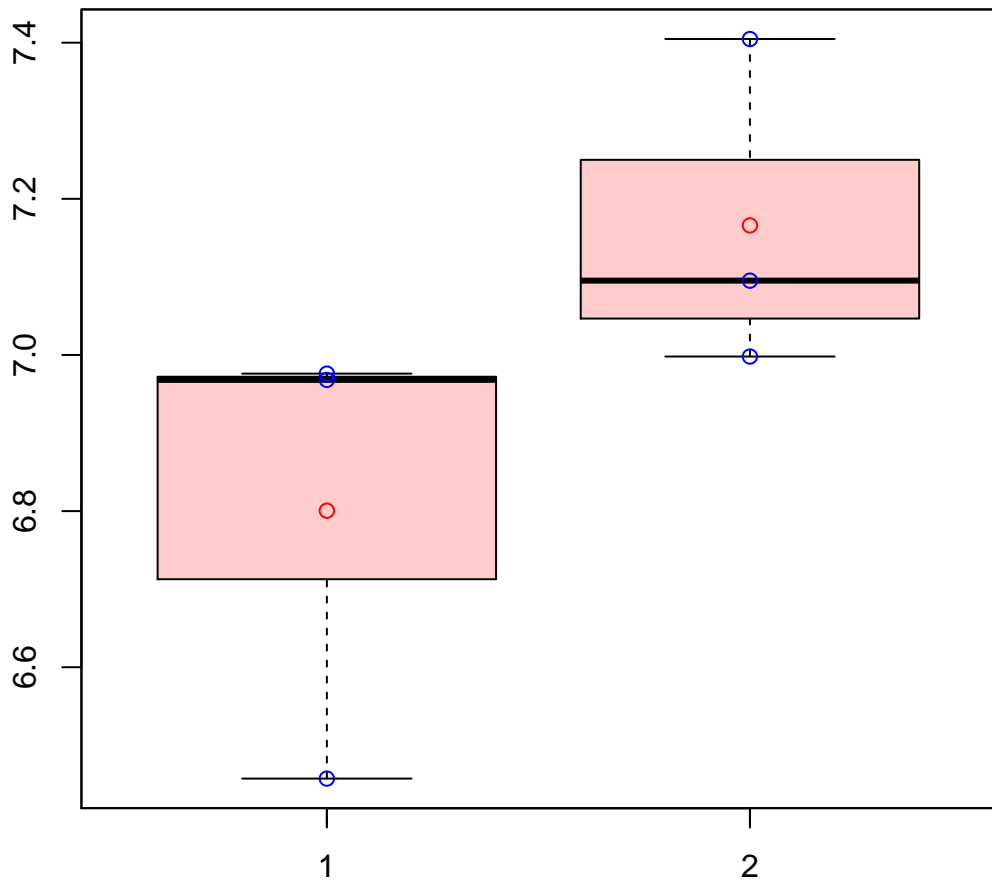

t-Test: p-value = 0.17

# K6ZXR0|K6ZXR0\_PHLPR

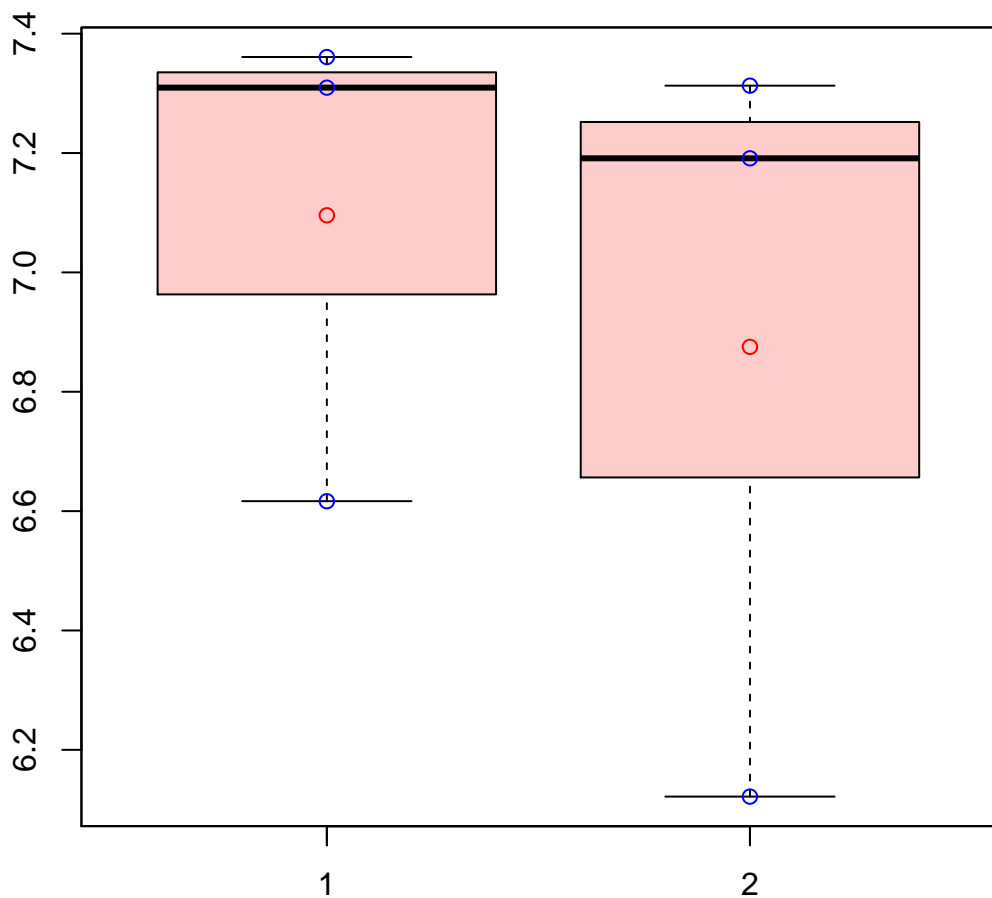

t-Test: p-value = 0.65

# K6ZXY9|K6ZXY9\_PHLPR

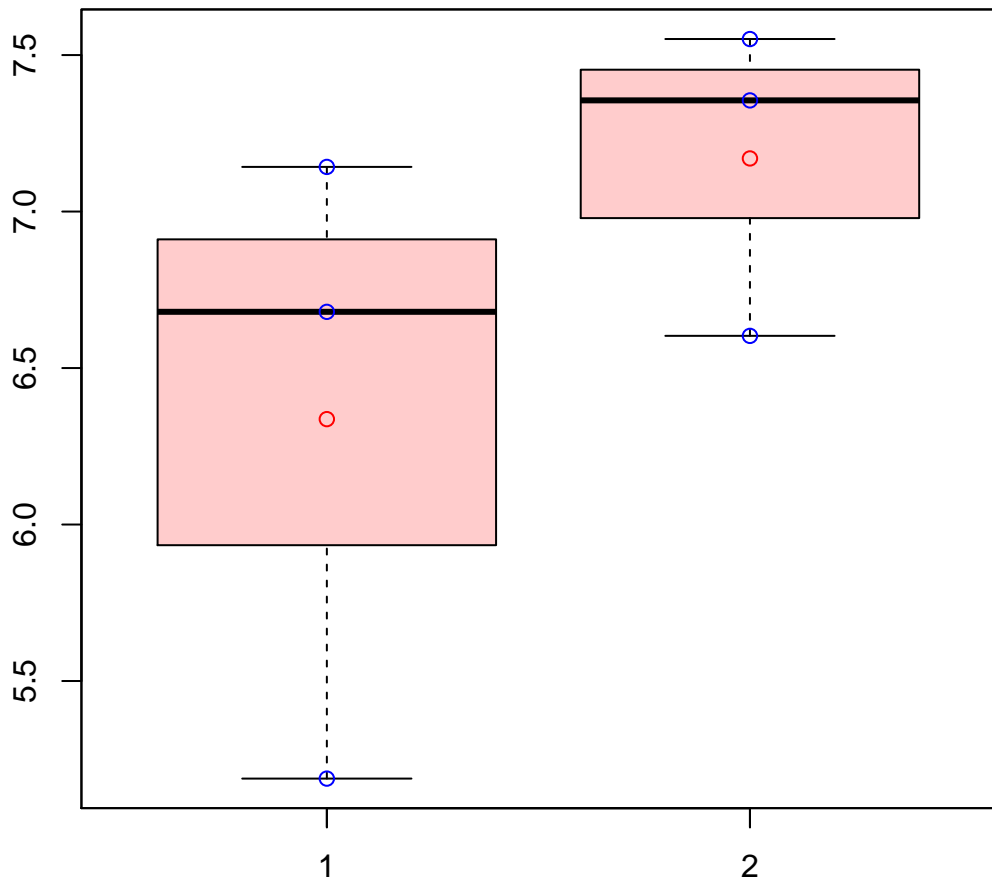

t-Test: p-value = 0.3

# K6ZYU6|K6ZYU6\_PHLPR

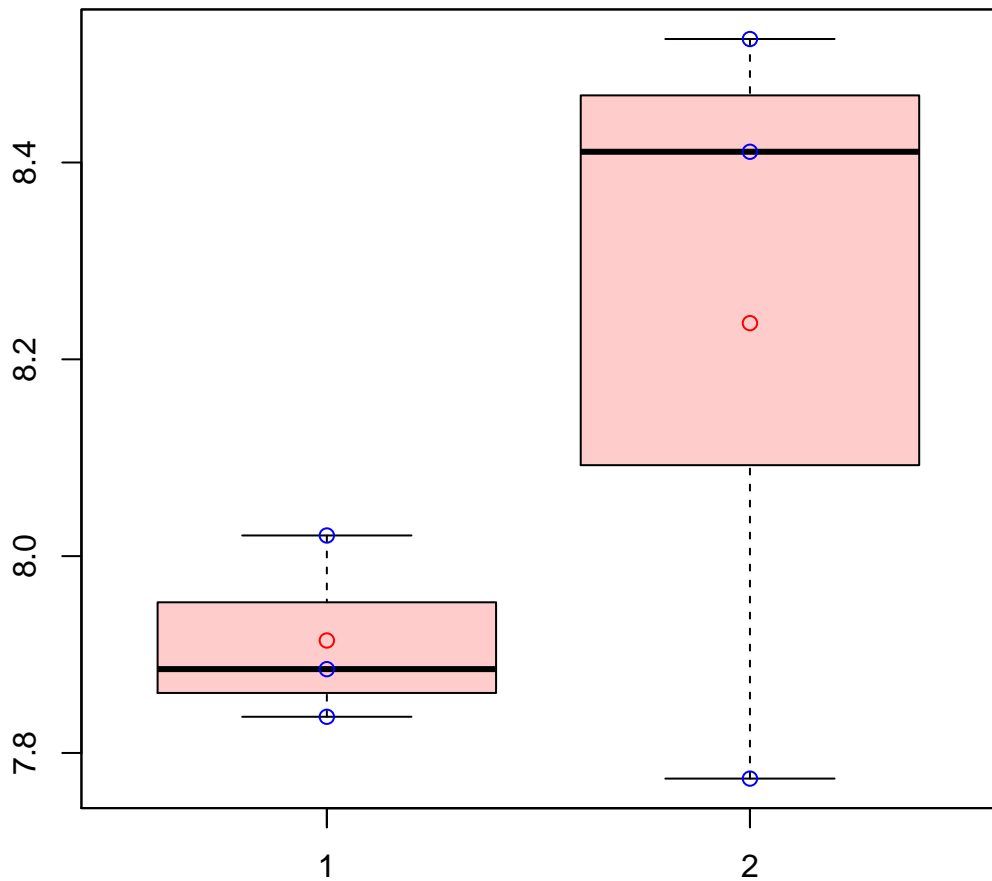

t-Test: p-value = 0.3

# K7AF06|K7AF06\_PHLPR

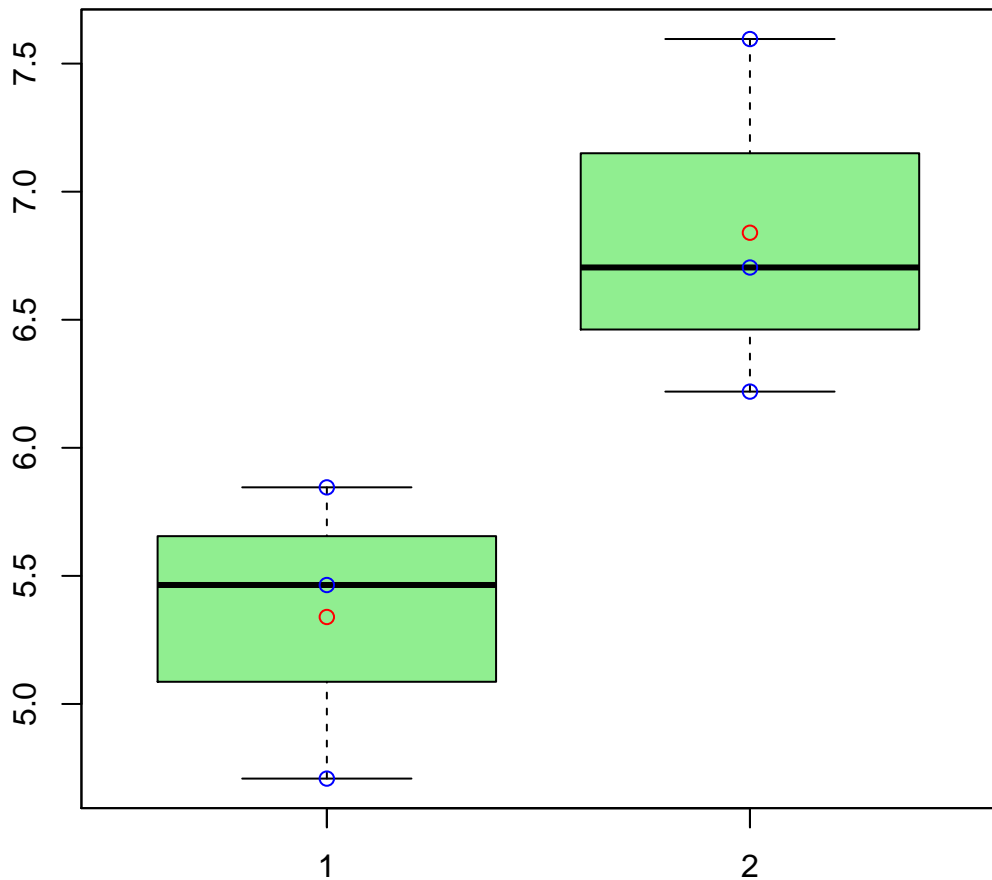

t-Test: p-value = 0.05

# K7AK25|K7AK25\_PHLPR

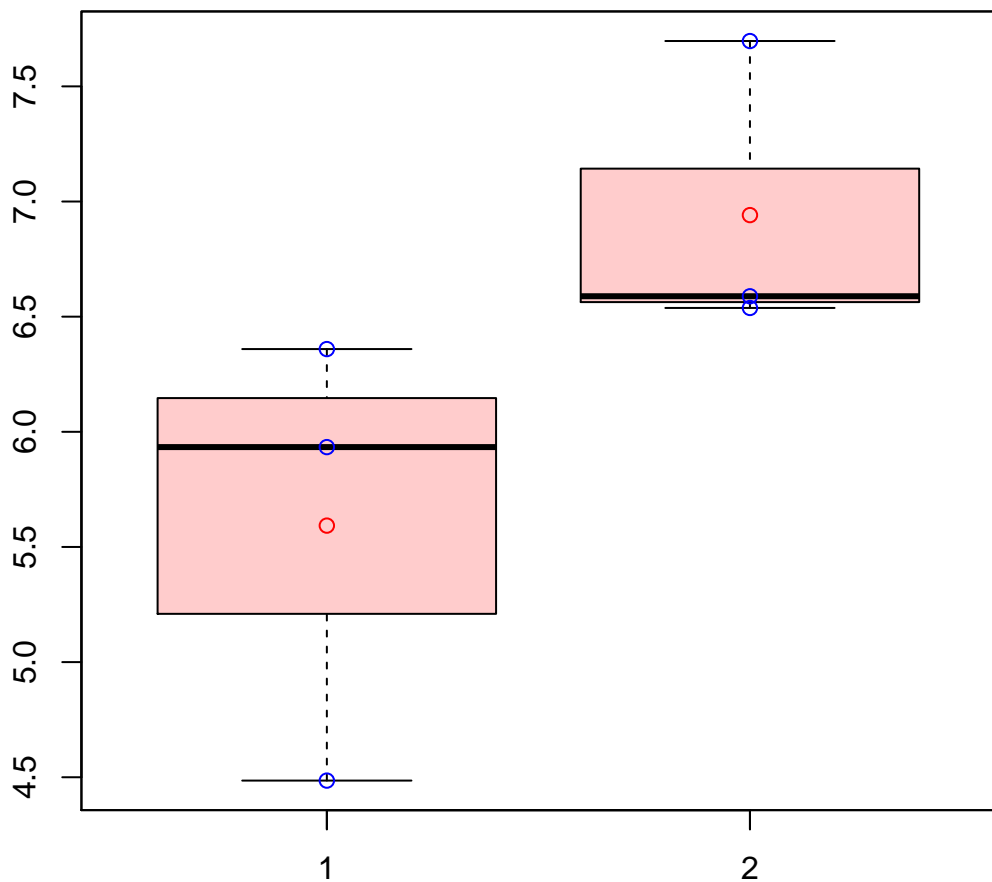

t-Test: p-value = 0.13



# K7AKA8|K7AKA8\_PHLPR

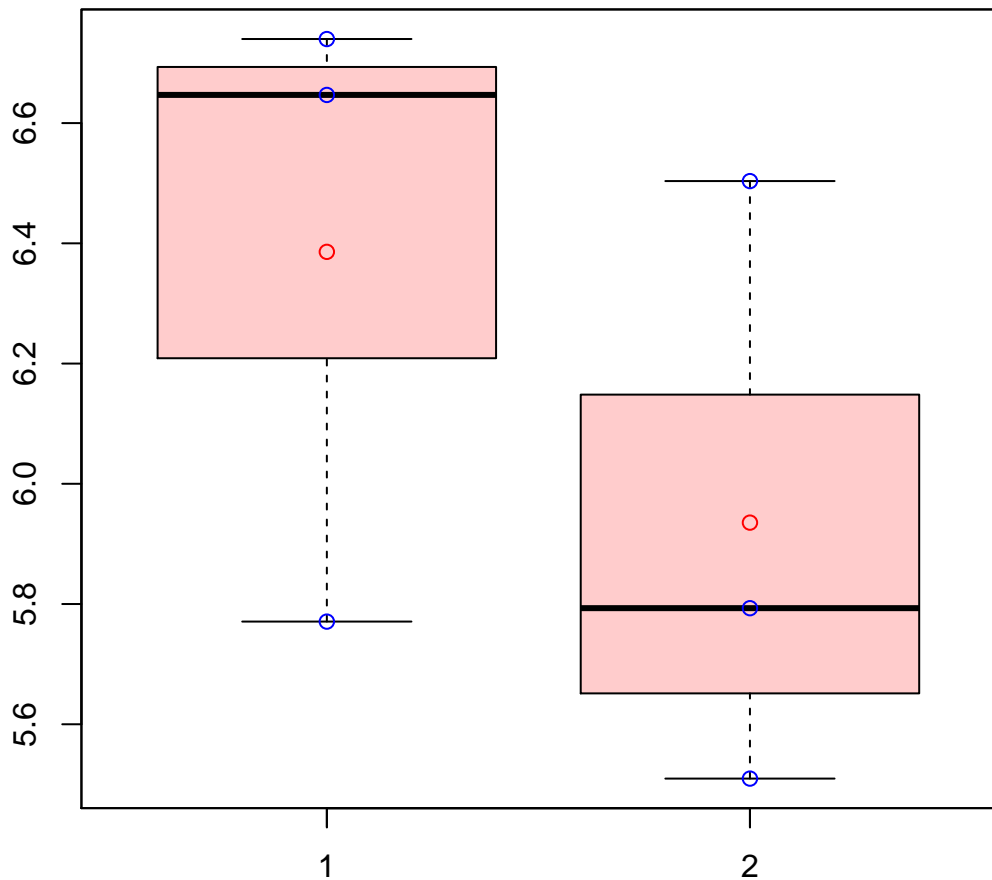

t-Test: p-value = 0.35

# K7N8A9|K7N8A9\_ELAGV

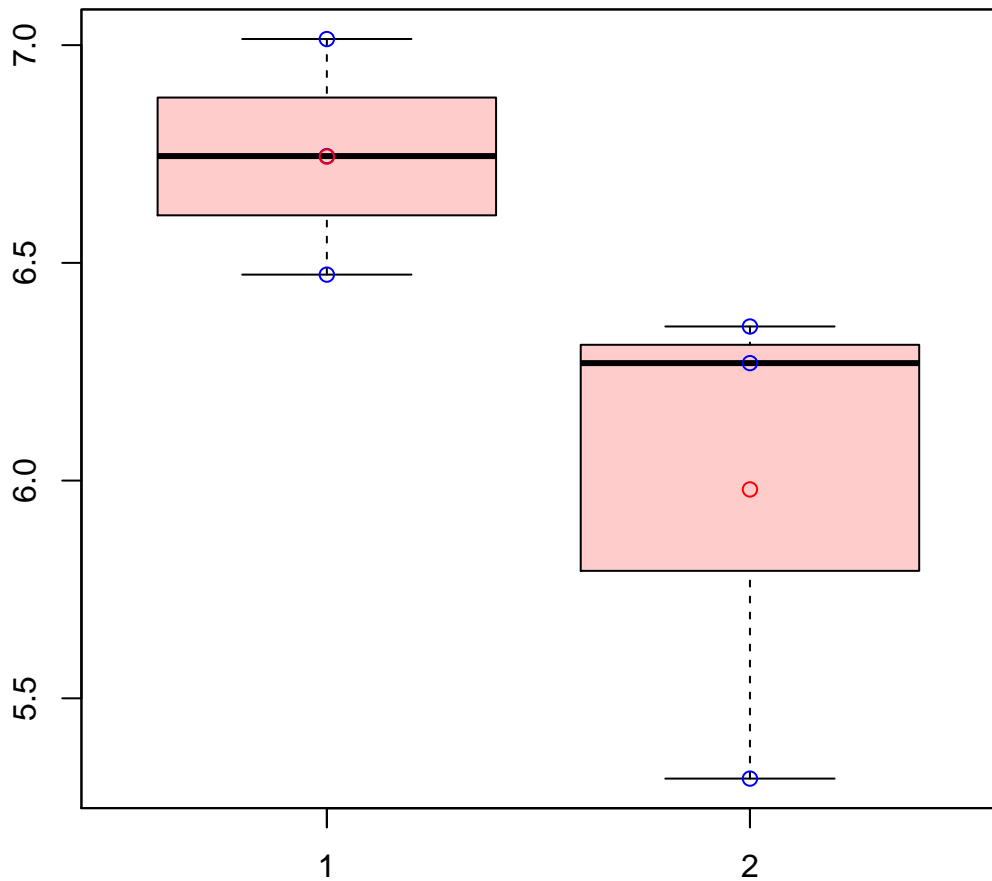

t-Test: p-value = 0.13

# K7ST04|K7ST04\_9POAL

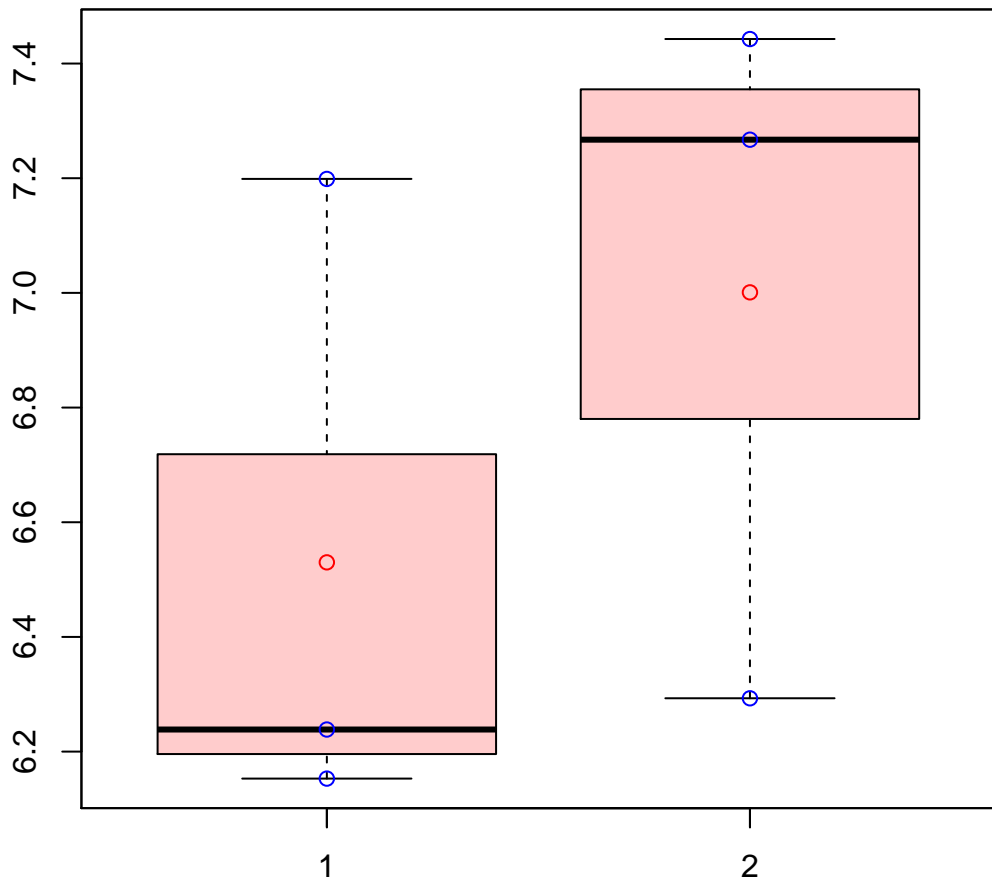

t-Test: p-value = 0.39

# K7TGZ6|K7TGZ6\_MAIZE

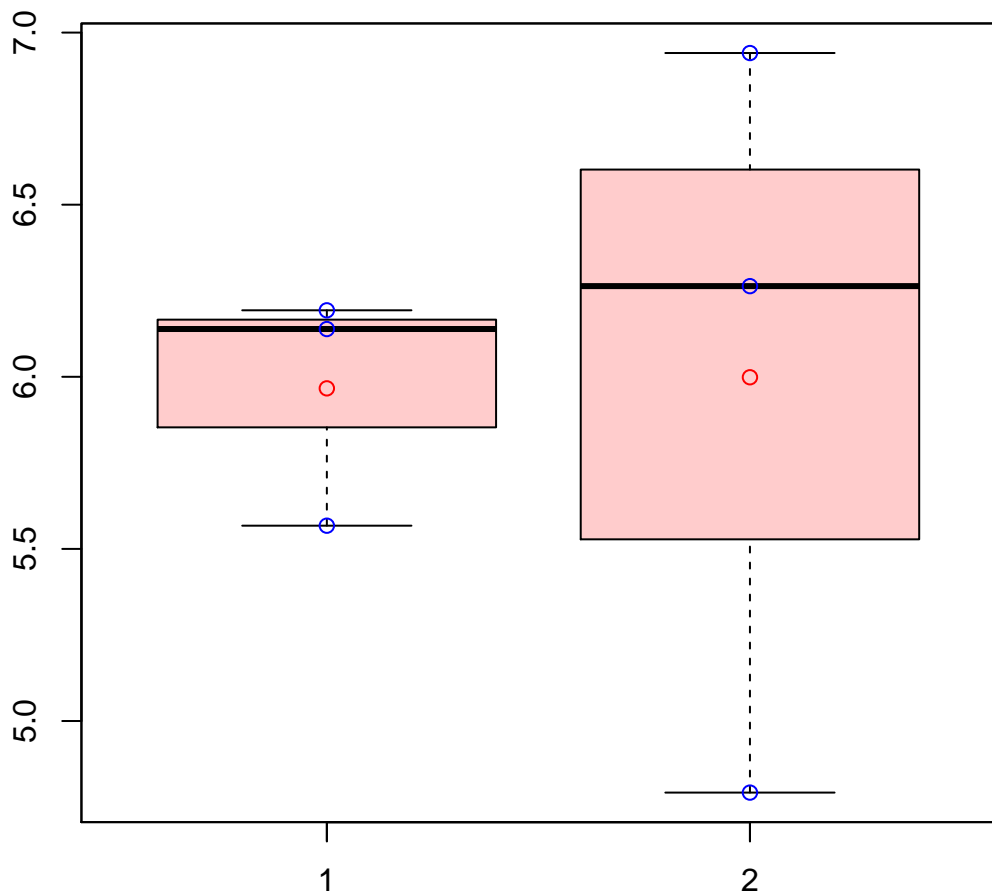

t-Test: p-value = 0.97

# K7TI14|K7TI14\_MAIZE

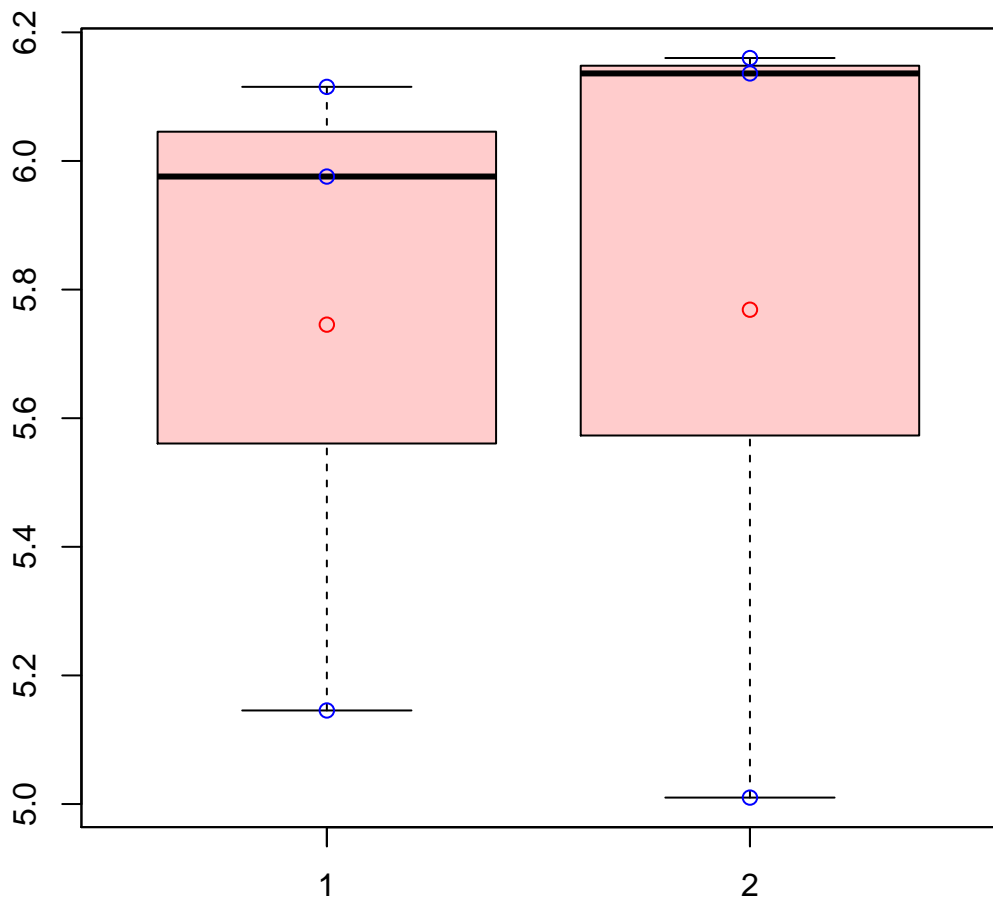

t-Test: p-value = 0.96

# K7TIB4|K7TIB4\_MAIZE

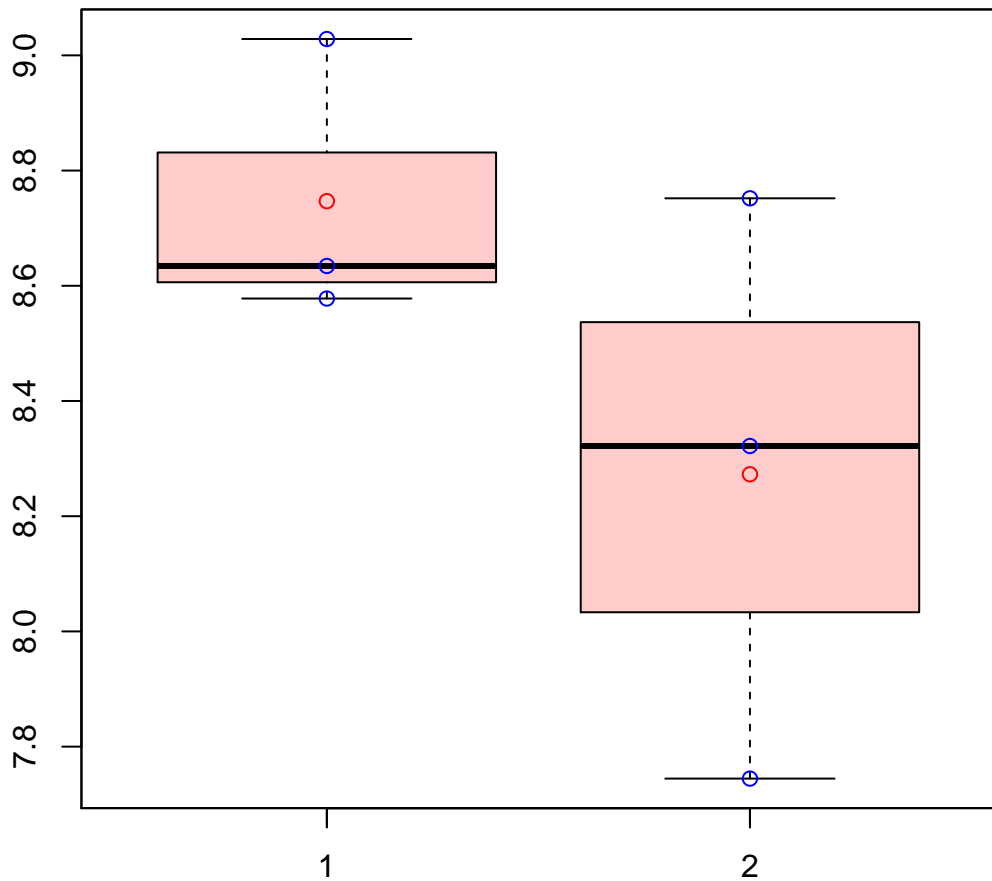

t-Test: p-value = 0.24

# K7TKN0|K7TKN0\_MAIZE

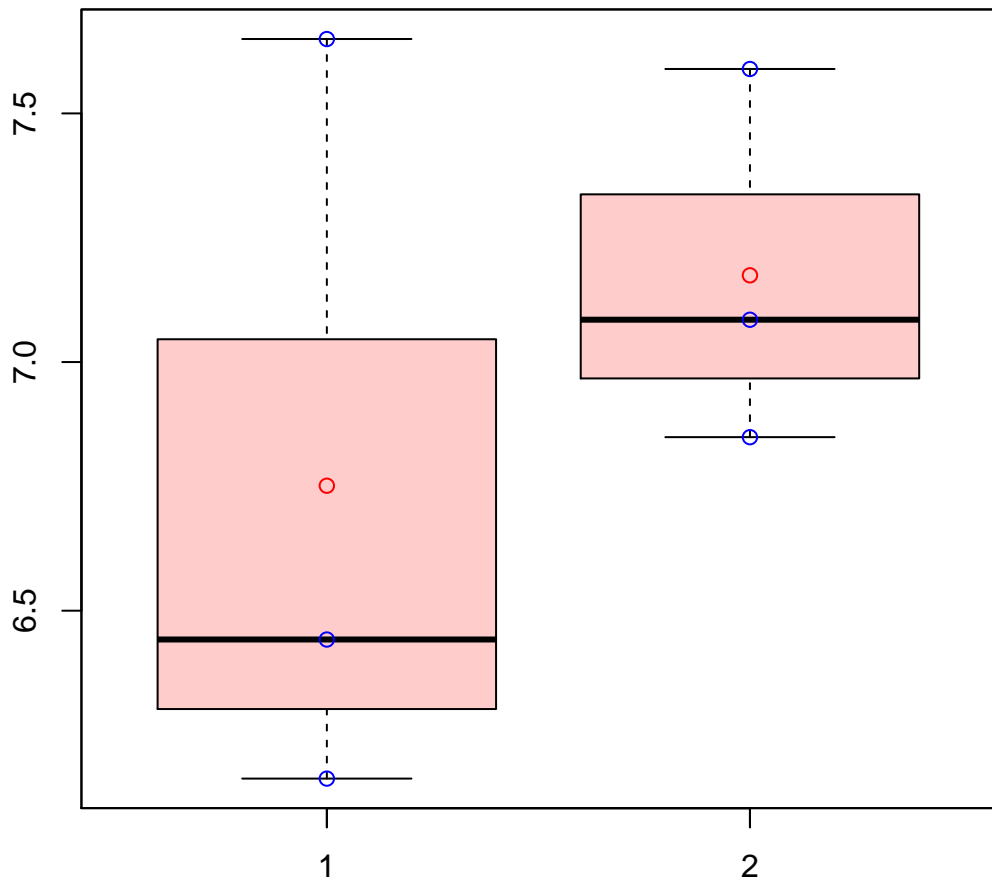

t-Test: p-value = 0.47

# K7TLD5|K7TLD5\_MAIZE

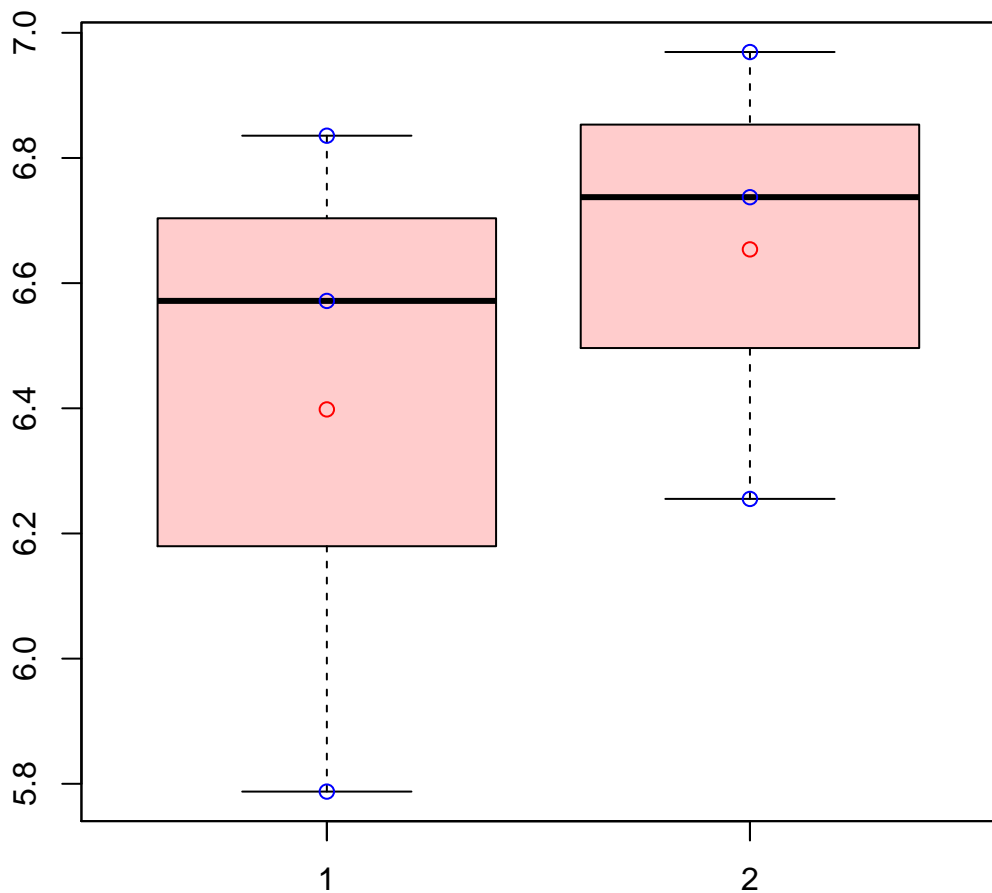

t-Test: p-value = 0.54



# K7TM76|K7TM76\_MAIZE

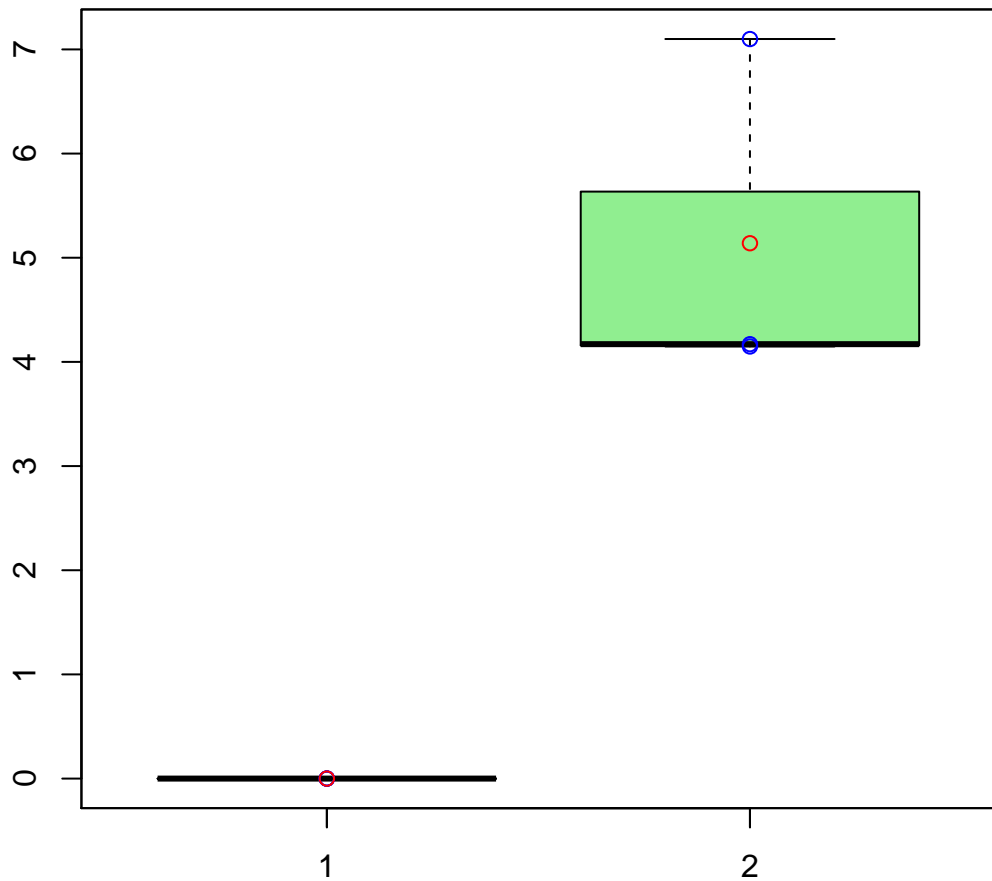

t-Test: p-value = 0.03

# K7TPL8|K7TPL8\_MAIZE

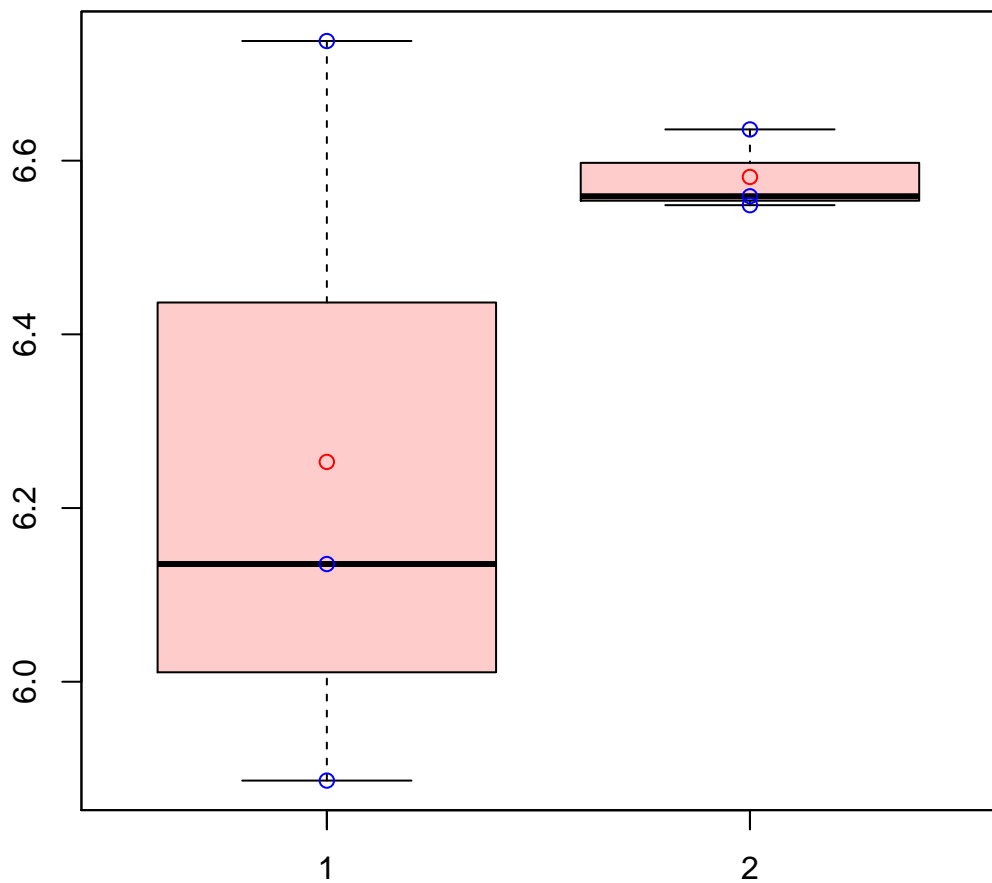

t-Test: p-value = 0.32

# K7TPT6|K7TPT6\_MAIZE

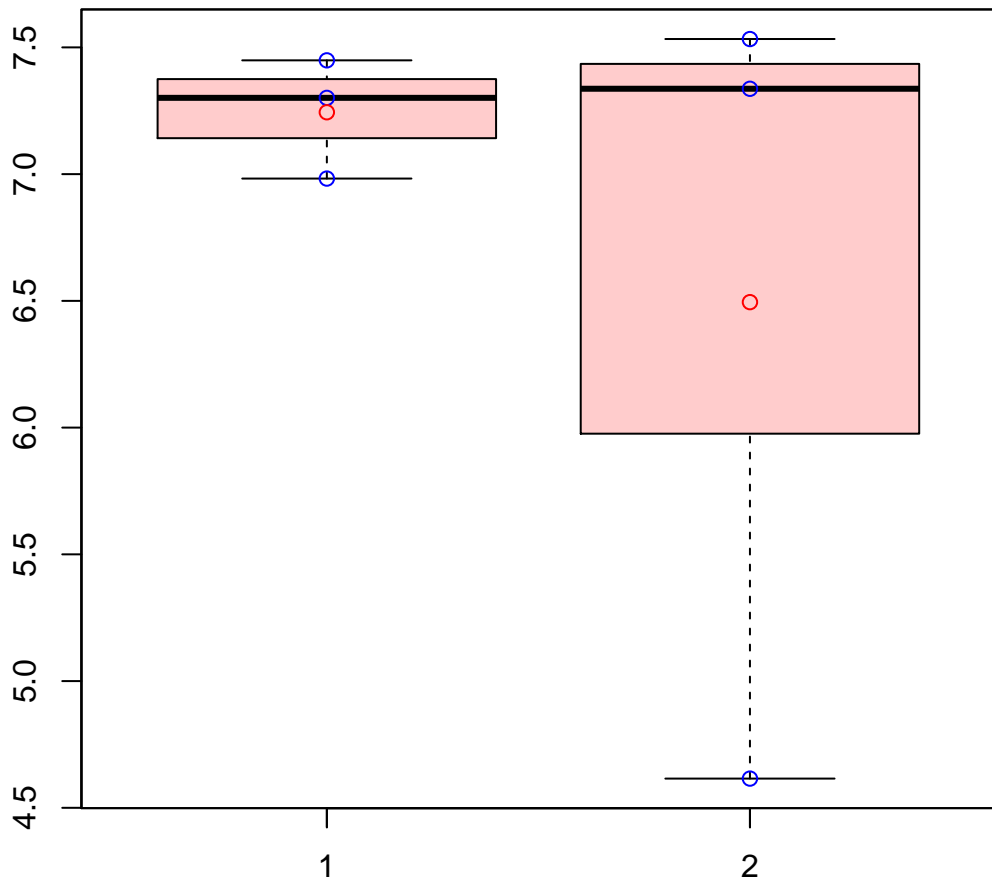

t-Test: p-value = 0.51

# K7TPT9|K7TPT9\_MAIZE

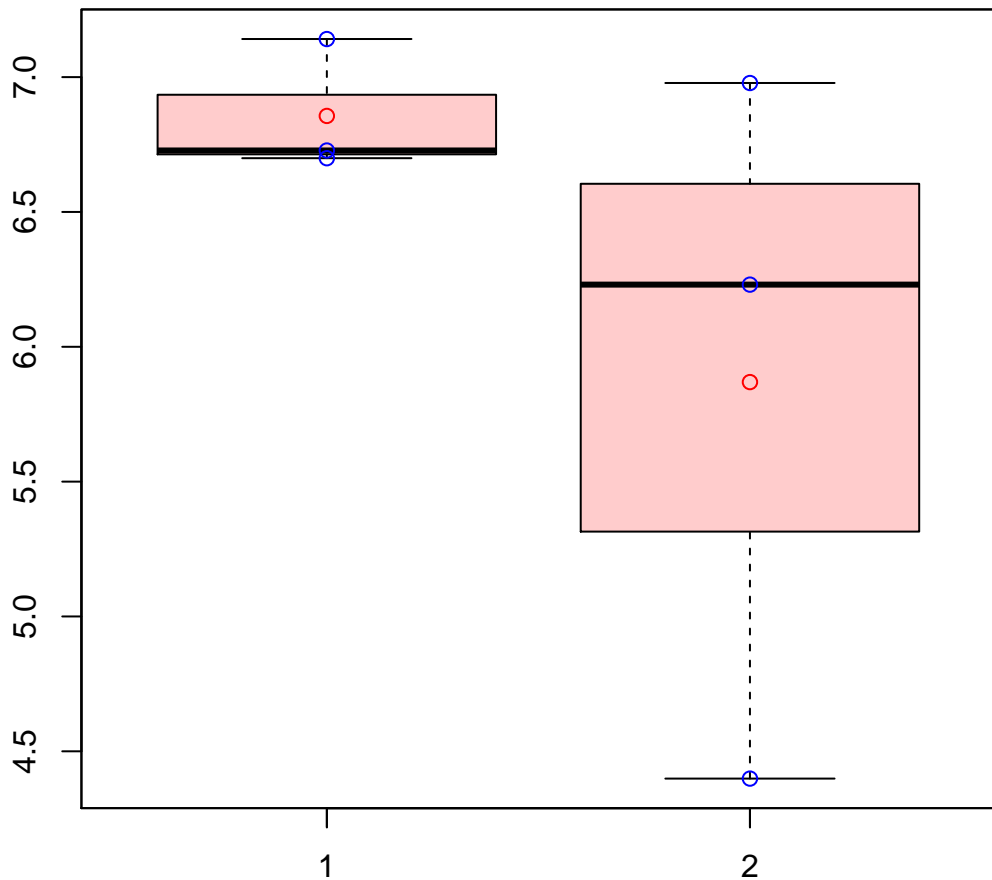

t-Test: p-value = 0.33

# K7TR72|K7TR72\_MAIZE

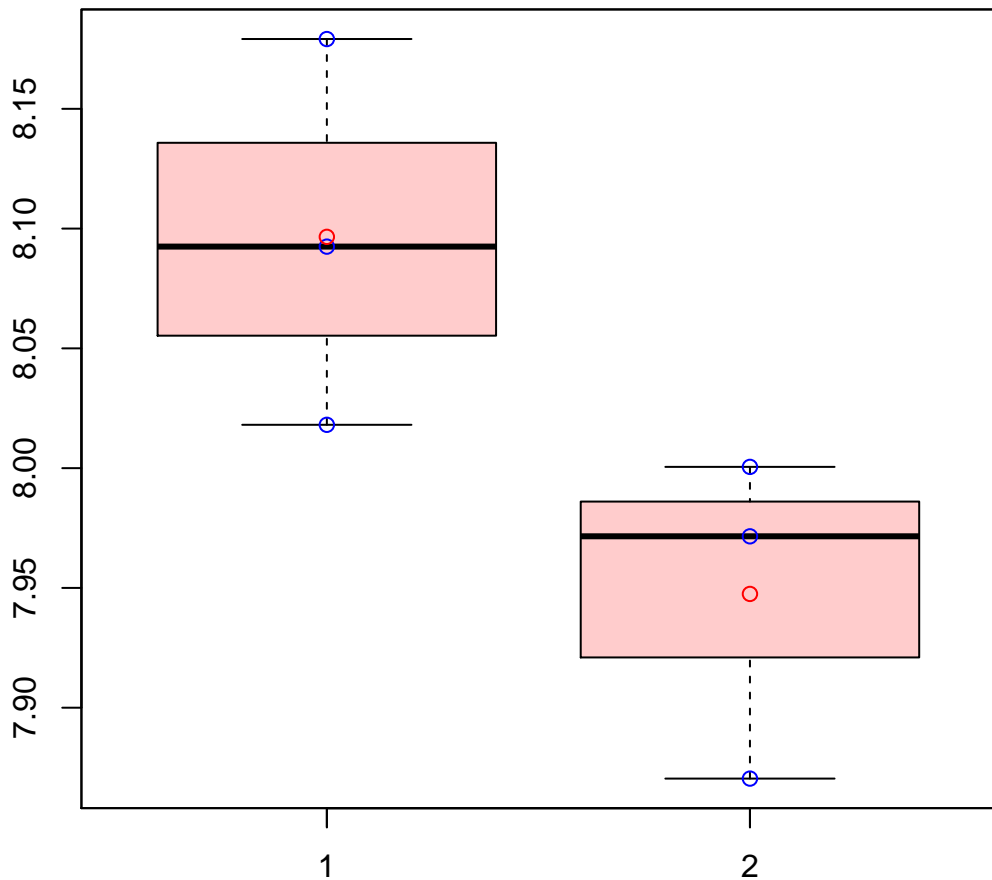

t-Test: p-value = 0.07

# K7TSB0|K7TSB0\_MAIZE

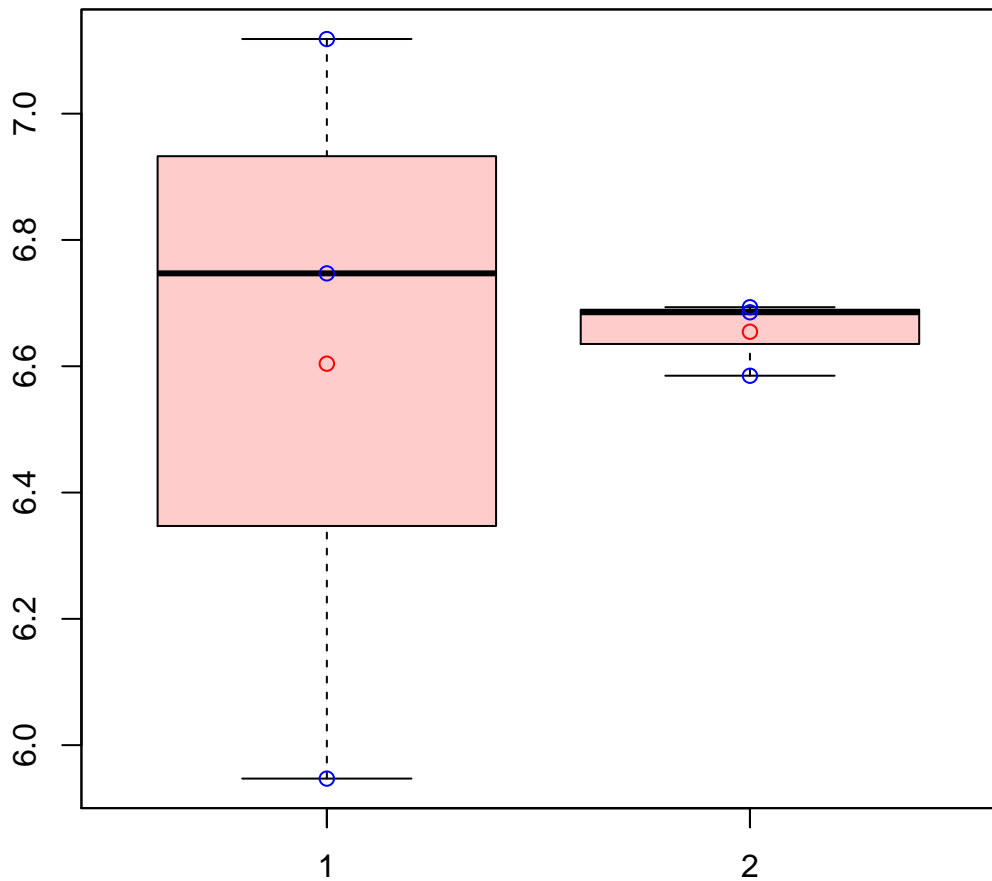

t-Test: p-value = 0.9

# K7TSP8|K7TSP8\_MAIZE

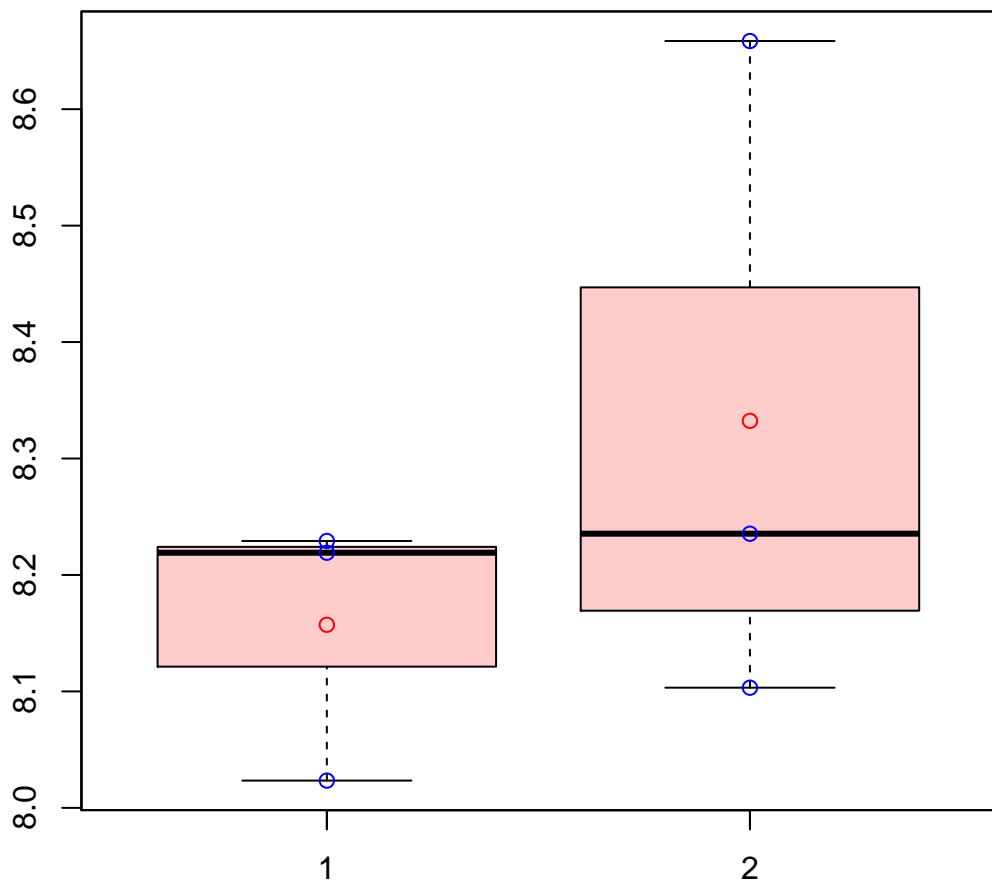

t-Test: p-value = 0.41

# K7TSU4|K7TSU4\_MAIZE

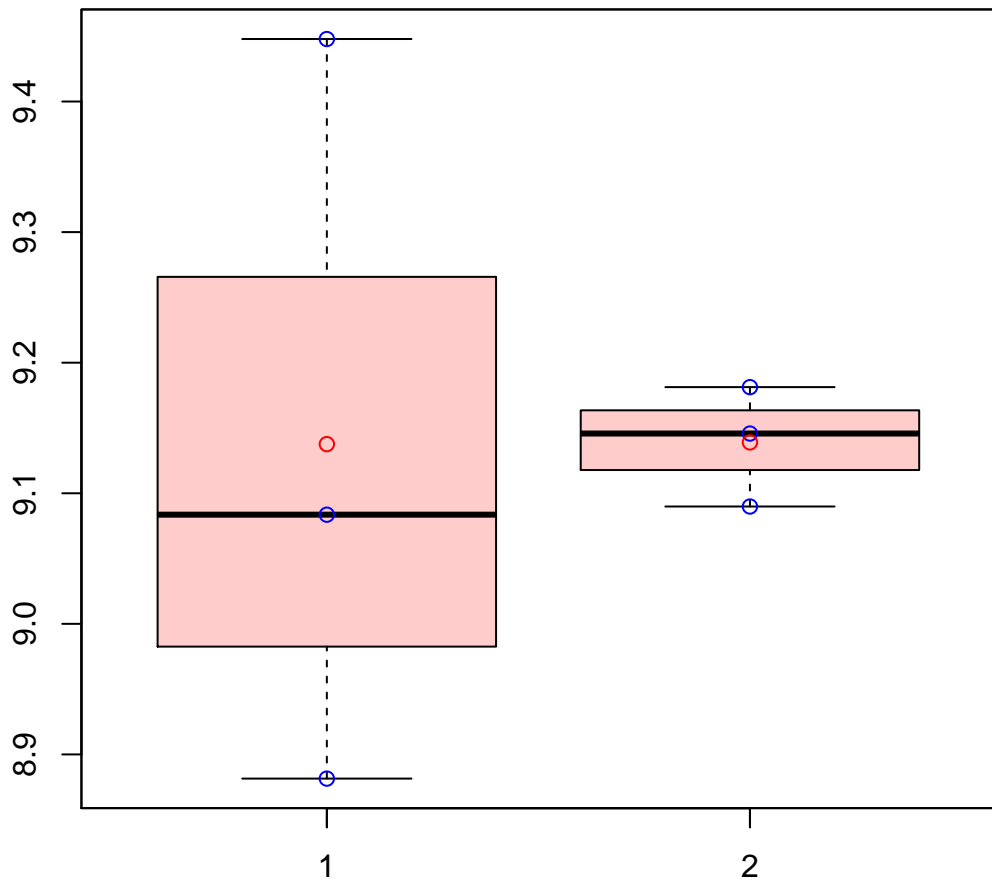

t-Test: p-value = 0.99



# K7TUN9|K7TUN9\_MAIZE

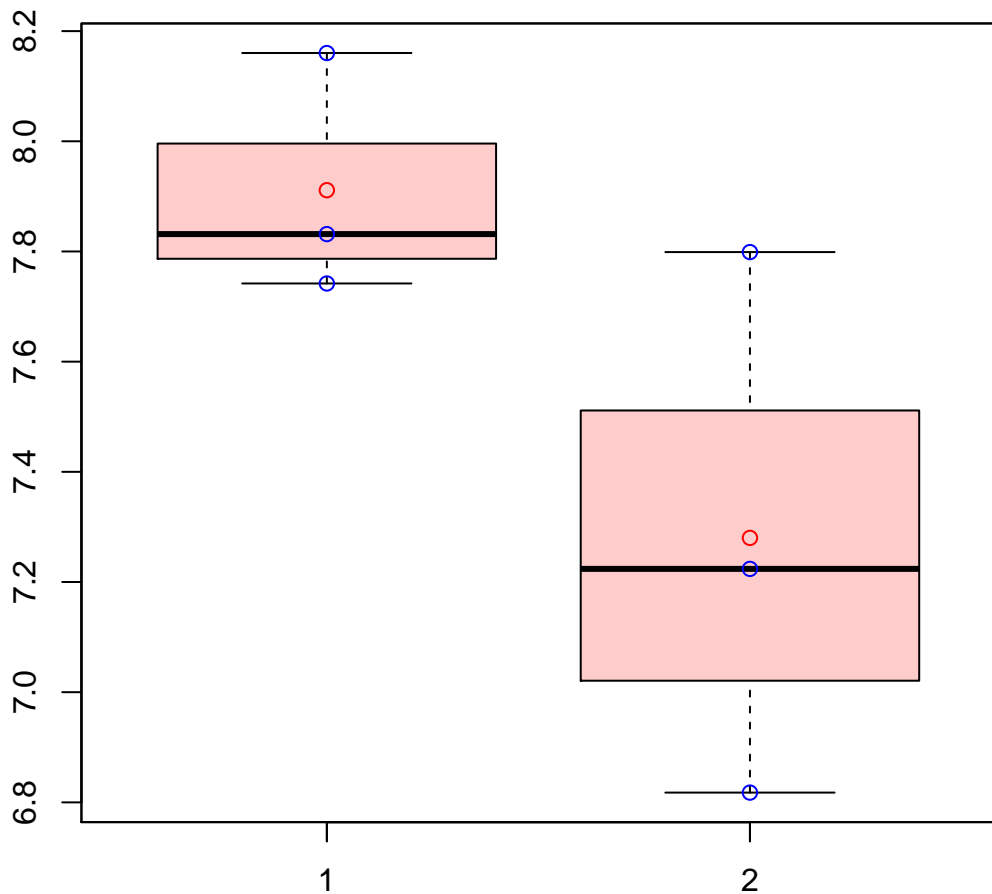

t-Test: p-value = 0.14

# K7TV49|K7TV49\_MAIZE

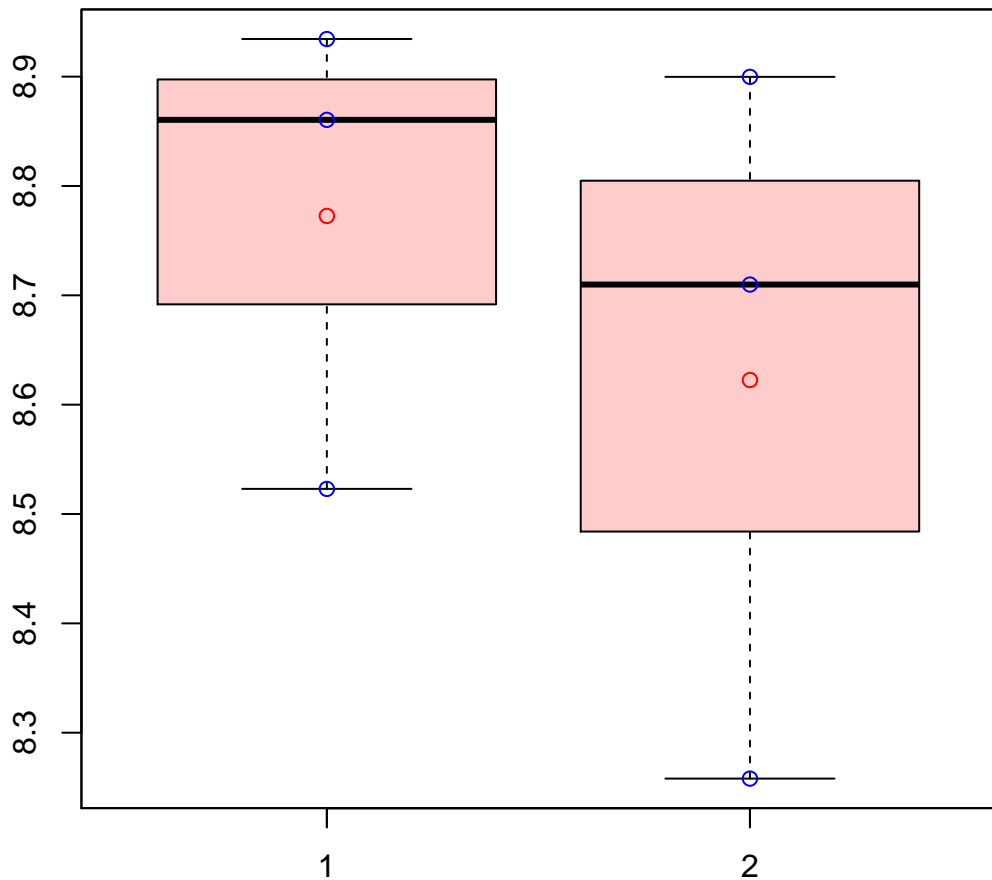

t-Test: p-value = 0.55

# K7TV73|K7TV73\_MAIZE

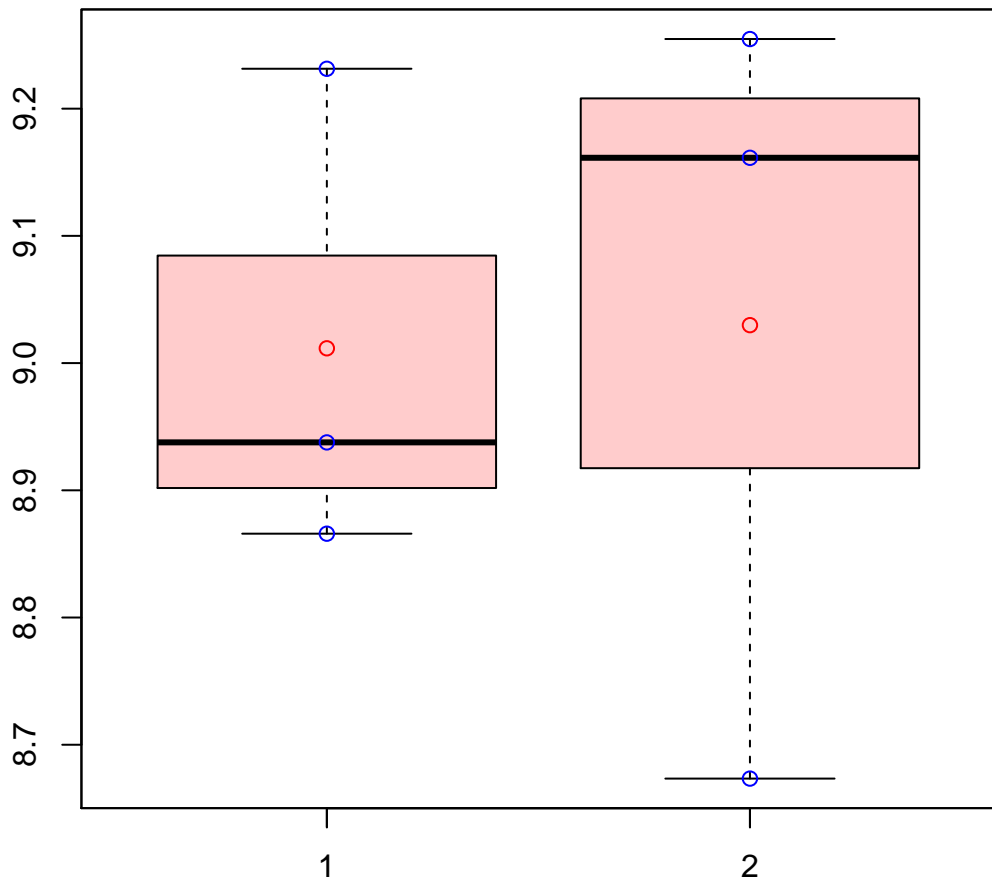

t-Test: p-value = 0.94

# K7TW55|K7TW55\_MAIZE

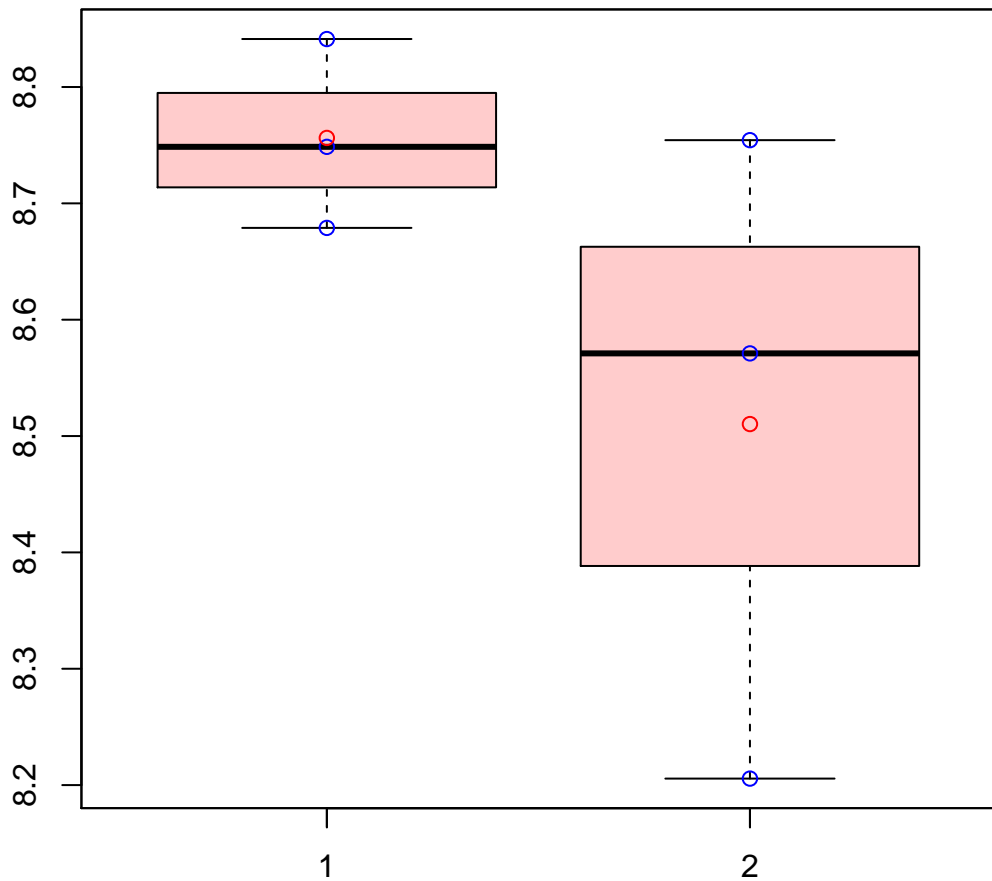

t-Test: p-value = 0.26

# K7TWP1|K7TWP1\_MAIZE

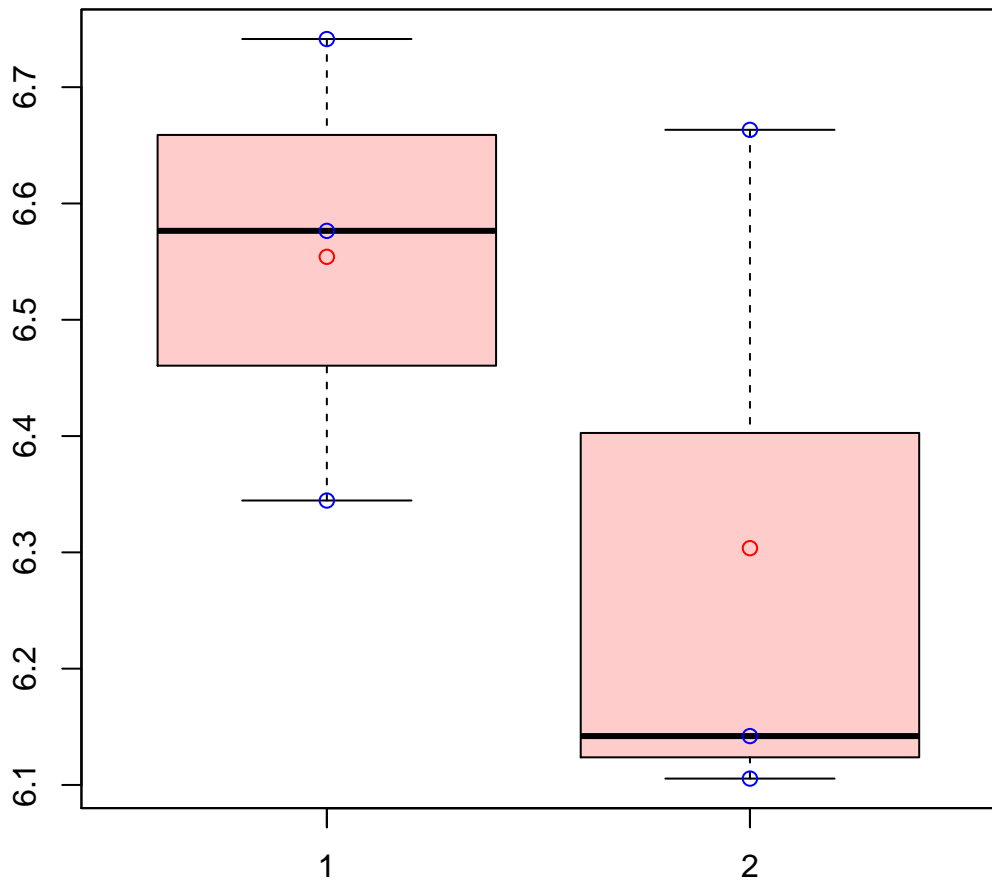

t-Test: p-value = 0.32

# K7TWX2|K7TWX2\_MAIZE

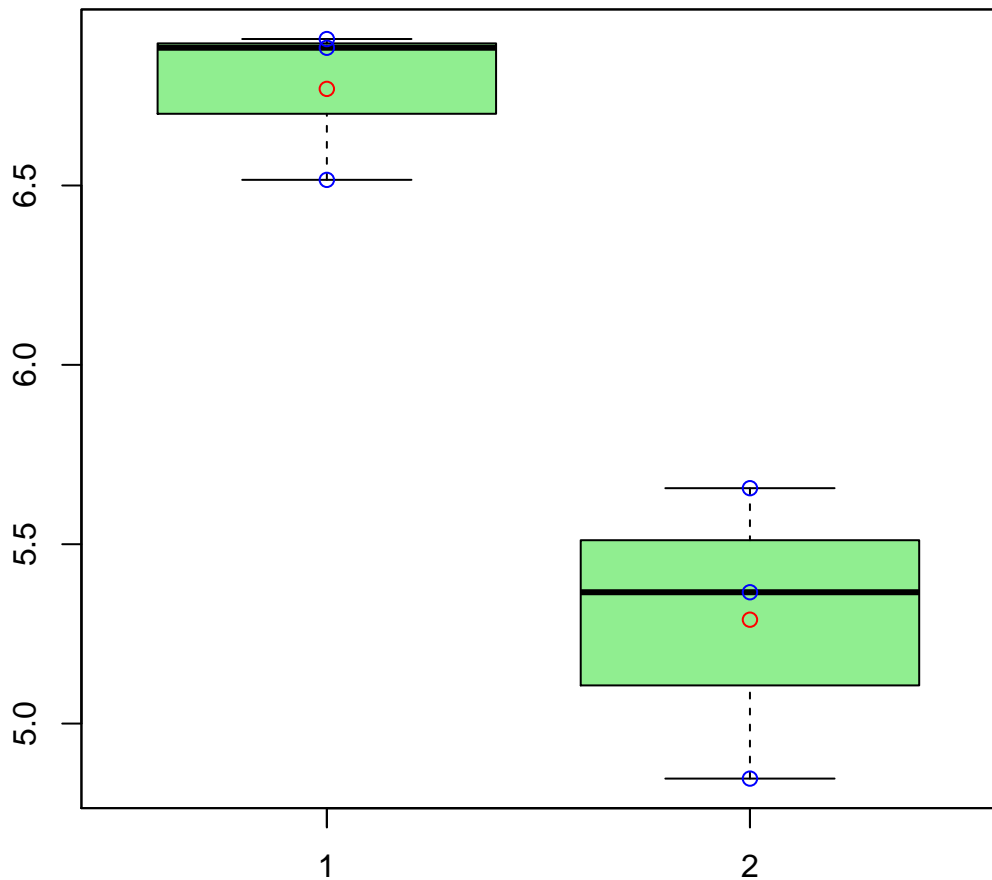

t-Test: p-value = 0.01

# K7TX67|K7TX67\_MAIZE

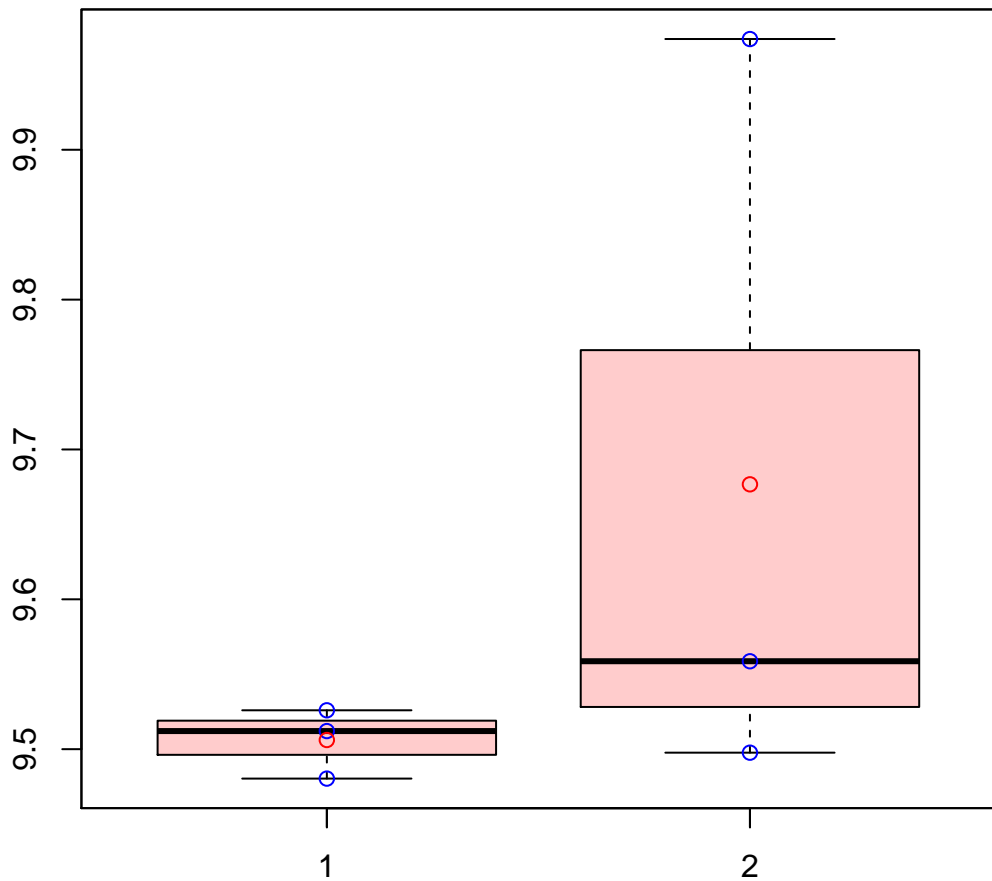

t-Test: p-value = 0.37

# K7TYC6|K7TYC6\_MAIZE

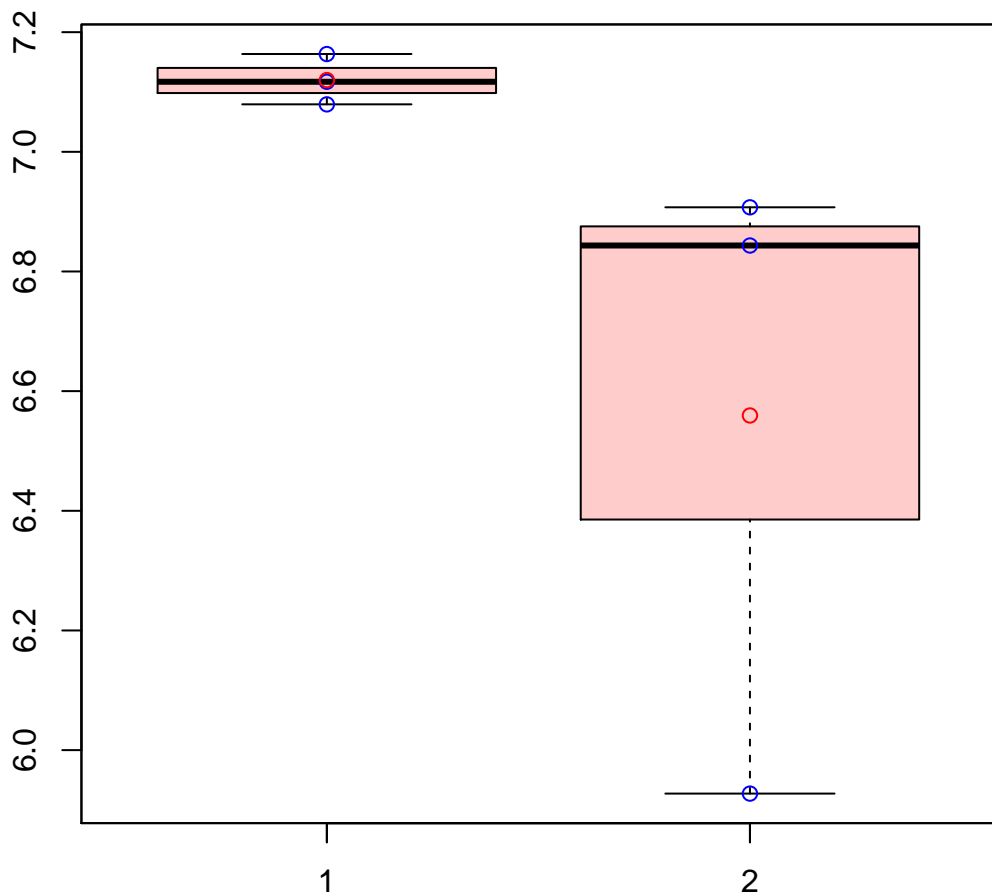

t-Test: p-value = 0.22



# K7TYG1|K7TYG1\_MAIZE

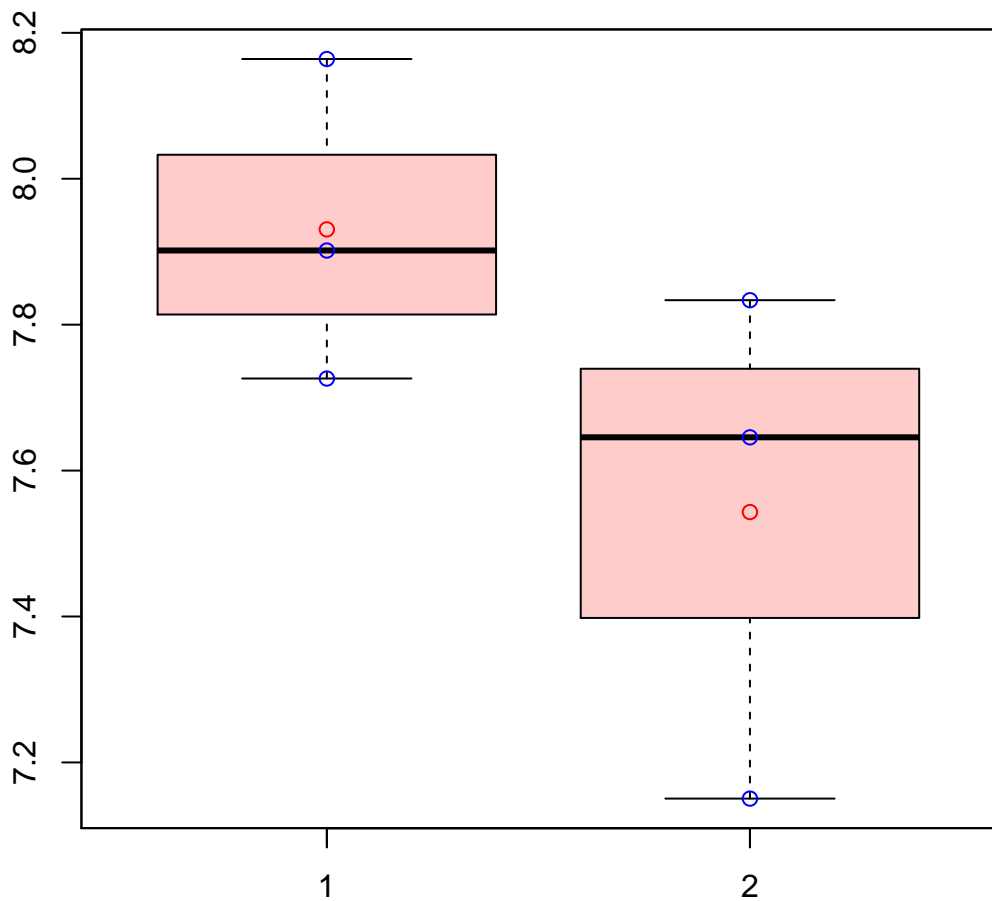

t-Test: p-value = 0.2

# K7TZB8|K7TZB8\_MAIZE

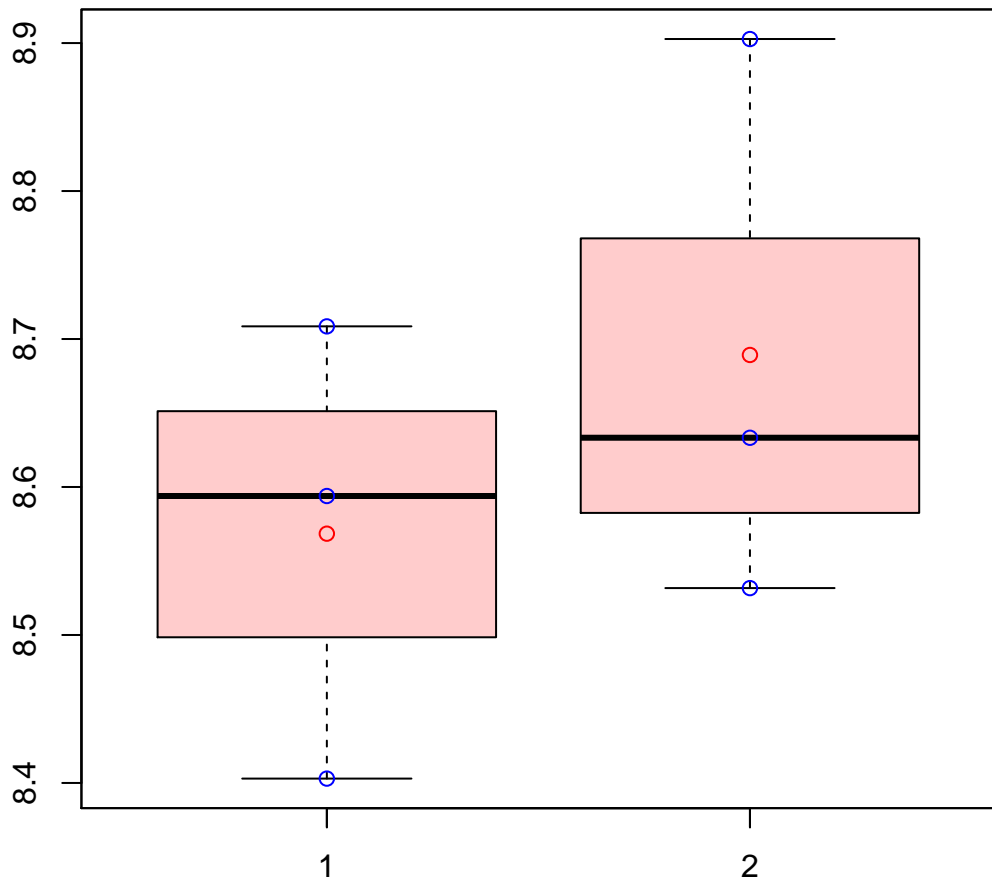

t-Test: p-value = 0.45

# K7TZY7|K7TZY7\_MAIZE

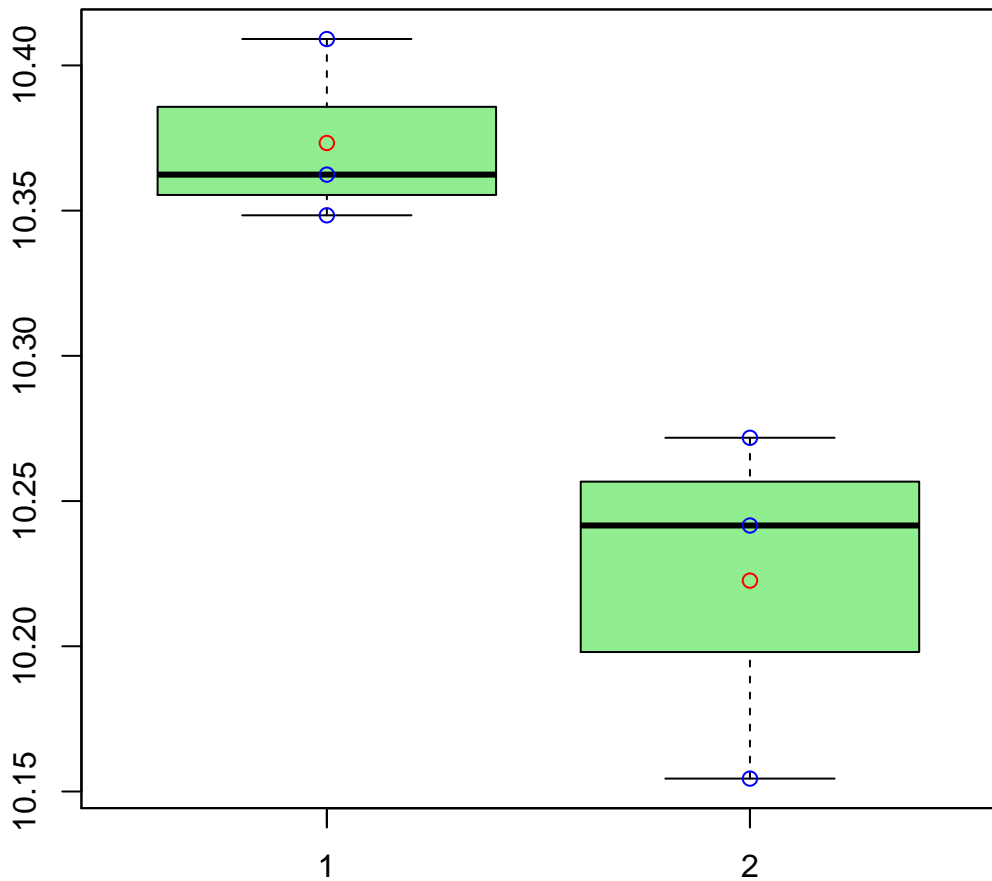

t-Test: p-value = 0.03

# K7U074|K7U074\_MAIZE

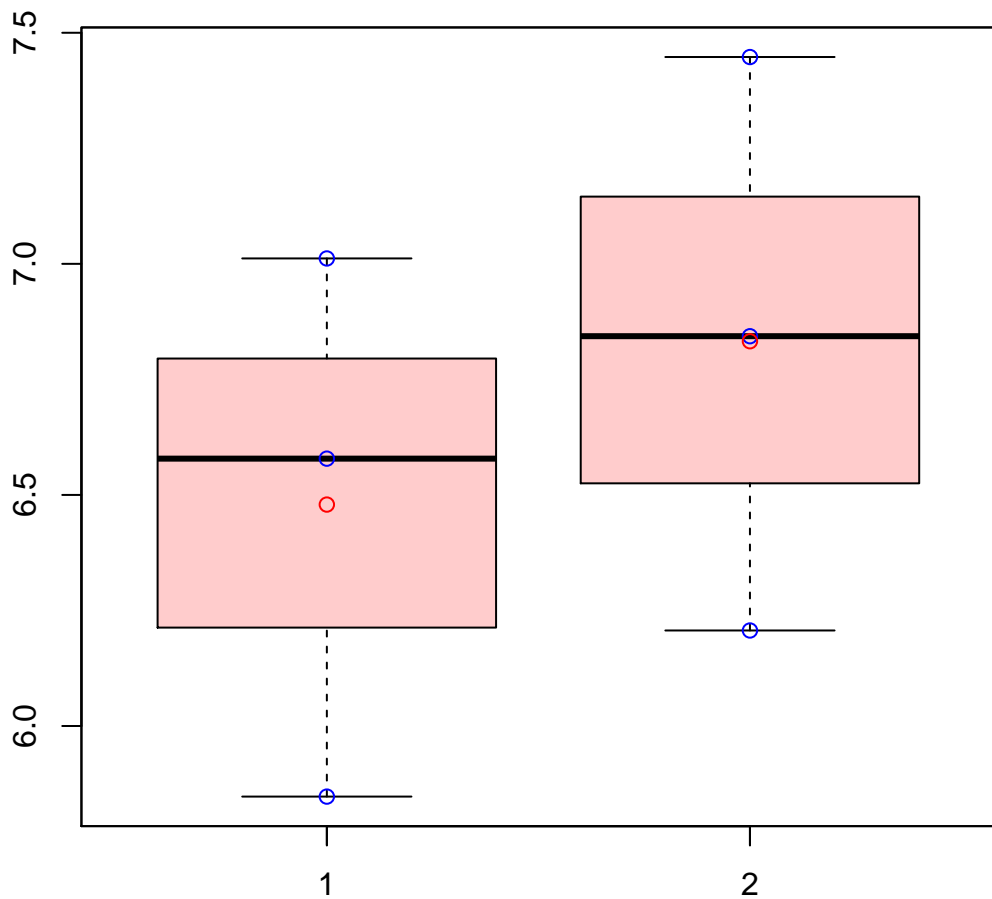

t-Test: p-value = 0.51

# K7U135|K7U135\_MAIZE

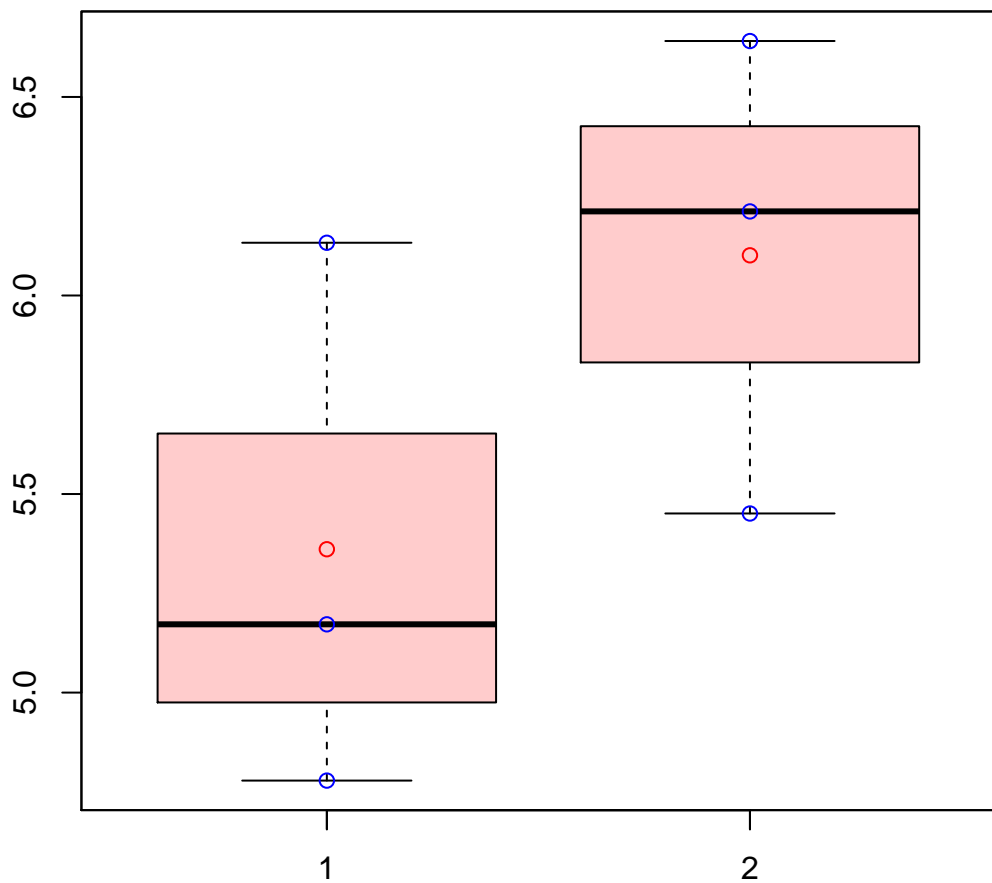

t-Test: p-value = 0.24

# K7U2L3|K7U2L3\_MAIZE

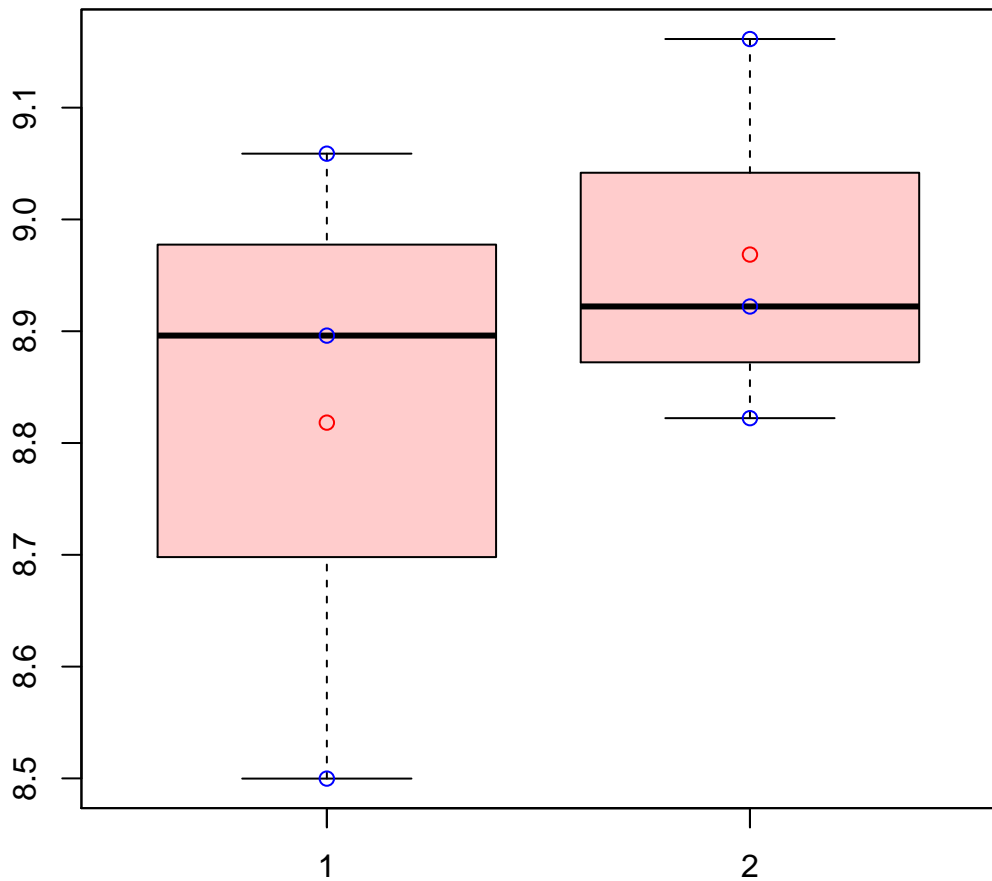

t-Test: p-value = 0.49

# K7U3B1|K7U3B1\_MAIZE

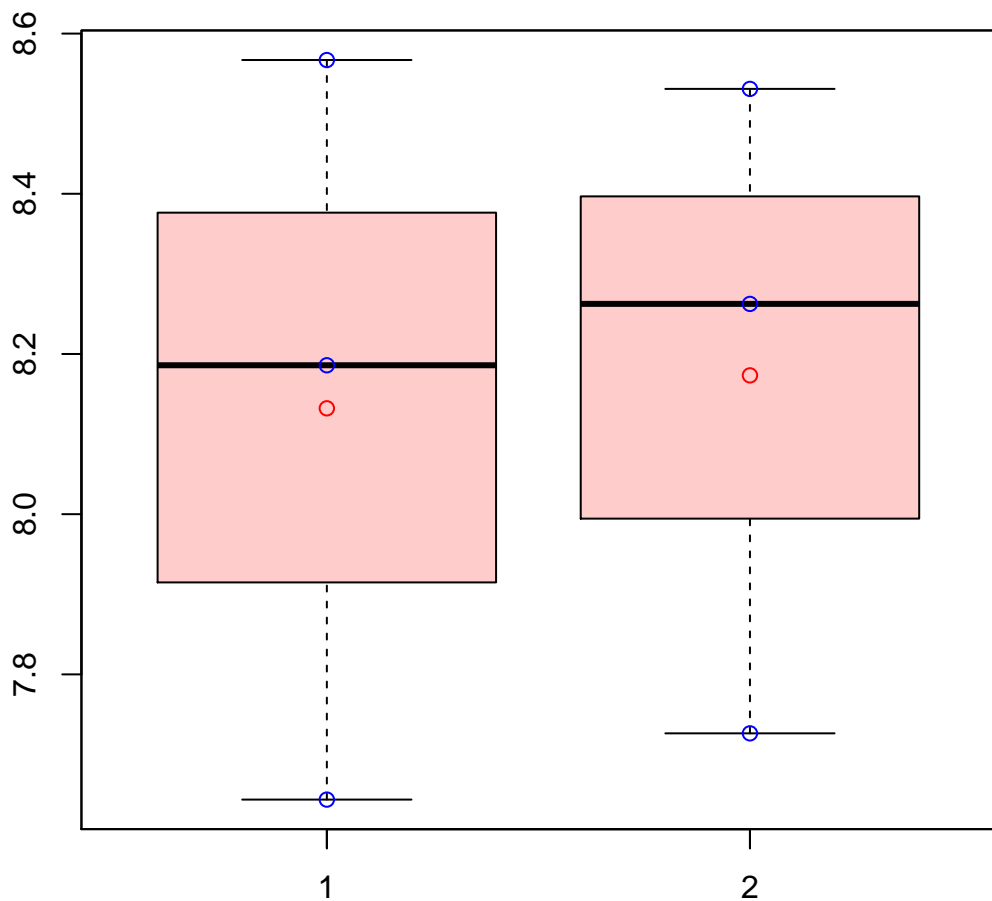

t-Test: p-value = 0.91

# K7U4E3|K7U4E3\_MAIZE

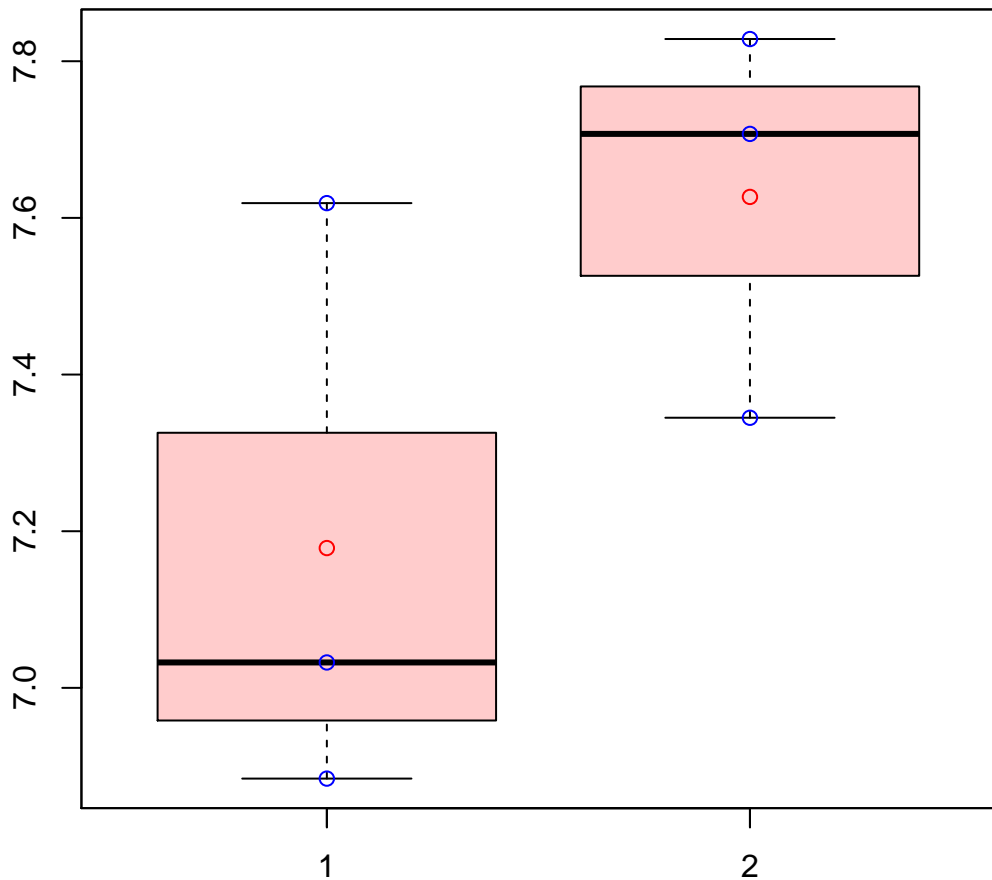

t-Test: p-value = 0.18



# K7U511|K7U511\_MAIZE

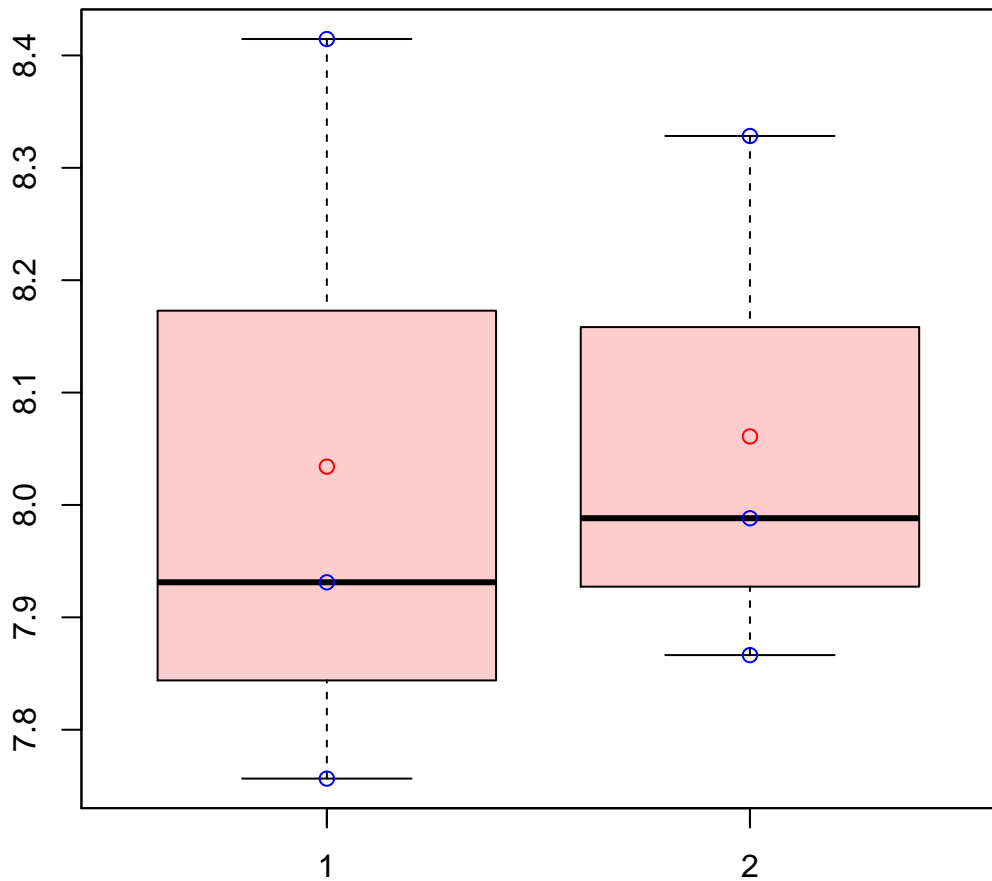

t-Test: p-value = 0.92

# K7U5H7|K7U5H7\_MAIZE

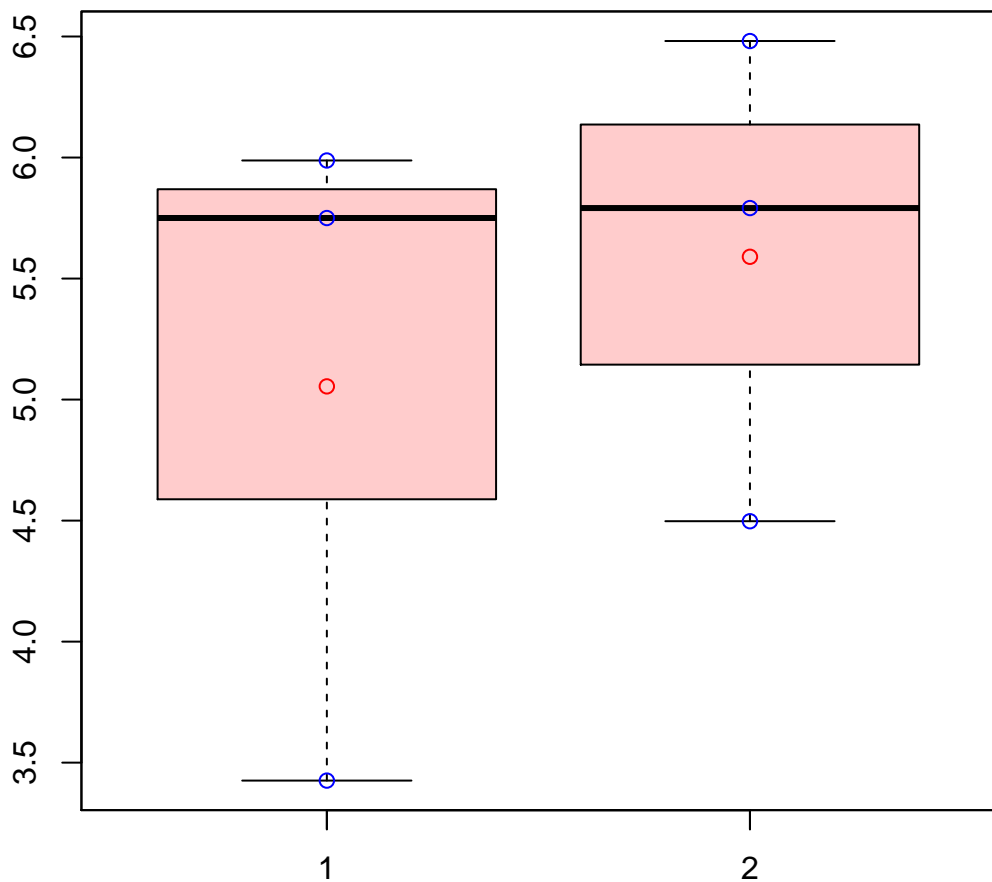

t-Test: p-value = 0.62

# K7U658|K7U658\_MAIZE

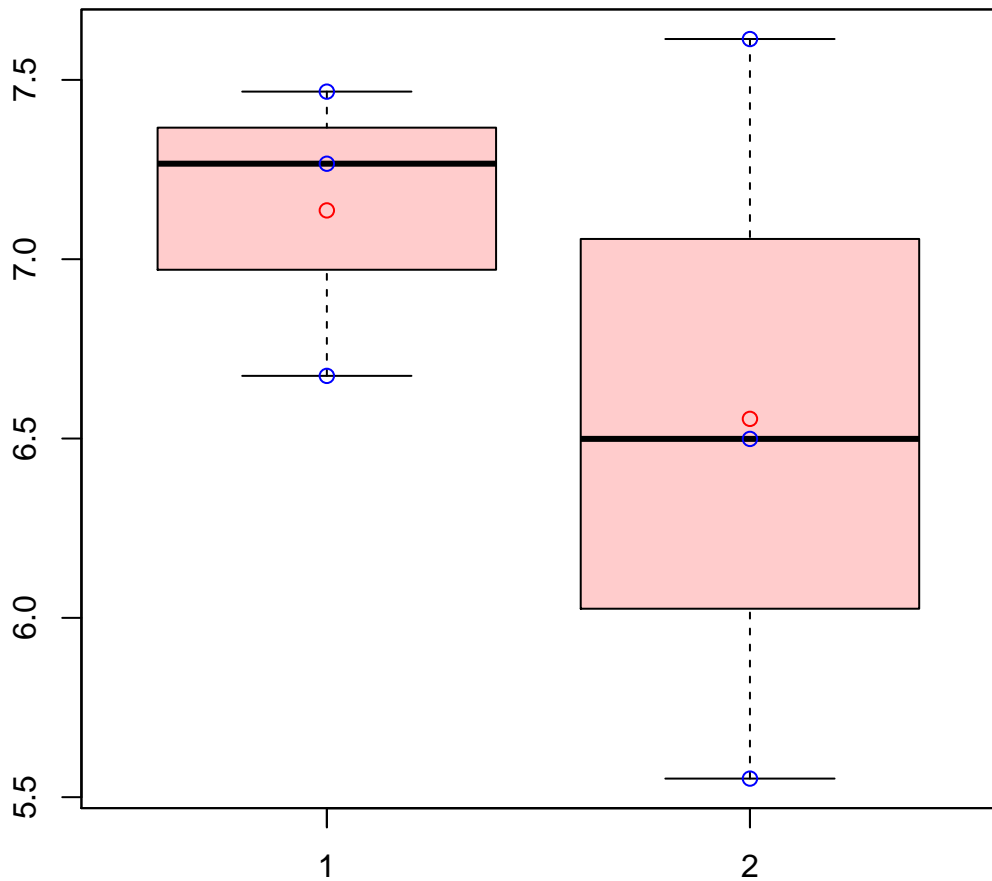

t-Test: p-value = 0.44

# K7U6F7|K7U6F7\_MAIZE

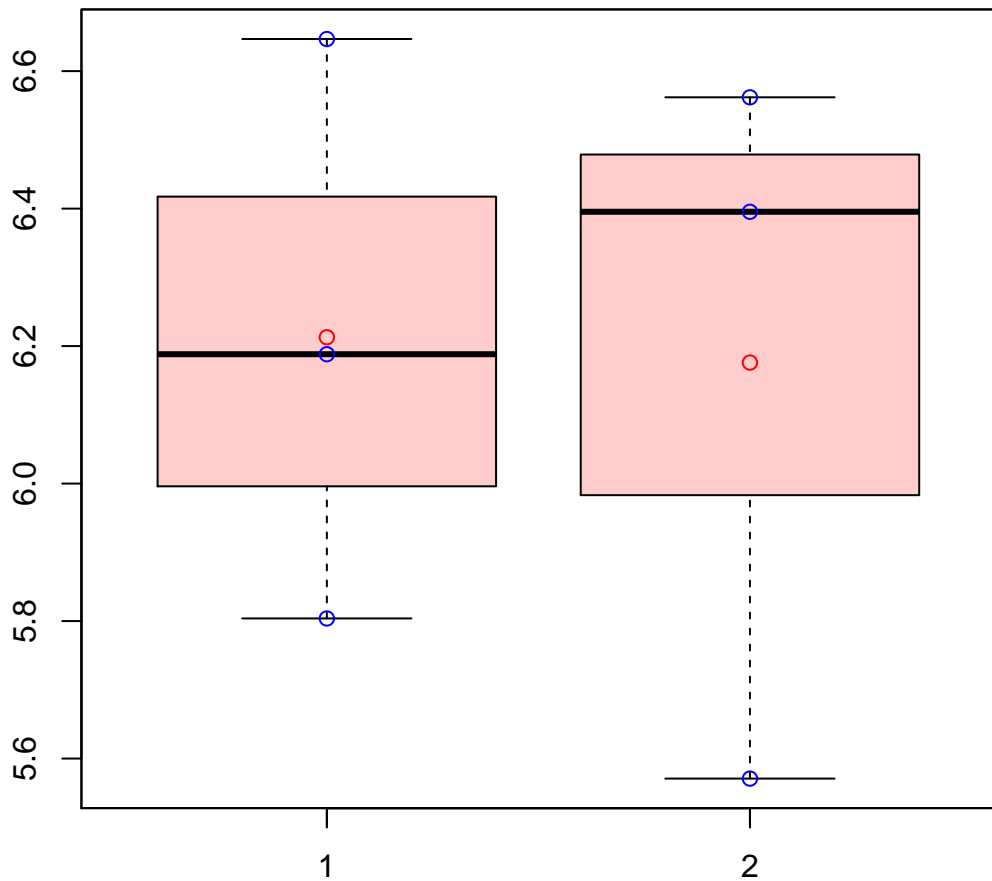

t-Test: p-value = 0.93

# K7U715|K7U715\_MAIZE

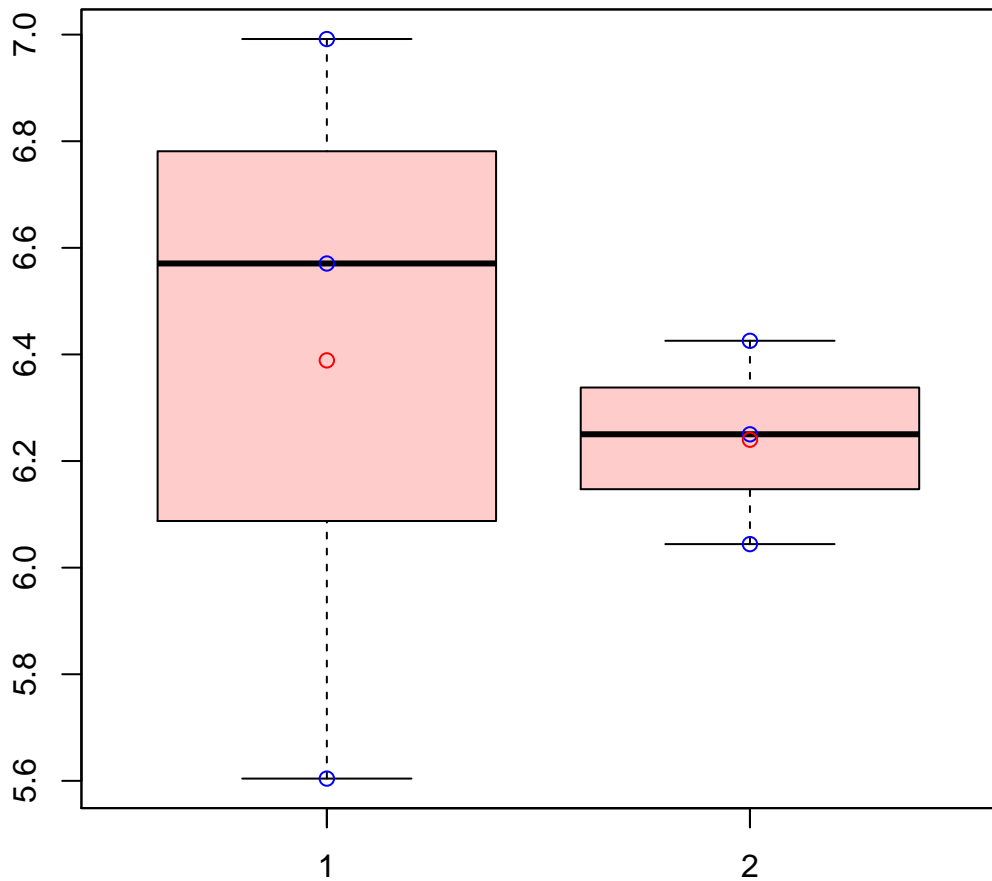

t-Test: p-value = 0.76

# K7U850|K7U850\_MAIZE

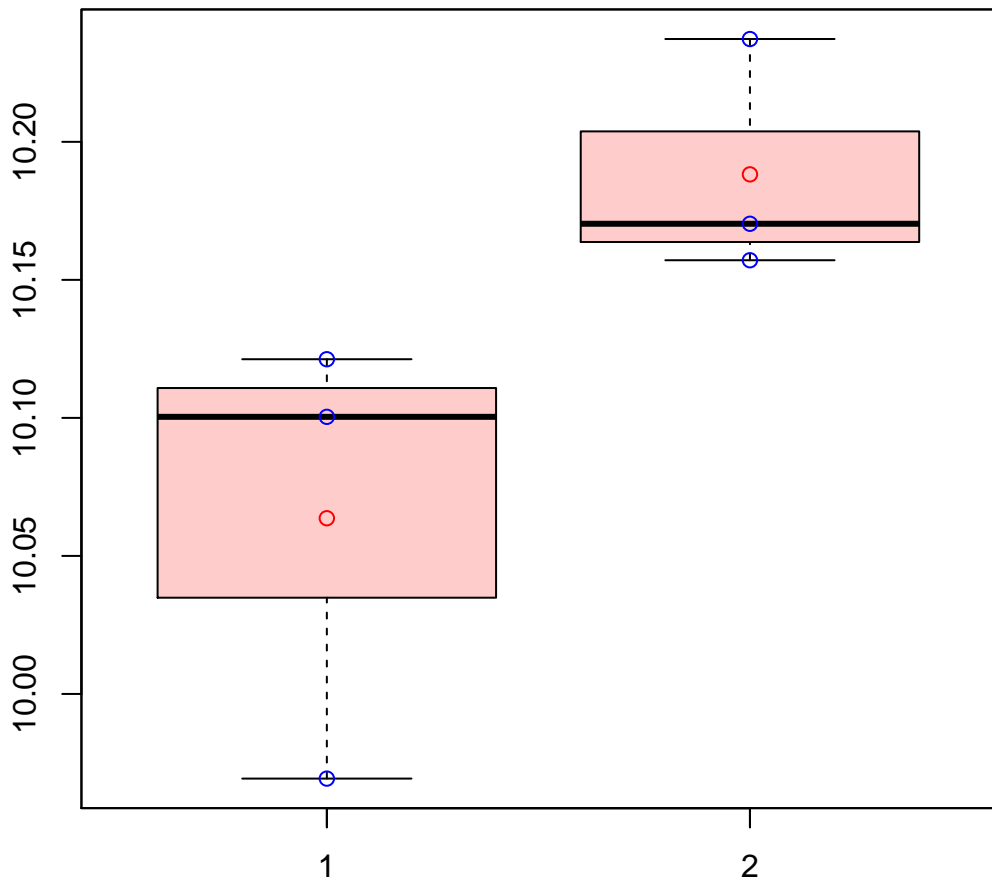

t-Test: p-value = 0.1

# K7U863|K7U863\_MAIZE

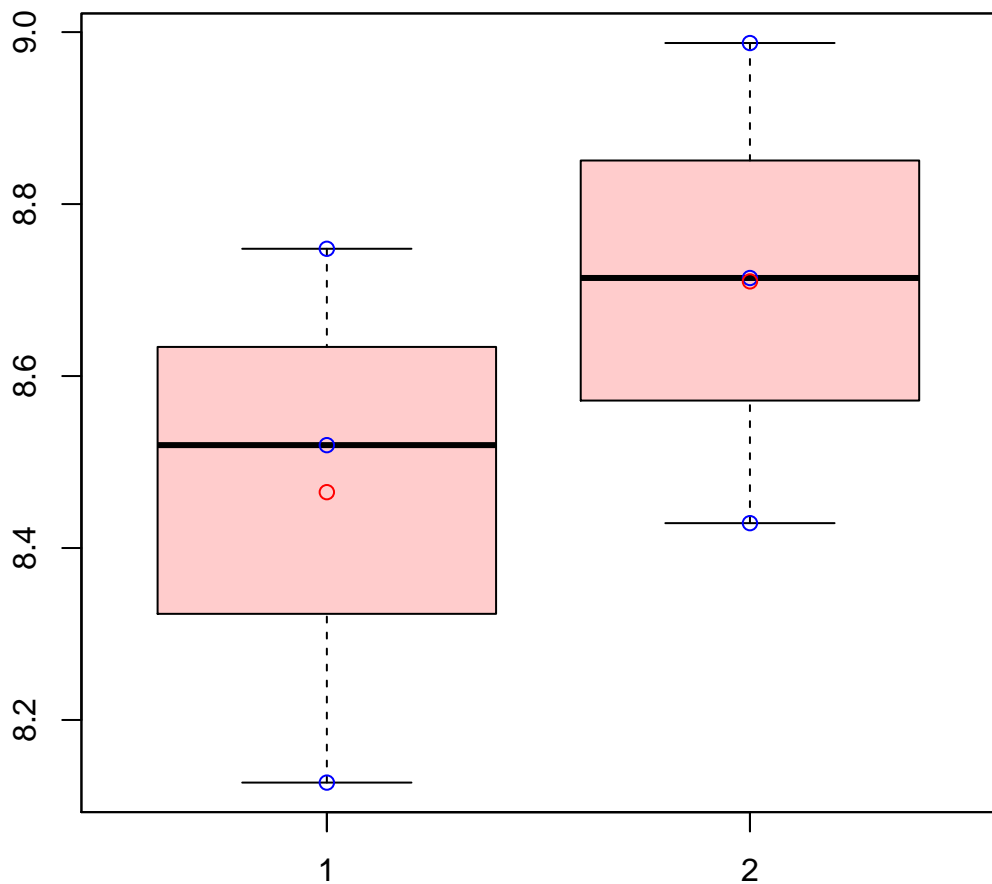

t-Test: p-value = 0.37

# K7UAW1|K7UAW1\_MAIZE

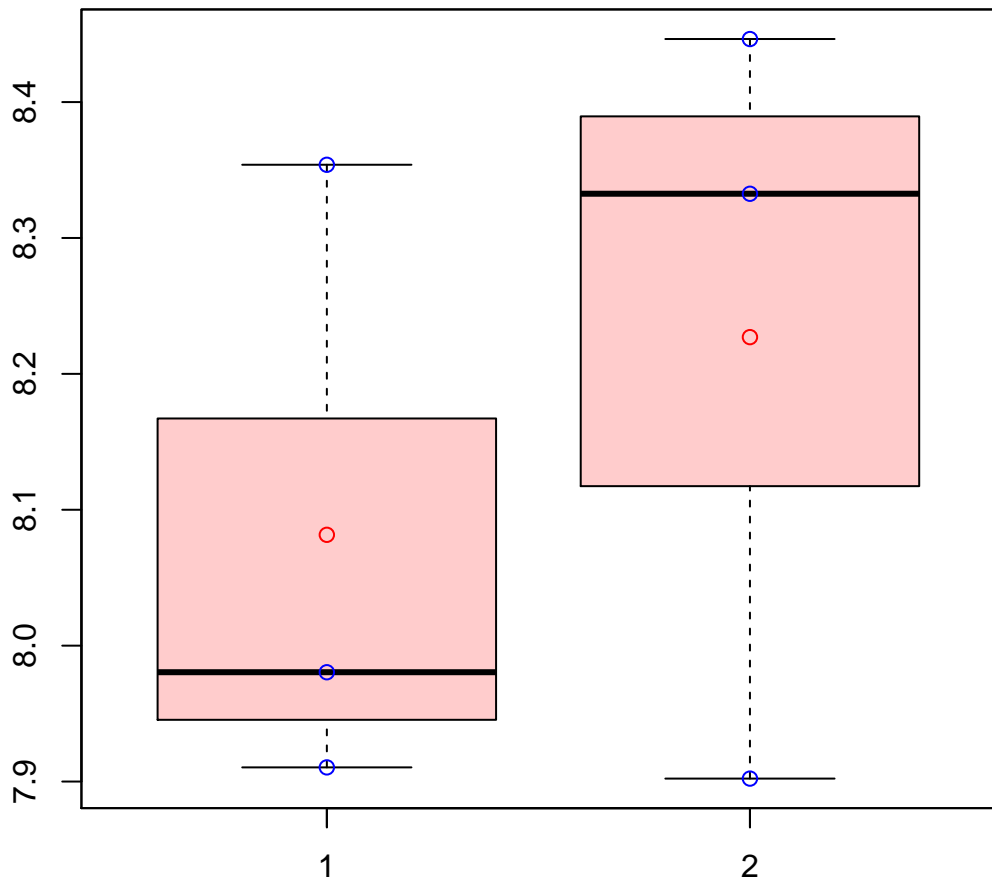

t-Test: p-value = 0.54



# K7UB00|K7UB00\_MAIZE

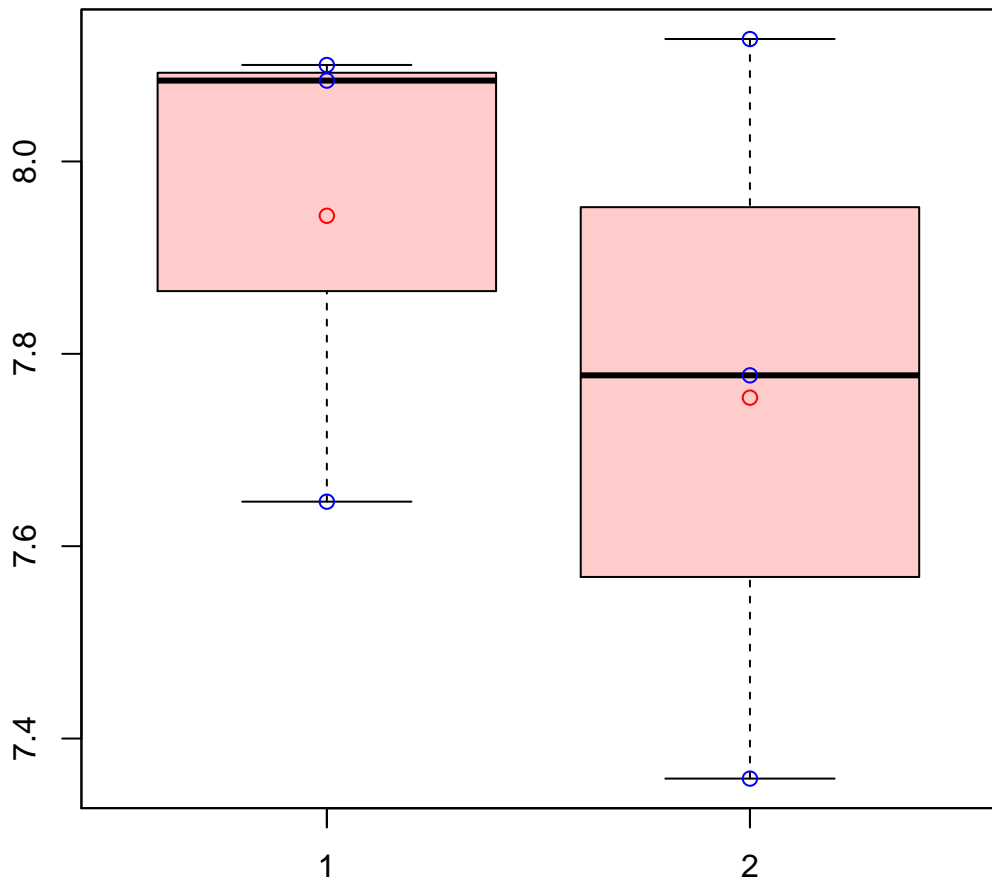

t-Test: p-value = 0.52

# K7UCD7|K7UCD7\_MAIZE

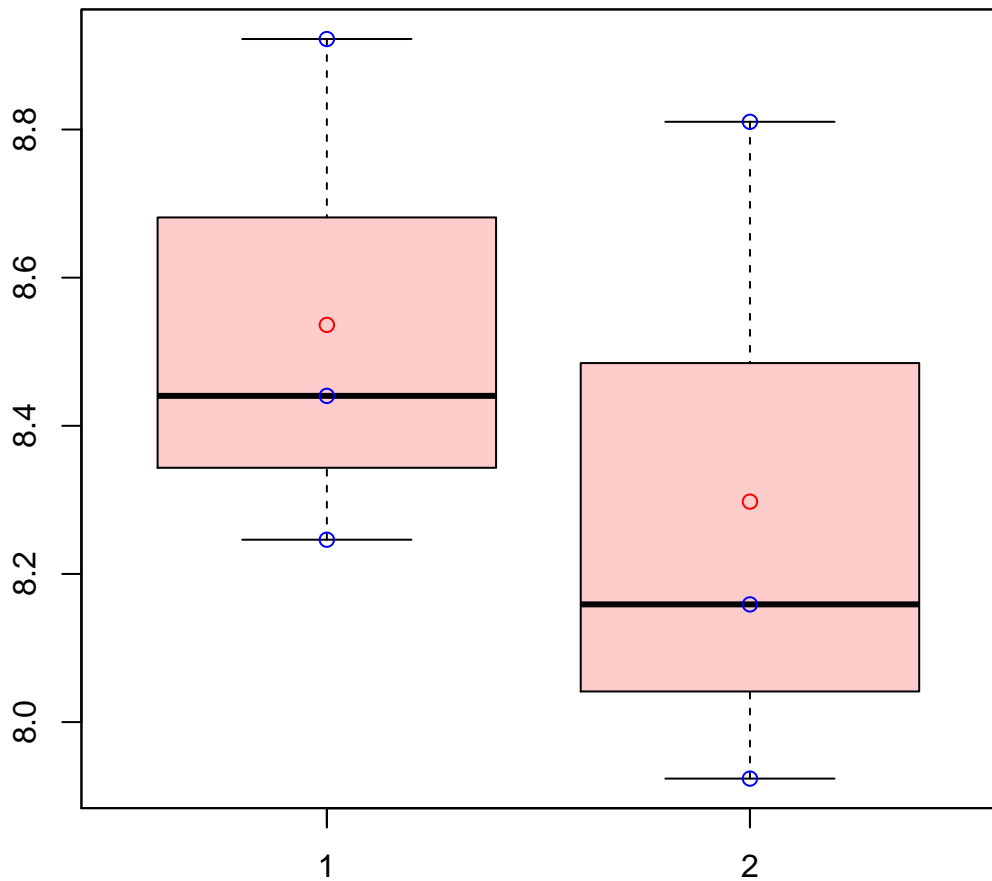

t-Test: p-value = 0.52

# K7UCV5|K7UCV5\_MAIZE

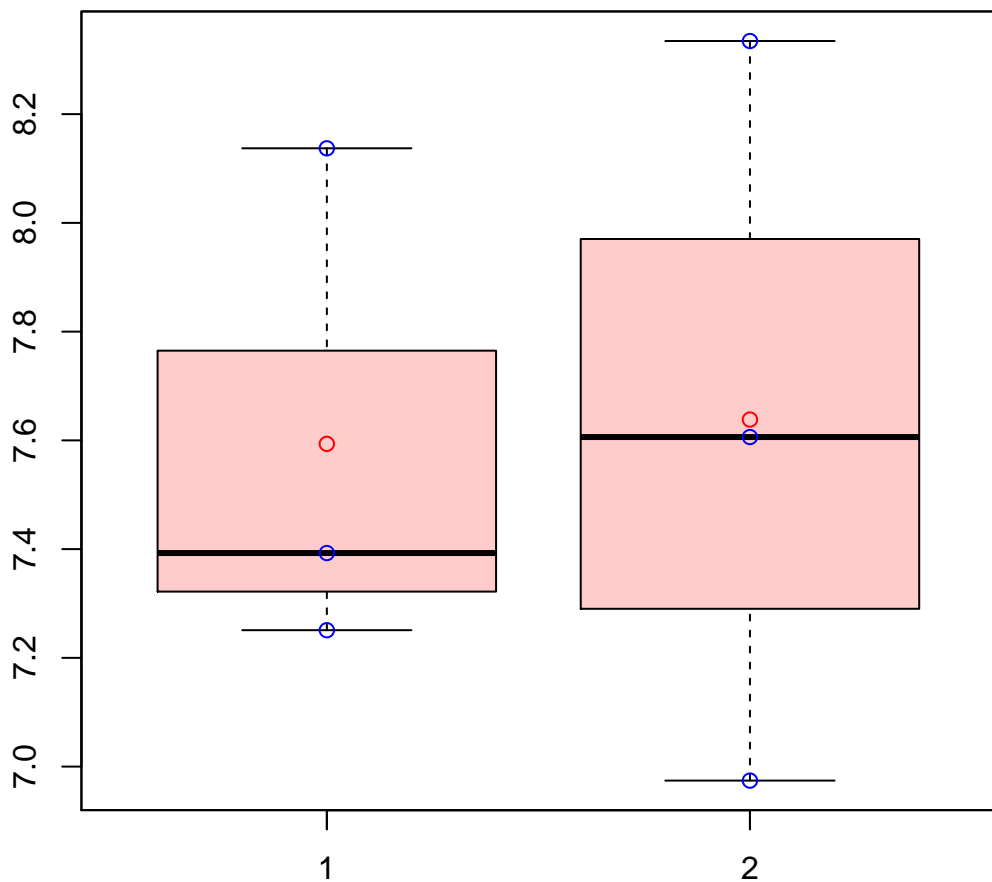

t-Test: p-value = 0.93

# K7UDI4|K7UDI4\_MAIZE

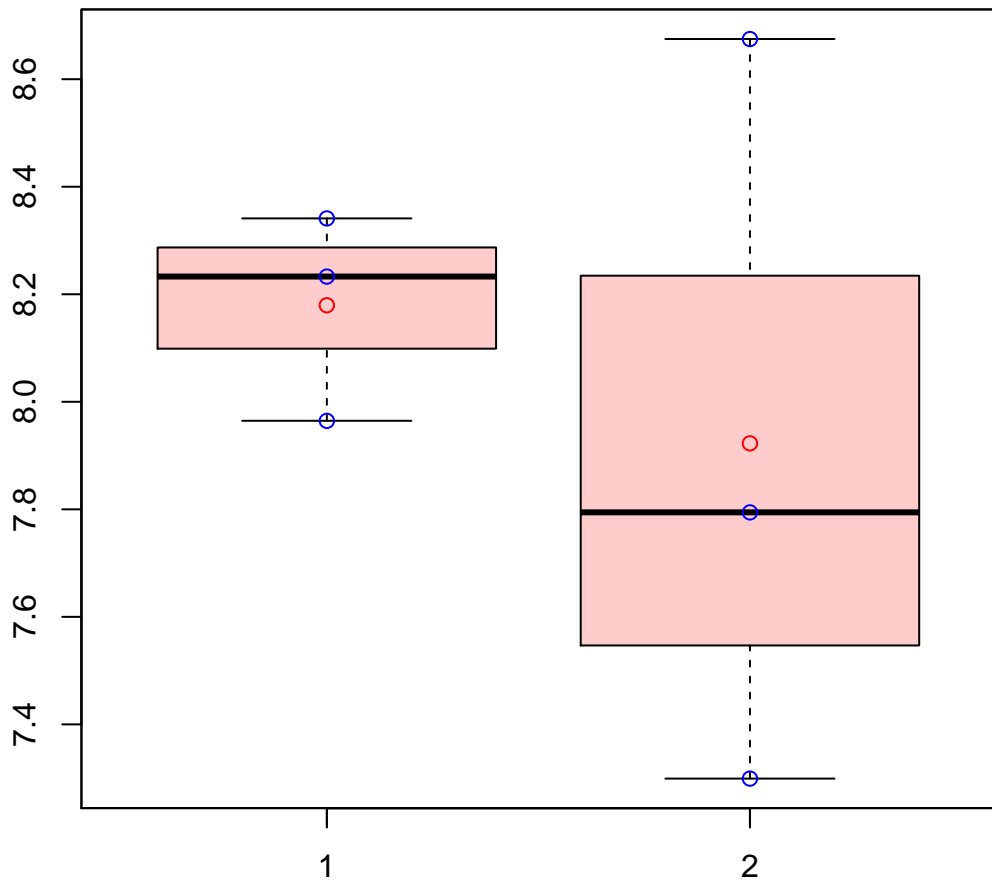

t-Test: p-value = 0.59

# K7UDL4|K7UDL4\_MAIZE

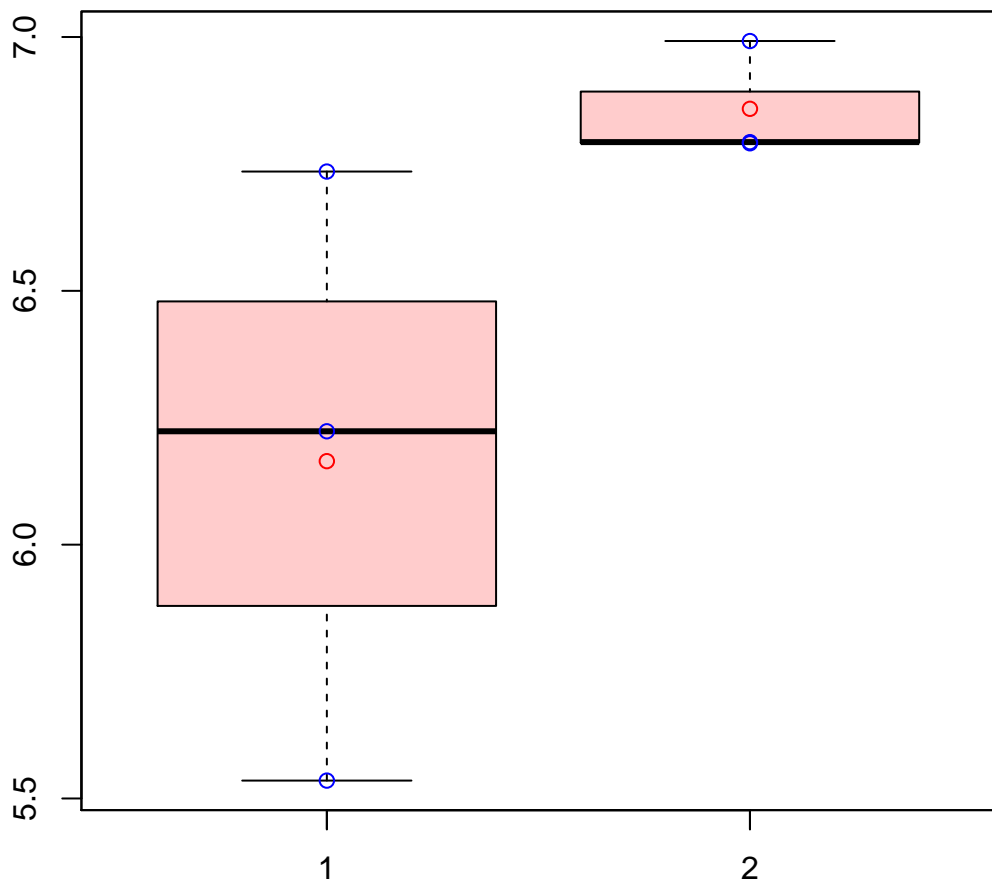

t-Test: p-value = 0.18

# K7UDM8|K7UDM8\_MAIZE

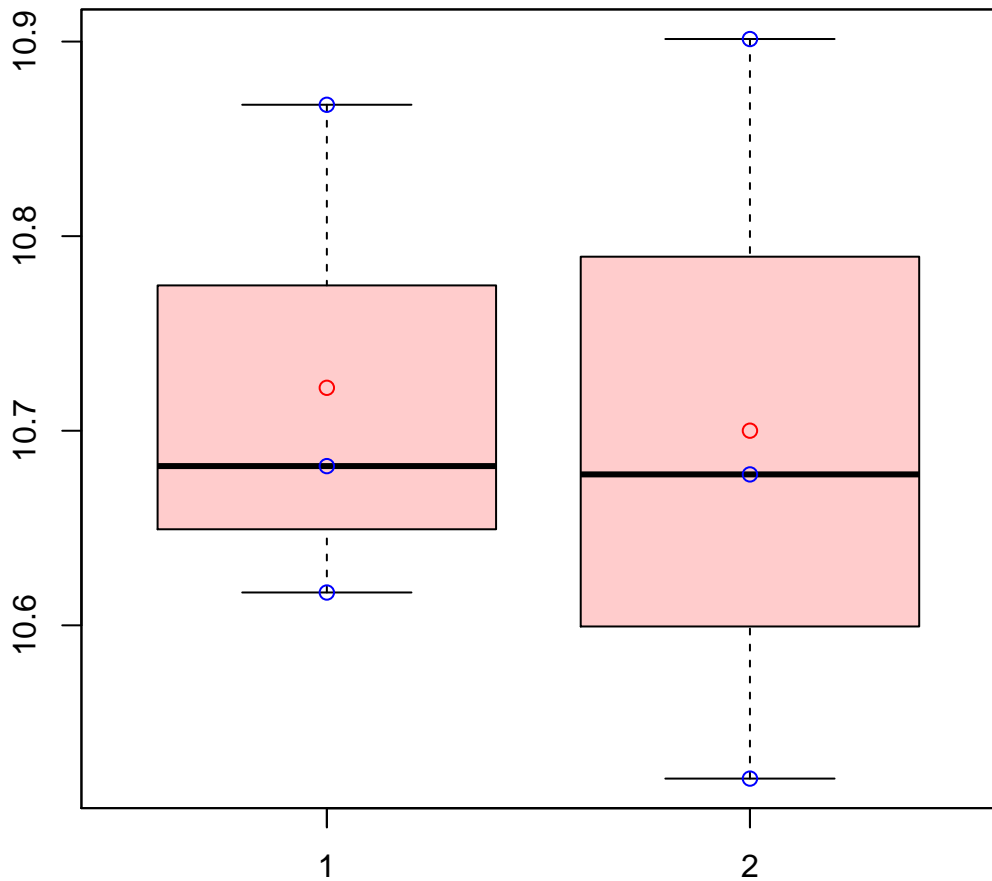

t-Test: p-value = 0.88

# K7UDN5|K7UDN5\_MAIZE

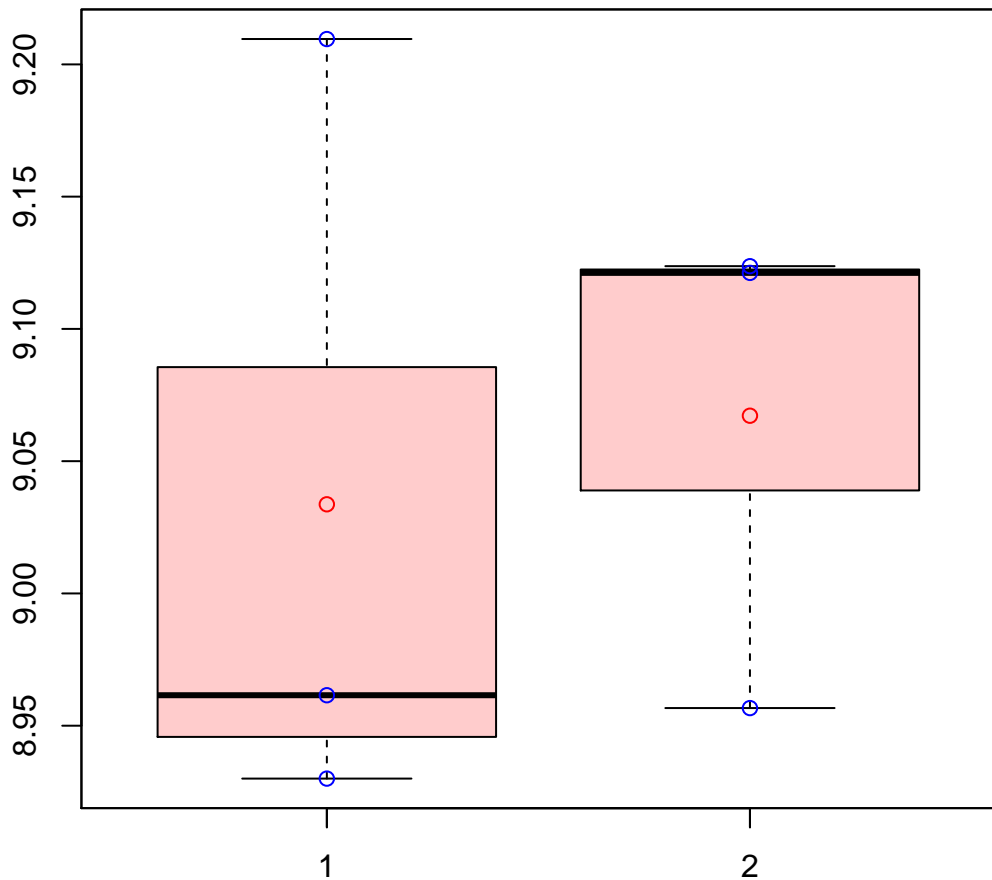

t-Test: p-value = 0.77

# K7UEF8|K7UEF8\_MAIZE

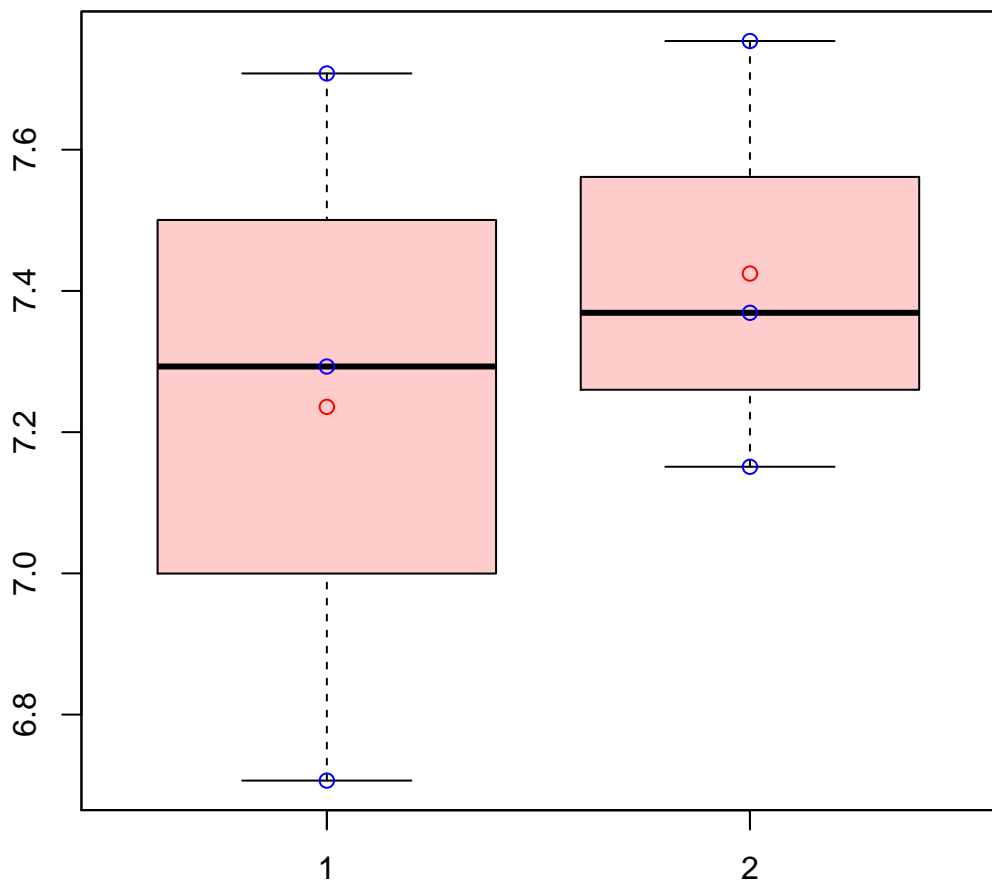

t-Test: p-value = 0.61



# K7UFB4|K7UFB4\_MAIZE

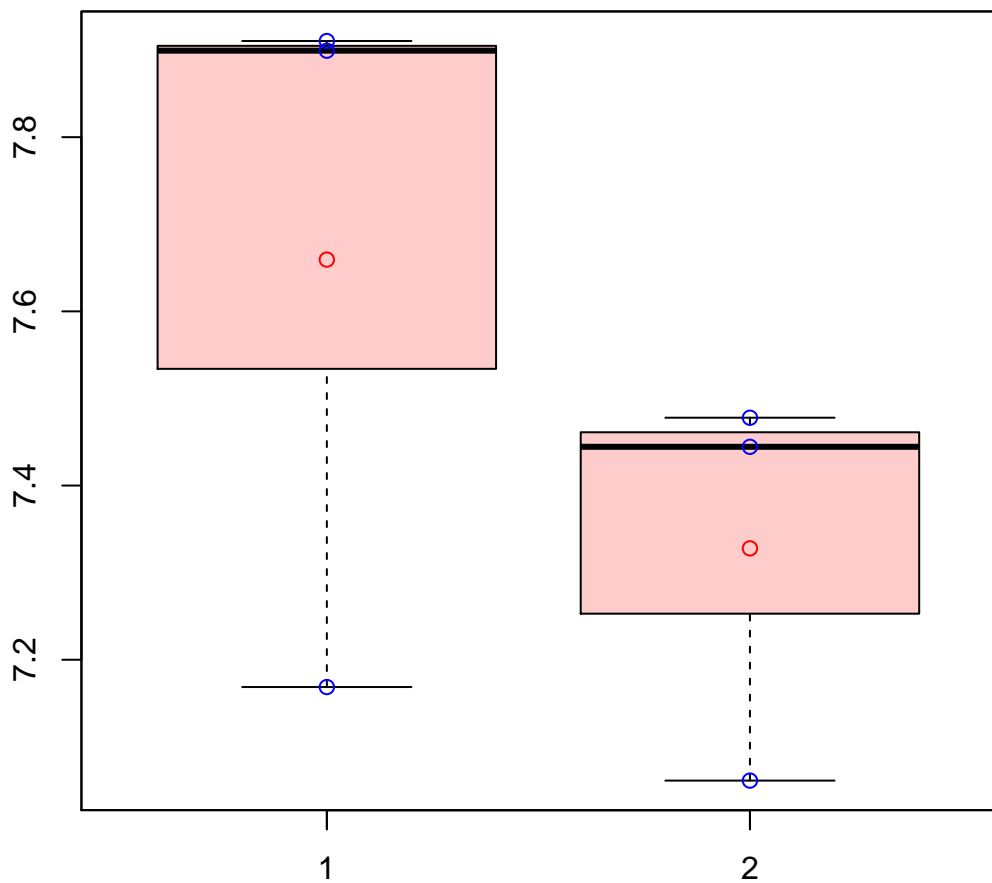

t-Test: p-value = 0.32

# K7UFB9|K7UFB9\_MAIZE

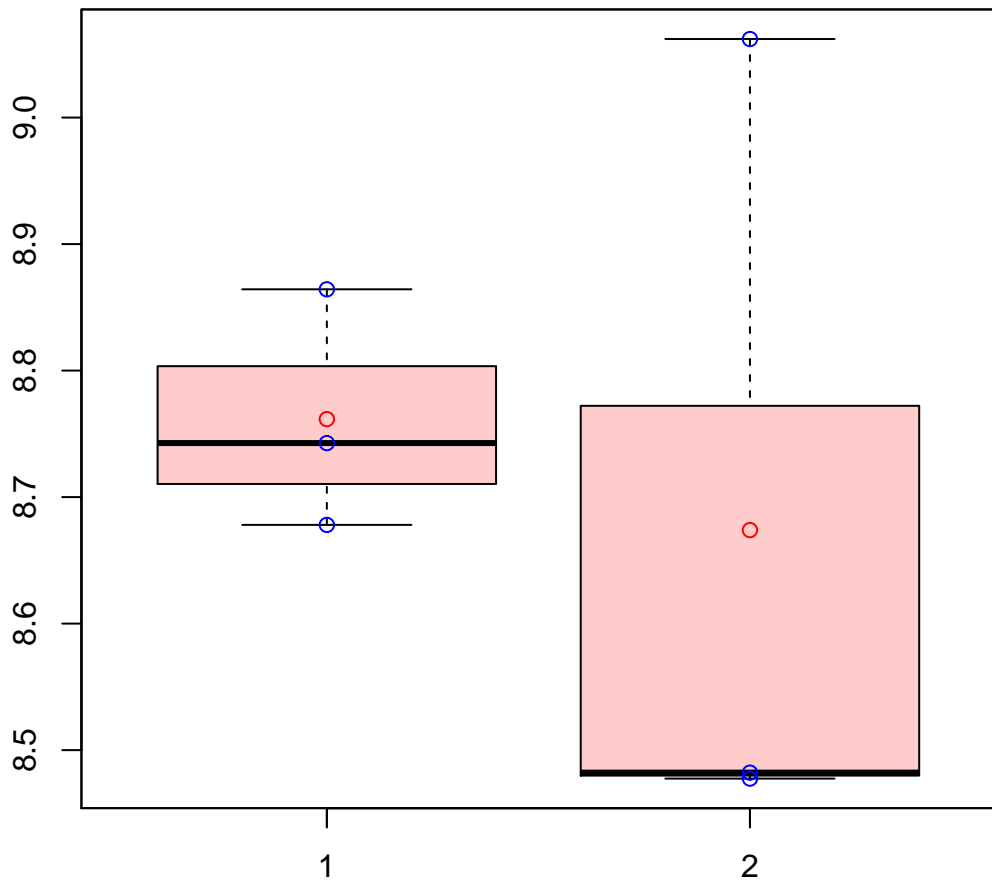

t-Test: p-value = 0.7

# K7UFU7|K7UFU7\_MAIZE

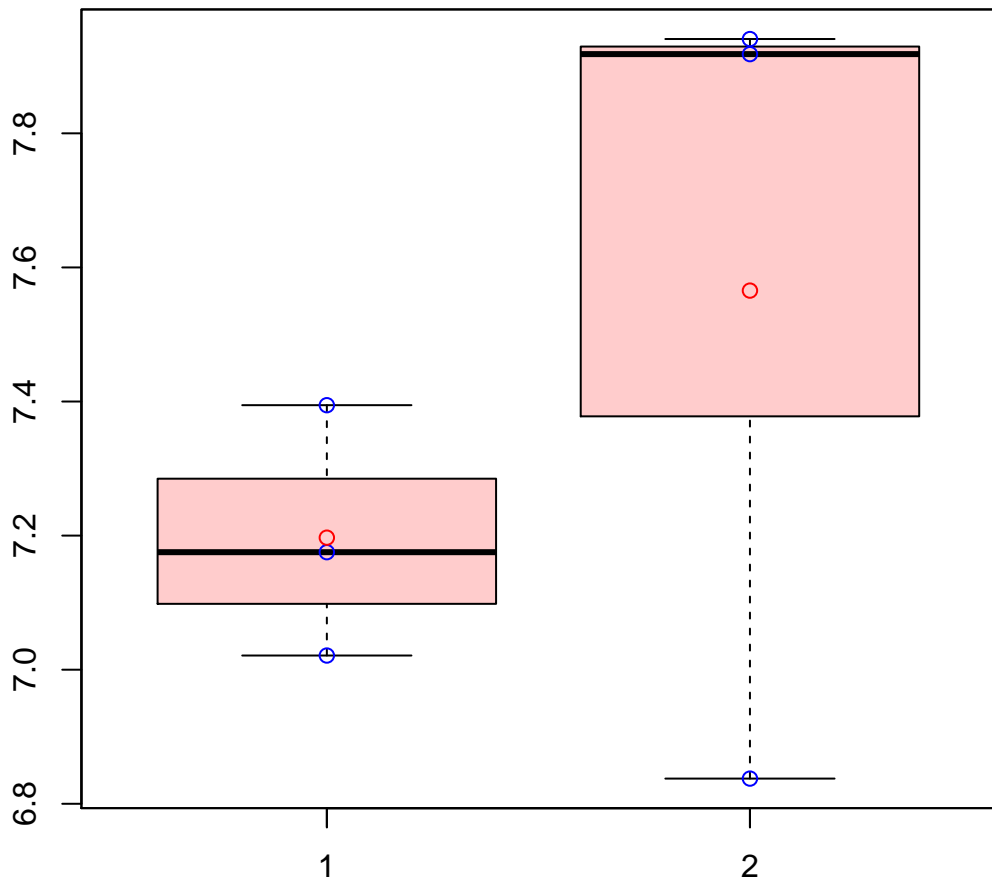

t-Test: p-value = 0.42

# K7UFW0|K7UFW0\_MAIZE

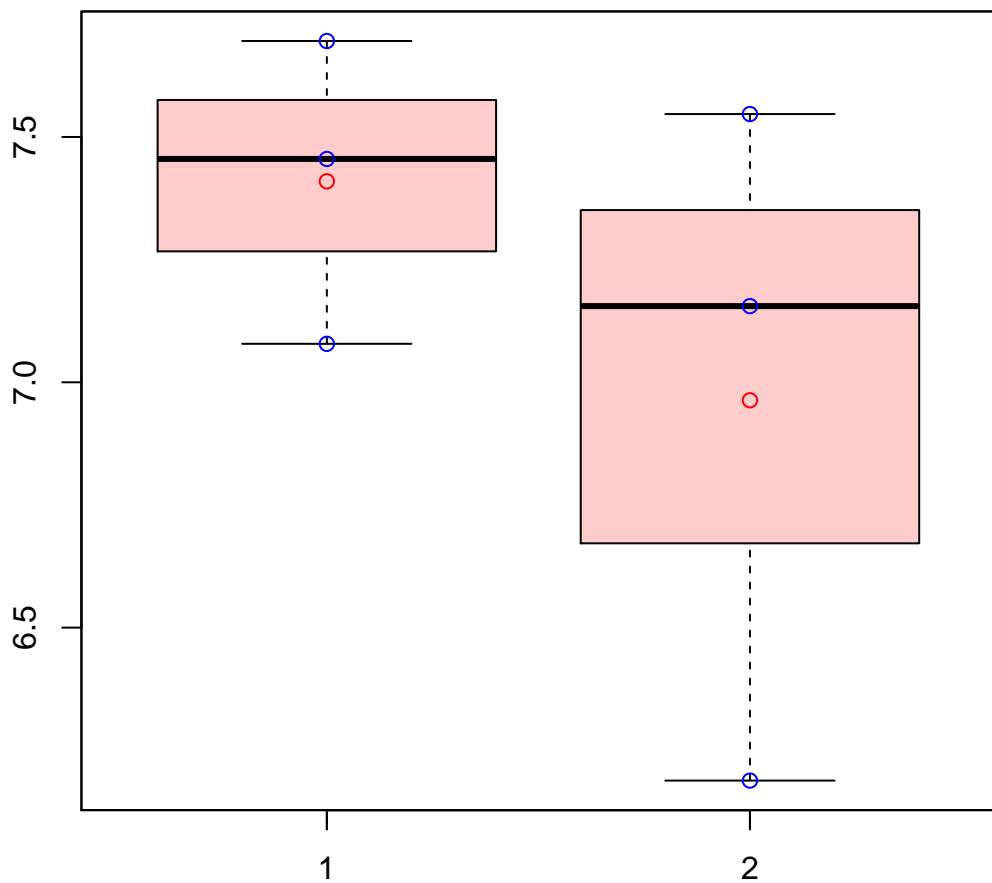

t-Test: p-value = 0.39

# K7UGC5|K7UGC5\_MAIZE

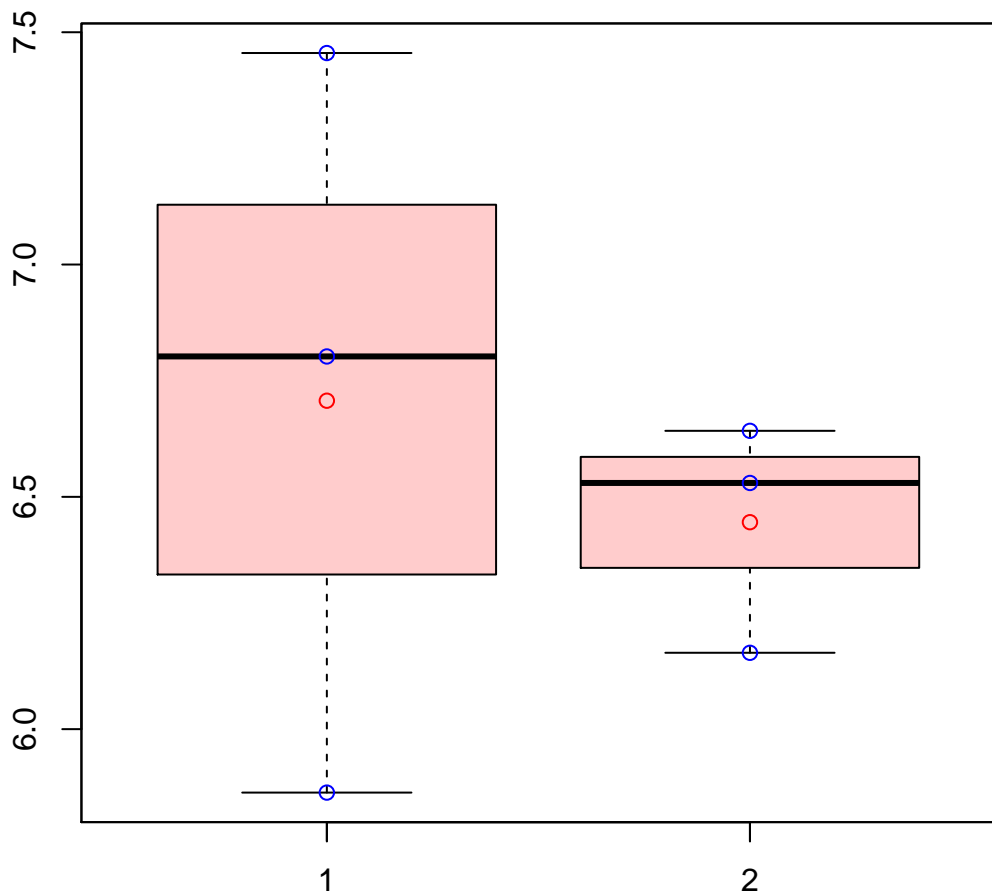

t-Test: p-value = 0.64

# K7UGF3|K7UGF3\_MAIZE

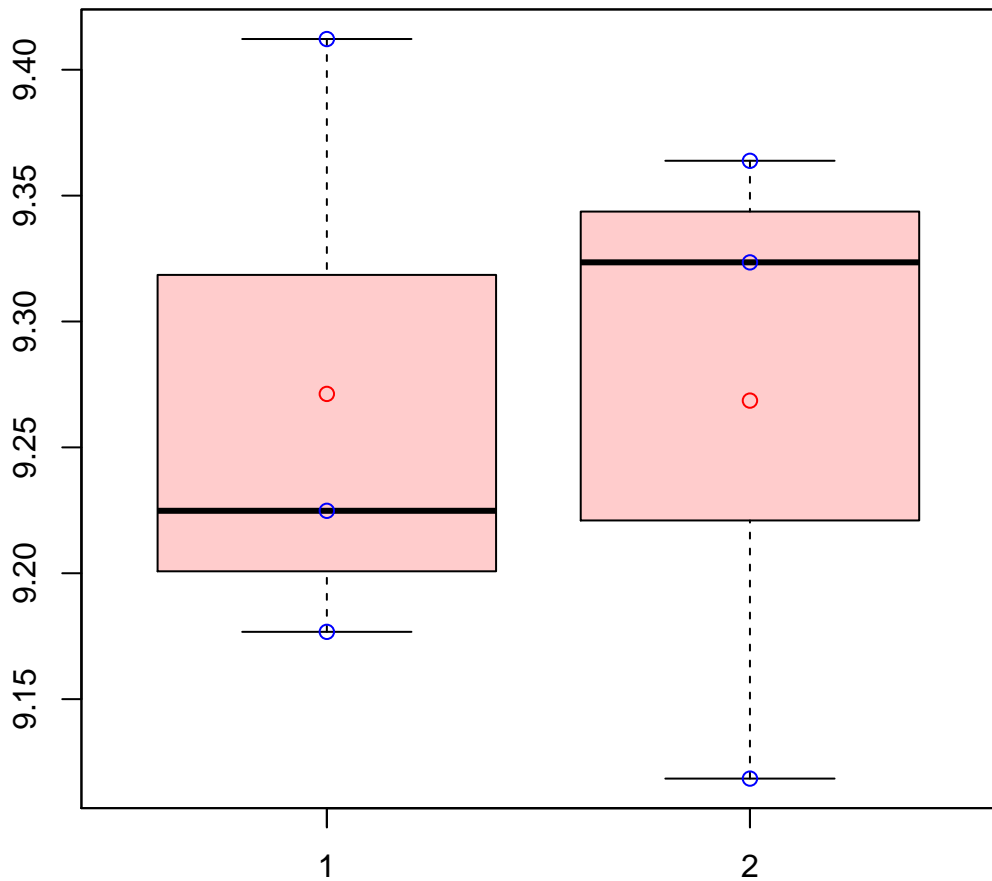

t-Test: p-value = 0.98

# K7UGM3|K7UGM3\_MAIZE

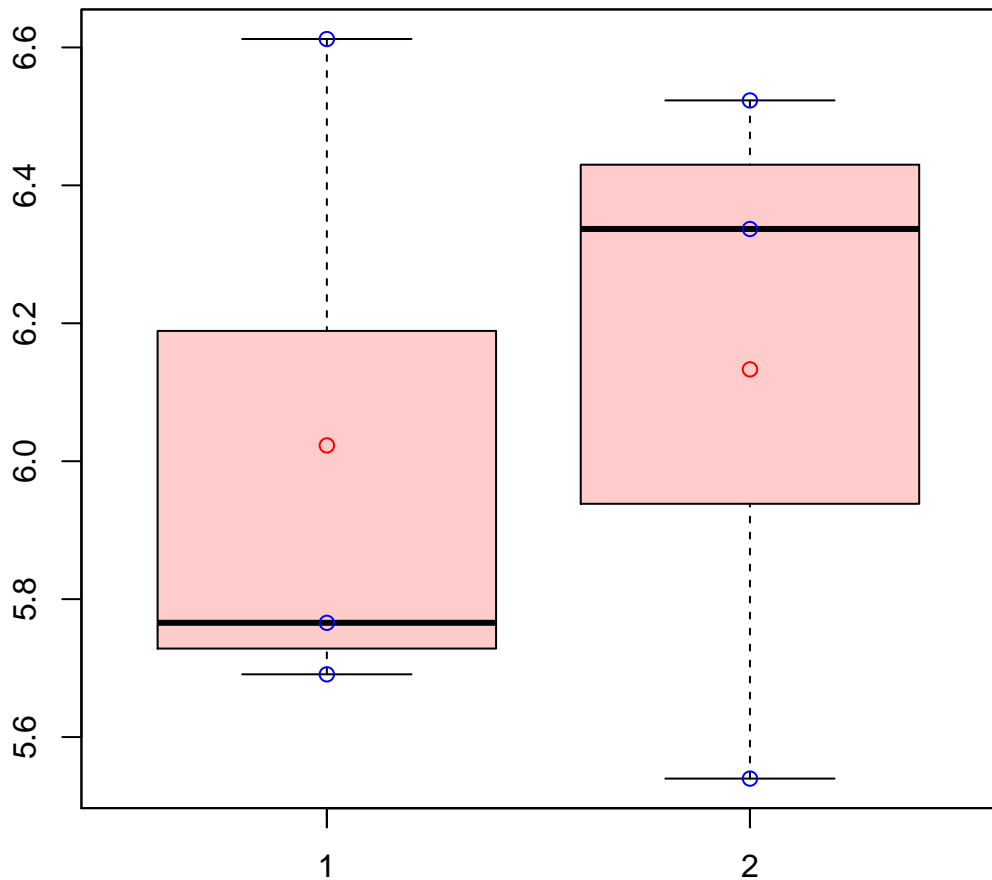

t-Test: p-value = 0.81

# K7UHV6|K7UHV6\_MAIZE

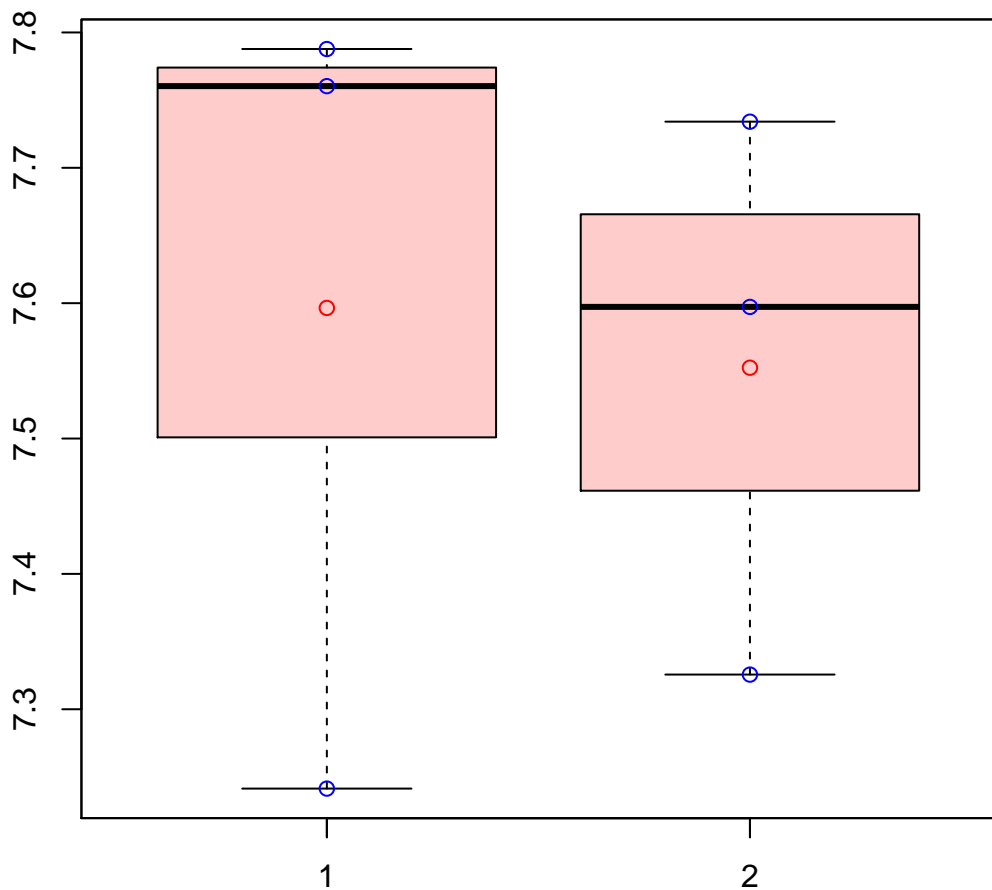

t-Test: p-value = 0.85



# K7UIA4|K7UIA4\_MAIZE

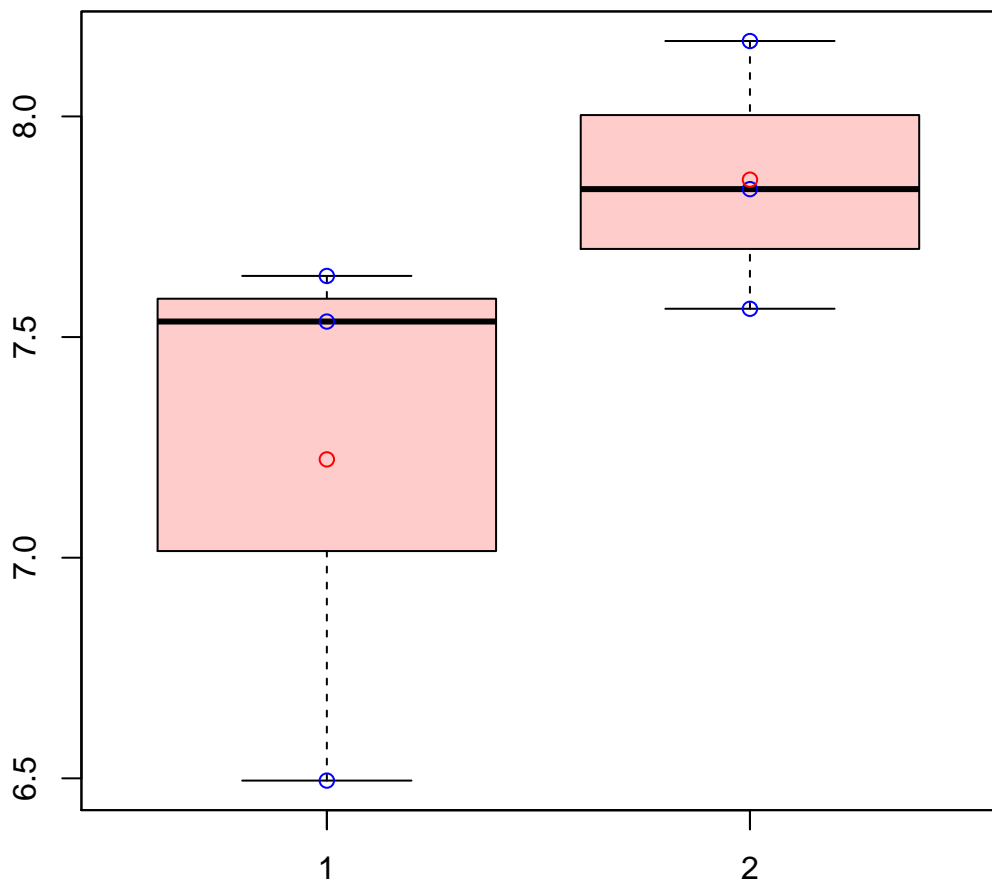

t-Test: p-value = 0.22

# K7UIS3|K7UIS3\_MAIZE

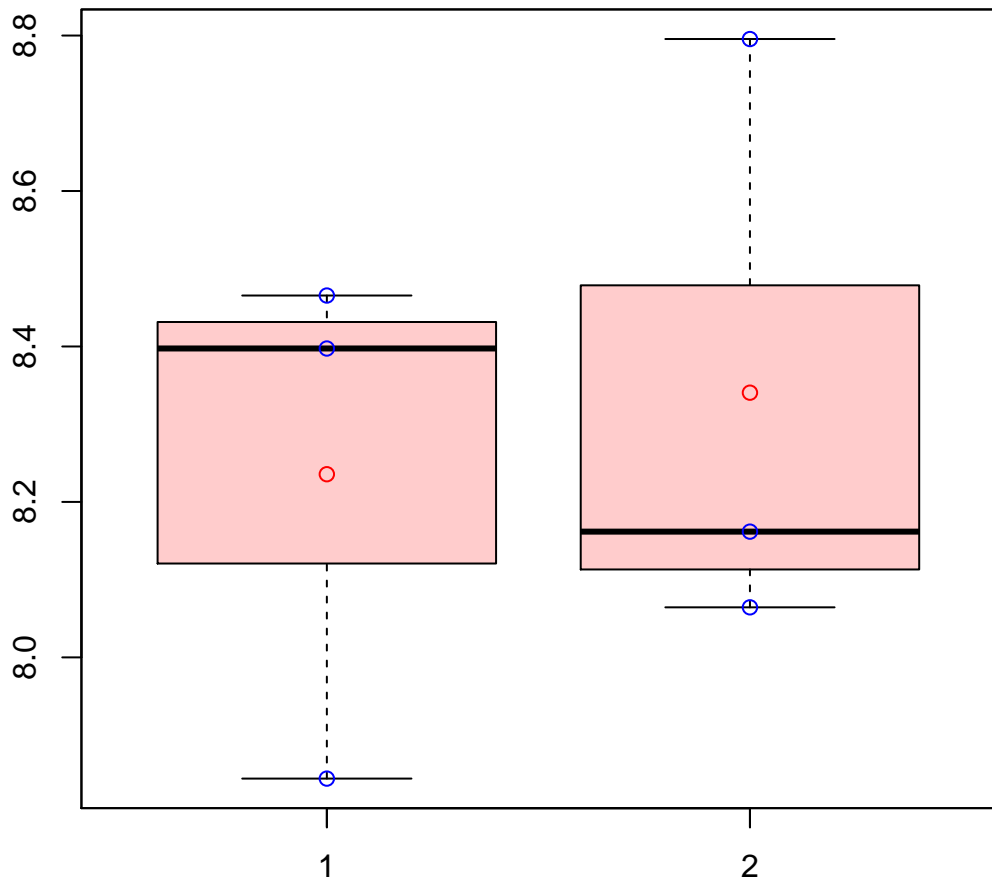

t-Test: p-value = 0.75

# K7UJ05|K7UJ05\_MAIZE

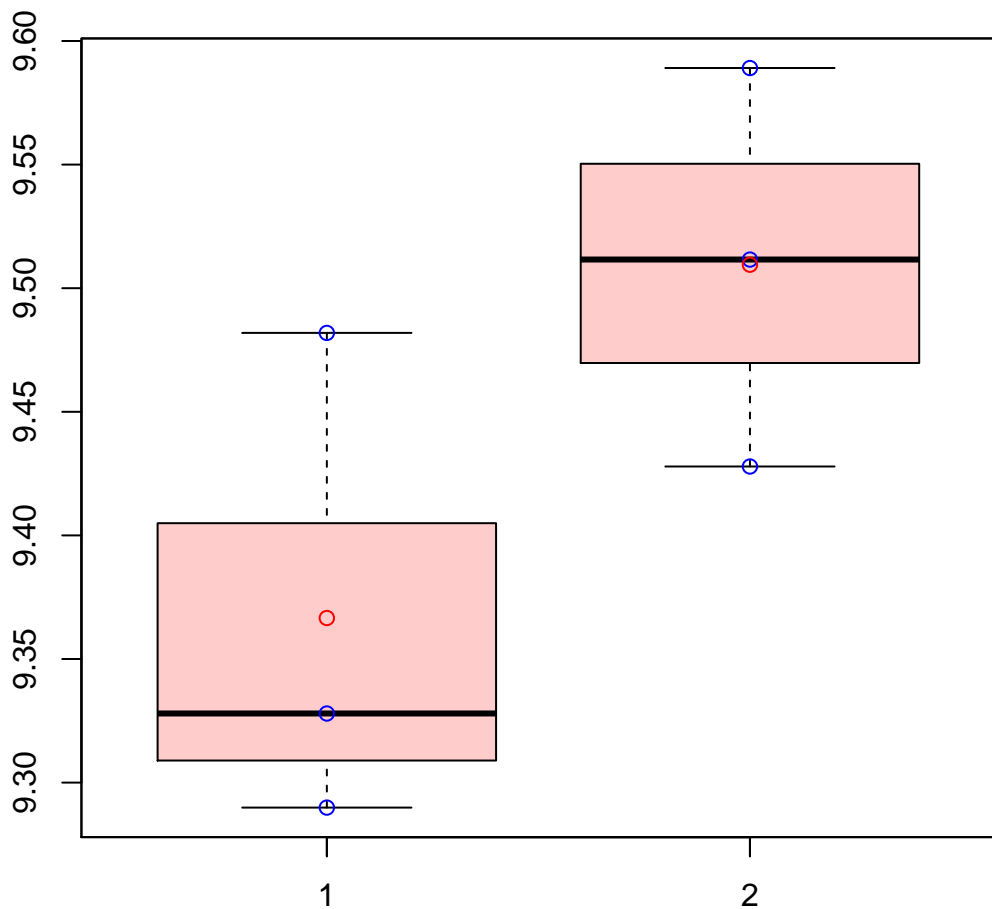

t-Test: p-value = 0.13

# K7UJ60|K7UJ60\_MAIZE

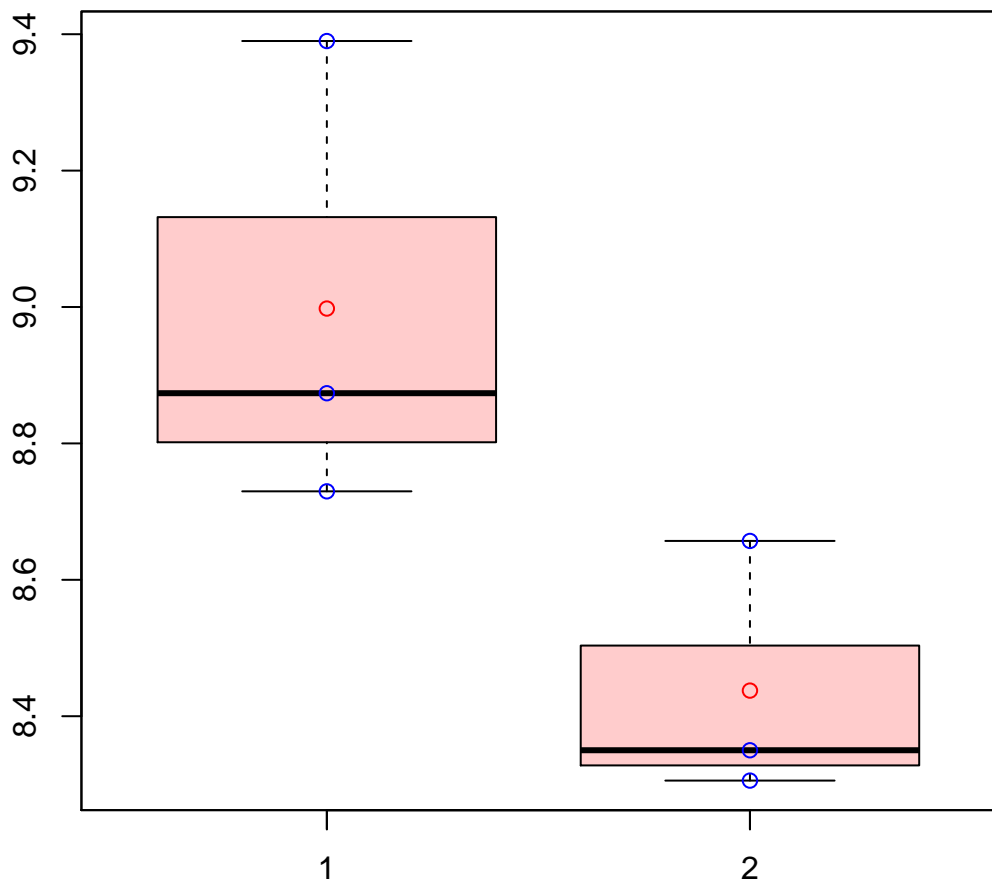

t-Test: p-value = 0.09

# K7UJW0|K7UJW0\_MAIZE

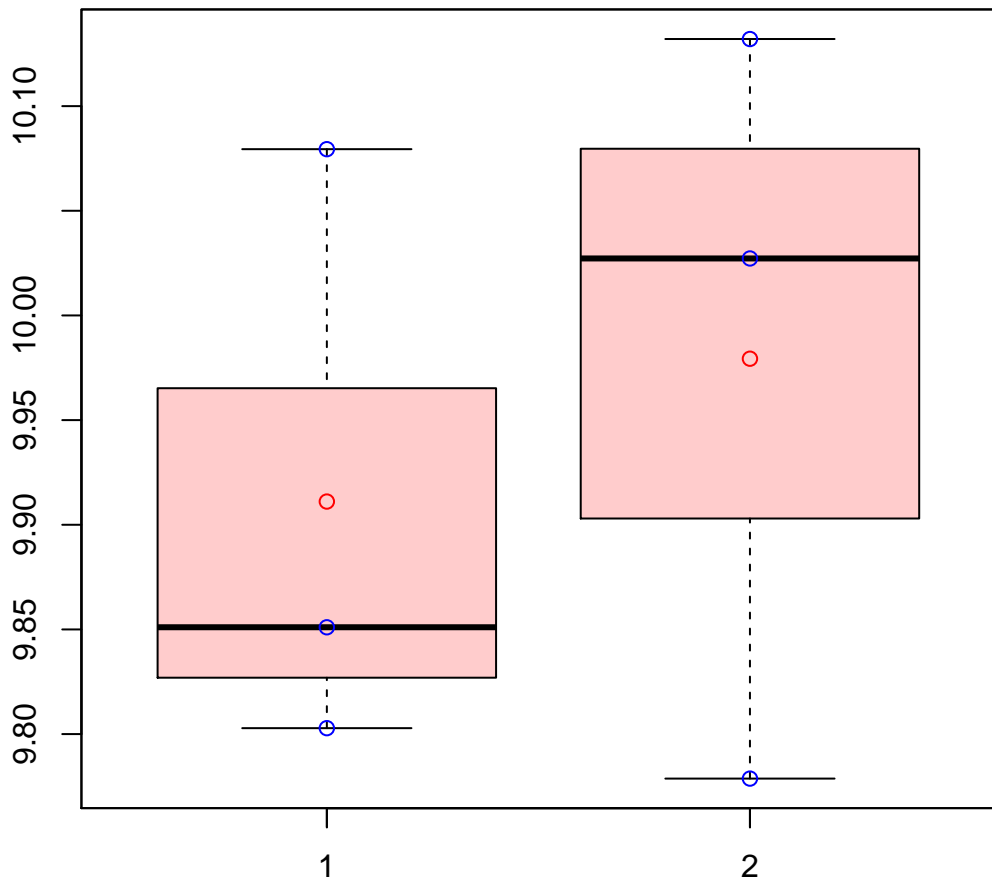

t-Test: p-value = 0.64

# K7UKF0|K7UKF0\_MAIZE

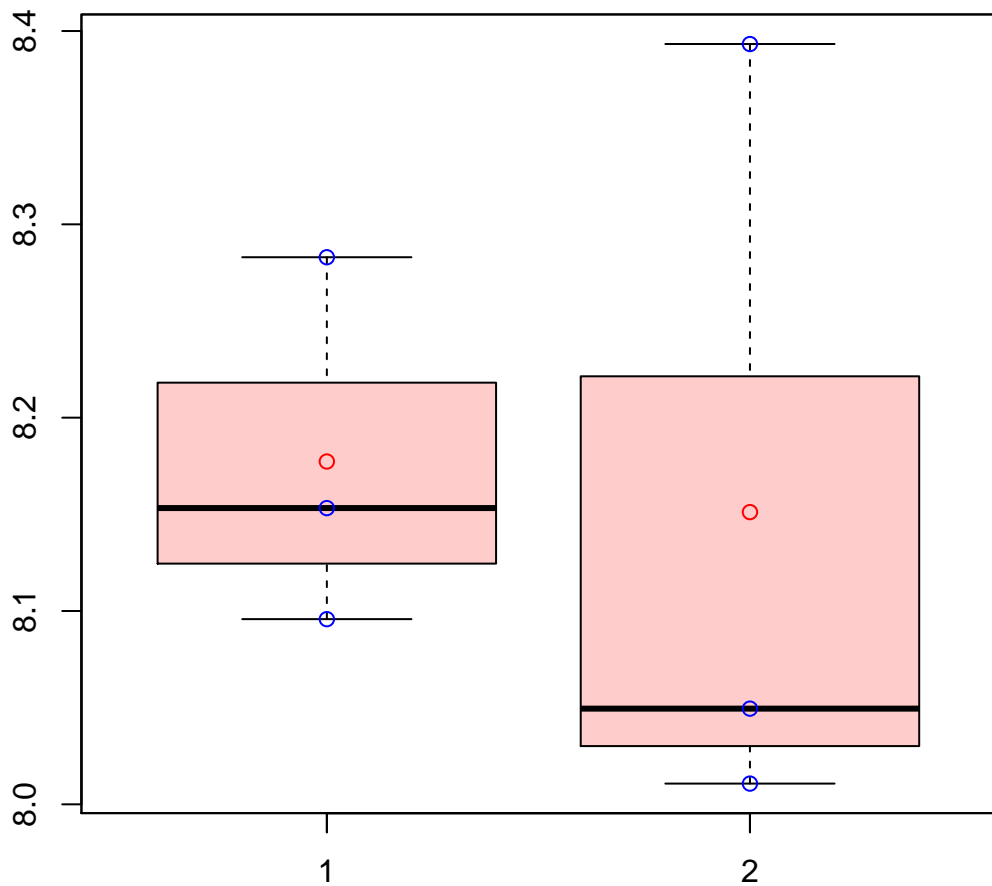

t-Test: p-value = 0.86

# K7UKK5|K7UKK5\_MAIZE

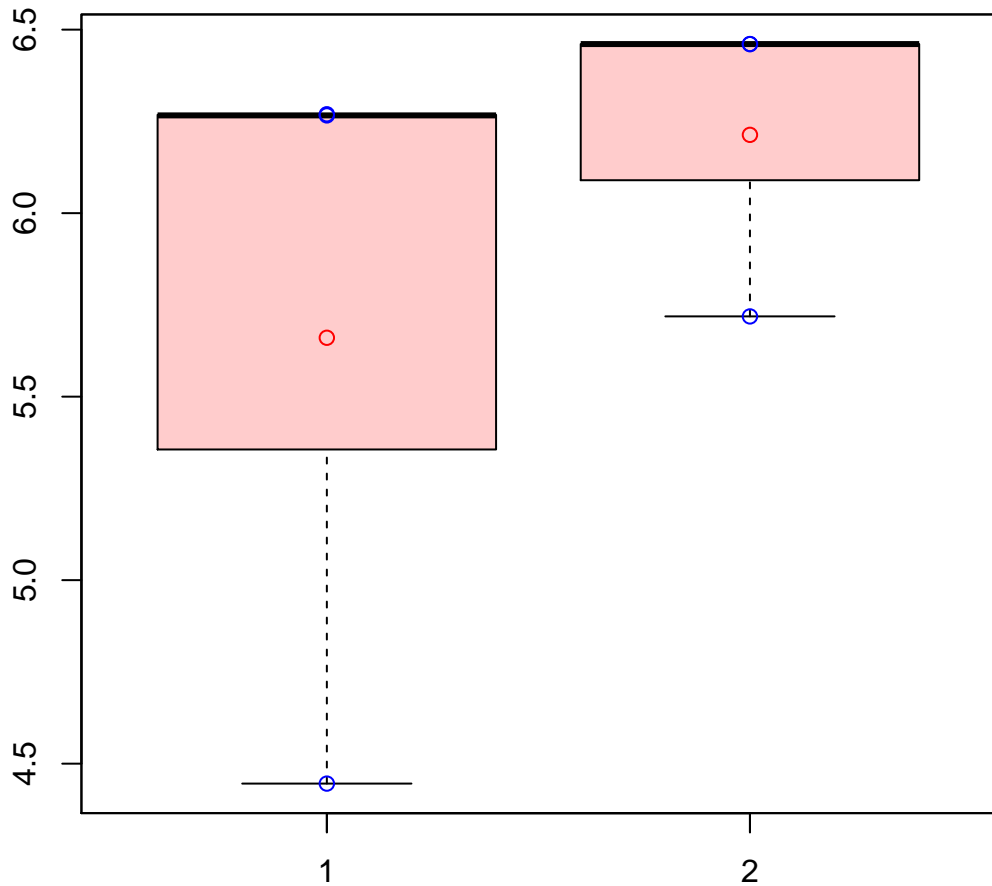

t-Test: p-value = 0.47

# K7UKW9|K7UKW9\_MAIZE

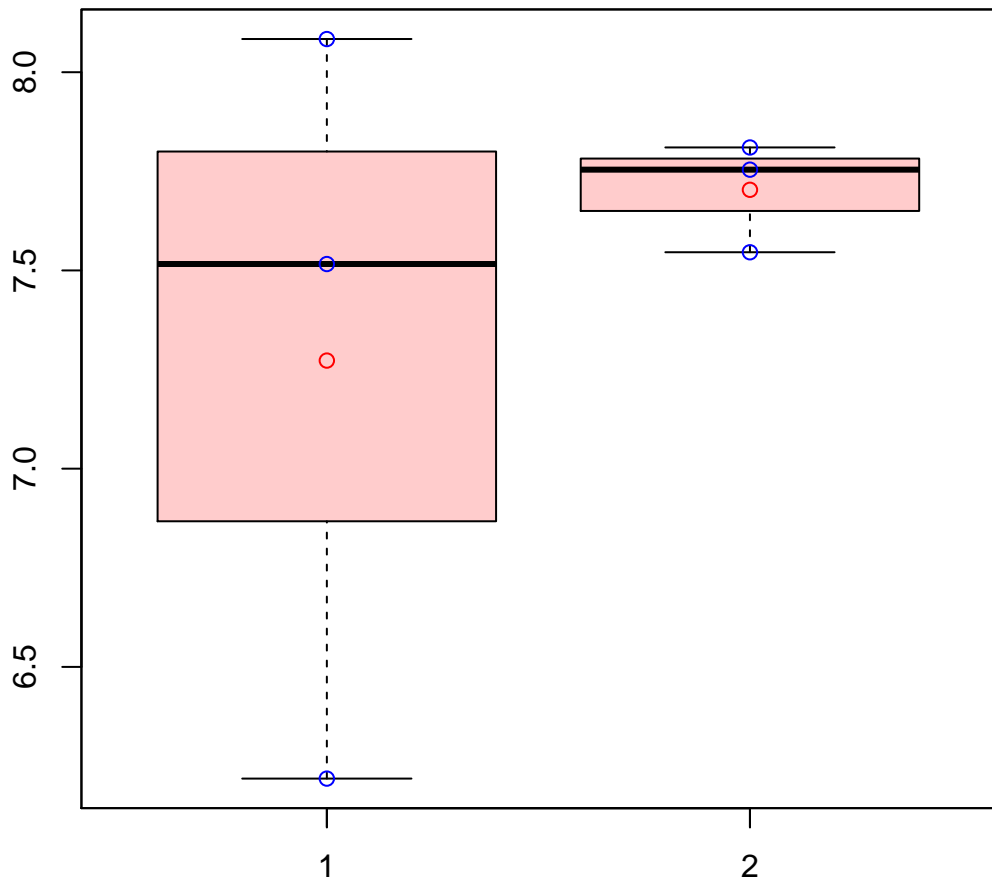

t-Test: p-value = 0.52



# K7UL12|K7UL12\_MAIZE

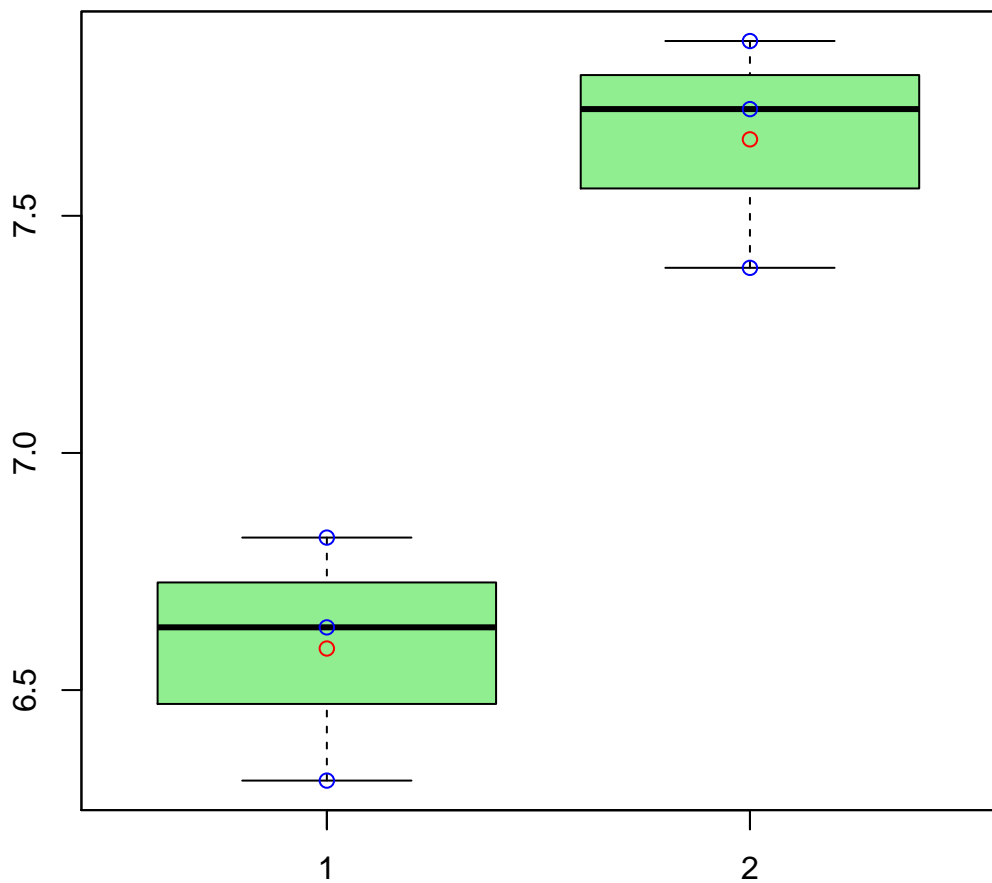

t-Test: p-value = 0.01

# K7UMV4|K7UMV4\_MAIZE

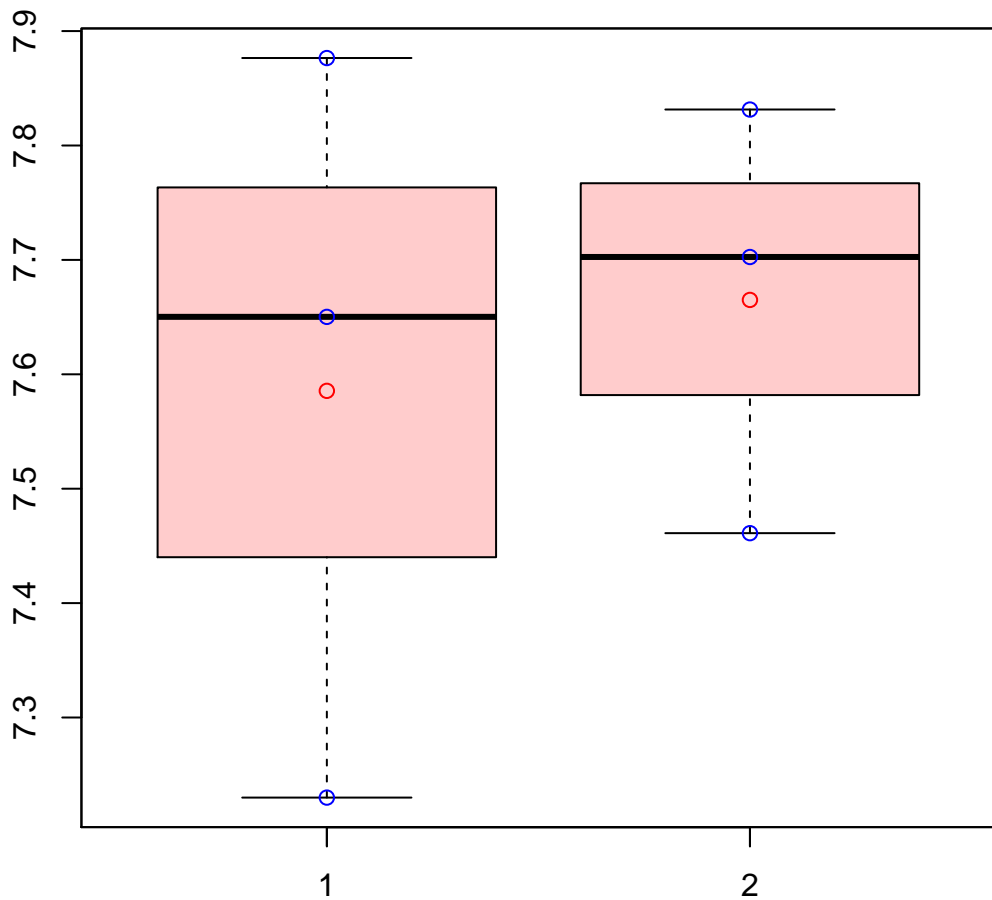

t-Test: p-value = 0.74

# K7UPB1|K7UPB1\_MAIZE

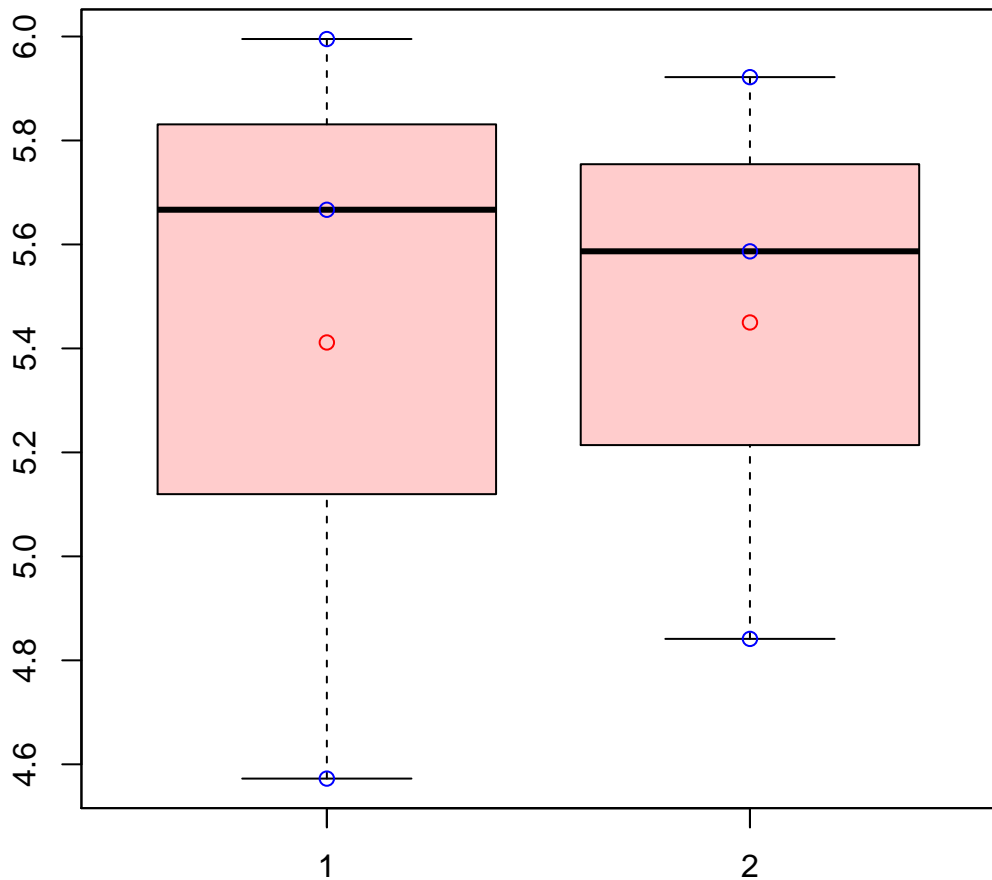

t-Test: p-value = 0.95

# K7URA2|K7URA2\_MAIZE

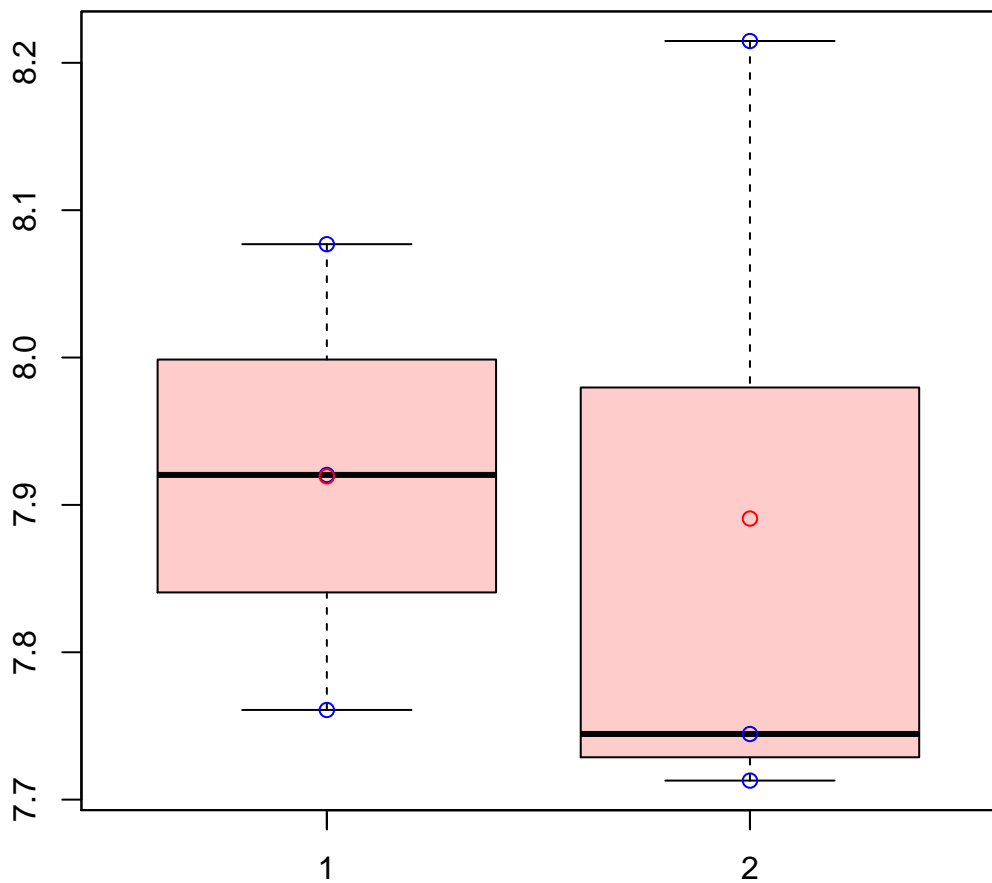

t-Test: p-value = 0.89

# K7URD0|K7URD0\_MAIZE

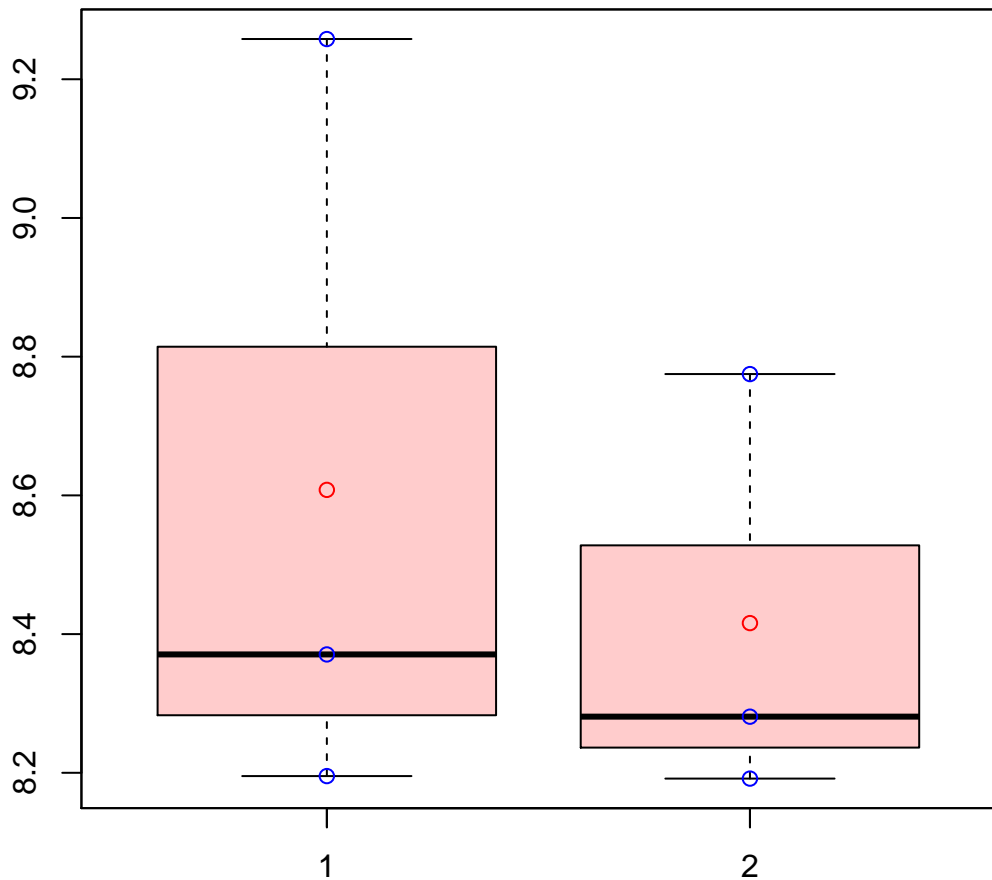

t-Test: p-value = 0.64

# K7URL6|K7URL6\_MAIZE

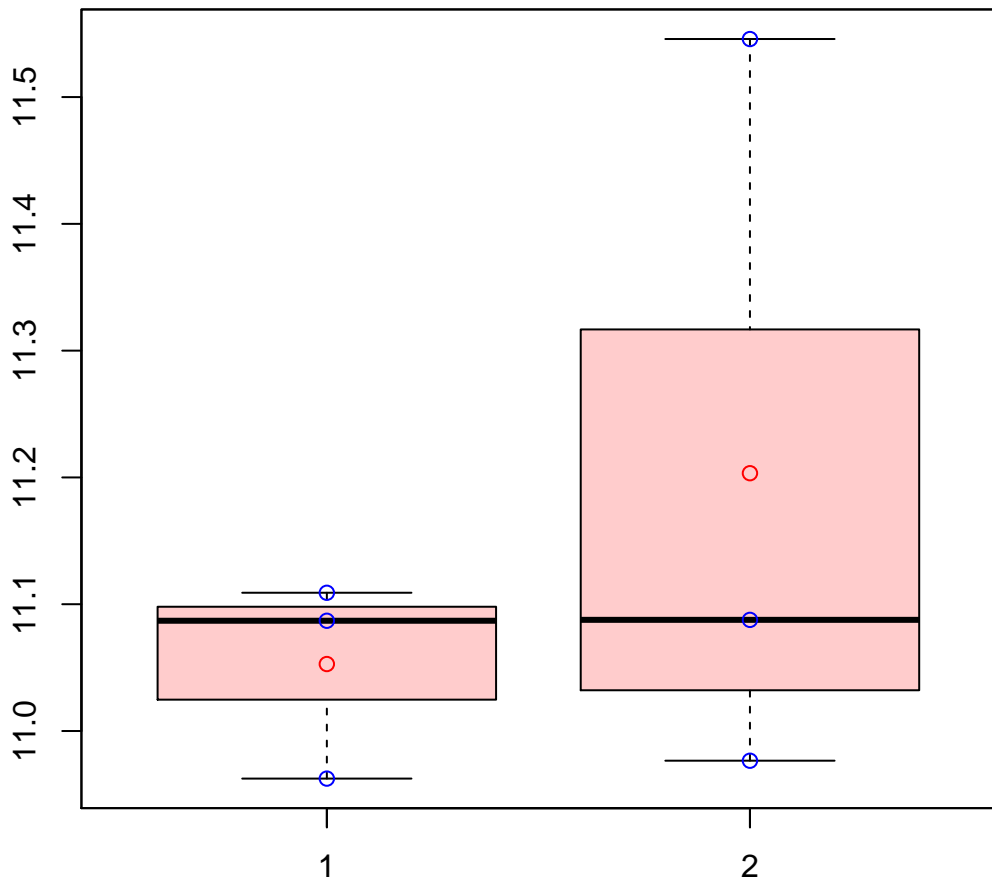

t-Test: p-value = 0.48

# K7US98|K7US98\_MAIZE

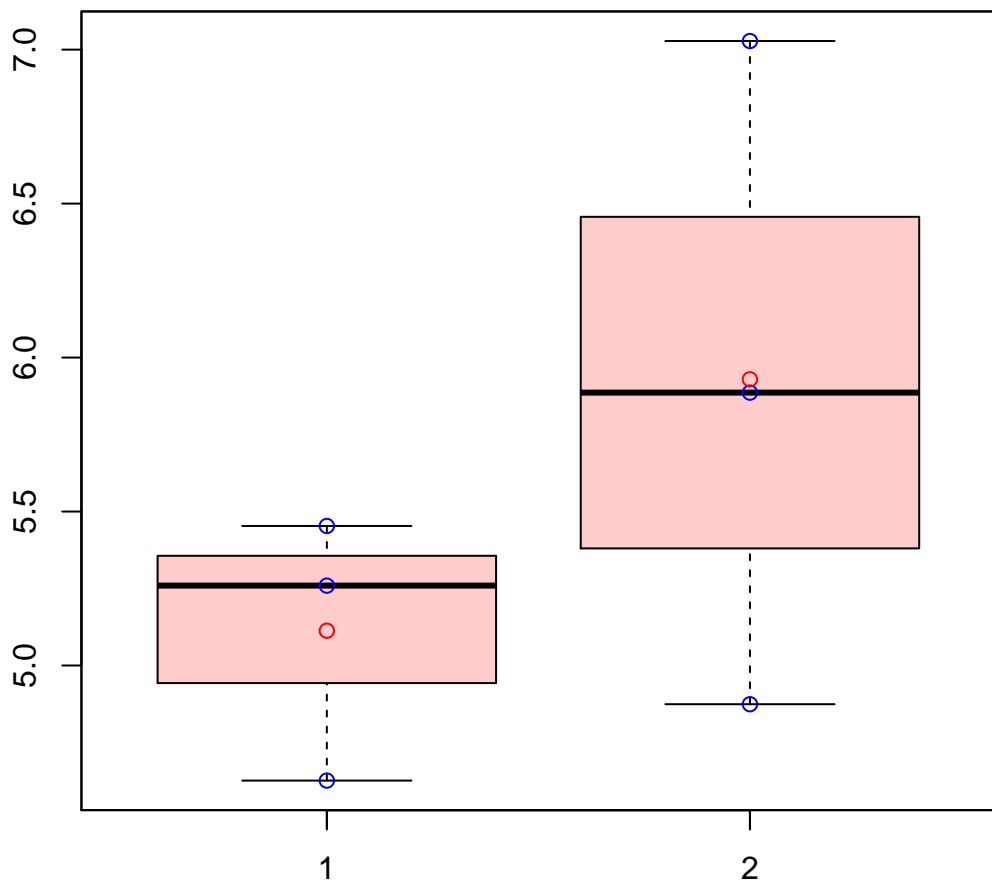

t-Test: p-value = 0.32

# K7USR3|K7USR3\_MAIZE

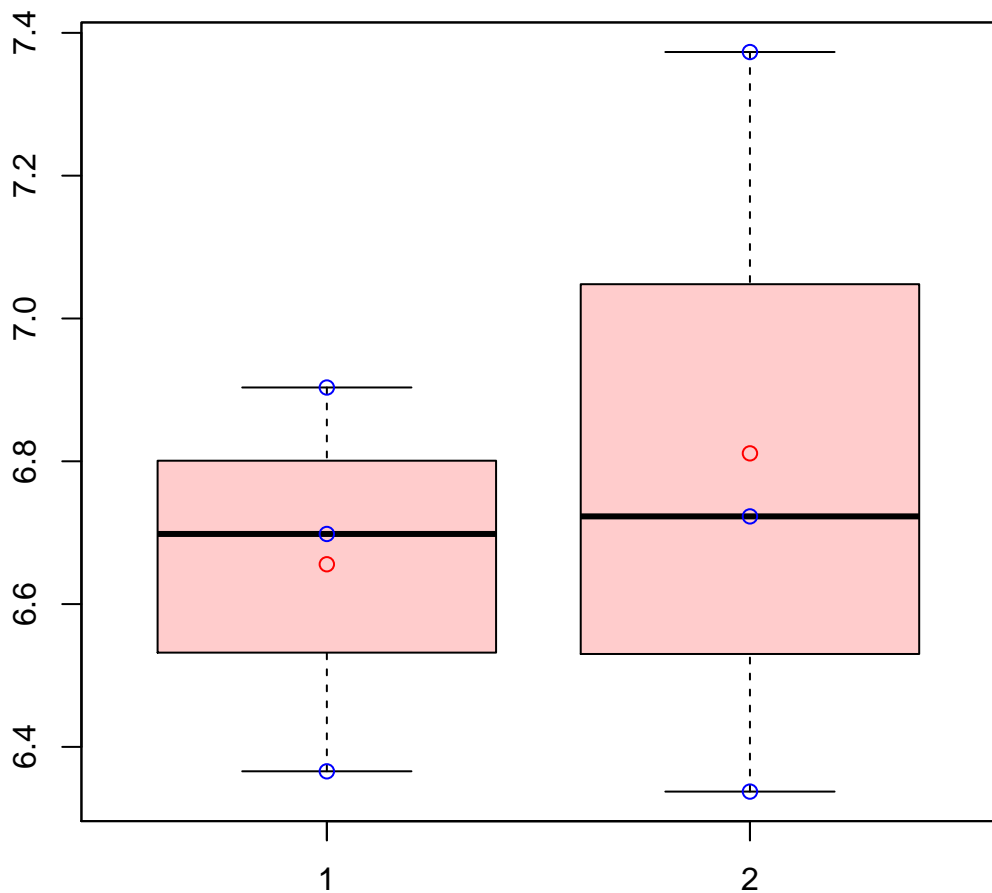

t-Test: p-value = 0.68



# K7UT92|K7UT92\_MAIZE

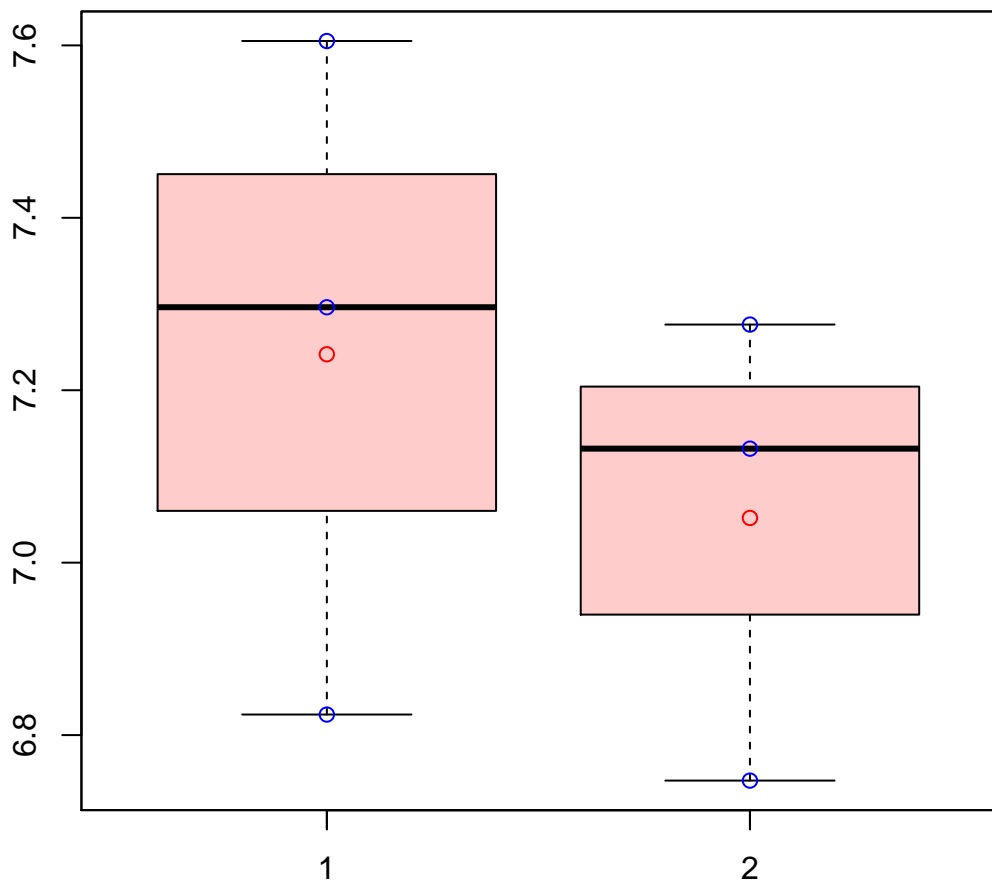

t-Test: p-value = 0.53

# K7UTZ2|K7UTZ2\_MAIZE

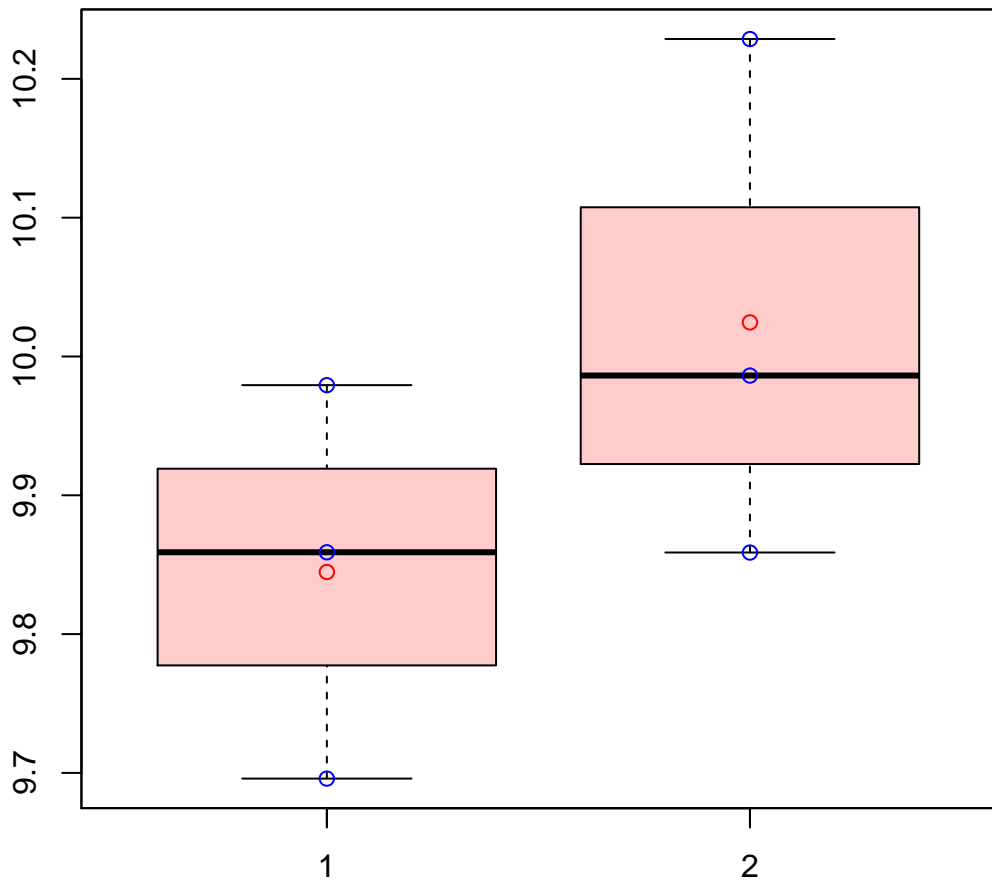

t-Test: p-value = 0.26

# K7UU03|K7UU03\_MAIZE

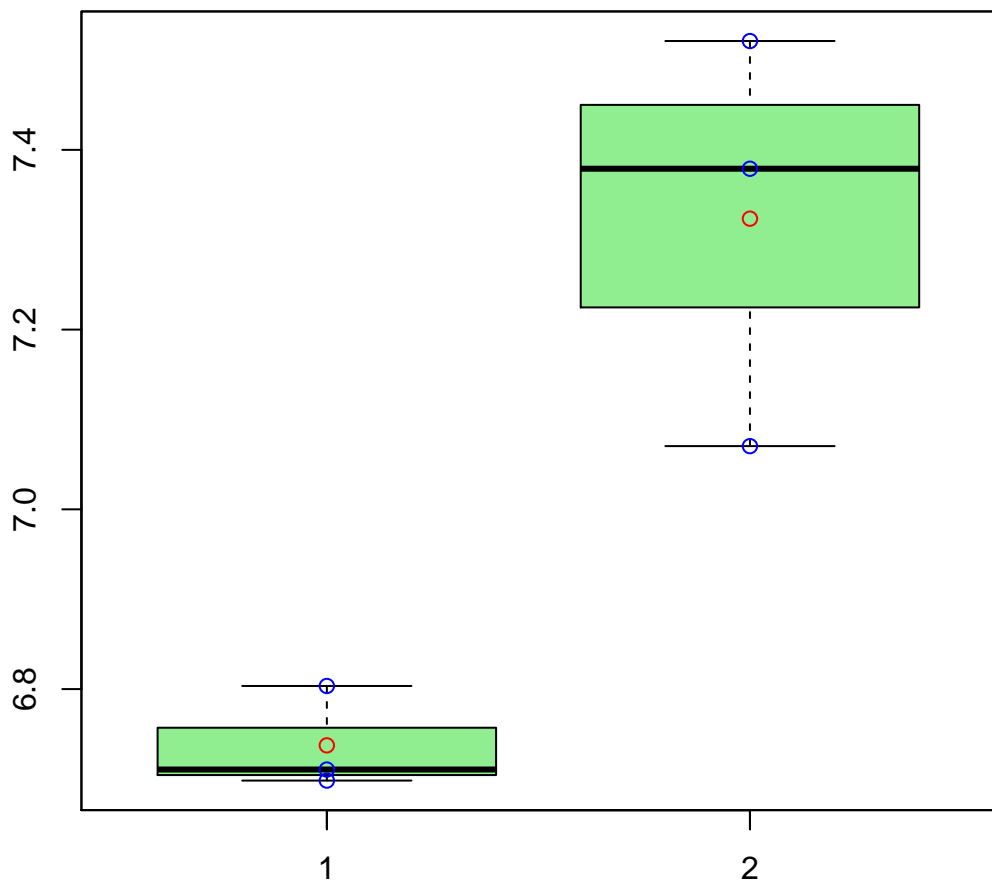

t-Test: p-value = 0.04

# K7UVD7|K7UVD7\_MAIZE

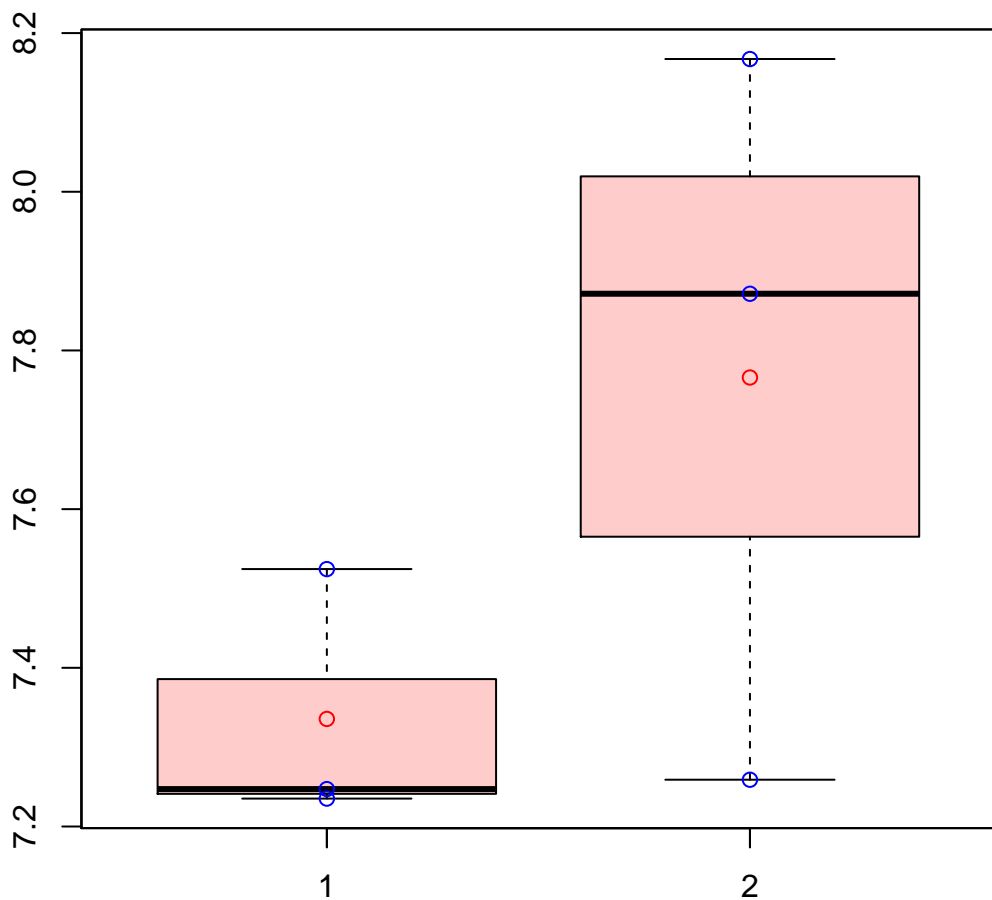

t-Test: p-value = 0.24

# K7UVS4|K7UVS4\_MAIZE

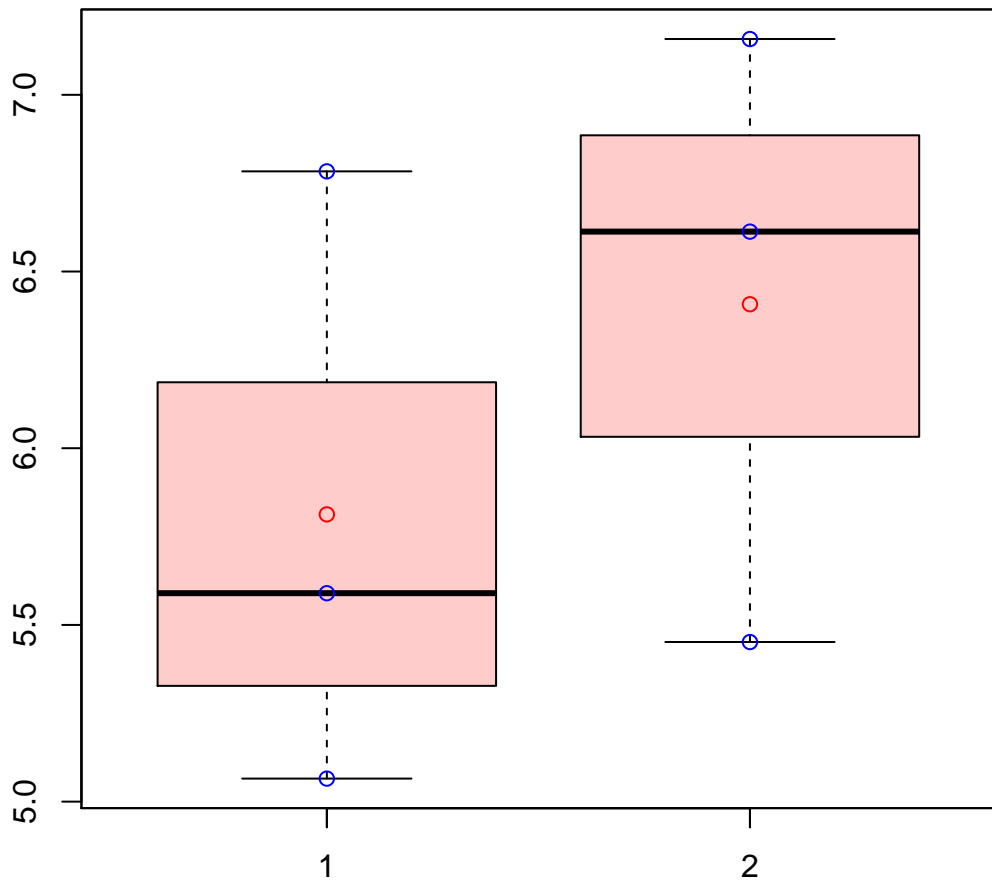

t-Test: p-value = 0.45

# K7UZD8|K7UZD8\_MAIZE

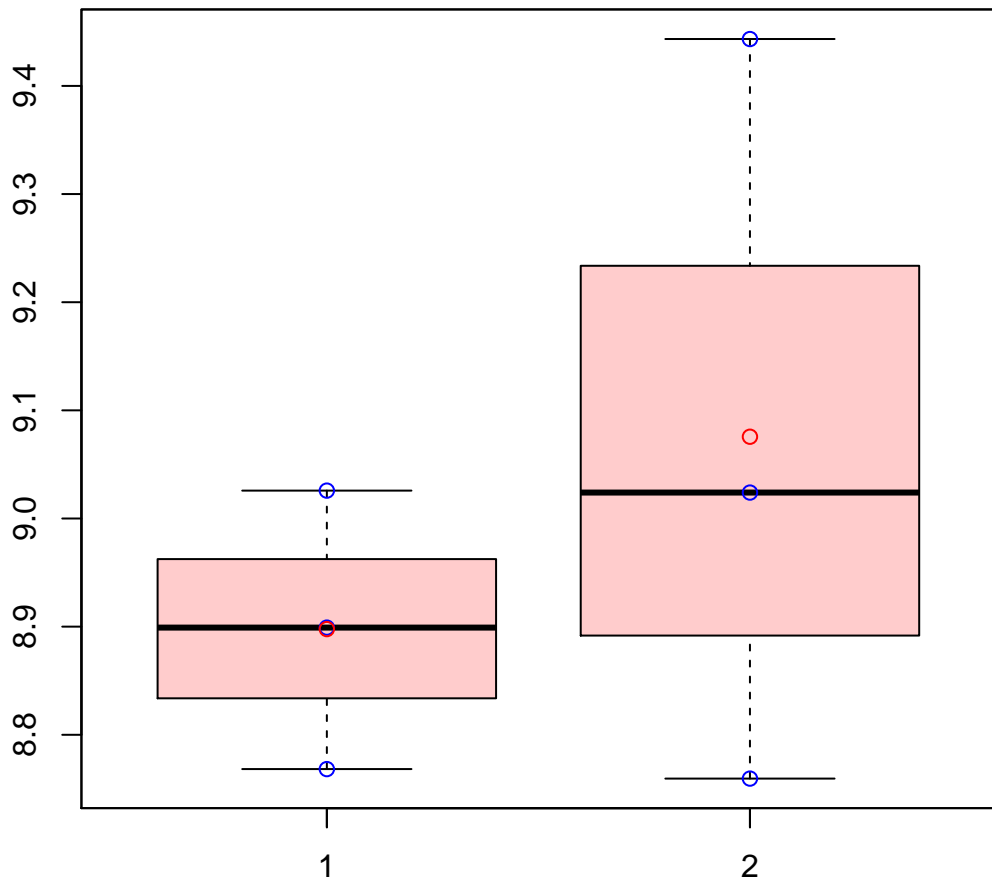

t-Test: p-value = 0.47

# K7UZK4|K7UZK4\_MAIZE

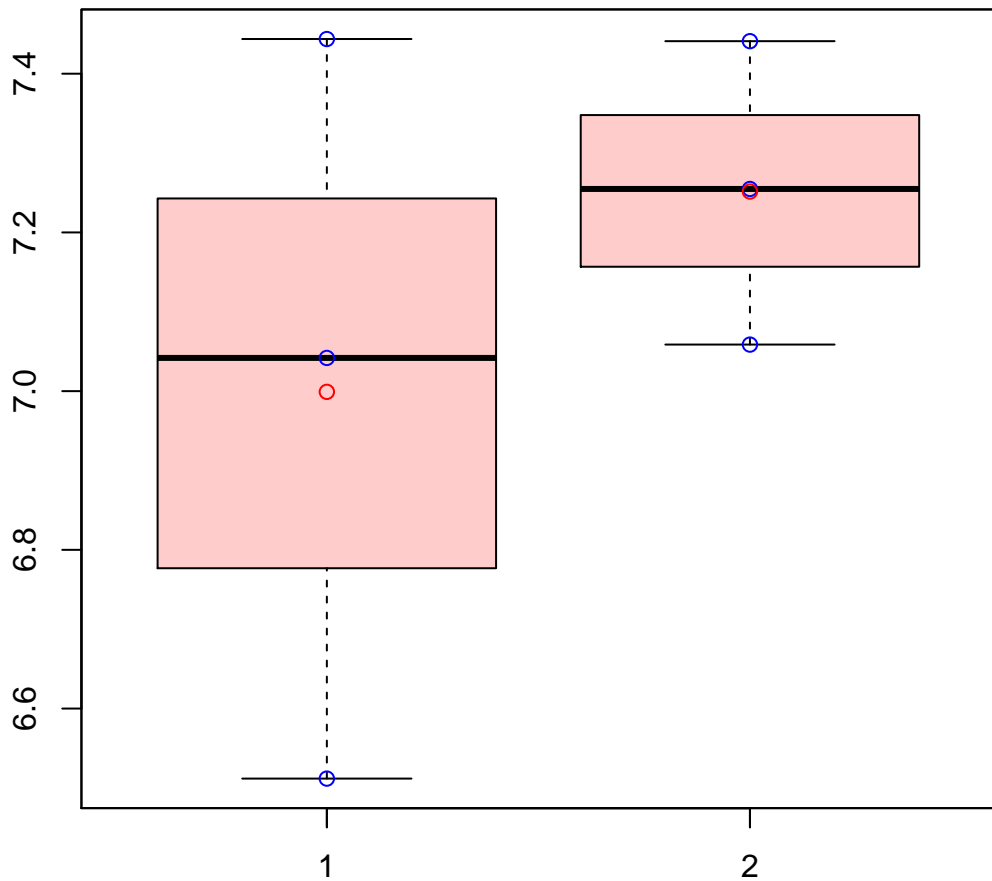

t-Test: p-value = 0.46

# K7UZT6|K7UZT6\_MAIZE

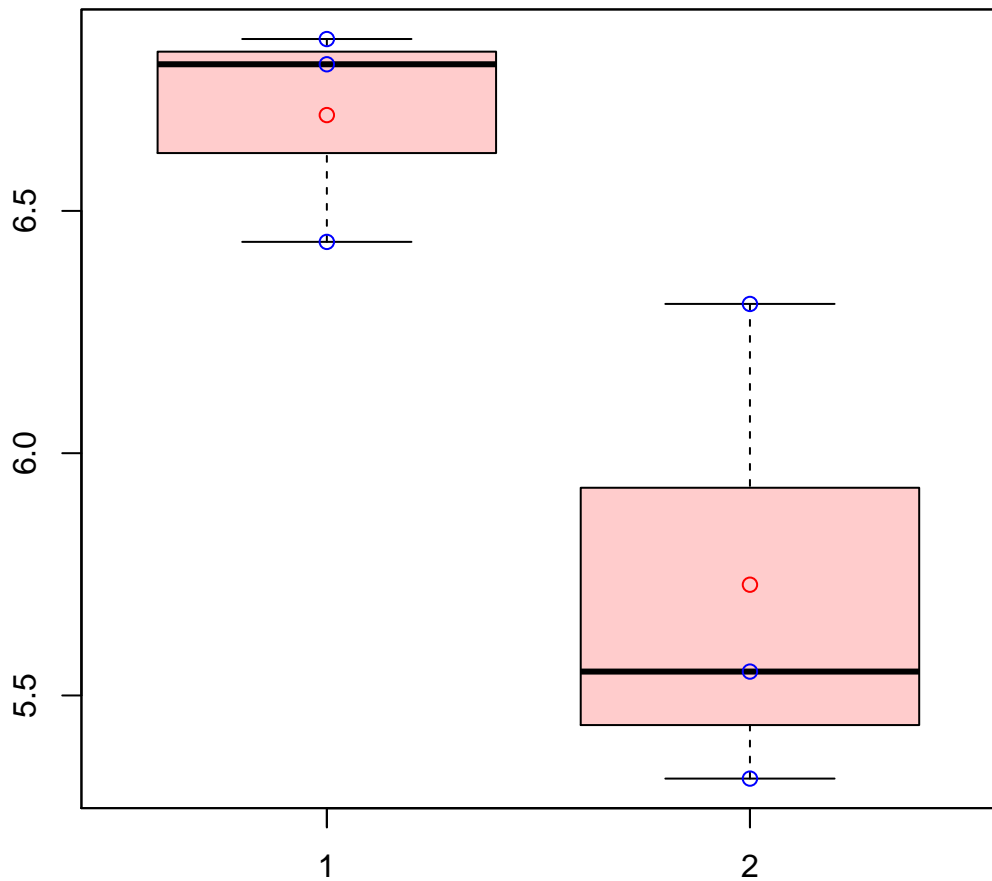

t-Test: p-value = 0.06



# K7V2C6|K7V2C6\_MAIZE

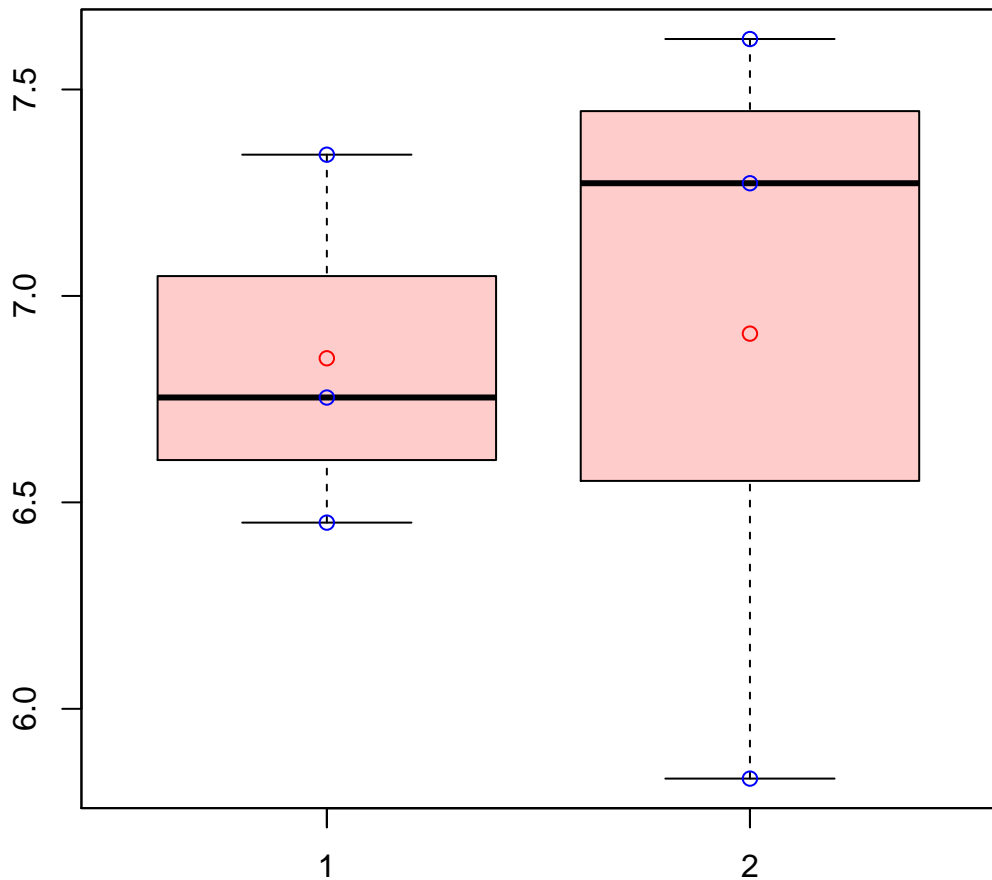

t-Test: p-value = 0.93

# K7V2Z8|K7V2Z8\_MAIZE

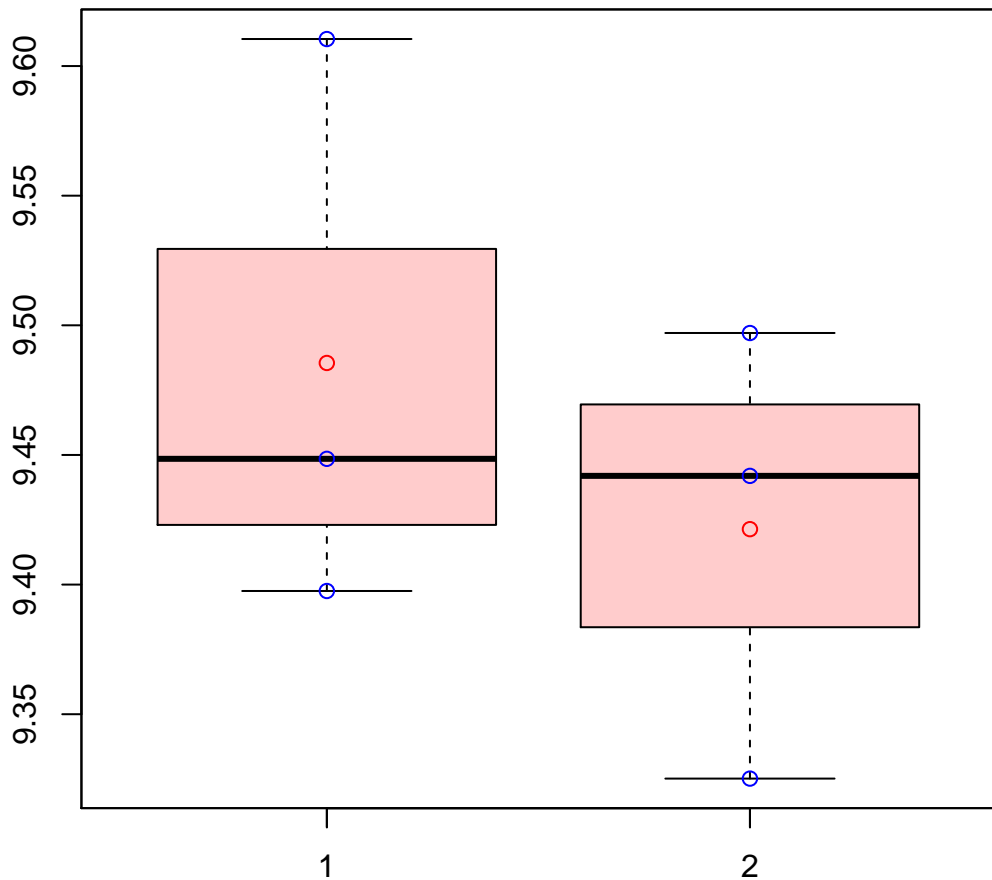

t-Test: p-value = 0.48

# K7V3A4|K7V3A4\_MAIZE

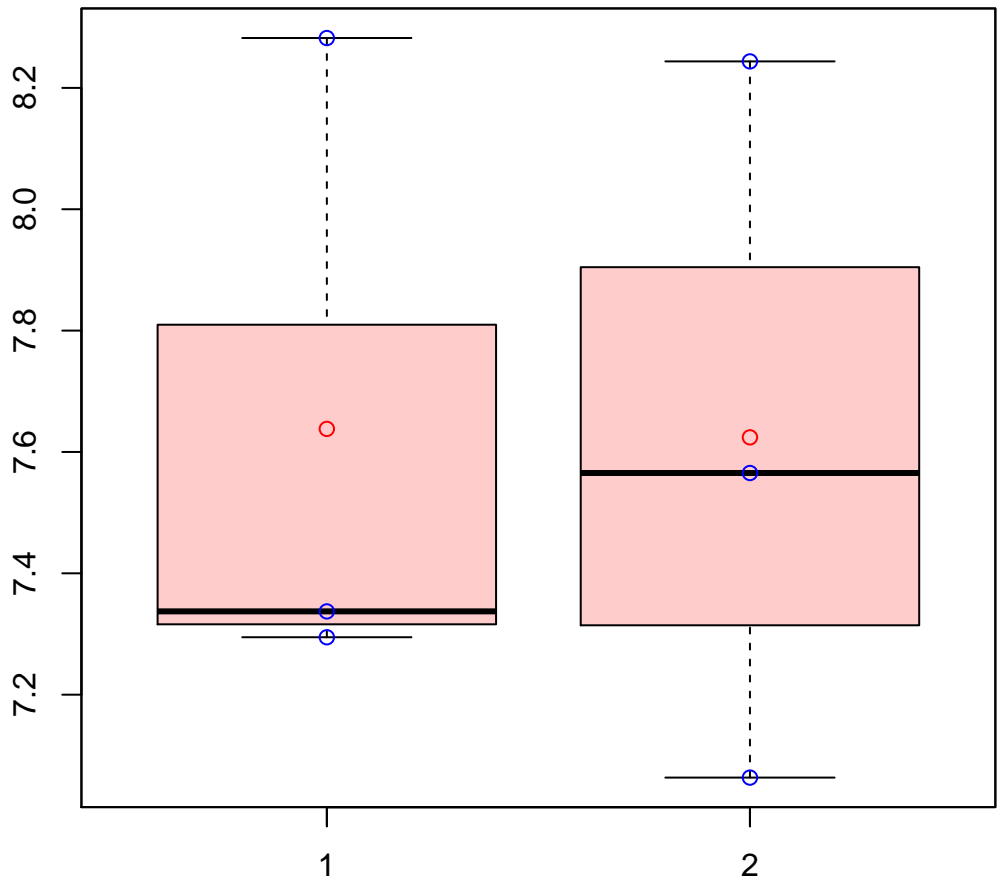

t-Test: p-value = 0.98

# K7V3B1|K7V3B1\_MAIZE

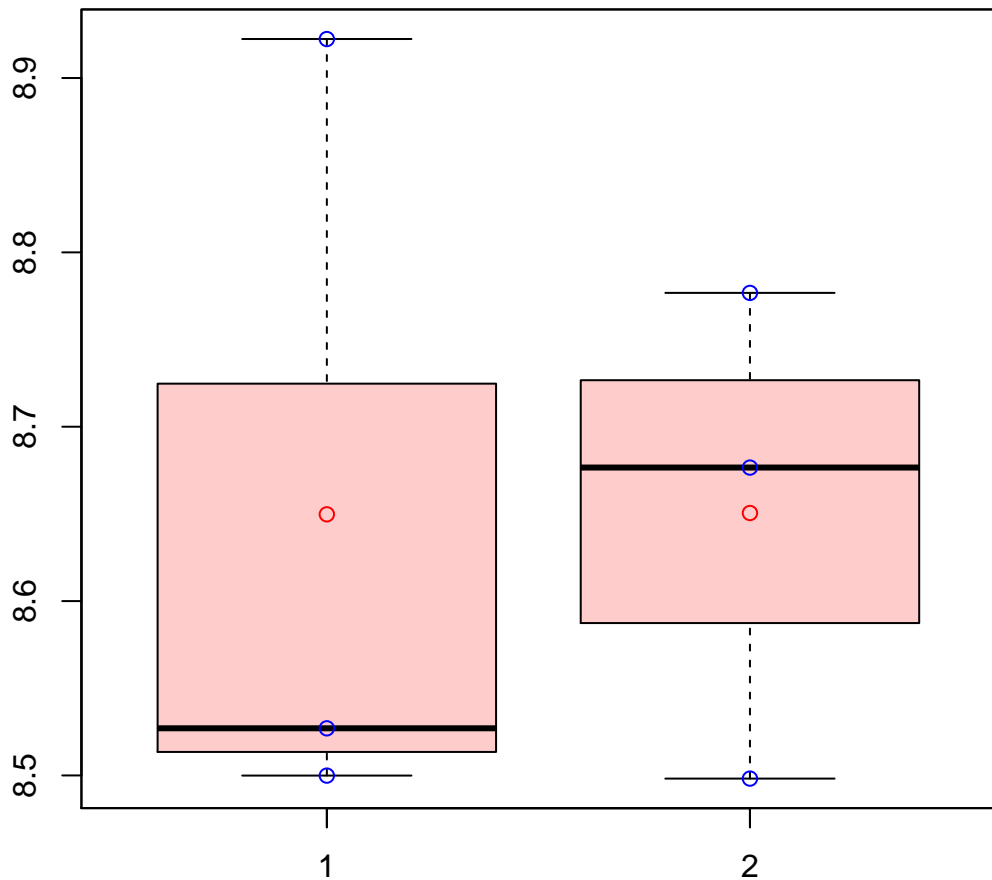

t-Test: p-value = 1

# K7V3R8|K7V3R8\_MAIZE

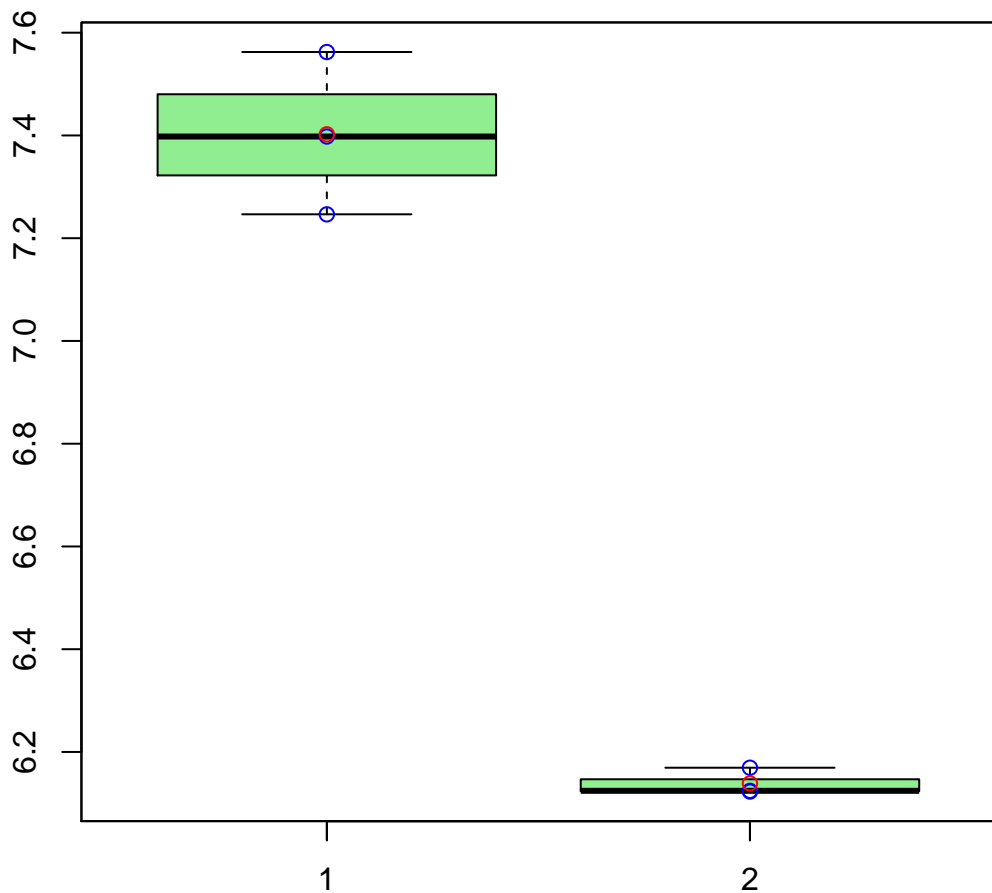

t-Test: p-value = 0

# K7V3Y4|K7V3Y4\_MAIZE

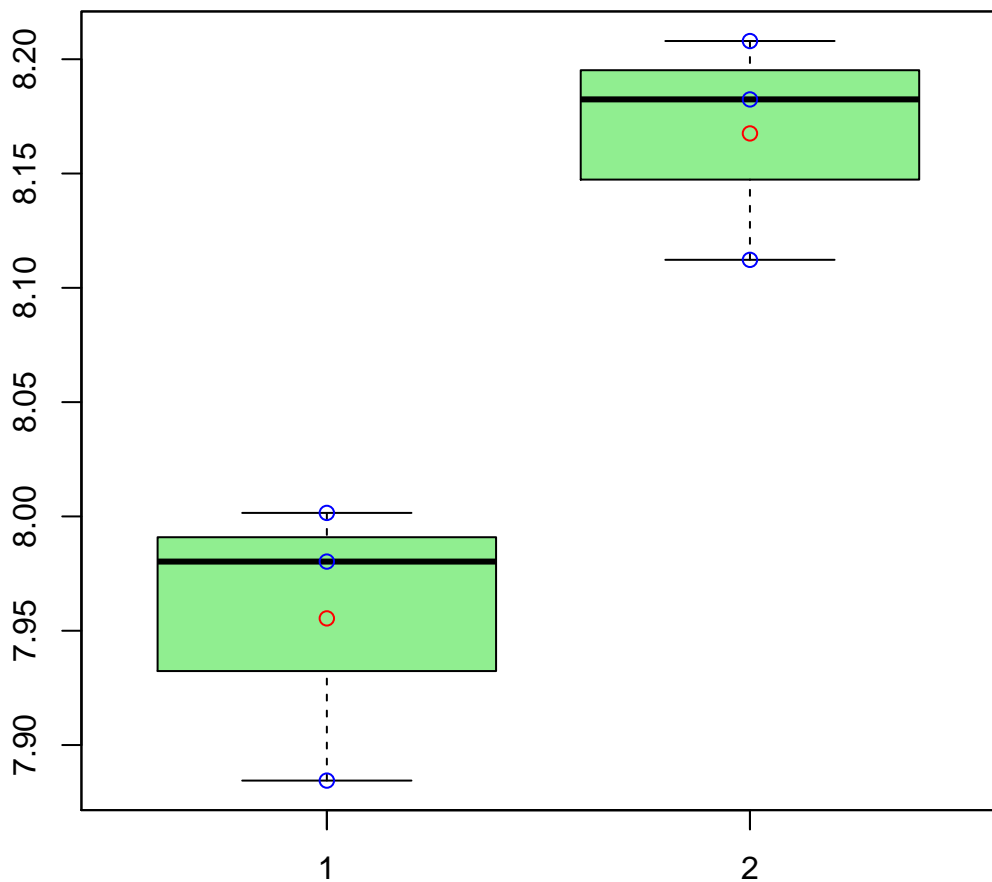

t-Test: p-value = 0.01

# K7V5G0|K7V5G0\_MAIZE

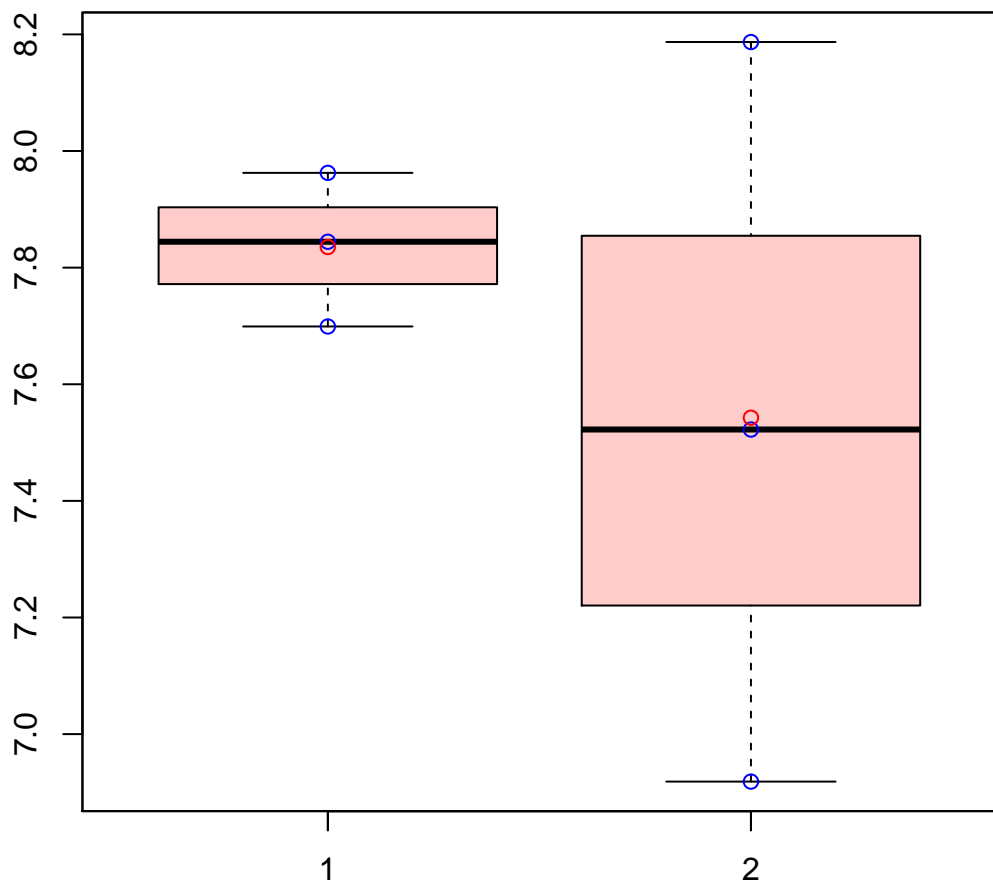

t-Test: p-value = 0.51

# K7V794|K7V794\_MAIZE

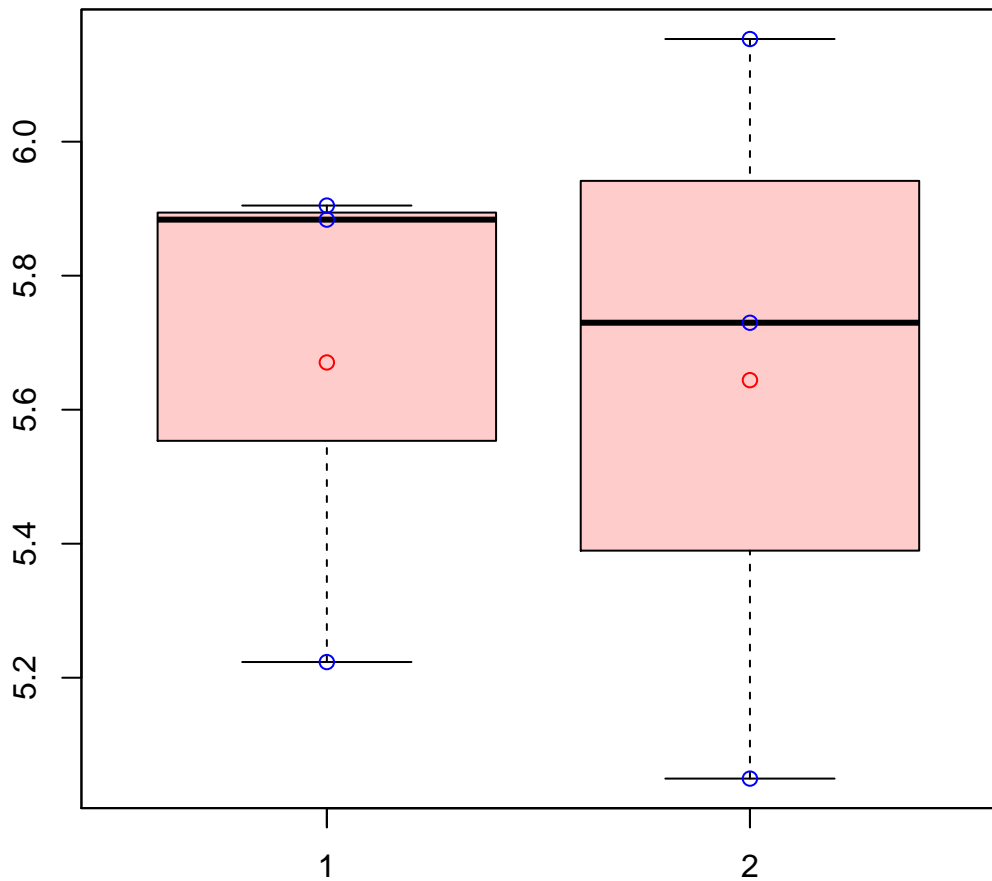

t-Test: p-value = 0.95



# K7V9L0|K7V9L0\_MAIZE

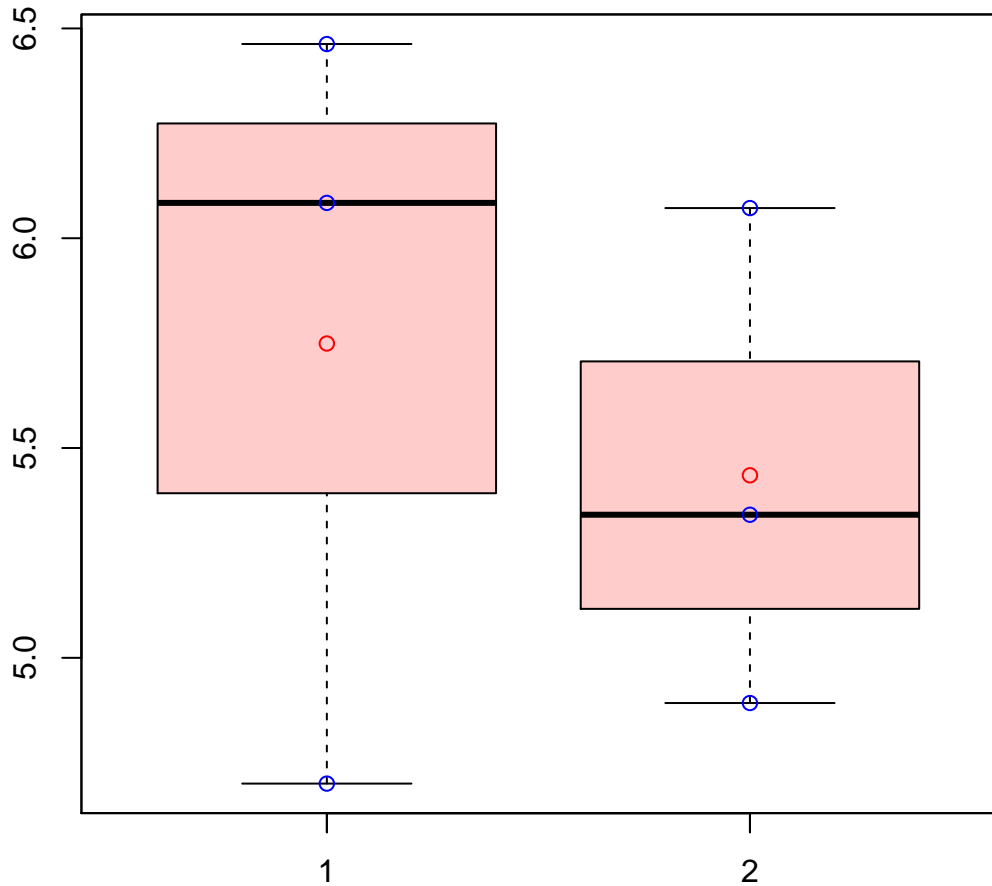

t-Test: p-value = 0.65

# K7V9V1|K7V9V1\_MAIZE

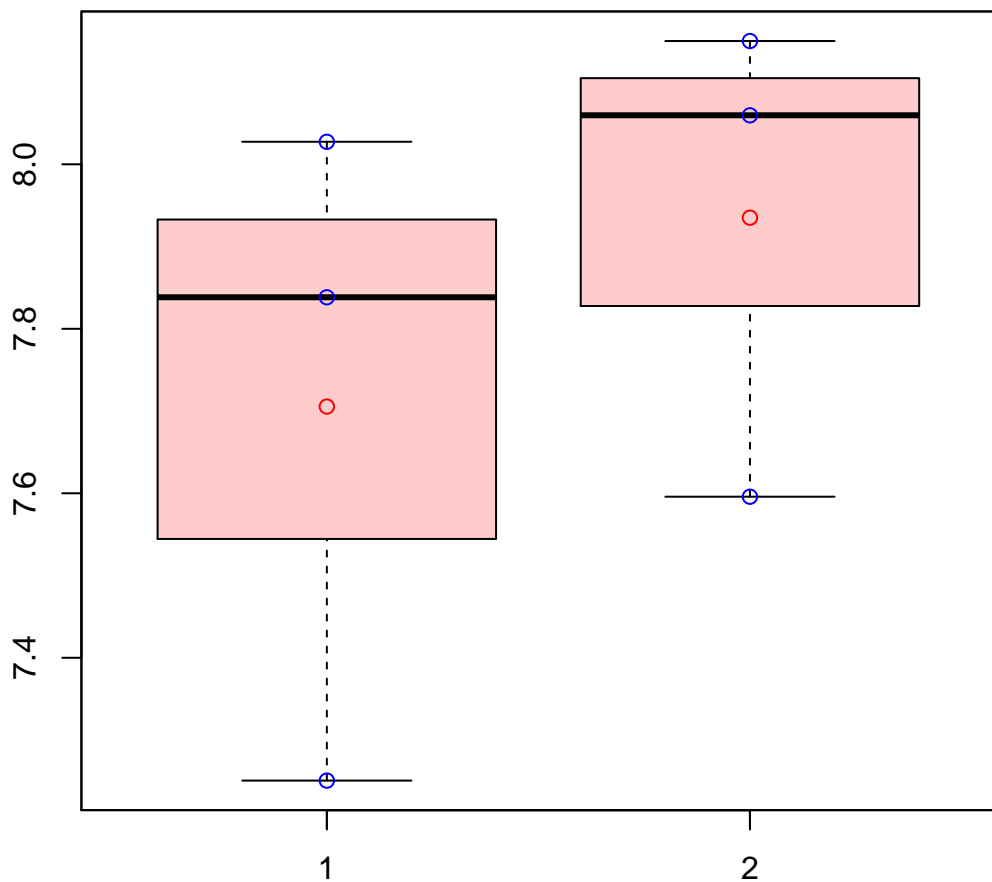

t-Test: p-value = 0.48

# K7V9V6|K7V9V6\_MAIZE

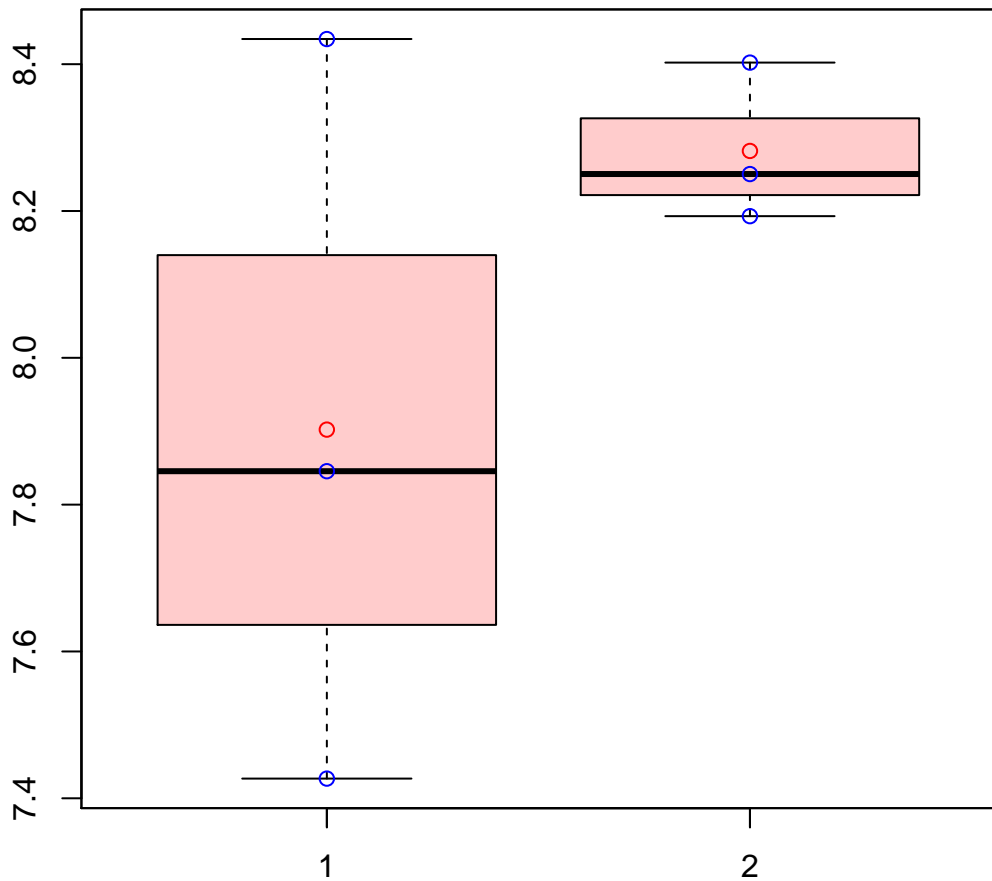

t-Test: p-value = 0.32

# K7VA40|K7VA40\_MAIZE

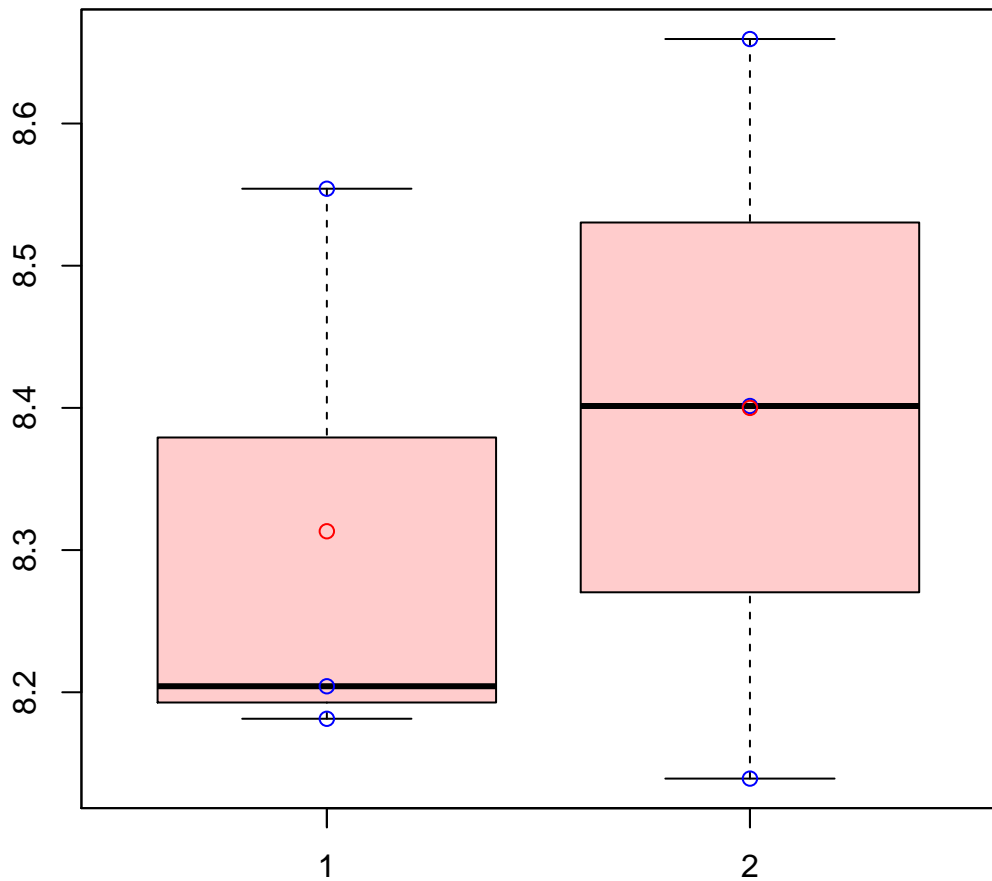

t-Test: p-value = 0.68

# K7VBB4|K7VBB4\_MAIZE

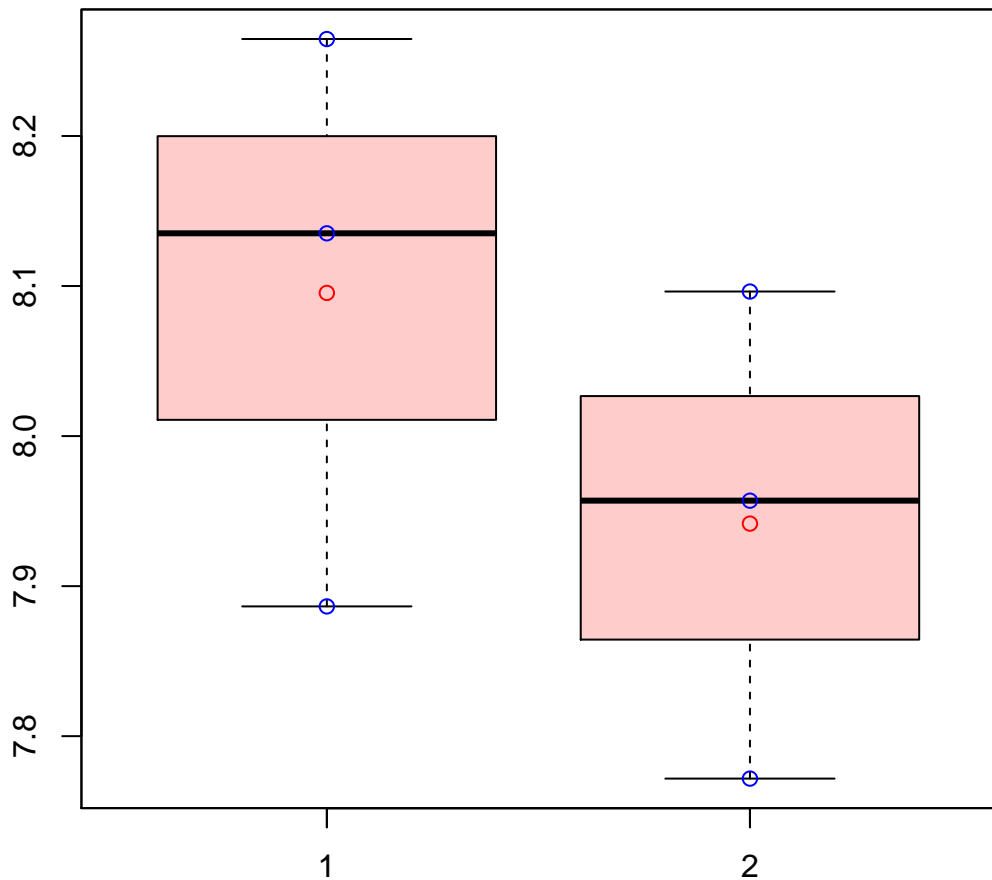

t-Test: p-value = 0.35

# K7VBJ4|K7VBJ4\_MAIZE

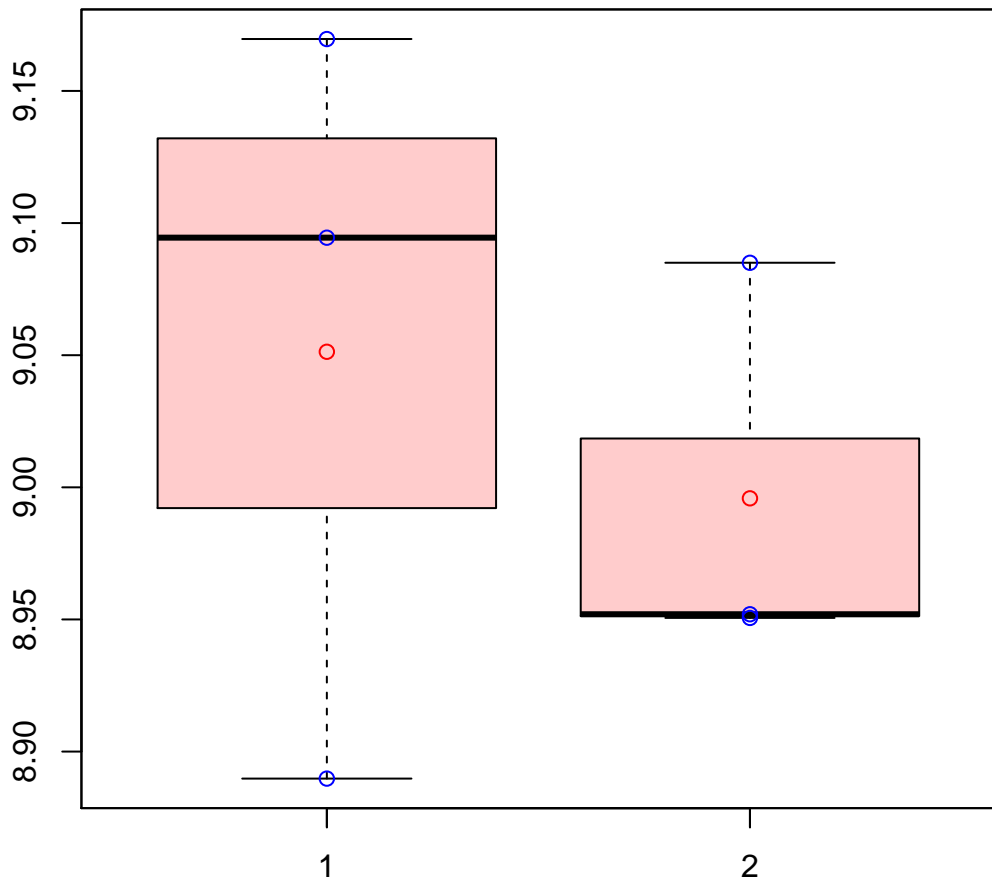

t-Test: p-value = 0.6

# K7VBT1|K7VBT1\_MAIZE

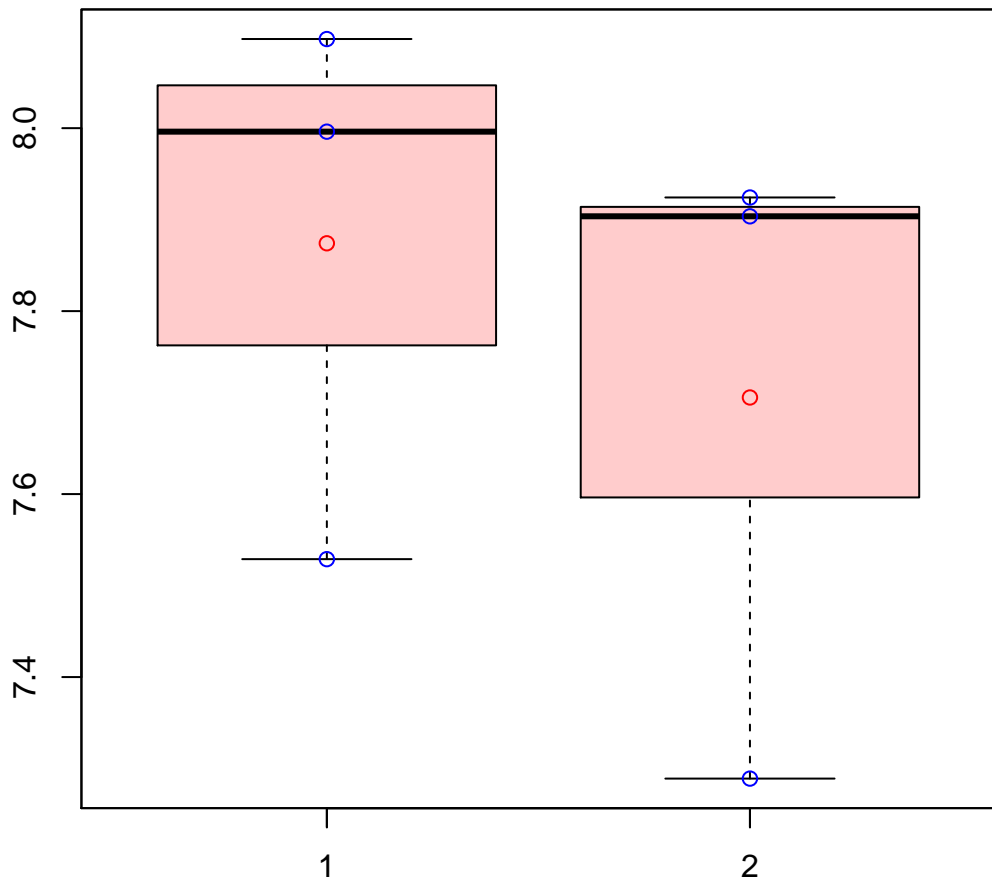

t-Test: p-value = 0.57

# K7VC25|K7VC25\_MAIZE

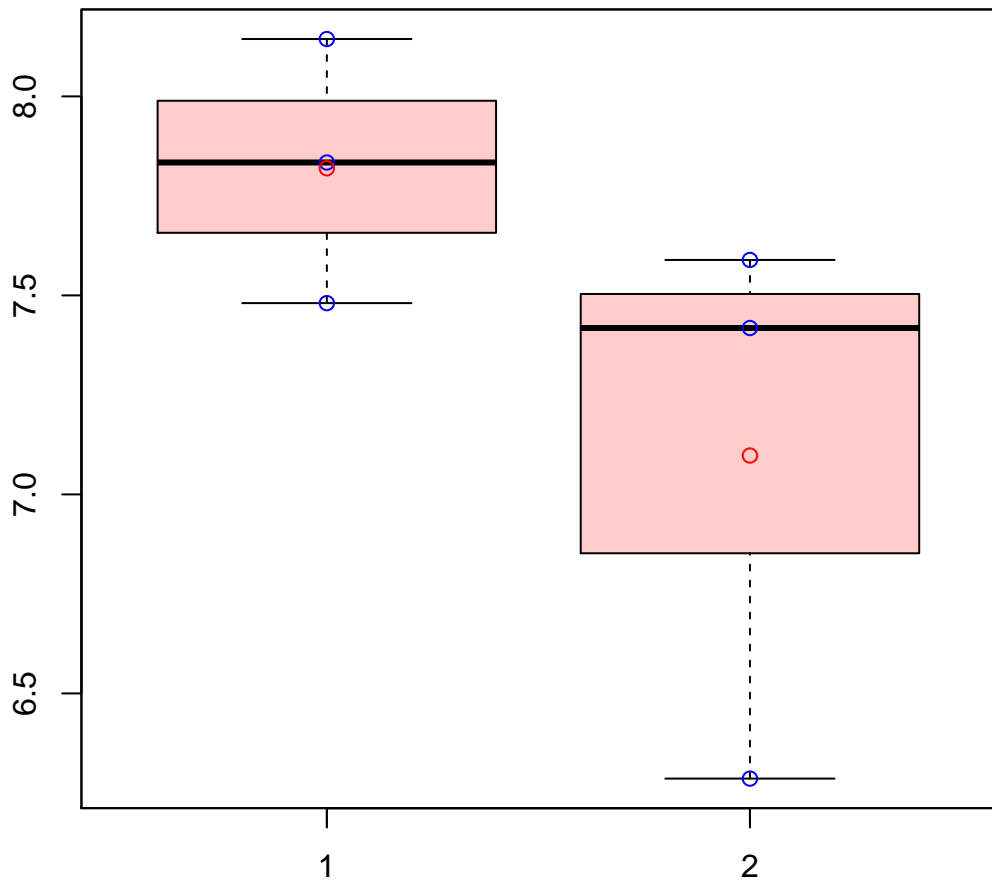

t-Test: p-value = 0.21



# K7VC37|K7VC37\_MAIZE

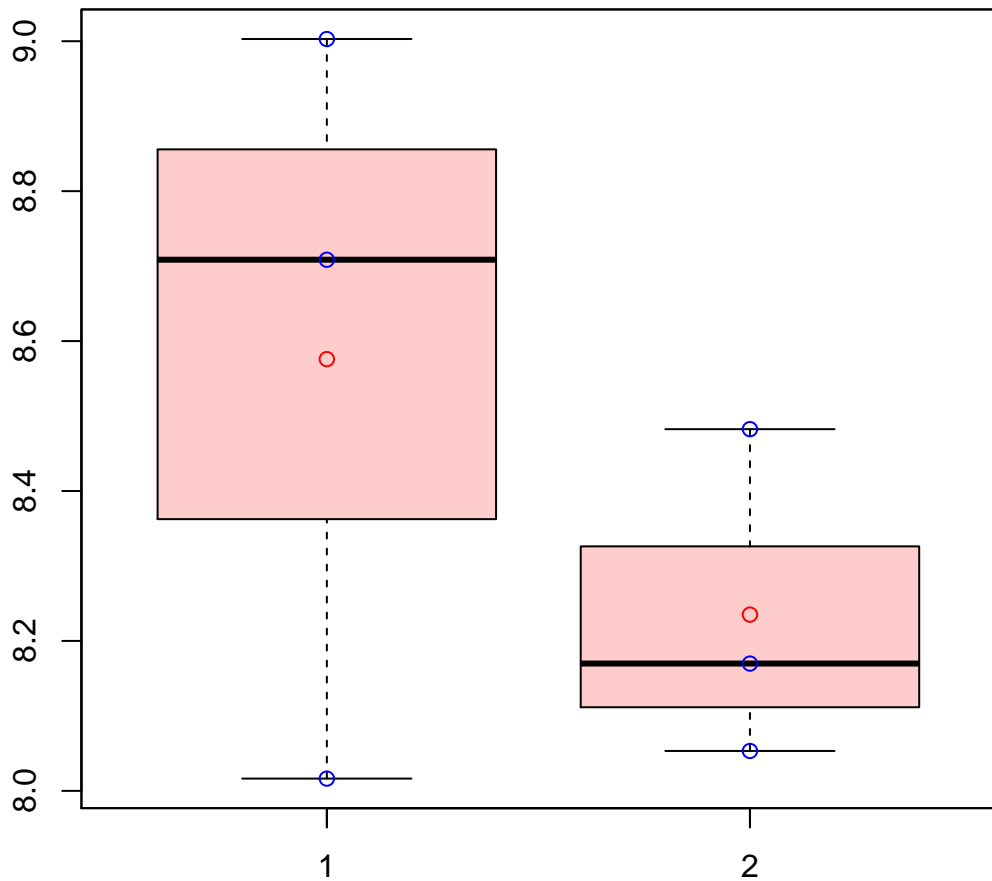

t-Test: p-value = 0.37

# K7VCA6|K7VCA6\_MAIZE

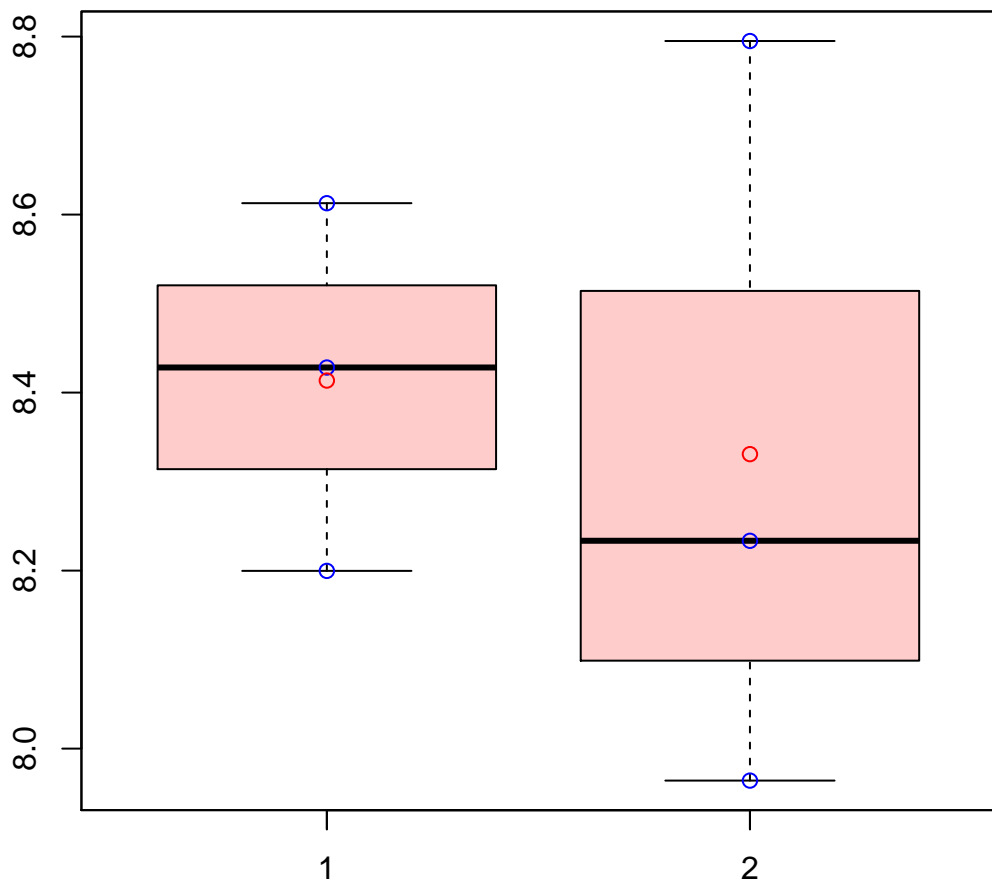

t-Test: p-value = 0.78

# K7VCX4|K7VCX4\_MAIZE

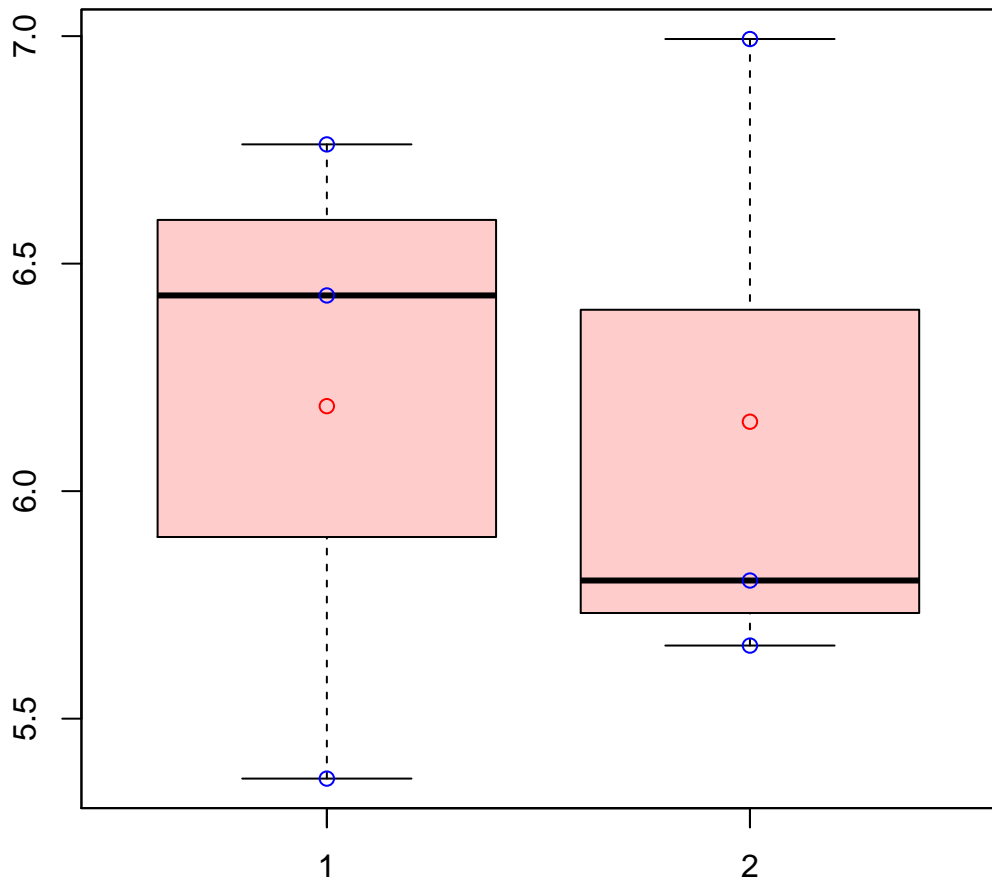

t-Test: p-value = 0.96

# K7VDG3|K7VDG3\_MAIZE

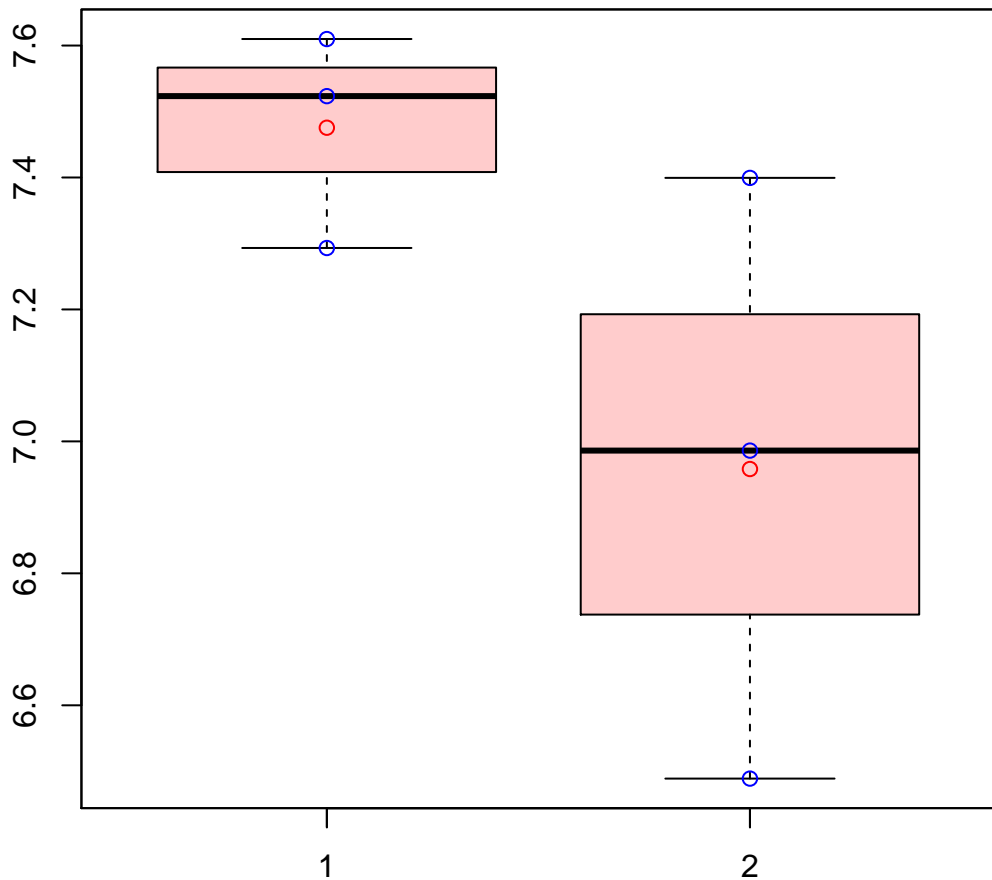

t-Test: p-value = 0.18

# K7VE43|K7VE43\_MAIZE

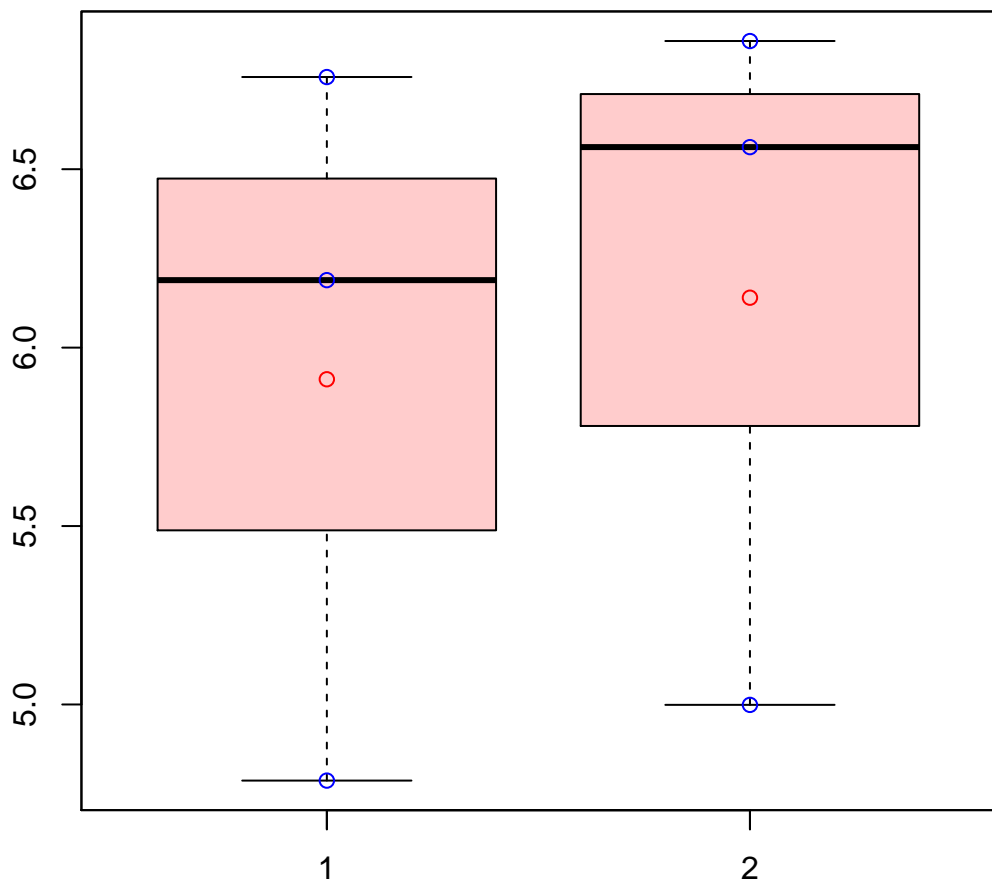

t-Test: p-value = 0.79

# K7VEK4|K7VEK4\_MAIZE

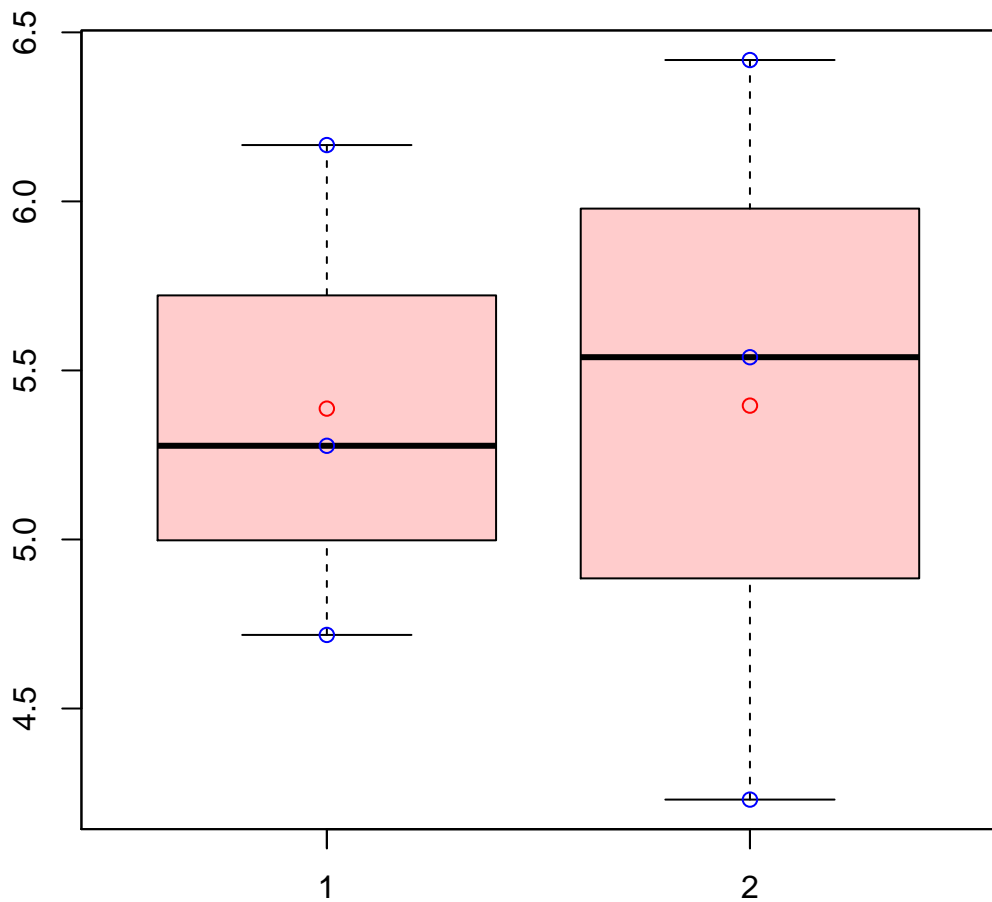

t-Test: p-value = 0.99

# K7VEW5|K7VEW5\_MAIZE

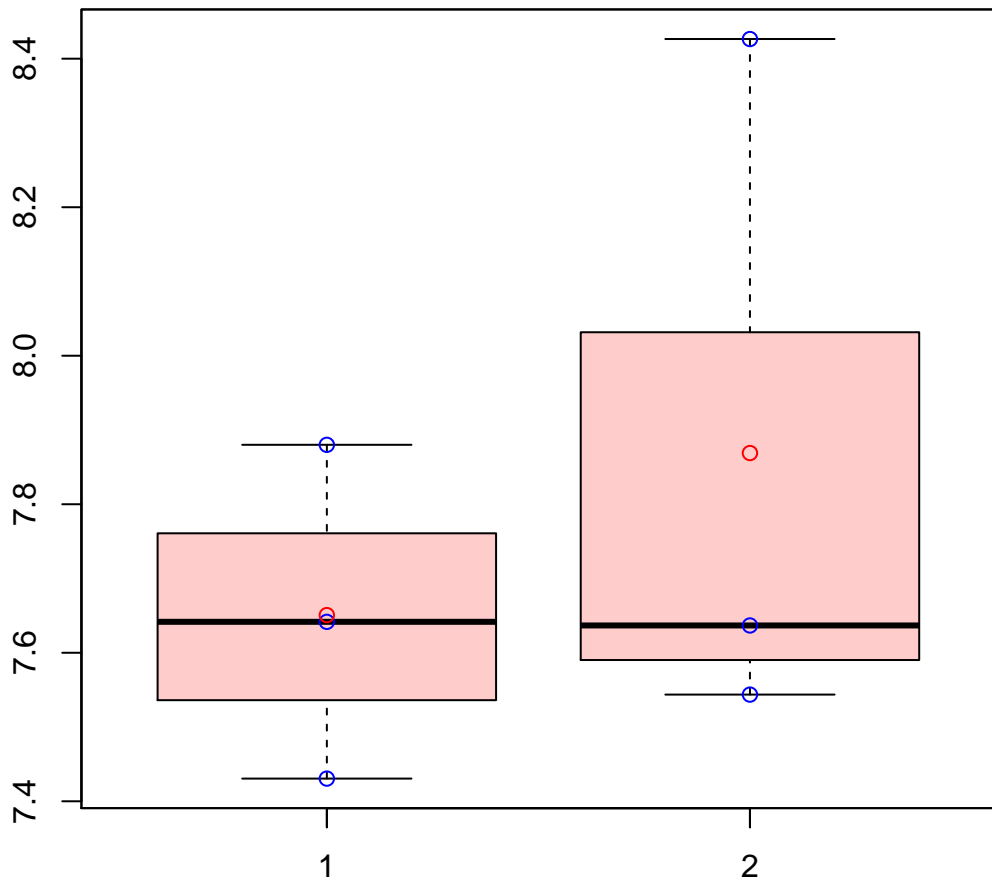

# K7VG66|K7VG66\_MAIZE

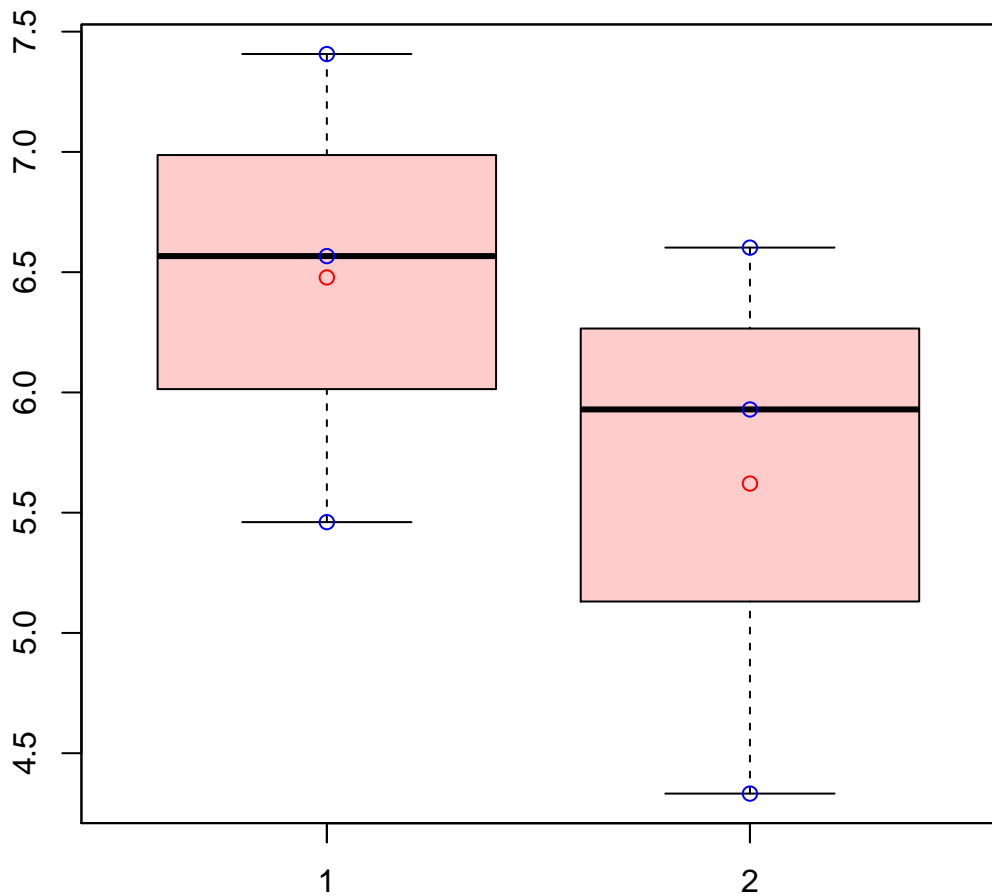

t-Test: p-value = 0.39



# K7VH97|K7VH97\_MAIZE

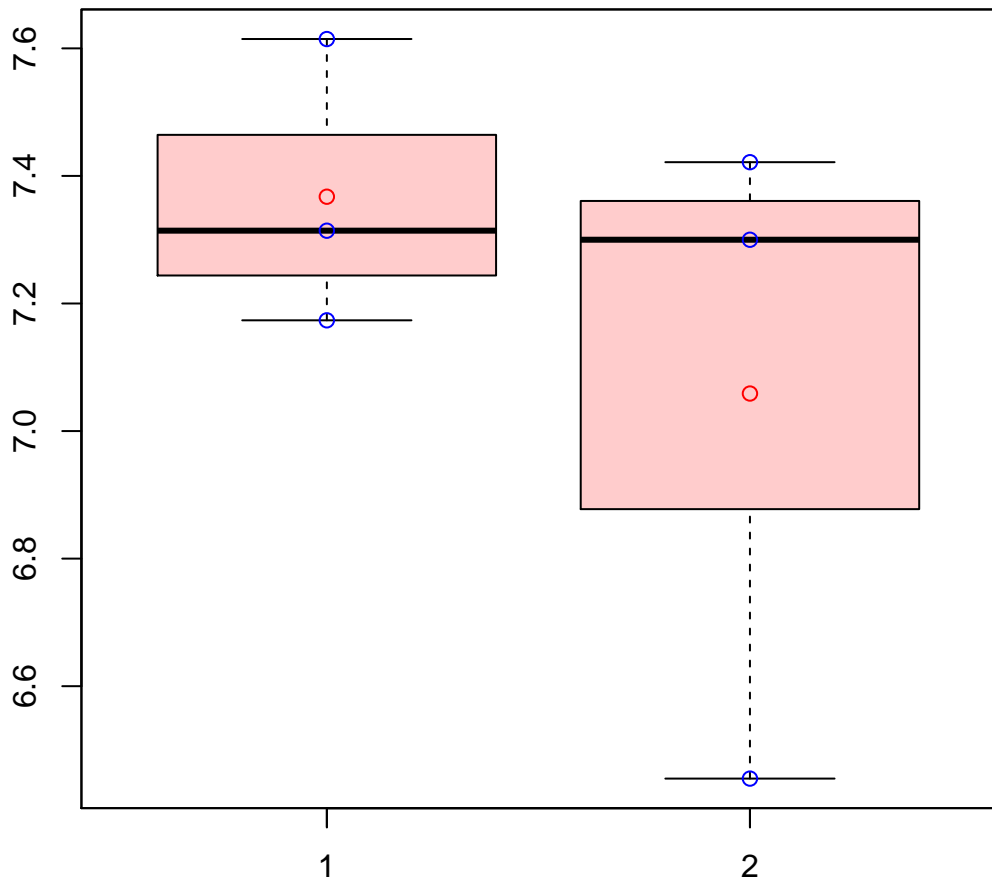

t-Test: p-value = 0.43

# K7VIM1|K7VIM1\_MAIZE

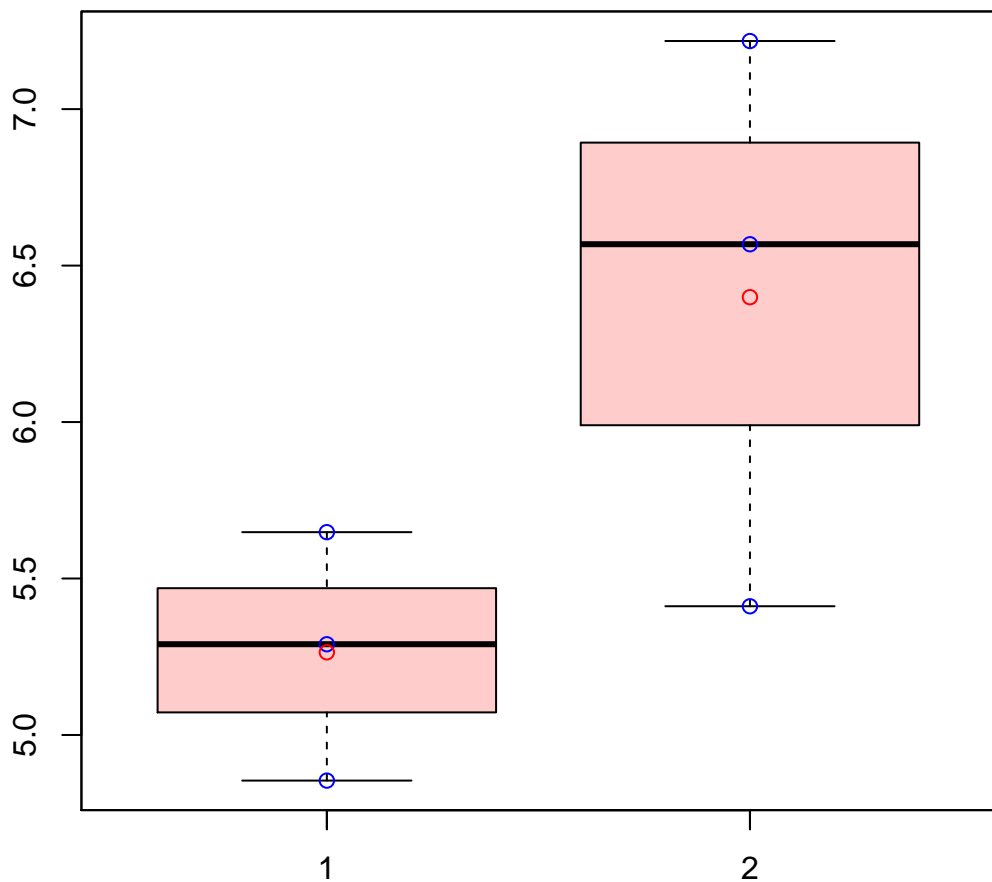

t-Test: p-value = 0.15

# K7VJL5|K7VJL5\_MAIZE

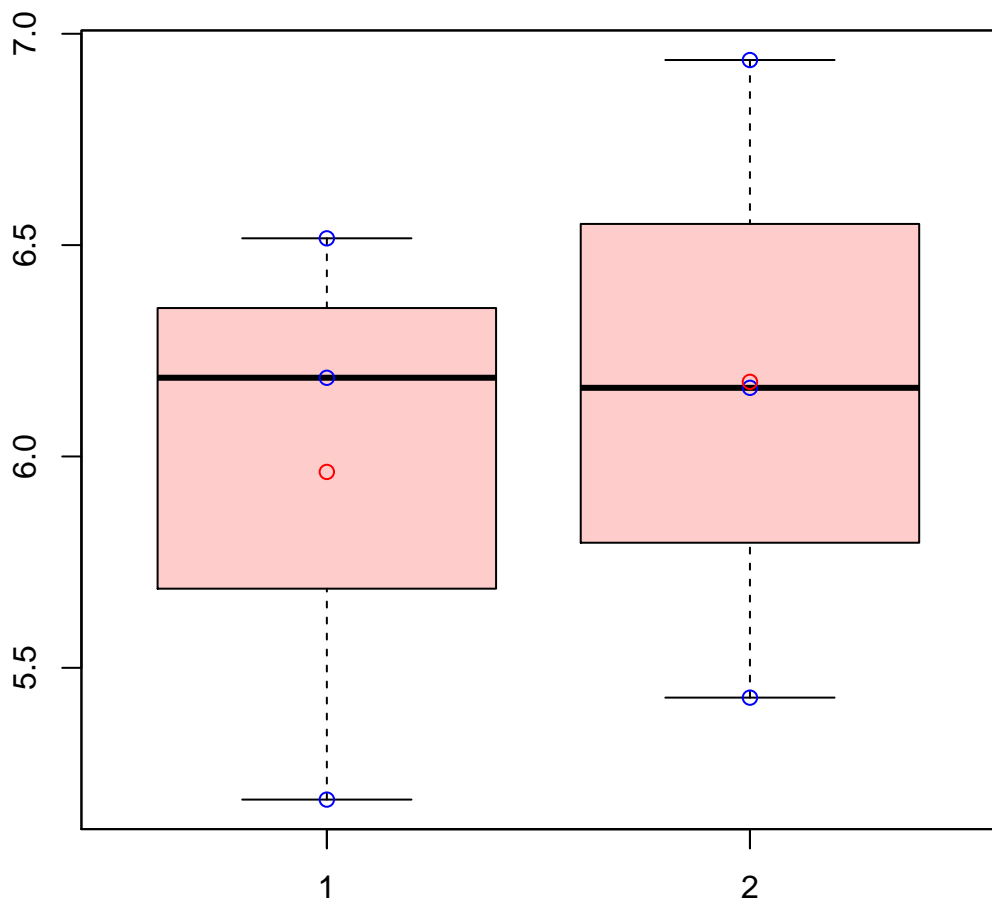

# K7VNL7|K7VNL7\_MAIZE

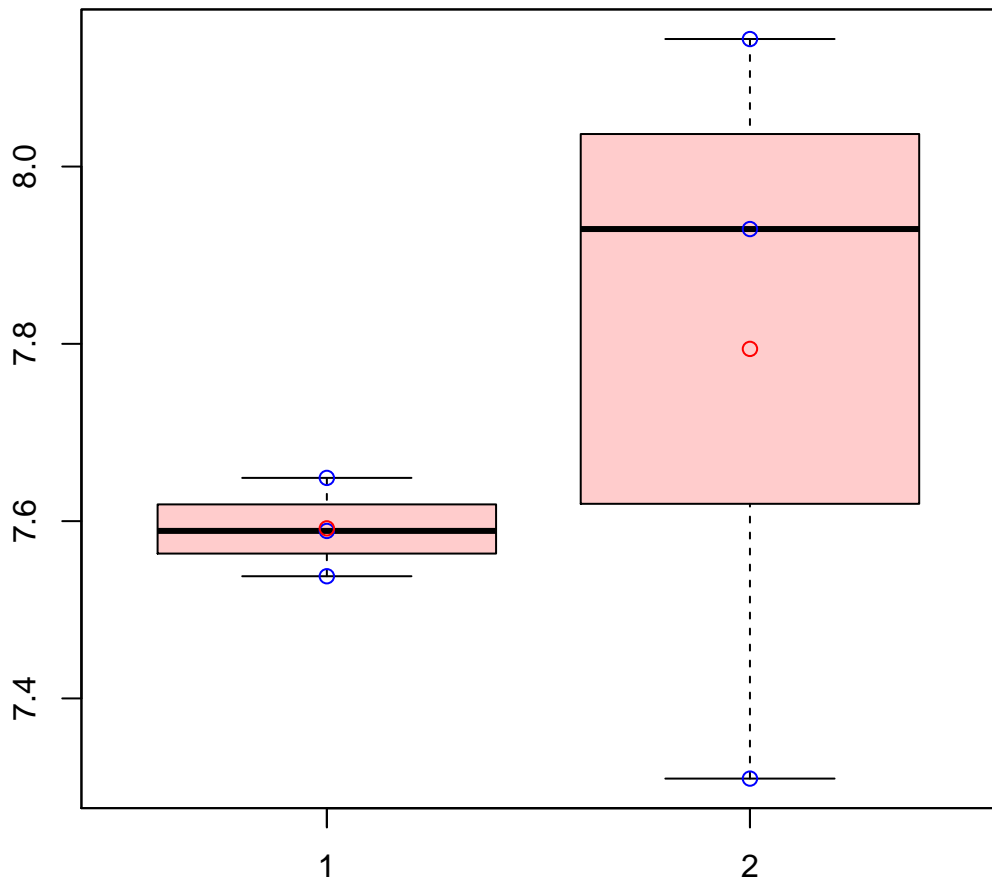

t-Test: p-value = 0.5

# K7VQ65|K7VQ65\_MAIZE

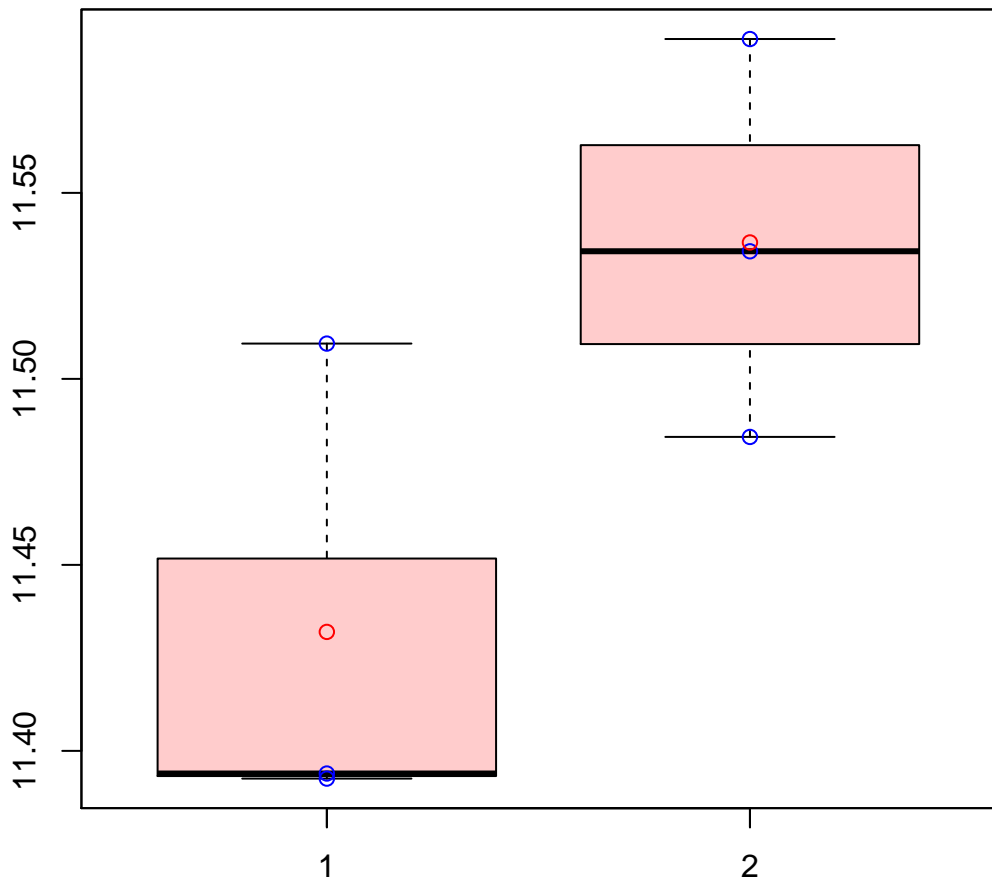

t-Test: p-value = 0.11

# K7VQC2|K7VQC2\_MAIZE

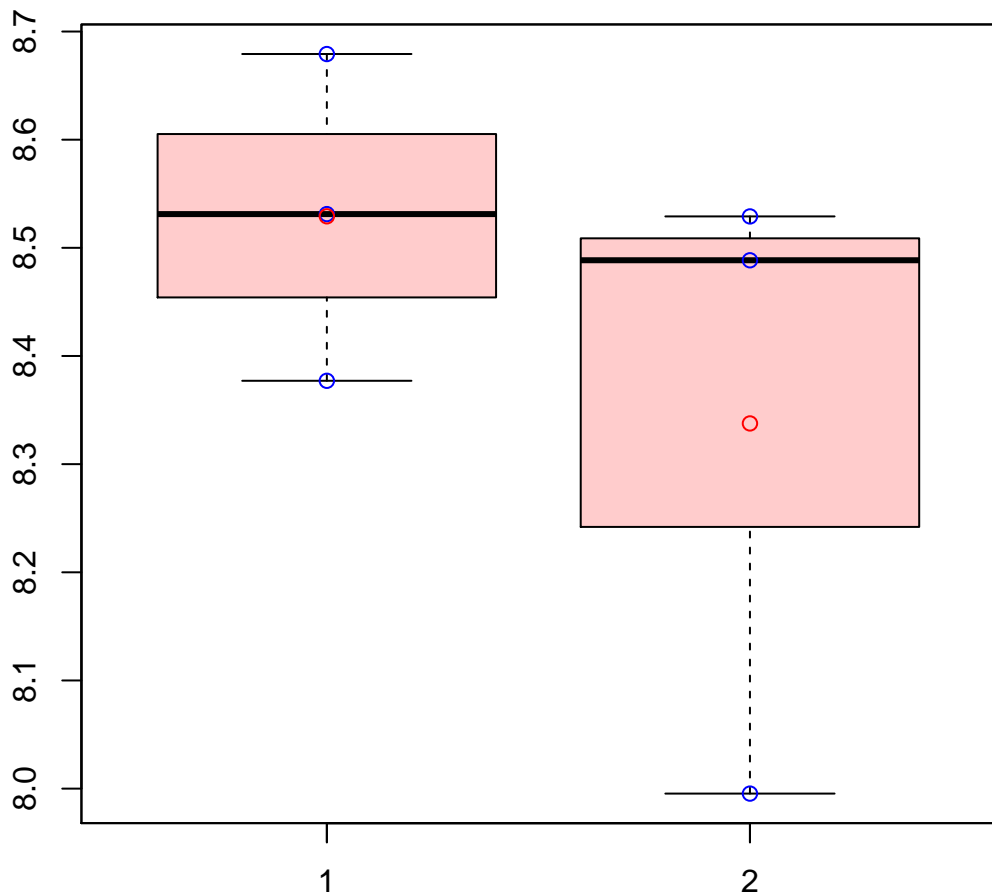

t-Test: p-value = 0.39

# K7VQM2|K7VQM2\_MAIZE

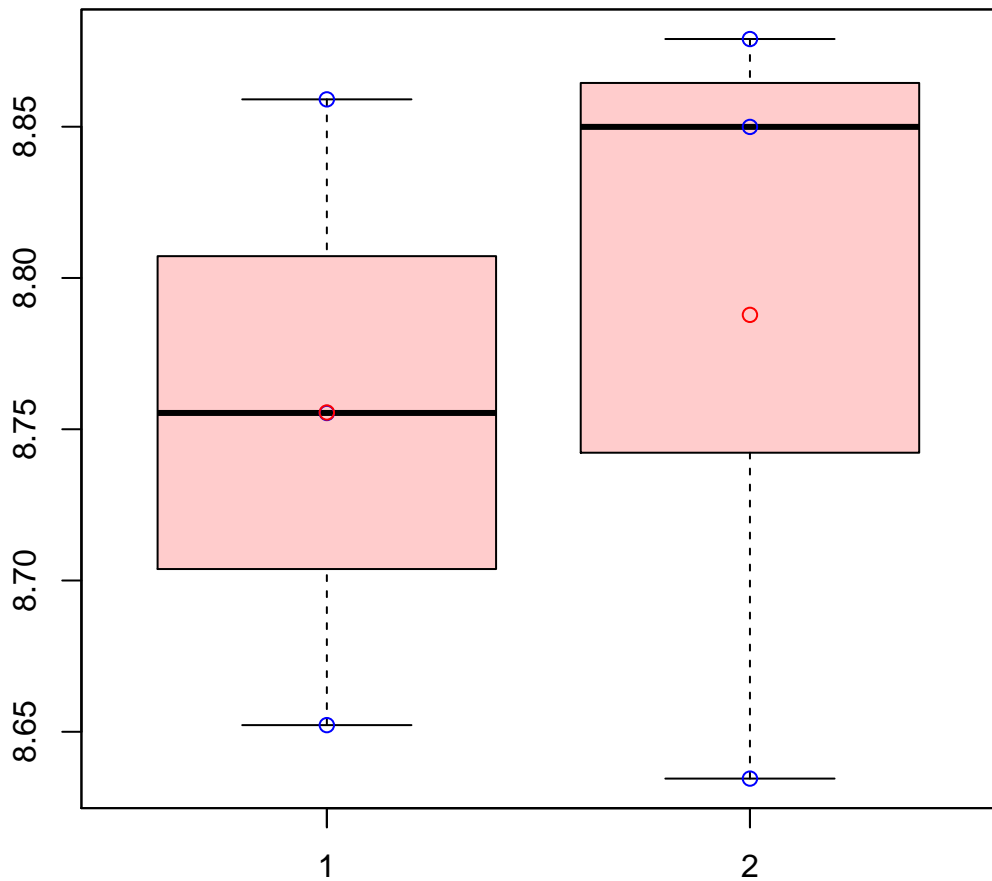

t-Test: p-value = 0.76

# K7VQP2|K7VQP2\_MAIZE

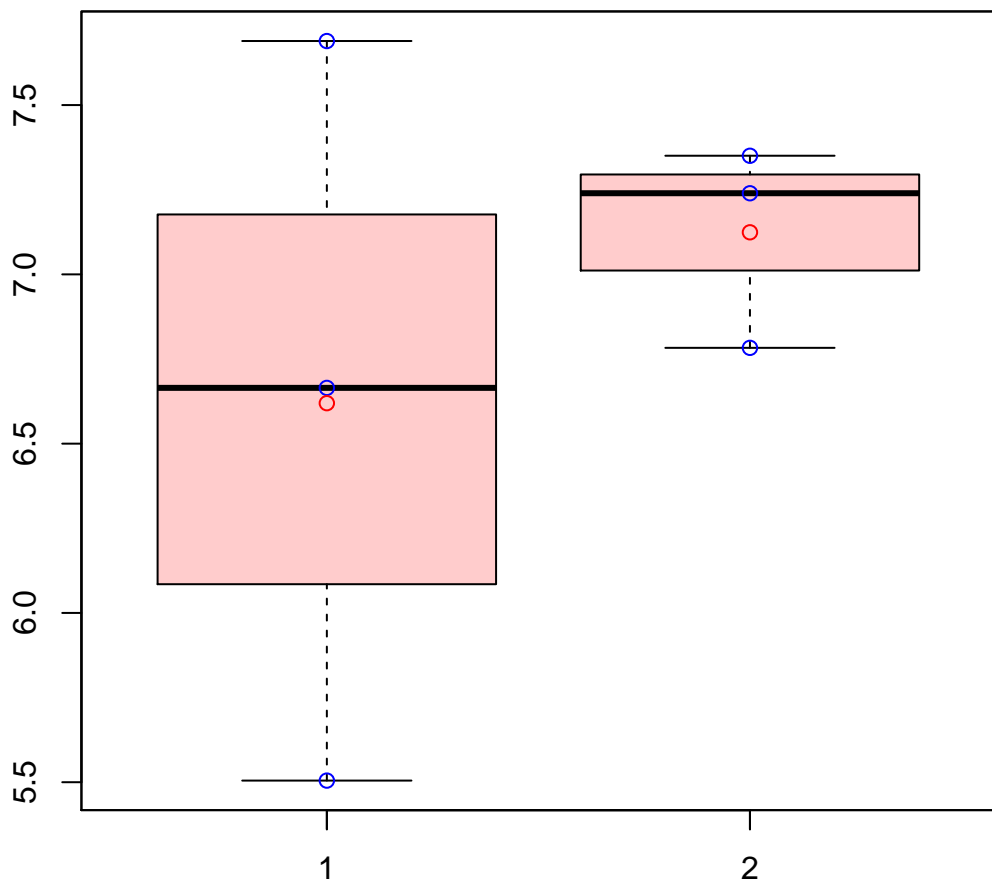

t-Test: p-value = 0.51



# K7VTA2|K7VTA2\_MAIZE

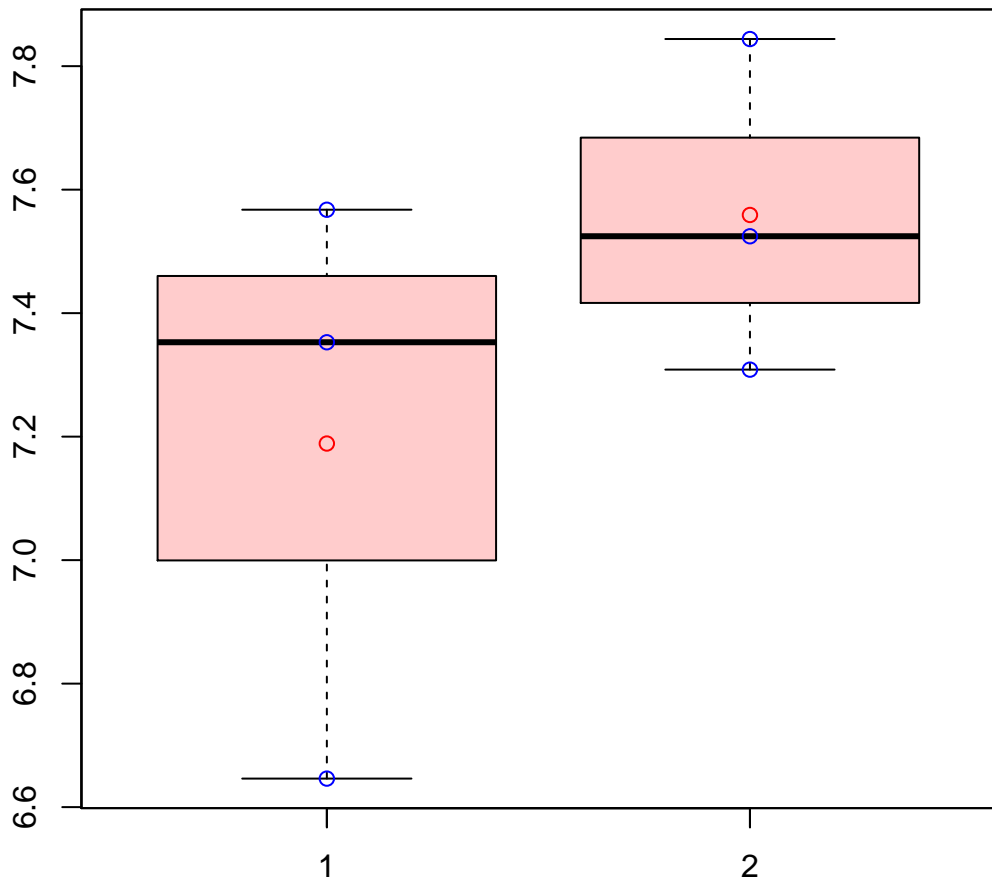

t-Test: p-value = 0.33

# K7VTX9|K7VTX9\_MAIZE

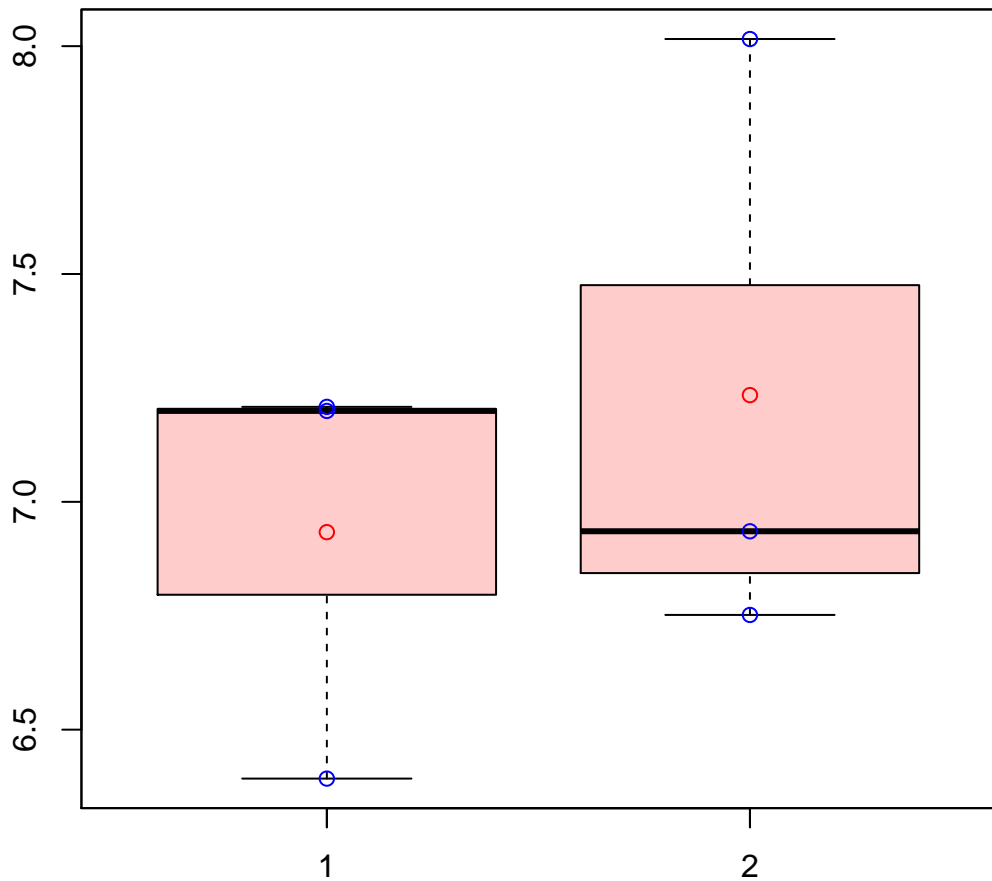

t-Test: p-value = 0.57

# K7VU19|K7VU19\_MAIZE

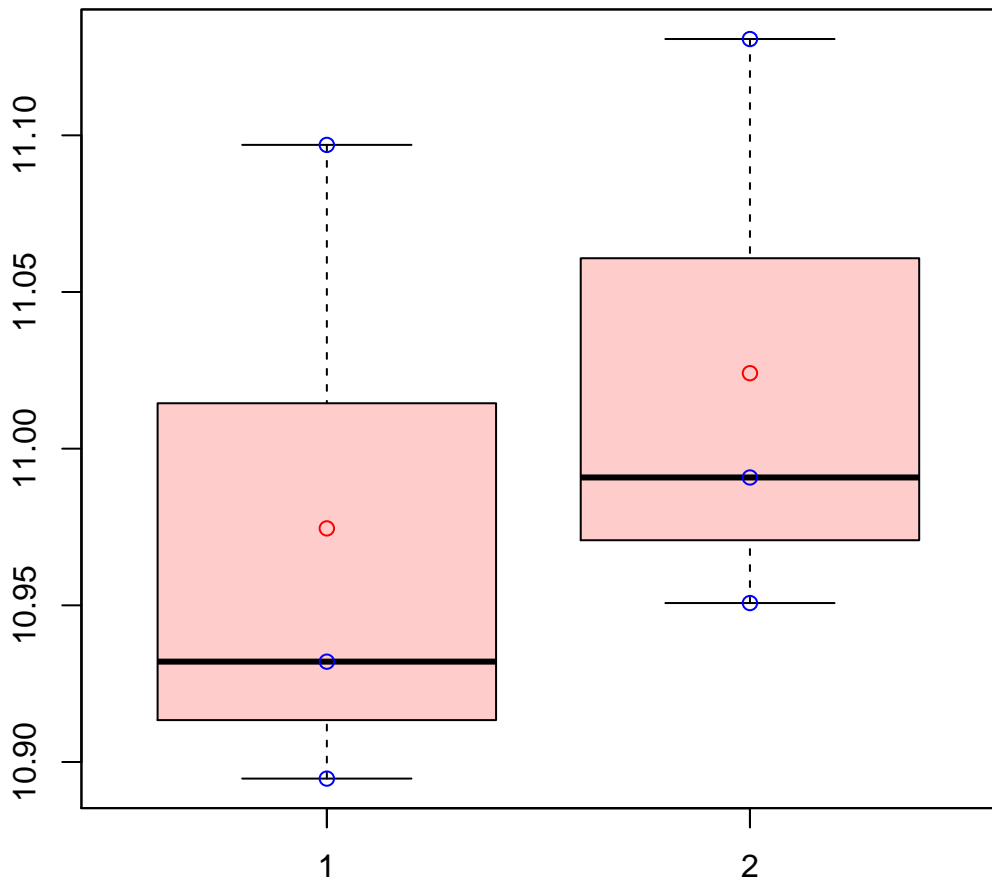

t-Test: p-value = 0.58

# K7VUV0|K7VUV0\_MAIZE

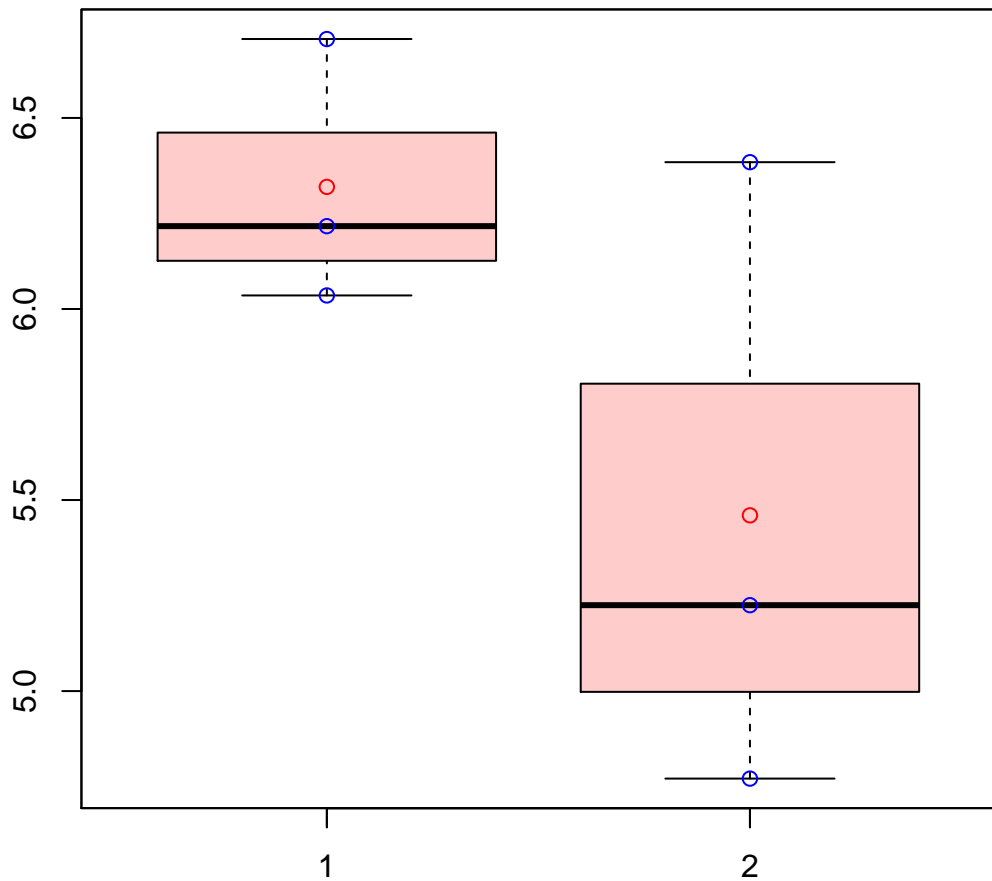

t-Test: p-value = 0.21

# K7VXL2|K7VXL2\_MAIZE

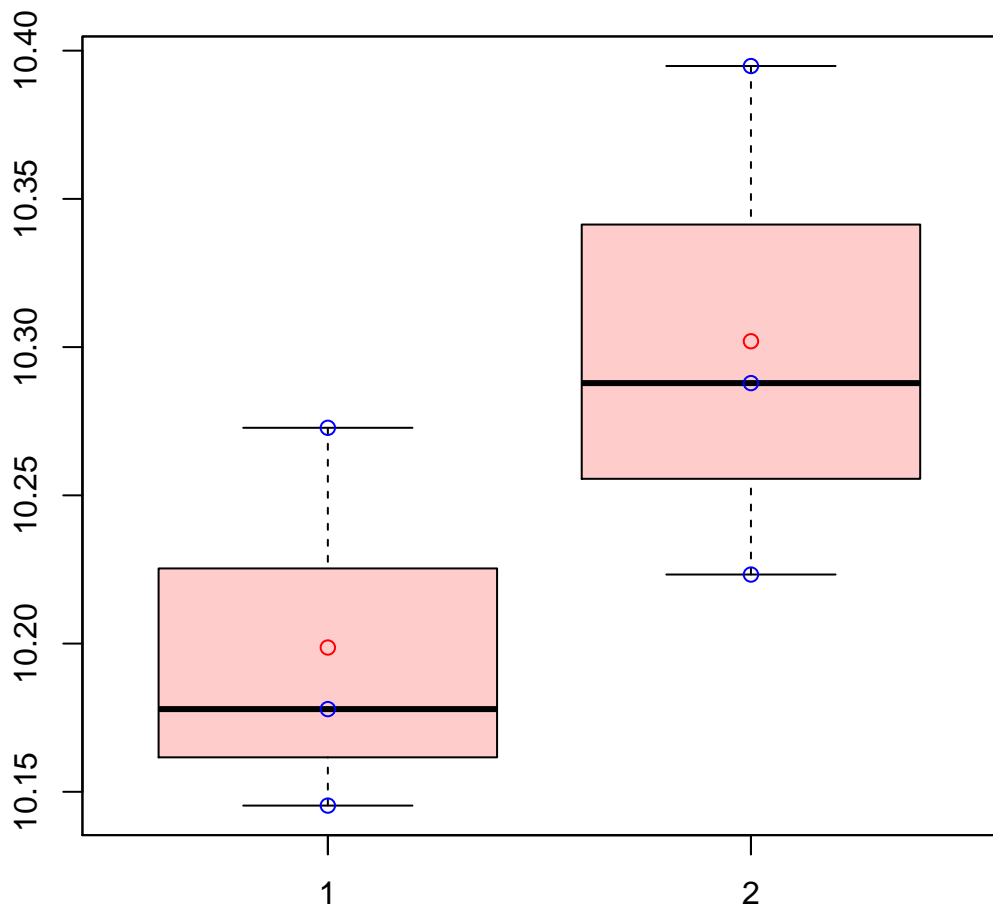

t-Test: p-value = 0.18

# K7W6R8|K7W6R8\_MAIZE

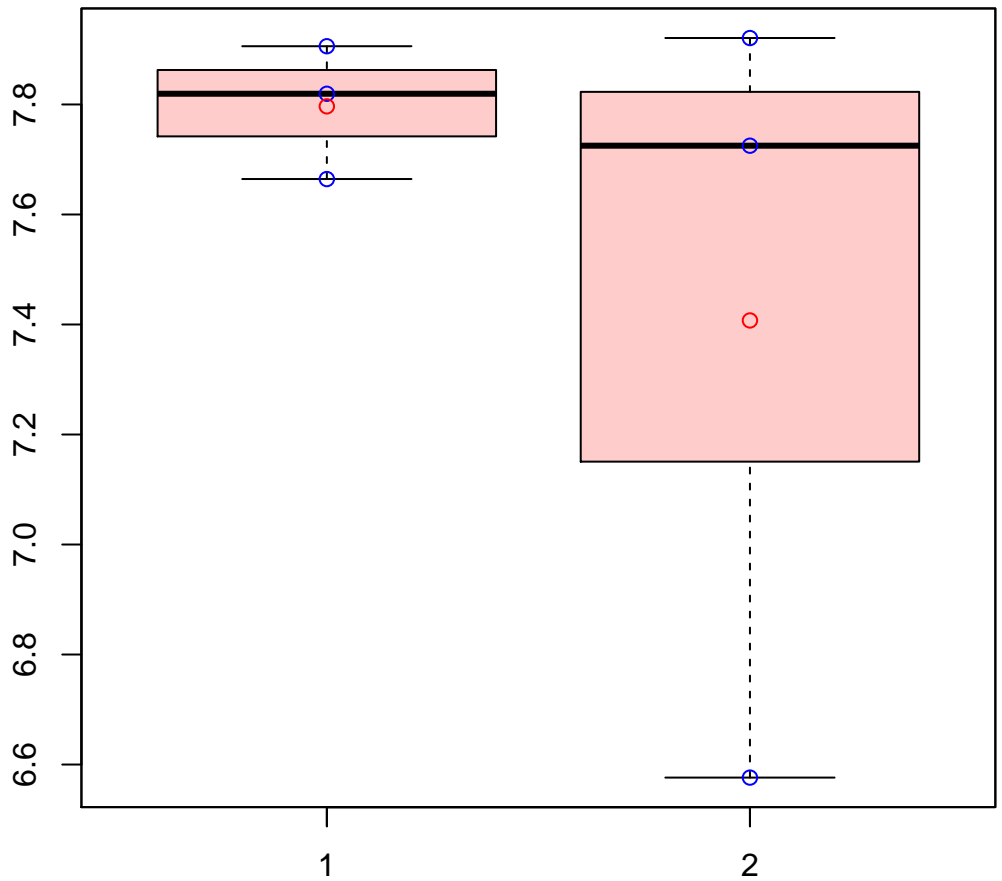

t-Test: p-value = 0.45

# K7WEG0|K7WEG0\_MAIZE

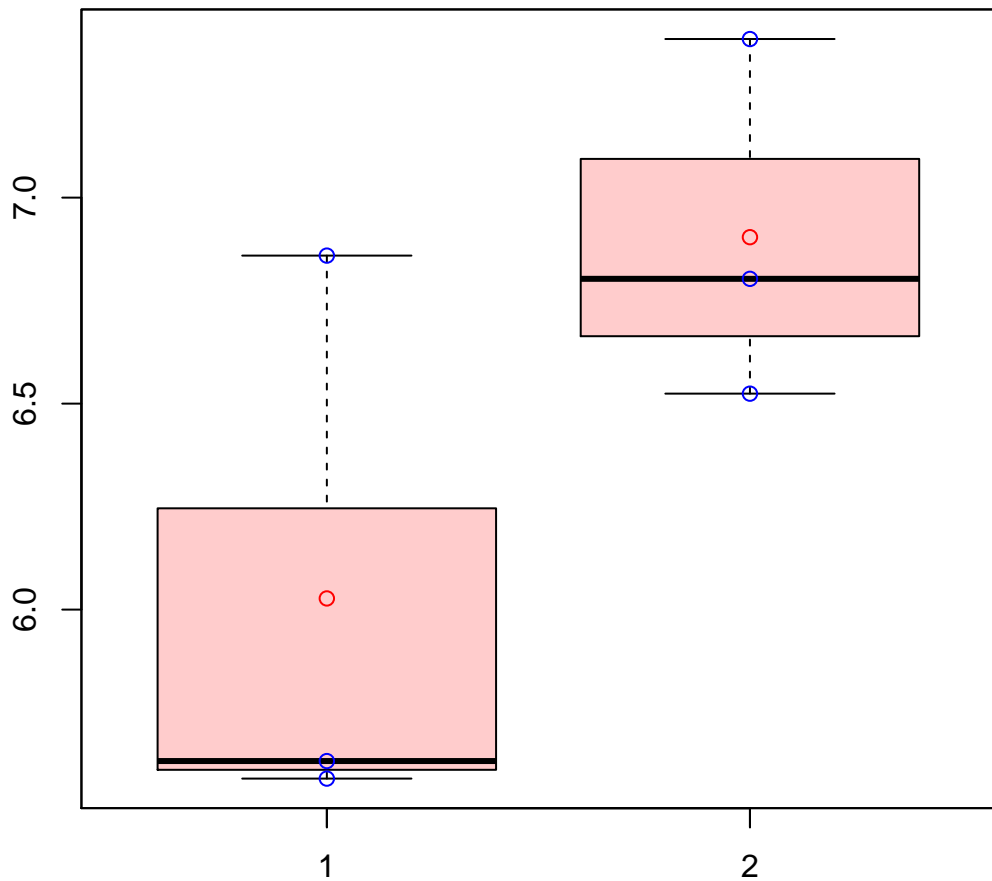

t-Test: p-value = 0.16

# K7WFQ0|K7WFQ0\_MAIZE

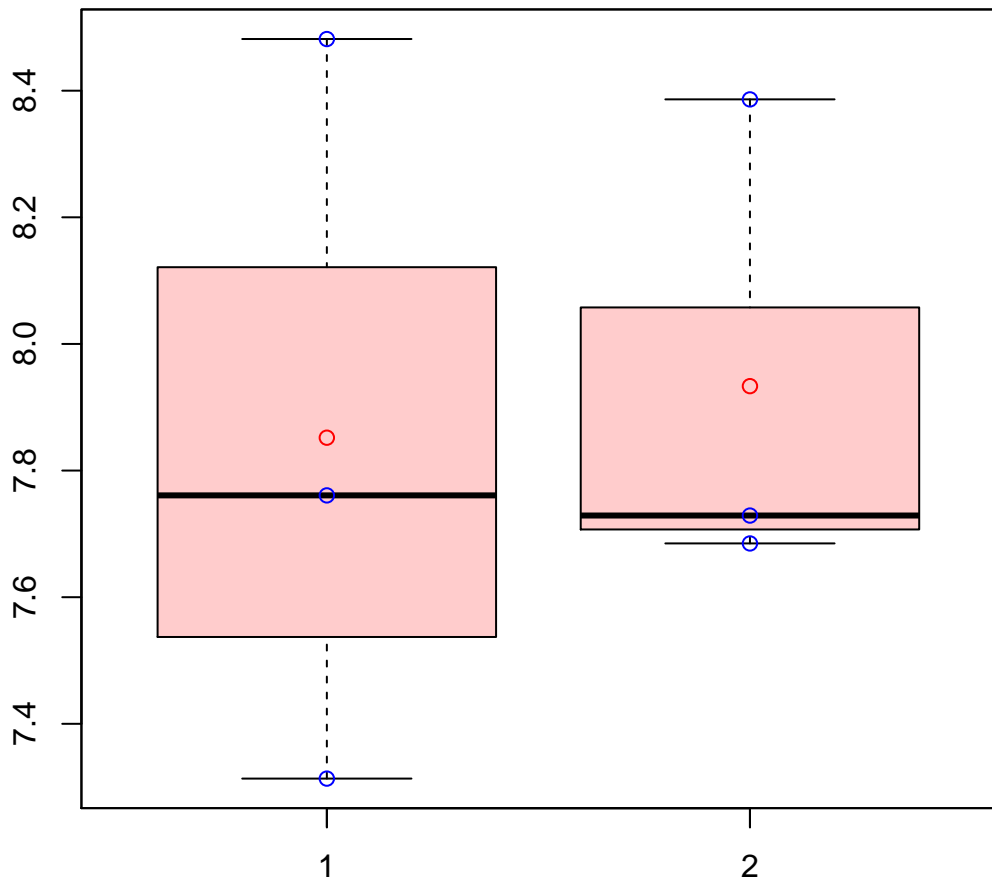

t-Test: p-value = 0.85



# K7WGK8|K7WGK8\_MAIZE

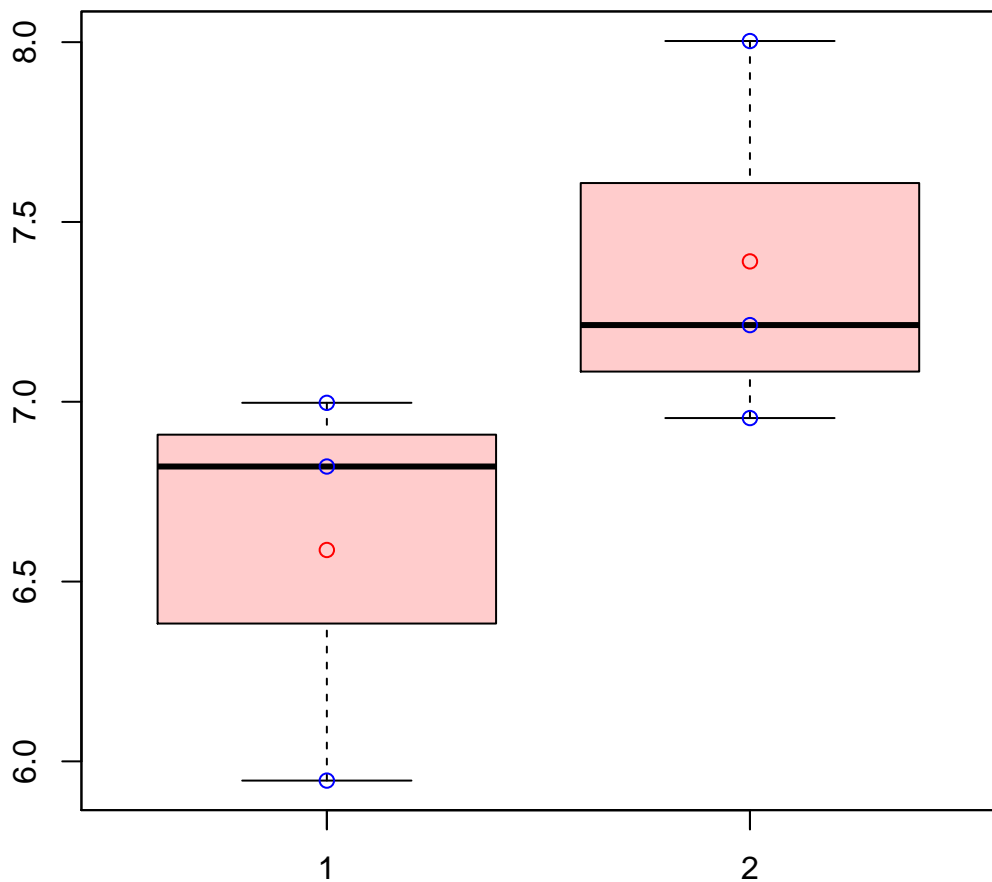

t-Test: p-value = 0.15

# K7WHB6|K7WHB6\_MAIZE

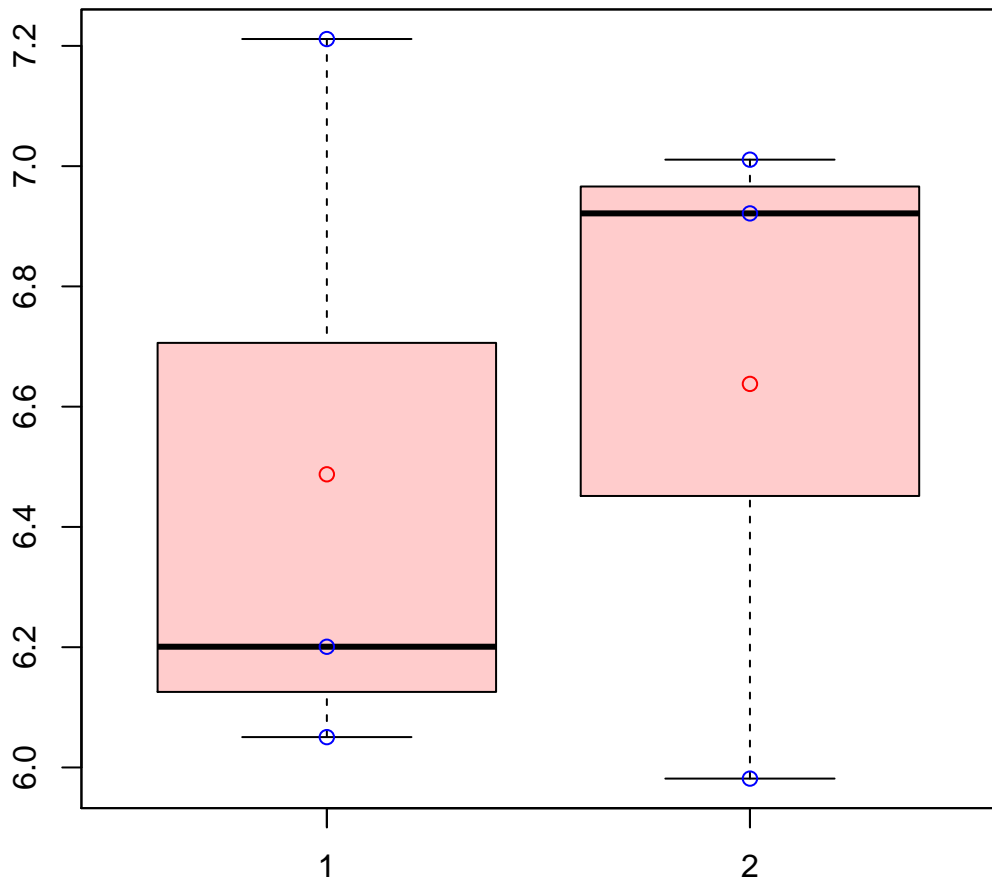

t-Test: p-value = 0.77

# K9J8W8|K9J8W8\_9POAL

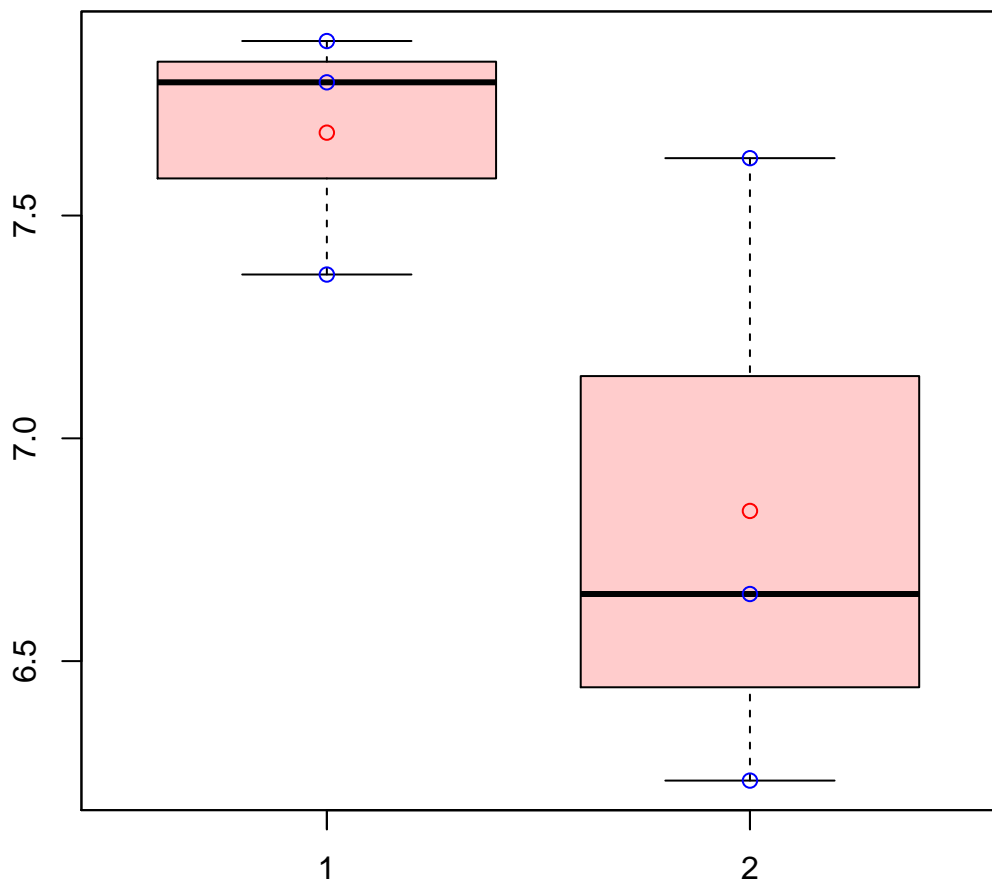

t-Test: p-value = 0.17

# K9JA88|K9JA88\_MAIZE

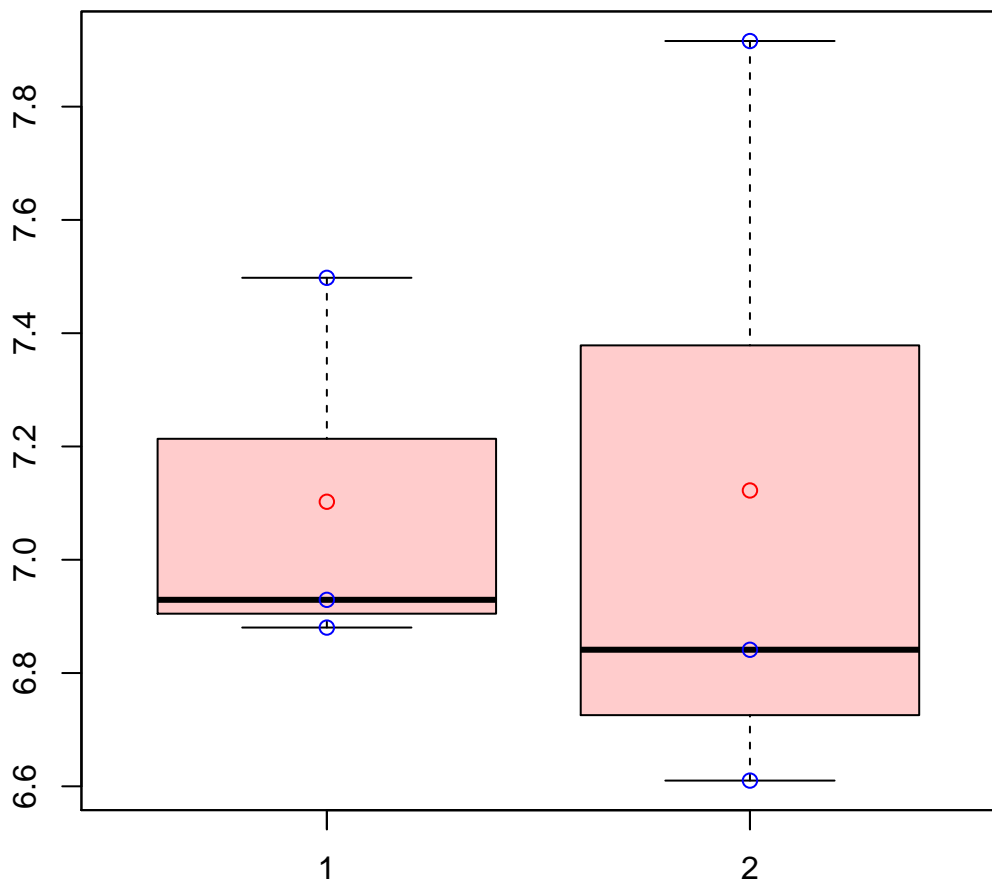

t-Test: p-value = 0.97

# LOGDQ5|LOGDQ5\_WHEAT

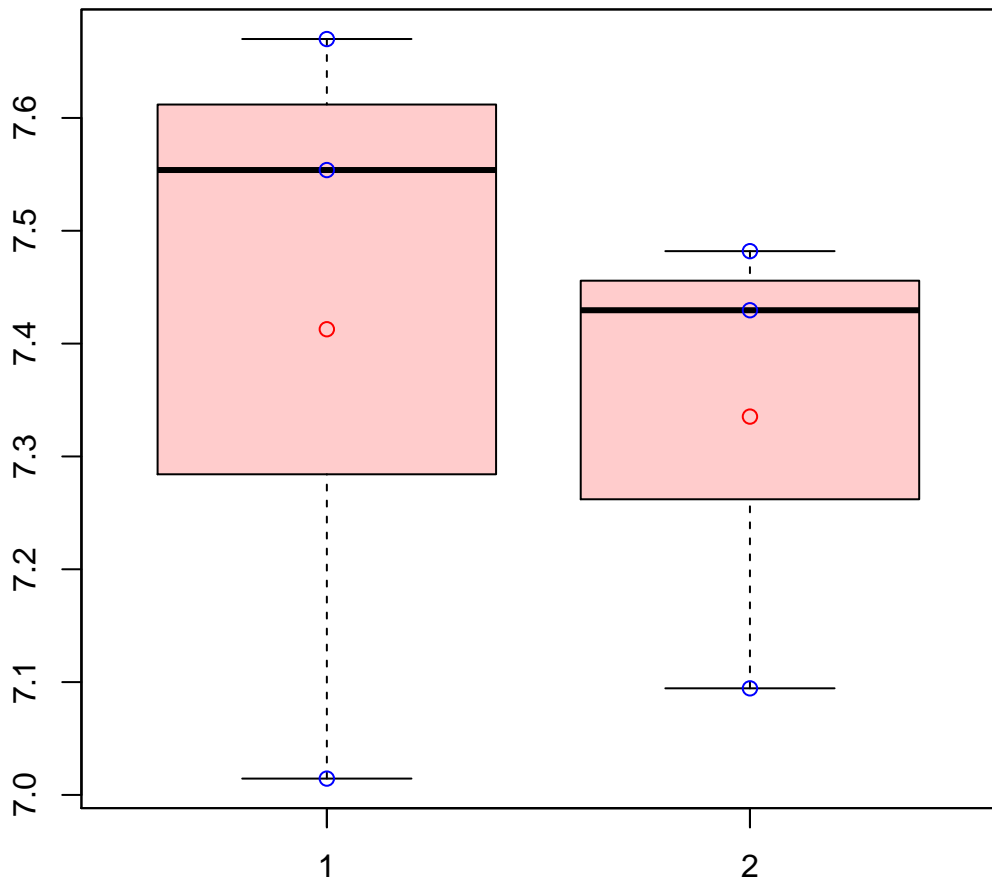

t-Test: p-value = 0.76

# L7S1T0|L7S1T0\_MUSAC

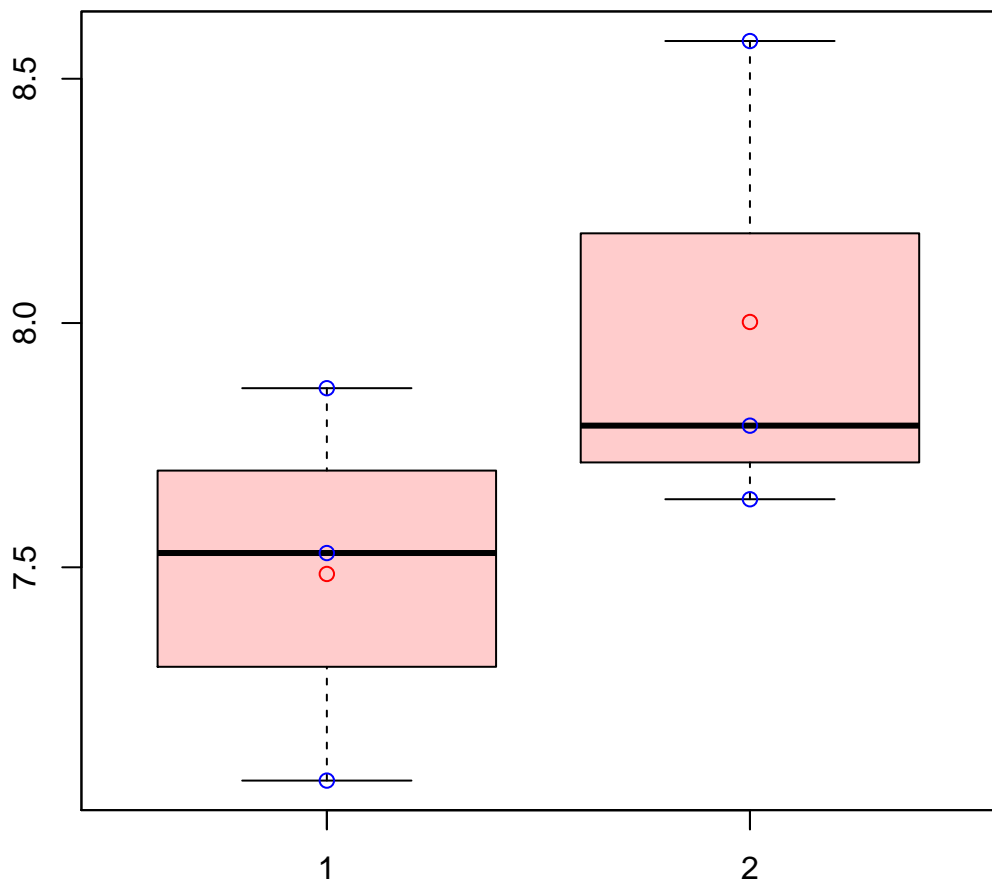

t-Test: p-value = 0.24

# L7TP50|L7TP50\_9POAL

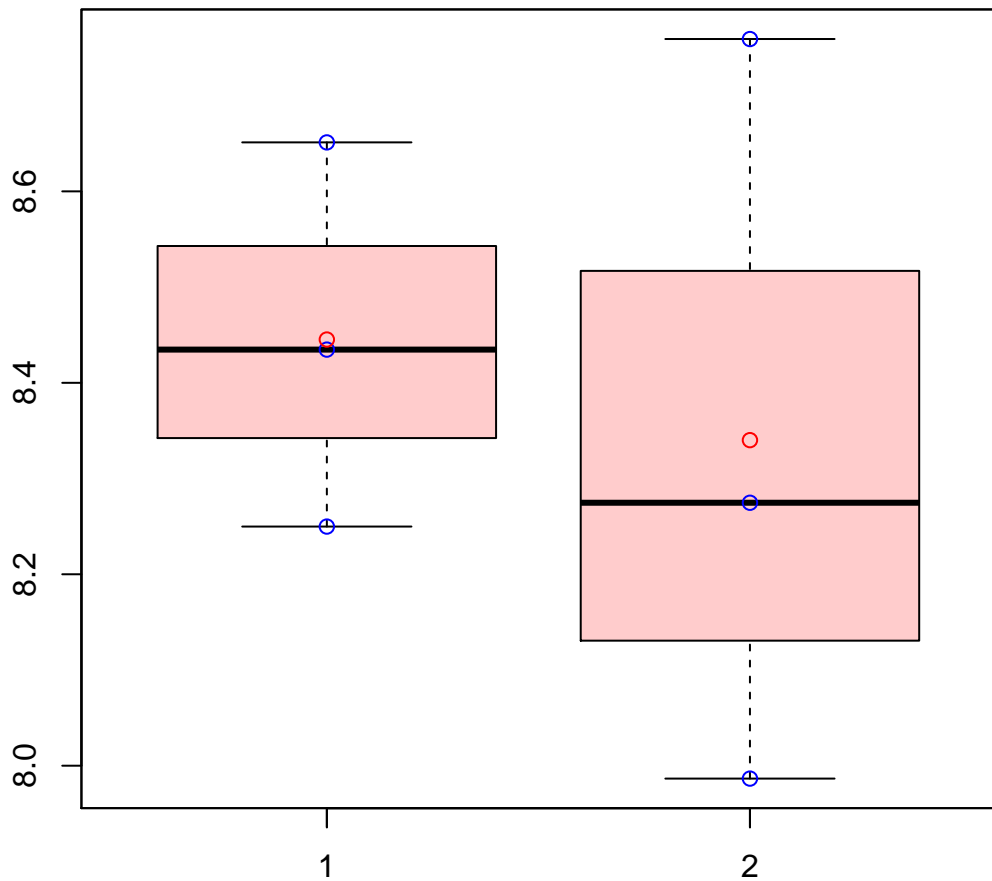

t-Test: p-value = 0.71

# L7TPA8|L7TPA8\_9POAL

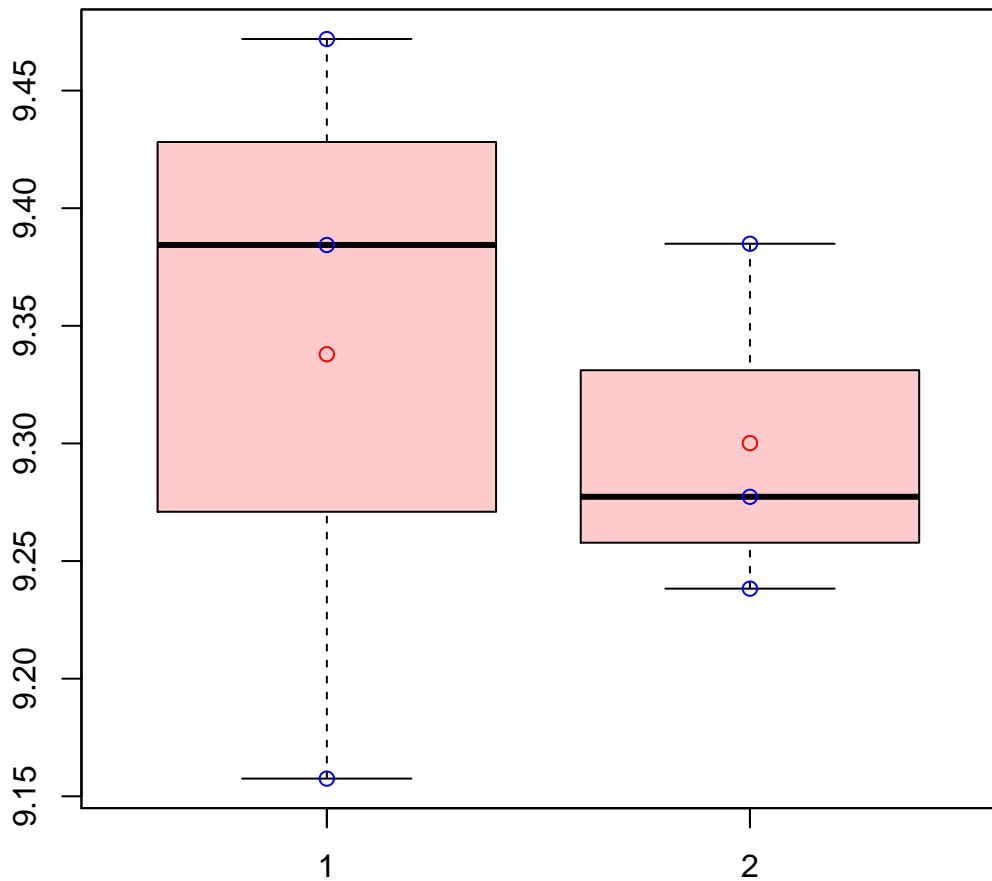

t-Test: p-value = 0.74



# L7TPG6|L7TPG6\_9POAL

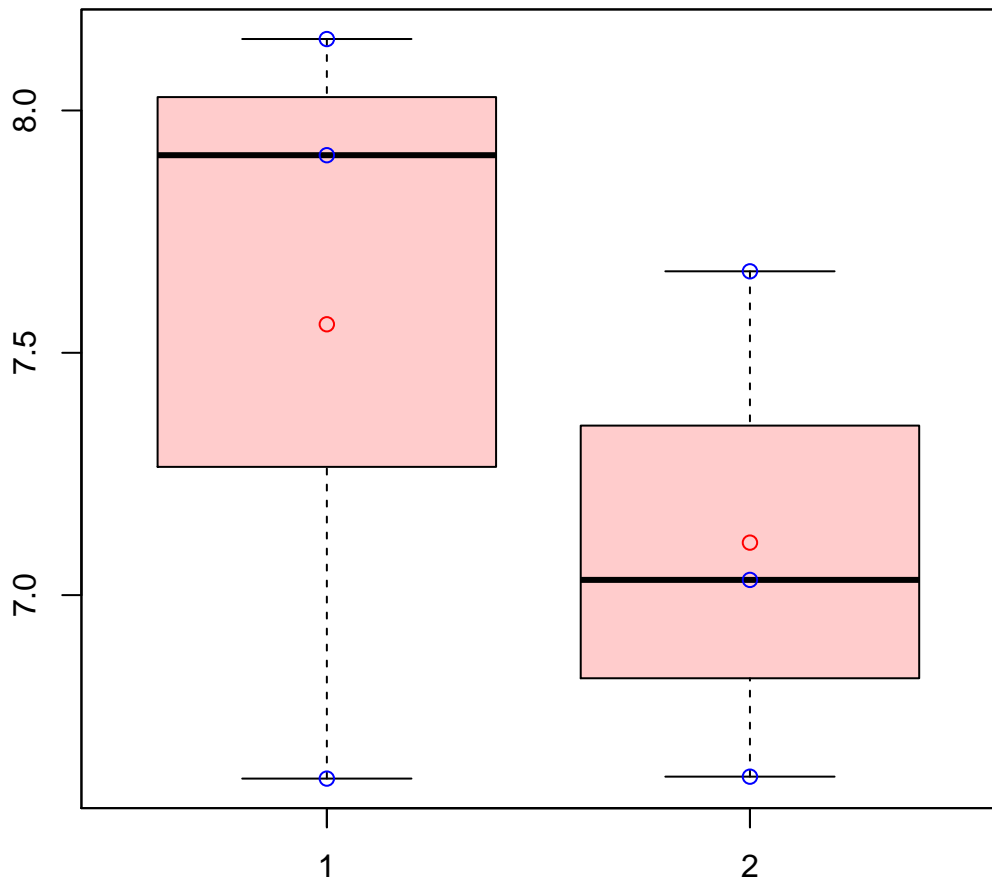

t-Test: p-value = 0.48

# L7TVF2|L7TVF2\_9POAL

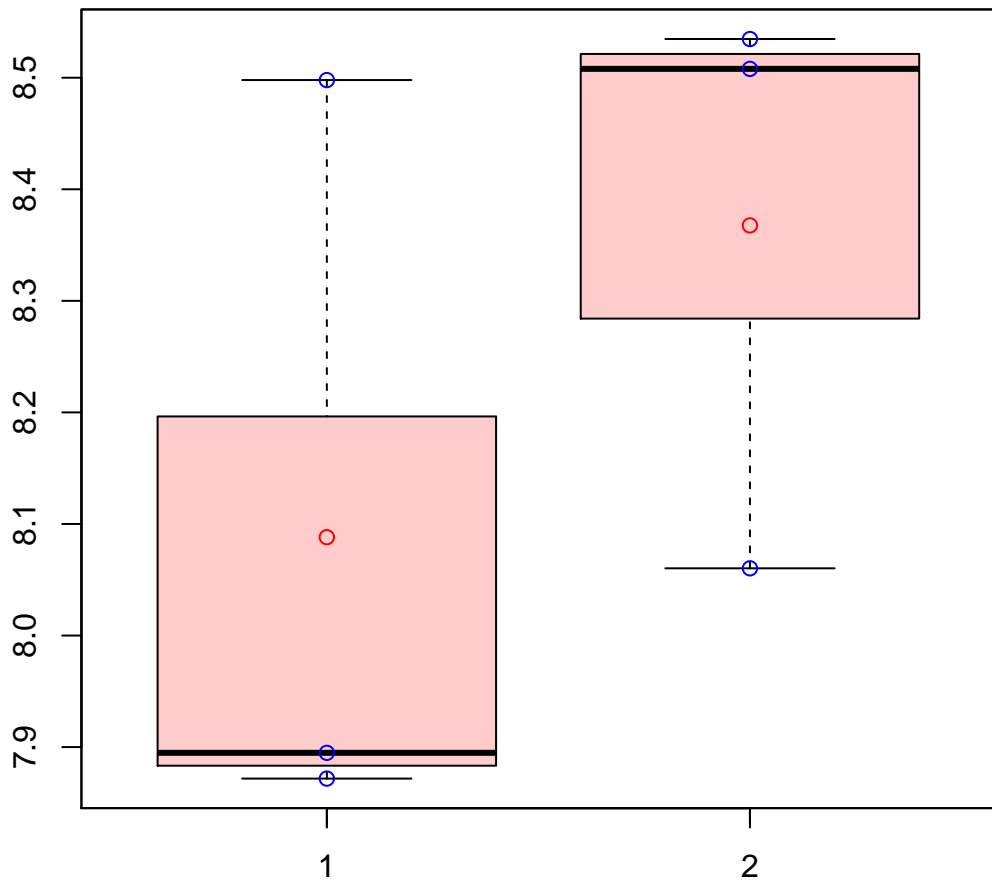

t-Test: p-value = 0.34

# L7WLJ8|L7WLJ8\_MAIZE

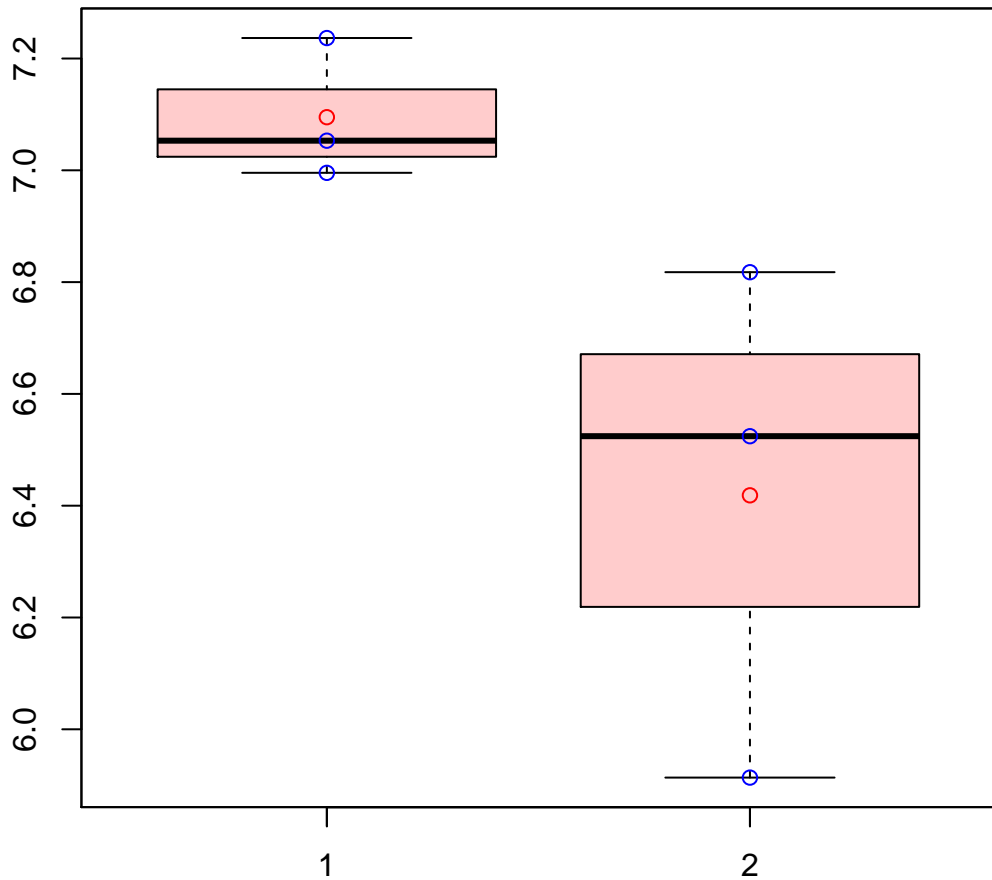

t-Test: p-value = 0.12

# M0RE62|M0RE62\_MUSAM

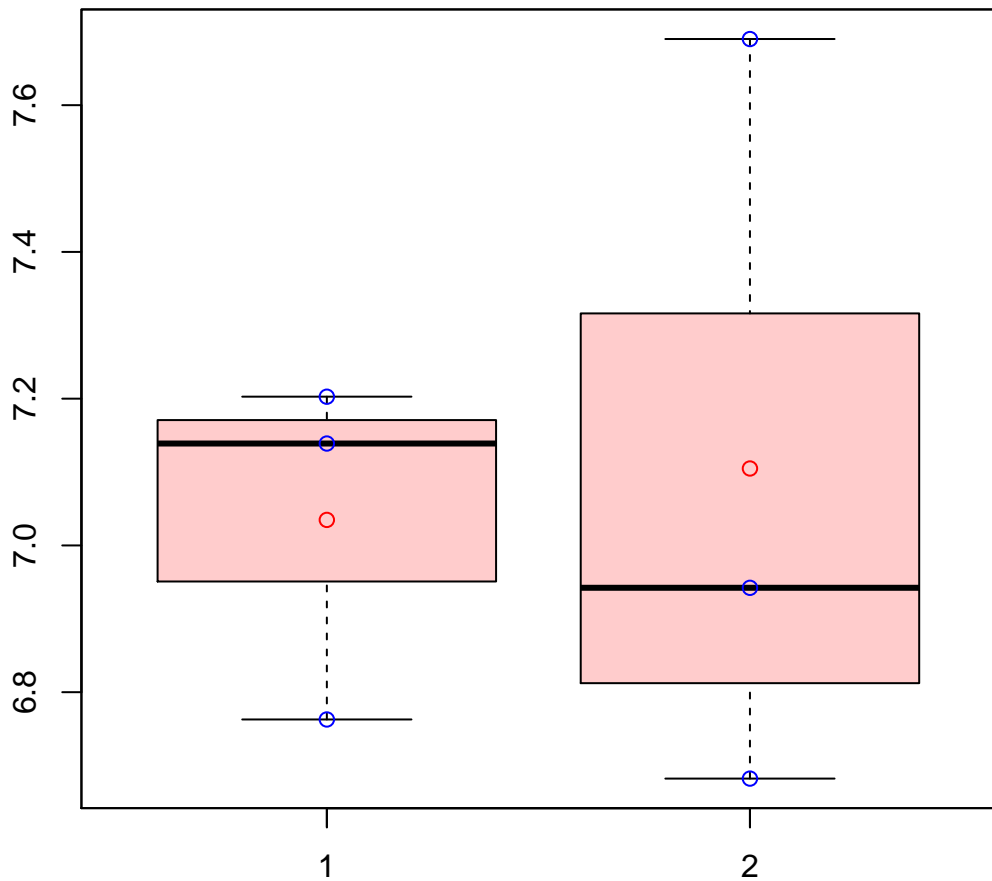

t-Test: p-value = 0.85

# M0RE64|M0RE64\_MUSAM

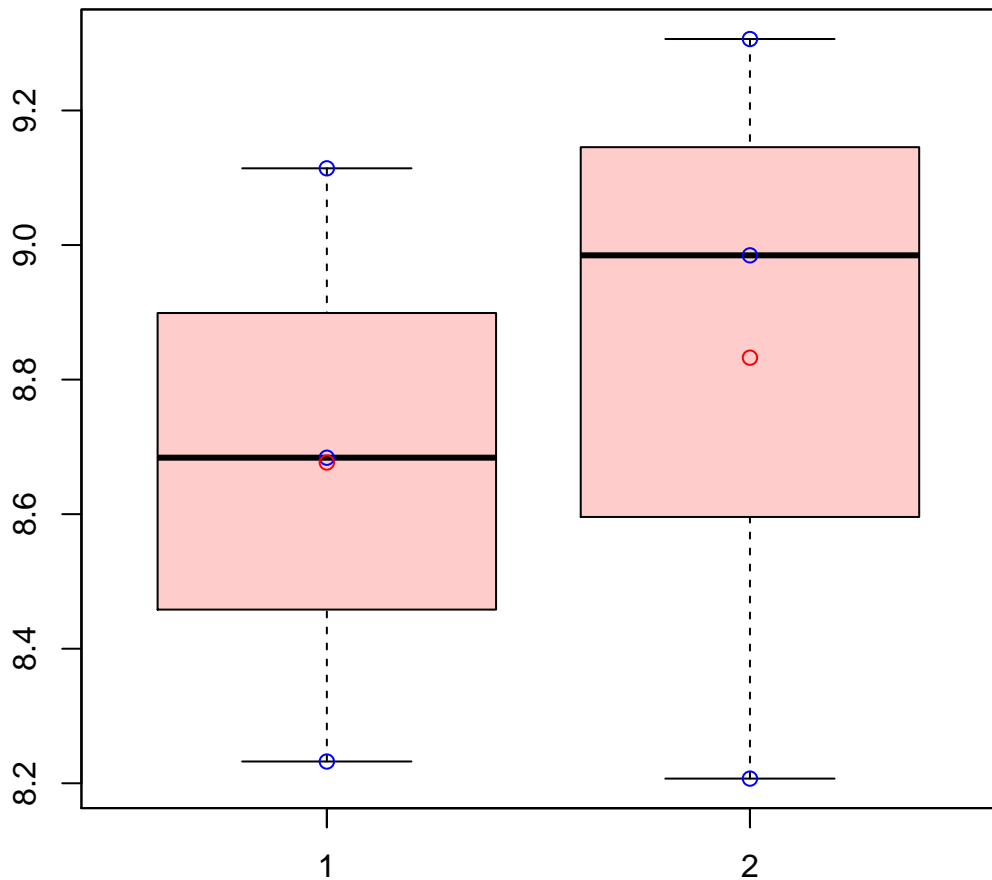

t-Test: p-value = 0.73

# M0RE92|M0RE92\_MUSAM

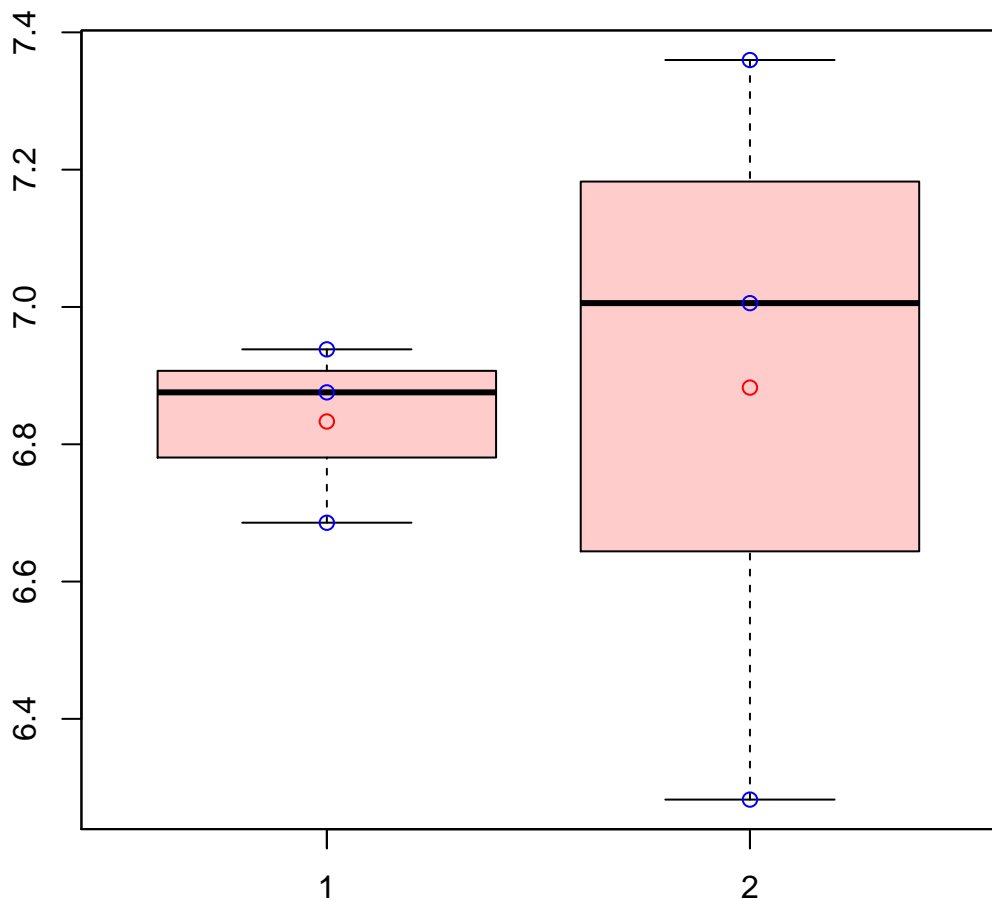

t-Test: p-value = 0.89

# M0REU5|M0REU5\_MUSAM

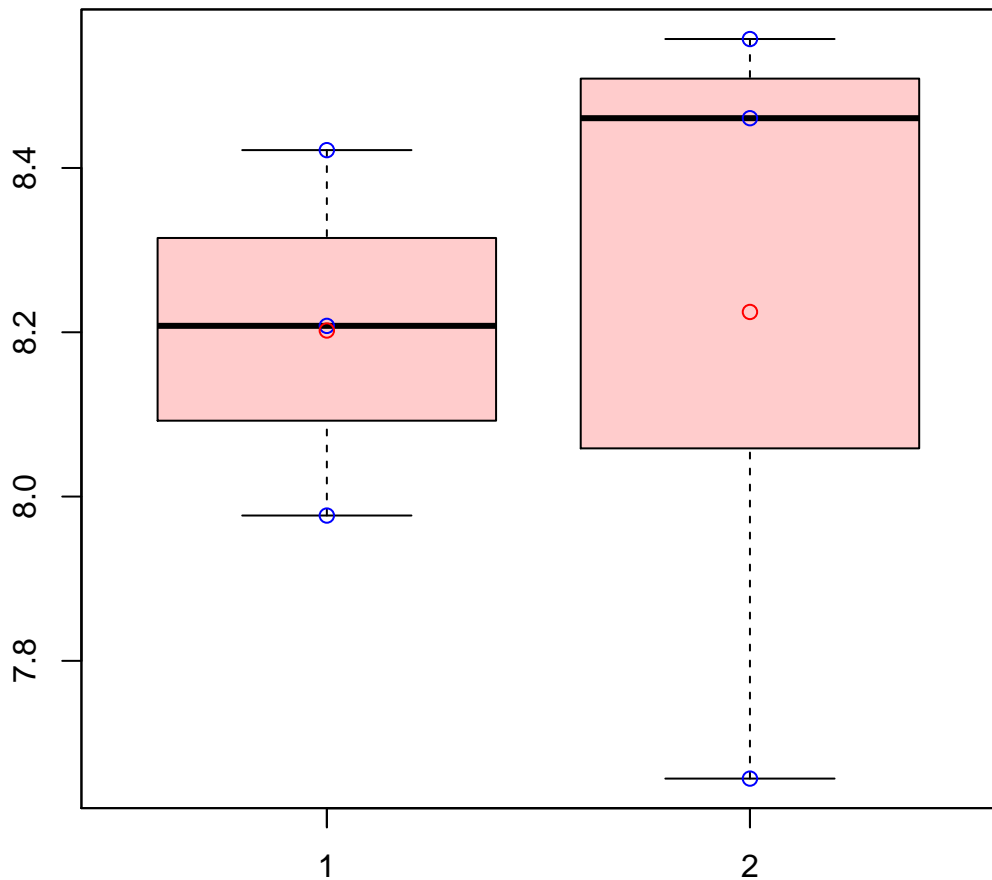

t-Test: p-value = 0.95

# M0RF29|M0RF29\_MUSAM

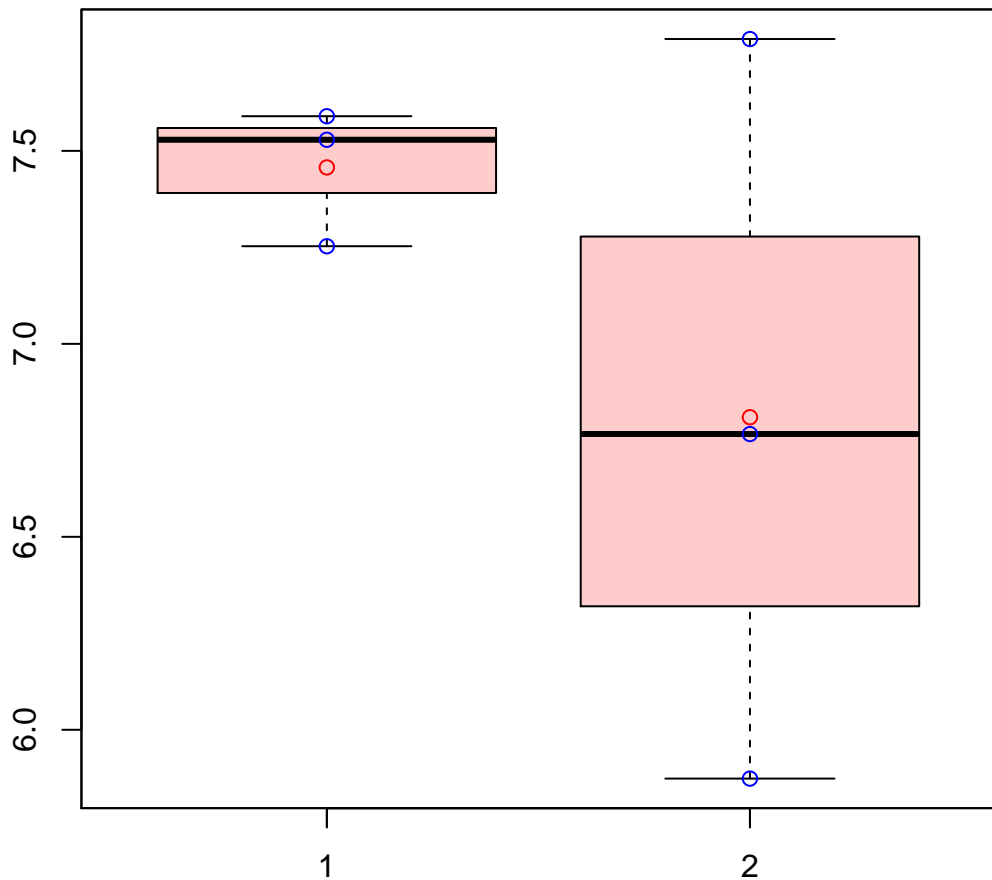

t-Test: p-value = 0.36



# M0RF75|M0RF75\_MUSAM

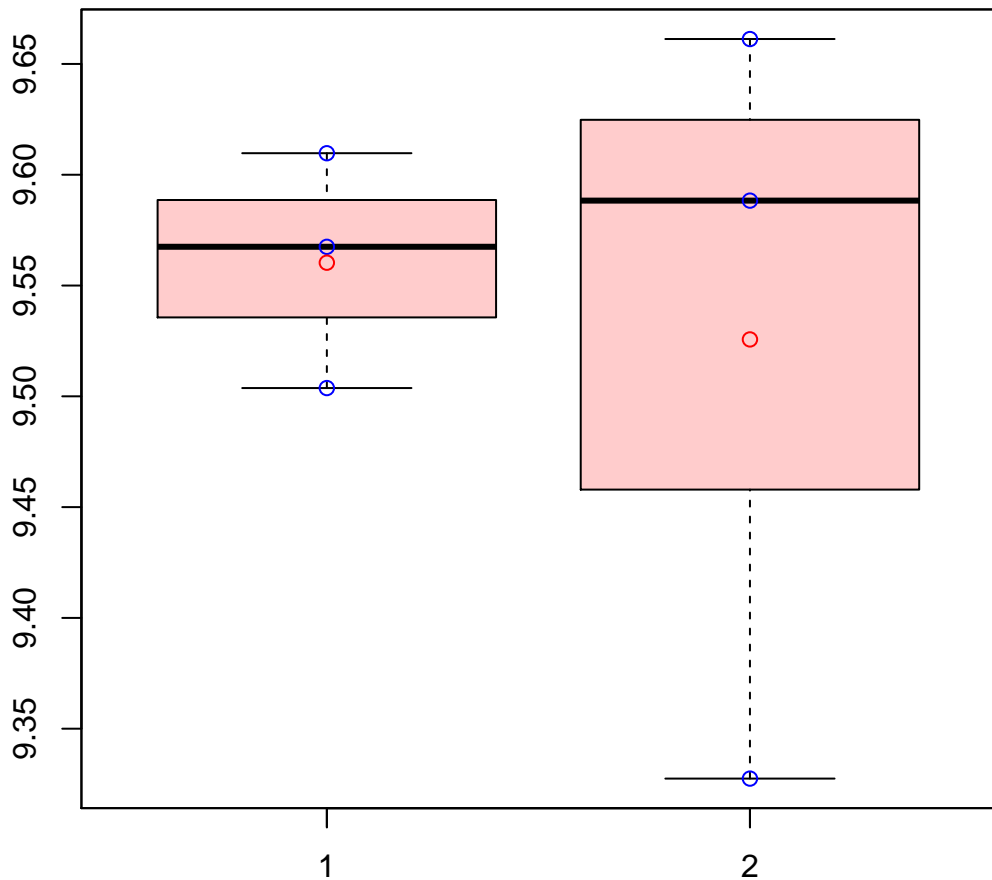

t-Test: p-value = 0.77

# M0RFF6|M0RFF6\_MUSAM

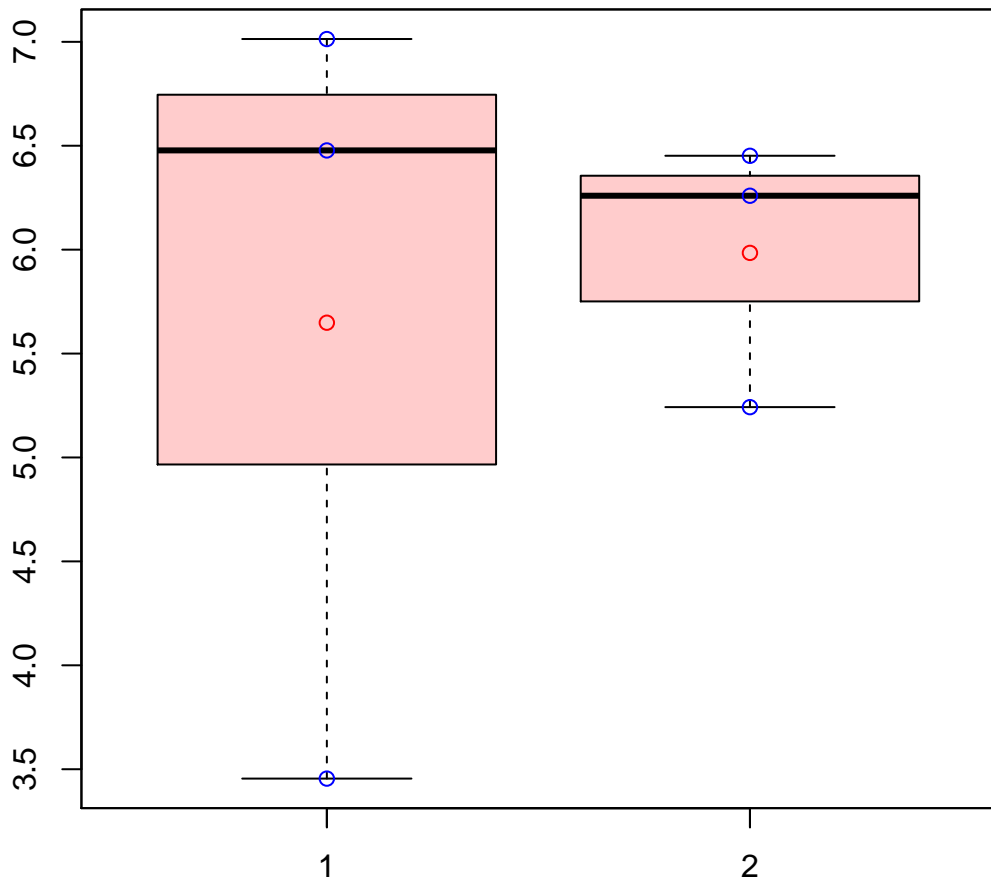

t-Test: p-value = 0.8

# M0RFV2|M0RFV2\_MUSAM

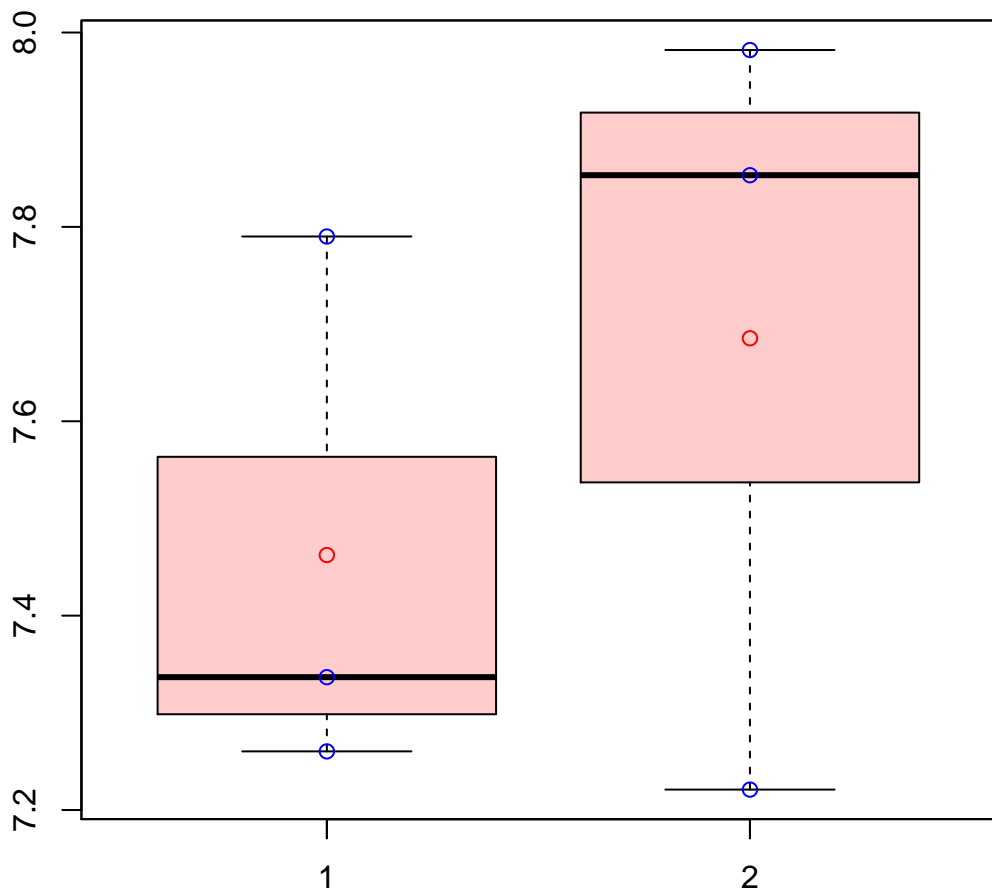

t-Test: p-value = 0.49

# M0RGB8|M0RGB8\_MUSAM

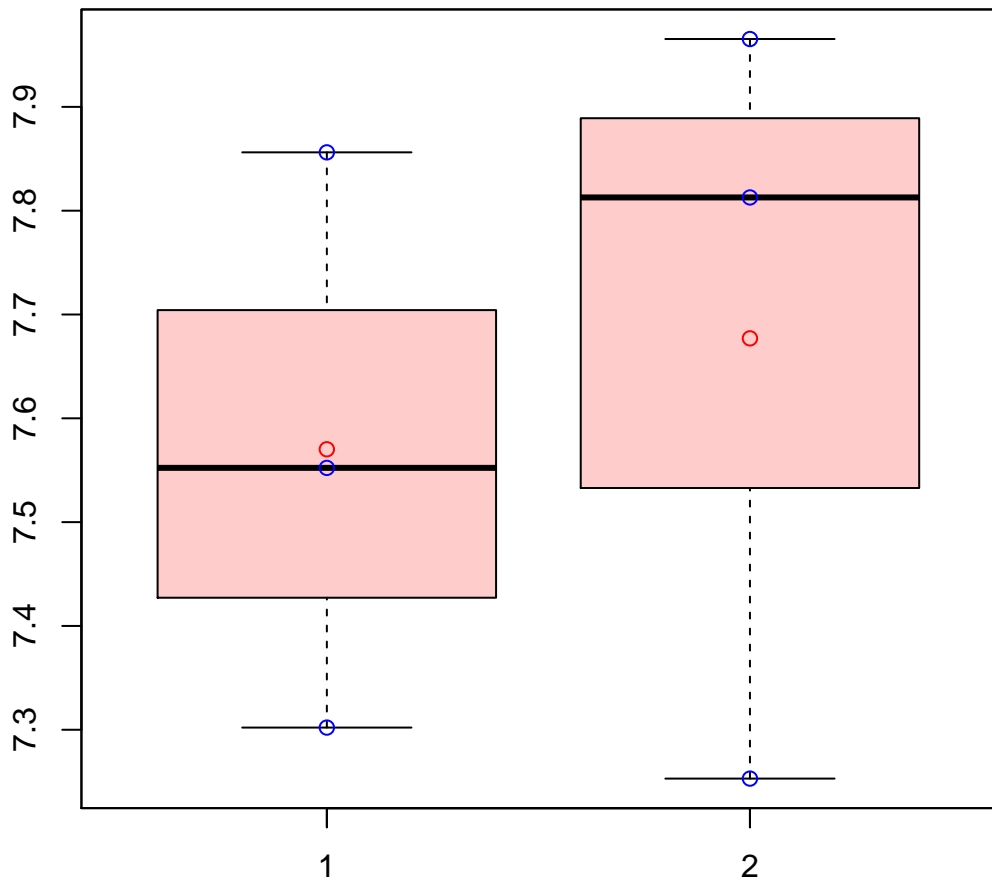

t-Test: p-value = 0.71

# M0RGM3|M0RGM3\_MUSAM

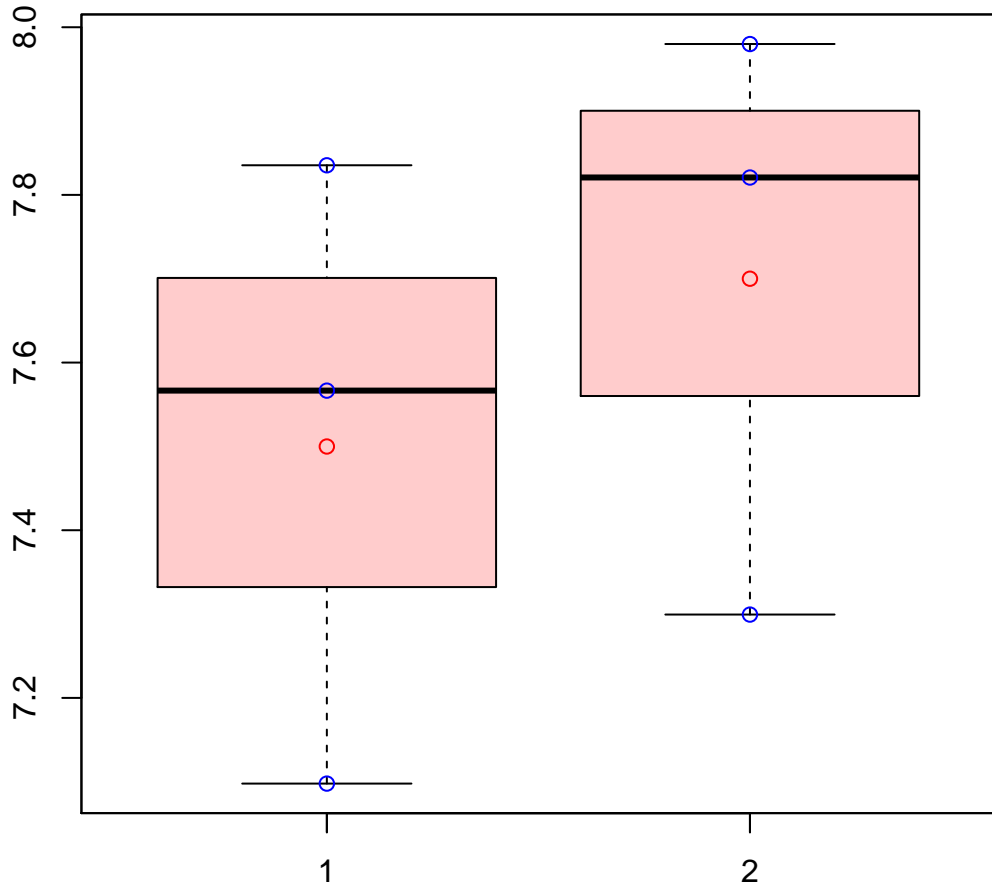

t-Test: p-value = 0.54

# M0RGZ6|M0RGZ6\_MUSAM

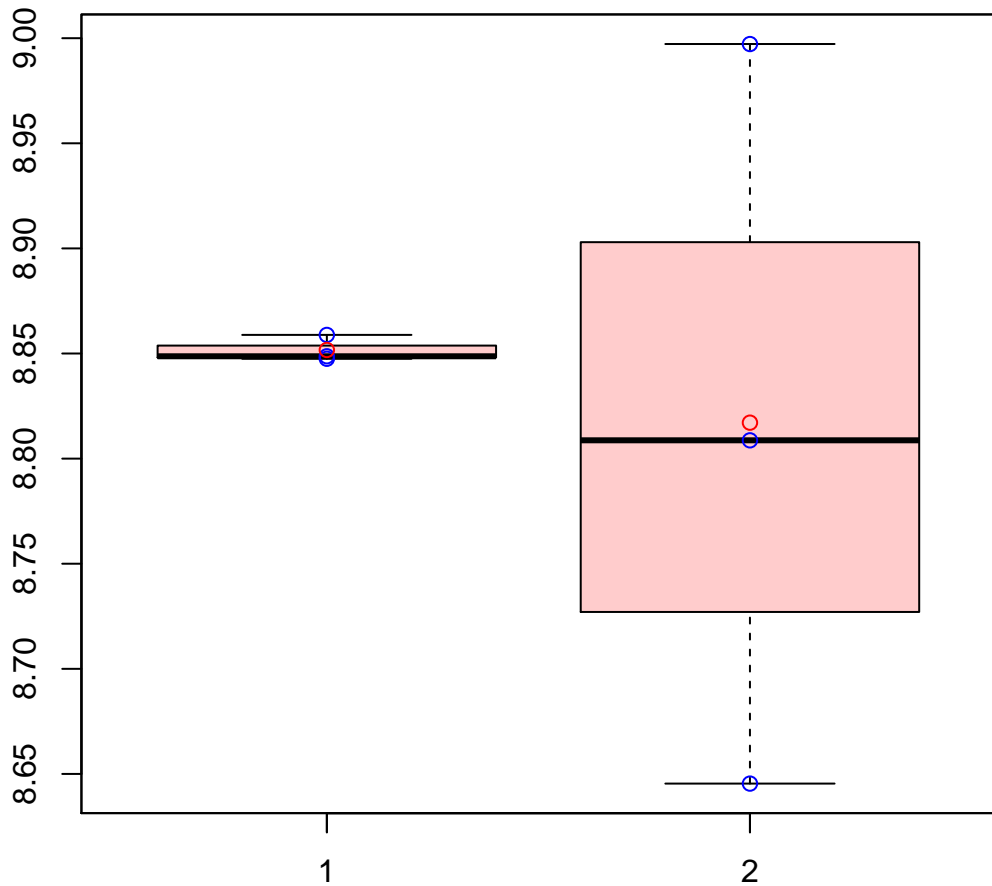

t-Test: p-value = 0.77

# M0RH23|M0RH23\_MUSAM

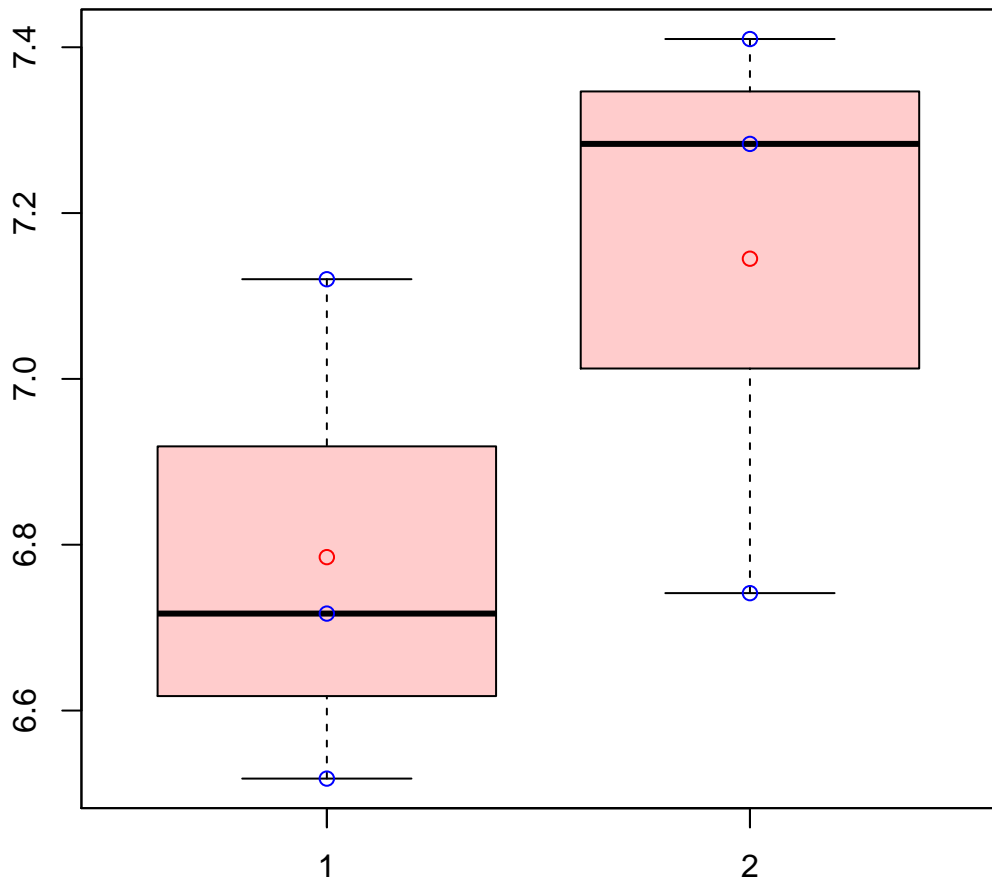

t-Test: p-value = 0.26

# M0RHD8|M0RHD8\_MUSAM

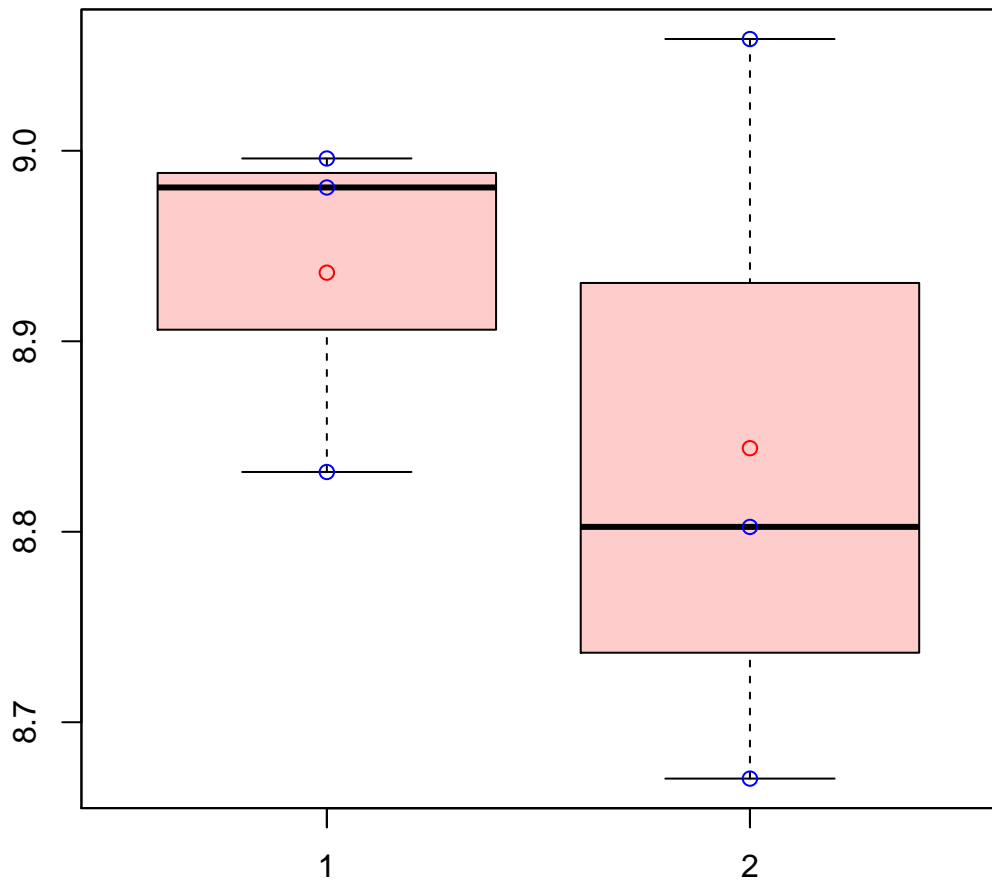

t-Test: p-value = 0.52



# M0RHL9|M0RHL9\_MUSAM

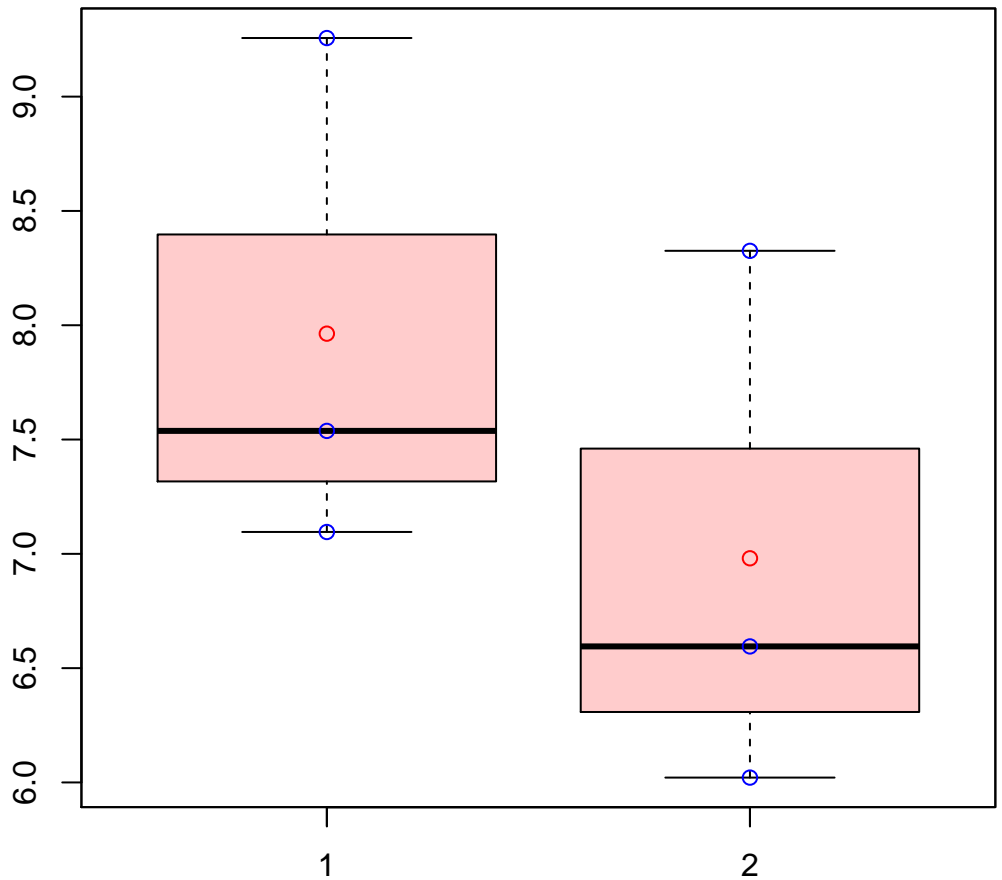

t-Test: p-value = 0.36

# M0RHR5|M0RHR5\_MUSAM

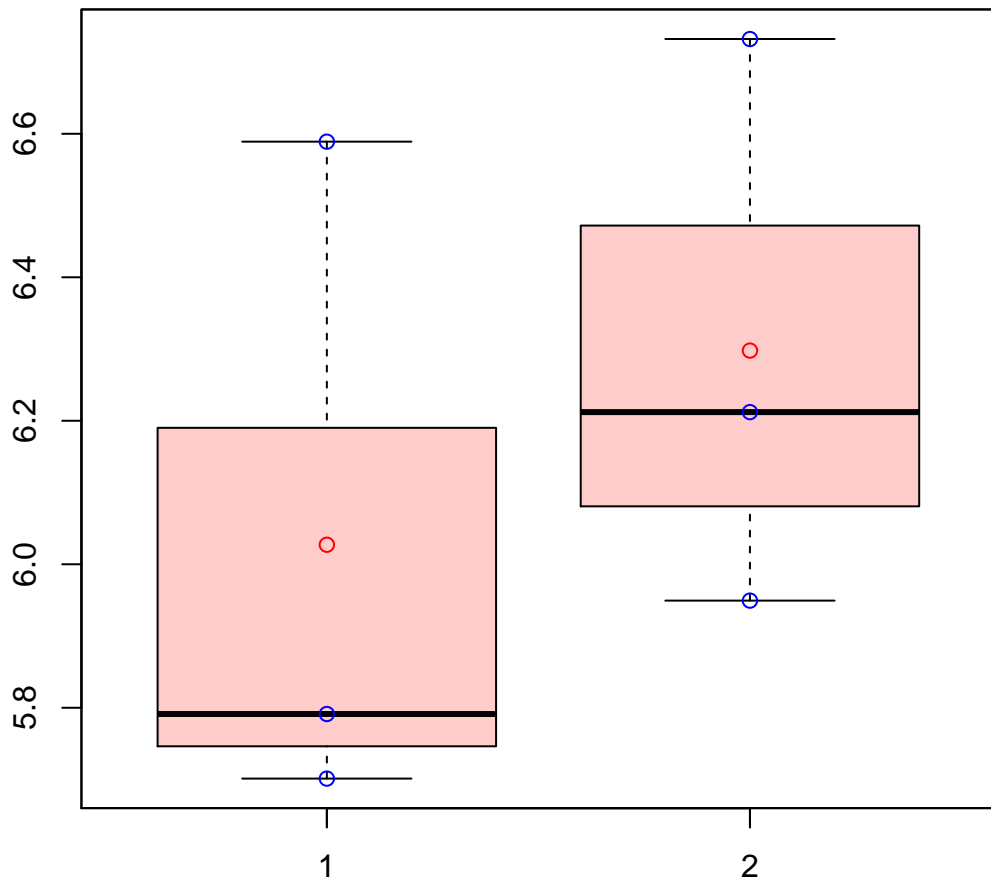

t-Test: p-value = 0.5

# M0RHX6|M0RHX6\_MUSAM

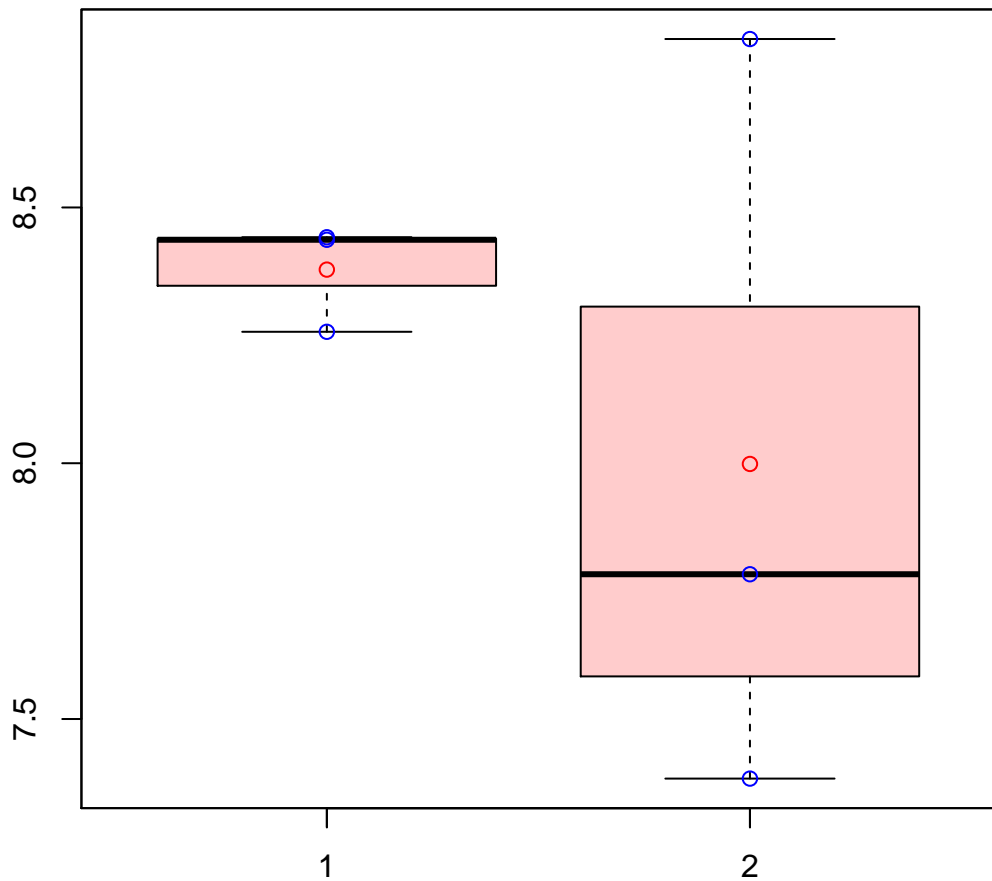

t-Test: p-value = 0.47

# M0RIR1|M0RIR1\_MUSAM

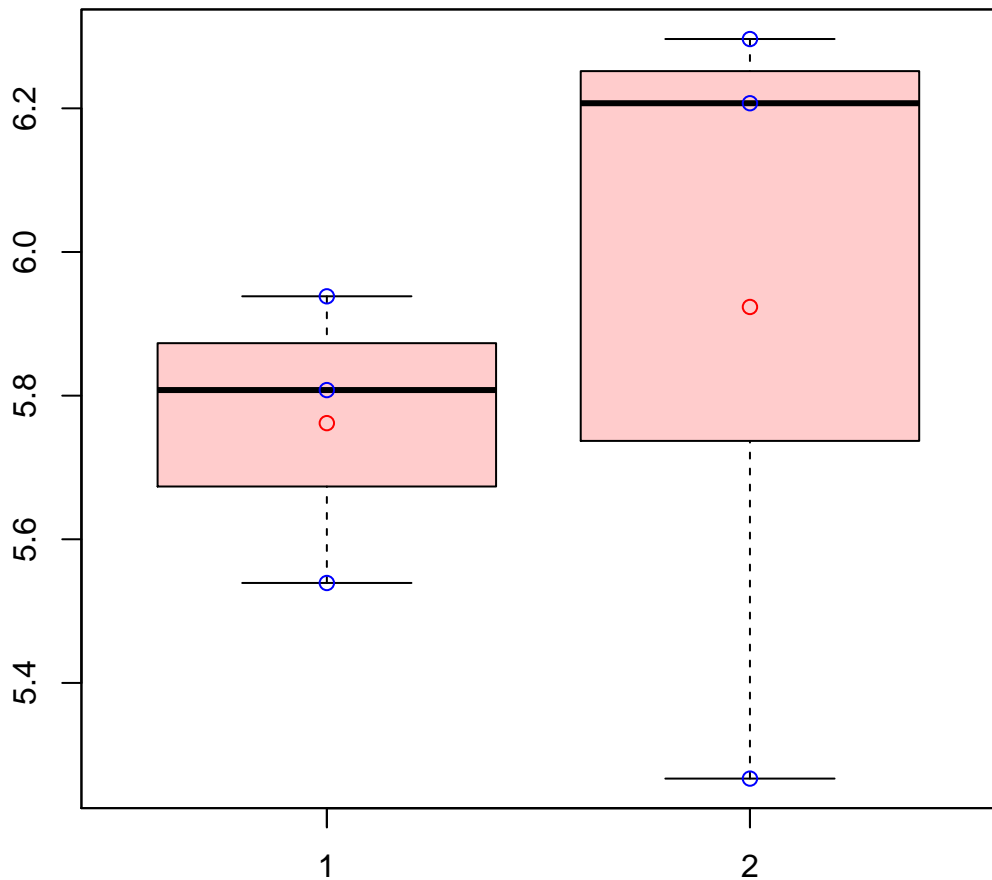

t-Test: p-value = 0.68

# M0RIT8|M0RIT8\_MUSAM

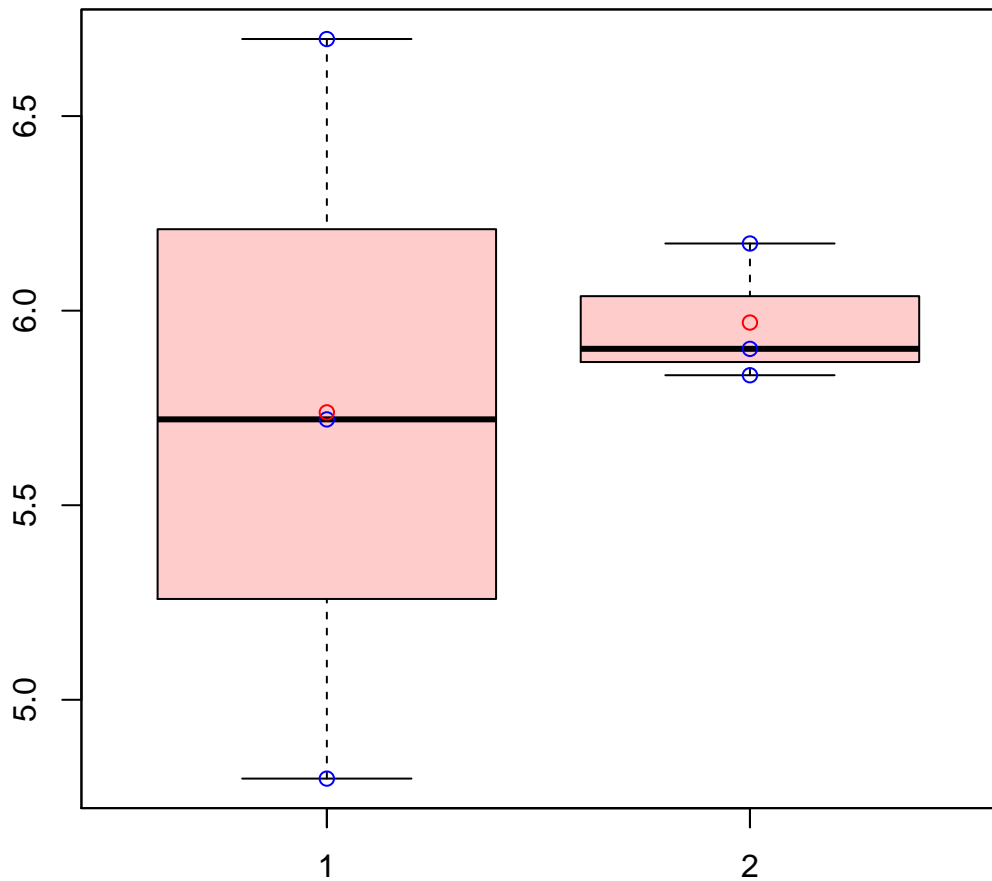

t-Test: p-value = 0.72

# M0RJA3|M0RJA3\_MUSAM

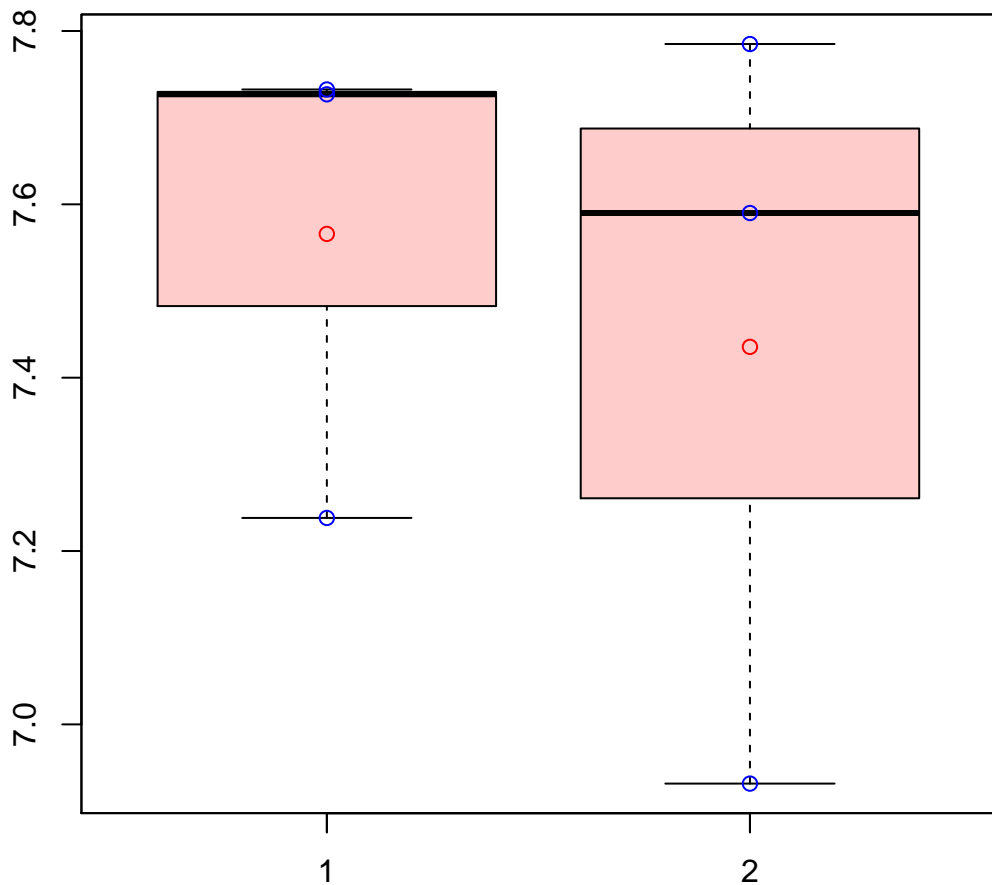

t-Test: p-value = 0.7

# M0RJA4|M0RJA4\_MUSAM

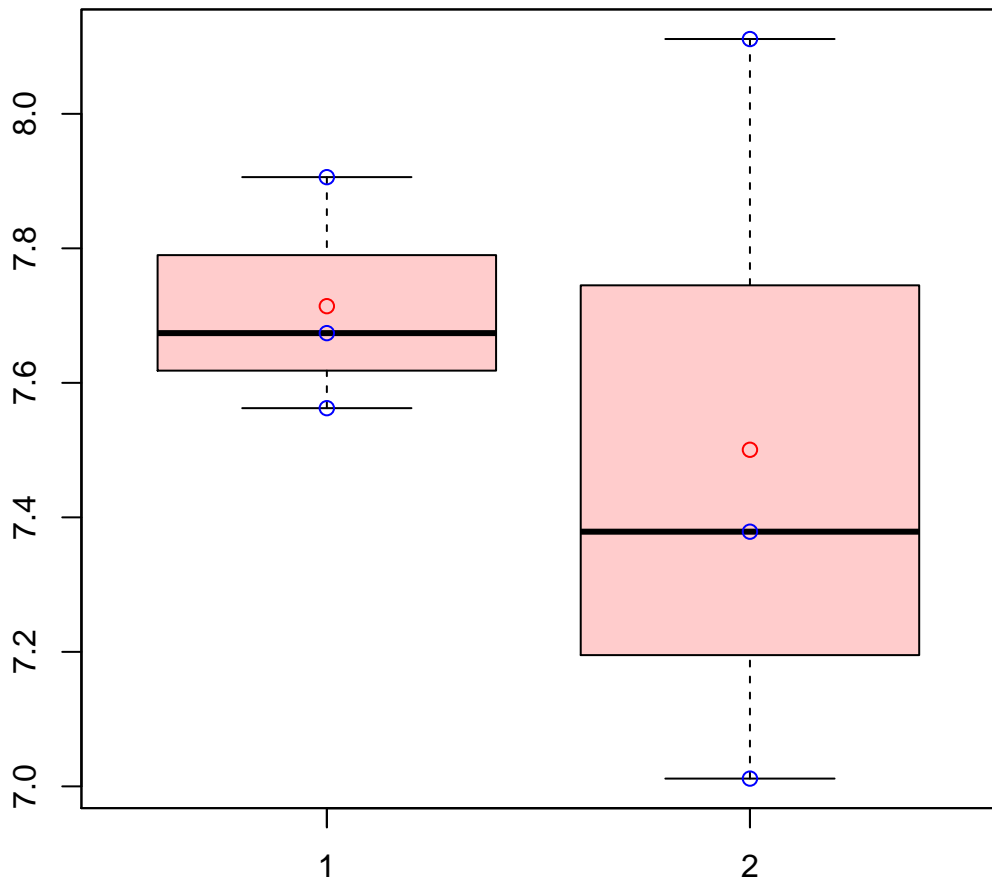

t-Test: p-value = 0.58

# M0RJE8|M0RJE8\_MUSAM

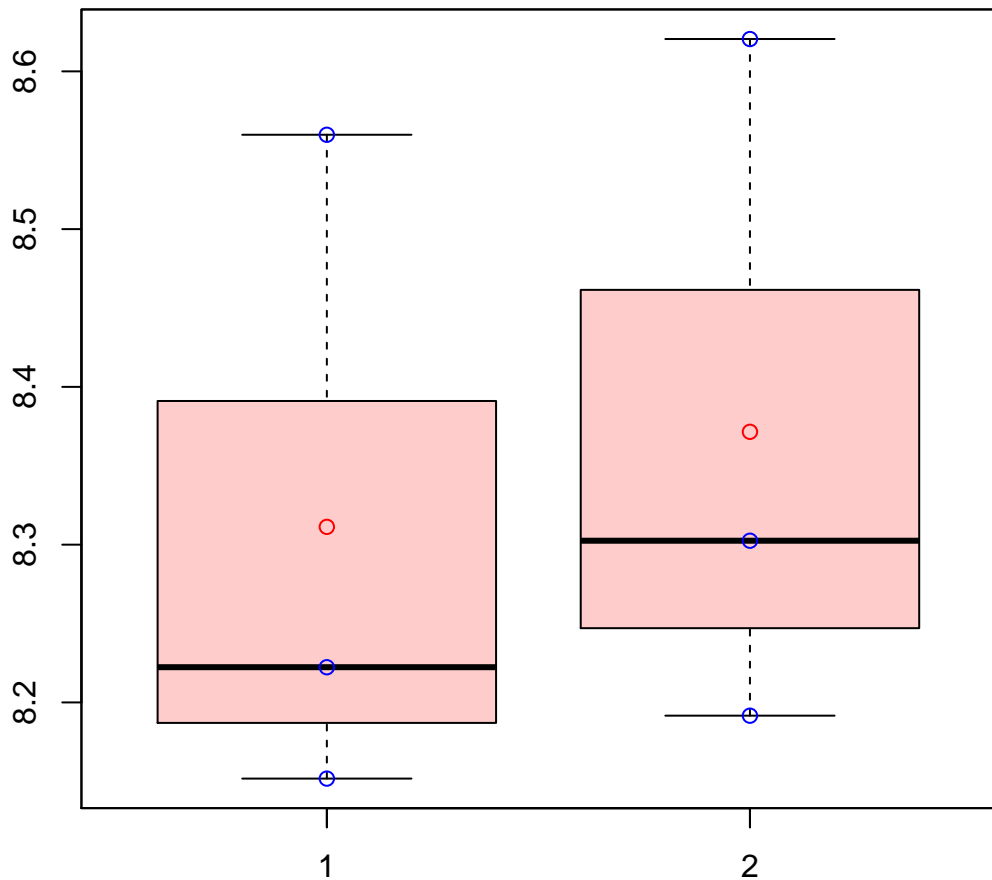

t-Test: p-value = 0.75



# M0RJL4|M0RJL4\_MUSAM

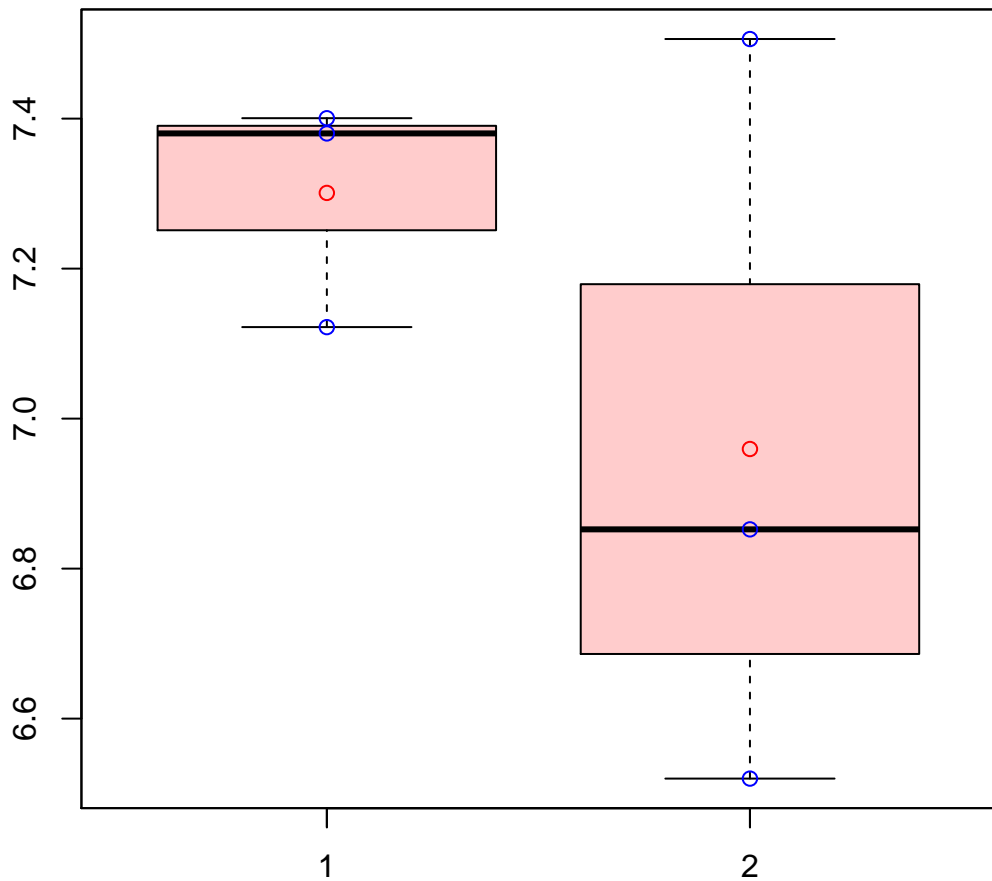

# M0RJV3|M0RJV3\_MUSAM

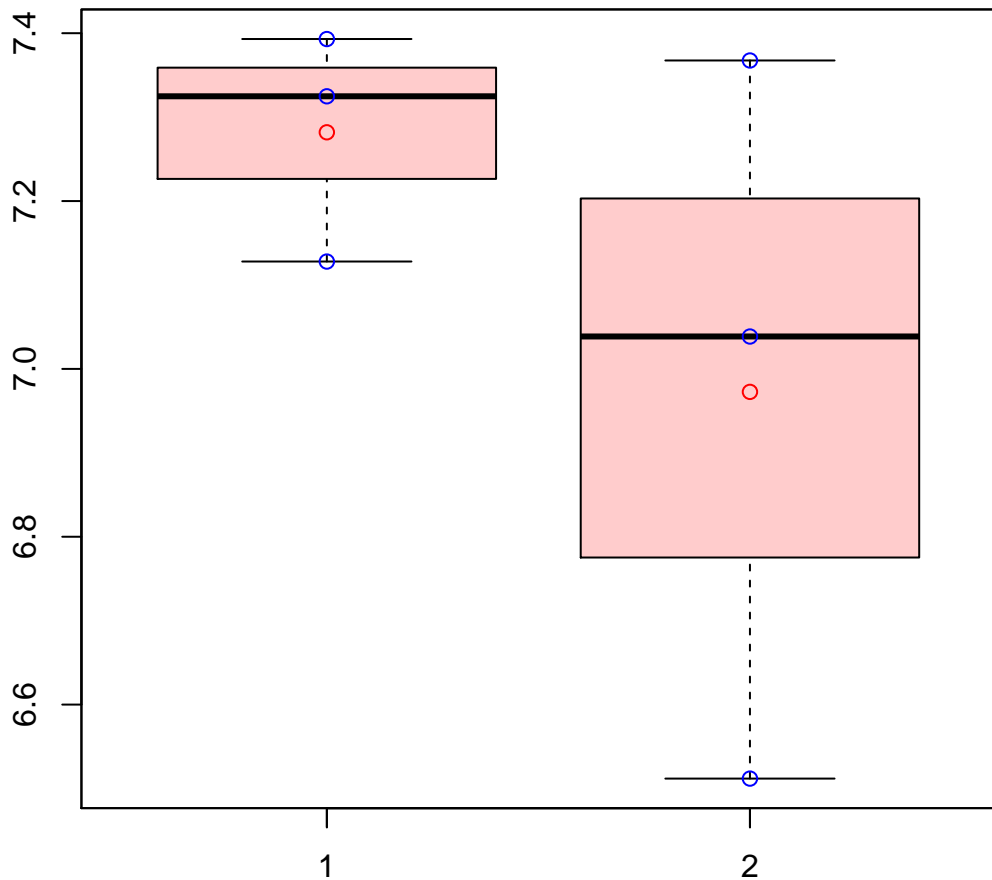

t-Test: p-value = 0.34

# M0RKL9|M0RKL9\_MUSAM

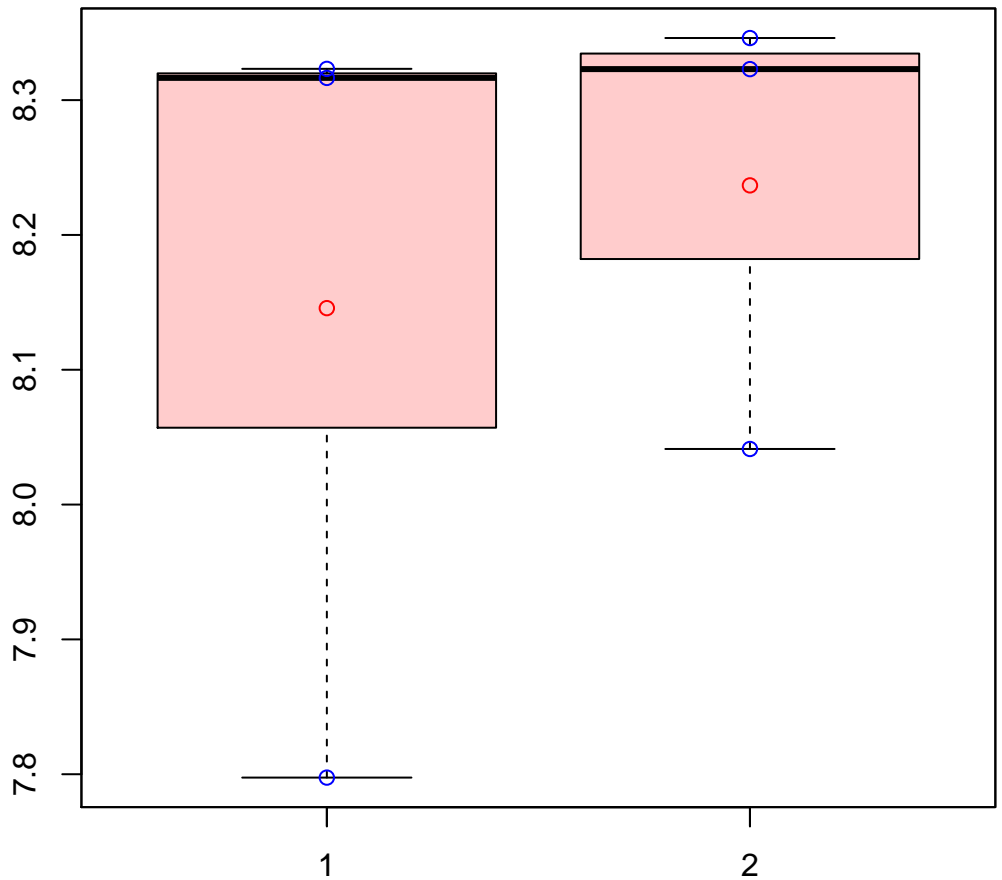

t-Test: p-value = 0.68

# M0RKX7|M0RKX7\_MUSAM

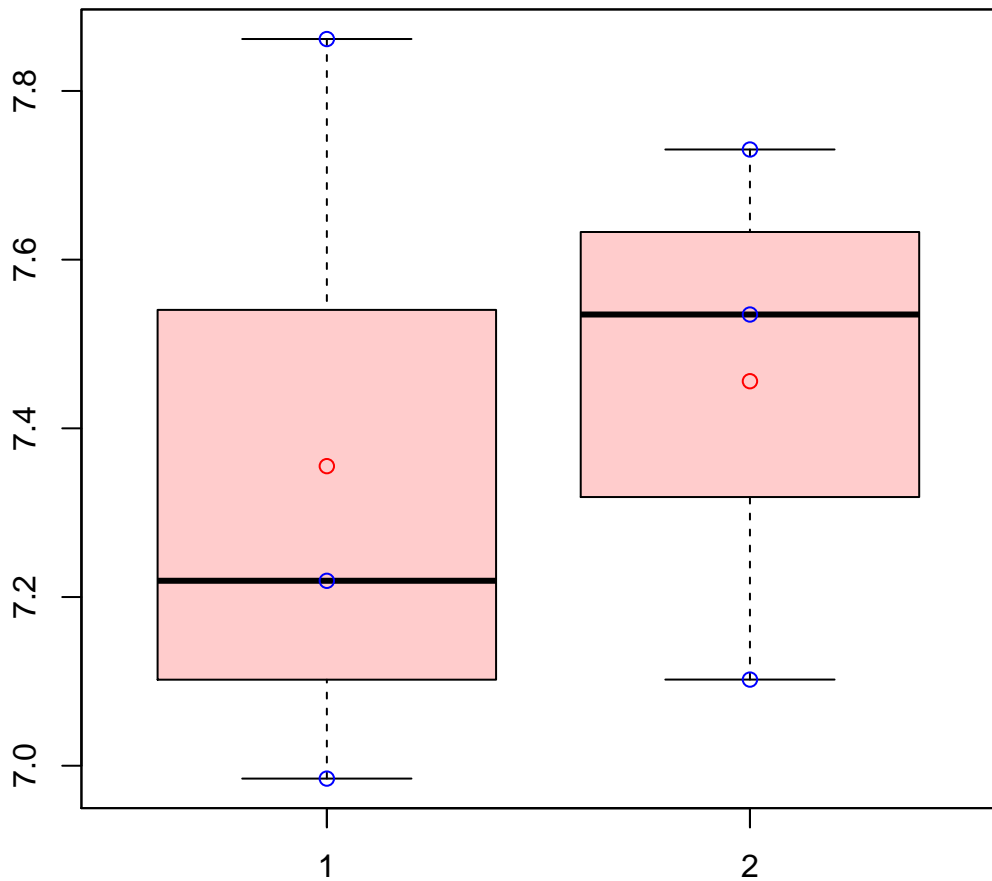

t-Test: p-value = 0.77

# MORKY1|MORKY1\_MUSAM

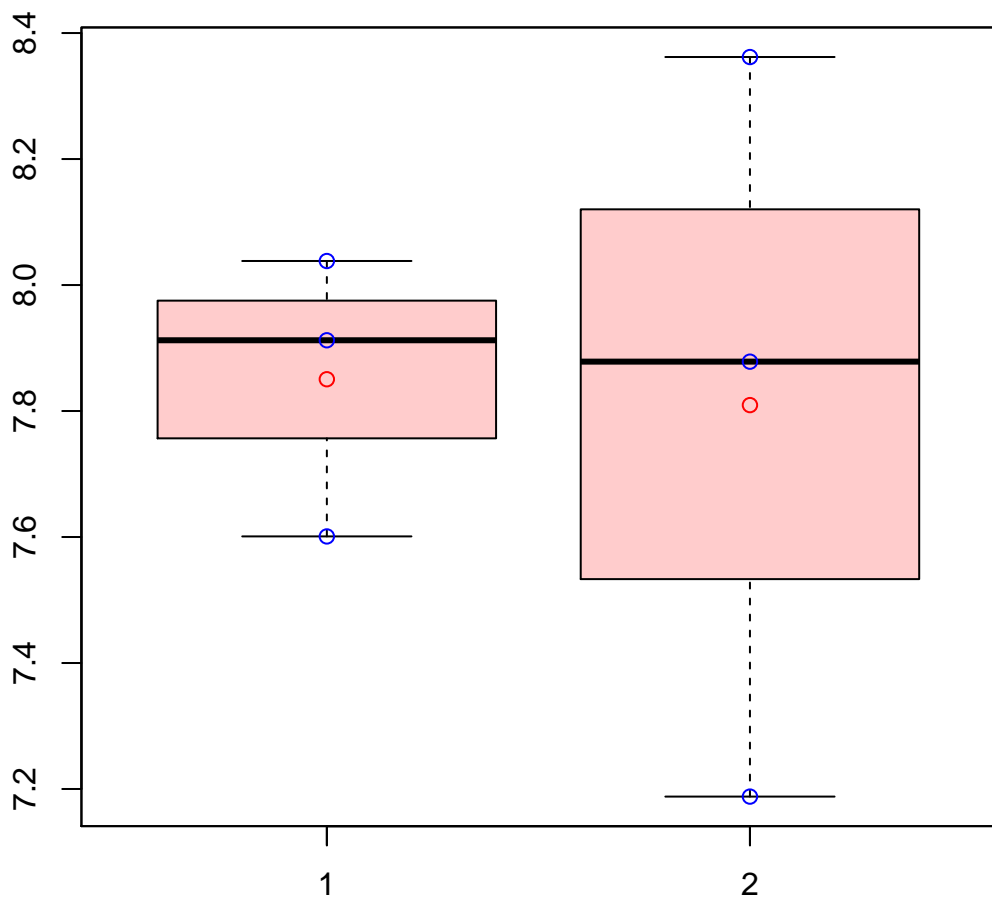

t-Test: p-value = 0.92

# M0RL81|M0RL81\_MUSAM

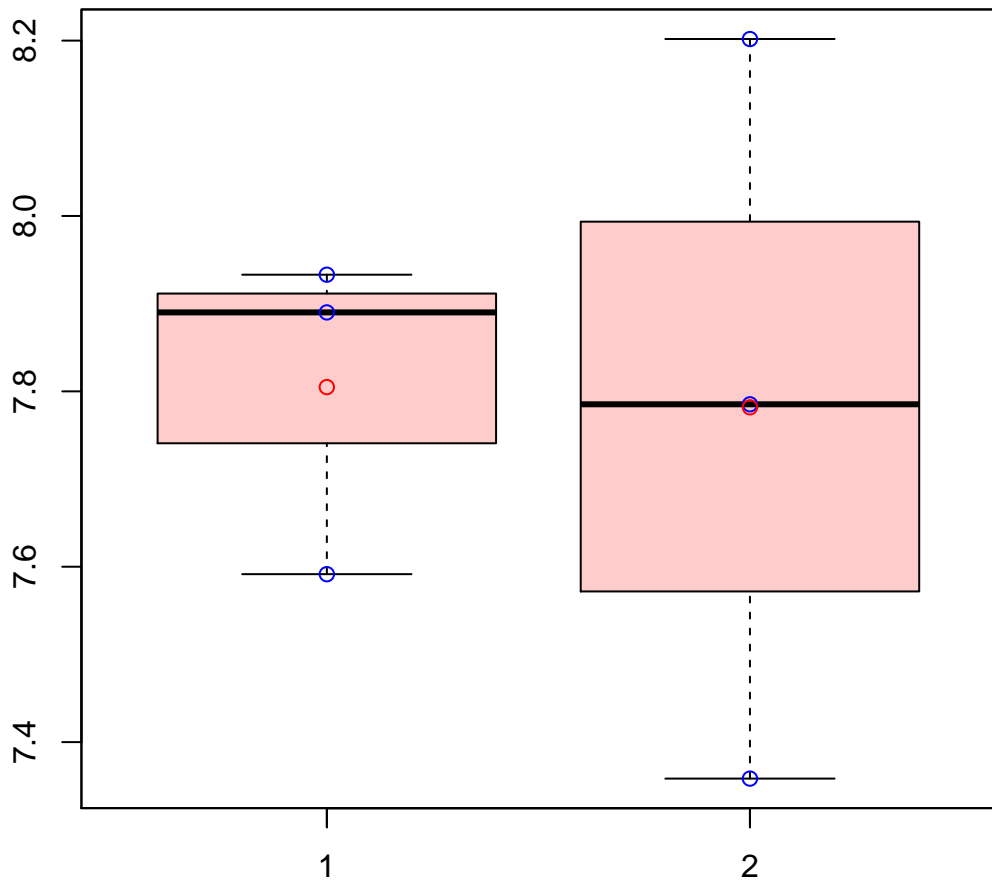

t-Test: p-value = 0.94

# M0RLB5|M0RLB5\_MUSAM

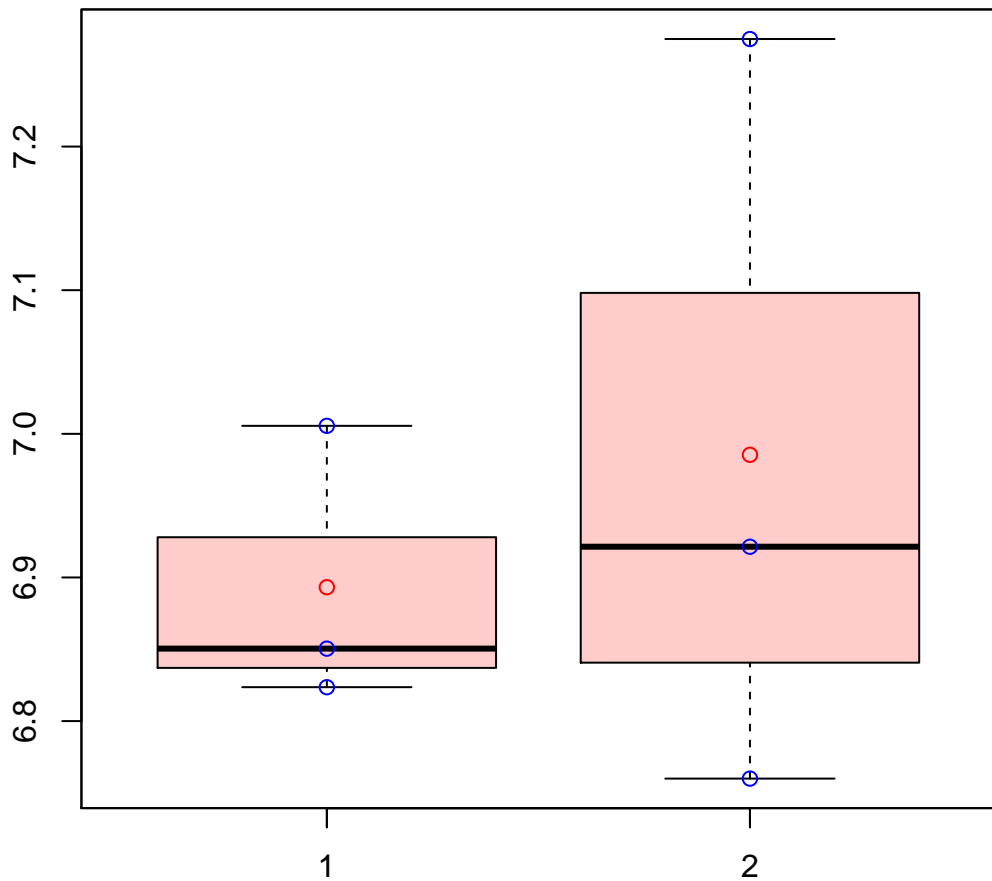

t-Test: p-value = 0.62

# M0RM88|M0RM88\_MUSAM

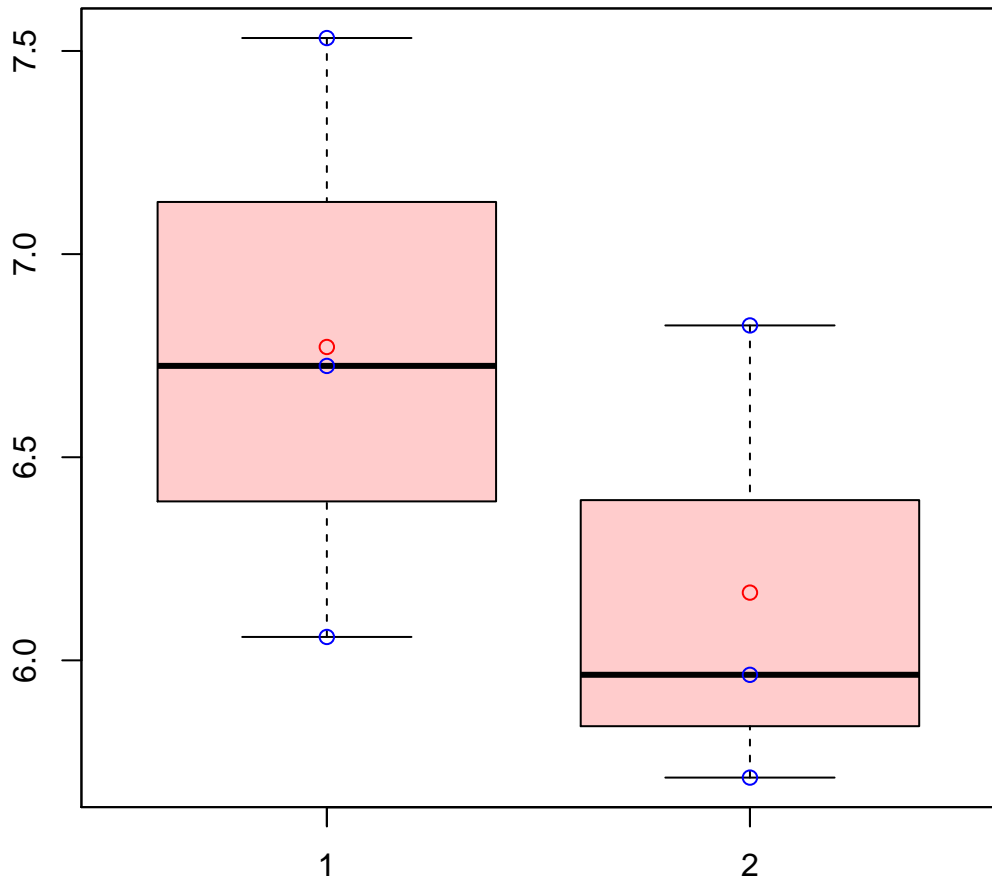

t-Test: p-value = 0.33



# M0RMD9|M0RMD9\_MUSAM

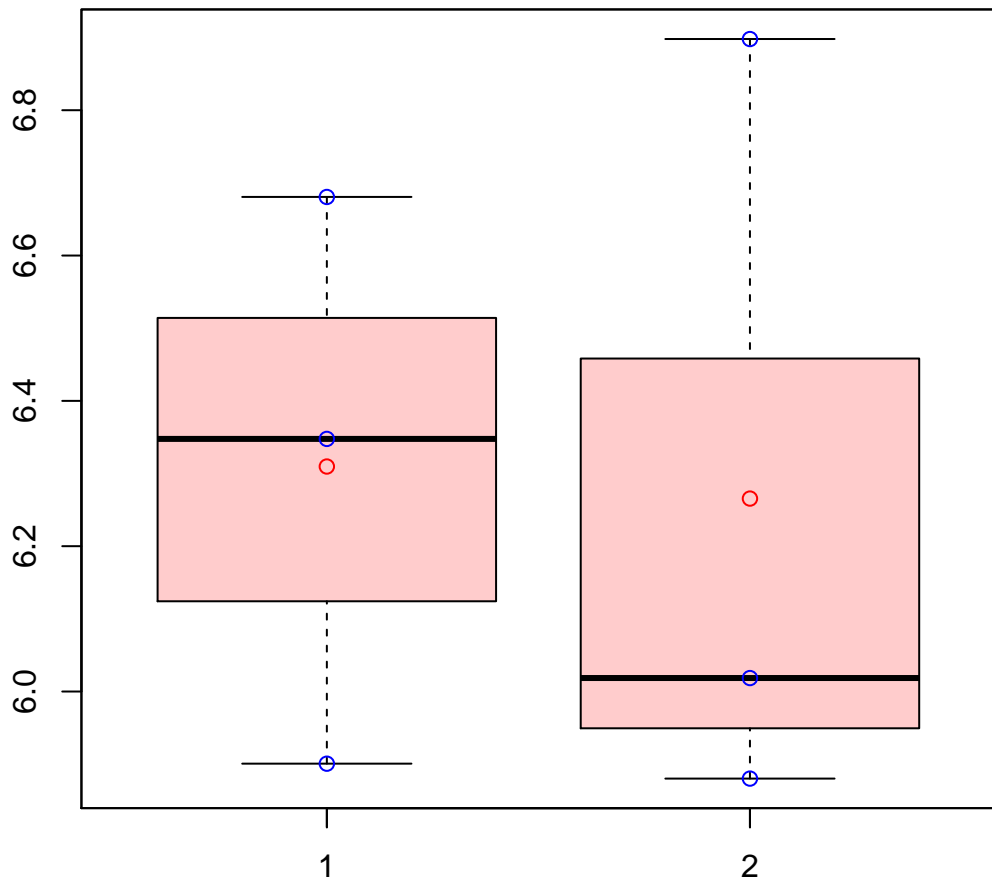

t-Test: p-value = 0.92

# M0RMI5|M0RMI5\_MUSAM

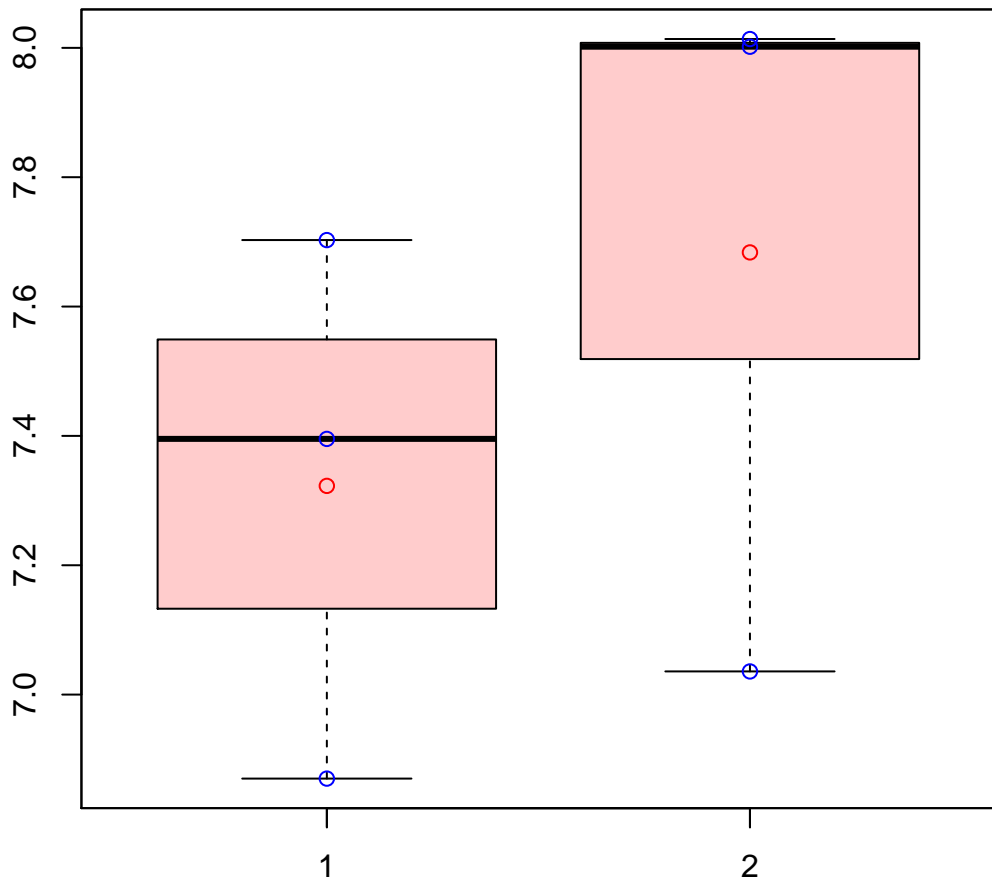

t-Test: p-value = 0.43

# M0RMV5|M0RMV5\_MUSAM

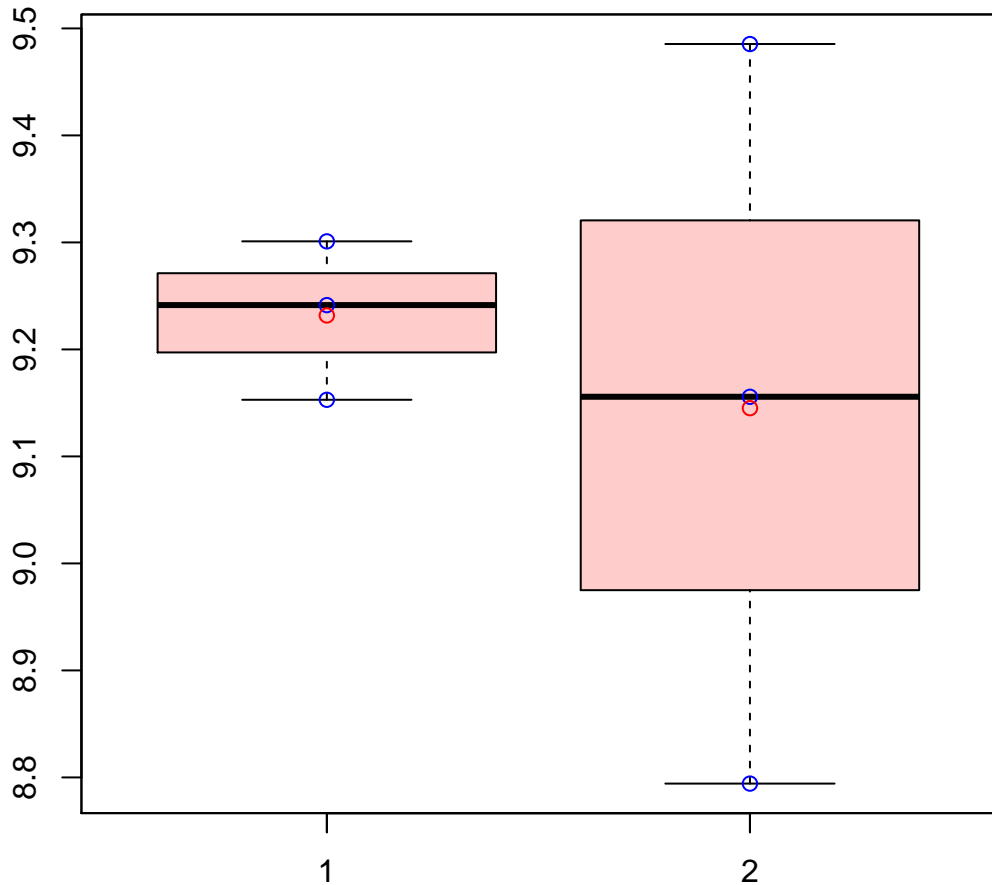

t-Test: p-value = 0.71

# M0RMV9|M0RMV9\_MUSAM

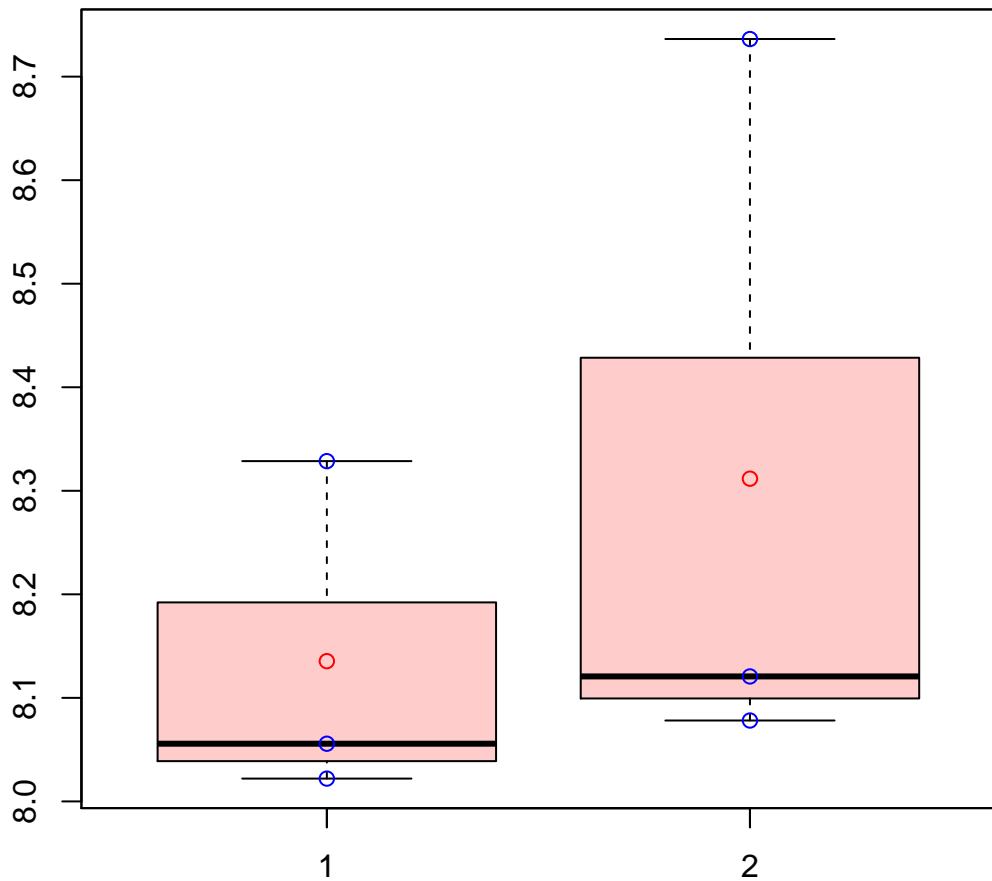

t-Test: p-value = 0.51

# M0RN55|M0RN55\_MUSAM

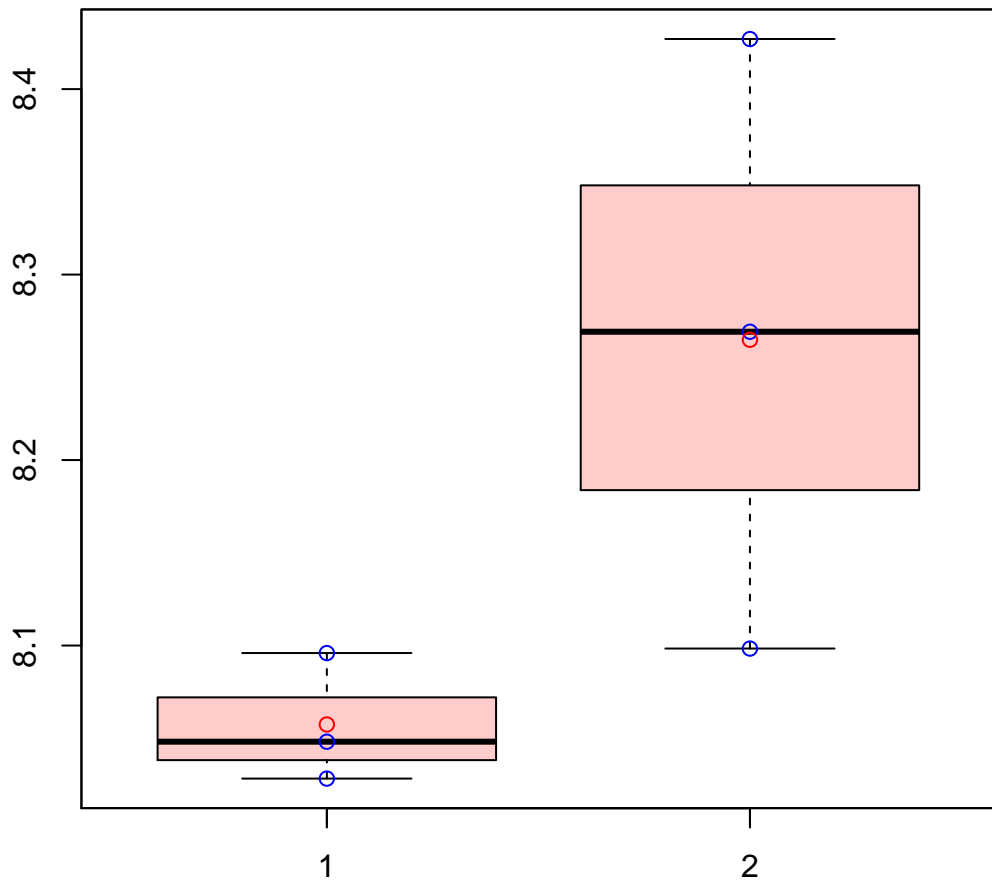

t-Test: p-value = 0.16

# MORNE8|MORNE8\_MUSAM

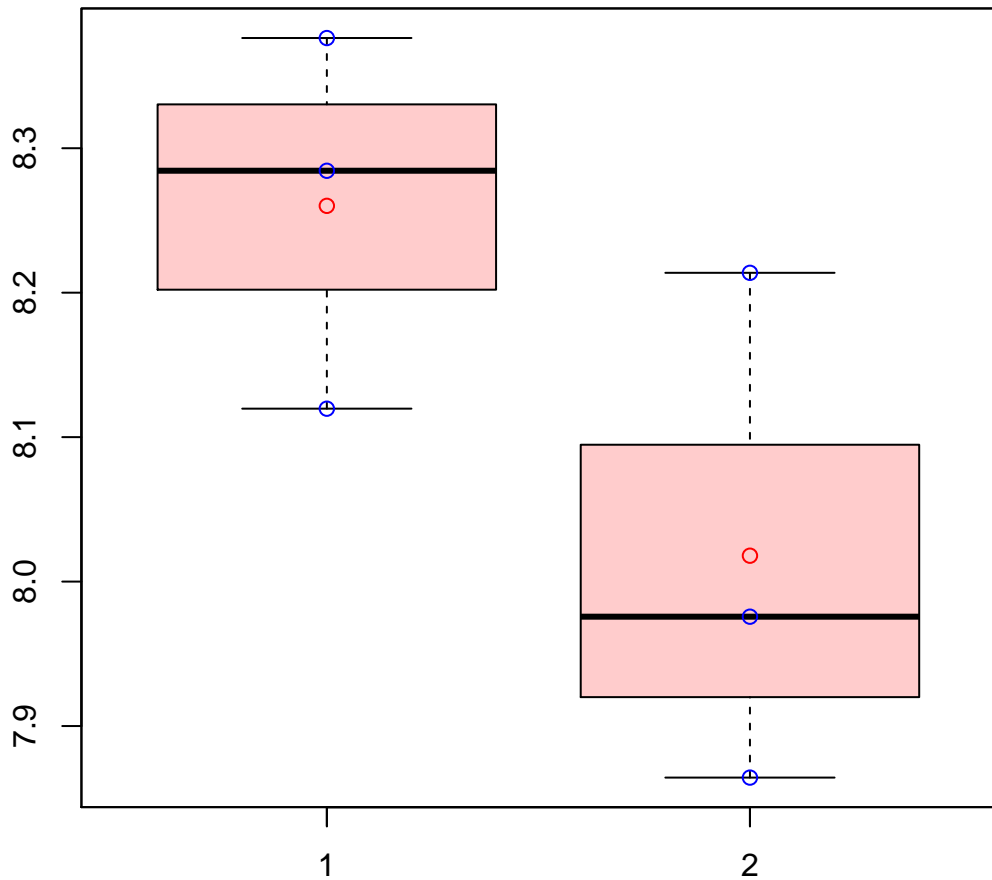

t-Test: p-value = 0.14

# M0RNH3|M0RNH3\_MUSAM

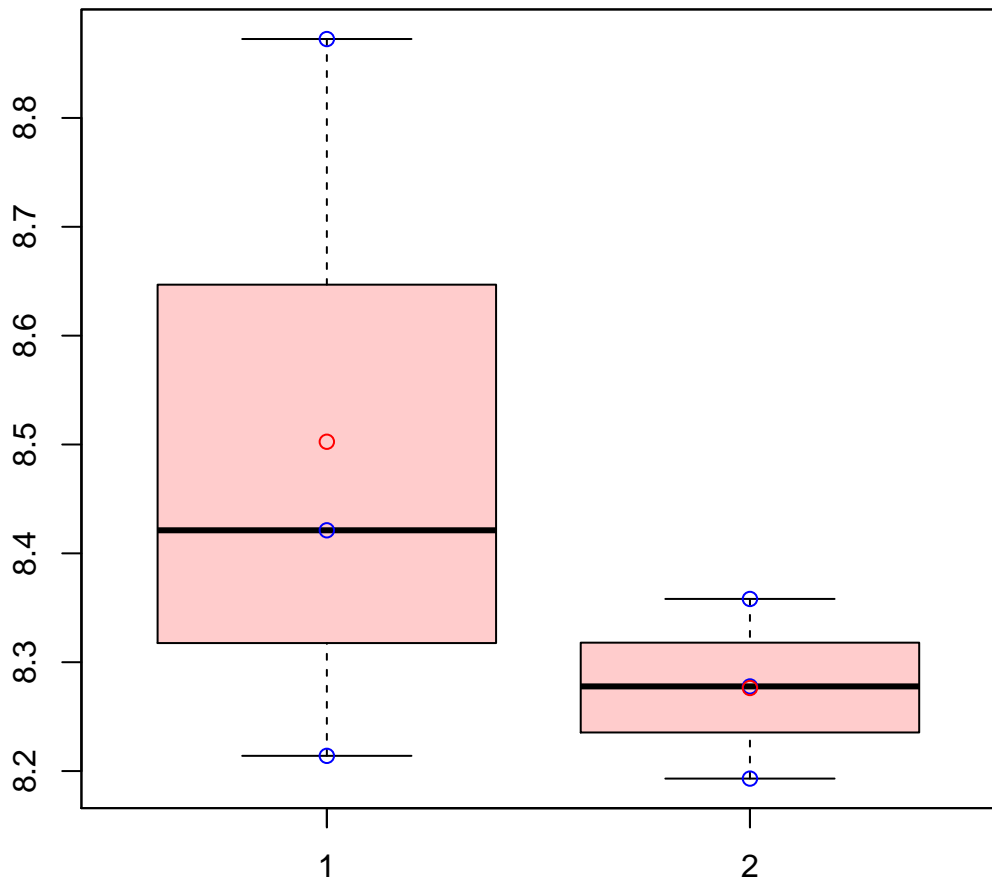

t-Test: p-value = 0.36

# M0RNH5|M0RNH5\_MUSAM

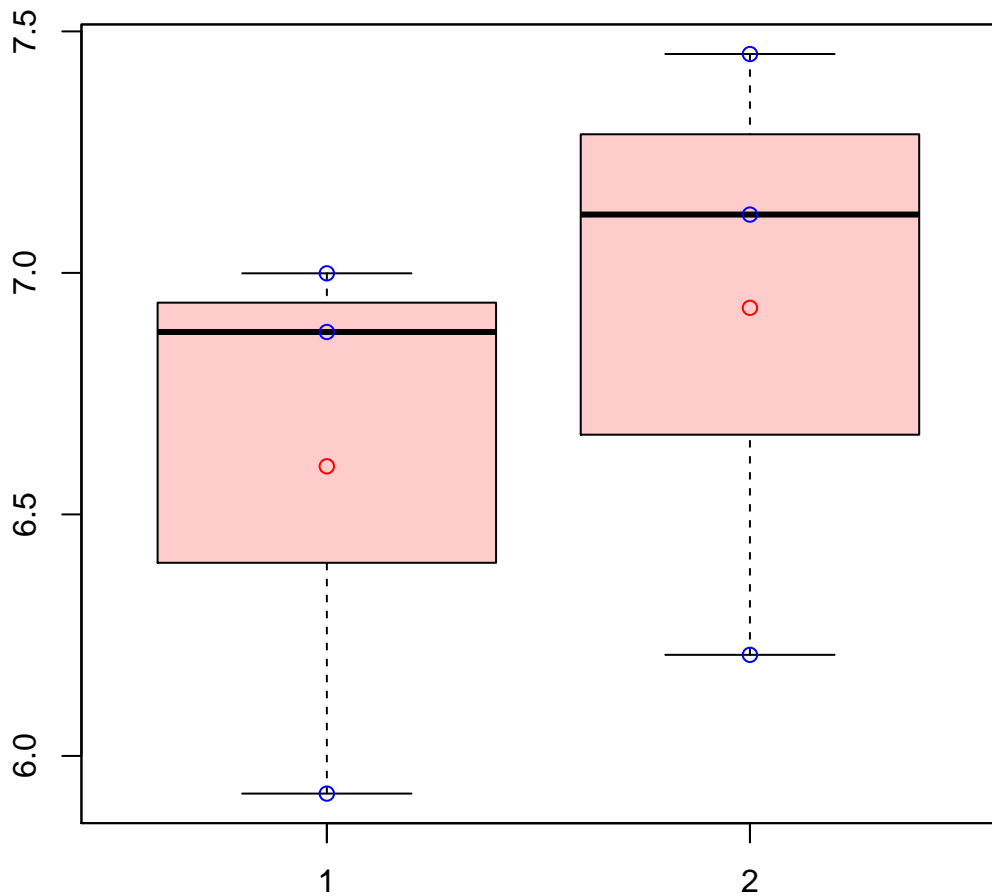

t-Test: p-value = 0.55



# M0RNL4|M0RNL4\_MUSAM

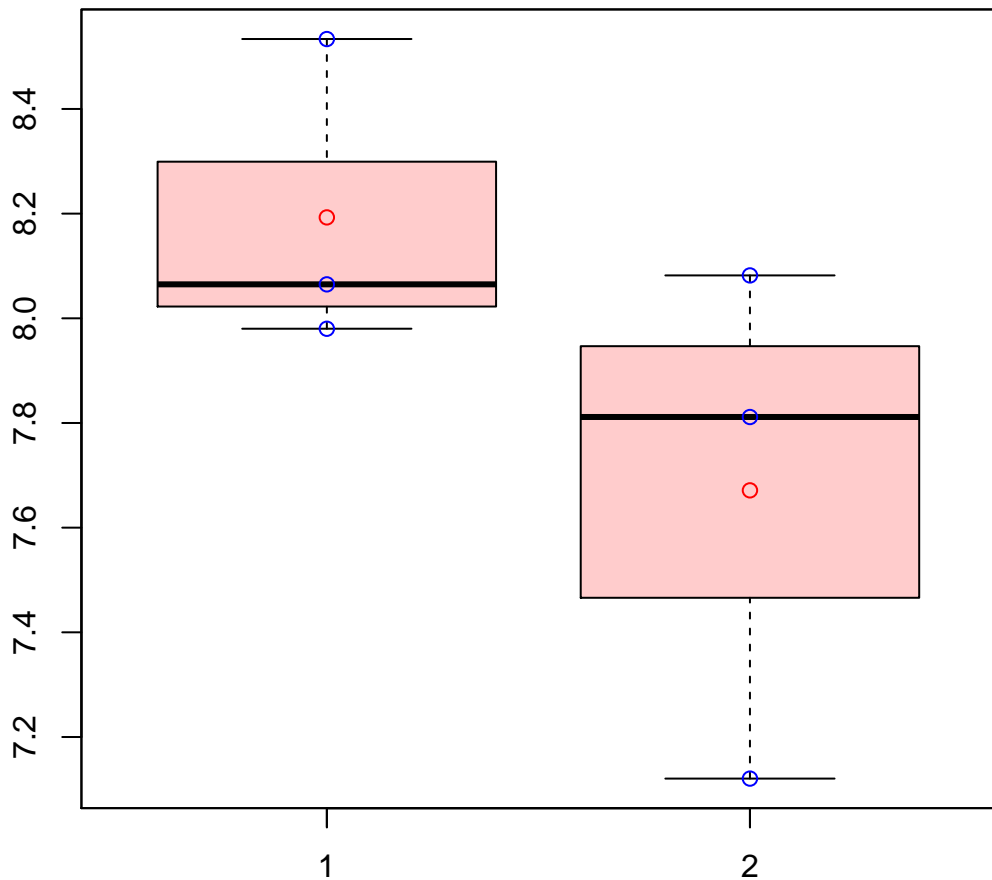

t-Test: p-value = 0.21

# M0RNY5|M0RNY5\_MUSAM

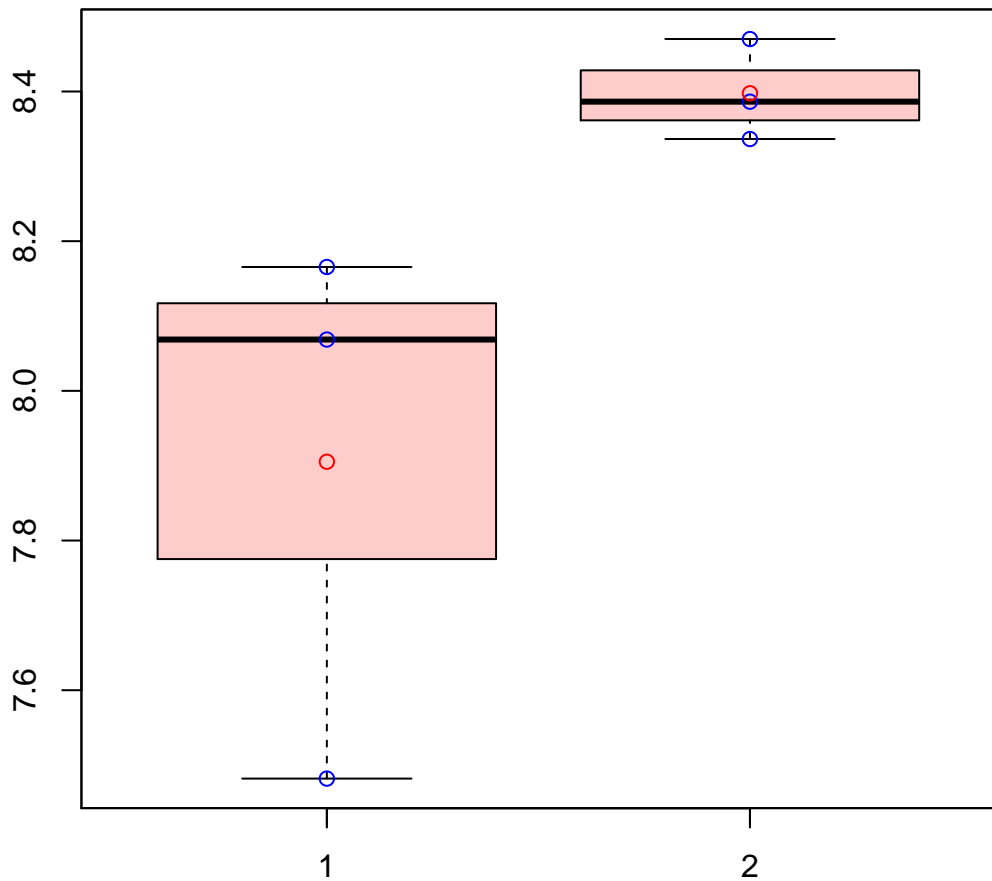

t-Test: p-value = 0.14

# M0RPG0|M0RPG0\_MUSAM

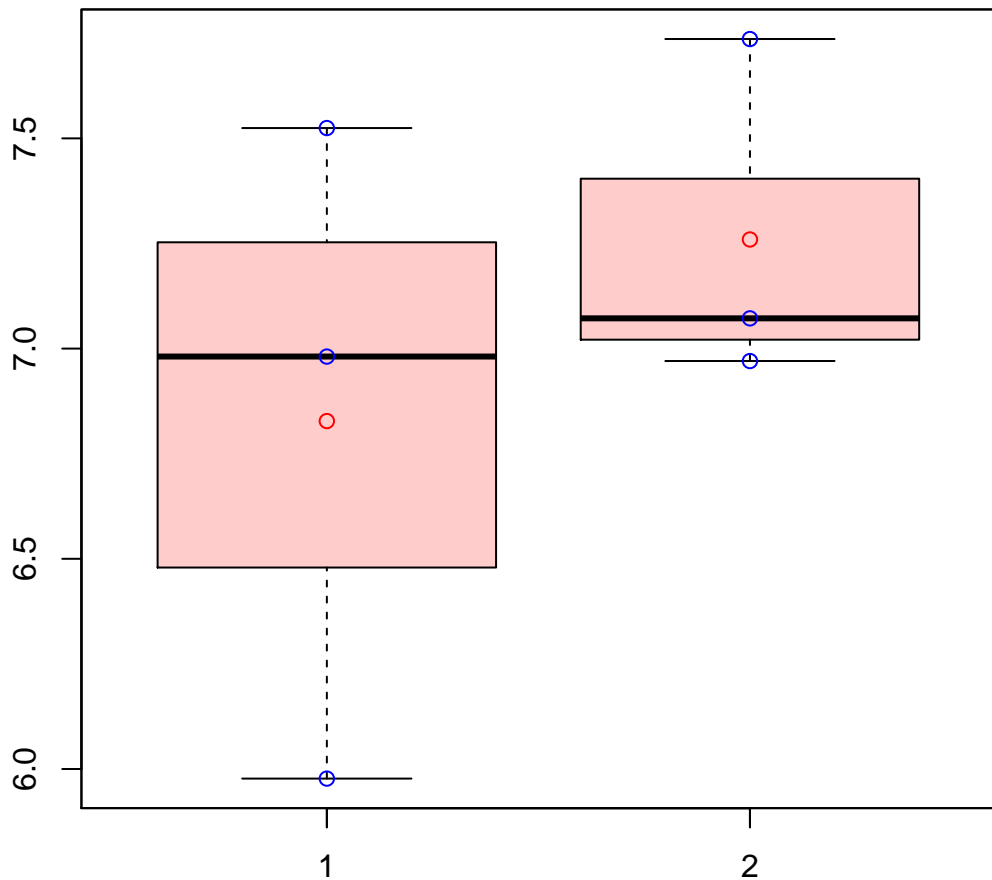

t-Test: p-value = 0.46

# M0RPV7|M0RPV7\_MUSAM

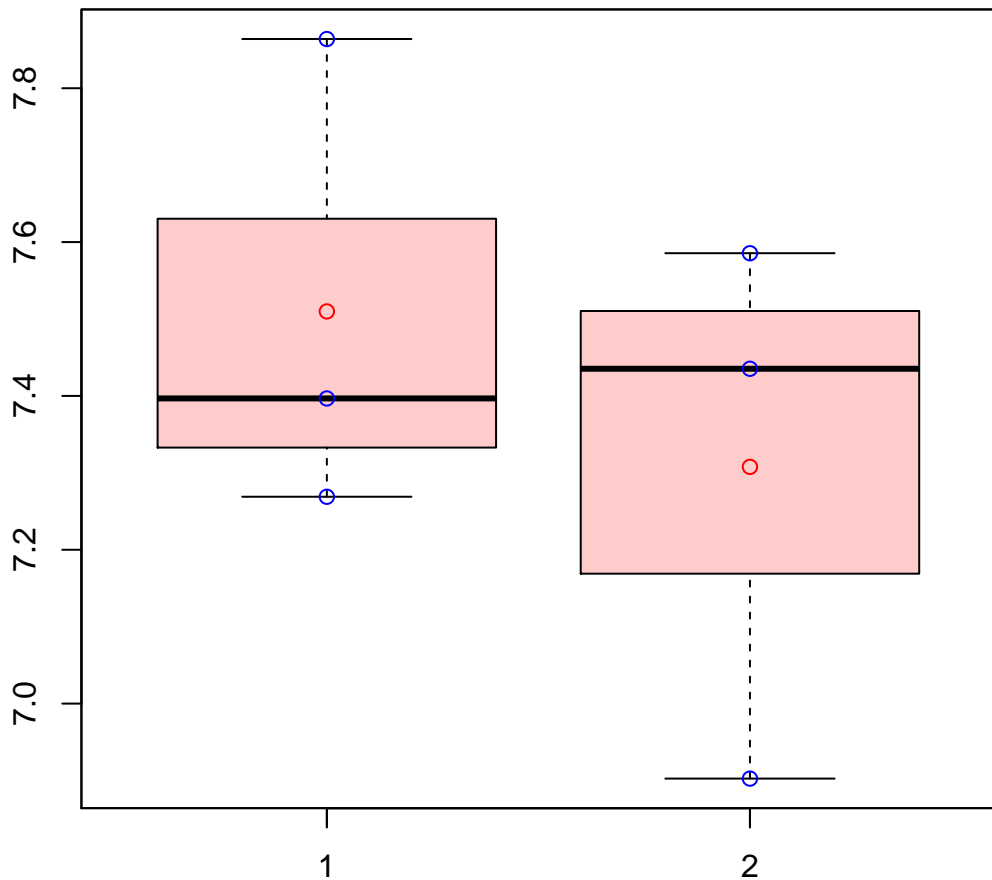

t-Test: p-value = 0.5

# M0RQE4|M0RQE4\_MUSAM

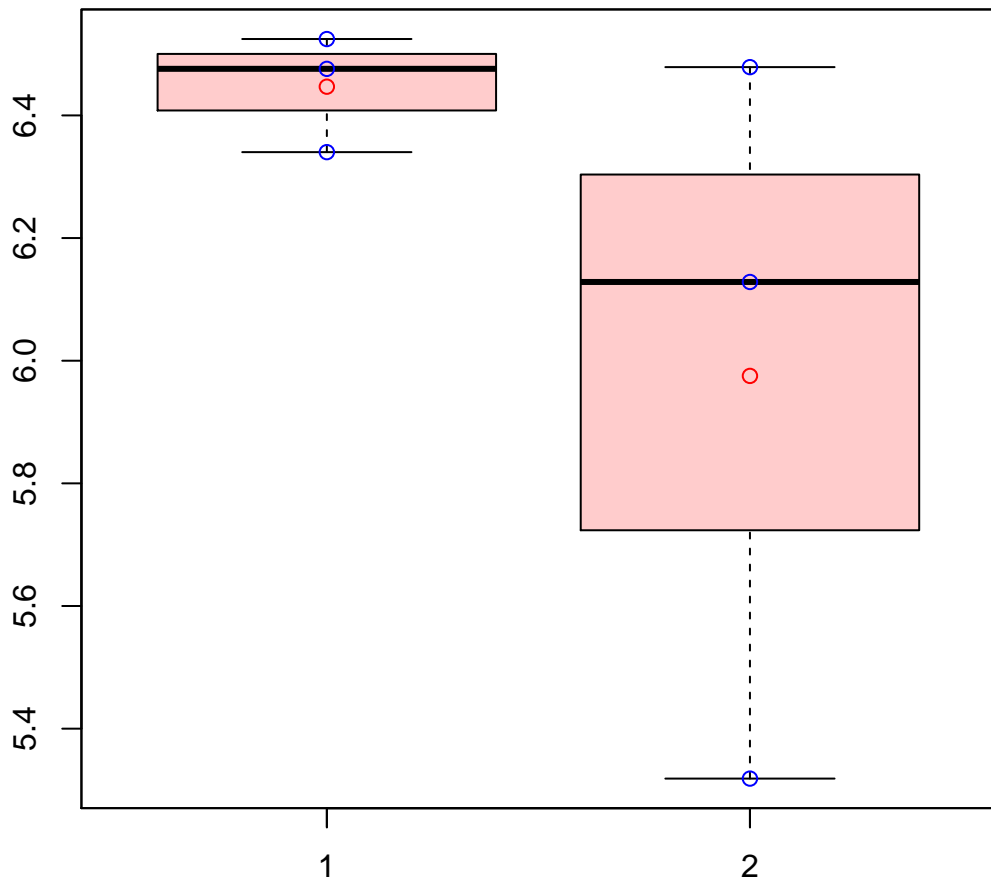

t-Test: p-value = 0.3

# M0RQN5|M0RQN5\_MUSAM

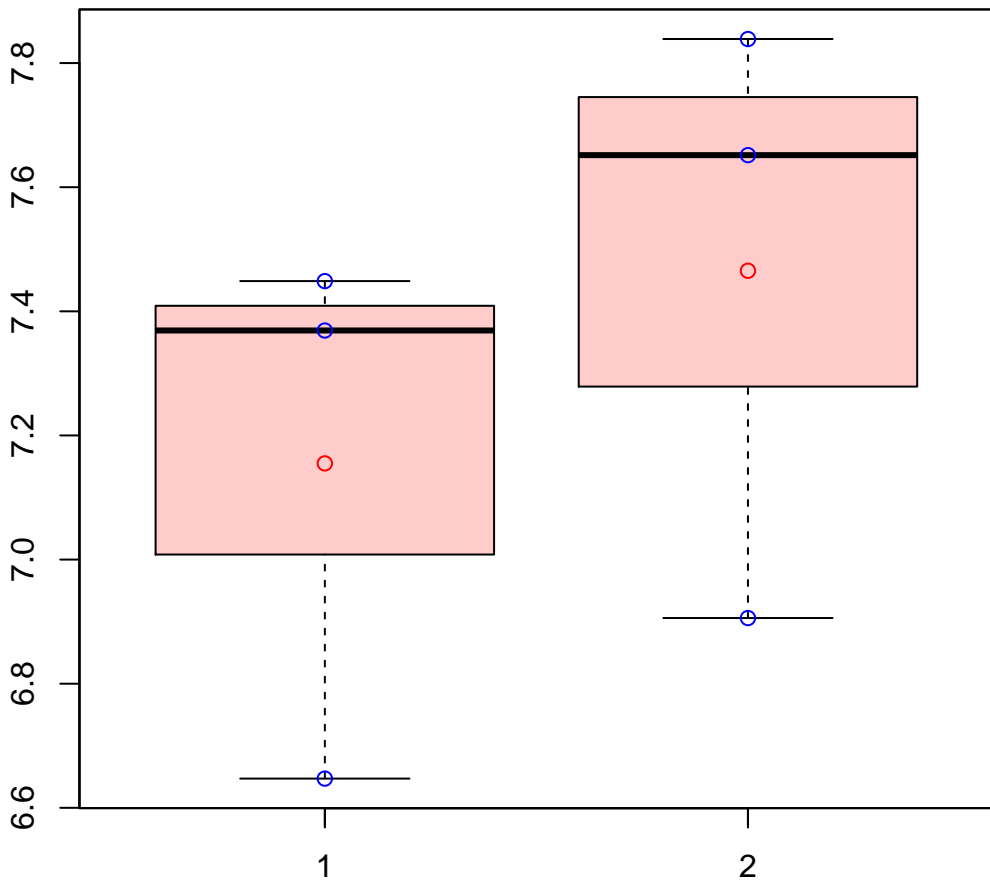

t-Test: p-value = 0.46

# M0RR84|M0RR84\_MUSAM

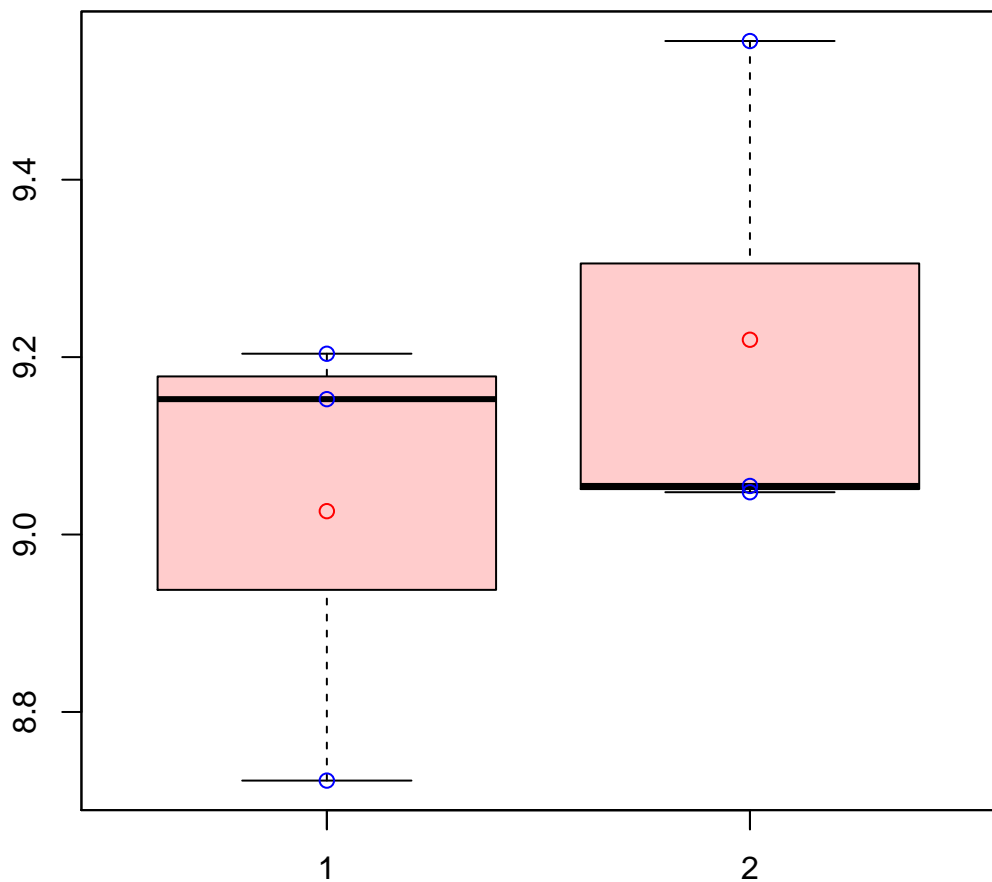

t-Test: p-value = 0.44

# M0RRK7|M0RRK7\_MUSAM

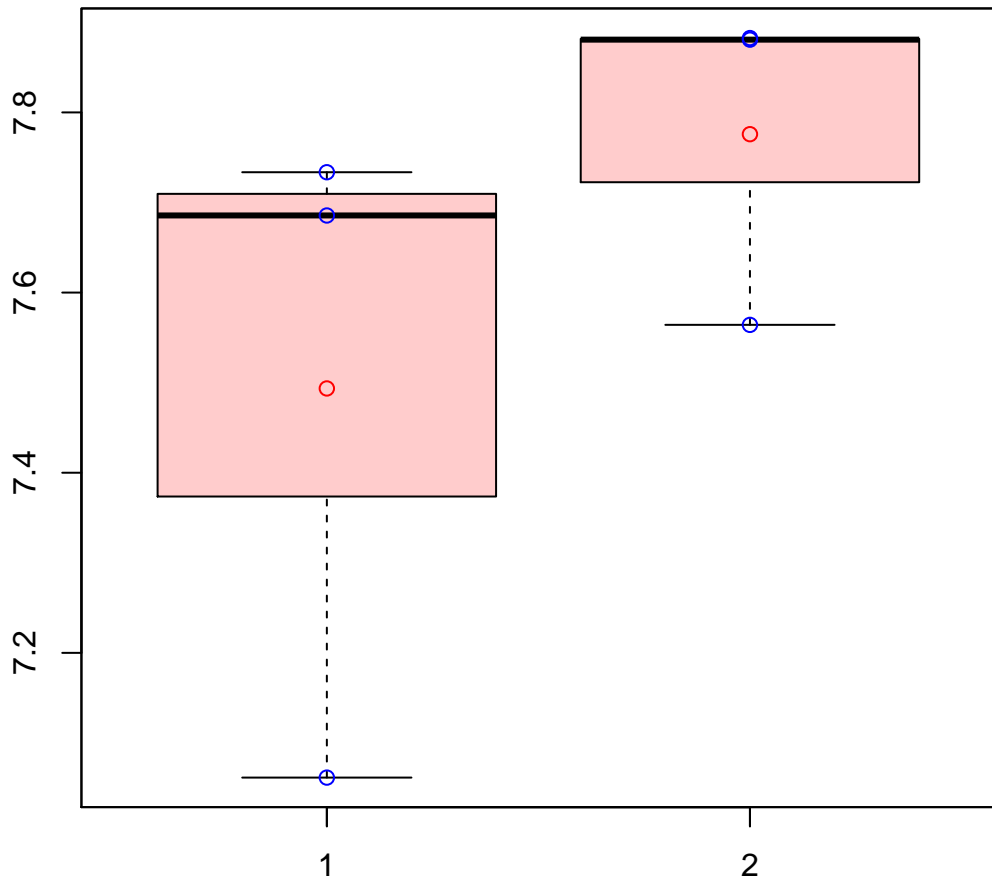

t-Test: p-value = 0.33



# MORRU0|MORRU0\_MUSAM

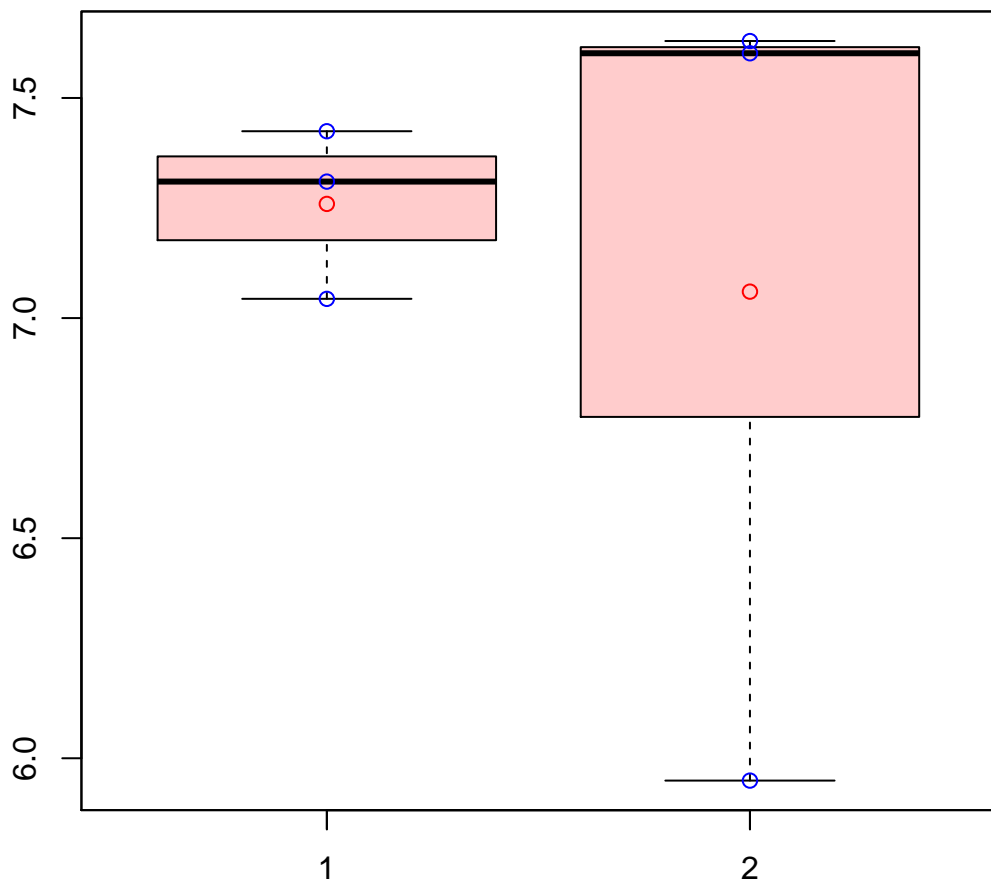

t-Test: p-value = 0.76

# M0RRV7|M0RRV7\_MUSAM

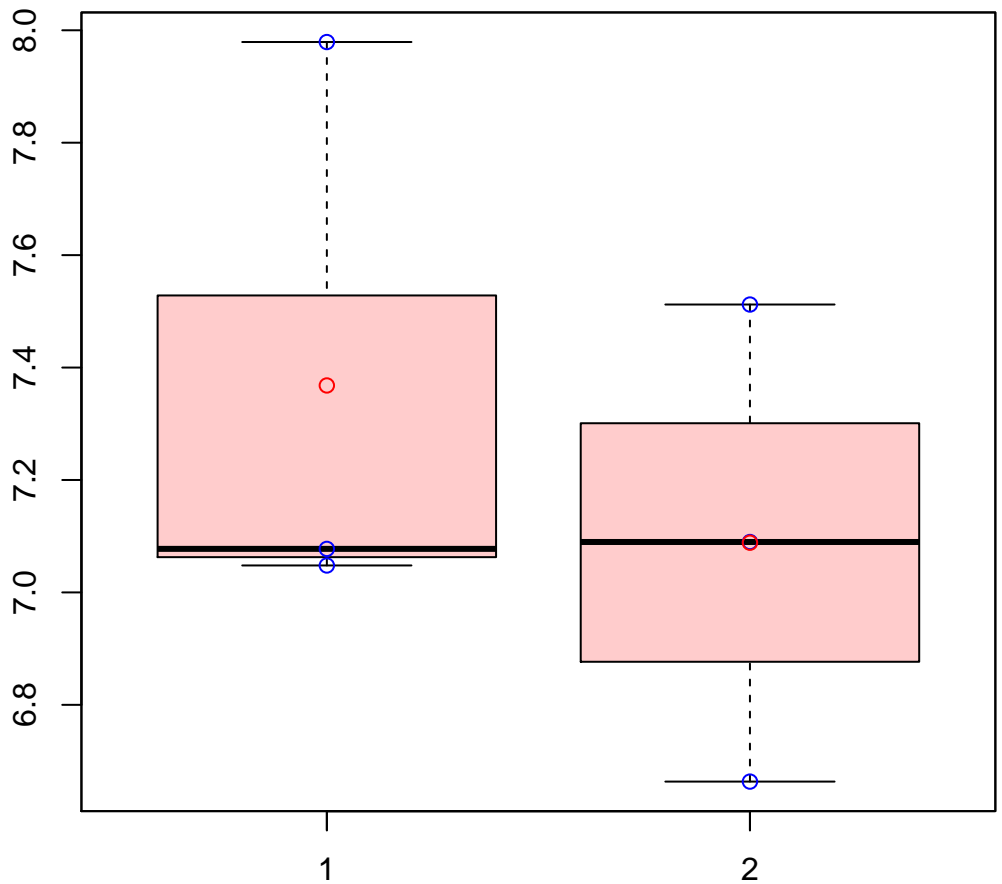

t-Test: p-value = 0.52

# M0RSV3|M0RSV3\_MUSAM

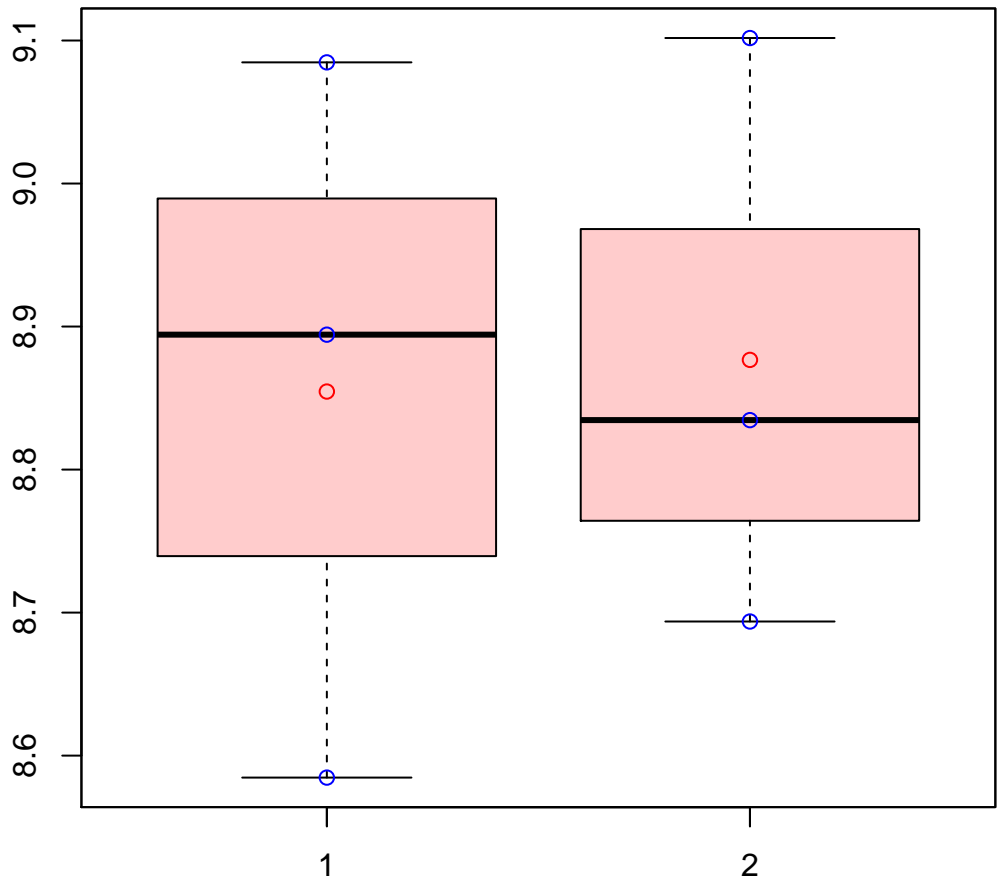

t-Test: p-value = 0.91

# M0RT43|M0RT43\_MUSAM

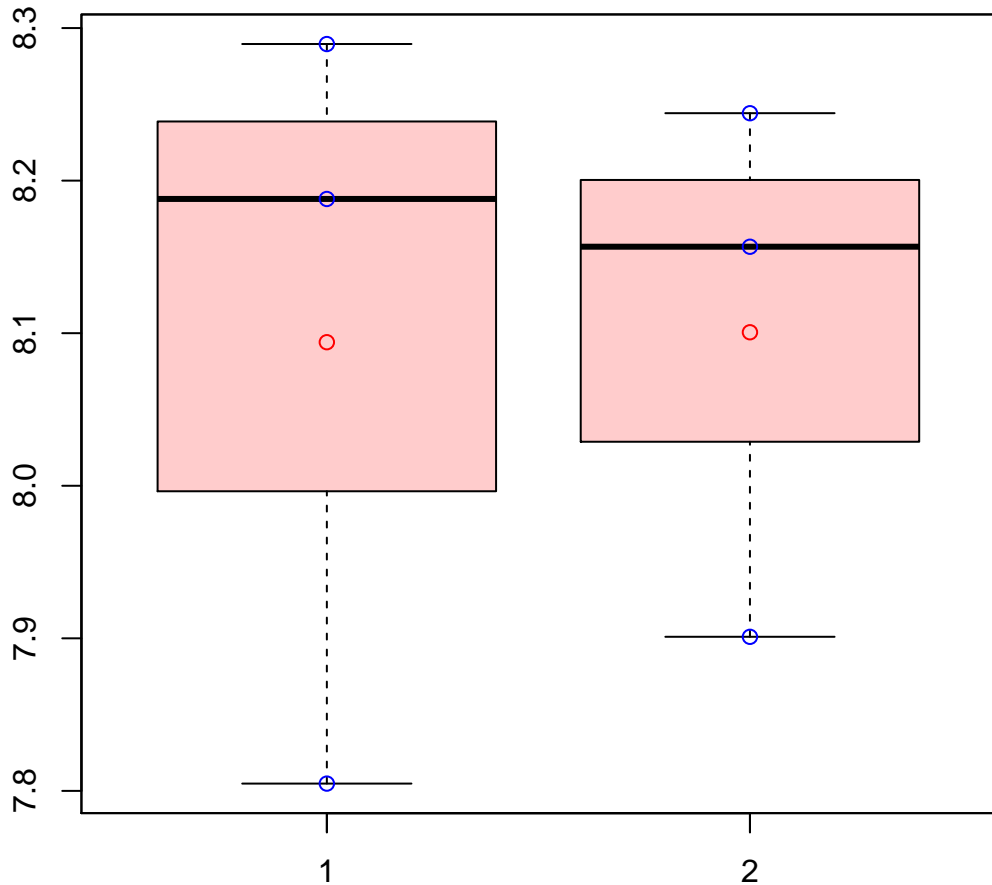

t-Test: p-value = 0.97

# M0RTC1|M0RTC1\_MUSAM

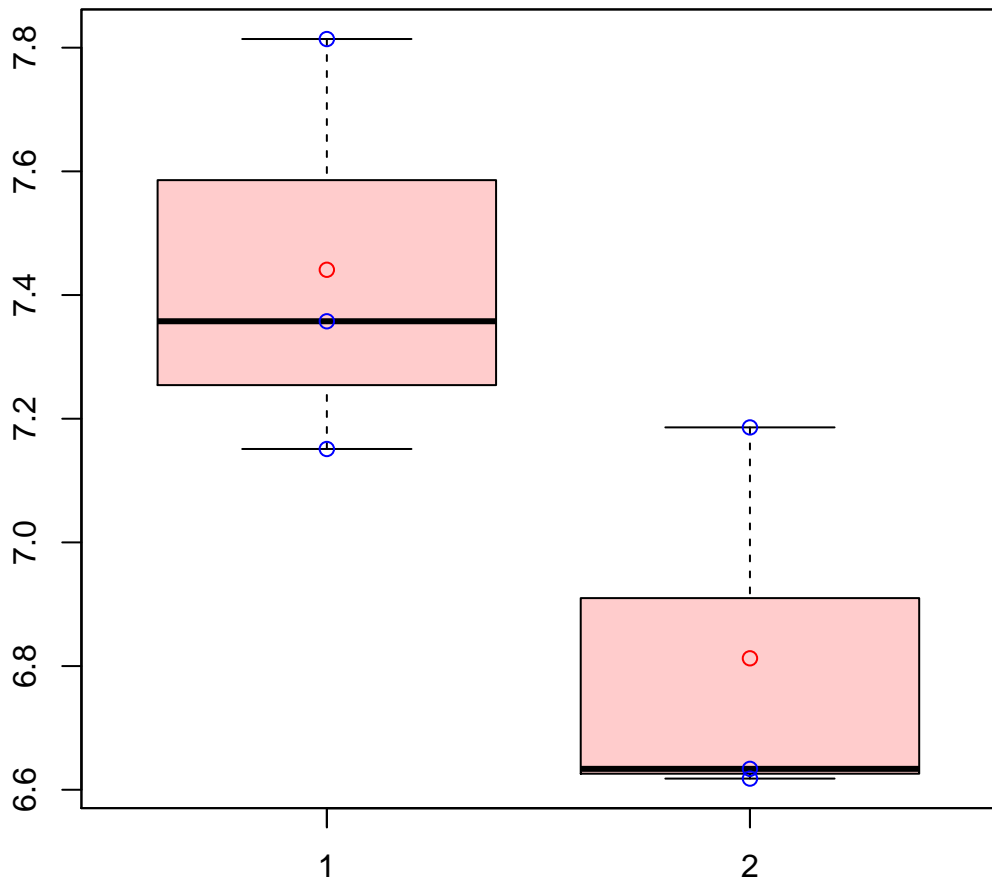

t-Test: p-value = 0.08

# M0RTS3|M0RTS3\_MUSAM

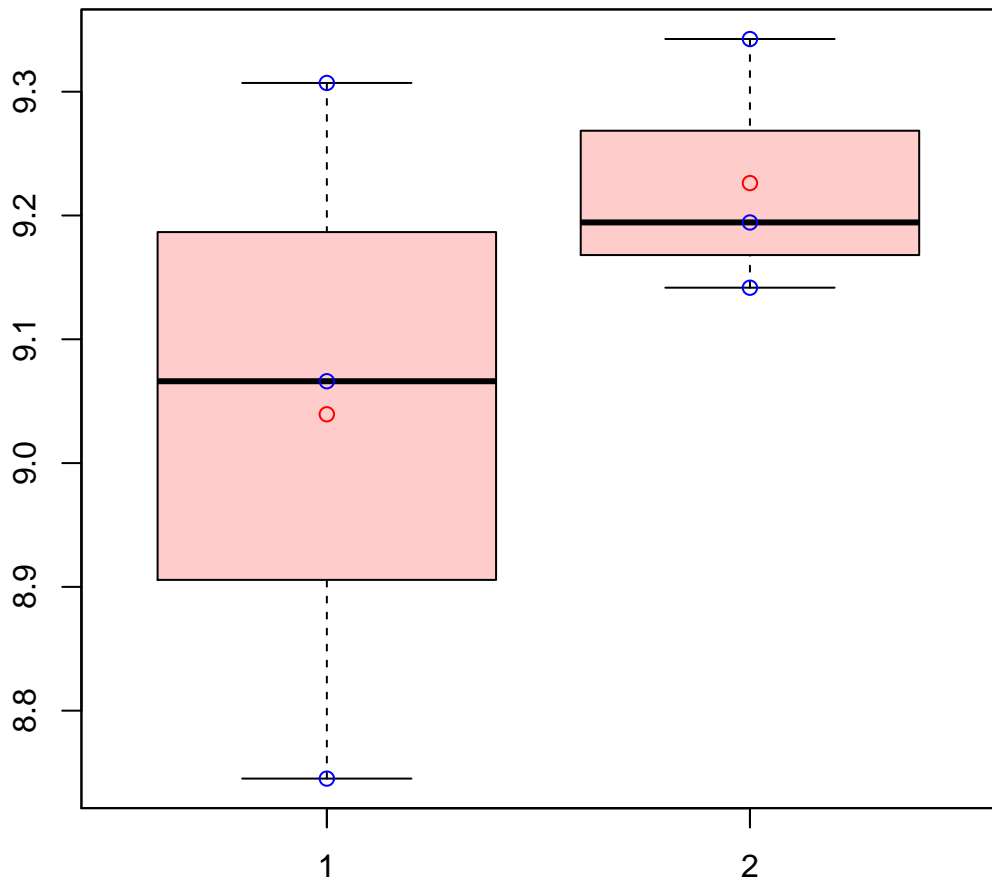

t-Test: p-value = 0.37

# M0RUD5|M0RUD5\_MUSAM

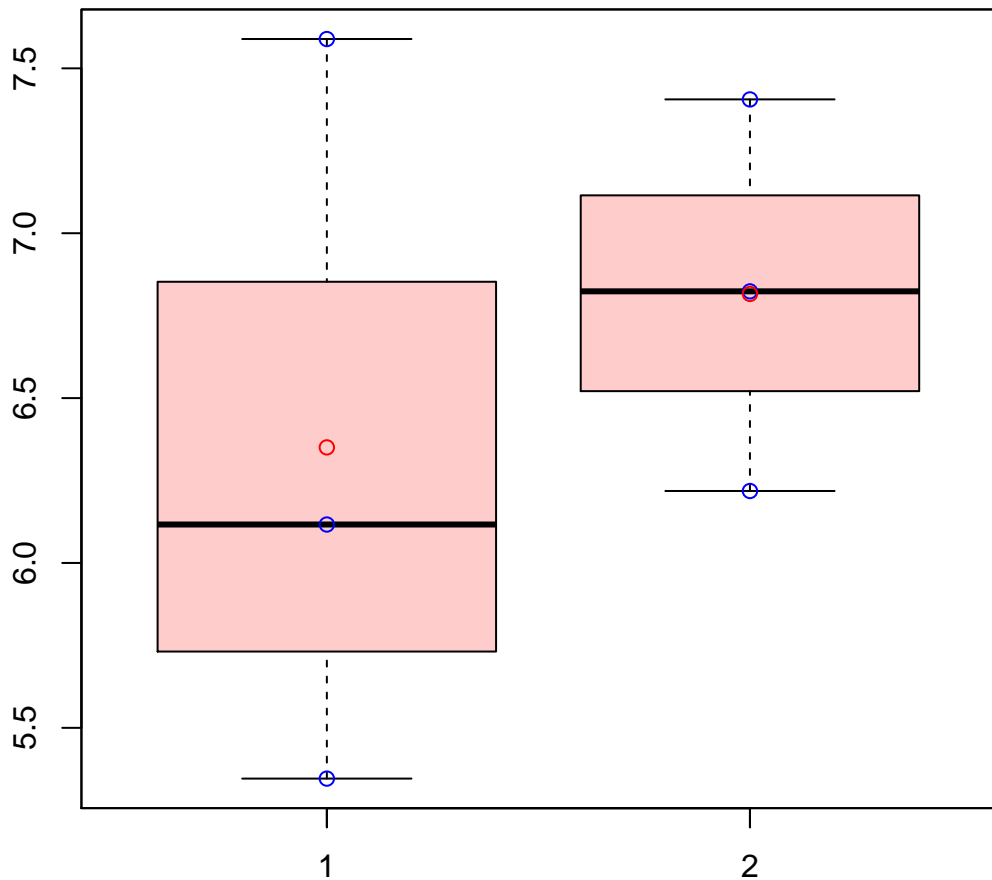

t-Test: p-value = 0.57

# M0RUY9|M0RUY9\_MUSAM

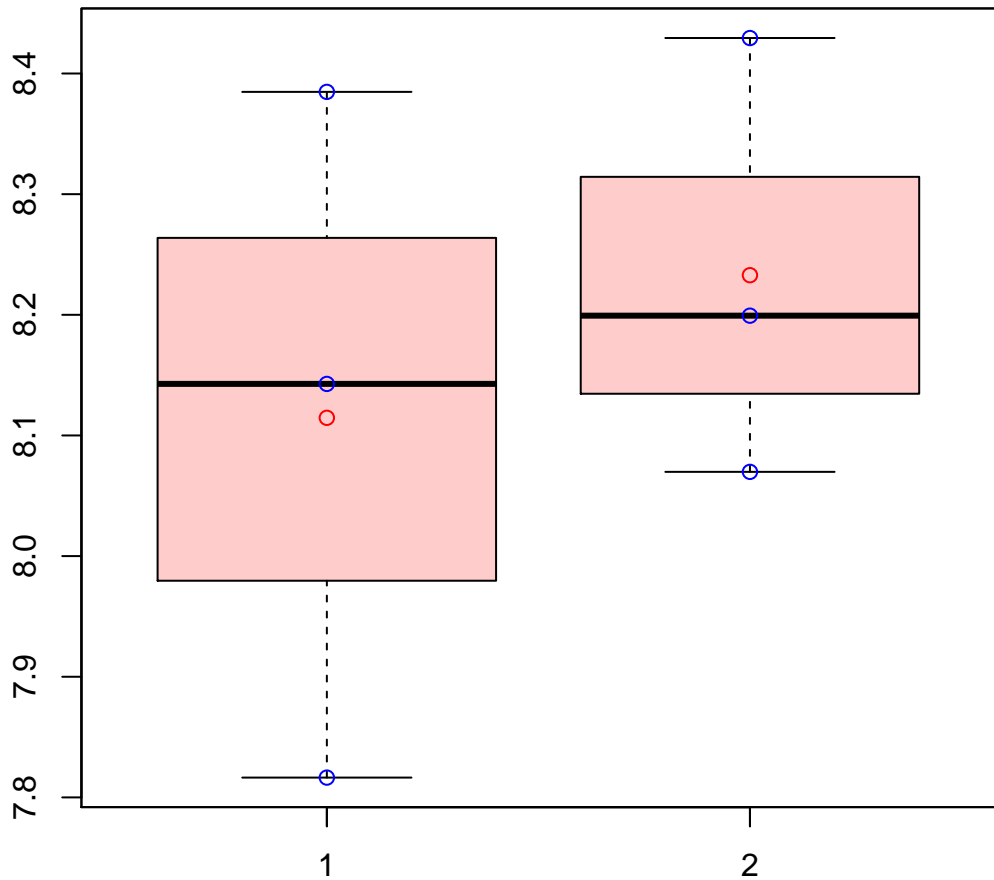

t-Test: p-value = 0.58



# M0RV12|M0RV12\_MUSAM

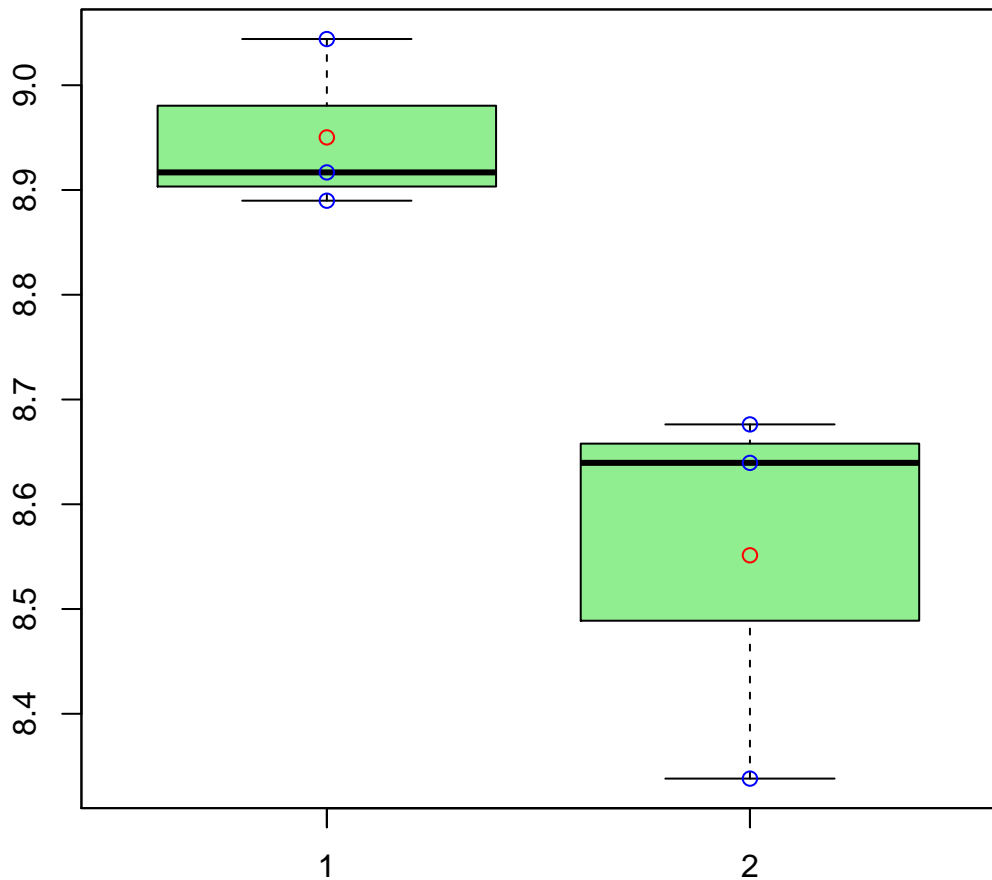

t-Test: p-value = 0.05

# M0RVA6|M0RVA6\_MUSAM

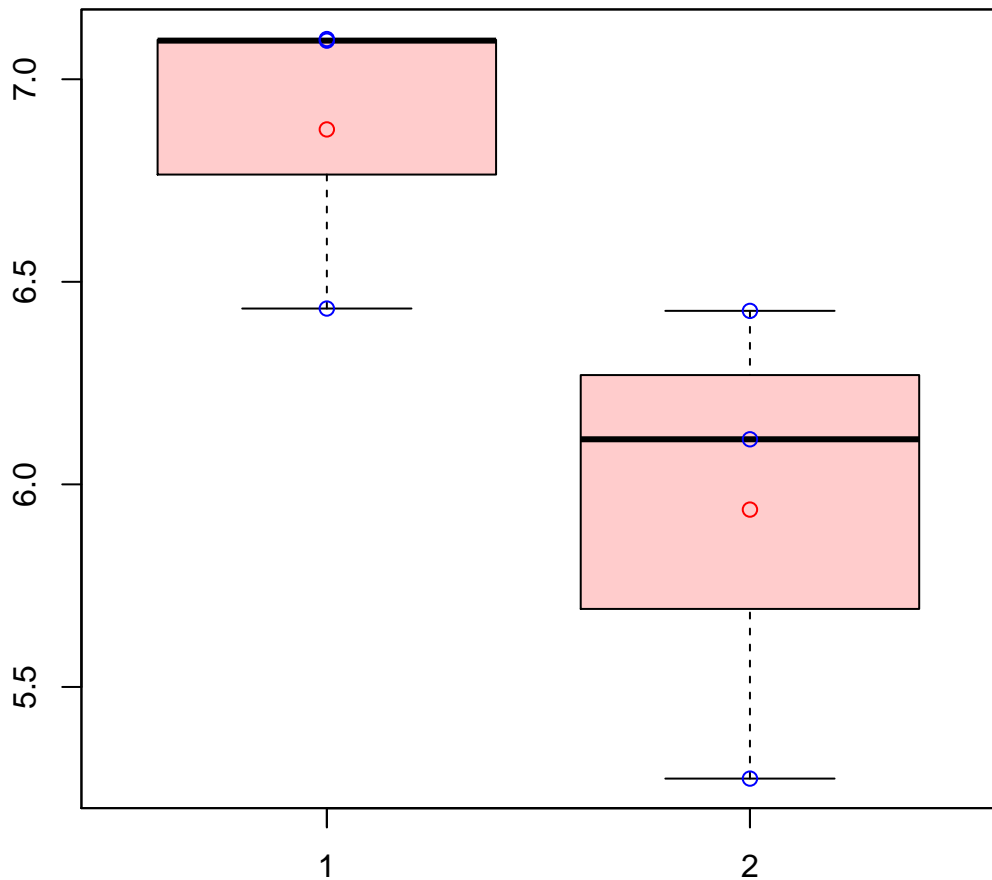

t-Test: p-value = 0.1

# M0RVS9|M0RVS9\_MUSAM

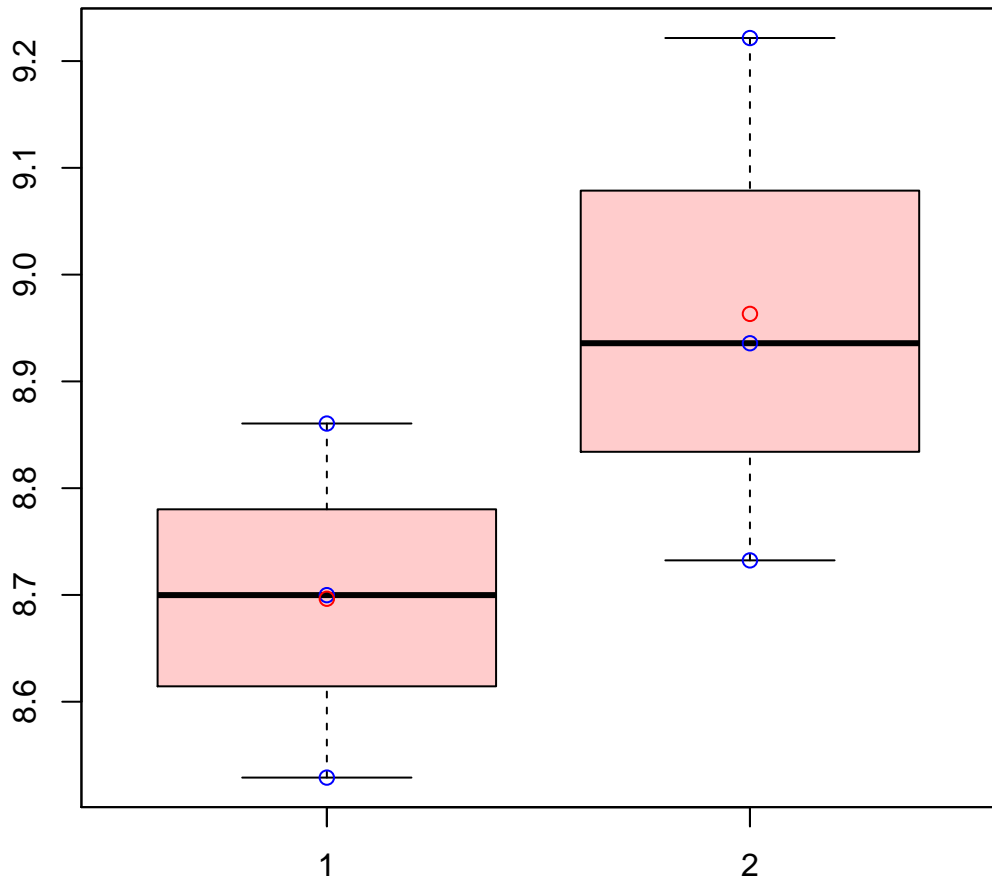

t-Test: p-value = 0.2

# M0RVU1|M0RVU1\_MUSAM

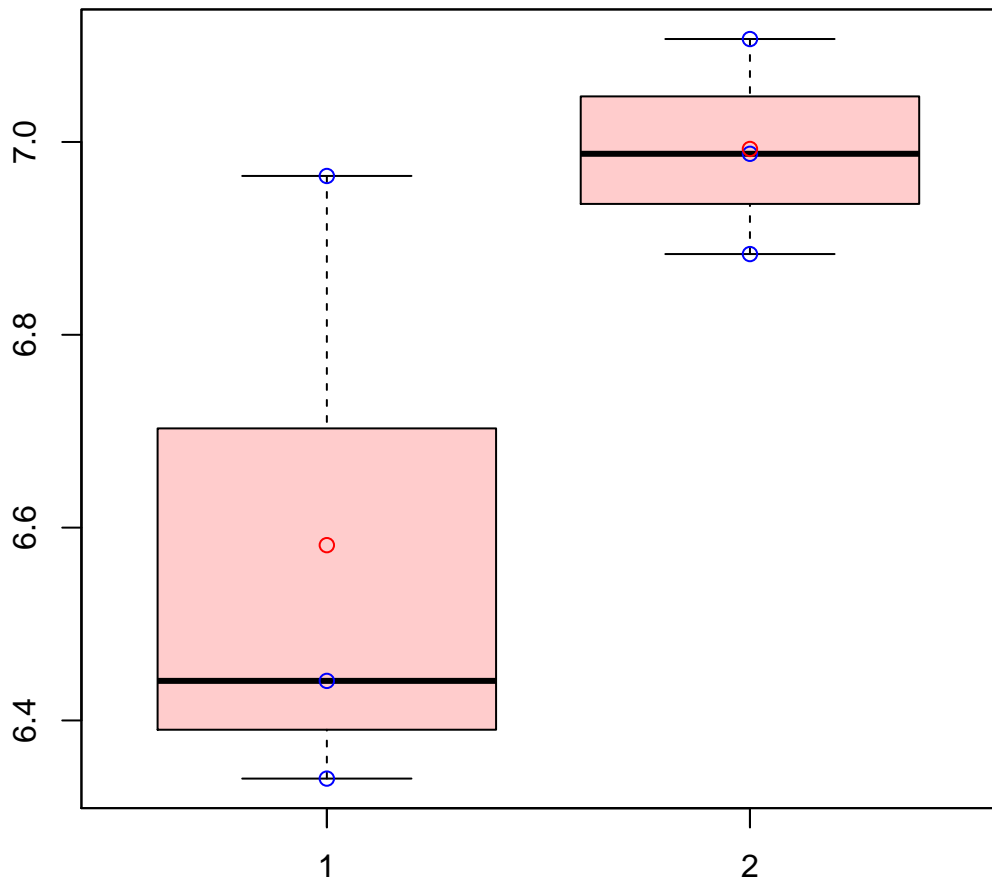

t-Test: p-value = 0.16

# M0RVY2|M0RVY2\_MUSAM

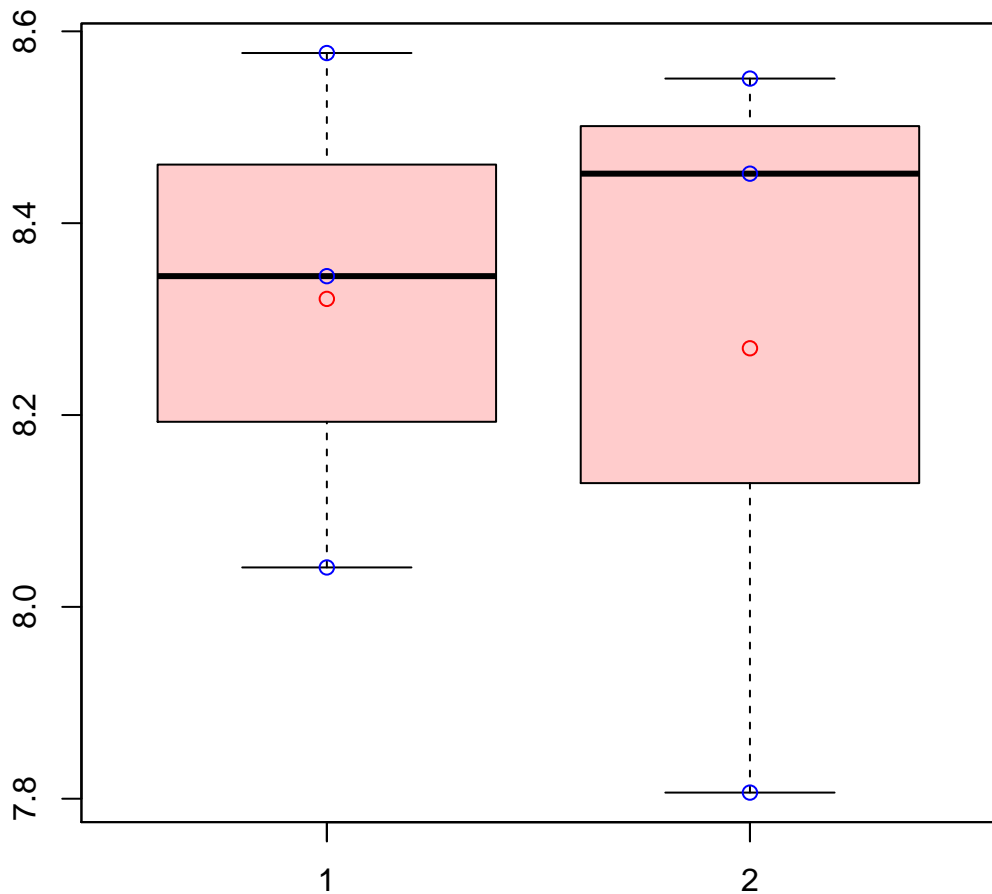

t-Test: p-value = 0.86

# M0RW32|M0RW32\_MUSAM

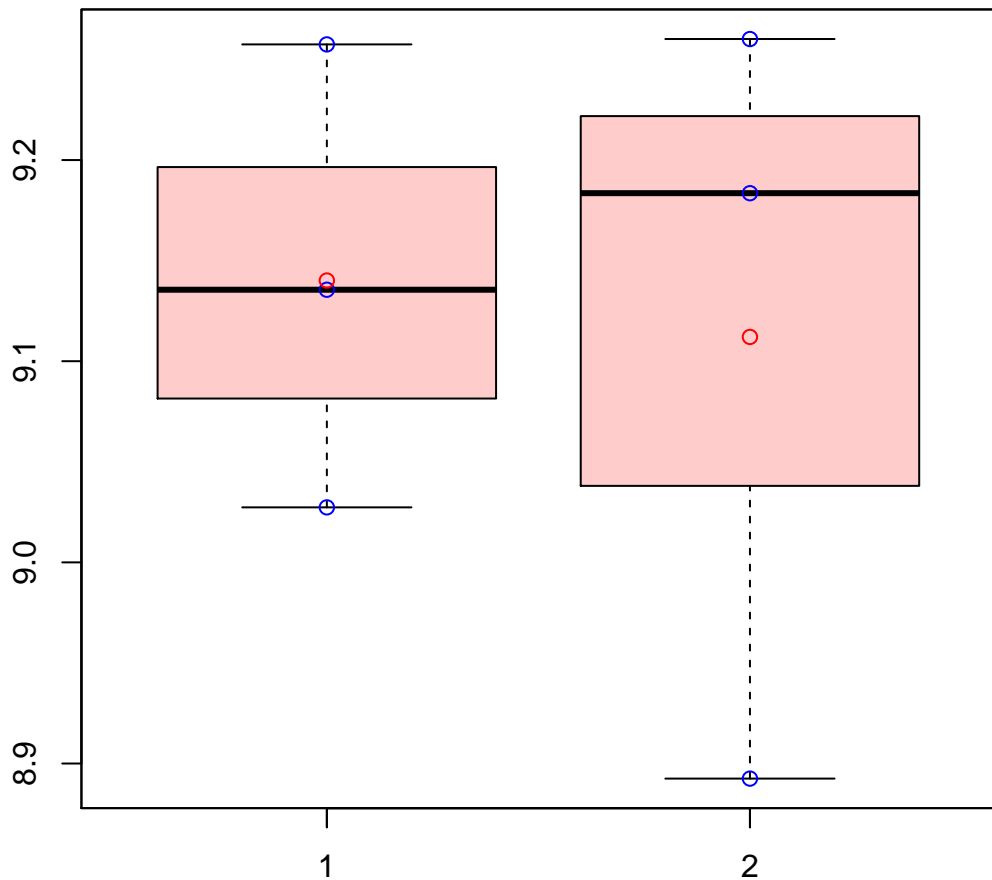

t-Test: p-value = 0.84

# M0RWJ1|M0RWJ1\_MUSAM

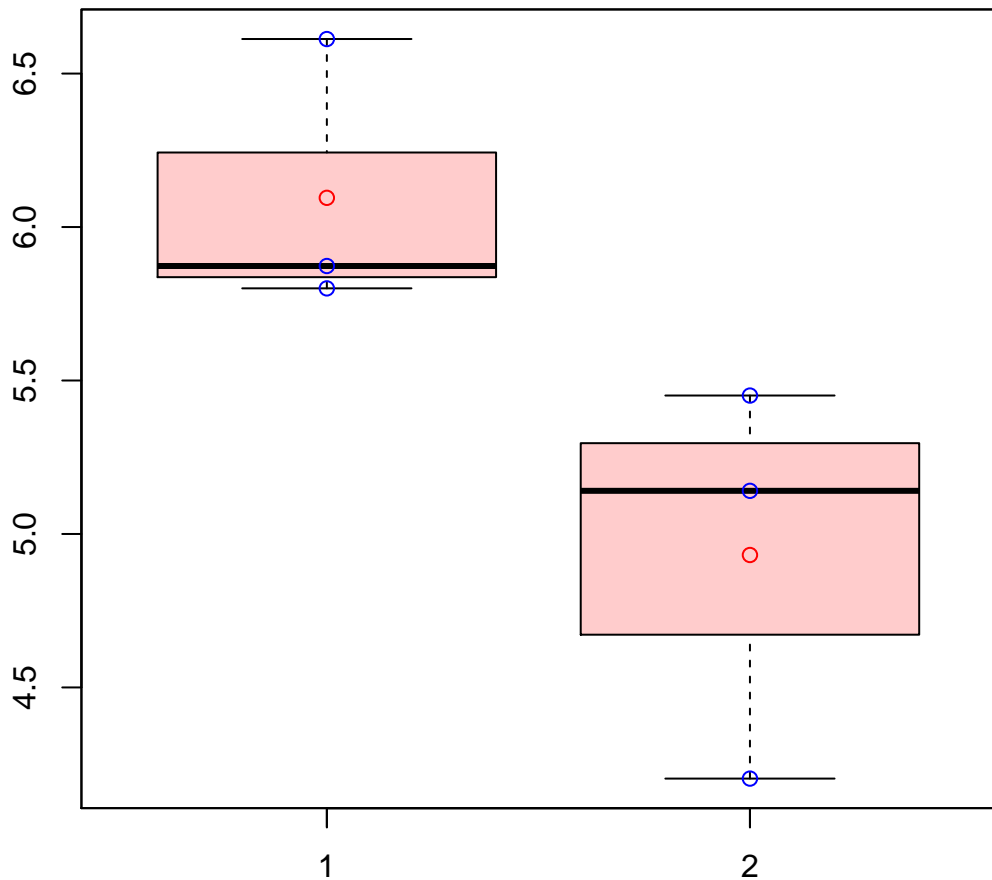

t-Test: p-value = 0.07

# M0RWT6|M0RWT6\_MUSAM

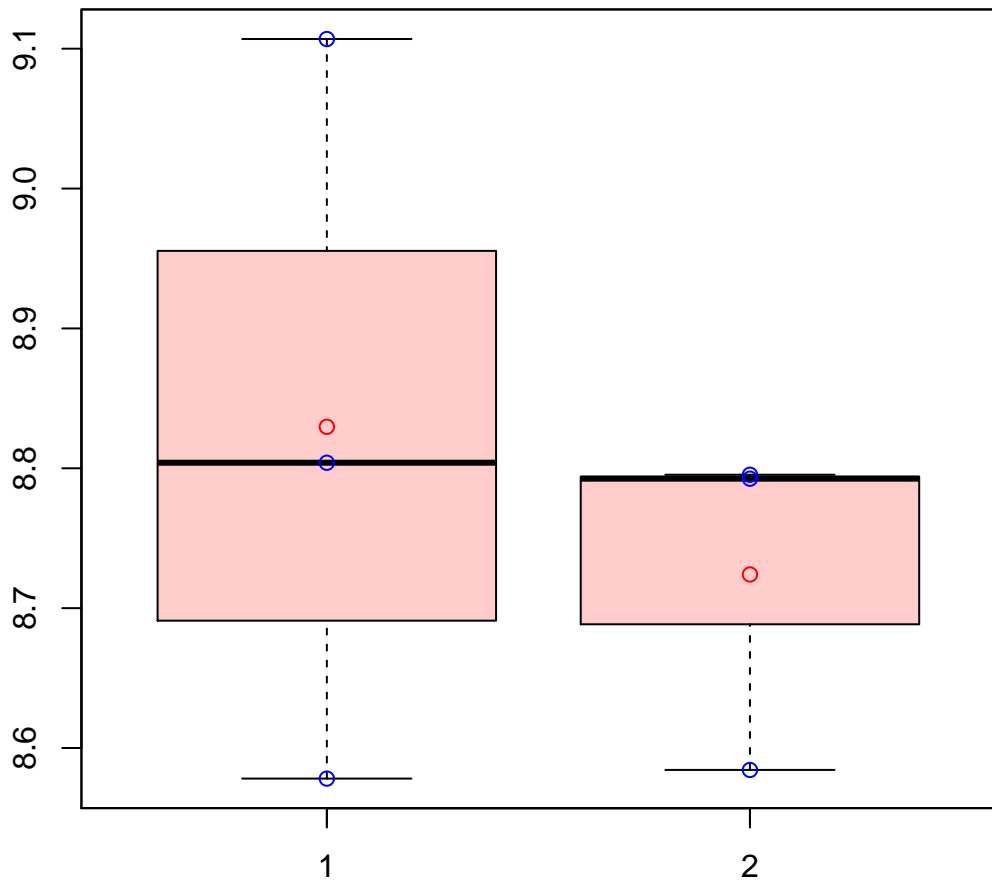

t-Test: p-value = 0.58



# M0RWX9|M0RWX9\_MUSAM

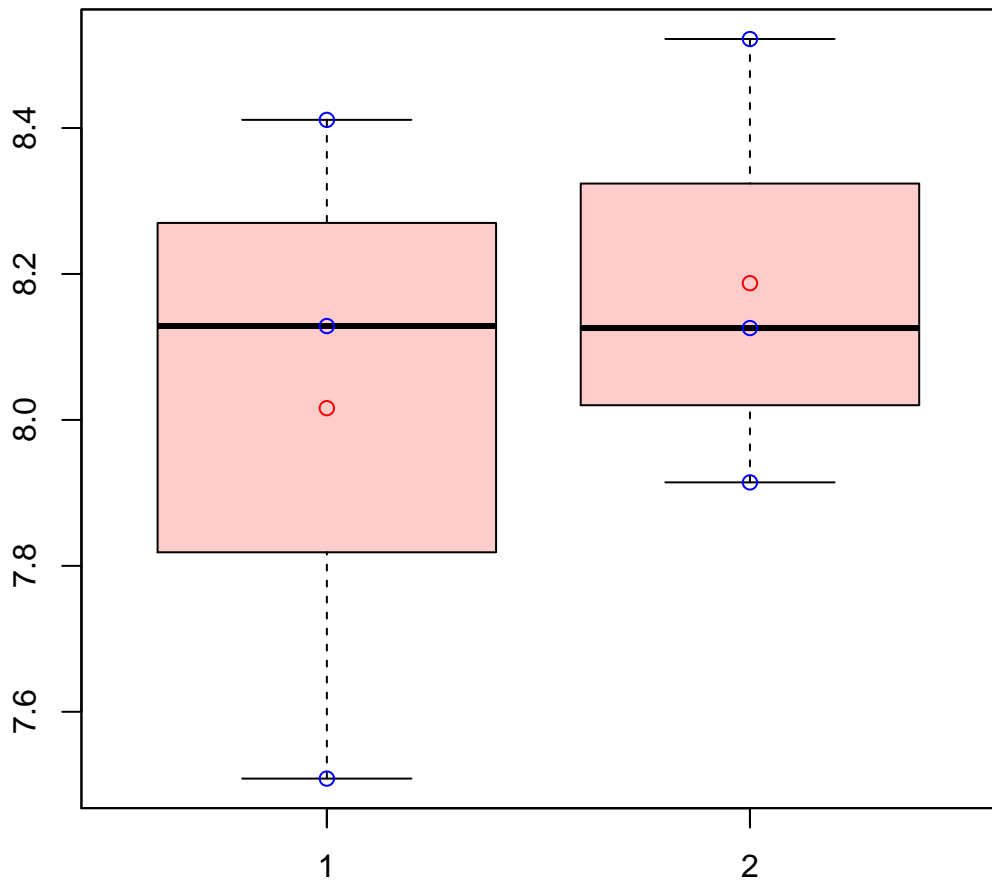

t-Test: p-value = 0.63

# M0RXL4|M0RXL4\_MUSAM

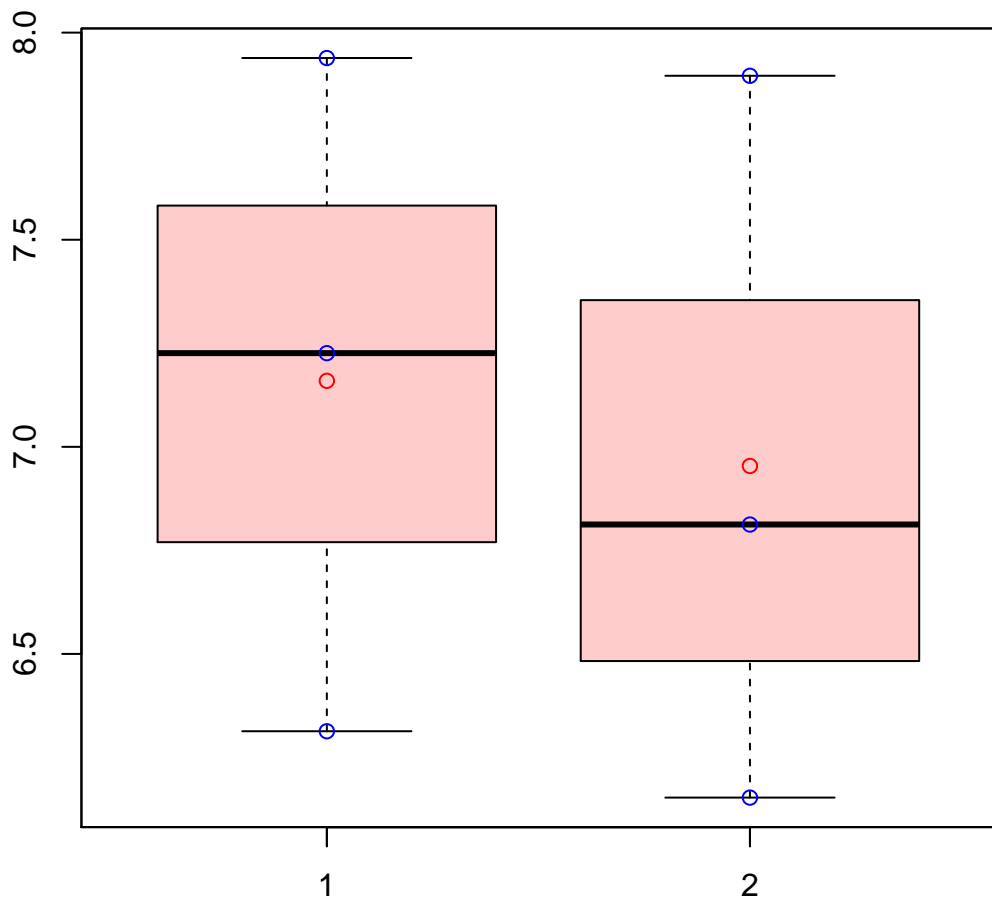

t-Test: p-value = 0.78

# M0RY00|M0RY00\_MUSAM

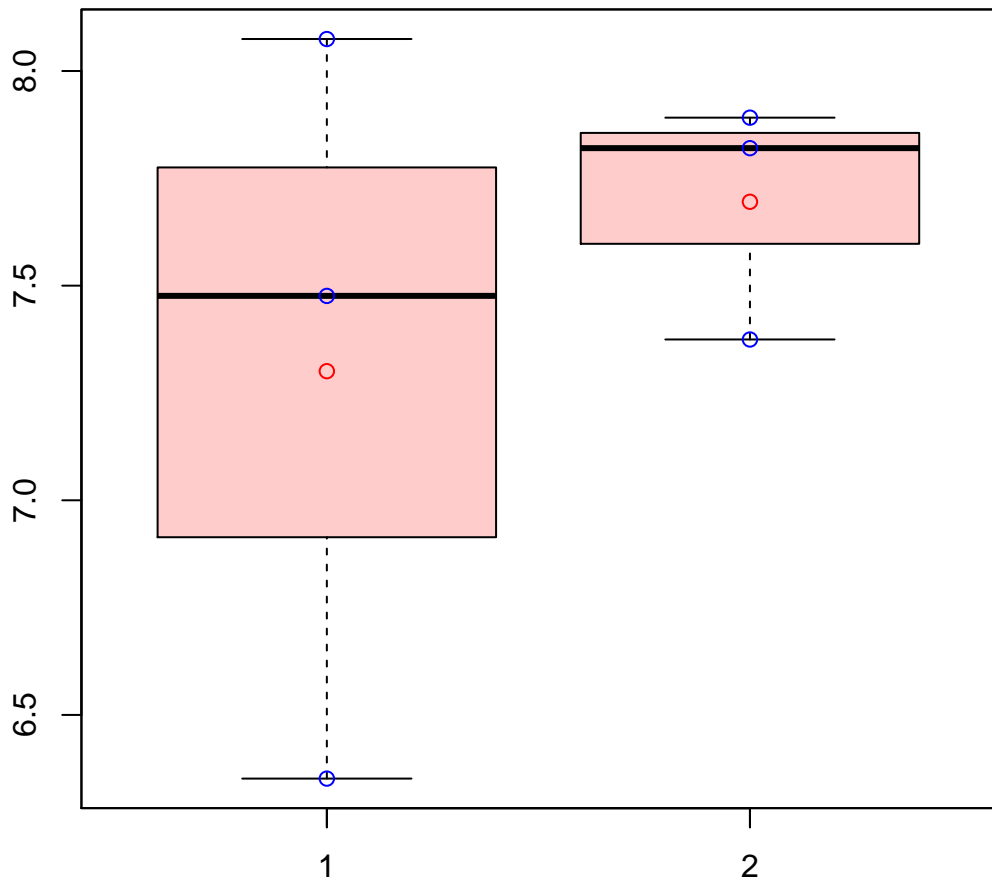

# M0RY86|M0RY86\_MUSAM

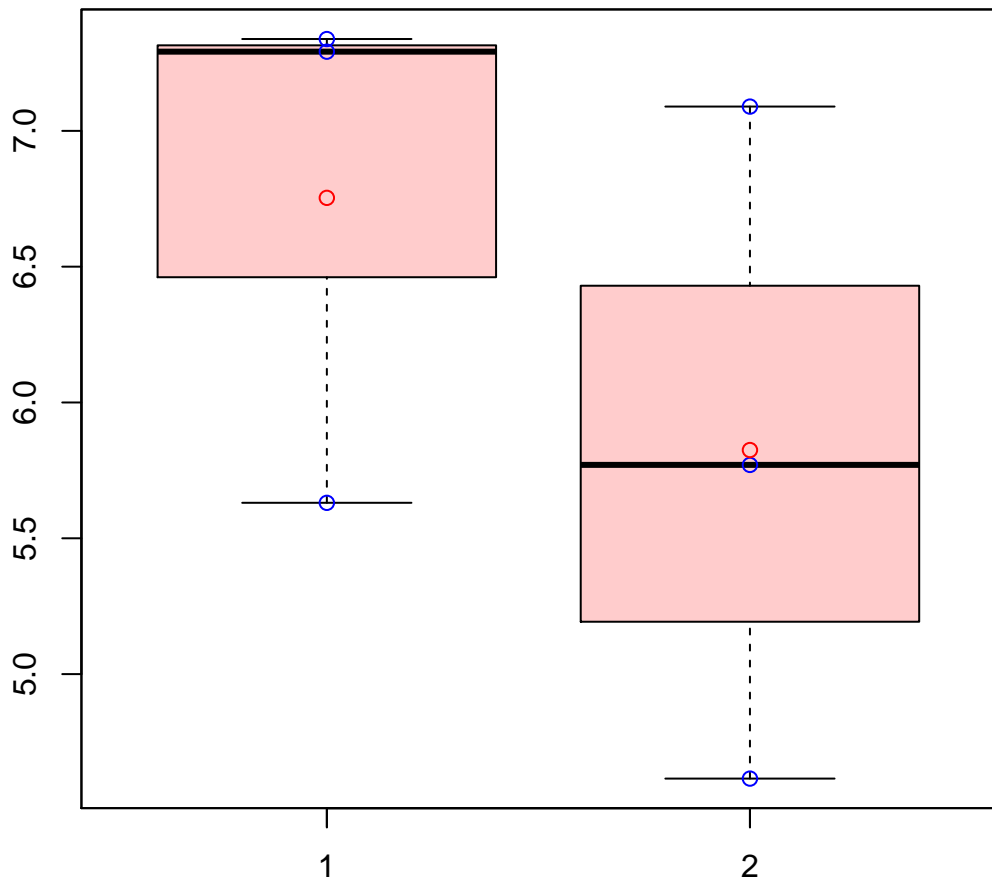

t-Test: p-value = 0.37

# M0RYL8|M0RYL8\_MUSAM

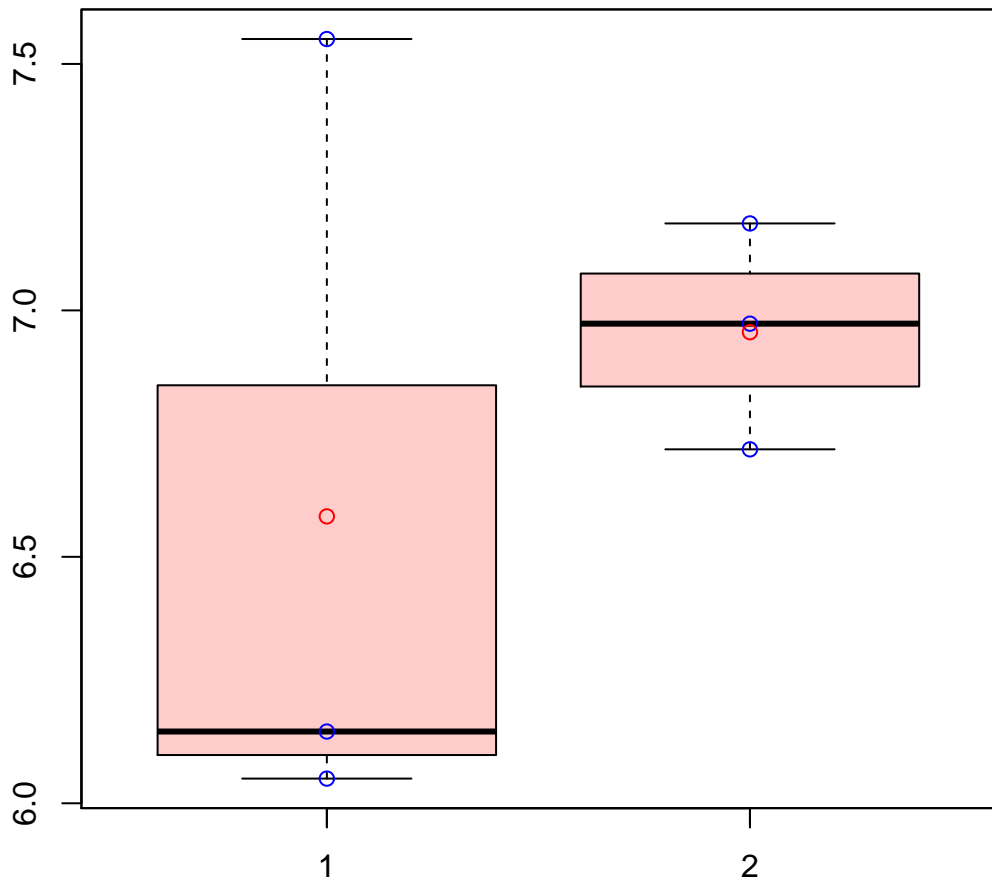

t-Test: p-value = 0.53

# M0RYP4|M0RYP4\_MUSAM

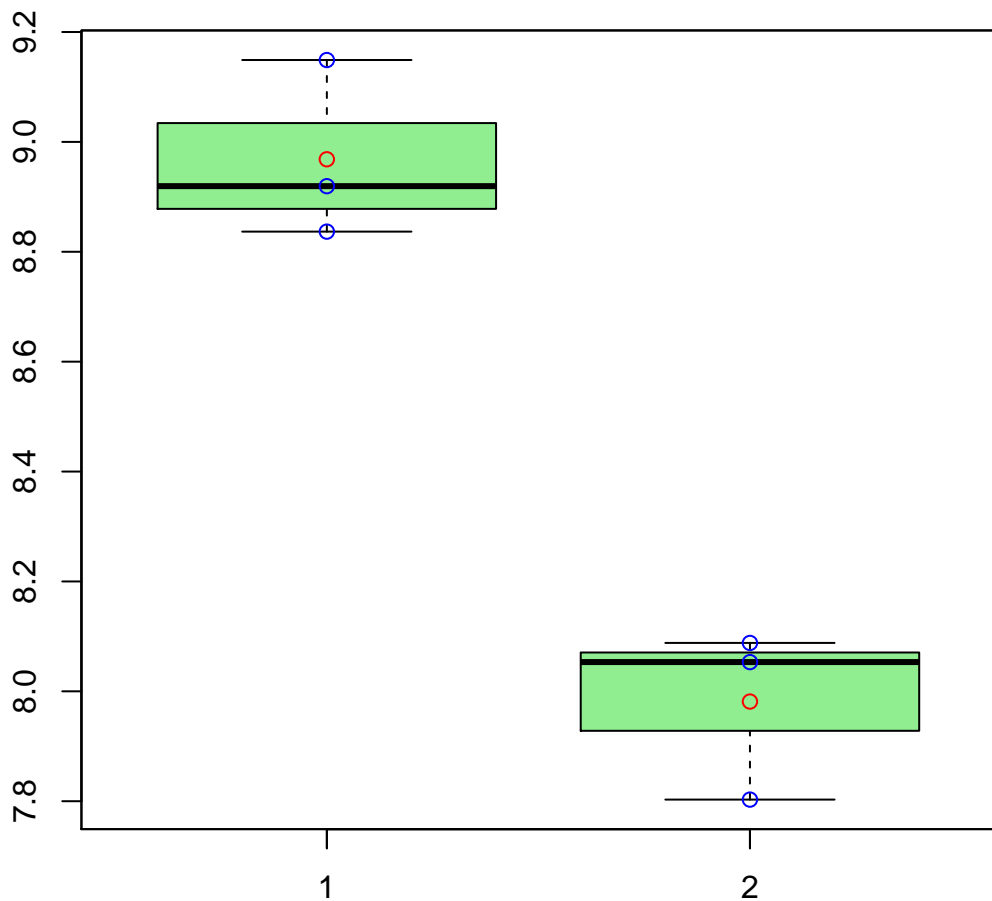

t-Test: p-value = 0

# M0RYR1|M0RYR1\_MUSAM

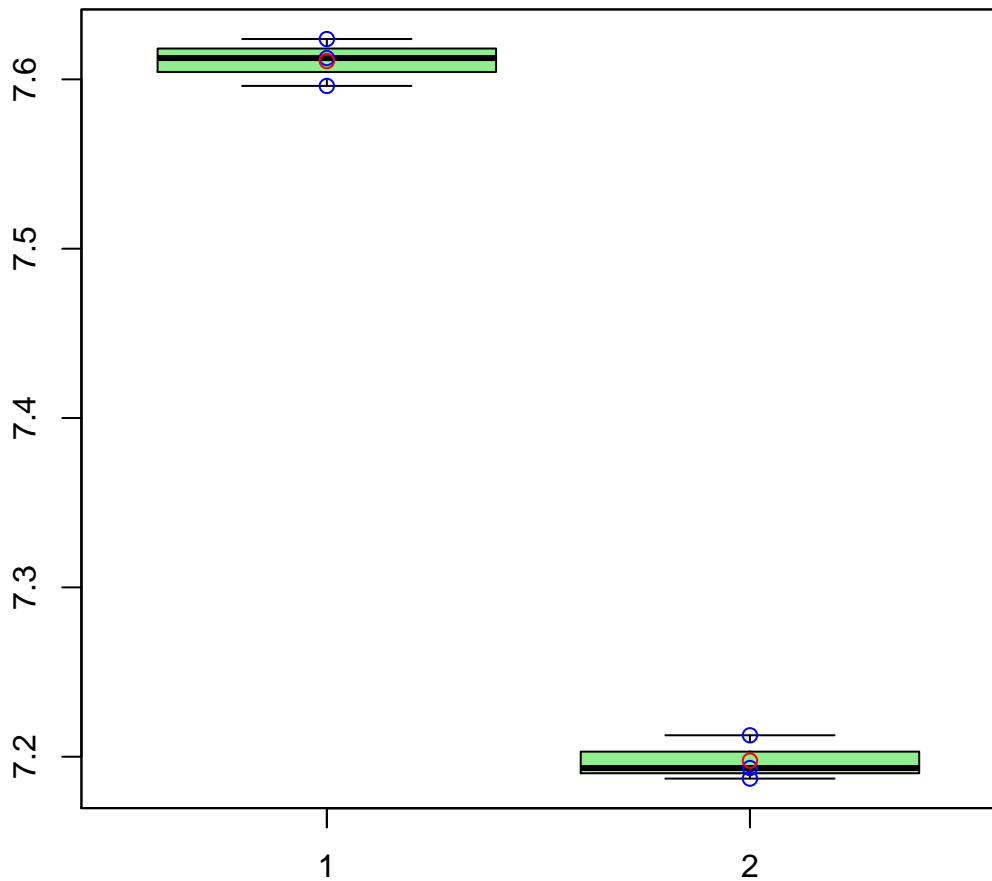

t-Test: p-value = 0

# M0RZ15|M0RZ15\_MUSAM

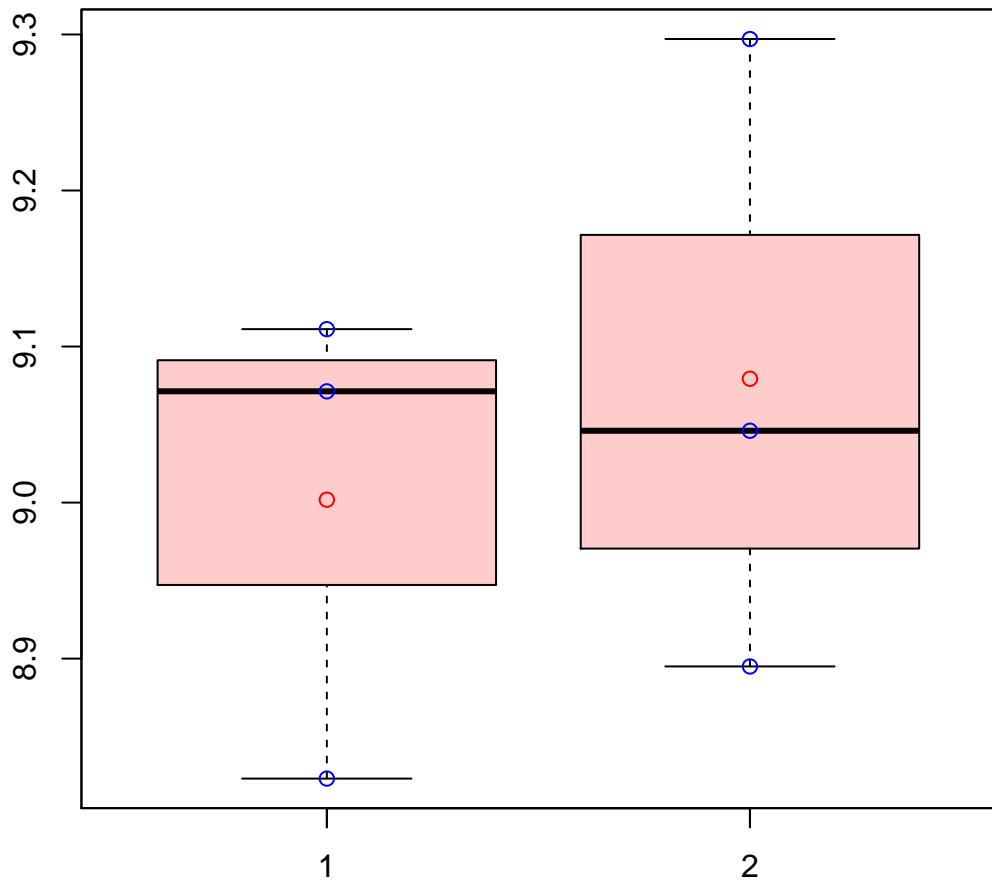

t-Test: p-value = 0.63



# M0RZ40|M0RZ40\_MUSAM

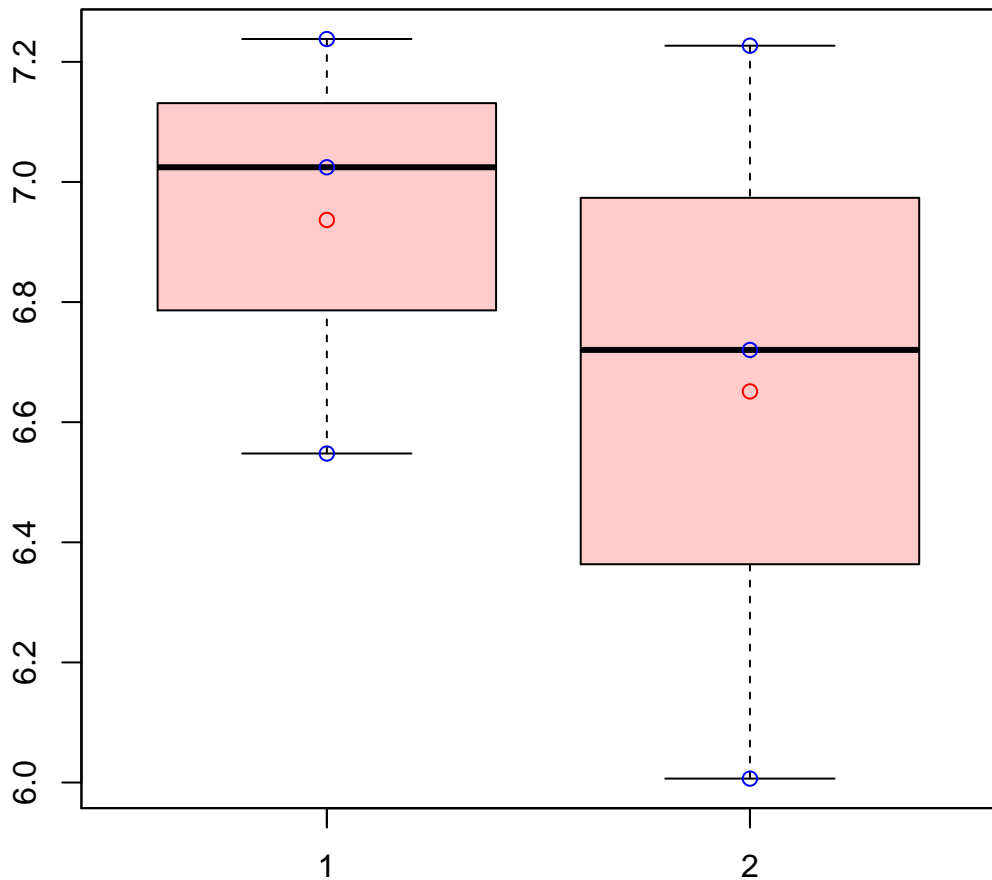

t-Test: p-value = 0.53

# M0RZV1|M0RZV1\_MUSAM

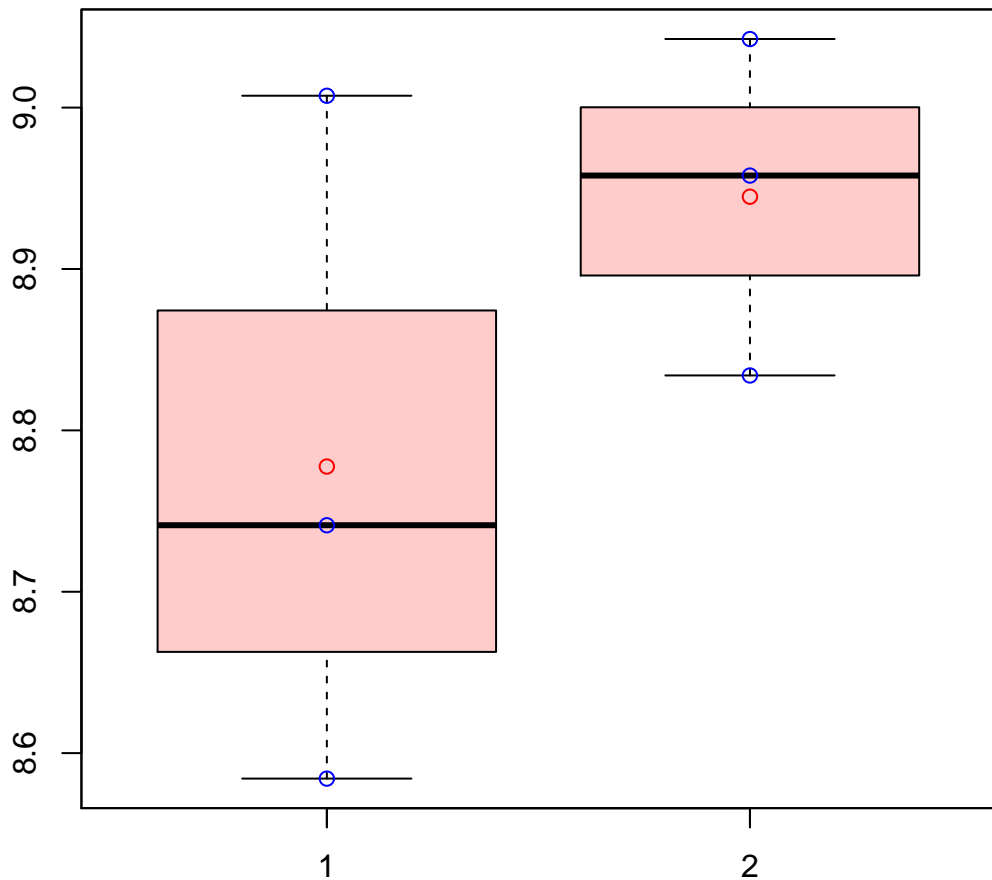

t-Test: p-value = 0.31

# M0S044|M0S044\_MUSAM

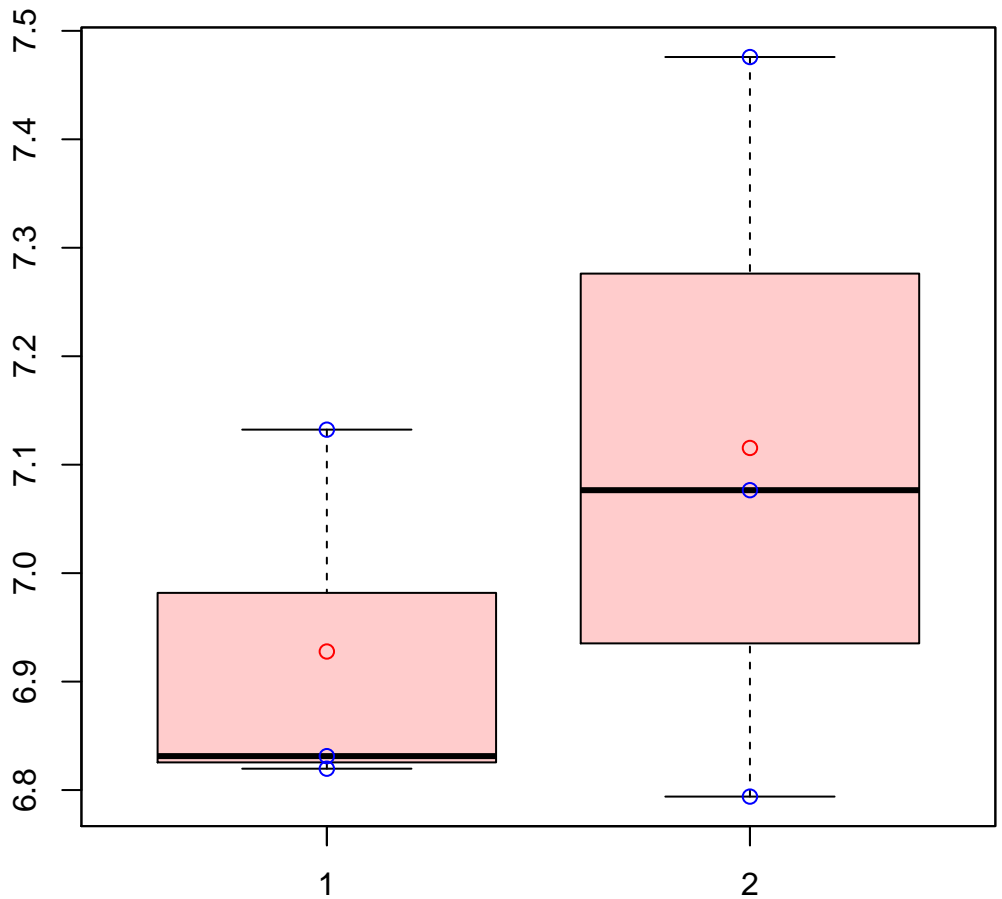

t-Test: p-value = 0.46

# M0S0G6|M0S0G6\_MUSAM

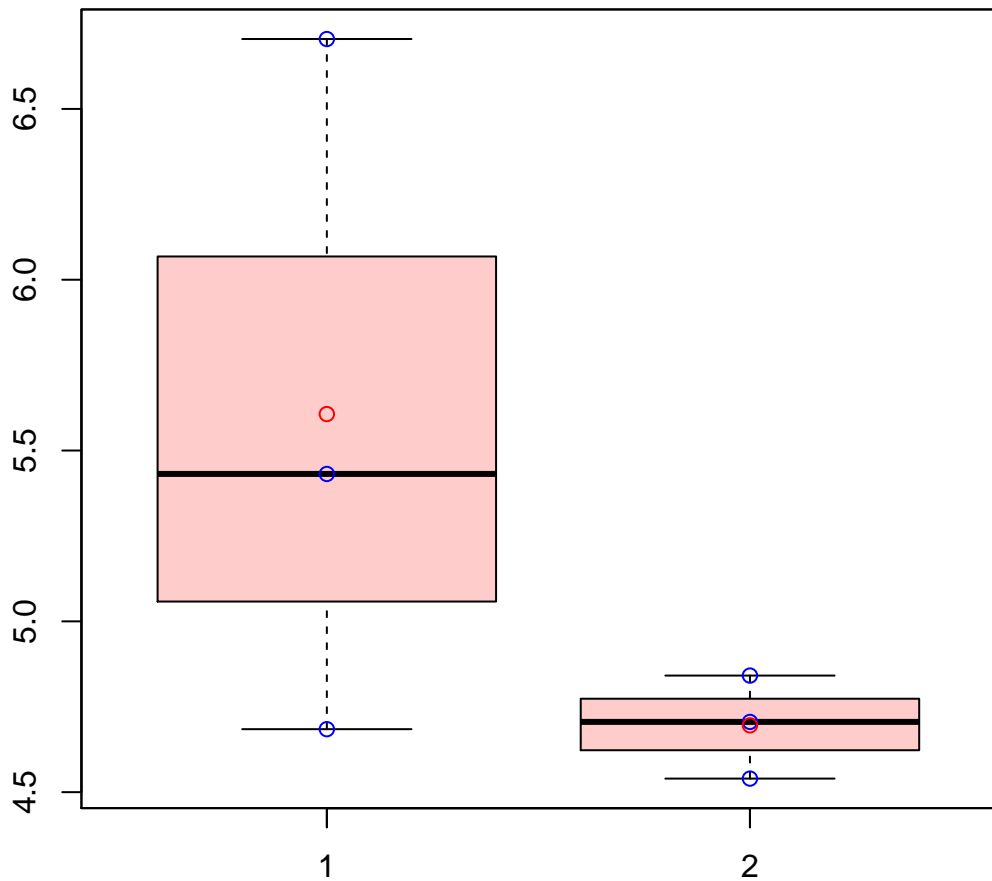

t-Test: p-value = 0.26

# M0S0N5|M0S0N5\_MUSAM

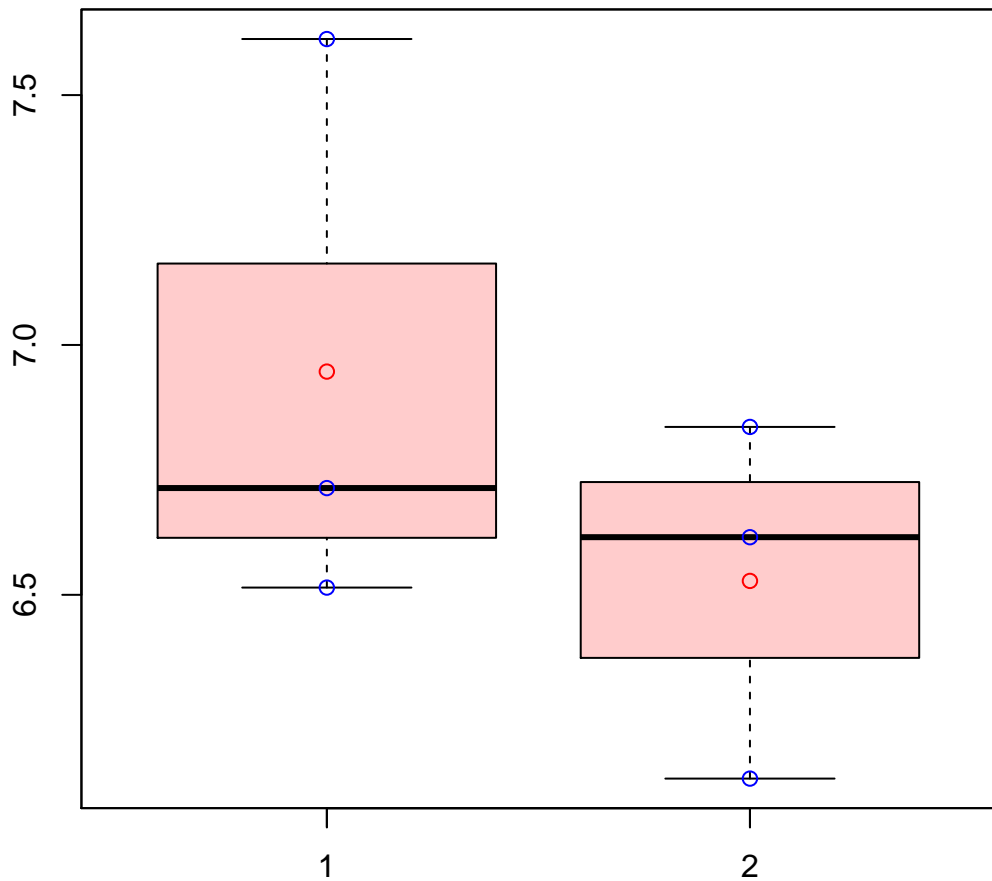

t-Test: p-value = 0.36

# M0S102|M0S102\_MUSAM

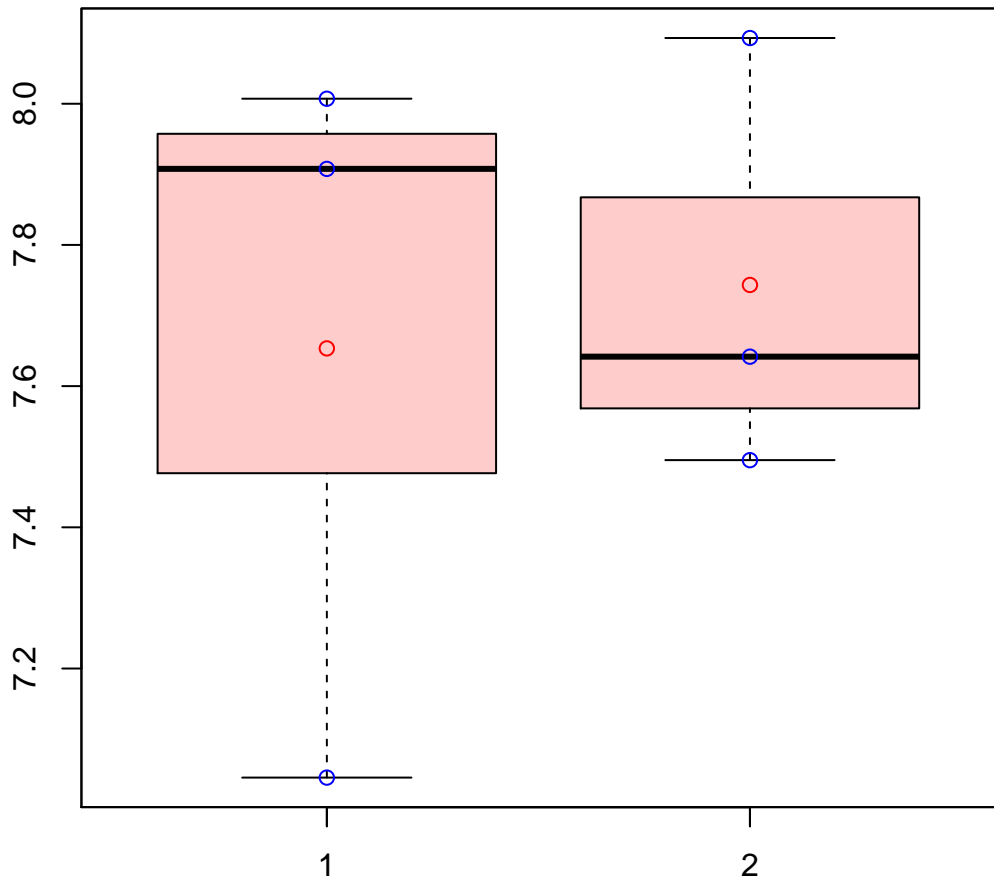

t-Test: p-value = 0.82

# M0S163|M0S163\_MUSAM

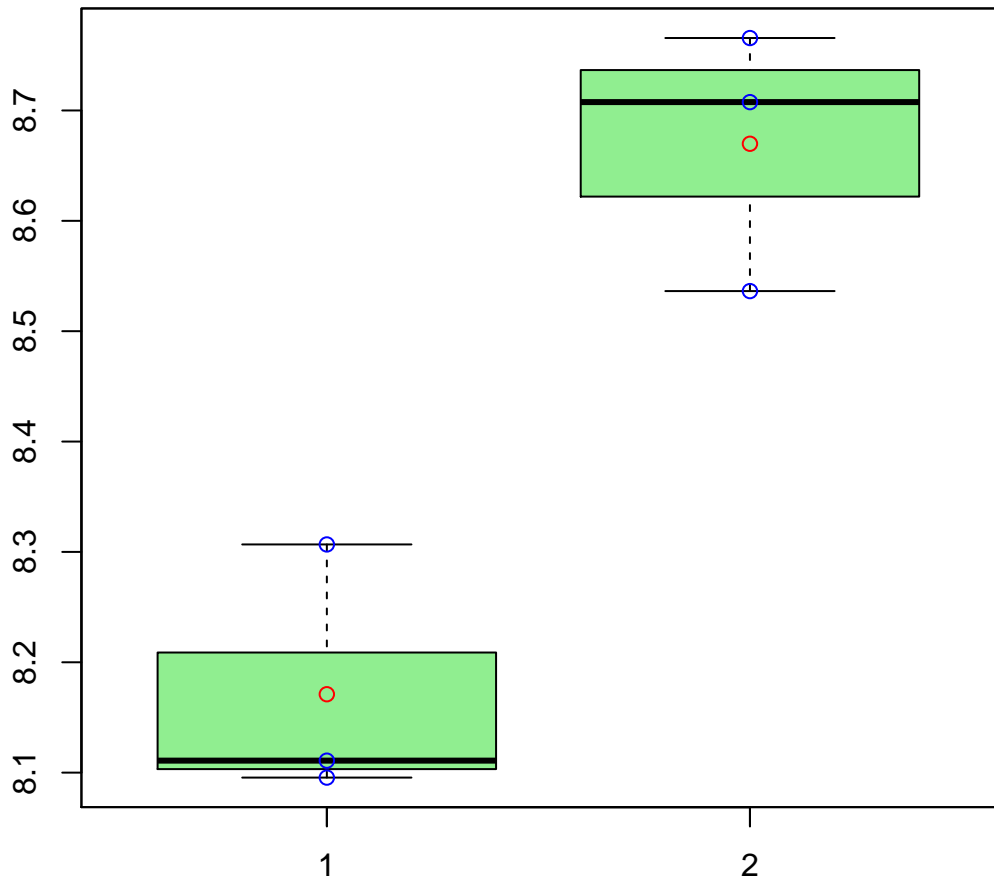

t-Test: p-value = 0.01

# M0S1C3|M0S1C3\_MUSAM

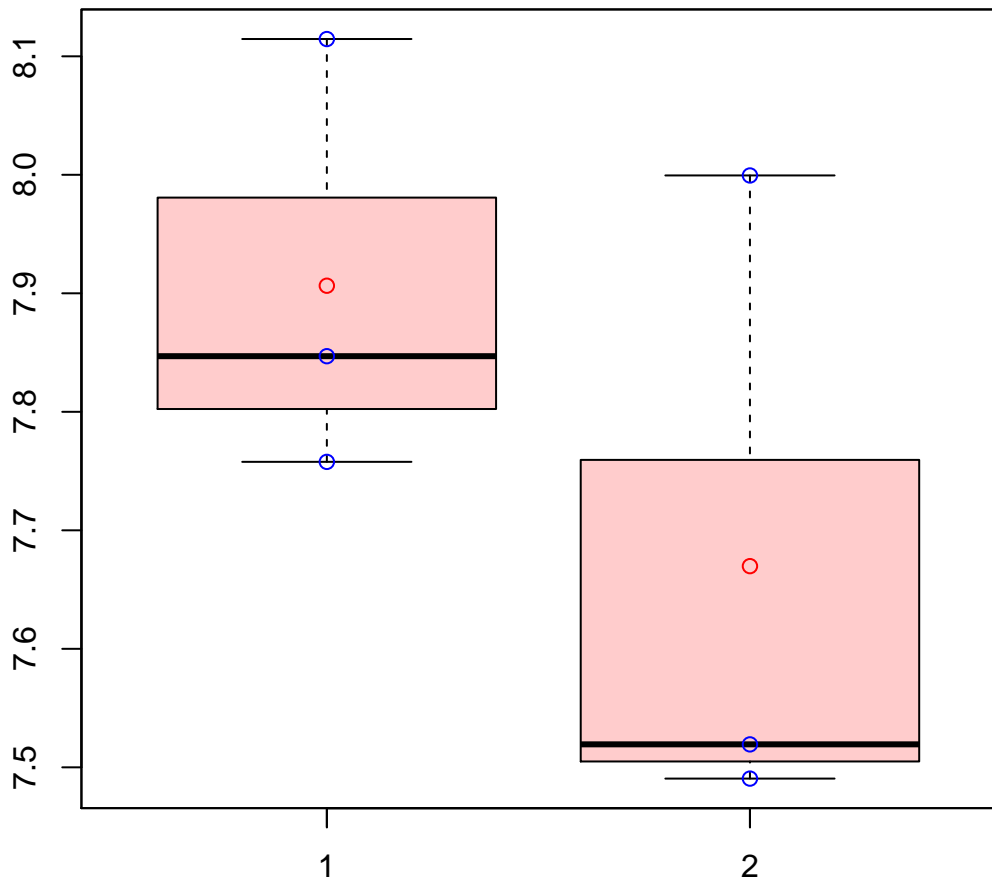

t-Test: p-value = 0.31



# M0S1D8|M0S1D8\_MUSAM

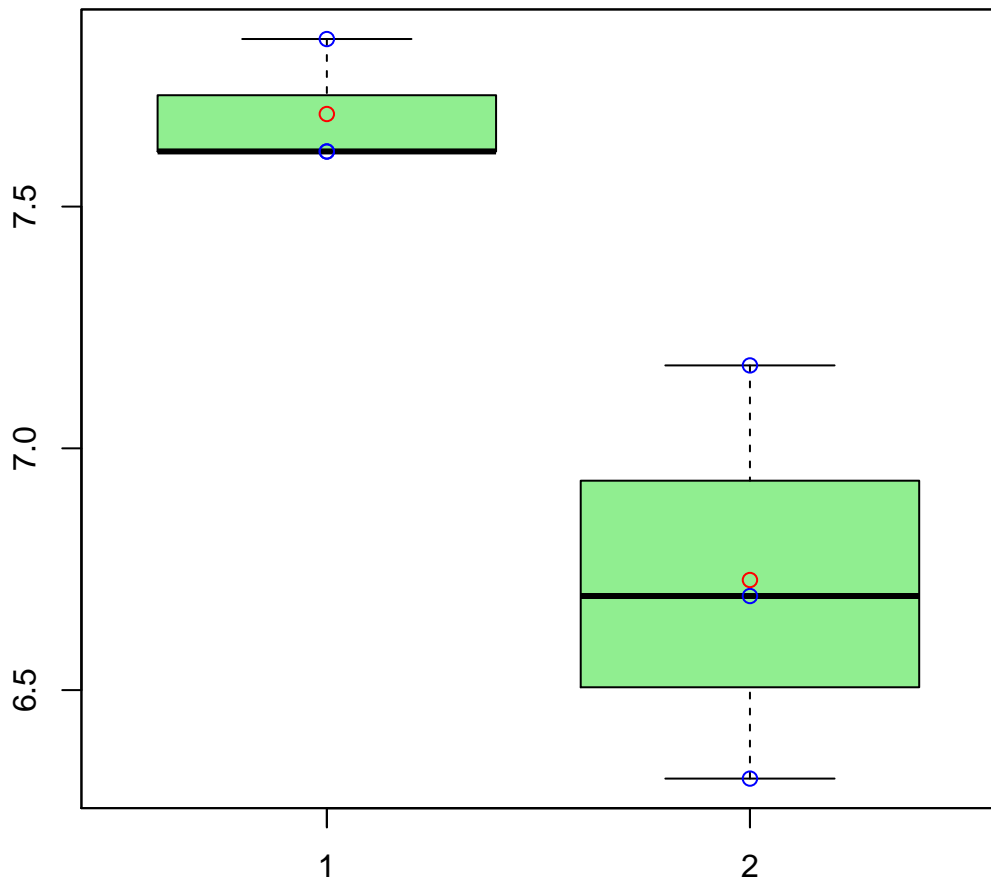

t-Test: p-value = 0.05

# M0S283|M0S283\_MUSAM

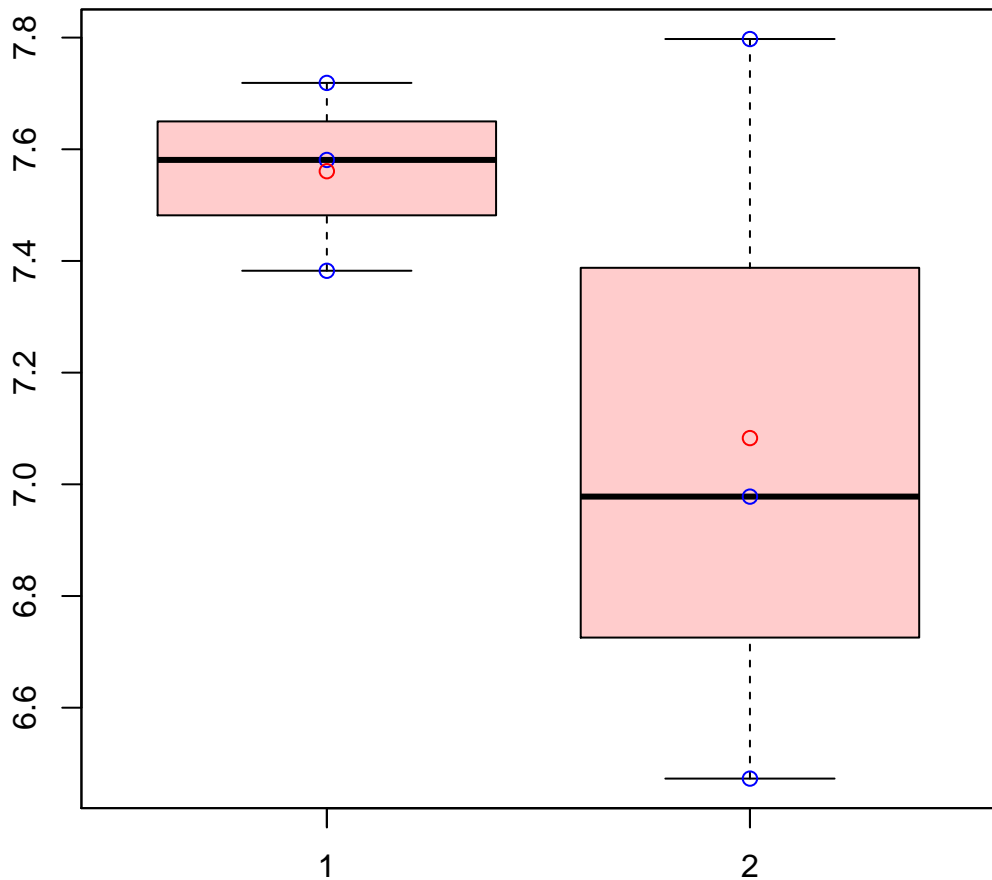

t-Test: p-value = 0.34

# M0S2J6|M0S2J6\_MUSAM

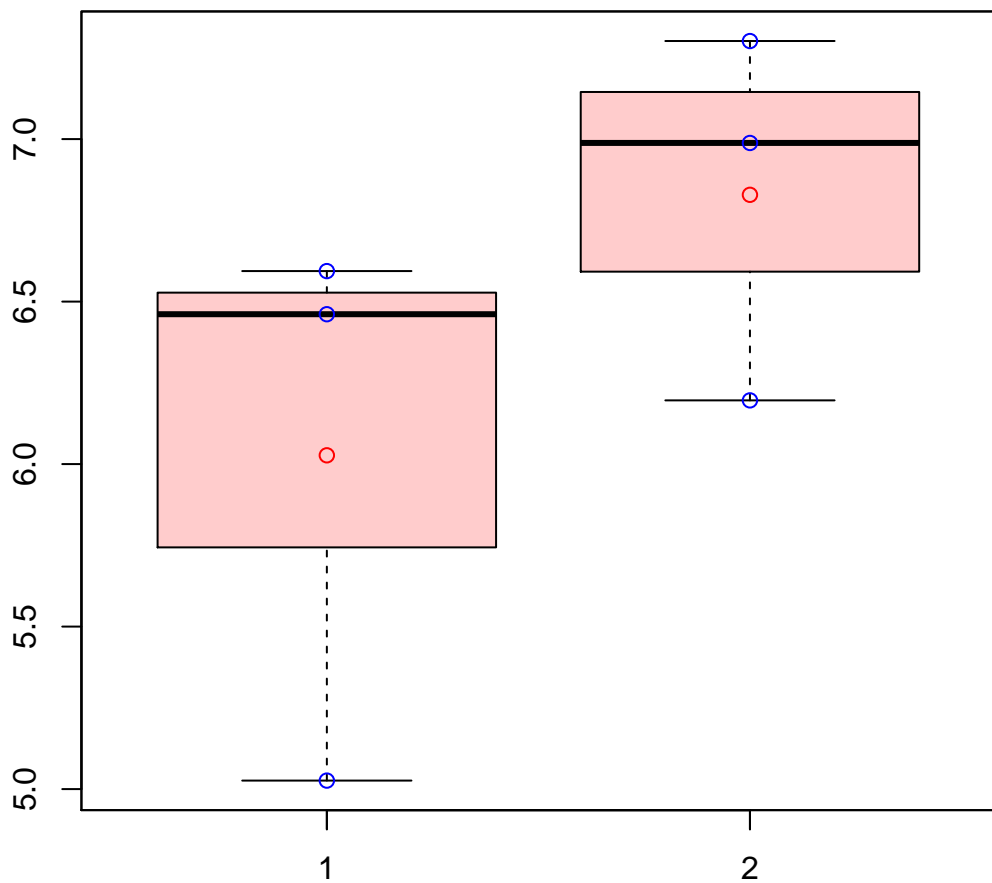

t-Test: p-value = 0.26

# M0S2U5|M0S2U5\_MUSAM

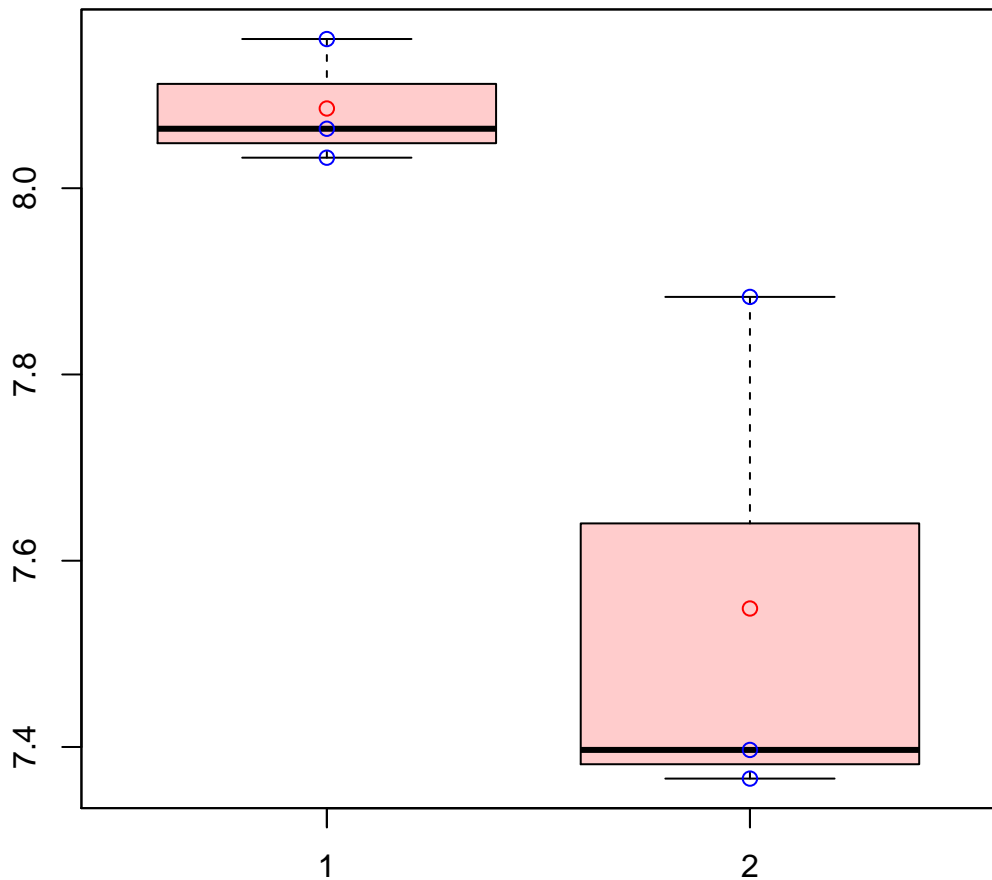

t-Test: p-value = 0.08

# M0S3W6|M0S3W6\_MUSAM

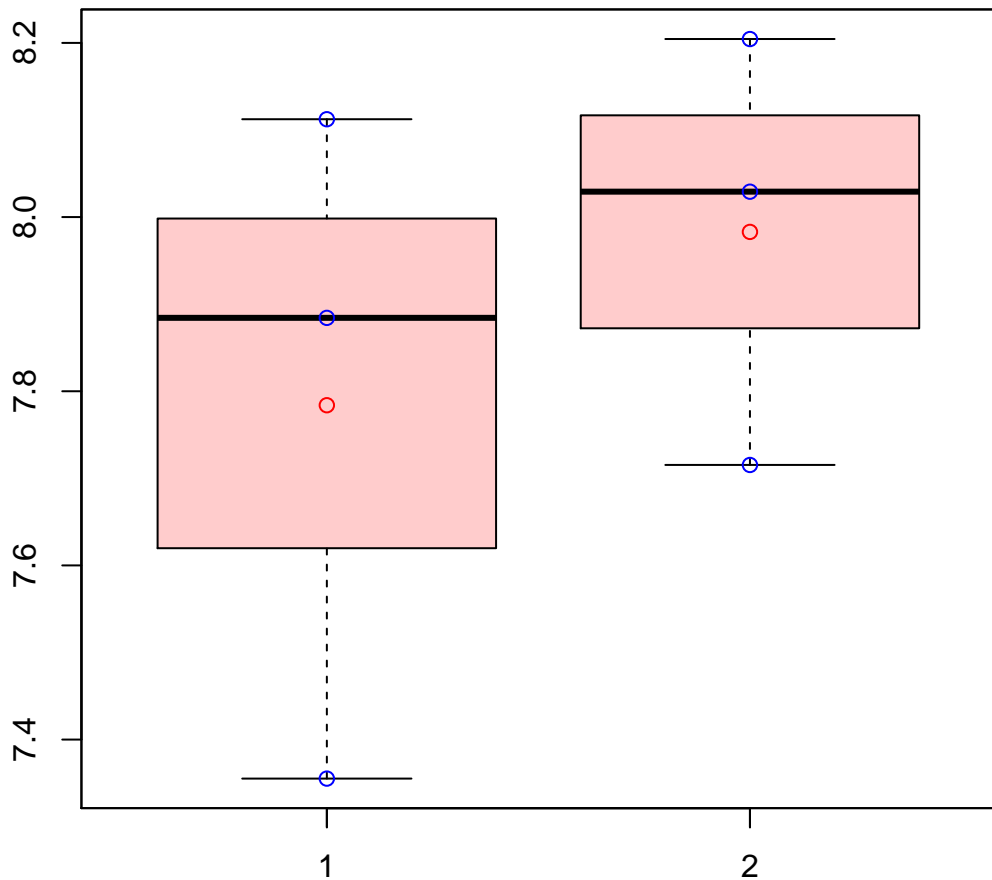

t-Test: p-value = 0.5

# M0S4C8|M0S4C8\_MUSAM

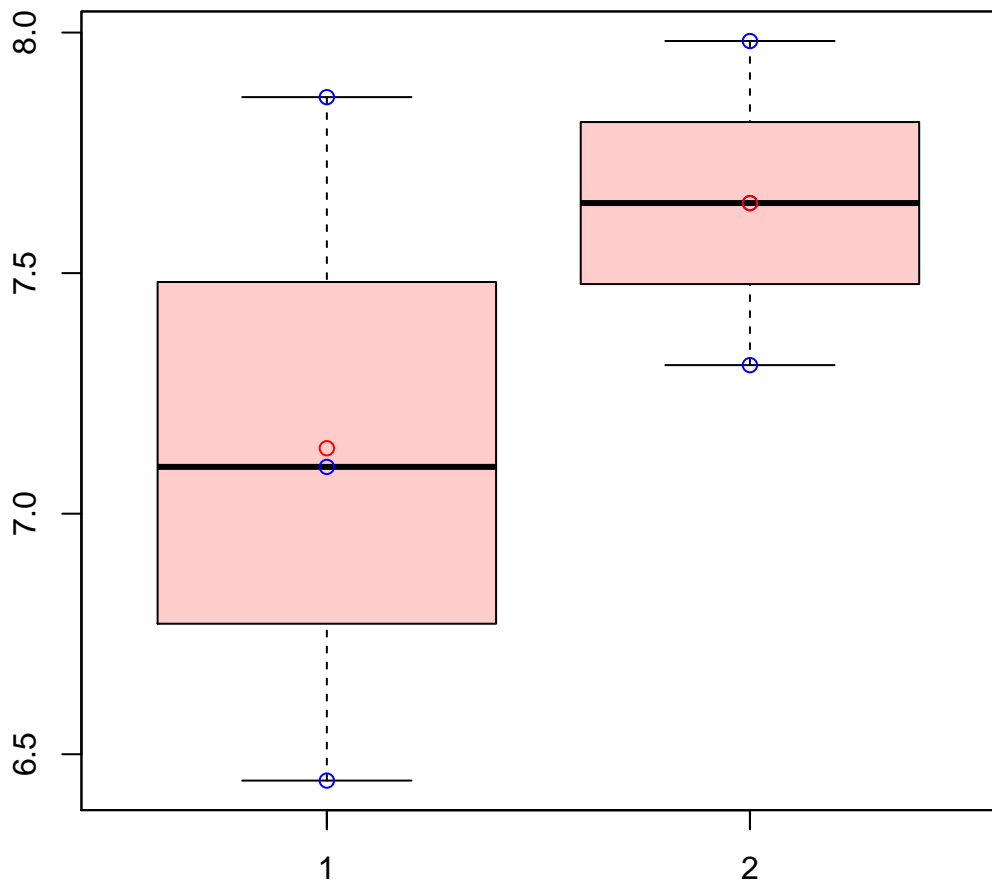

t-Test: p-value = 0.35

# M0S4E0|M0S4E0\_MUSAM

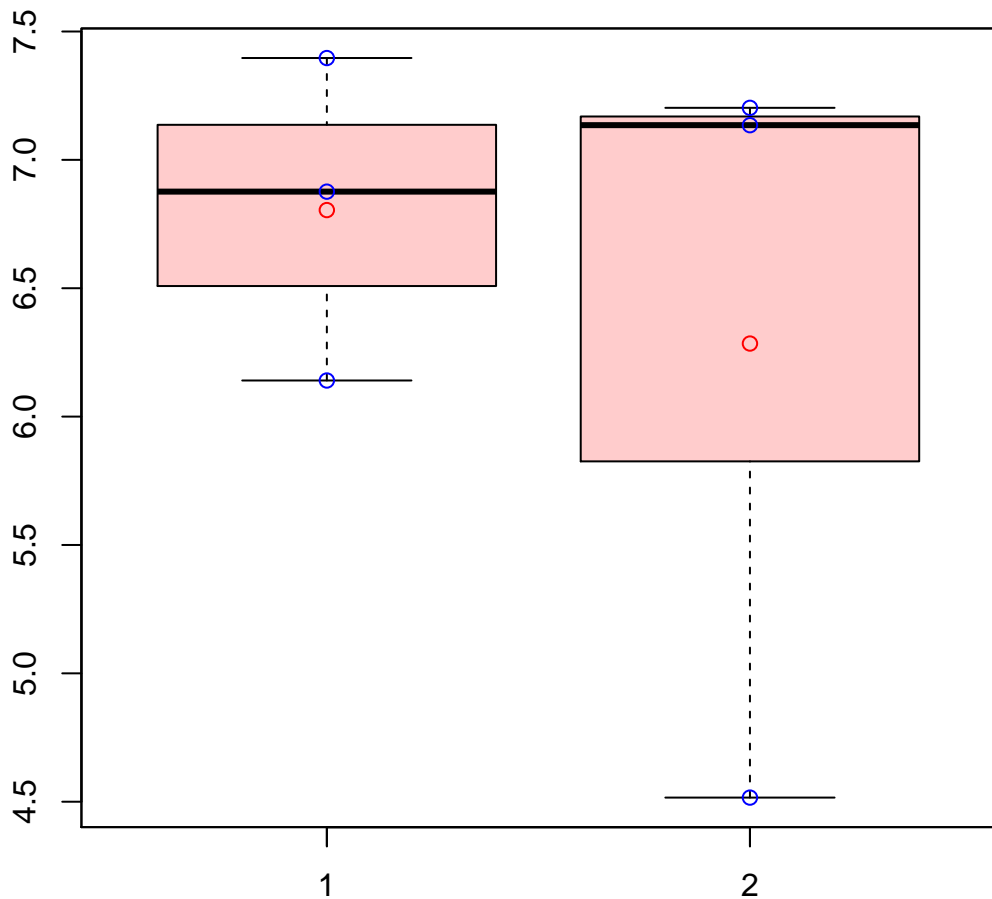

t-Test: p-value = 0.63

# M0S4R2|M0S4R2\_MUSAM

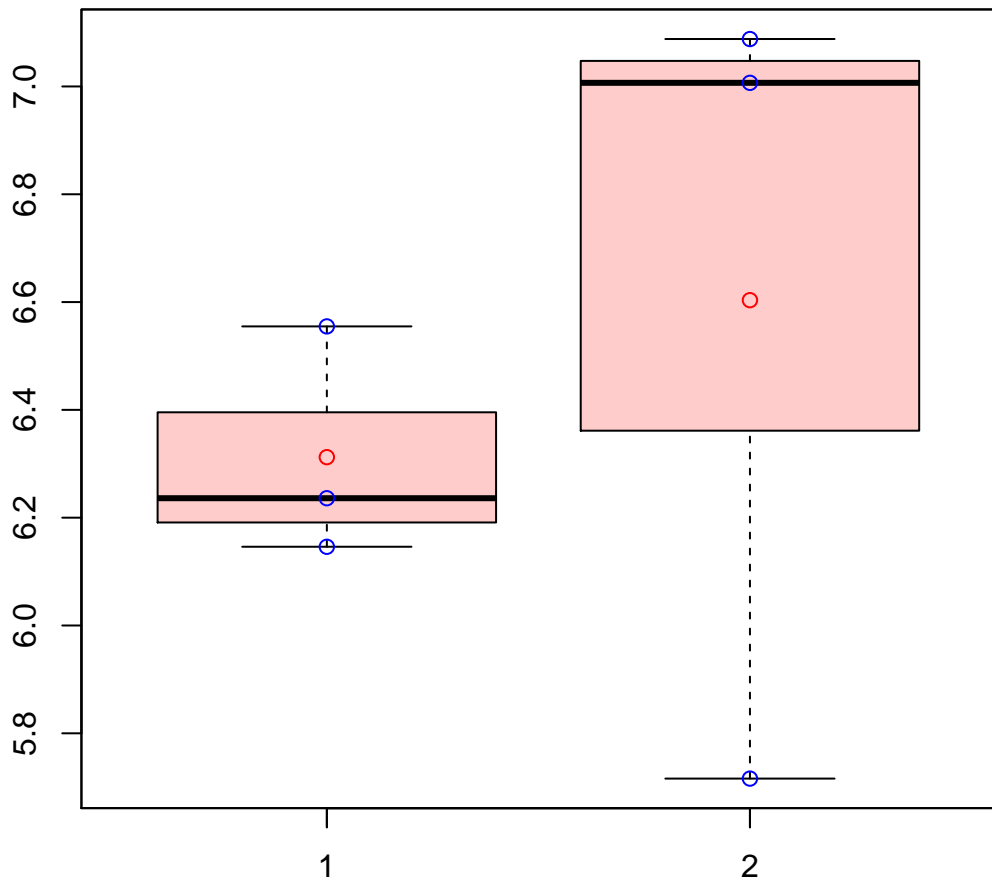

t-Test: p-value = 0.58



# M0S580|M0S580\_MUSAM

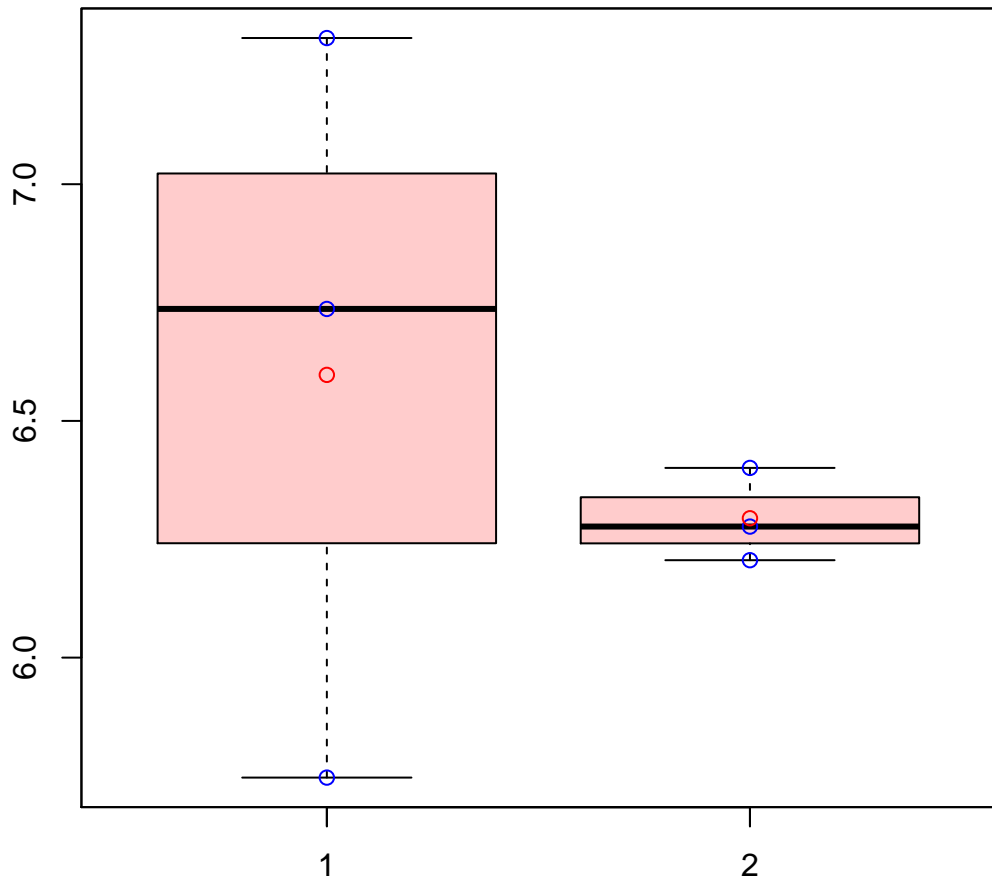

t-Test: p-value = 0.58

# M0S583|M0S583\_MUSAM

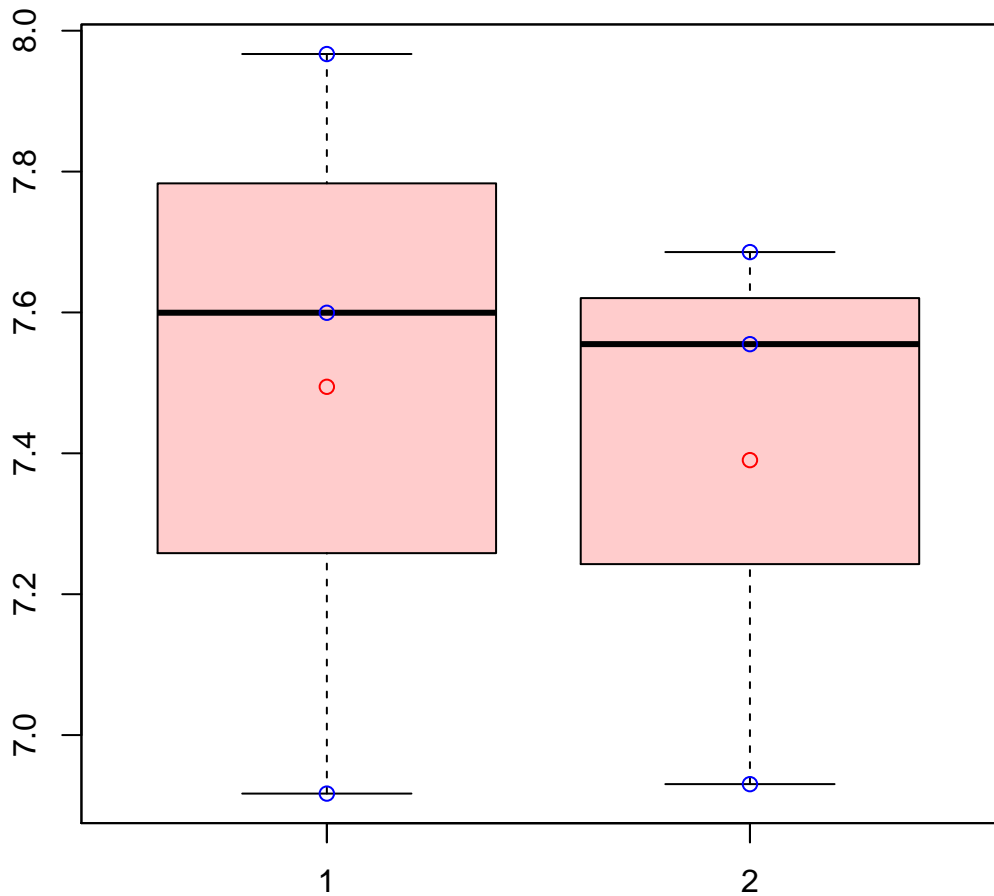

t-Test: p-value = 0.8

# M0S5L9|M0S5L9\_MUSAM

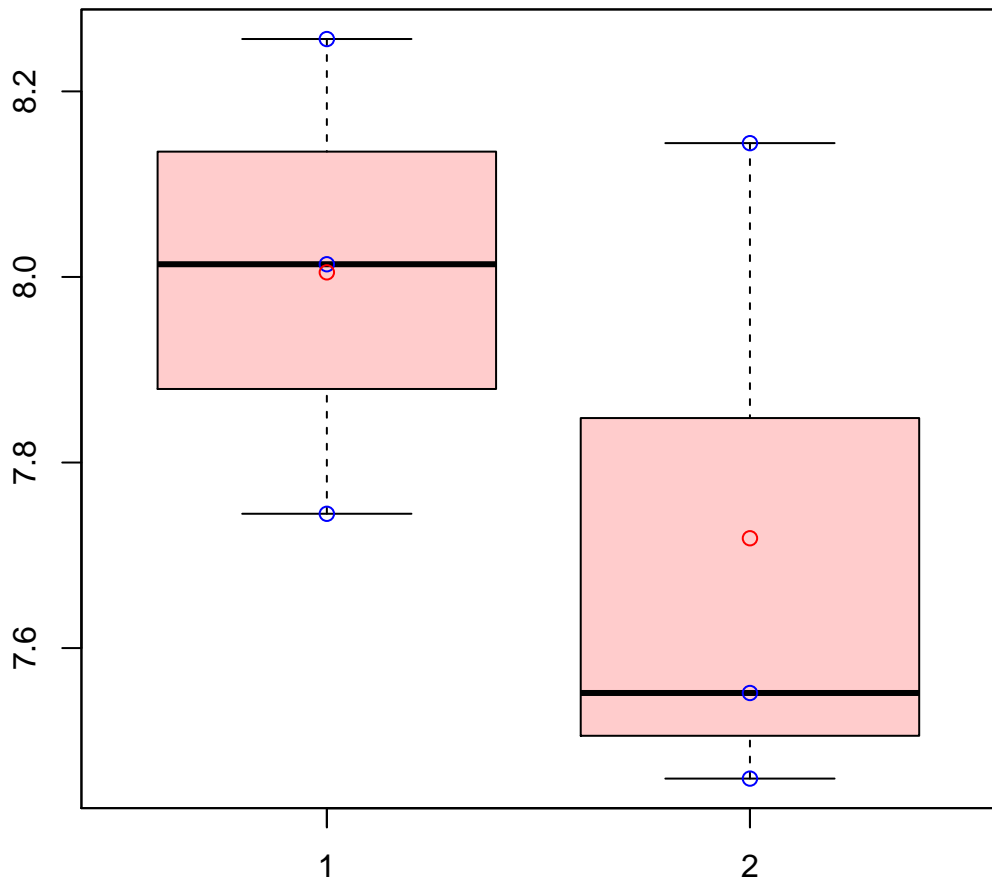

t-Test: p-value = 0.34

# M0S5S1|M0S5S1\_MUSAM

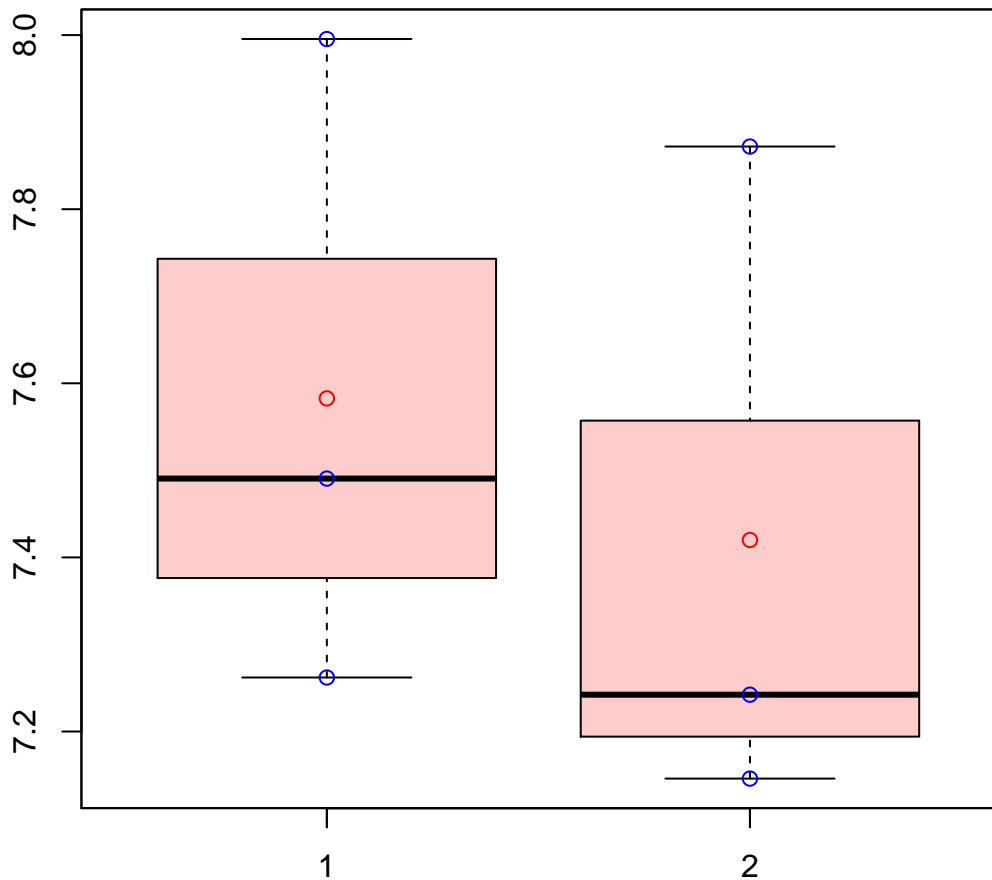

t-Test: p-value = 0.63

# M0S620|M0S620\_MUSAM

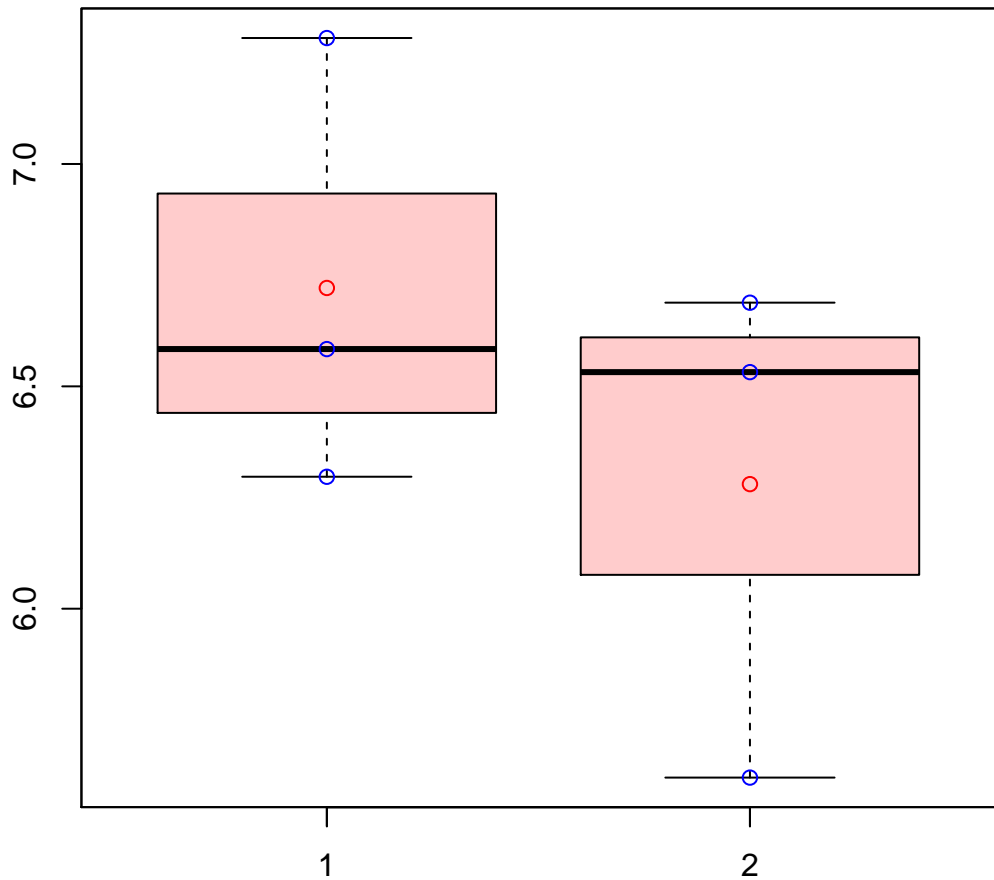

t-Test: p-value = 0.38

# M0S6H1|M0S6H1\_MUSAM

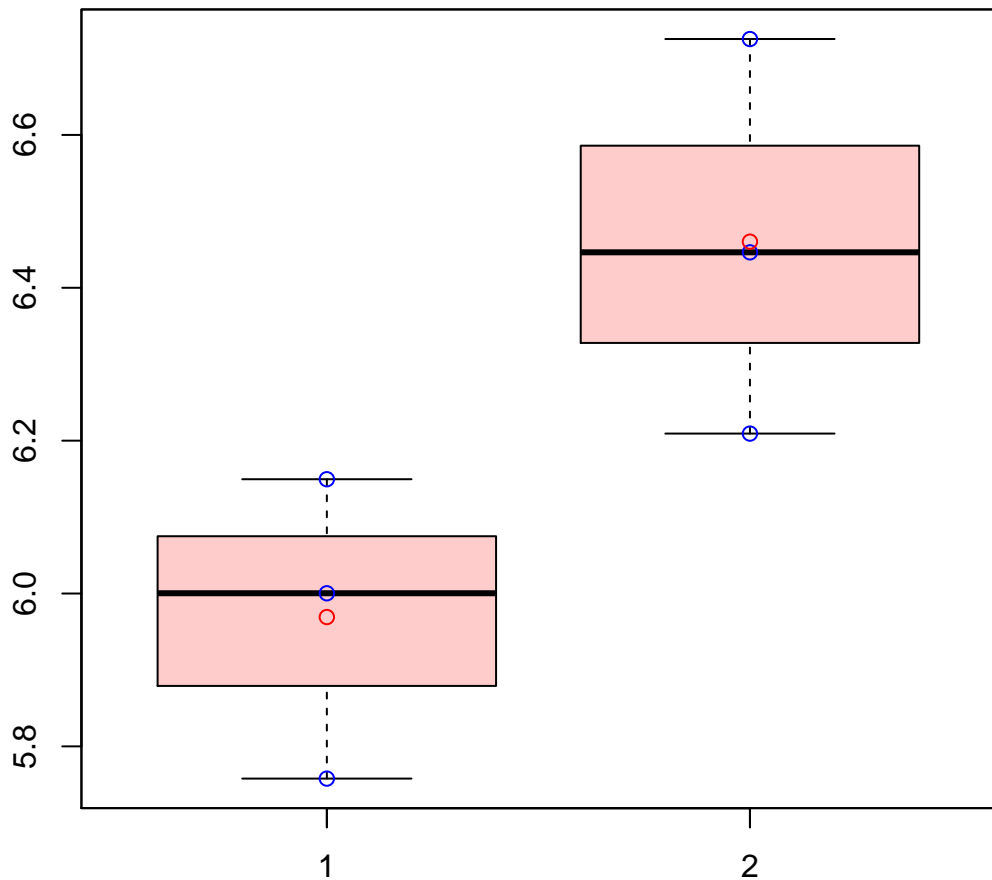

t-Test: p-value = 0.06

# M0S7B5|M0S7B5\_MUSAM

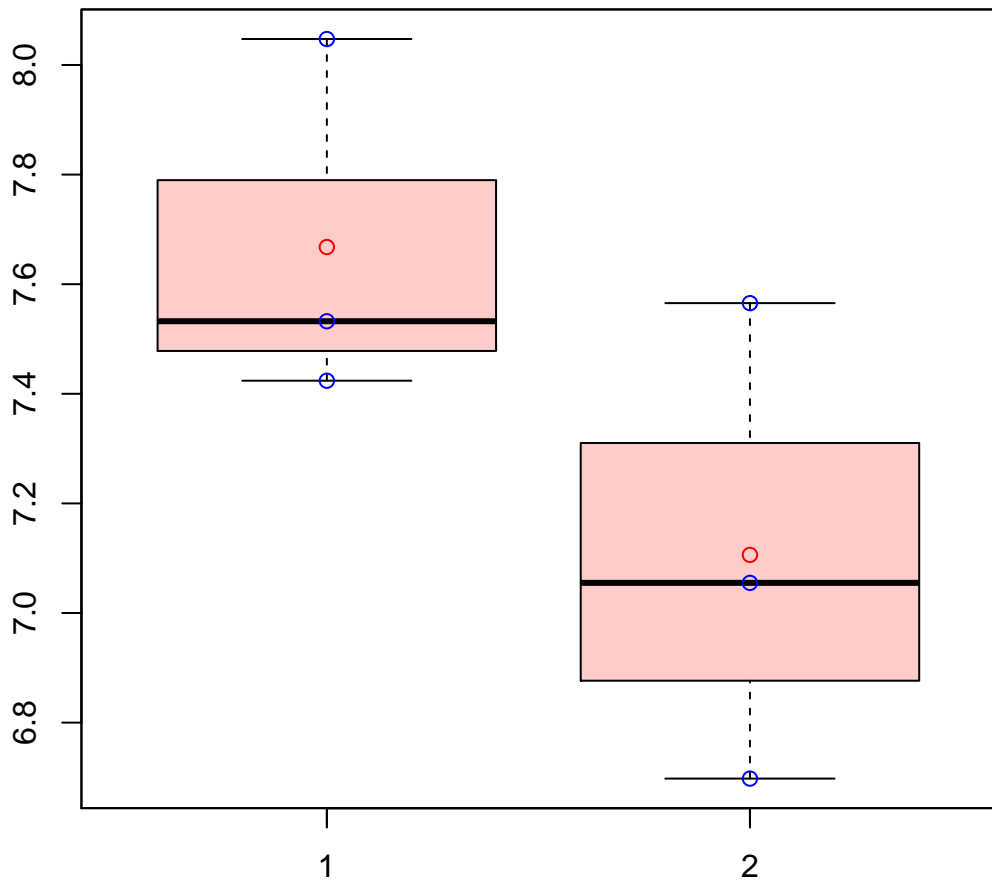

t-Test: p-value = 0.16

# M0S8D7|M0S8D7\_MUSAM

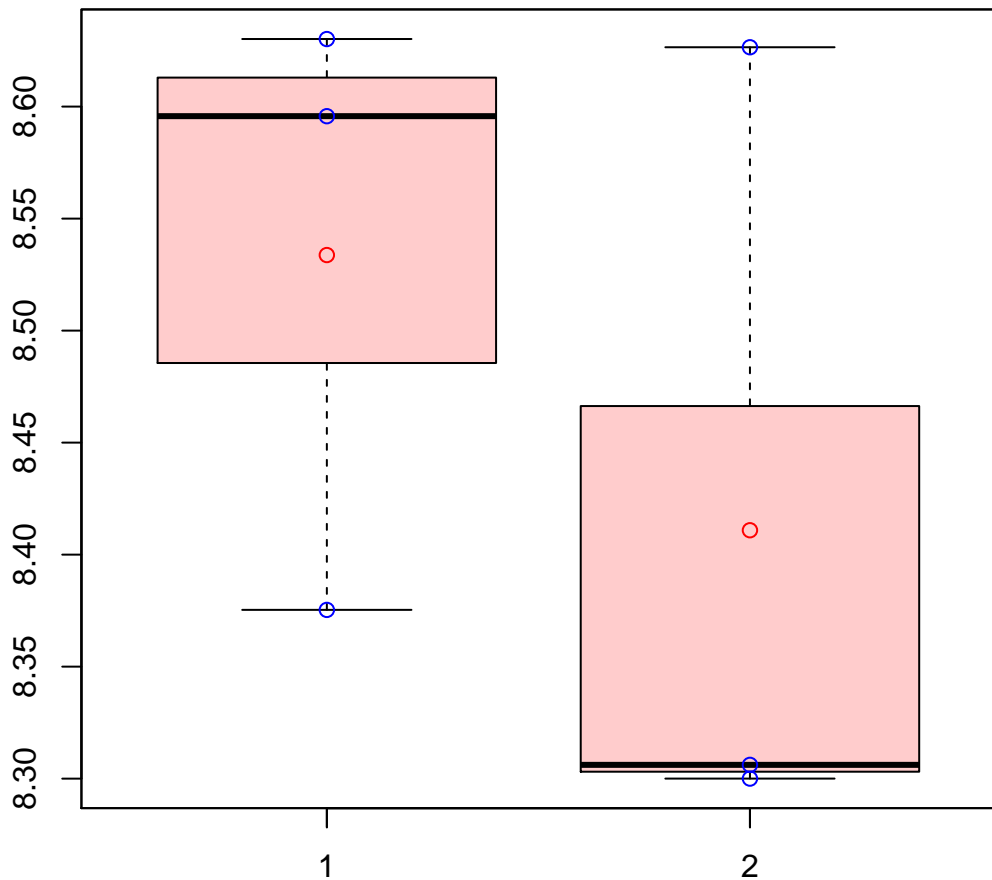

t-Test: p-value = 0.42



# M0S8F7|M0S8F7\_MUSAM

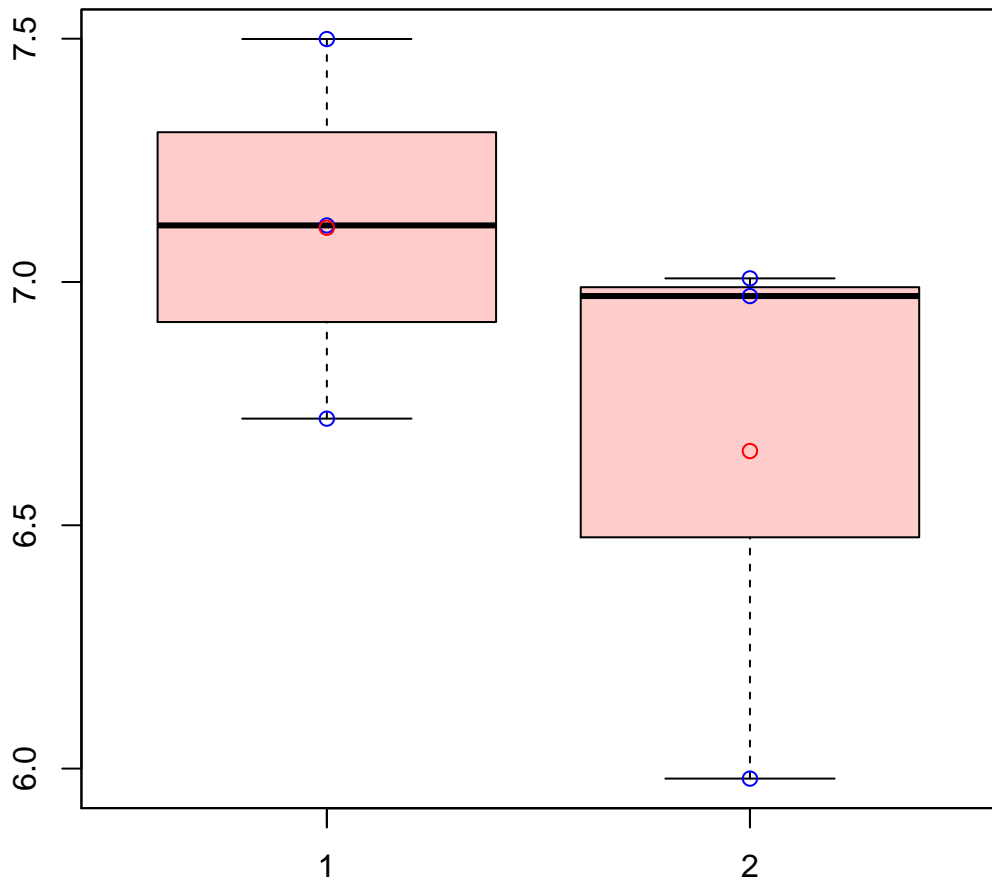

t-Test: p-value = 0.33

# M0S8I6|M0S8I6\_MUSAM

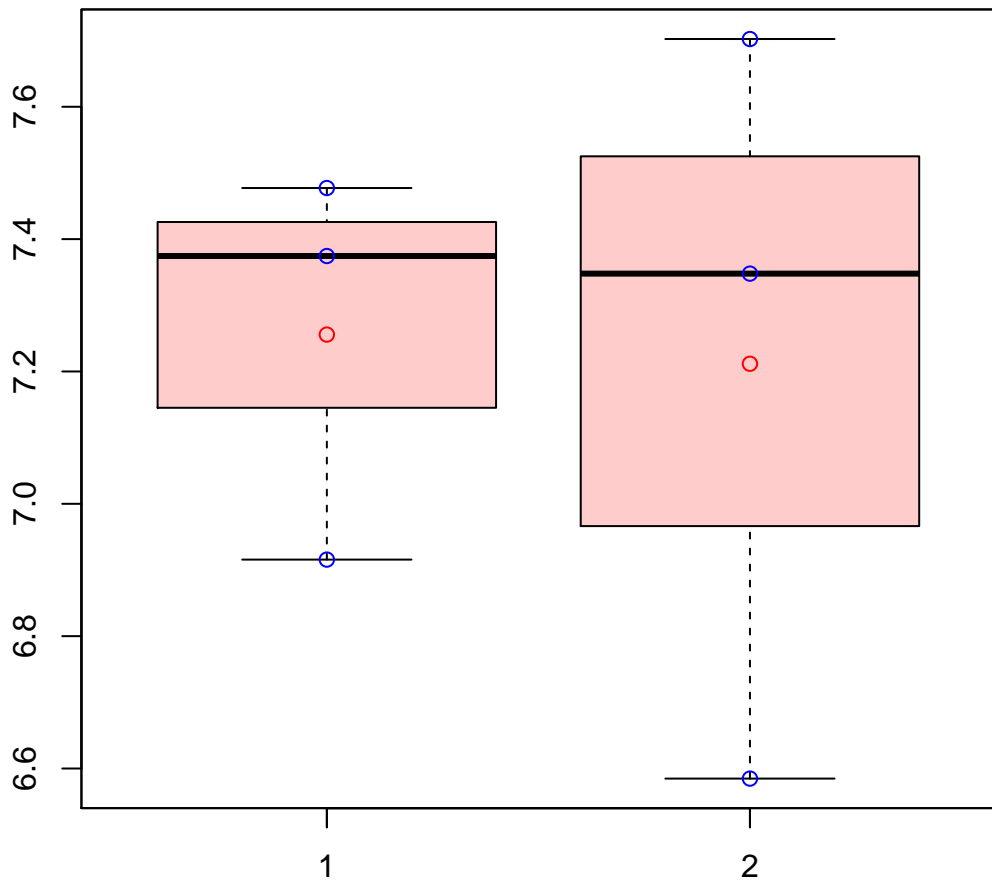

t-Test: p-value = 0.91

# M0S8L2|M0S8L2\_MUSAM

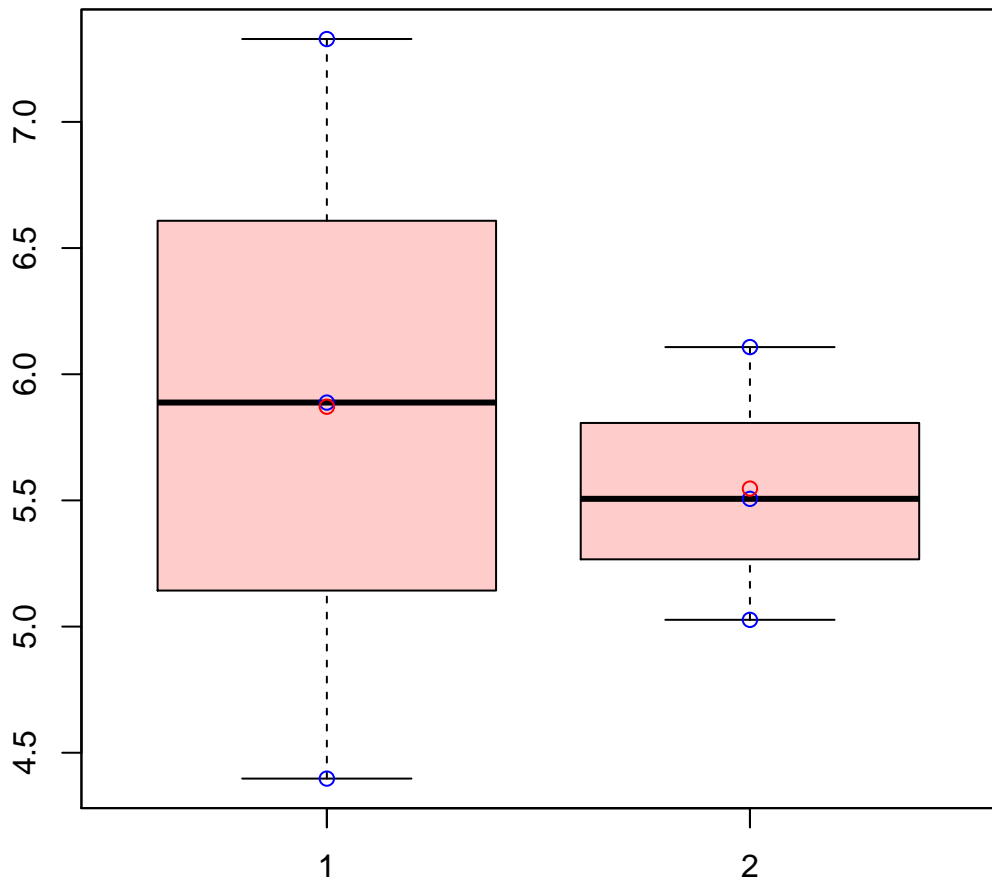

t-Test: p-value = 0.75

# M0S920|M0S920\_MUSAM

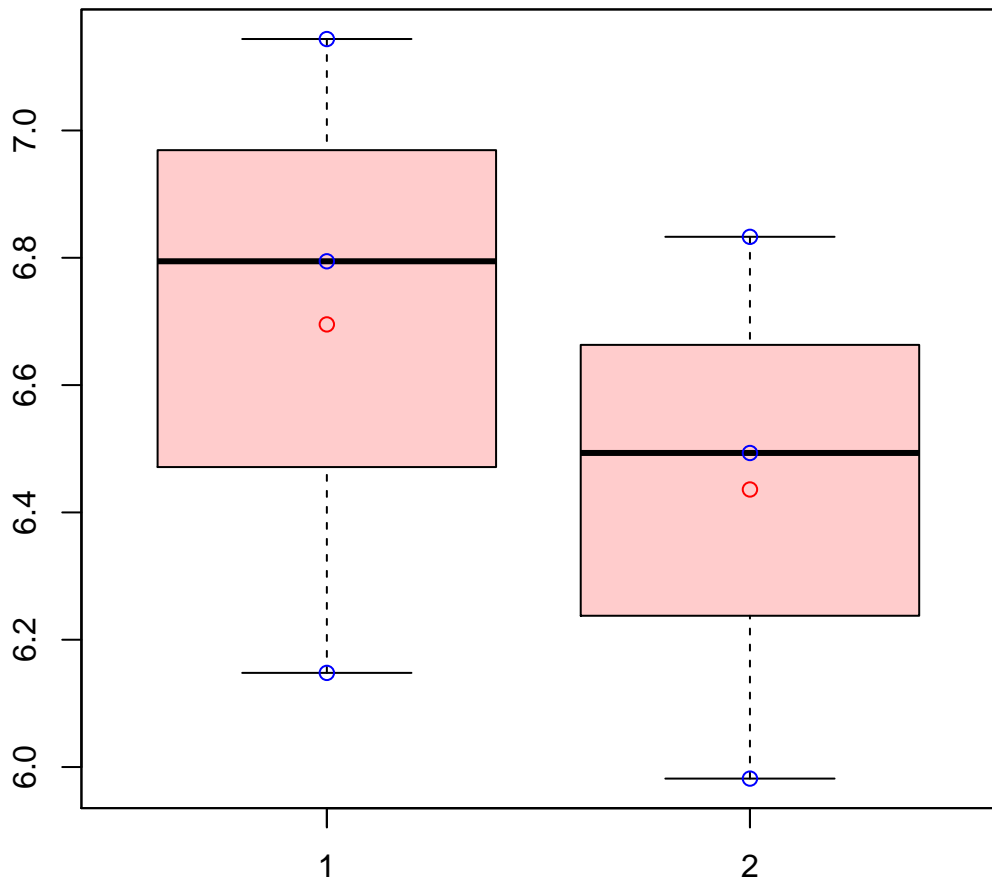

t-Test: p-value = 0.54

# M0S942|M0S942\_MUSAM

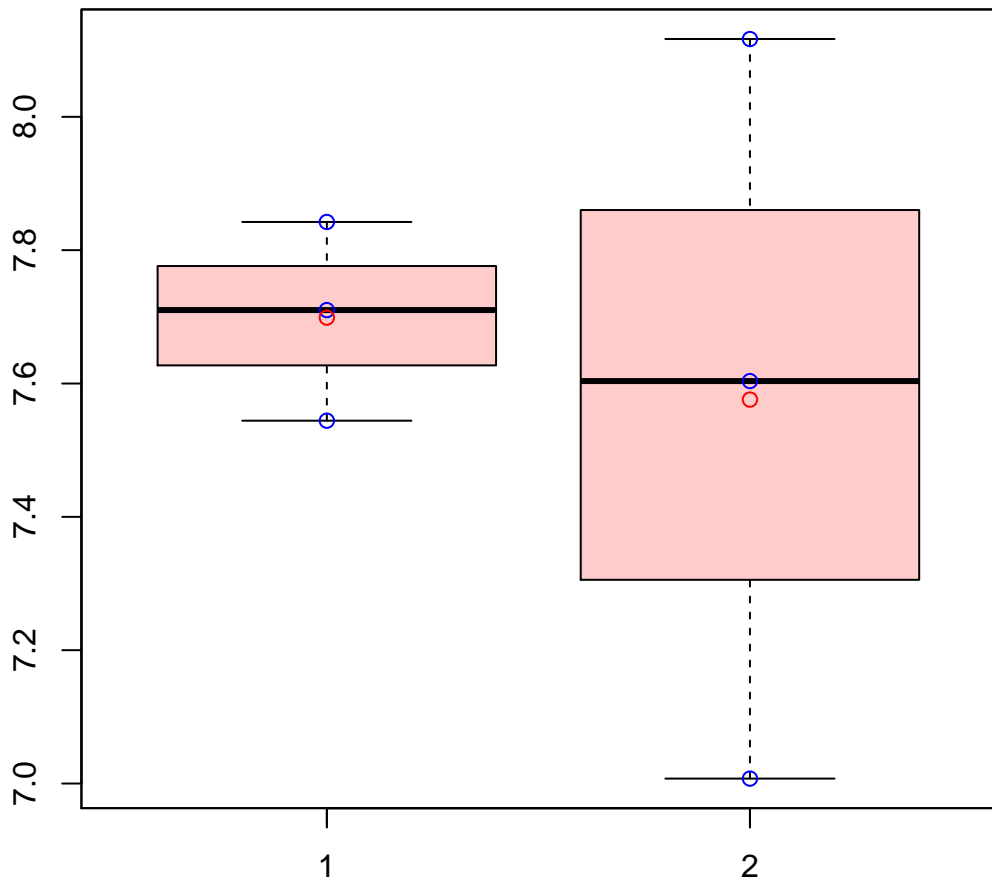

t-Test: p-value = 0.74

# M0S999|M0S999\_MUSAM

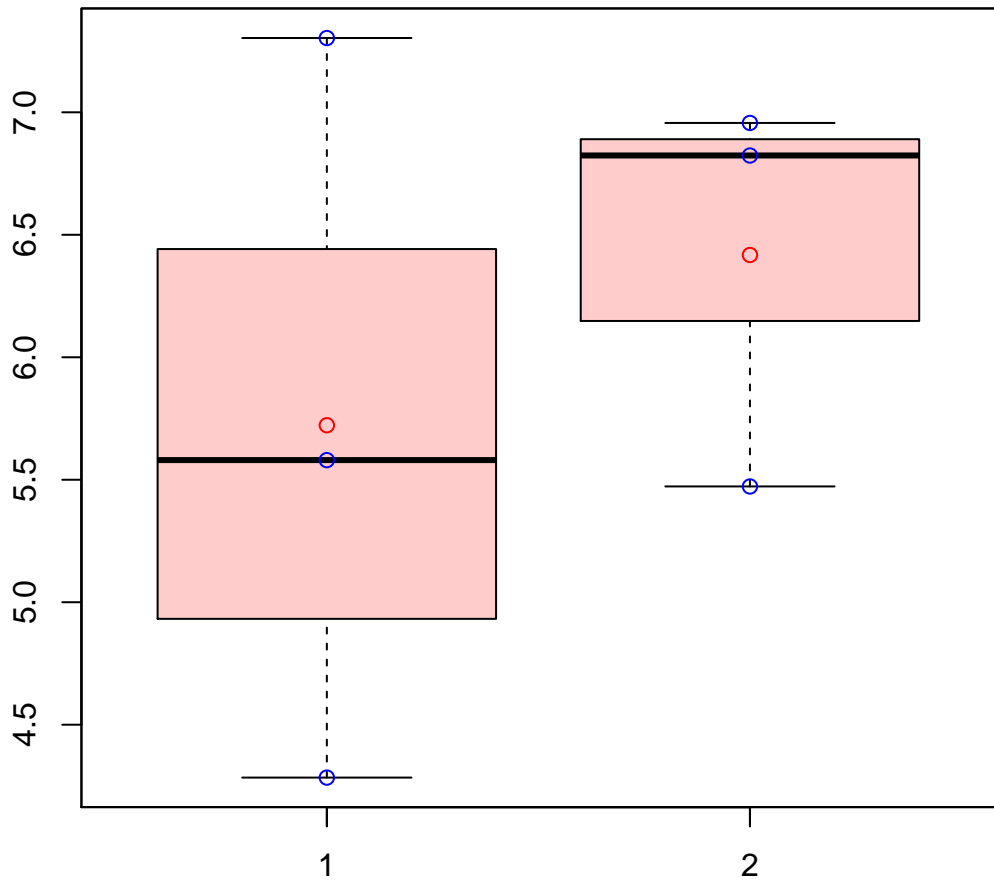

t-Test: p-value = 0.53

# M0S9V6|M0S9V6\_MUSAM

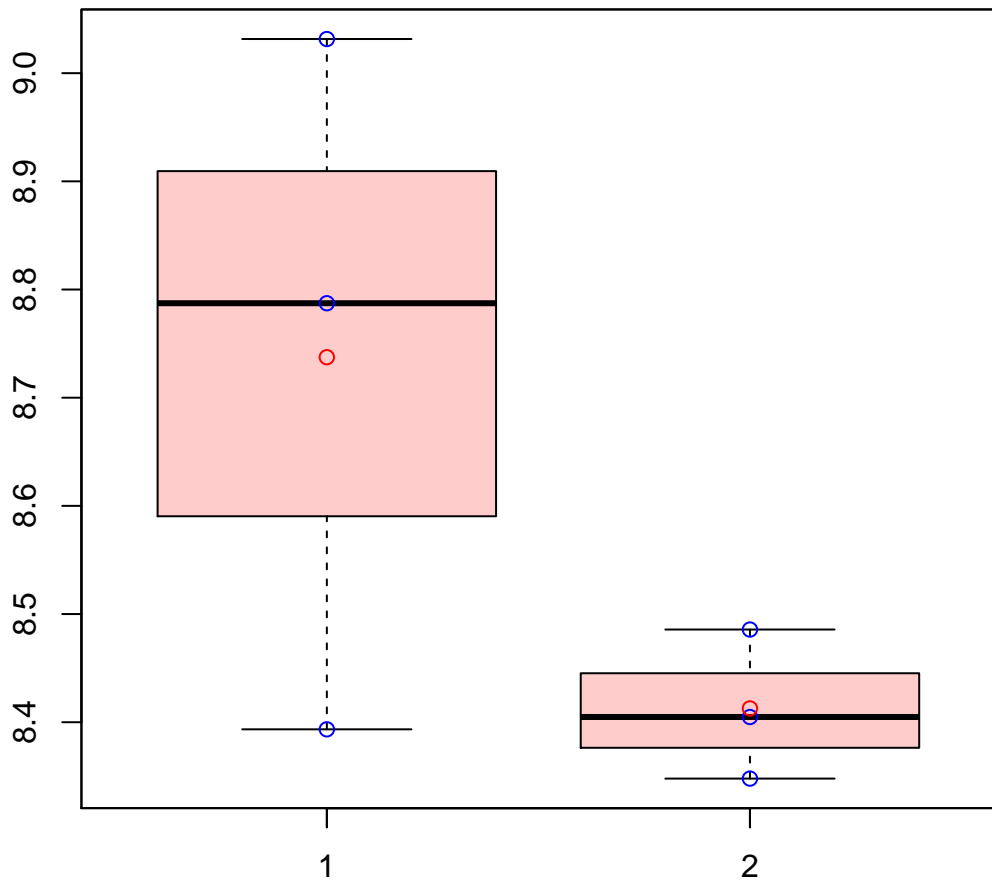

t-Test: p-value = 0.22

# M0S9X0|M0S9X0\_MUSAM

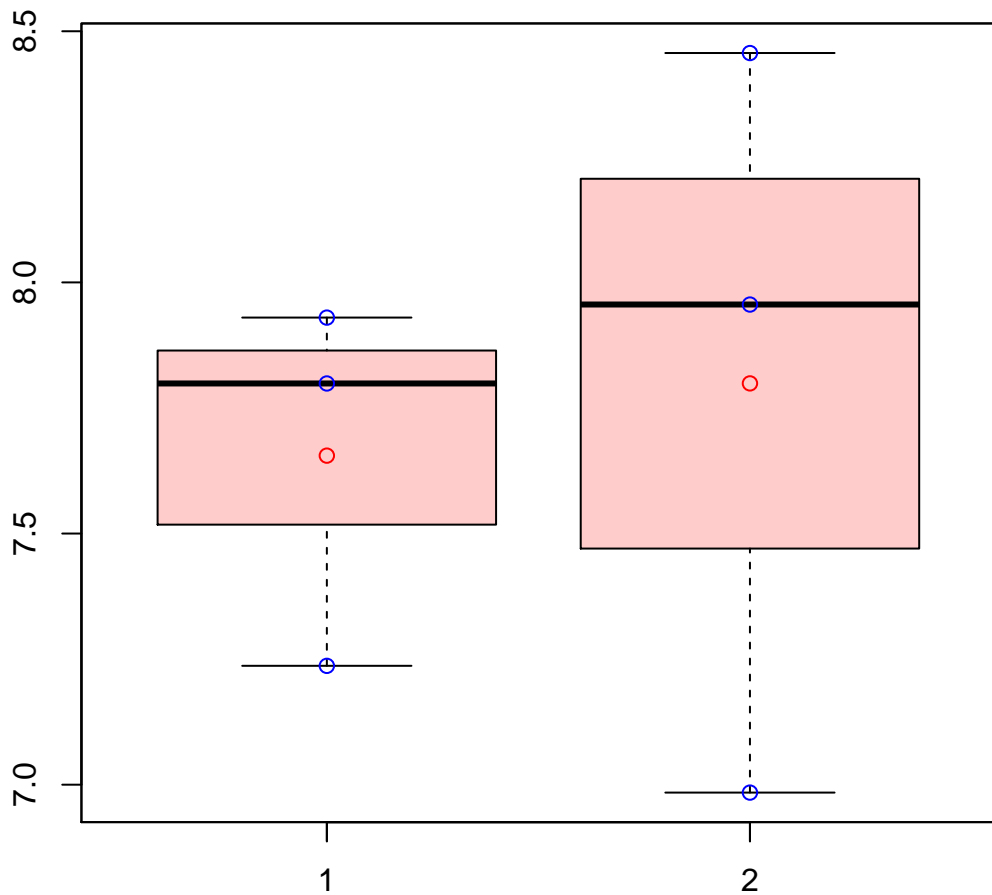

t-Test: p-value = 0.79



# M0SAJ4|M0SAJ4\_MUSAM

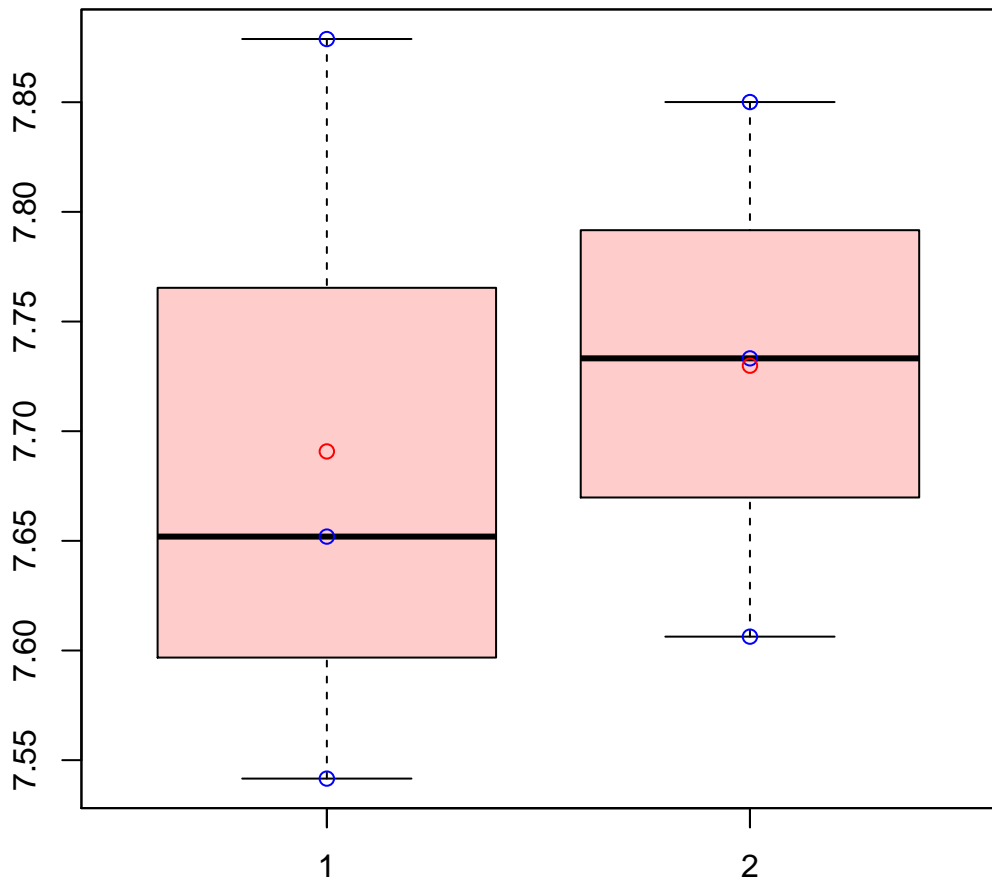

t-Test: p-value = 0.77

# M0SBI6|M0SBI6\_MUSAM

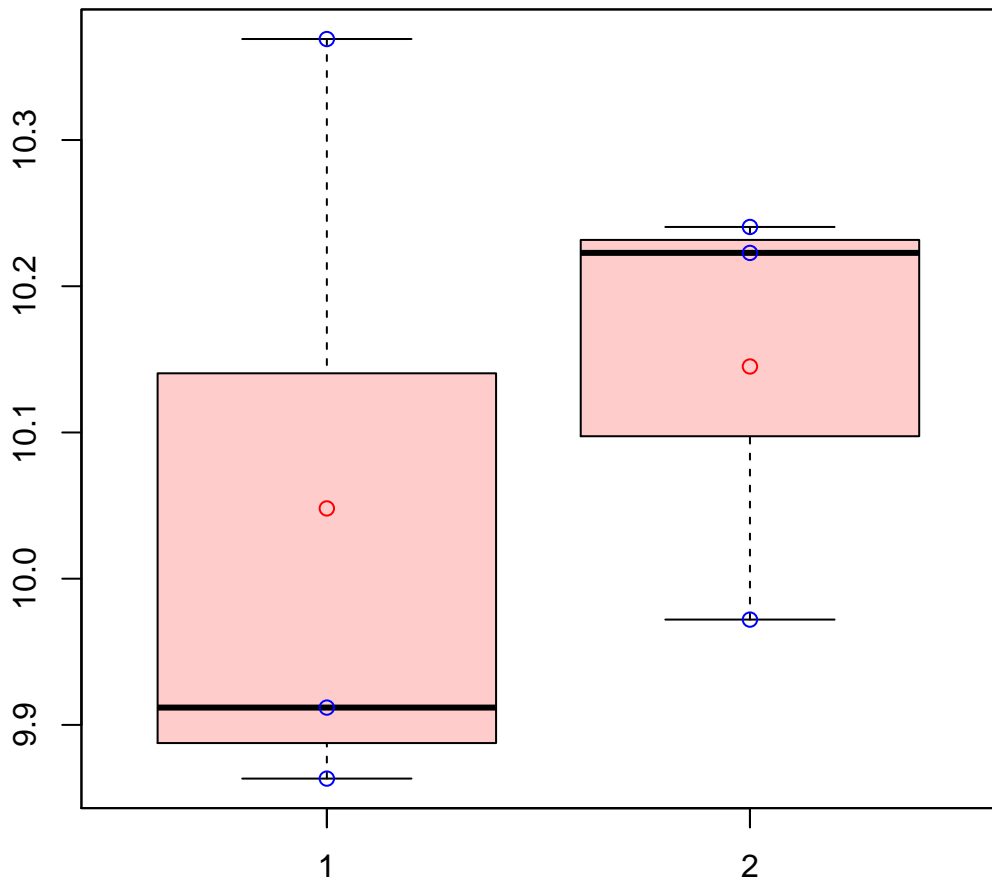

t-Test: p-value = 0.63

# M0SBL9|M0SBL9\_MUSAM

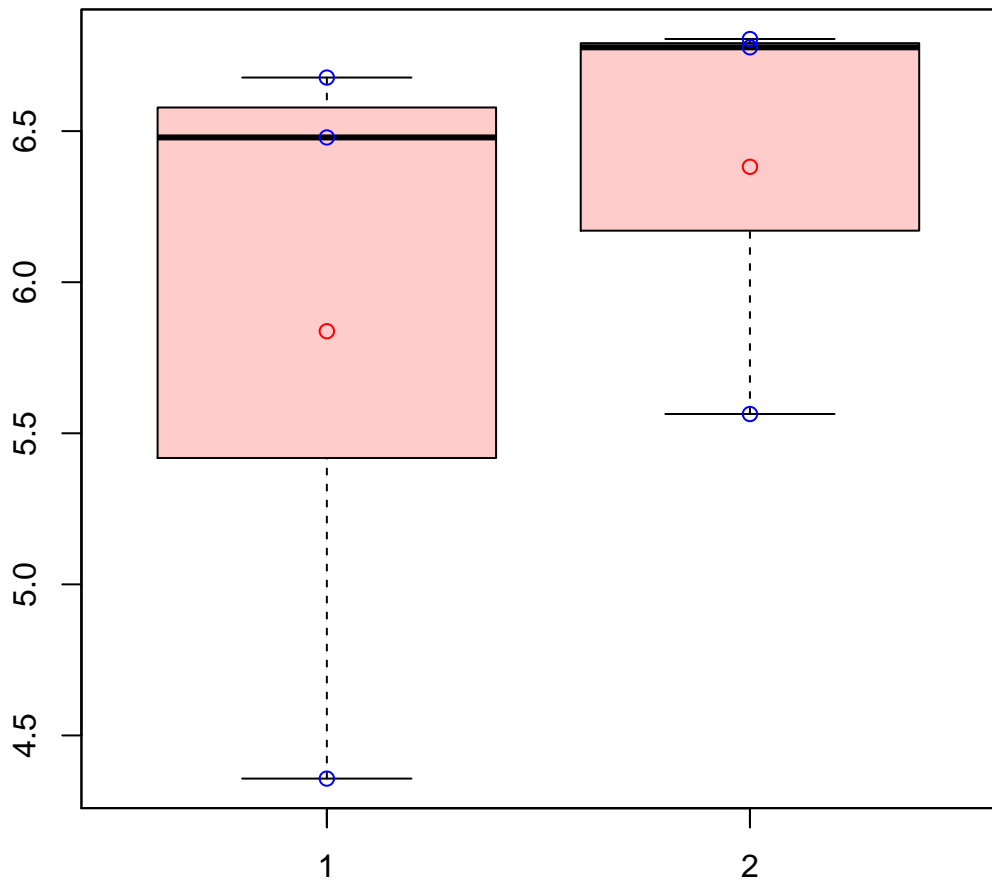

t-Test: p-value = 0.57

# M0SBM9|M0SBM9\_MUSAM

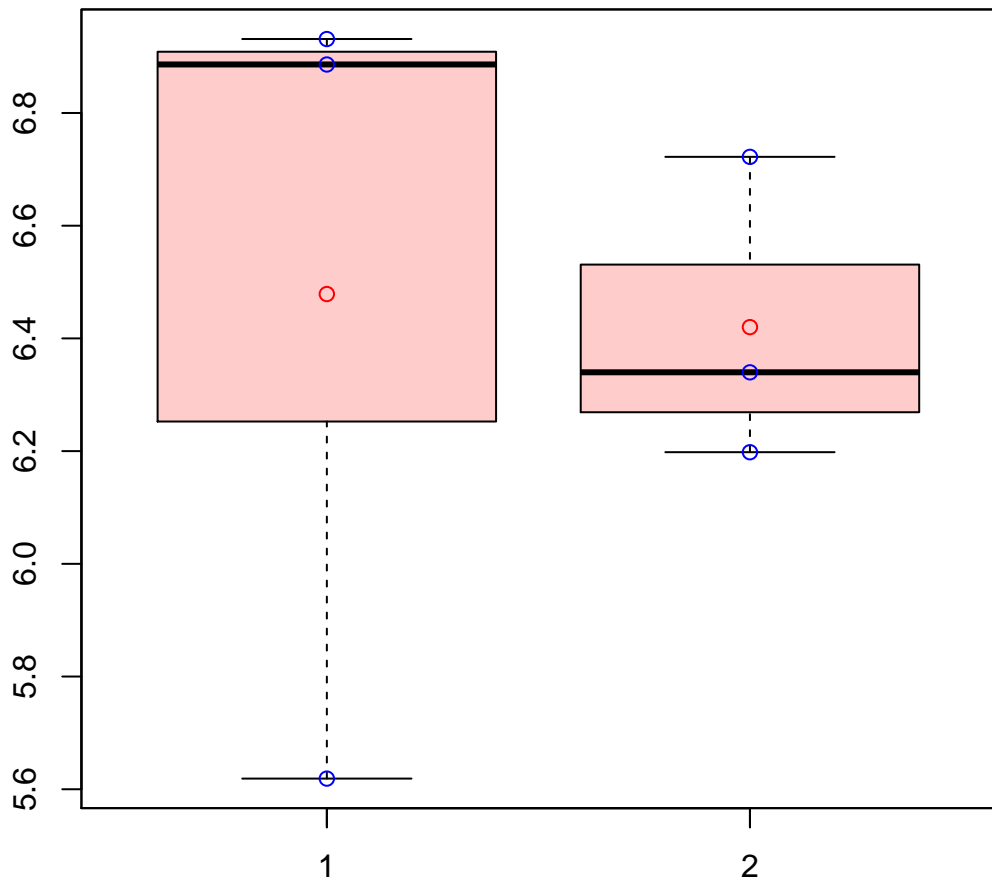

t-Test: p-value = 0.91

# M0SBS2|M0SBS2\_MUSAM

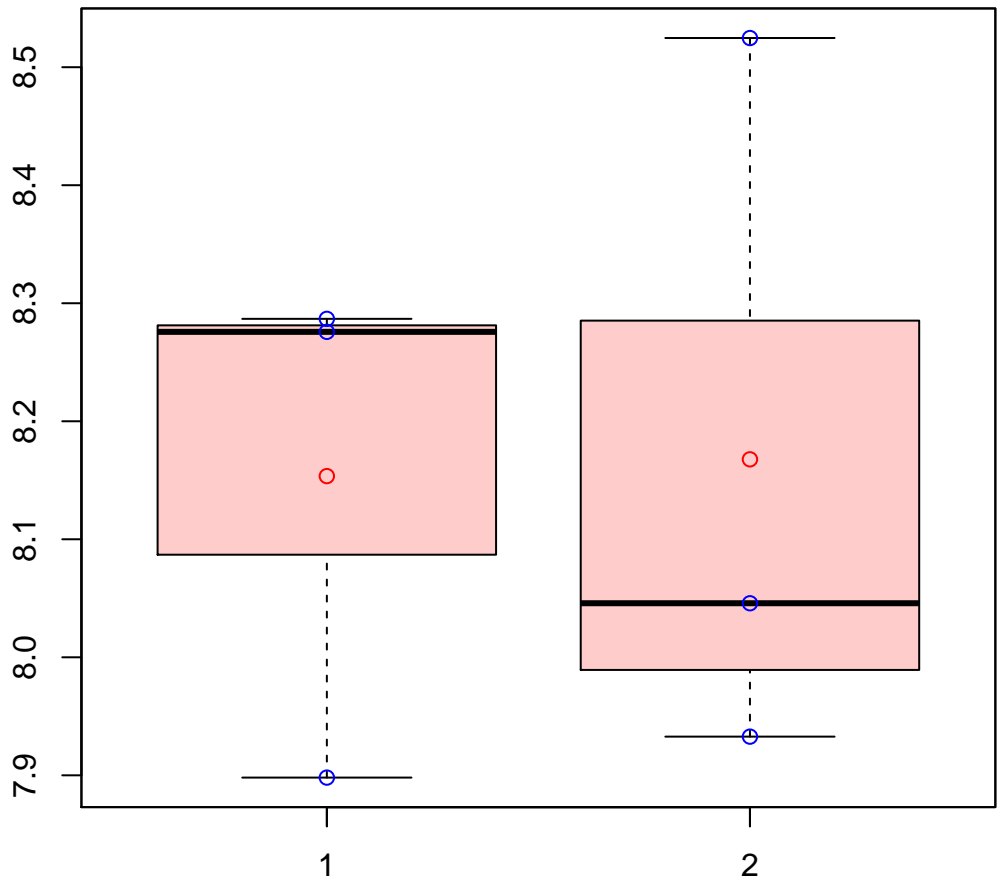

t-Test: p-value = 0.95

# M0SC84|M0SC84\_MUSAM

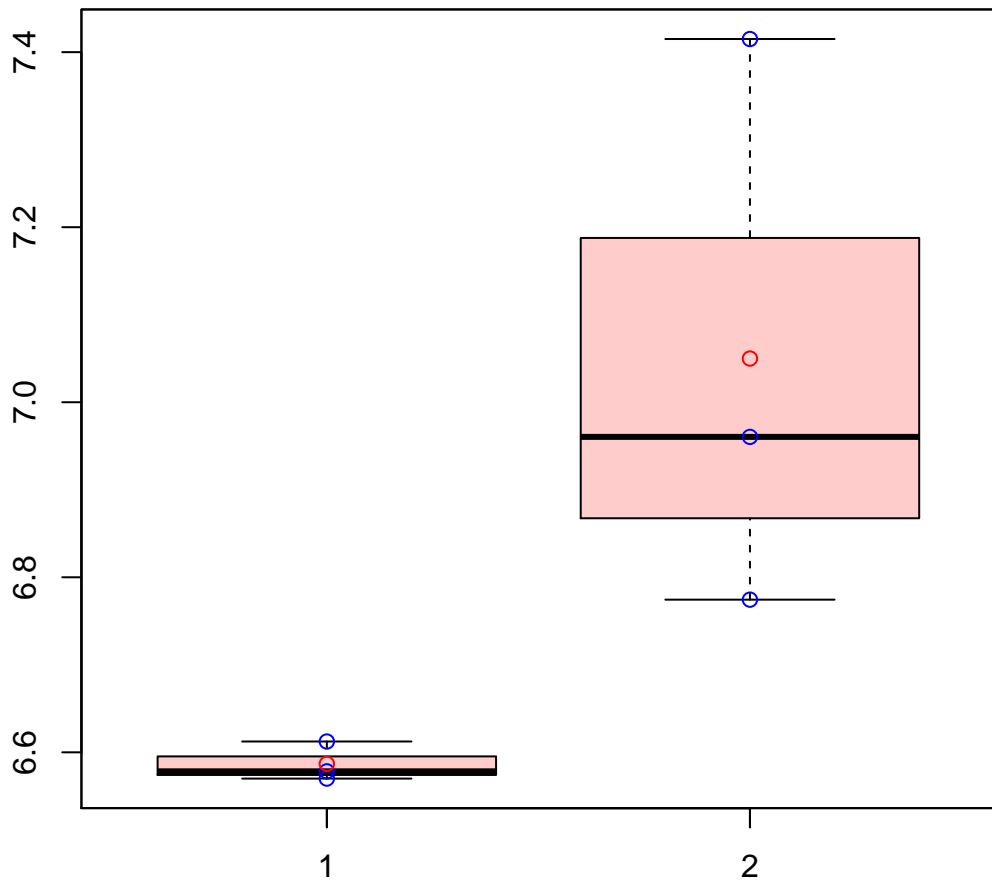

t-Test: p-value = 0.13

# M0SCE3|M0SCE3\_MUSAM

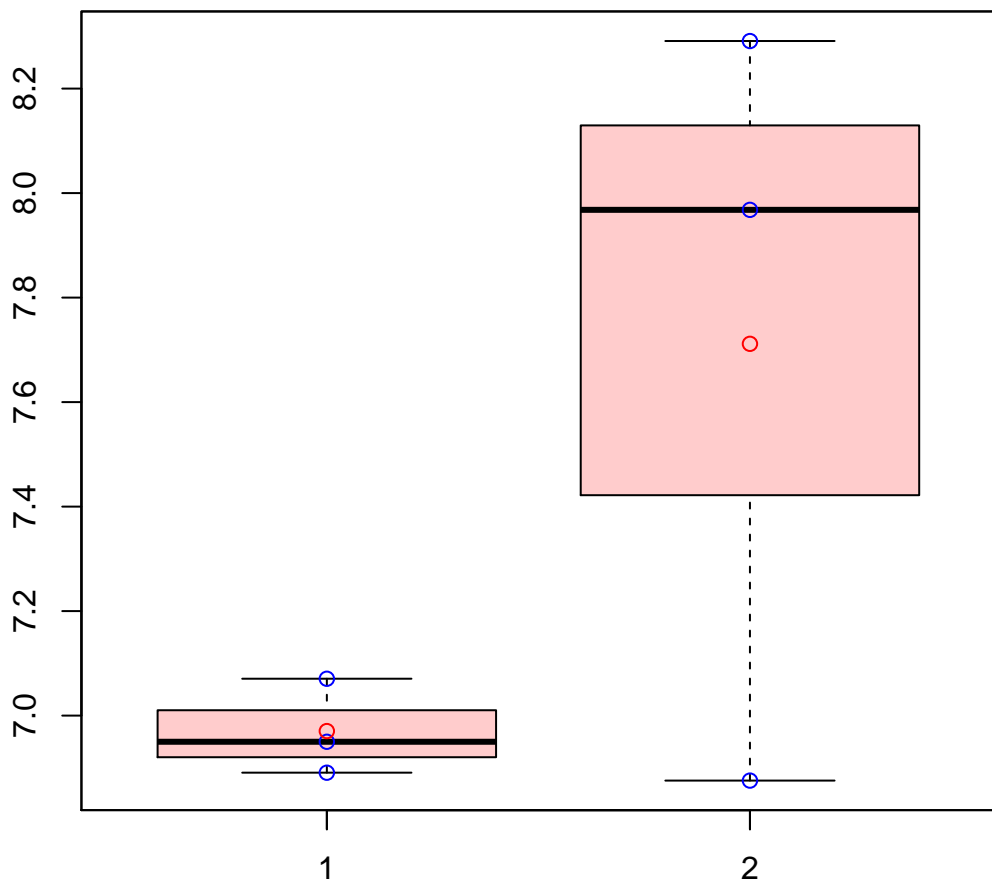

t-Test: p-value = 0.22

# M0SD30|M0SD30\_MUSAM

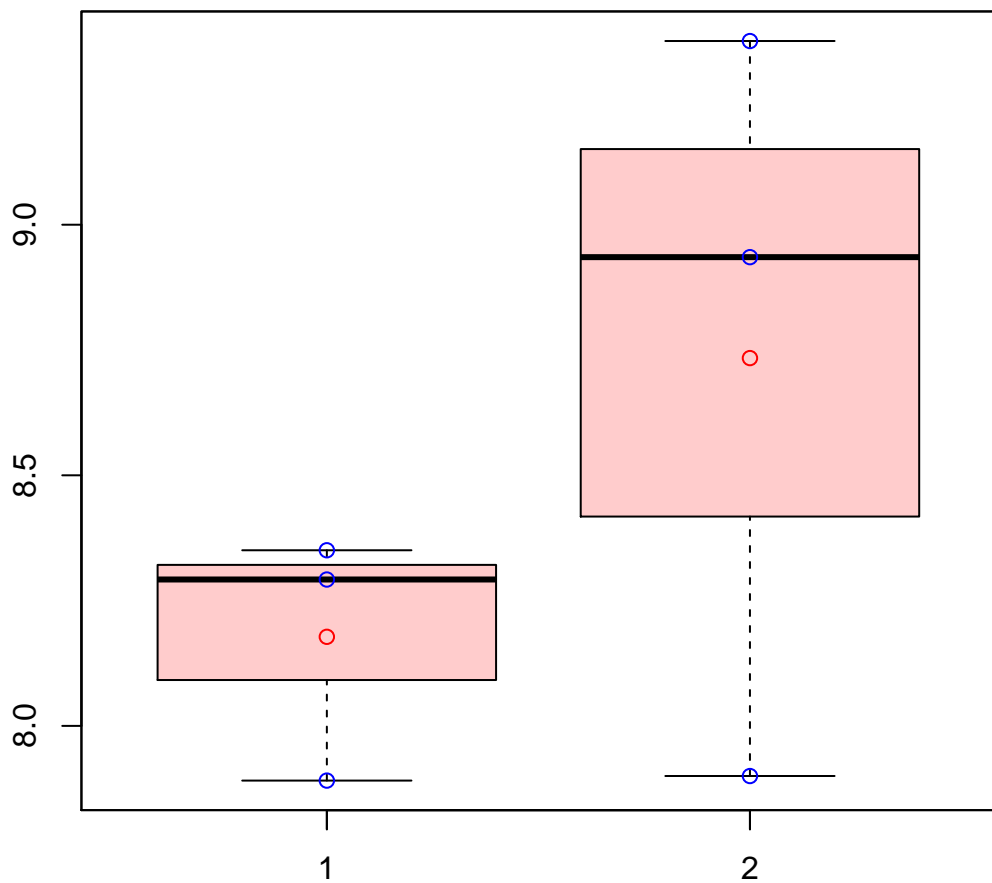

t-Test: p-value = 0.33



# M0SDL4|M0SDL4\_MUSAM

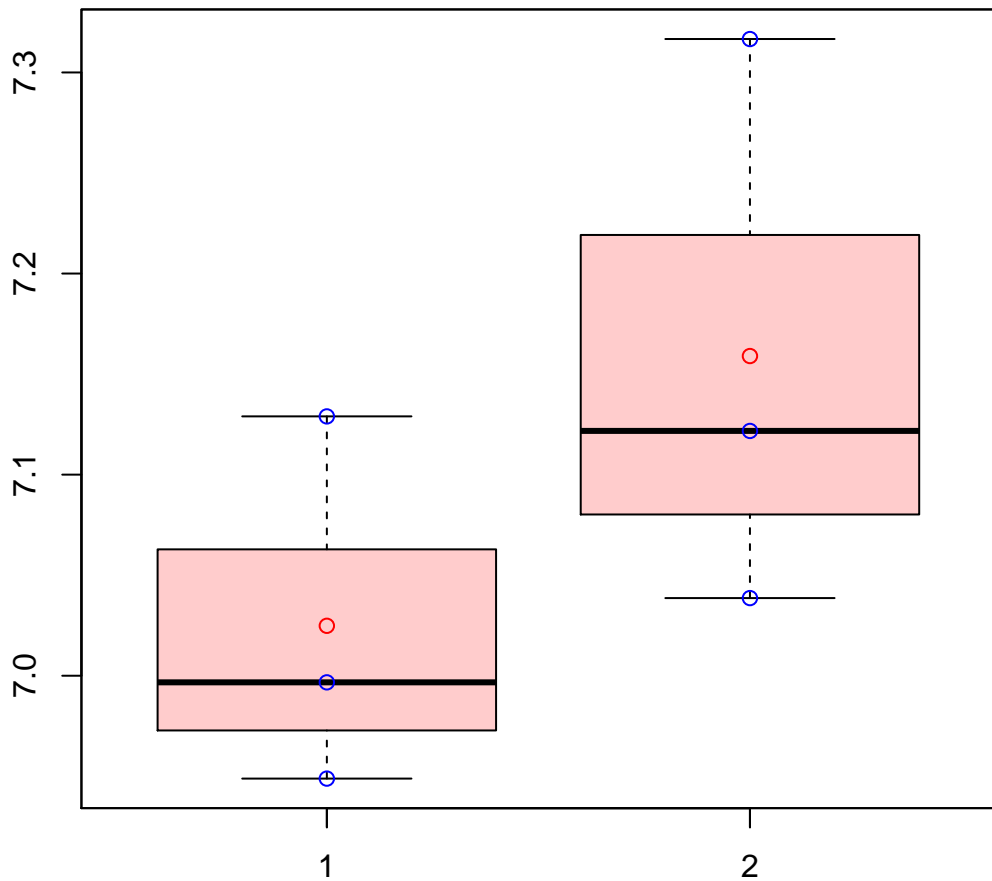

t-Test: p-value = 0.26

# M0SDS2|M0SDS2\_MUSAM

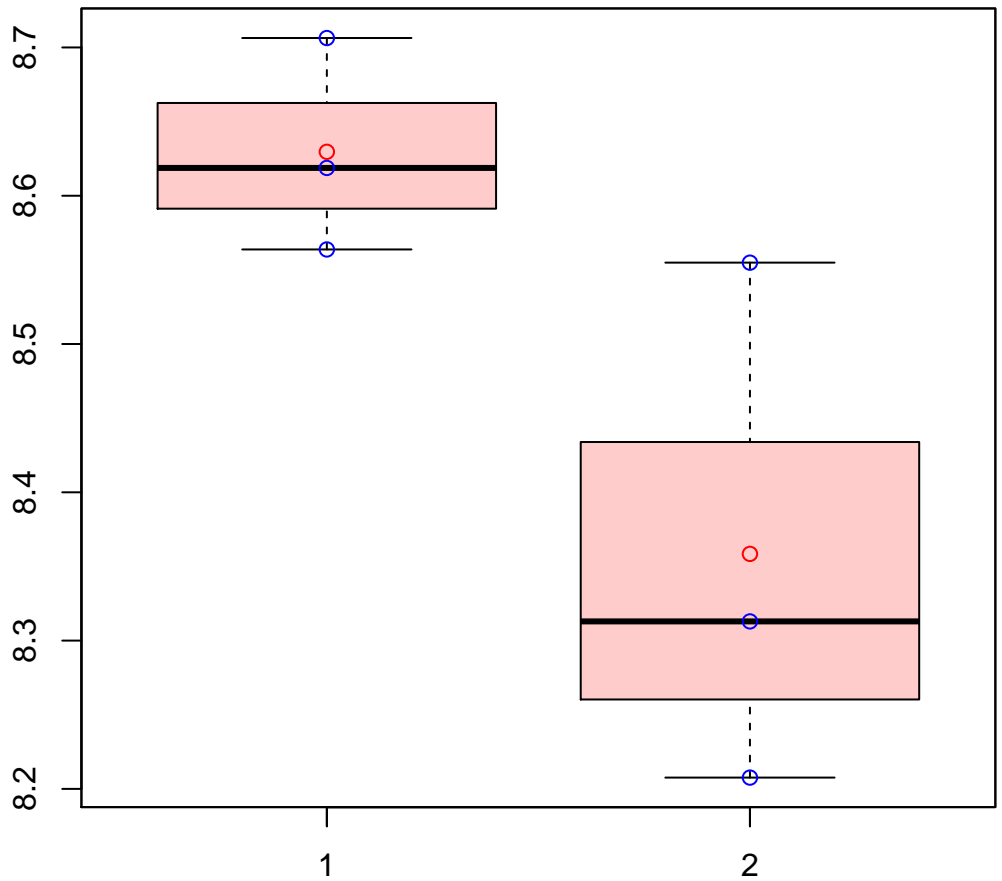

t-Test: p-value = 0.1

# M0SDW7|M0SDW7\_MUSAM

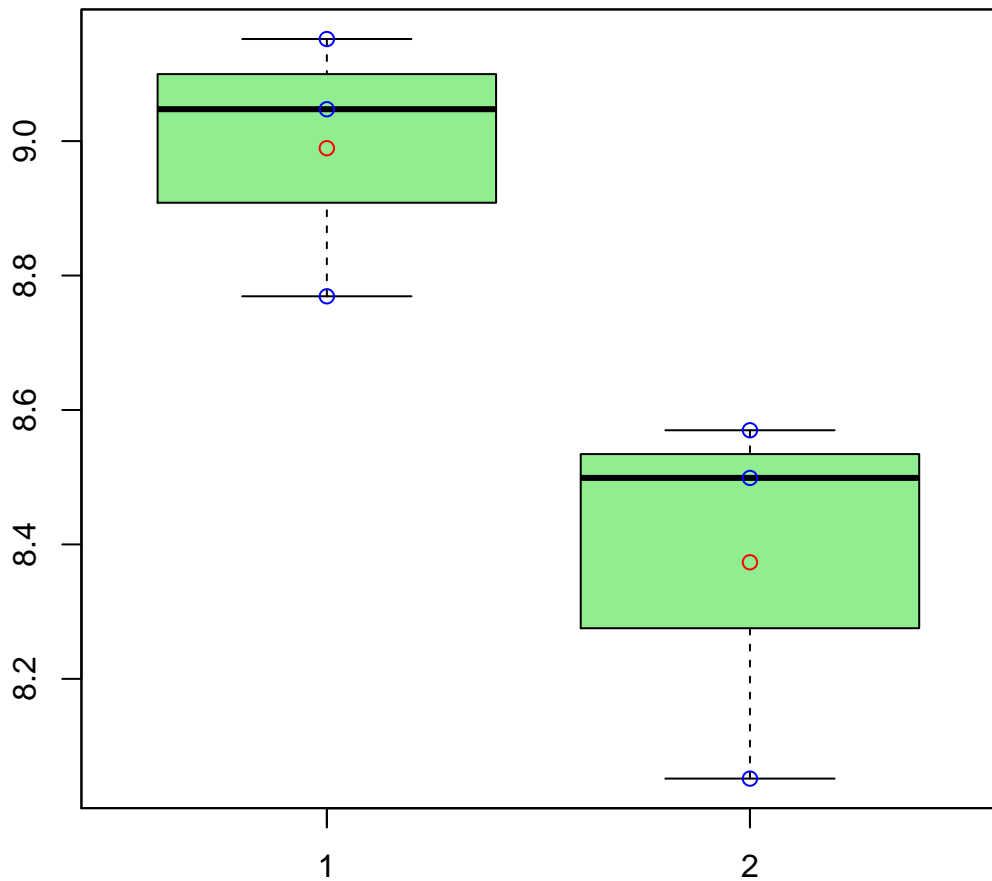

t-Test: p-value = 0.04

# M0SE13|M0SE13\_MUSAM

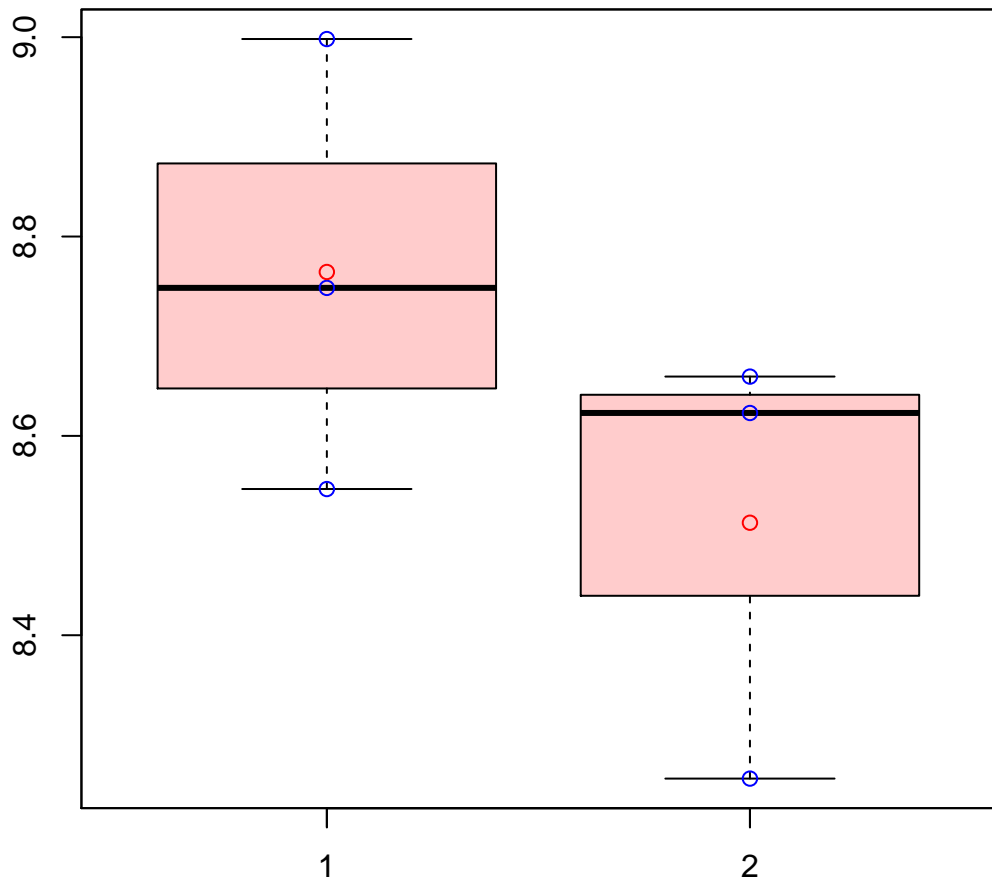

t-Test: p-value = 0.24

# M0SEC9|M0SEC9\_MUSAM

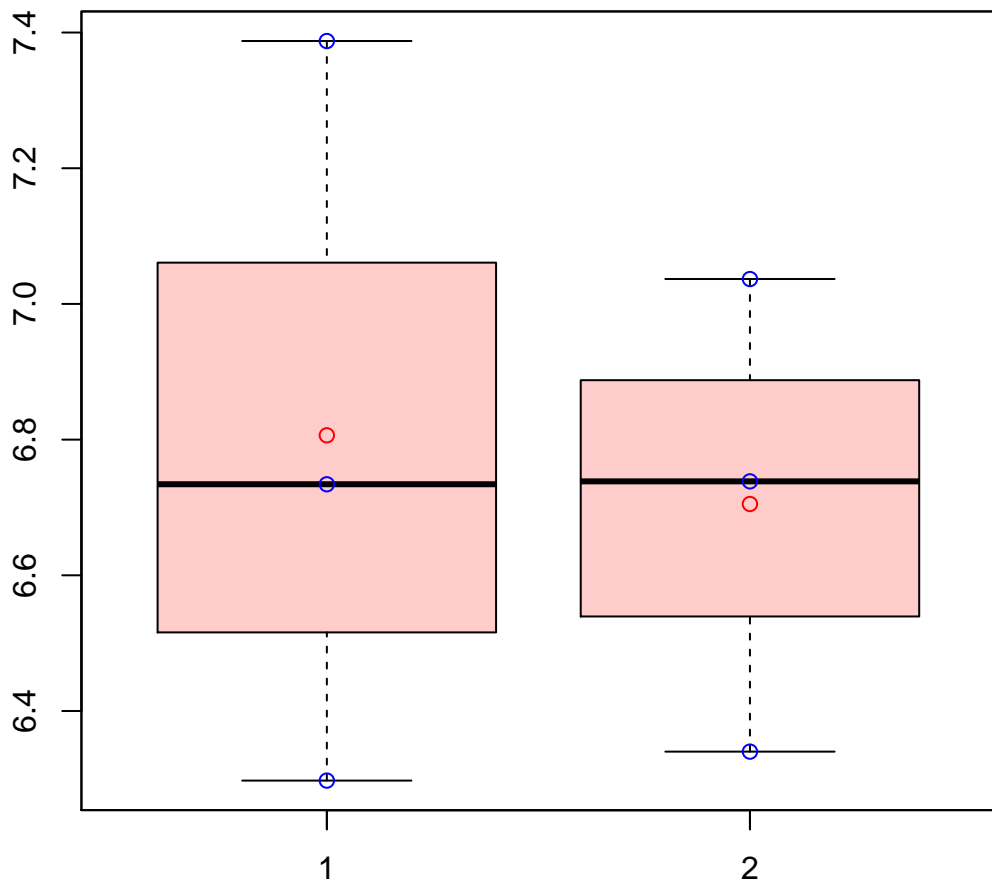

t-Test: p-value = 0.8

# M0SEH0|M0SEH0\_MUSAM

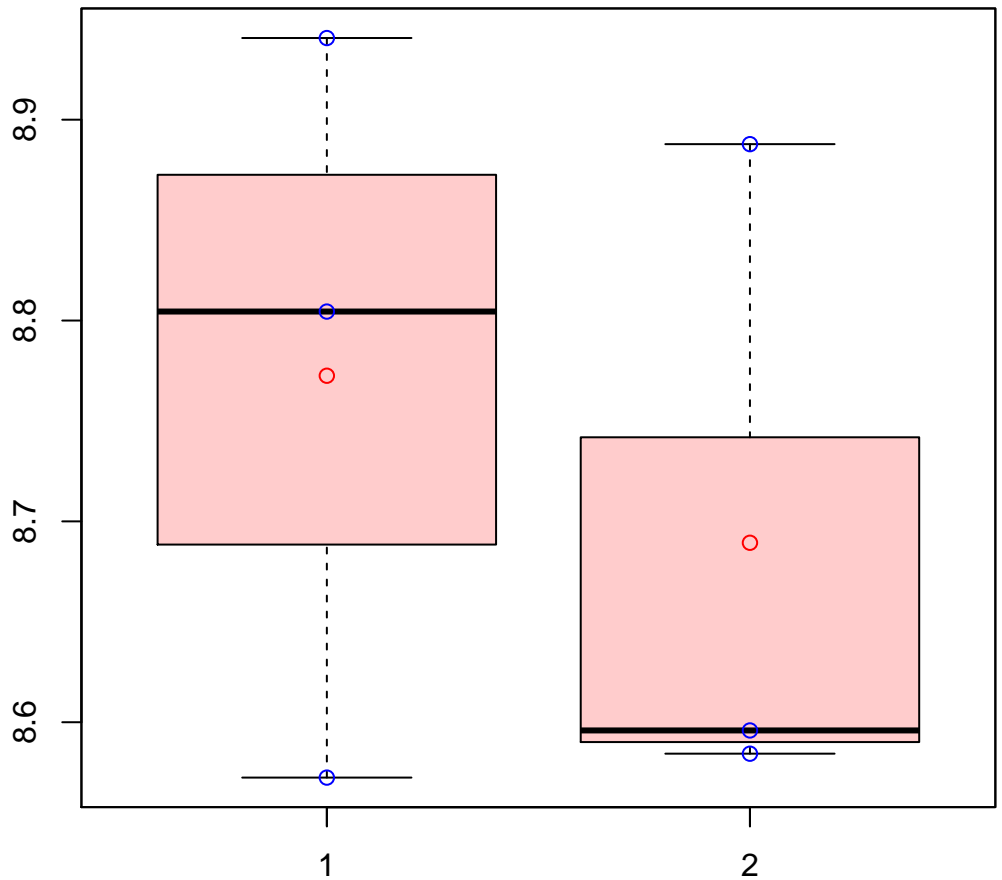

t-Test: p-value = 0.6

# M0SEQ7|M0SEQ7\_MUSAM

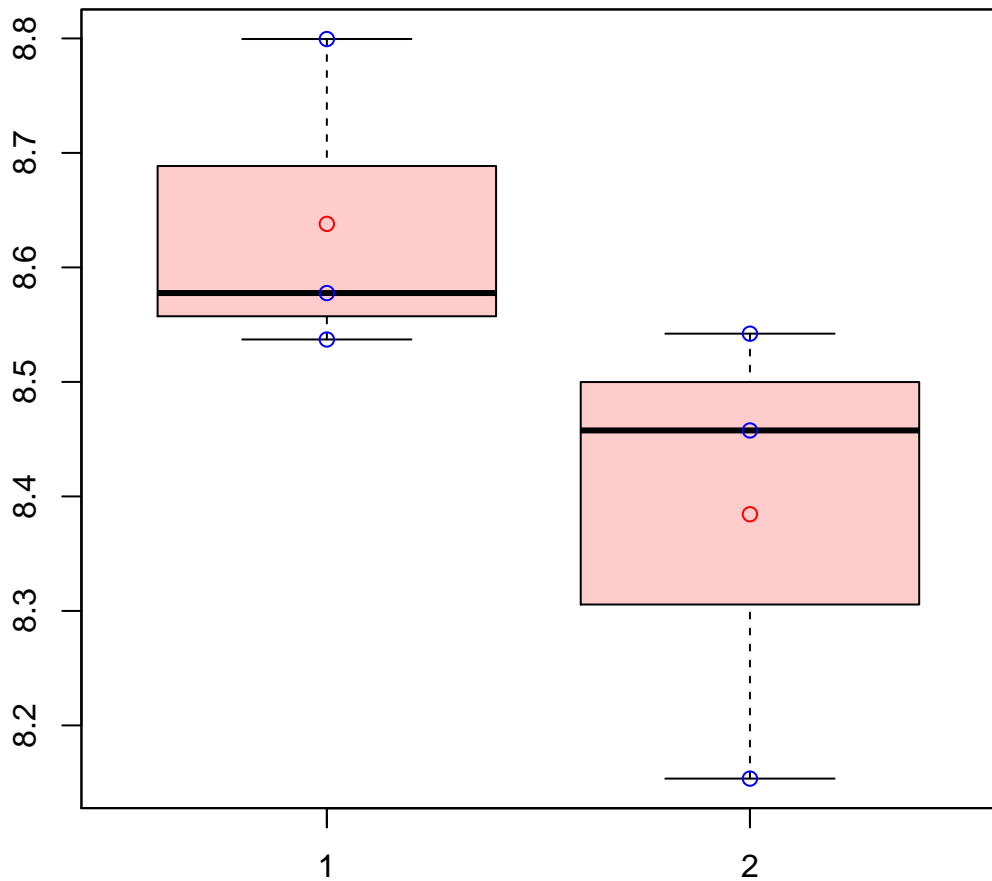

t-Test: p-value = 0.16

# M0SFQ5|M0SFQ5\_MUSAM

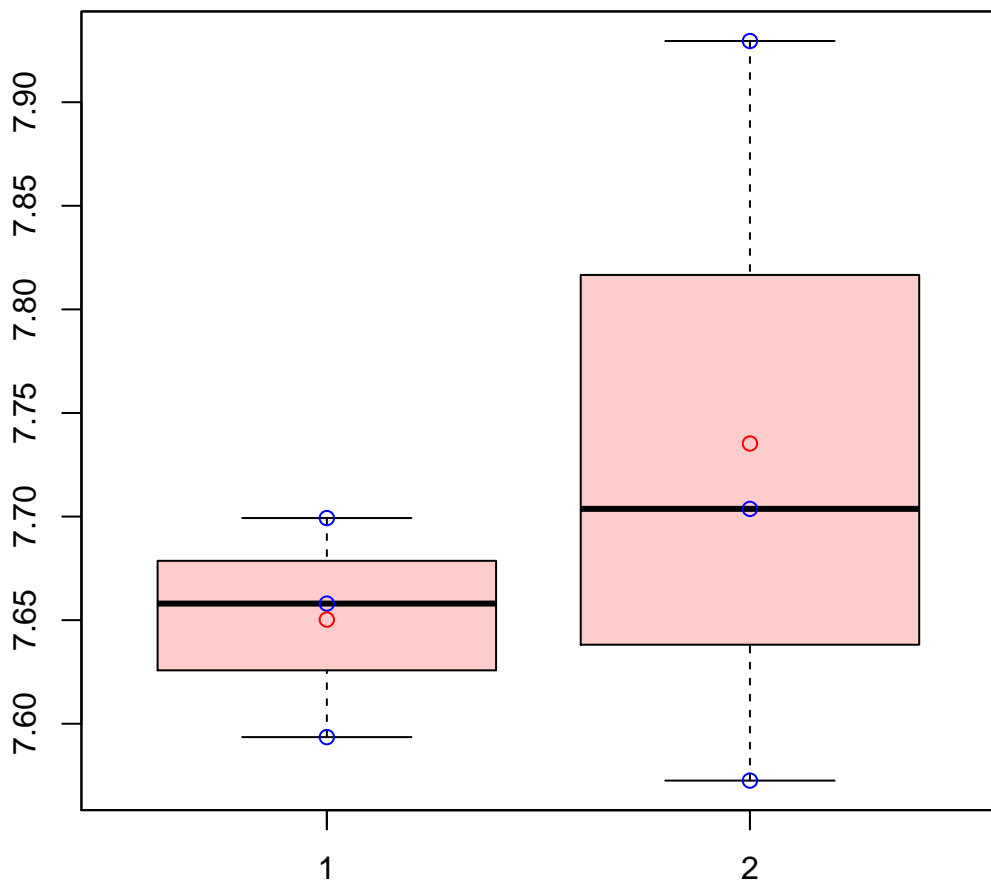

t-Test: p-value = 0.51



# M0SFS9|M0SFS9\_MUSAM

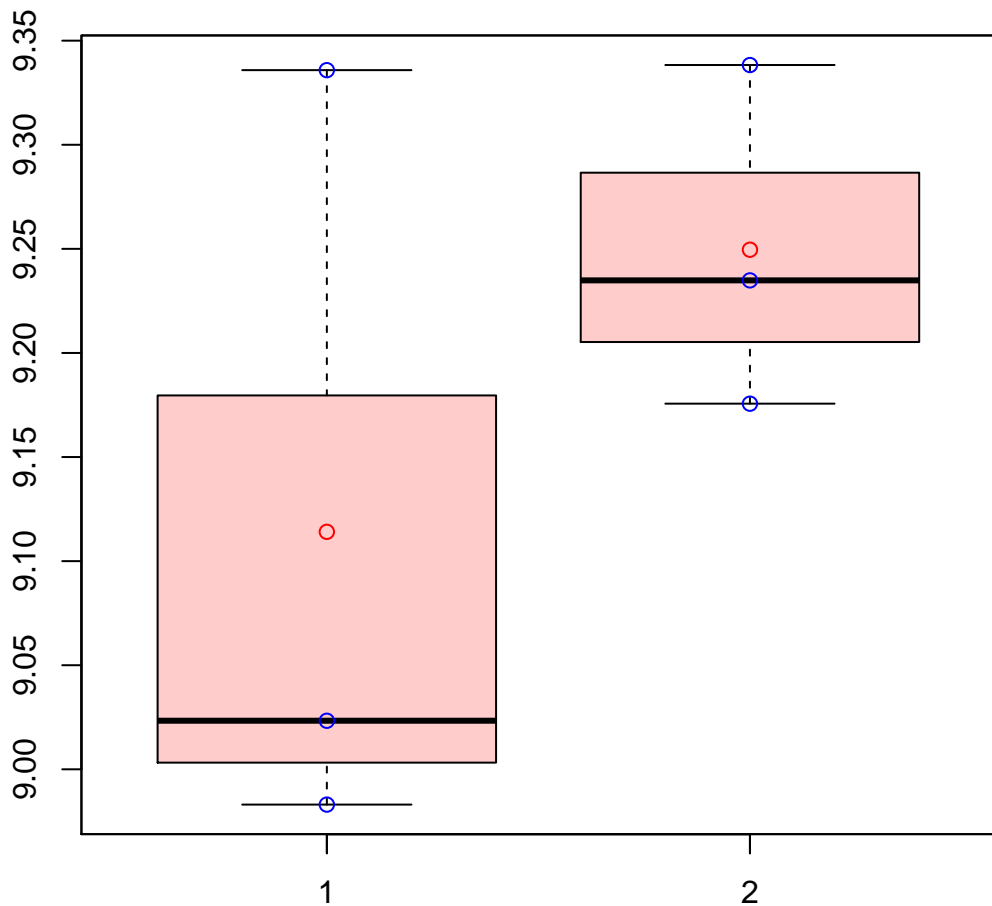

t-Test: p-value = 0.35

# M0SG91|M0SG91\_MUSAM

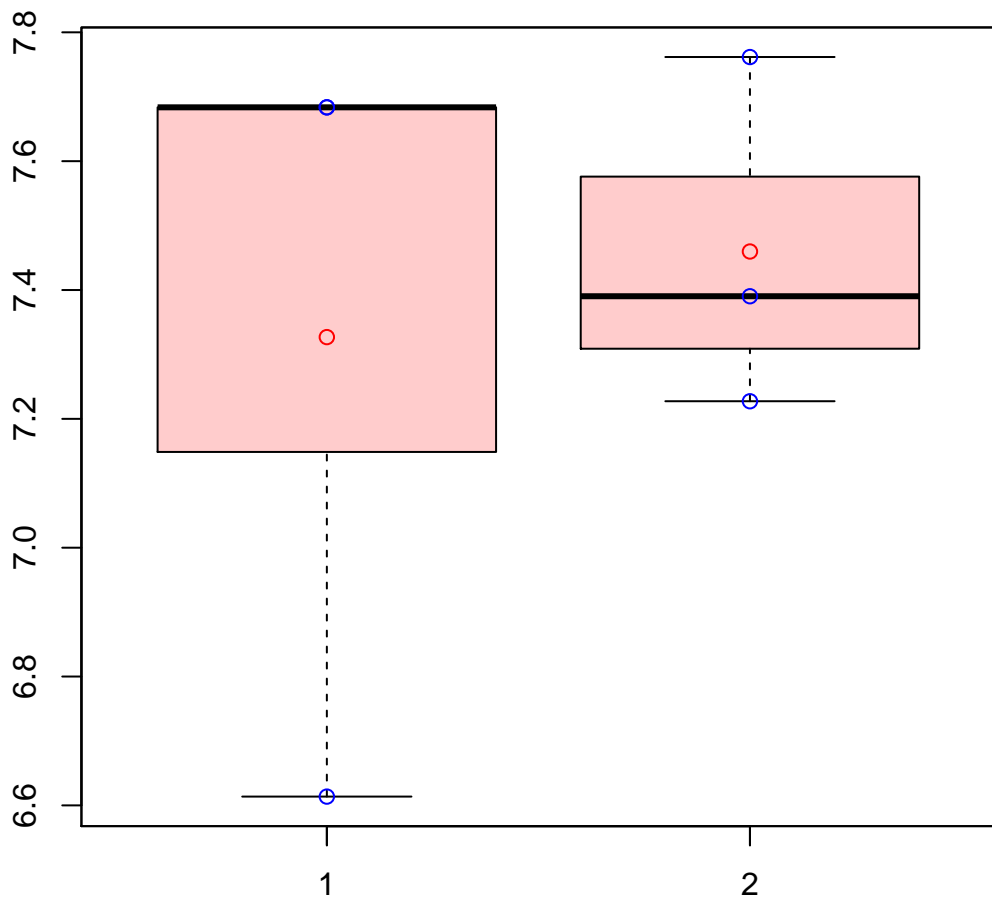

t-Test: p-value = 0.76

# M0SGS9|M0SGS9\_MUSAM

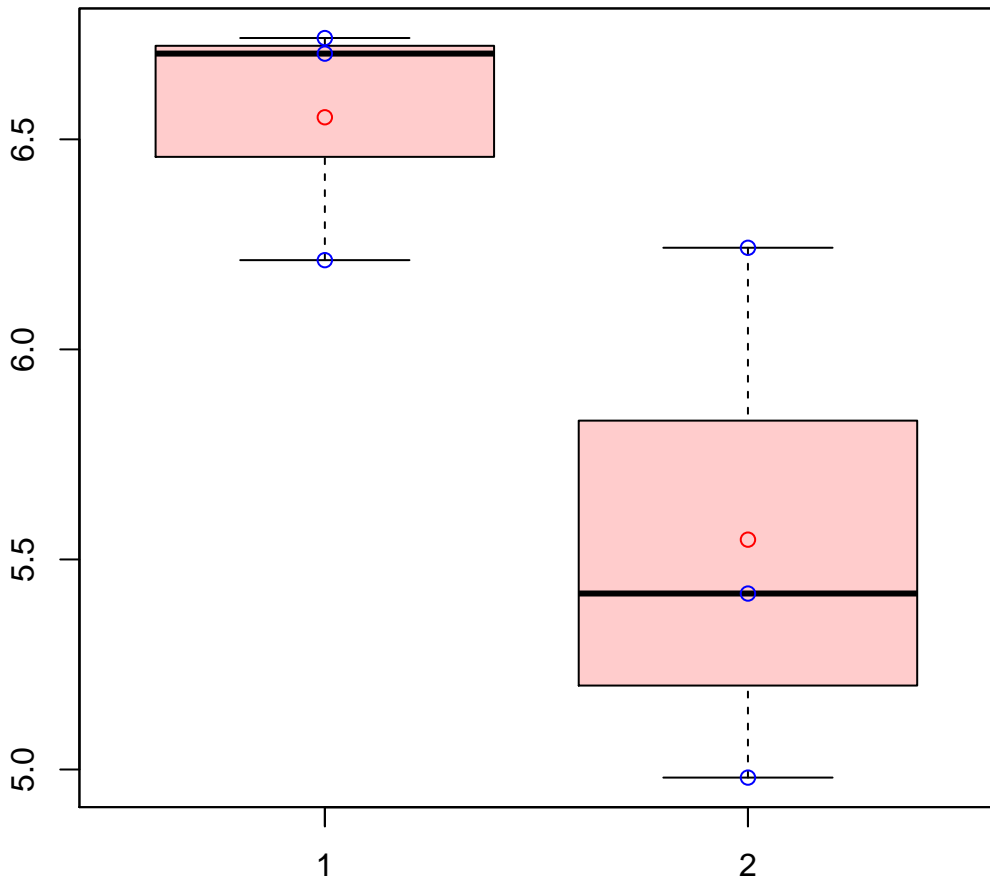

t-Test: p-value = 0.1

# M0SGU1|M0SGU1\_MUSAM

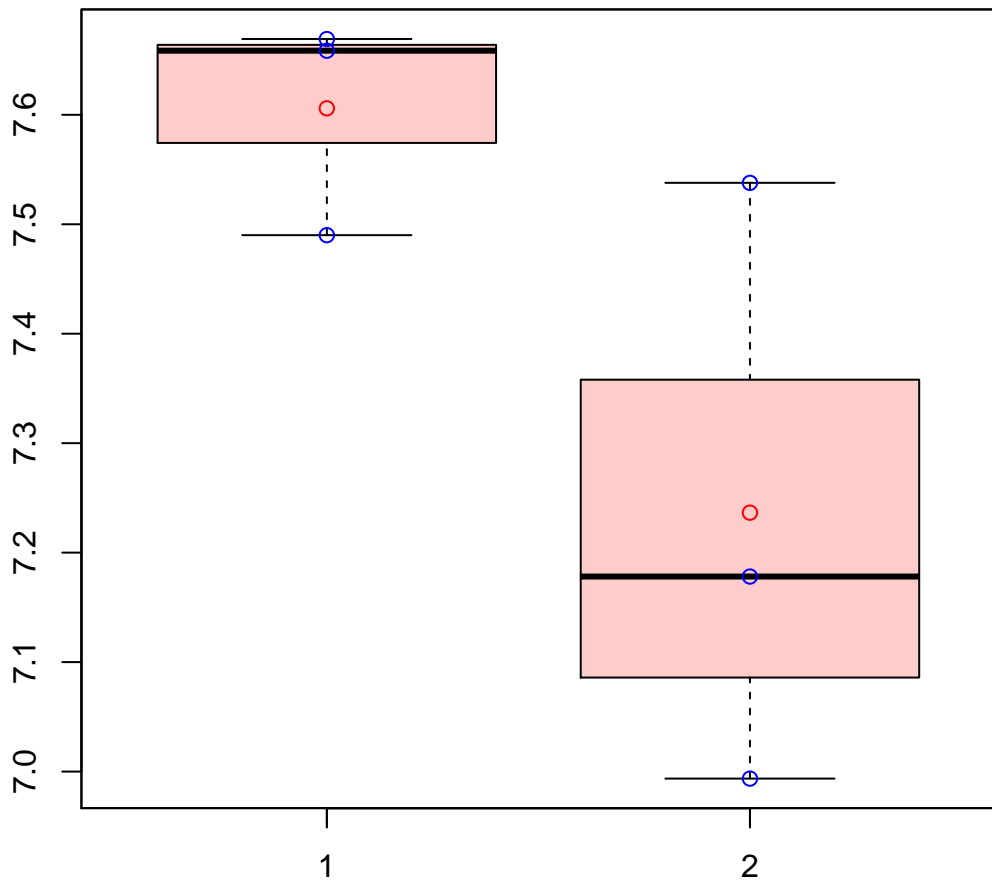

t-Test: p-value = 0.14

# M0SGU6|M0SGU6\_MUSAM

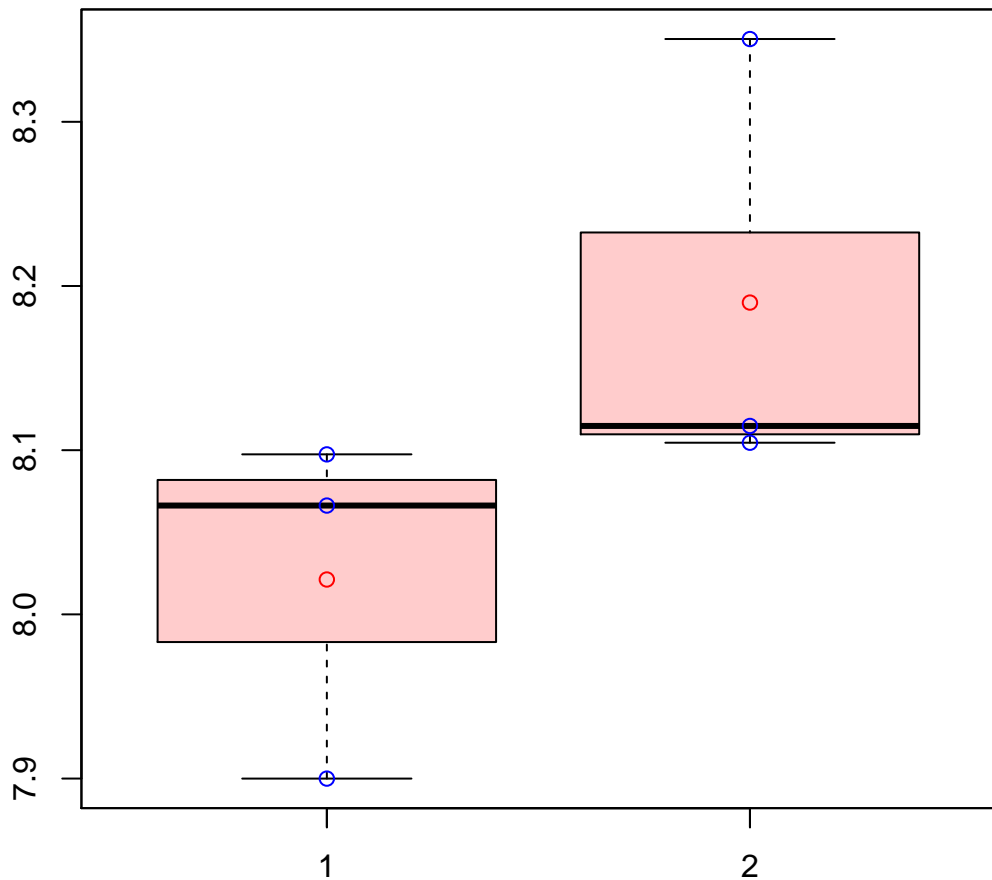

t-Test: p-value = 0.18

# M0SGU9|M0SGU9\_MUSAM

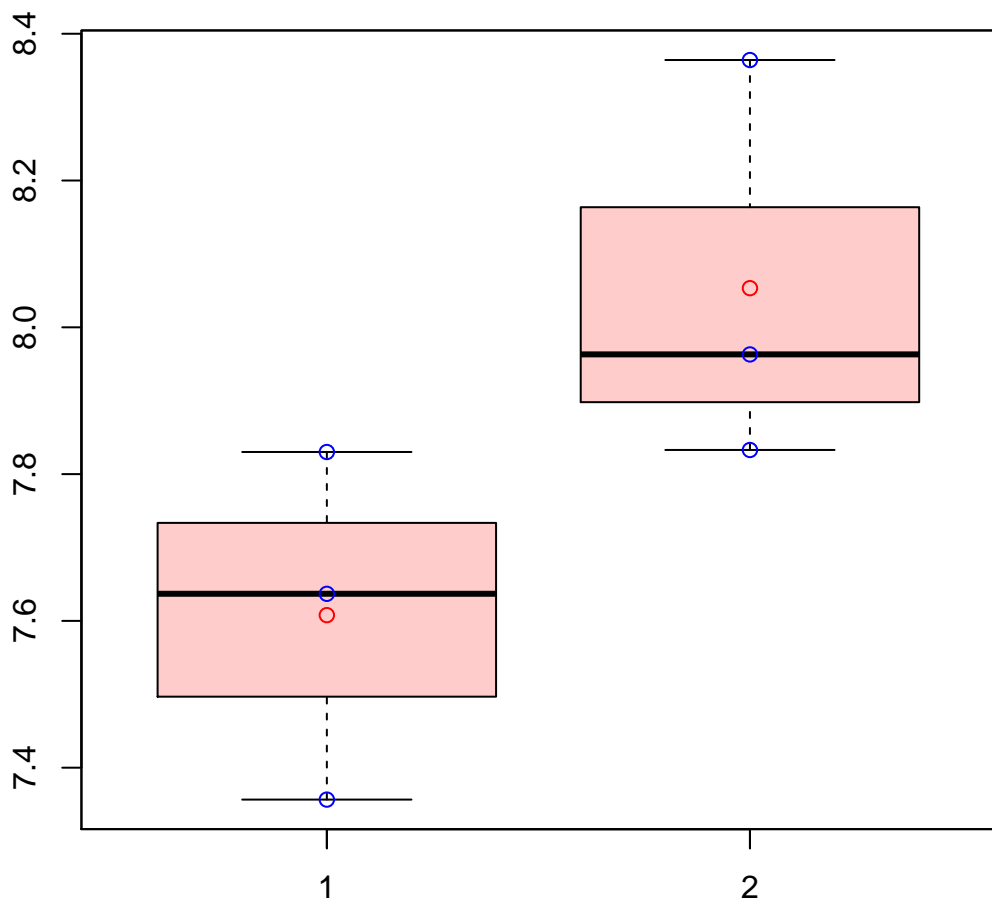

t-Test: p-value = 0.1

# M0SHB3|M0SHB3\_MUSAM

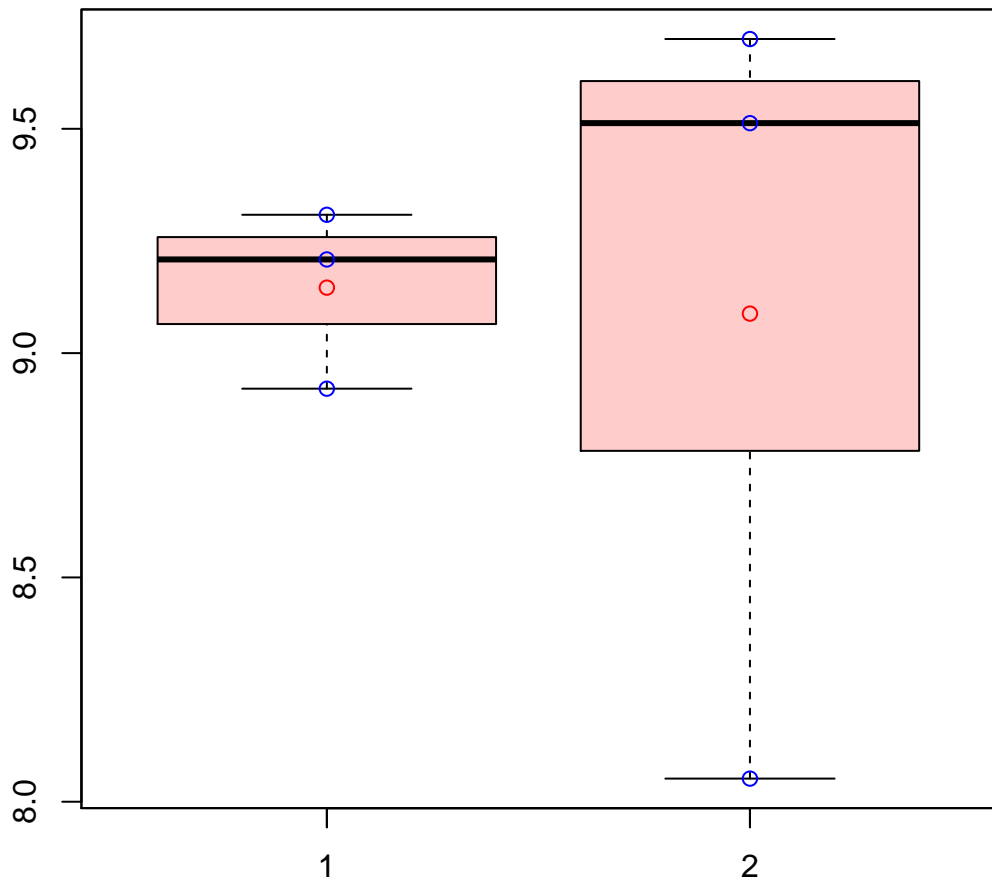

t-Test: p-value = 0.92

# M0SHK7|M0SHK7\_MUSAM

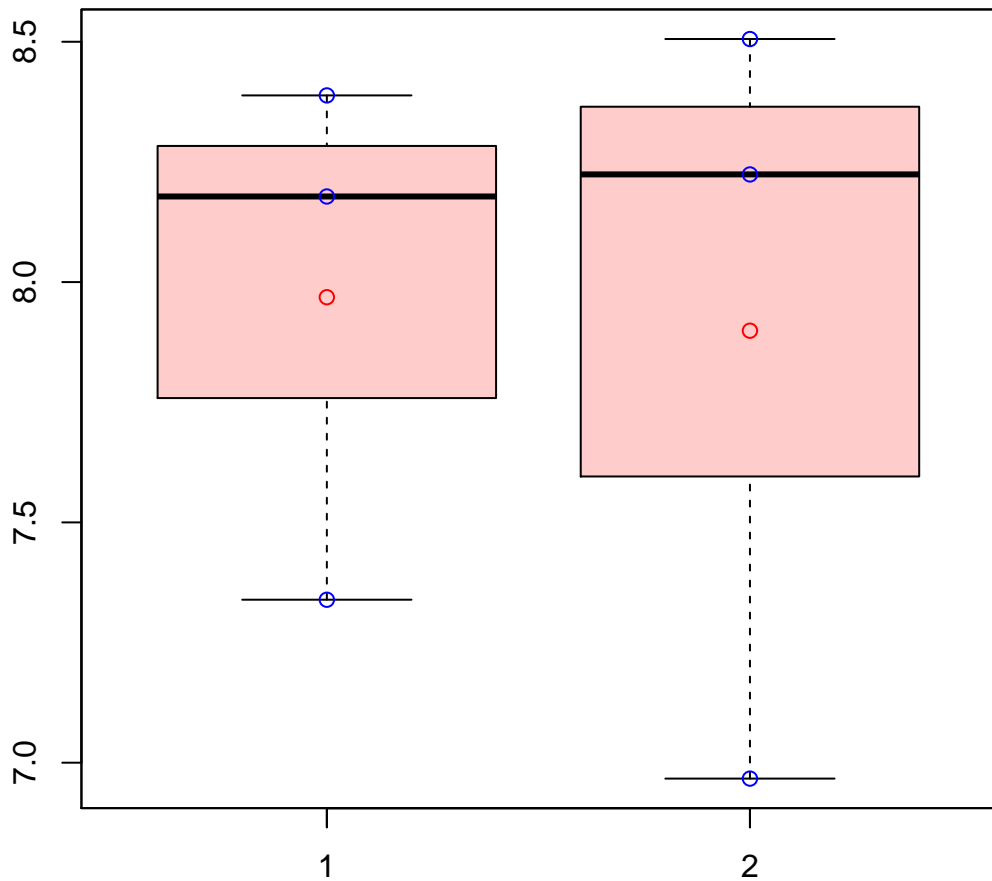

t-Test: p-value = 0.91



# M0SHM1|M0SHM1\_MUSAM

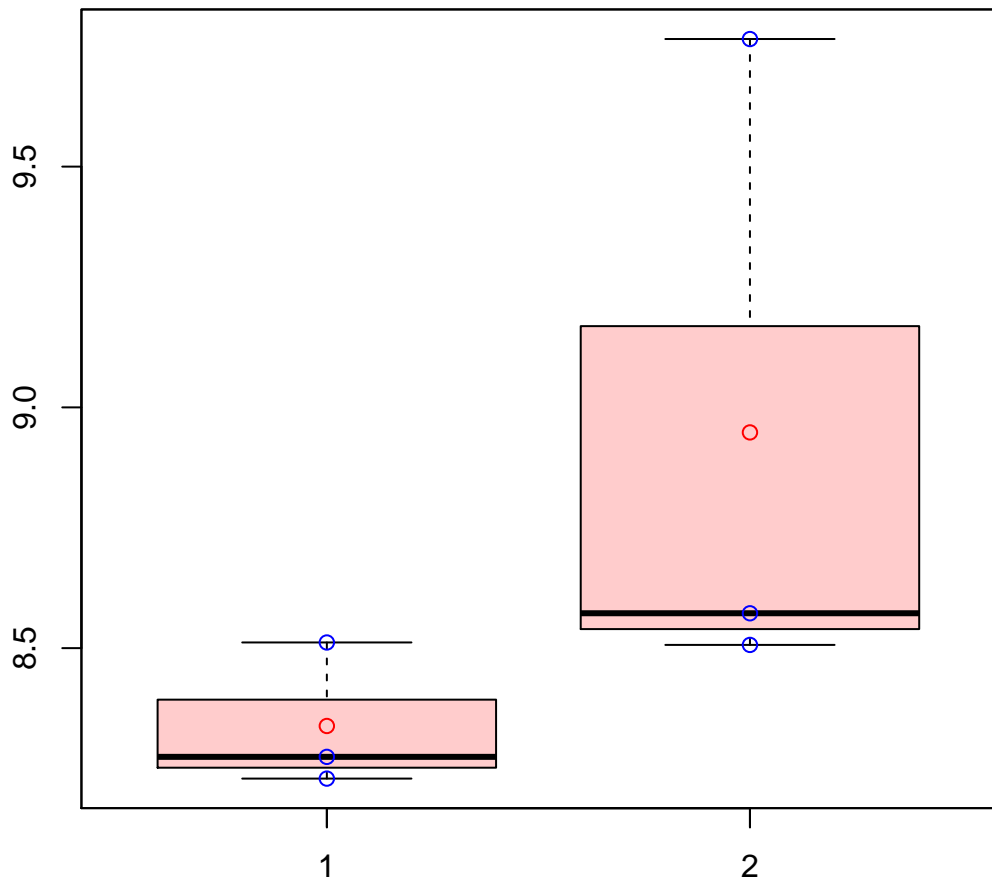

t-Test: p-value = 0.27

# M0SHT5|M0SHT5\_MUSAM

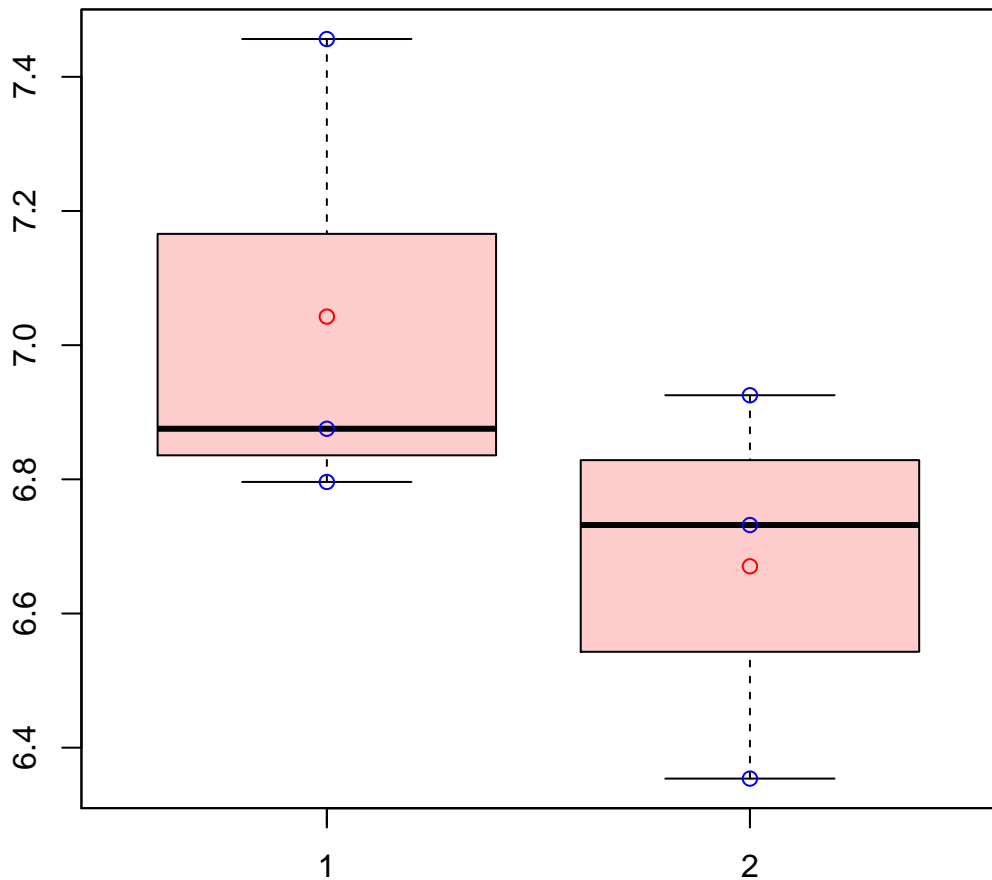

t-Test: p-value = 0.24

# M0SHZ7|M0SHZ7\_MUSAM

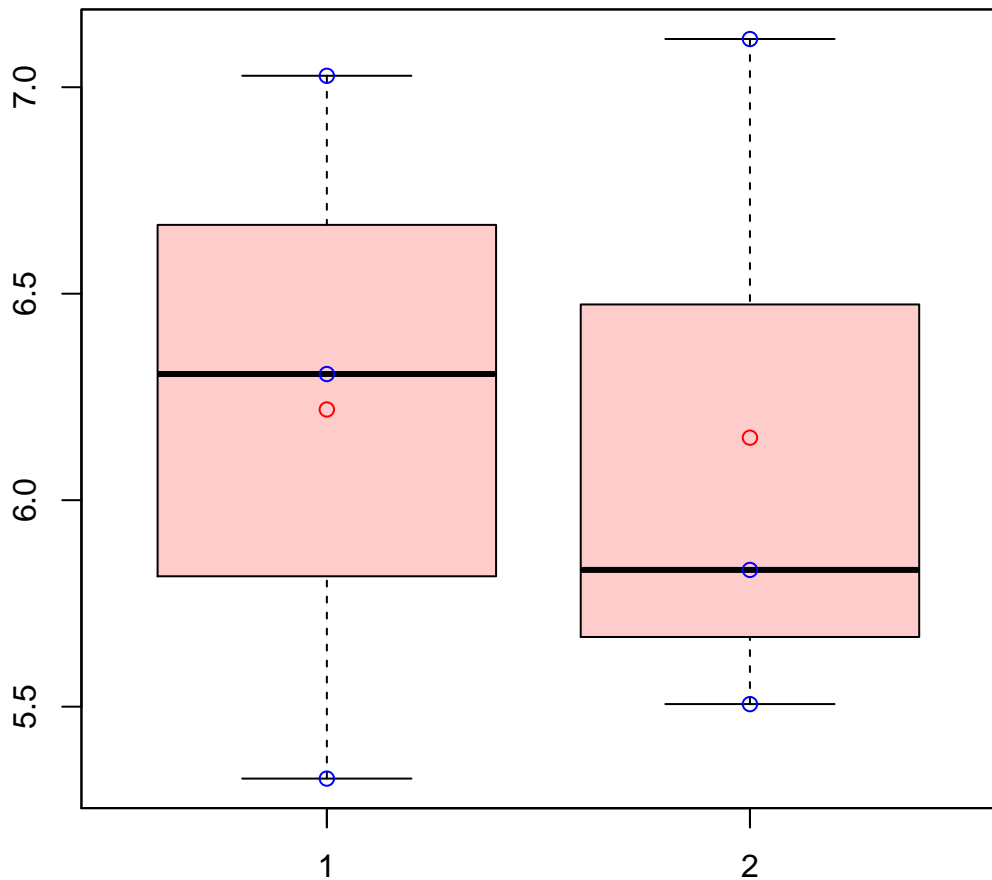

t-Test: p-value = 0.93

# M0SI37|M0SI37\_MUSAM

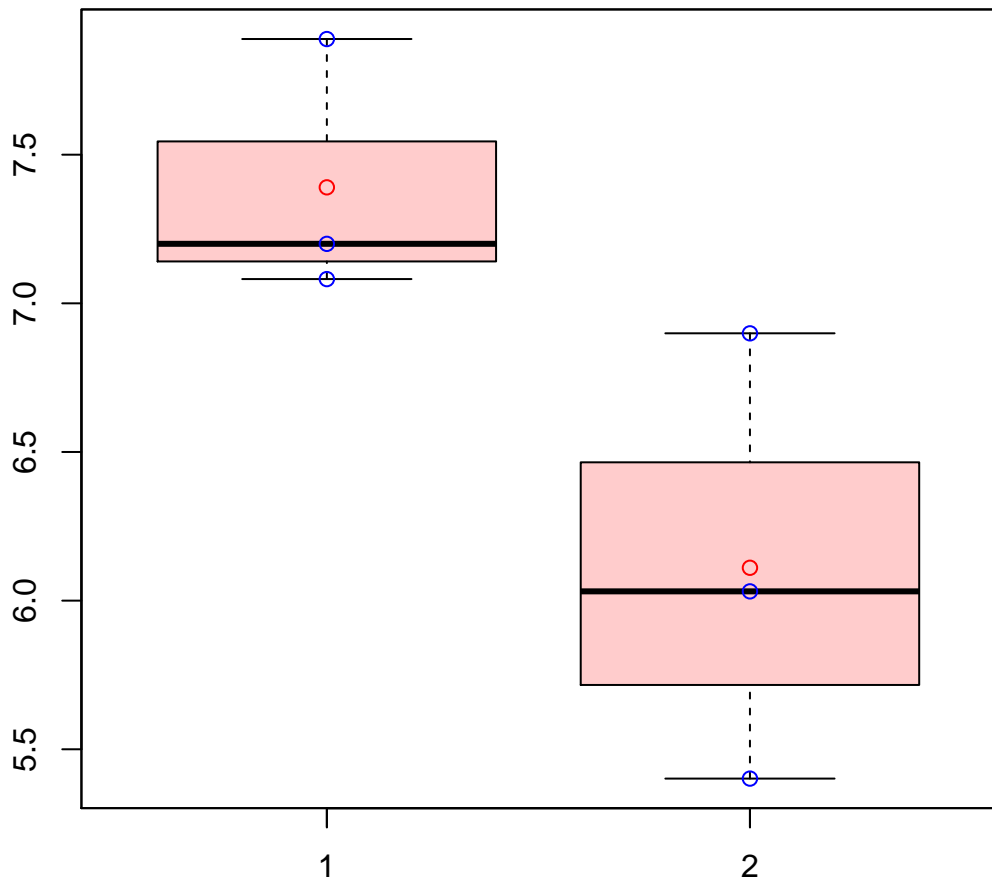

t-Test: p-value = 0.08

# M0SI69|M0SI69\_MUSAM

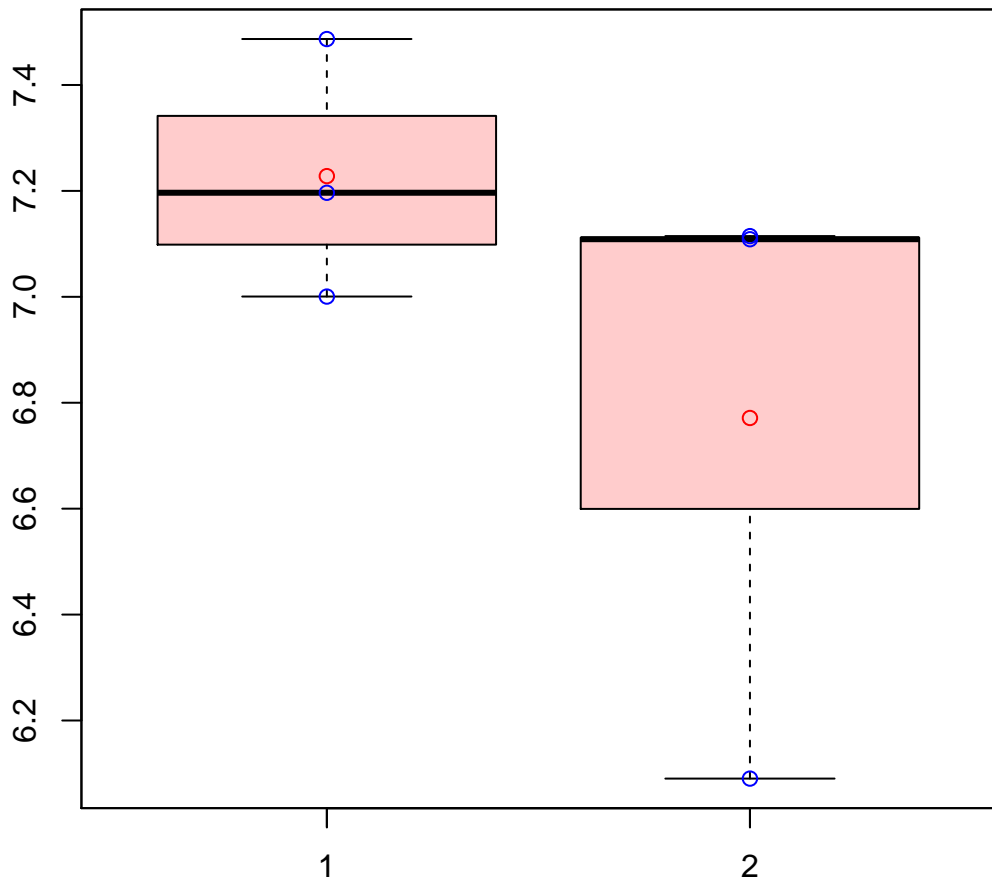

t-Test: p-value = 0.31

# M0SI91|M0SI91\_MUSAM

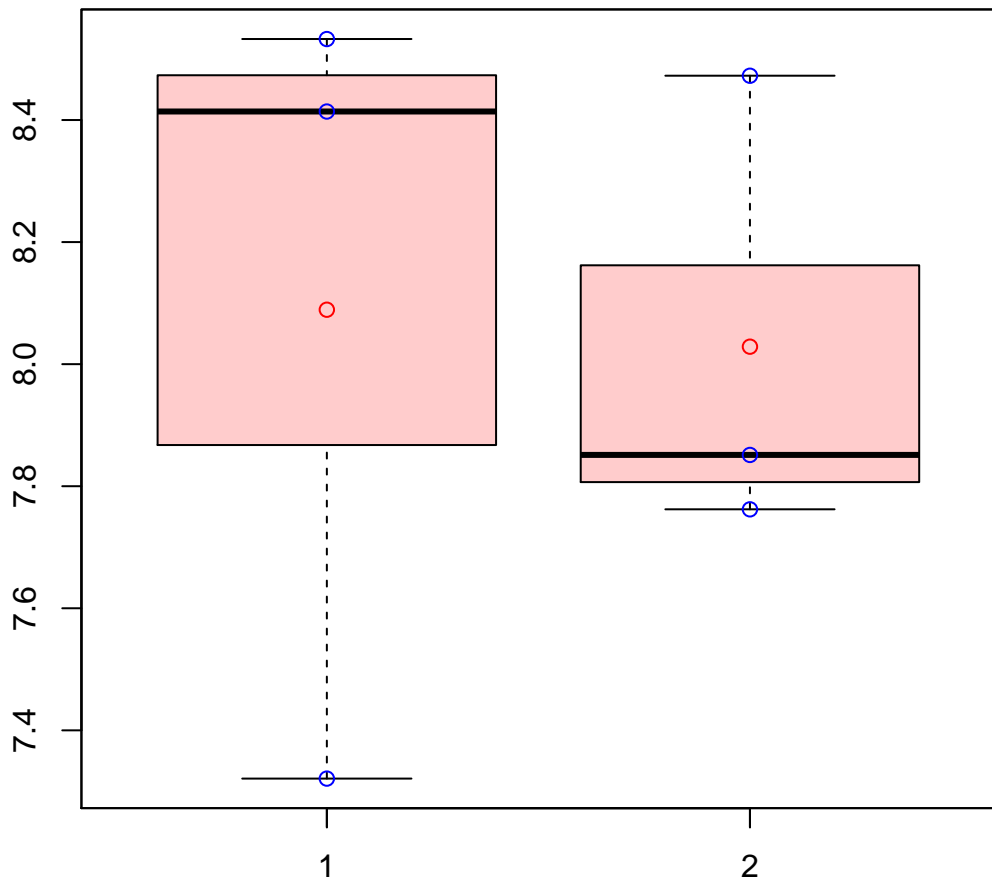

t-Test: p-value = 0.9

# M0SIC8|M0SIC8\_MUSAM

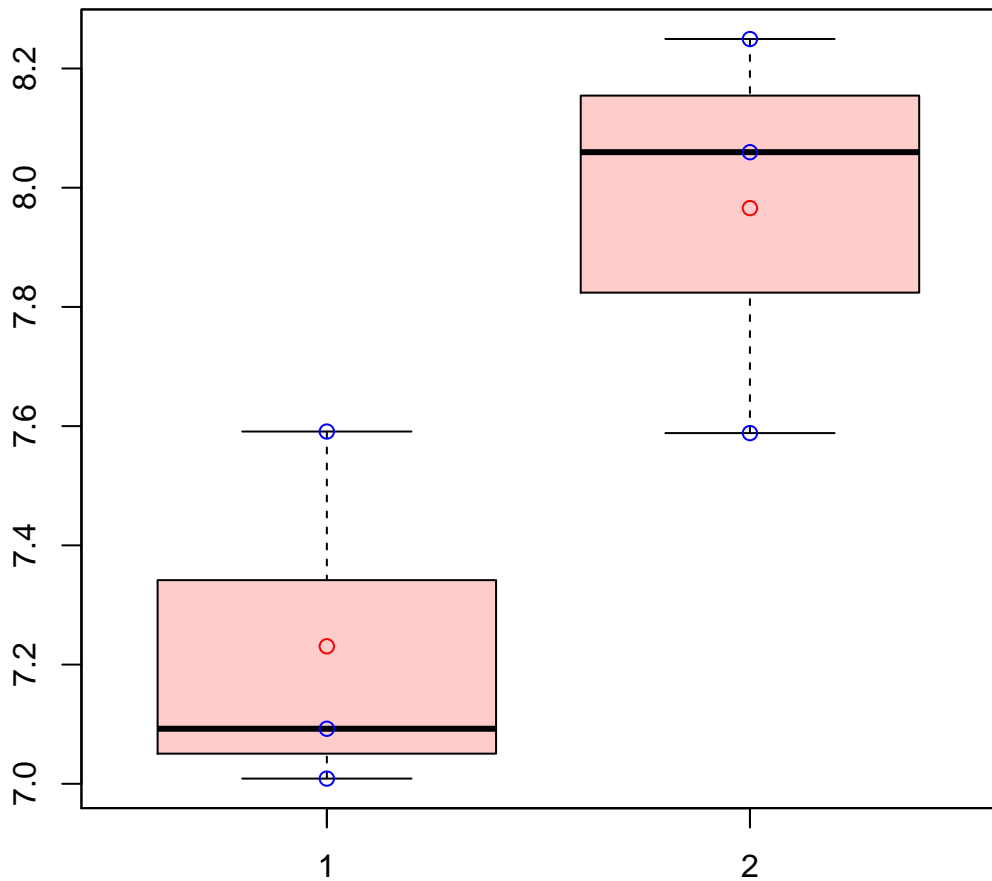

t-Test: p-value = 0.05

# M0SIF7|M0SIF7\_MUSAM

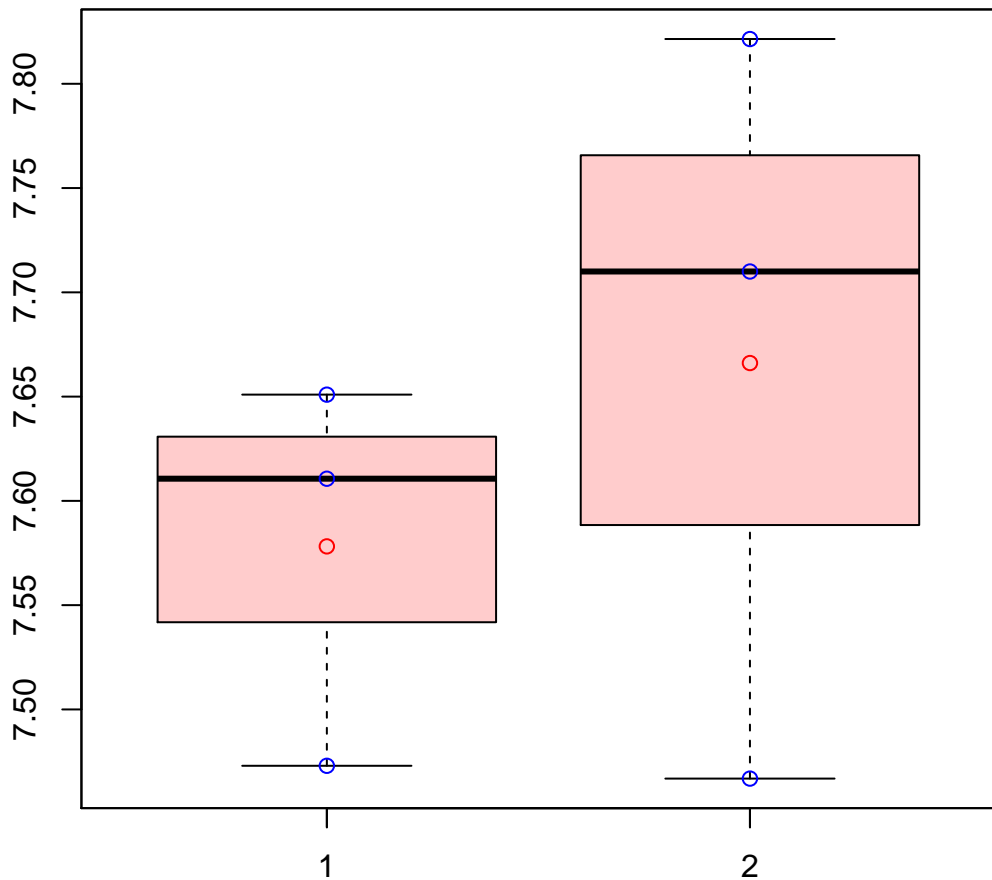

t-Test: p-value = 0.51



# M0SIG5|M0SIG5\_MUSAM

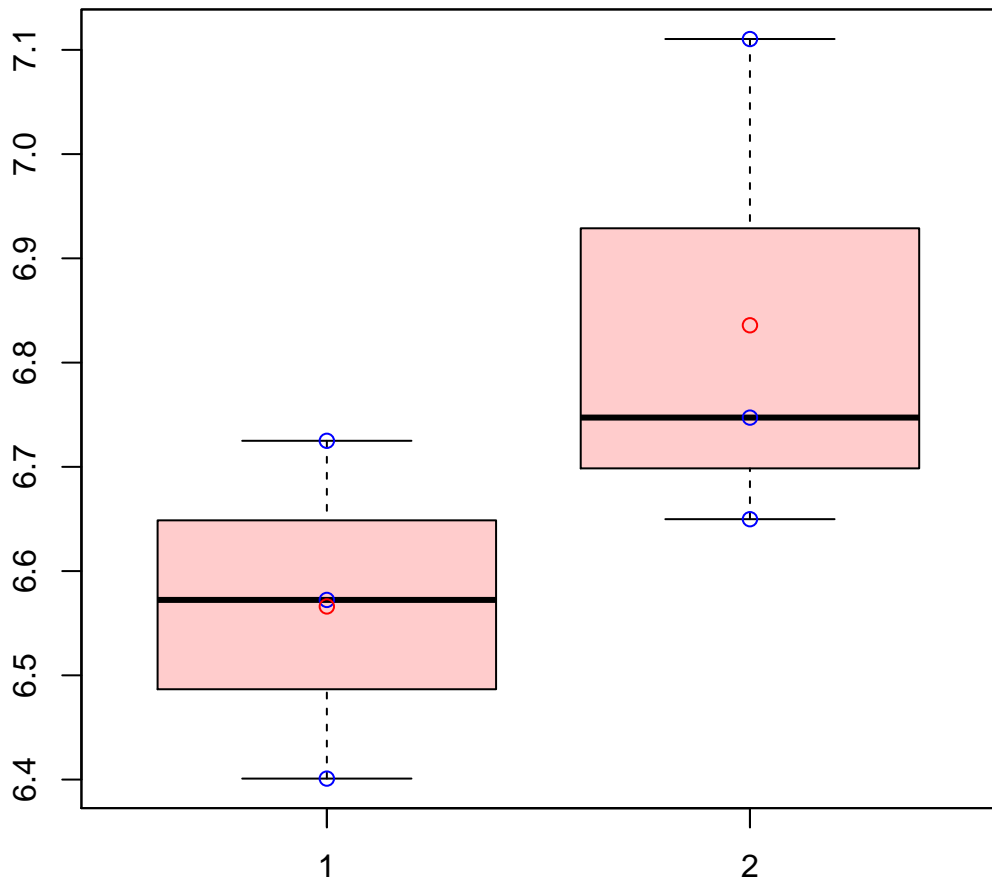

t-Test: p-value = 0.2

# M0SIL2|M0SIL2\_MUSAM

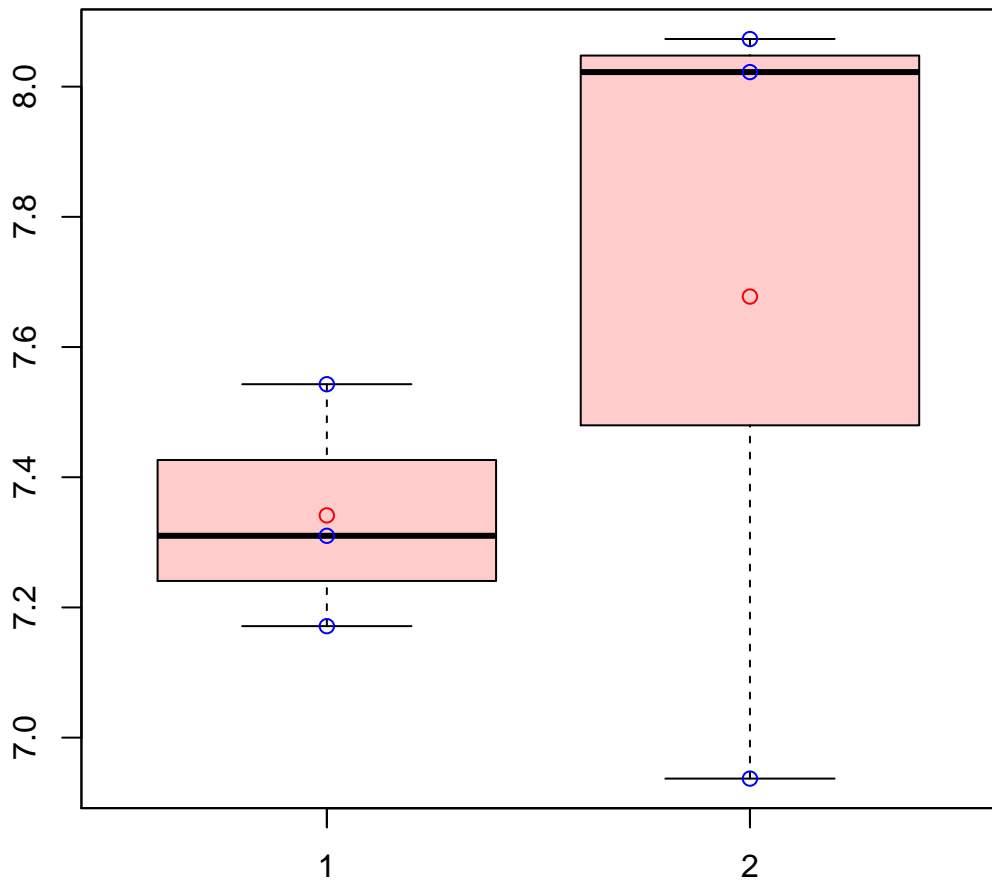

t-Test: p-value = 0.46

# M0SIL9|M0SIL9\_MUSAM

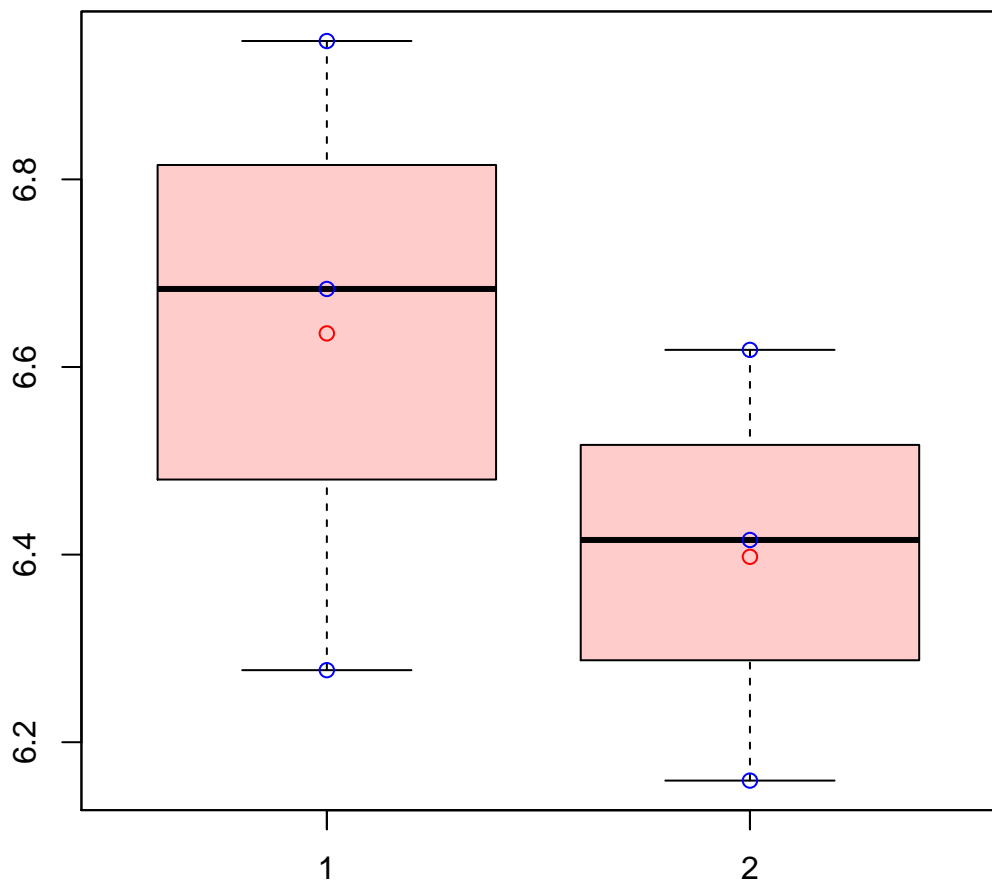

t-Test: p-value = 0.38

# M0SJ90|M0SJ90\_MUSAM

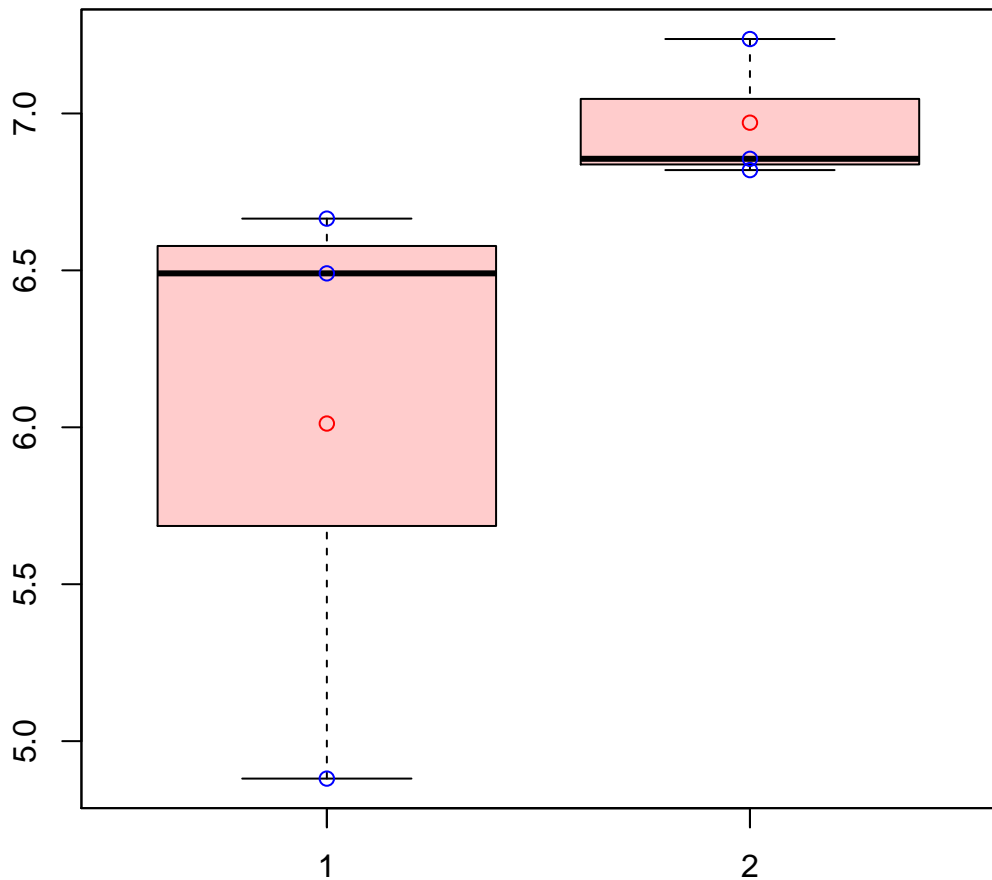

t-Test: p-value = 0.23

# M0SJS0|M0SJS0\_MUSAM

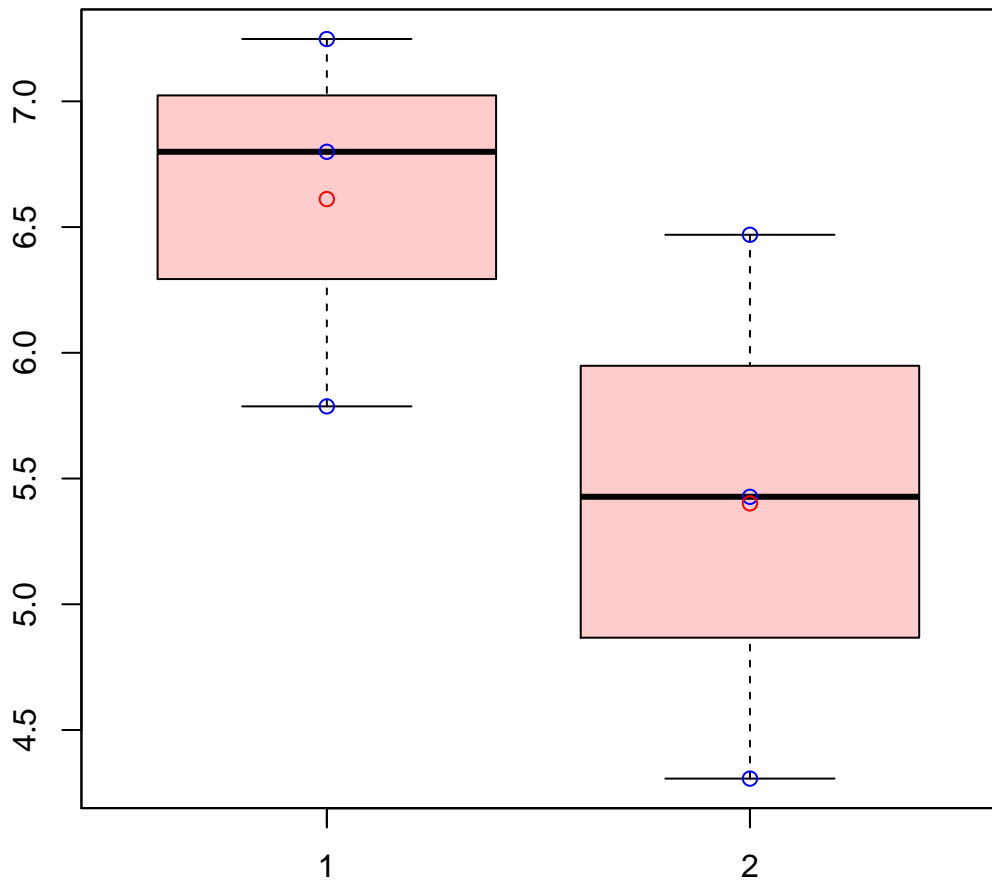

t-Test: p-value = 0.19

# M0SK54|M0SK54\_MUSAM

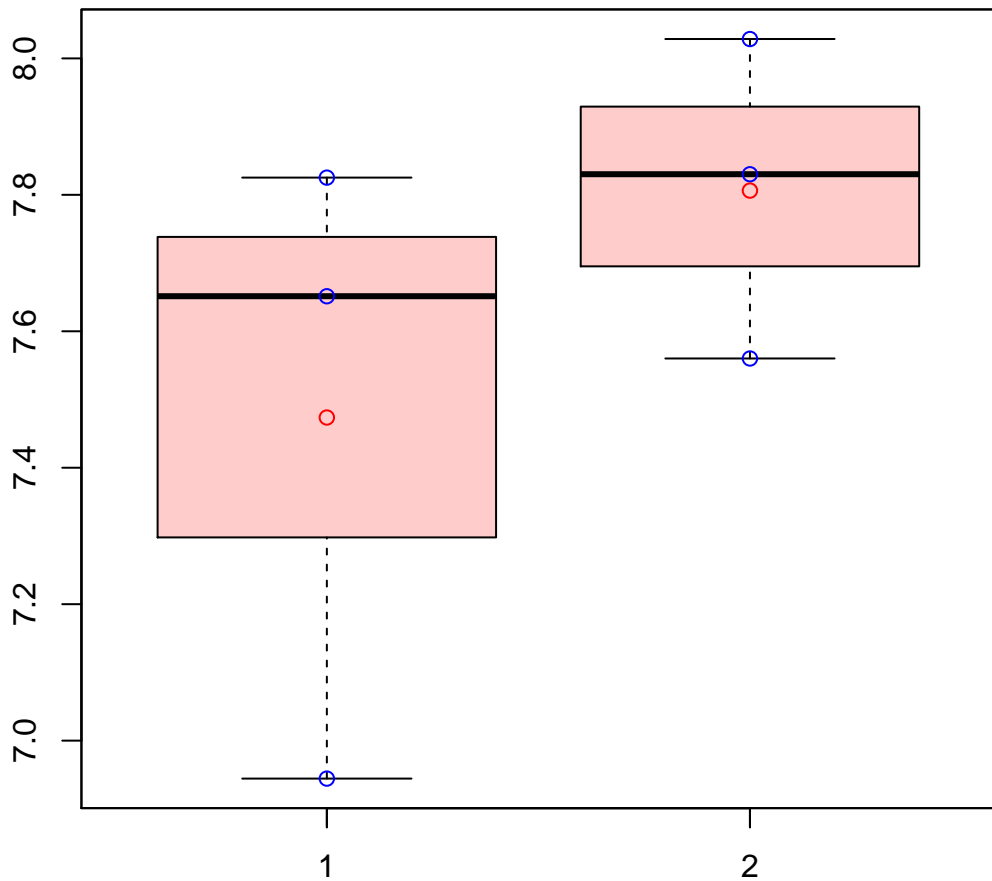

t-Test: p-value = 0.35

# M0SKT9|M0SKT9\_MUSAM

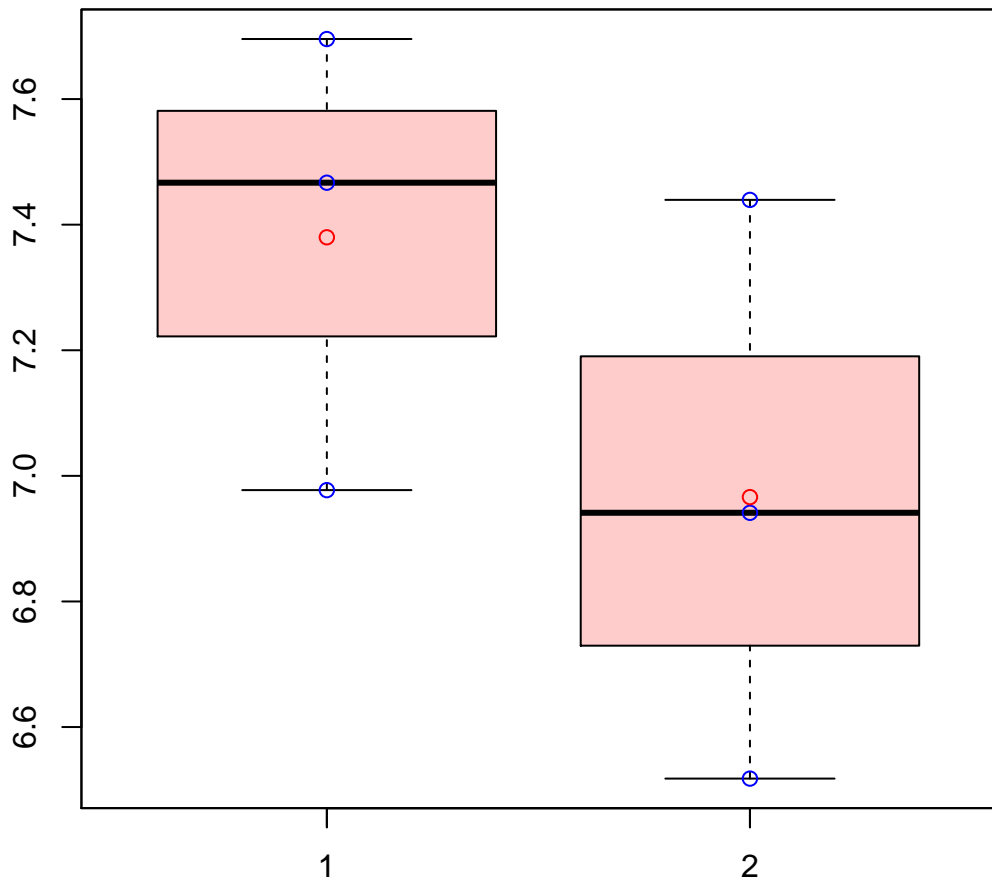

t-Test: p-value = 0.29

# M0SL45|M0SL45\_MUSAM

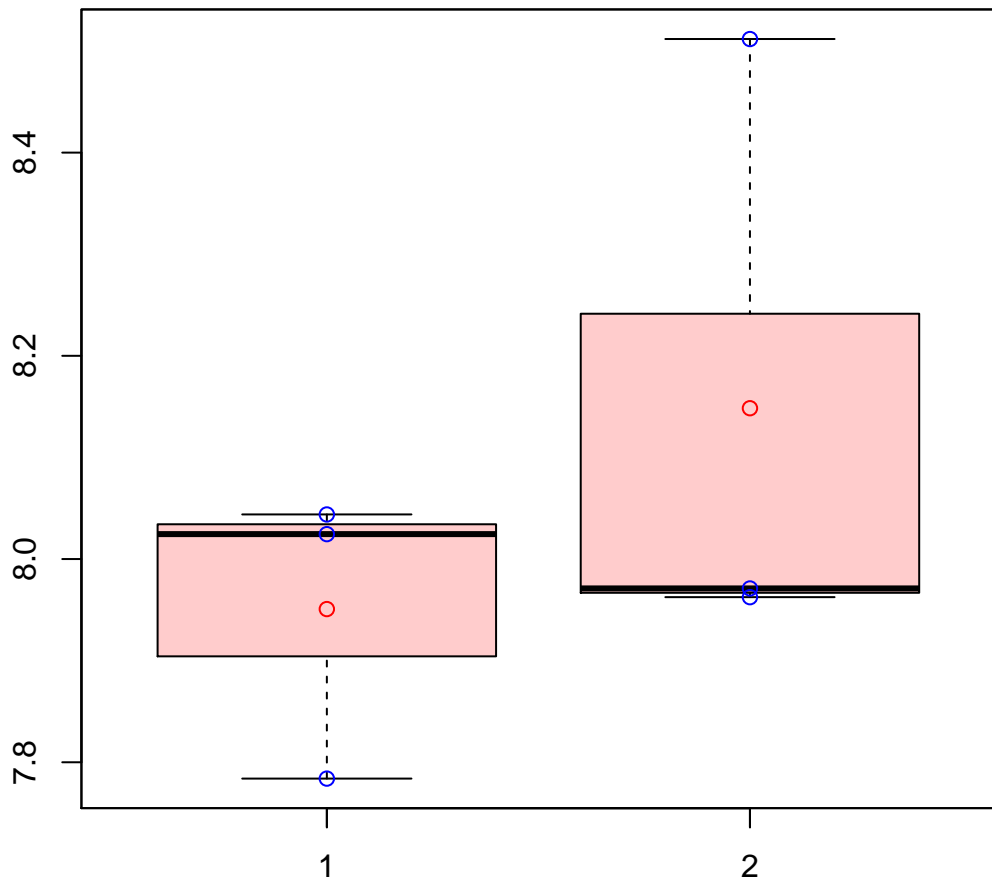

t-Test: p-value = 0.4



# M0SL72|M0SL72\_MUSAM

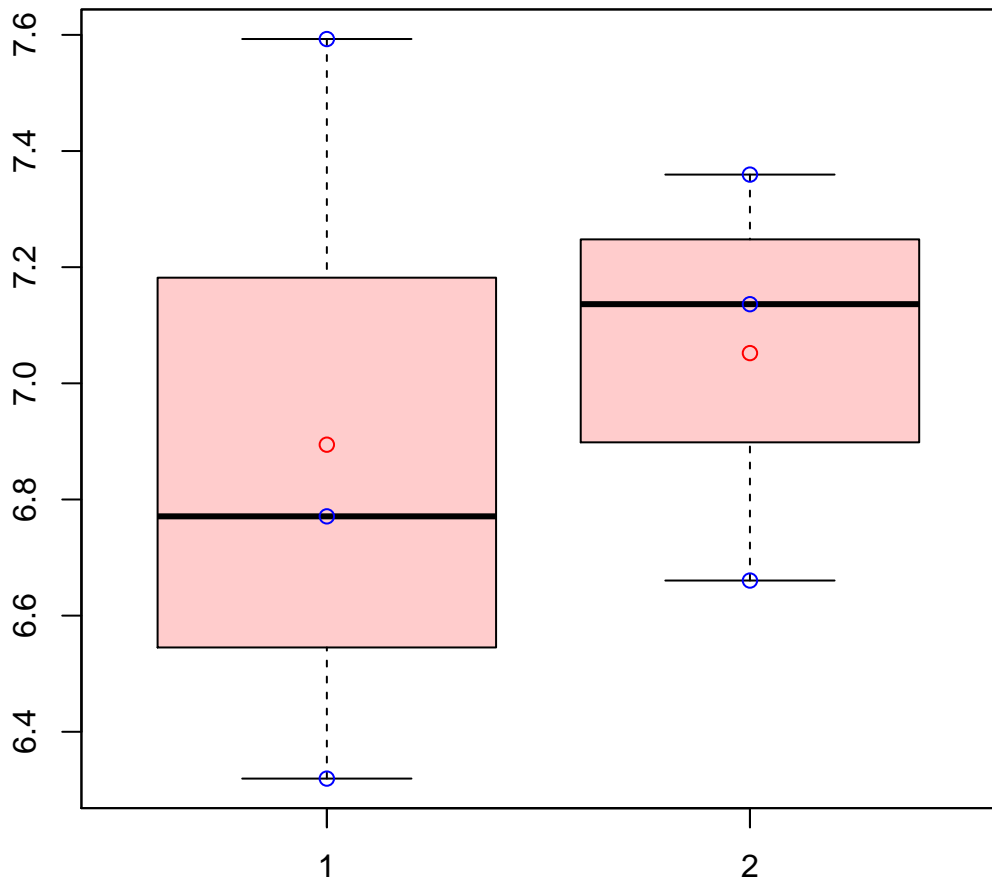

t-Test: p-value = 0.74

# M0SLI1|M0SLI1\_MUSAM

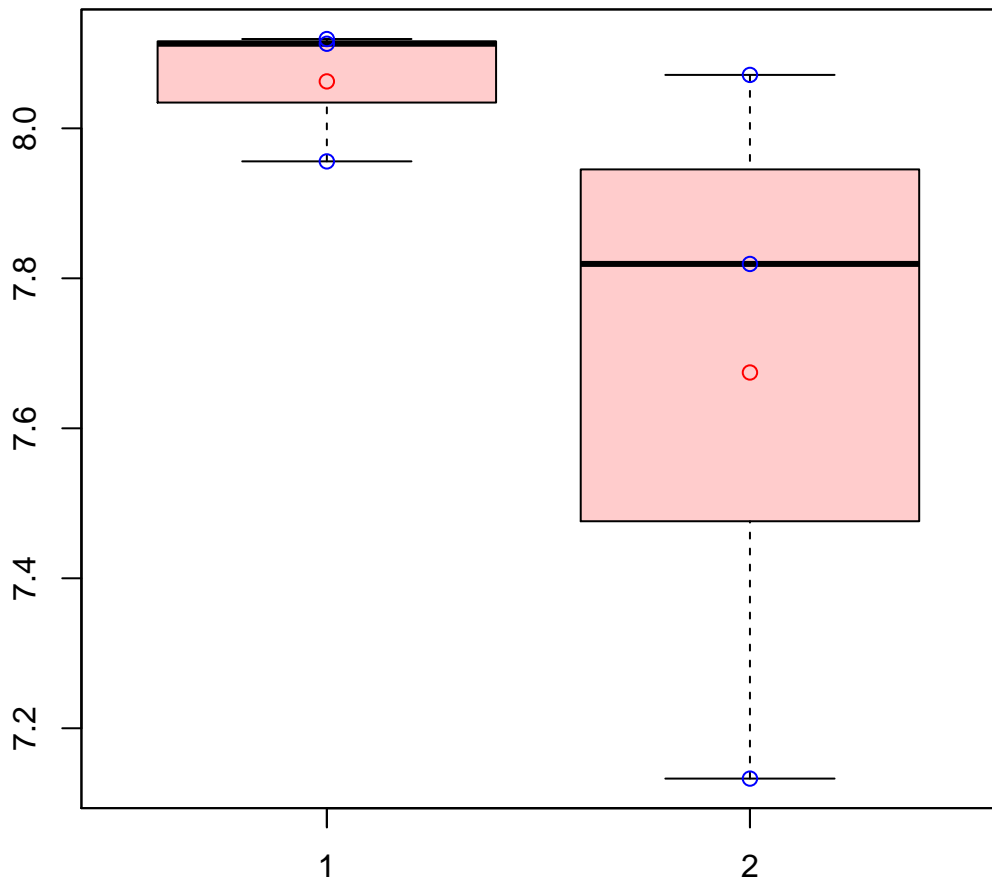

t-Test: p-value = 0.3

# M0SLI6|M0SLI6\_MUSAM

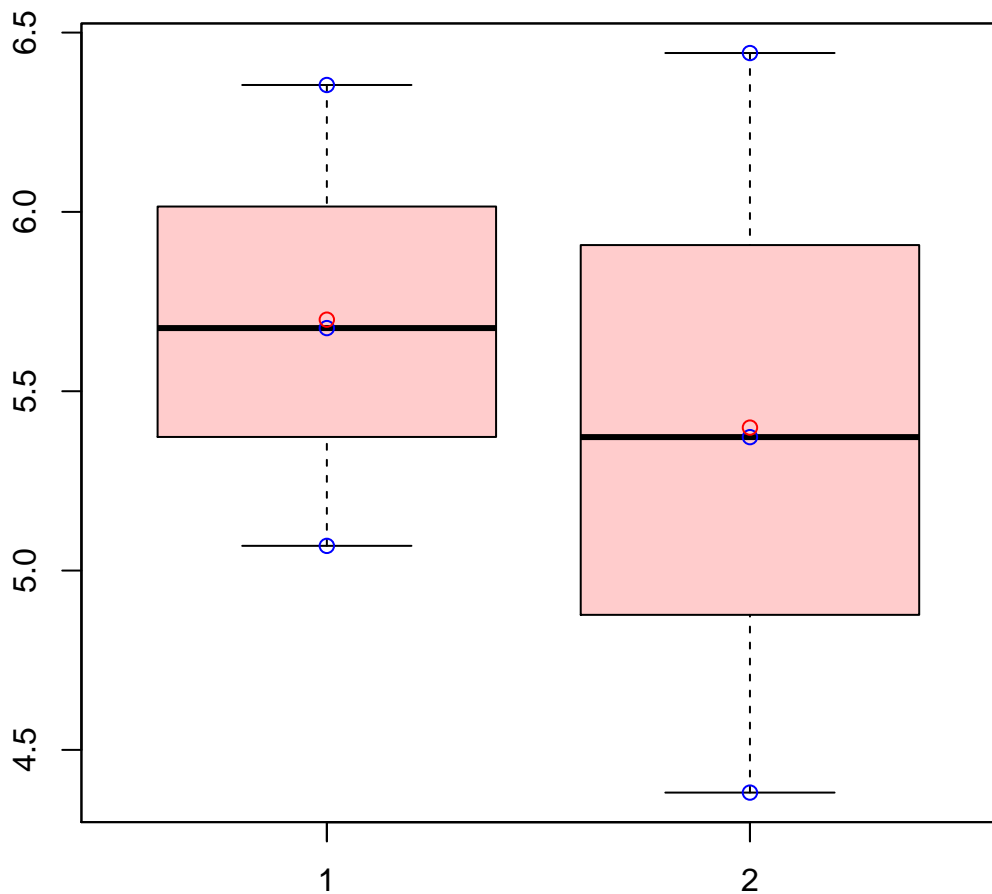

t-Test: p-value = 0.69

# M0SLK6|M0SLK6\_MUSAM

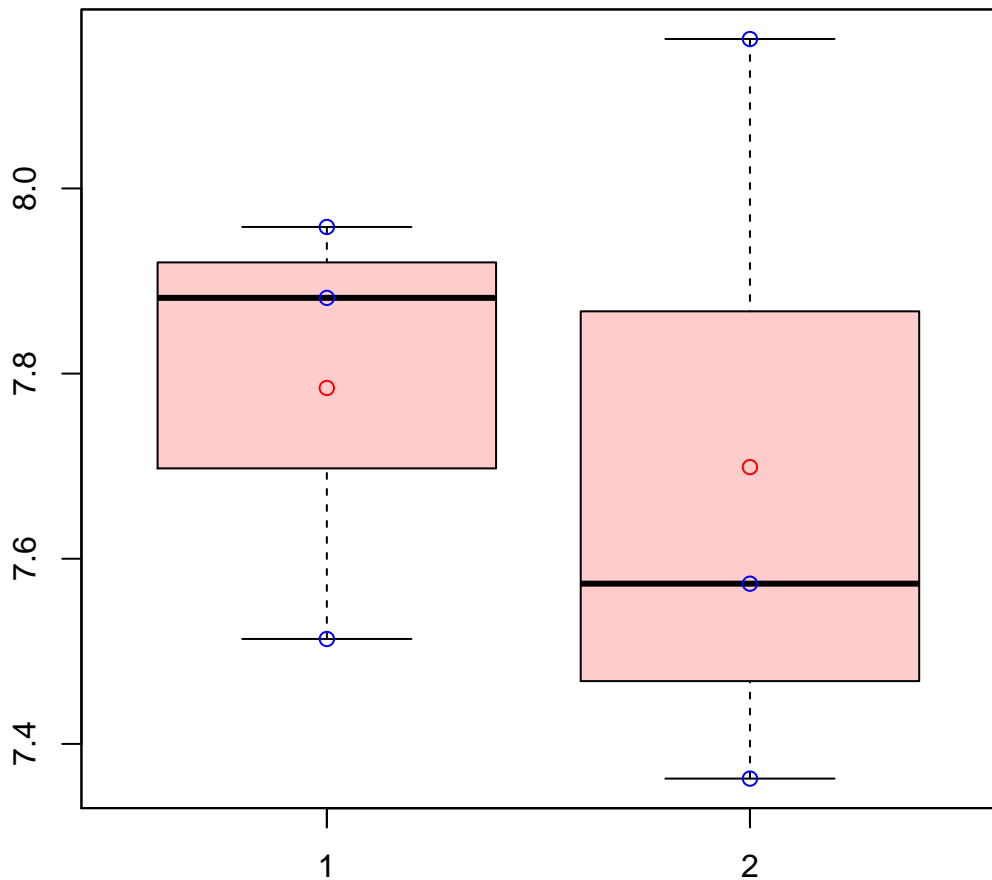

t-Test: p-value = 0.78

# M0SLS3|M0SLS3\_MUSAM

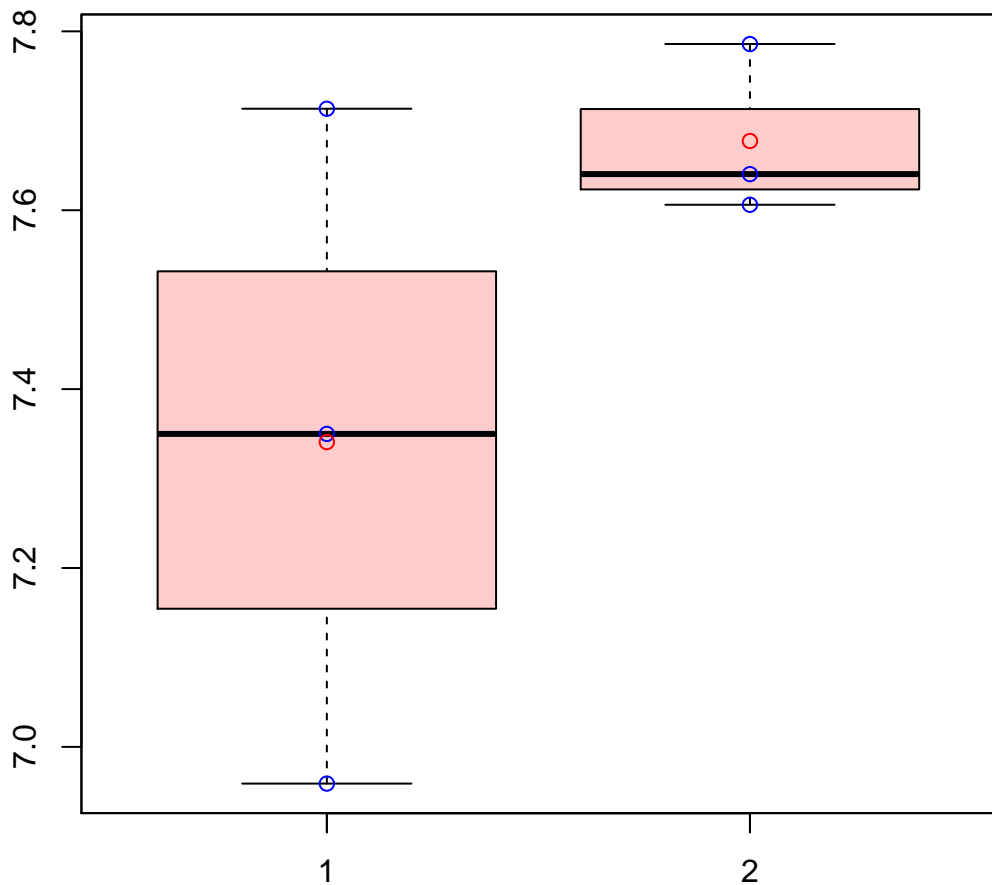

t-Test: p-value = 0.26

# M0SLX3|M0SLX3\_MUSAM

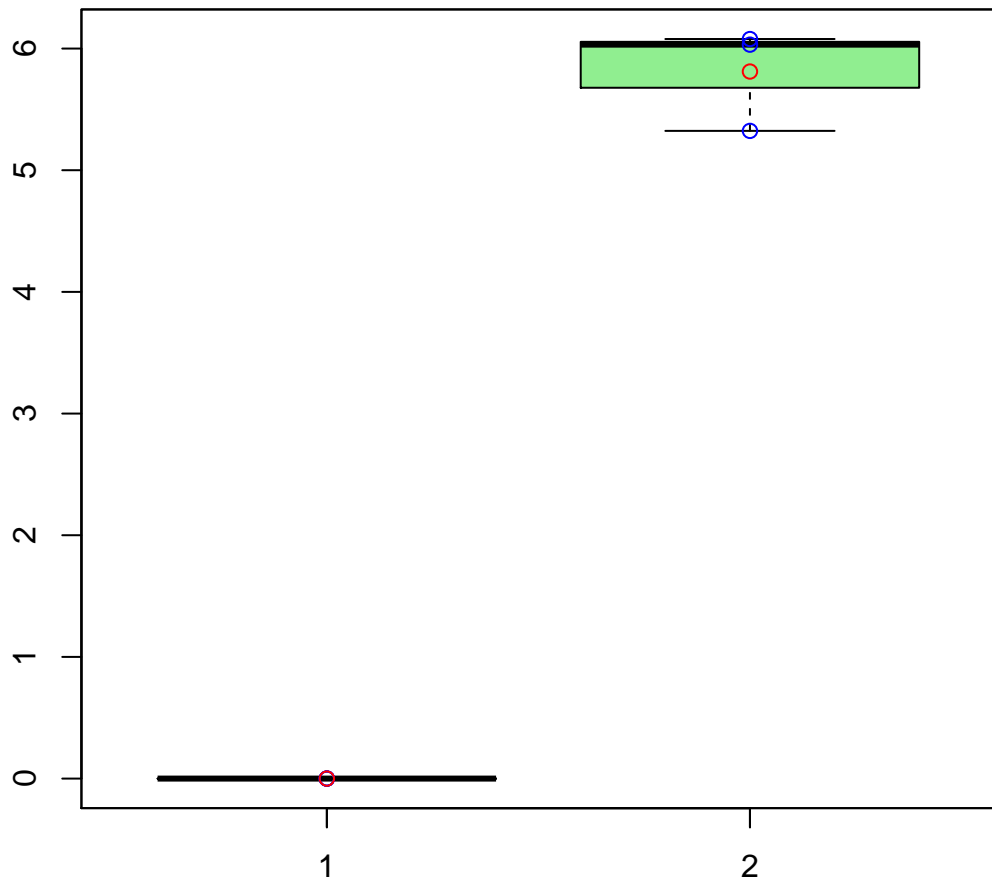

t-Test: p-value = 0

# M0SM28|M0SM28\_MUSAM

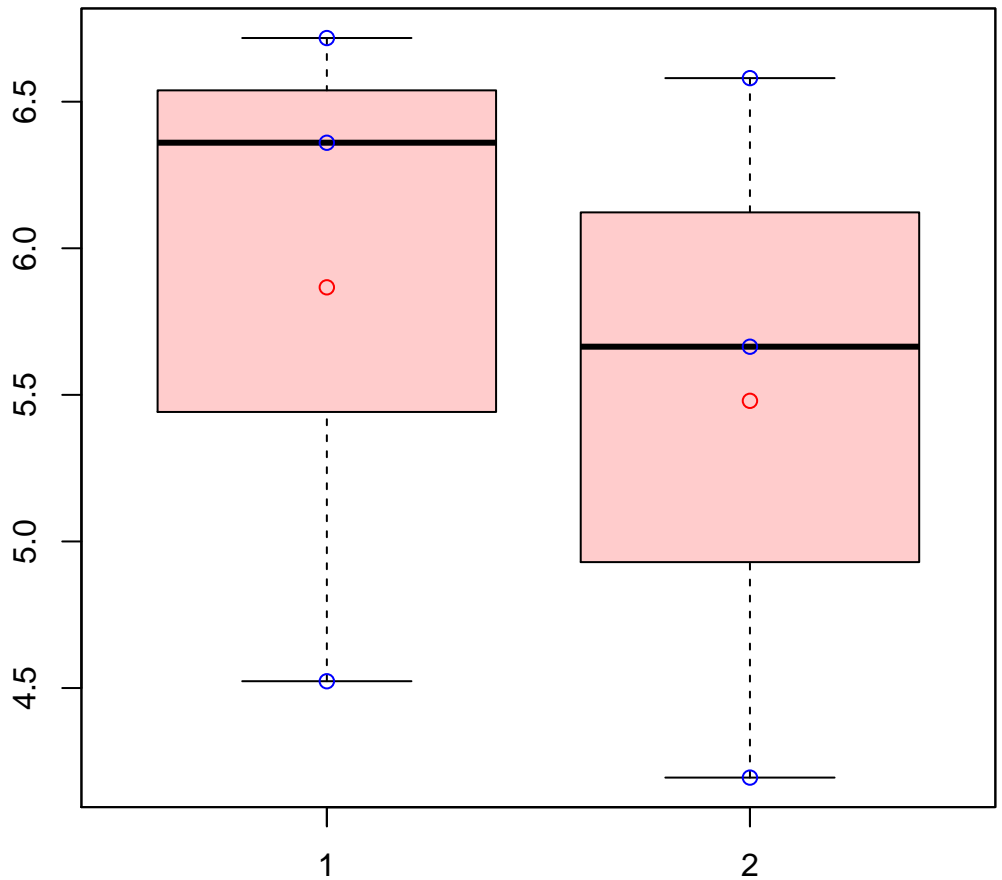

t-Test: p-value = 0.71

# M0SM91|M0SM91\_MUSAM

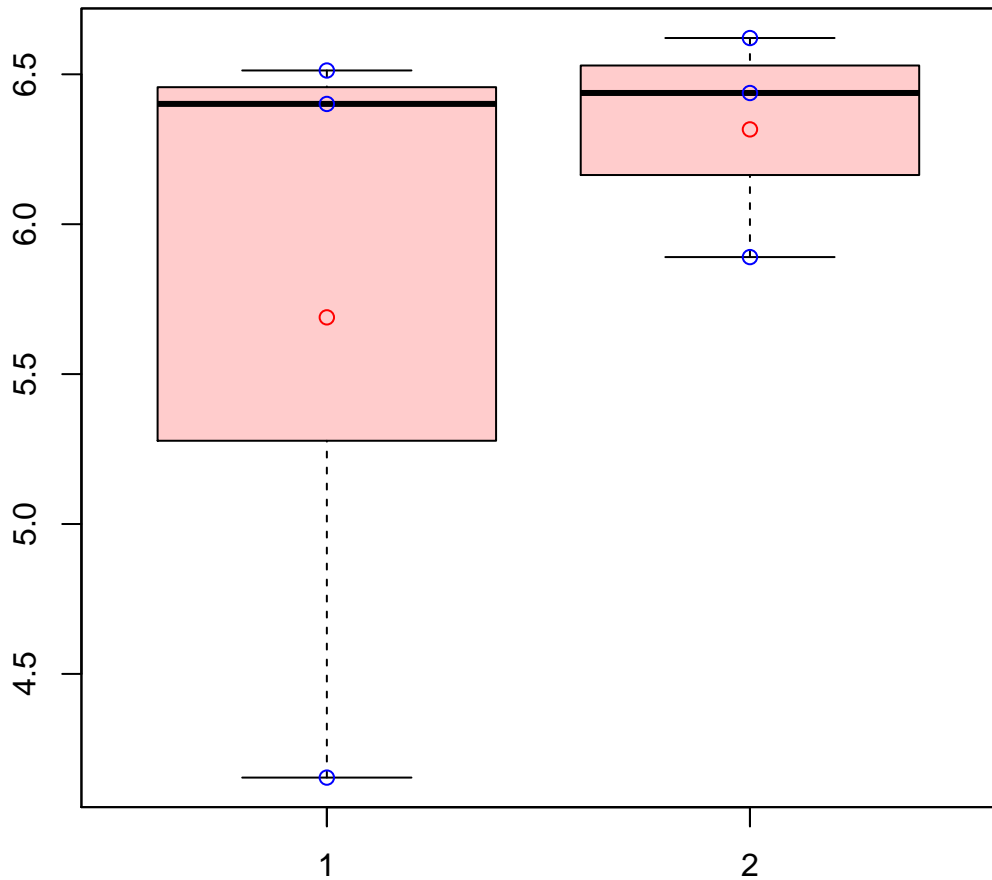

t-Test: p-value = 0.5



# M0SME2|M0SME2\_MUSAM

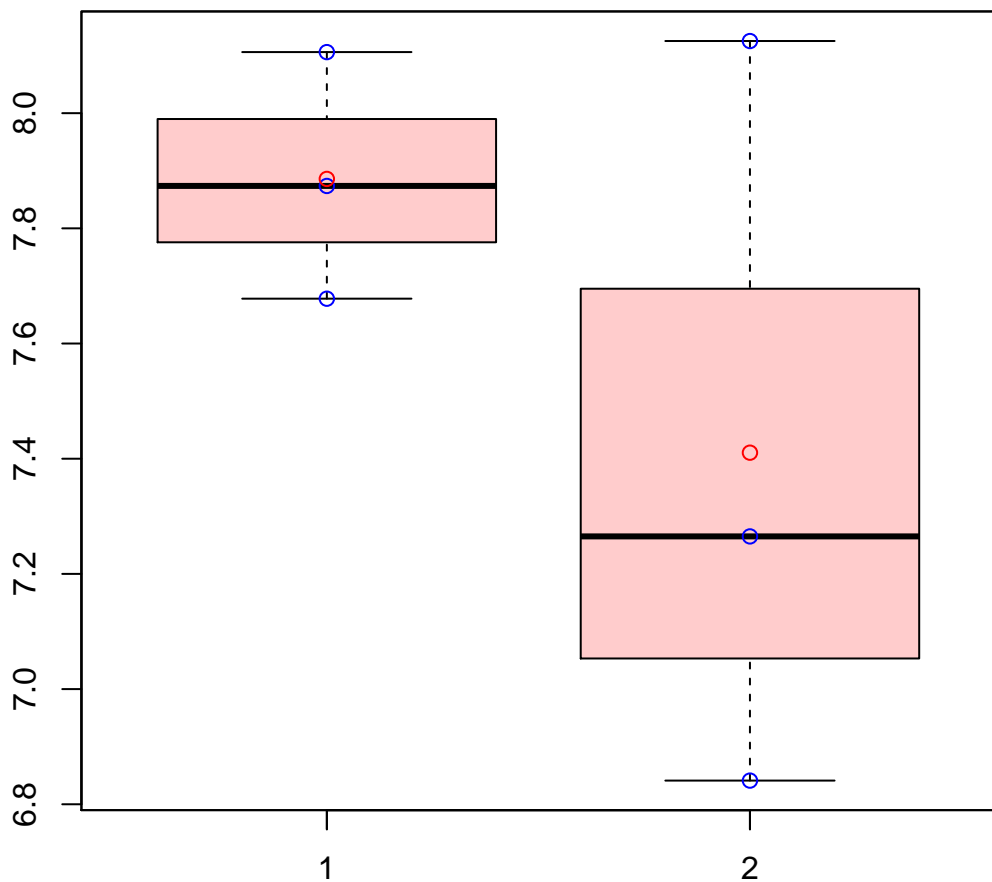

t-Test: p-value = 0.34

# M0SMK9|M0SMK9\_MUSAM

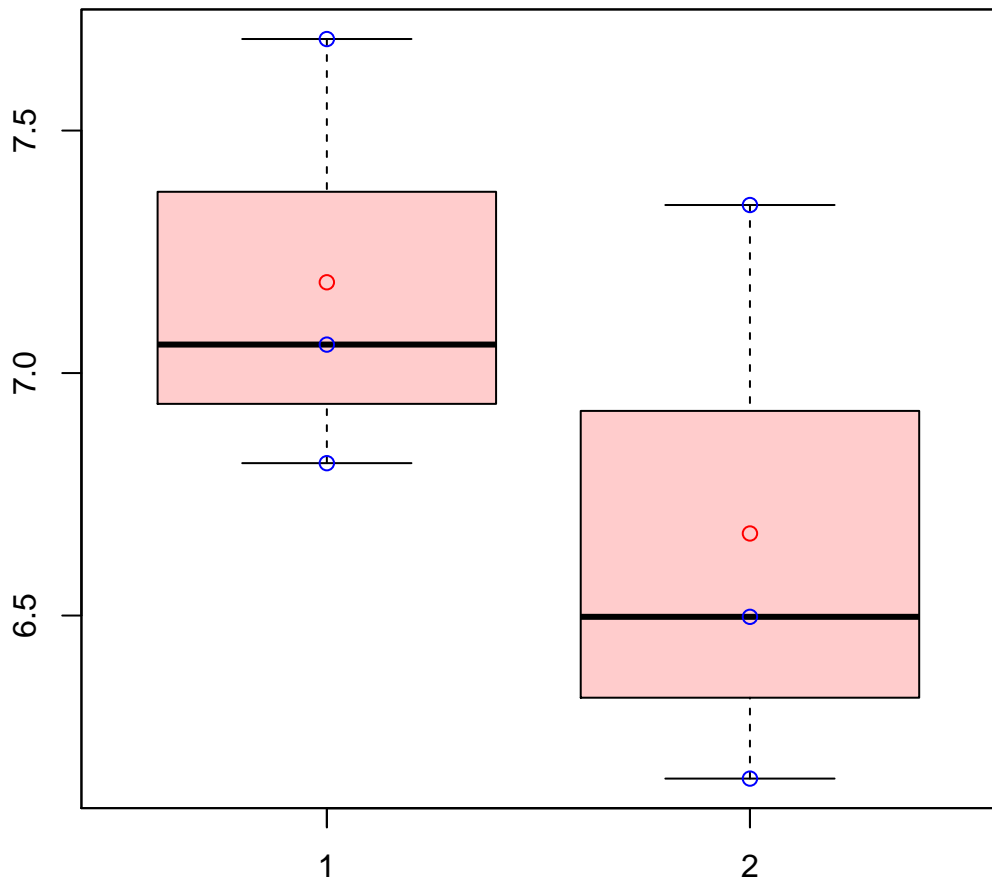

t-Test: p-value = 0.31

# M0SMP9|M0SMP9\_MUSAM

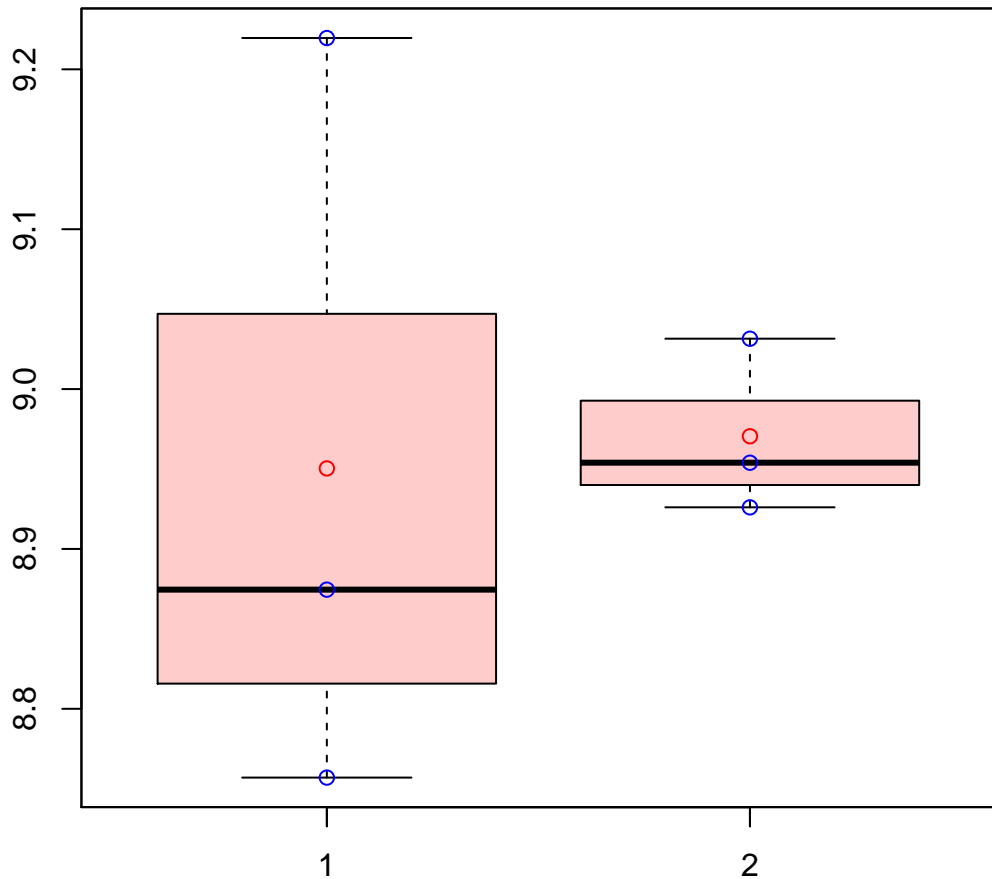

t-Test: p-value = 0.9

# M0SMU9|M0SMU9\_MUSAM

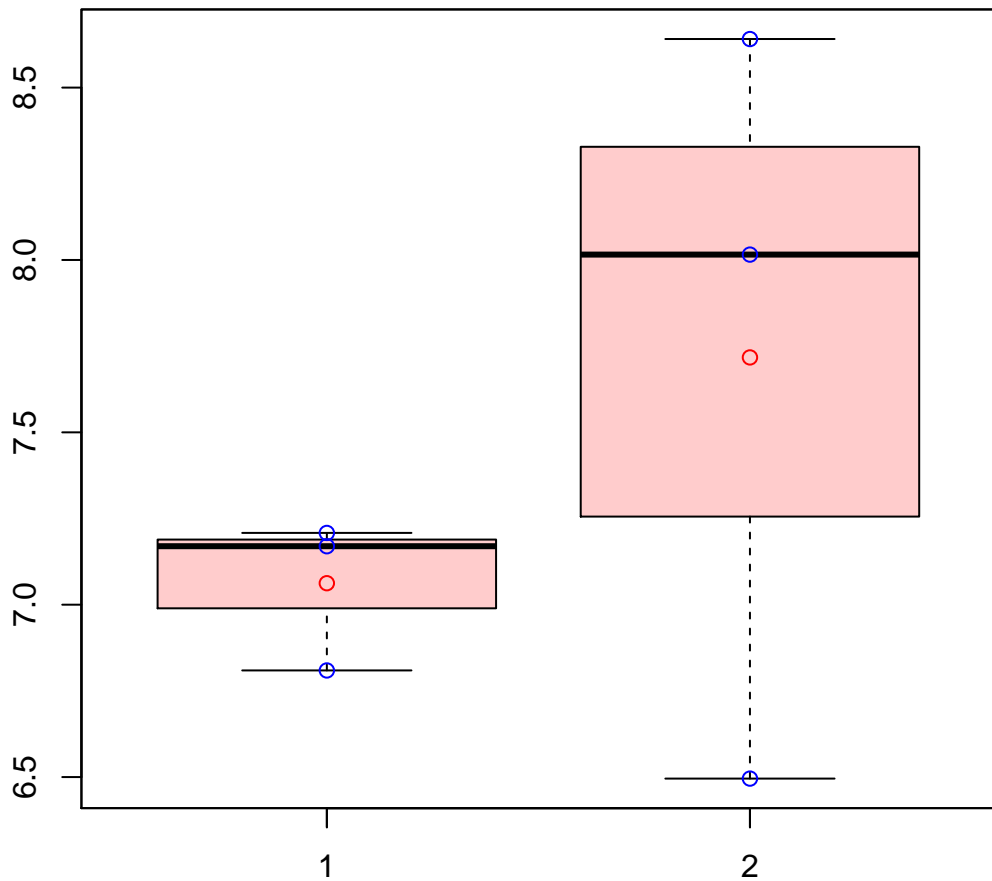

t-Test: p-value = 0.41

# M0SN40|M0SN40\_MUSAM

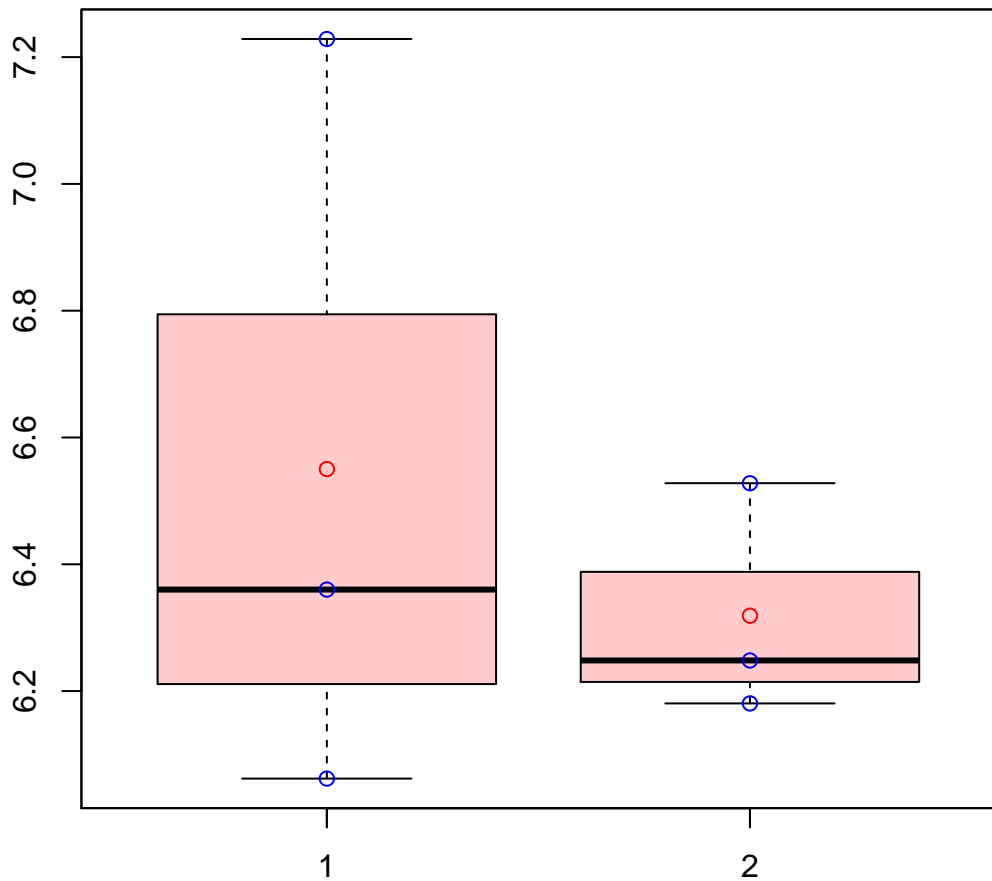

t-Test: p-value = 0.58

# M0SN63|M0SN63\_MUSAM

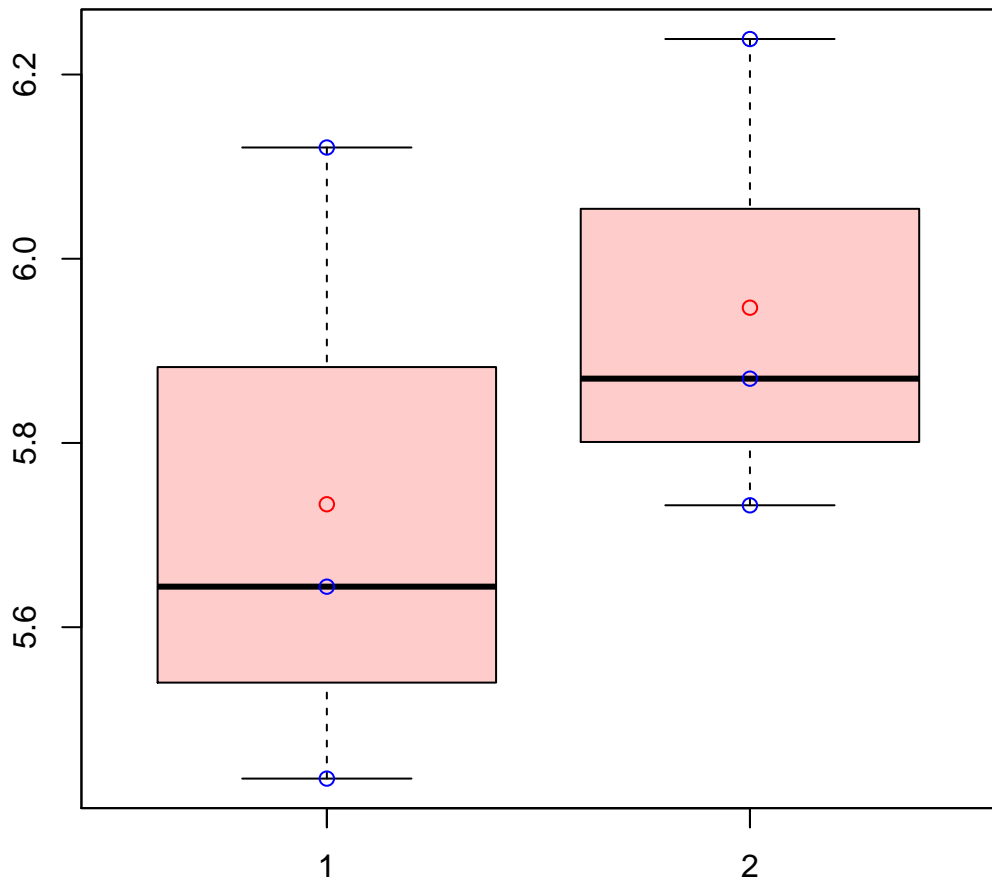

t-Test: p-value = 0.45

# M0SPJ1|M0SPJ1\_MUSAM

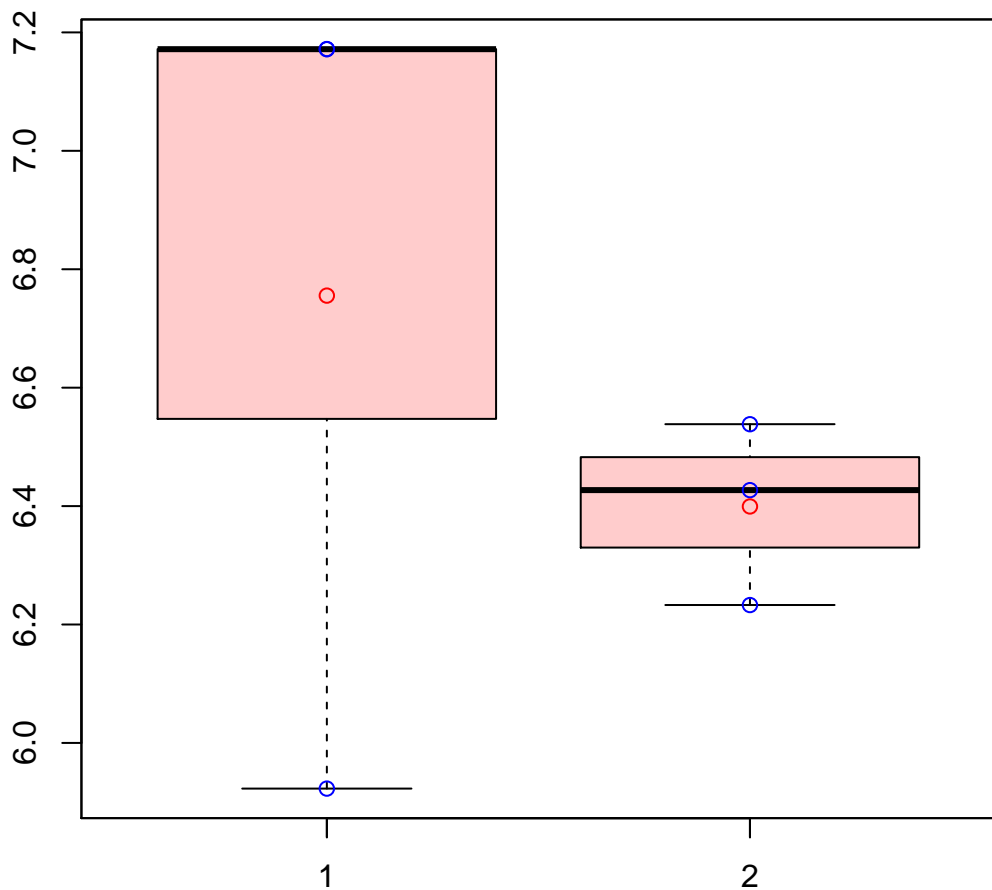

t-Test: p-value = 0.48

# M0SPK0|M0SPK0\_MUSAM

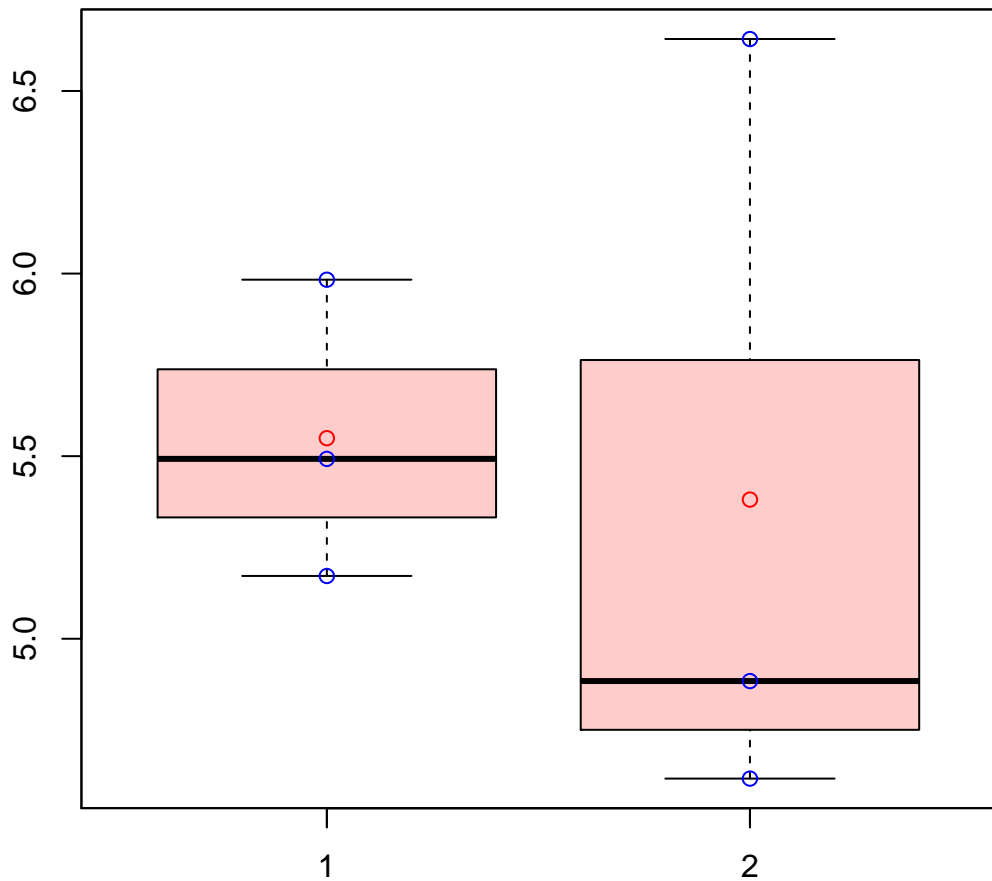

t-Test: p-value = 0.82



# M0SPZ8|M0SPZ8\_MUSAM

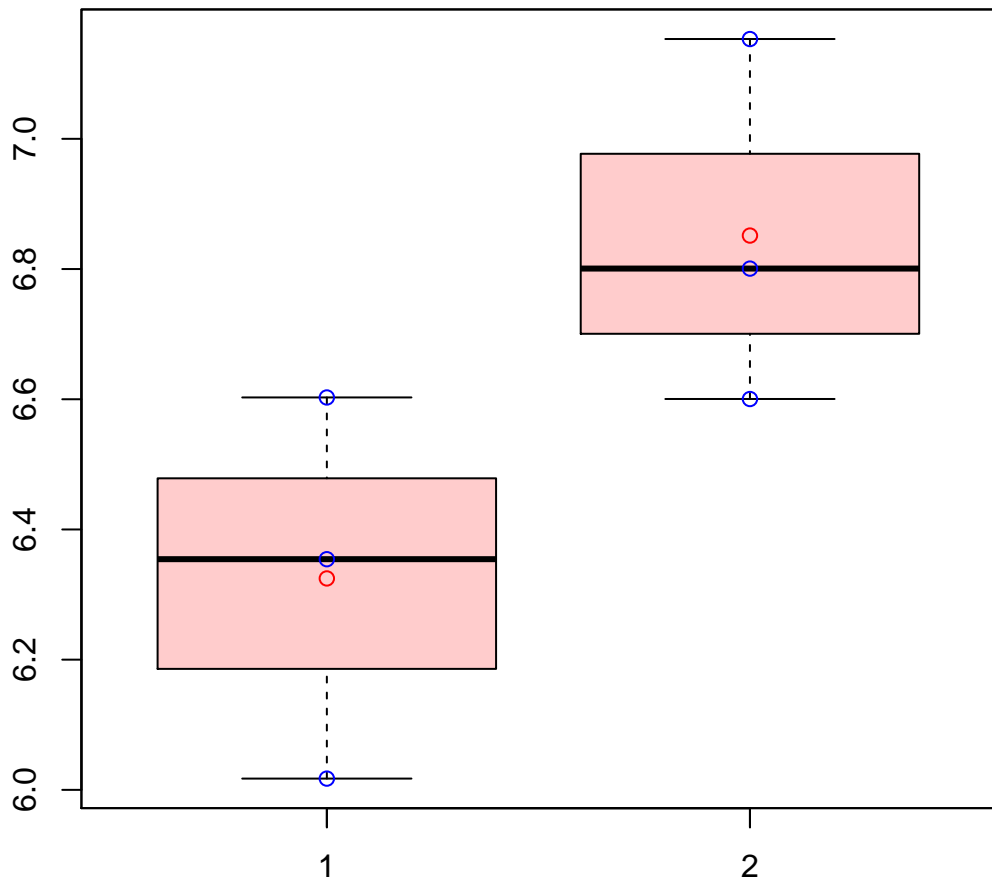

t-Test: p-value = 0.09

# M0SQS4|M0SQS4\_MUSAM

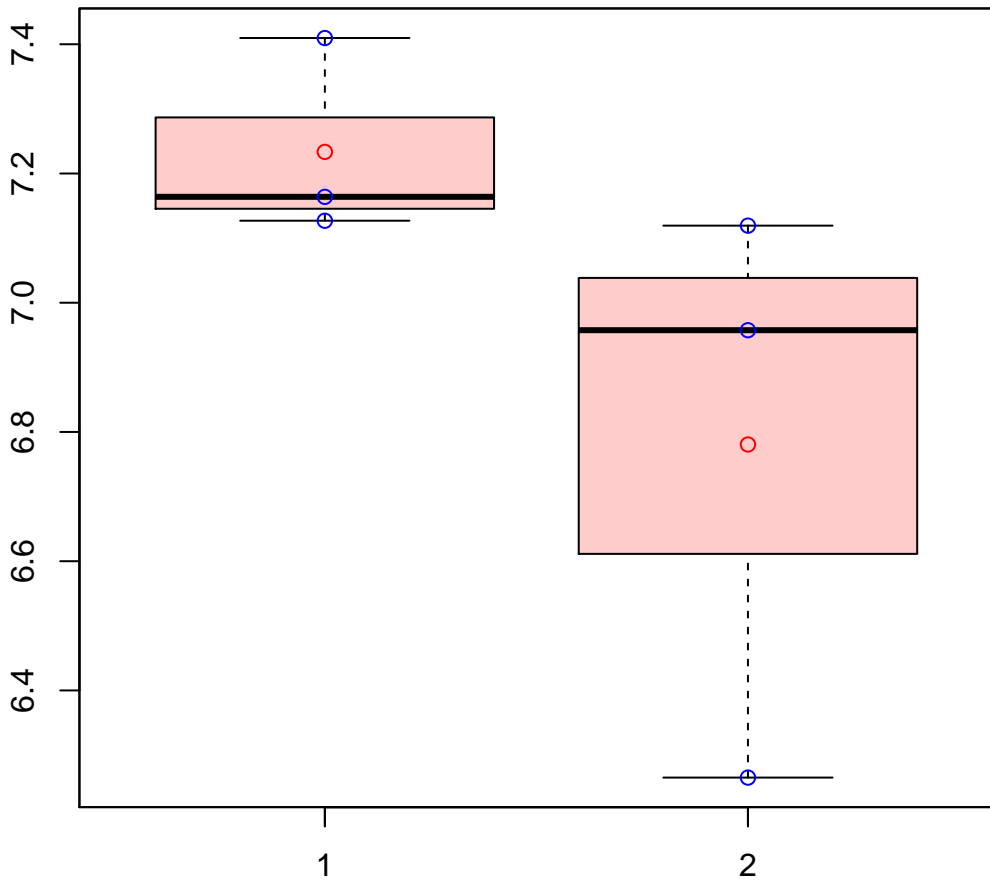

t-Test: p-value = 0.22

# M0SQW0|M0SQW0\_MUSAM

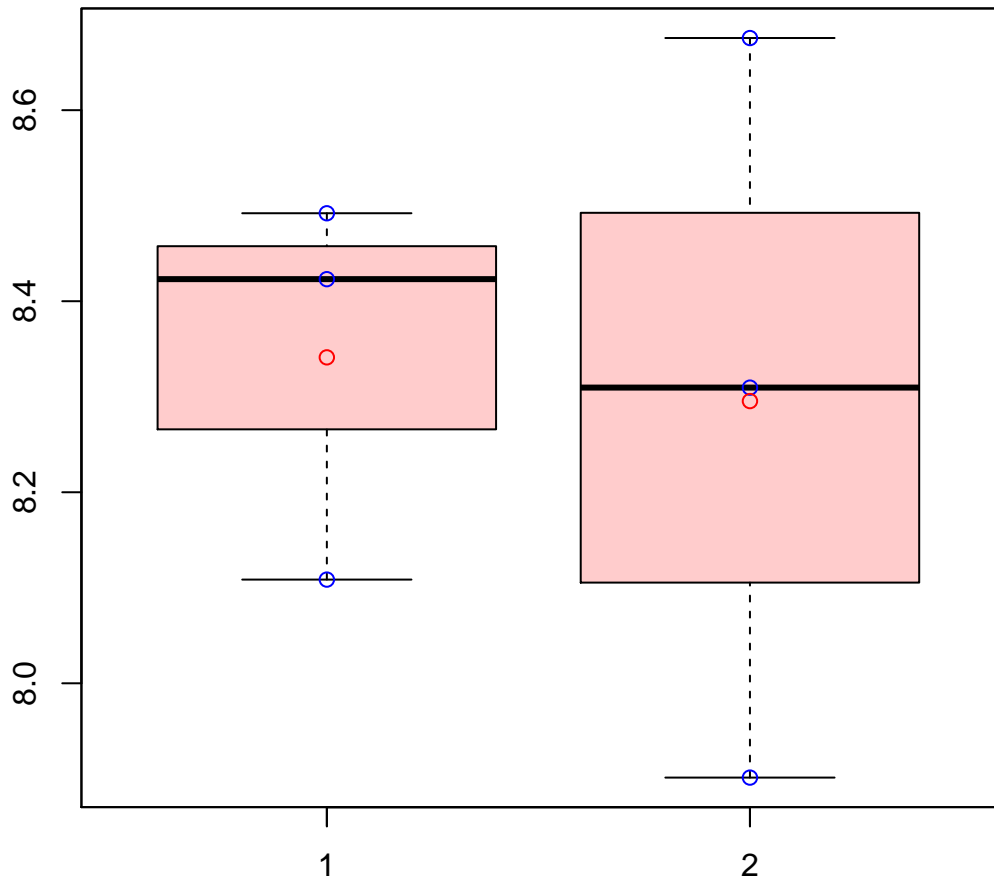

t-Test: p-value = 0.87

# M0SR42|M0SR42\_MUSAM

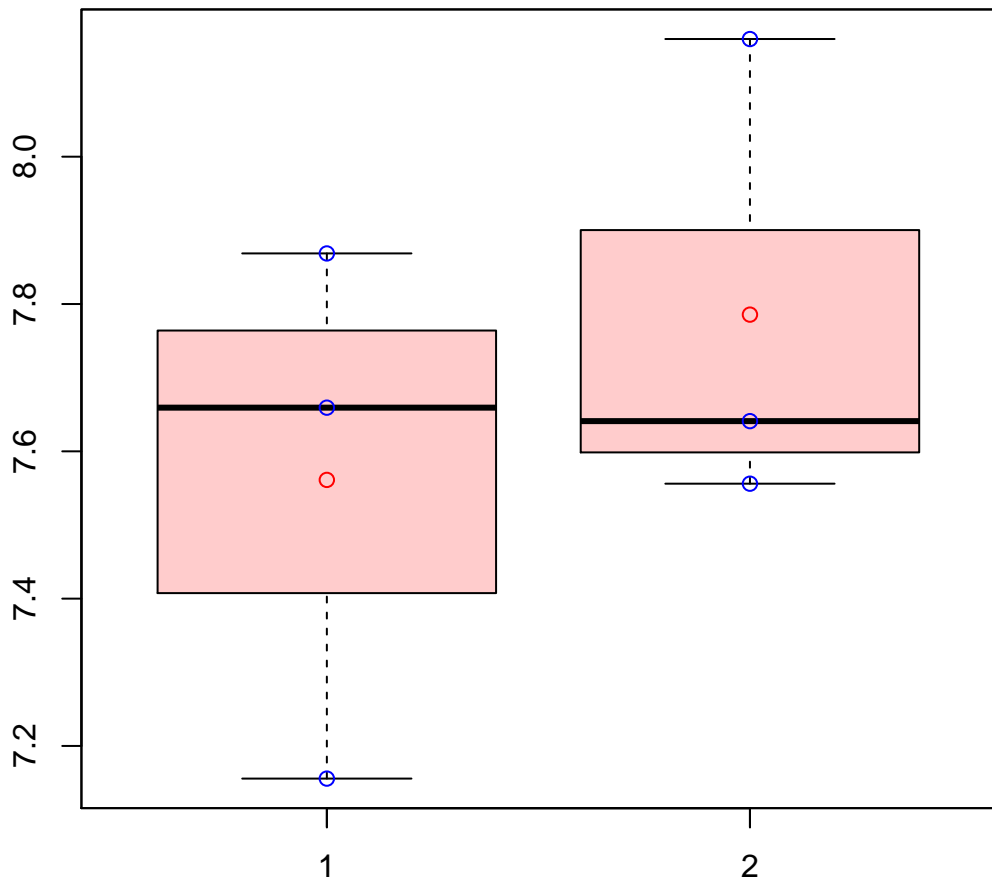

t-Test: p-value = 0.47

# M0SR53|M0SR53\_MUSAM

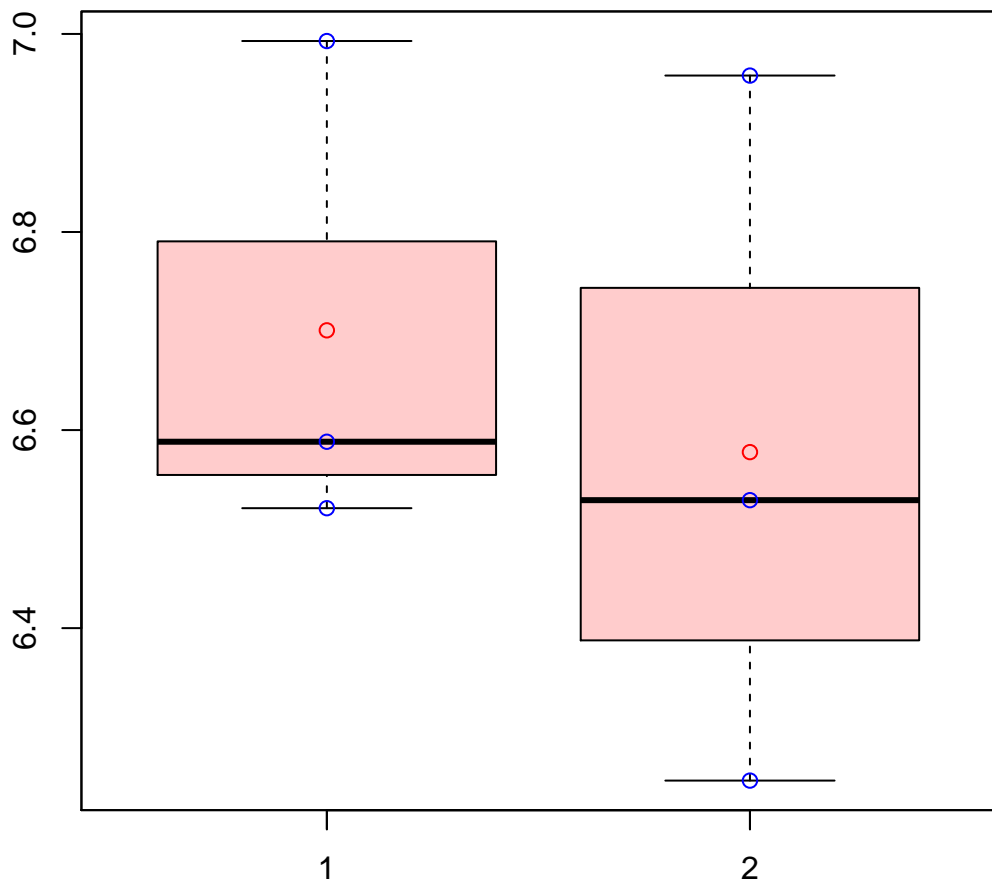

t-Test: p-value = 0.66

# M0SSK3|M0SSK3\_MUSAM

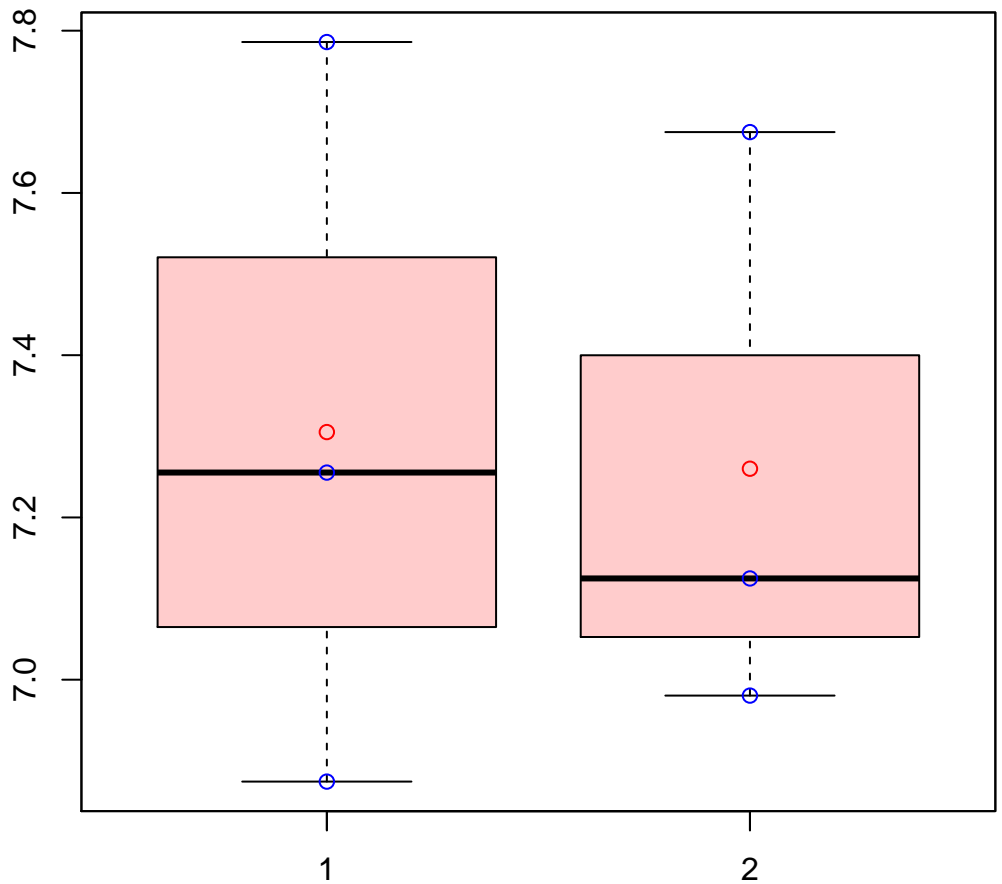

t-Test: p-value = 0.9

# M0SSL2|M0SSL2\_MUSAM

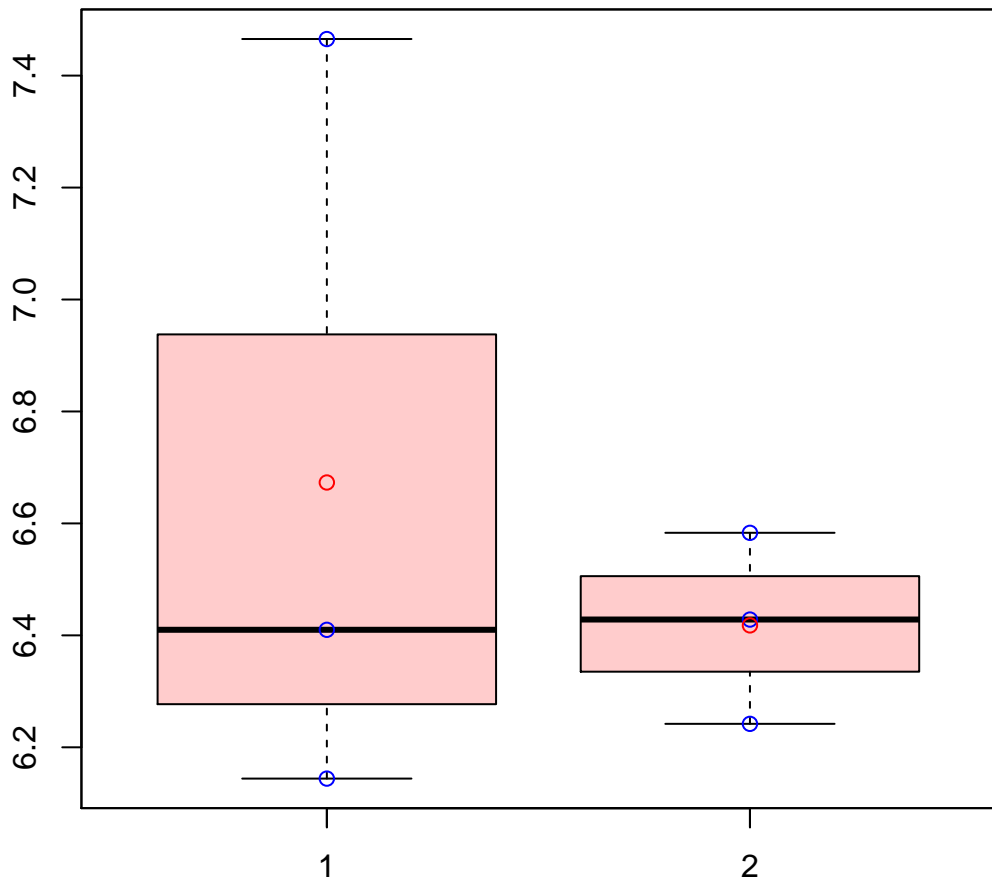

t-Test: p-value = 0.6

# M0STU0|M0STU0\_MUSAM

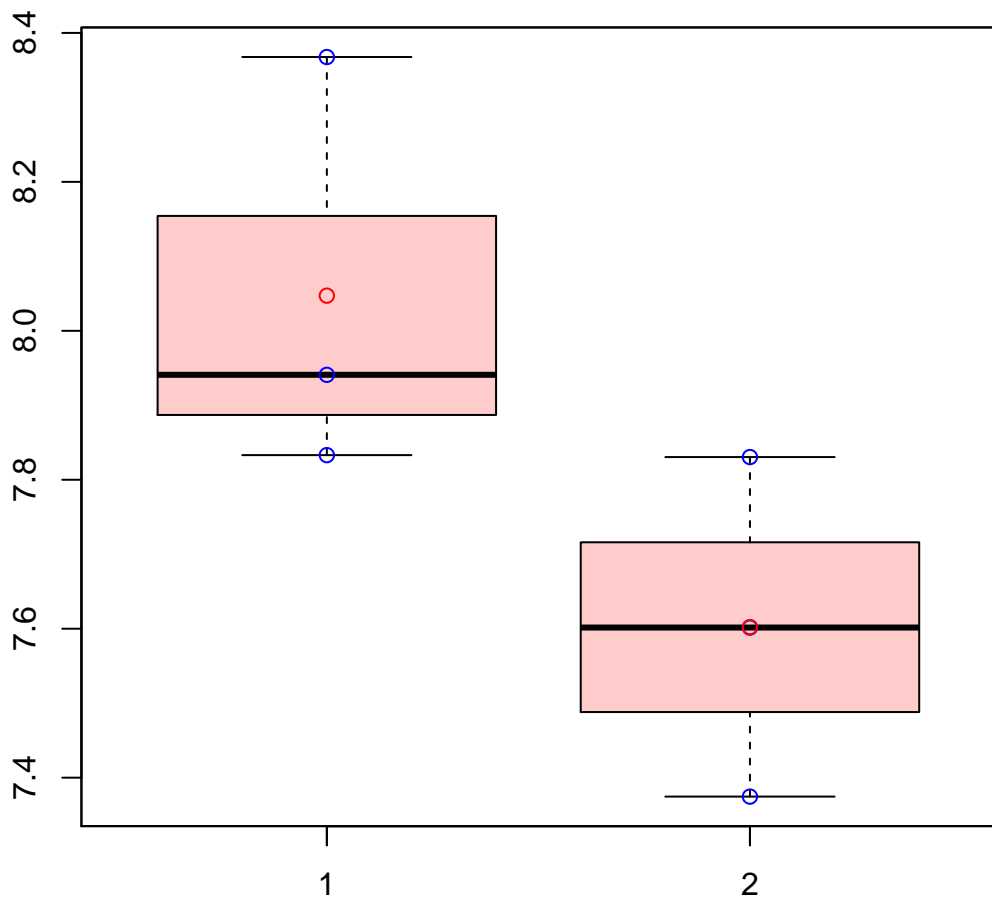

t-Test: p-value = 0.1



# M0SUG2|M0SUG2\_MUSAM

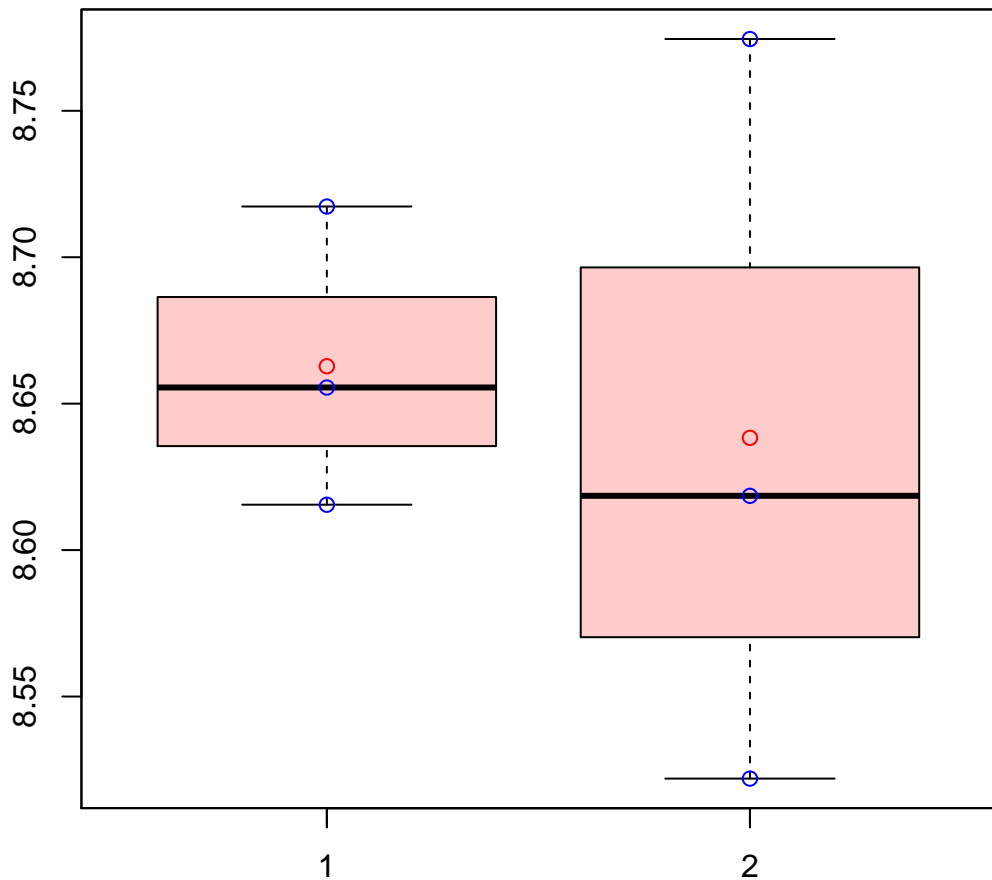

t-Test: p-value = 0.78

# M0SUI3|M0SUI3\_MUSAM

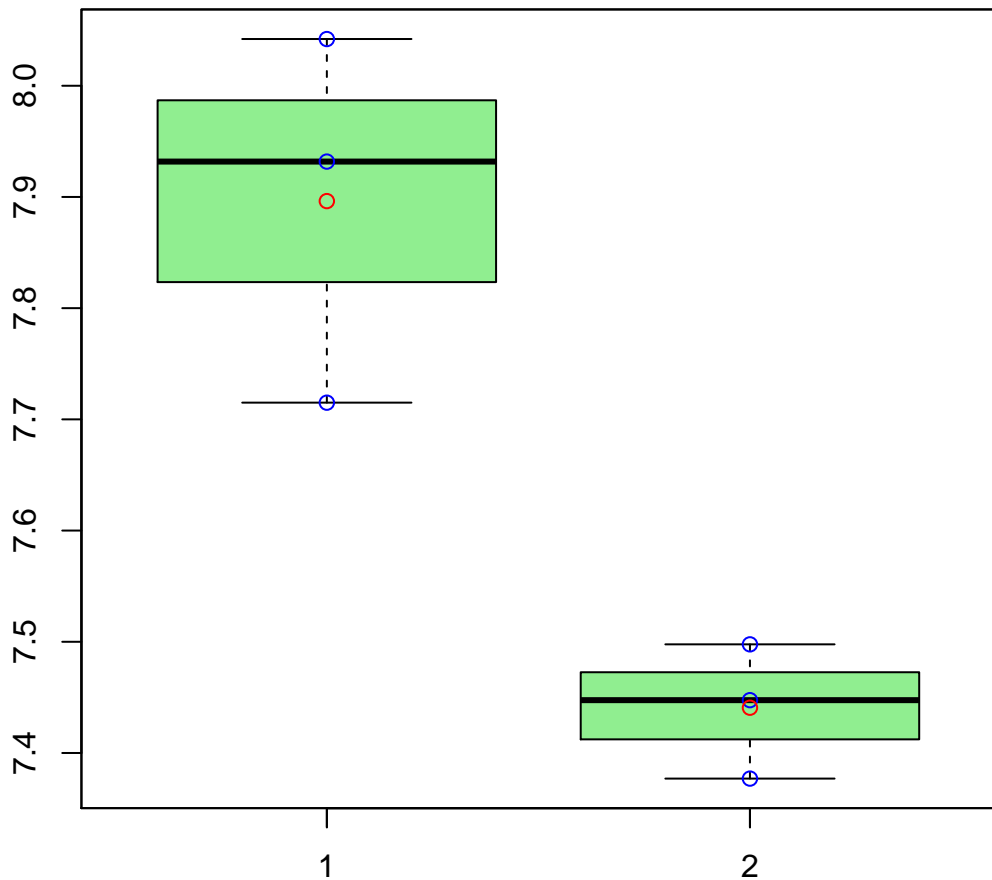

t-Test: p-value = 0.03

# M0SUK0|M0SUK0\_MUSAM

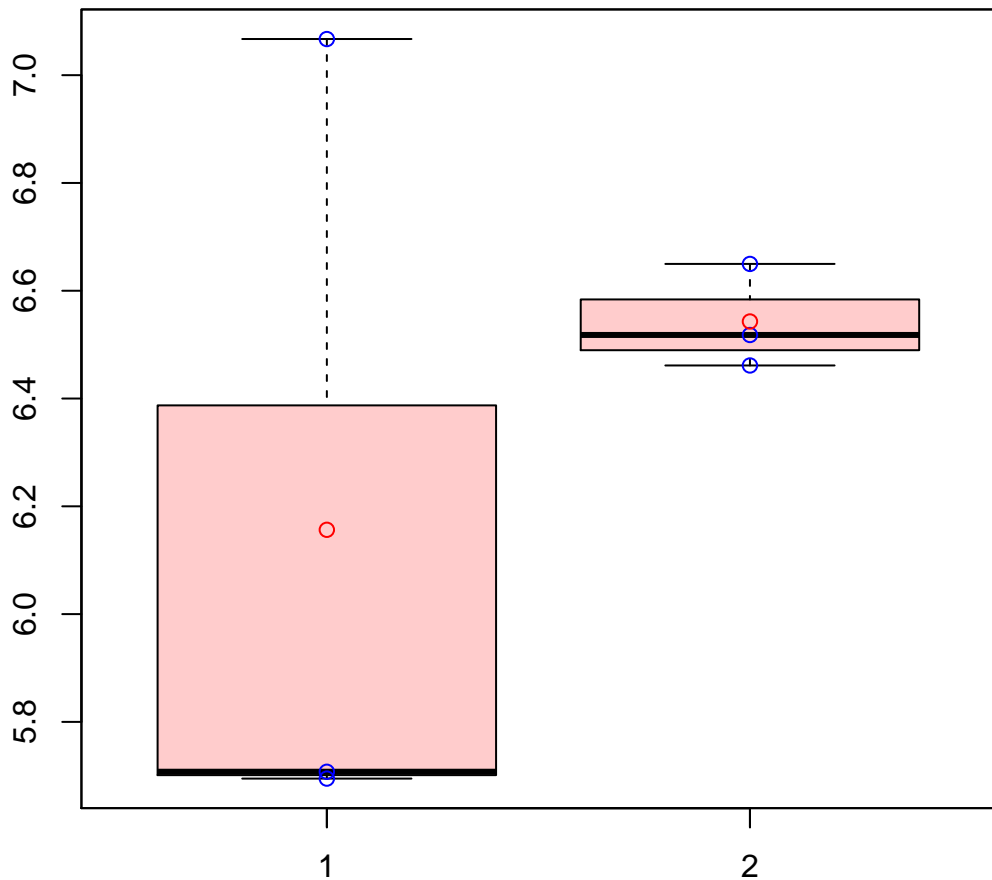

t-Test: p-value = 0.49

# M0SVE1|M0SVE1\_MUSAM

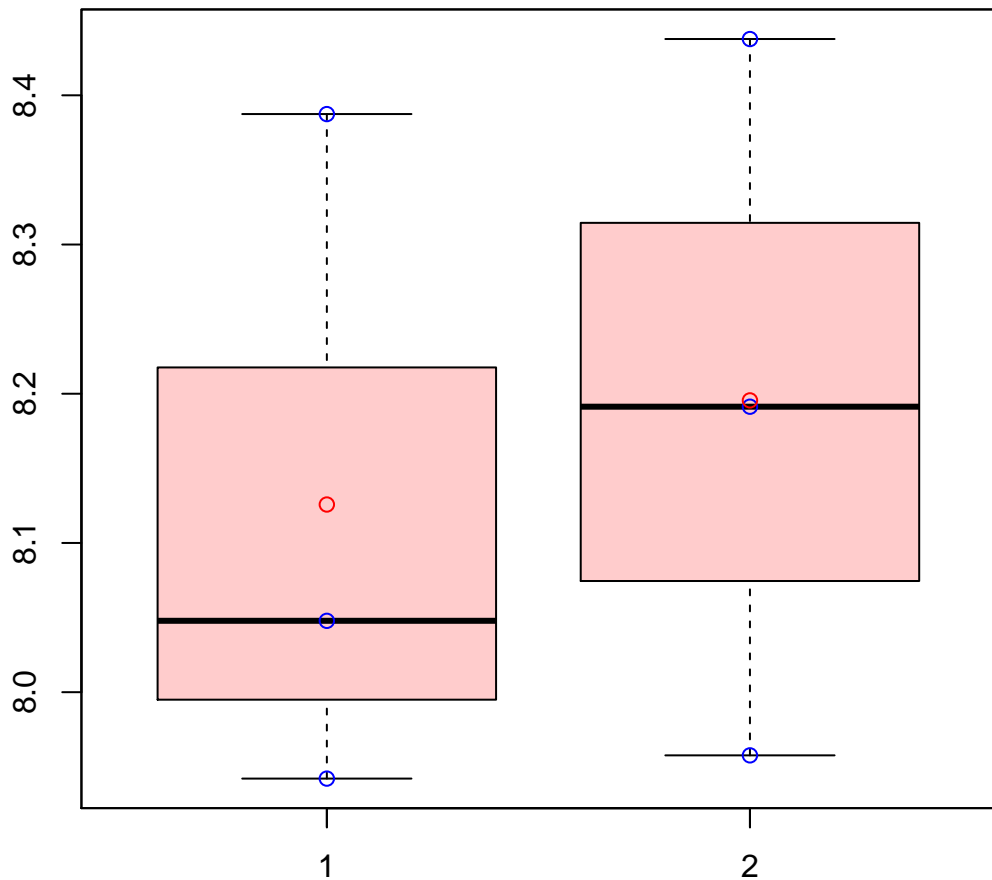

t-Test: p-value = 0.74

# M0SVE5|M0SVE5\_MUSAM

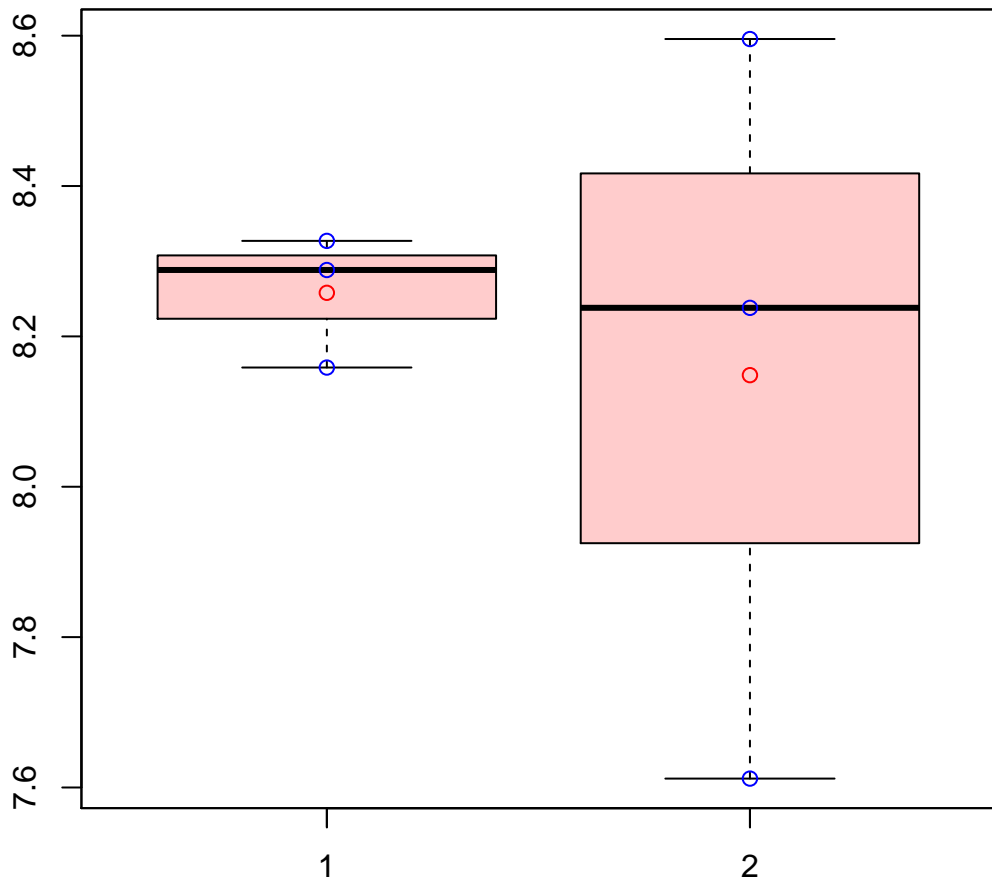

t-Test: p-value = 0.74

# M0SVM4|M0SVM4\_MUSAM

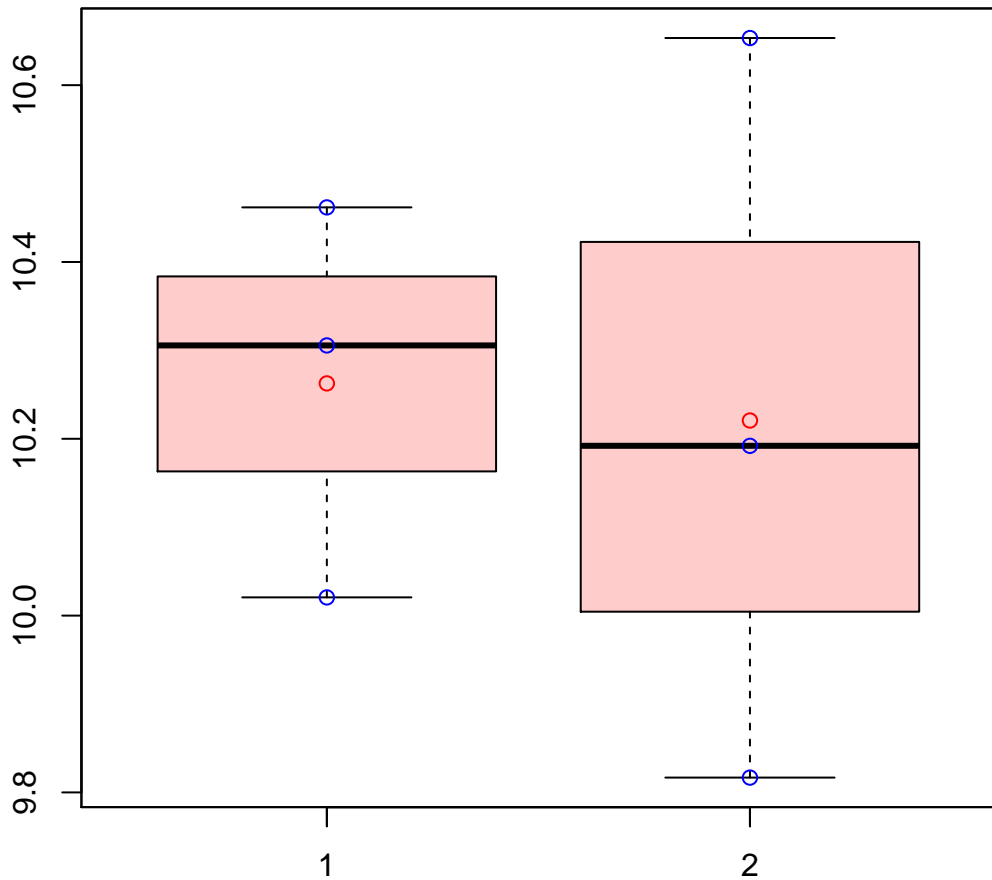

t-Test: p-value = 0.89

# M0SVW2|M0SVW2\_MUSAM

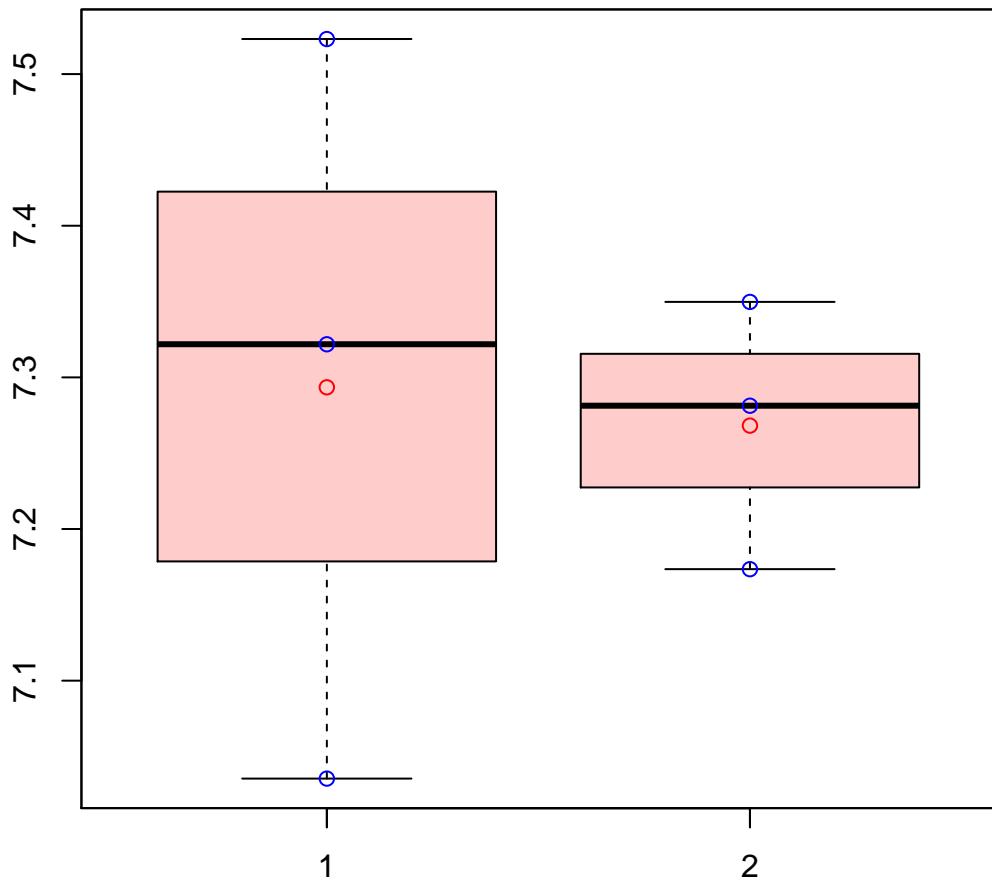

t-Test: p-value = 0.88

# M0SW70|M0SW70\_MUSAM

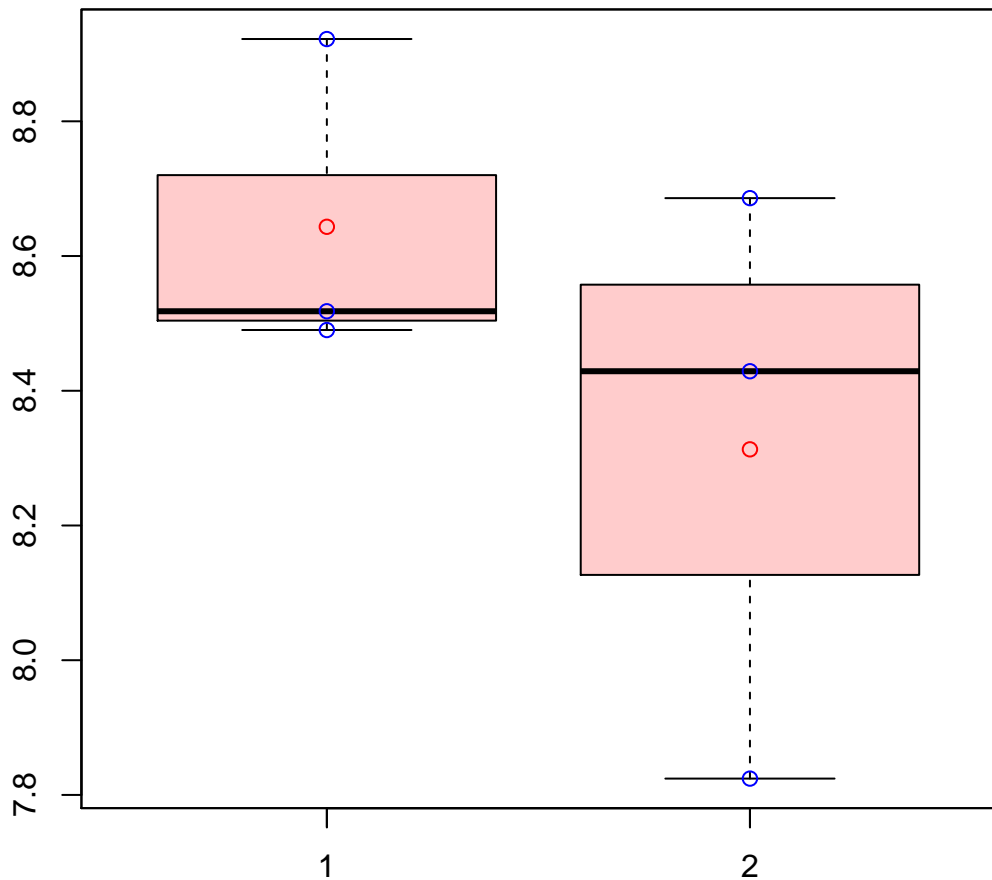

t-Test: p-value = 0.34



# M0SWI1|M0SWI1\_MUSAM

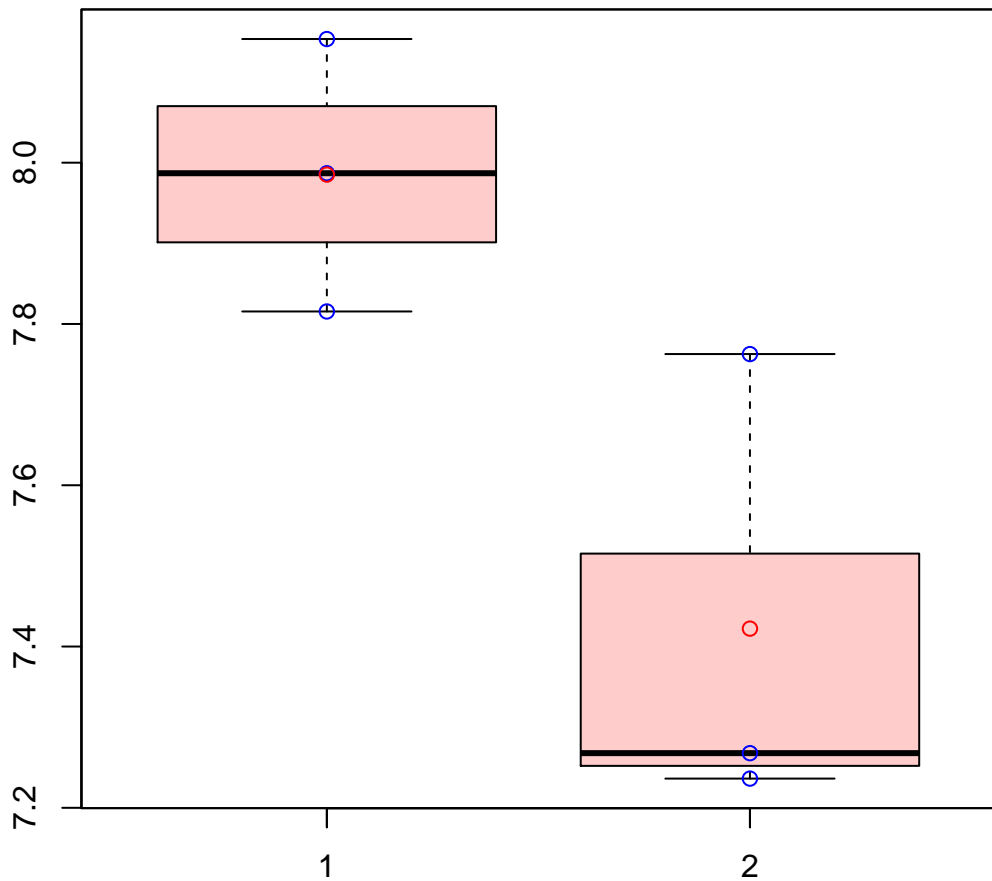

t-Test: p-value = 0.06

# M0SWR0|M0SWR0\_MUSAM

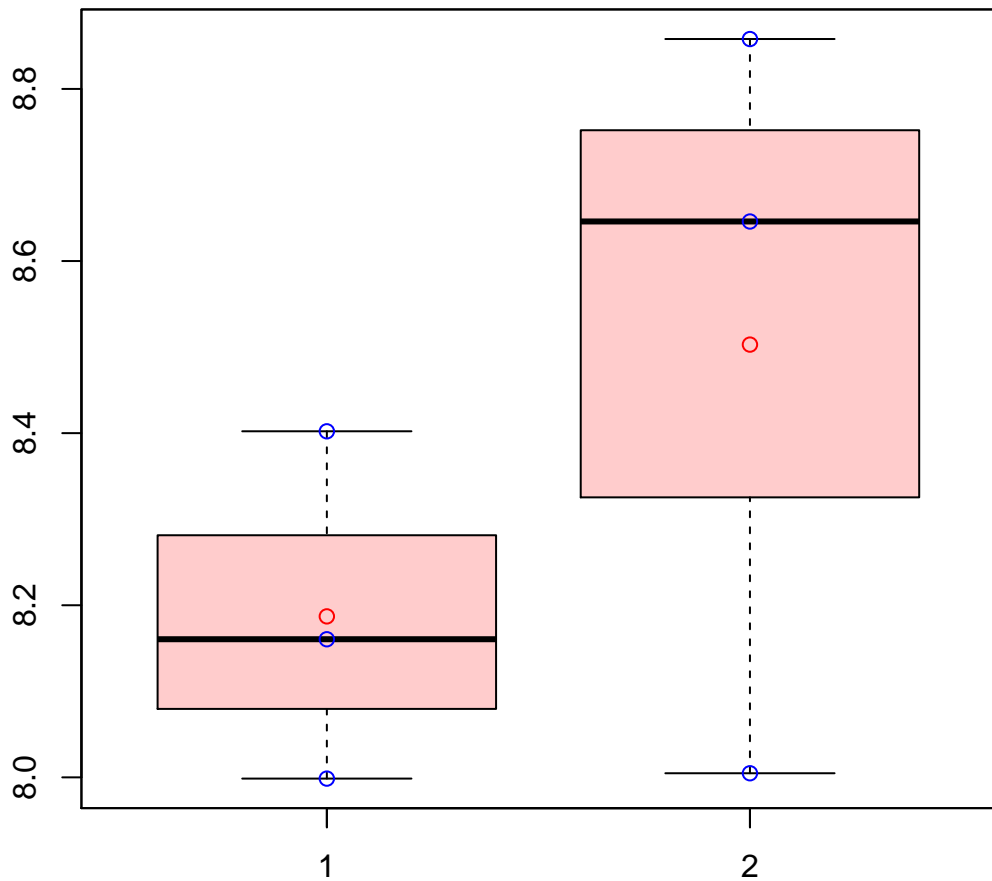

t-Test: p-value = 0.35

# M0SWU9|M0SWU9\_MUSAM

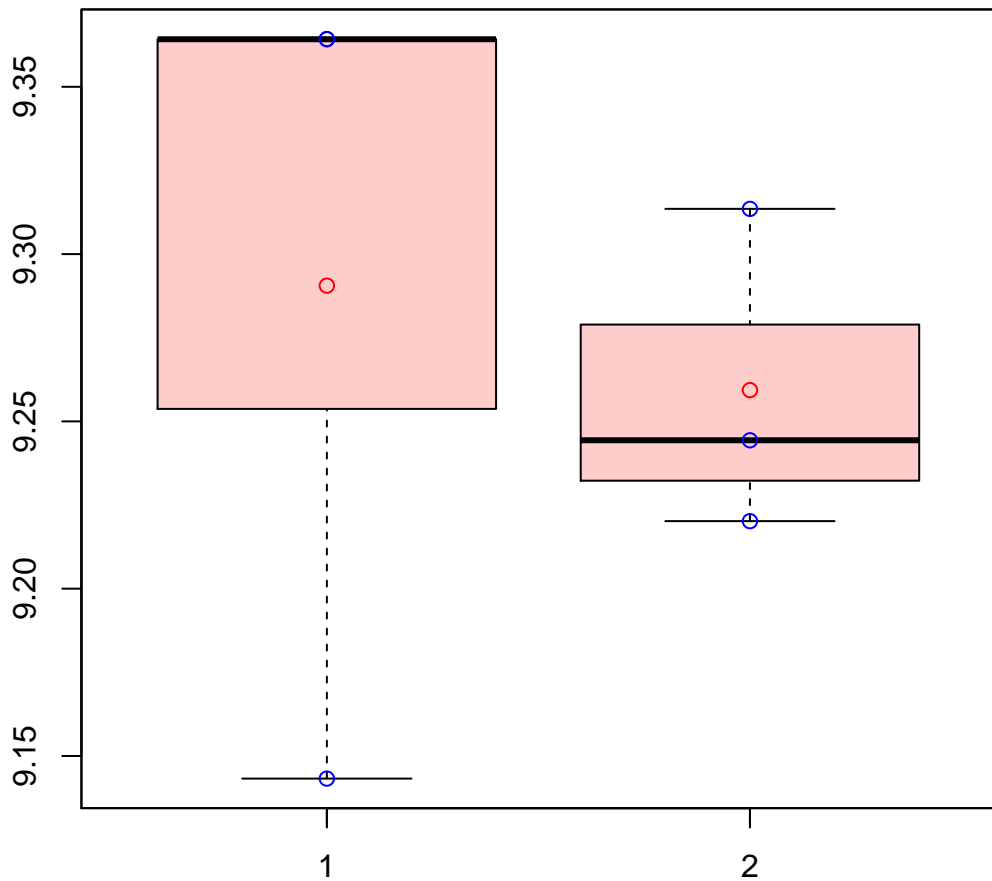

t-Test: p-value = 0.72

# M0SX71|M0SX71\_MUSAM

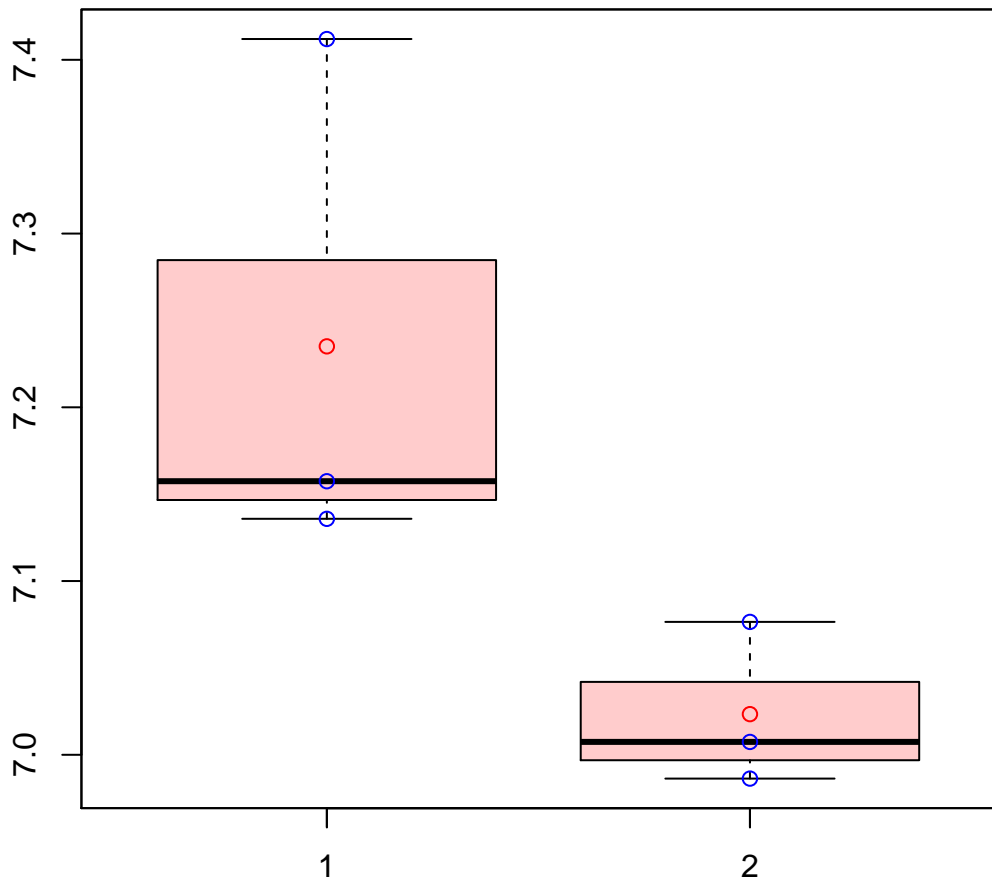

t-Test: p-value = 0.13

# M0SXF6|M0SXF6\_MUSAM

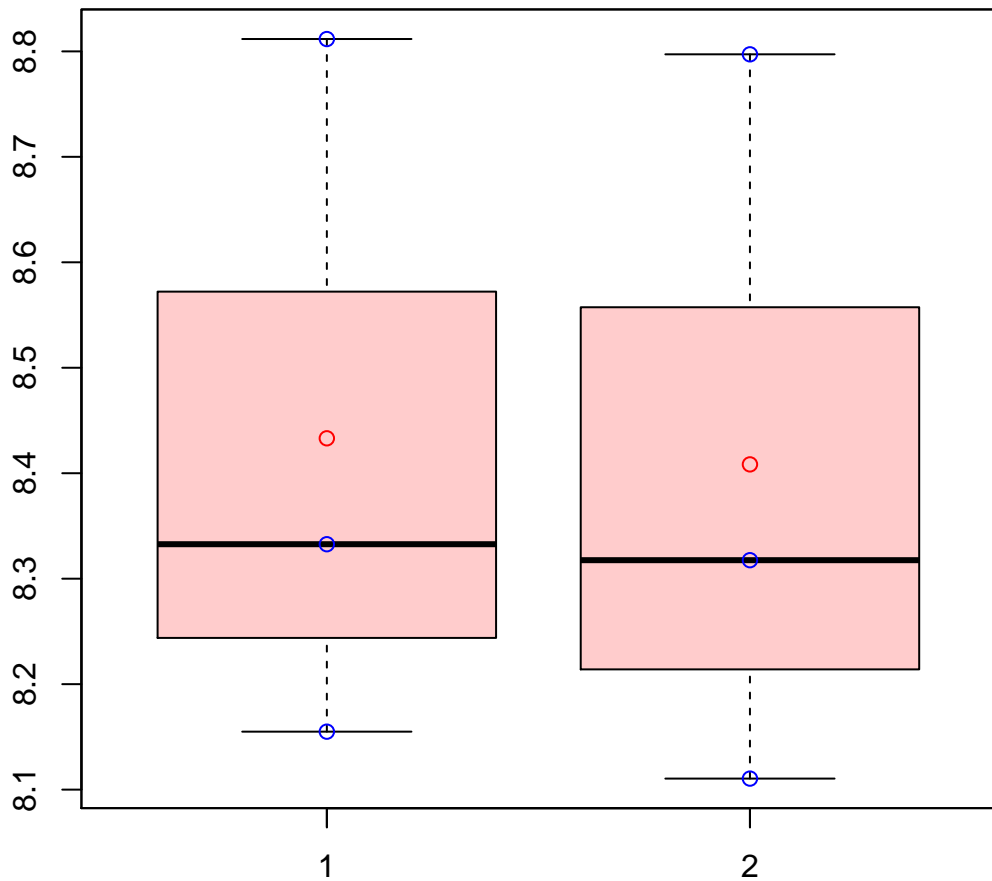

t-Test: p-value = 0.93

# M0SXW4|M0SXW4\_MUSAM

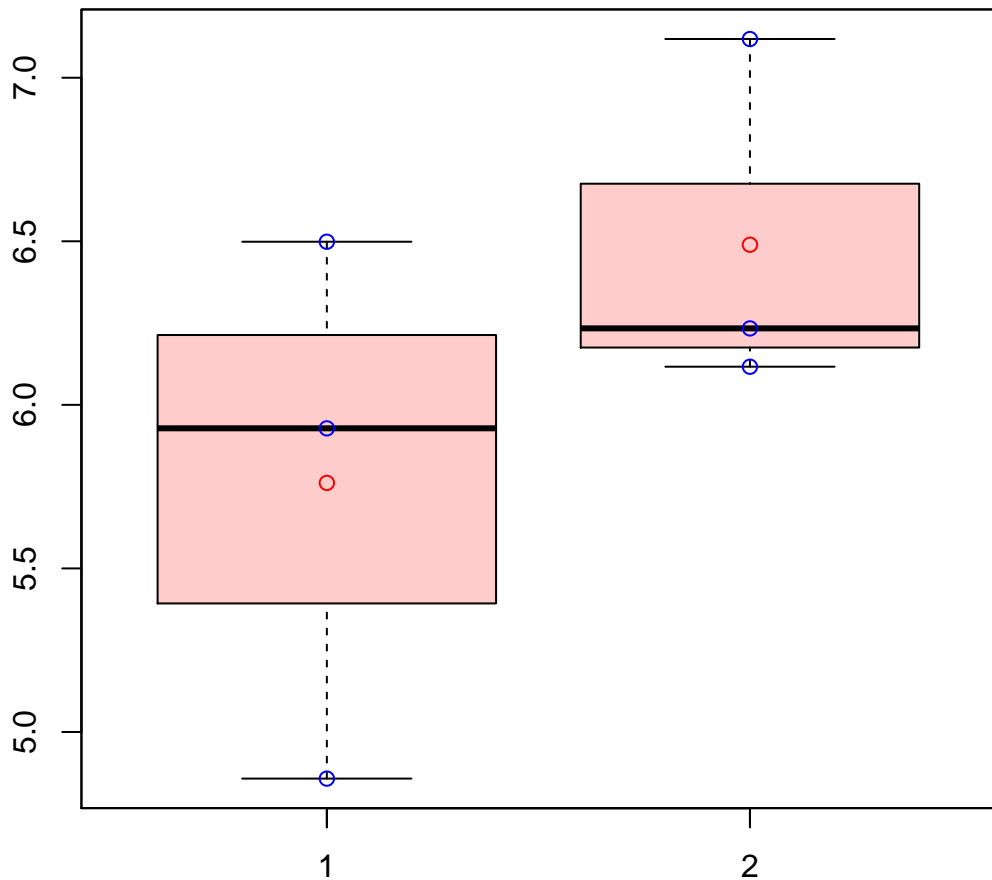

t-Test: p-value = 0.28

# M0SY86|M0SY86\_MUSAM

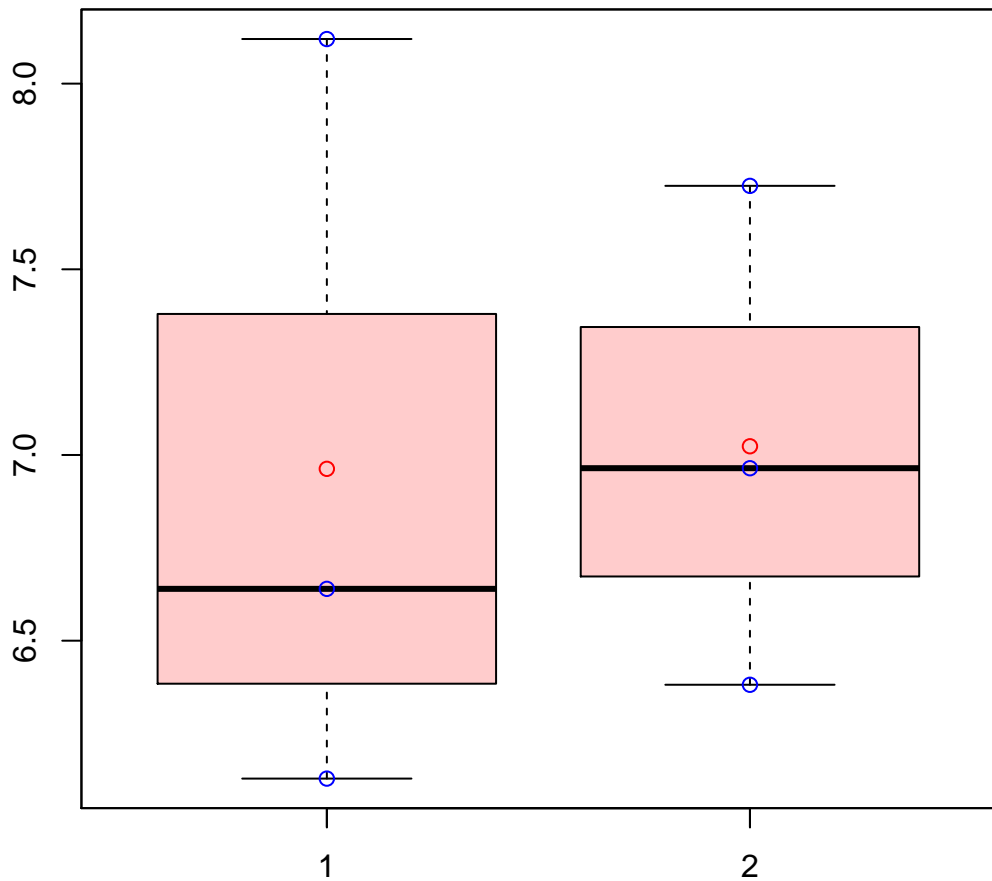

t-Test: p-value = 0.94

# M0SYI2|M0SYI2\_MUSAM

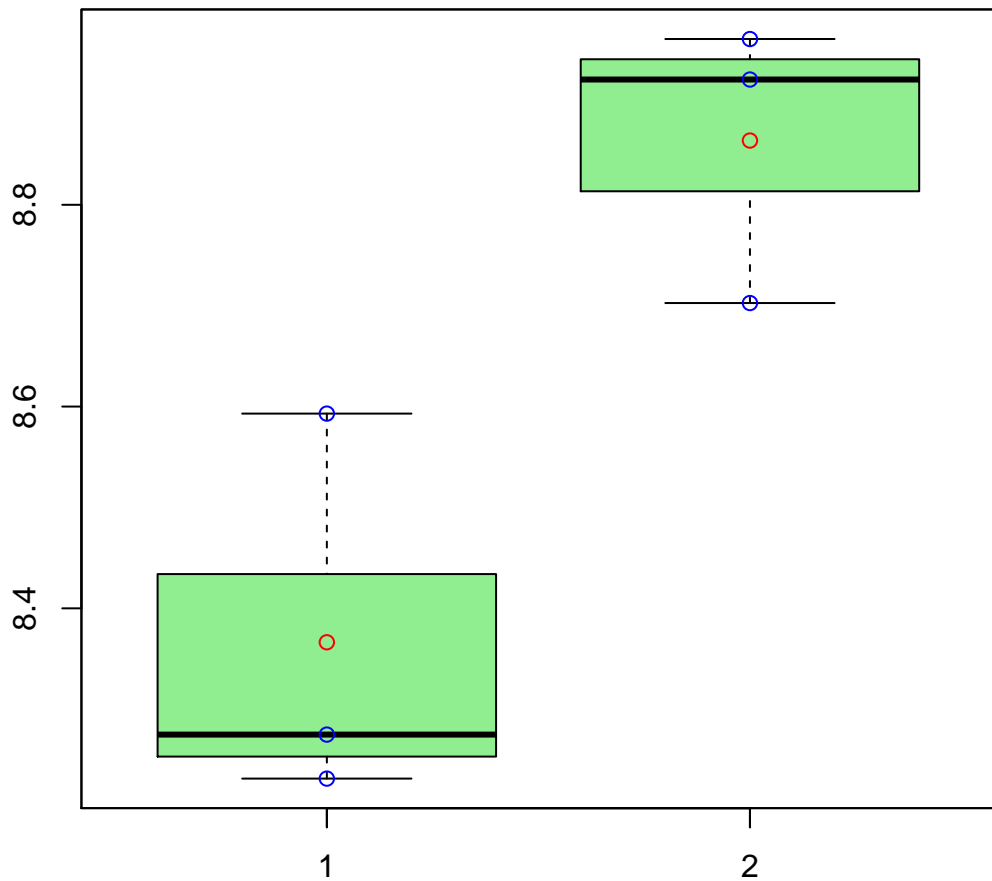

t-Test: p-value = 0.03



# M0SYK7|M0SYK7\_MUSAM

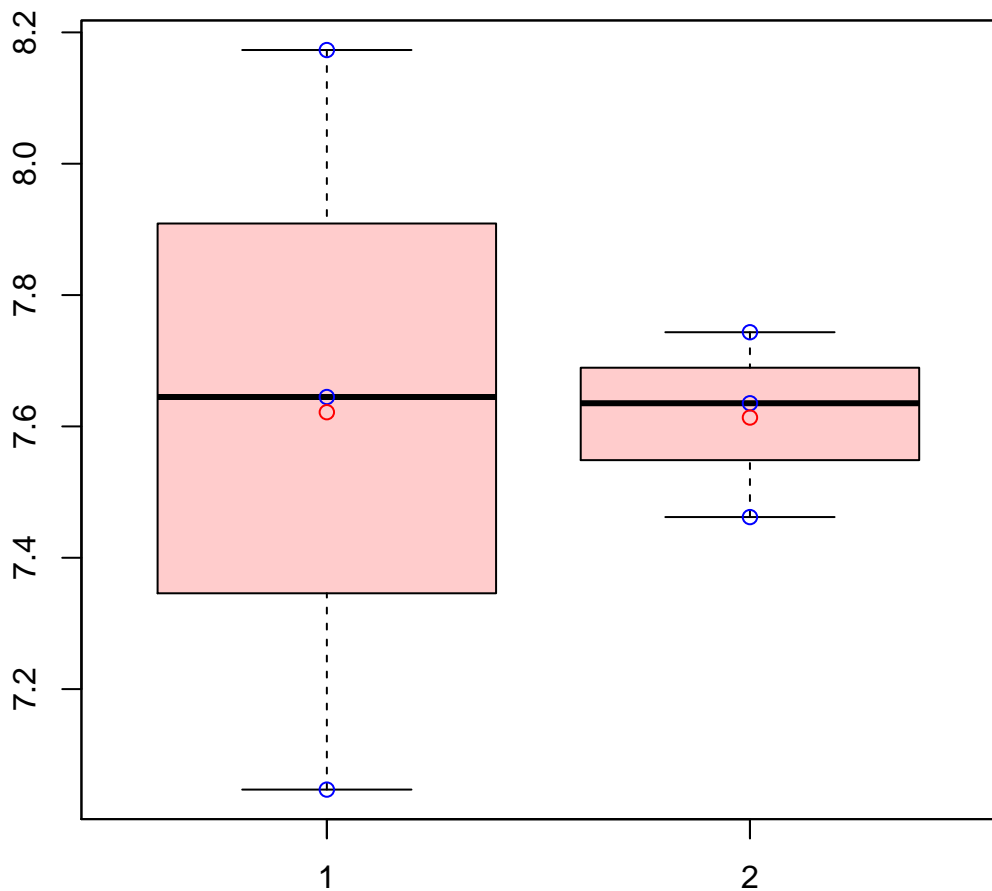

t-Test: p-value = 0.98

# M0SYM3|M0SYM3\_MUSAM

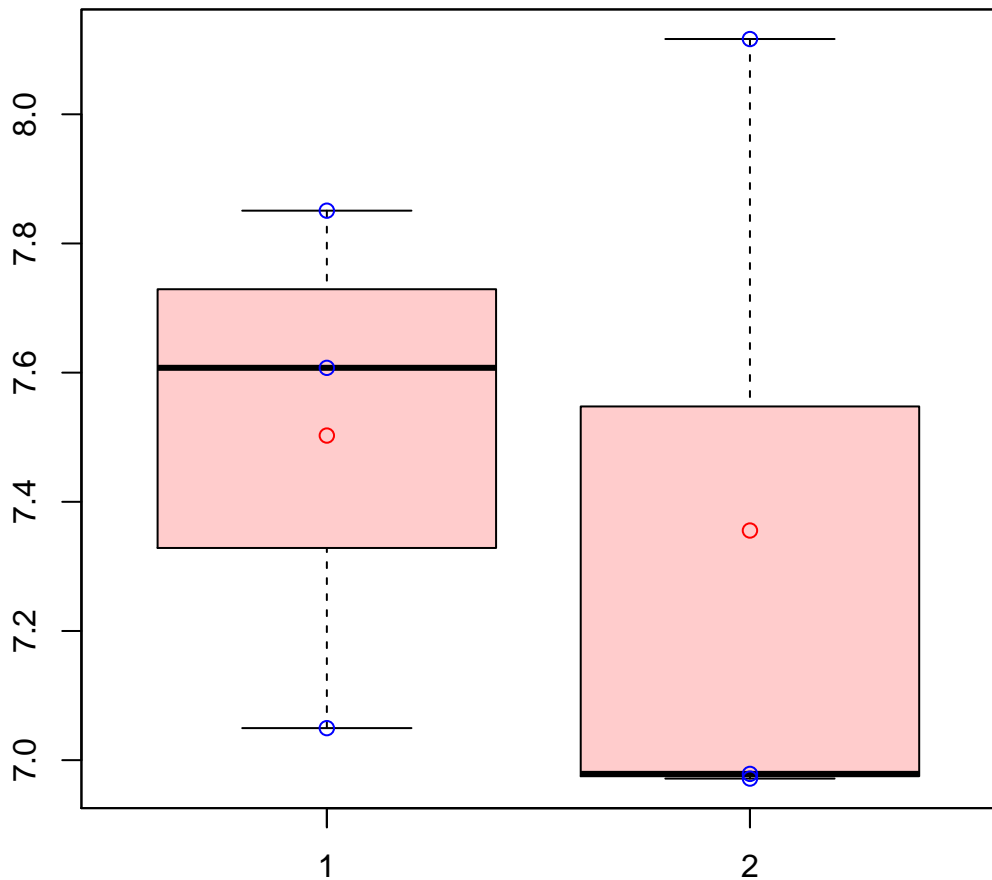

t-Test: p-value = 0.76

# M0SYS8|M0SYS8\_MUSAM

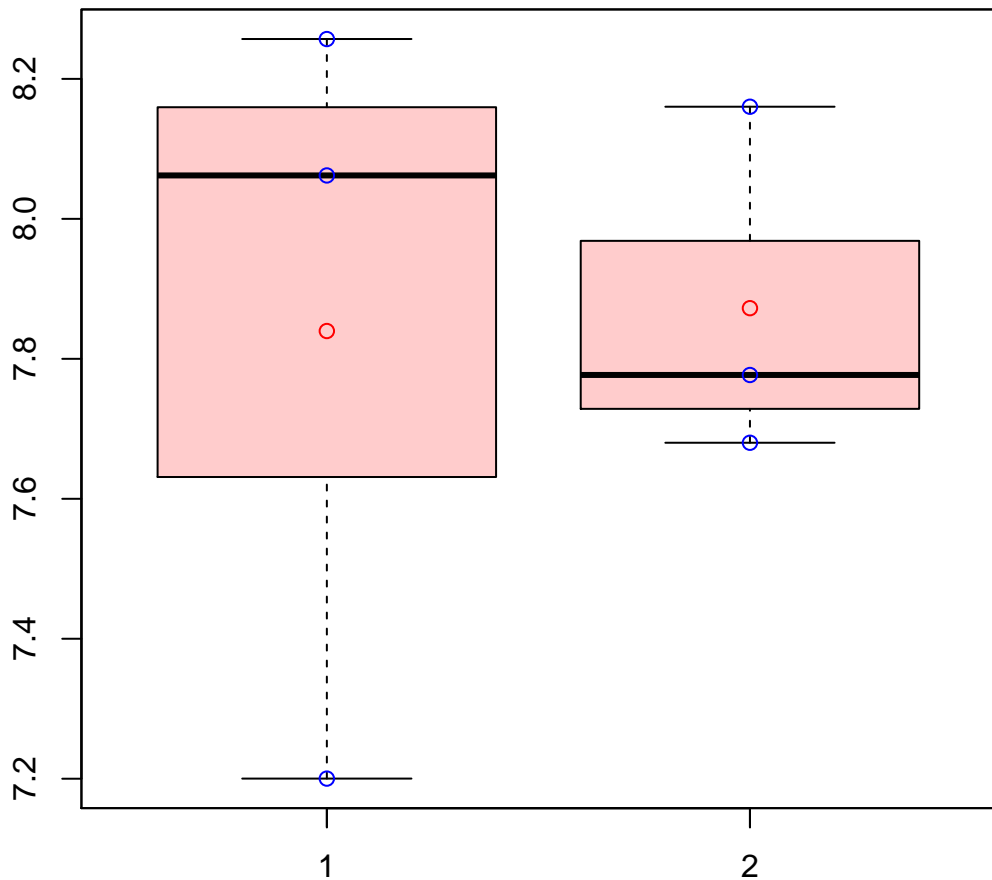

t-Test: p-value = 0.93

# M0SYY1|M0SYY1\_MUSAM

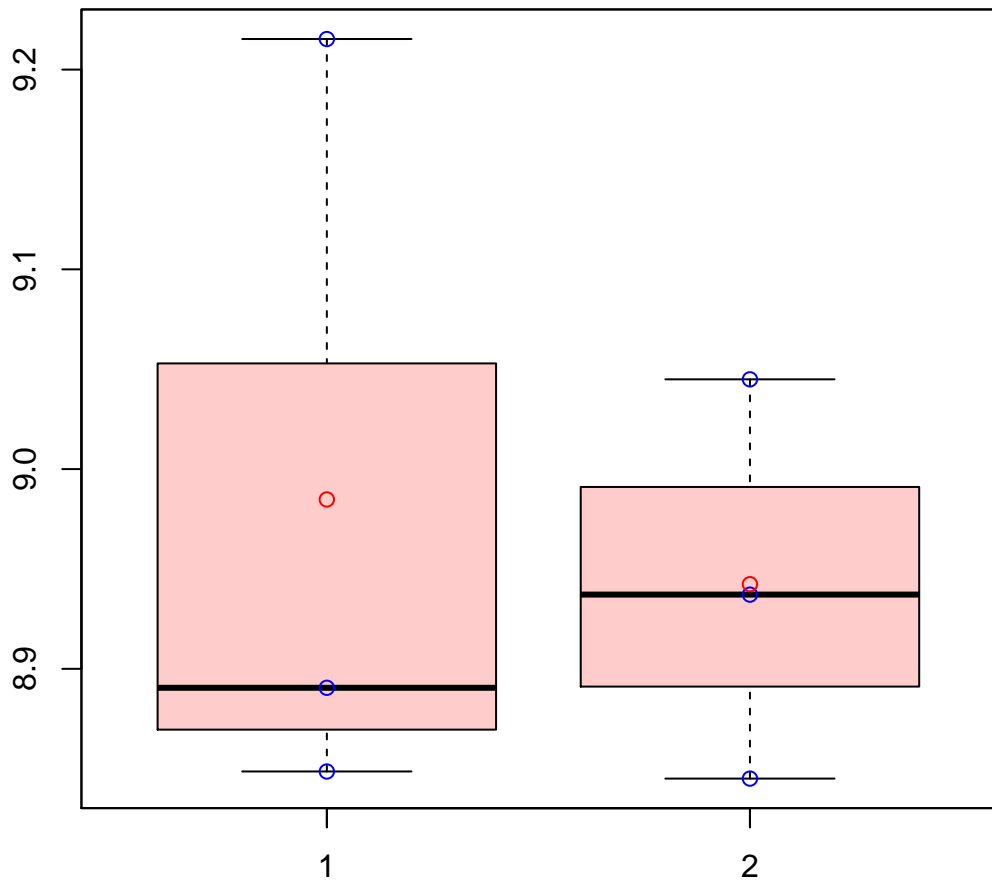

t-Test: p-value = 0.77

# M0SZH4|M0SZH4\_MUSAM

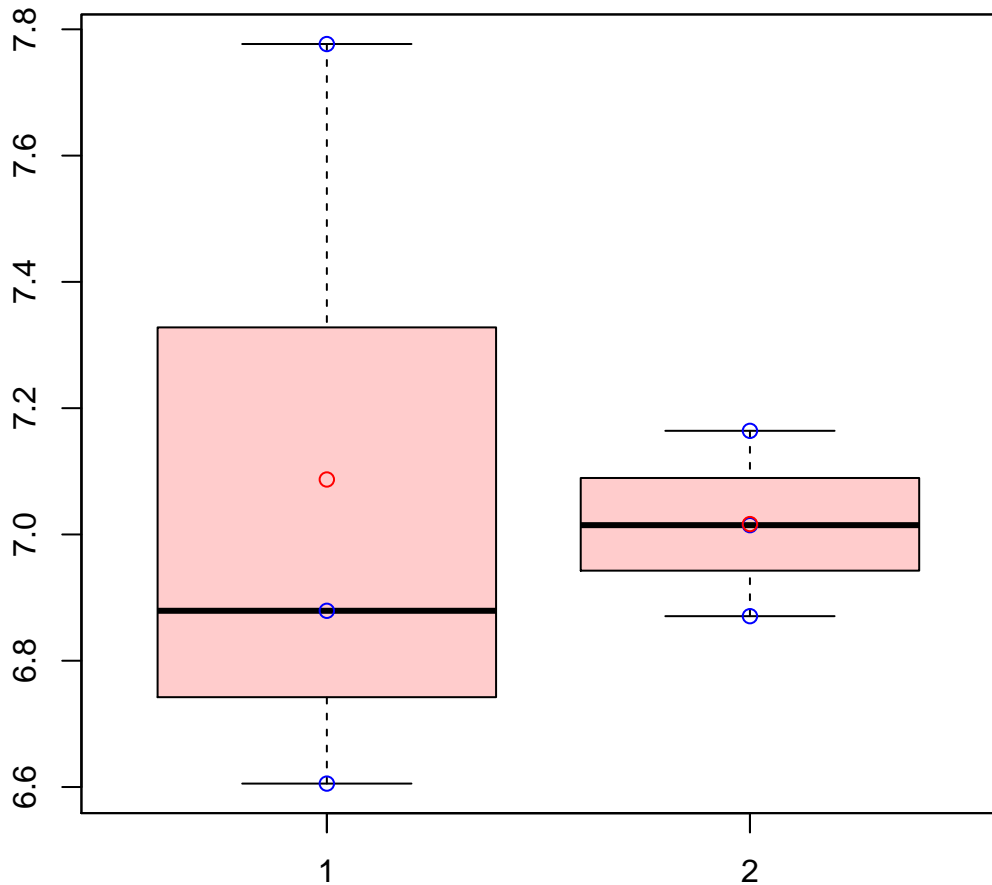

t-Test: p-value = 0.86

# M0SZR0|M0SZR0\_MUSAM

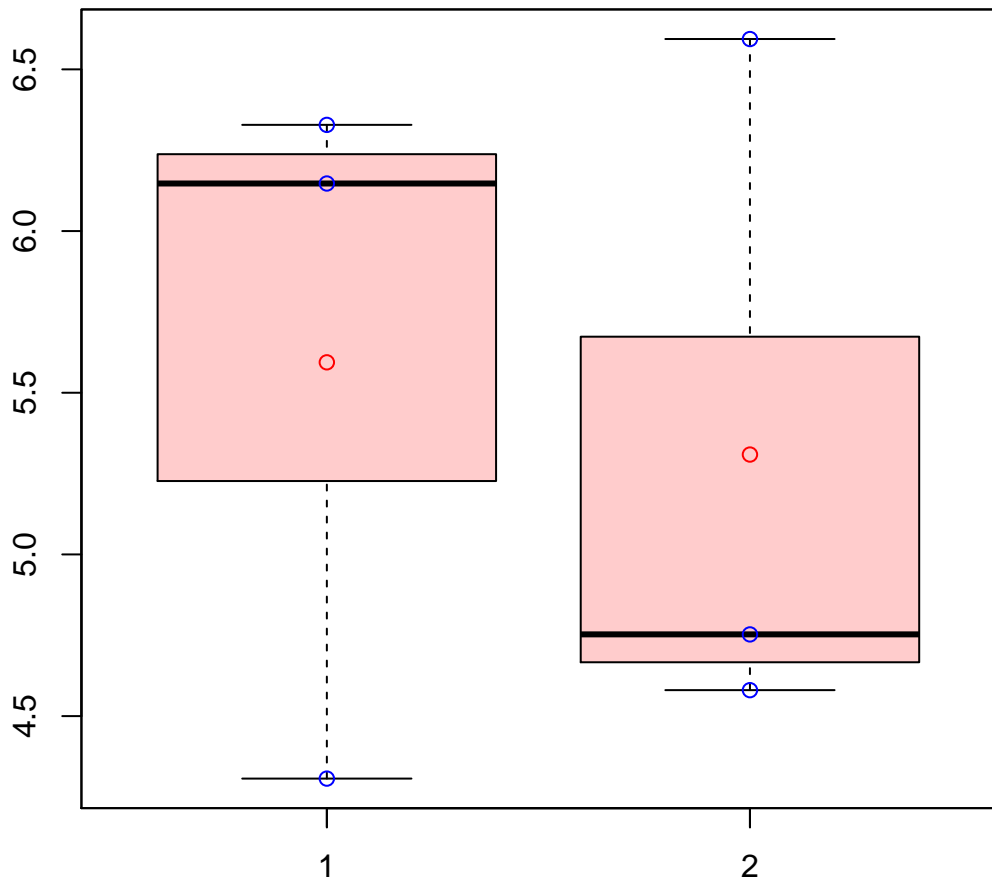

t-Test: p-value = 0.77

# M0SZT3|M0SZT3\_MUSAM

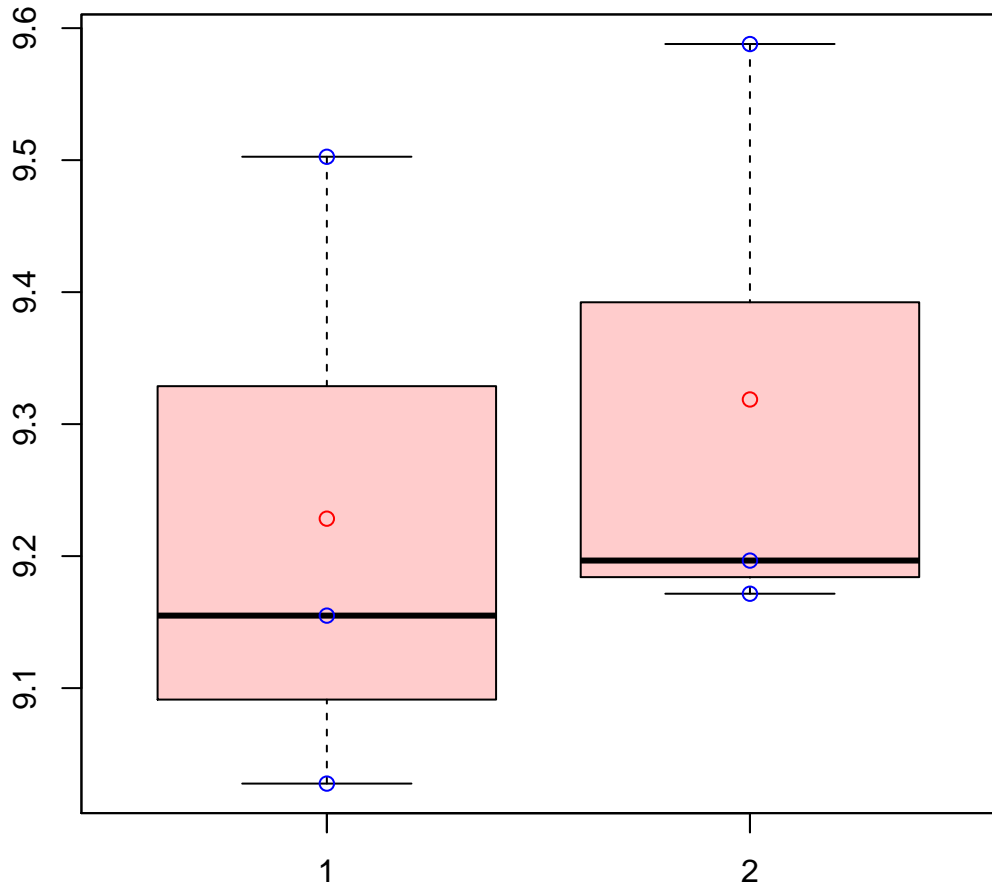

t-Test: p-value = 0.67

# M0SZX7|M0SZX7\_MUSAM

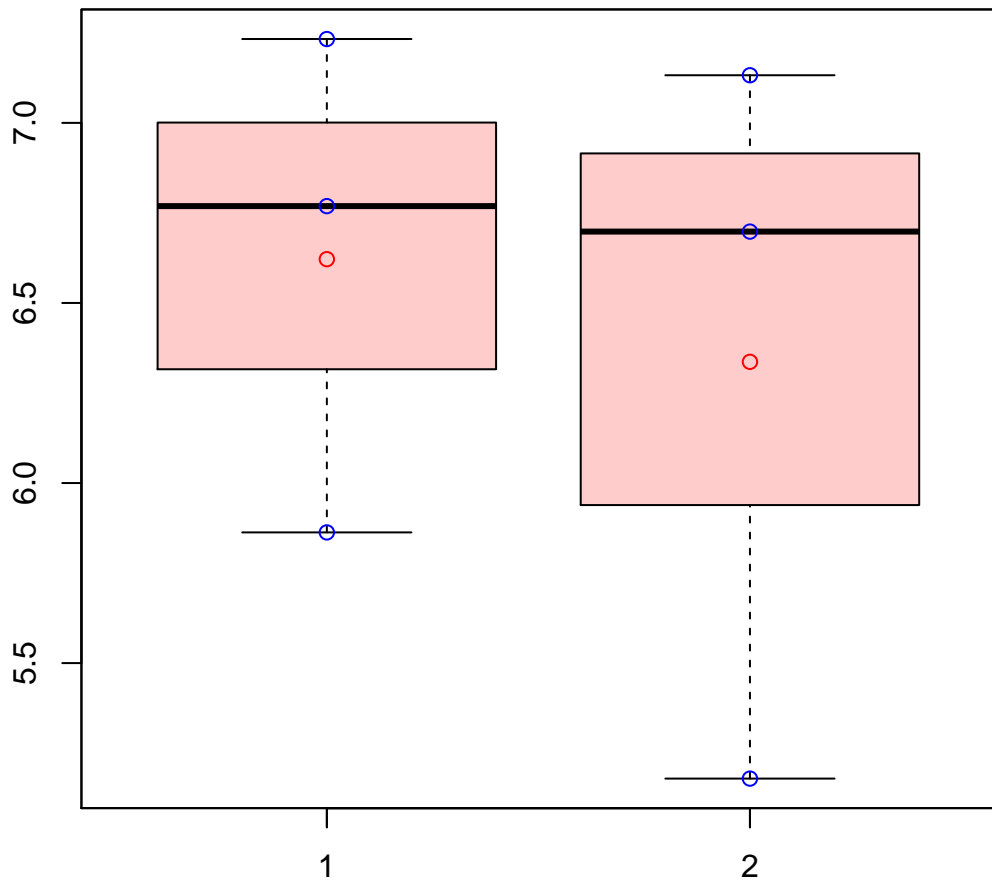

t-Test: p-value = 0.71



# M0T017|M0T017\_MUSAM

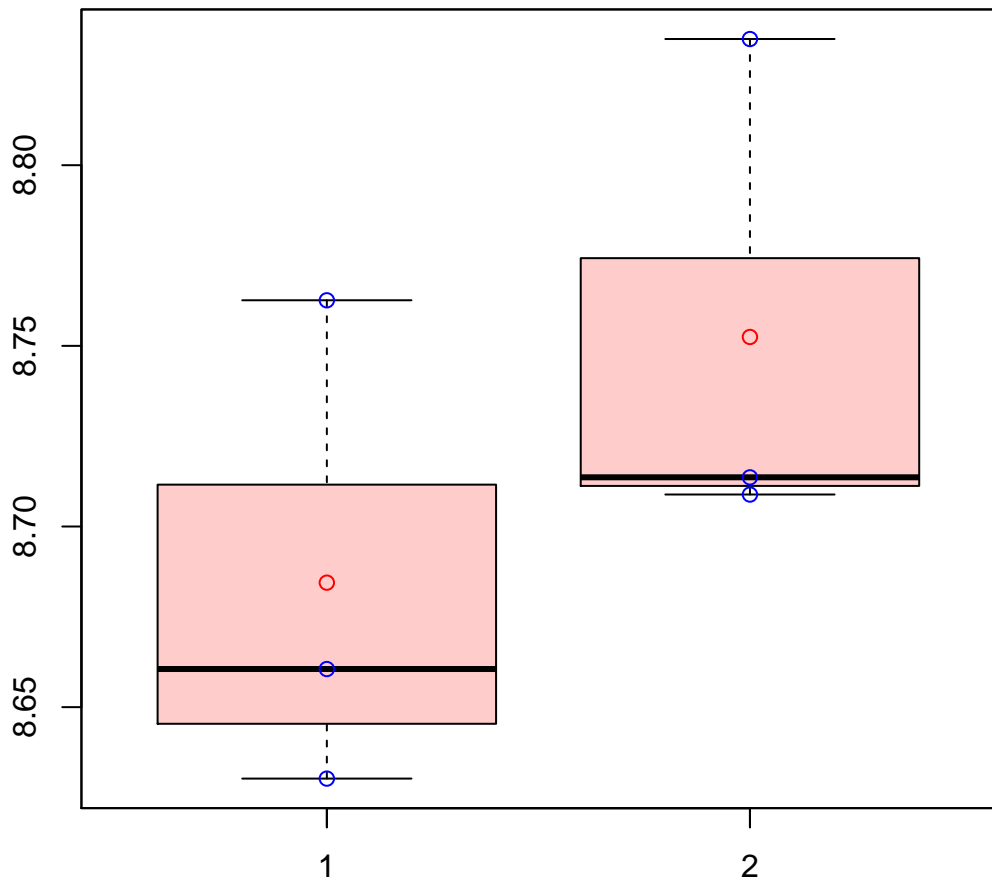

t-Test: p-value = 0.3

# M0T021|M0T021\_MUSAM

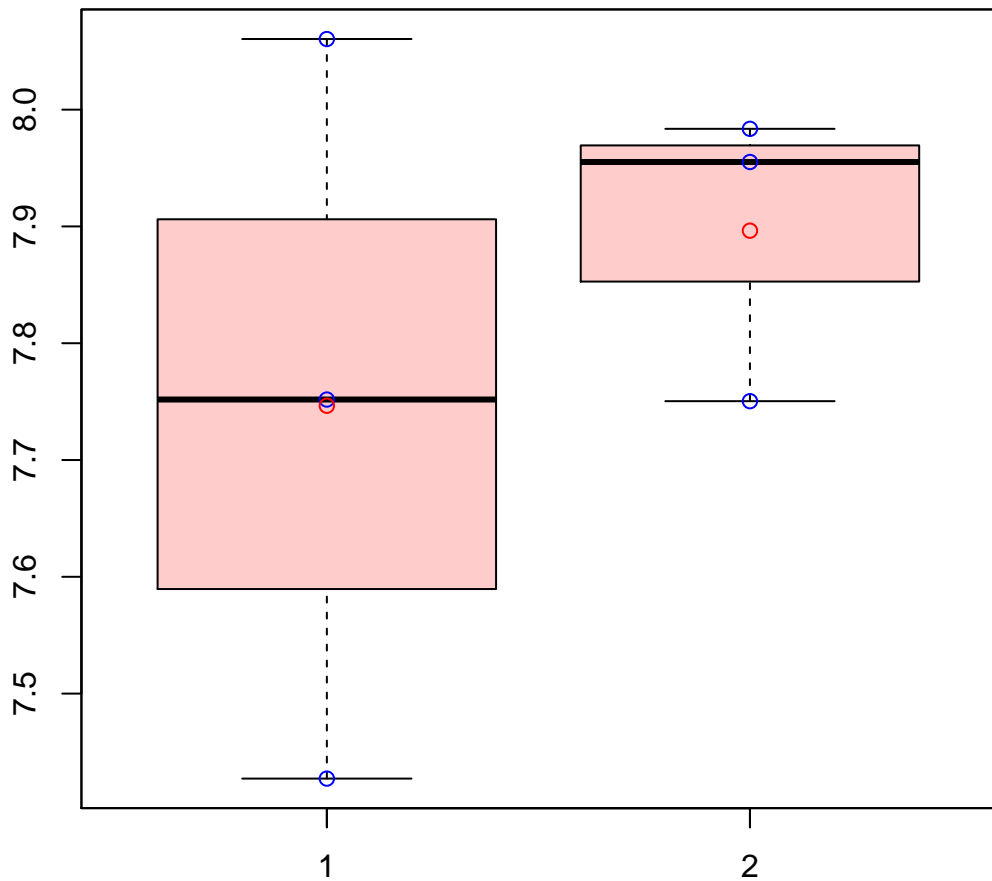

t-Test: p-value = 0.51

# M0T132|M0T132\_MUSAM

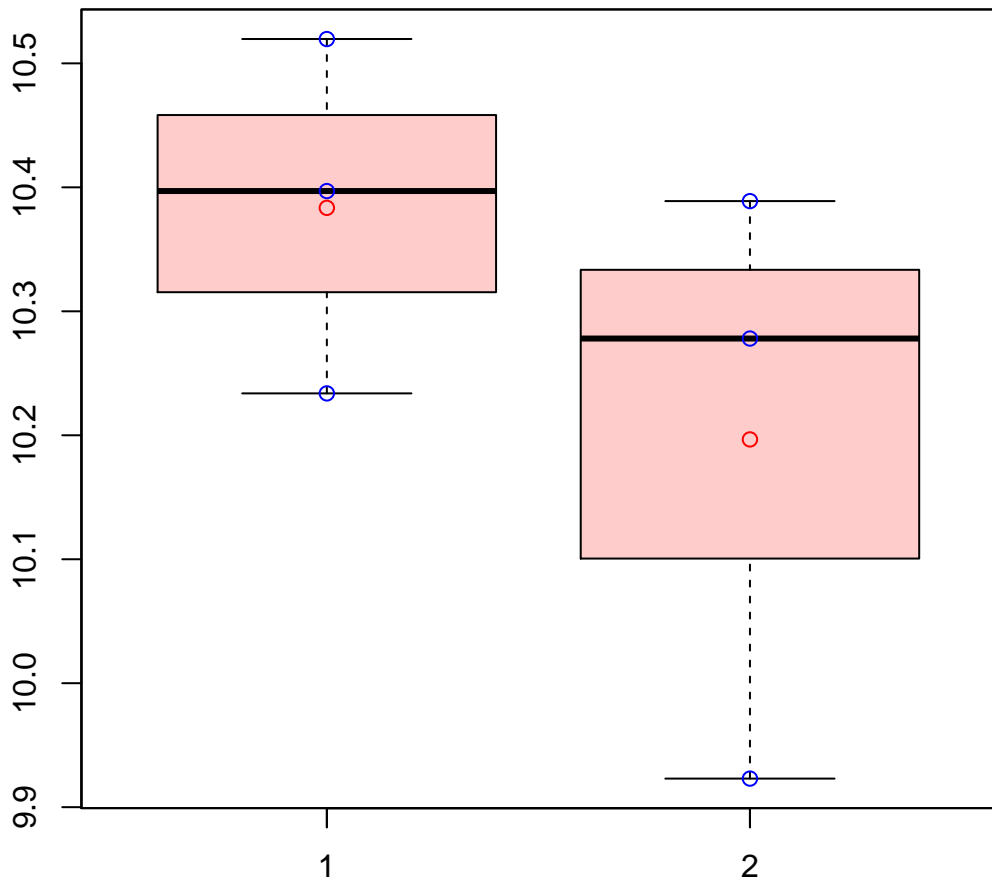

t-Test: p-value = 0.33

# M0T1B3|M0T1B3\_MUSAM

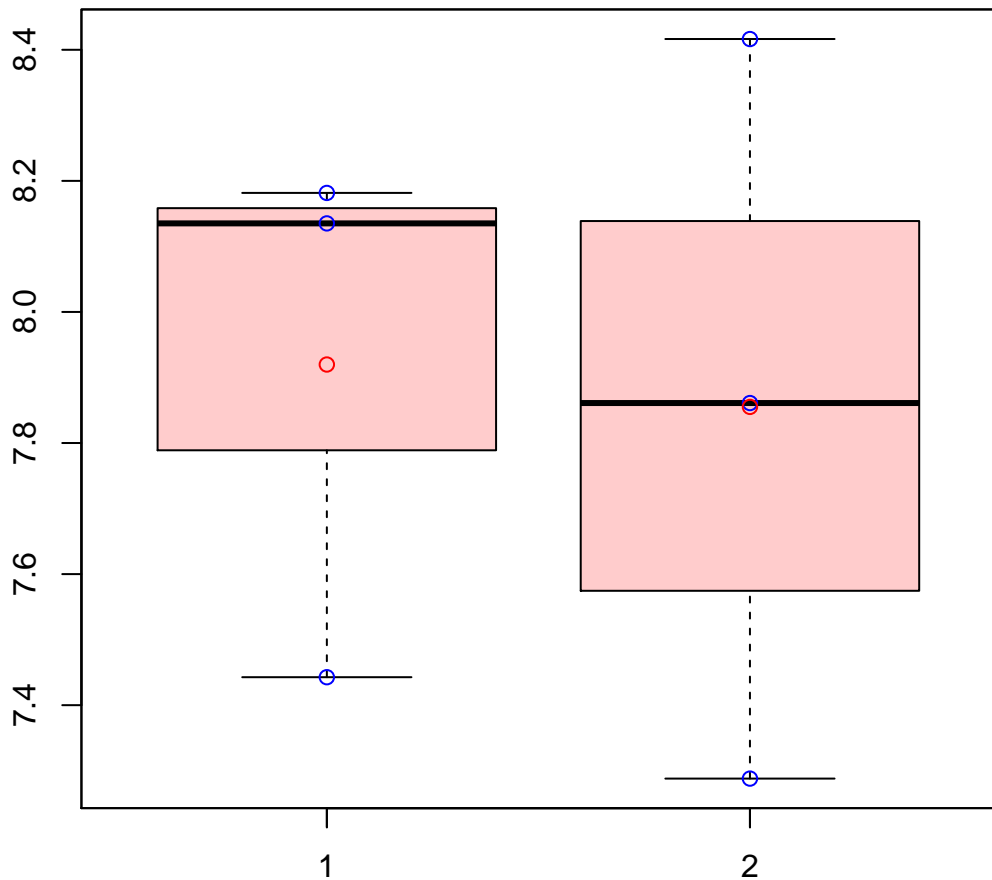

t-Test: p-value = 0.88

# M0T1L6|M0T1L6\_MUSAM

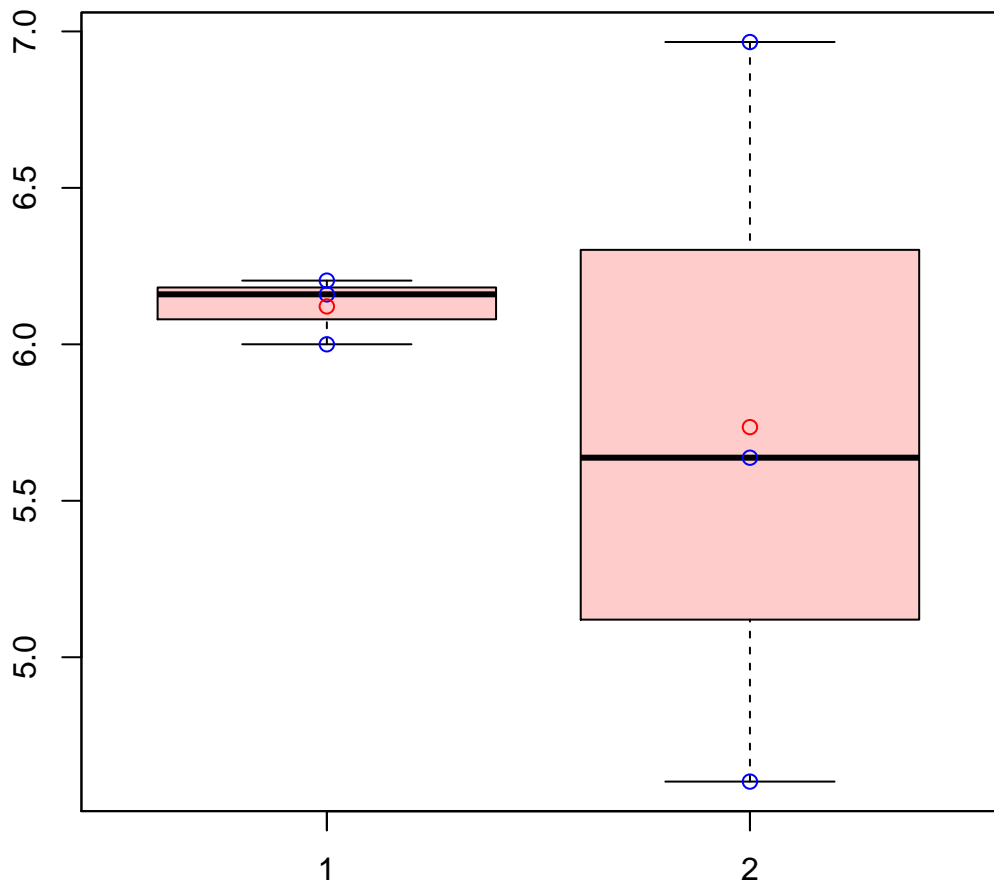

t-Test: p-value = 0.63

# M0T1M8|M0T1M8\_MUSAM

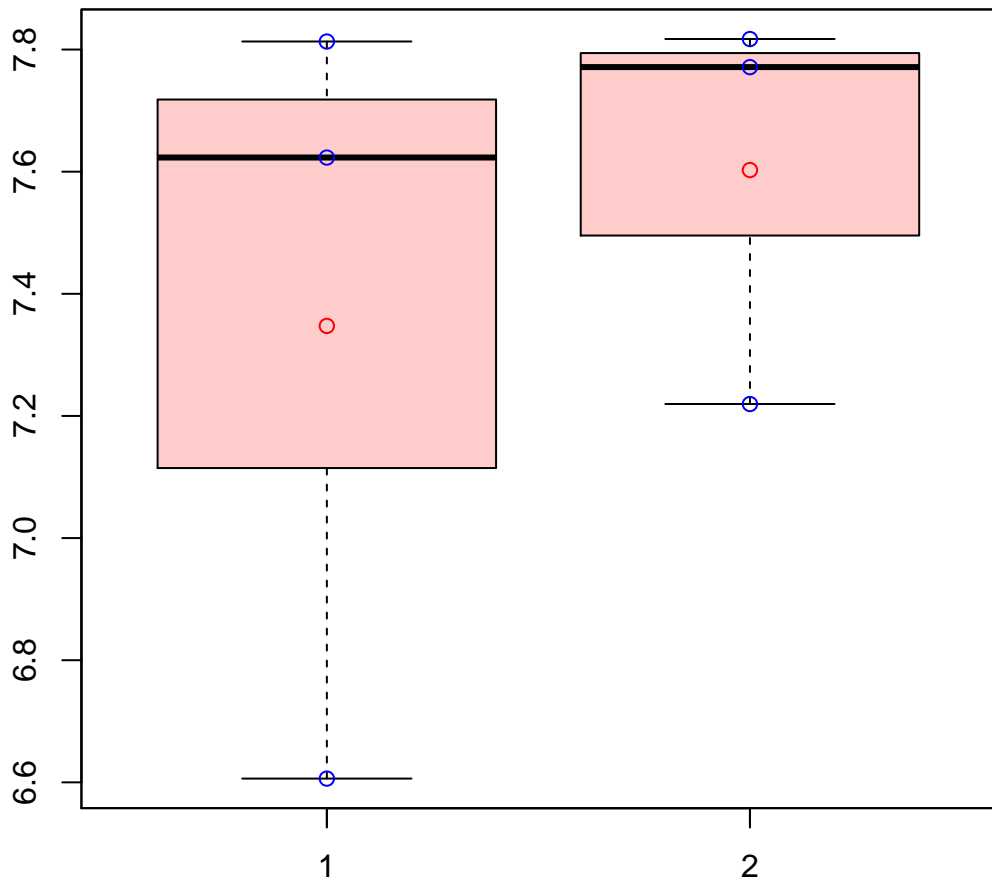

t-Test: p-value = 0.59

# M0T1S1|M0T1S1\_MUSAM

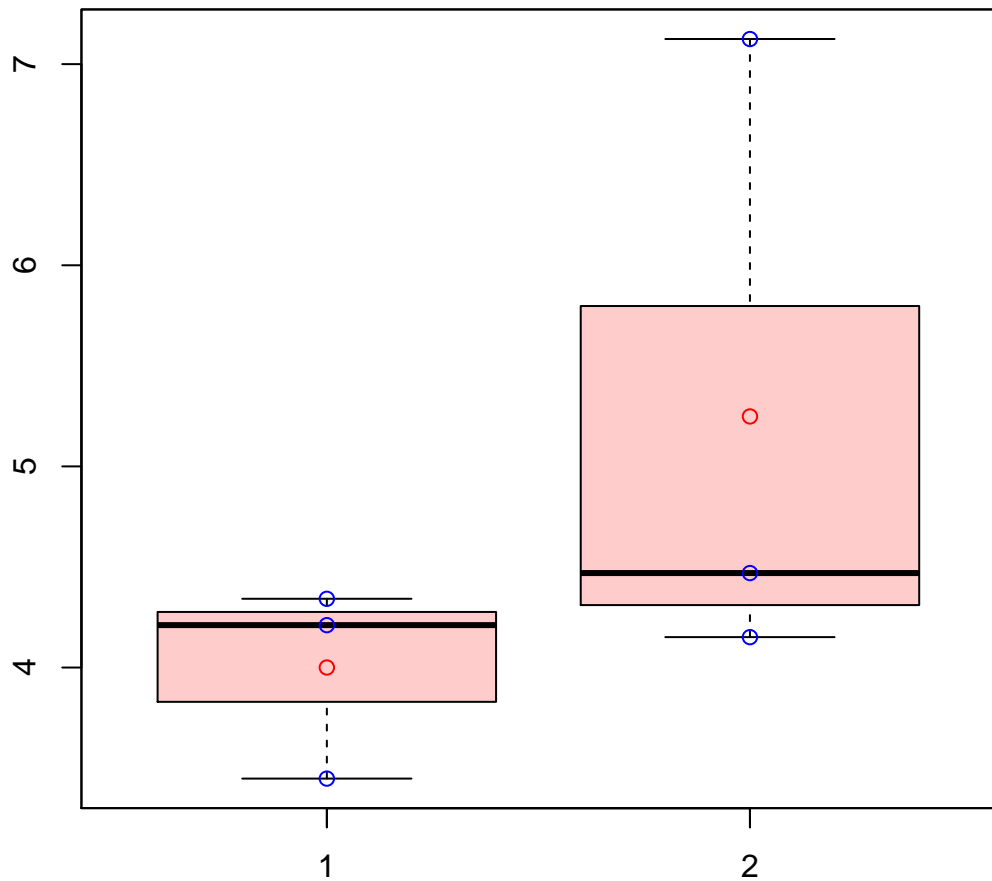

t-Test: p-value = 0.32

# M0T224|M0T224\_MUSAM

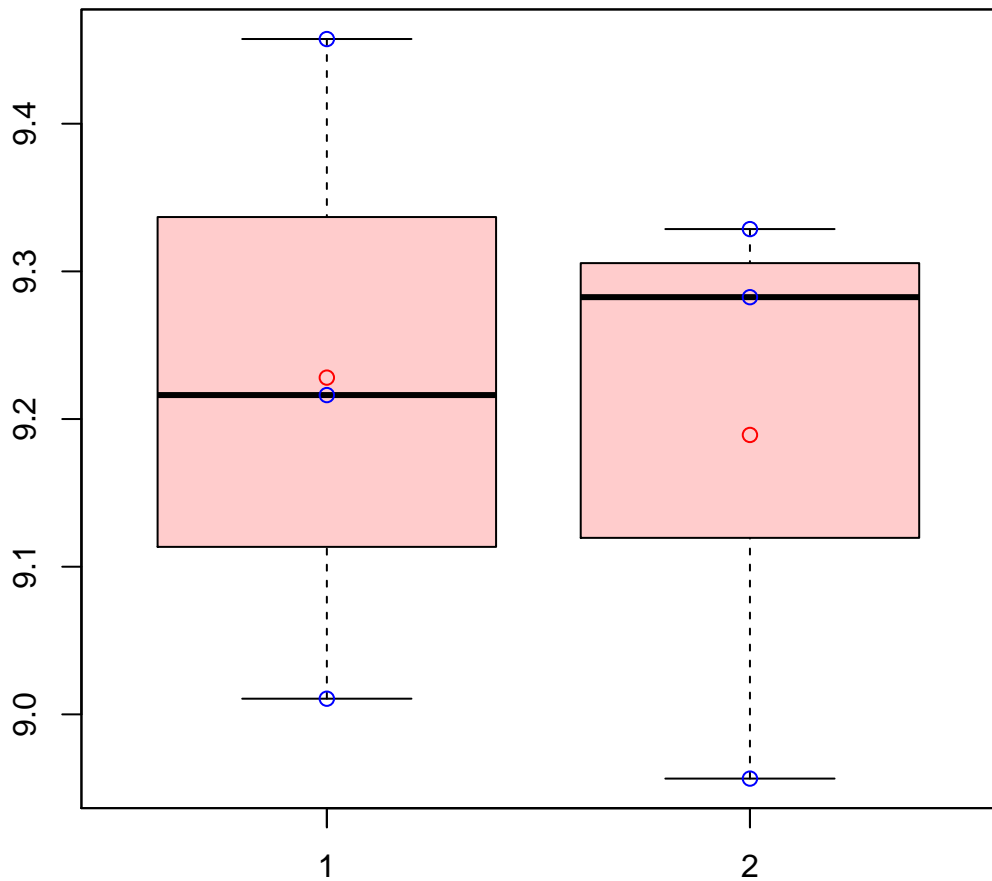

t-Test: p-value = 0.83



# M0T269|M0T269\_MUSAM

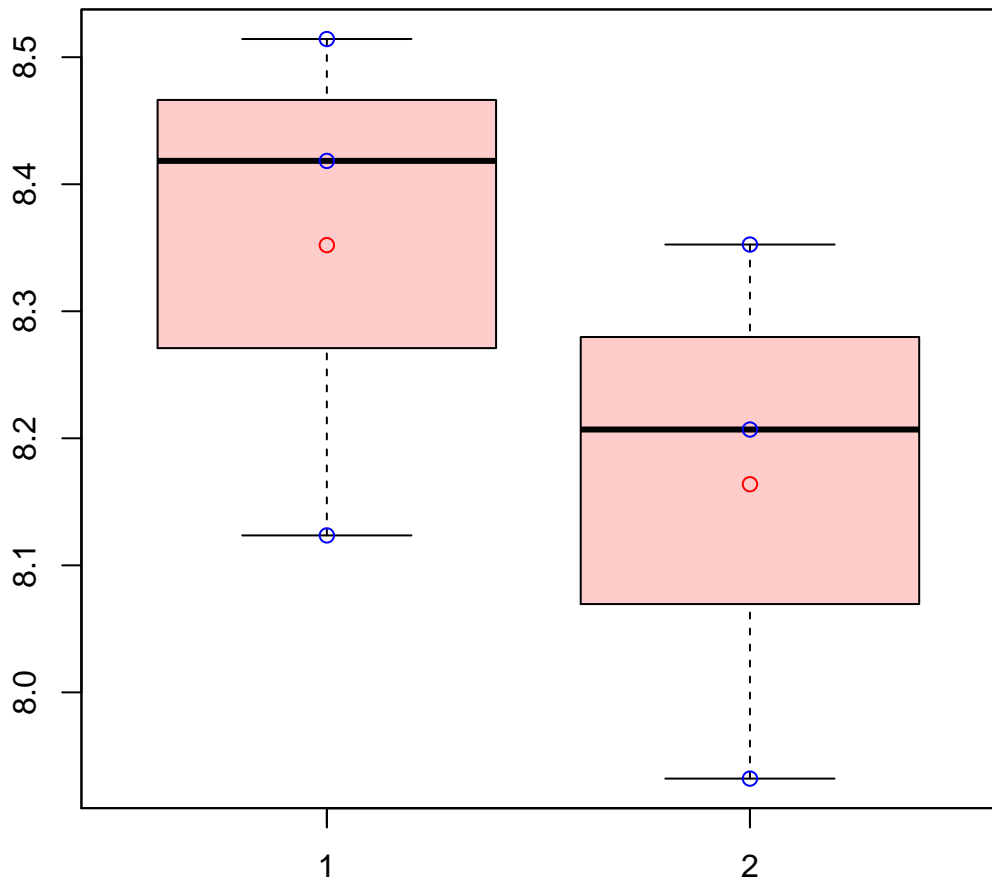

t-Test: p-value = 0.33

# M0T2W8|M0T2W8\_MUSAM

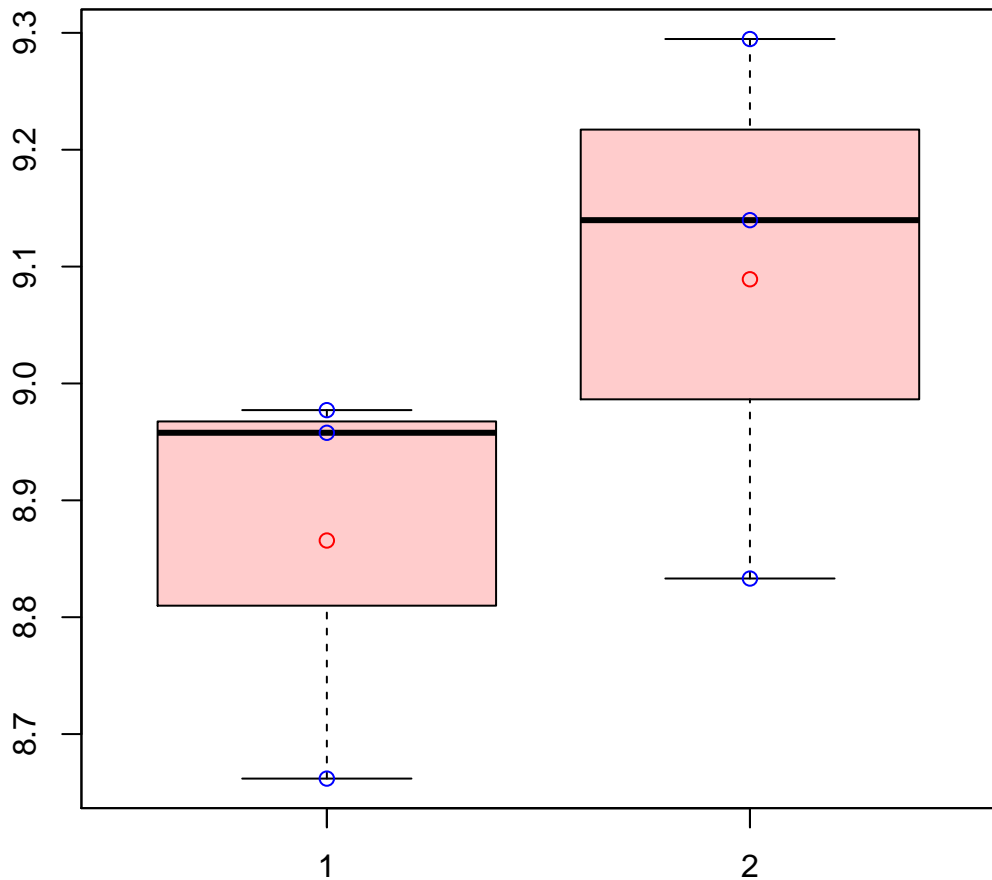

t-Test: p-value = 0.26

# M0T380|M0T380\_MUSAM

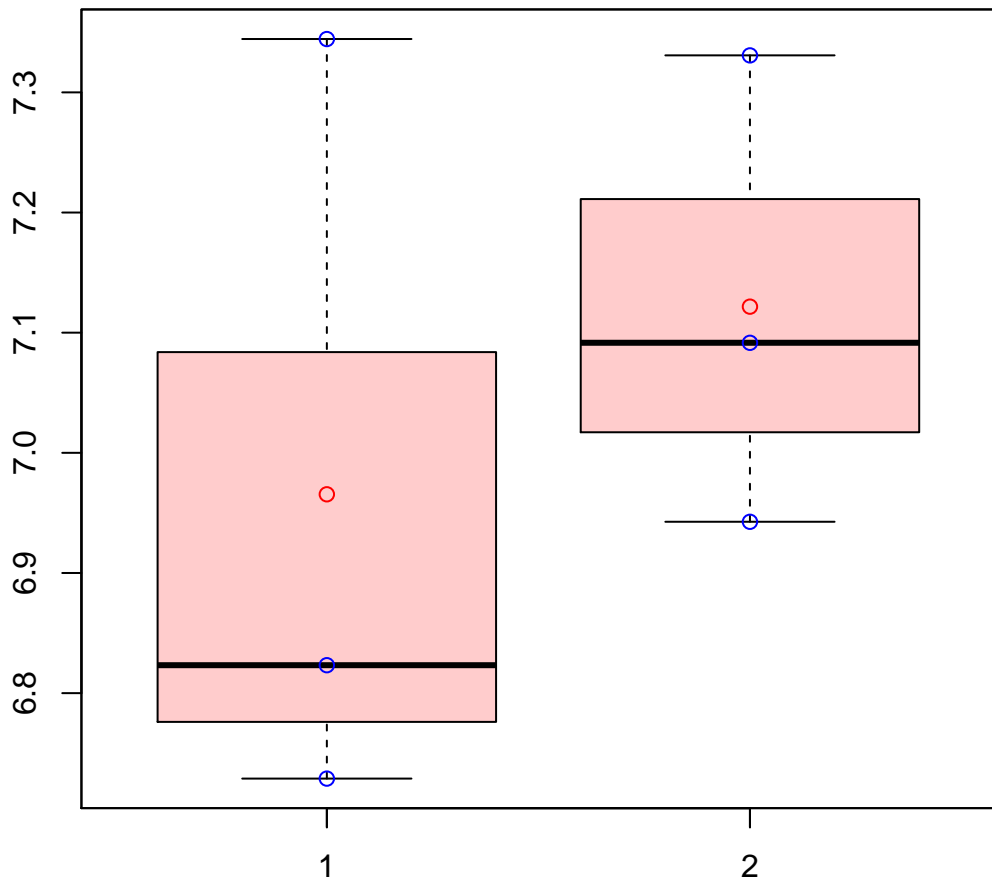

t-Test: p-value = 0.53

# M0T3A3|M0T3A3\_MUSAM

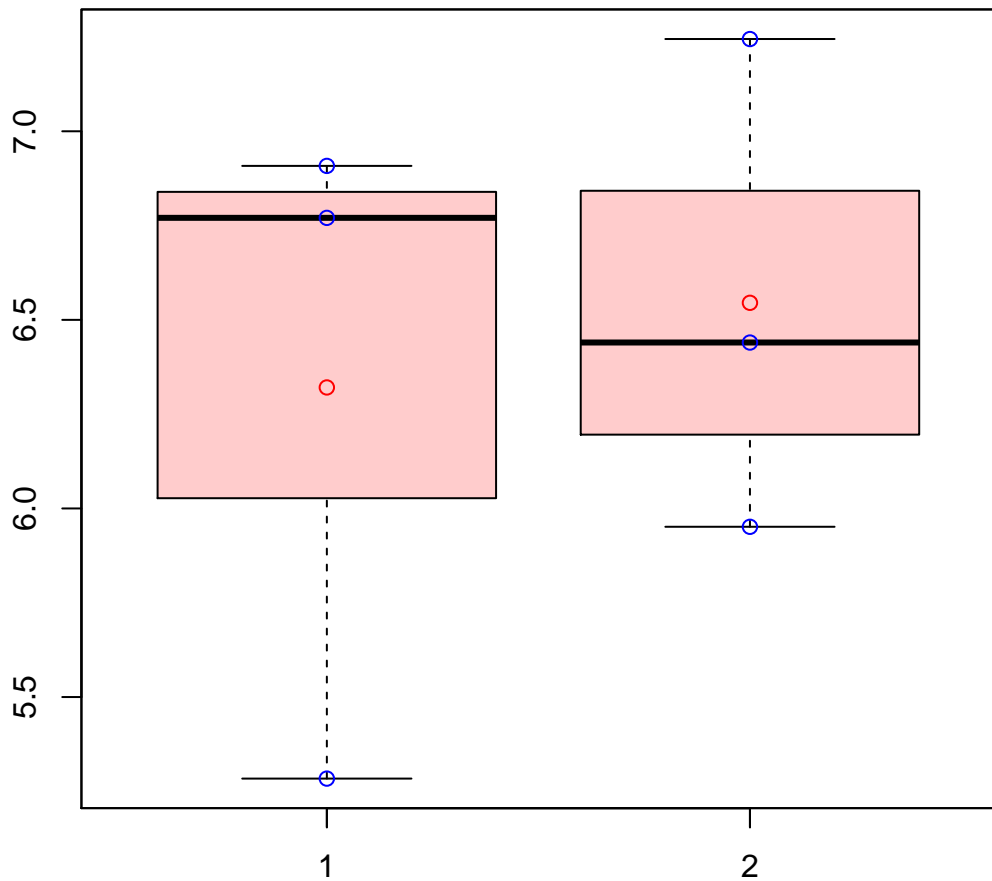

t-Test: p-value = 0.75

# M0T3F0|M0T3F0\_MUSAM

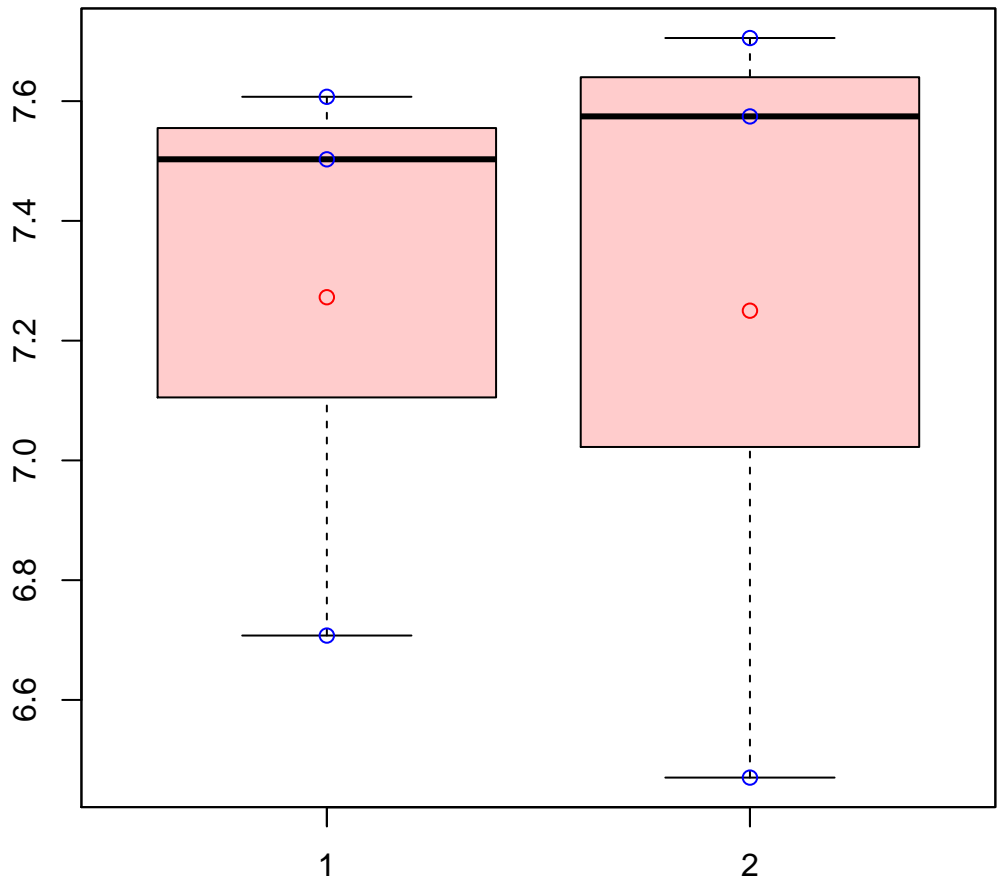

t-Test: p-value = 0.97

# M0T3L3|M0T3L3\_MUSAM

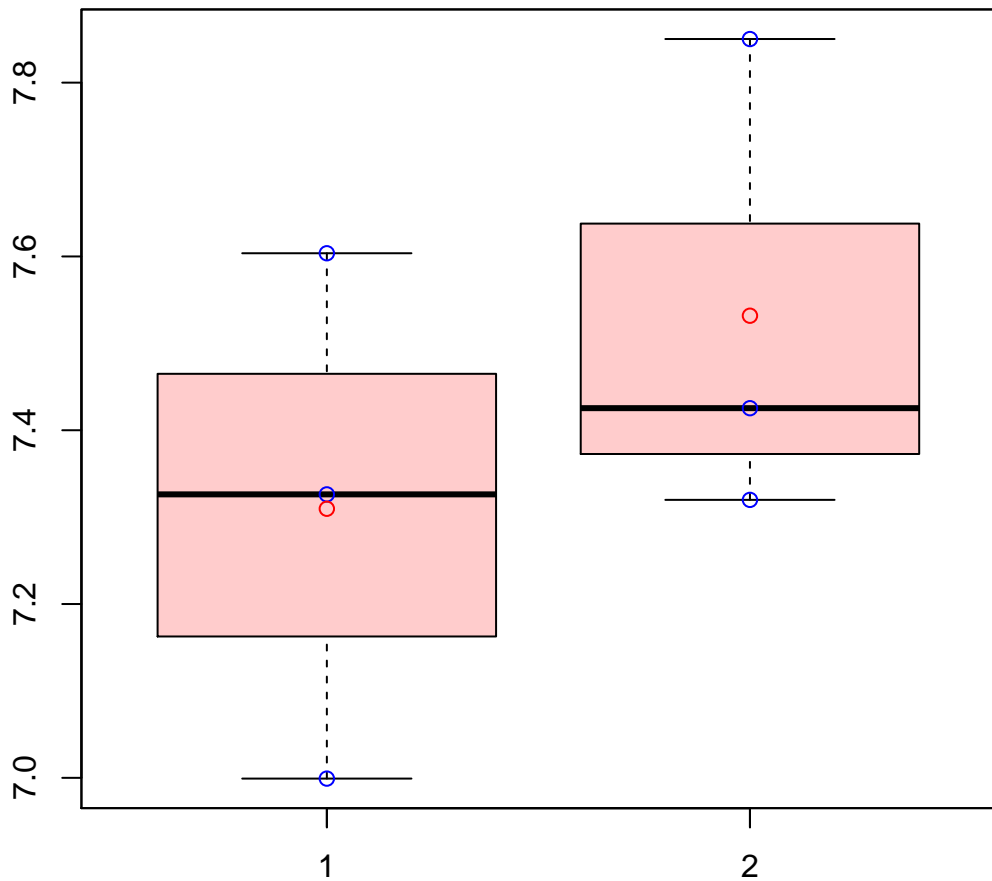

t-Test: p-value = 0.4

# M0T3U9|M0T3U9\_MUSAM

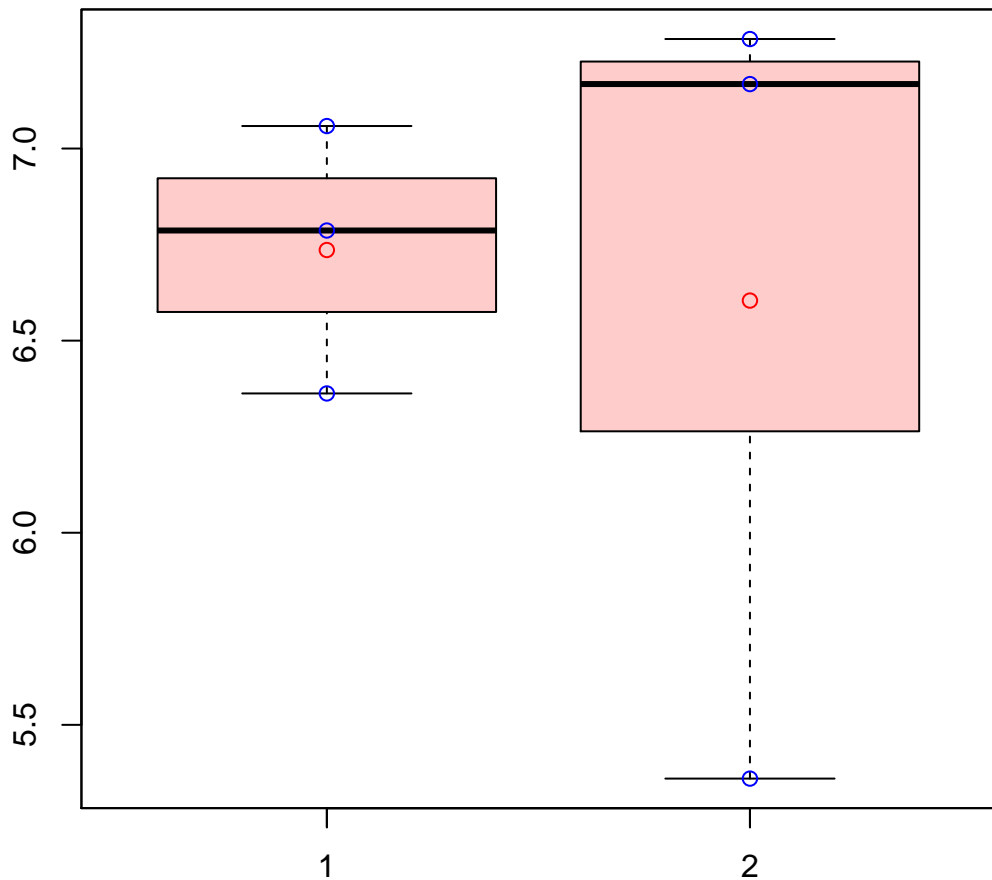

t-Test: p-value = 0.86

# M0T458|M0T458\_MUSAM

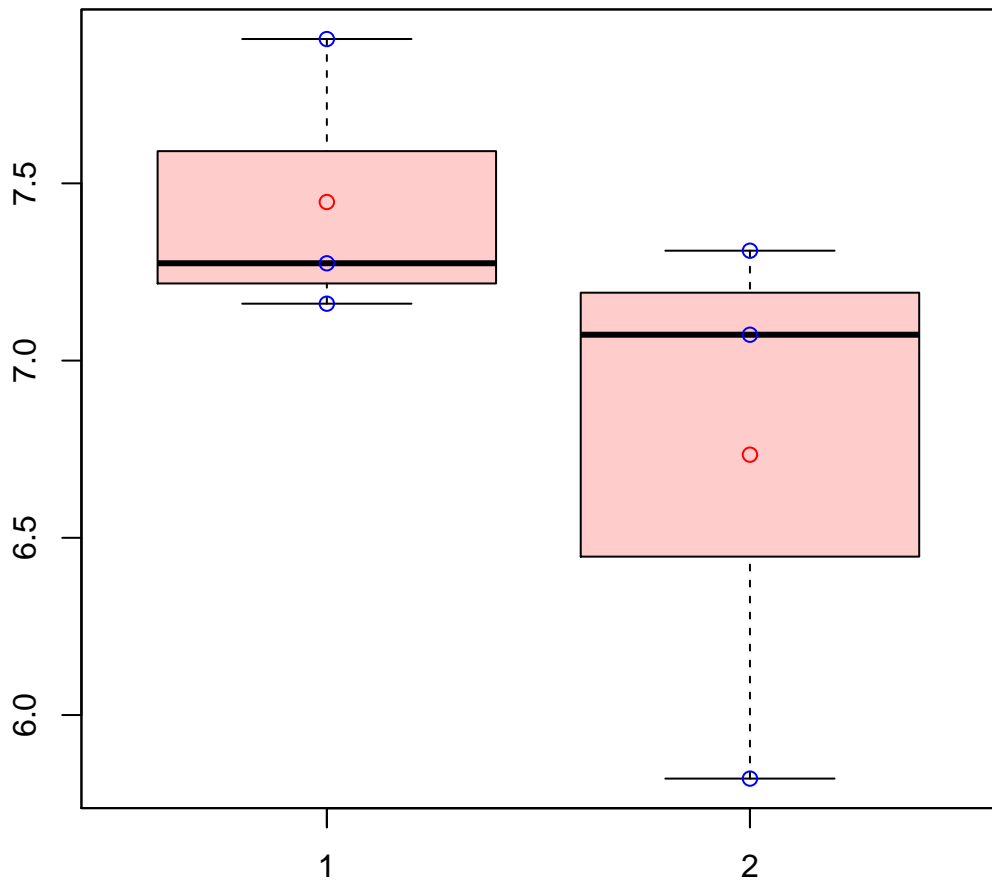

t-Test: p-value = 0.26



# M0T464|M0T464\_MUSAM

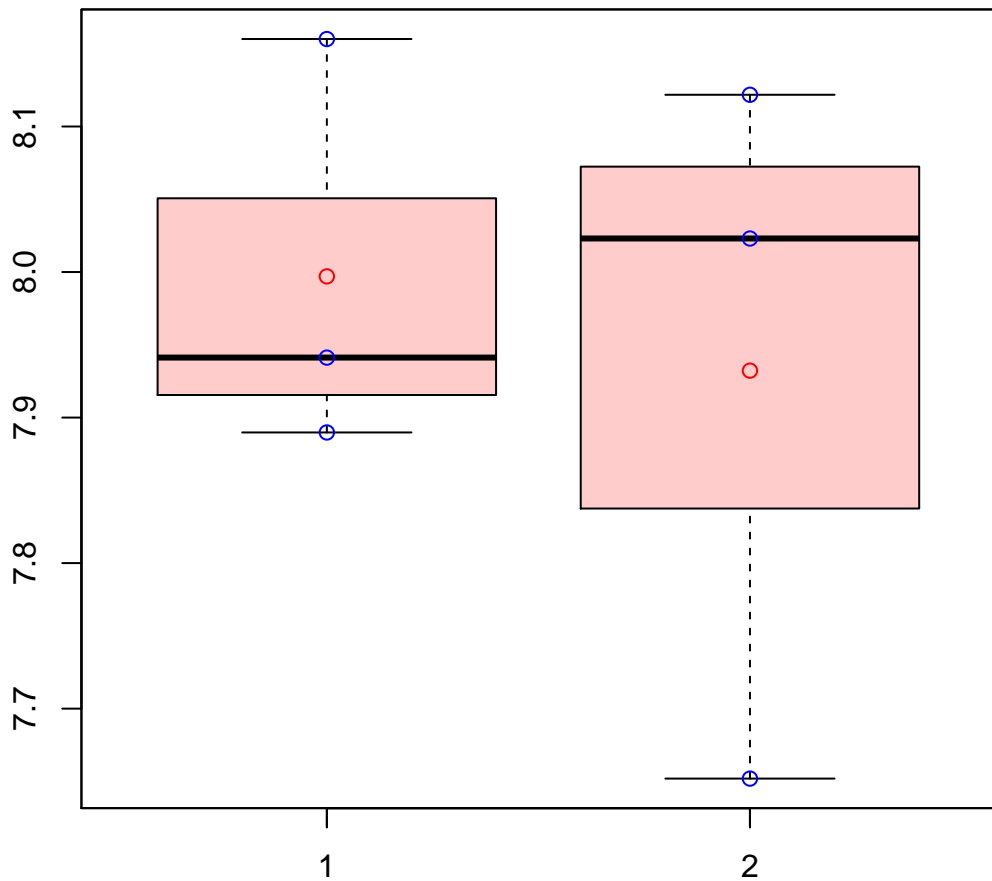

t-Test: p-value = 0.72

# M0T4D8|M0T4D8\_MUSAM

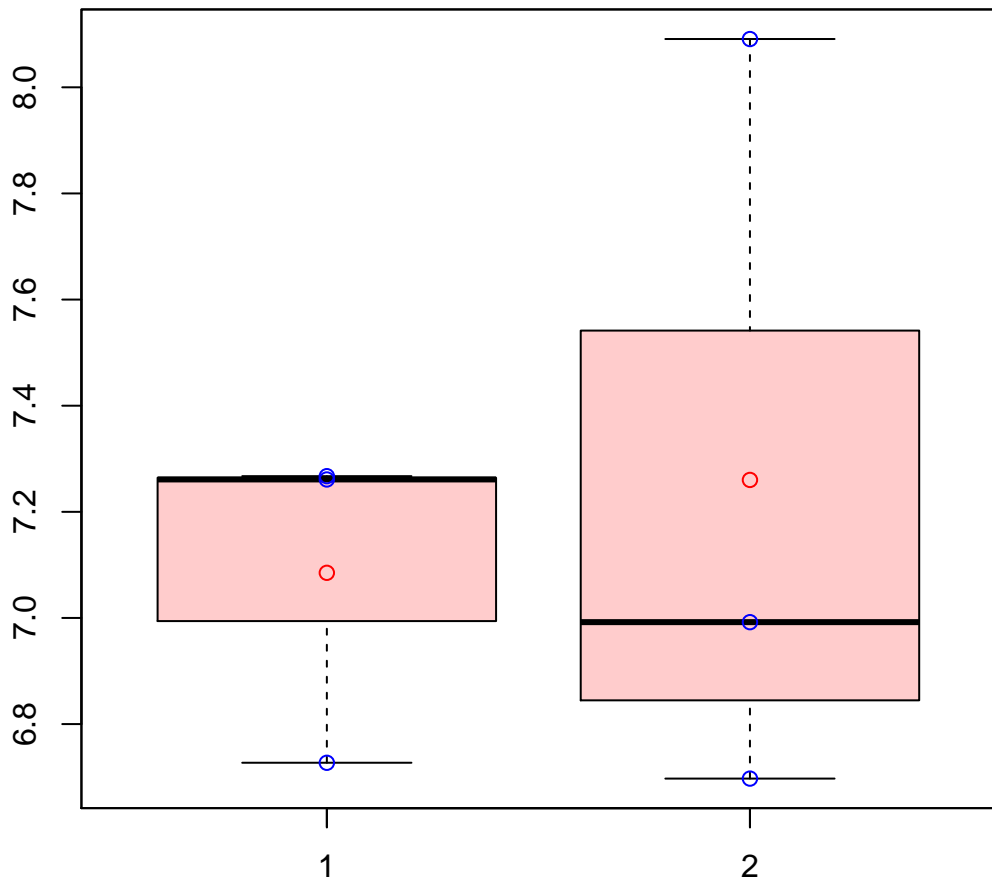

t-Test: p-value = 0.73

# M0T4F8|M0T4F8\_MUSAM

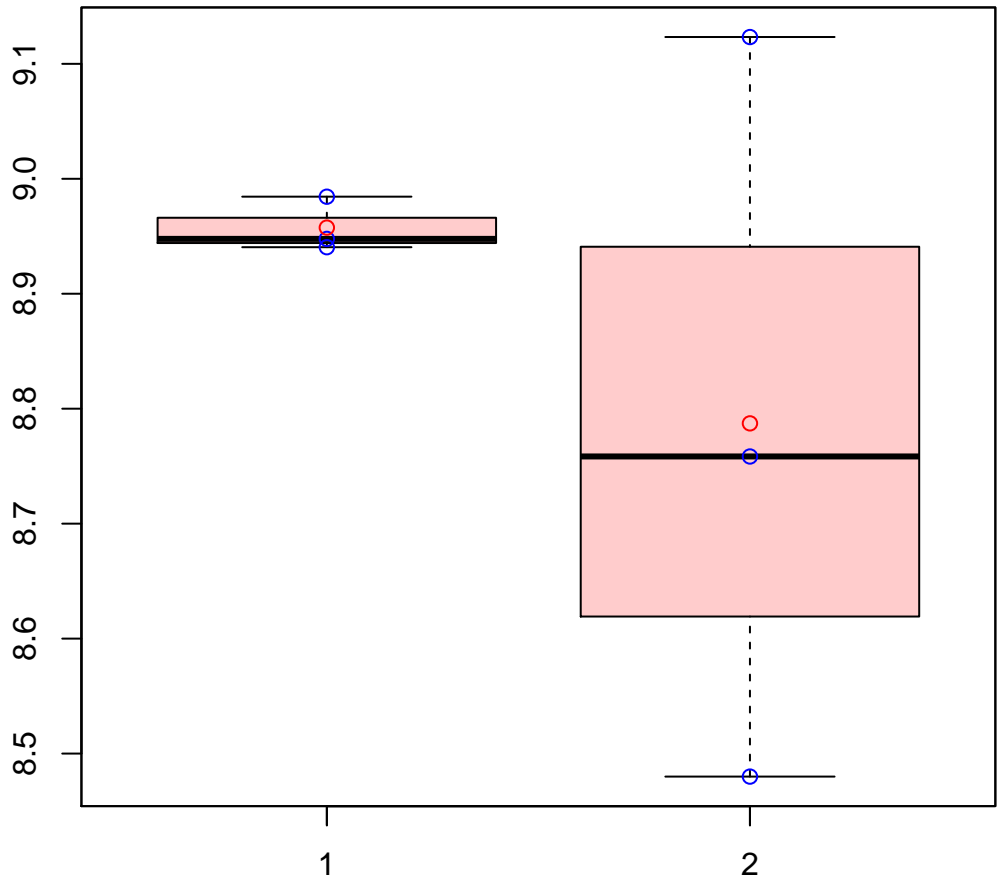

t-Test: p-value = 0.46

# M0T4I0|M0T4I0\_MUSAM

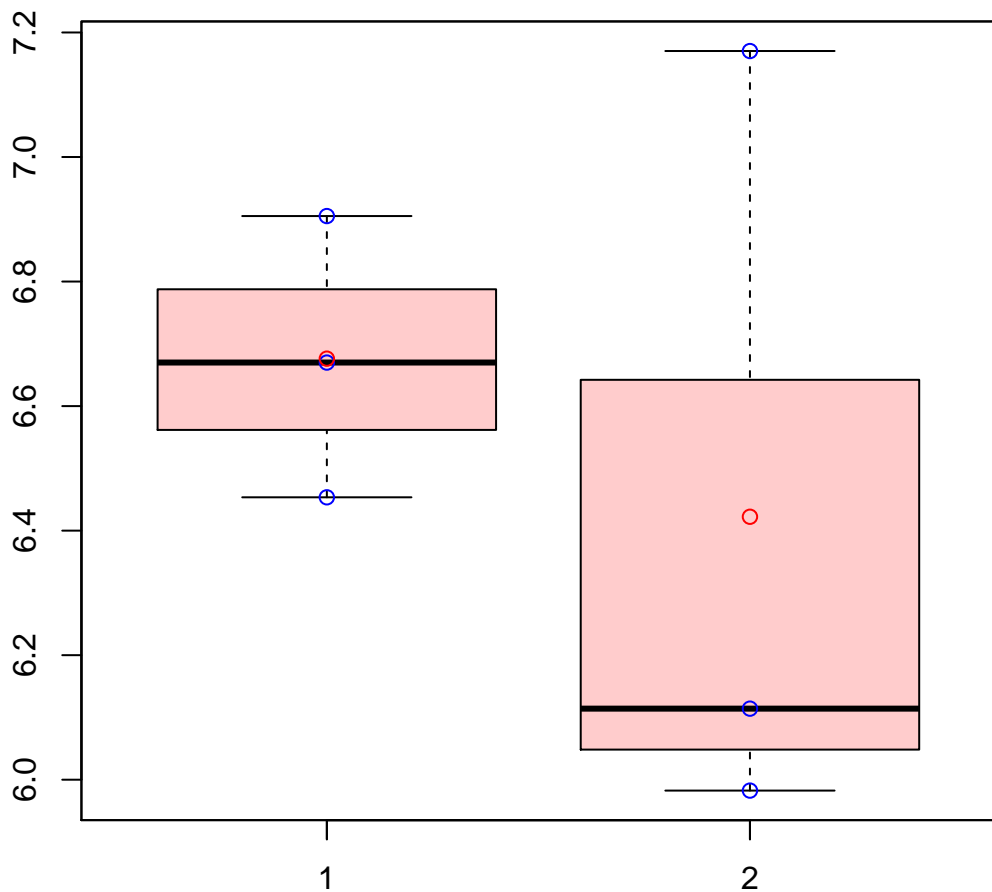

t-Test: p-value = 0.58

# M0T4Q0|M0T4Q0\_MUSAM

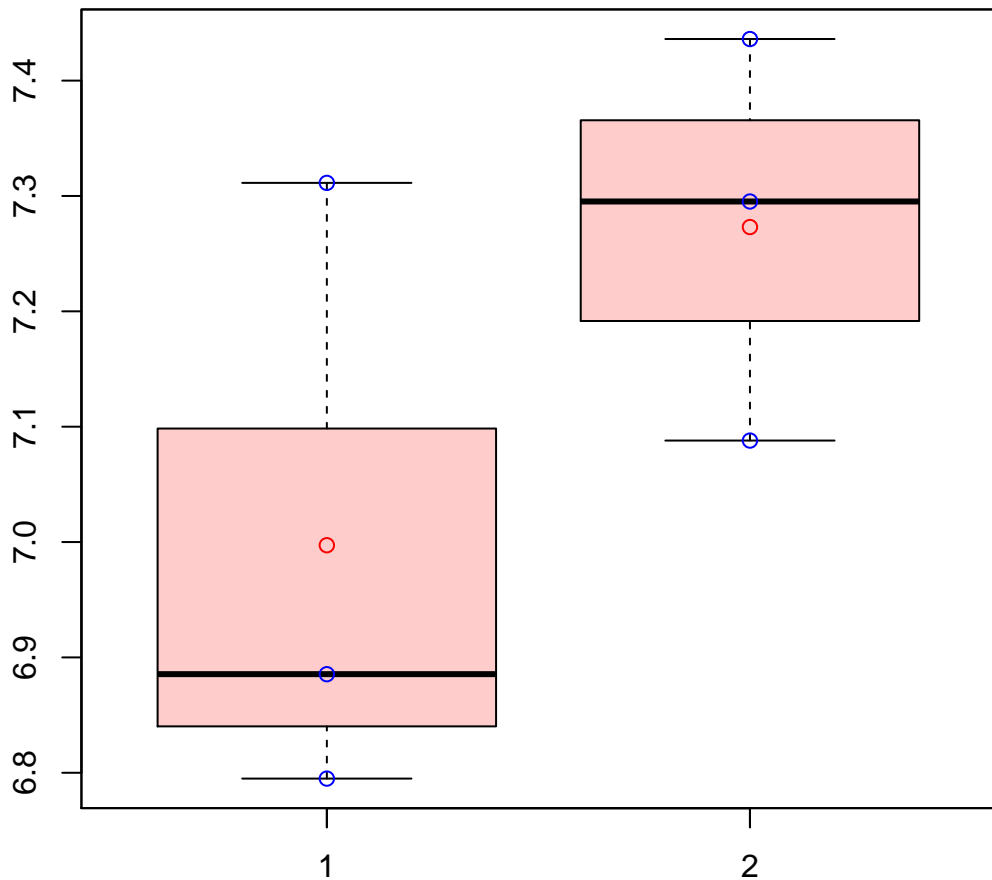

t-Test: p-value = 0.23

# M0T4R8|M0T4R8\_MUSAM

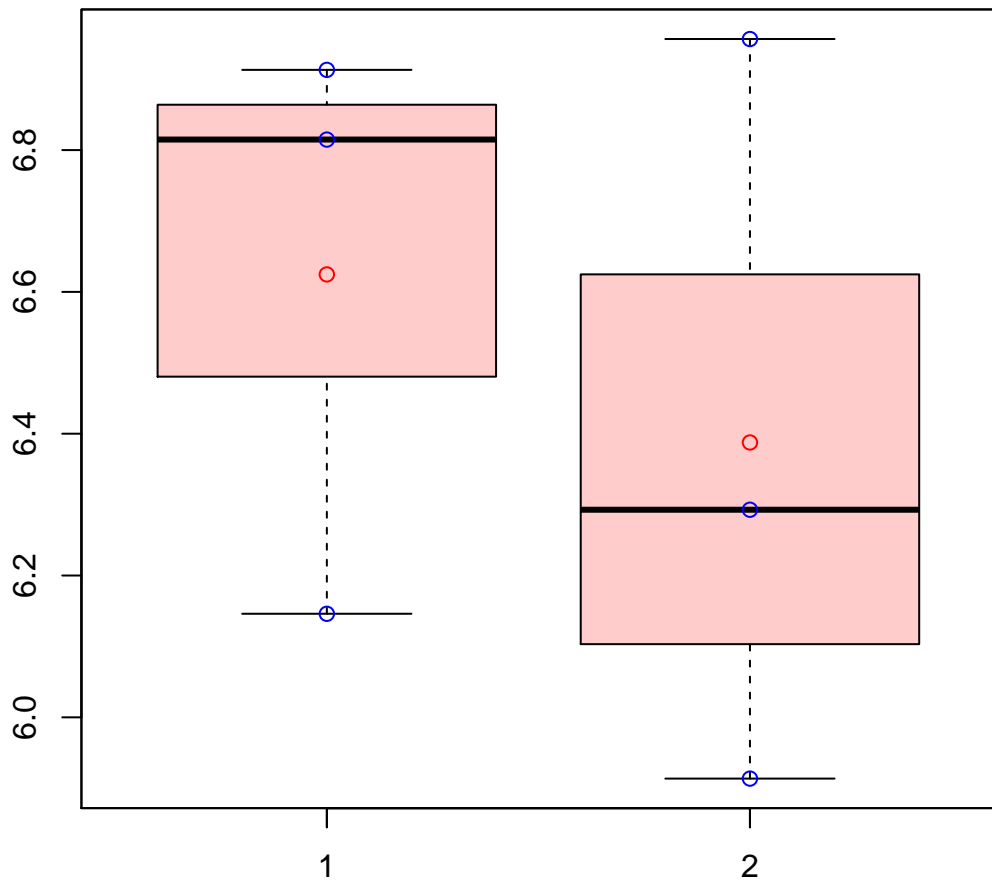

t-Test: p-value = 0.58

# M0T543|M0T543\_MUSAM

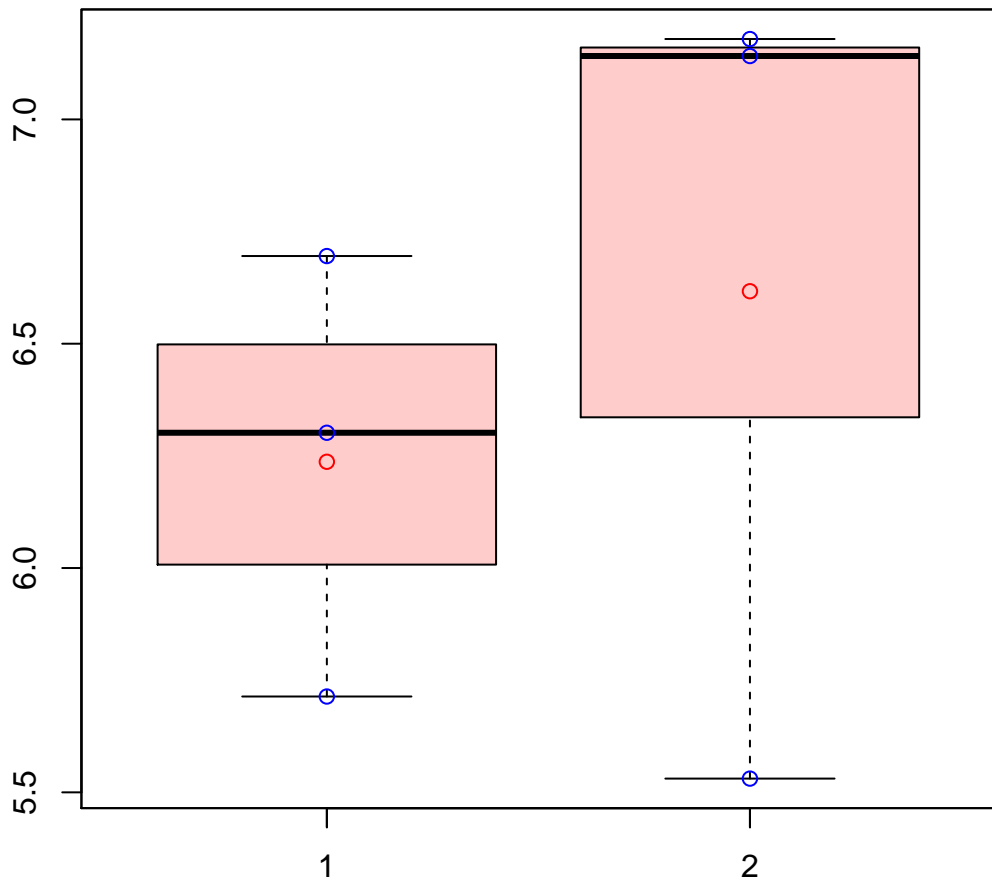

t-Test: p-value = 0.58

# M0T5J3|M0T5J3\_MUSAM

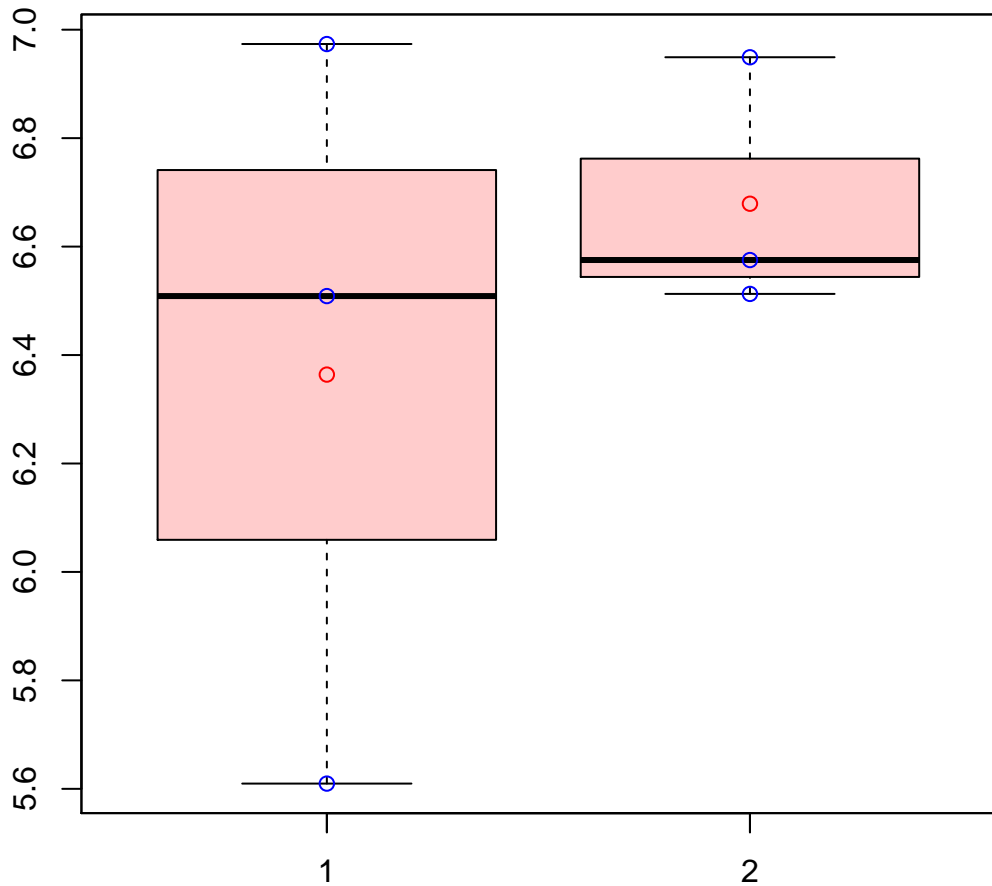

t-Test: p-value = 0.52



# M0T5K0|M0T5K0\_MUSAM

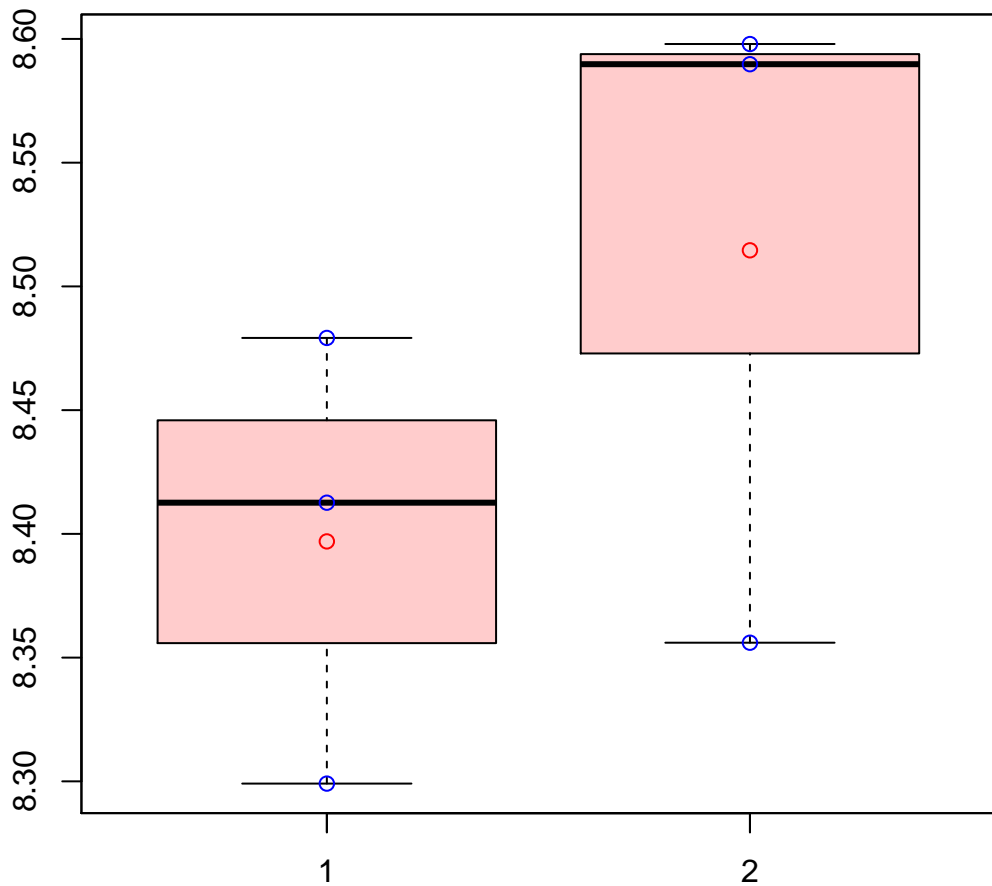

t-Test: p-value = 0.29

# M0T5T9|M0T5T9\_MUSAM

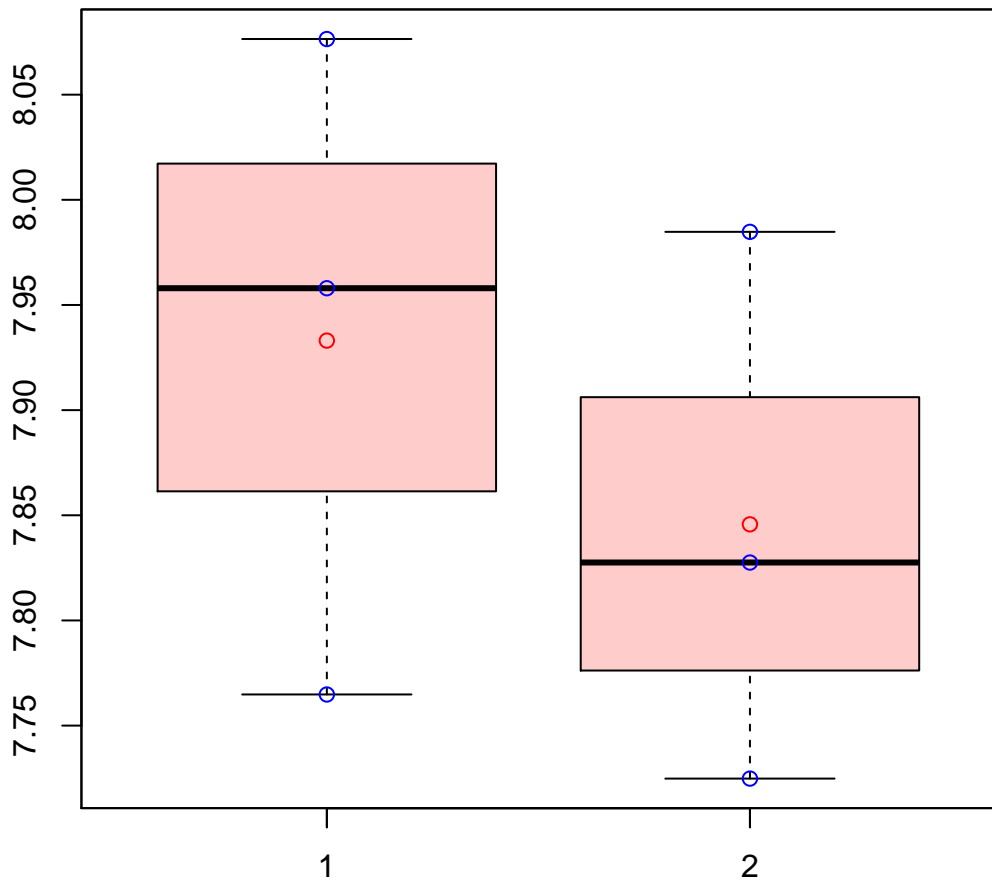

t-Test: p-value = 0.5

# M0T5Y8|M0T5Y8\_MUSAM

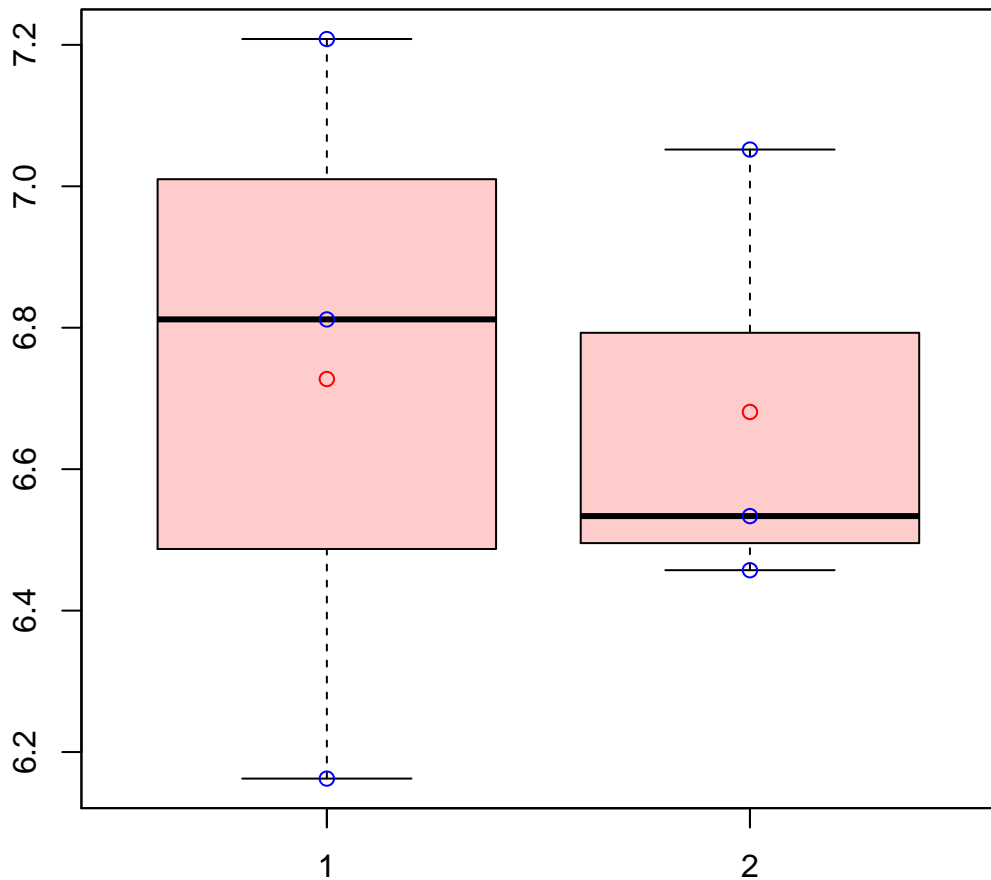

t-Test: p-value = 0.9

# M0T641|M0T641\_MUSAM

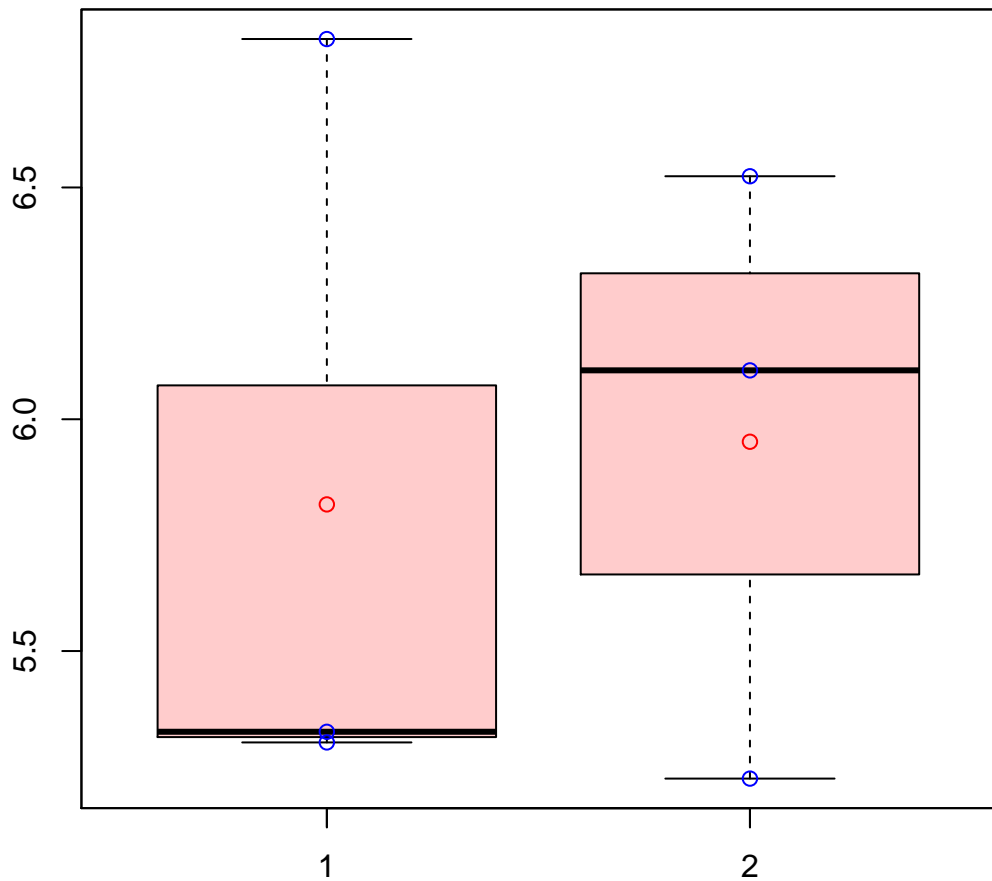

t-Test: p-value = 0.84

# M0T6D5|M0T6D5\_MUSAM

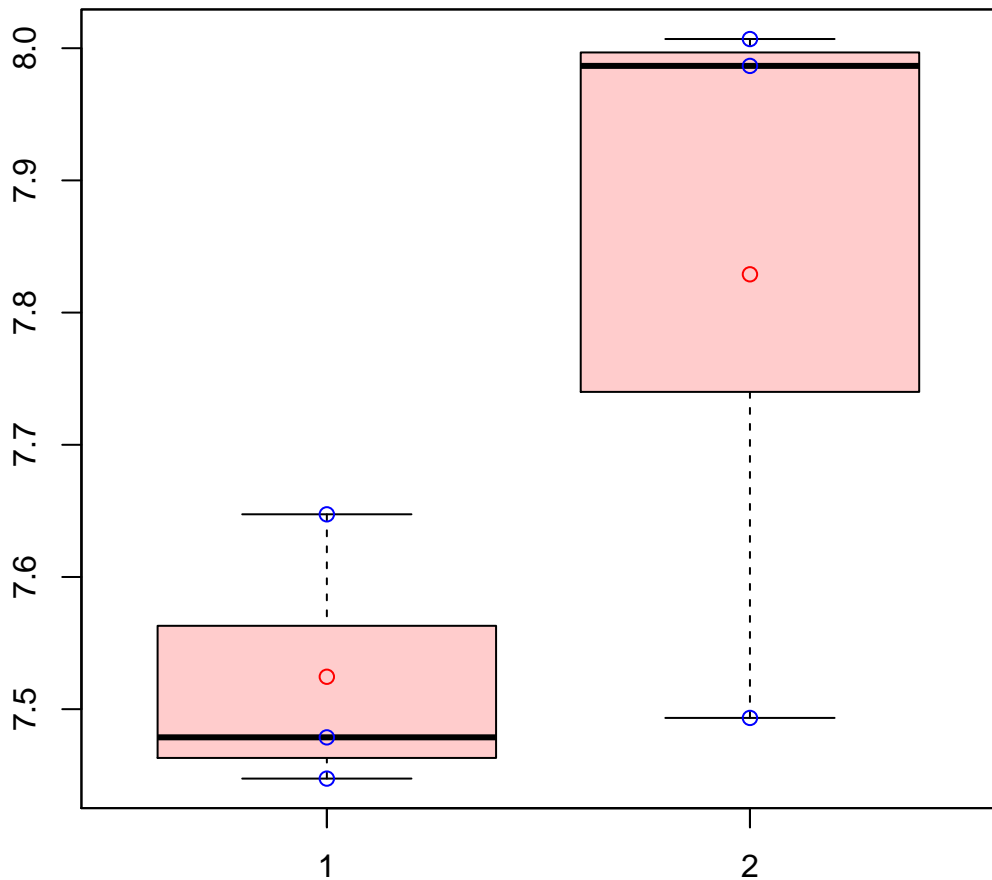

t-Test: p-value = 0.2

# M0T6G5|M0T6G5\_MUSAM

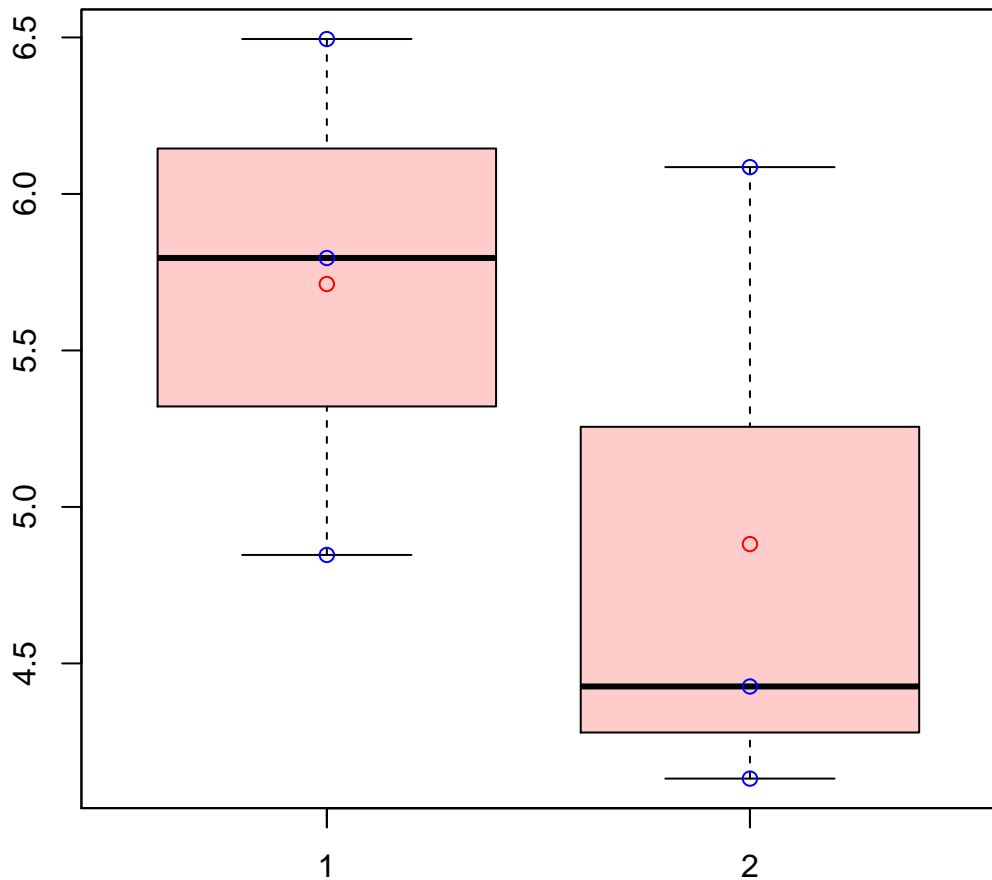

t-Test: p-value = 0.35

# M0T6P1|M0T6P1\_MUSAM

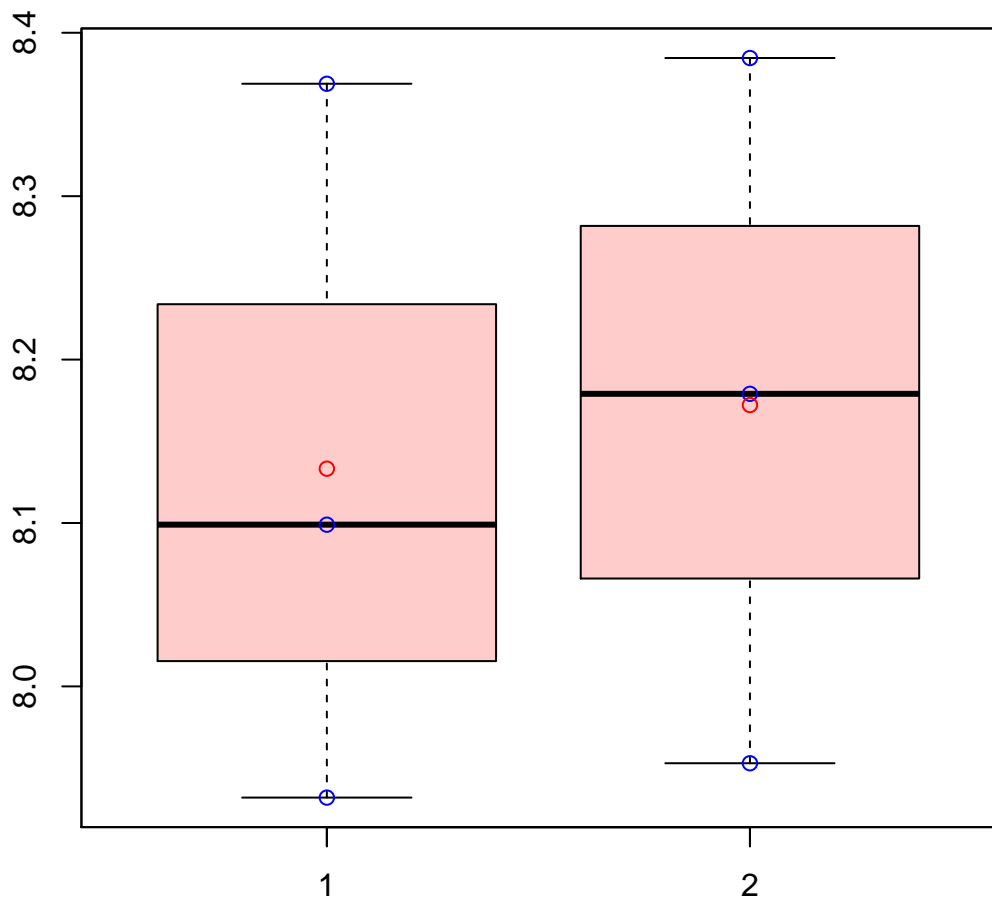

t-Test: p-value = 0.84

# M0T6Z7|M0T6Z7\_MUSAM

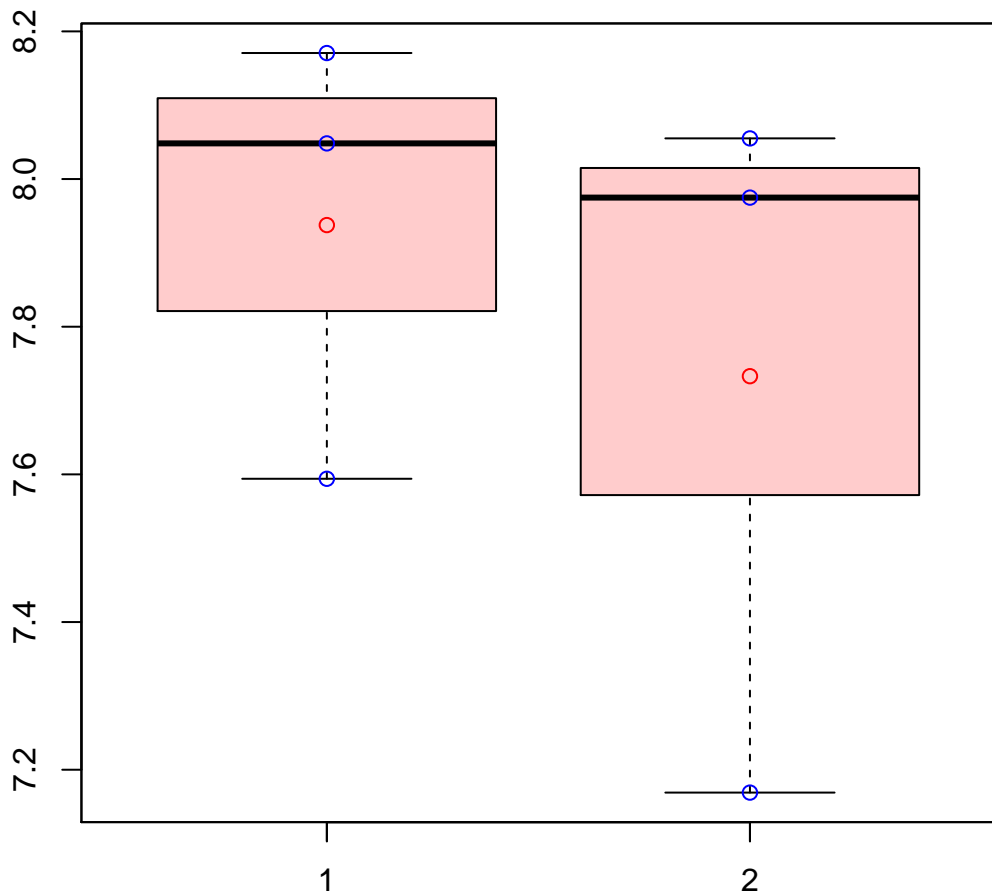

t-Test: p-value = 0.58



# M0T713|M0T713\_MUSAM

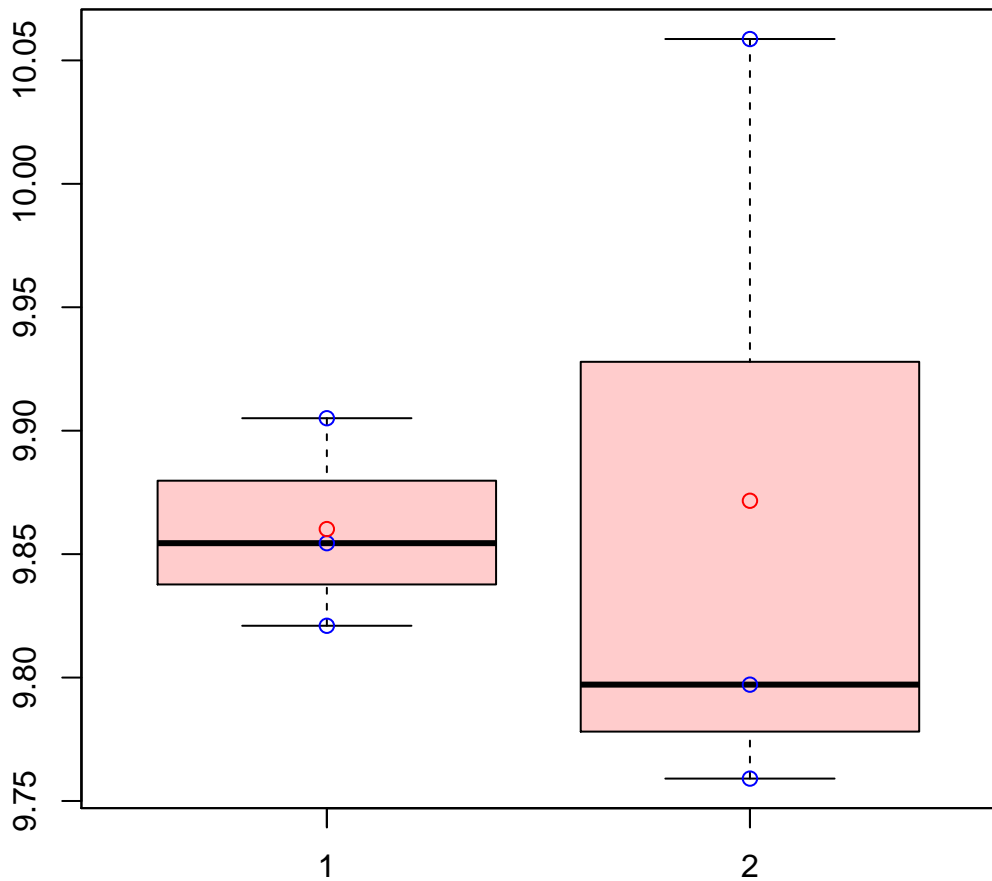

t-Test: p-value = 0.92

# M0T7H3|M0T7H3\_MUSAM

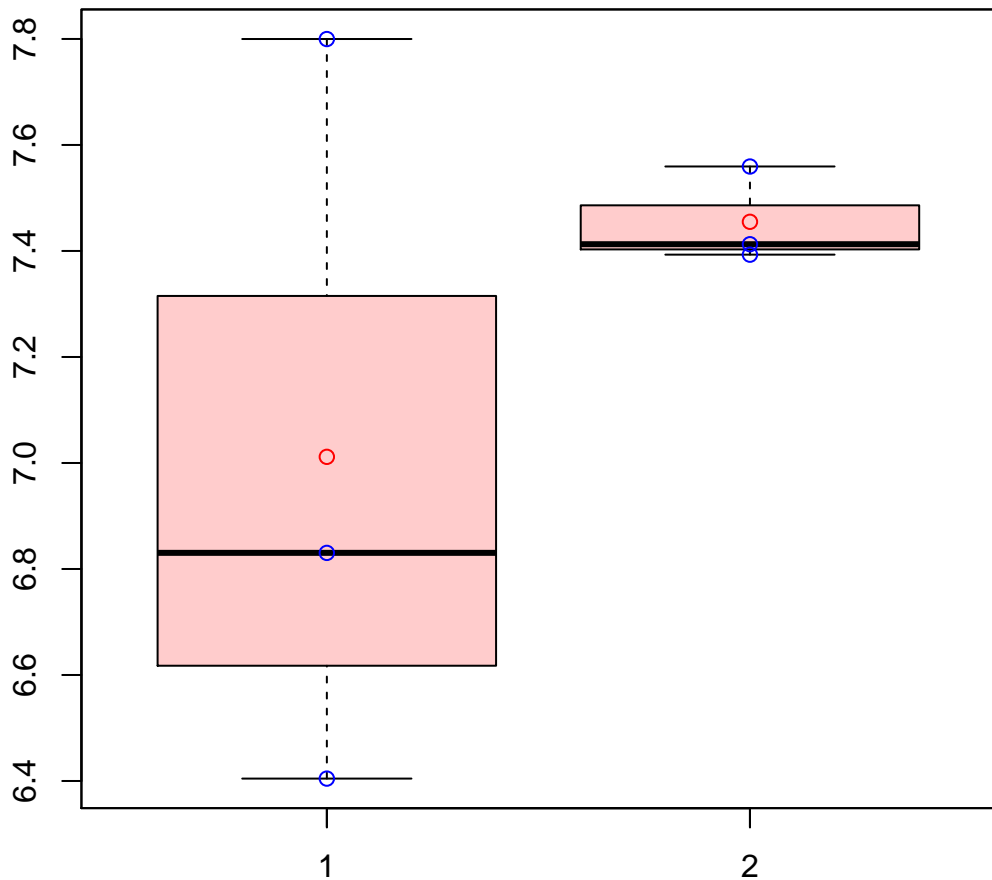

t-Test: p-value = 0.4

# M0T7J5|M0T7J5\_MUSAM

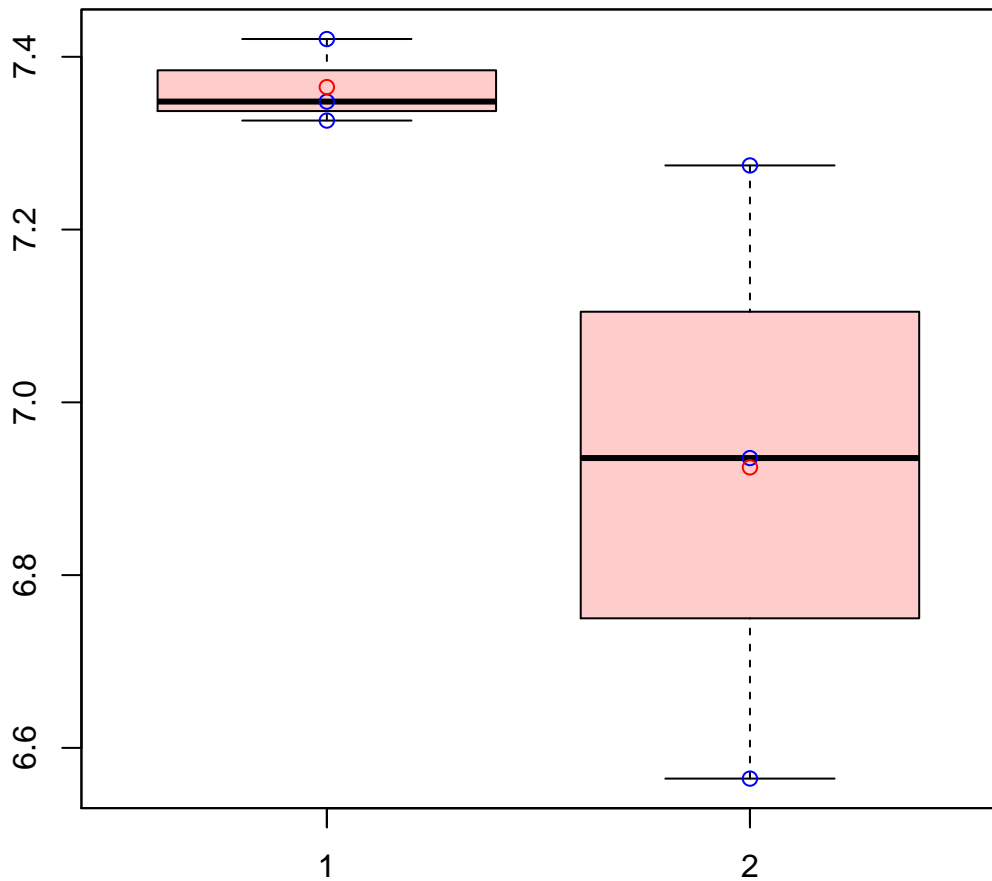

t-Test: p-value = 0.16

# M0T7L8|M0T7L8\_MUSAM

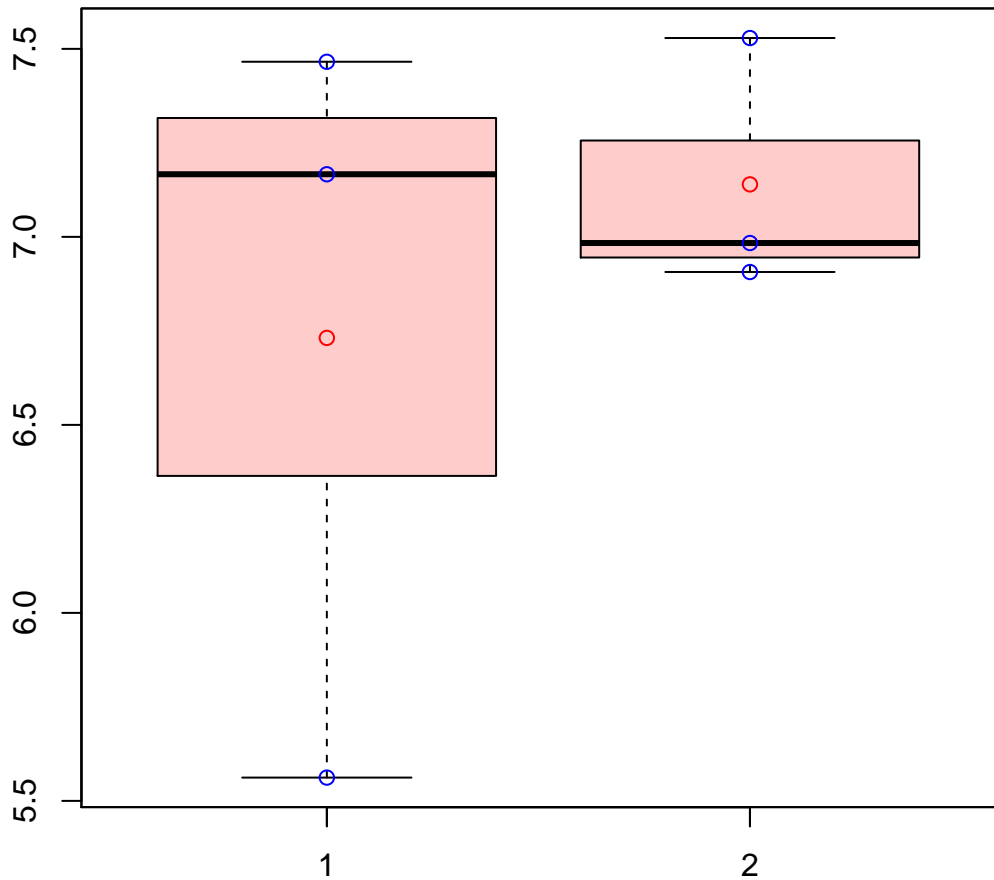

t-Test: p-value = 0.57

# M0T7P0|M0T7P0\_MUSAM

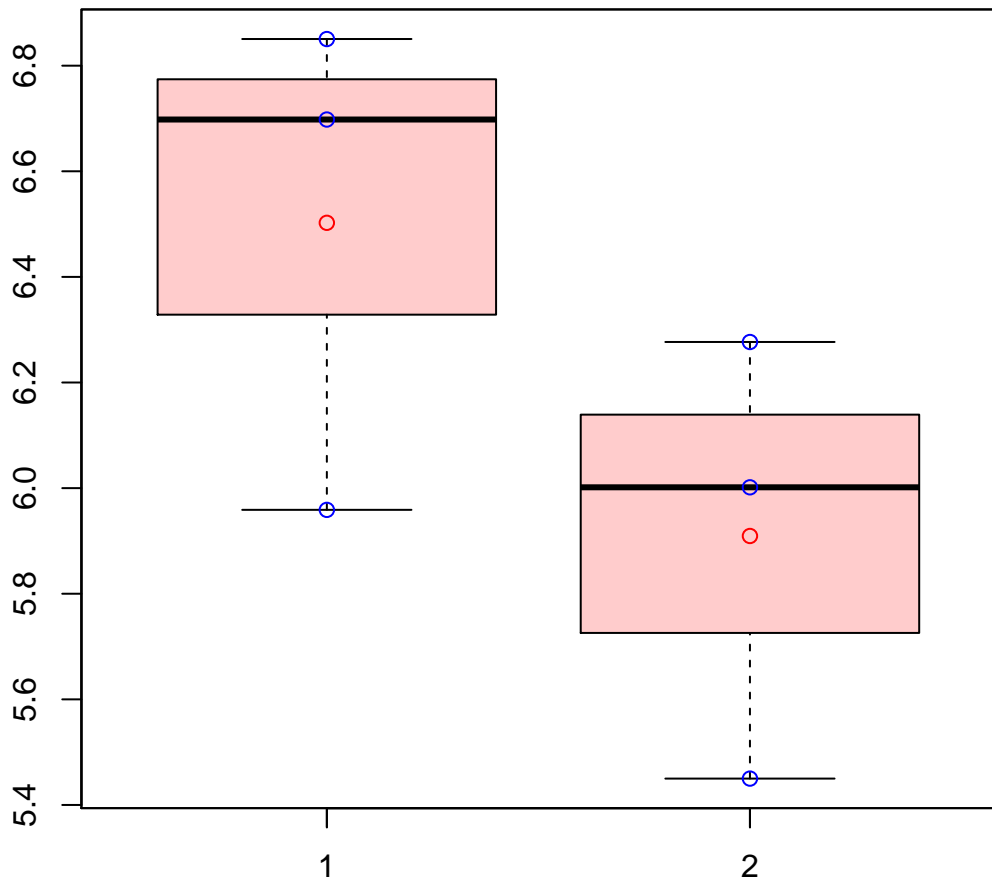

t-Test: p-value = 0.18

# M0T7Y8|M0T7Y8\_MUSAM

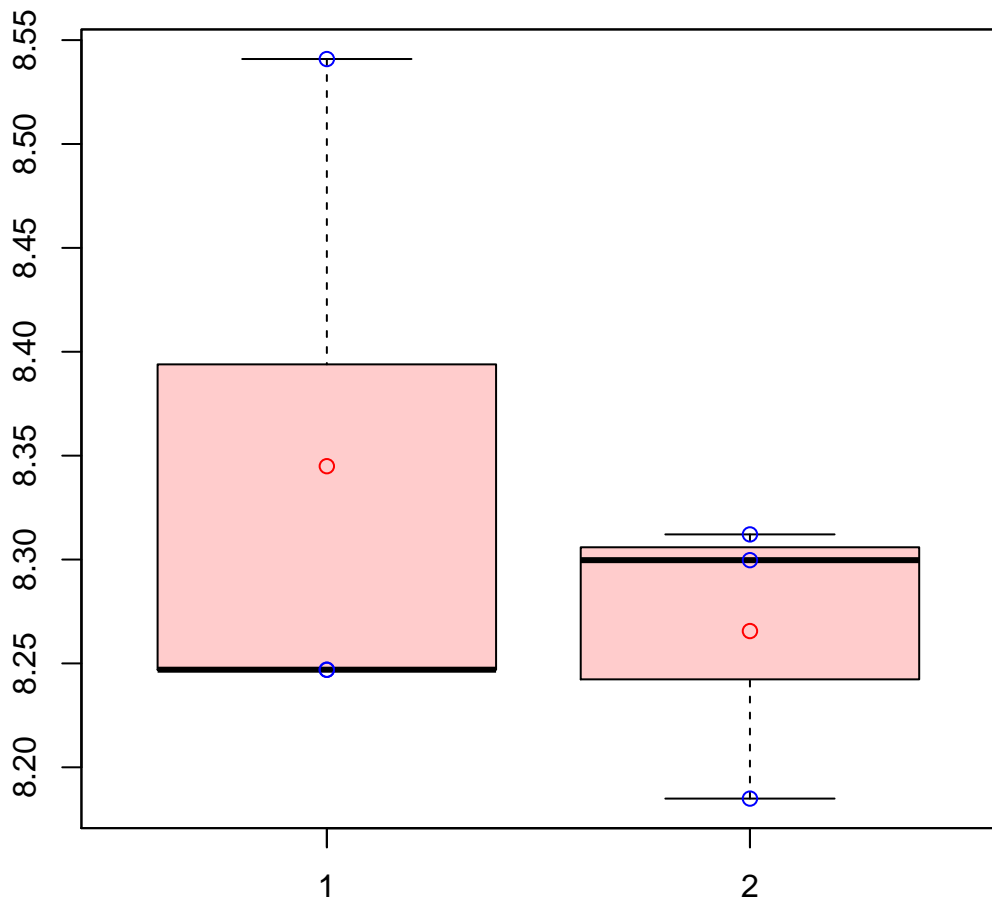

t-Test: p-value = 0.51

# M0T8D1|M0T8D1\_MUSAM

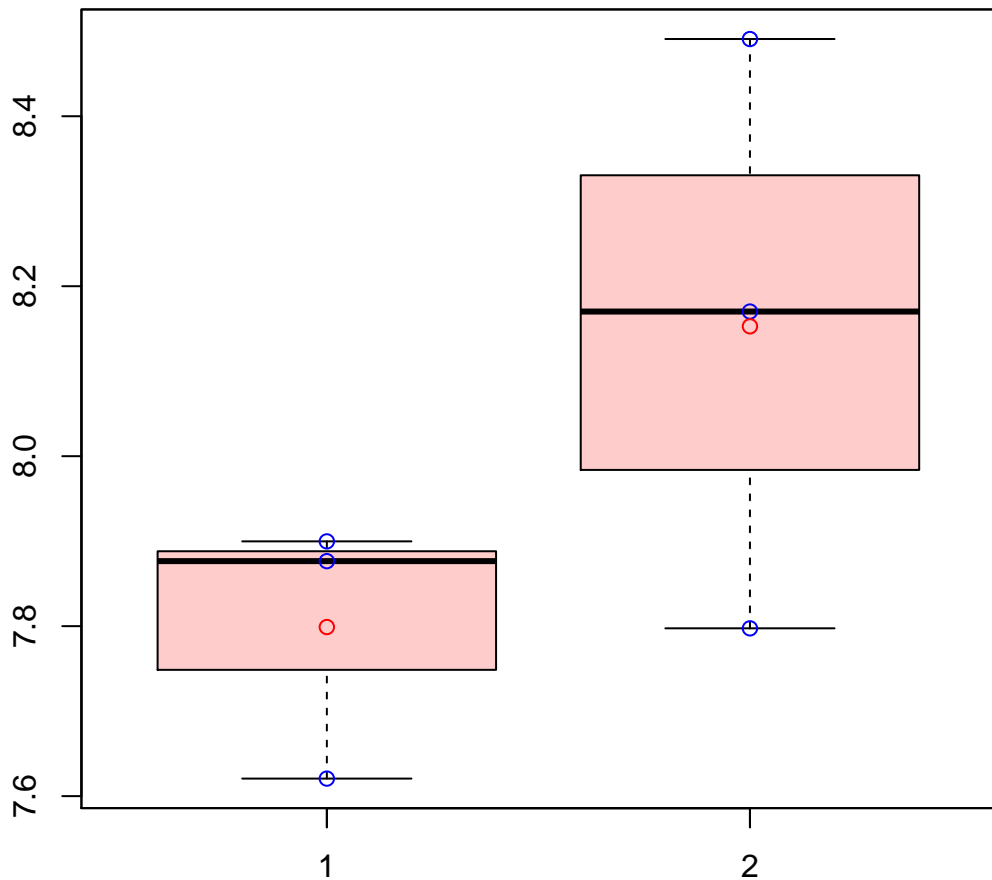

t-Test: p-value = 0.21

# M0T8I6|M0T8I6\_MUSAM

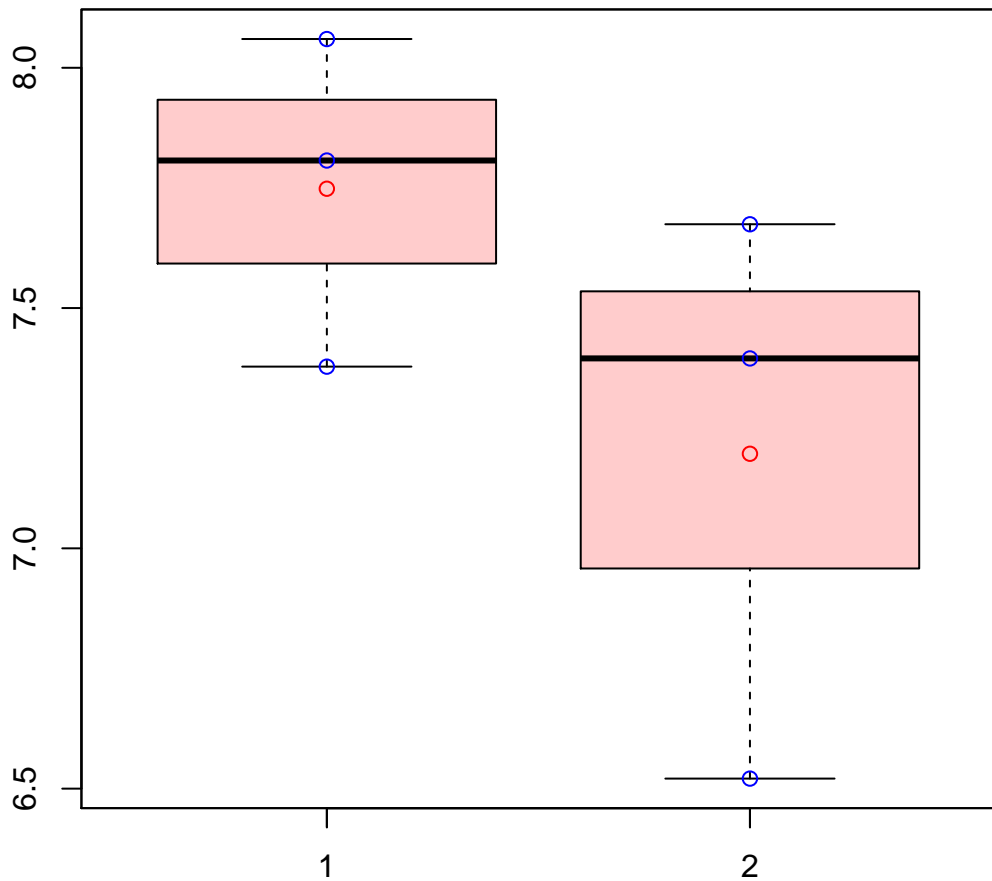

t-Test: p-value = 0.26



# M0T8J4|M0T8J4\_MUSAM

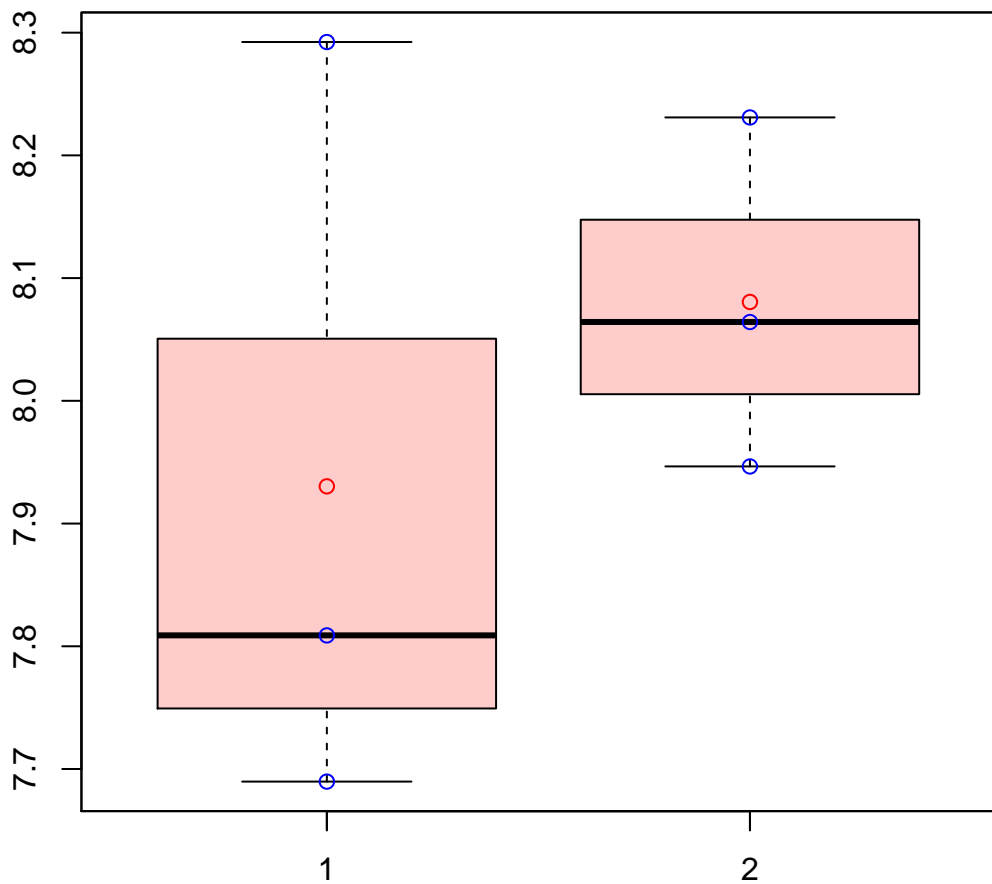

t-Test: p-value = 0.51

# M0T8W2|M0T8W2\_MUSAM

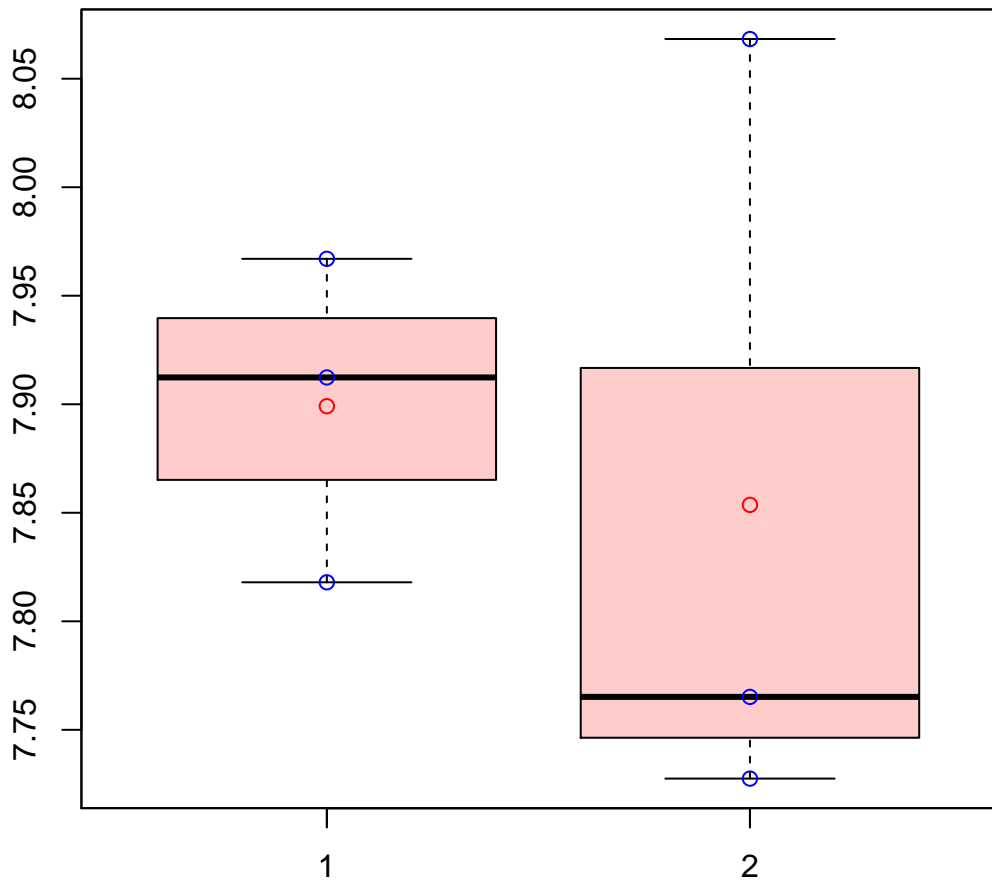

t-Test: p-value = 0.73

# M0T9A0|M0T9A0\_MUSAM

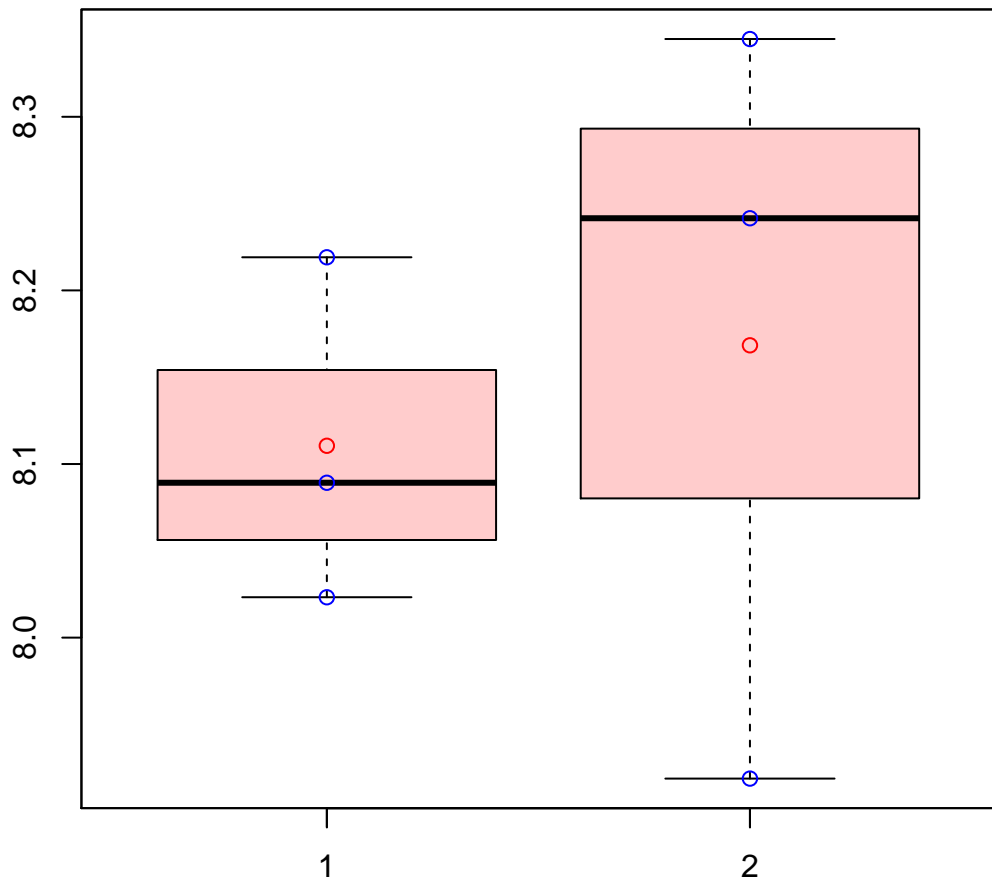

t-Test: p-value = 0.71

# M0T9G2|M0T9G2\_MUSAM

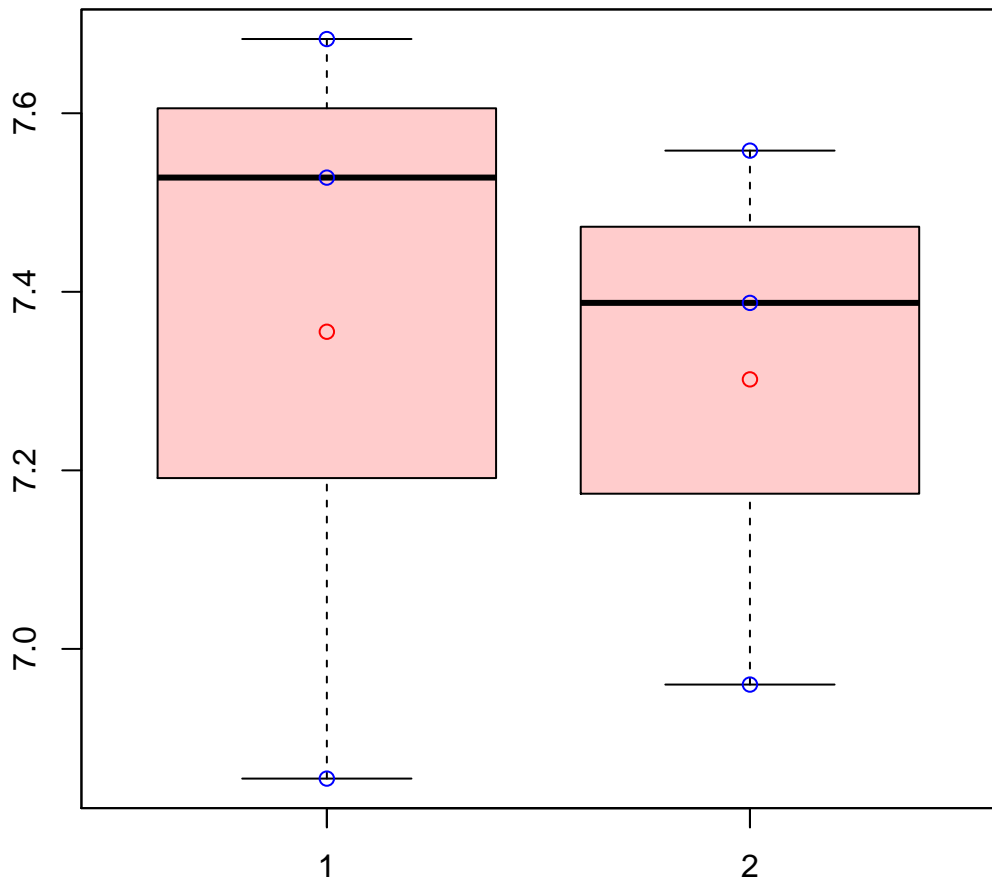

t-Test: p-value = 0.87

# M0T9Q4|M0T9Q4\_MUSAM

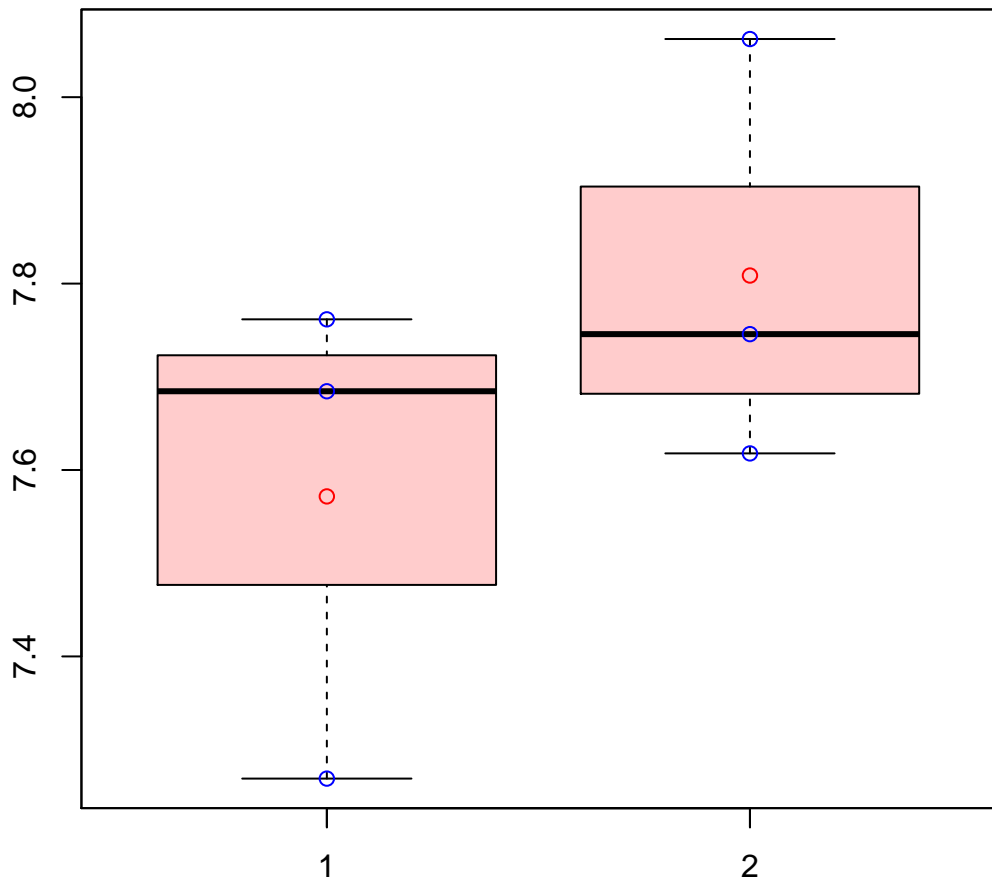

t-Test: p-value = 0.31

# M0TAI1|M0TAI1\_MUSAM

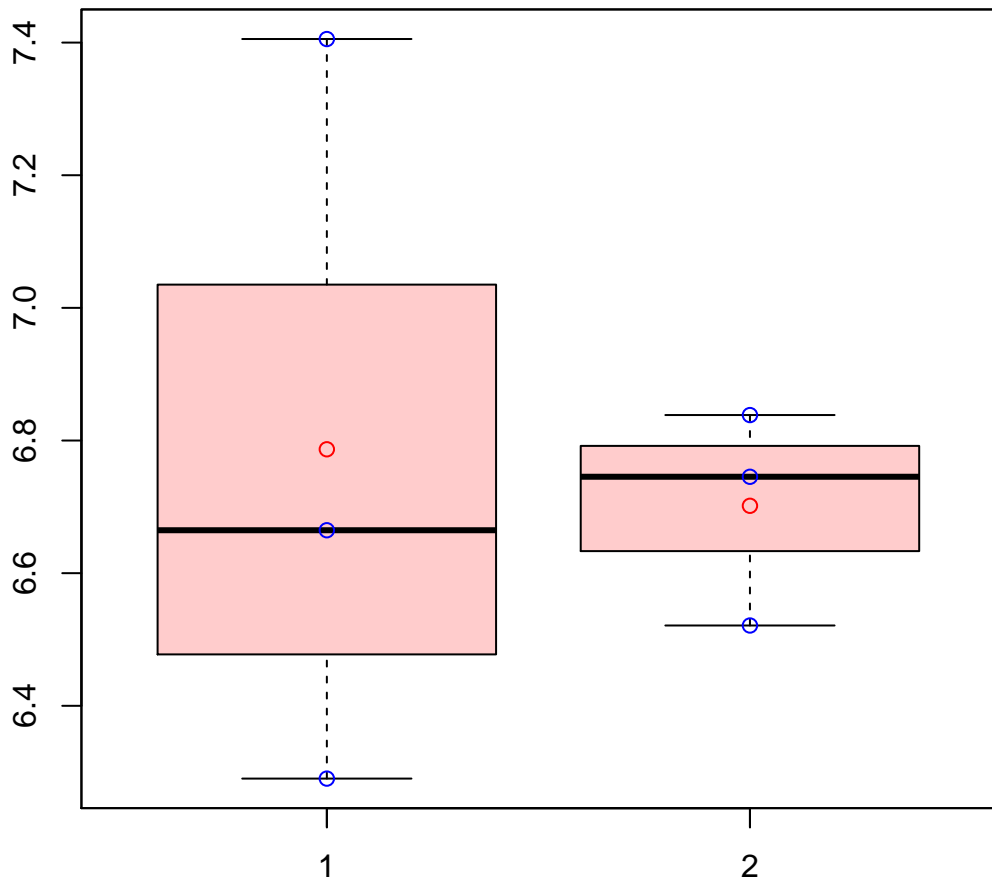

t-Test: p-value = 0.82

# M0TAI9|M0TAI9\_MUSAM

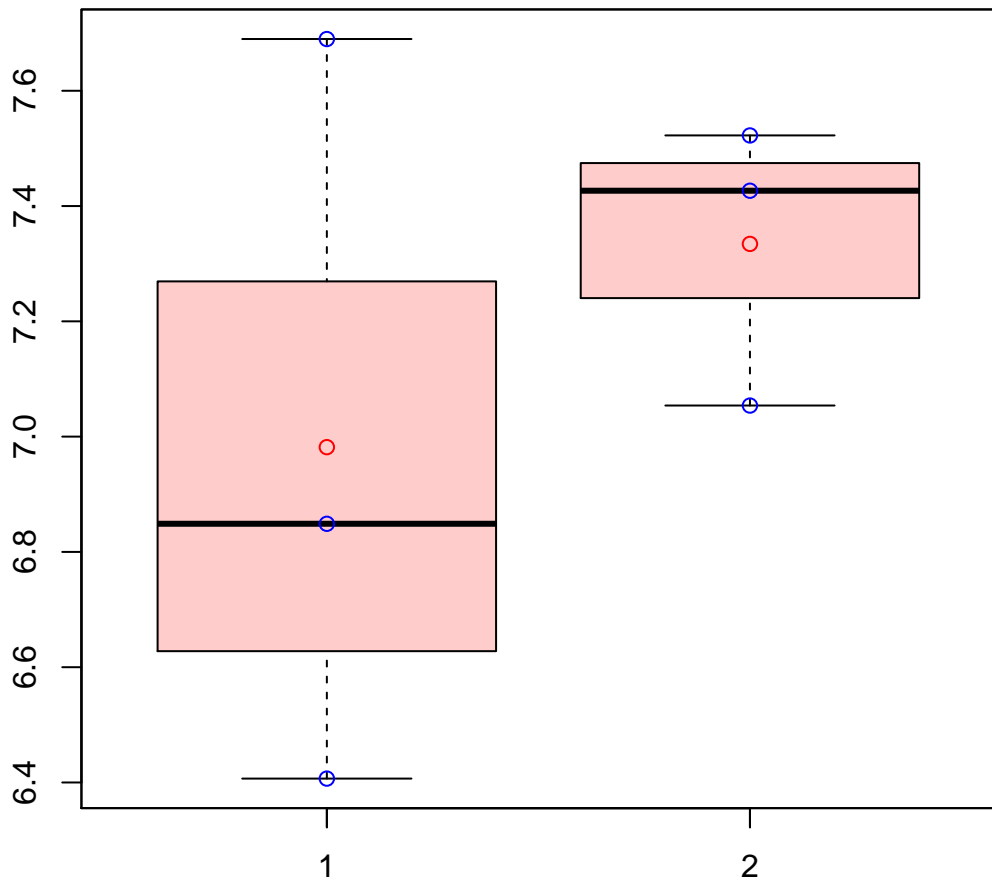

t-Test: p-value = 0.46

# M0TAJ3|M0TAJ3\_MUSAM

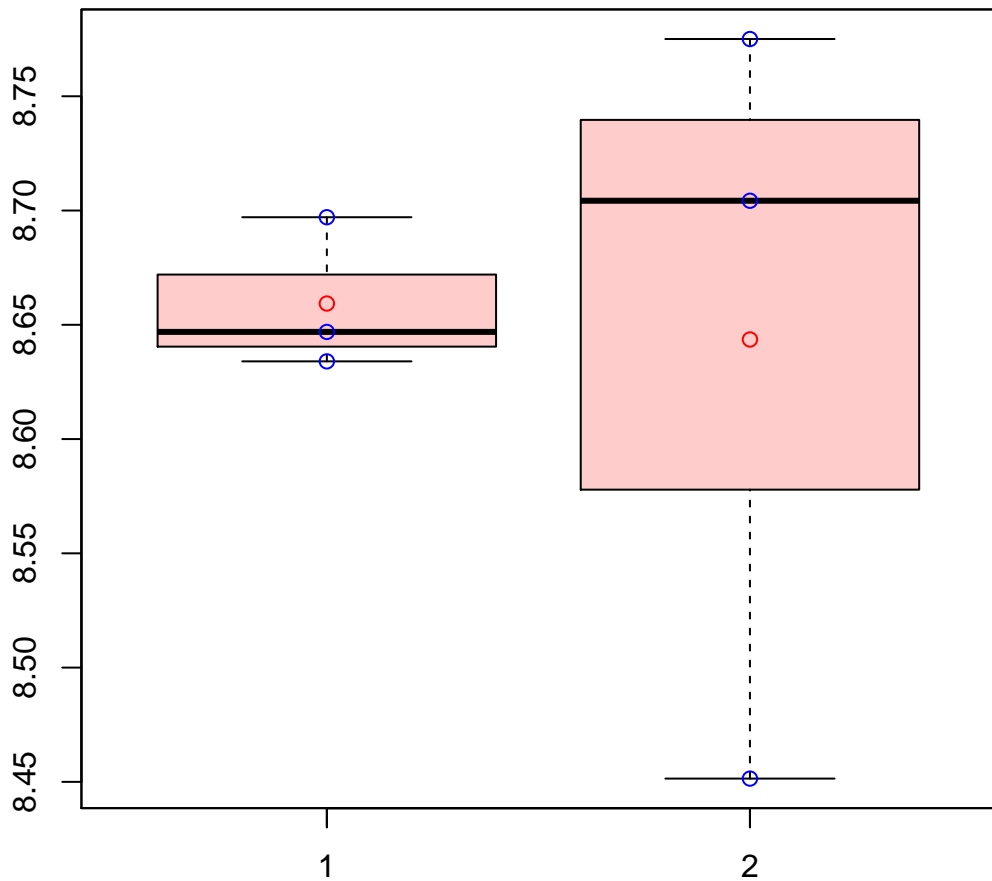

t-Test: p-value = 0.89



# M0TC33|M0TC33\_MUSAM

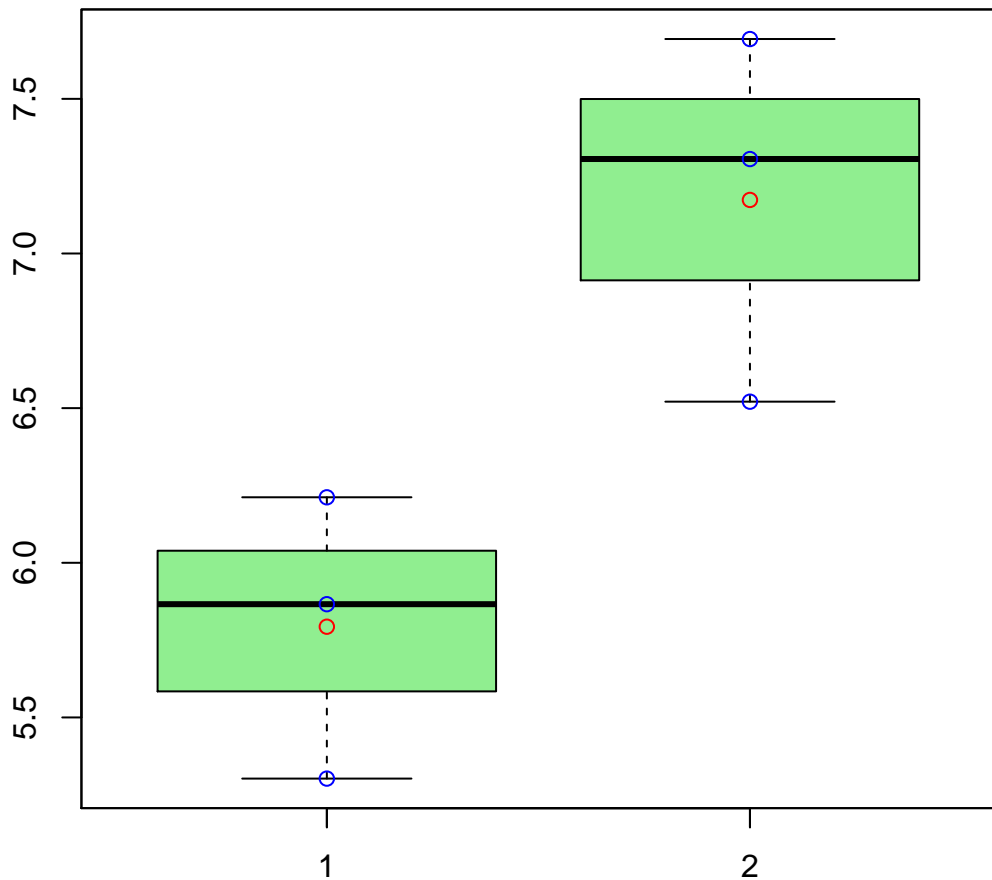

t-Test: p-value = 0.04

# M0TCG9|M0TCG9\_MUSAM

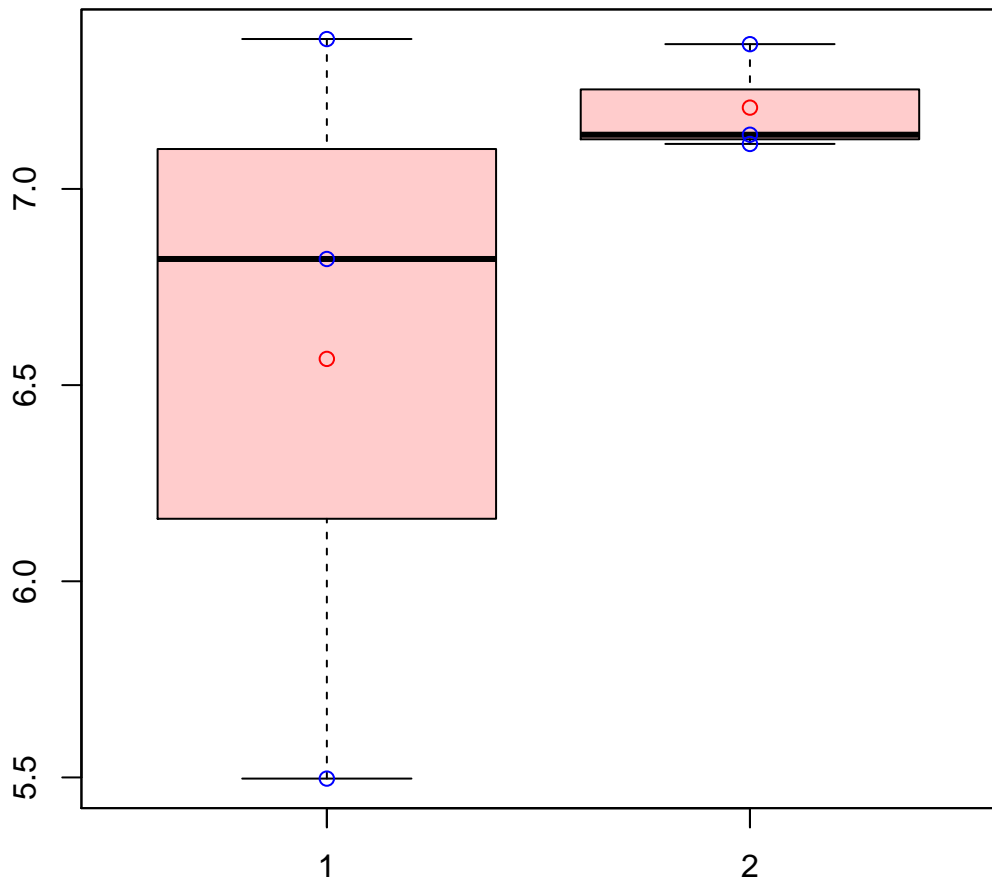

t-Test: p-value = 0.37

# M0TCW4|M0TCW4\_MUSAM

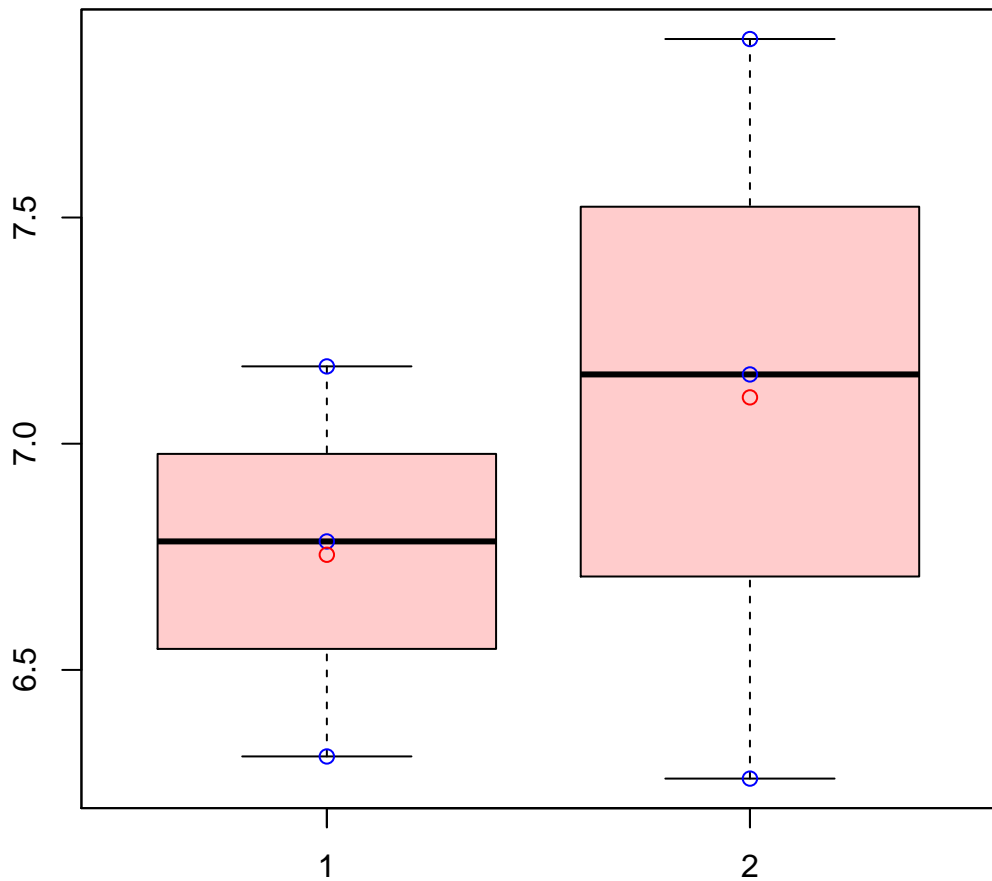

t-Test: p-value = 0.56

# M0TCX9|M0TCX9\_MUSAM

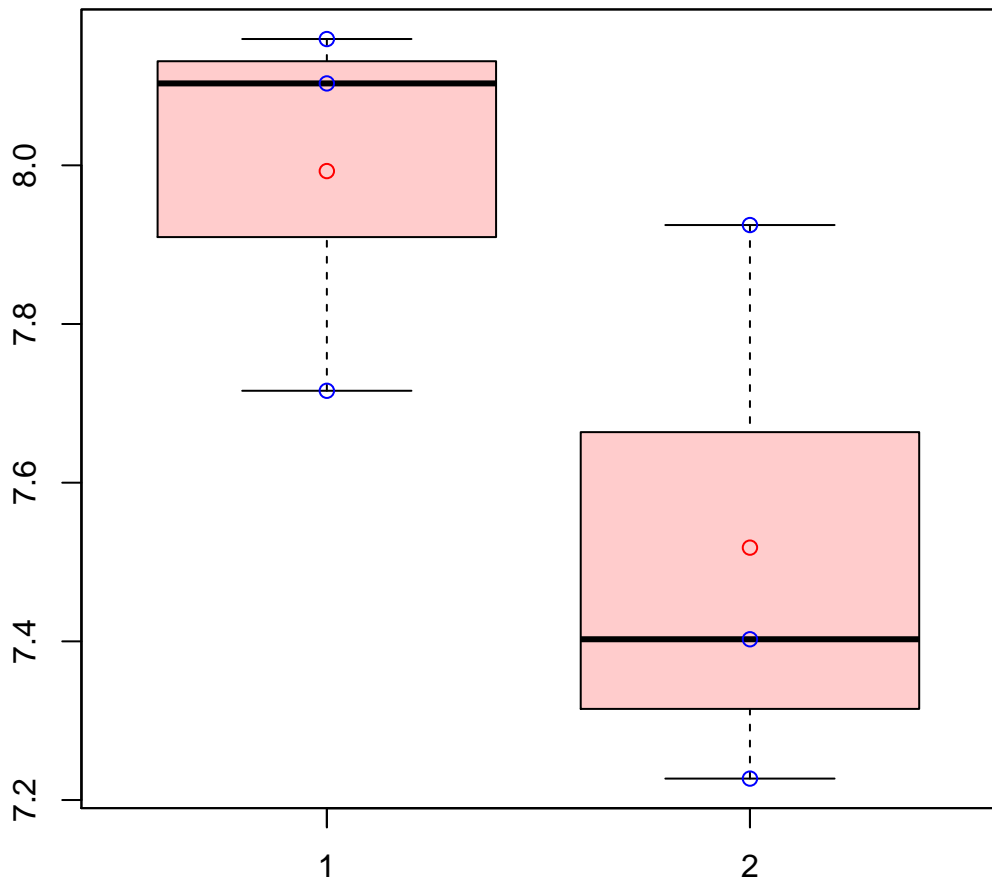

t-Test: p-value = 0.14

# M0TD77|M0TD77\_MUSAM

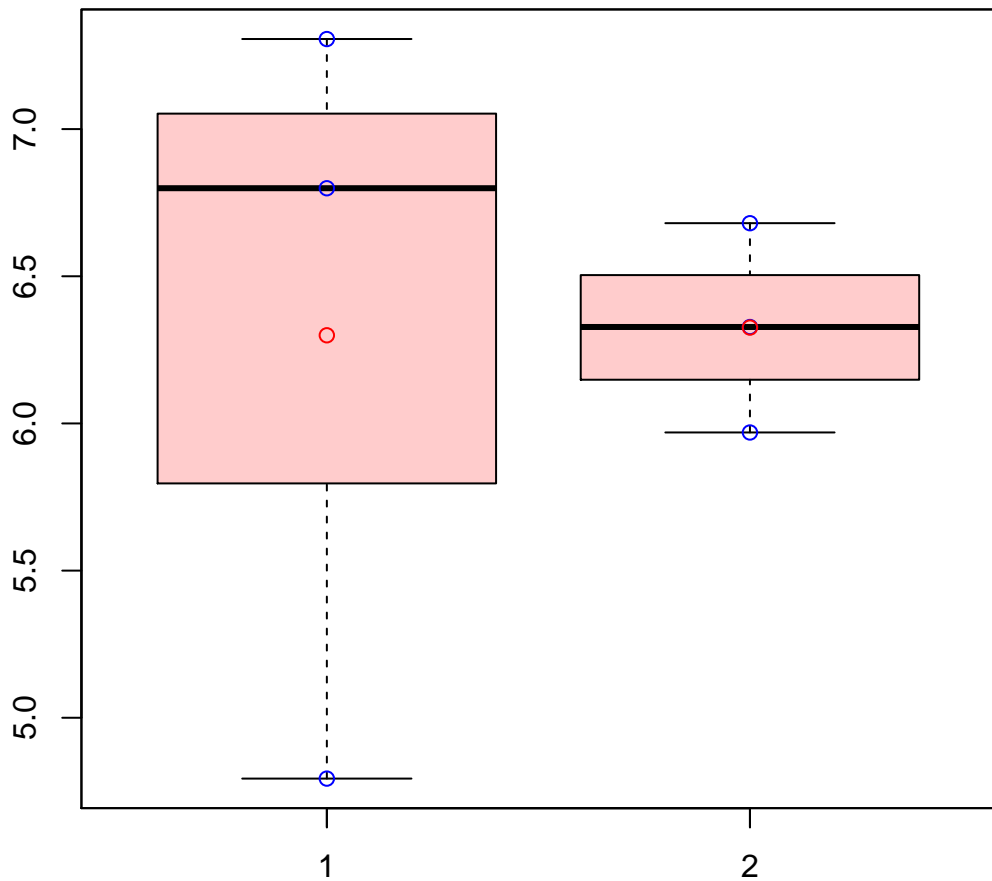

t-Test: p-value = 0.98

# M0TDJ2|M0TDJ2\_MUSAM

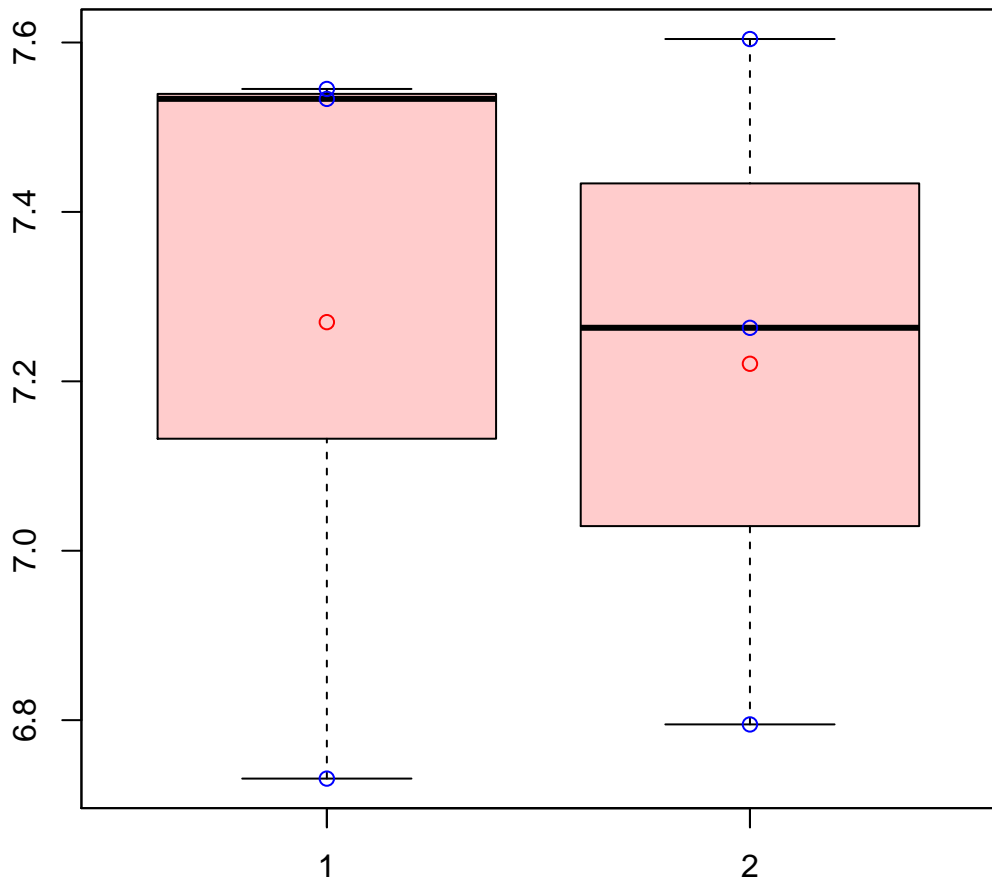

t-Test: p-value = 0.9

# M0TDJ5|M0TDJ5\_MUSAM

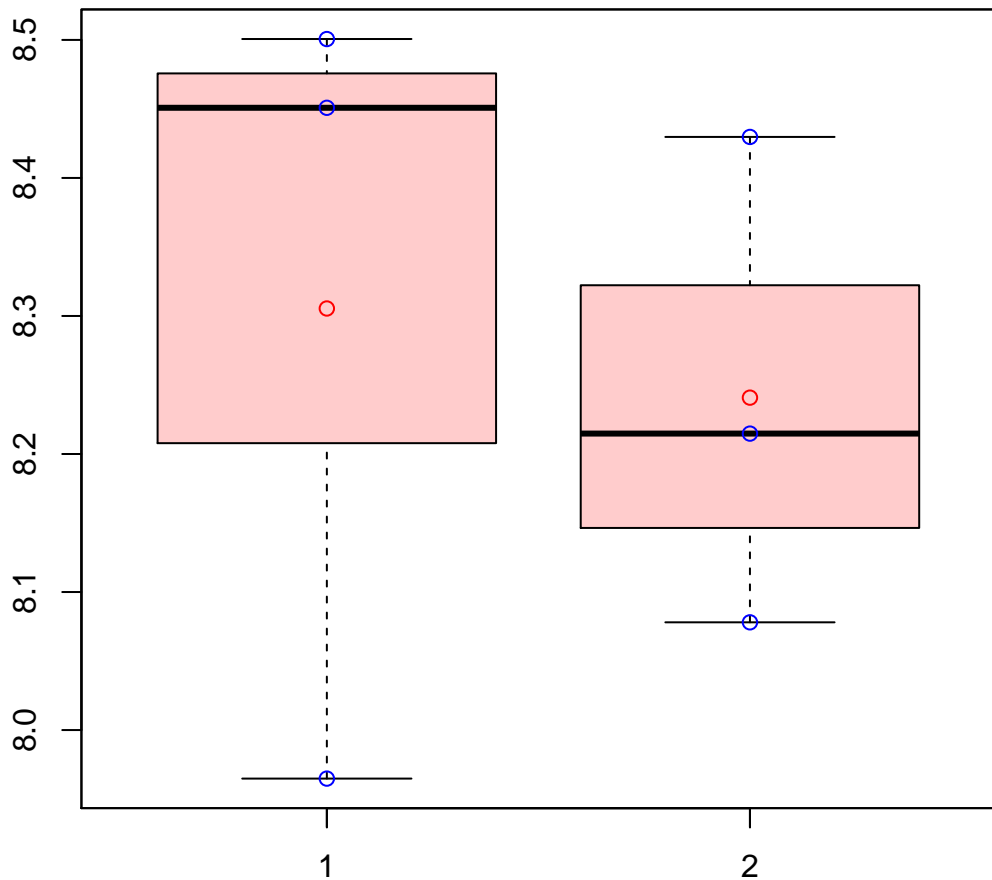

t-Test: p-value = 0.77

# M0TE03|M0TE03\_MUSAM

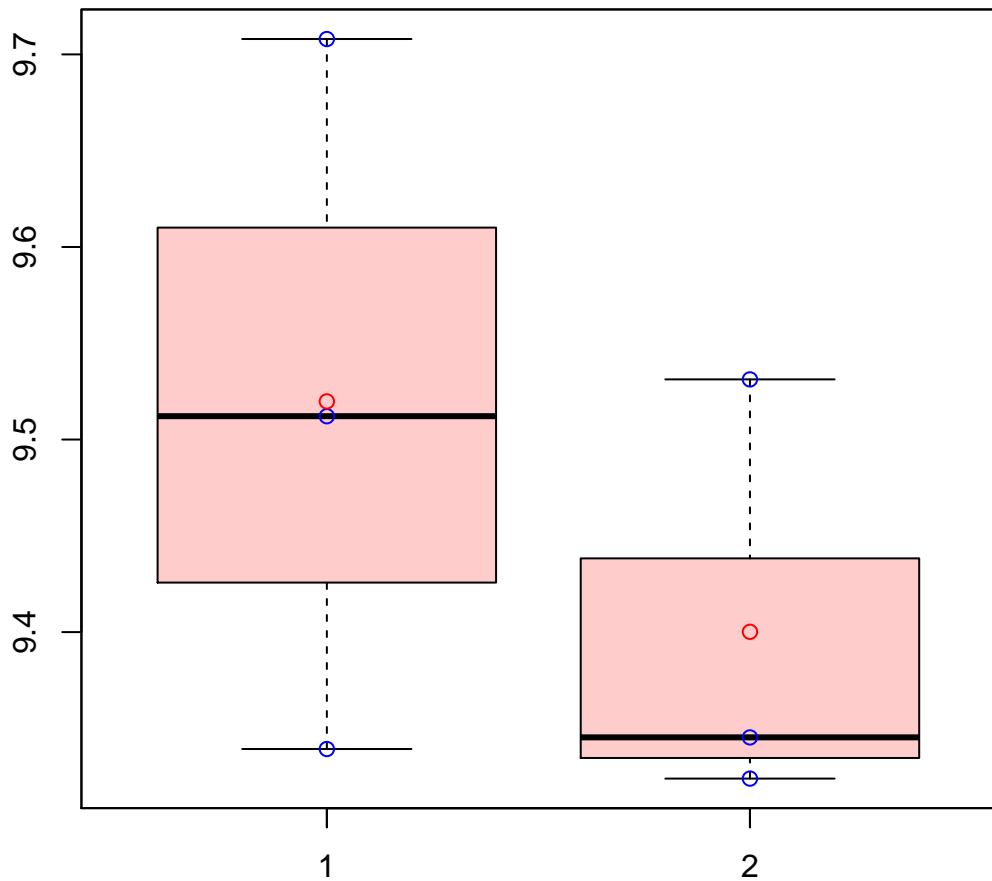

t-Test: p-value = 0.4



# M0TEP4|M0TEP4\_MUSAM

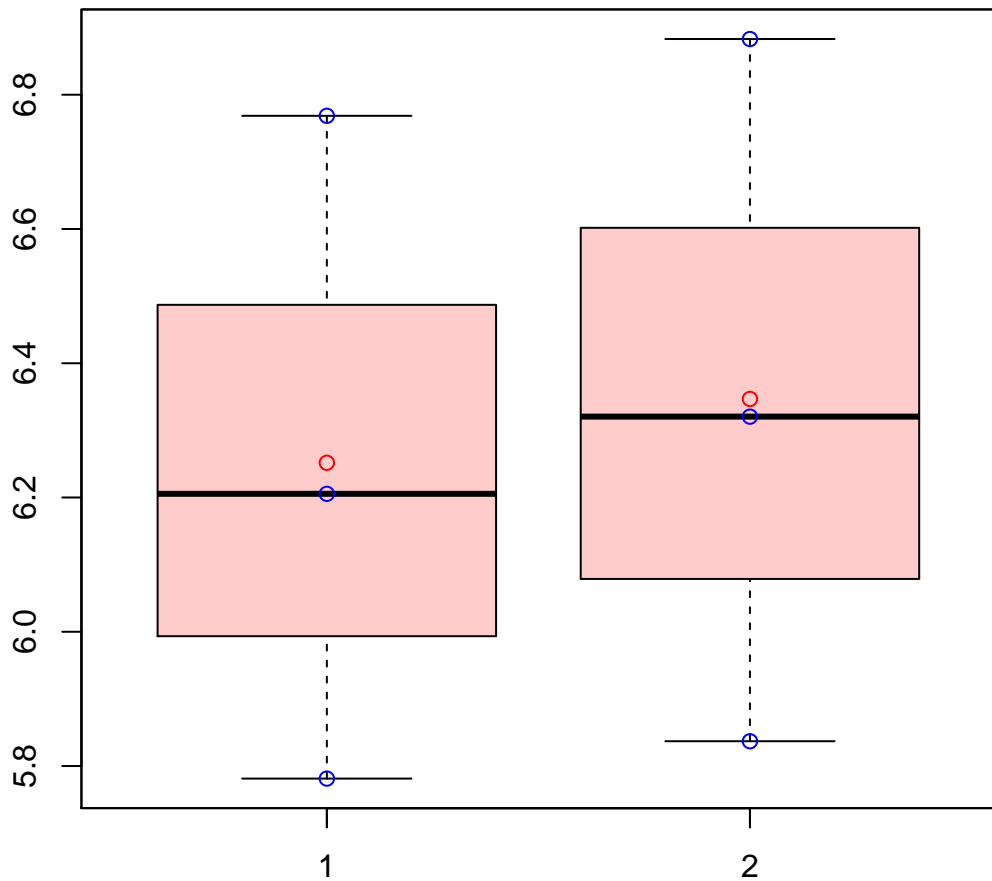

t-Test: p-value = 0.83

# M0TEP9|M0TEP9\_MUSAM

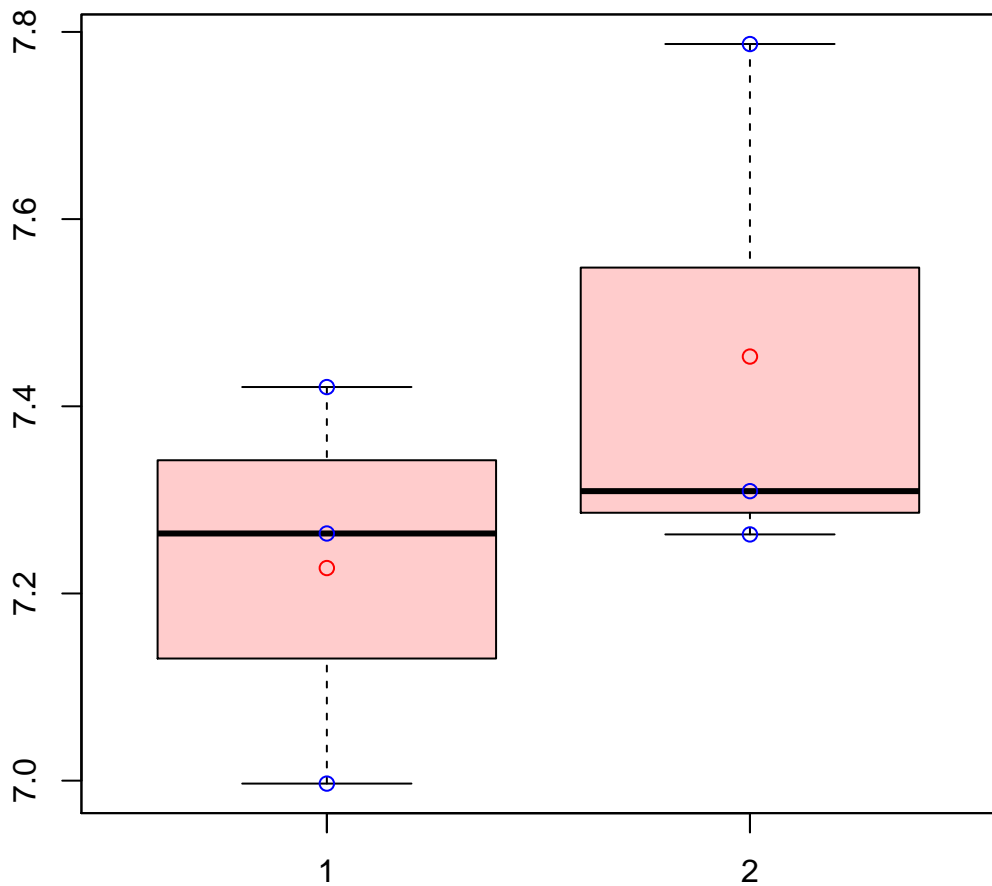

t-Test: p-value = 0.34

# M0TFC3|M0TFC3\_MUSAM

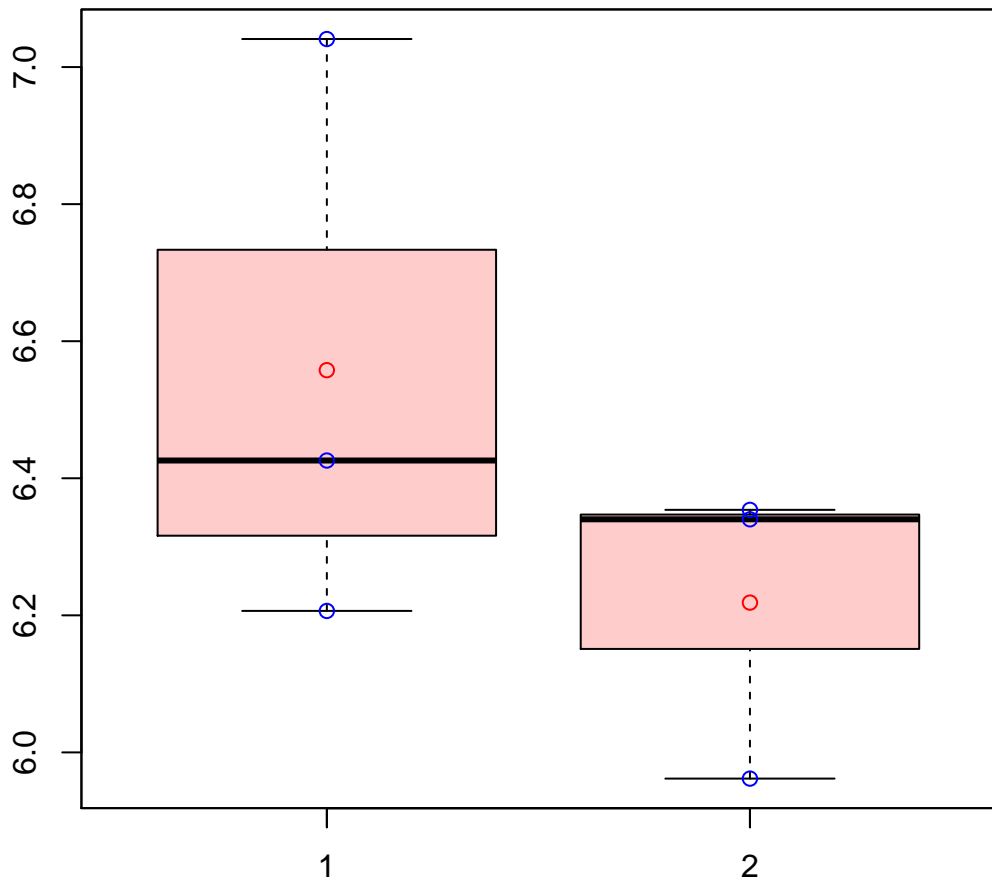

t-Test: p-value = 0.31

# M0TFQ1|M0TFQ1\_MUSAM

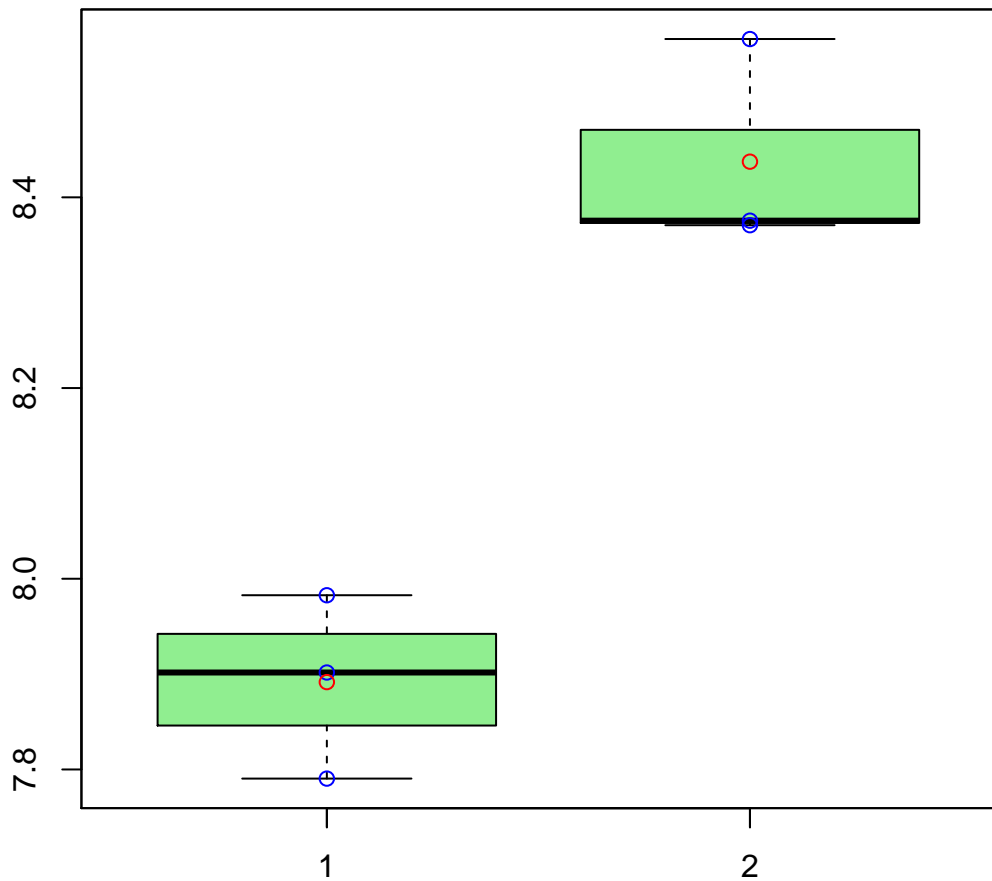

t-Test: p-value = 0

# M0TG28|M0TG28\_MUSAM

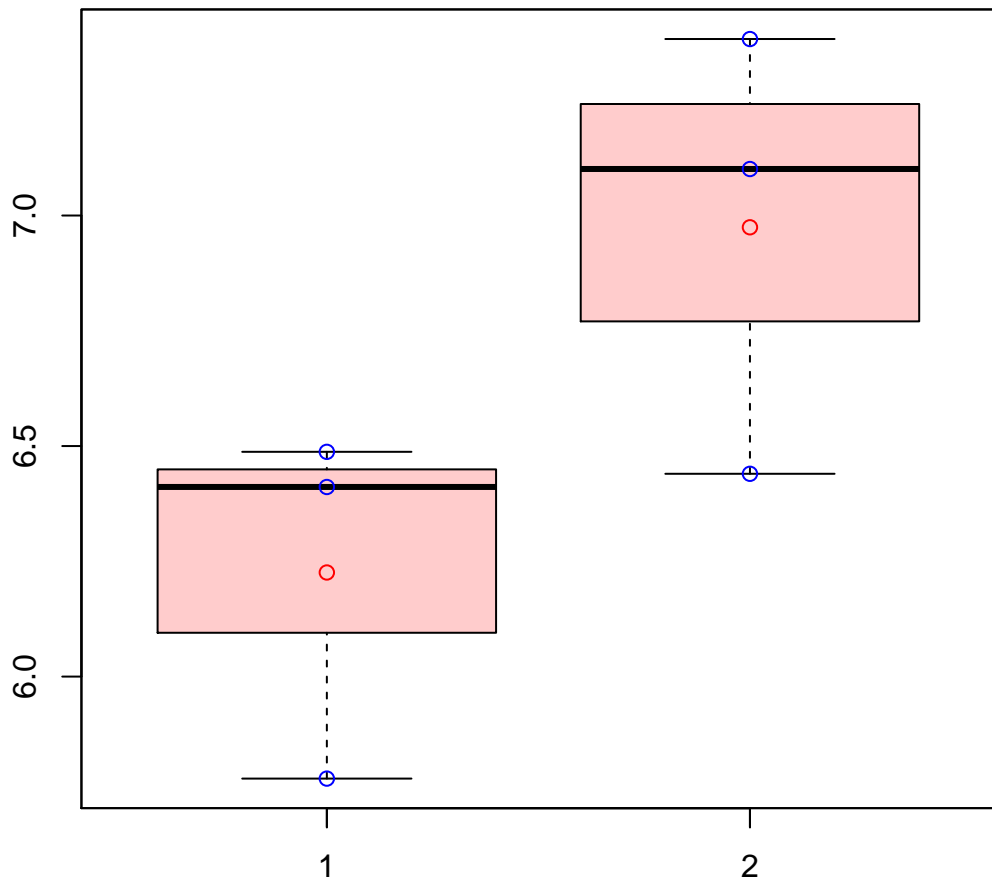

t-Test: p-value = 0.11

# M0TGP2|M0TGP2\_MUSAM

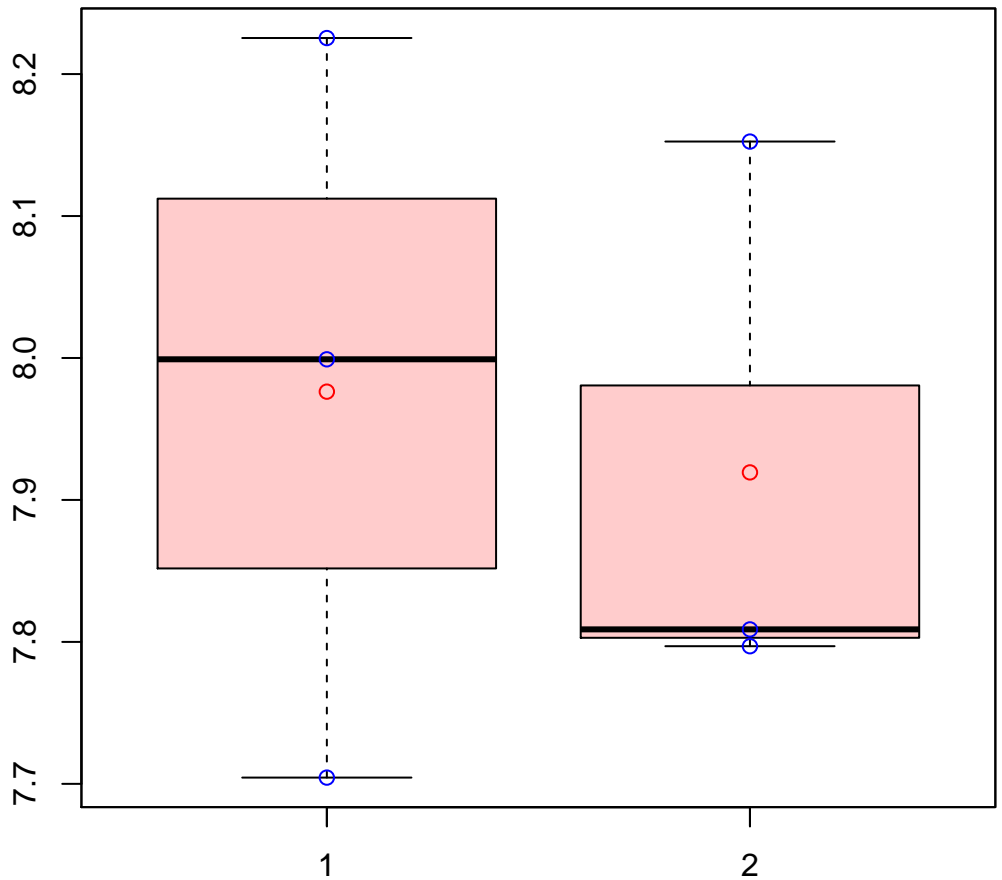

t-Test: p-value = 0.78

# M0TH42|M0TH42\_MUSAM

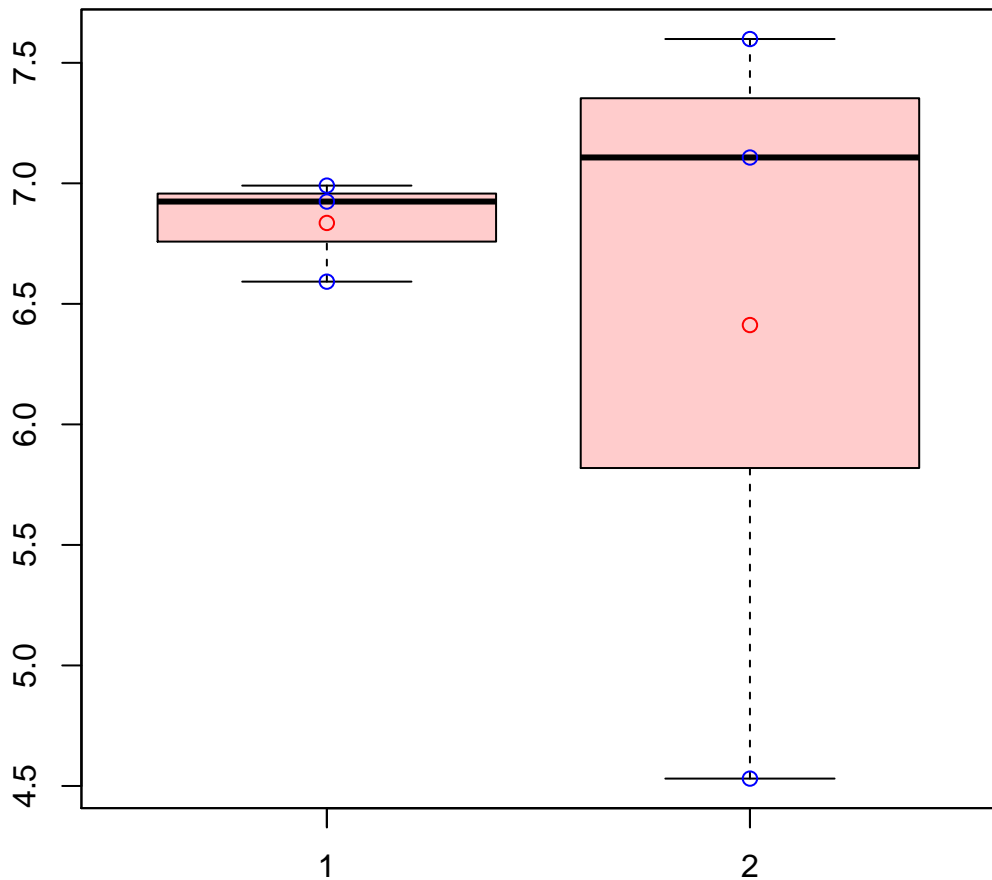

t-Test: p-value = 0.7

# M0TH70|M0TH70\_MUSAM

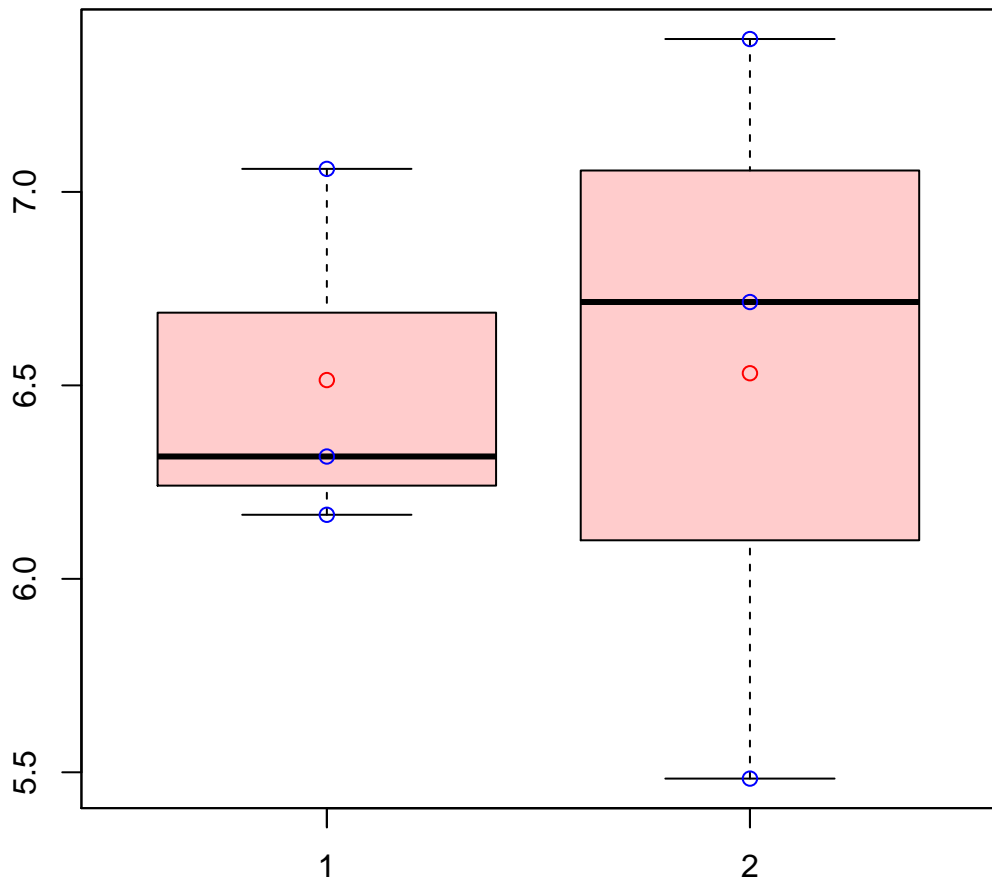

t-Test: p-value = 0.98



# M0THE6|M0THE6\_MUSAM

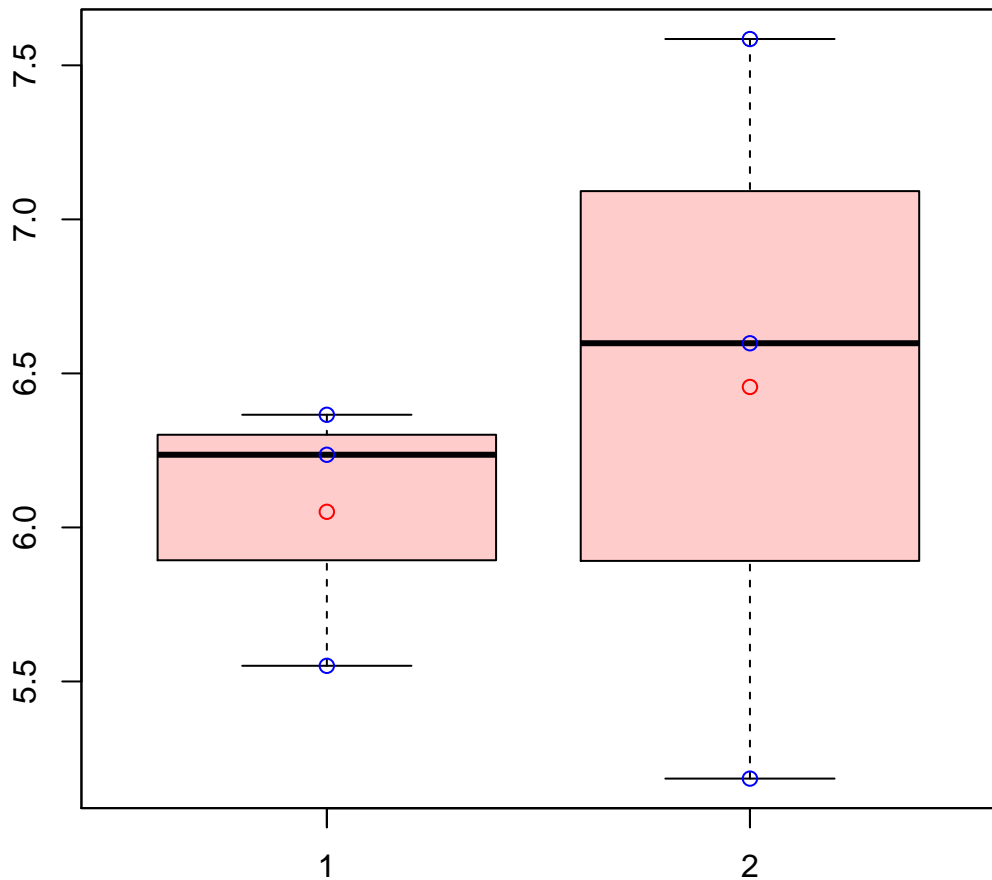

t-Test: p-value = 0.63

# M0THQ3|M0THQ3\_MUSAM

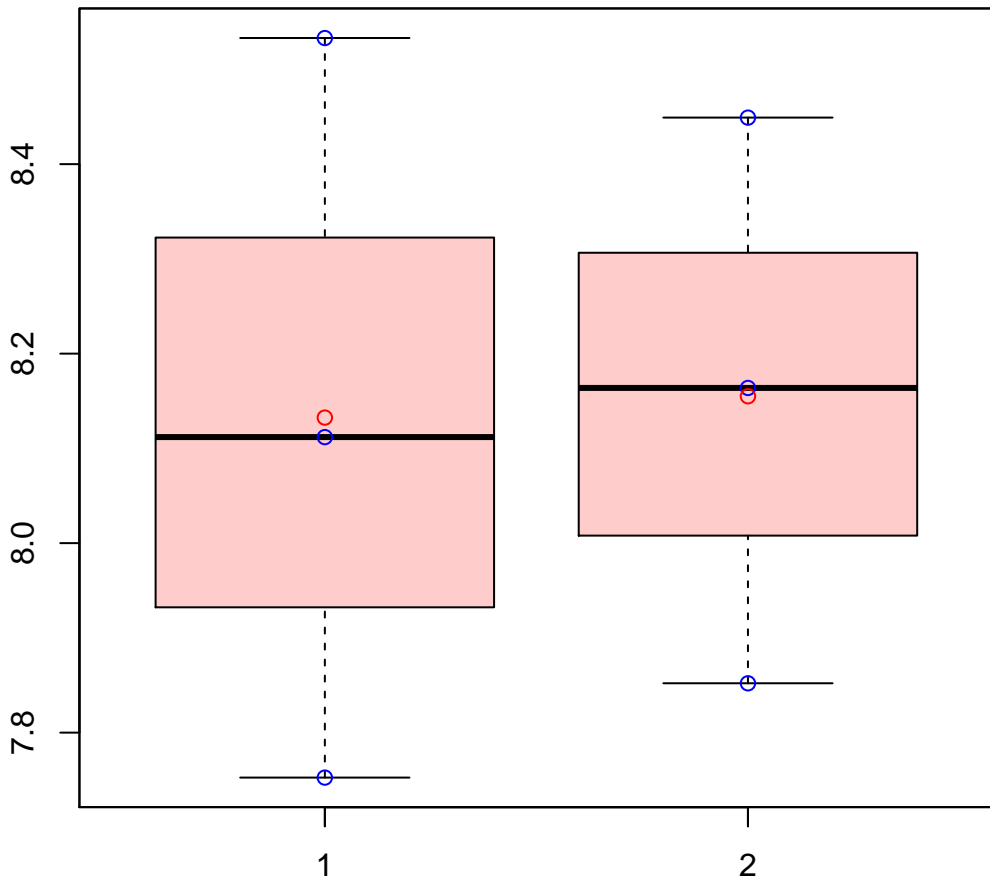

t-Test: p-value = 0.94

# M0THR3|M0THR3\_MUSAM

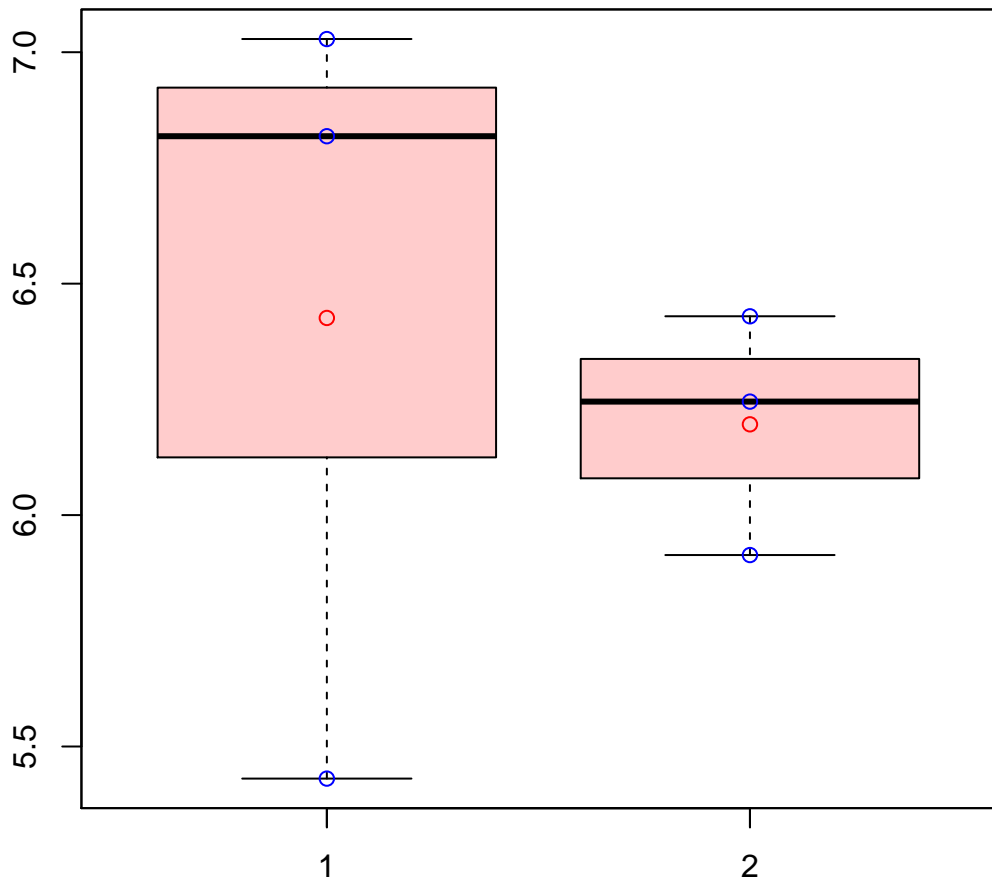

t-Test: p-value = 0.7

# M0THT8|M0THT8\_MUSAM

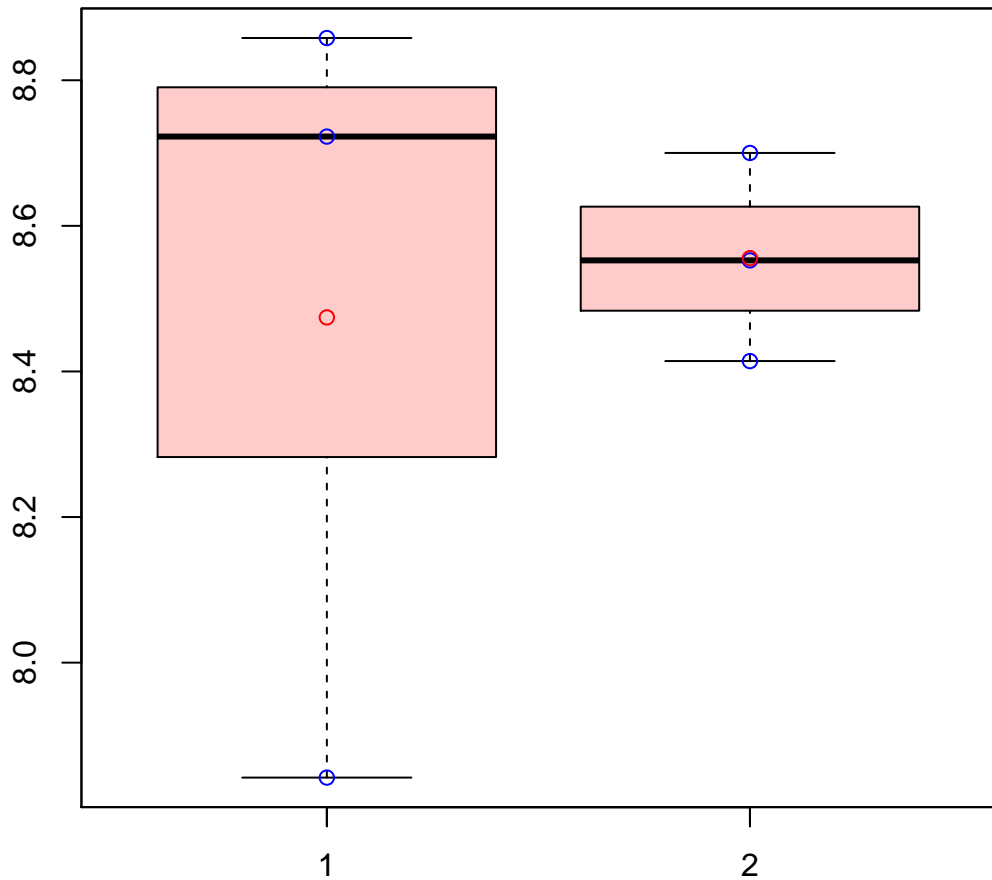

t-Test: p-value = 0.83

# M0TIE9|M0TIE9\_MUSAM

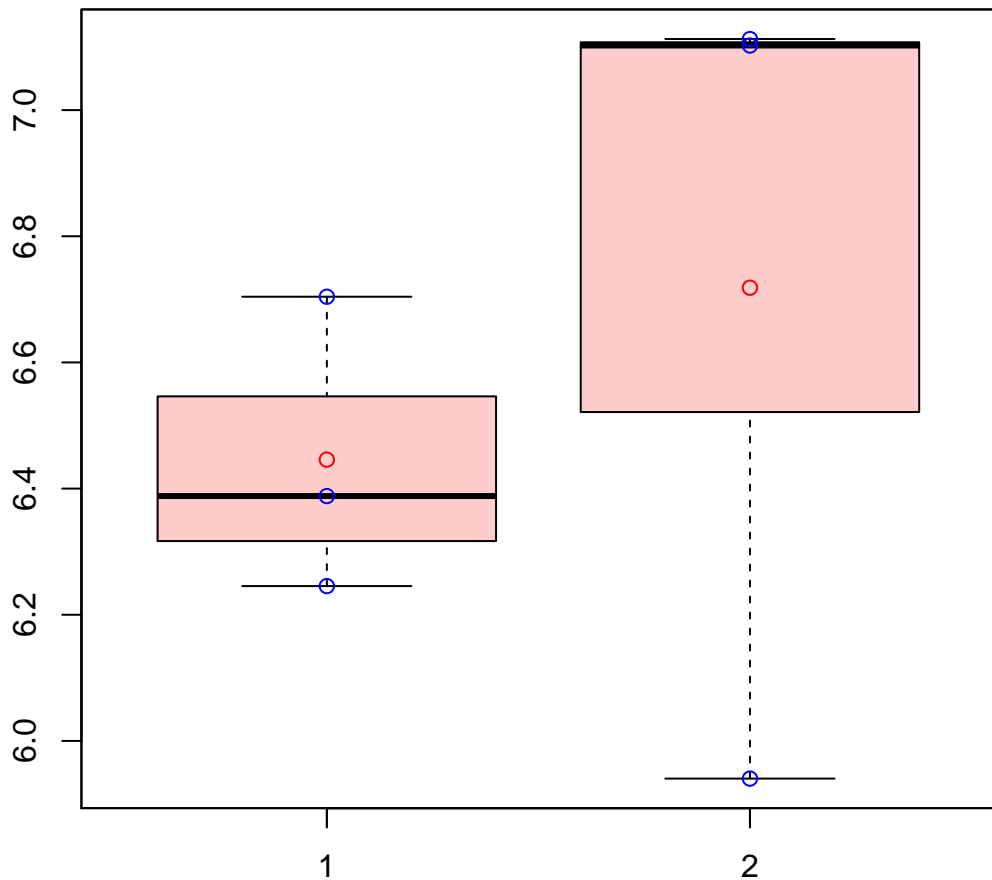

t-Test: p-value = 0.56

# M0TIG4|M0TIG4\_MUSAM

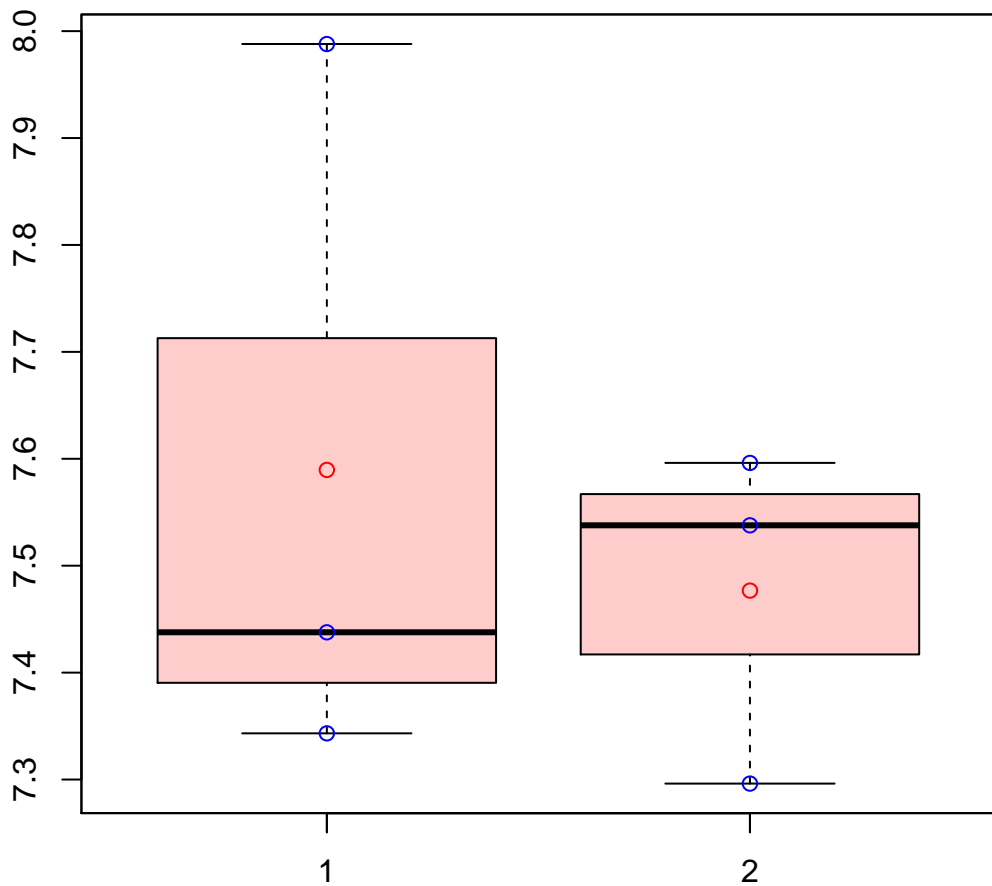

t-Test: p-value = 0.65

# MOTIK3|MOTIK3\_MUSAM

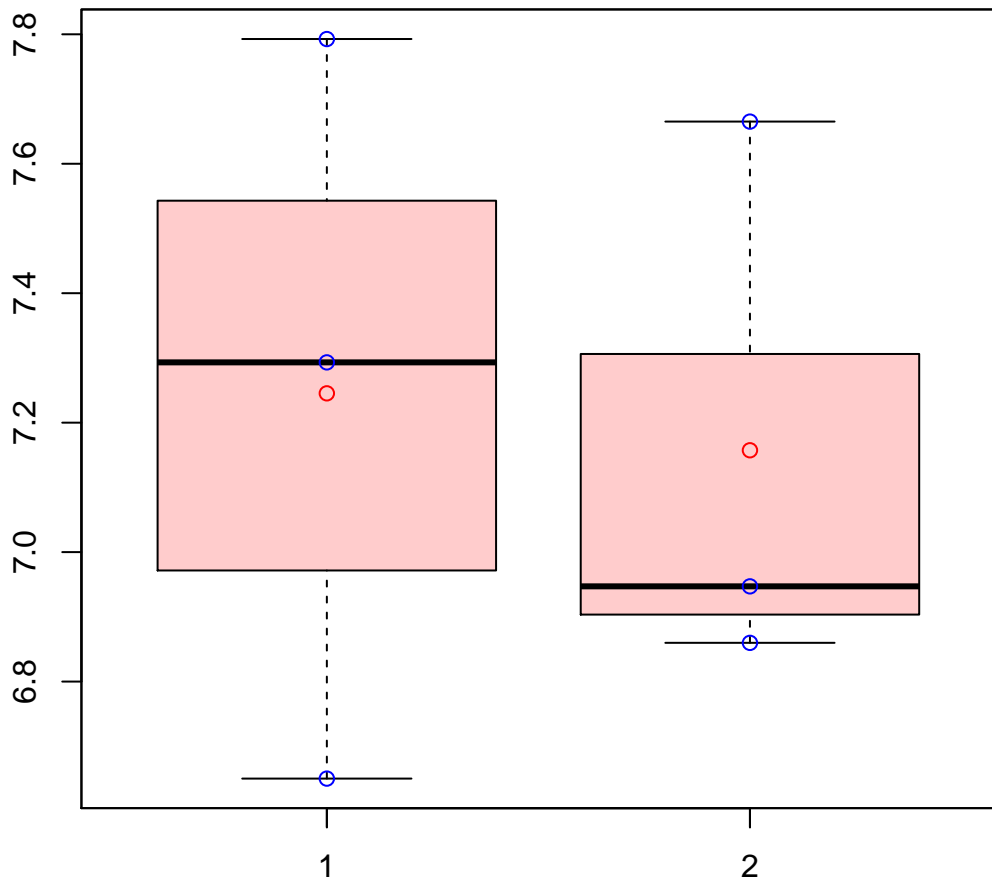

t-Test: p-value = 0.84

# MOTIS3|MOTIS3\_MUSAM

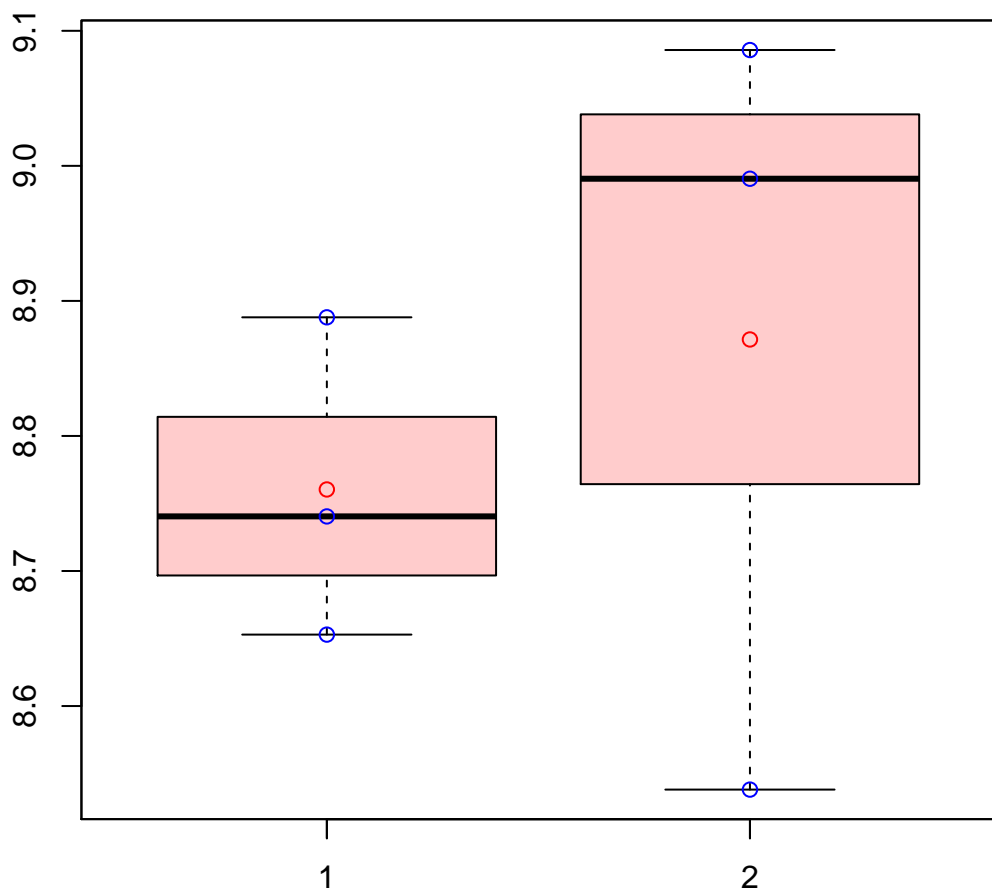

t-Test: p-value = 0.59



# M0TIW7|M0TIW7\_MUSAM

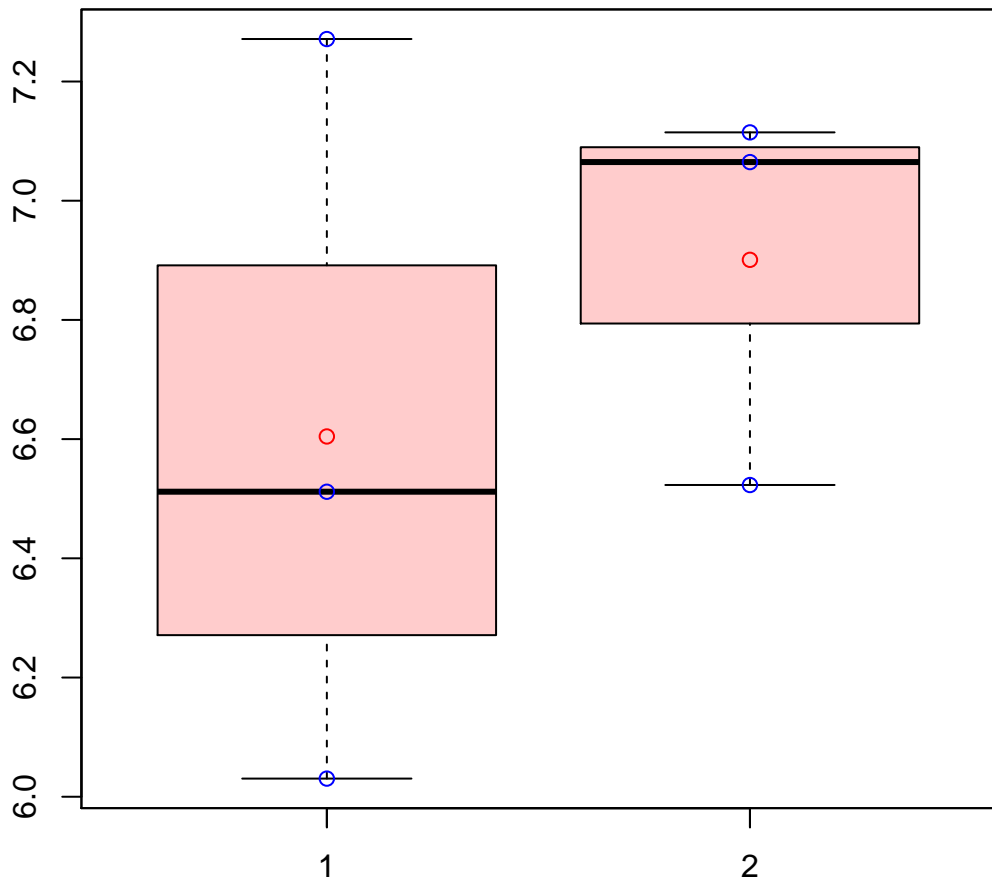

t-Test: p-value = 0.52

# MOTIX0|MOTIX0\_MUSAM

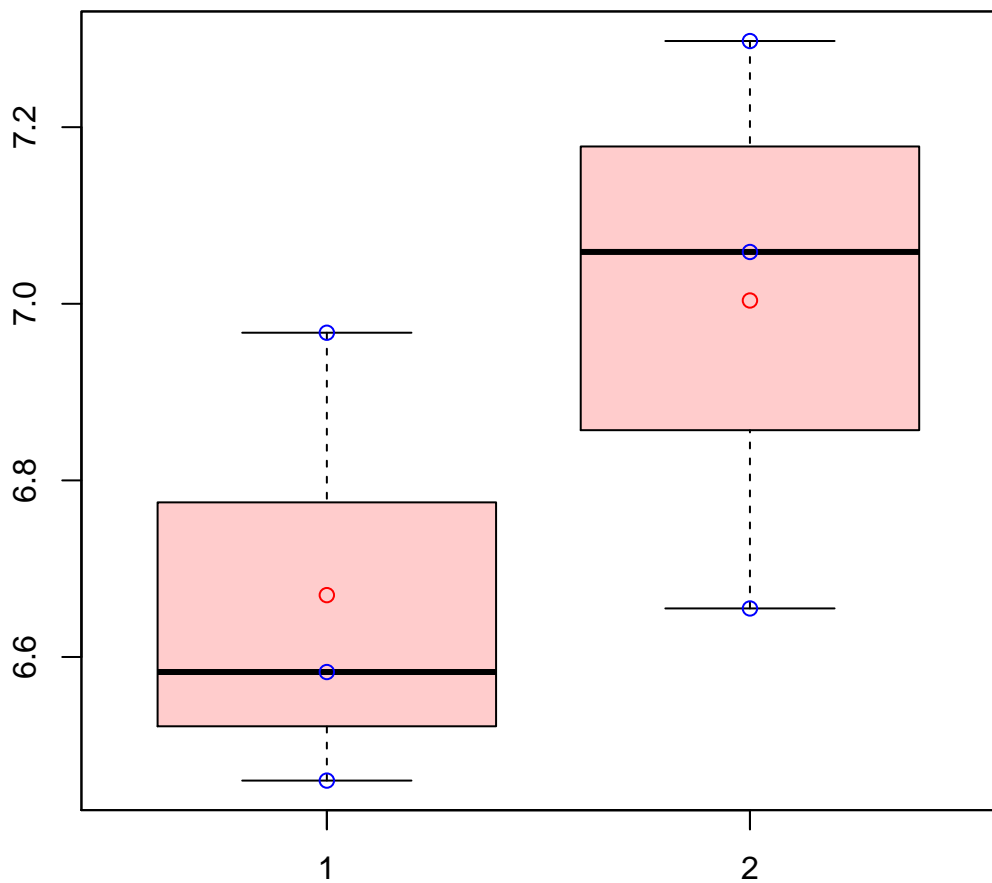

t-Test: p-value = 0.24

# M0TJ06|M0TJ06\_MUSAM

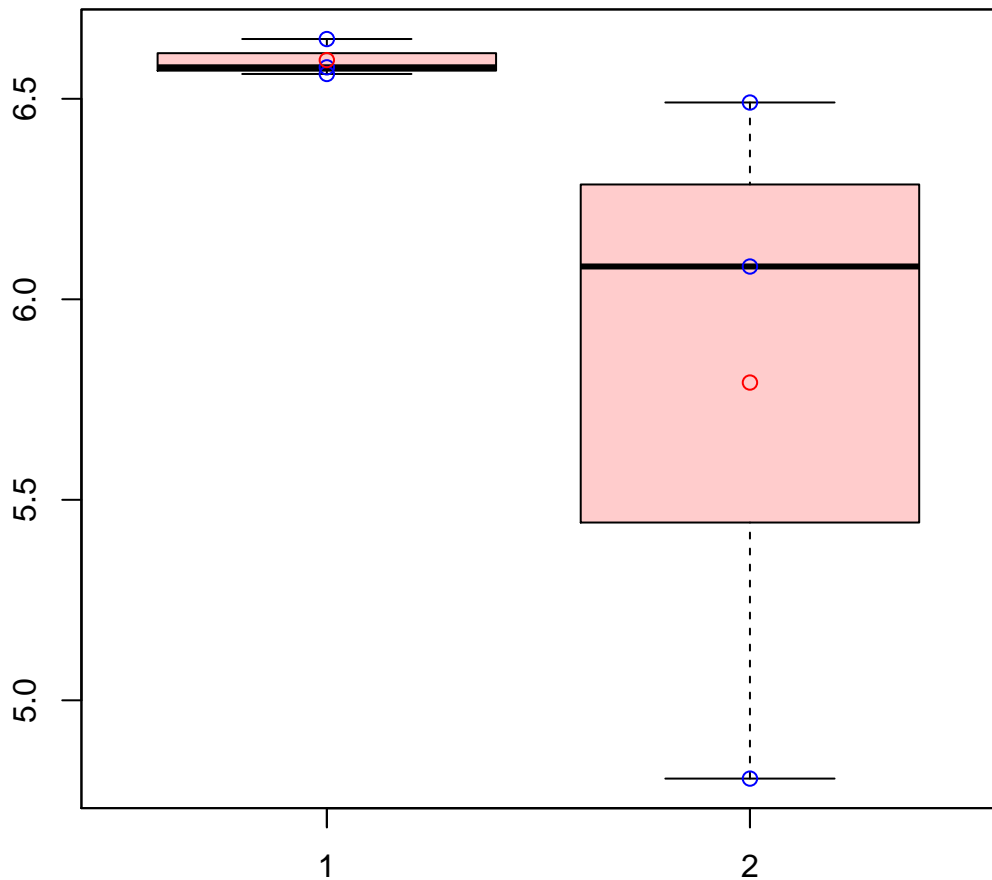

t-Test: p-value = 0.25

# M0TJC4|M0TJC4\_MUSAM

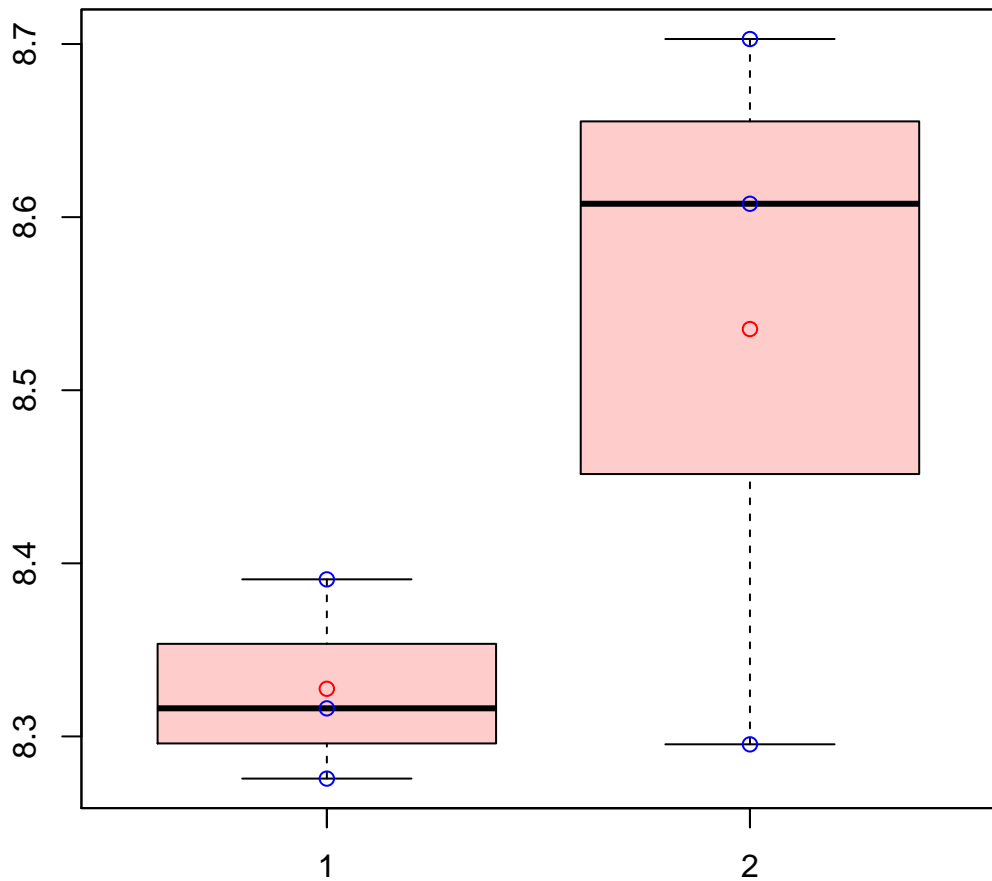

t-Test: p-value = 0.23

# M0TJM5|M0TJM5\_MUSAM

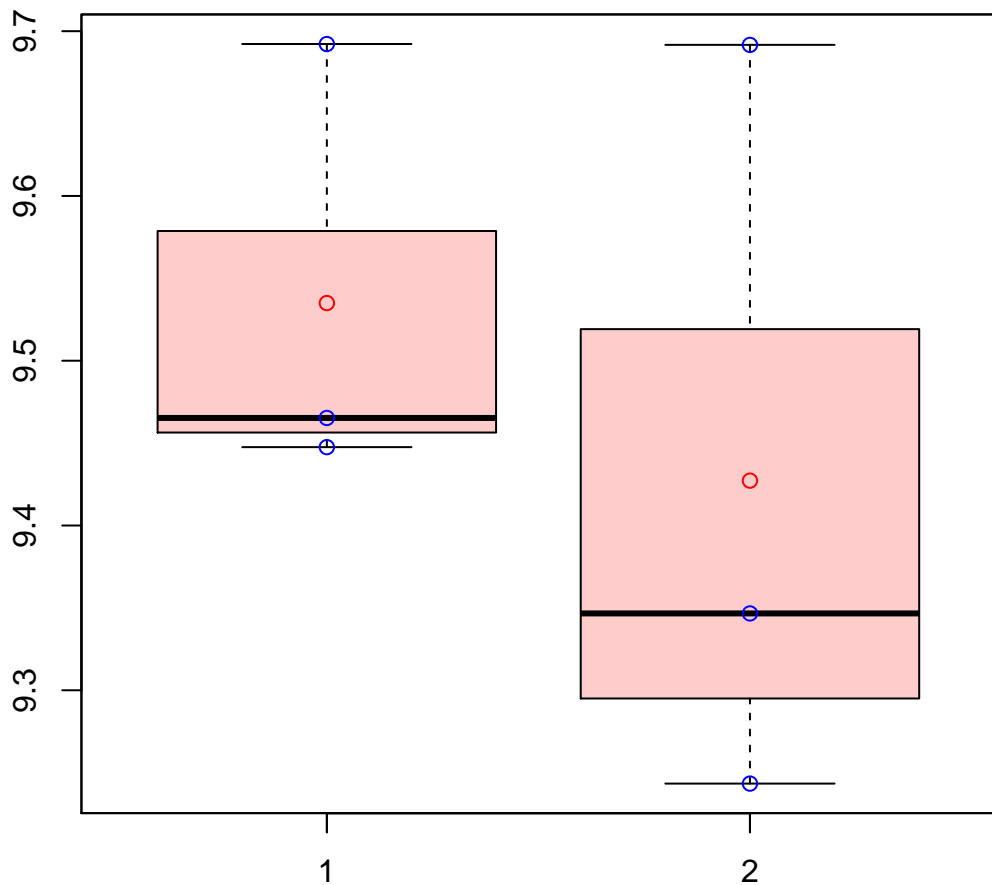

t-Test: p-value = 0.54

# M0TJZ9|M0TJZ9\_MUSAM

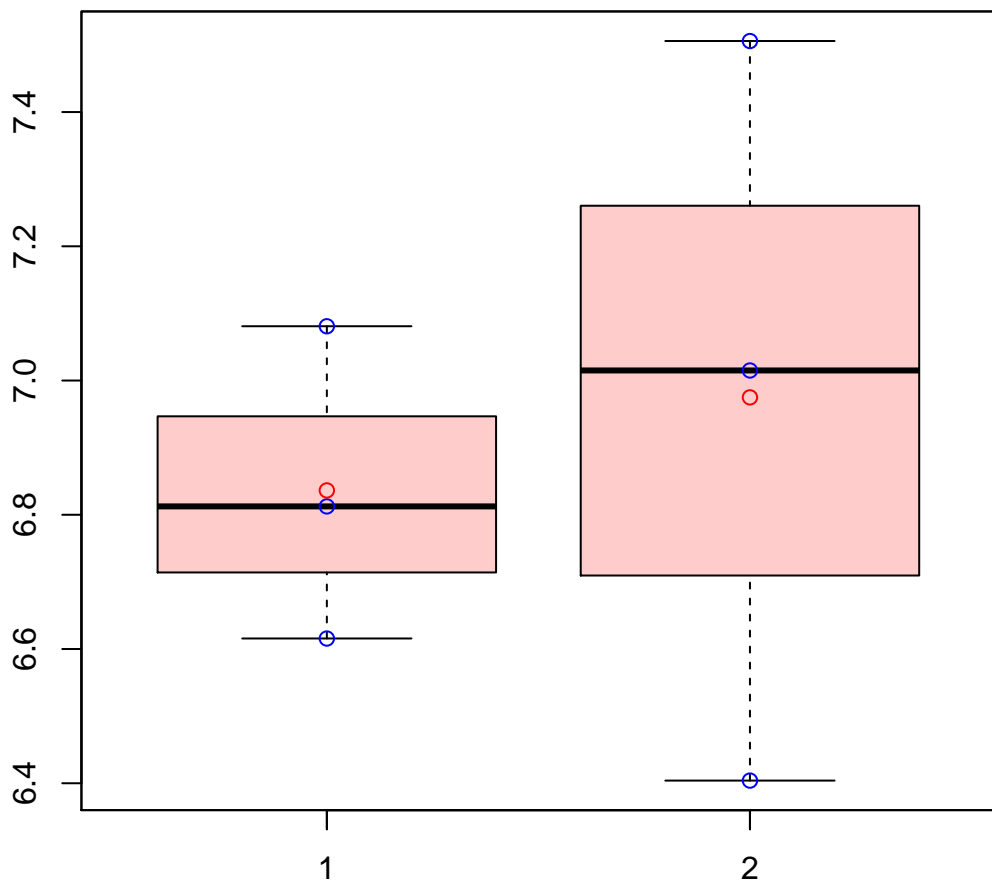

t-Test: p-value = 0.72

# M0TK35|M0TK35\_MUSAM

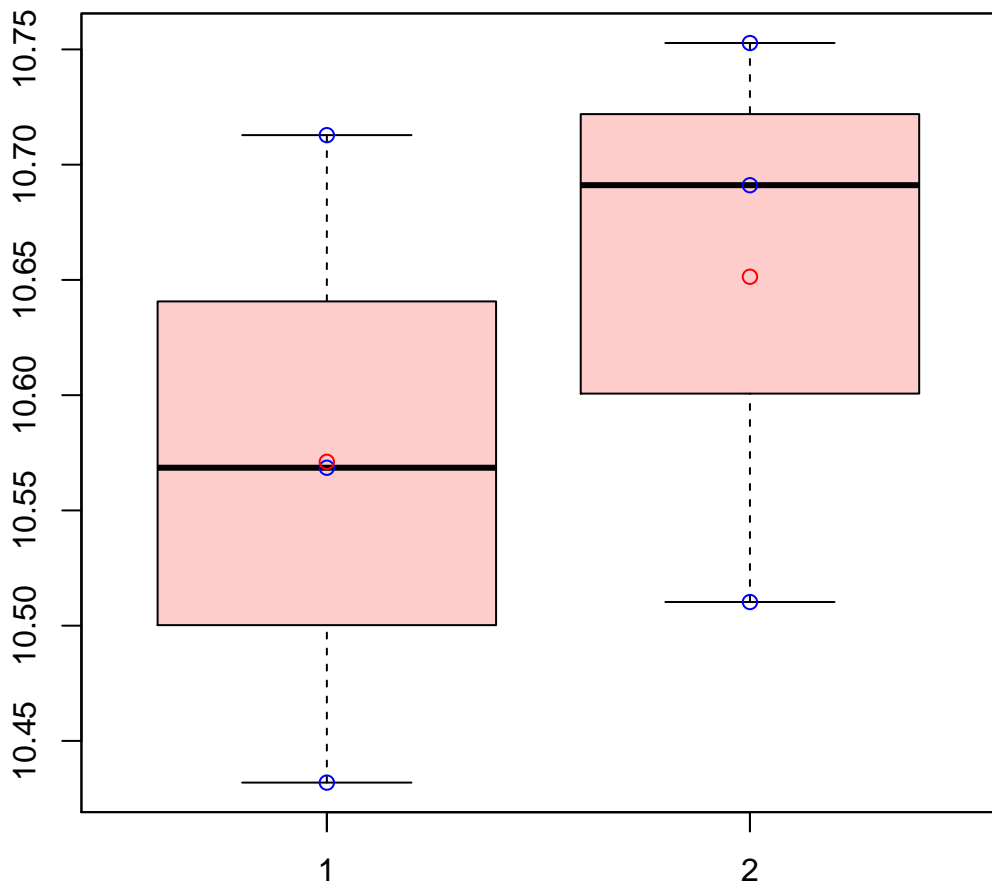

t-Test: p-value = 0.5

# M0TK53|M0TK53\_MUSAM

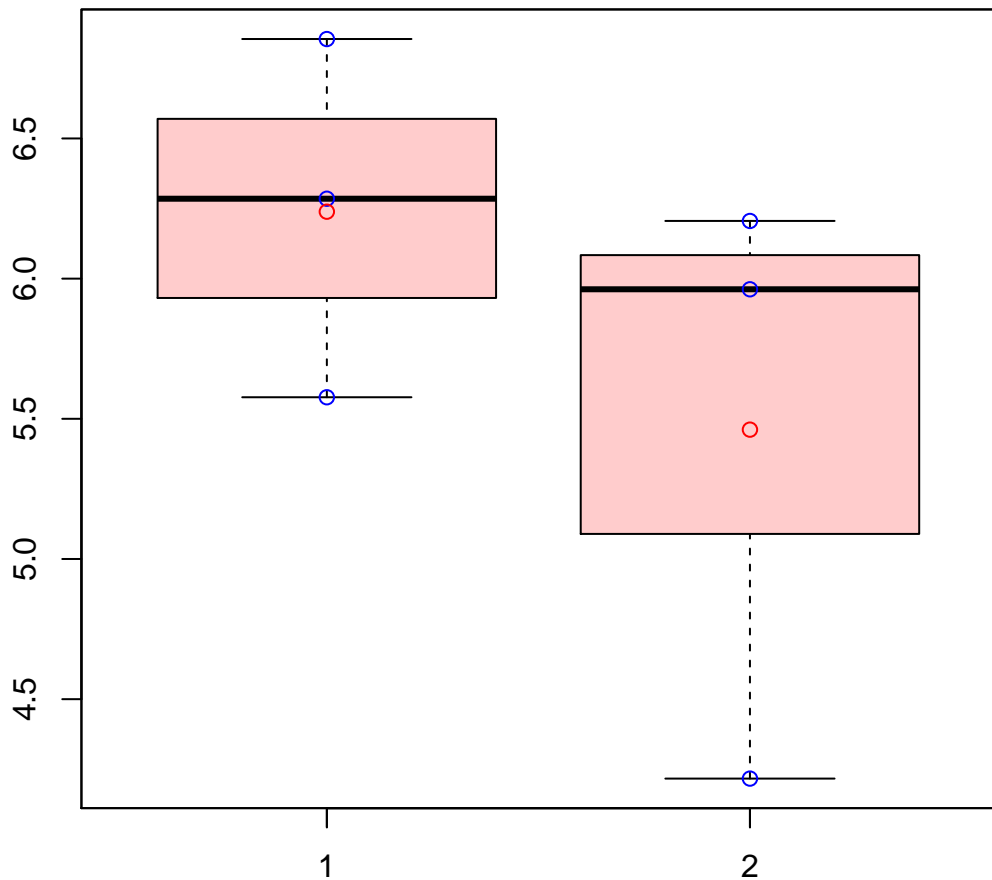

t-Test: p-value = 0.36



# M0TK75|M0TK75\_MUSAM

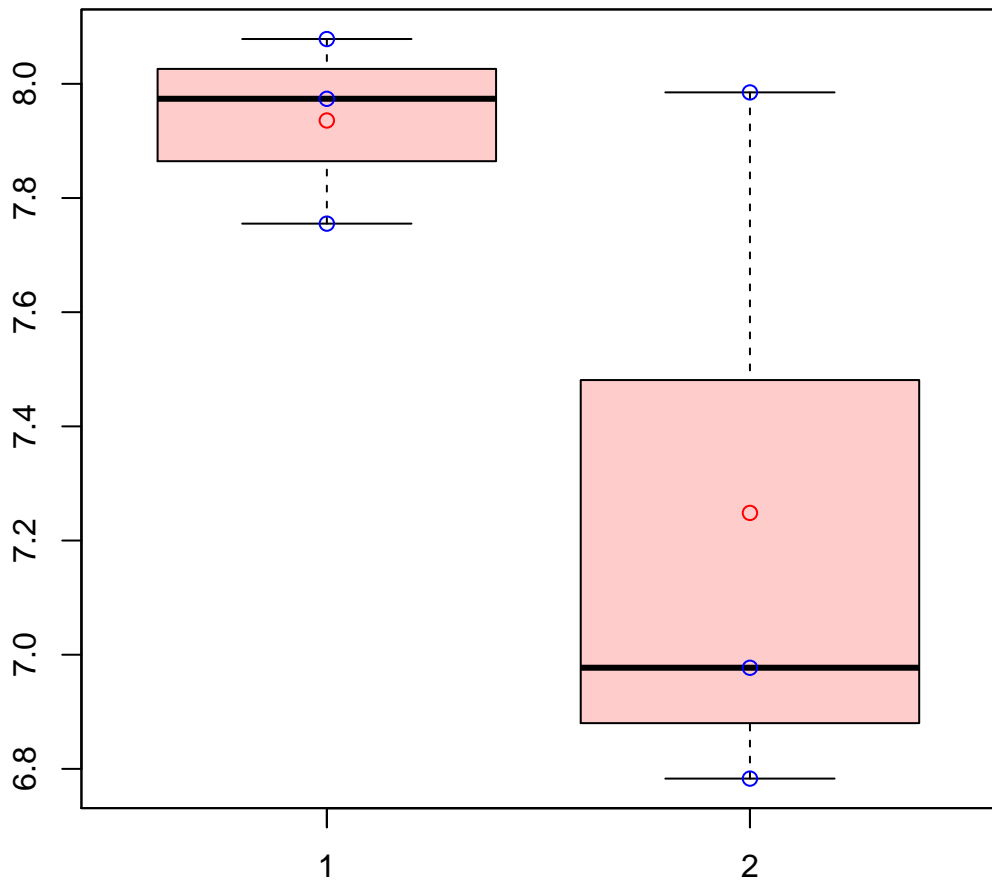

t-Test: p-value = 0.2

# M0TKD3|M0TKD3\_MUSAM

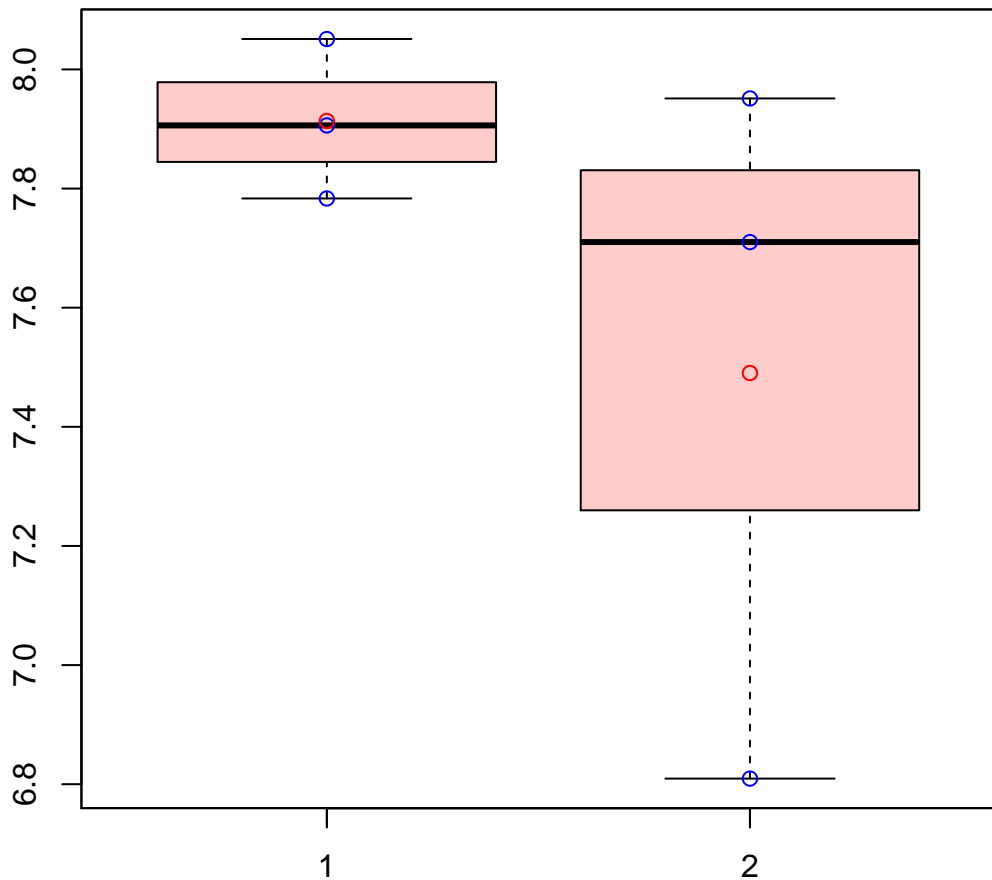

t-Test: p-value = 0.35

# M0TL72|M0TL72\_MUSAM

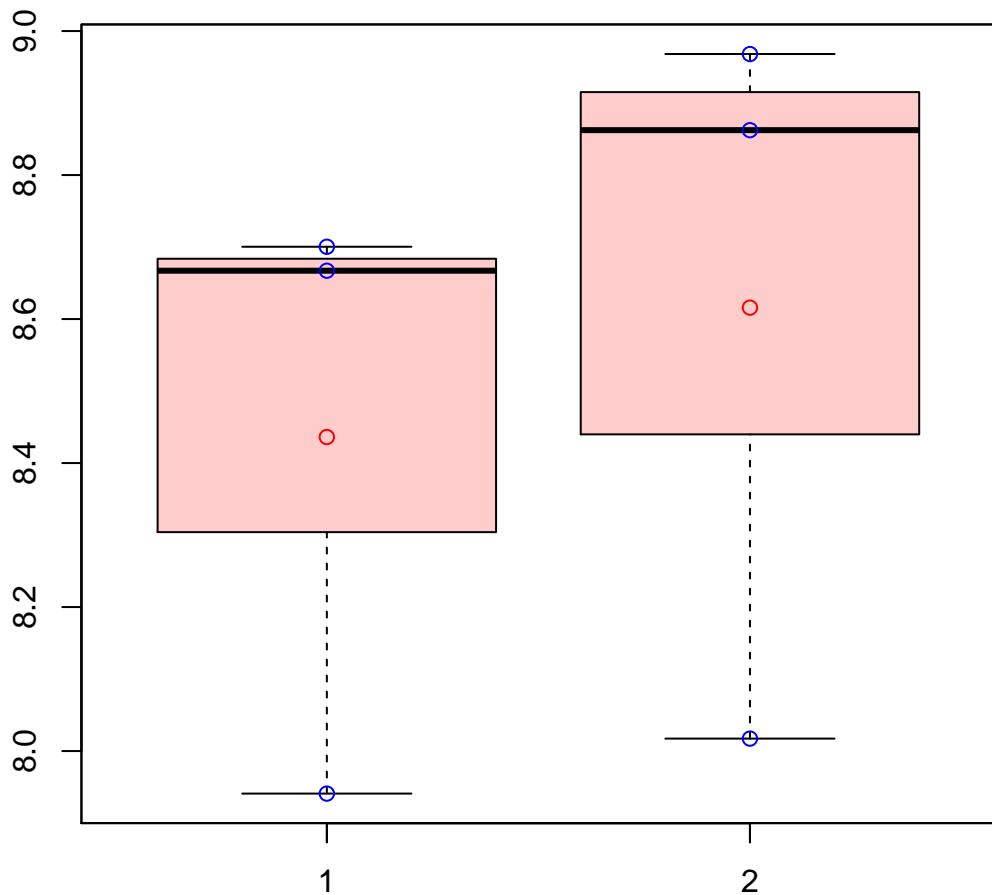

t-Test: p-value = 0.67

# M0TLM5|M0TLM5\_MUSAM

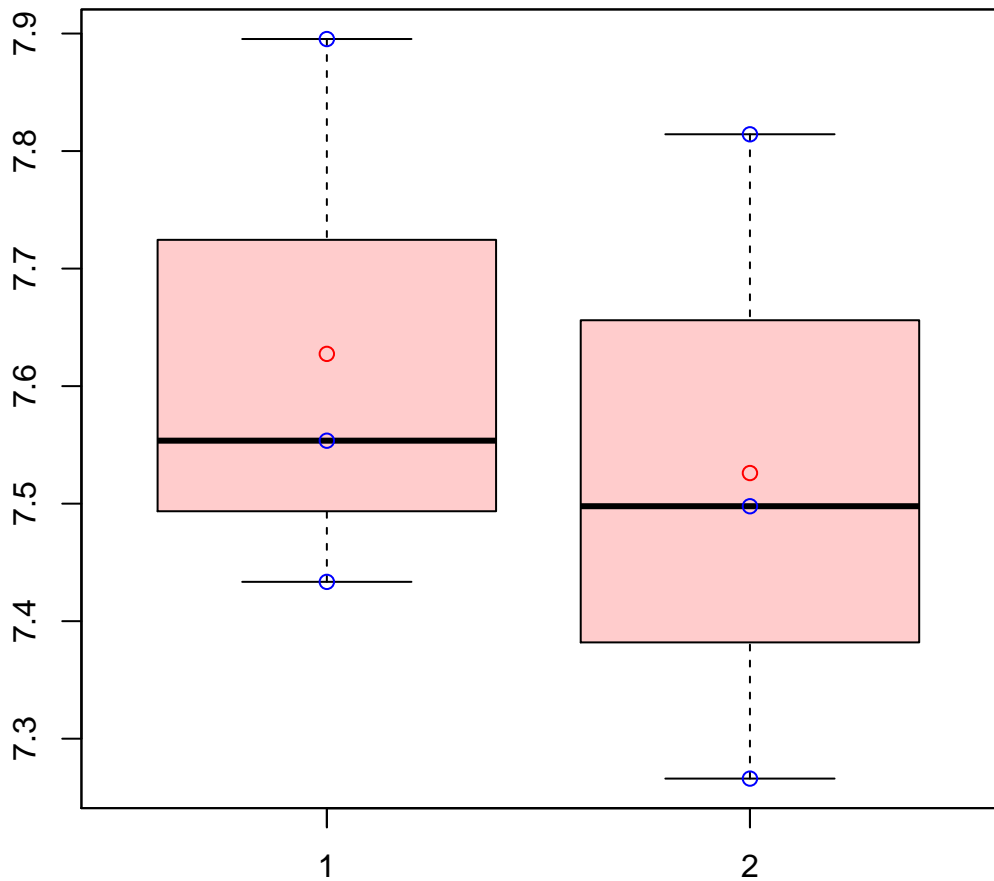

t-Test: p-value = 0.66

# M0TM87|M0TM87\_MUSAM

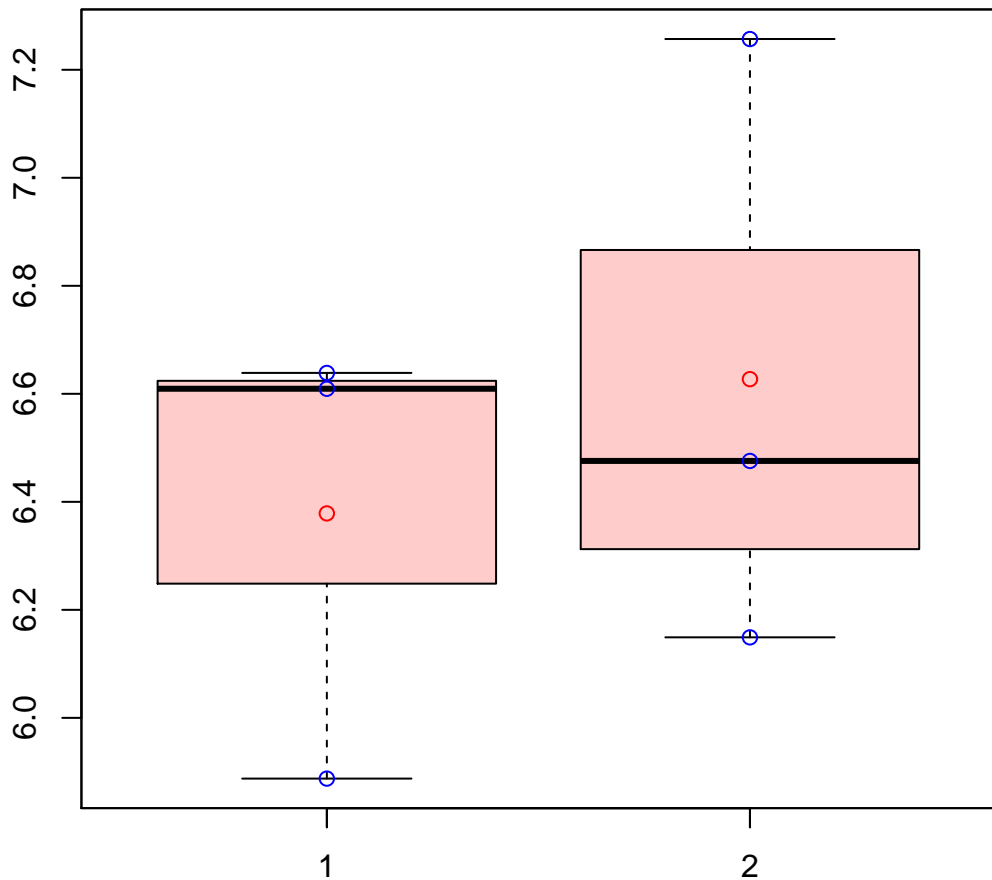

t-Test: p-value = 0.58

# M0TMB2|M0TMB2\_MUSAM

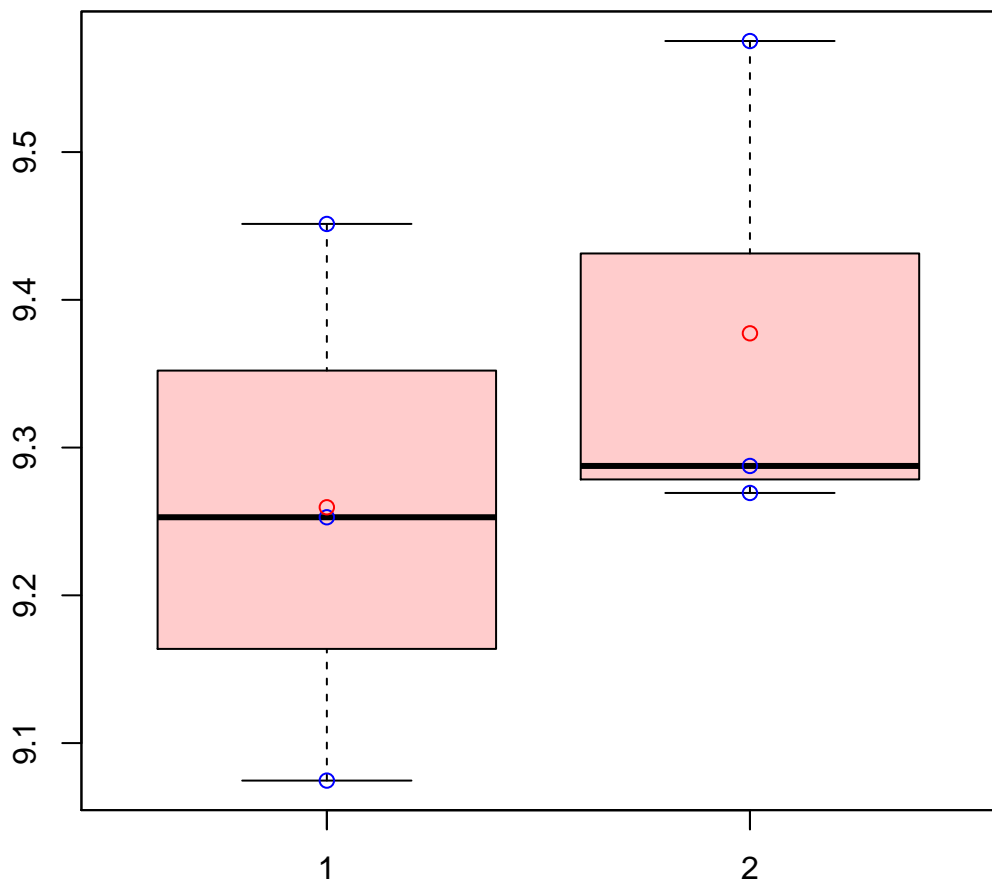

t-Test: p-value = 0.47

# M0TMD0|M0TMD0\_MUSAM

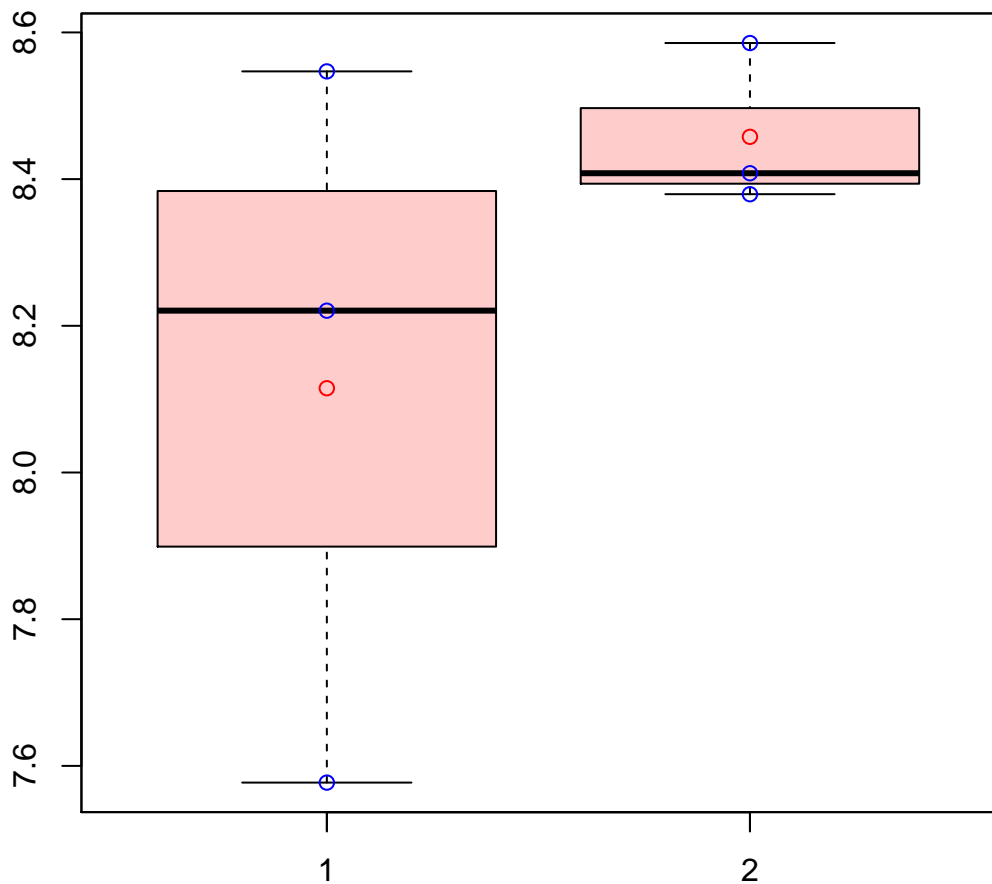

t-Test: p-value = 0.35

# M0TMJ8|M0TMJ8\_MUSAM

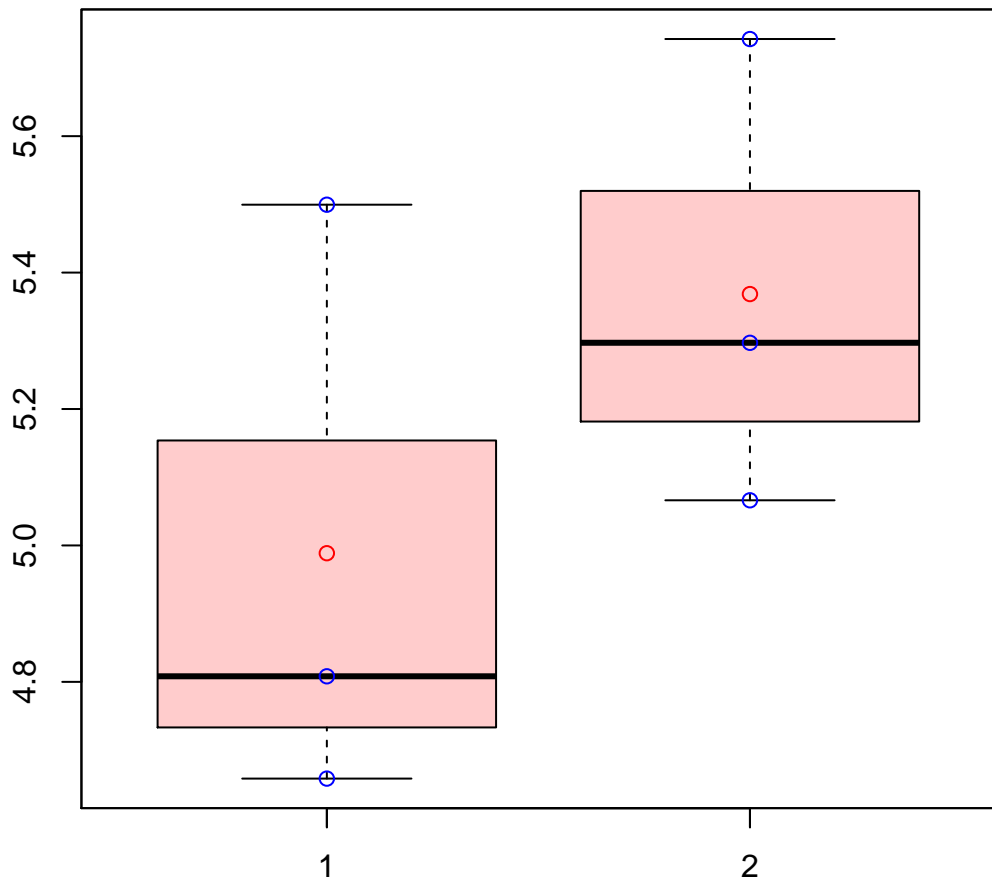

t-Test: p-value = 0.31



# M0TMV8|M0TMV8\_MUSAM

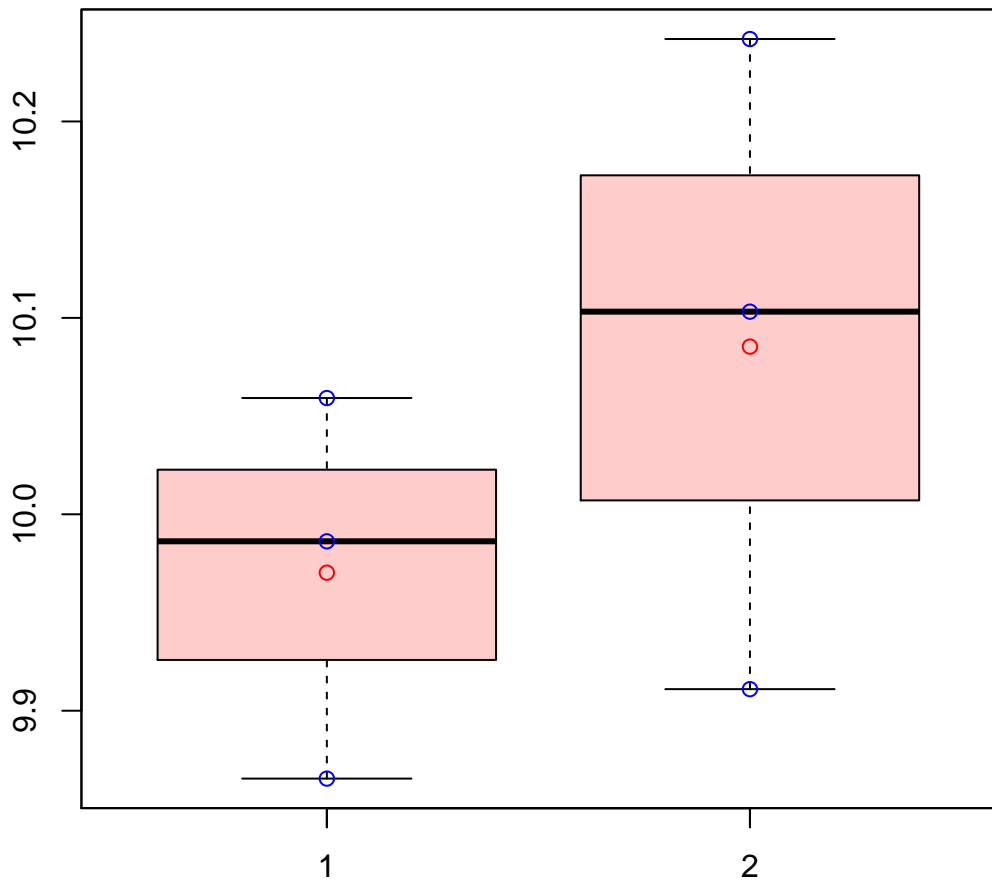

t-Test: p-value = 0.37

# M0TN29|M0TN29\_MUSAM

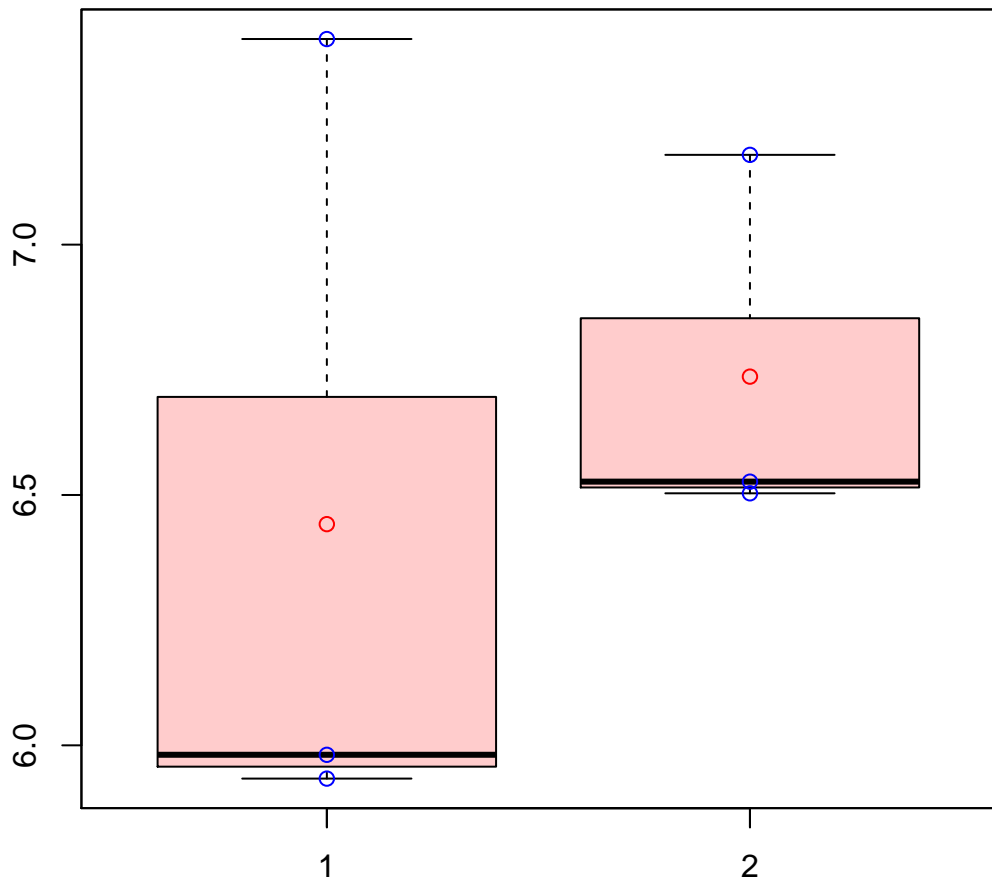

t-Test: p-value = 0.62

# M0TN76|M0TN76\_MUSAM

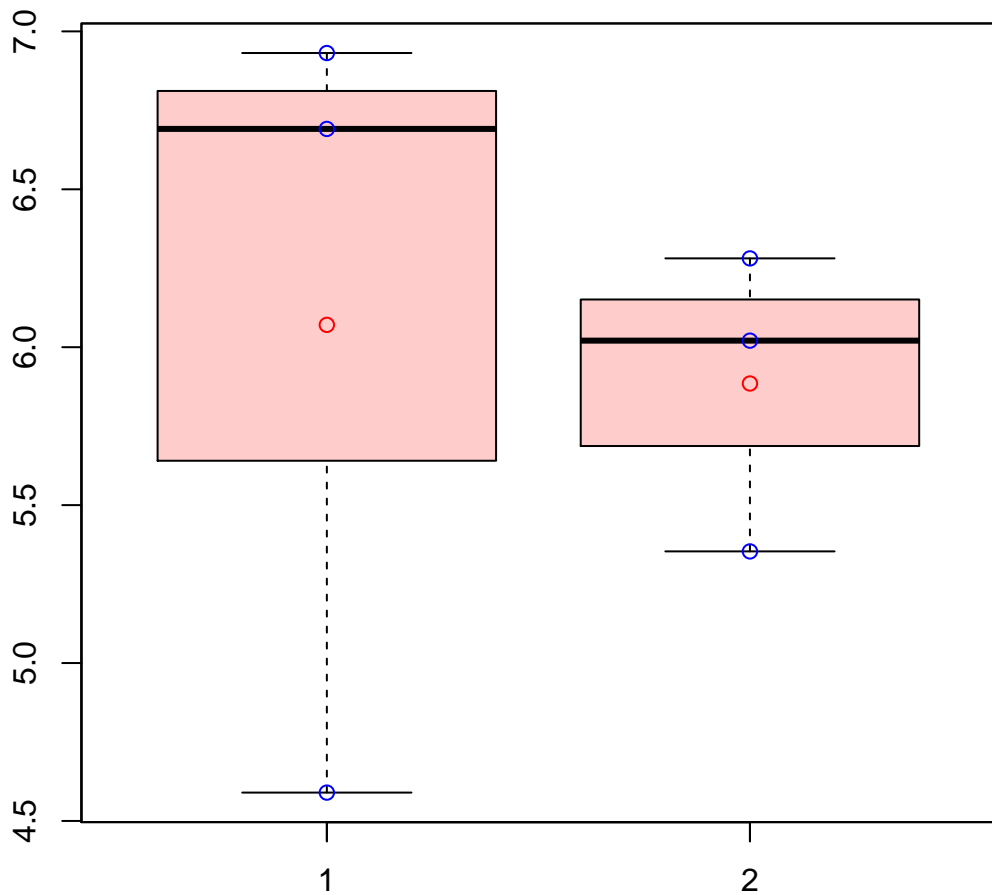

t-Test: p-value = 0.83

# M0TNC0|M0TNC0\_MUSAM

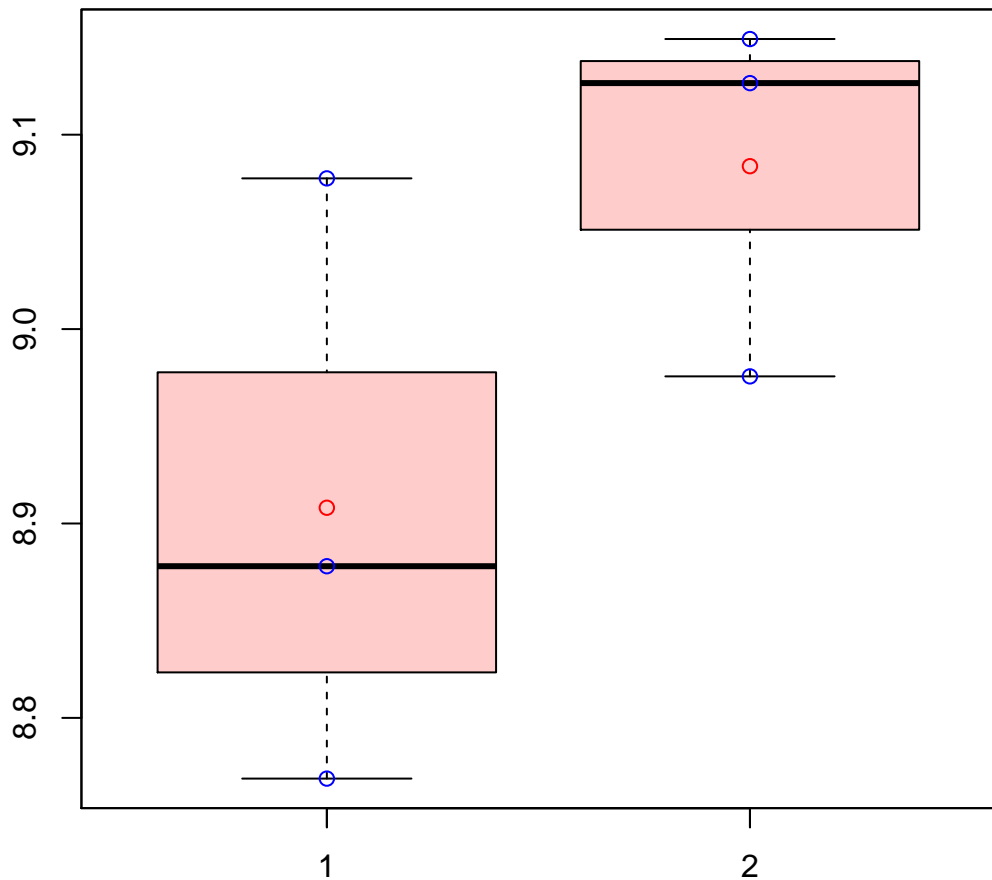

t-Test: p-value = 0.19

# M0TNP8|M0TNP8\_MUSAM

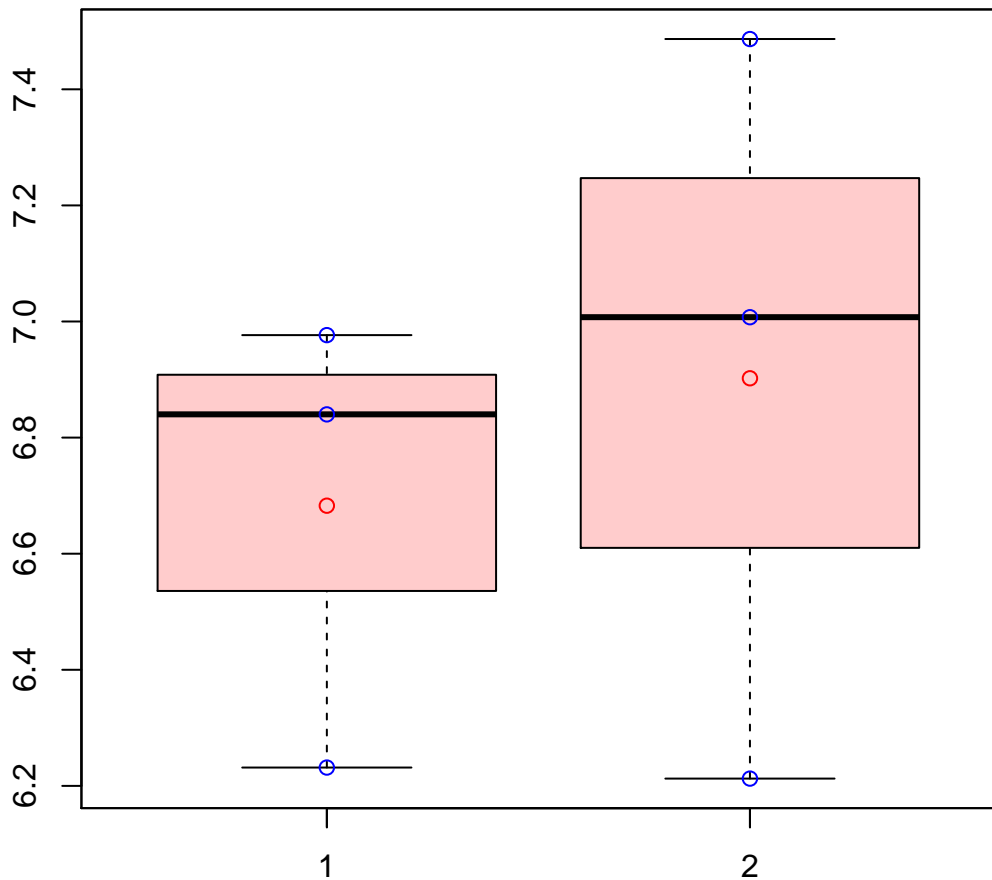

t-Test: p-value = 0.65

# M0TP47|M0TP47\_MUSAM

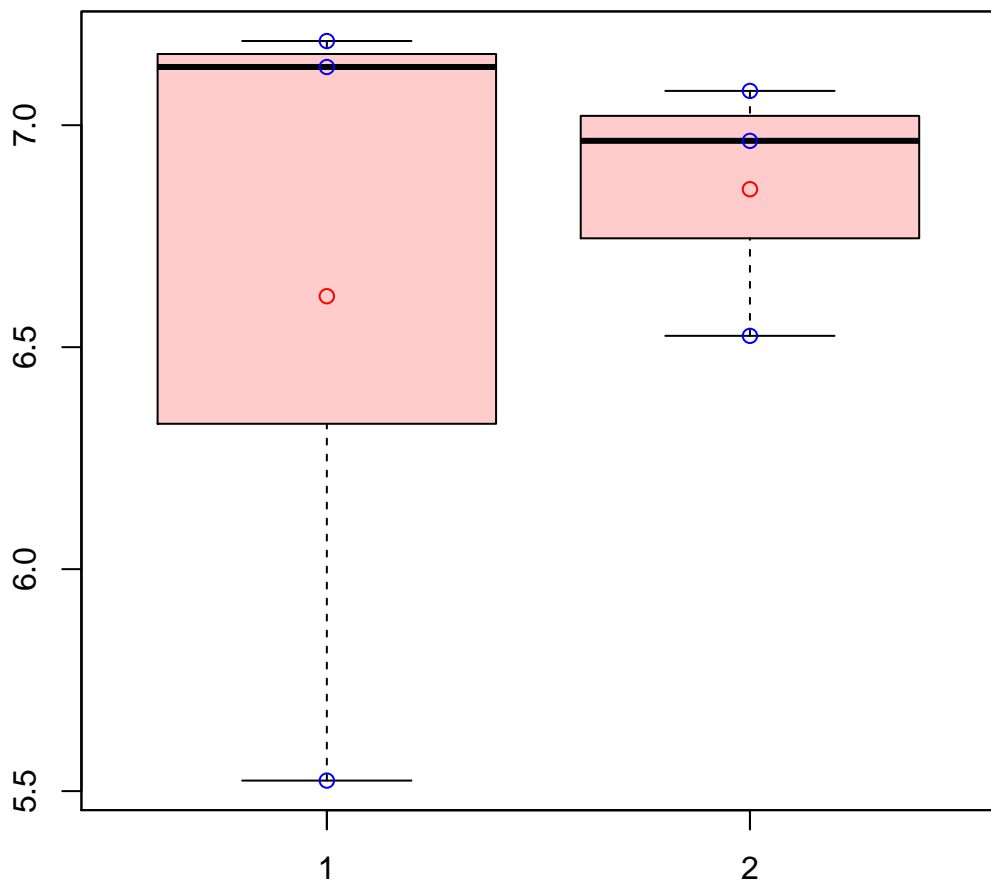

t-Test: p-value = 0.71

# M0TPB5|M0TPB5\_MUSAM

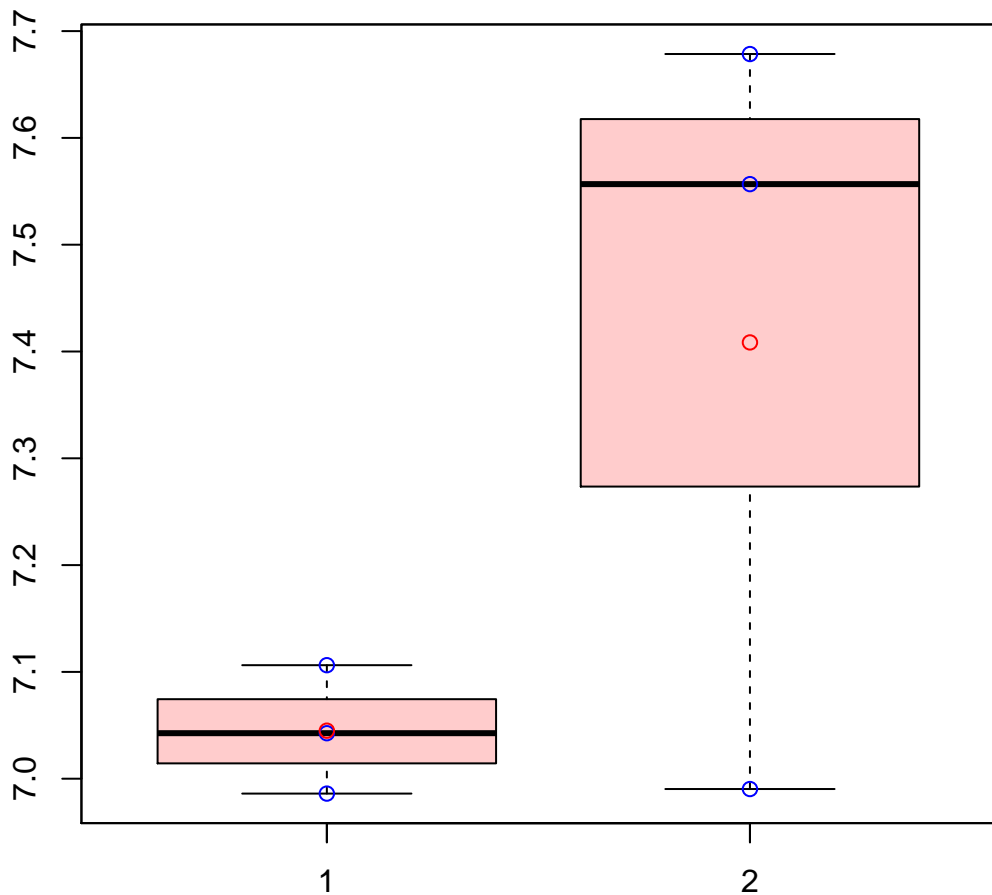

t-Test: p-value = 0.23

# M0TQ89|M0TQ89\_MUSAM

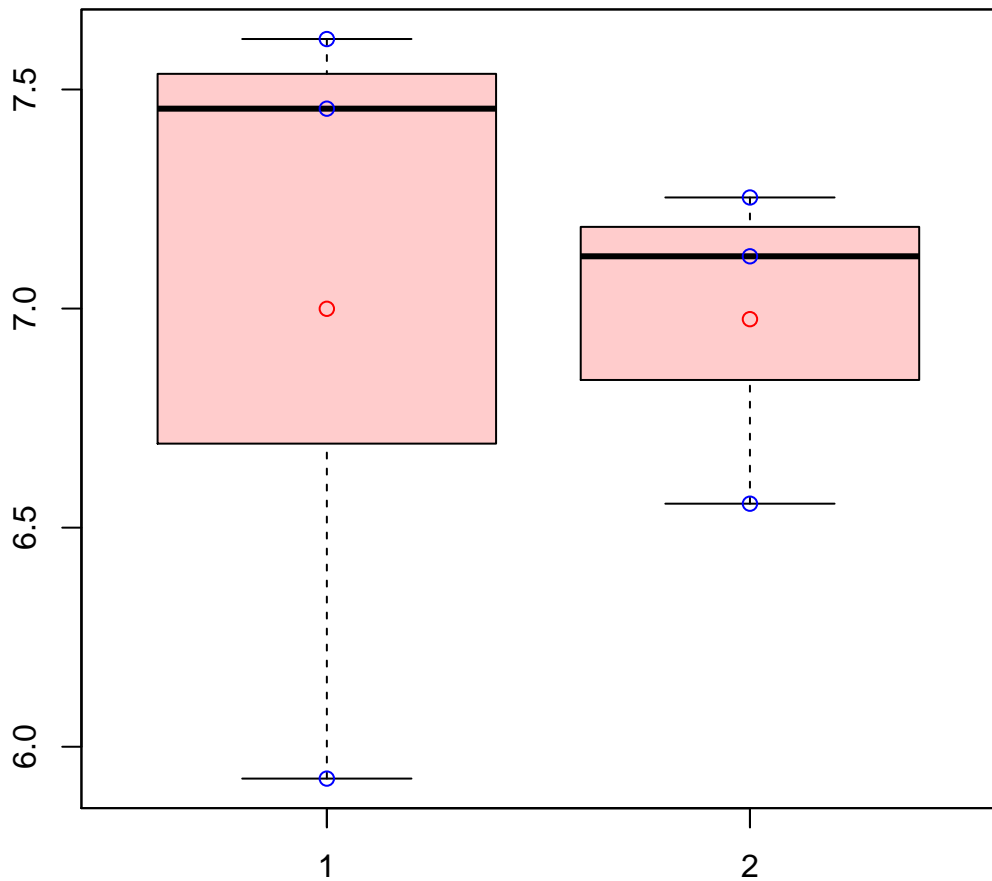

t-Test: p-value = 0.97



# M0TQB3|M0TQB3\_MUSAM

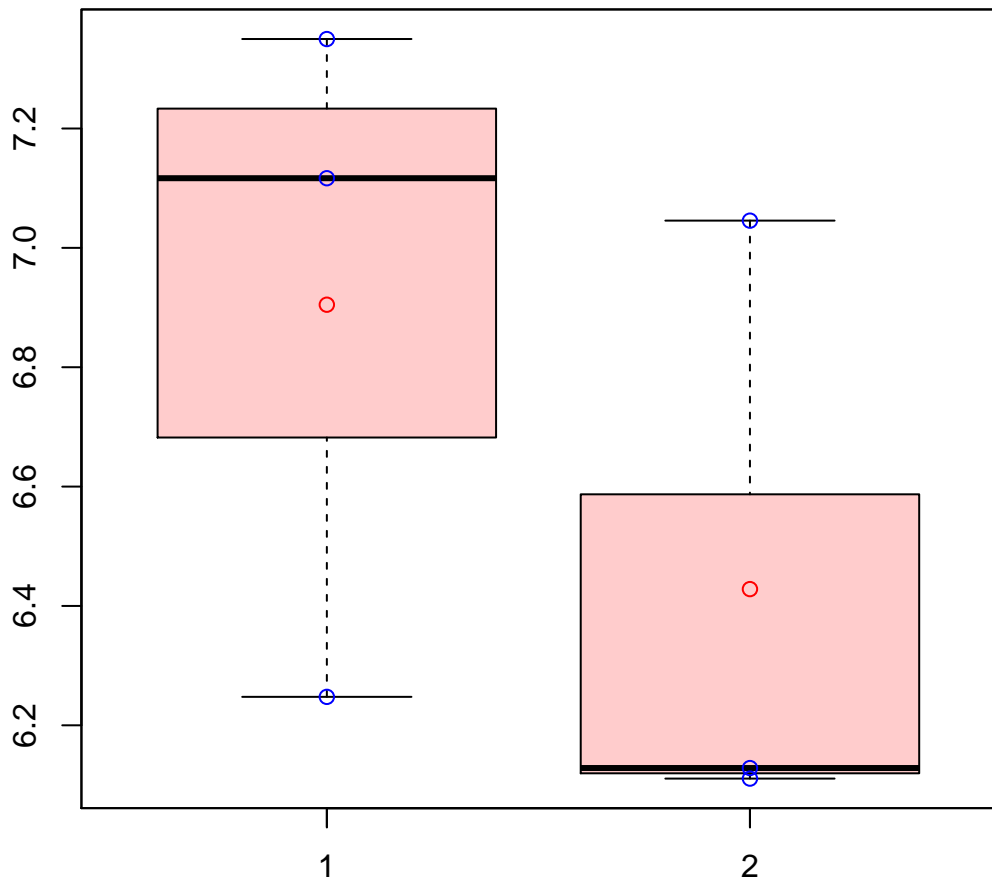

t-Test: p-value = 0.36

# M0TQE3|M0TQE3\_MUSAM

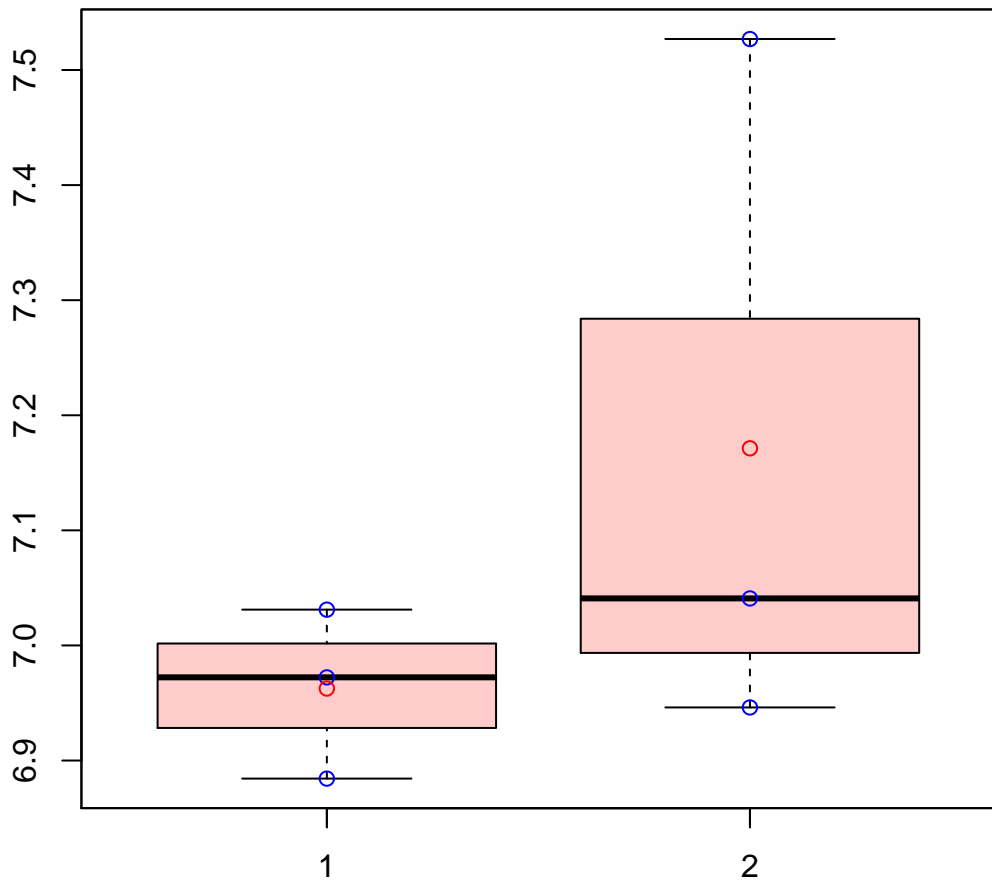

t-Test: p-value = 0.37

# M0TQJ7|M0TQJ7\_MUSAM

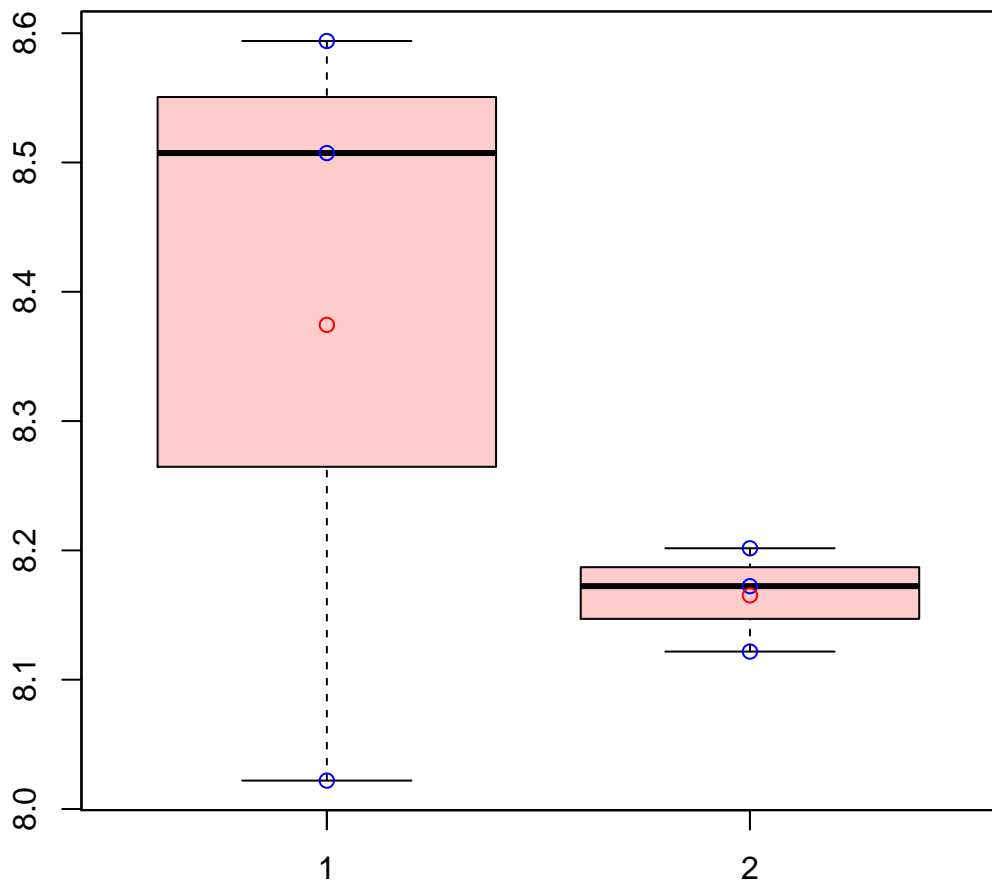

t-Test: p-value = 0.36

# M0TQN5|M0TQN5\_MUSAM

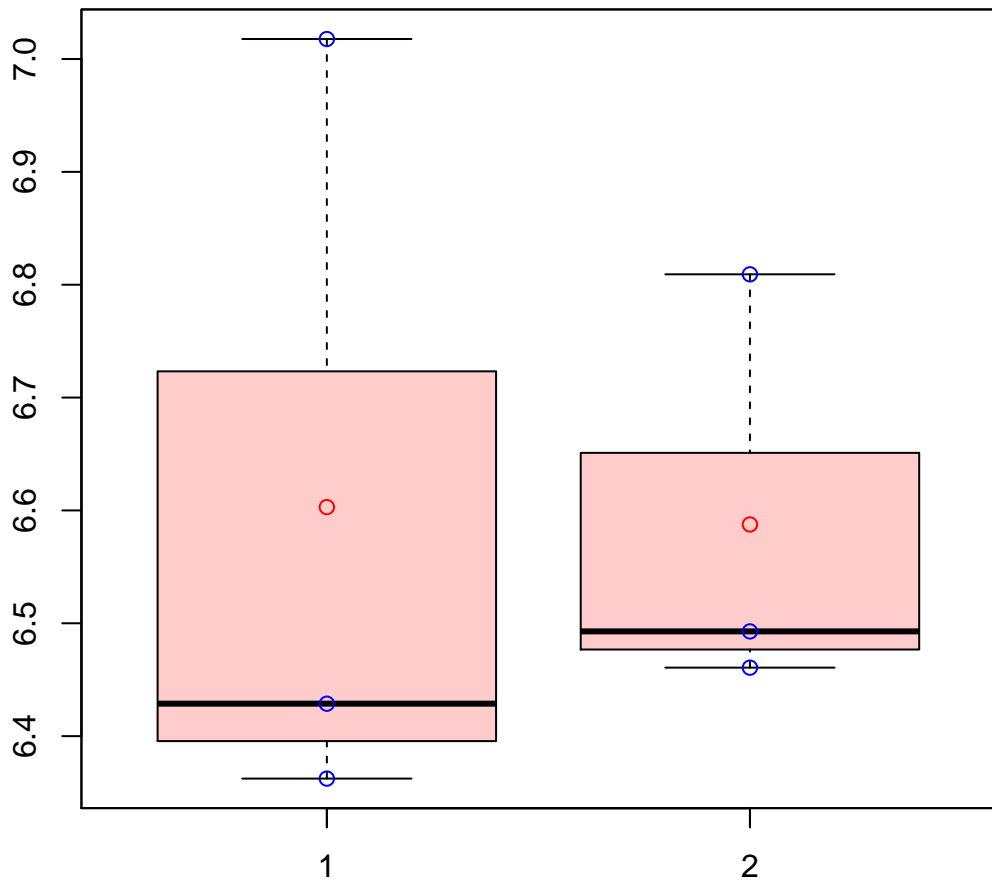

t-Test: p-value = 0.95

# M0TR36|M0TR36\_MUSAM

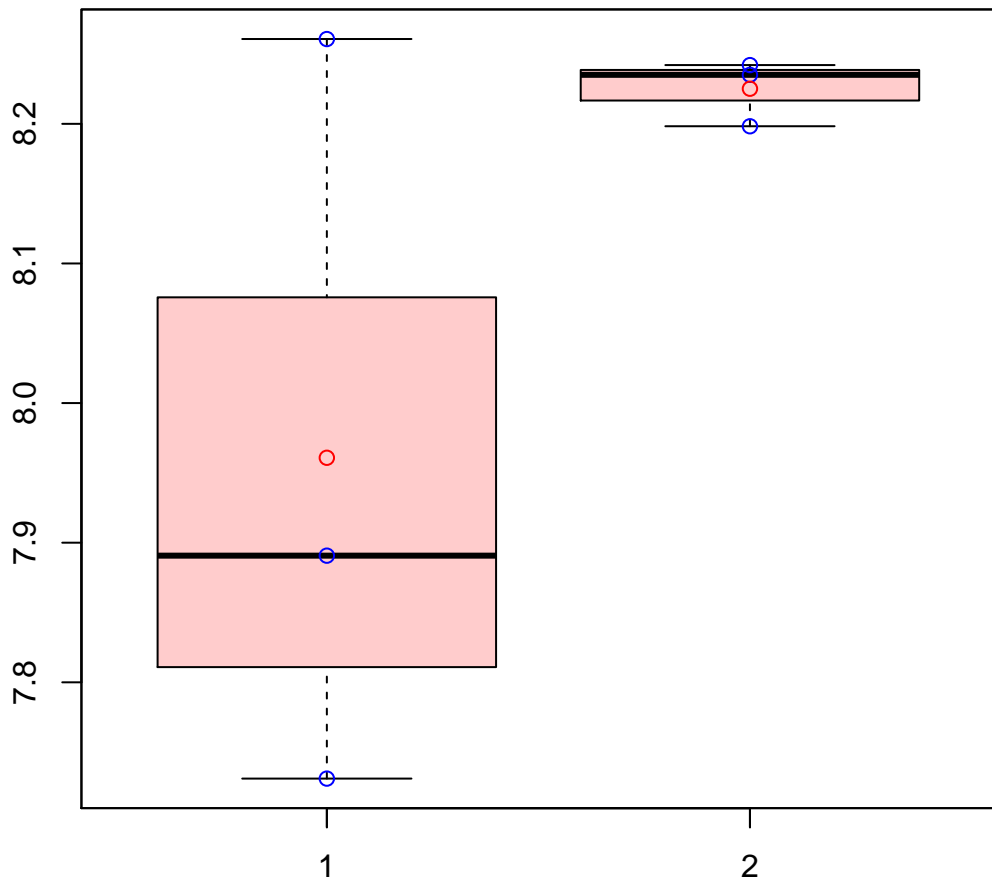

t-Test: p-value = 0.23

# M0TR81|M0TR81\_MUSAM

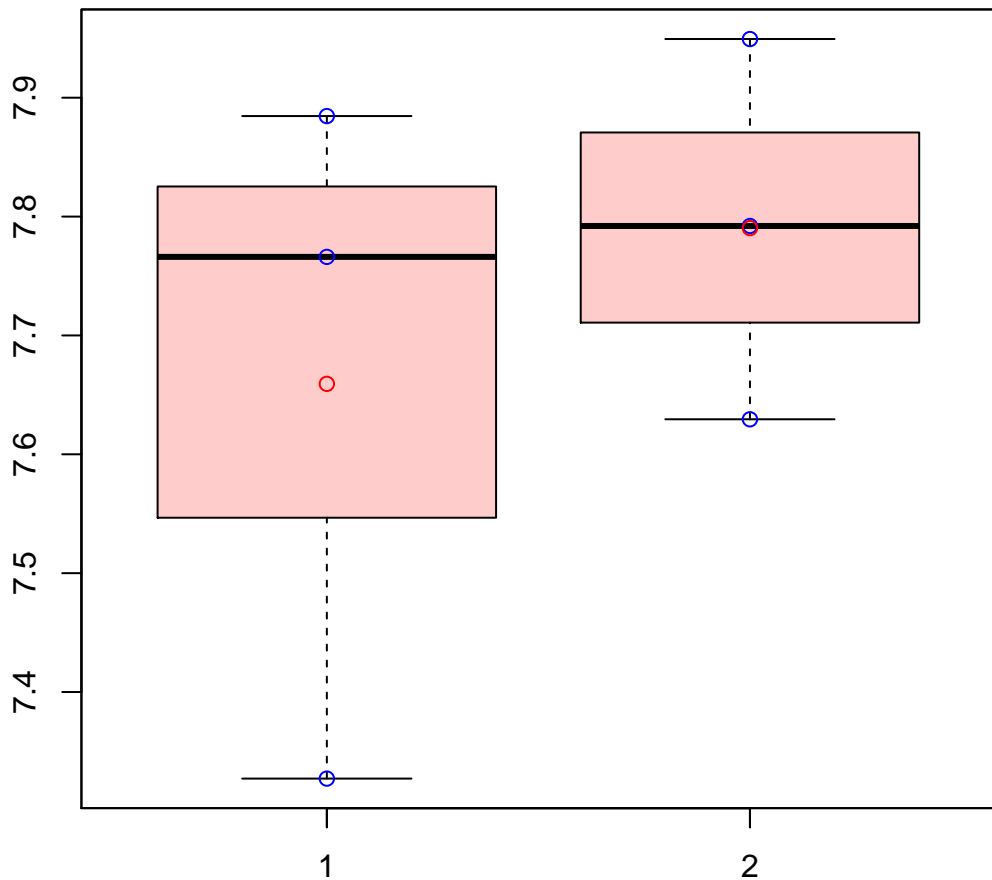

t-Test: p-value = 0.54

# M0TRB6|M0TRB6\_MUSAM

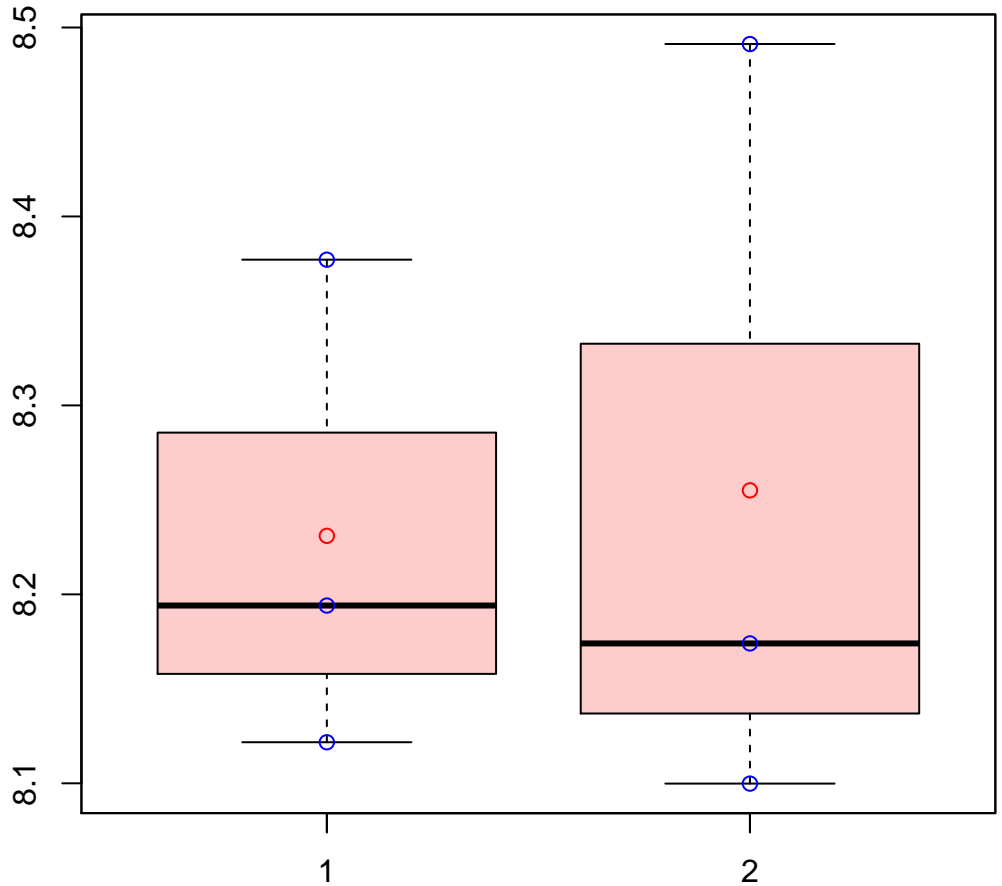

t-Test: p-value = 0.88

# M0TRR4|M0TRR4\_MUSAM

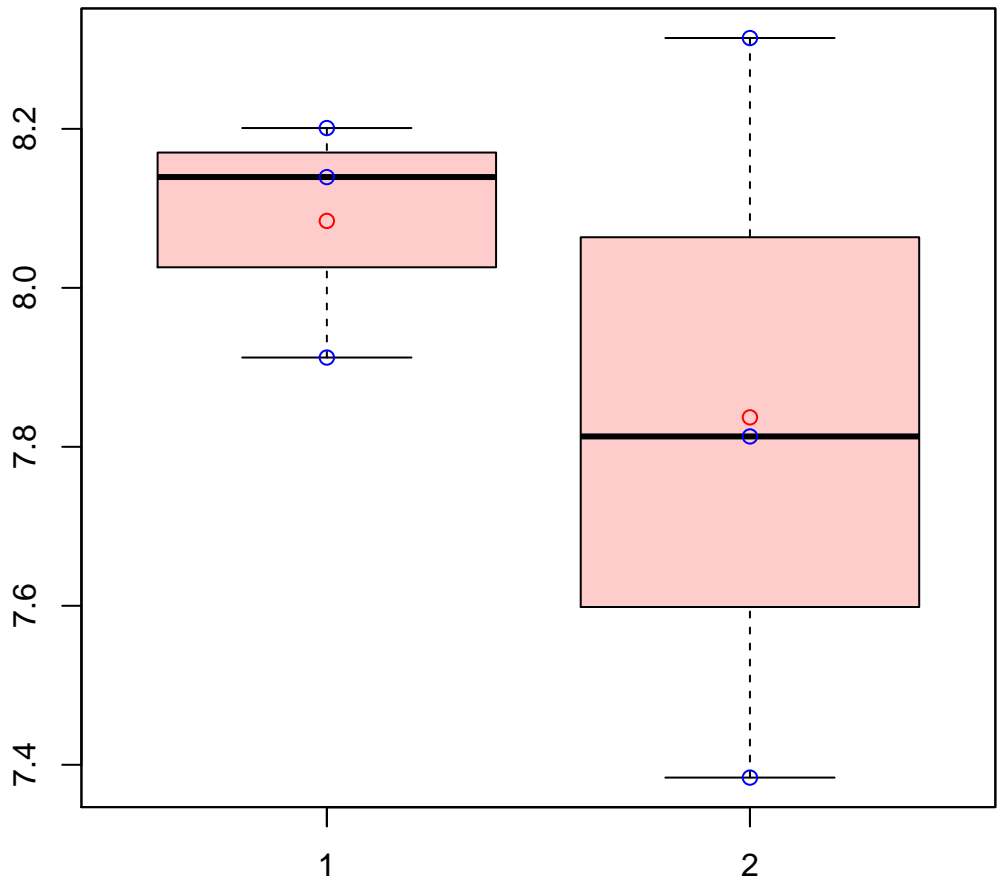

t-Test: p-value = 0.46



# M0TRY2|M0TRY2\_MUSAM

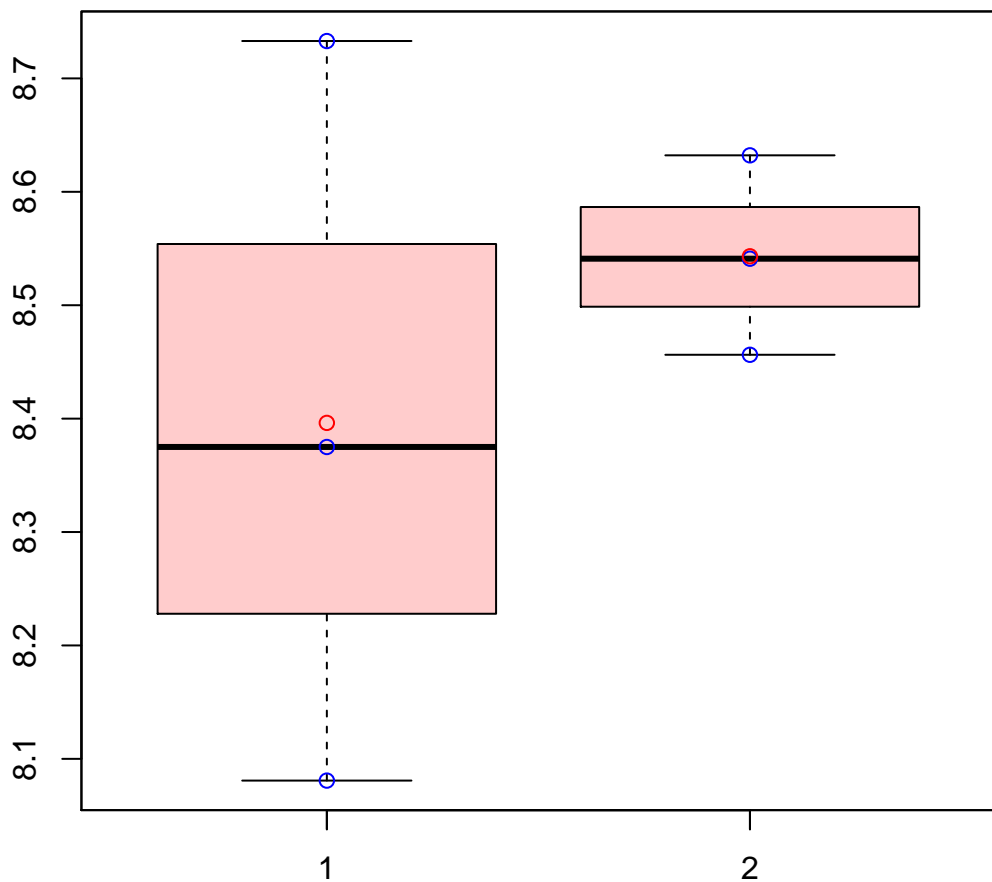

t-Test: p-value = 0.52

# M0TS31|M0TS31\_MUSAM

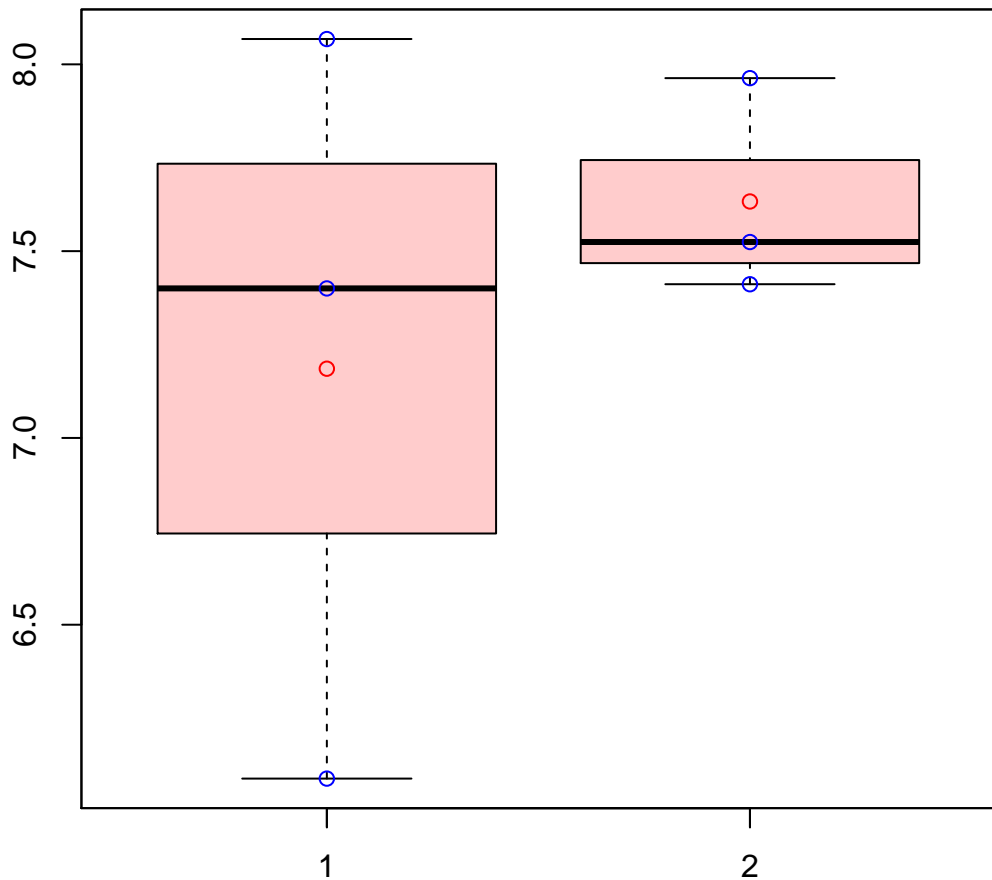

t-Test: p-value = 0.53

# M0TS90|M0TS90\_MUSAM

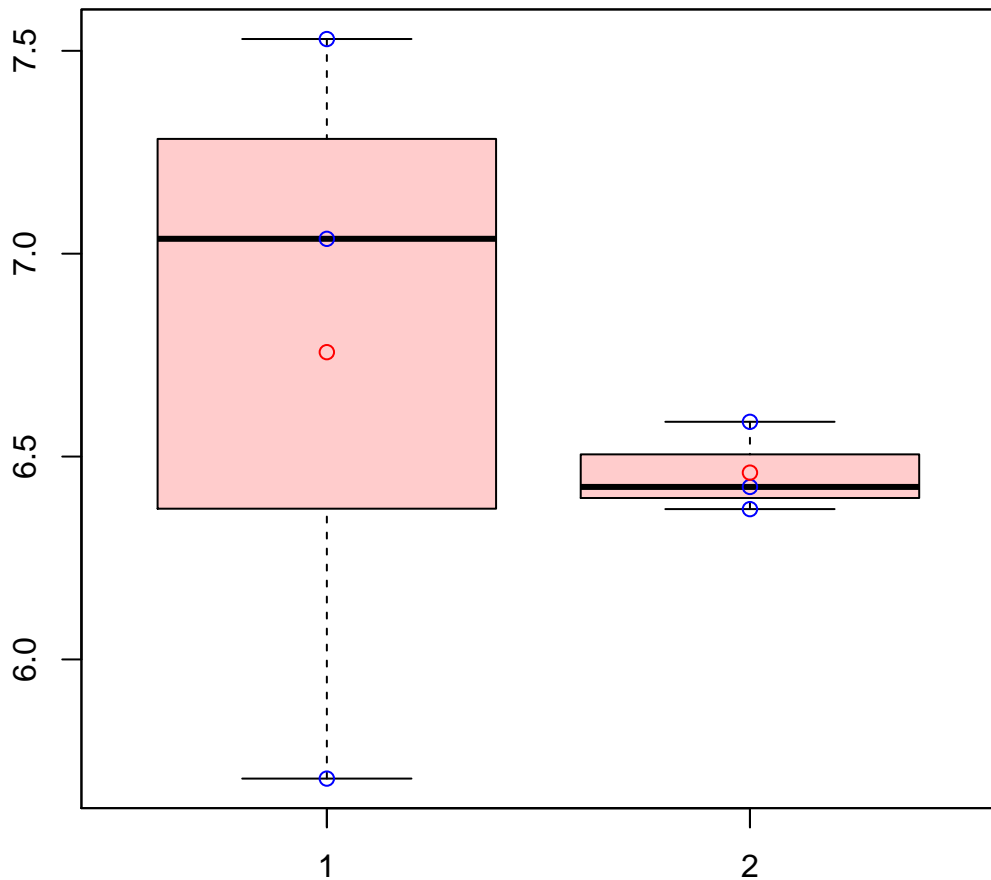

t-Test: p-value = 0.64

# M0TSL8|M0TSL8\_MUSAM

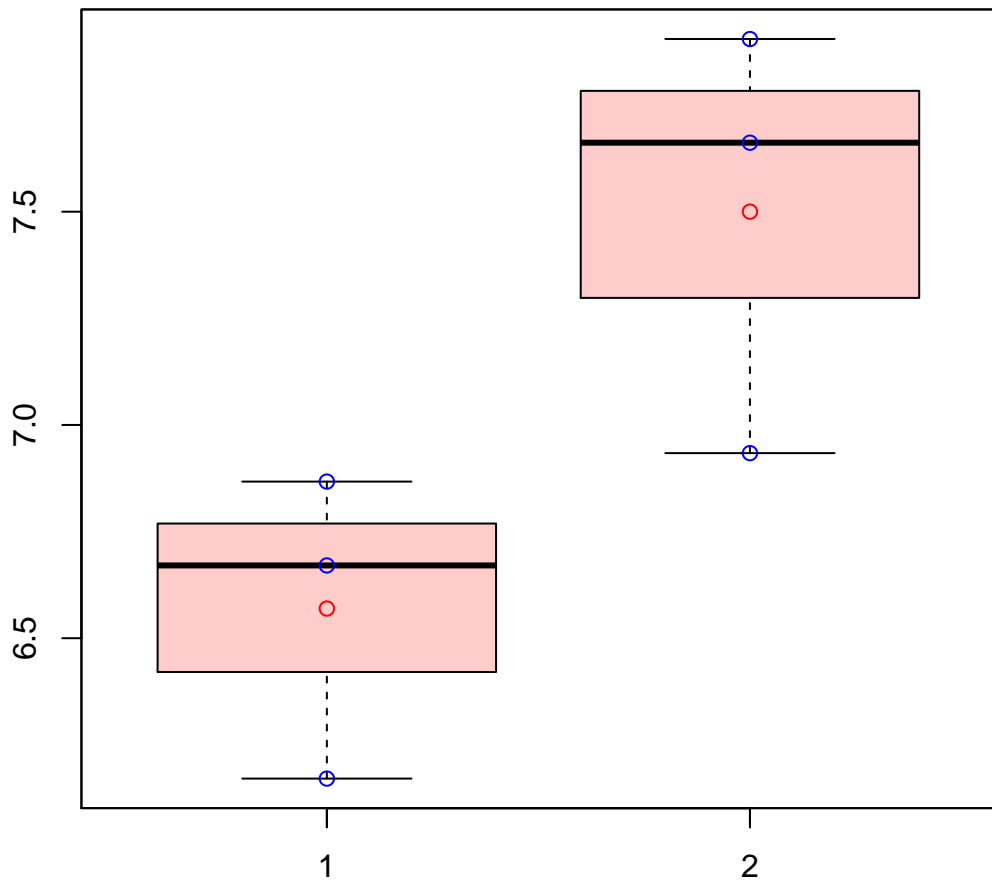

t-Test: p-value = 0.07

# M0TSN2|M0TSN2\_MUSAM

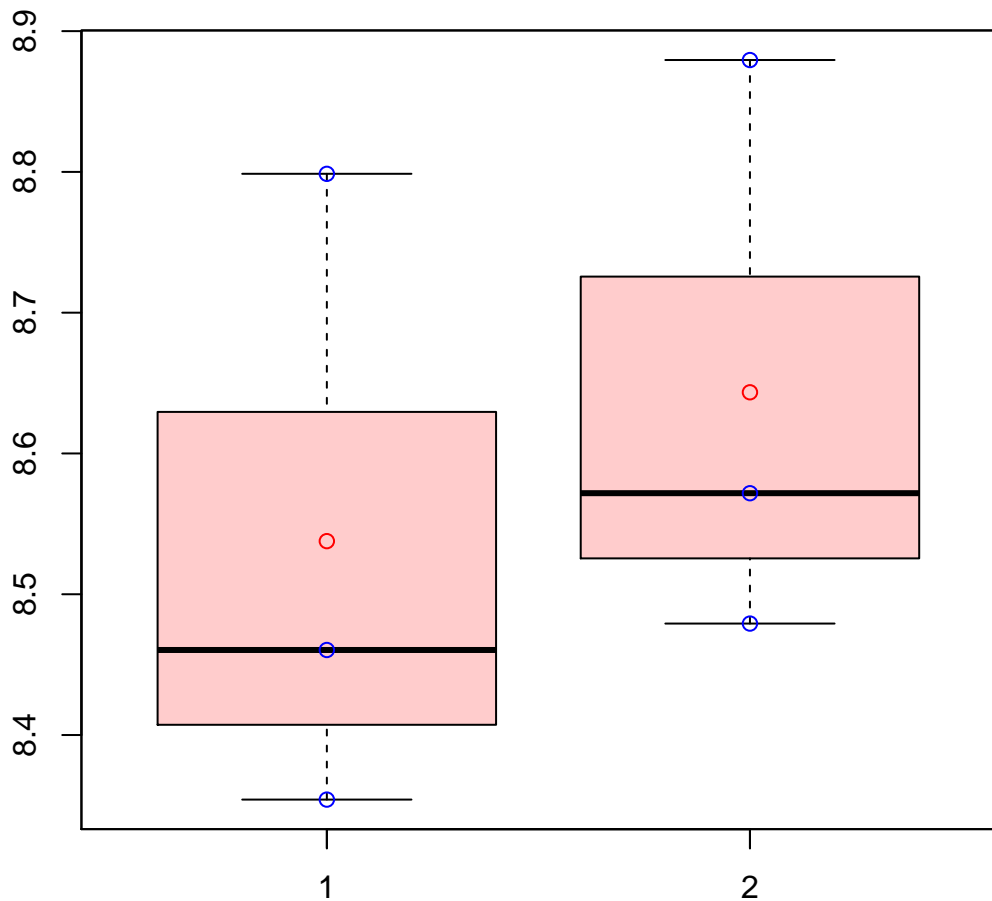

t-Test: p-value = 0.59

# M0TSQ0|M0TSQ0\_MUSAM

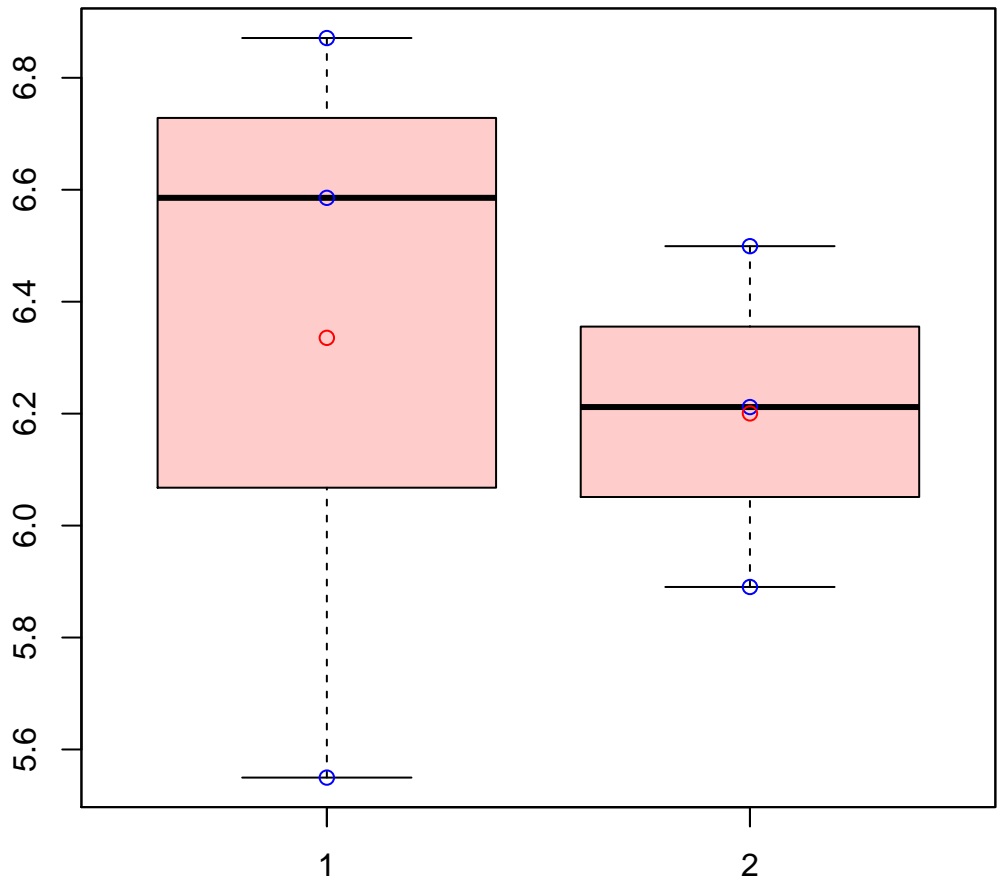

t-Test: p-value = 0.78

# M0TT66|M0TT66\_MUSAM

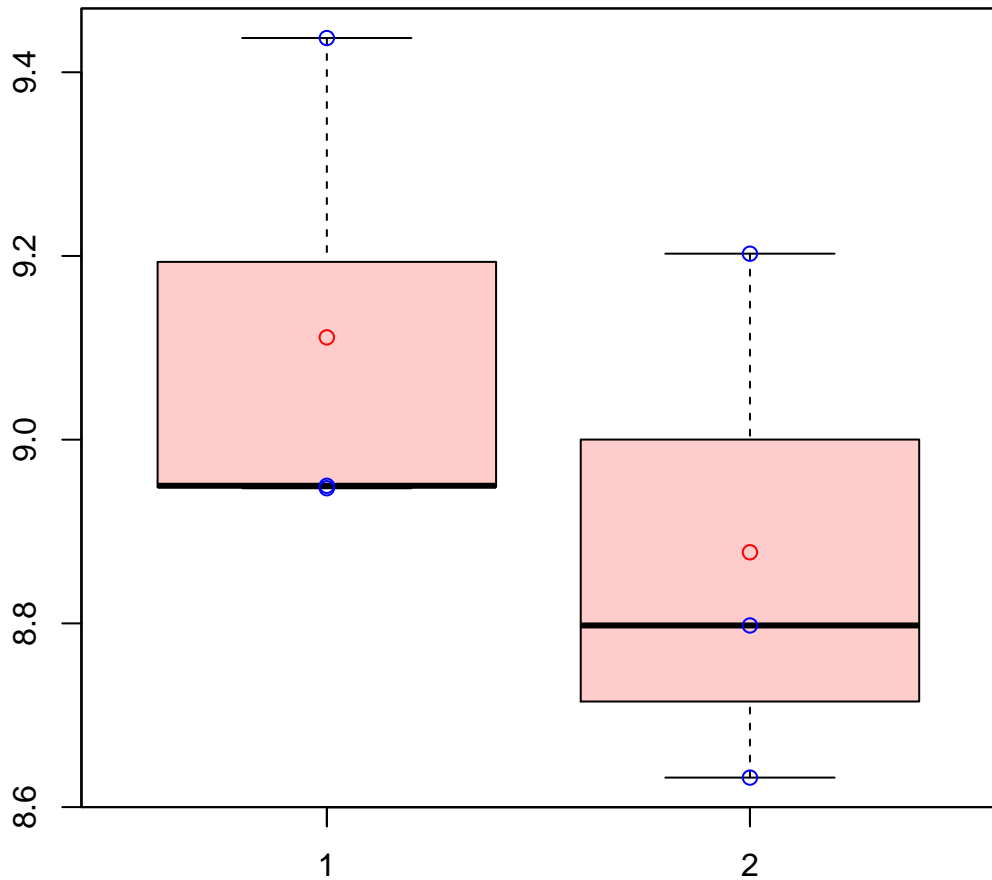

t-Test: p-value = 0.38

# M0TT93|M0TT93\_MUSAM

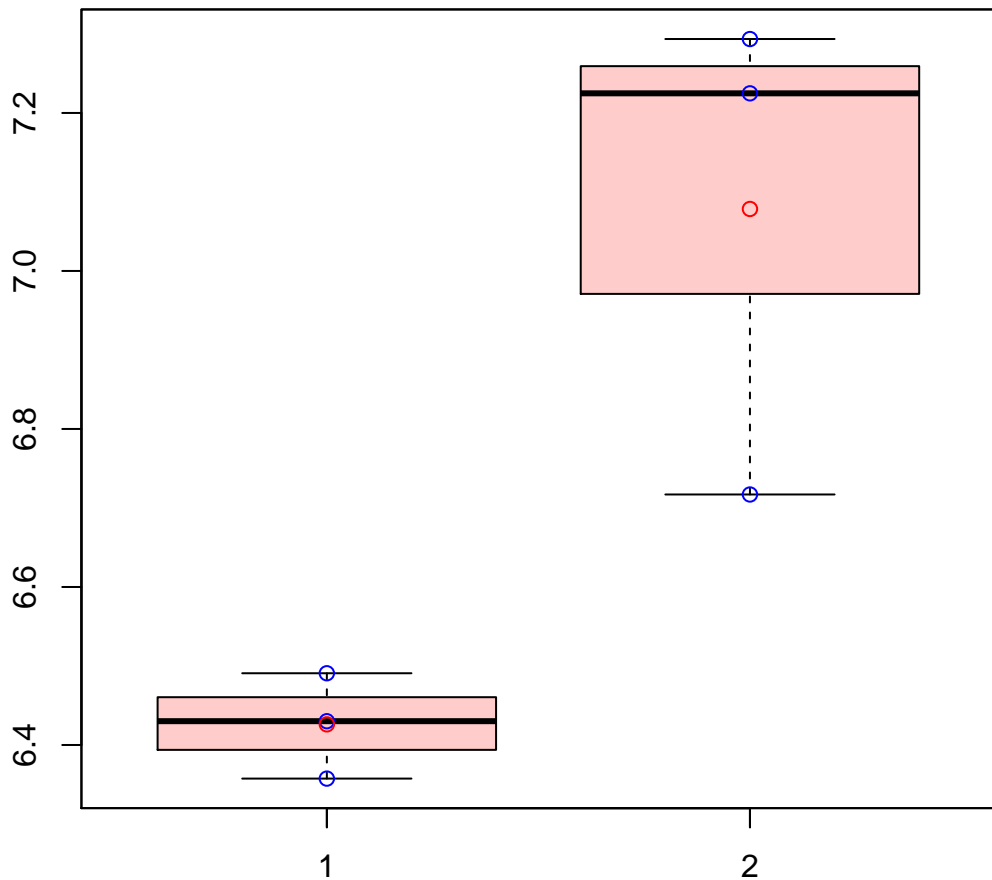

t-Test: p-value = 0.06



# M0TTB9|M0TTB9\_MUSAM

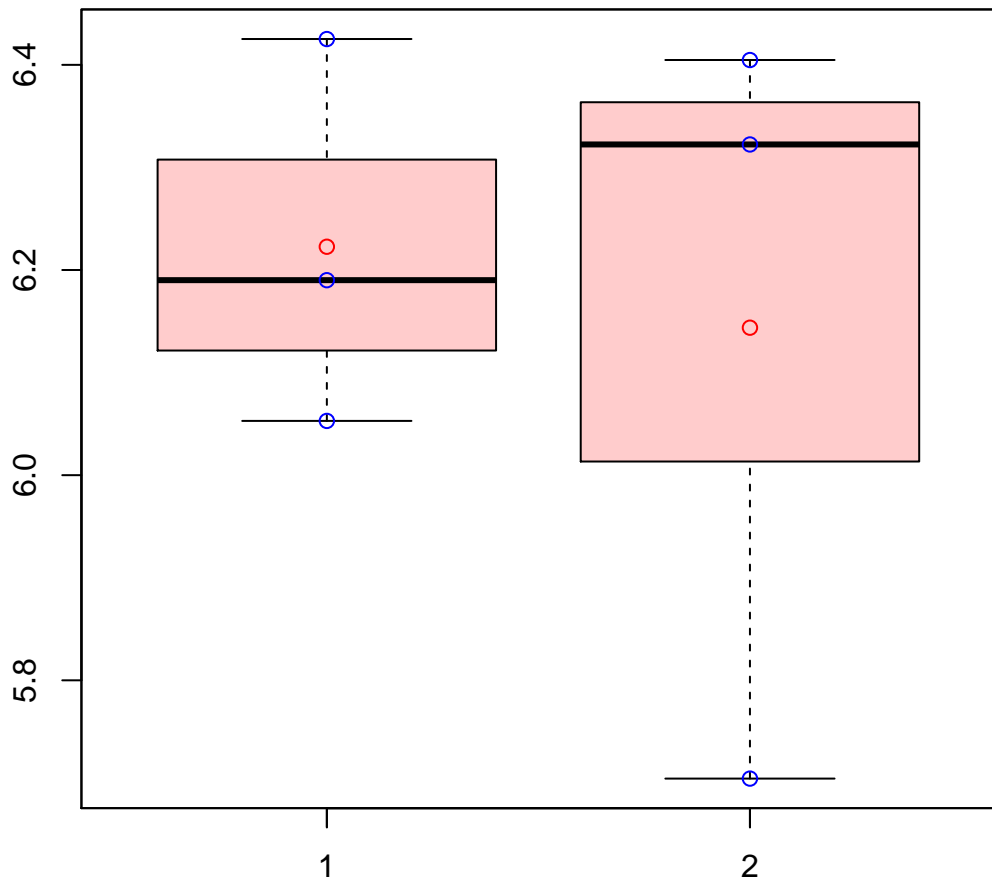

t-Test: p-value = 0.77

# M0TTD9|M0TTD9\_MUSAM

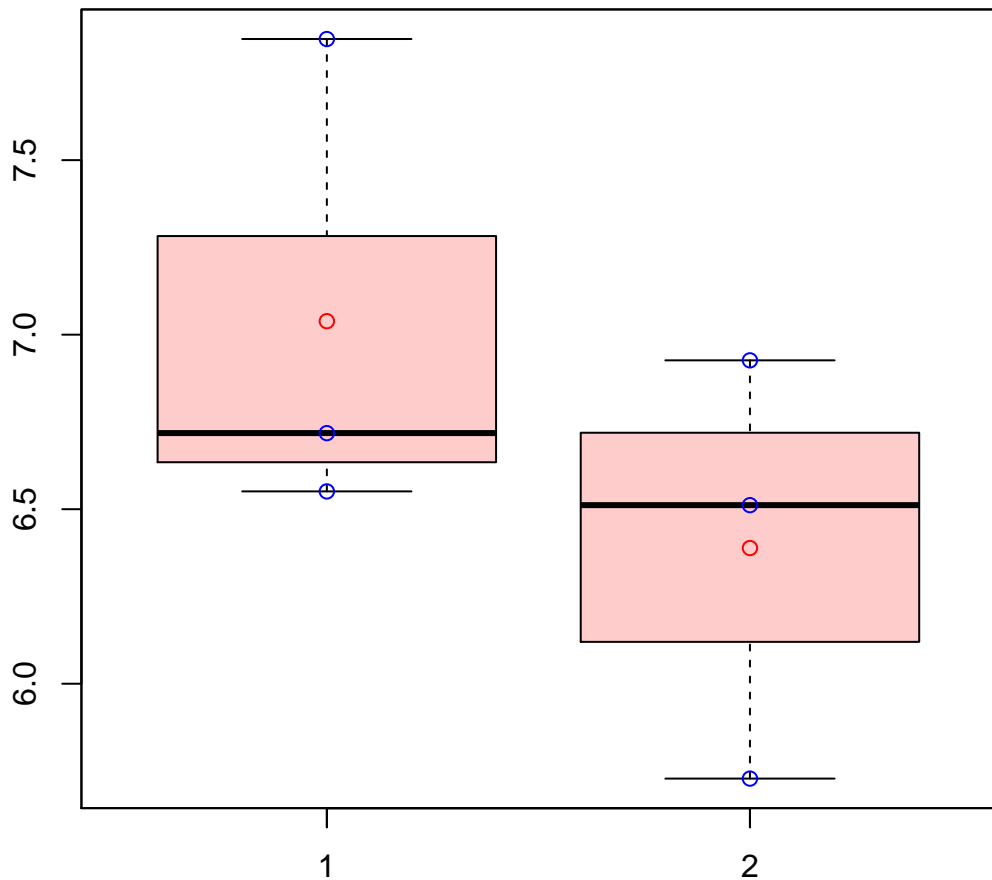

t-Test: p-value = 0.29

# M0TTZ2|M0TTZ2\_MUSAM

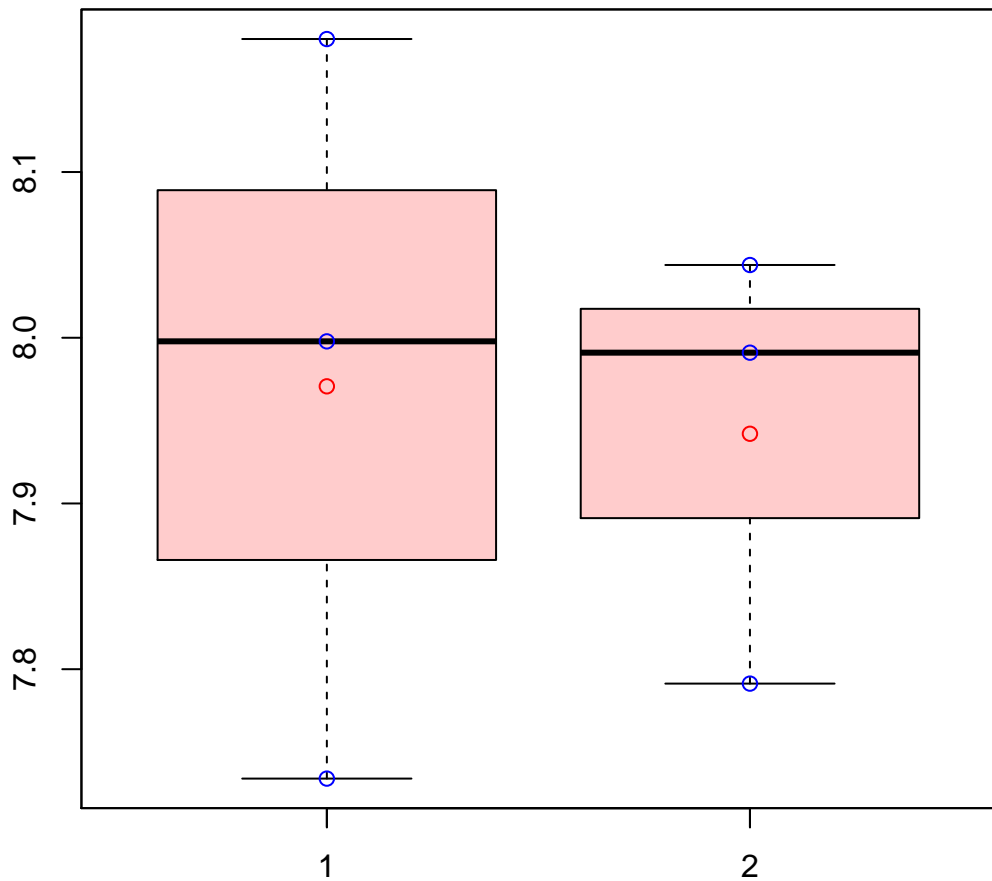

t-Test: p-value = 0.86

# M0TU31|M0TU31\_MUSAM

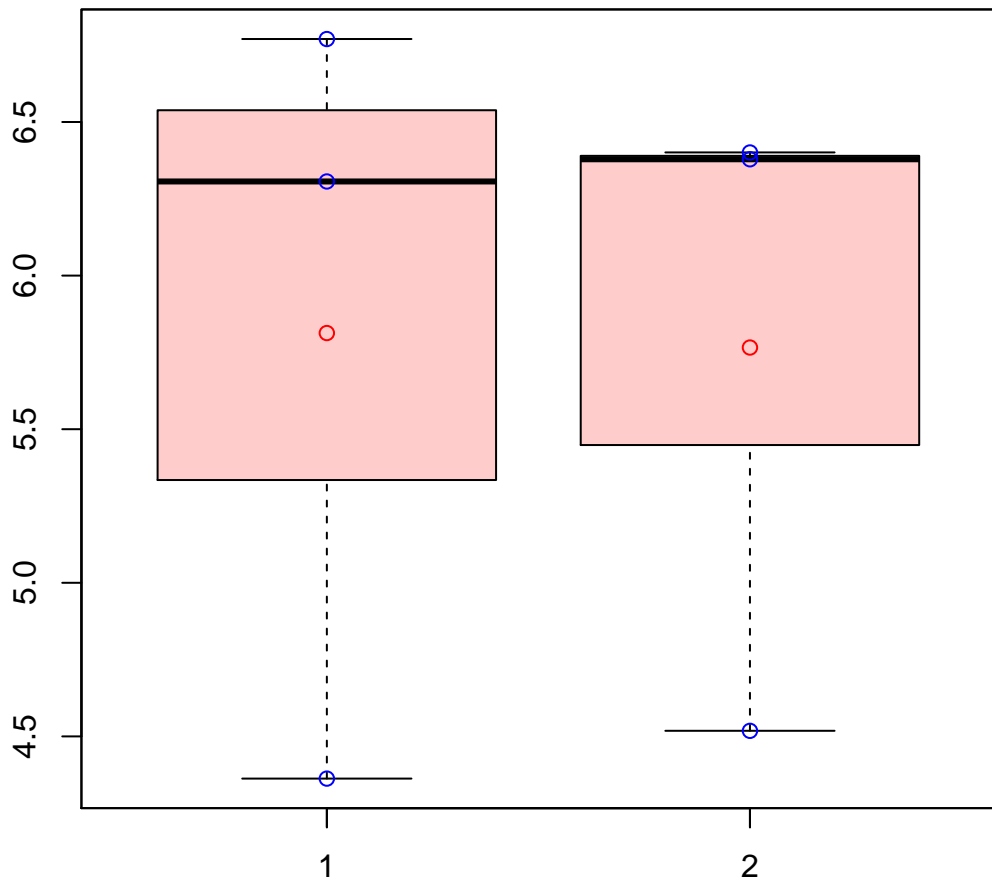

t-Test: p-value = 0.96

# M0TV25|M0TV25\_MUSAM

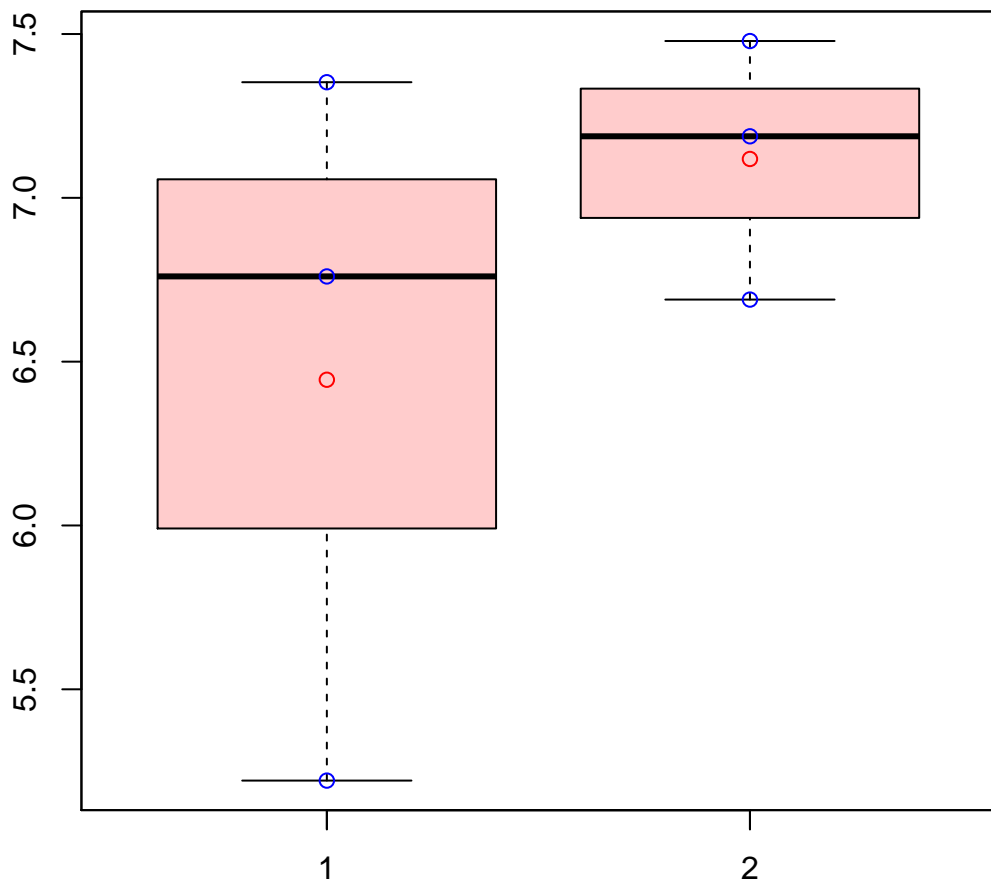

t-Test: p-value = 0.4

# M0TV42|M0TV42\_MUSAM

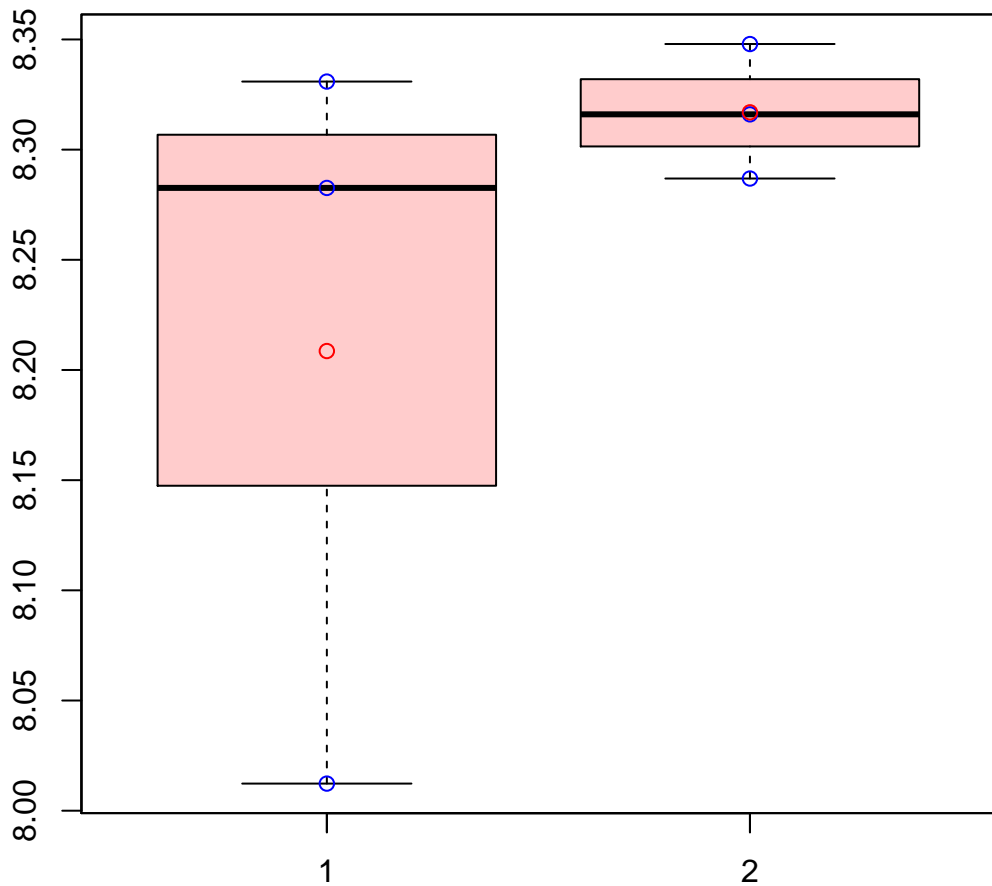

t-Test: p-value = 0.39

# M0TV84|M0TV84\_MUSAM

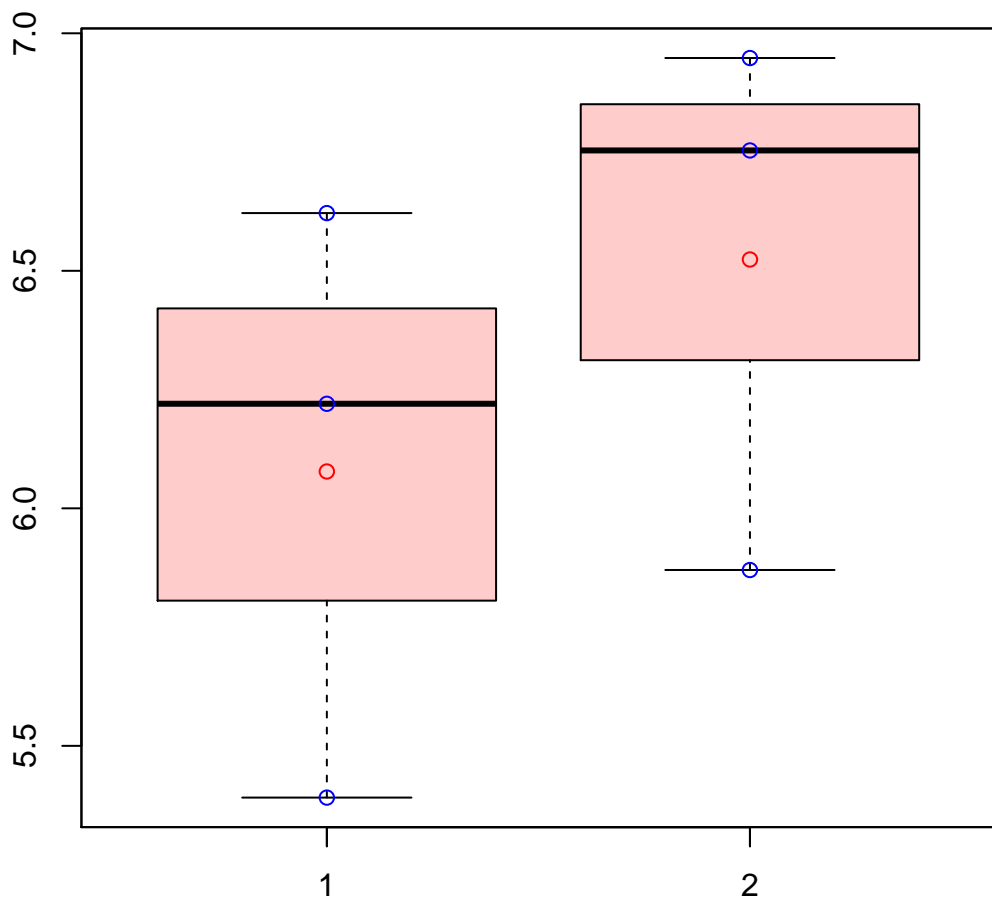

t-Test: p-value = 0.42

# M0TVG6|M0TVG6\_MUSAM

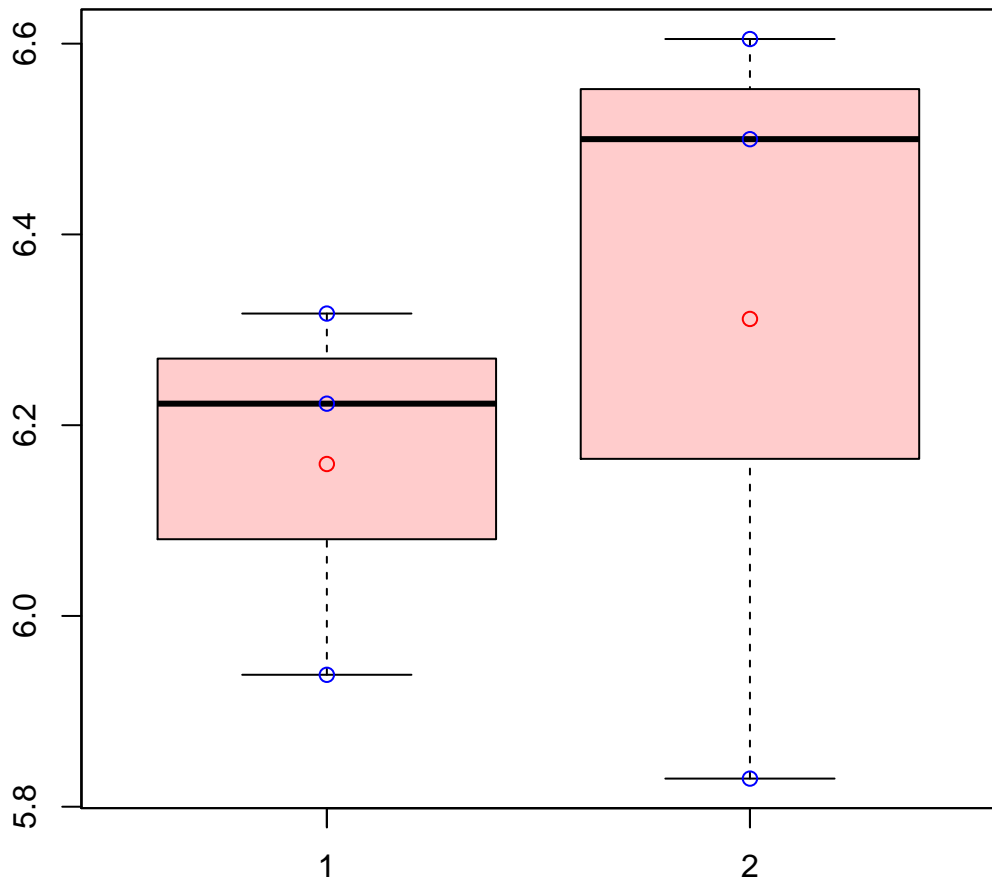

t-Test: p-value = 0.61



# M0TVU9|M0TVU9\_MUSAM

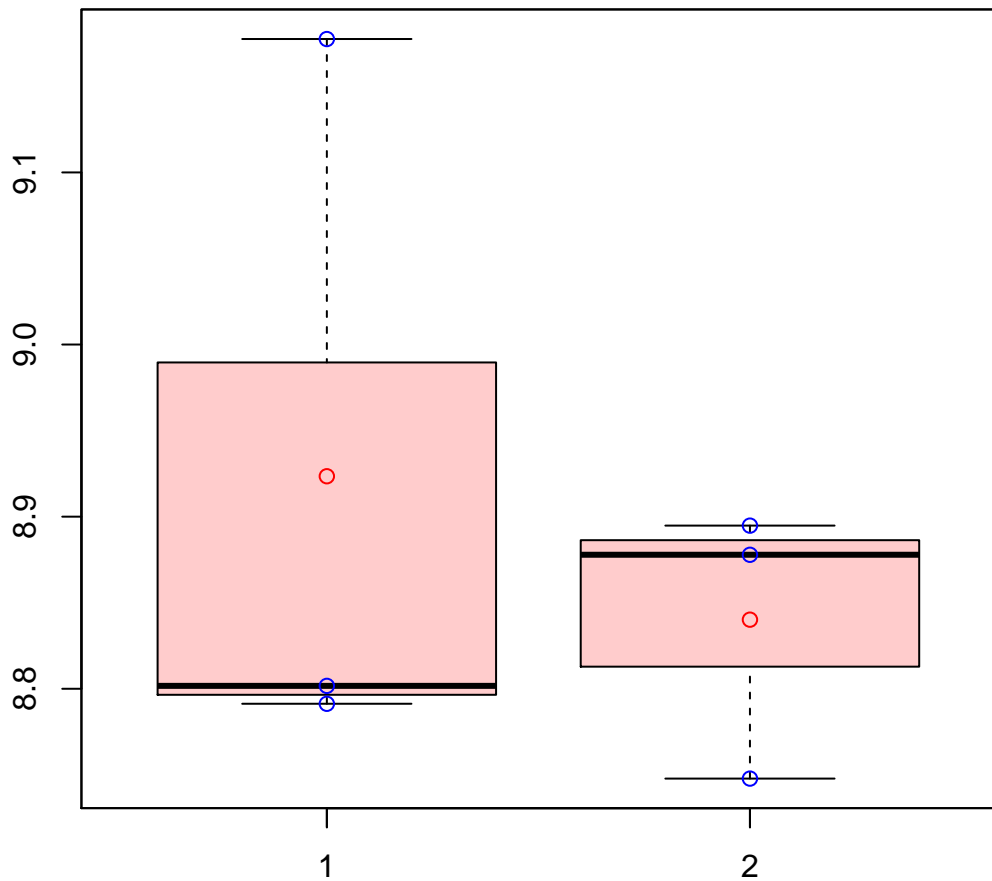

t-Test: p-value = 0.59

# M0TVY0|M0TVY0\_MUSAM

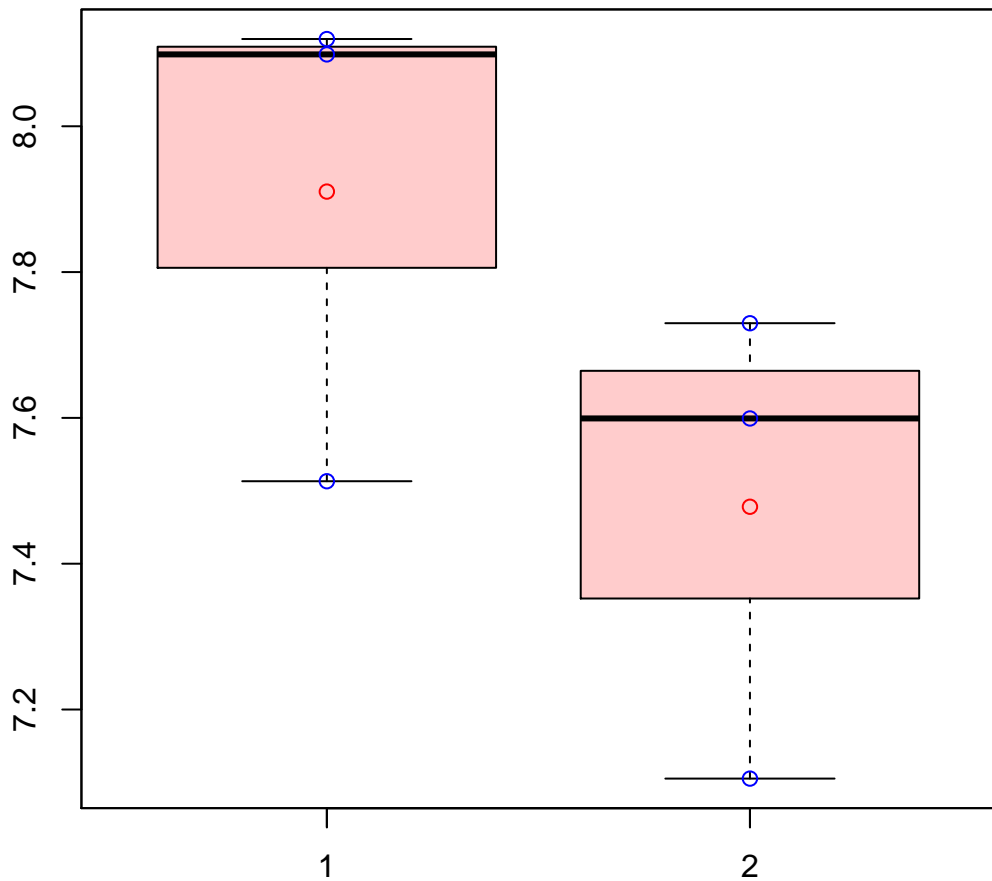

t-Test: p-value = 0.19

# M0TW38|M0TW38\_MUSAM

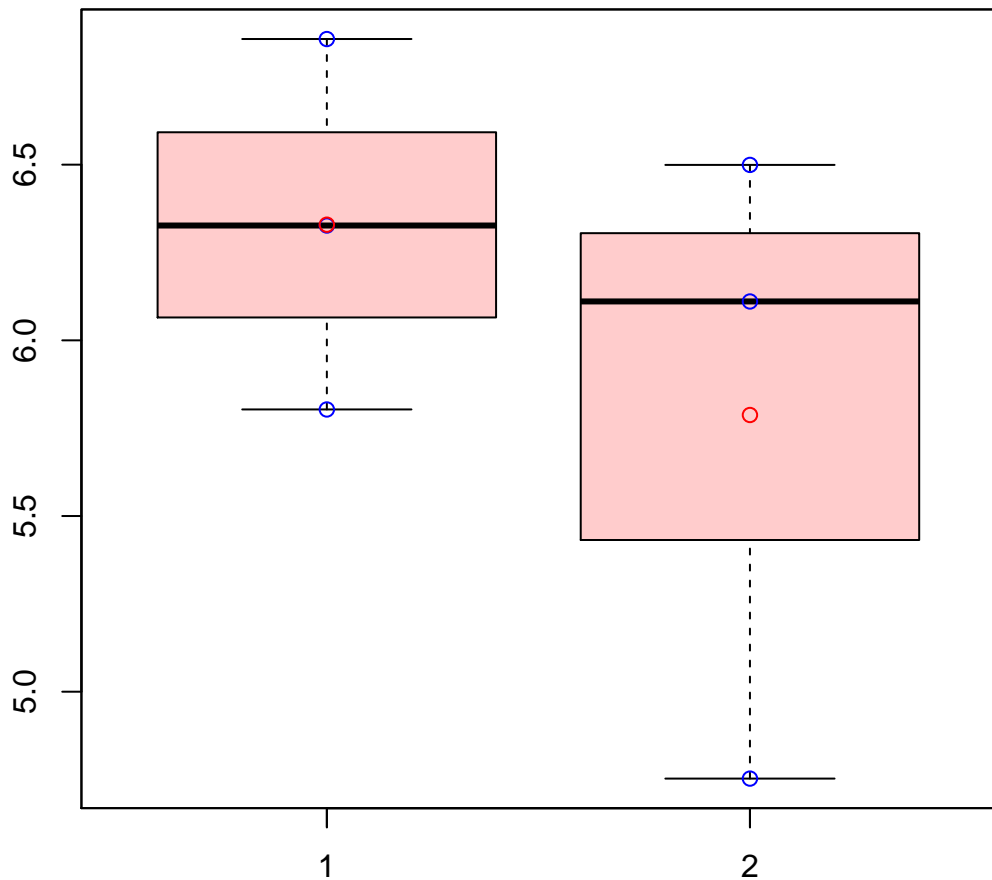

t-Test: p-value = 0.44

# M0TW86|M0TW86\_MUSAM

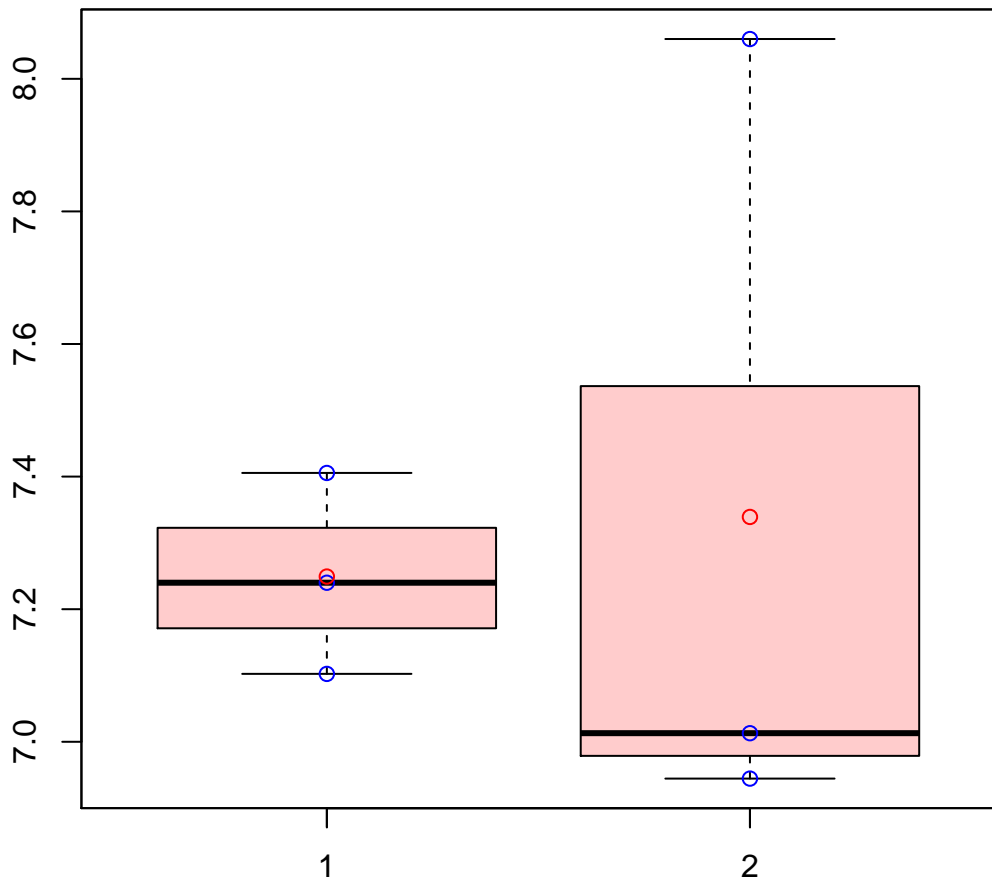

t-Test: p-value = 0.83

# M0TWD8|M0TWD8\_MUSAM

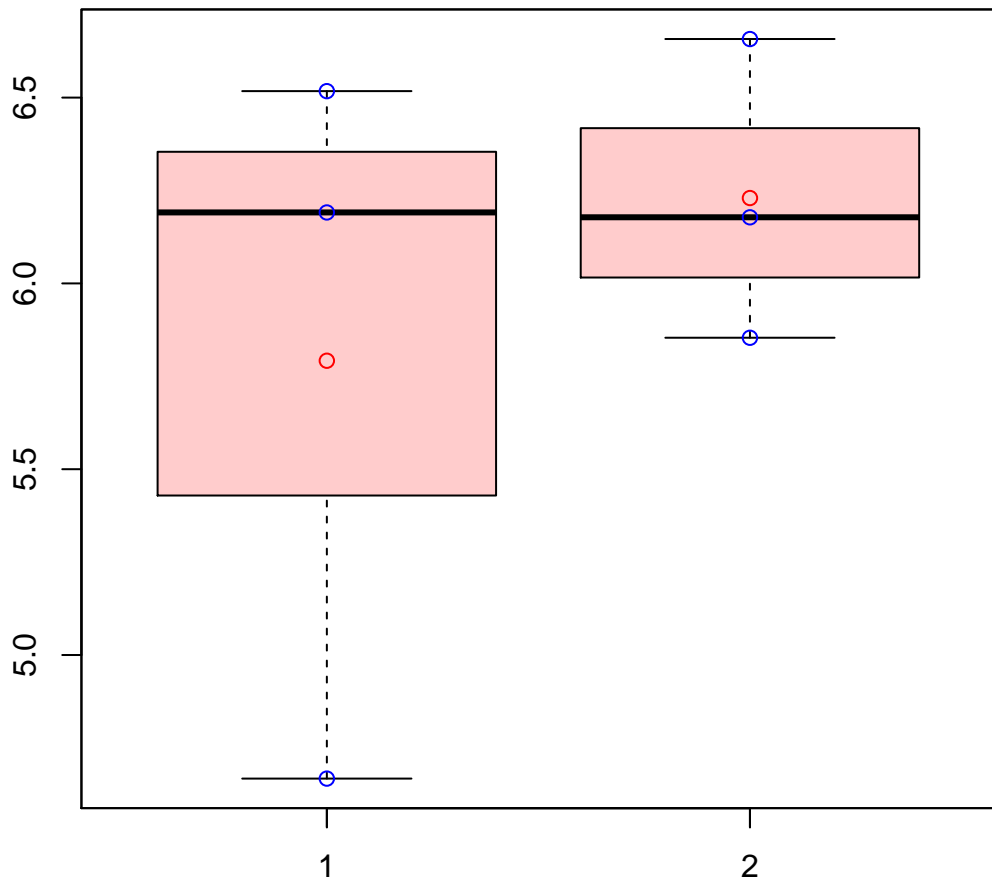

t-Test: p-value = 0.53

# M0TWQ0|M0TWQ0\_MUSAM

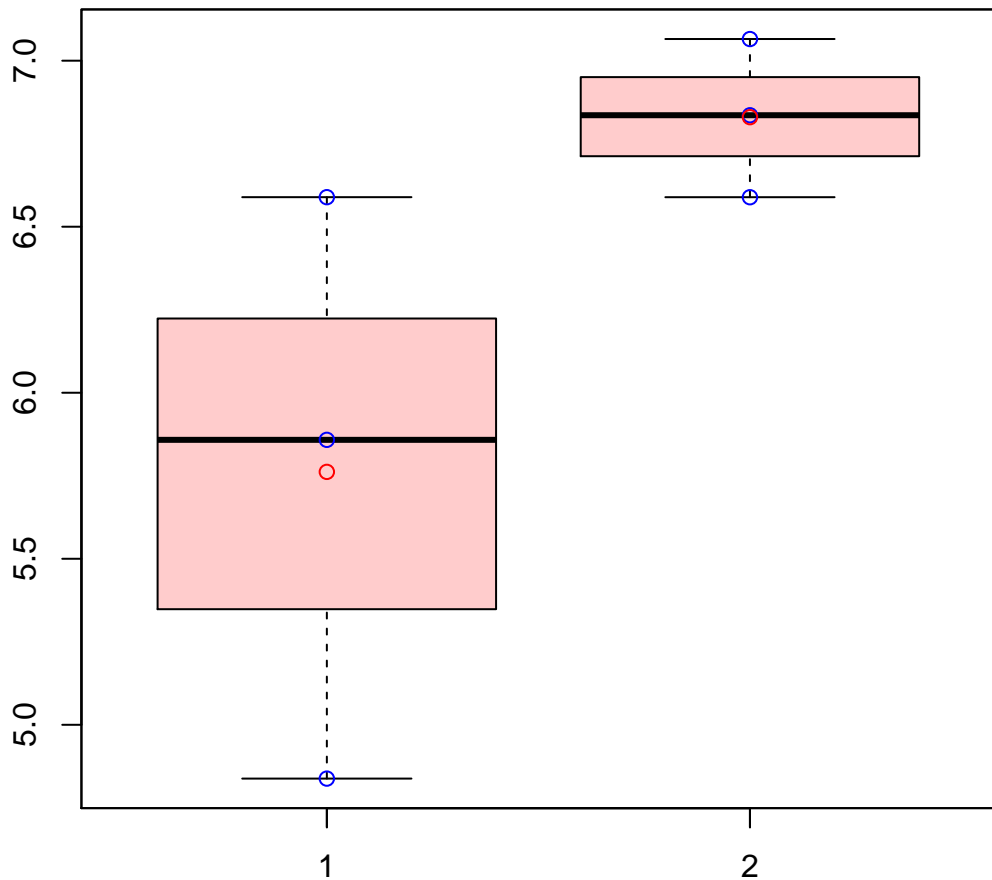

t-Test: p-value = 0.16

# M0TWQ7|M0TWQ7\_MUSAM

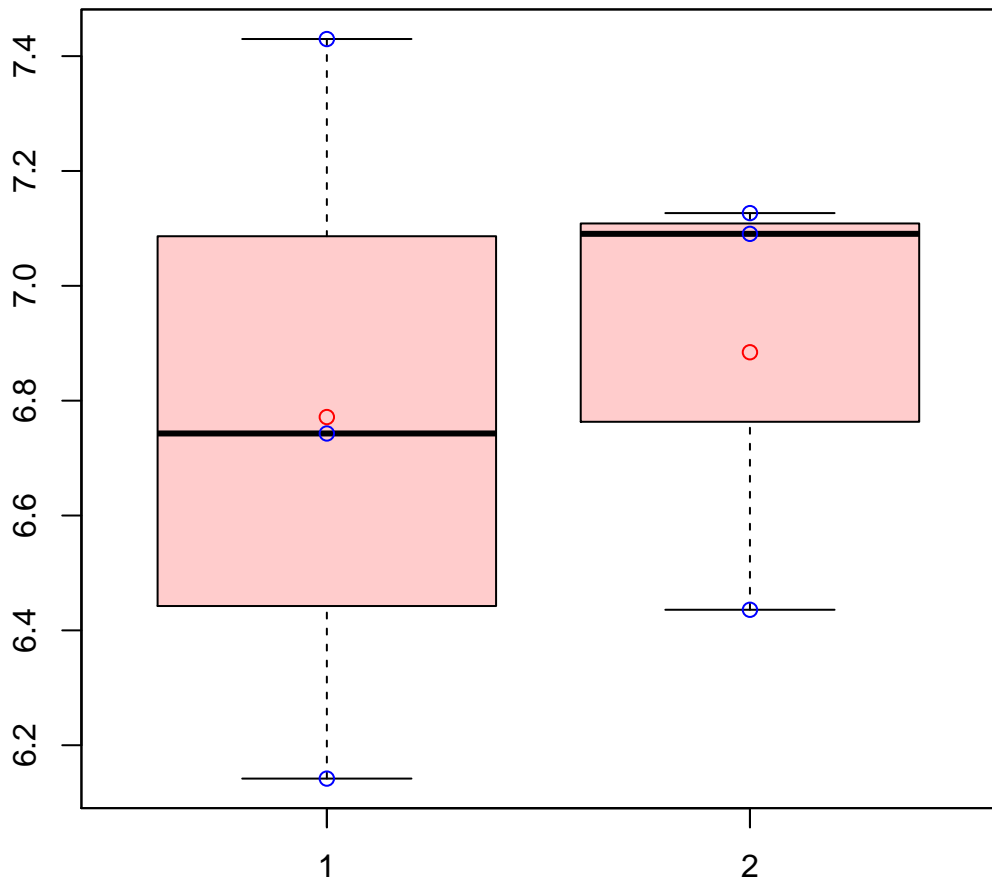

t-Test: p-value = 0.81

# M0TX42|M0TX42\_MUSAM

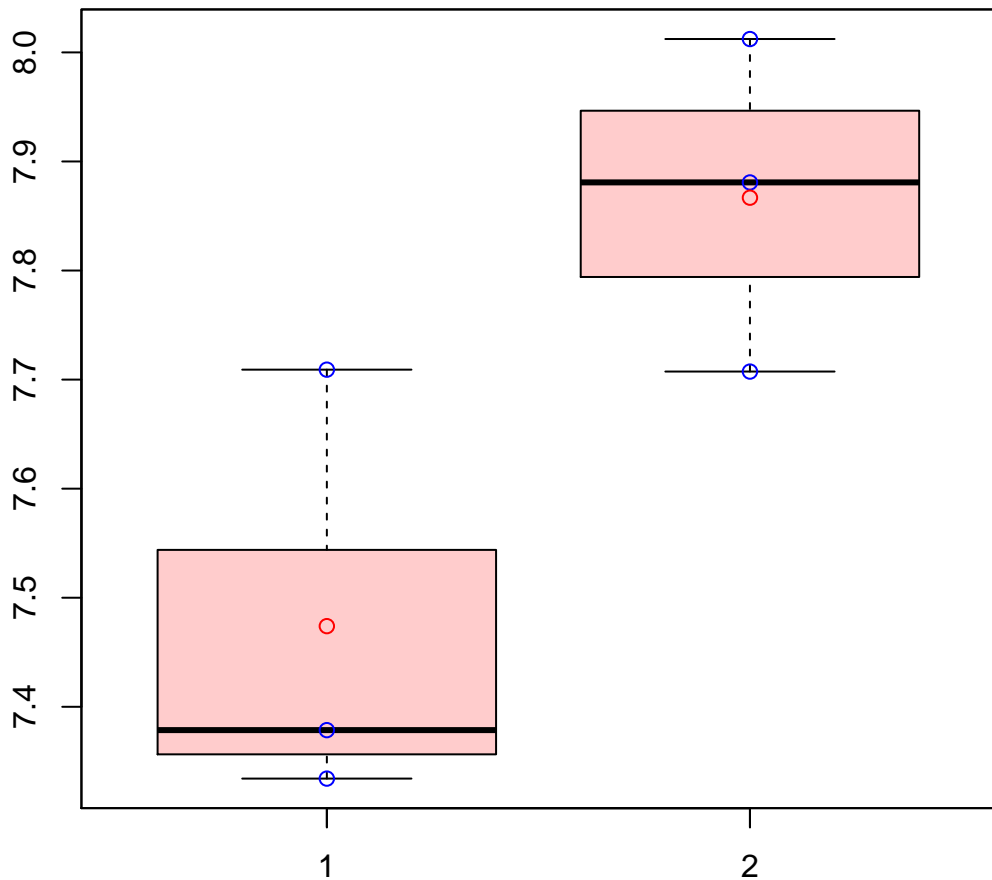

t-Test: p-value = 0.06



# M0TXB5|M0TXB5\_MUSAM

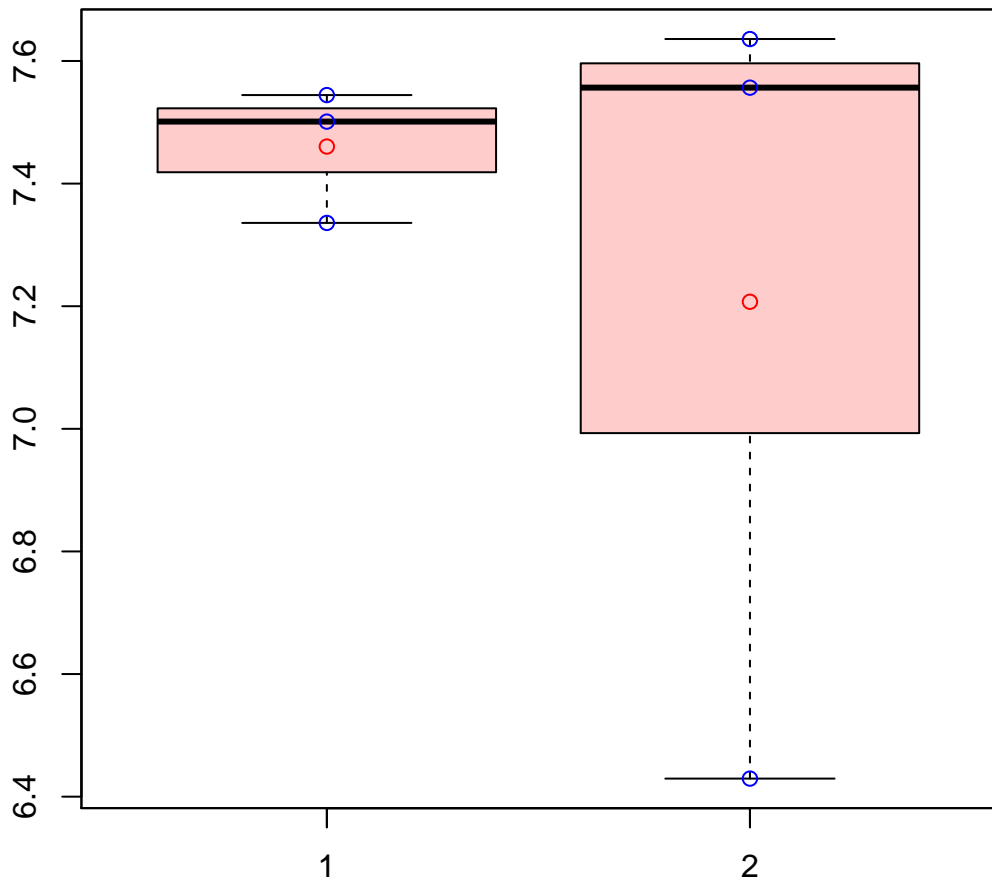

t-Test: p-value = 0.58

# M0TXG4|M0TXG4\_MUSAM

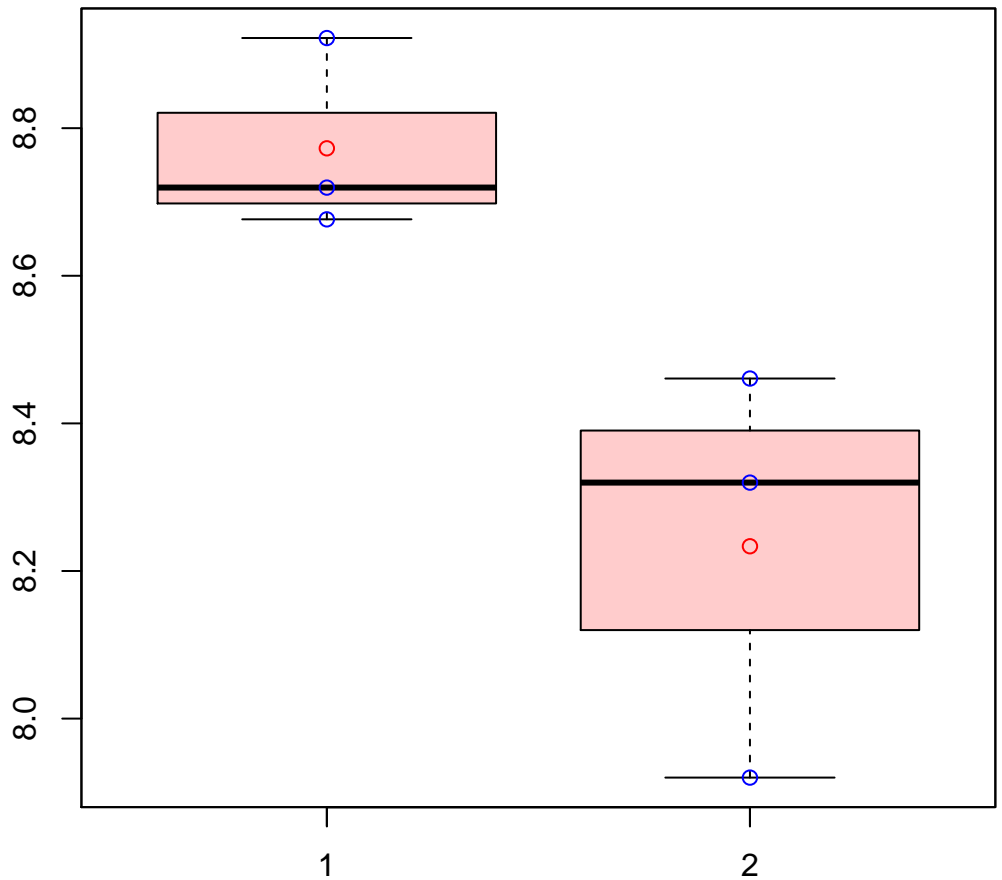

t-Test: p-value = 0.06

# M0TXL2|M0TXL2\_MUSAM

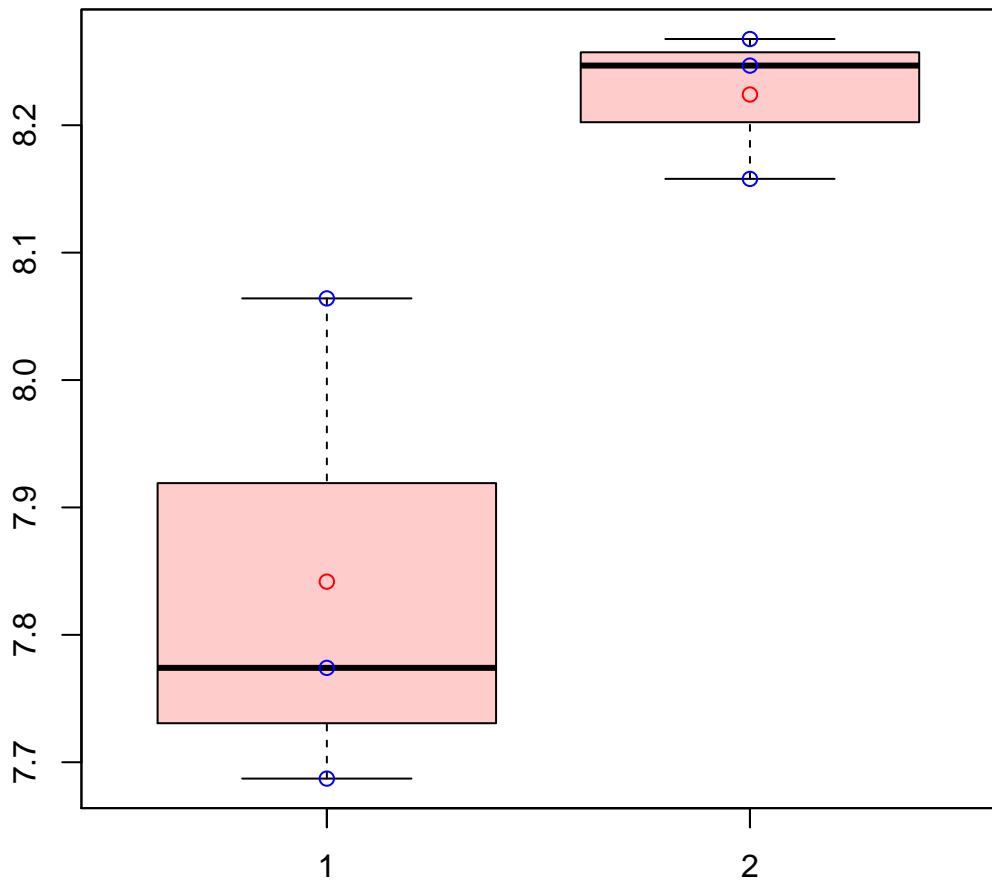

t-Test: p-value = 0.07

# M0TY01|M0TY01\_MUSAM

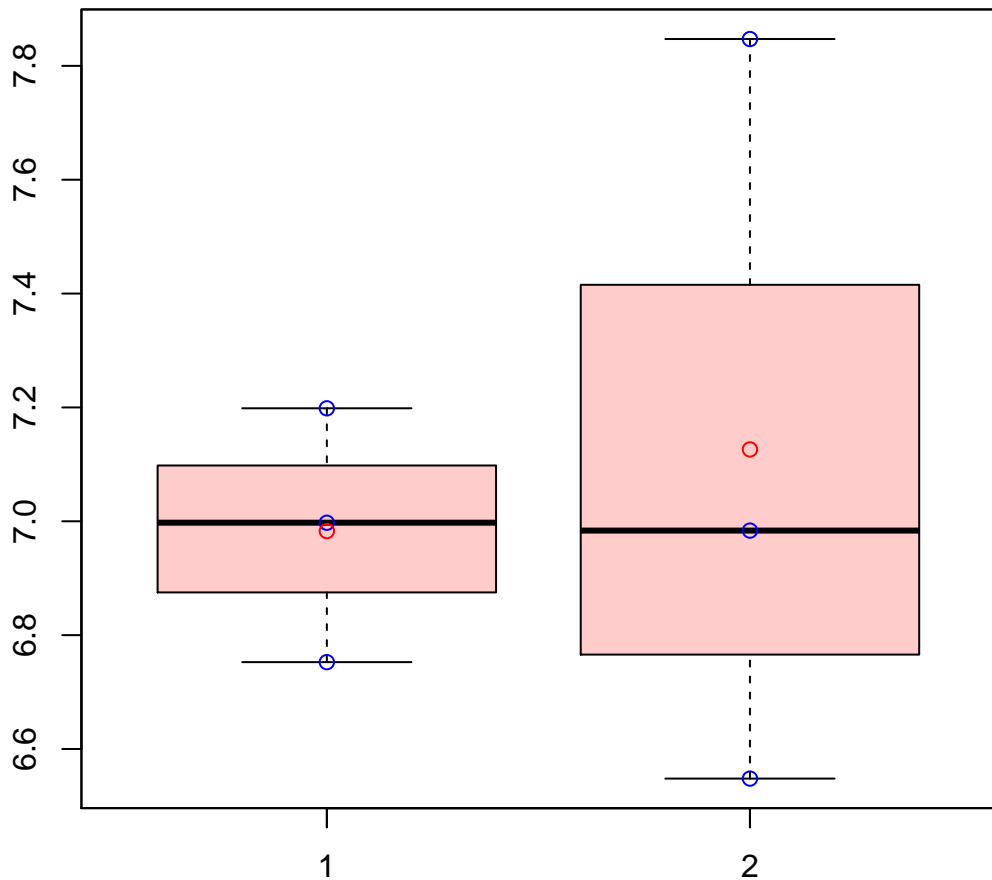

t-Test: p-value = 0.75

# M0TY90|M0TY90\_MUSAM

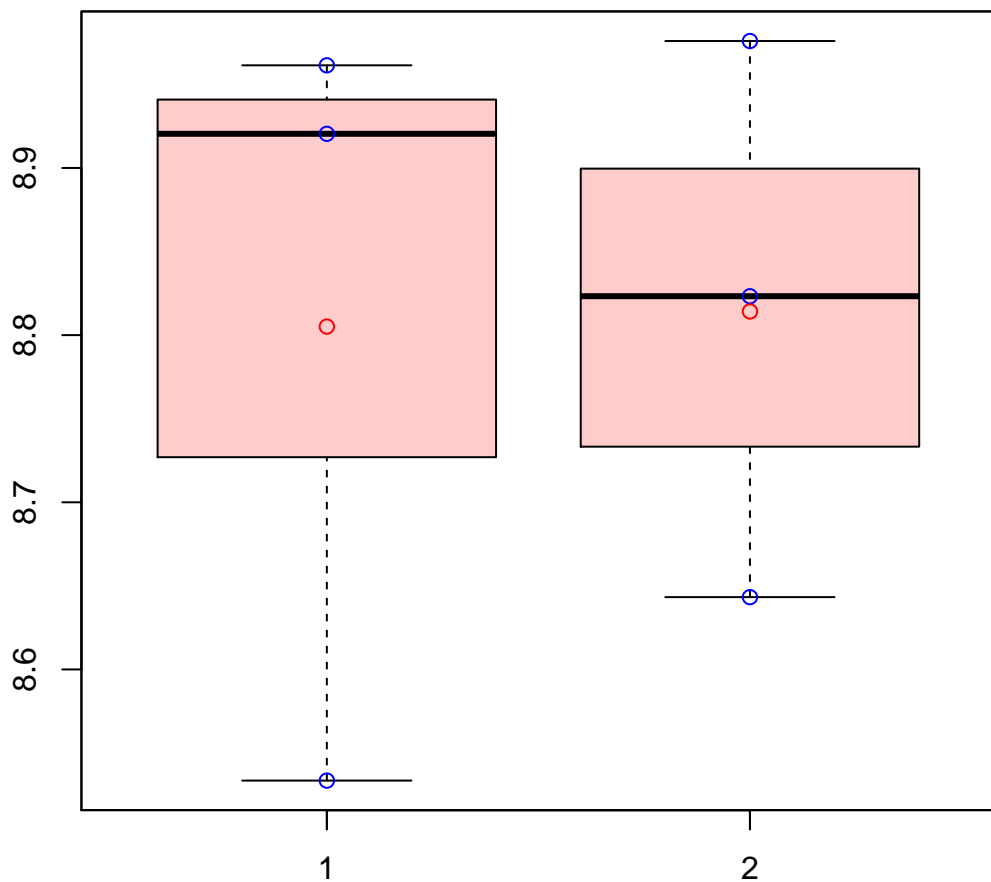

t-Test: p-value = 0.96

# M0TYD4|M0TYD4\_MUSAM

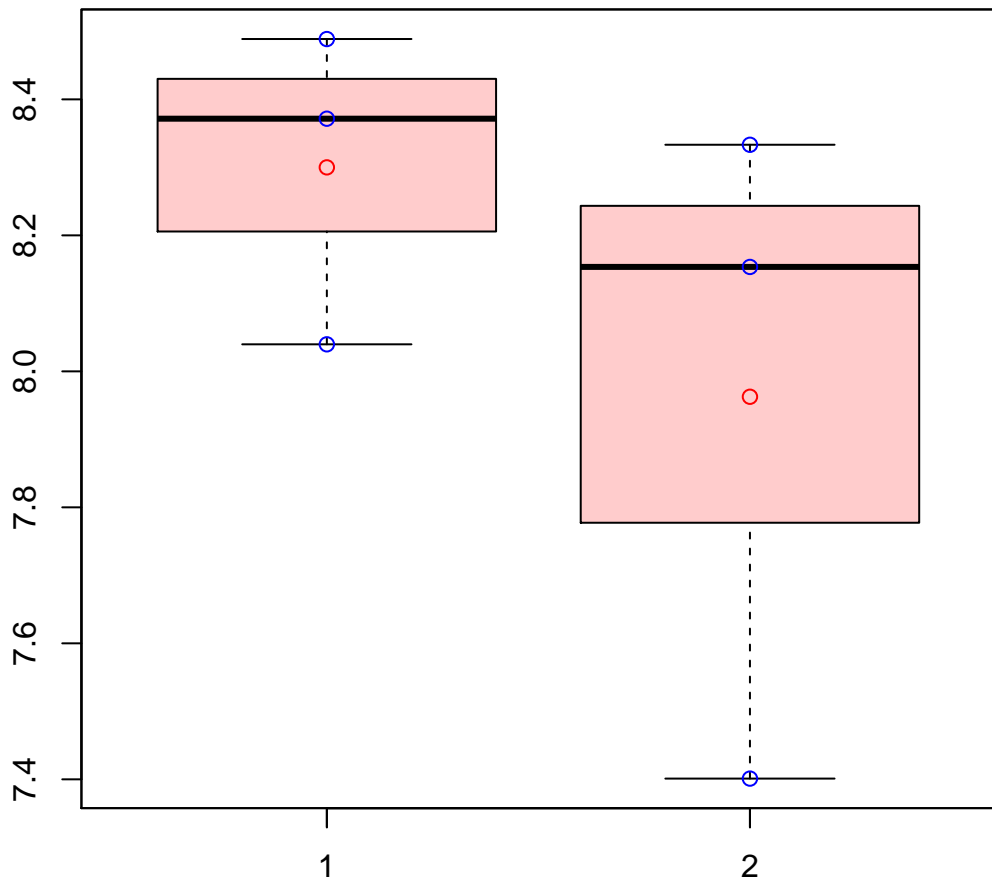

t-Test: p-value = 0.37

# M0TZA6|M0TZA6\_MUSAM

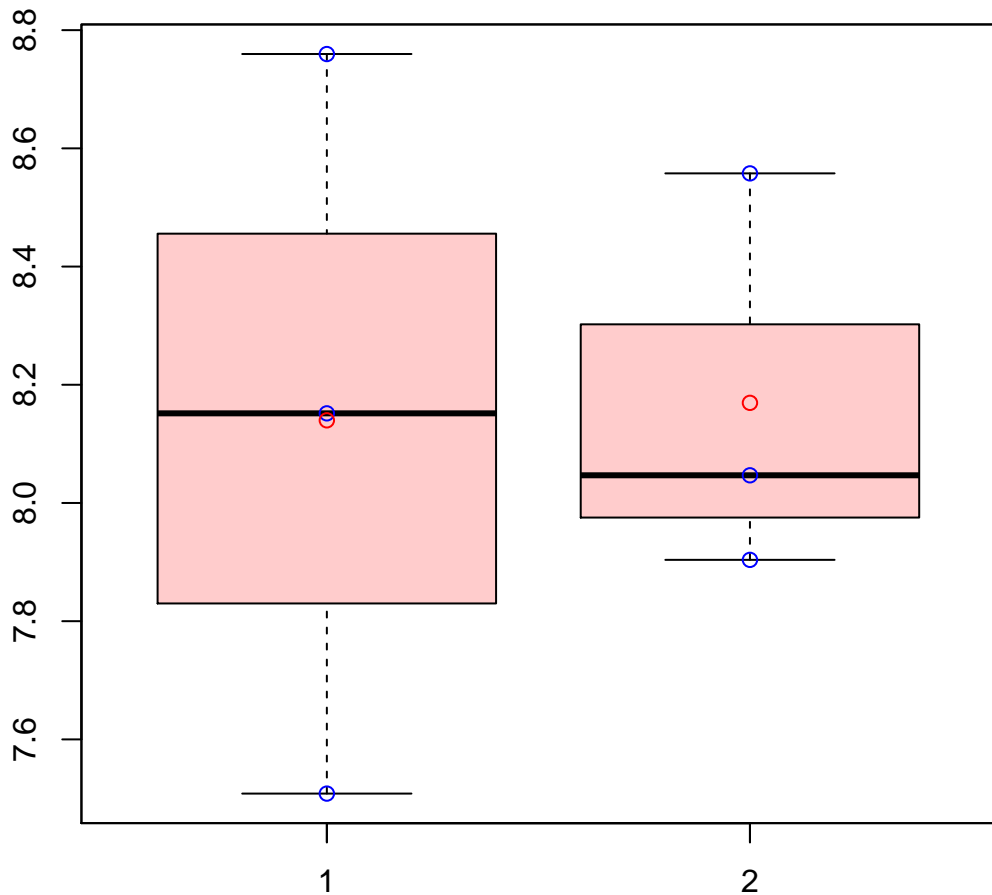

t-Test: p-value = 0.95

# M0TZE8|M0TZE8\_MUSAM

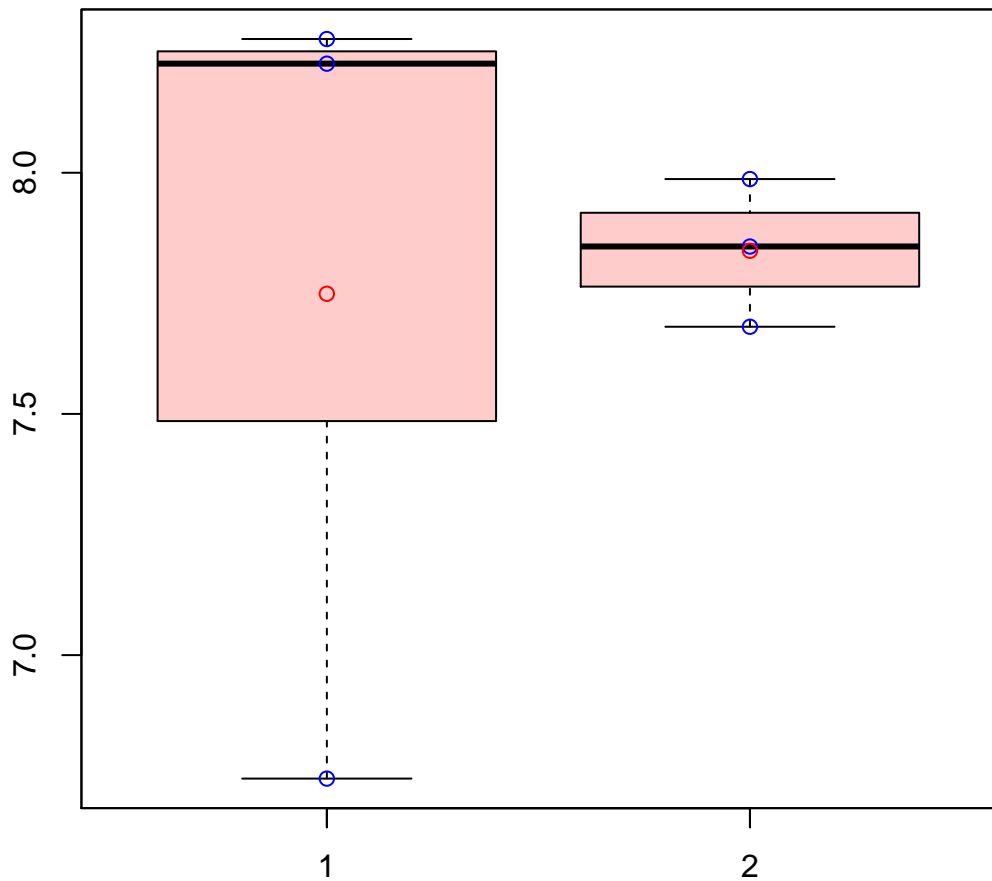

t-Test: p-value = 0.88



# M0TZF6|M0TZF6\_MUSAM

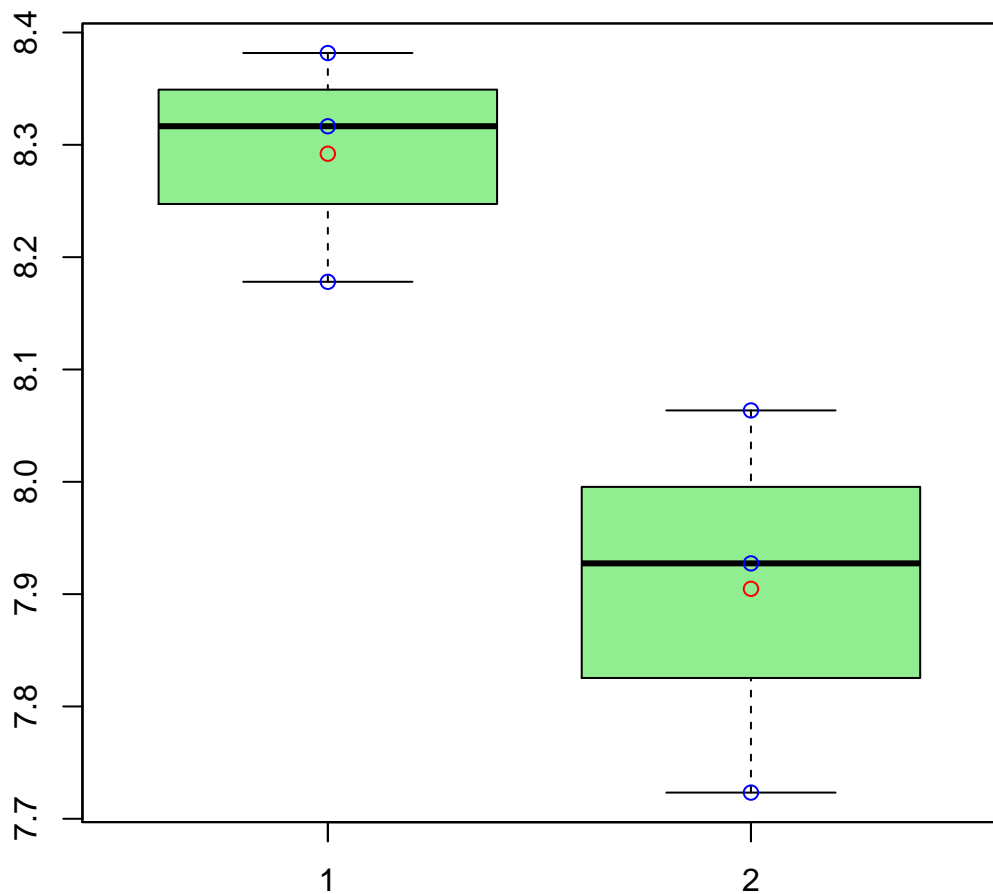

t-Test: p-value = 0.04

# M0TZM8|M0TZM8\_MUSAM

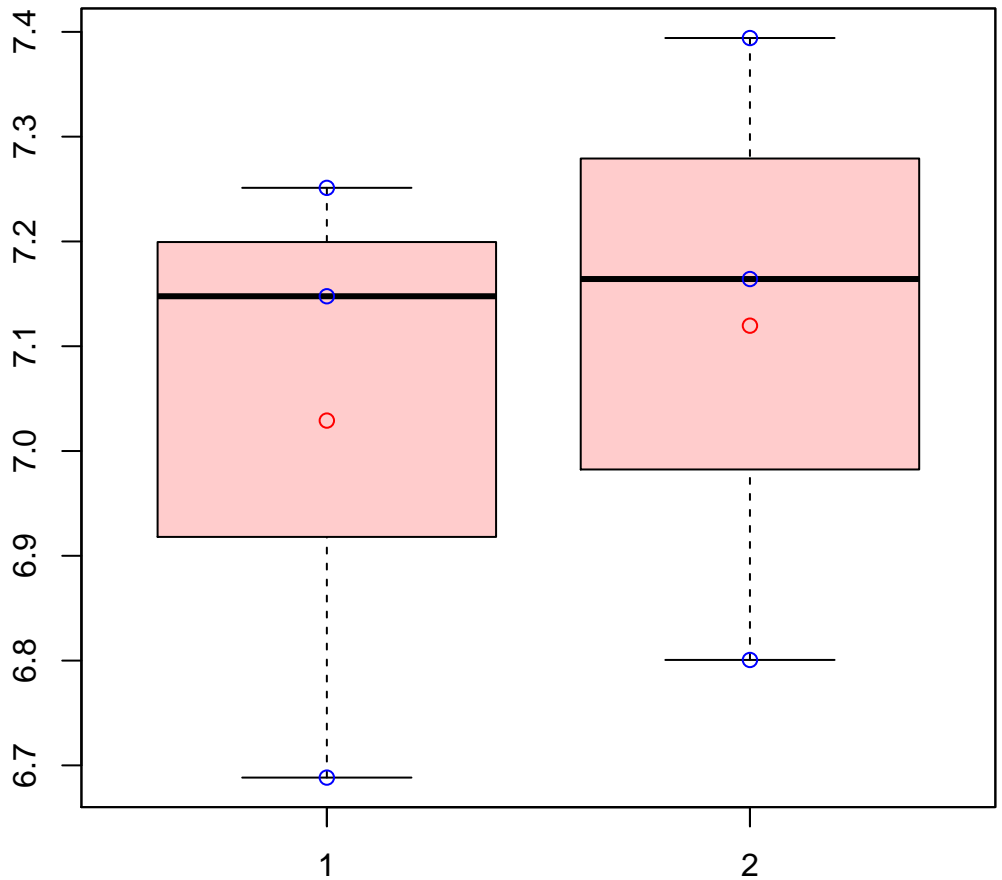

t-Test: p-value = 0.73

# M0TZX8|M0TZX8\_MUSAM

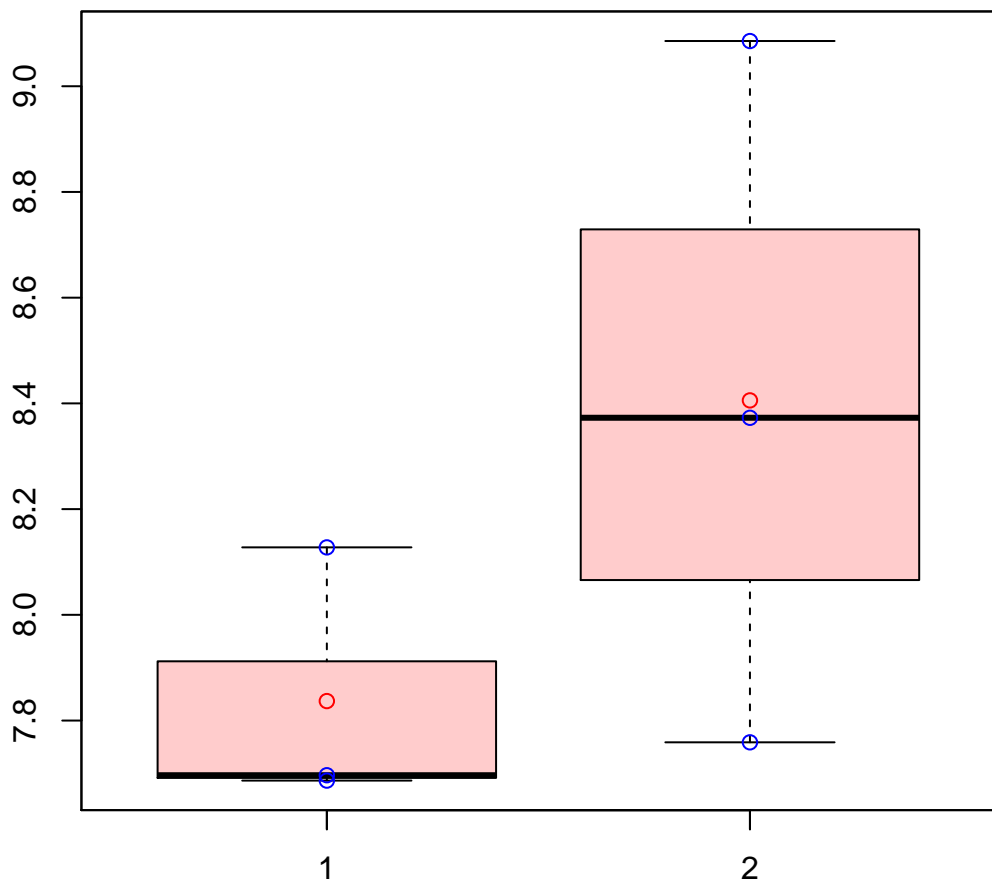

t-Test: p-value = 0.27

# M0U0B7|M0U0B7\_MUSAM

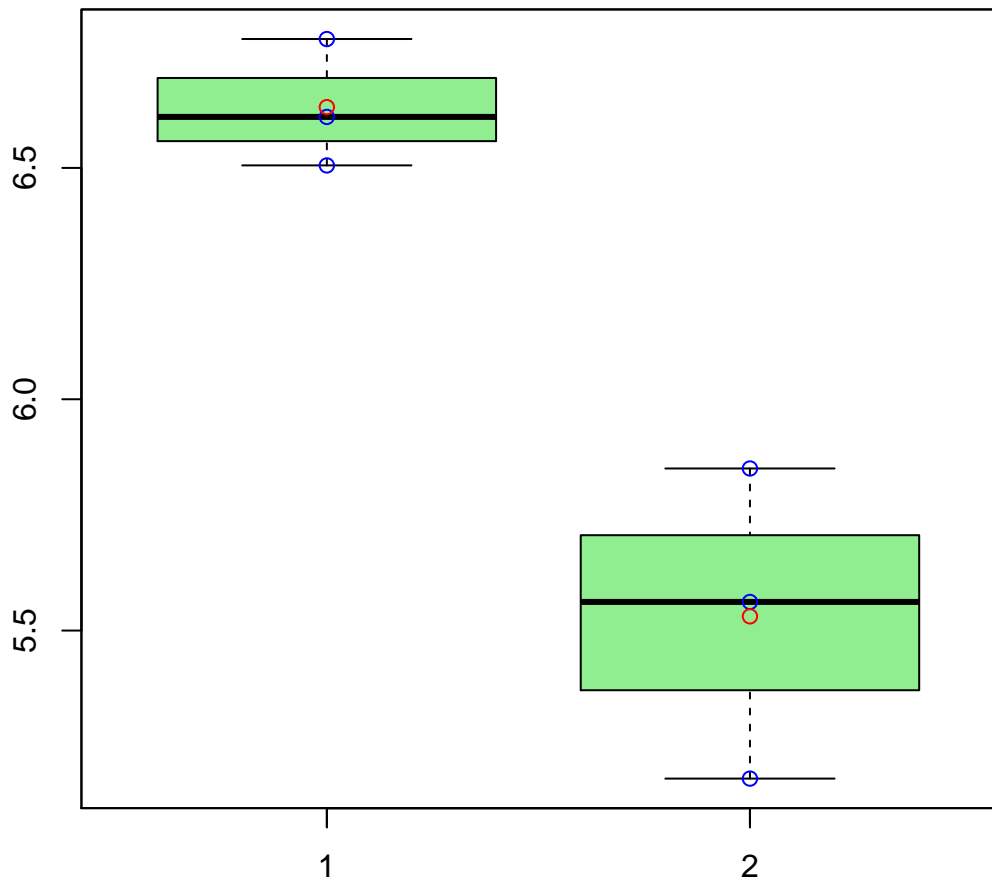

t-Test: p-value = 0.02

# M0U0C4|M0U0C4\_MUSAM

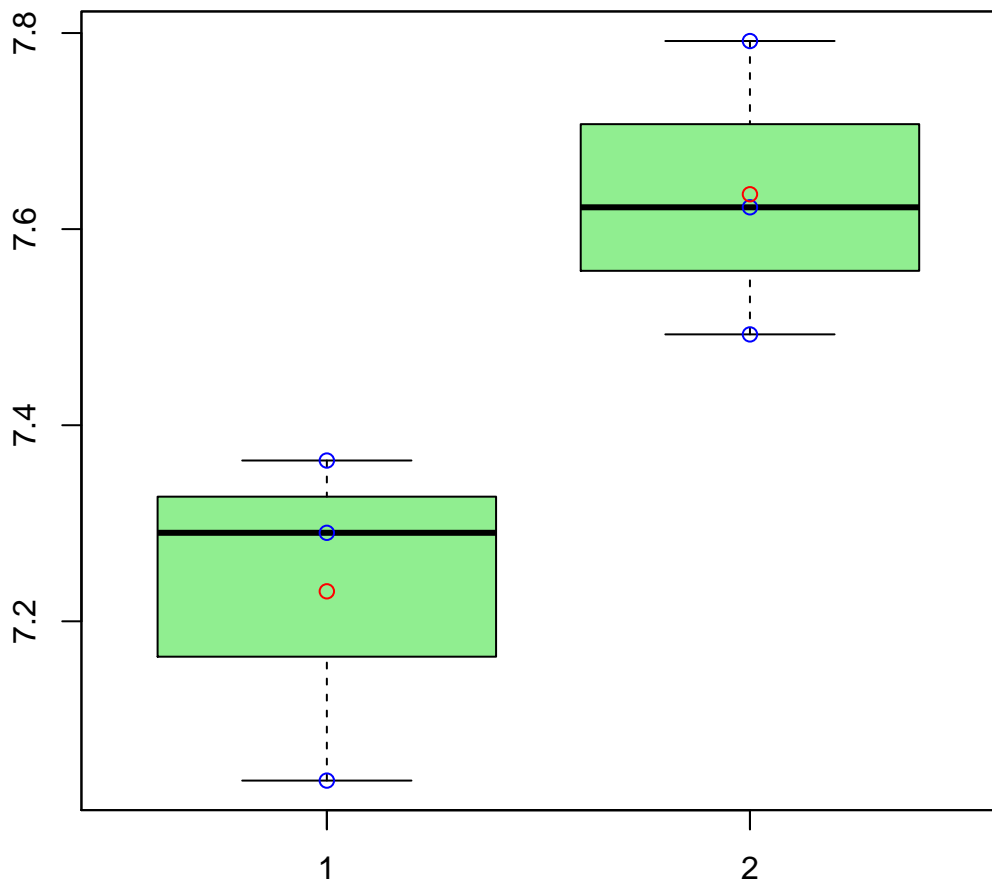

t-Test: p-value = 0.04

# M0U0C6|M0U0C6\_MUSAM

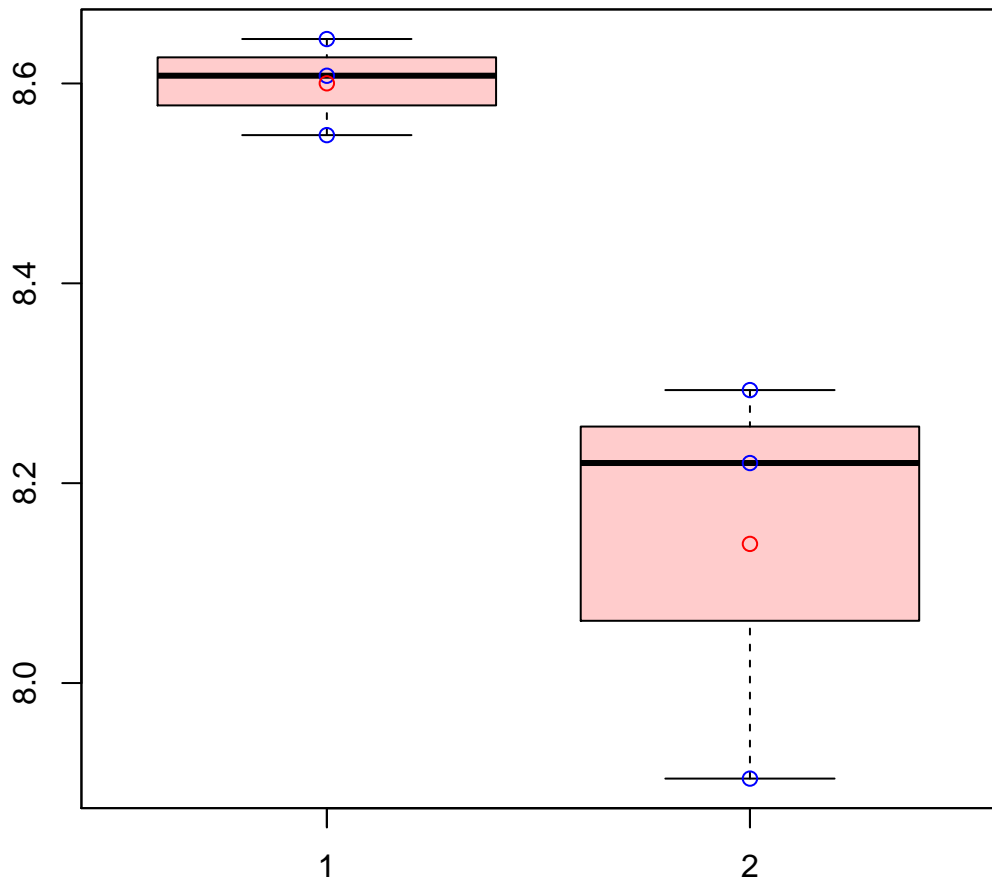

t-Test: p-value = 0.05

# MOU010|MOU010\_MUSAM

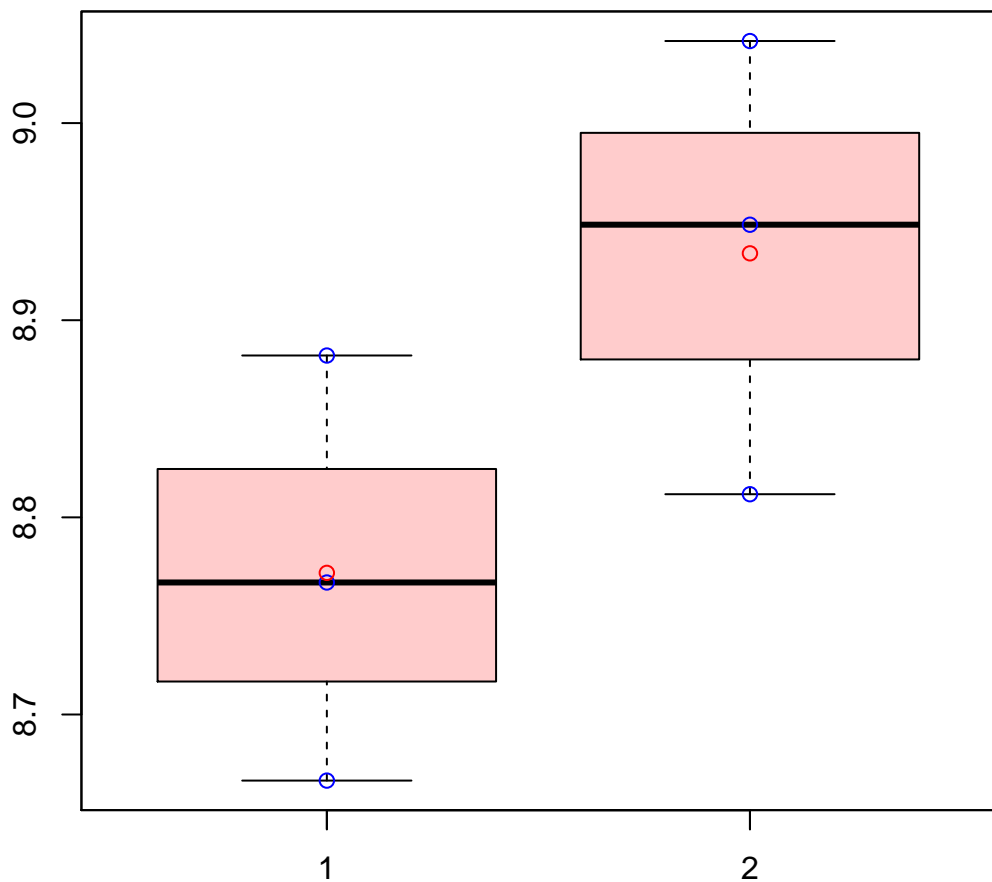

t-Test: p-value = 0.15

# M0U0J3|M0U0J3\_MUSAM

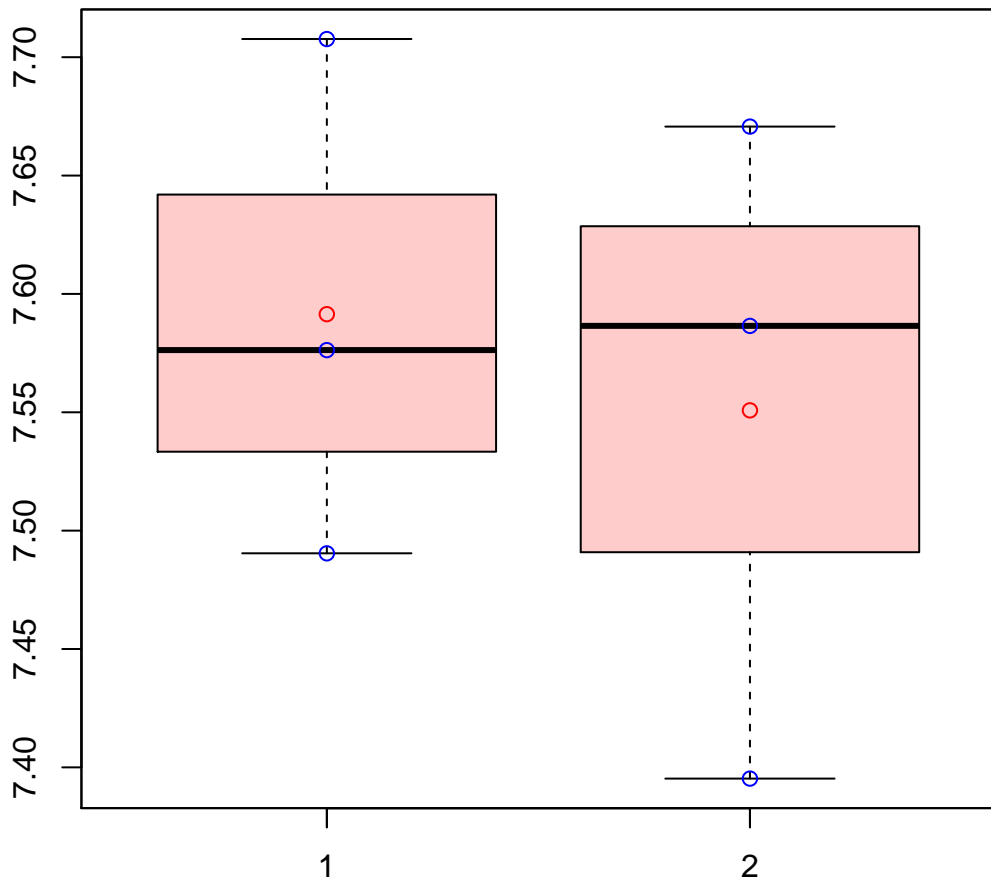

t-Test: p-value = 0.71



# MOUOKO|MOUOKO\_MUSAM

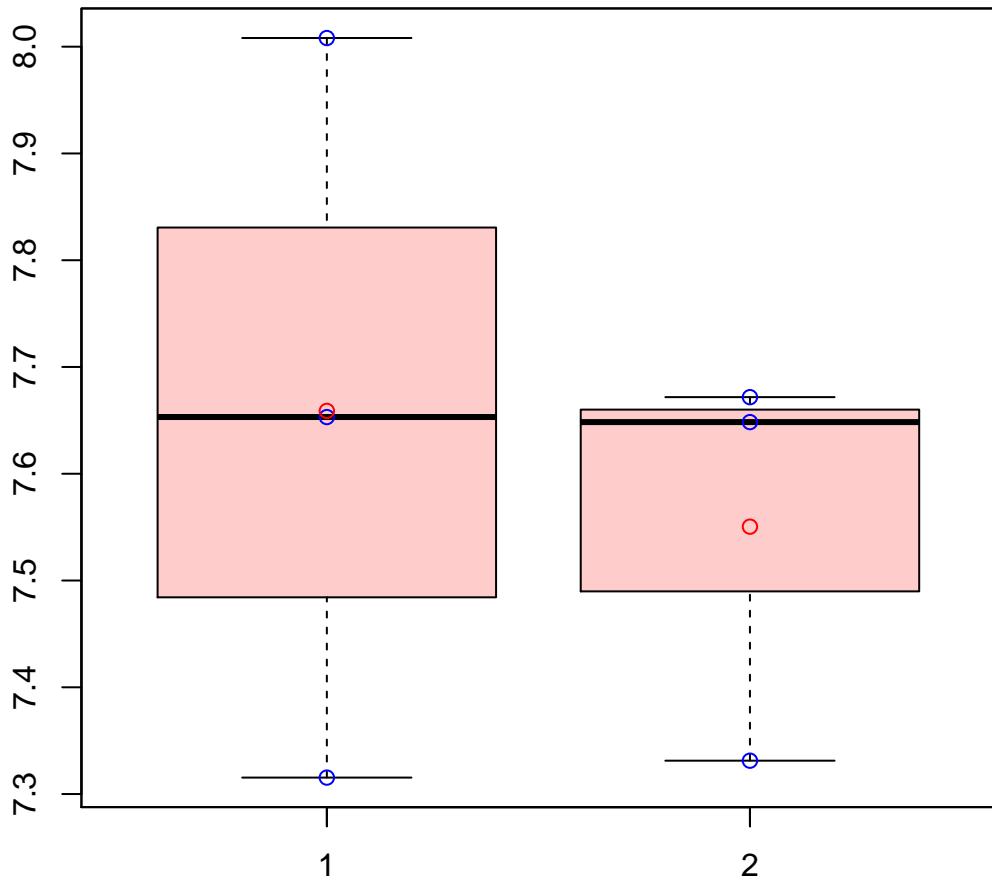

t-Test: p-value = 0.67

# M0U0M5|M0U0M5\_MUSAM

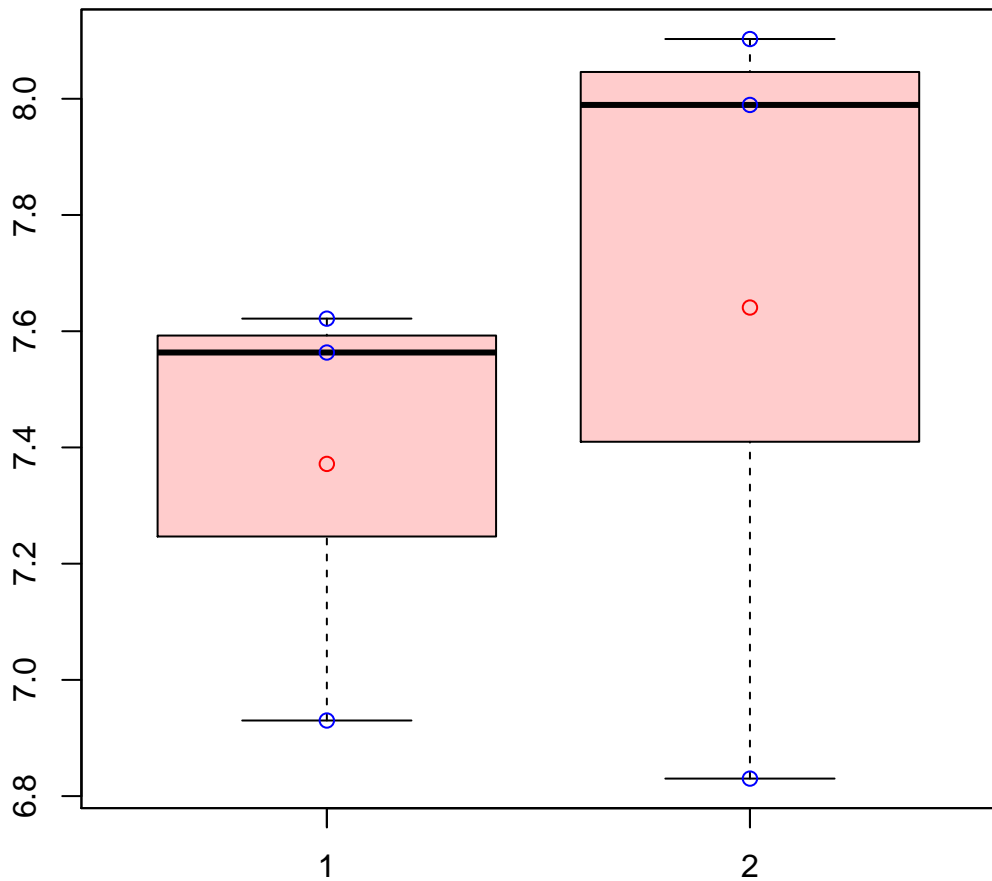

t-Test: p-value = 0.6

# M0U1A3|M0U1A3\_MUSAM

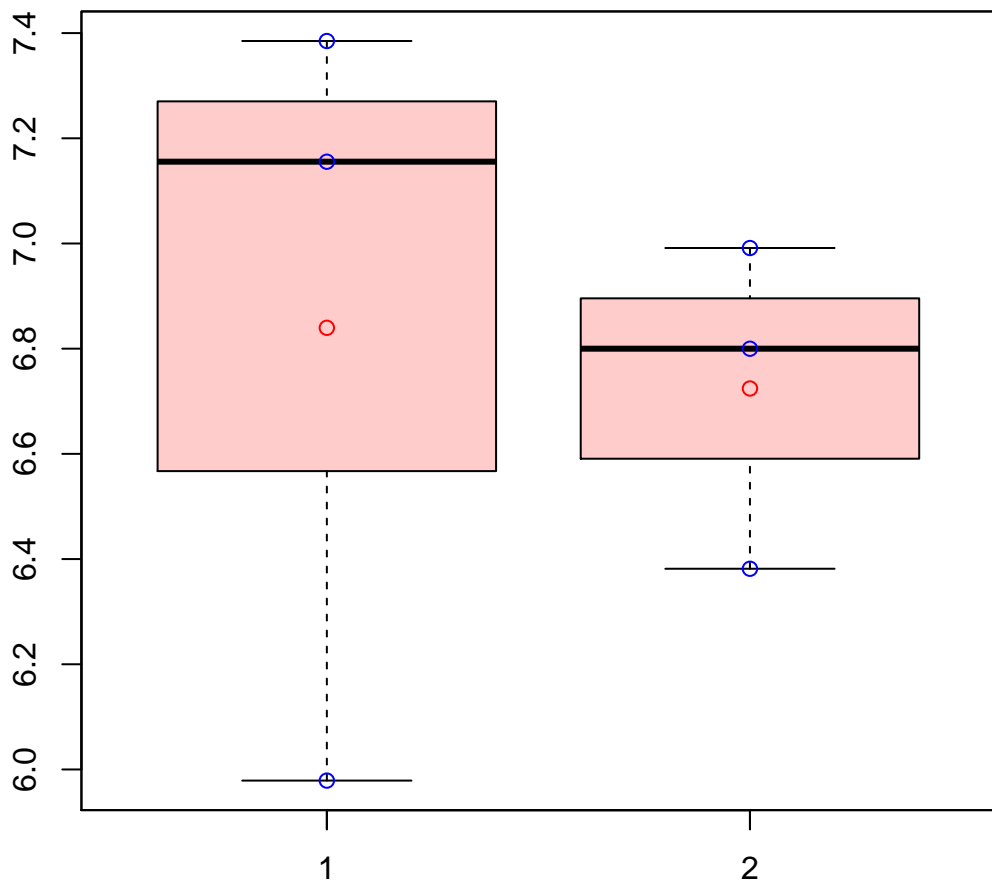

t-Test: p-value = 0.82

# M0U1K9|M0U1K9\_MUSAM

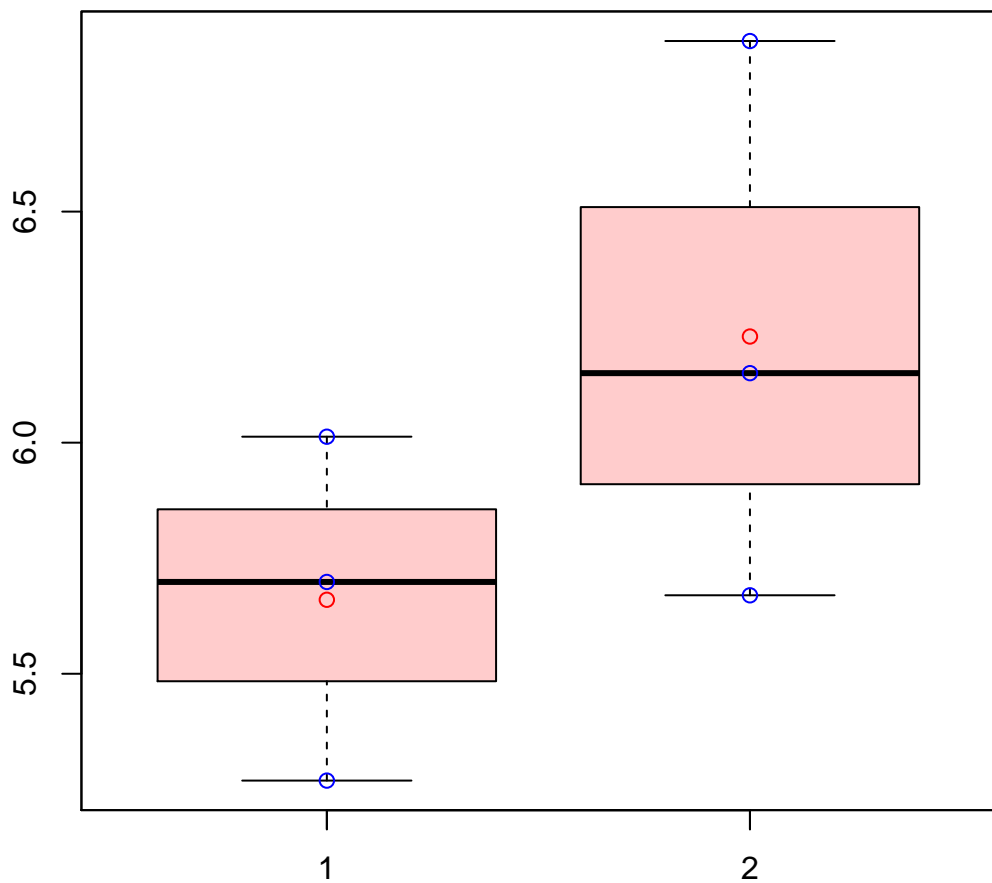

t-Test: p-value = 0.25

# M0U1M6|M0U1M6\_MUSAM

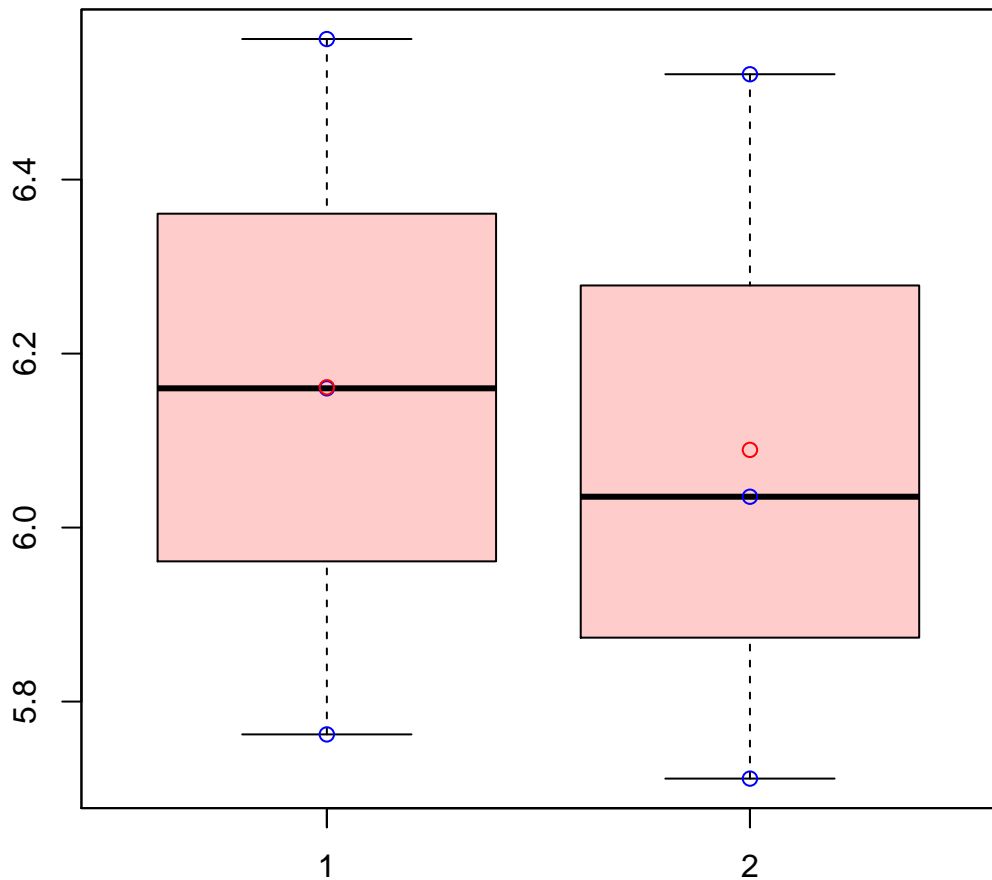

t-Test: p-value = 0.84

# M0U1N2|M0U1N2\_MUSAM

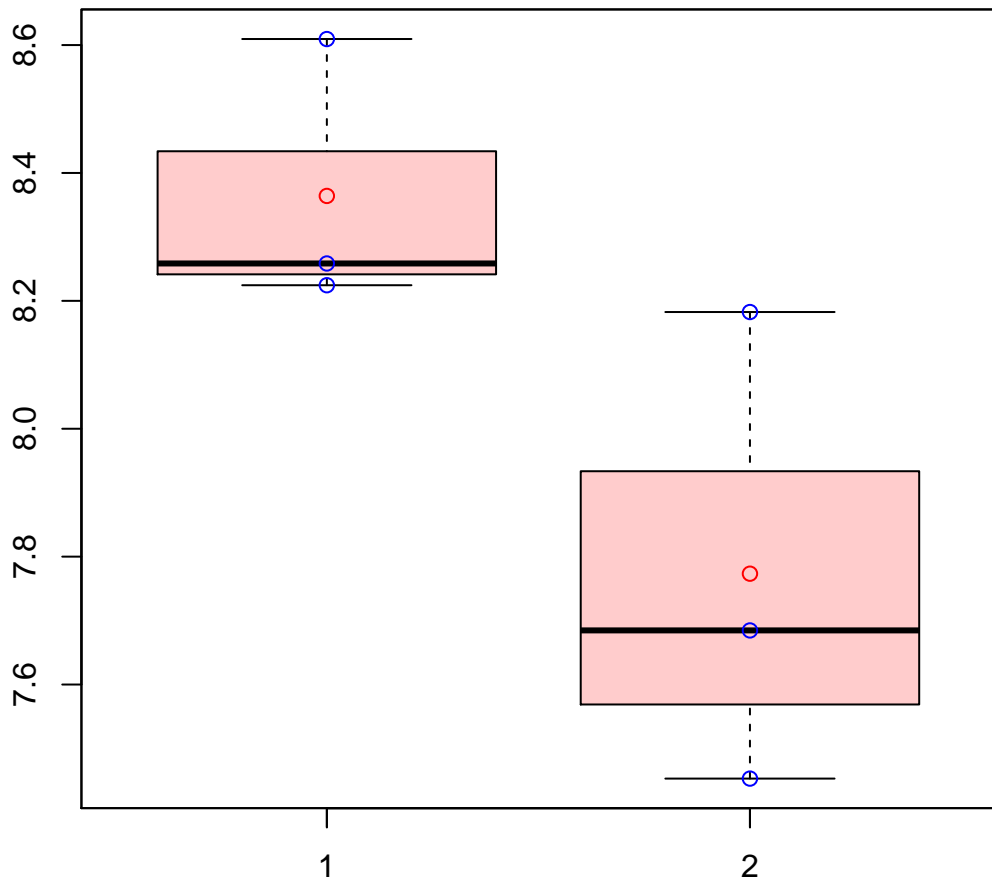

t-Test: p-value = 0.09

# M0U1V4|M0U1V4\_MUSAM

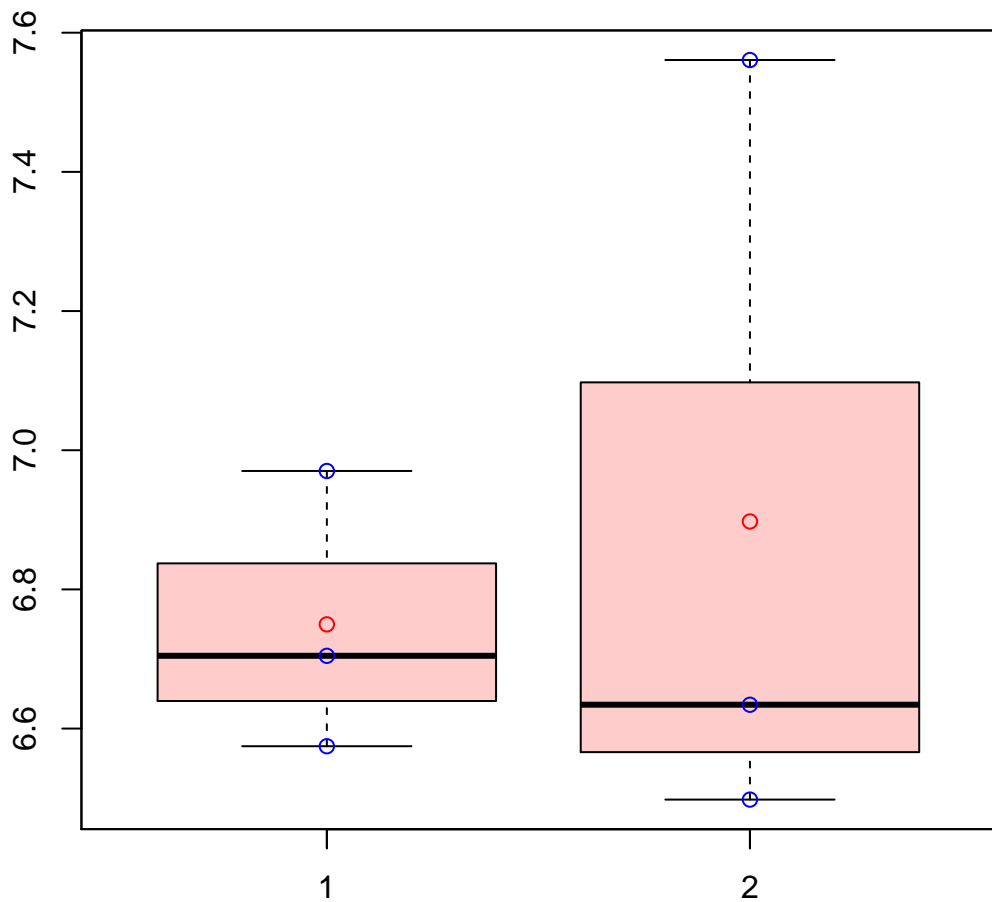

t-Test: p-value = 0.71

# M0U1Y7|M0U1Y7\_MUSAM

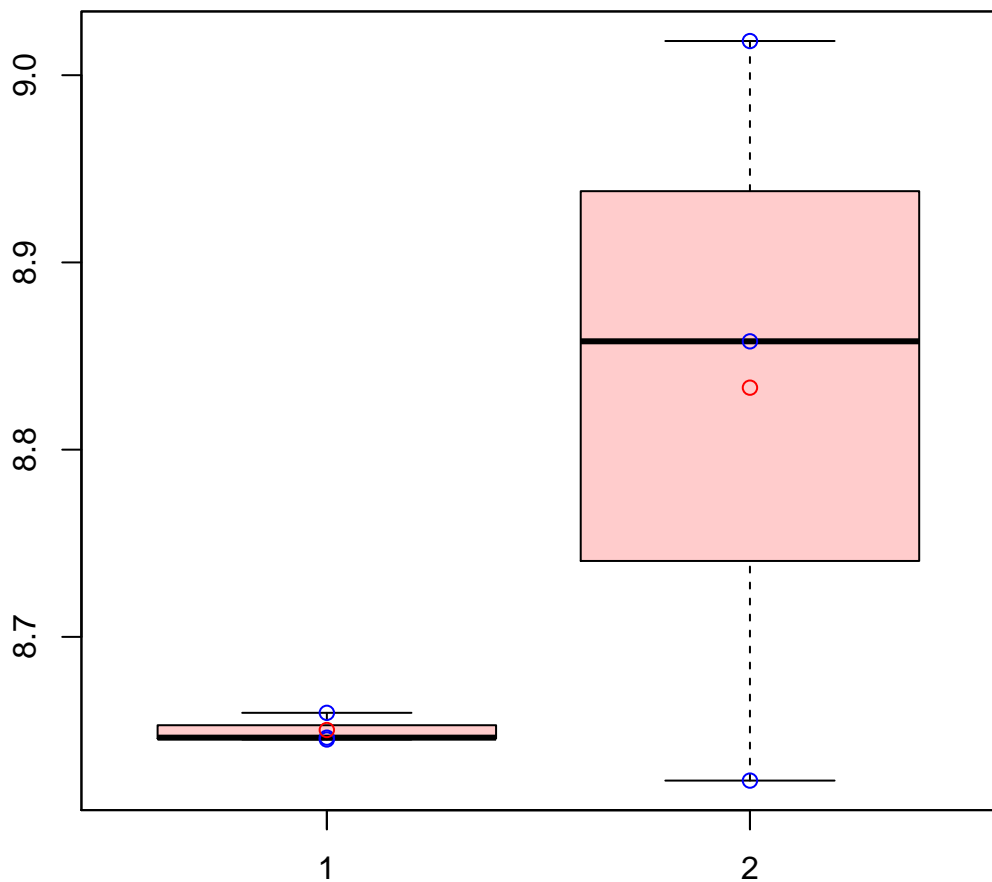

t-Test: p-value = 0.25



# M0U2D0|M0U2D0\_MUSAM

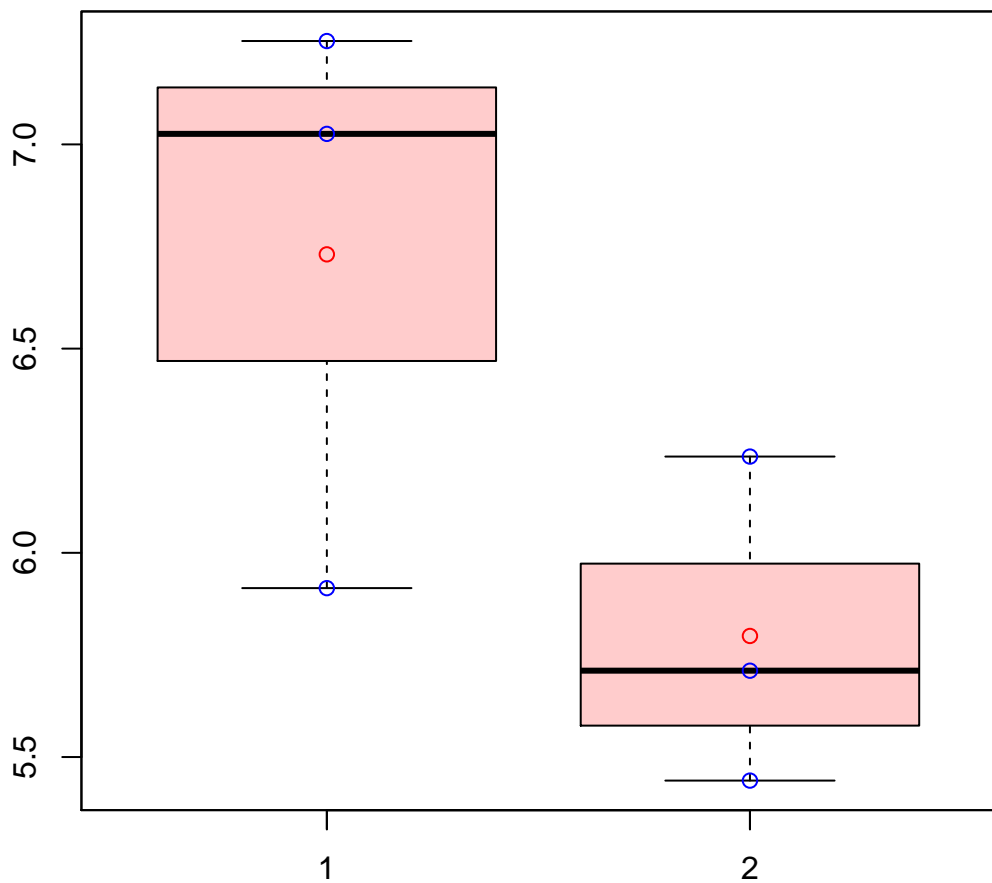

t-Test: p-value = 0.14

# M0U2T3|M0U2T3\_MUSAM

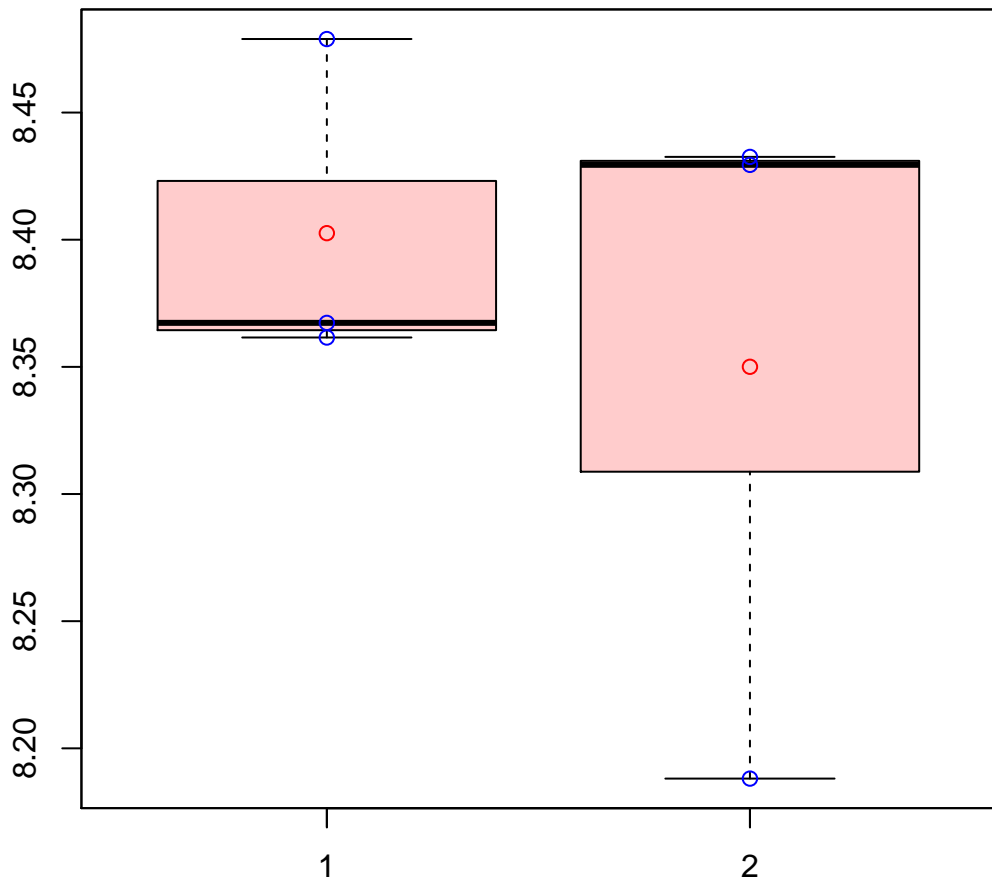

t-Test: p-value = 0.6

# M0U2Y5|M0U2Y5\_MUSAM

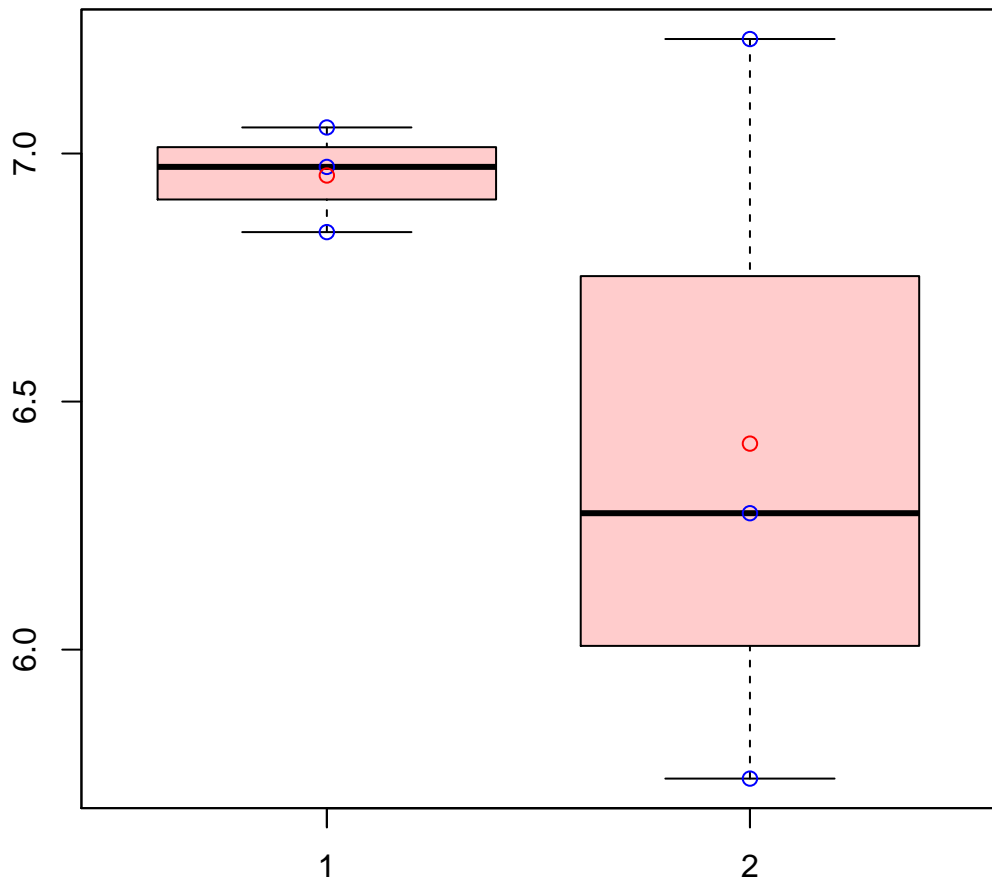

t-Test: p-value = 0.34

# M0U2Y8|M0U2Y8\_MUSAM

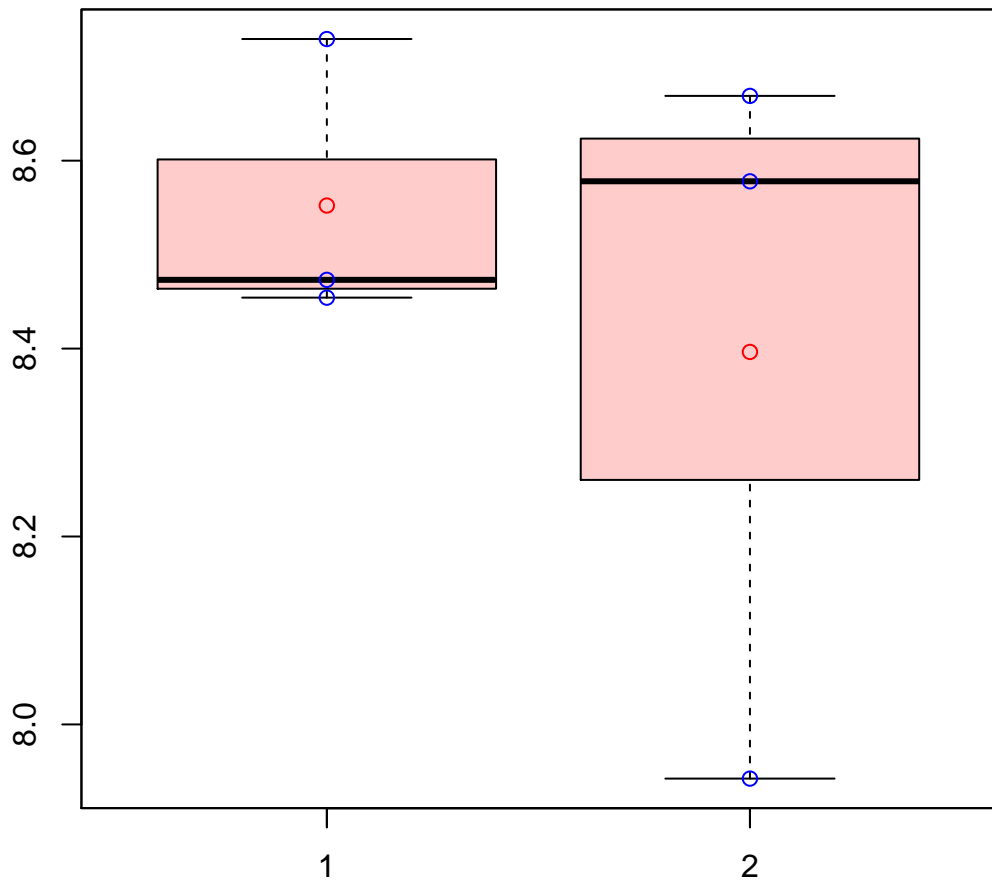

t-Test: p-value = 0.58

# M0U310|M0U310\_MUSAM

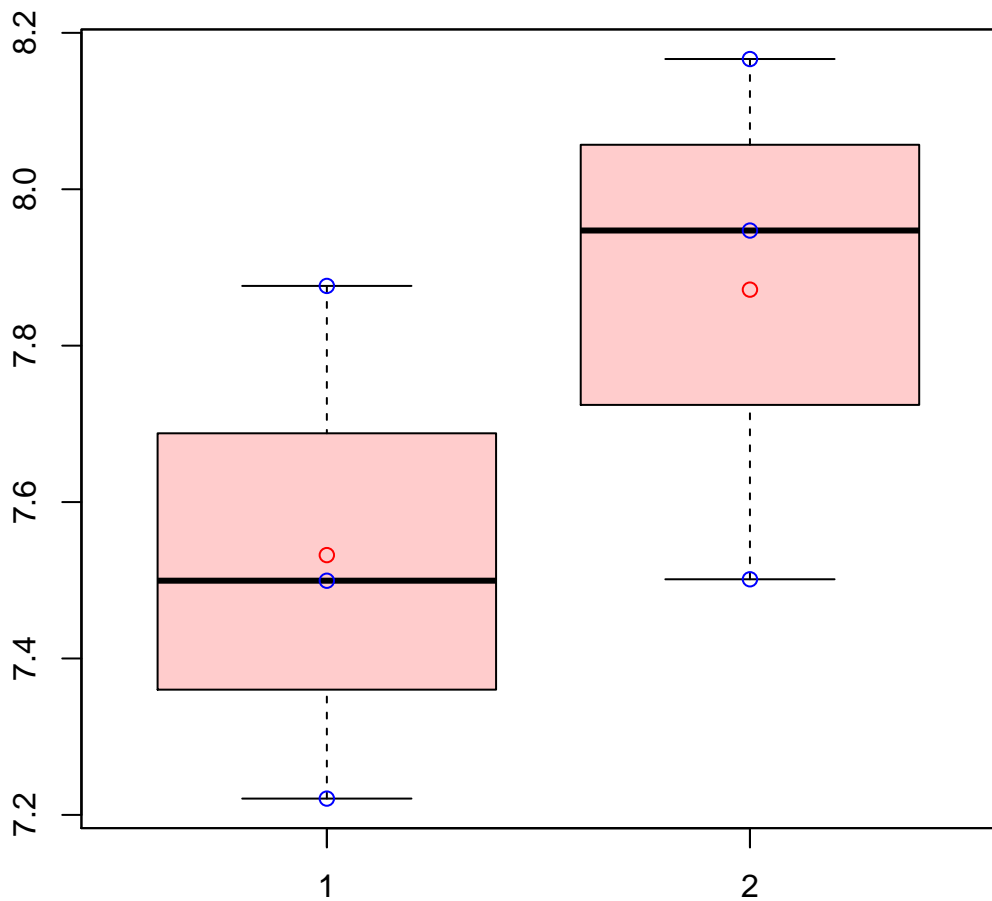

t-Test: p-value = 0.28

# M0U366|M0U366\_MUSAM

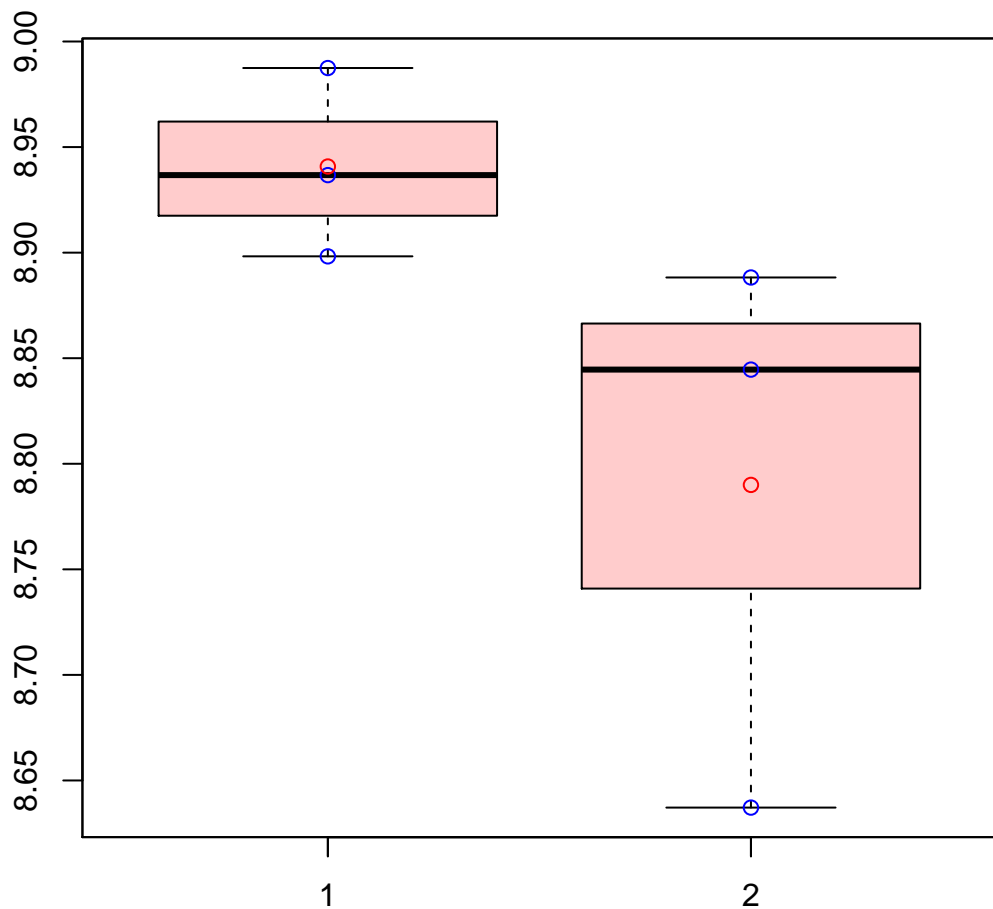

t-Test: p-value = 0.18

# M0U382|M0U382\_MUSAM

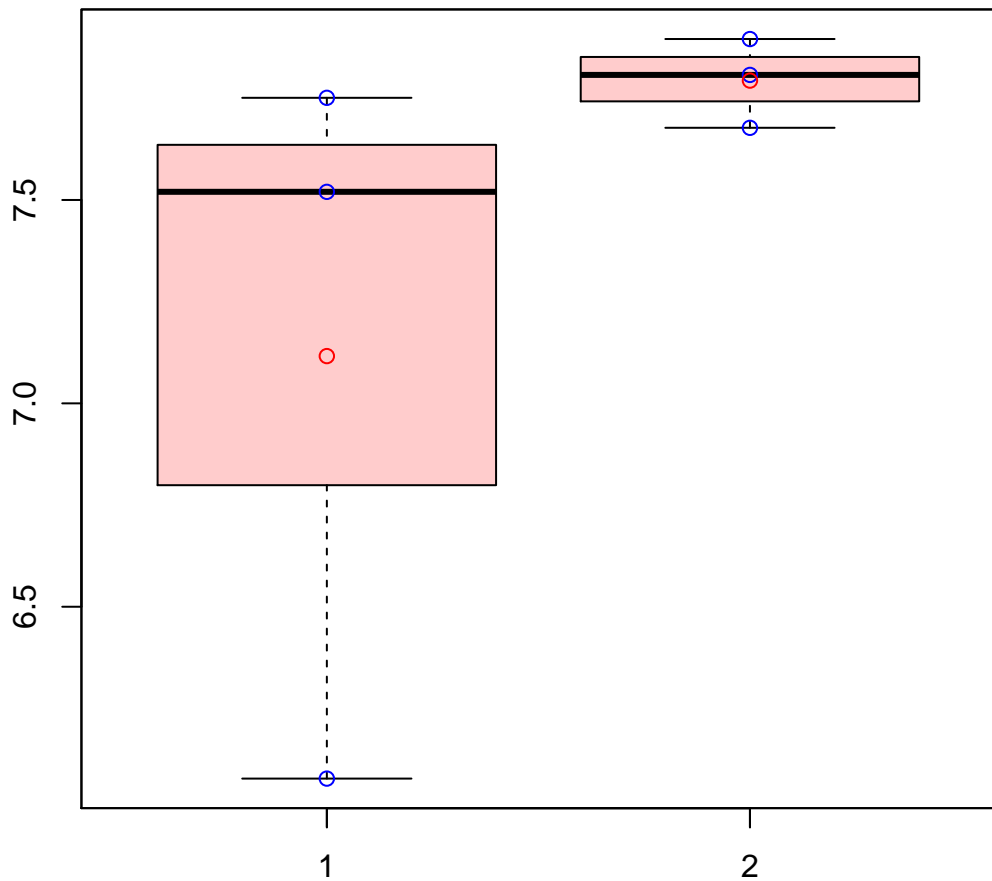

t-Test: p-value = 0.32

# M0U3I3|M0U3I3\_MUSAM

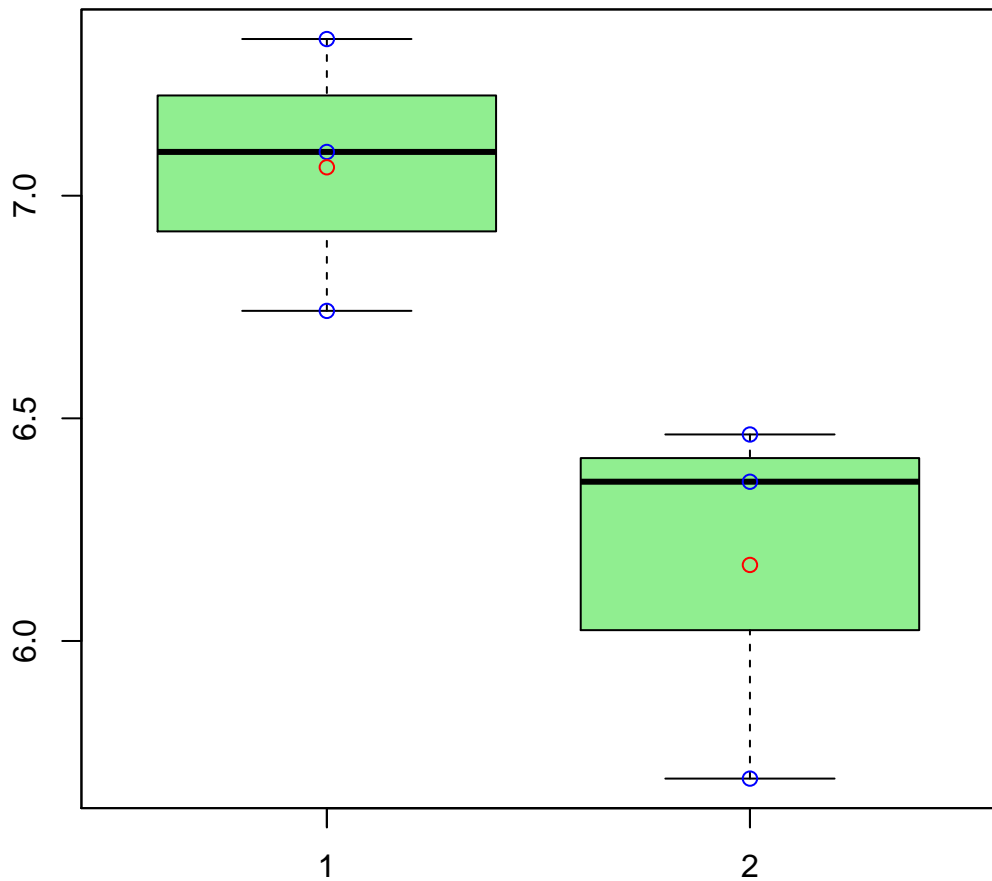

t-Test: p-value = 0.05



# M0U3M2|M0U3M2\_MUSAM

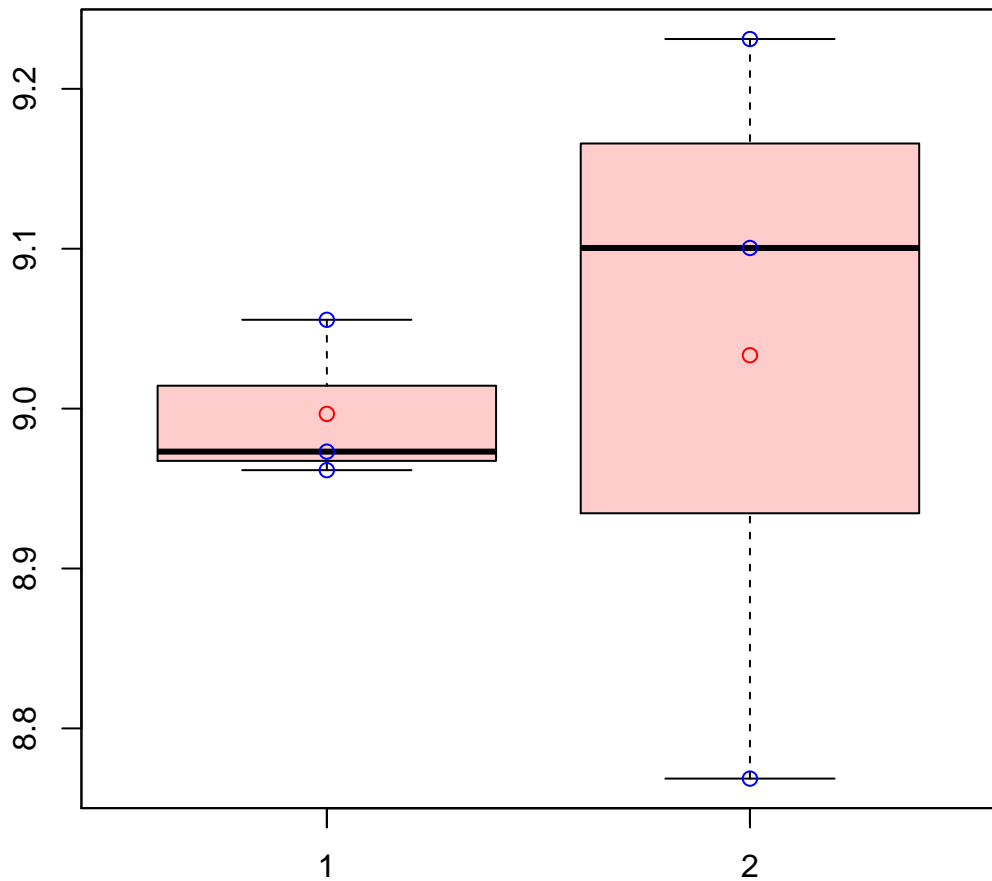

t-Test: p-value = 0.82

# M0U3N3|M0U3N3\_MUSAM

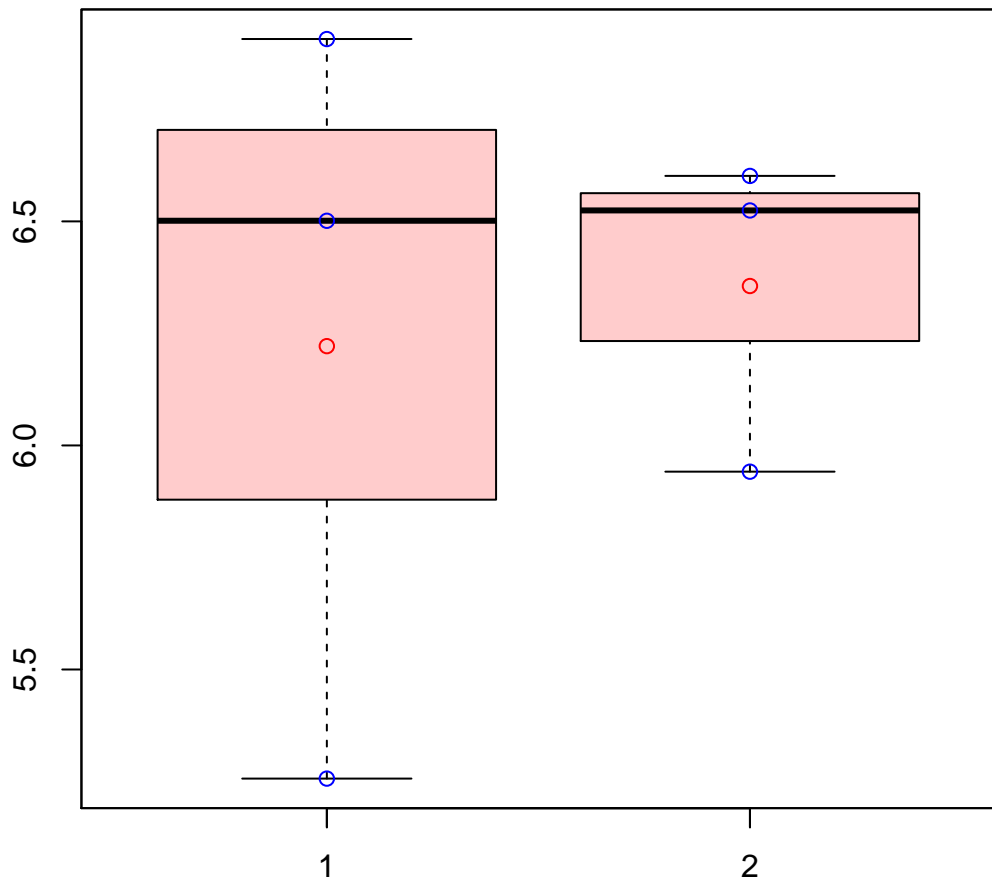

t-Test: p-value = 0.82

# M0U3W7|M0U3W7\_MUSAM

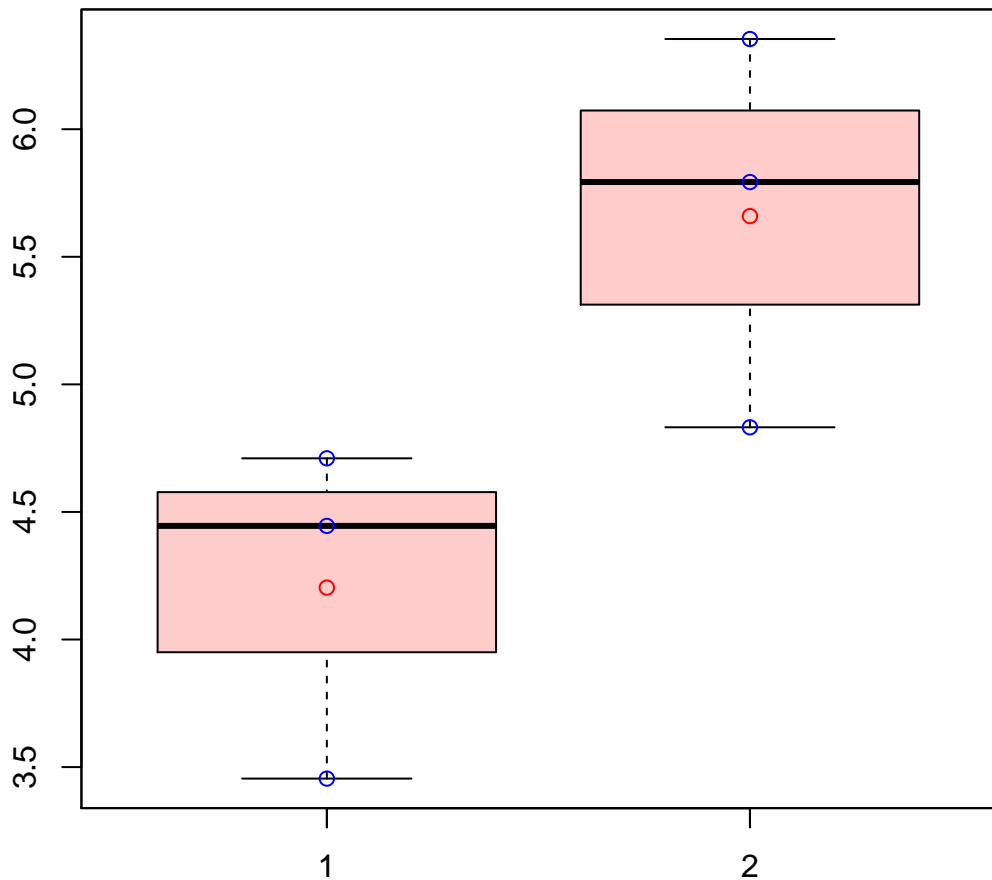

t-Test: p-value = 0.07

# M0U4F0|M0U4F0\_MUSAM

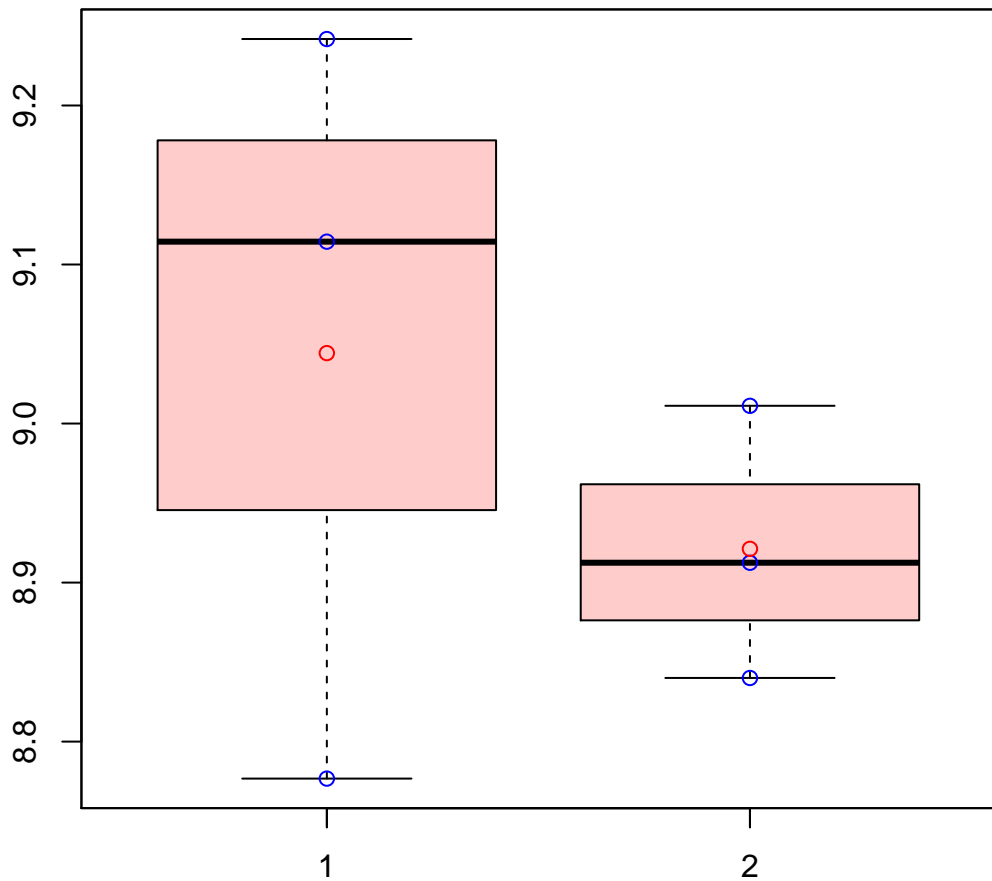

t-Test: p-value = 0.48

# M0U4I4|M0U4I4\_MUSAM

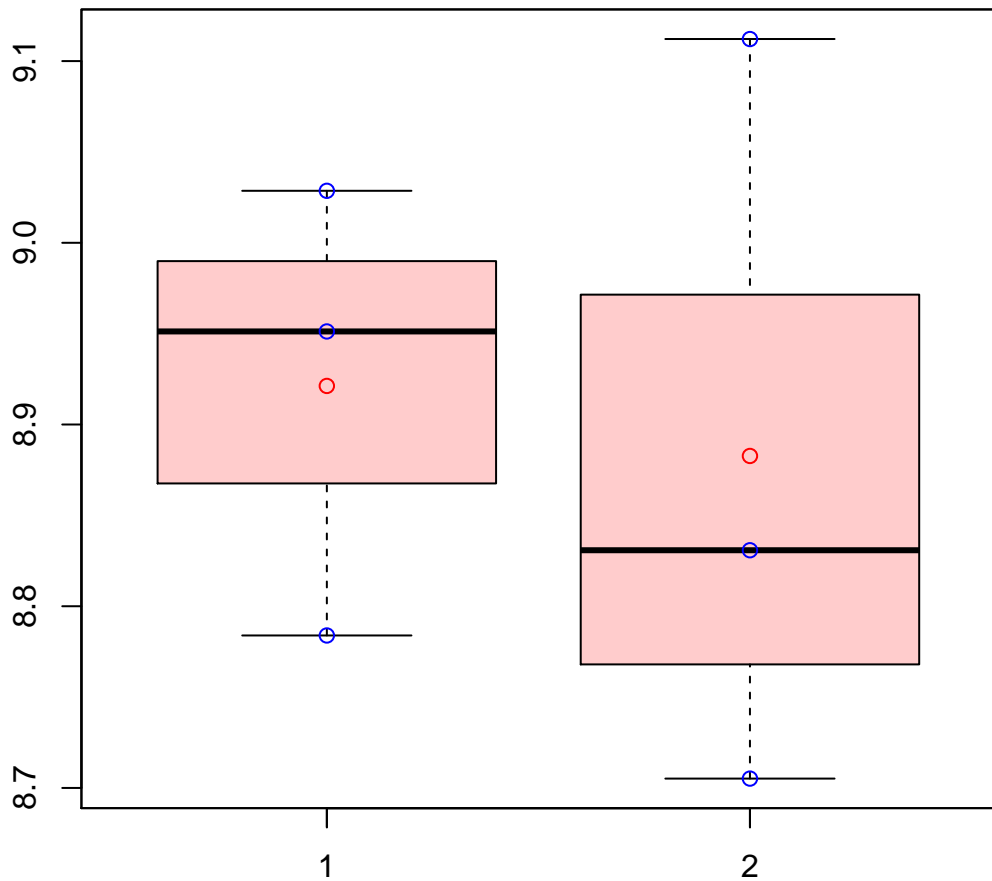

t-Test: p-value = 0.8

# M0U4U2|M0U4U2\_MUSAM

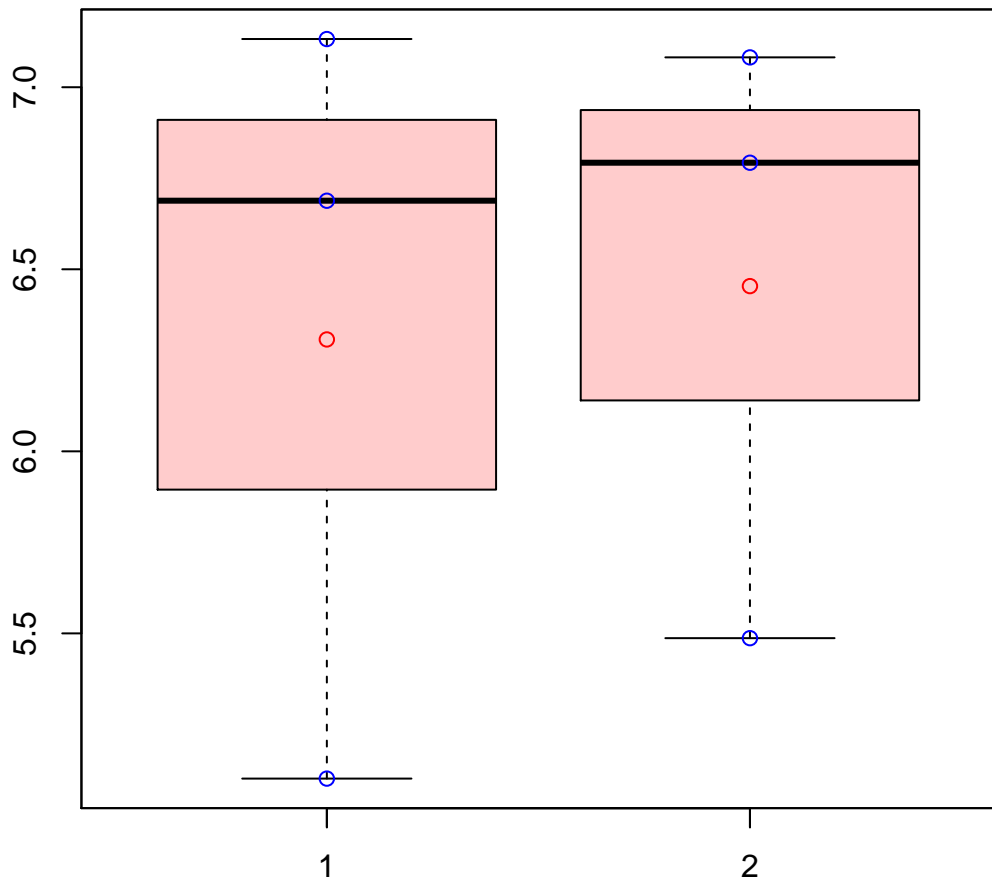

t-Test: p-value = 0.86

# M0U511|M0U511\_MUSAM

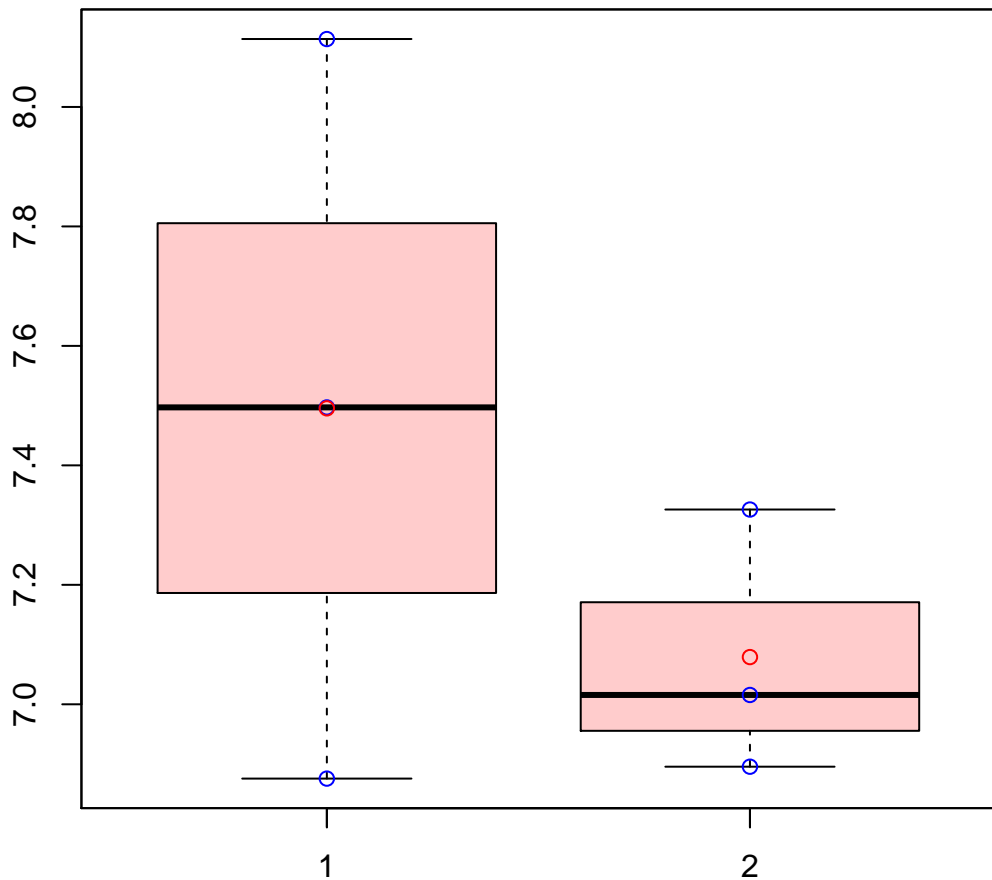

t-Test: p-value = 0.37

# M0U5L7|M0U5L7\_MUSAM

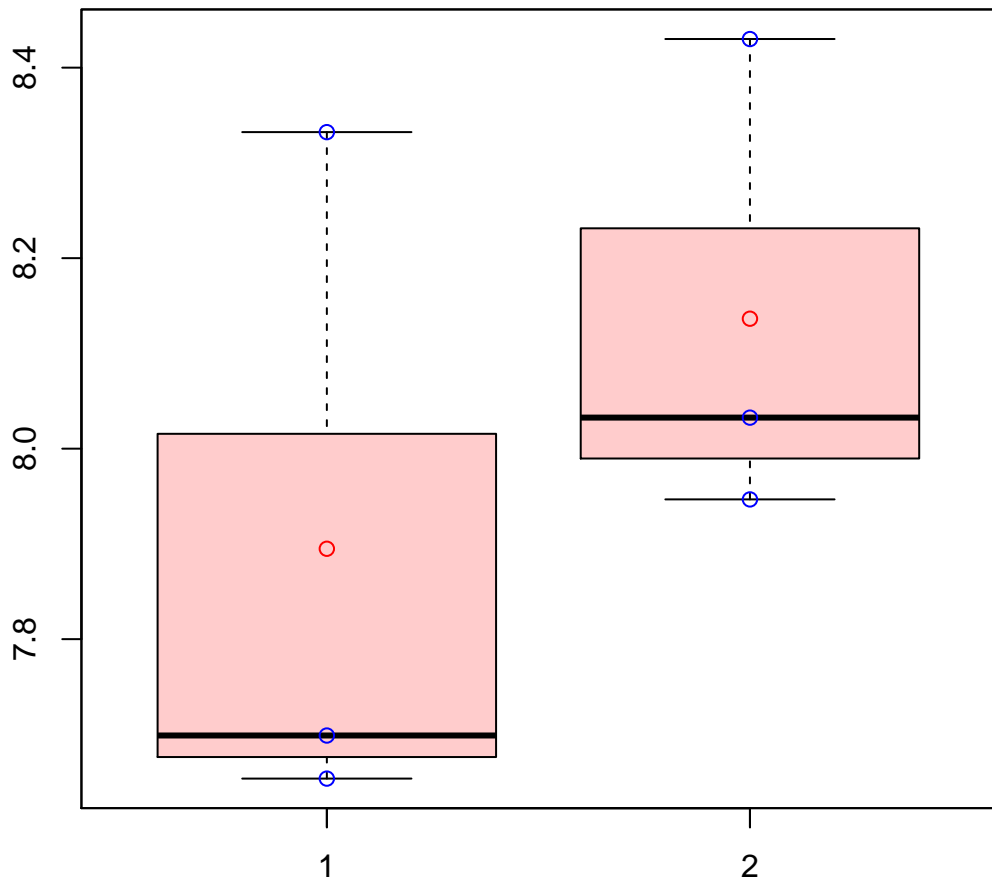

t-Test: p-value = 0.42



# M0U5W6|M0U5W6\_MUSAM

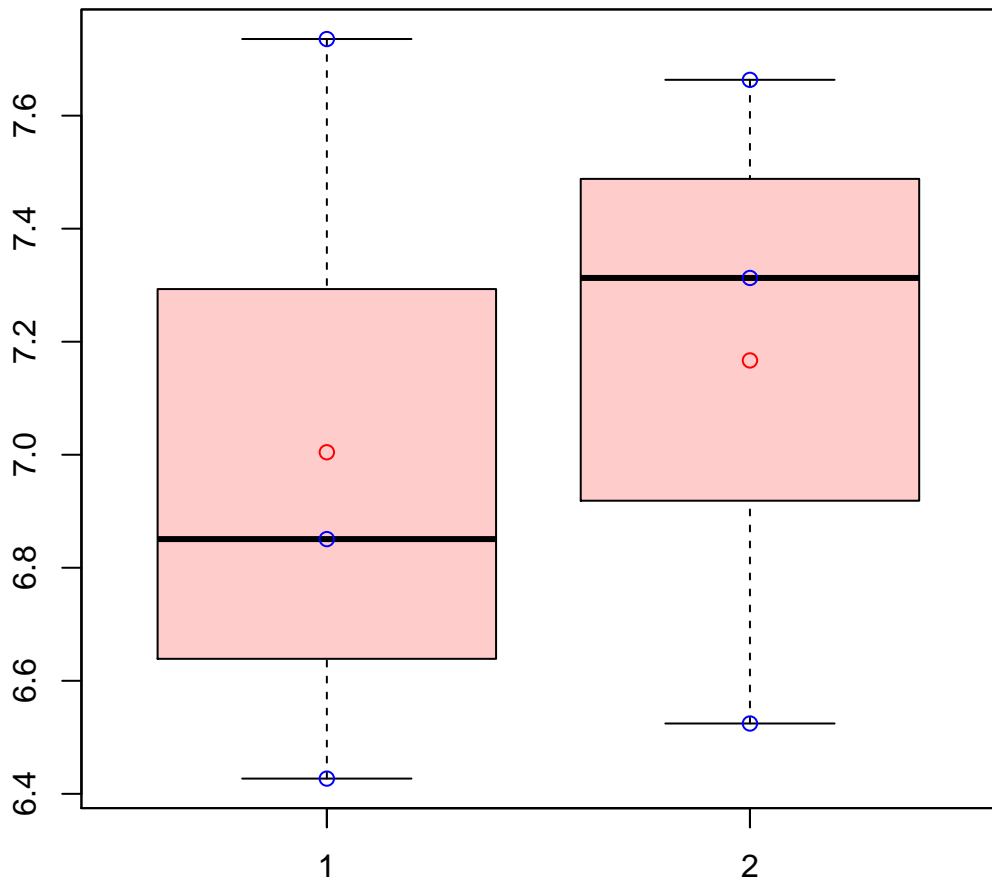

t-Test: p-value = 0.77

# M0U6J8|M0U6J8\_MUSAM

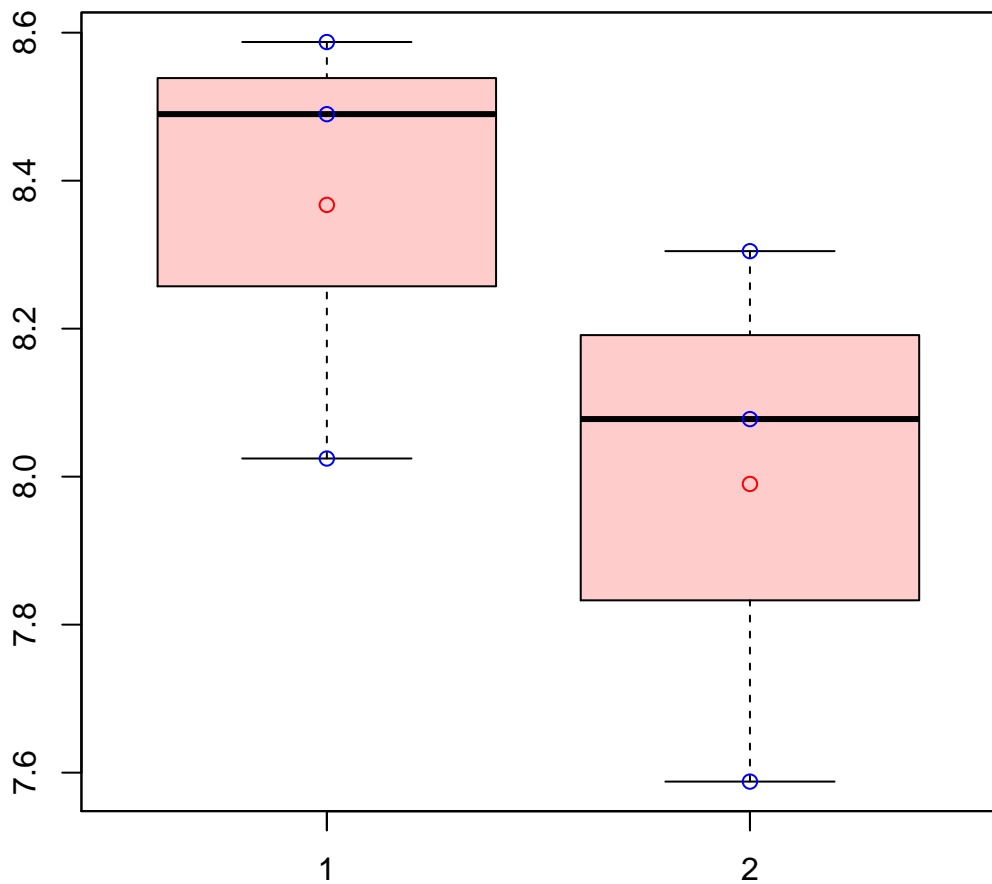

t-Test: p-value = 0.24

# M0U714|M0U714\_MUSAM

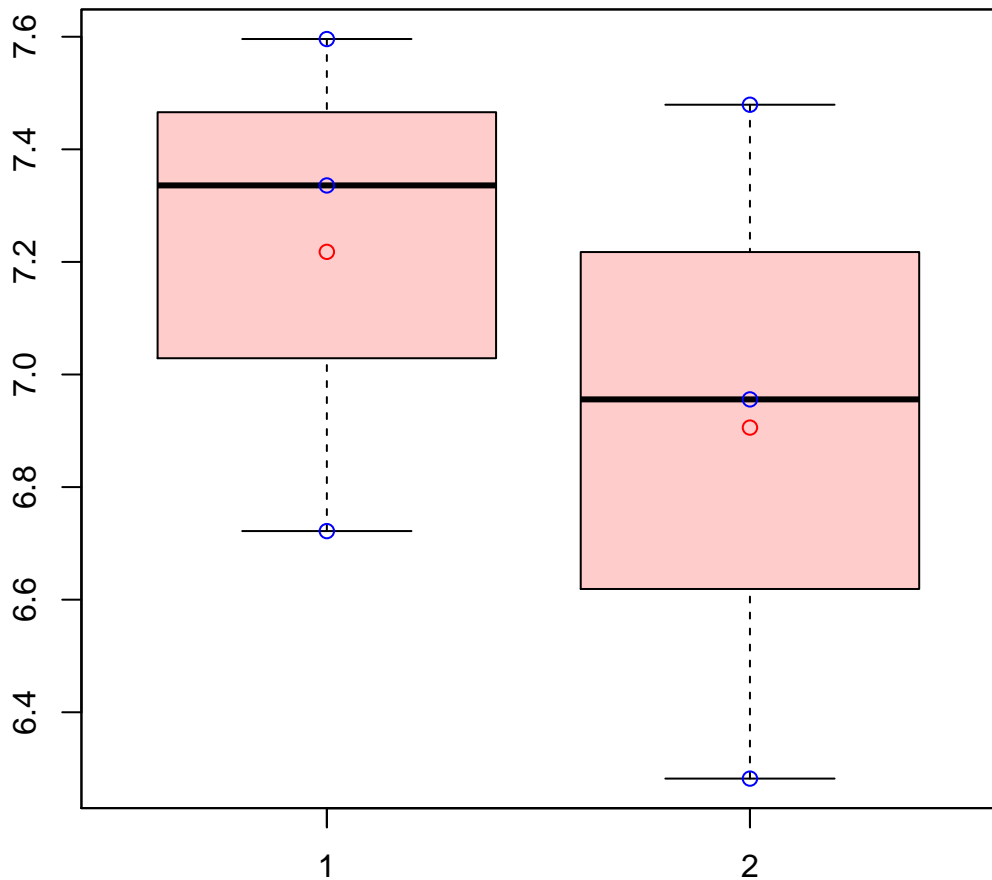

t-Test: p-value = 0.51

# M0U771|M0U771\_MUSAM

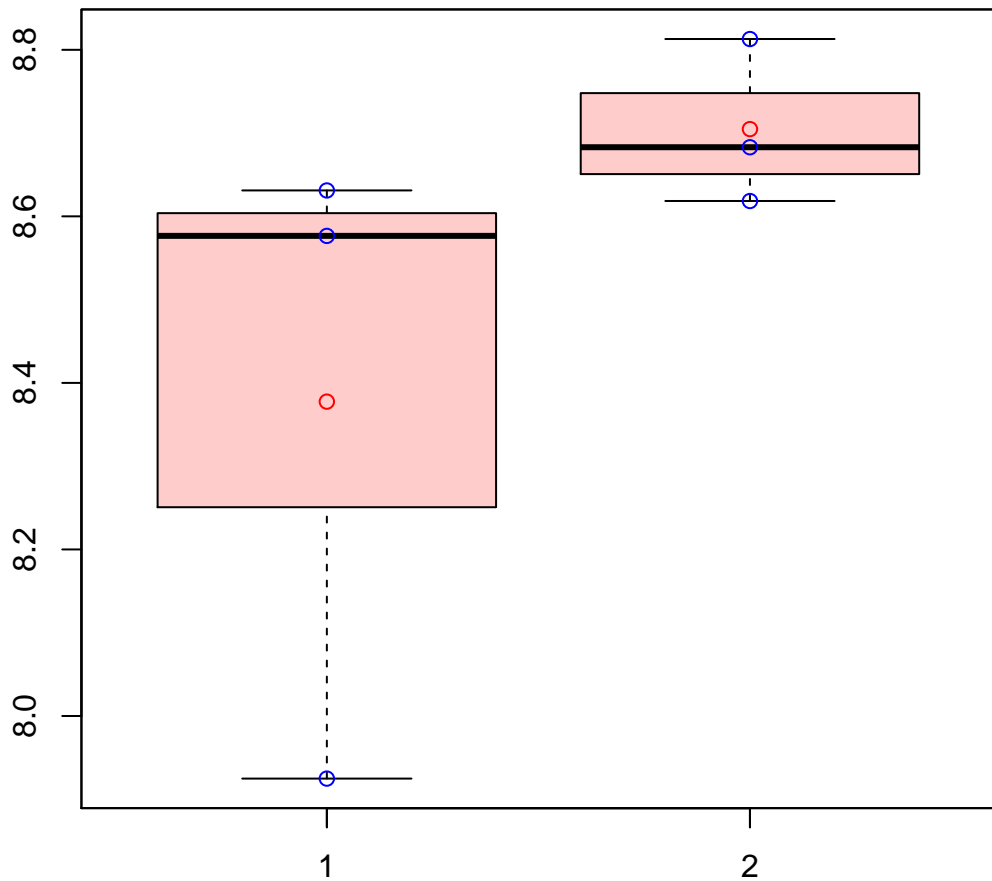

t-Test: p-value = 0.28

# M0U7C5|M0U7C5\_MUSAM

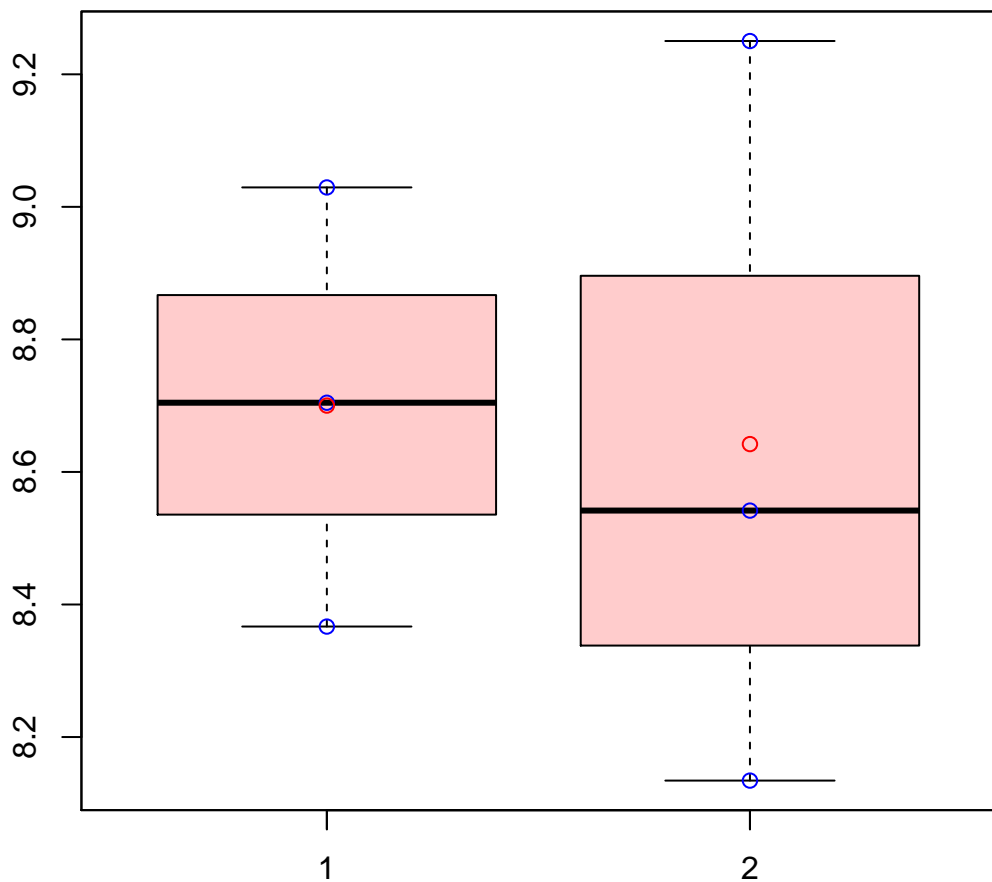

t-Test: p-value = 0.89

# M0U7M4|M0U7M4\_MUSAM

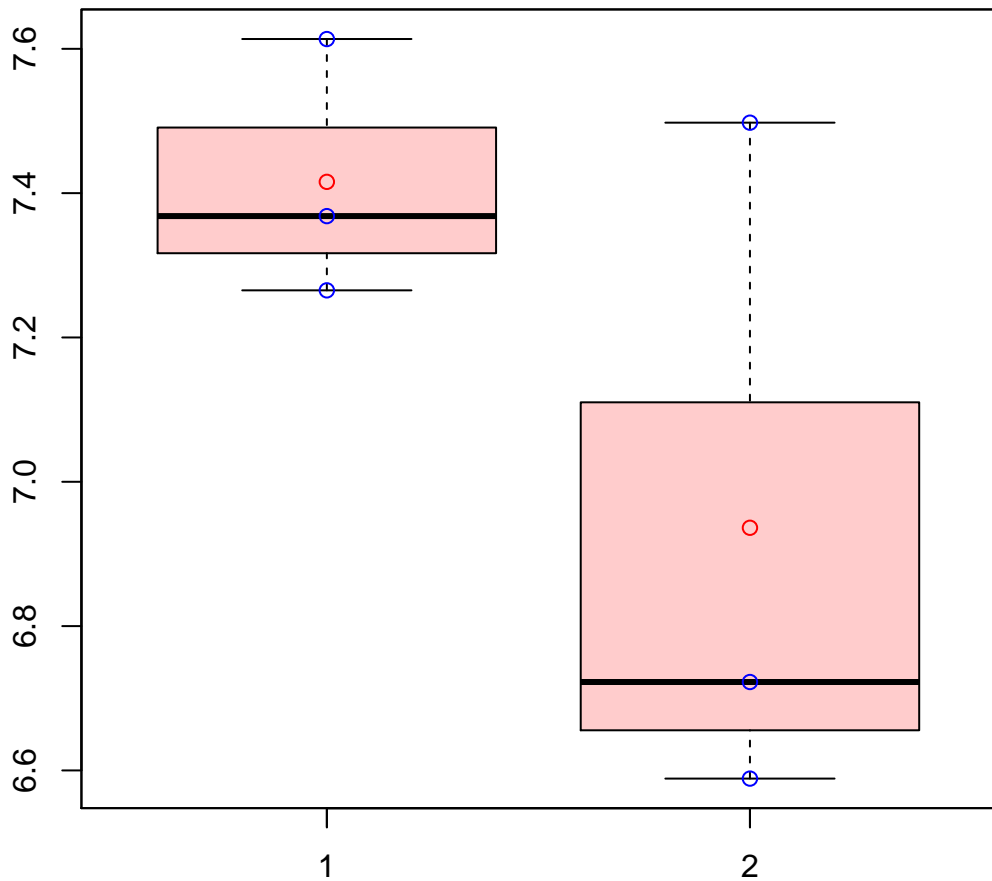

t-Test: p-value = 0.23

# M0U875|M0U875\_MUSAM

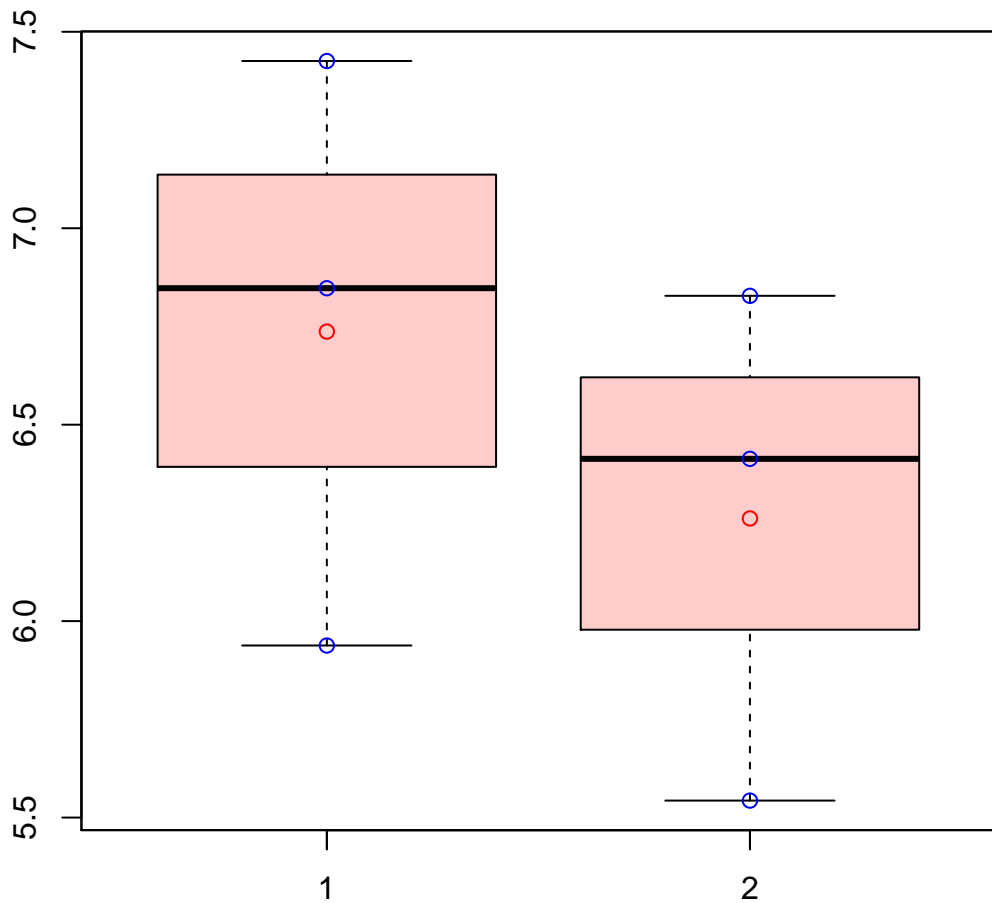

t-Test: p-value = 0.46

# M0U8E1|M0U8E1\_MUSAM

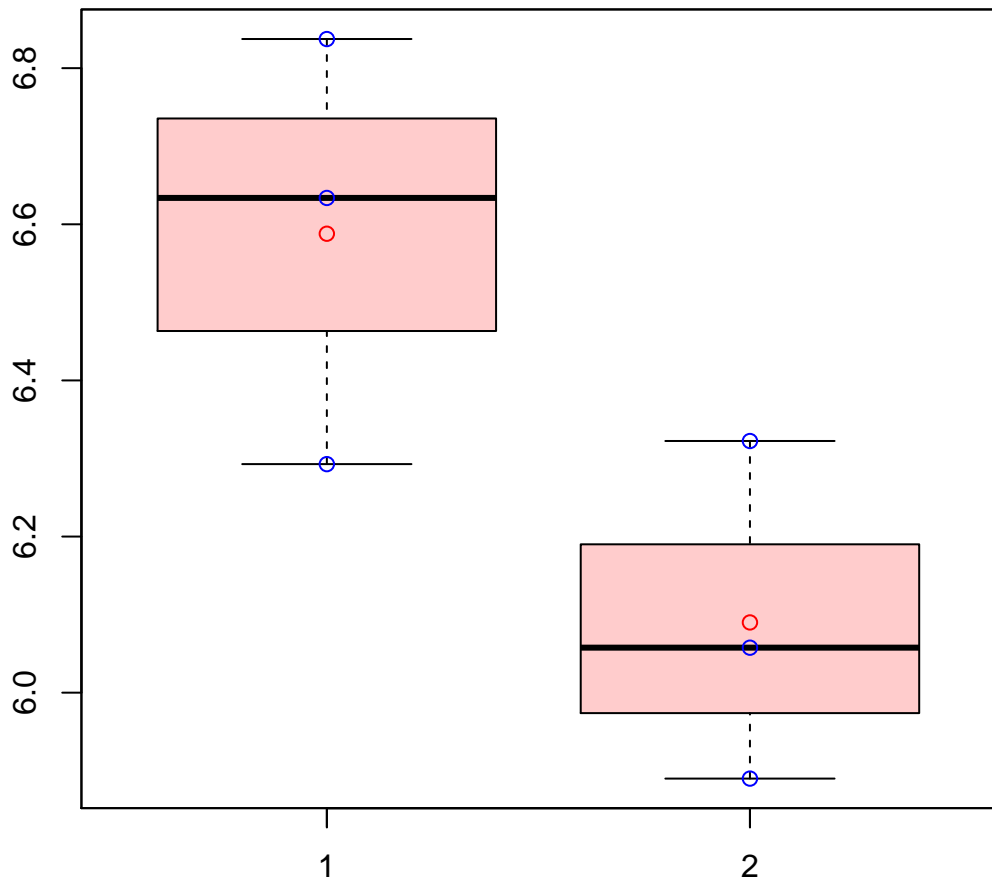

t-Test: p-value = 0.07



# M0U940|M0U940\_MUSAM

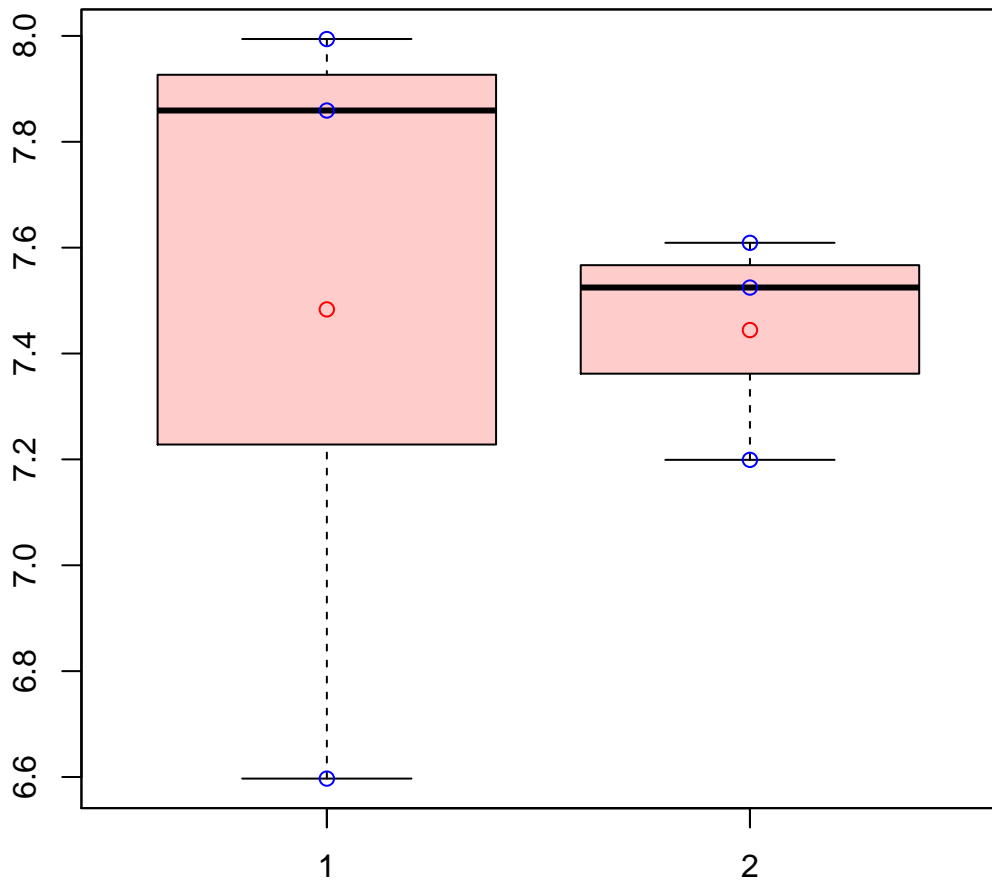

t-Test: p-value = 0.94

# M0U9D2|M0U9D2\_MUSAM

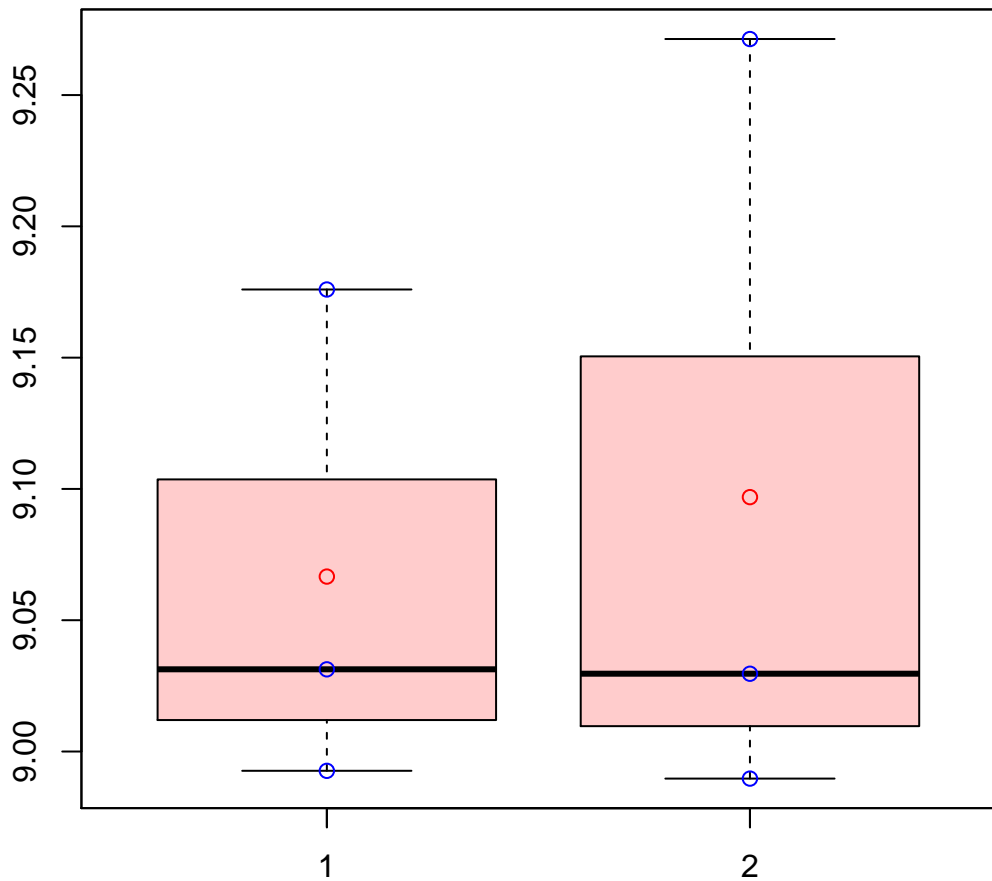

t-Test: p-value = 0.79

# M0U9F4|M0U9F4\_MUSAM

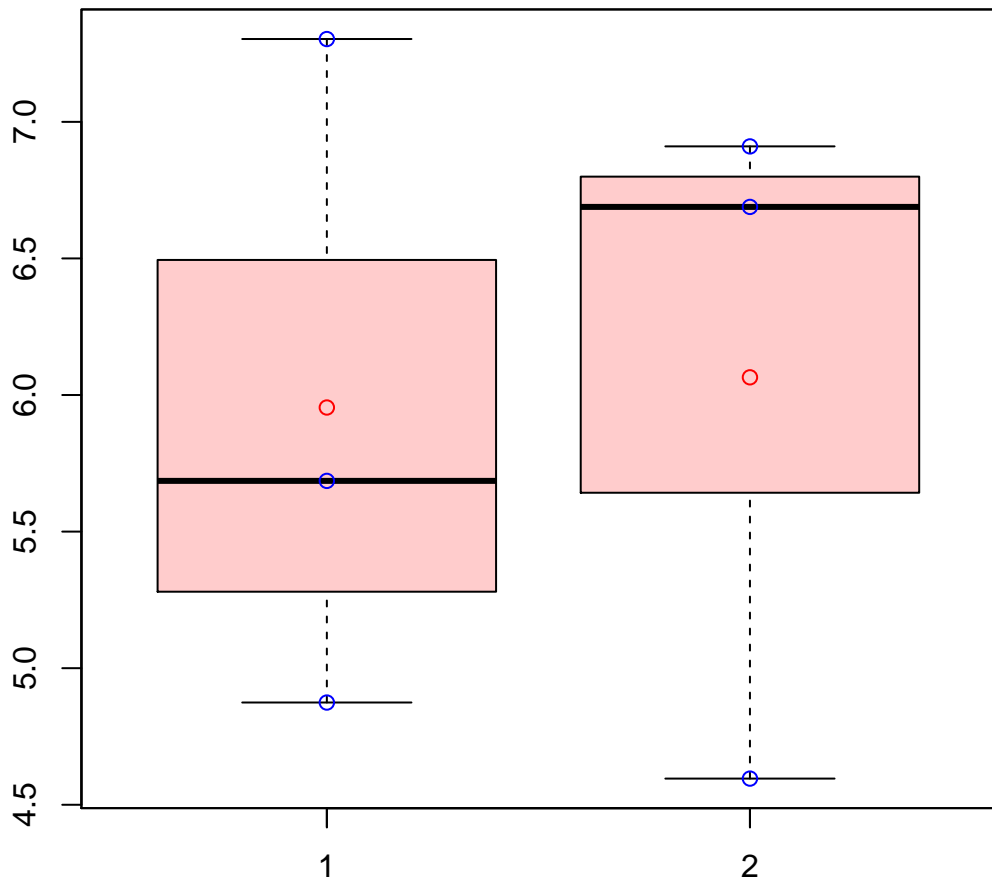

t-Test: p-value = 0.92

# M0U9P4|M0U9P4\_MUSAM

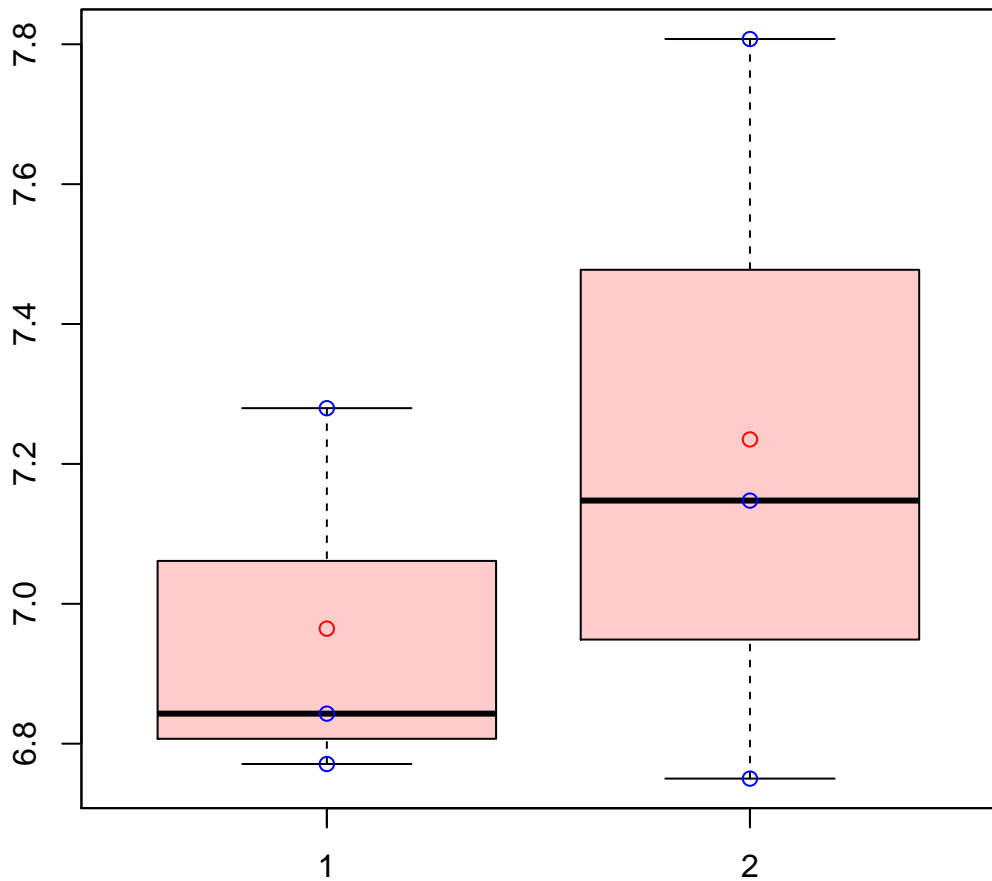

t-Test: p-value = 0.49

# M0UAB0|M0UAB0\_MUSAM

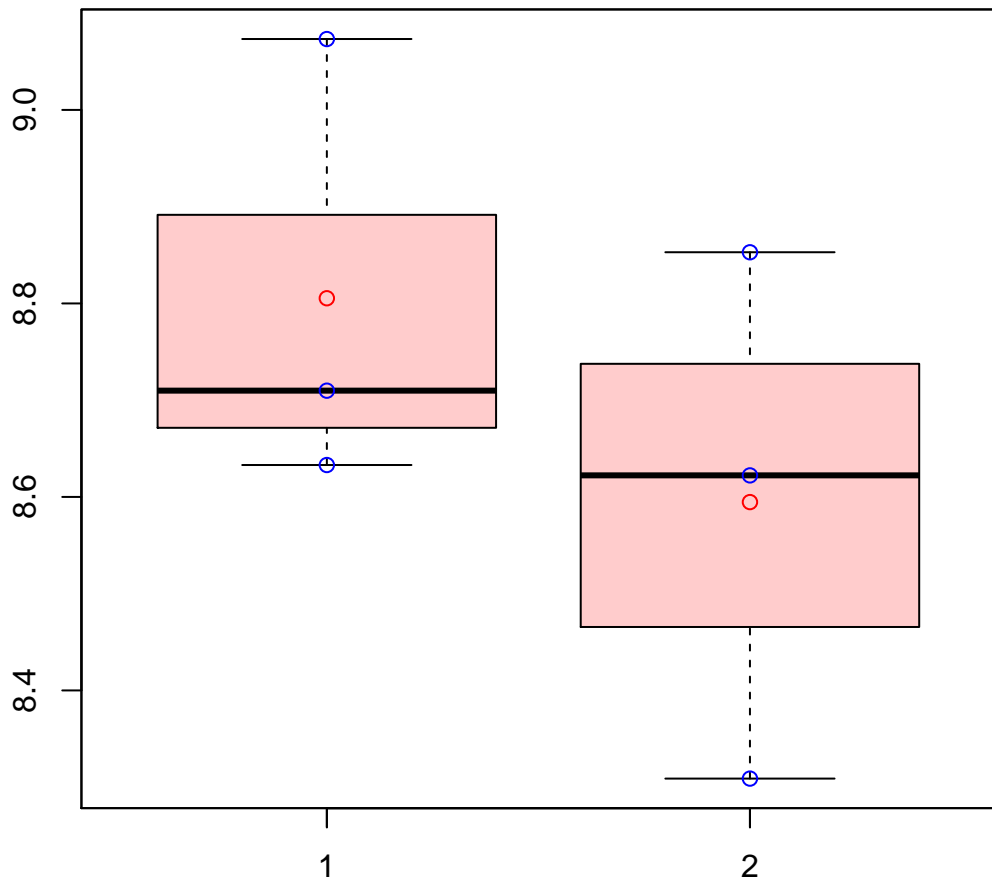

t-Test: p-value = 0.37

# M0UB14|M0UB14\_MUSAM

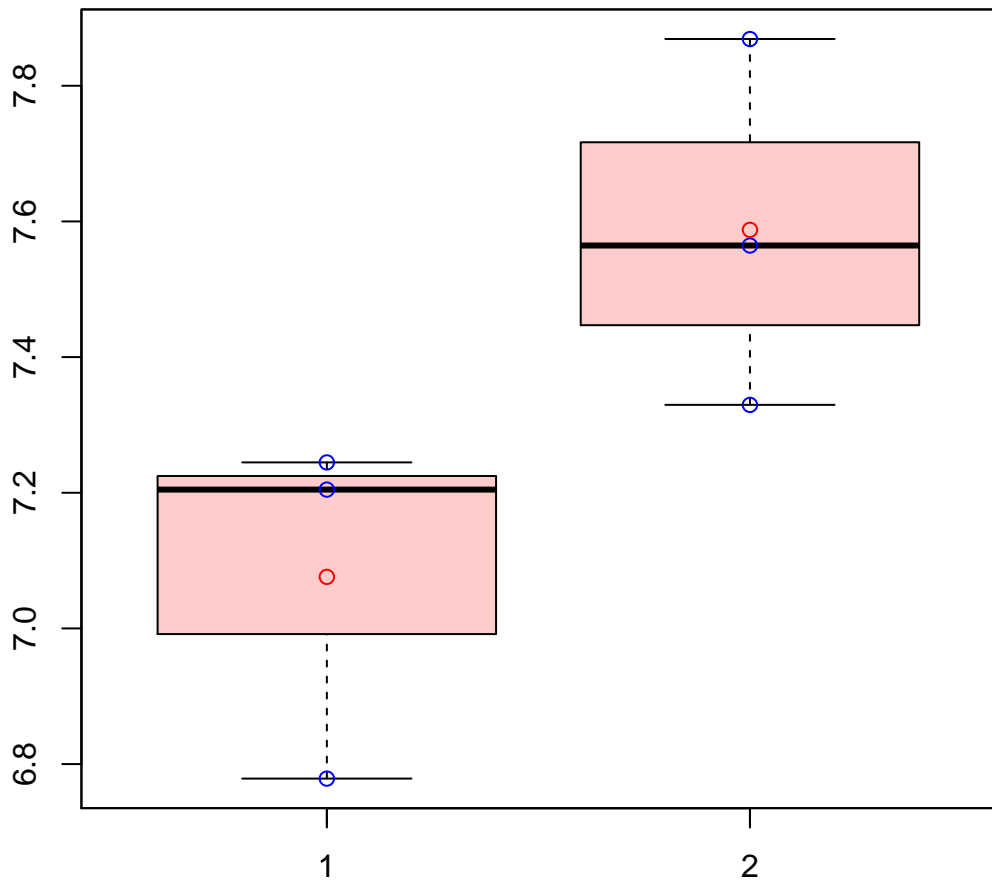

t-Test: p-value = 0.08

# M0UBF2|M0UBF2\_MUSAM

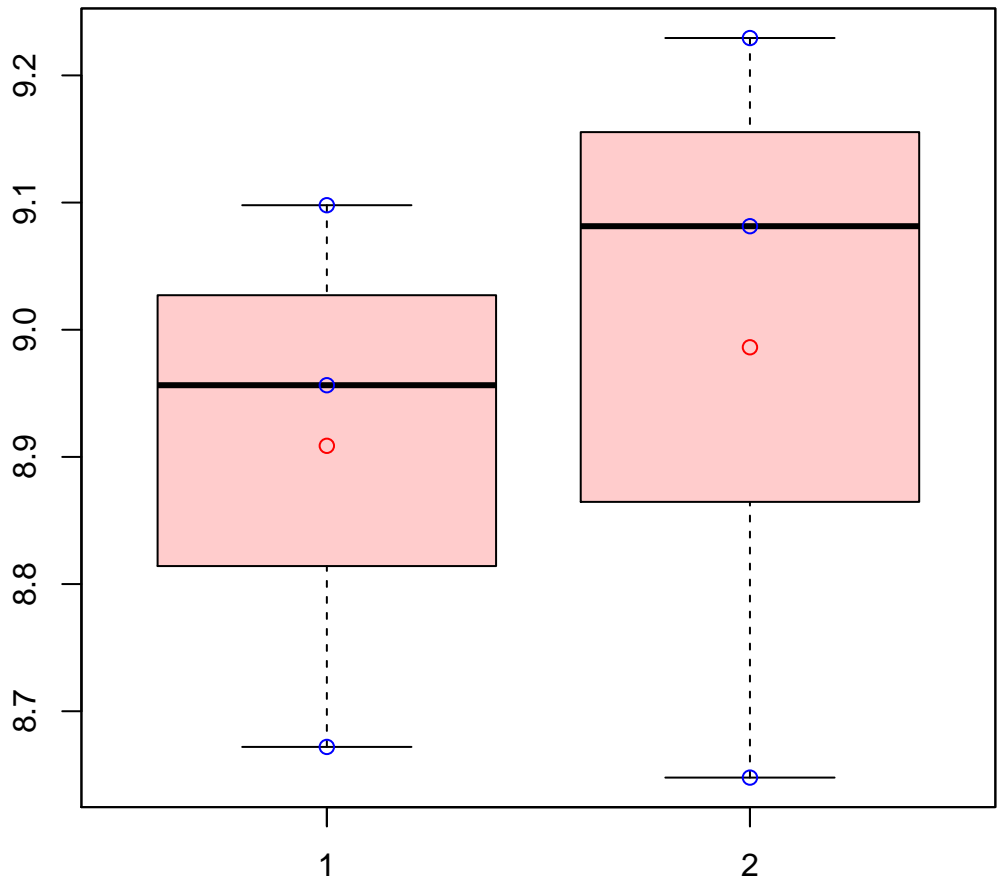

t-Test: p-value = 0.74

# M0UCA4|M0UCA4\_MUSAM

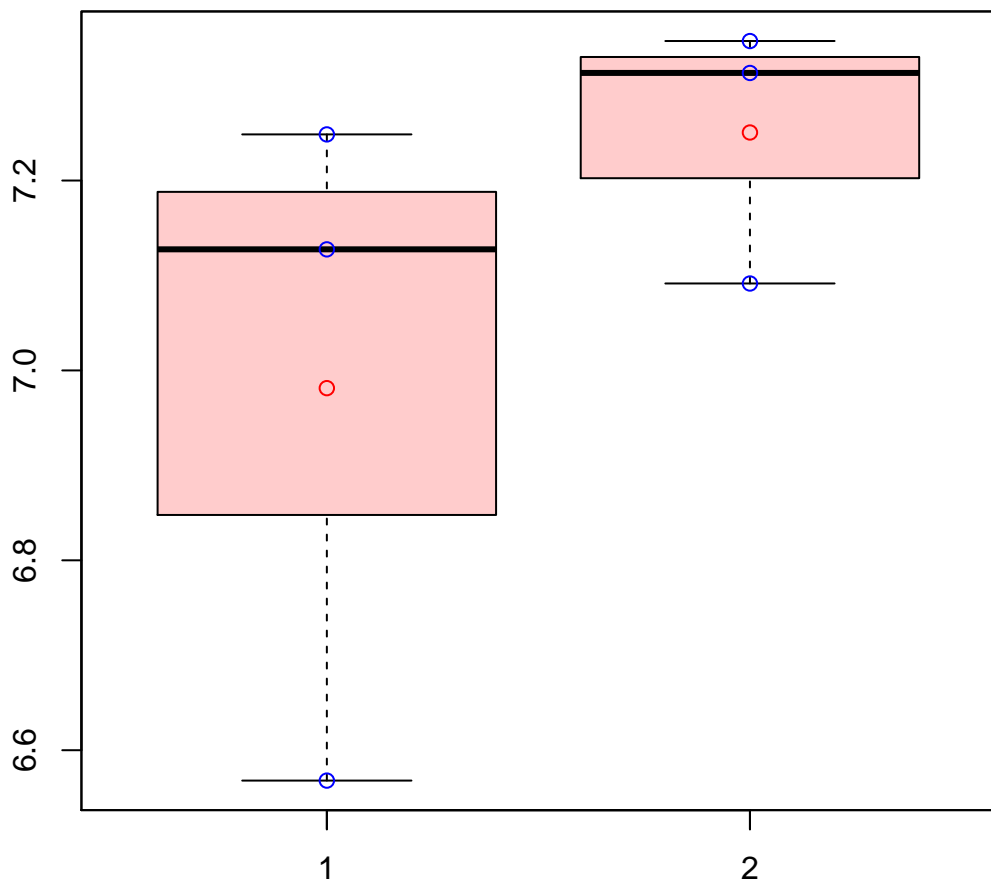

t-Test: p-value = 0.33



# M0UCJ4|M0UCJ4\_MUSAM

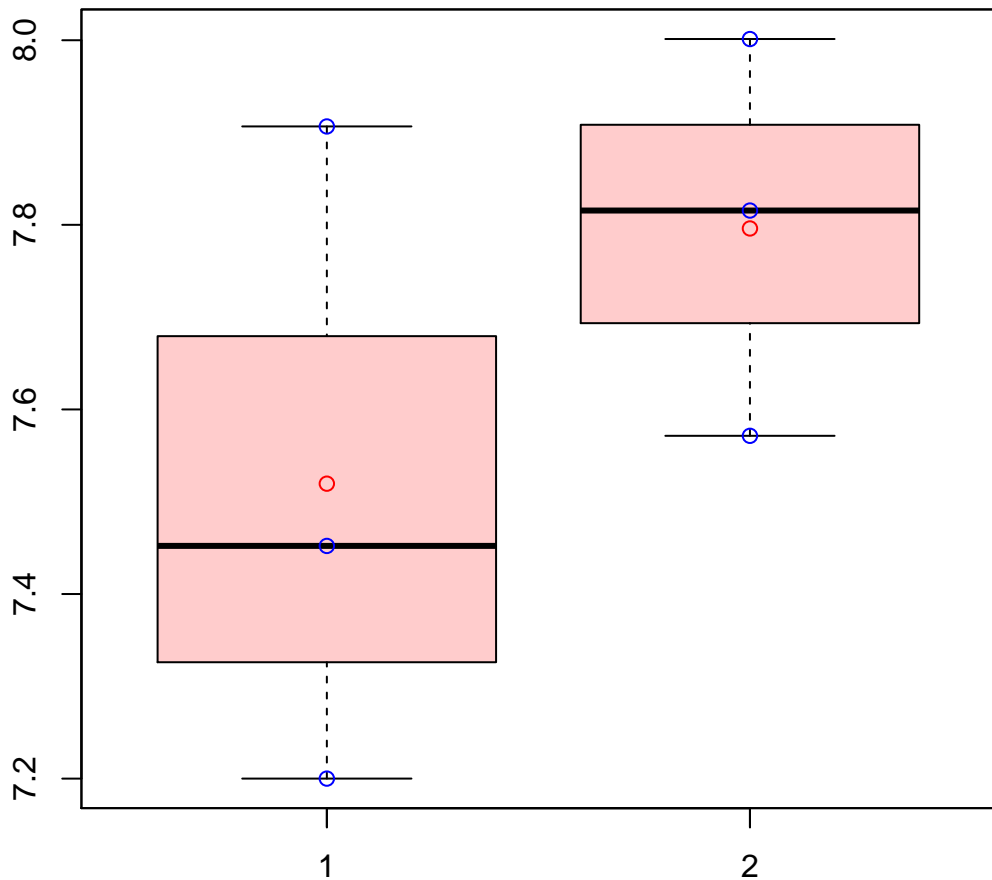

t-Test: p-value = 0.33

# M0UG17|M0UG17\_HORVD

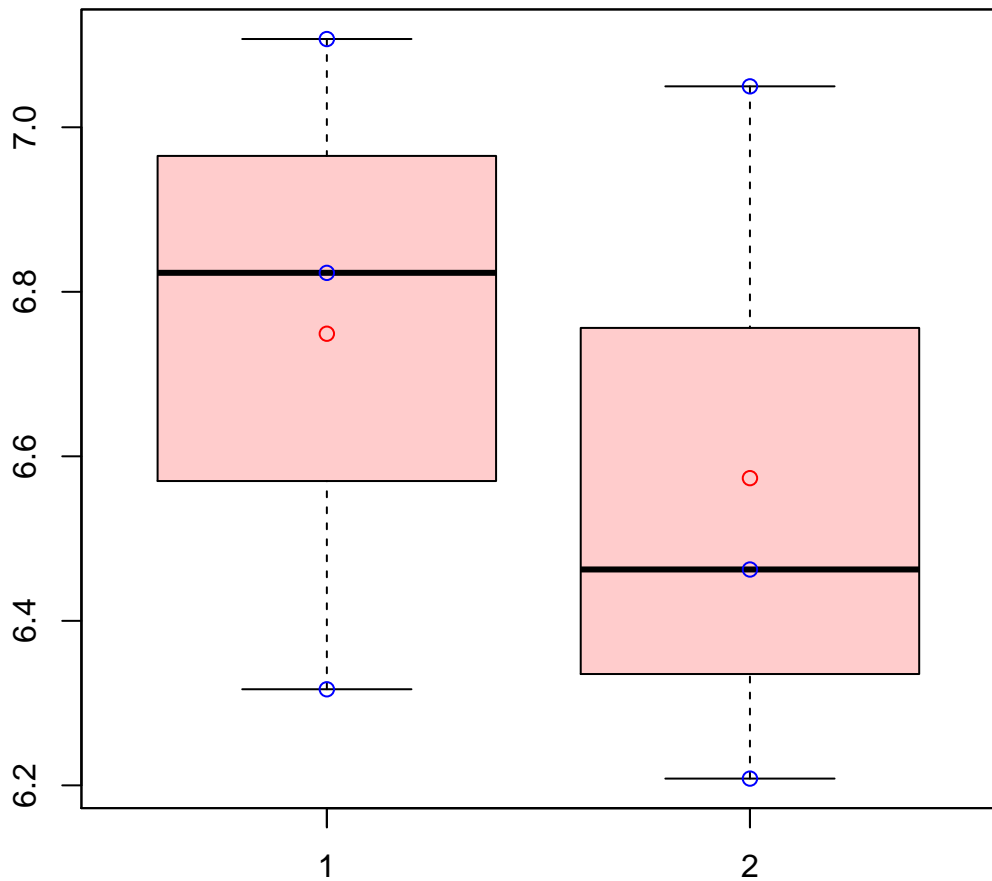

t-Test: p-value = 0.63

# M0UG80|M0UG80\_HORVD

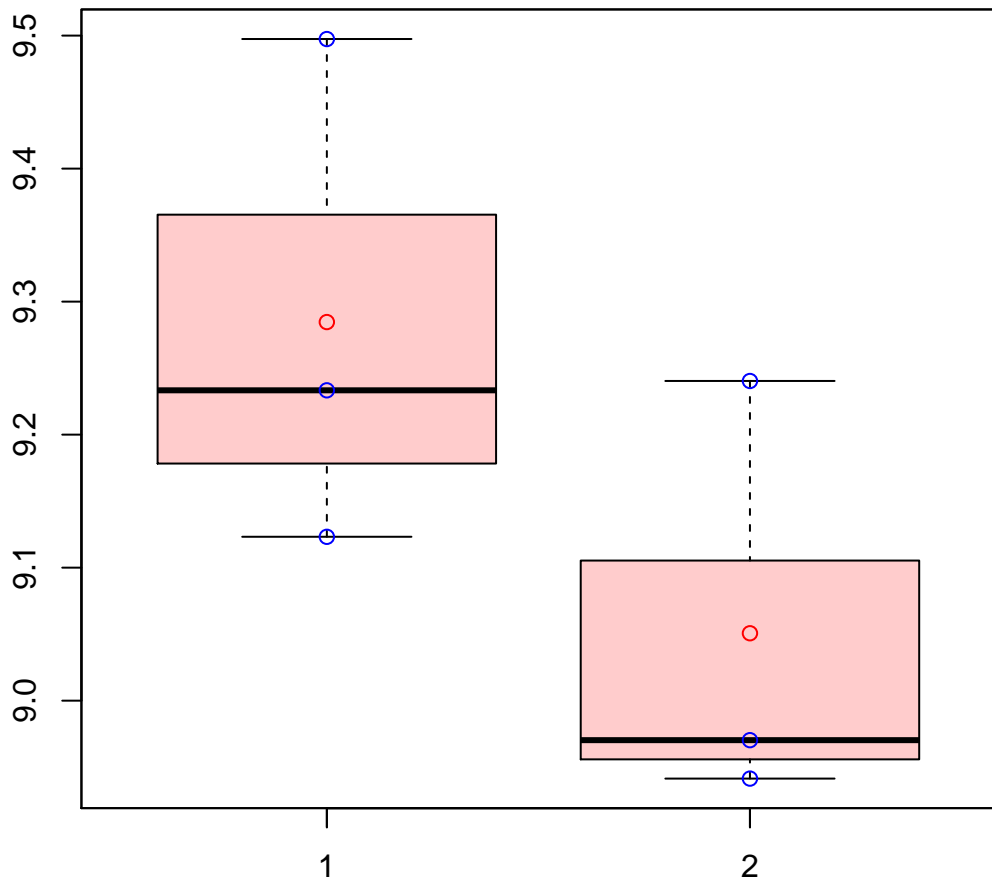

t-Test: p-value = 0.19

# M0UH10|M0UH10\_HORVD

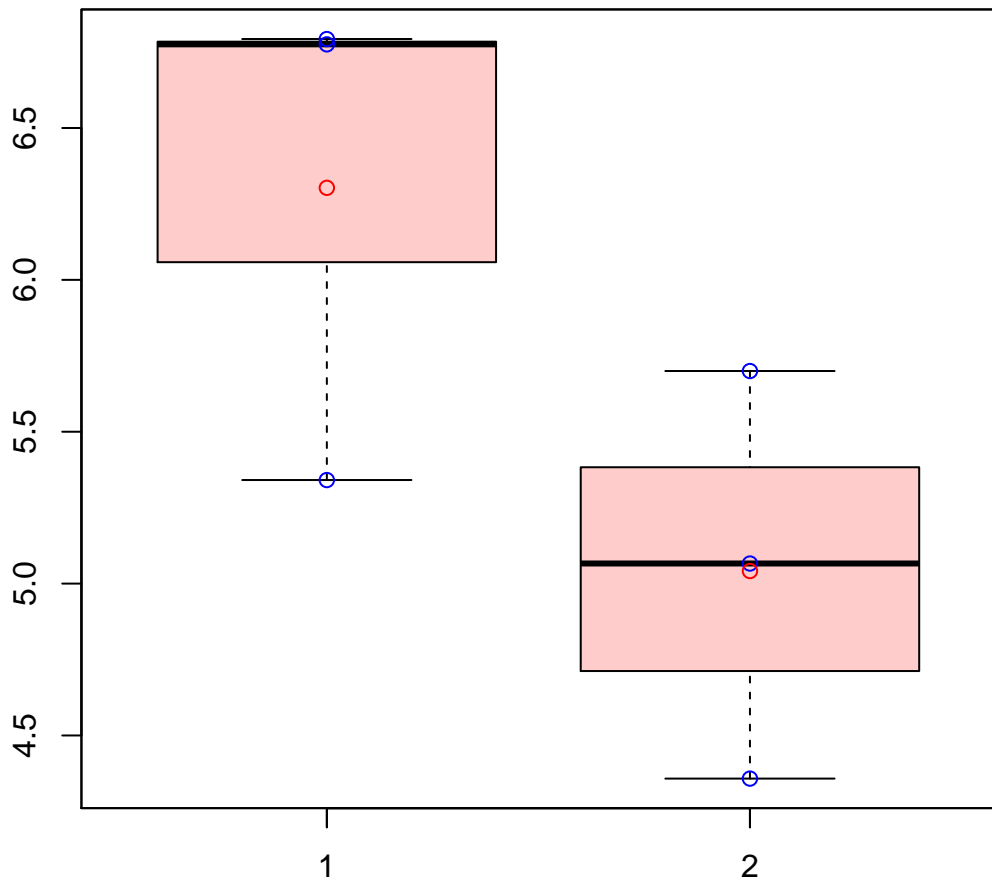

t-Test: p-value = 0.11

# M0UIF1|M0UIF1\_HORVD

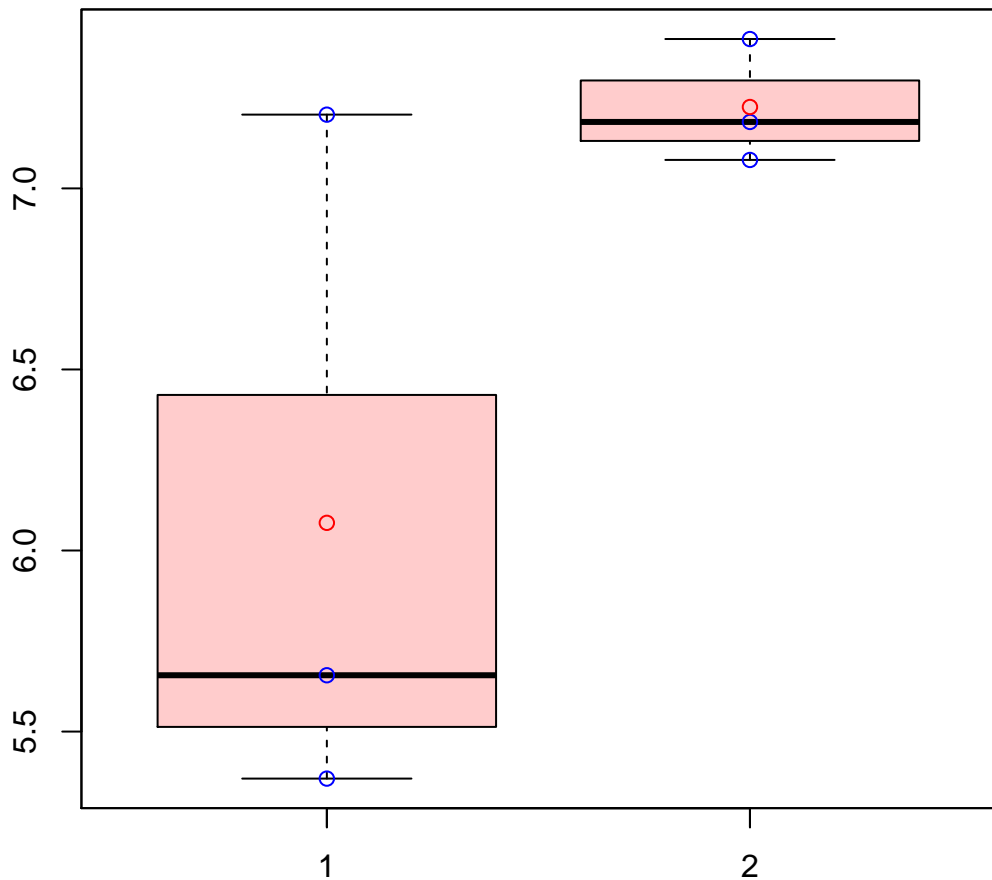

t-Test: p-value = 0.18

# M0UK65|M0UK65\_HORVD

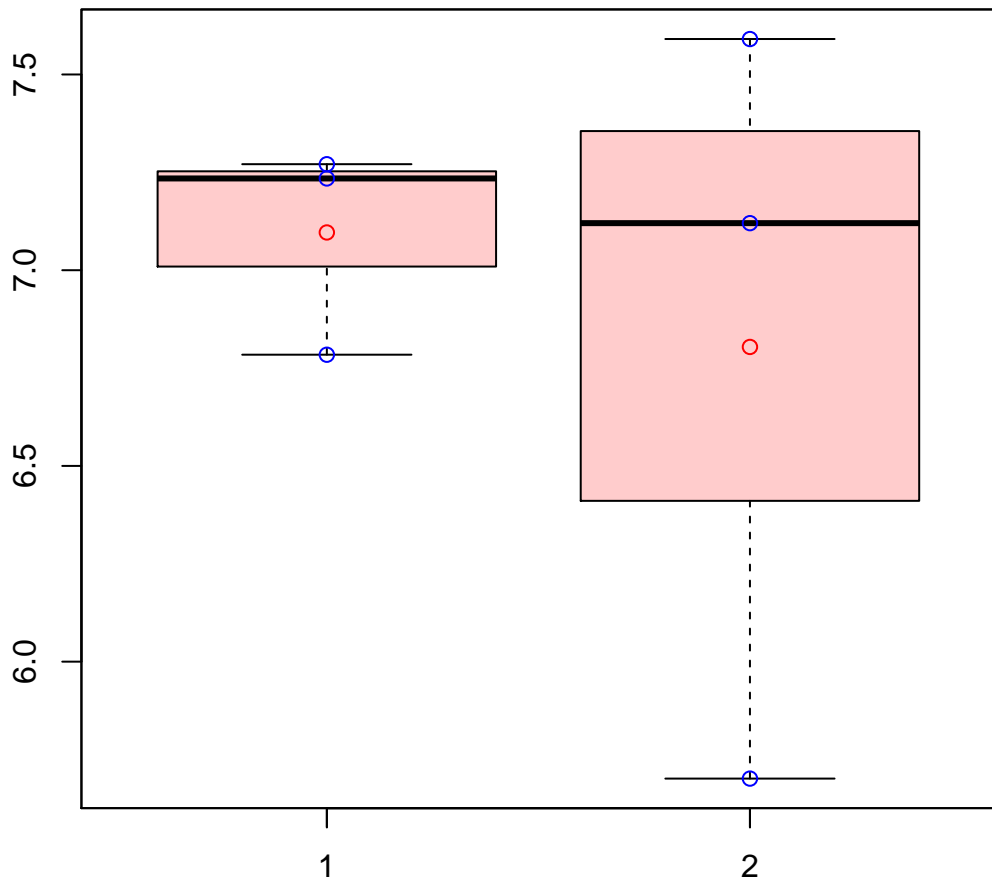

t-Test: p-value = 0.66

# M0UL10|M0UL10\_HORVD

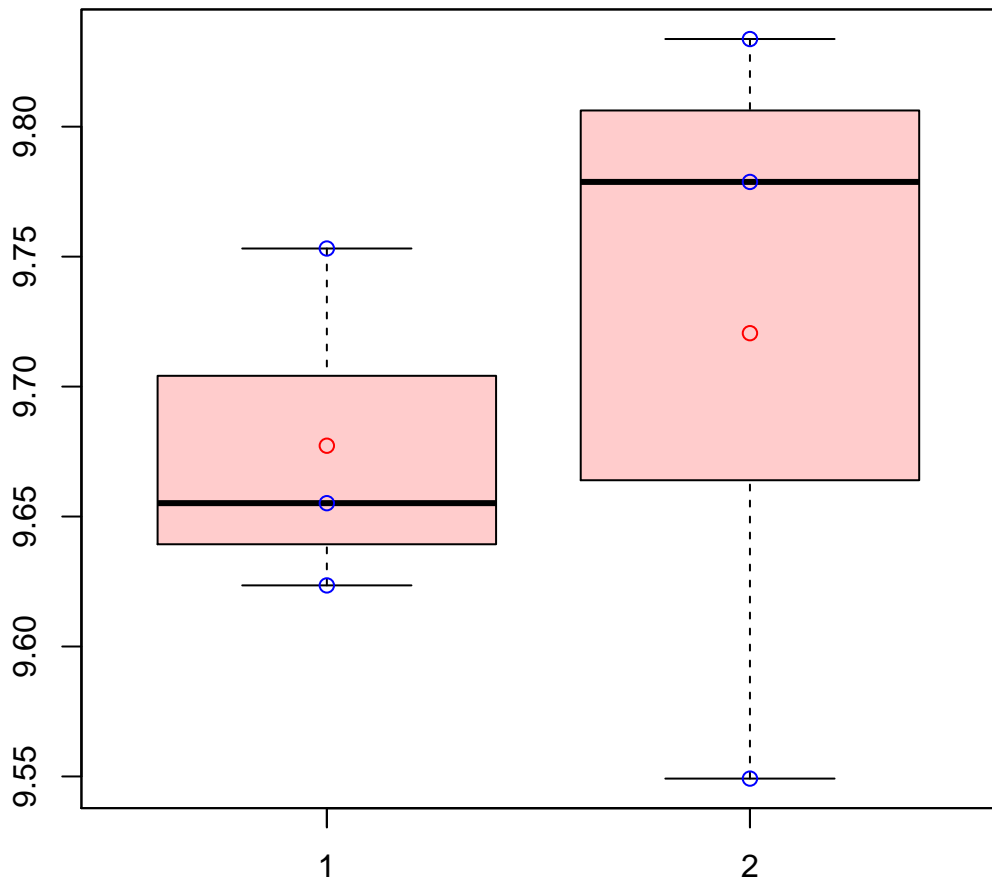

t-Test: p-value = 0.68

# M0UM98|M0UM98\_HORVD

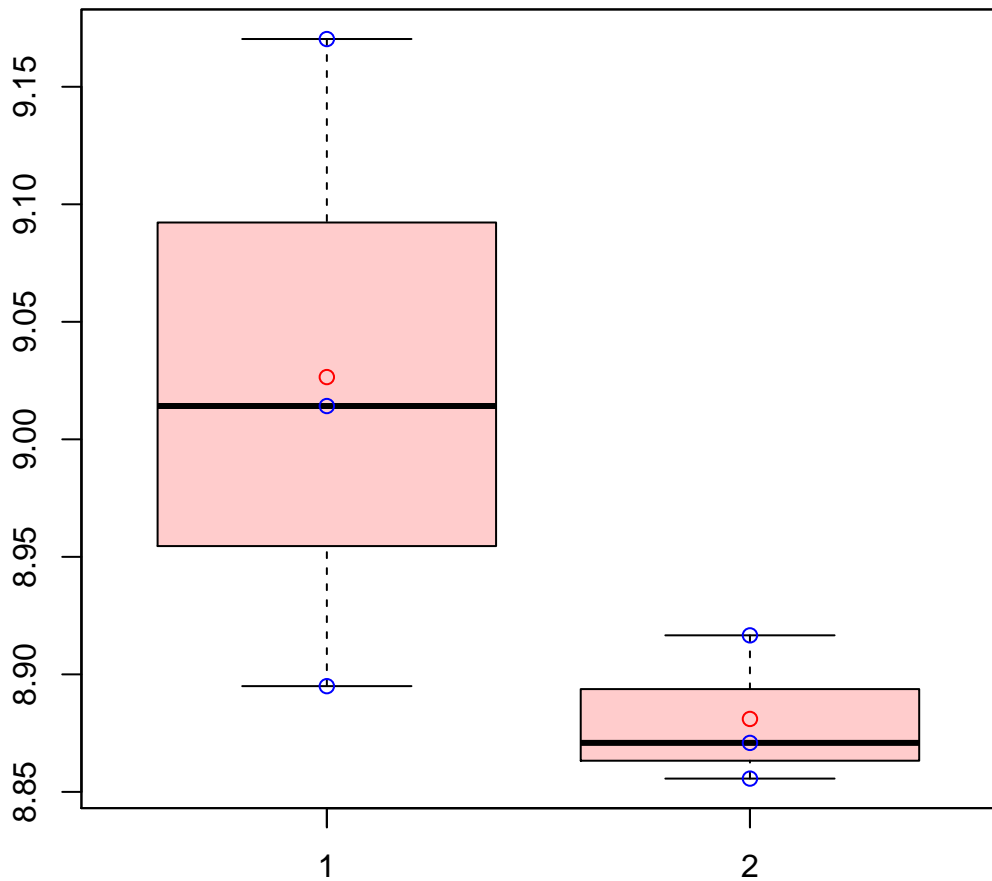

t-Test: p-value = 0.21



# M0UMF1|M0UMF1\_HORVD

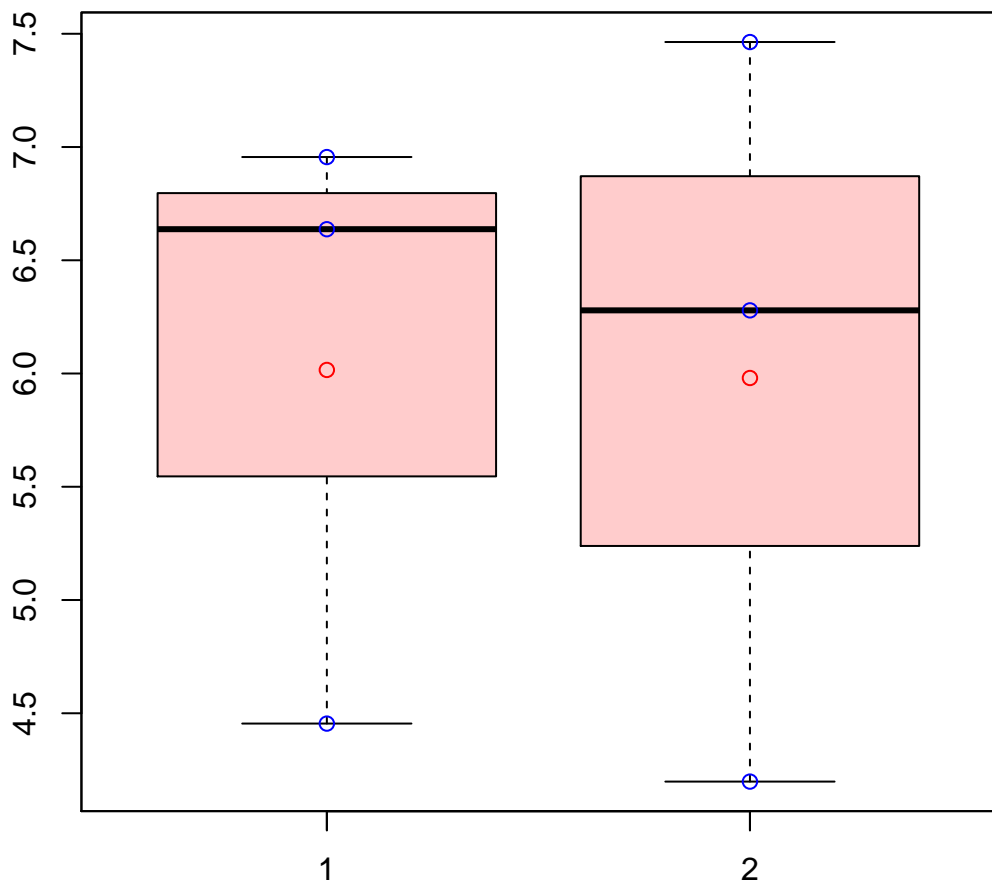

t-Test: p-value = 0.98

# M0UR64|M0UR64\_HORVD

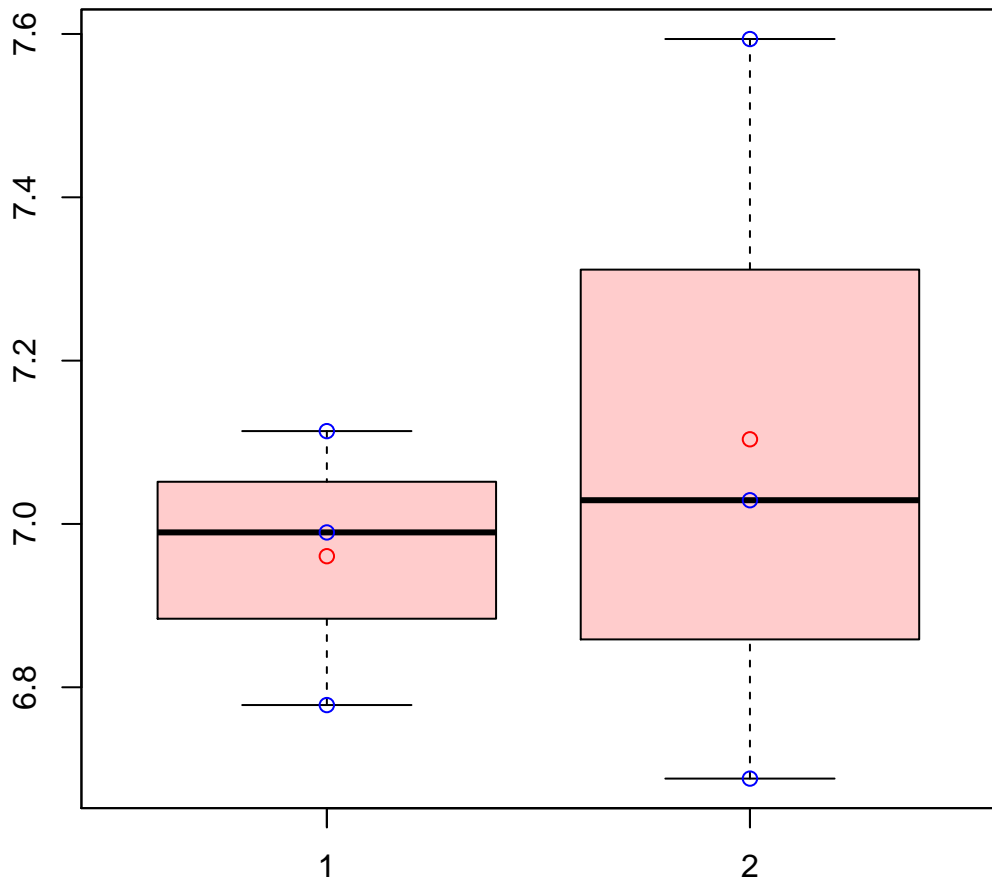

t-Test: p-value = 0.65

# M0URS7|M0URS7\_HORVD

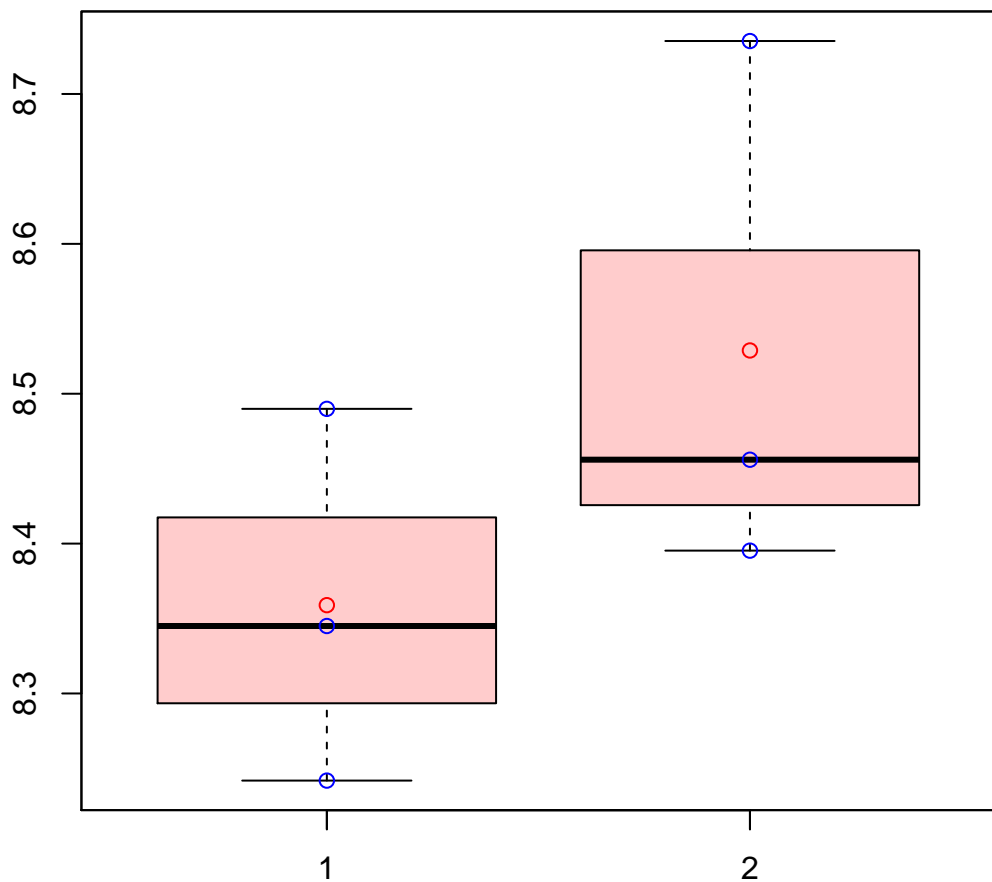

t-Test: p-value = 0.26

# M0USC9|M0USC9\_HORVD

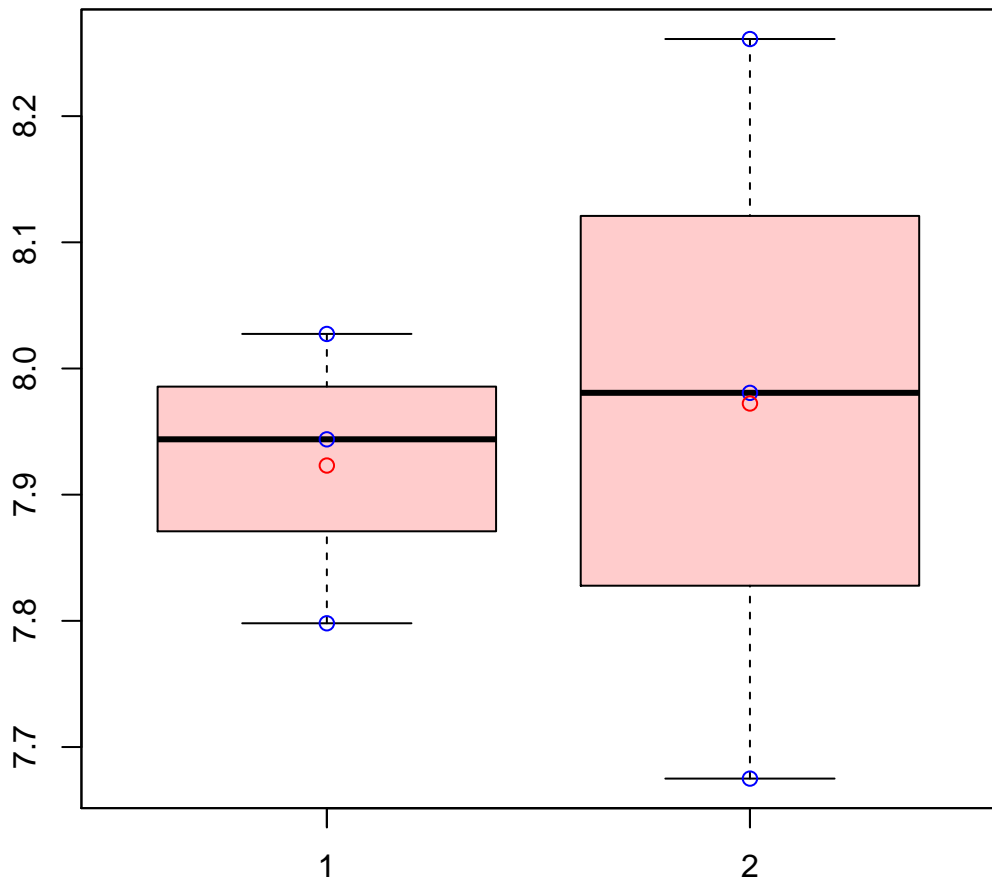

t-Test: p-value = 0.81

# M0USV1|M0USV1\_HORVD

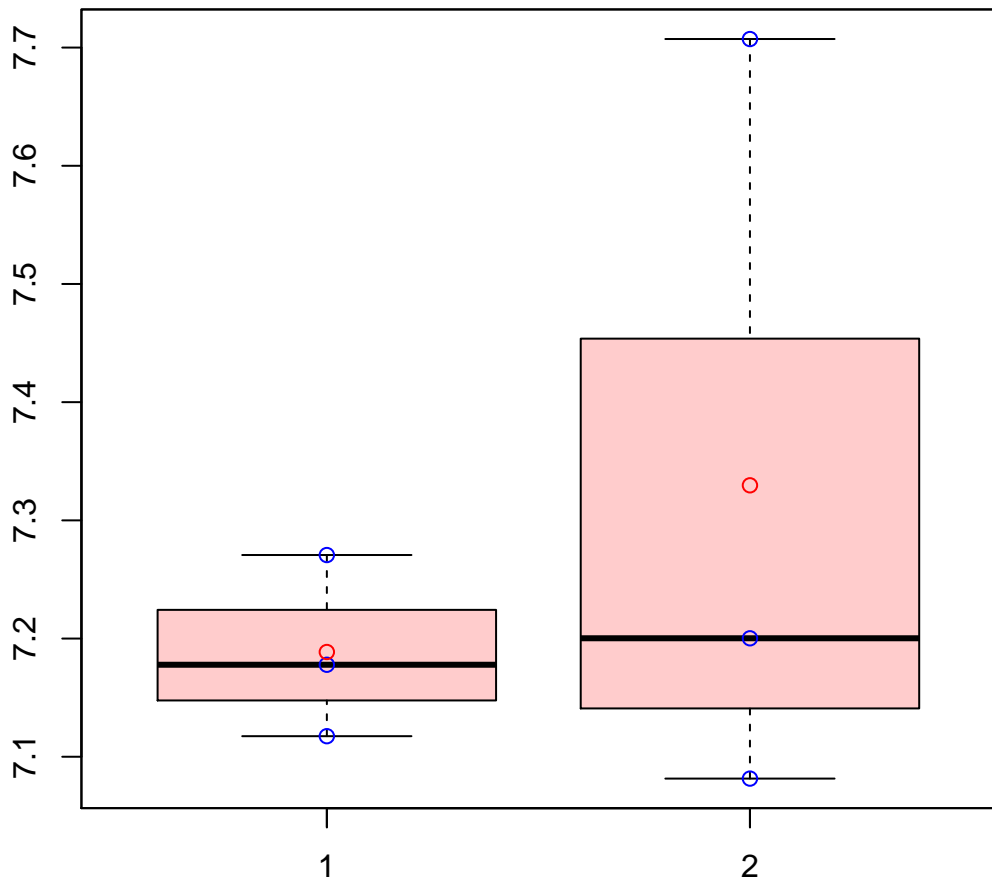

t-Test: p-value = 0.54

# M0UTN4|M0UTN4\_HORVD

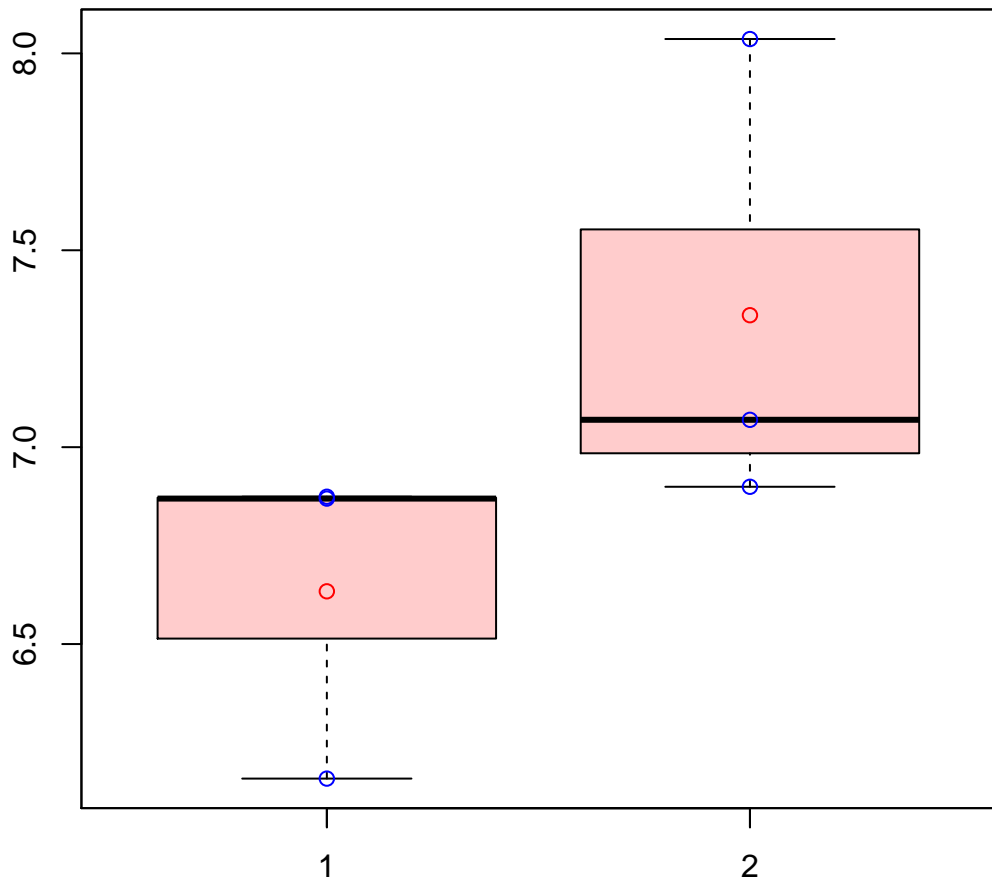

t-Test: p-value = 0.19

# M0UVN6|M0UVN6\_HORVD

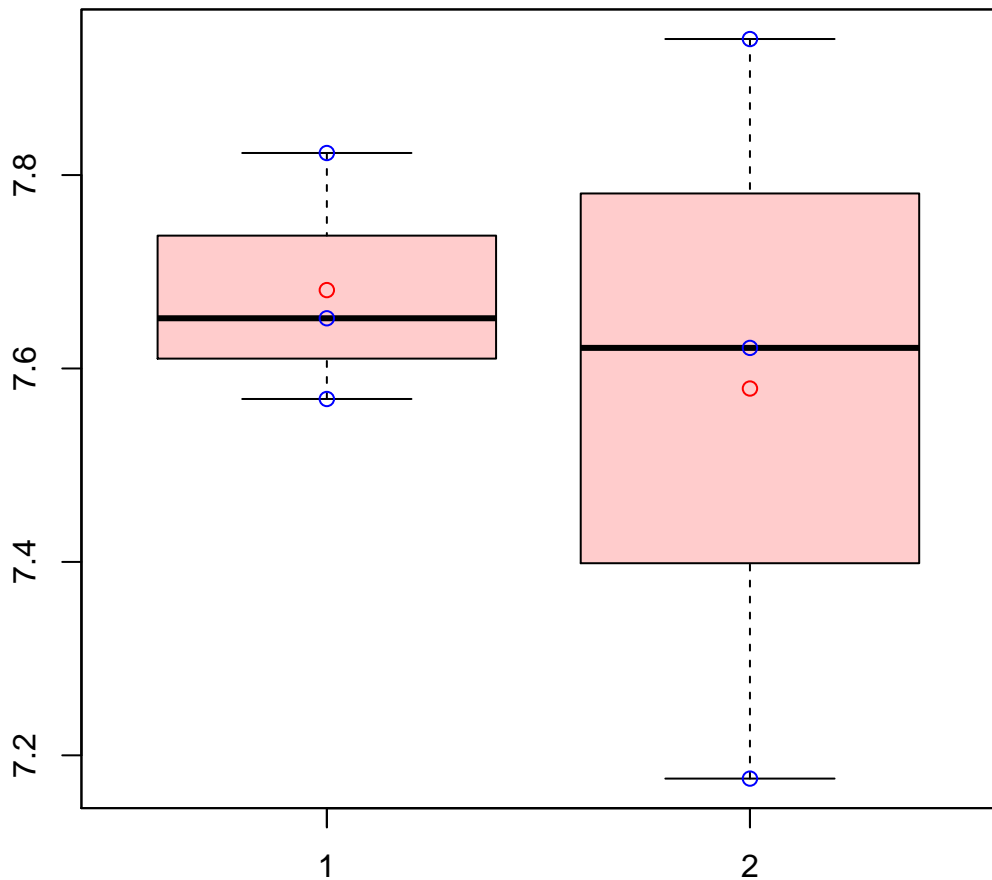

t-Test: p-value = 0.7

# M0UWD2|M0UWD2\_HORVD

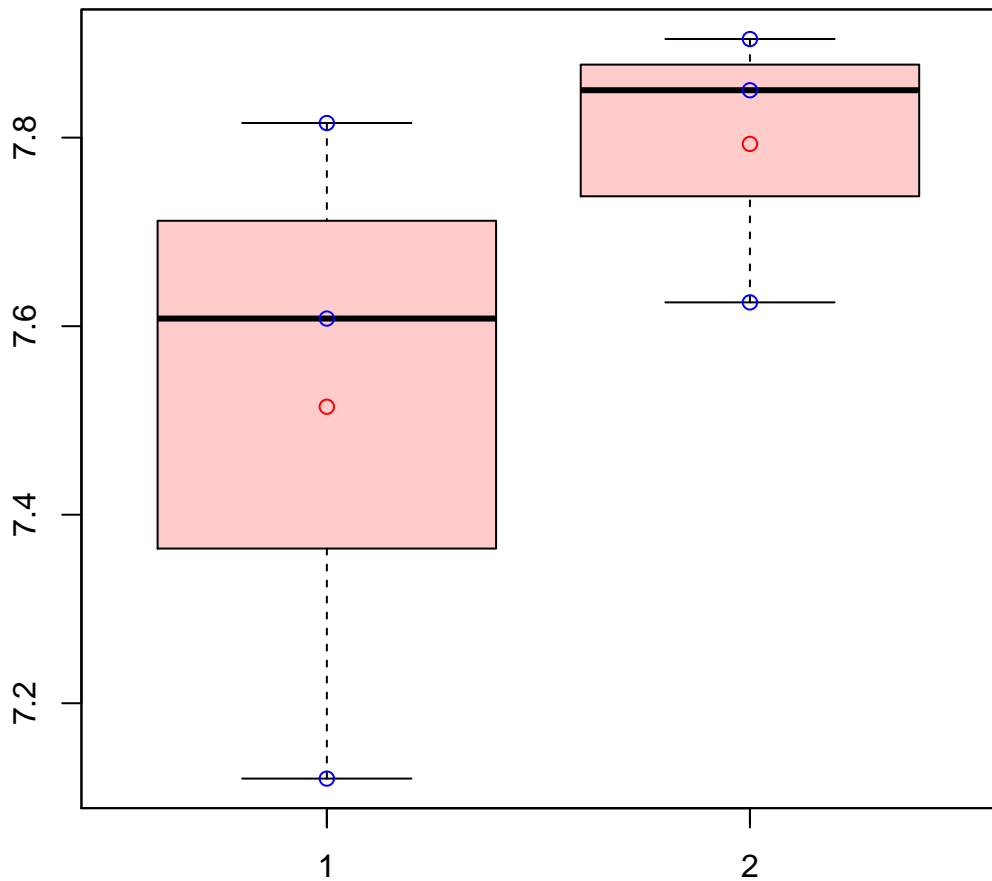

t-Test: p-value = 0.31



# M0UWV0|M0UWV0\_HORVD

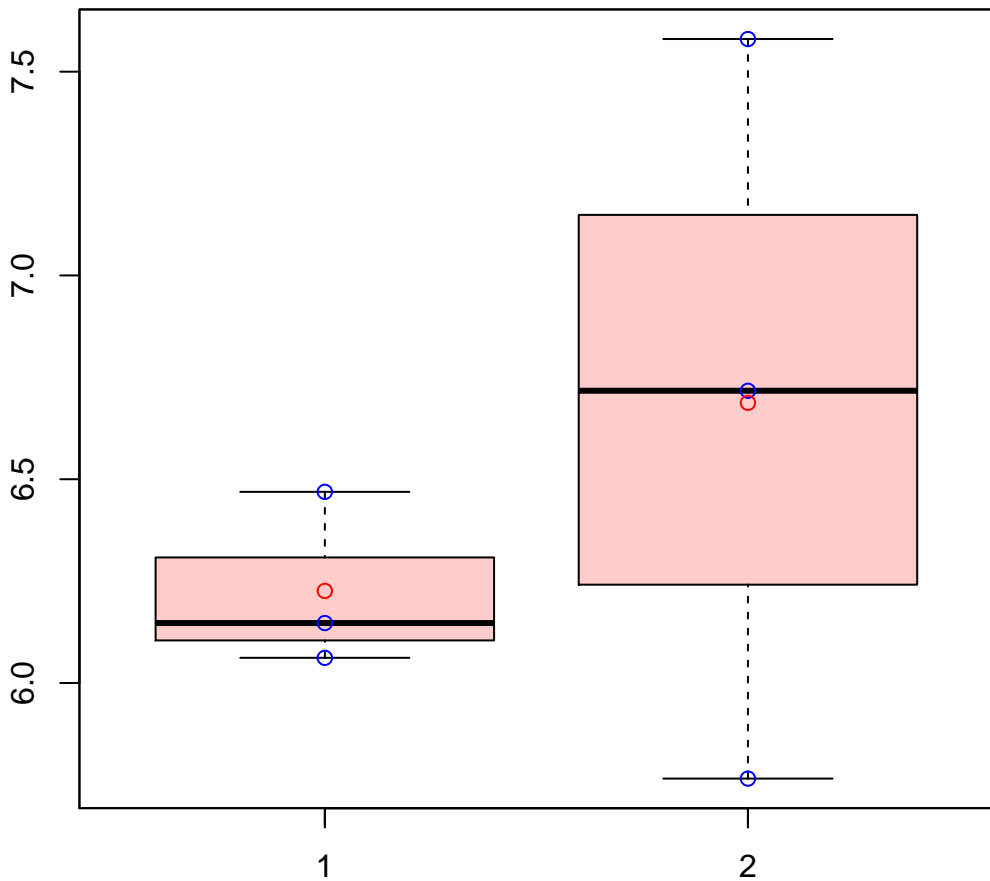

t-Test: p-value = 0.47

# M0UX33|M0UX33\_HORVD

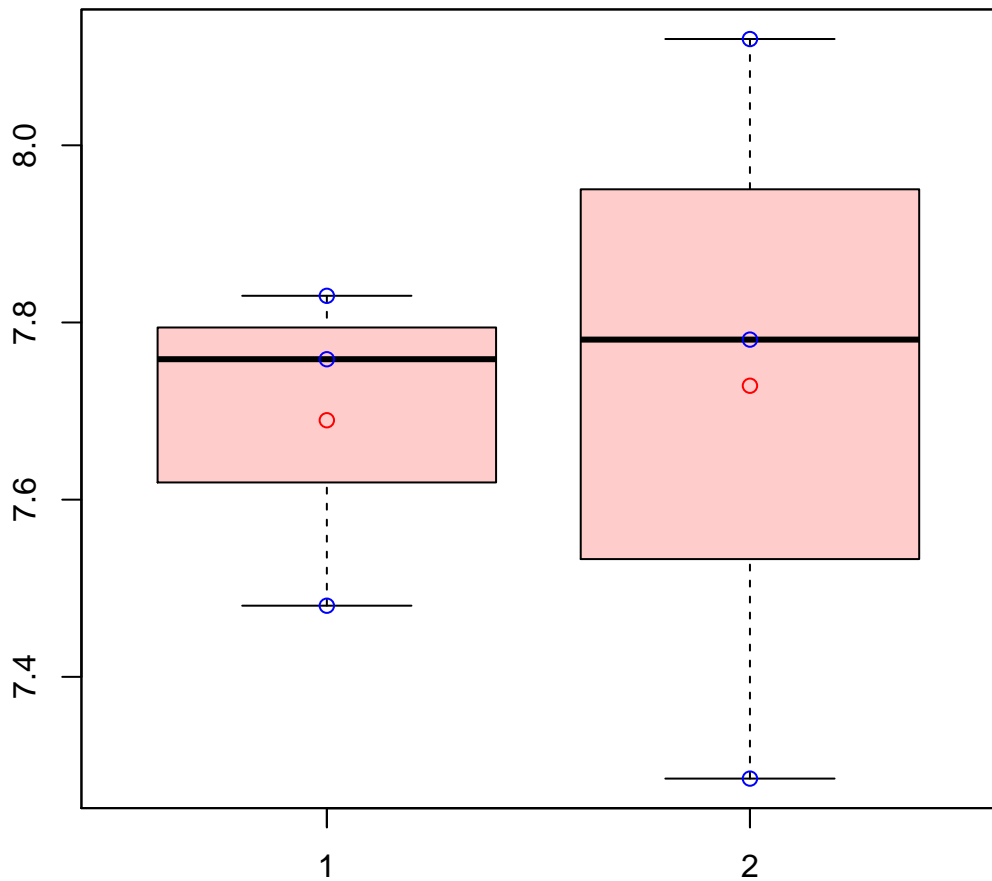

t-Test: p-value = 0.89

# M0UYD7|M0UYD7\_HORVD

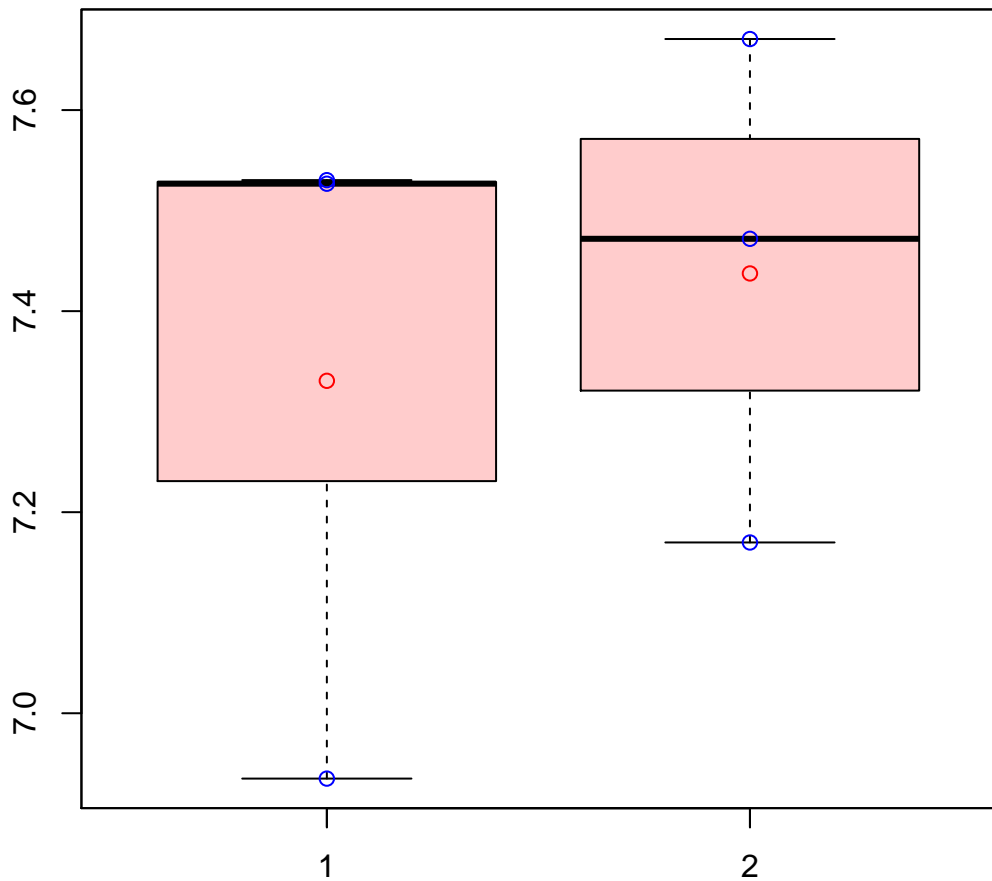

# M0UZ32|M0UZ32\_HORVD

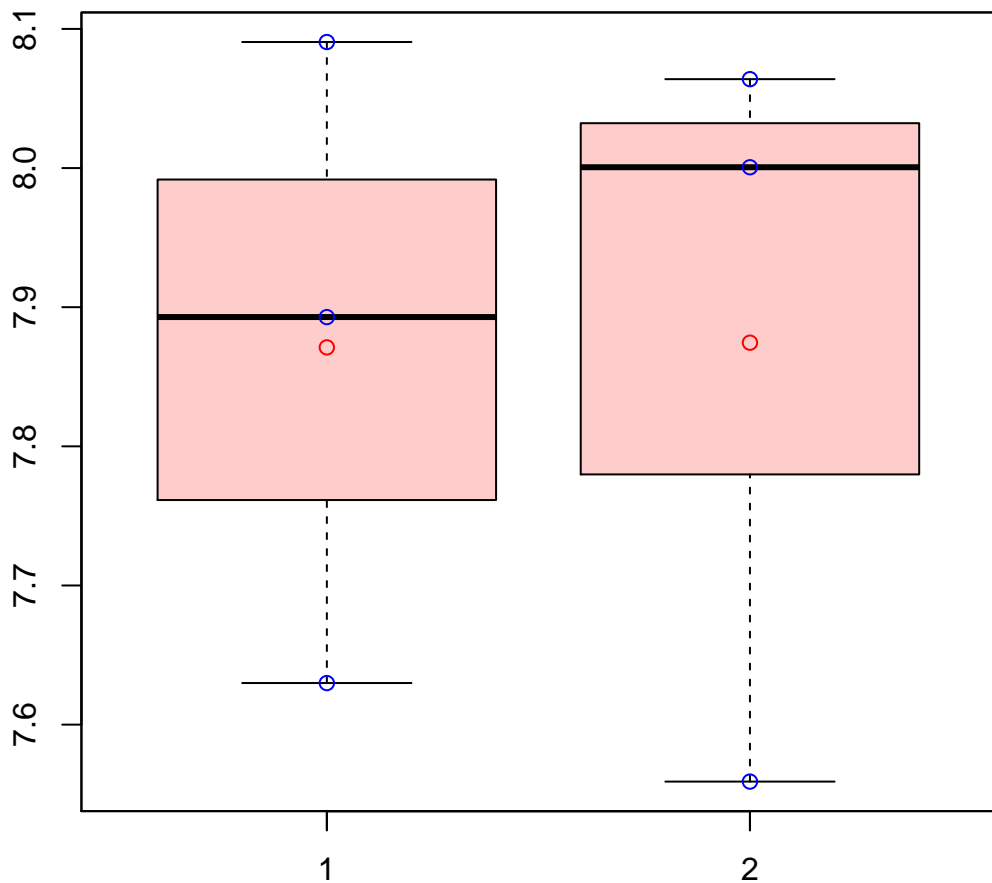

t-Test: p-value = 0.99

# M0UZ83|M0UZ83\_HORVD

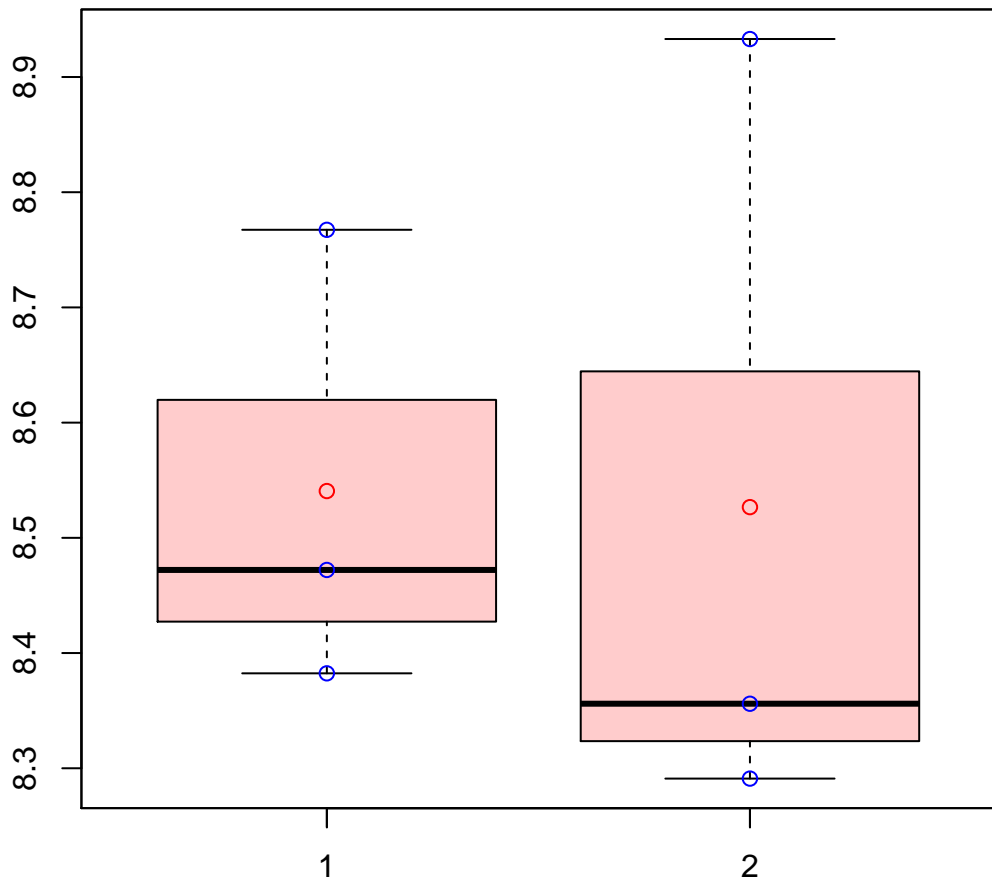

t-Test: p-value = 0.96

# M0UZL2|M0UZL2\_HORVD

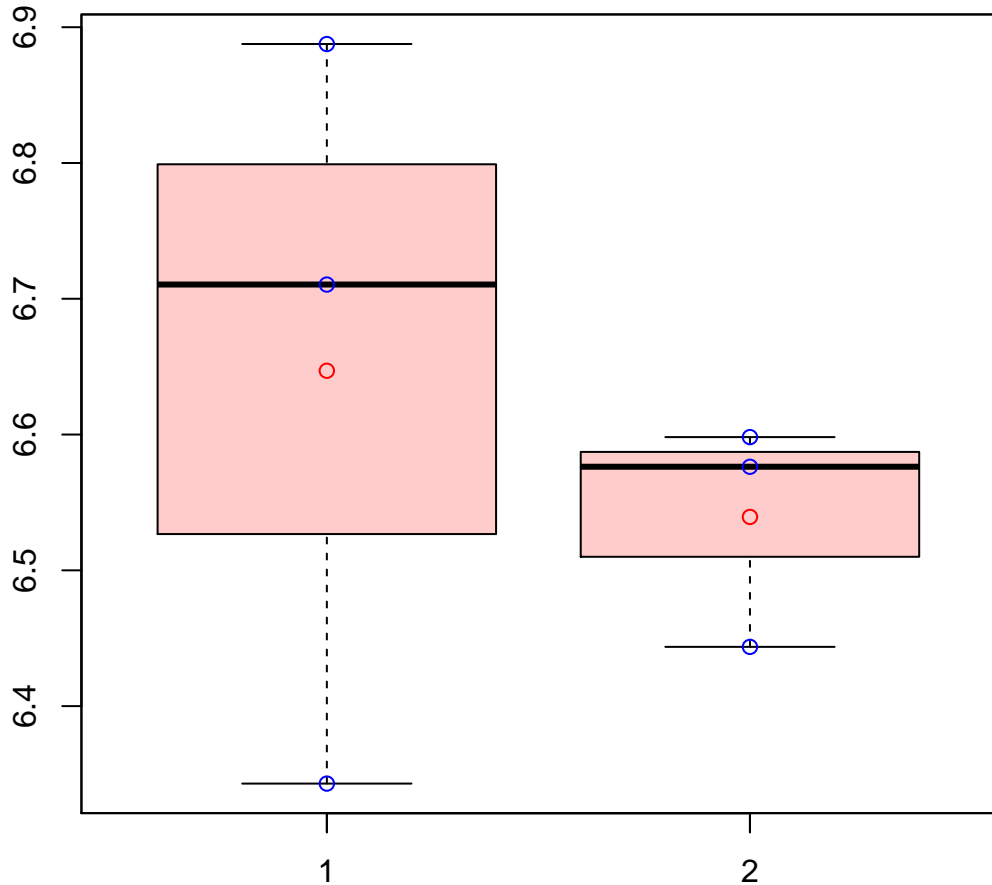

t-Test: p-value = 0.58

# M0V0S4|M0V0S4\_HORVD

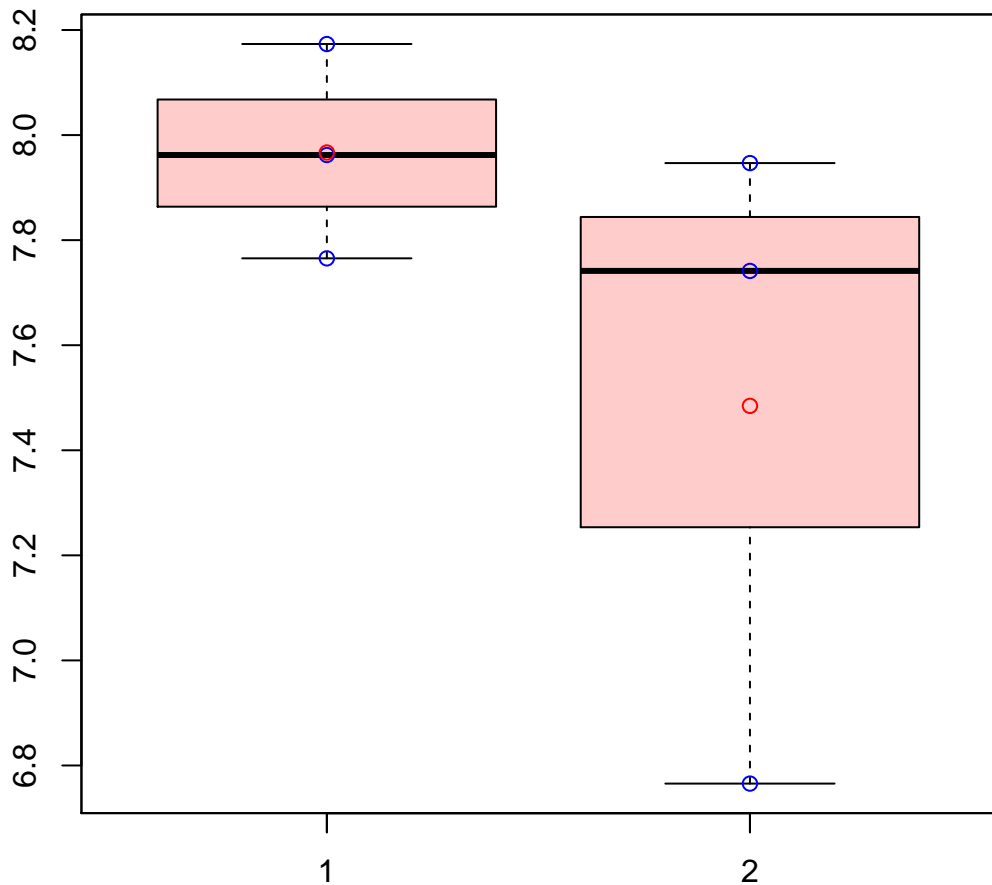

t-Test: p-value = 0.32

# M0V292|M0V292\_HORVD

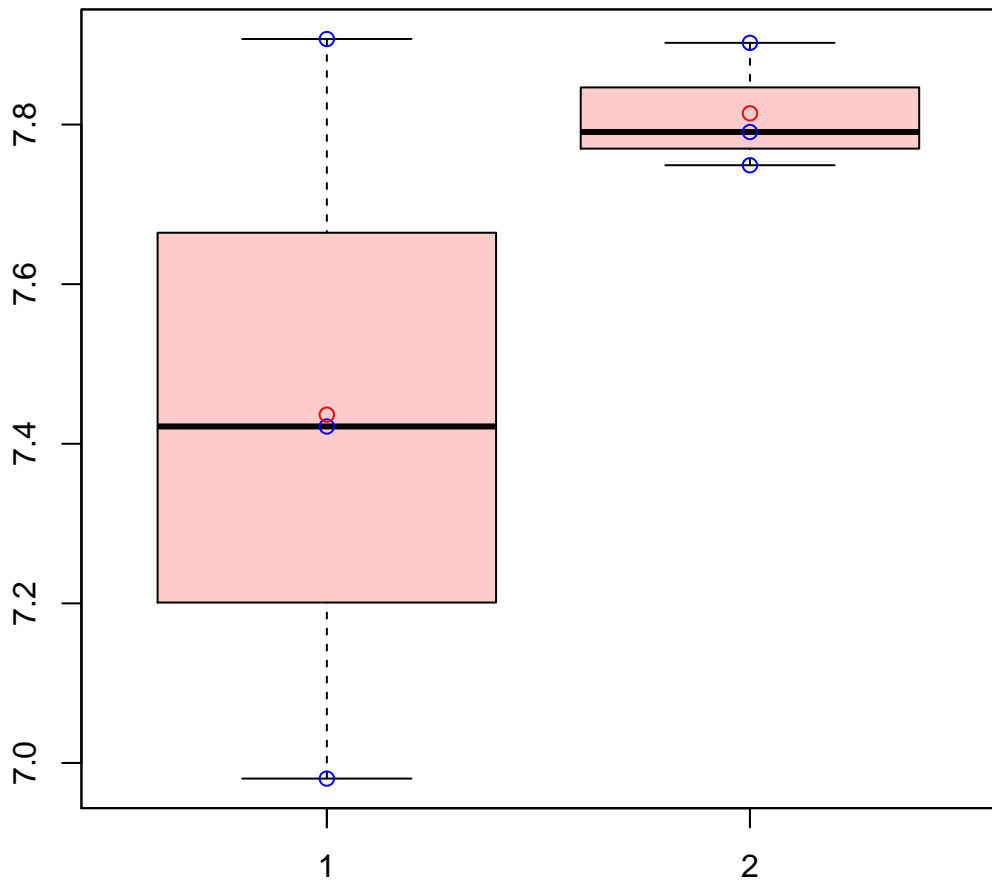

t-Test: p-value = 0.29



# M0V3W4|M0V3W4\_HORVD

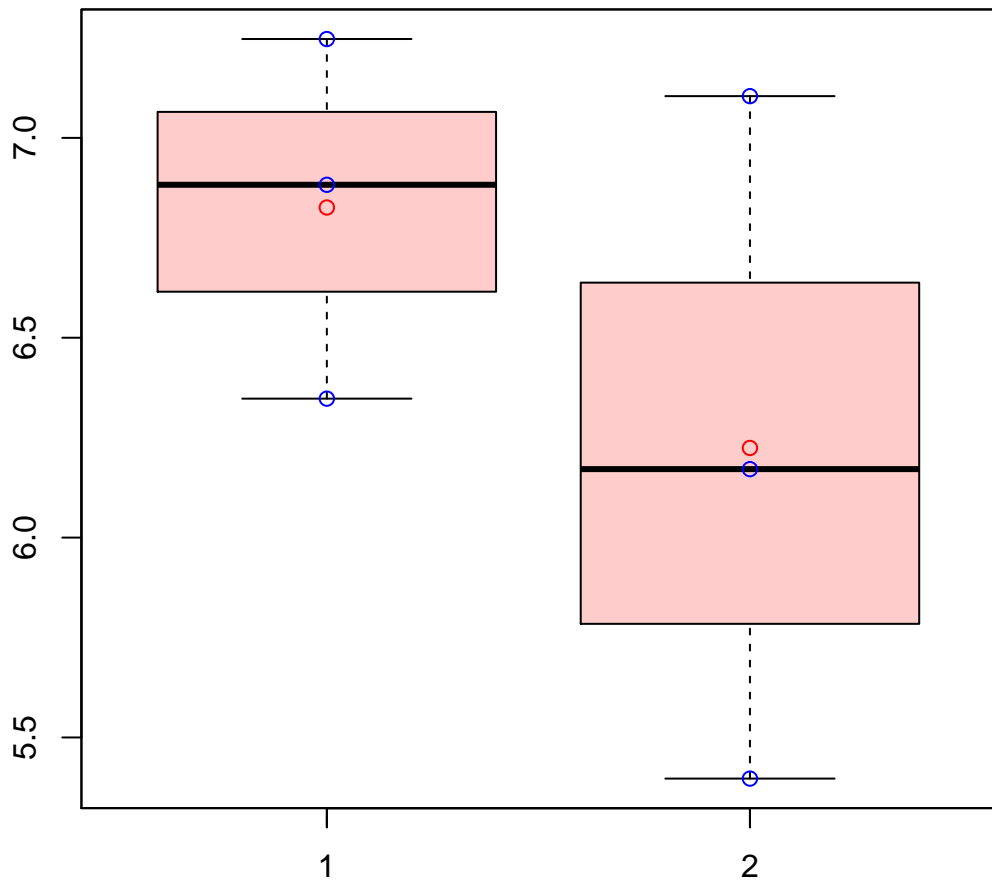

t-Test: p-value = 0.36

# M0V752|M0V752\_HORVD

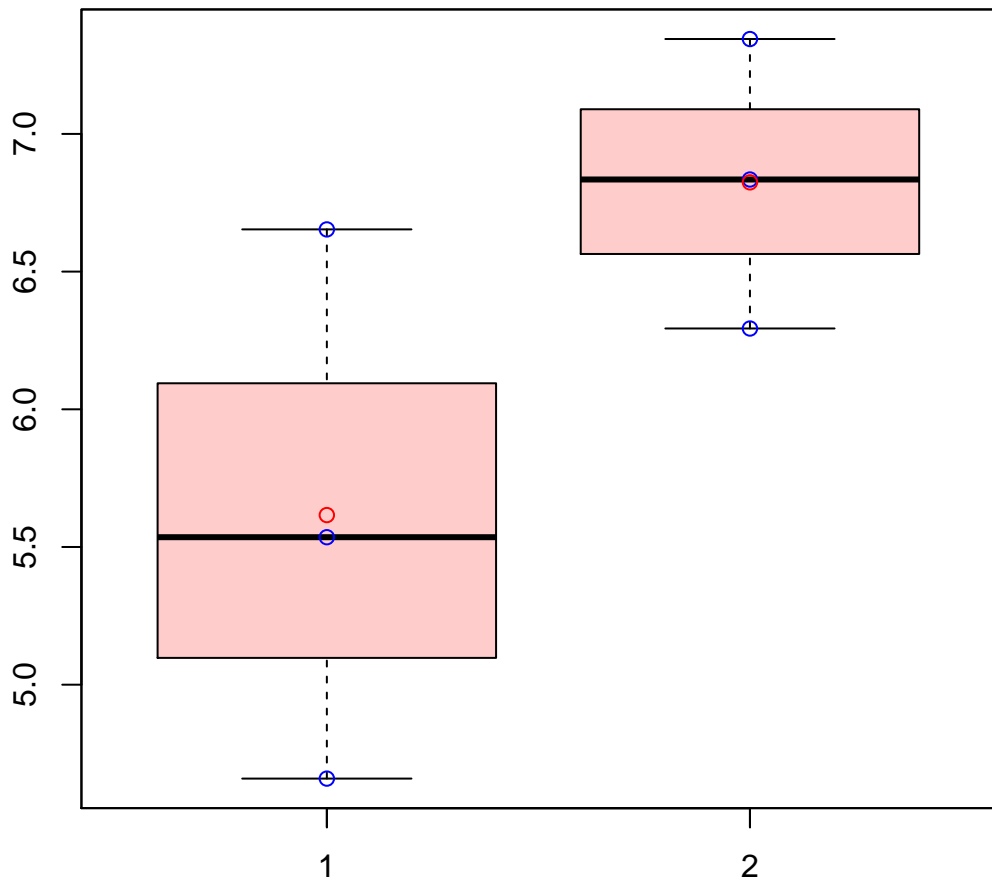

t-Test: p-value = 0.16

# M0V9H3|M0V9H3\_HORVD

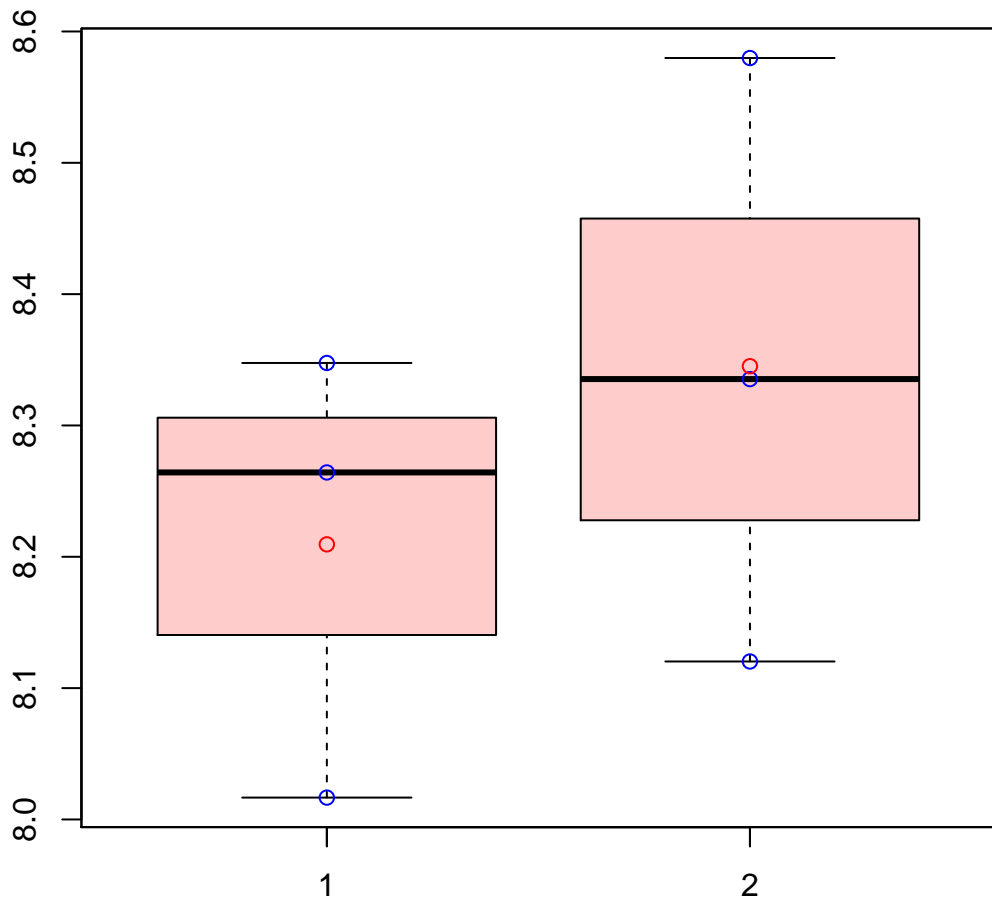

t-Test: p-value = 0.46

# M0VAF3|M0VAF3\_HORVD

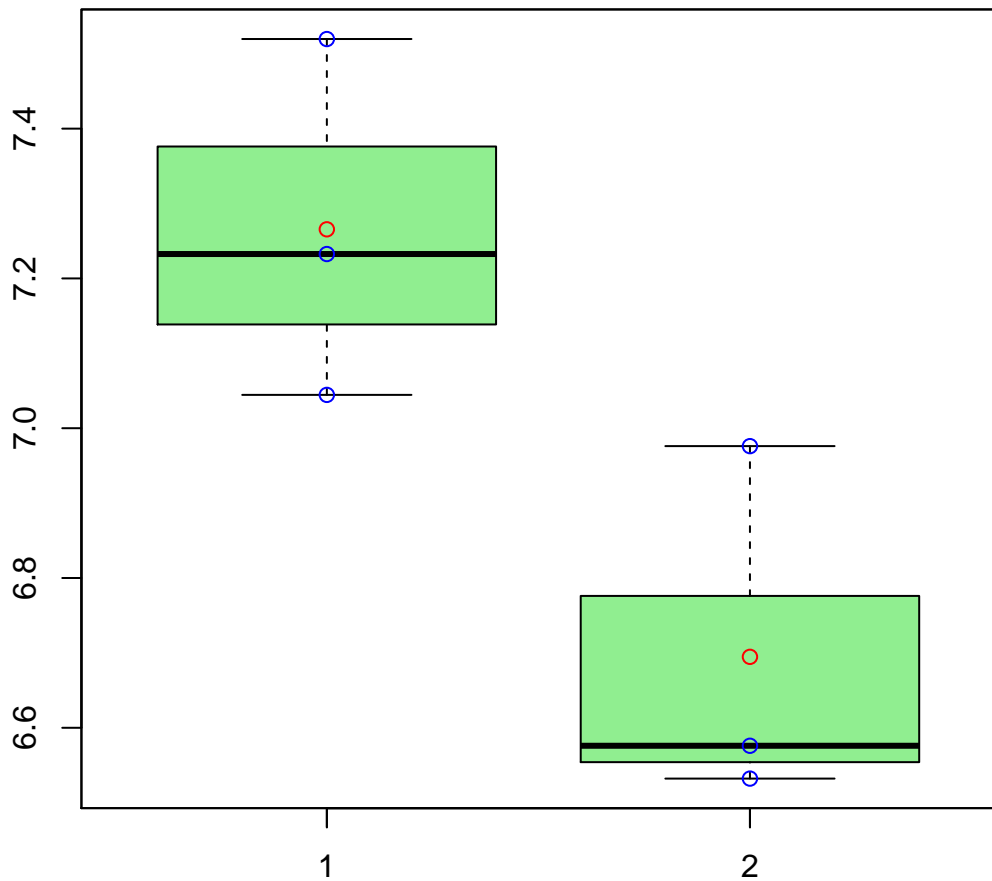

t-Test: p-value = 0.04

# M0VBA2|M0VBA2\_HORVD

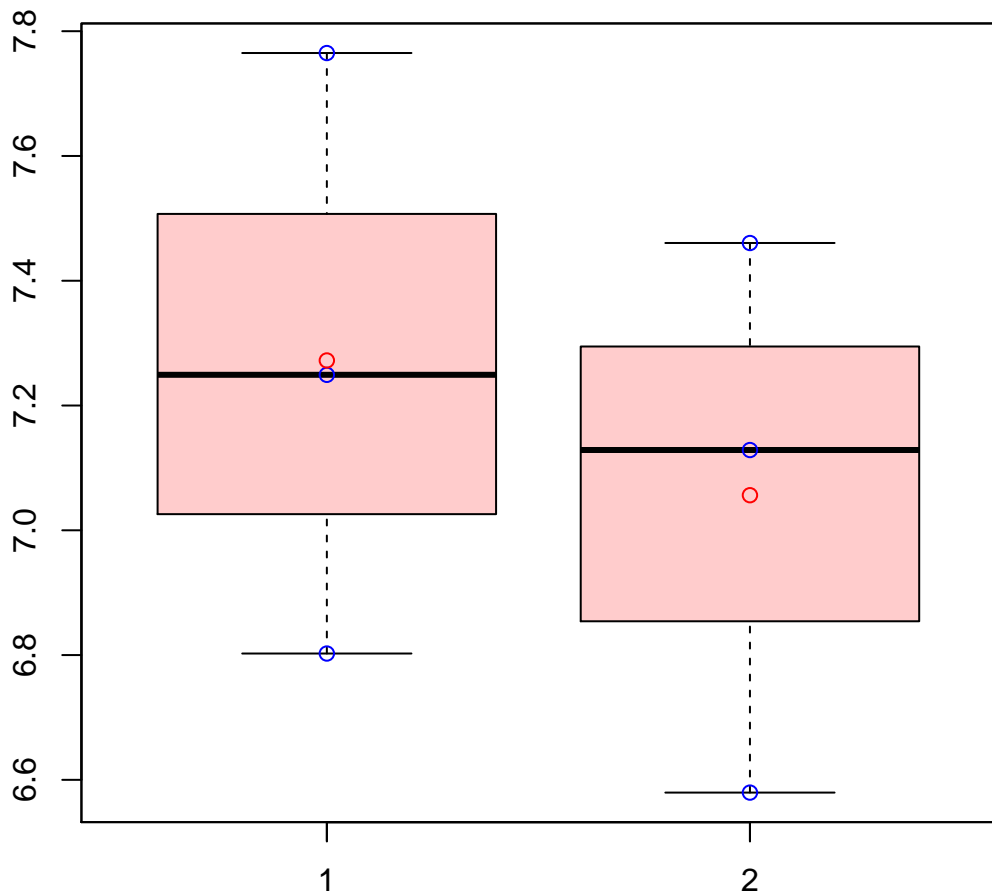

t-Test: p-value = 0.6

# M0VD47|M0VD47\_HORVD

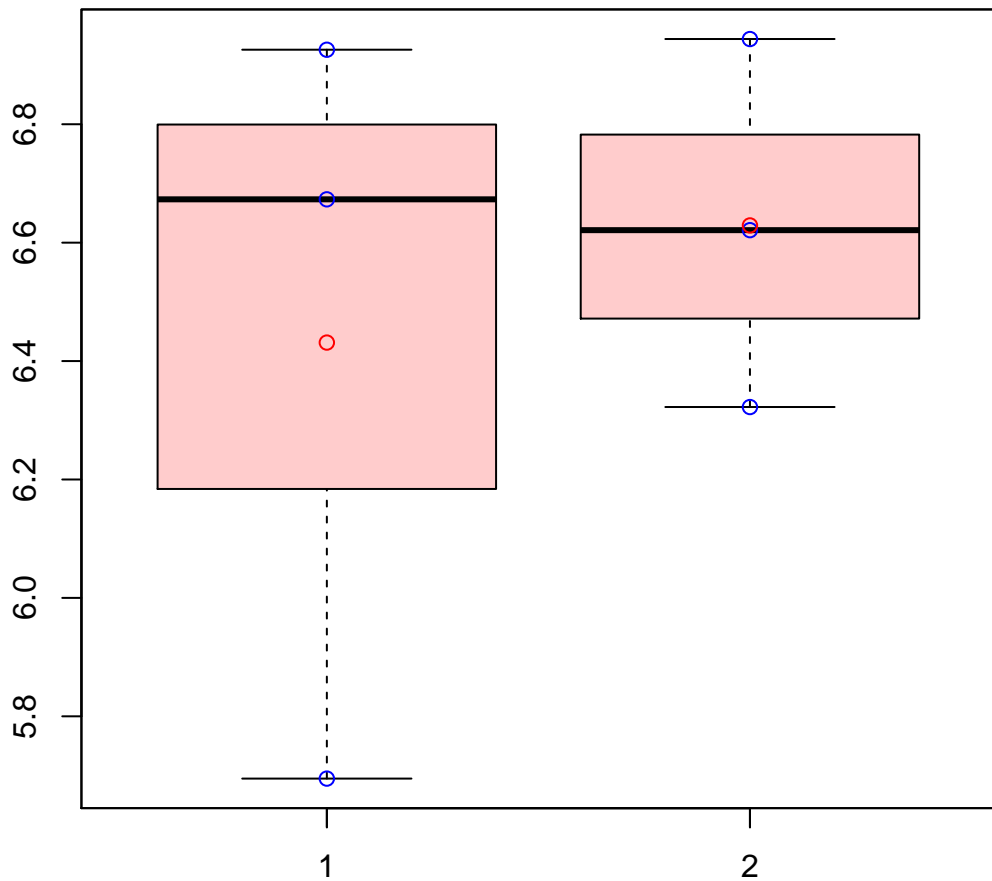

t-Test: p-value = 0.67

# M0VFD8|M0VFD8\_HORVD

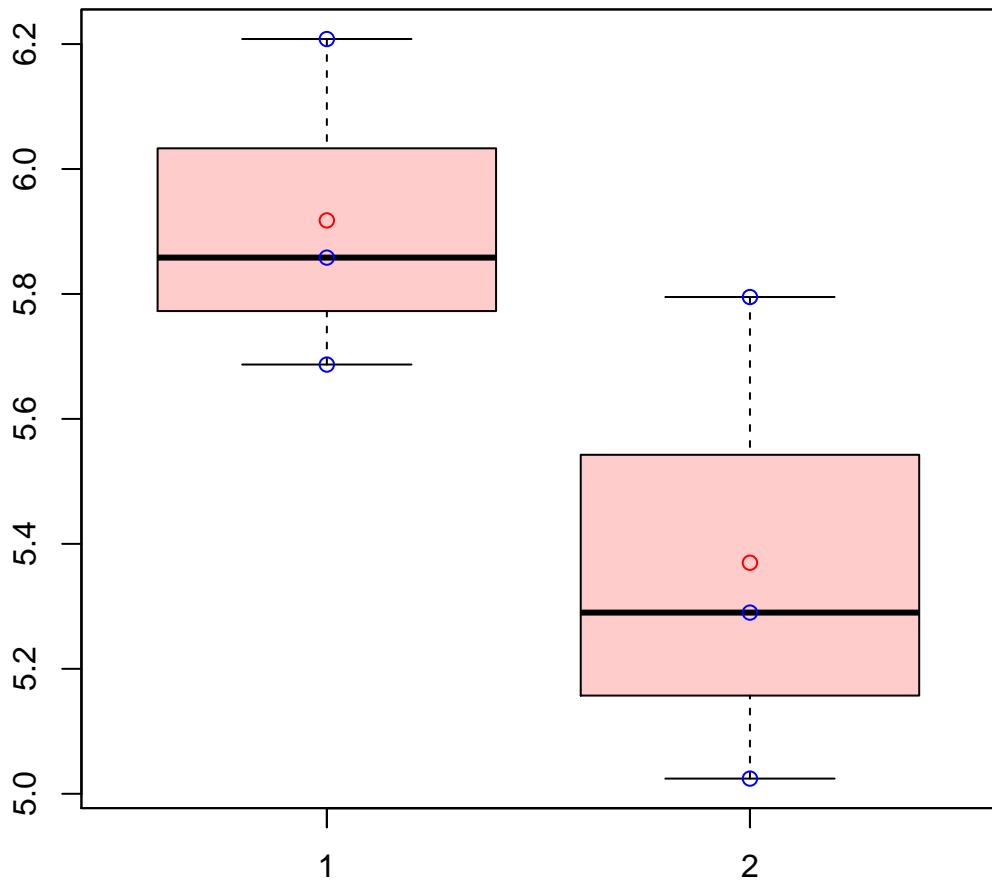

t-Test: p-value = 0.12

# M0VMS6|M0VMS6\_HORVD

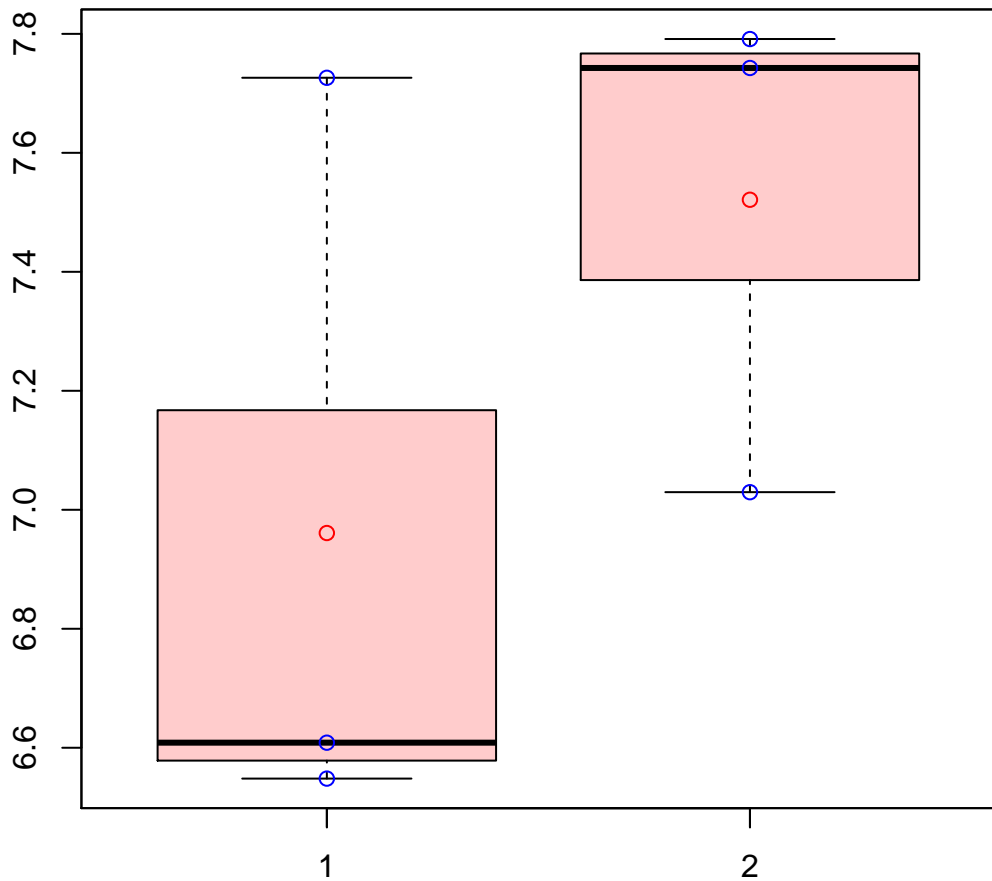

t-Test: p-value = 0.3



# M0VMX9|M0VMX9\_HORVD

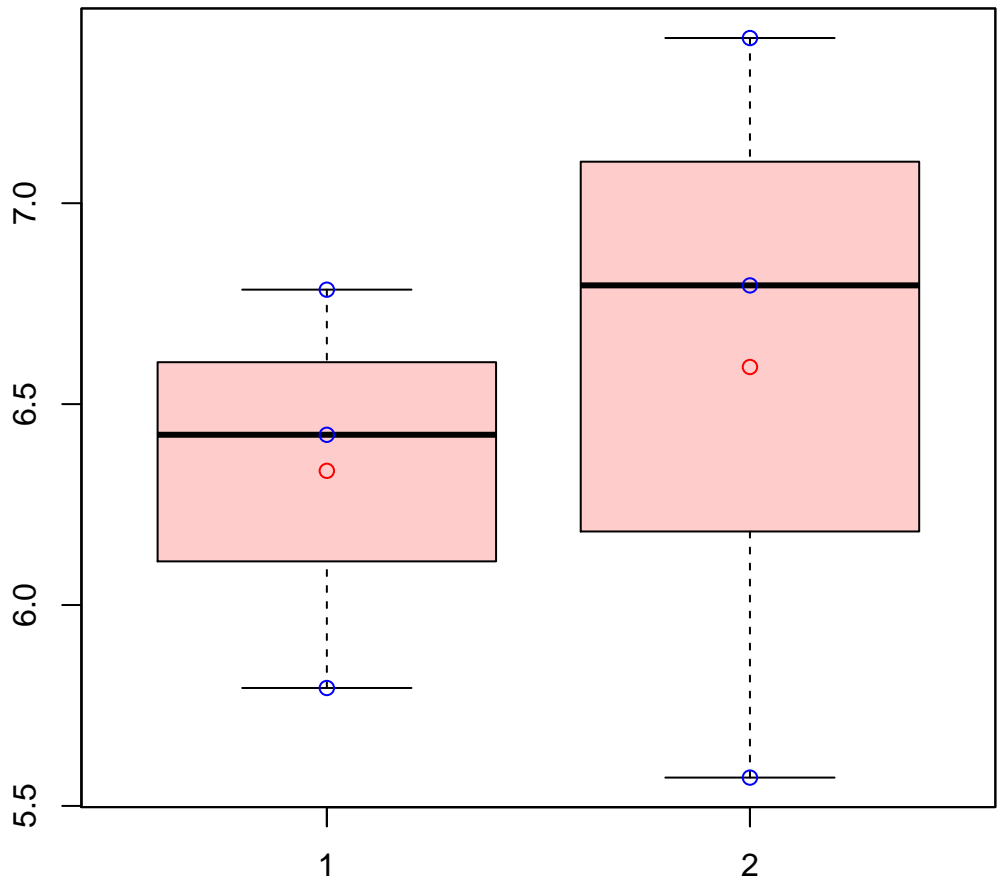

t-Test: p-value = 0.7

# M0VNQ9|M0VNQ9\_HORVD

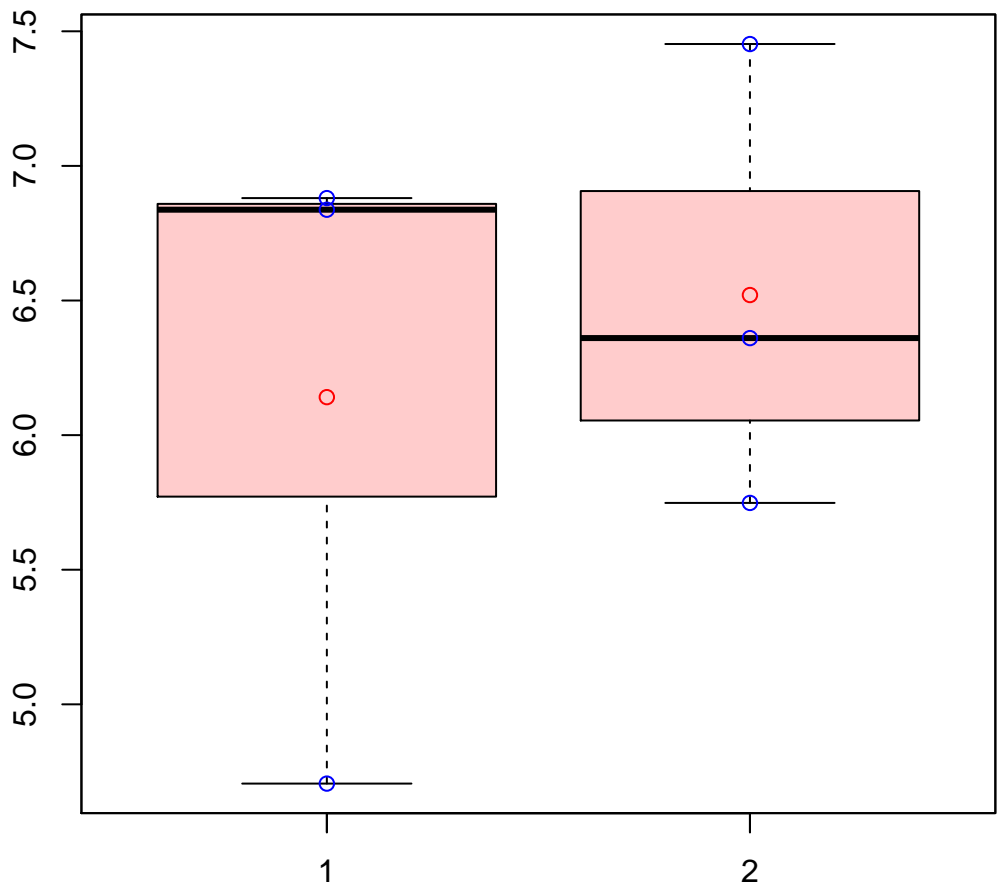

t-Test: p-value = 0.69

# M0VQZ7|M0VQZ7\_HORVD

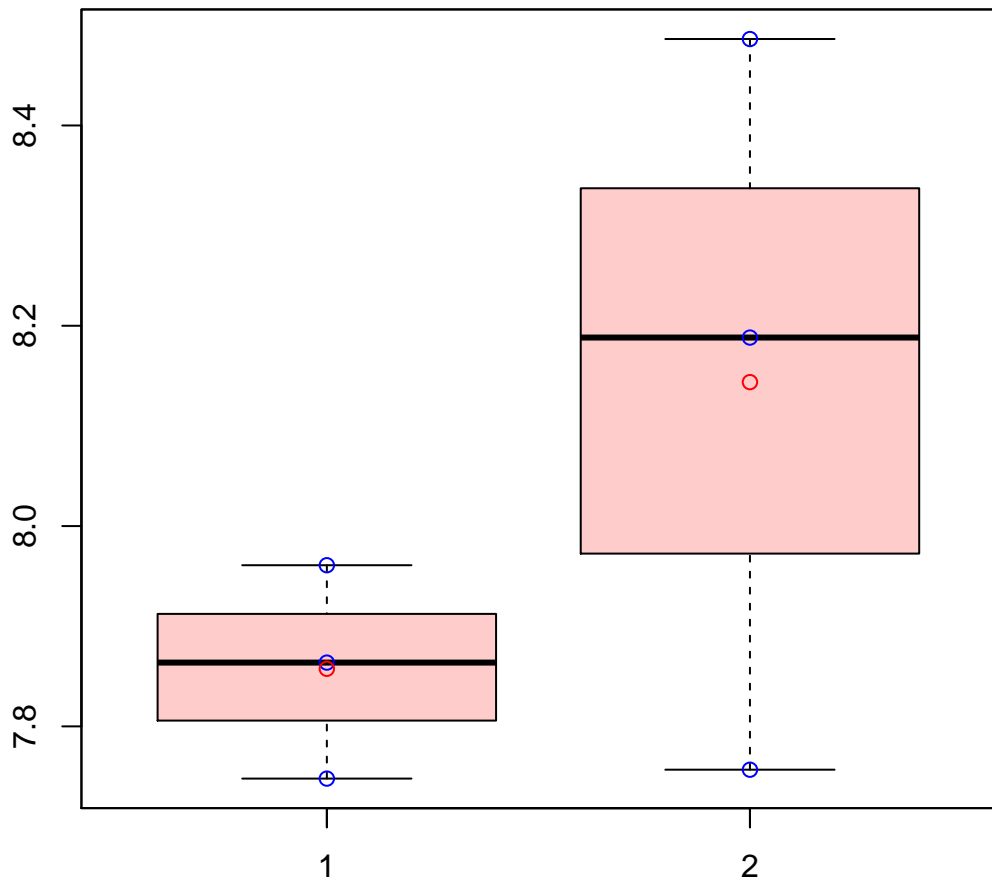

t-Test: p-value = 0.31

# M0VRC5|M0VRC5\_HORVD

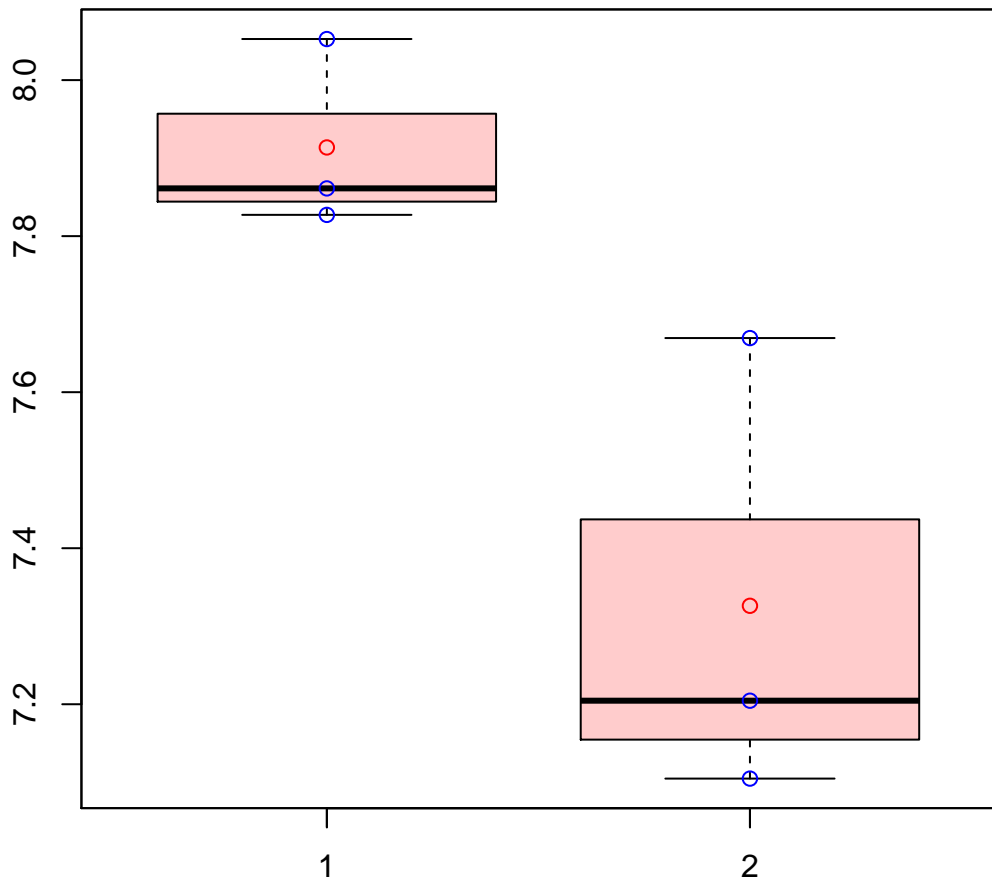

t-Test: p-value = 0.06

# M0VS38|M0VS38\_HORVD

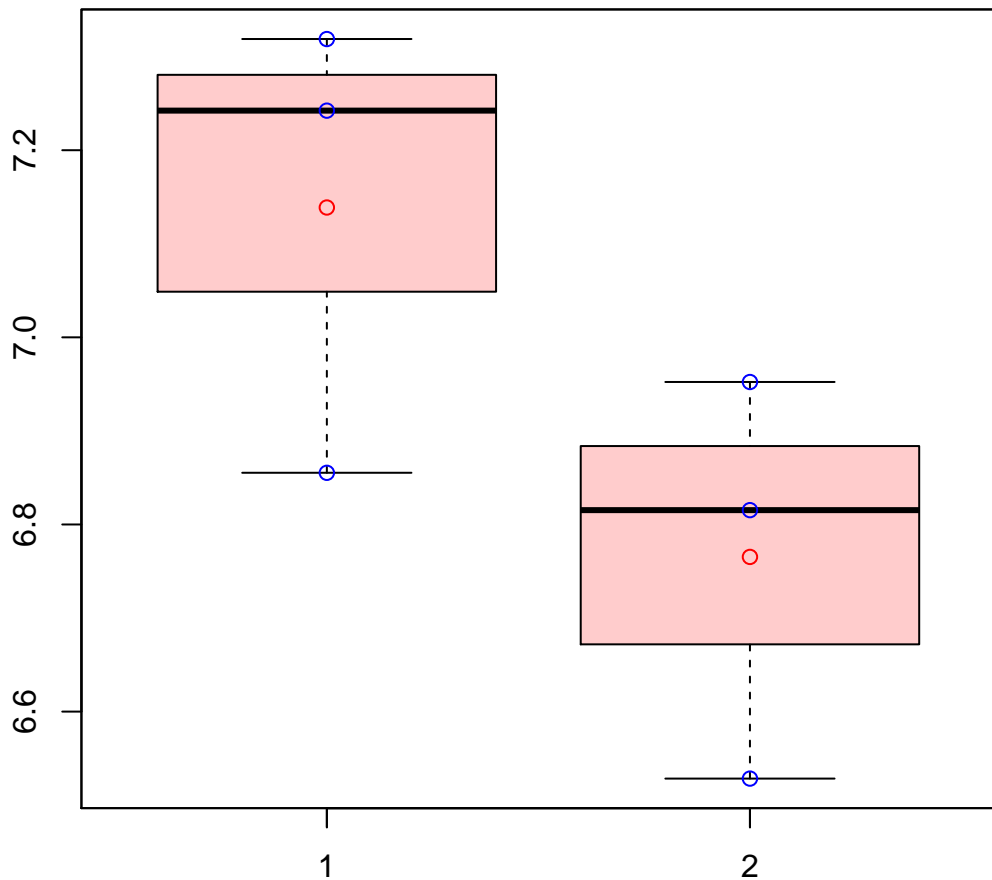

t-Test: p-value = 0.12

# M0VSJ1|M0VSJ1\_HORVD

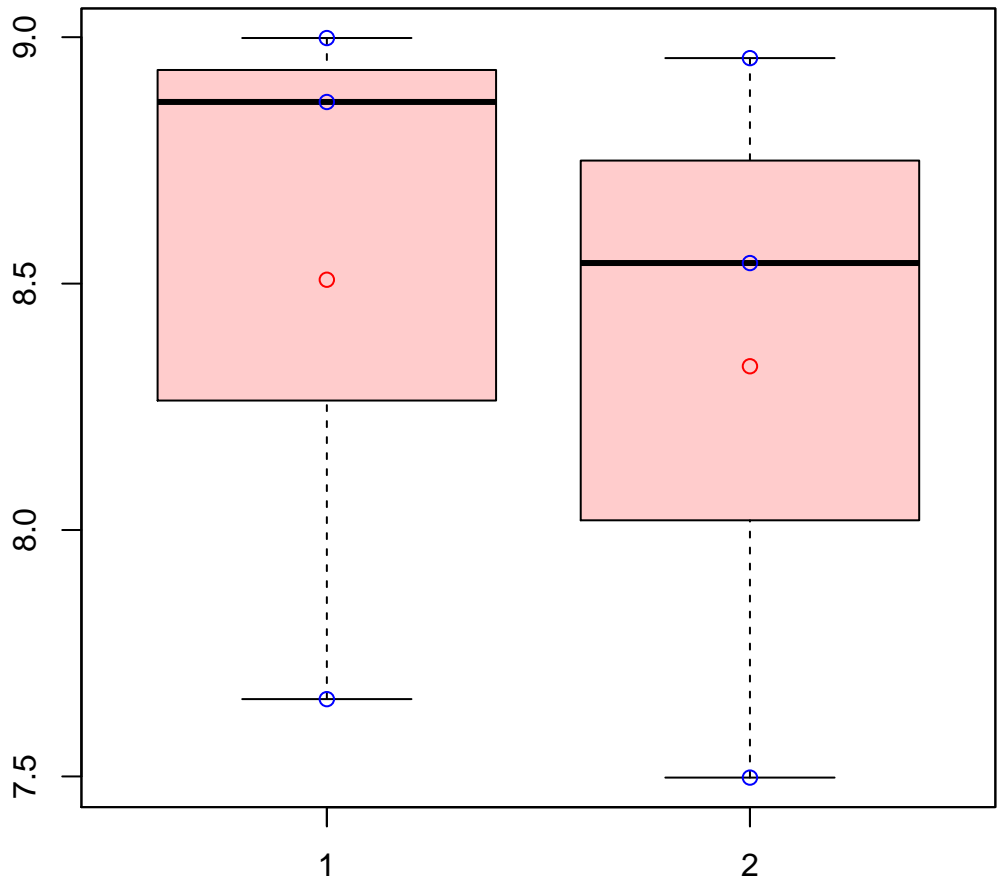

t-Test: p-value = 0.79

# M0VU12|M0VU12\_HORVD

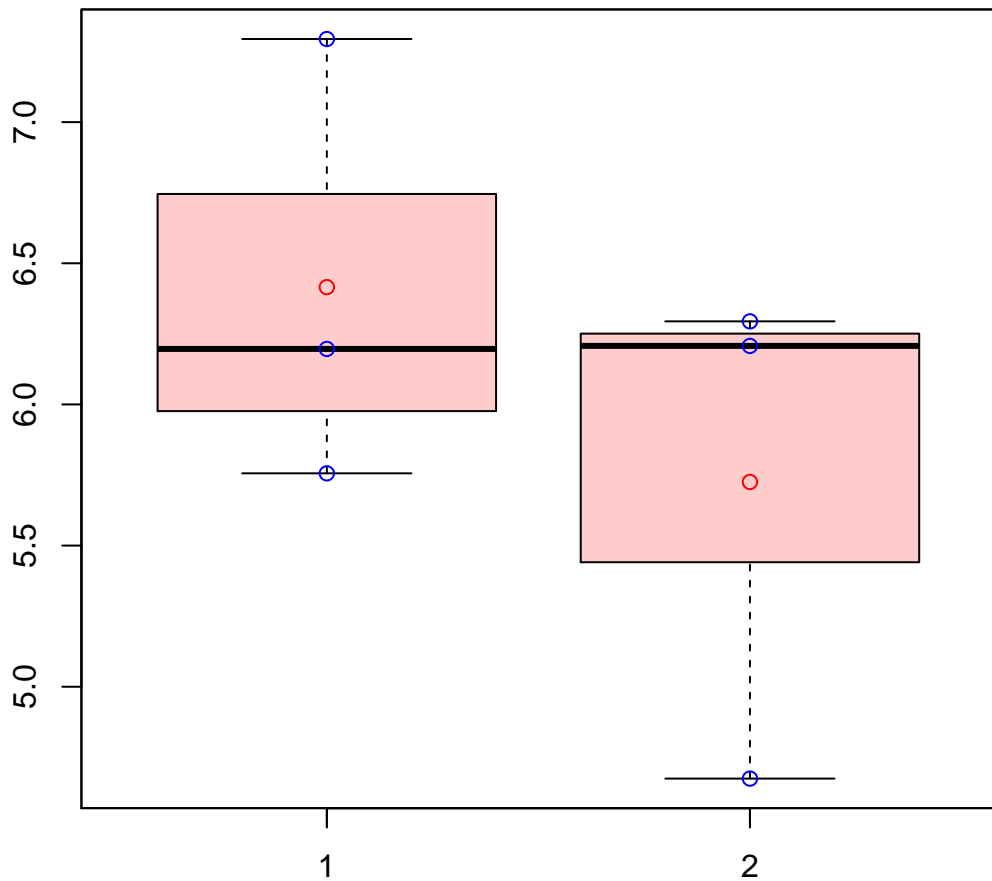

t-Test: p-value = 0.38

# M0VU69|M0VU69\_HORVD

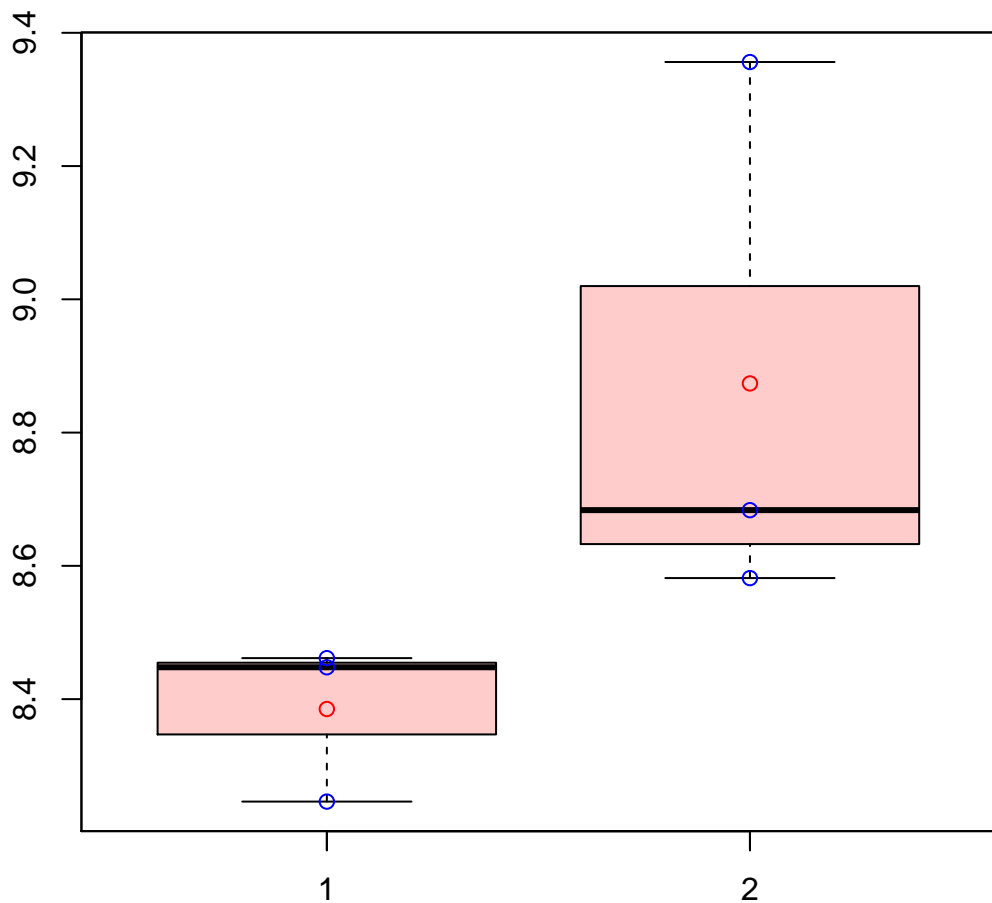

t-Test: p-value = 0.17



# M0VUY5|M0VUY5\_HORVD

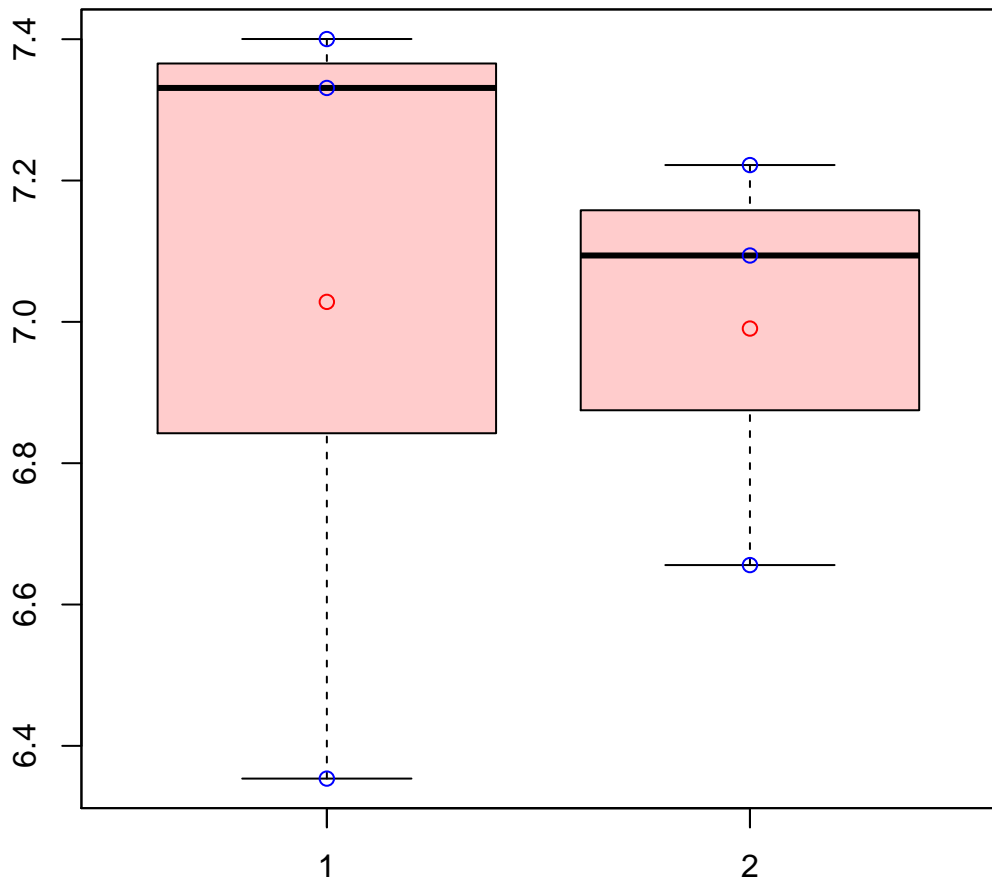

t-Test: p-value = 0.93

# M0VWF0|M0VWF0\_HORVD

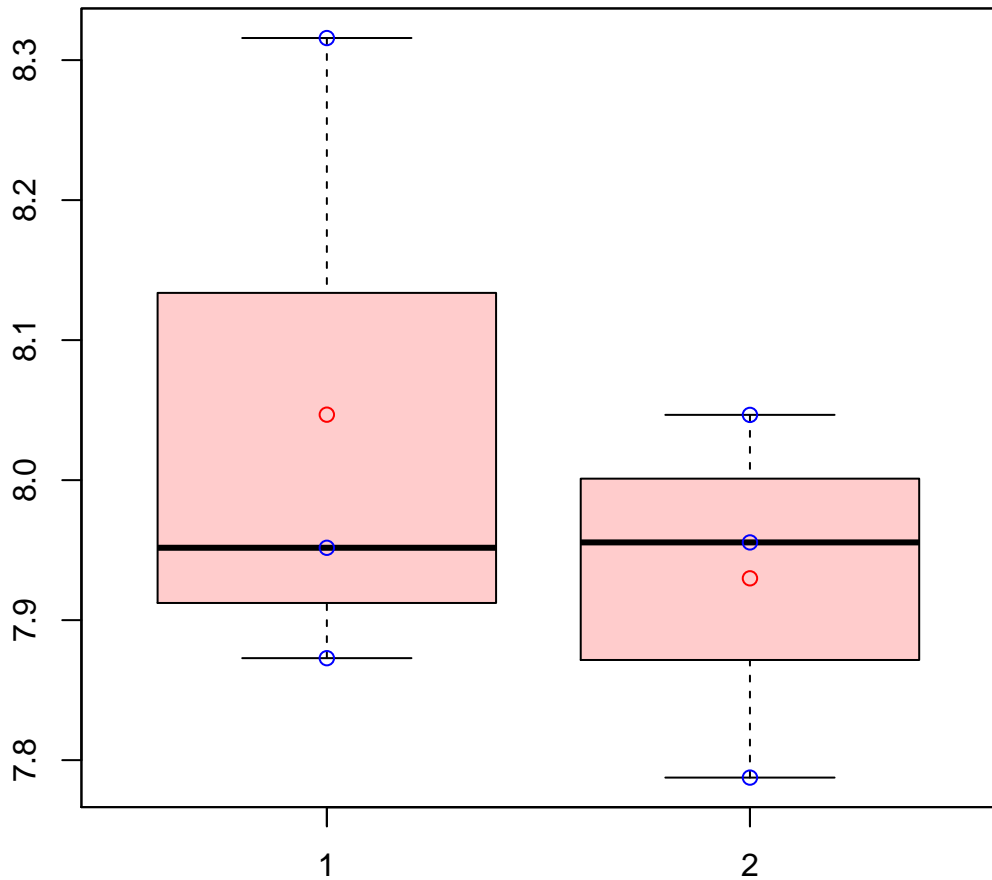

t-Test: p-value = 0.51

# M0VXQ1|M0VXQ1\_HORVD

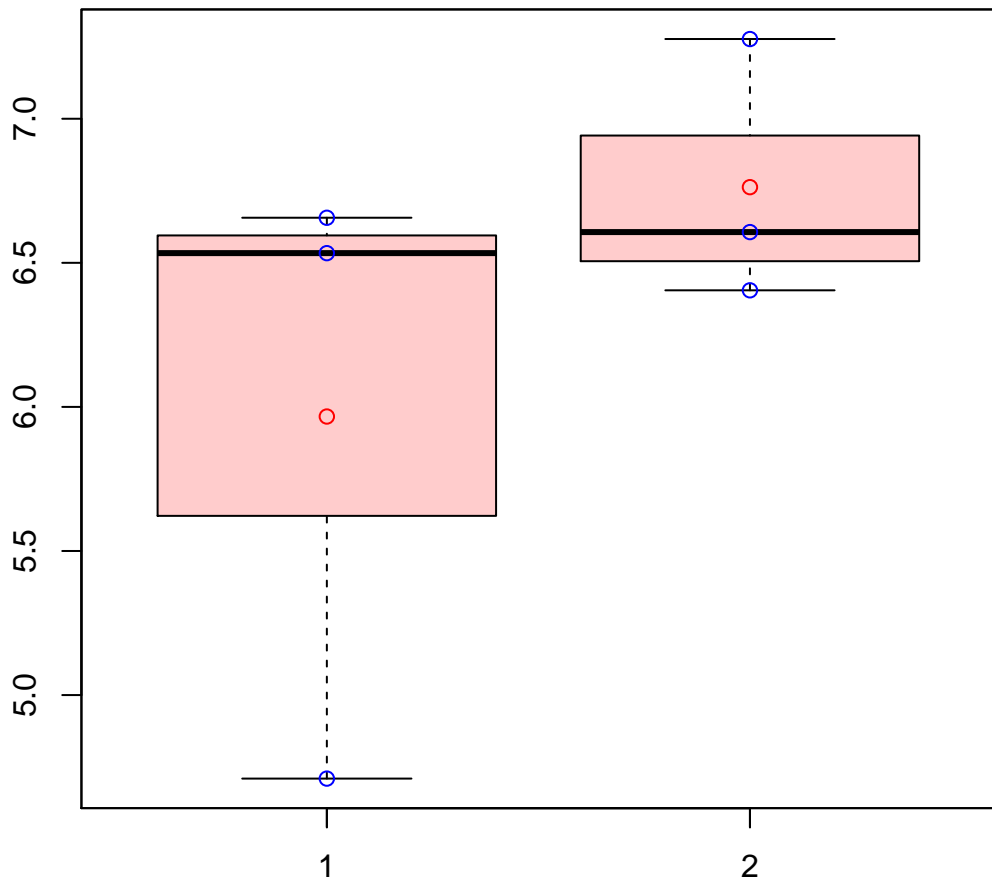

t-Test: p-value = 0.34

# M0W080|M0W080\_HORVD

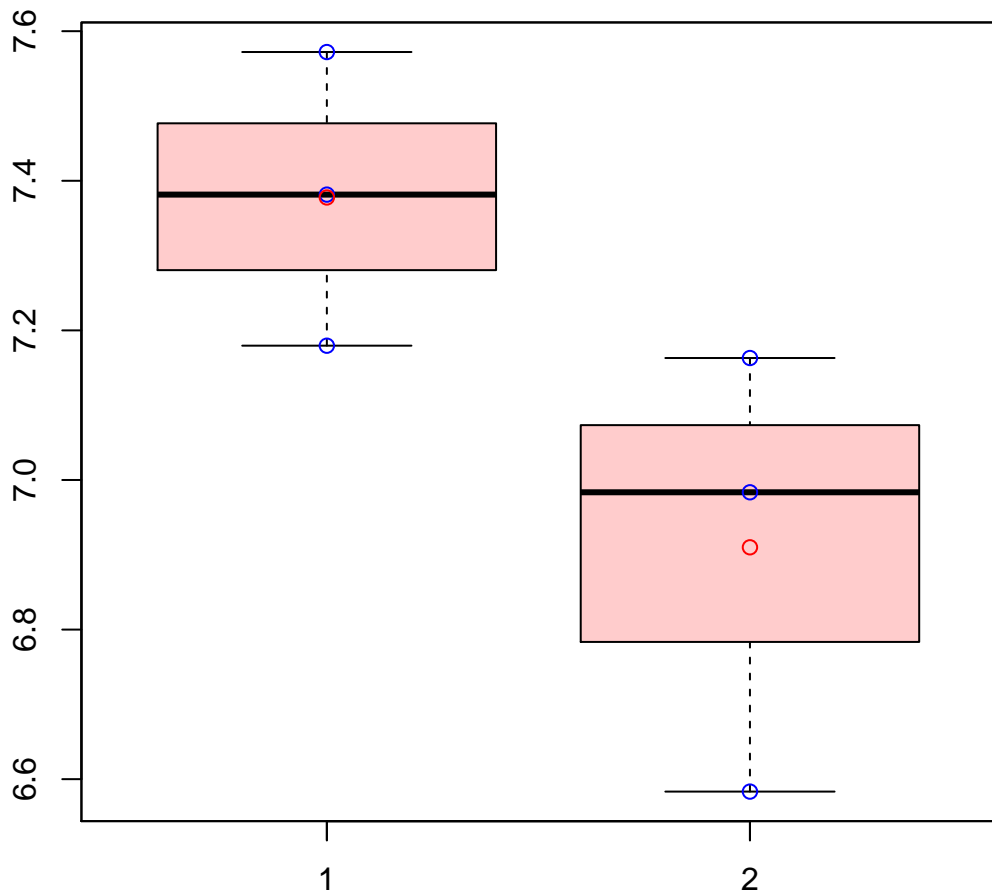

t-Test: p-value = 0.1

# M0W0A3|M0W0A3\_HORVD

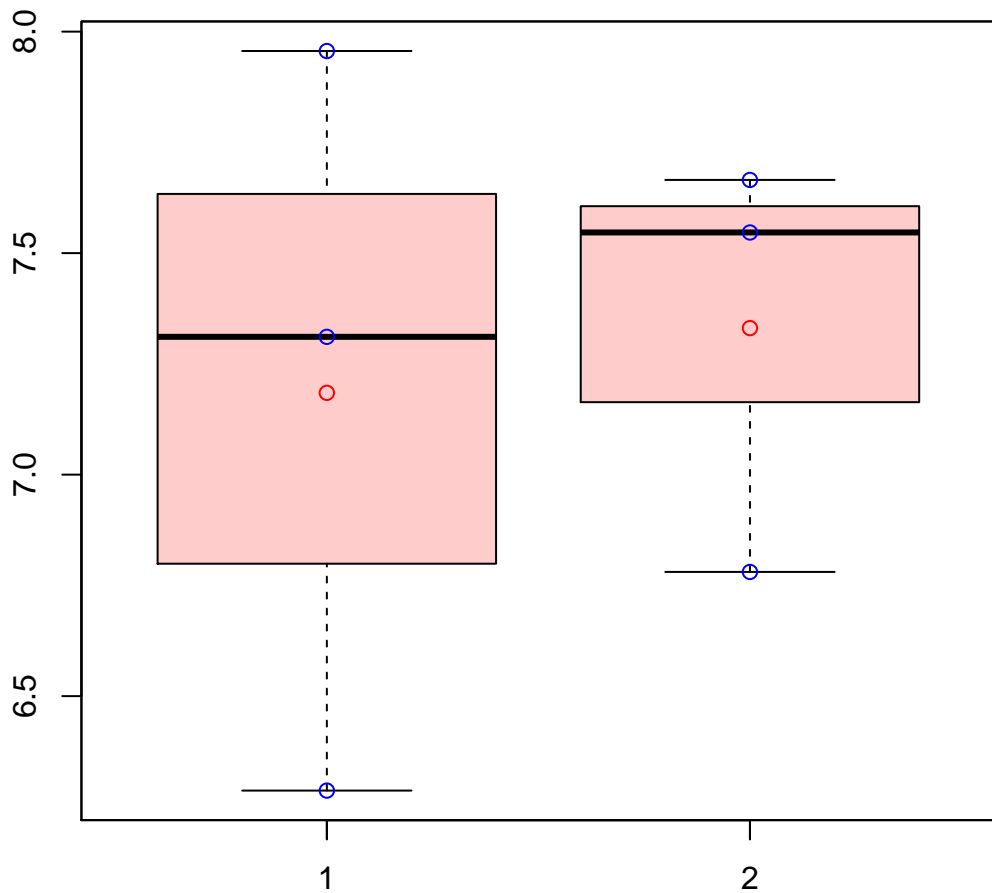

t-Test: p-value = 0.81

# M0W0L9|M0W0L9\_HORVD

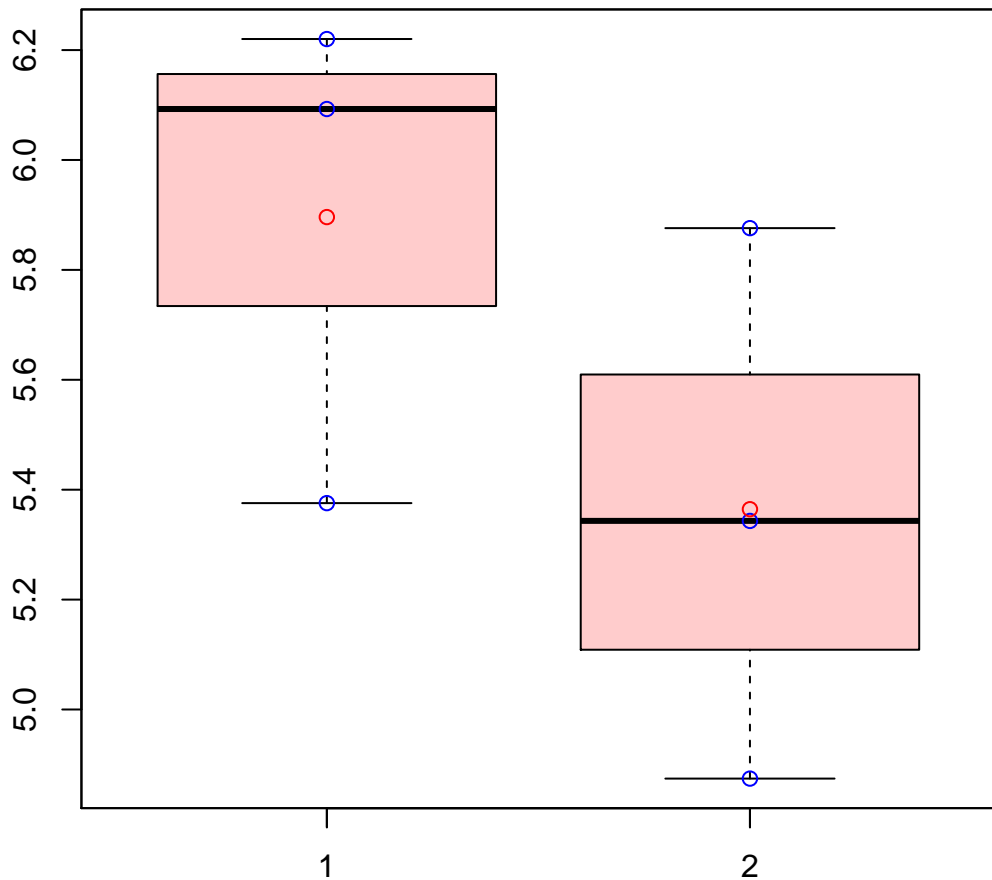

t-Test: p-value = 0.25

# M0W114|M0W114\_HORVD

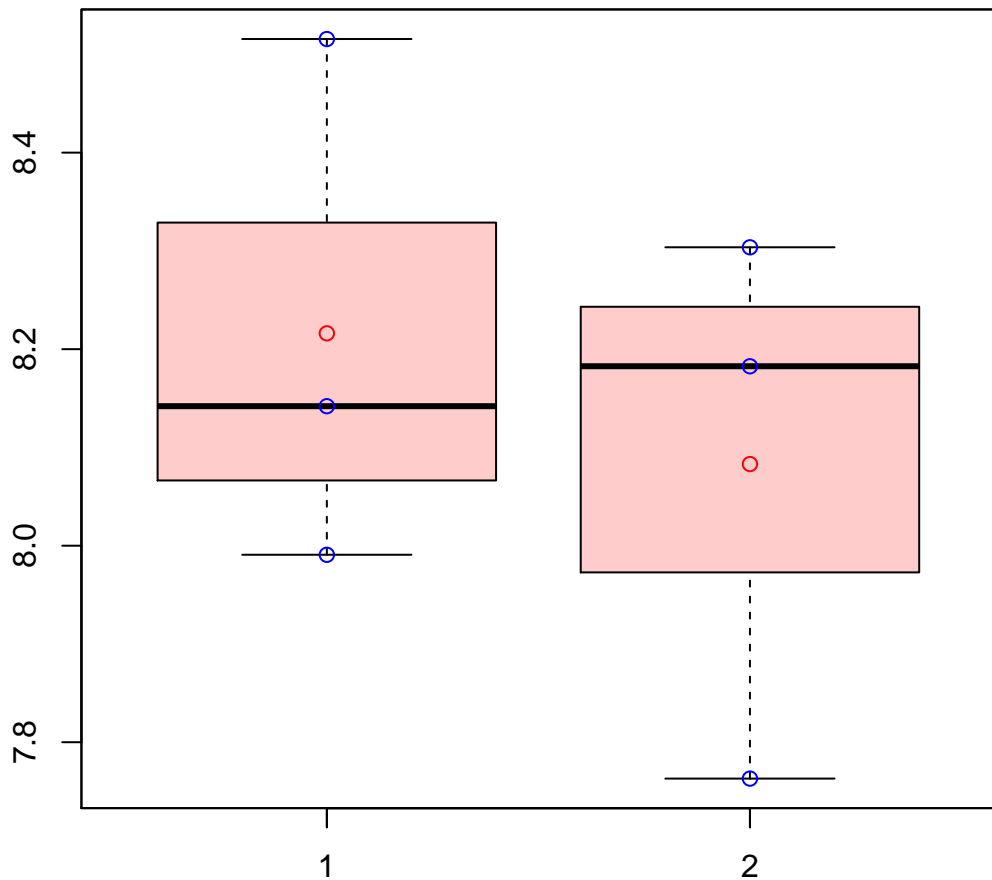

t-Test: p-value = 0.59

# M0W271|M0W271\_HORVD

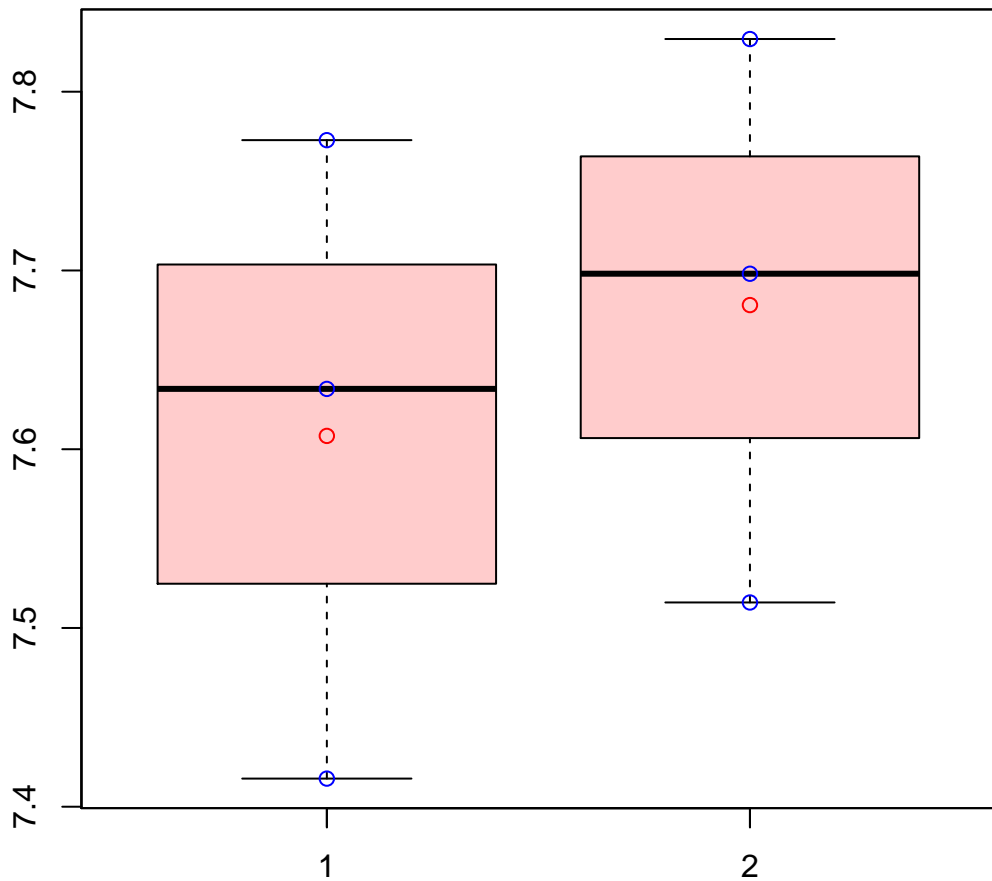

t-Test: p-value = 0.63



# M0W276|M0W276\_HORVD

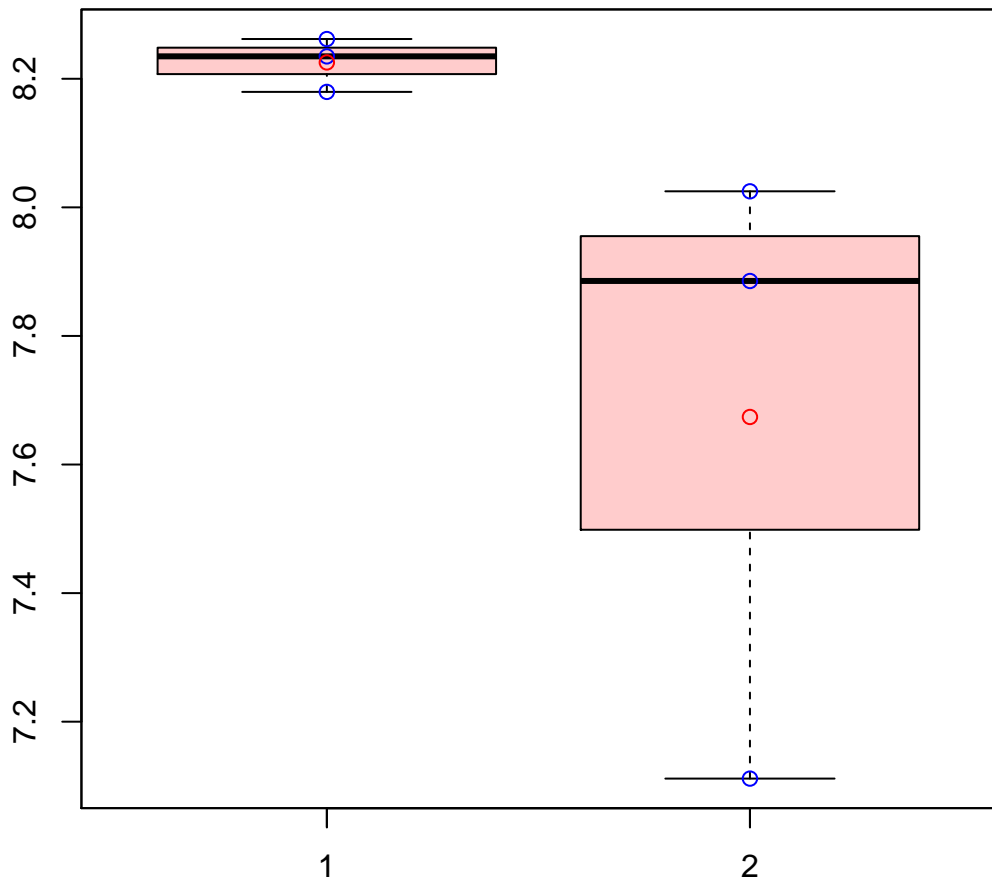

t-Test: p-value = 0.19

# M0W319|M0W319\_HORVD

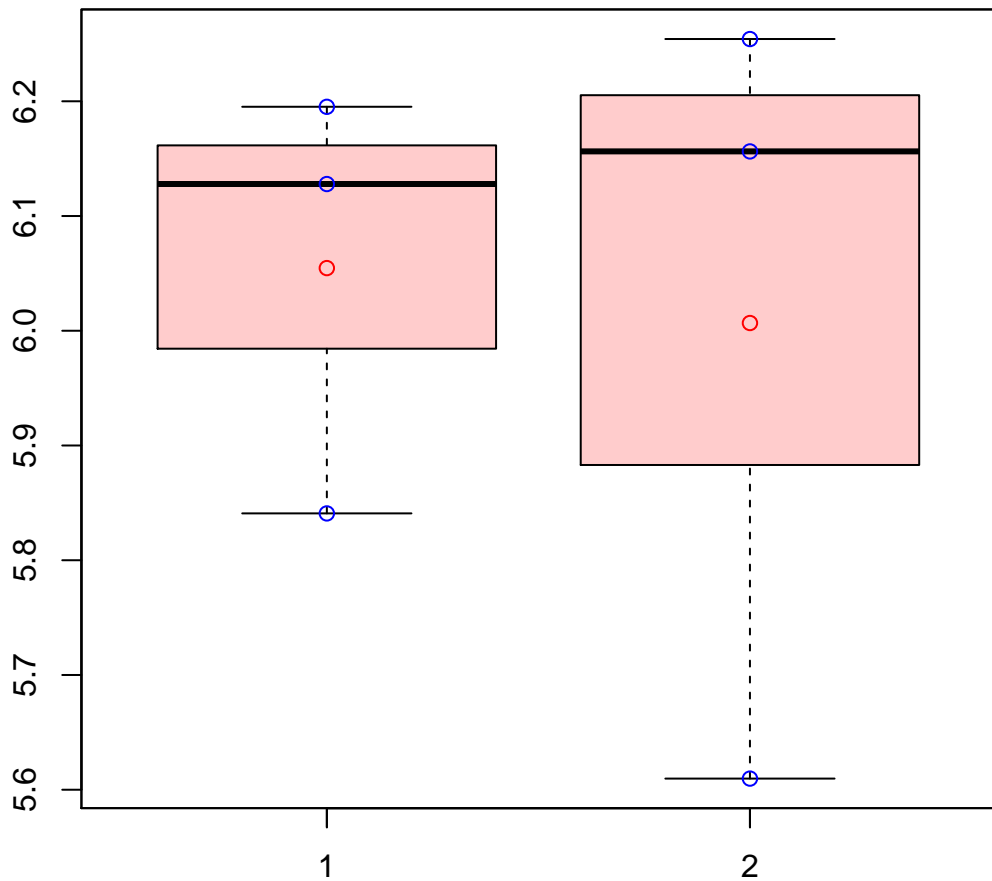

t-Test: p-value = 0.85

# M0W4W4|M0W4W4\_HORVD

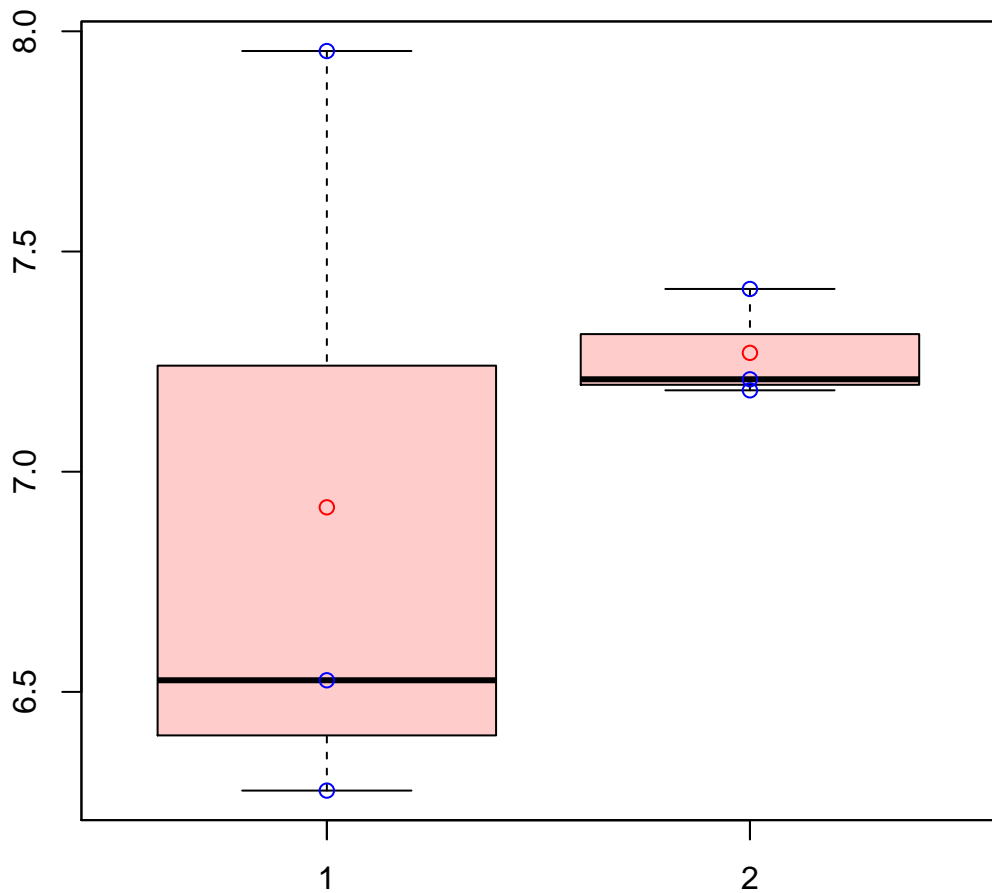

t-Test: p-value = 0.57

# M0W6J4|M0W6J4\_HORVD

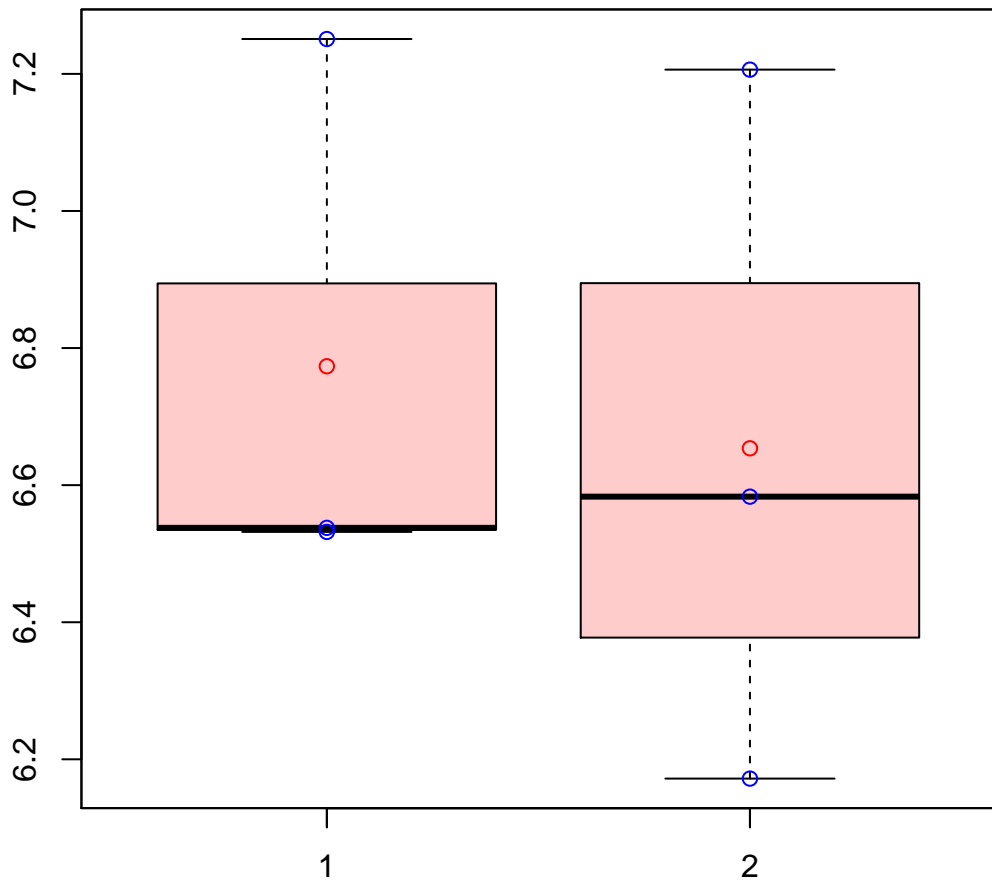

t-Test: p-value = 0.77

# M0W6W2|M0W6W2\_HORVD

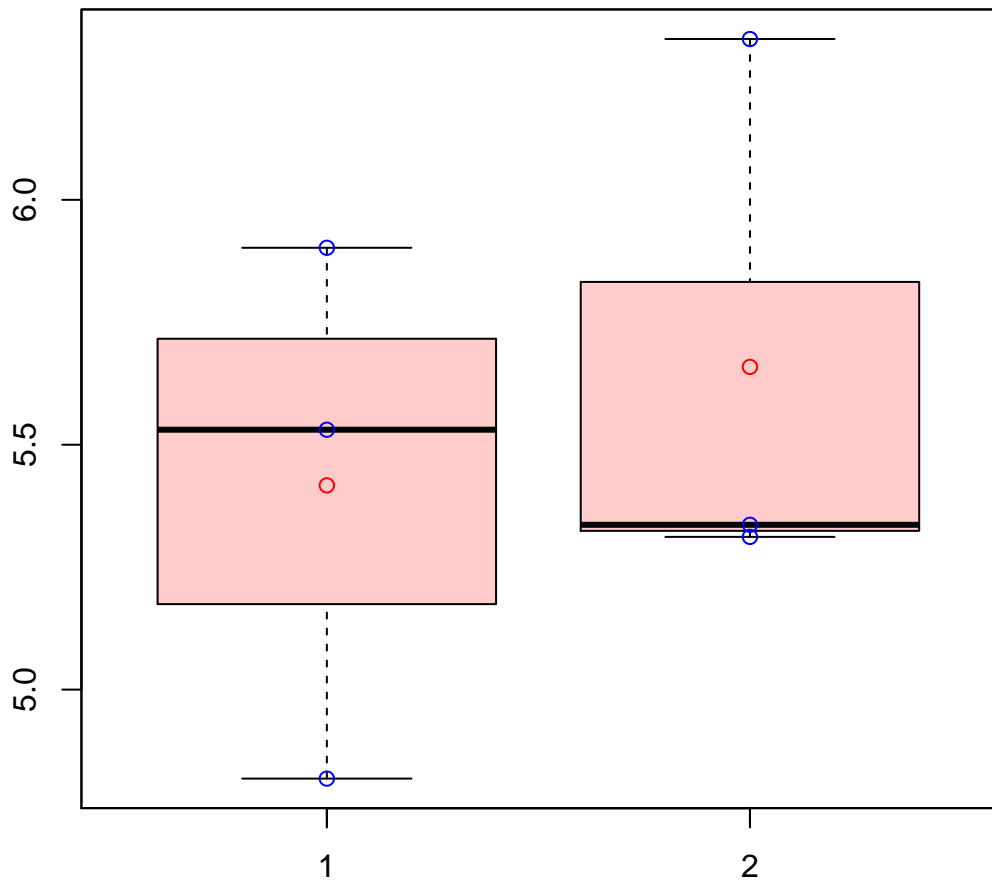

t-Test: p-value = 0.63

# M0W8F5|M0W8F5\_HORVD

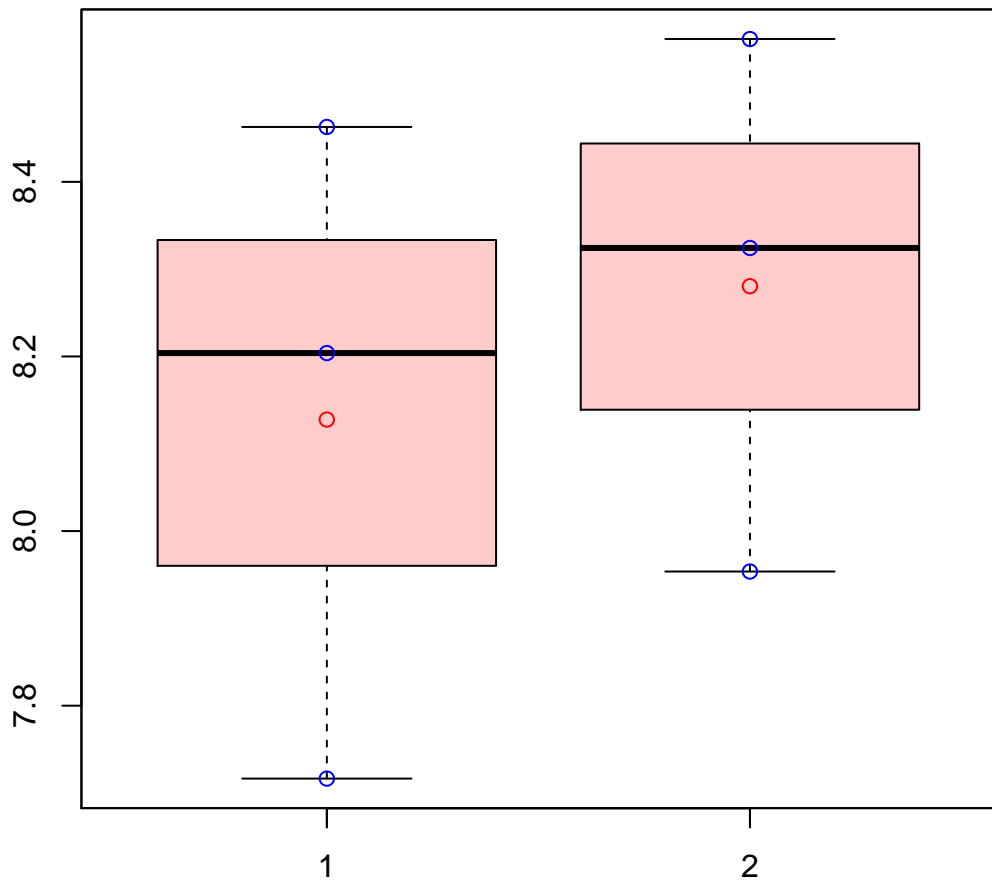

t-Test: p-value = 0.62

# M0W967|M0W967\_HORVD

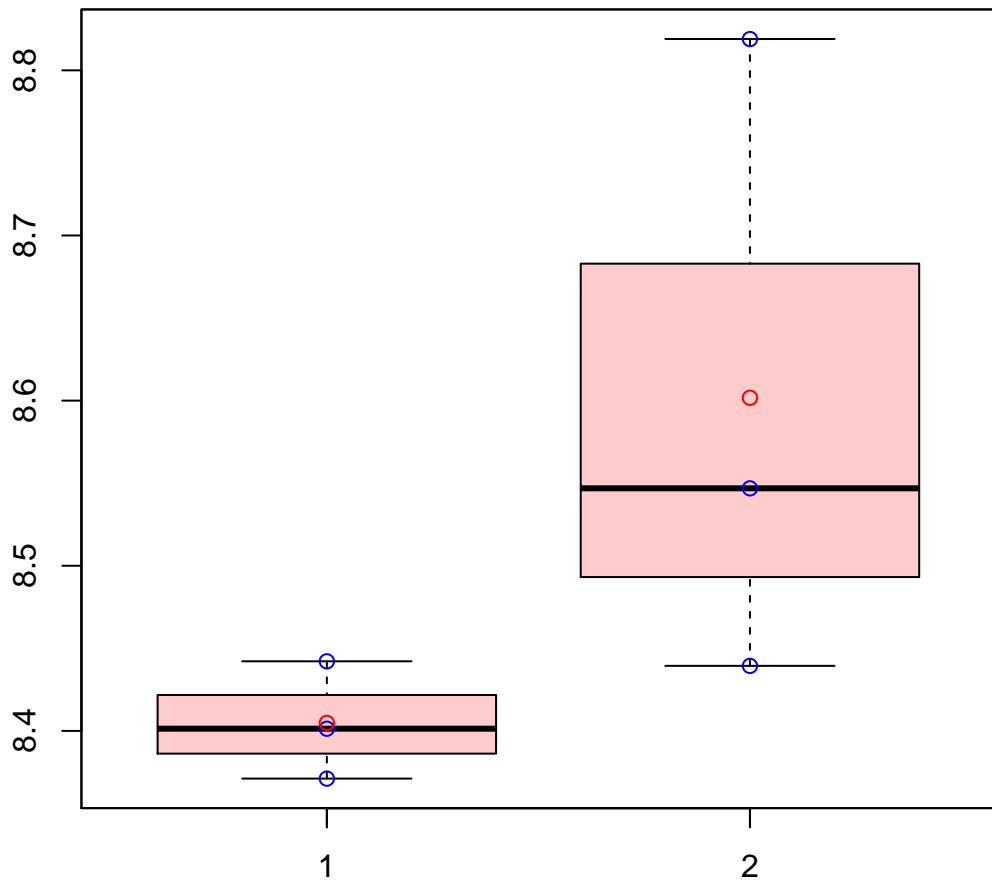

t-Test: p-value = 0.22

# M0WB80|M0WB80\_HORVD

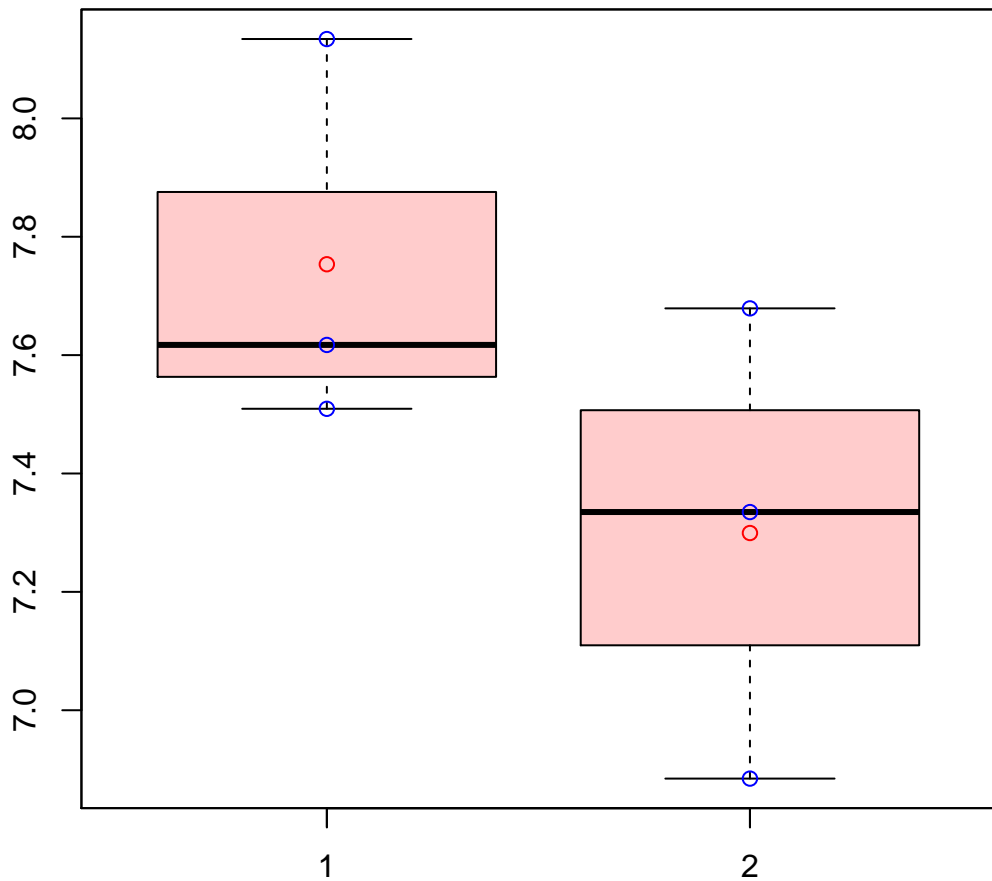

t-Test: p-value = 0.21



# M0WBU8|M0WBU8\_HORVD

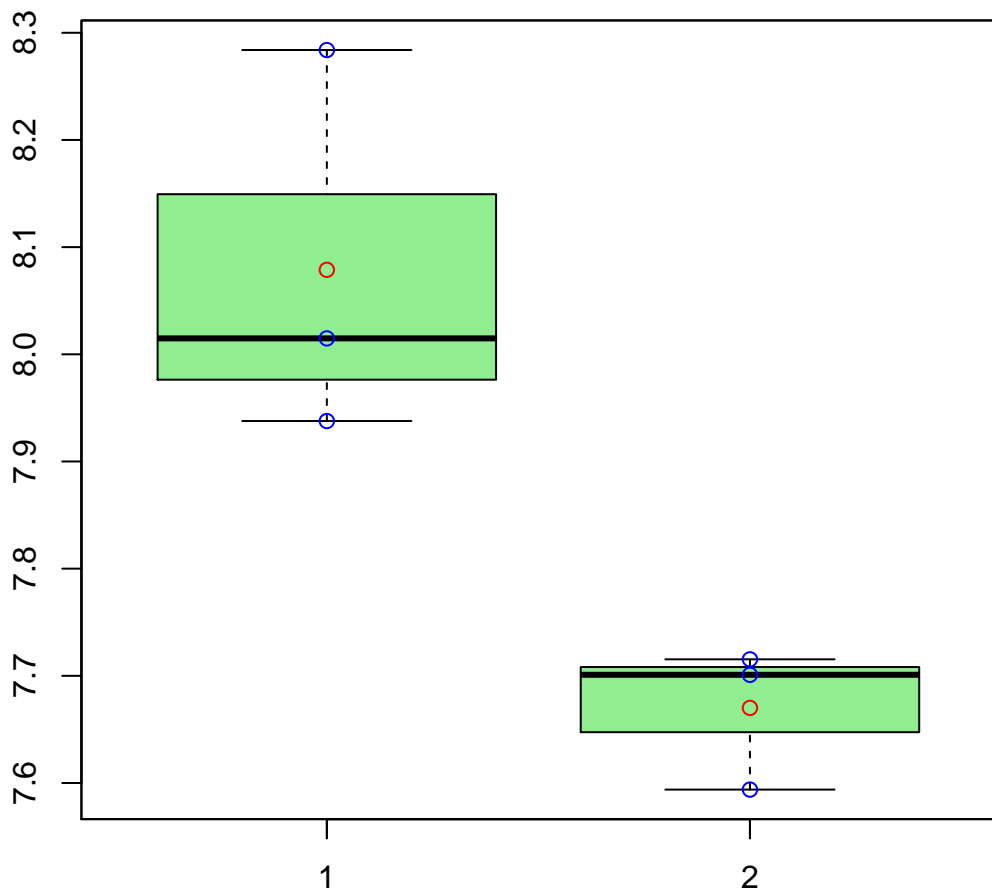

t-Test: p-value = 0.05

# M0WE00|M0WE00\_HORVD

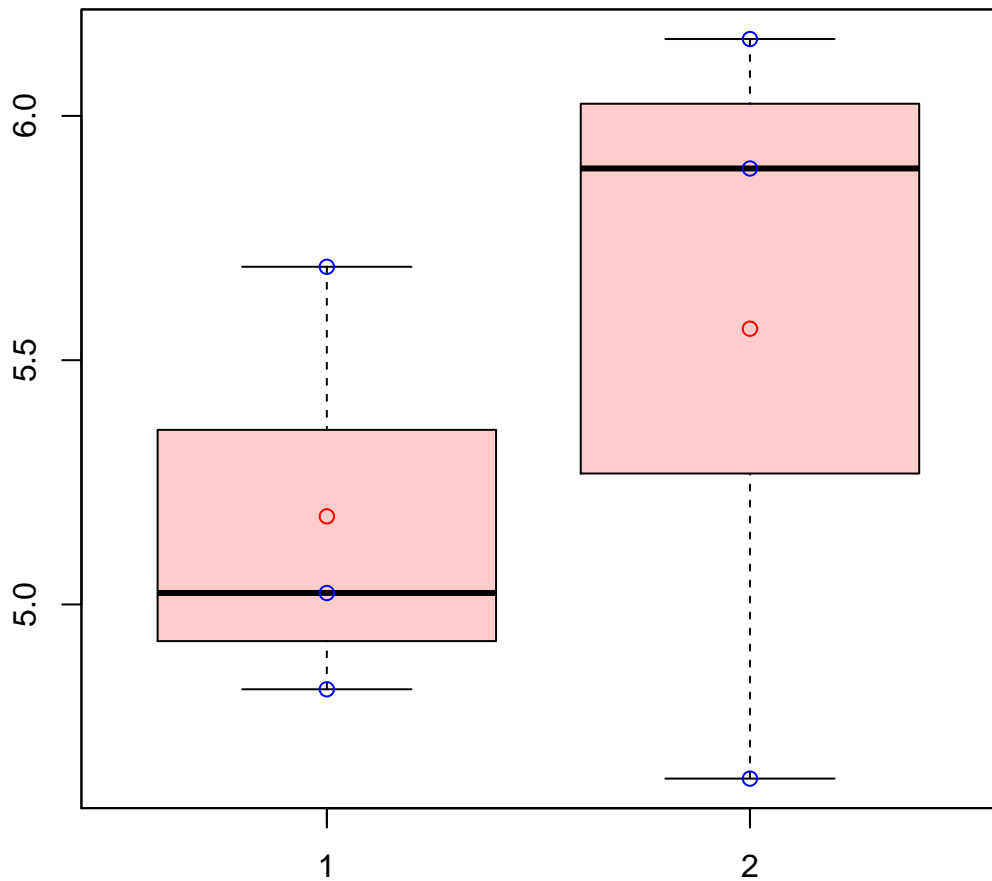

t-Test: p-value = 0.52

# M0WE03|M0WE03\_HORVD

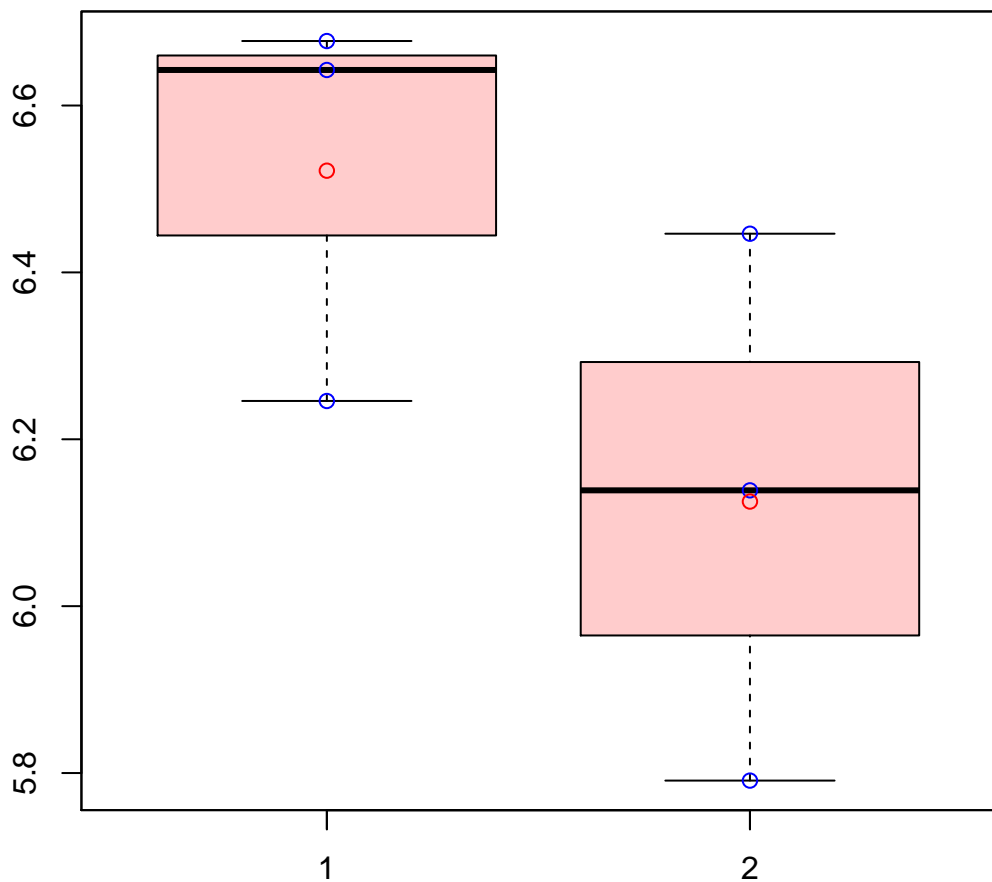

t-Test: p-value = 0.17

# M0WE56|M0WE56\_HORVD

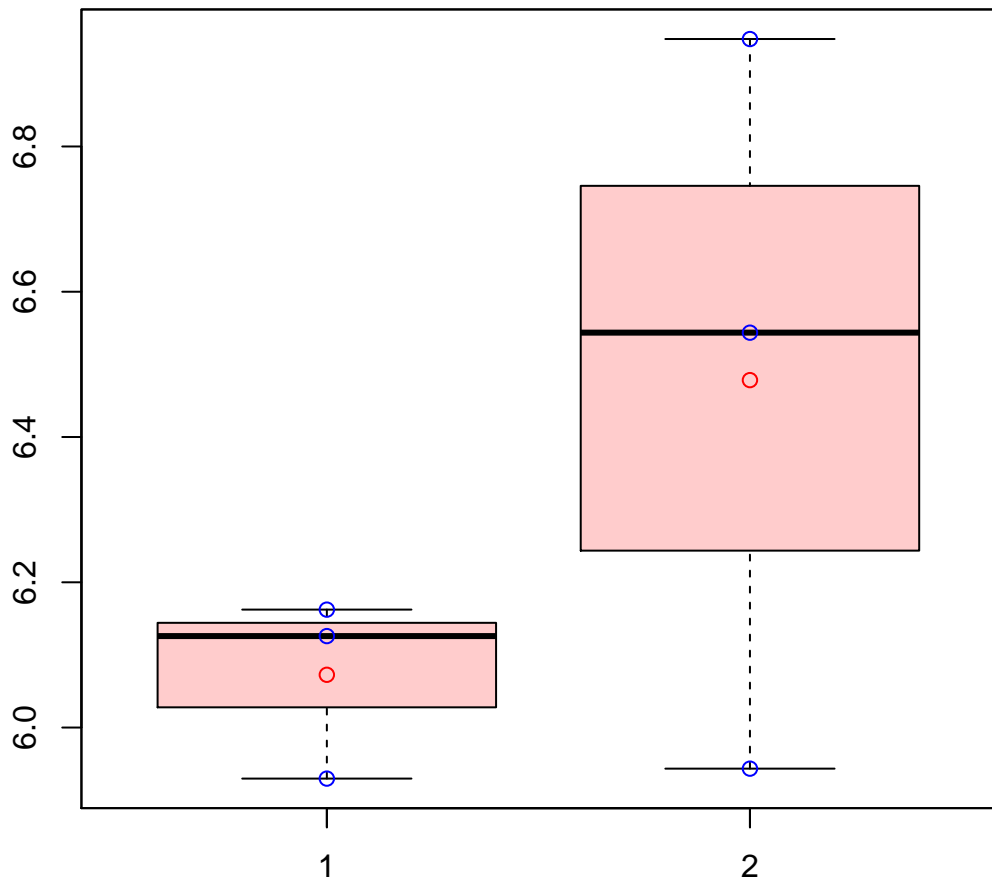

t-Test: p-value = 0.3

# M0WEI4|M0WEI4\_HORVD

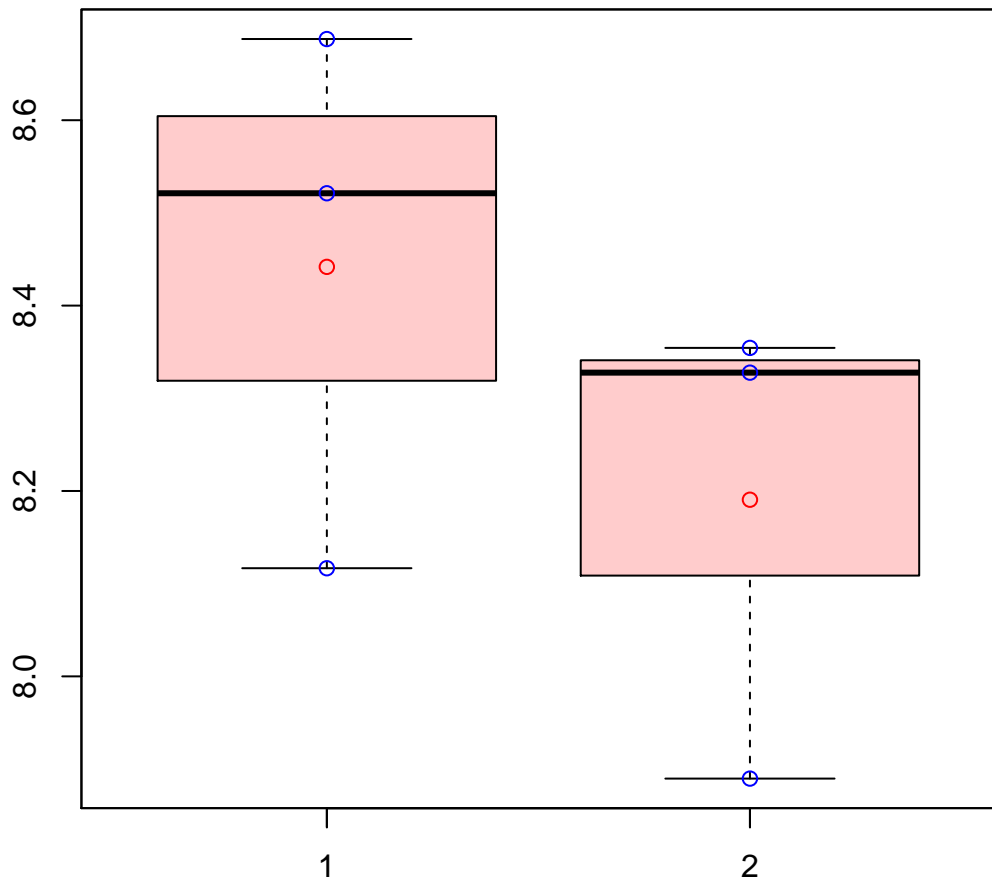

t-Test: p-value = 0.33

# M0WG08|M0WG08\_HORVD

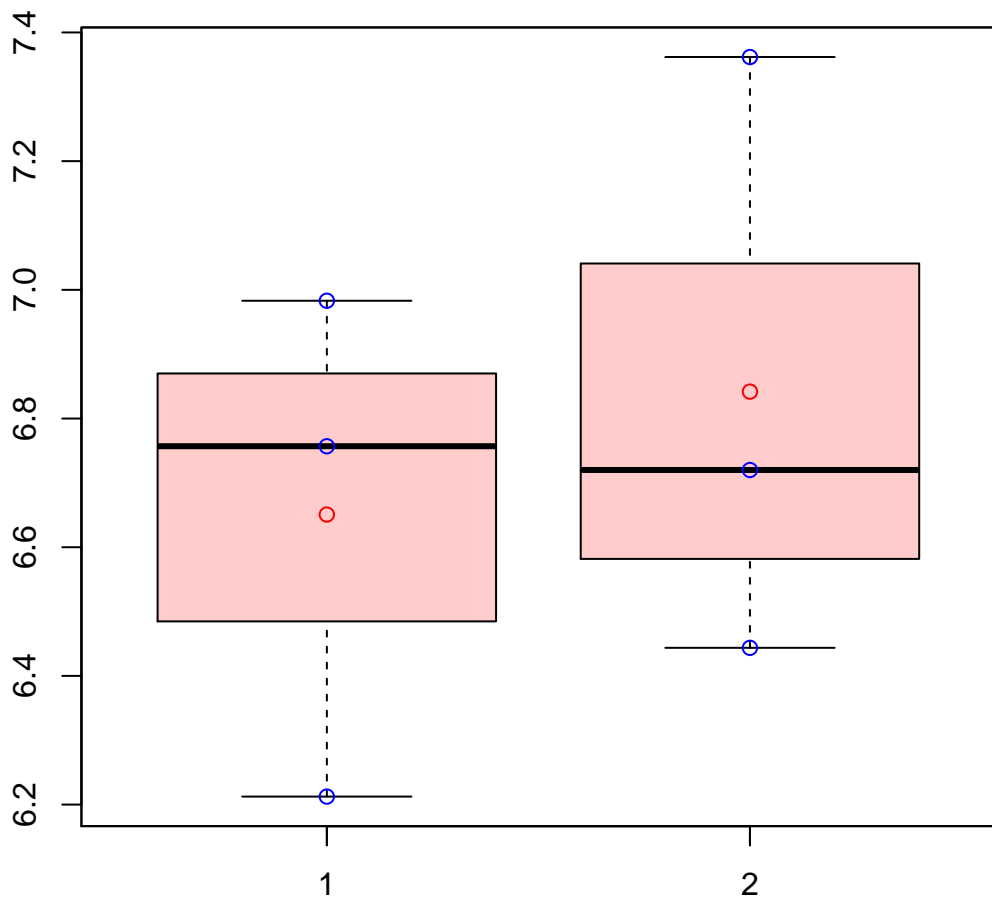

t-Test: p-value = 0.62

# M0WKV0|M0WKV0\_HORVD

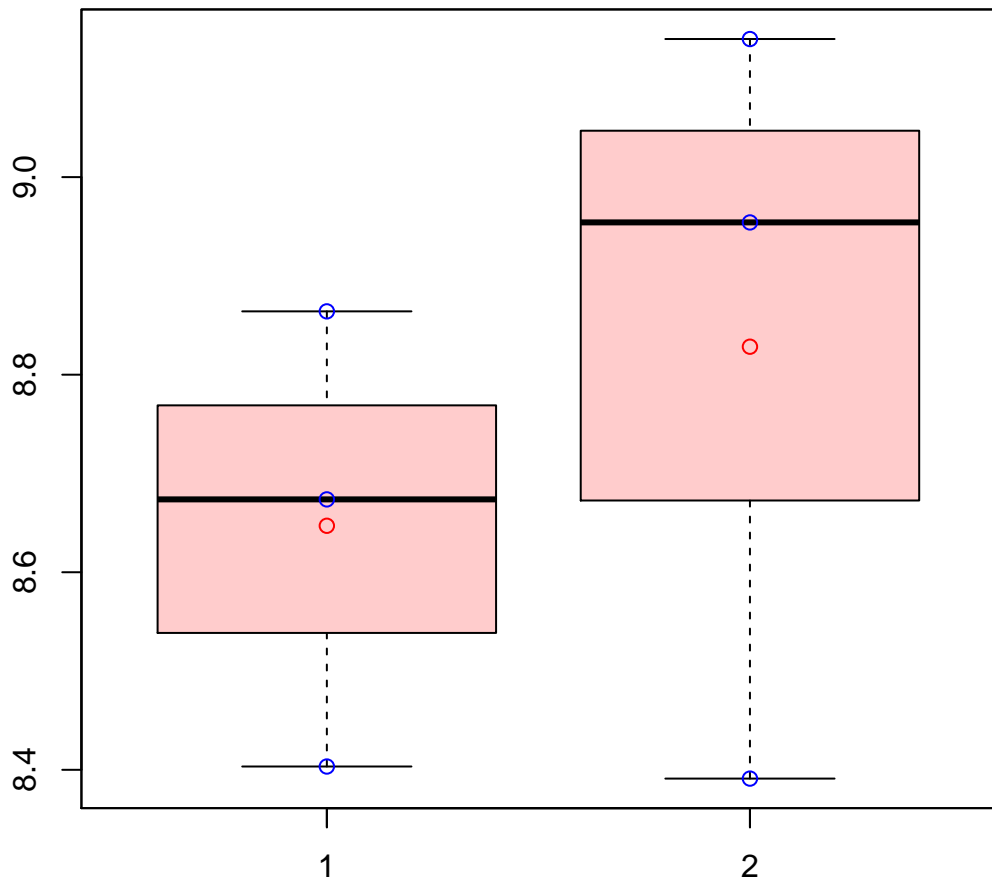

t-Test: p-value = 0.53

# M0WLI6|M0WLI6\_HORVD

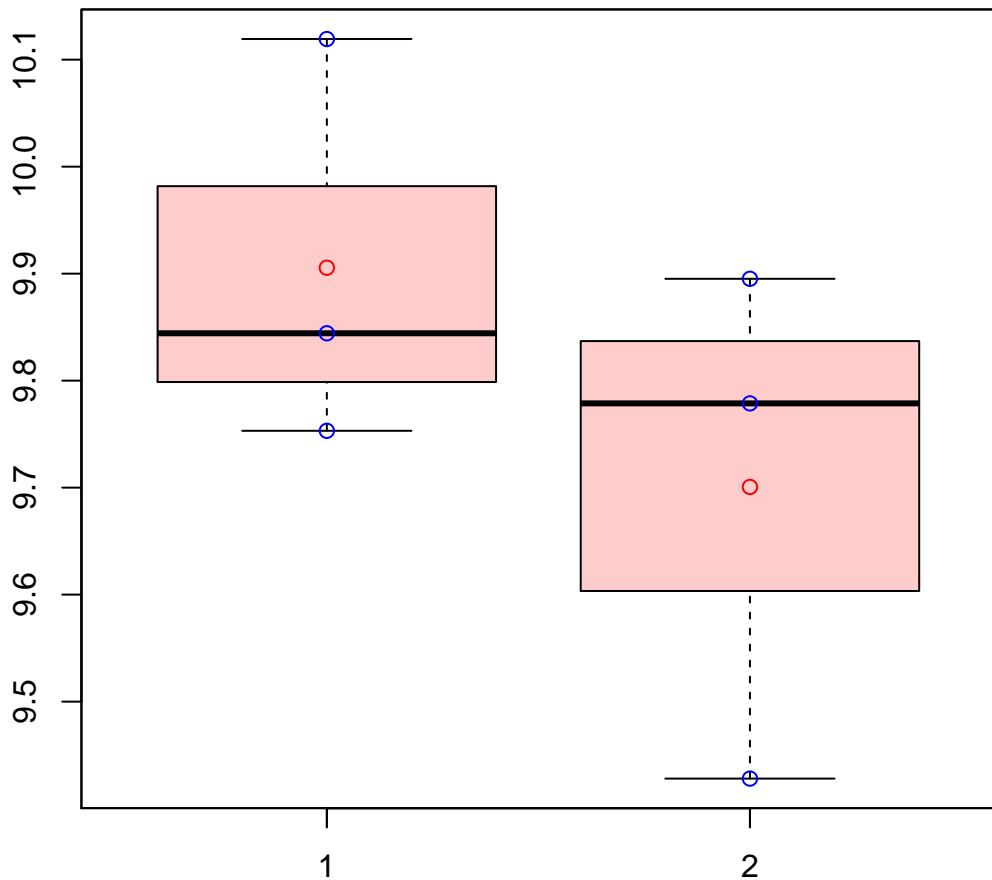

t-Test: p-value = 0.32



# M0WMY1|M0WMY1\_HORVD

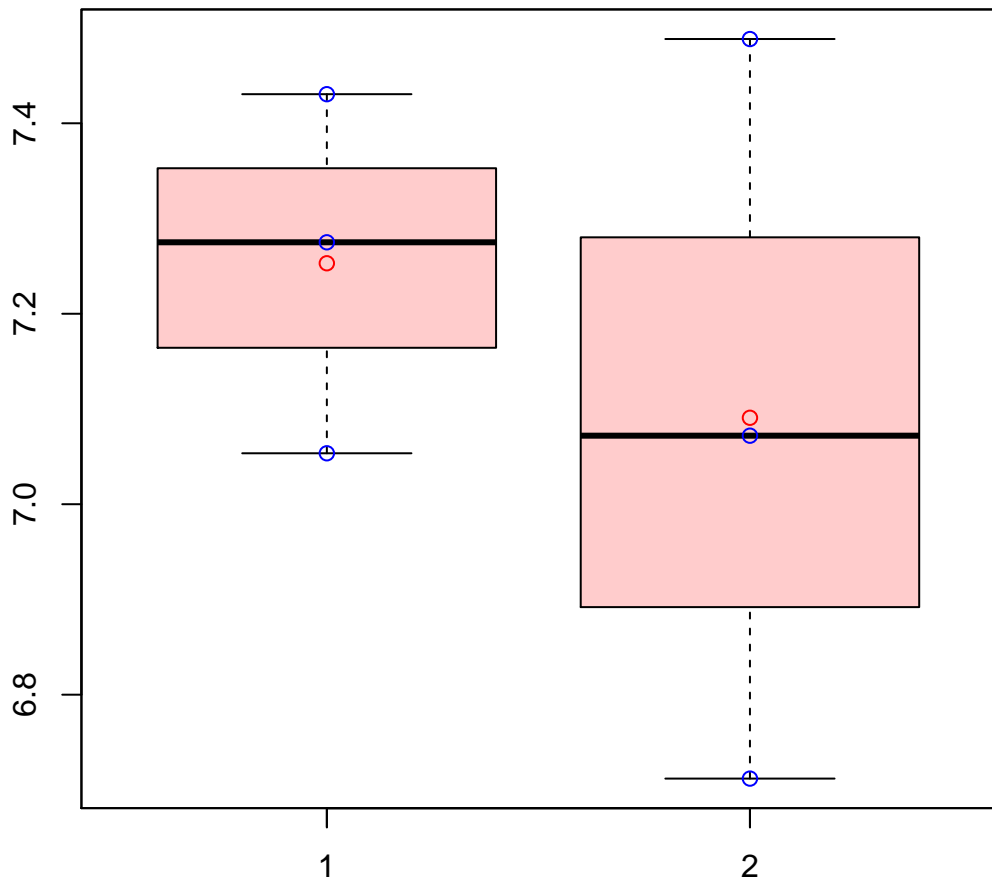

t-Test: p-value = 0.56

# M0WNE7|M0WNE7\_HORVD

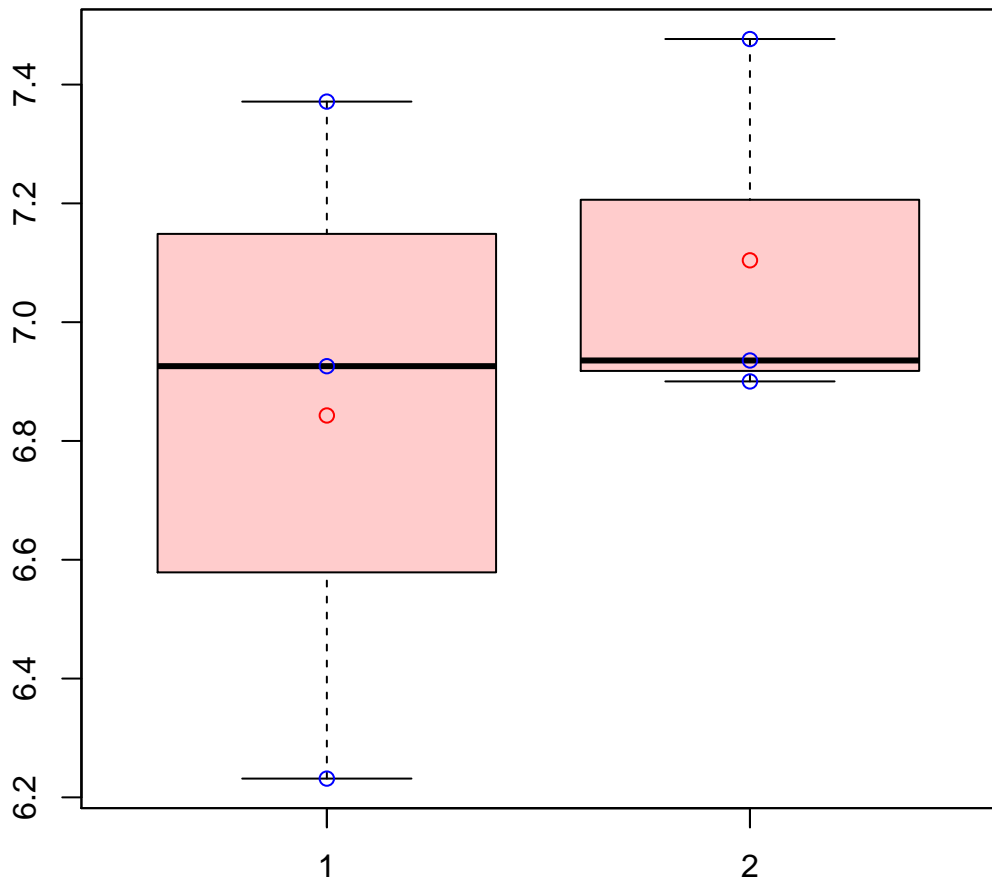

t-Test: p-value = 0.54

# M0WNH7|M0WNH7\_HORVD

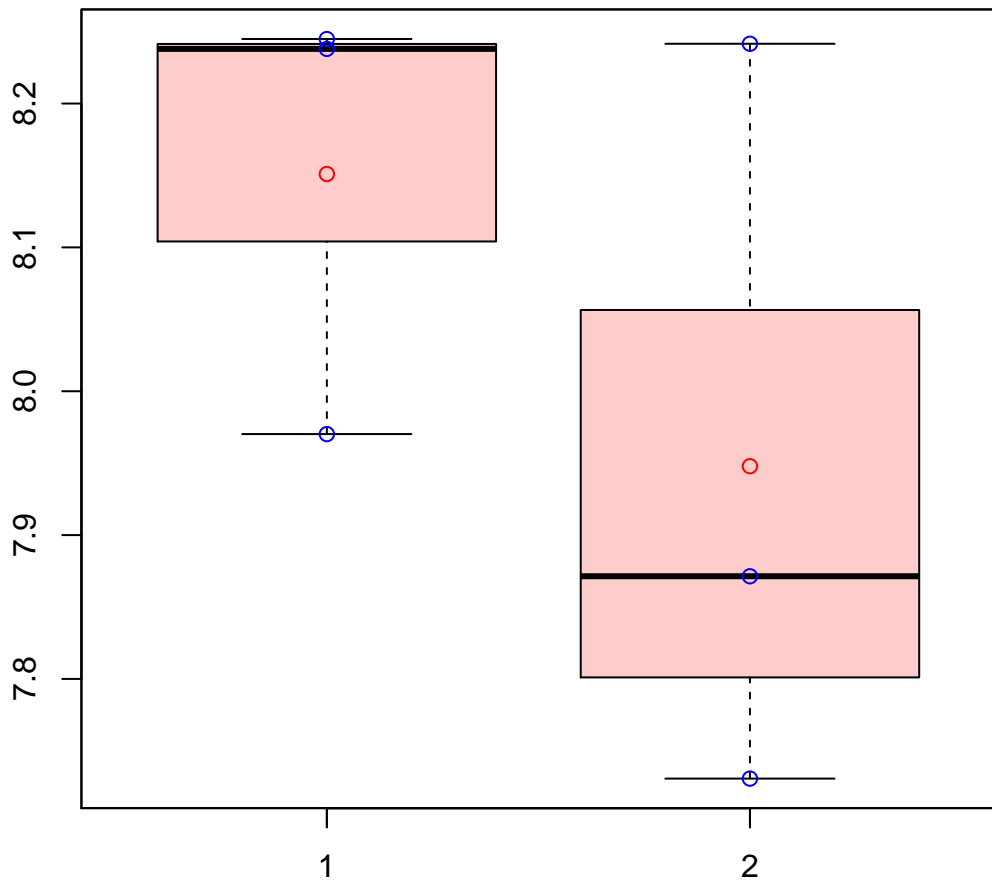

t-Test: p-value = 0.33

# M0WP71|M0WP71\_HORVD

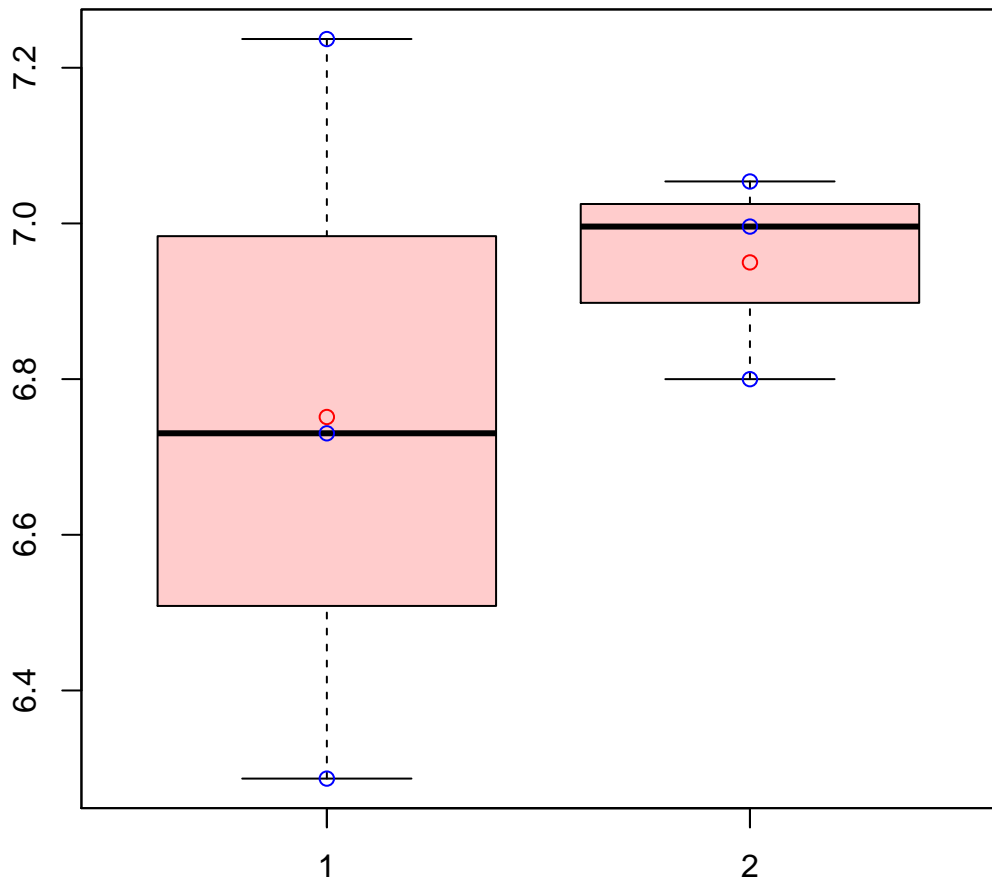

t-Test: p-value = 0.55

# M0WSS9|M0WSS9\_HORVD

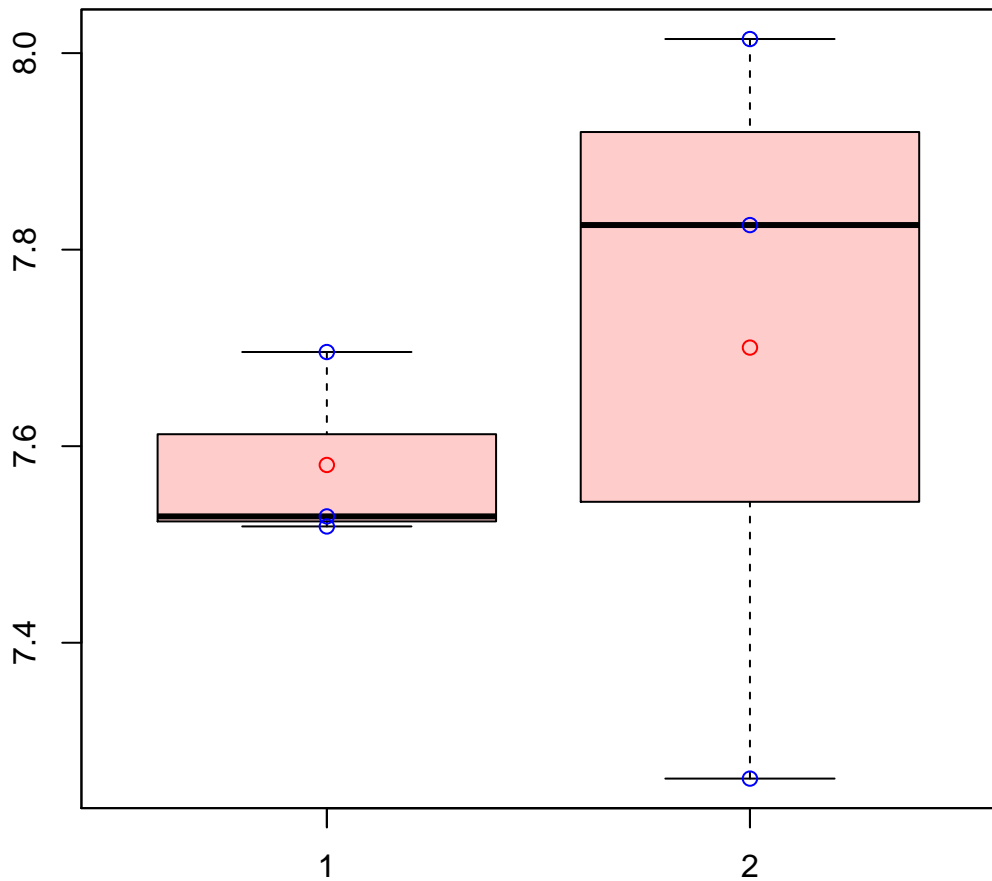

t-Test: p-value = 0.65

# M0WSZ3|M0WSZ3\_HORVD

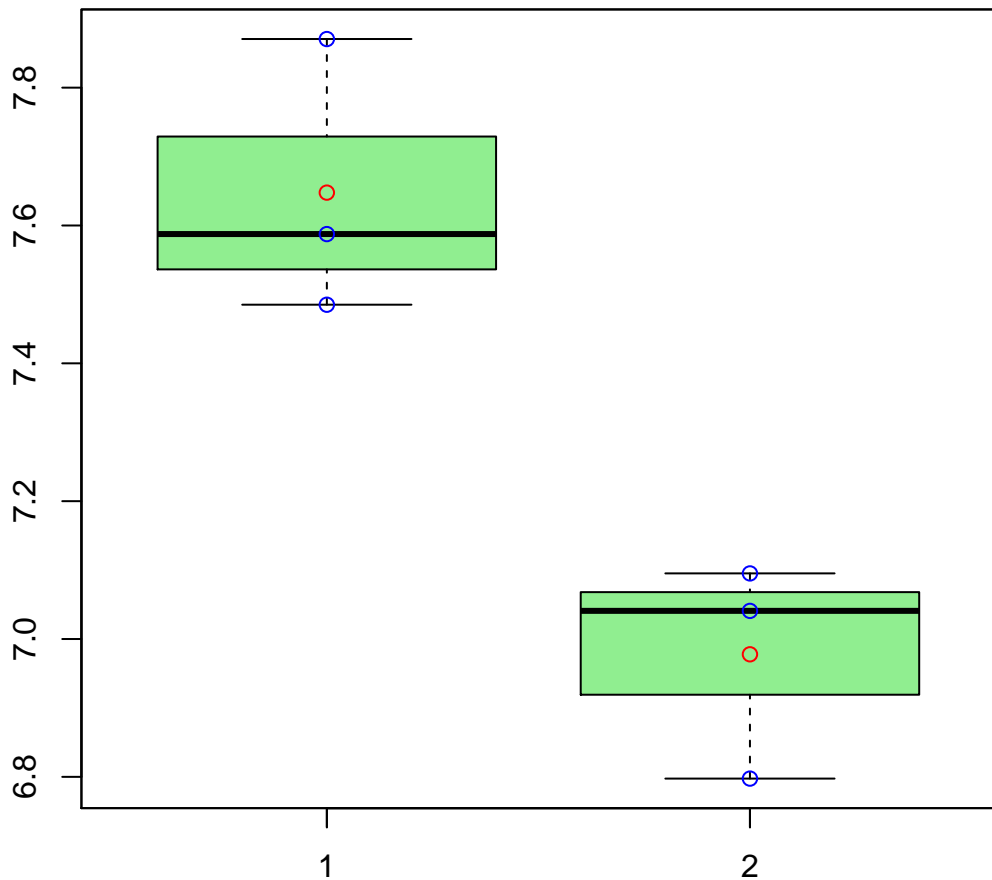

t-Test: p-value = 0.01

# M0WUC3|M0WUC3\_HORVD

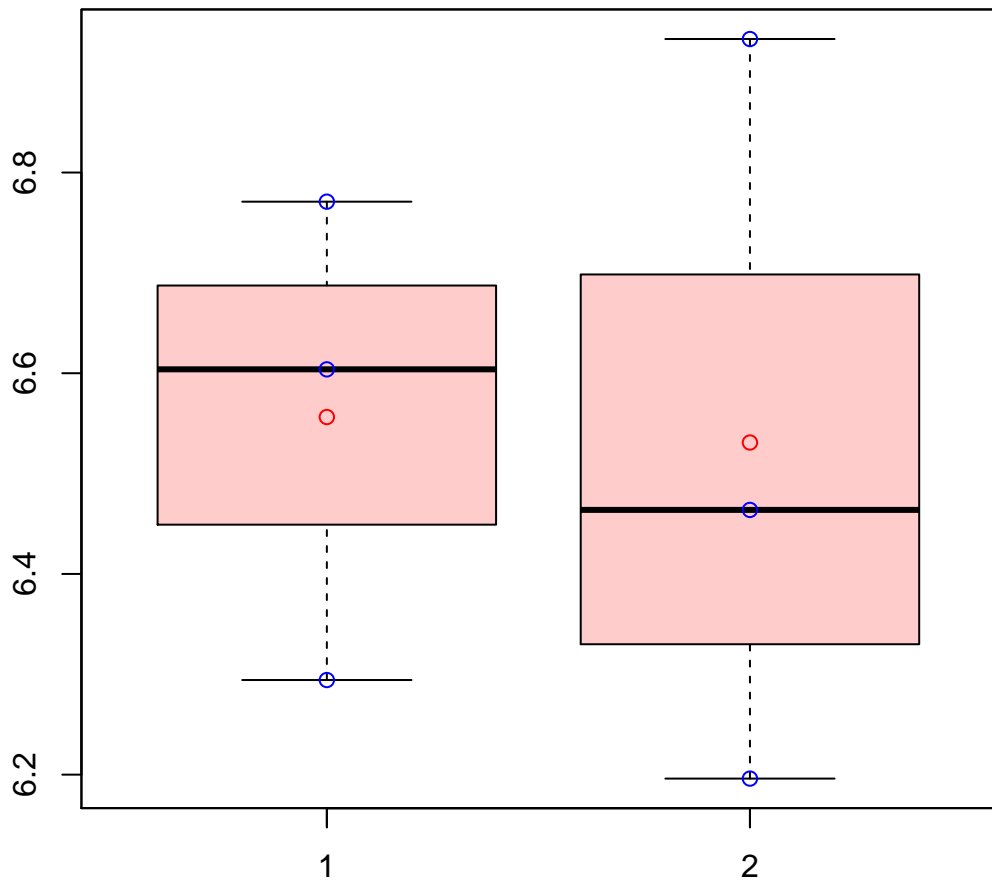

t-Test: p-value = 0.93

# M0WW06|M0WW06\_HORVD

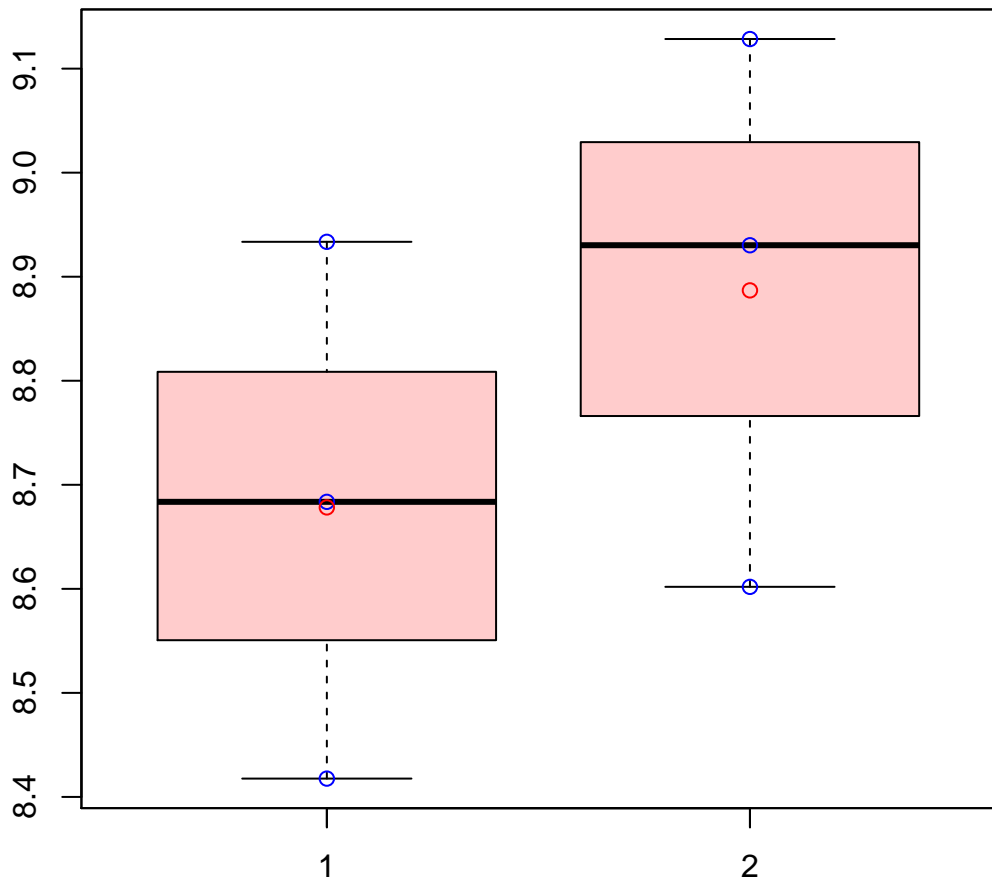

t-Test: p-value = 0.38



# M0WWI0|M0WWI0\_HORVD

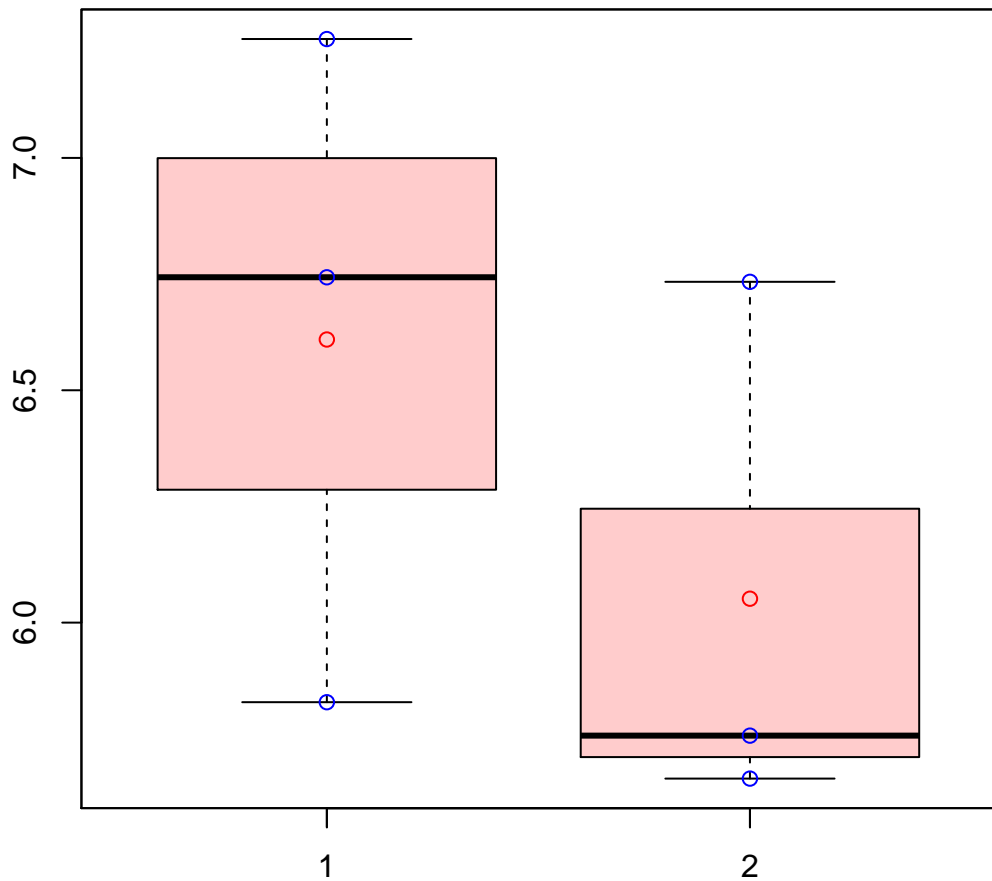

t-Test: p-value = 0.36

# M0WWN5|M0WWN5\_HORVD

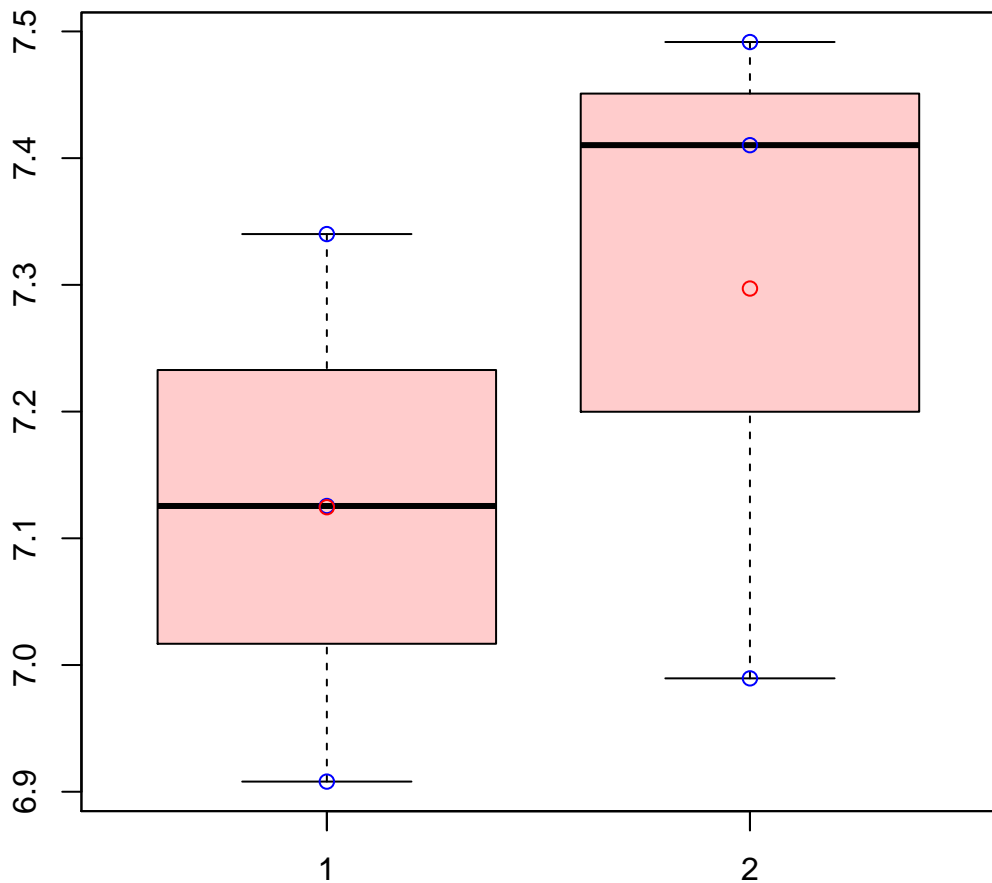

t-Test: p-value = 0.44

# M0WXQ5|M0WXQ5\_HORVD

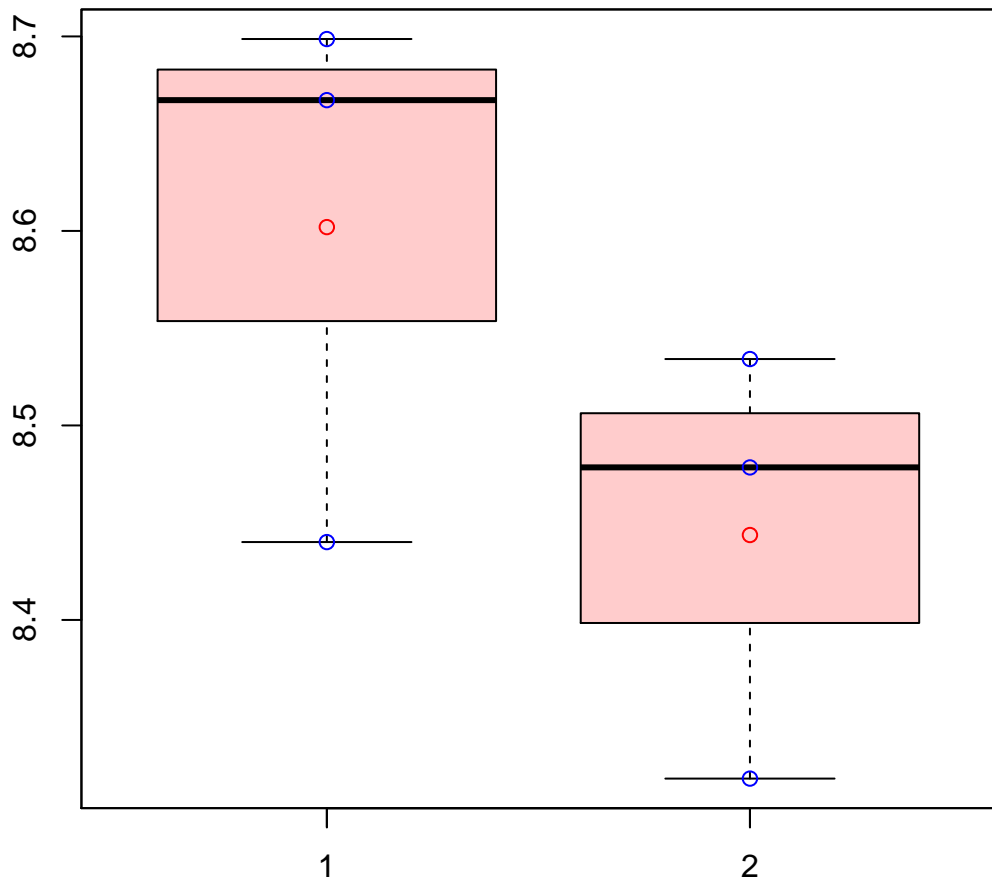

t-Test: p-value = 0.21

# M0WZV9|M0WZV9\_HORVD

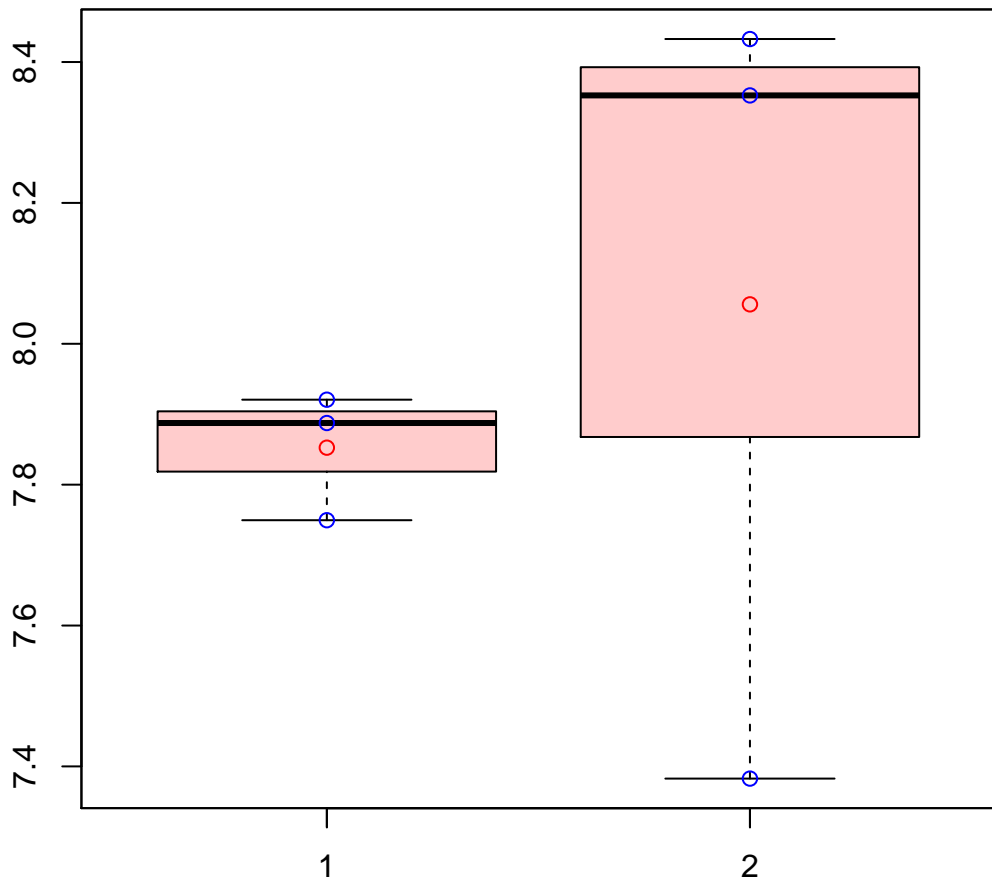

t-Test: p-value = 0.61

# M0X009|M0X009\_HORVD

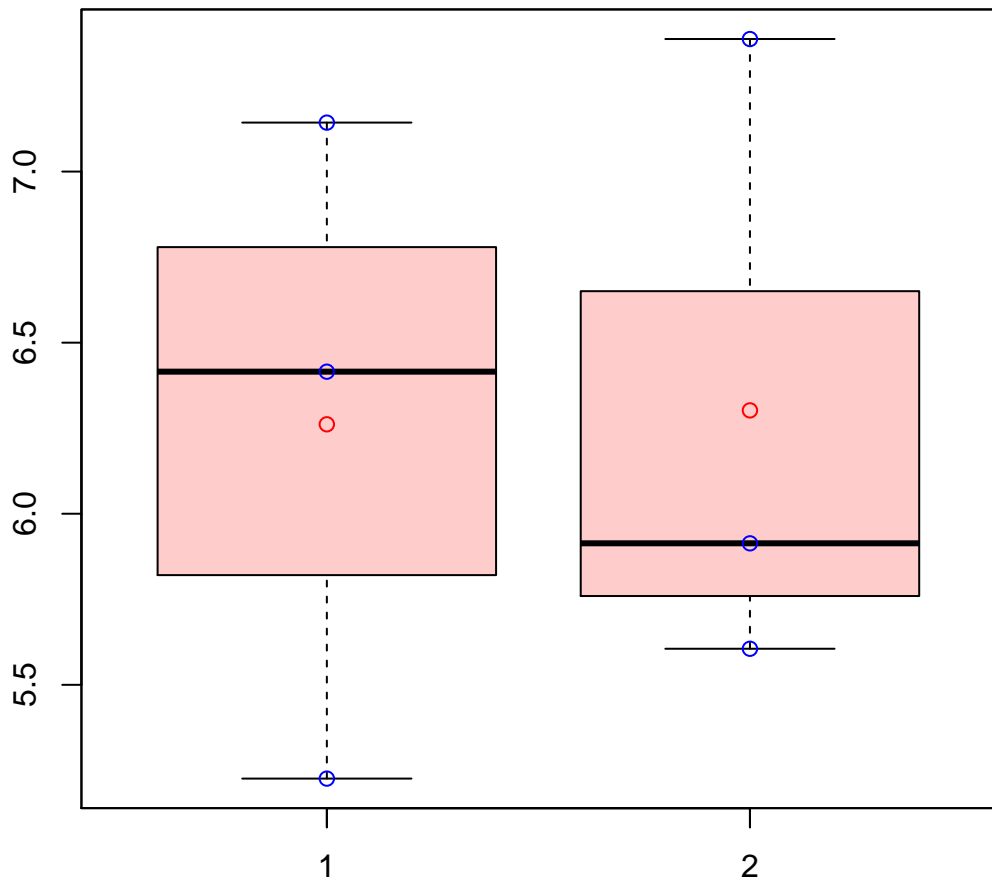

t-Test: p-value = 0.96

# M0X2I0|M0X2I0\_HORVD

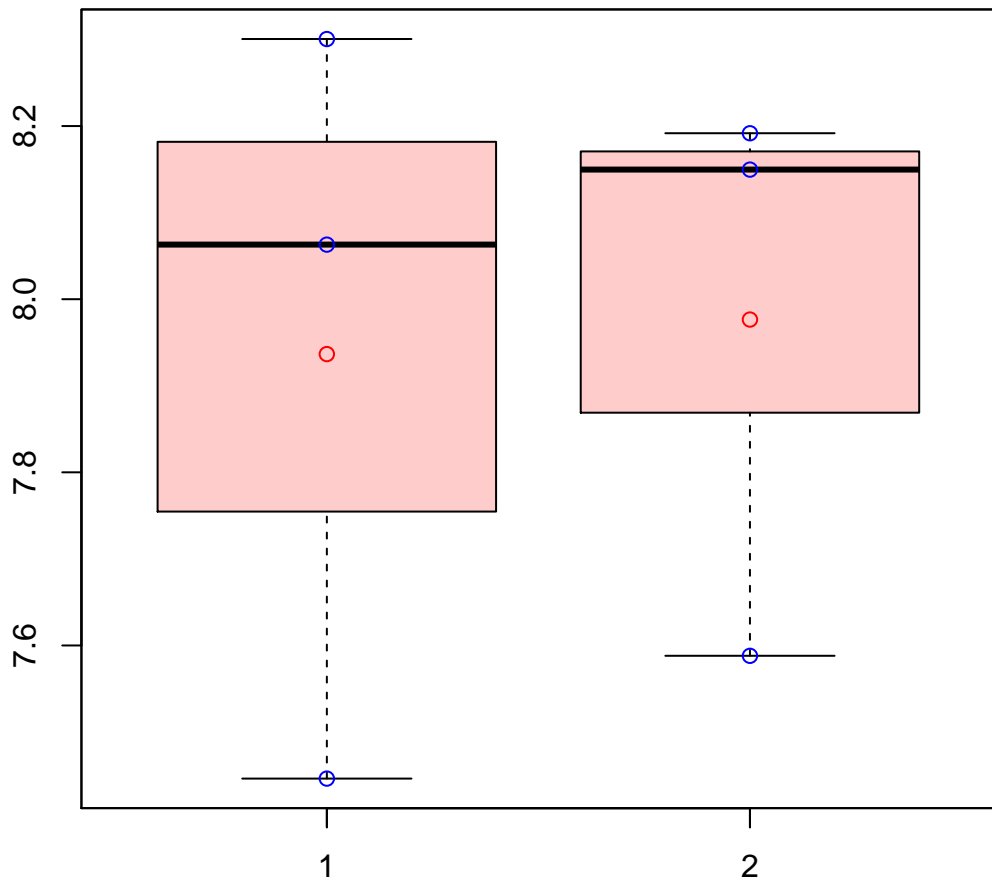

t-Test: p-value = 0.91

# M0X2R3|M0X2R3\_HORVD

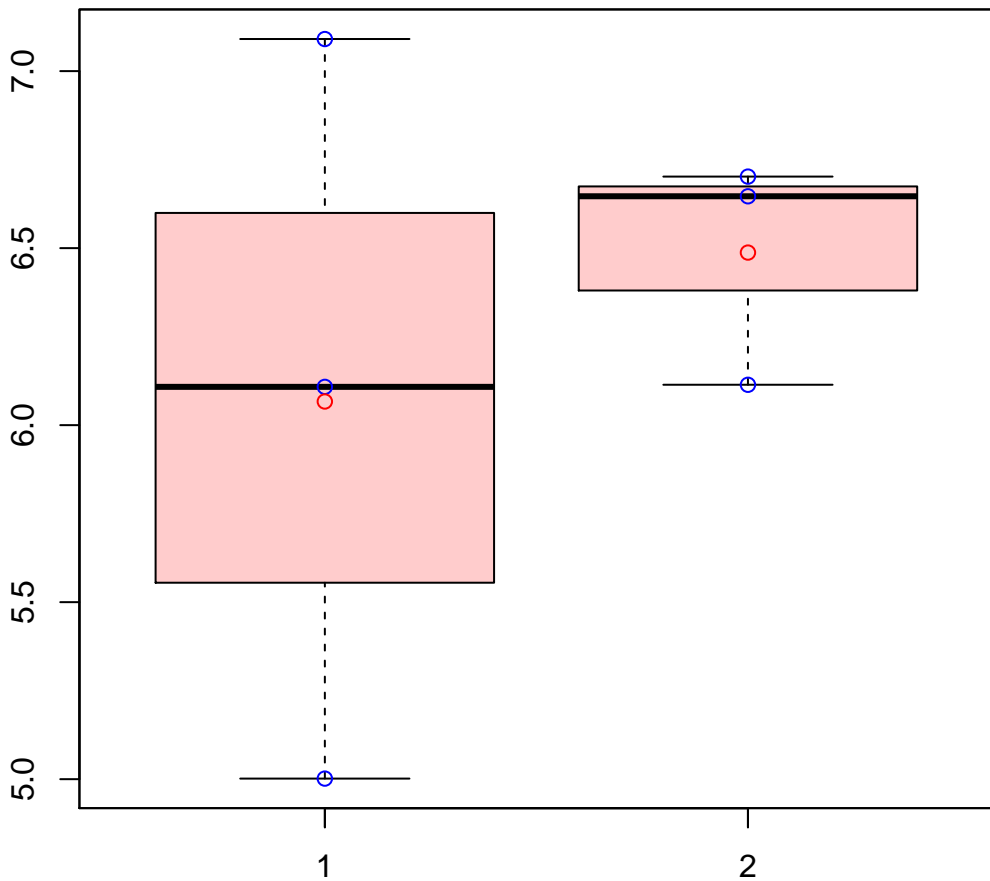

t-Test: p-value = 0.56

# M0X5B1|M0X5B1\_HORVD

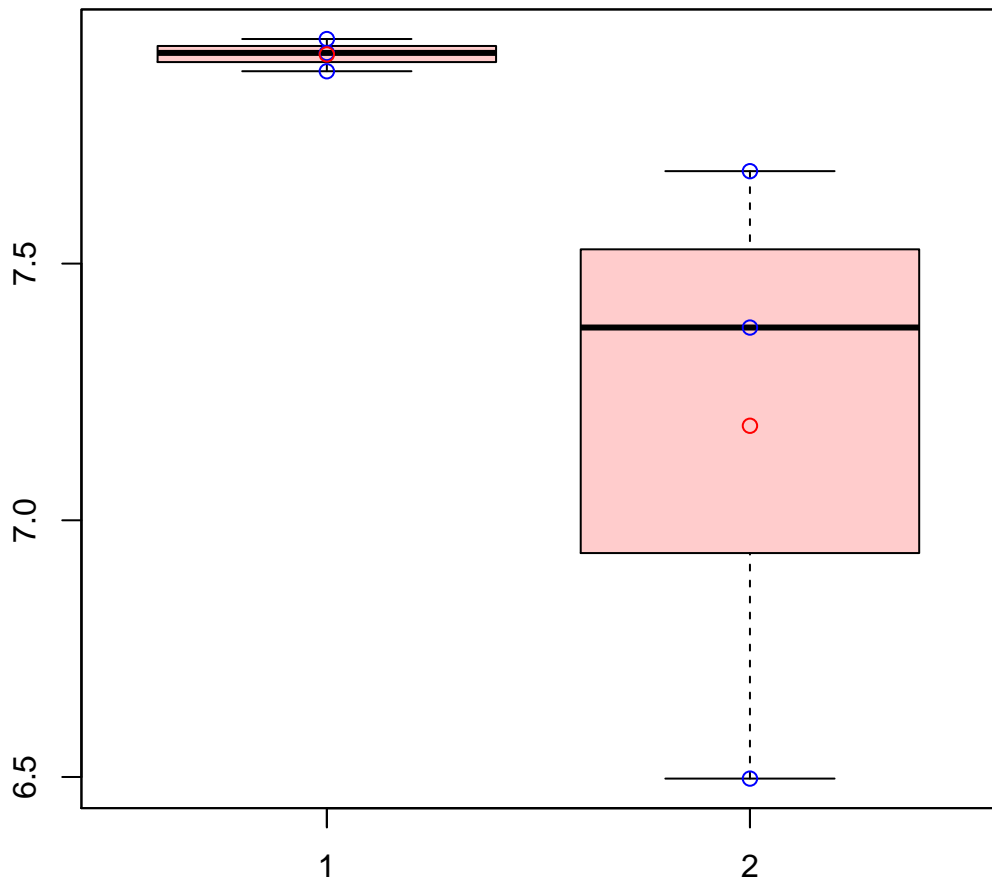

t-Test: p-value = 0.18



# M0X5Q7|M0X5Q7\_HORVD

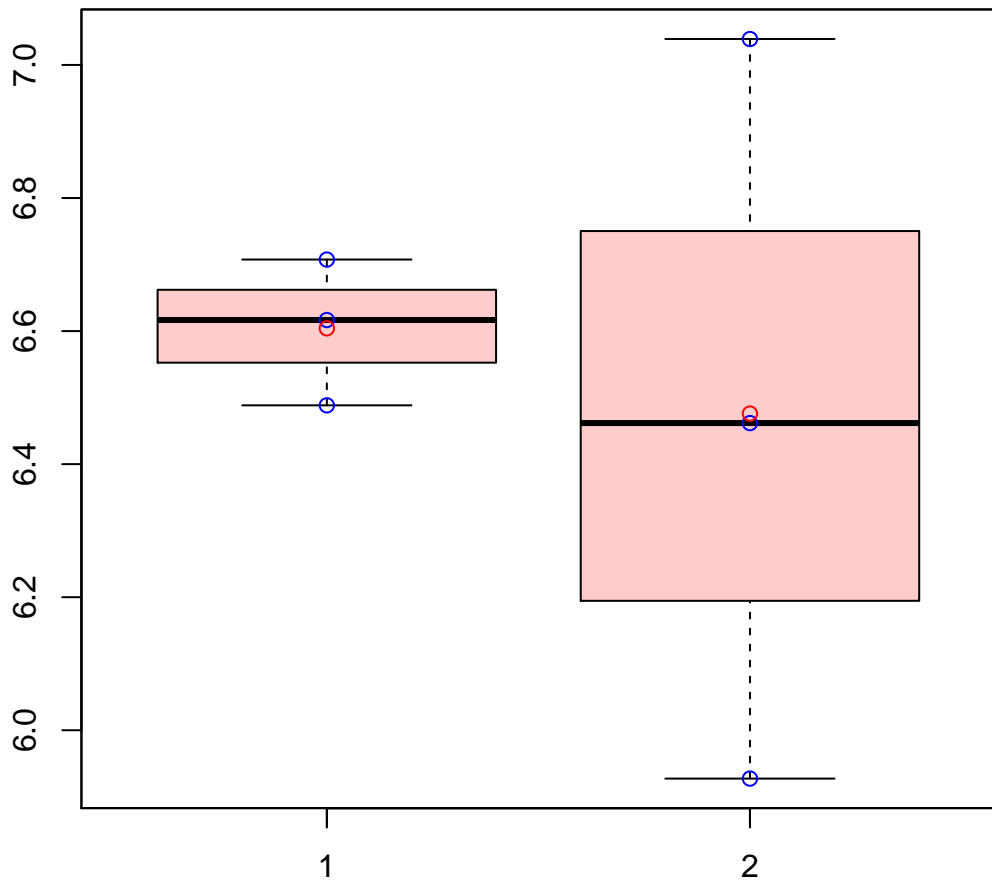

t-Test: p-value = 0.73

# M0X5Z0|M0X5Z0\_HORVD

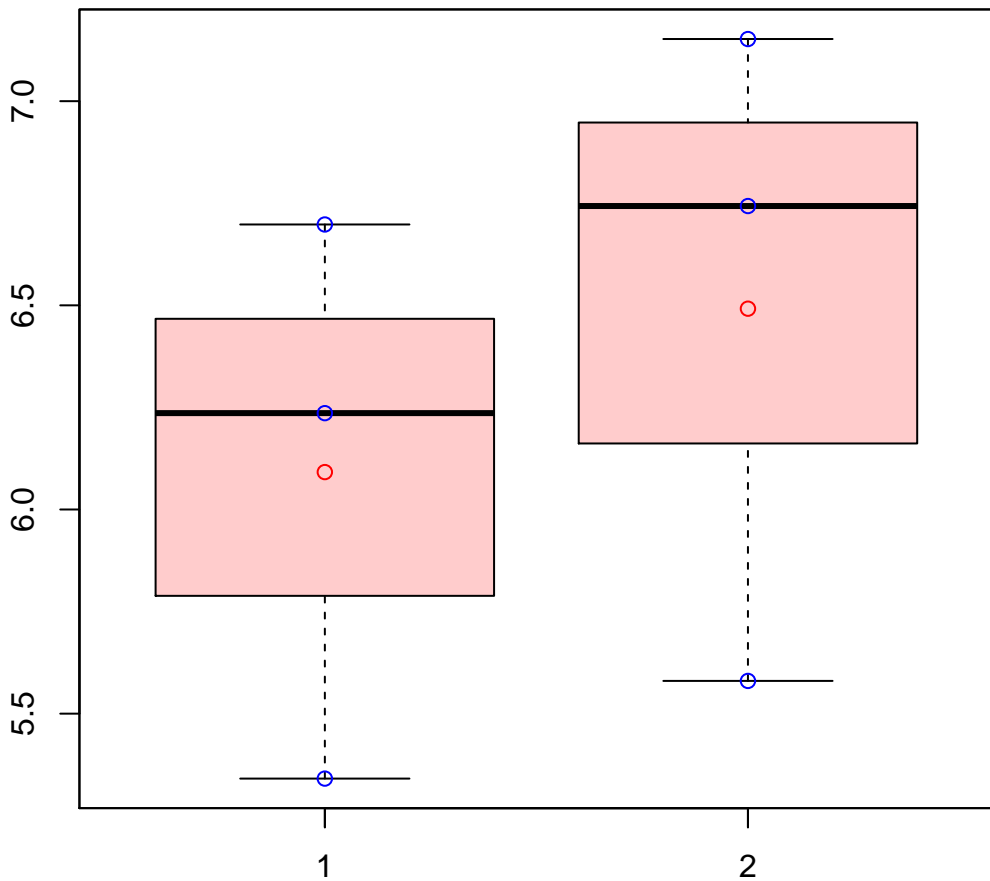

t-Test: p-value = 0.55

# M0X641|M0X641\_HORVD

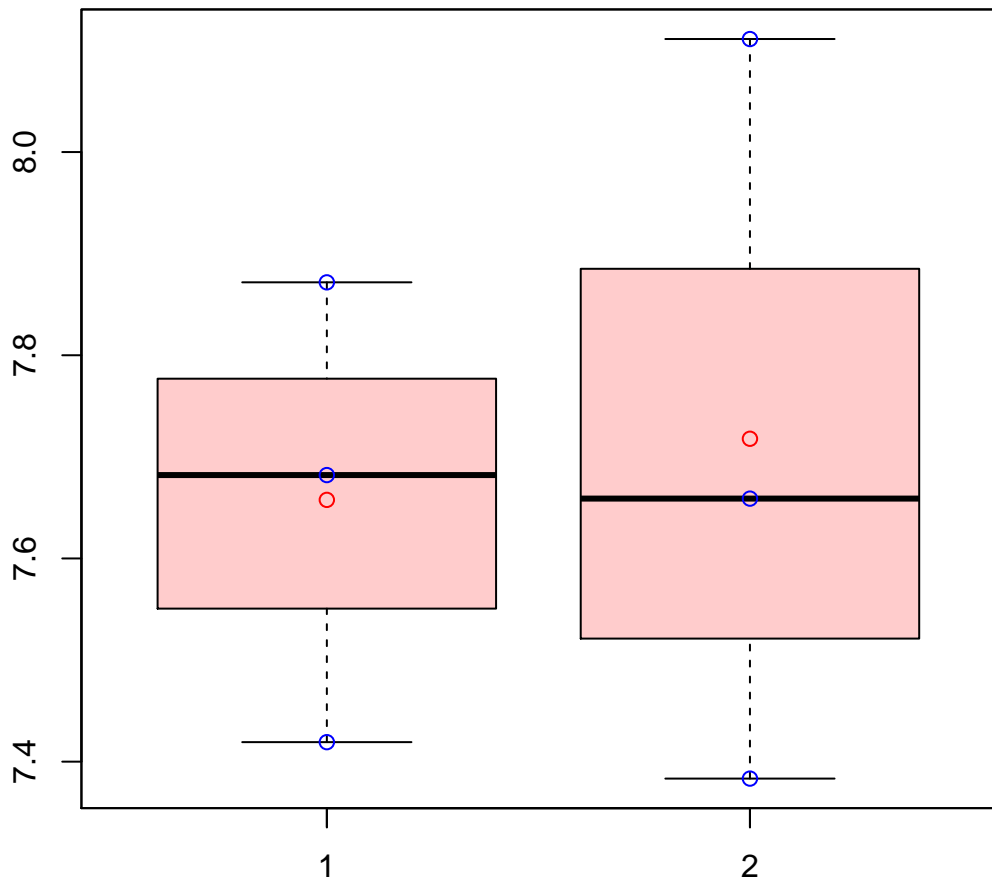

t-Test: p-value = 0.82

# M0X690|M0X690\_HORVD

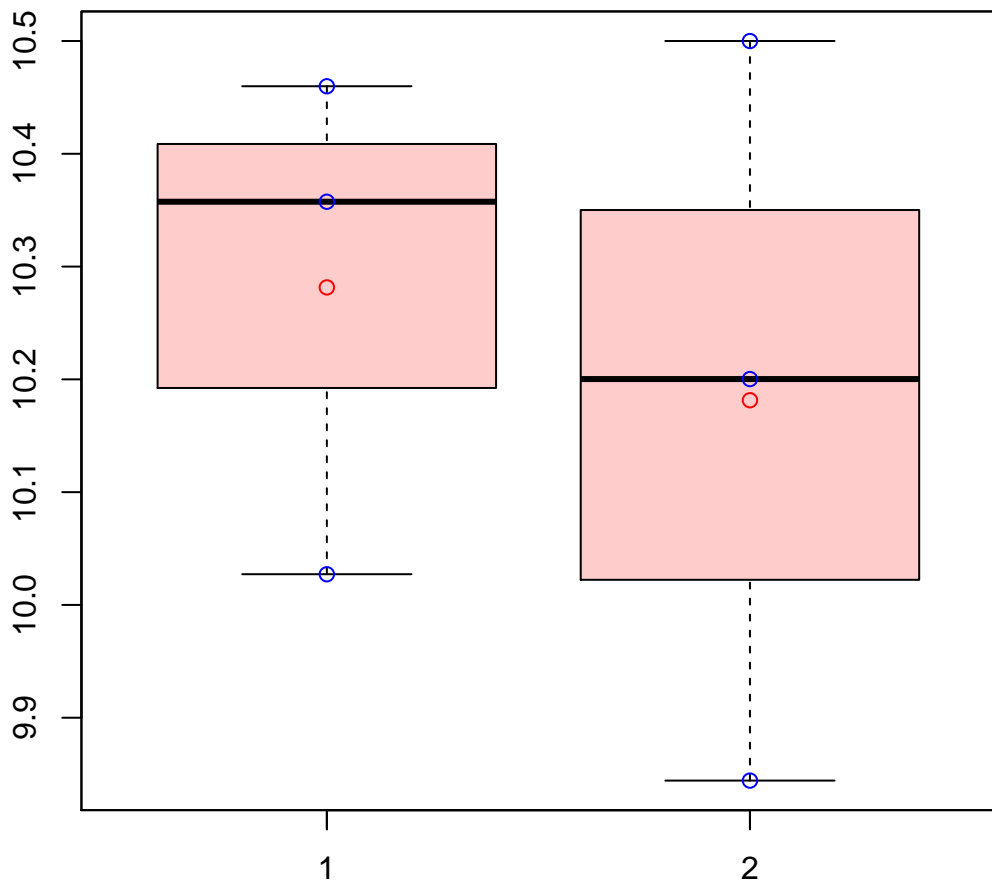

t-Test: p-value = 0.69

# M0X6E4|M0X6E4\_HORVD

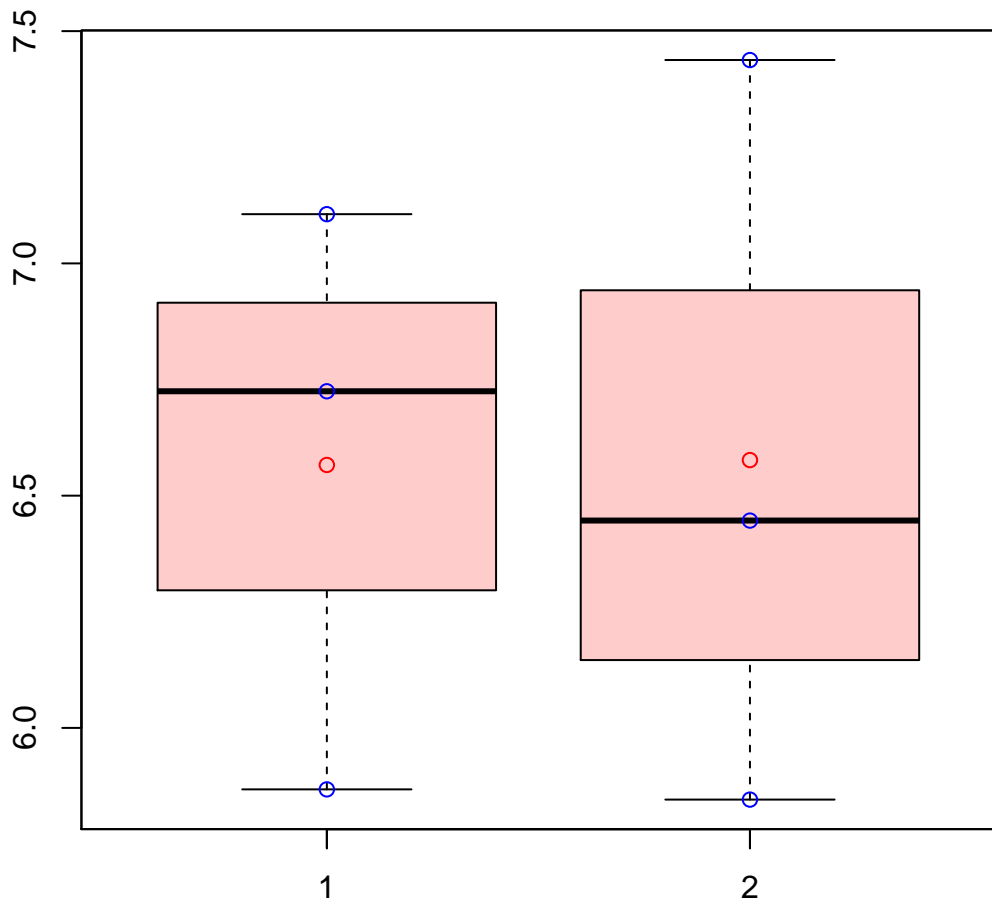

t-Test: p-value = 0.99

# M0X710|M0X710\_HORVD

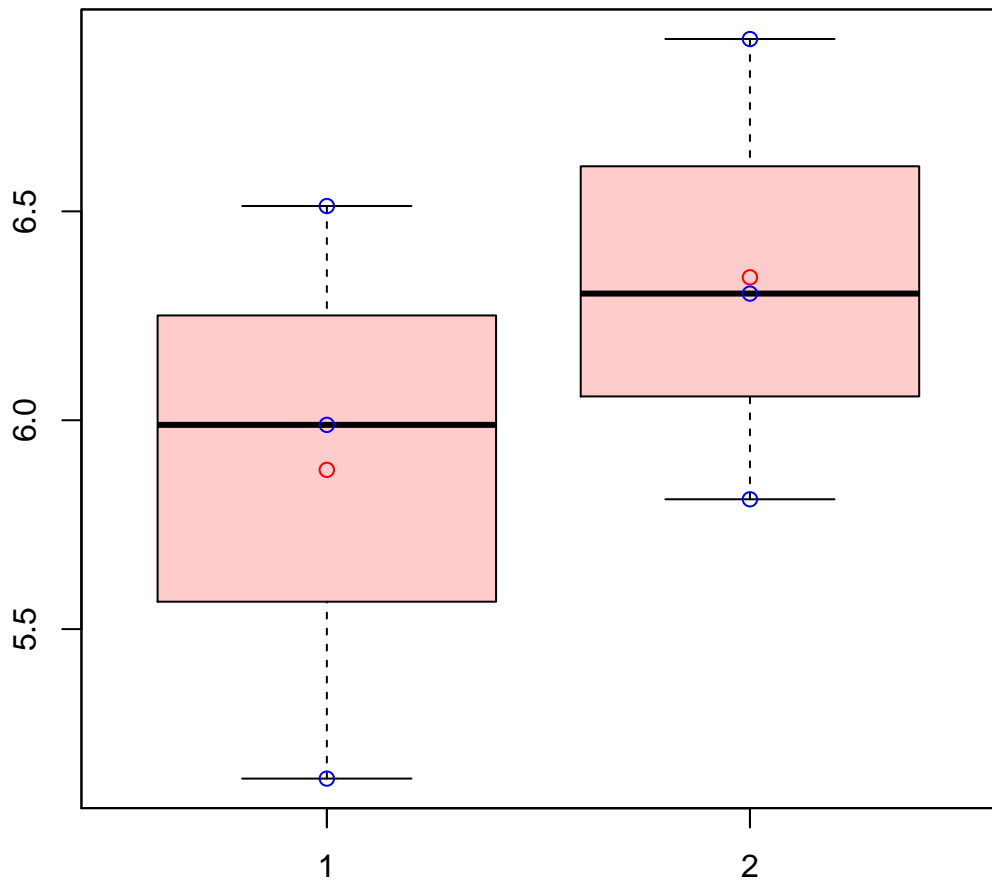

t-Test: p-value = 0.42

# M0X7H3|M0X7H3\_HORVD

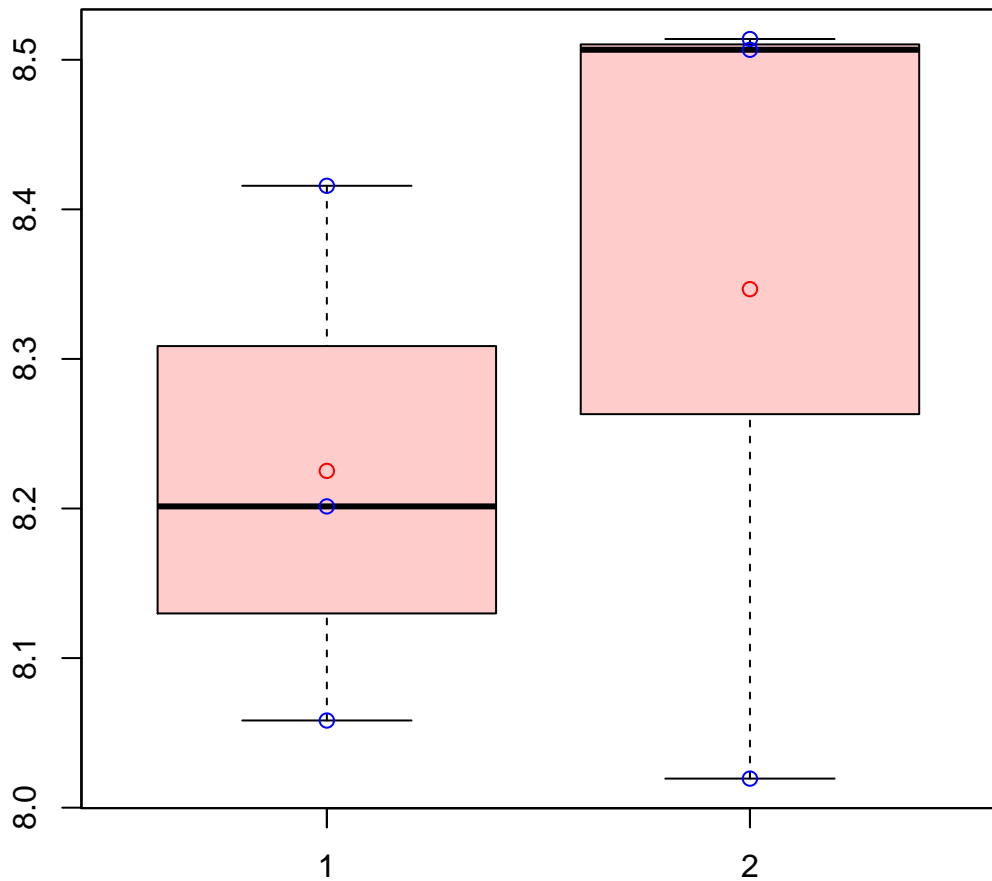

t-Test: p-value = 0.57

# M0X7Y6|M0X7Y6\_HORVD

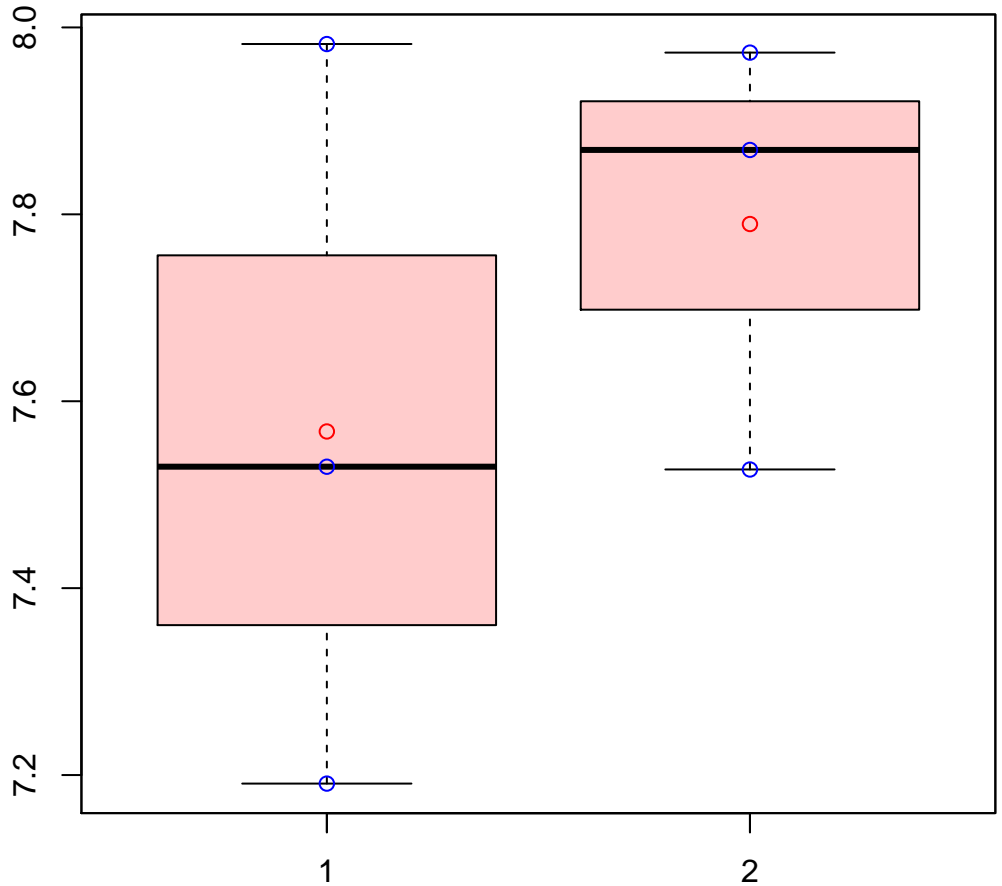

t-Test: p-value = 0.46



# M0X9D6|M0X9D6\_HORVD

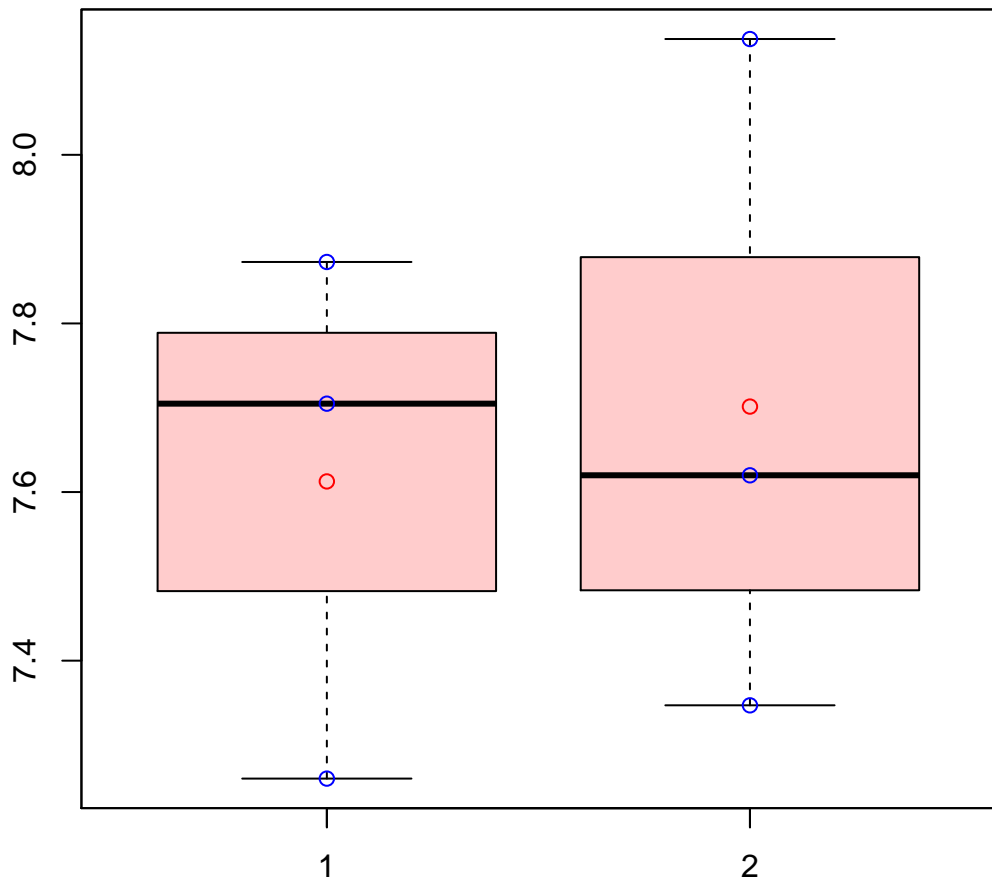

t-Test: p-value = 0.78

# M0X9F6|M0X9F6\_HORVD

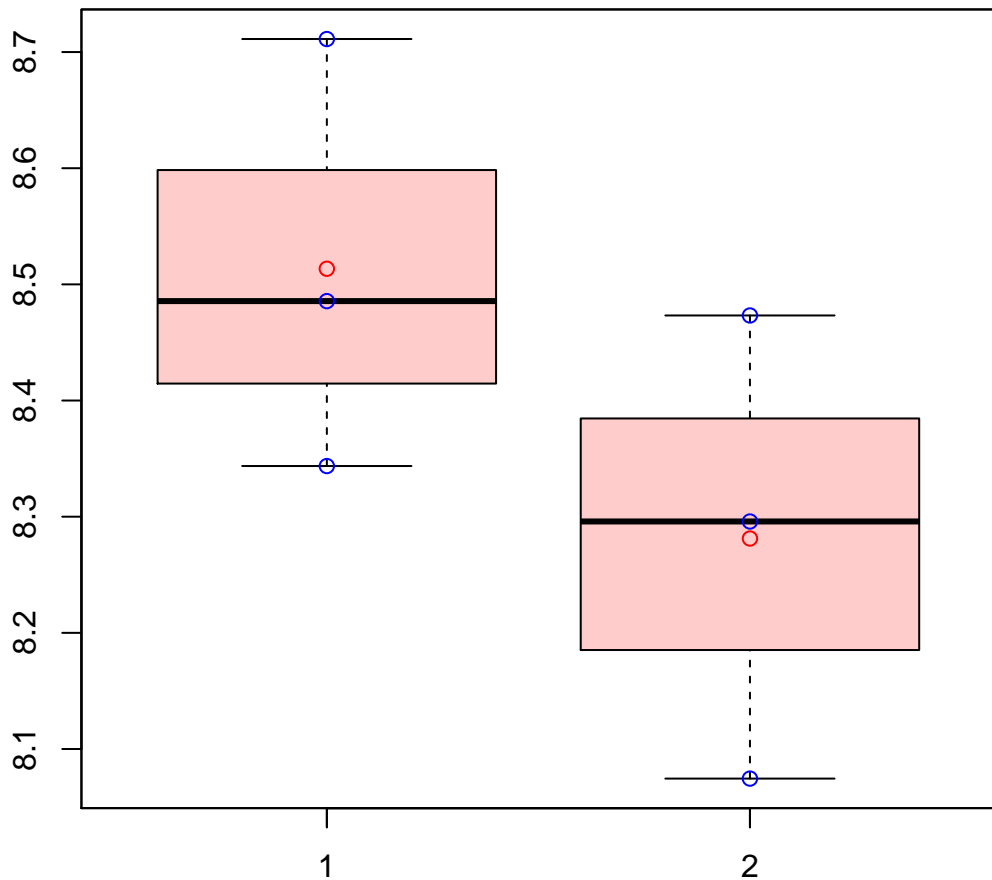

t-Test: p-value = 0.21

# M0XBI3|M0XBI3\_HORVD

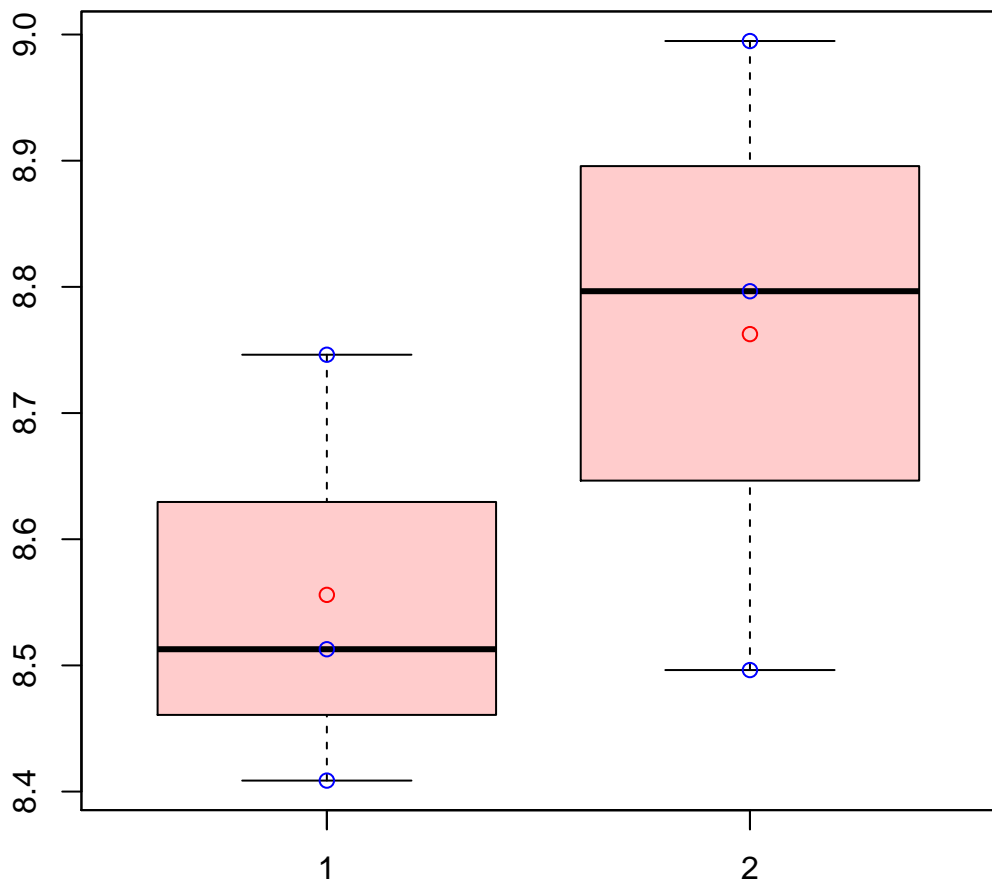

t-Test: p-value = 0.31

# M0XC60|M0XC60\_HORVD

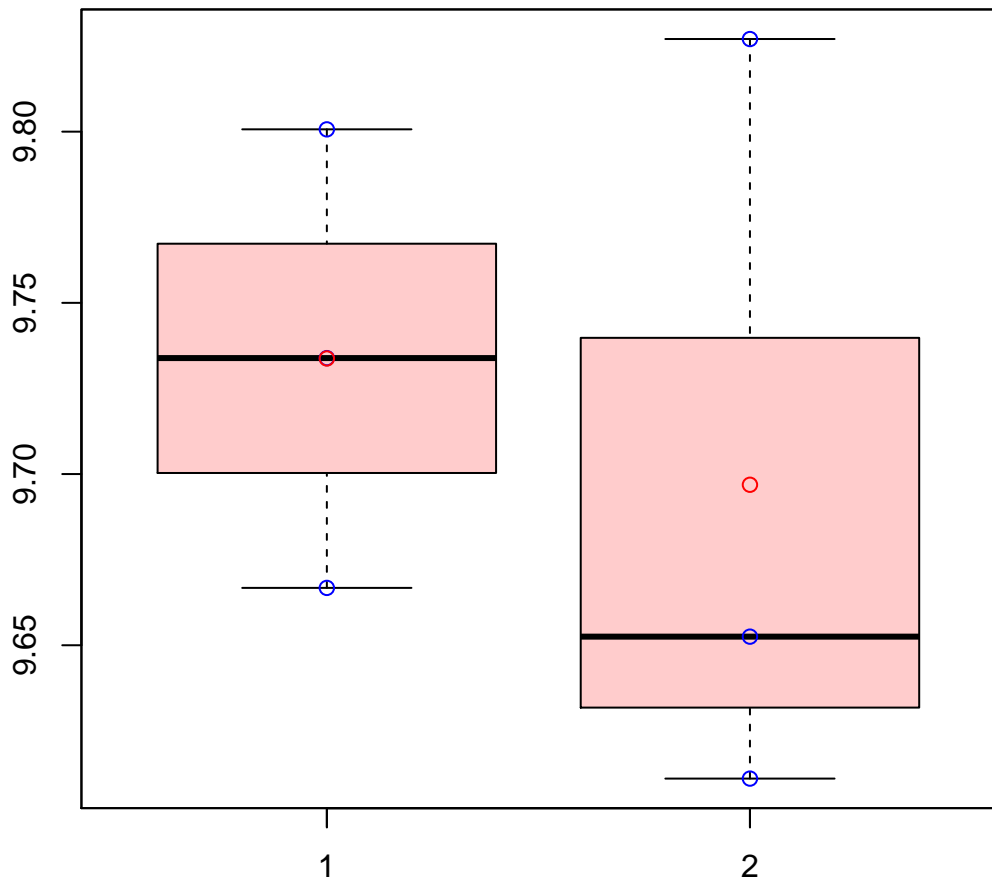

t-Test: p-value = 0.66

# M0XD11|M0XD11\_HORVD

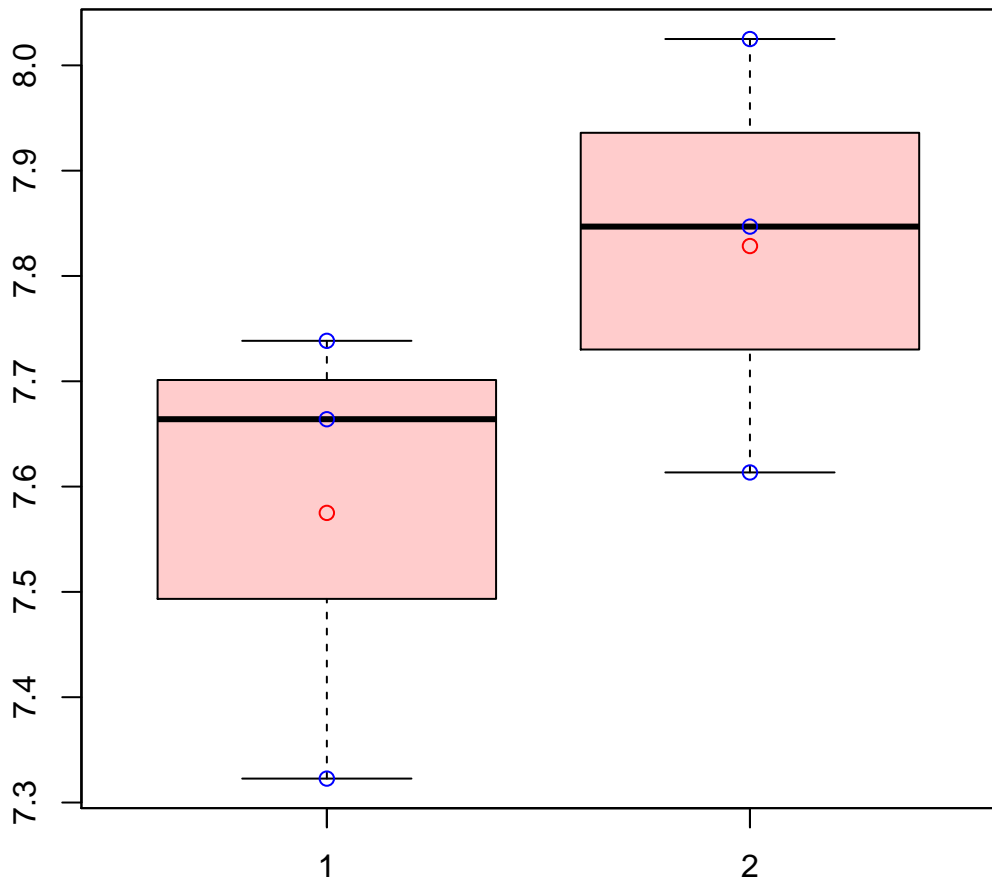

t-Test: p-value = 0.22

# M0XEI7|M0XEI7\_HORVD

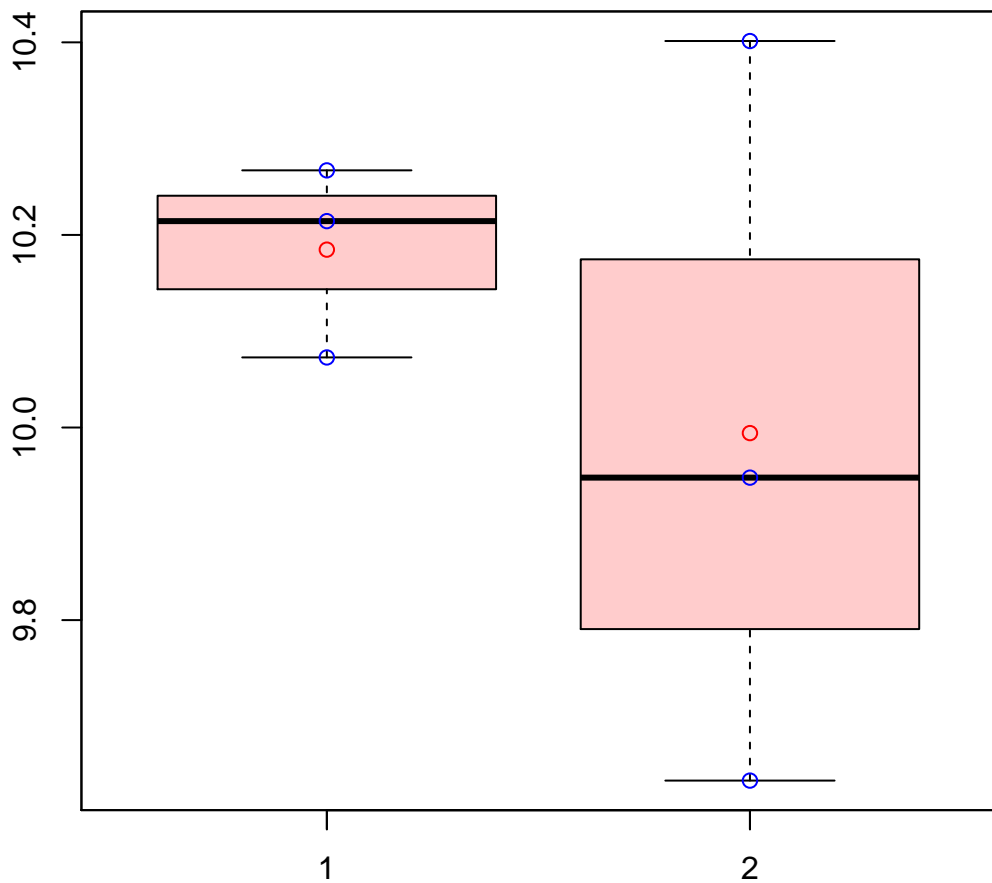

t-Test: p-value = 0.49

# M0XFC8|M0XFC8\_HORVD

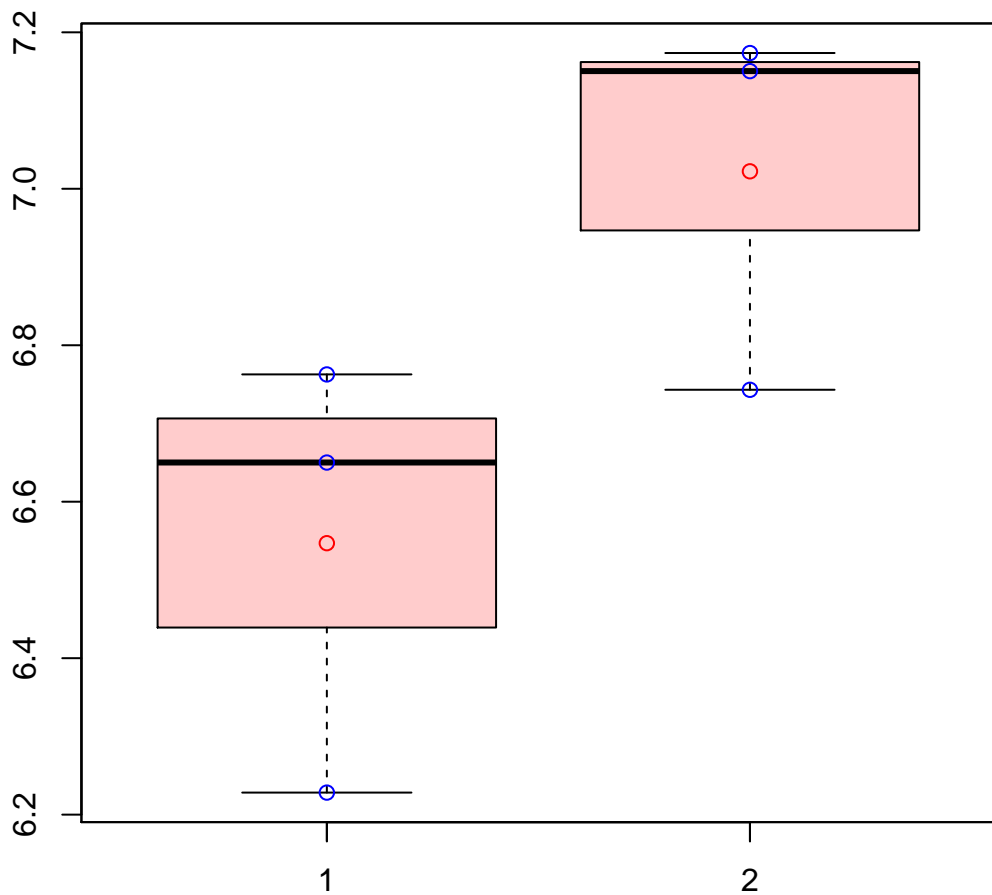

t-Test: p-value = 0.09

# M0XFE8|M0XFE8\_HORVD

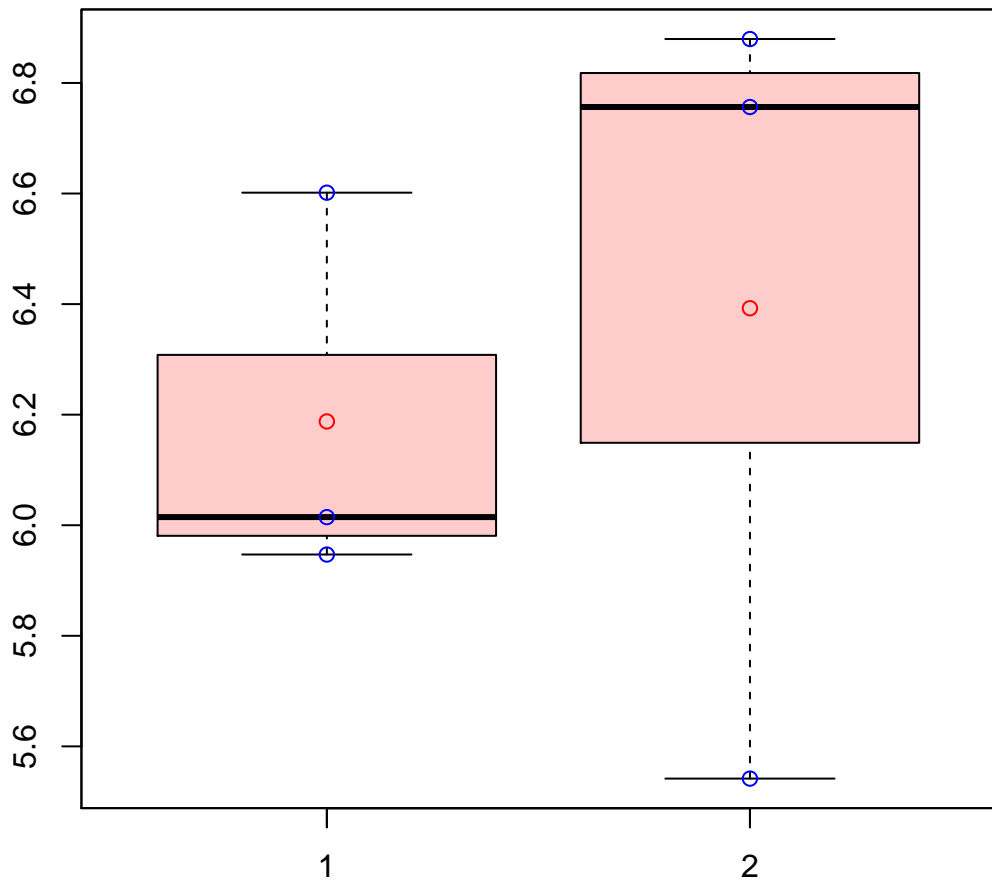

t-Test: p-value = 0.7



# M0XFF2|M0XFF2\_HORVD

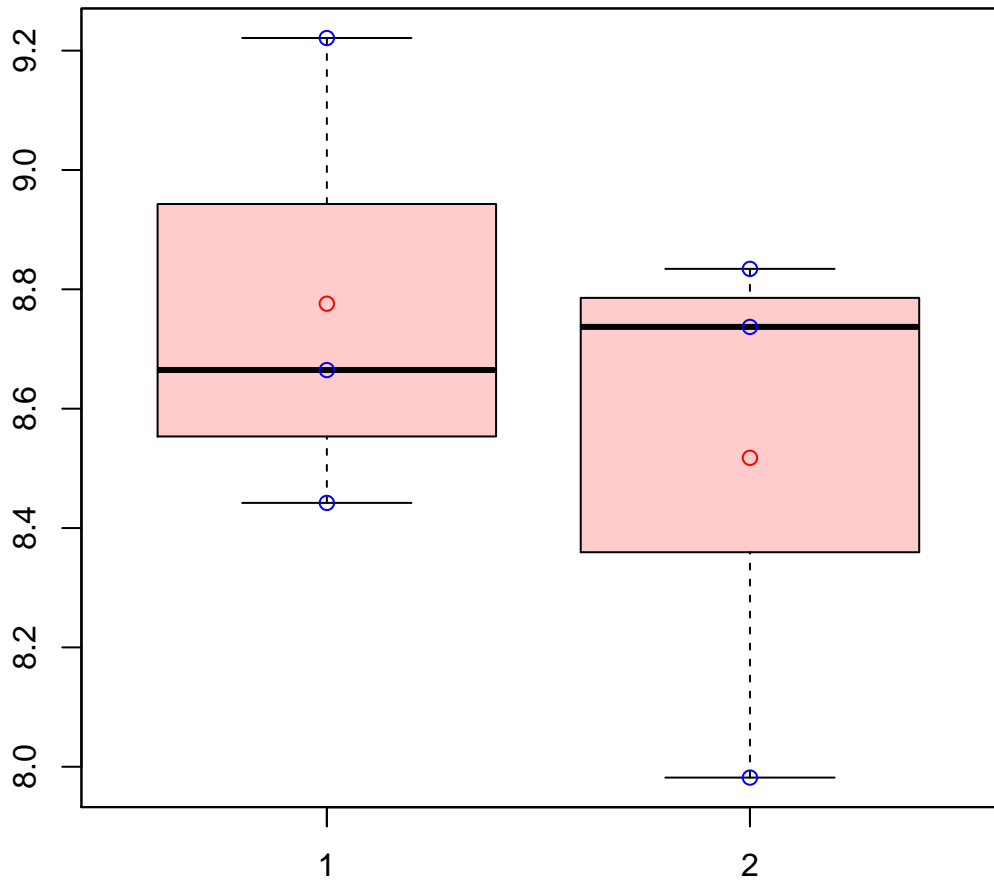

t-Test: p-value = 0.51

# M0XG72|M0XG72\_HORVD

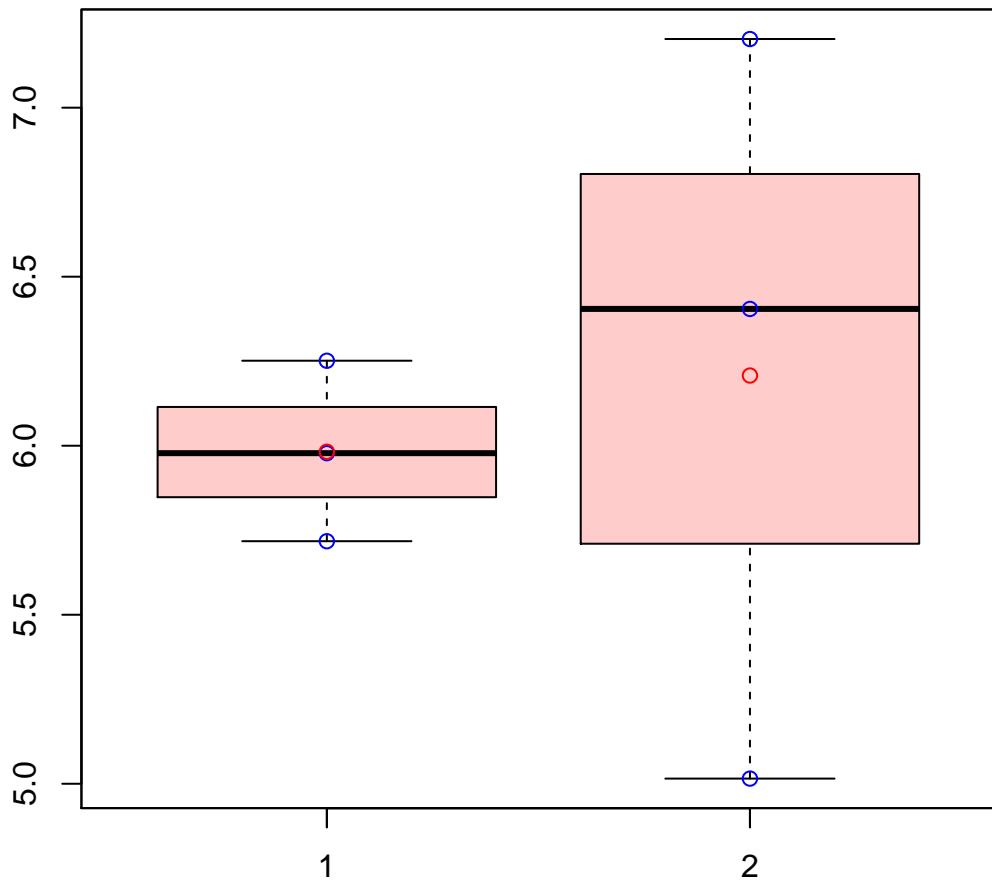

t-Test: p-value = 0.76

# M0XGX0|M0XGX0\_HORVD

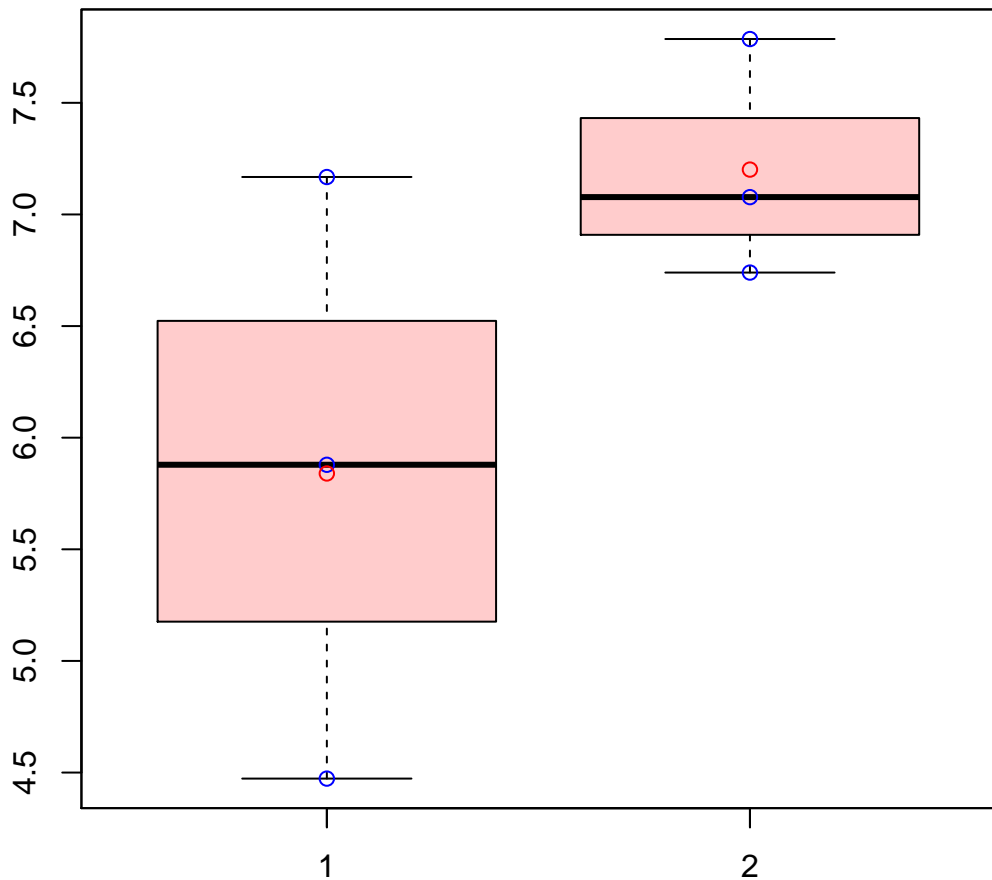

t-Test: p-value = 0.22

# M0XKE1|M0XKE1\_HORVD

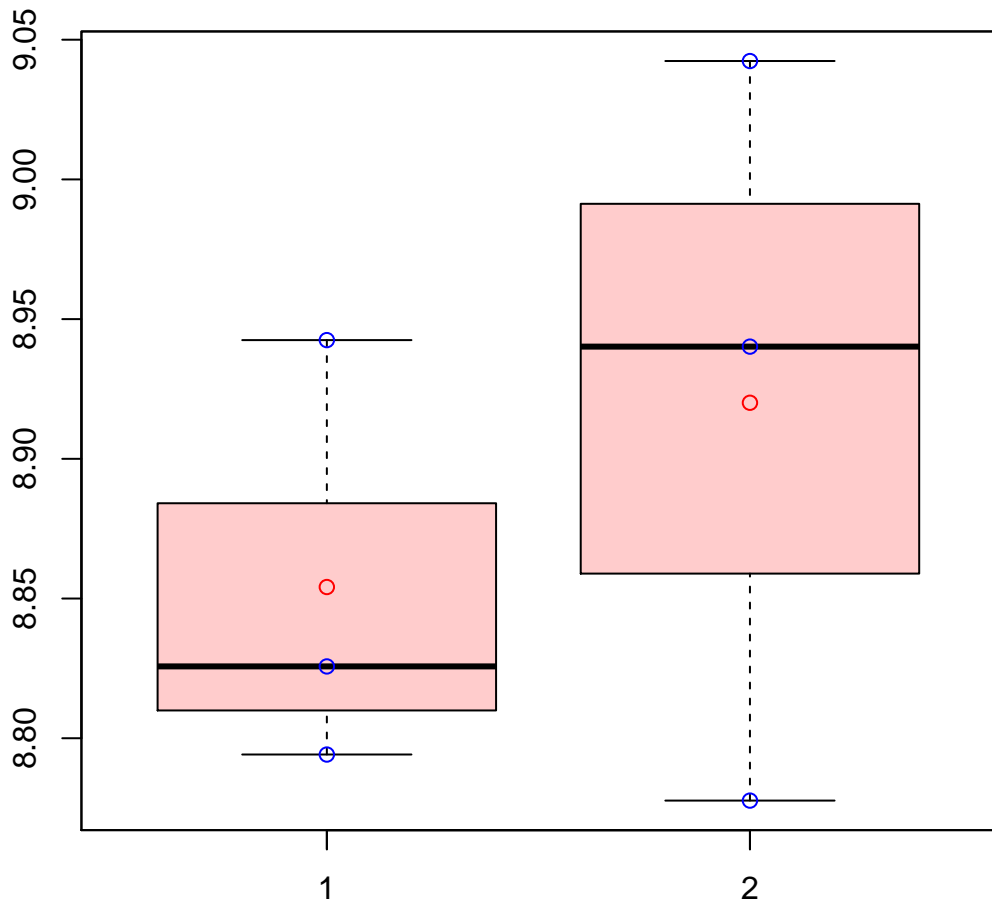

t-Test: p-value = 0.51

# M0XKP4|M0XKP4\_HORVD

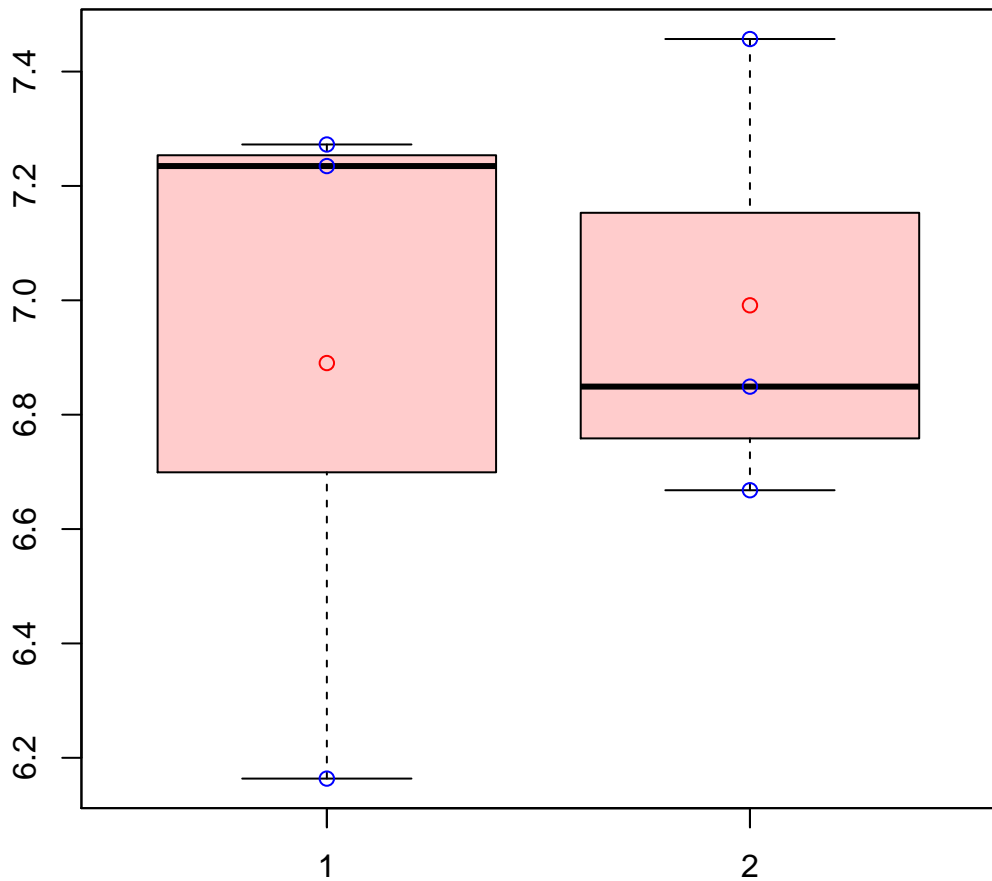

t-Test: p-value = 0.83

# M0XL55|M0XL55\_HORVD

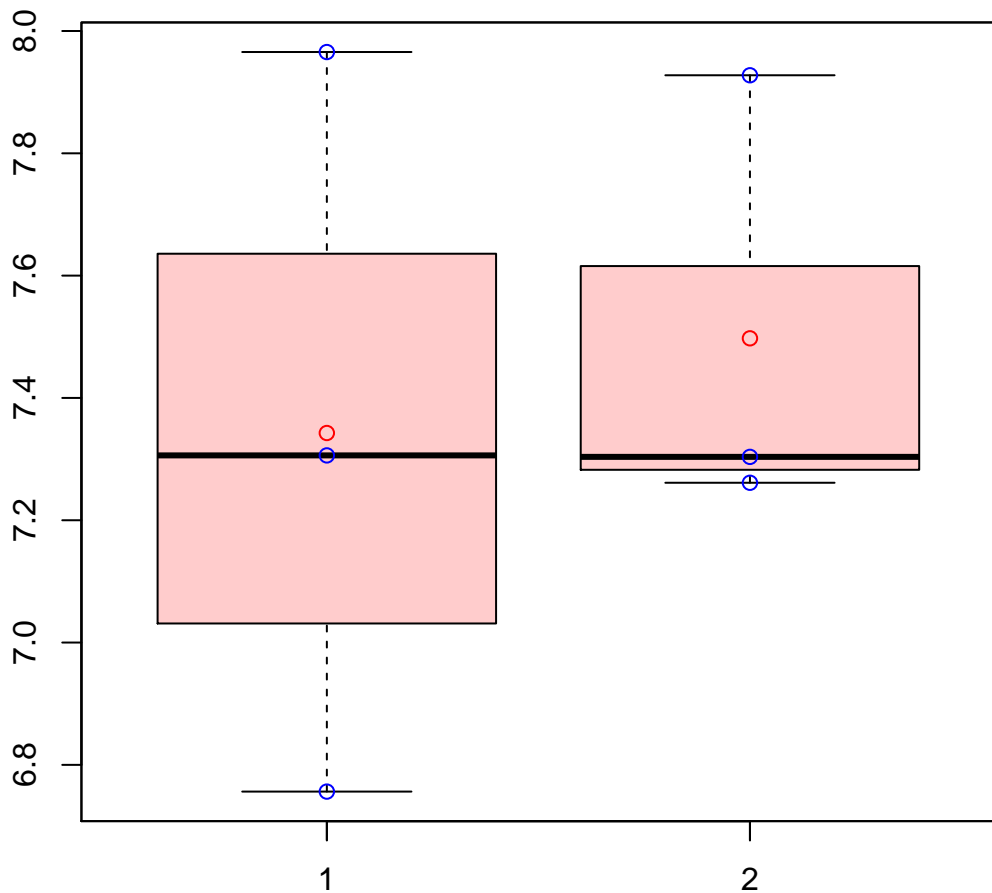

t-Test: p-value = 0.73

# M0XM51|M0XM51\_HORVD

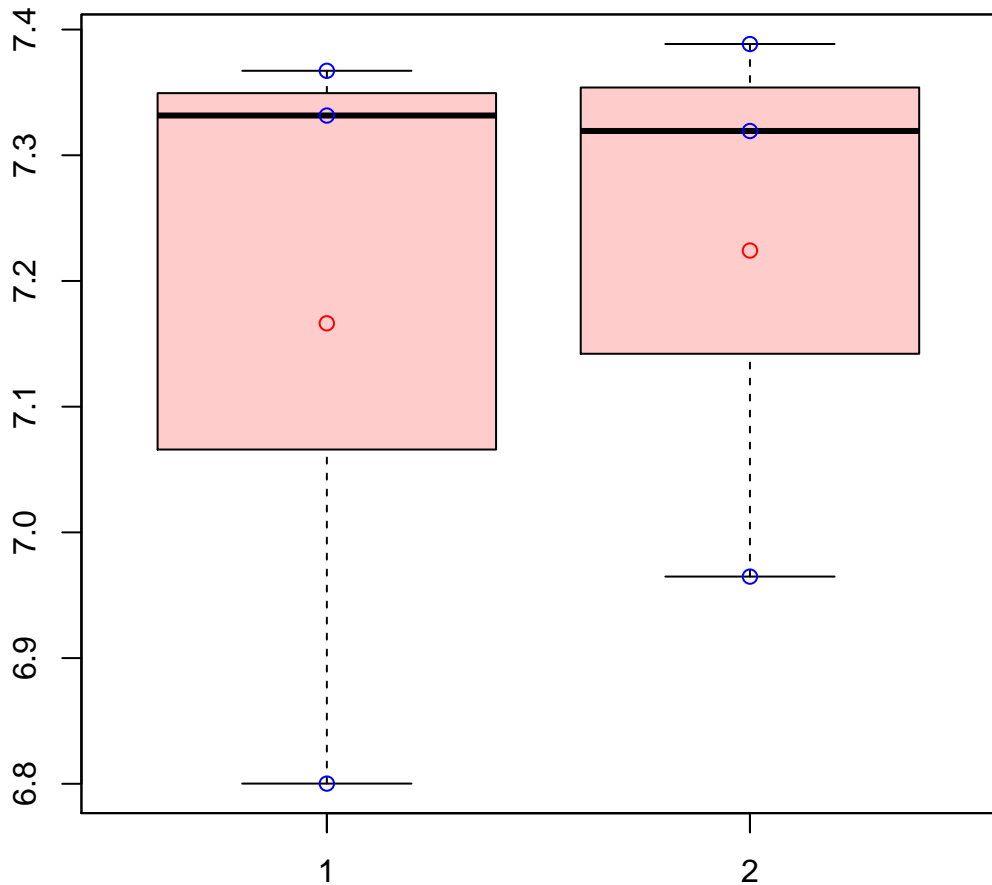

t-Test: p-value = 0.81

# M0XMG0|M0XMG0\_HORVD

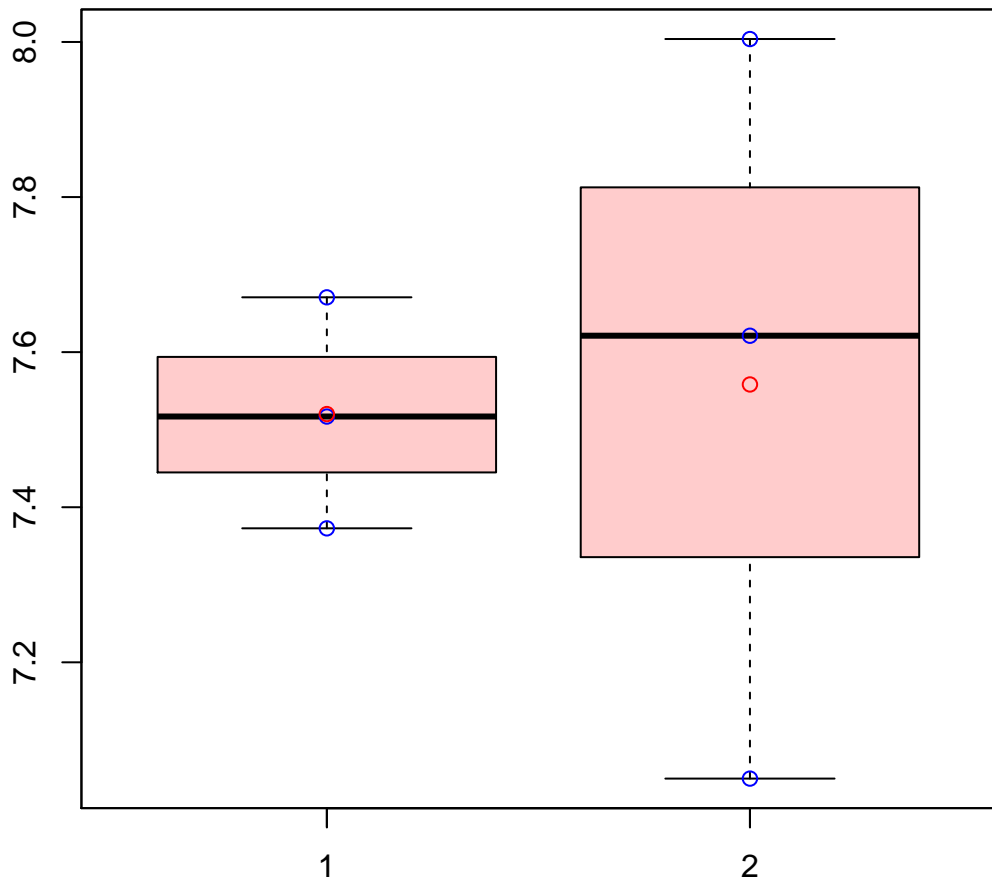

t-Test: p-value = 0.91



# M0XMU4|M0XMU4\_HORVD

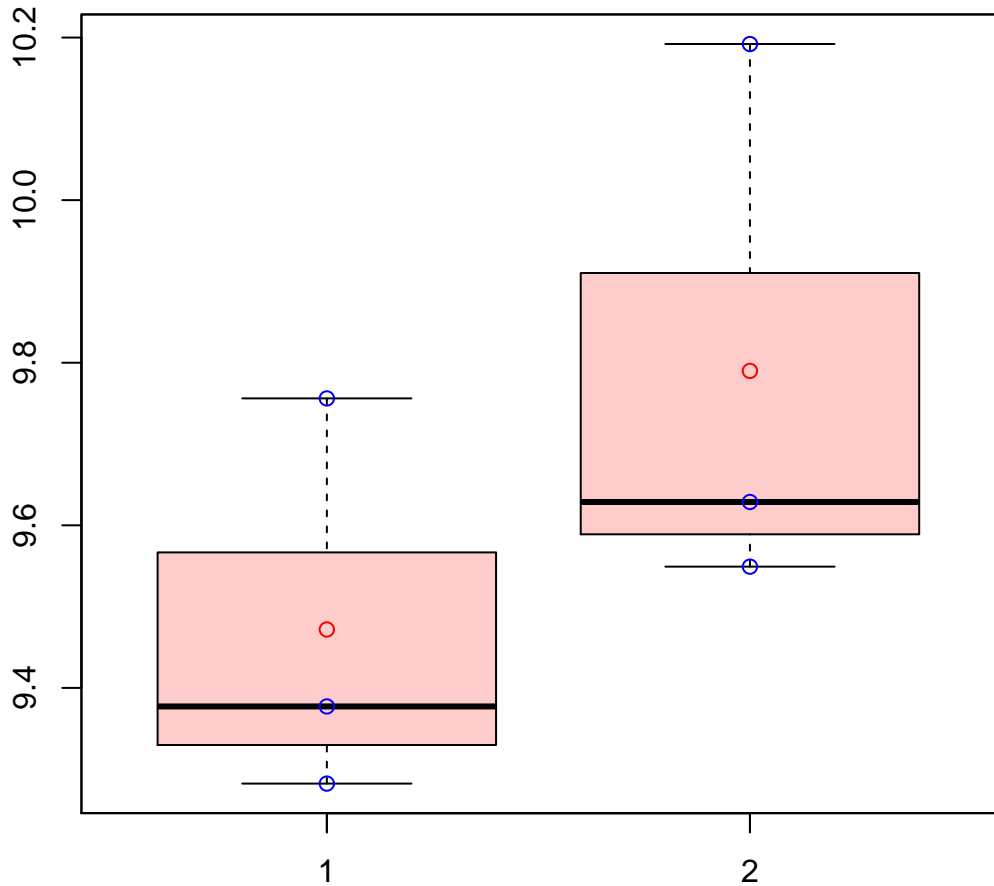

t-Test: p-value = 0.28

# M0XN88|M0XN88\_HORVD

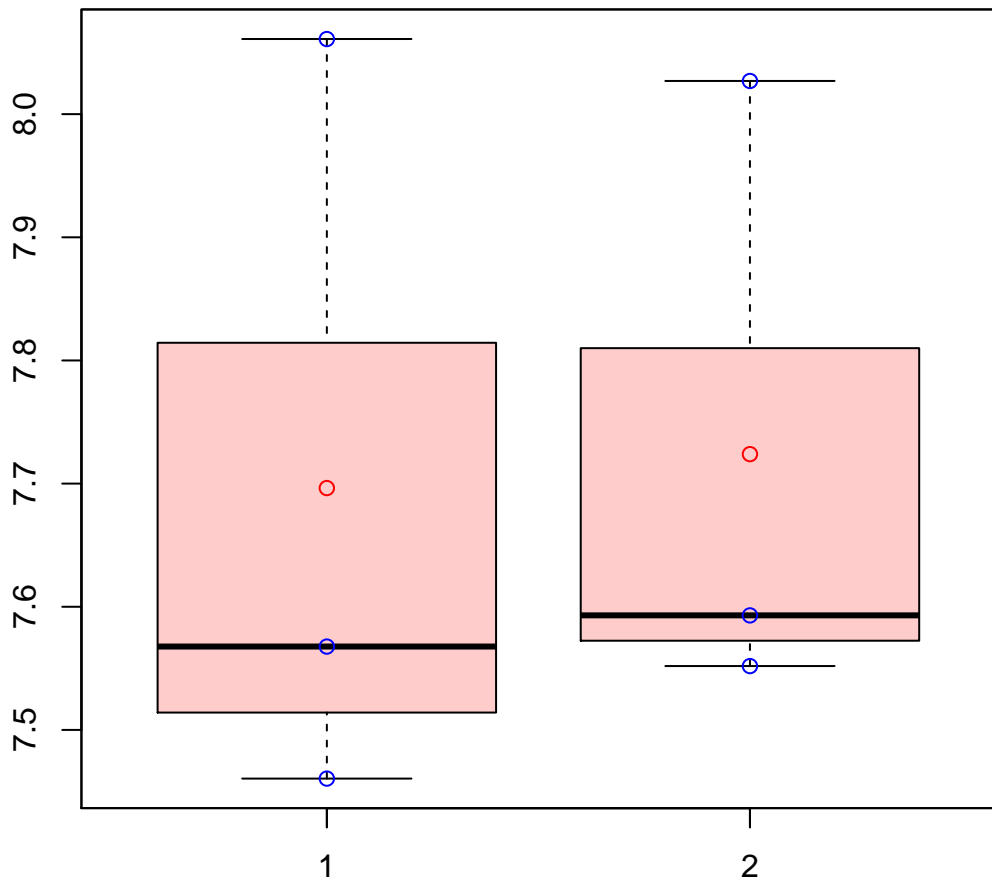

t-Test: p-value = 0.91

# M0XNU2|M0XNU2\_HORVD

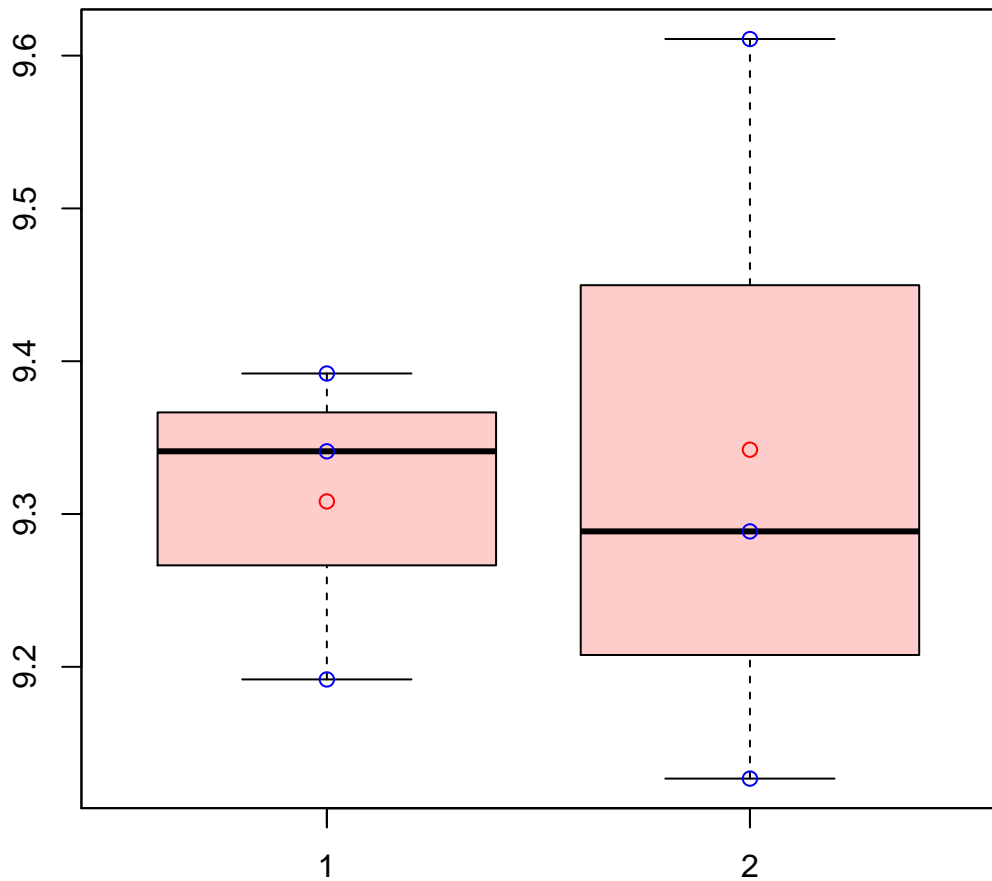

t-Test: p-value = 0.84

# M0XP75|M0XP75\_HORVD

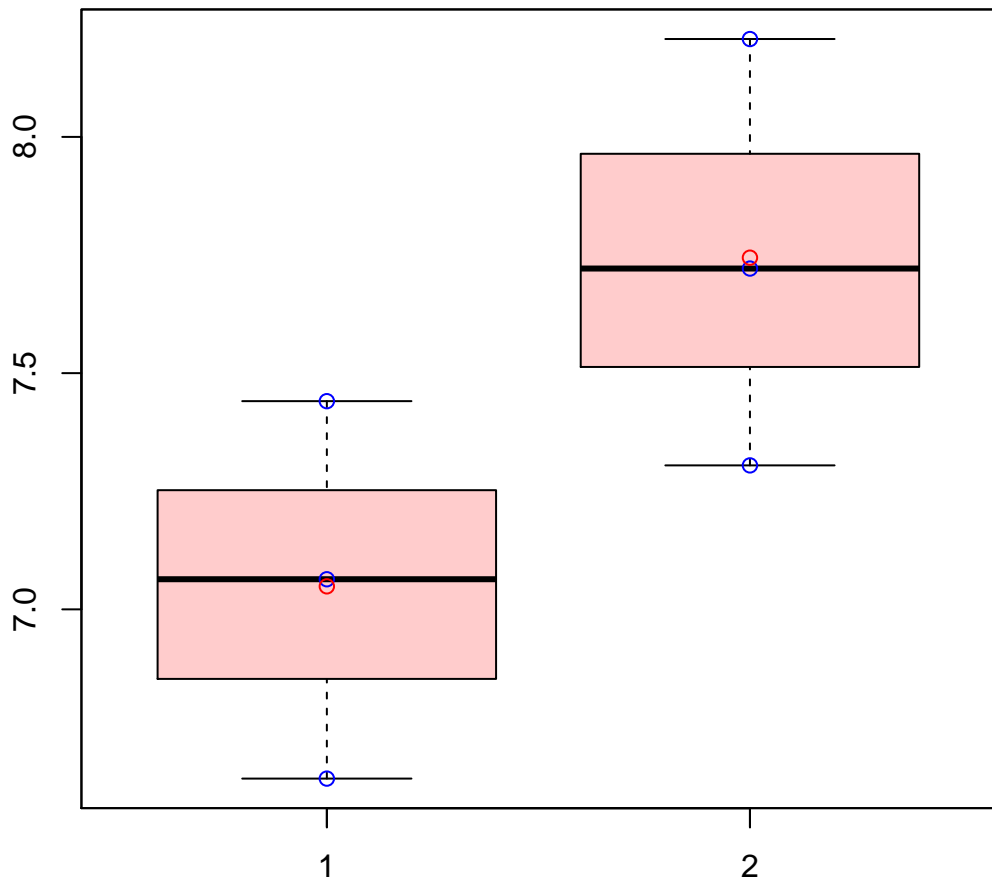

t-Test: p-value = 0.12

# M0XR68|M0XR68\_HORVD

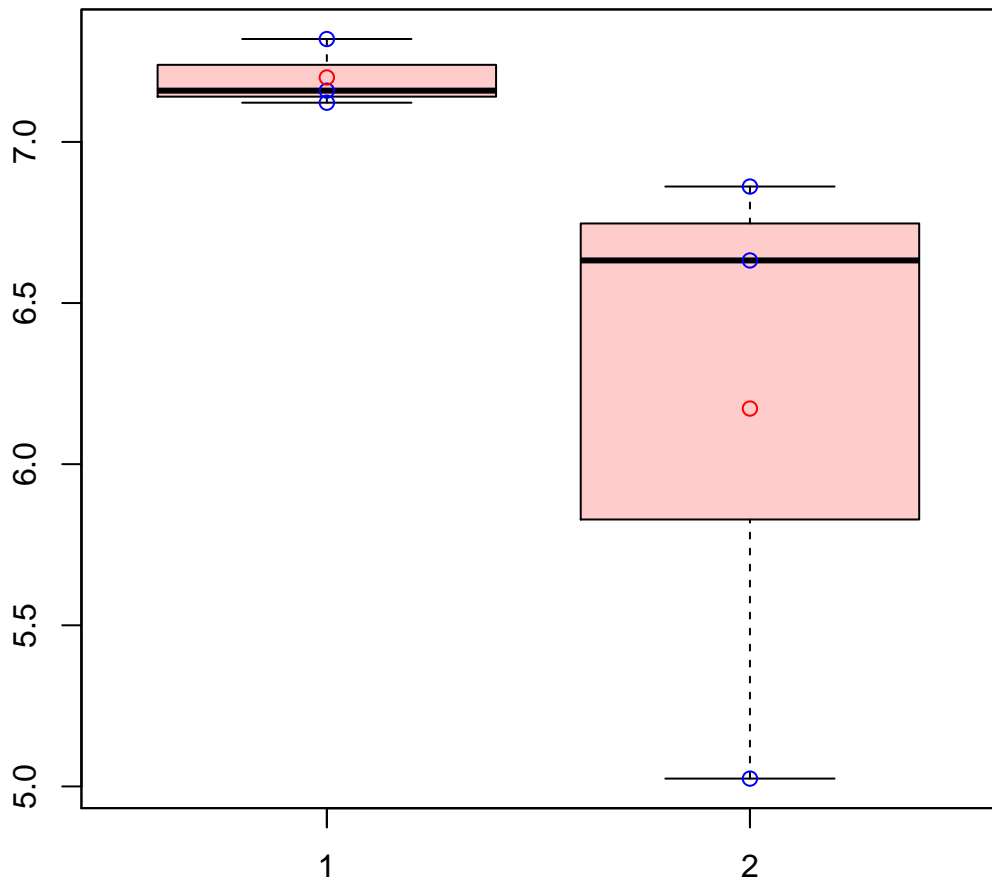

t-Test: p-value = 0.22

# M0XS28|M0XS28\_HORVD

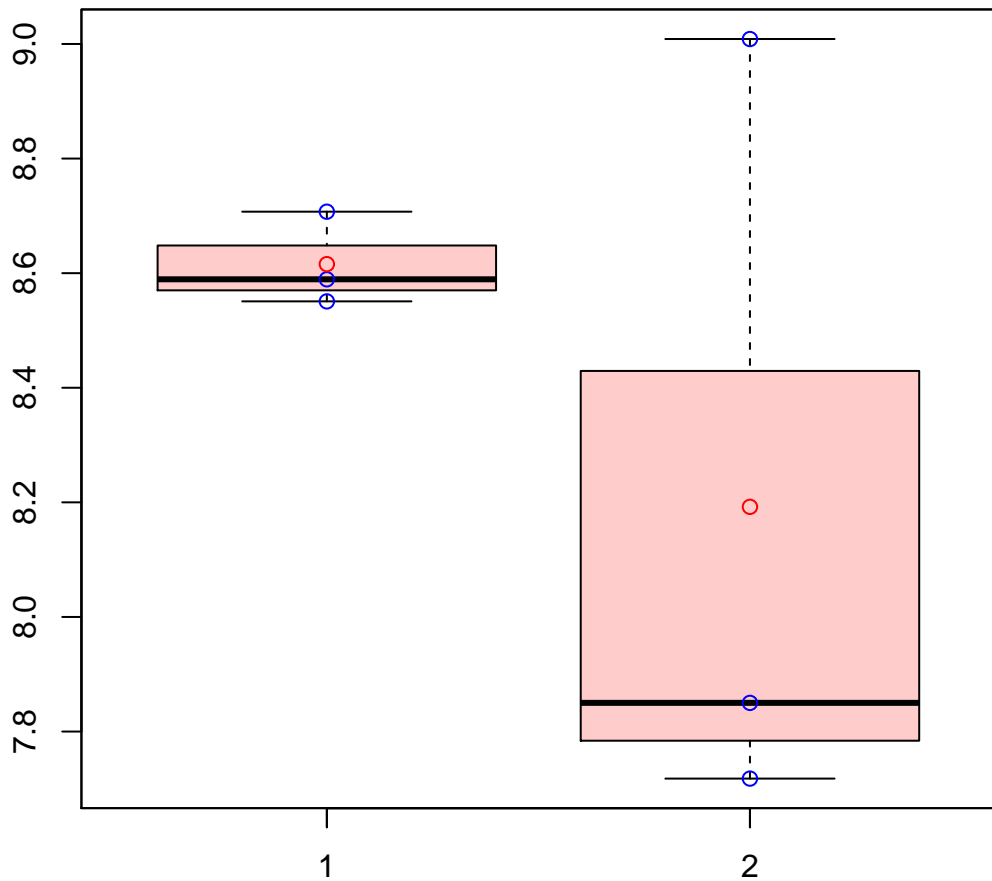

t-Test: p-value = 0.41

# M0XSE5|M0XSE5\_HORVD

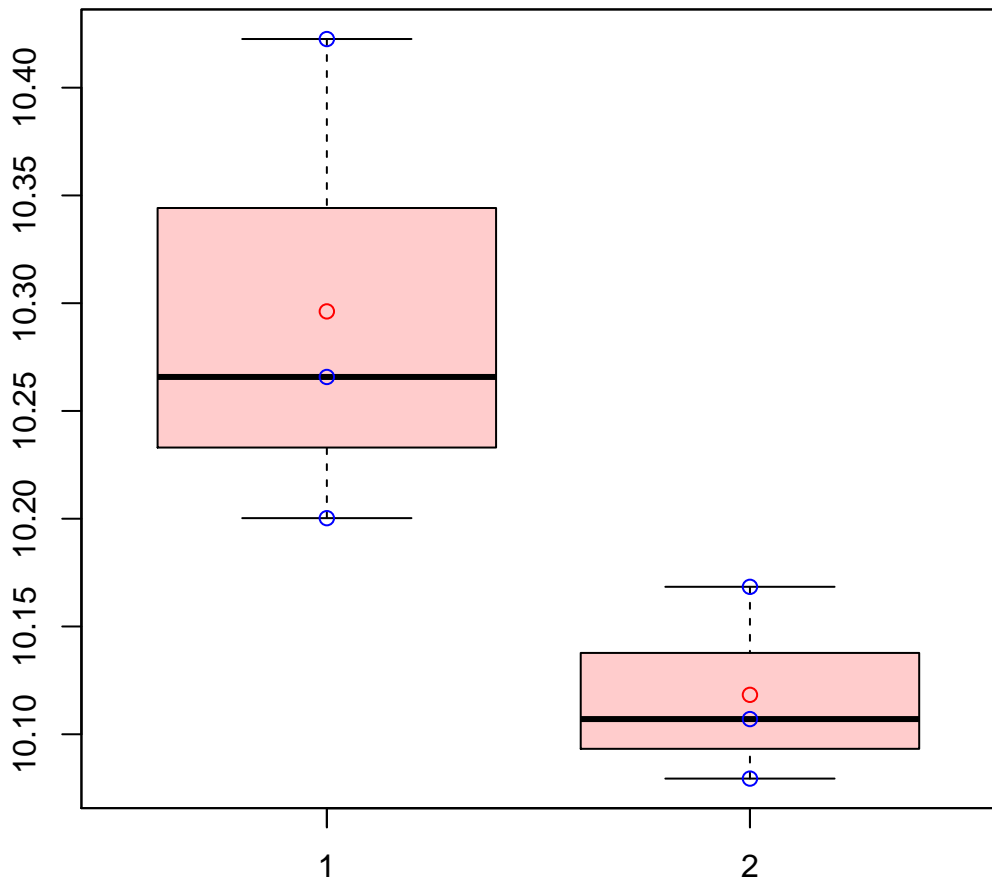

t-Test: p-value = 0.1

# M0XTM4|M0XTM4\_HORVD

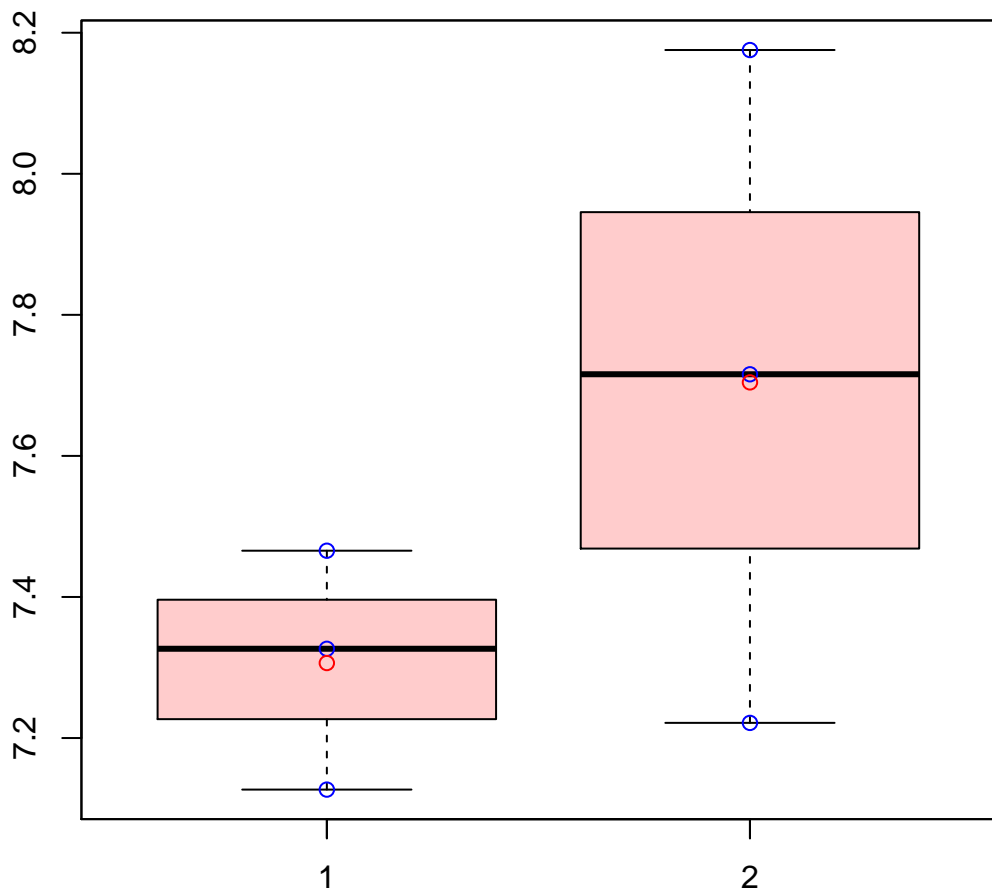

t-Test: p-value = 0.28



# M0XVB1|M0XVB1\_HORVD

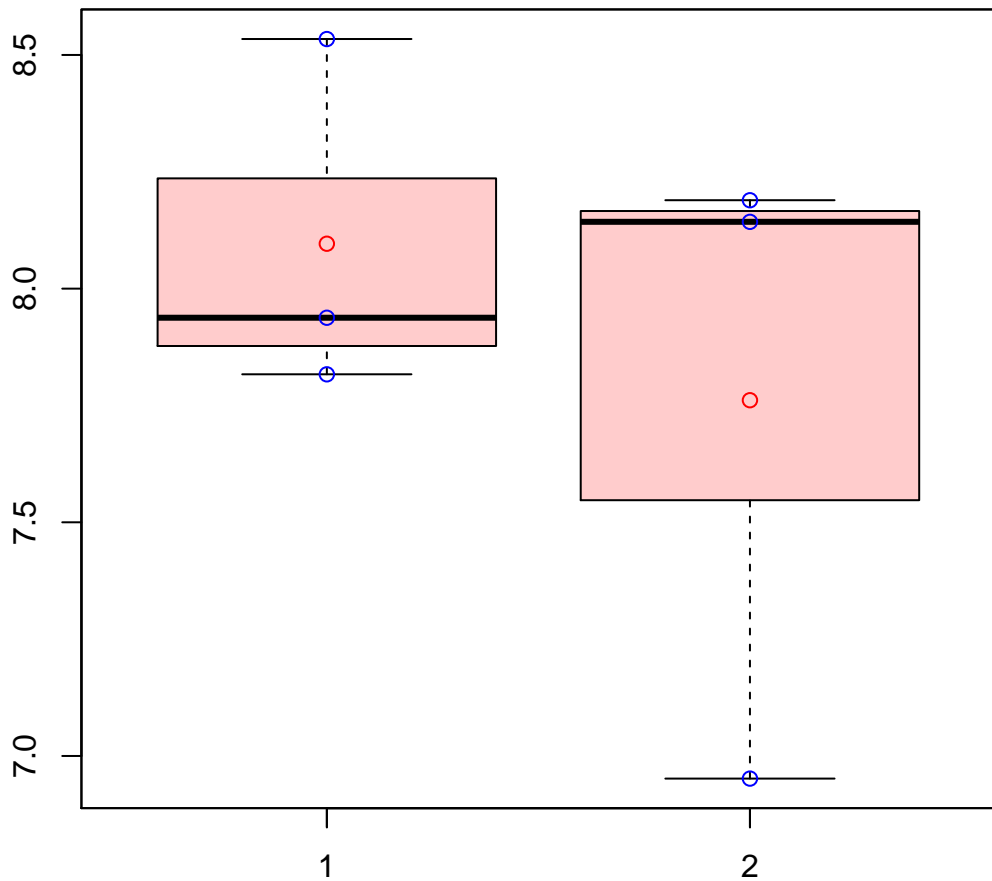

t-Test: p-value = 0.52

# M0XW11|M0XW11\_HORVD

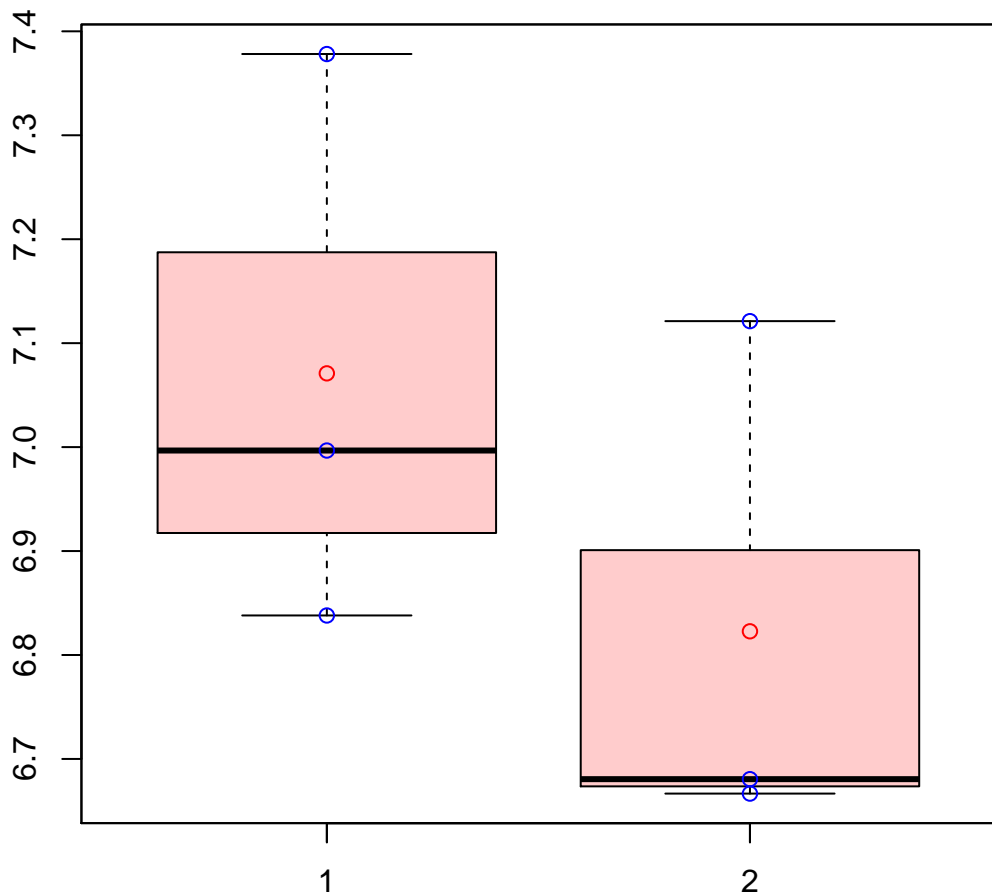

t-Test: p-value = 0.32

# M0XZY7|M0XZY7\_HORVD

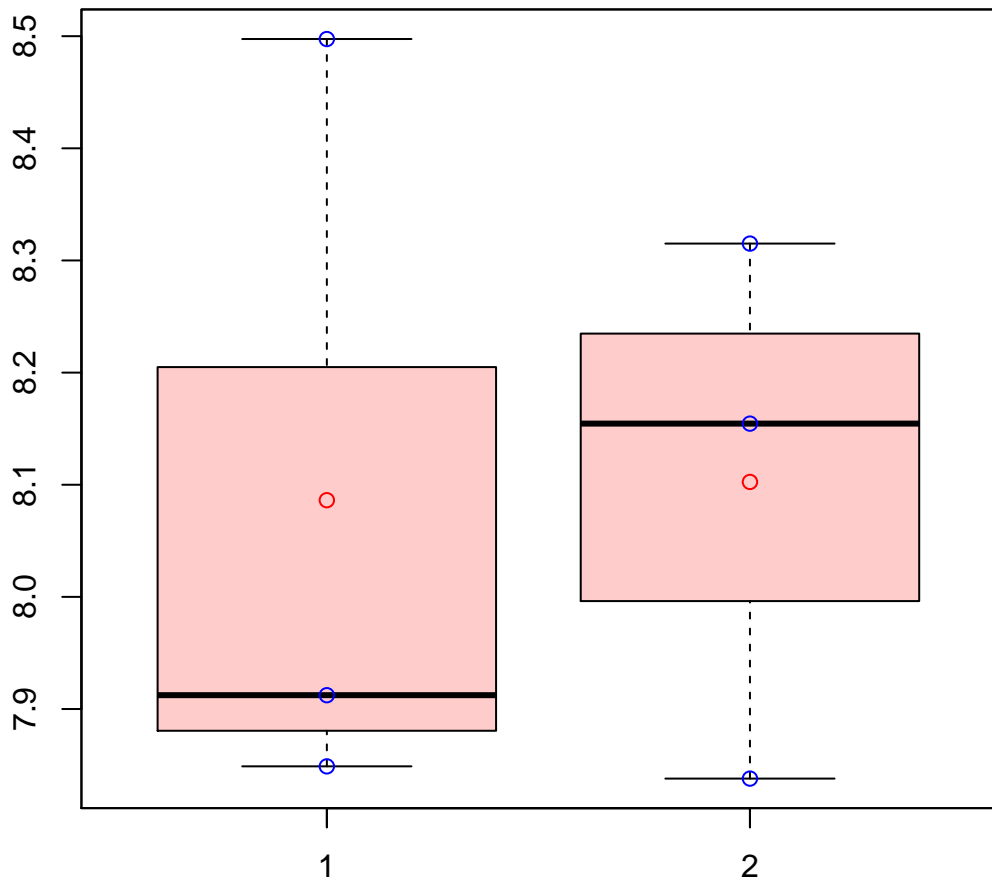

t-Test: p-value = 0.95

# M0Y1F6|M0Y1F6\_HORVD

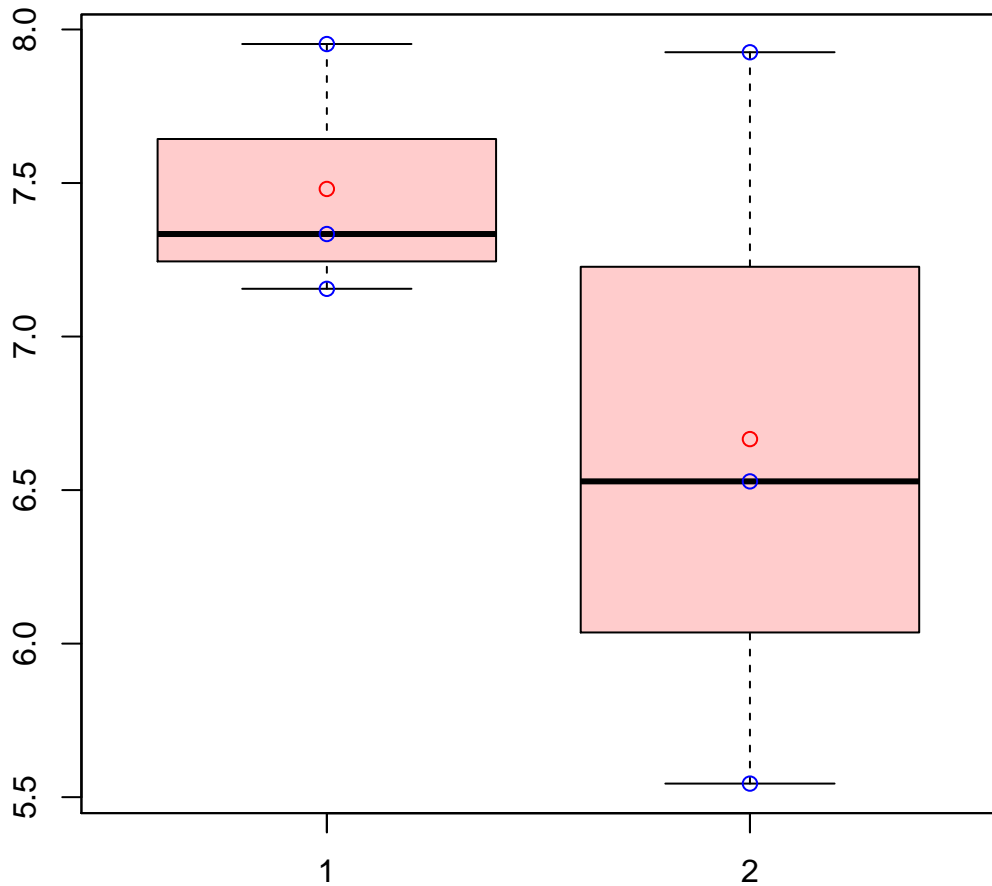

t-Test: p-value = 0.36

# M0Y1G8|M0Y1G8\_HORVD

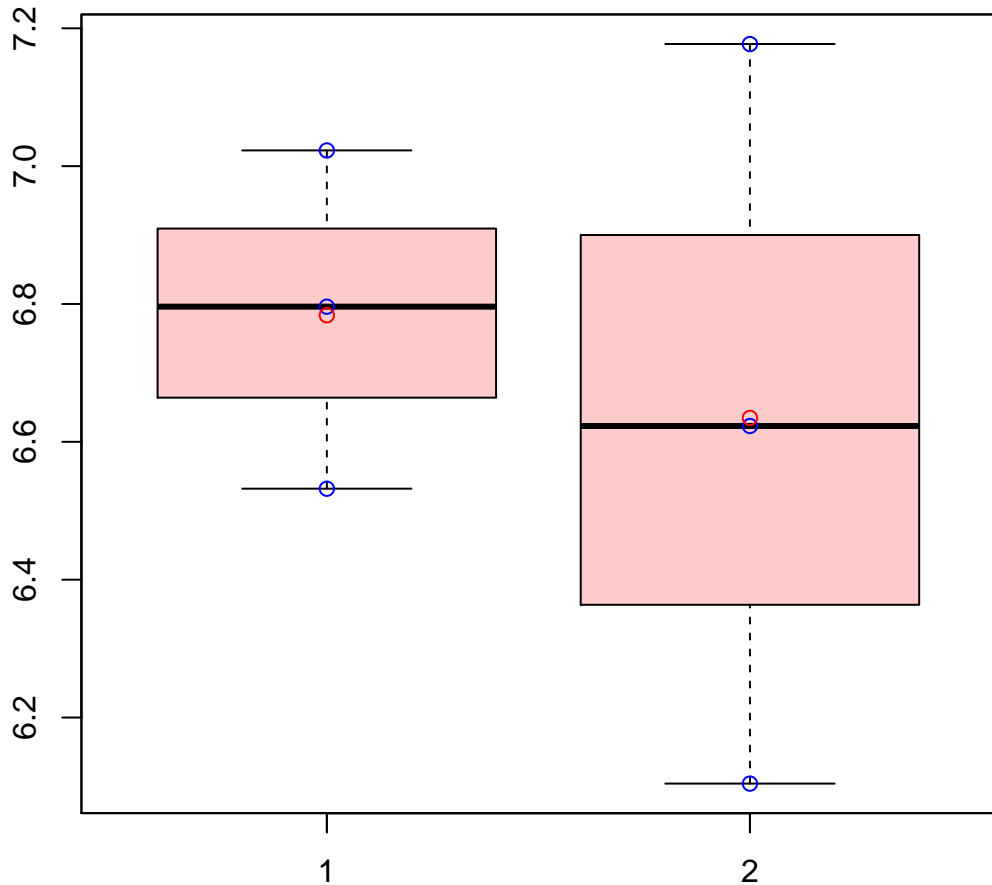

t-Test: p-value = 0.69

# M0Y4H1|M0Y4H1\_HORVD

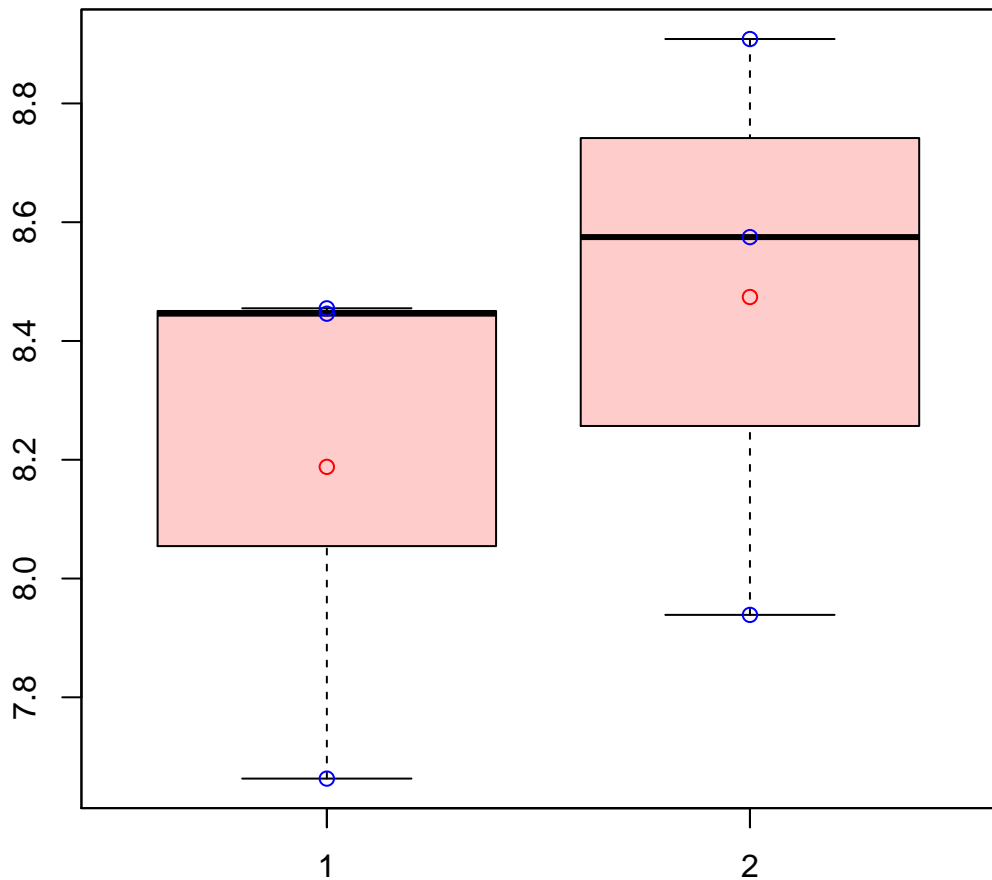

t-Test: p-value = 0.5

# M0Y5F6|M0Y5F6\_HORVD

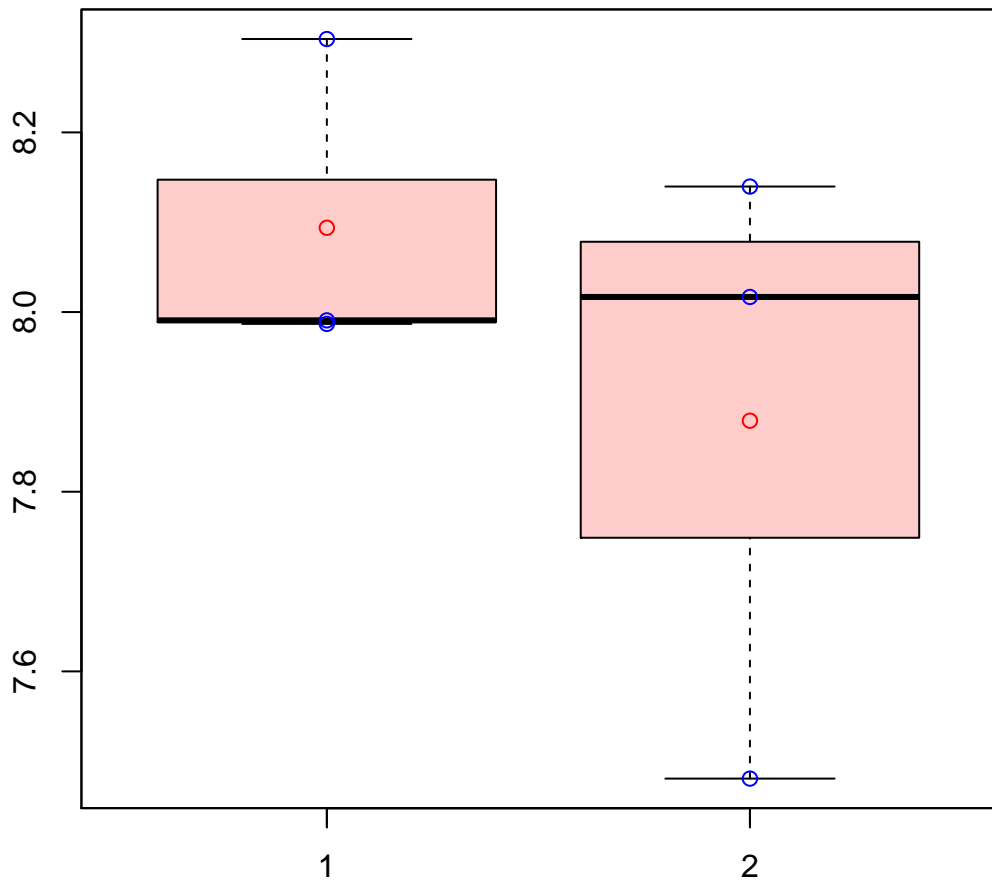

t-Test: p-value = 0.42

# M0Y5V0|M0Y5V0\_HORVD

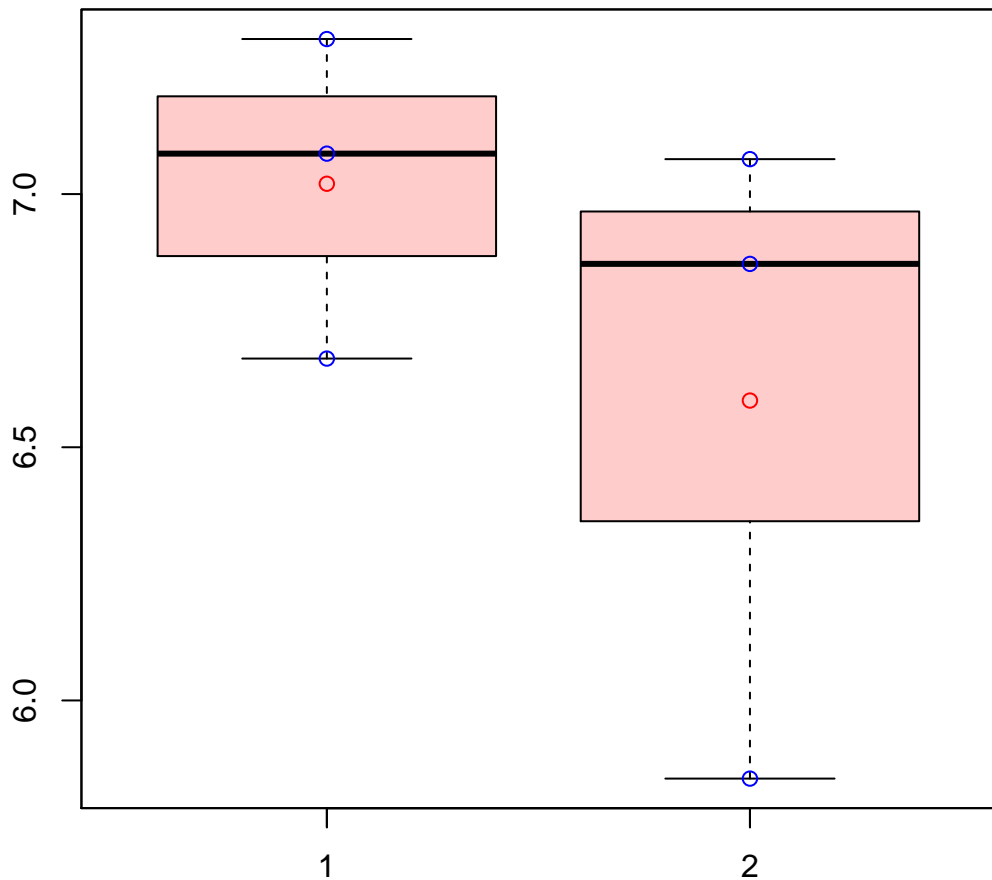

t-Test: p-value = 0.39



# M0Y614|M0Y614\_HORVD

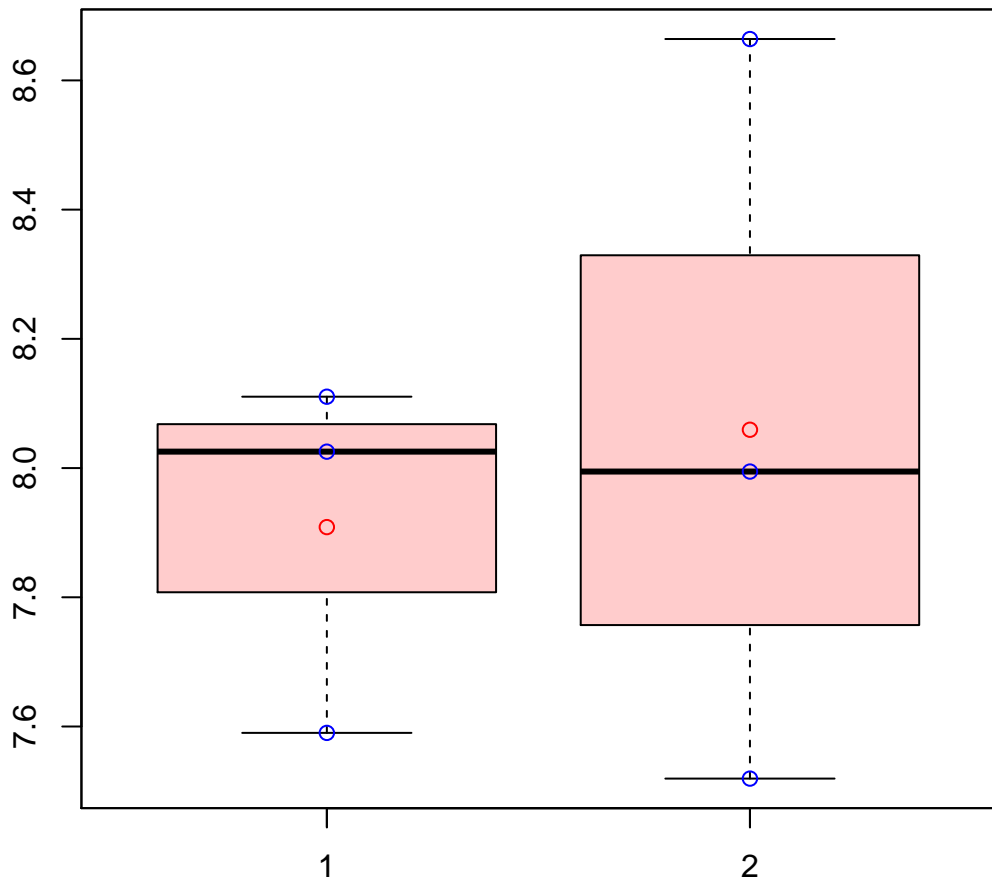

t-Test: p-value = 0.71

# M0Y631|M0Y631\_HORVD

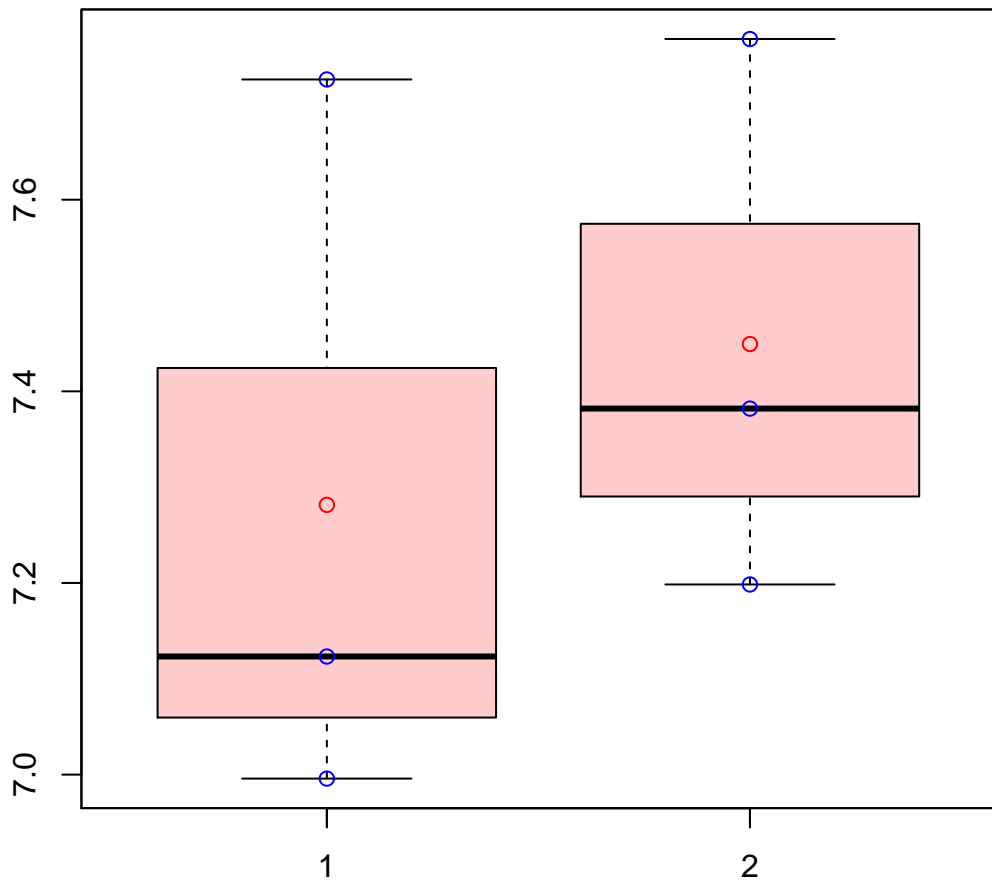

t-Test: p-value = 0.58

# M0Y6L7|M0Y6L7\_HORVD

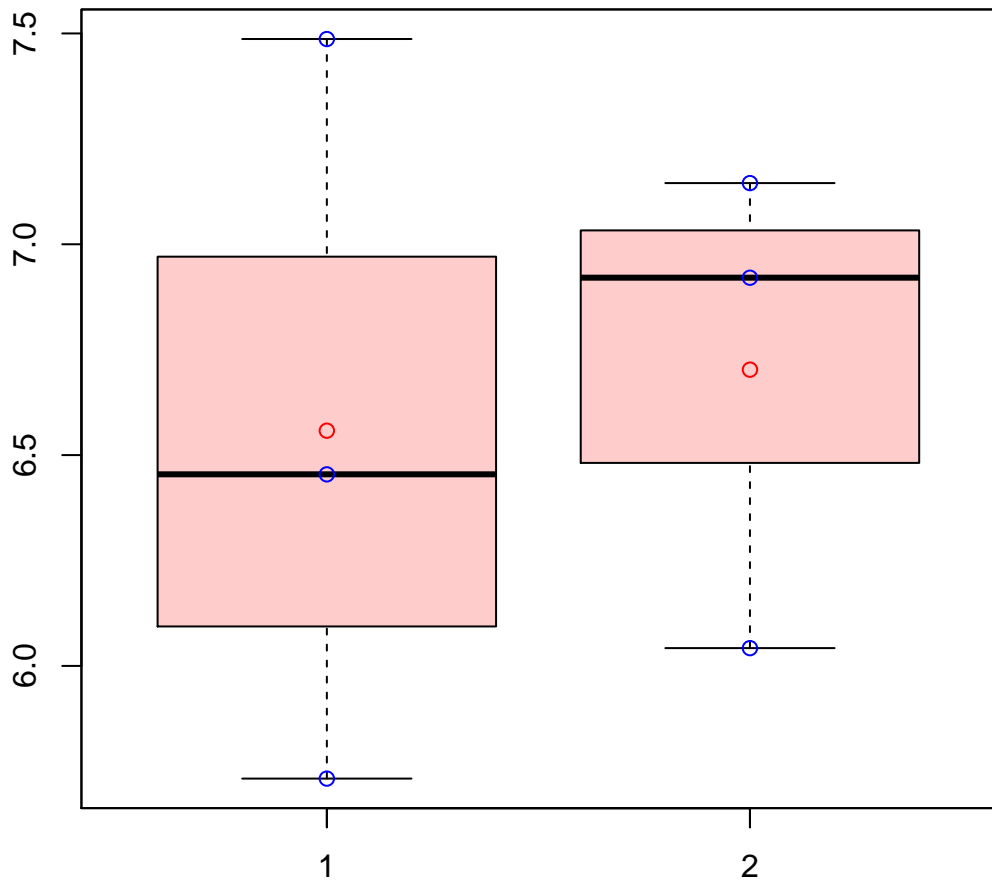

t-Test: p-value = 0.83

# M0Y8I0|M0Y8I0\_HORVD

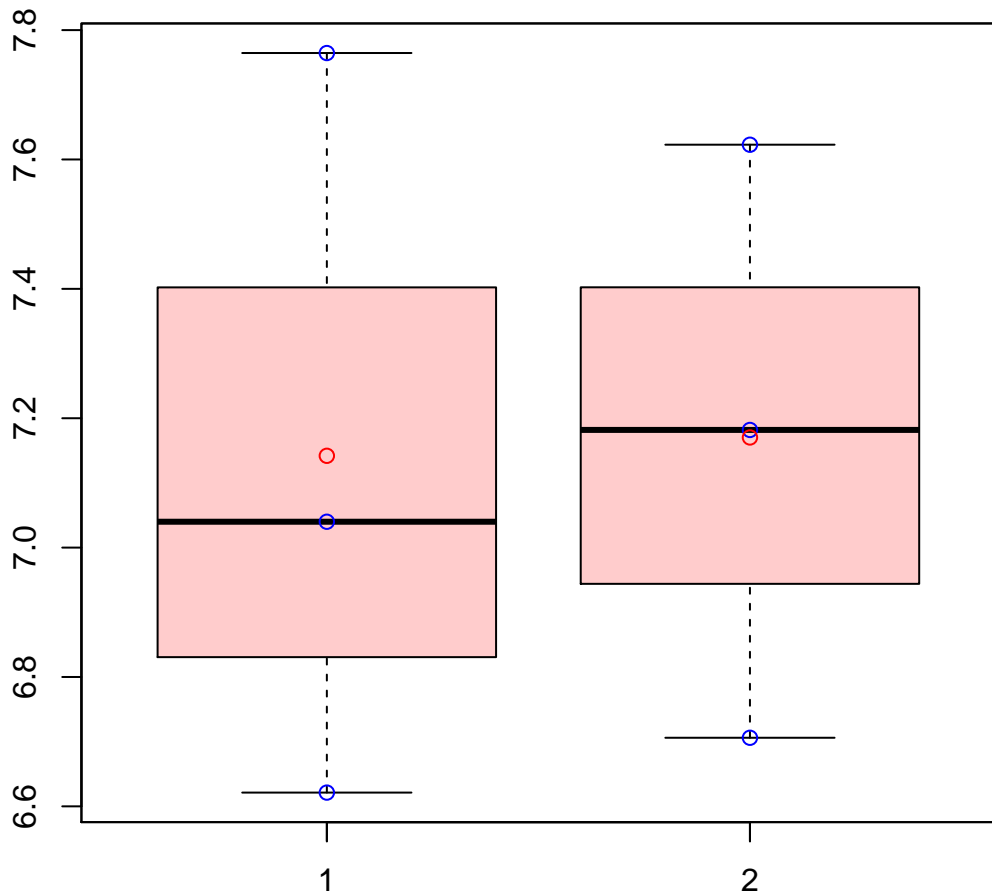

t-Test: p-value = 0.95

# M0Y9H9|M0Y9H9\_HORVD

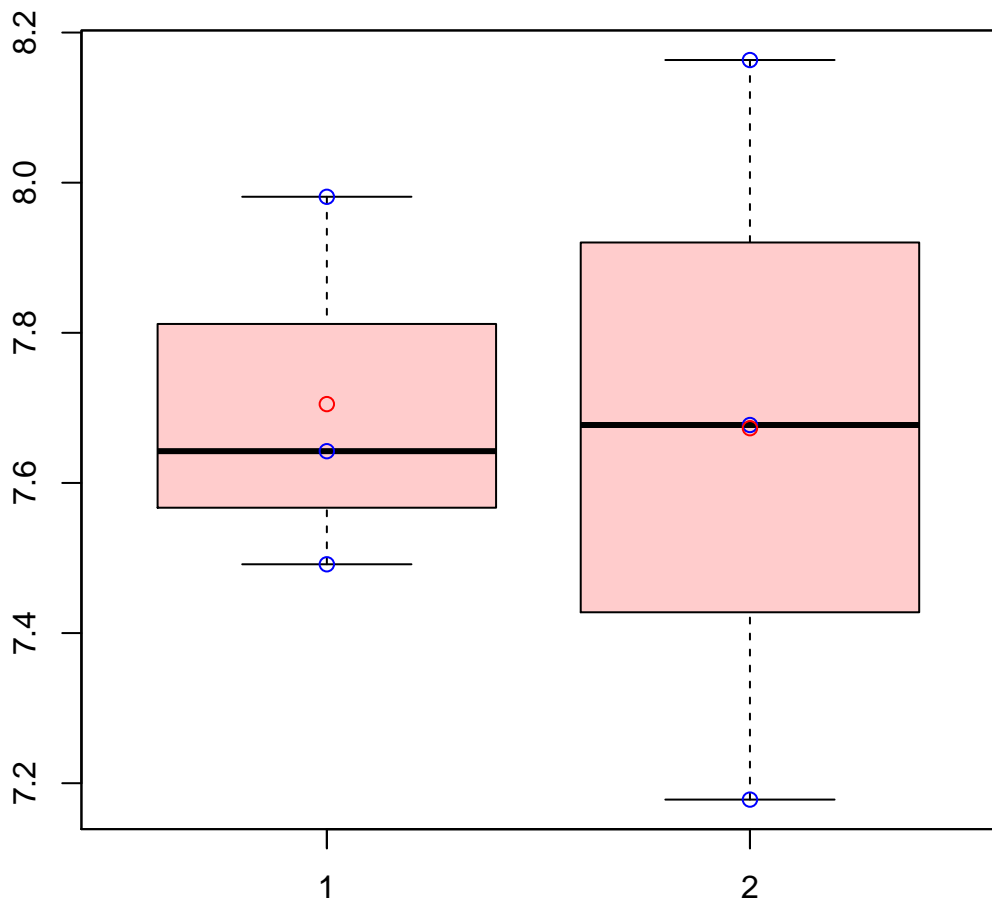

t-Test: p-value = 0.93

# M0YA42|M0YA42\_HORVD

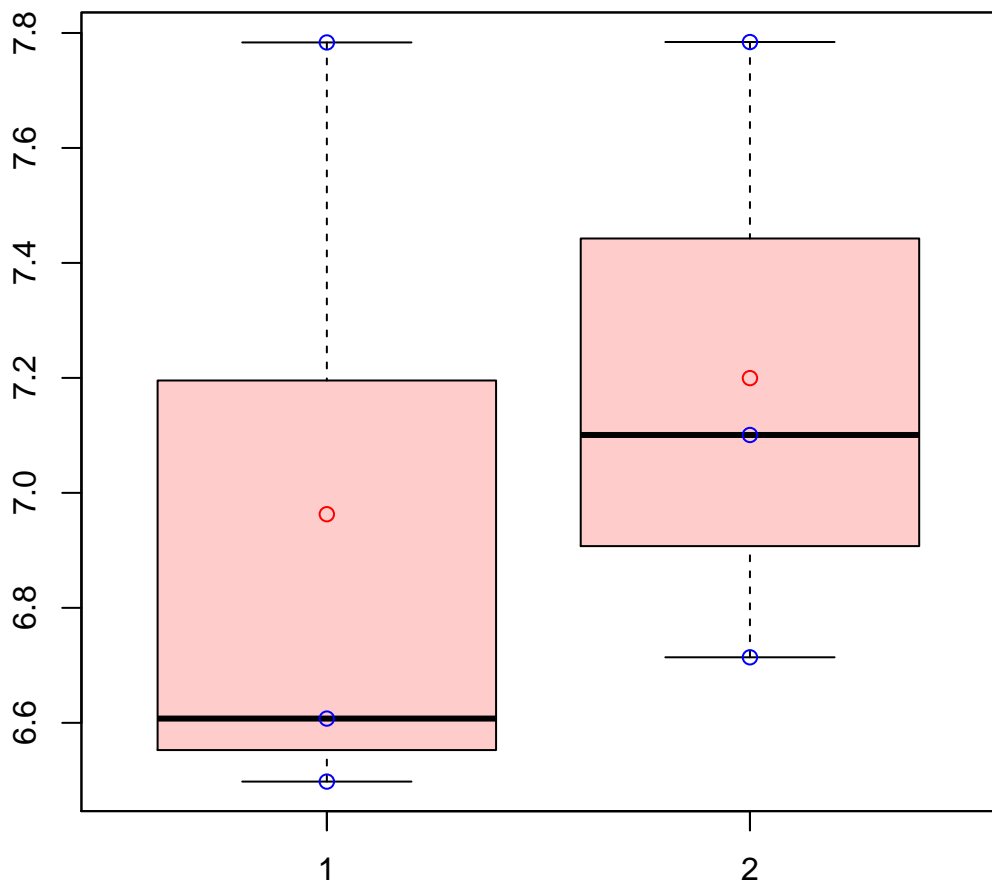

t-Test: p-value = 0.67

# M0YAF5|M0YAF5\_HORVD

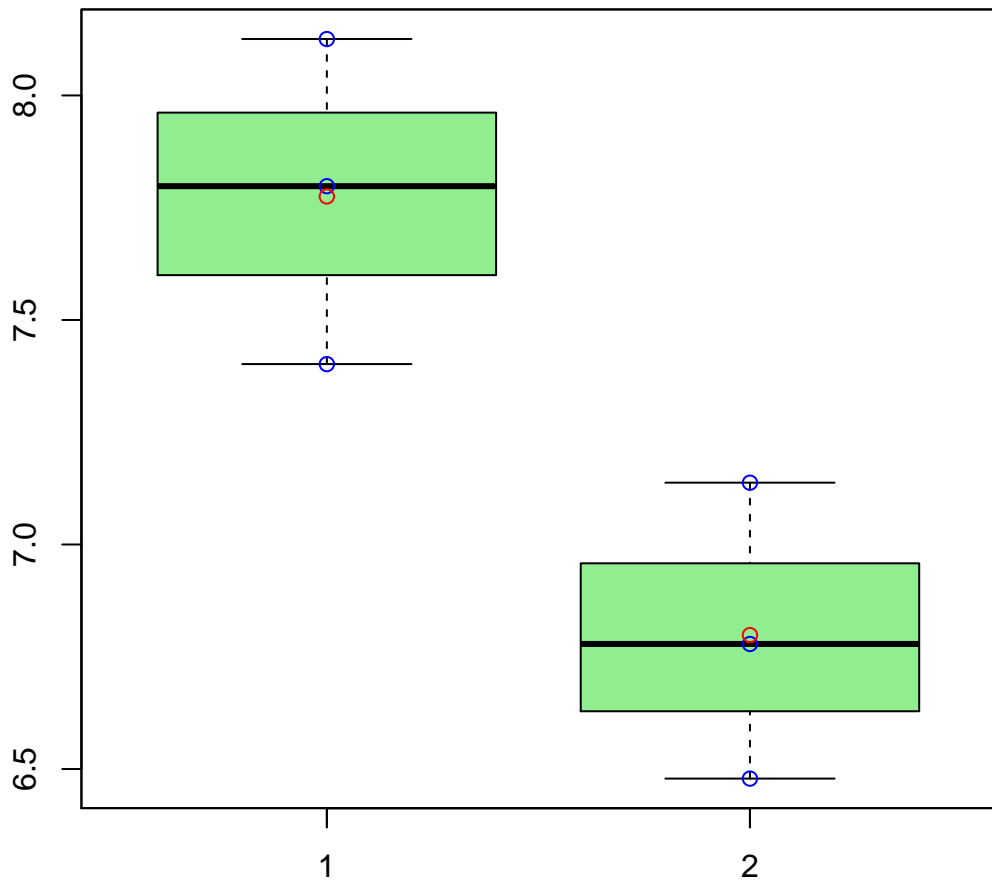

t-Test: p-value = 0.03

# M0YC69|M0YC69\_HORVD

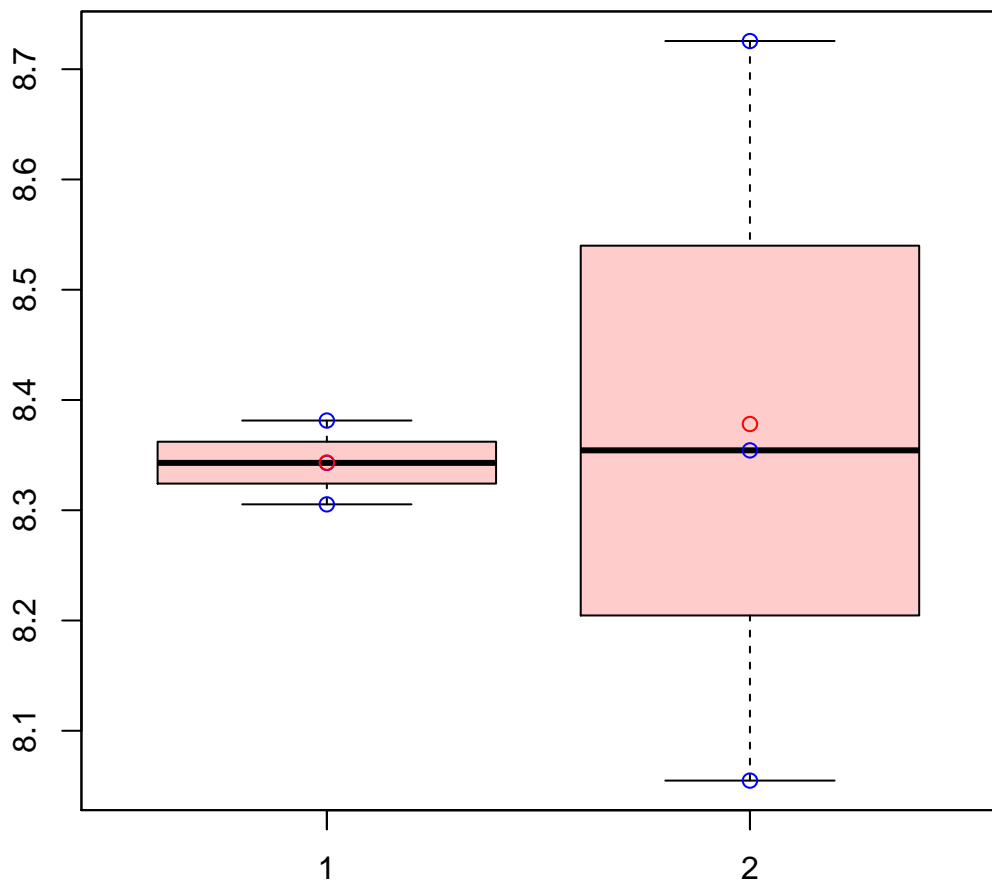

t-Test: p-value = 0.87



# M0YDA0|M0YDA0\_HORVD

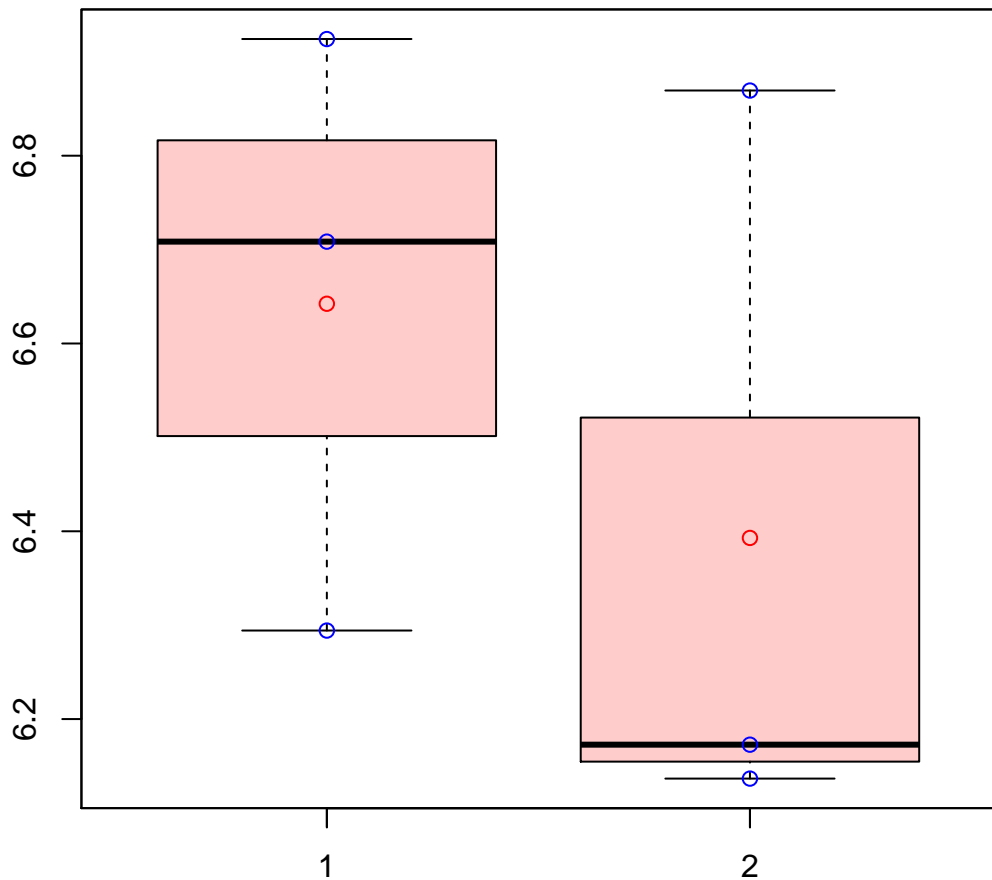

t-Test: p-value = 0.46

# M0YEW4|M0YEW4\_HORVD

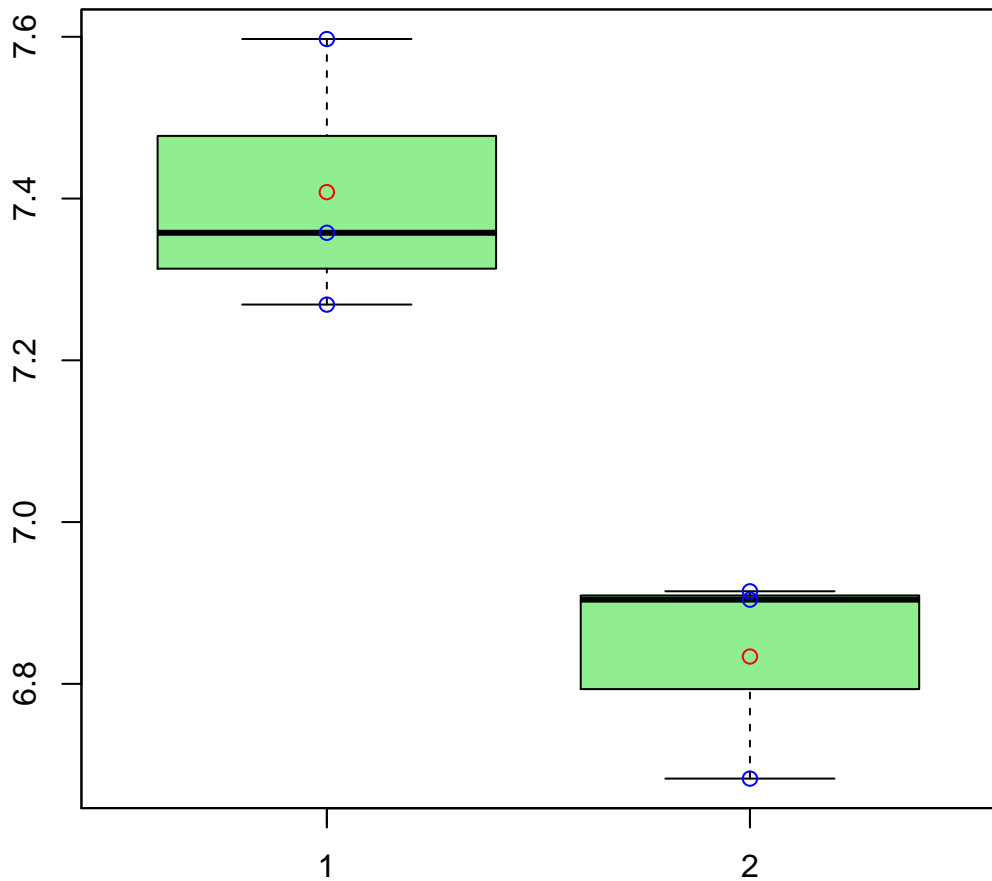

t-Test: p-value = 0.01

# M0YFR8|M0YFR8\_HORVD

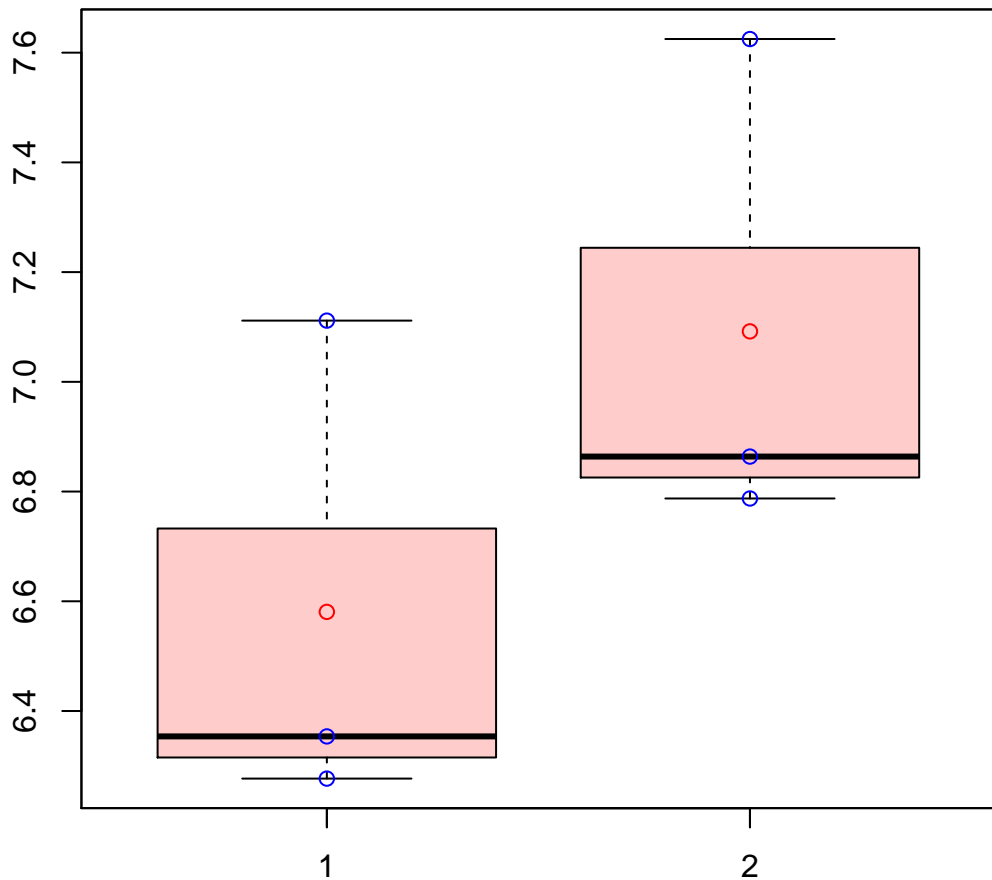

t-Test: p-value = 0.25

# M0YH60|M0YH60\_HORVD

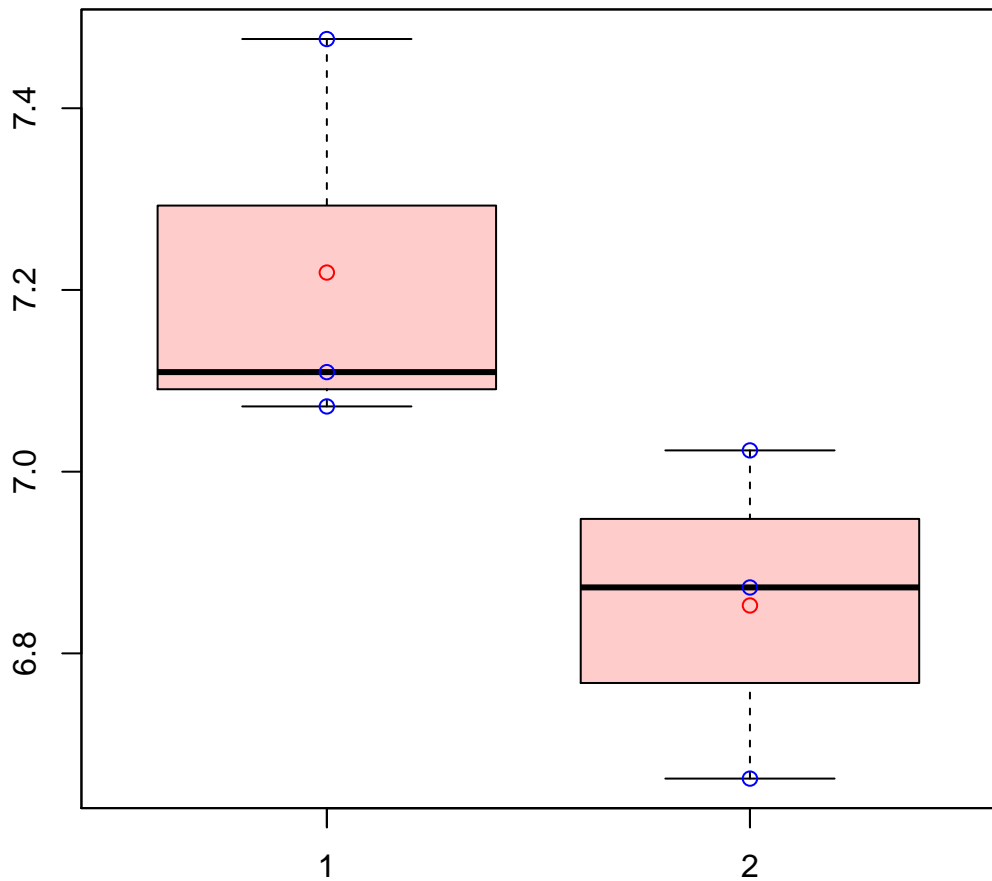

t-Test: p-value = 0.09

# M0YJF4|M0YJF4\_HORVD

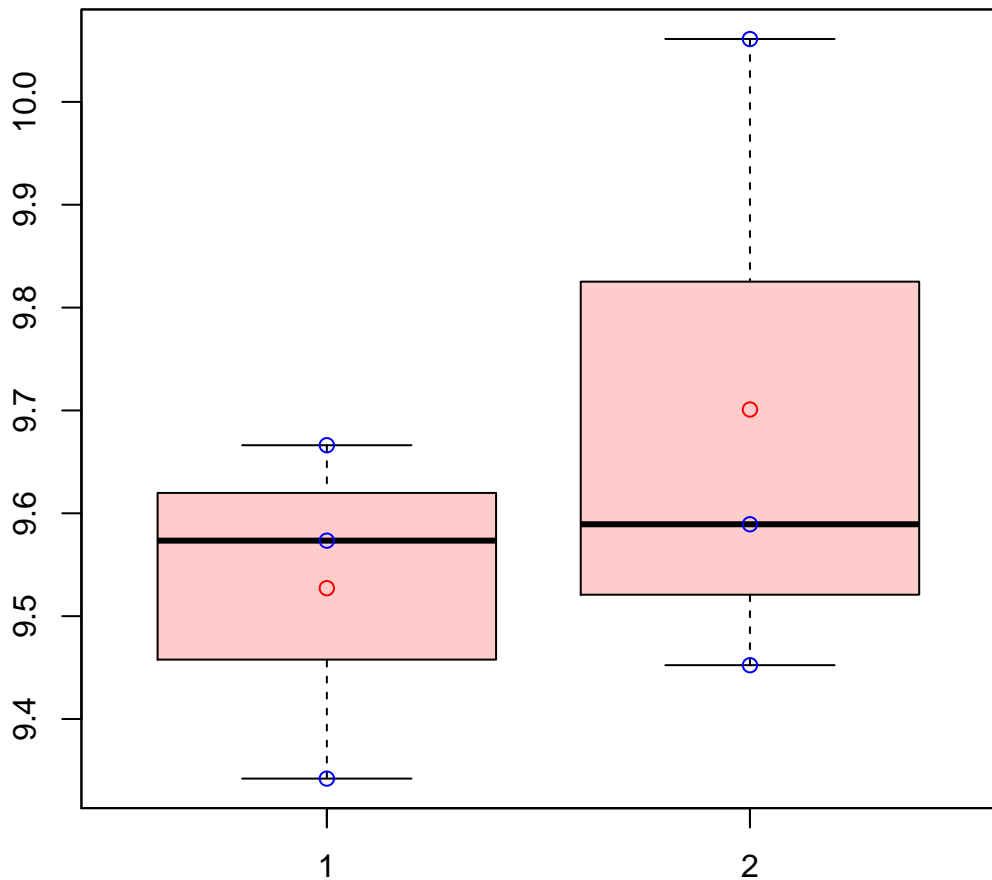

t-Test: p-value = 0.46

# M0YM98|M0YM98\_HORVD

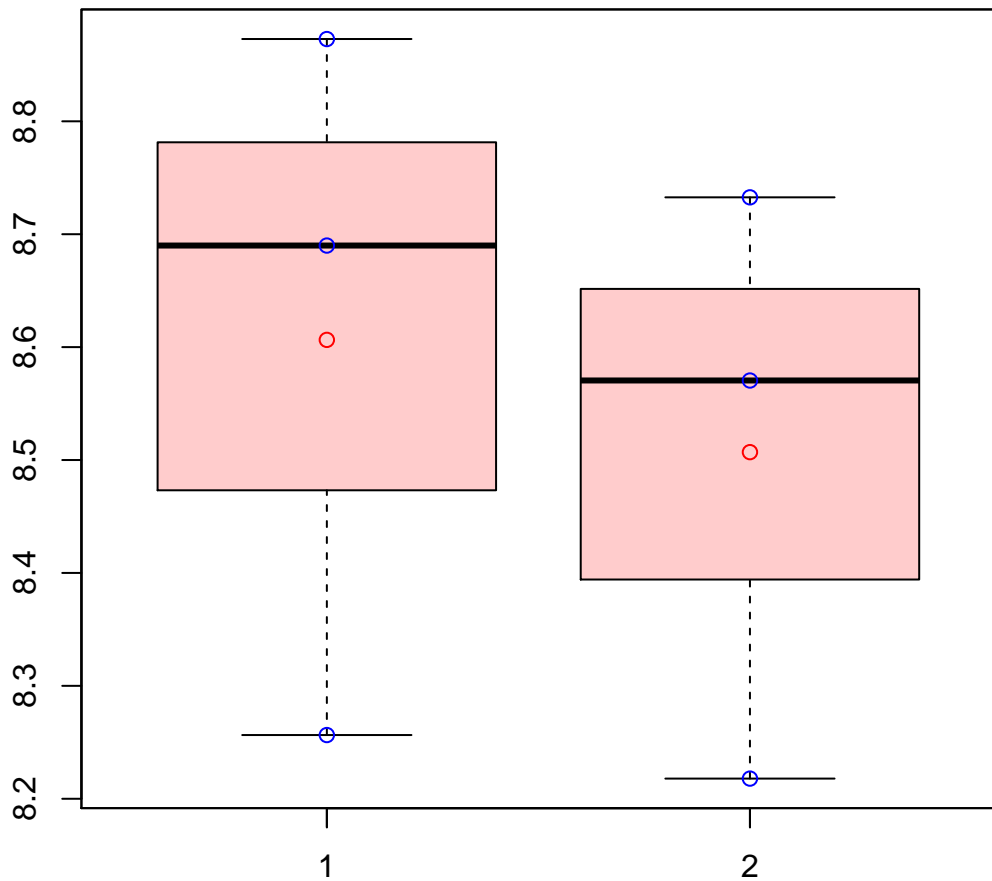

t-Test: p-value = 0.7

# M0YMM0|M0YMM0\_HORVD

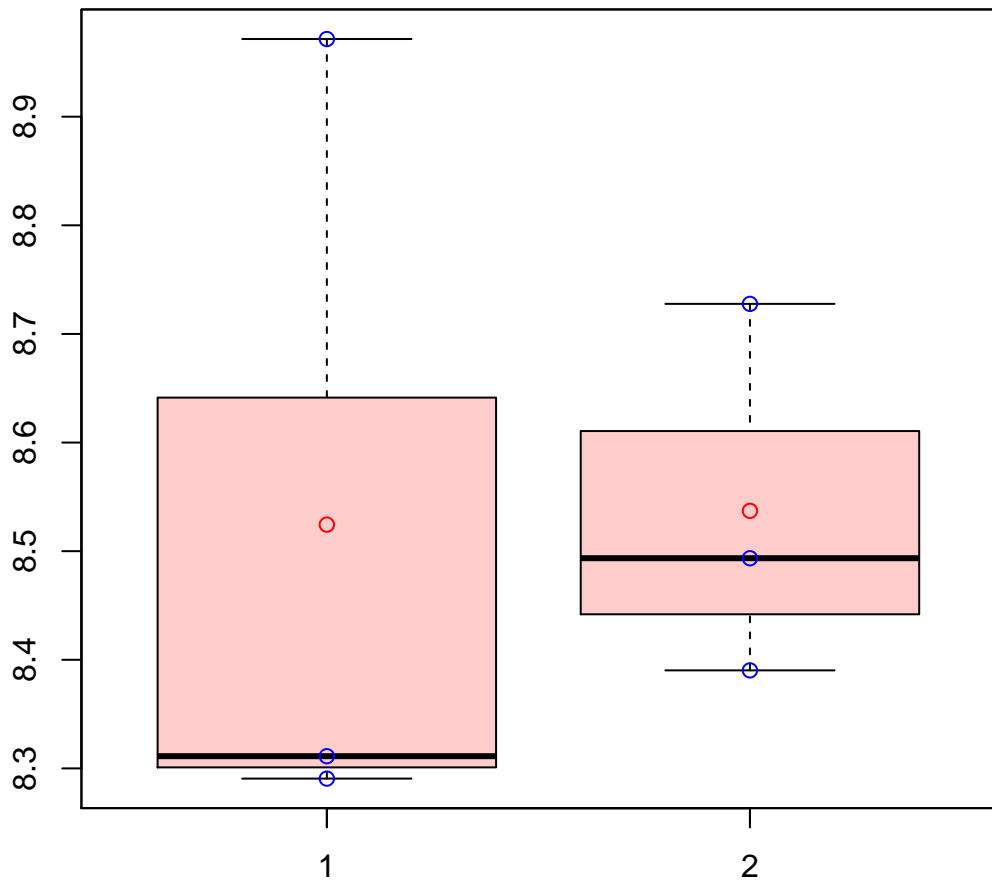

t-Test: p-value = 0.96

# M0YMZ1|M0YMZ1\_HORVD

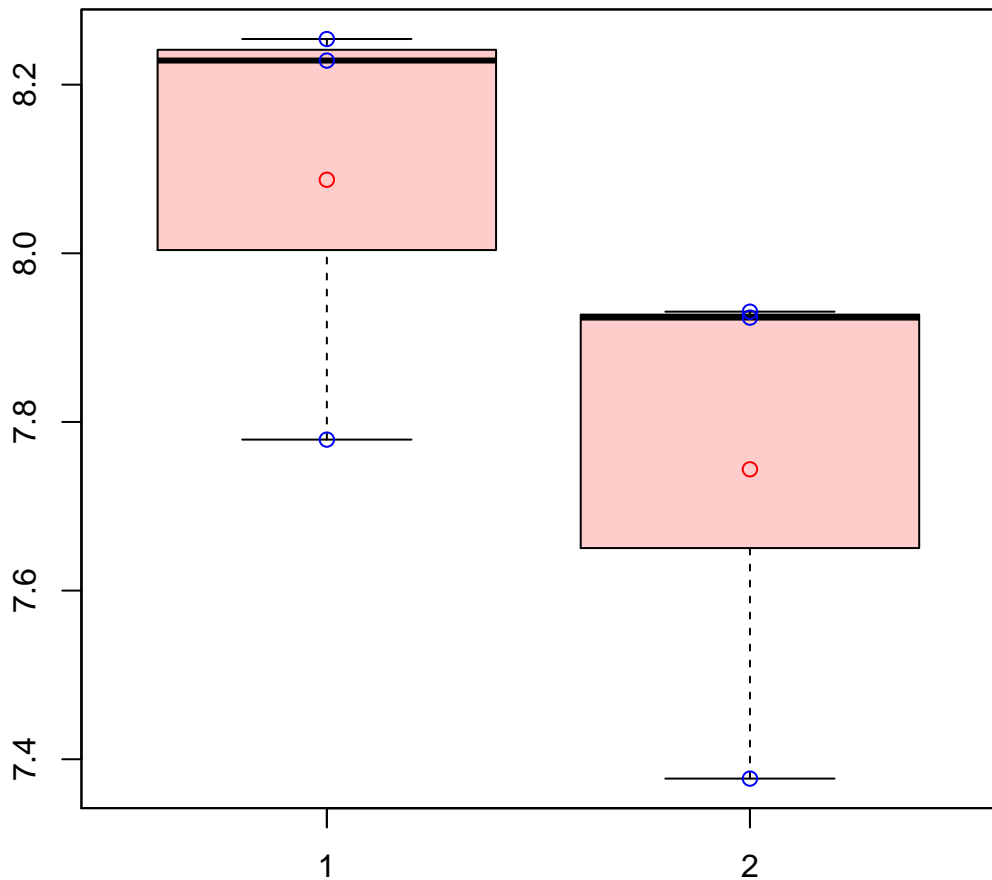

t-Test: p-value = 0.23



# M0YPG1|M0YPG1\_HORVD

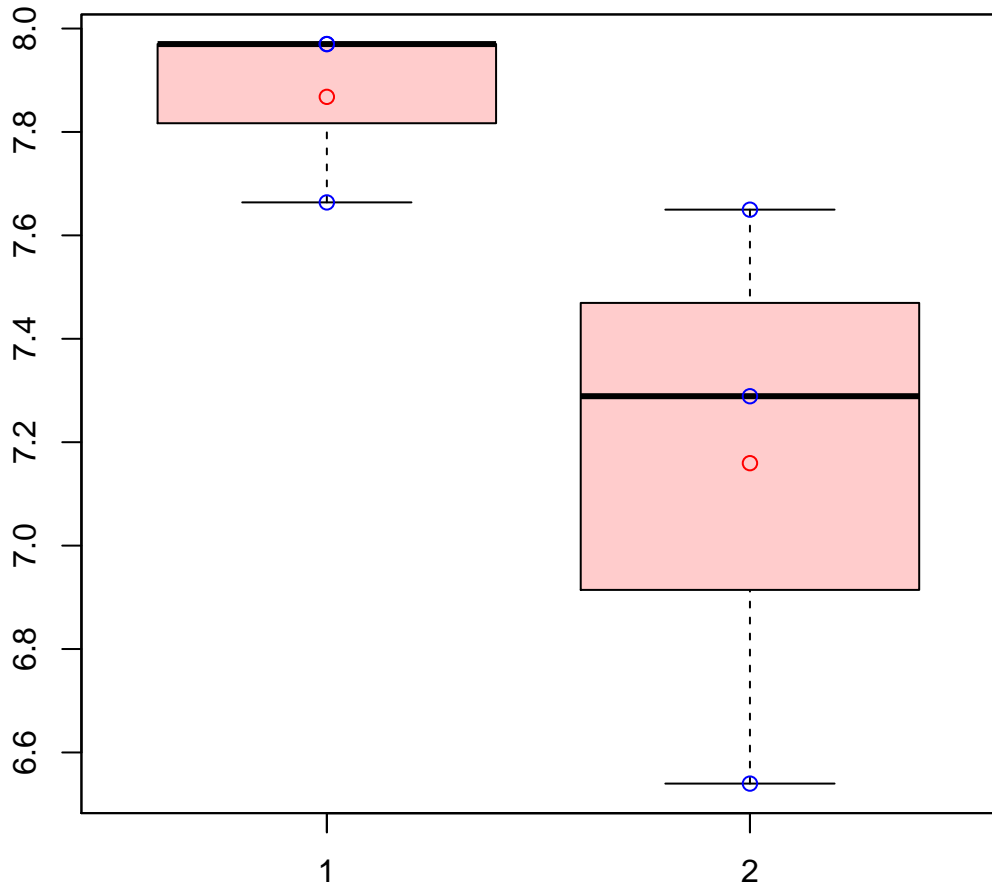

t-Test: p-value = 0.15

# M0YPY6|M0YPY6\_HORVD

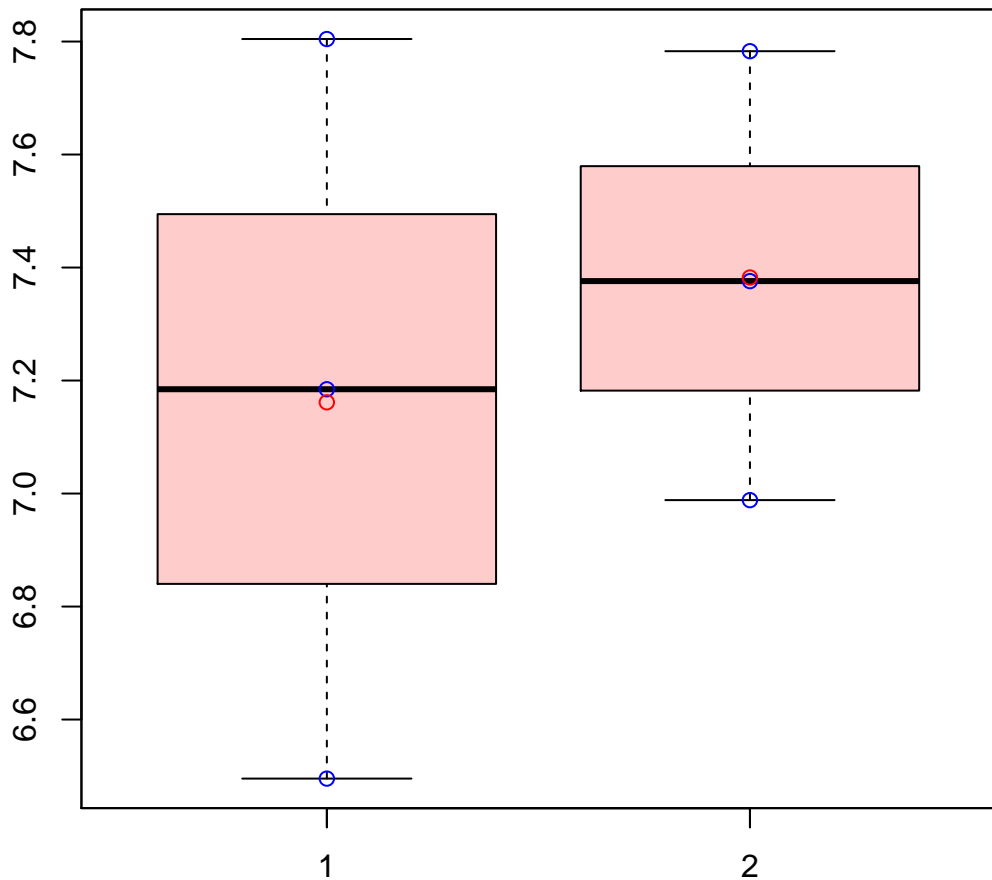

t-Test: p-value = 0.65

# M0YQ39|M0YQ39\_HORVD

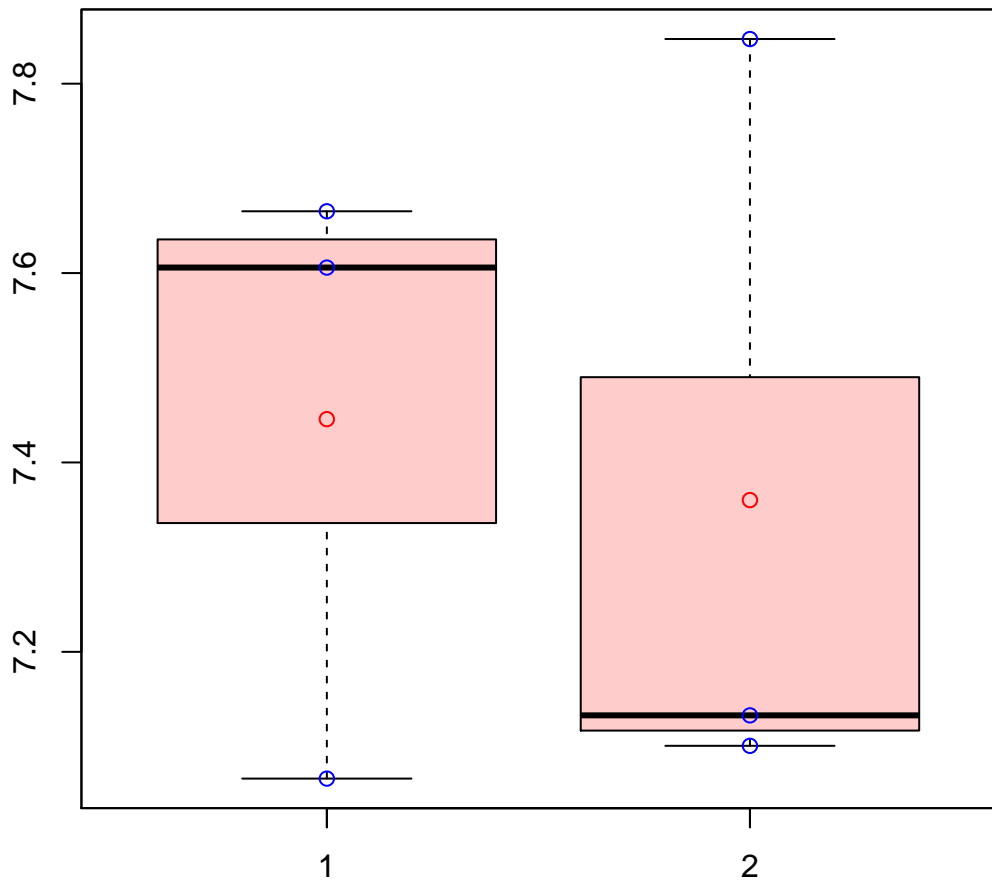

t-Test: p-value = 0.8

# M0YQL4|M0YQL4\_HORVD

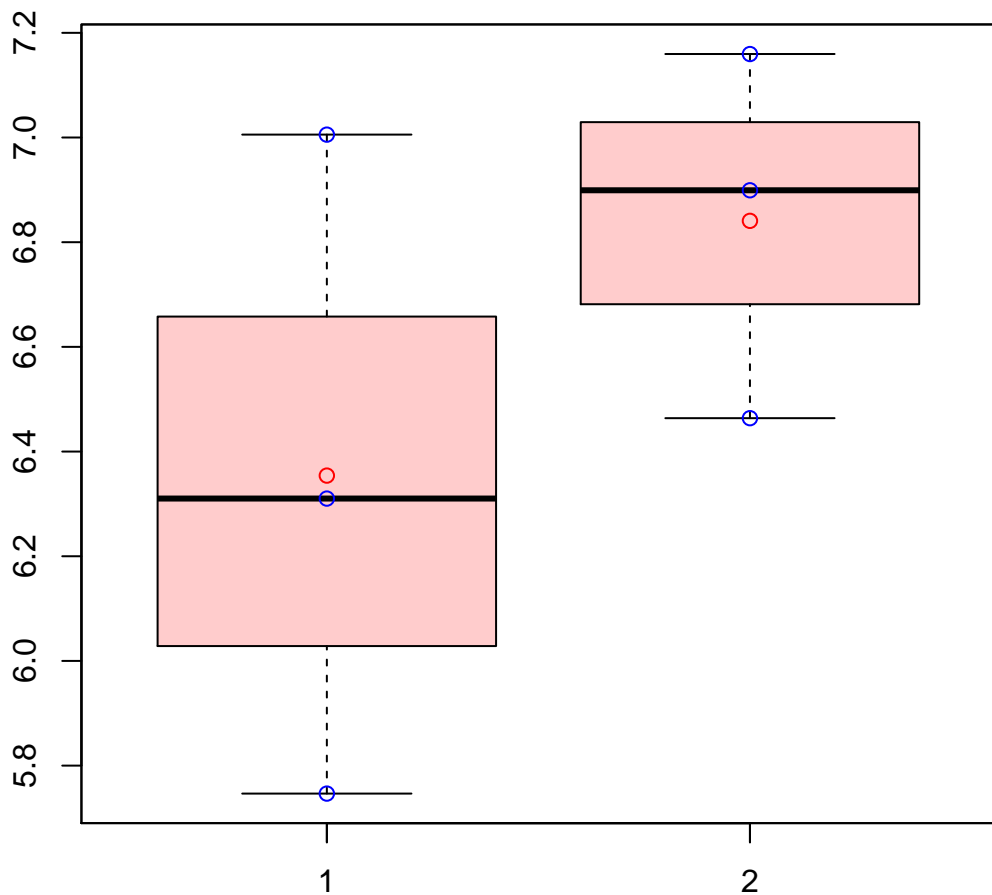

t-Test: p-value = 0.32

# M0YSF8|M0YSF8\_HORVD

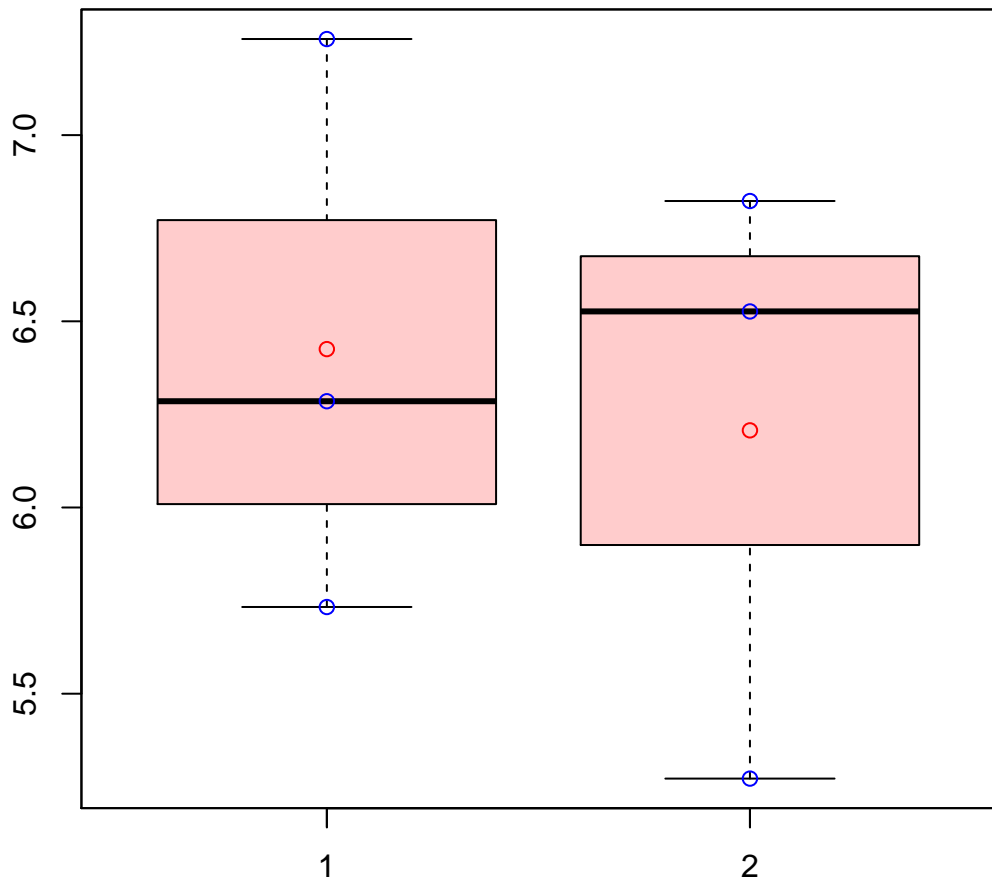

t-Test: p-value = 0.75

# M0YTX5|M0YTX5\_HORVD

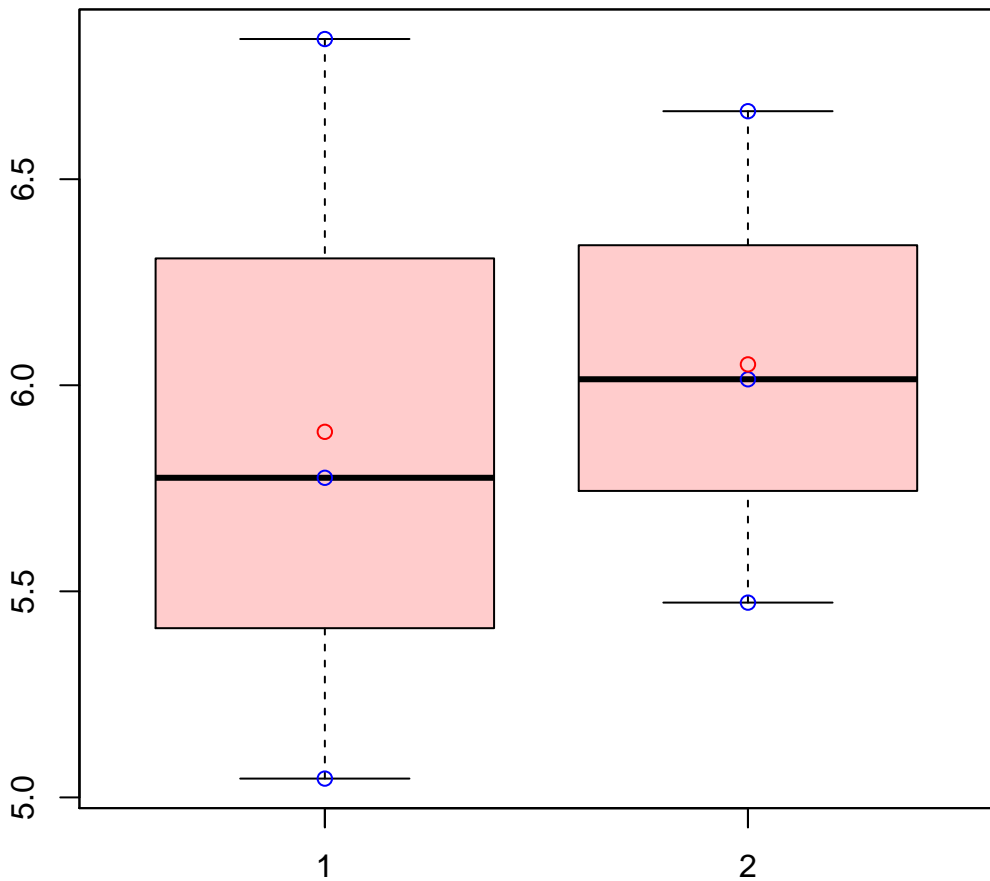

t-Test: p-value = 0.81

# M0YU19|M0YU19\_HORVD

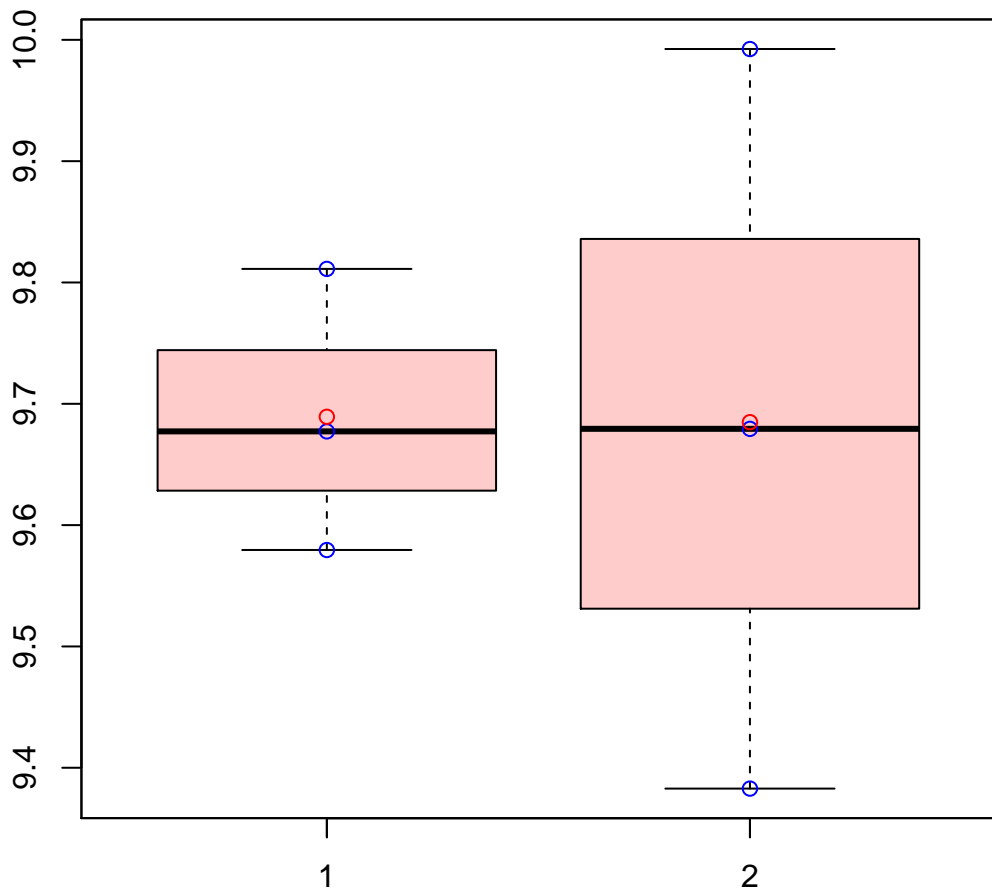

t-Test: p-value = 0.98

# M0YWV5|M0YWV5\_HORVD

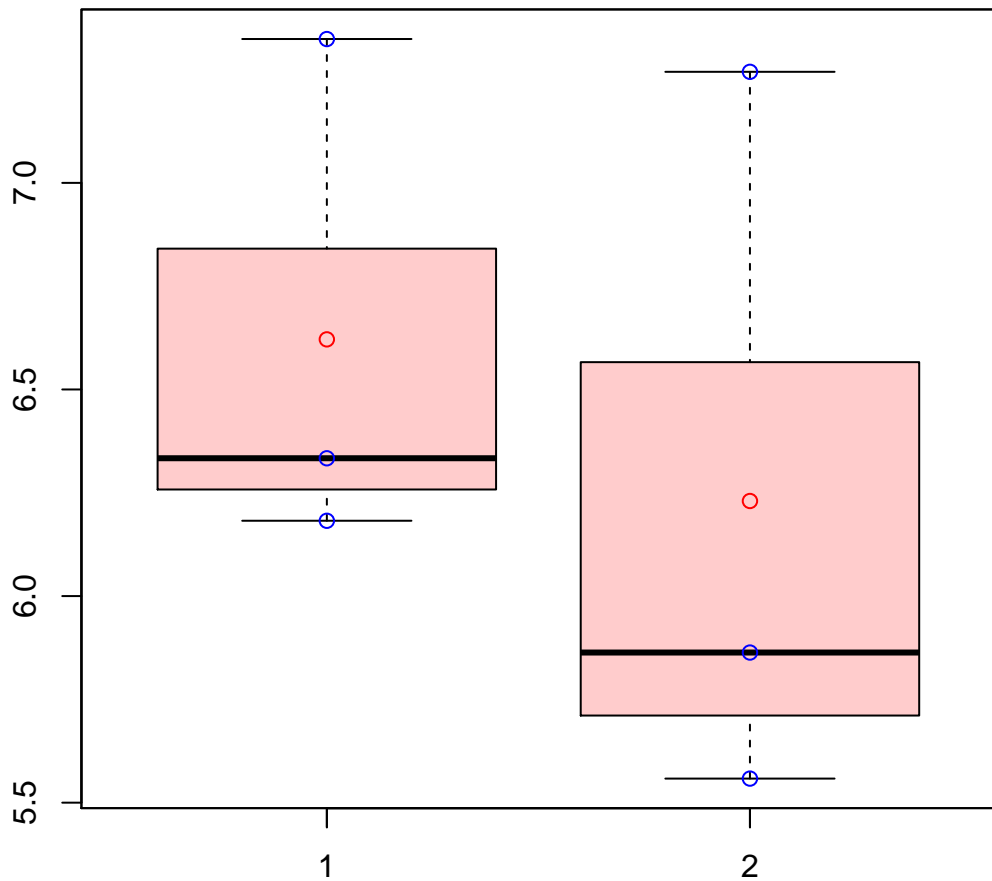

t-Test: p-value = 0.58



# M0Z0U7|M0Z0U7\_HORVD

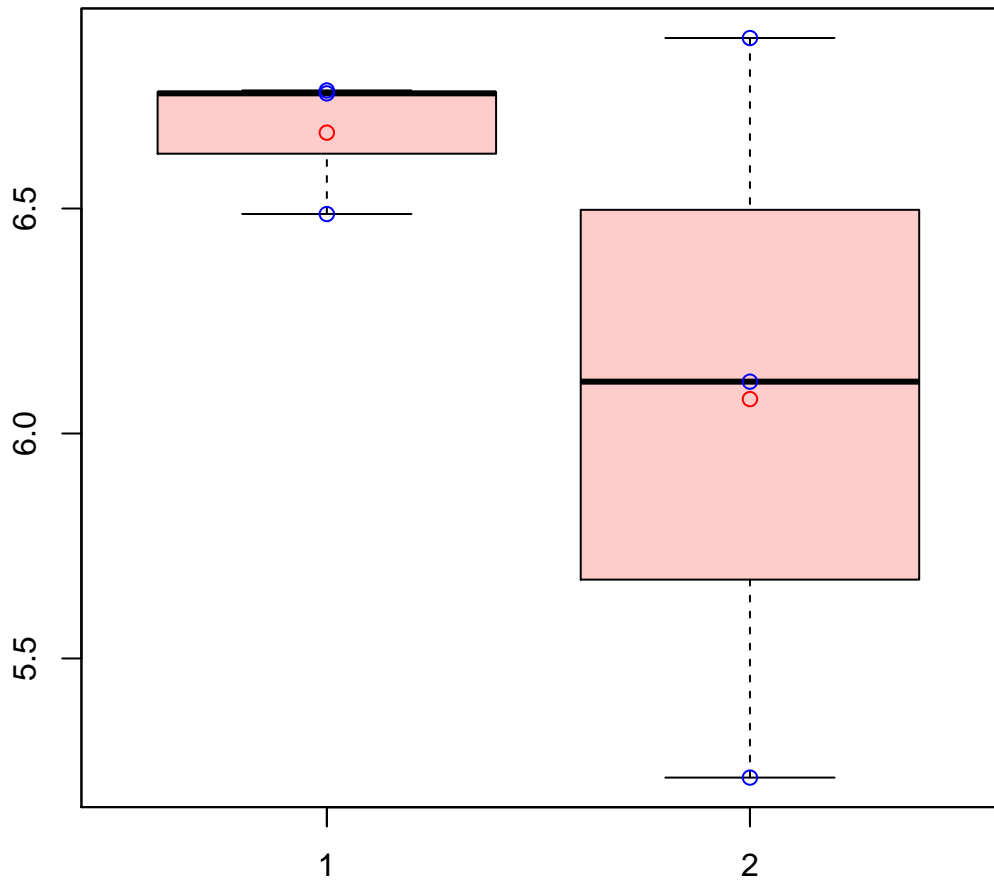

t-Test: p-value = 0.34

# M0Z1M7|M0Z1M7\_HORVD

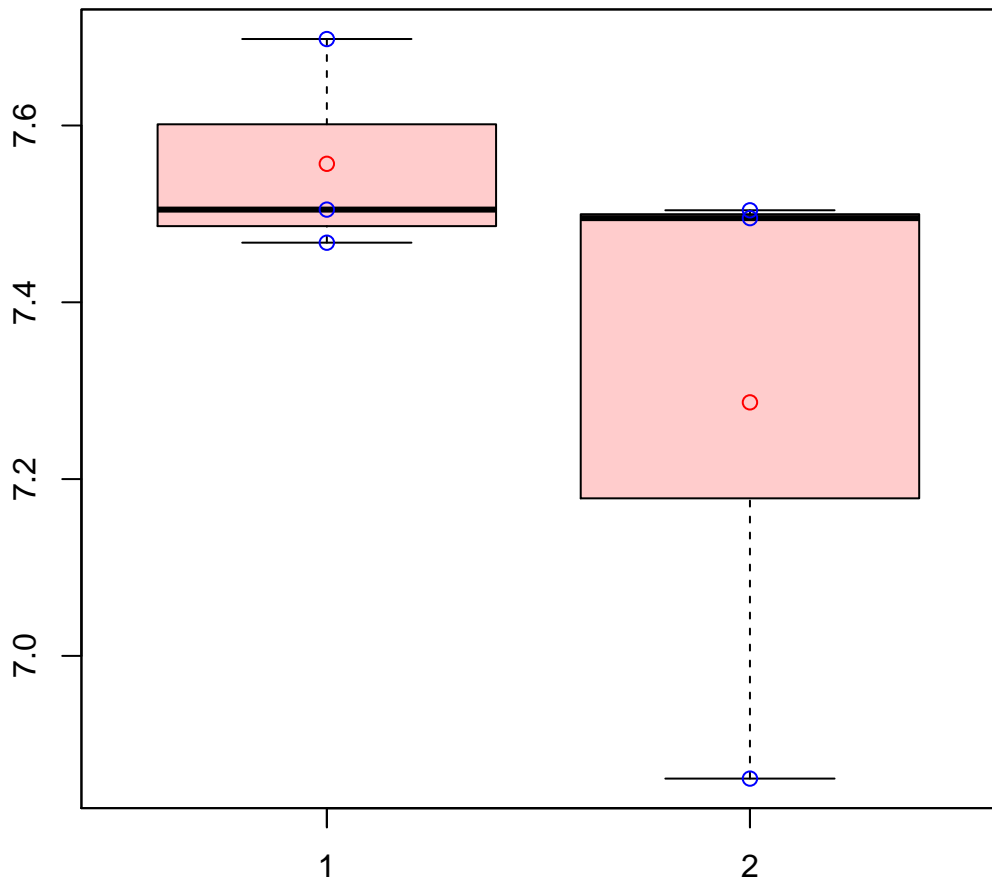

t-Test: p-value = 0.33

# M0Z1Q3|M0Z1Q3\_HORVD

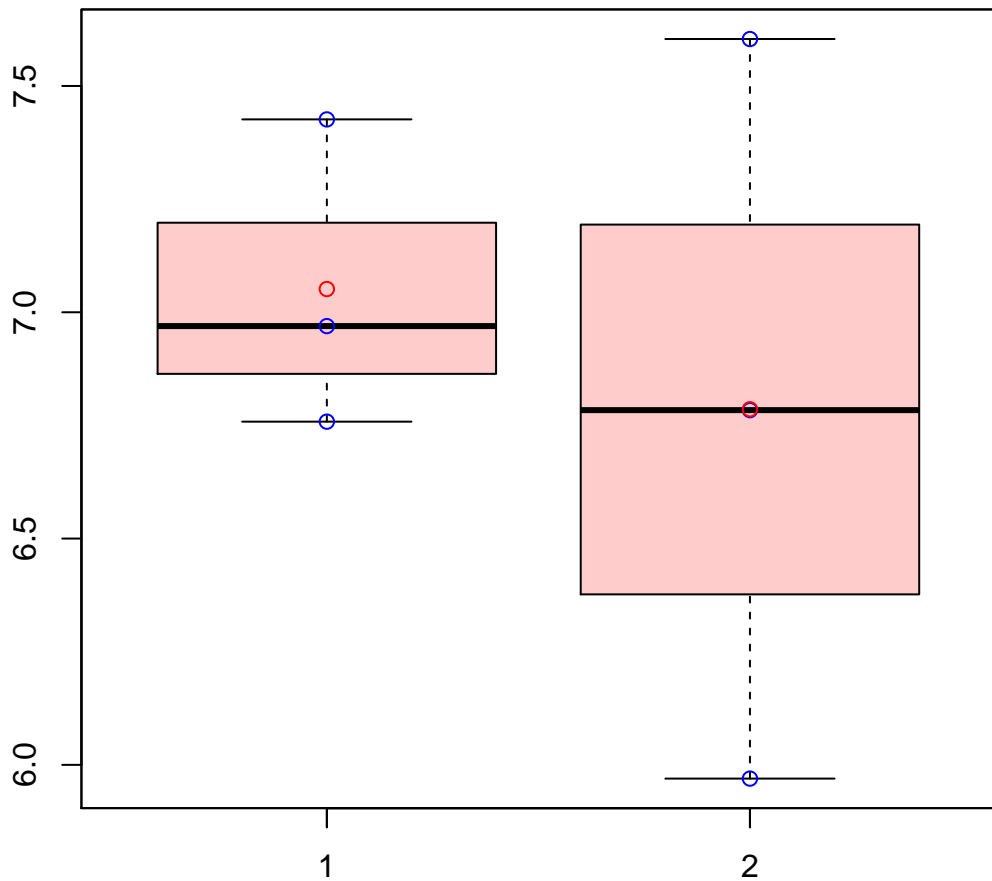

t-Test: p-value = 0.64

# M0Z7C6|M0Z7C6\_HORVD

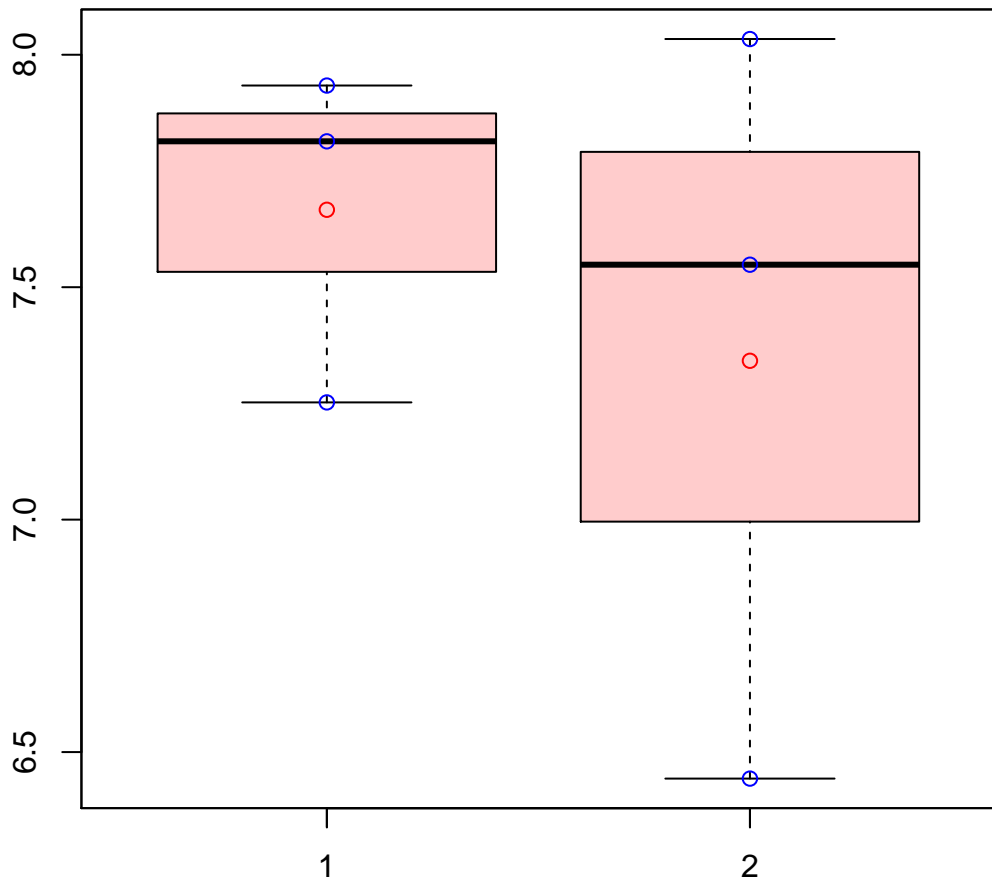

t-Test: p-value = 0.58

# M0Z7W1|M0Z7W1\_HORVD

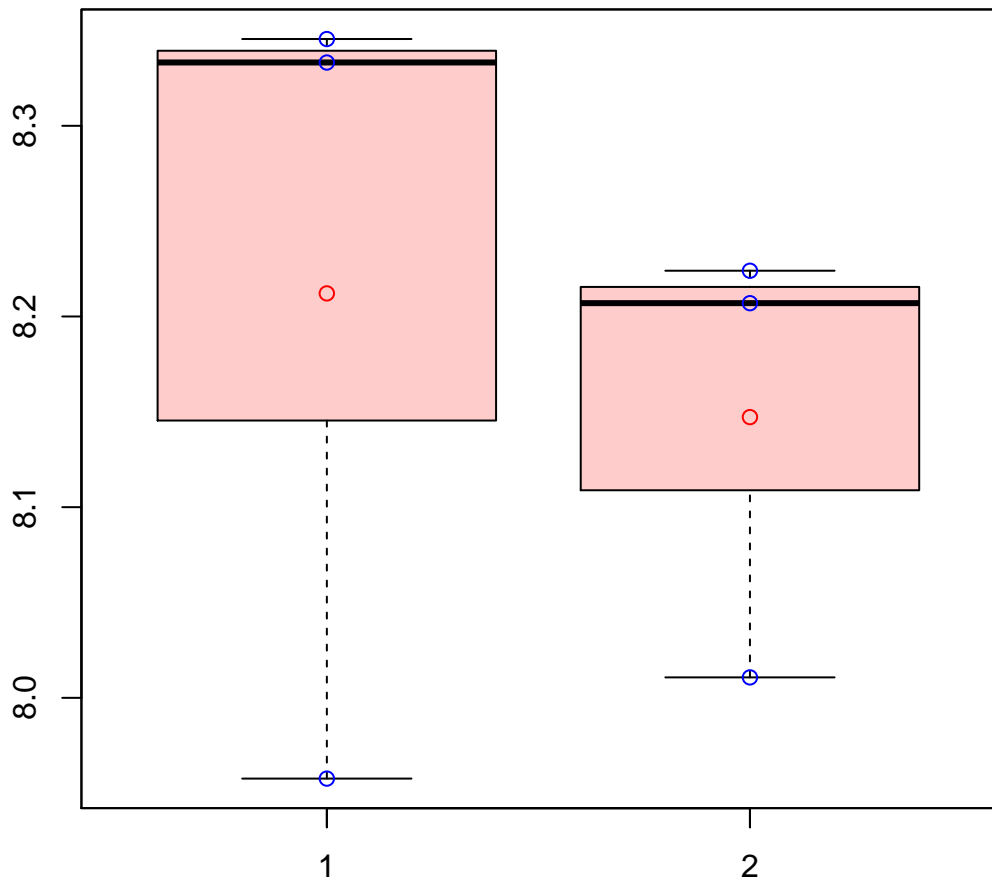

t-Test: p-value = 0.68

# M0Z9N8|M0Z9N8\_HORVD

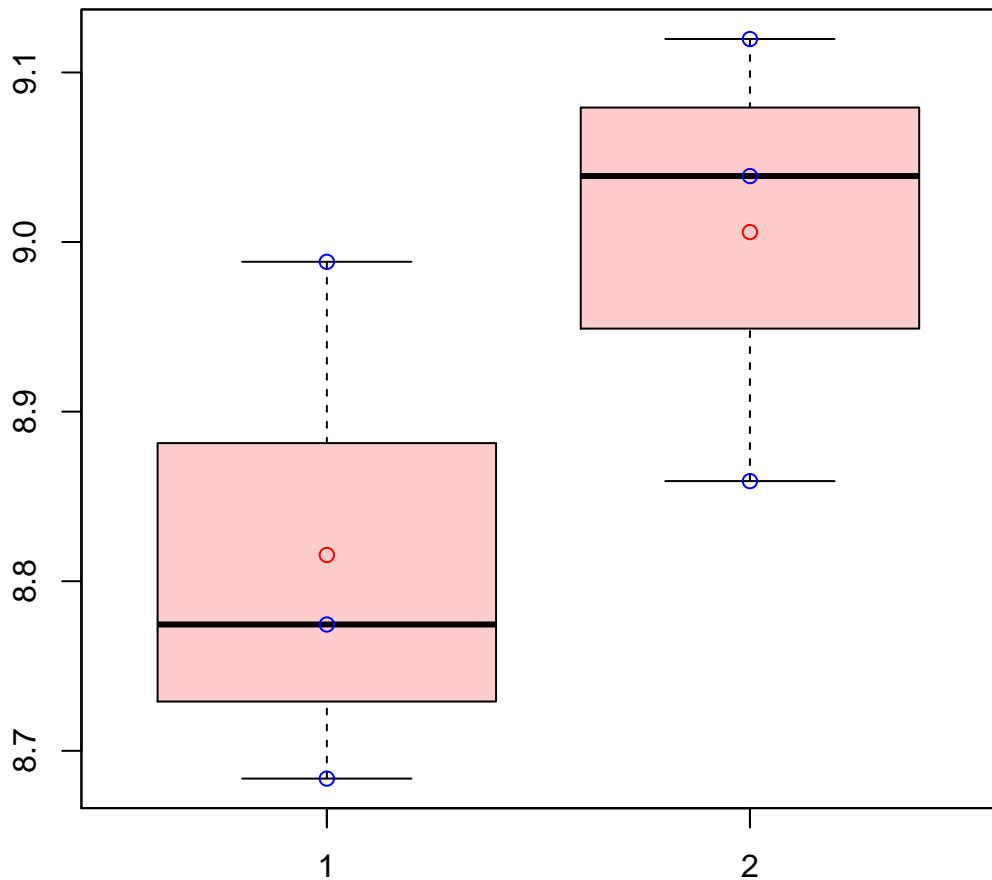

t-Test: p-value = 0.19

# M0ZB80|M0ZB80\_HORVD

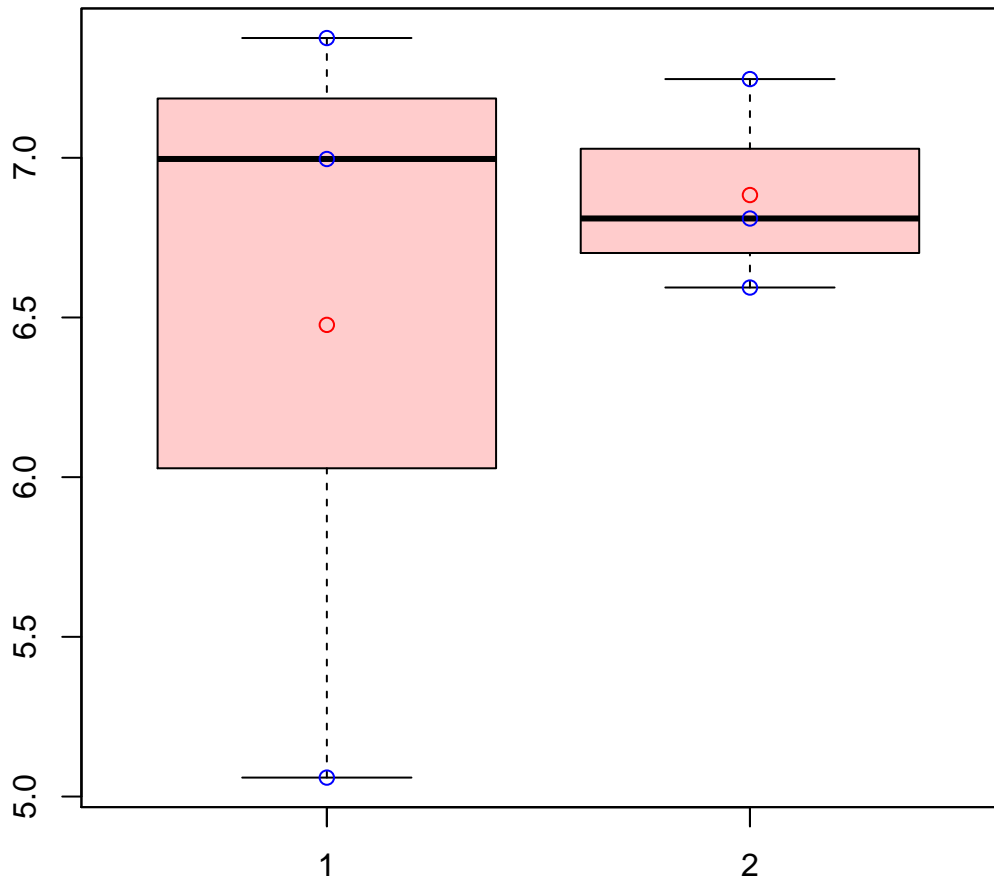

t-Test: p-value = 0.63

# M0ZBU4|M0ZBU4\_HORVD

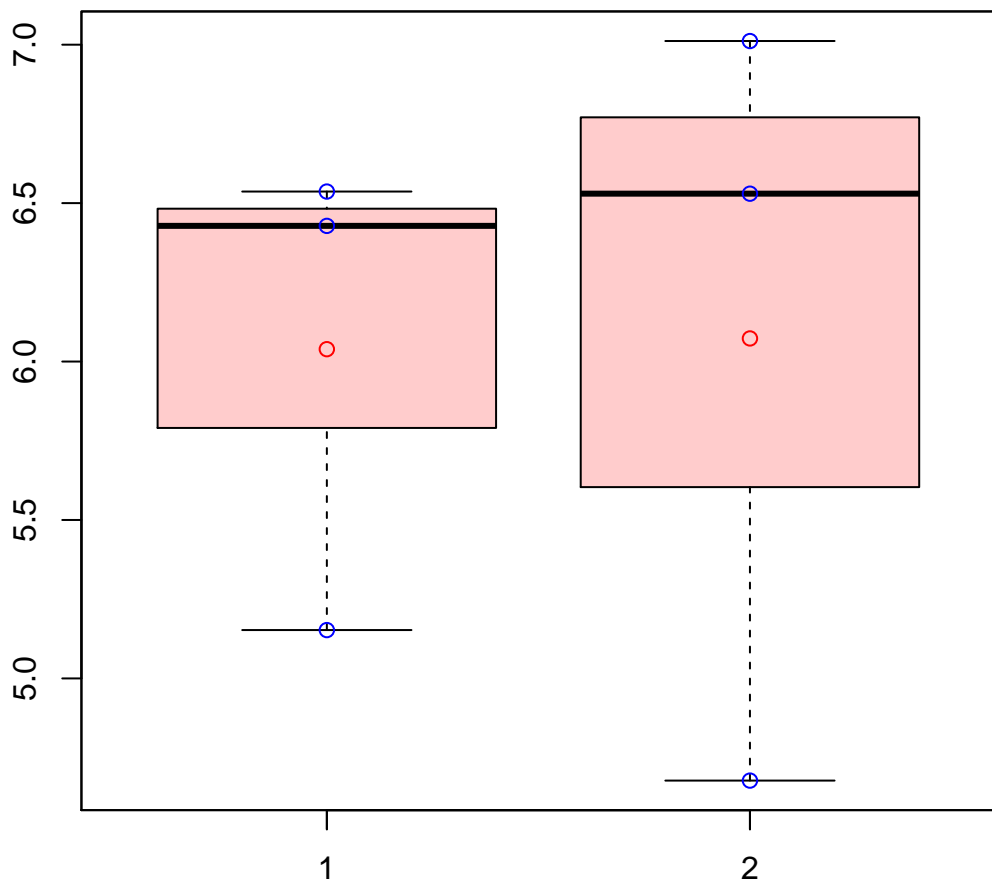

t-Test: p-value = 0.97



# M0ZBZ5|M0ZBZ5\_HORVD

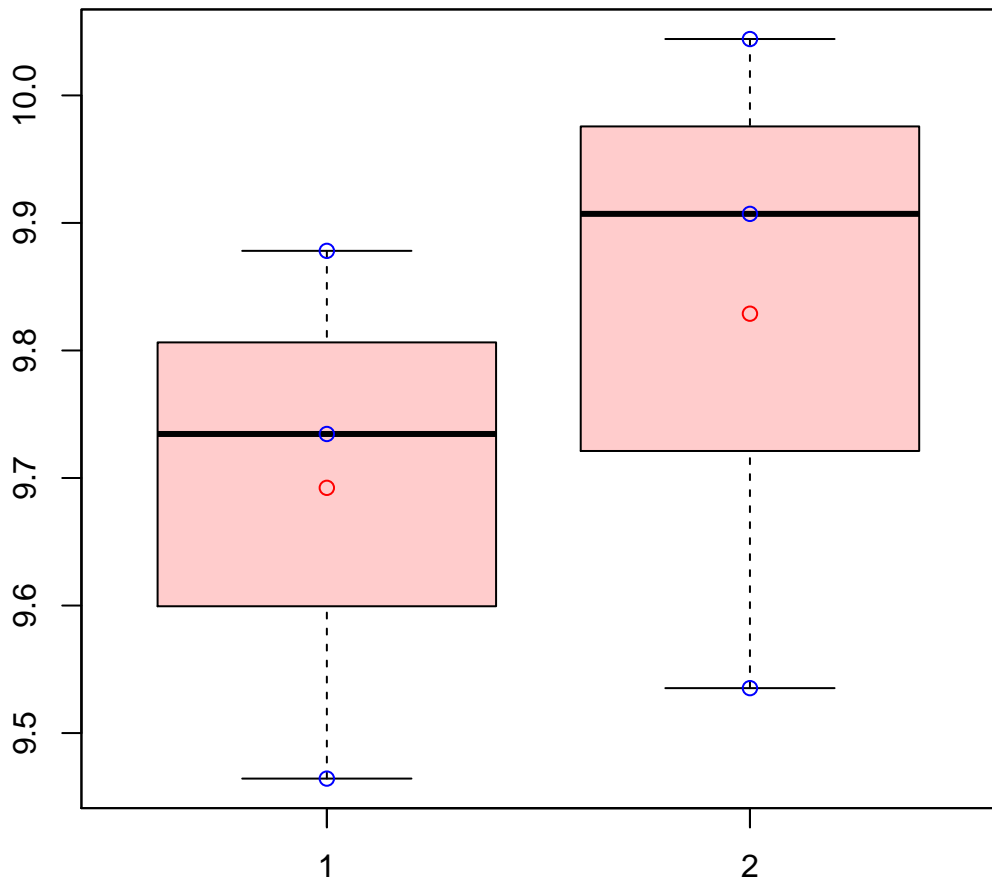

t-Test: p-value = 0.52

# M0ZCR1|M0ZCR1\_HORVD

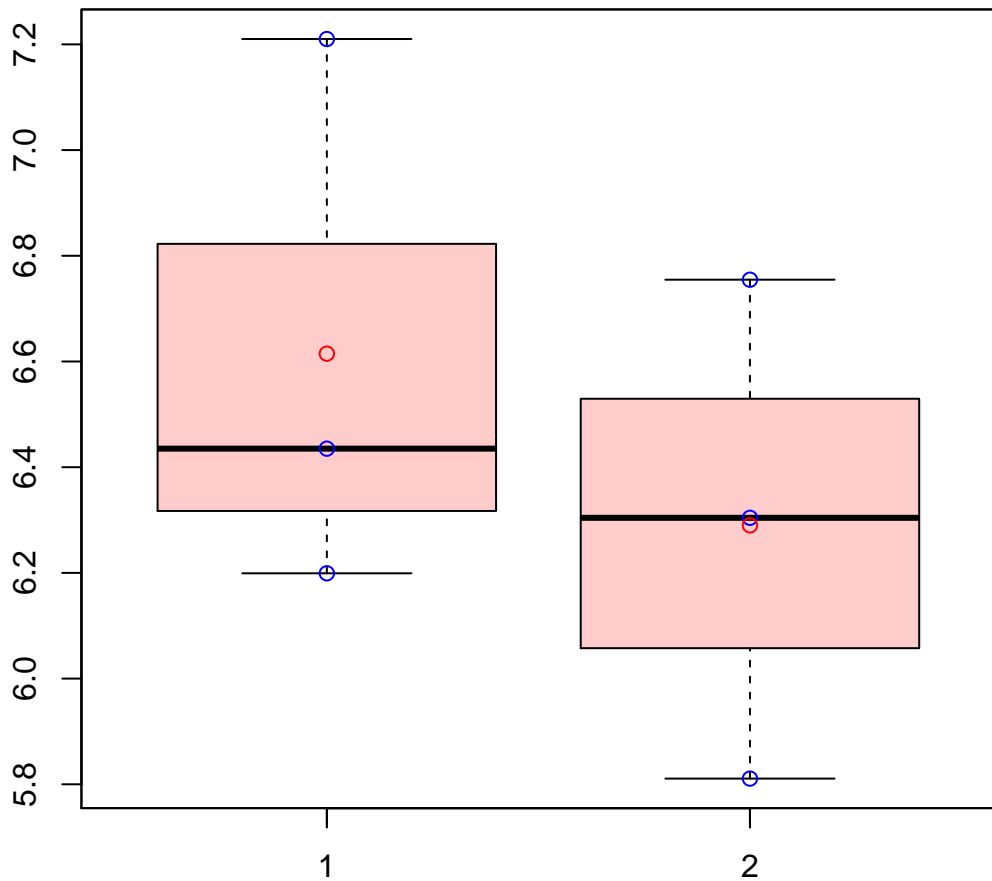

t-Test: p-value = 0.47

# M0ZCY8|M0ZCY8\_HORVD

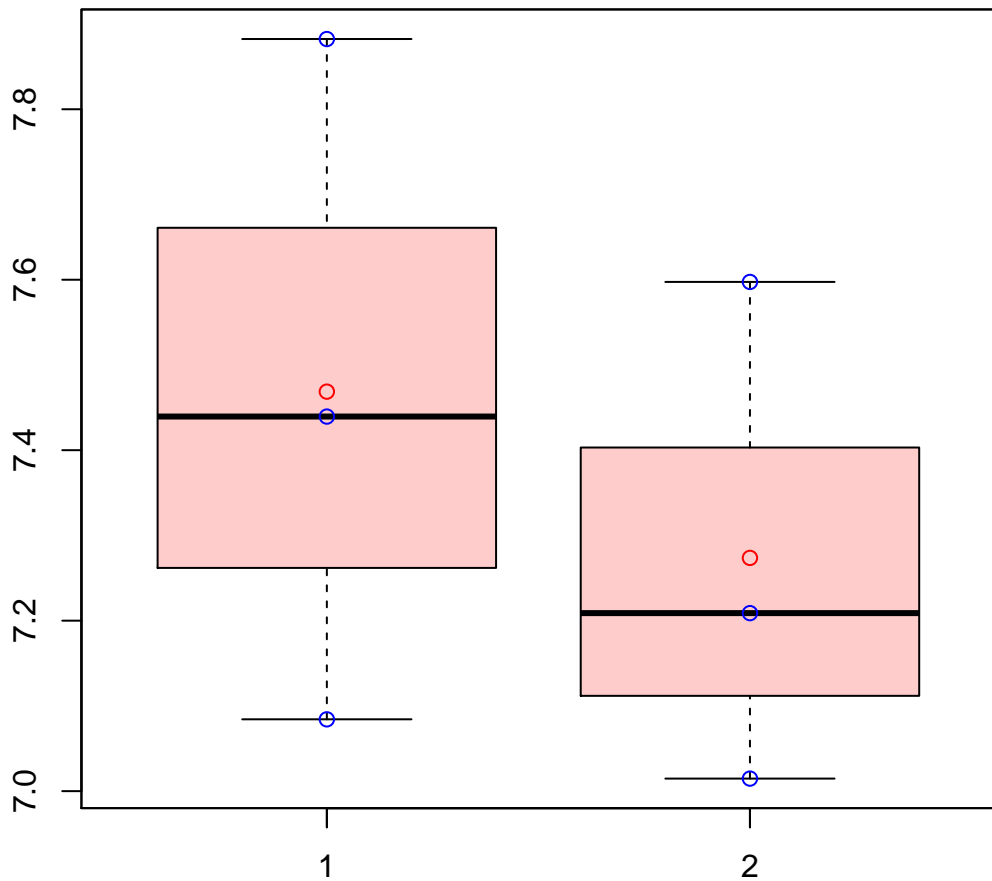

t-Test: p-value = 0.54

# M1JDP7|M1JDP7\_9LILI

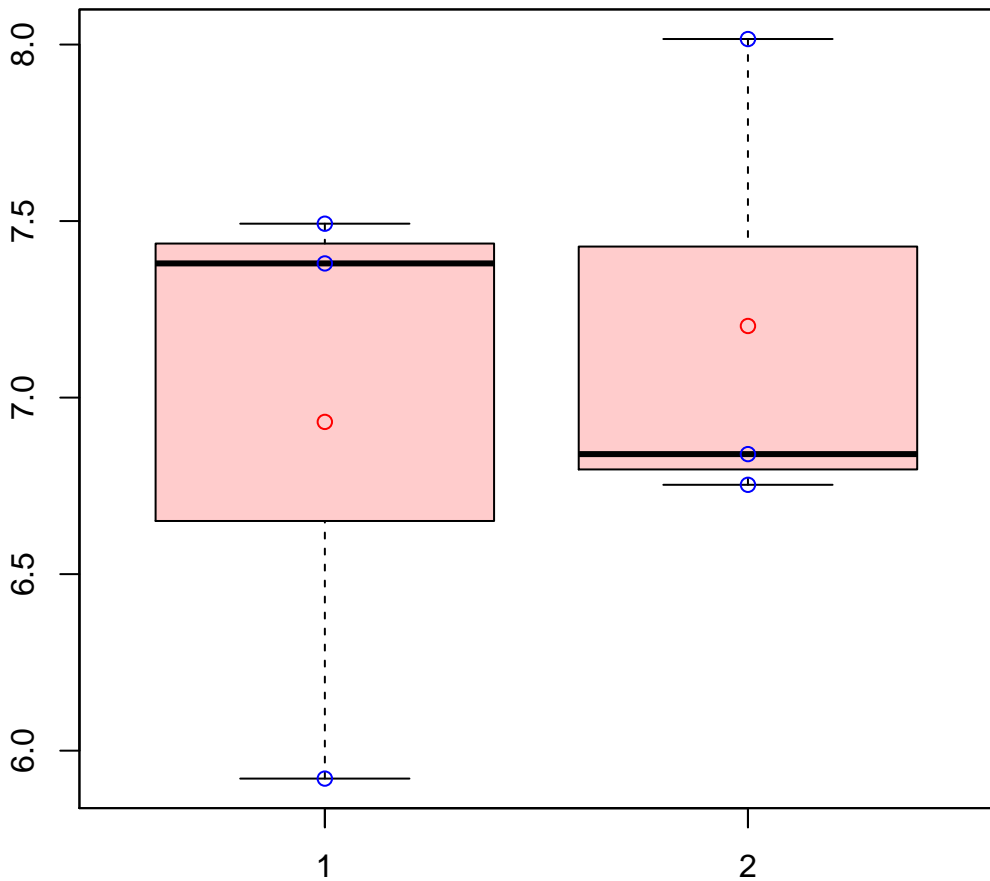

t-Test: p-value = 0.7

# M1JYJ5|M1JYJ5\_9LILI

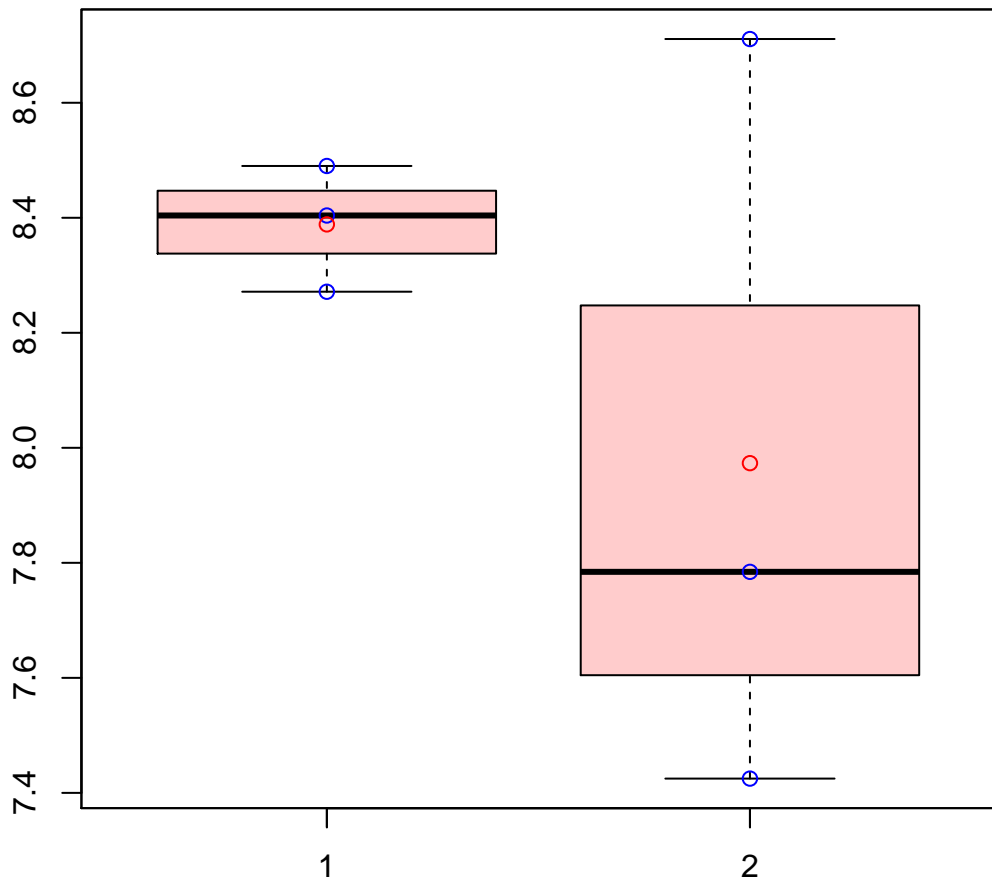

t-Test: p-value = 0.39

# M1JYJ9|M1JYJ9\_9LILI

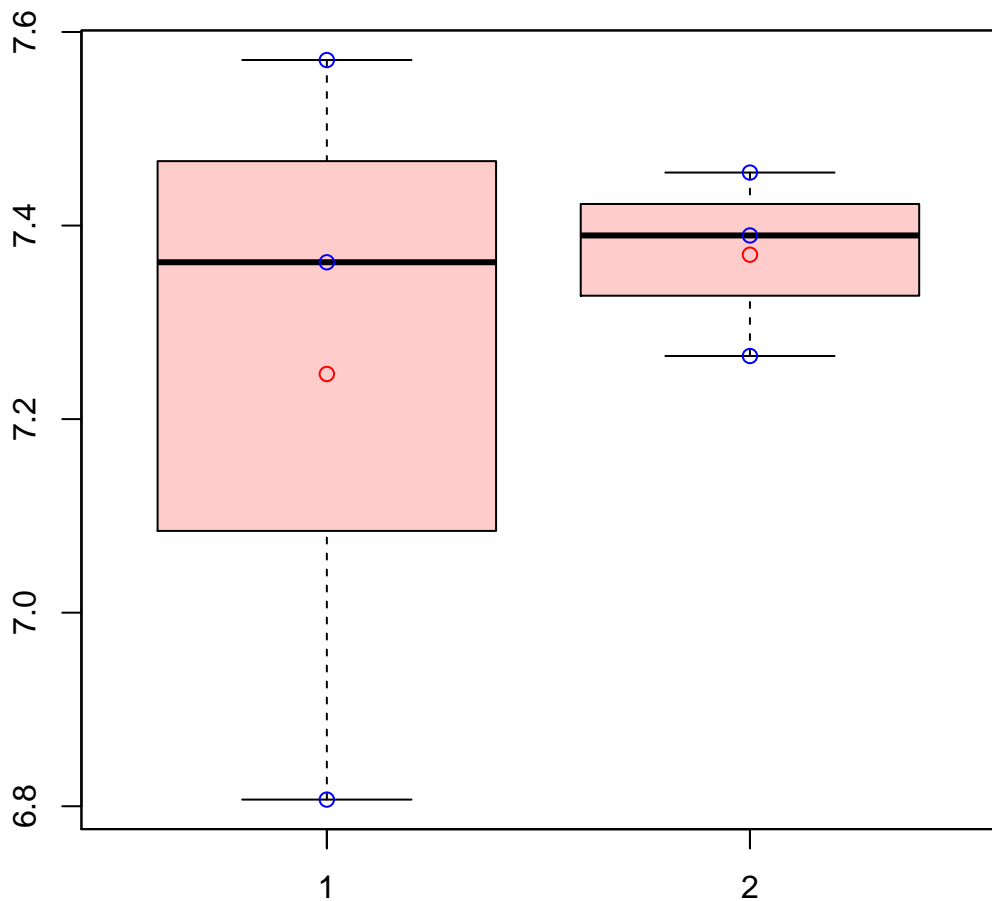

t-Test: p-value = 0.65

# M1K1Z9|M1K1Z9\_9LILI

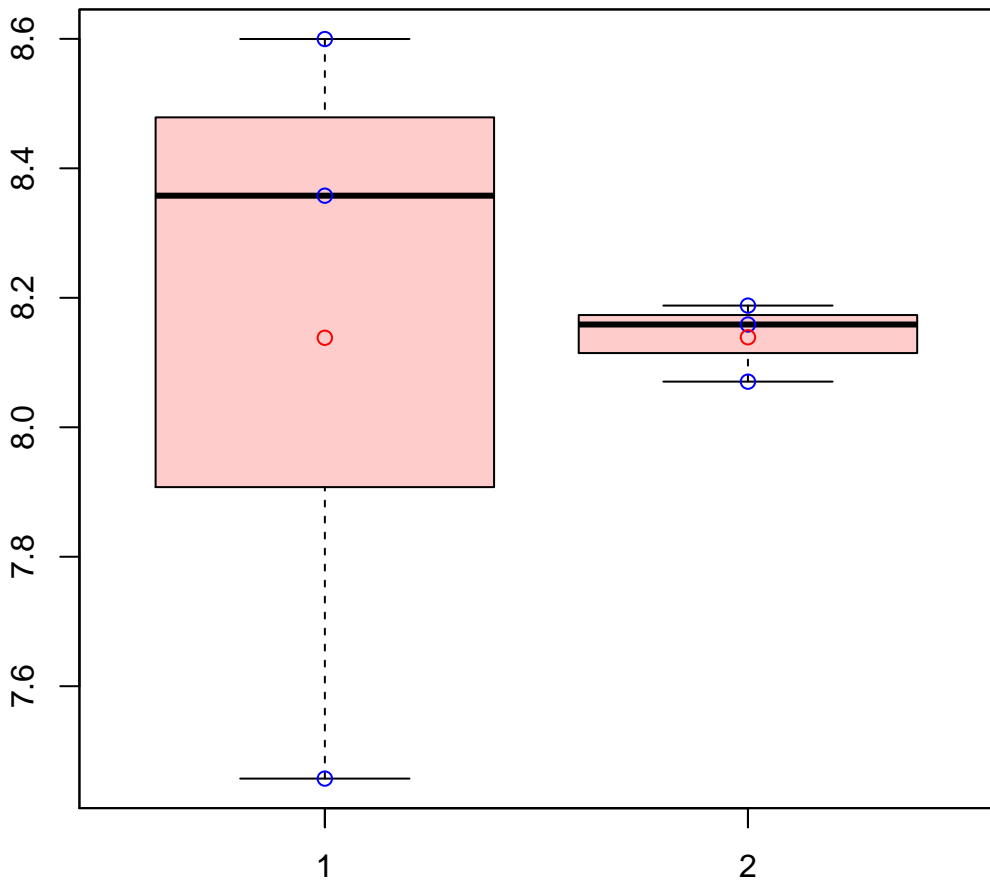

t-Test: p-value = 1

**M1K4D2|M1K4D2\_XIPCA**

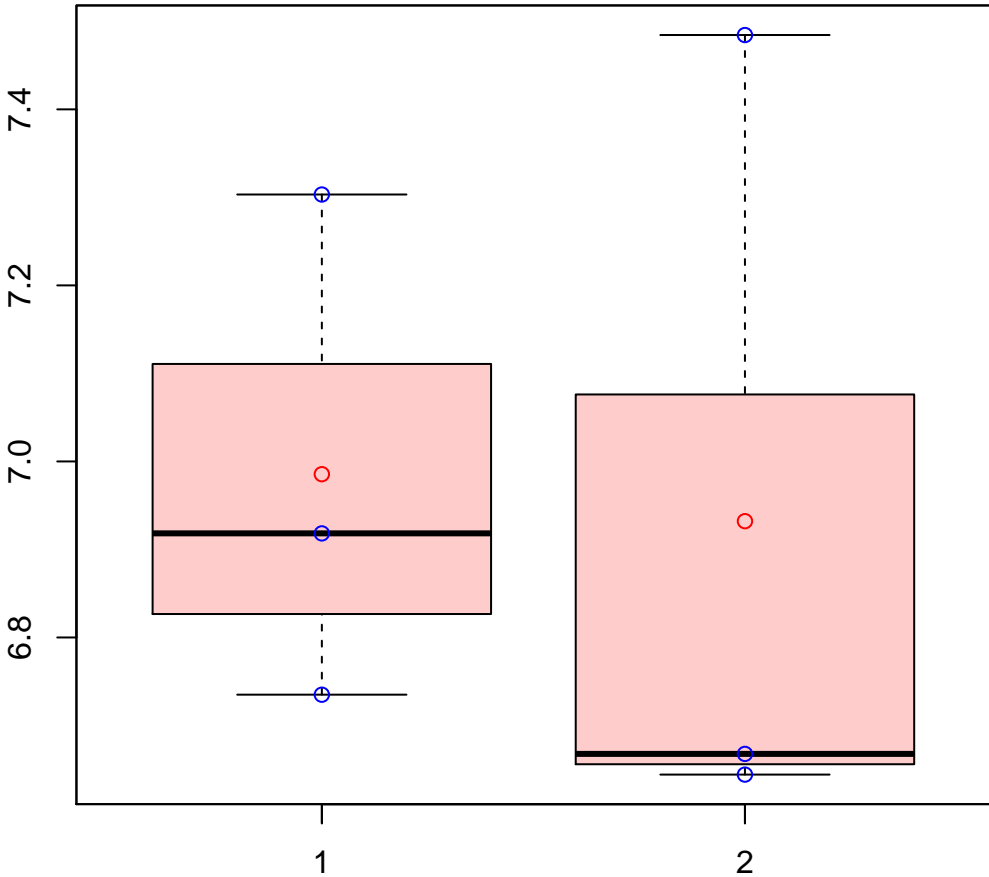

t-Test: p-value = 0.88



# M1NJV3|M1NJV3\_WHEAT

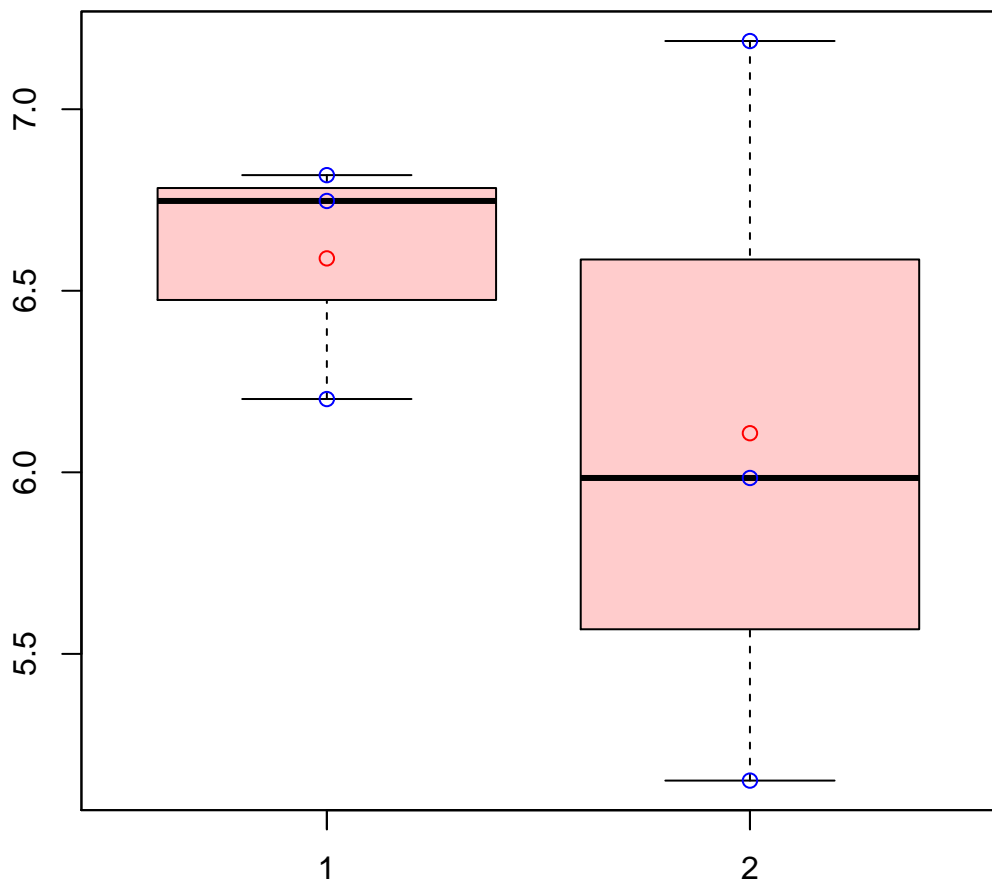

t-Test: p-value = 0.51

# M4PKP3|M4PKP3\_9POAL

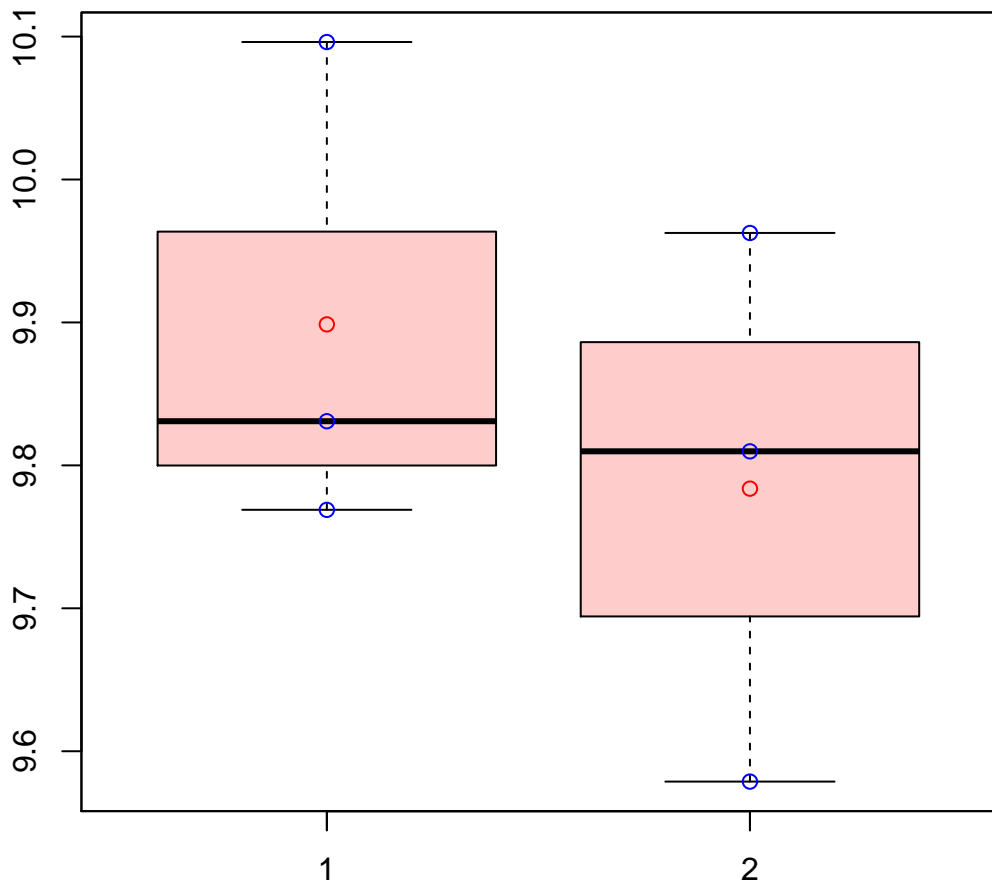

t-Test: p-value = 0.49

# M7Y5E9|M7Y5E9\_TRIUA

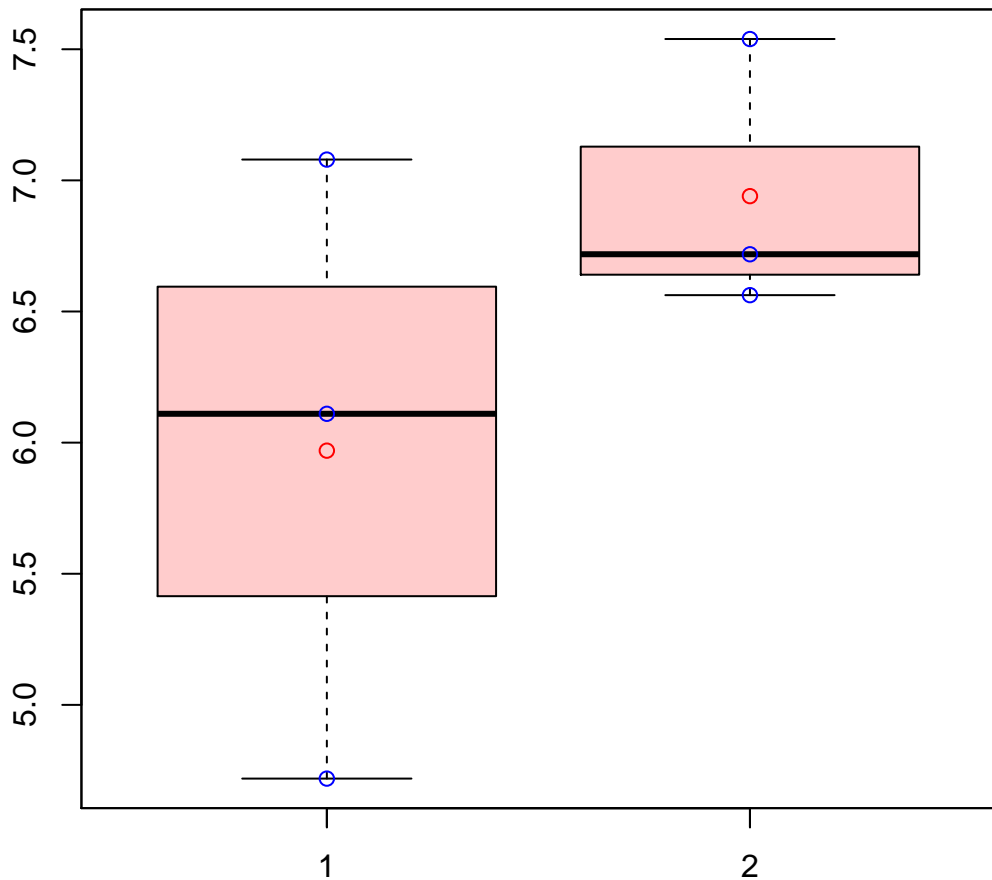

t-Test: p-value = 0.29

**M7Y5U6|M7Y5U6\_TRIUA**

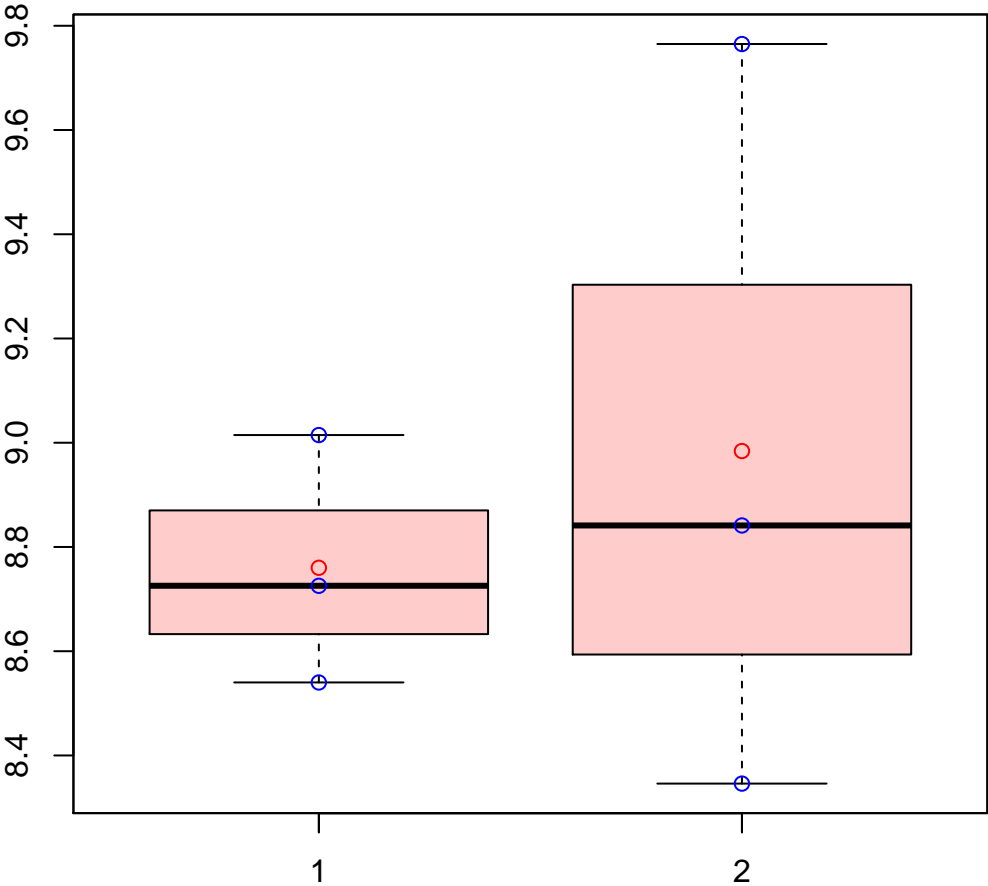

t-Test: p-value = 0.65

# M7Y700|M7Y700\_TRIUA

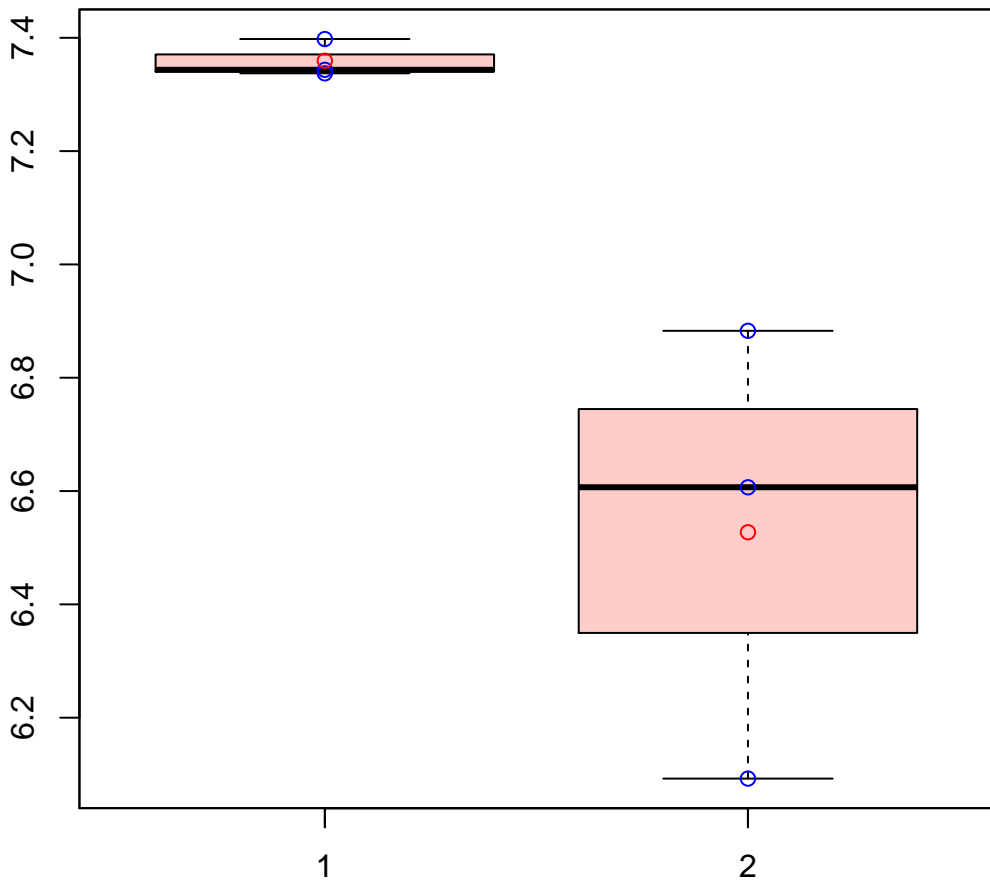

t-Test: p-value = 0.07

# M7Y7Y8|M7Y7Y8\_TRIUA

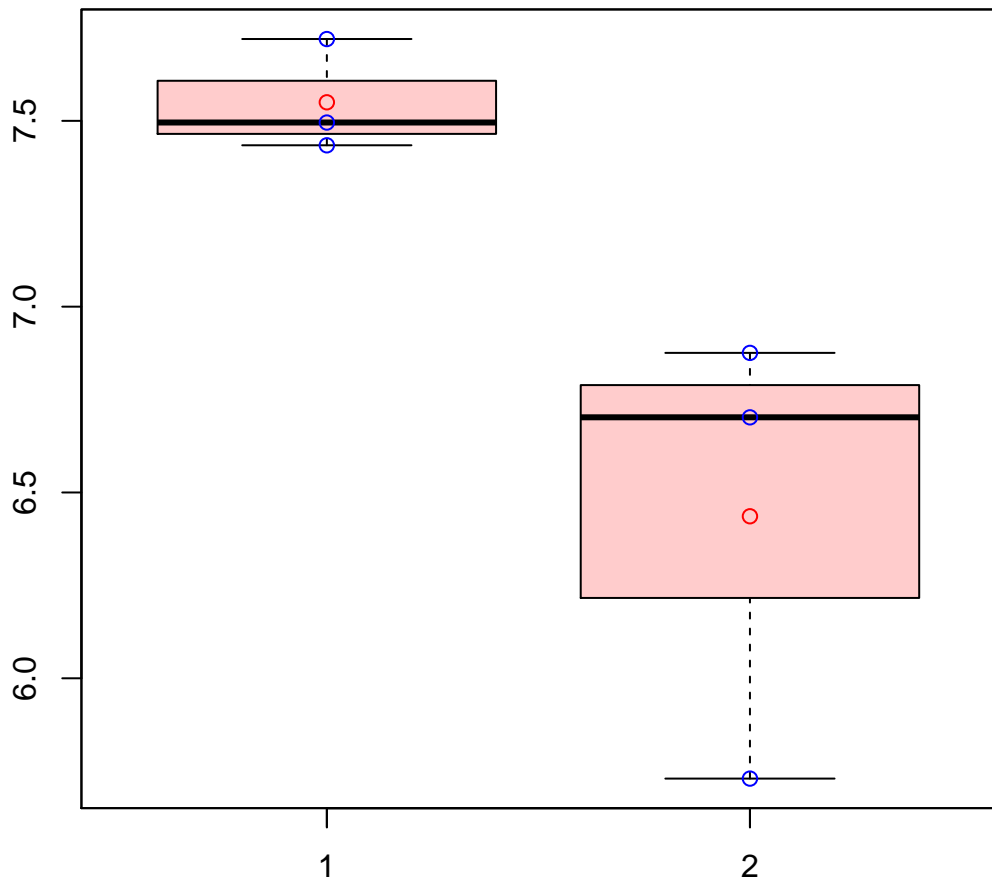

t-Test: p-value = 0.08

# M7Y8J1|M7Y8J1\_TRIUA

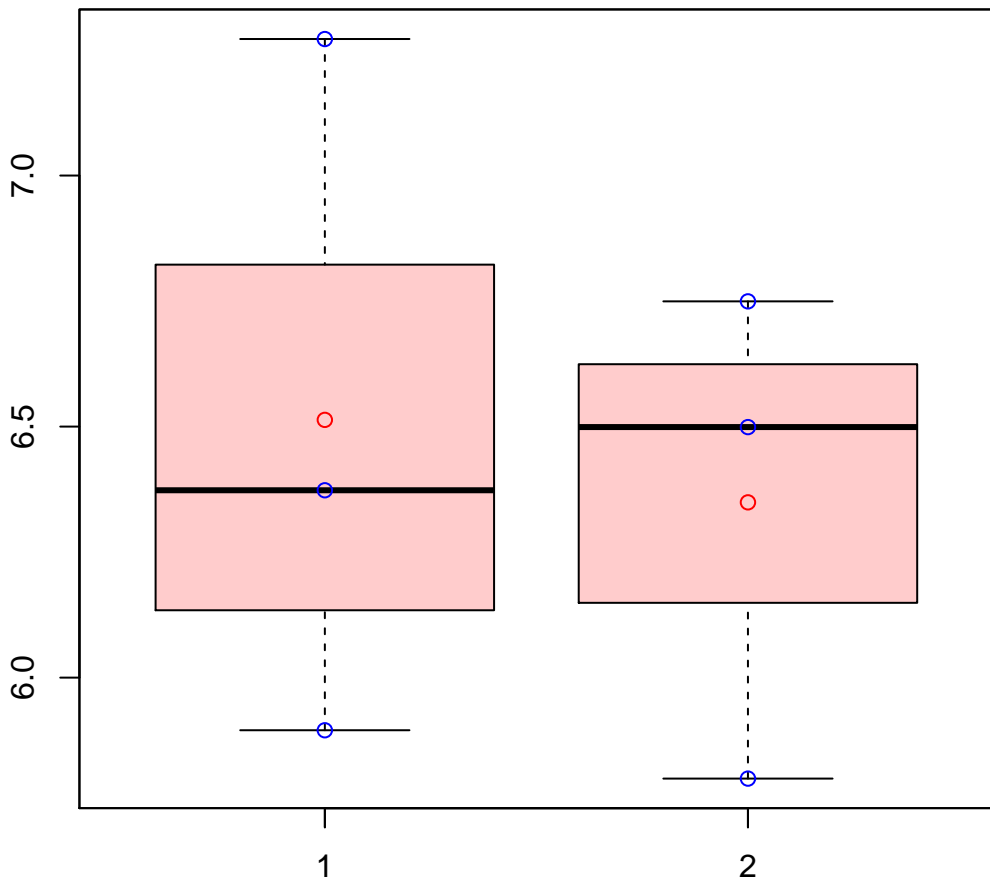

t-Test: p-value = 0.76

# M7YAG3|M7YAG3\_TRIUA

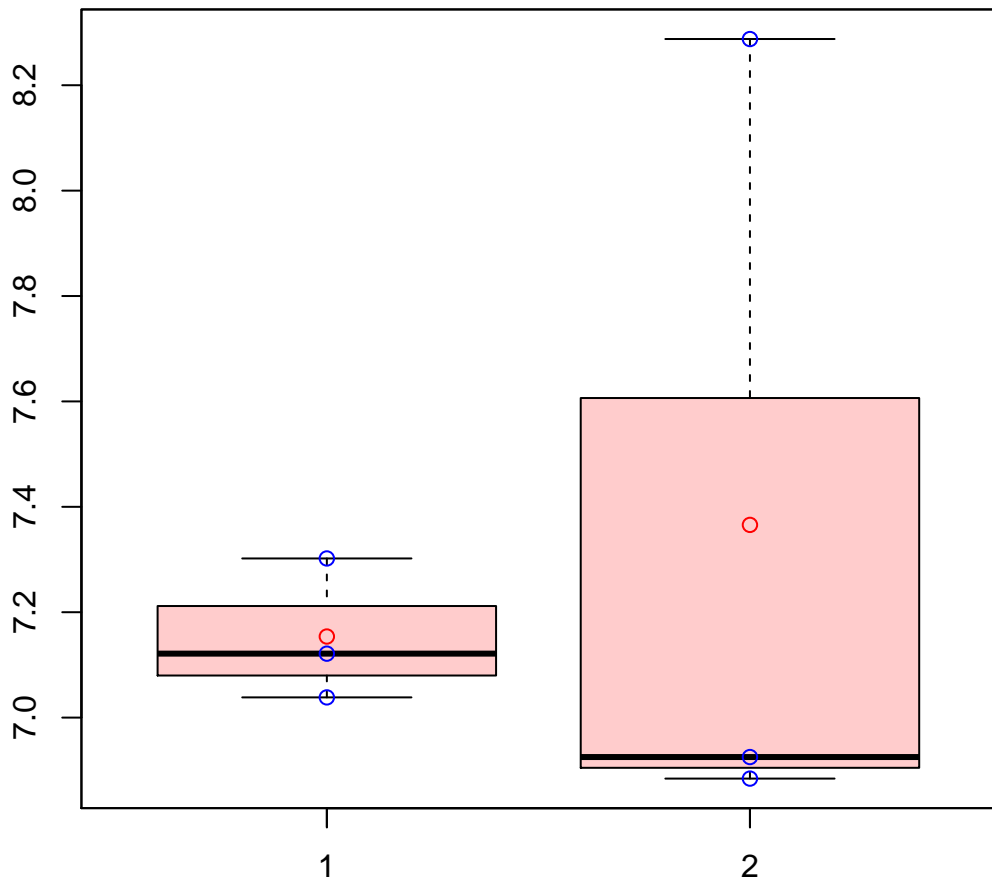

t-Test: p-value = 0.69



# M7YBW5|M7YBW5\_TRIUA

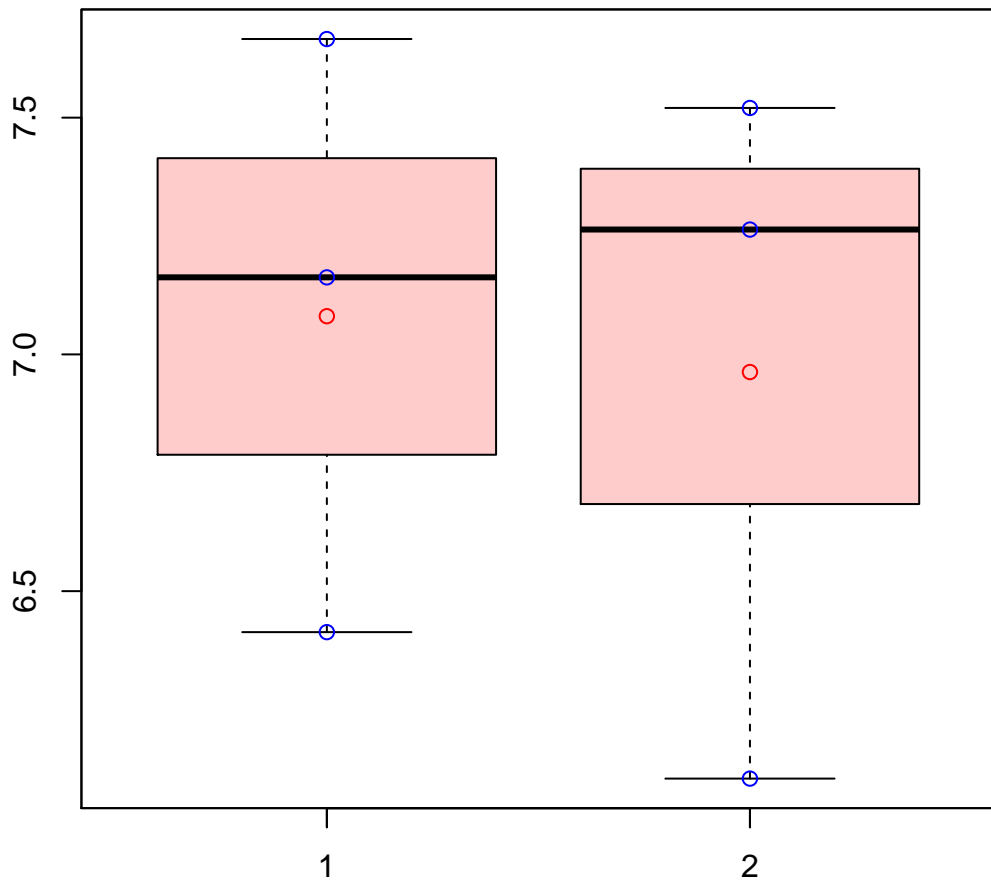

t-Test: p-value = 0.85

# M7YDR1|M7YDR1\_TRIUA

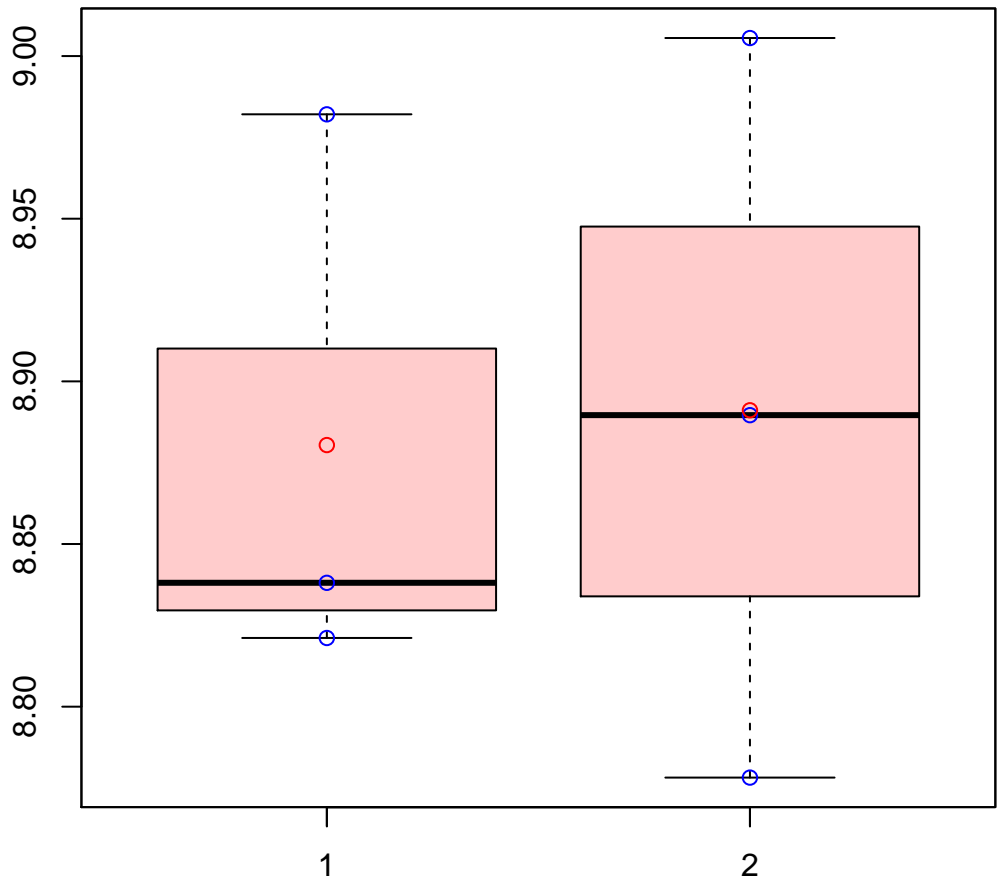

t-Test: p-value = 0.9

# M7YDV2|M7YDV2\_TRIUA

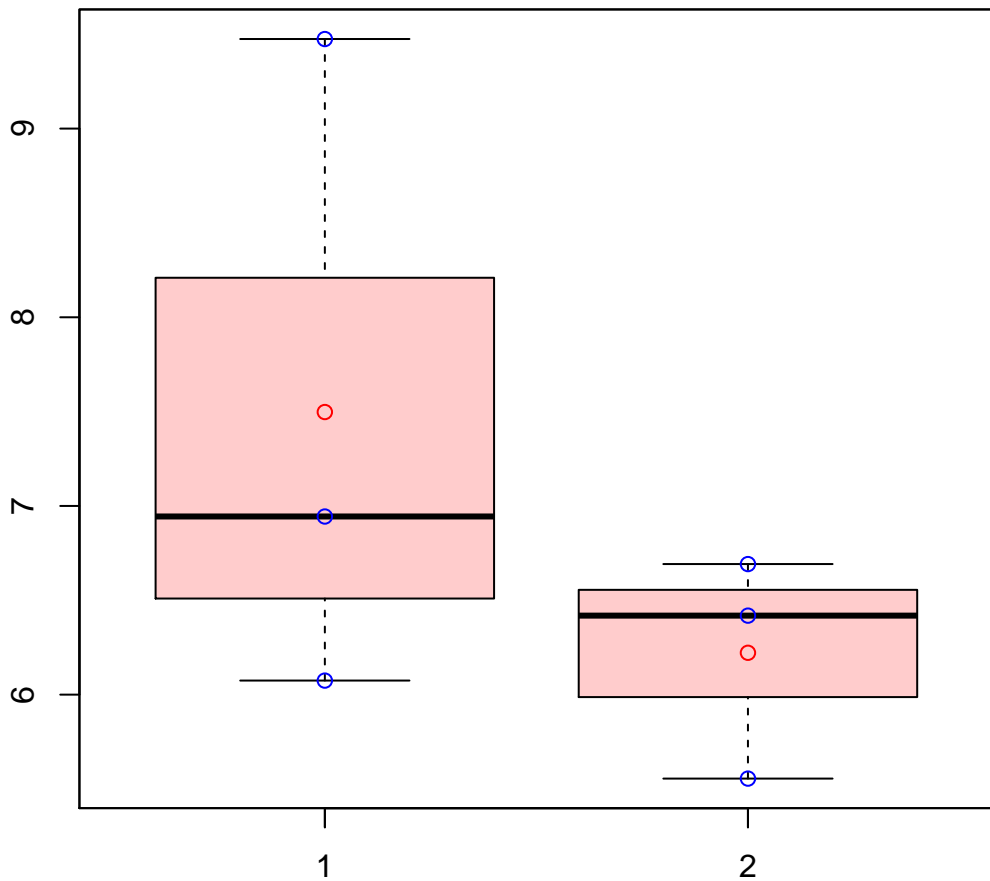

t-Test: p-value = 0.34

# M7YE69|M7YE69\_TRIUA

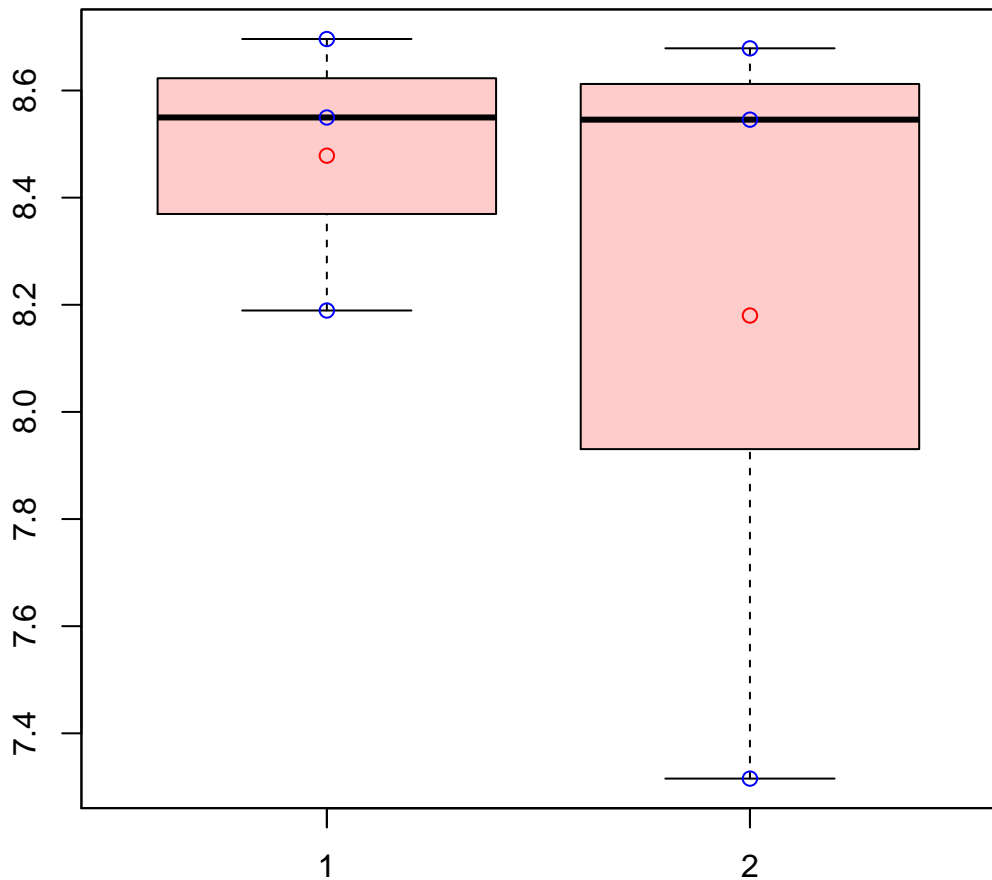

t-Test: p-value = 0.57

# M7YEF5|M7YEF5\_TRIUA

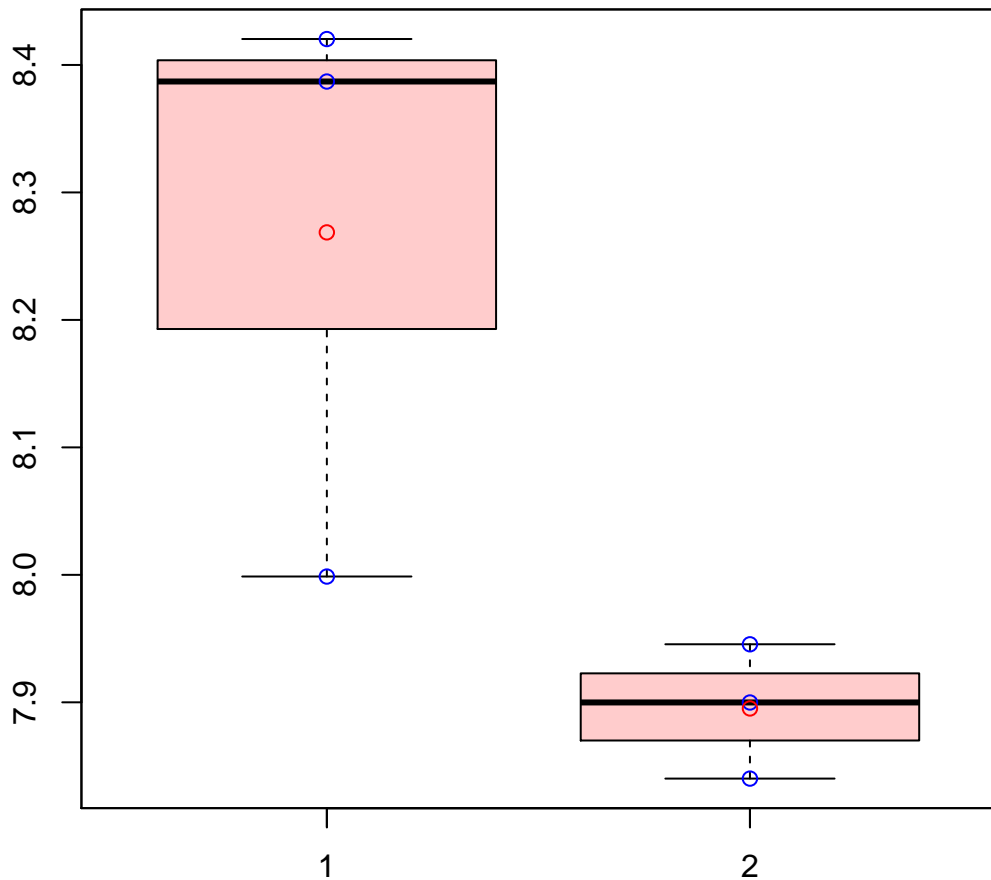

t-Test: p-value = 0.1

# M7YFQ8|M7YFQ8\_TRIUA

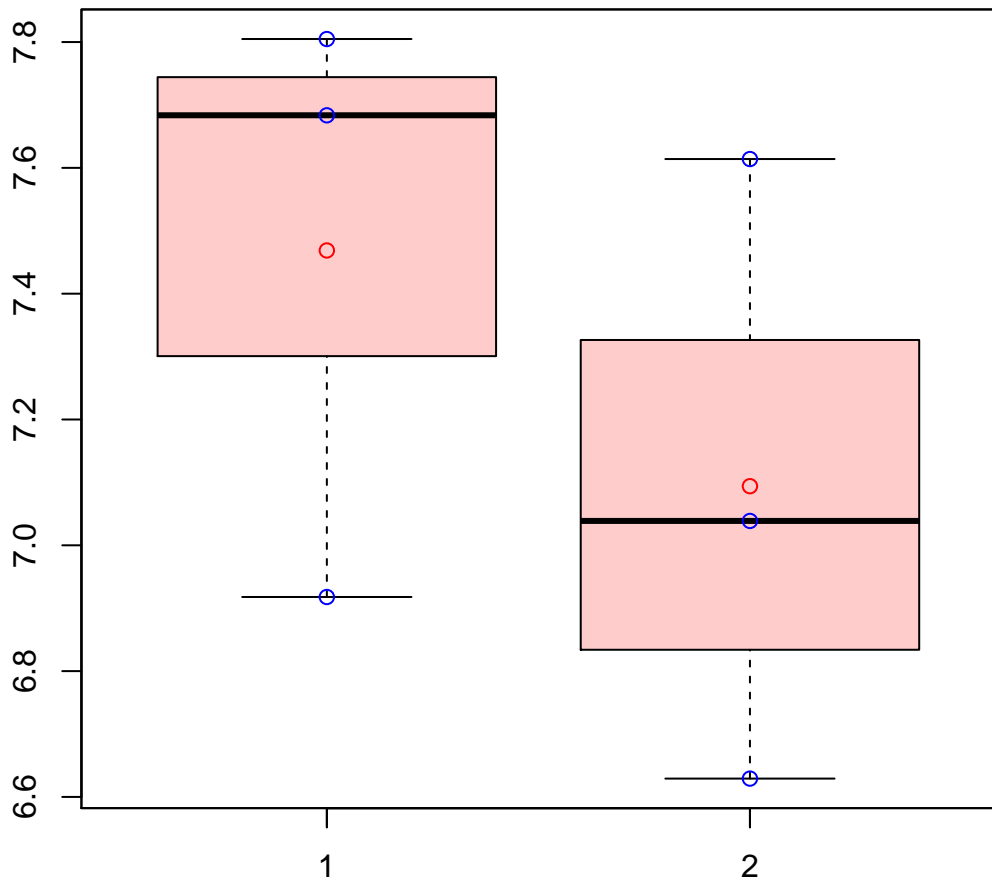

t-Test: p-value = 0.4

# M7YG89|M7YG89\_TRIUA

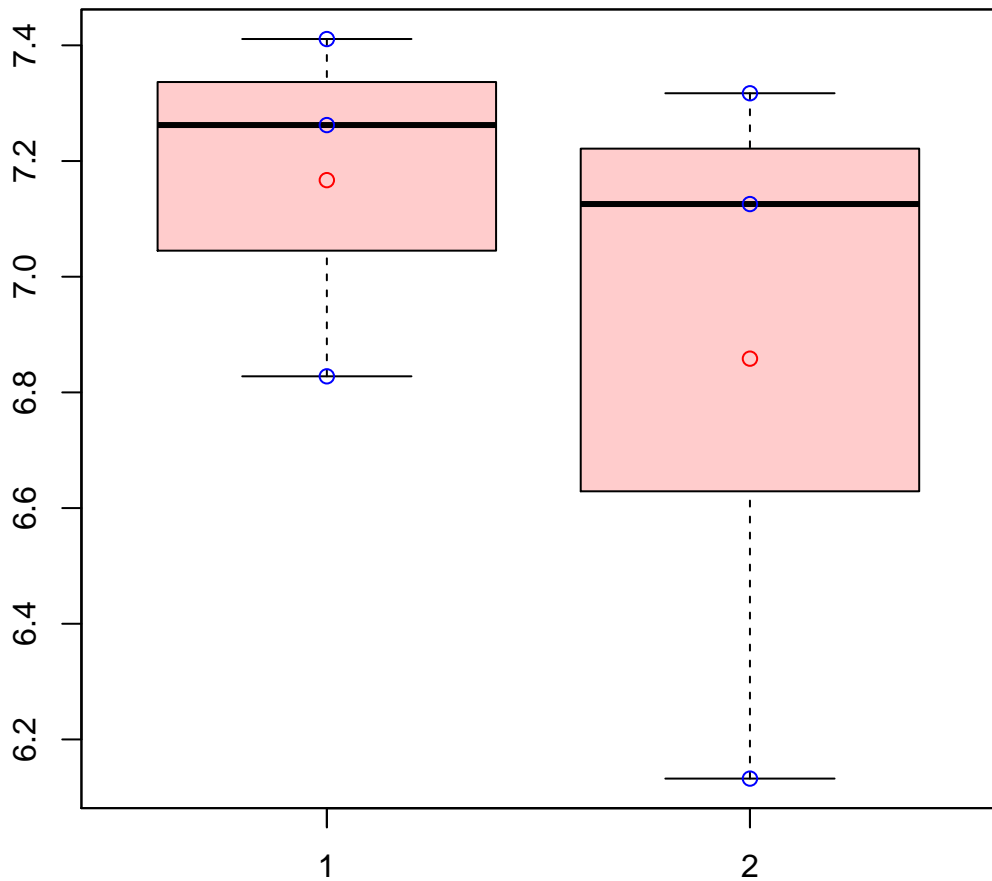

t-Test: p-value = 0.51

# M7YGC6|M7YGC6\_TRIUA

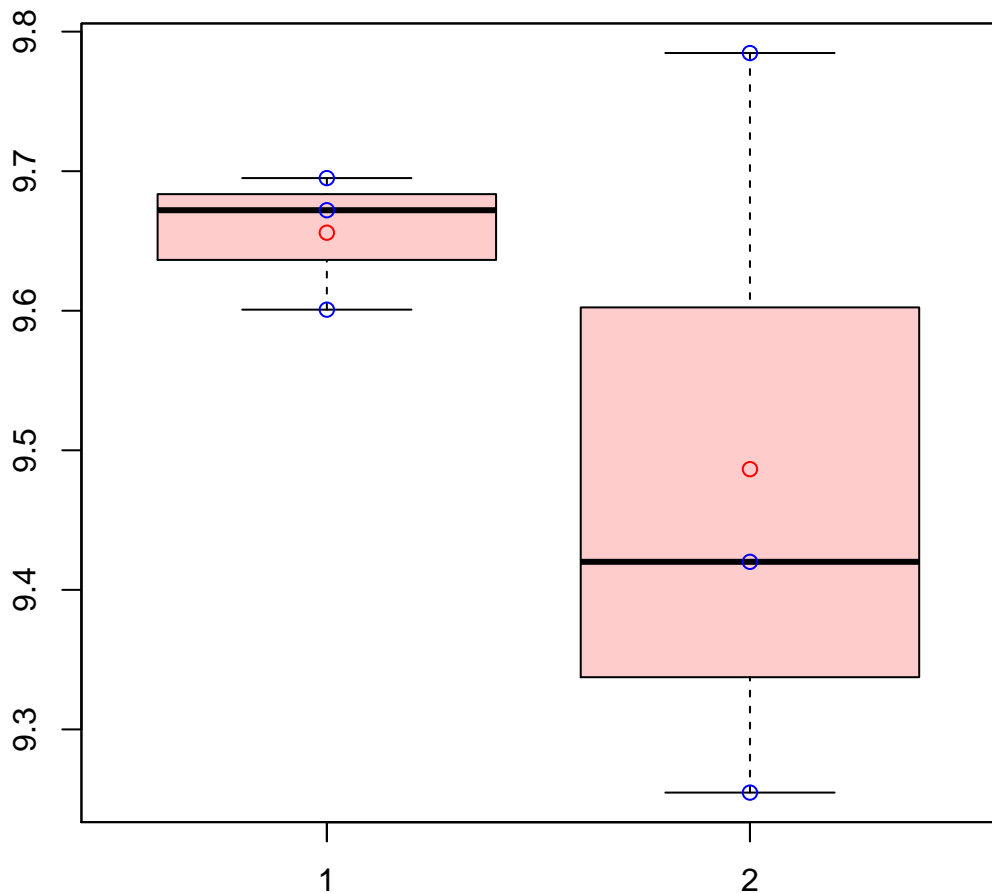

t-Test: p-value = 0.39



# M7YGN6|M7YGN6\_TRIUA

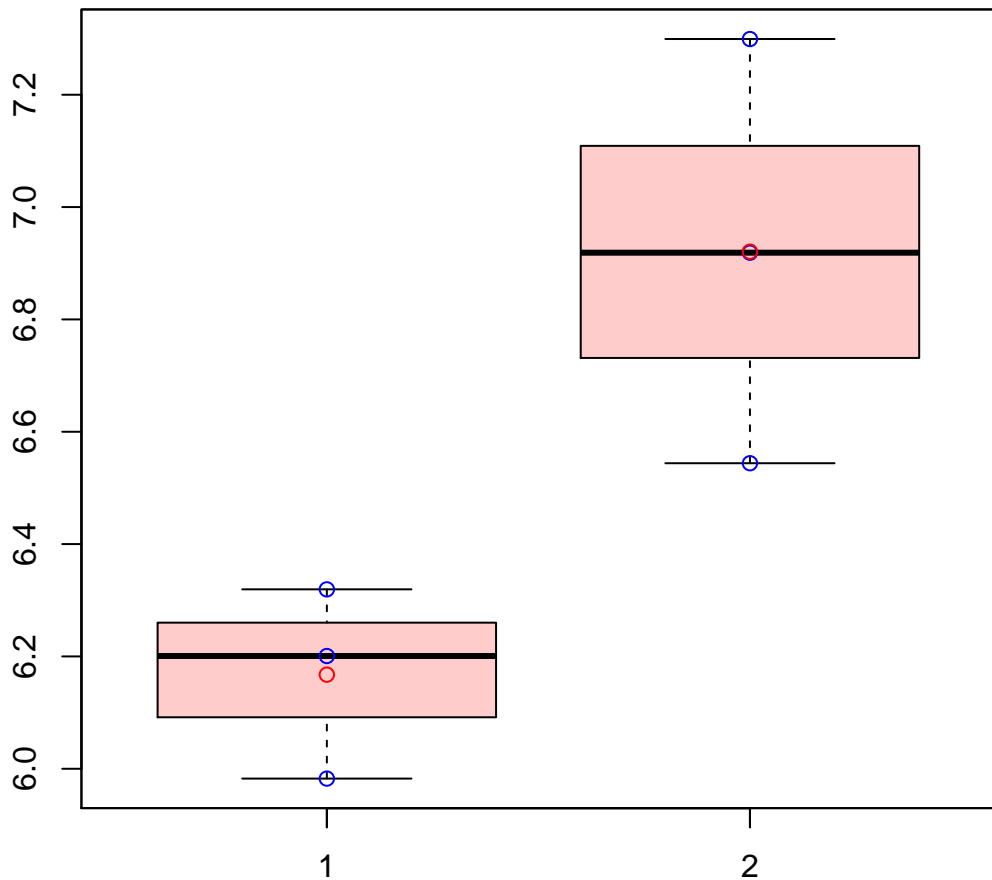

t-Test: p-value = 0.06

# M7YGZ5|M7YGZ5\_TRIUA

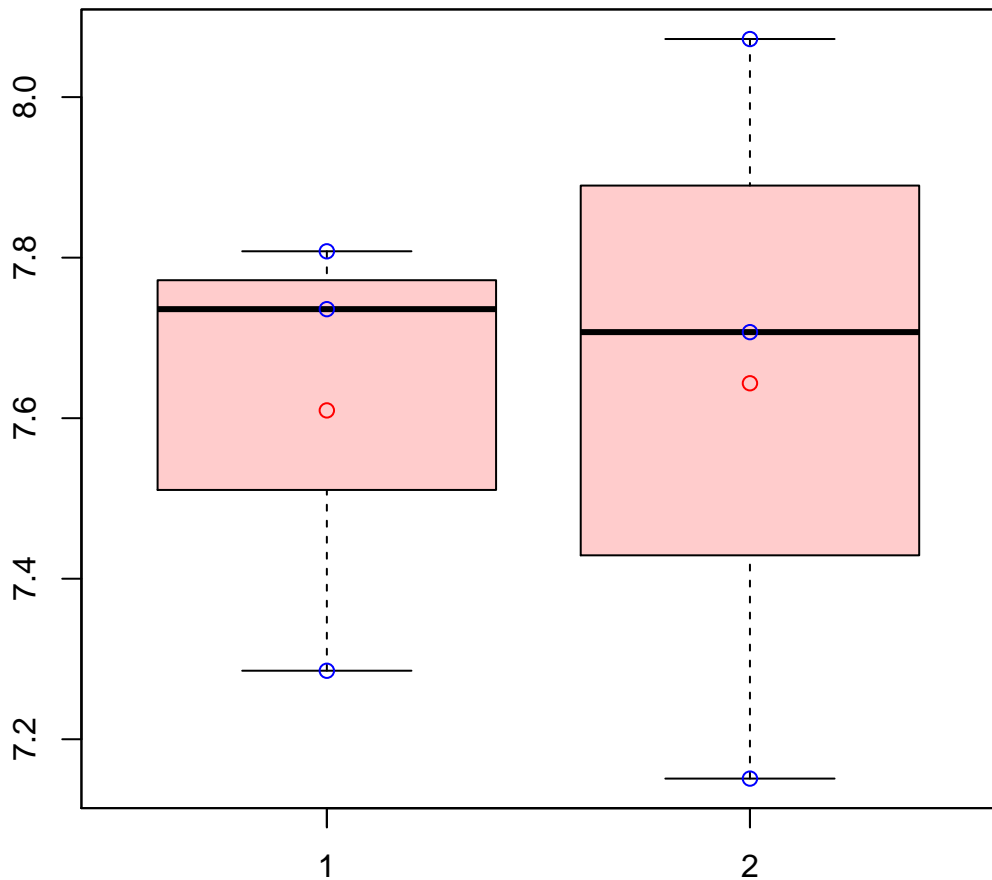

t-Test: p-value = 0.92

# M7YH23|M7YH23\_TRIUA

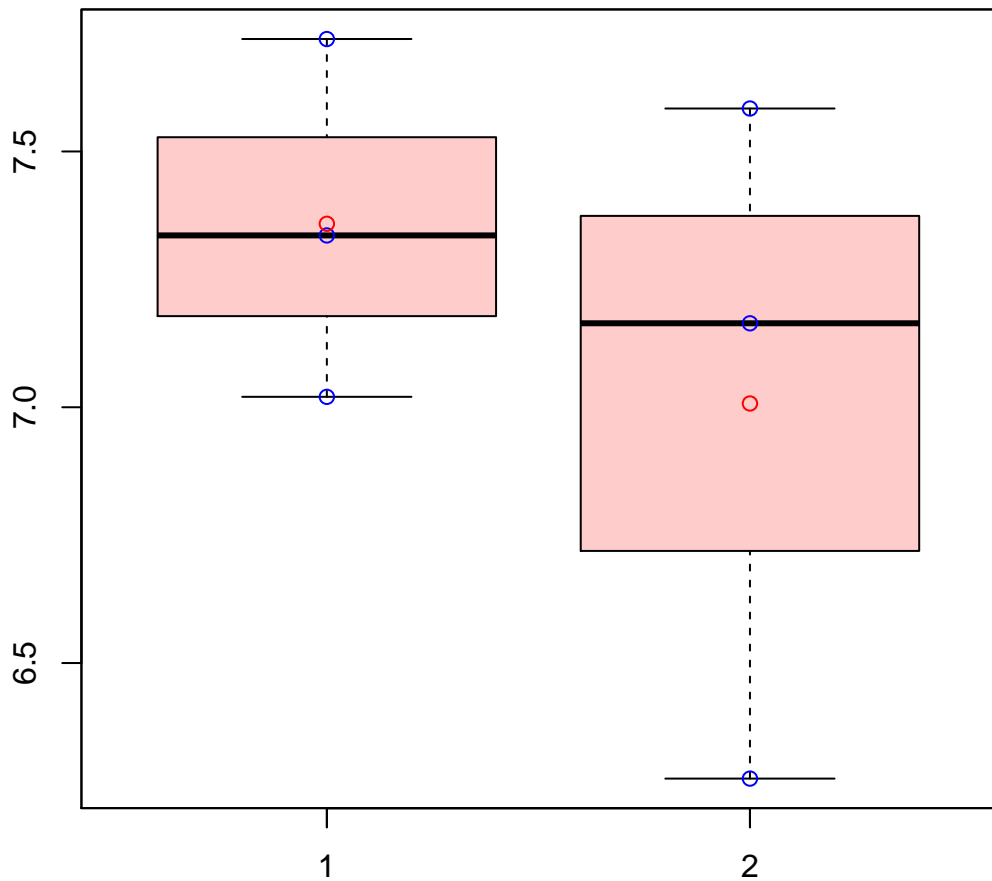

t-Test: p-value = 0.48

# M7YHC6|M7YHC6\_TRIUA

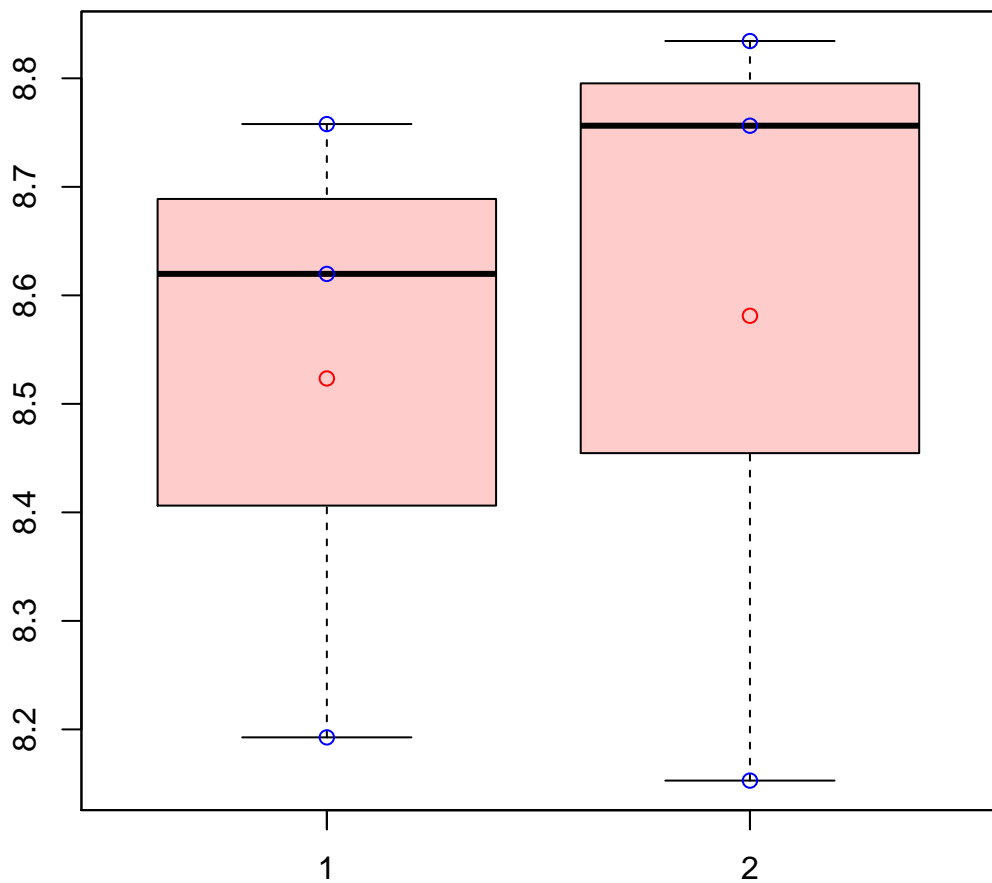

t-Test: p-value = 0.84

# M7YIU9|M7YIU9\_TRIUA

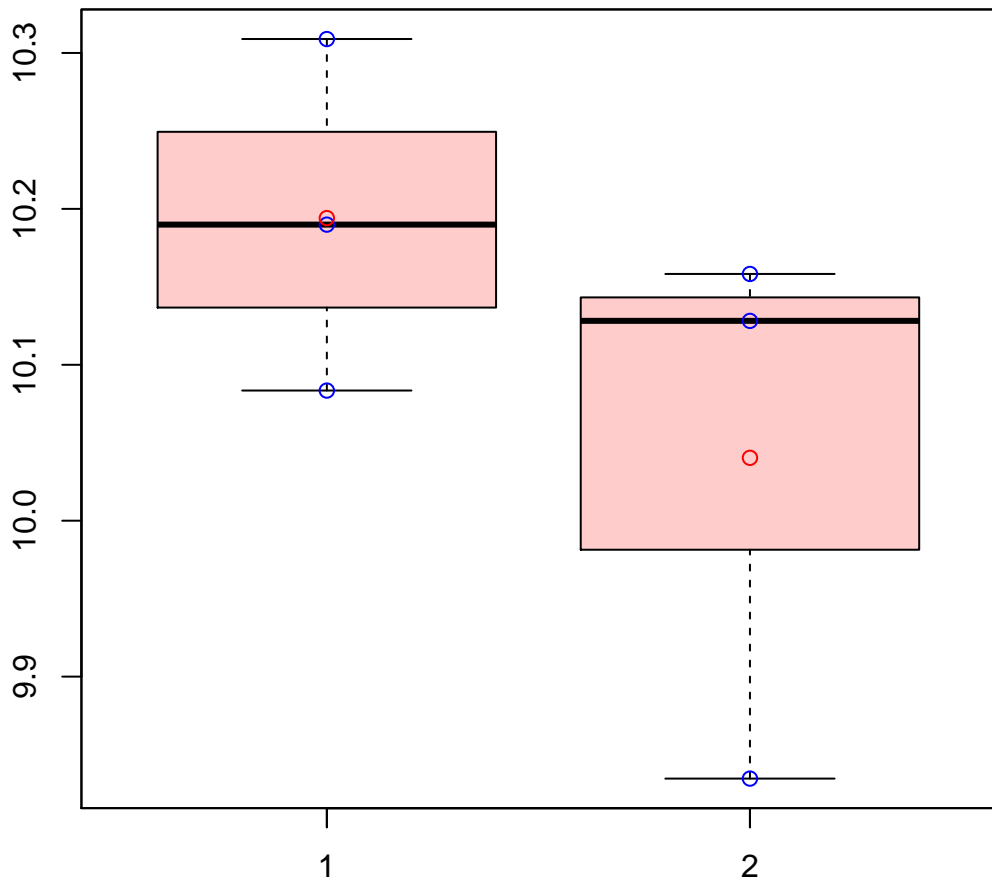

t-Test: p-value = 0.29

# M7YJ04|M7YJ04\_TRIUA

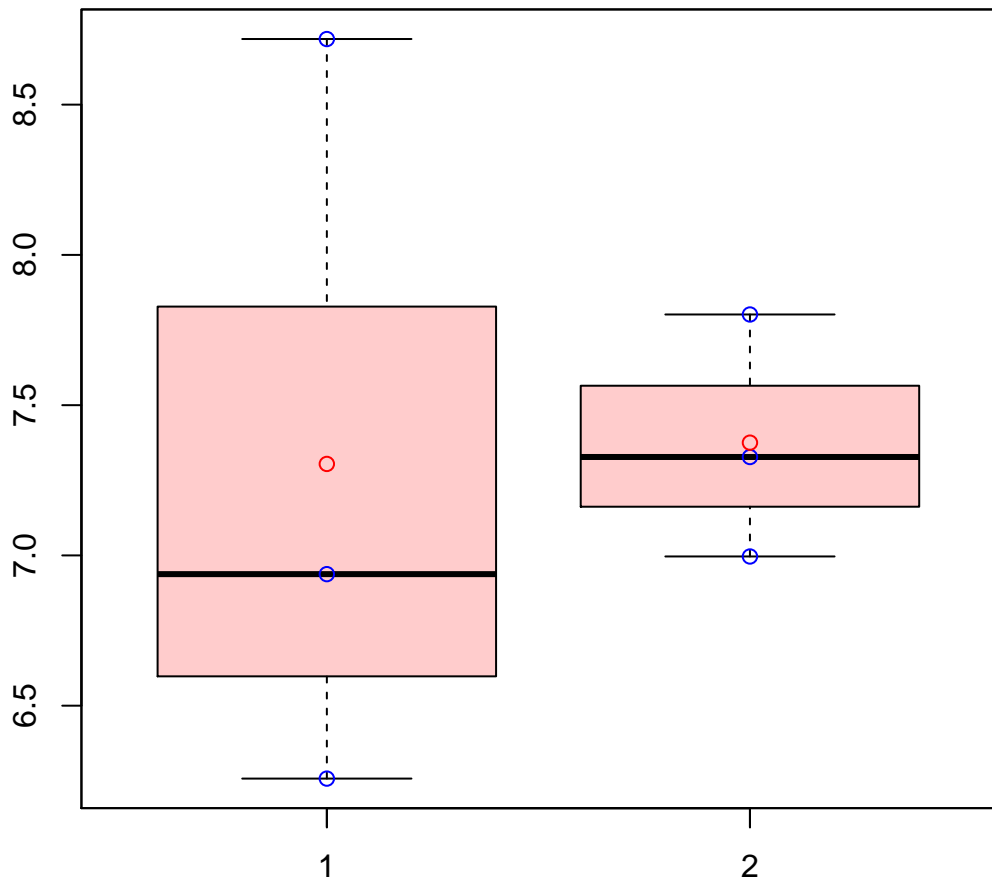

t-Test: p-value = 0.93

# M7YJH1|M7YJH1\_TRIUA

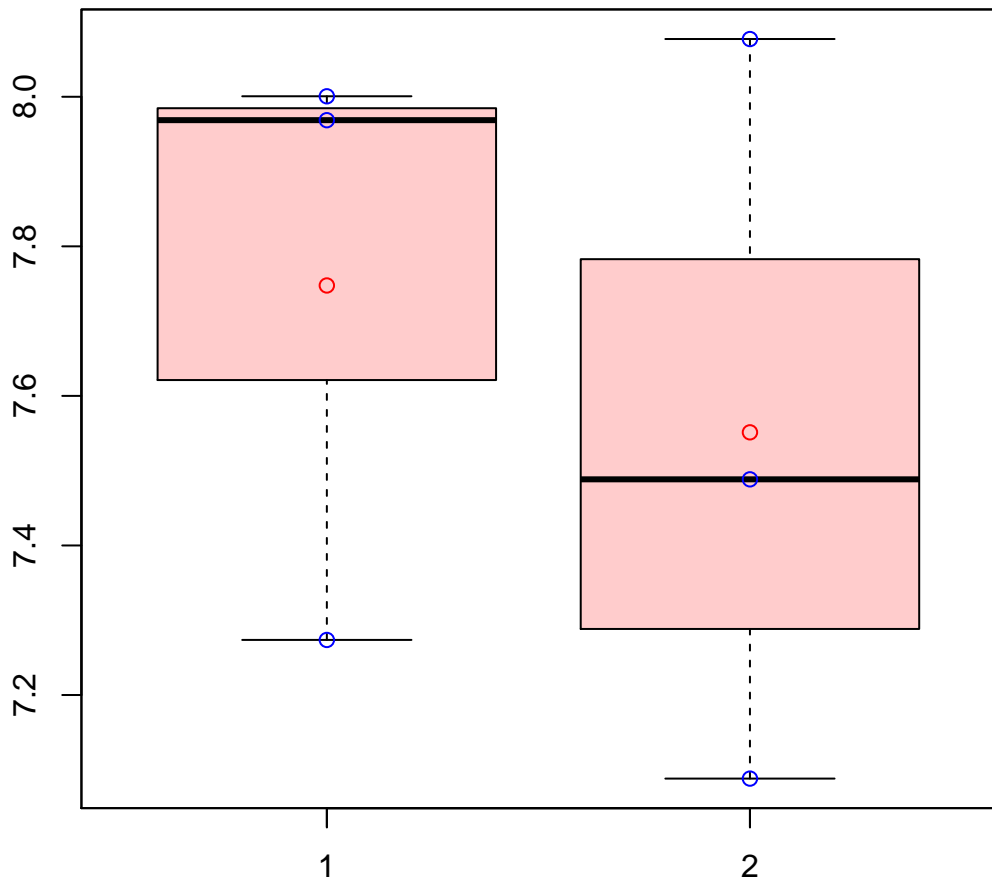

t-Test: p-value = 0.63

# M7YJH4|M7YJH4\_TRIUA

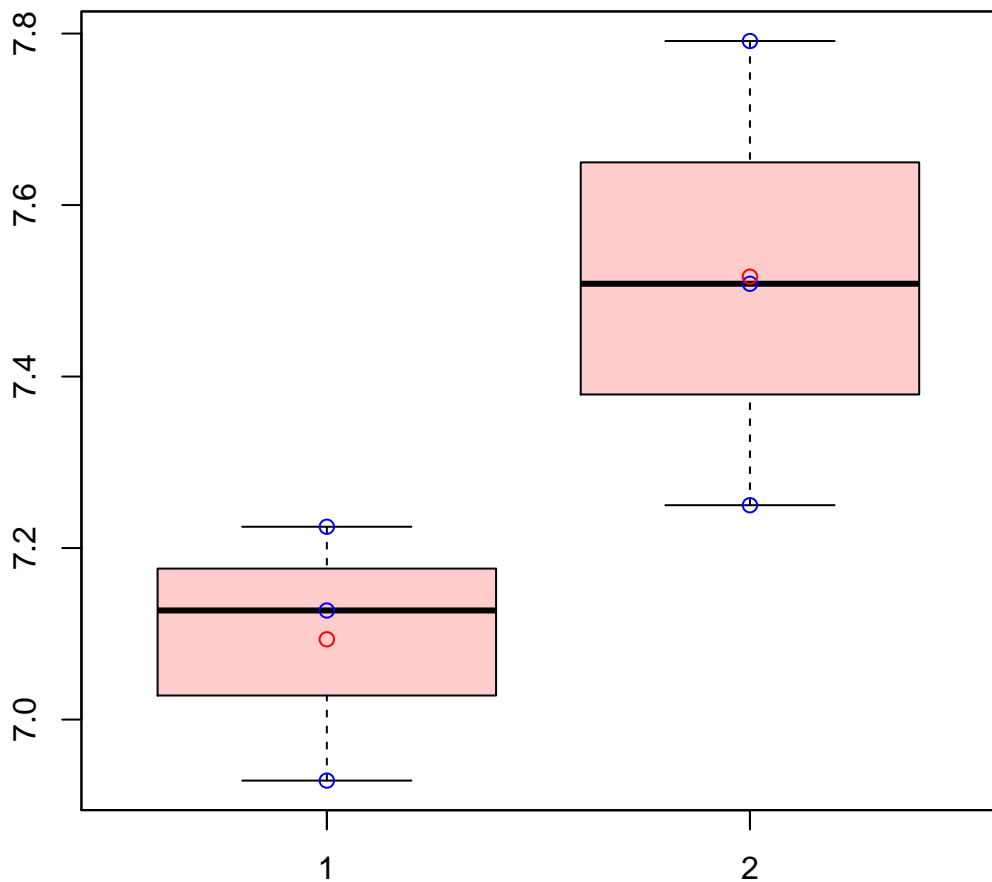

t-Test: p-value = 0.1



# M7YK14|M7YK14\_TRIUA

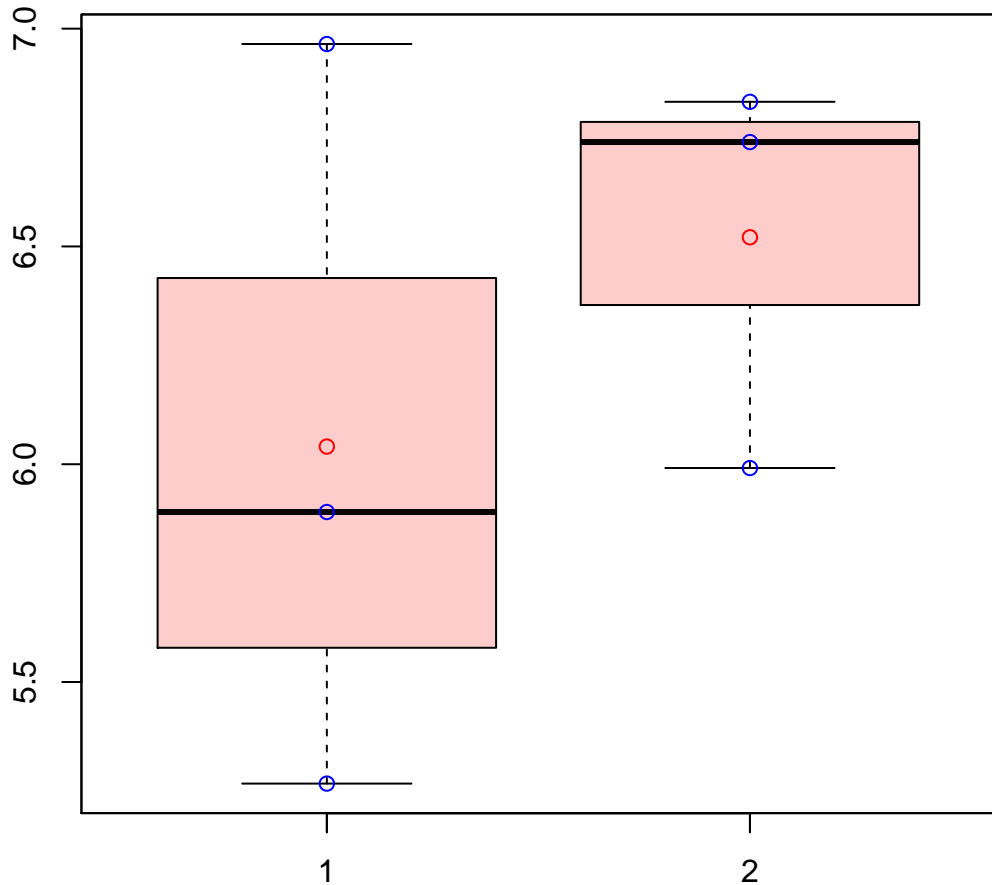

t-Test: p-value = 0.45

# M7YLI6|M7YLI6\_TRIUA

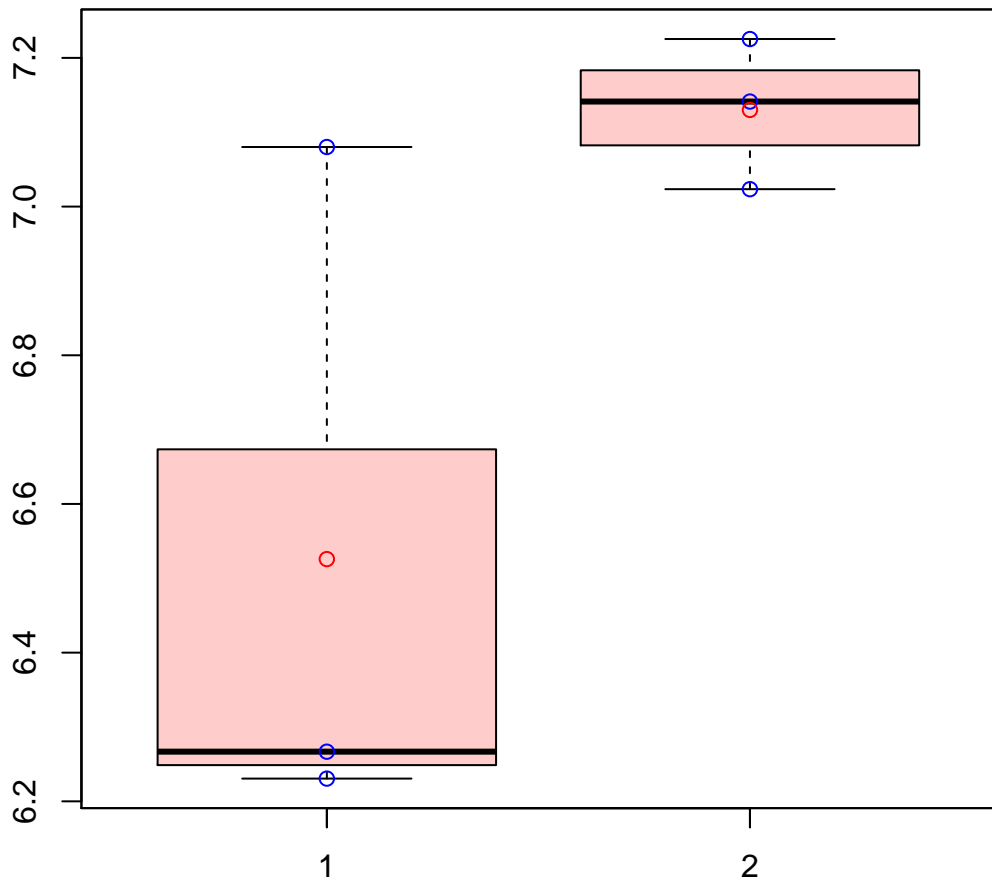

t-Test: p-value = 0.16

# M7YMT4|M7YMT4\_TRIUA

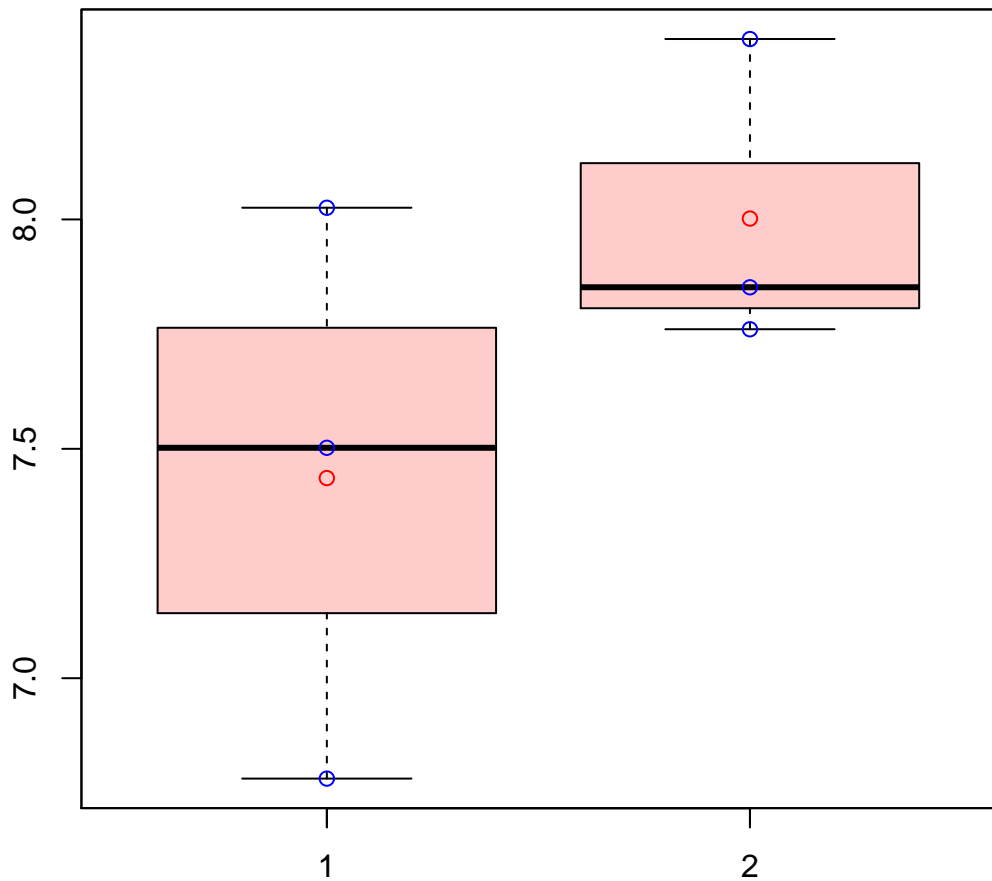

t-Test: p-value = 0.26

# M7YN66|M7YN66\_TRIUA

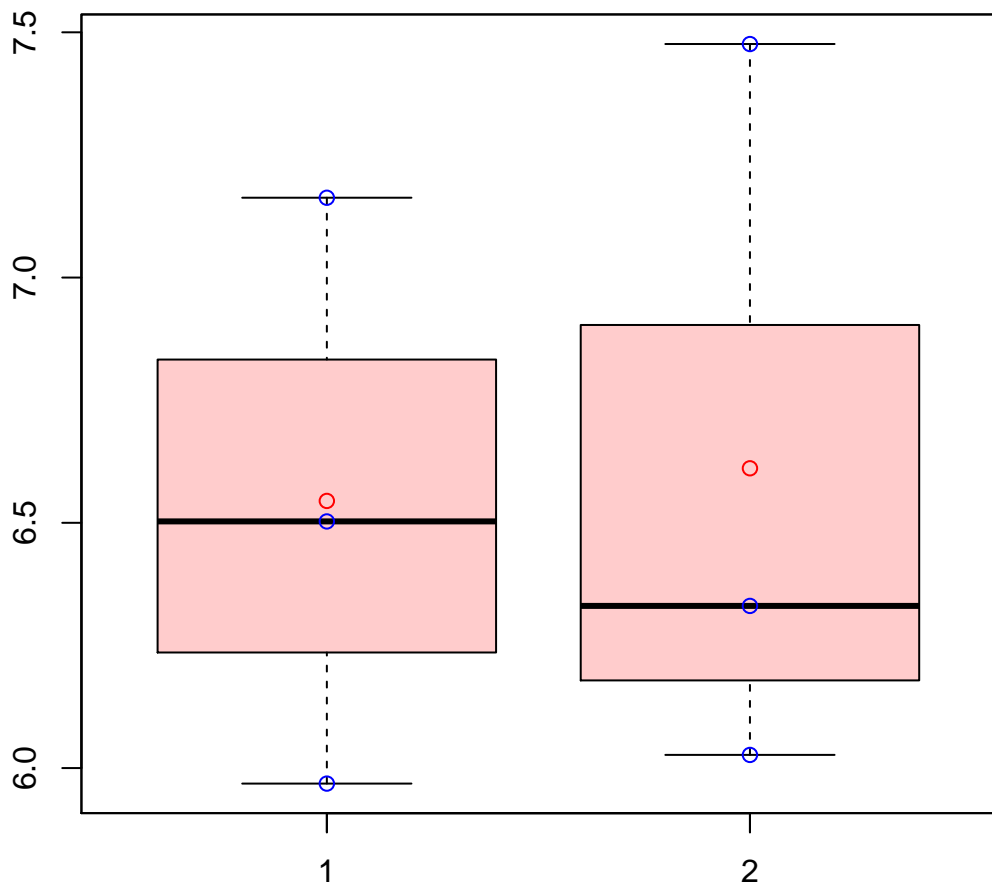

t-Test: p-value = 0.91

# M7YNT3|M7YNT3\_TRIUA

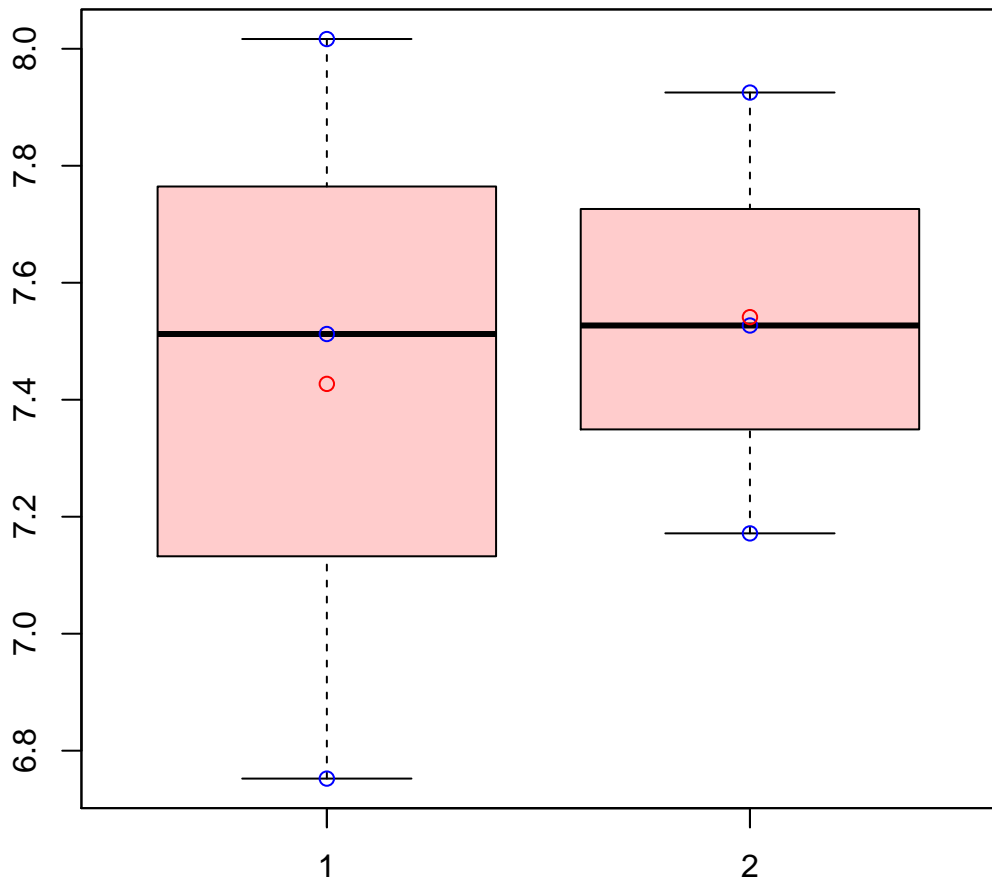

t-Test: p-value = 0.81

# M7YPN4|M7YPN4\_TRIUA

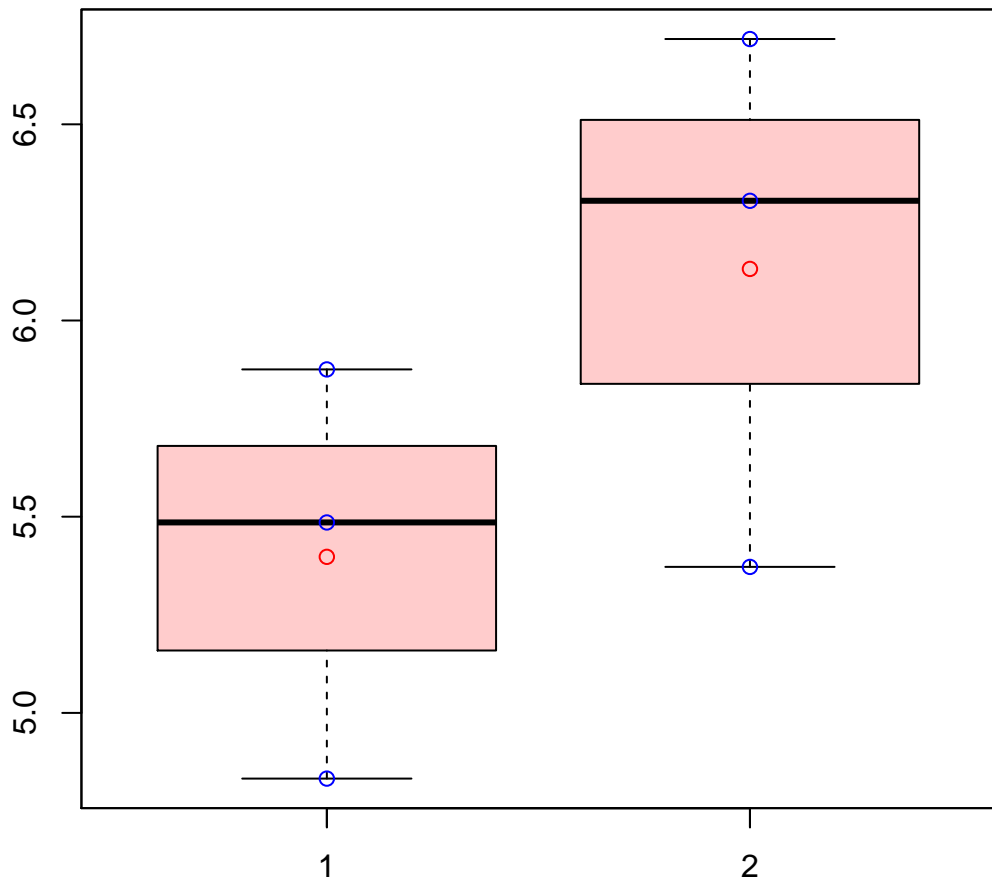

t-Test: p-value = 0.22

# M7YQB5|M7YQB5\_TRIUA

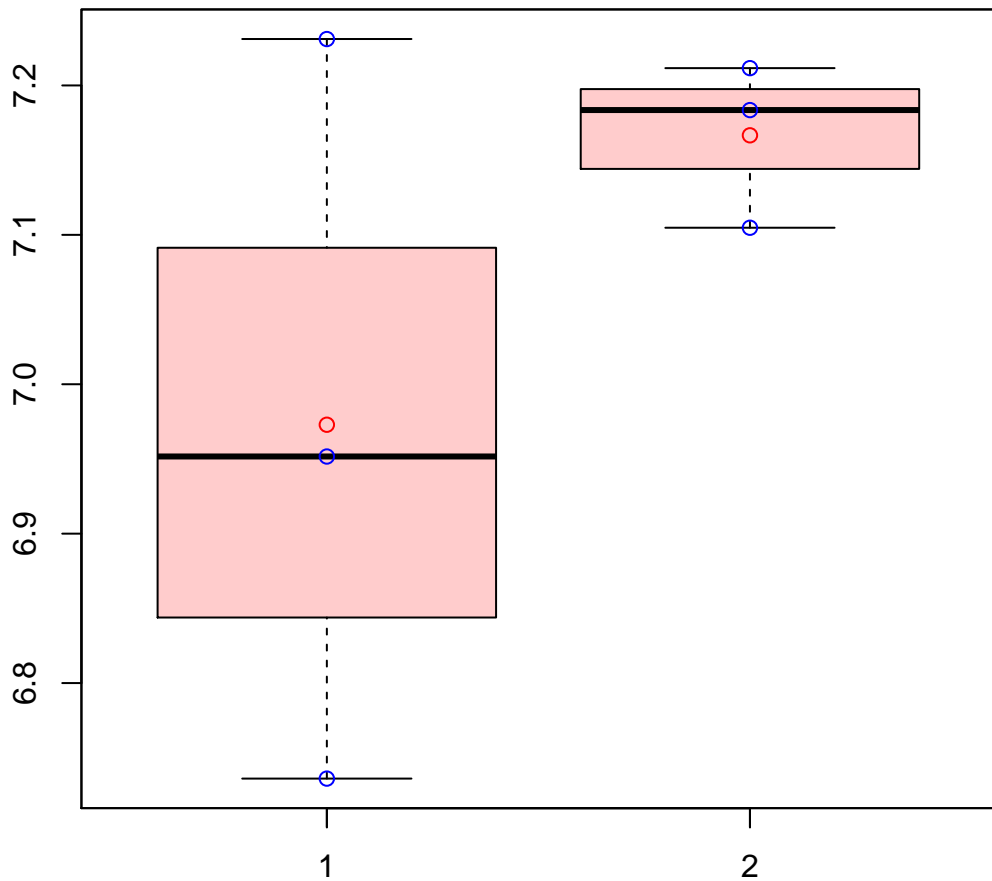

t-Test: p-value = 0.31

# M7YQS3|M7YQS3\_TRIUA

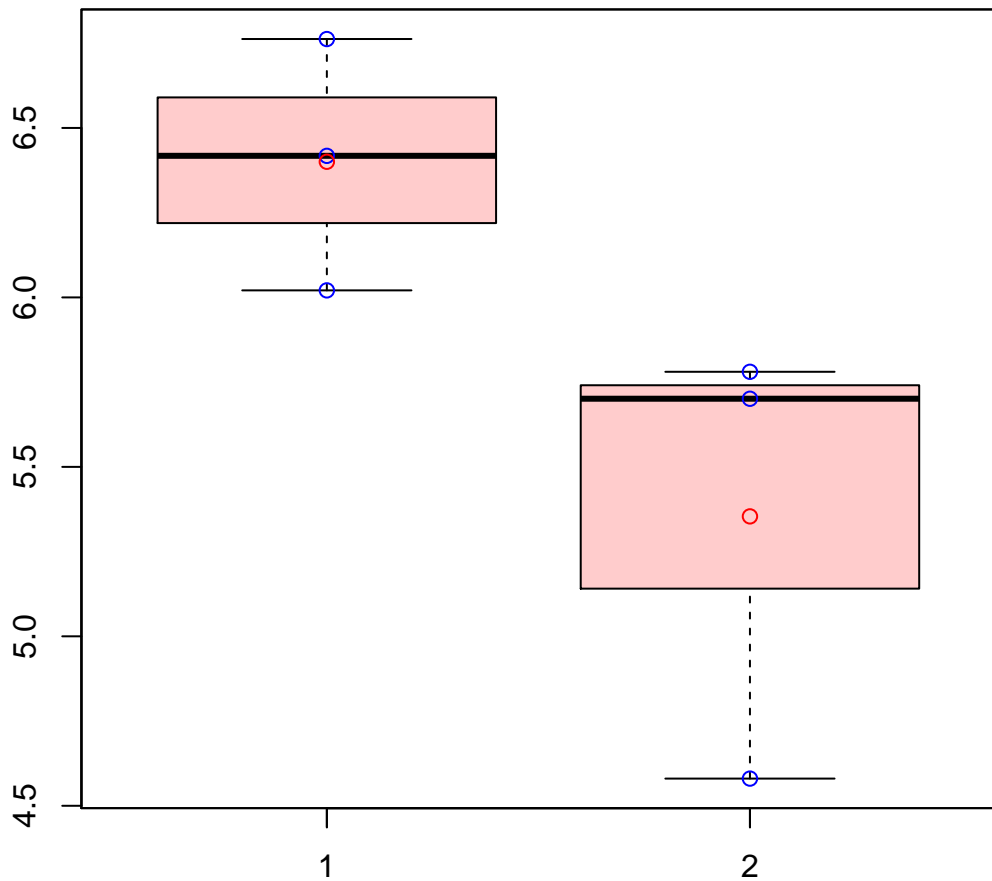

t-Test: p-value = 0.1



# M7YQT8|M7YQT8\_TRIUA

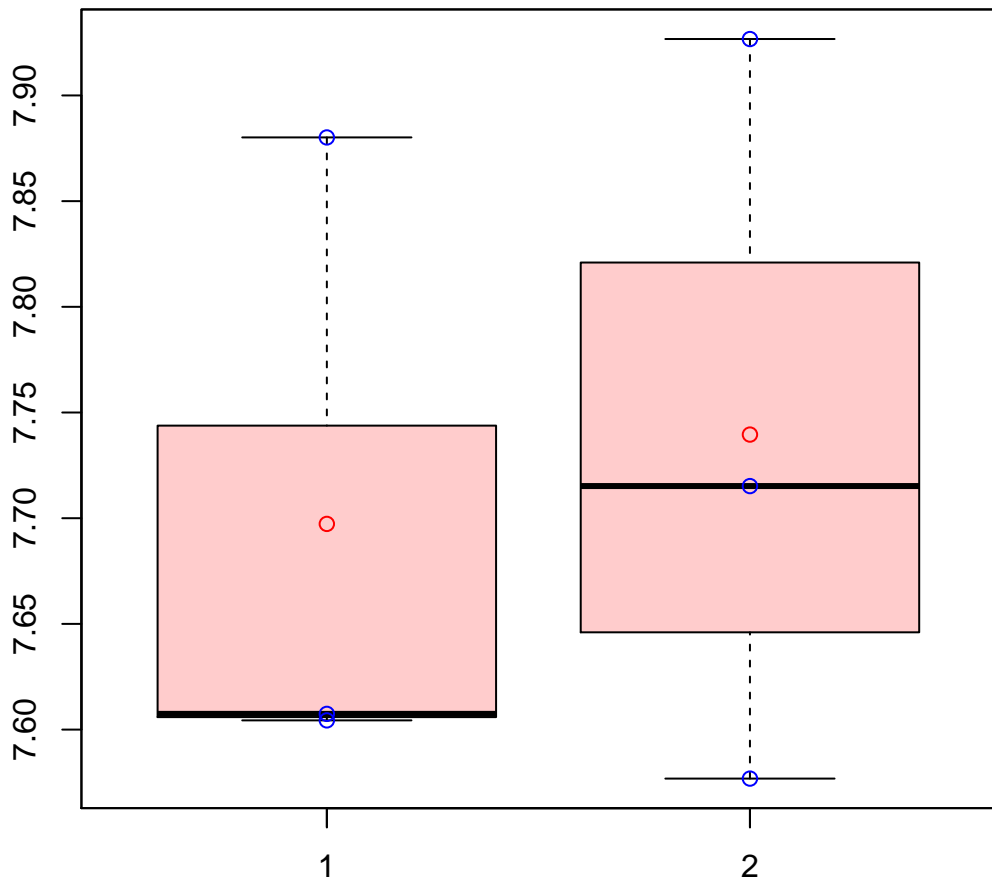

t-Test: p-value = 0.77

# M7YSK0|M7YSK0\_TRIUA

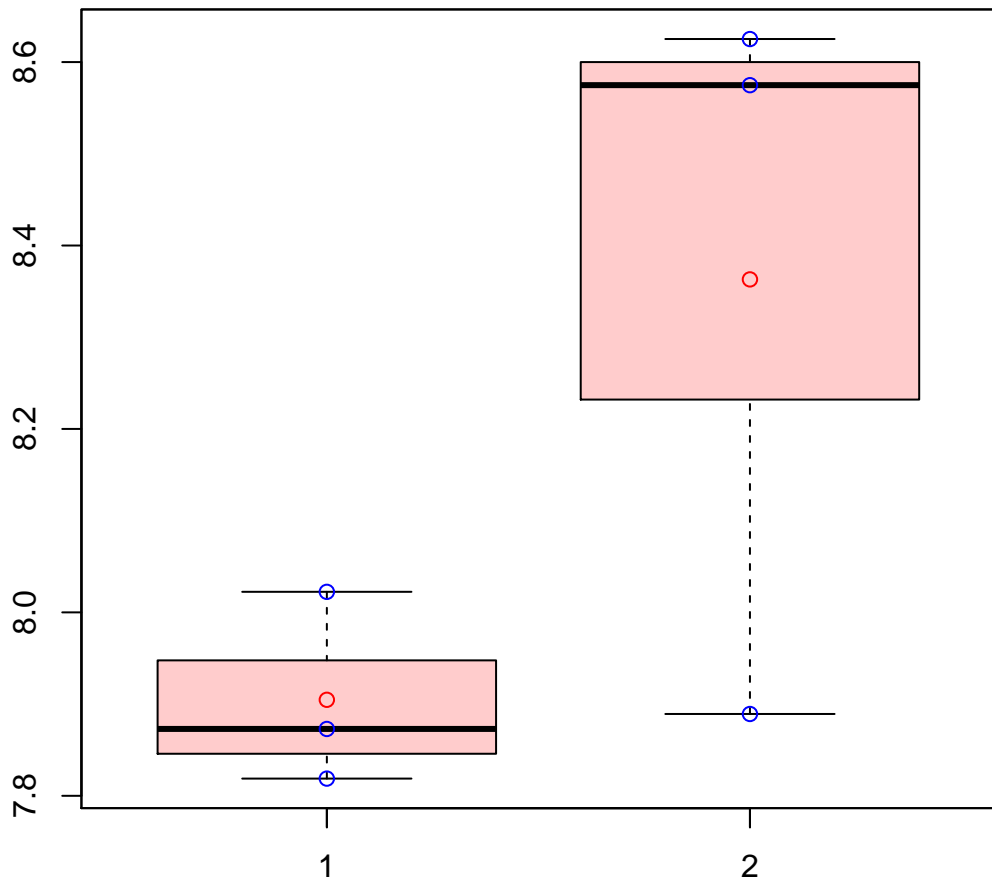

t-Test: p-value = 0.19

# M7YTL8|M7YTL8\_TRIUA

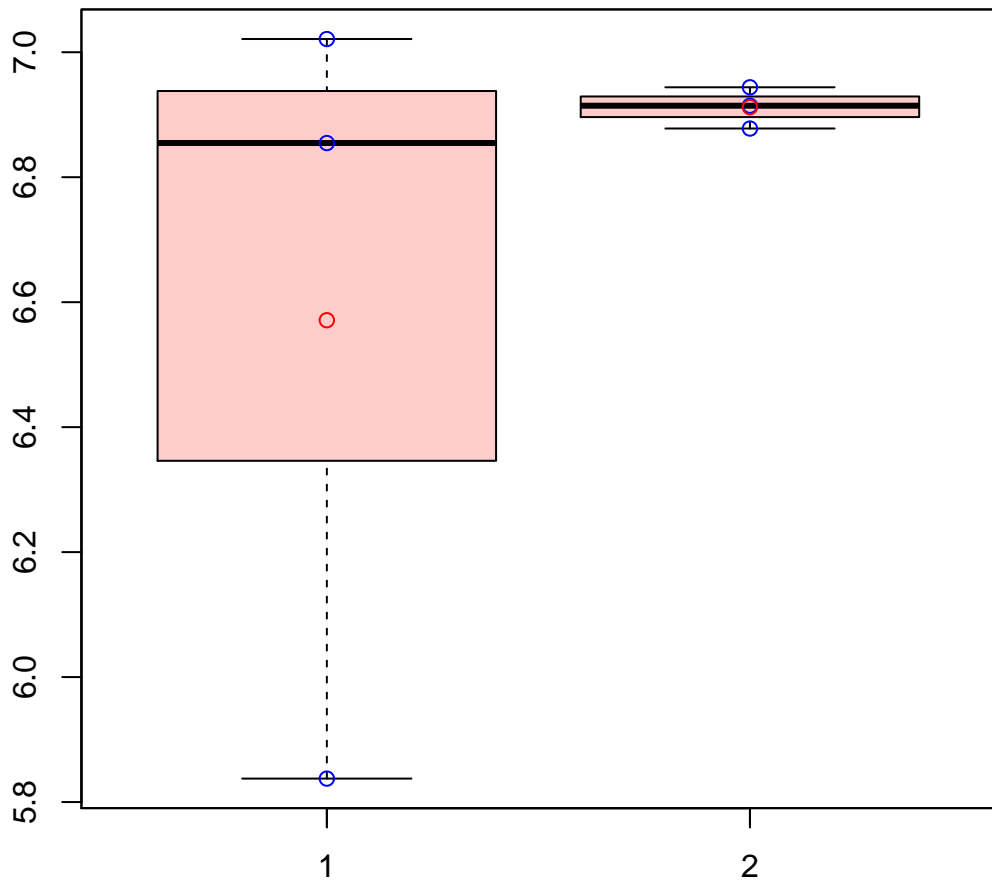

t-Test: p-value = 0.45

# M7YUU6|M7YUU6\_TRIUA

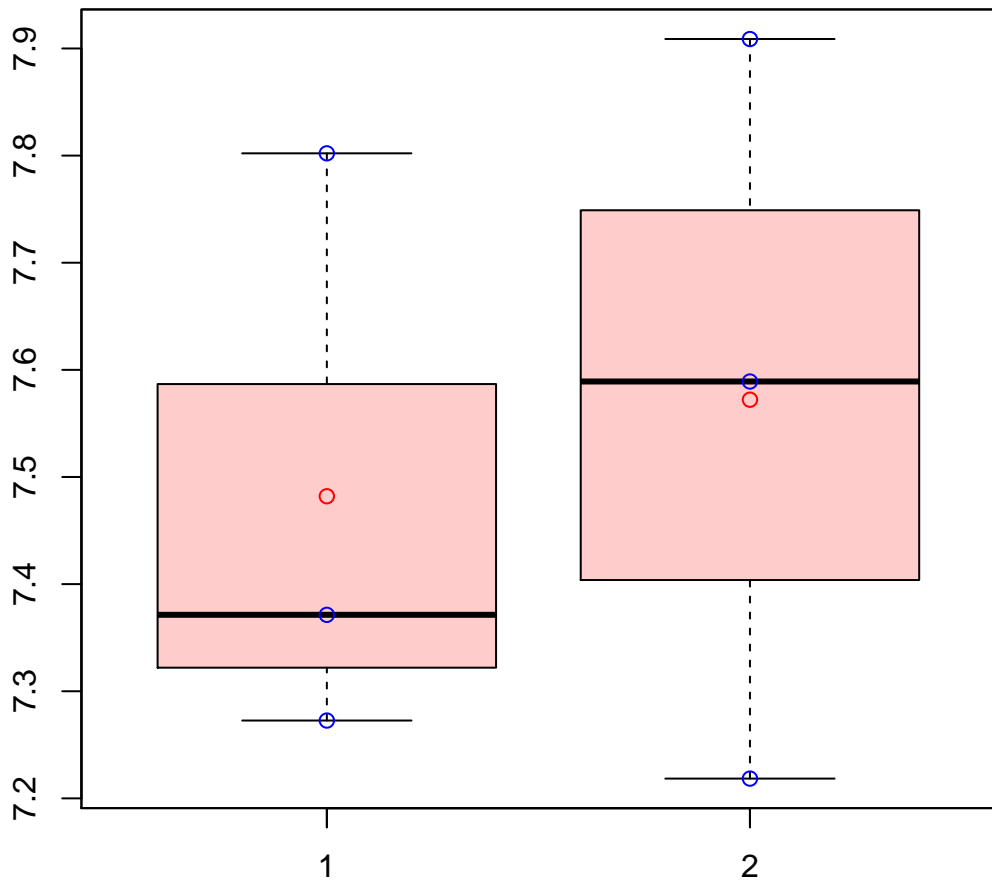

t-Test: p-value = 0.74

# M7YW97|M7YW97\_TRIUA

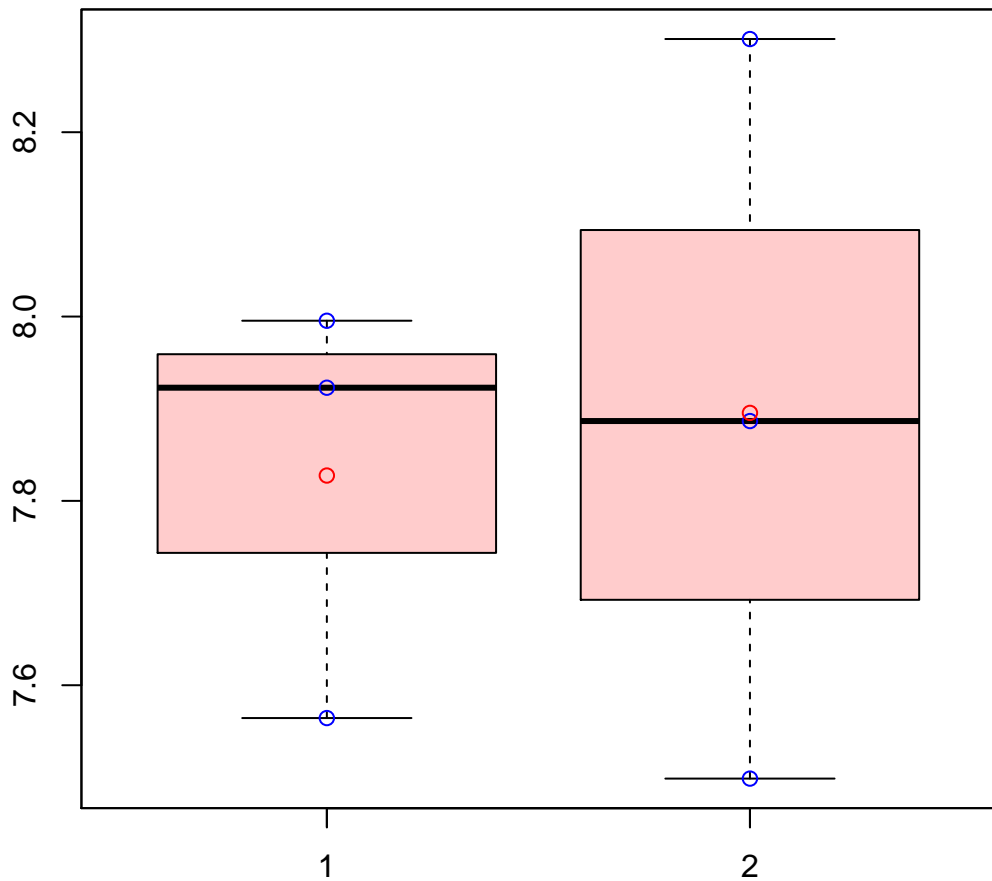

t-Test: p-value = 0.81

# M7YWU3|M7YWU3\_TRIUA

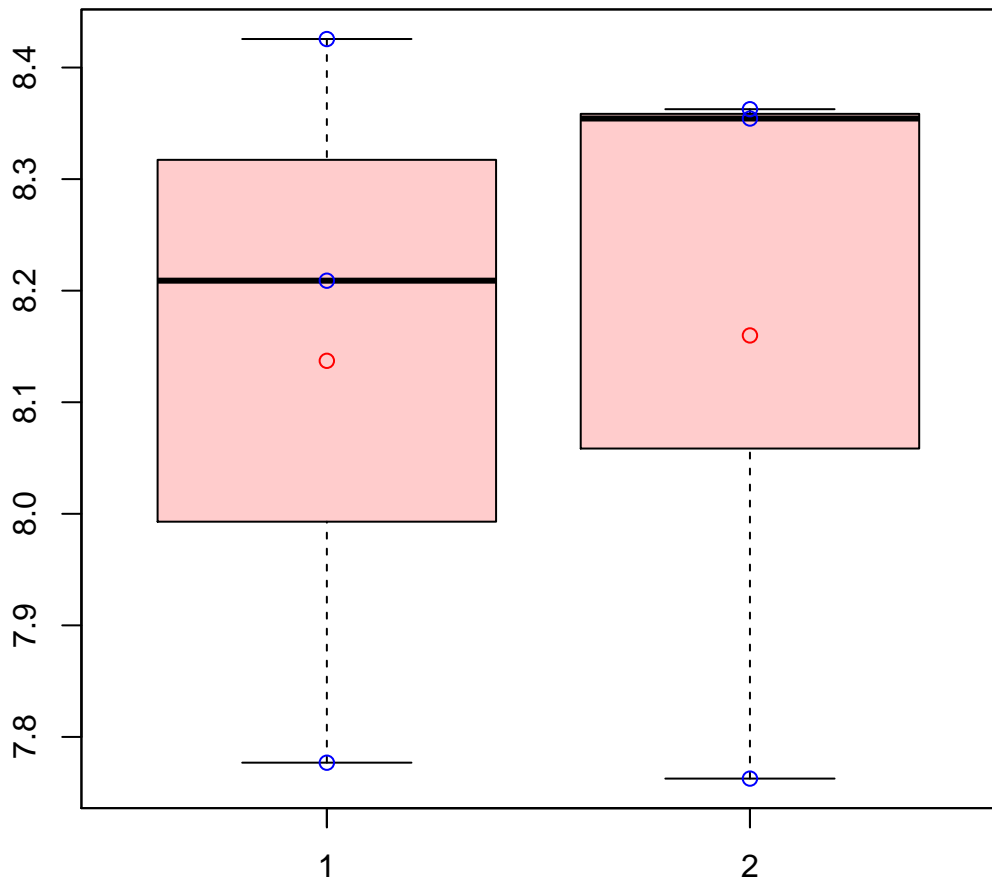

t-Test: p-value = 0.94

# M7YXE0|M7YXE0\_TRIUA

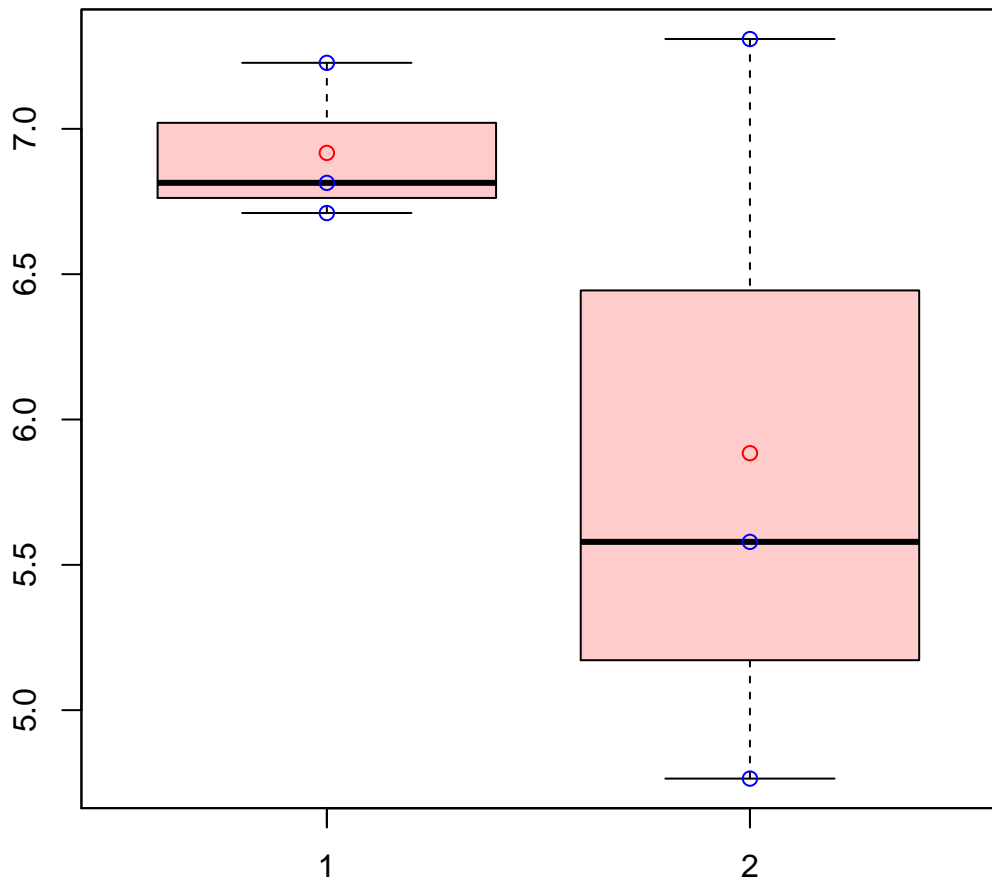

t-Test: p-value = 0.3

# M7YXG7|M7YXG7\_TRIUA

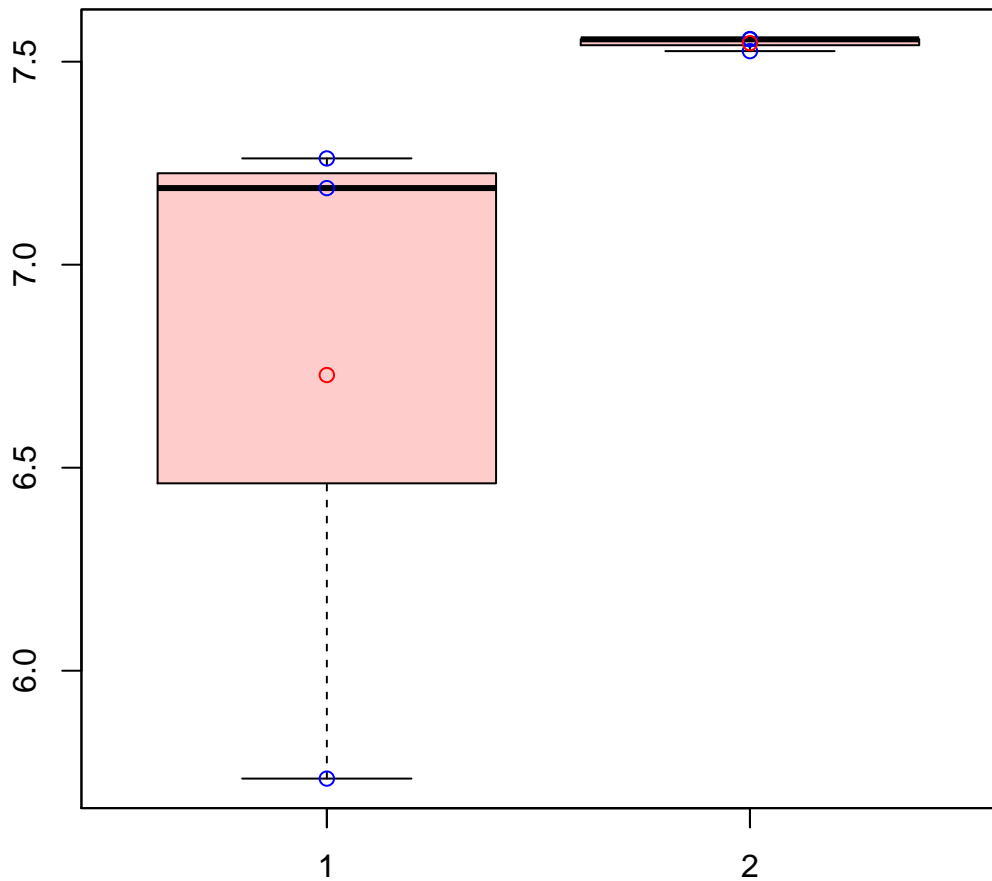

t-Test: p-value = 0.24



# M7YXL1|M7YXL1\_TRIUA

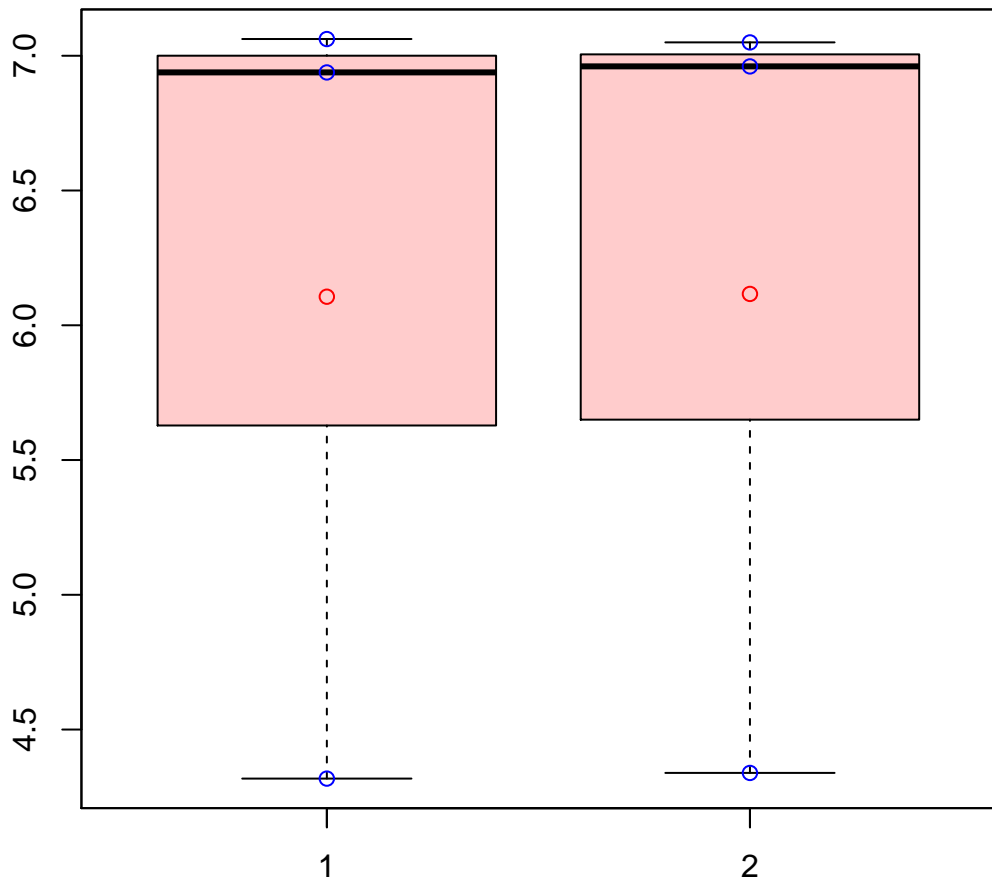

t-Test: p-value = 0.99

# M7YXN0|M7YXN0\_TRIUA

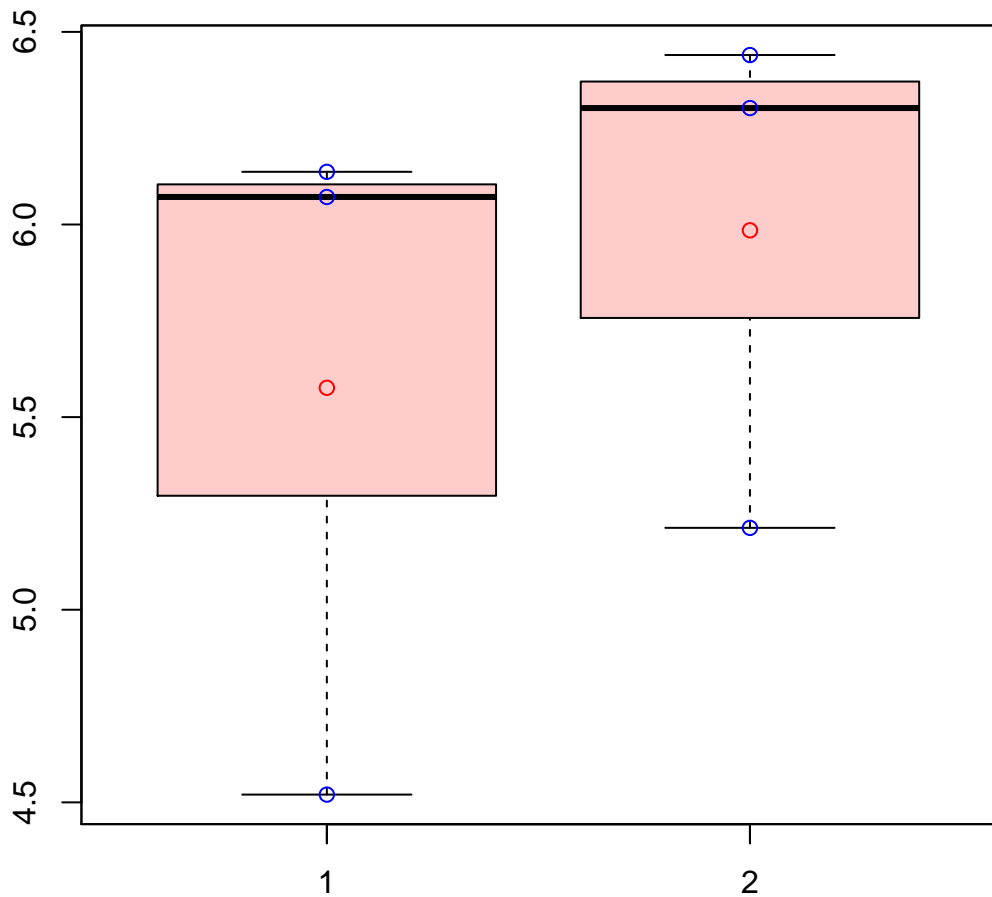

t-Test: p-value = 0.57

# M7YXN3|M7YXN3\_TRIUA

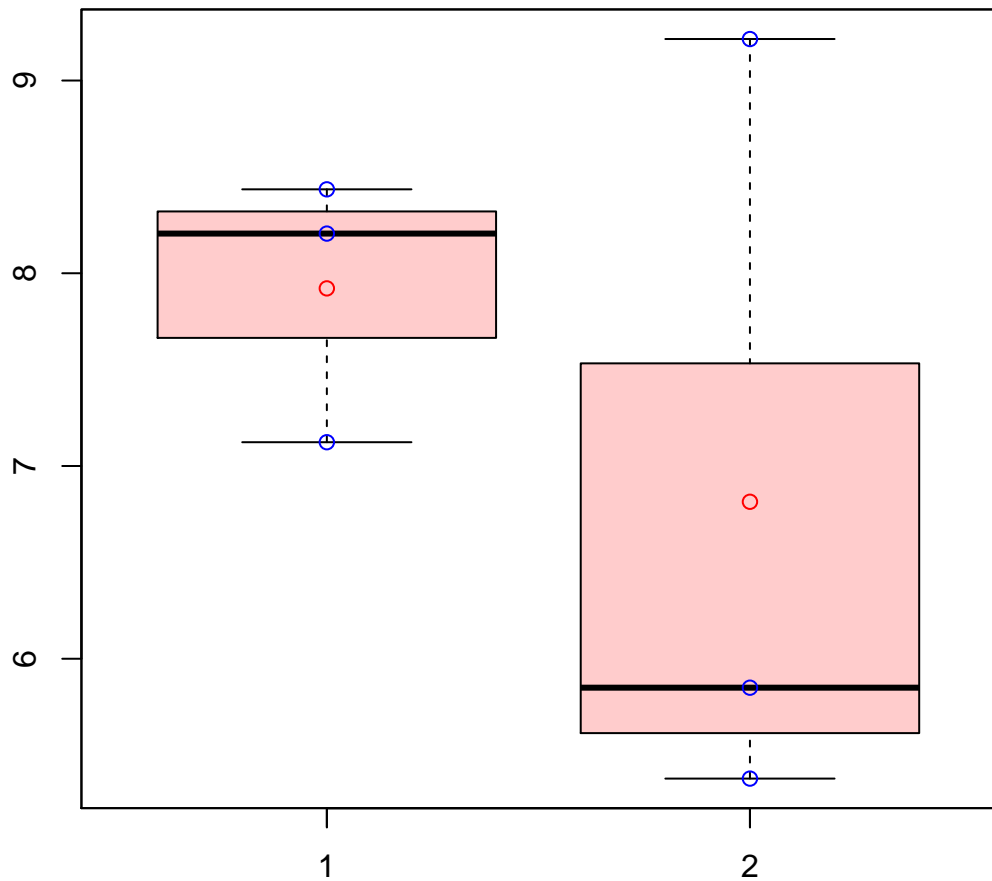

t-Test: p-value = 0.46

# M7YY59|M7YY59\_TRIUA

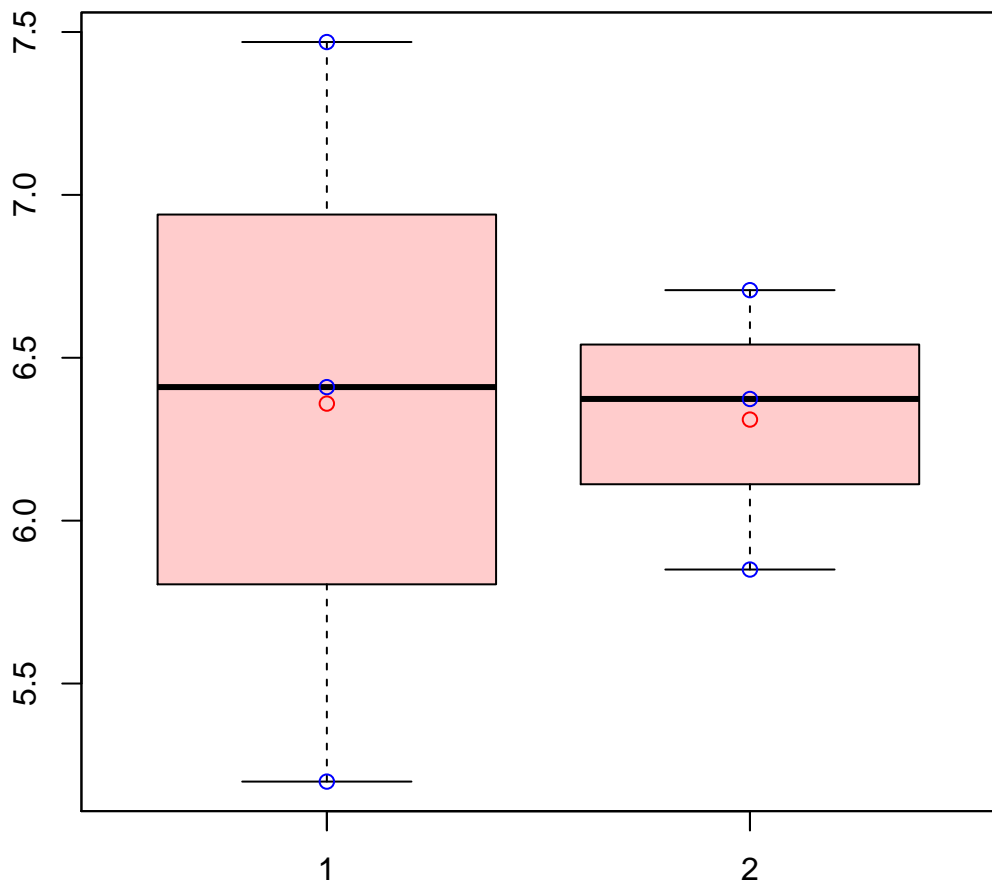

t-Test: p-value = 0.95

# M7YZ21|M7YZ21\_TRIUA

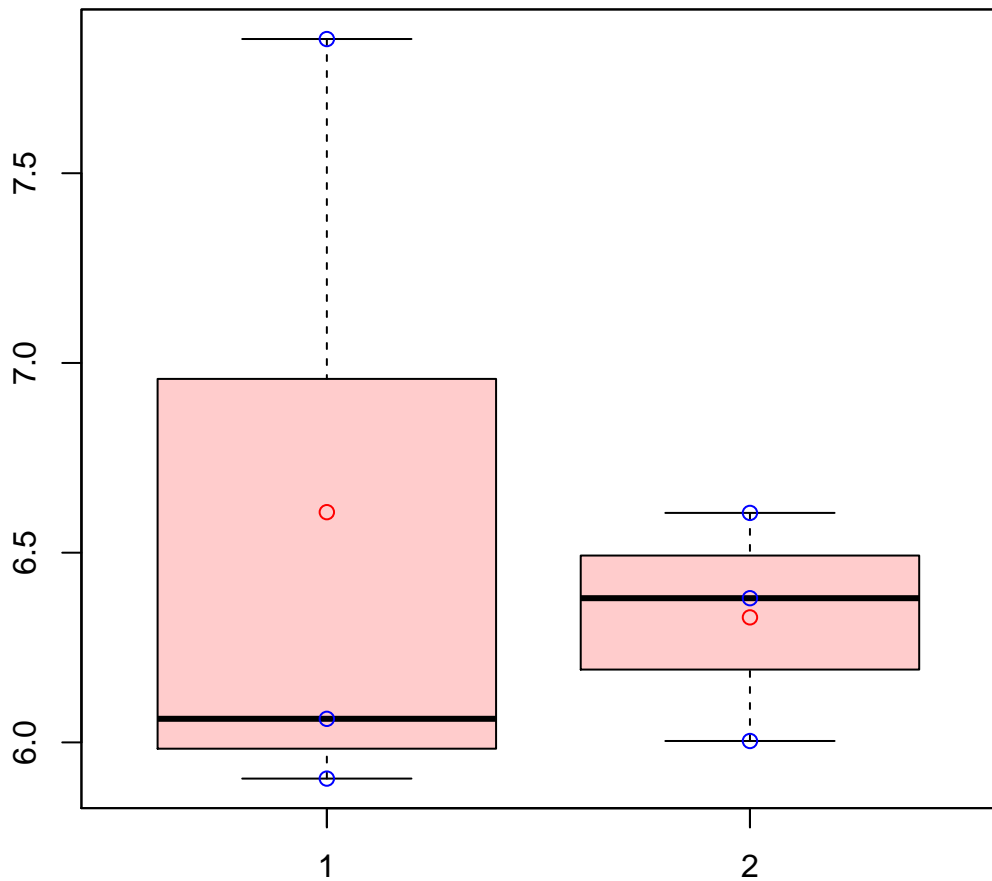

t-Test: p-value = 0.71

# M7YZ66|M7YZ66\_TRIUA

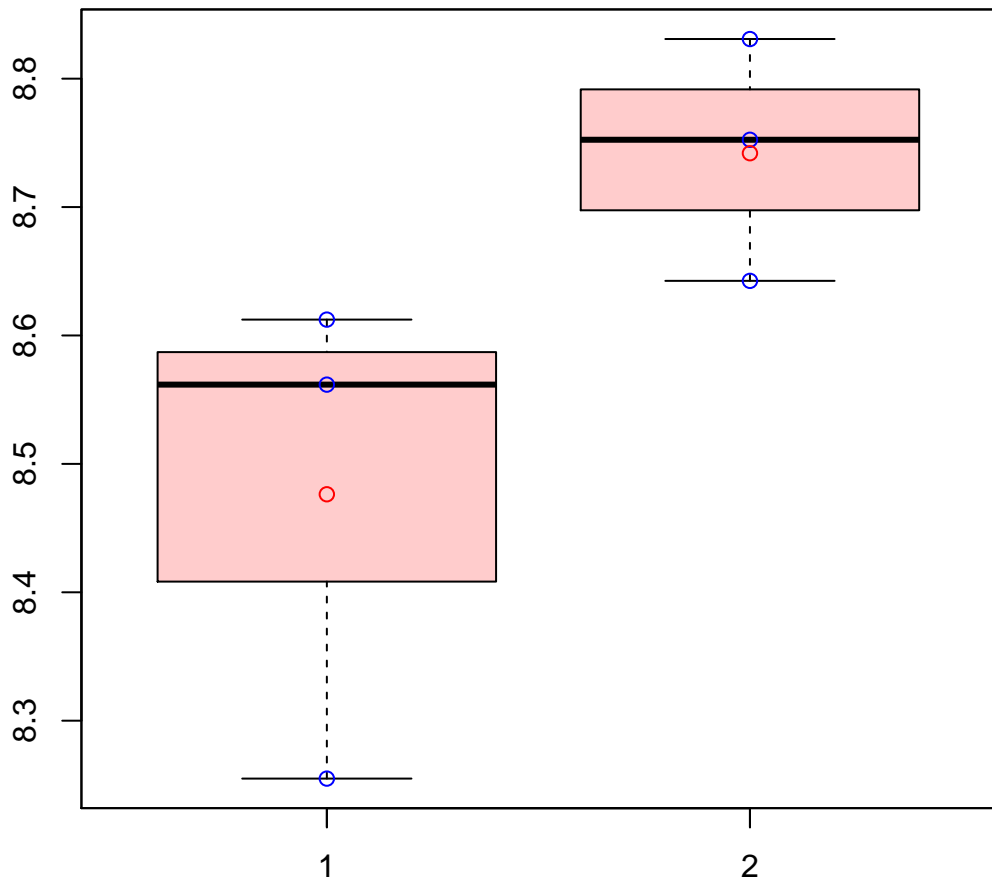

t-Test: p-value = 0.13

# M7YZ91|M7YZ91\_TRIUA

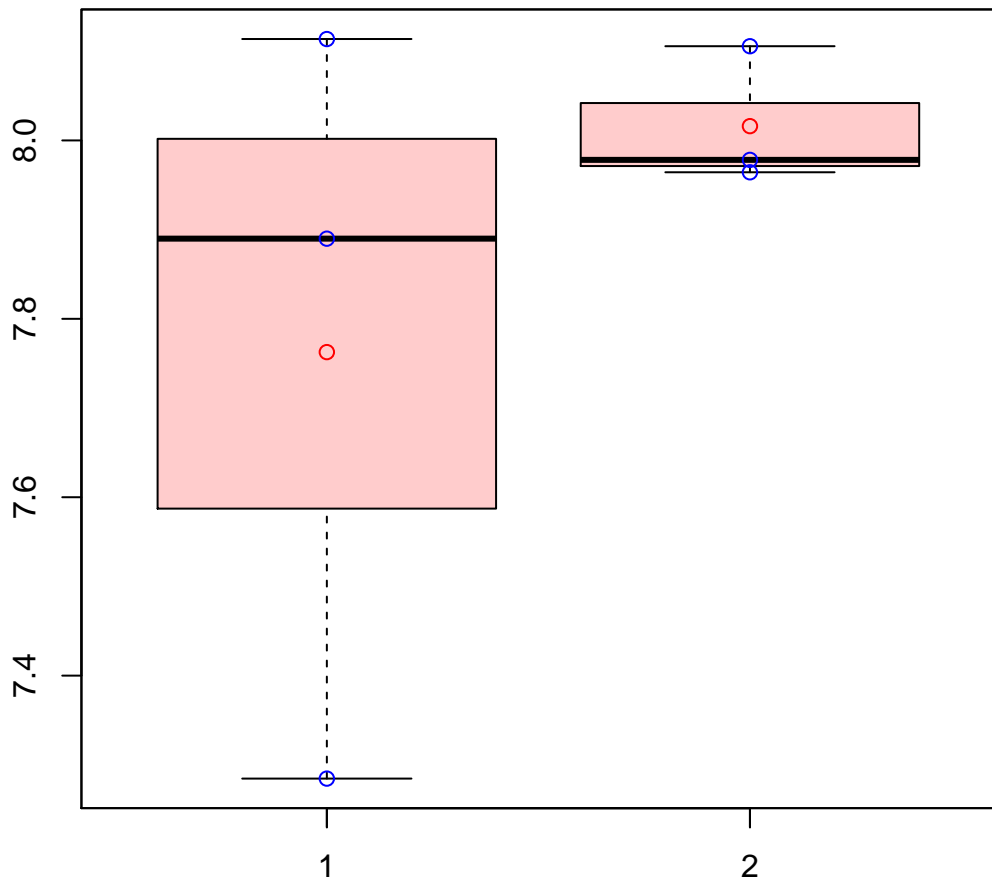

t-Test: p-value = 0.41

# M7YZG7|M7YZG7\_TRIUA

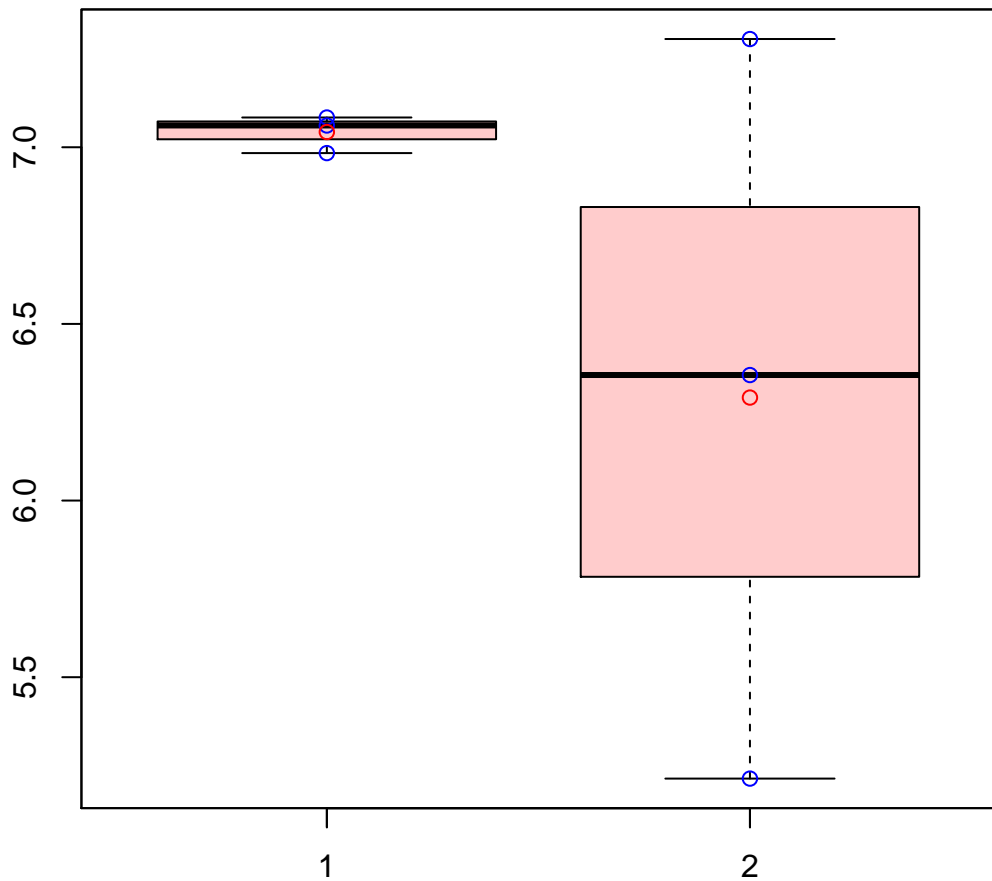

t-Test: p-value = 0.34



# M7YZS1|M7YZS1\_TRIUA

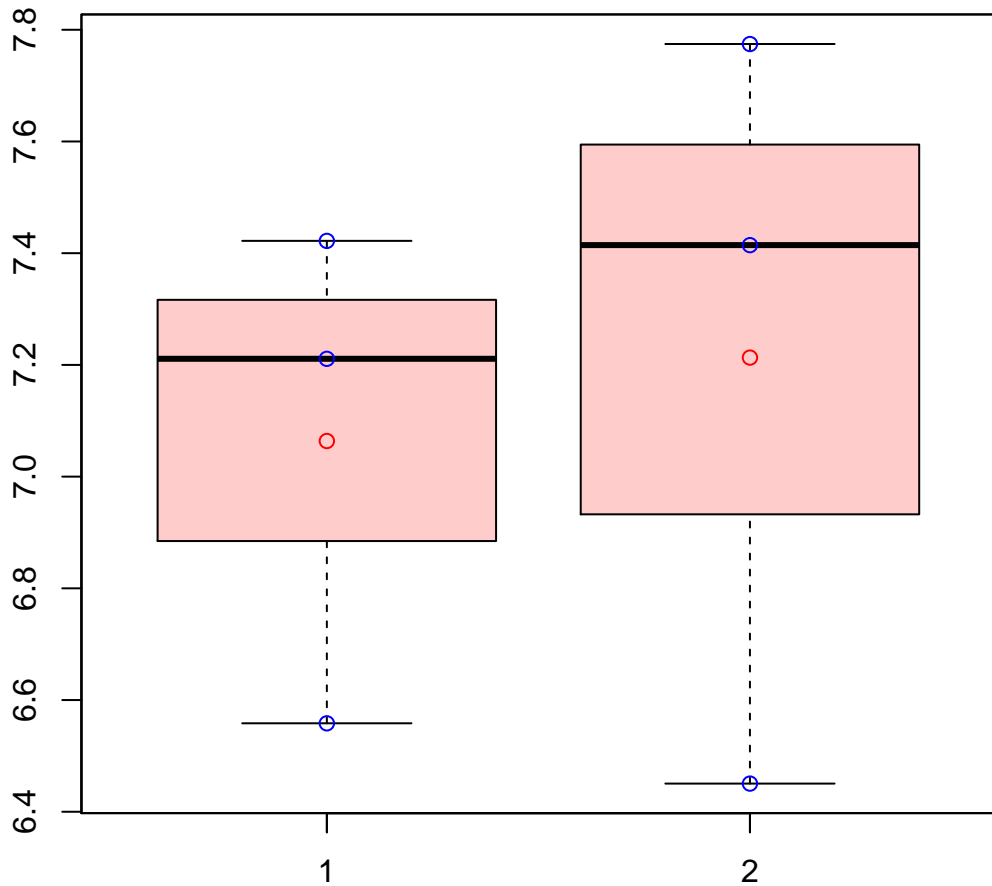

t-Test: p-value = 0.77

# M7YZY8|M7YZY8\_TRIUA

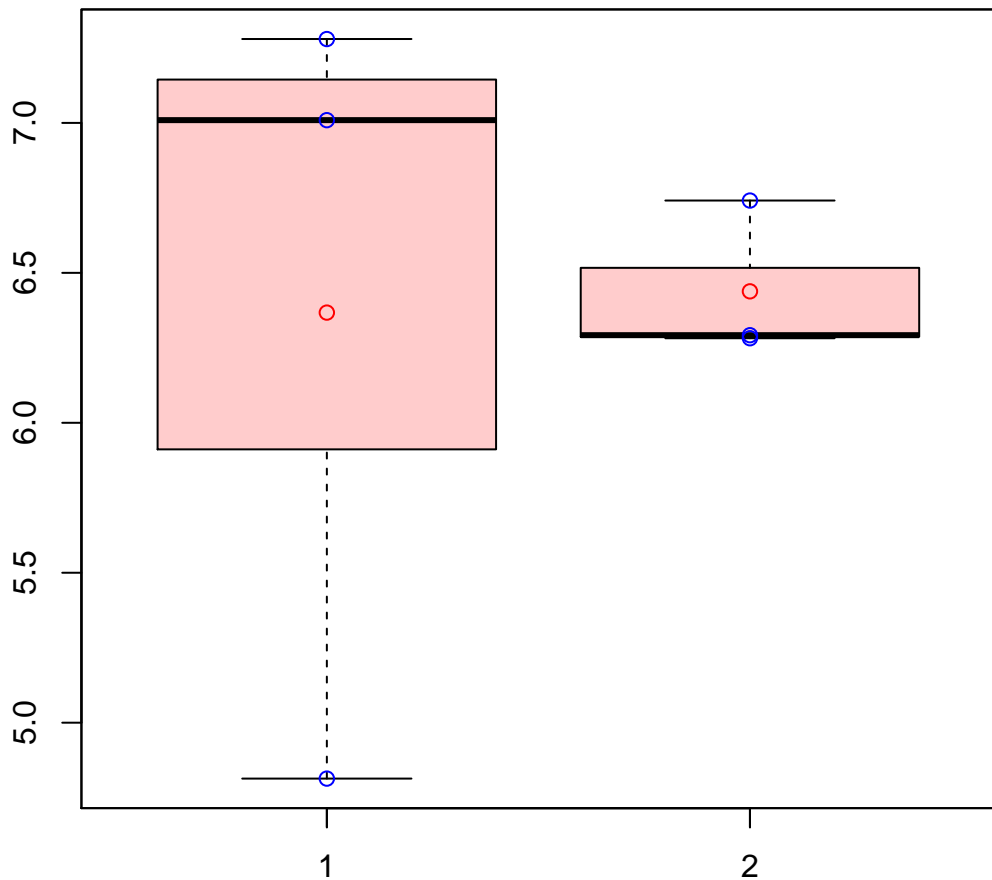

t-Test: p-value = 0.94

# M7Z031|M7Z031\_TRIUA

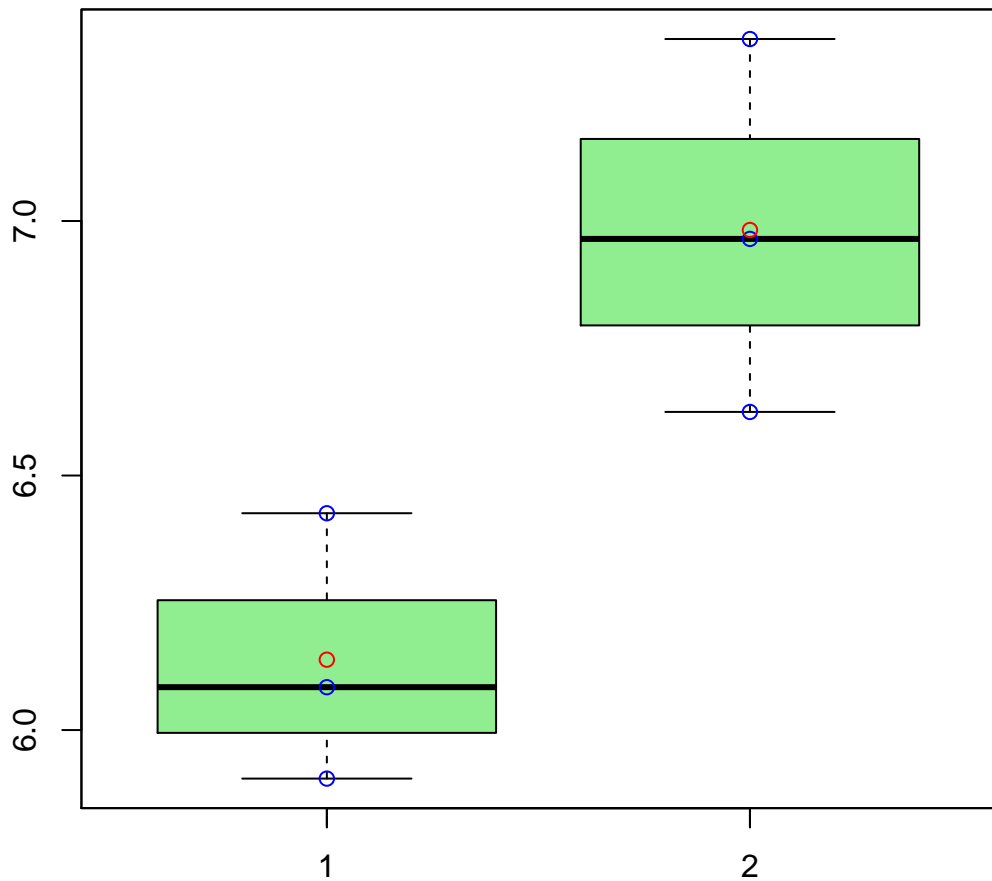

t-Test: p-value = 0.04

# M7Z036|M7Z036\_TRIUA

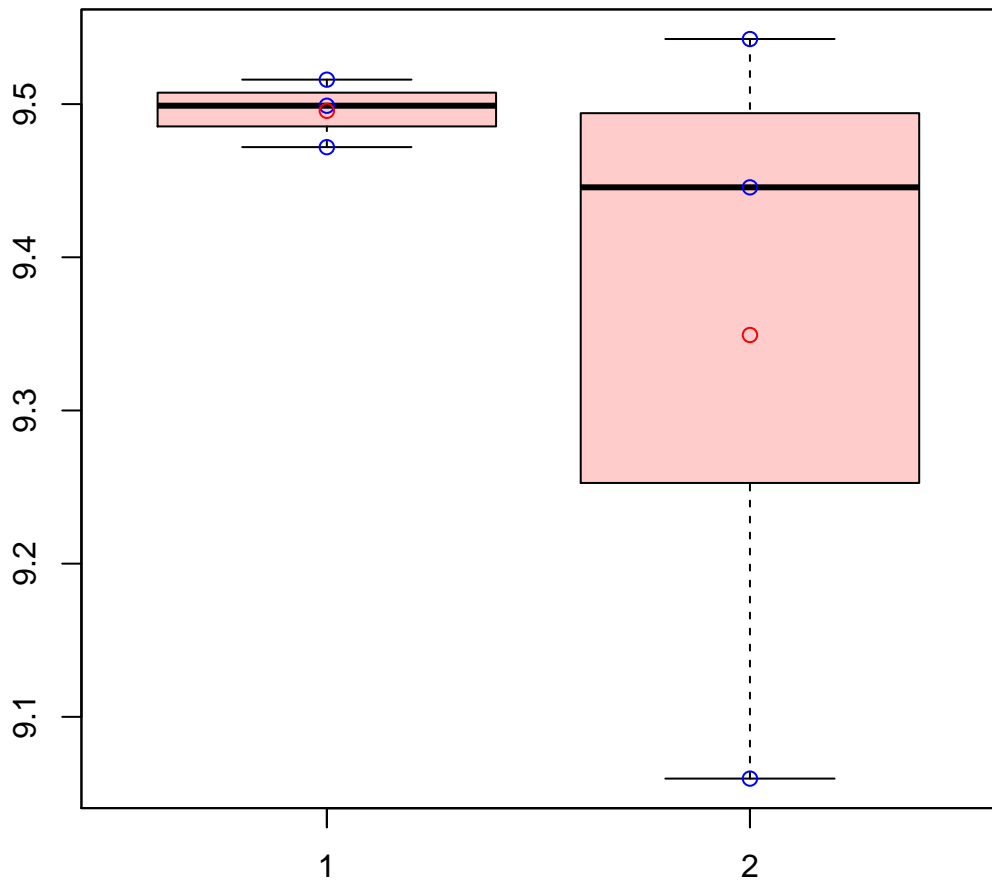

t-Test: p-value = 0.43

# M7Z046|M7Z046\_TRIUA

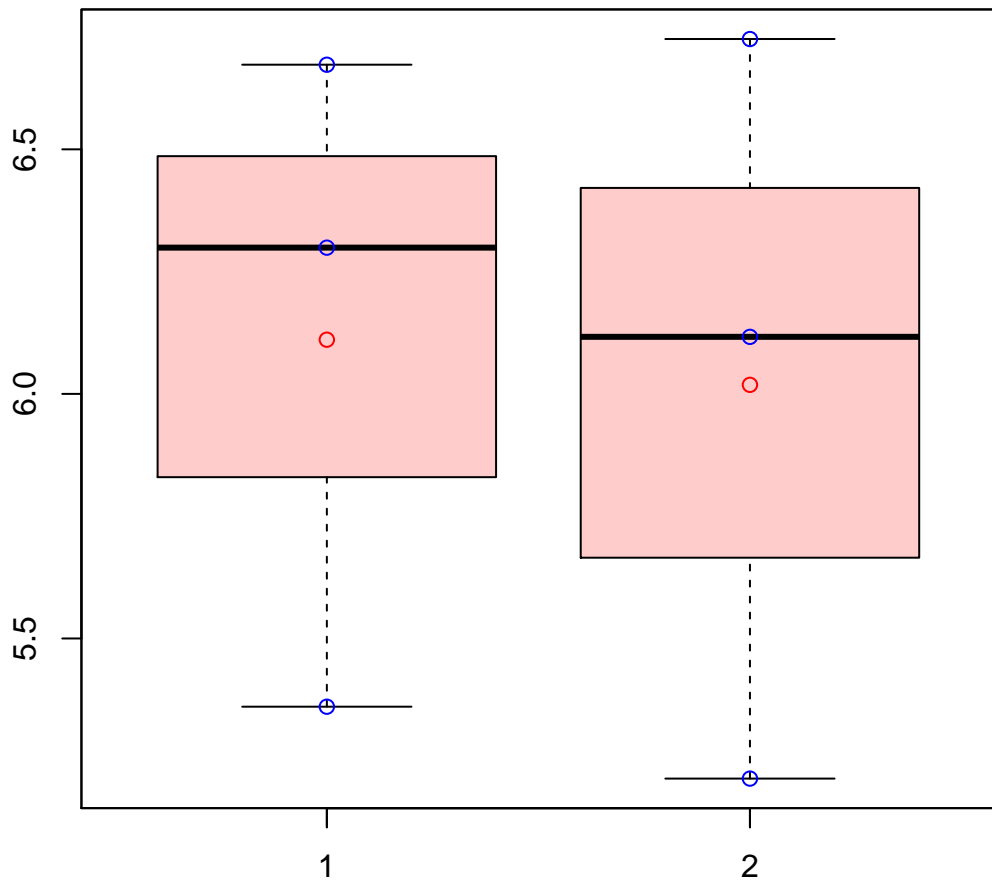

t-Test: p-value = 0.88

# M7Z0F7|M7Z0F7\_TRIUA

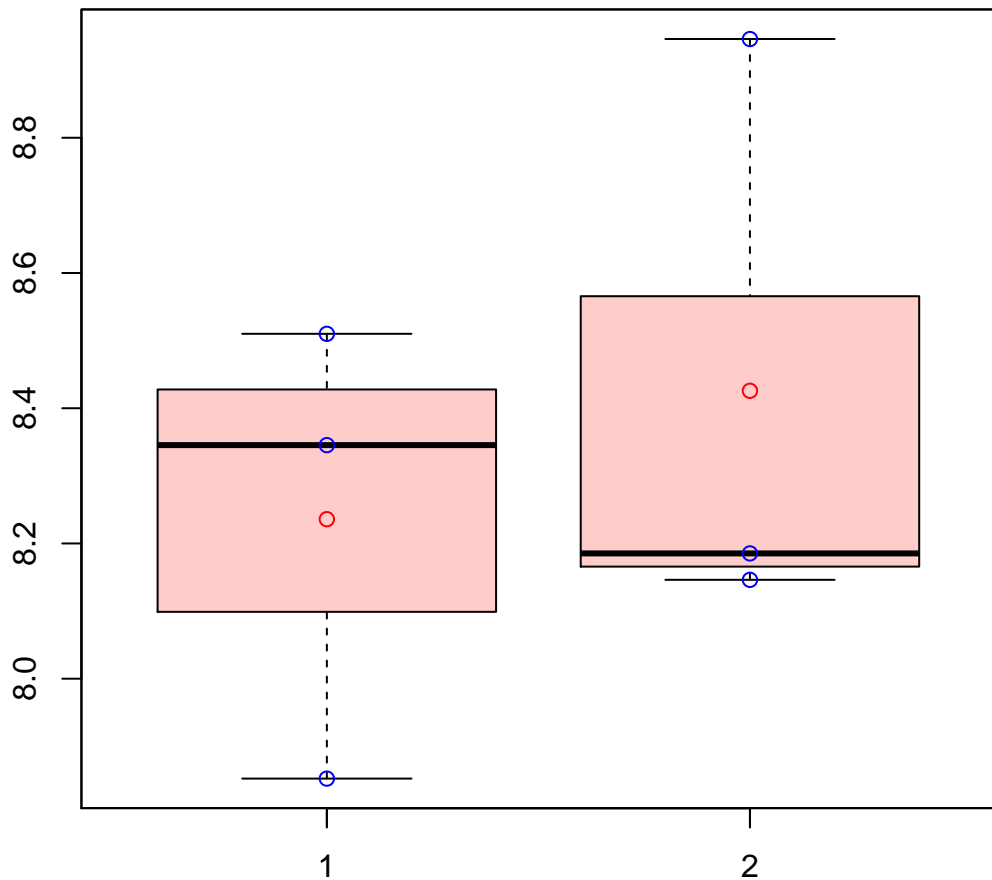

t-Test: p-value = 0.59

# M7Z141|M7Z141\_TRIUA

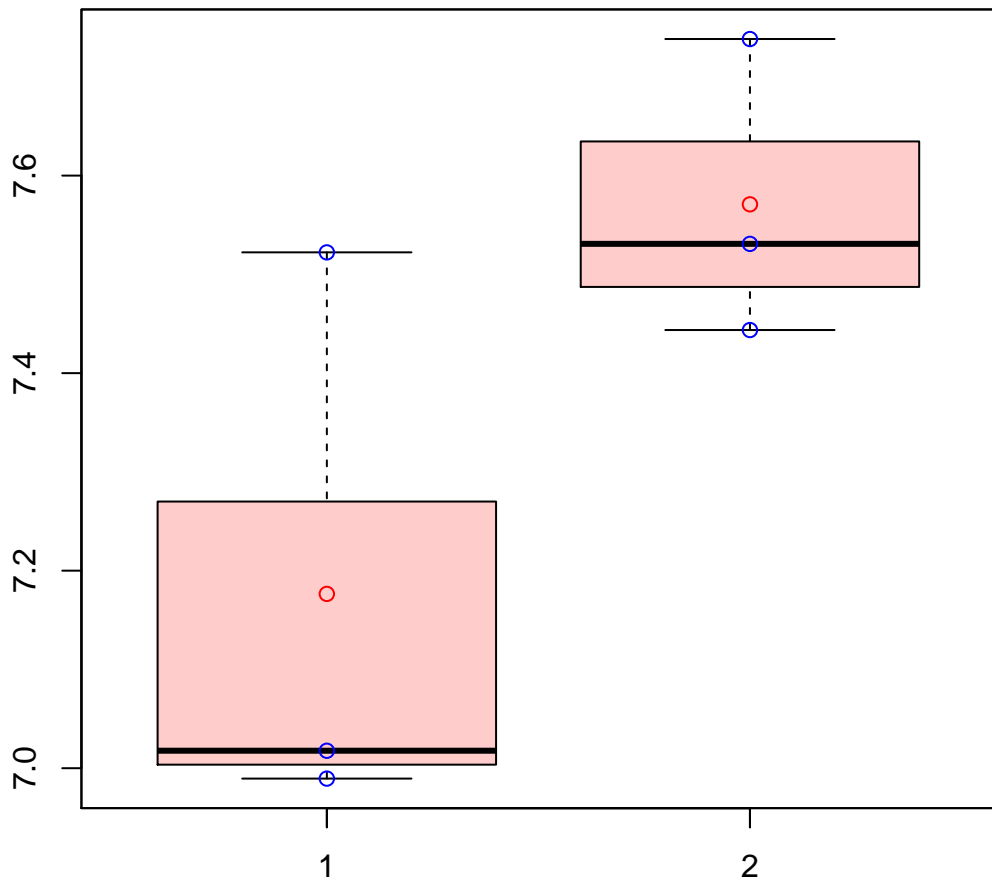

t-Test: p-value = 0.14

# M7Z178|M7Z178\_TRIUA

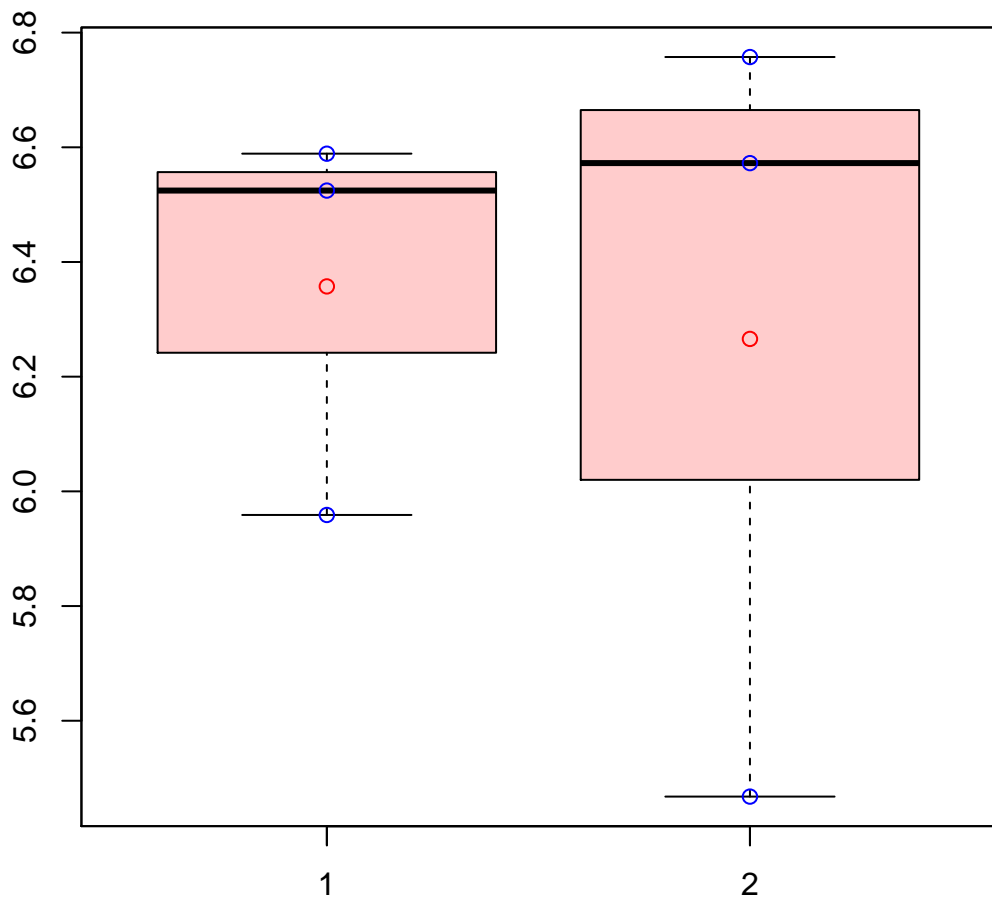

t-Test: p-value = 0.85



# M7Z1H8|M7Z1H8\_TRIUA

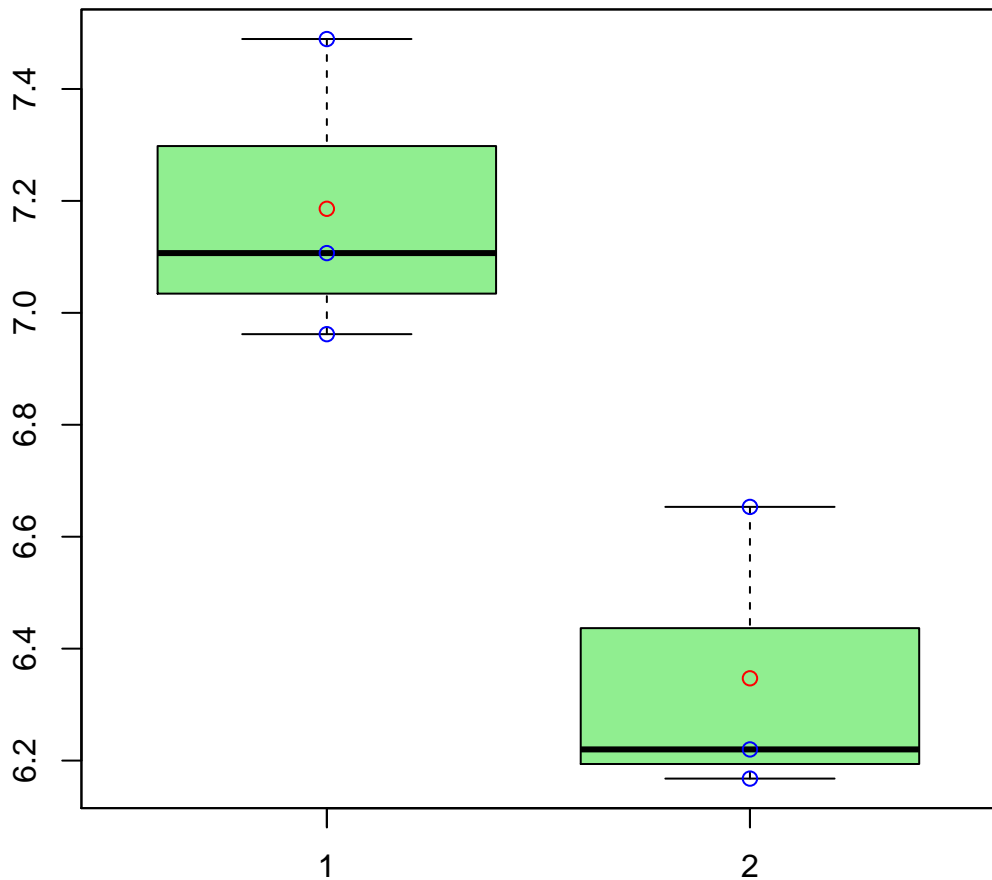

t-Test: p-value = 0.02

# M7Z1R4|M7Z1R4\_TRIUA

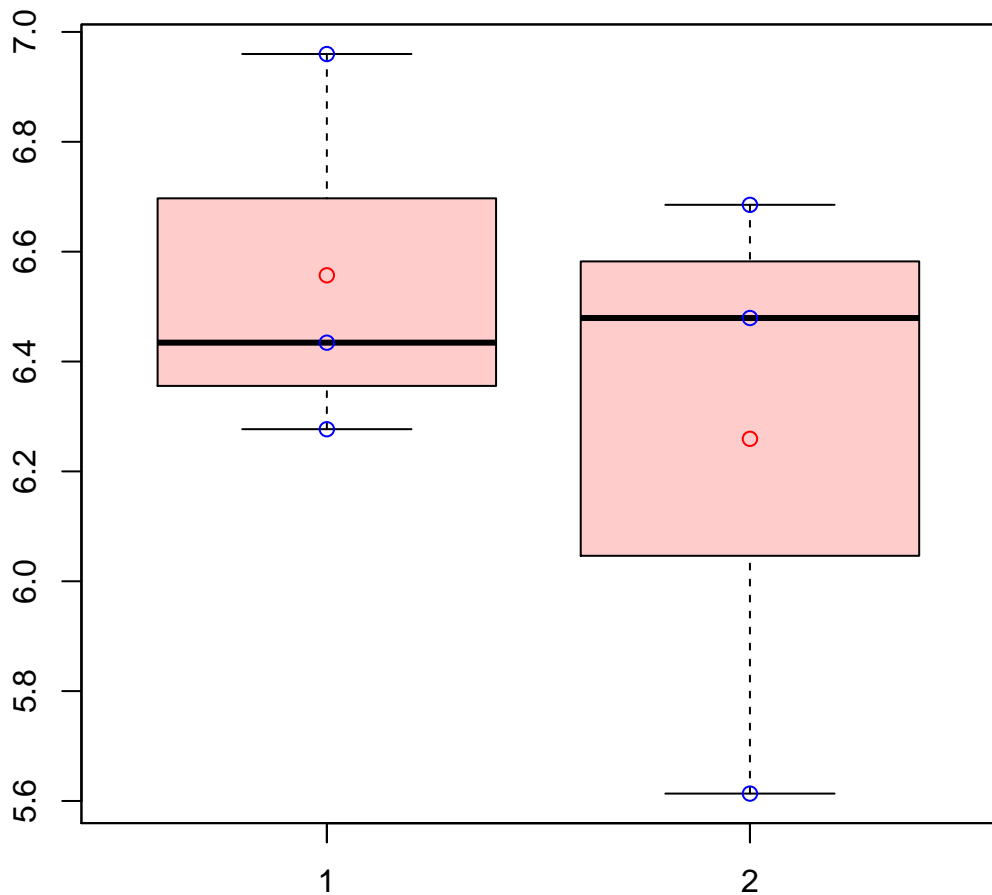

t-Test: p-value = 0.49

# M7Z1V0|M7Z1V0\_TRIUA

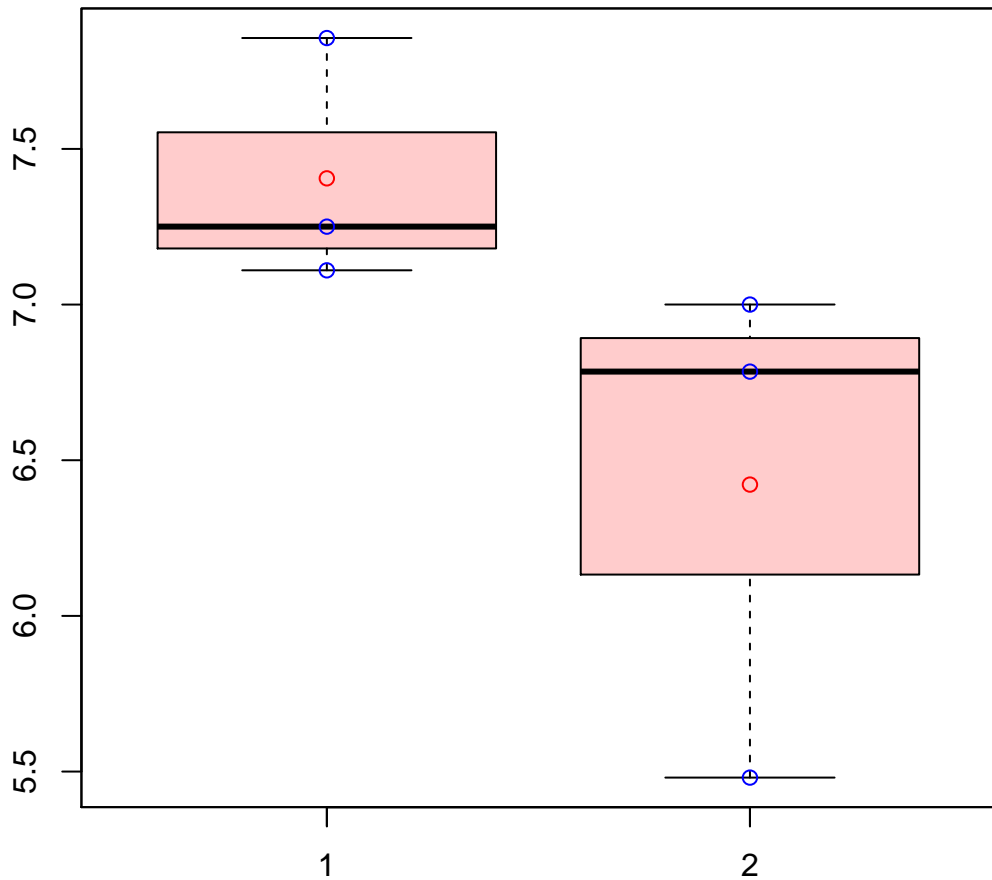

t-Test: p-value = 0.16

# M7Z200|M7Z200\_TRIUA

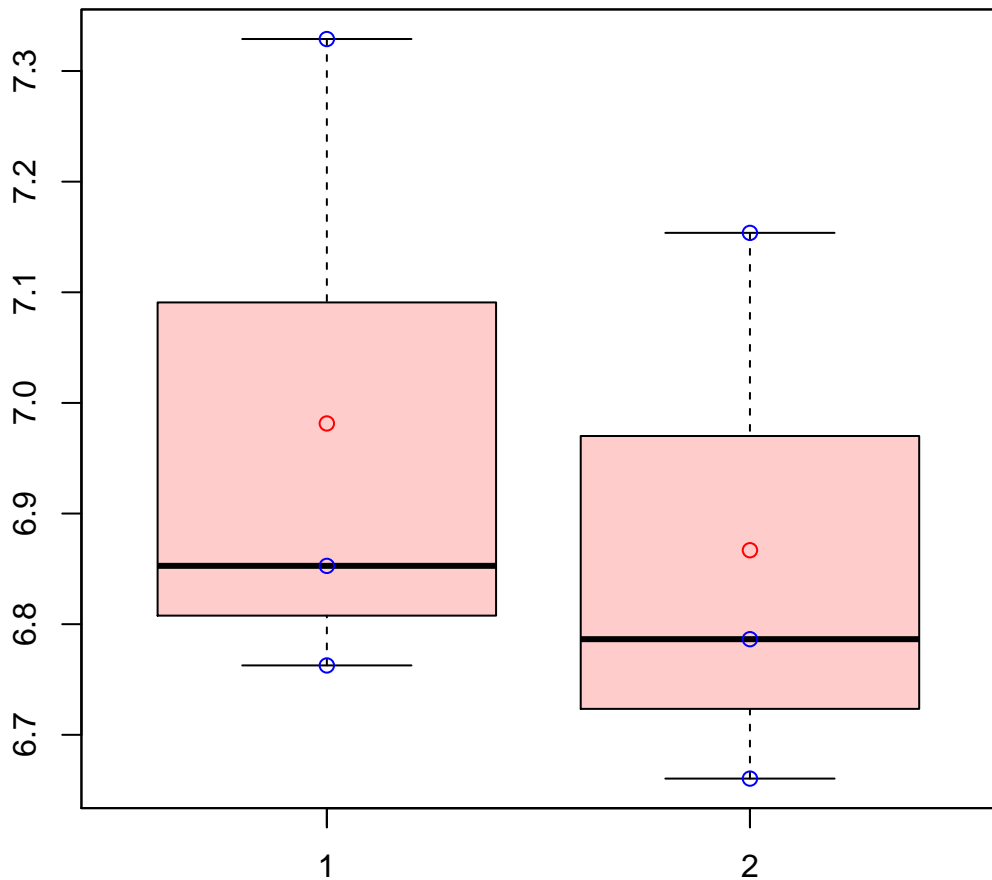

t-Test: p-value = 0.64

# M7Z208|M7Z208\_TRIUA

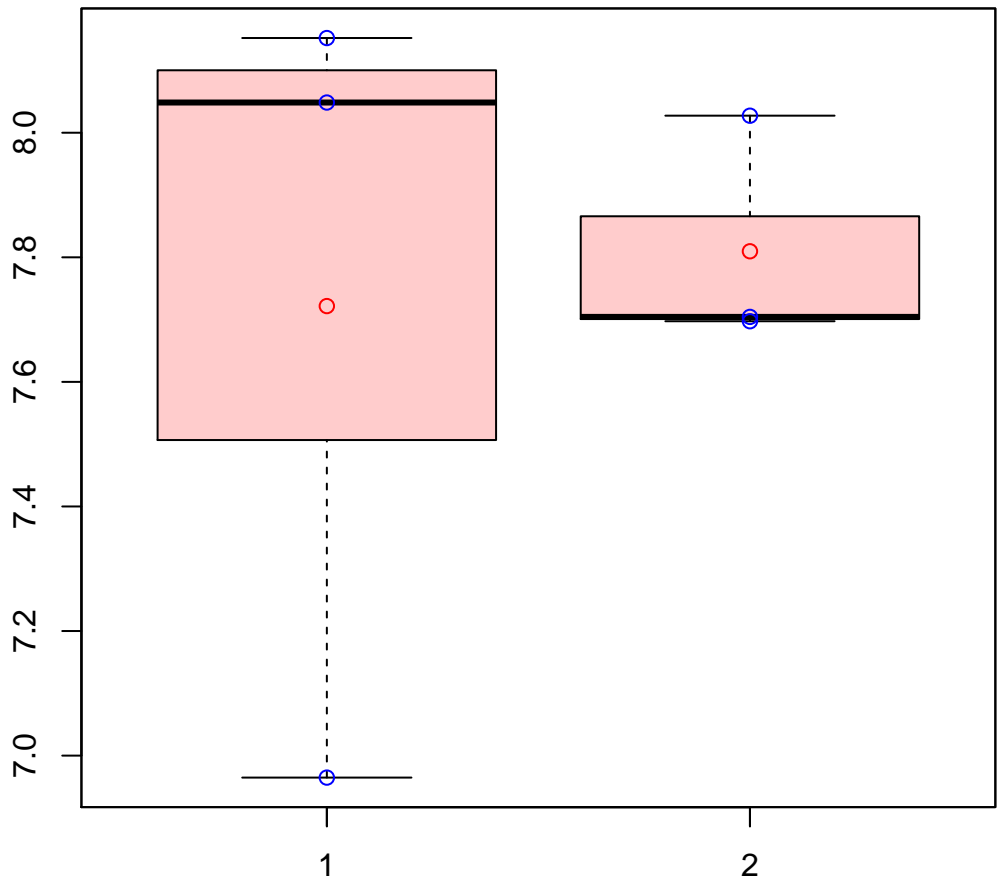

t-Test: p-value = 0.84

# M7Z227|M7Z227\_TRIUA

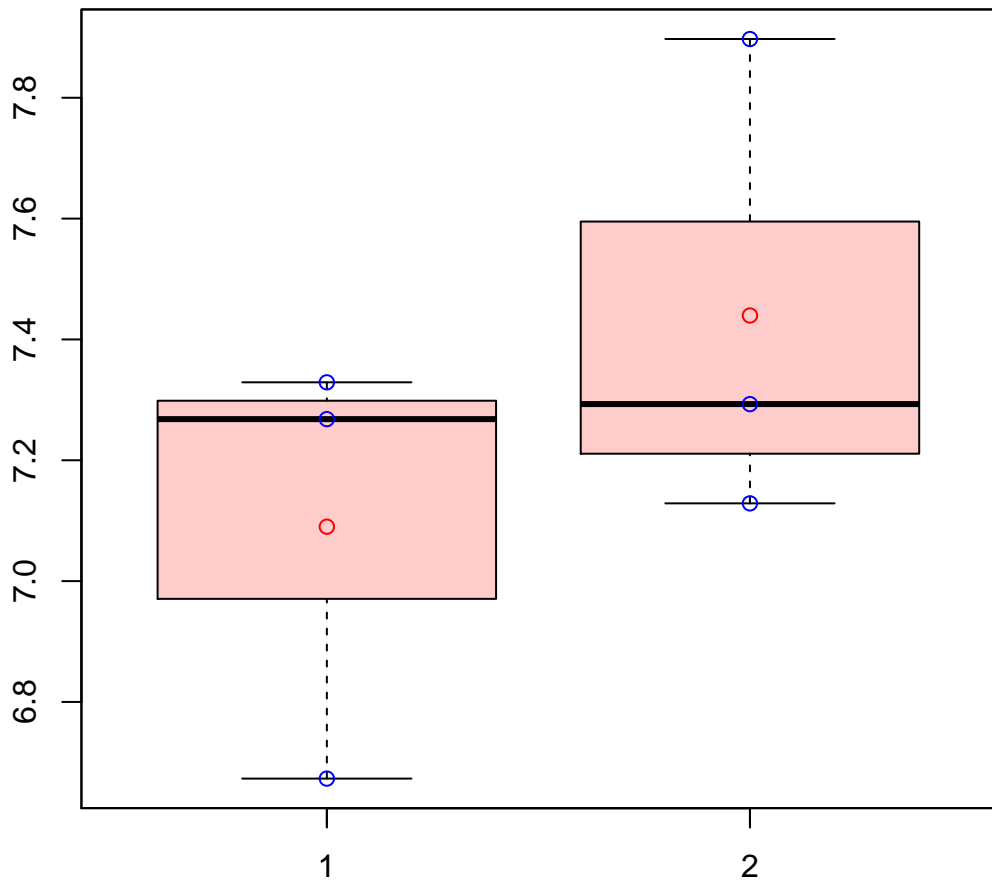

t-Test: p-value = 0.33

# M7Z3V3|M7Z3V3\_TRIUA

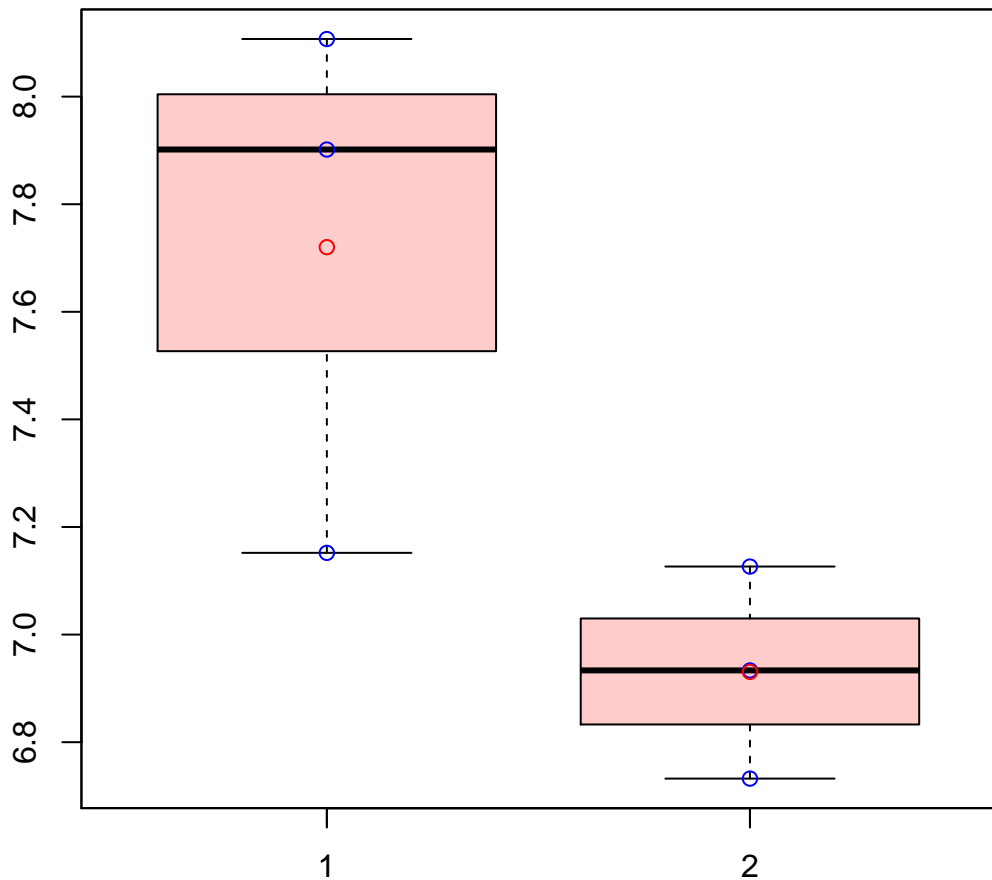

t-Test: p-value = 0.1

# M7Z405|M7Z405\_TRIUA

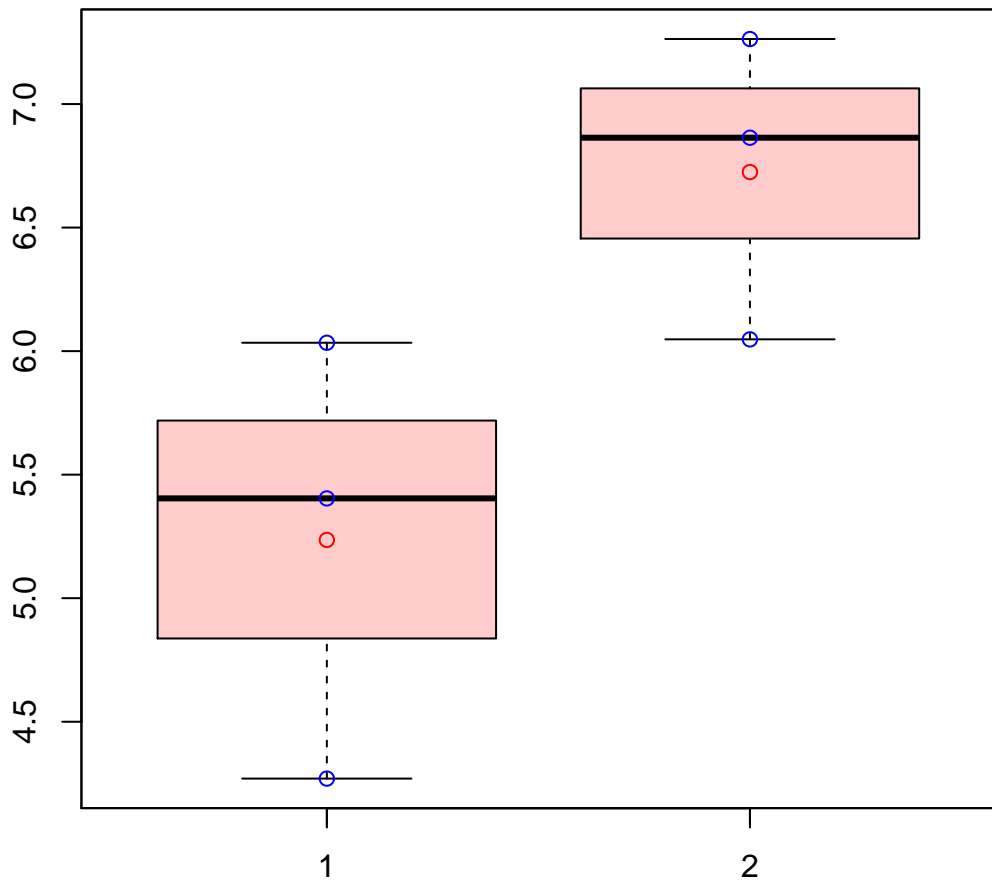

t-Test: p-value = 0.08



# M7Z4N6|M7Z4N6\_TRIUA

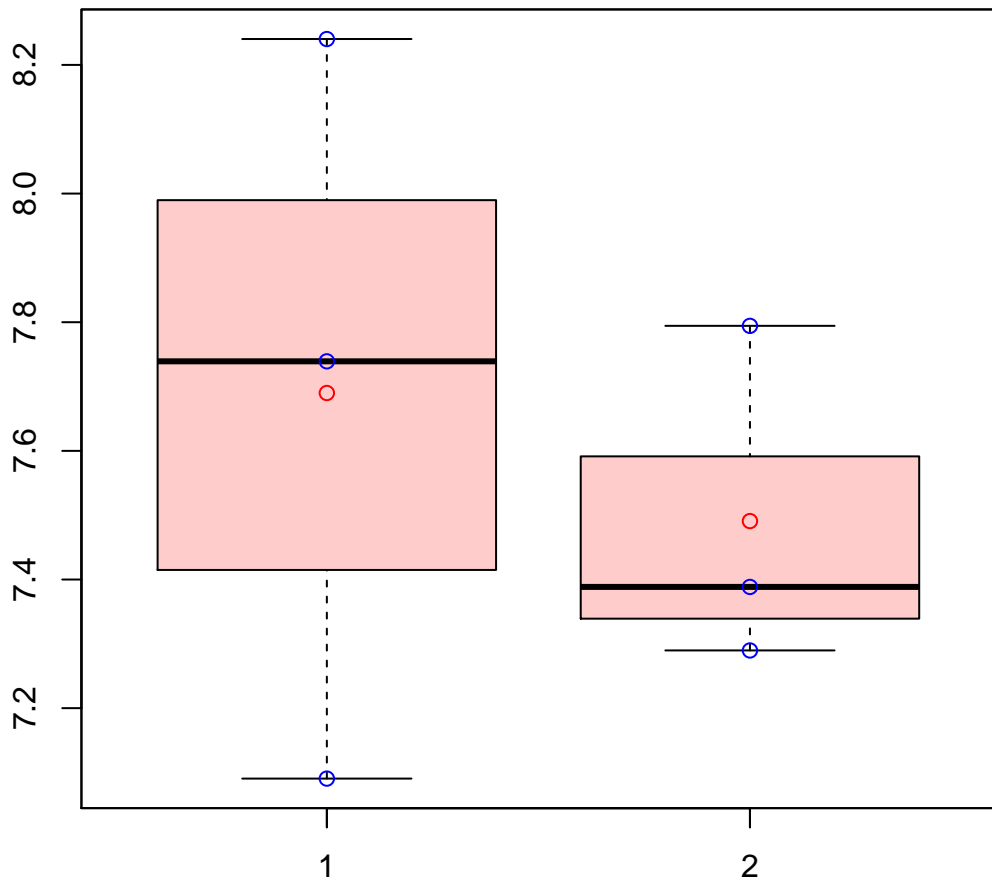

t-Test: p-value = 0.63

# M7Z581|M7Z581\_TRIUA

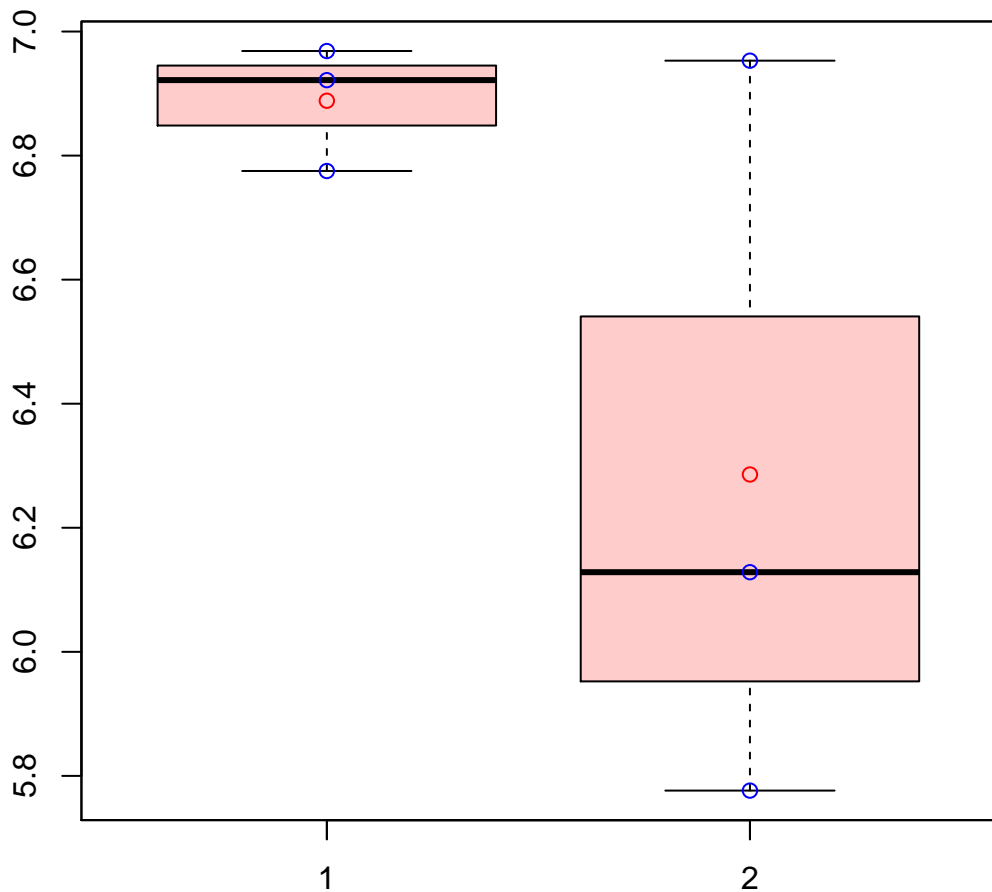

t-Test: p-value = 0.22

# M7Z5Z3|M7Z5Z3\_TRIUA

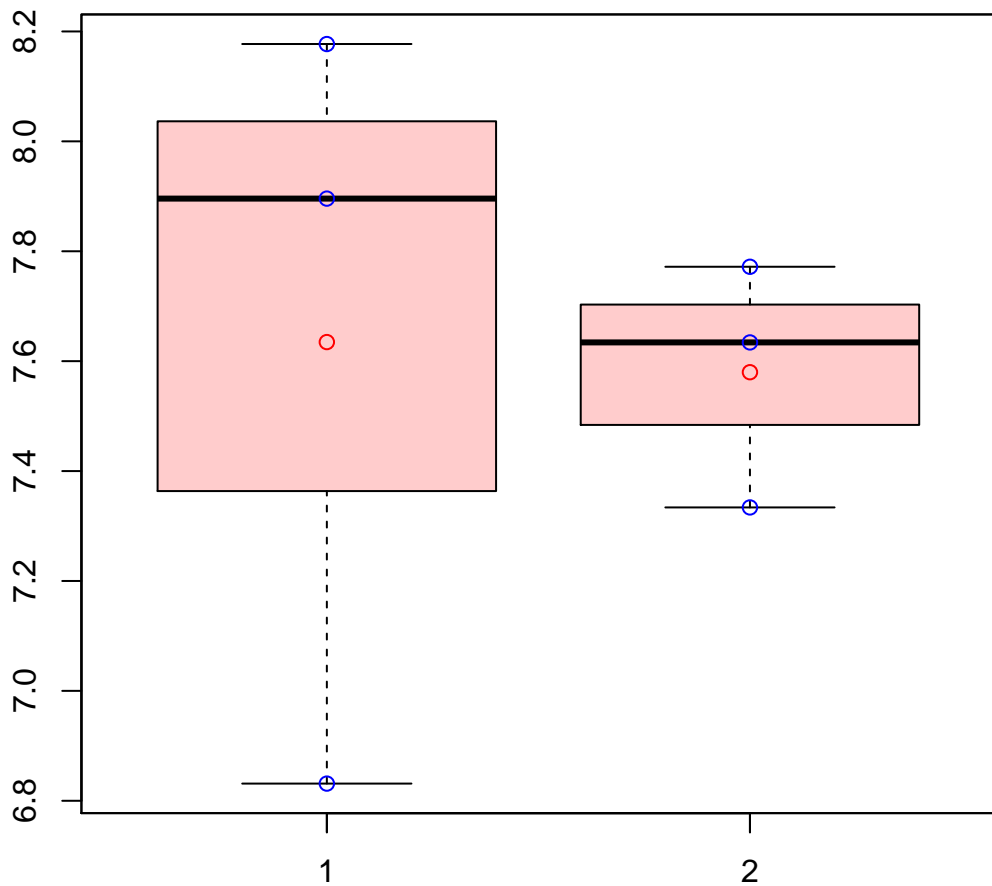

t-Test: p-value = 0.91

# M7Z617|M7Z617\_TRIUA

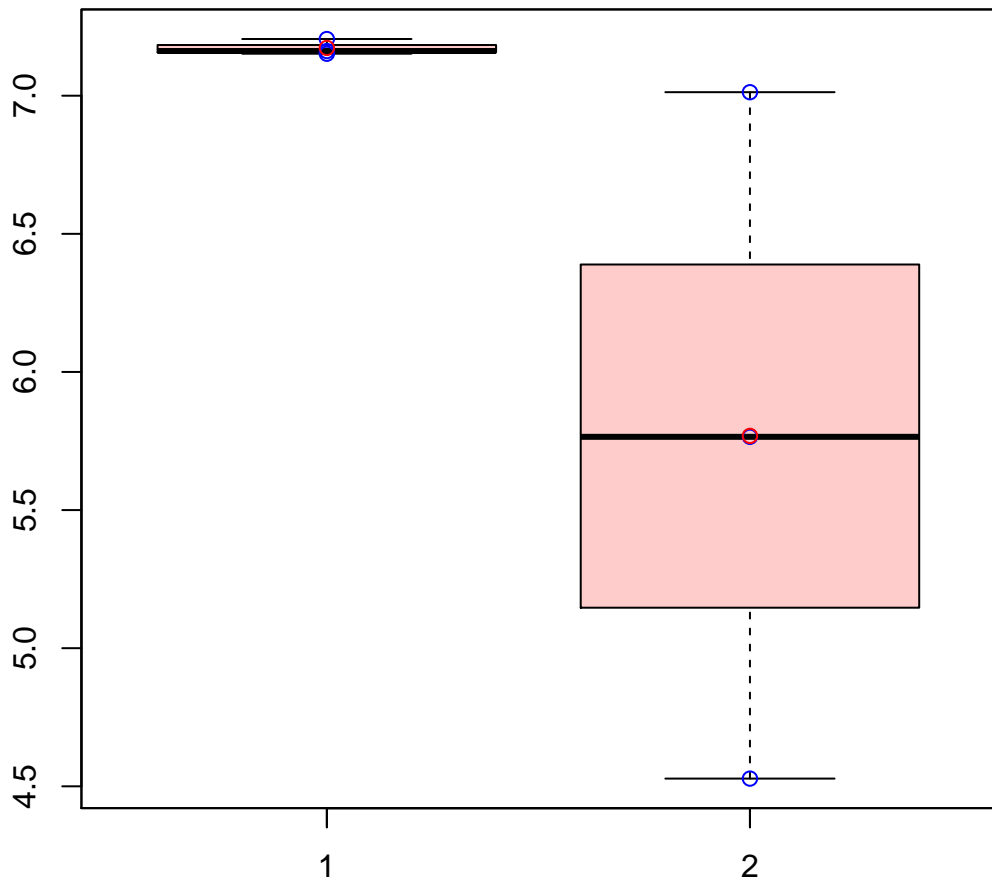

t-Test: p-value = 0.19

# M7Z647|M7Z647\_TRIUA

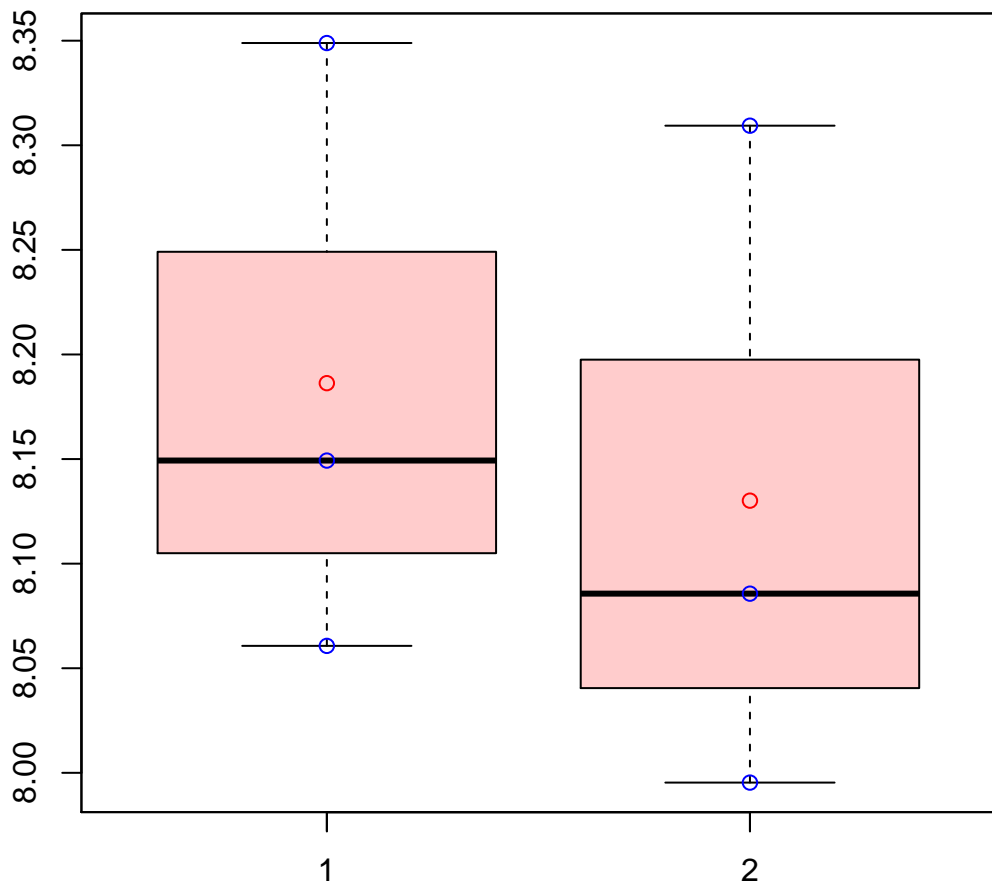

t-Test: p-value = 0.68

# M7Z6E4|M7Z6E4\_TRIUA

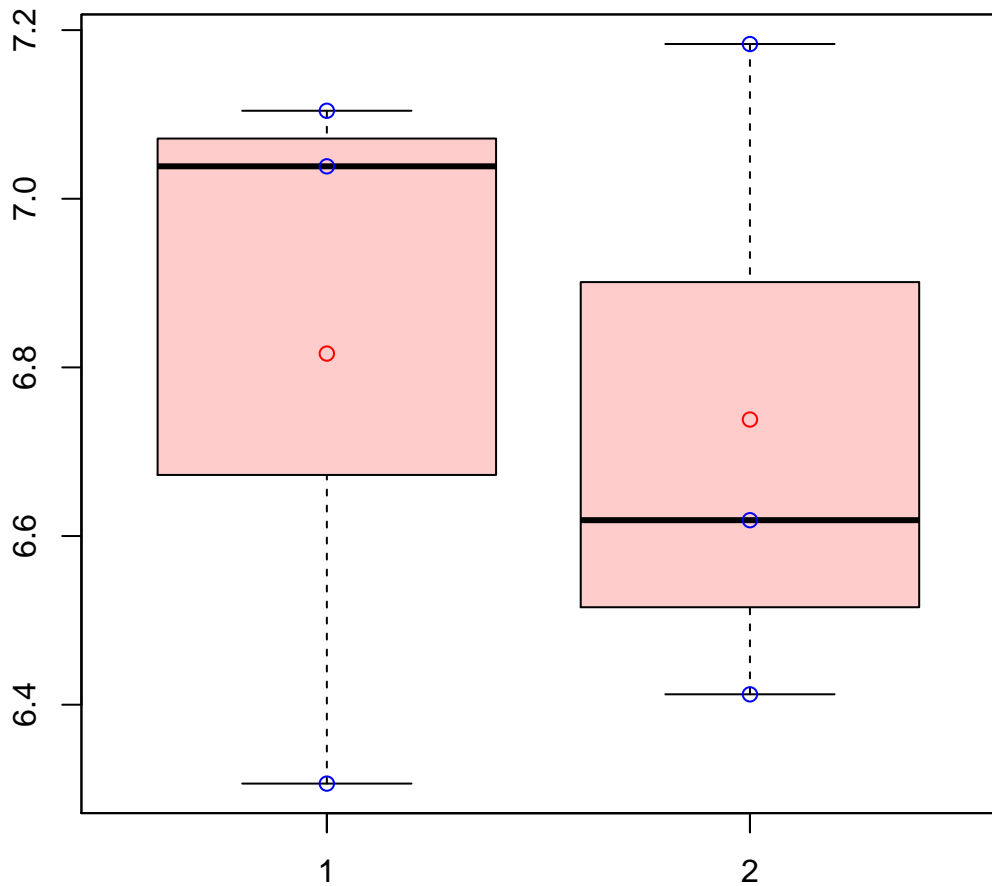

t-Test: p-value = 0.83

# M7Z6S4|M7Z6S4\_TRIUA

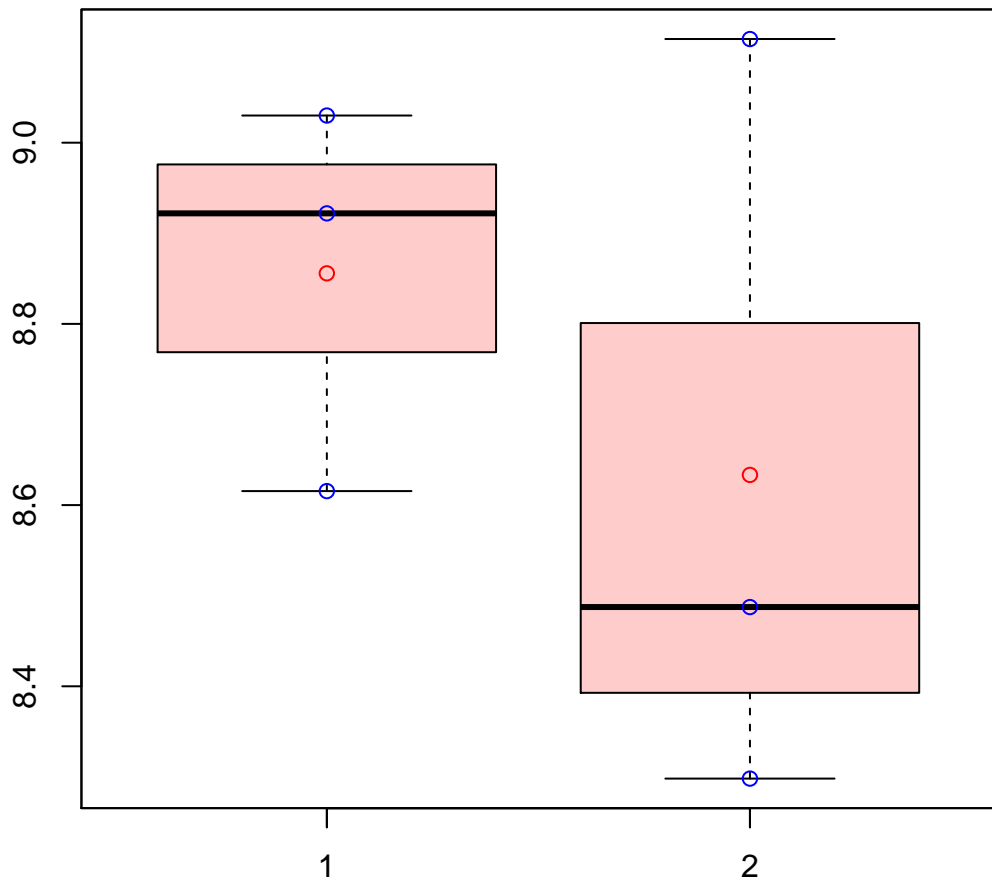

t-Test: p-value = 0.48

# M7Z6W6|M7Z6W6\_TRIUA

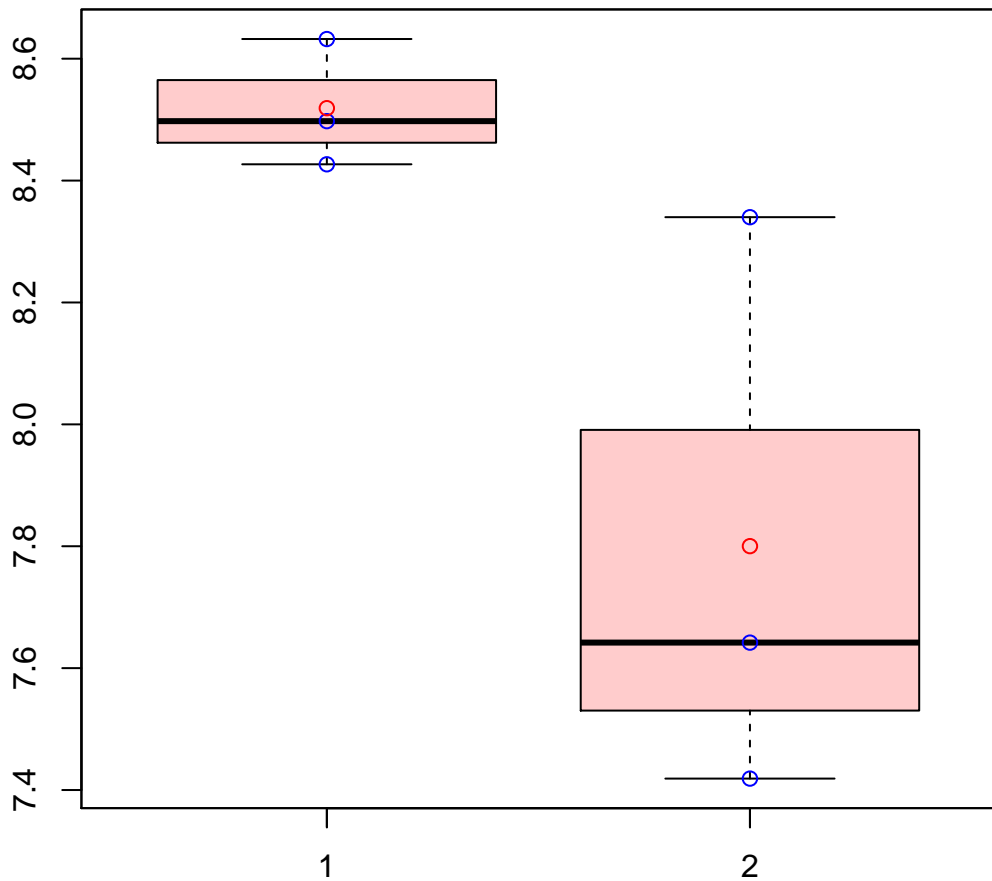

t-Test: p-value = 0.12



# M7Z7F4|M7Z7F4\_TRIUA

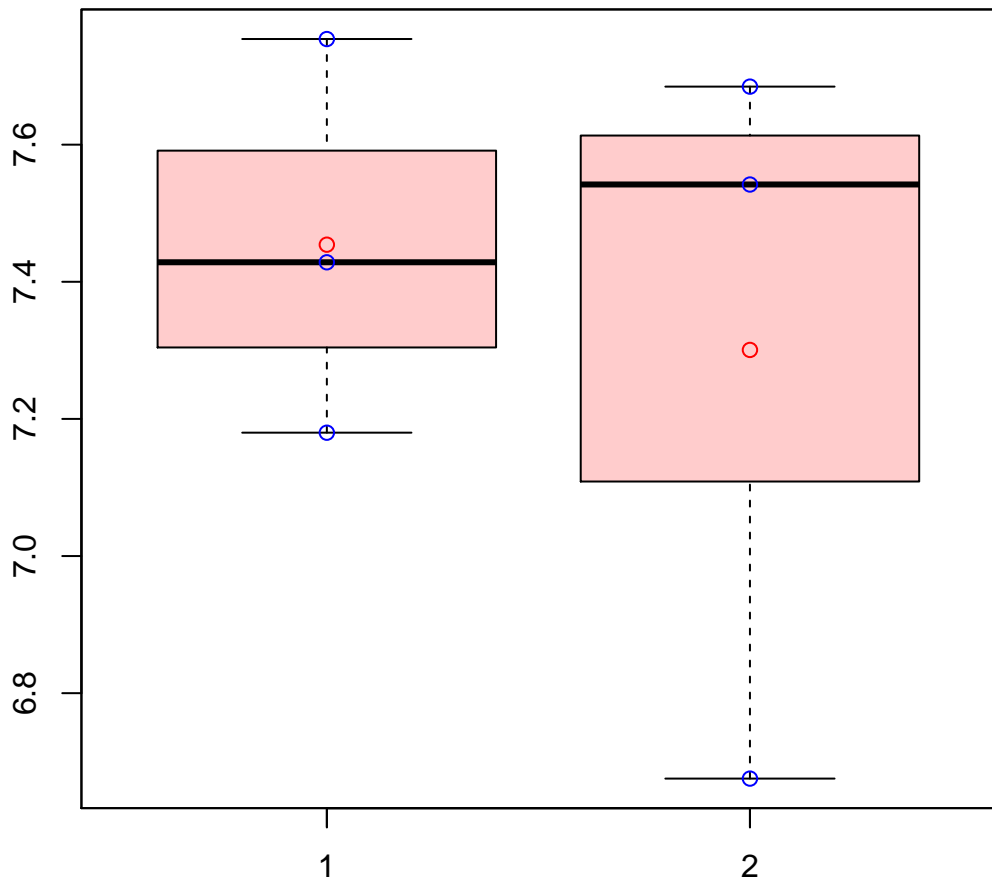

t-Test: p-value = 0.7

# M7Z7L2|M7Z7L2\_TRIUA

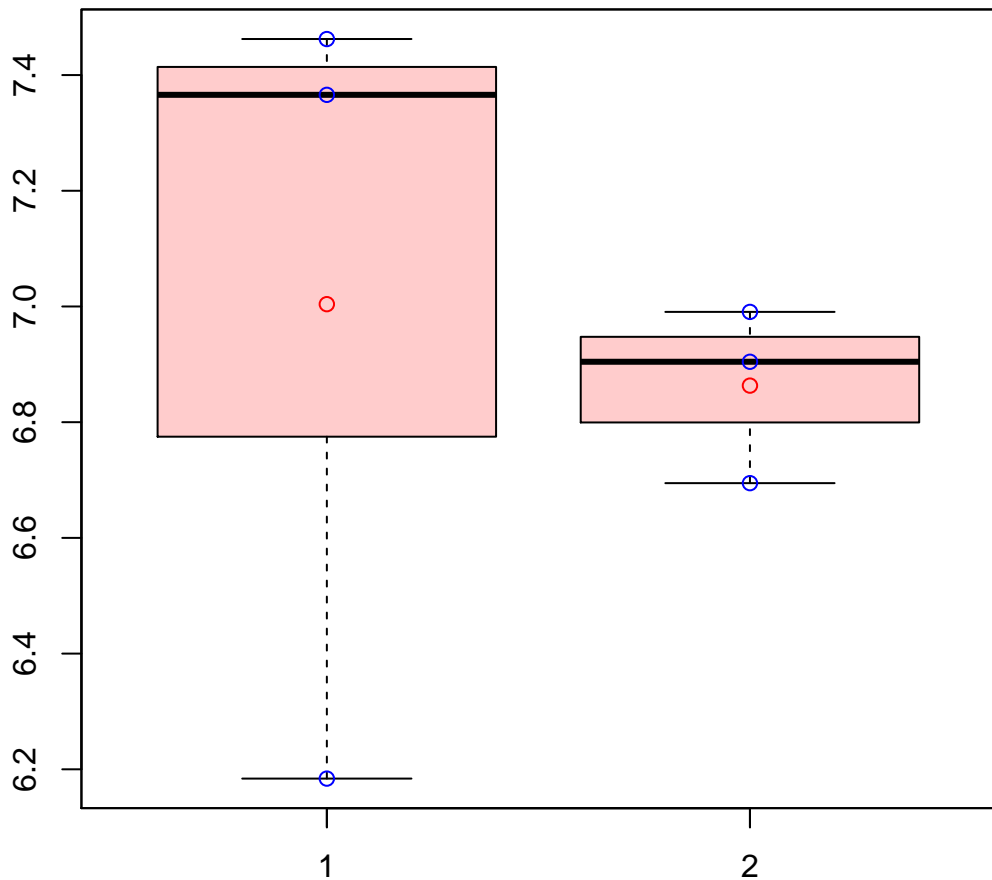

t-Test: p-value = 0.77

# M7Z831|M7Z831\_TRIUA

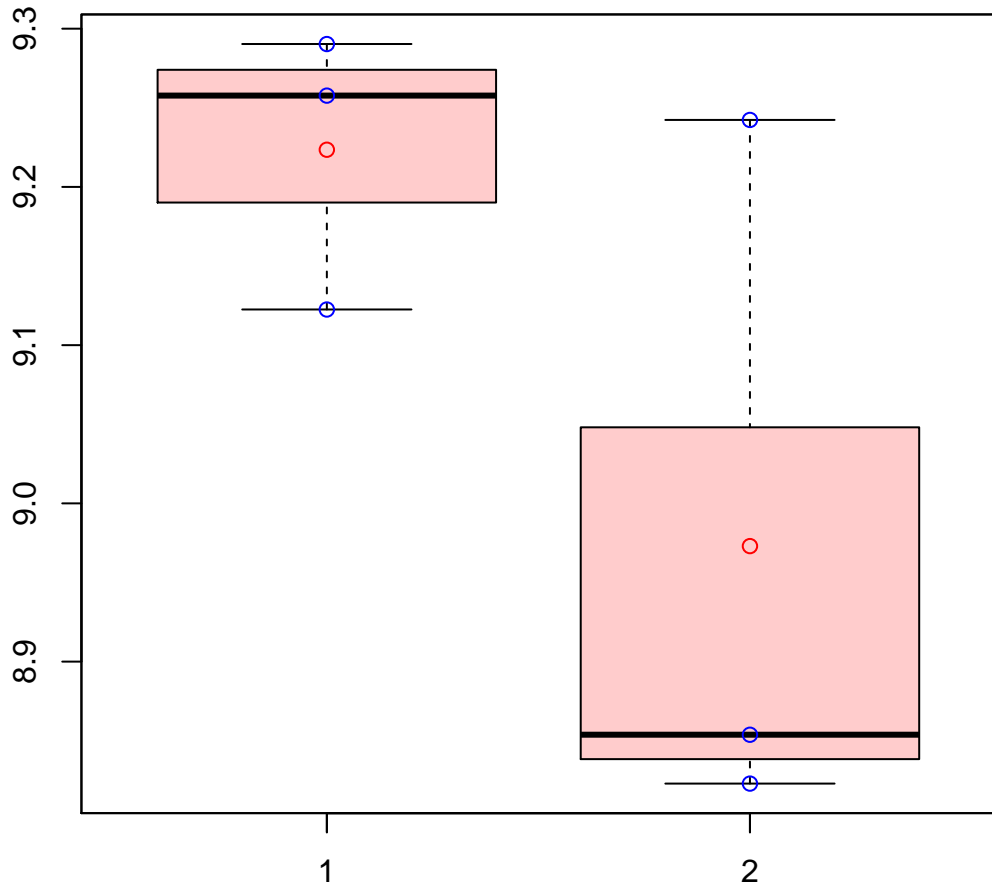

t-Test: p-value = 0.2

# M7Z8Q3|M7Z8Q3\_TRIUA

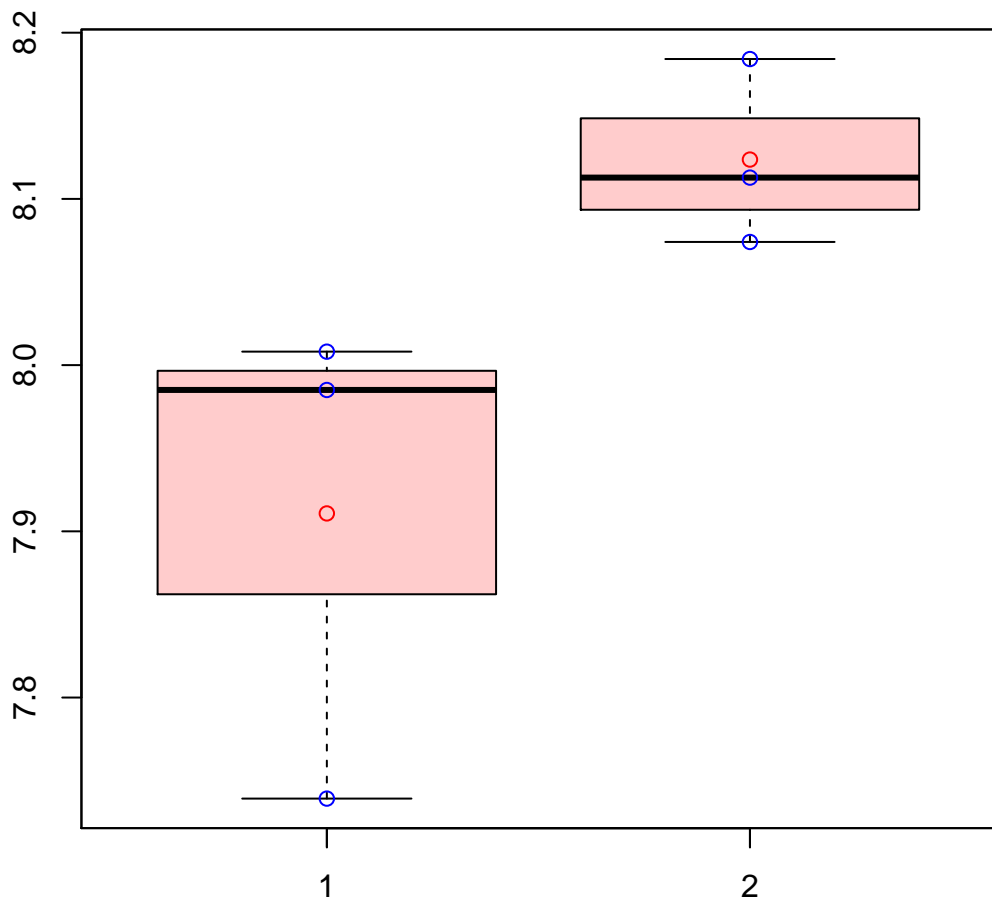

t-Test: p-value = 0.12

# M7Z925|M7Z925\_TRIUA

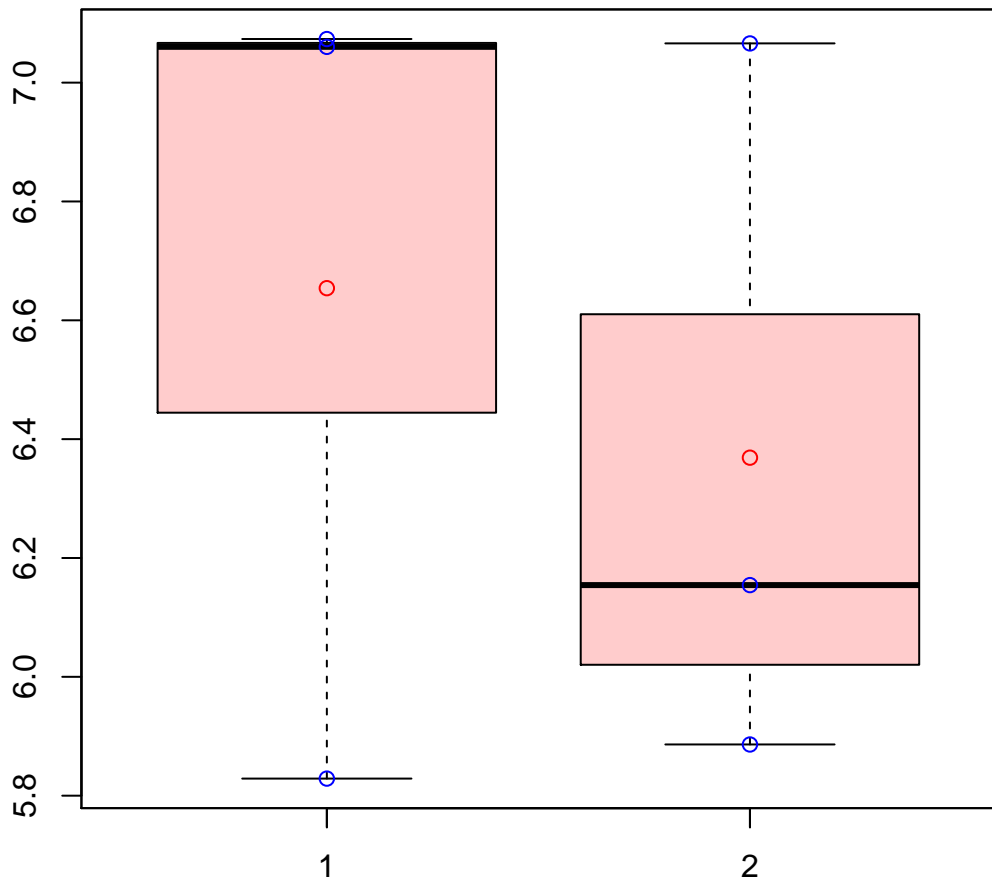

t-Test: p-value = 0.63

# M7Z9N8|M7Z9N8\_TRIUA

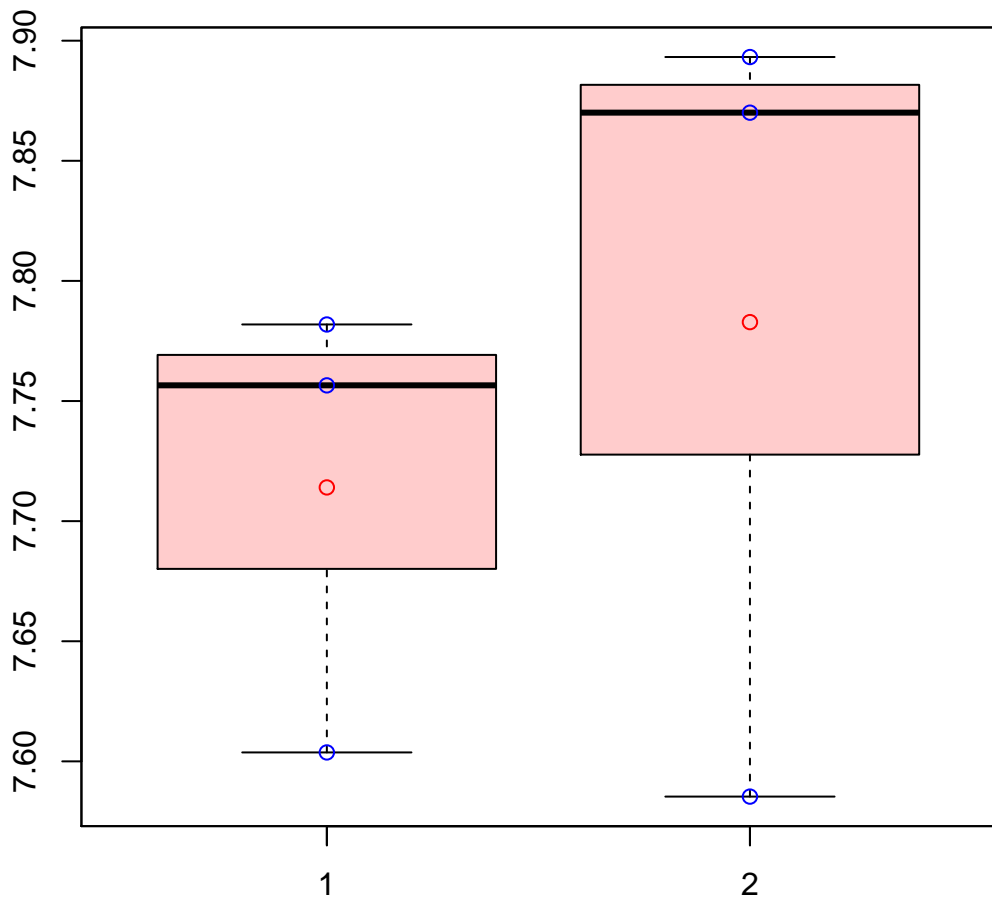

t-Test: p-value = 0.59

# M7ZB77|M7ZB77\_TRIUA

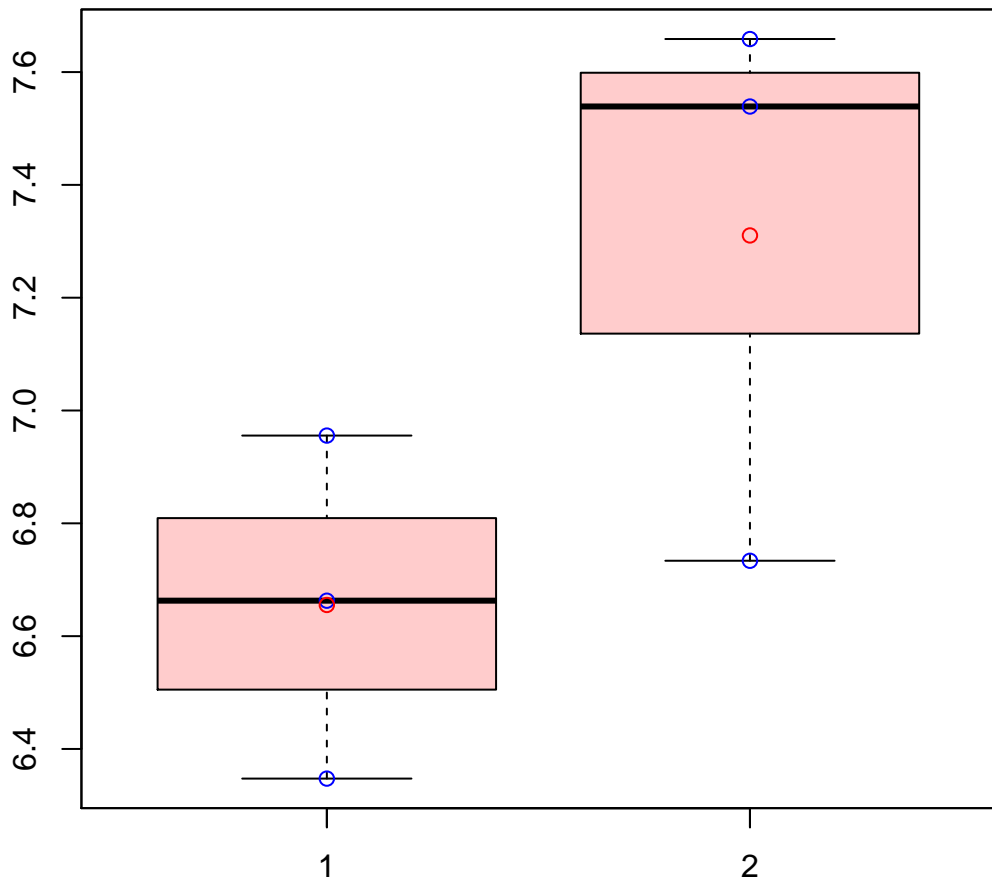

t-Test: p-value = 0.14

# M7ZBM4|M7ZBM4\_TRIUA

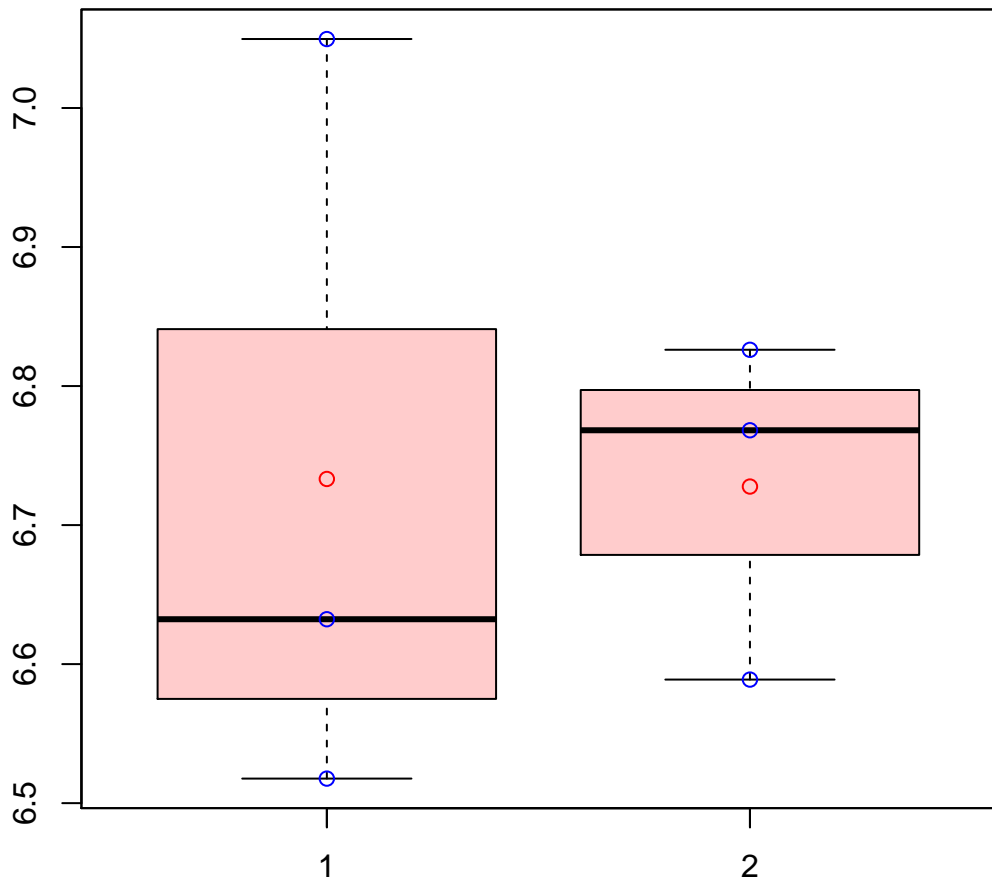

t-Test: p-value = 0.98



# M7ZBZ9|M7ZBZ9\_TRIUA

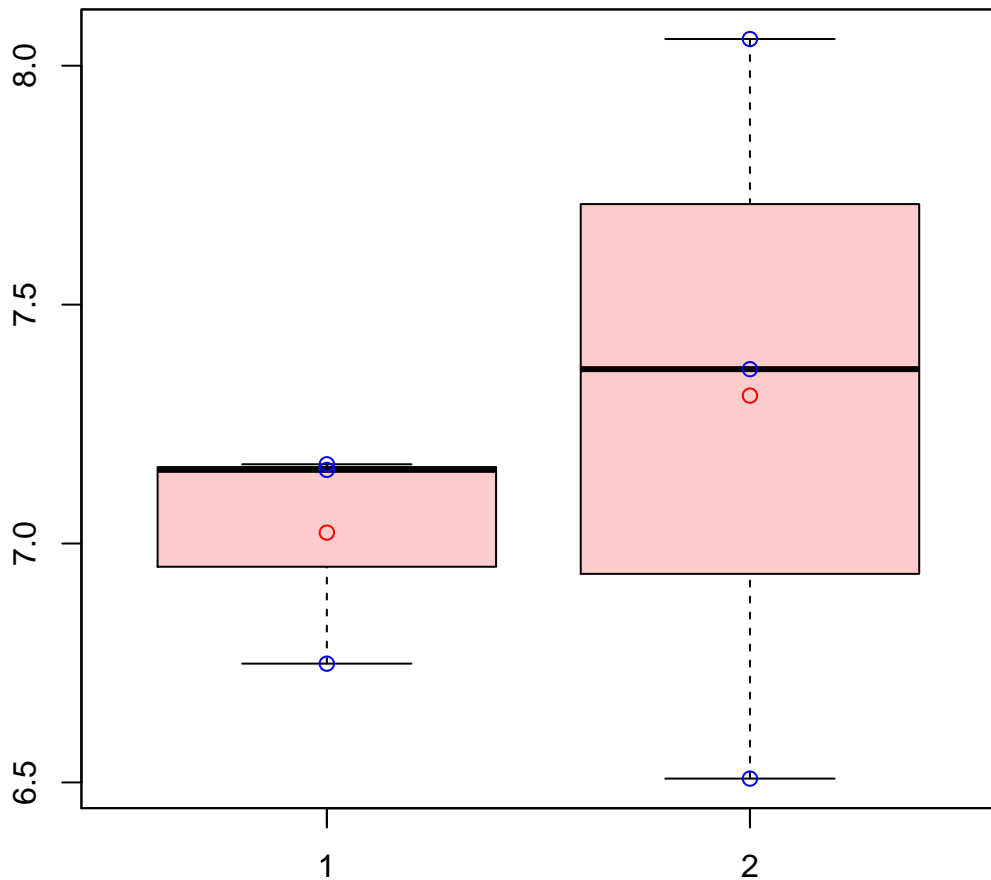

t-Test: p-value = 0.59

# M7ZC43|M7ZC43\_TRIUA

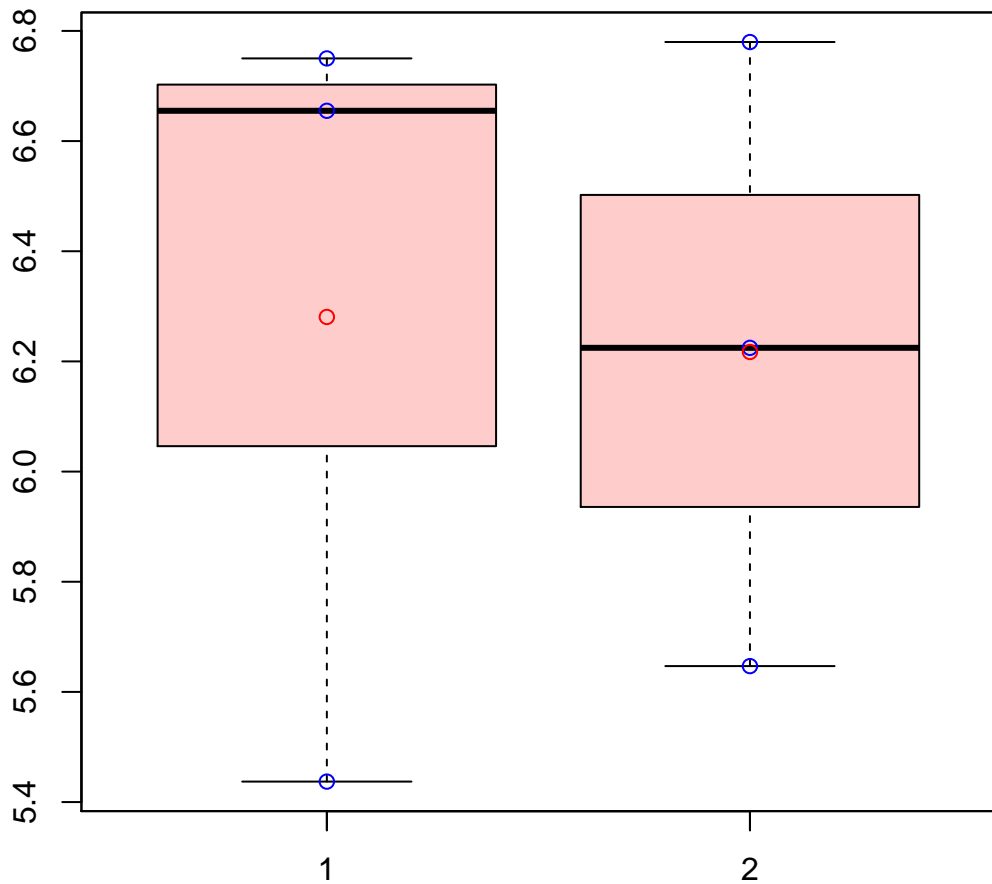

t-Test: p-value = 0.91

# M7ZC95|M7ZC95\_TRIUA

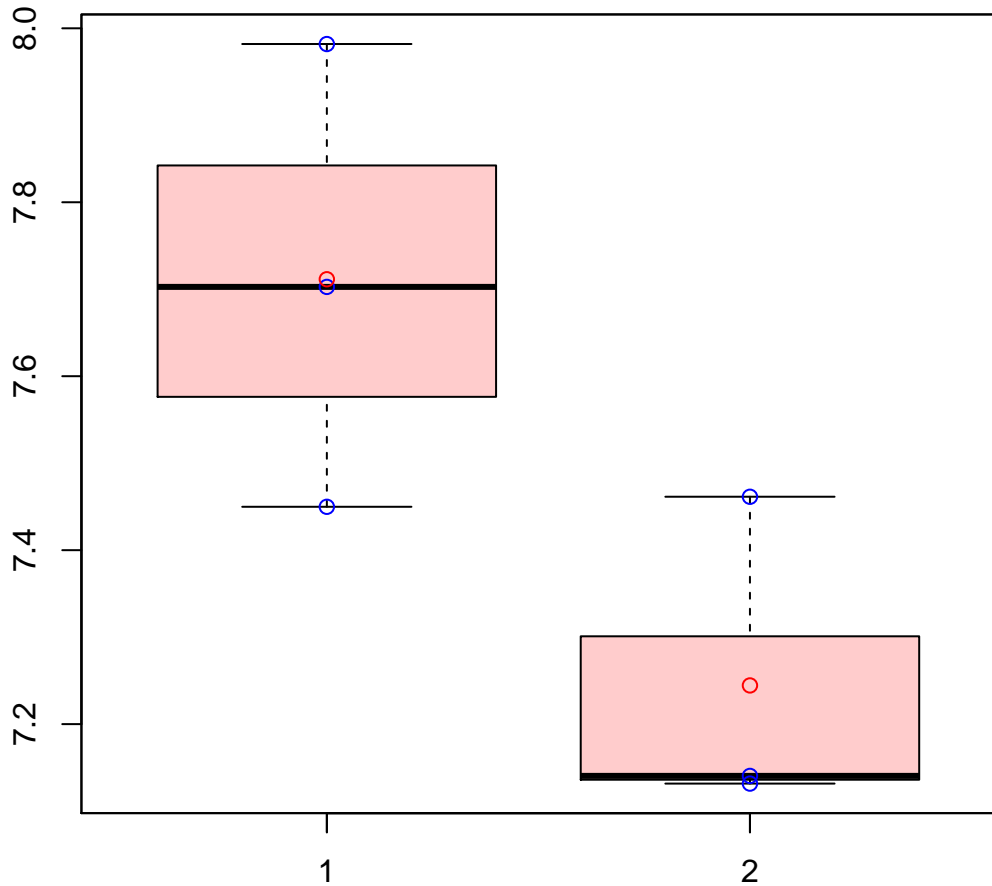

t-Test: p-value = 0.08

# M7ZD99|M7ZD99\_TRIUA

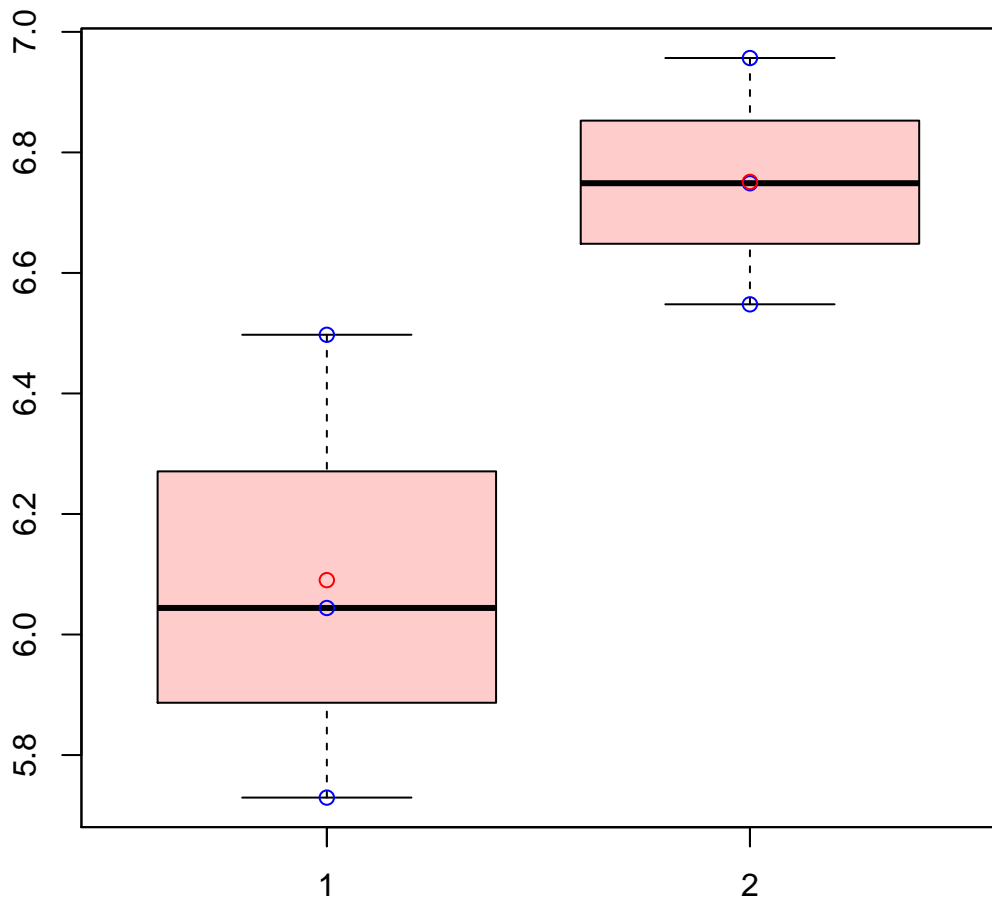

t-Test: p-value = 0.08

# M7ZE22|M7ZE22\_TRIUA

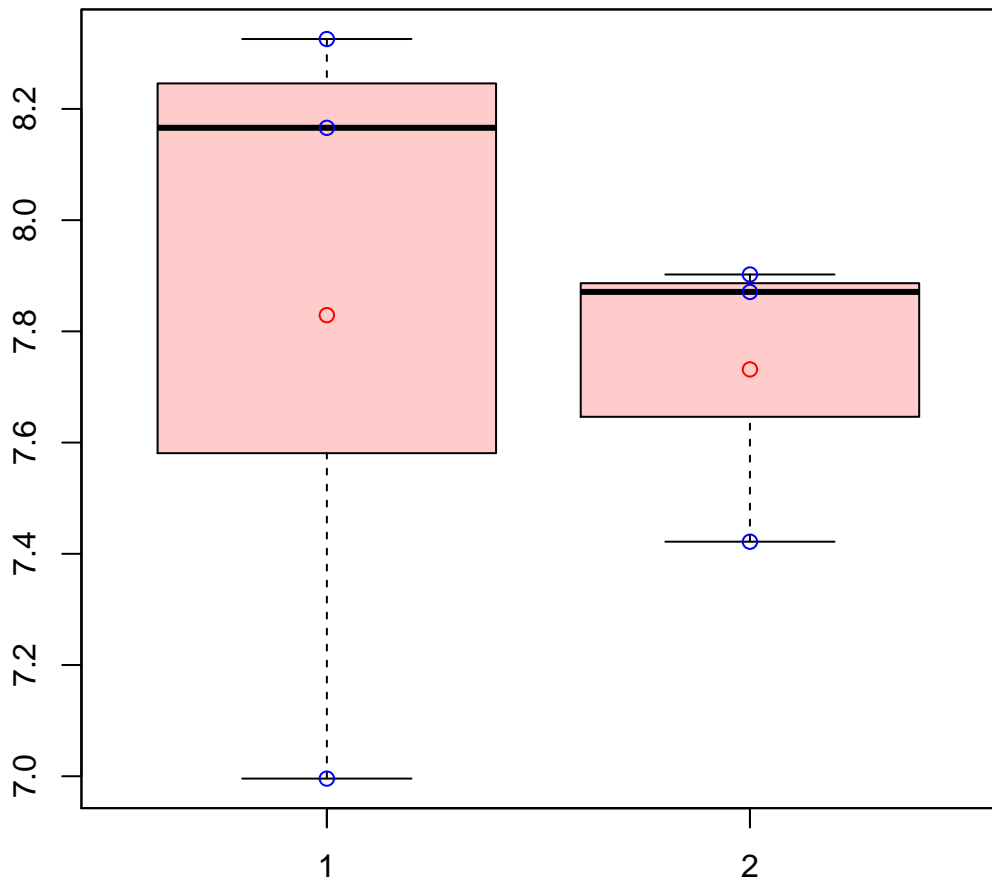

t-Test: p-value = 0.84

# M7ZE25|M7ZE25\_TRIUA

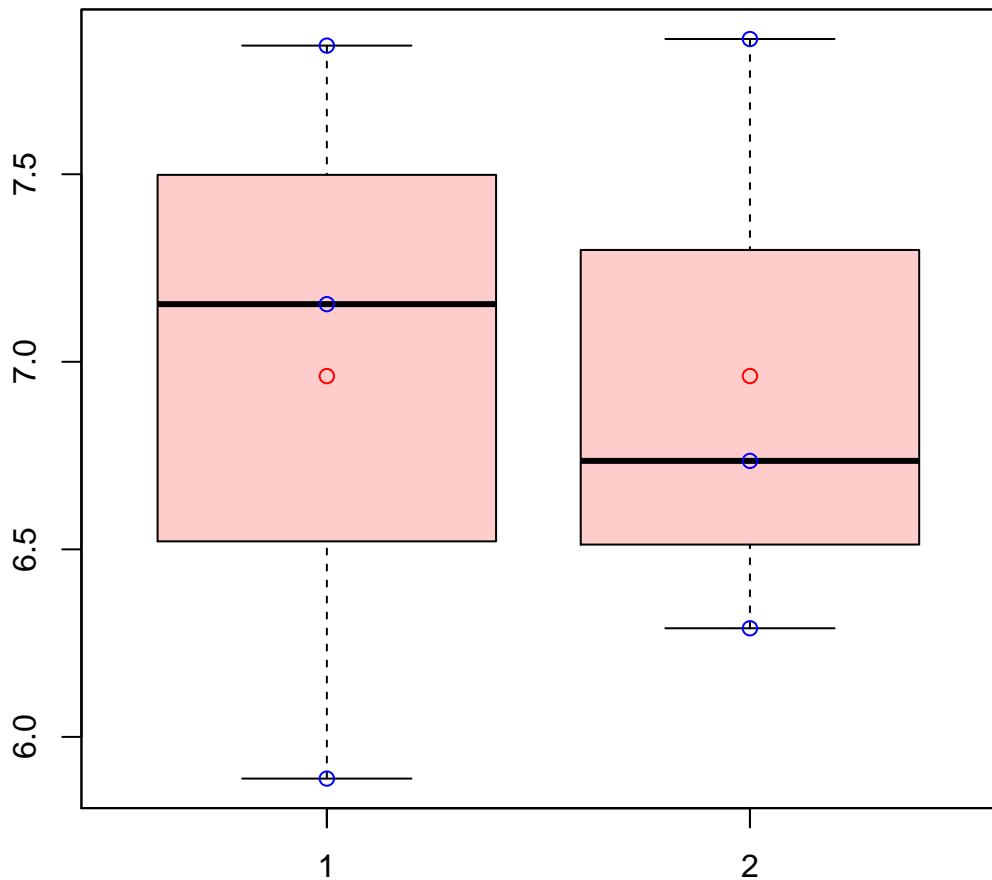

t-Test: p-value = 1

# M7ZE80|M7ZE80\_TRIUA

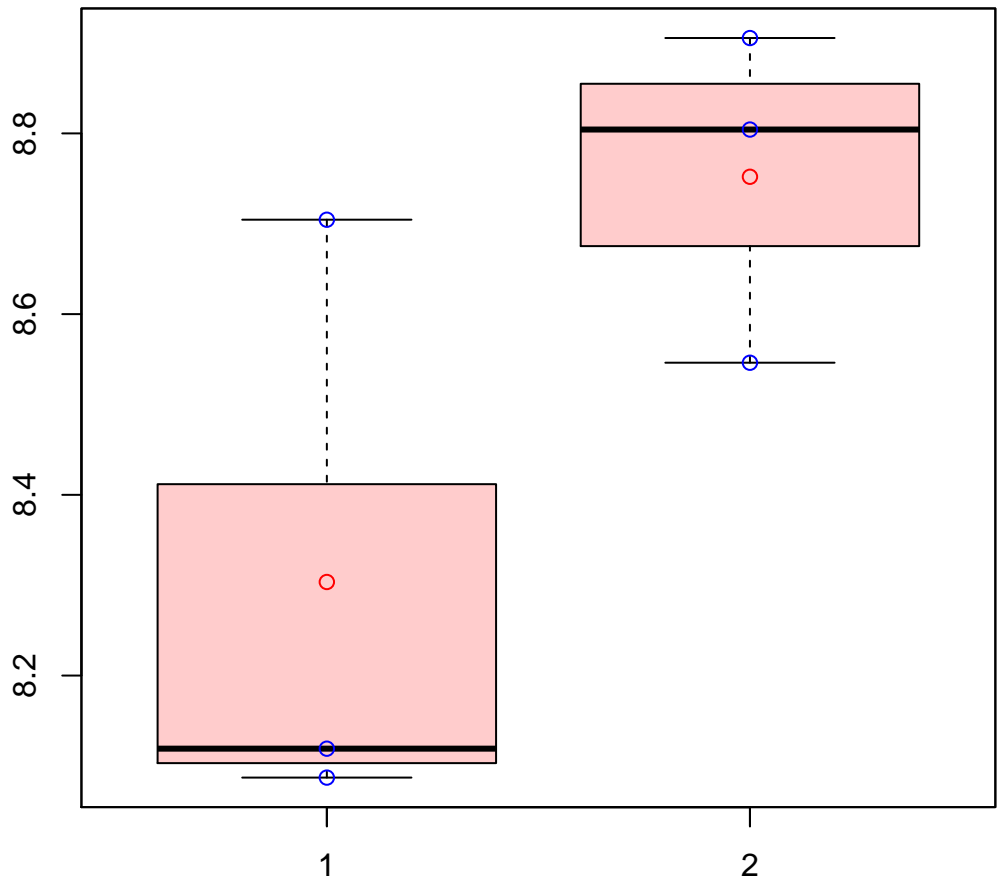

t-Test: p-value = 0.14

# M7ZEZ2|M7ZEZ2\_TRIUA

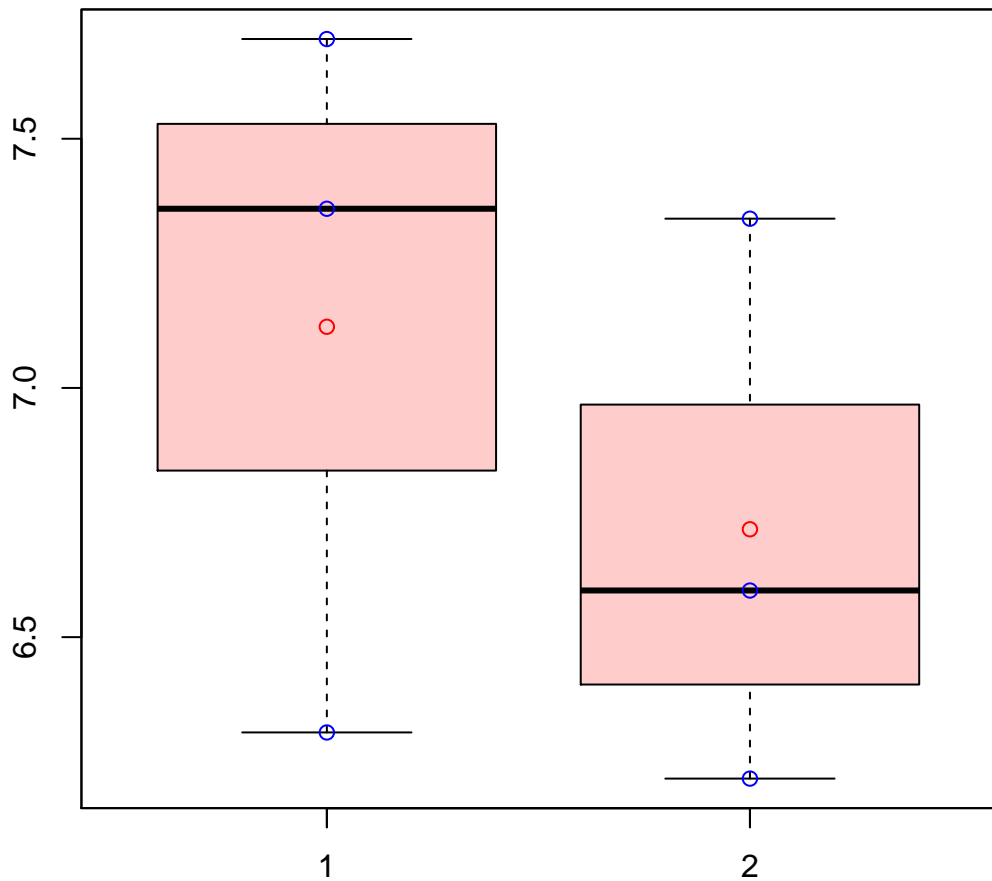

t-Test: p-value = 0.49



# M7ZF50|M7ZF50\_TRIUA

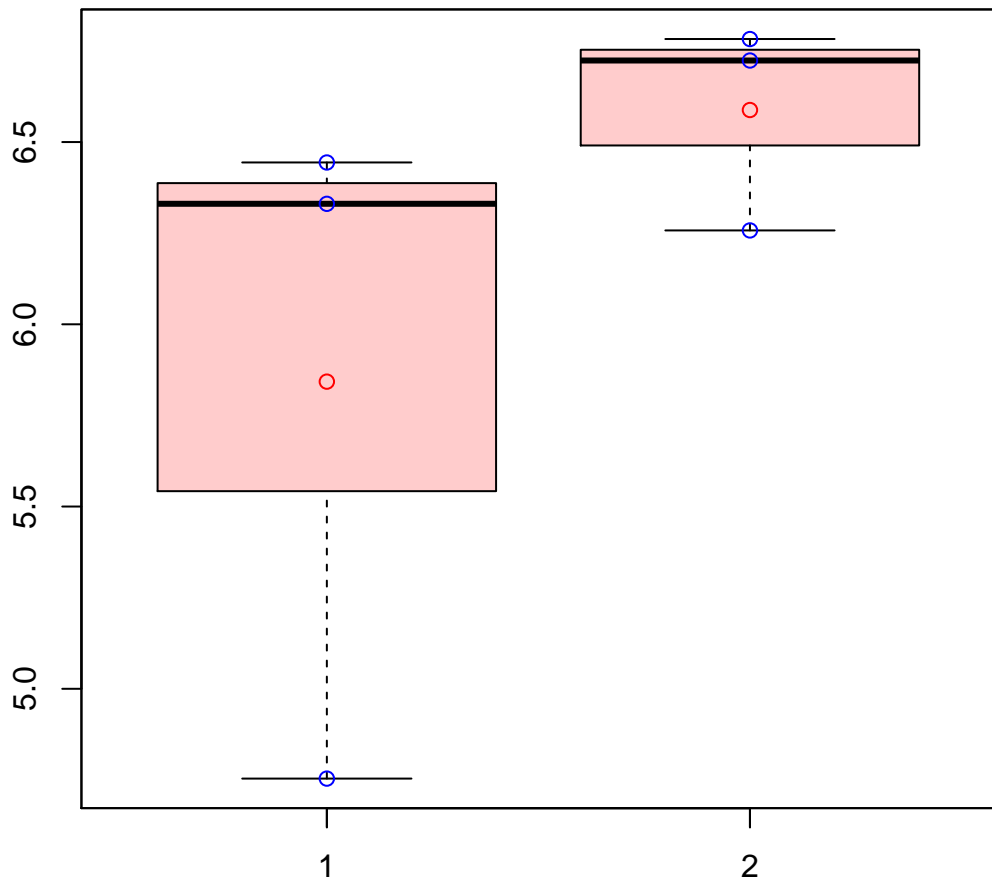

t-Test: p-value = 0.3

# M7ZF75|M7ZF75\_TRIUA

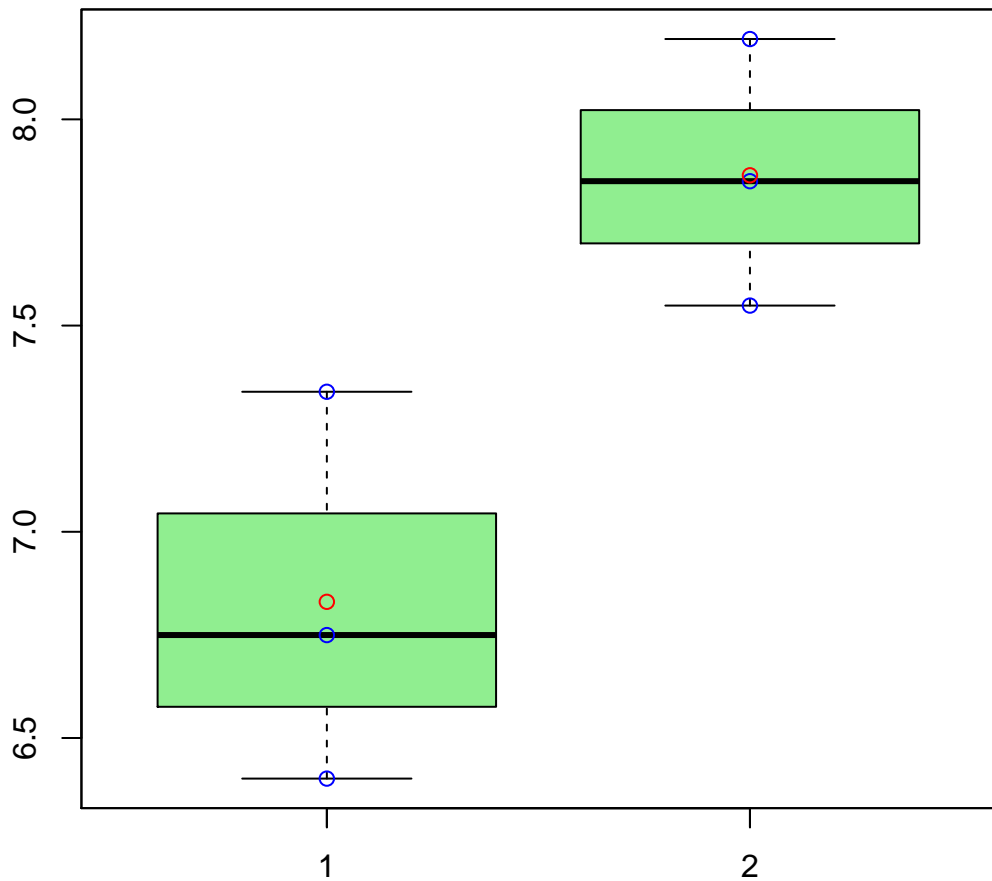

t-Test: p-value = 0.04

# M7ZFR9|M7ZFR9\_TRIUA

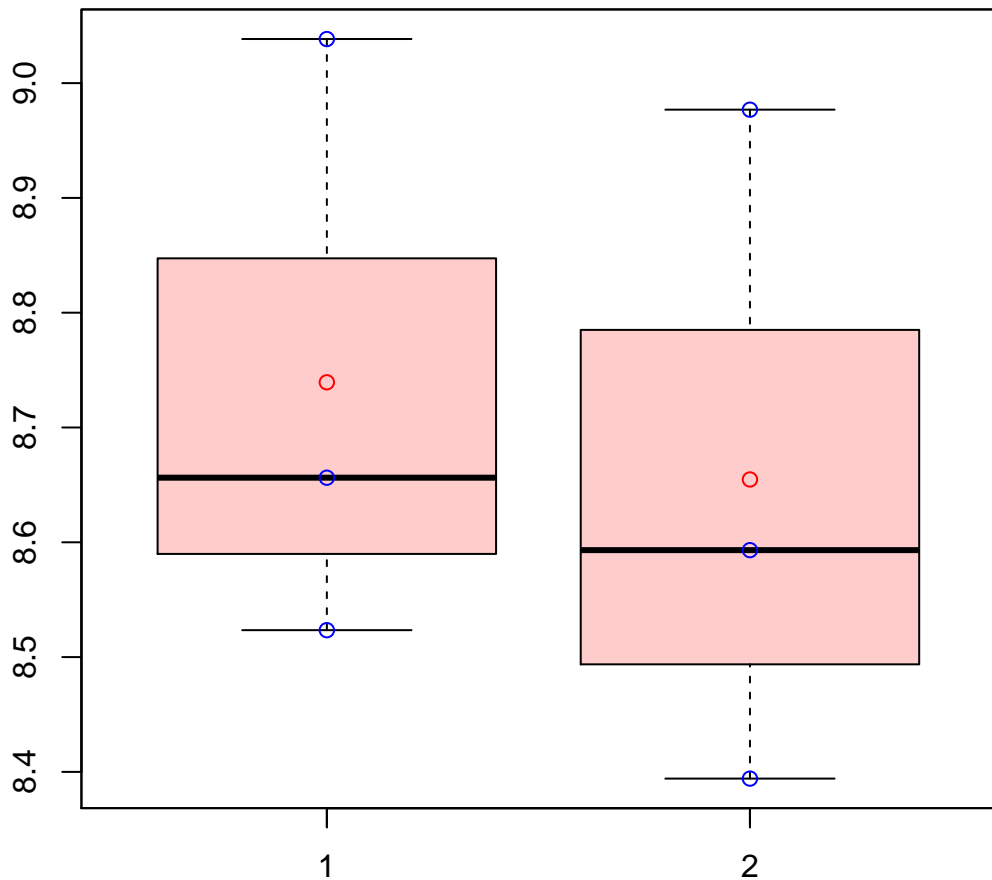

t-Test: p-value = 0.73

# M7ZGE7|M7ZGE7\_TRIUA

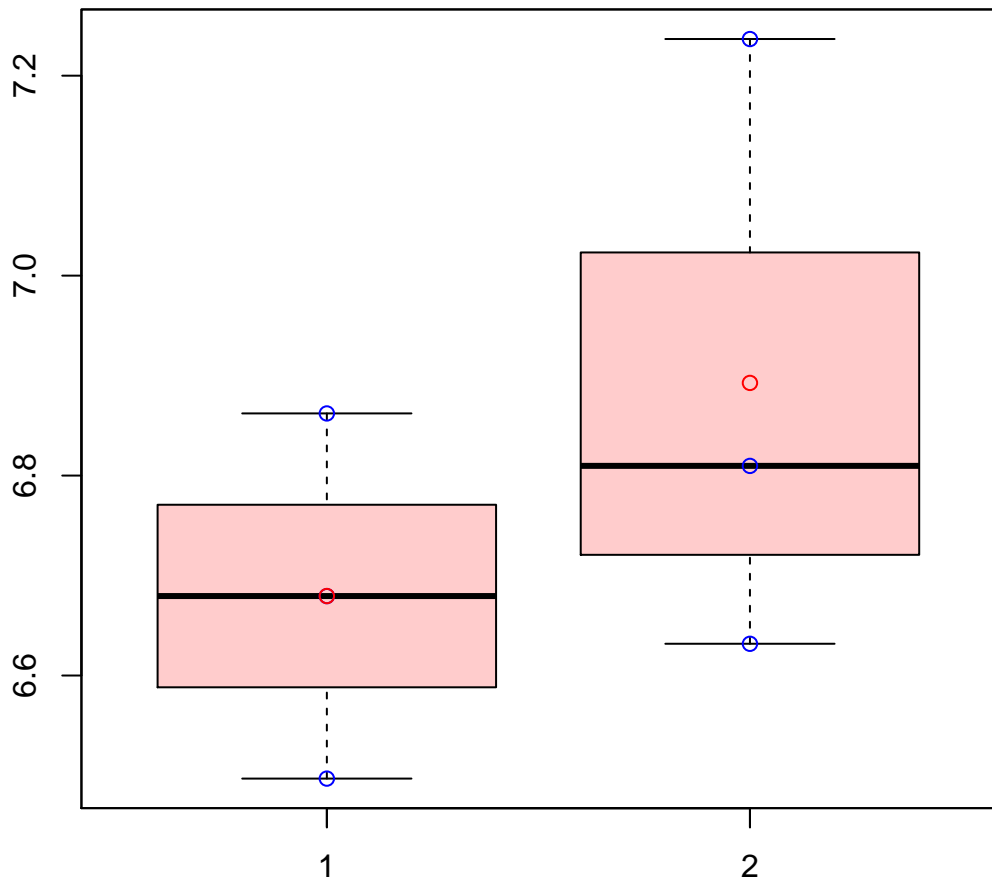

t-Test: p-value = 0.38

# M7ZGS6|M7ZGS6\_TRIUA

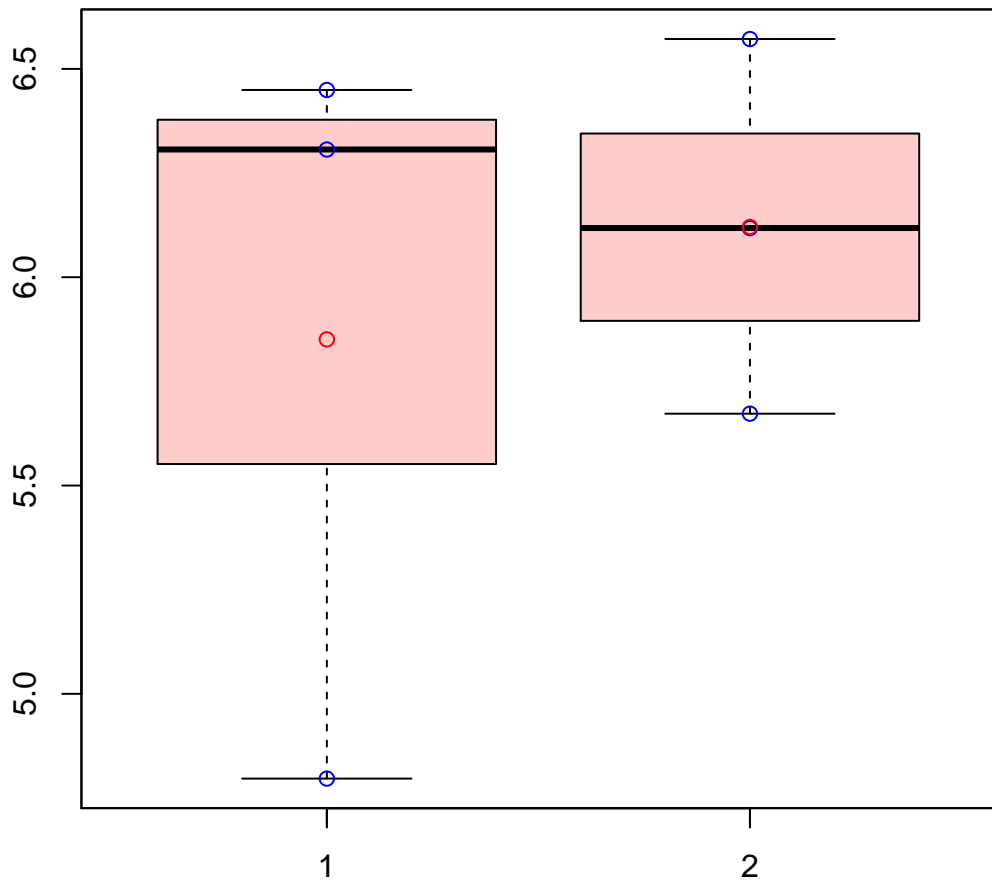

t-Test: p-value = 0.68

# M7ZHT5|M7ZHT5\_TRIUA

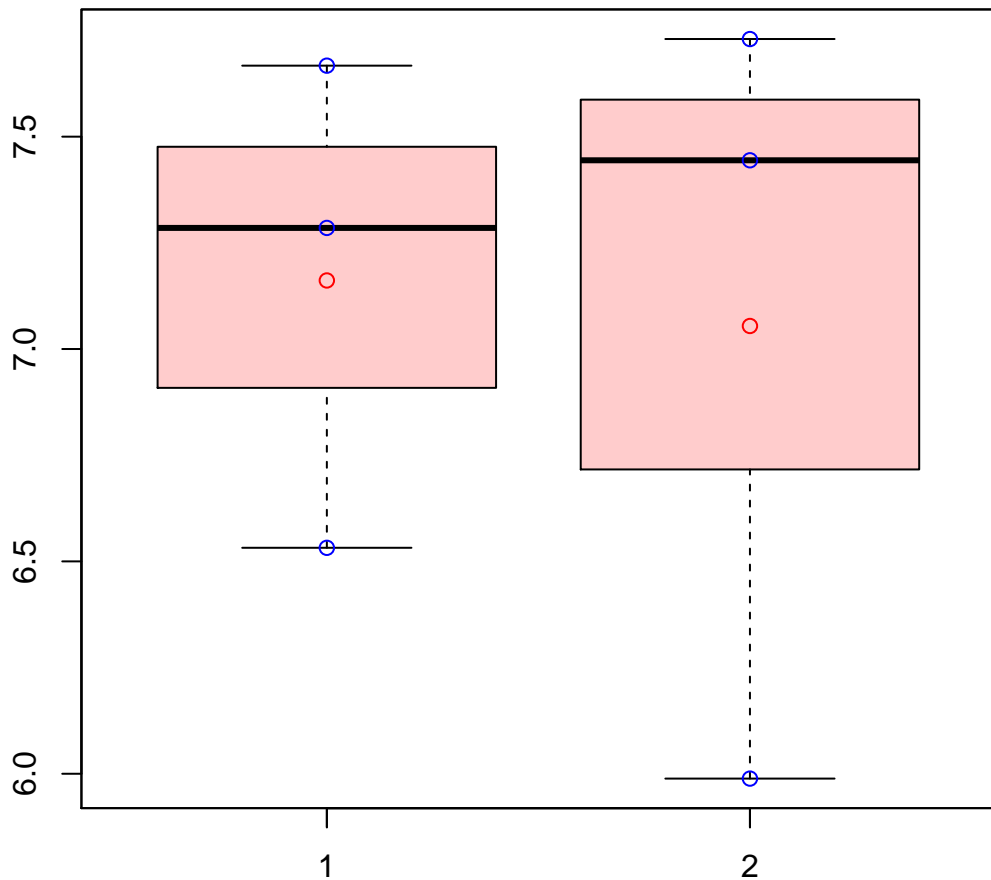

t-Test: p-value = 0.88

# M7ZI02|M7ZI02\_TRIUA

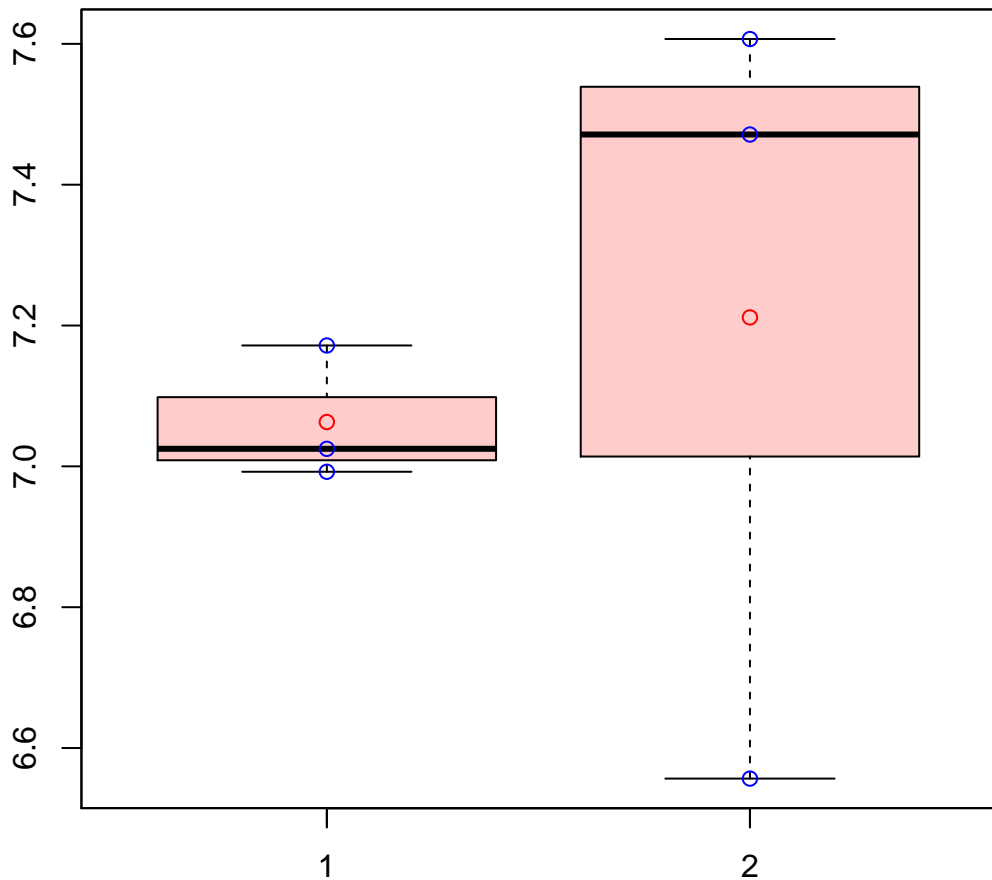

t-Test: p-value = 0.7

# M7ZJA8|M7ZJA8\_TRIUA

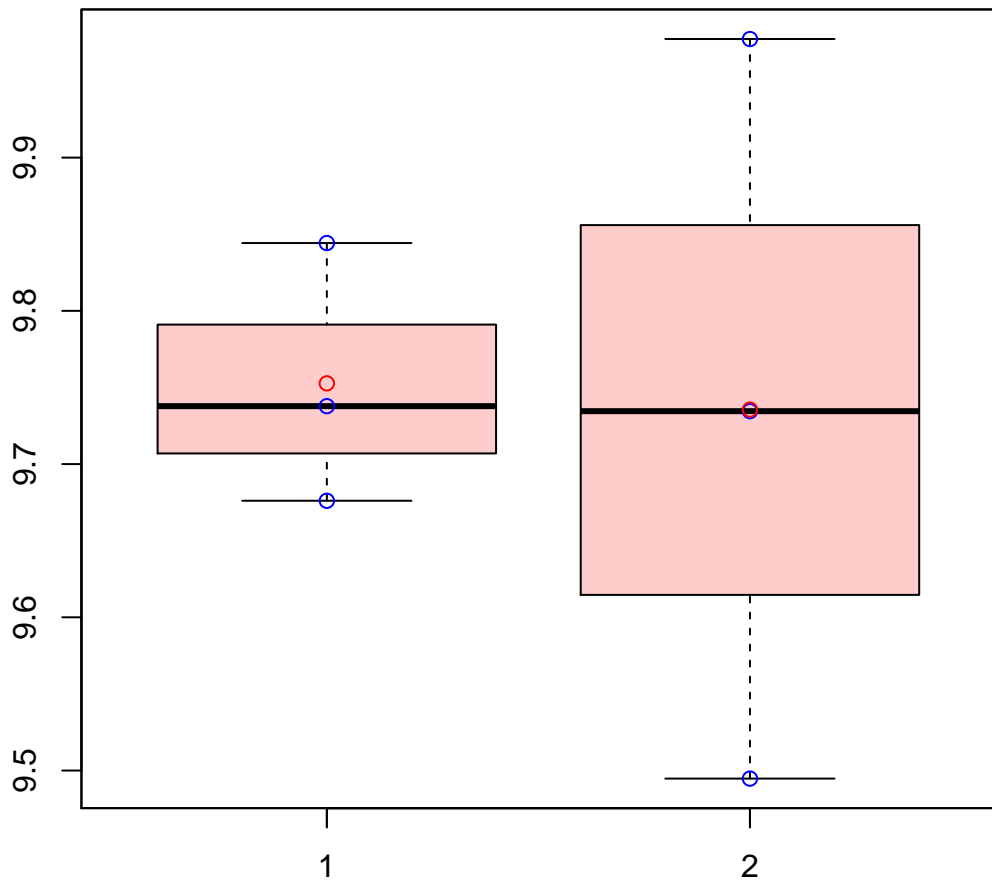

t-Test: p-value = 0.92



# M7ZJZ8|M7ZJZ8\_TRIUA

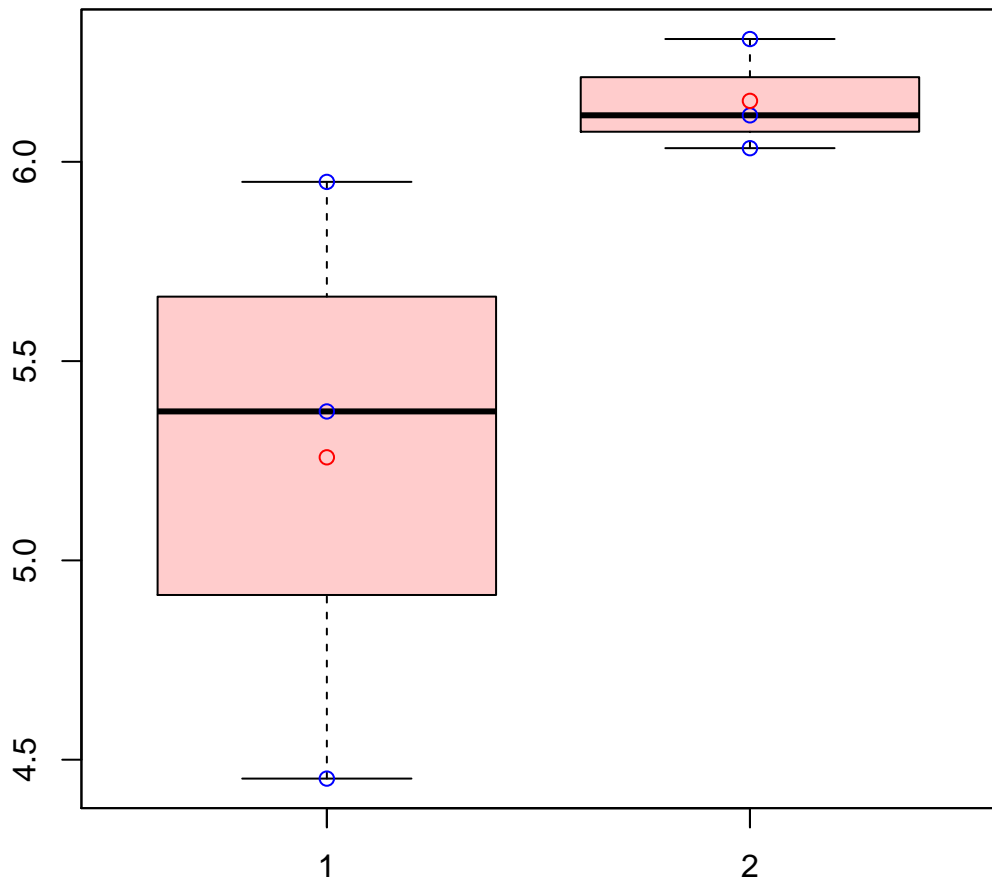

t-Test: p-value = 0.17

# M7ZKG2|M7ZKG2\_TRIUA

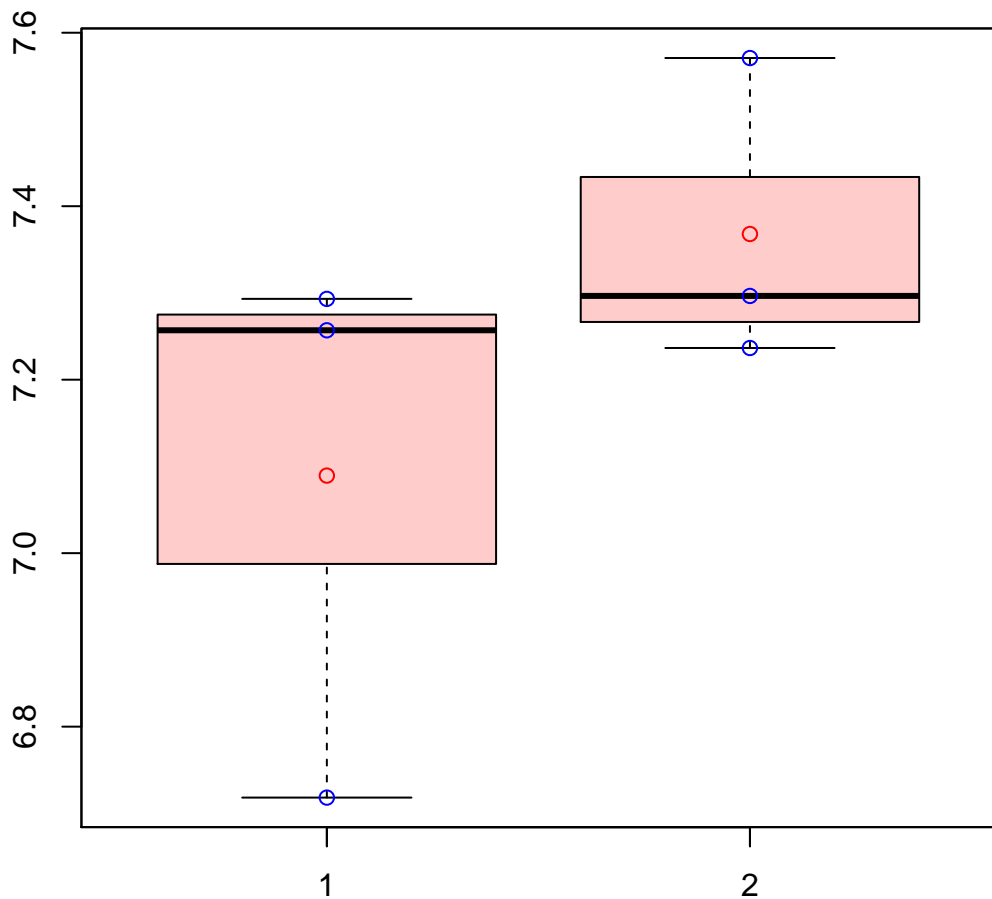

t-Test: p-value = 0.28

# M7ZKX9|M7ZKX9\_TRIUA

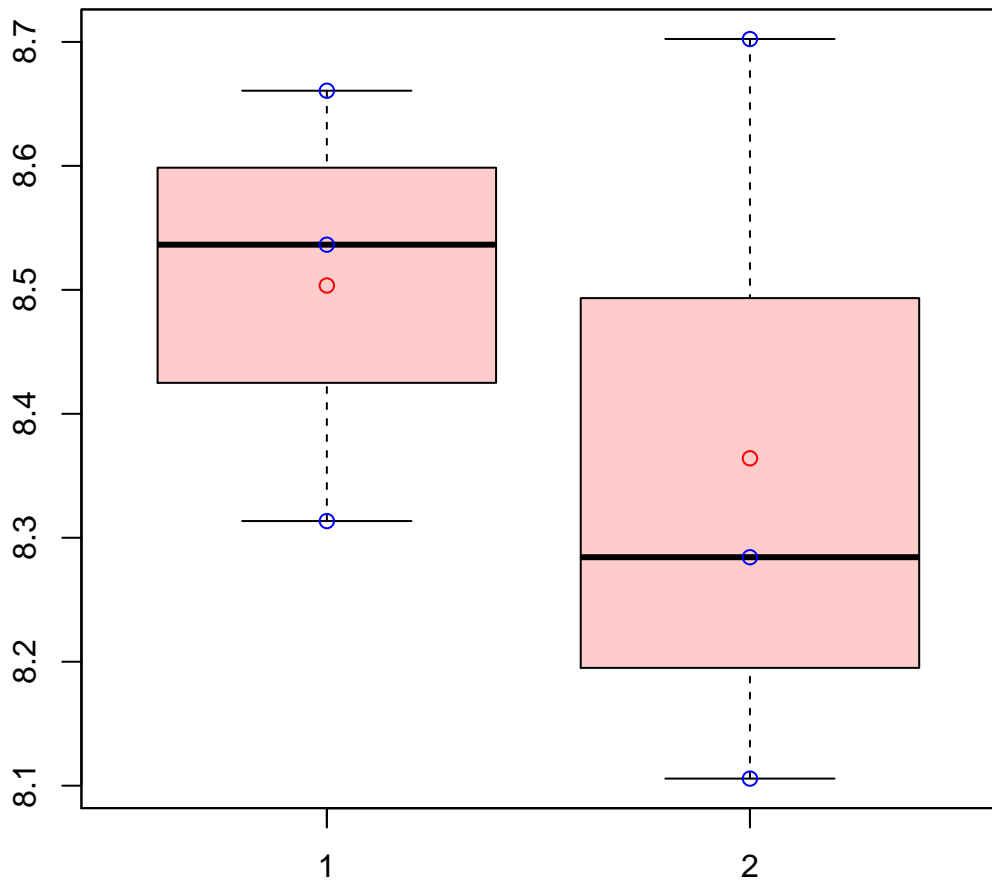

t-Test: p-value = 0.54

# M7ZL97|M7ZL97\_TRIUA

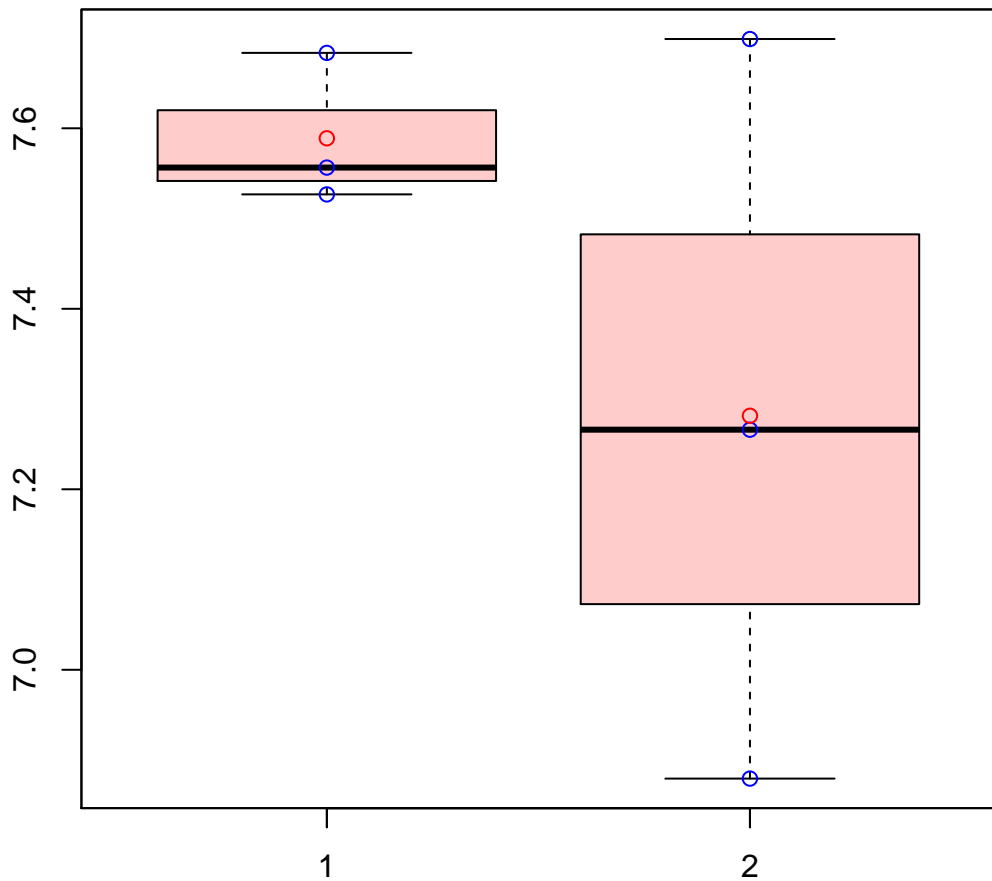

t-Test: p-value = 0.32

# M7ZLY3|M7ZLY3\_TRIUA

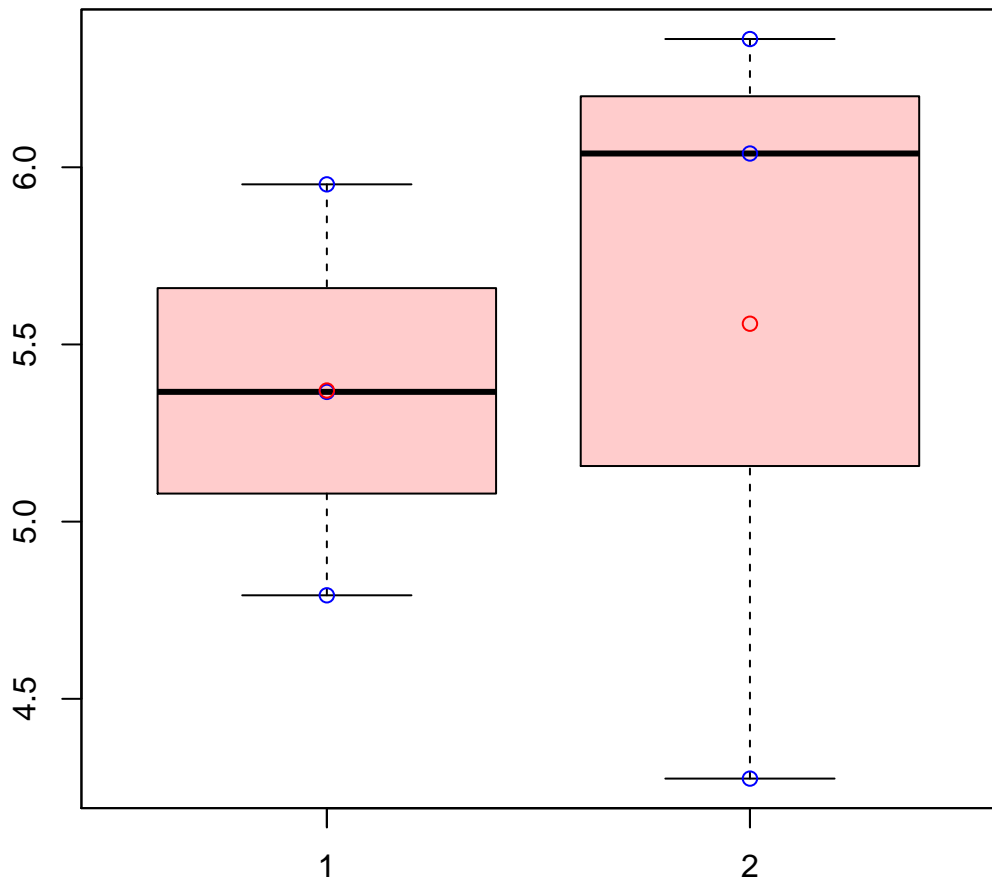

t-Test: p-value = 0.81

# M7ZLY5|M7ZLY5\_TRIUA

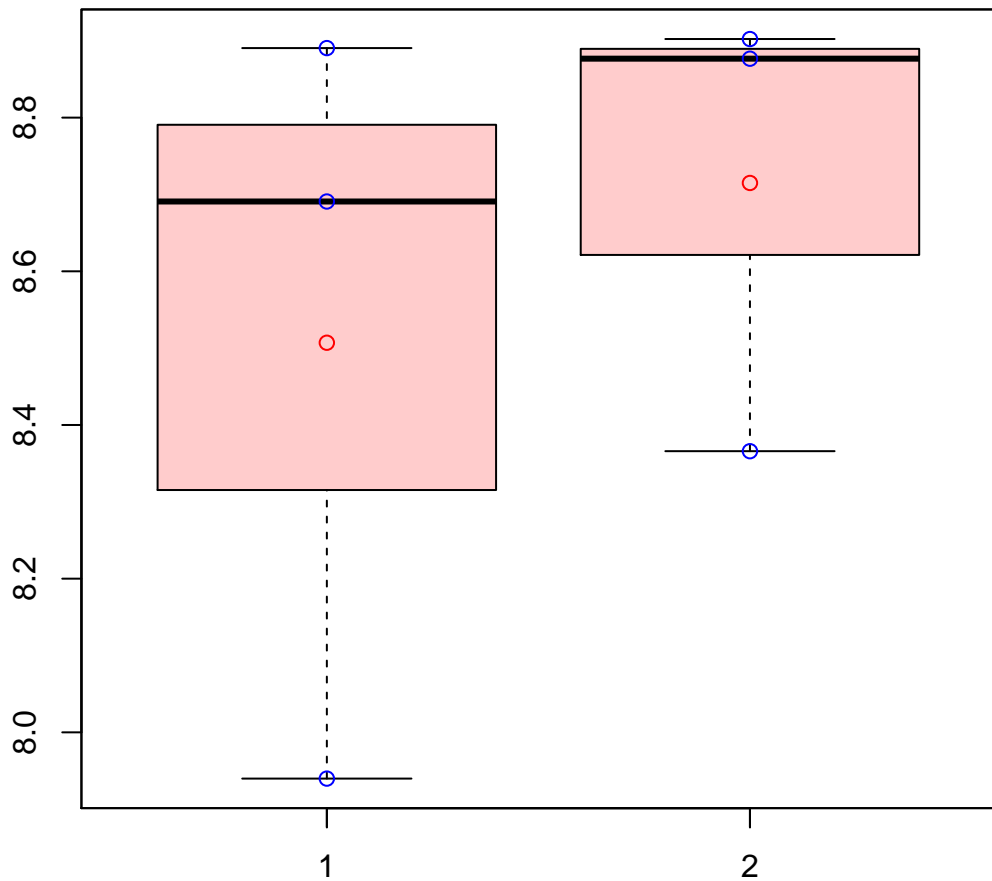

t-Test: p-value = 0.58

# M7ZM61|M7ZM61\_TRIUA

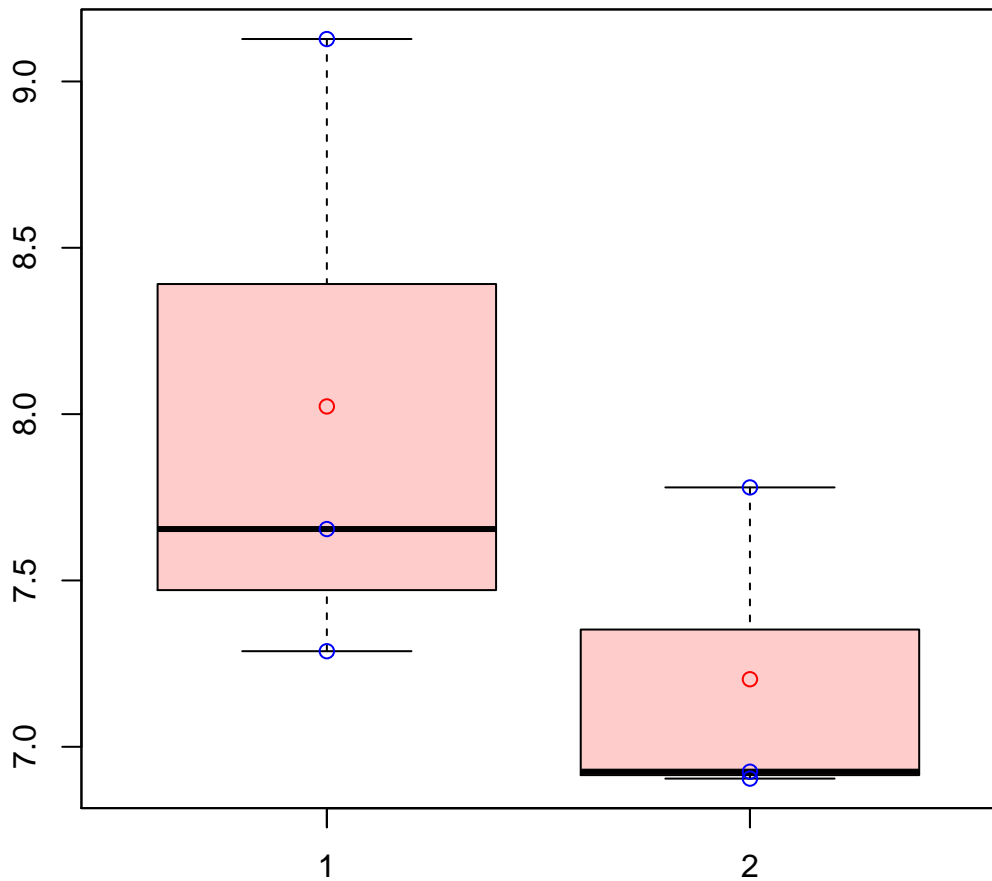

t-Test: p-value = 0.29

# M7ZM91|M7ZM91\_TRIUA

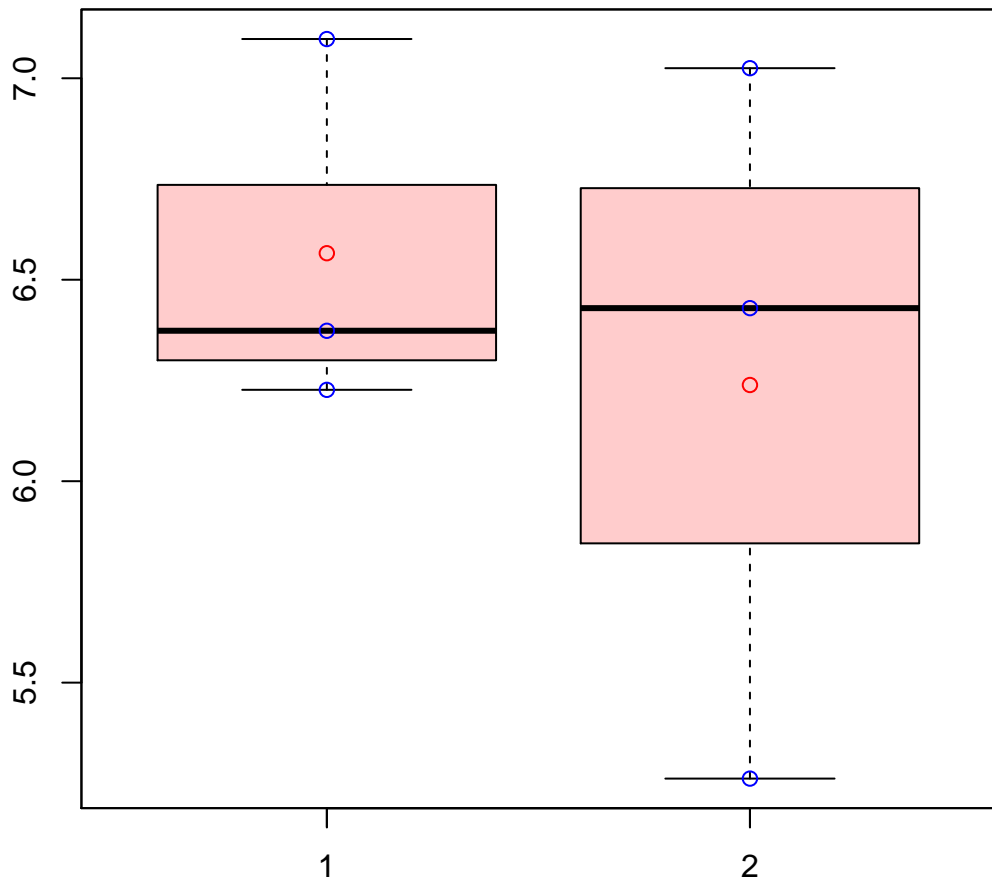

t-Test: p-value = 0.61



# M7ZMX1|M7ZMX1\_TRIUA

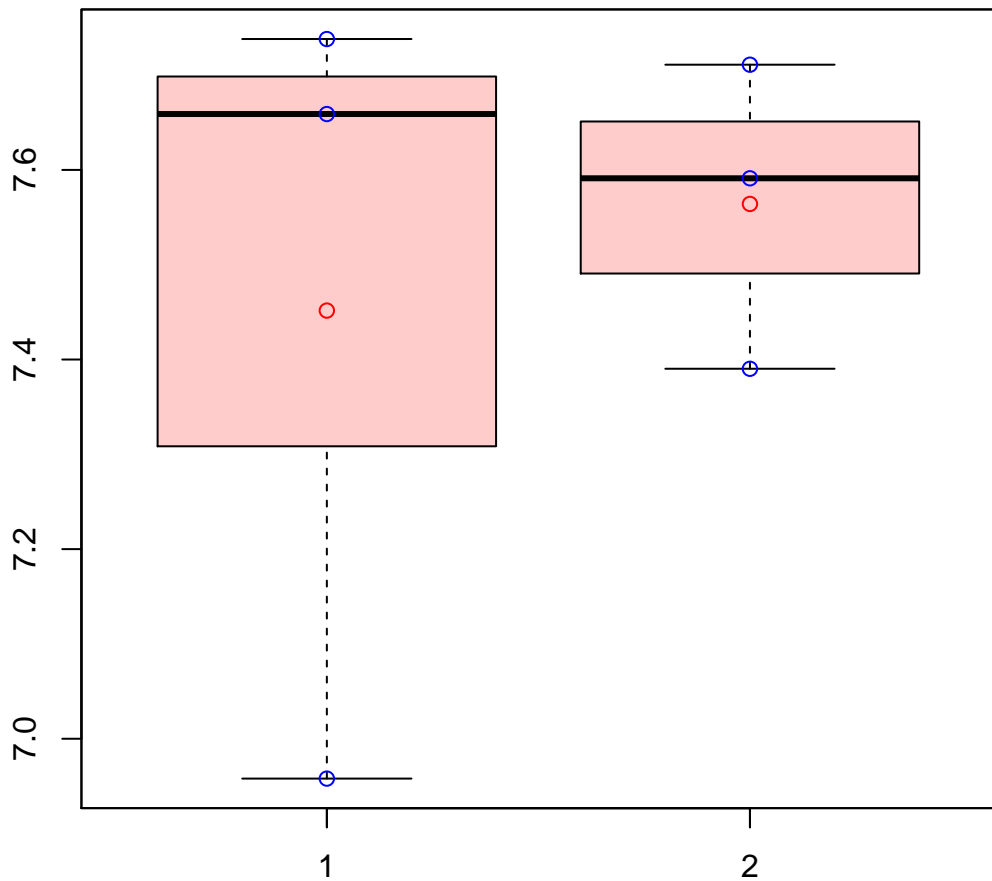

t-Test: p-value = 0.7

# M7ZN76|M7ZN76\_TRIUA

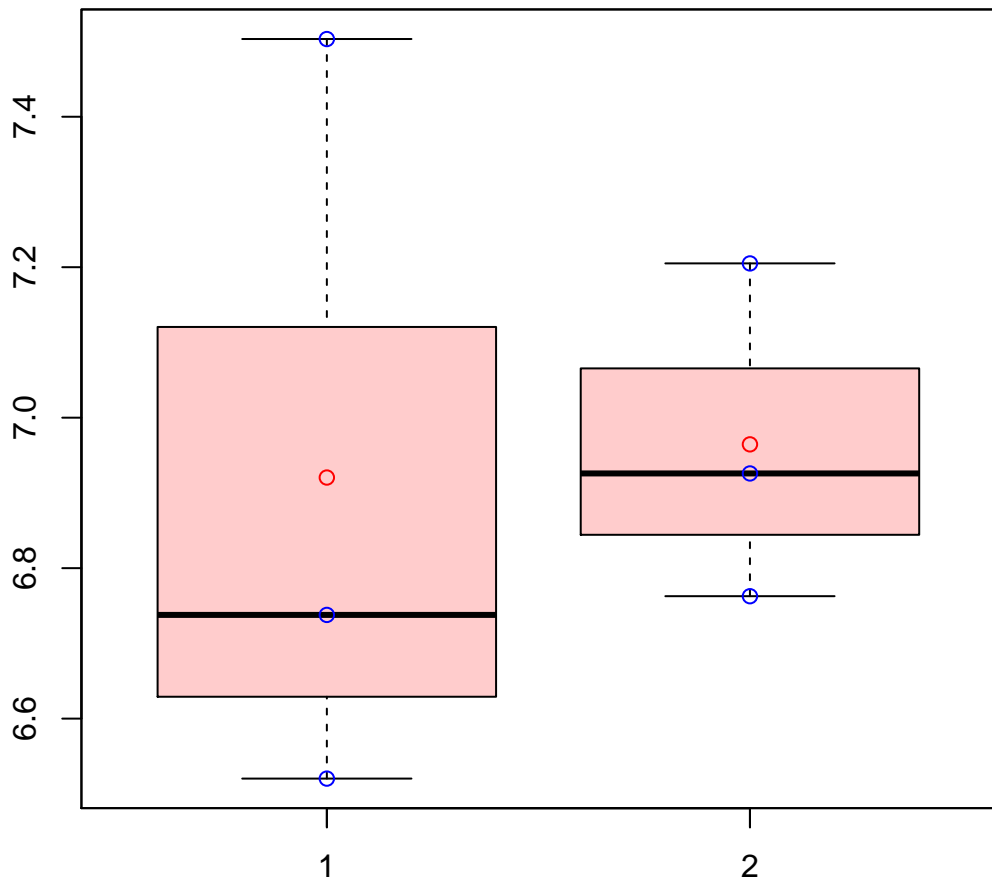

t-Test: p-value = 0.9

# M7ZNI1|M7ZNI1\_TRIUA

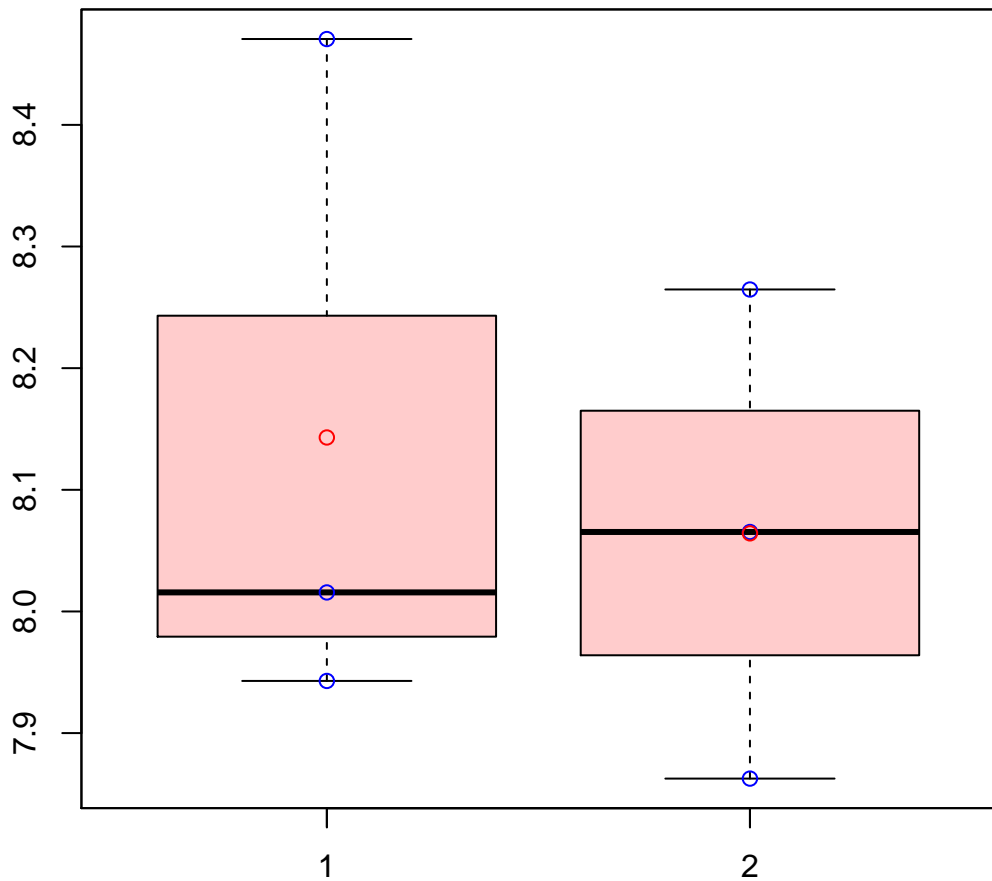

t-Test: p-value = 0.72

# M7ZPN9|M7ZPN9\_TRIUA

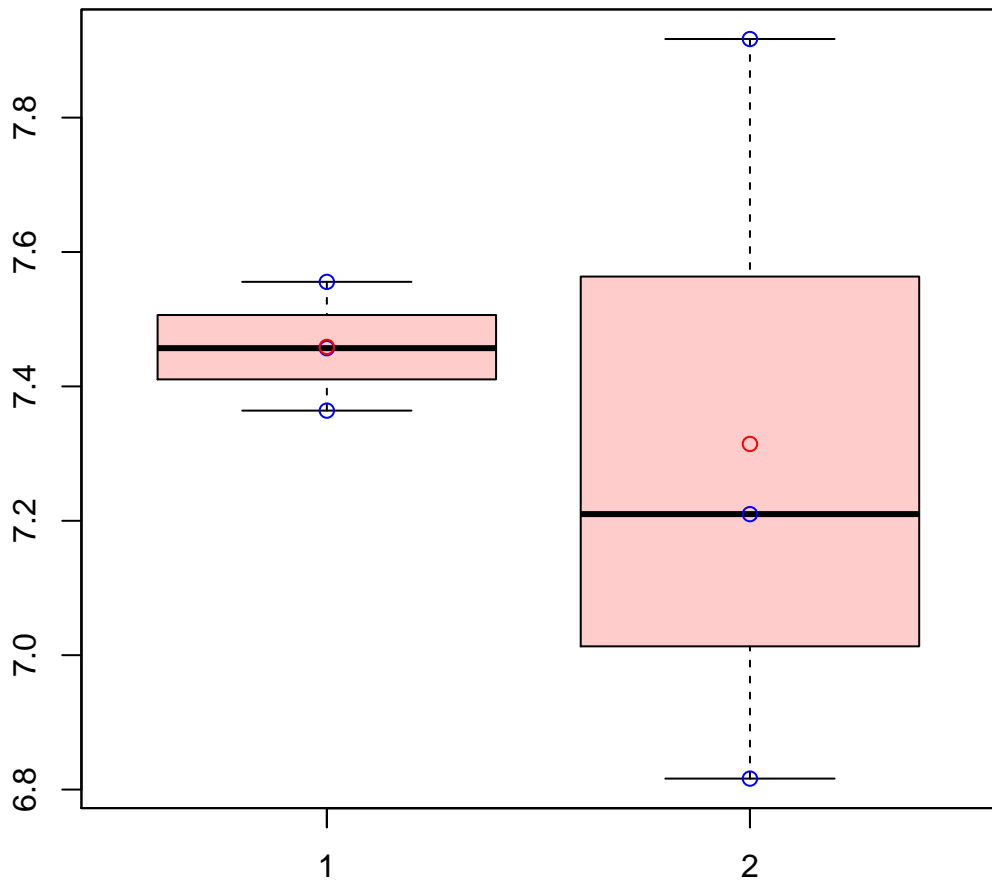

t-Test: p-value = 0.7

# M7ZPY7|M7ZPY7\_TRIUA

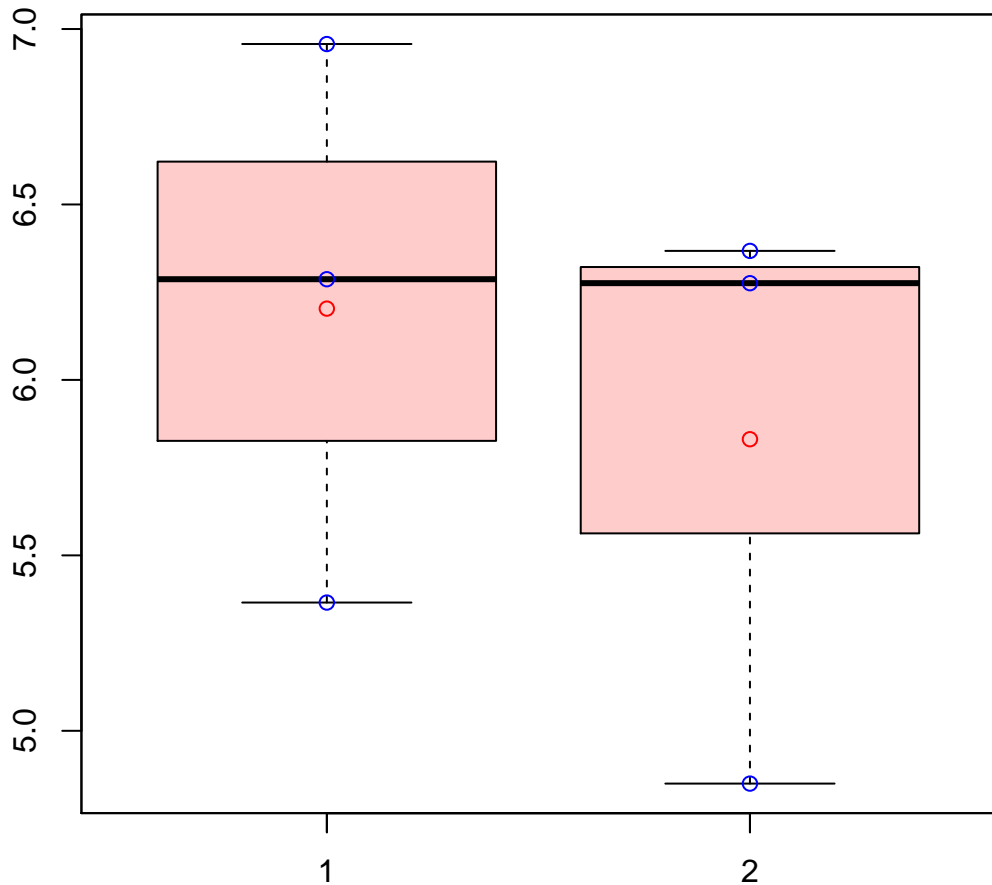

t-Test: p-value = 0.61

# M7ZQZ0|M7ZQZ0\_TRIUA

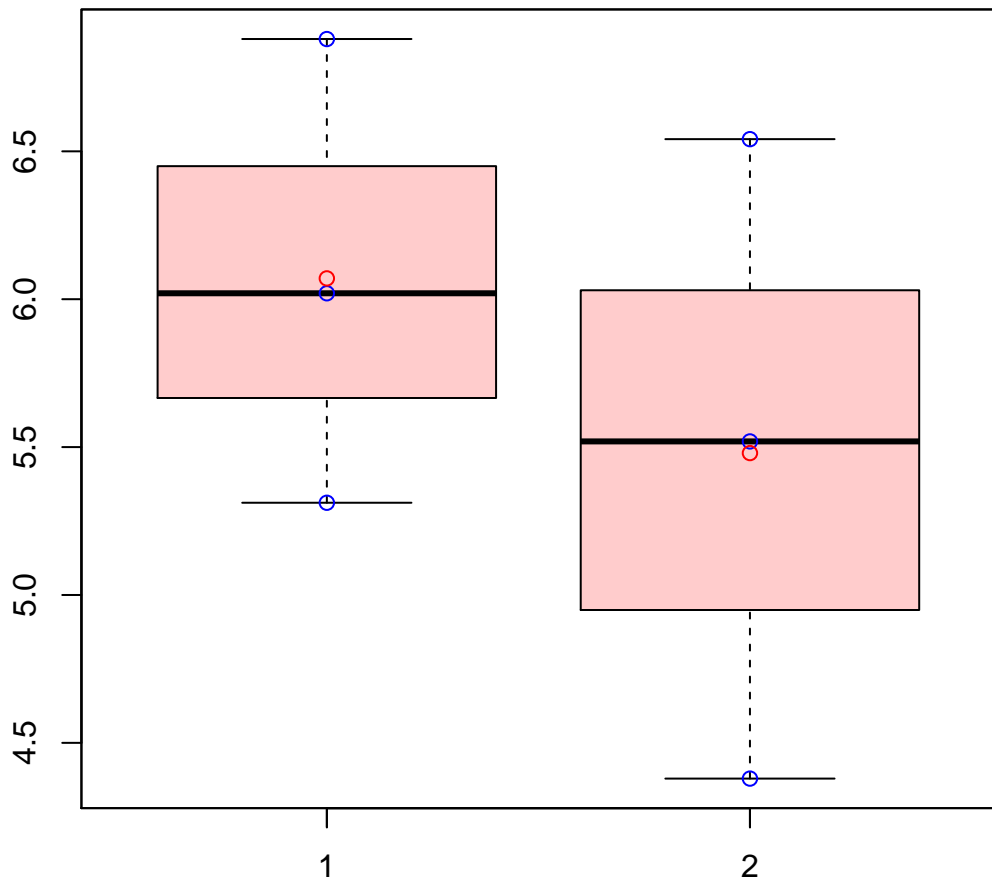

t-Test: p-value = 0.49

# M7ZR53|M7ZR53\_TRIUA

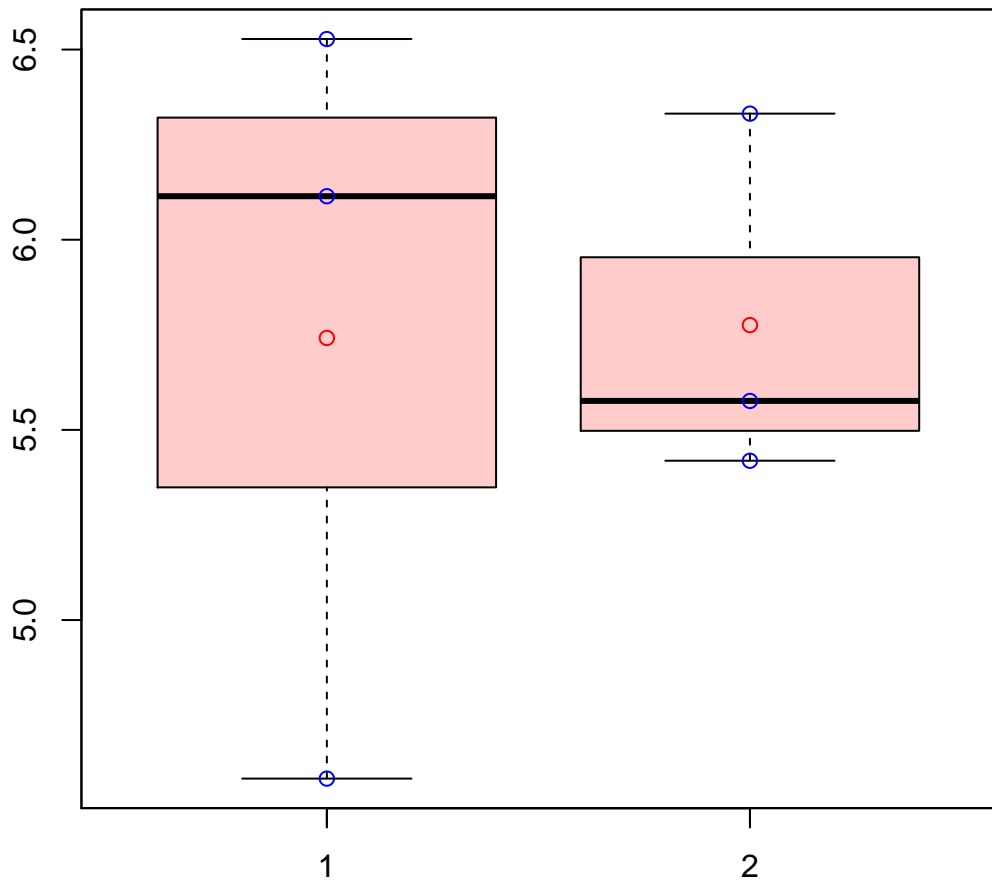

t-Test: p-value = 0.96

# M7ZR60|M7ZR60\_TRIUA

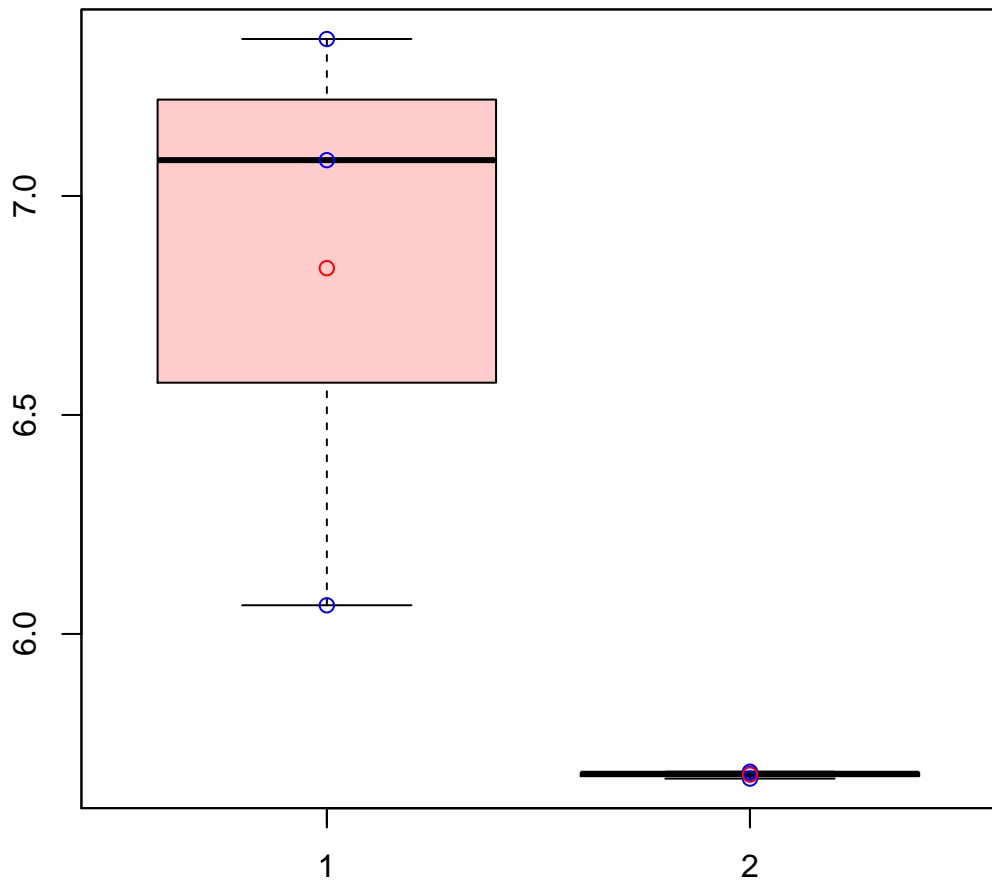

t-Test: p-value = 0.1



# M7ZSN5|M7ZSN5\_TRIUA

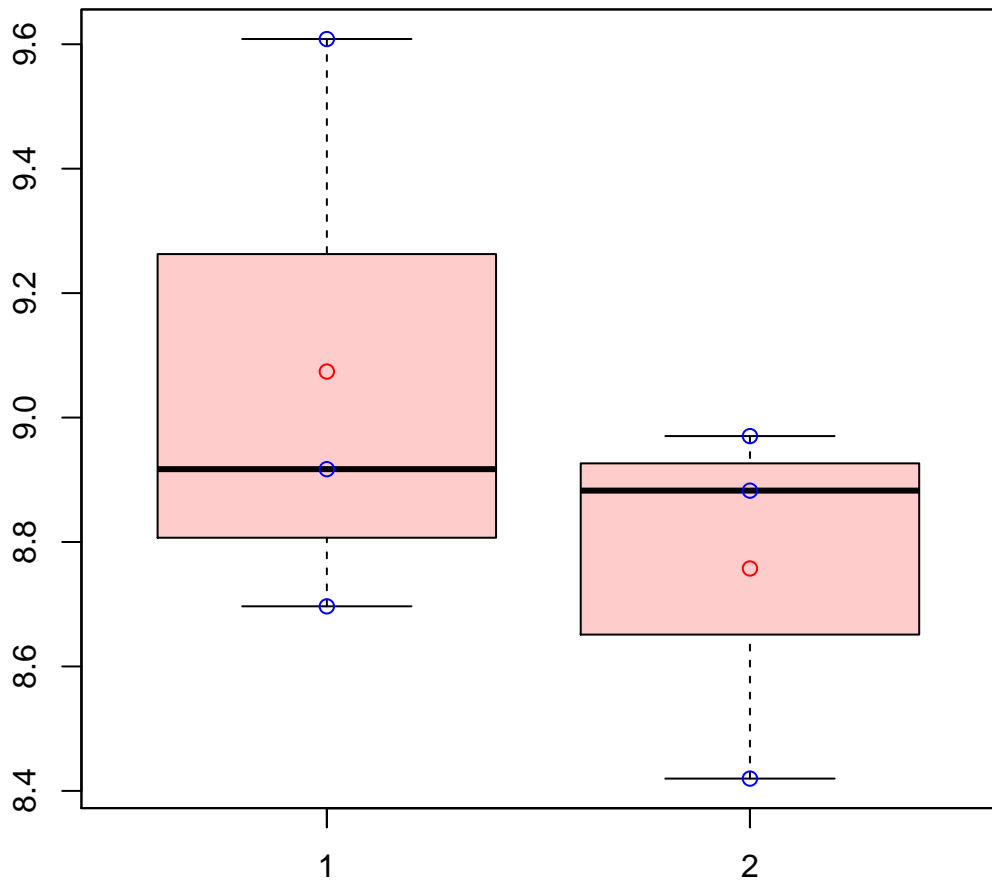

t-Test: p-value = 0.39

# M7ZSZ7|M7ZSZ7\_TRIUA

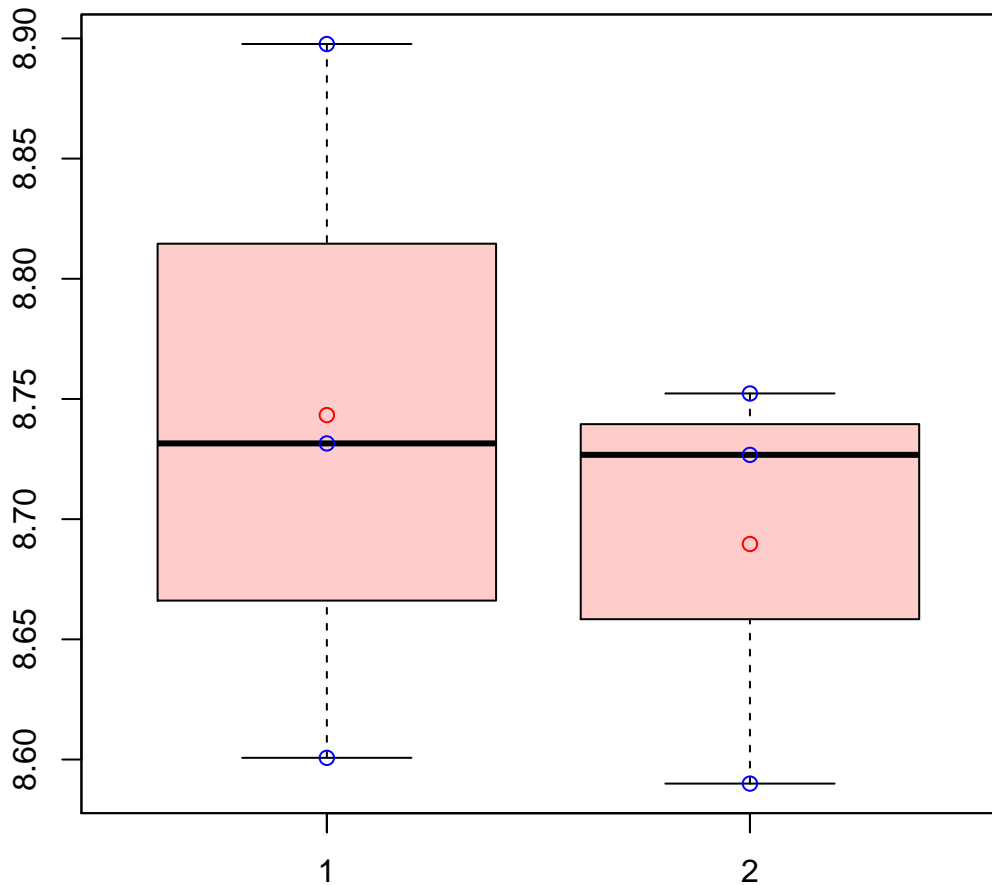

t-Test: p-value = 0.63

# M7ZT78|M7ZT78\_TRIUA

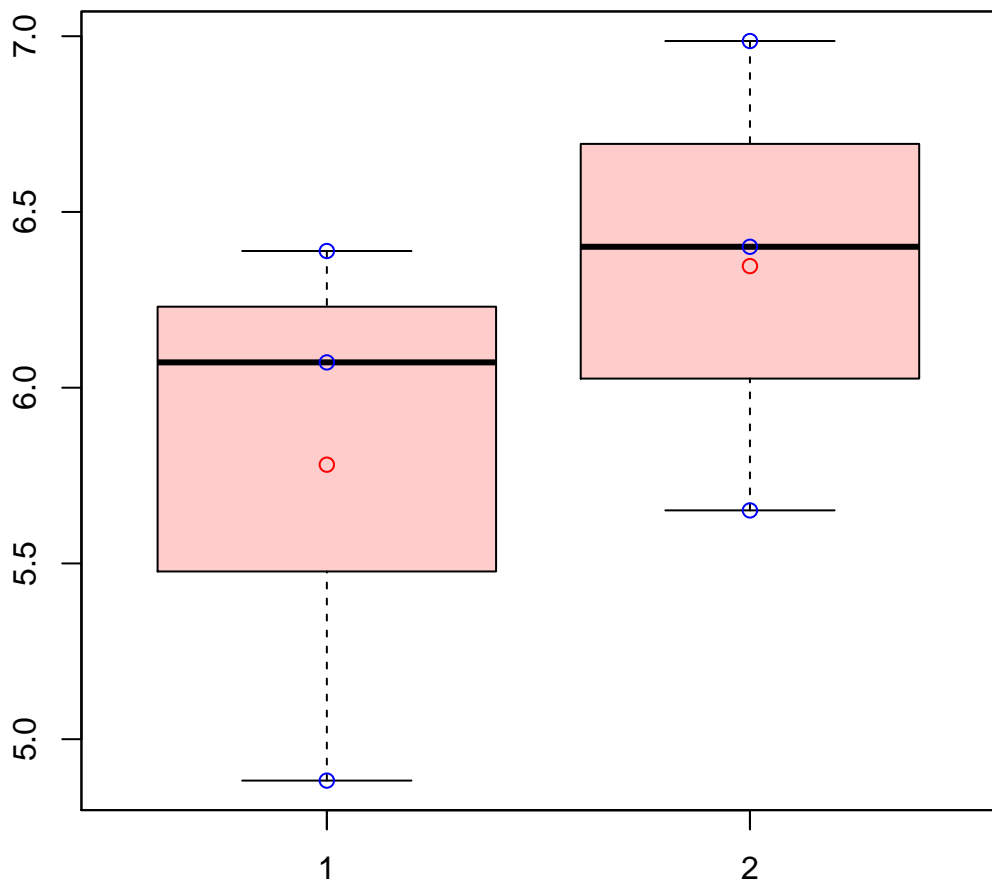

t-Test: p-value = 0.4

# M7ZT79|M7ZT79\_TRIUA

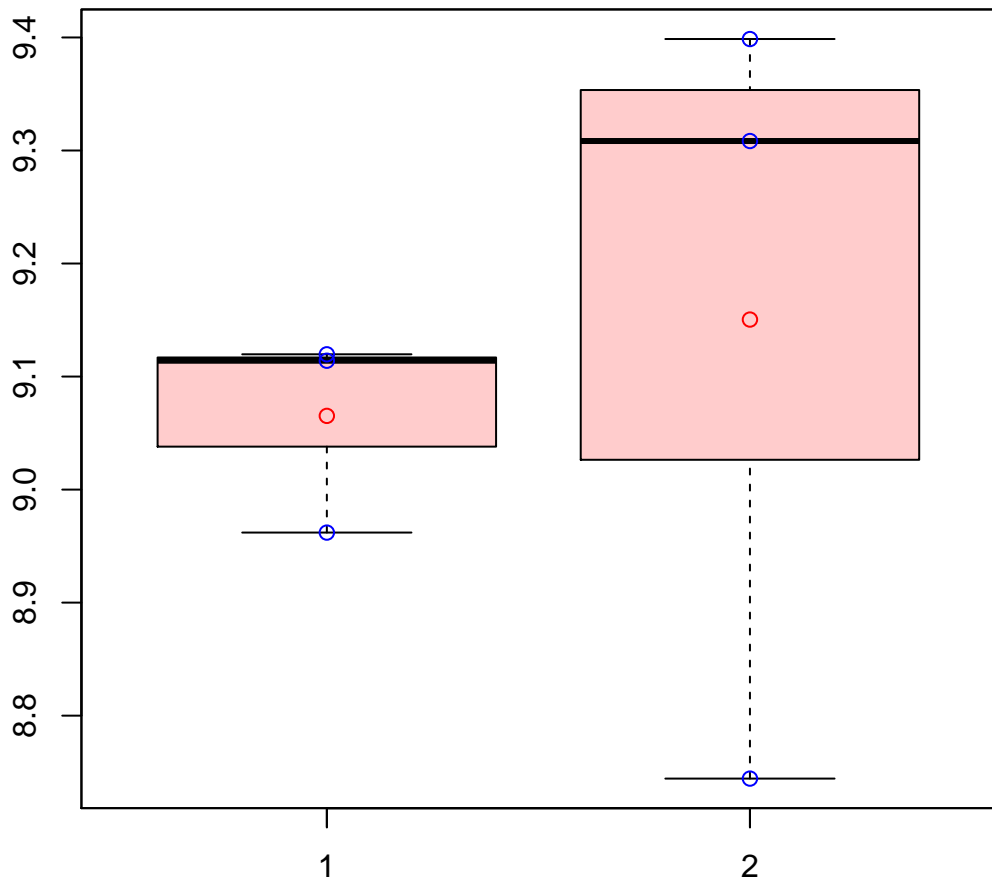

t-Test: p-value = 0.72

# M7ZU58|M7ZU58\_TRIUA

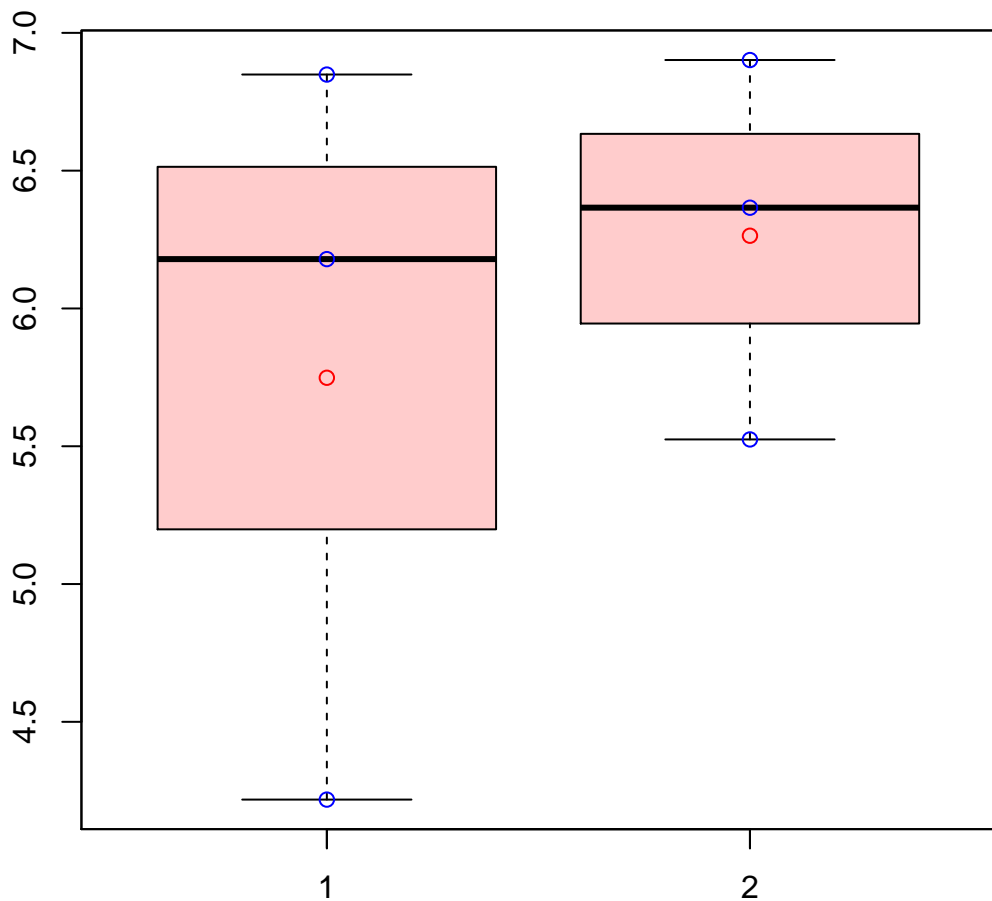

t-Test: p-value = 0.6

# M7ZV19|M7ZV19\_TRIUA

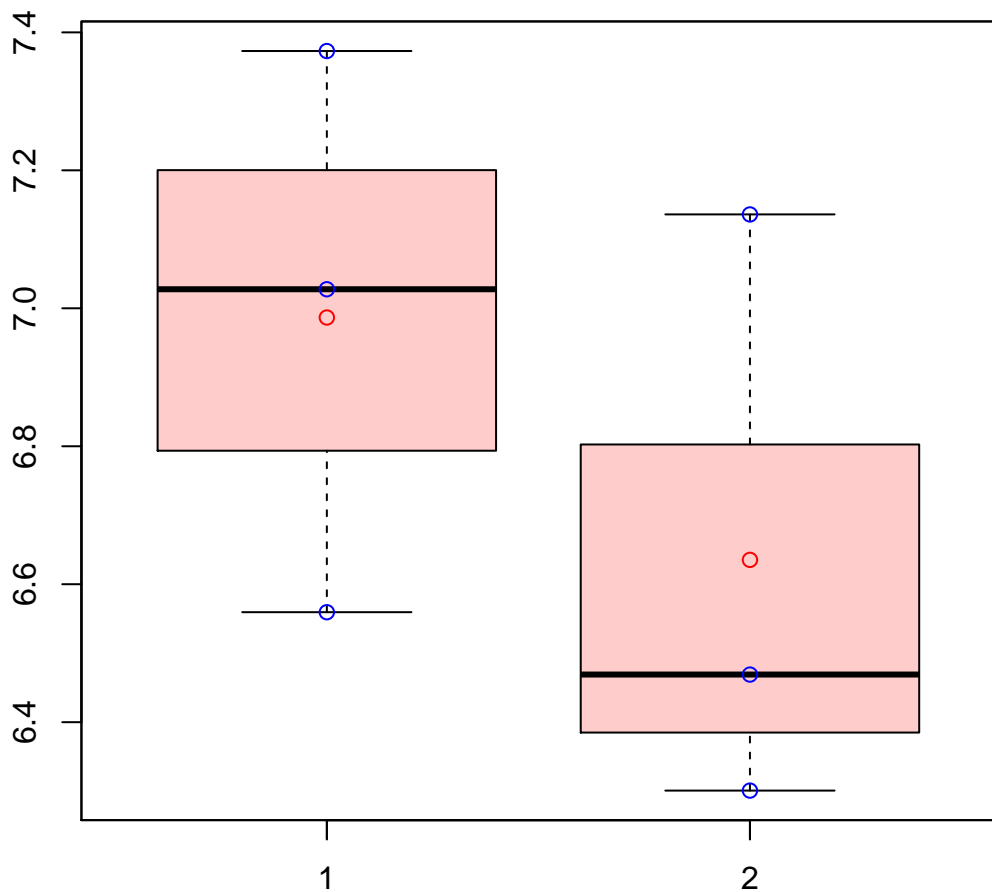

t-Test: p-value = 0.37

# M7ZVS0|M7ZVS0\_TRIUA

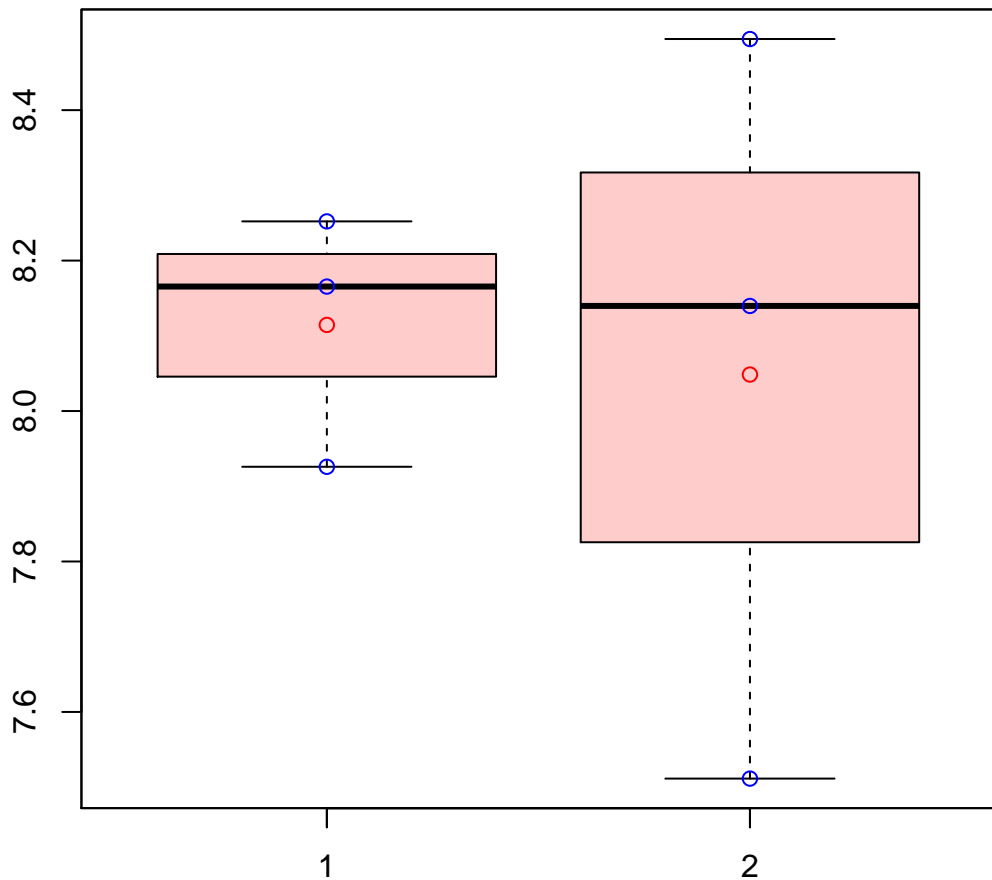

t-Test: p-value = 0.84

# M7ZWJ0|M7ZWJ0\_TRIUA

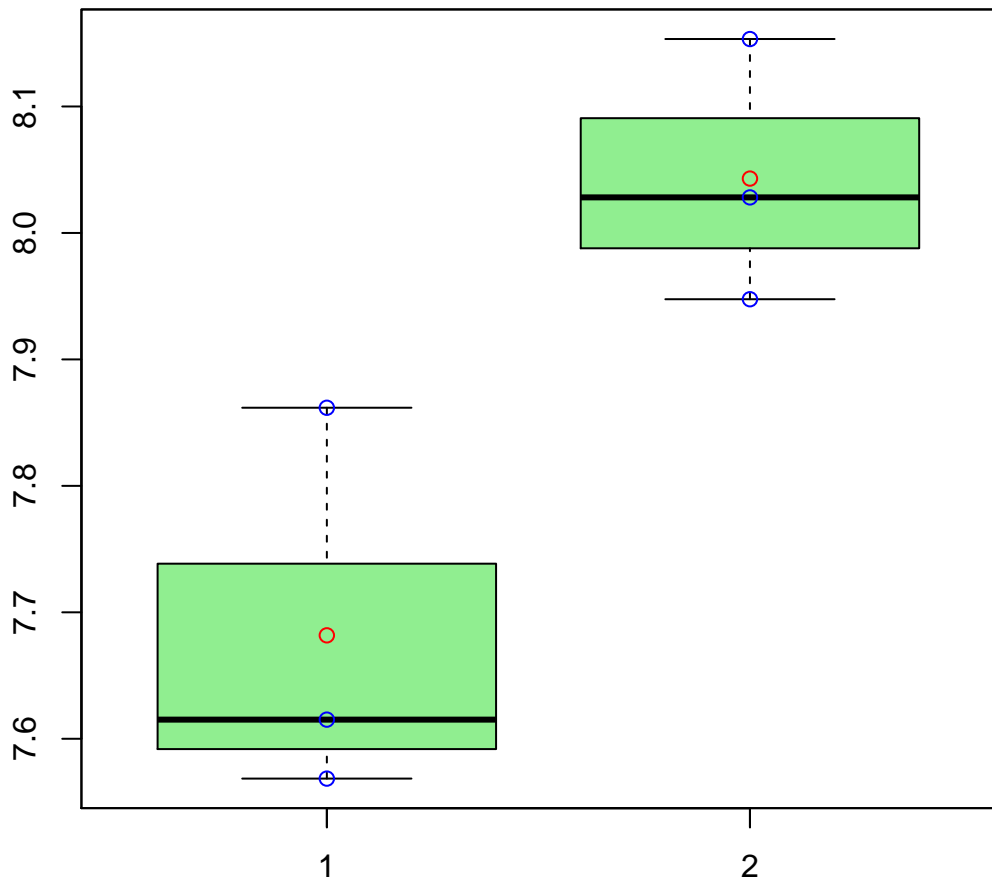

t-Test: p-value = 0.04



# M7ZWK3|M7ZWK3\_TRIUA

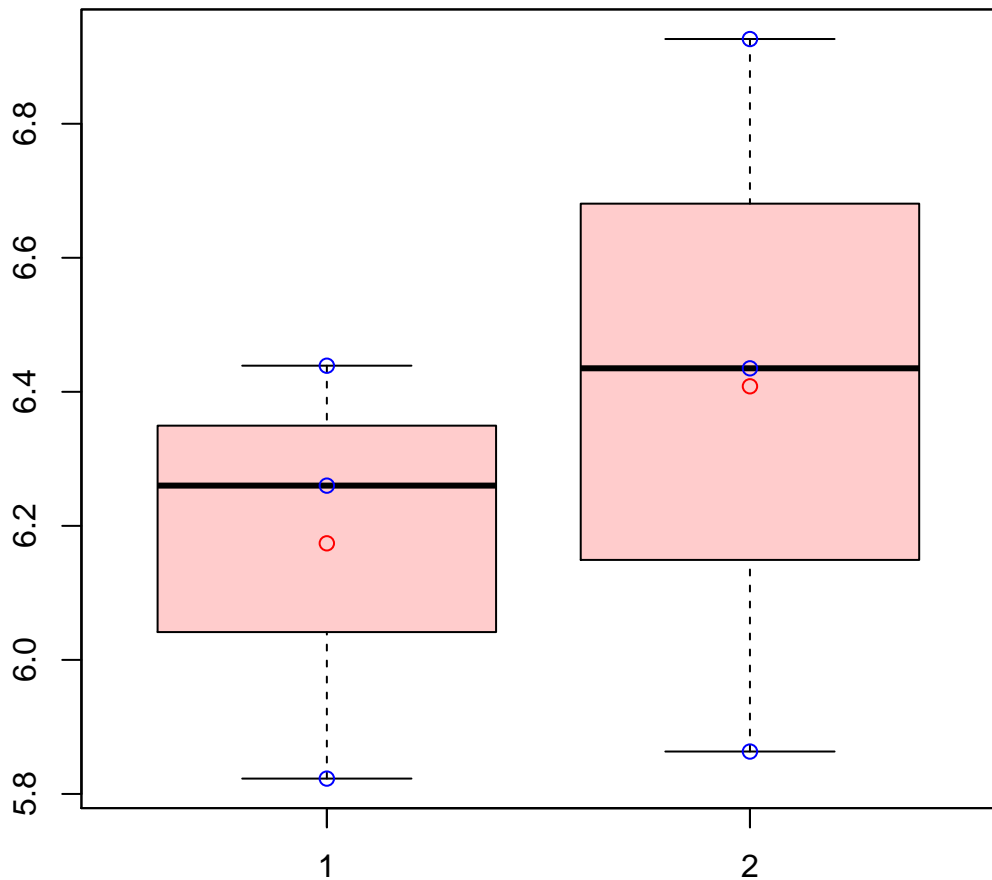

t-Test: p-value = 0.56

# M7ZWK4|M7ZWK4\_TRIUA

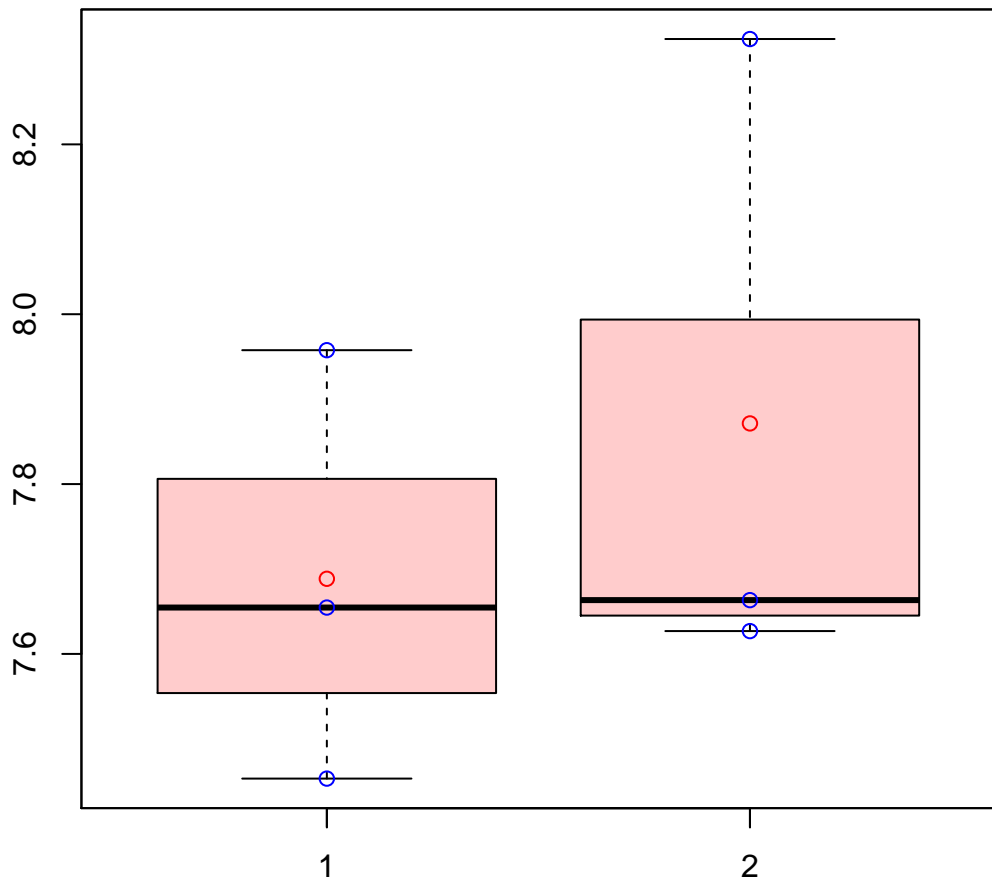

t-Test: p-value = 0.54

# M7ZWK6|M7ZWK6\_TRIUA

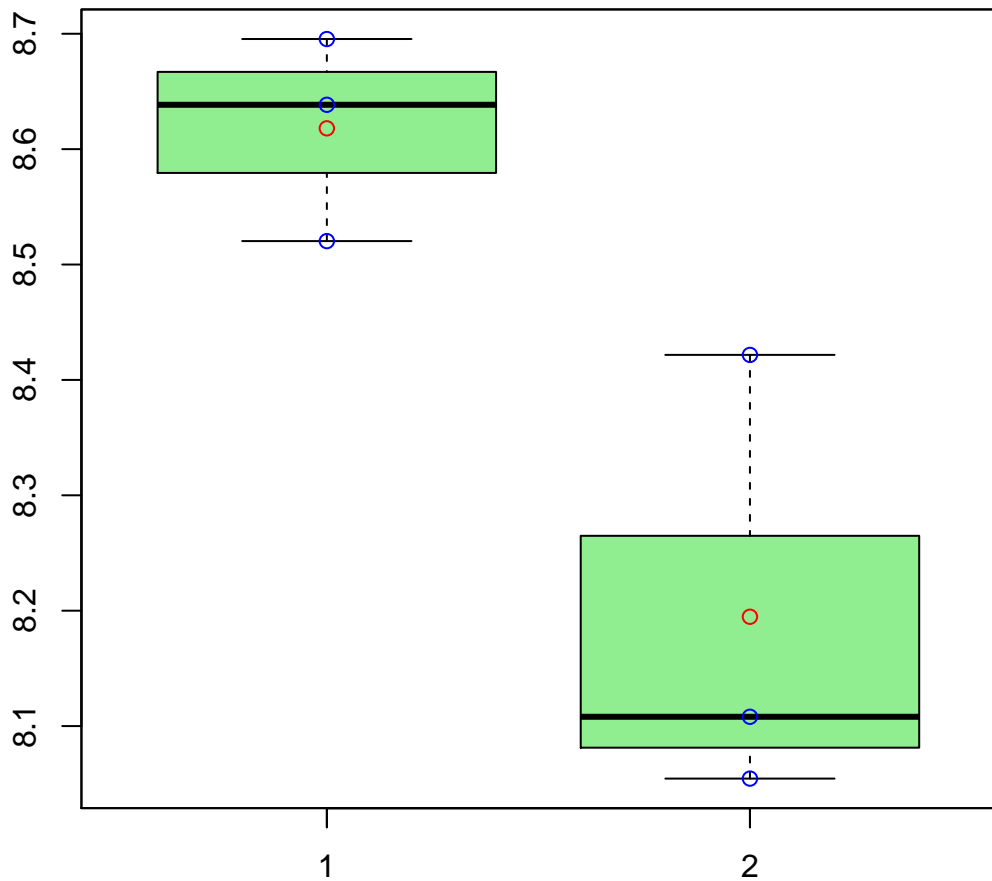

t-Test: p-value = 0.05

# M7ZWN3|M7ZWN3\_TRIUA

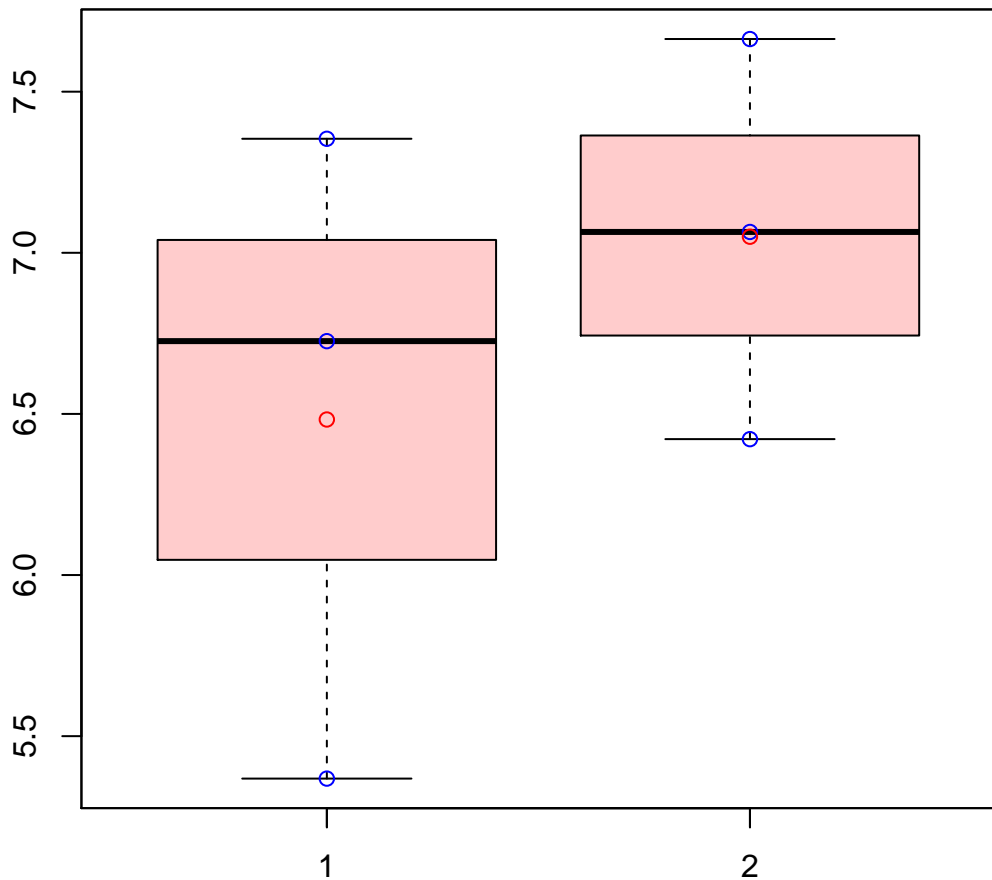

t-Test: p-value = 0.46

# M7ZWS2|M7ZWS2\_TRIUA

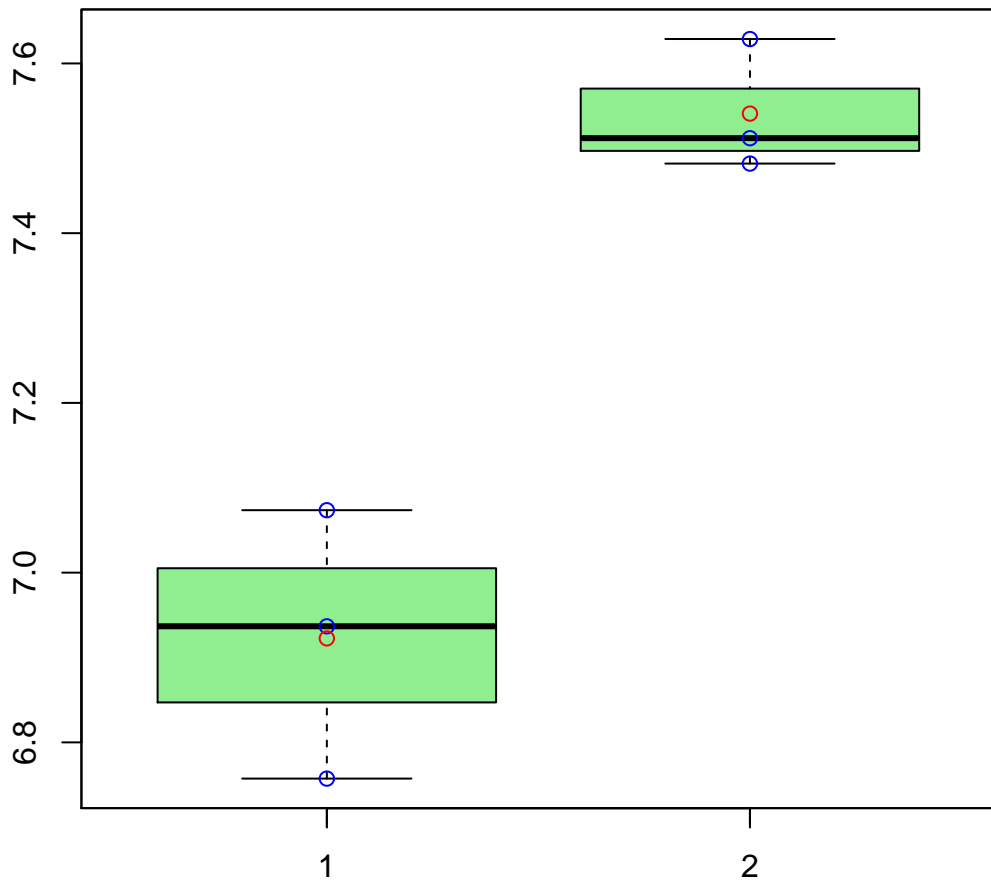

t-Test: p-value = 0.01

# M7ZXD7|M7ZXD7\_TRIUA

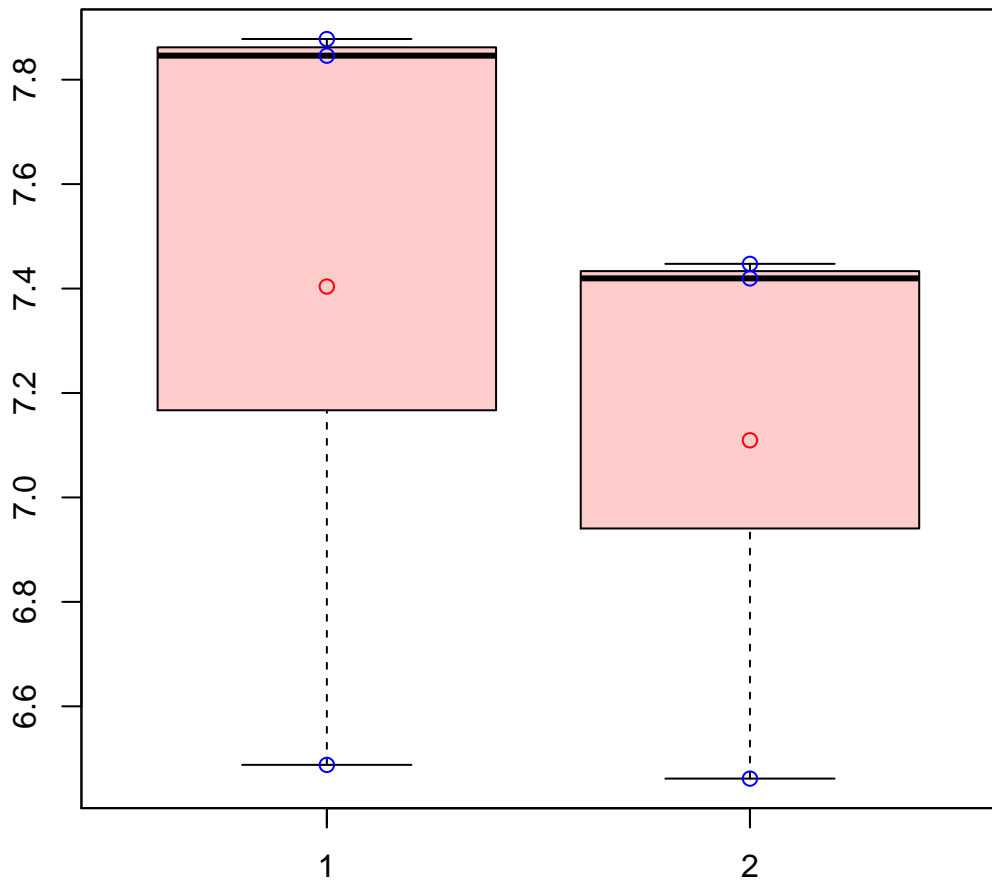

t-Test: p-value = 0.63

# M7ZXX2|M7ZXX2\_TRIUA

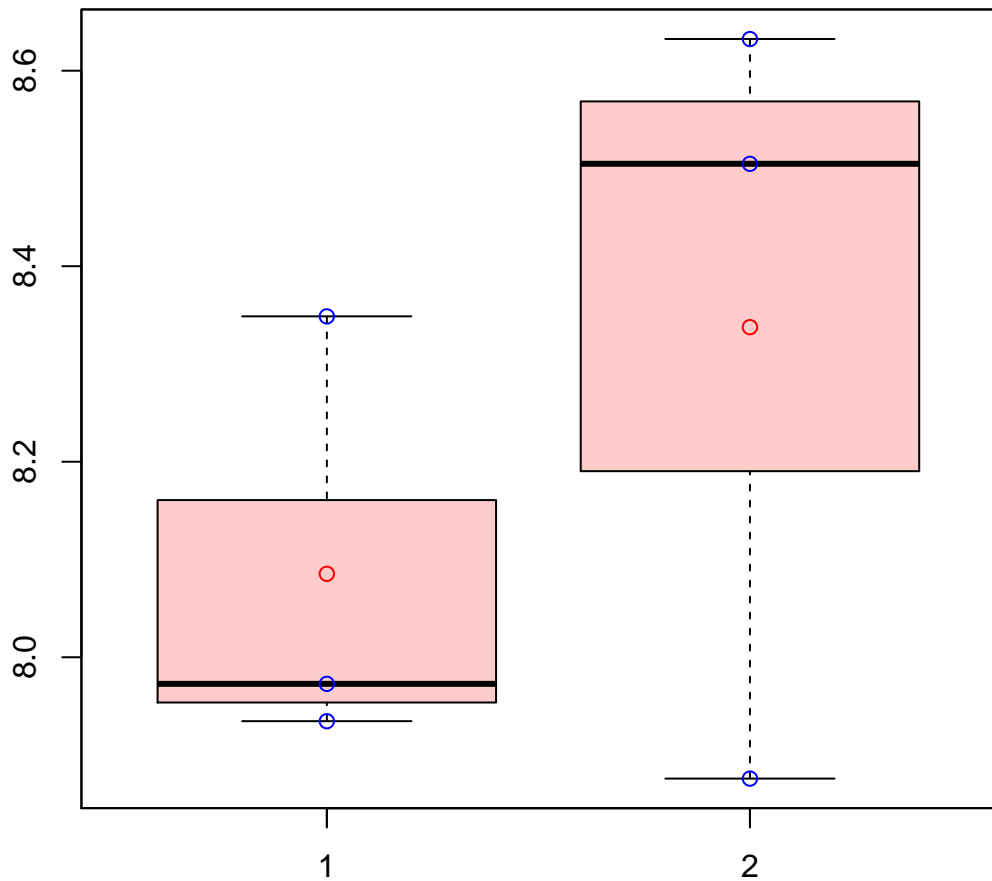

t-Test: p-value = 0.41

# M7ZY34|M7ZY34\_TRIUA

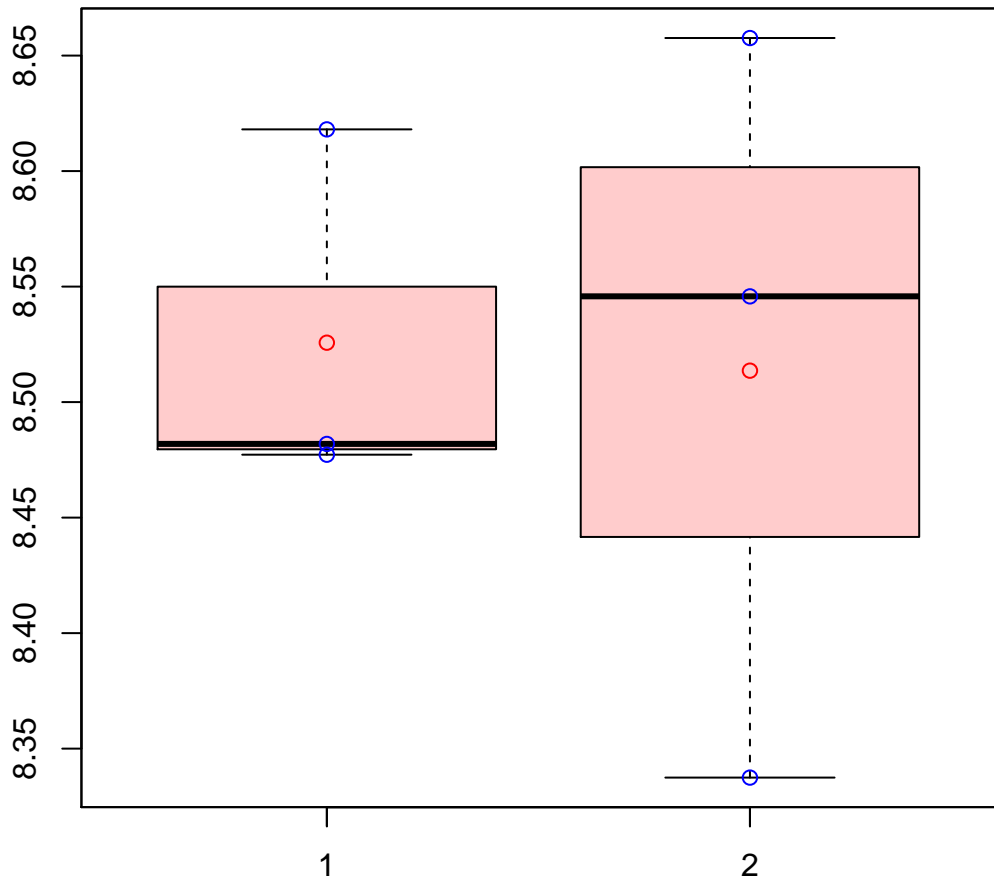

t-Test: p-value = 0.92



# M7ZYB3|M7ZYB3\_TRIUA

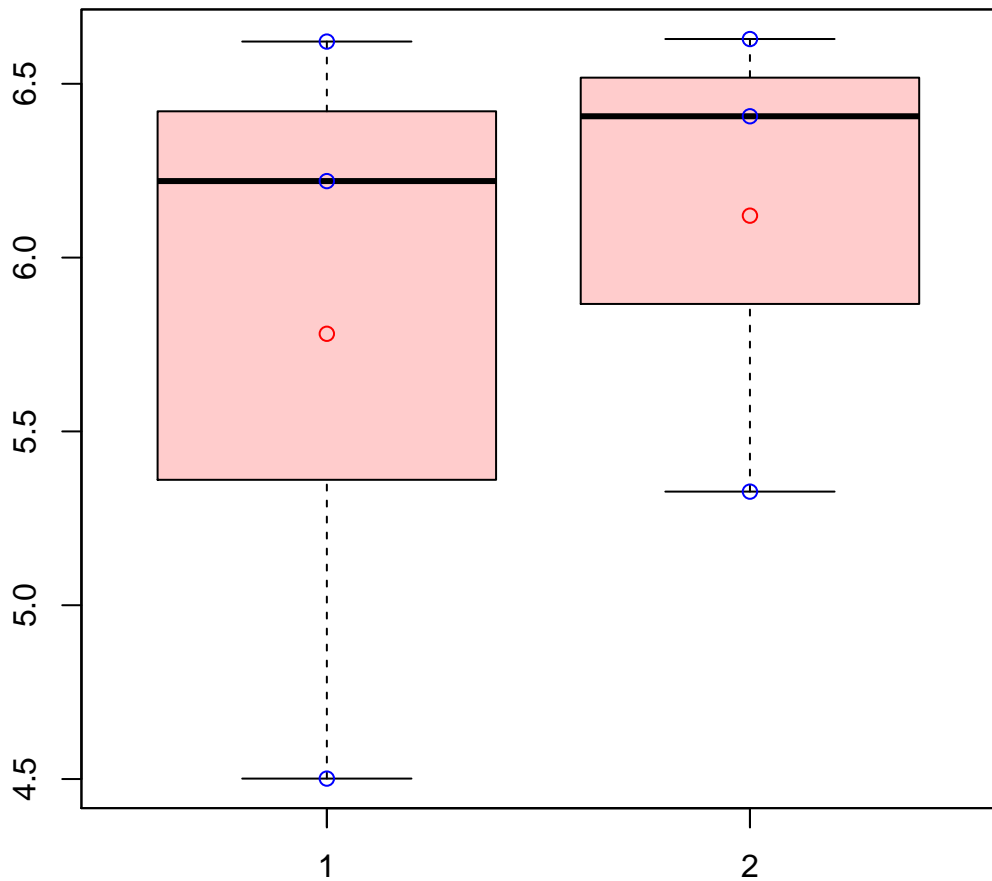

t-Test: p-value = 0.68

# M7ZYK1|M7ZYK1\_TRIUA

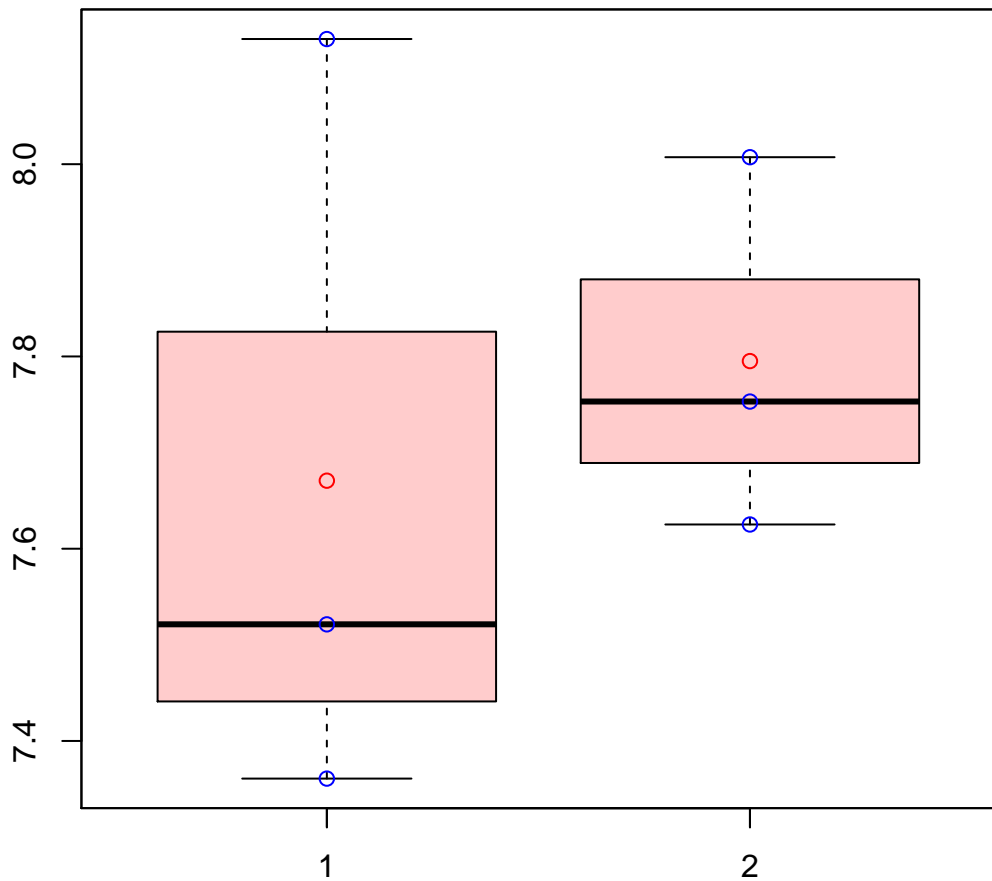

t-Test: p-value = 0.67

# M7ZYP1|M7ZYP1\_TRIUA

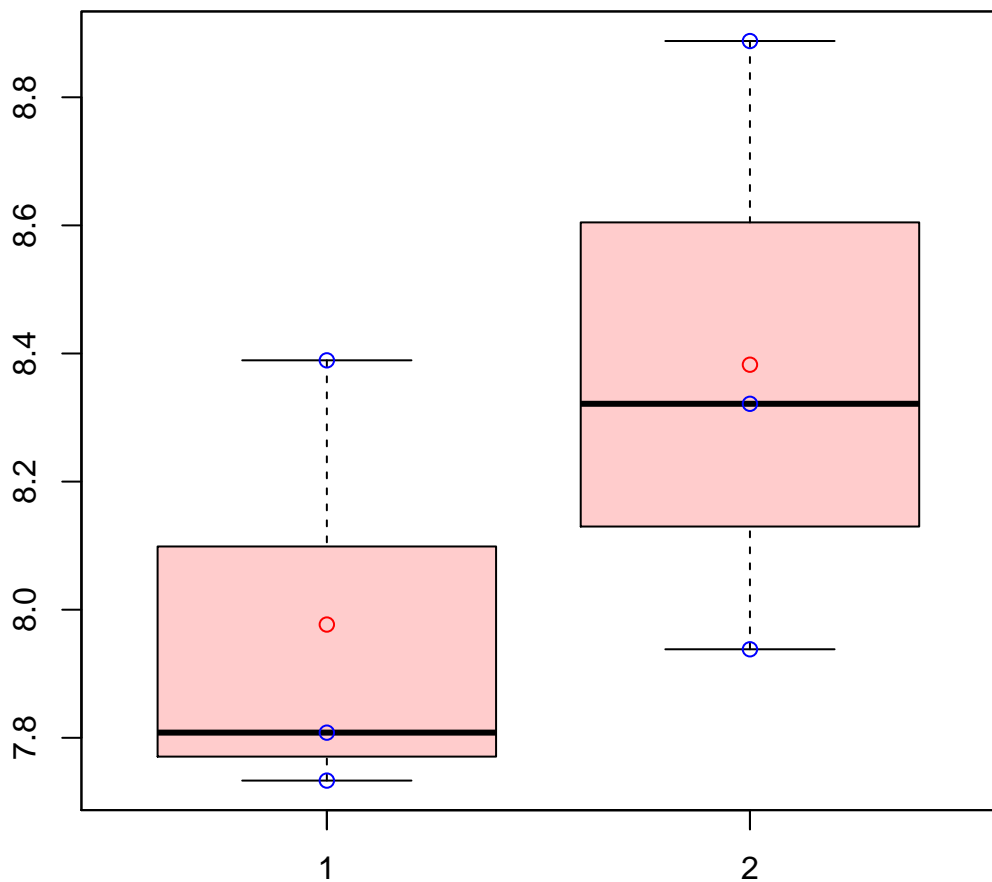

t-Test: p-value = 0.31

# M7ZYV4|M7ZYV4\_TRIUA

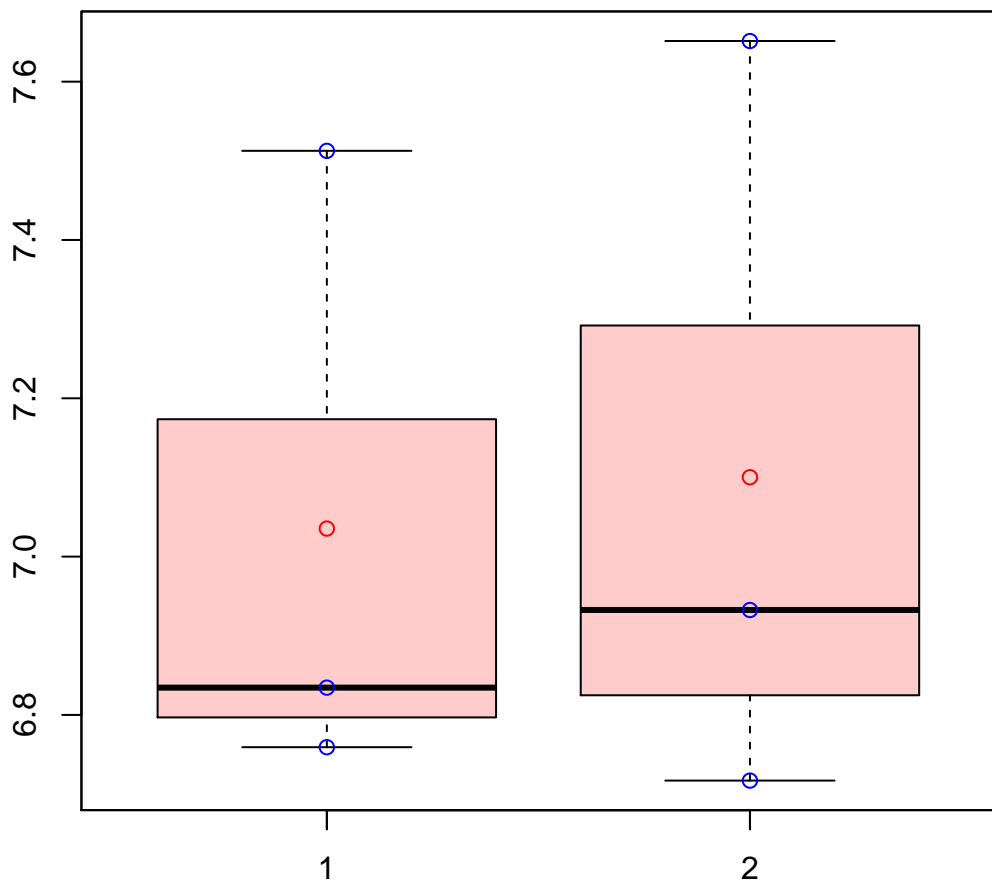

t-Test: p-value = 0.87

# M7YZZ3|M7YZZ3\_TRIUA

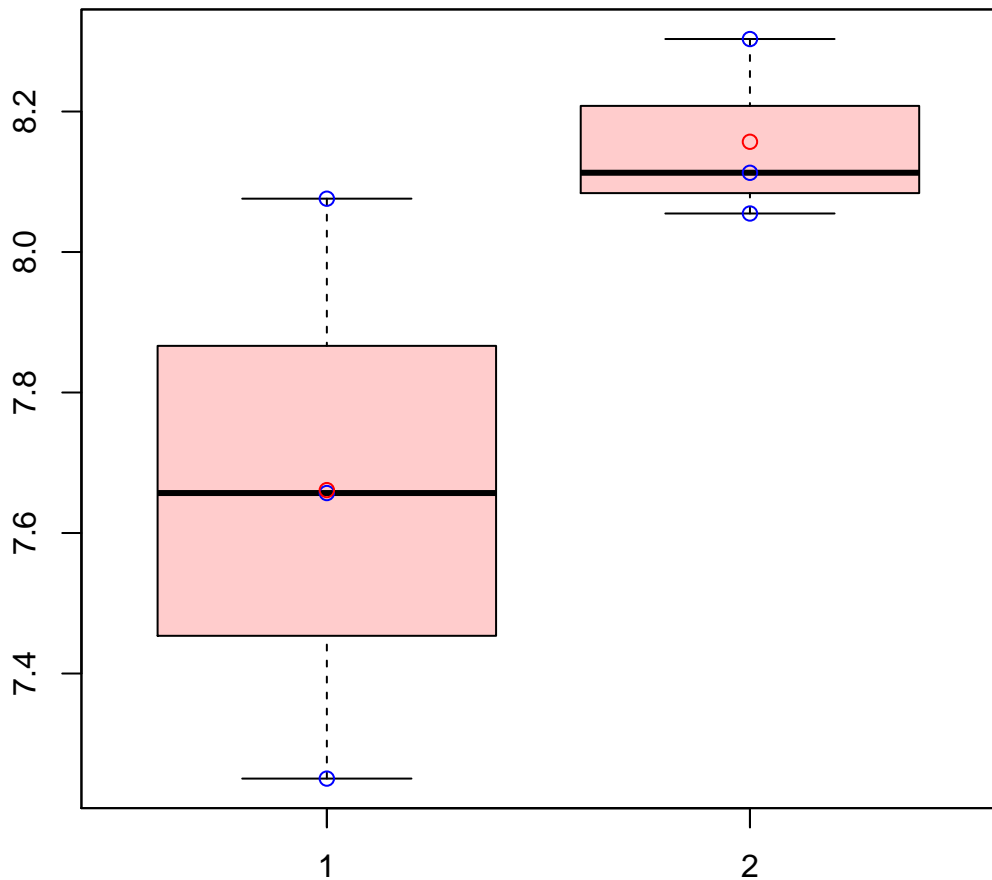

t-Test: p-value = 0.16

# M7ZZC6|M7ZZC6\_TRIUA

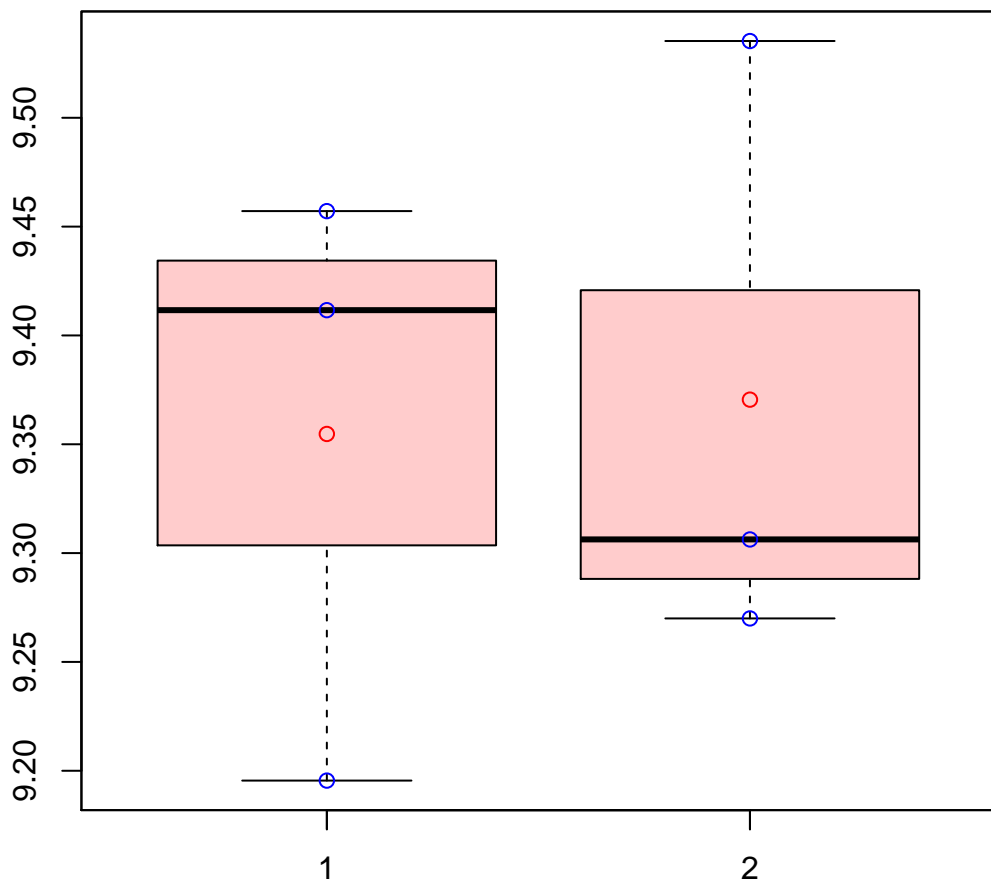

t-Test: p-value = 0.9

# M7ZZK7|M7ZZK7\_TRIUA

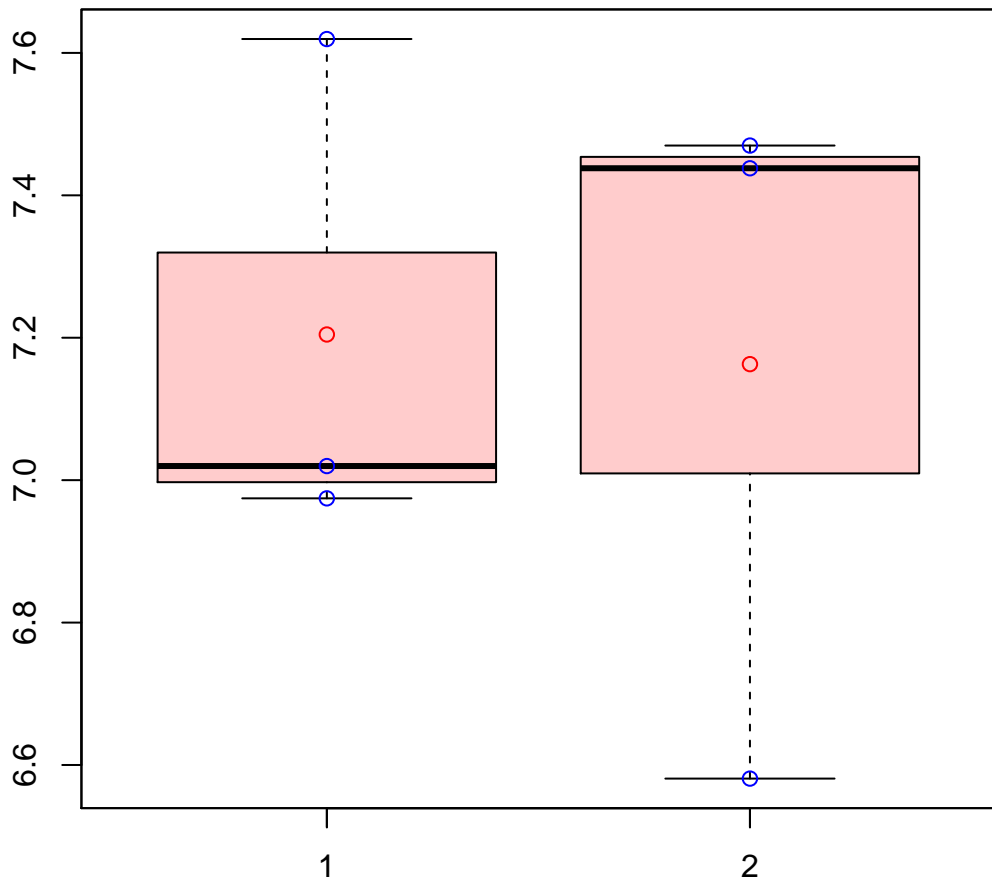

t-Test: p-value = 0.91

# M8A0S1|M8A0S1\_TRIUA

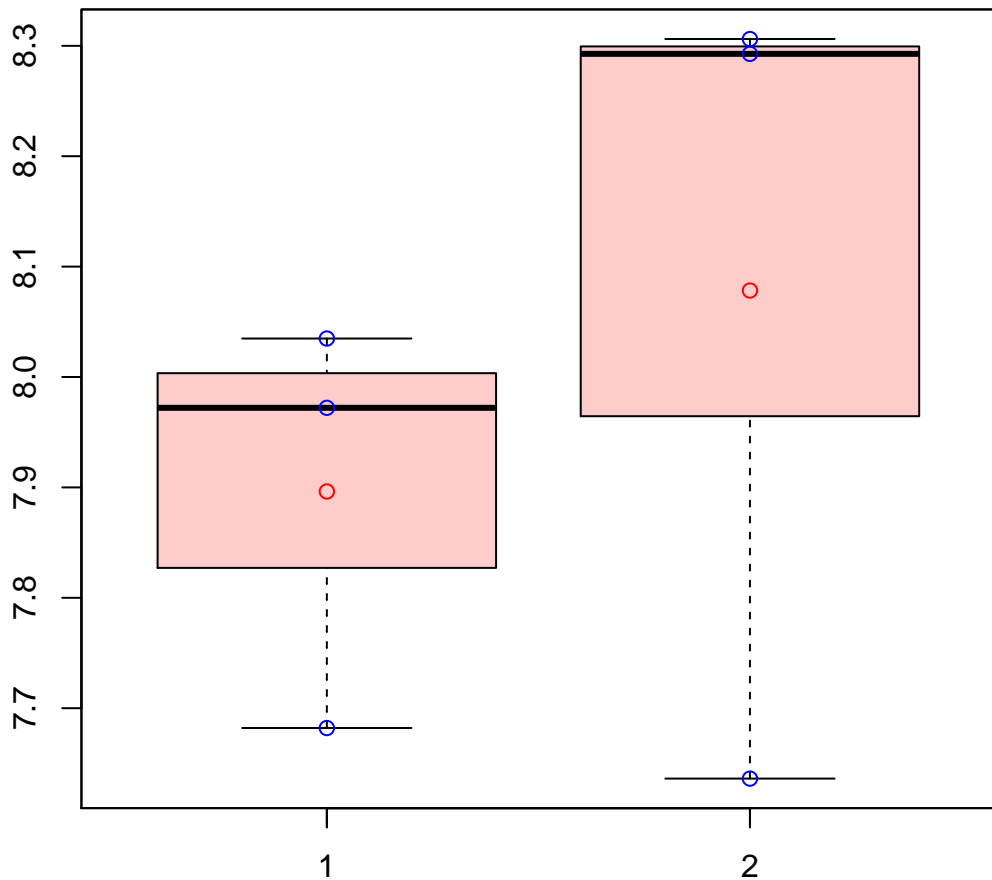

t-Test: p-value = 0.51



# M8A257|M8A257\_TRIUA

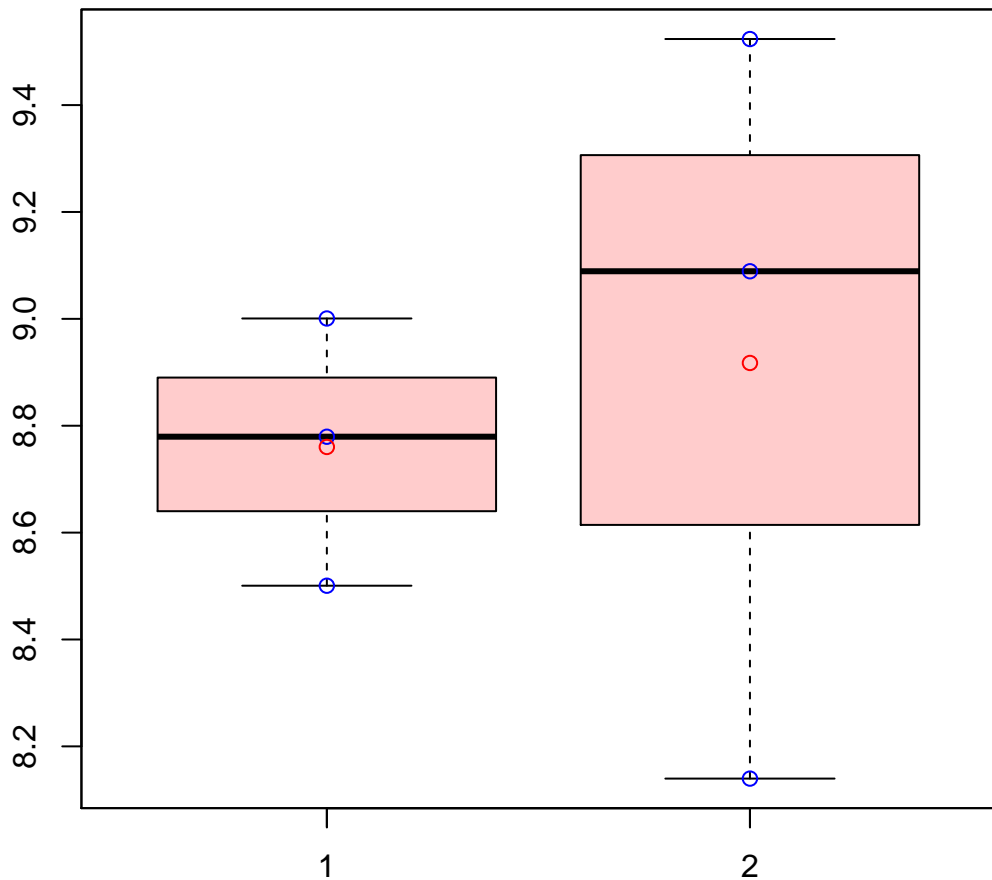

t-Test: p-value = 0.75

# M8A2D7|M8A2D7\_TRIUA

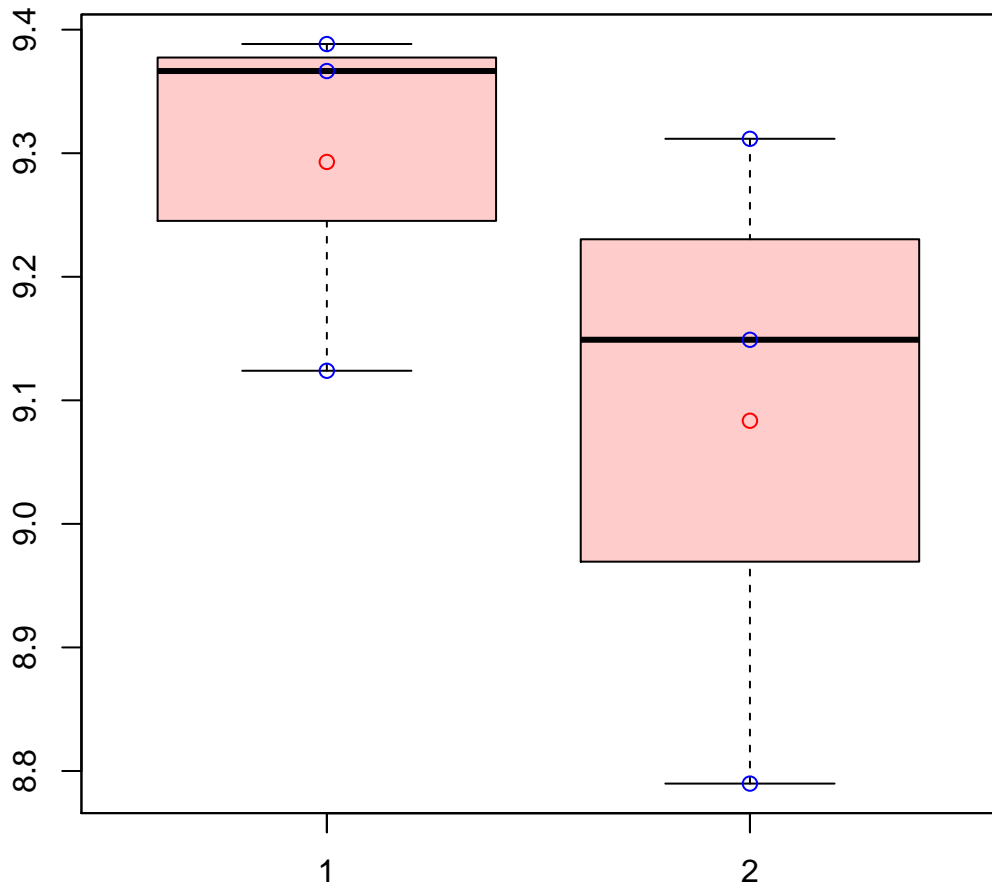

t-Test: p-value = 0.32

# M8A2E3|M8A2E3\_TRIUA

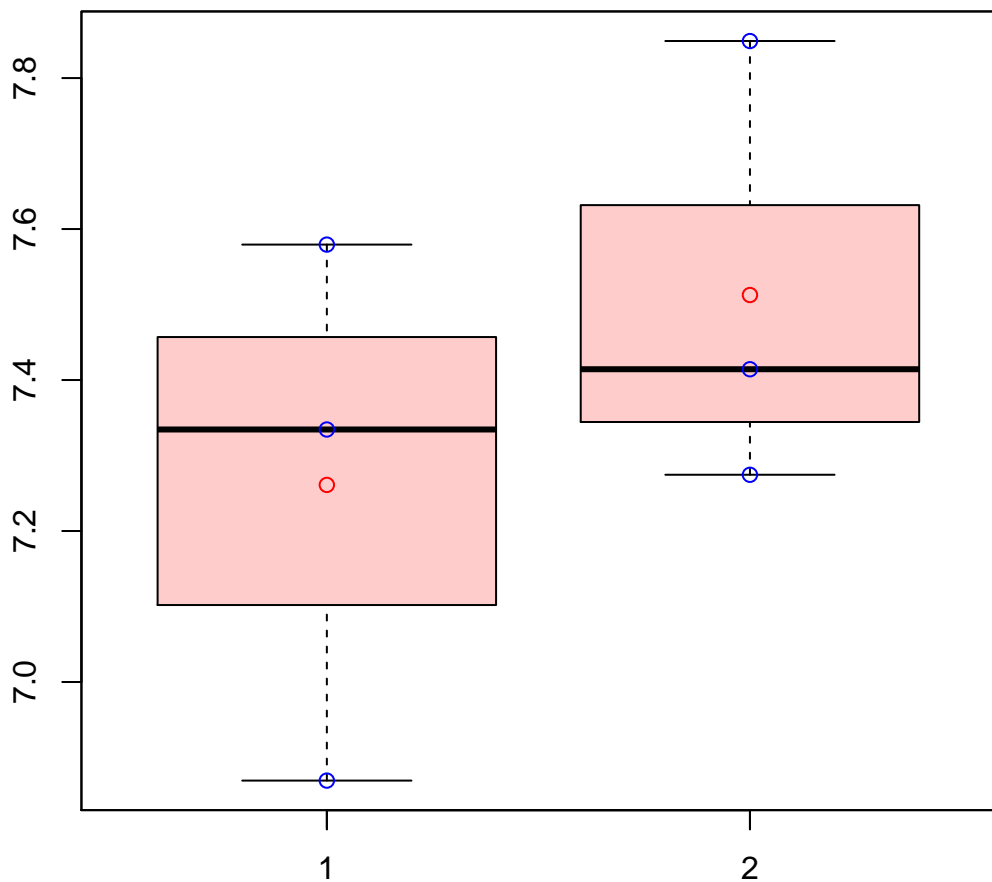

t-Test: p-value = 0.41

# M8A322|M8A322\_TRIUA

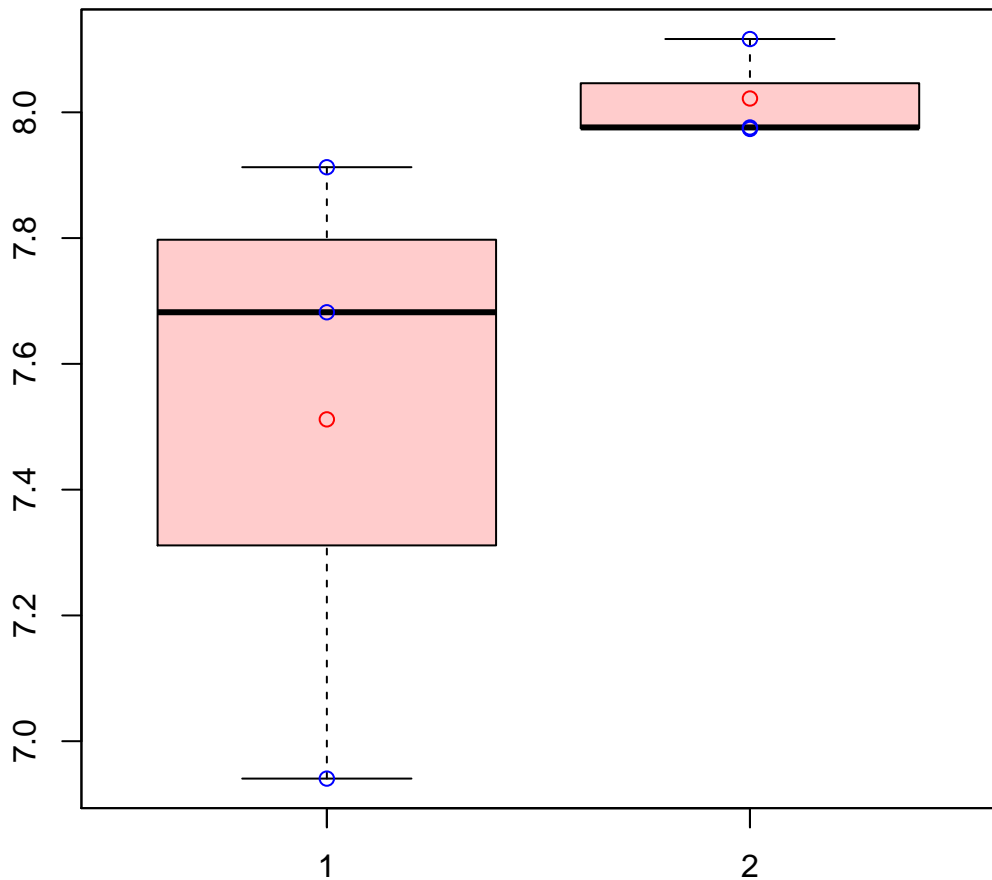

t-Test: p-value = 0.22

# M8A354|M8A354\_TRIUA

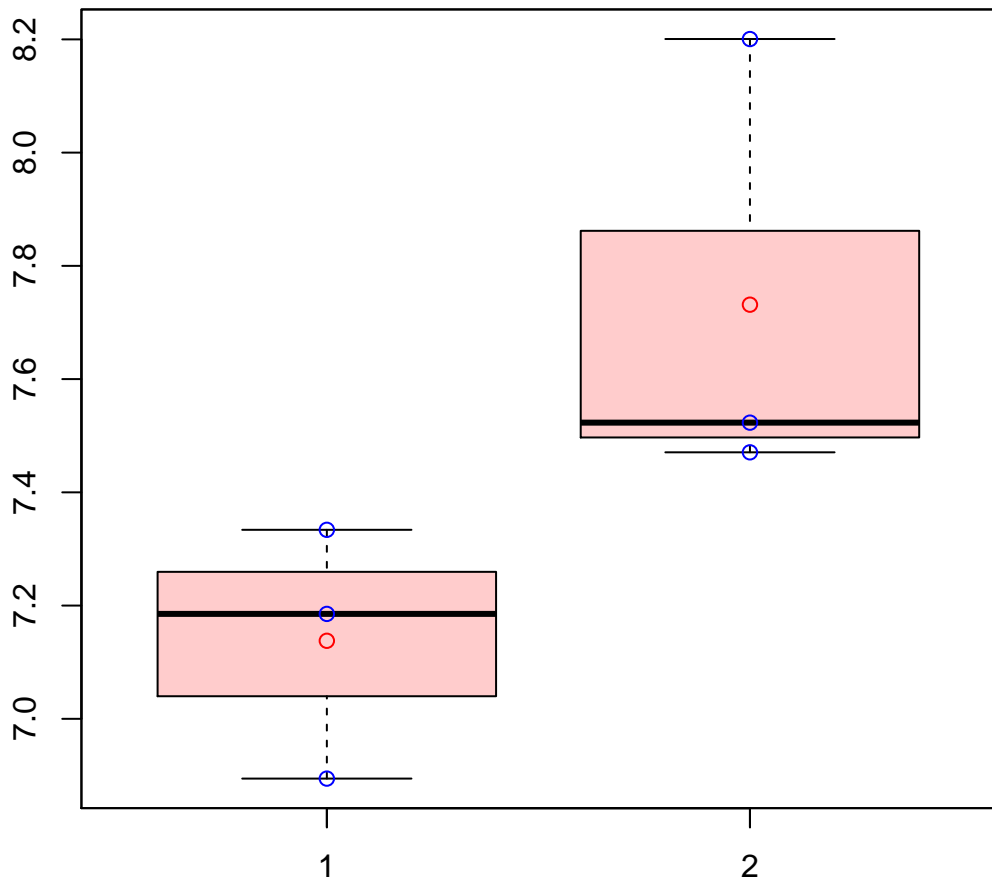

t-Test: p-value = 0.11

# M8A376|M8A376\_TRIUA

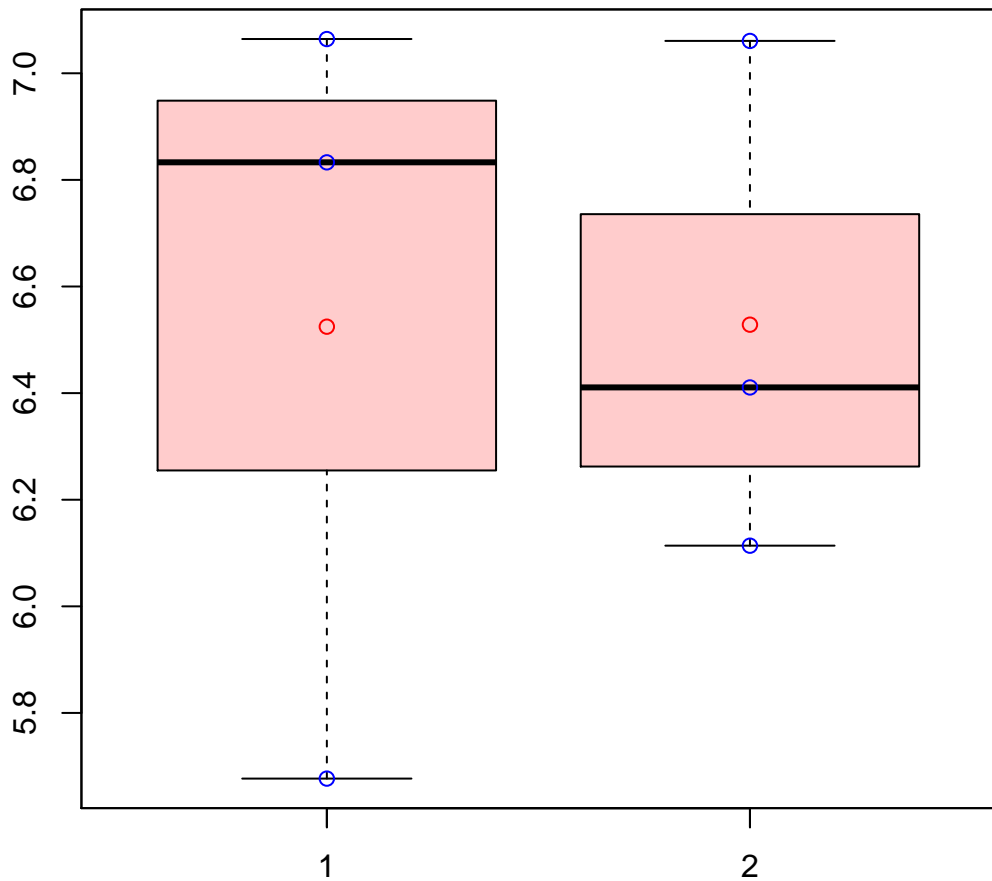

t-Test: p-value = 0.99

# M8A4U3|M8A4U3\_TRIUA

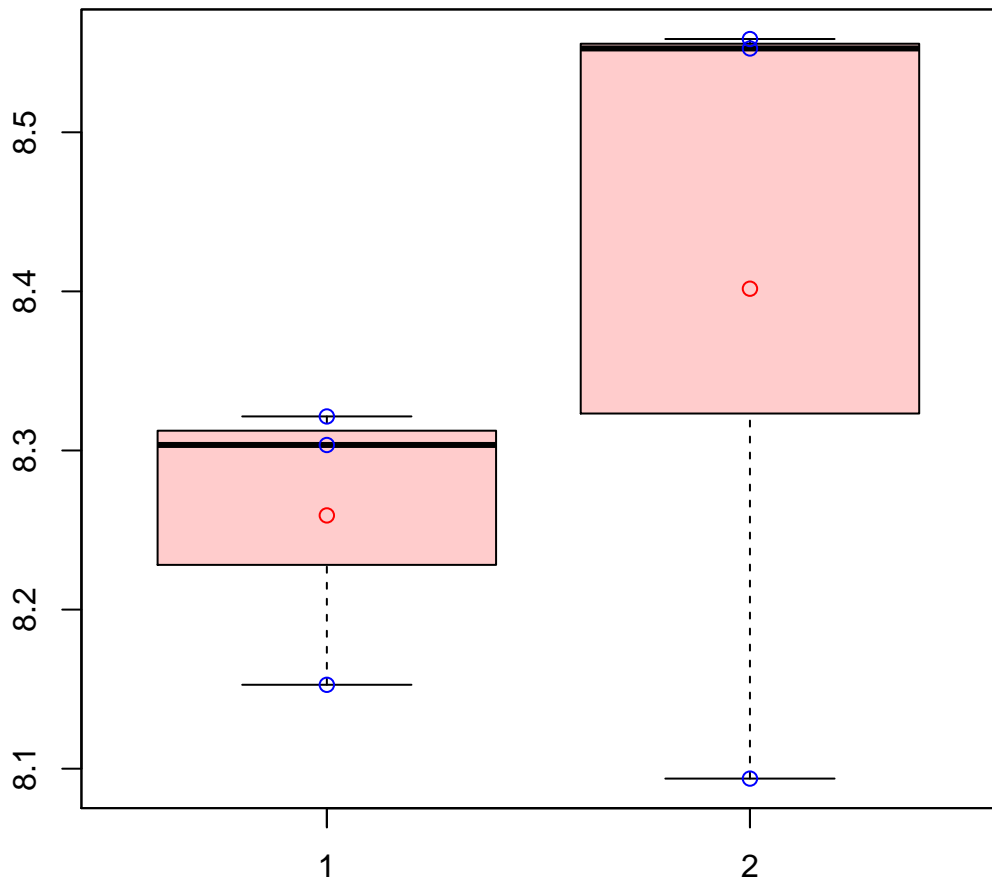

t-Test: p-value = 0.46

# M8A5B9|M8A5B9\_TRIUA

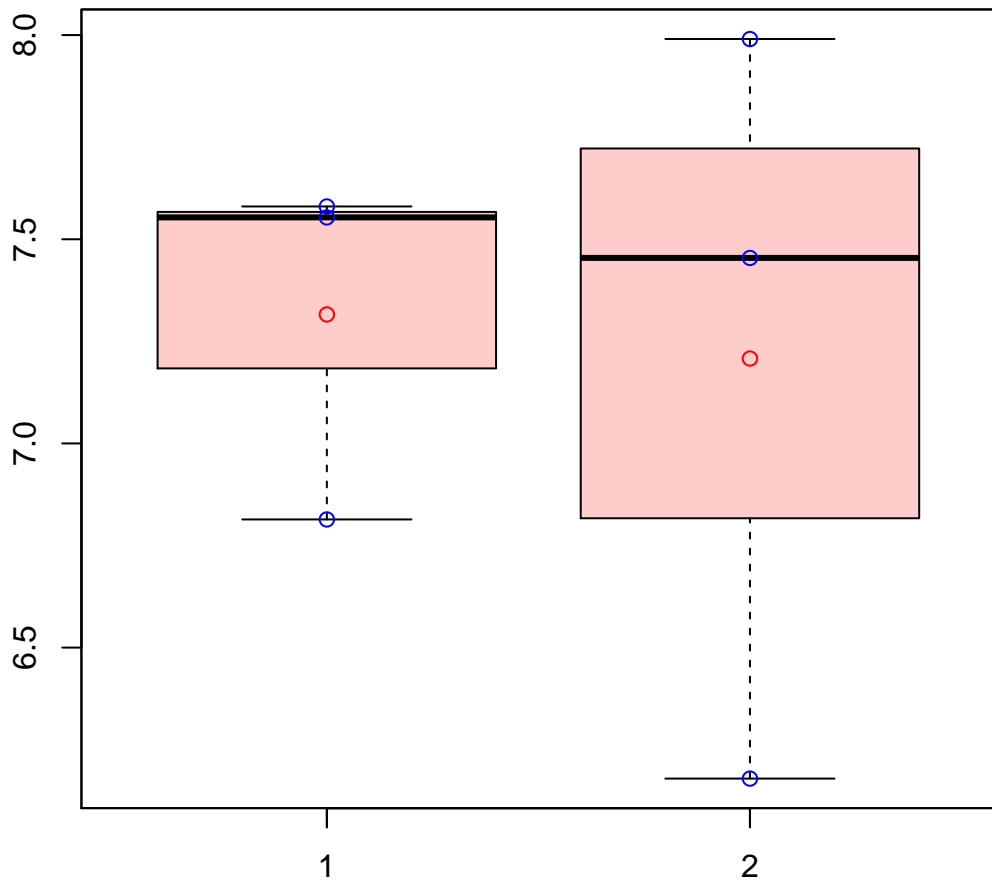

t-Test: p-value = 0.87



# M8A788|M8A788\_TRIUA

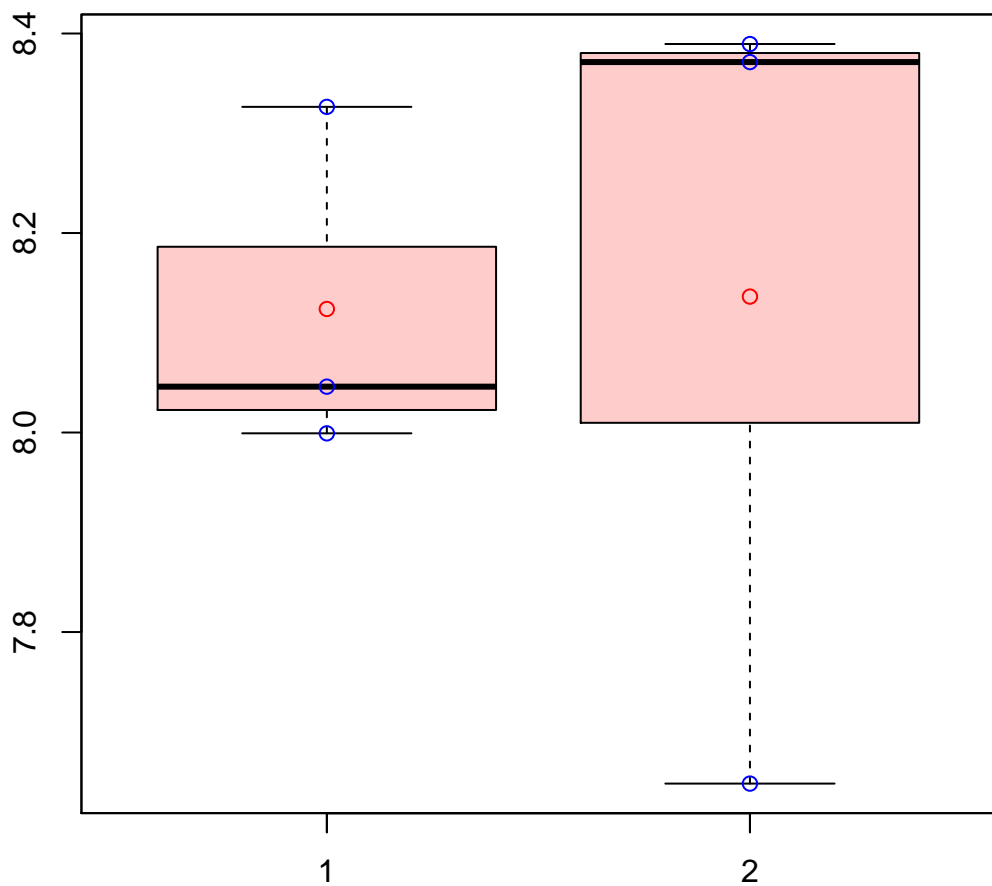

t-Test: p-value = 0.97

# M8A7W2|M8A7W2\_TRIUA

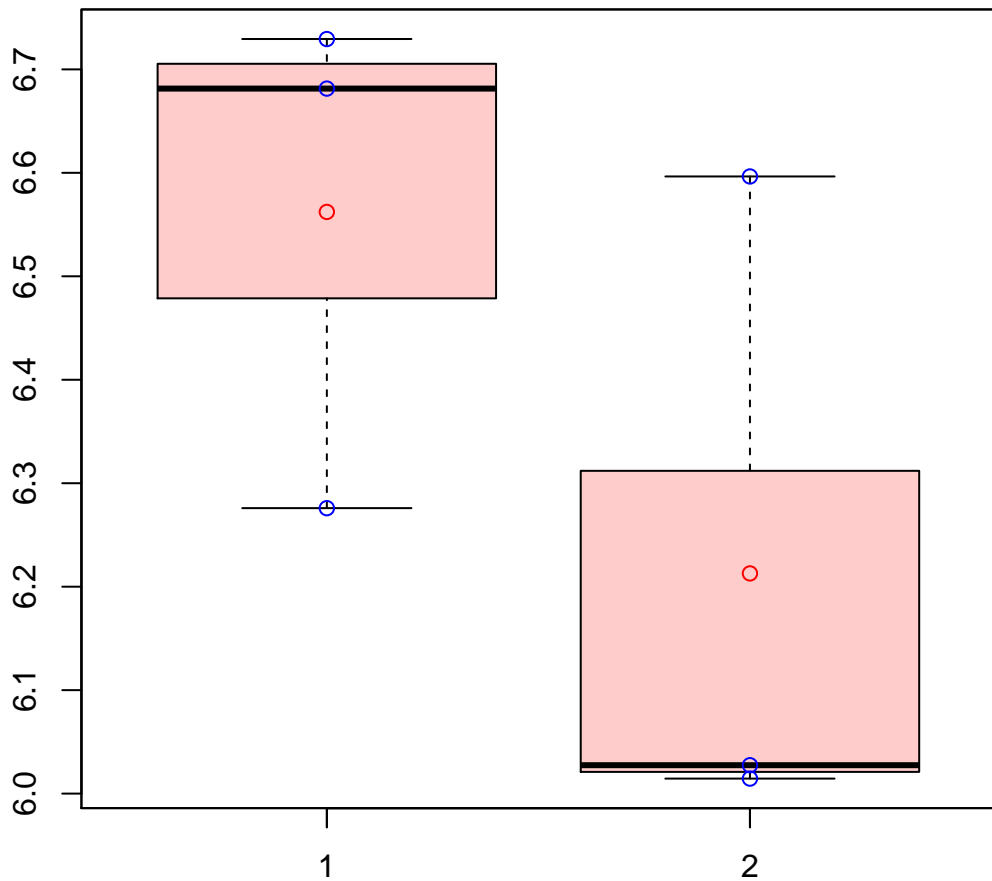

t-Test: p-value = 0.22

# M8A8I0|M8A8I0\_TRIUA

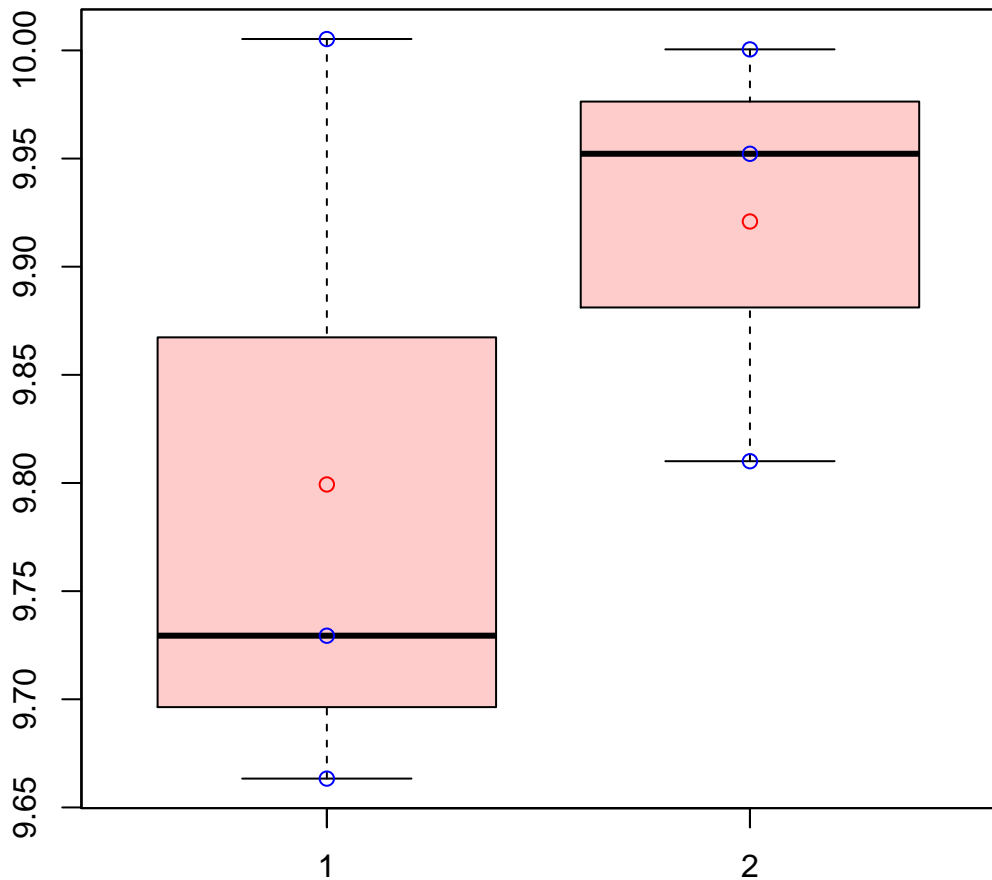

t-Test: p-value = 0.38

# M8A8N8|M8A8N8\_TRIUA

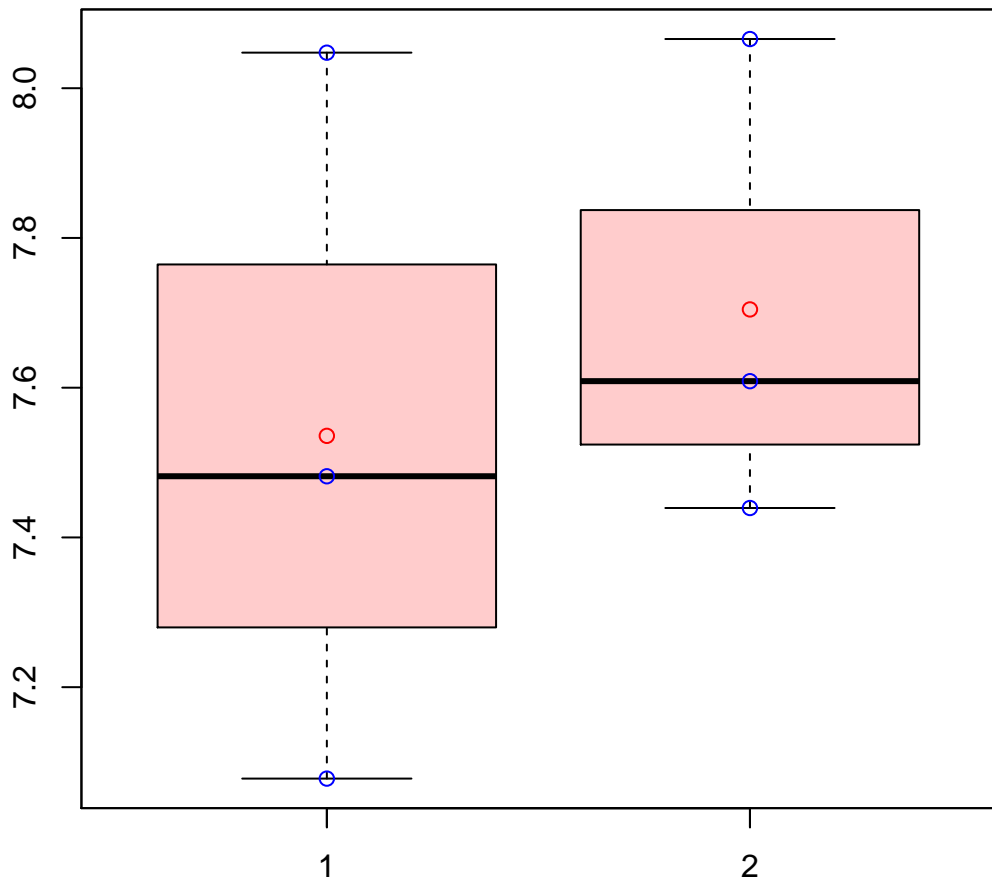

t-Test: p-value = 0.65

# M8A948|M8A948\_TRIUA

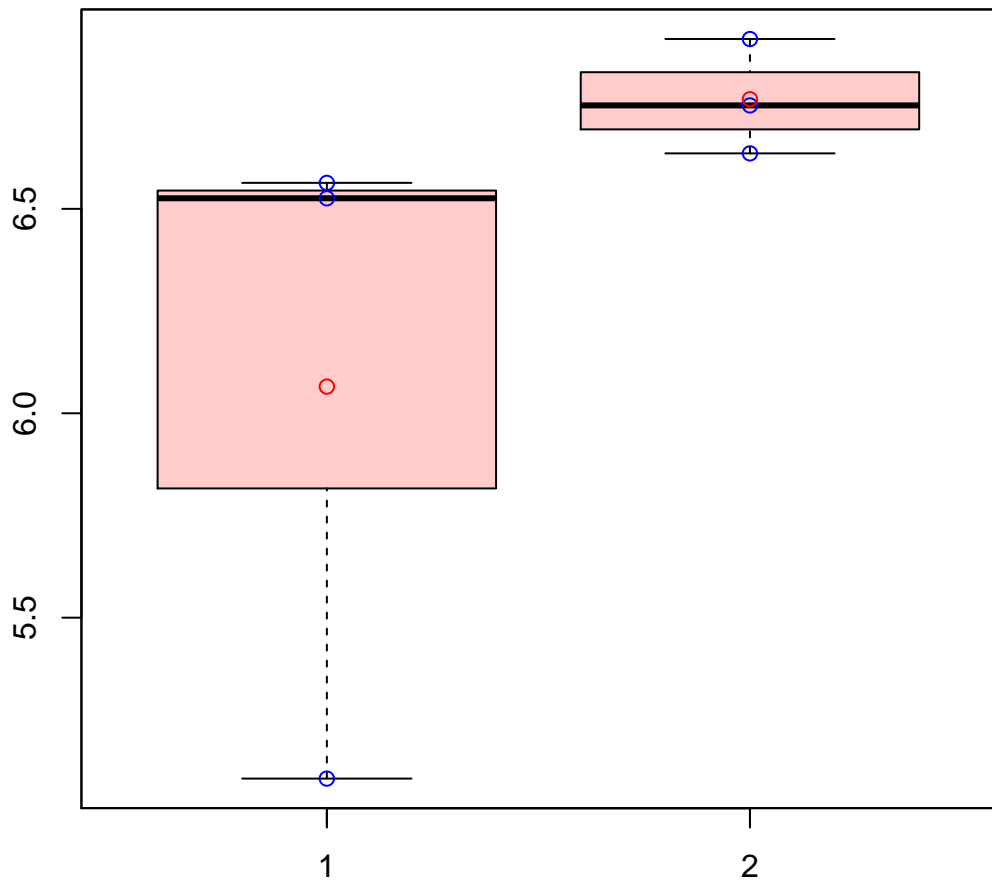

t-Test: p-value = 0.28

# M8ABX9|M8ABX9\_TRIUA

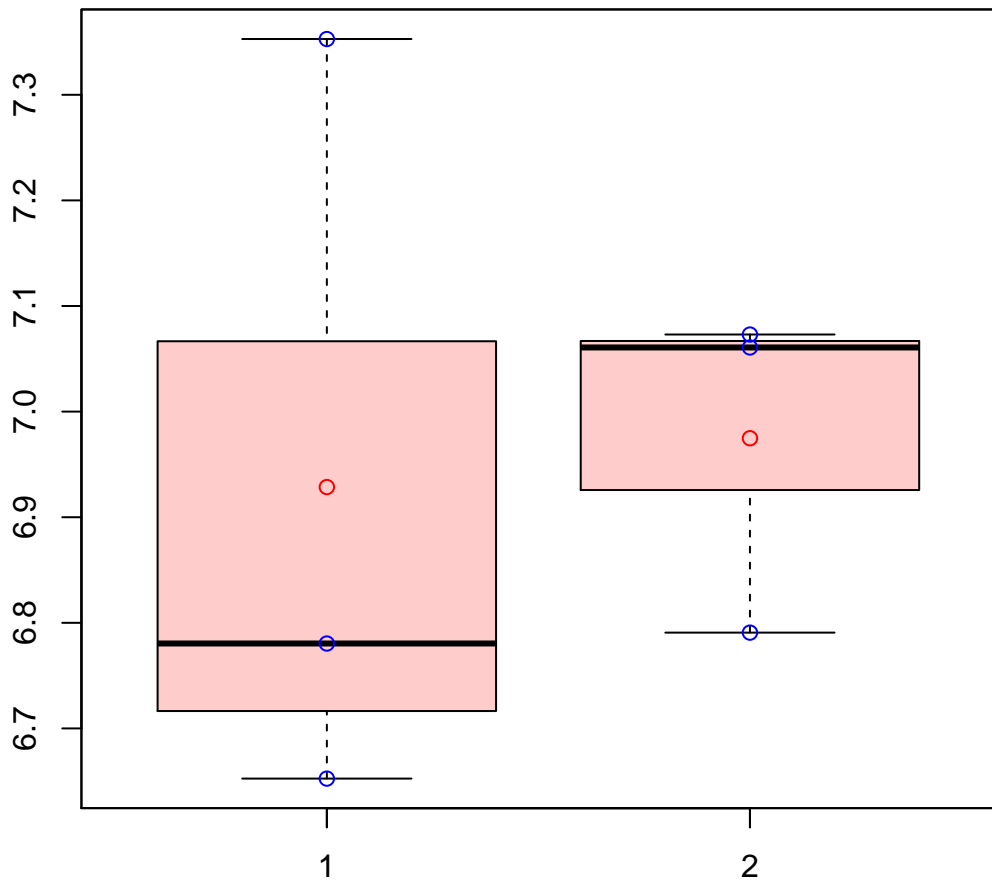

t-Test: p-value = 0.86

# M8ACQ0|M8ACQ0\_TRIUA

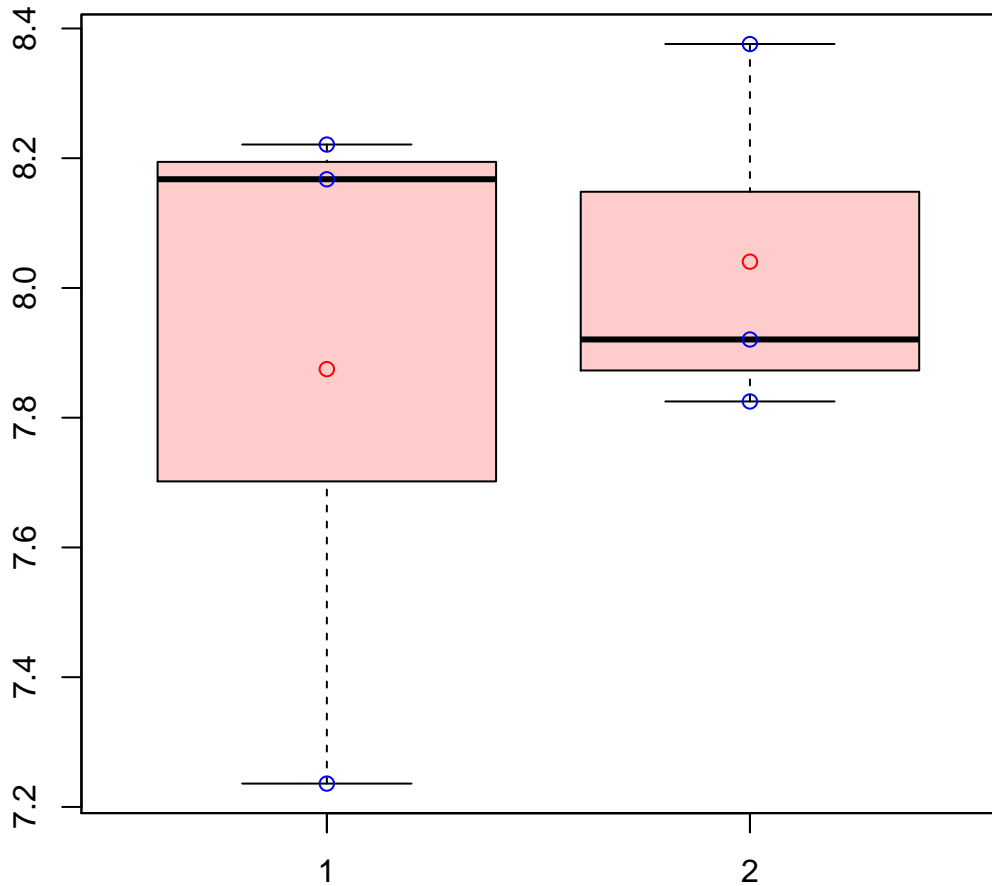

t-Test: p-value = 0.68

# M8AD97|M8AD97\_TRIUA

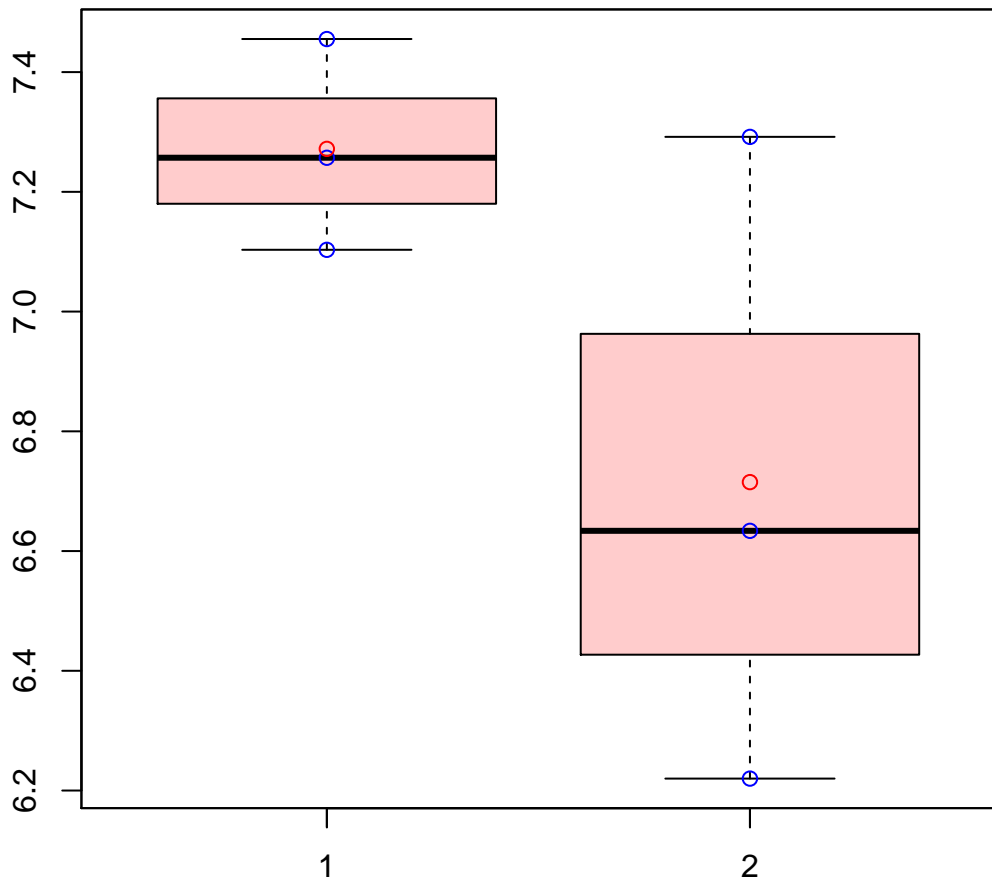

t-Test: p-value = 0.21



# M8AE33|M8AE33\_TRIUA

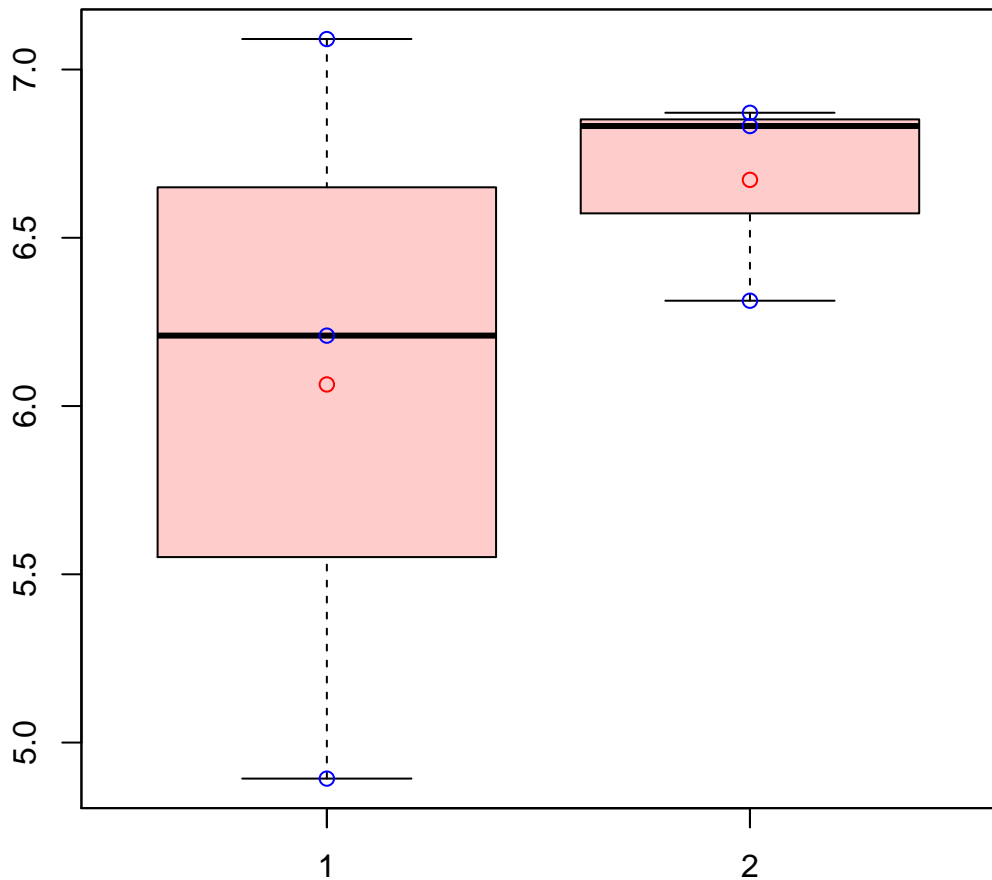

t-Test: p-value = 0.44

# M8AEX2|M8AEX2\_TRIUA

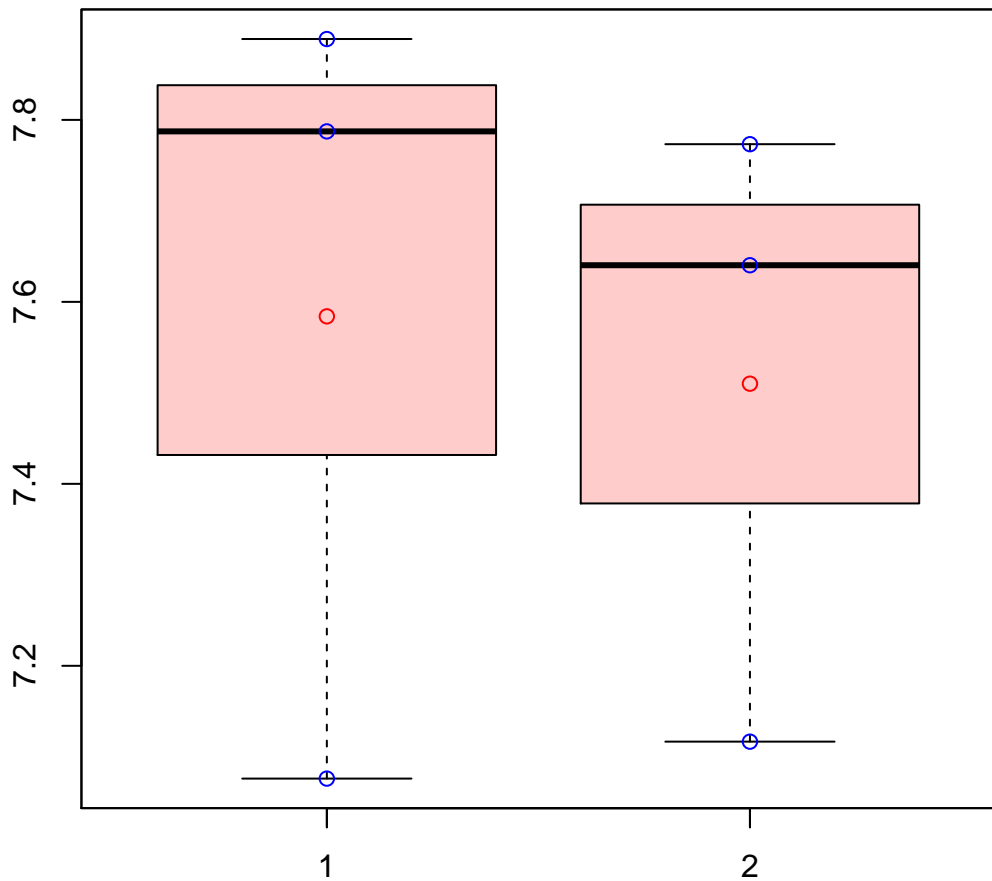

t-Test: p-value = 0.83

# M8AH61|M8AH61\_AEGTA

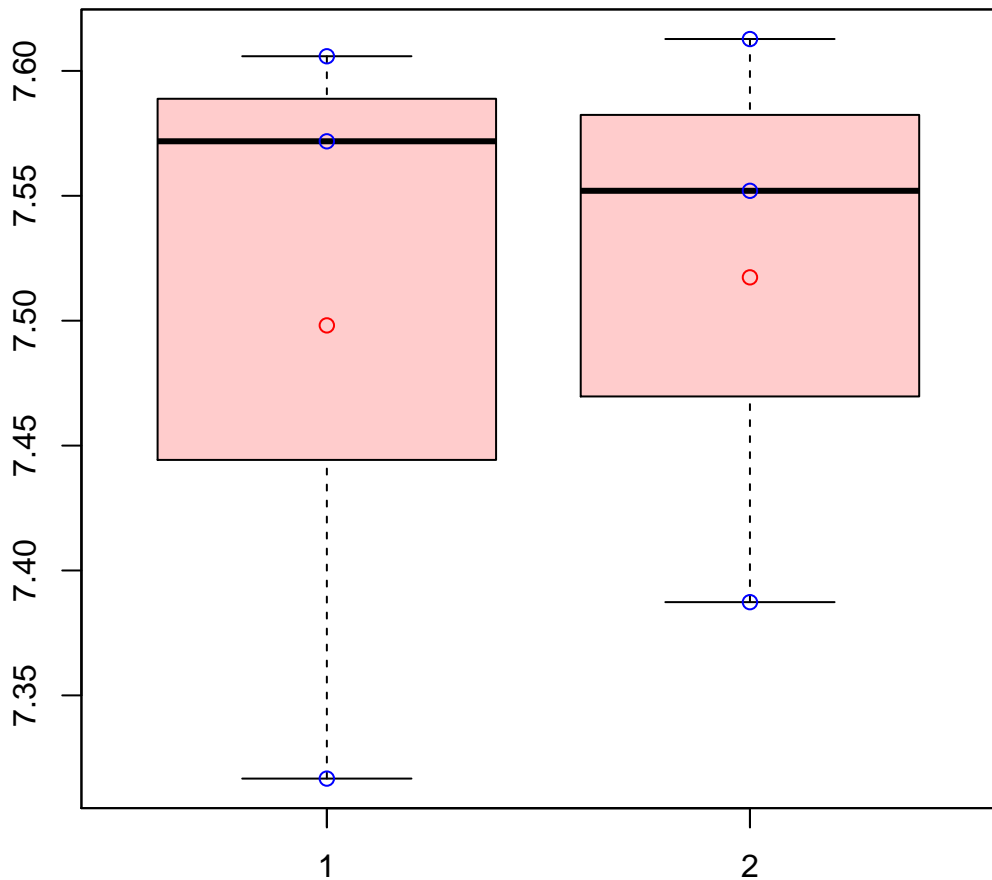

t-Test: p-value = 0.87

# M8AIX4|M8AIX4\_AEGTA

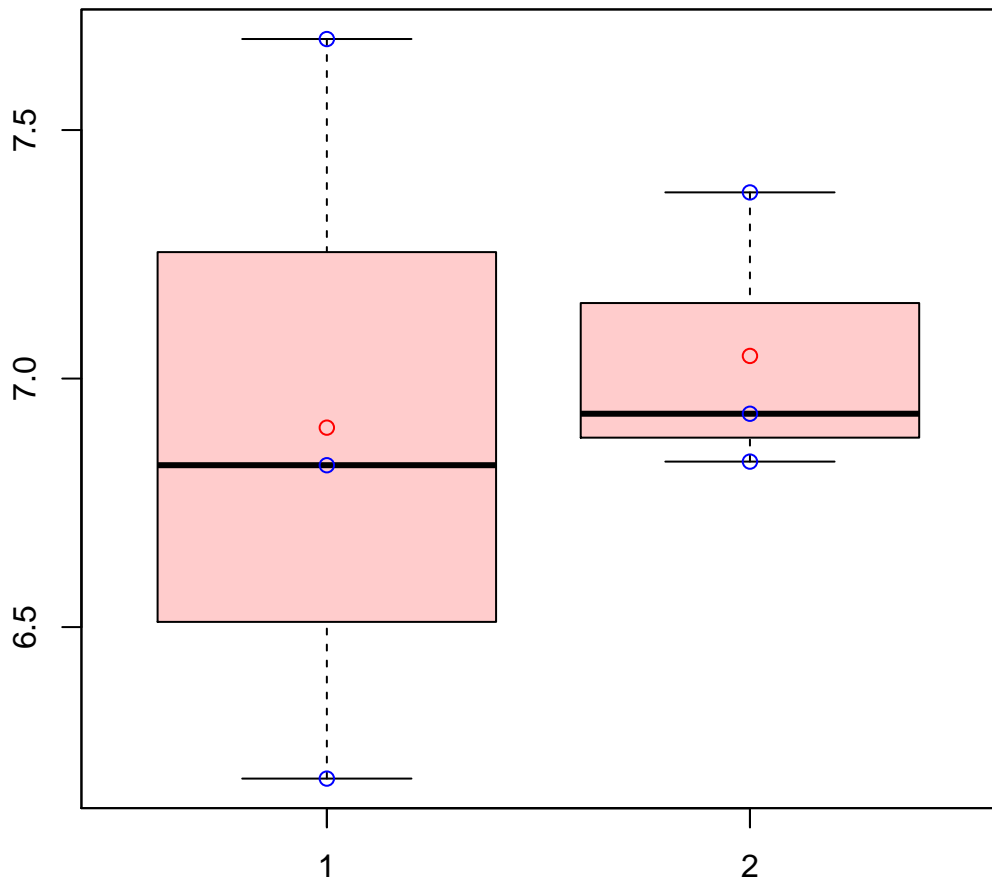

t-Test: p-value = 0.78

# M8AJR3|M8AJR3\_TRIUA

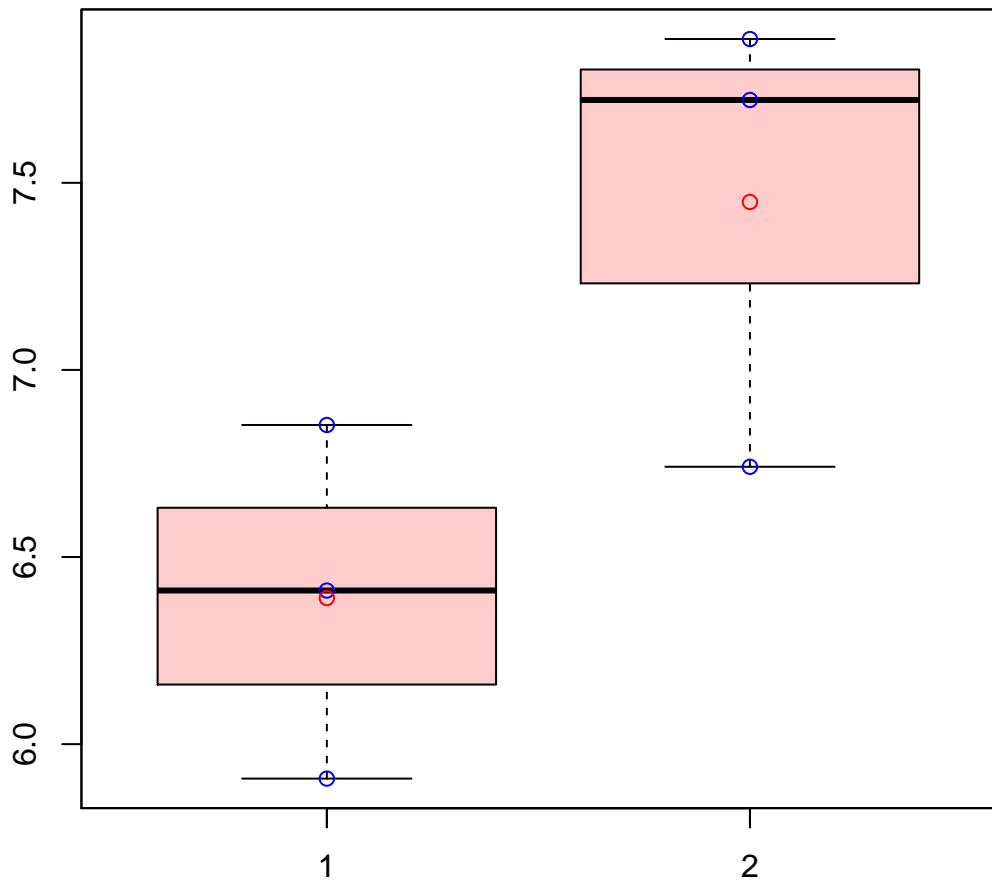

t-Test: p-value = 0.08

# M8AK21|M8AK21\_AEGTA

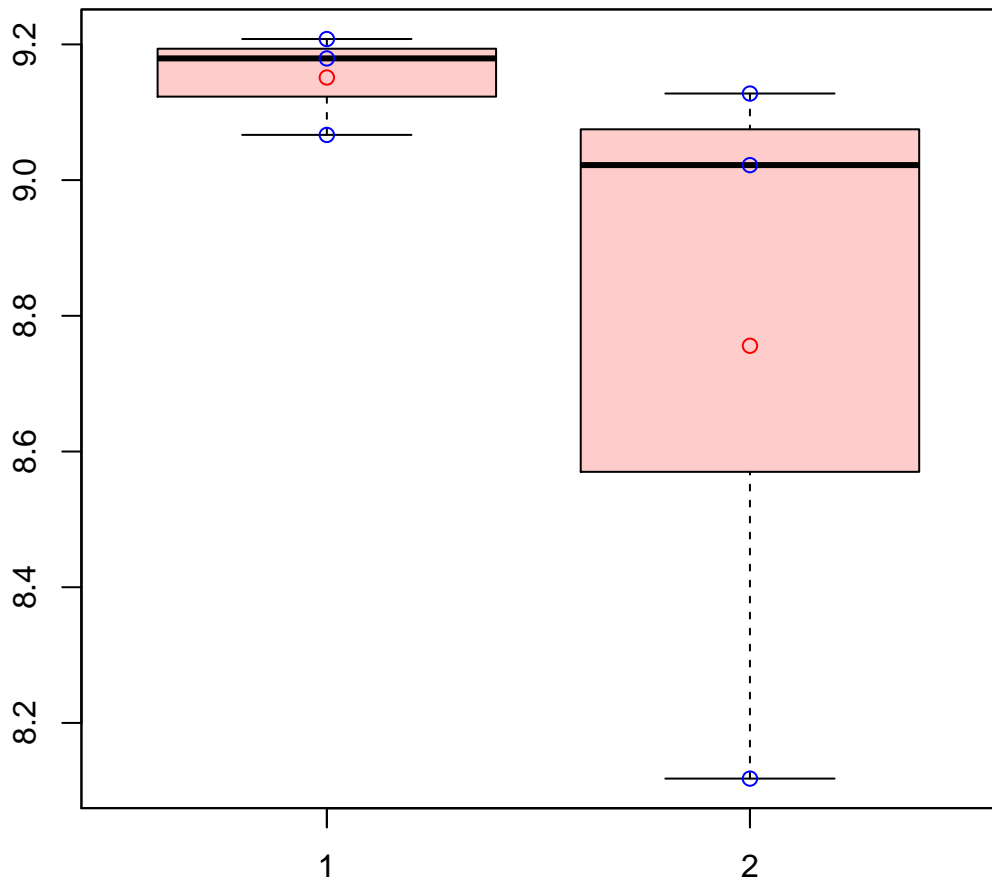

t-Test: p-value = 0.34

# M8AKK9|M8AKK9\_TRIUA

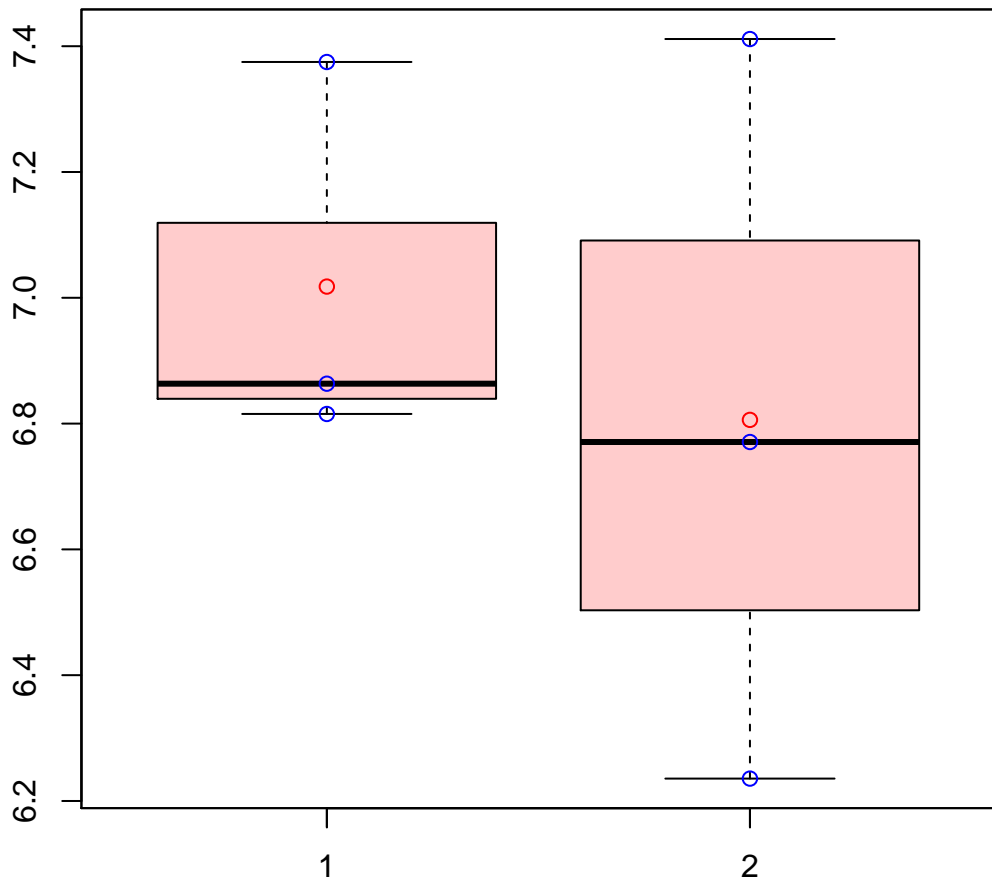

t-Test: p-value = 0.62

# M8ALL6|M8ALL6\_AEGTA

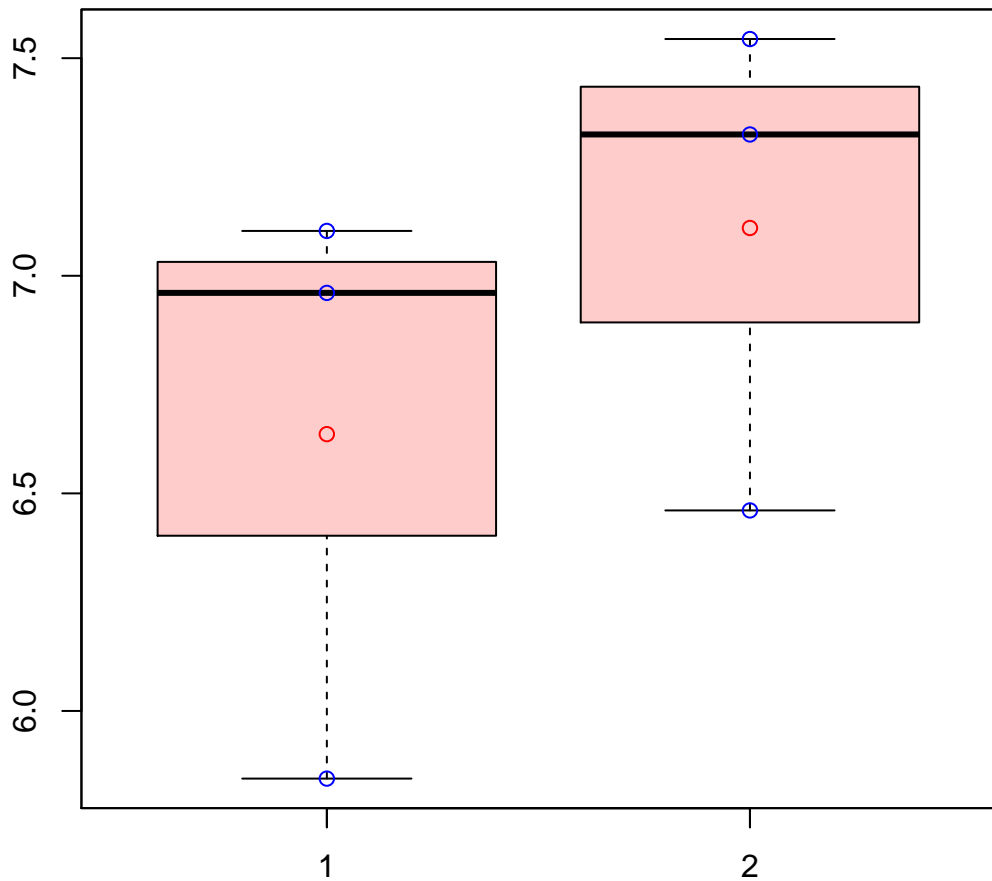

t-Test: p-value = 0.41



# M8AMH4|M8AMH4\_TRIUA

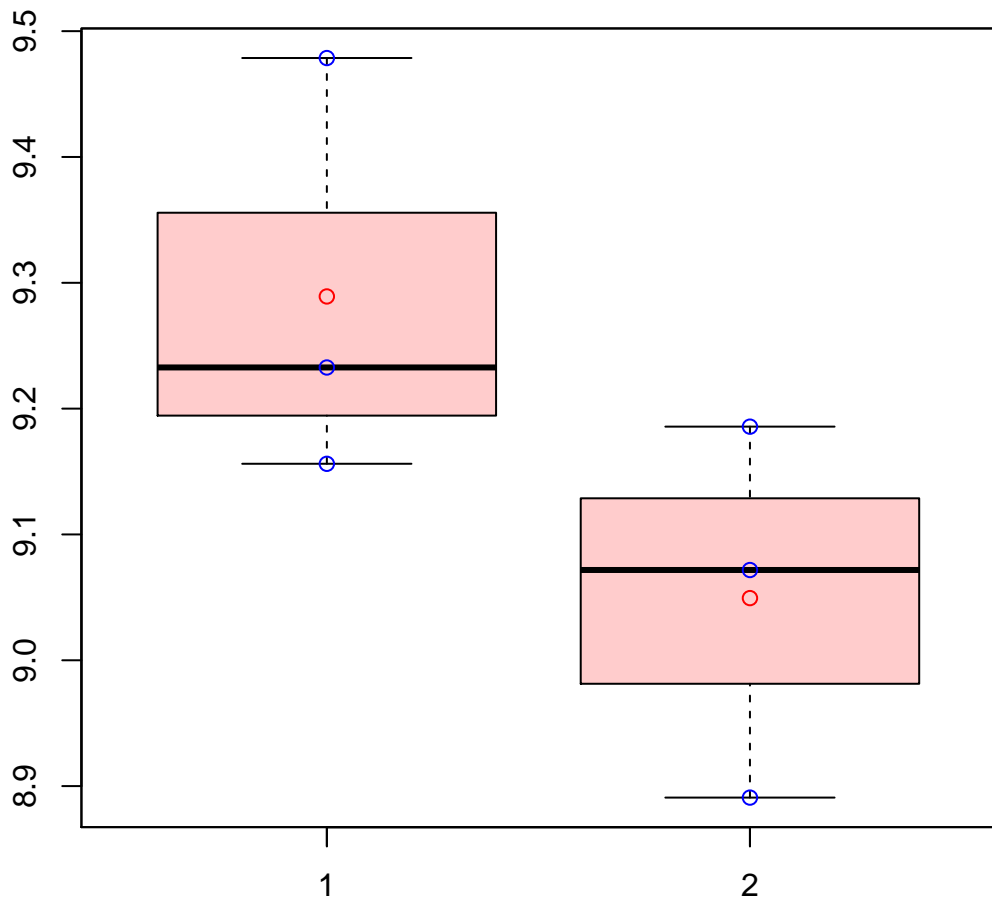

t-Test: p-value = 0.14

# M8AMR2|M8AMR2\_TRIUA

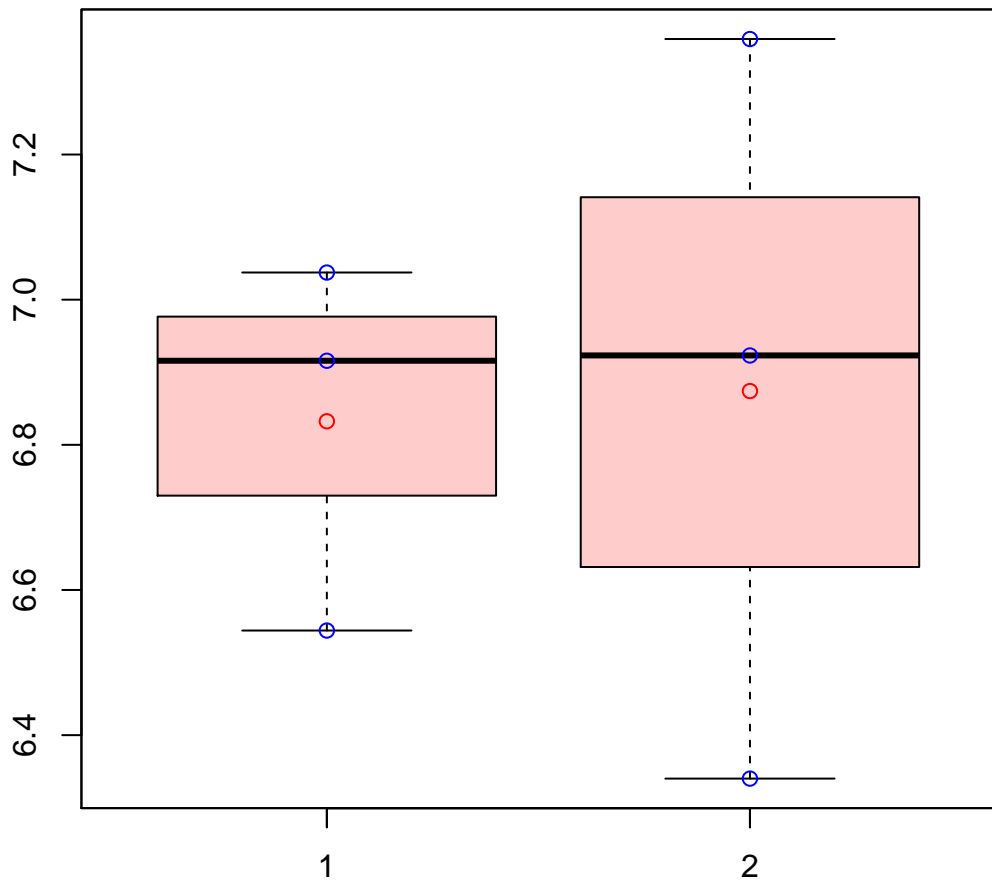

t-Test: p-value = 0.91

# M8AN75|M8AN75\_TRIUA

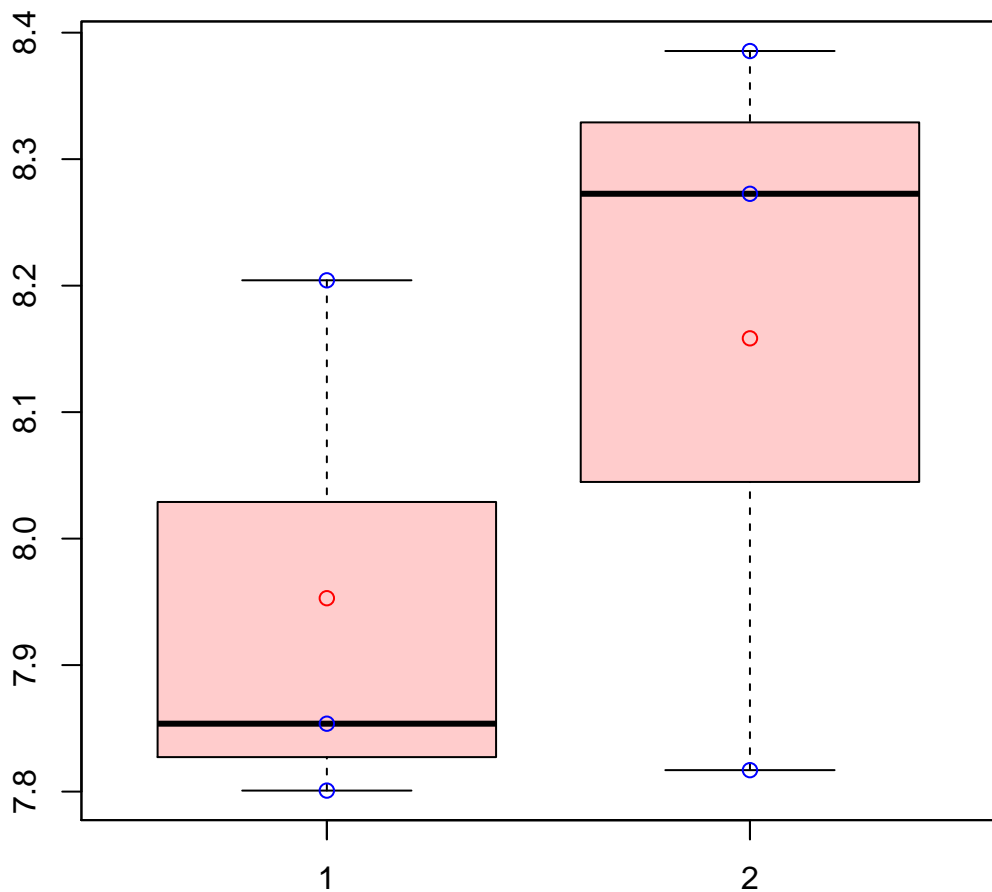

t-Test: p-value = 0.4

# M8AN94|M8AN94\_AEGTA

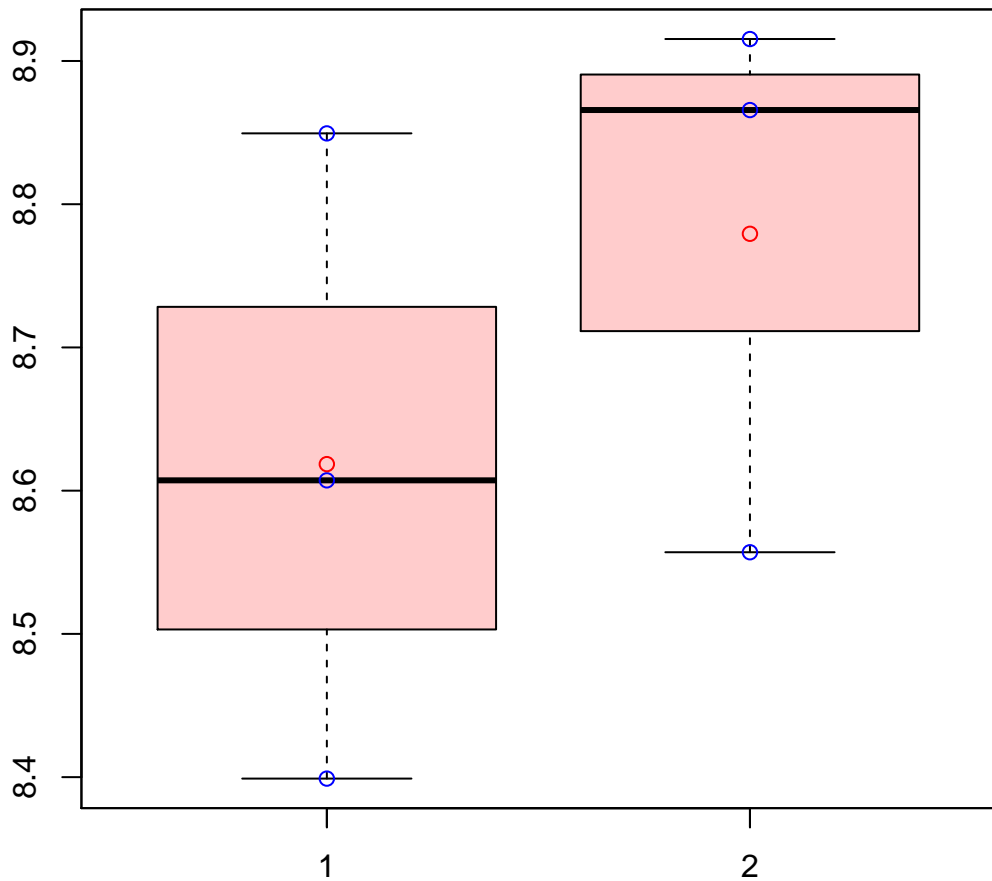

t-Test: p-value = 0.4

# M8ANC9|M8ANC9\_TRIUA

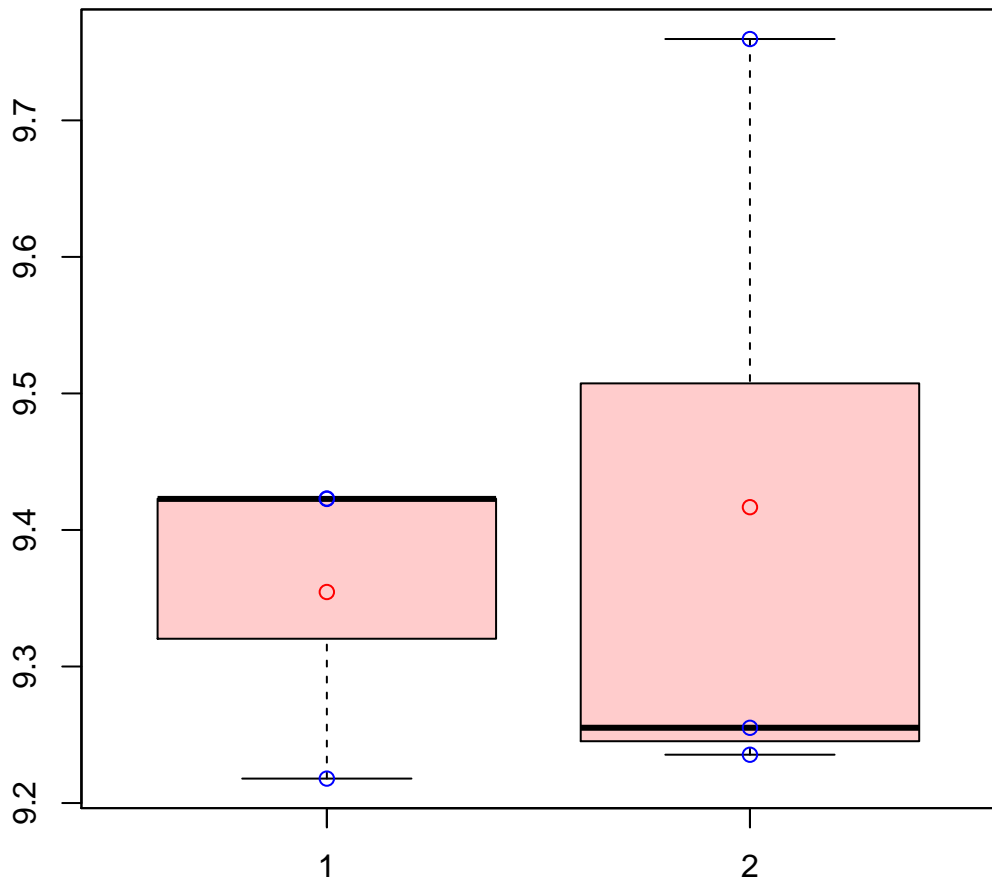

t-Test: p-value = 0.76

# M8AQK1|M8AQK1\_TRIUA

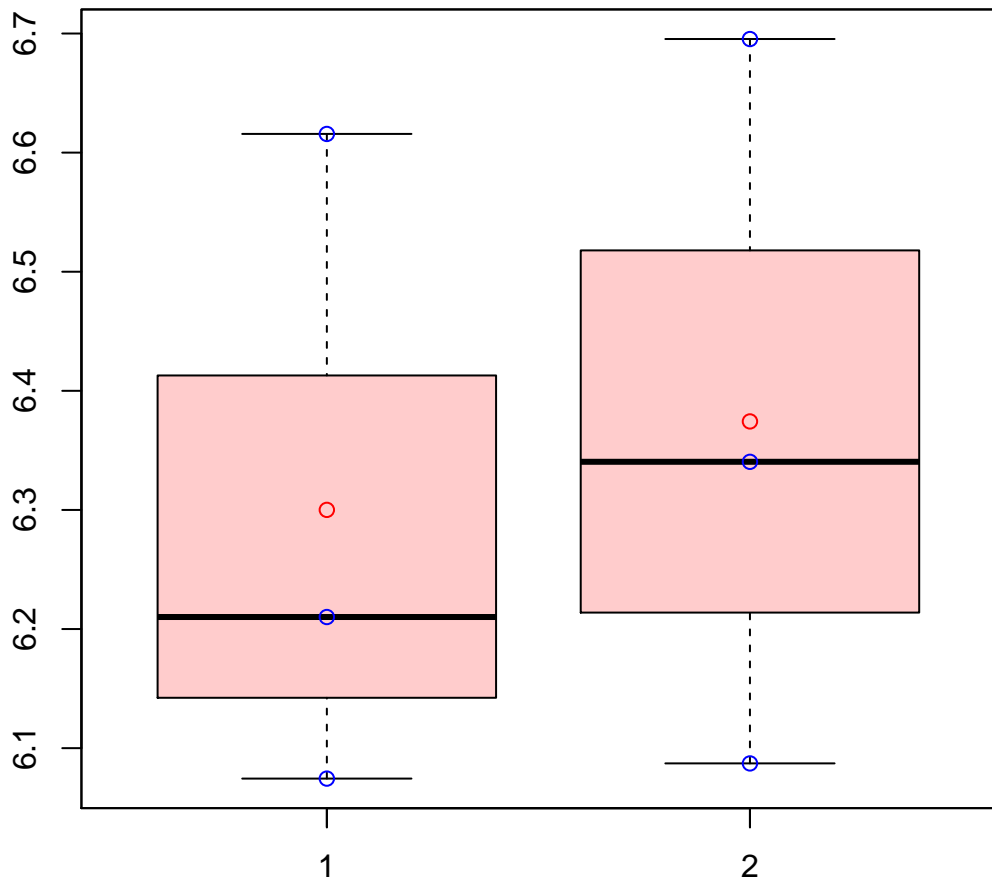

t-Test: p-value = 0.77

# M8AQP4|M8AQP4\_AEGTA

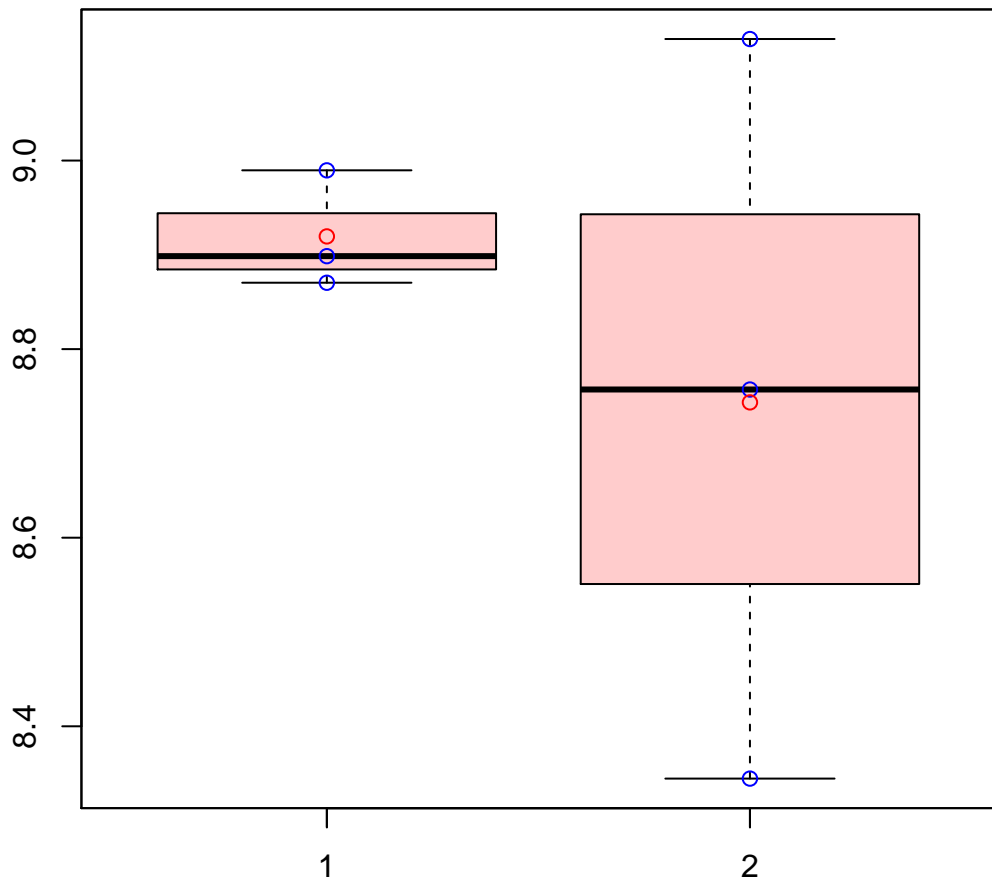

t-Test: p-value = 0.52

# M8ARH5|M8ARH5\_AEGTA

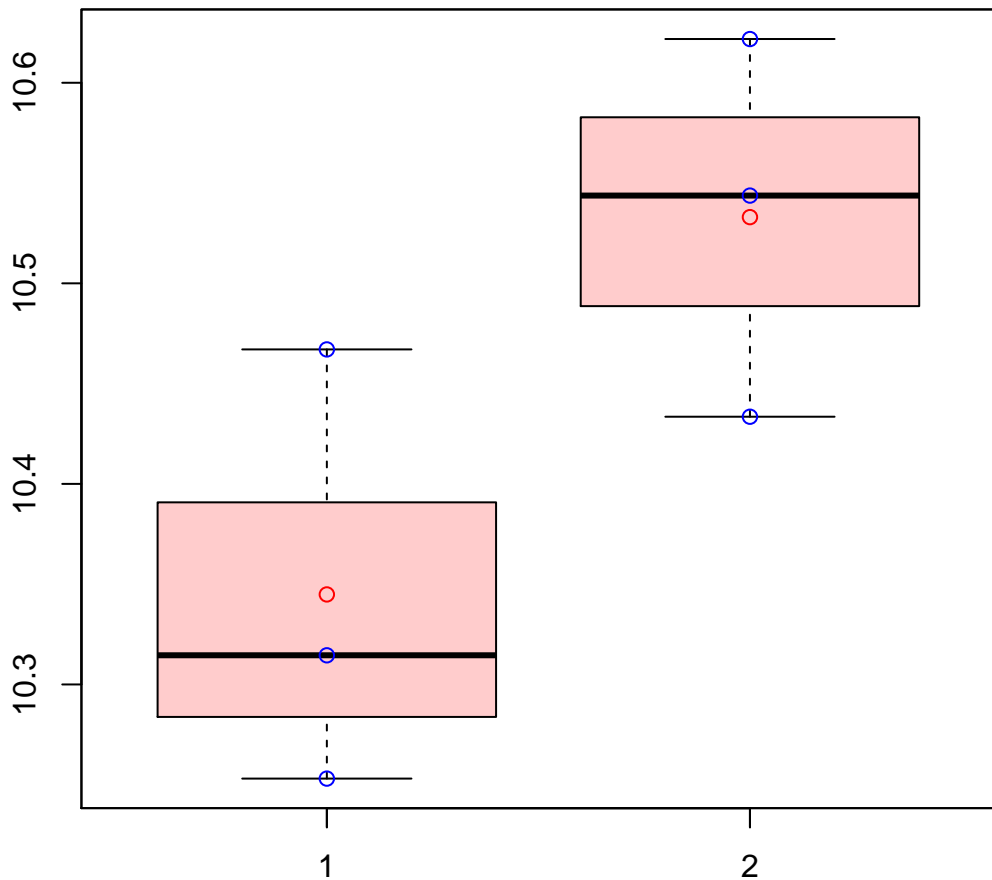

t-Test: p-value = 0.09



# M8ARQ1|M8ARQ1\_TRIUA

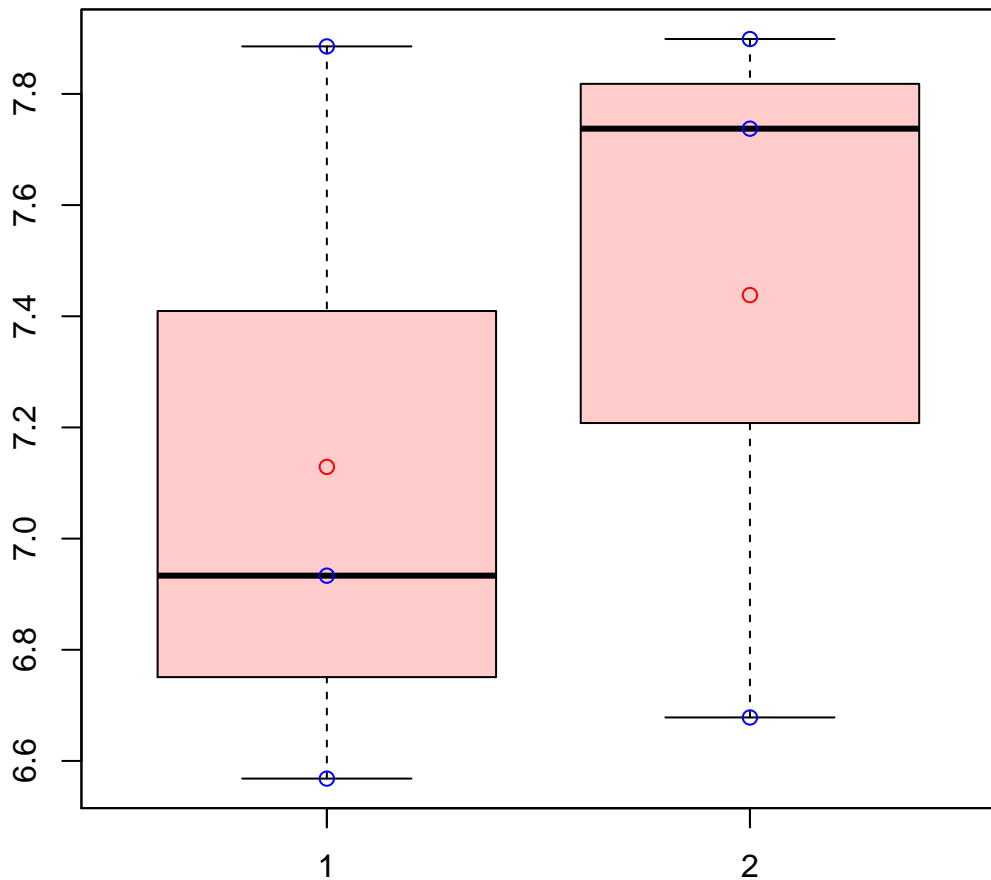

t-Test: p-value = 0.6

# M8ARQ2|M8ARQ2\_AEGTA

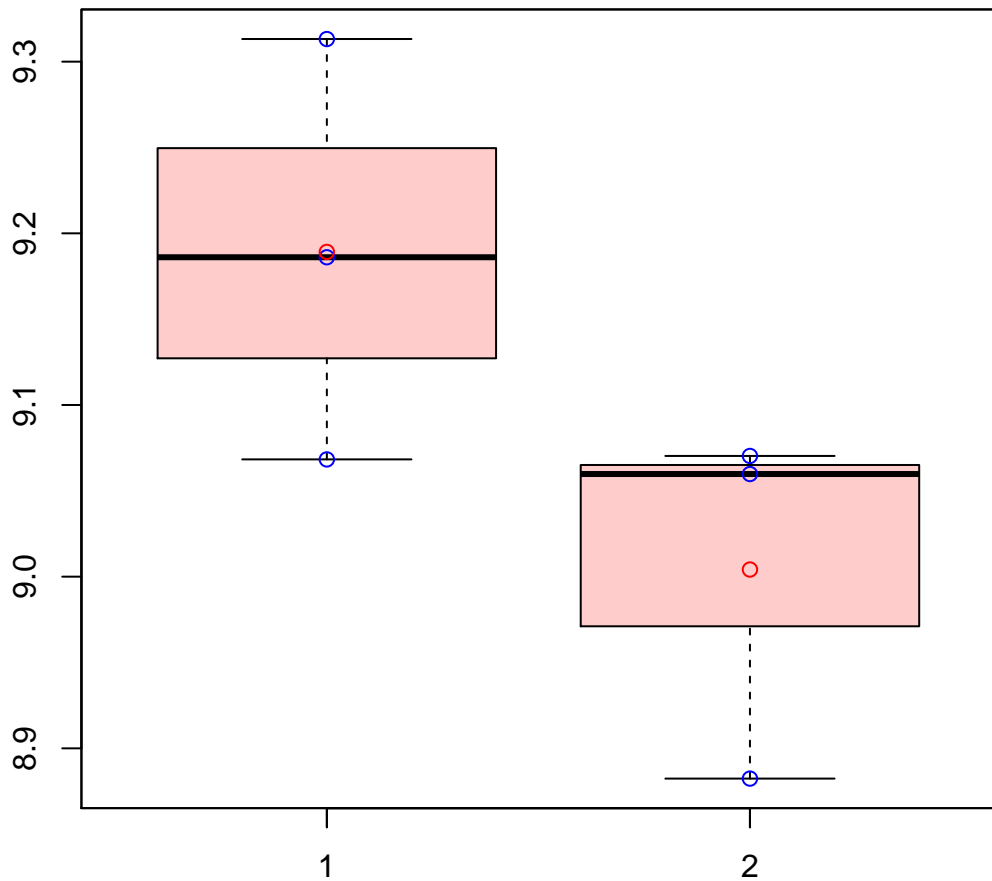

t-Test: p-value = 0.12

# M8AS79|M8AS79\_AEGTA

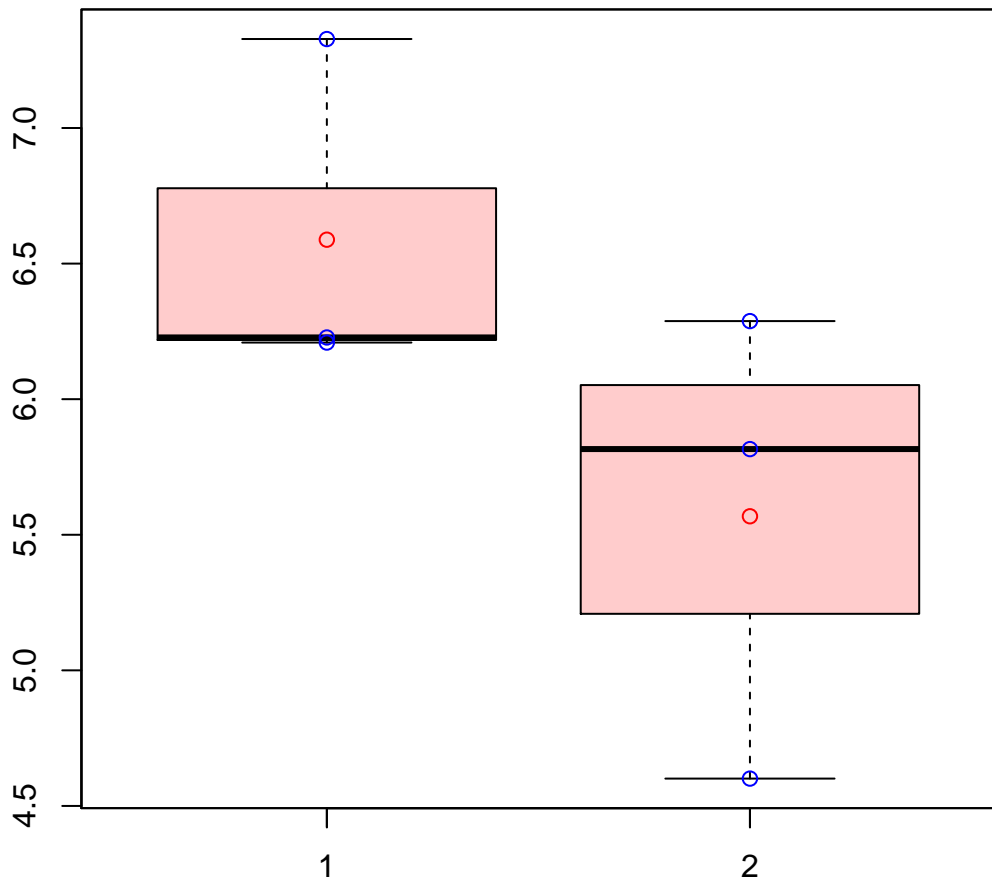

t-Test: p-value = 0.18

# M8ASA4|M8ASA4\_AEGTA

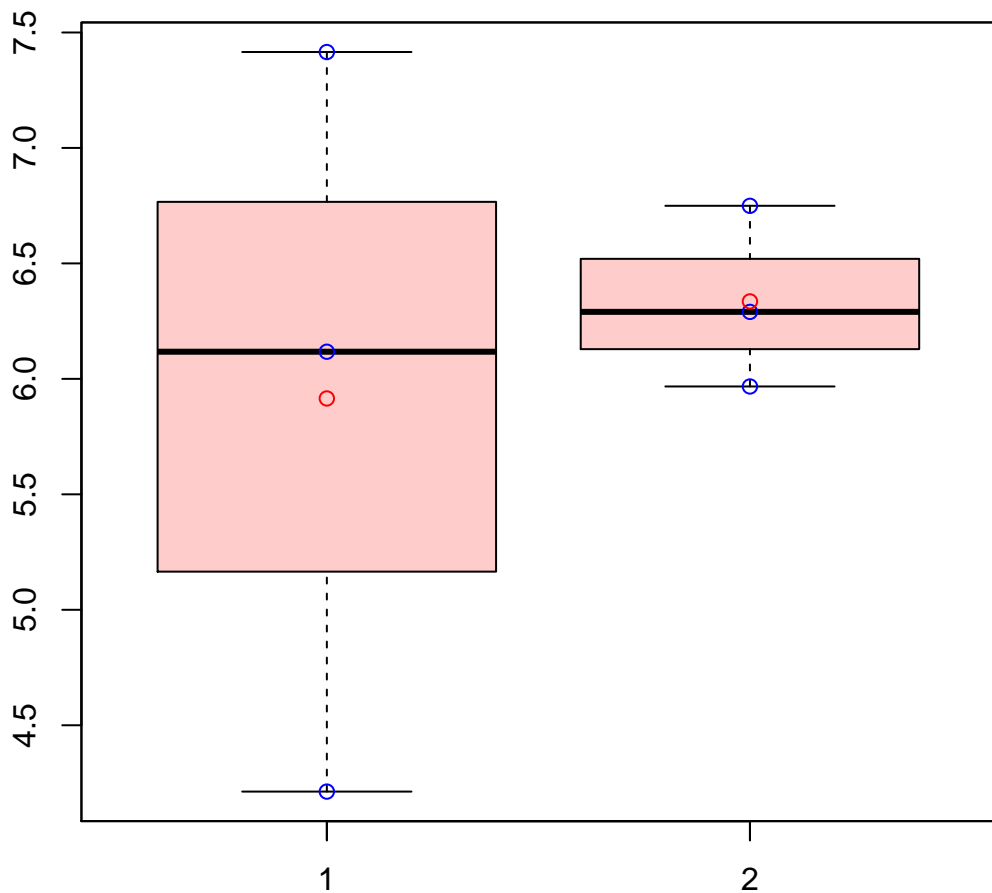

t-Test: p-value = 0.7

# M8AT16|M8AT16\_TRIUA

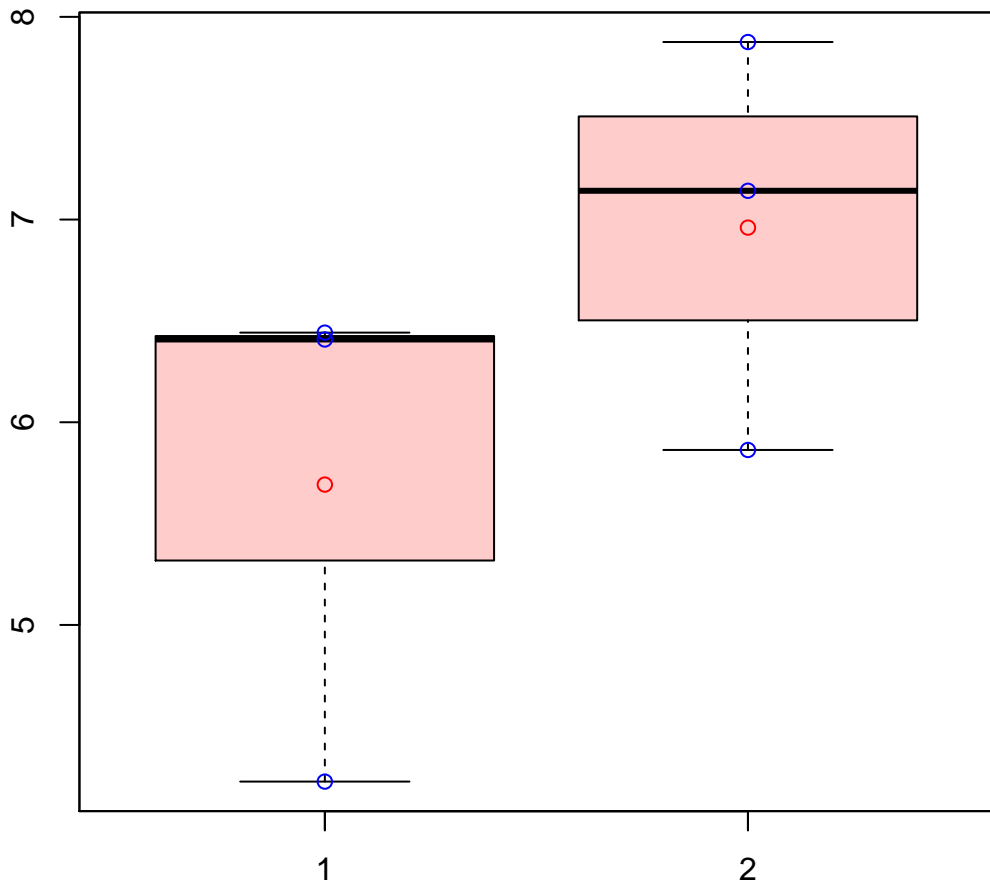

t-Test: p-value = 0.25

# M8ATS8|M8ATS8\_AEGTA

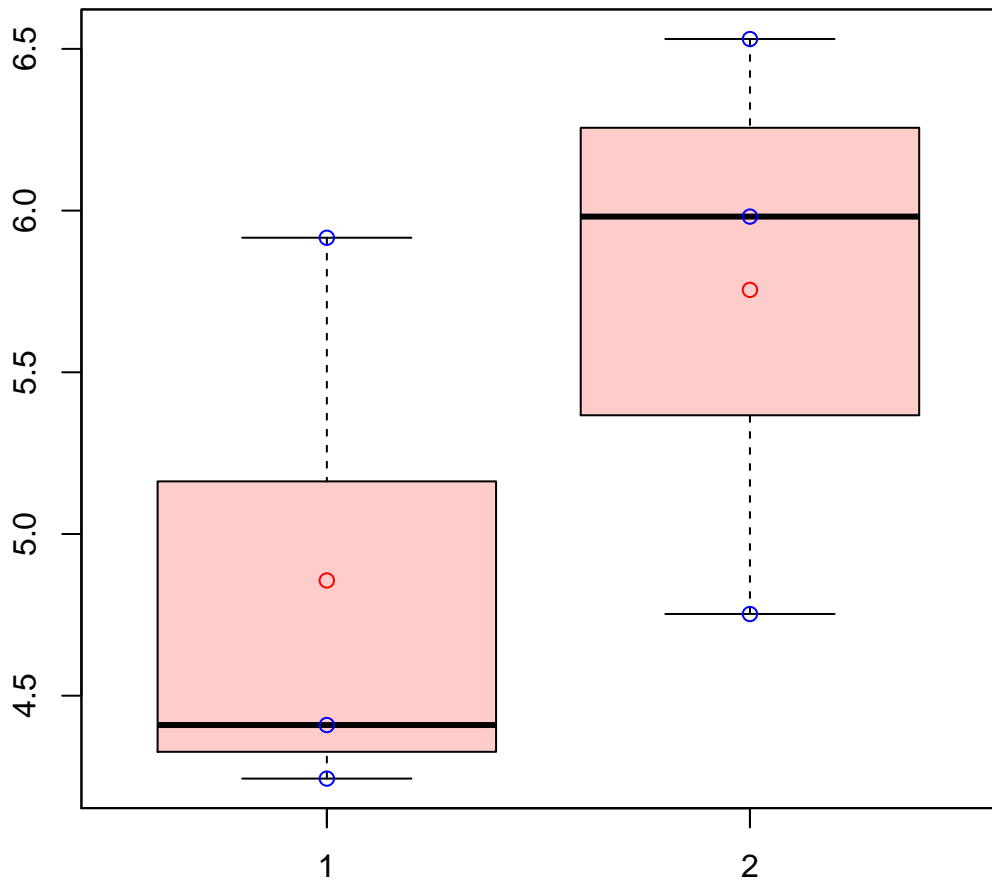

t-Test: p-value = 0.3

# M8AUW8|M8AUW8\_TRIUA

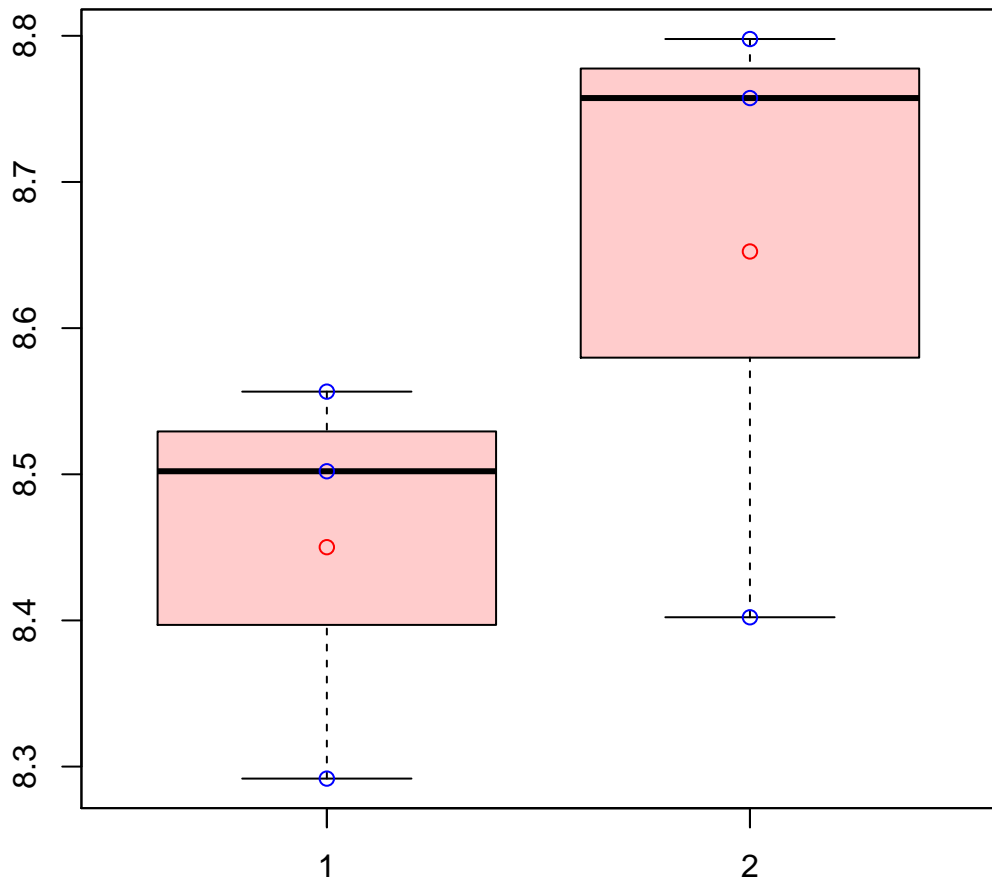

t-Test: p-value = 0.26

# M8AUZ0|M8AUZ0\_AEGTA

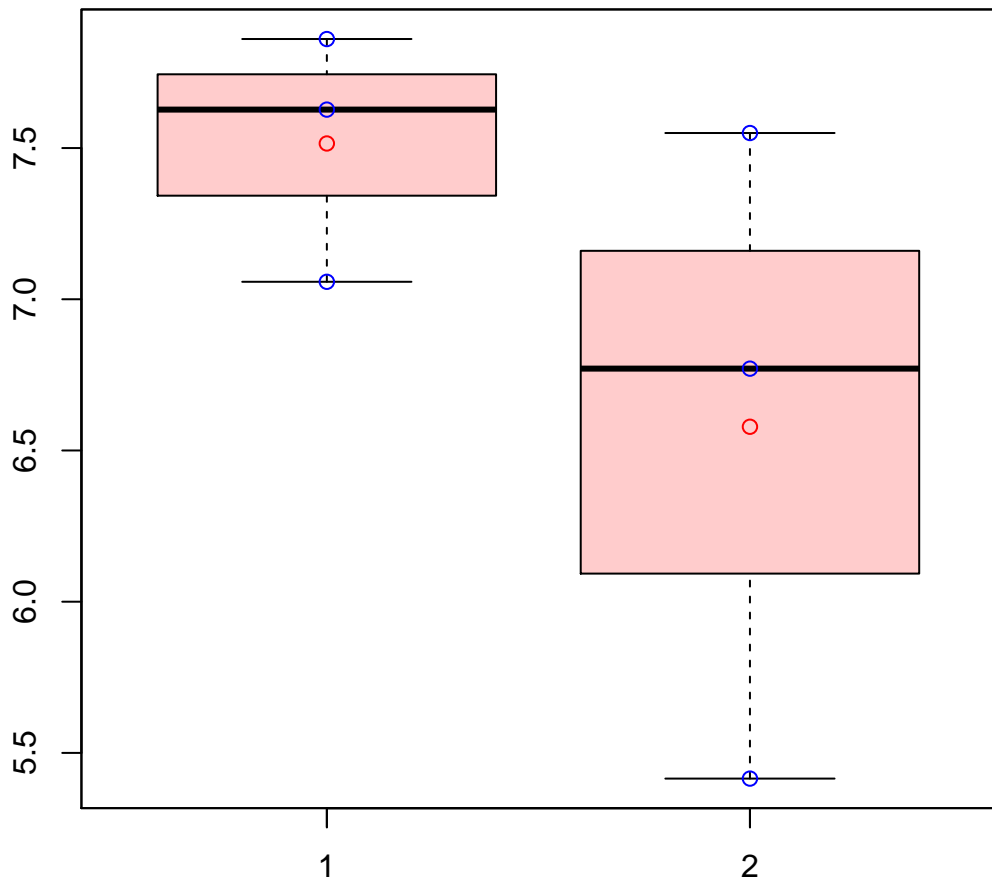

t-Test: p-value = 0.27



# M8AVF4|M8AVF4\_AEGTA

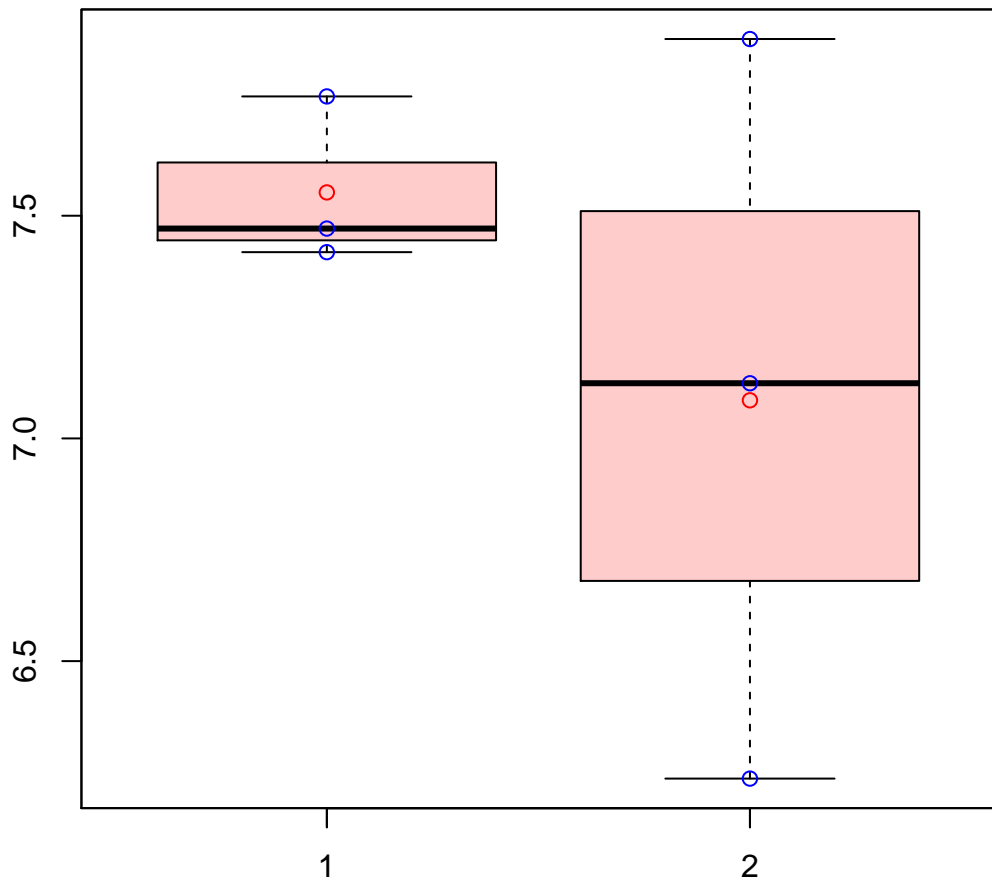

t-Test: p-value = 0.43

# M8AVP7|M8AVP7\_AEGTA

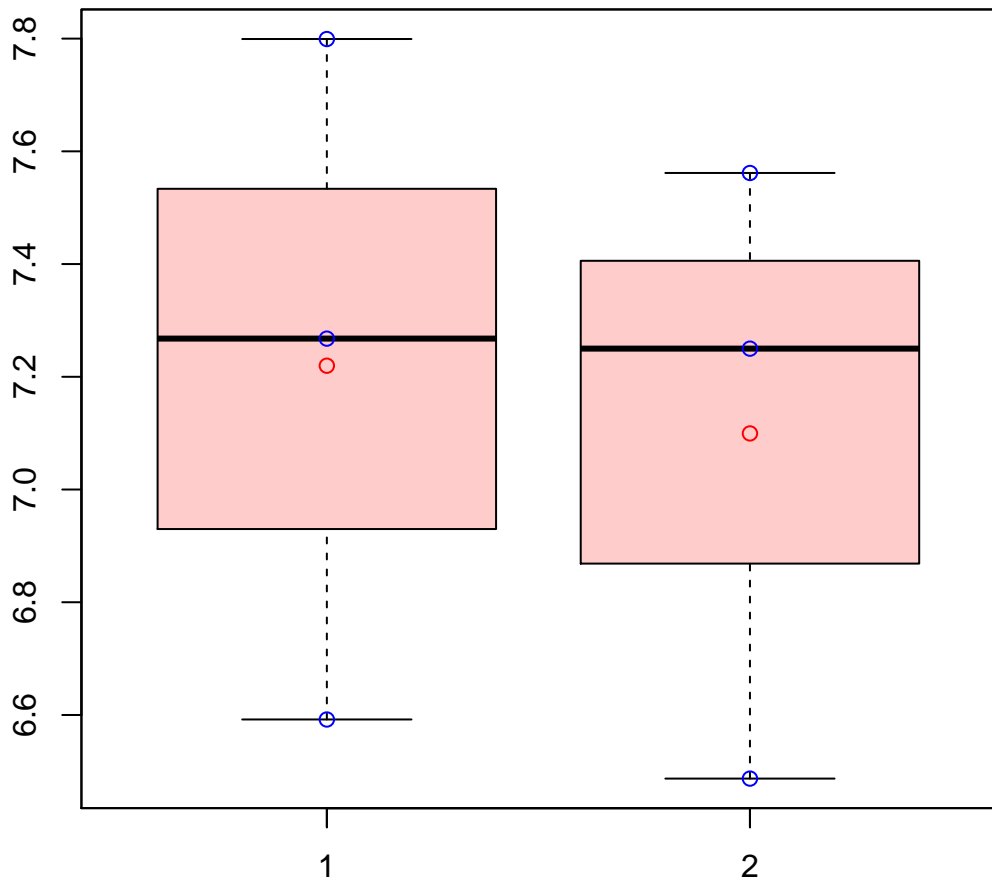

t-Test: p-value = 0.81

# M8AW35|M8AW35\_AEGTA

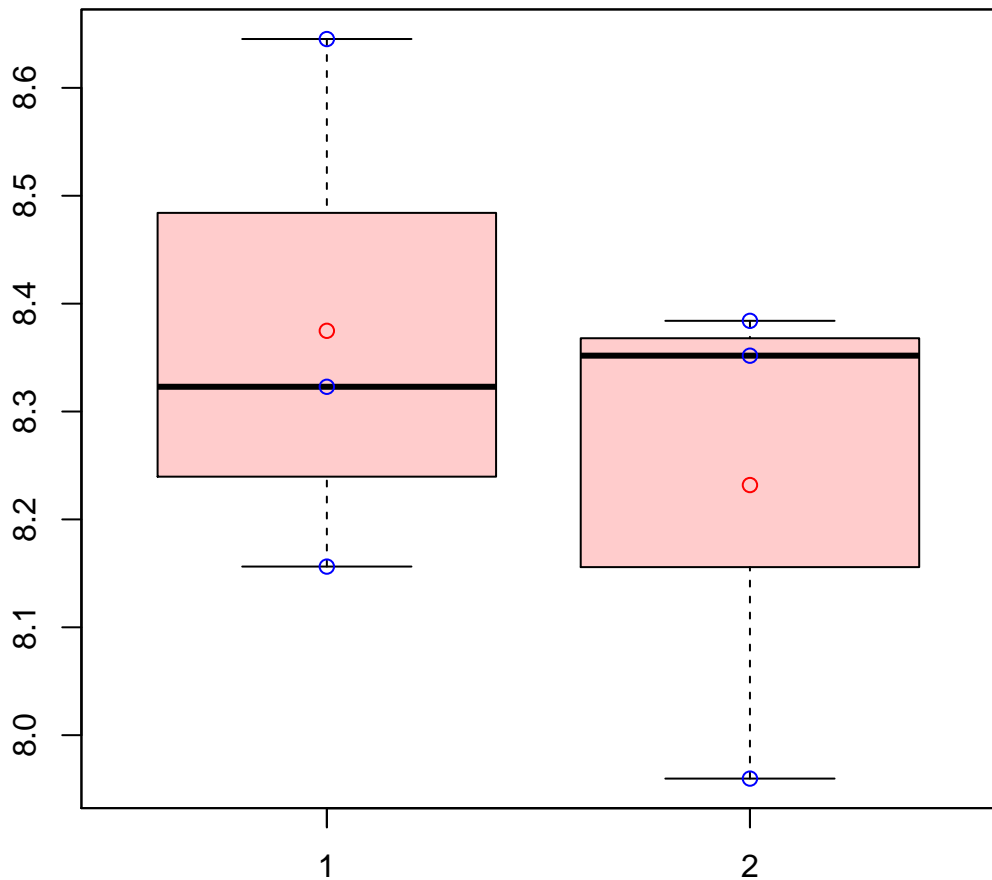

t-Test: p-value = 0.51

# M8AW39|M8AW39\_AEGTA

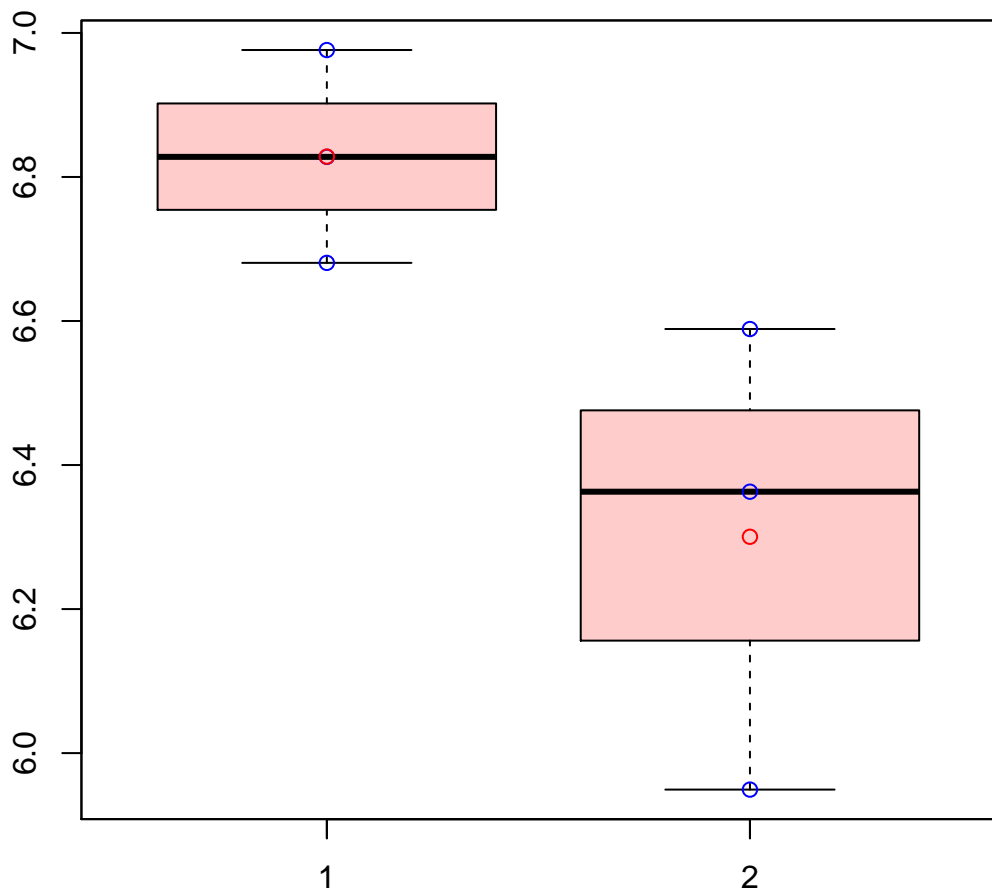

t-Test: p-value = 0.09

# M8AXK6|M8AXK6\_AEGTA

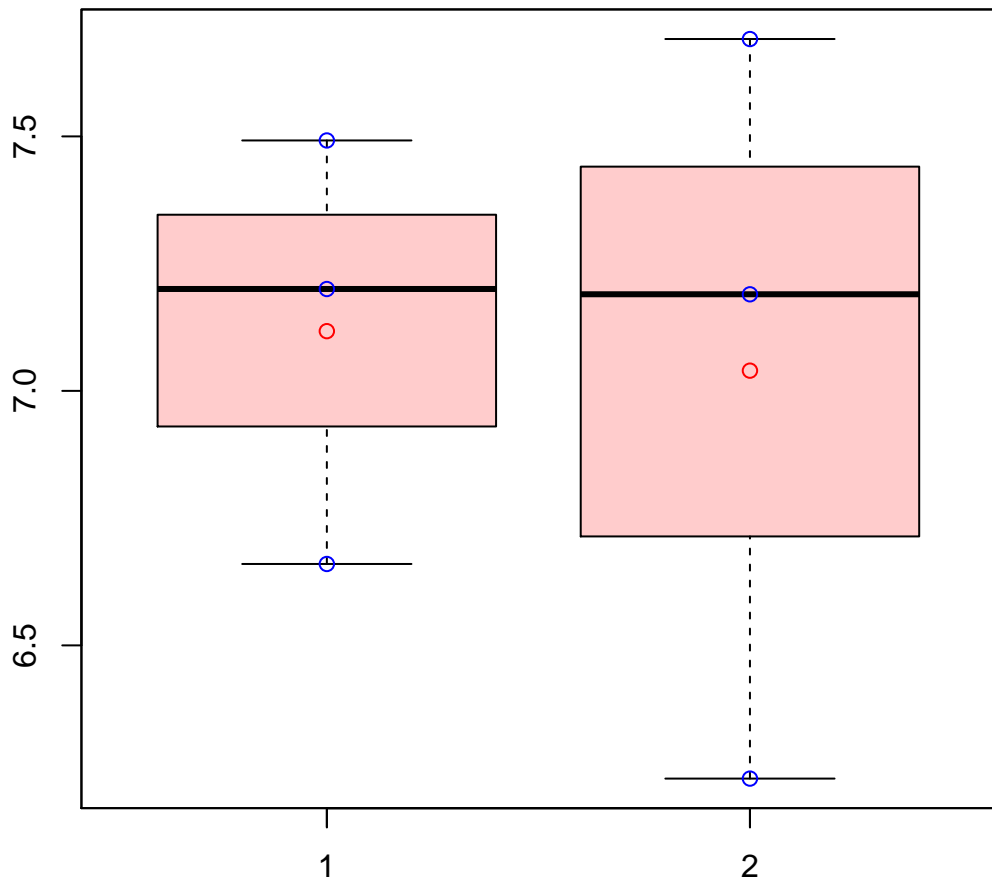

t-Test: p-value = 0.88

# M8AY46|M8AY46\_AEGTA

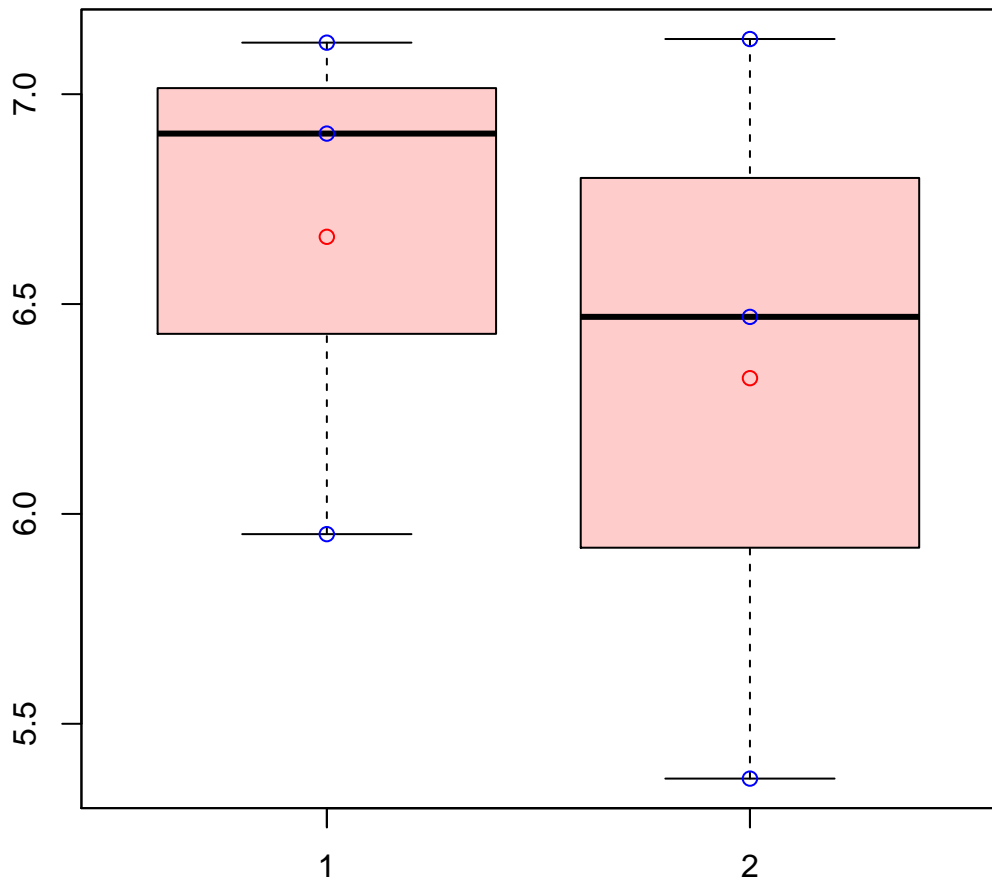

t-Test: p-value = 0.62

# M8AYG1|M8AYG1\_AEGTA

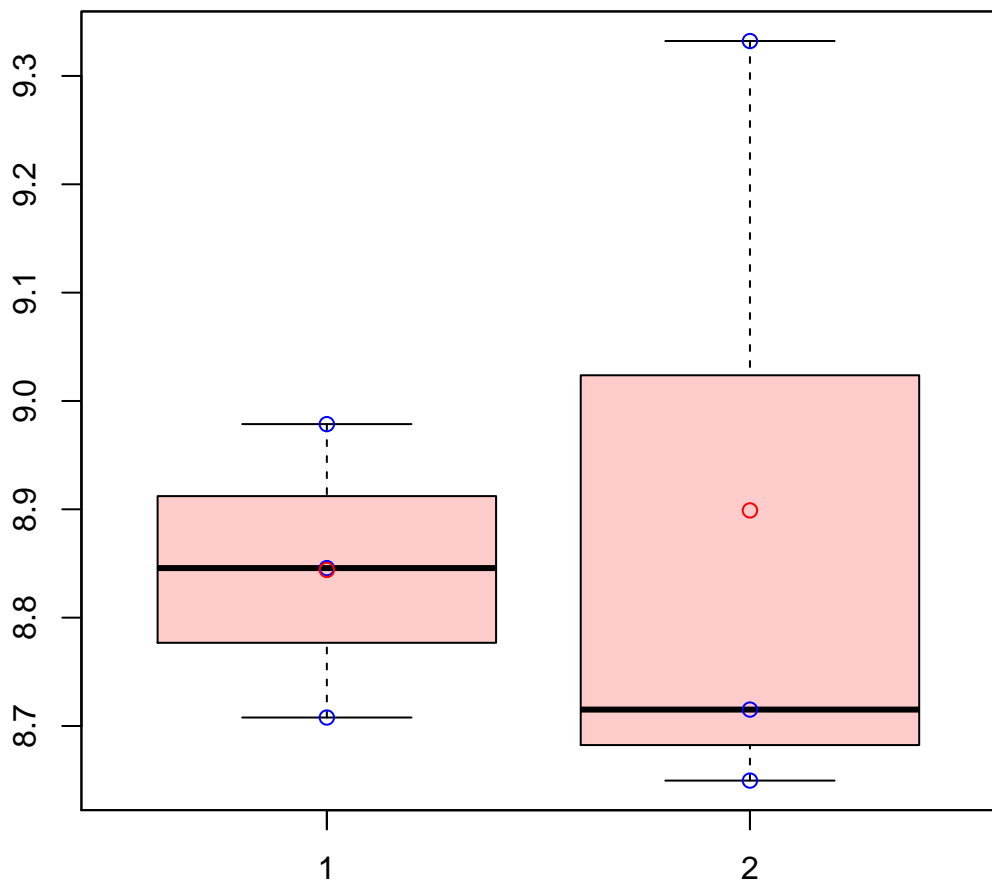

t-Test: p-value = 0.83

# M8AYI5|M8AYI5\_AEGTA

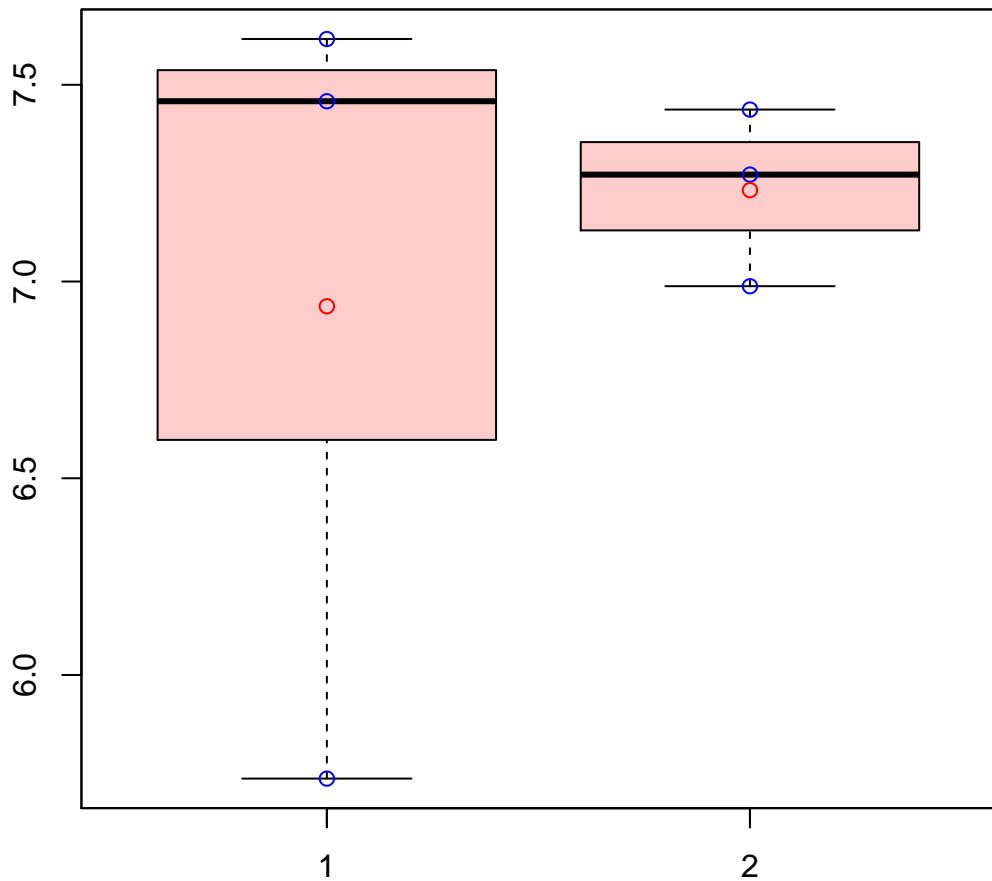

t-Test: p-value = 0.68



# M8AYS8|M8AYS8\_AEGTA

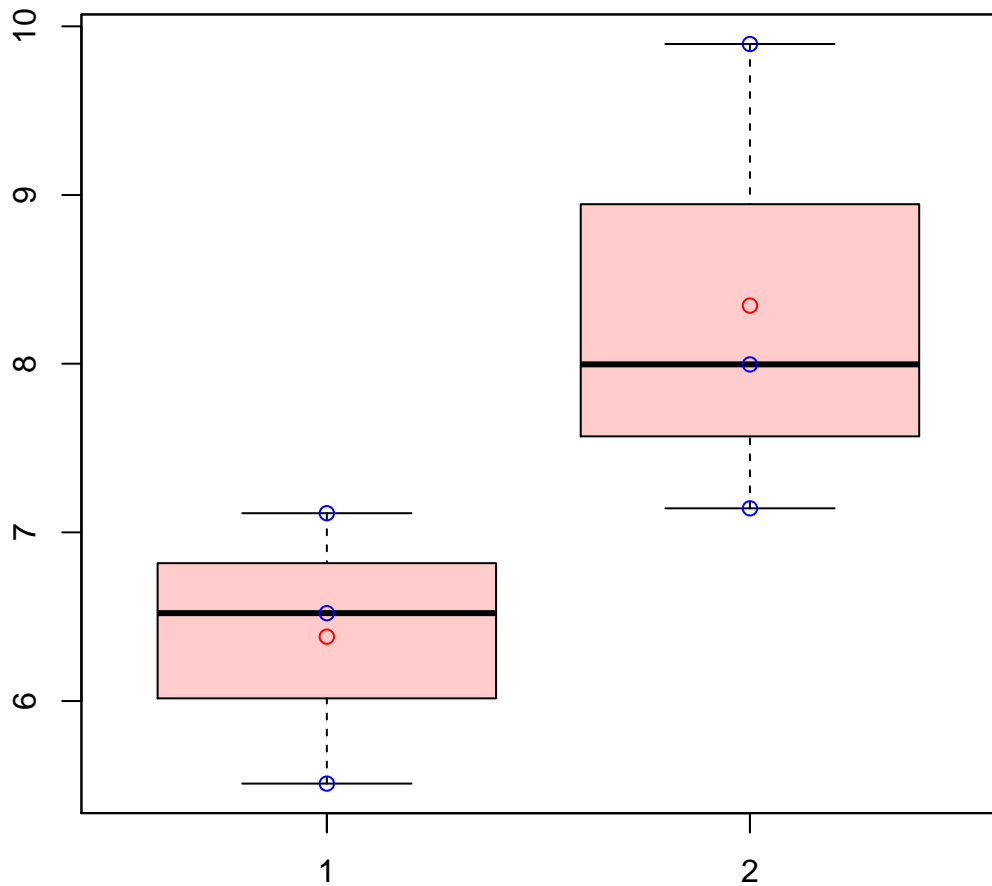

t-Test: p-value = 0.12

# M8AZ01|M8AZ01\_AEGTA

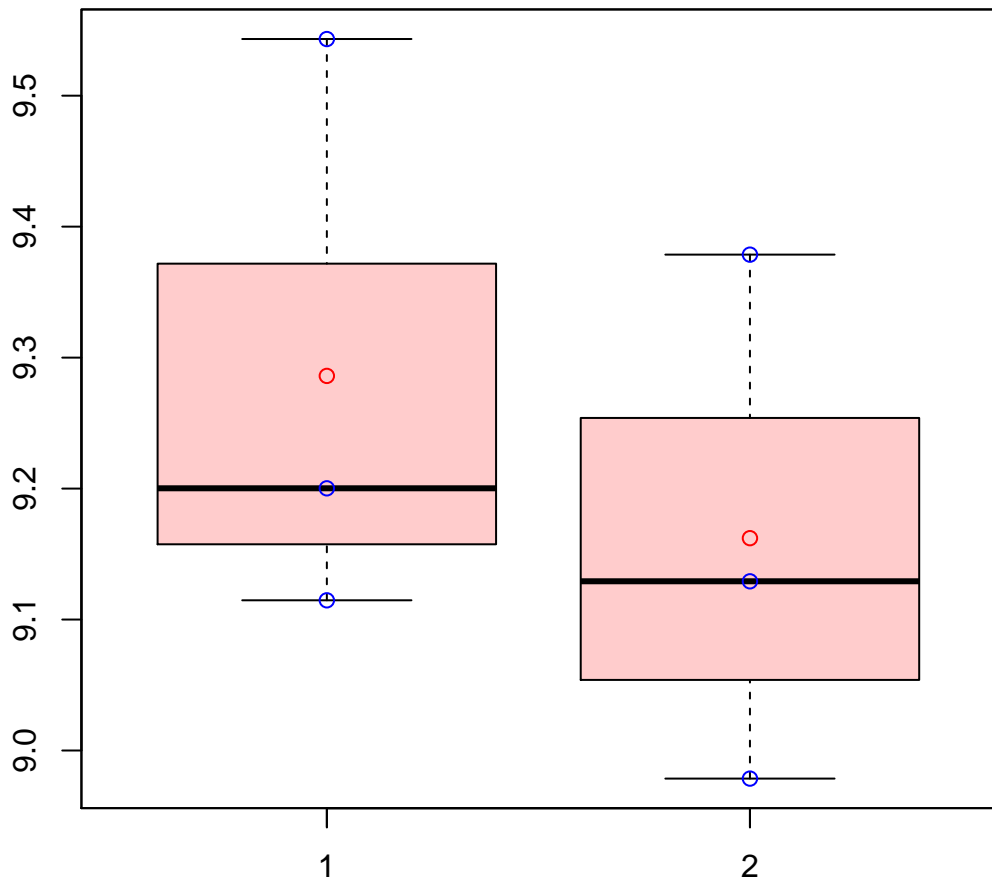

t-Test: p-value = 0.52

# M8AZG5|M8AZG5\_TRIUA

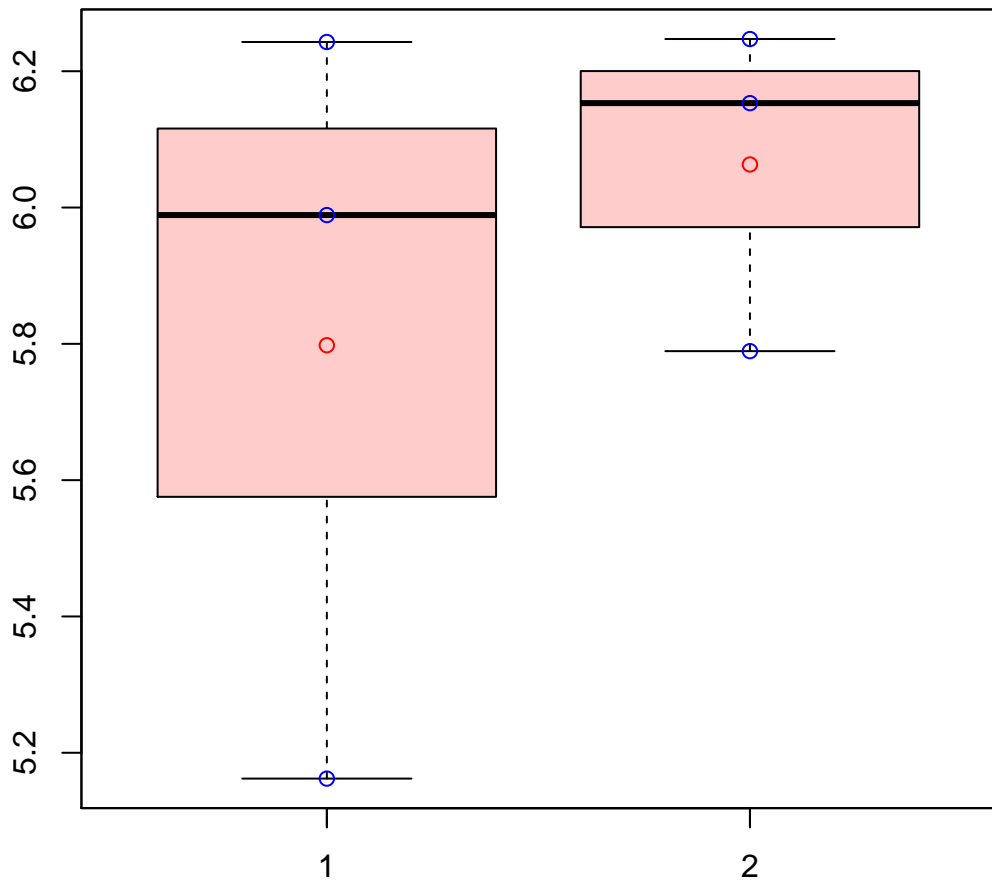

t-Test: p-value = 0.51

# M8AZH0|M8AZH0\_TRIUA

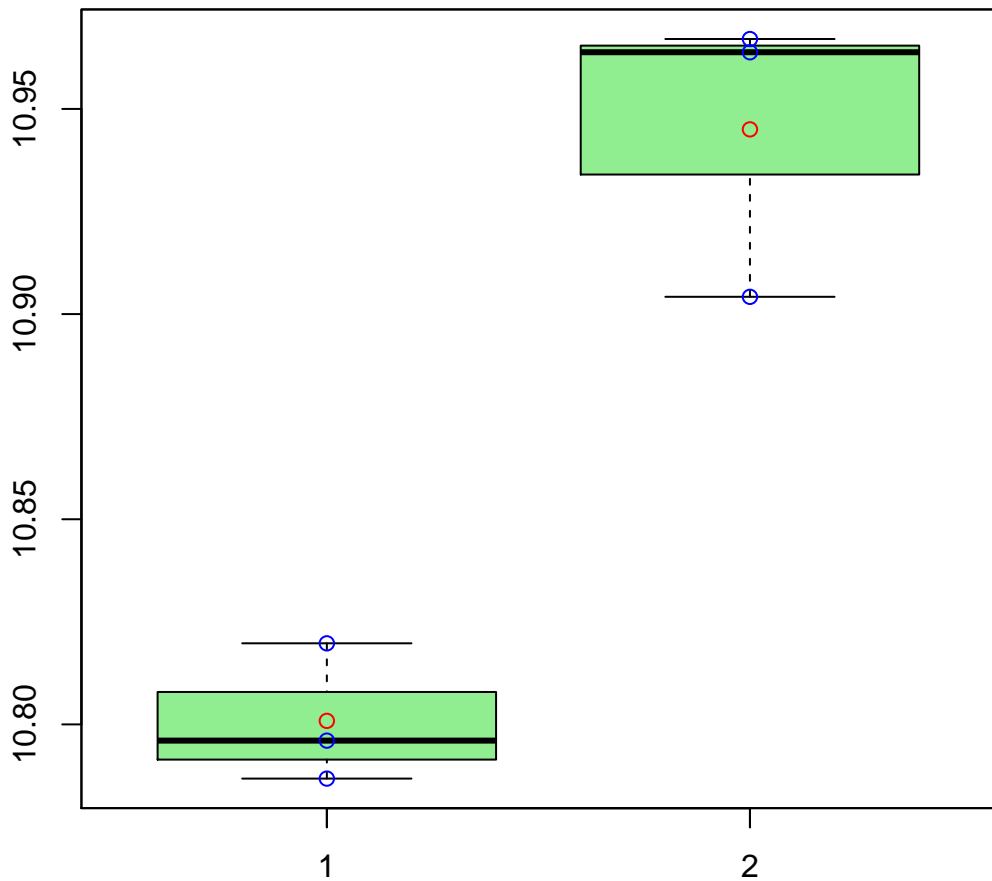

t-Test: p-value = 0.01

# M8AZL6|M8AZL6\_AEGTA

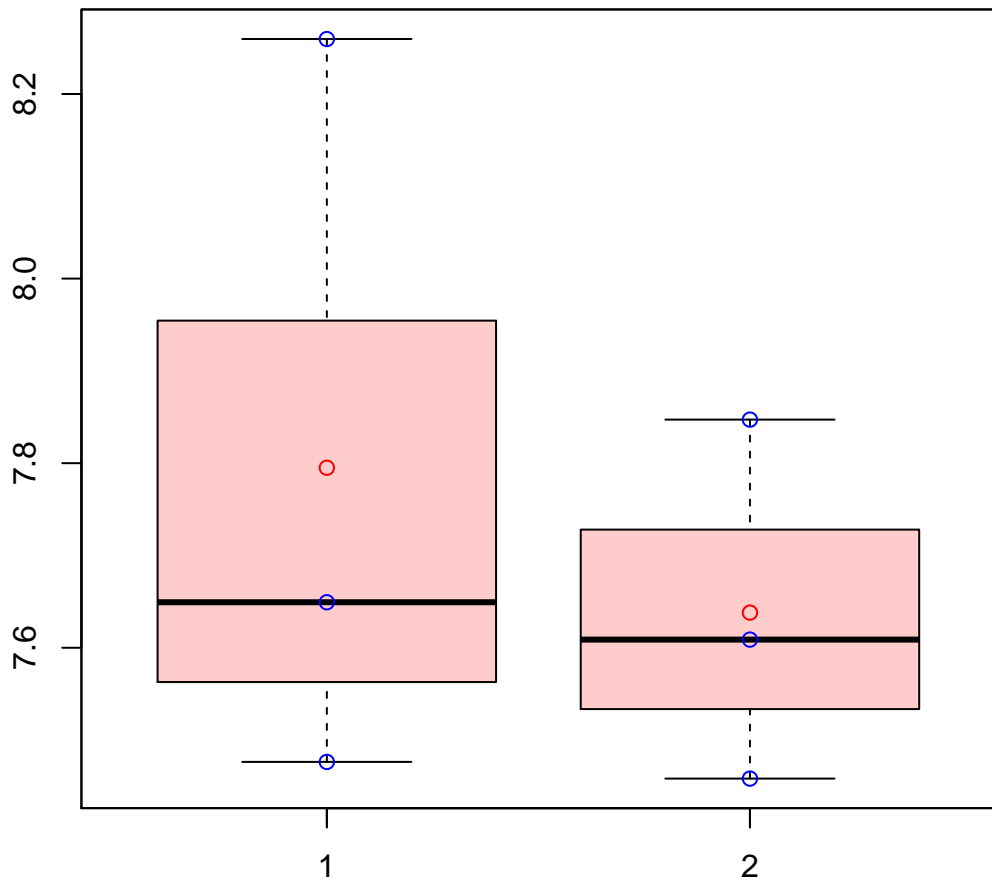

t-Test: p-value = 0.59

# M8B0Q6|M8B0Q6\_AEGTA

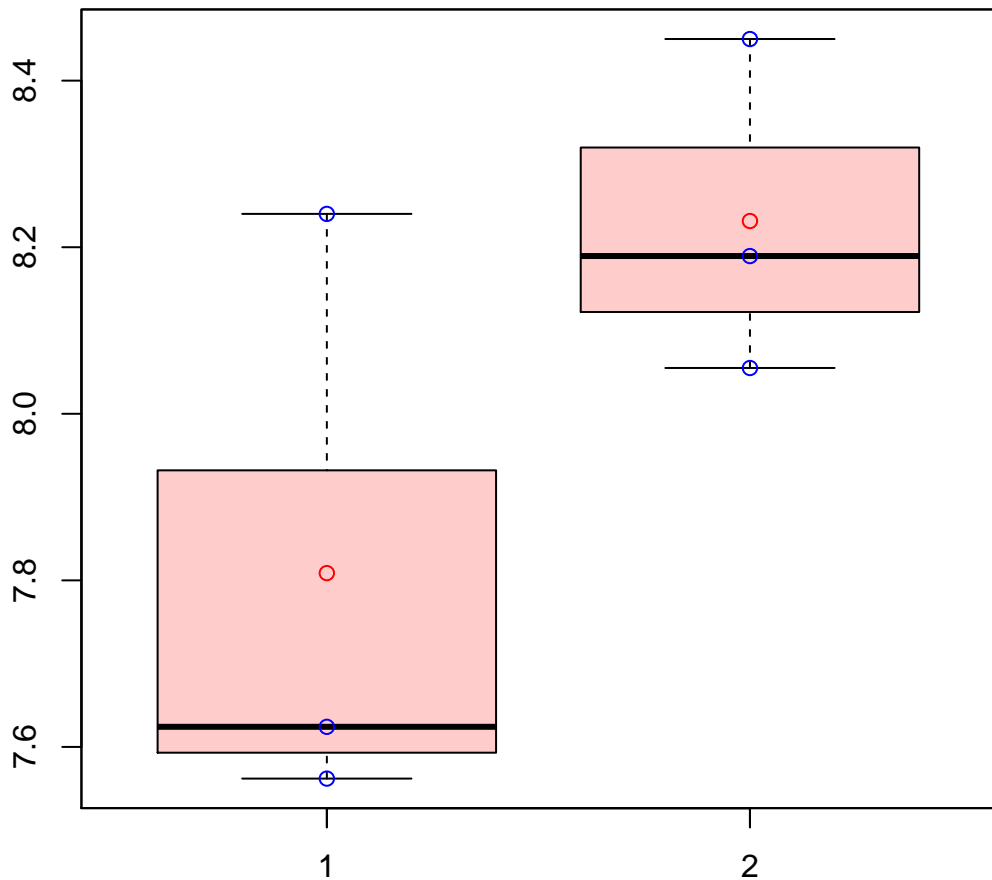

t-Test: p-value = 0.18

# M8B121|M8B121\_AEGTA

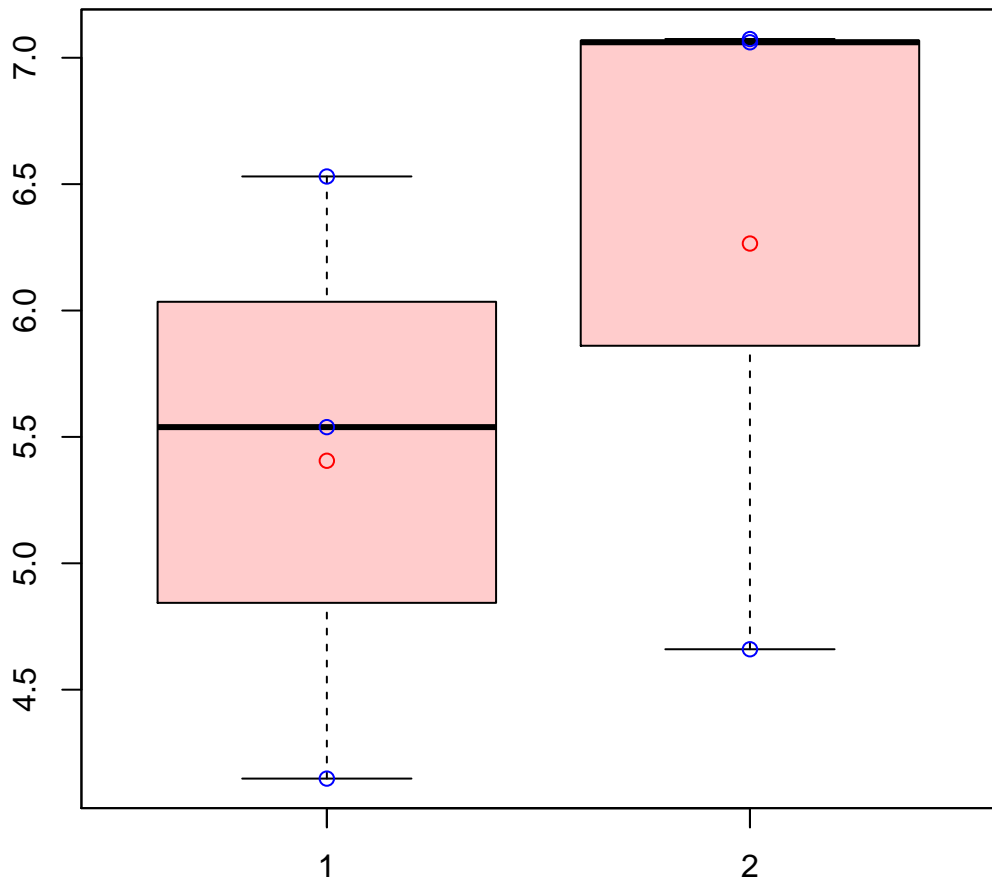

t-Test: p-value = 0.46

# M8B1Z5|M8B1Z5\_AEGTA

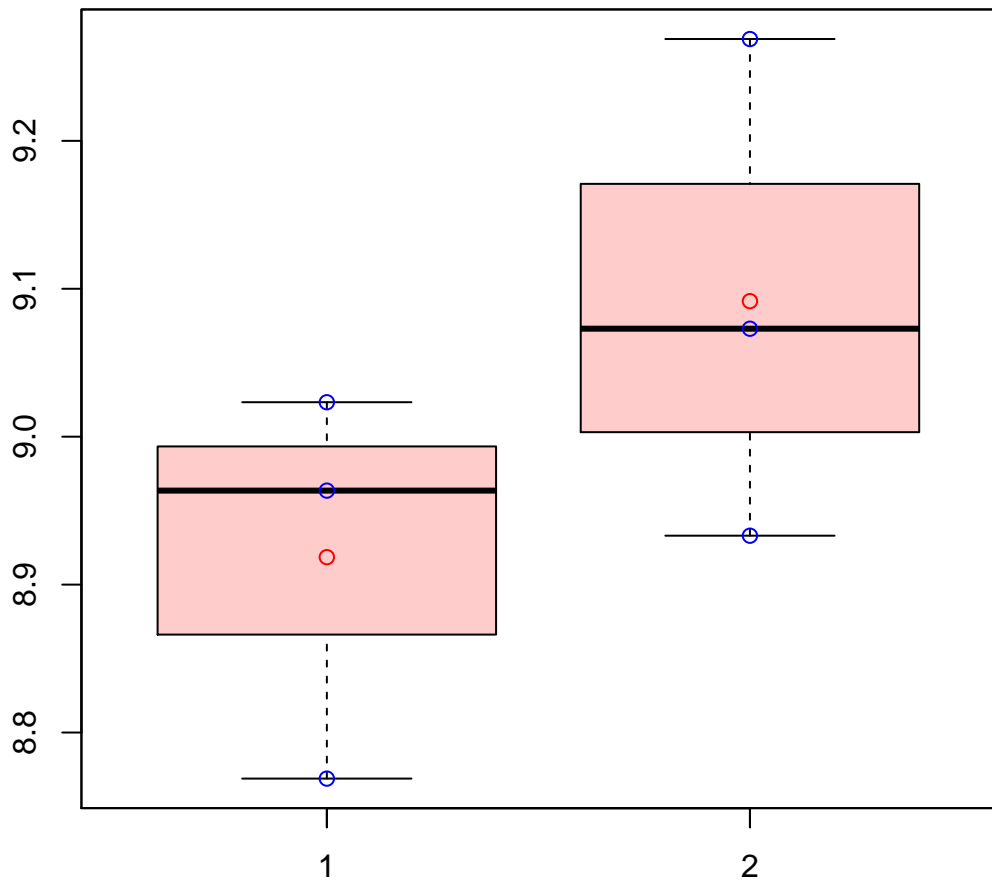

t-Test: p-value = 0.24



# M8B220|M8B220\_AEGTA

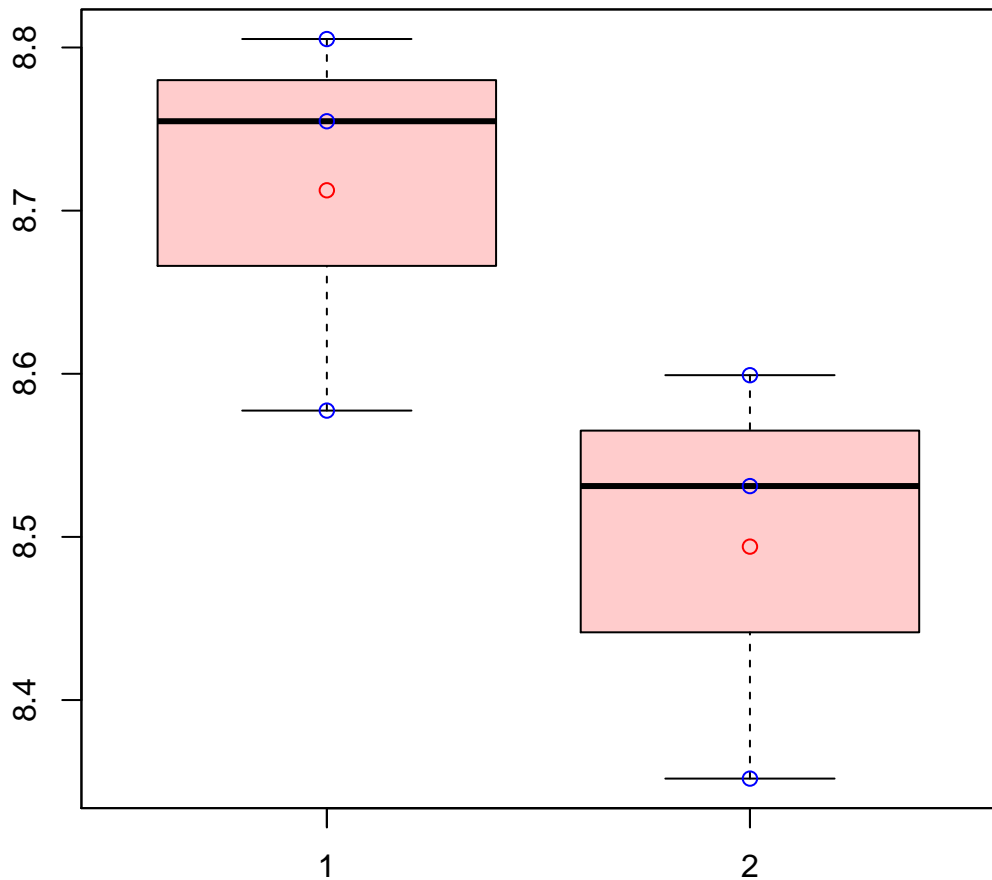

t-Test: p-value = 0.1

# M8B2C7|M8B2C7\_TRIUA

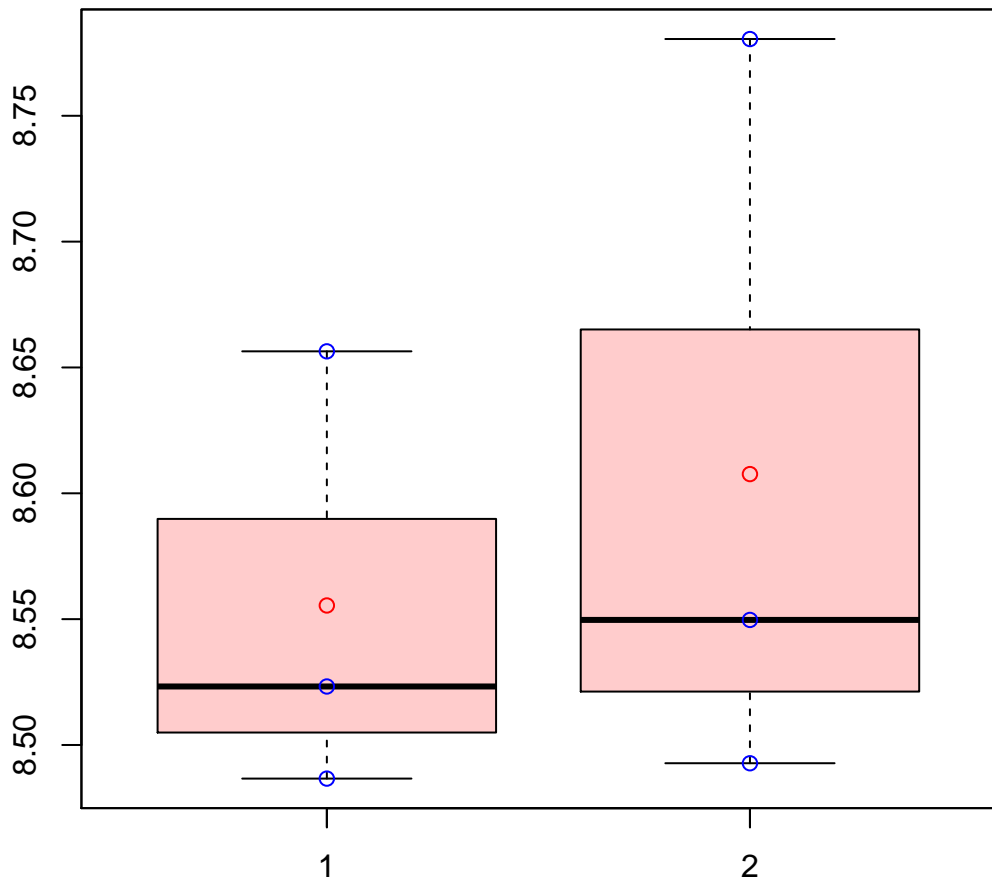

t-Test: p-value = 0.64

# M8B2E0|M8B2E0\_TRIUA

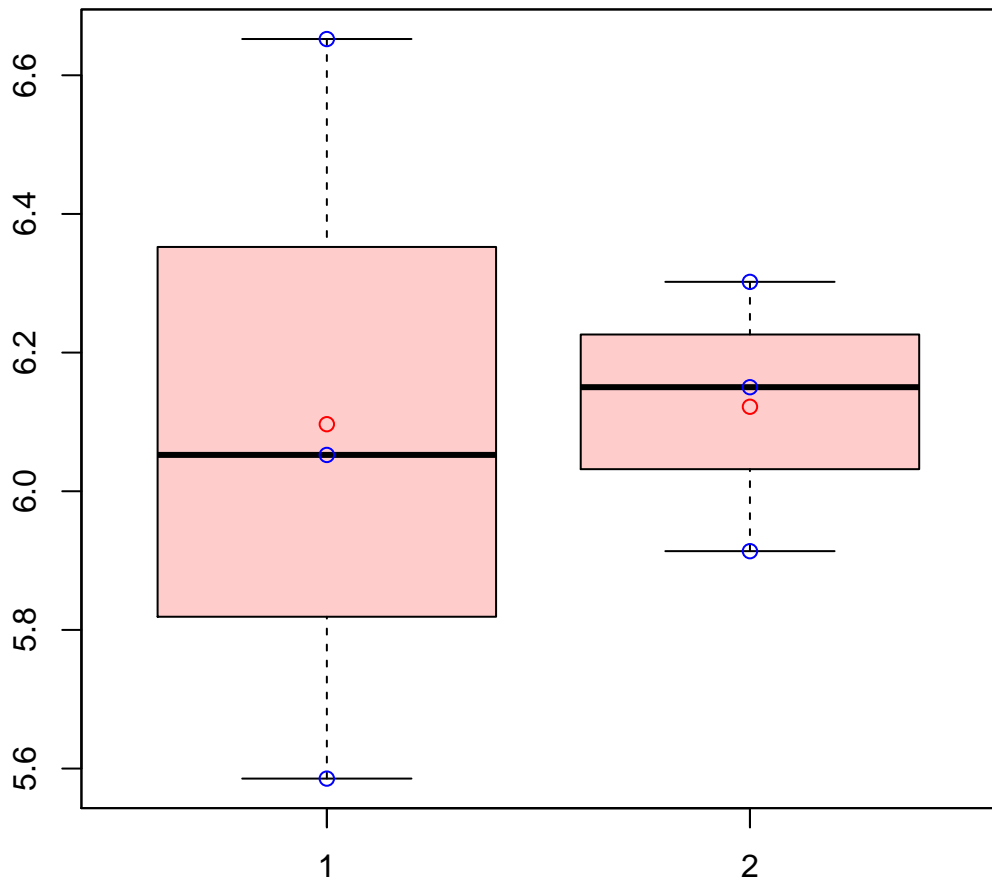

t-Test: p-value = 0.94

# M8B2F5|M8B2F5\_AEGTA

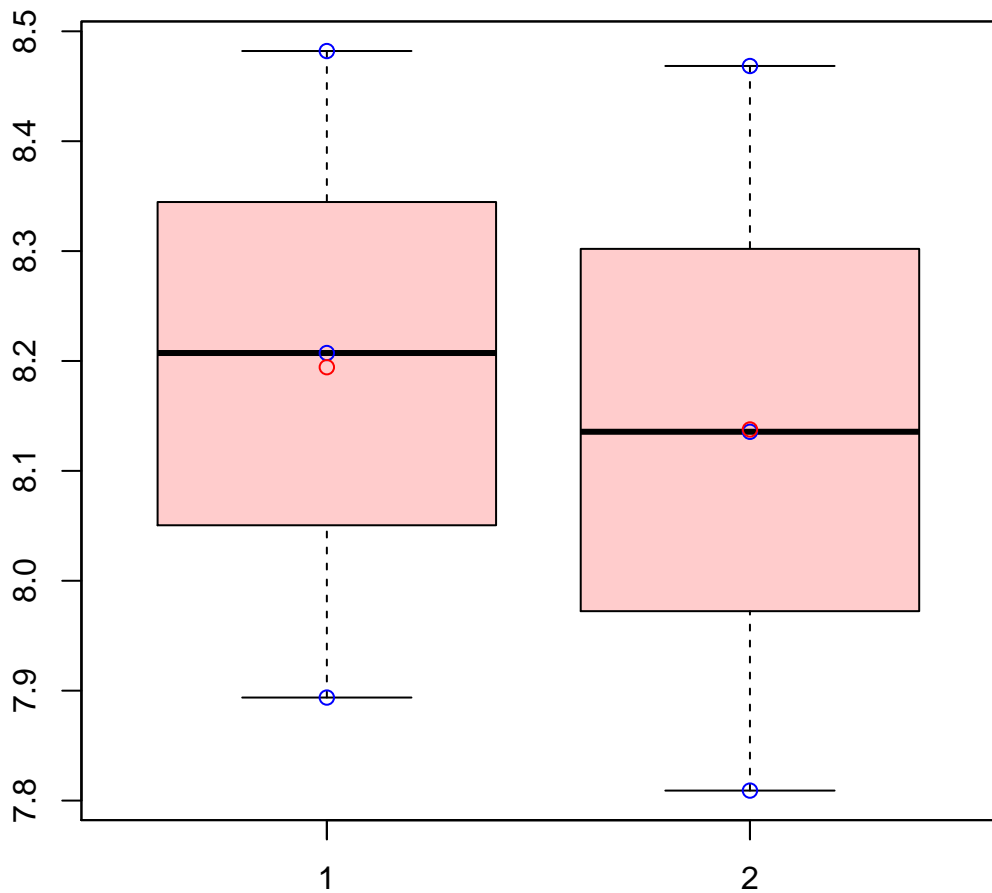

t-Test: p-value = 0.84

# M8B2N0|M8B2N0\_AEGTA

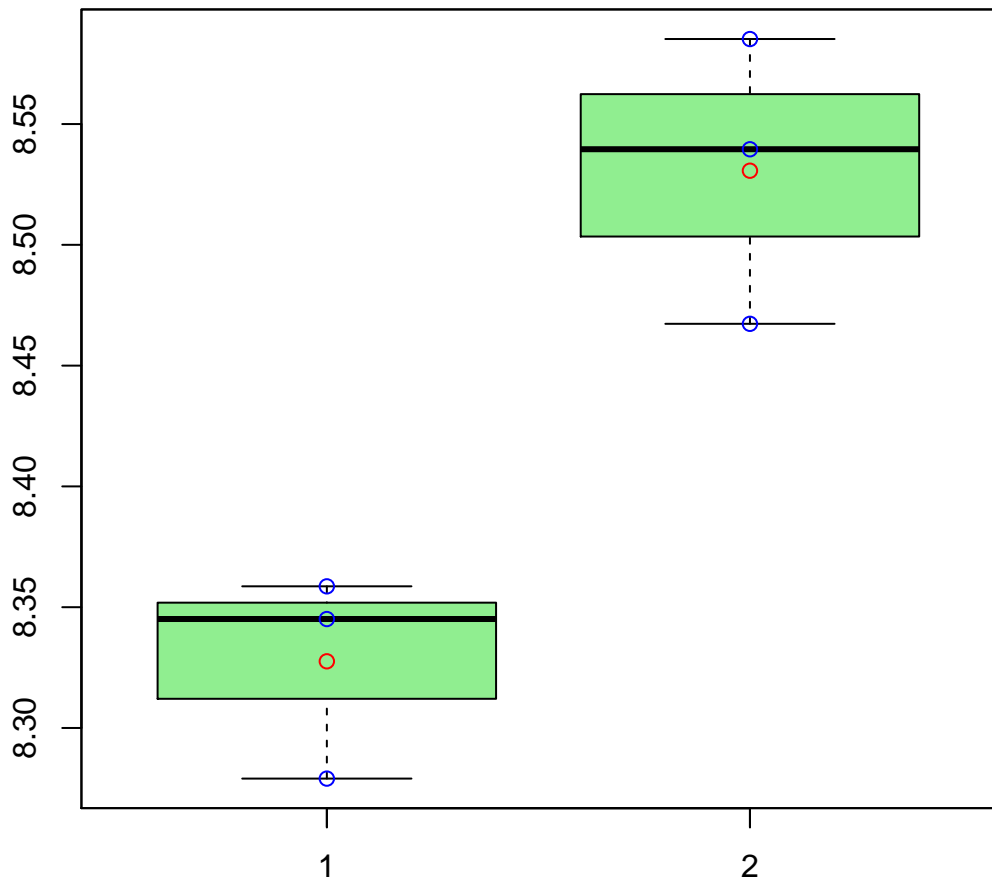

t-Test: p-value = 0.01

# M8B3Q2|M8B3Q2\_AEGTA

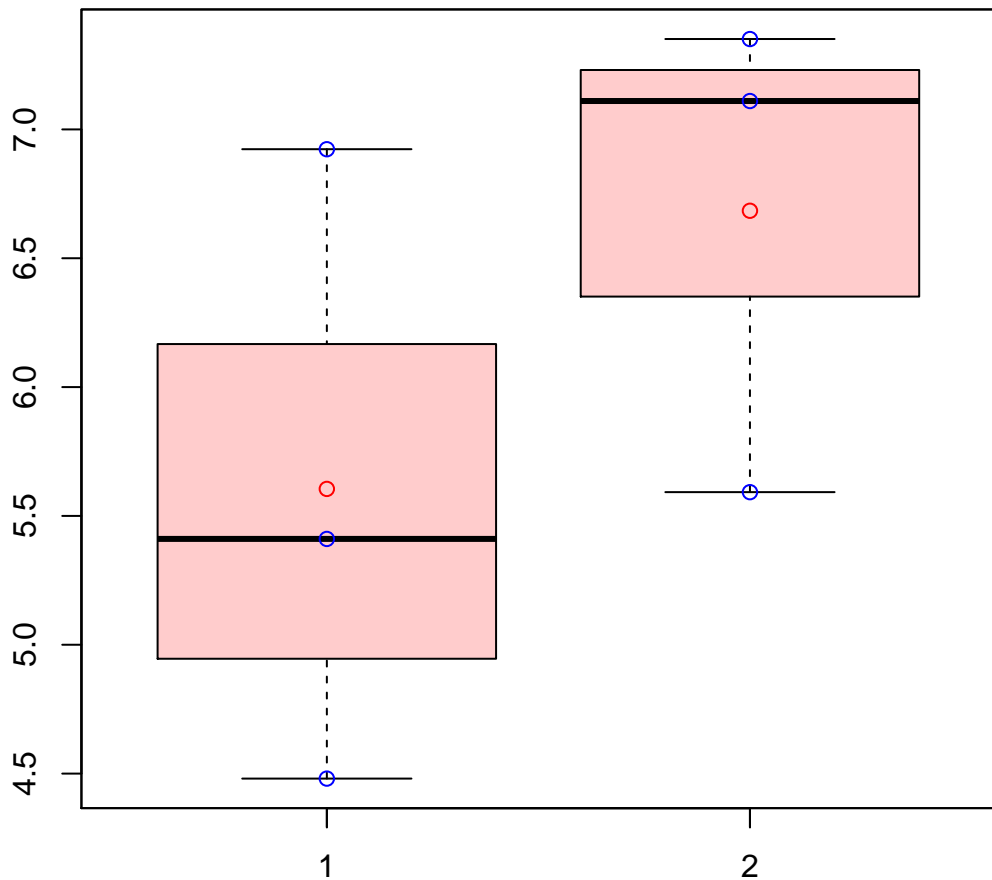

t-Test: p-value = 0.3

# M8B410|M8B410\_TRIUA

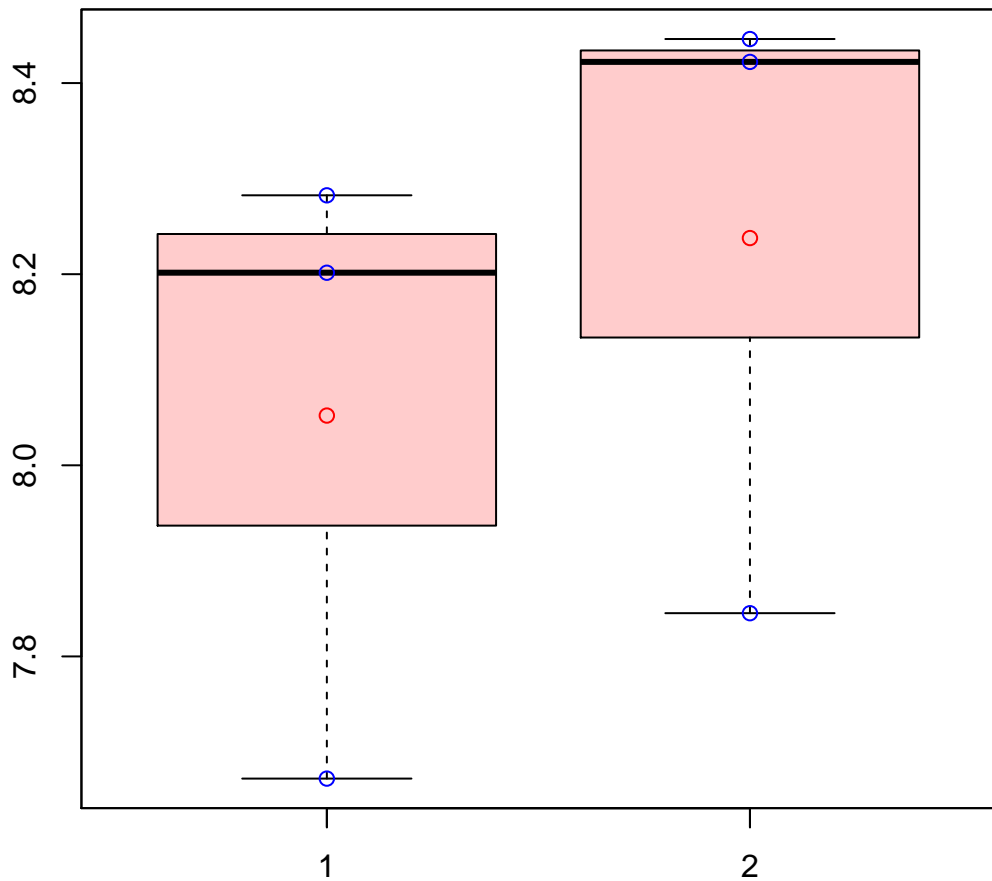

t-Test: p-value = 0.54

# M8B493|M8B493\_AEGTA

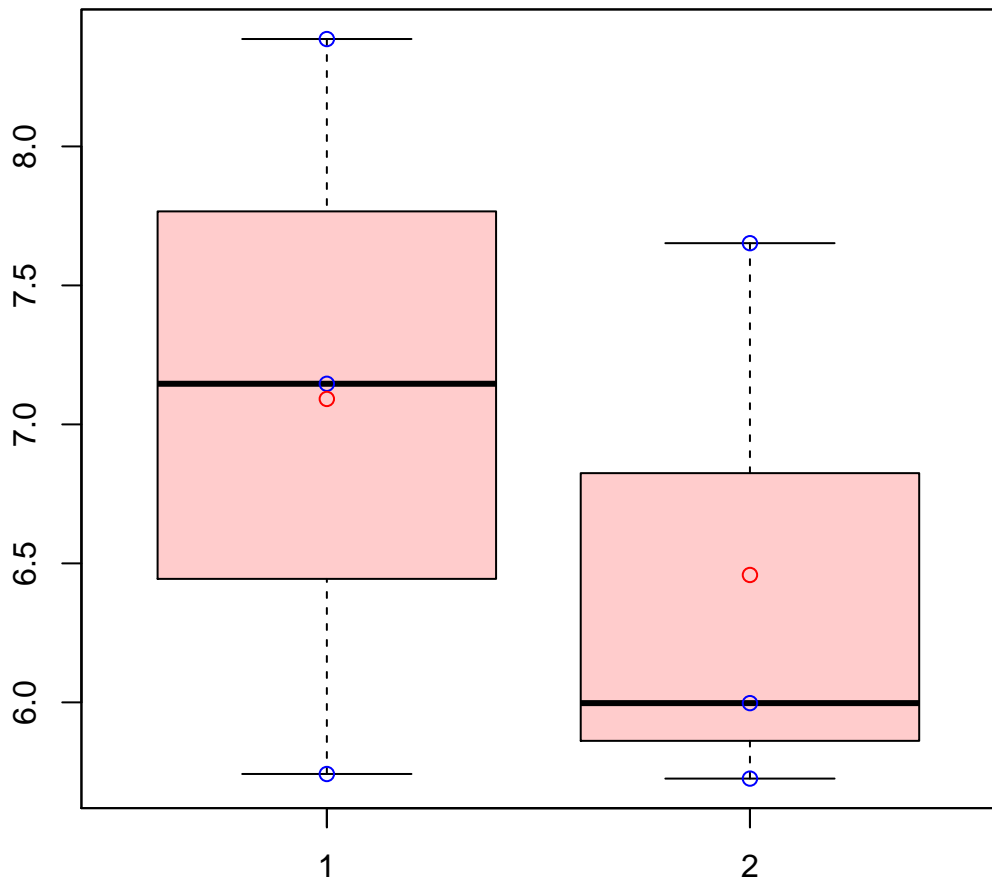

t-Test: p-value = 0.55



# M8B4C2|M8B4C2\_AEGTA

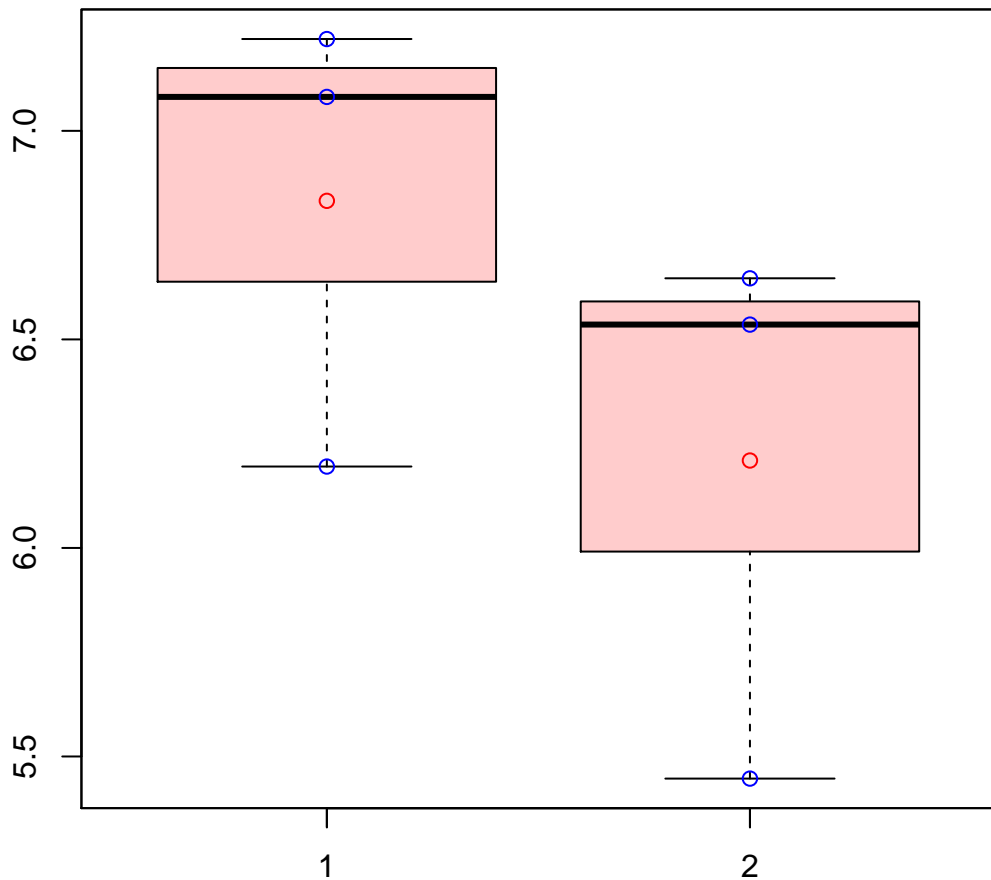

t-Test: p-value = 0.28

# M8B4G1|M8B4G1\_AEGTA

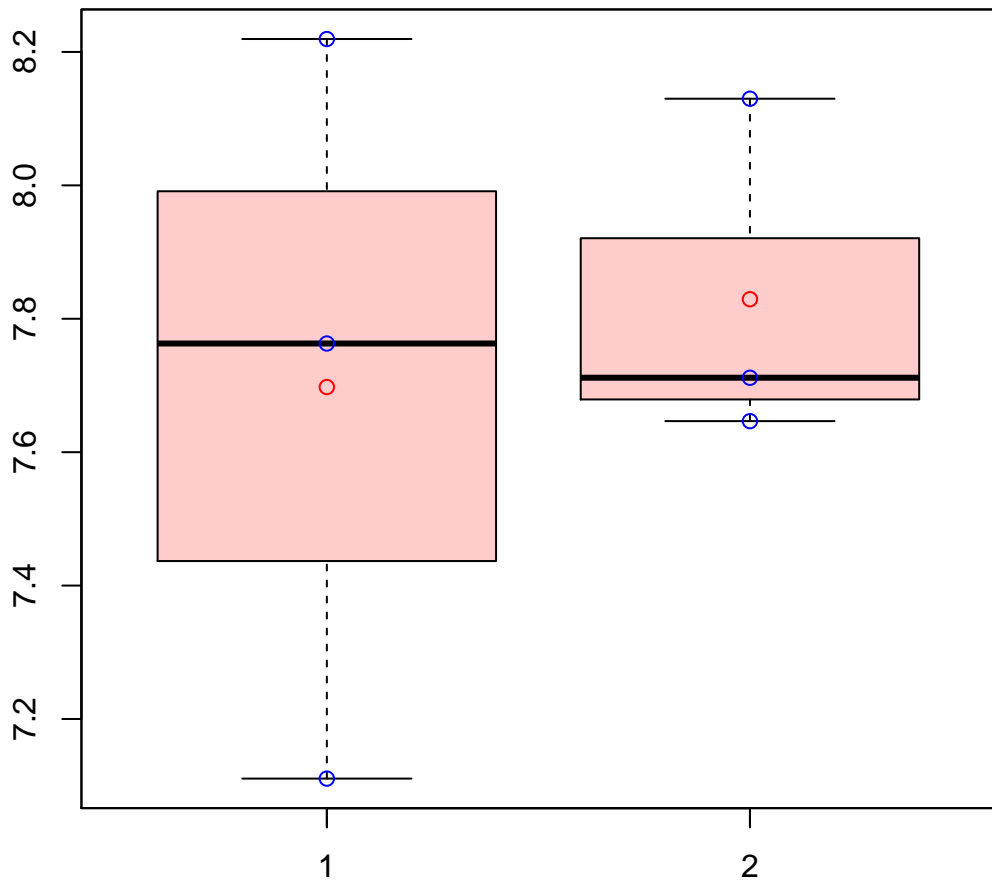

t-Test: p-value = 0.74

# M8B5V9|M8B5V9\_AEGTA

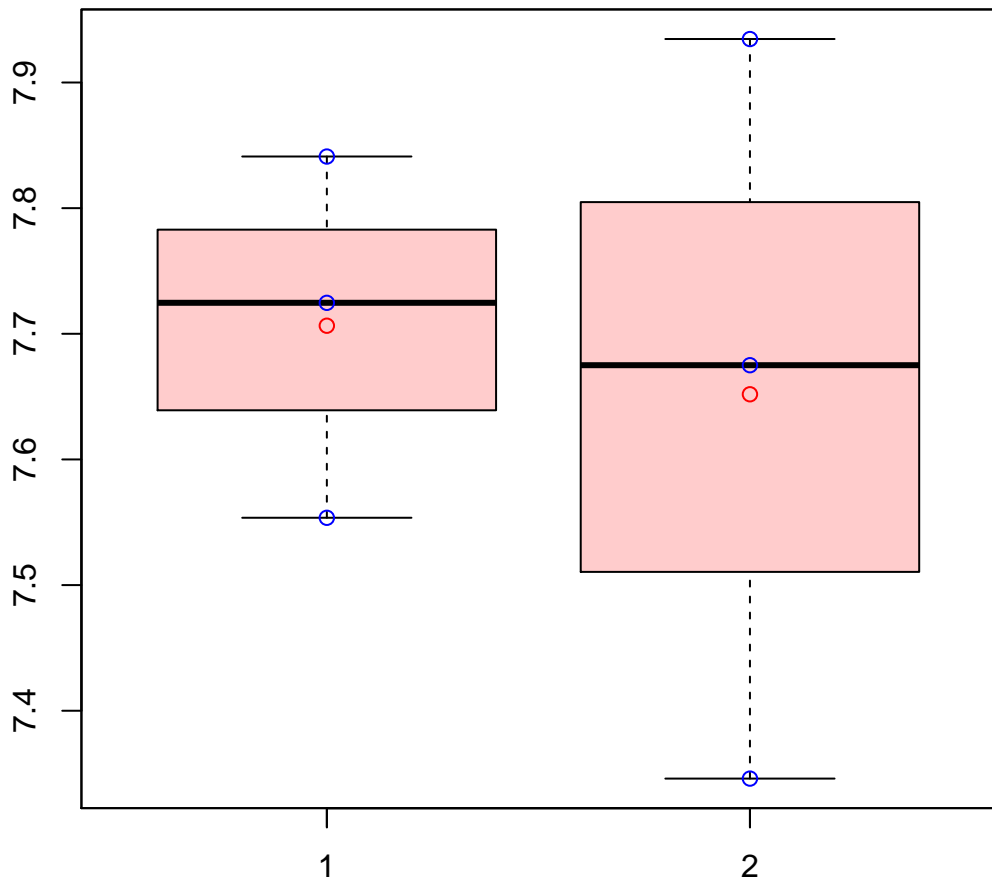

t-Test: p-value = 0.79

# M8B909|M8B909\_AEGTA

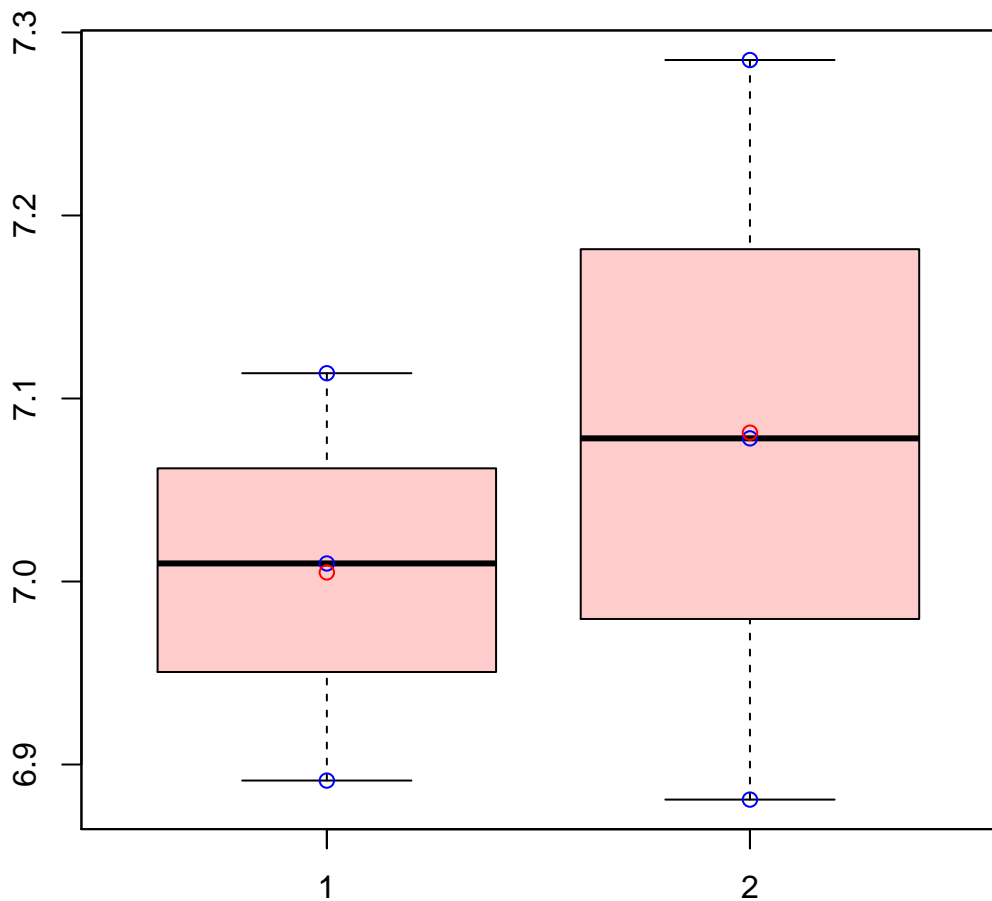

t-Test: p-value = 0.61

# M8B9W4|M8B9W4\_AEGTA

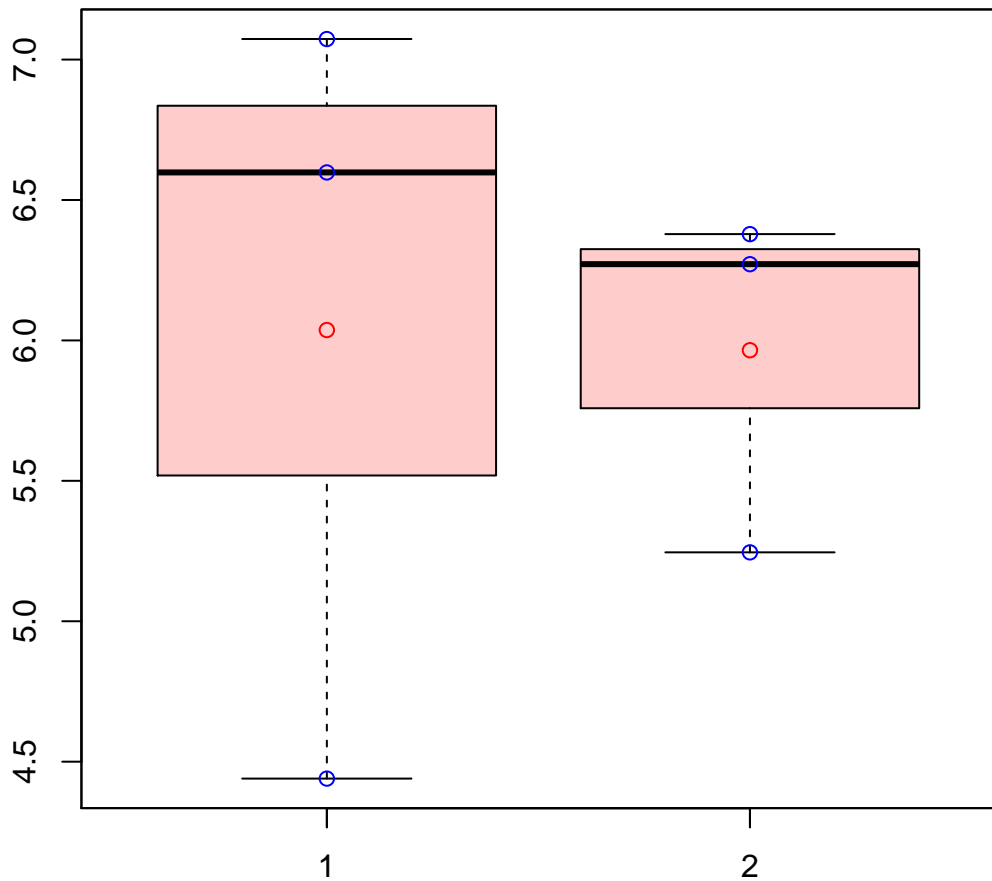

t-Test: p-value = 0.94

# M8BAA4|M8BAA4\_AEGTA

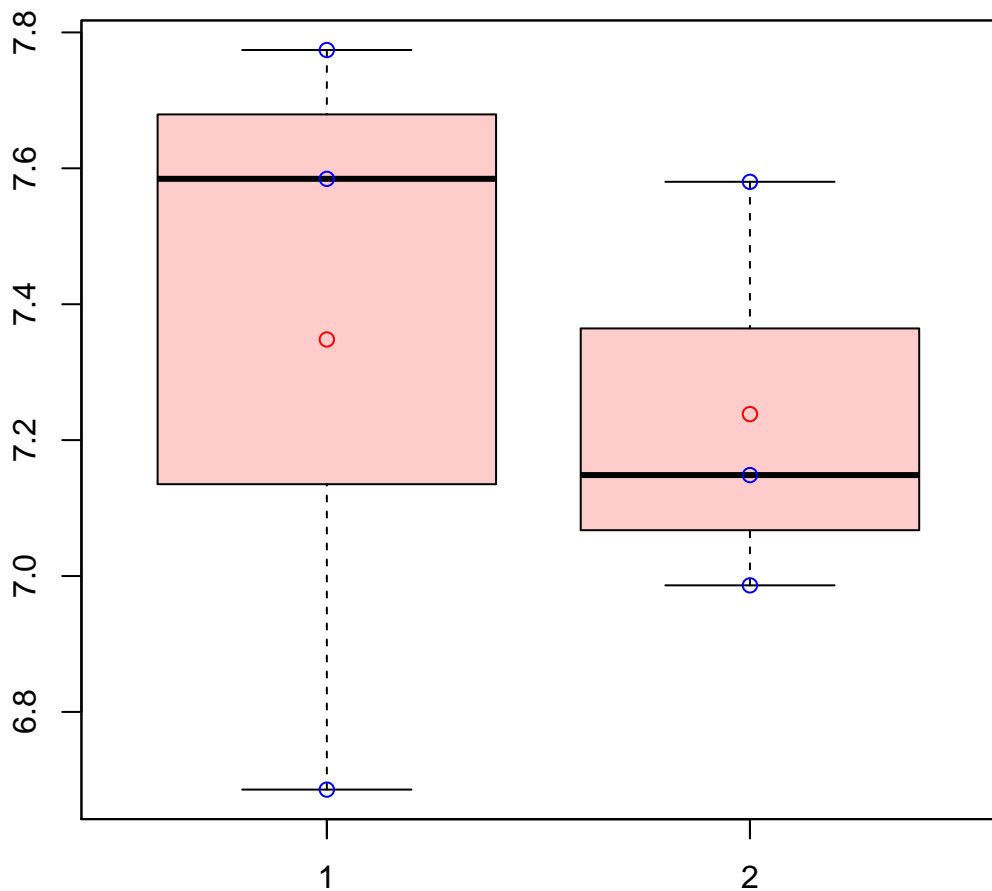

t-Test: p-value = 0.79

# M8BAM1|M8BAM1\_AEGTA

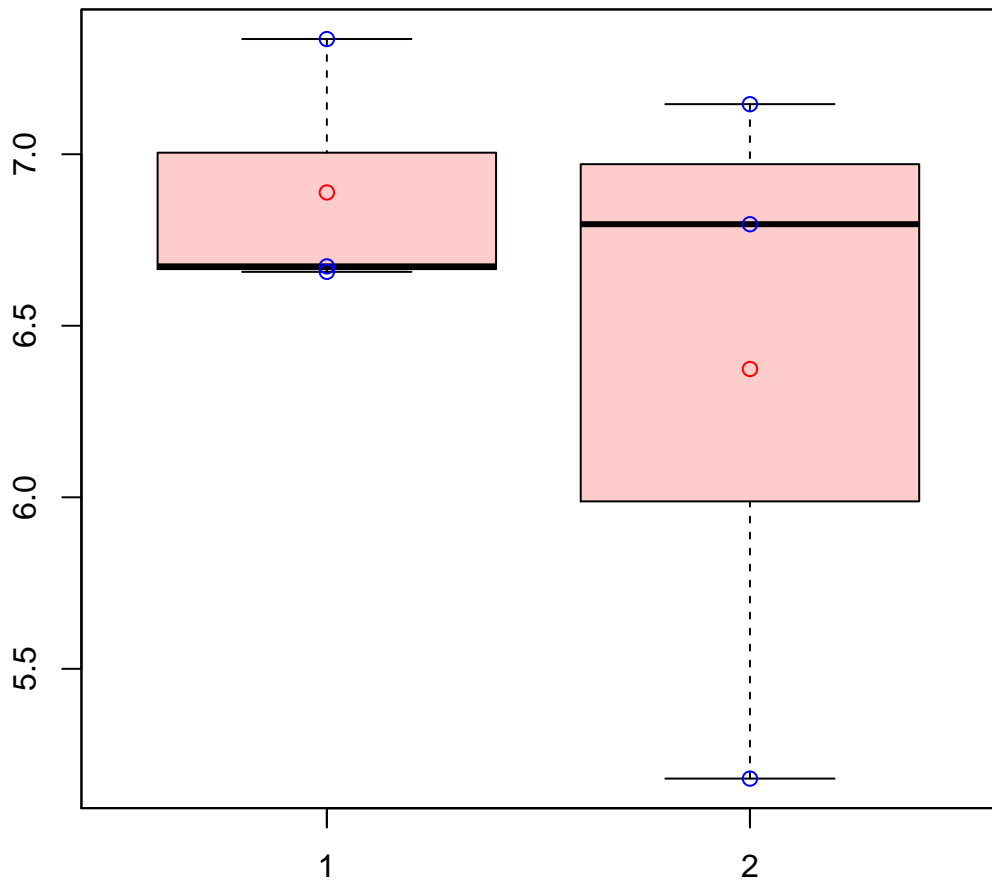

t-Test: p-value = 0.49

# M8BAQ8|M8BAQ8\_AEGTA

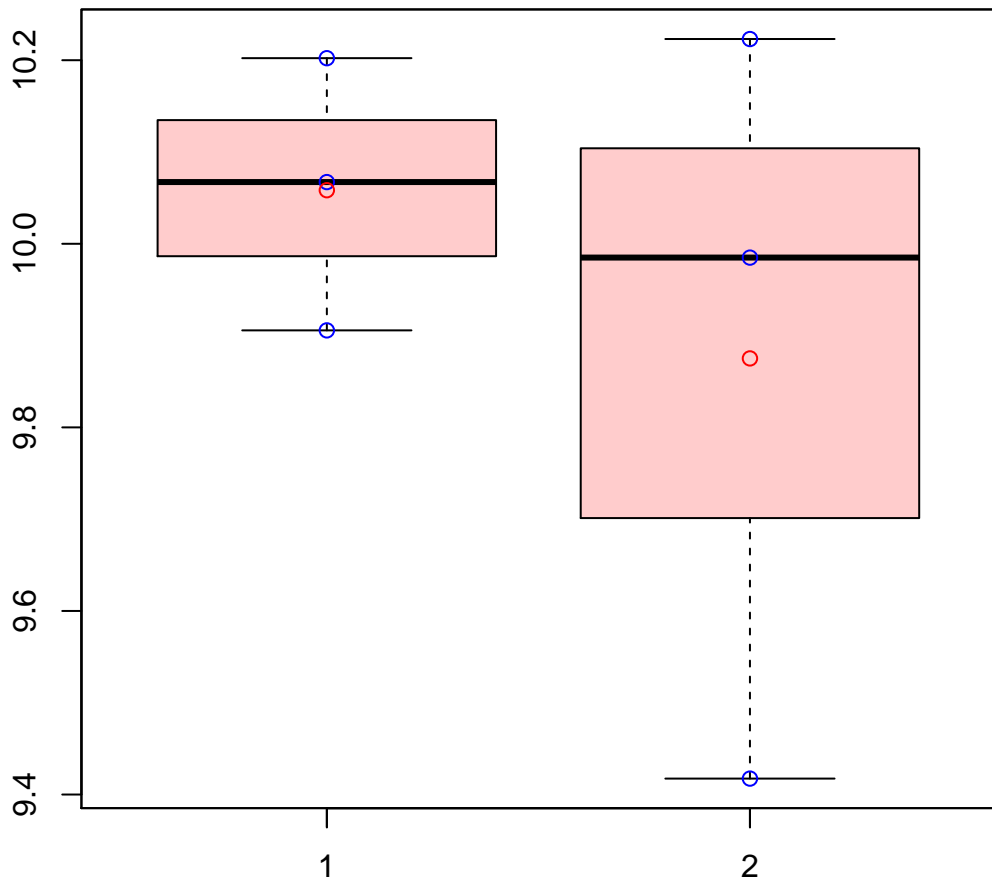

t-Test: p-value = 0.53



# M8BBY2|M8BBY2\_AEGTA

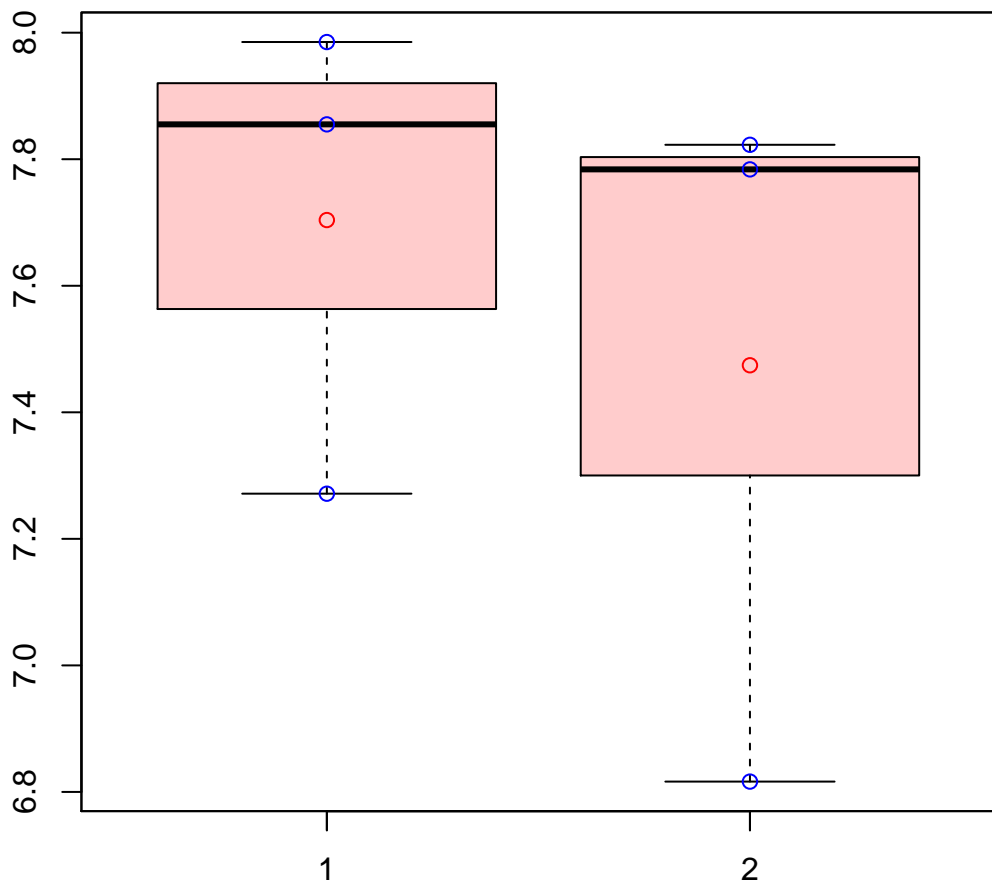

t-Test: p-value = 0.6

# M8BCQ5|M8BCQ5\_AEGTA

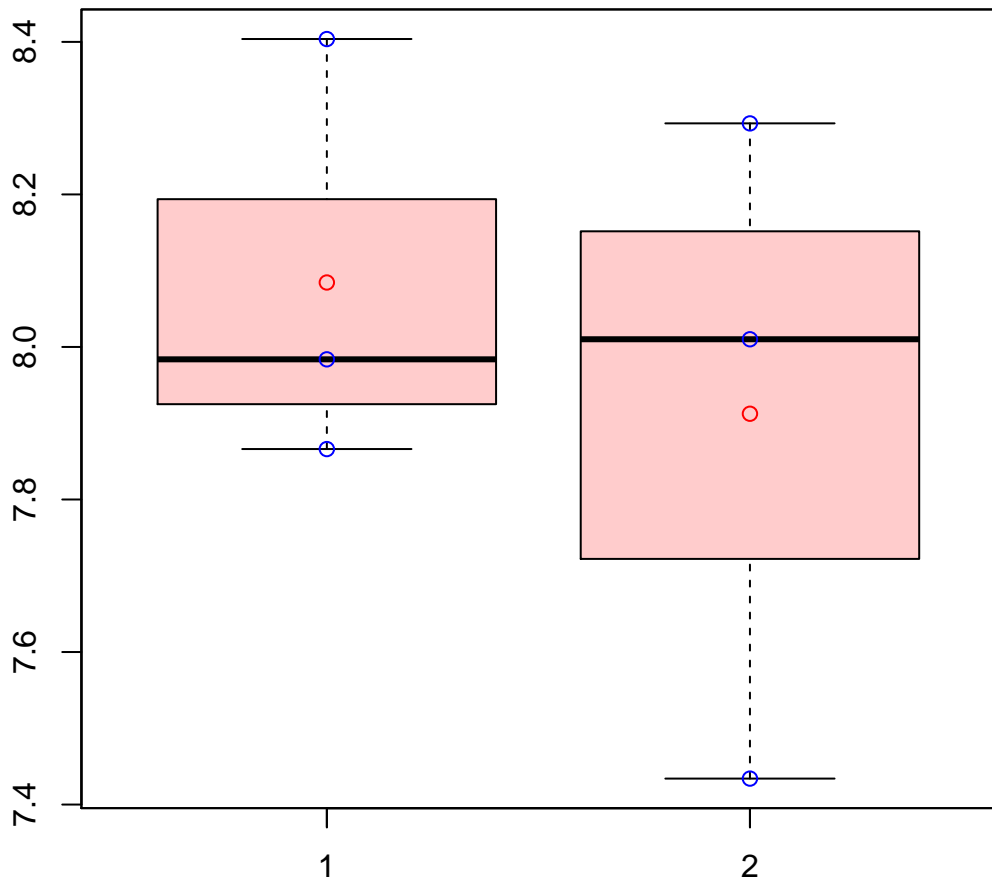

t-Test: p-value = 0.6

# M8BCY6|M8BCY6\_AEGTA

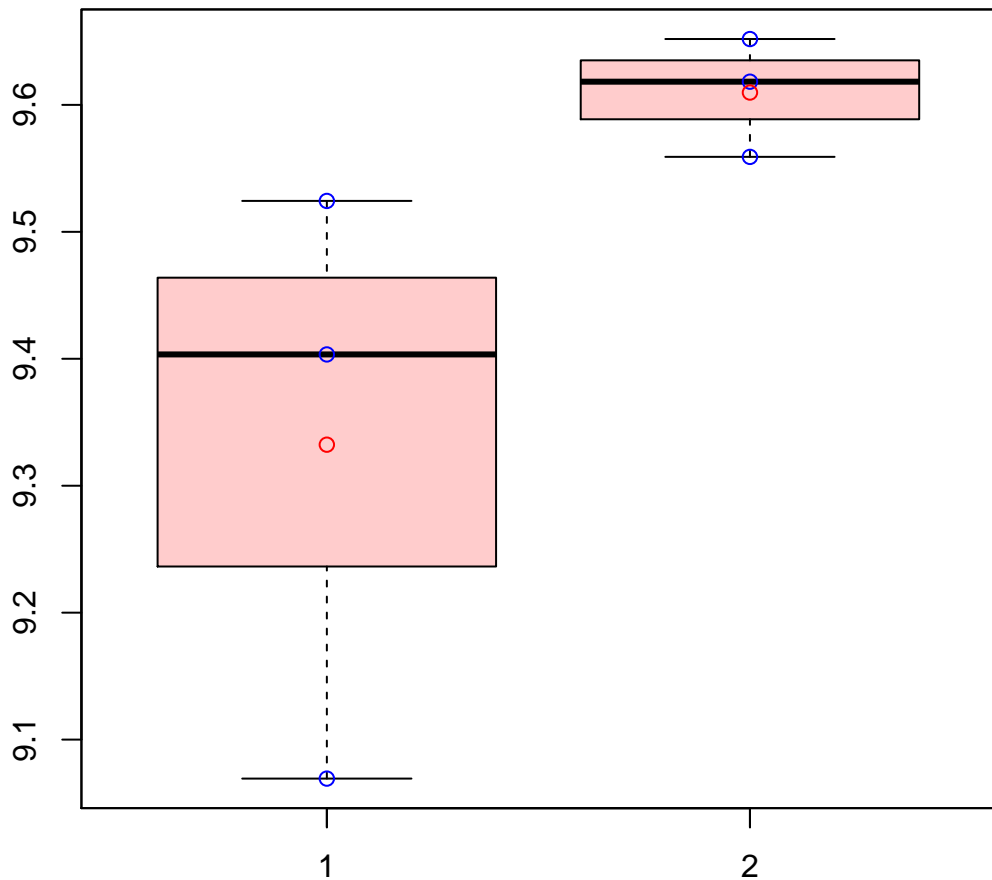

t-Test: p-value = 0.17

# M8BDP7|M8BDP7\_AEGTA

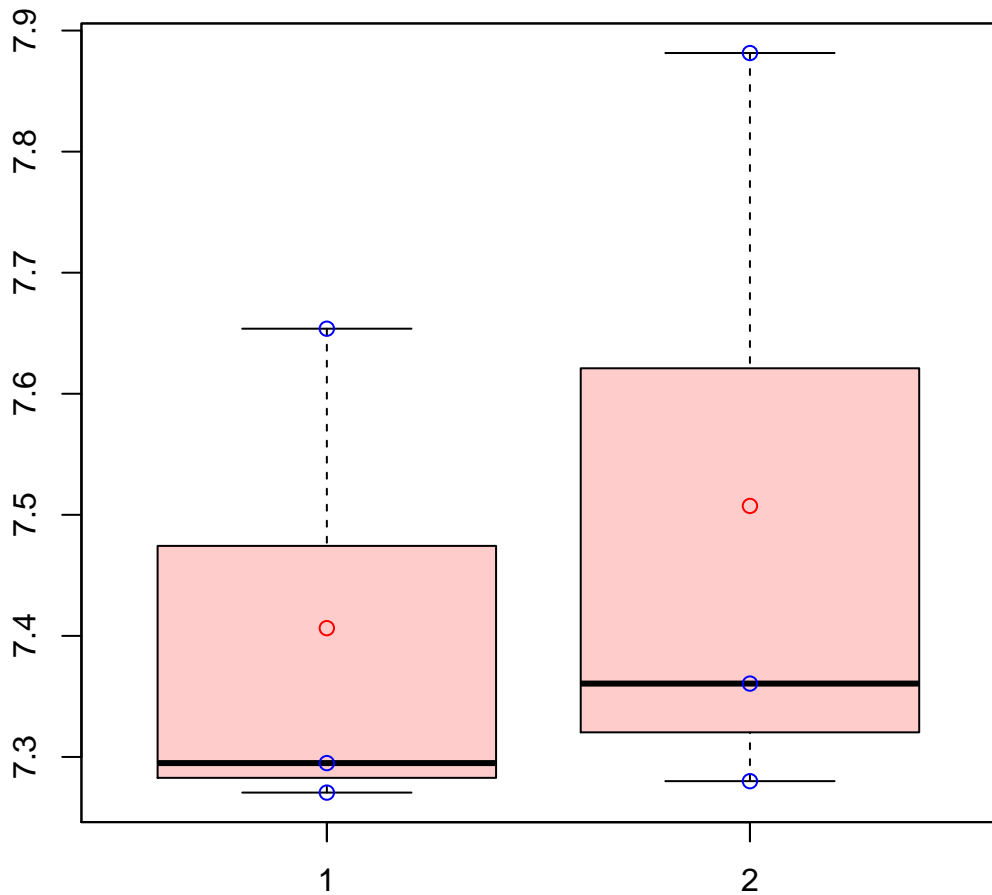

t-Test: p-value = 0.68

# M8BF88|M8BF88\_AEGTA

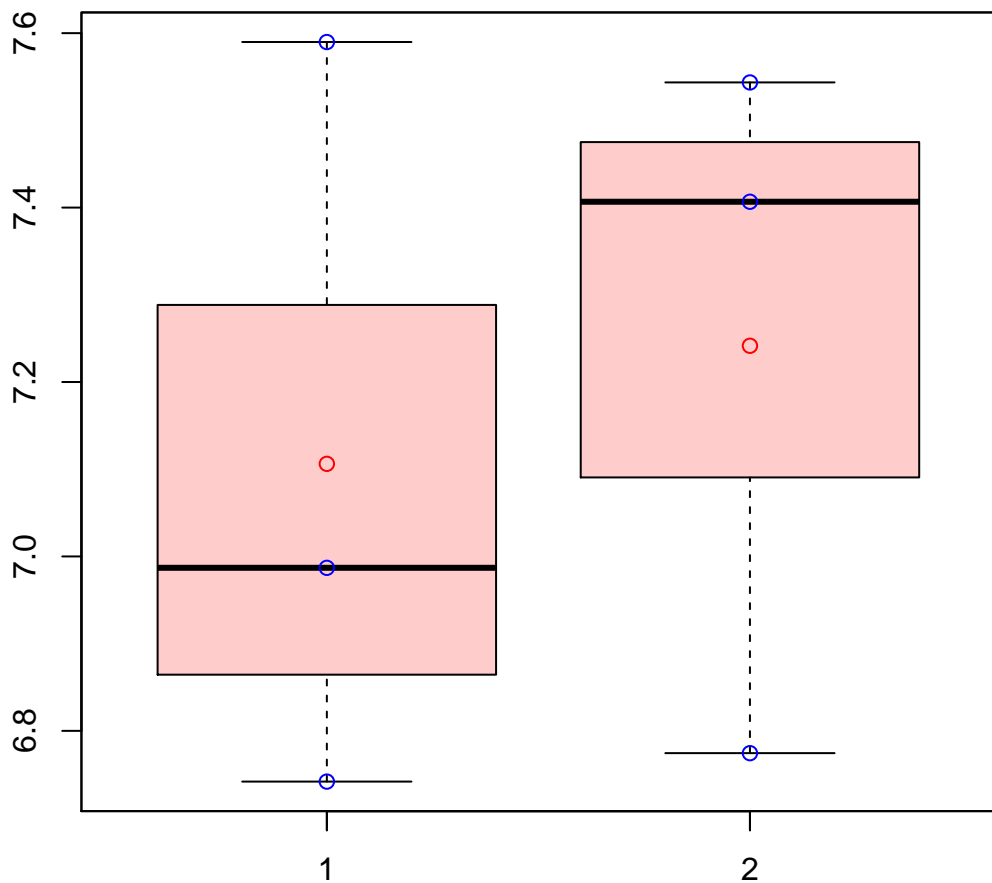

t-Test: p-value = 0.72

# M8BFB9|M8BFB9\_AEGTA

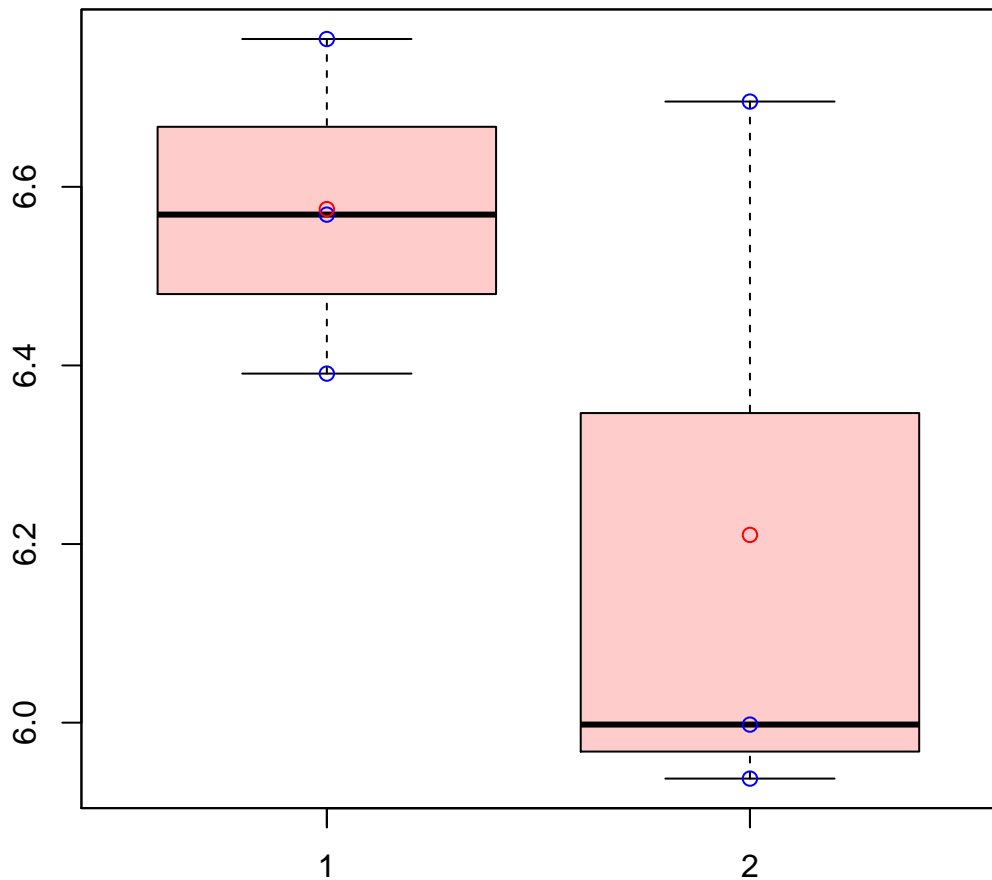

t-Test: p-value = 0.27

# M8BFU2|M8BFU2\_AEGTA

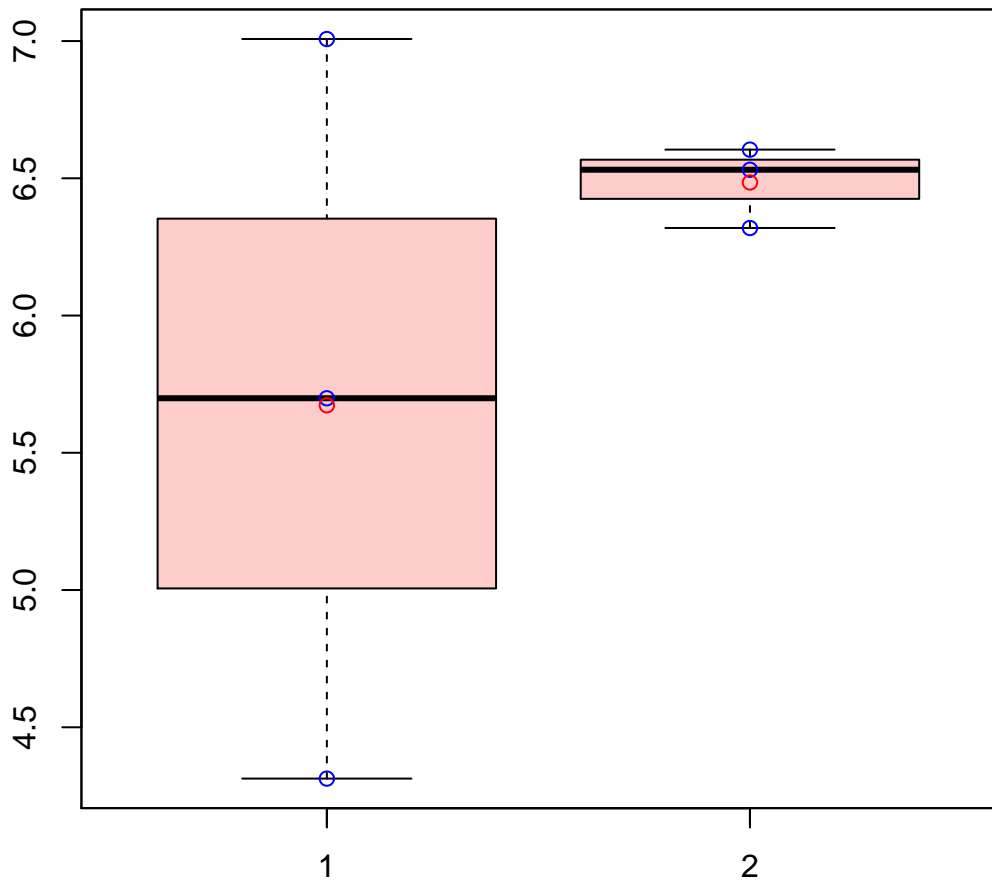

t-Test: p-value = 0.41

# M8BG98|M8BG98\_AEGTA

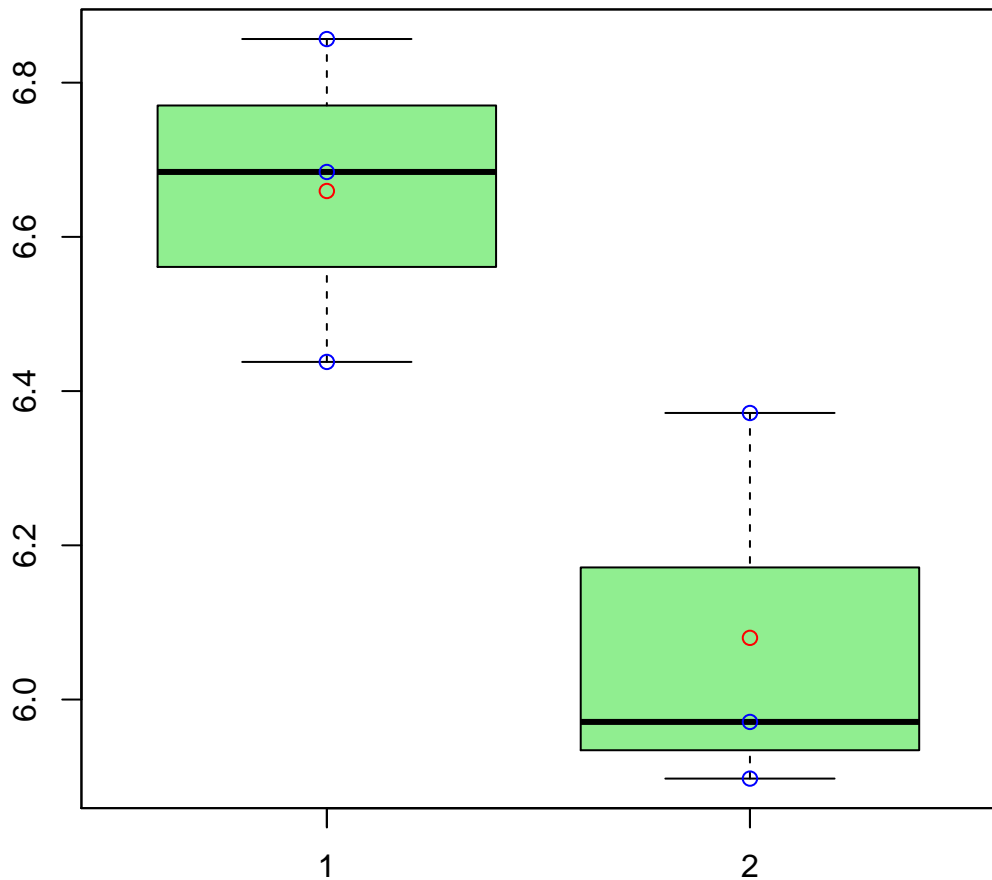

t-Test: p-value = 0.04



# M8BGA1|M8BGA1\_AEGTA

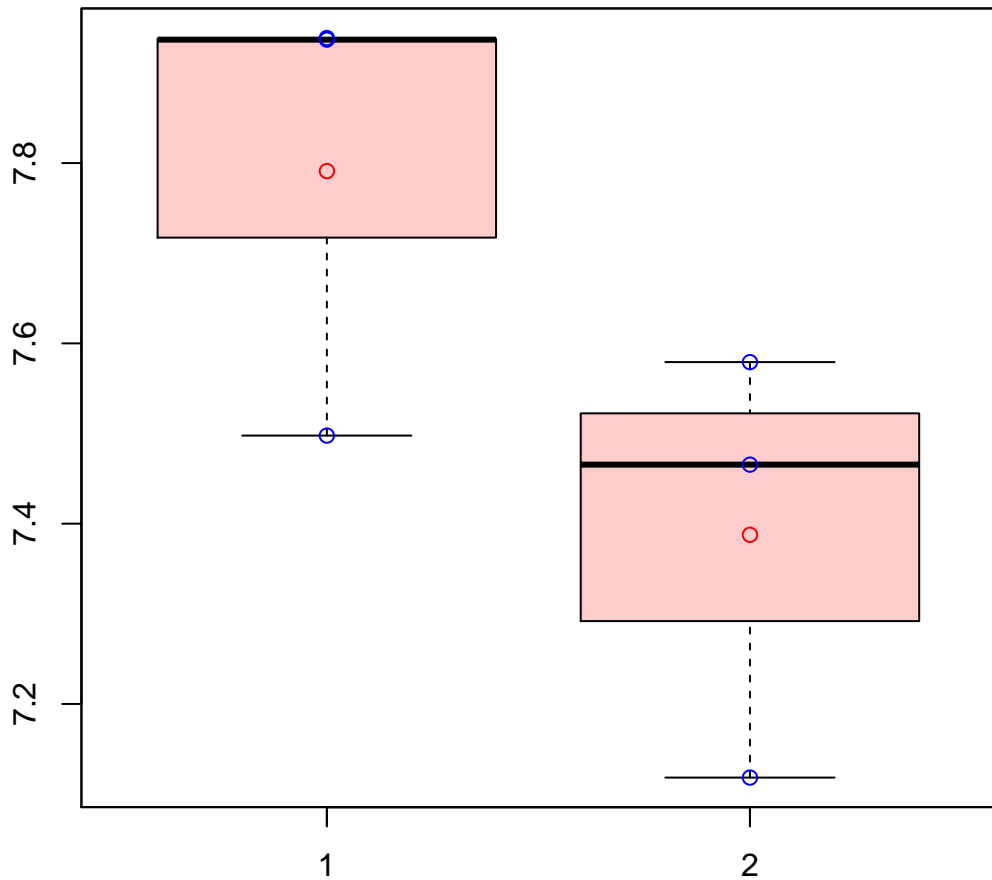

t-Test: p-value = 0.12

# M8BHN0|M8BHN0\_AEGTA

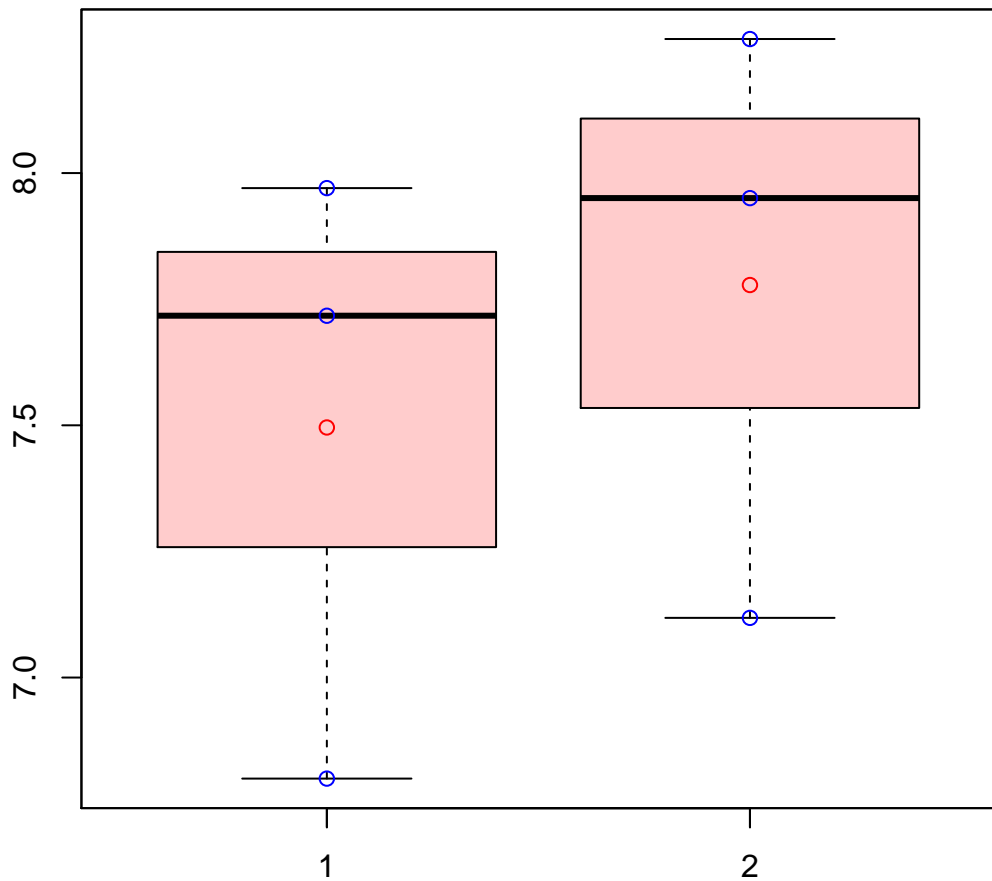

t-Test: p-value = 0.6

# M8BHW0|M8BHW0\_AEGTA

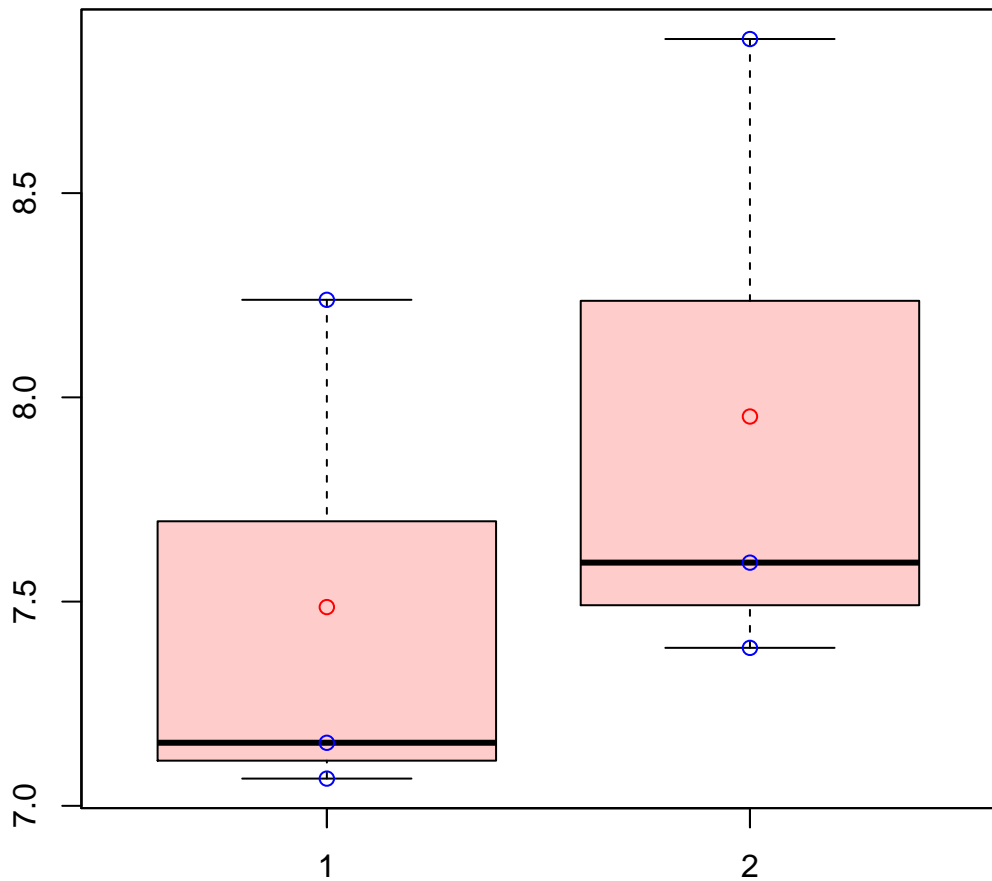

t-Test: p-value = 0.48

# M8BI22|M8BI22\_AEGTA

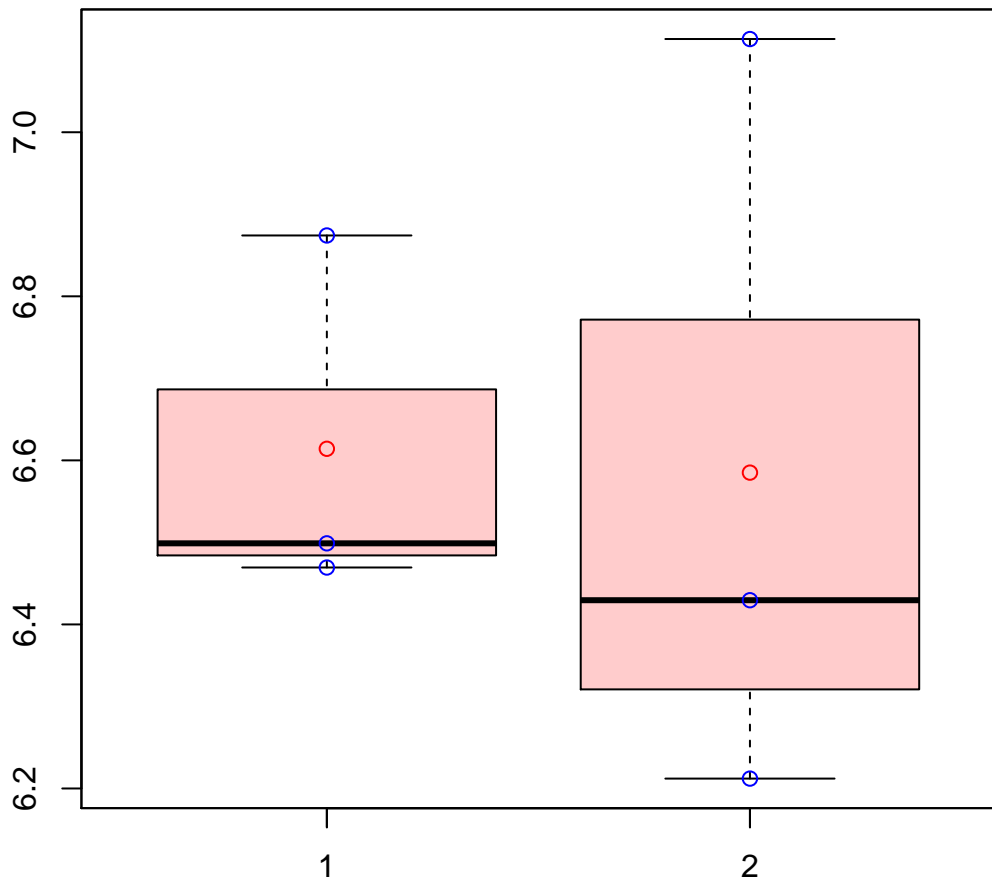

t-Test: p-value = 0.93

# M8BI90|M8BI90\_AEGTA

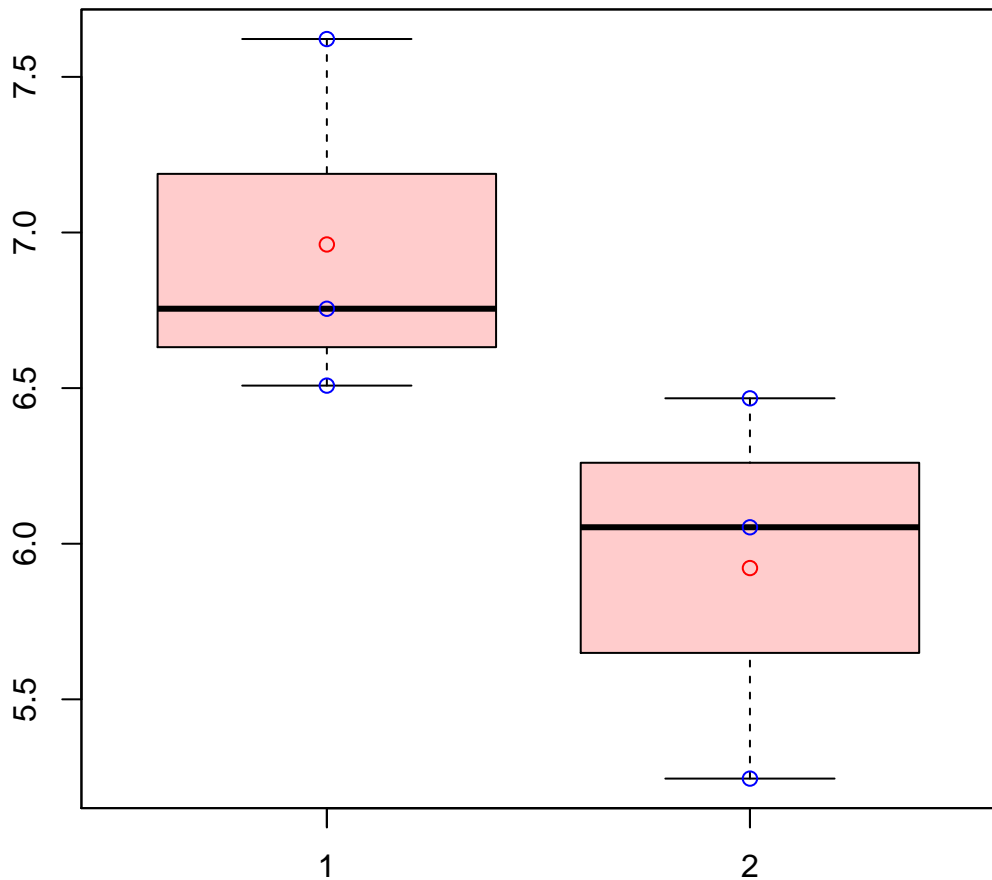

t-Test: p-value = 0.1

# M8BJ57|M8BJ57\_AEGTA

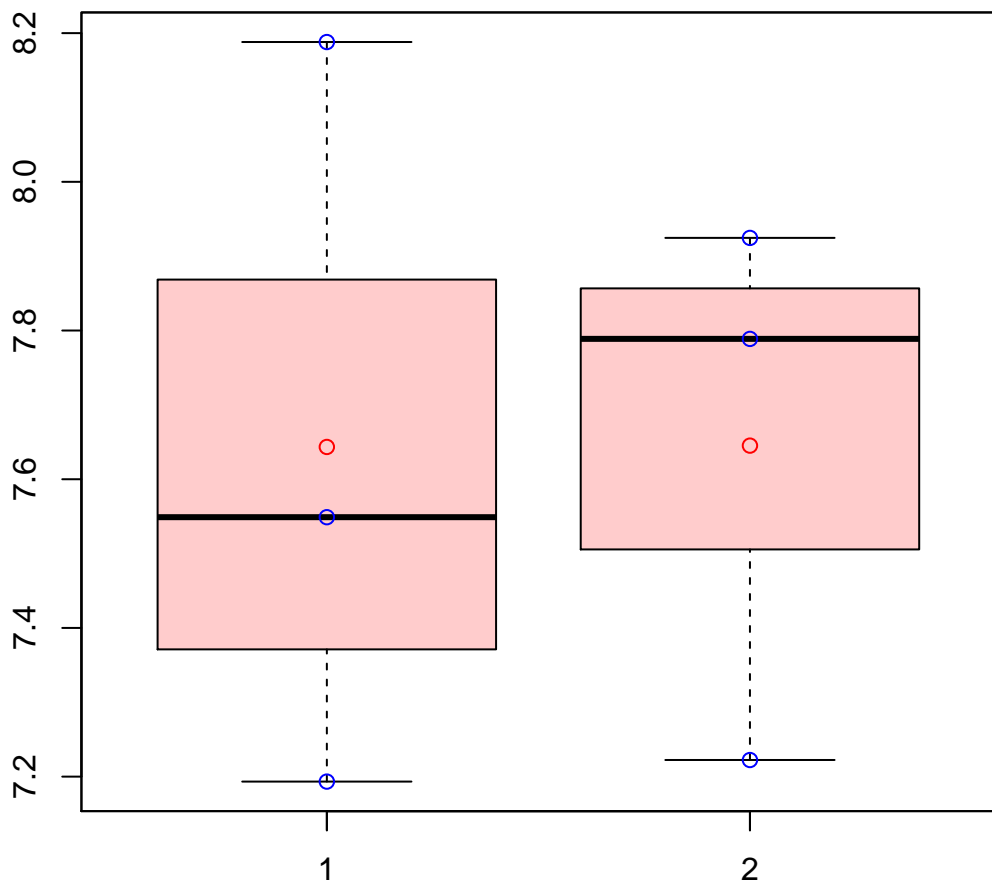

t-Test: p-value = 1

# M8BKC7|M8BKC7\_AEGTA

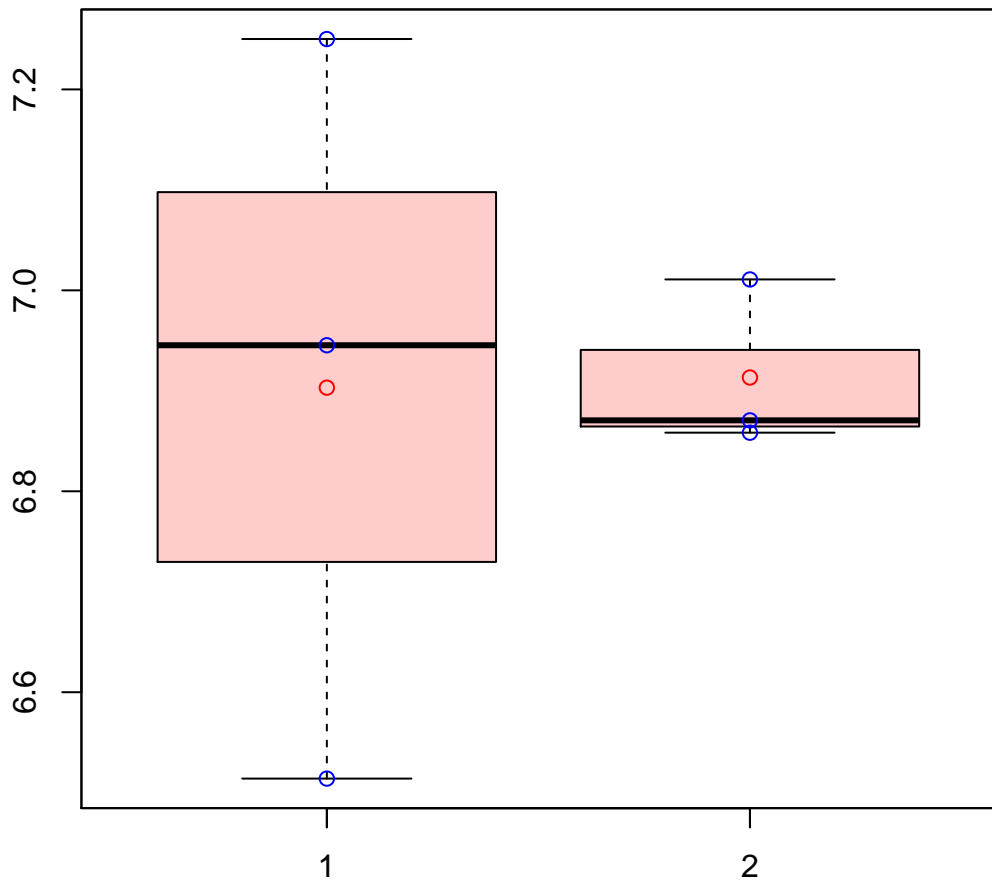

t-Test: p-value = 0.97

# M8BLA5|M8BLA5\_AEGTA

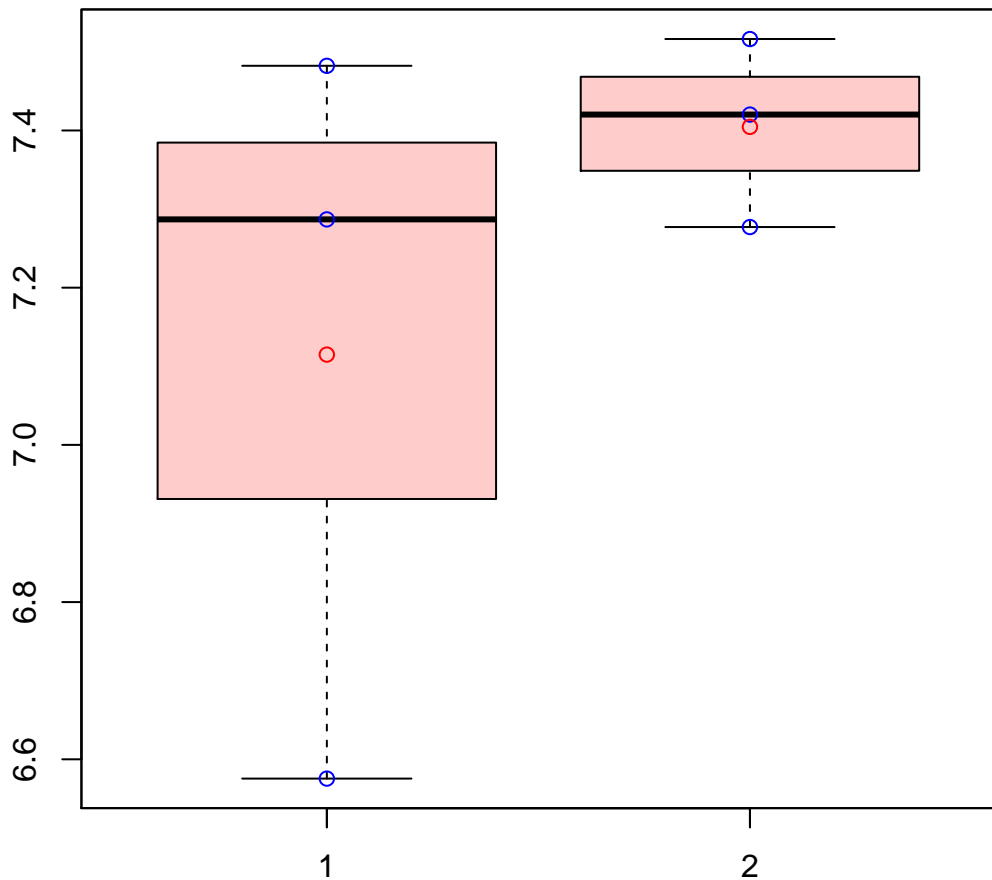

t-Test: p-value = 0.4



# M8BLB8|M8BLB8\_AEGTA

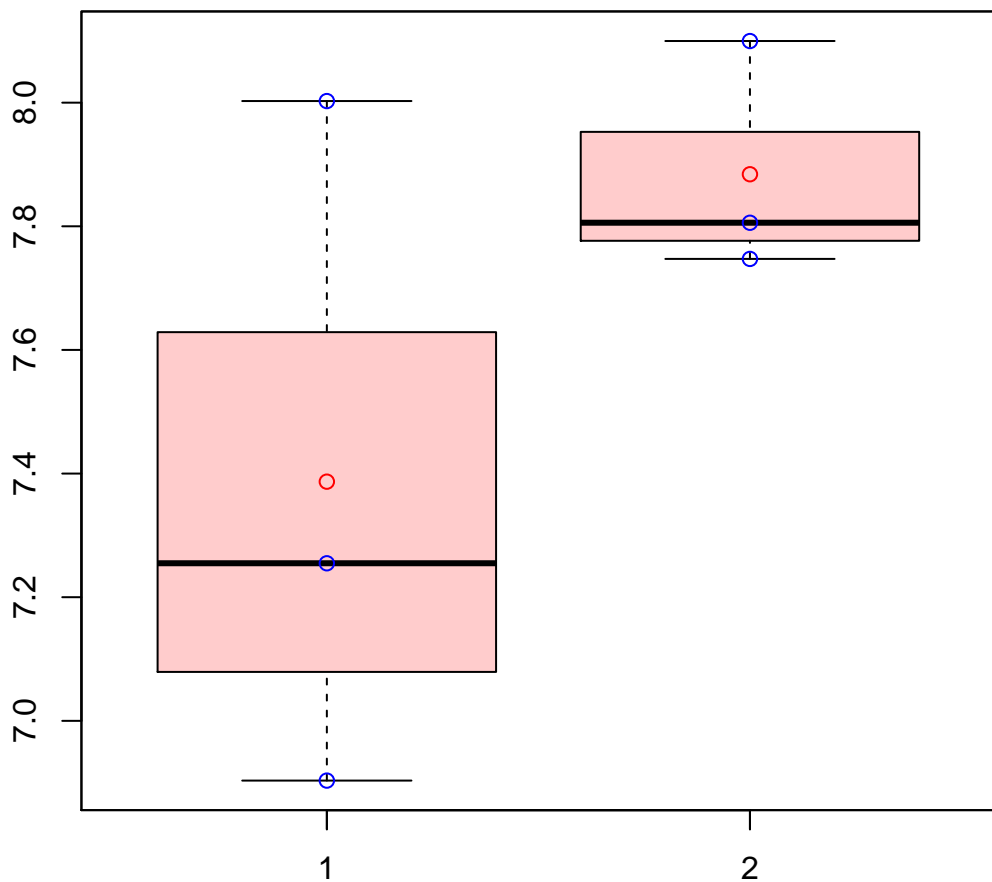

t-Test: p-value = 0.26

# M8BLD4|M8BLD4\_AEGTA

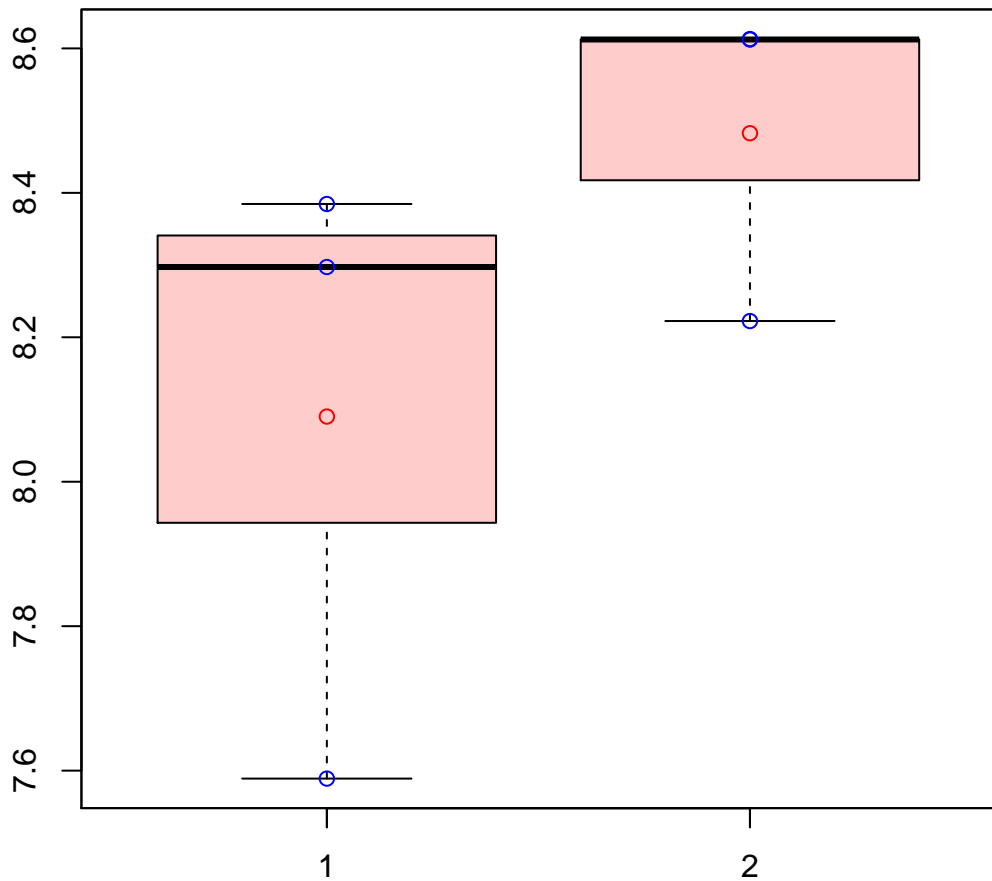

t-Test: p-value = 0.26

# M8BLH7|M8BLH7\_AEGTA

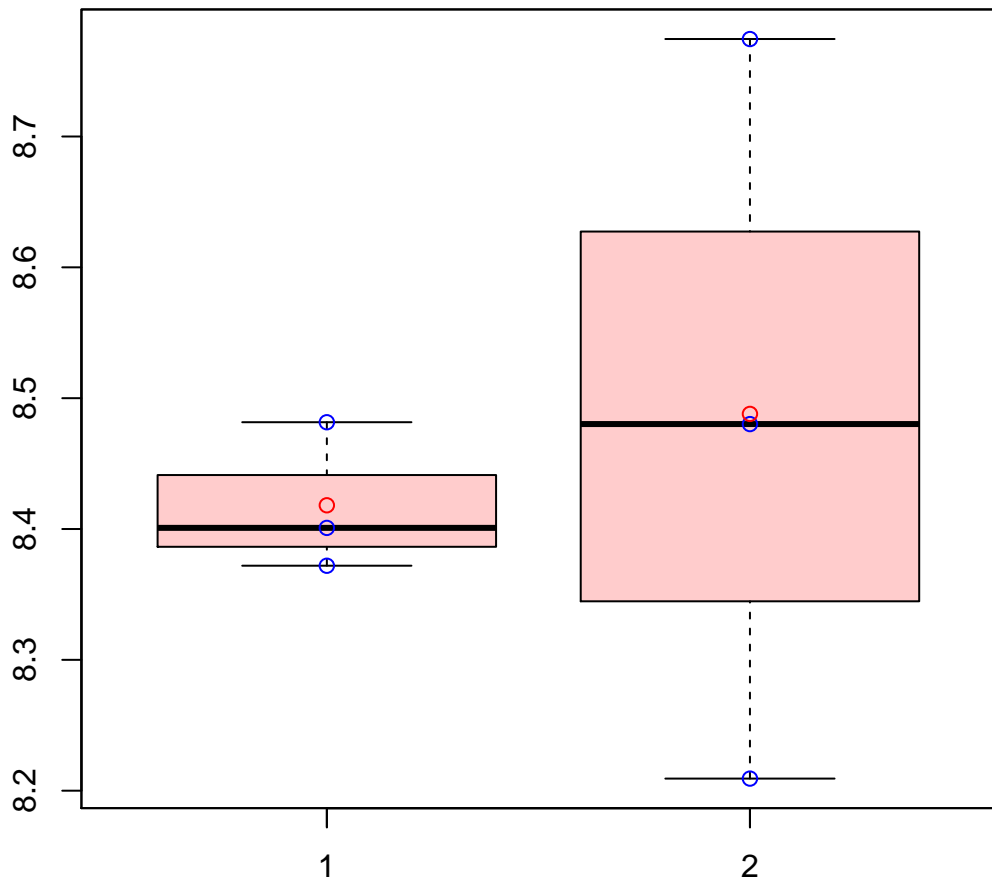

t-Test: p-value = 0.71

# M8BLL3|M8BLL3\_AEGTA

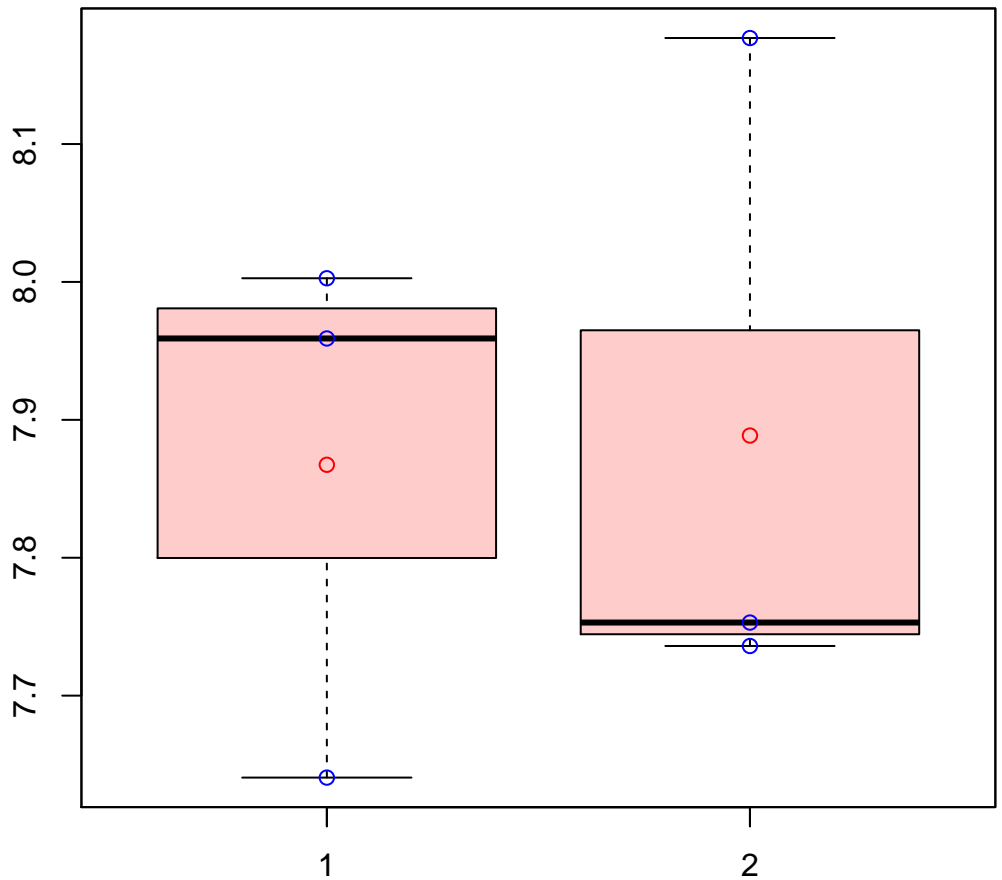

t-Test: p-value = 0.91

# M8BLP5|M8BLP5\_AEGTA

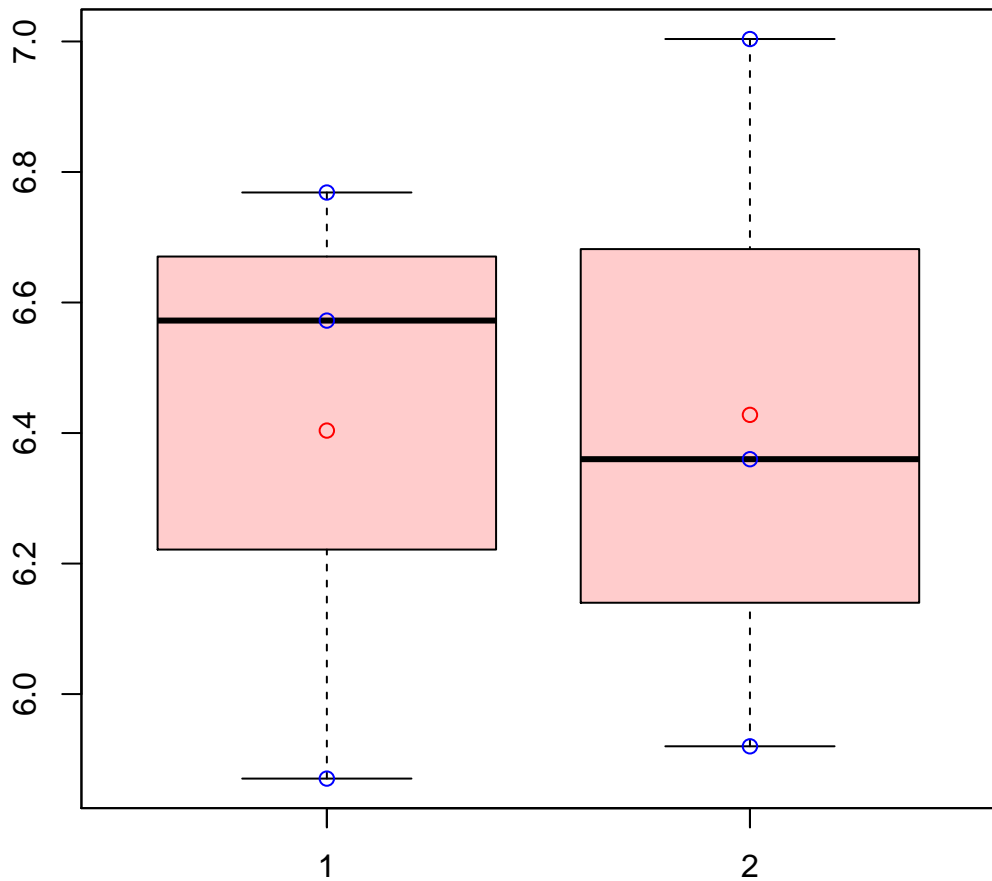

t-Test: p-value = 0.96

# M8BLV3|M8BLV3\_AEGTA

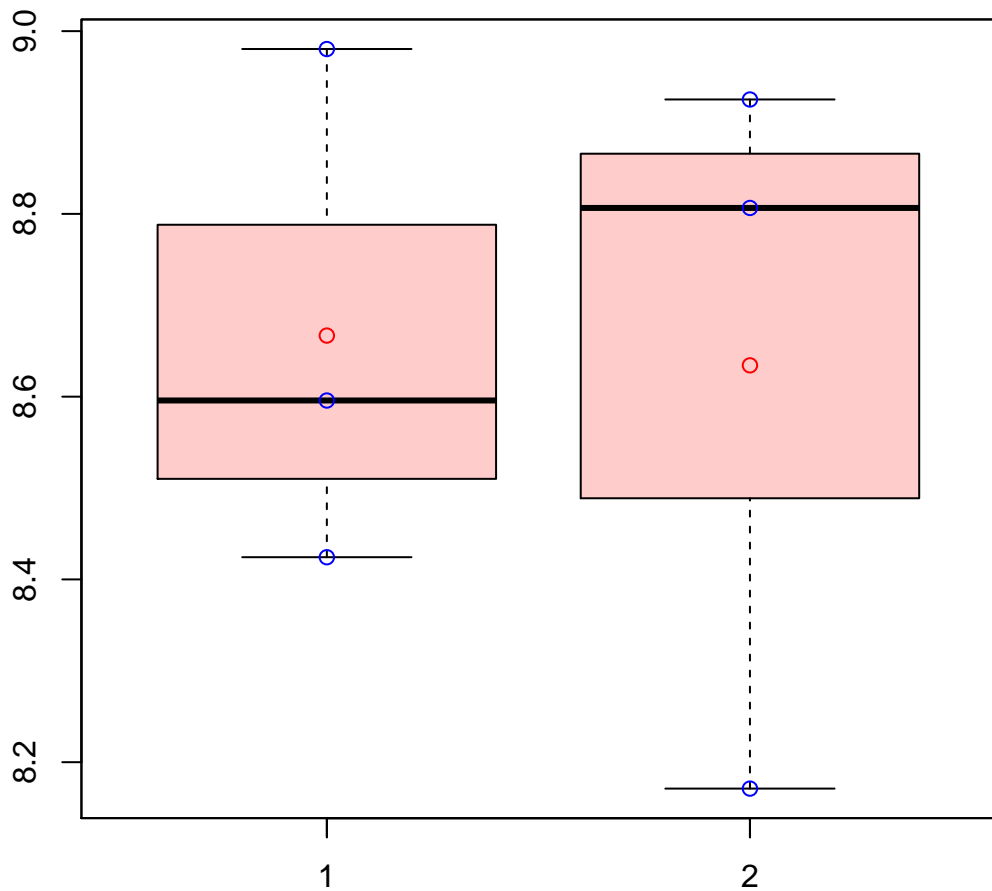

t-Test: p-value = 0.92

# M8BLX2|M8BLX2\_AEGTA

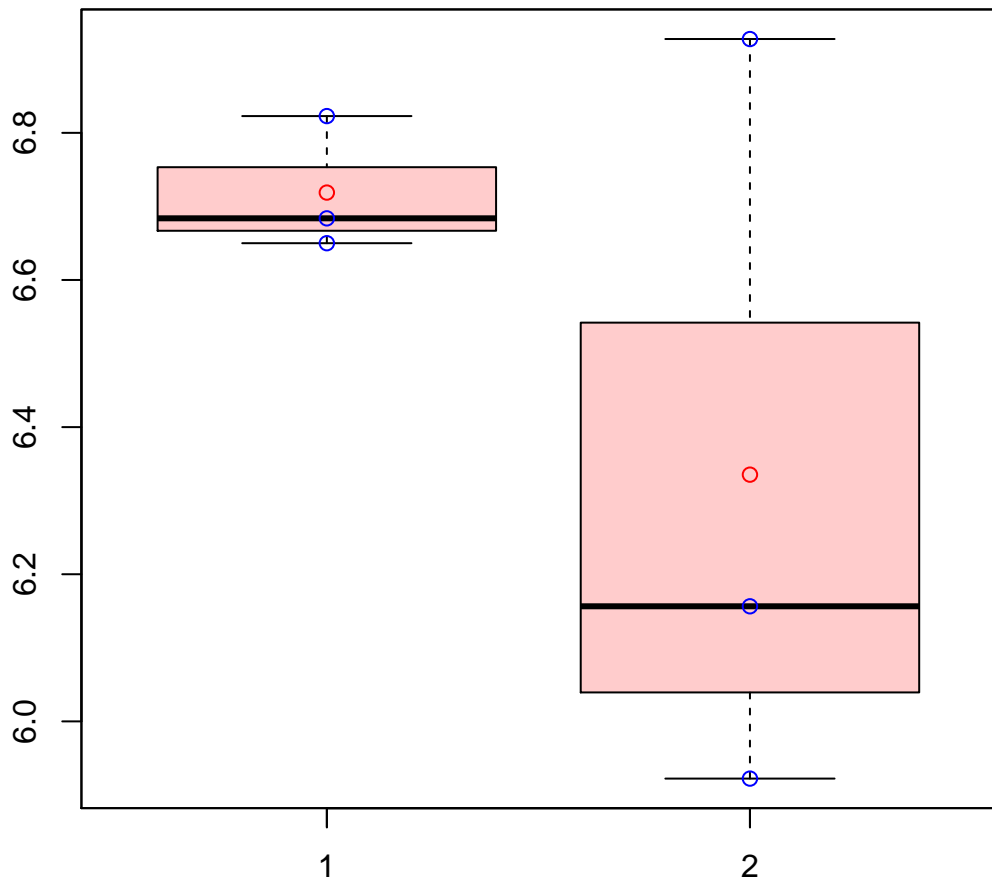

t-Test: p-value = 0.33

# M8BM12|M8BM12\_AEGTA

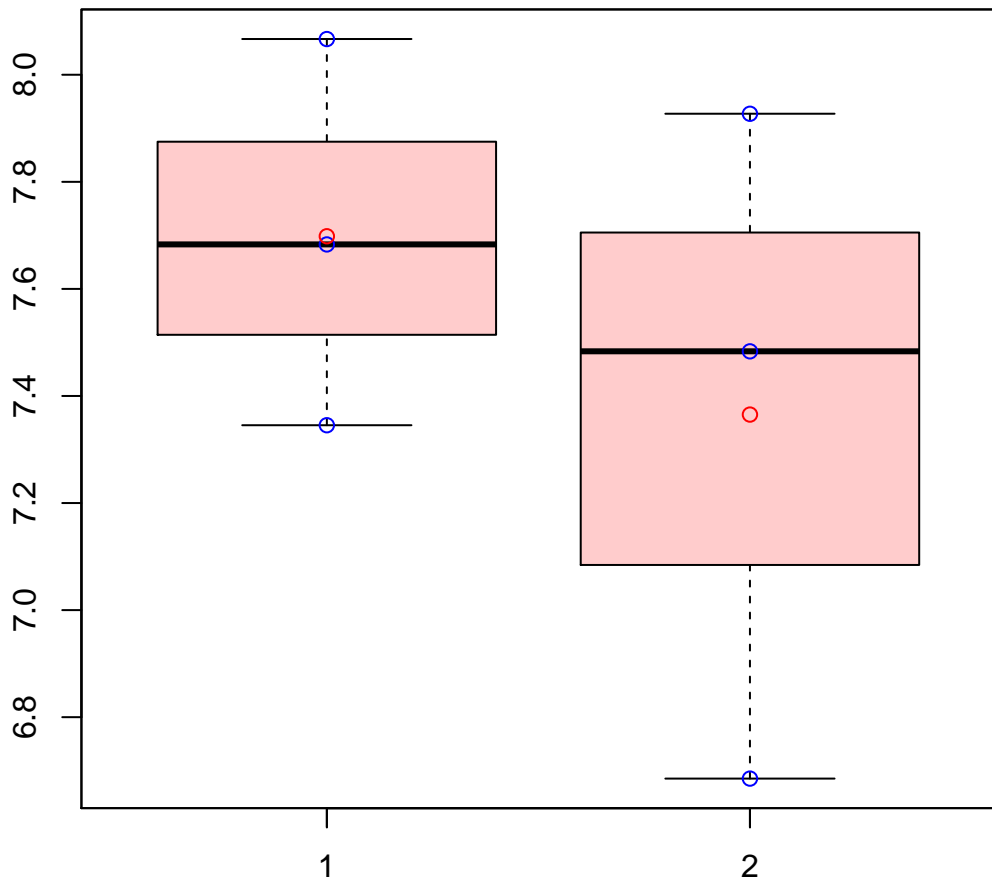

t-Test: p-value = 0.48



# M8BMC6|M8BMC6\_AEGTA

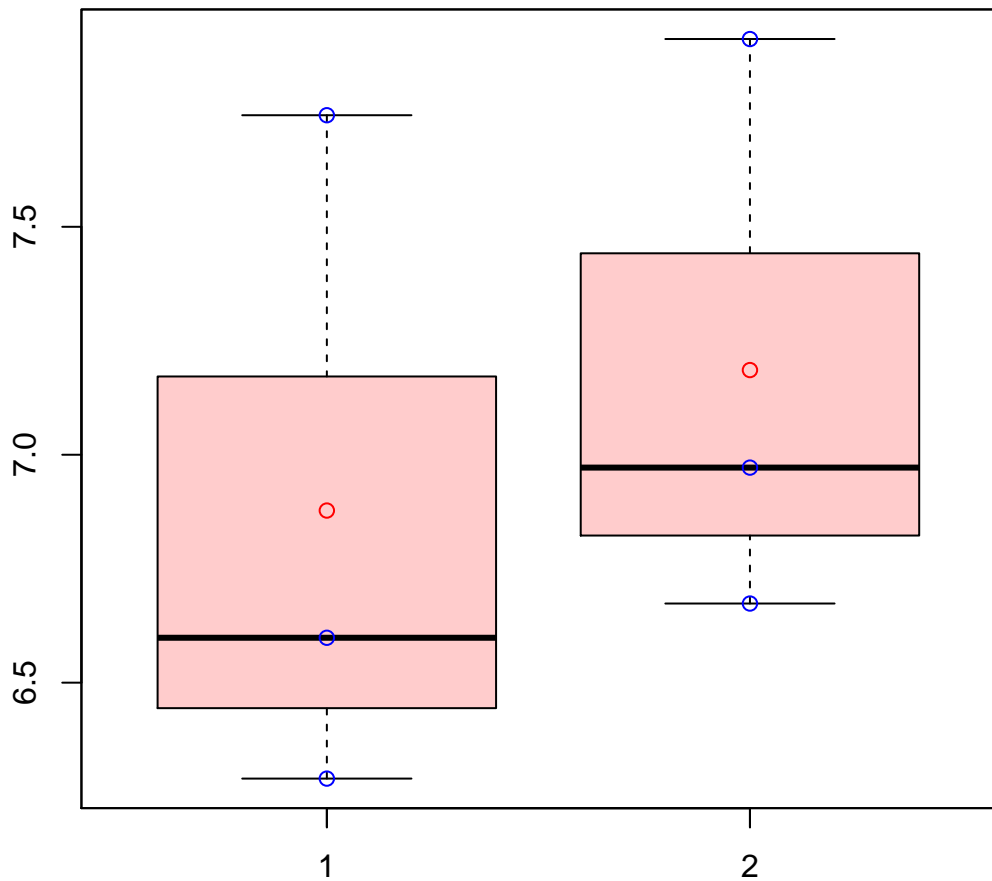

t-Test: p-value = 0.62

# M8BN03|M8BN03\_AEGTA

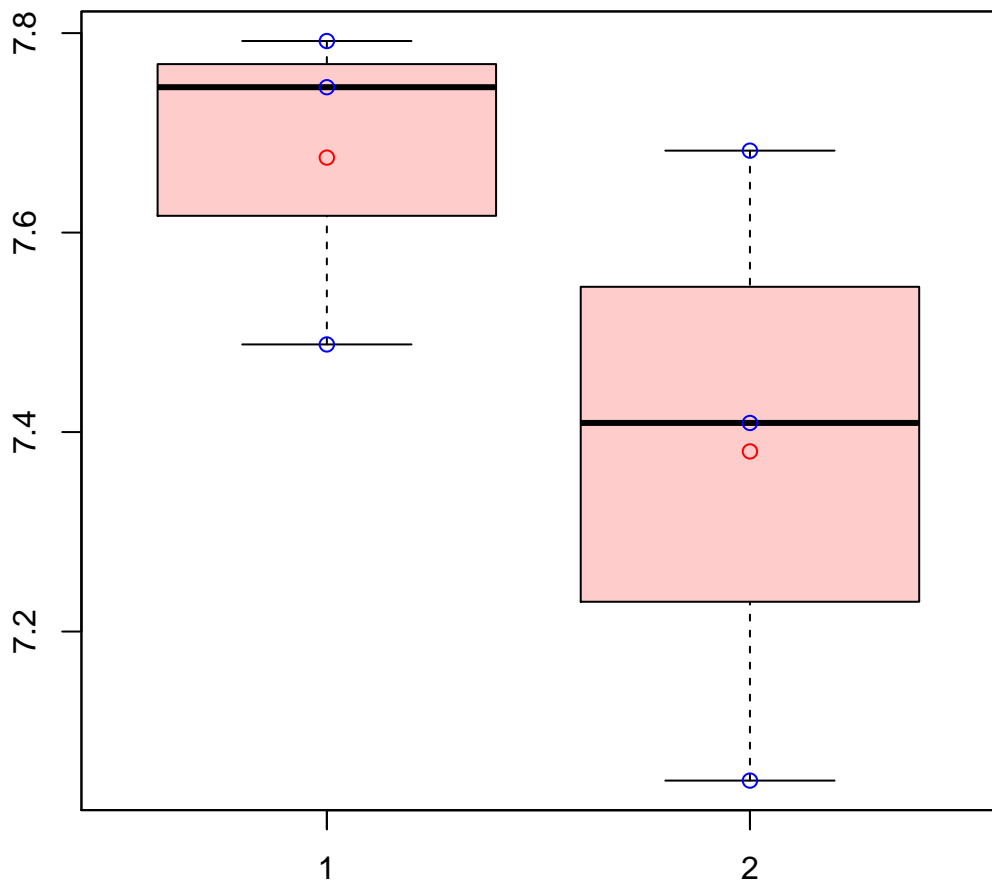

t-Test: p-value = 0.25

# M8BNA3|M8BNA3\_AEGTA

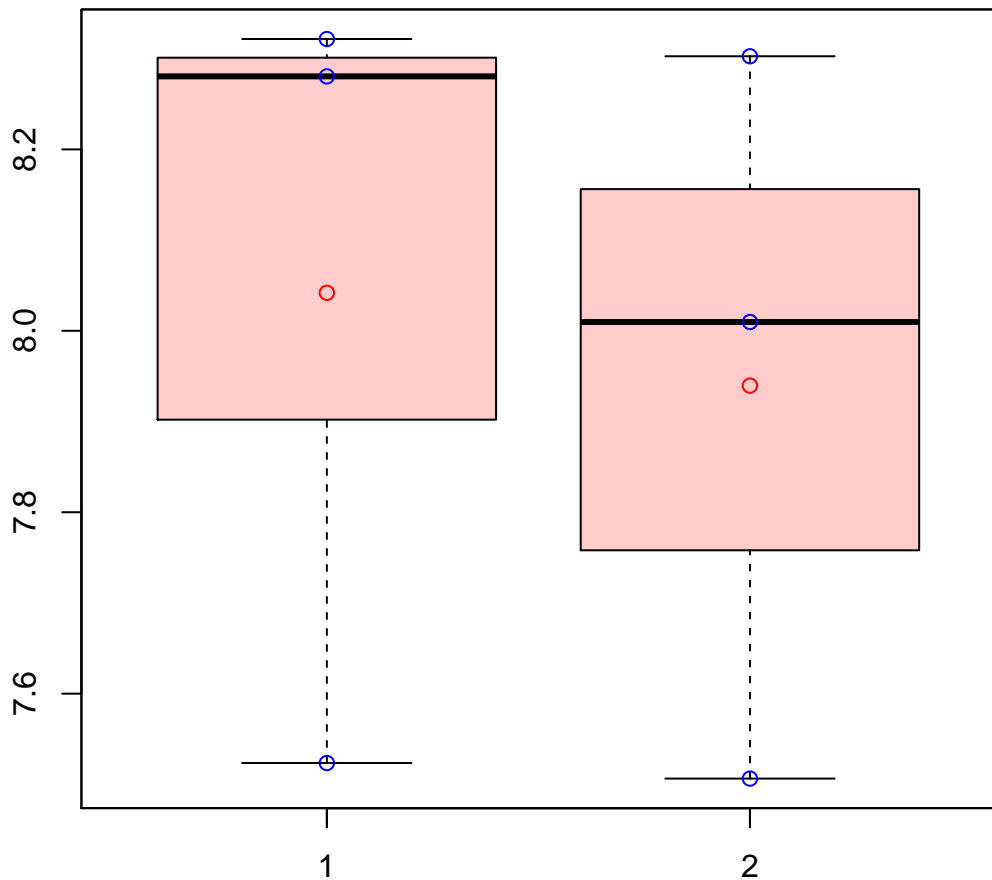

t-Test: p-value = 0.78

# M8BNT6|M8BNT6\_AEGTA

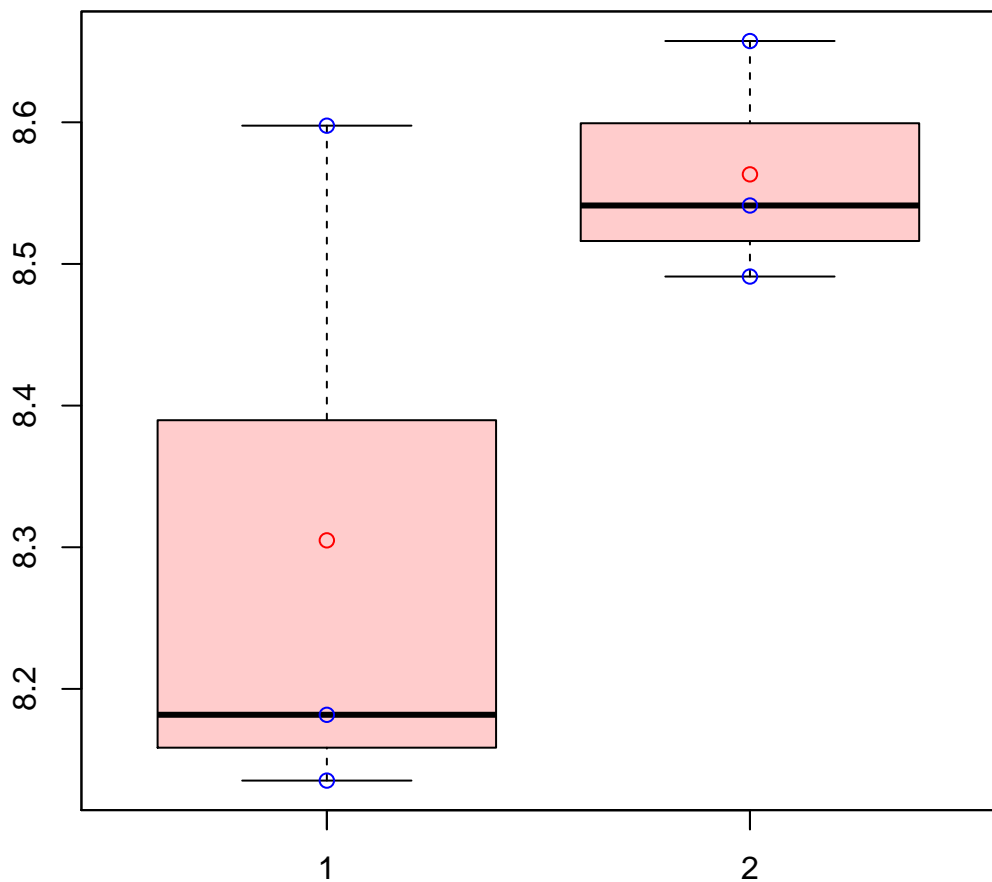

t-Test: p-value = 0.21

# M8BP49|M8BP49\_AEGTA

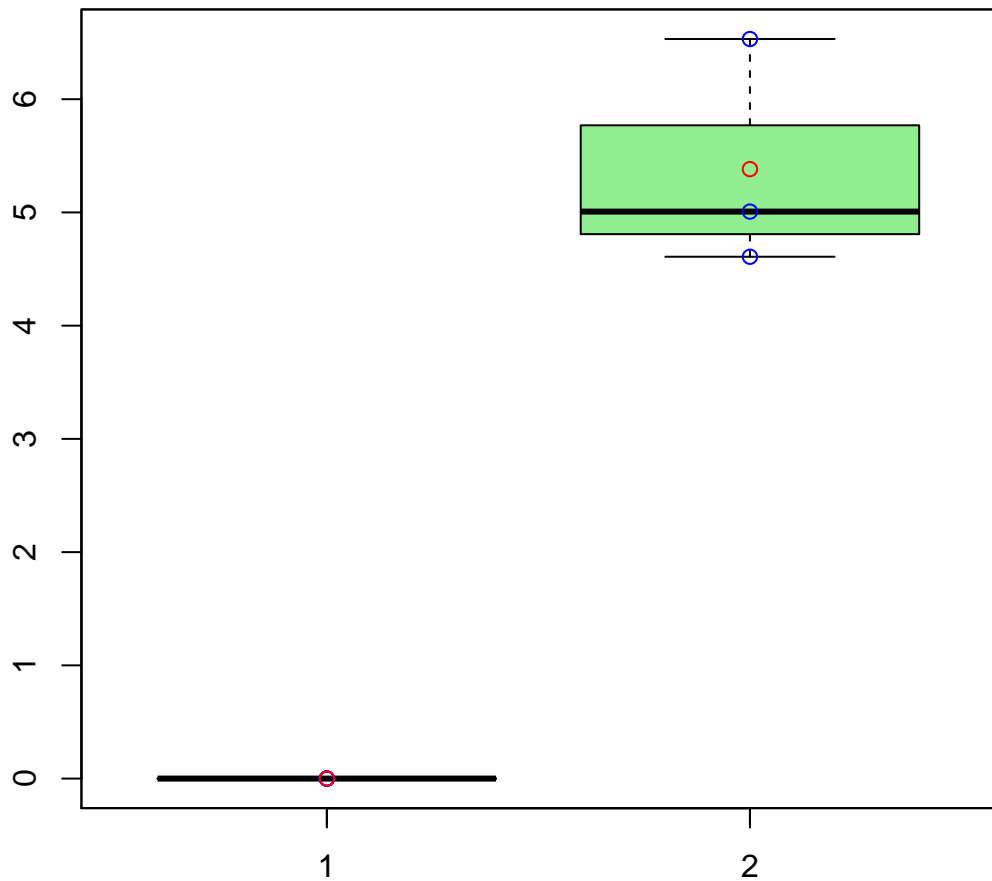

t-Test: p-value = 0.01

# M8BPE2|M8BPE2\_AEGTA

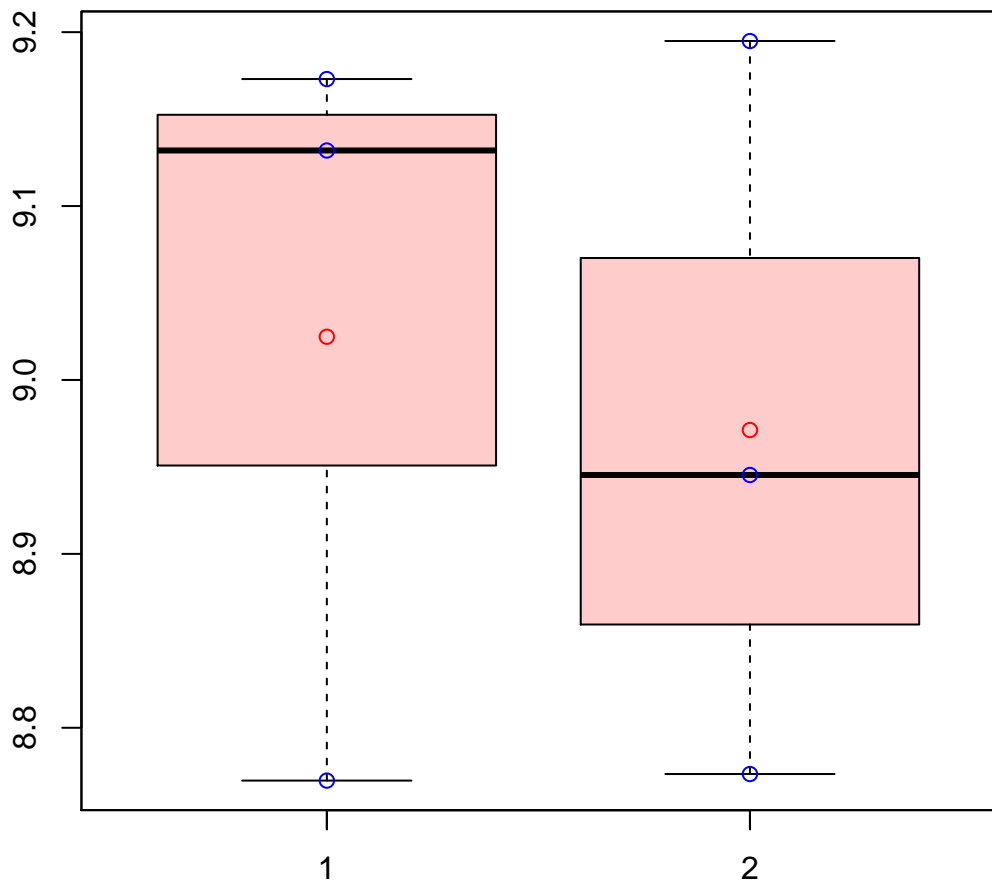

t-Test: p-value = 0.78

# M8BQ55|M8BQ55\_AEGTA

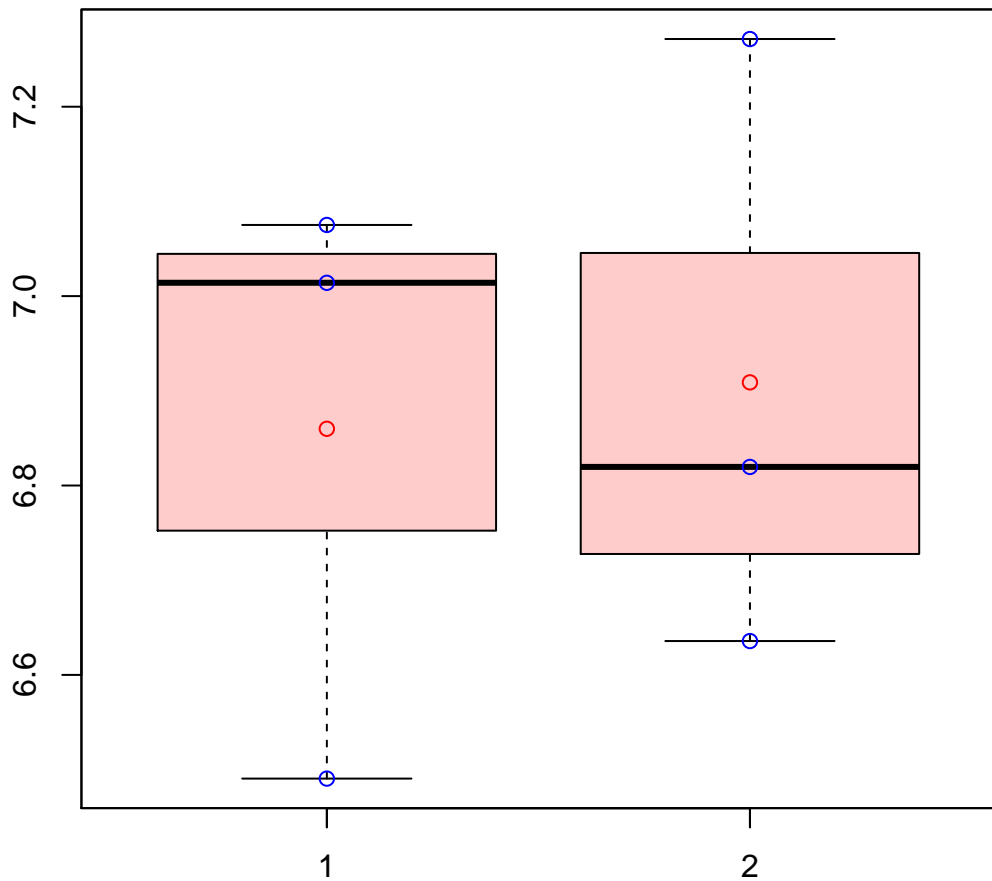

t-Test: p-value = 0.86

# M8BR94|M8BR94\_AEGTA

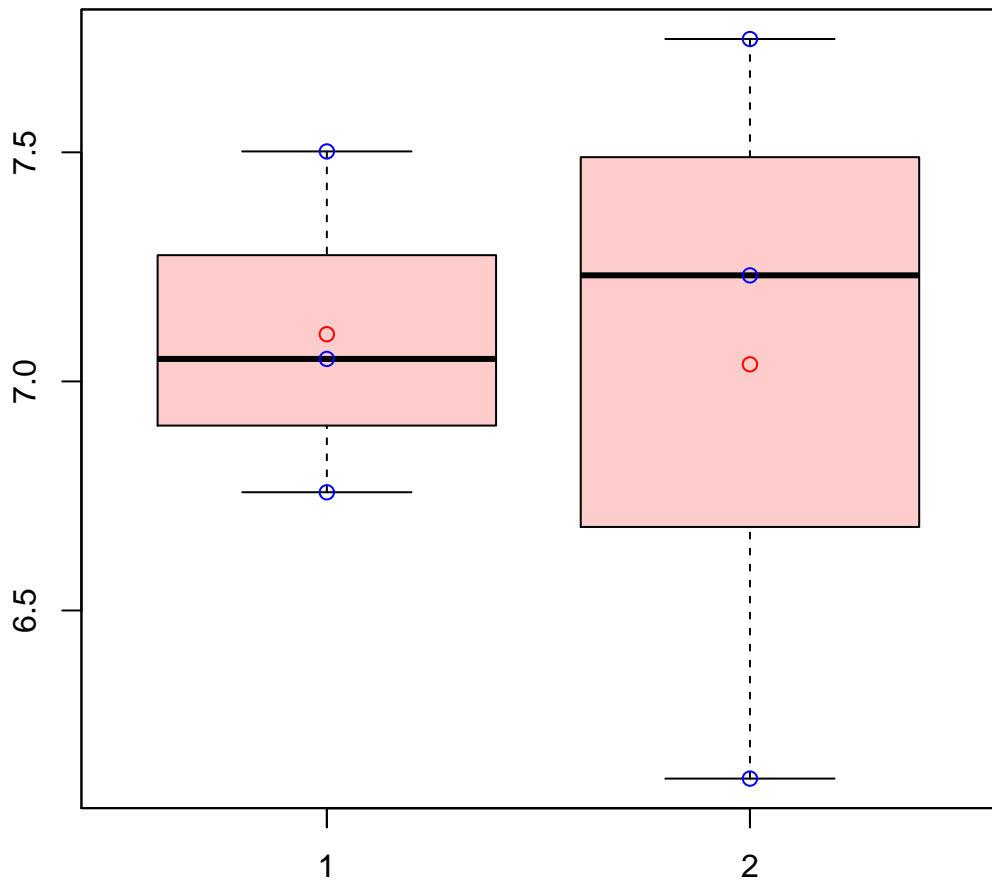

t-Test: p-value = 0.91



# M8BRL0|M8BRL0\_AEGTA

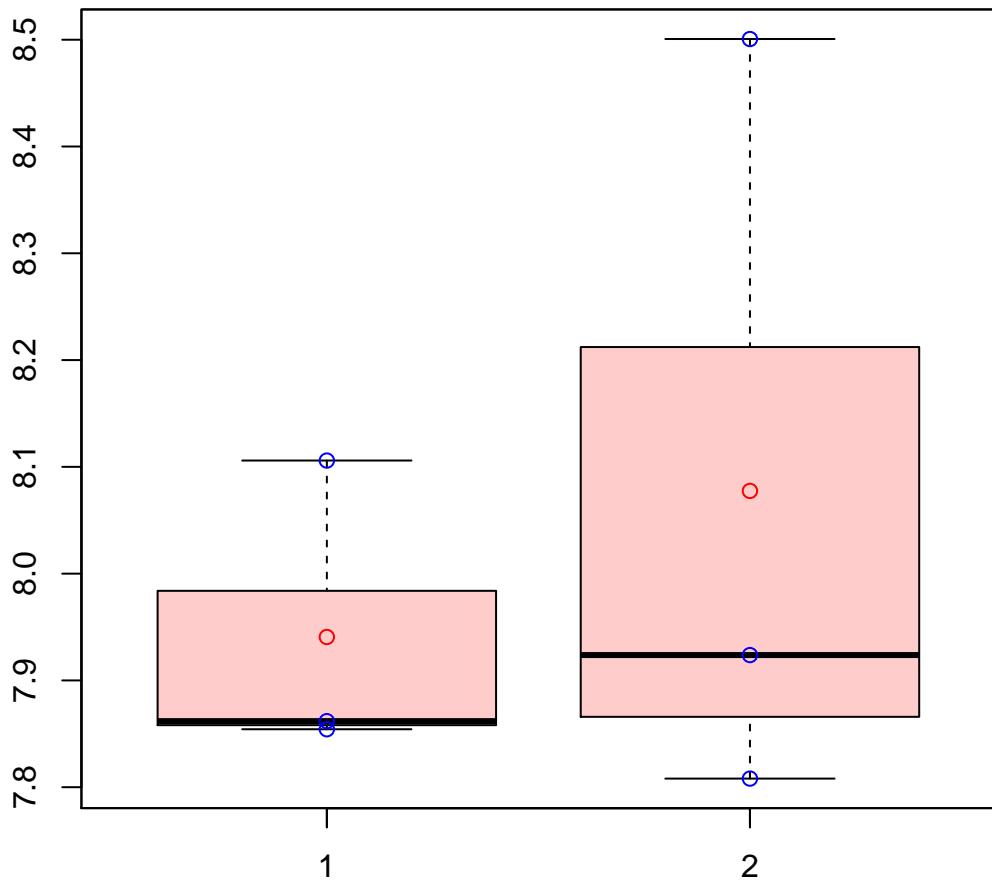

# M8BRP5|M8BRP5\_AEGTA

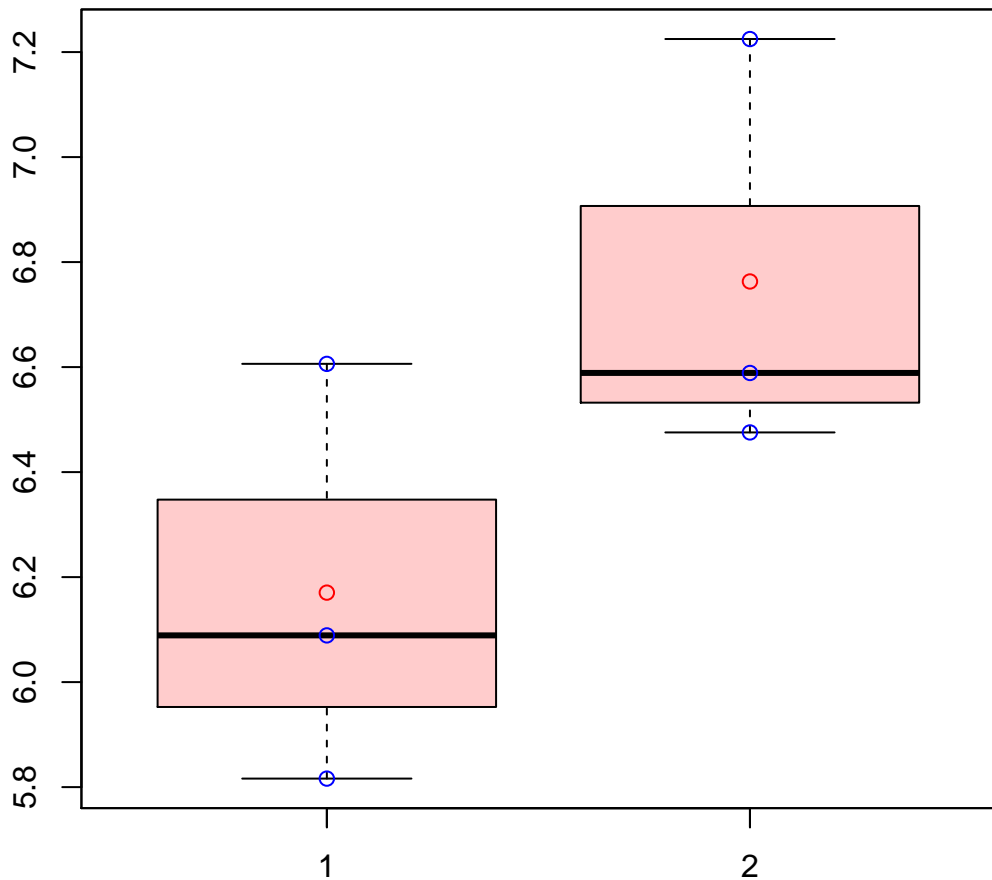

t-Test: p-value = 0.15

# M8BSG2|M8BSG2\_AEGTA

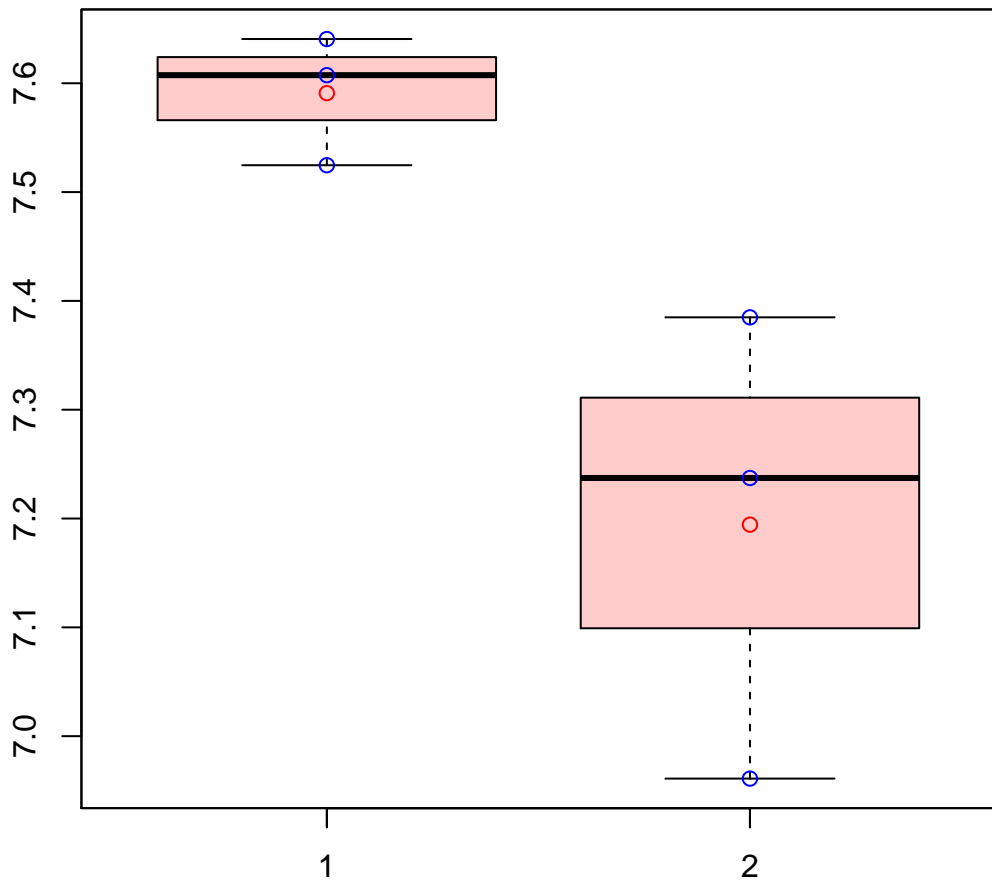

t-Test: p-value = 0.08

# M8BSL0|M8BSL0\_AEGTA

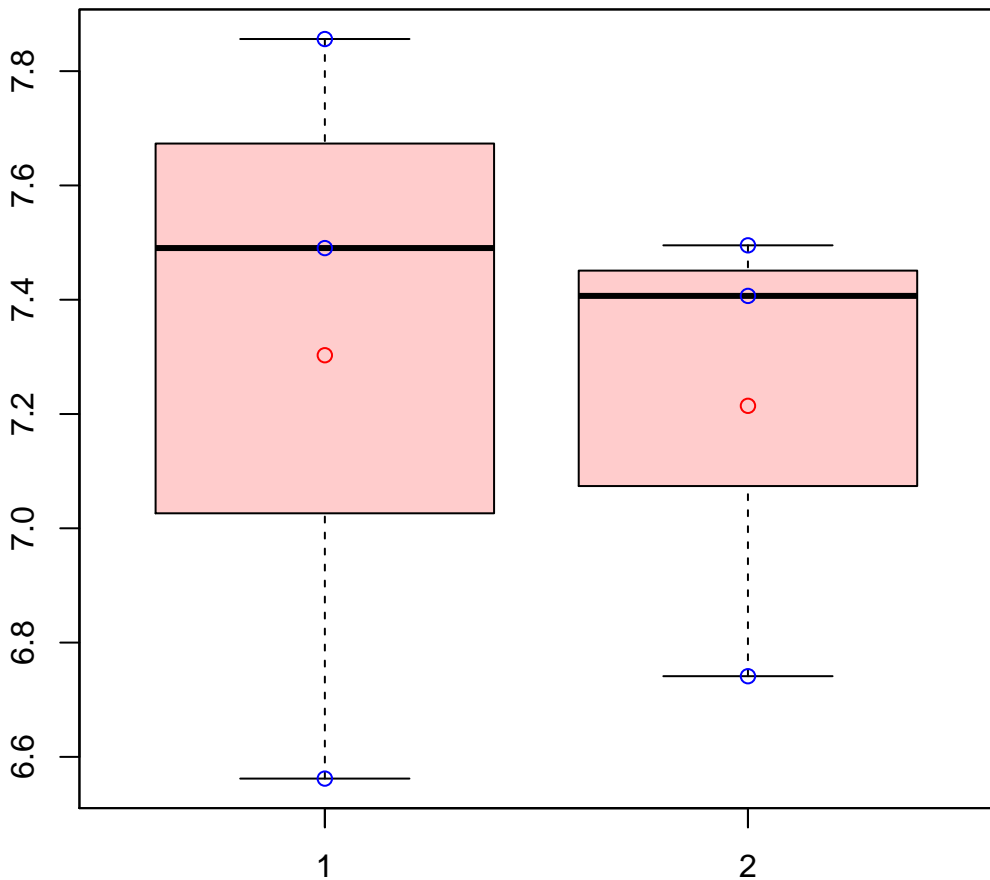

t-Test: p-value = 0.86

# M8BTQ8|M8BTQ8\_AEGTA

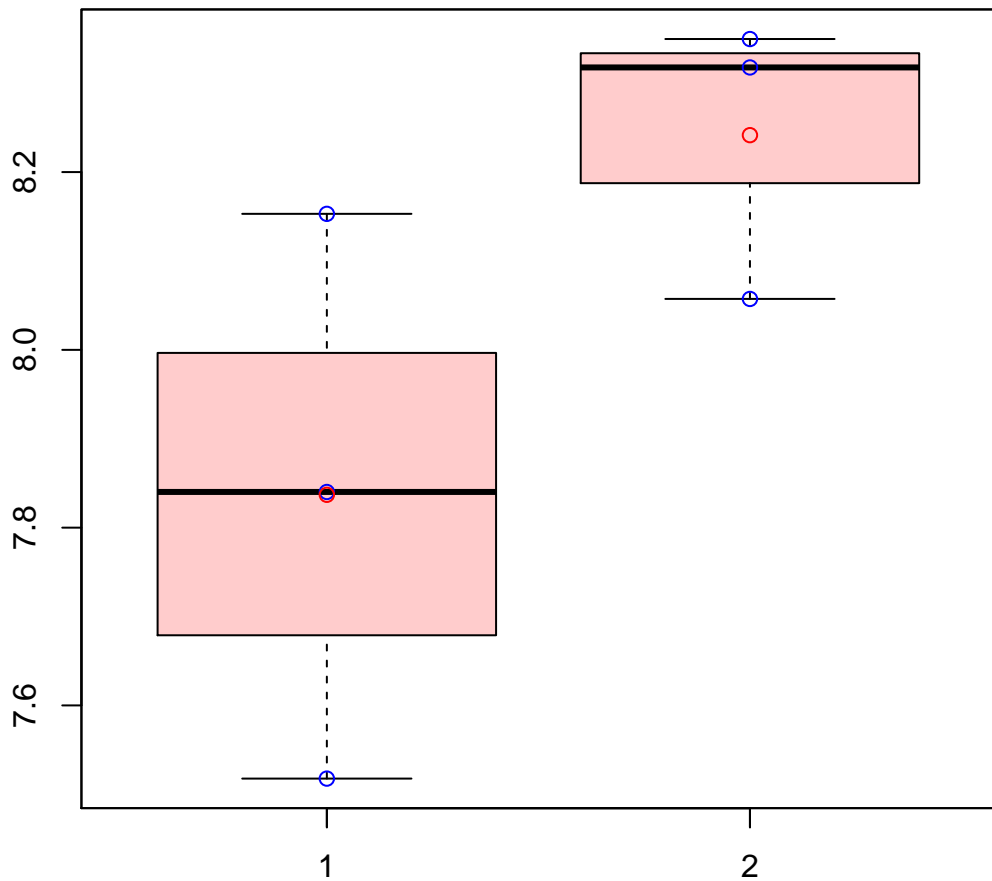

t-Test: p-value = 0.14

# M8BTR9|M8BTR9\_AEGTA

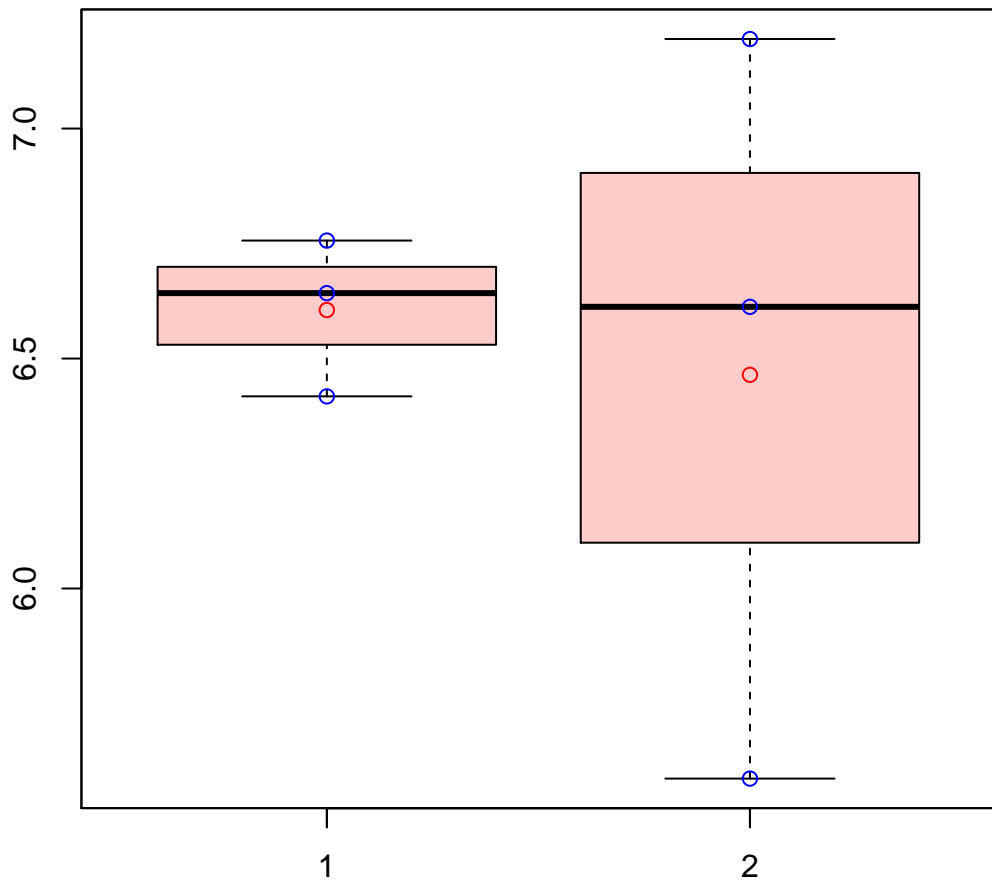

t-Test: p-value = 0.79

# M8BTS5|M8BTS5\_AEGTA

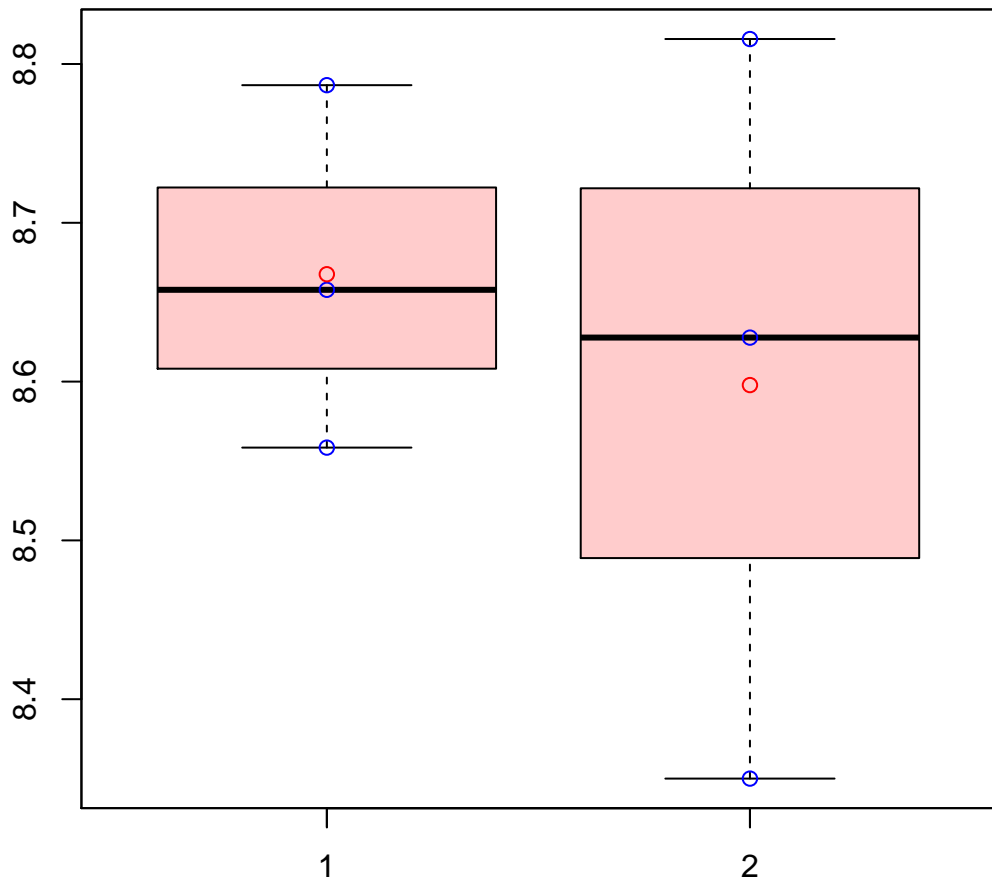

t-Test: p-value = 0.68

# M8BU46|M8BU46\_AEGTA

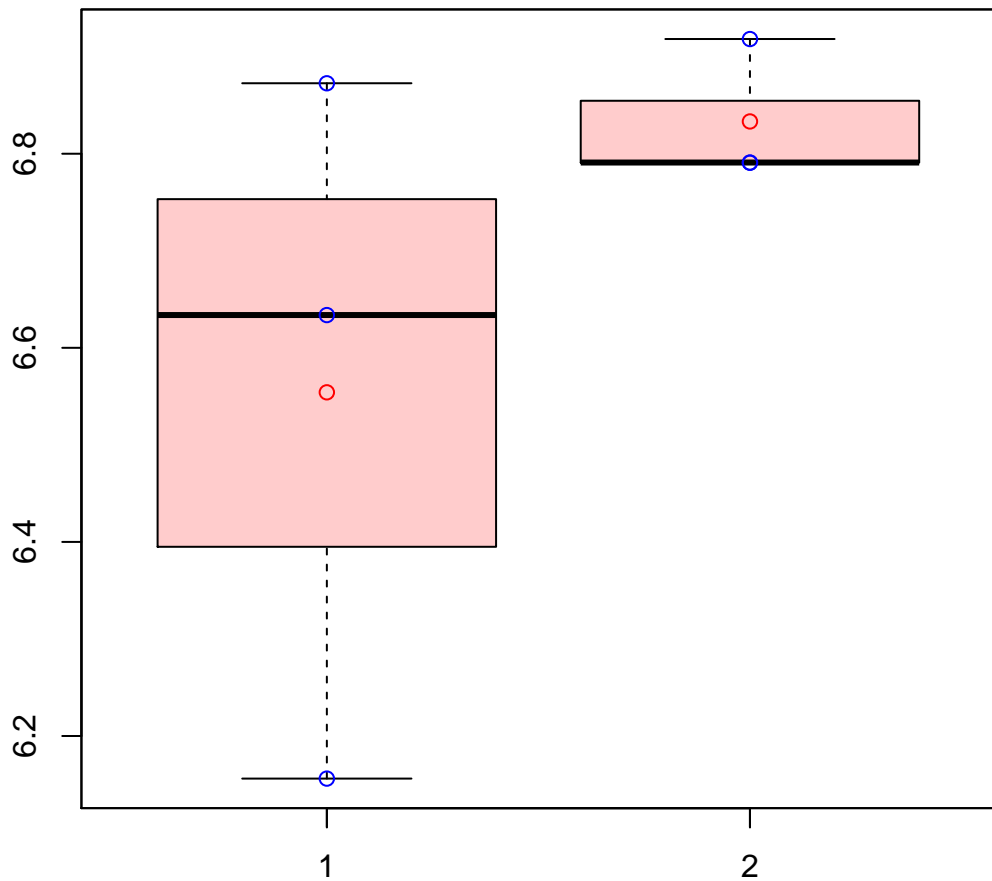

t-Test: p-value = 0.32



# M8BUX4|M8BUX4\_AEGTA

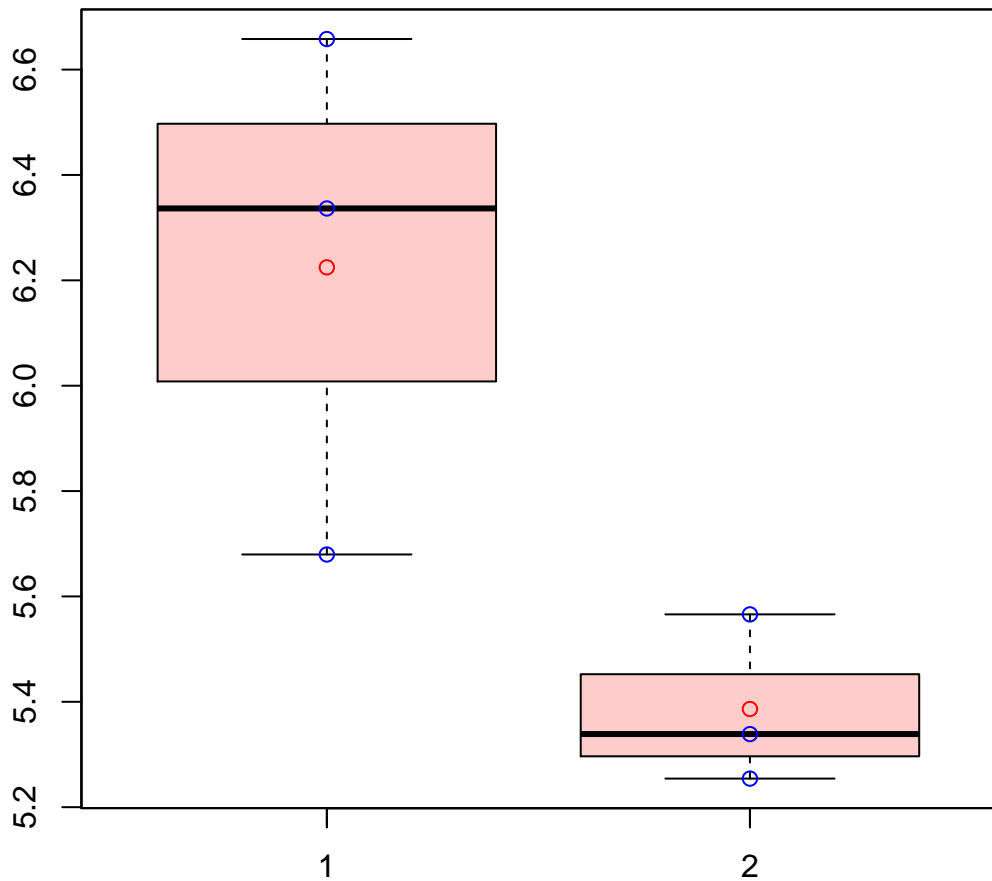

t-Test: p-value = 0.09

# M8BVZ7|M8BVZ7\_AEGTA

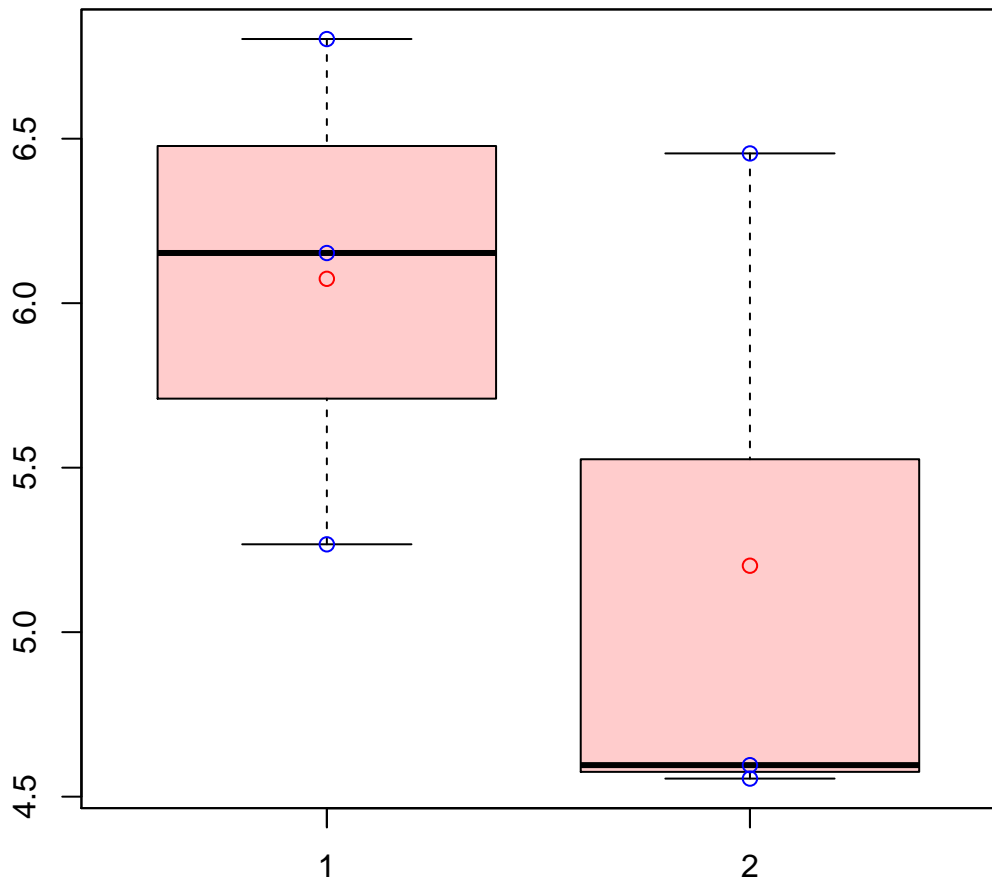

t-Test: p-value = 0.33

# M8BW02|M8BW02\_AEGTA

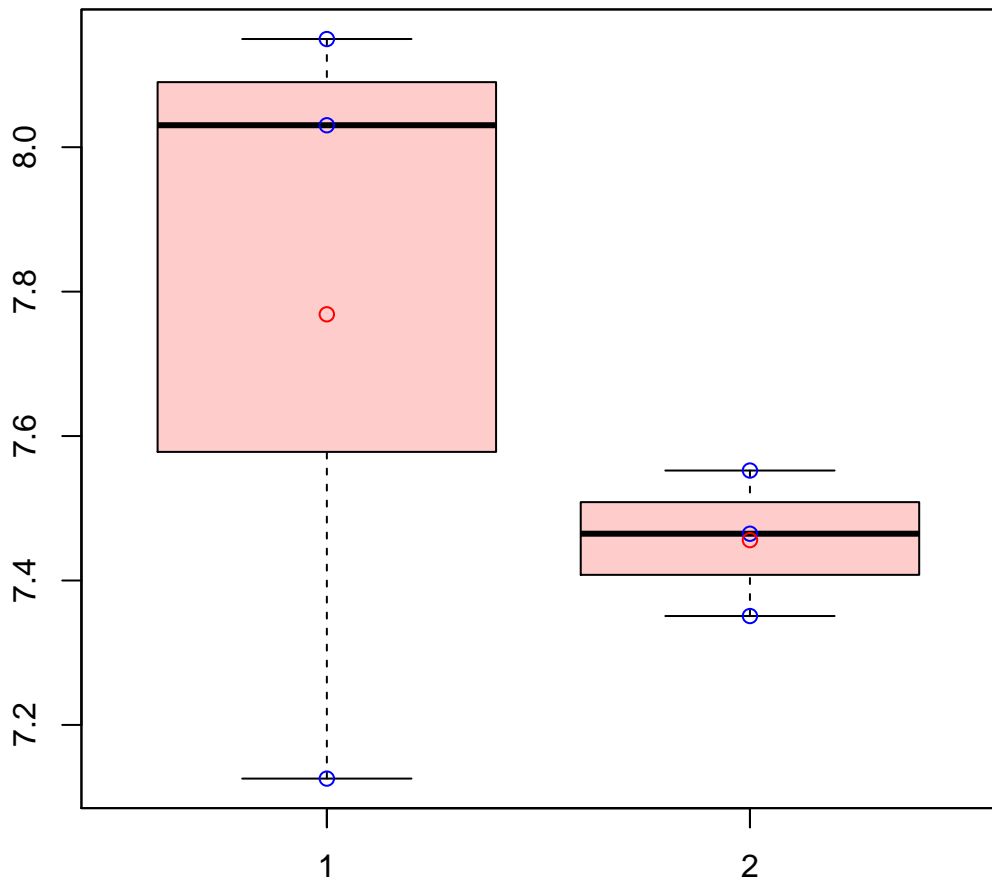

t-Test: p-value = 0.44

# M8BWE3|M8BWE3\_AEGTA

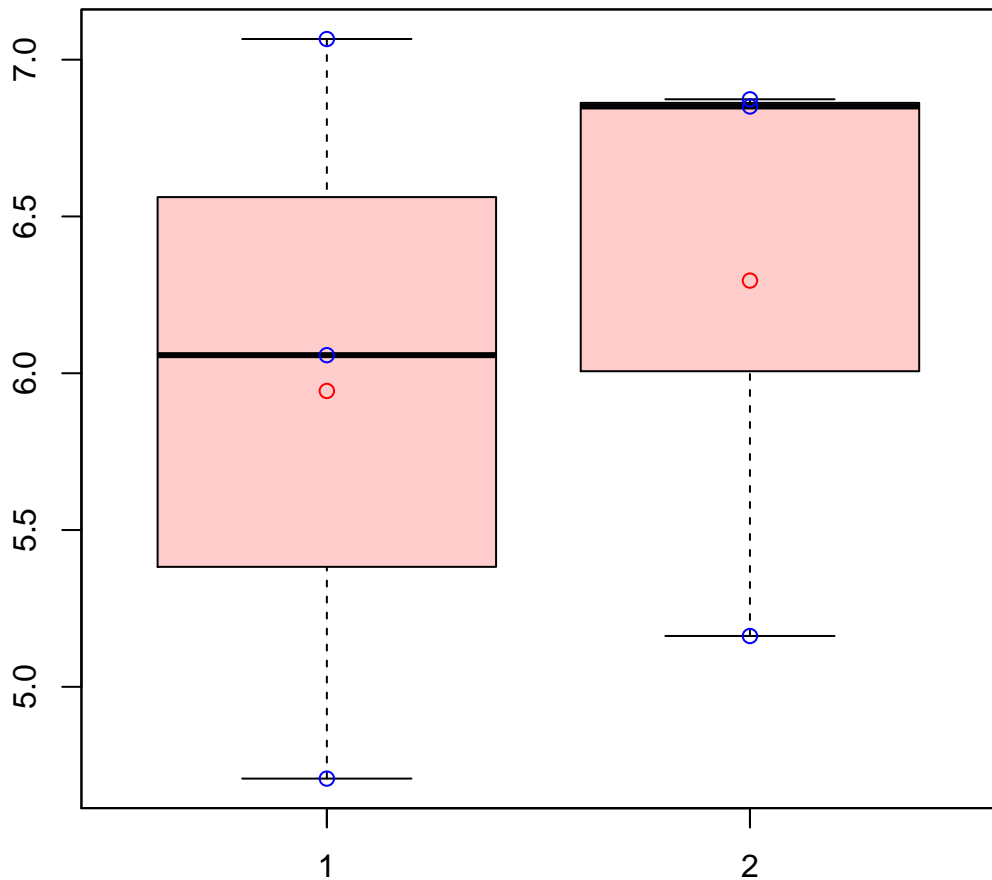

t-Test: p-value = 0.71

# M8BW10|M8BW10\_AEGTA

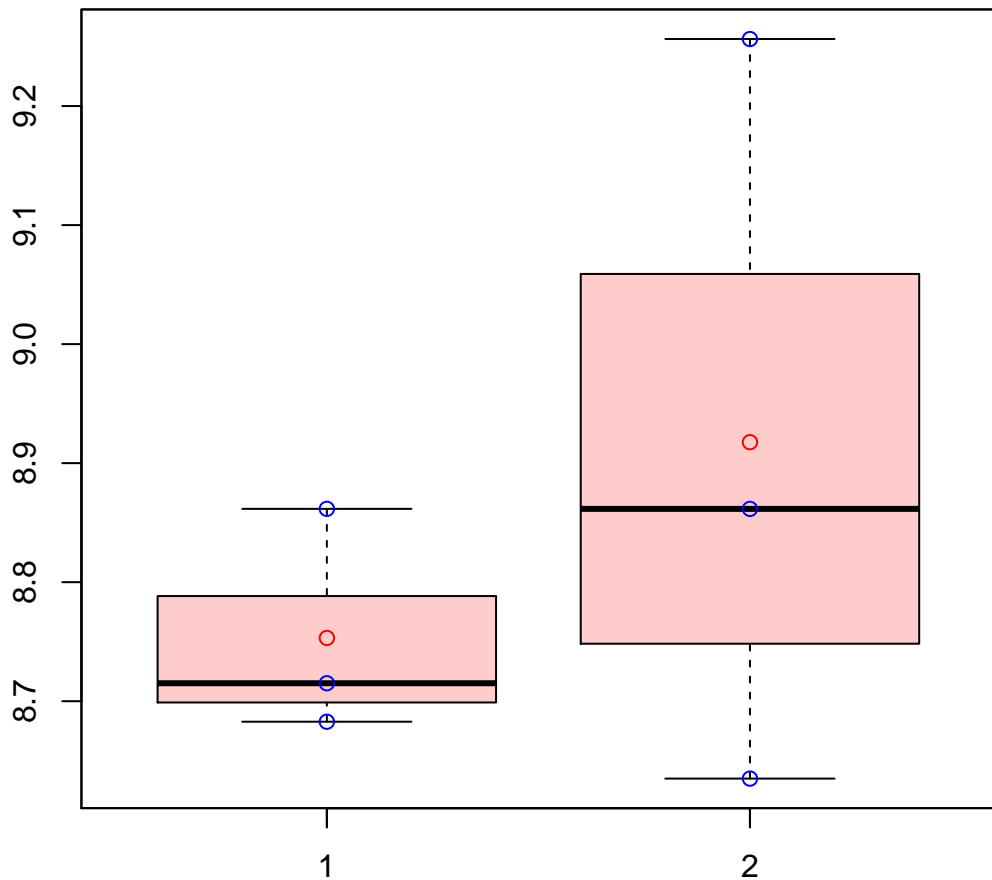

t-Test: p-value = 0.46

# M8BWQ5|M8BWQ5\_AEGTA

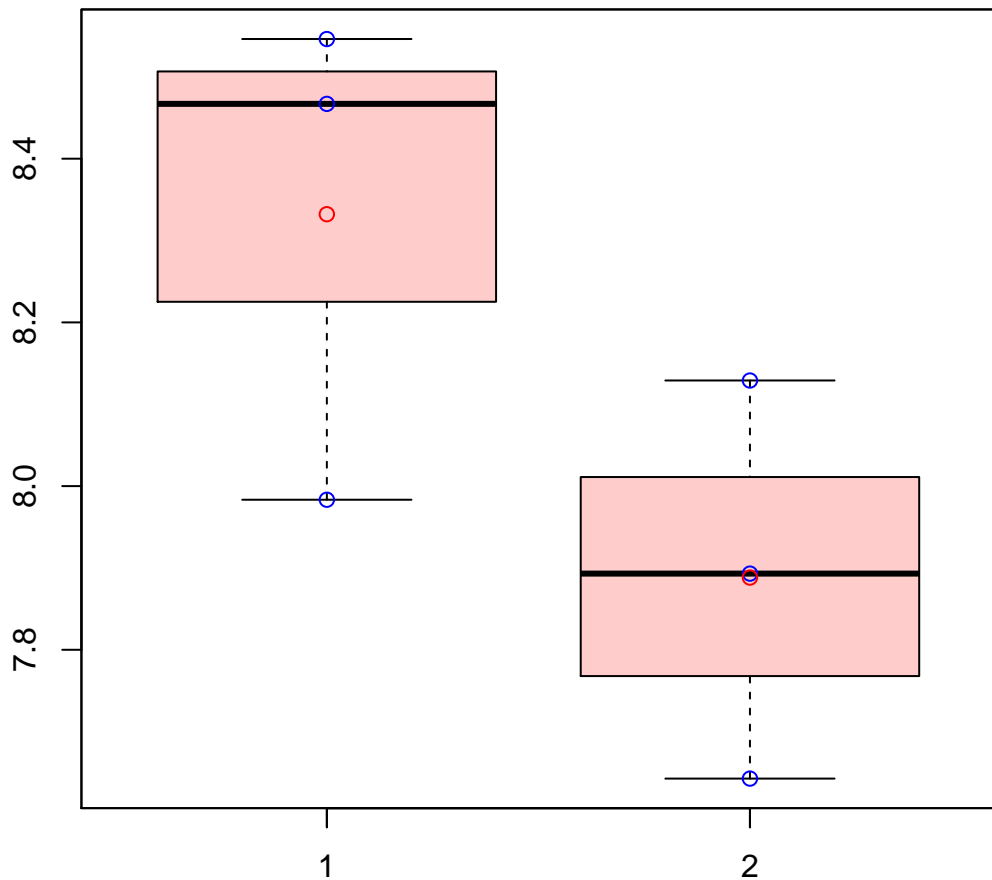

t-Test: p-value = 0.12

# M8BX40|M8BX40\_AEGTA

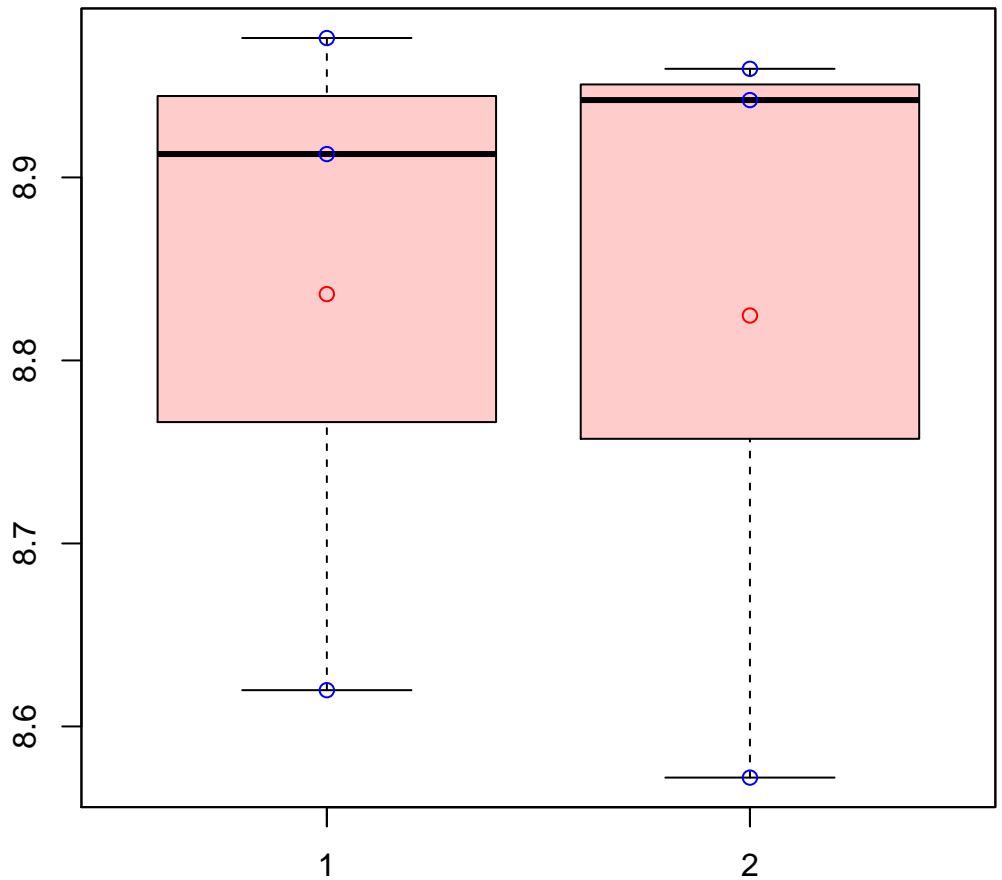

t-Test: p-value = 0.95

# M8BXK7|M8BXK7\_AEGTA

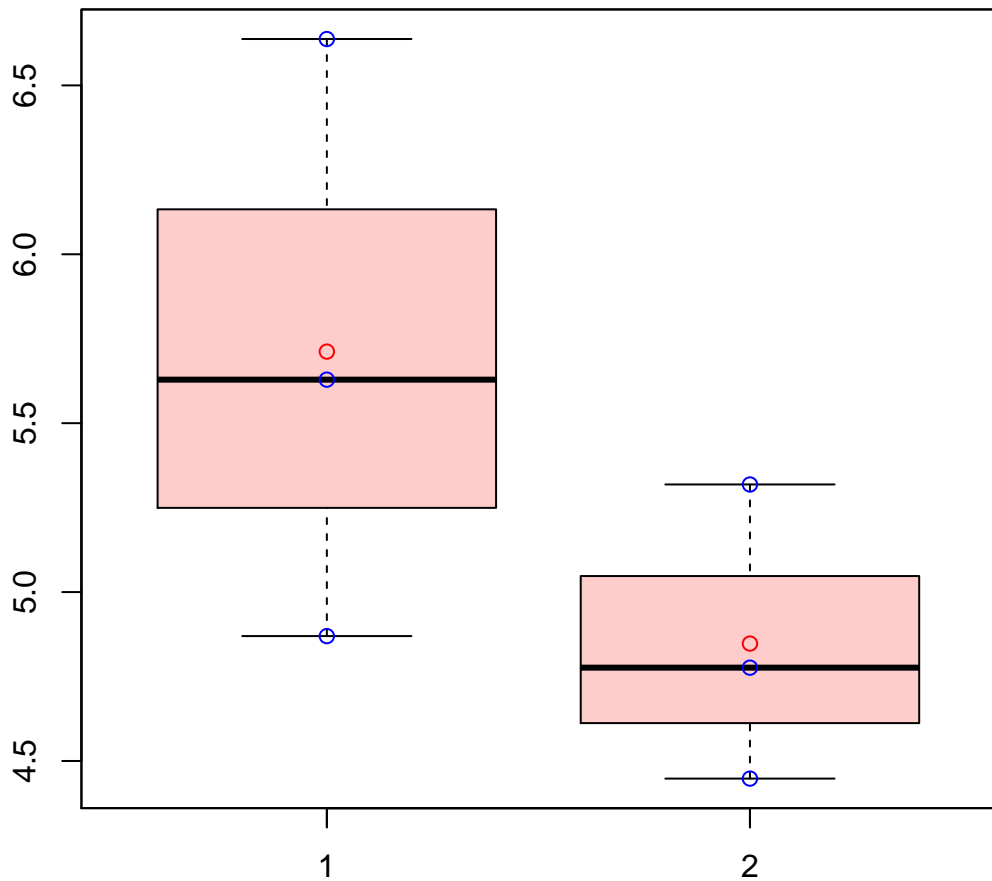

t-Test: p-value = 0.23



# M8BY33|M8BY33\_AEGTA

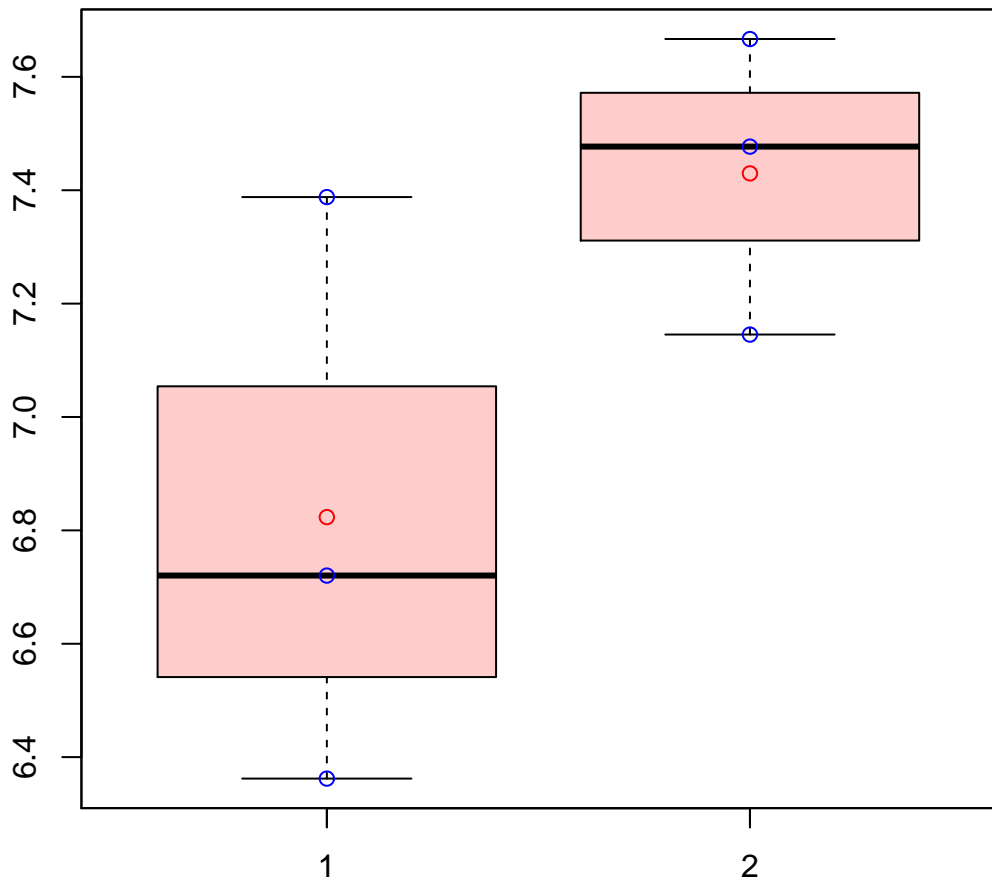

t-Test: p-value = 0.17

# M8BYR5|M8BYR5\_AEGTA

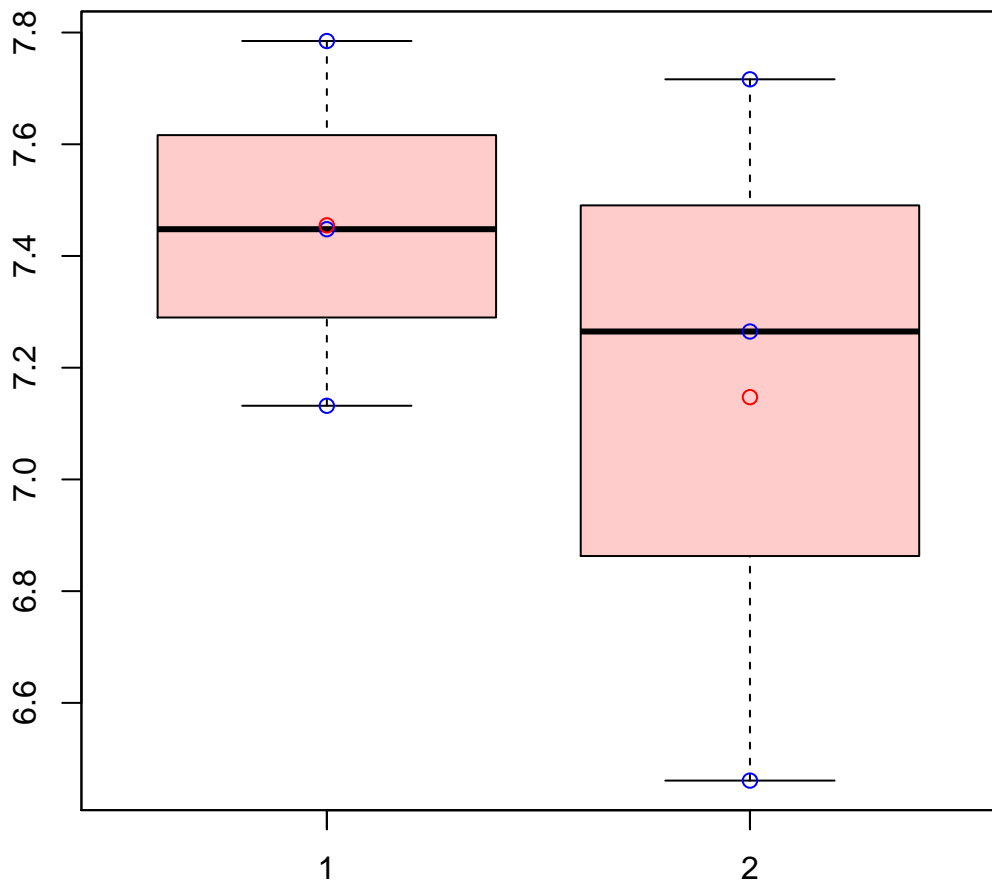

t-Test: p-value = 0.51

# M8BZ92|M8BZ92\_AEGTA

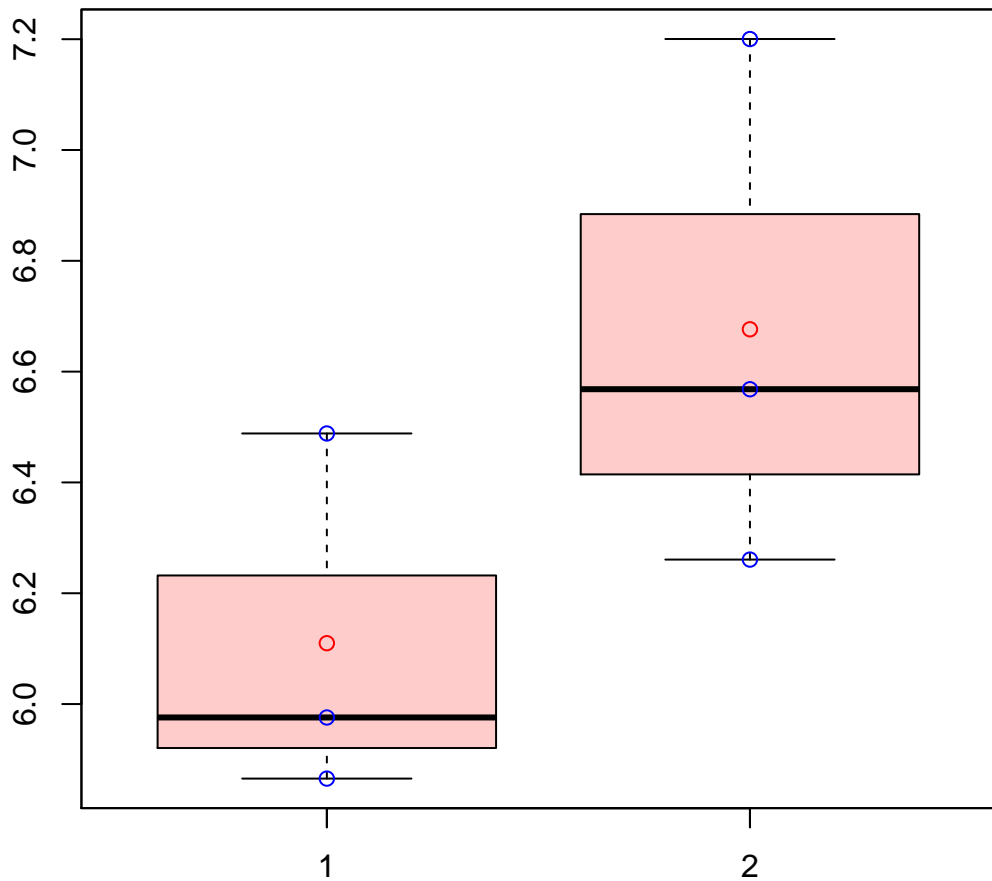

t-Test: p-value = 0.18

# M8BZX4|M8BZX4\_AEGTA

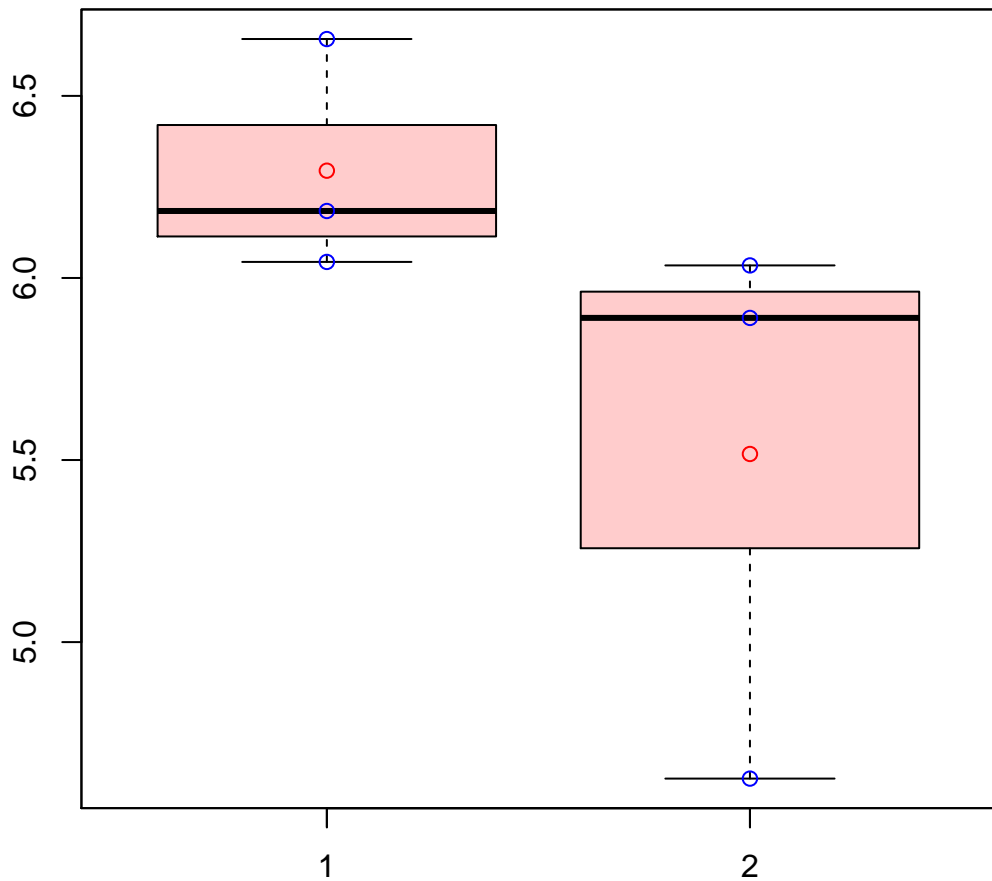

t-Test: p-value = 0.22

# M8C019|M8C019\_AEGTA

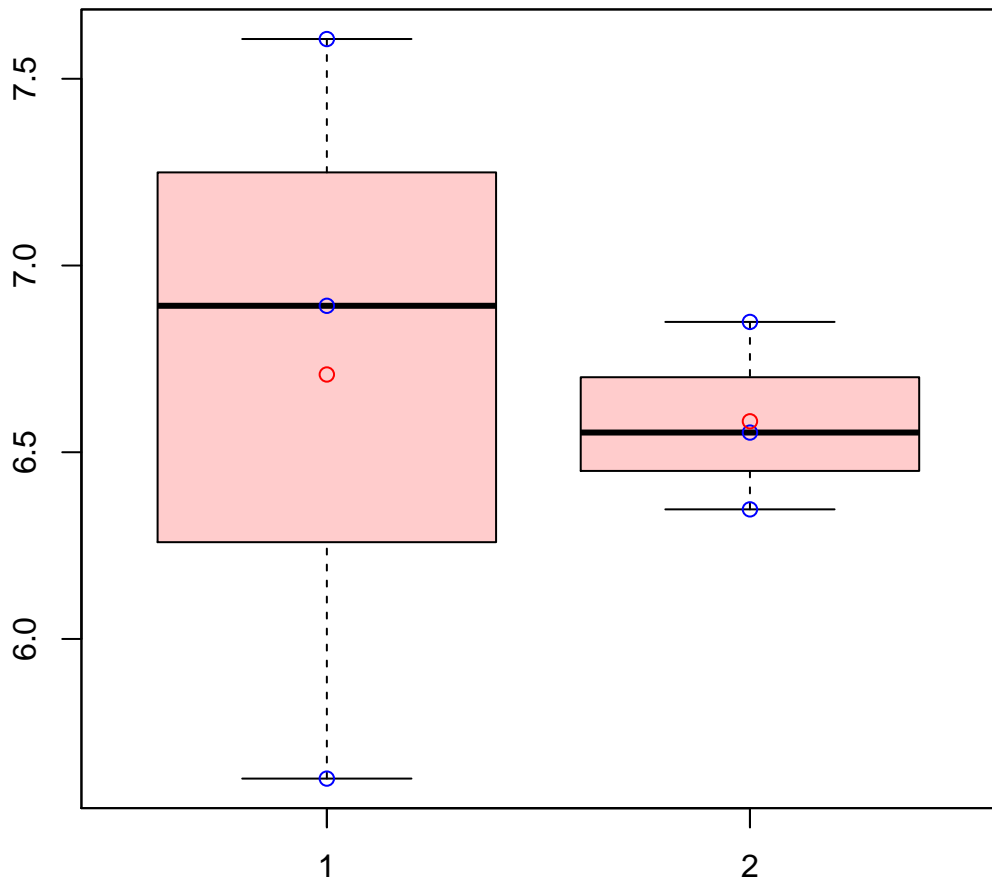

t-Test: p-value = 0.85

# M8C044|M8C044\_AEGTA

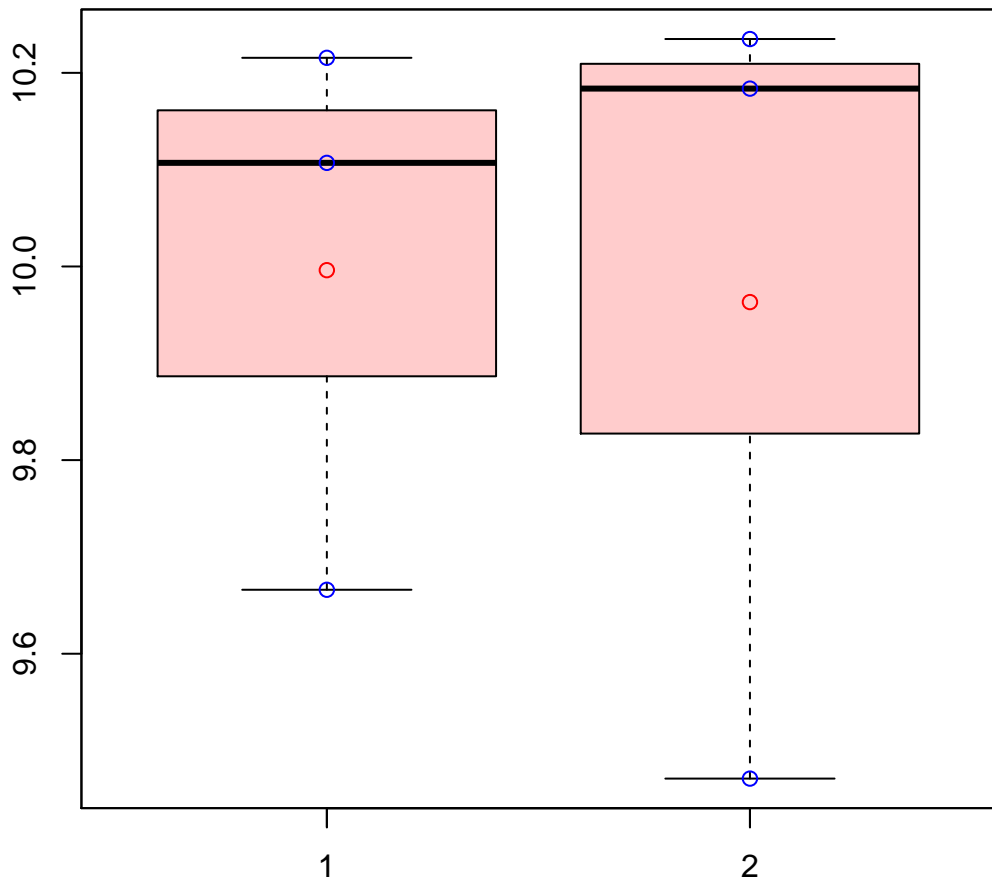

t-Test: p-value = 0.92

# M8C0P4|M8C0P4\_AEGTA

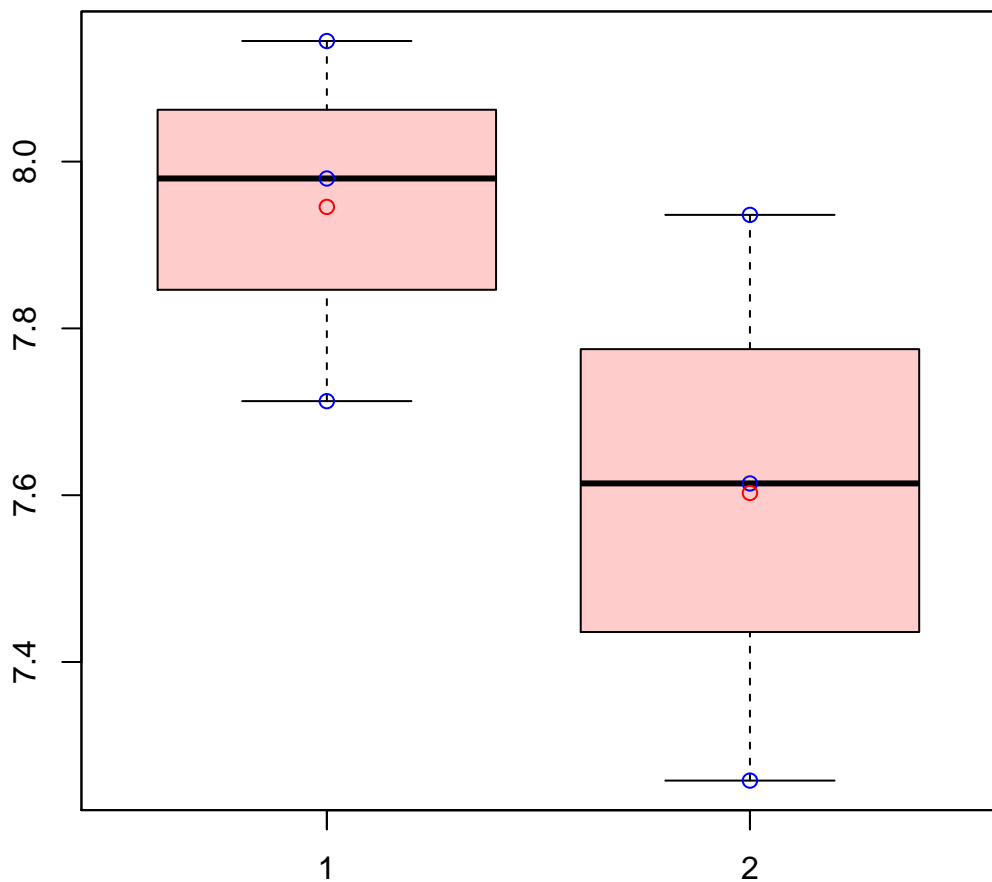

t-Test: p-value = 0.23

# M8C1A8|M8C1A8\_AEGTA

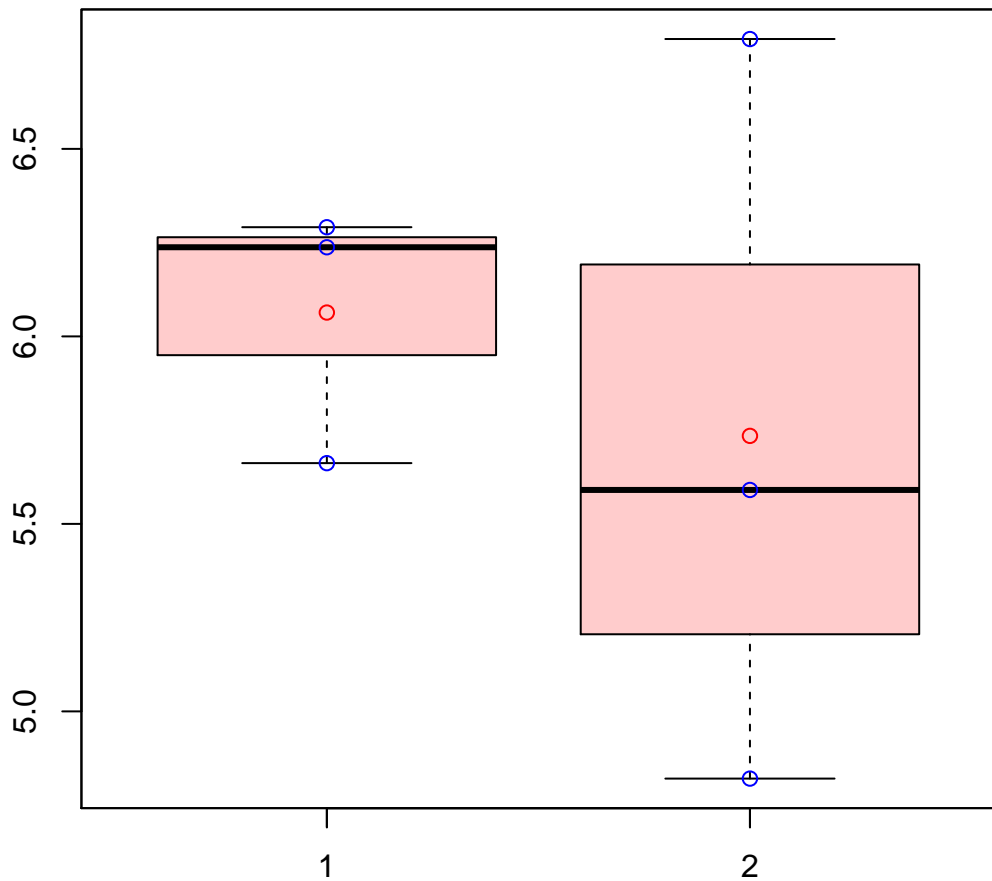

t-Test: p-value = 0.63



# M8C1B5|M8C1B5\_AEGTA

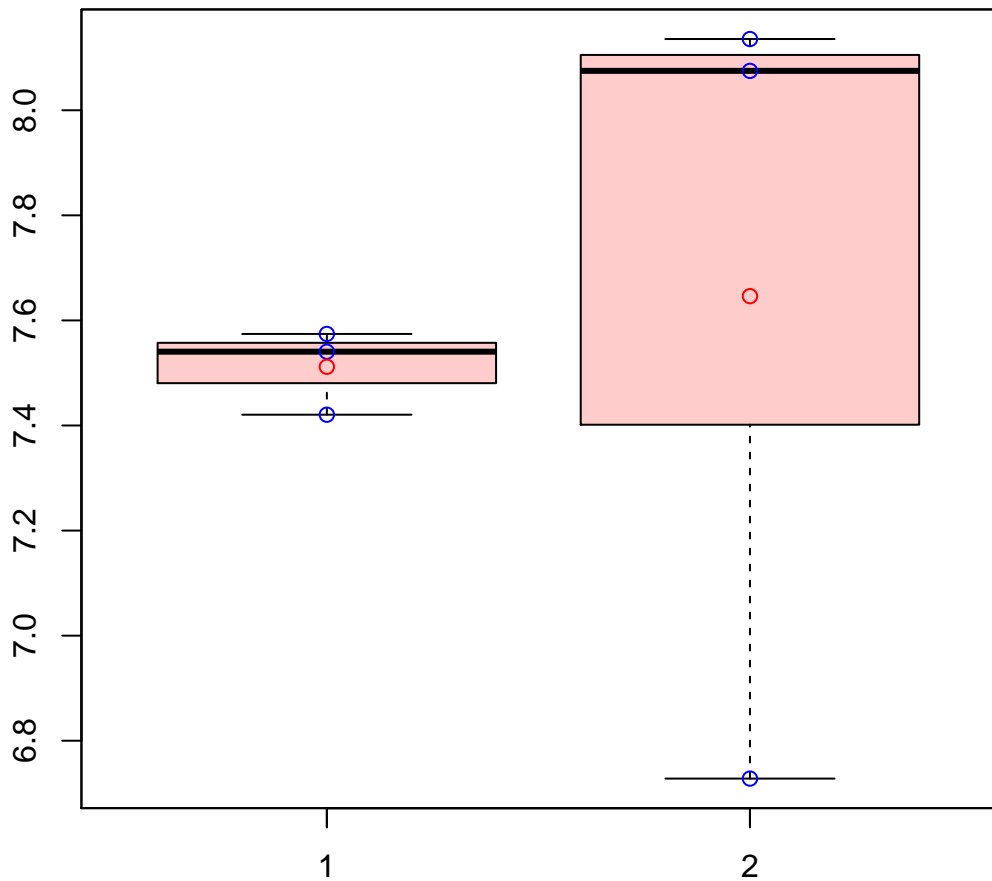

t-Test: p-value = 0.8

# M8C1C7|M8C1C7\_AEGTA

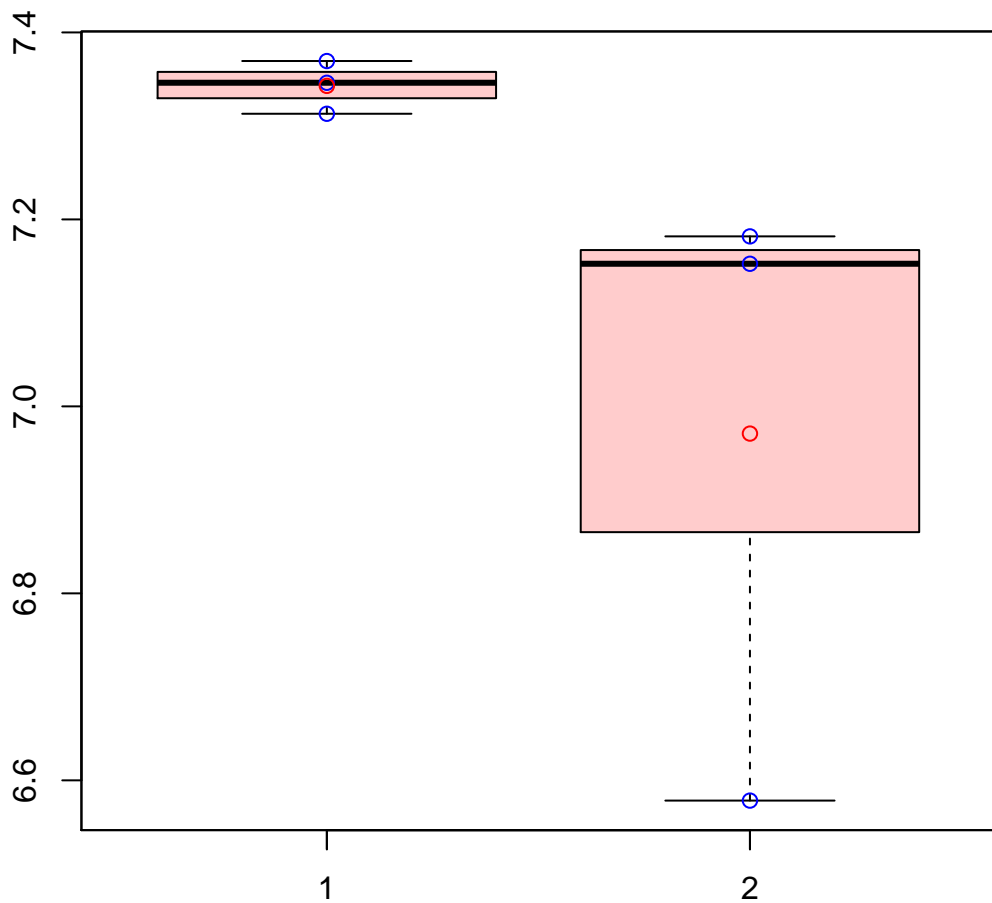

t-Test: p-value = 0.2

# M8C2A7|M8C2A7\_AEGTA

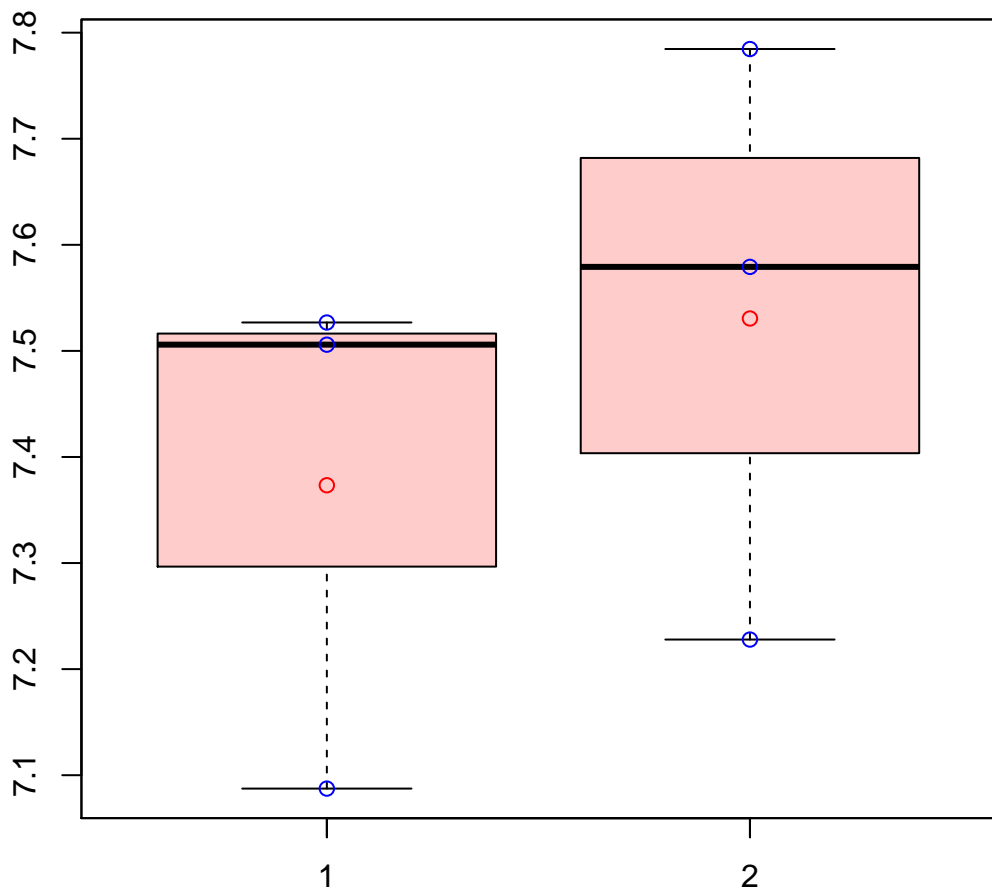

t-Test: p-value = 0.51

# M8C2G8|M8C2G8\_AEGTA

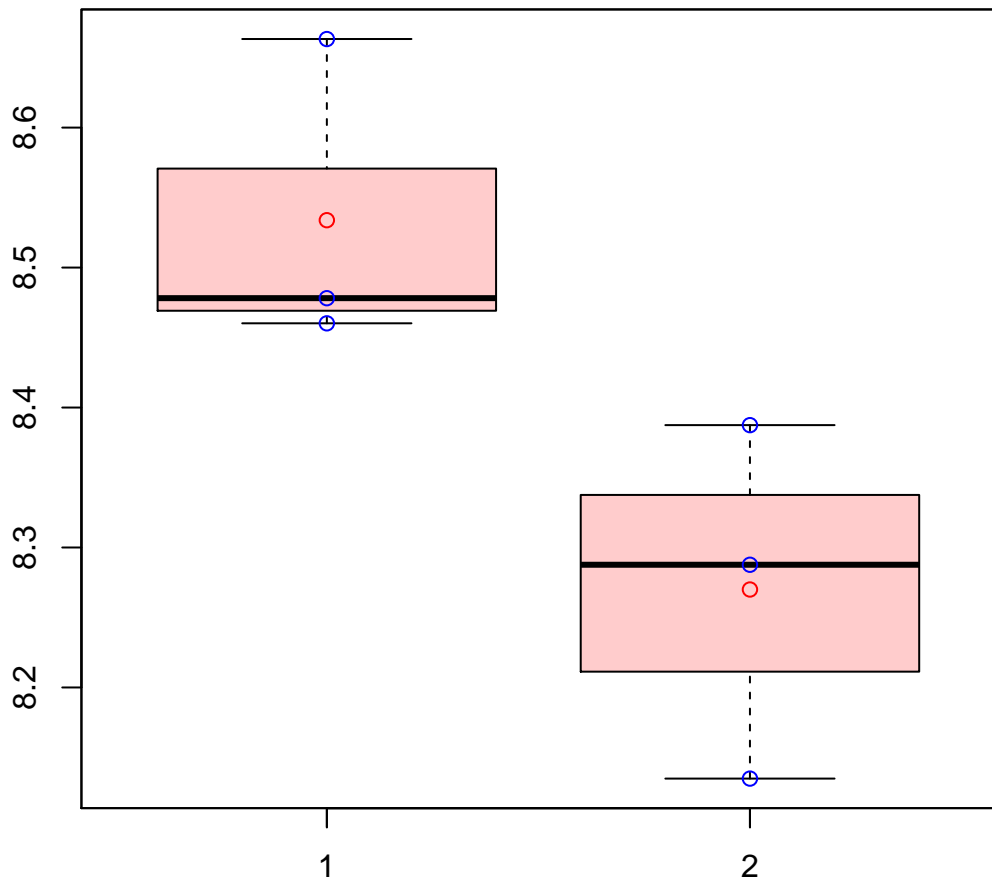

t-Test: p-value = 0.06

# M8C2N4|M8C2N4\_AEGTA

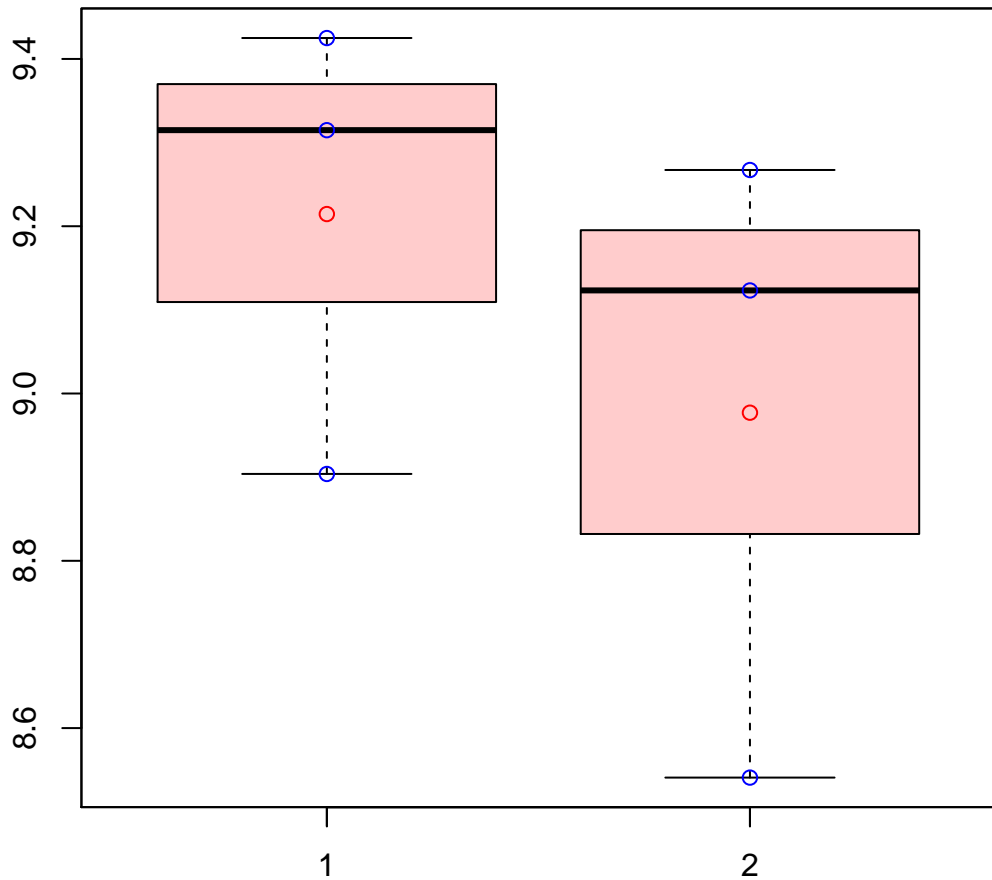

t-Test: p-value = 0.44

# M8C2Q5|M8C2Q5\_AEGTA

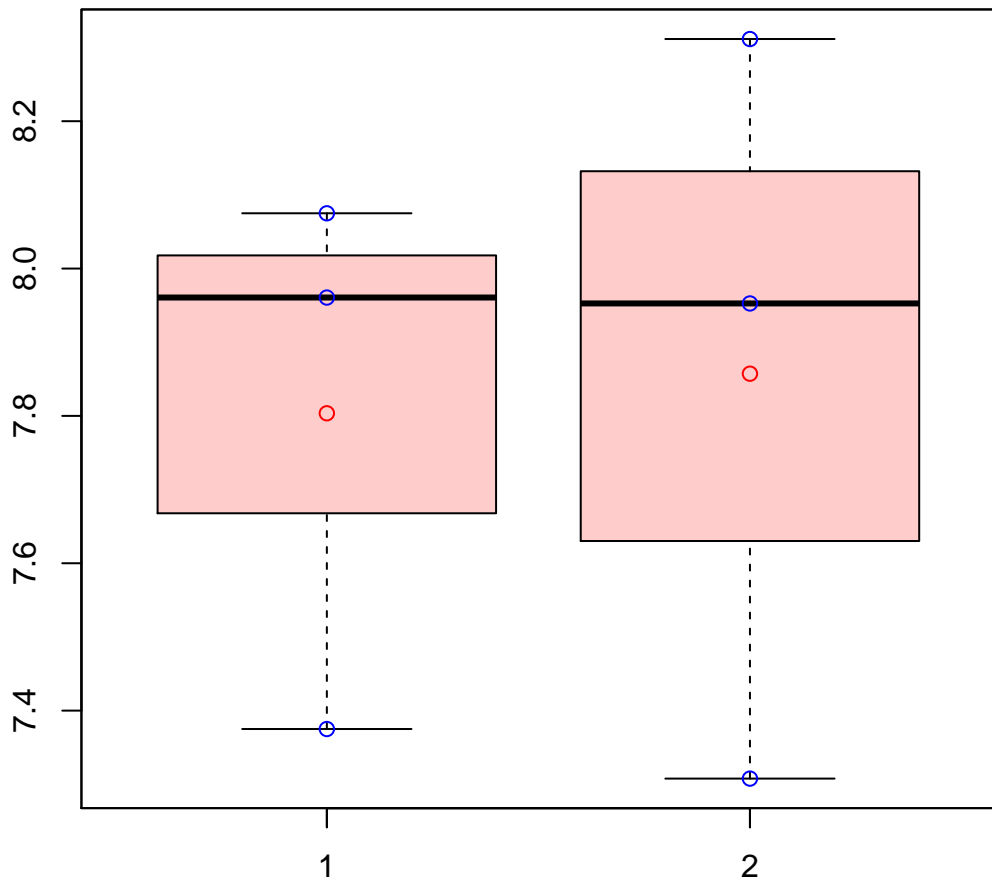

t-Test: p-value = 0.89

# M8C2V4|M8C2V4\_AEGTA

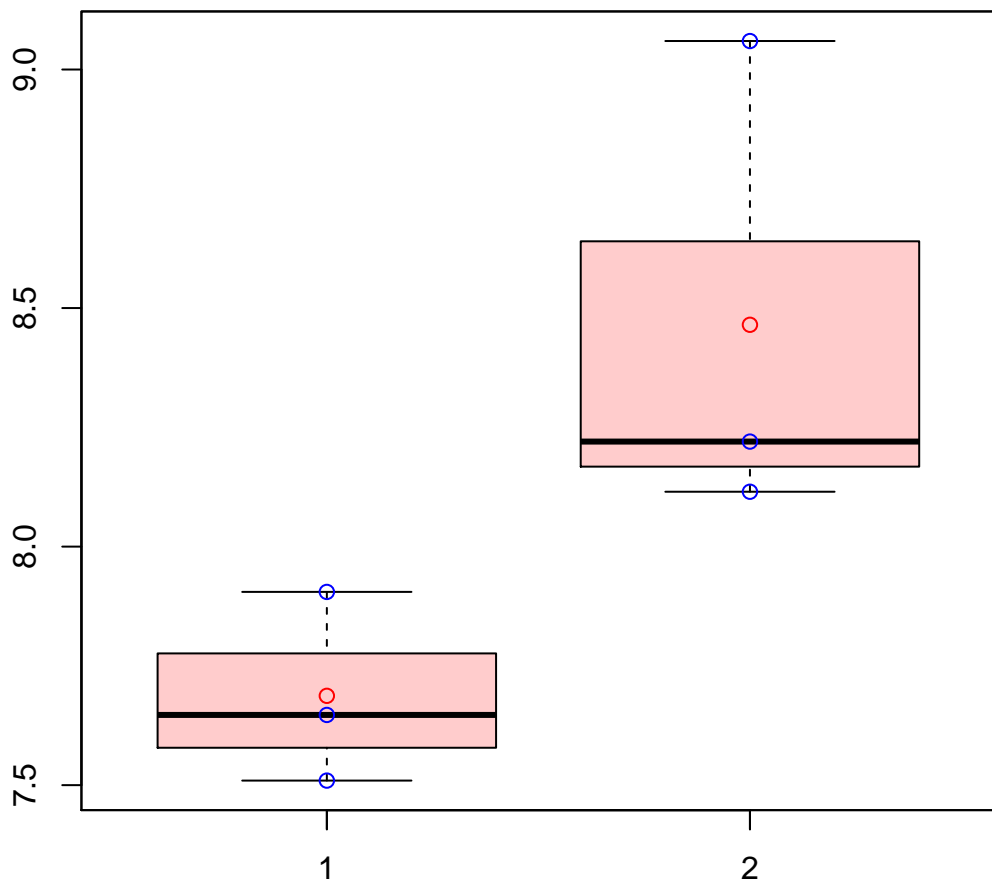

t-Test: p-value = 0.11

# M8C3H7|M8C3H7\_AEGTA

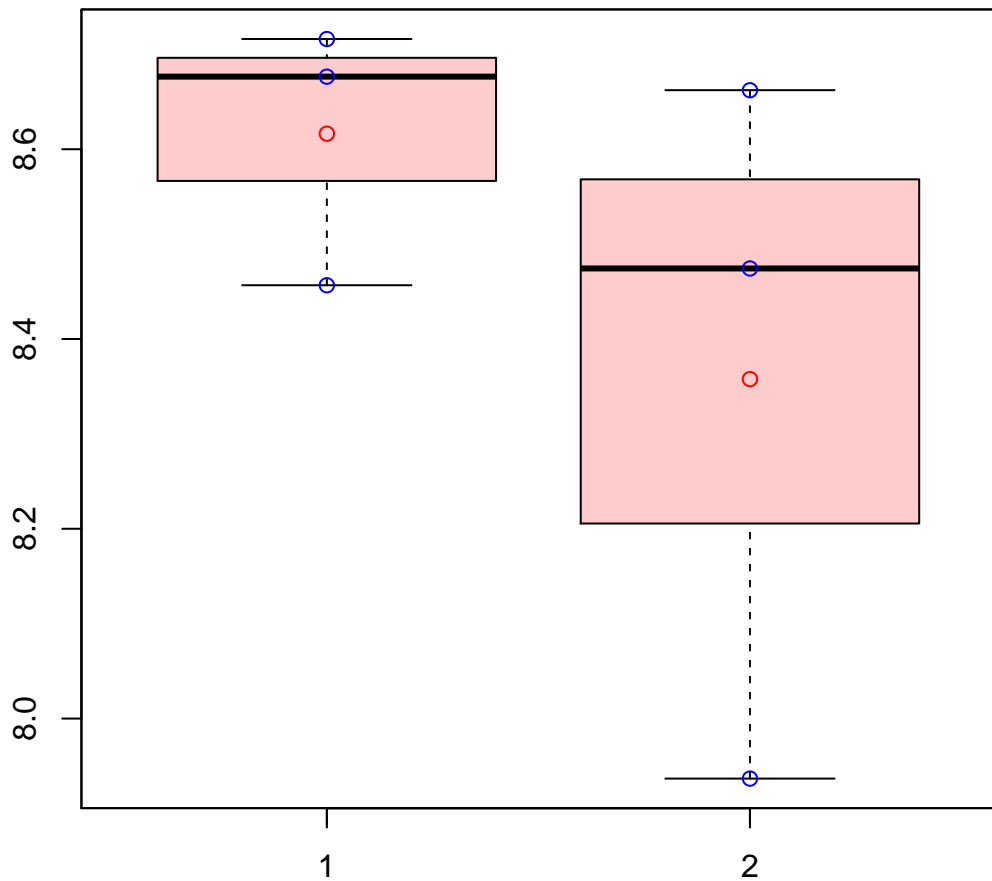

t-Test: p-value = 0.36



# M8C4H1|M8C4H1\_AEGTA

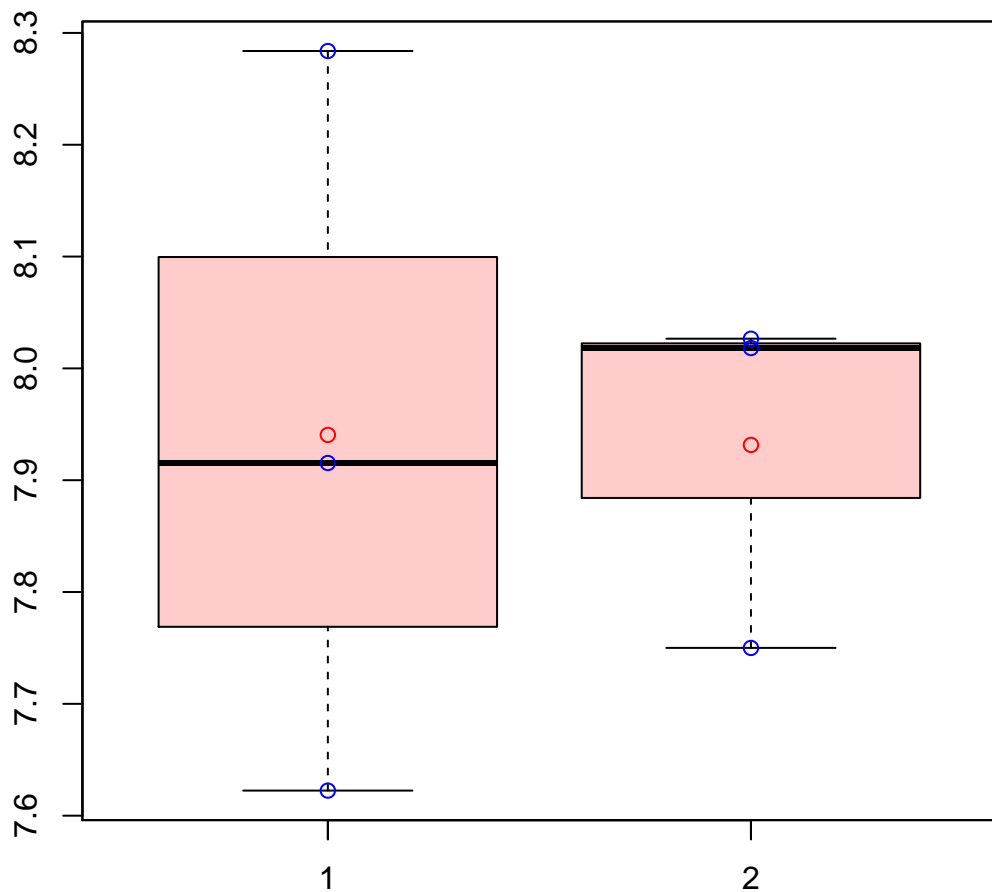

t-Test: p-value = 0.97

# M8C4I1|M8C4I1\_AEGTA

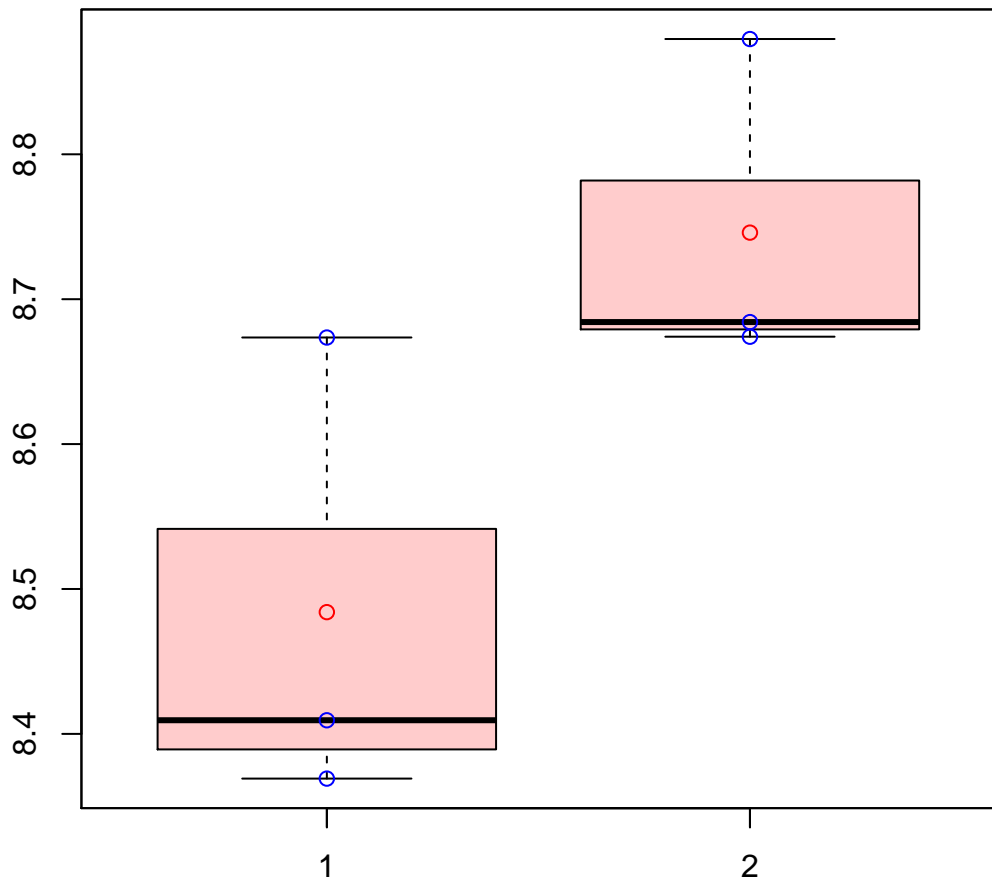

t-Test: p-value = 0.1

# M8C4P6|M8C4P6\_AEGTA

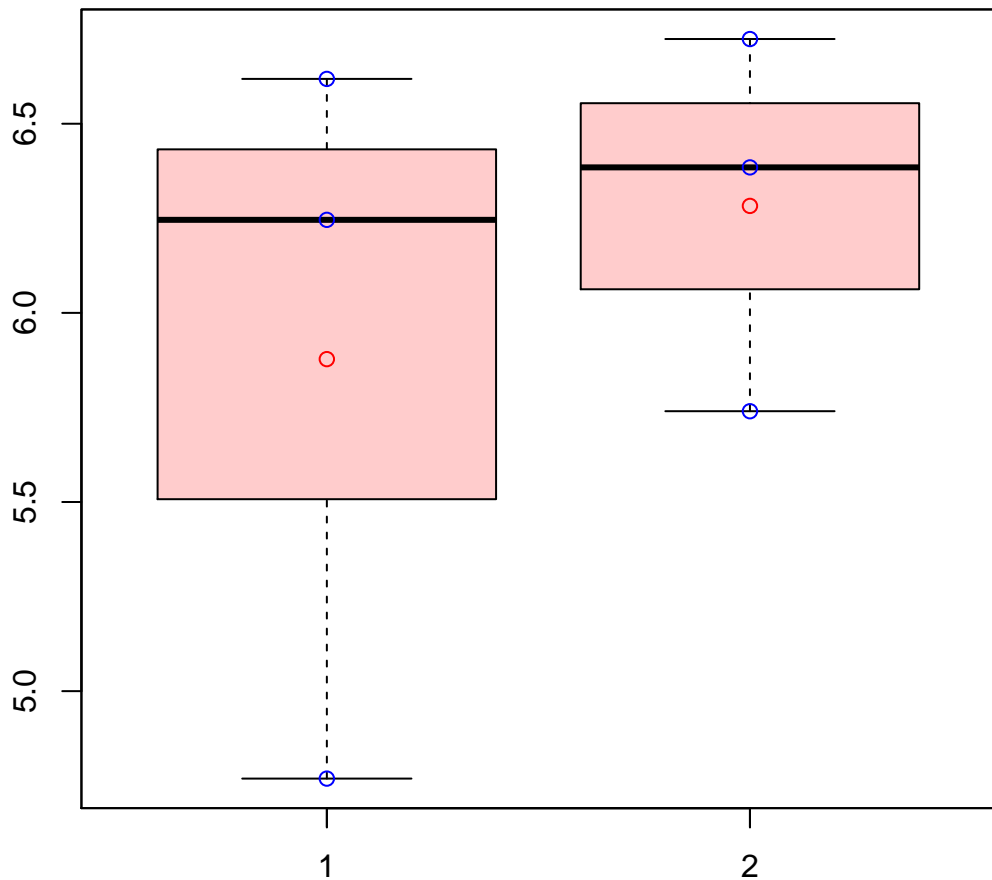

t-Test: p-value = 0.57

# M8C564|M8C564\_AEGTA

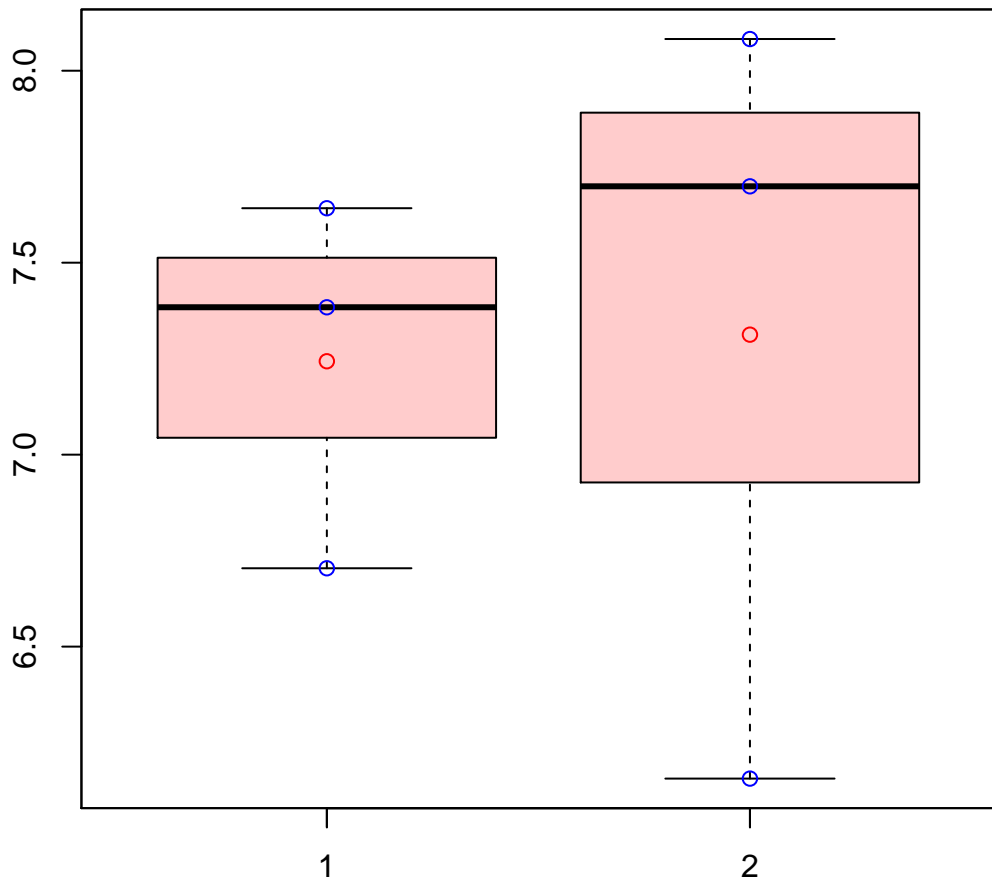

t-Test: p-value = 0.92

# M8C6V8|M8C6V8\_AEGTA

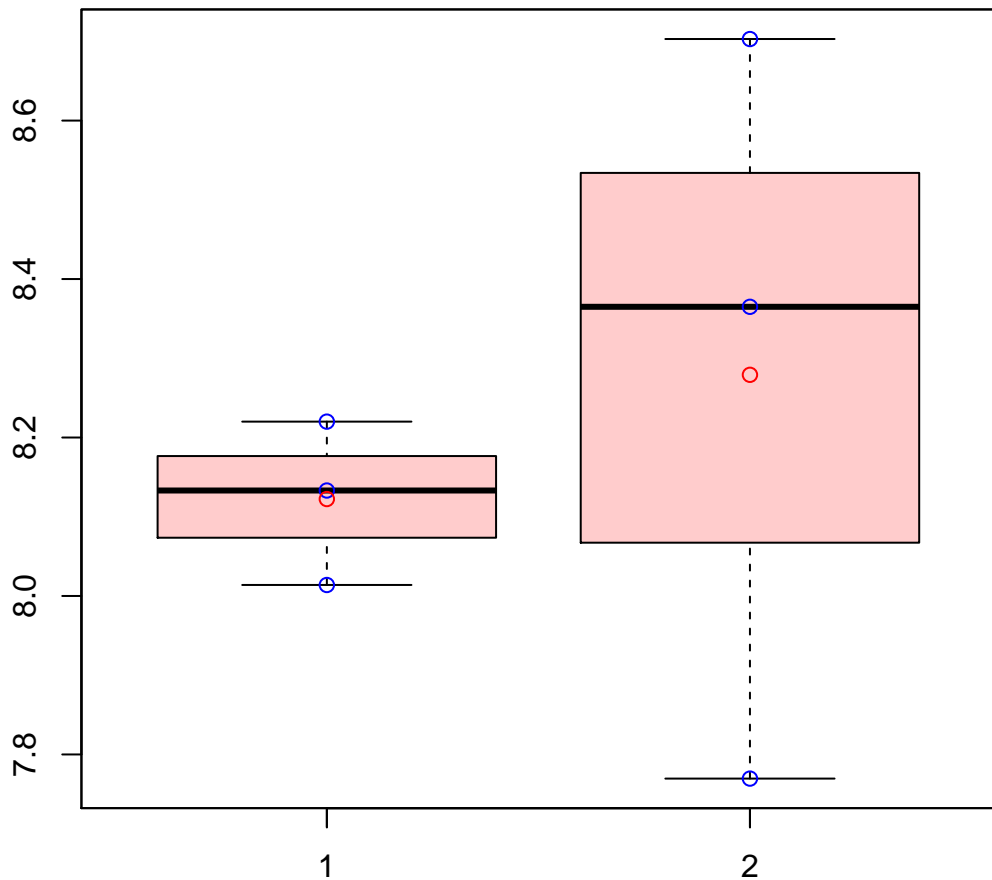

t-Test: p-value = 0.63

# M8C7A2|M8C7A2\_AEGTA

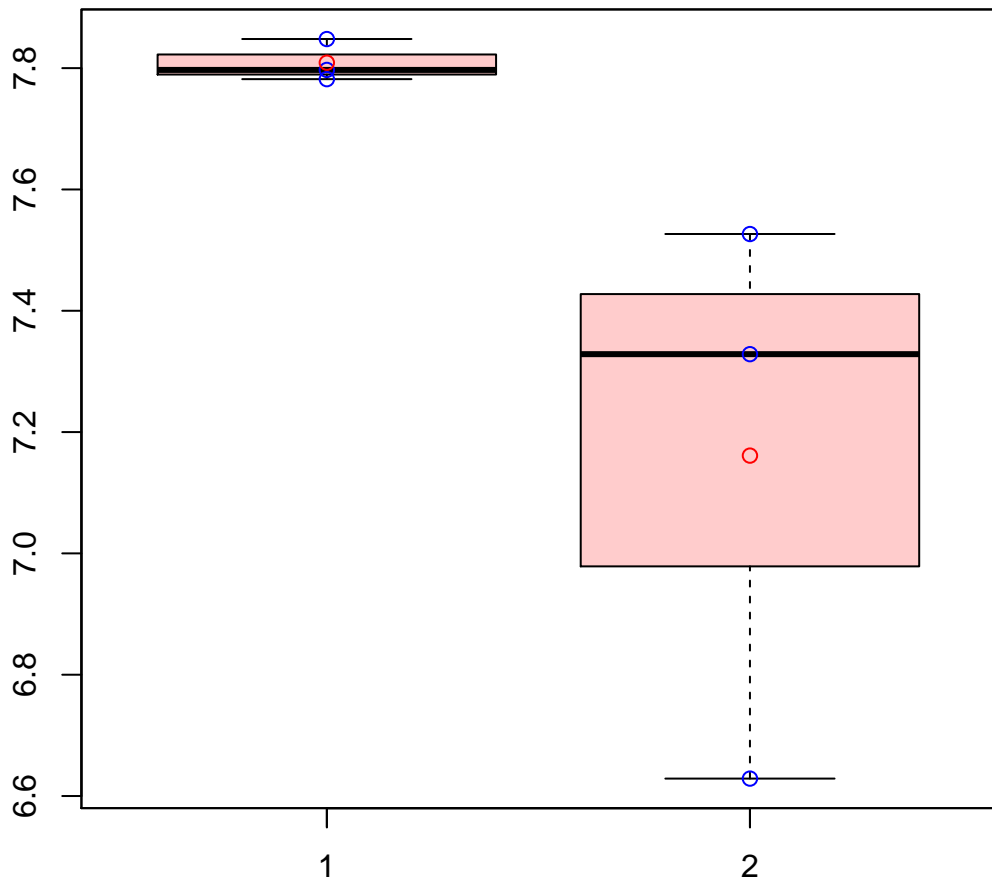

t-Test: p-value = 0.14

# M8C7G4|M8C7G4\_AEGTA

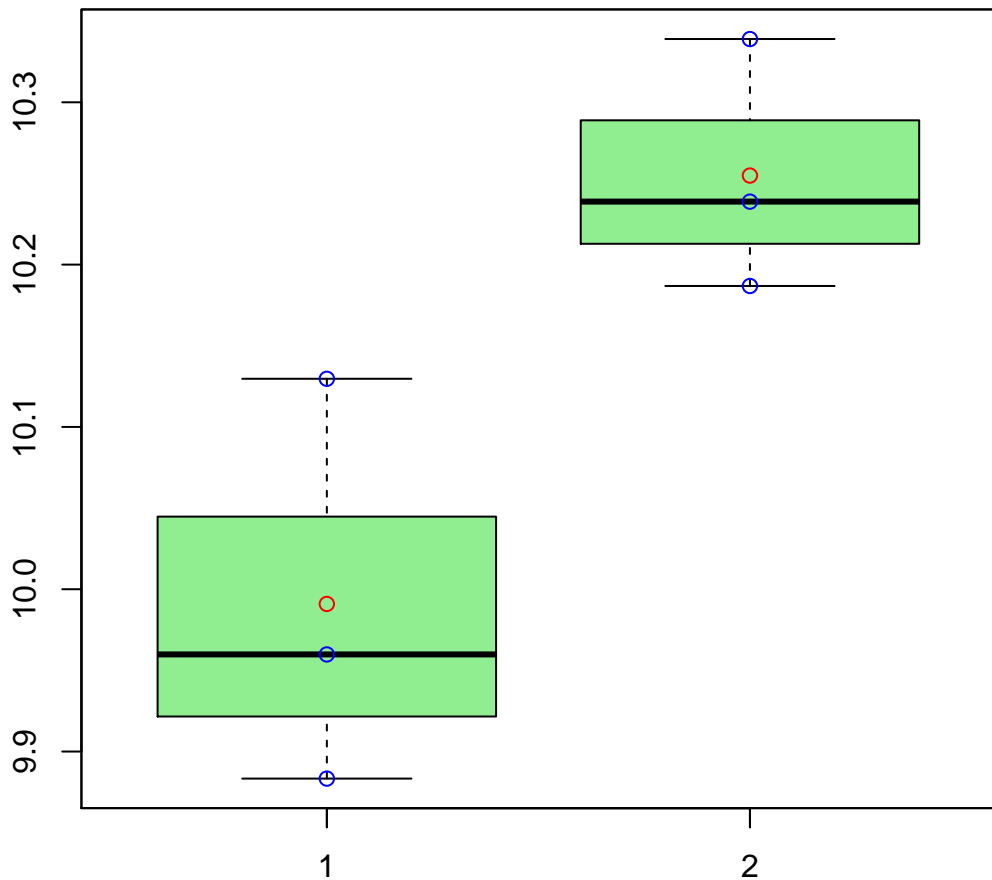

t-Test: p-value = 0.05

# M8C843|M8C843\_AEGTA

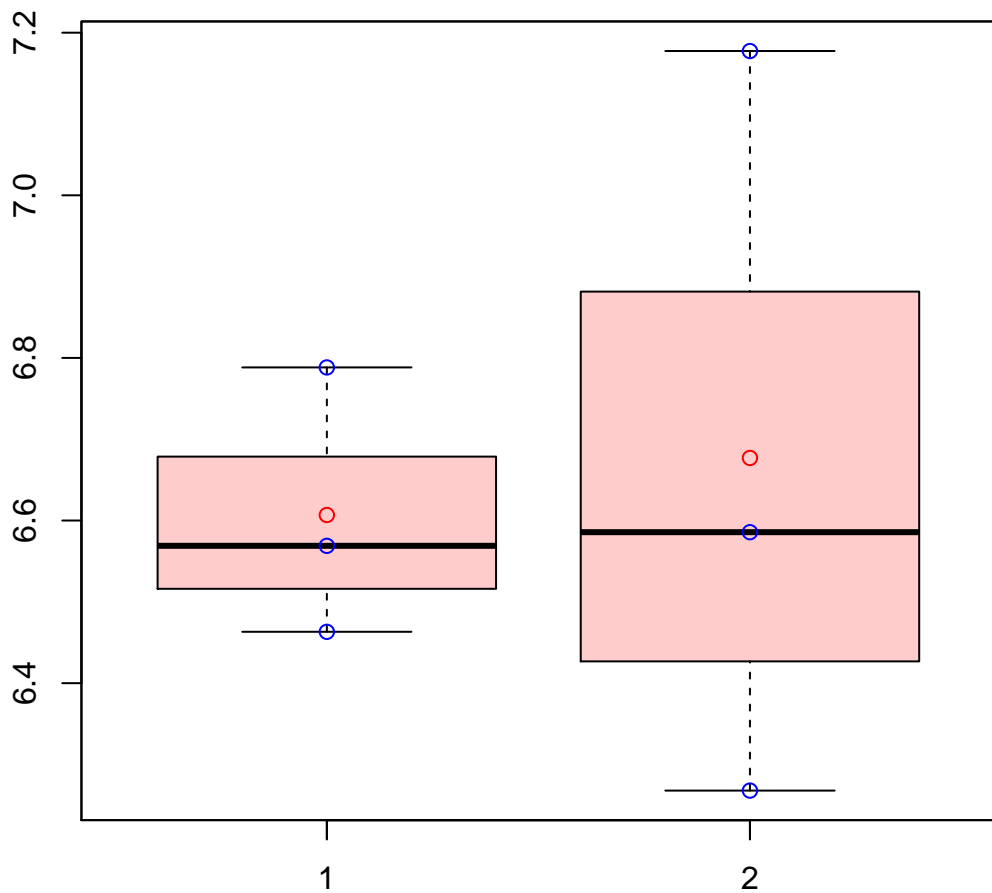

t-Test: p-value = 0.82



# M8CAR8|M8CAR8\_AEGTA

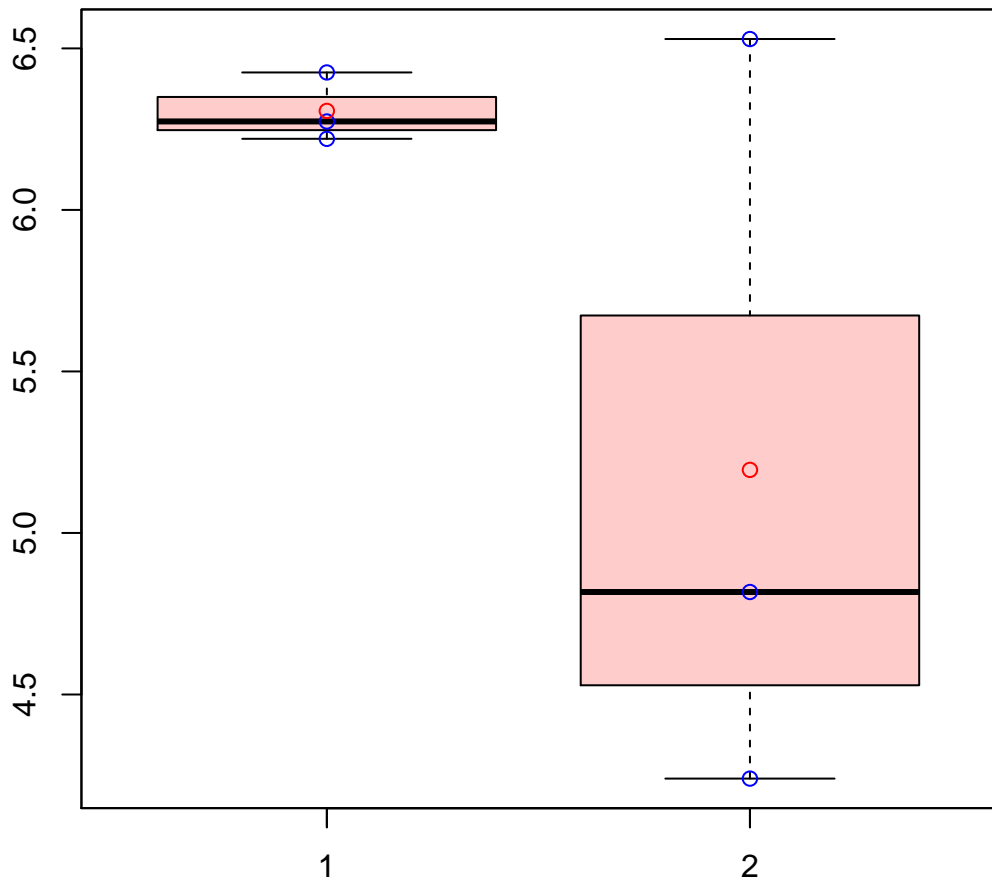

t-Test: p-value = 0.25

# M8CB58|M8CB58\_AEGTA

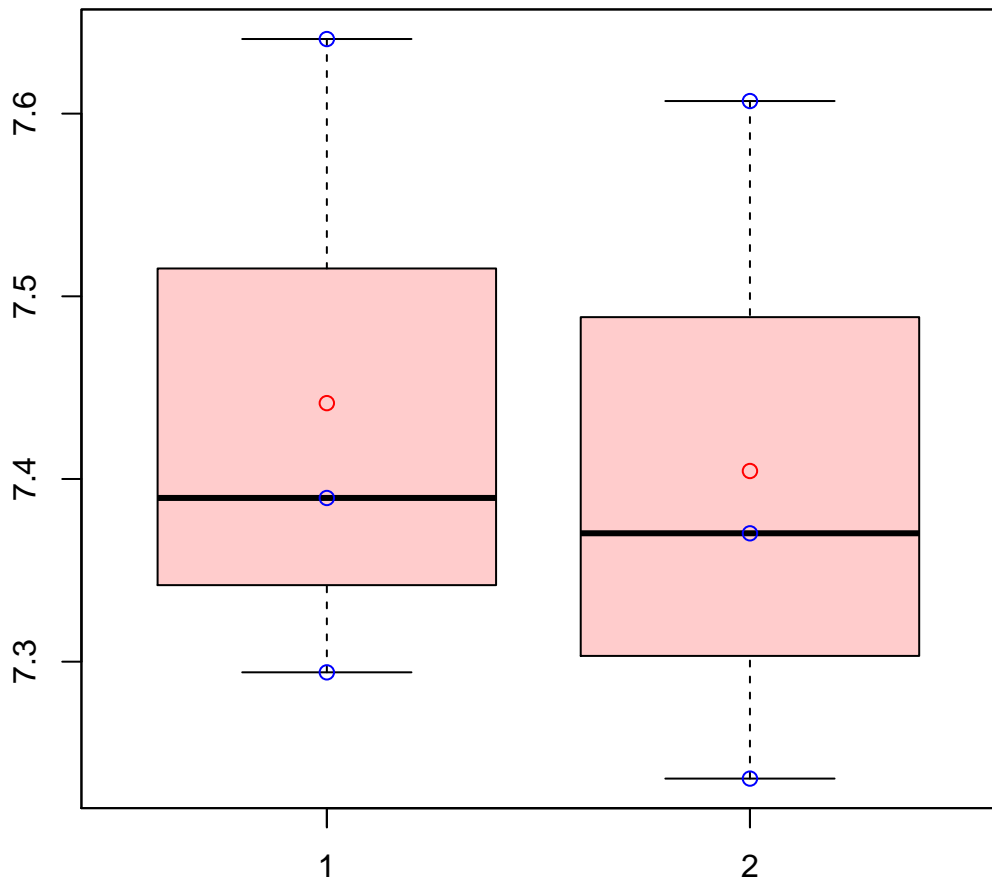

t-Test: p-value = 0.82

# M8CDW2|M8CDW2\_AEGTA

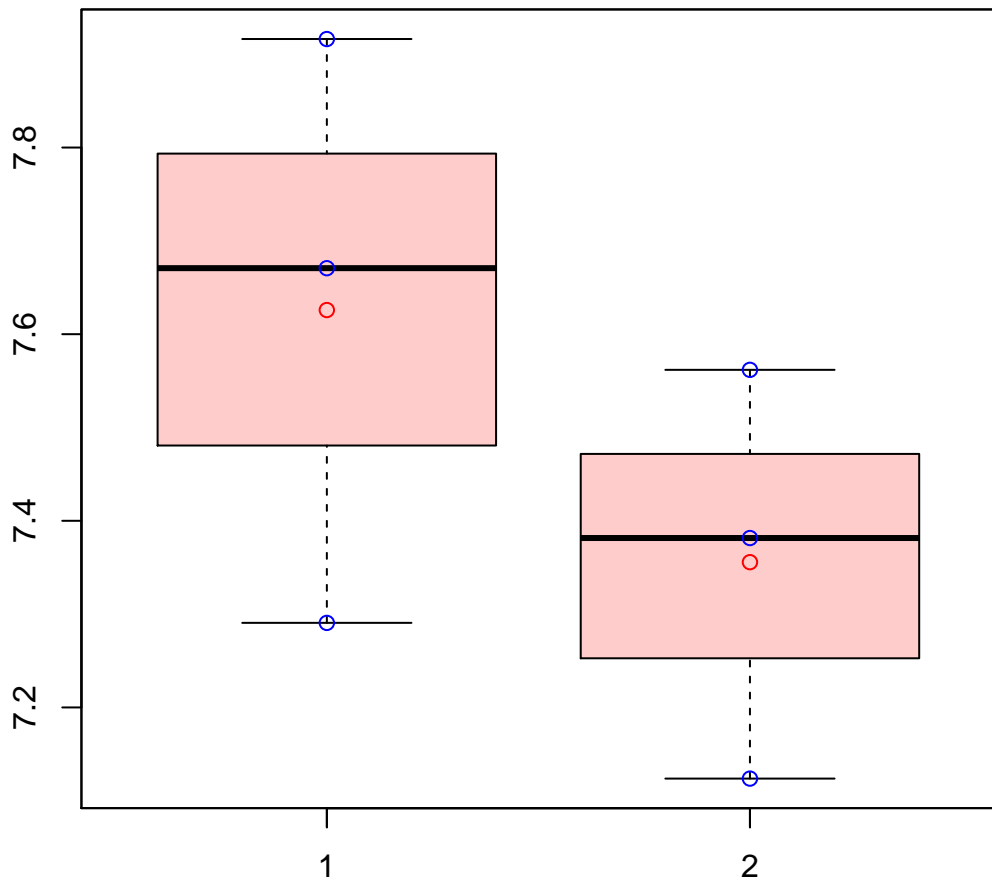

t-Test: p-value = 0.3

# M8CEF5|M8CEF5\_AEGTA

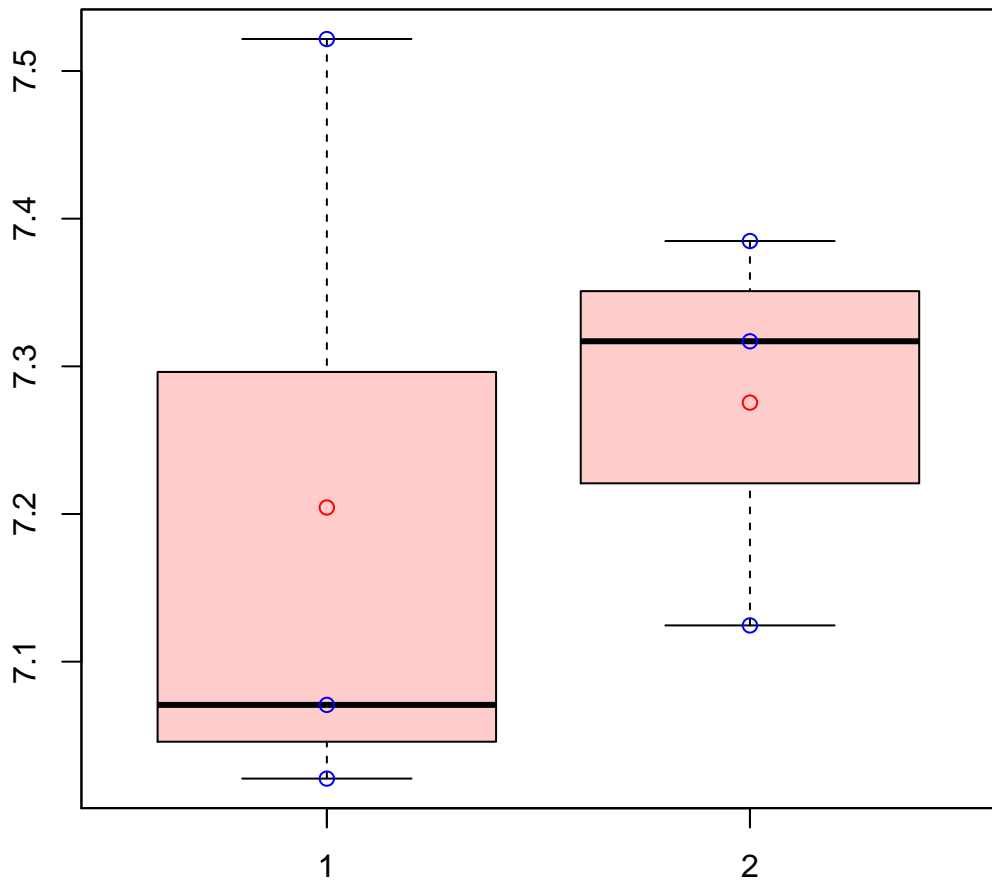

t-Test: p-value = 0.72

# M8CEN7|M8CEN7\_AEGTA

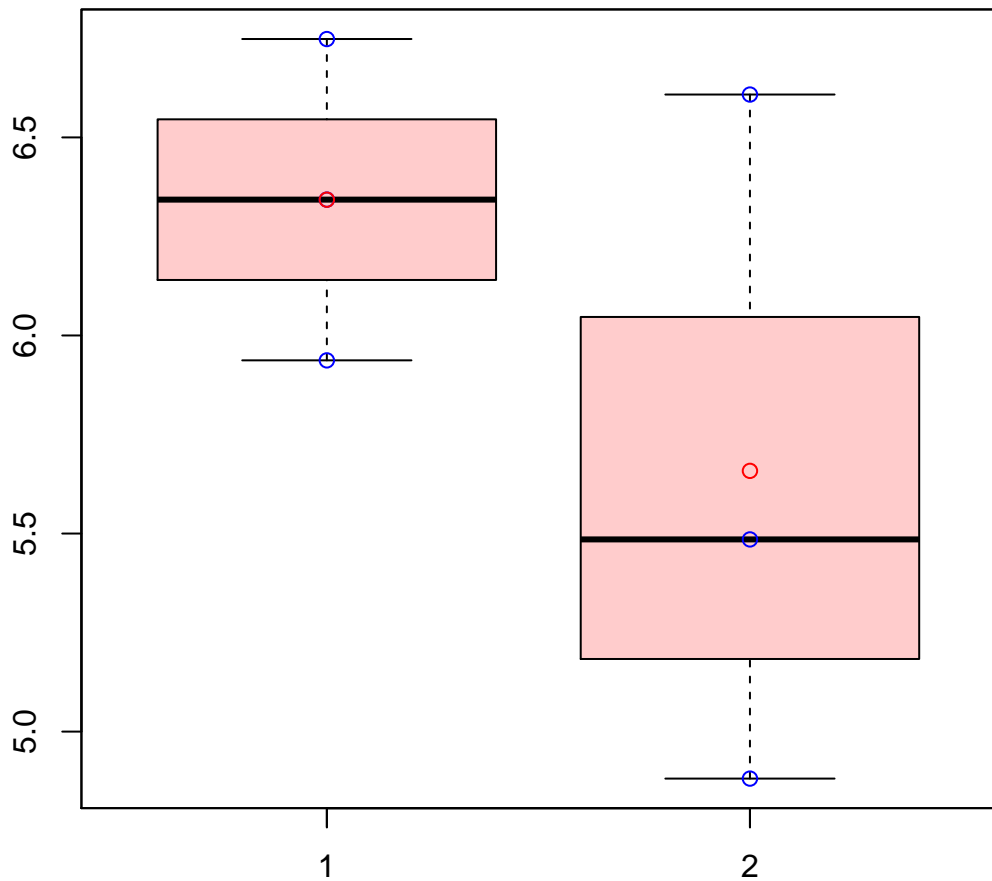

t-Test: p-value = 0.31

# M8CER6|M8CER6\_AEGTA

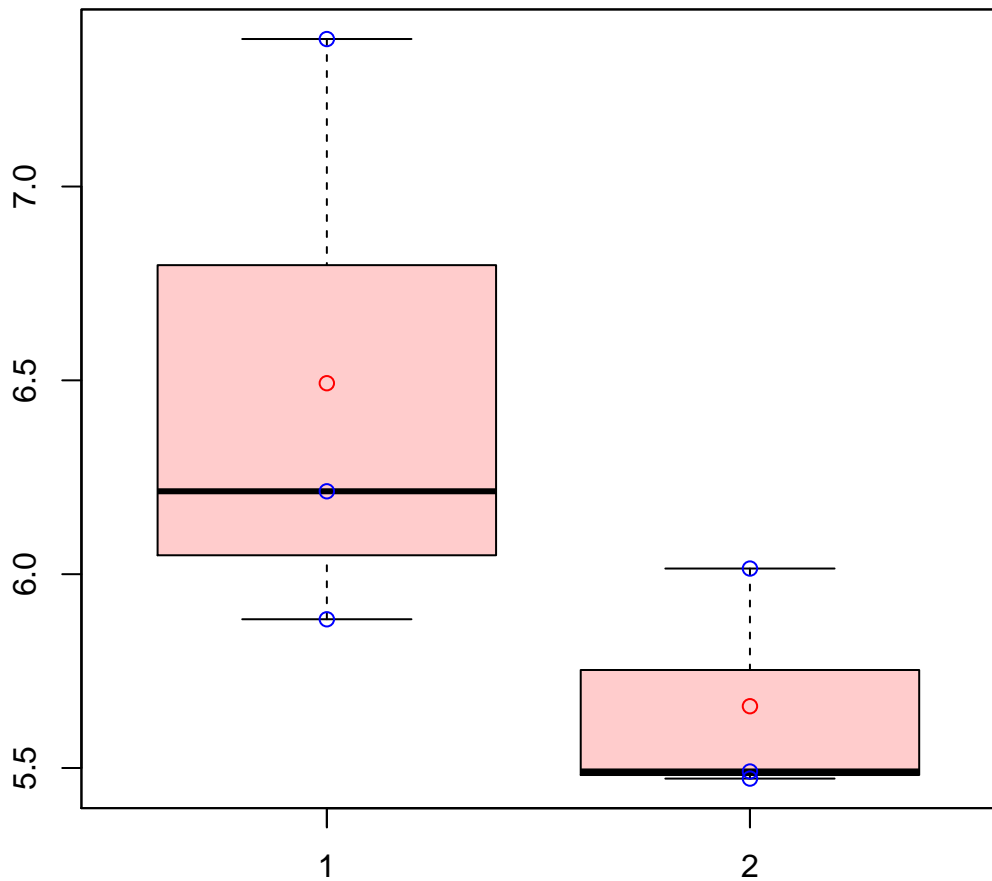

t-Test: p-value = 0.2

# M8CET9|M8CET9\_AEGTA

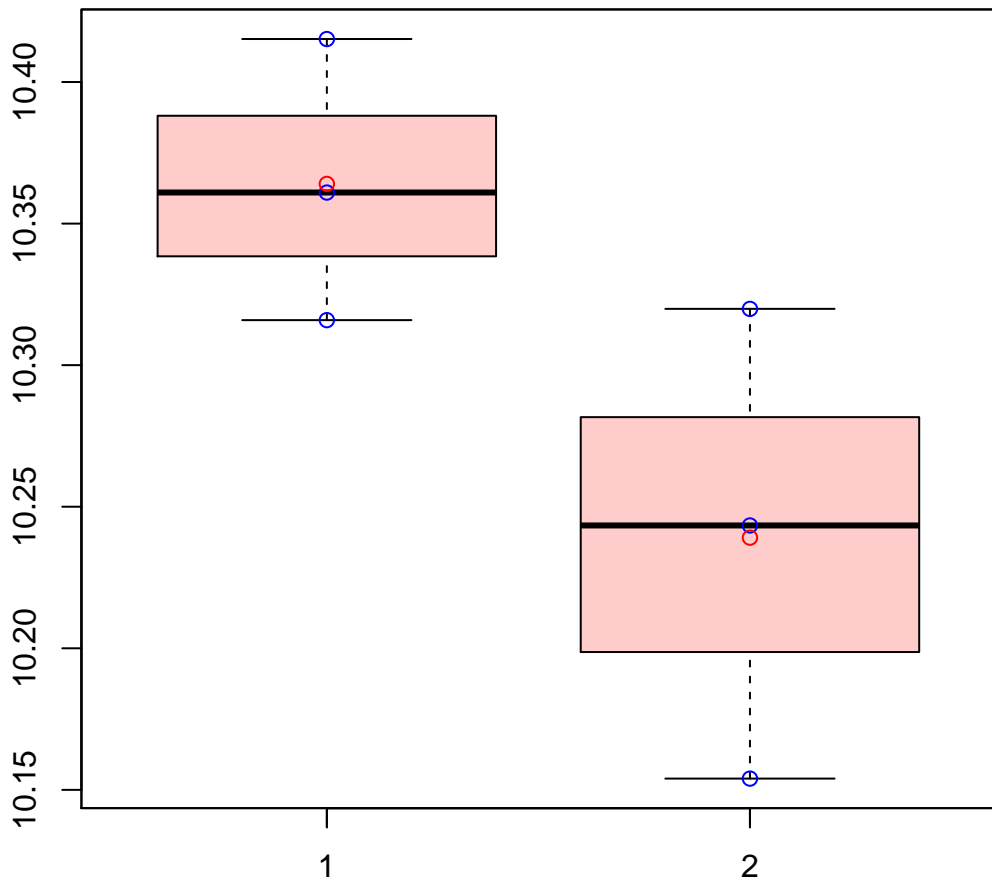

t-Test: p-value = 0.1

# M8CEU1|M8CEU1\_AEGTA

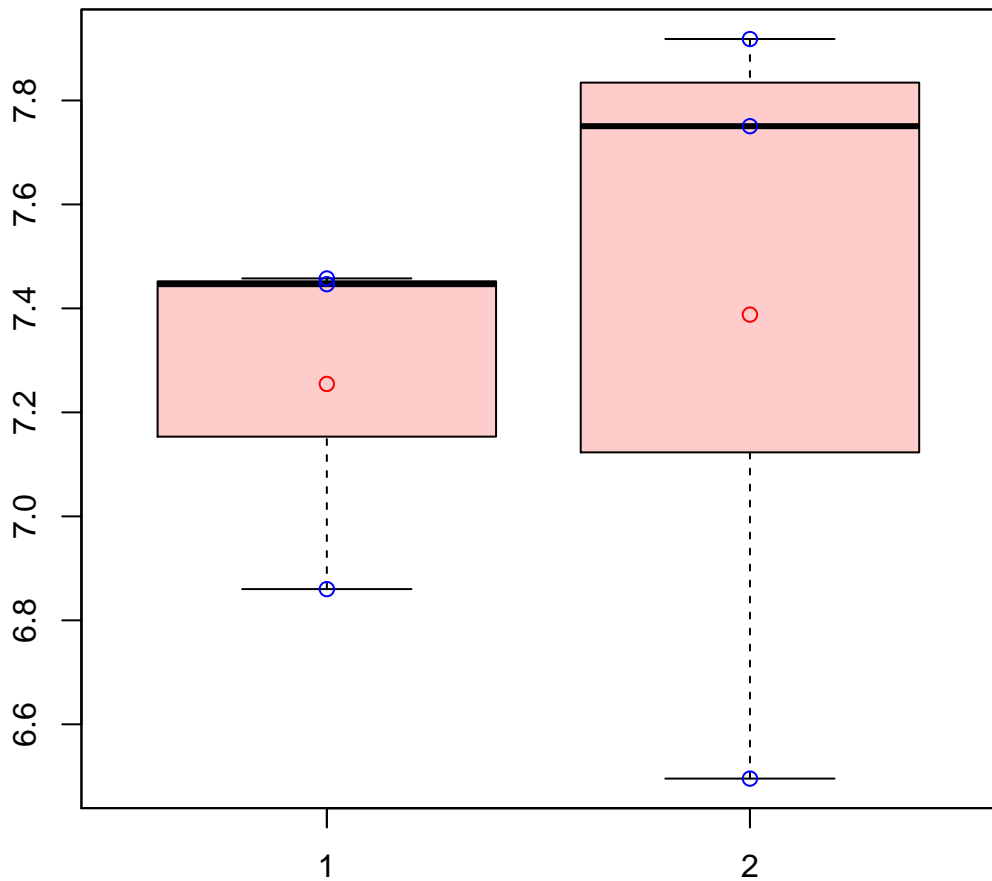

t-Test: p-value = 0.8



# M8CEY0|M8CEY0\_AEGTA

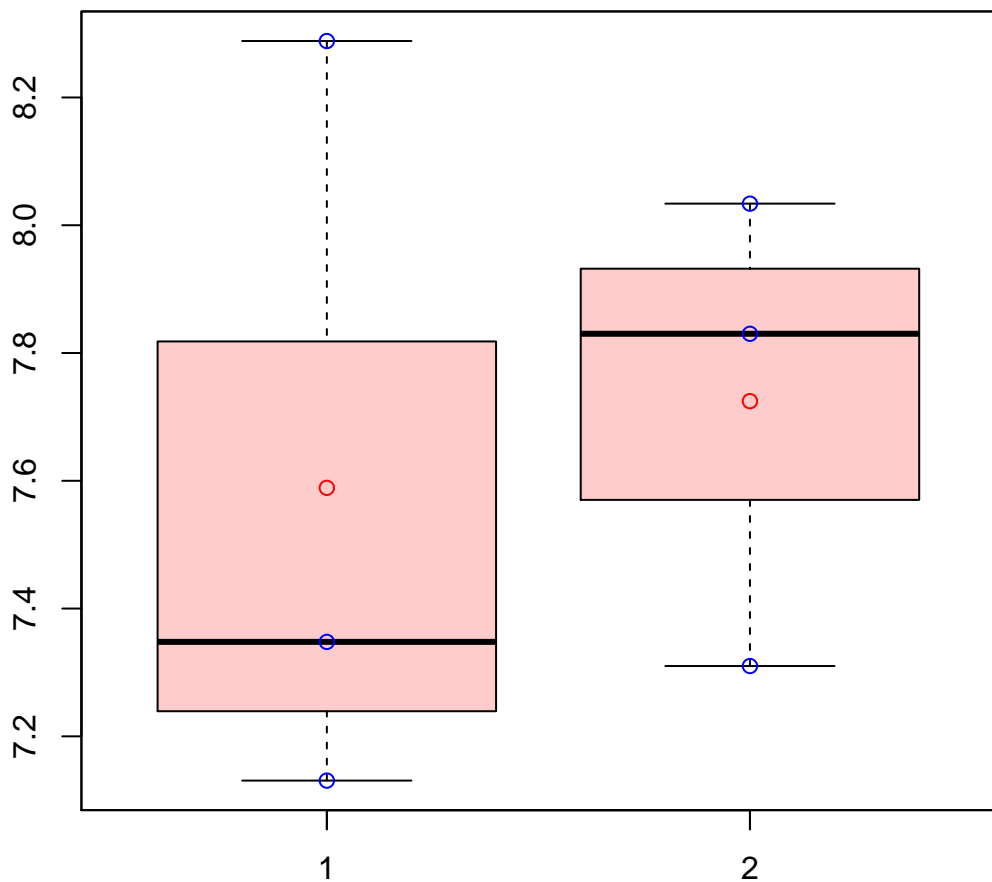

t-Test: p-value = 0.76

# M8CFS7|M8CFS7\_AEGTA

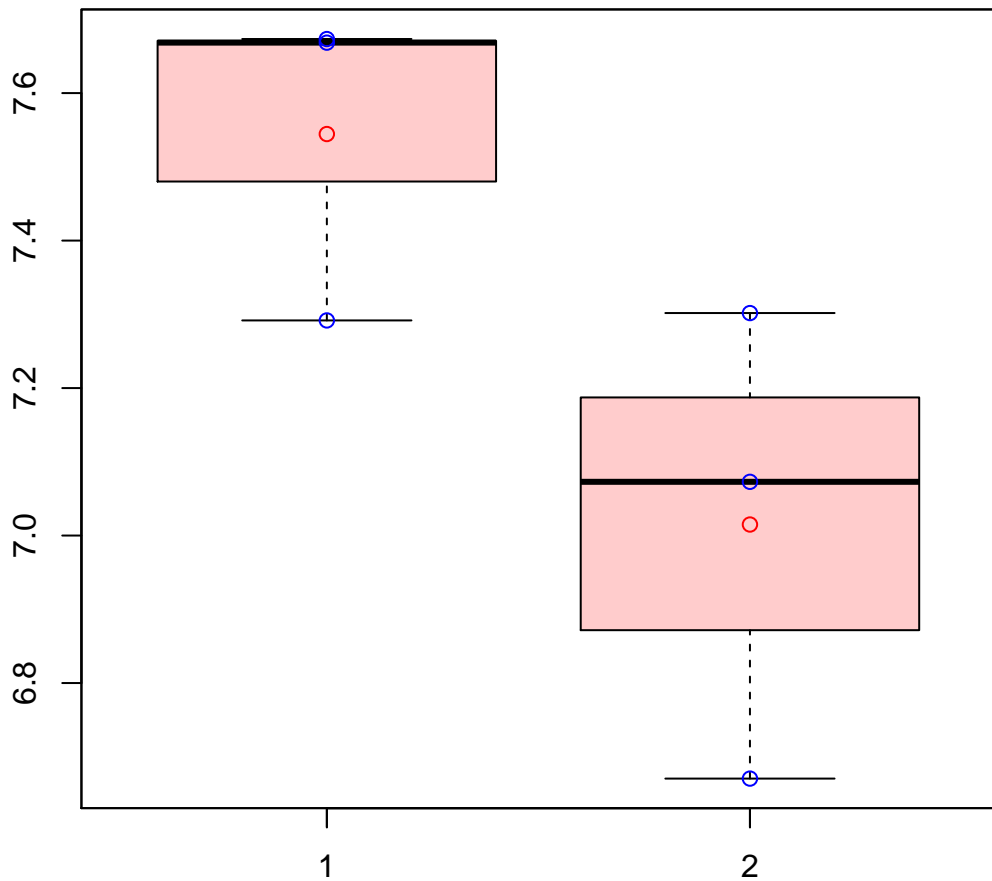

t-Test: p-value = 0.09

# M8CGM8|M8CGM8\_AEGTA

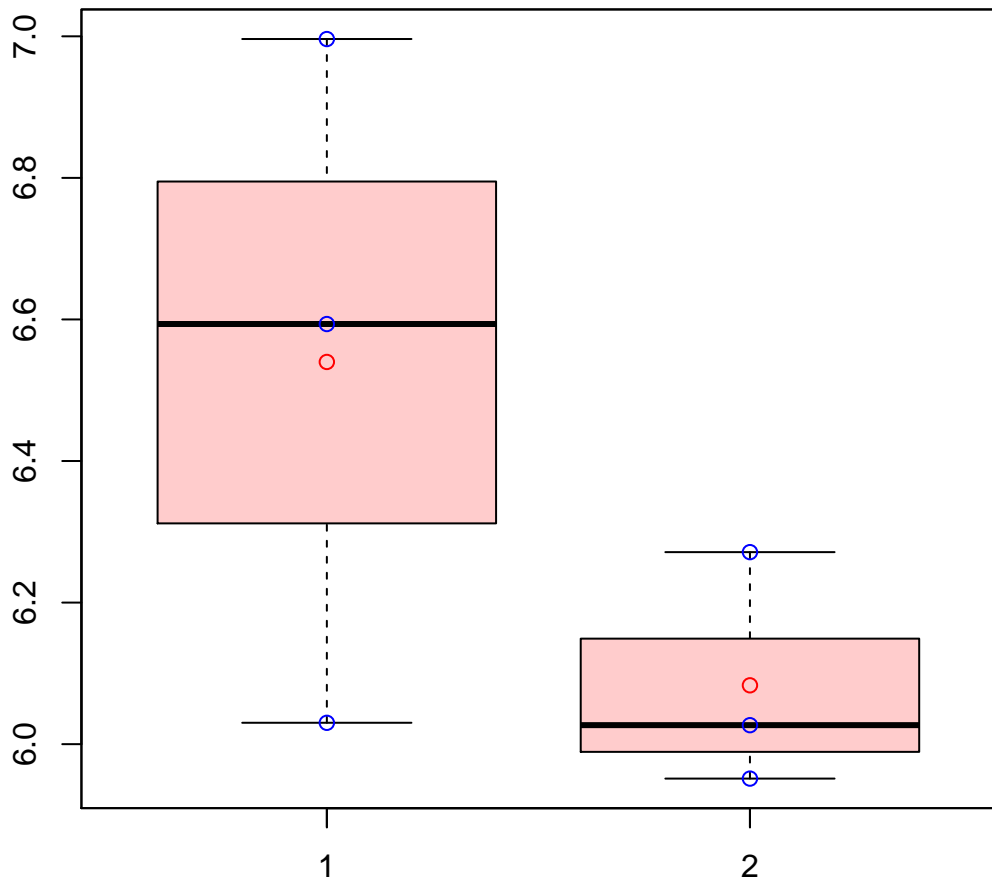

t-Test: p-value = 0.24

# M8CGV9|M8CGV9\_AEGTA

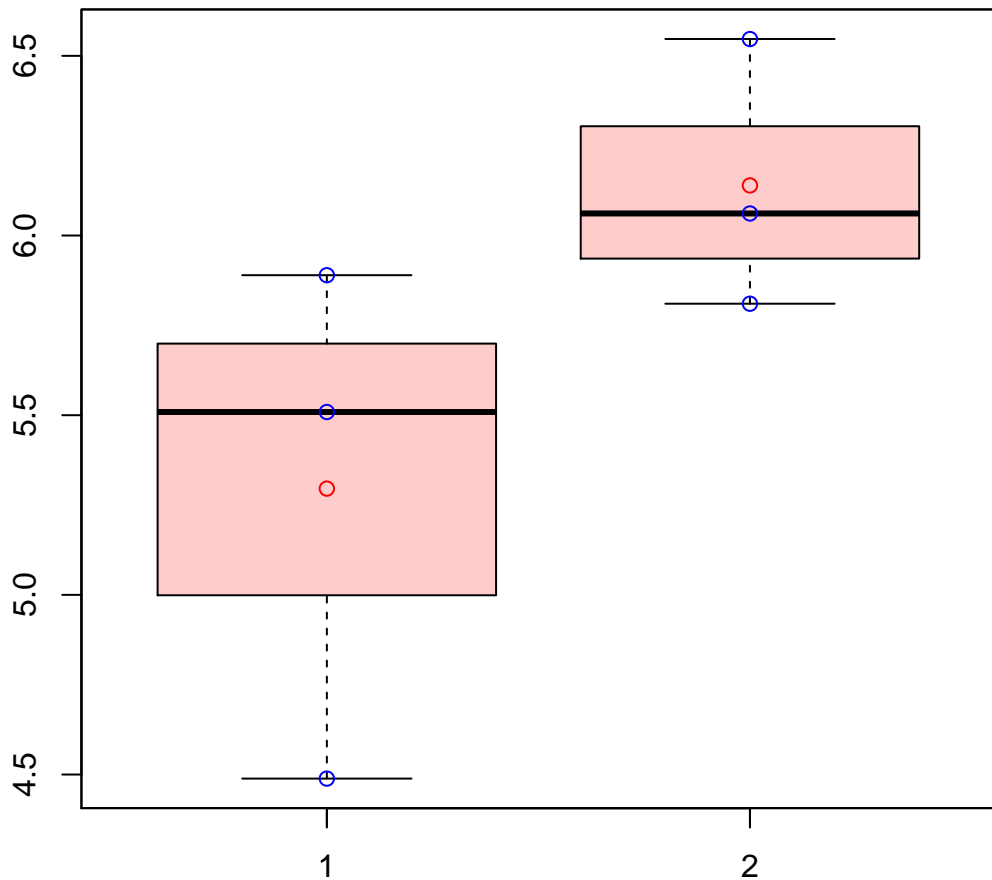

t-Test: p-value = 0.17

# M8CI56|M8CI56\_AEGTA

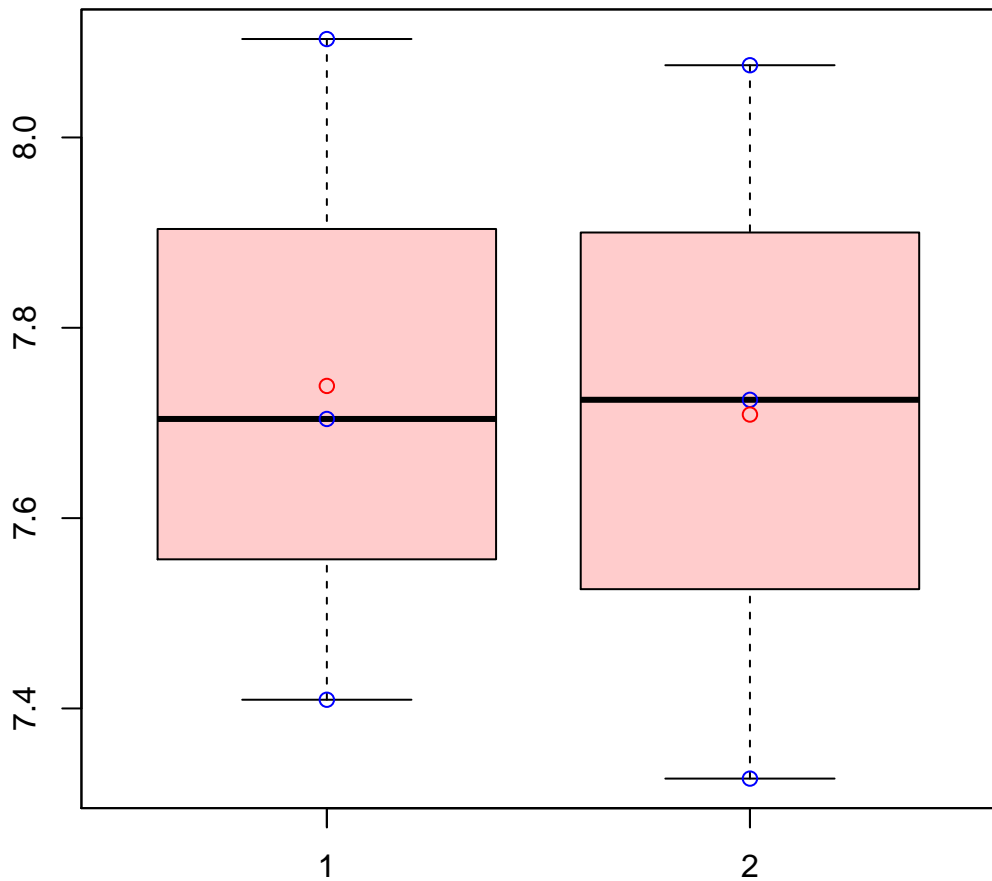

t-Test: p-value = 0.92

# M8CL49|M8CL49\_AEGTA

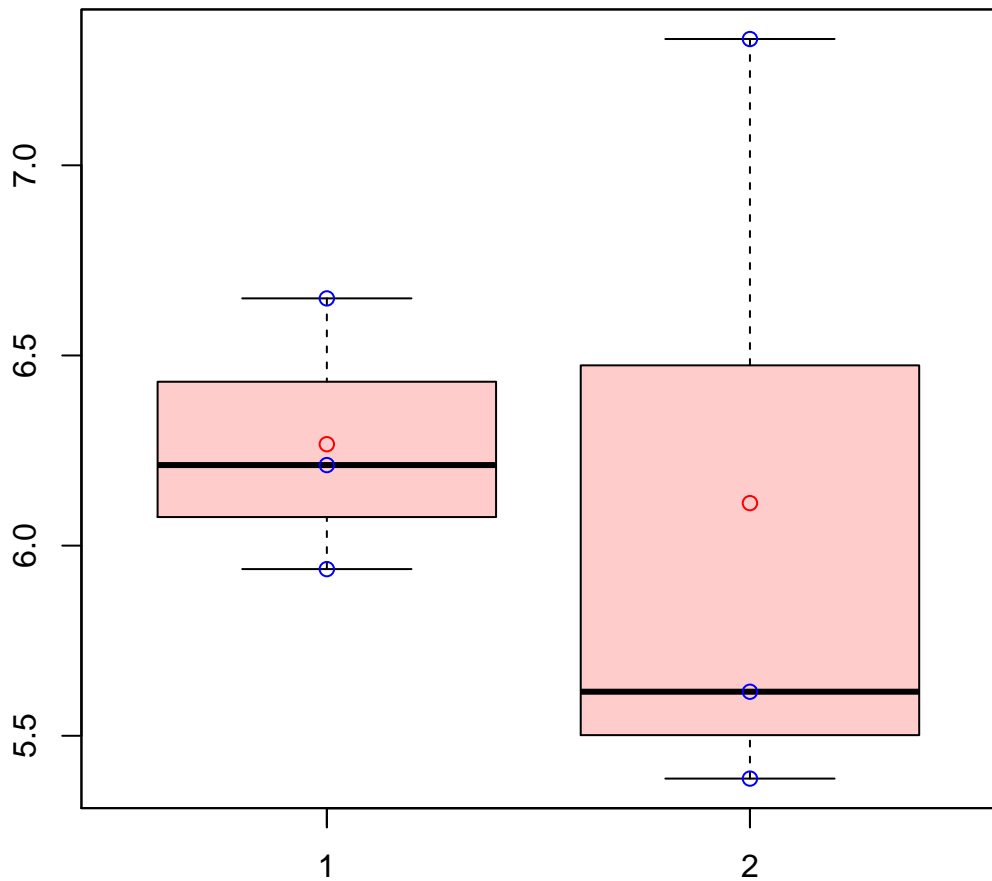

t-Test: p-value = 0.83

# M8CM50|M8CM50\_AEGTA

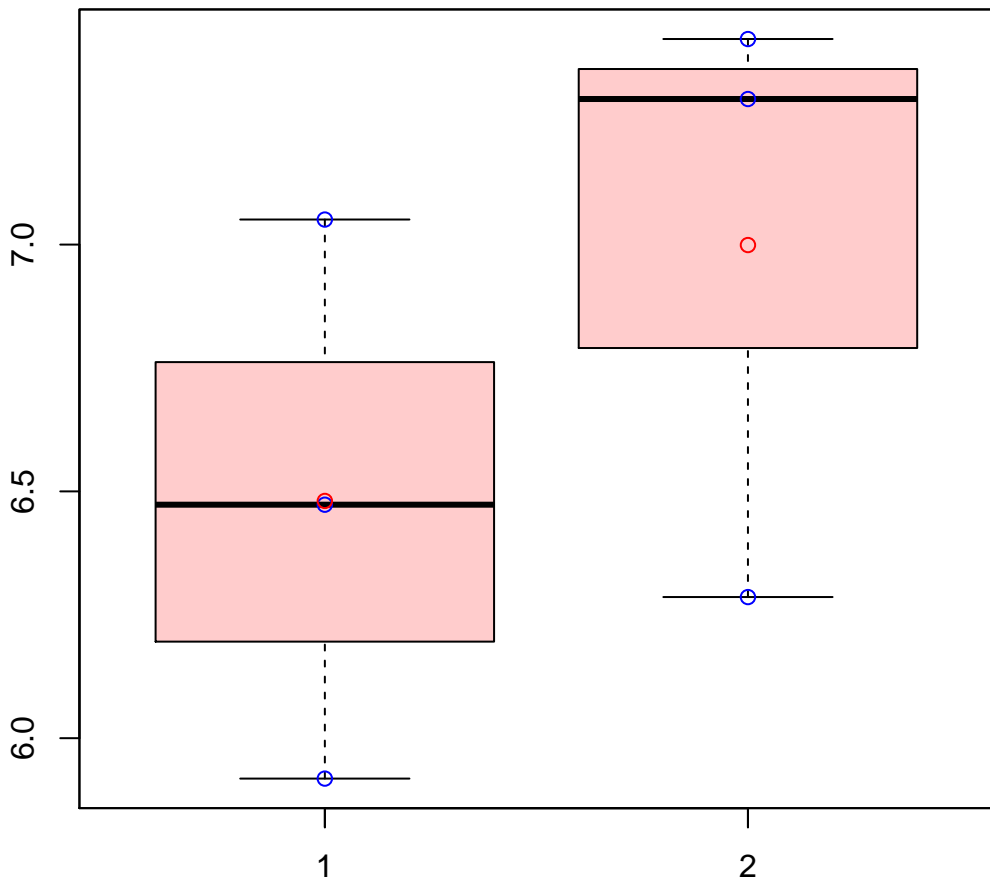

t-Test: p-value = 0.35

# M8CMG6|M8CMG6\_AEGTA

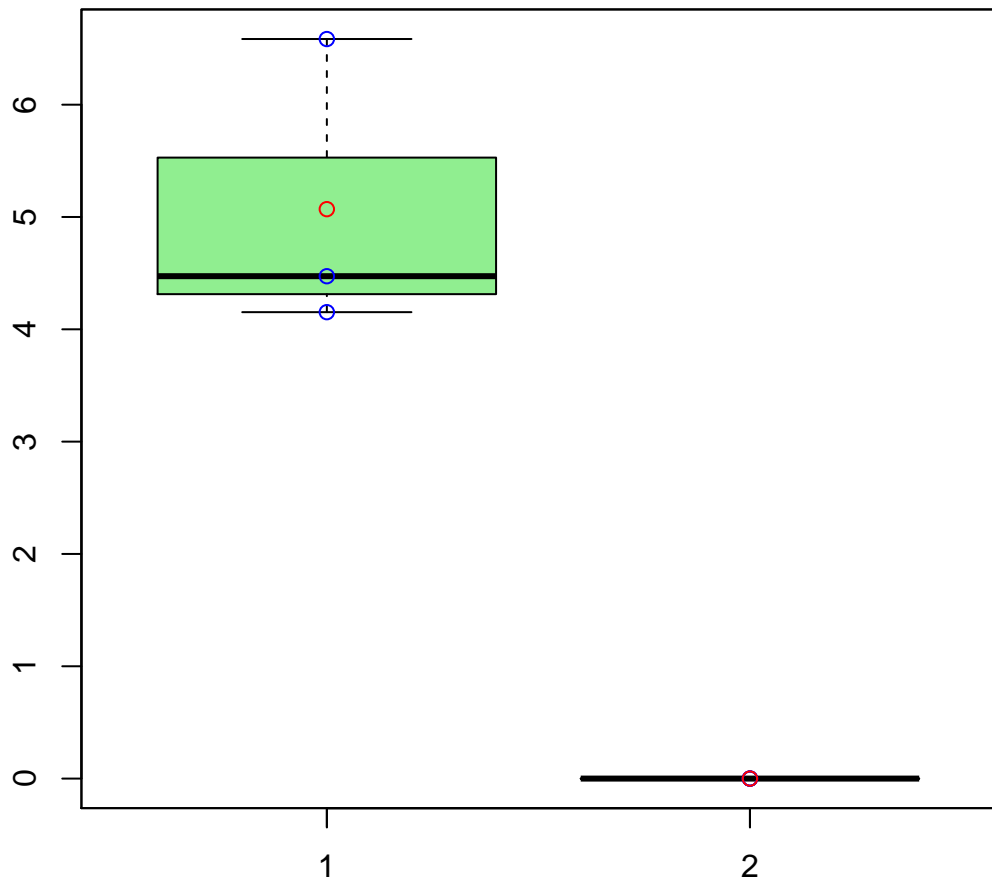

t-Test: p-value = 0.02



# M8CNU2|M8CNU2\_AEGTA

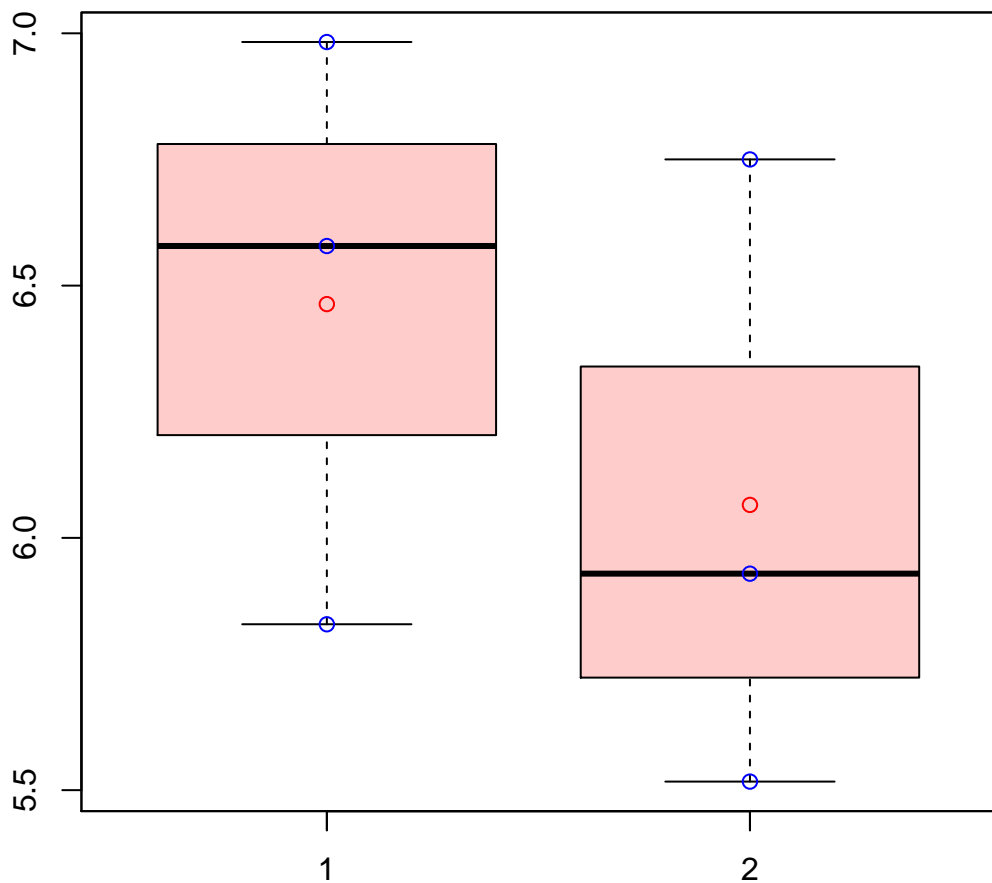

t-Test: p-value = 0.47

# M8CPL1|M8CPL1\_AEGTA

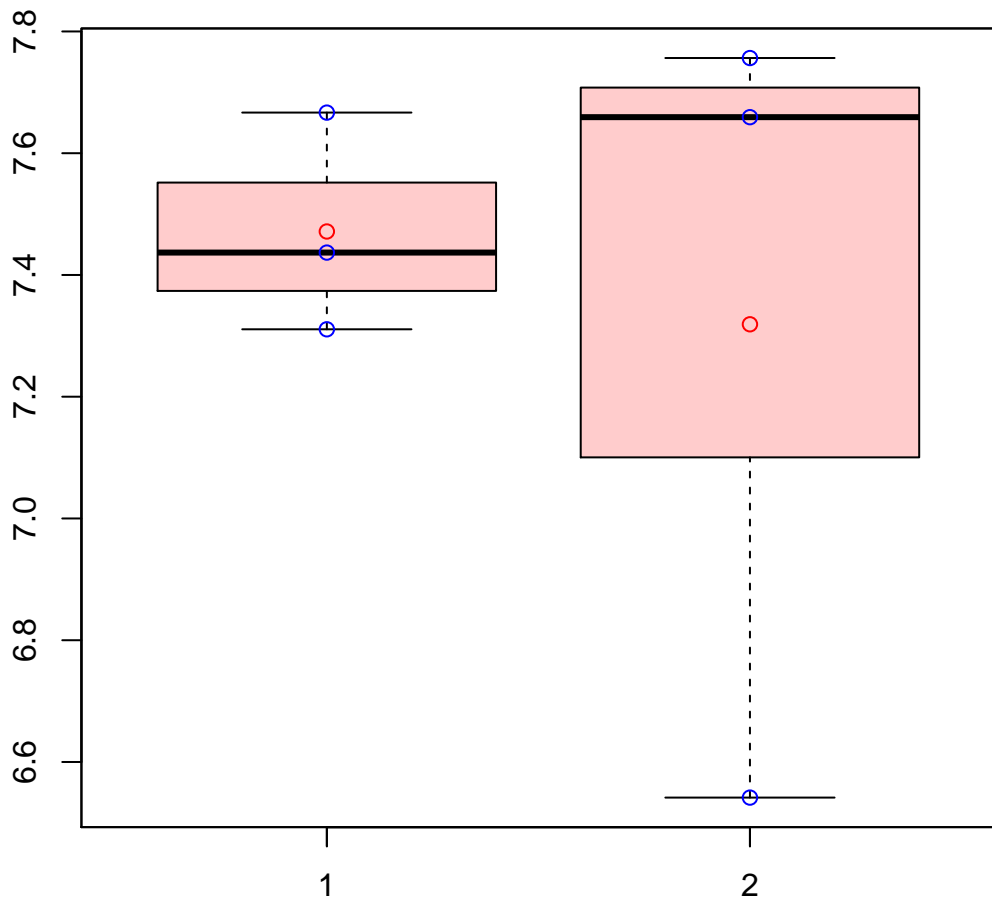

t-Test: p-value = 0.74

# M8CPP5|M8CPP5\_AEGTA

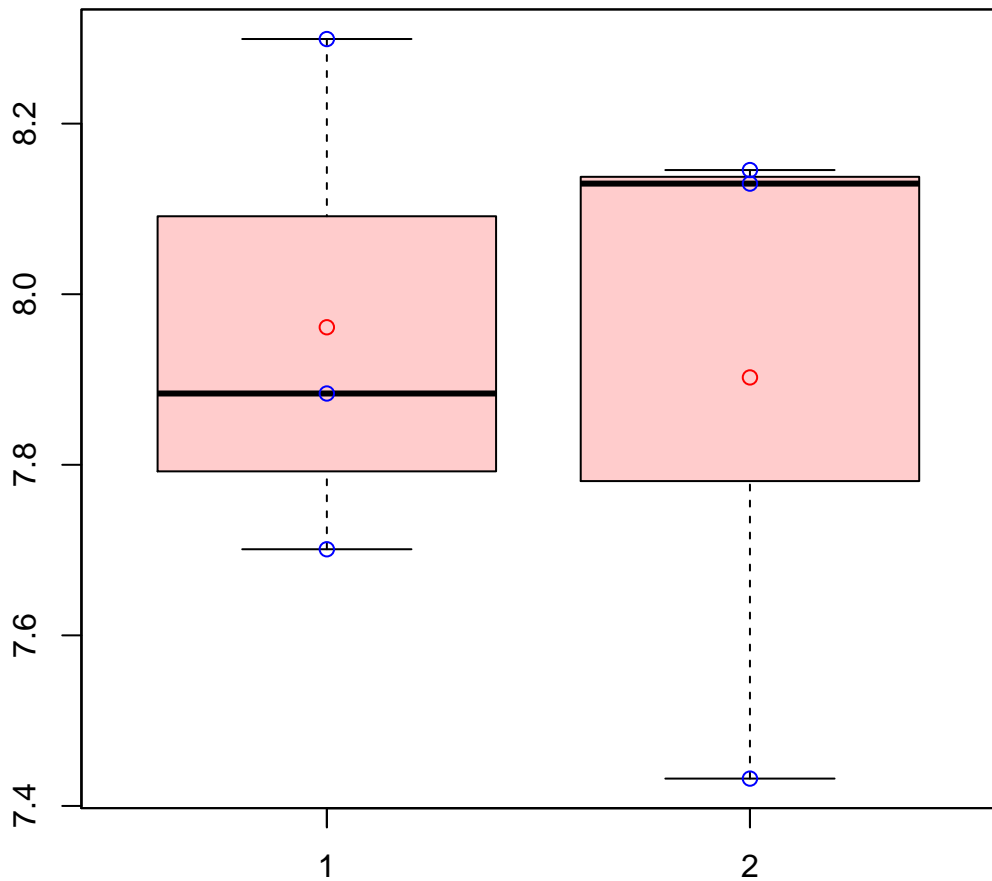

t-Test: p-value = 0.85

# M8CQ87|M8CQ87\_AEGTA

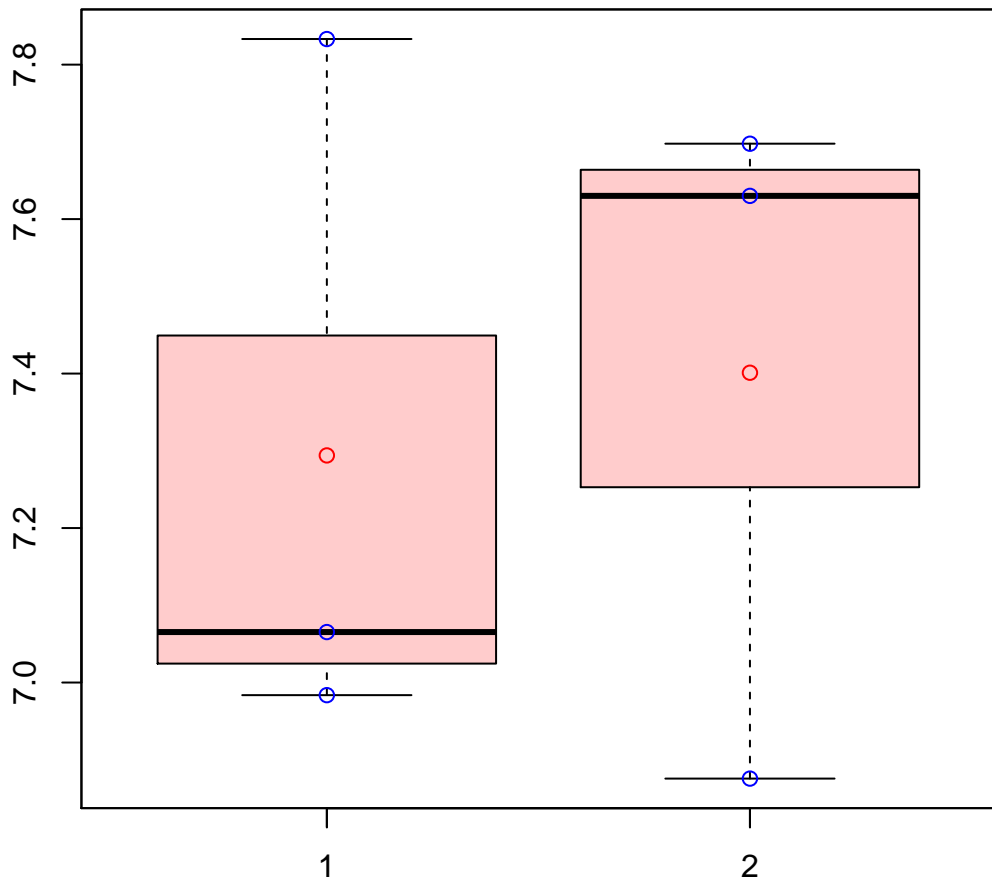

t-Test: p-value = 0.79

# M8CQN8|M8CQN8\_AEGTA

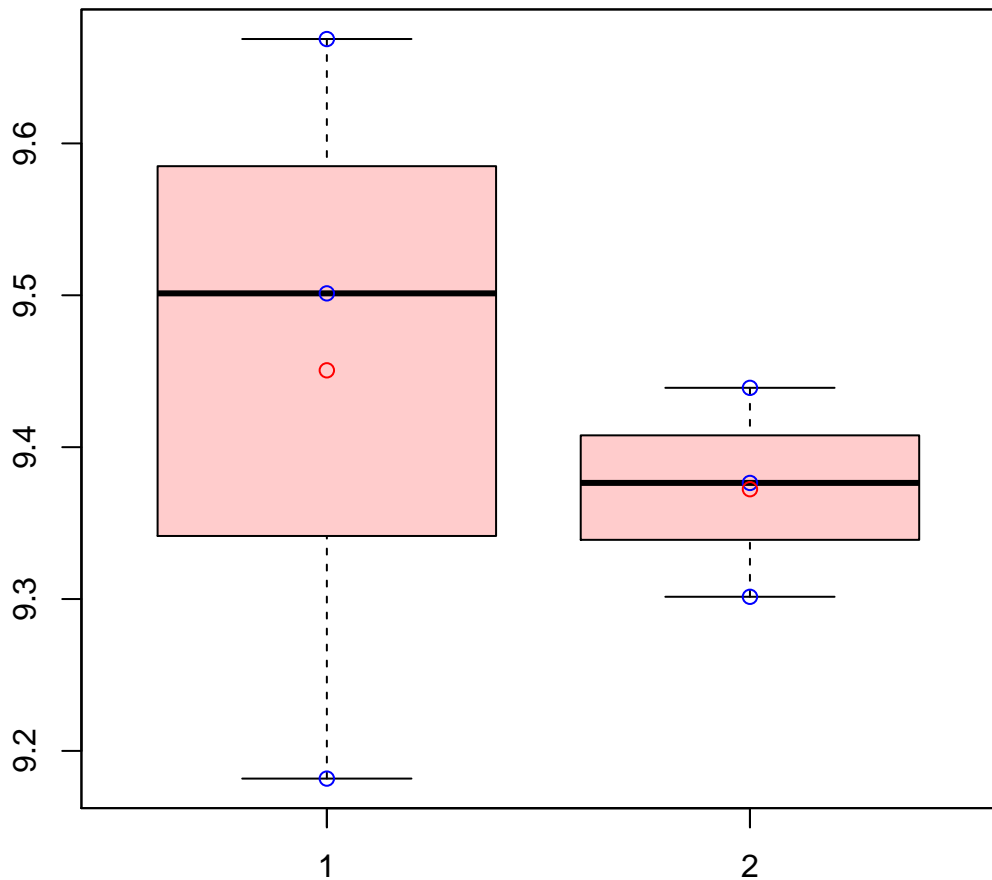

t-Test: p-value = 0.64

# M8CRW4|M8CRW4\_AEGTA

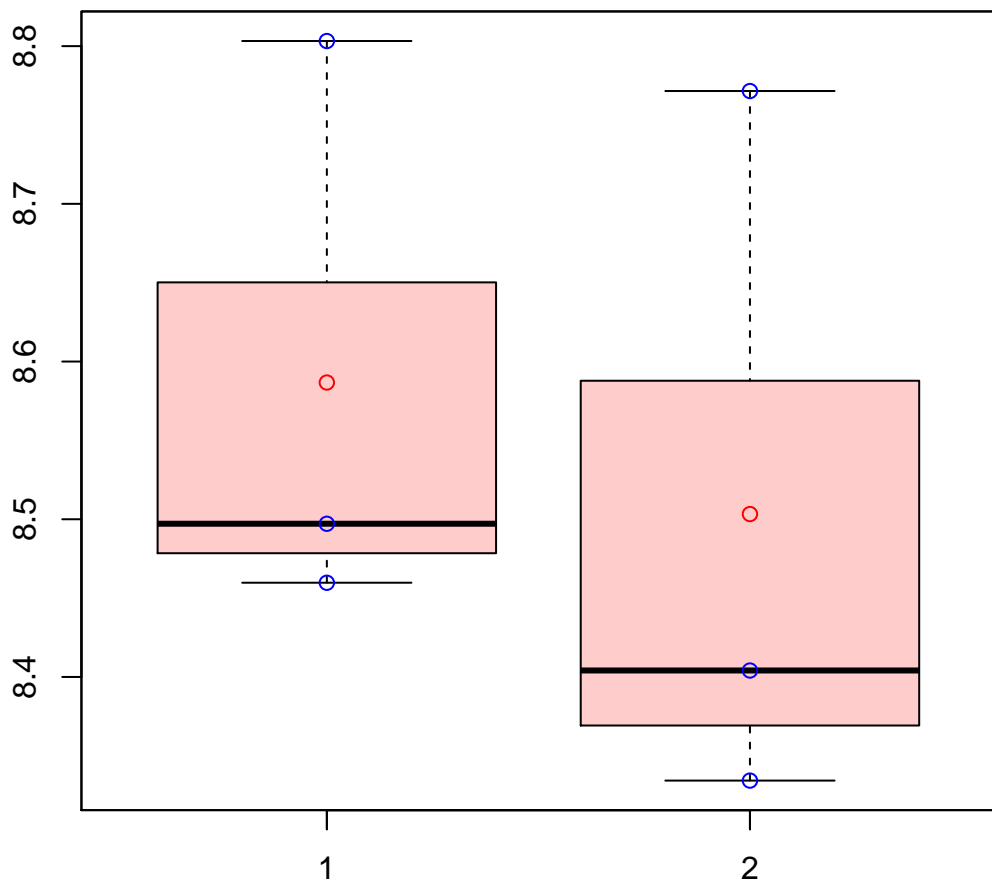

t-Test: p-value = 0.66

# M8CRZ1|M8CRZ1\_AEGTA

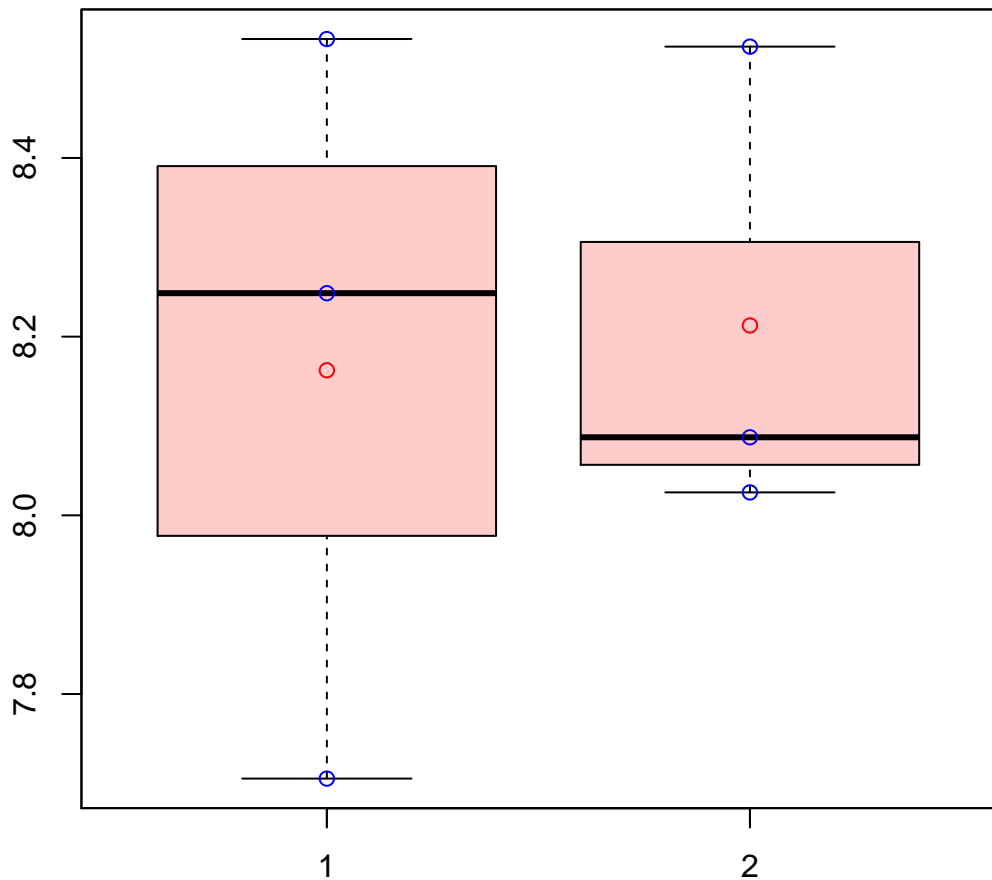

t-Test: p-value = 0.87

# M8CW07|M8CW07\_AEGTA

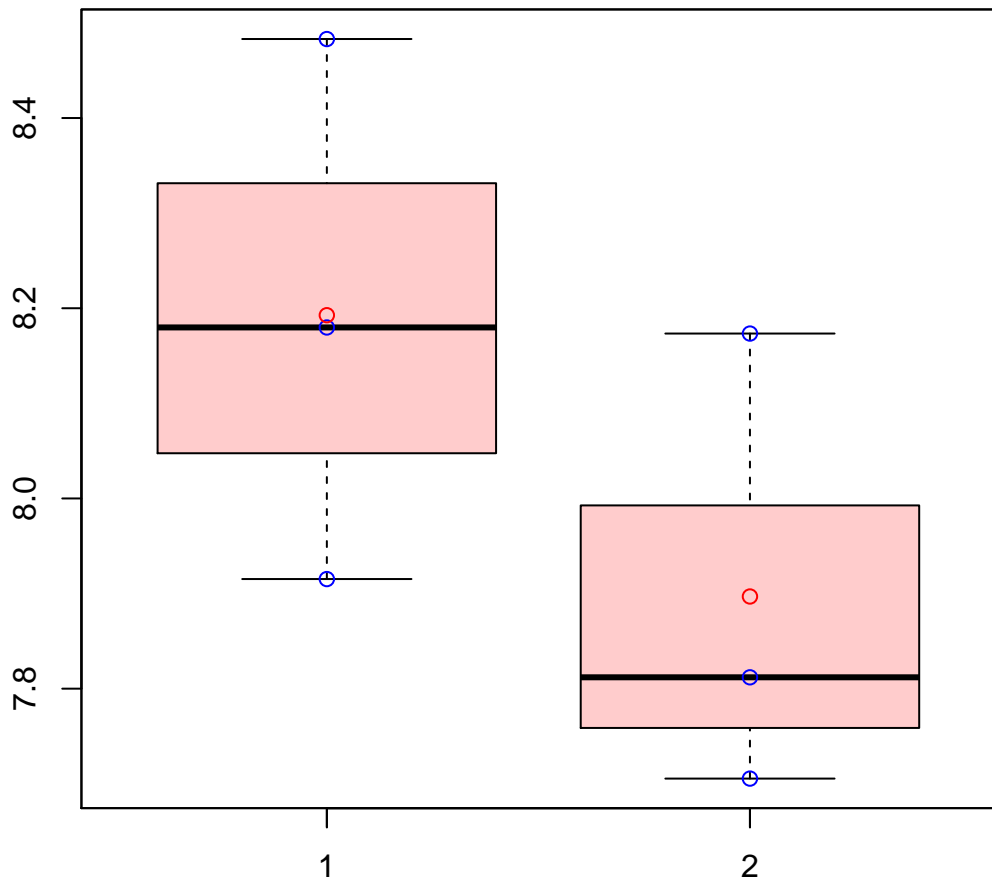

t-Test: p-value = 0.25



# M8CWI6|M8CWI6\_AEGTA

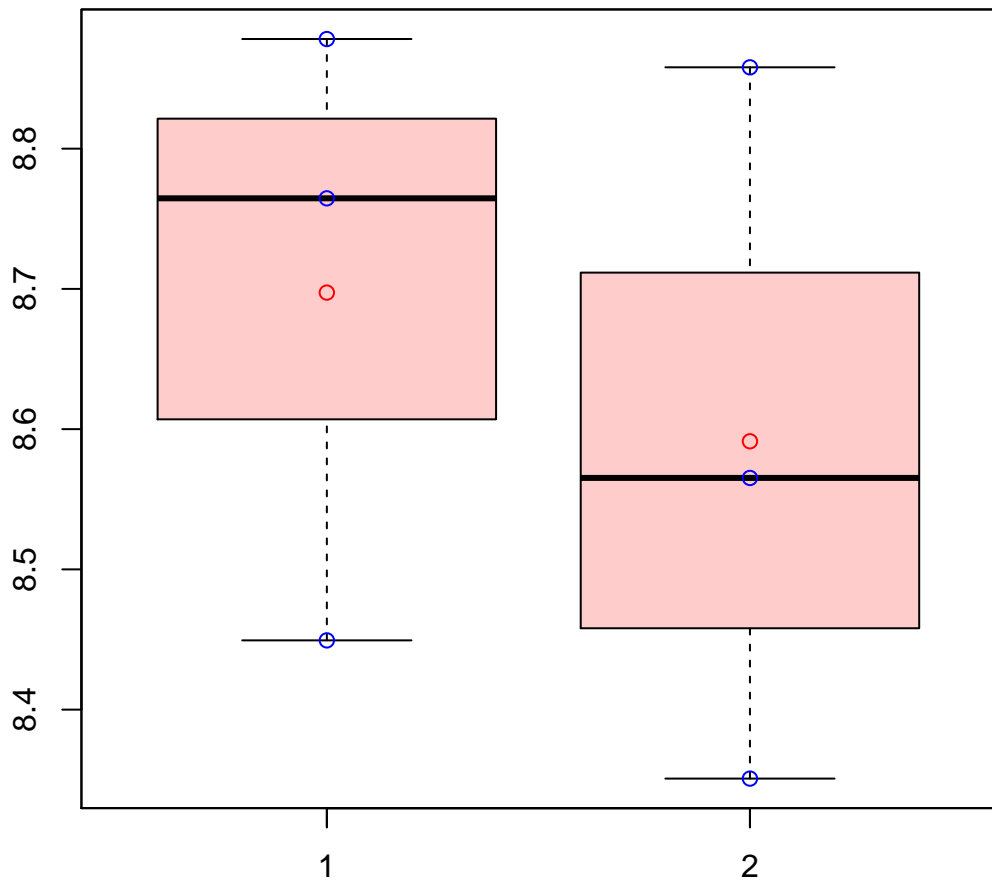

t-Test: p-value = 0.62

# M8CY84|M8CY84\_AEGTA

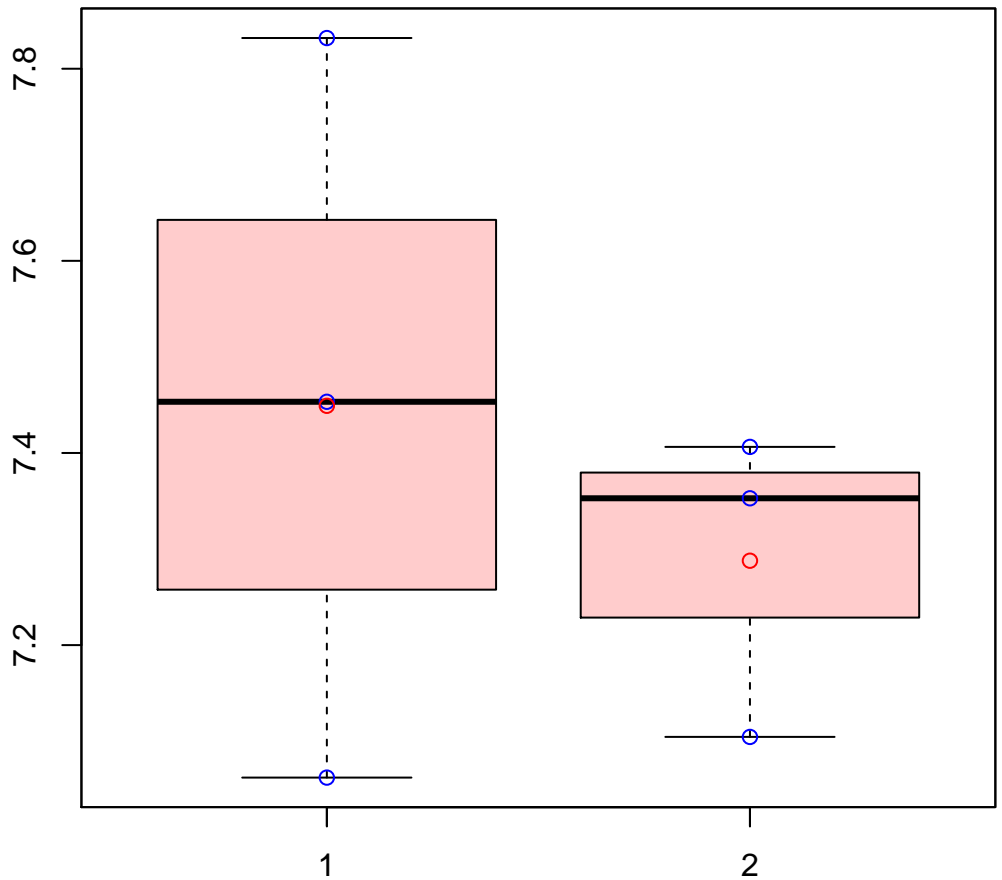

t-Test: p-value = 0.56

# M8CYT7|M8CYT7\_AEGTA

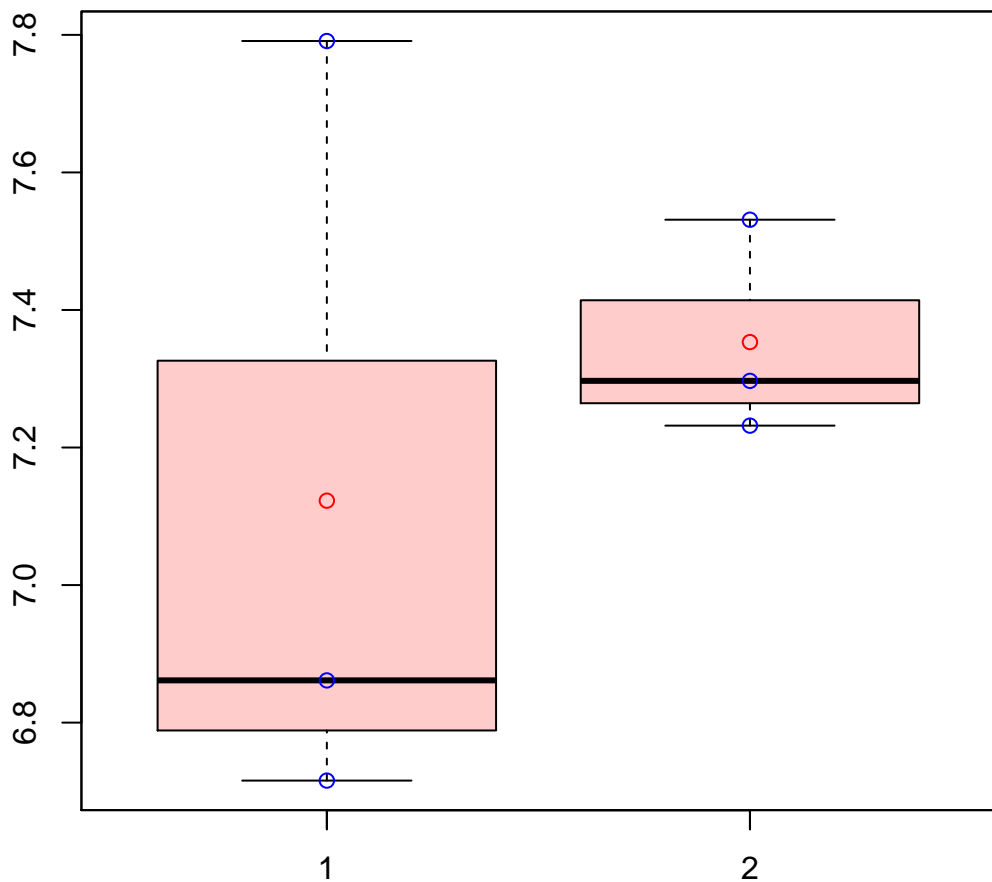

t-Test: p-value = 0.57

# M8CZZ3|M8CZZ3\_AEGTA

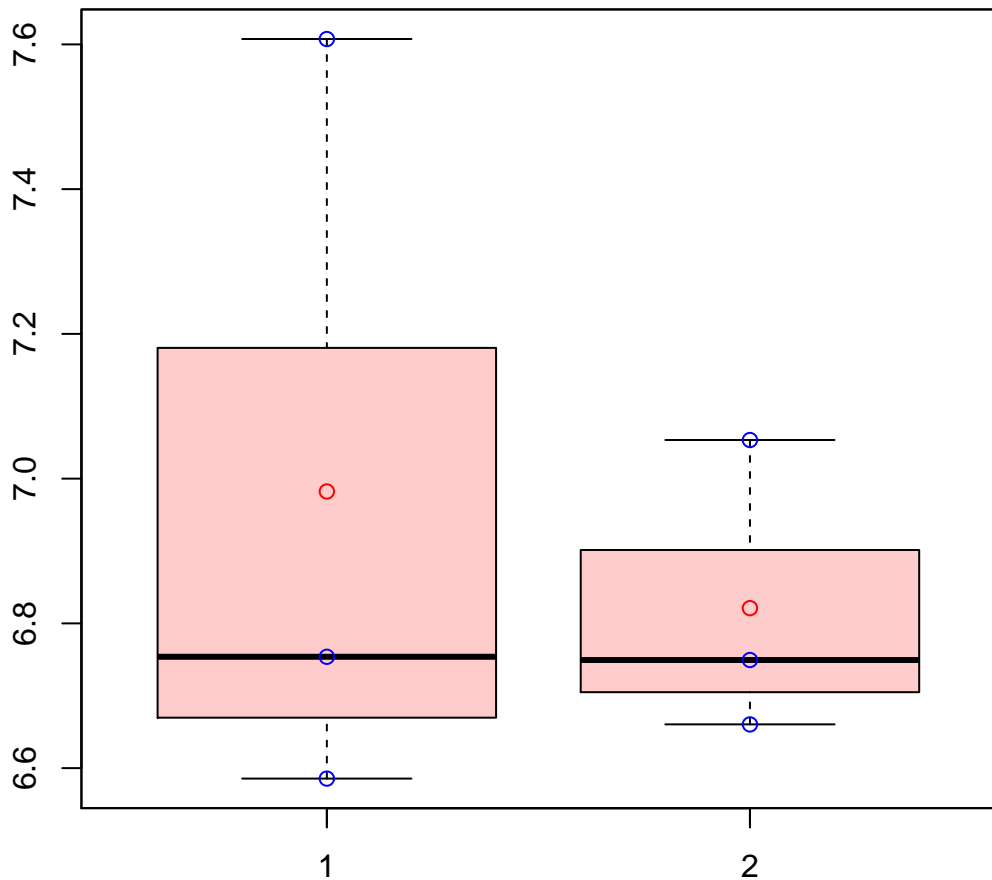

t-Test: p-value = 0.67

# M8D0Q7|M8D0Q7\_AEGTA

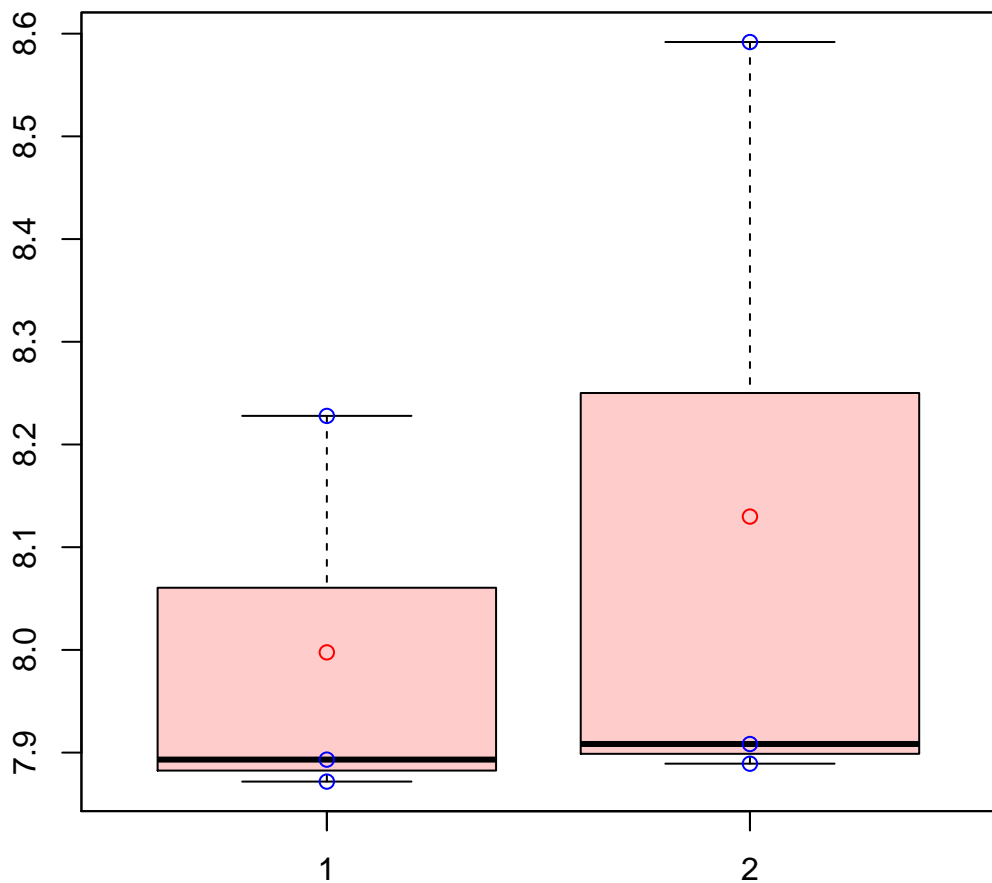

t-Test: p-value = 0.64

# M8D381|M8D381\_AEGTA

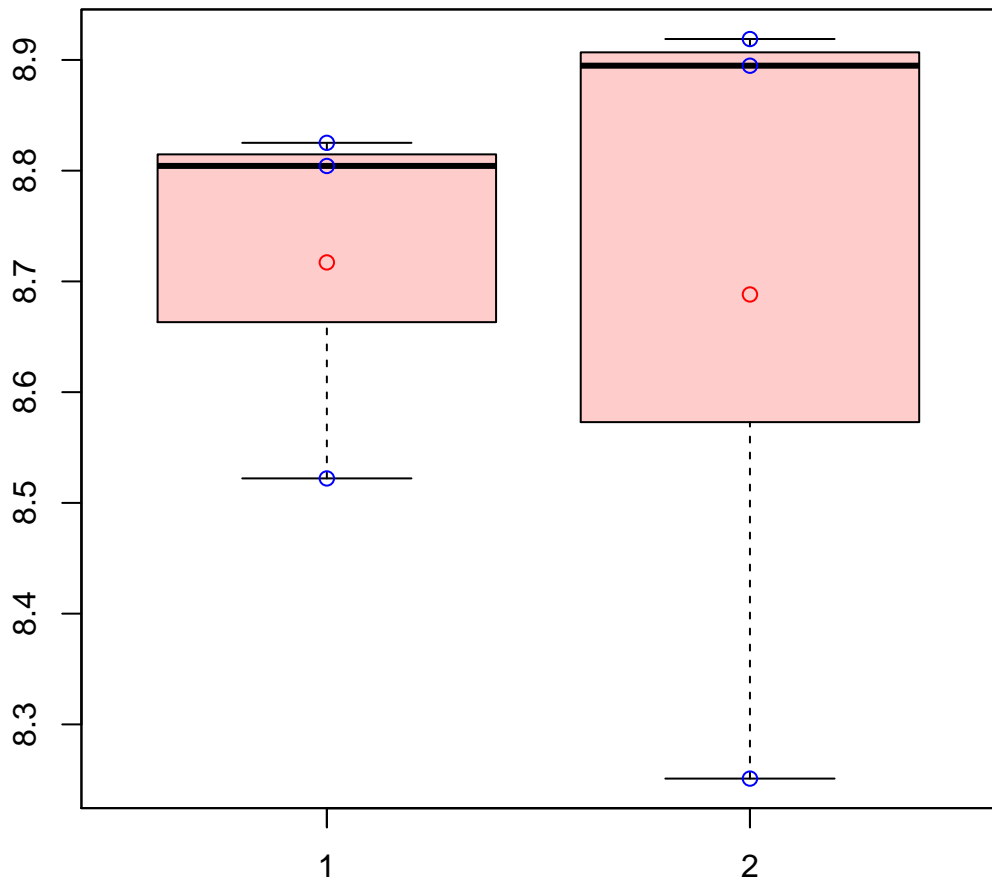

t-Test: p-value = 0.91

# M8D498|M8D498\_AEGTA

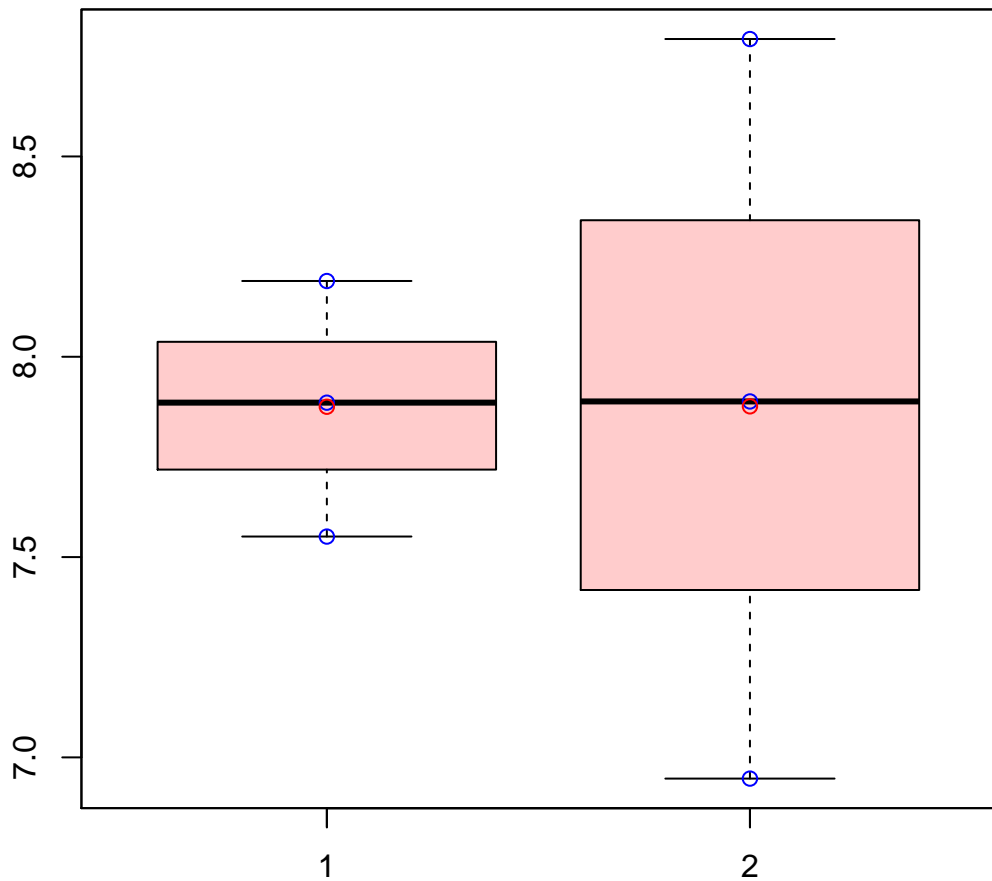

t-Test: p-value = 1

# M8D6T1|M8D6T1\_AEGTA

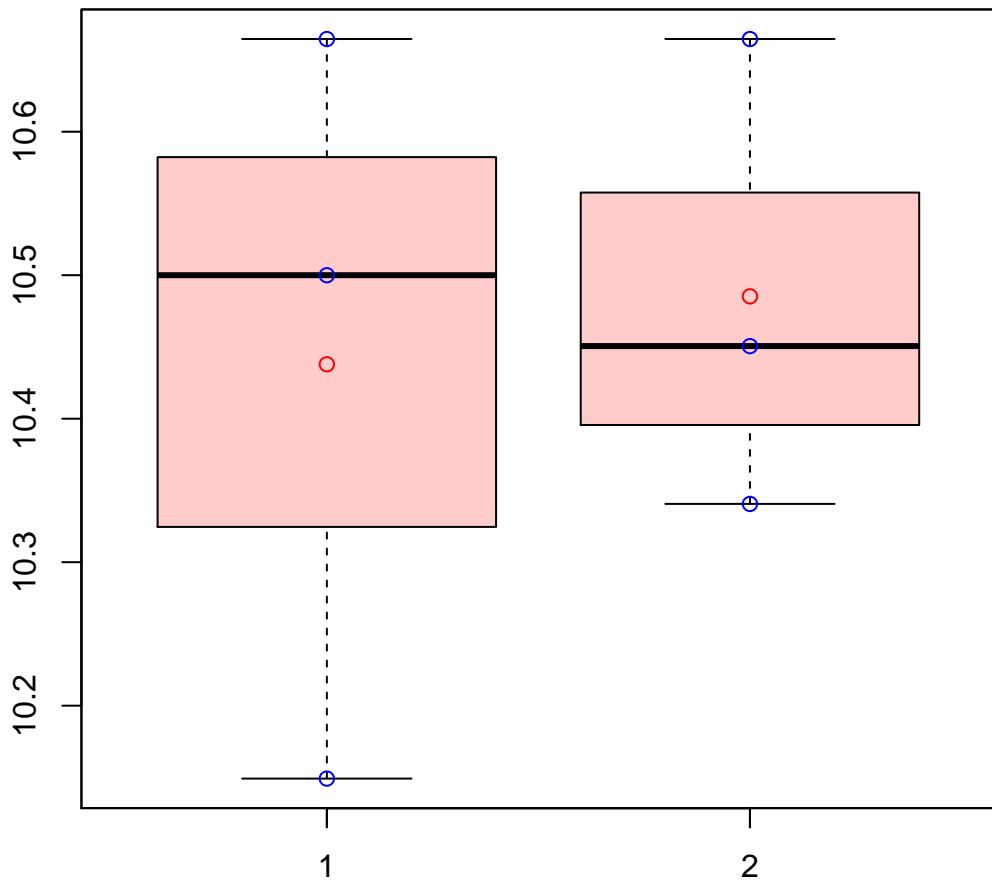

t-Test: p-value = 0.81



# M8D6V1|M8D6V1\_AEGTA

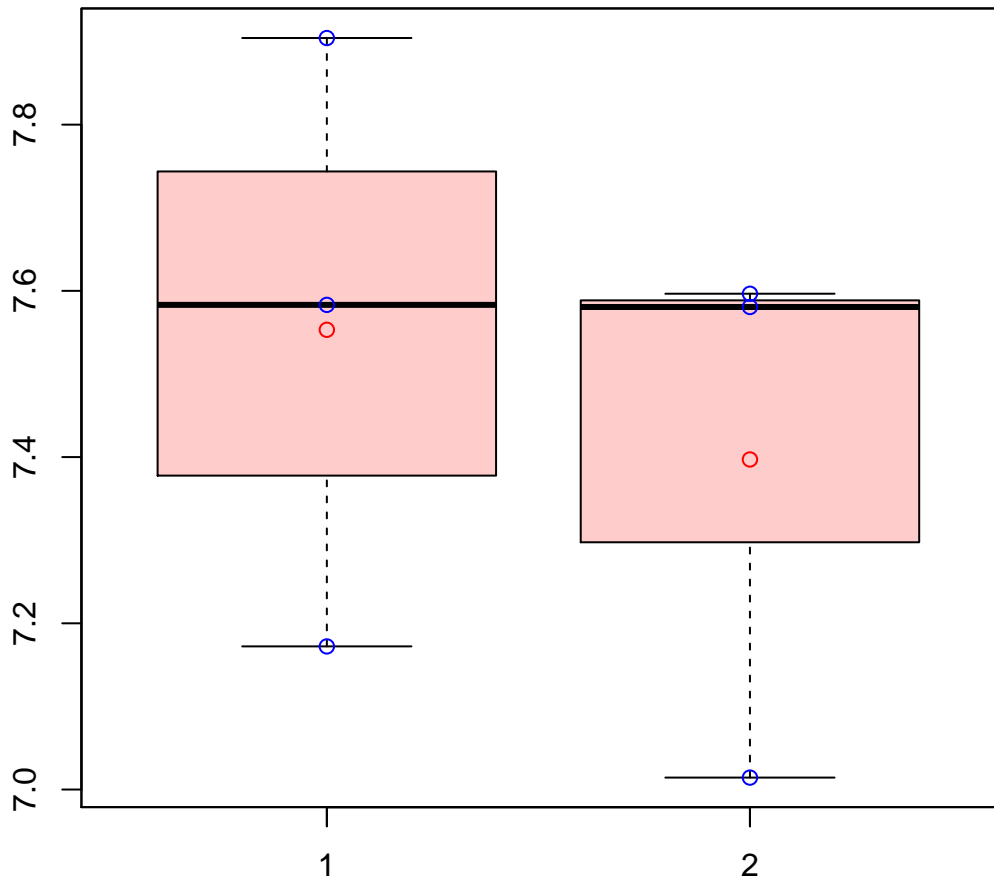

t-Test: p-value = 0.61

# M8D862|M8D862\_AEGTA

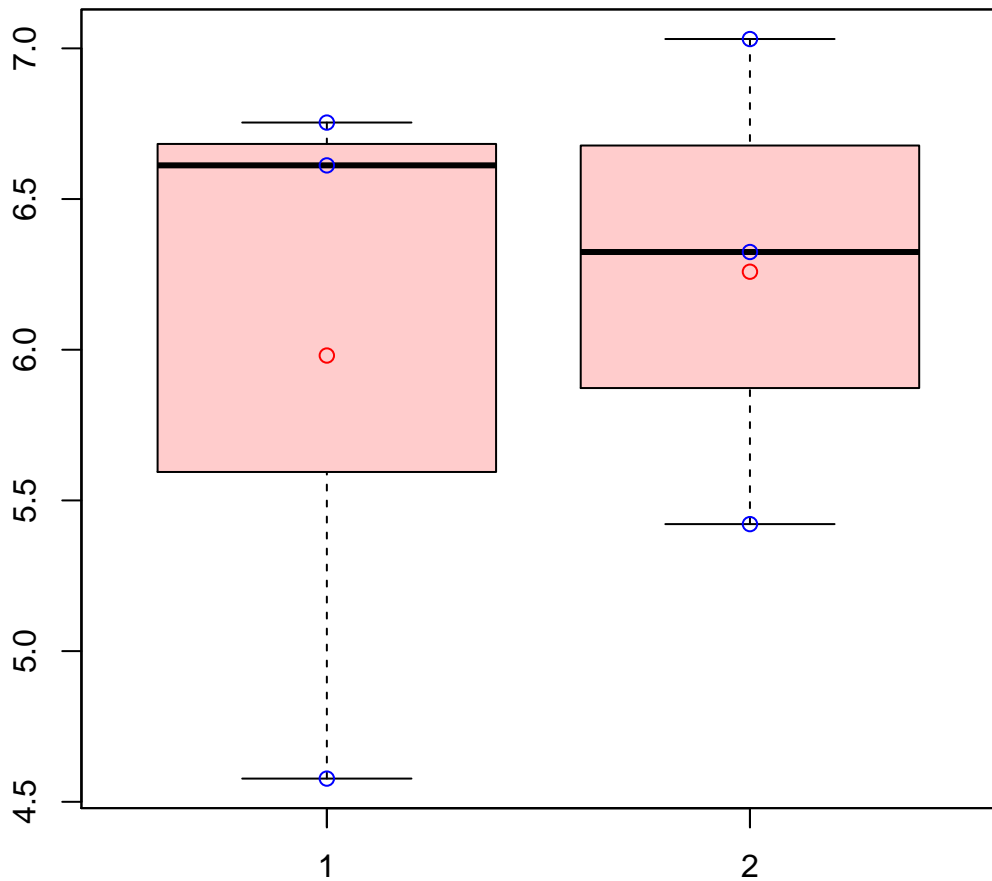

t-Test: p-value = 0.76

# M8D8M6|M8D8M6\_AEGTA

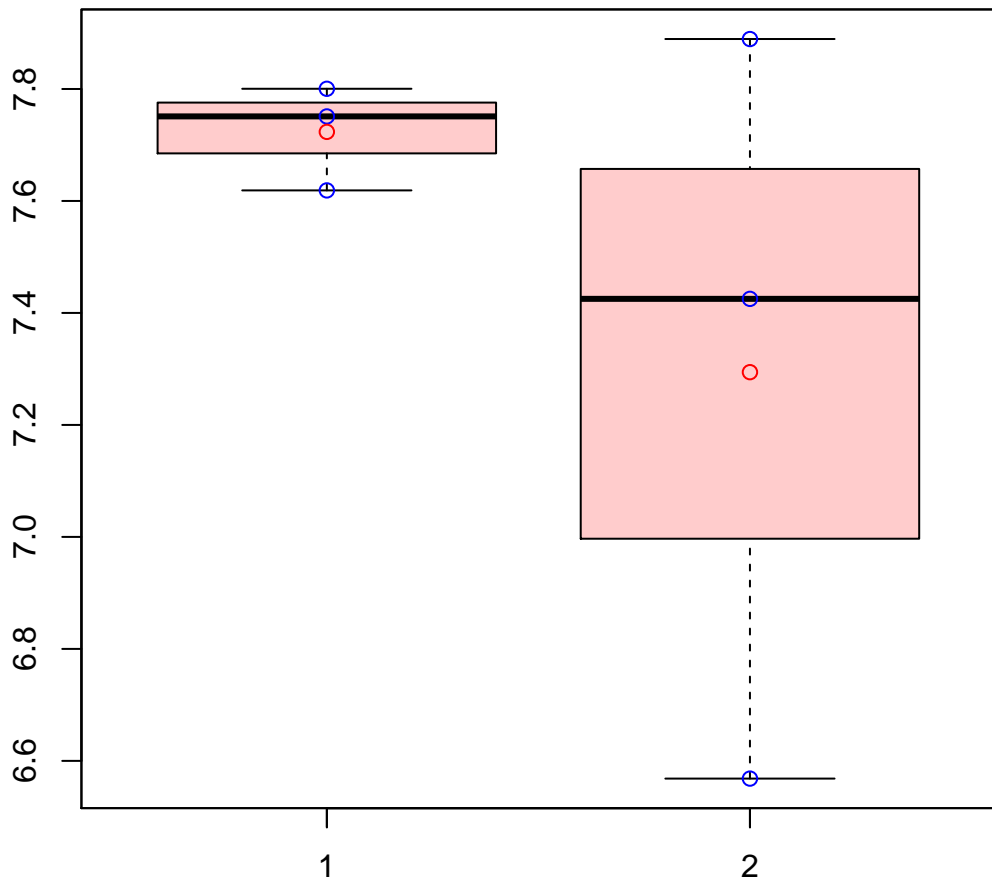

t-Test: p-value = 0.38

# M9NND6|M9NND6\_PANVG

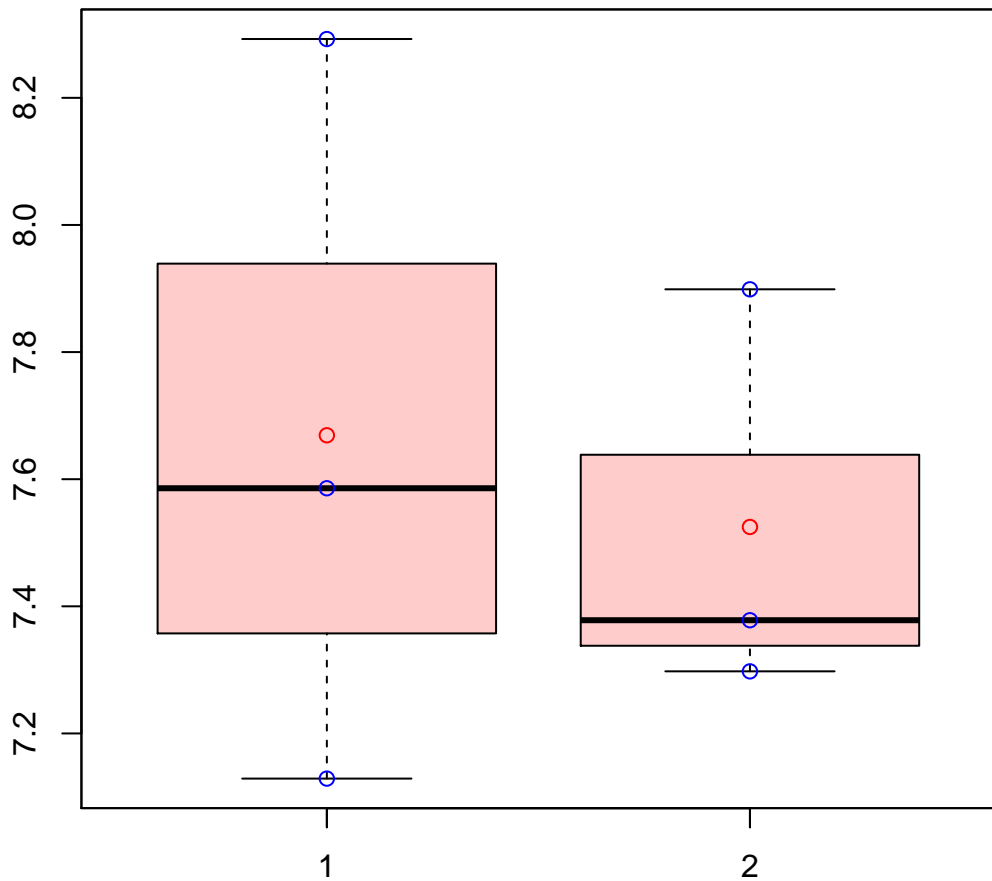

t-Test: p-value = 0.73

# M9T6Y7|M9T6Y7\_TRIDB

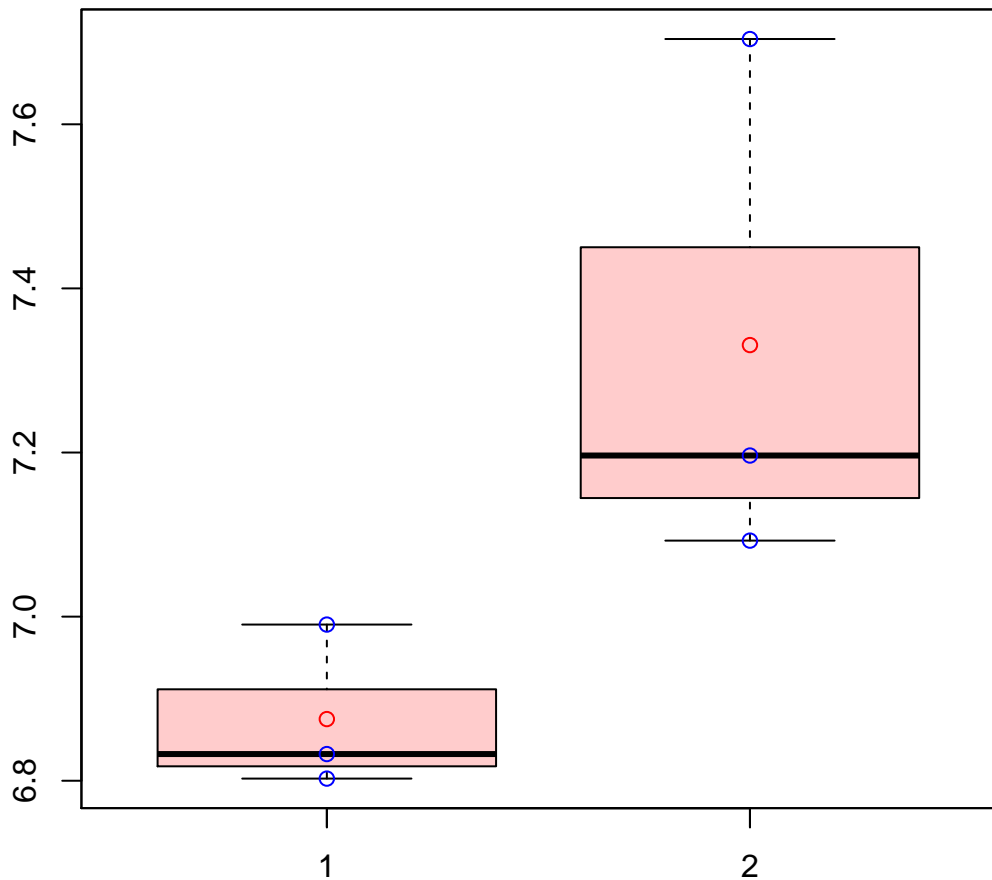

t-Test: p-value = 0.13

# M9VE05|M9VE05\_ECHCG

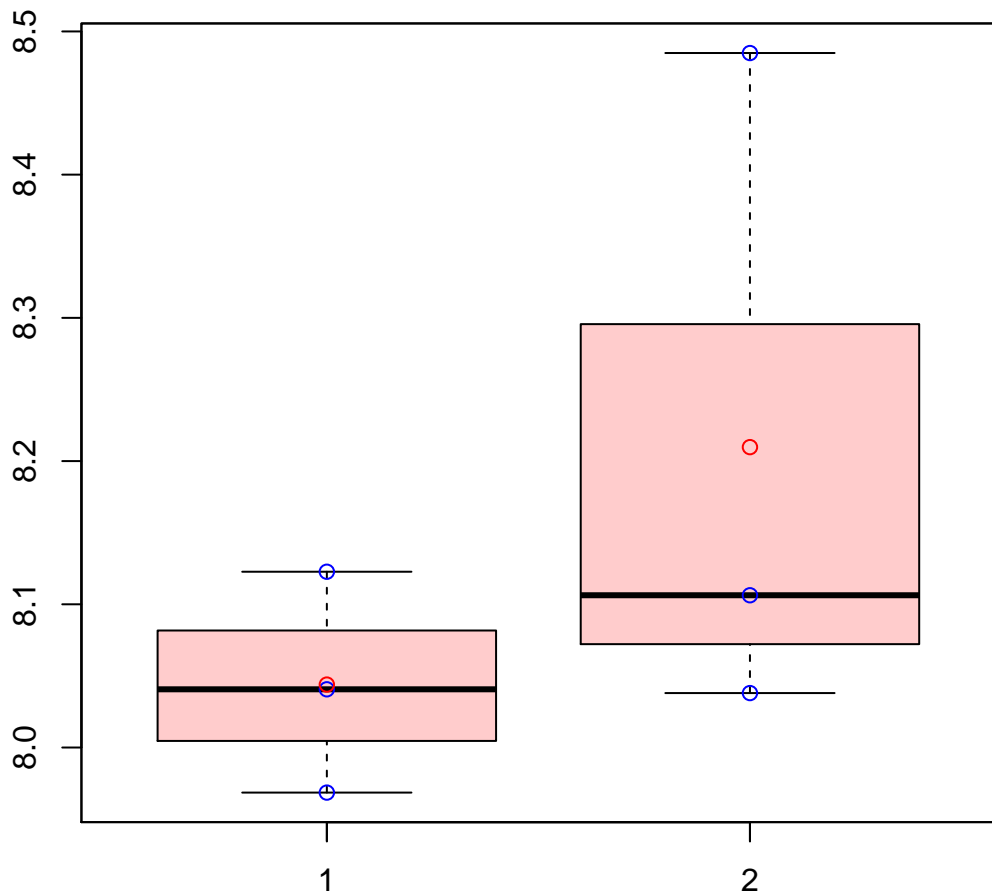

t-Test: p-value = 0.36

# N1QQ42|N1QQ42\_AEGTA

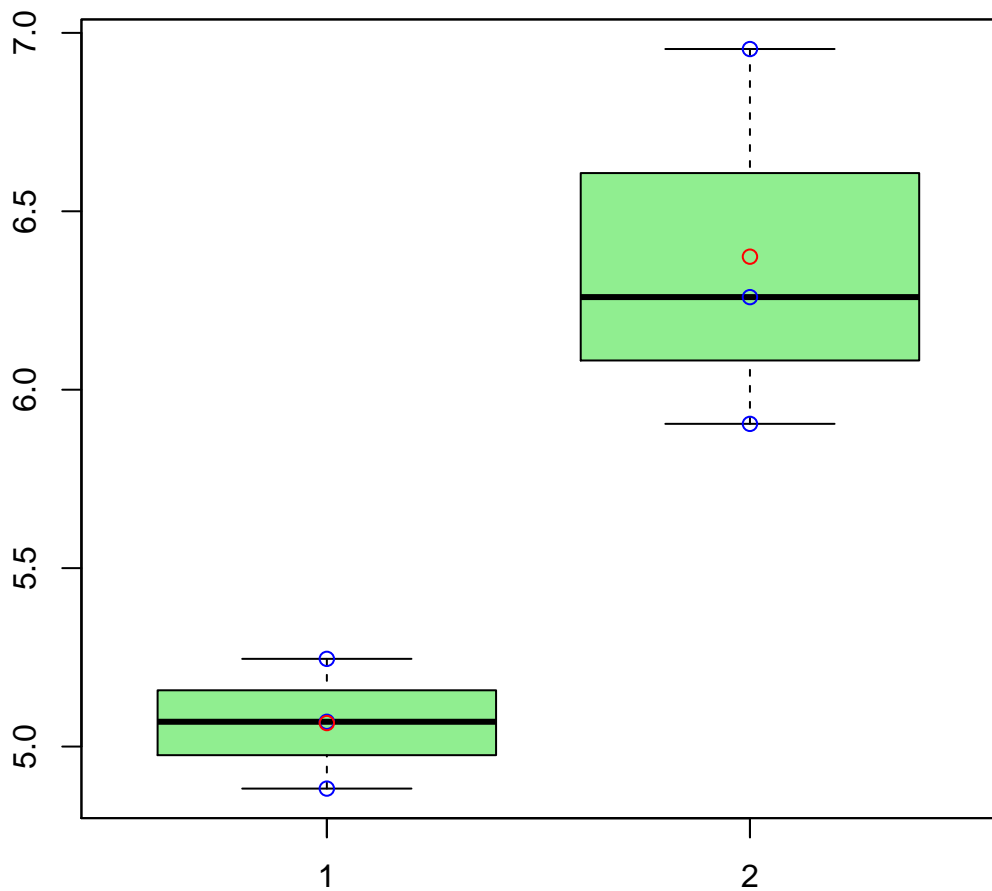

t-Test: p-value = 0.04

# N1QQC6|N1QQC6\_AEGTA

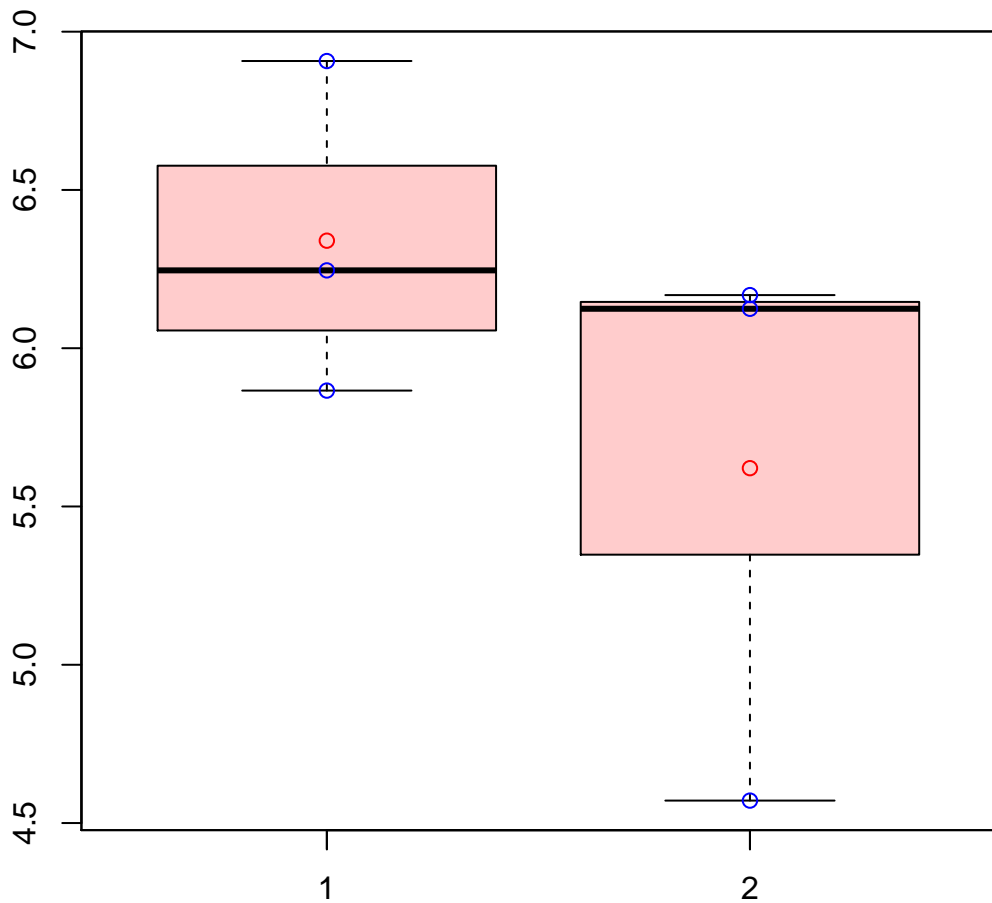

t-Test: p-value = 0.32



# N1QR91|N1QR91\_AEGTA

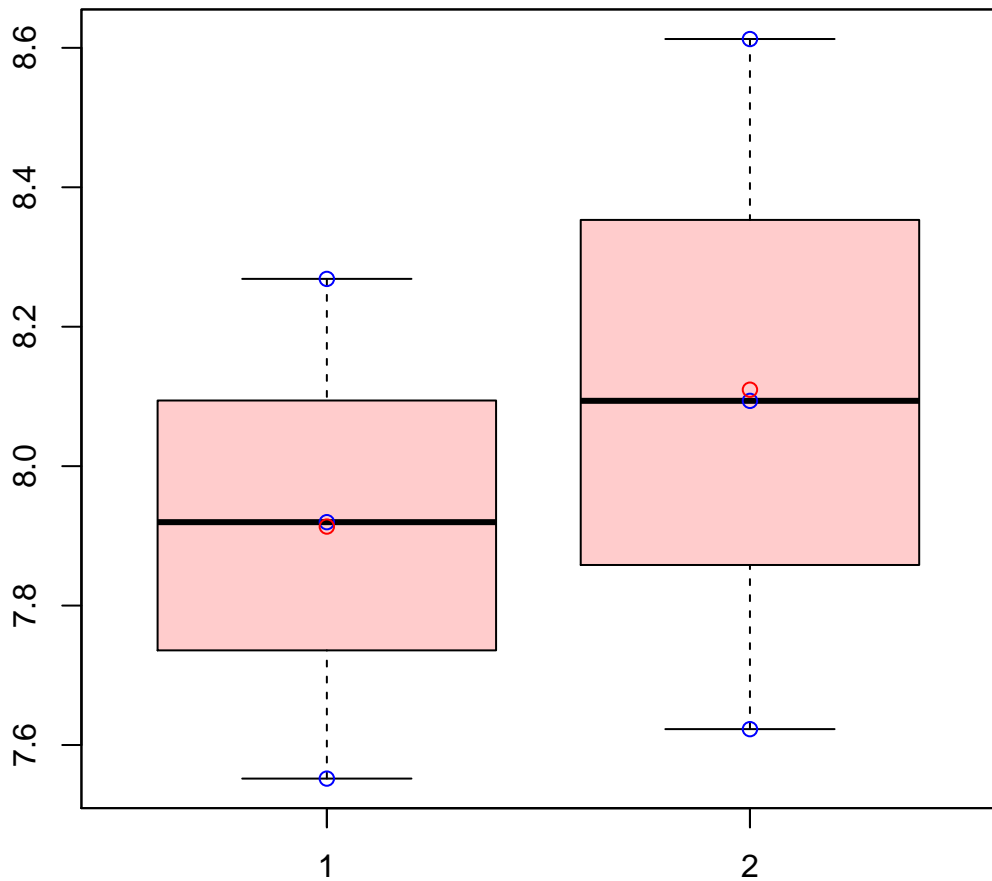

t-Test: p-value = 0.61

# N1QSL7|N1QSL7\_AEGTA

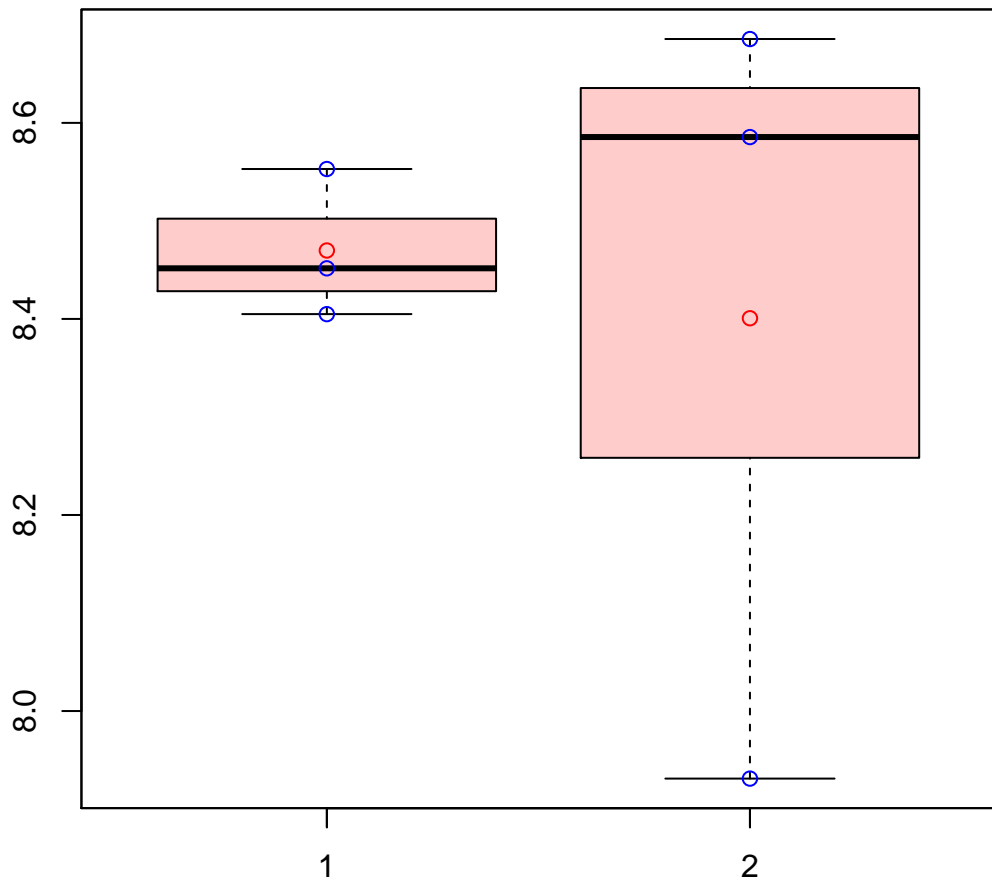

t-Test: p-value = 0.8

# N1QSP3|N1QSP3\_AEGTA

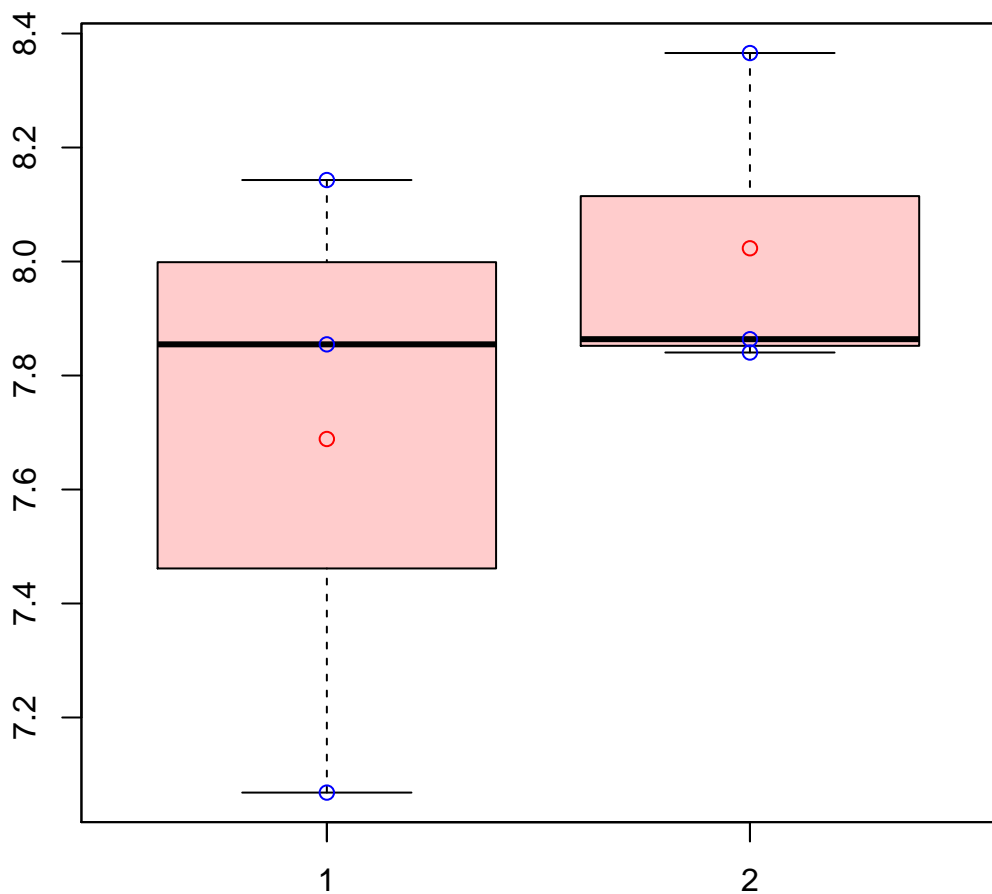

t-Test: p-value = 0.42

# N1QSQ8|N1QSQ8\_AEGTA

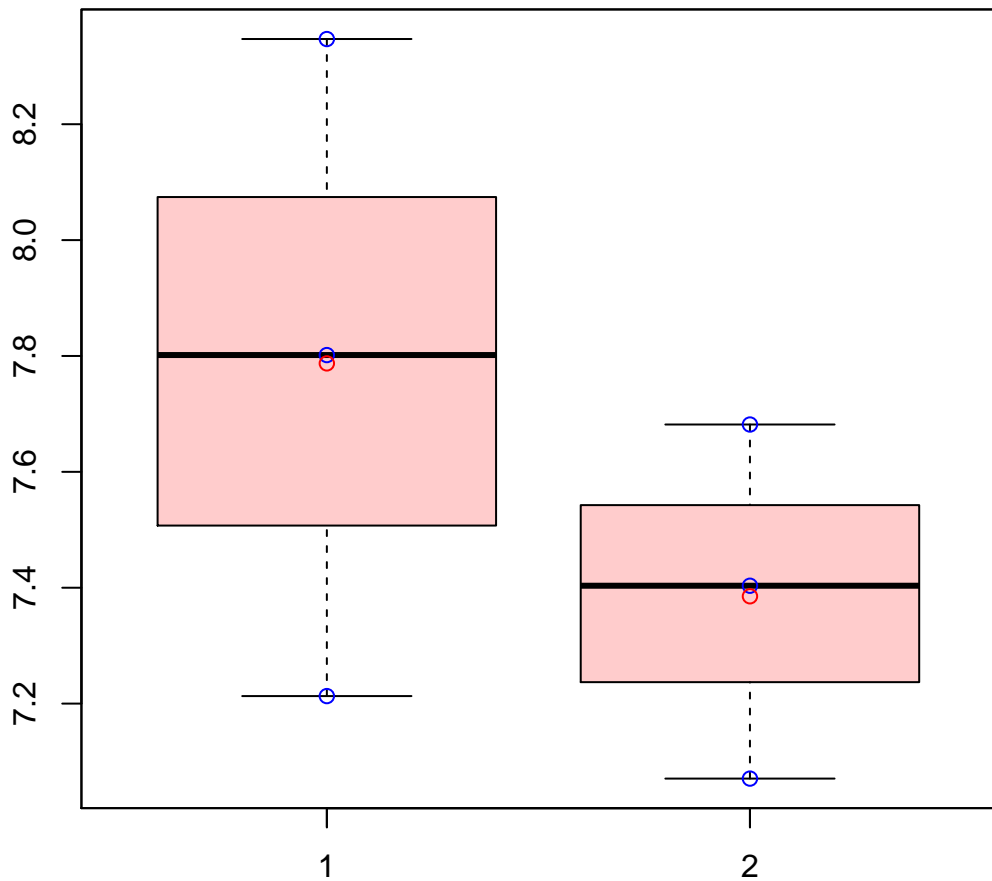

t-Test: p-value = 0.36

# N1QSR9|N1QSR9\_AEGTA

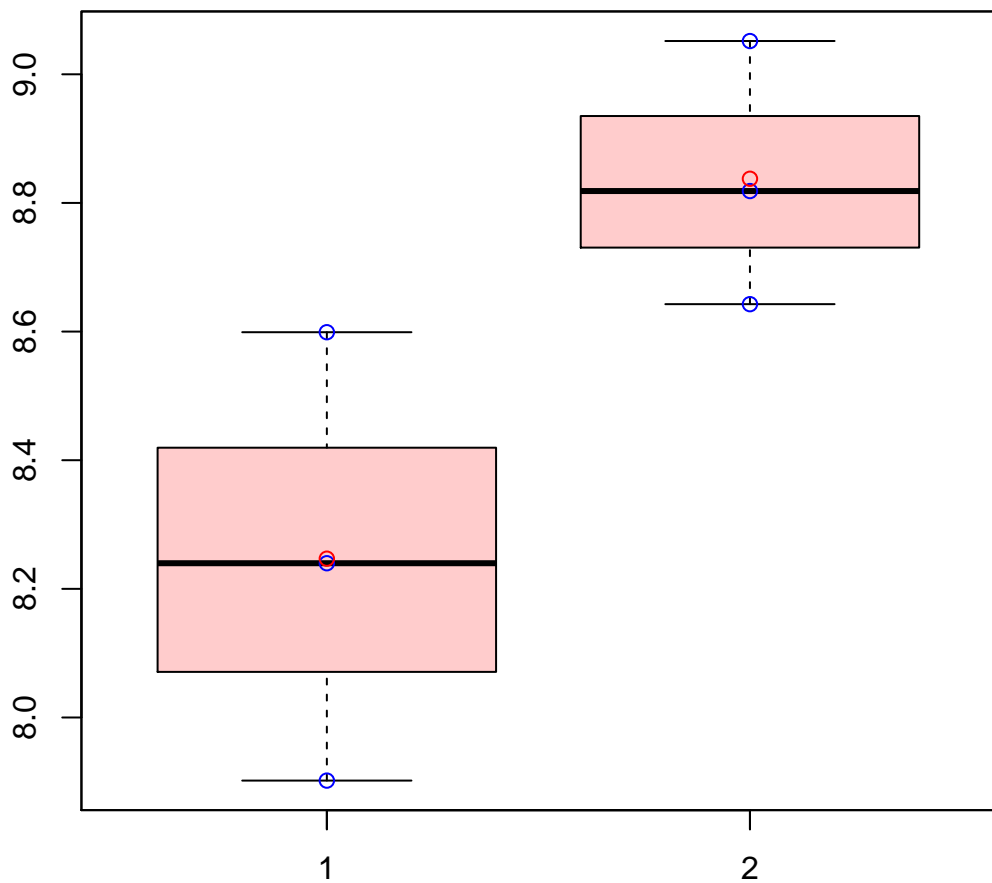

t-Test: p-value = 0.08

# N1QU93|N1QU93\_AEGTA

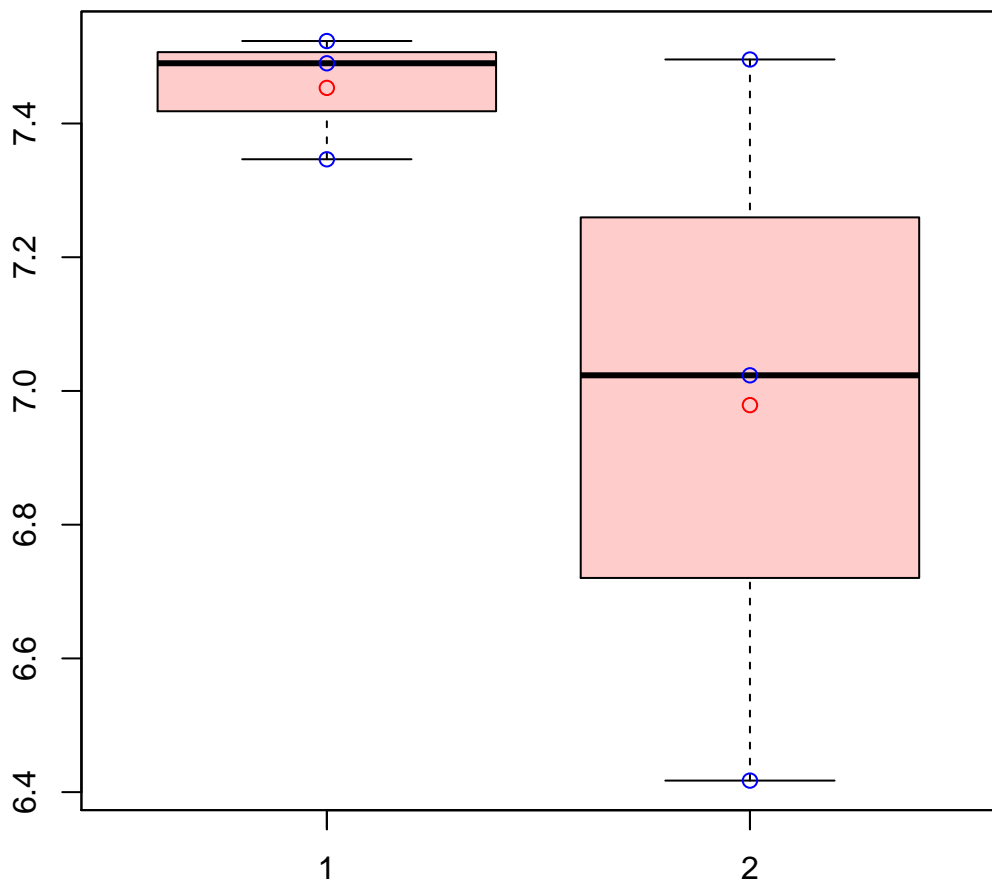

t-Test: p-value = 0.27

# N1QUA9|N1QUA9\_AEGTA

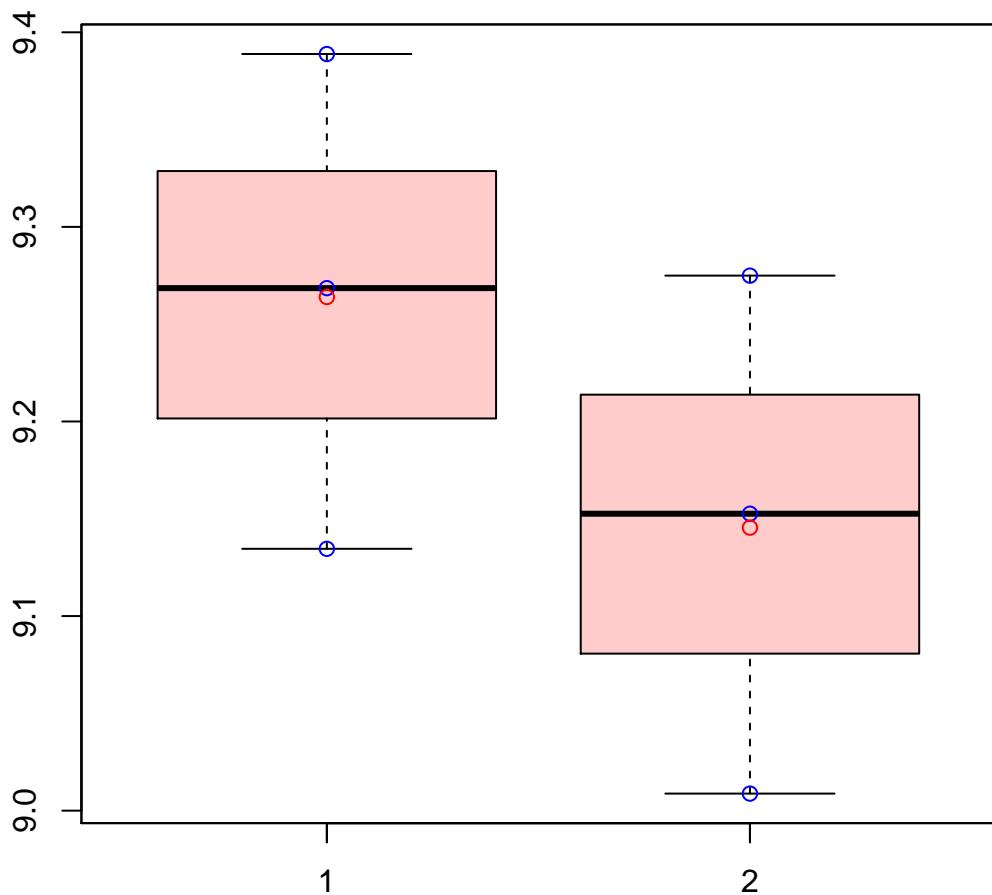

t-Test: p-value = 0.33

# N1QVD8|N1QVD8\_AEGTA

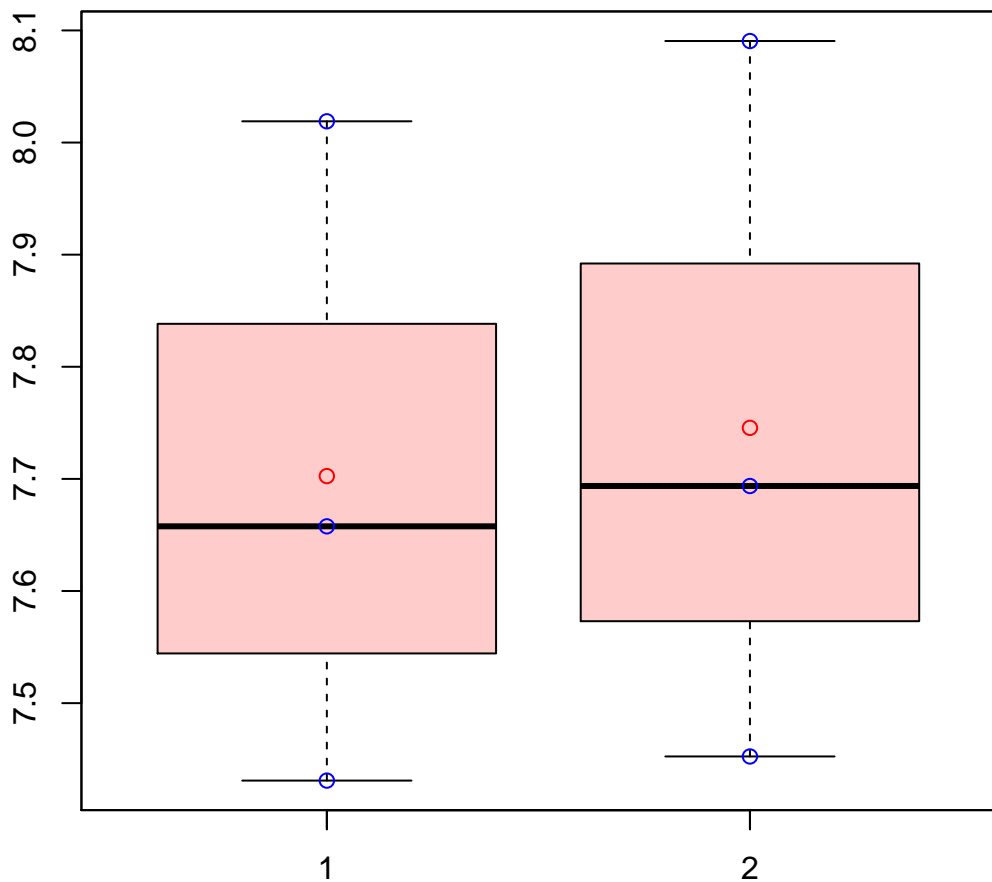

t-Test: p-value = 0.87



# N1QVF2|N1QVF2\_AEGTA

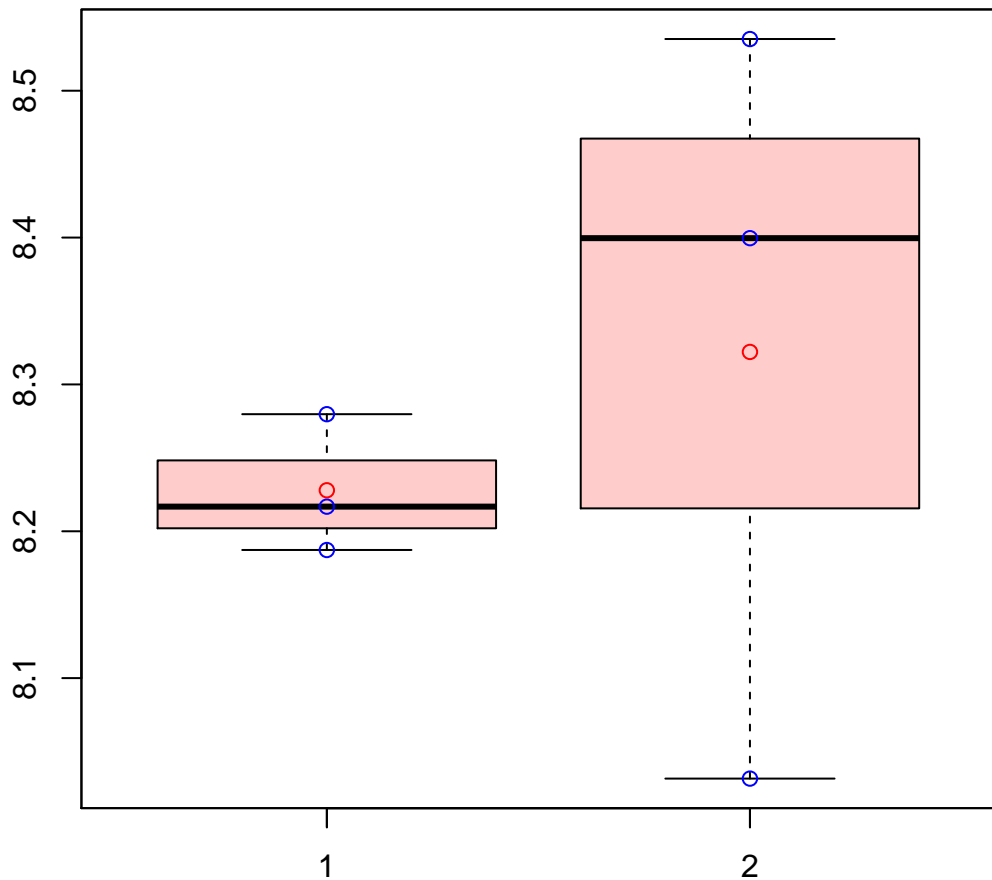

t-Test: p-value = 0.6

# N1QVK0|N1QVK0\_AEGTA

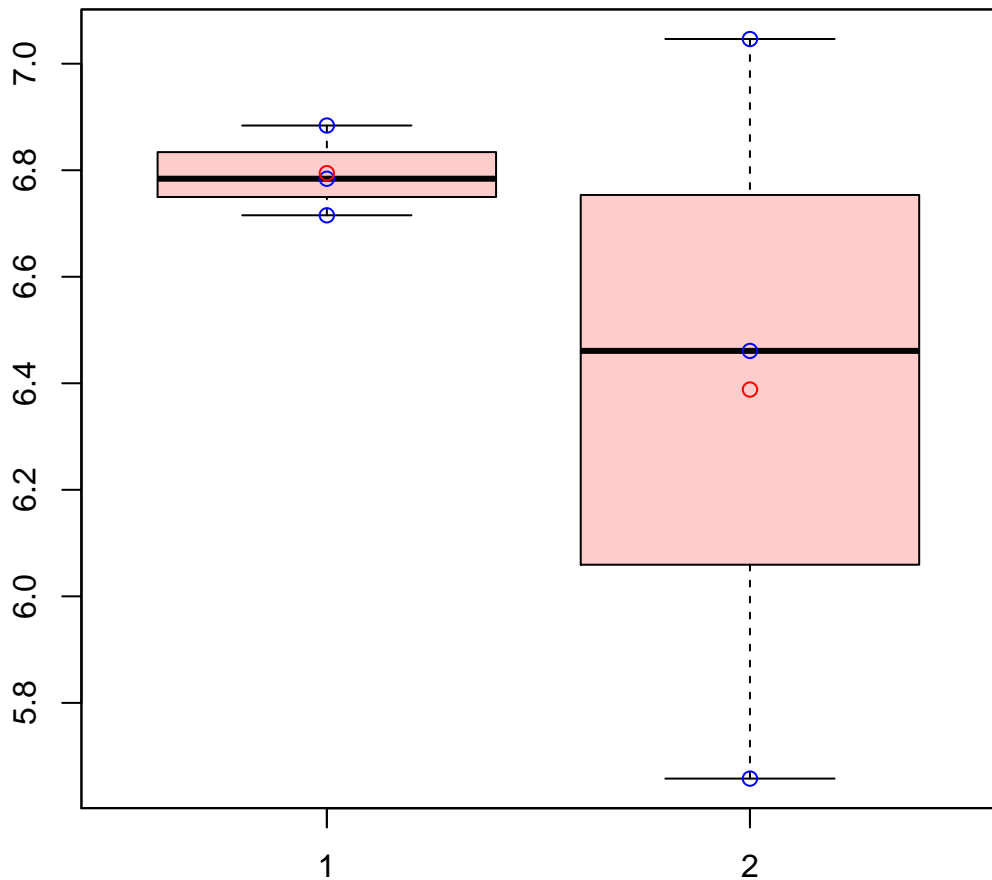

t-Test: p-value = 0.42

# N1QVZ2|N1QVZ2\_AEGTA

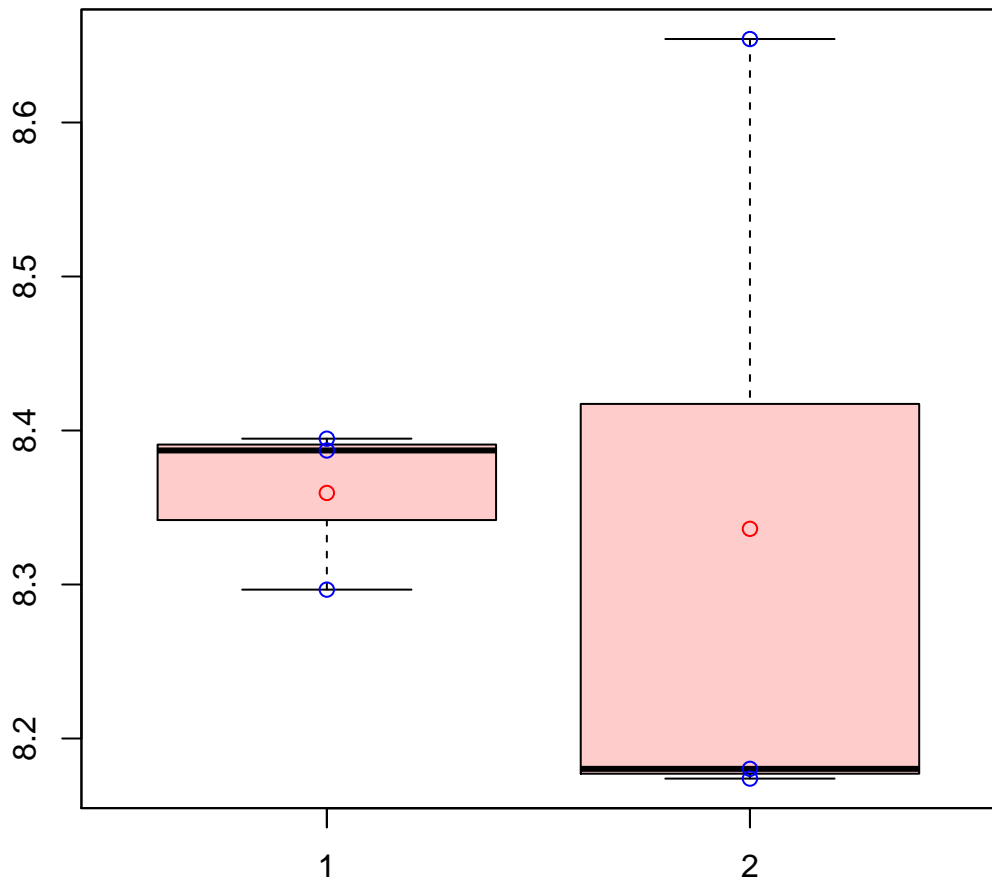

t-Test: p-value = 0.9

# N1QW38|N1QW38\_AEGTA

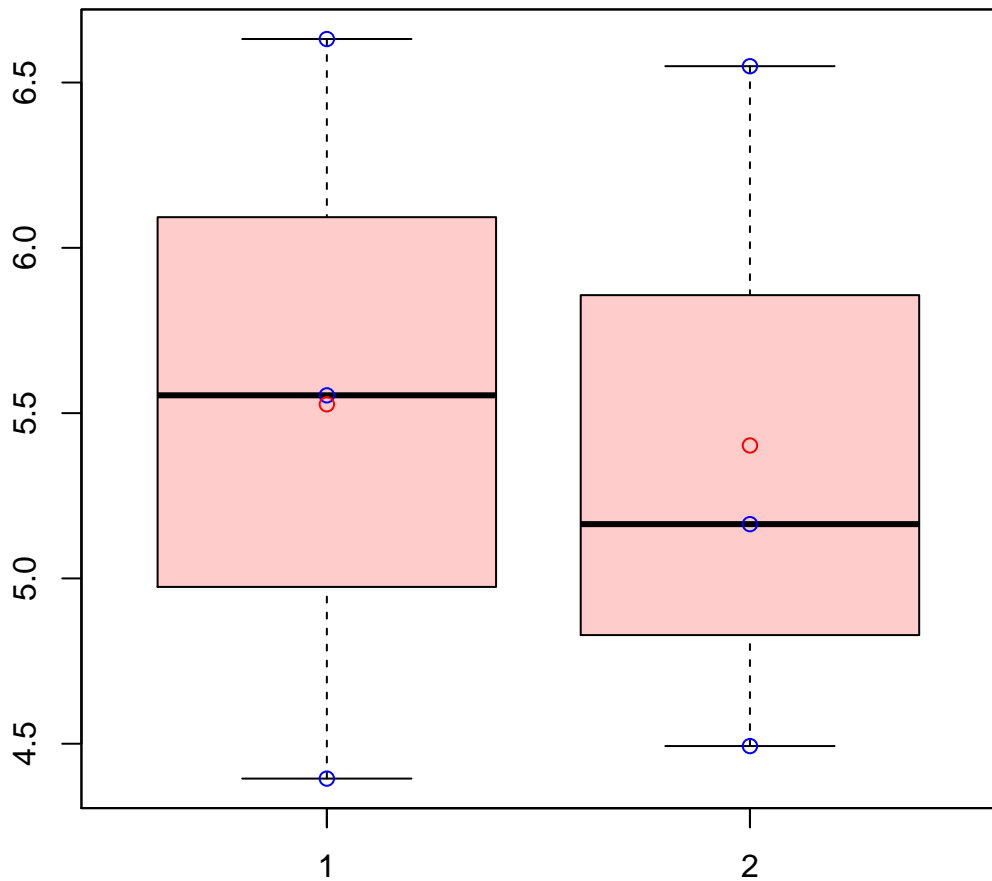

t-Test: p-value = 0.89

# N1QWI2|N1QWI2\_AEGTA

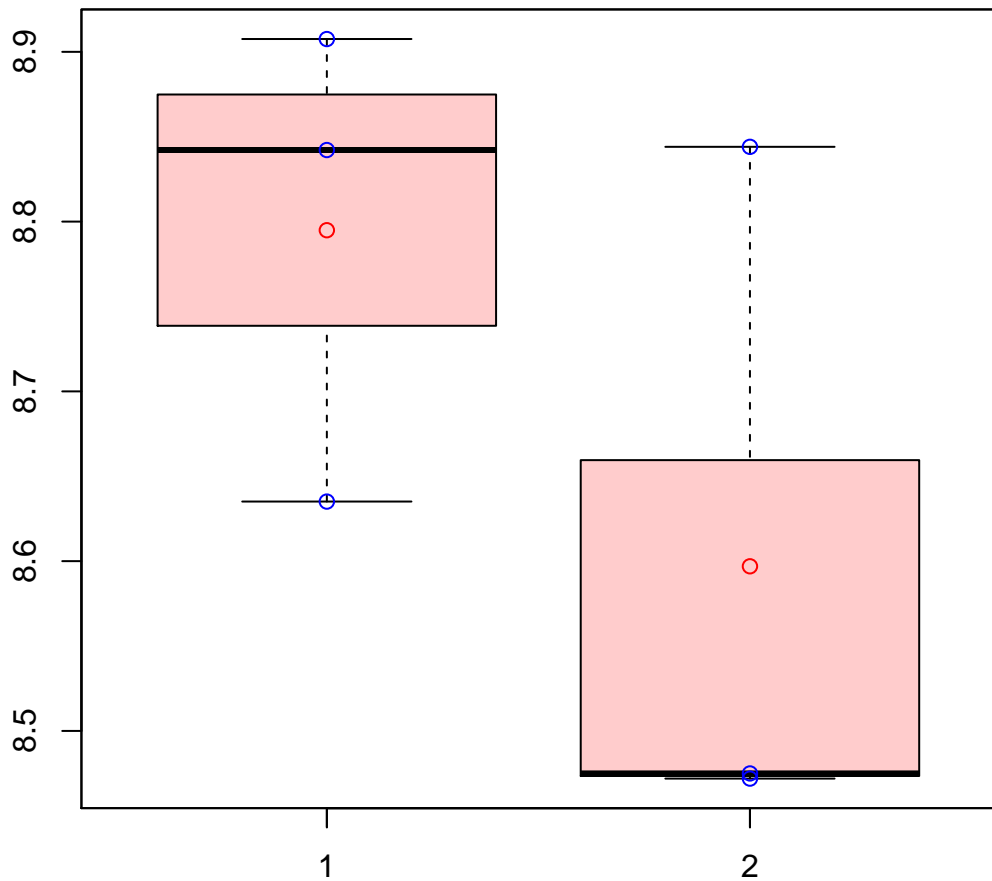

t-Test: p-value = 0.26

# N1QWJ4|N1QWJ4\_AEGTA

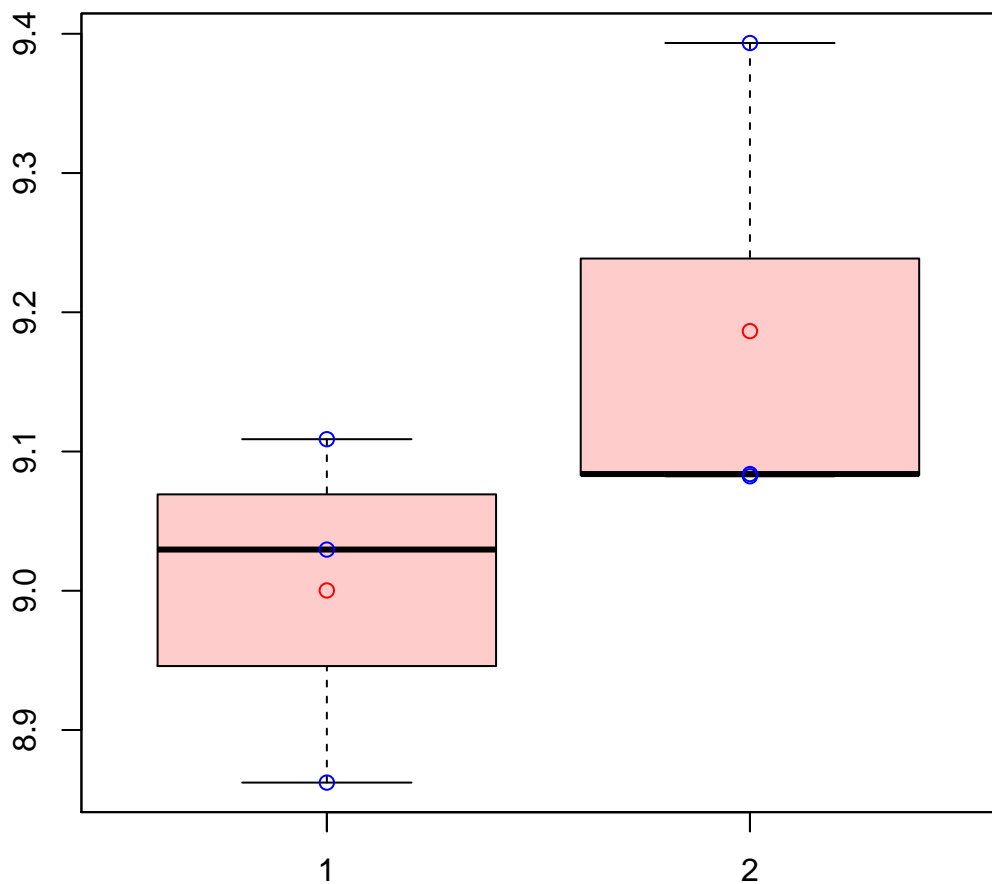

t-Test: p-value = 0.22

# N1QX89|N1QX89\_AEGTA

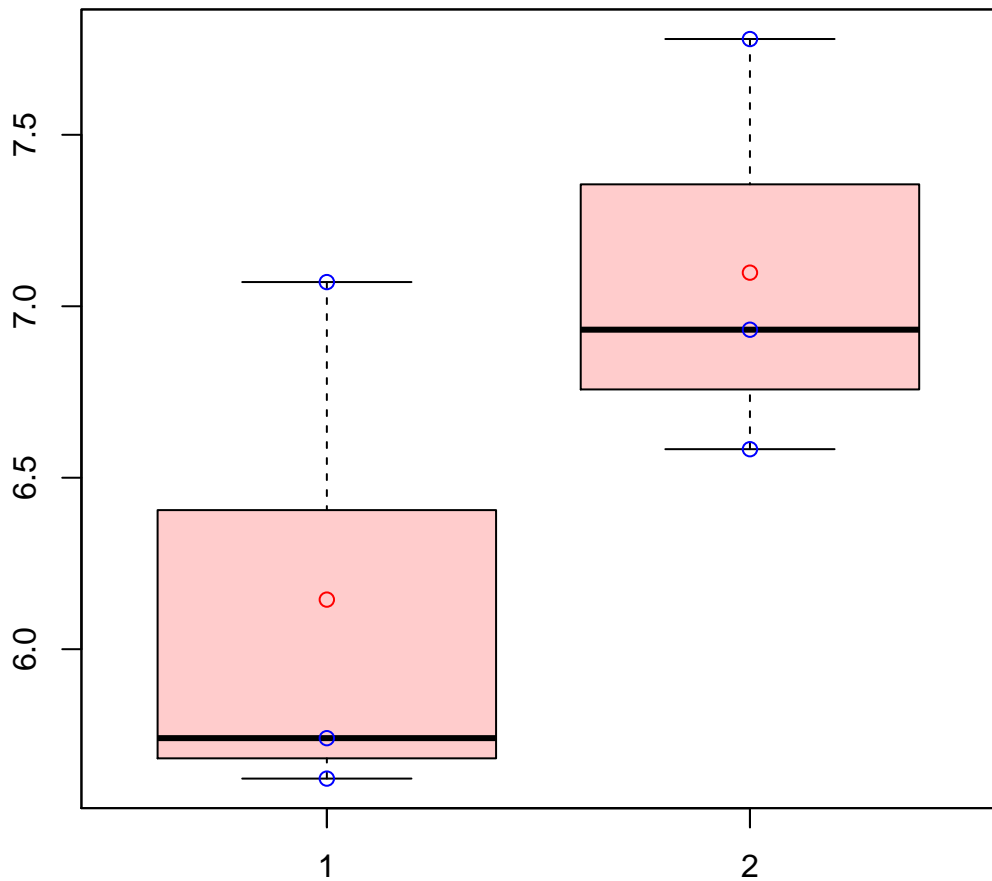

t-Test: p-value = 0.18

# N1QXB6|N1QXB6\_AEGTA

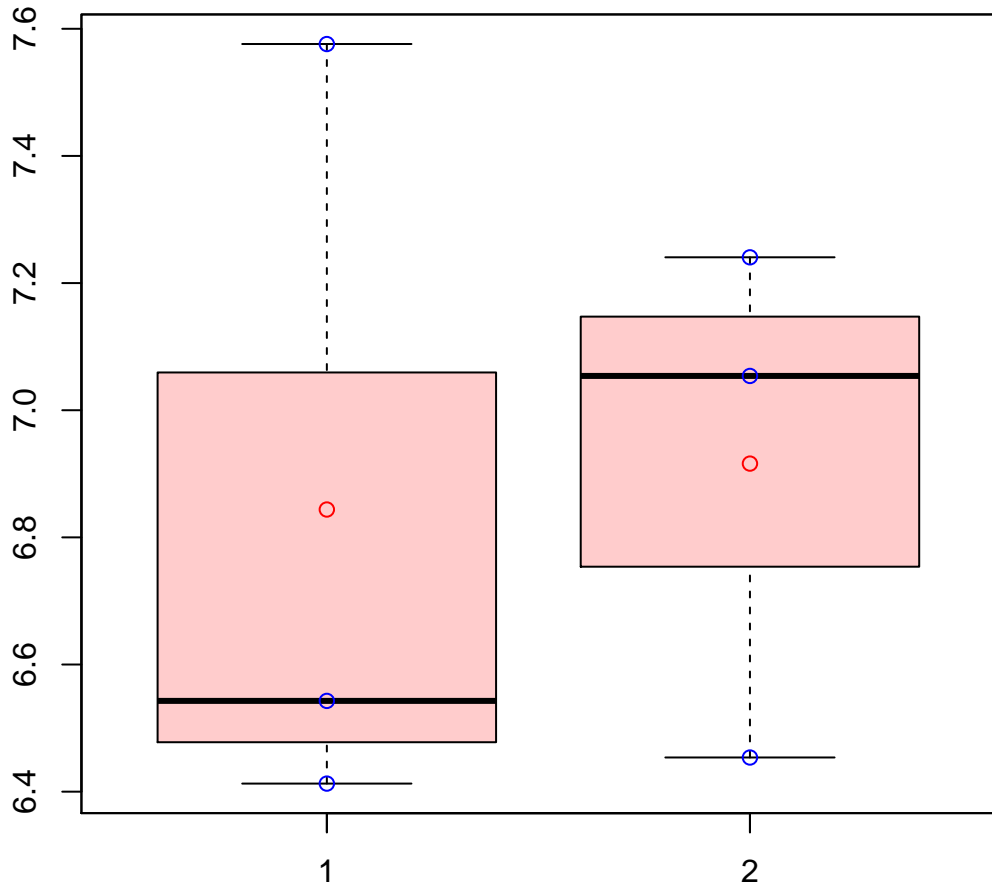

t-Test: p-value = 0.88



# N1QXW8|N1QXW8\_AEGTA

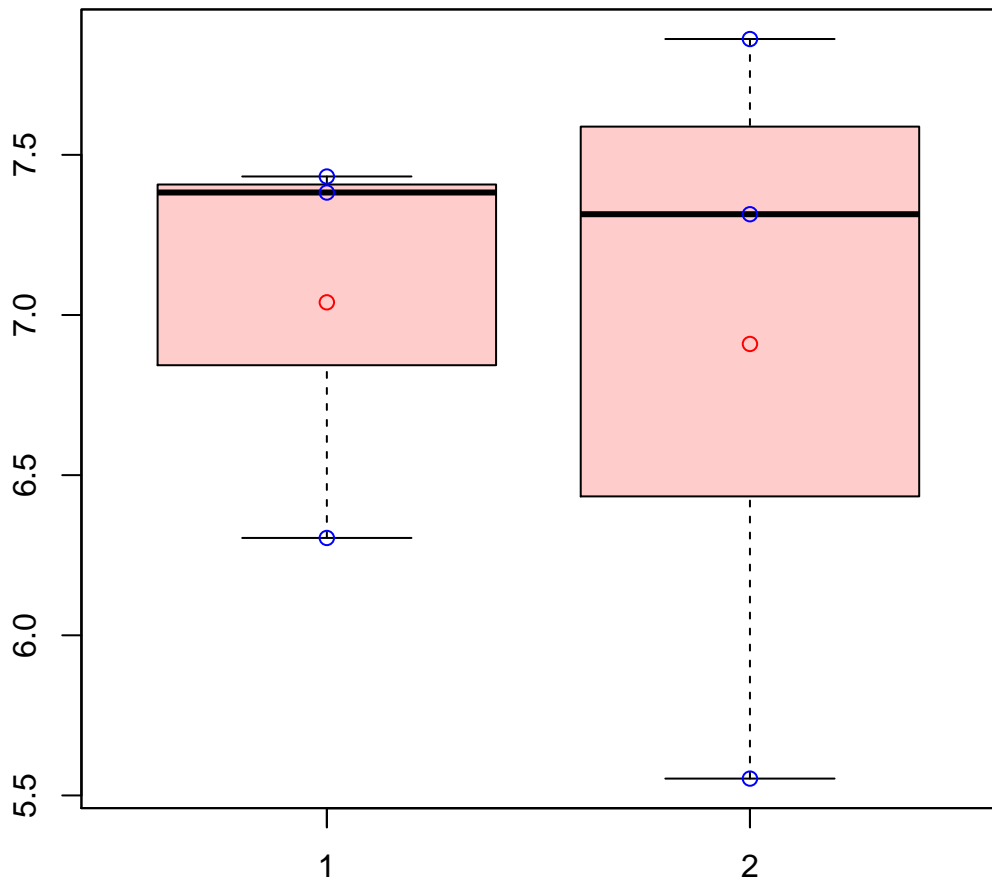

t-Test: p-value = 0.88

# N1QY12|N1QY12\_AEGTA

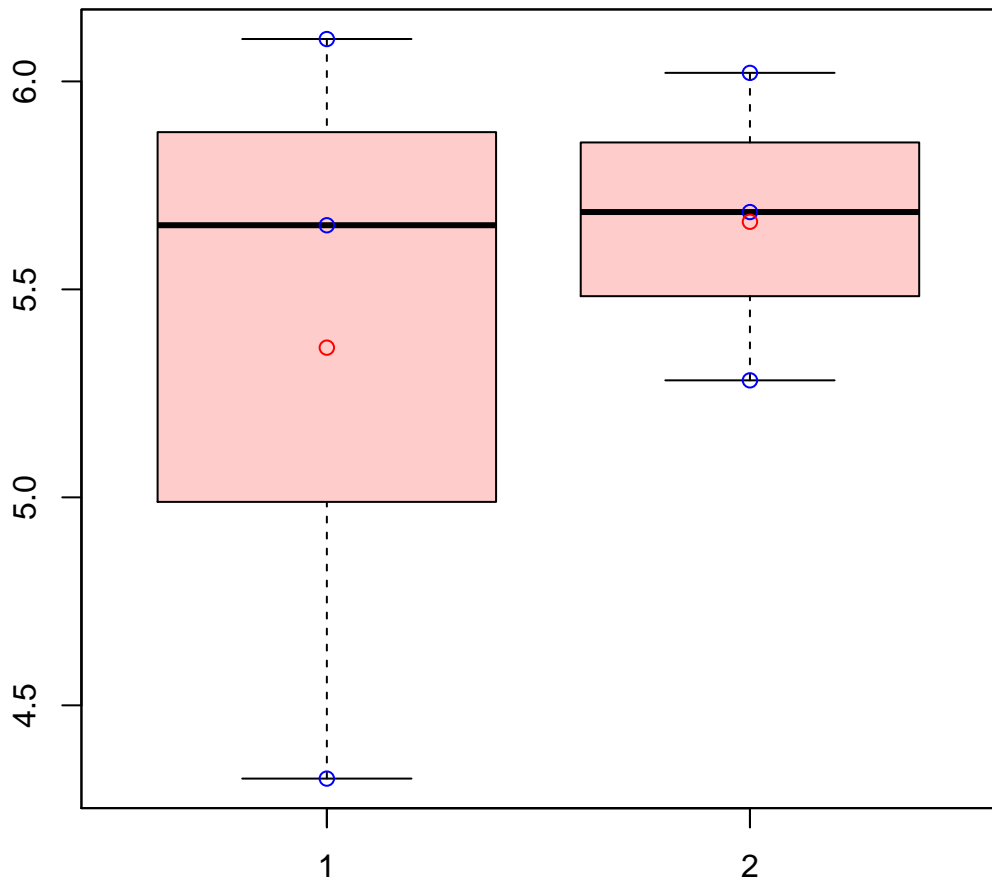

t-Test: p-value = 0.64

# N1QYD5|N1QYD5\_AEGTA

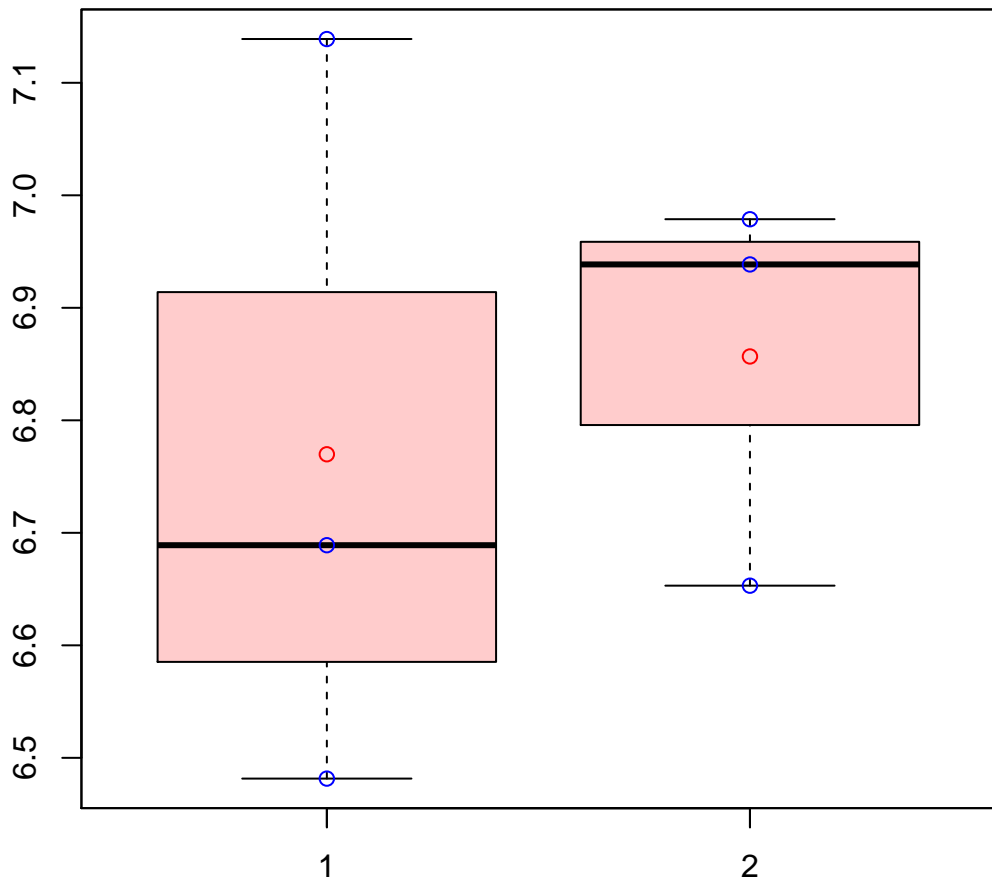

t-Test: p-value = 0.72

# N1QYP3|N1QYP3\_AEGTA

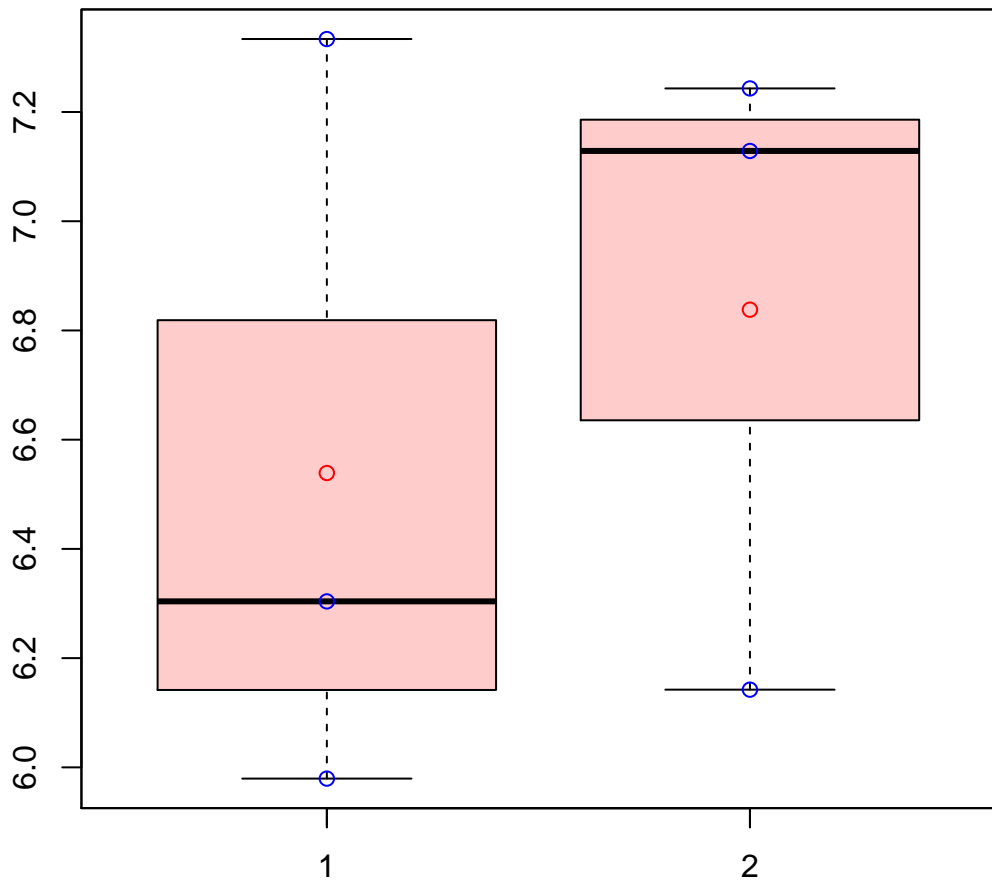

t-Test: p-value = 0.61

# N1QYY7|N1QYY7\_AEGTA

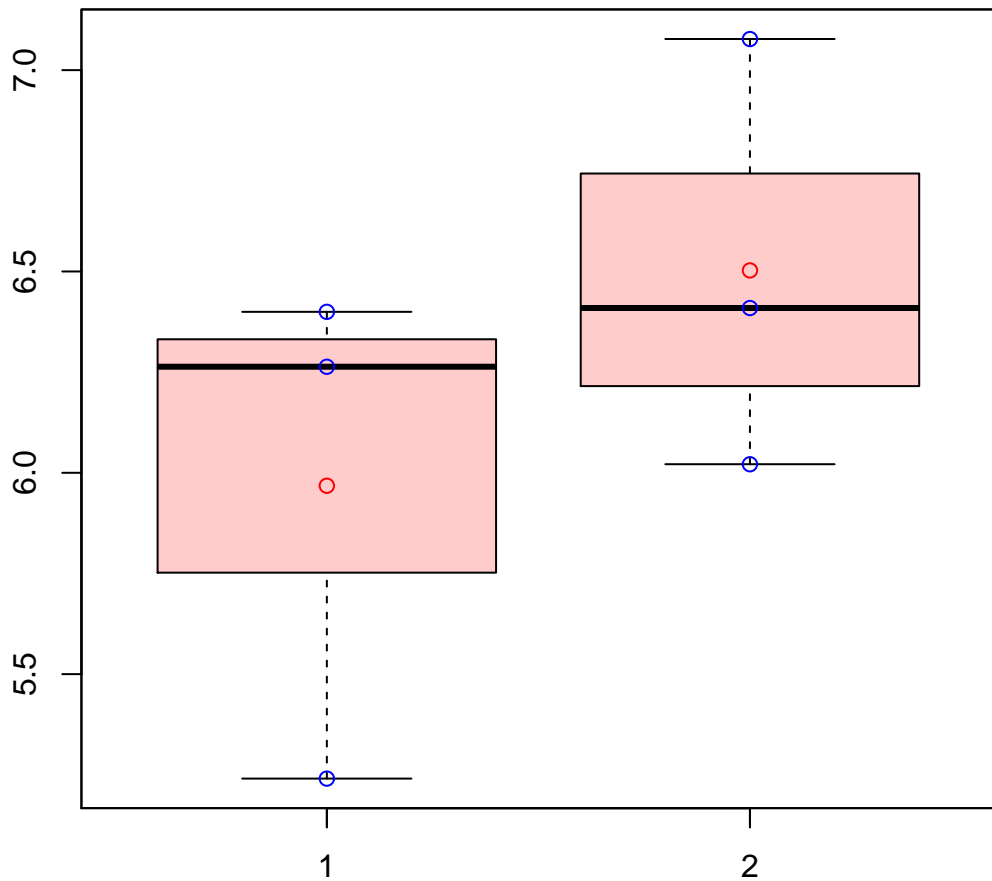

t-Test: p-value = 0.33

# N1QZ65|N1QZ65\_AEGTA

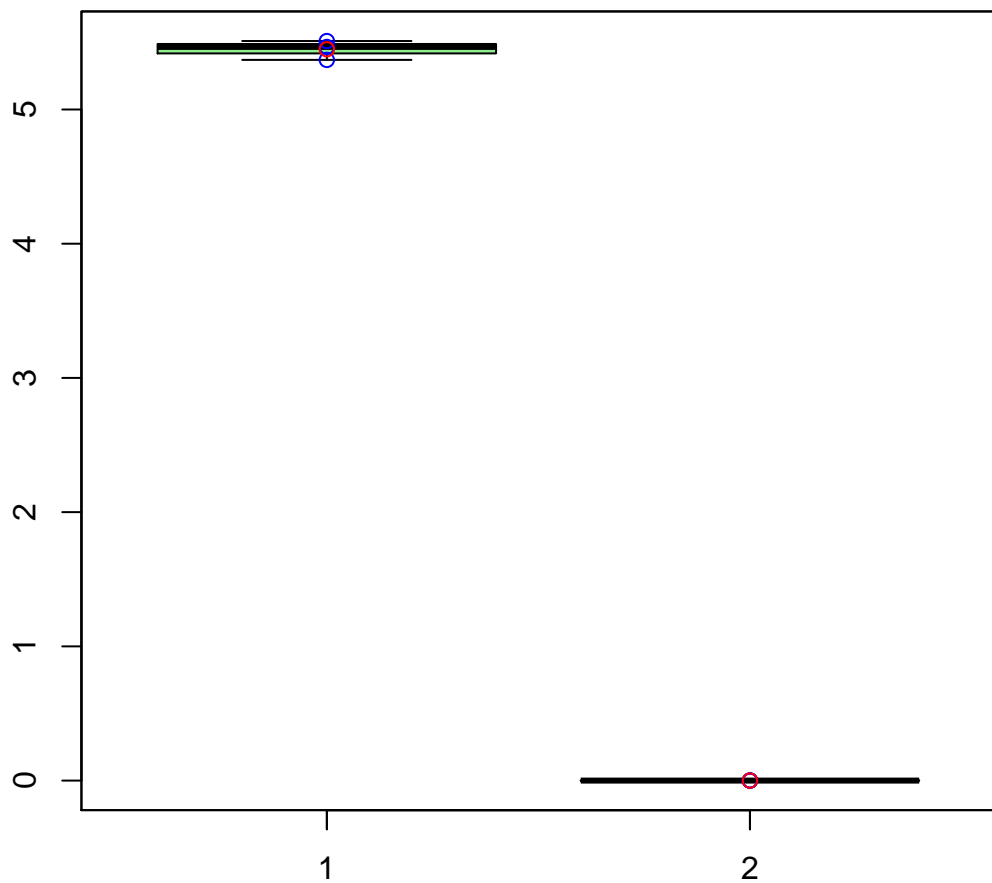

t-Test: p-value = 0

# N1QZ67|N1QZ67\_AEGTA

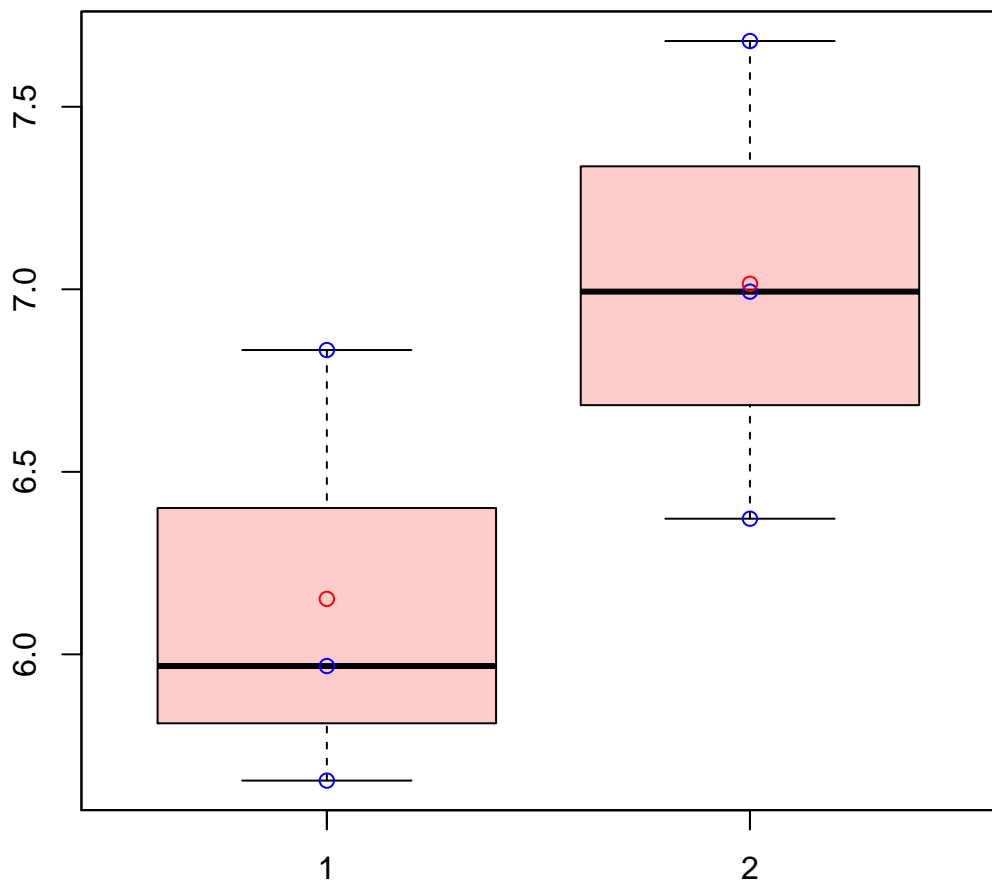

t-Test: p-value = 0.17

# N1QZH0|N1QZH0\_AEGTA

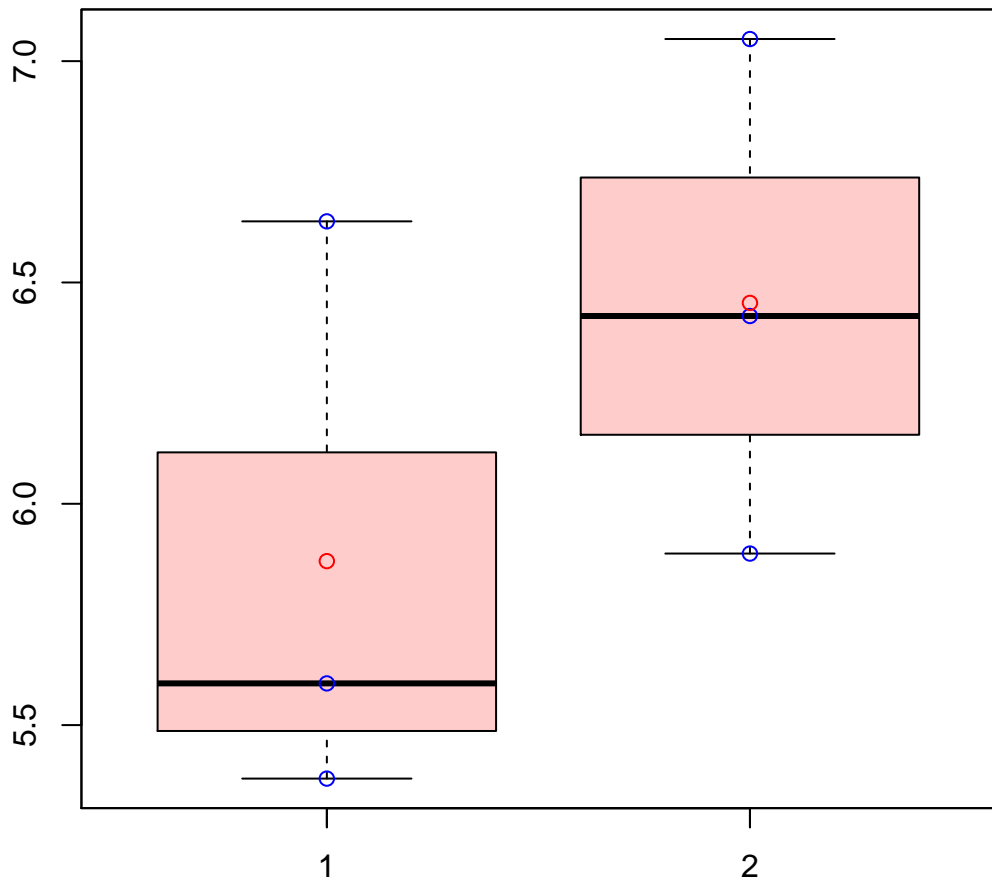

t-Test: p-value = 0.32



# N1R0H2|N1R0H2\_AEGTA

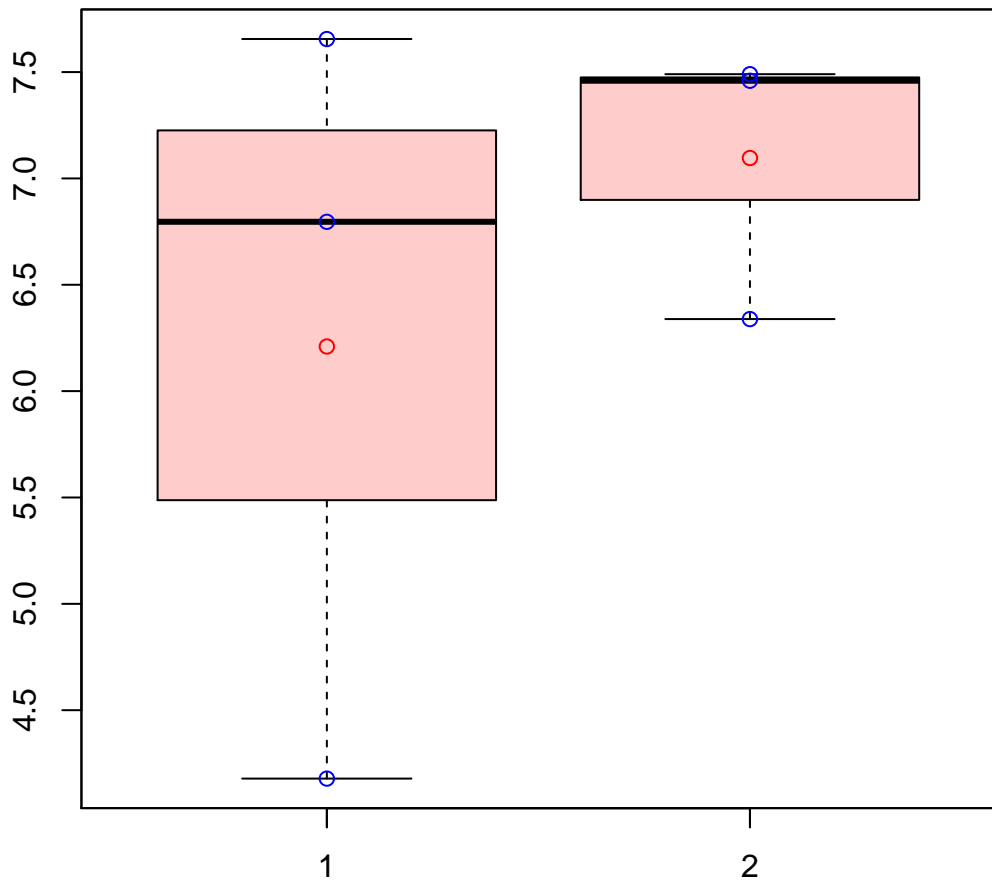

t-Test: p-value = 0.49

# N1R0M7|N1R0M7\_AEGTA

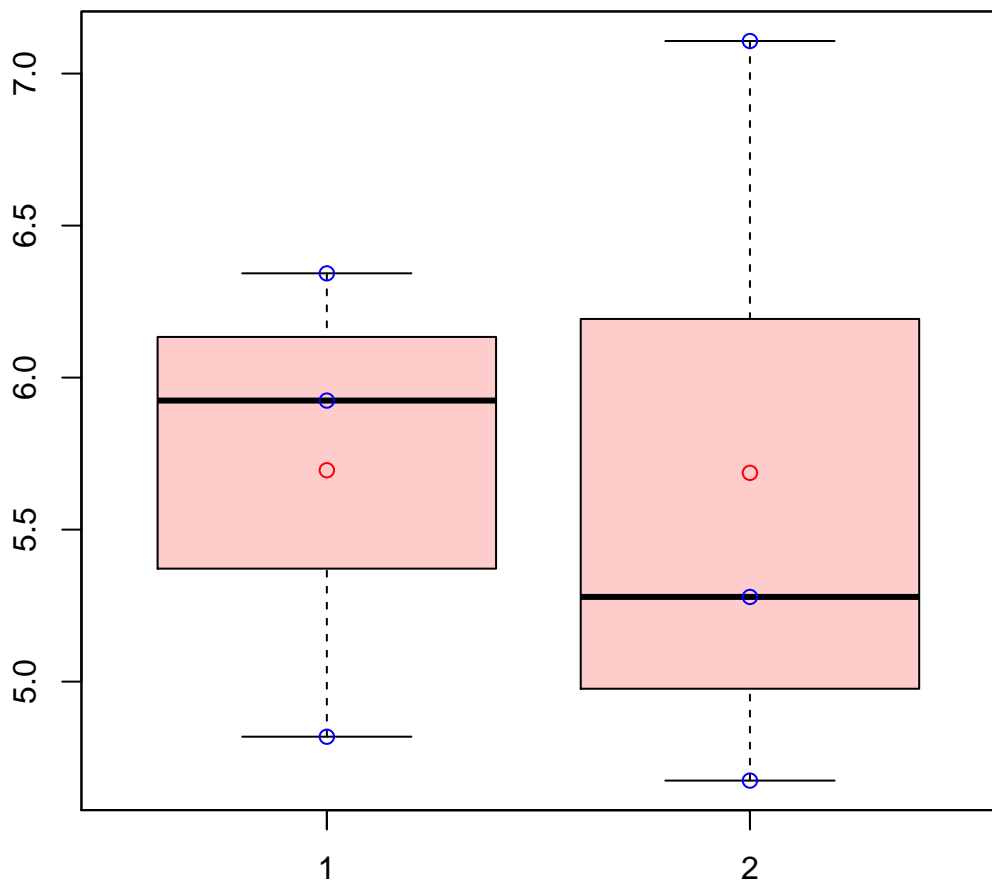

t-Test: p-value = 0.99

# N1R0X0|N1R0X0\_AEGTA

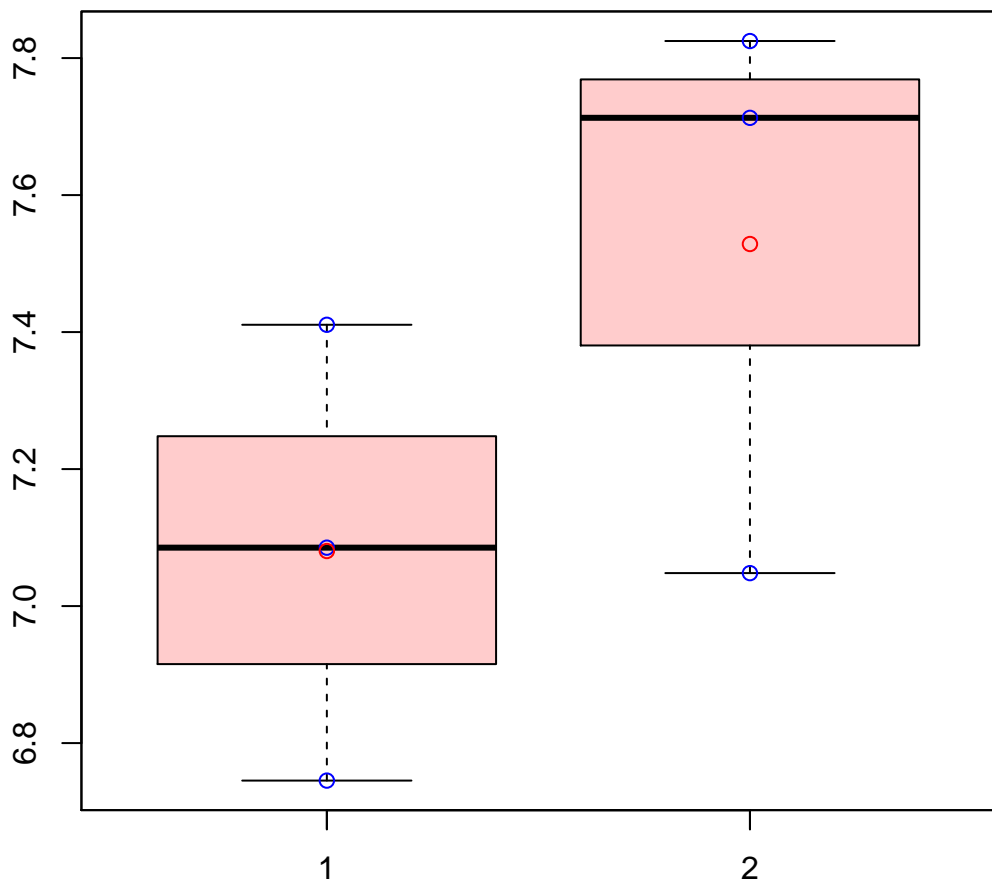

t-Test: p-value = 0.22

# N1R101|N1R101\_AEGTA

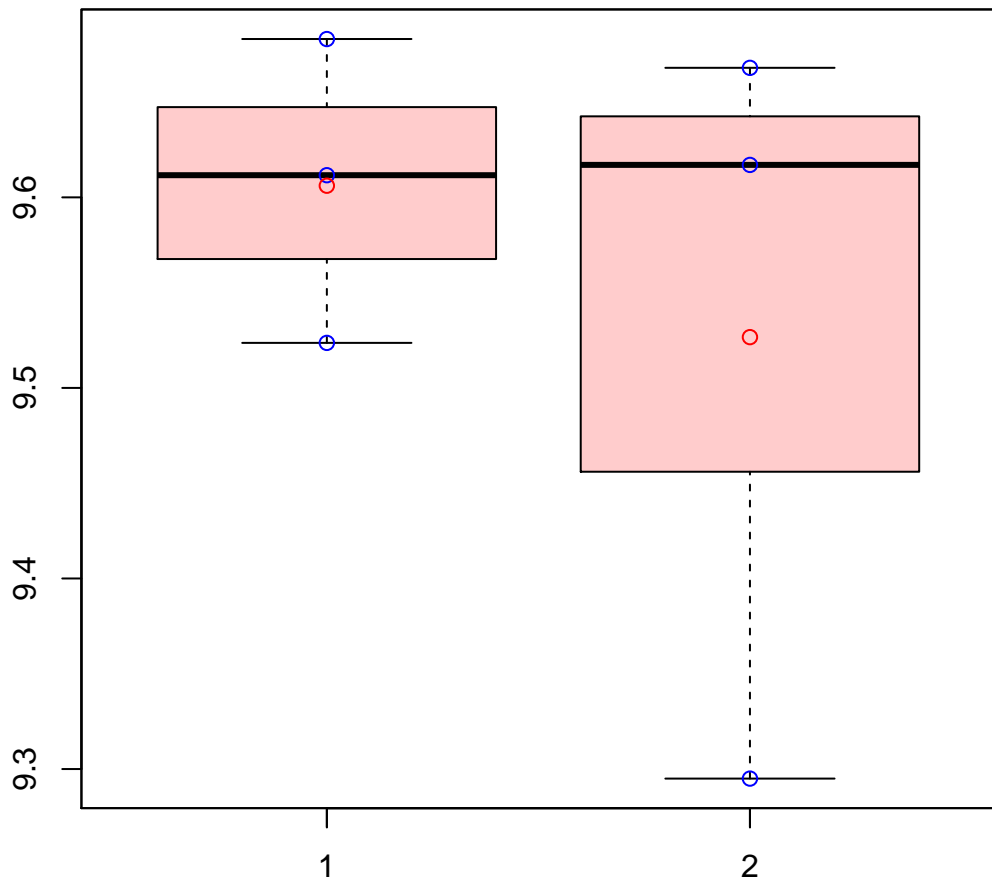

t-Test: p-value = 0.58

# N1R1H0|N1R1H0\_AEGTA

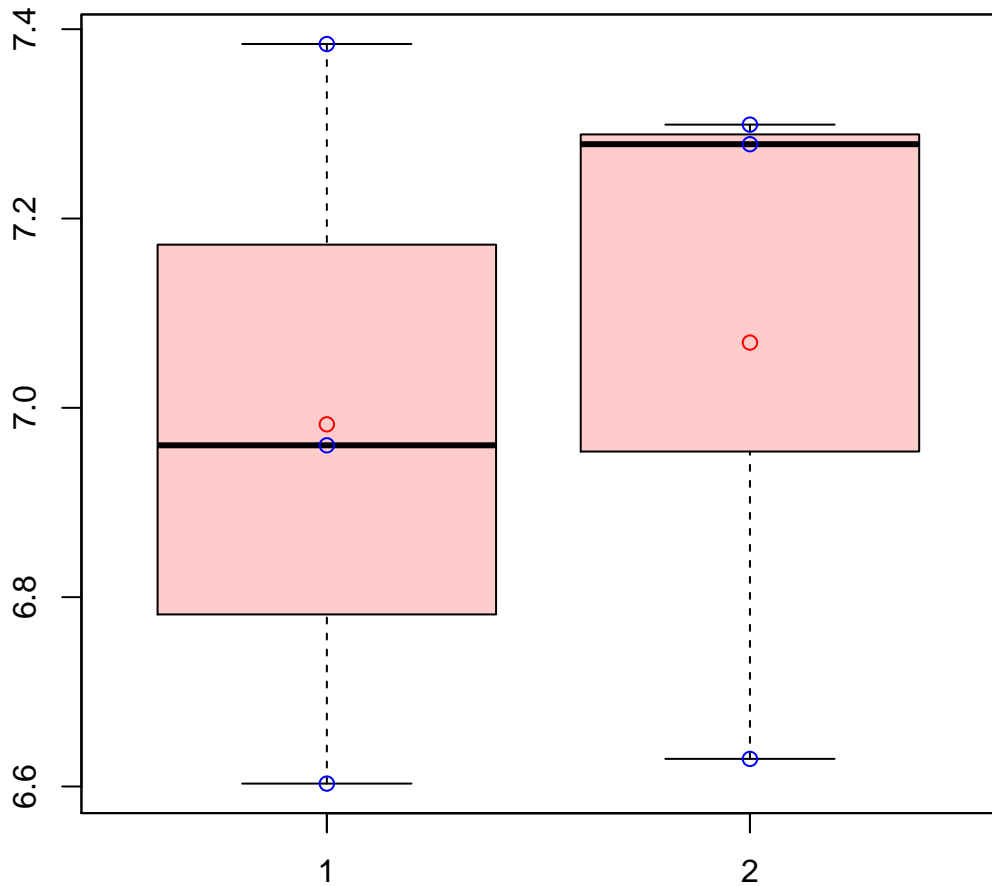

t-Test: p-value = 0.8

# N1R359|N1R359\_AEGTA

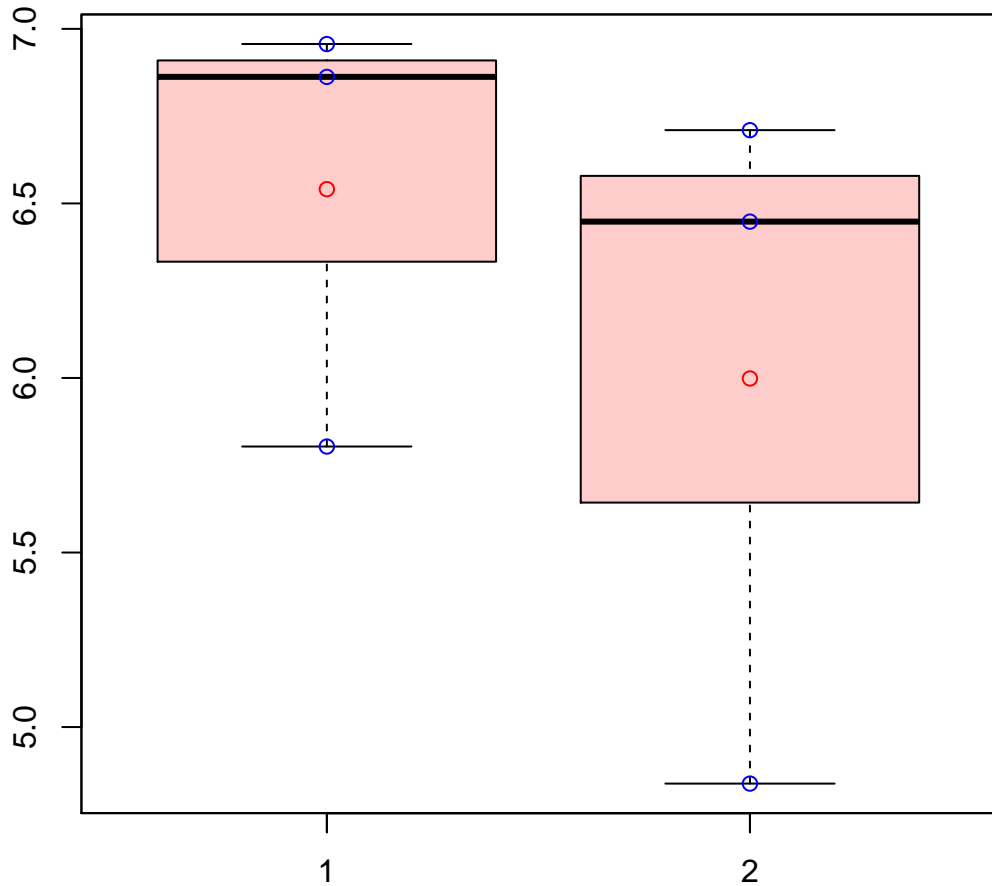

t-Test: p-value = 0.48

# N1R361|N1R361\_AEGTA

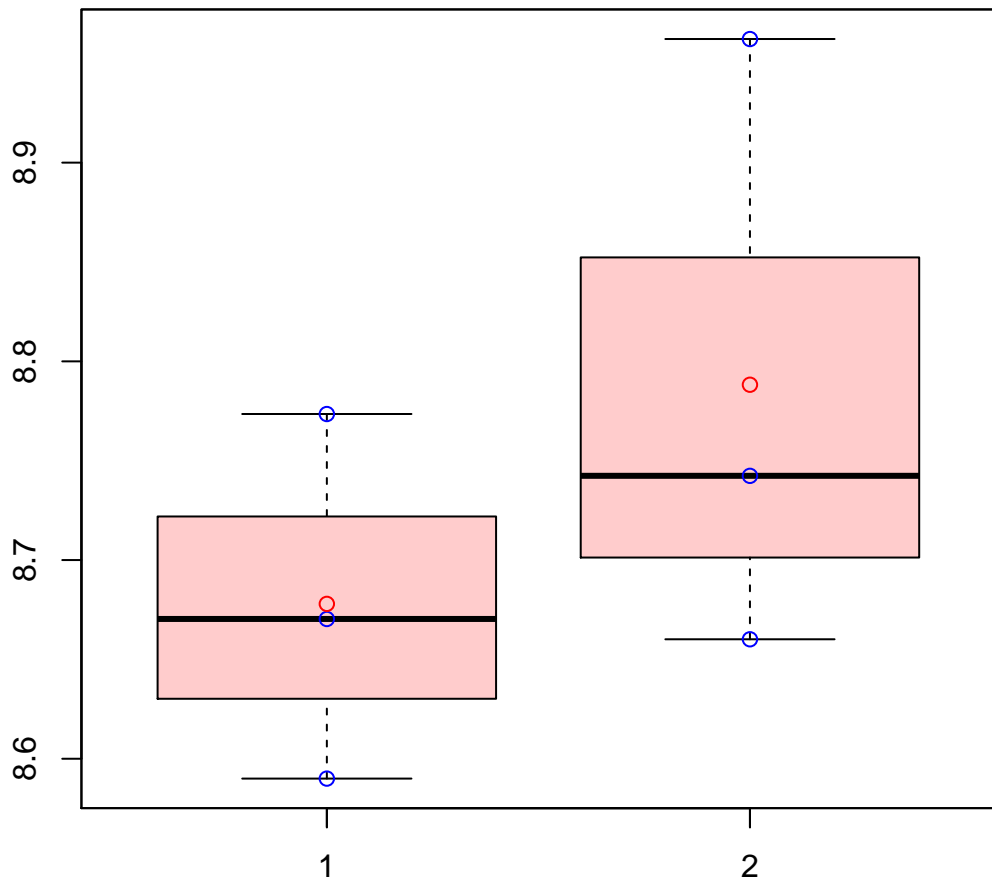

t-Test: p-value = 0.36

# N1R3A7|N1R3A7\_AEGTA

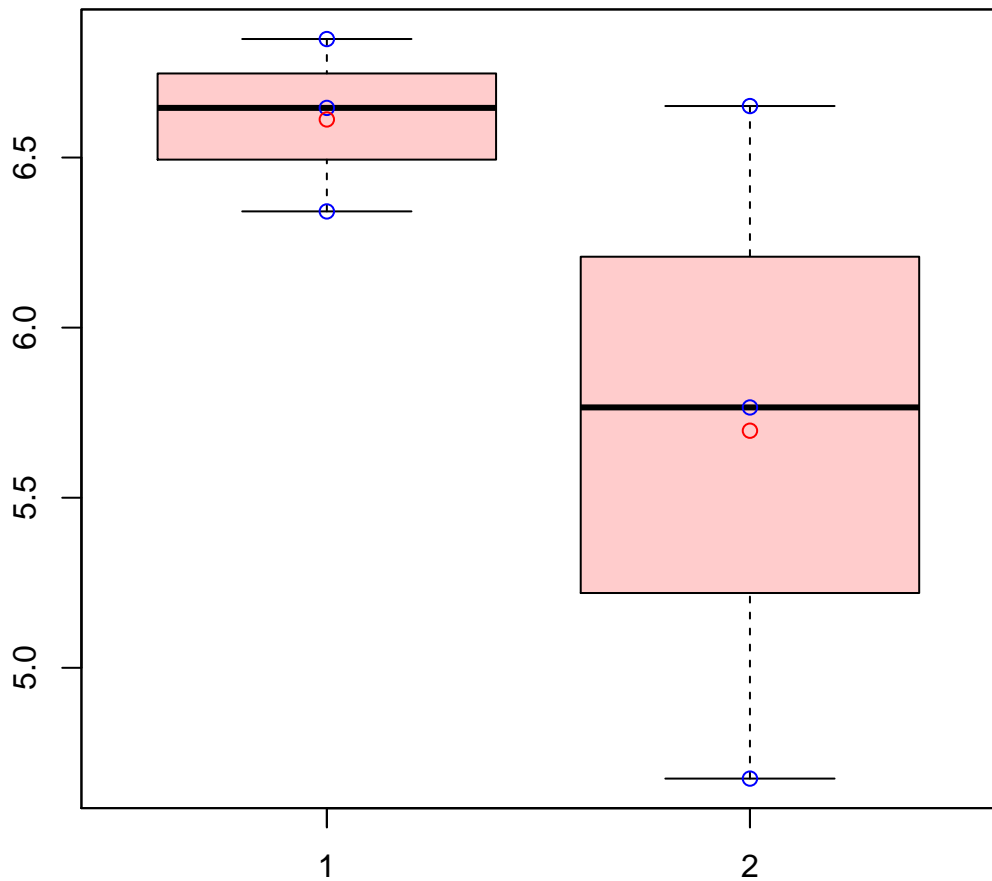

t-Test: p-value = 0.25



# N1R433|N1R433\_AEGTA

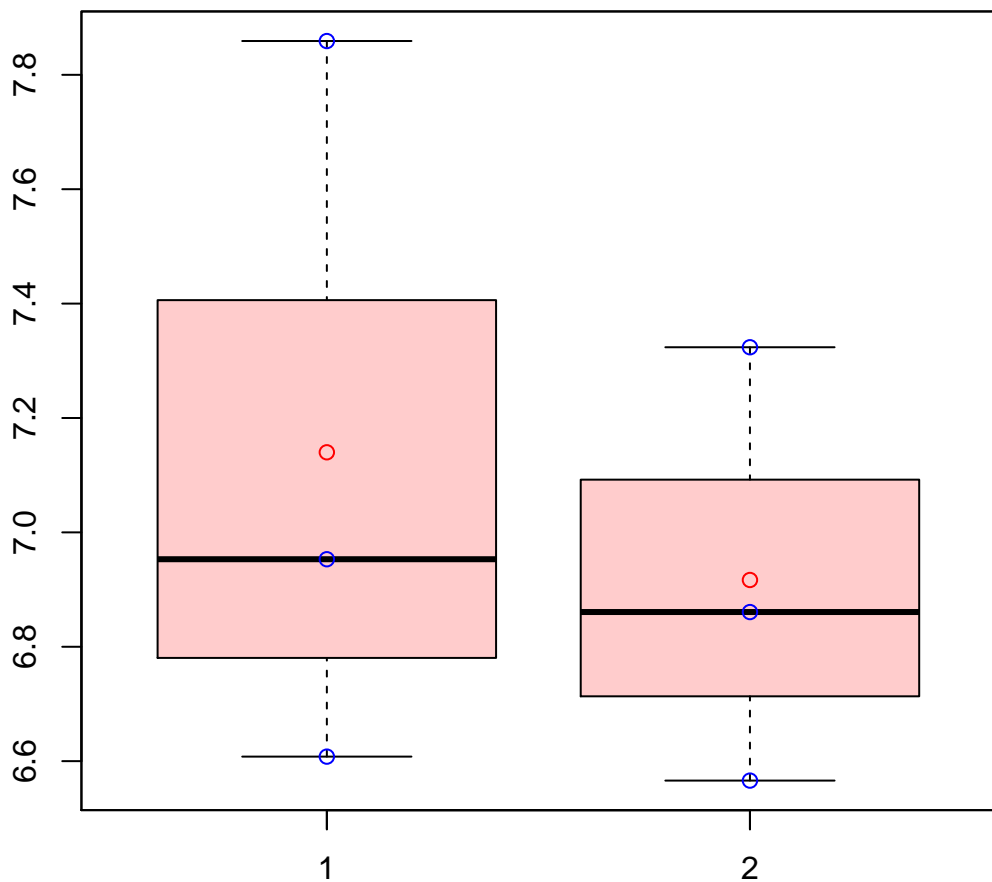

t-Test: p-value = 0.64

# N1R443|N1R443\_AEGTA

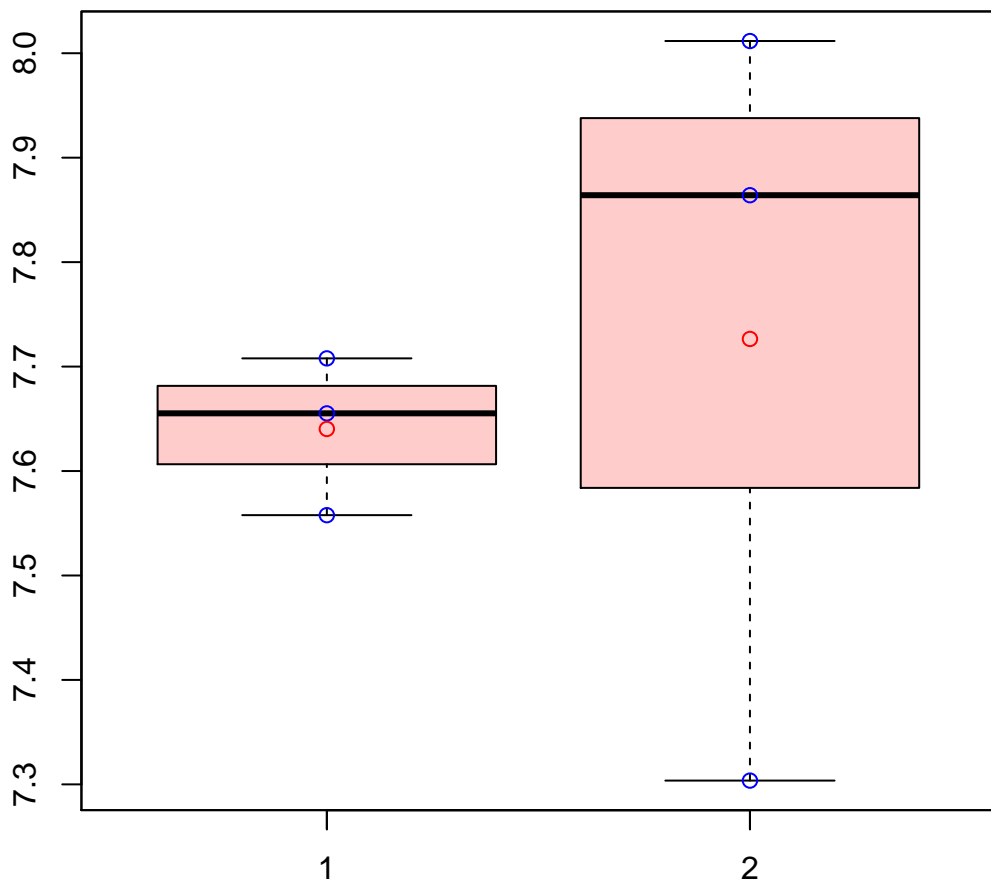

t-Test: p-value = 0.73

# N1R4D0|N1R4D0\_AEGTA

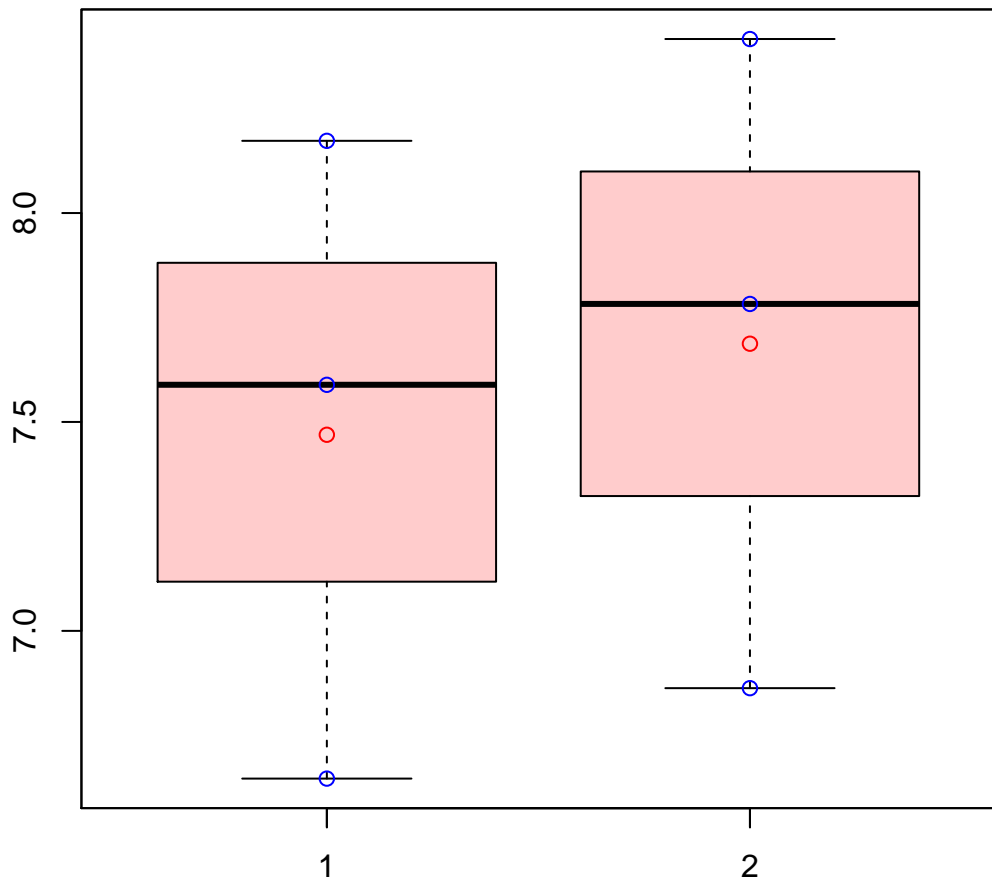

t-Test: p-value = 0.75

# N1R4J0|N1R4J0\_AEGTA

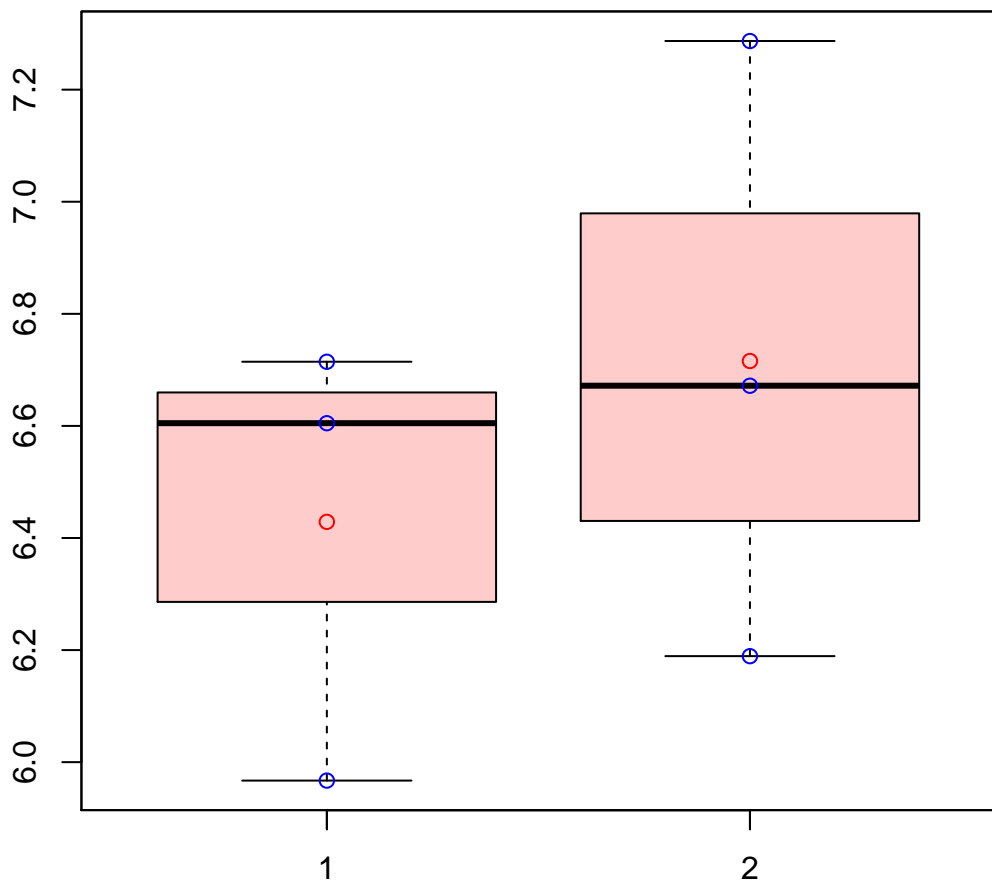

t-Test: p-value = 0.51

# N1R4K2|N1R4K2\_AEGTA

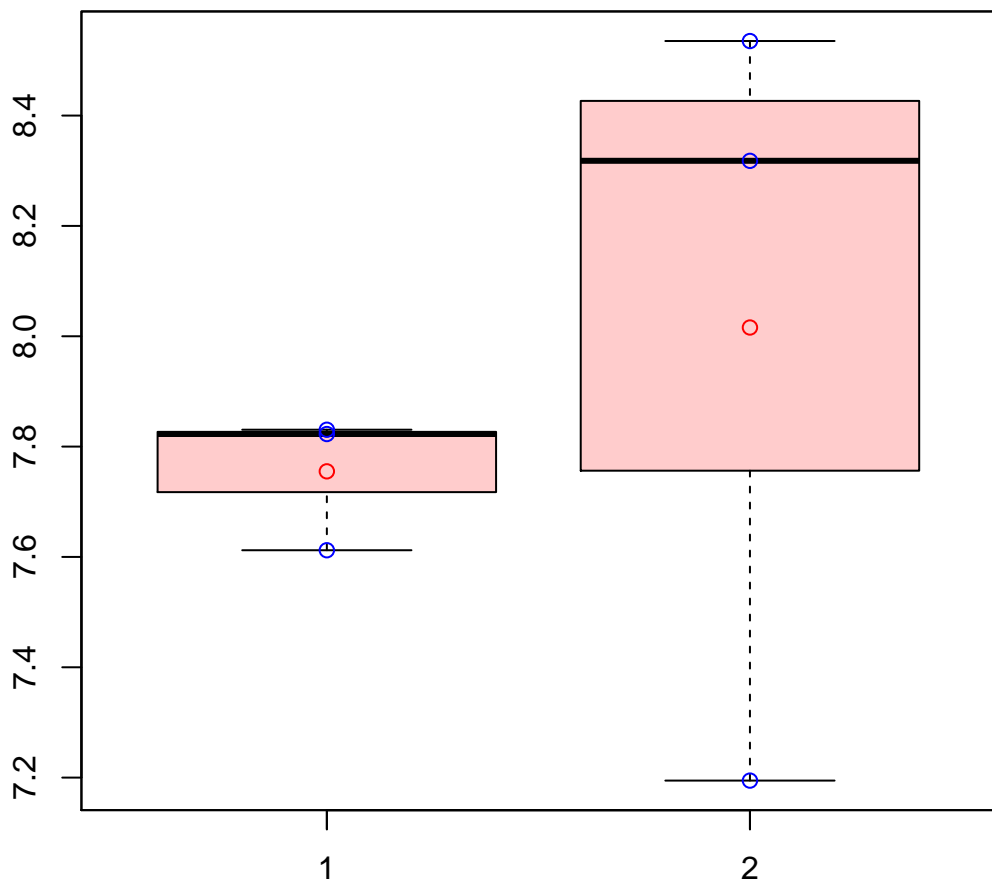

t-Test: p-value = 0.6

# N1R4L8|N1R4L8\_AEGTA

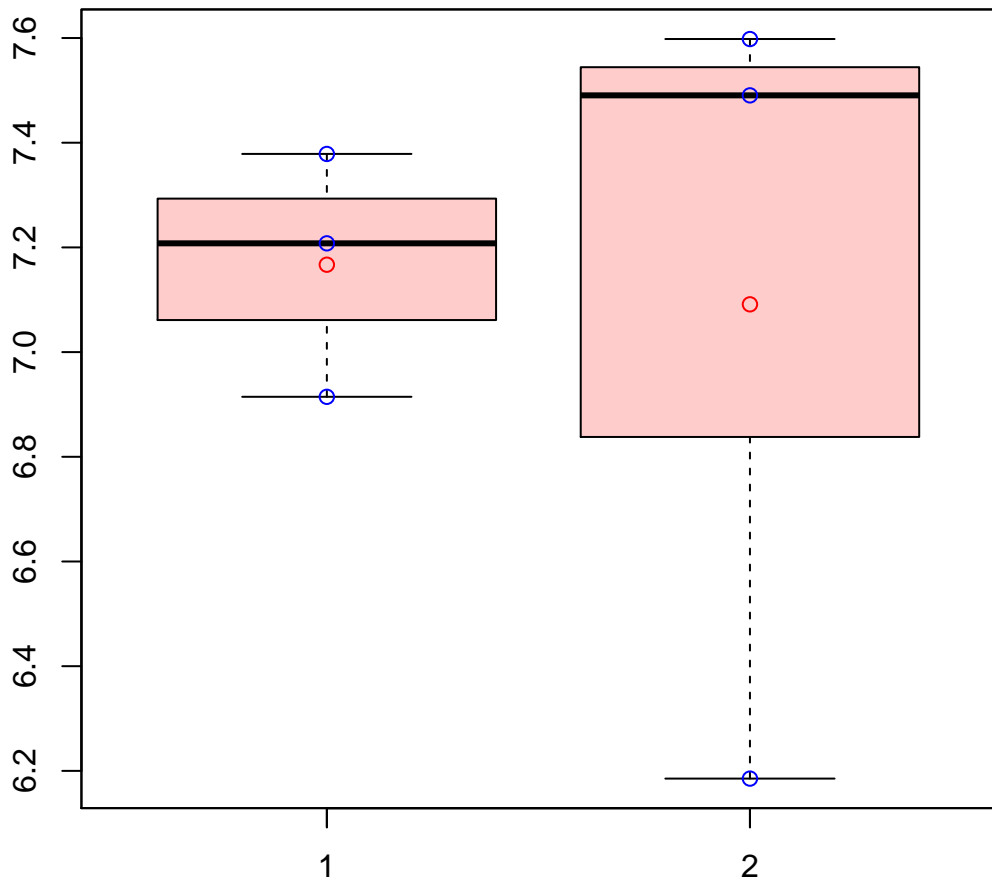

t-Test: p-value = 0.89

# N1R4R9|N1R4R9\_AEGTA

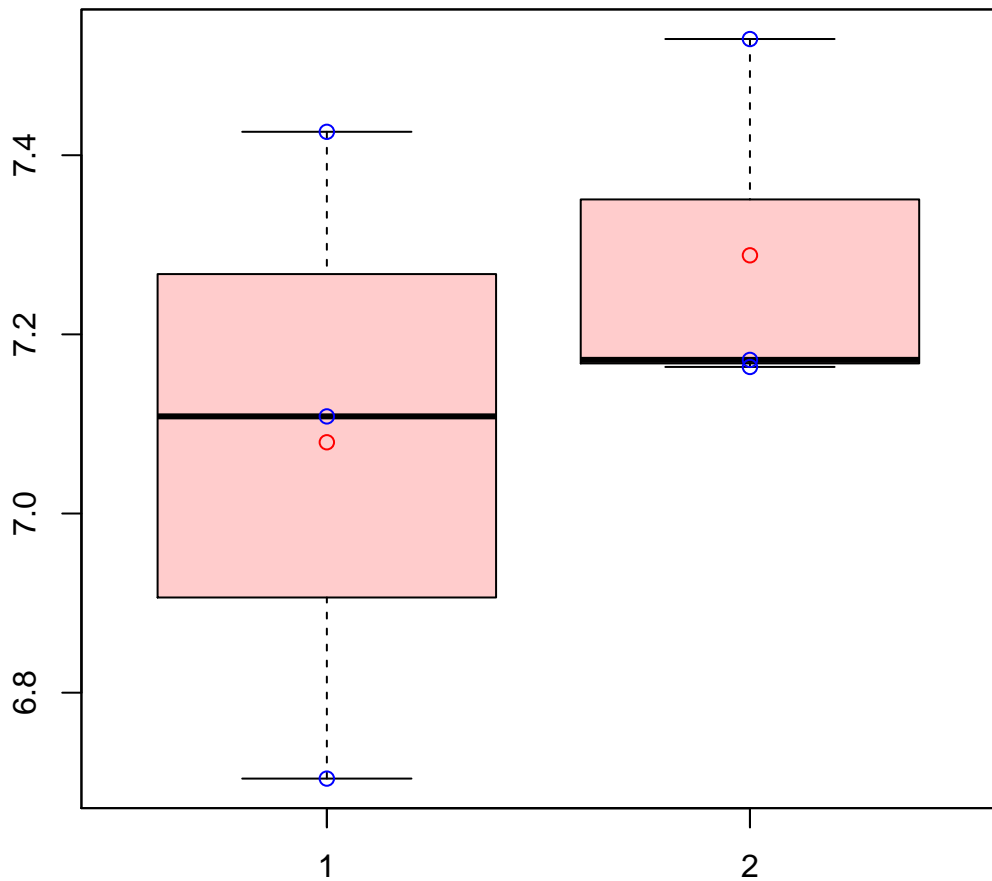

t-Test: p-value = 0.45

# N1R4X3|N1R4X3\_AEGTA

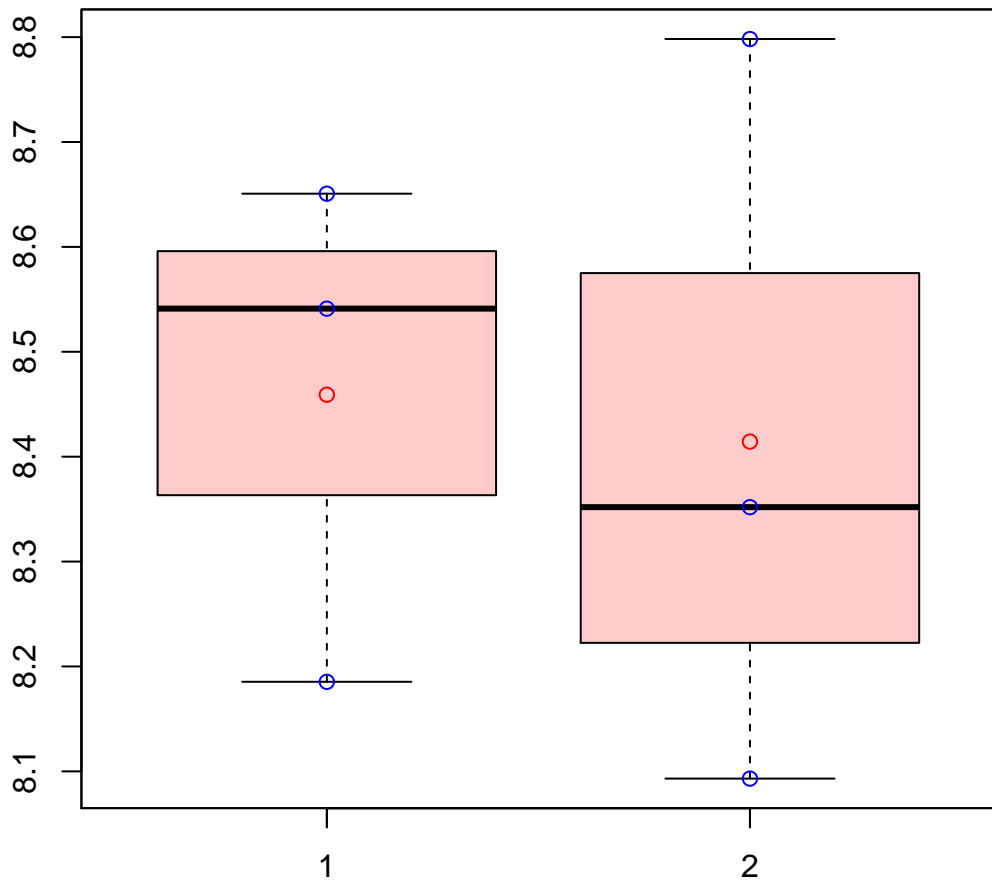

t-Test: p-value = 0.87



# O04372|O04372\_ASPOF

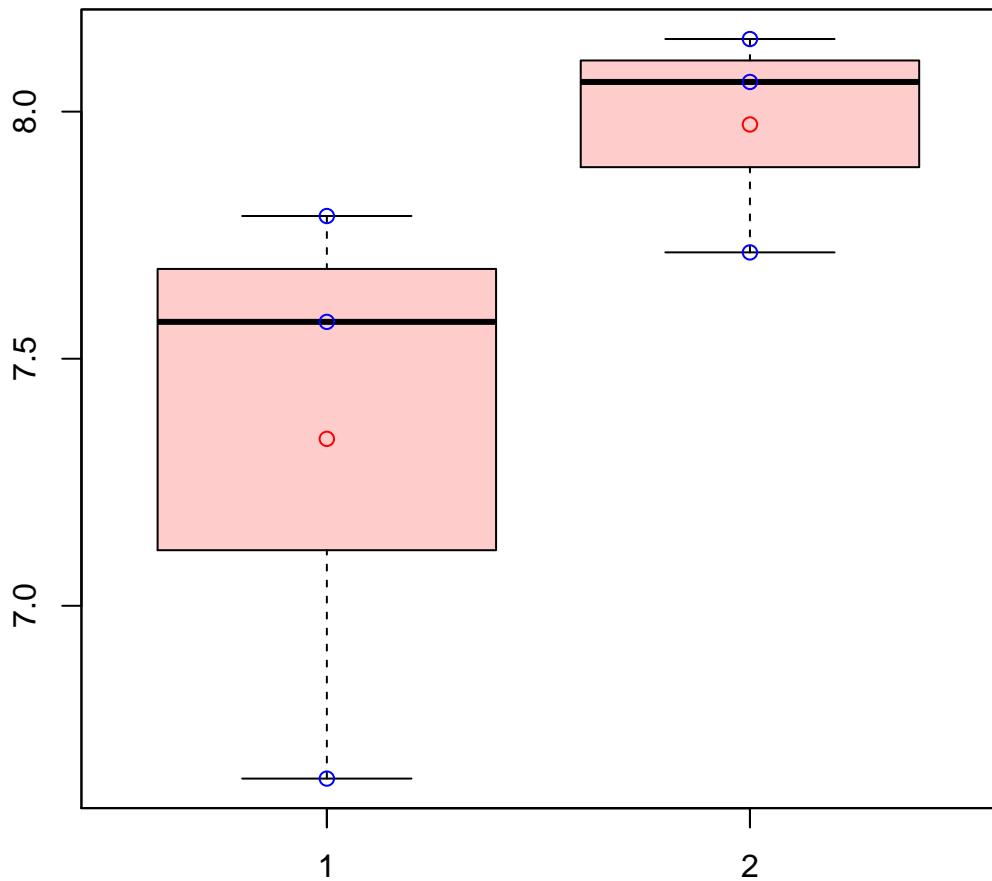

t-Test: p-value = 0.2

# O04818|O04818\_SPOST

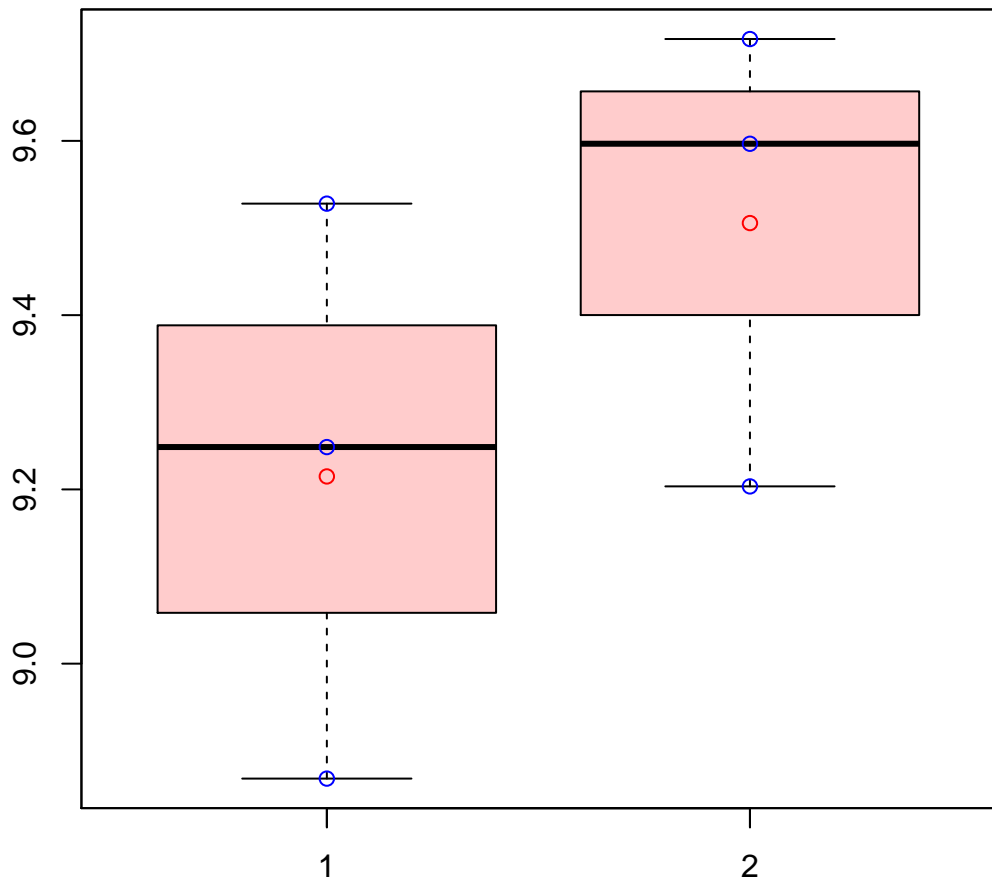

t-Test: p-value = 0.31

# O22542|O22542\_ORYSA

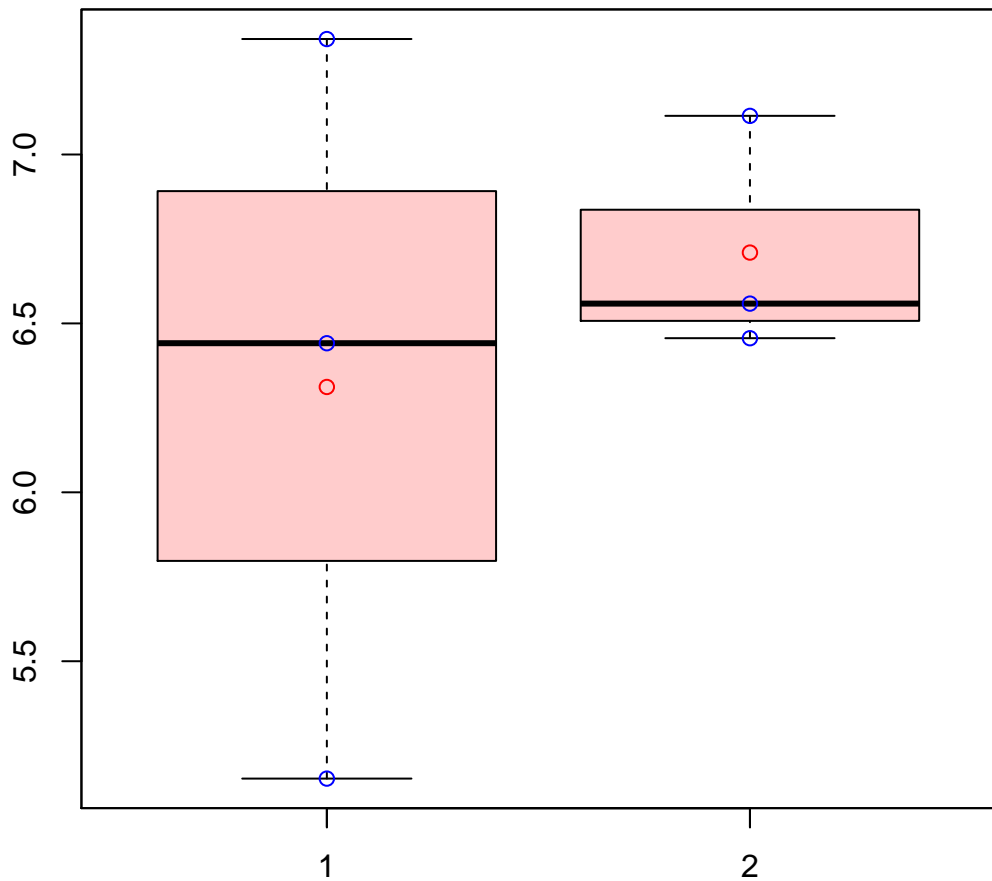

t-Test: p-value = 0.6

# O23927|O23927\_9POAL

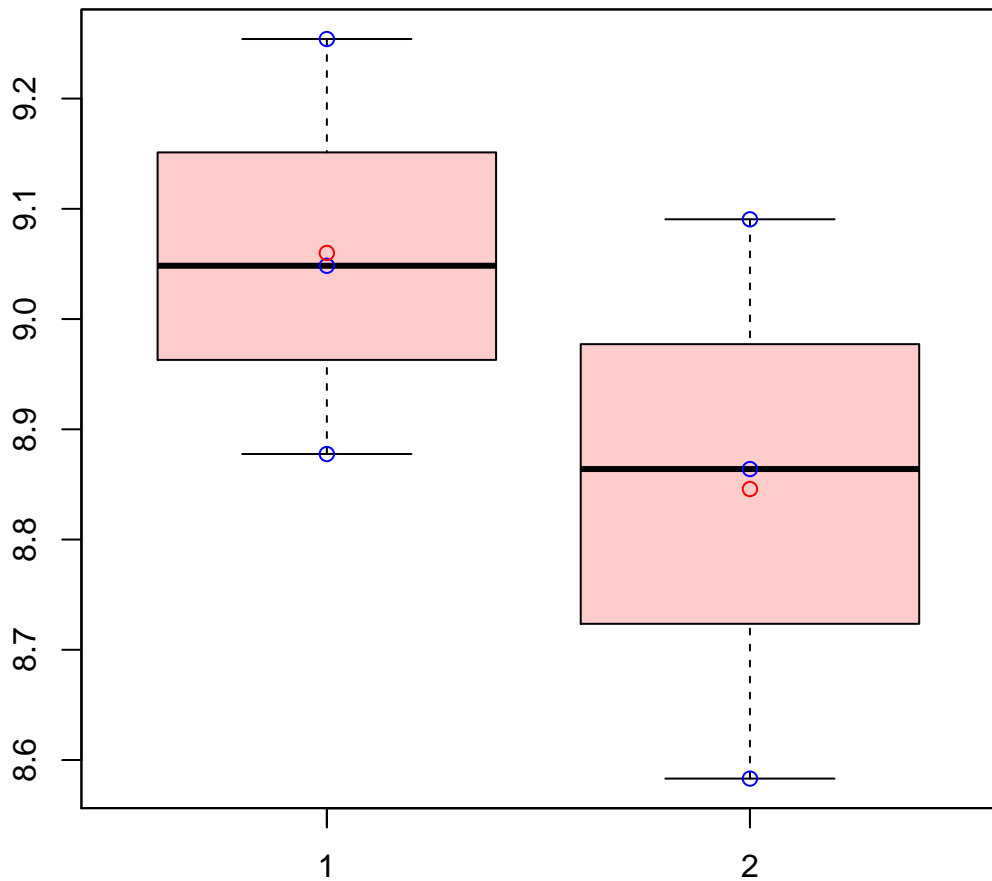

t-Test: p-value = 0.31

# O23928|O23928\_9POAL

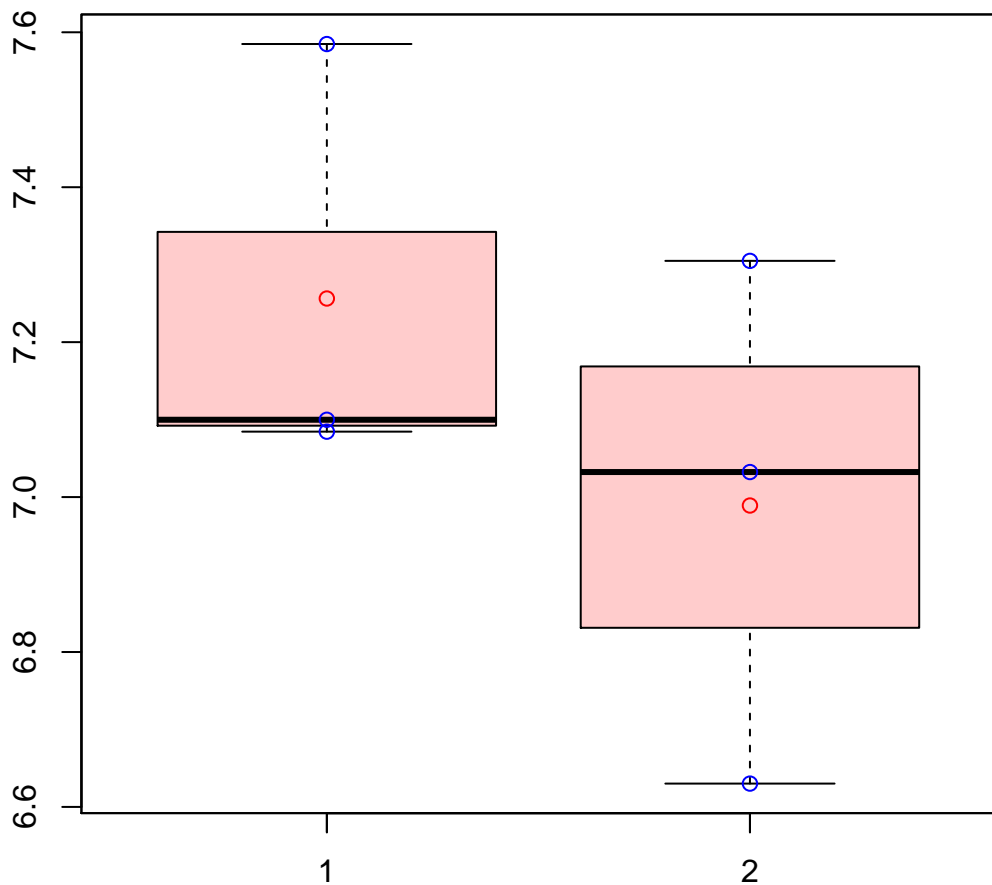

t-Test: p-value = 0.36

# O24345|O24345\_SORBI

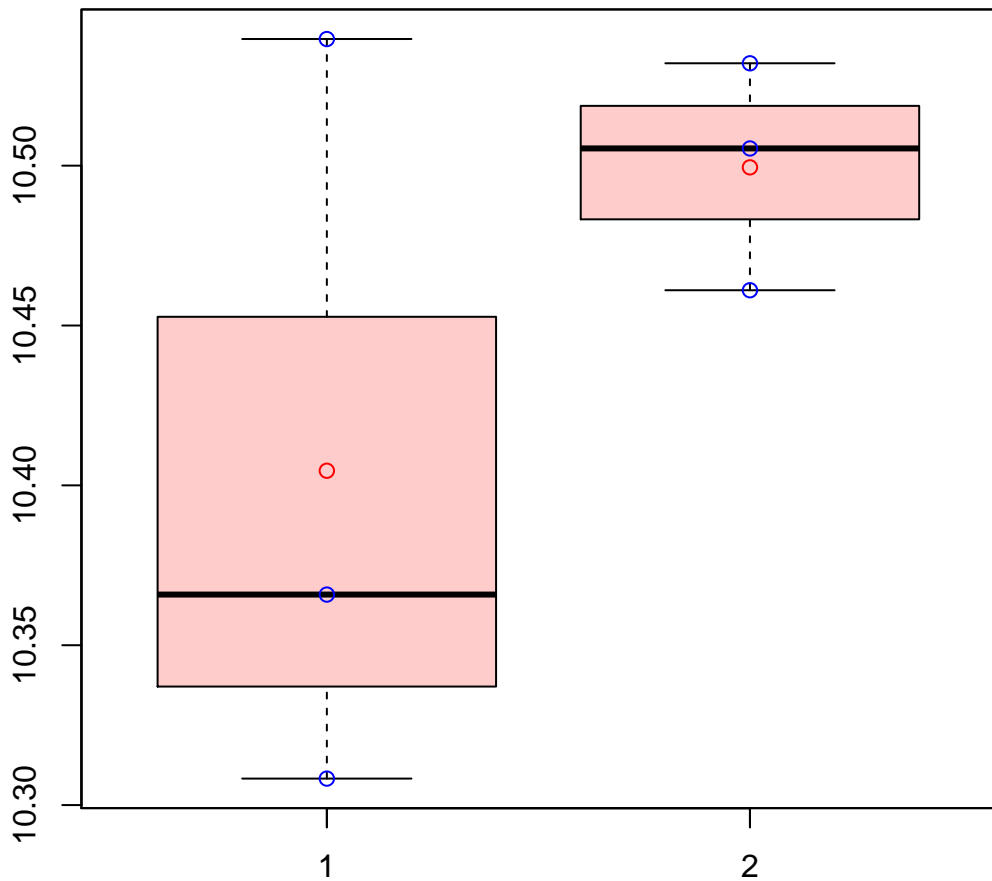

t-Test: p-value = 0.3

# O49124|O49124\_FRIAG

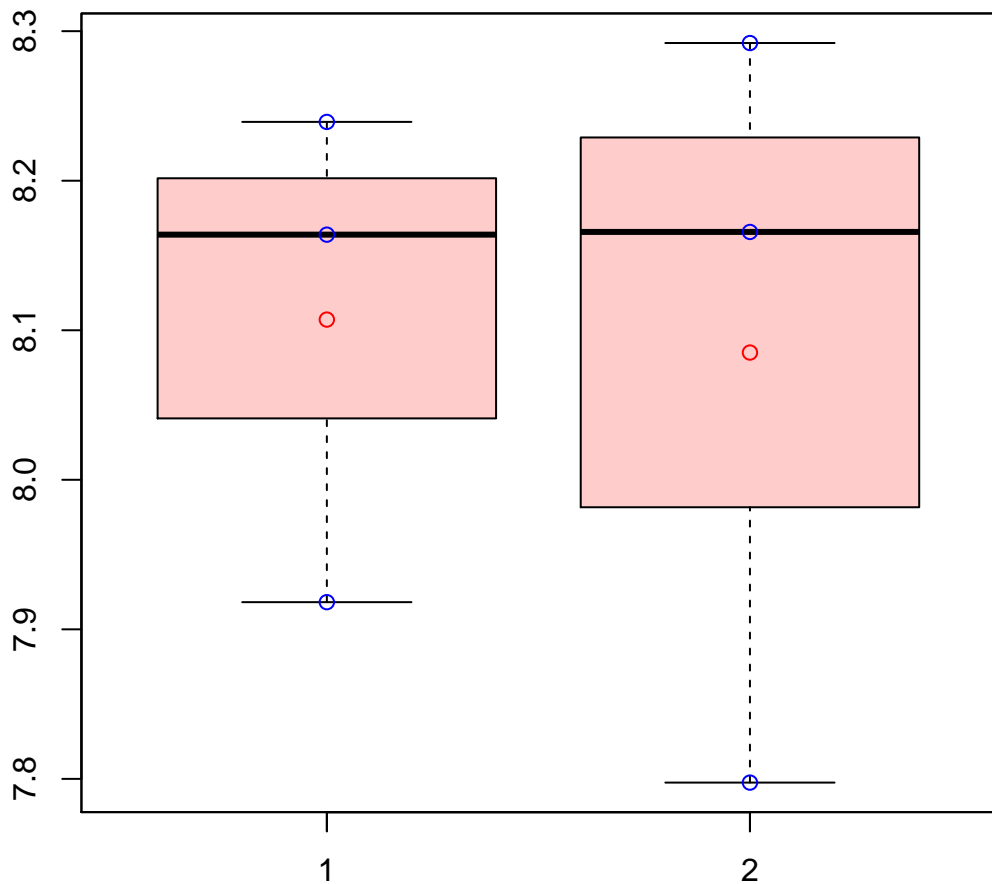

t-Test: p-value = 0.91

# O81237|O81237\_MAIZE

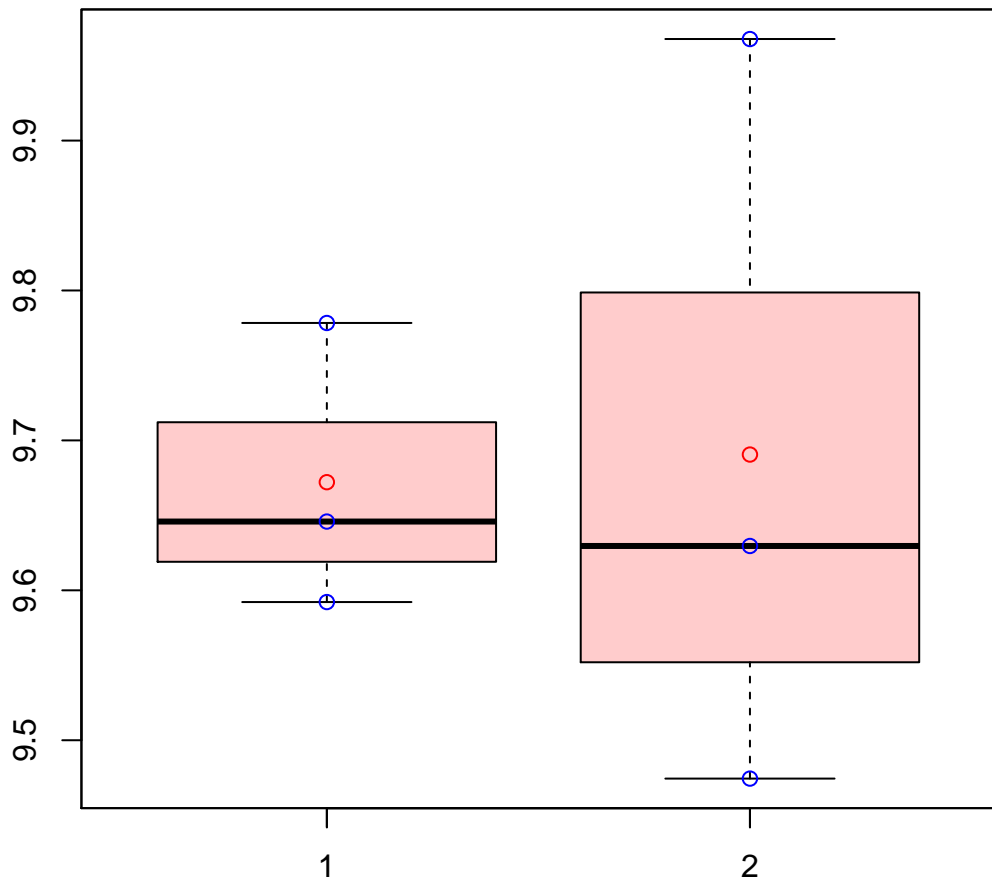

t-Test: p-value = 0.91



# O82072|O82072\_WHEAT

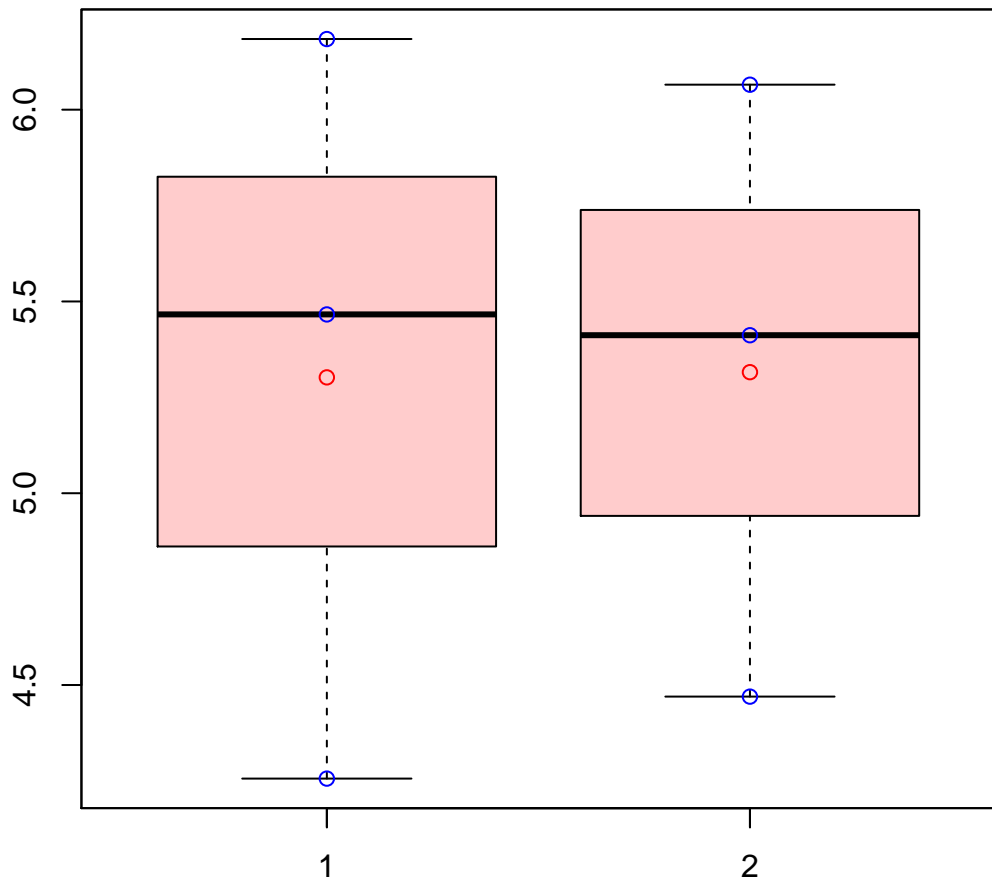

t-Test: p-value = 0.99

# O82073|O82073\_WHEAT

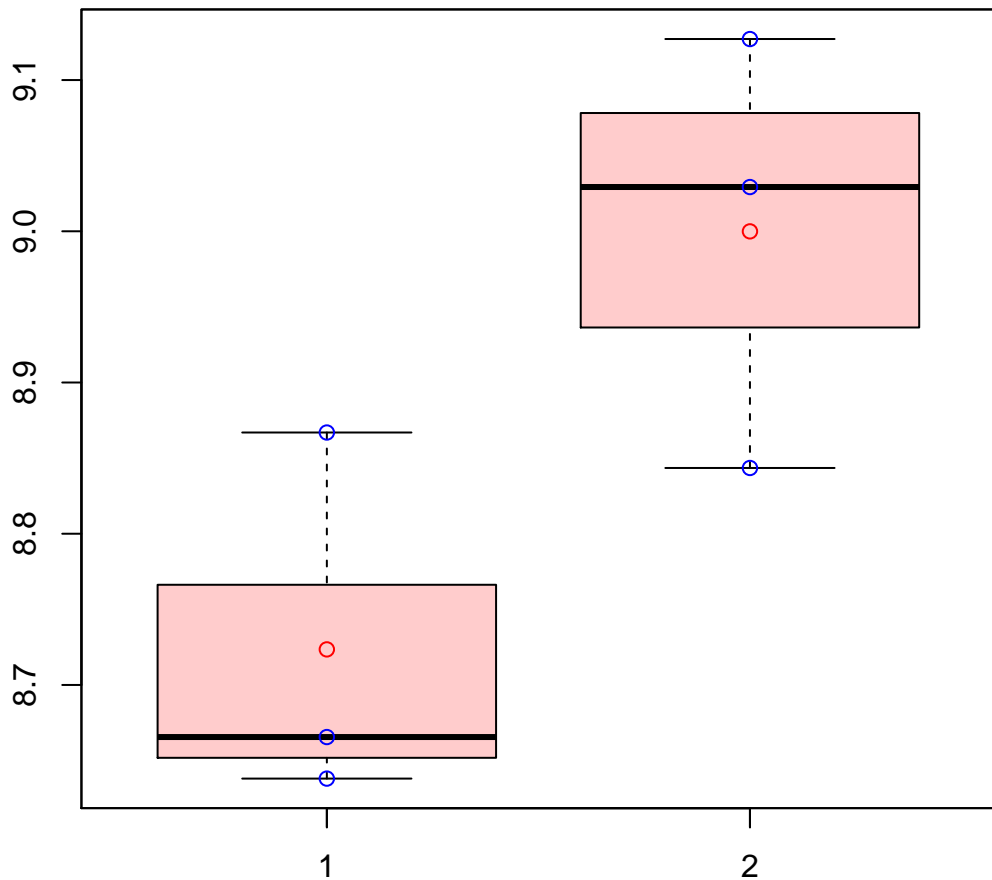

t-Test: p-value = 0.07

# O82576|O82576\_MAIZE

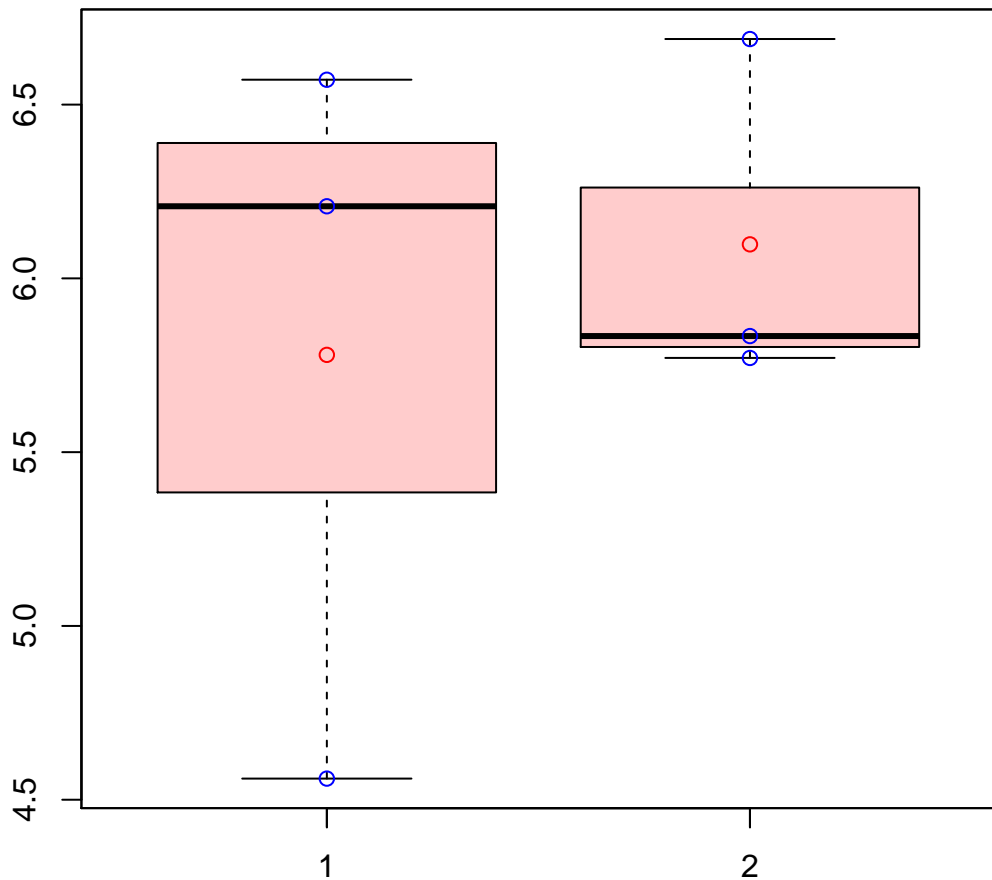

t-Test: p-value = 0.68

# O82578|O82578\_MAIZE

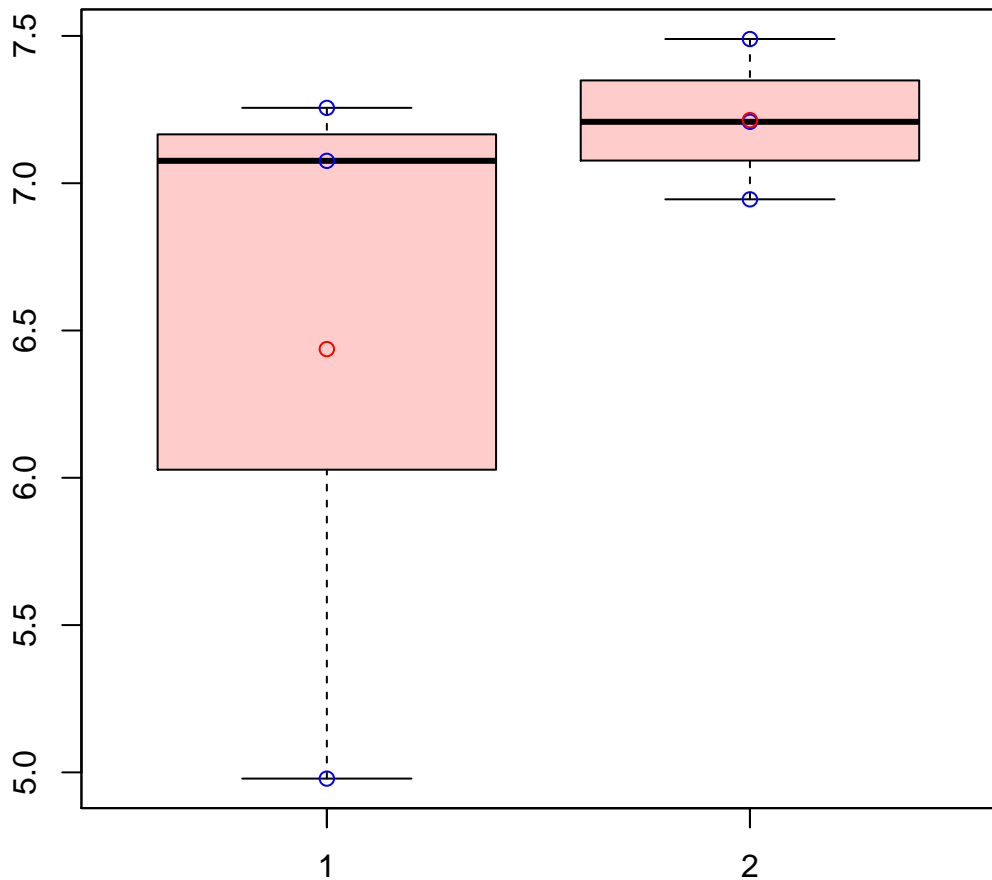

t-Test: p-value = 0.4

# P93624|P93624\_WASRO

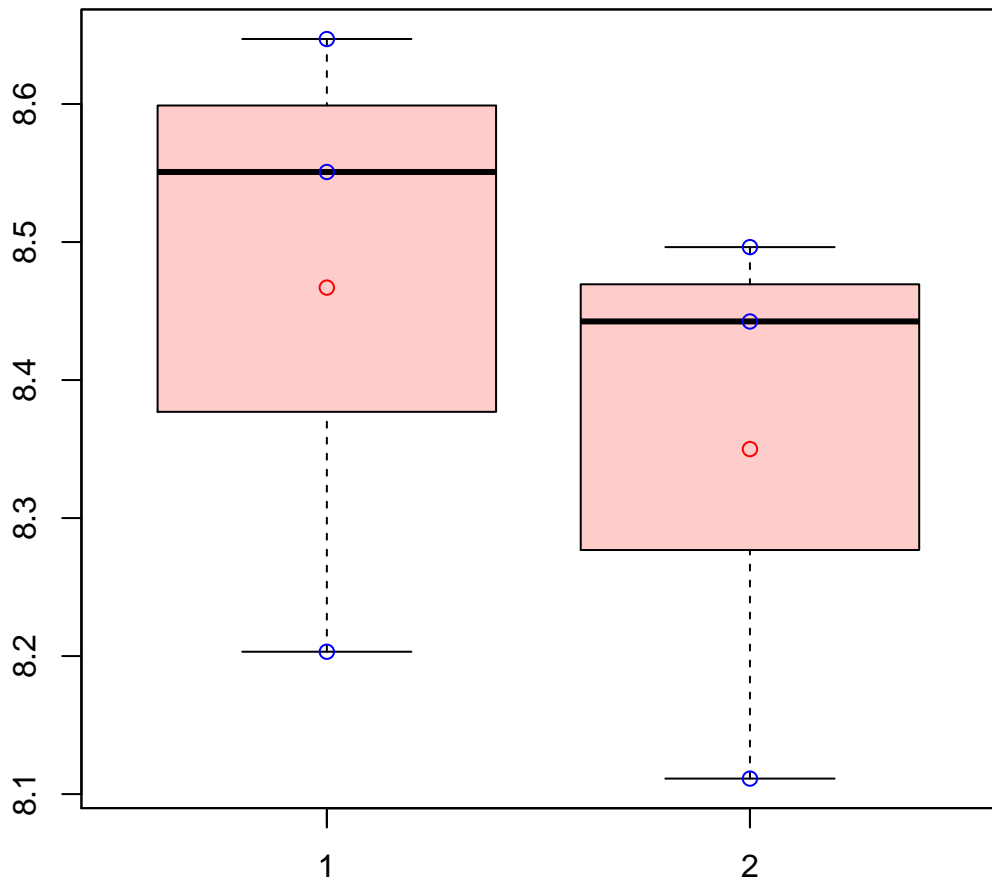

t-Test: p-value = 0.55

# P93914|P93914\_9ASPA

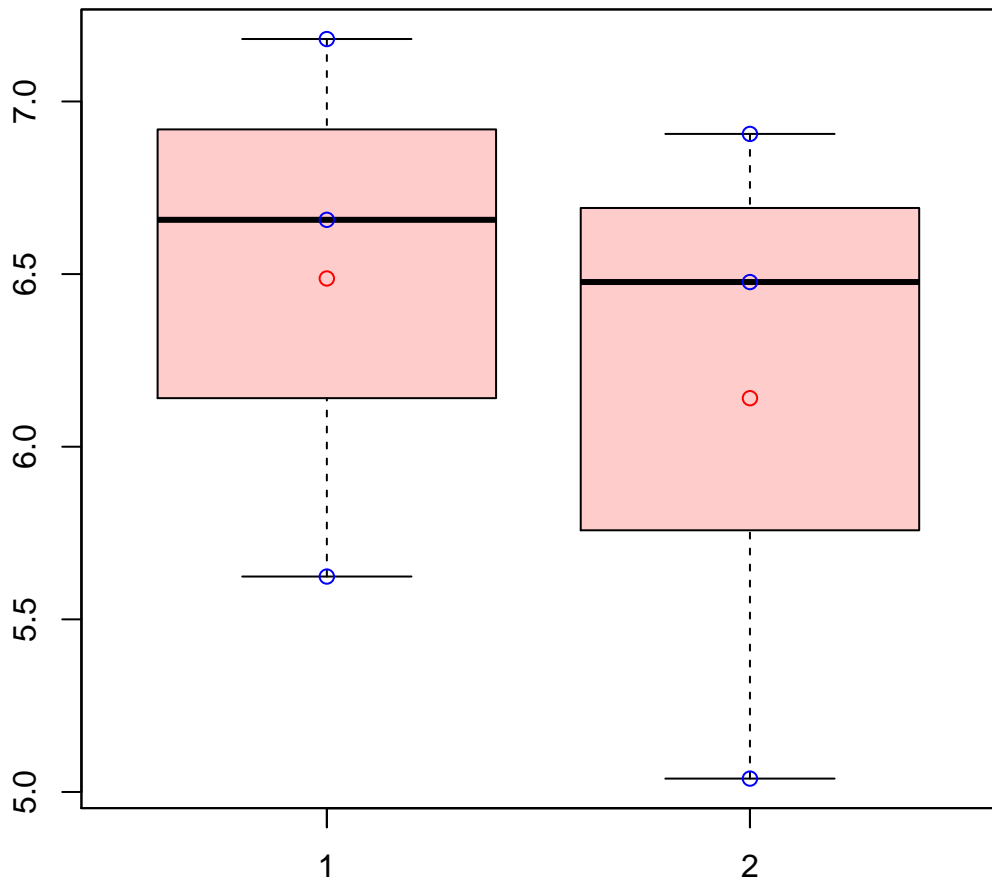

t-Test: p-value = 0.66

## Protein Accession

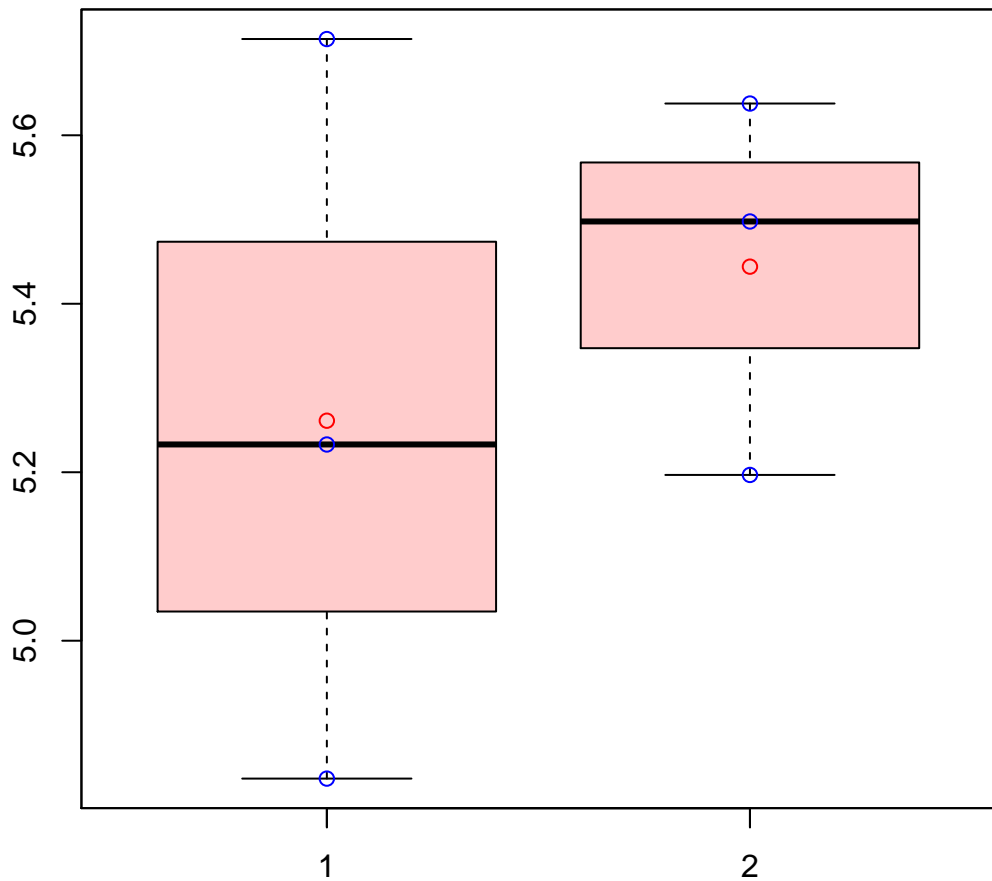

t-Test: p-value = 0.57

**Q01H94|Q01H94\_ORYSA**

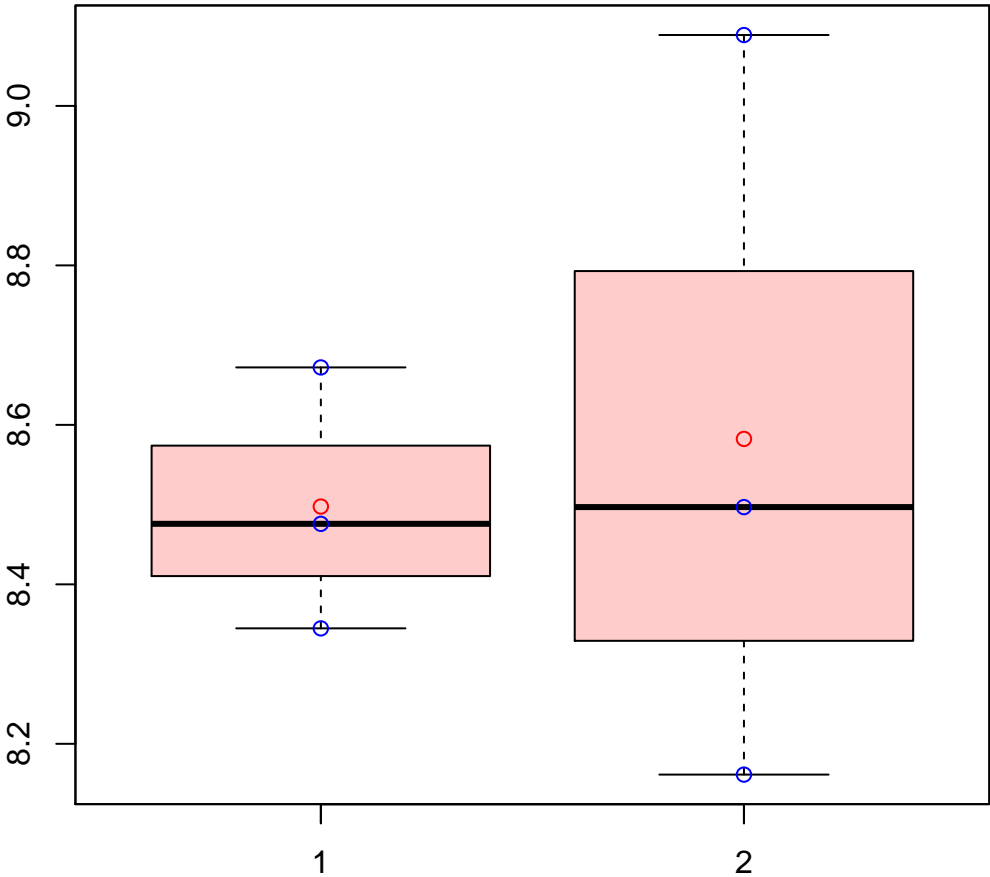

t-Test: p-value = 0.79



# Q01HI3|Q01HI3\_ORYSA

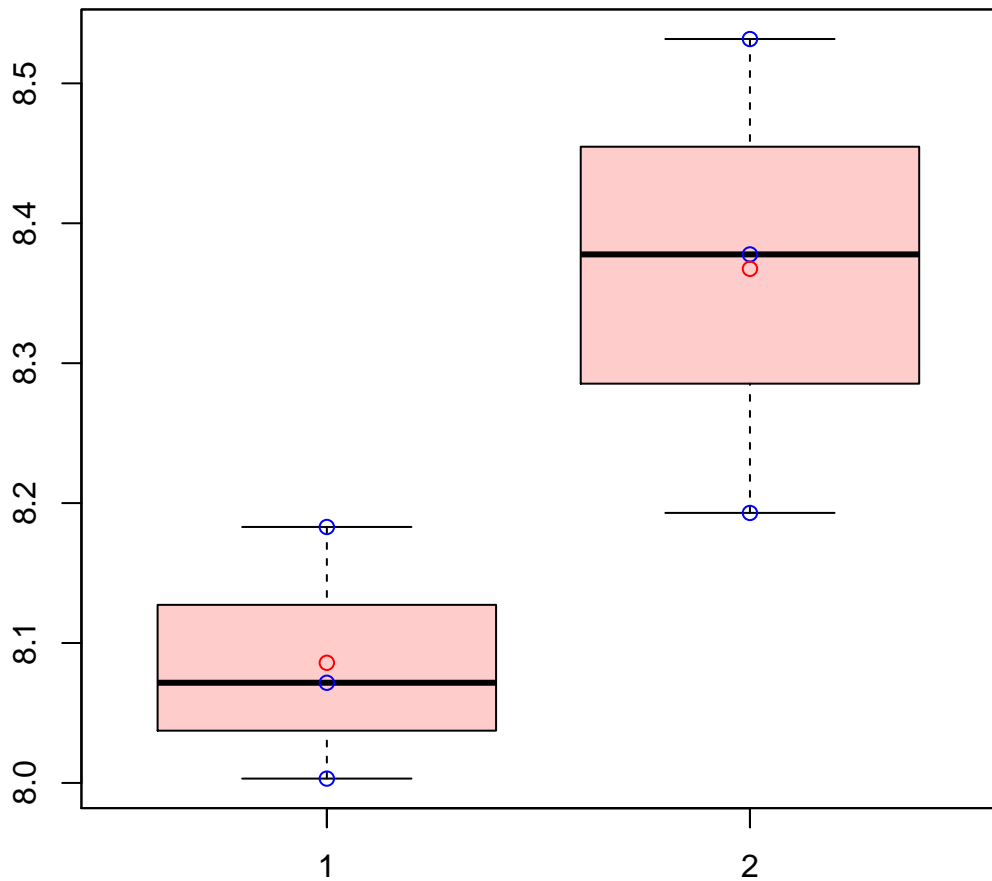

t-Test: p-value = 0.08

# Q01HN9|Q01HN9\_ORYSA

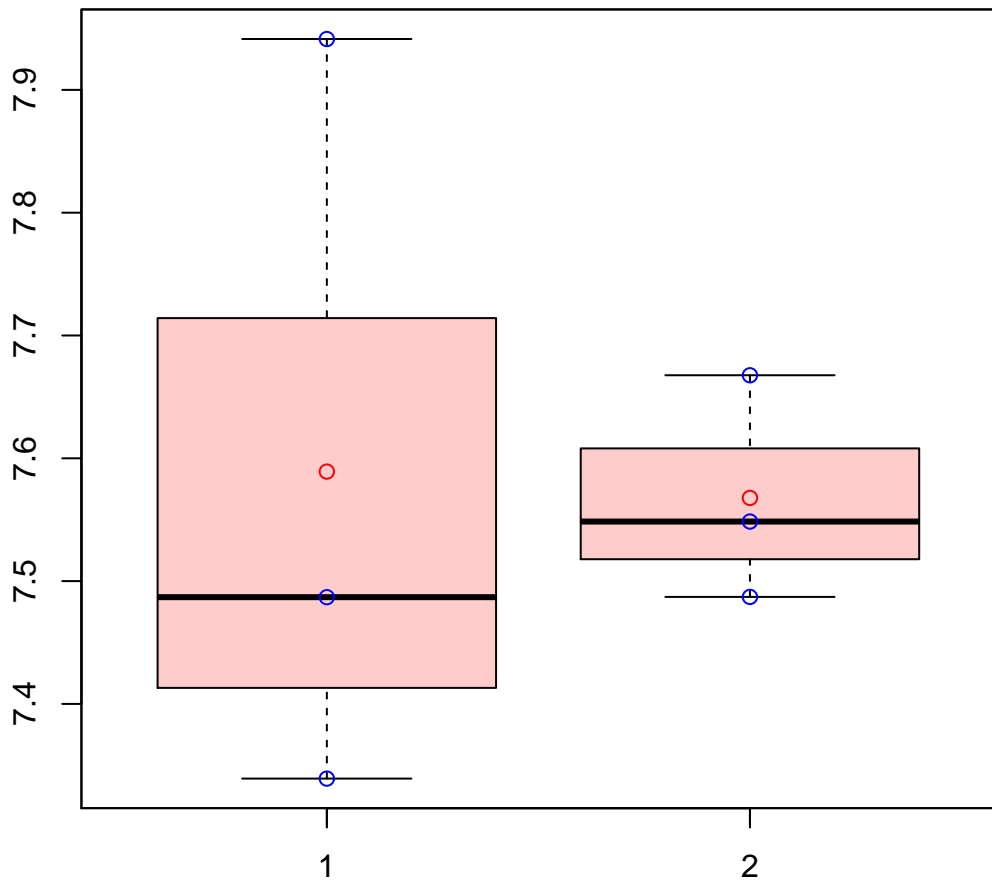

t-Test: p-value = 0.92

# Q01HR0|Q01HR0\_ORYSA

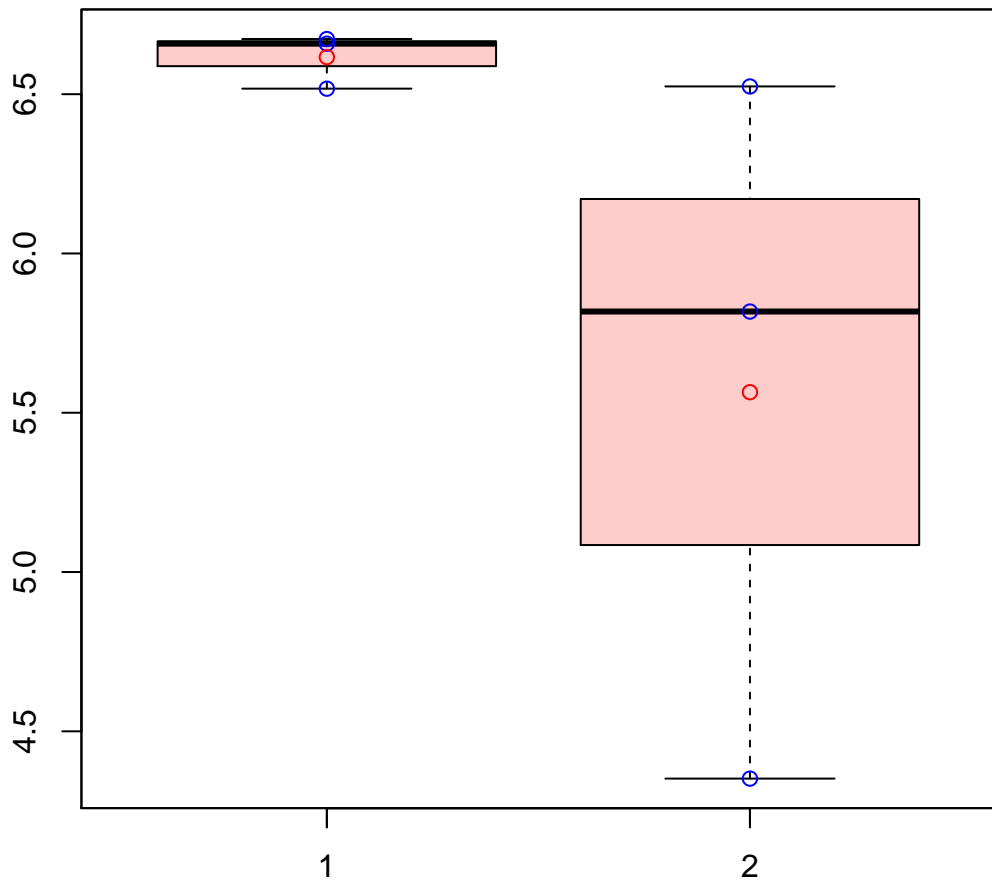

t-Test: p-value = 0.24

# Q01HZ5|Q01HZ5\_ORYSA

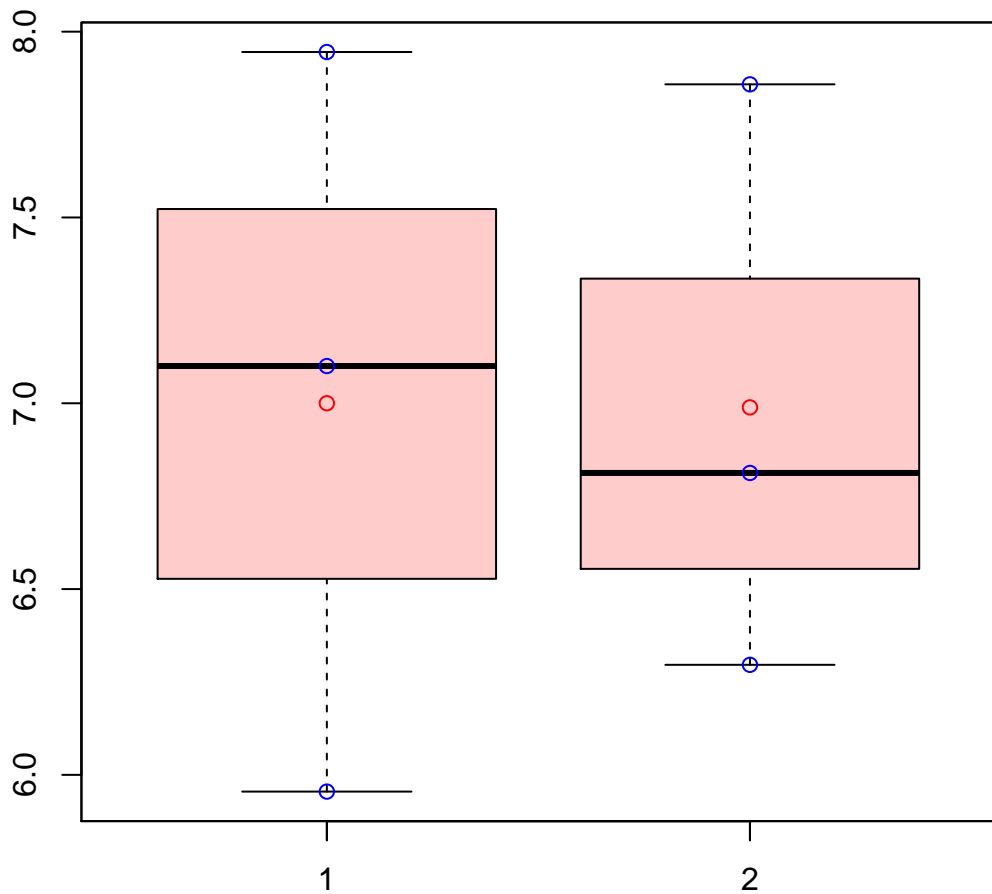

t-Test: p-value = 0.99

# Q01MI7|Q01MI7\_ORYSA

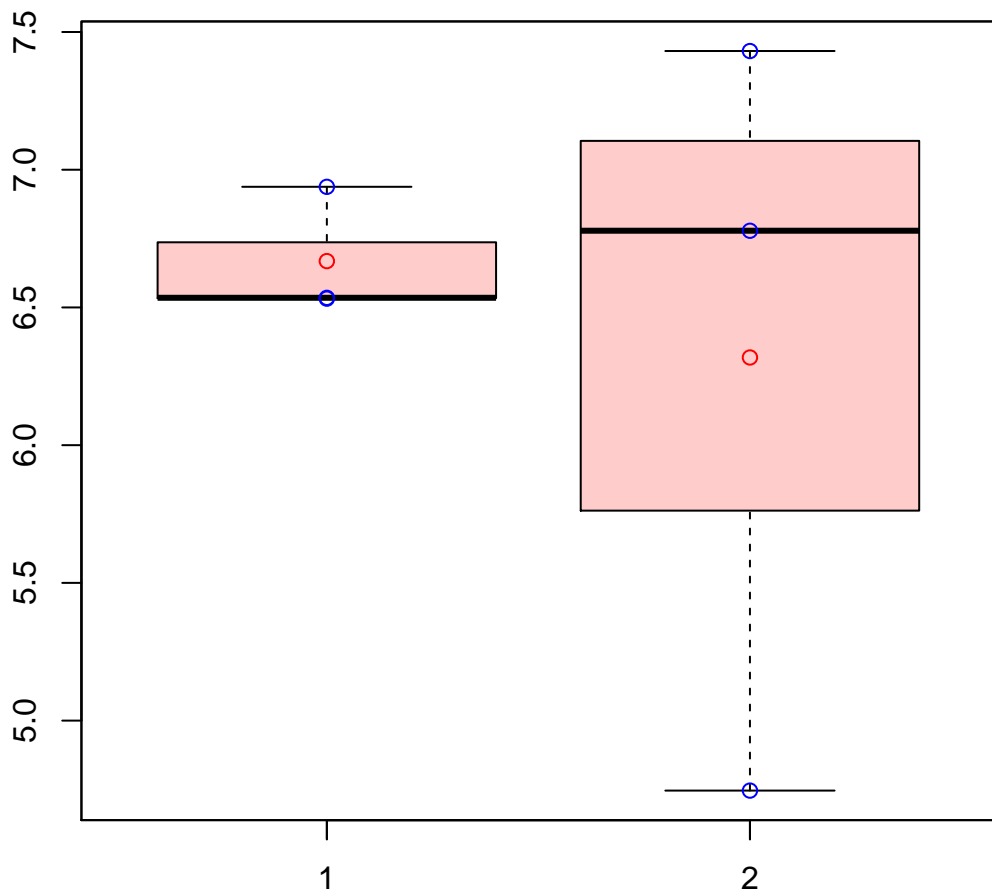

t-Test: p-value = 0.71

# Q01MK8|Q01MK8\_ORYSA

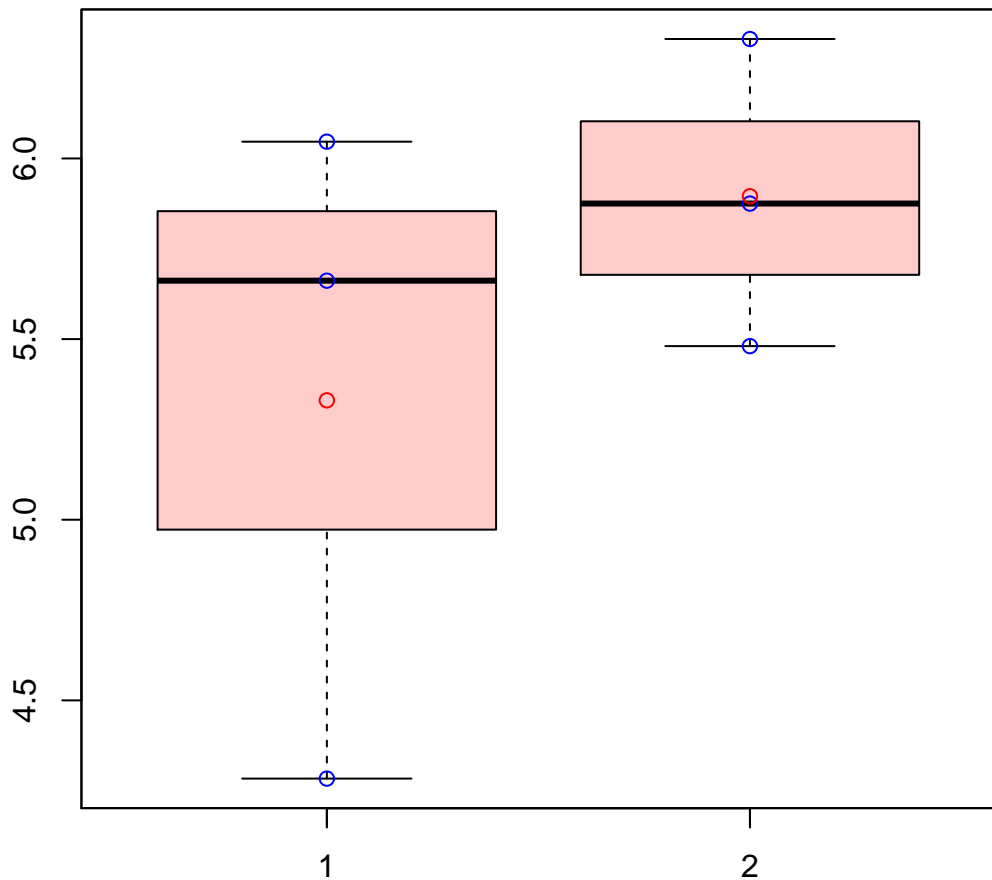

t-Test: p-value = 0.41

# Q01MW9|Q01MW9\_ORYSA

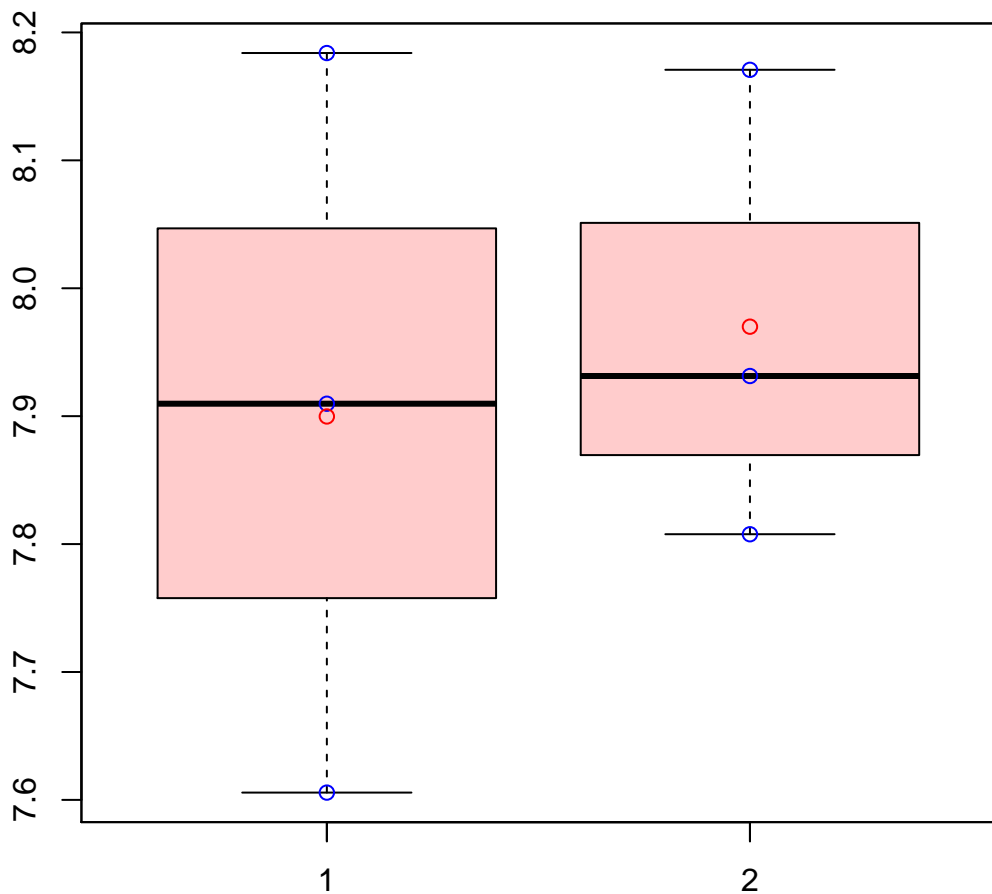

t-Test: p-value = 0.74

# Q08G39|Q08G39\_WHEAT

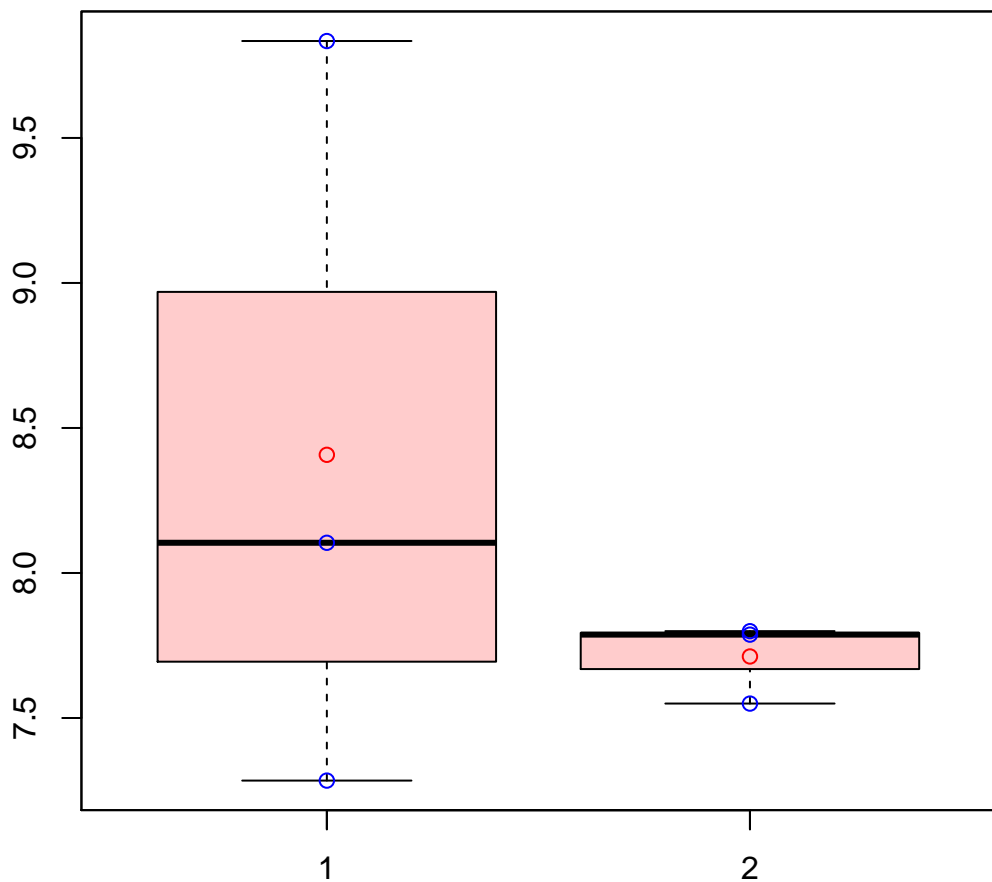

t-Test: p-value = 0.45



# Q09EN6|Q09EN6\_TRIDA

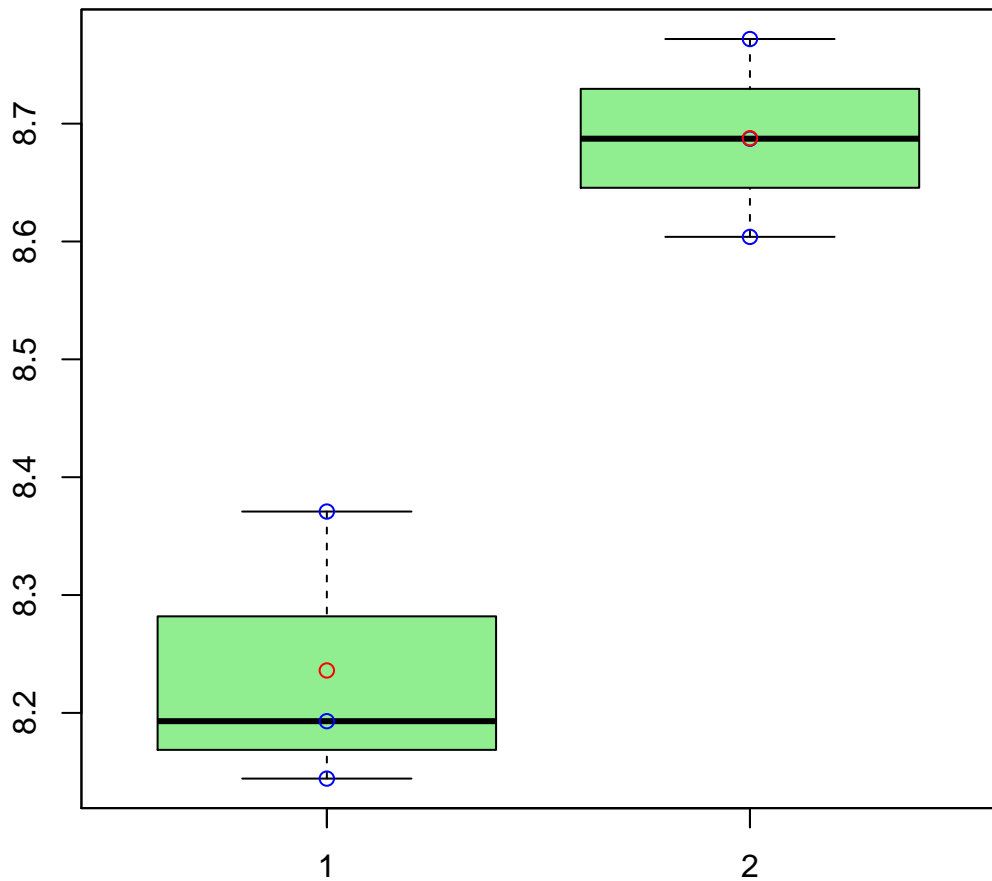

t-Test: p-value = 0.01

# Q0D499|Q0D499\_ORYSJ

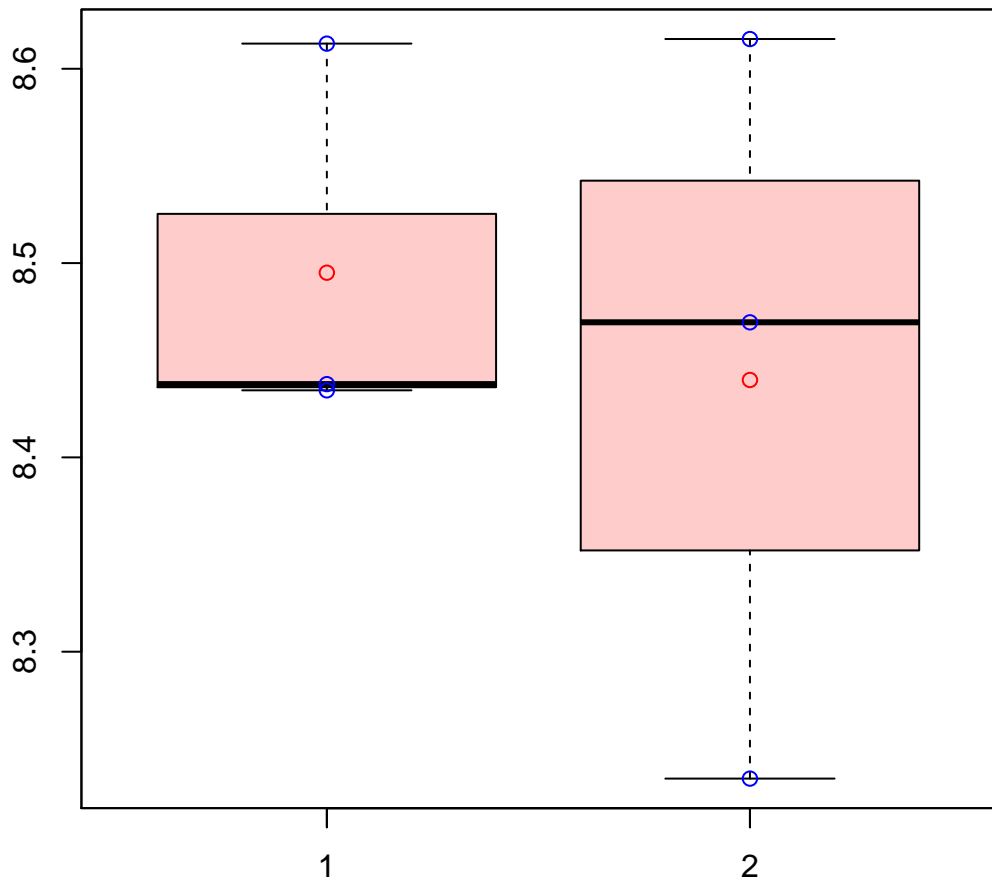

t-Test: p-value = 0.69

# Q0D574|Q0D574\_ORYSJ

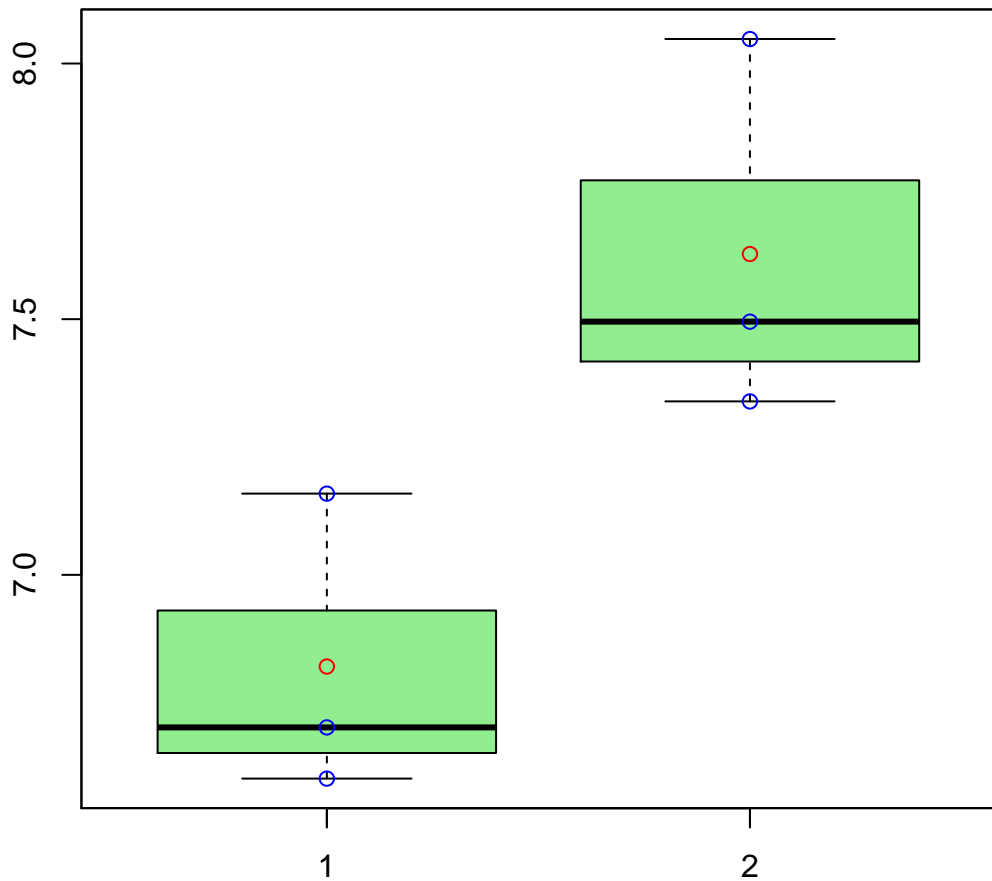

t-Test: p-value = 0.05

# Q0DEU8|Q0DEU8\_ORYSJ

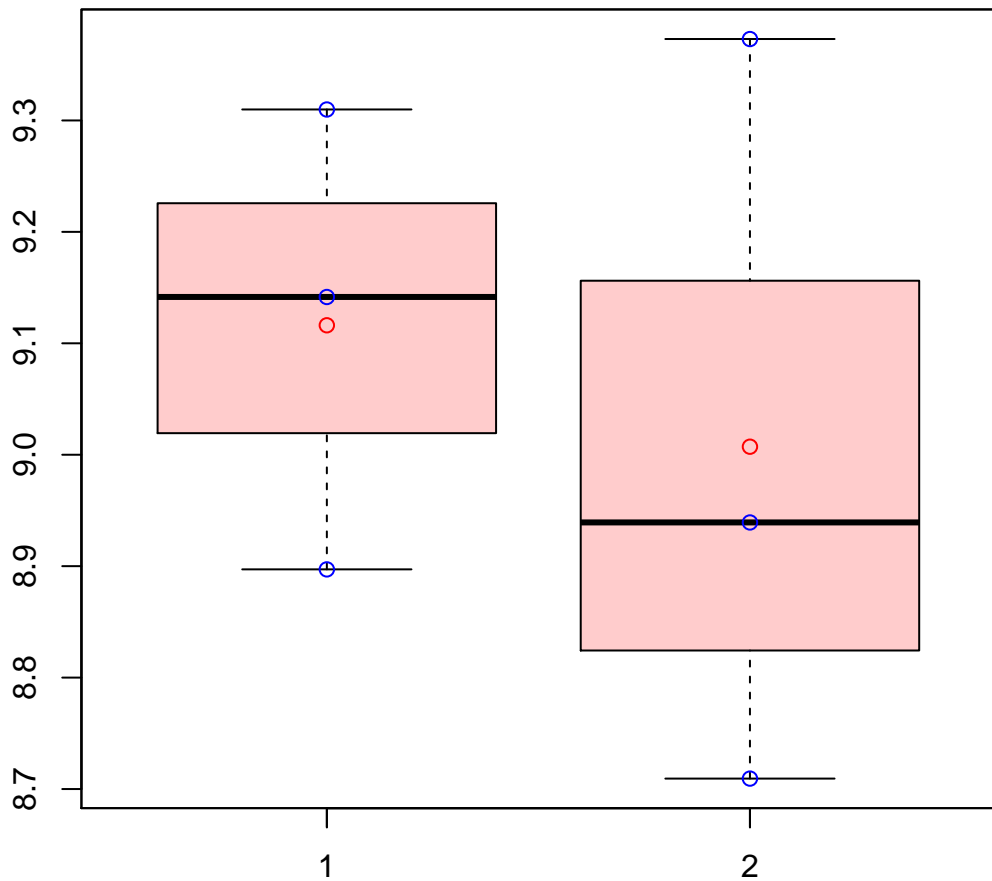

t-Test: p-value = 0.66

# Q0DF89|Q0DF89\_ORYSJ

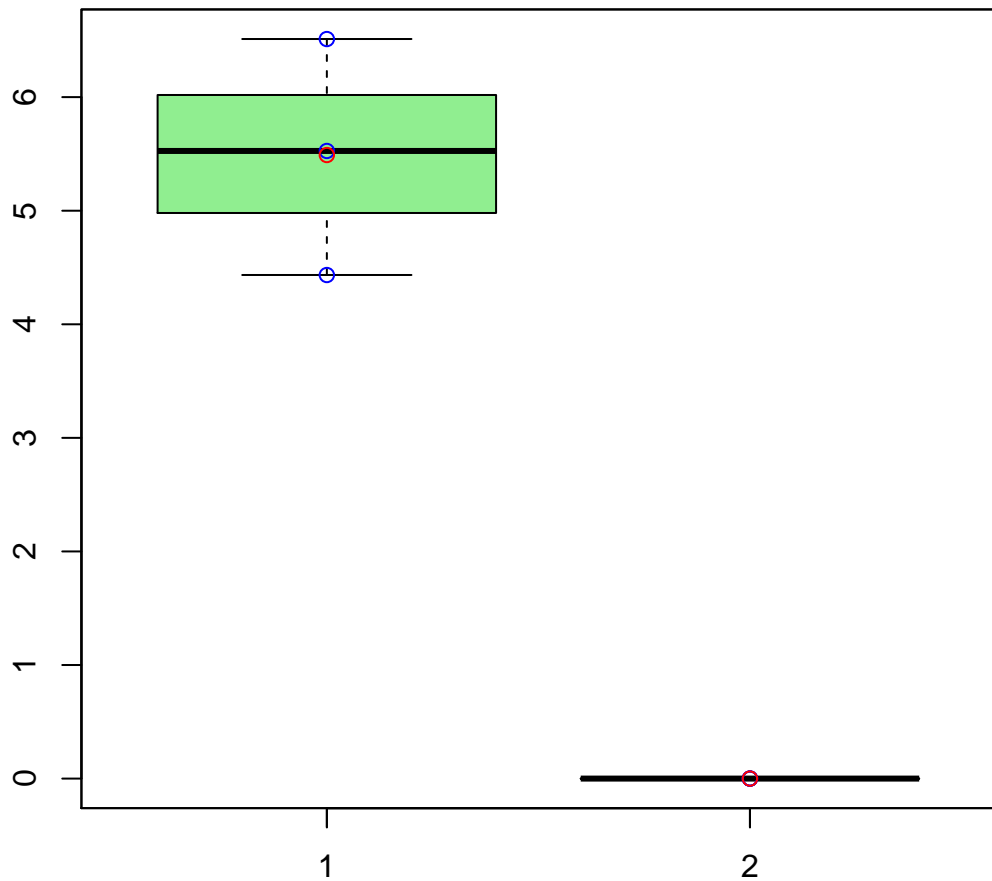

t-Test: p-value = 0.01

# Q0DI63|Q0DI63\_ORYSJ

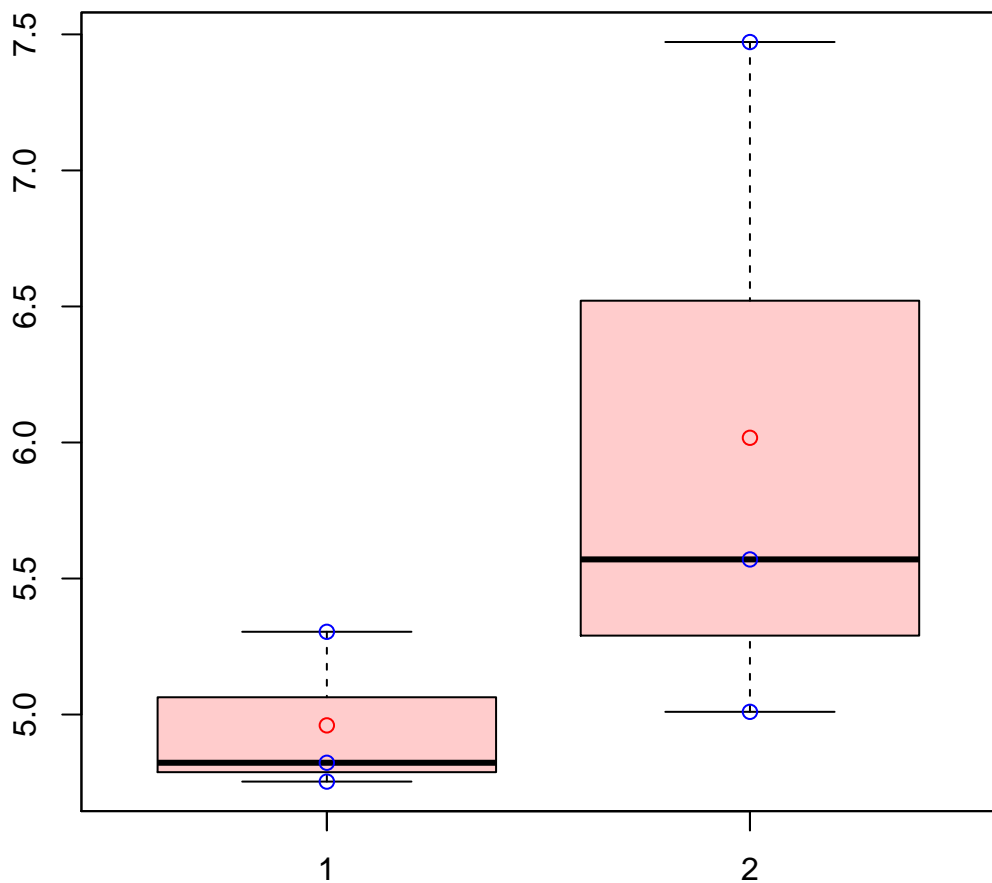

t-Test: p-value = 0.29

# Q0DIR7|Q0DIR7\_ORYSJ

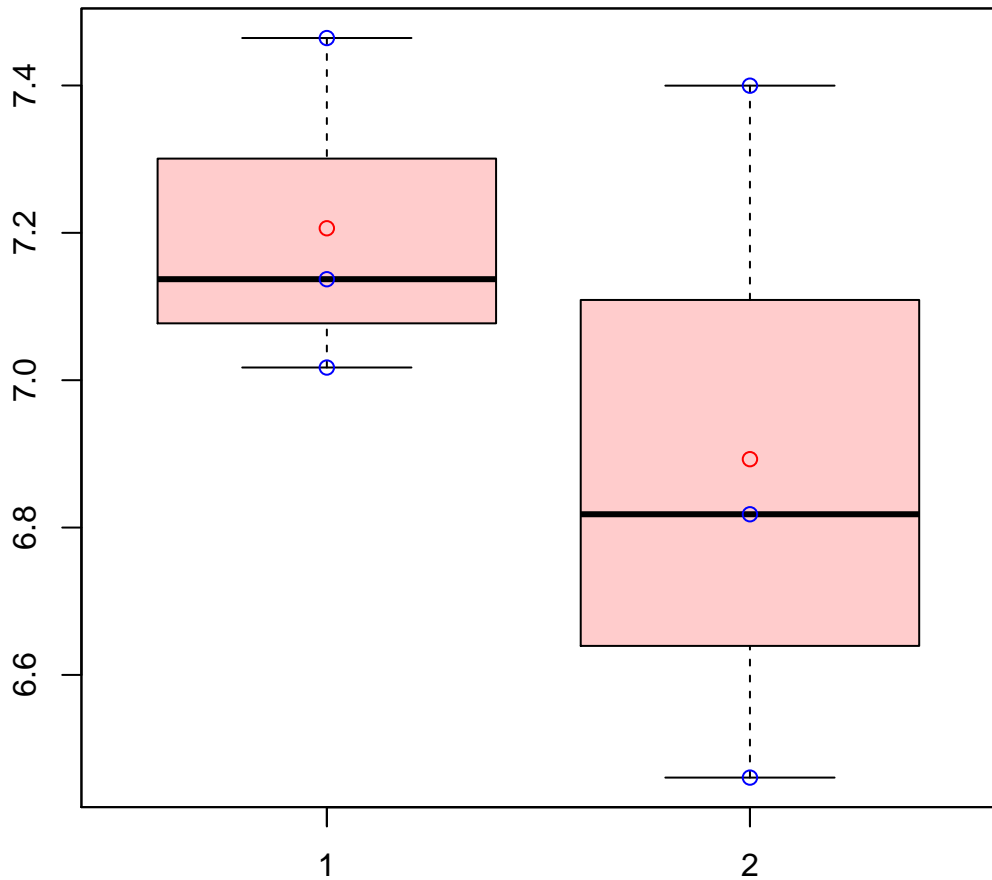

t-Test: p-value = 0.38

# Q0DJF9|Q0DJF9\_ORYSJ

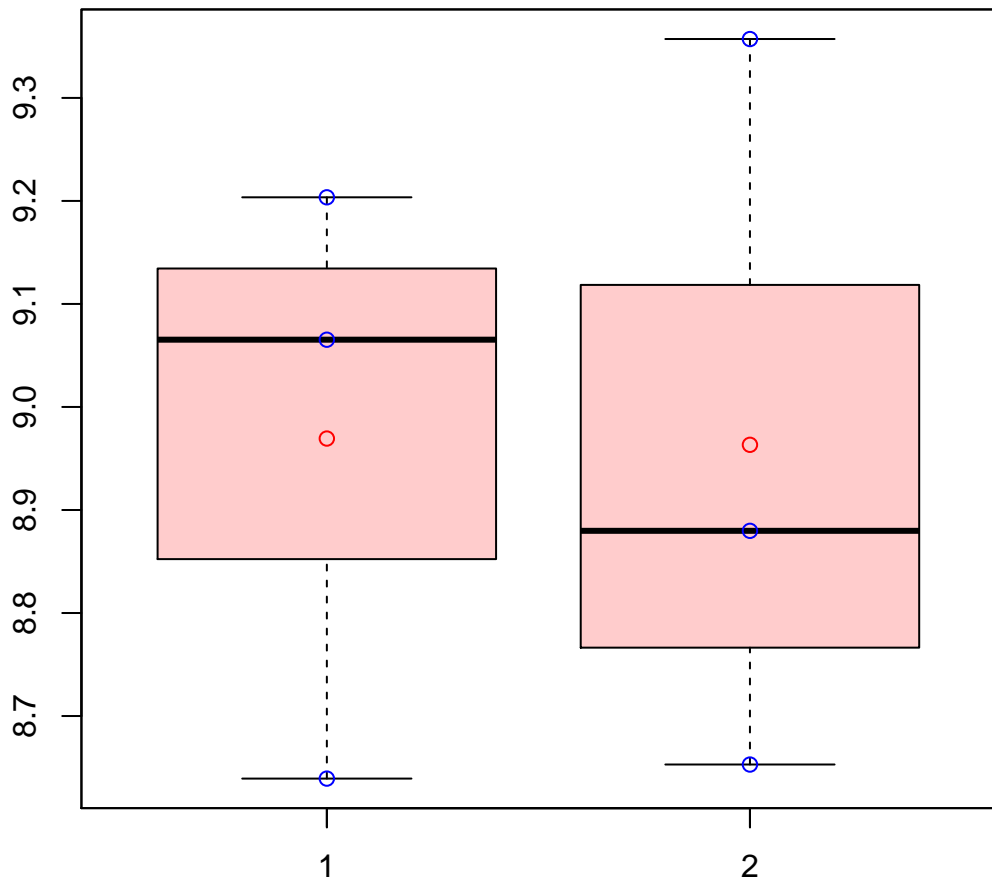

t-Test: p-value = 0.98



# Q0DPZ0|Q0DPZ0\_ORYSJ

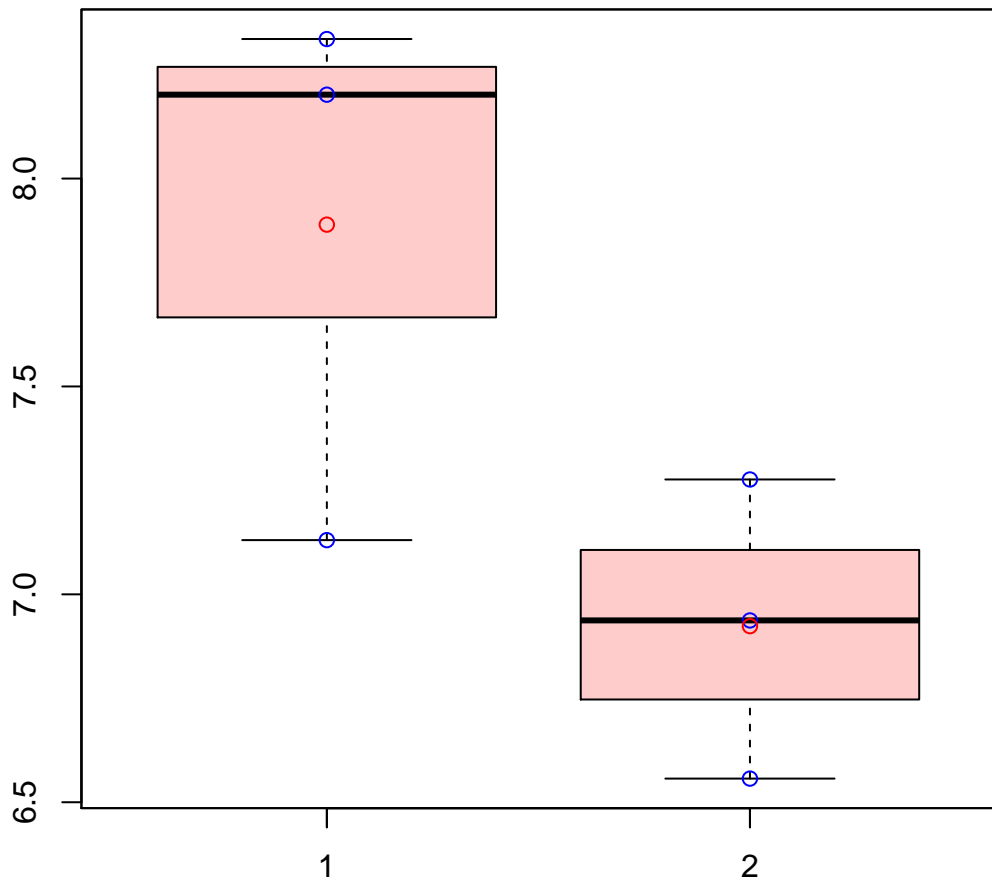

t-Test: p-value = 0.11

# Q0DS66|Q0DS66\_ORYSJ

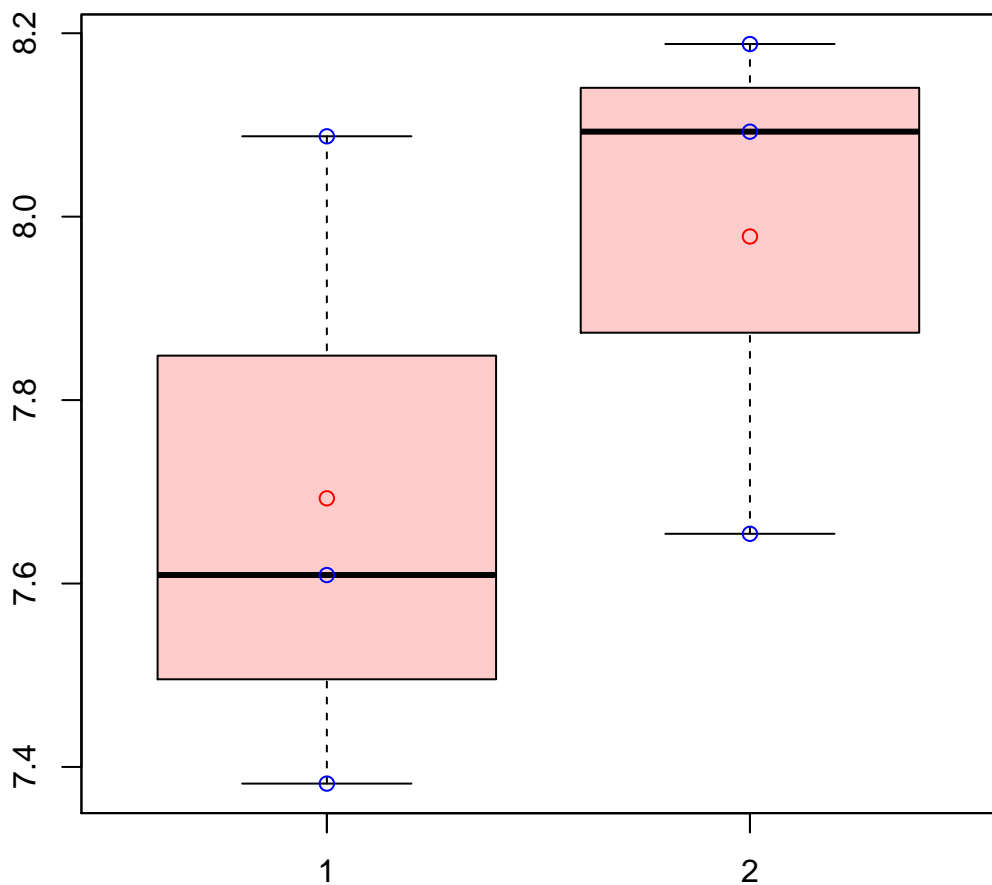

t-Test: p-value = 0.35

# Q0DTE0|Q0DTE0\_ORYSJ

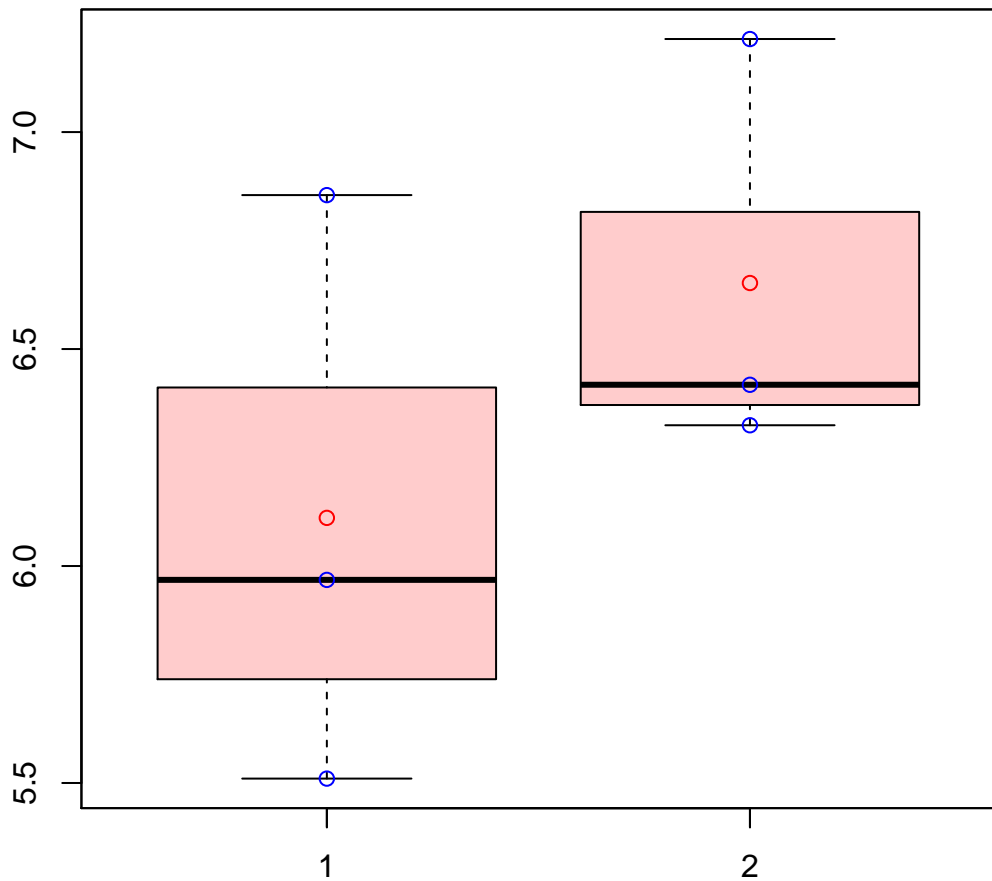

t-Test: p-value = 0.33

# Q0E3X0|Q0E3X0\_ORYSJ

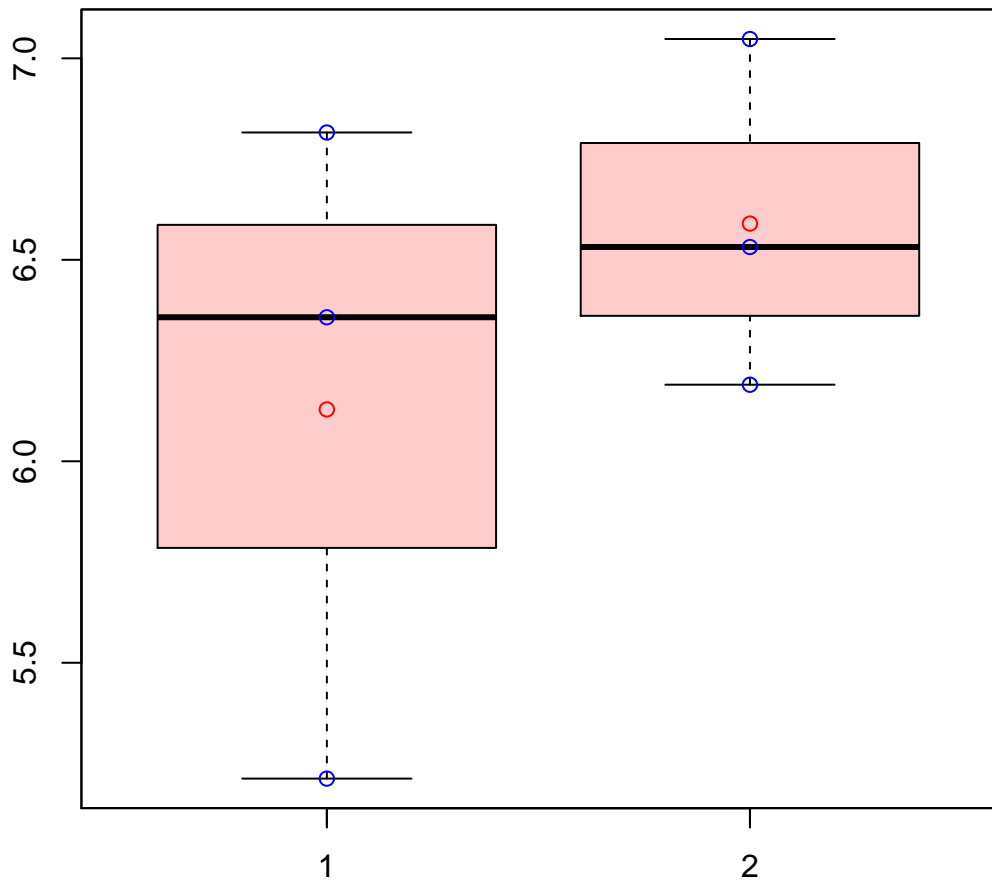

t-Test: p-value = 0.45

# Q0IPN8|Q0IPN8\_ORYSJ

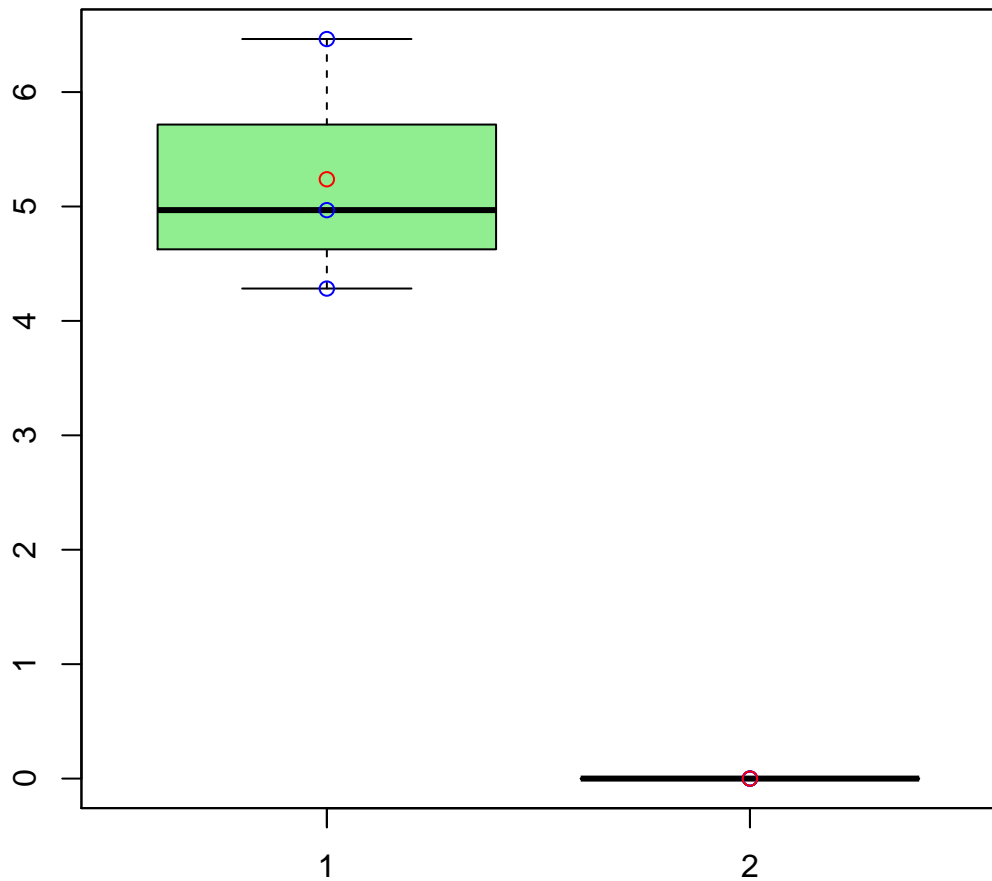

t-Test: p-value = 0.01

# Q0IR42|Q0IR42\_ORYSJ

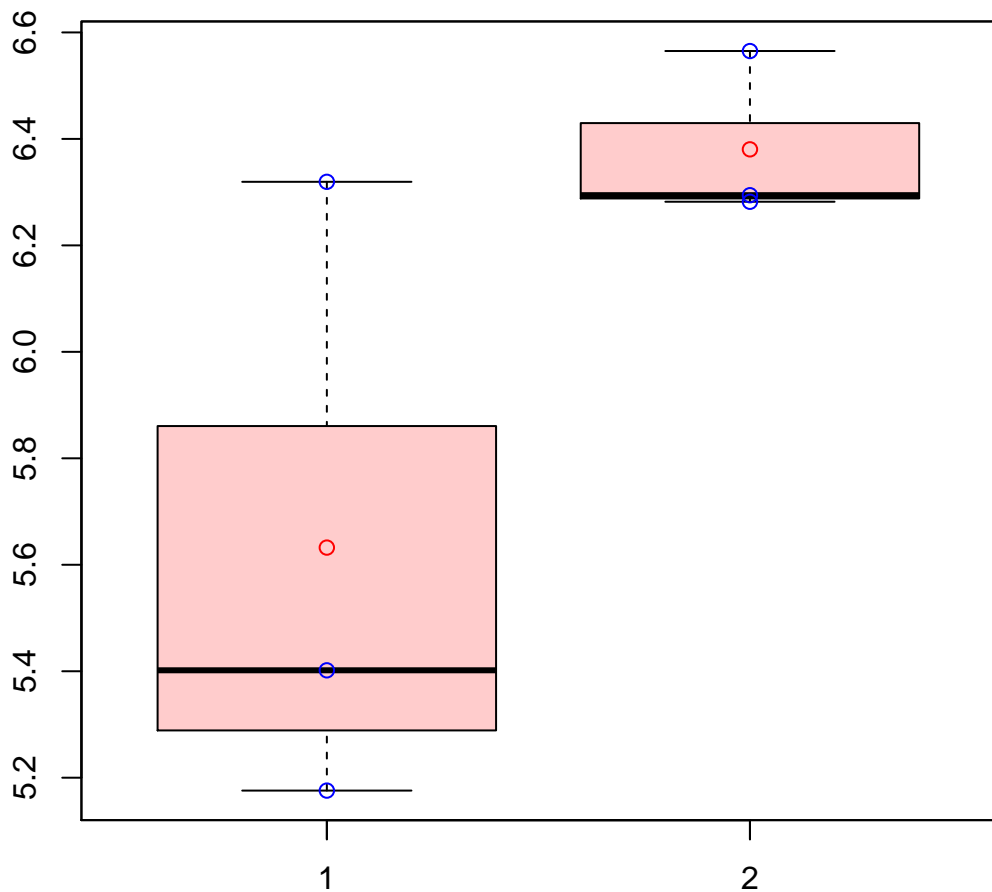

t-Test: p-value = 0.16

# Q0ISV6|Q0ISV6\_ORYSJ

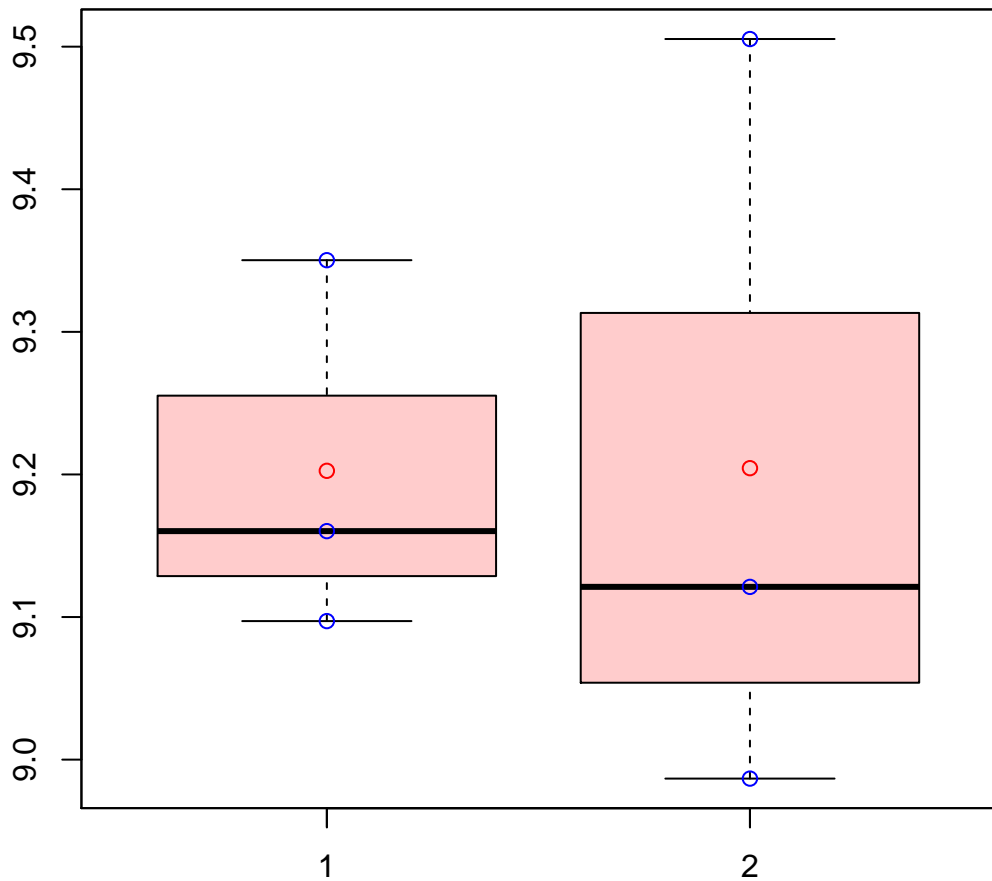

t-Test: p-value = 0.99

# Q0J0Z5|Q0J0Z5\_ORYSJ

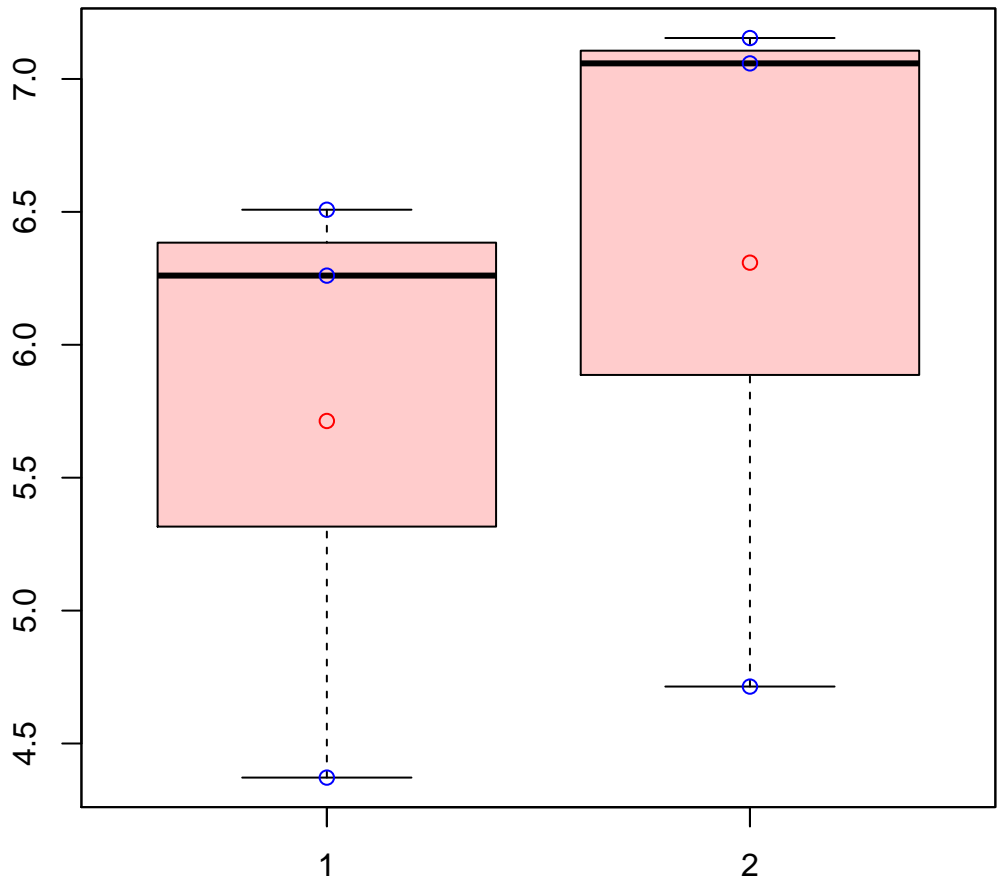

t-Test: p-value = 0.6



# Q0J5J5|Q0J5J5\_ORYSJ

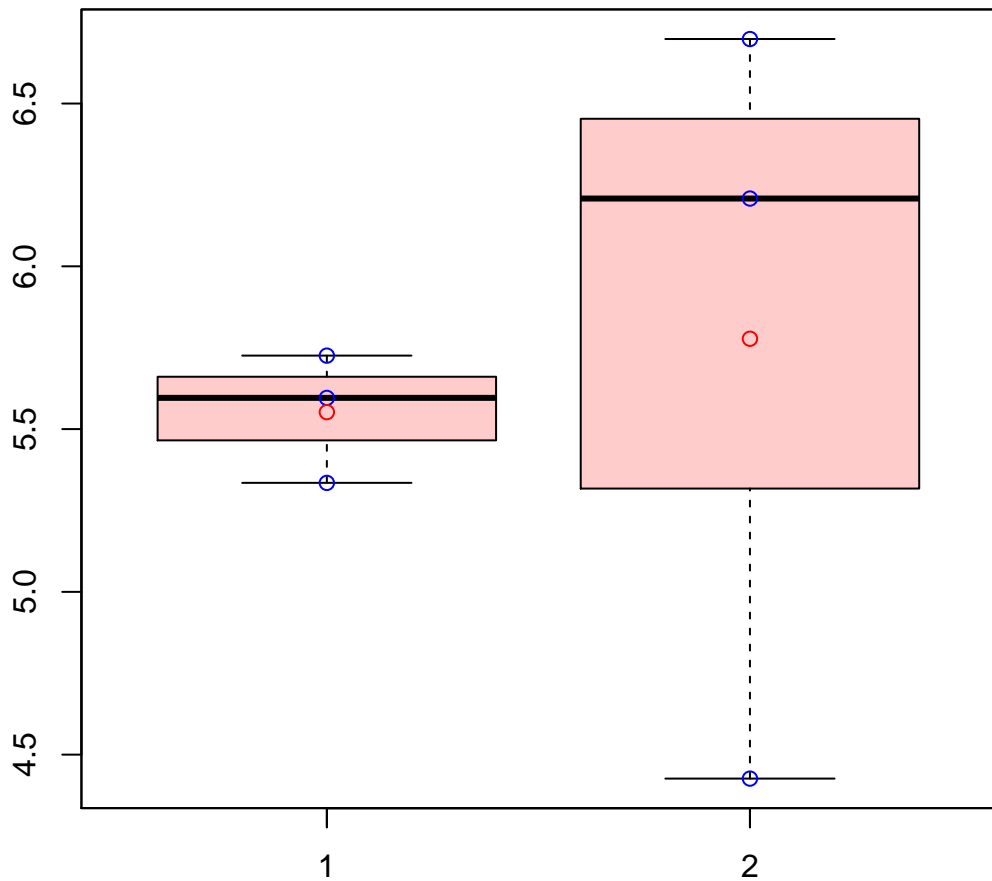

t-Test: p-value = 0.78

# Q0JC94|Q0JC94\_ORYSJ

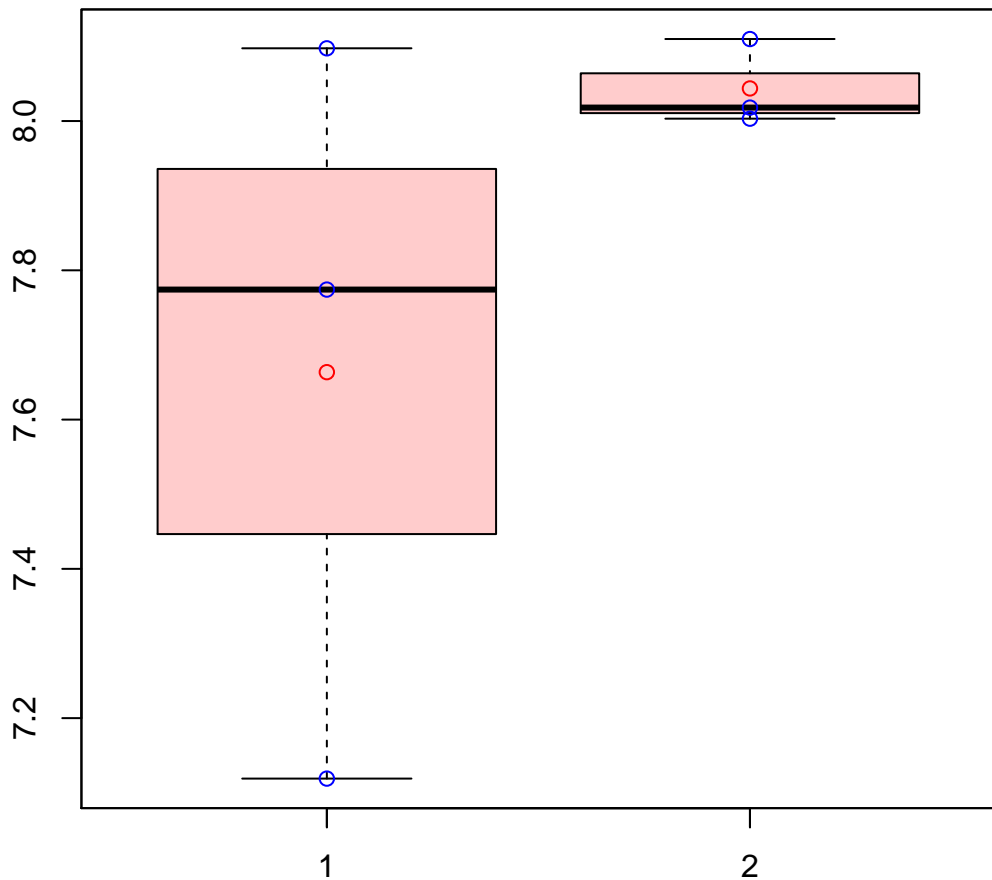

t-Test: p-value = 0.32

# Q0JDA9|Q0JDA9\_ORYSJ

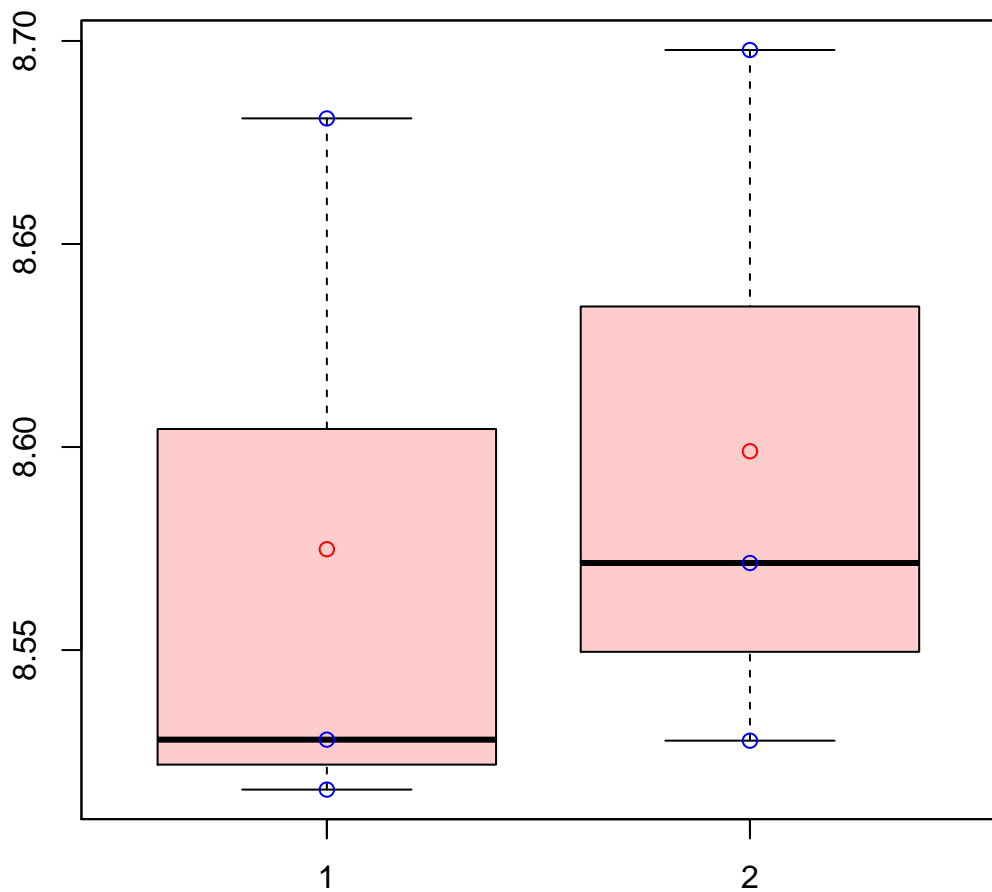

t-Test: p-value = 0.76

# Q0JDS3|Q0JDS3\_ORYSJ

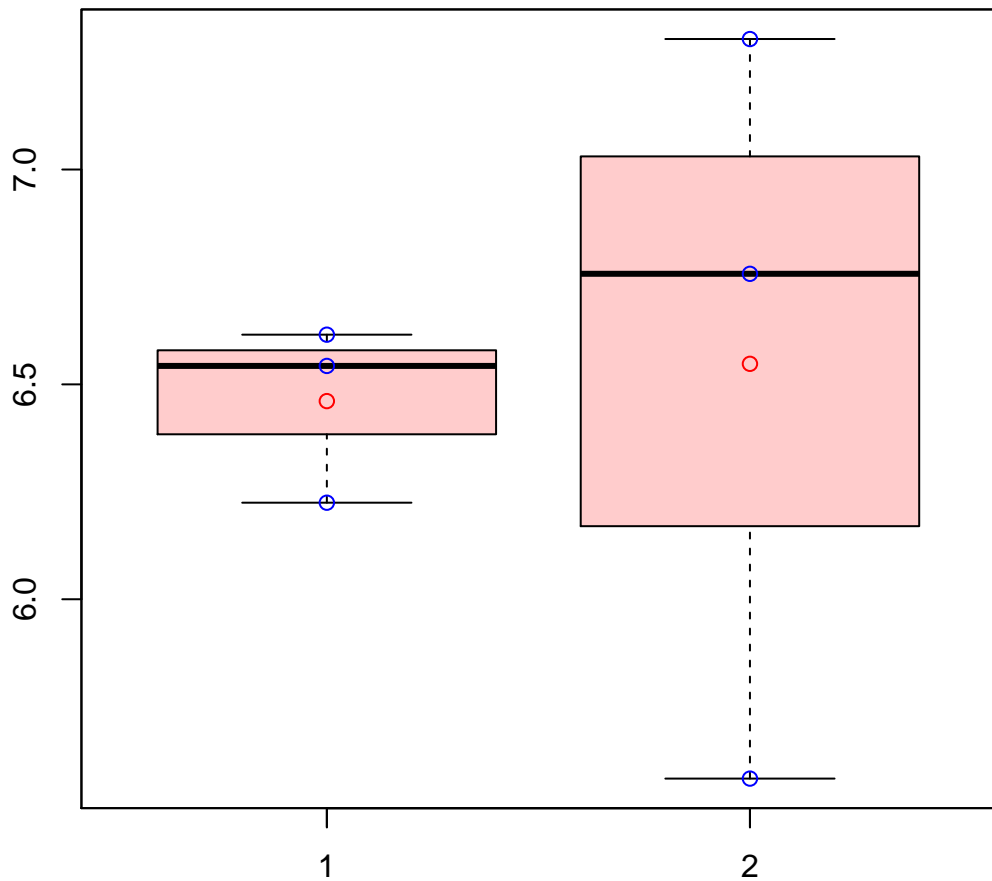

t-Test: p-value = 0.88

# Q0JGI9|Q0JGI9\_ORYSJ

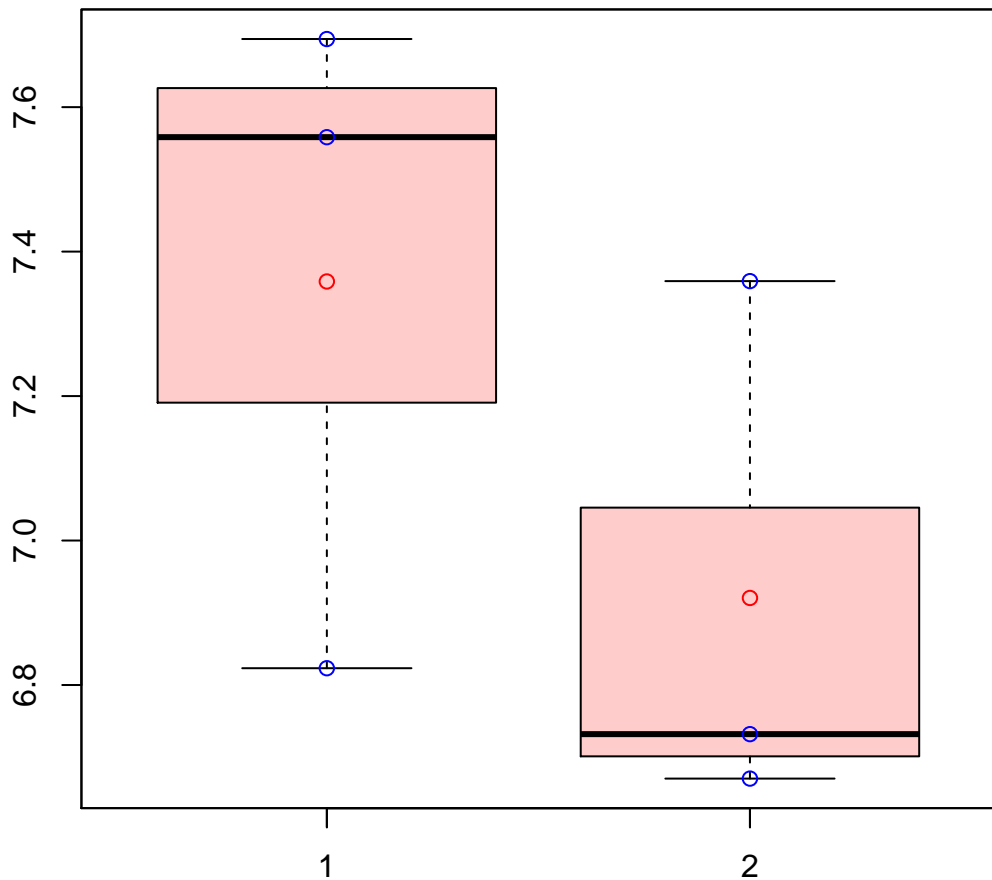

t-Test: p-value = 0.28

# Q0JNM8|Q0JNM8\_ORYSJ

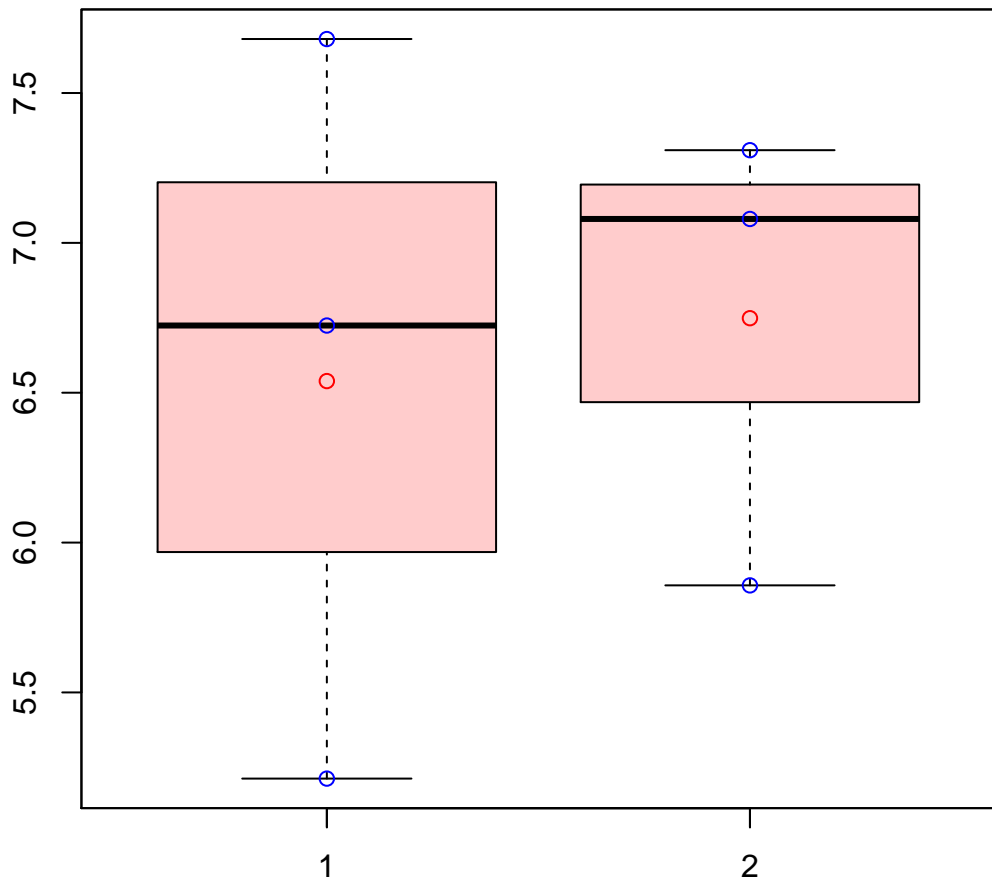

t-Test: p-value = 0.82

# Q0JQT1|Q0JQT1\_ORYSJ

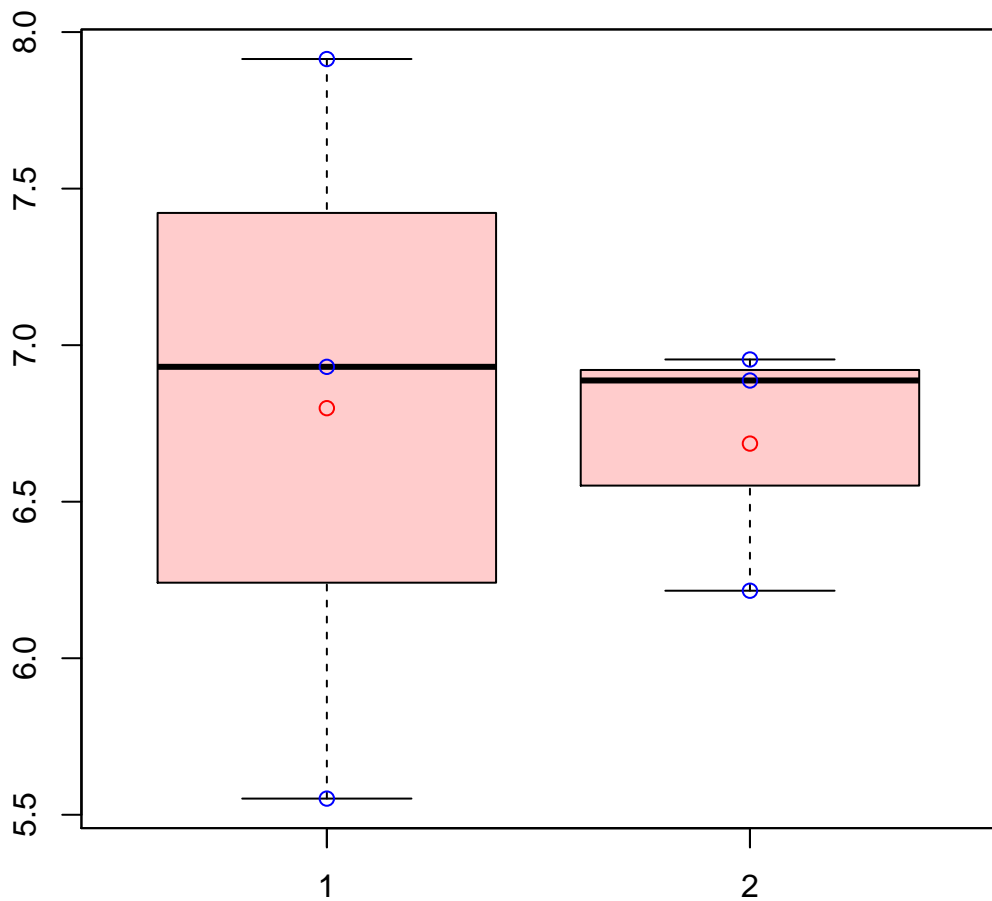

t-Test: p-value = 0.89

# Q0JRB0|Q0JRB0\_ORYSJ

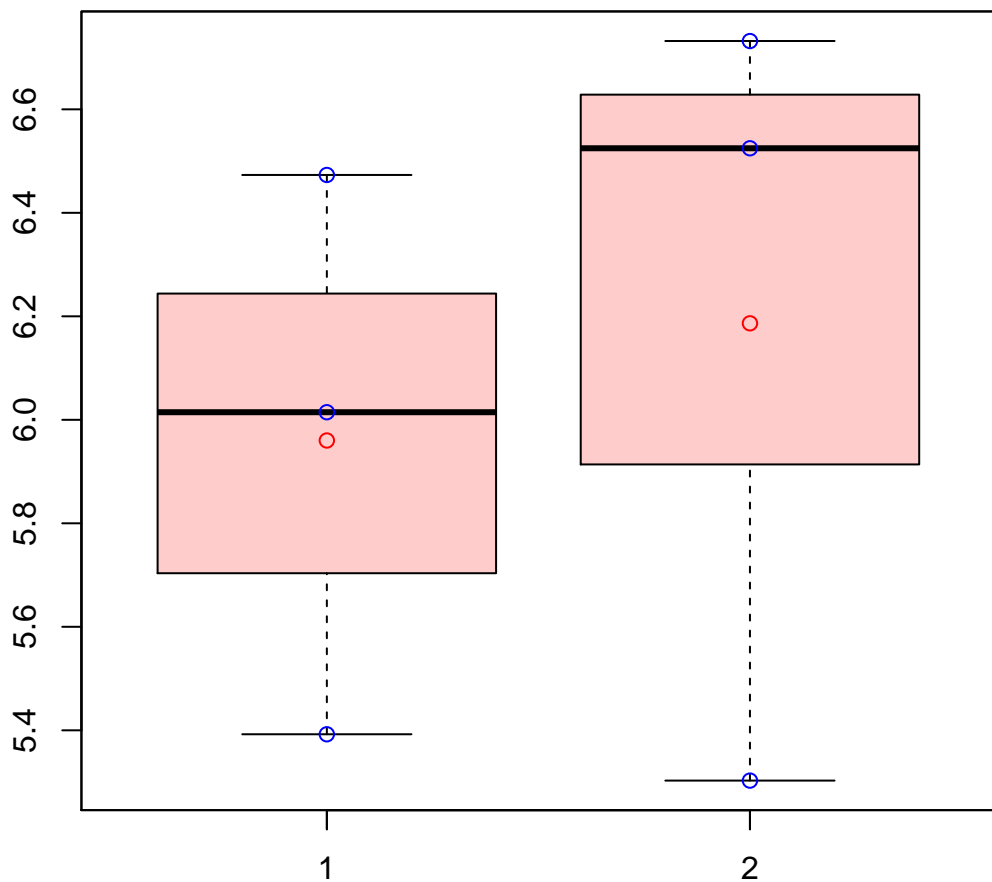

t-Test: p-value = 0.7



# Q0KKZ5|Q0KKZ5\_ZOSMR

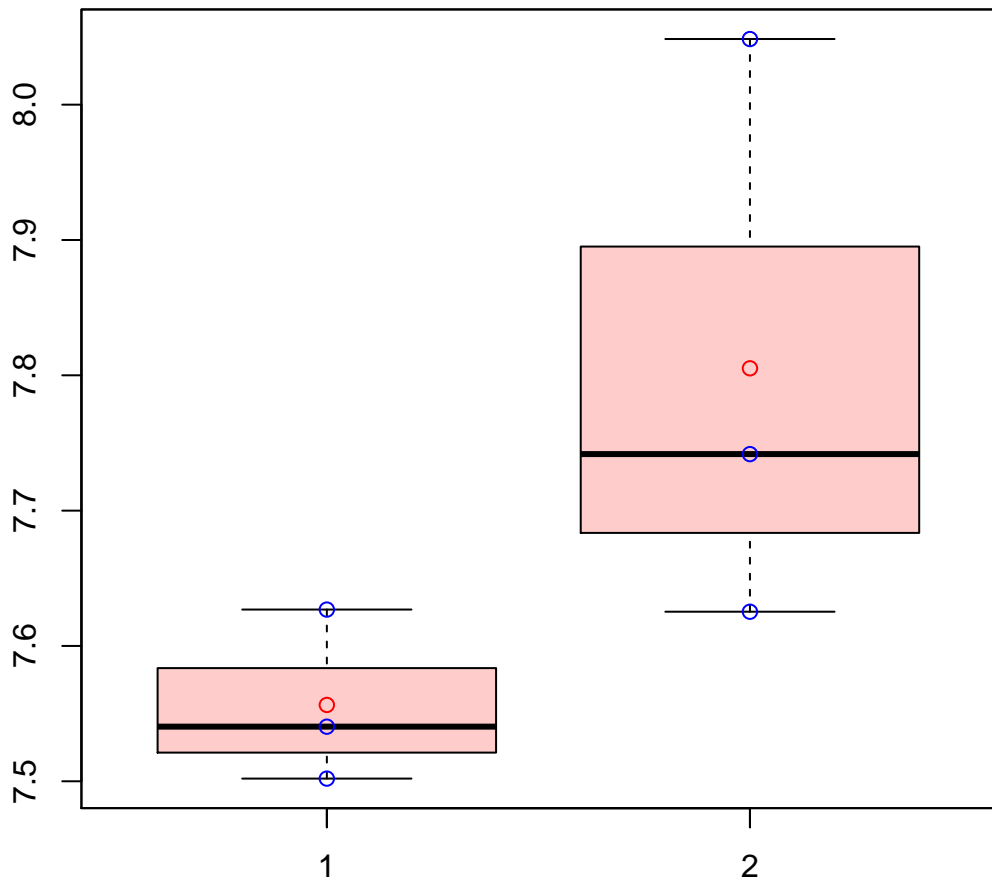

t-Test: p-value = 0.18

# Q0Q6S3|Q0Q6S3\_LILLO

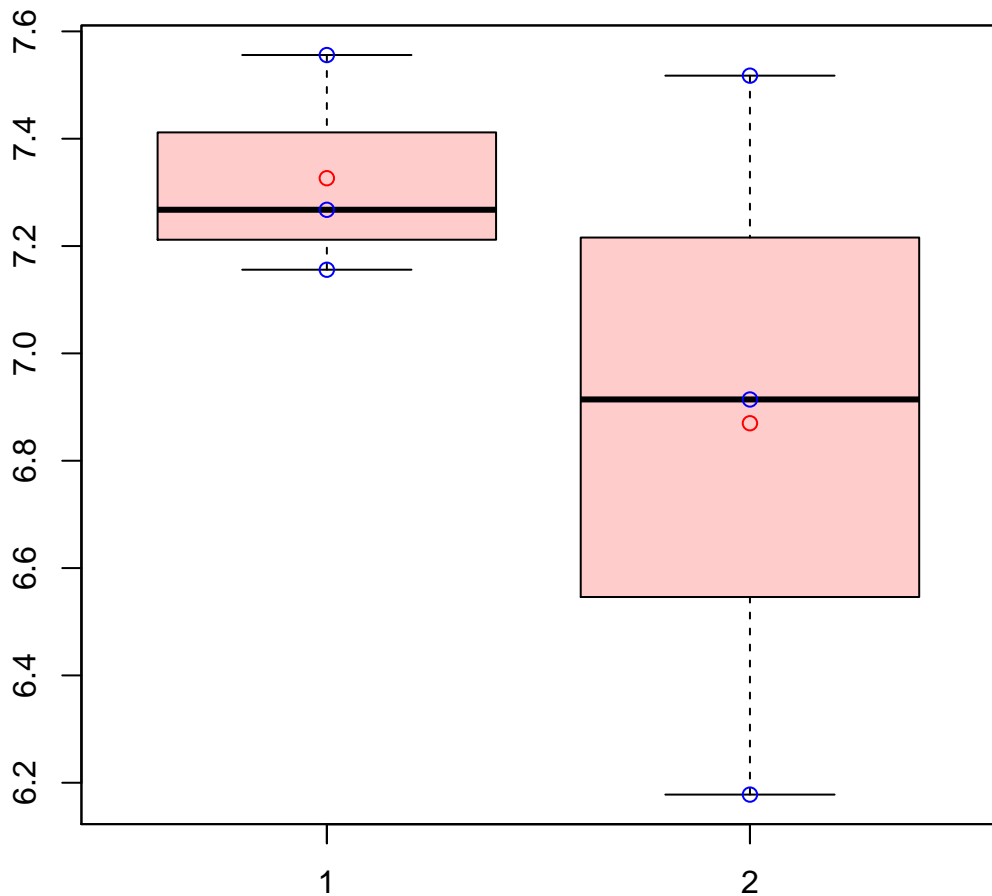

t-Test: p-value = 0.36

# Q109U3|Q109U3\_ORYSJ

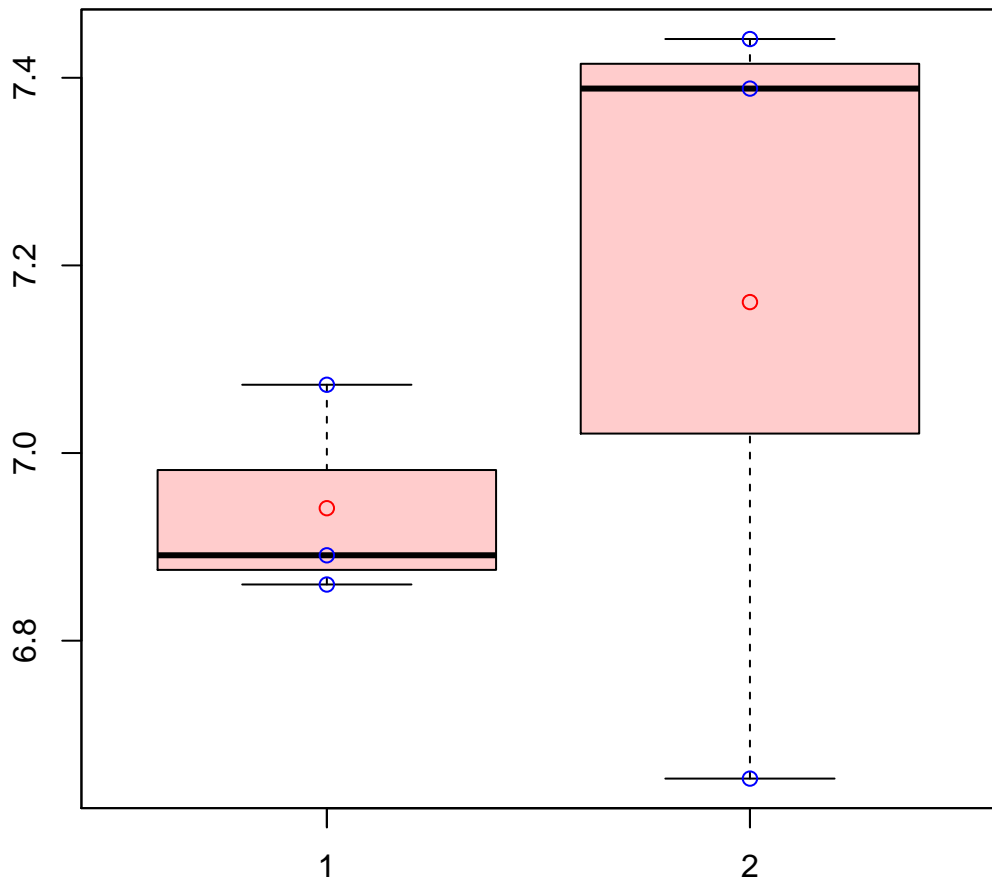

t-Test: p-value = 0.48

# Q10F64|Q10F64\_ORYSJ

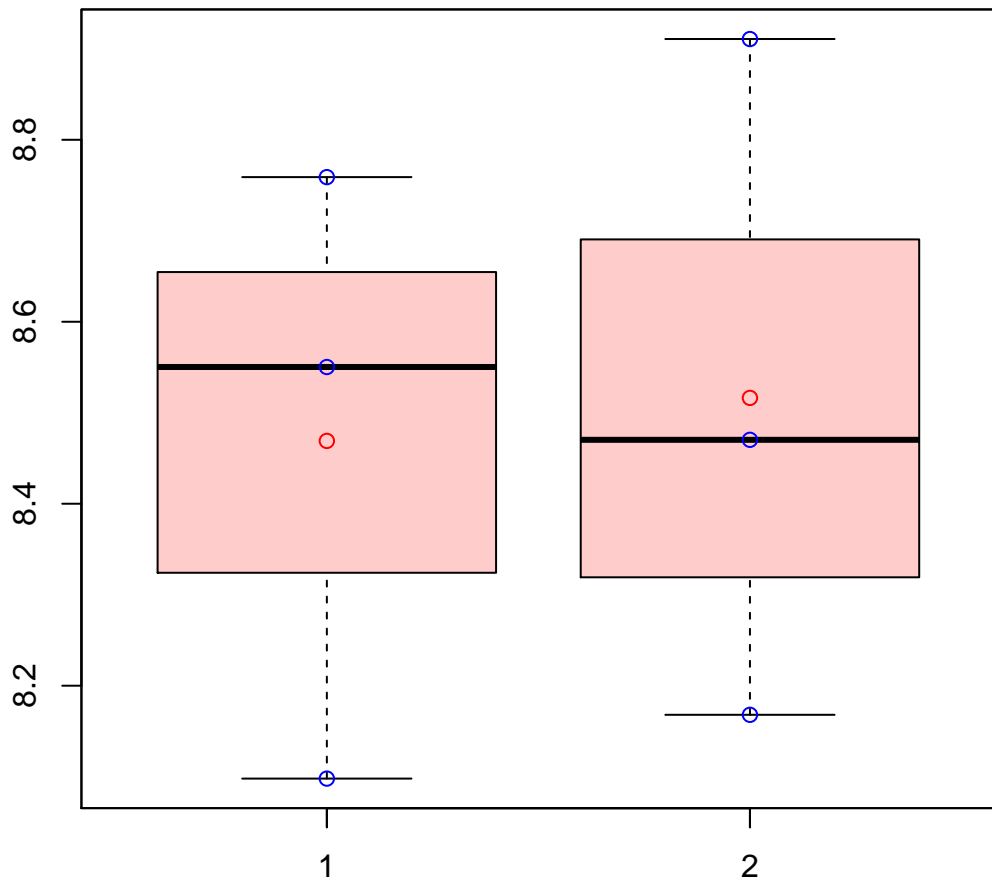

t-Test: p-value = 0.88

# Q10G29|Q10G29\_ORYSJ

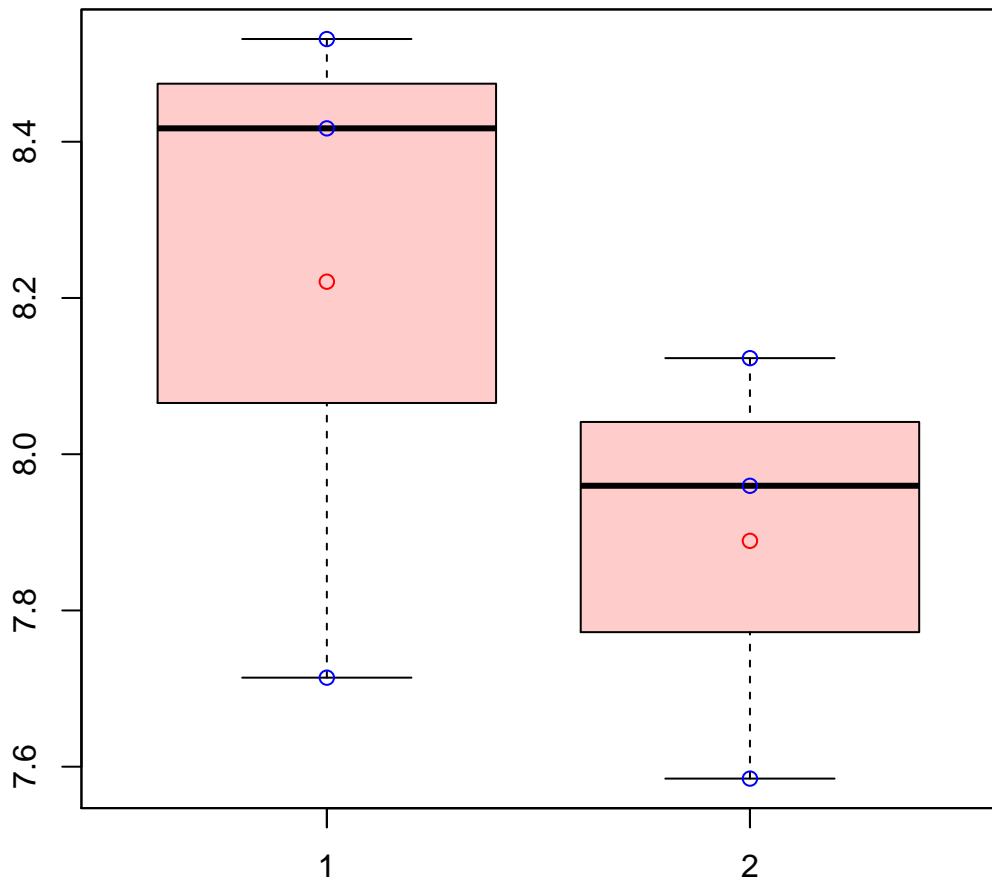

t-Test: p-value = 0.34

# Q10HT1|Q10HT1\_ORYSJ

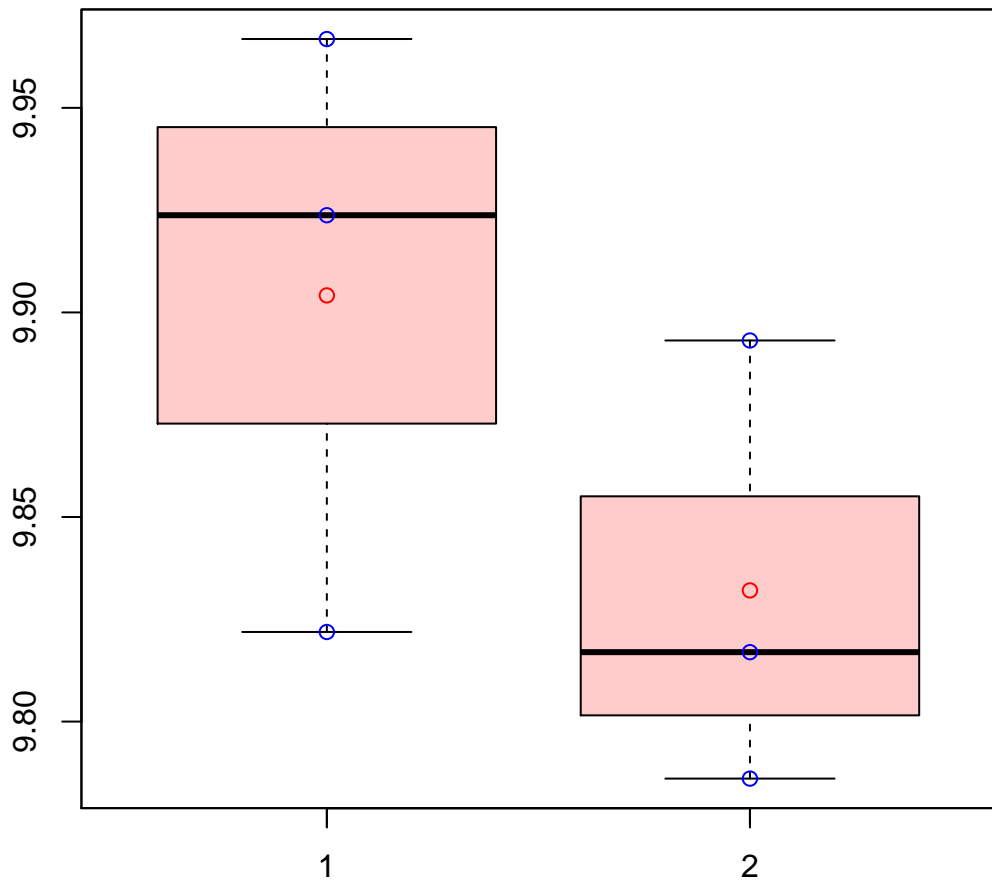

t-Test: p-value = 0.25

# Q10HY2|Q10HY2\_ORYSJ

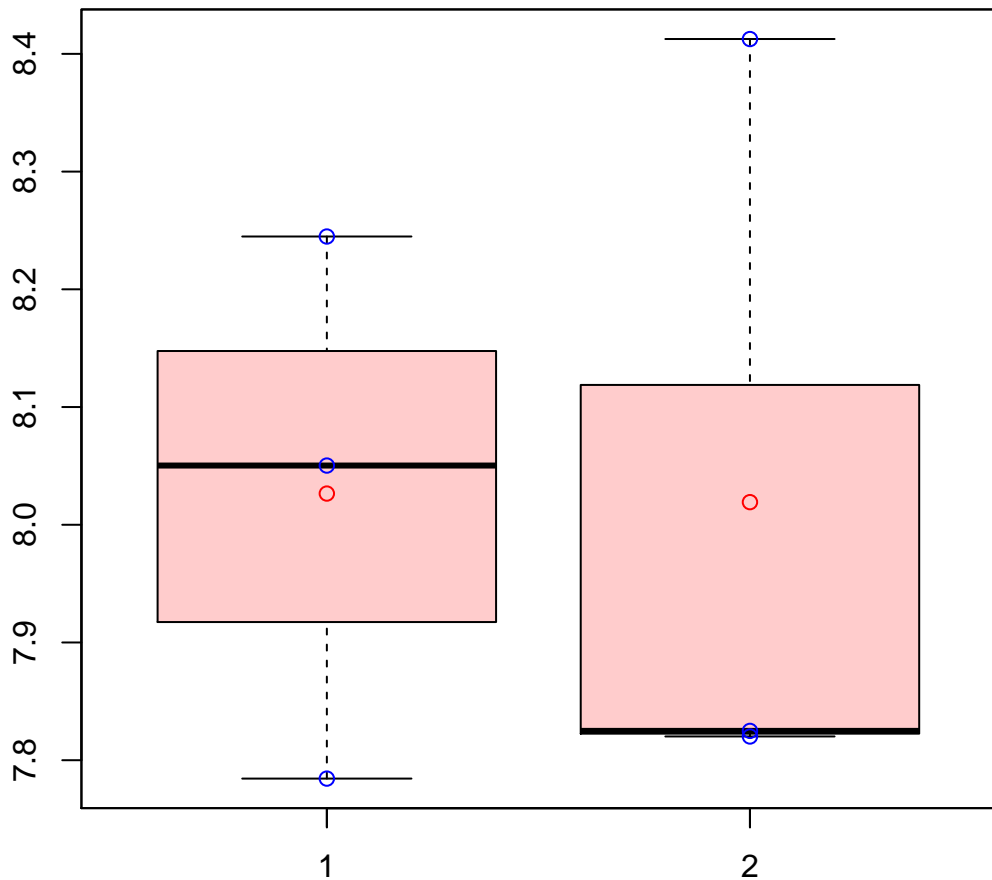

t-Test: p-value = 0.98

# Q10JD1|Q10JD1\_ORYSJ

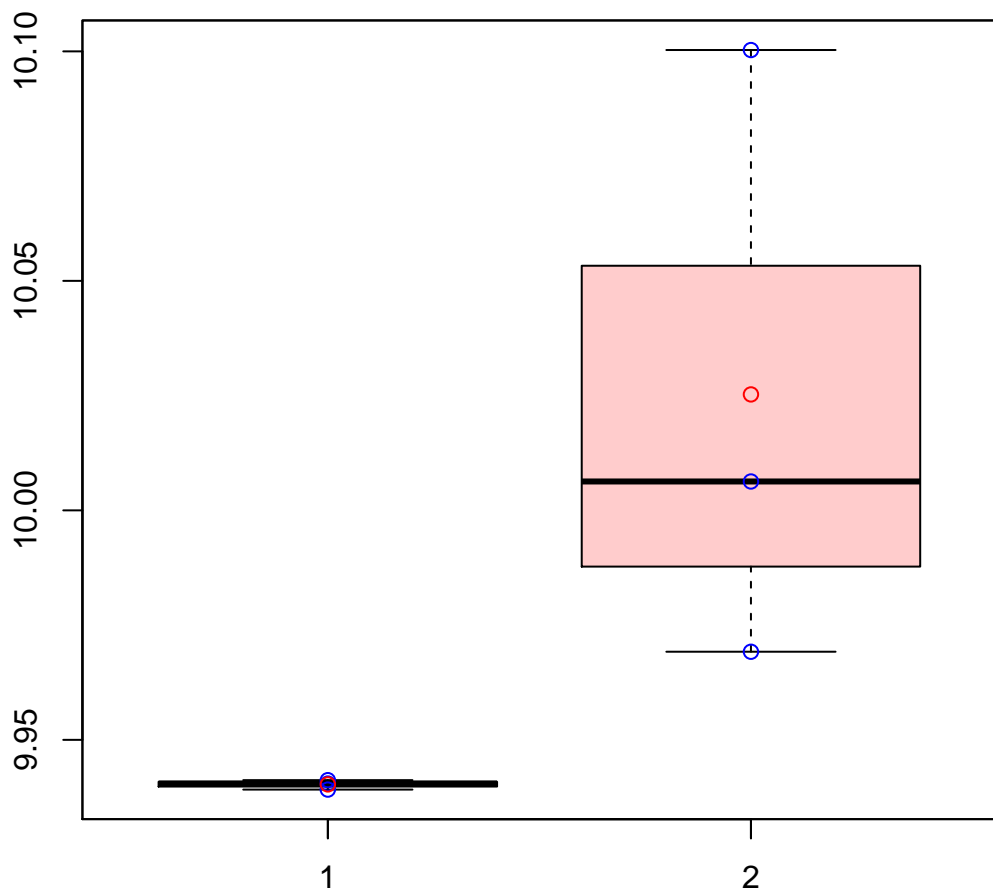

t-Test: p-value = 0.16



# Q10NA9|Q10NA9\_ORYSJ

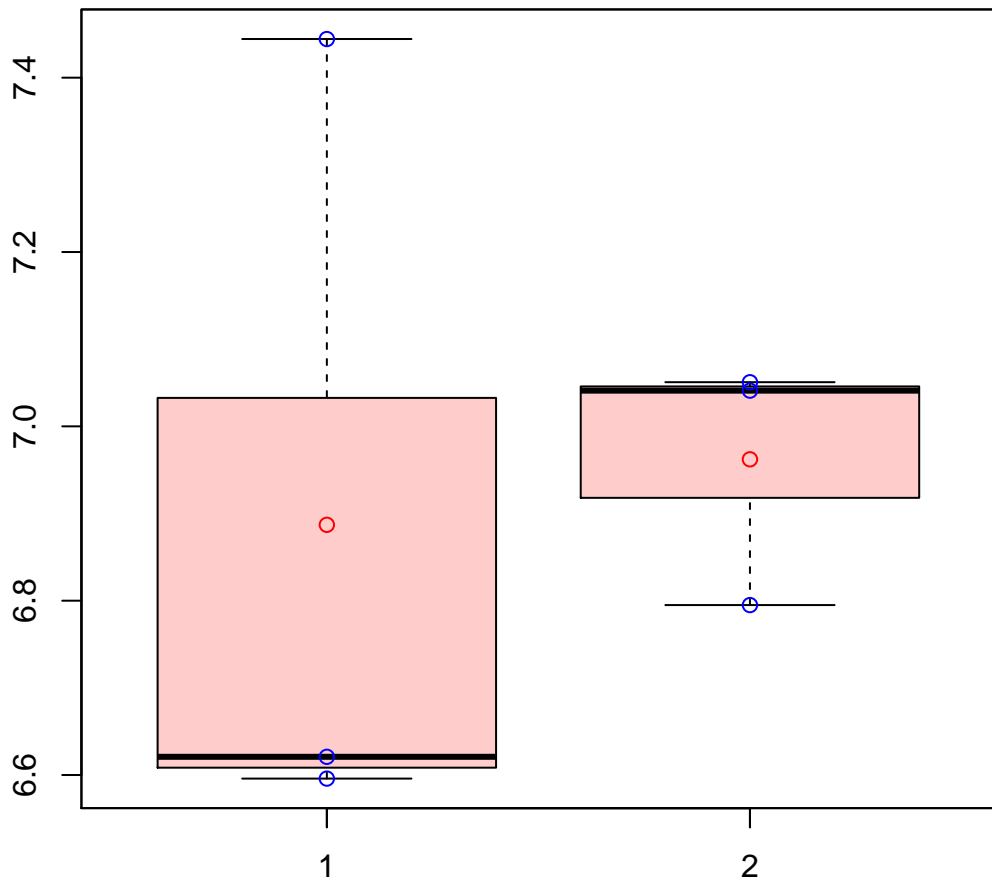

t-Test: p-value = 0.82

# Q10QU8|Q10QU8\_ORYSJ

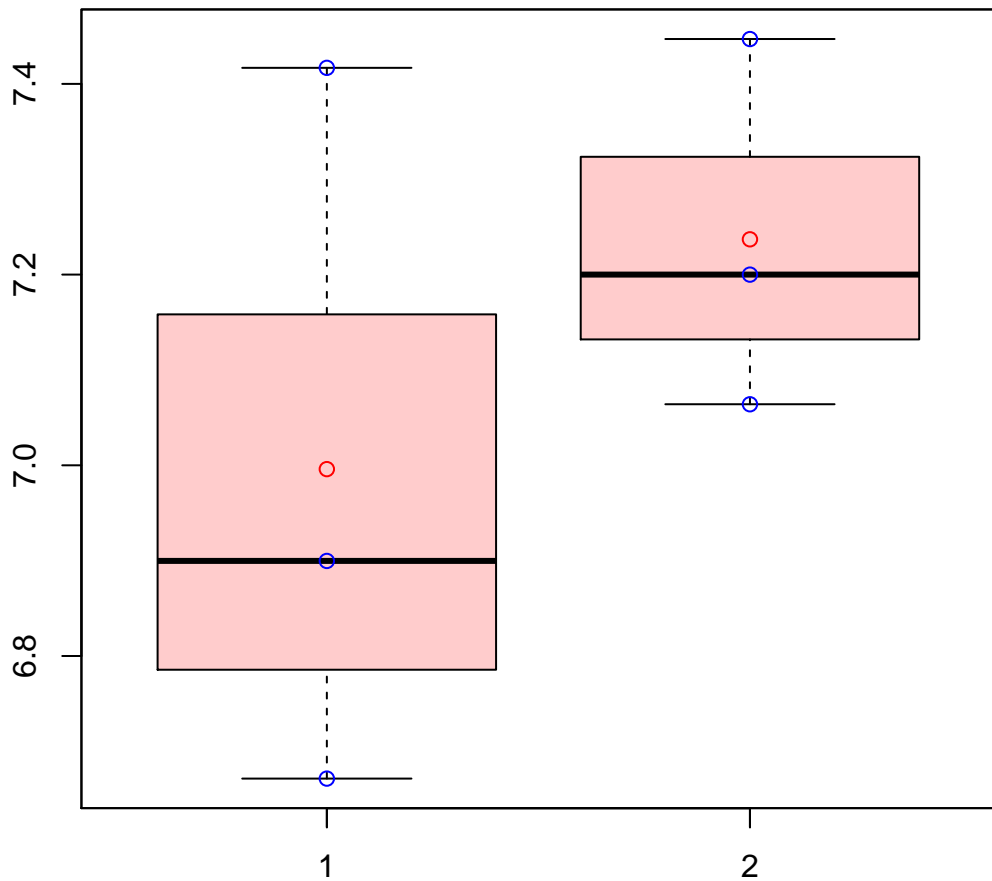

t-Test: p-value = 0.4

# Q10QW8|Q10QW8\_ORYSJ

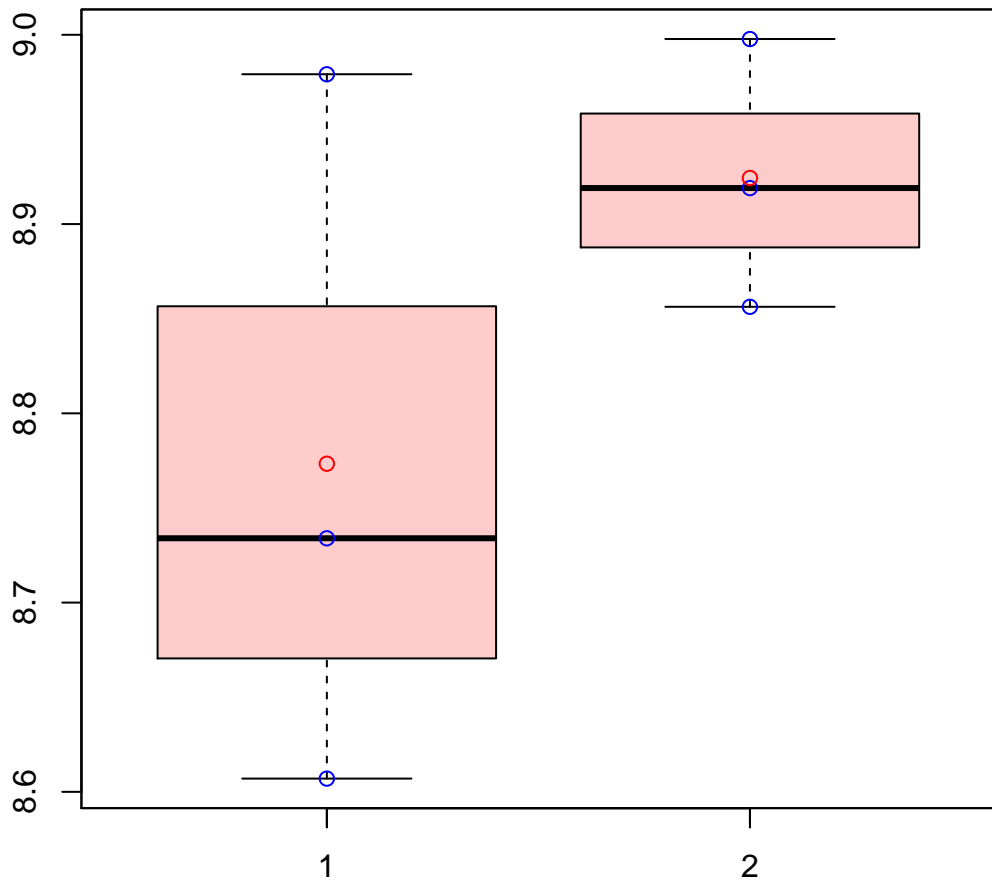

t-Test: p-value = 0.3

# Q10RP0|Q10RP0\_ORYSJ

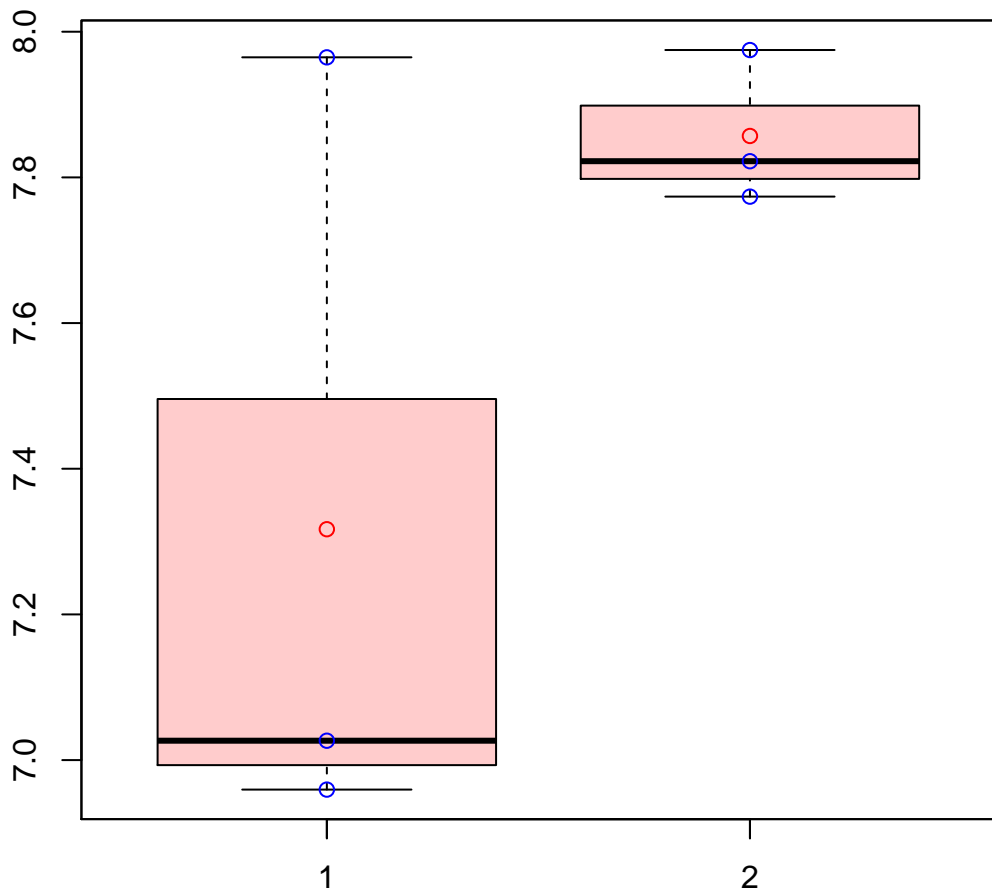

t-Test: p-value = 0.24

# Q10SM8|Q10SM8\_ORYSJ

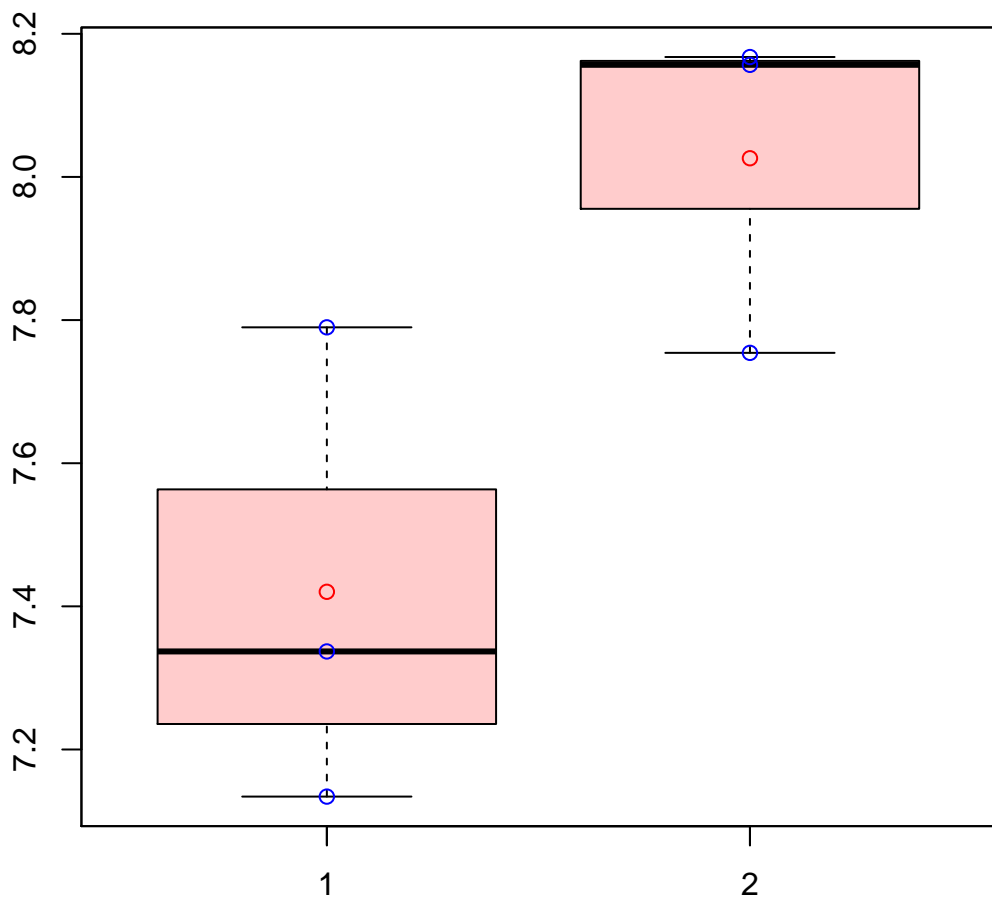

t-Test: p-value = 0.07

# Q1G196|Q1G196\_WHEAT

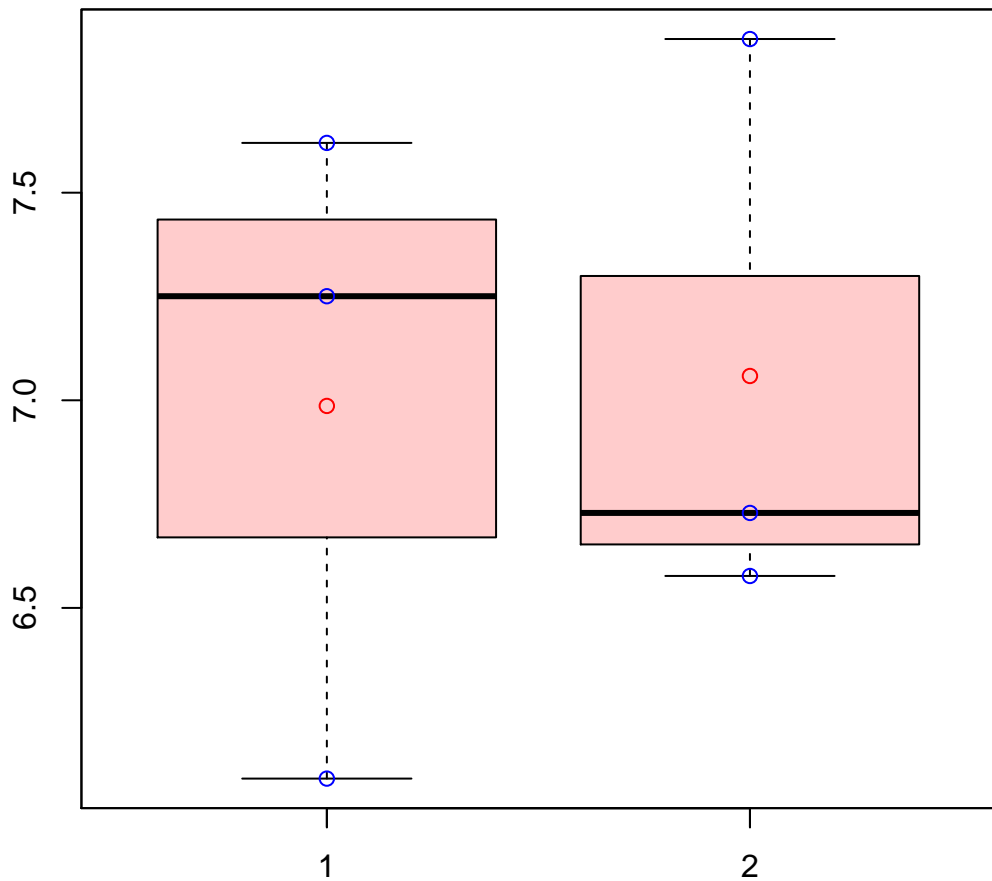

t-Test: p-value = 0.91

# Q1PBI4|Q1PBI4\_HORVU

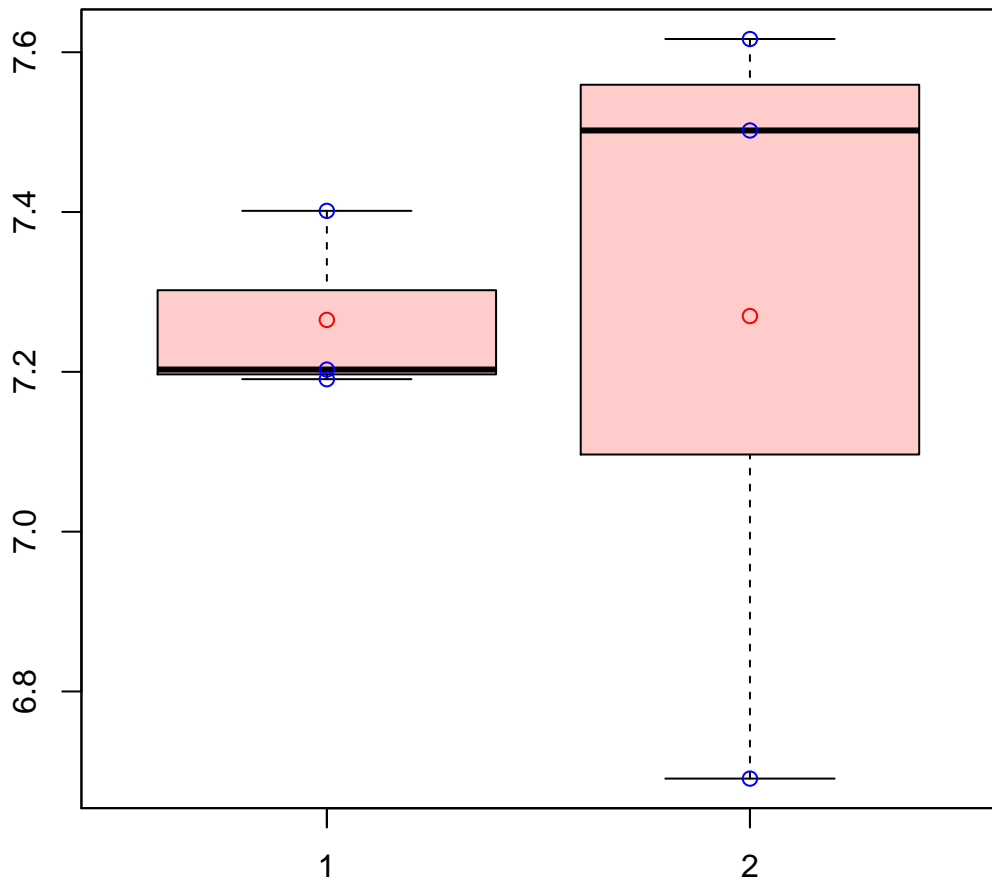

t-Test: p-value = 0.99

# Q1ZZ94|Q1ZZ94\_ZINOF

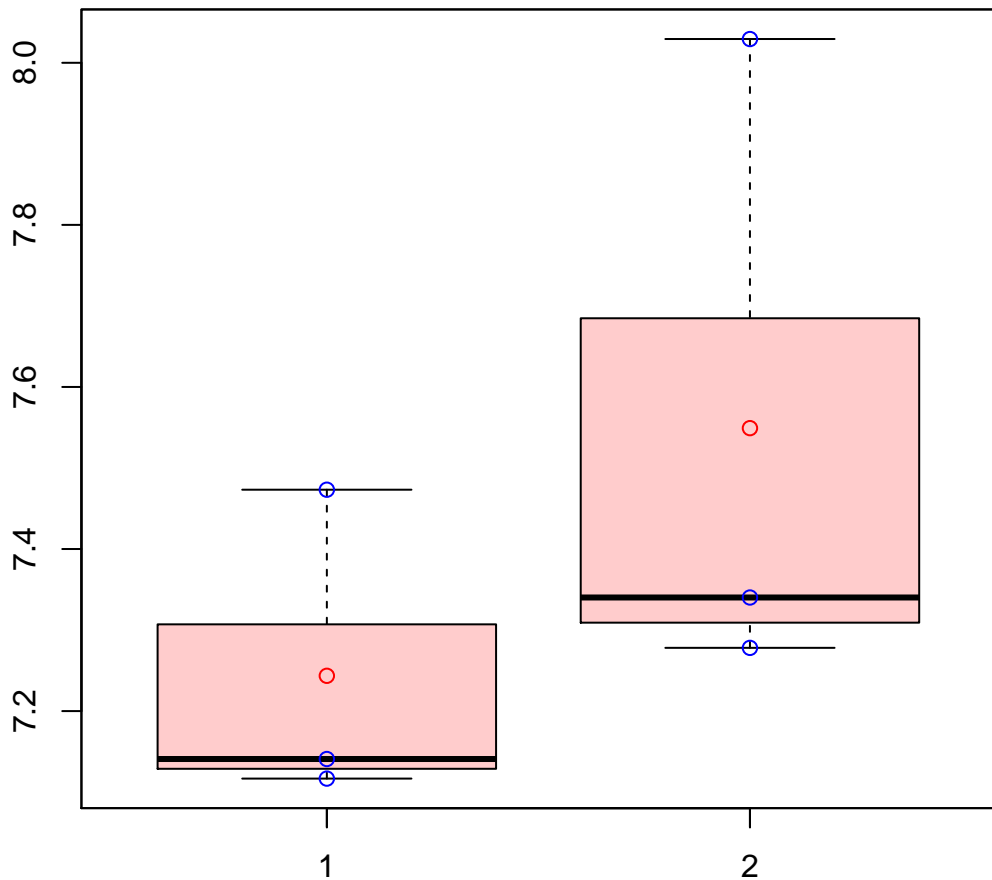

t-Test: p-value = 0.34



# Q259F9|Q259F9\_ORYSA

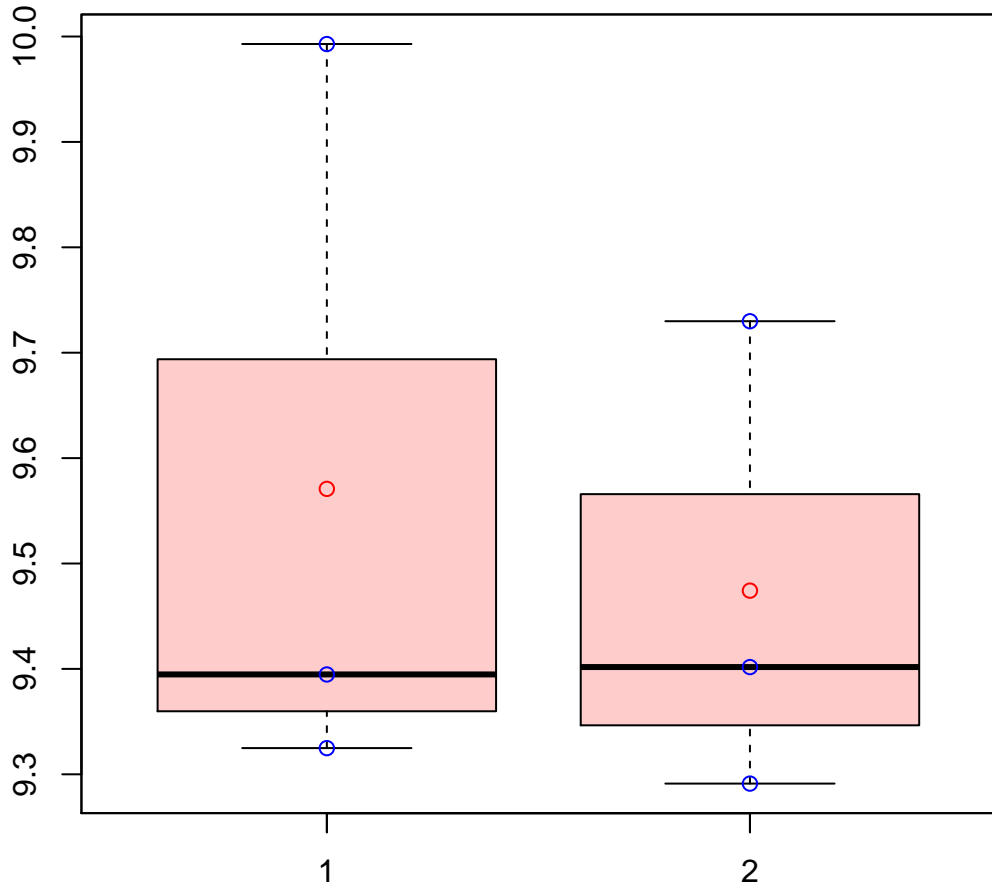

t-Test: p-value = 0.72

# Q259K4|Q259K4\_ORYSA

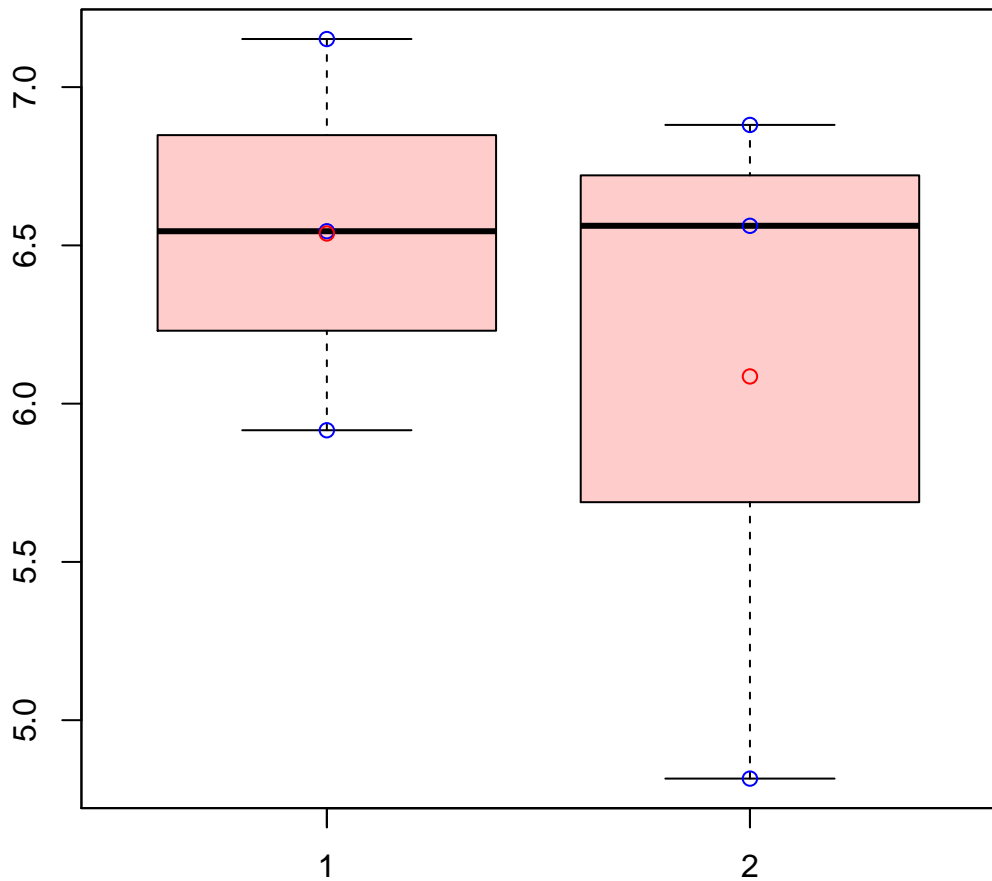

t-Test: p-value = 0.58

# Q259Q9|Q259Q9\_ORYSA

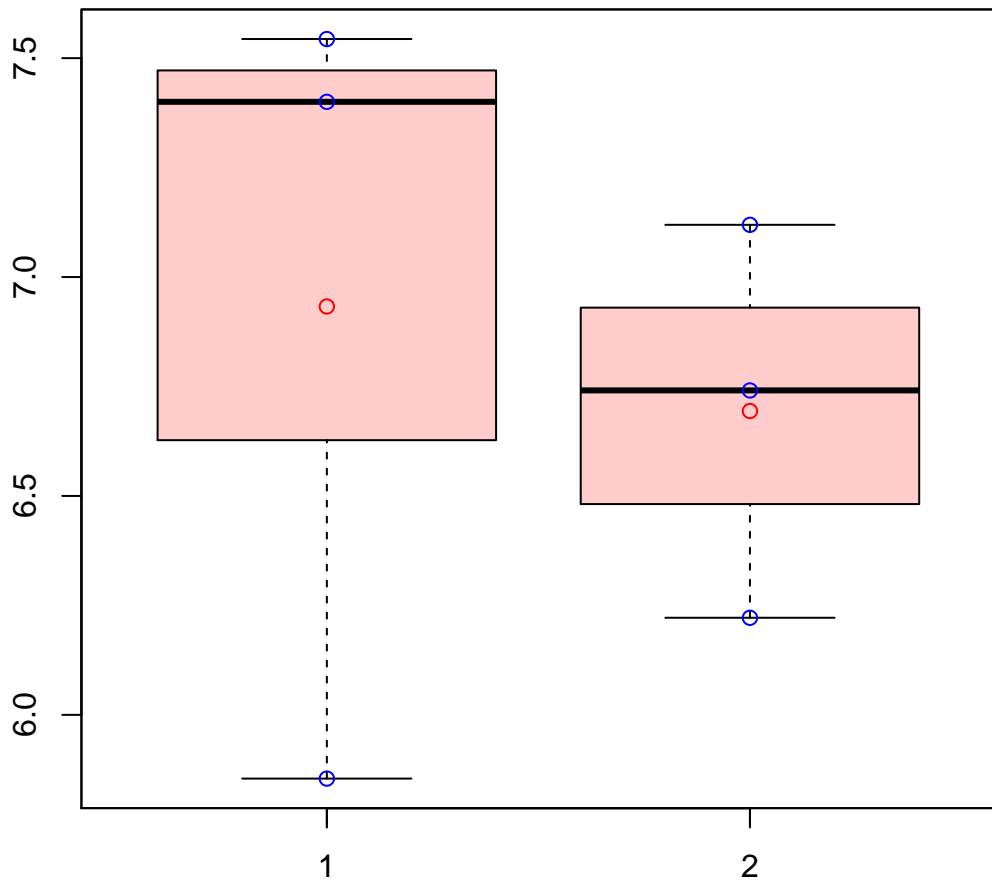

t-Test: p-value = 0.72

# Q25A57|Q25A57\_ORYSA

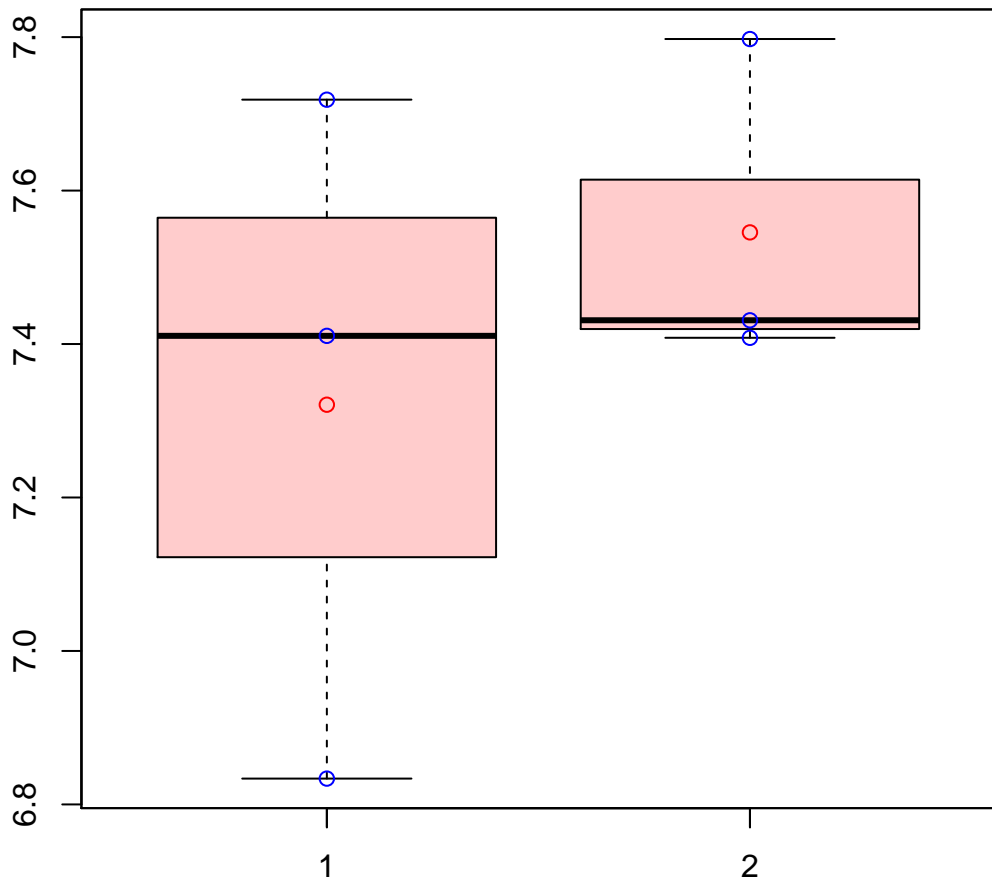

t-Test: p-value = 0.49

# Q25AK8|Q25AK8\_ORYSA

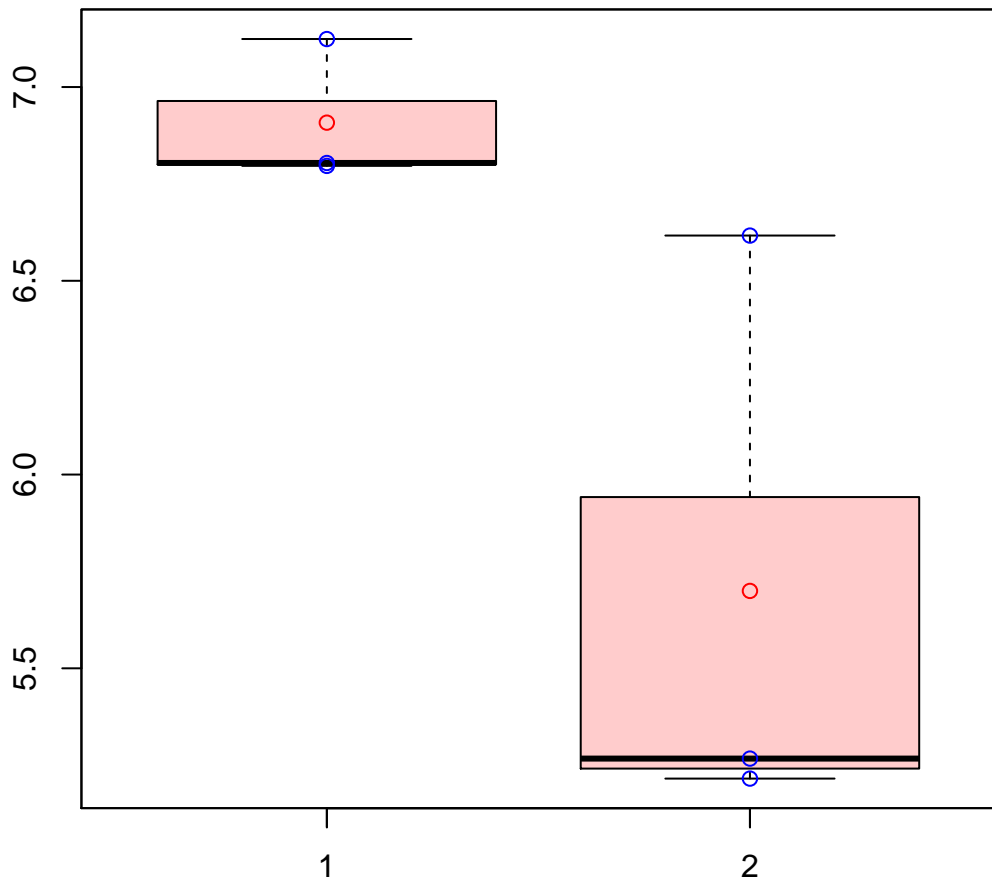

t-Test: p-value = 0.11

# Q25B80|Q25B80\_FESAR

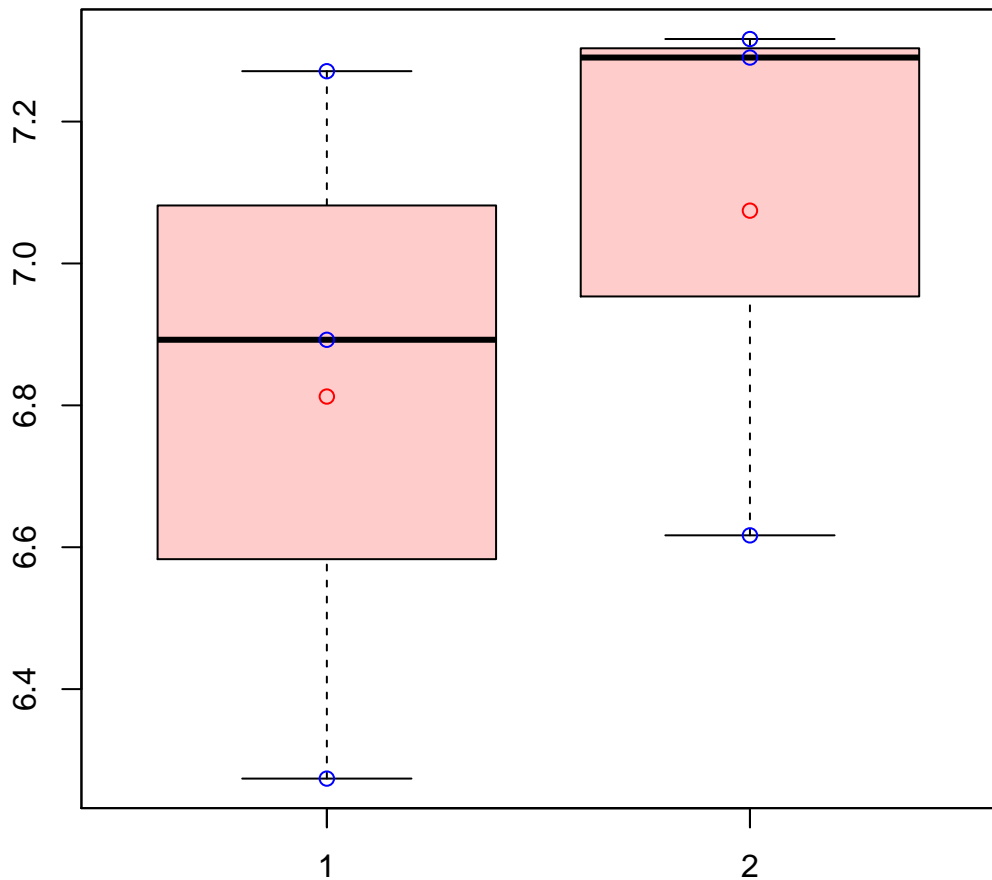

t-Test: p-value = 0.52

# Q2EZ09|Q2EZ09\_ORYSI

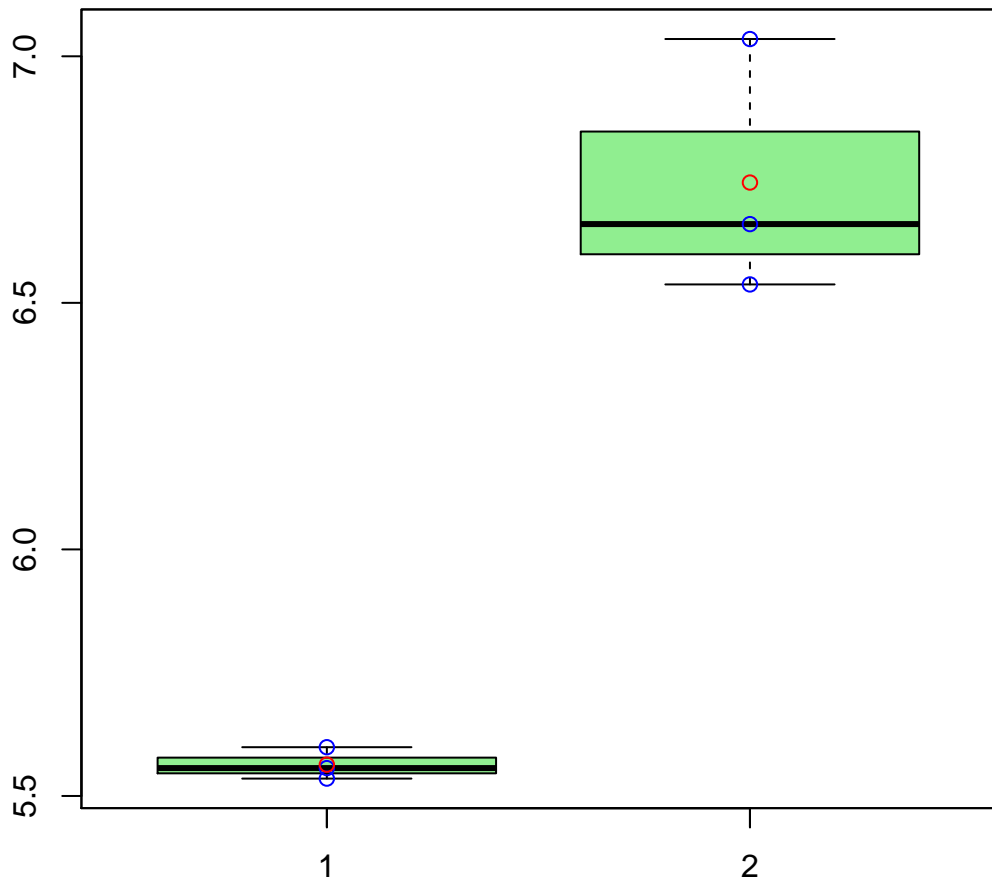

t-Test: p-value = 0.01

# Q2NNC0|Q2NNC0\_ELAGV

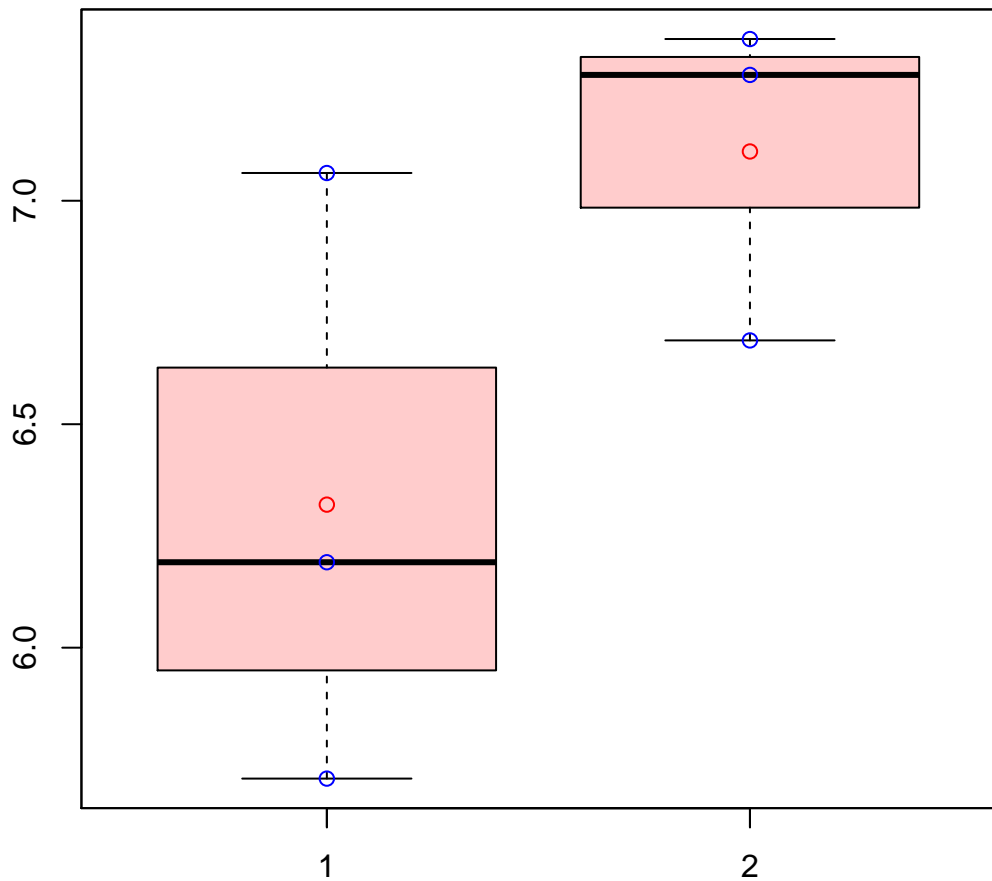

t-Test: p-value = 0.18



## Q2QLT1|Q2QLT1\_ORYSJ

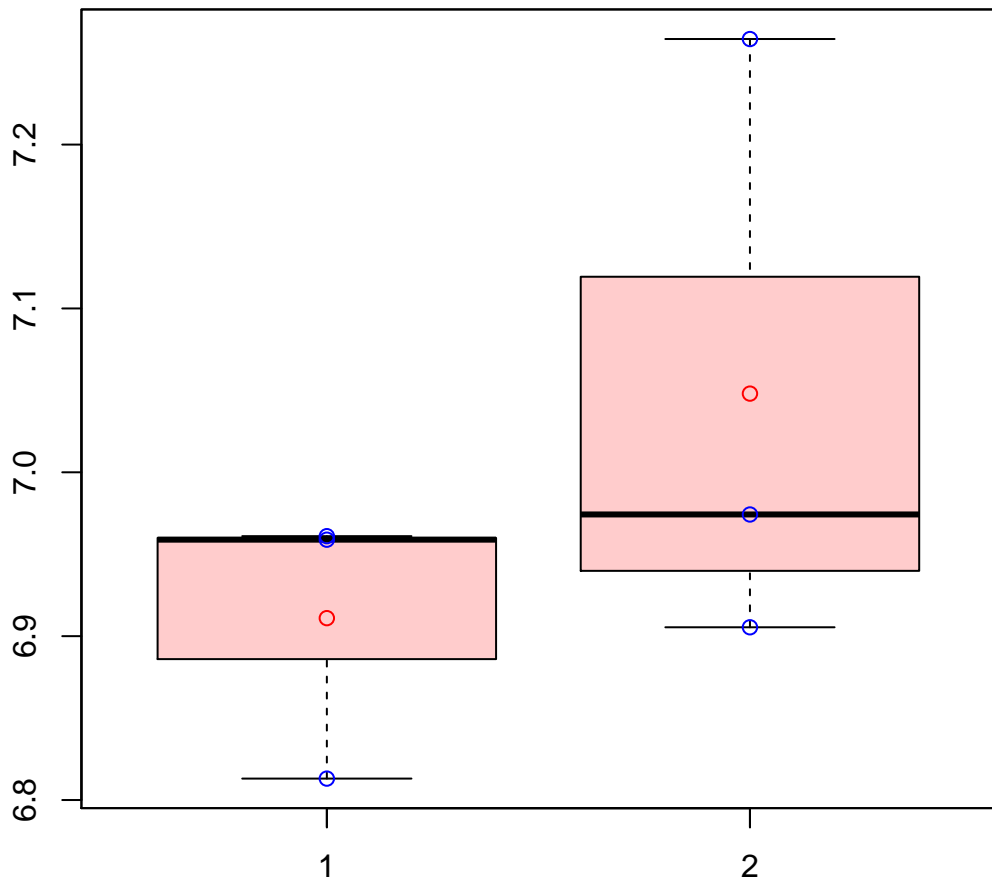

t-Test: p-value = 0.34

# Q2QLY5|Q2QLY5\_ORYSJ

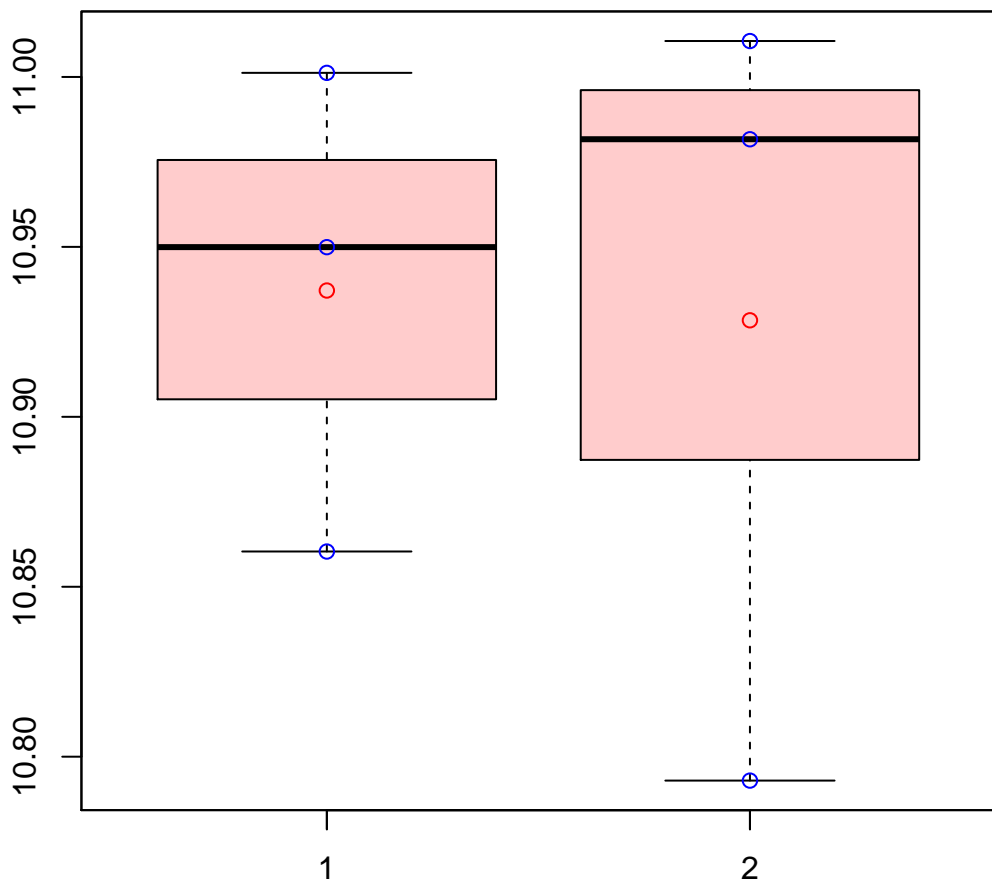

t-Test: p-value = 0.92

## Q2QM52|Q2QM52\_ORYSJ

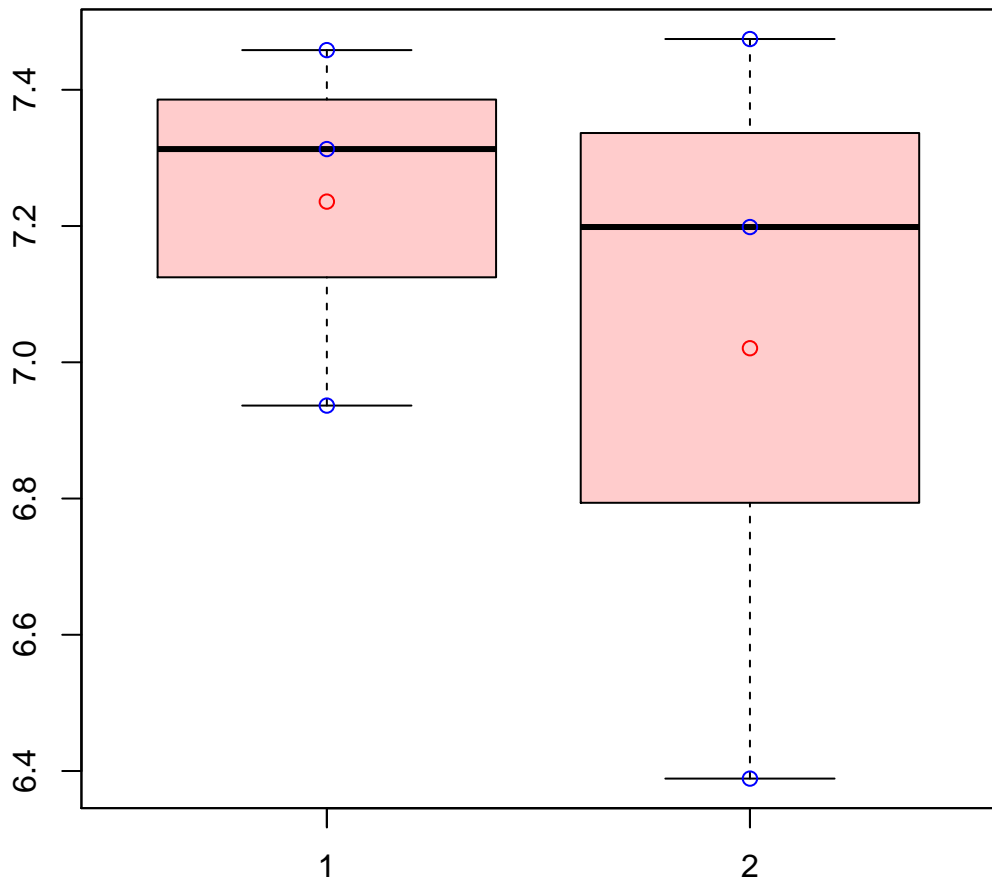

t-Test: p-value = 0.59

# Q2QMF7|Q2QMF7\_ORYSJ

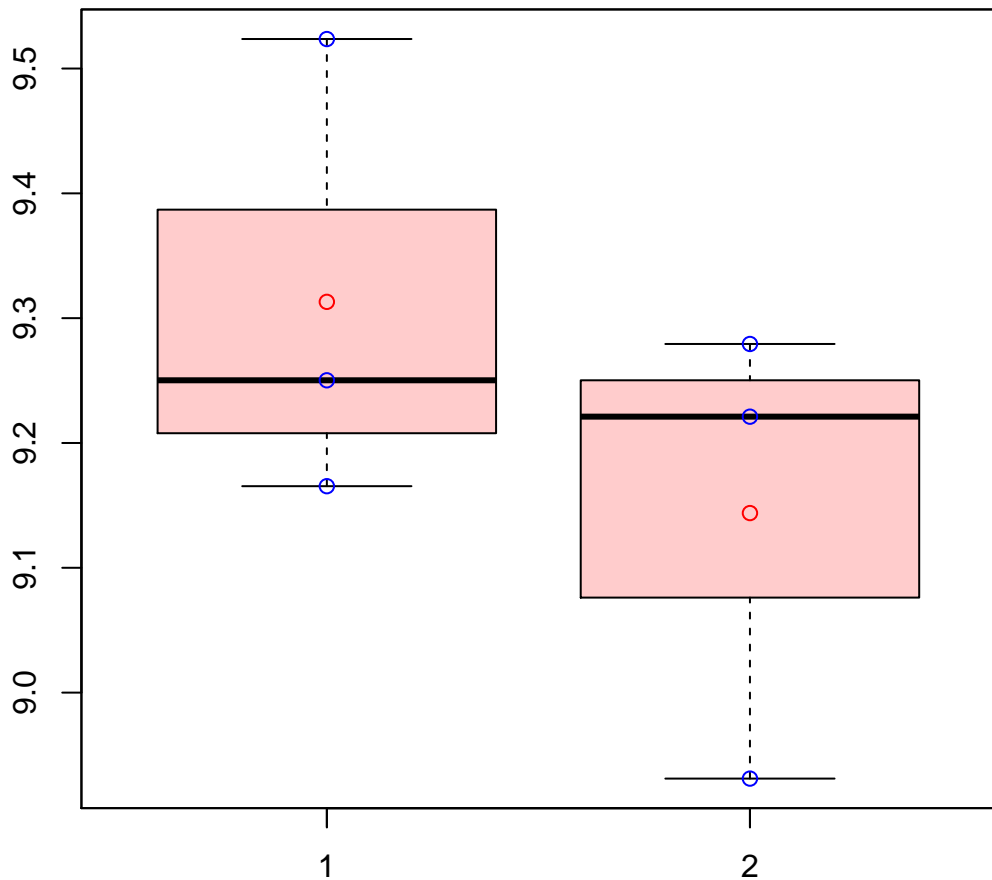

t-Test: p-value = 0.33

# Q2QMG9|Q2QMG9\_ORYSJ

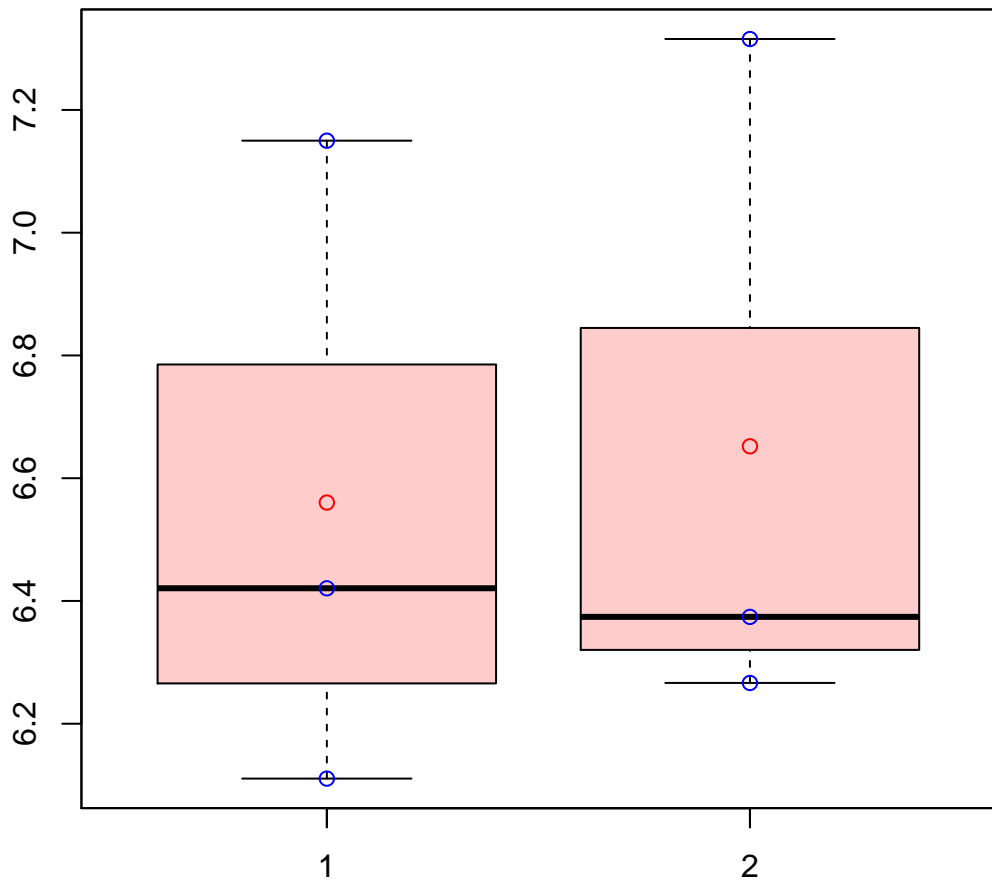

t-Test: p-value = 0.85

# Q2QN12|Q2QN12\_ORYSJ

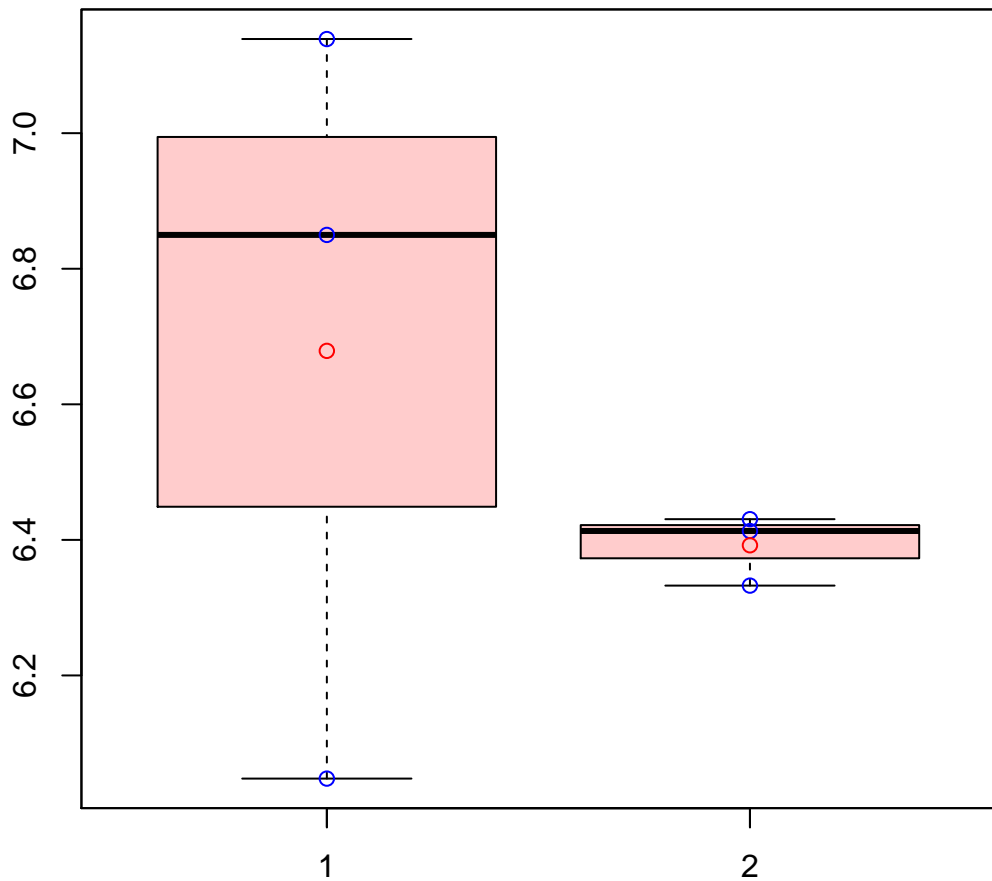

t-Test: p-value = 0.47

# Q2QN76|Q2QN76\_ORYSJ

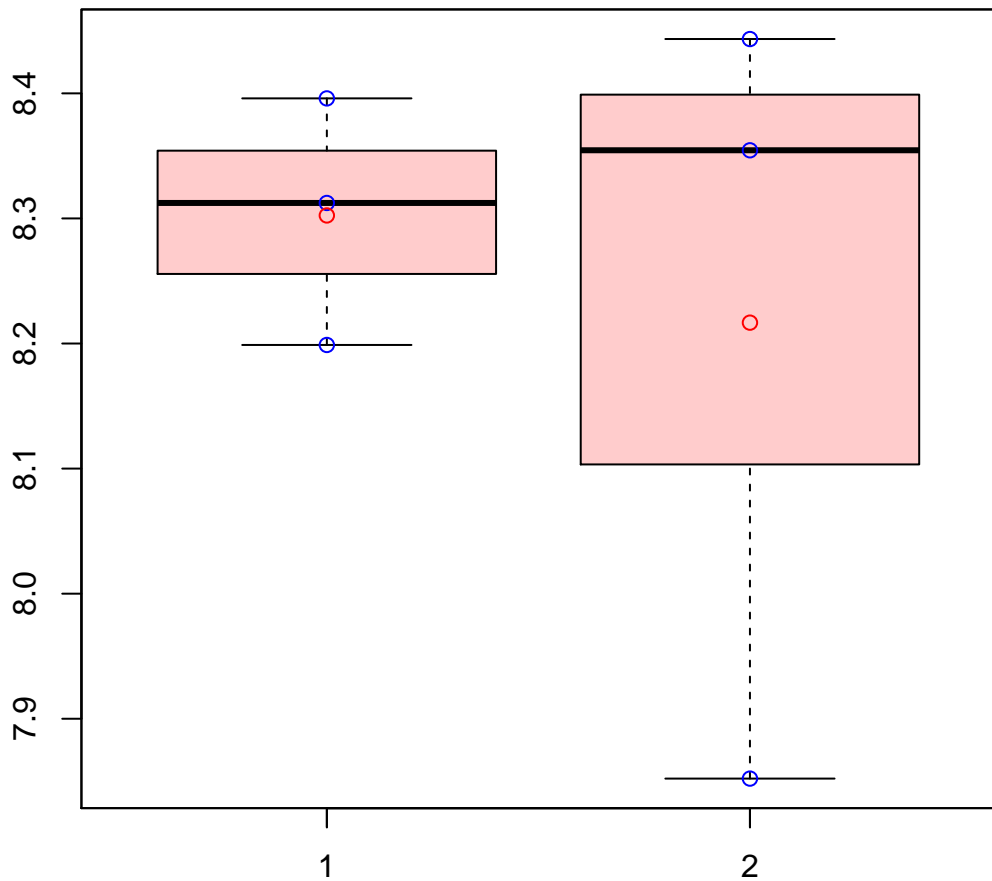

t-Test: p-value = 0.69

# Q2QNF3|Q2QNF3\_ORYSJ

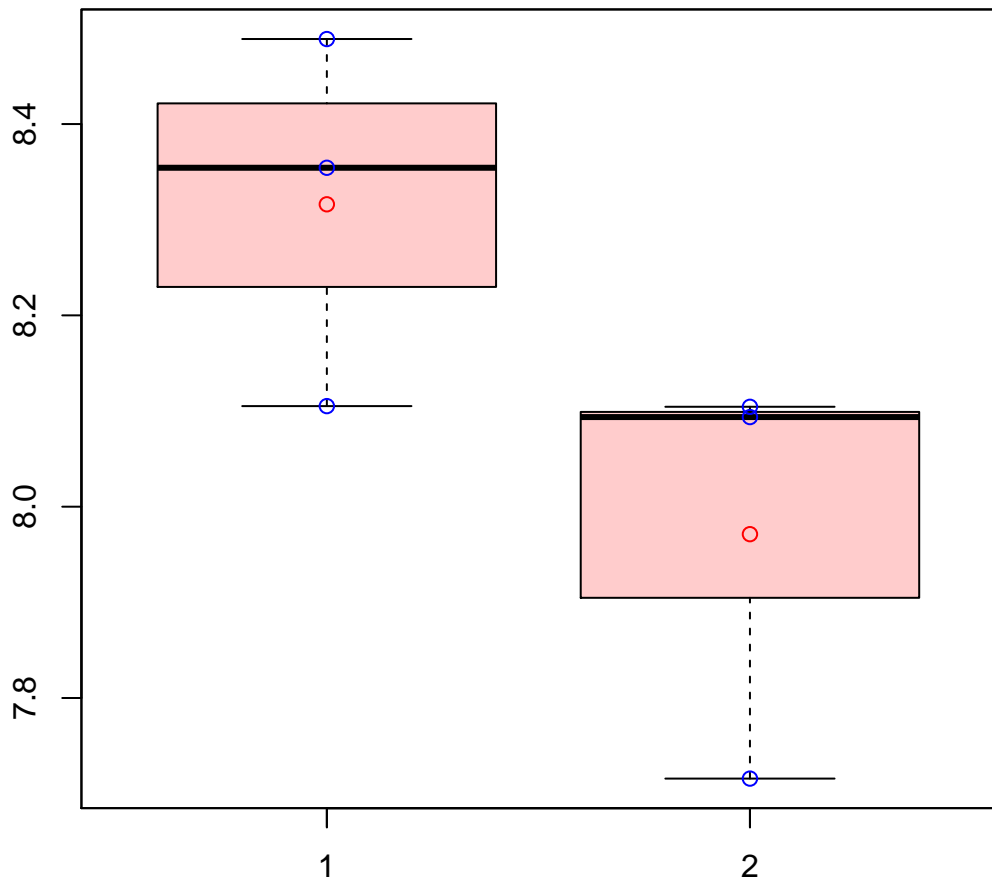

t-Test: p-value = 0.11



# Q2QPC0|Q2QPC0\_ORYSJ

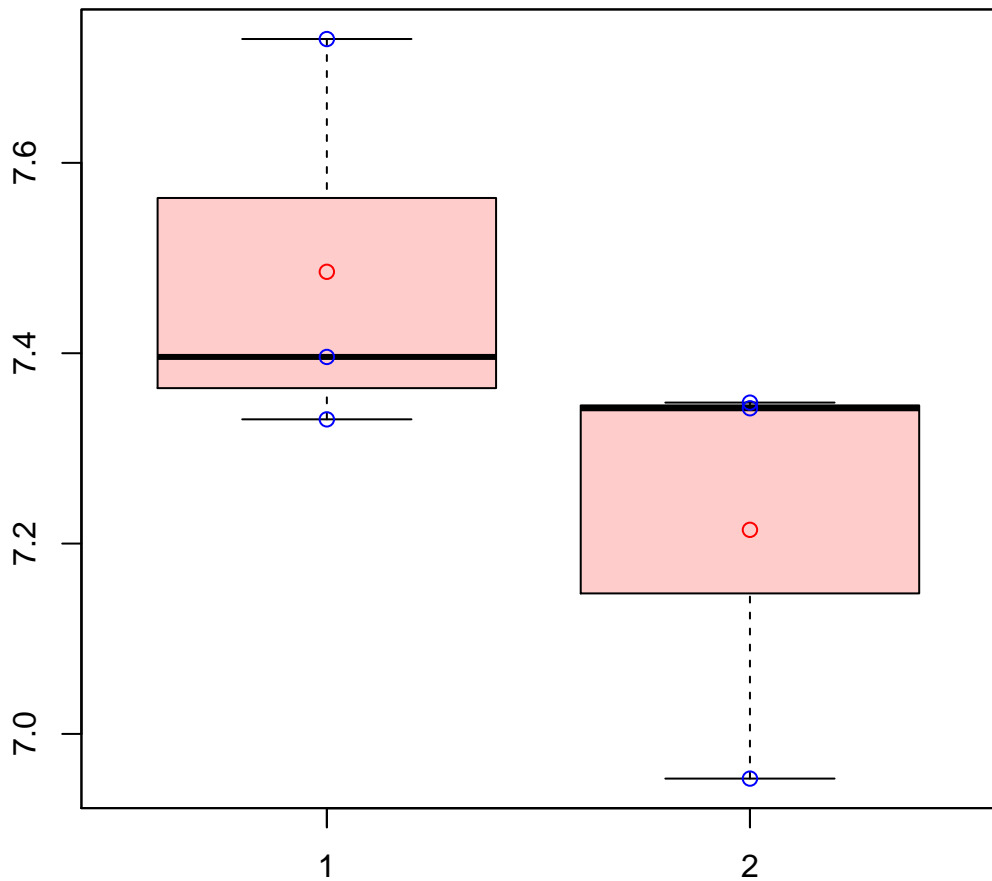

t-Test: p-value = 0.21

## Q2QPZ1|Q2QPZ1\_ORYSJ

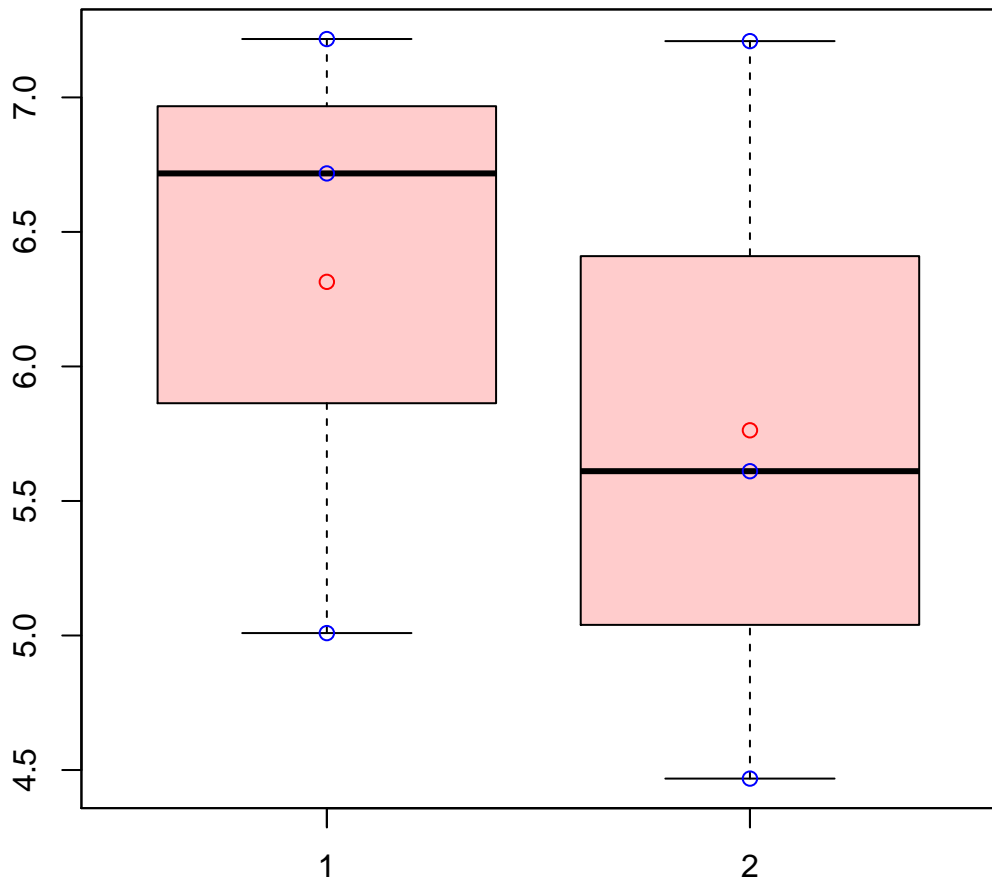

t-Test: p-value = 0.62

# Q2QTJ5|Q2QTJ5\_ORYSJ

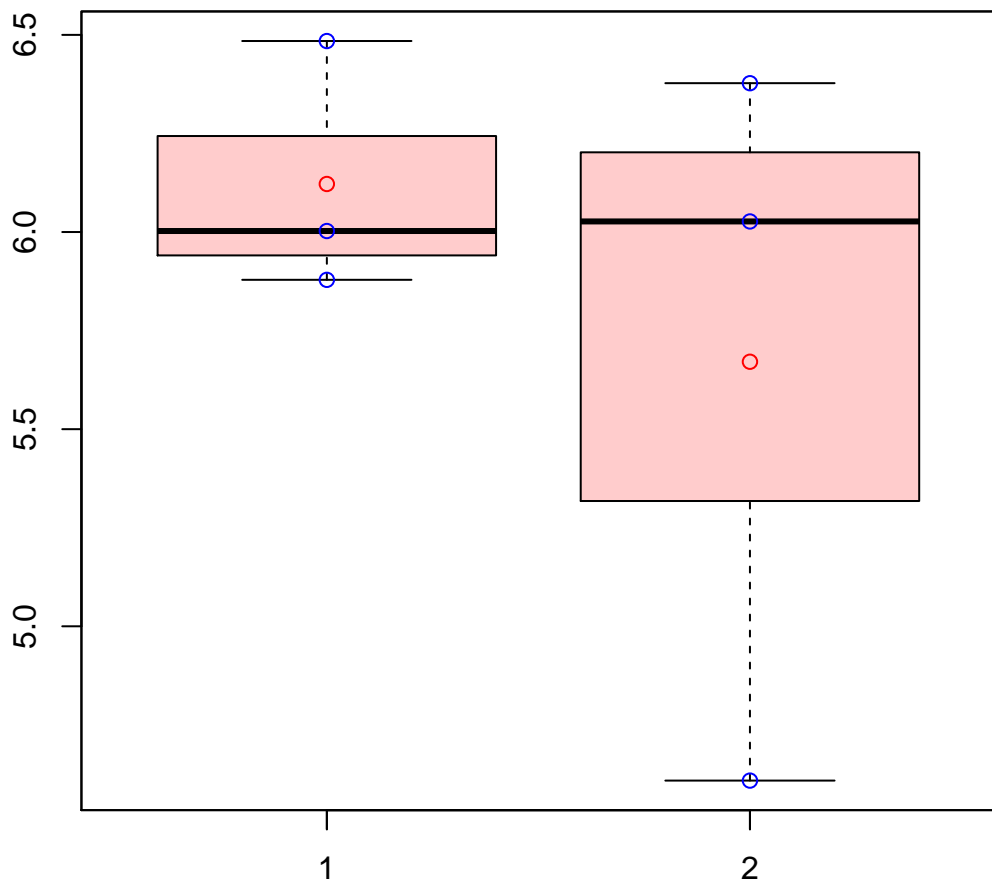

t-Test: p-value = 0.5

## Q2QTJ7|Q2QTJ7\_ORYSJ

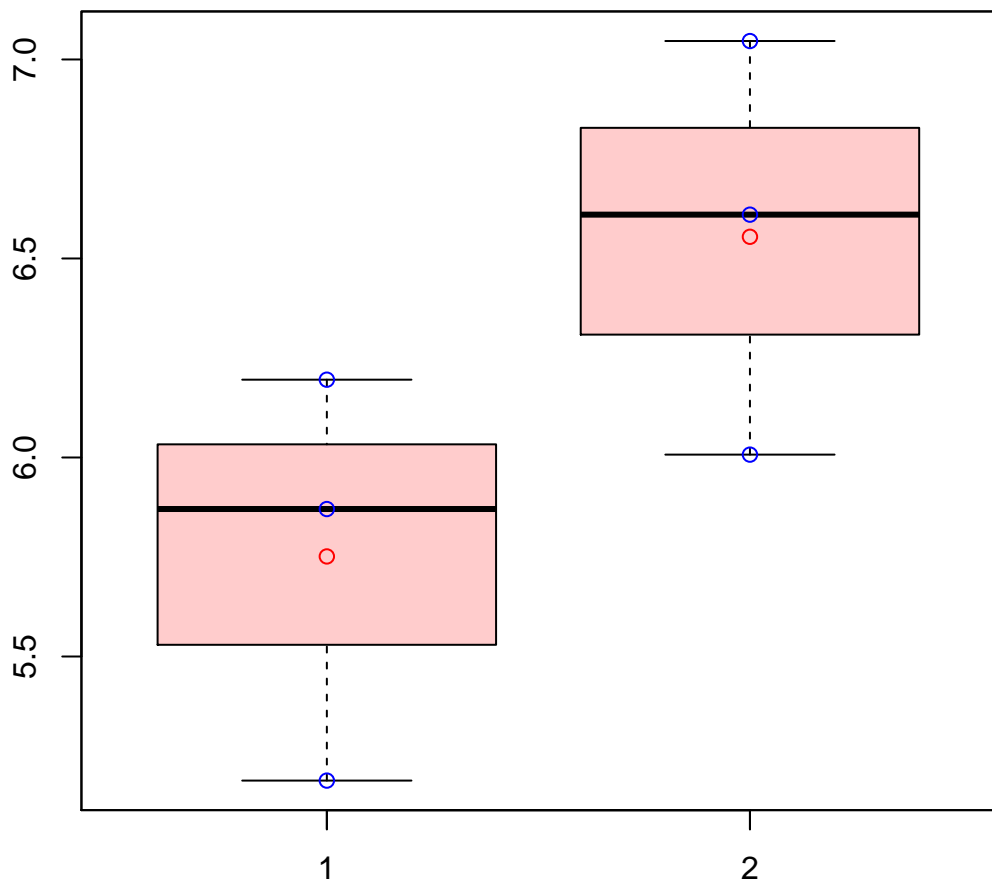

t-Test: p-value = 0.13

# Q2QTL7|Q2QTL7\_ORYSJ

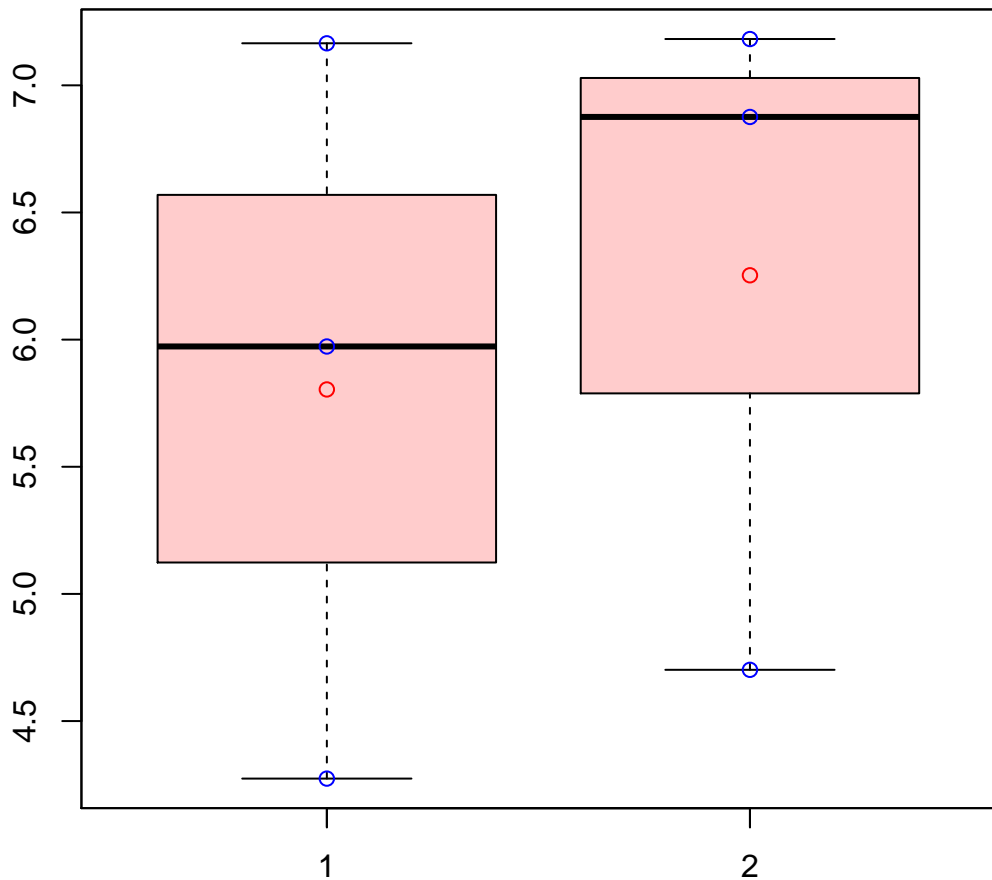

t-Test: p-value = 0.72

# Q2QUI1|Q2QUI1\_ORYSJ

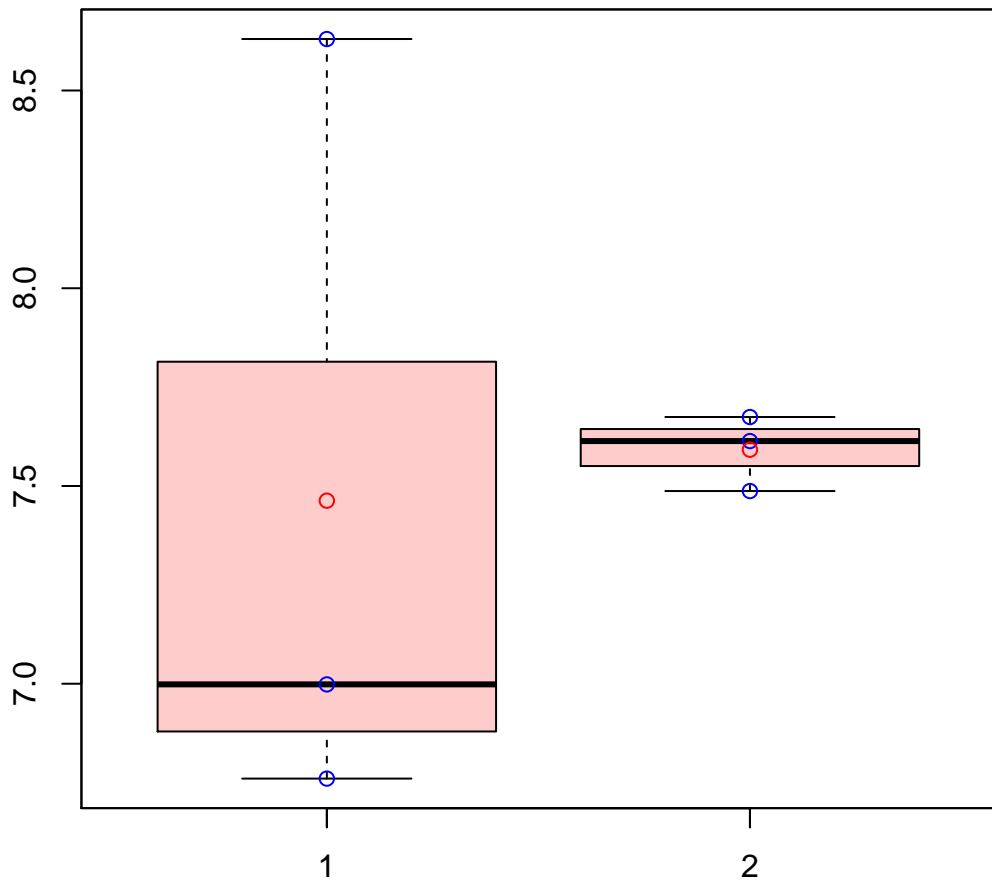

t-Test: p-value = 0.85

# Q2QUI9|Q2QUI9\_ORYSJ

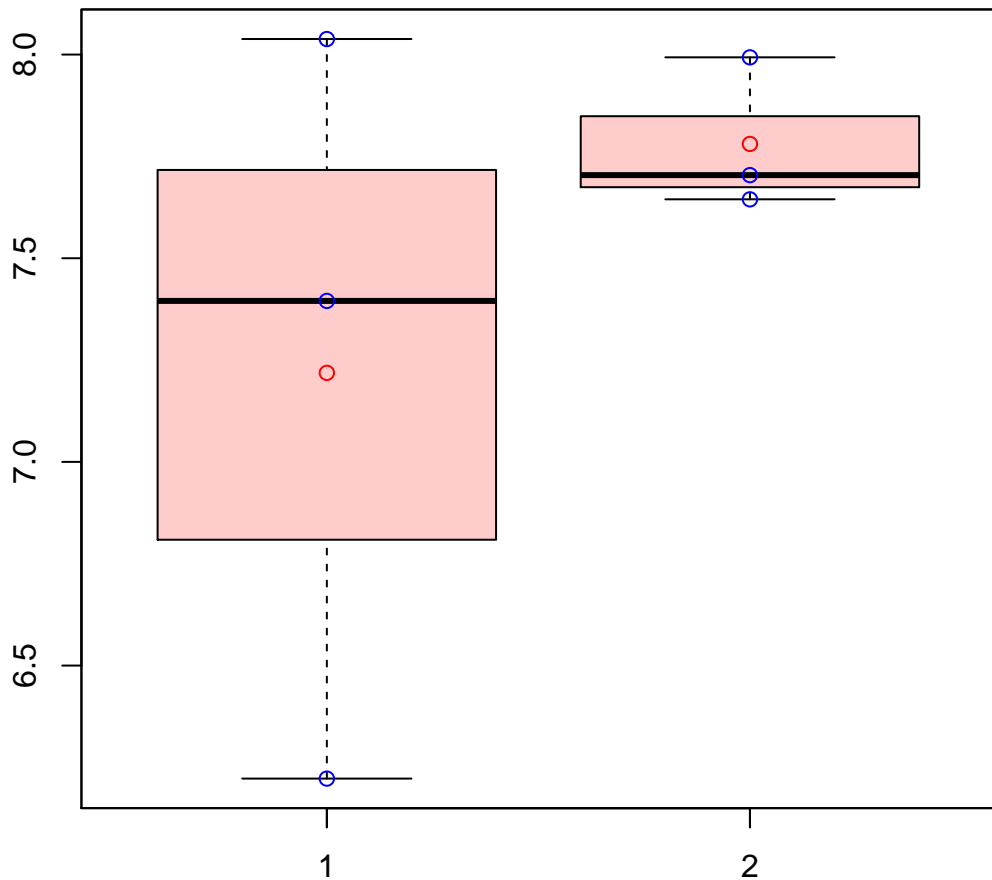

t-Test: p-value = 0.4

# Q2QUN0|Q2QUN0\_ORYSJ

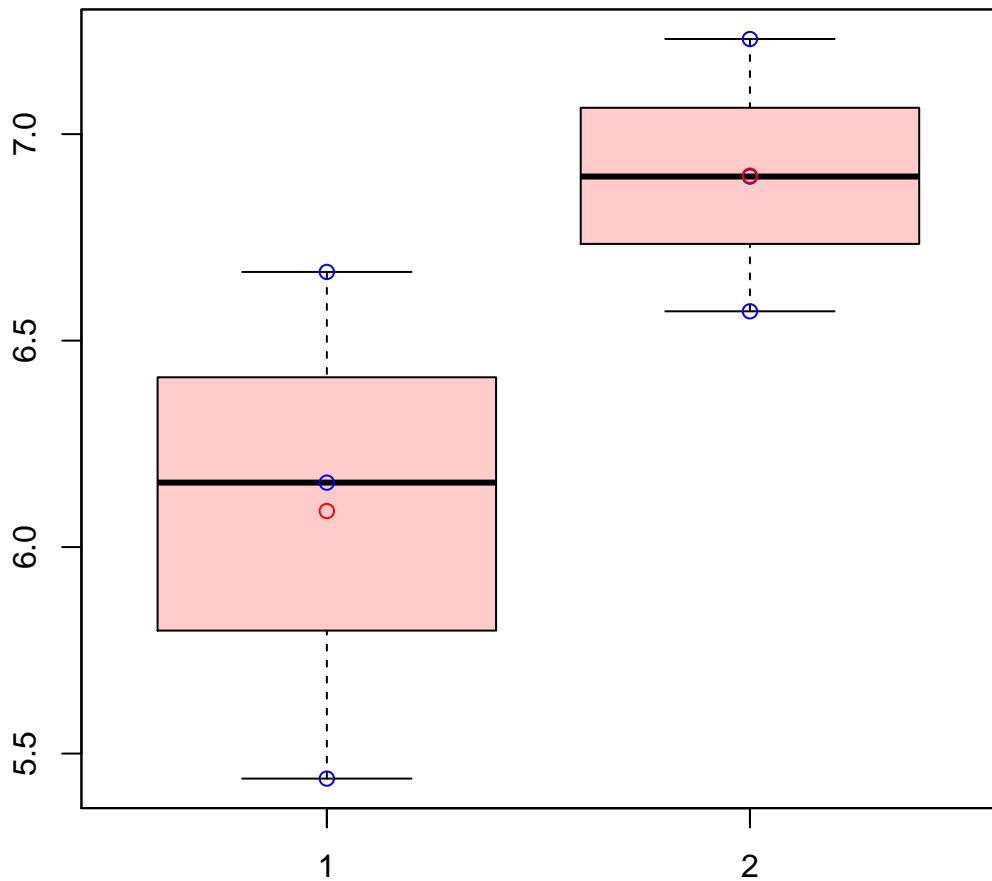

t-Test: p-value = 0.14



# Q2QVD9|Q2QVD9\_ORYSJ

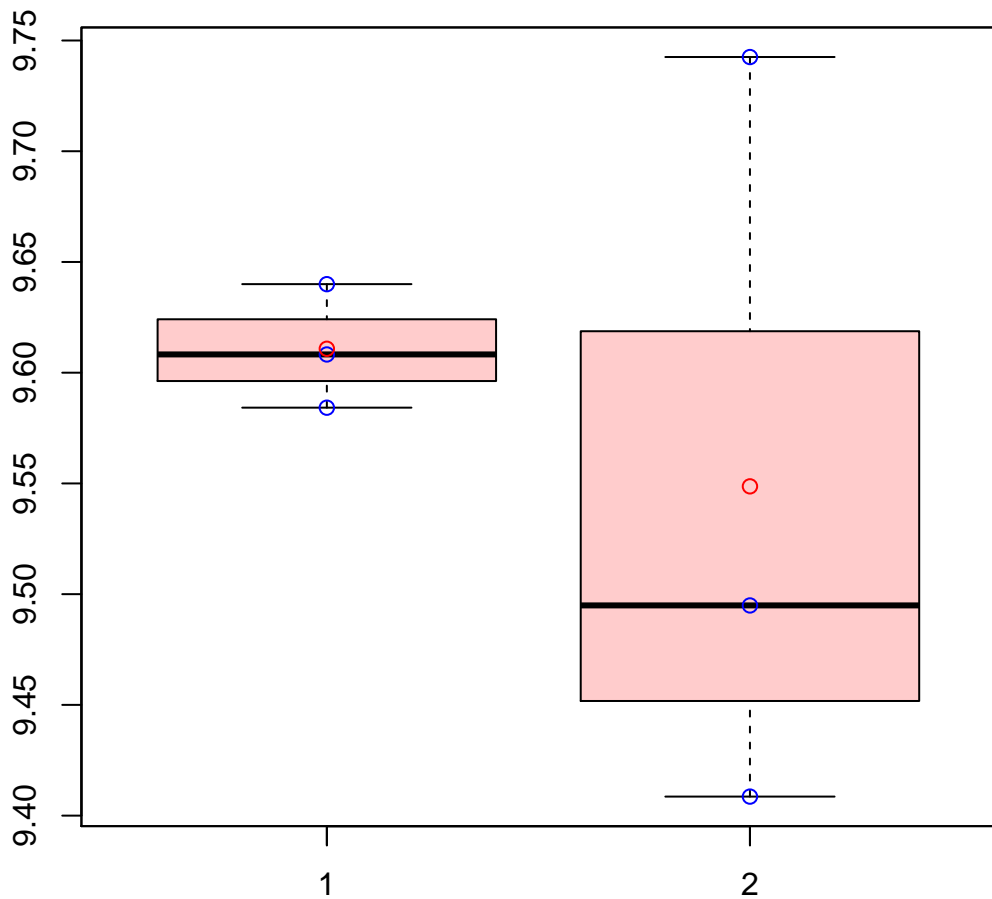

t-Test: p-value = 0.6

# Q2QW47|Q2QW47\_ORYSJ

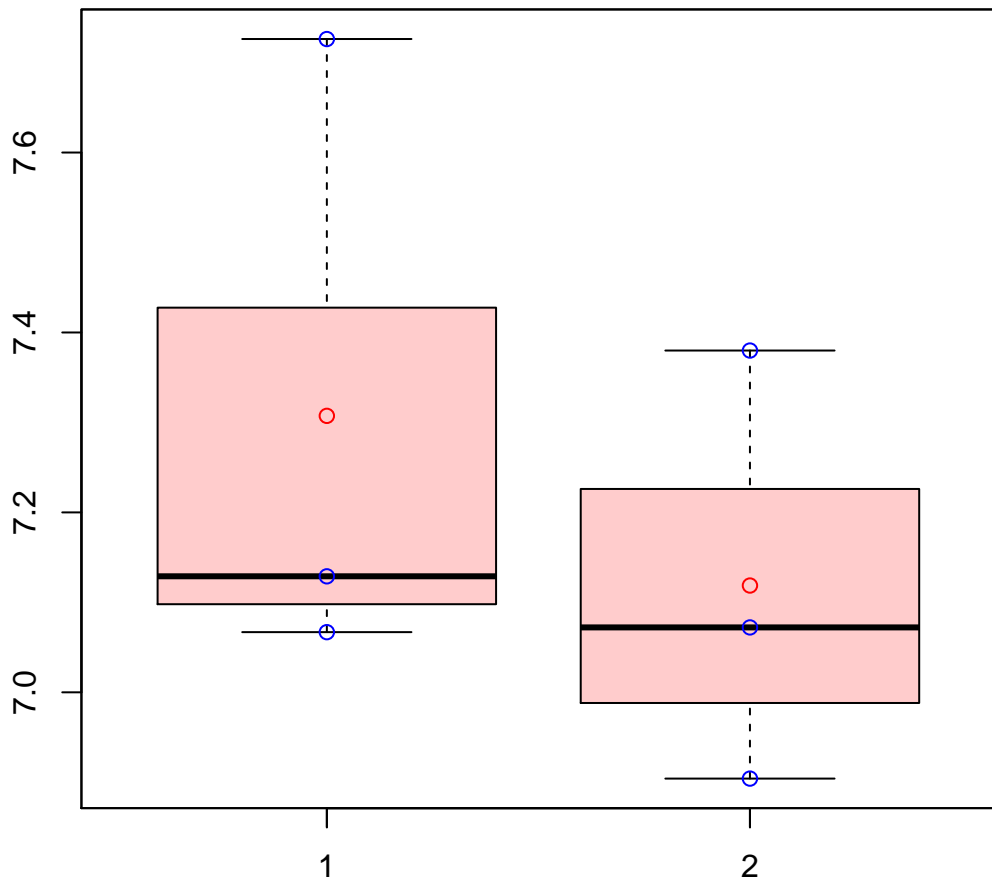

t-Test: p-value = 0.5

# Q2QW50|Q2QW50\_ORYSJ

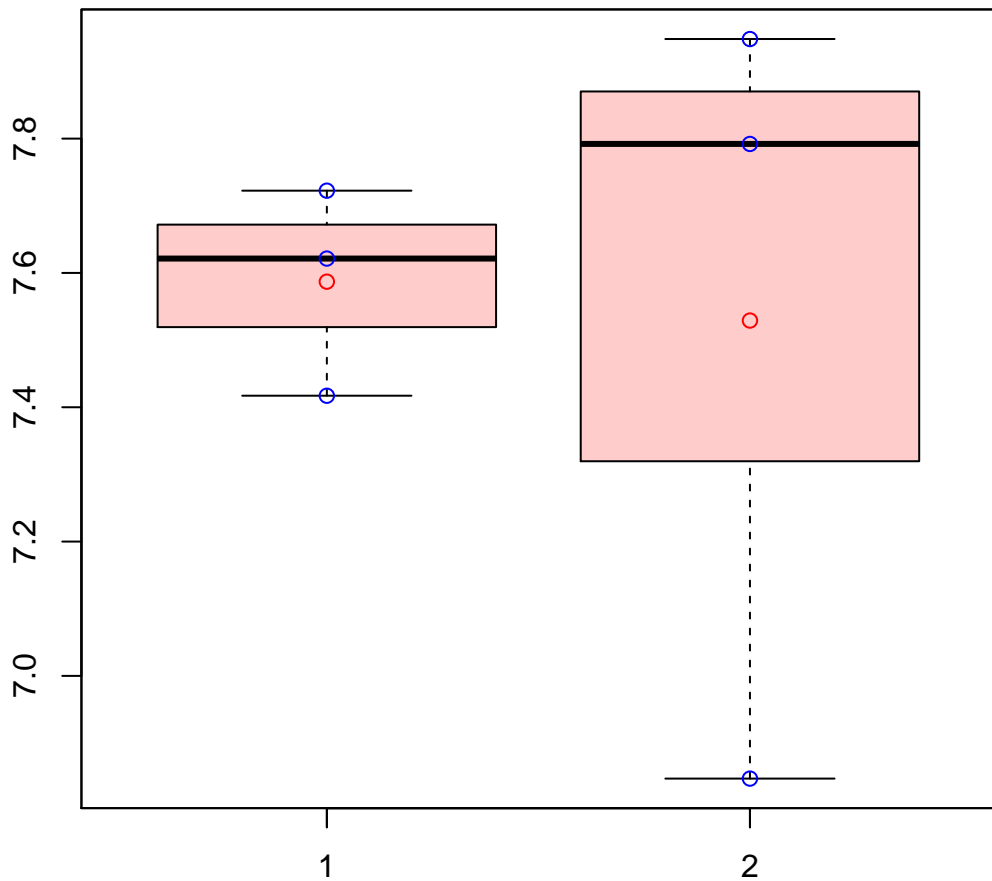

t-Test: p-value = 0.88

# Q2QWM7|Q2QWM7\_ORYSJ

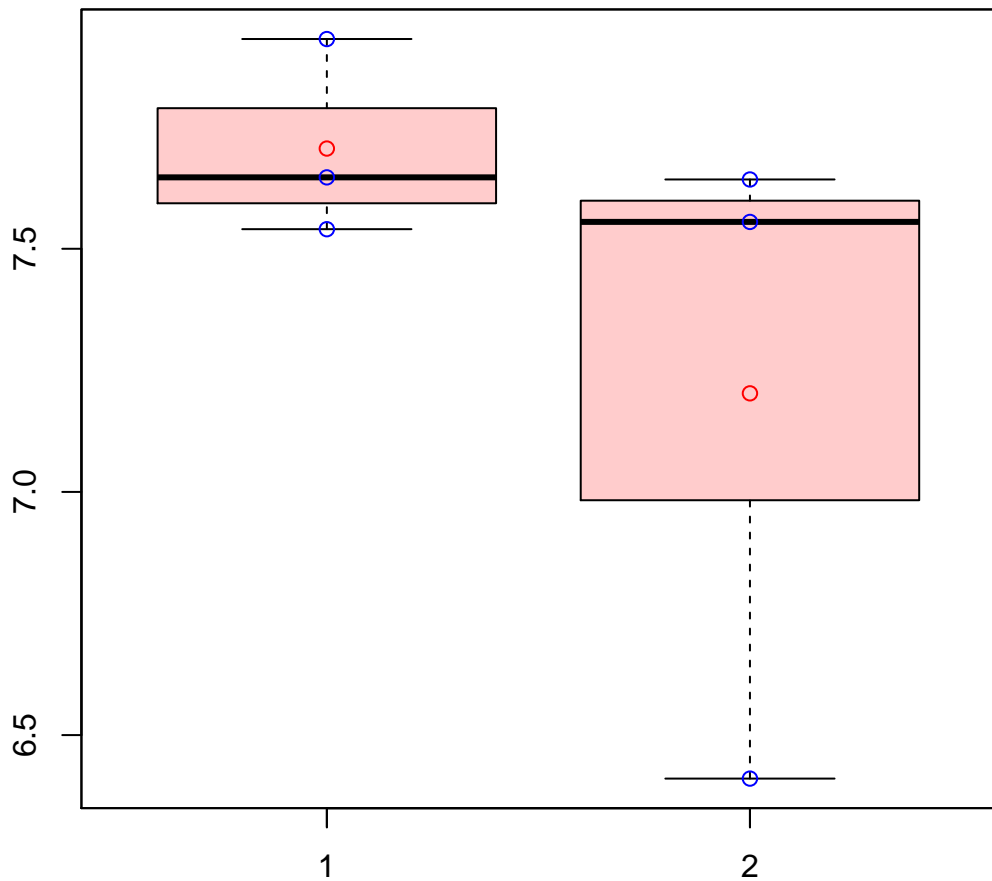

t-Test: p-value = 0.33

# Q2QX13|Q2QX13\_ORYSJ

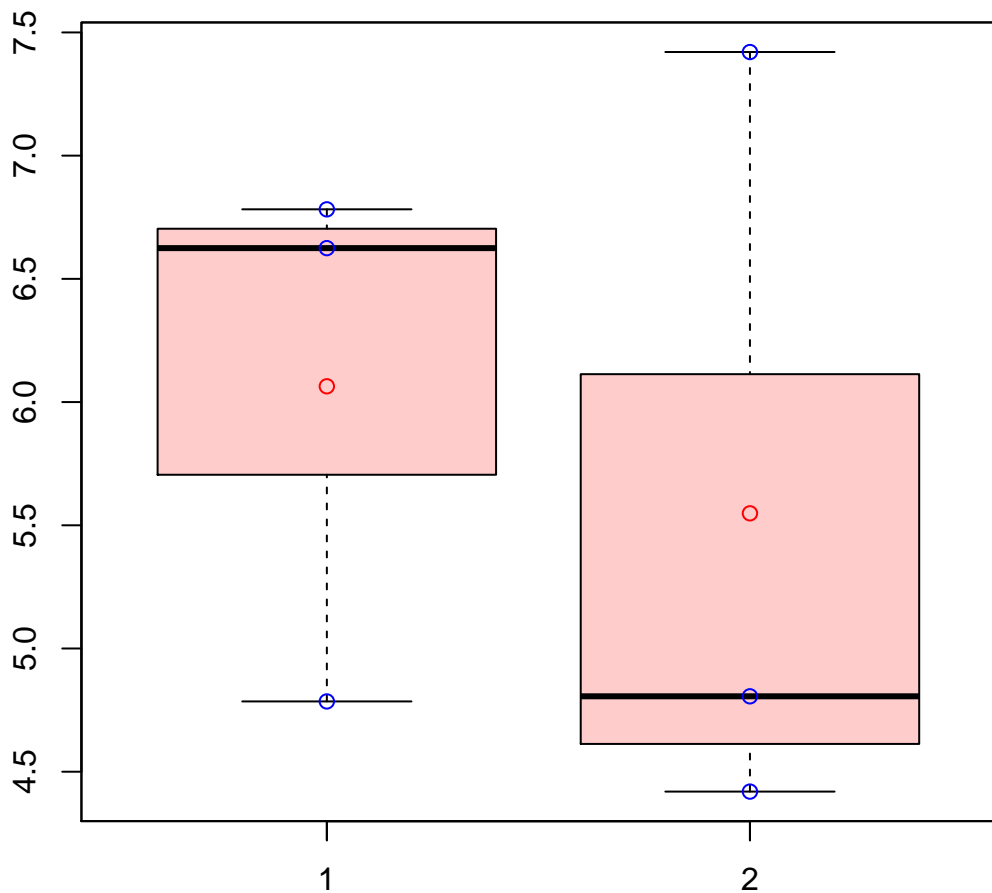

t-Test: p-value = 0.68

# Q2QXA4|Q2QXA4\_ORYSJ

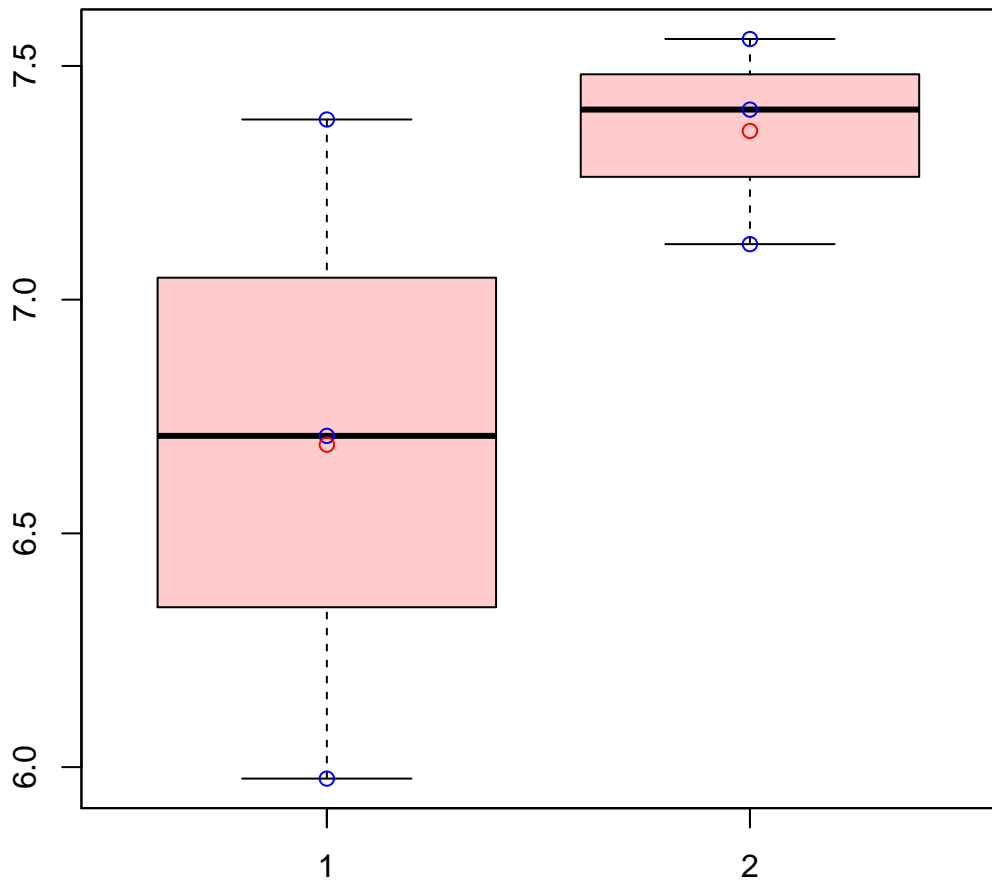

t-Test: p-value = 0.24

# Q2QYZ3|Q2QYZ3\_ORYSJ

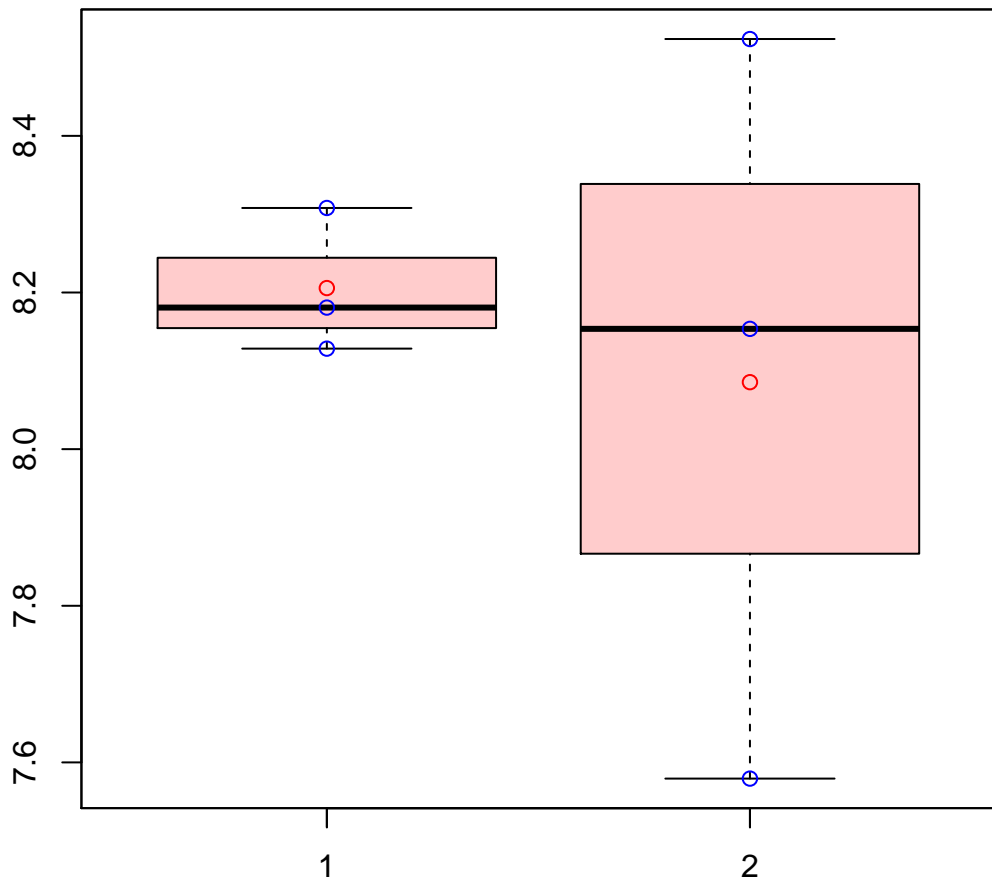

t-Test: p-value = 0.71

# Q2QZE3|Q2QZE3\_ORYSJ

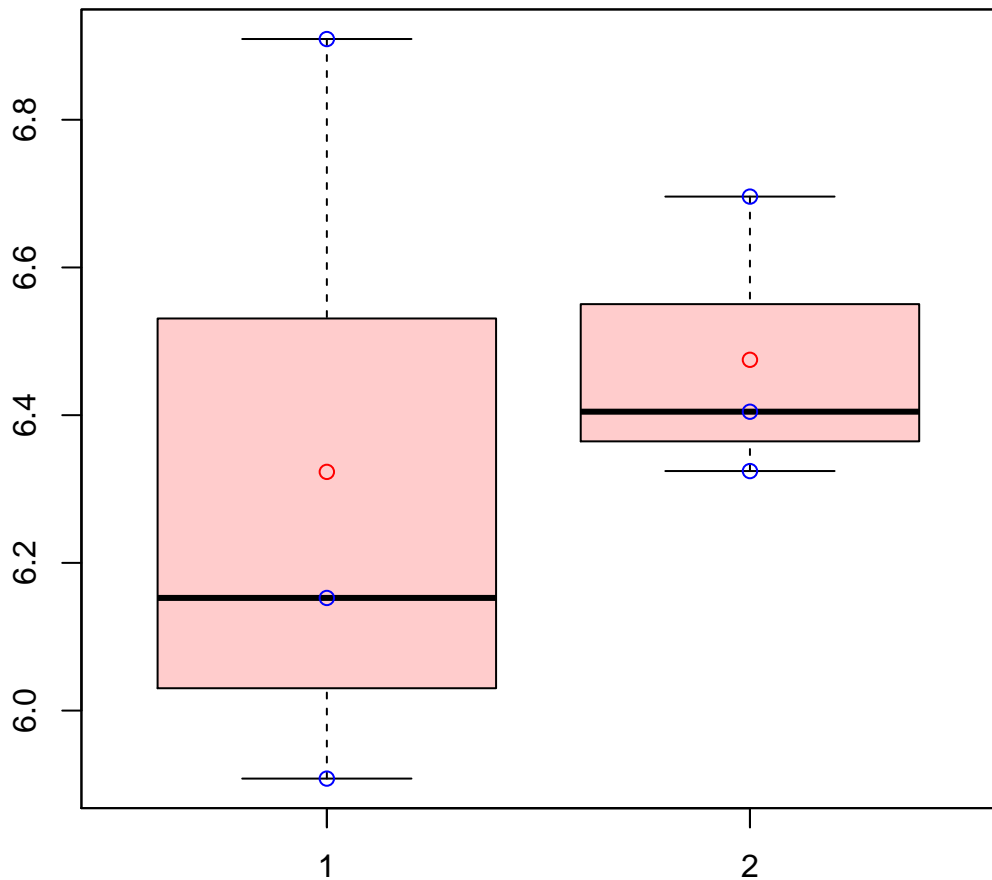

t-Test: p-value = 0.67



# Q2QZI0|Q2QZI0\_ORYSJ

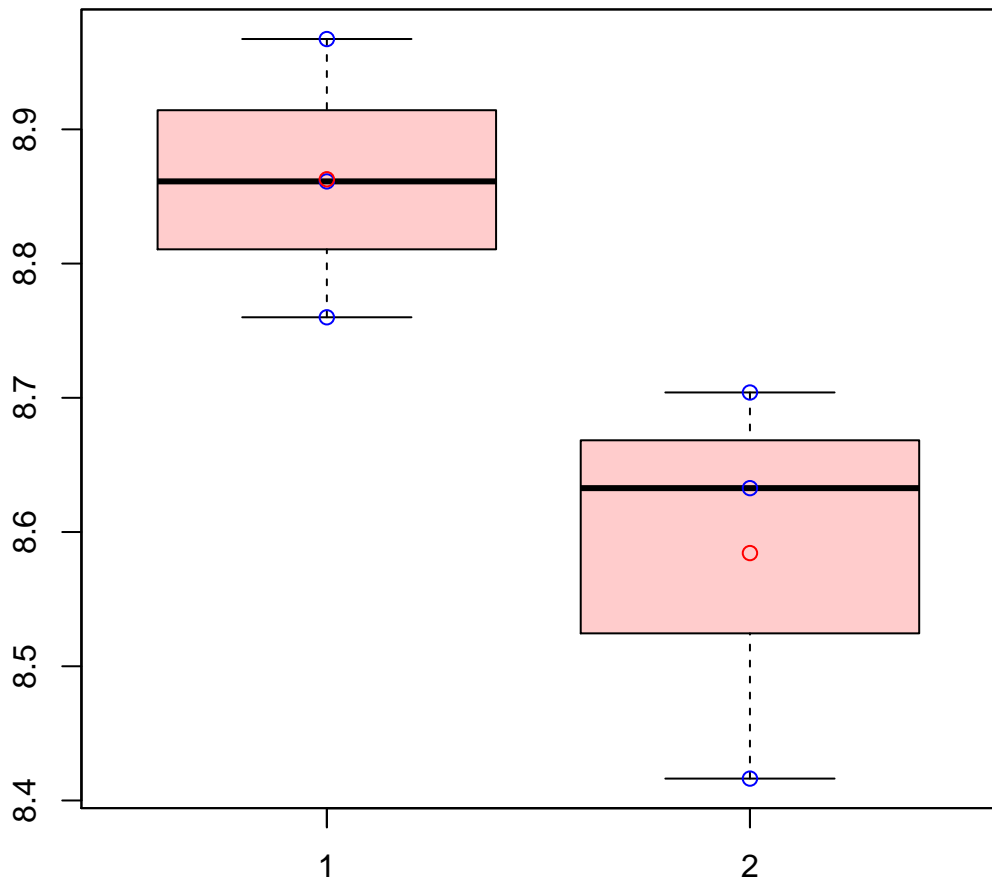

t-Test: p-value = 0.06

# Q2QZQ5|Q2QZQ5\_ORYSJ

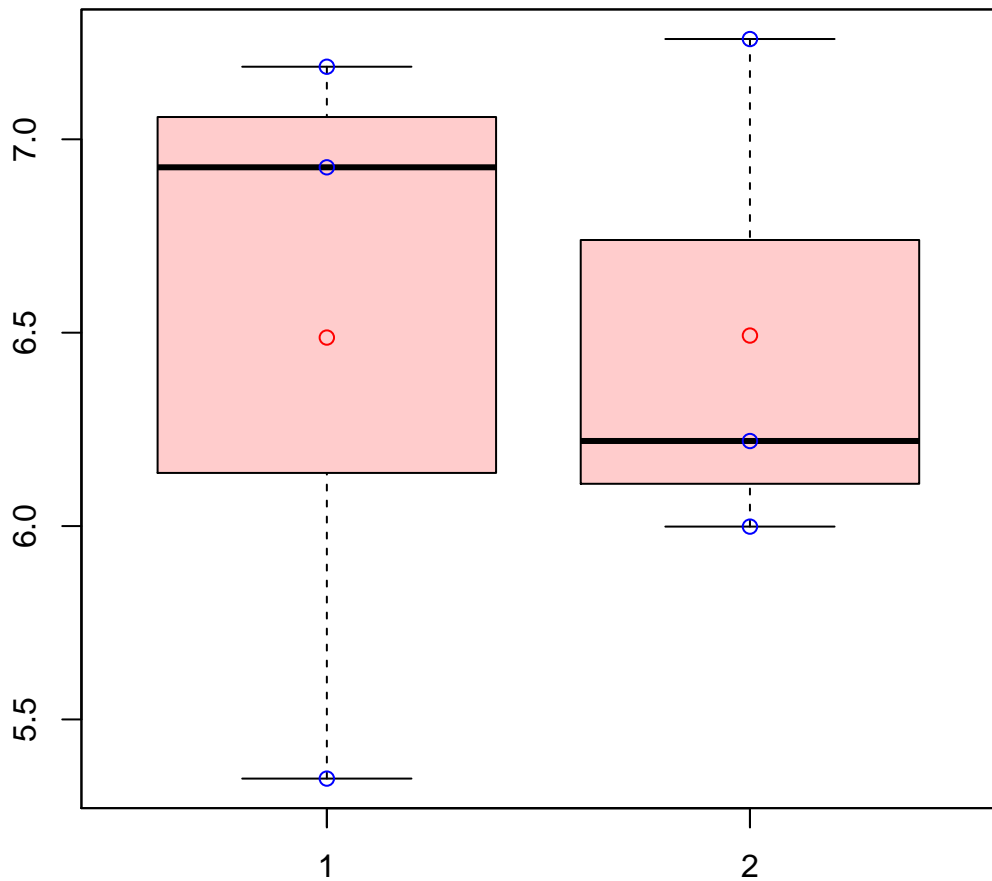

t-Test: p-value = 0.99

# Q2R2G1|Q2R2G1\_ORYSJ

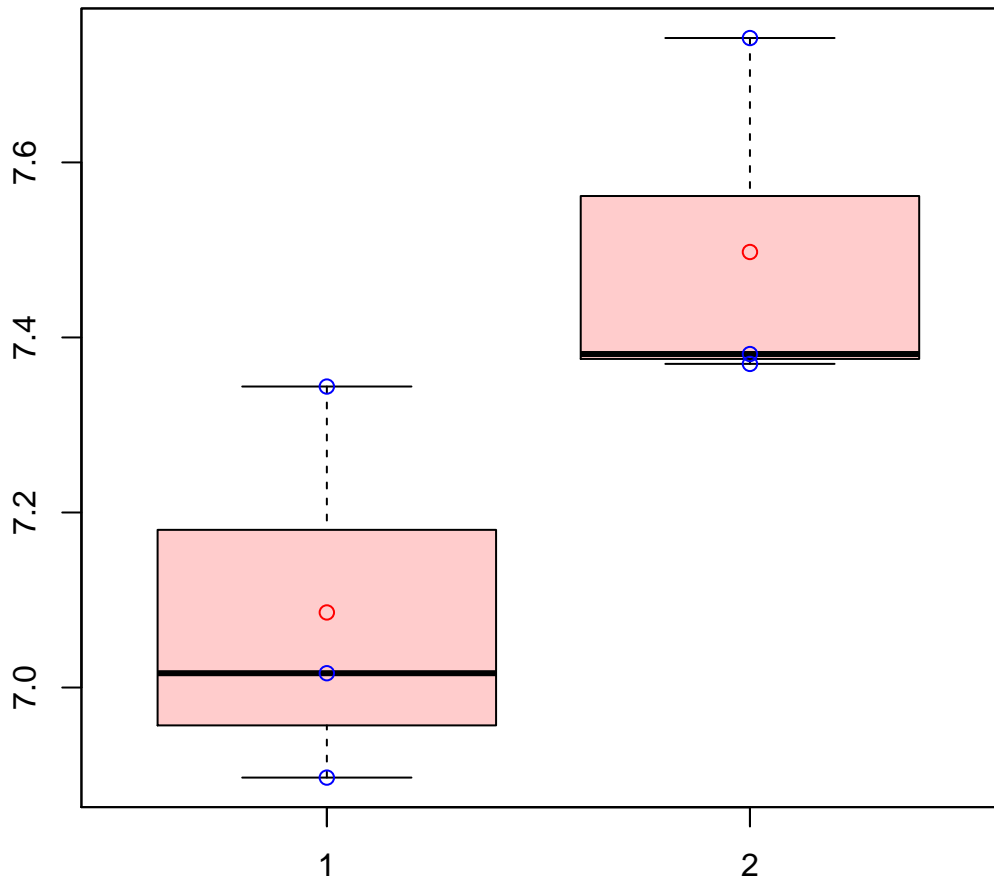

t-Test: p-value = 0.09

# Q2R2U7|Q2R2U7\_ORYSJ

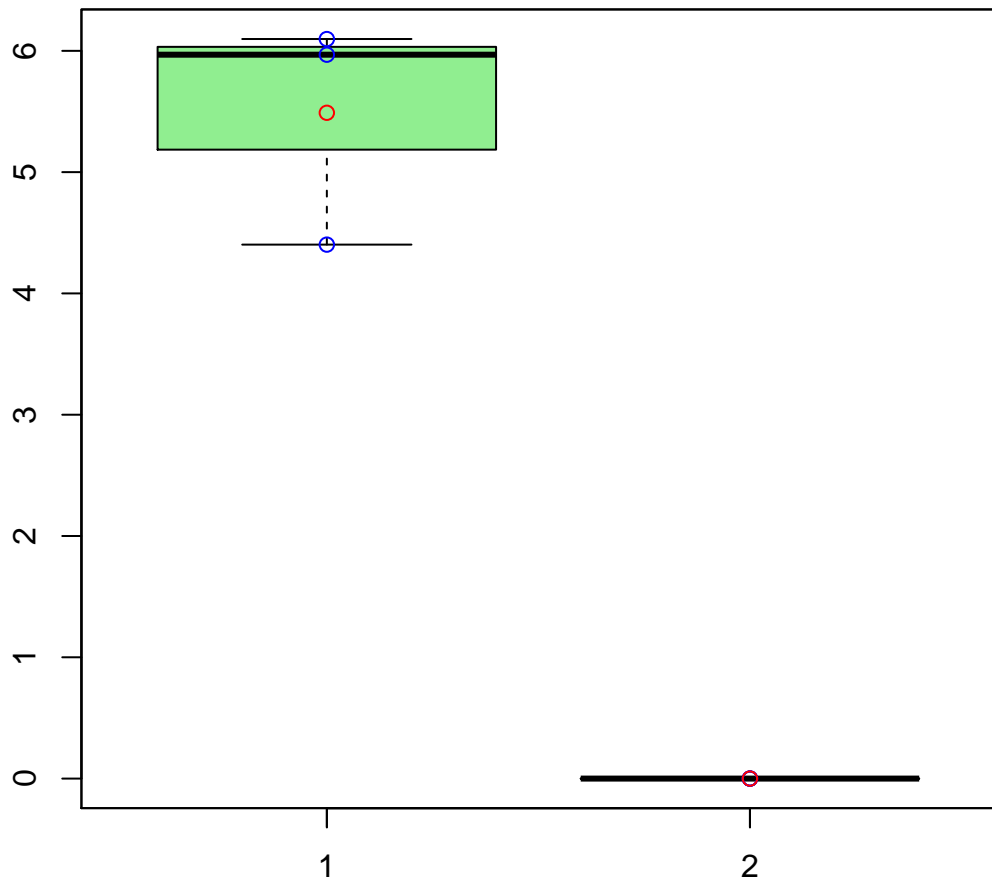

t-Test: p-value = 0.01

# Q2R355|Q2R355\_ORYSJ

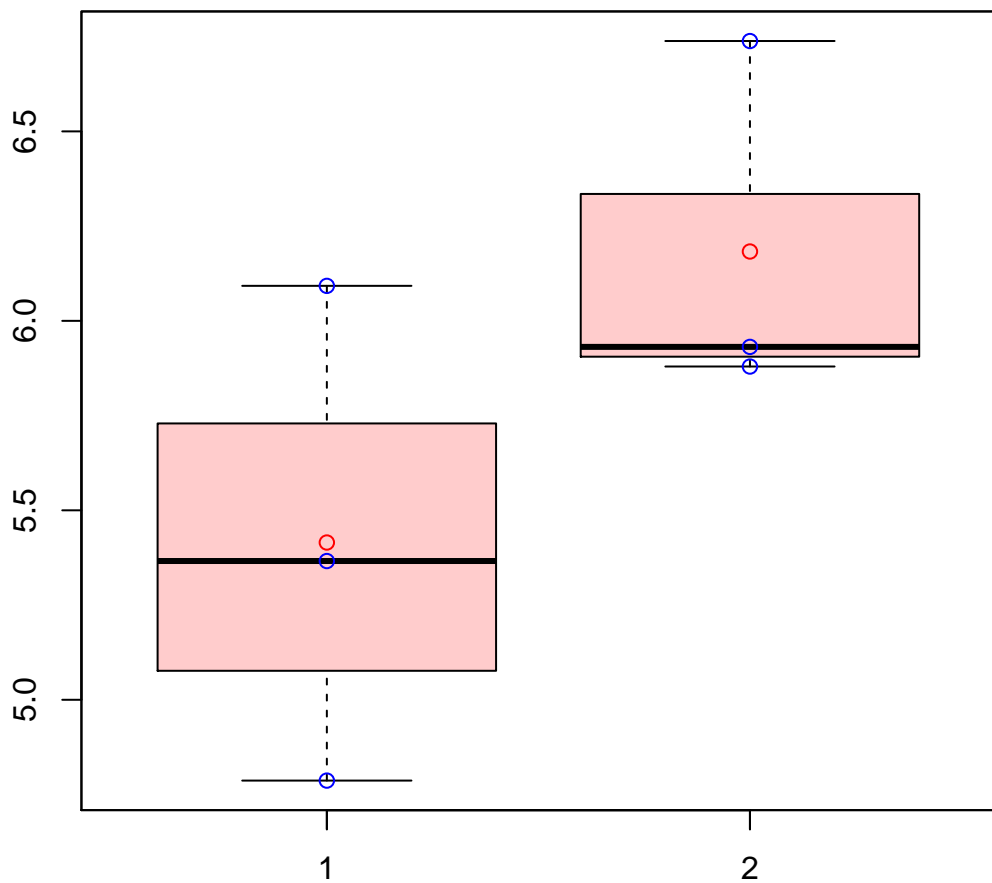

t-Test: p-value = 0.18

# Q2R3E6|Q2R3E6\_ORYSJ

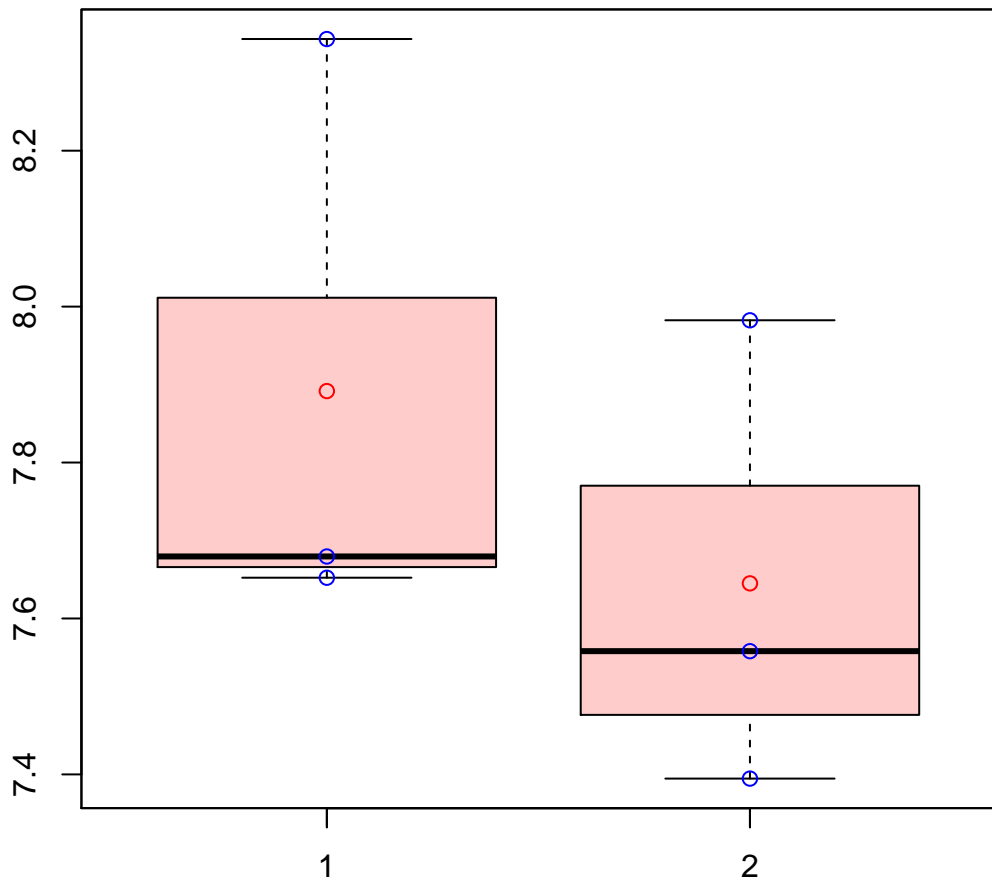

t-Test: p-value = 0.44

# Q2R3Y8|Q2R3Y8\_ORYSJ

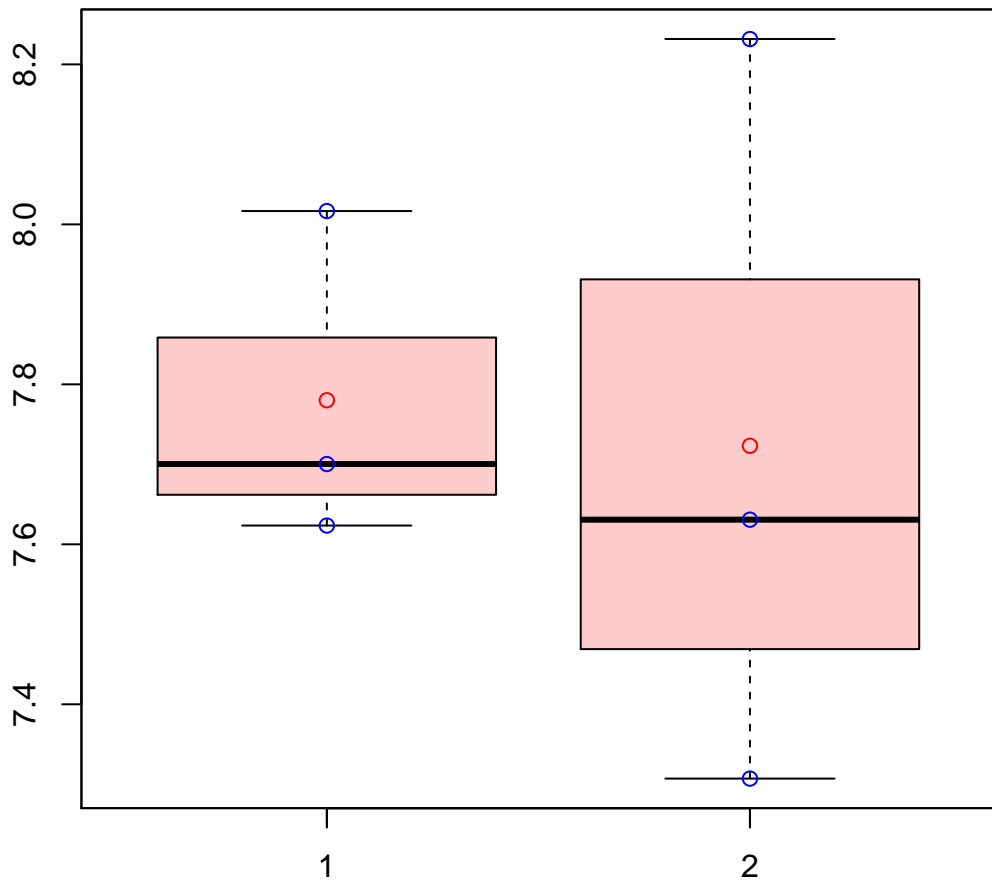

t-Test: p-value = 0.86

# Q2R4S0|Q2R4S0\_ORYSJ

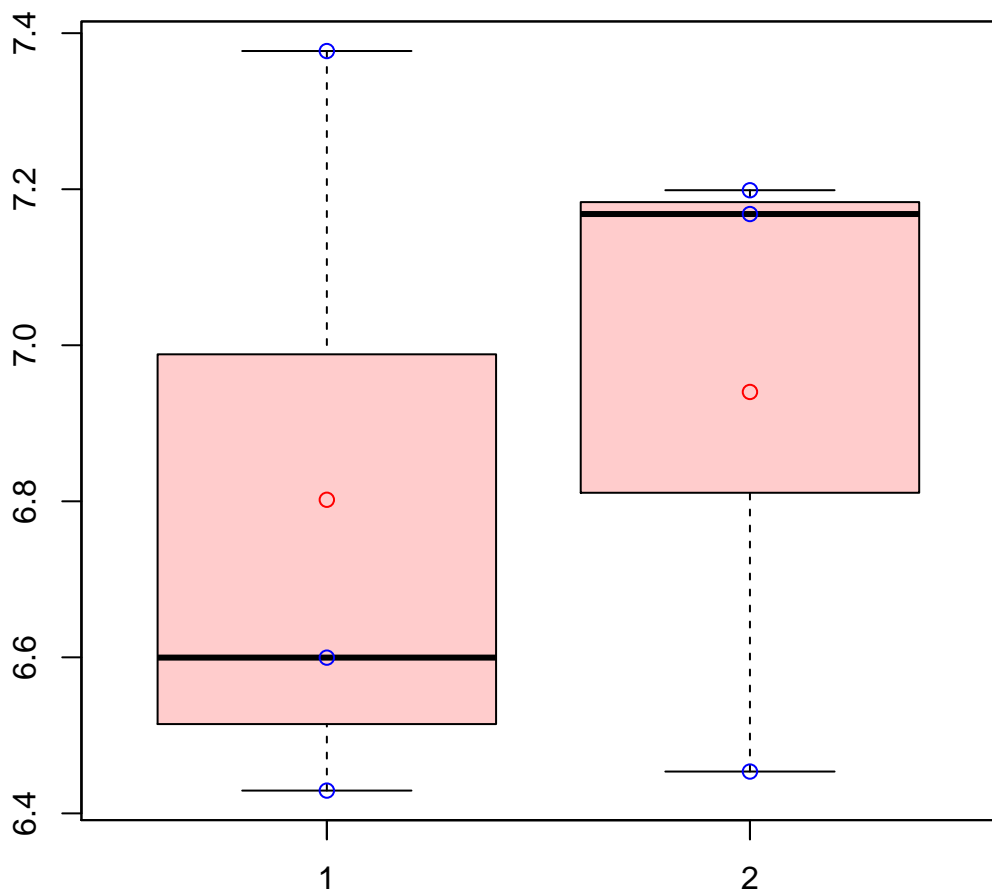

t-Test: p-value = 0.74



# Q2R9J3|Q2R9J3\_ORYSJ

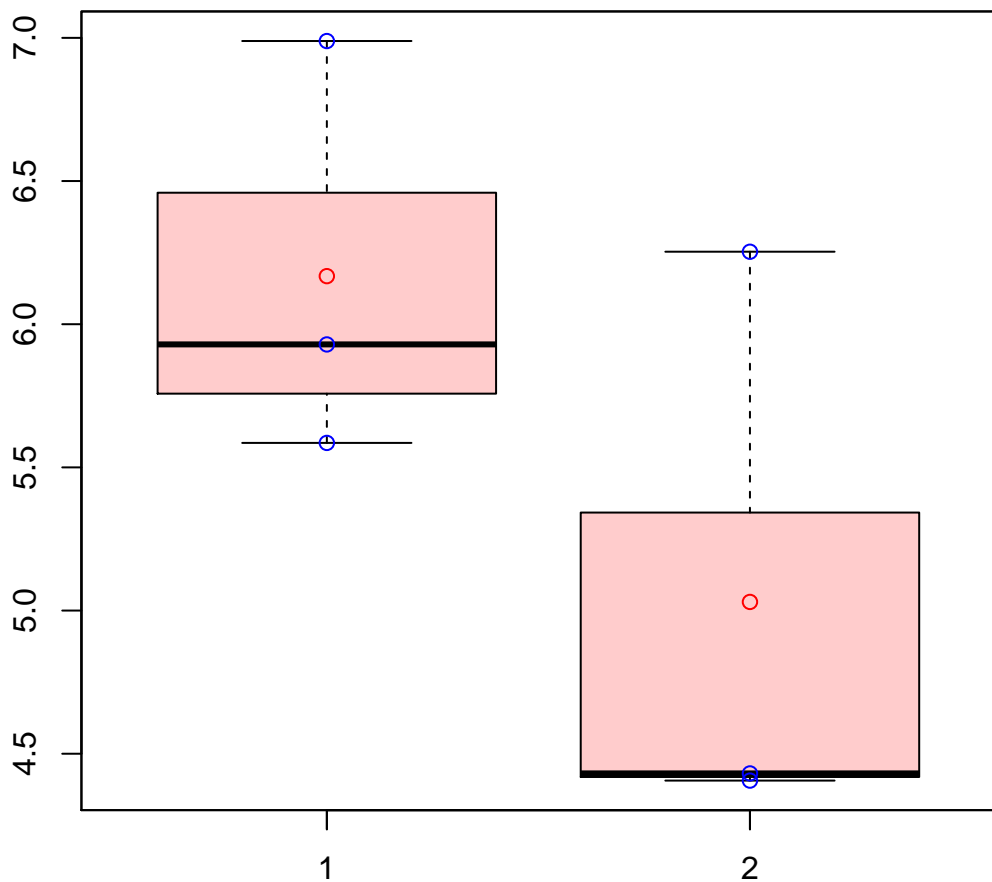

t-Test: p-value = 0.21

# Q2RA00|Q2RA00\_ORYSJ

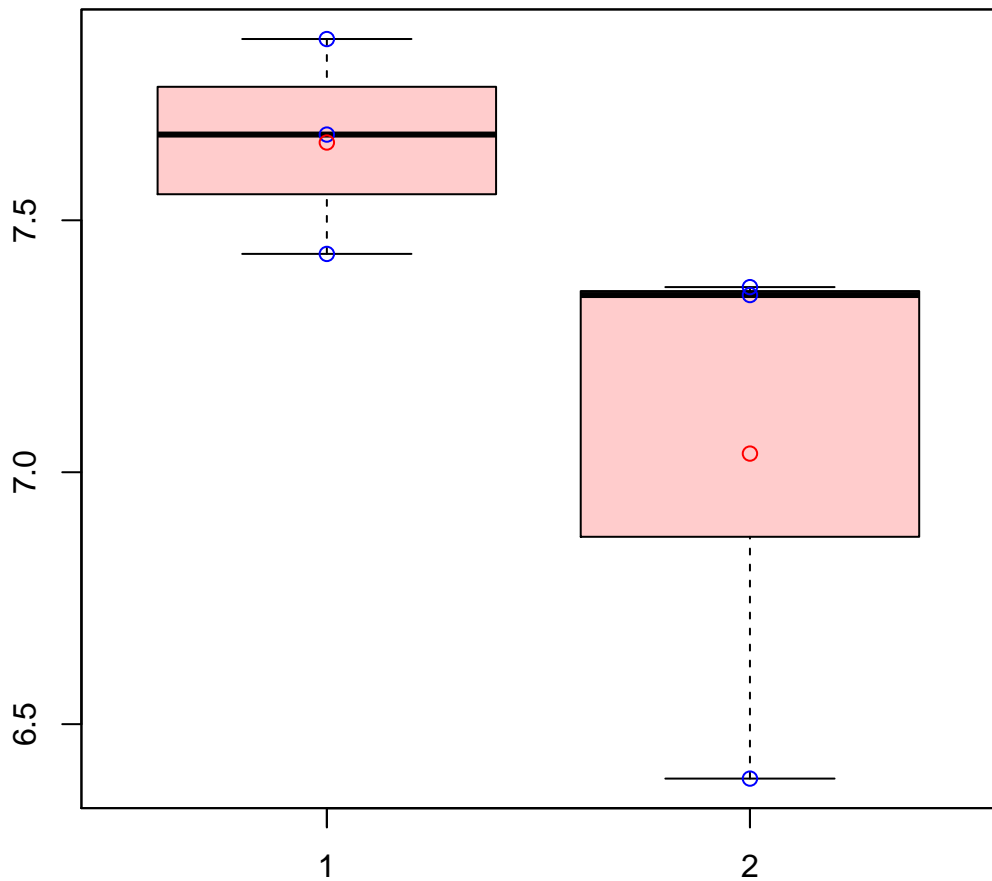

t-Test: p-value = 0.19

# Q2RBF7|Q2RBF7\_ORYSJ

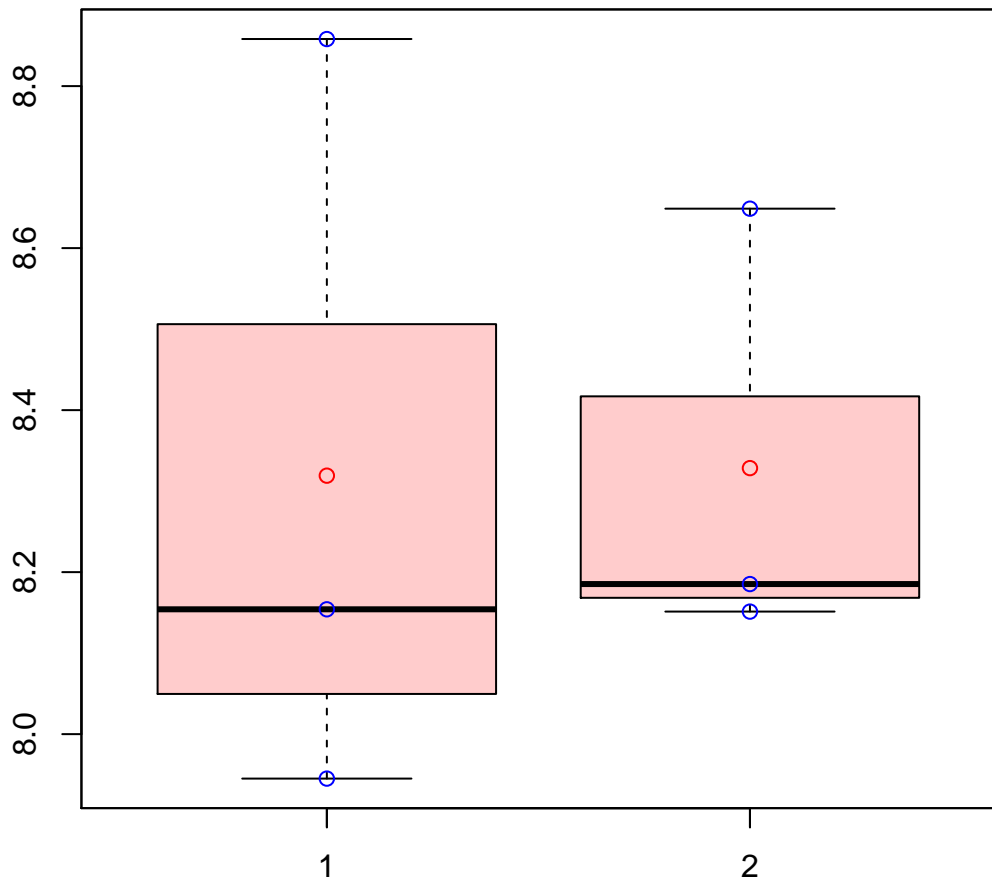

t-Test: p-value = 0.98

# Q2RBJ2|Q2RBJ2\_ORYSJ

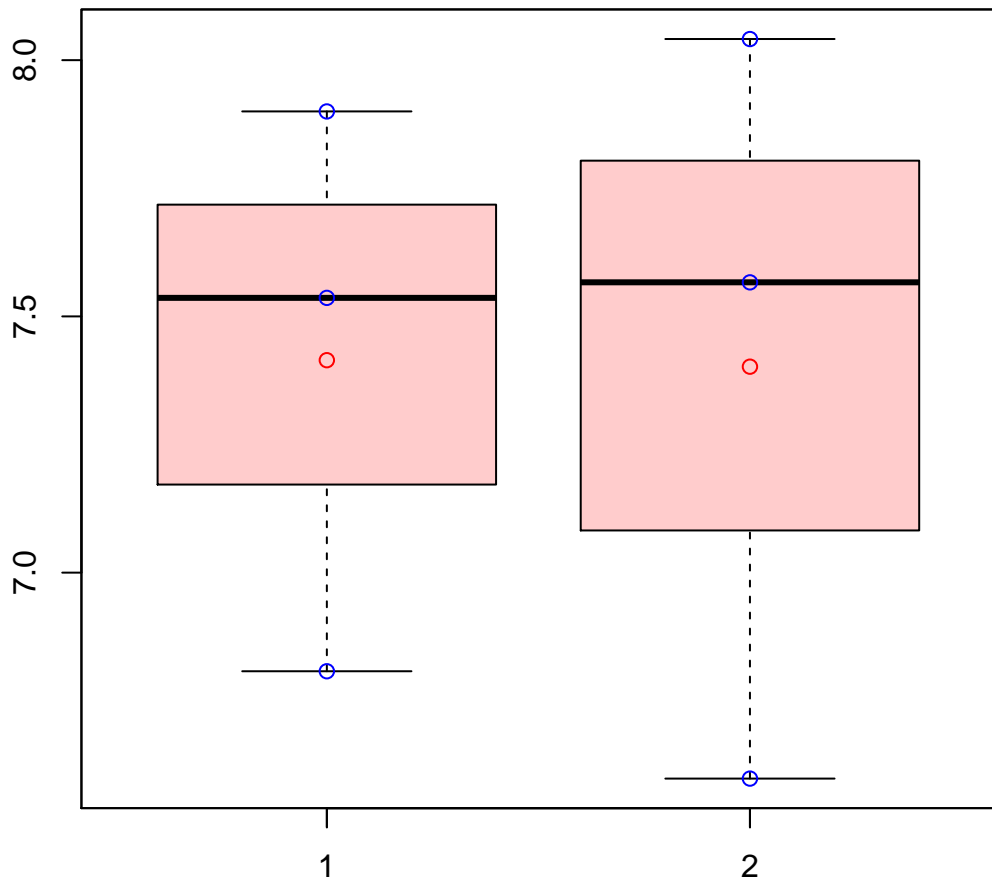

t-Test: p-value = 0.98

# Q2TR75|Q2TR75\_9LILI

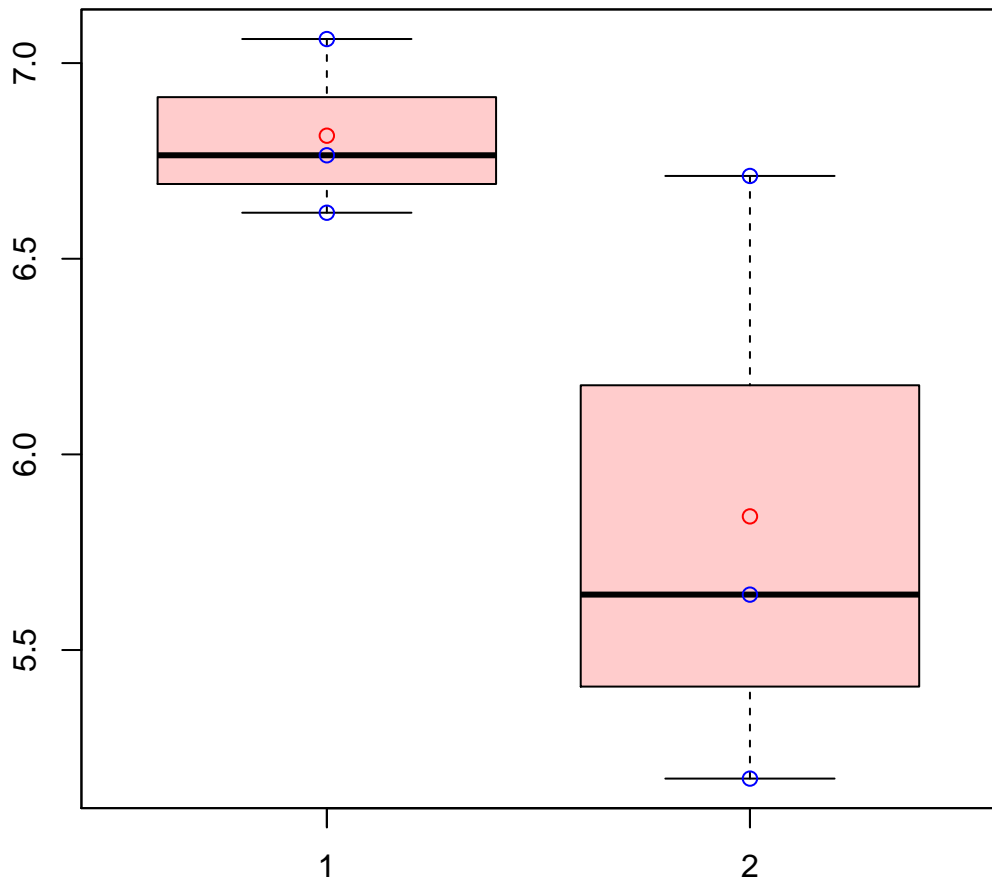

t-Test: p-value = 0.16

# Q2VU87|Q2VU87\_9ASPA

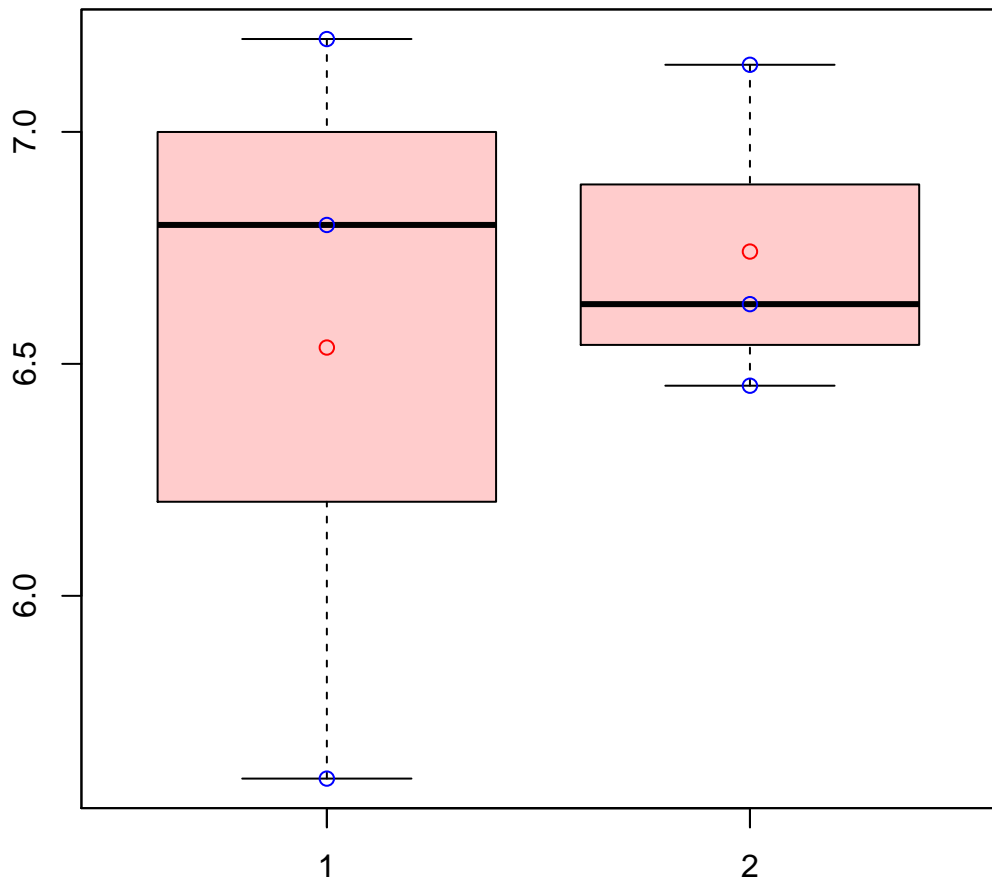

t-Test: p-value = 0.72

# Q2XX14|Q2XX14\_ZEAMP

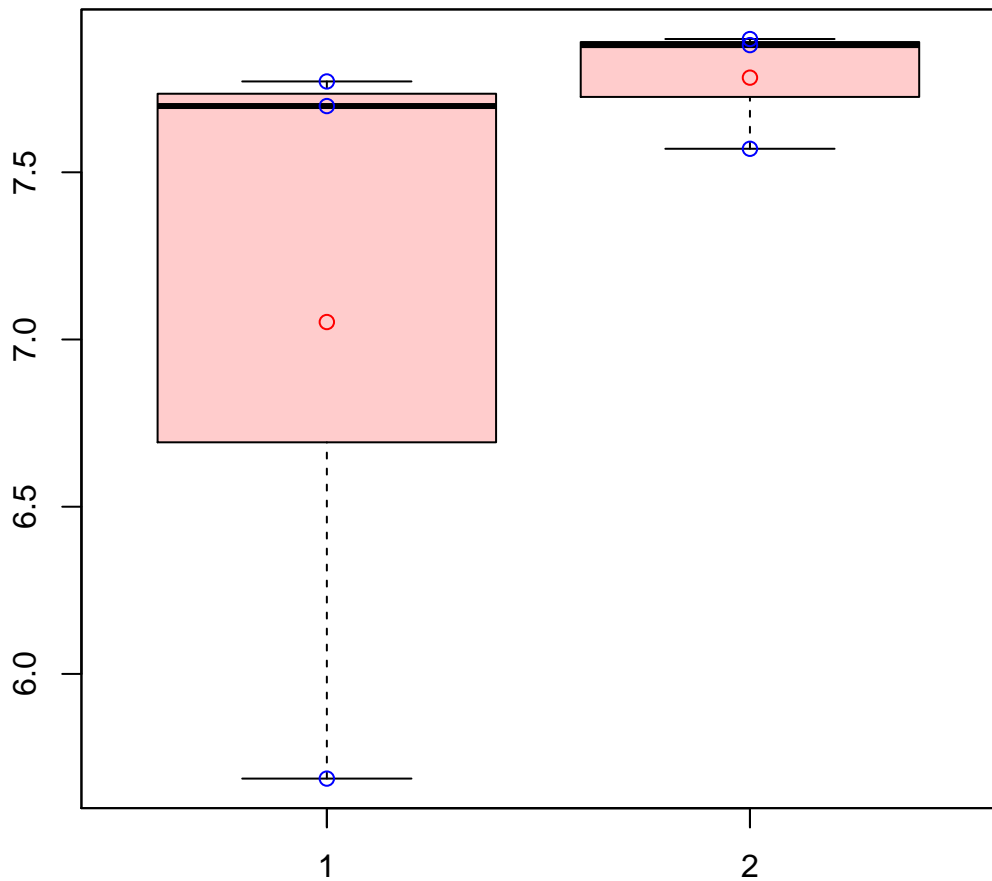

t-Test: p-value = 0.4

# Q31999|Q31999\_9LILI

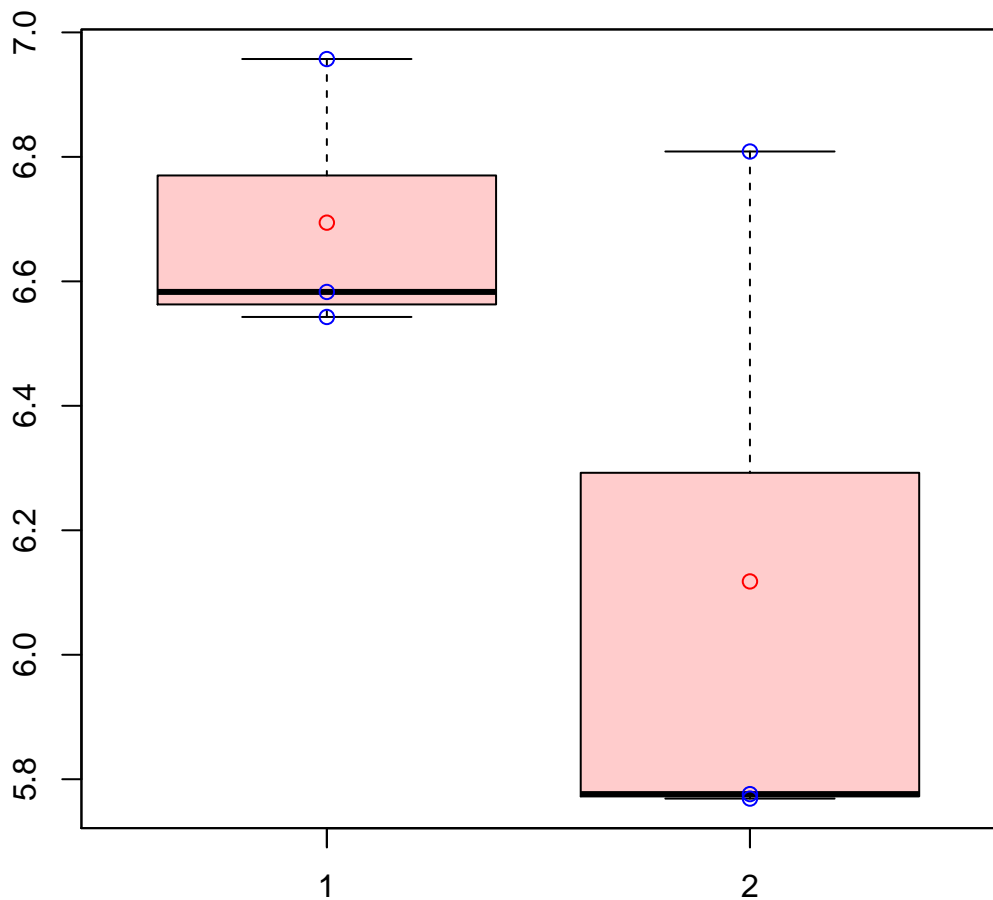

t-Test: p-value = 0.23



# Q337E9|Q337E9\_ORYSJ

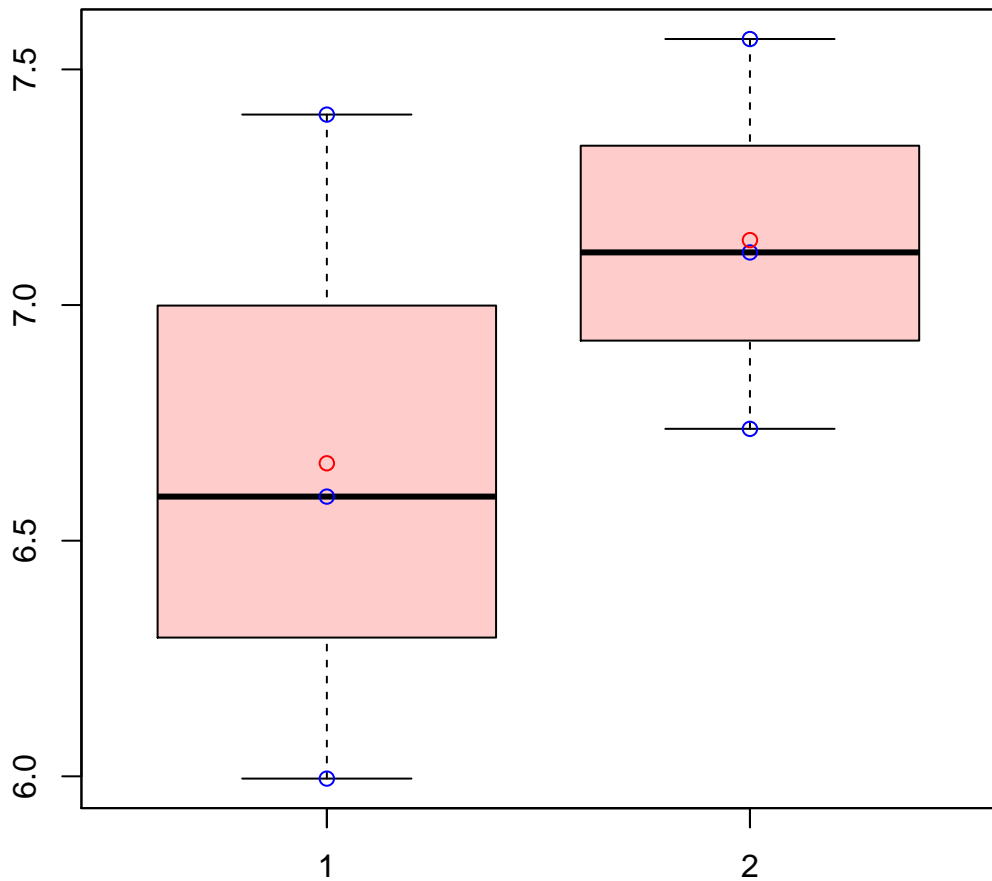

t-Test: p-value = 0.39

# Q33AJ4|Q33AJ4\_ORYSJ

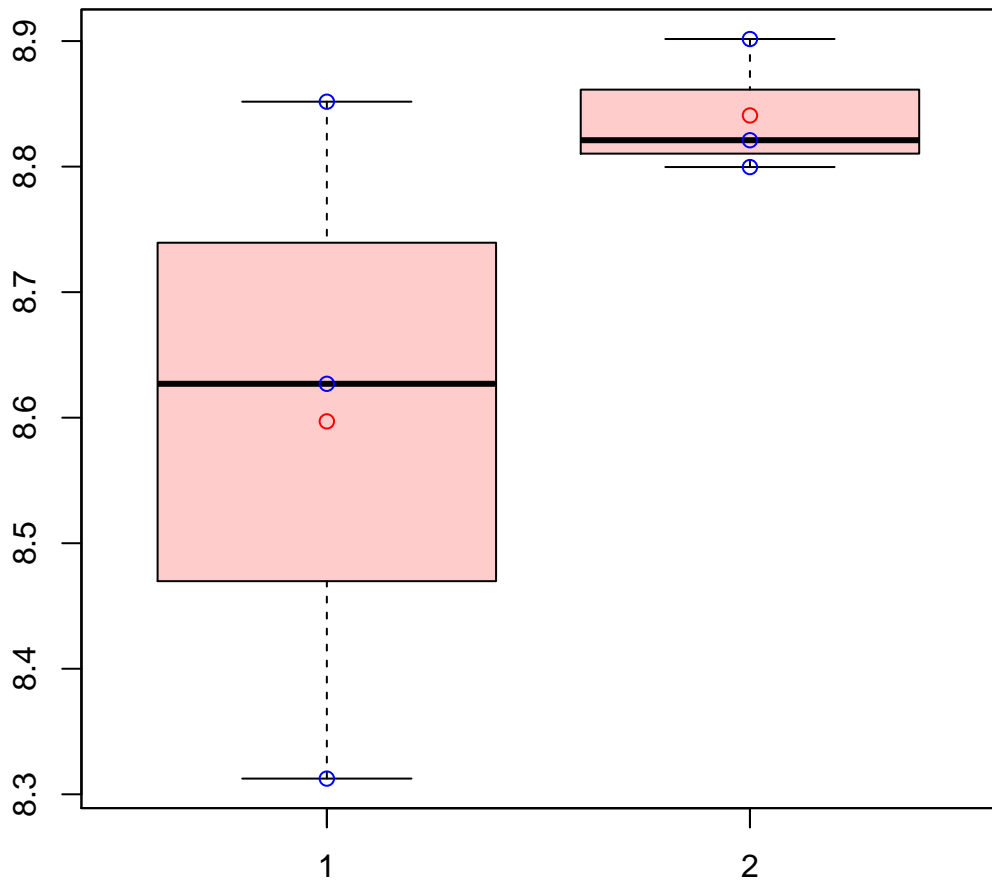

t-Test: p-value = 0.26

# Q37176|Q37176\_9ASPA

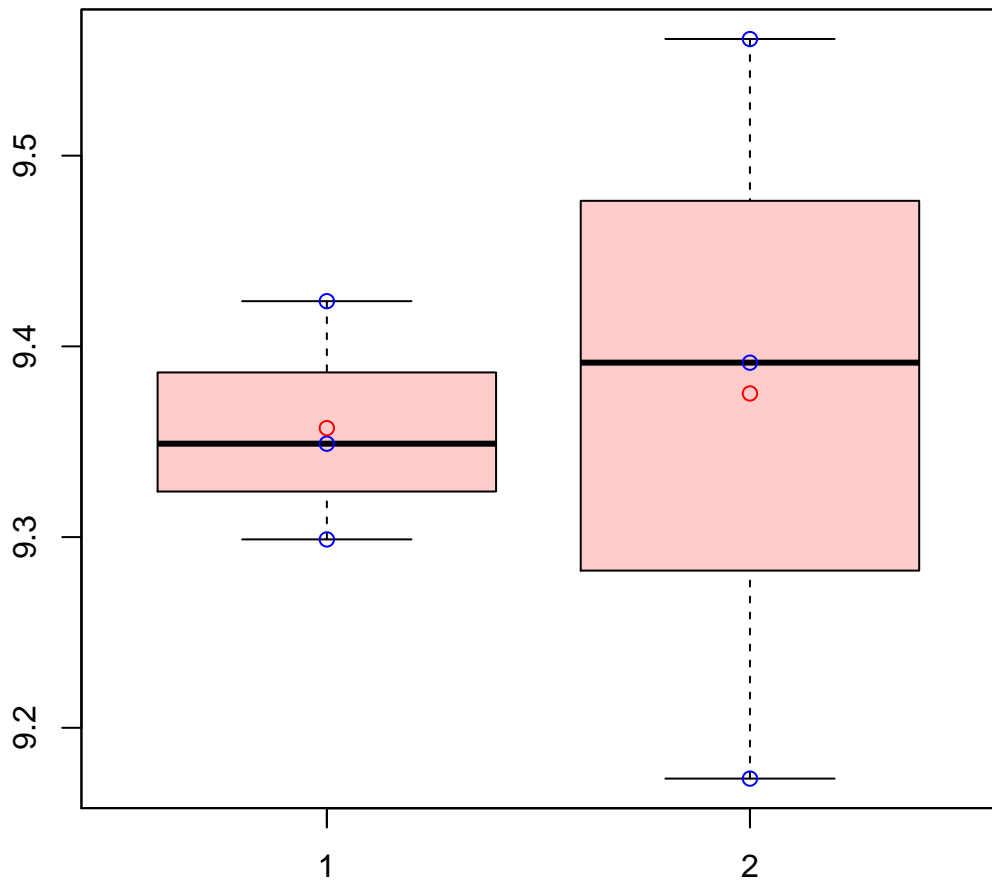

t-Test: p-value = 0.89

# Q38684|Q38684\_ALLCE

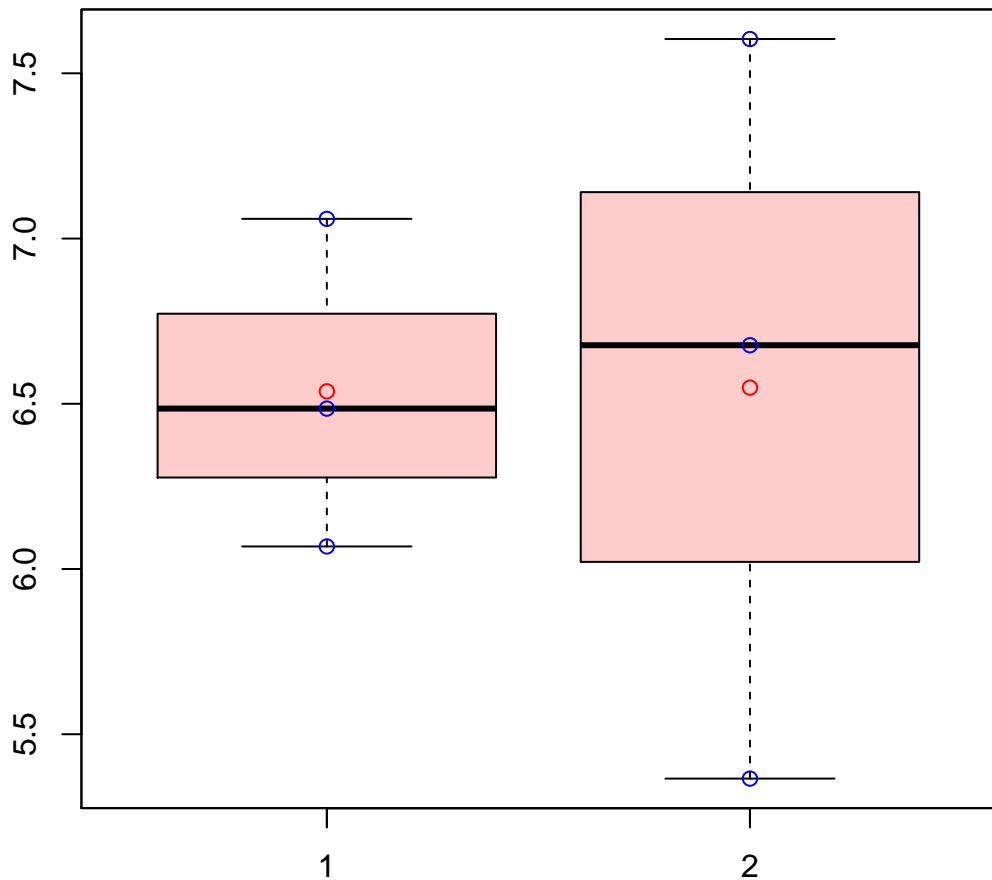

t-Test: p-value = 0.99

# Q38JE6|Q38JE6\_SORBI

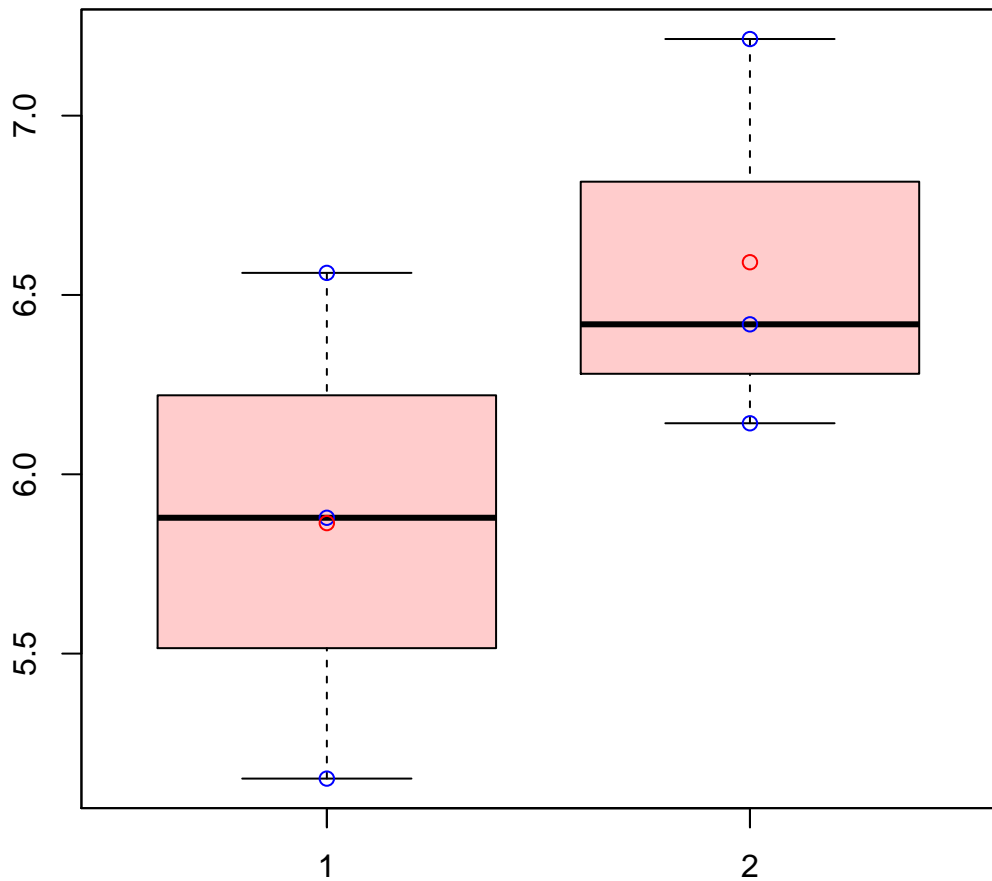

t-Test: p-value = 0.24

# Q3S2H9|Q3S2H9\_WHEAT

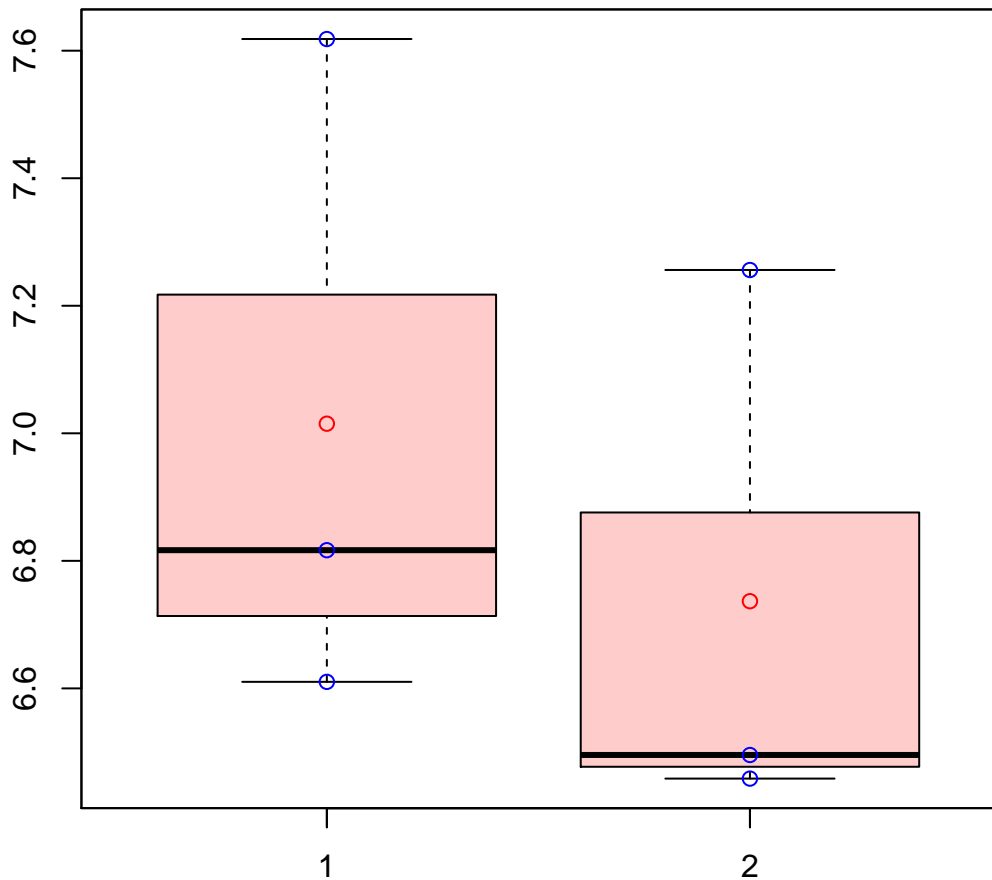

t-Test: p-value = 0.53

# Q3S861|Q3S861\_WHEAT

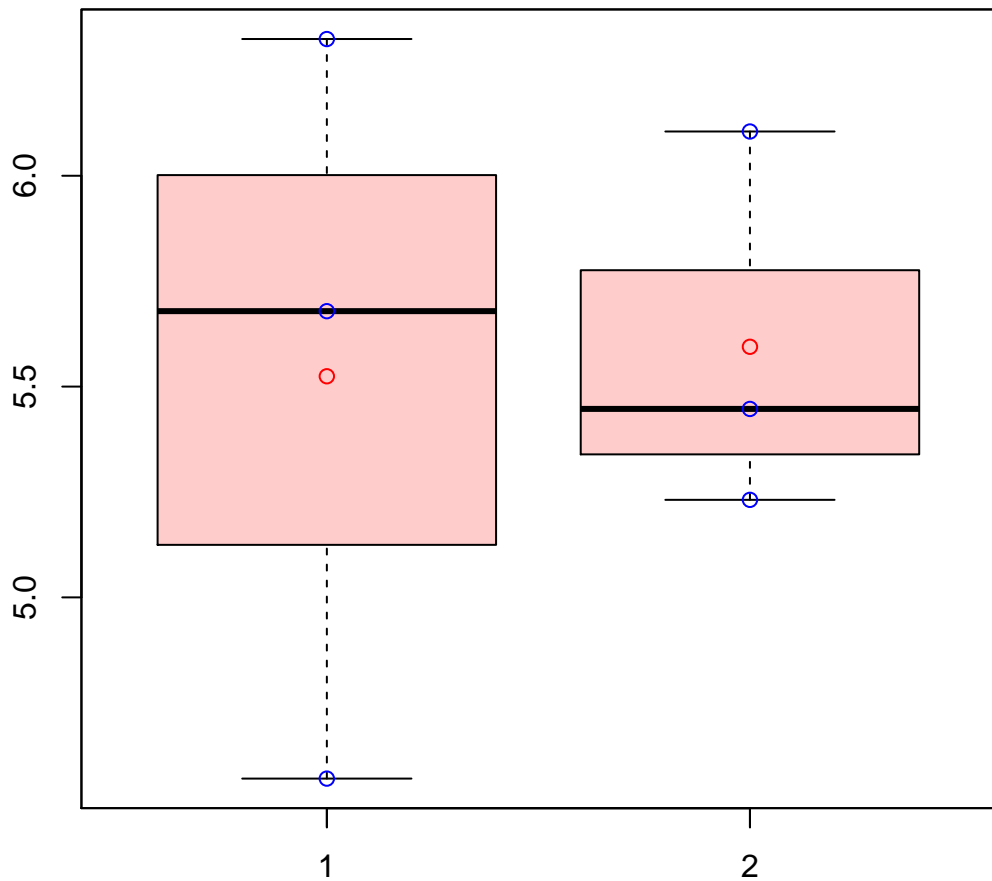

t-Test: p-value = 0.91

# Q3SAW0|Q3SAW0\_COCNU

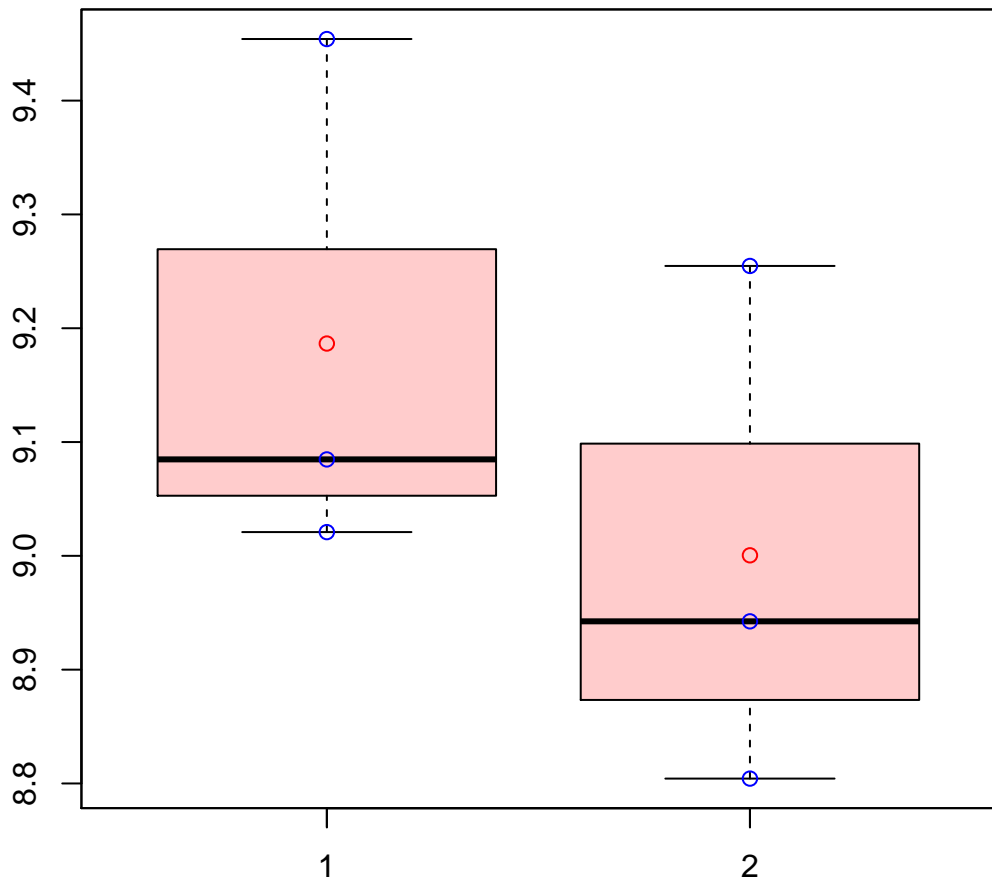

t-Test: p-value = 0.38



# Q3ZPP0|Q3ZPP0\_9ASPA

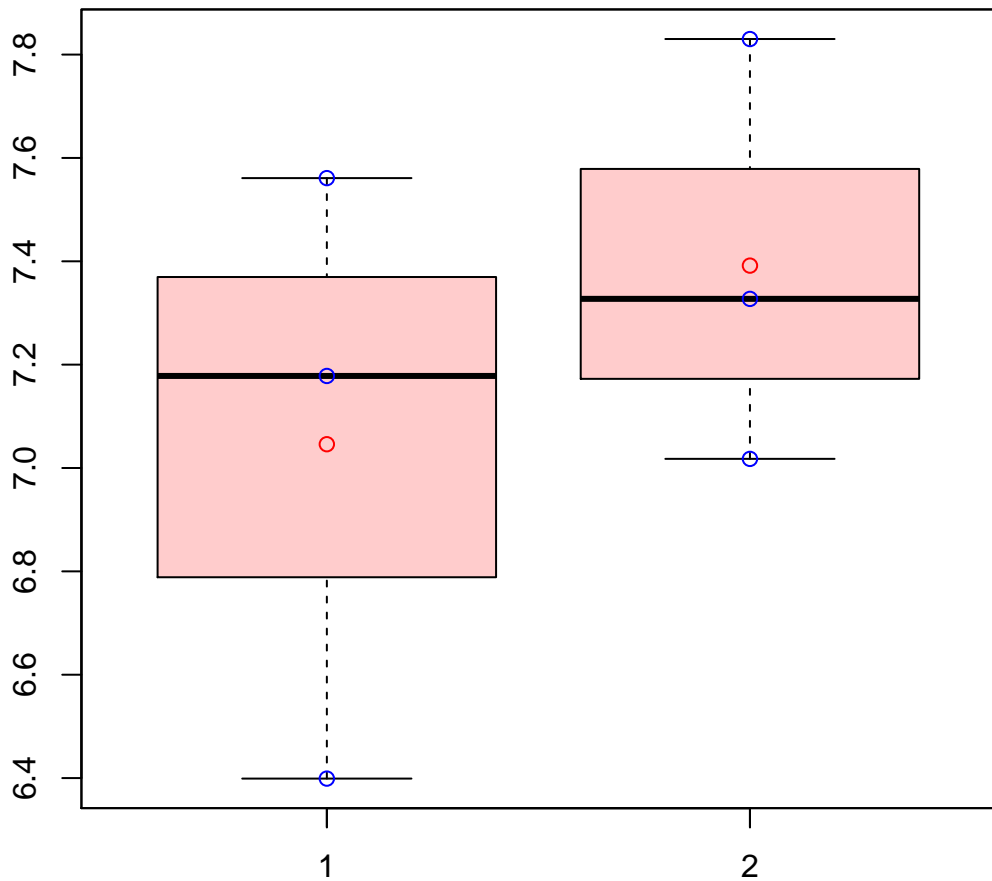

t-Test: p-value = 0.46

# Q40252|Q40252\_LOLTE

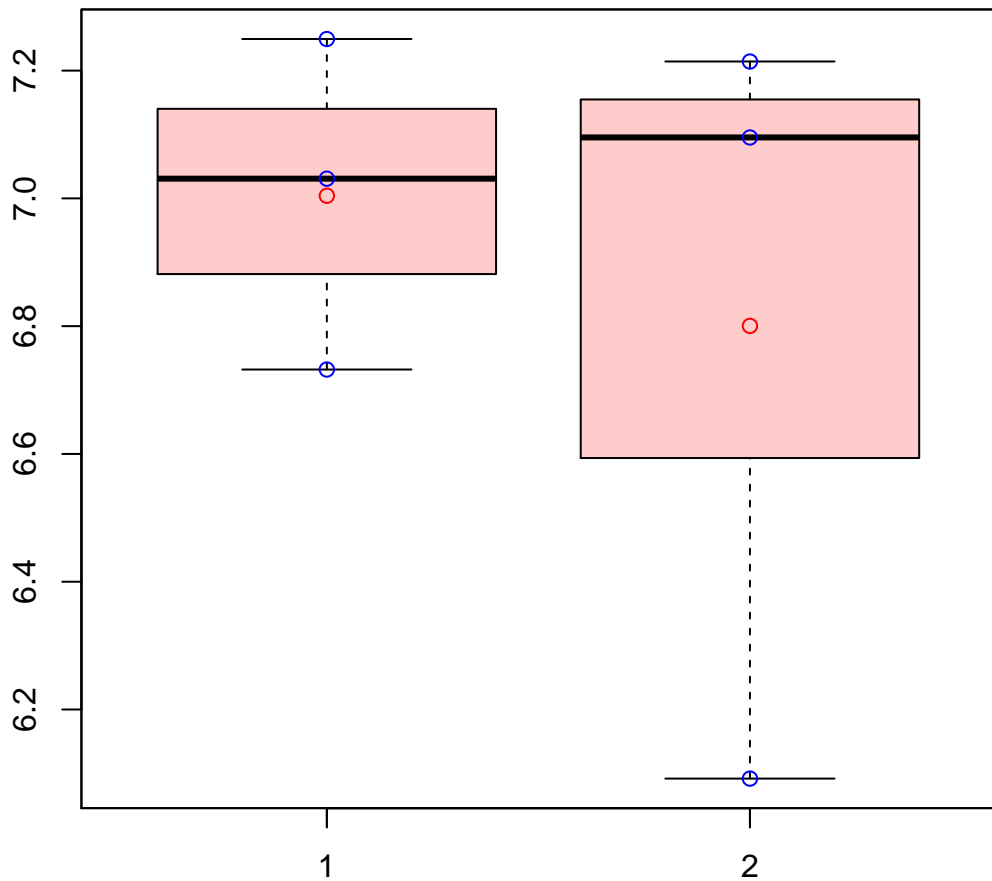

t-Test: p-value = 0.64

# Q40693|Q40693\_ORYSA

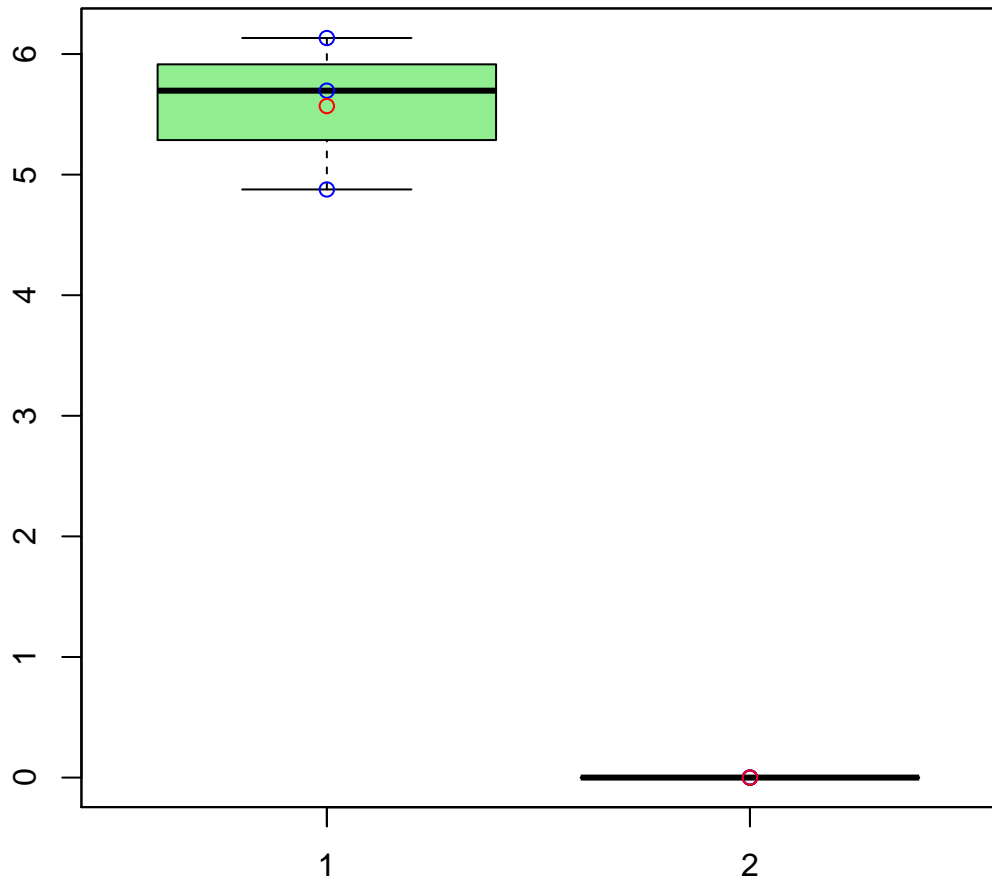

t-Test: p-value = 0

# Q40709|Q40709\_ORYSJ

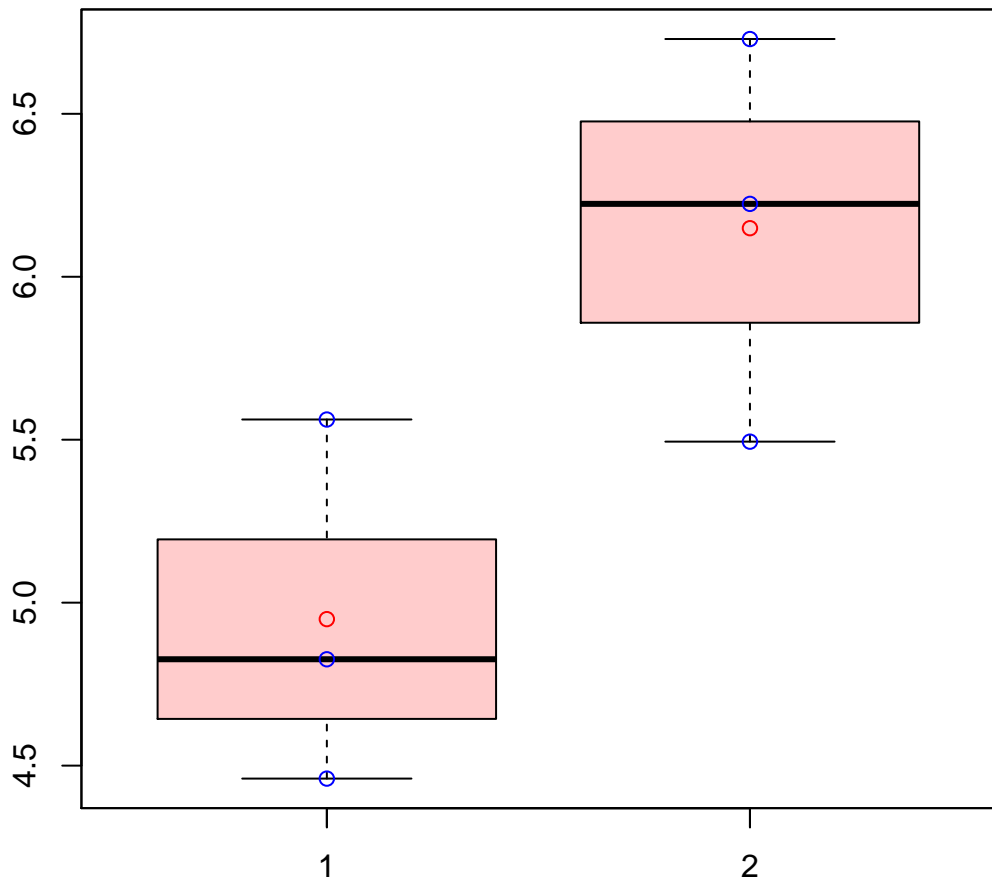

t-Test: p-value = 0.07

# Q40785|Q40785\_CENCI

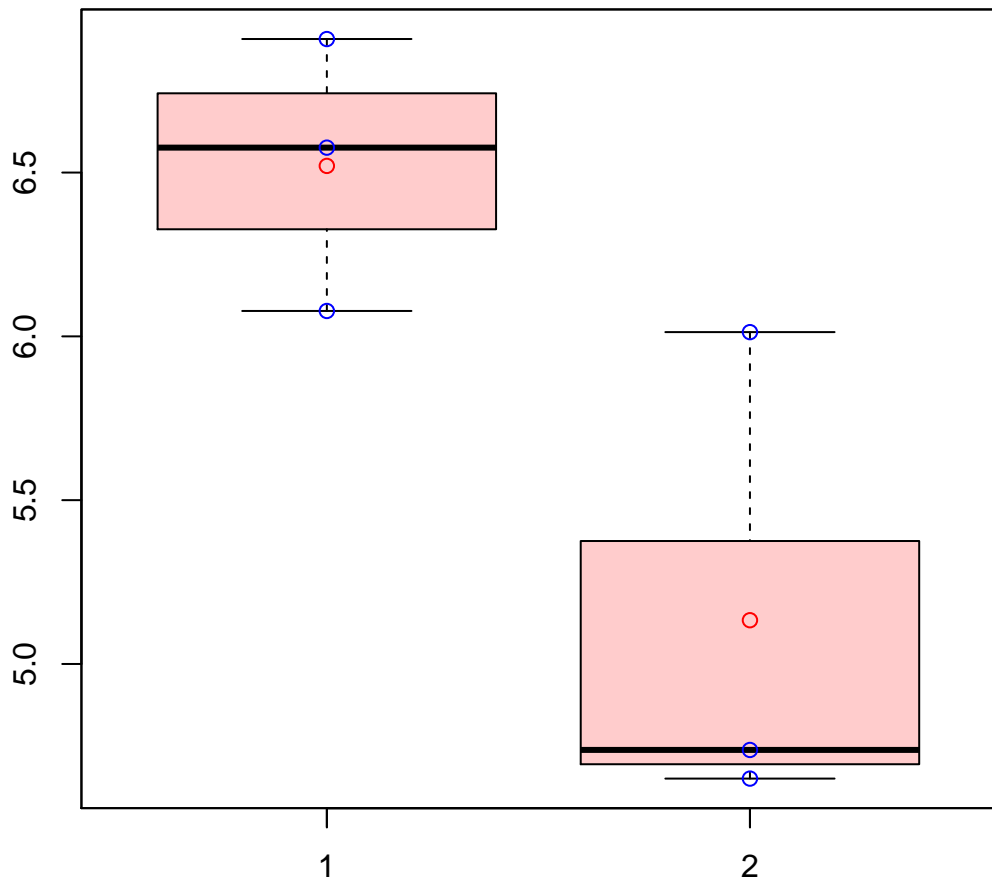

t-Test: p-value = 0.07

# Q41511|Q41511\_WHEAT

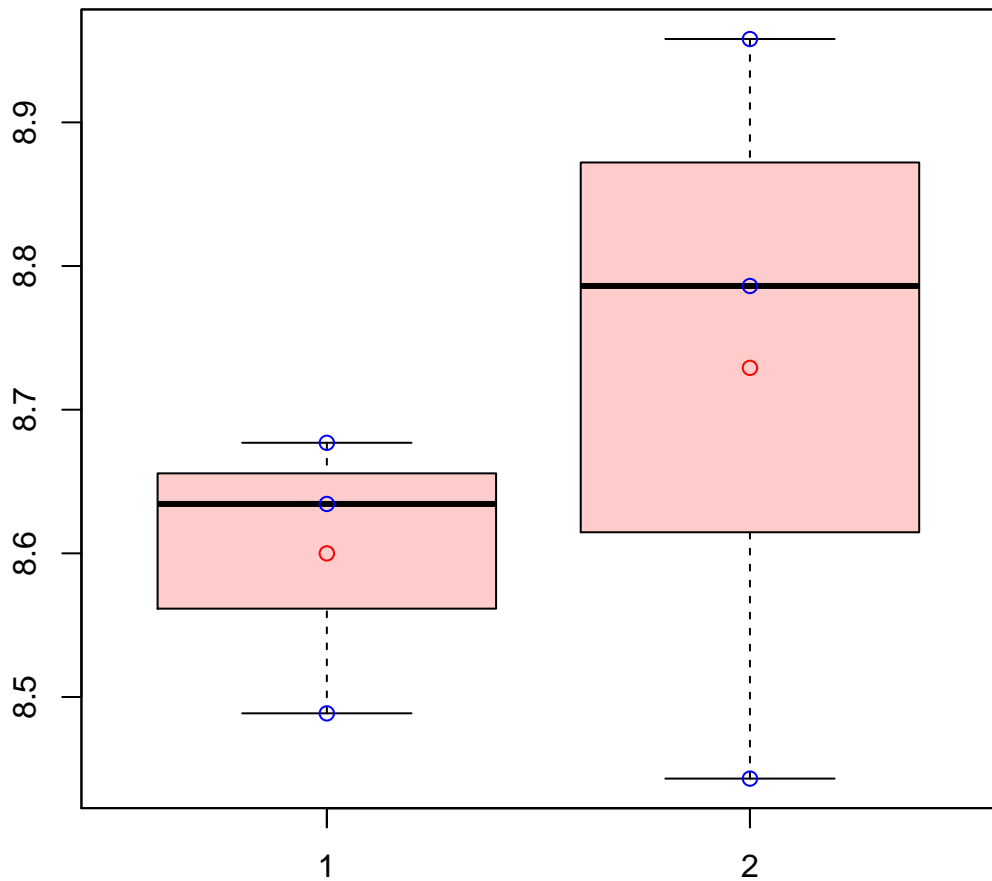

t-Test: p-value = 0.49

# Q41729|Q41729\_MAIZE

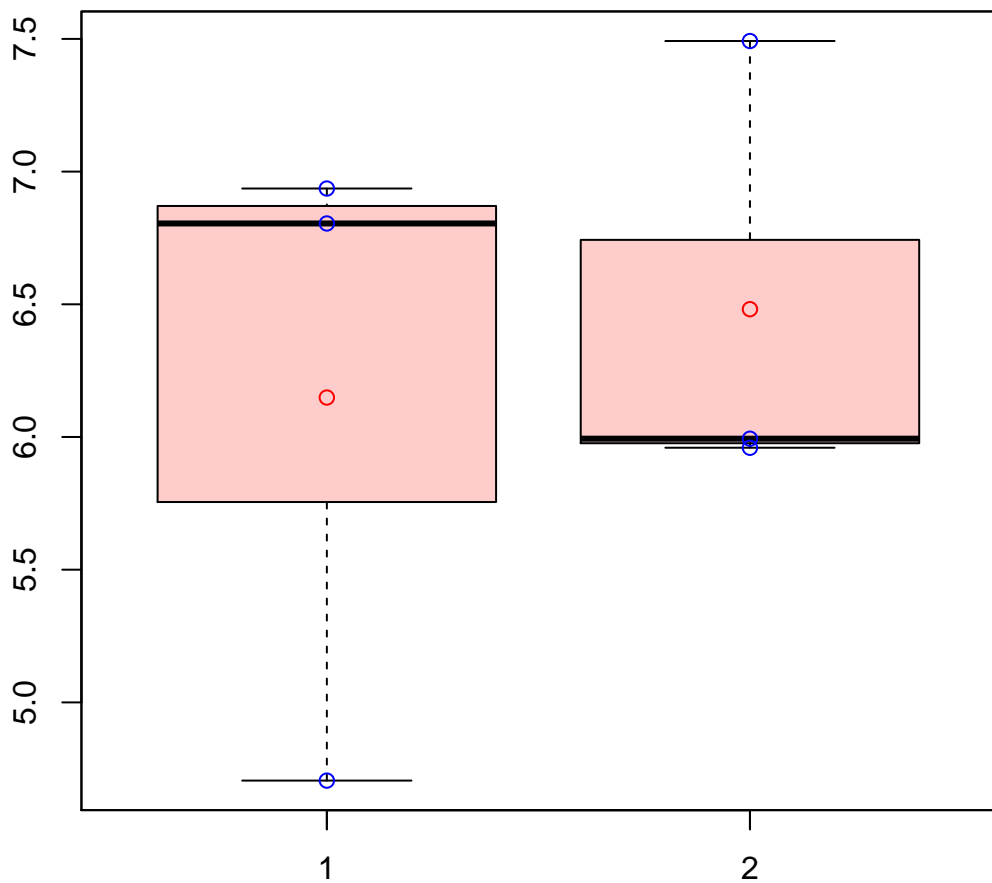

t-Test: p-value = 0.73

# Q41786|Q41786\_MAIZE

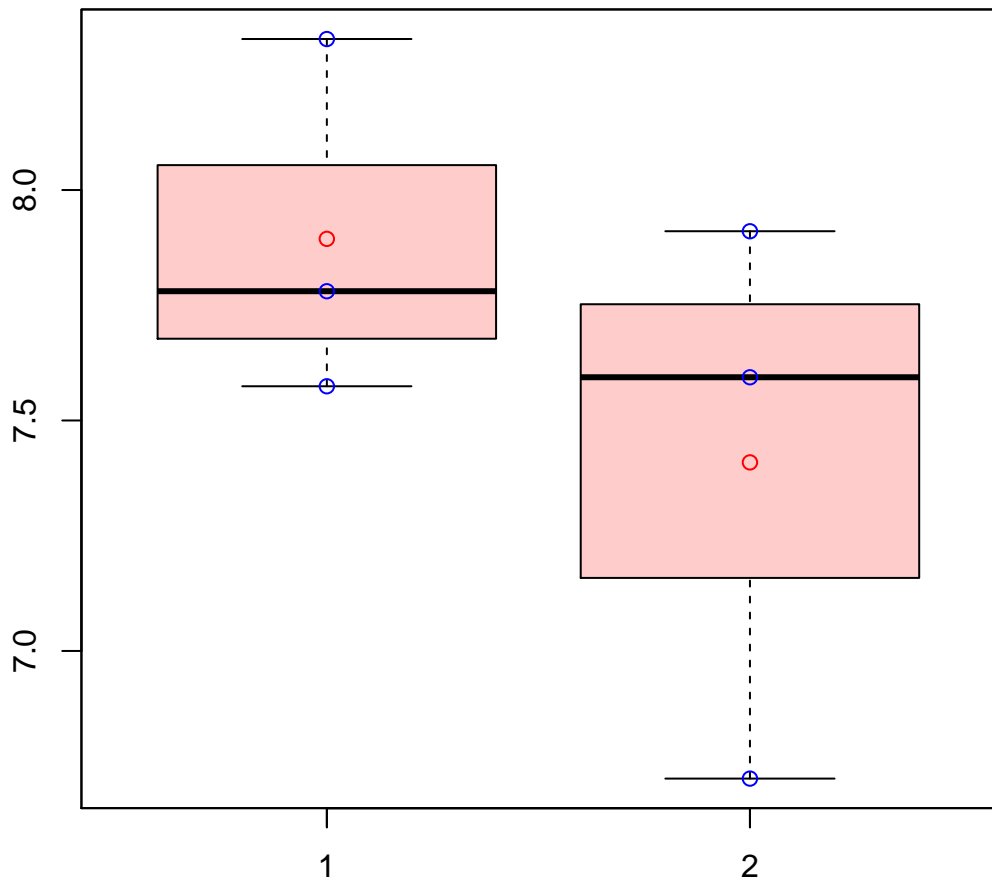

t-Test: p-value = 0.32



# Q41798|Q41798\_MAIZE

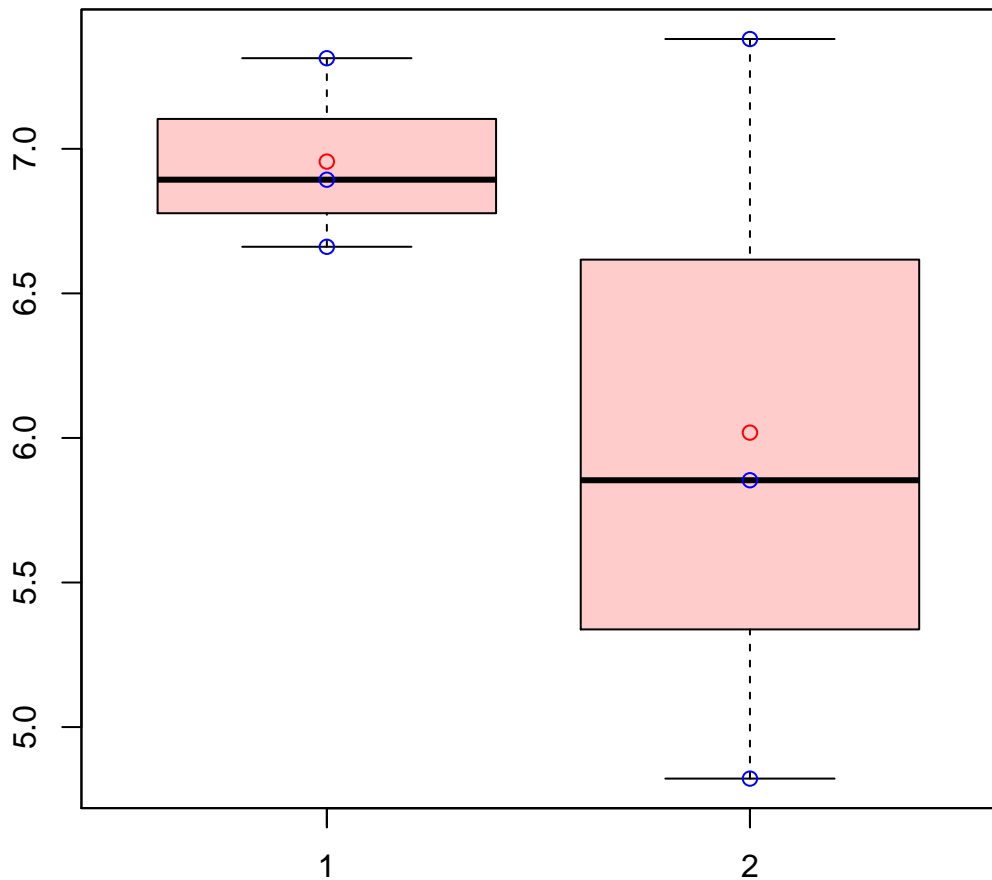

t-Test: p-value = 0.33

# Q42391|Q42391\_PANMI

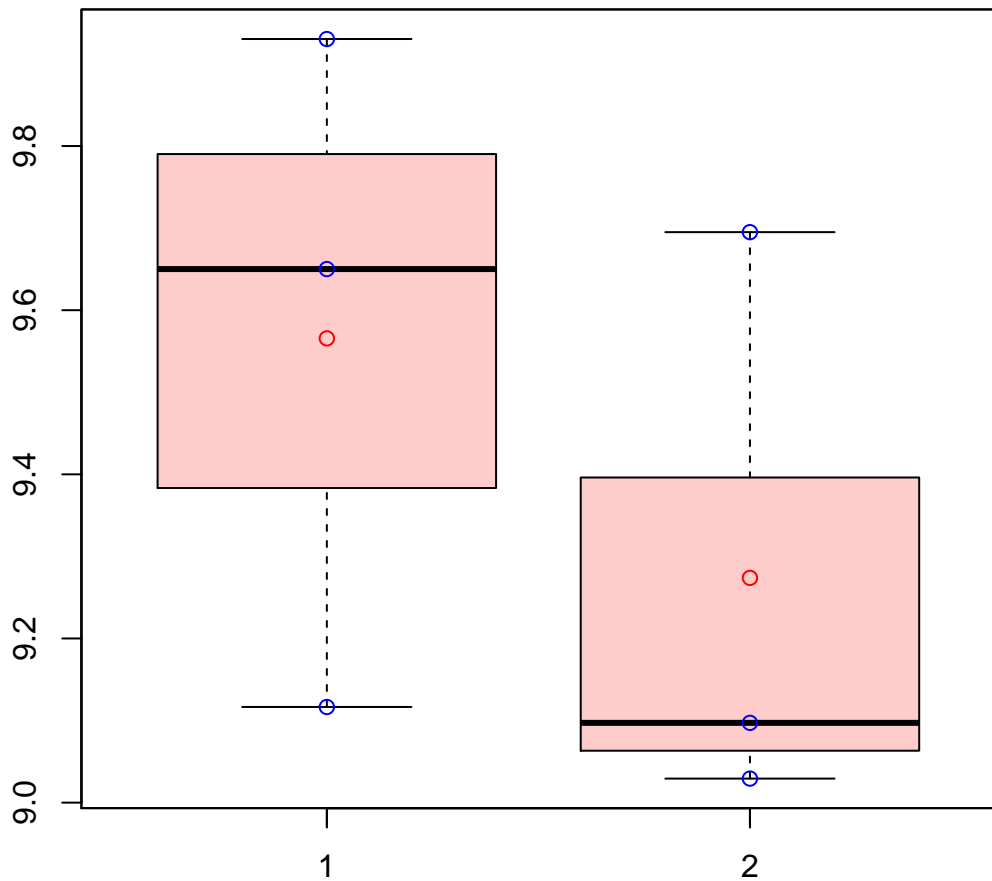

t-Test: p-value = 0.41

# Q43057|Q43057\_PANMI

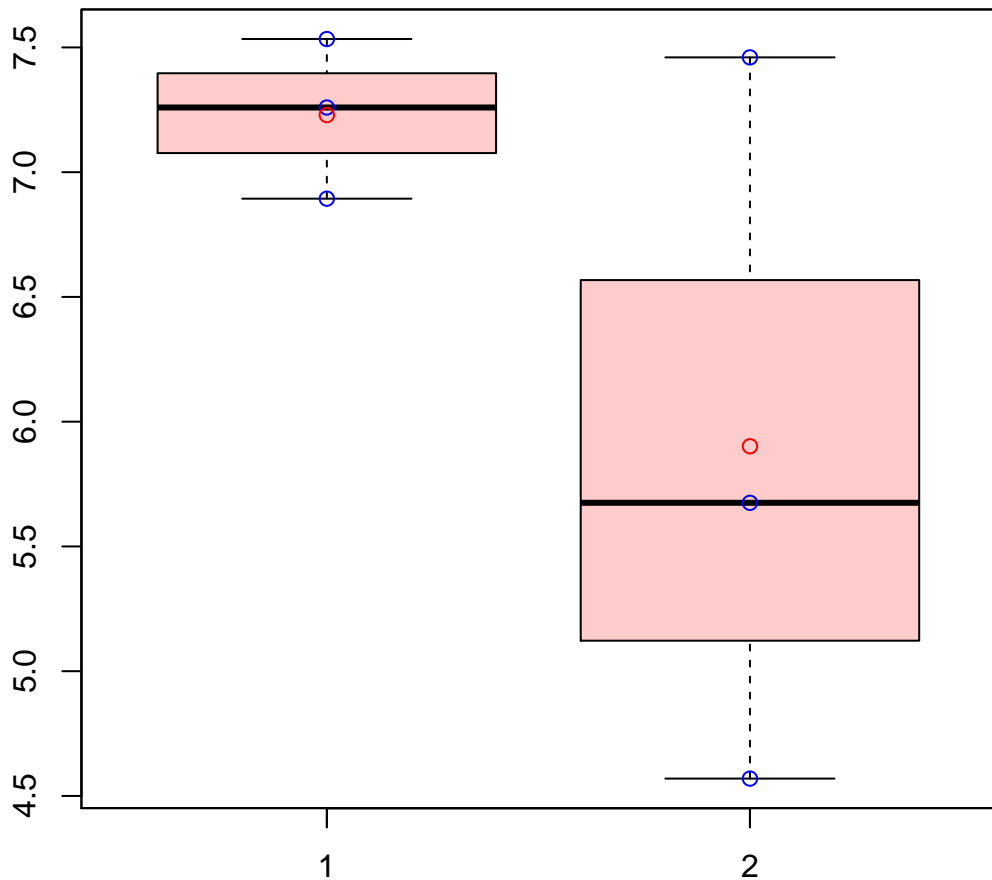

t-Test: p-value = 0.25

# Q43230|Q43230\_UROPA

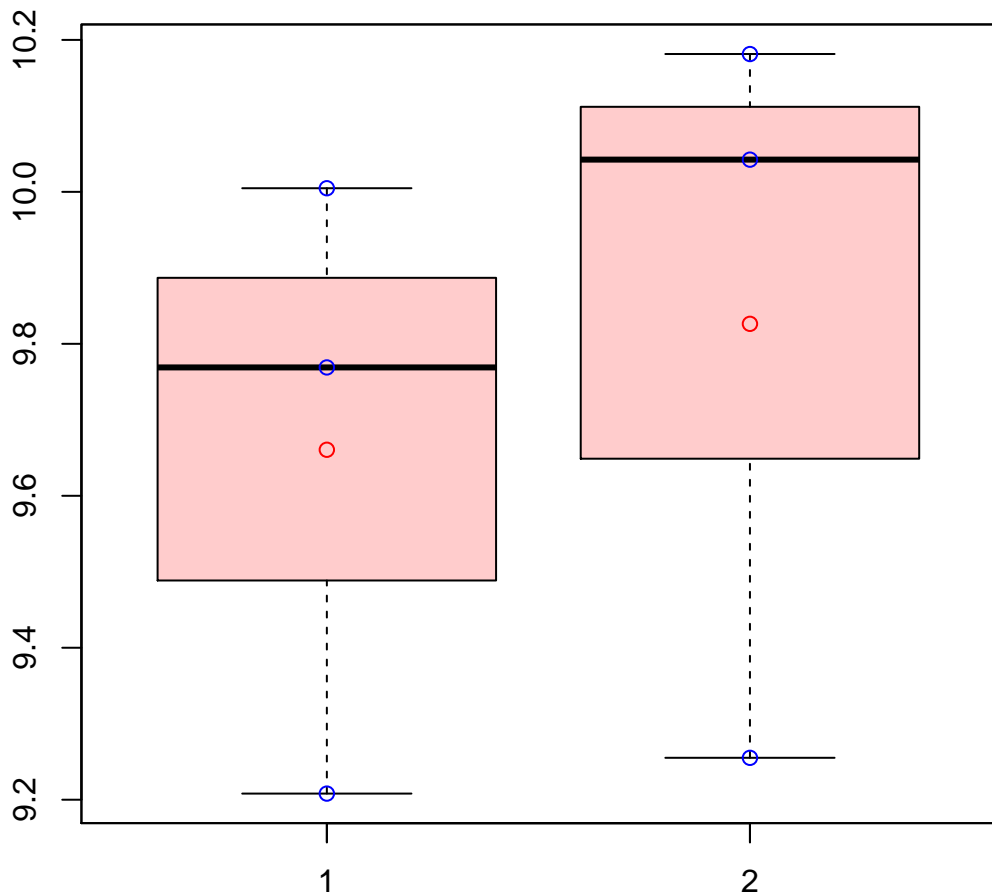

t-Test: p-value = 0.68

# Q43271|Q43271\_MAIZE

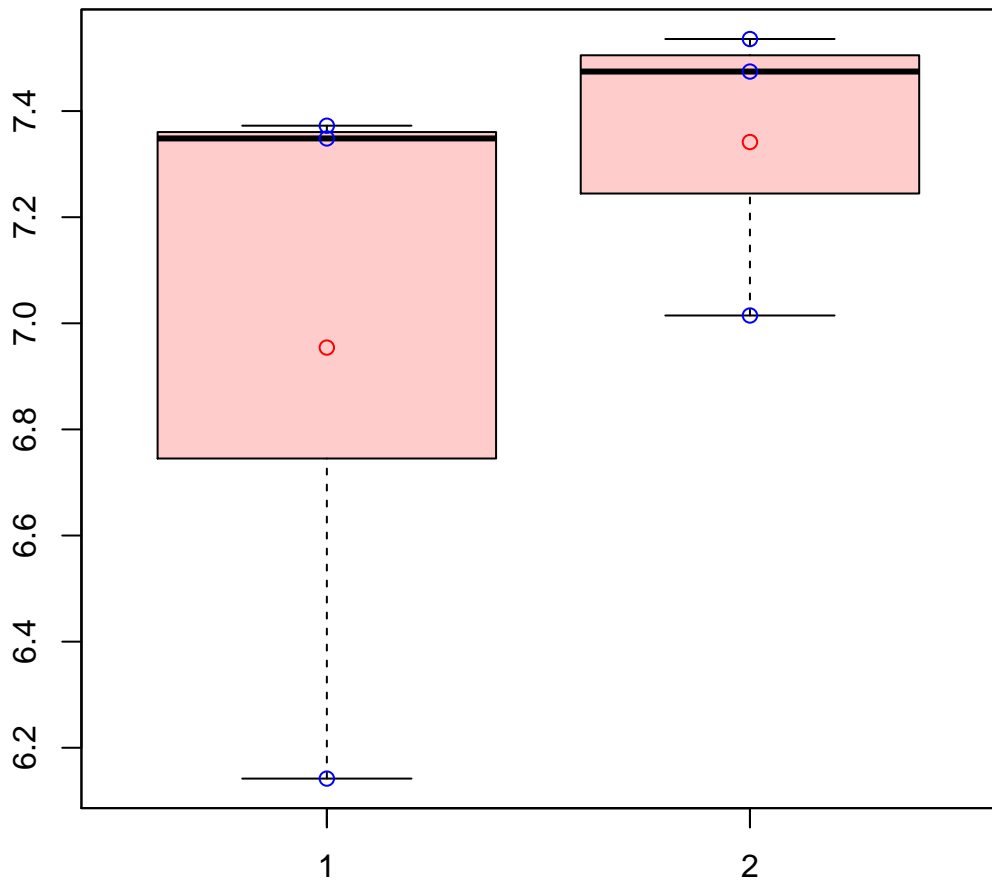

t-Test: p-value = 0.45

# Q43275|Q43275\_ZOSMR

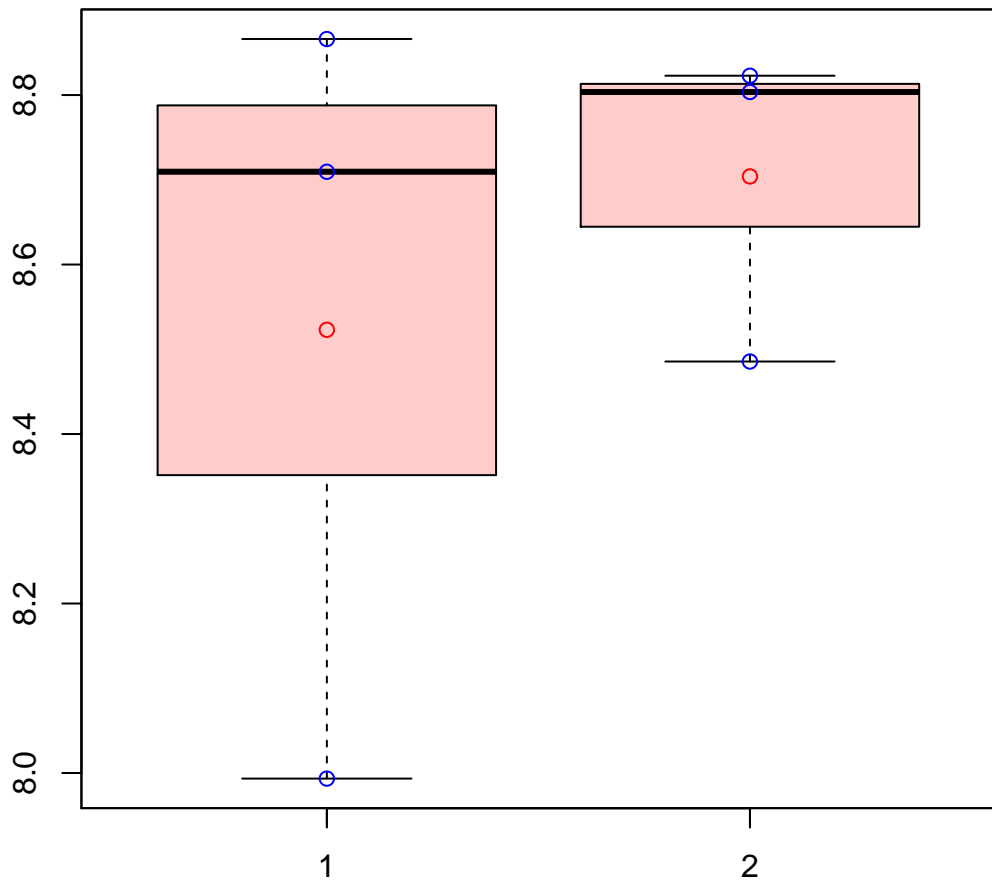

t-Test: p-value = 0.58

# Q43305|Q43305\_PANMI

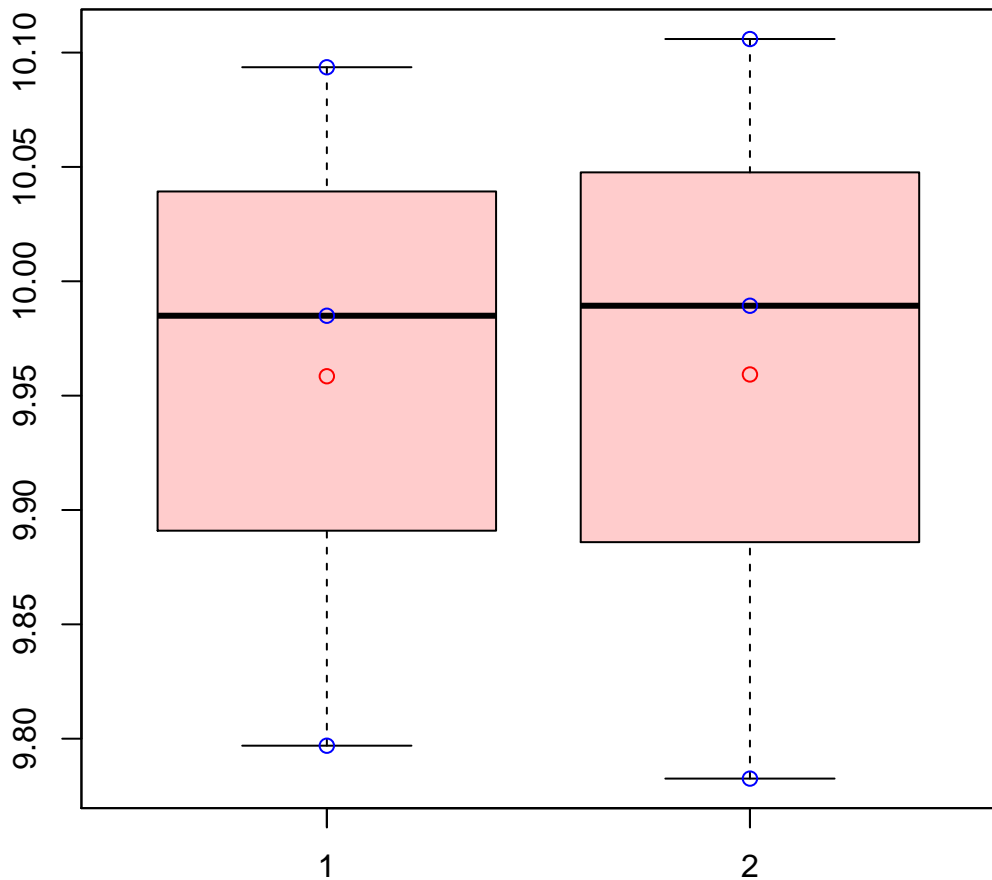

t-Test: p-value = 1

# Q43532|Q43532\_LILLO

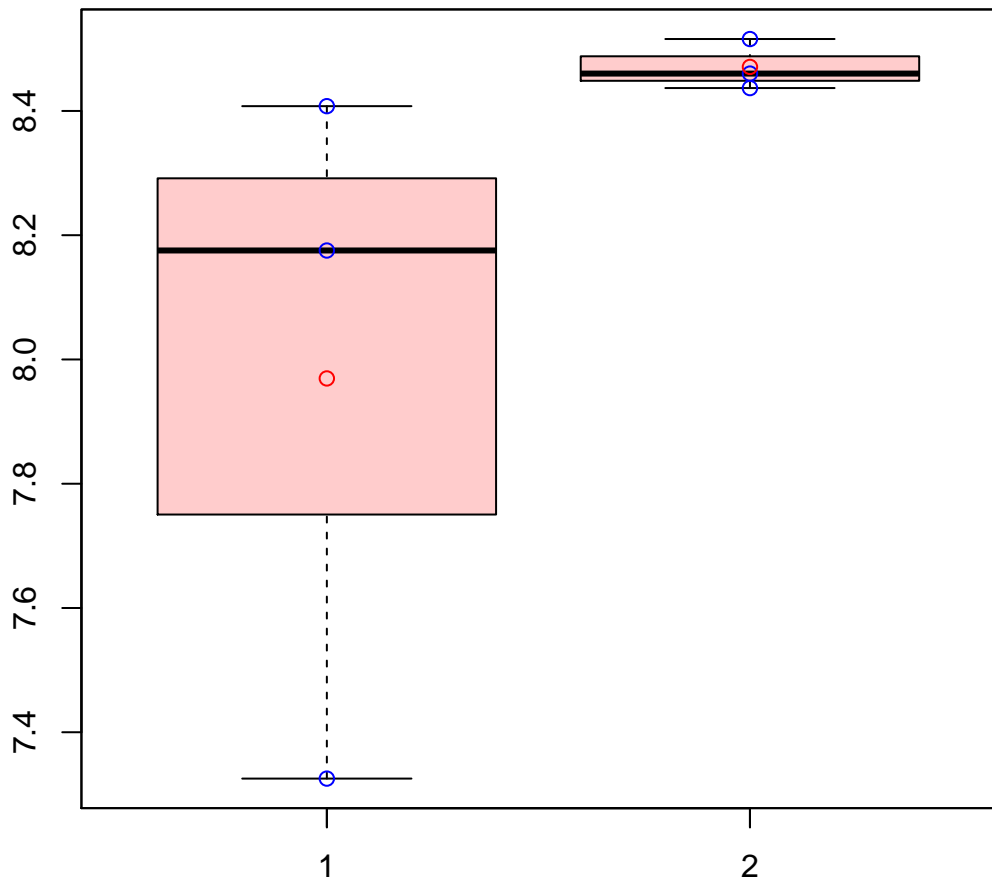

t-Test: p-value = 0.27



# Q43595|Q43595\_ORYSA

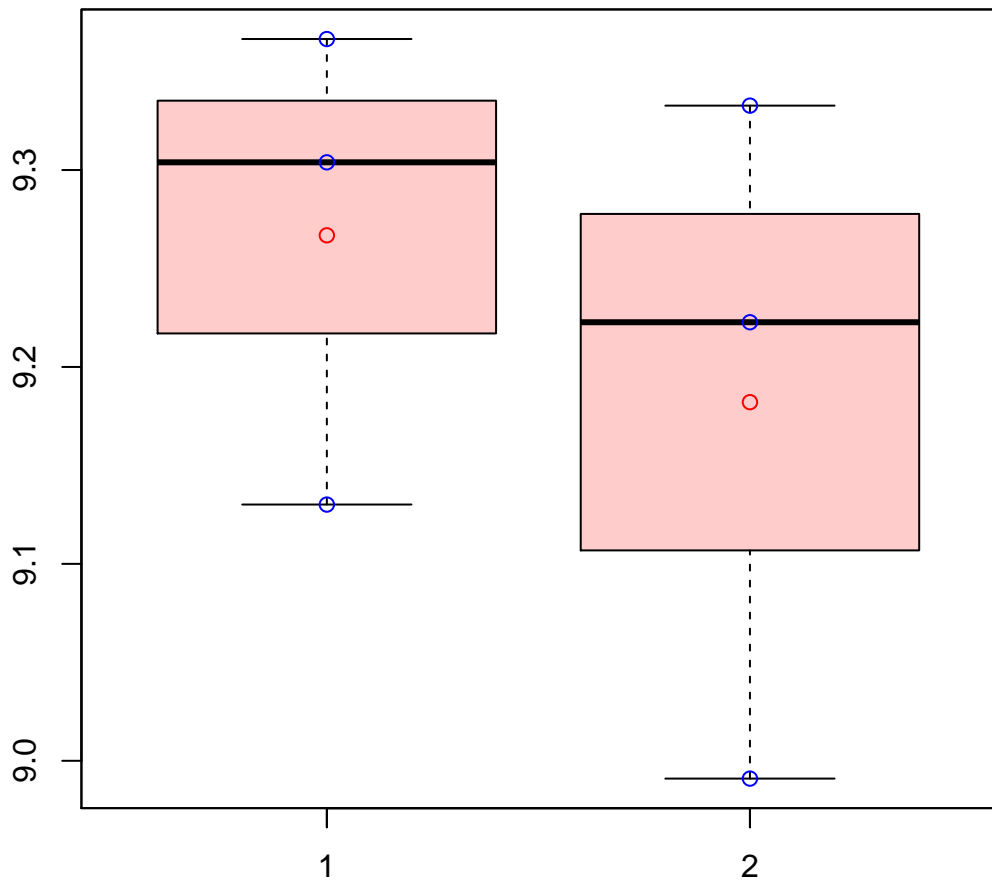

t-Test: p-value = 0.53

# Q49HE4|Q49HE4\_MAIZE

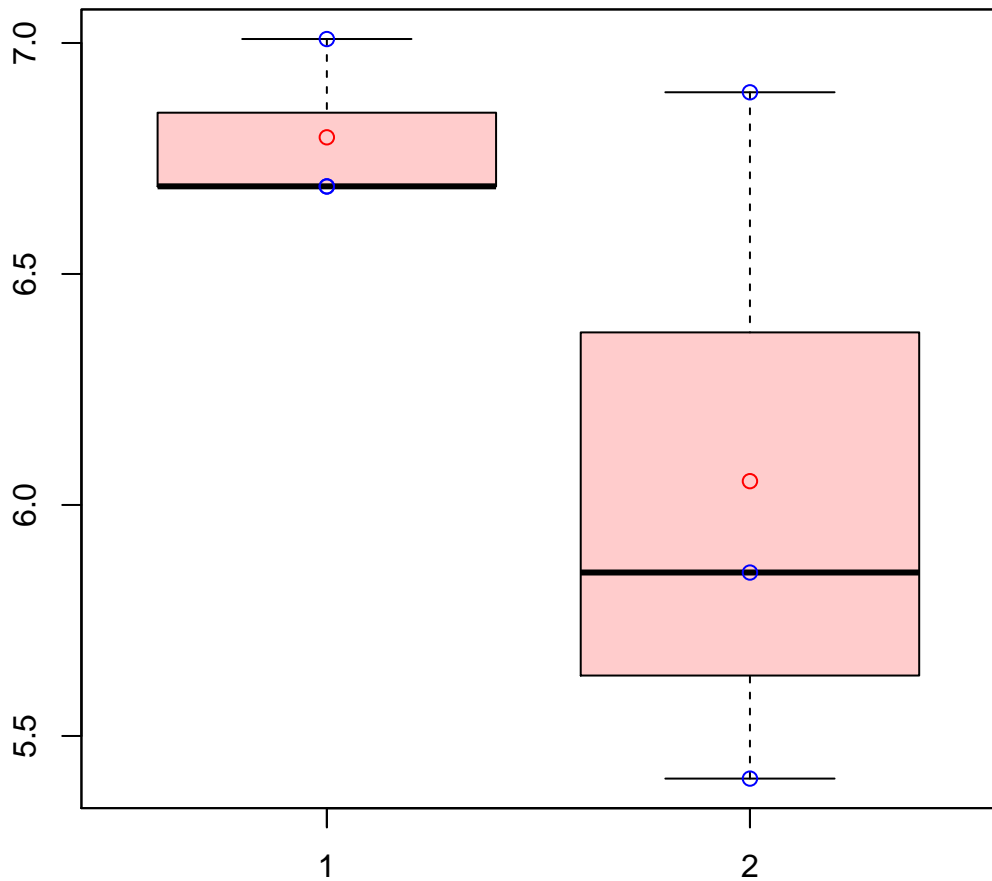

t-Test: p-value = 0.23

# Q4FCW1|Q4FCW1\_SACOF

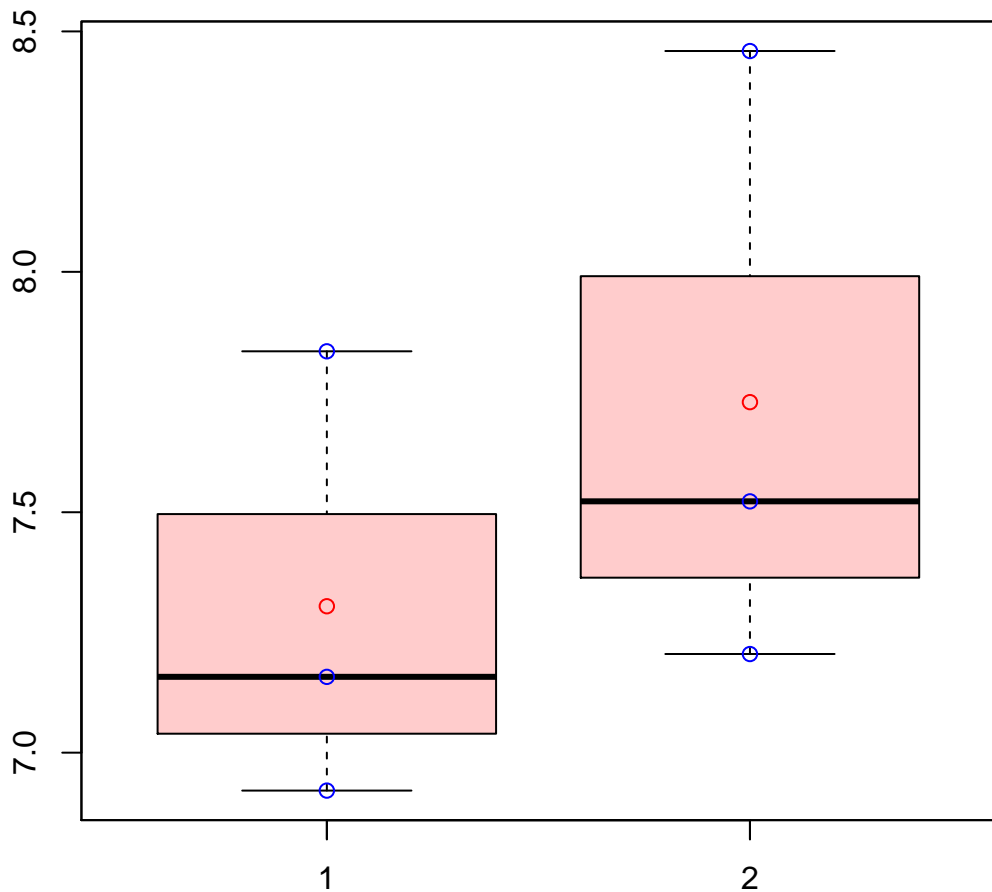

t-Test: p-value = 0.42

# Q4JIY1|Q4JIY1\_ECHCG

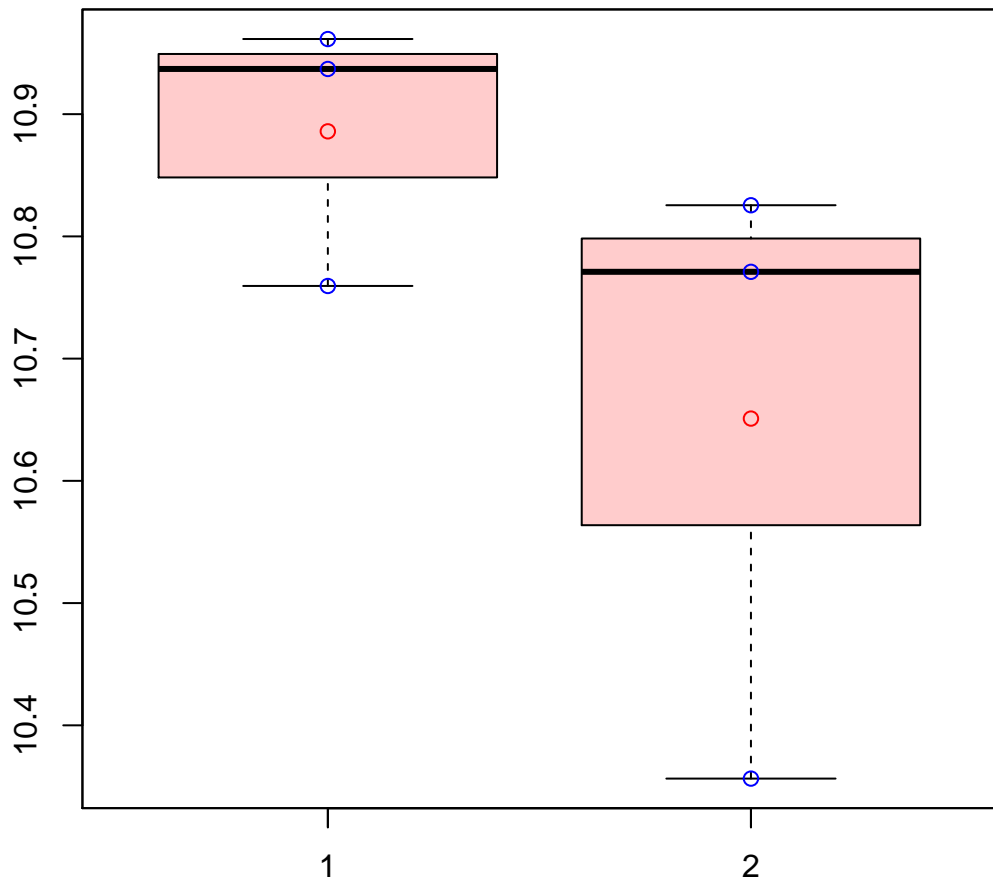

t-Test: p-value = 0.25

# Q4L1B1|Q4L1B1\_HORVU

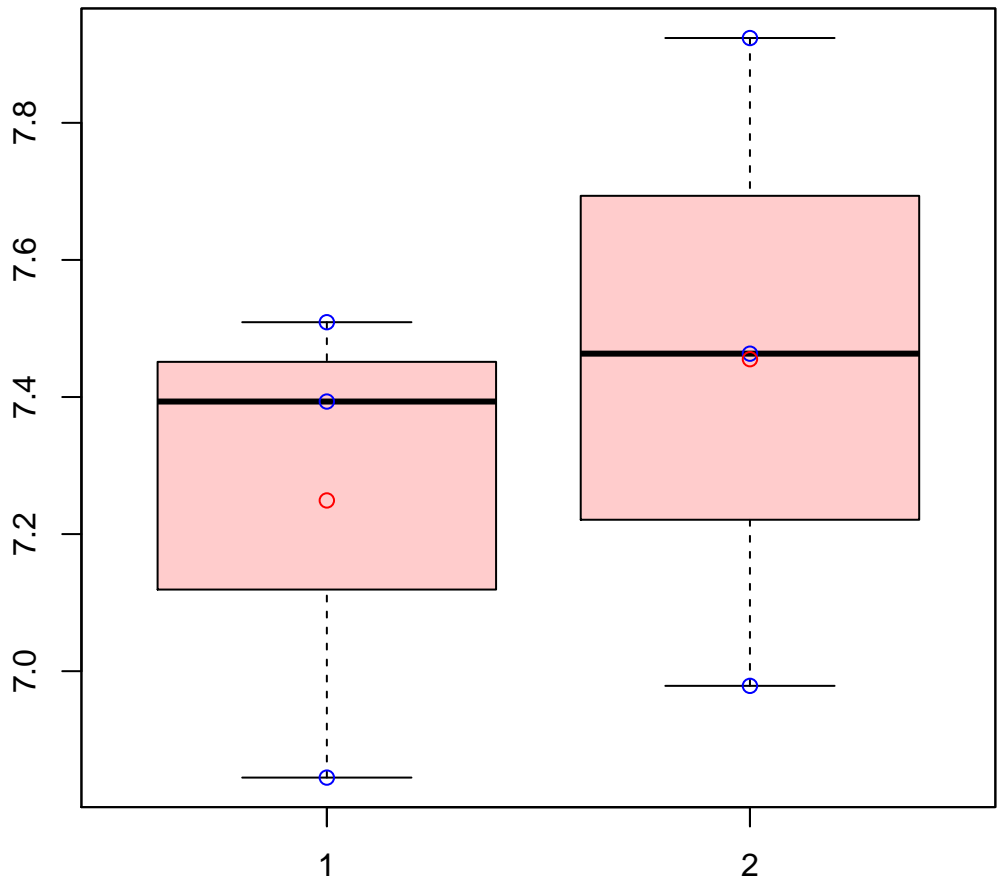

t-Test: p-value = 0.58

# Q4LB12|Q4LB12\_HORVU

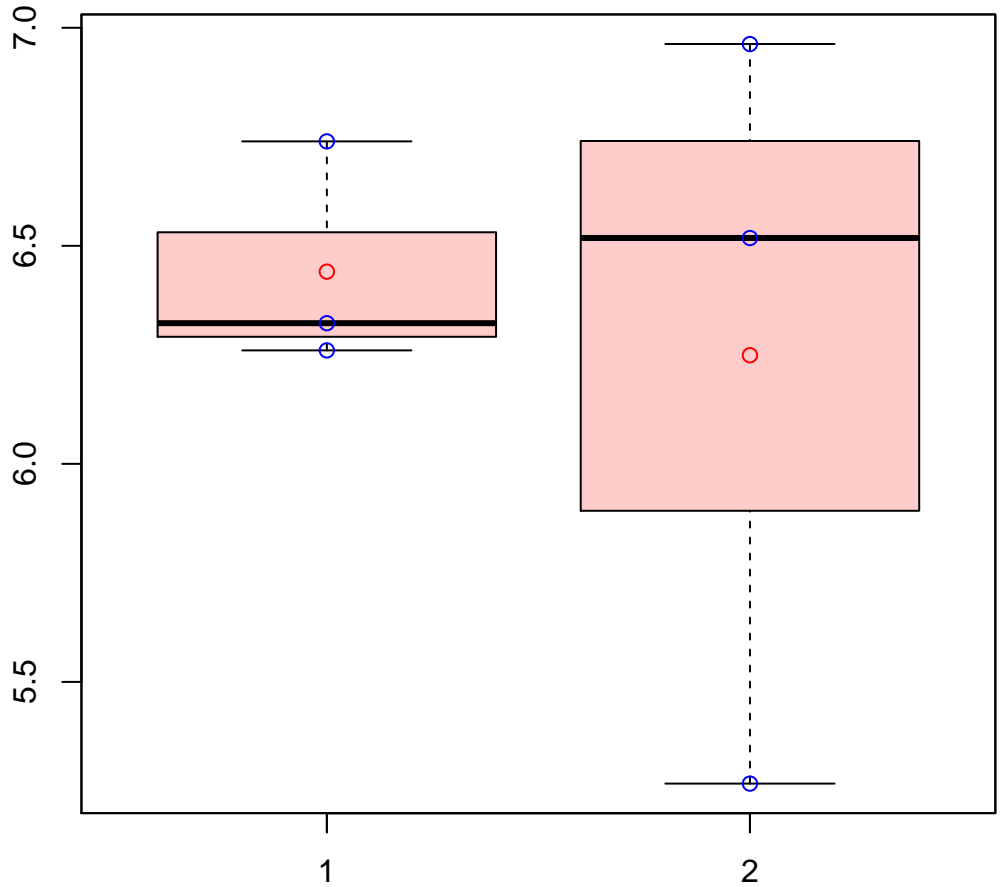

t-Test: p-value = 0.75

# Q4U400|Q4U400\_WHEAT

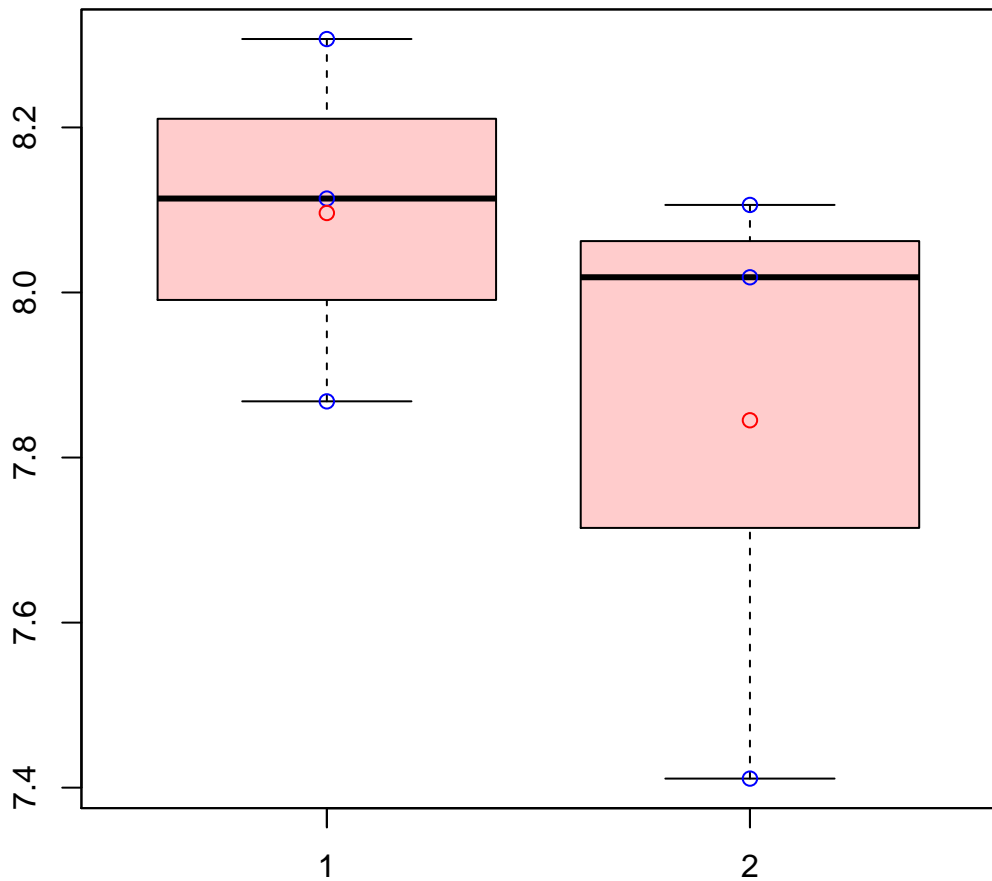

t-Test: p-value = 0.39

# Q50K58|Q50K58\_9ARAE

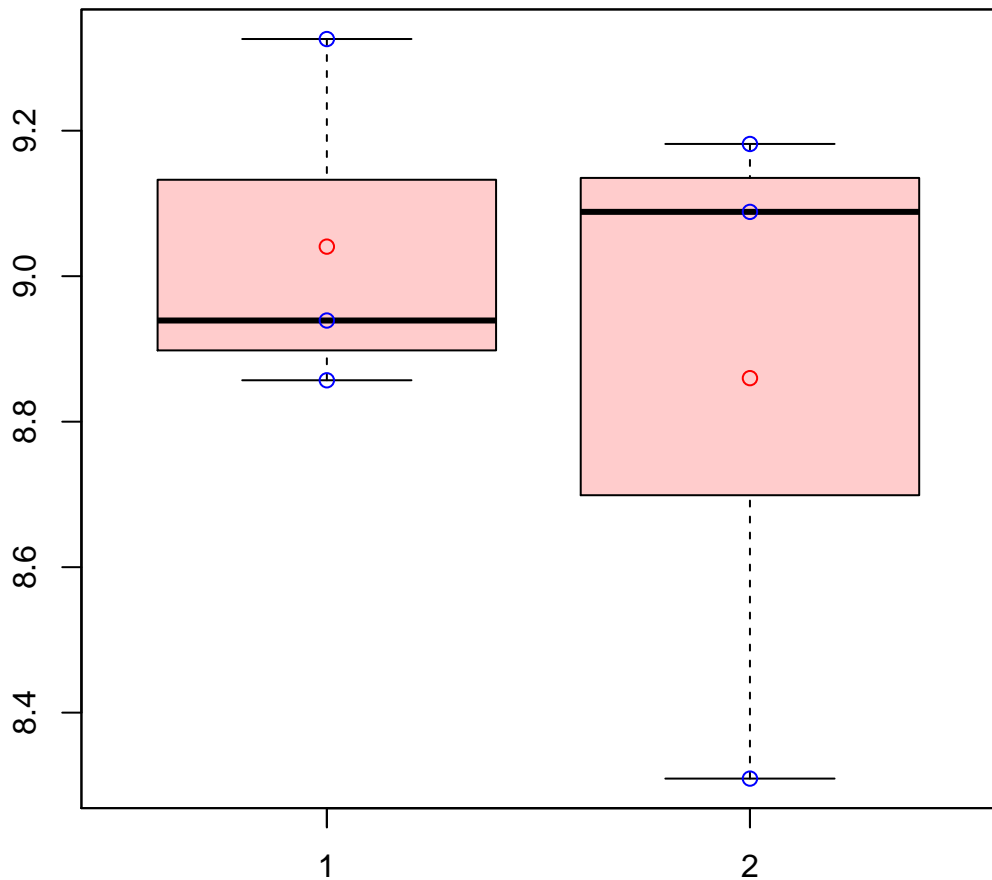

t-Test: p-value = 0.6



# Q52NW0|Q52NW0\_ECHCG

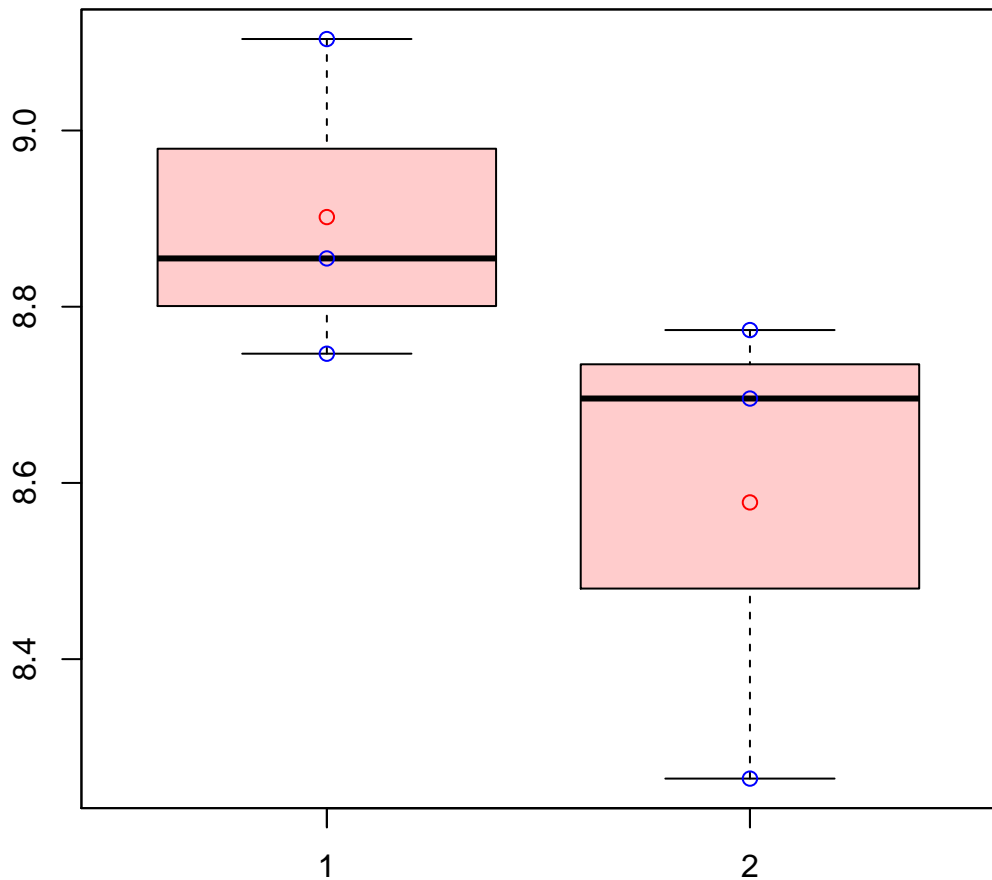

t-Test: p-value = 0.17

# Q53LU9|Q53LU9\_ORYSJ

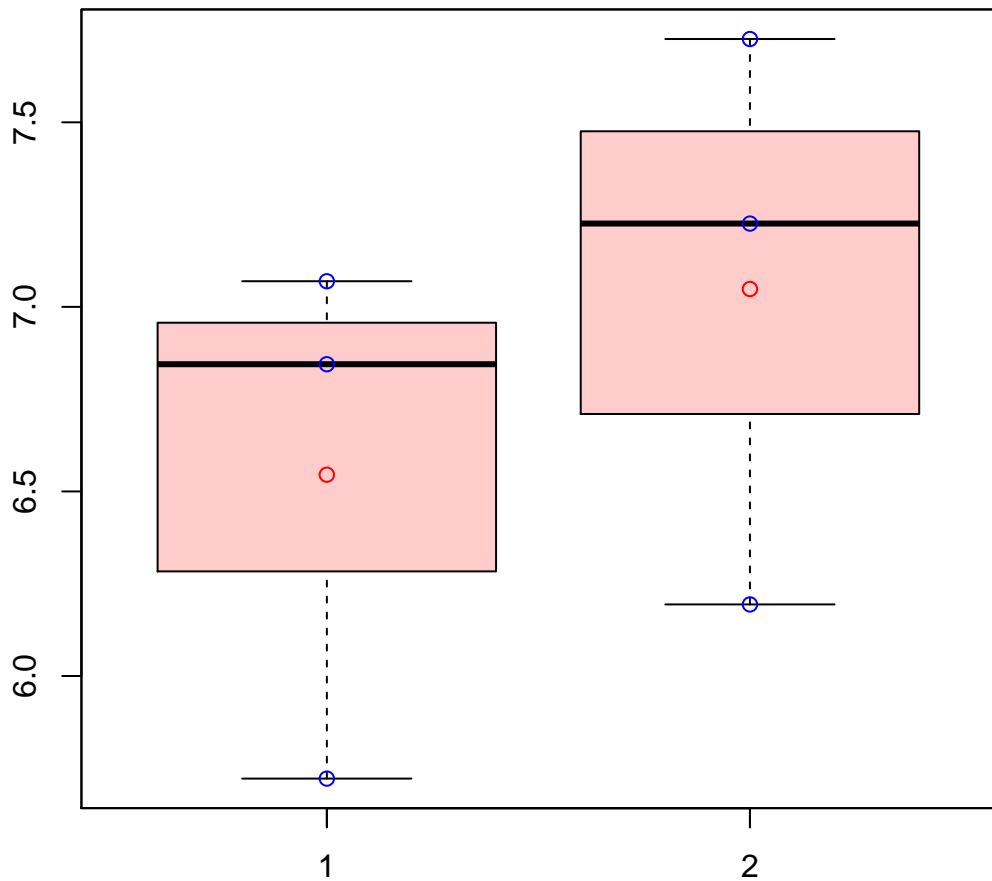

t-Test: p-value = 0.46

# Q53MP1|Q53MP1\_ORYSJ

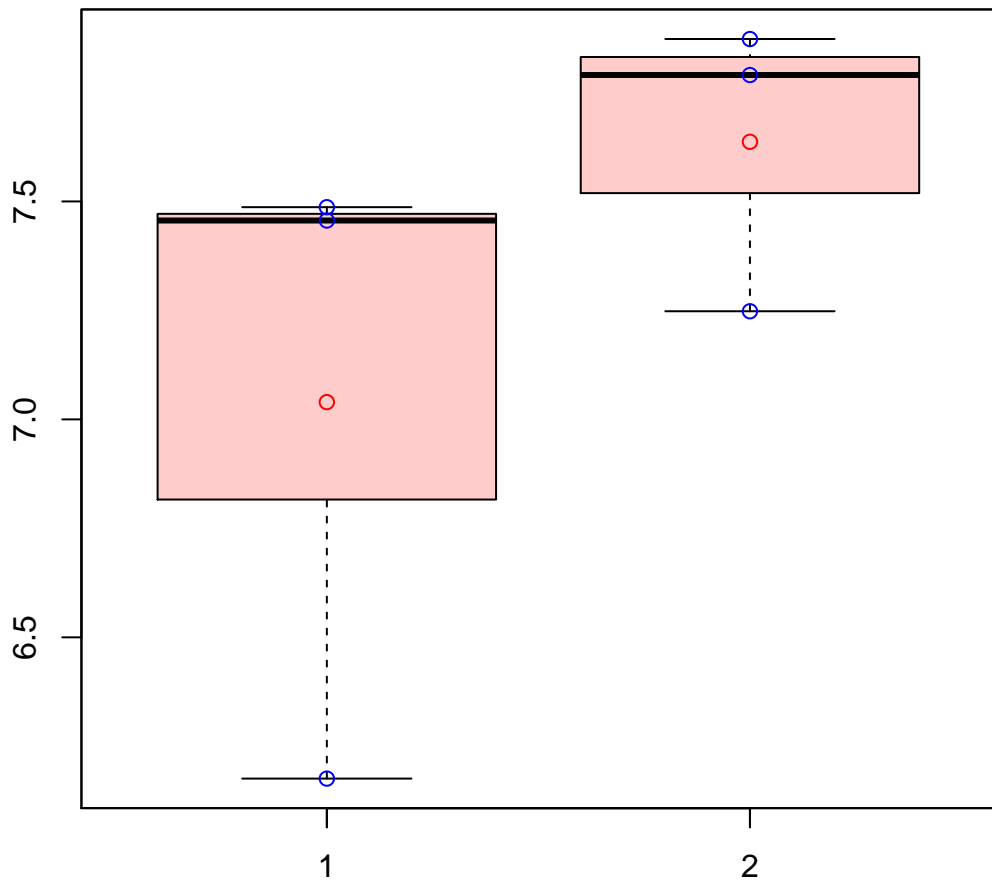

t-Test: p-value = 0.3

# Q53NB5|Q53NB5\_ORYSJ

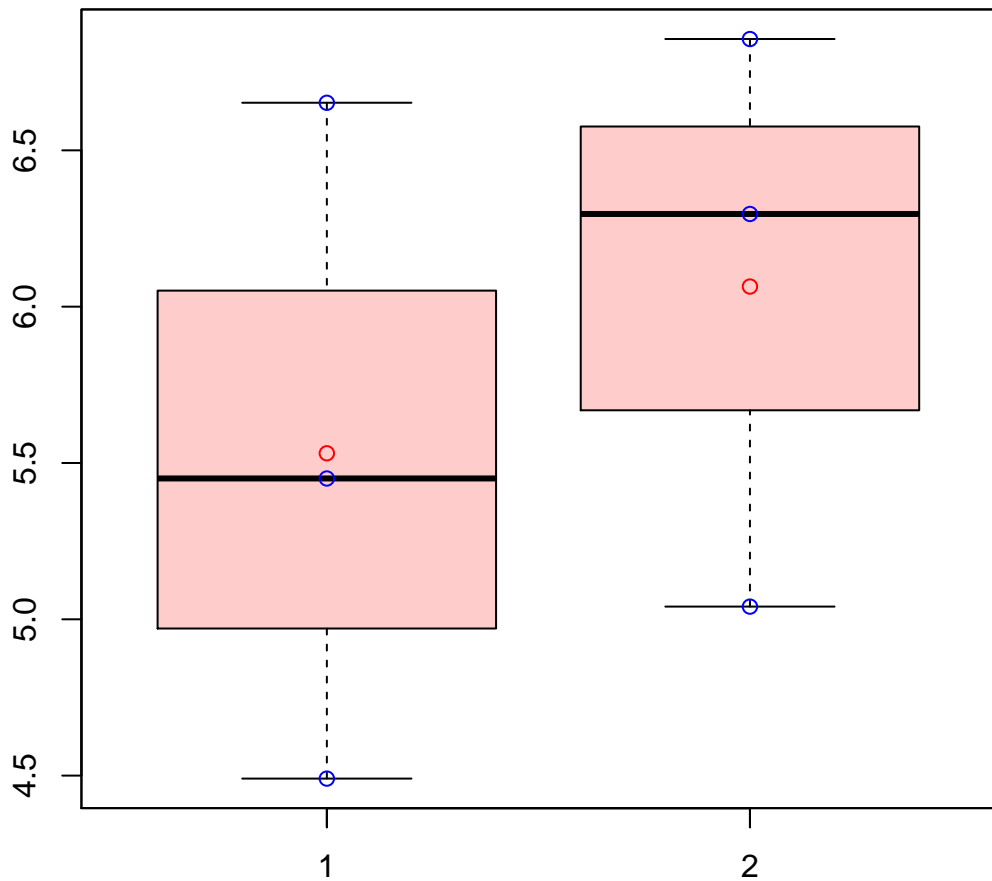

t-Test: p-value = 0.55

# Q53NQ5|Q53NQ5\_ORYSJ

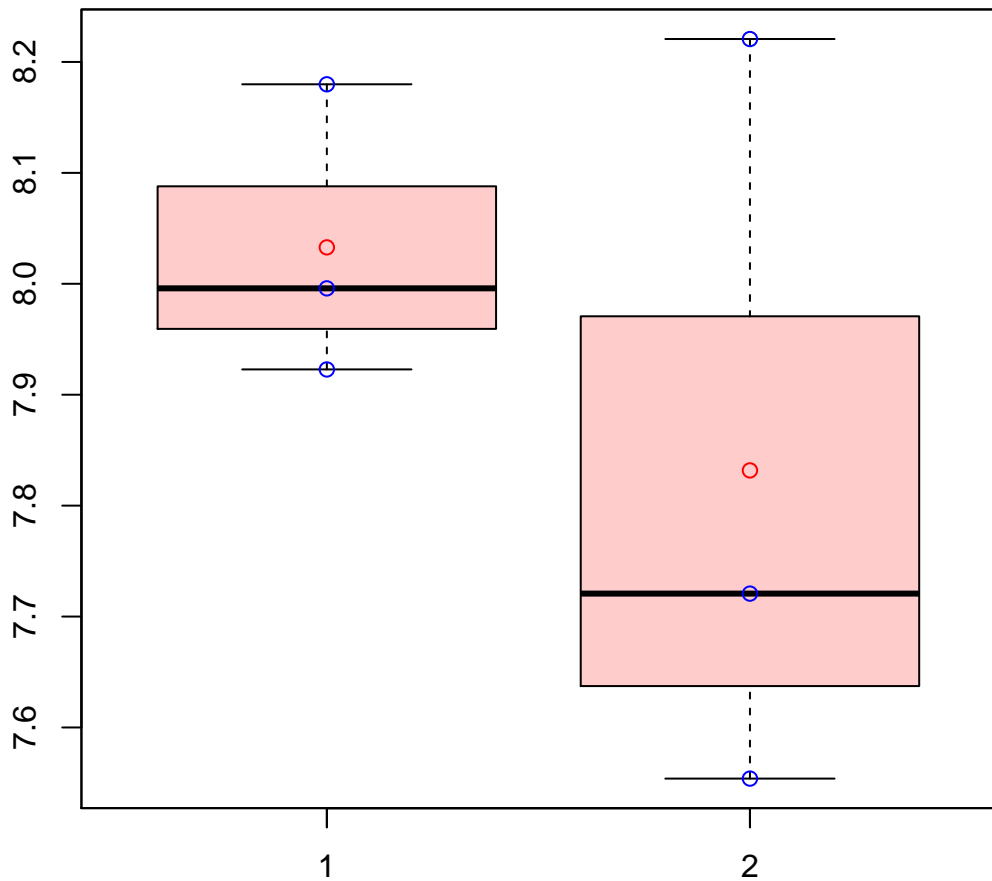

t-Test: p-value = 0.43

# Q53PD9|Q53PD9\_ORYSJ

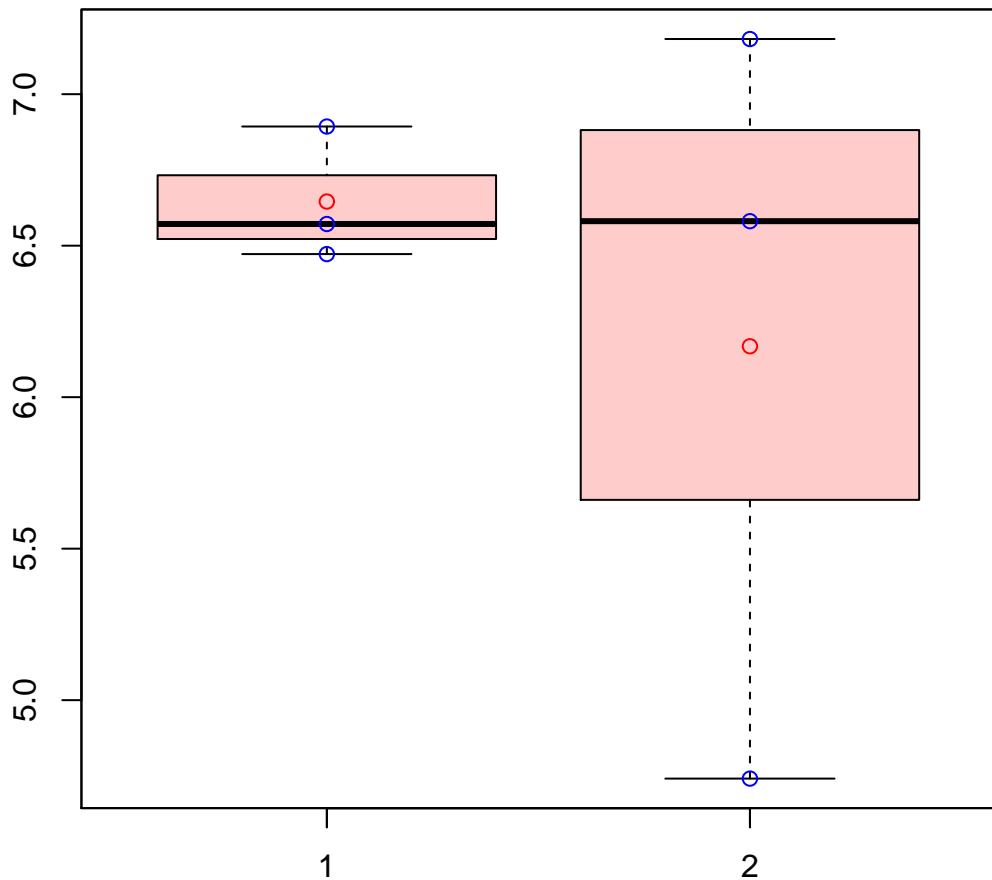

t-Test: p-value = 0.58

# Q53RB7|Q53RB7\_ORYSJ

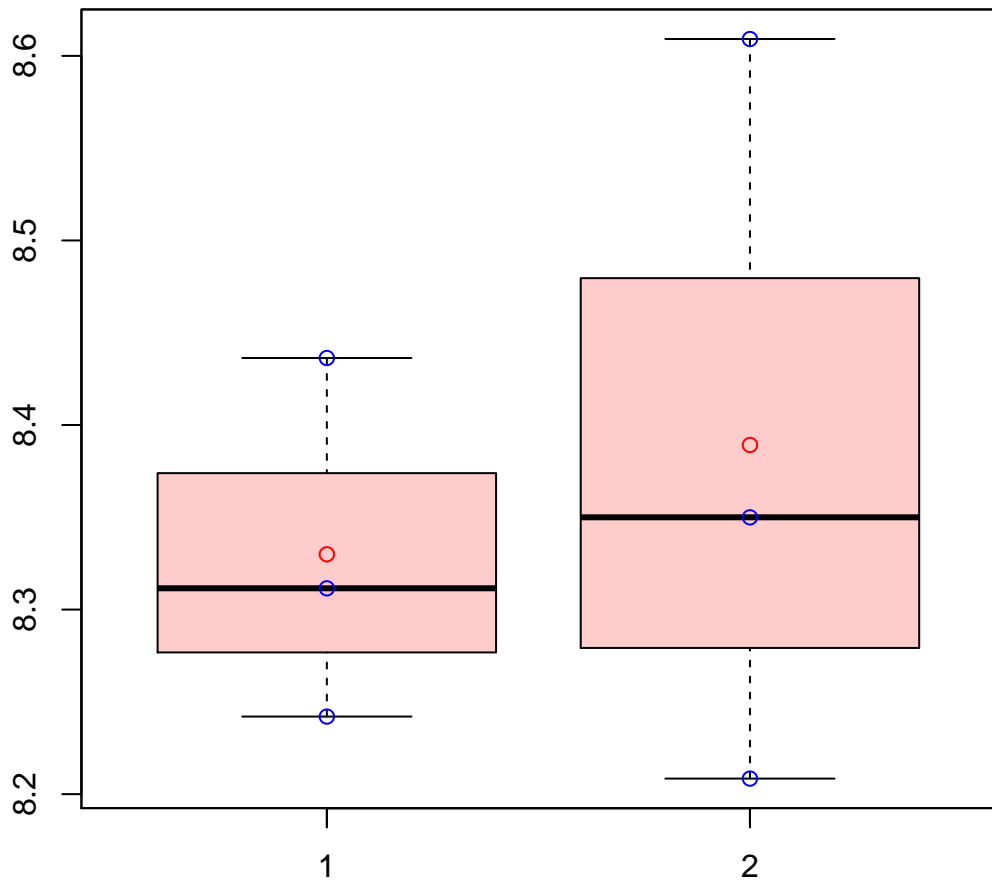

t-Test: p-value = 0.68

# Q5EUE1|Q5EUE1\_MAIZE

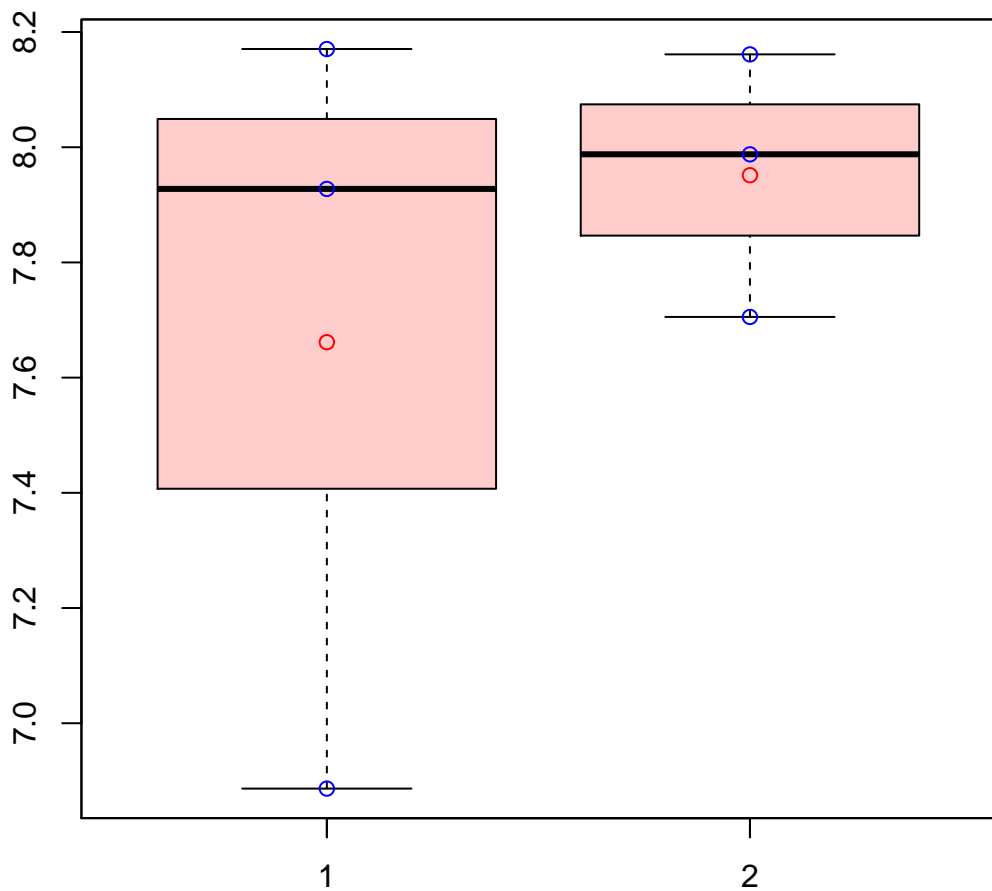

t-Test: p-value = 0.55



# Q5IA08|Q5IA08\_9ARAE

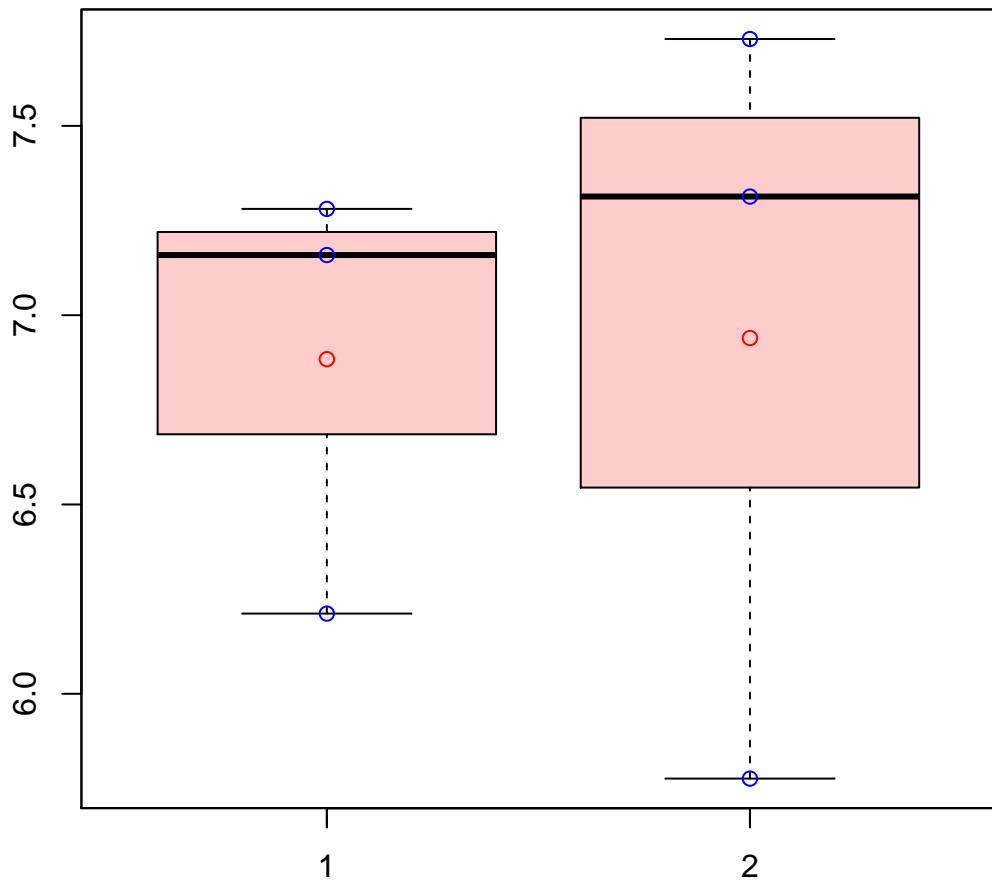

t-Test: p-value = 0.94

# Q5J1K3|Q5J1K3\_ELAGV

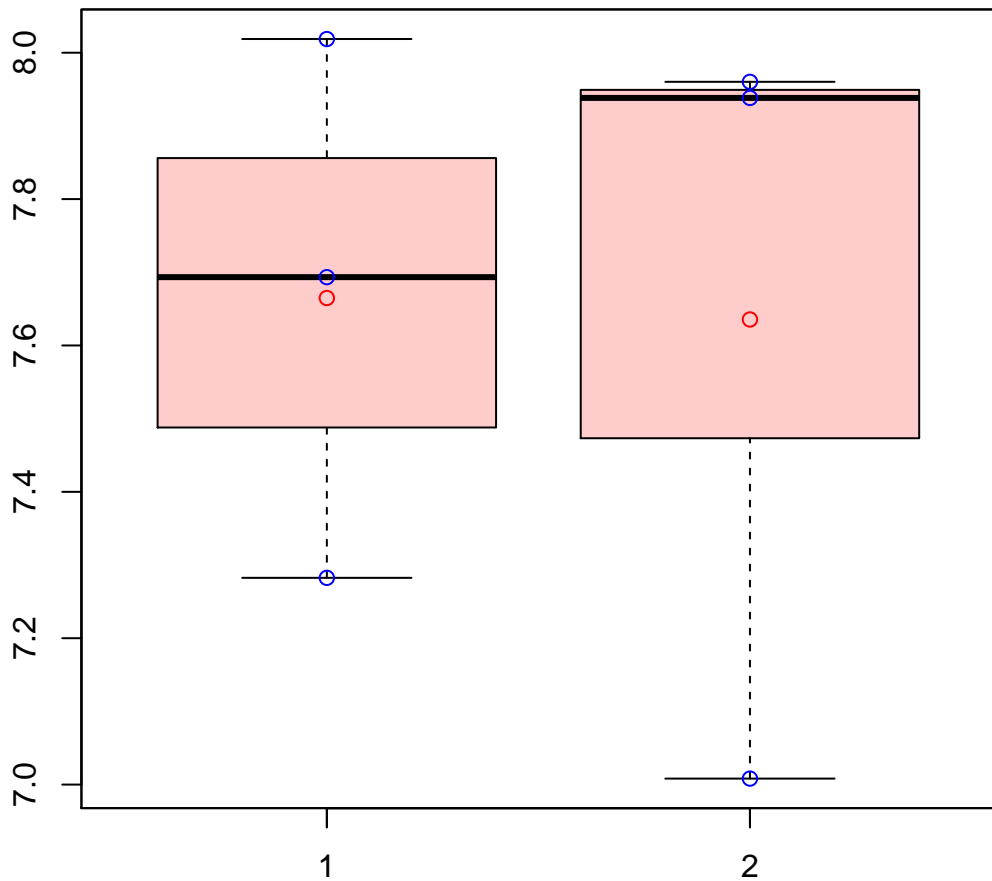

t-Test: p-value = 0.94

# Q5J9S7|Q5J9S7\_9LILI

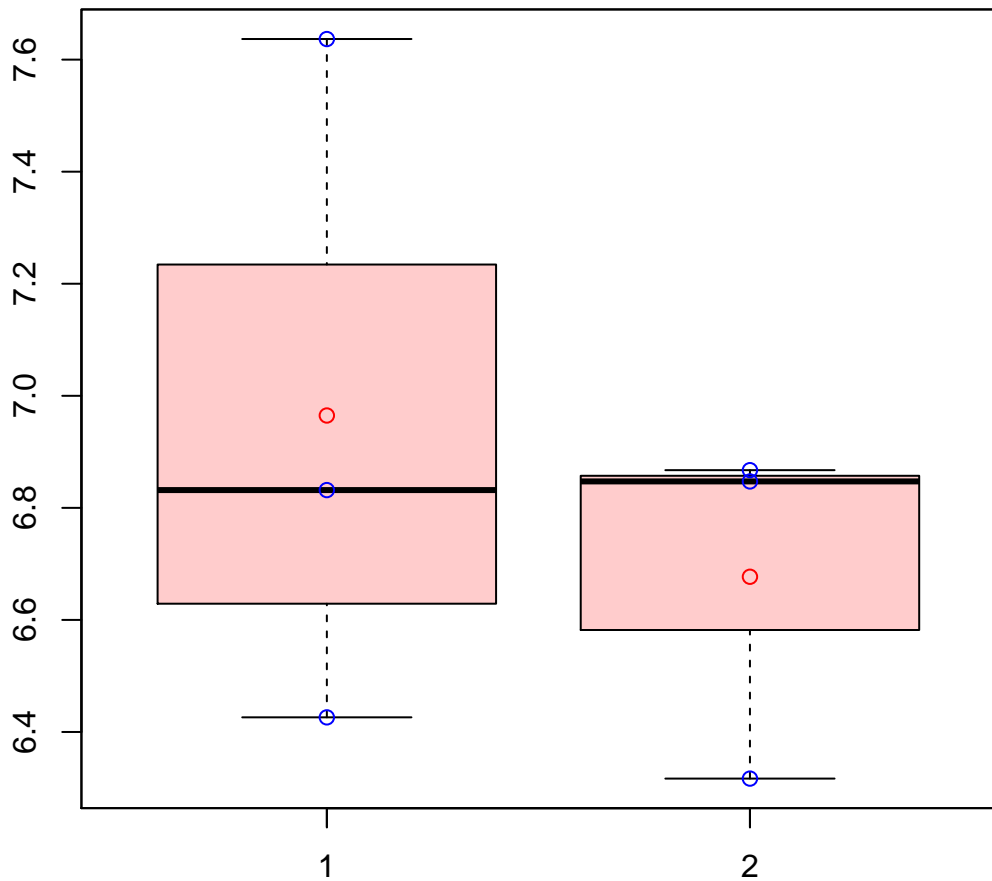

t-Test: p-value = 0.52

# Q5JJT0|Q5JJT0\_ORYSJ

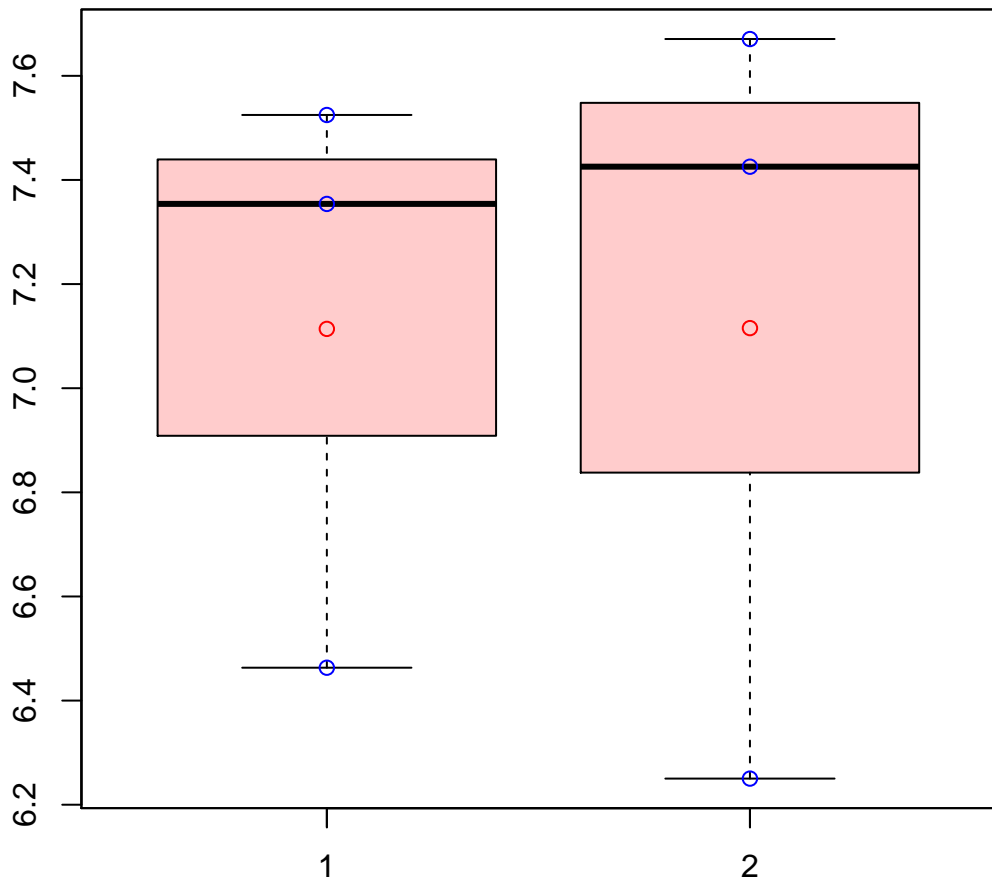

t-Test: p-value = 1

# Q5JK51|Q5JK51\_ORYSJ

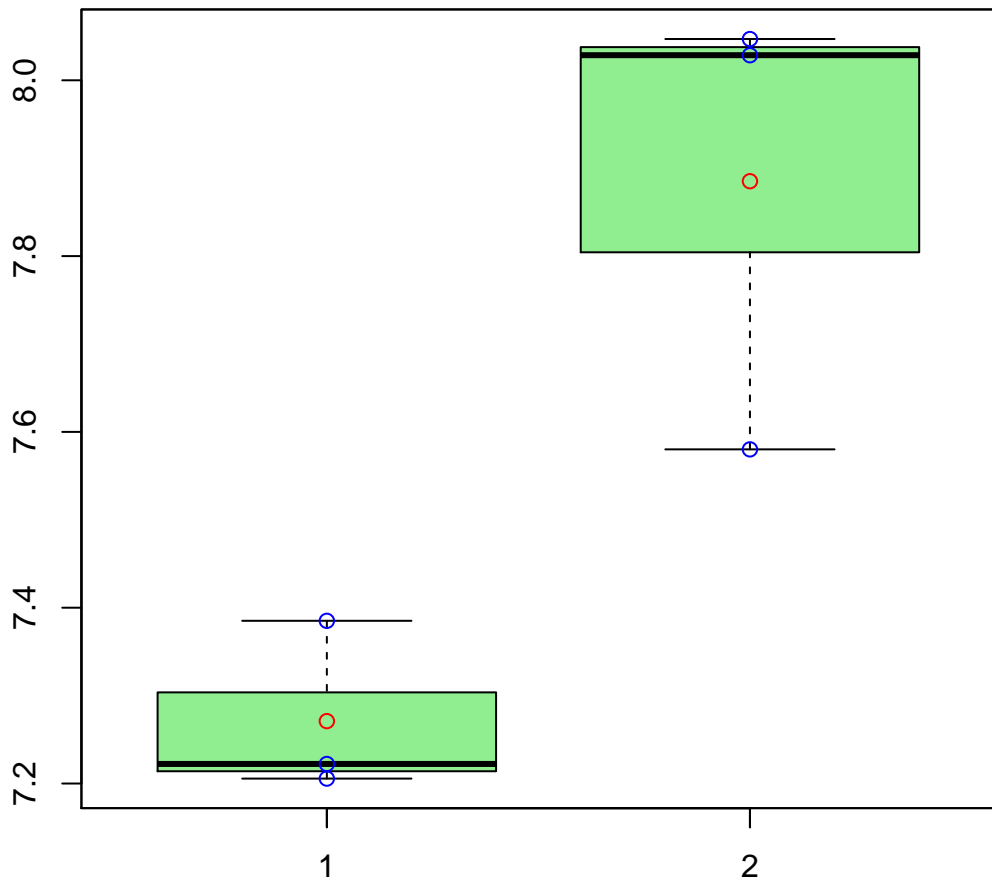

t-Test: p-value = 0.04

# Q5JL00|Q5JL00\_ORYSJ

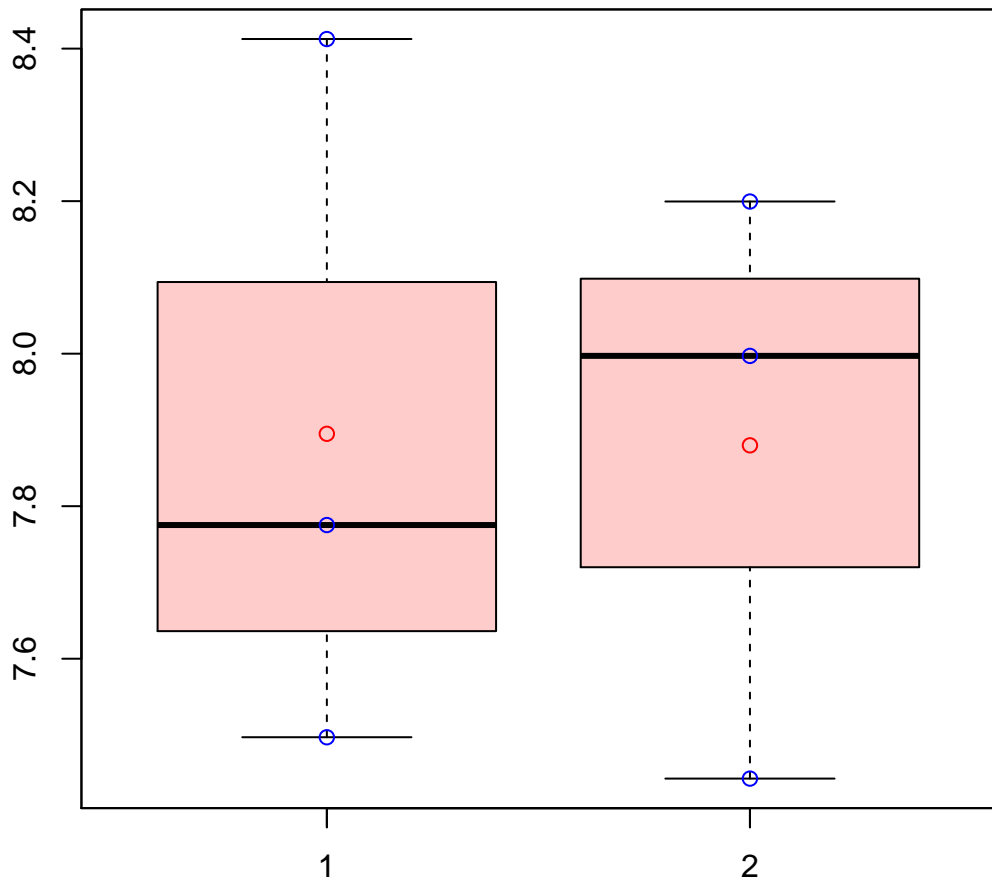

t-Test: p-value = 0.97

# Q5JLH8|Q5JLH8\_ORYSJ

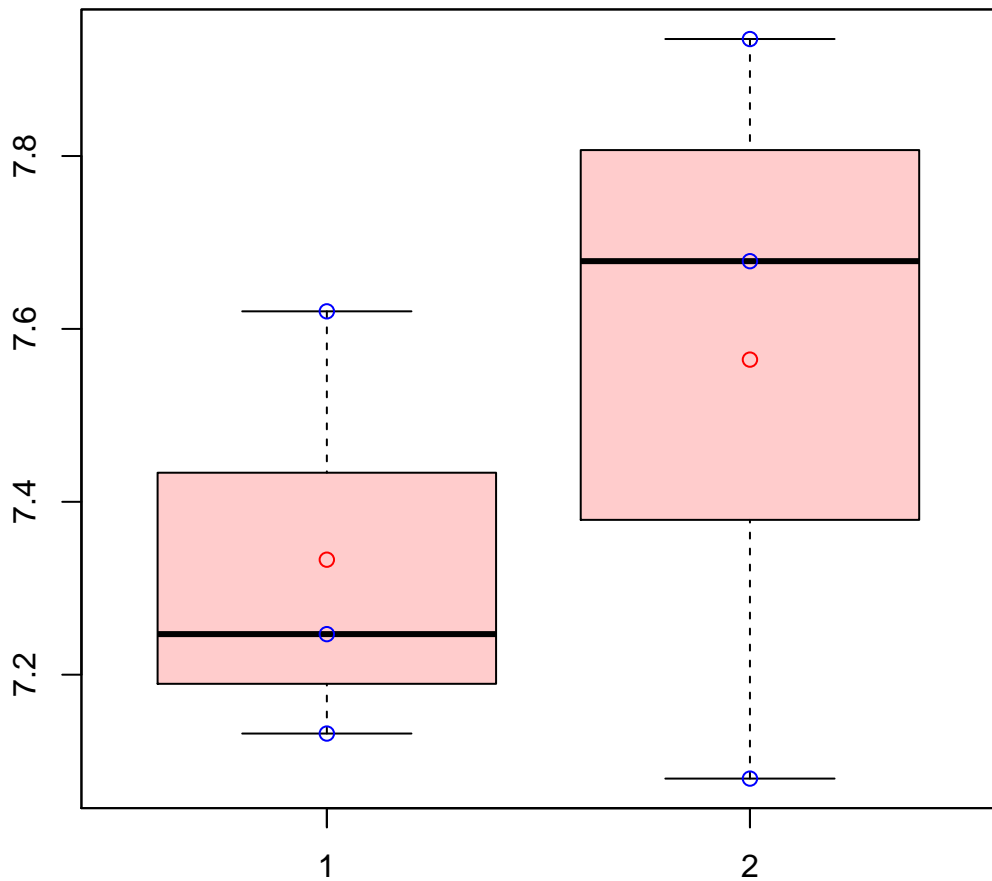

t-Test: p-value = 0.48

# Q5JLS6|Q5JLS6\_ORYSJ

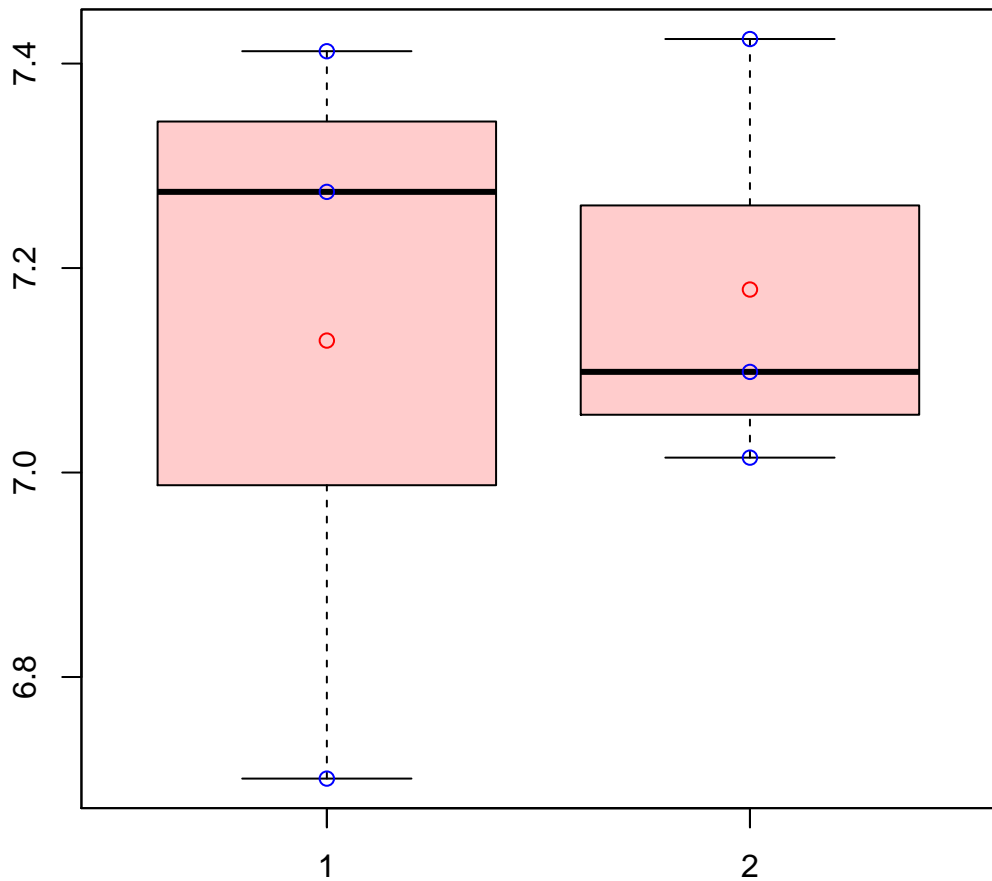

t-Test: p-value = 0.85



# Q5JNS5|Q5JNS5\_ORYSJ

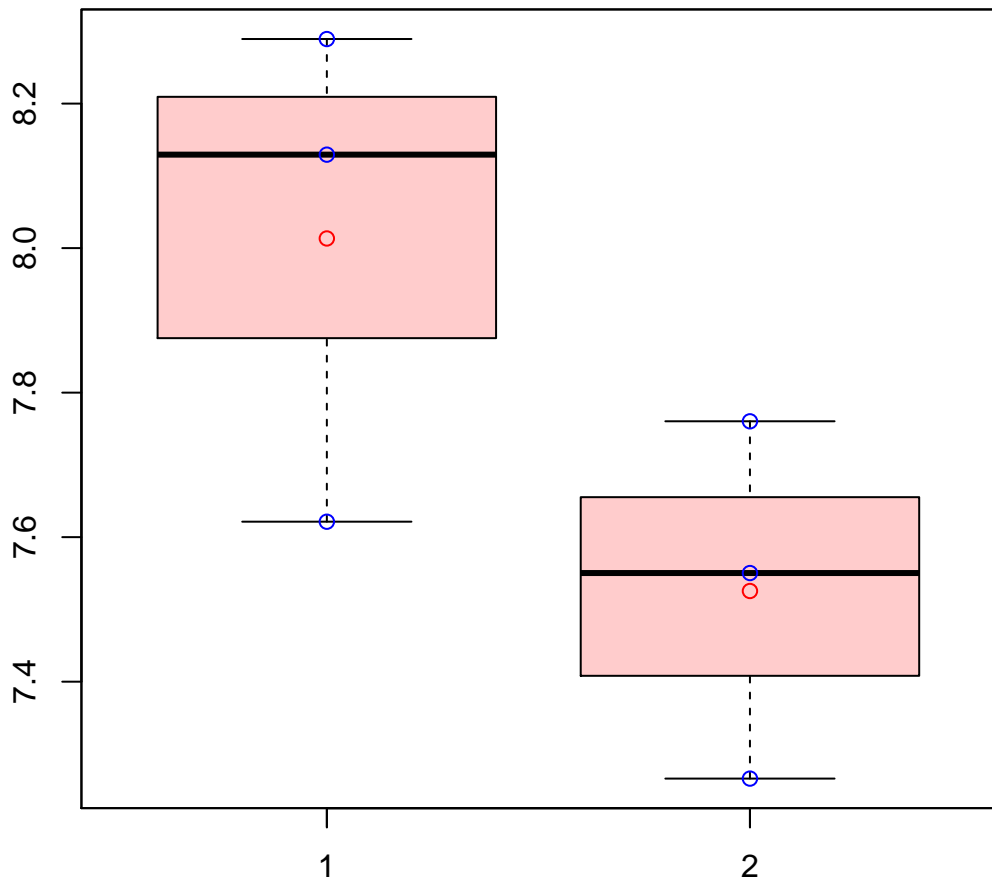

t-Test: p-value = 0.13

# Q5KQJ2|Q5KQJ2\_ORYSJ

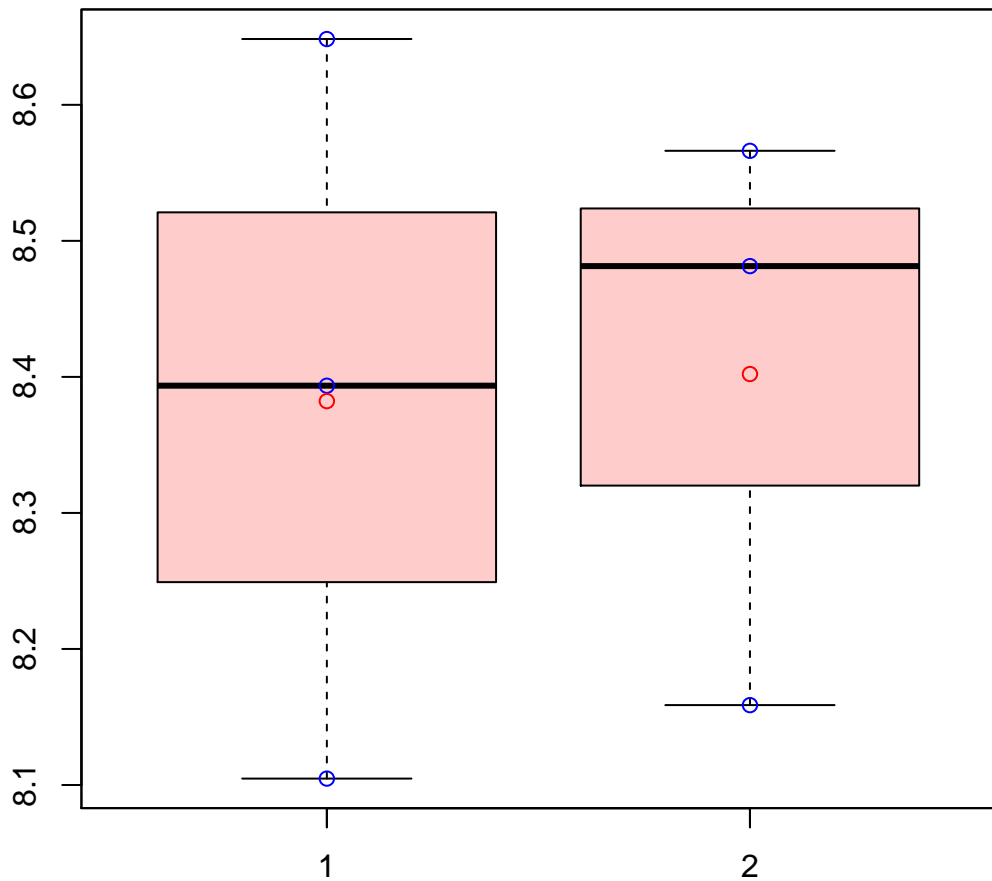

t-Test: p-value = 0.93

# Q5MD10|Q5MD10\_SACOF

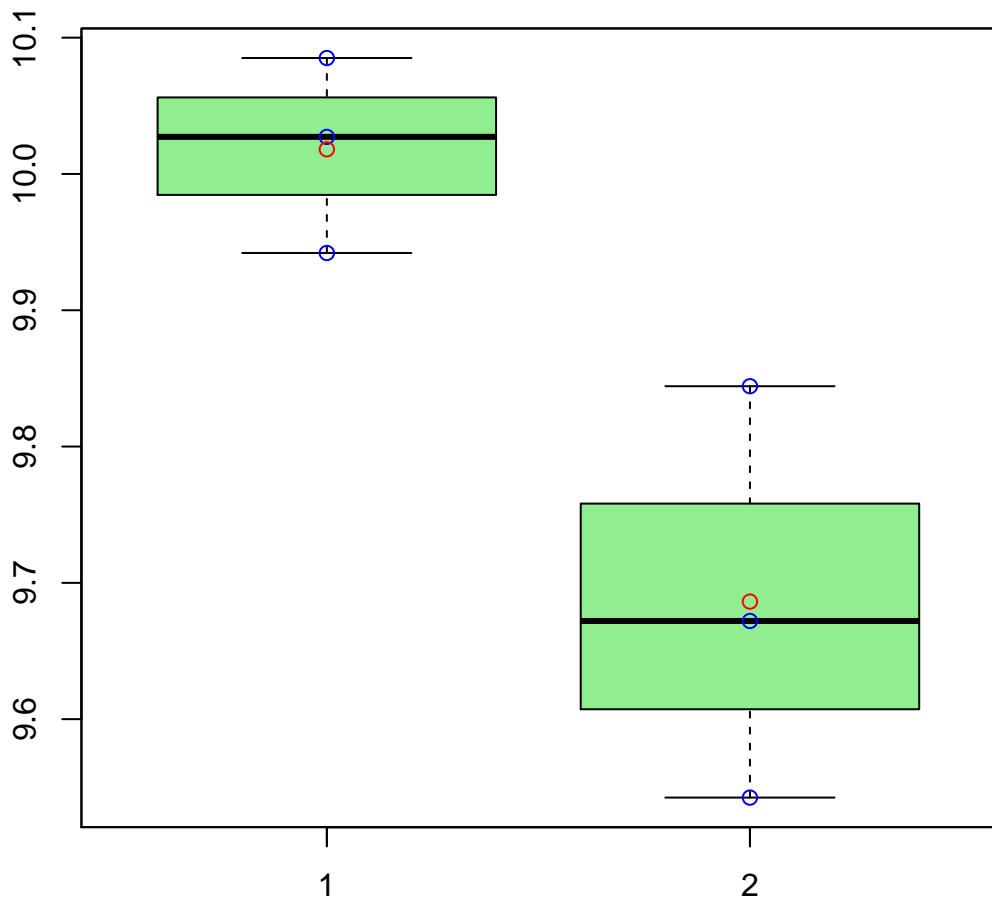

t-Test: p-value = 0.04

# Q5MXA7|Q5MXA7\_AGRCR

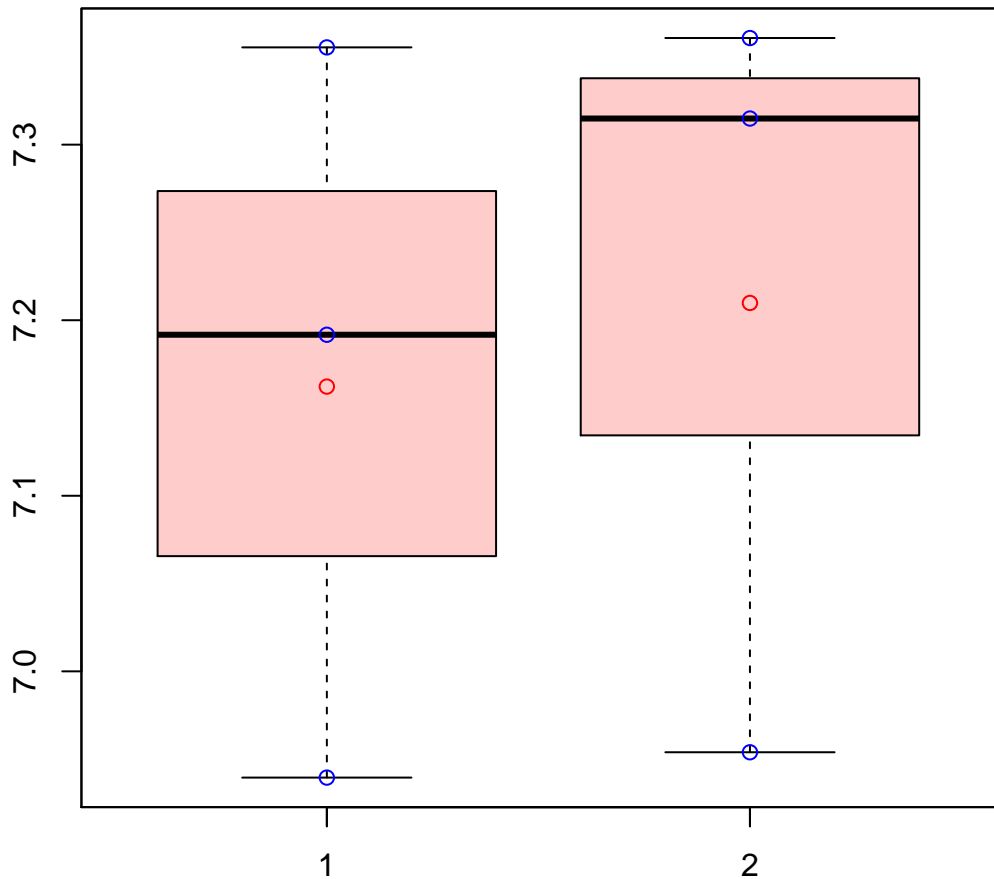

t-Test: p-value = 0.8

# Q5N7I5|Q5N7I5\_ORYSJ

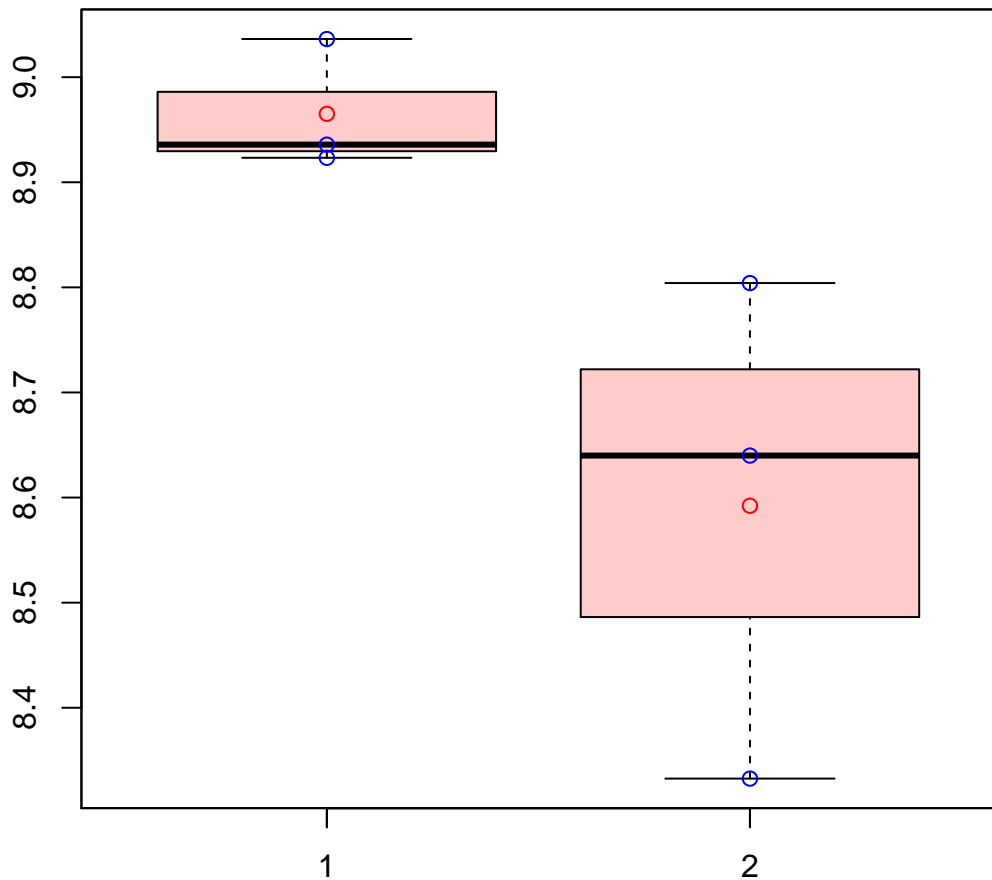

t-Test: p-value = 0.11

# Q5N884|Q5N884\_ORYSJ

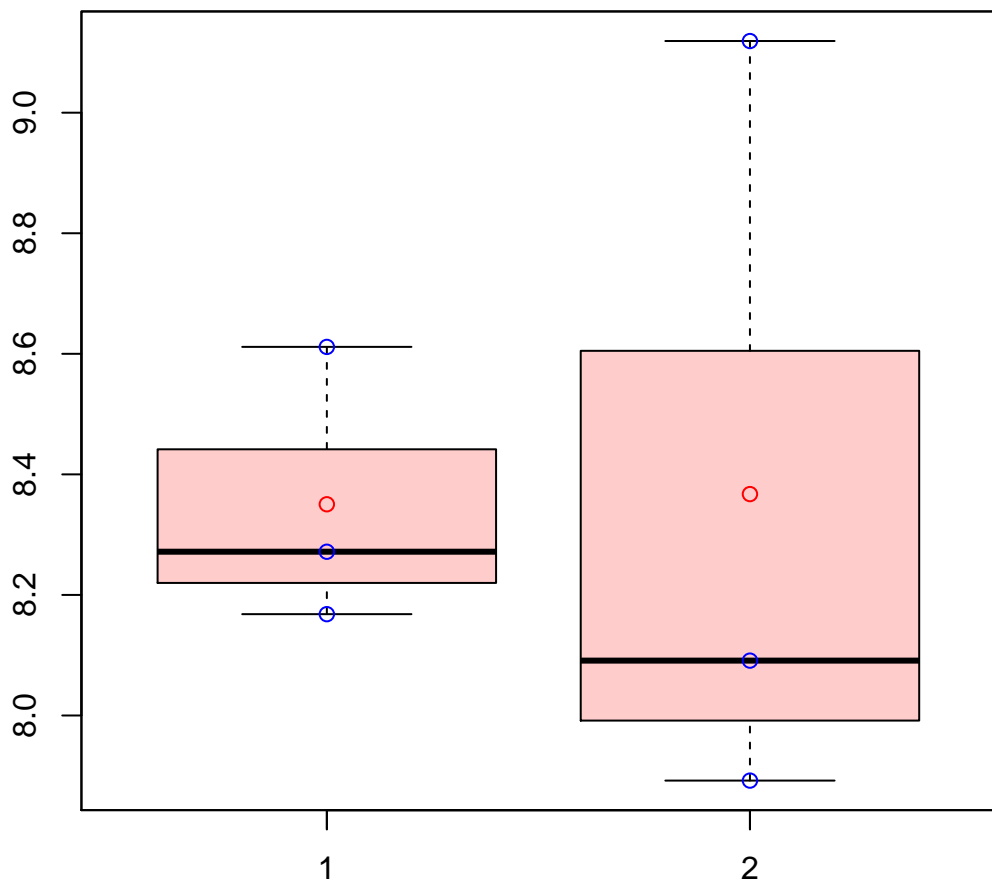

t-Test: p-value = 0.97

# Q5N987|Q5N987\_ORYSJ

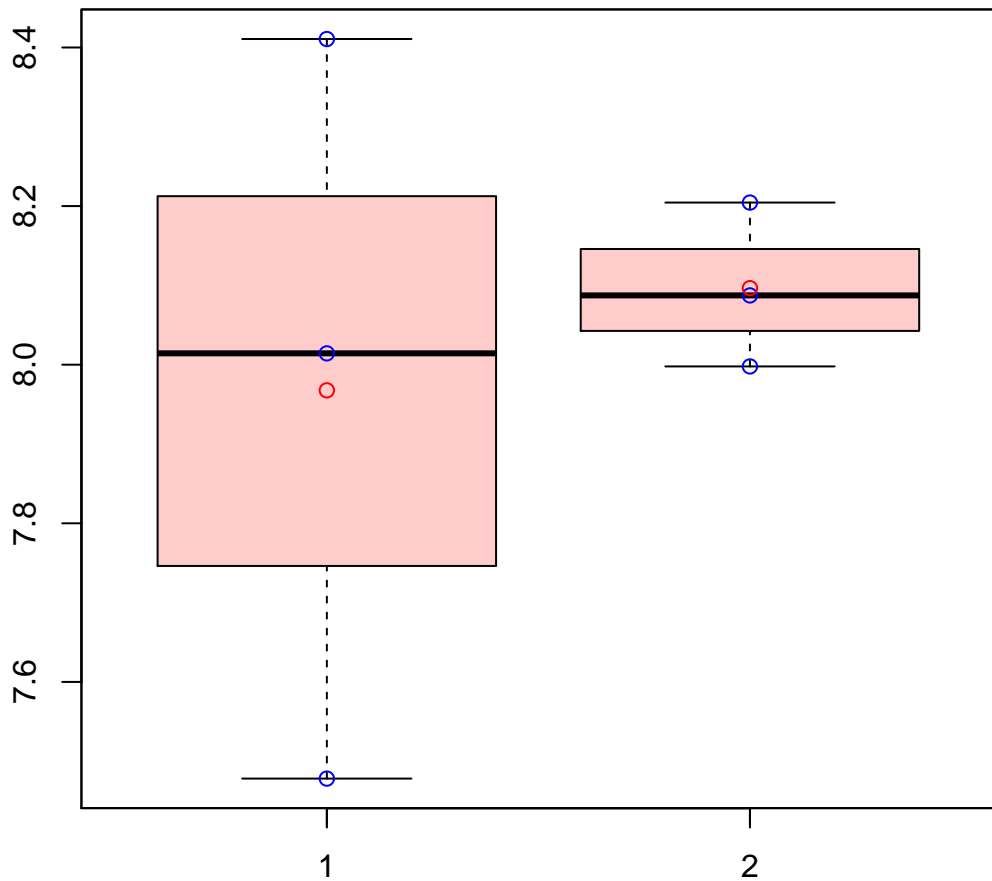

t-Test: p-value = 0.68

# Q5NAR2|Q5NAR2\_ORYSJ

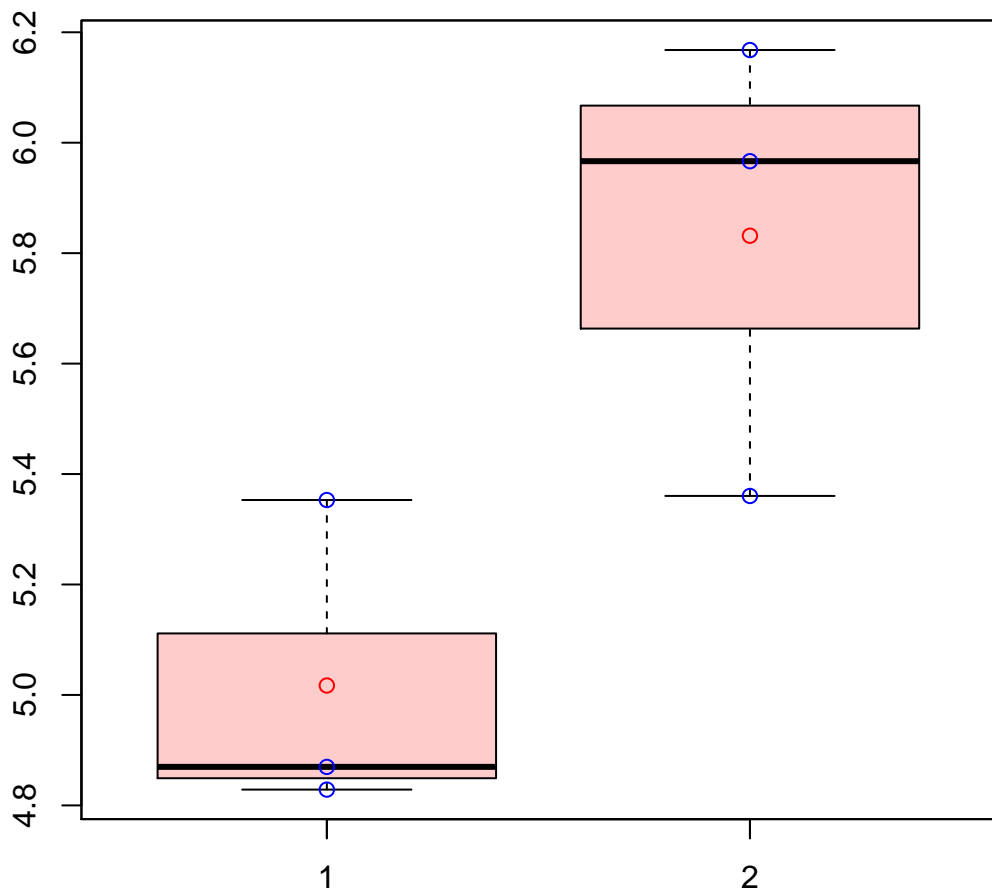

t-Test: p-value = 0.06



# Q5Q0X7|Q5Q0X7\_SACOF

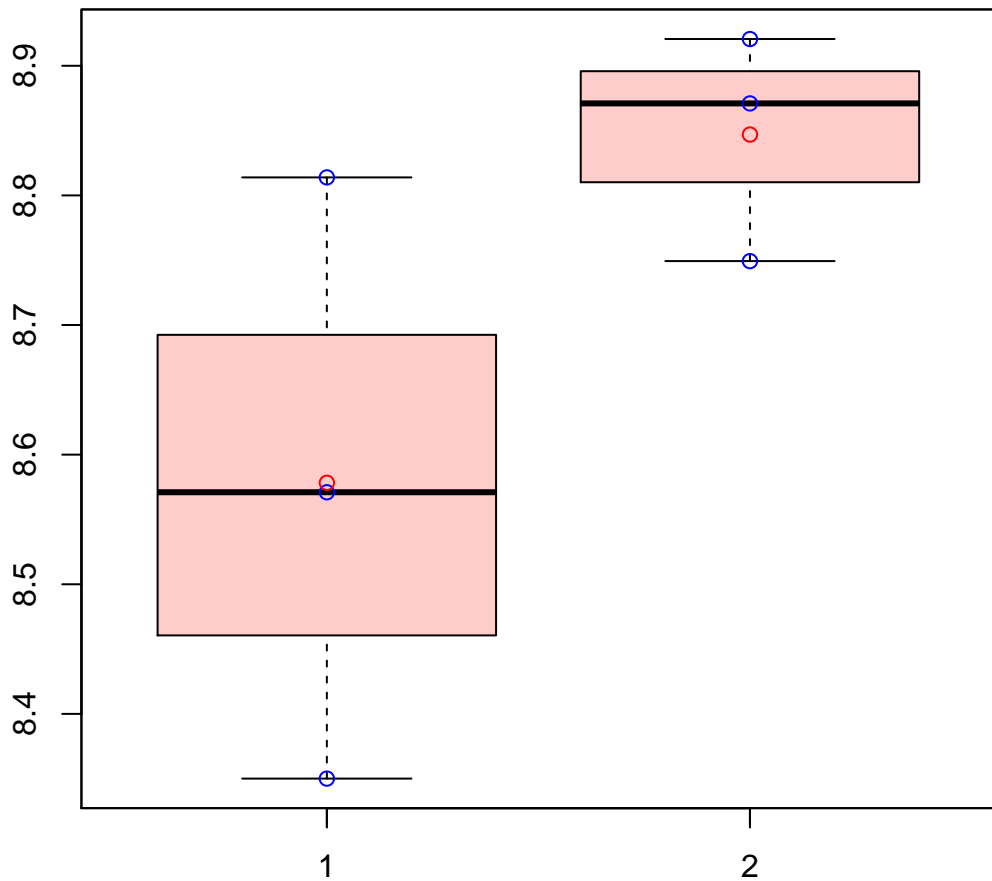

t-Test: p-value = 0.17

# Q5QJA2|Q5QJA2\_MAIZE

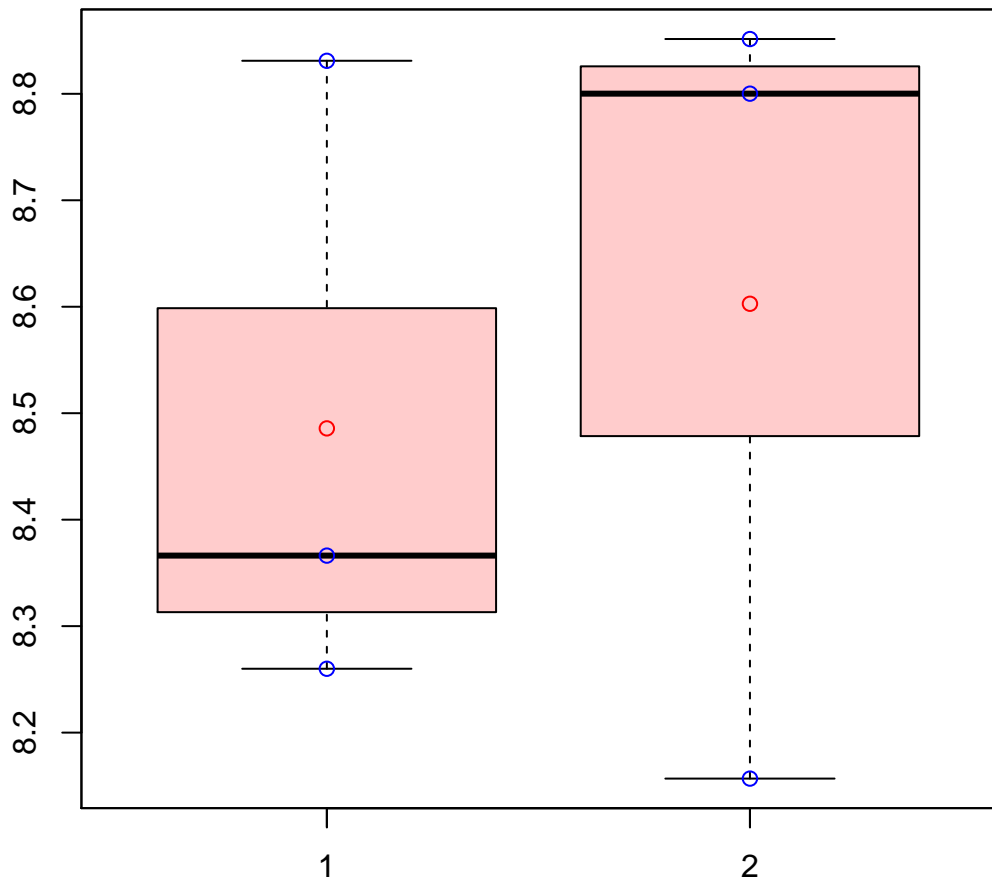

t-Test: p-value = 0.7

# Q5QJB5|Q5QJB5\_HORVD

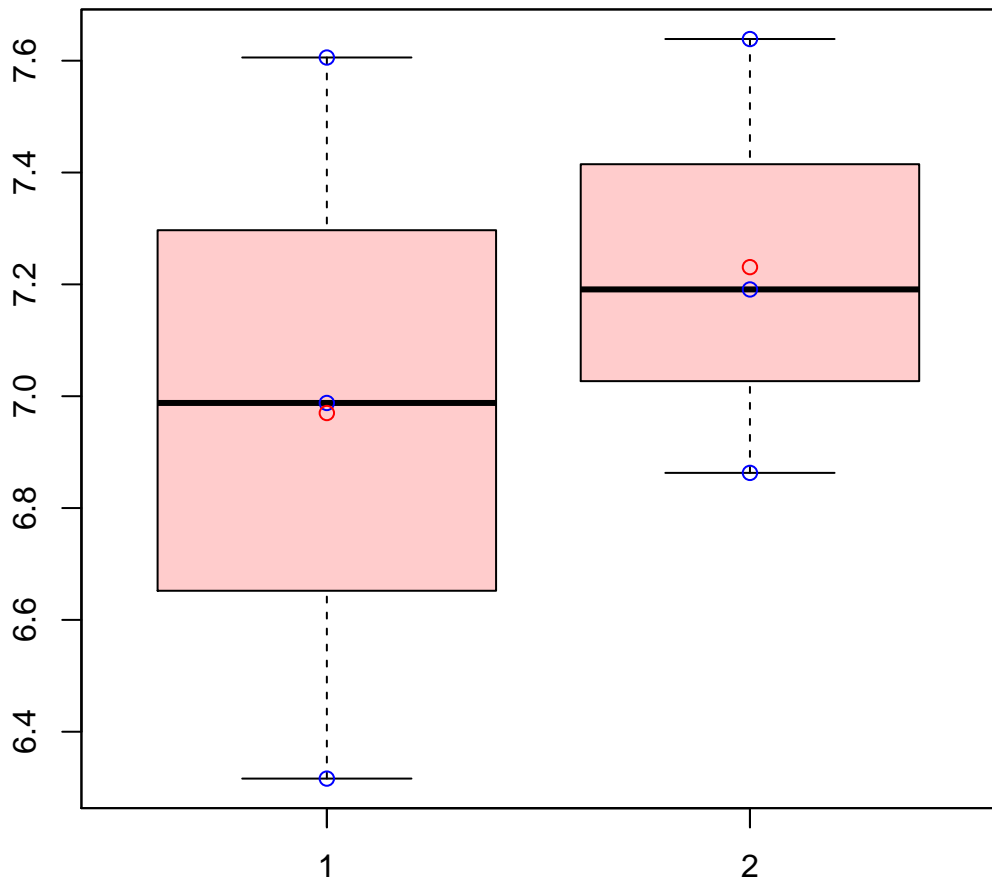

t-Test: p-value = 0.59

# Q5QMQ3|Q5QMQ3\_ORYSJ

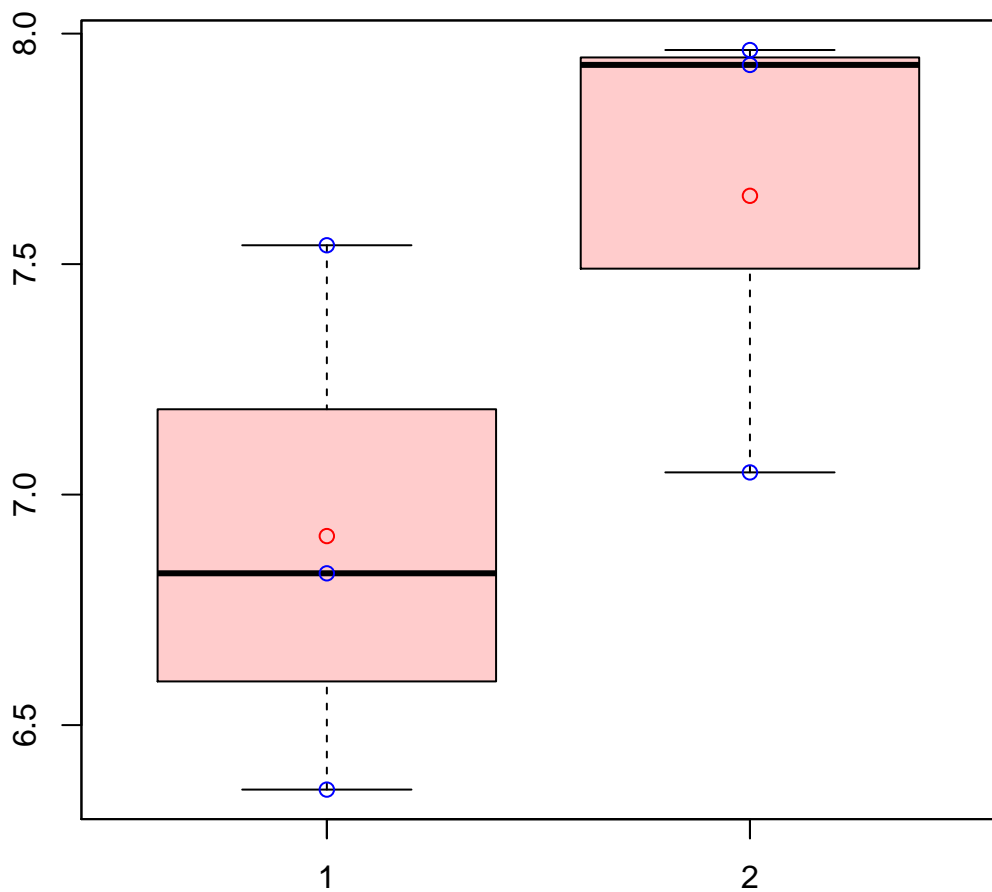

t-Test: p-value = 0.18

# Q5RZZ9|Q5RZZ9\_9POAL

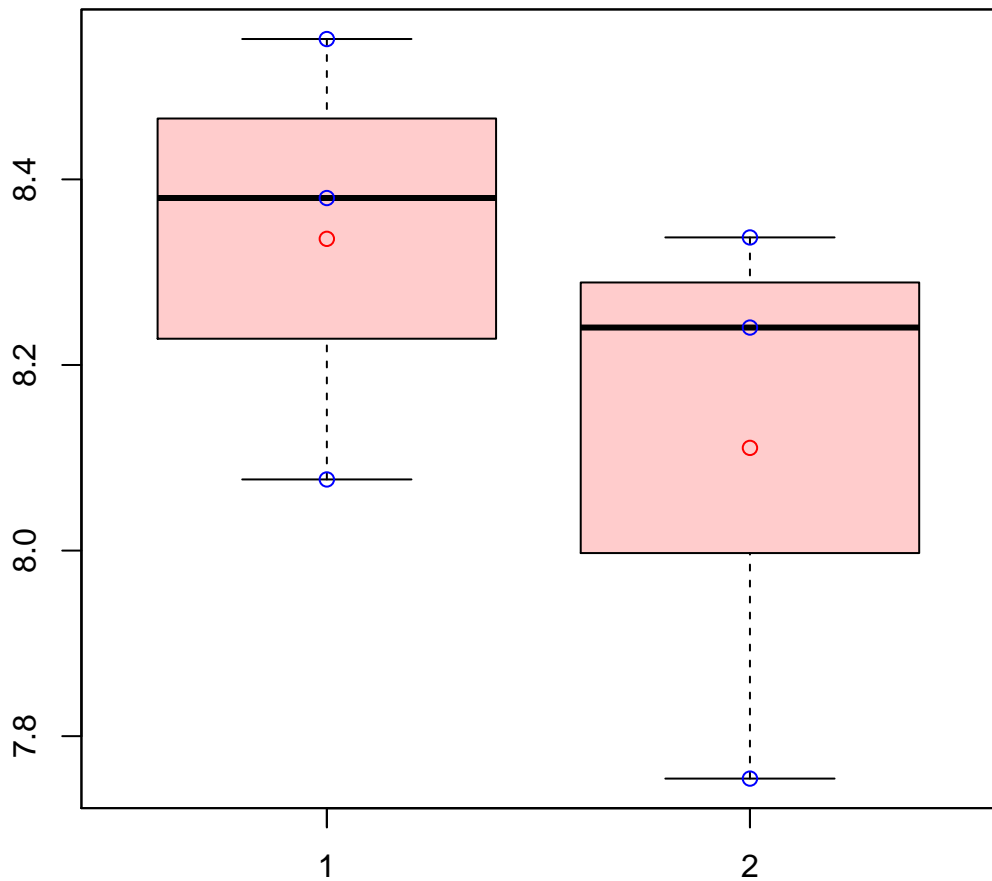

t-Test: p-value = 0.38

# Q5SBT2|Q5SBT2\_9POAL

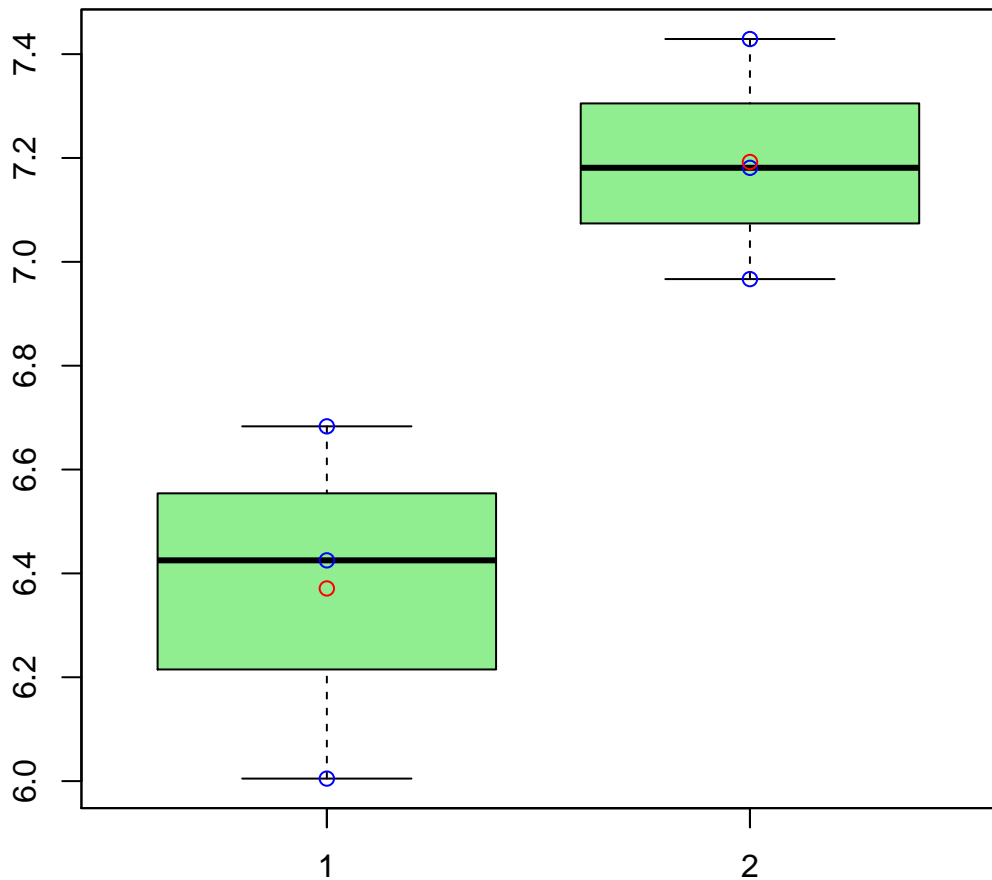

t-Test: p-value = 0.03

# Q5SMM6|Q5SMM6\_ORYSJ

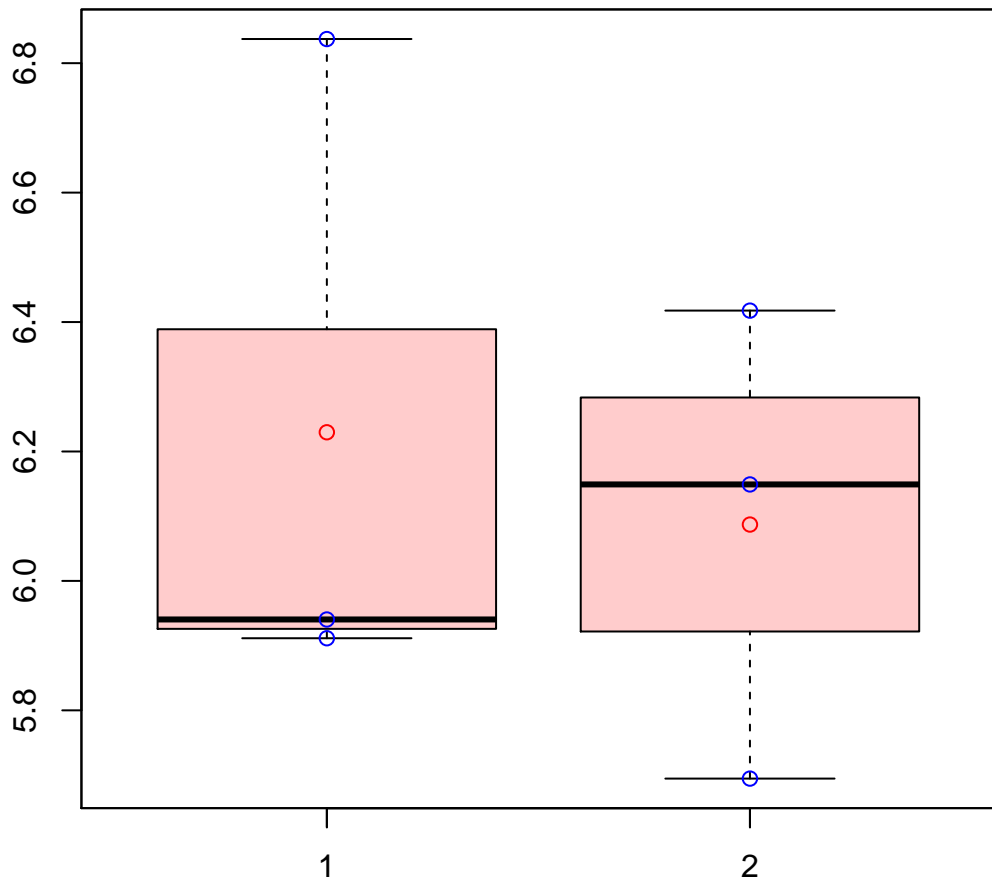

t-Test: p-value = 0.72

# Q5SN76|Q5SN76\_ORYSJ

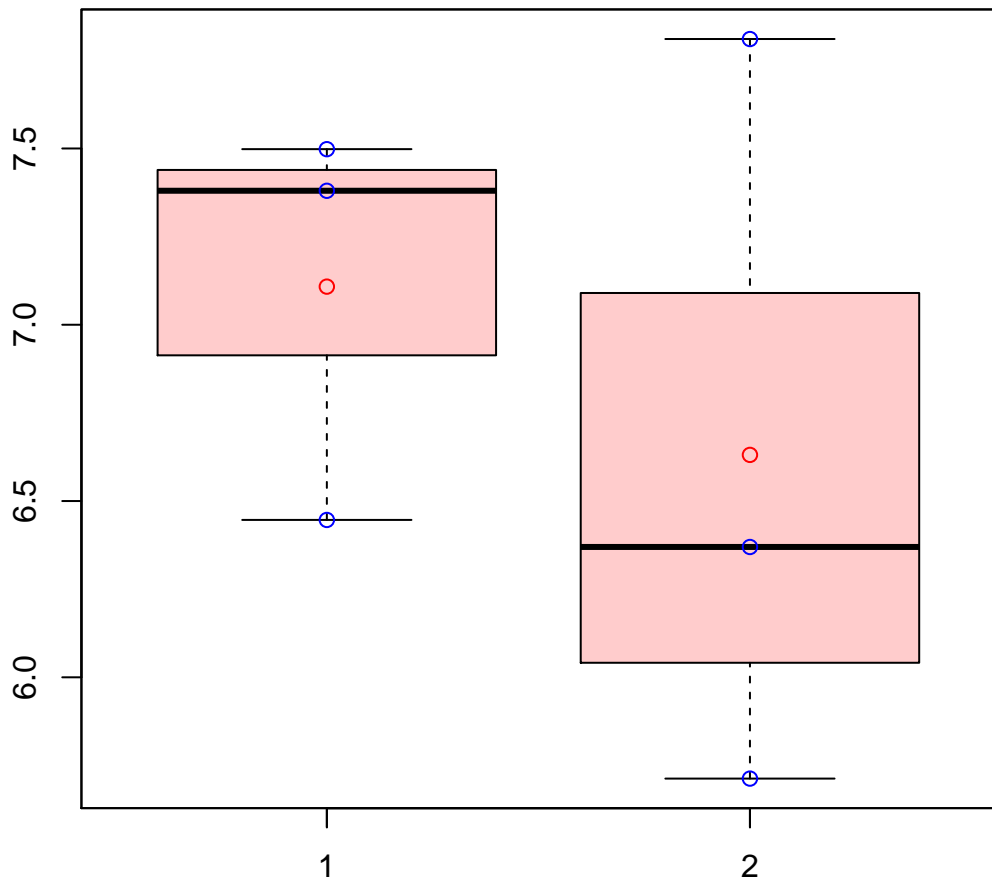

t-Test: p-value = 0.55



# Q5TK93|Q5TK93\_BAMOL

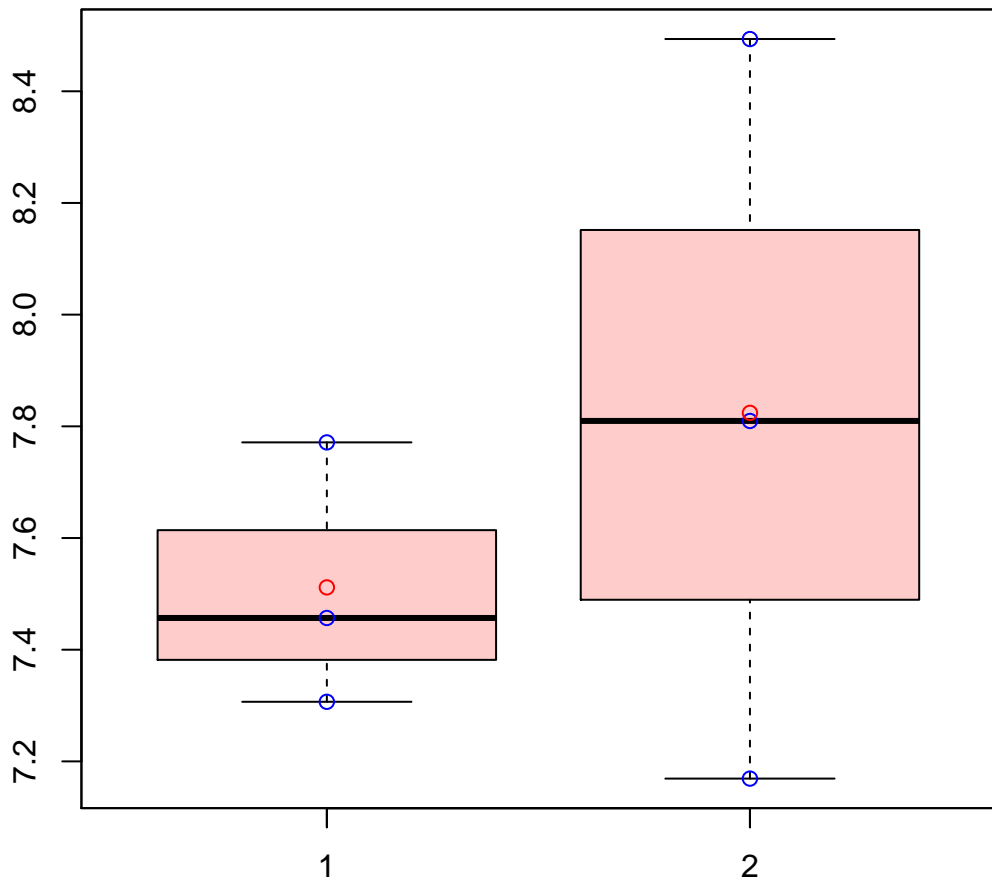

t-Test: p-value = 0.51

# Q5TKH2|Q5TKH2\_ORYSJ

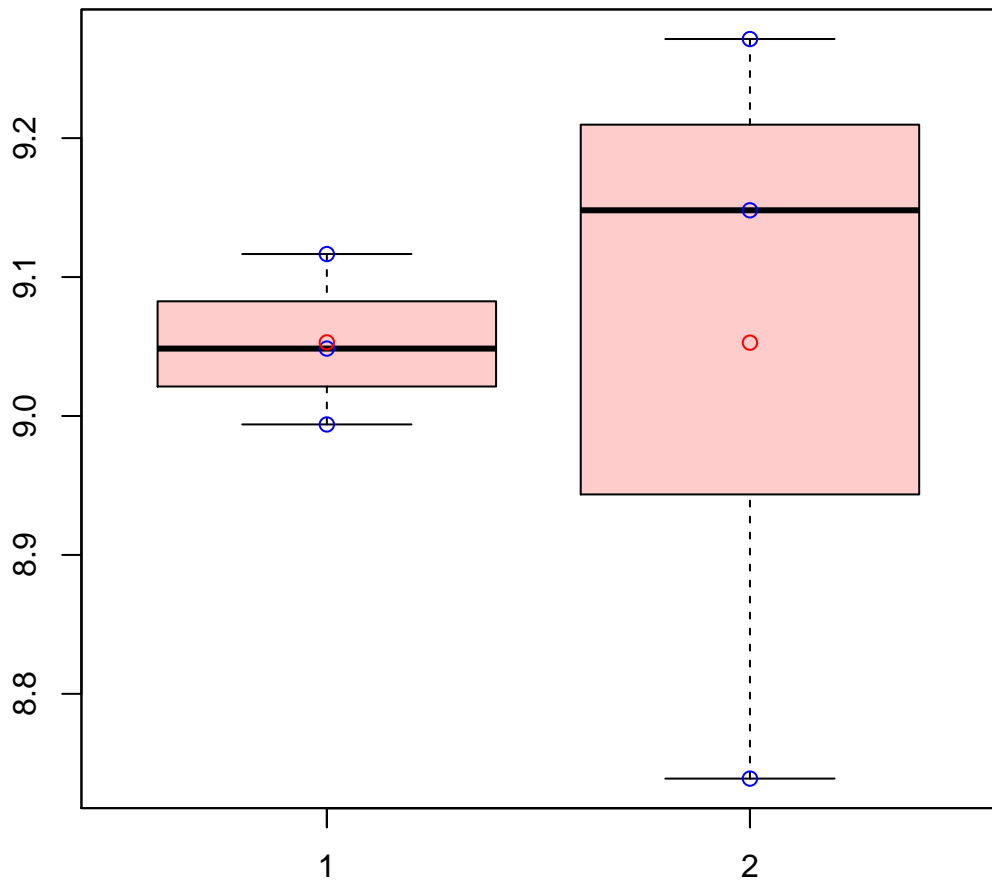

t-Test: p-value = 1

# Q5U1H0|Q5U1H0\_ORYSJ

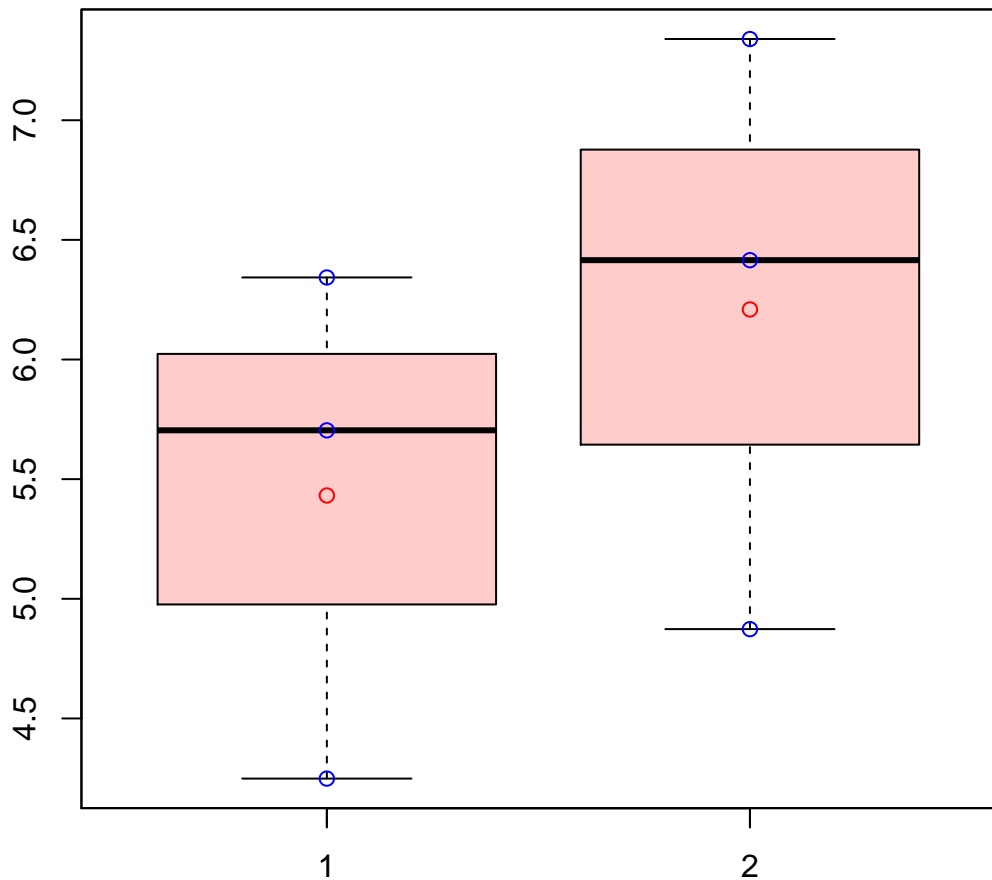

t-Test: p-value = 0.46

# Q5U1S3|Q5U1S3\_ORYSJ

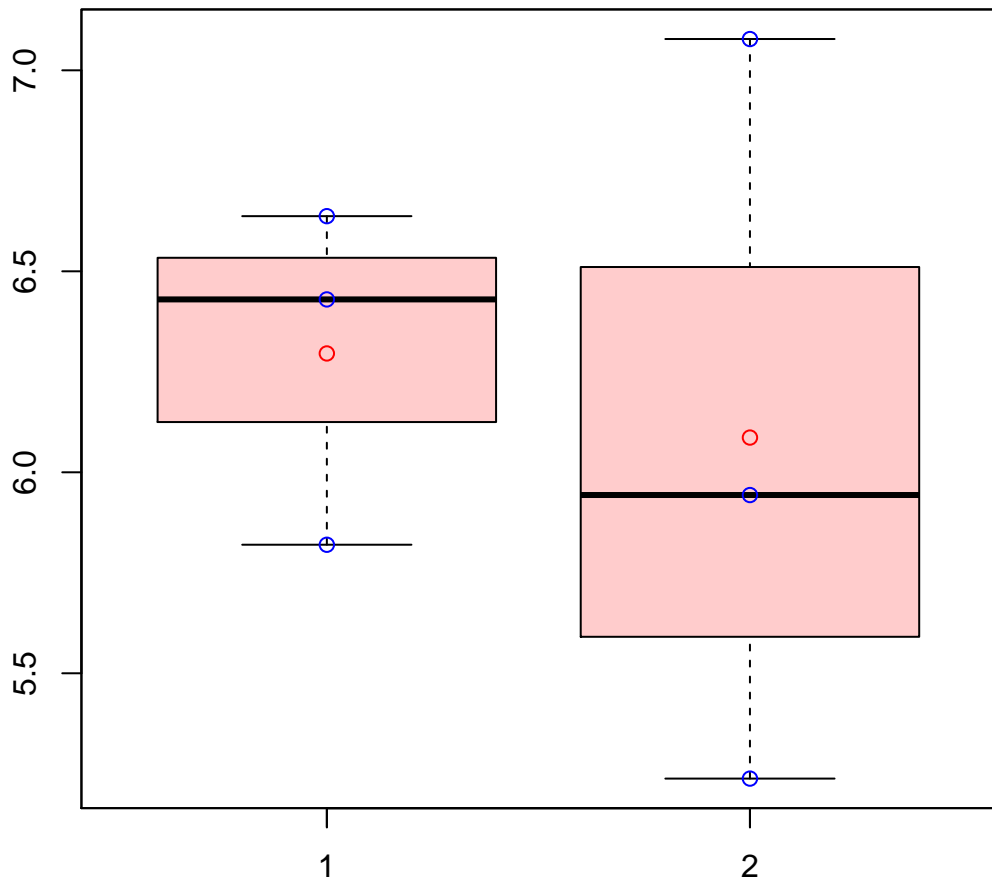

t-Test: p-value = 0.75

# Q5VKU7|Q5VKU7\_9LILI

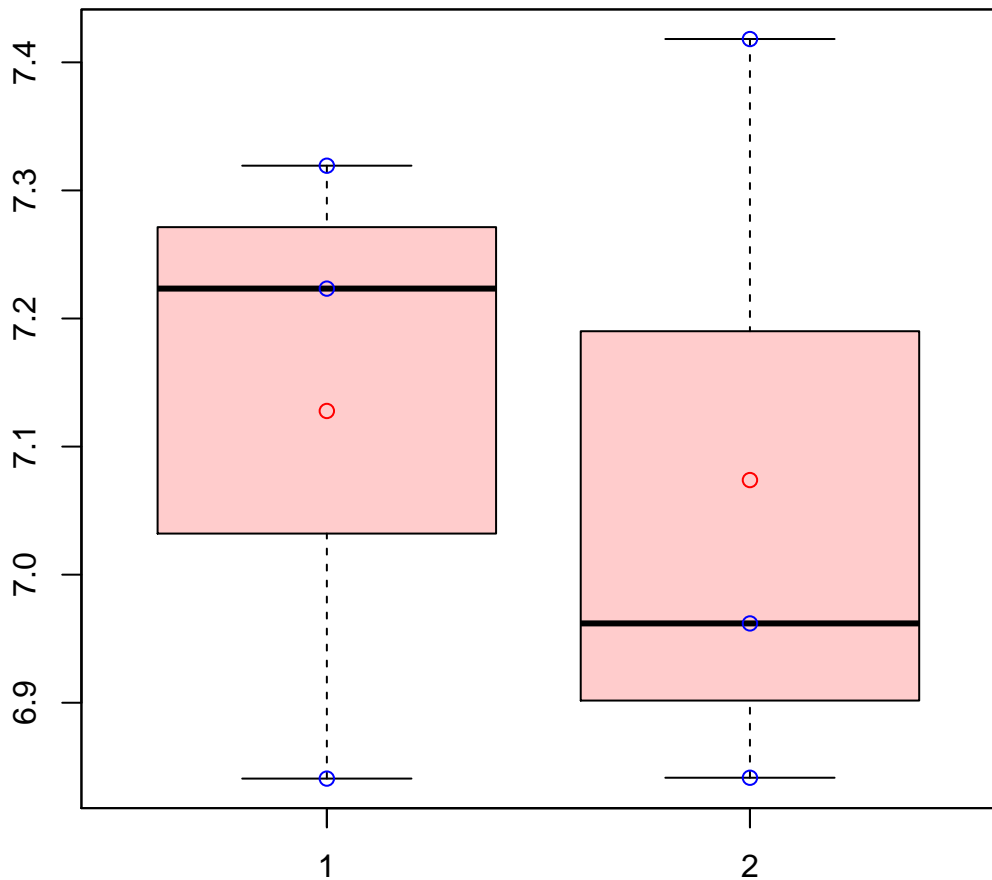

t-Test: p-value = 0.83

# Q5VKZ6|Q5VKZ6\_MUSNE

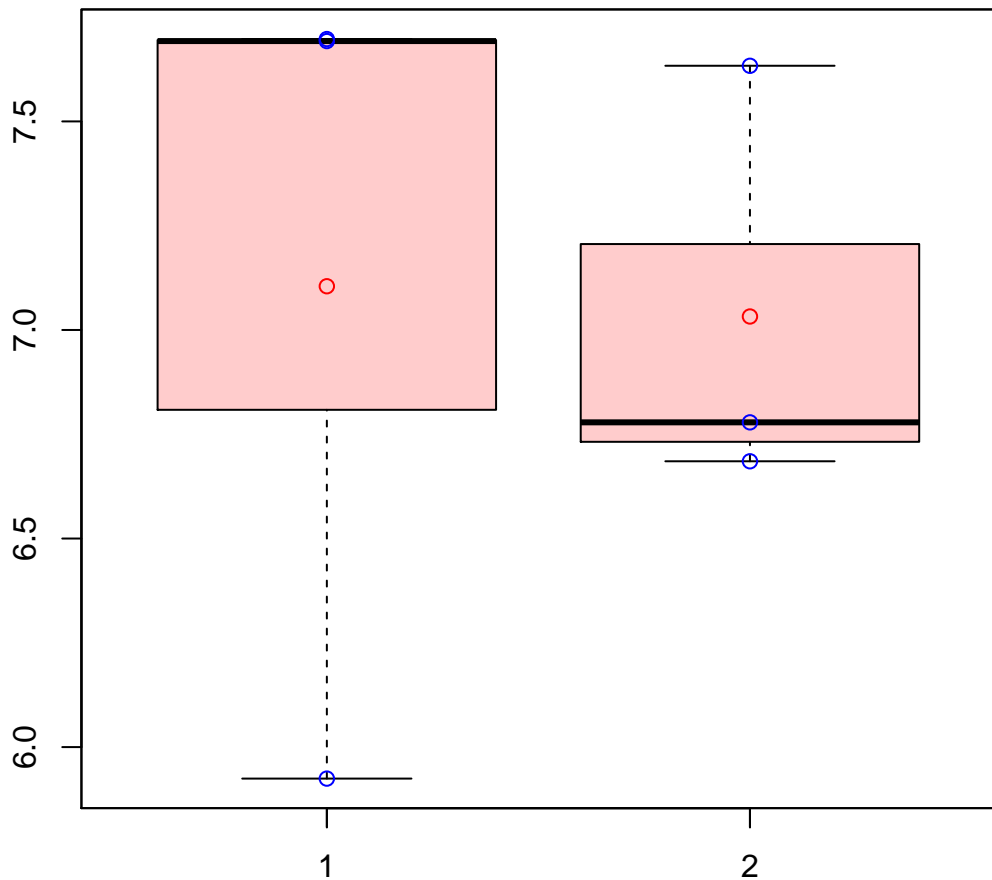

t-Test: p-value = 0.92

# Q5VMF8|Q5VMF8\_ORYSJ

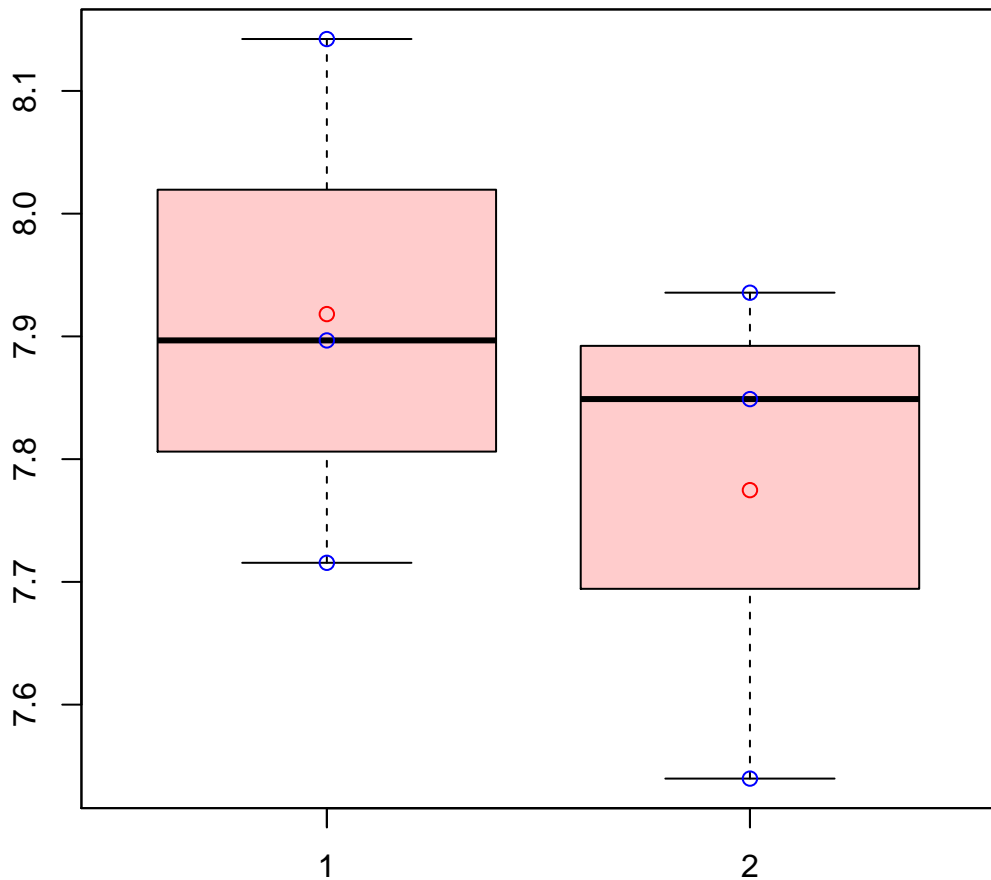

t-Test: p-value = 0.45

# Q5VMZ7|Q5VMZ7\_ORYSJ

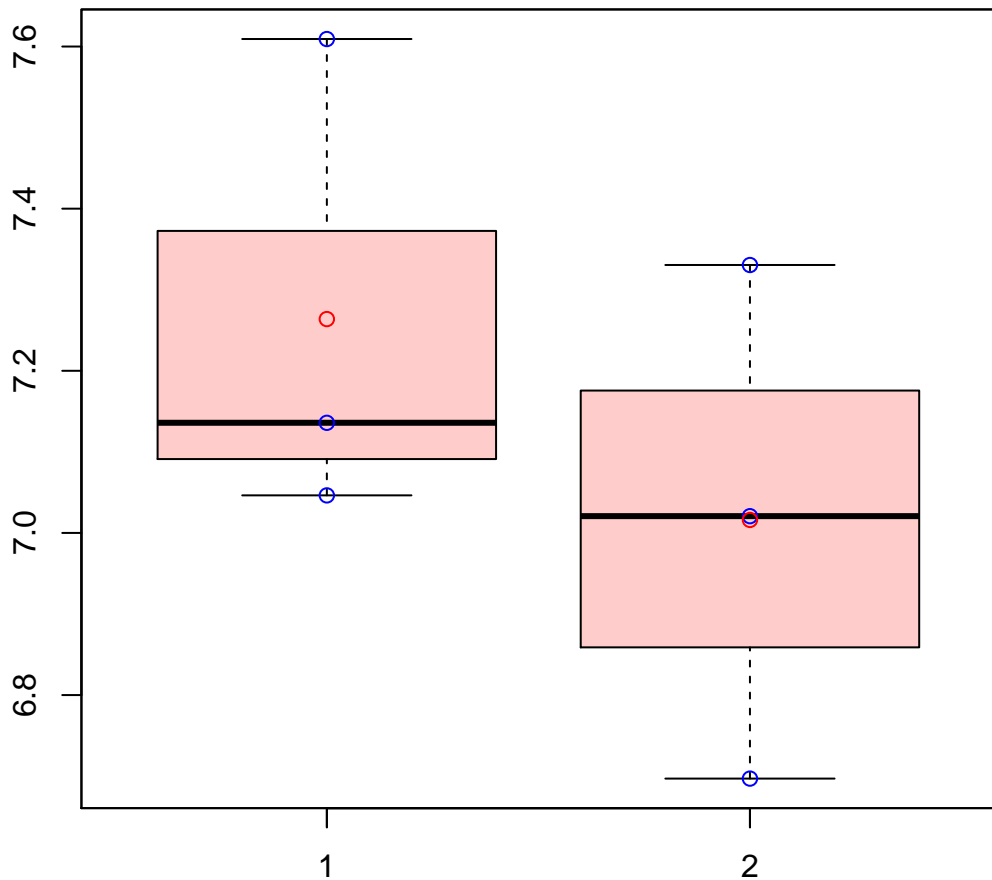

t-Test: p-value = 0.38



# Q5VNT5|Q5VNT5\_ORYSJ

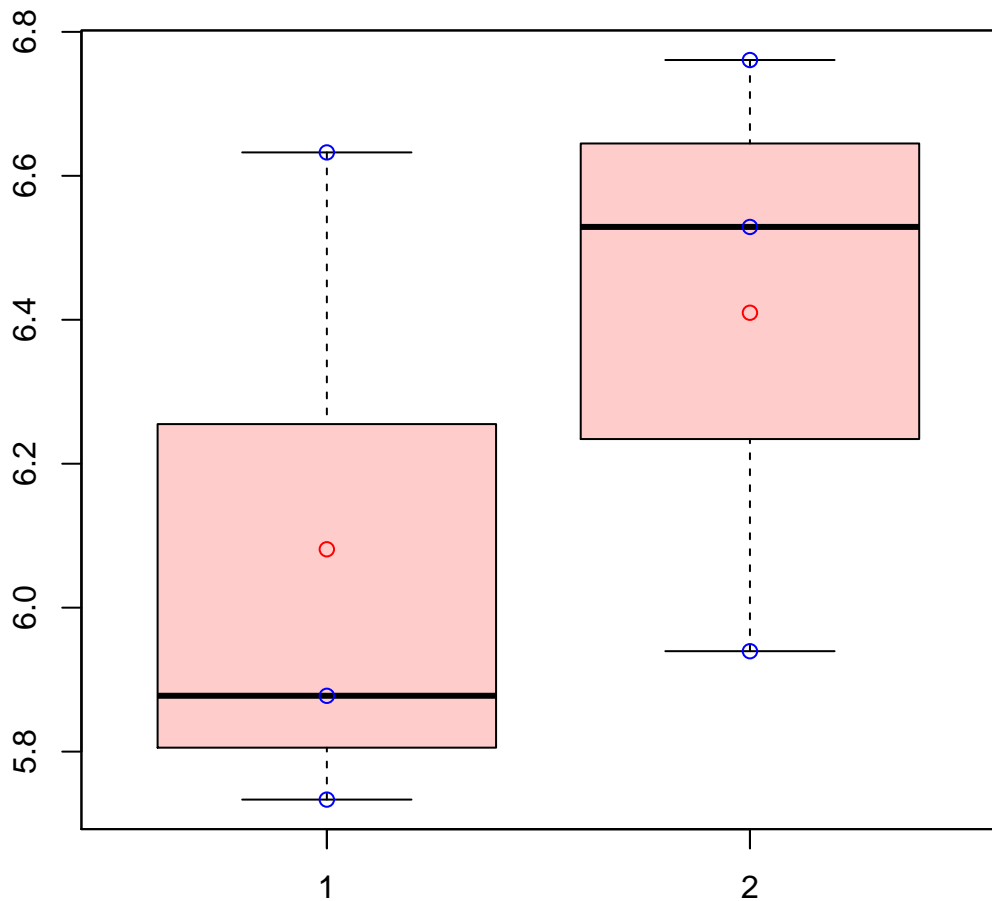

t-Test: p-value = 0.43

# Q5W652|Q5W652\_ORYSJ

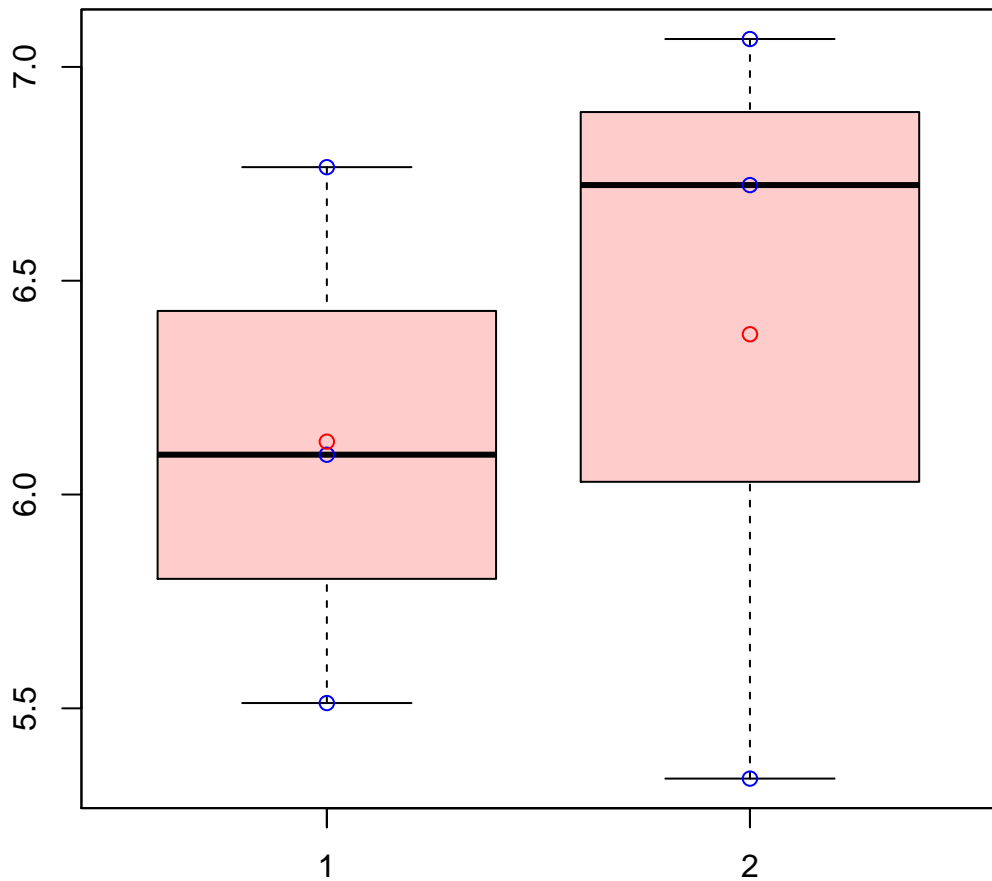

t-Test: p-value = 0.72

# Q5W6M8|Q5W6M8\_ORYSJ

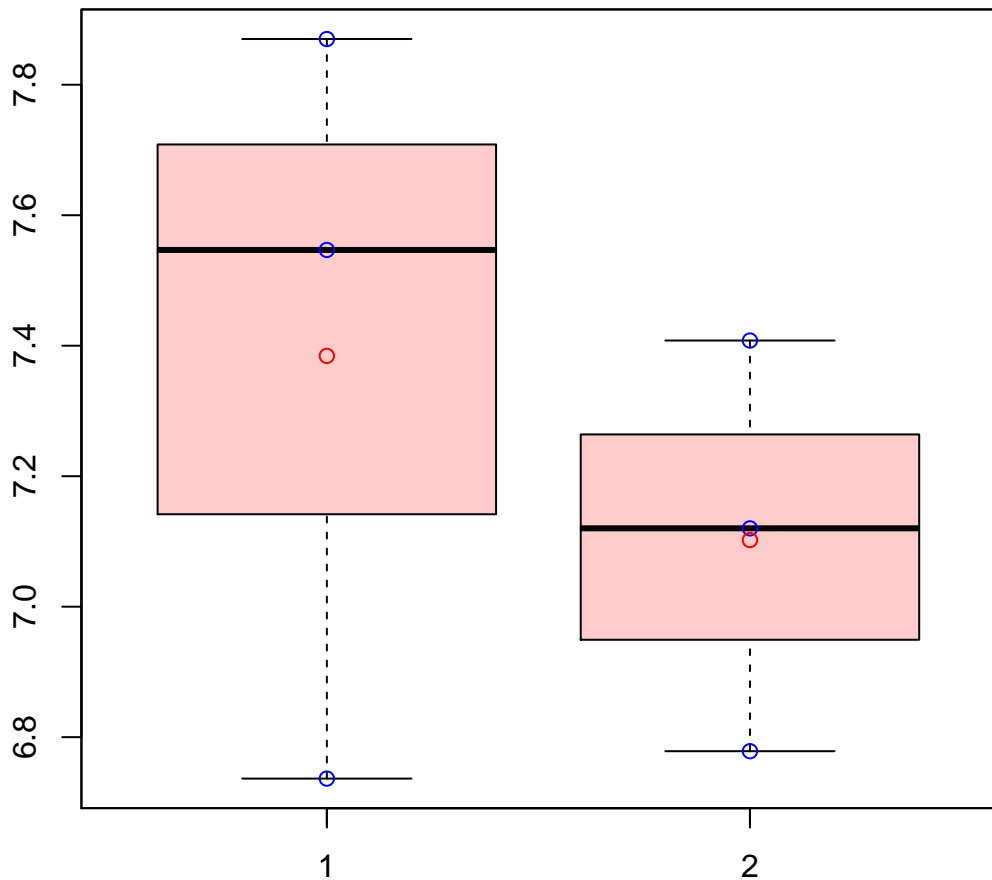

t-Test: p-value = 0.51

# Q5XLJ2|Q5XLJ2\_ORYSJ

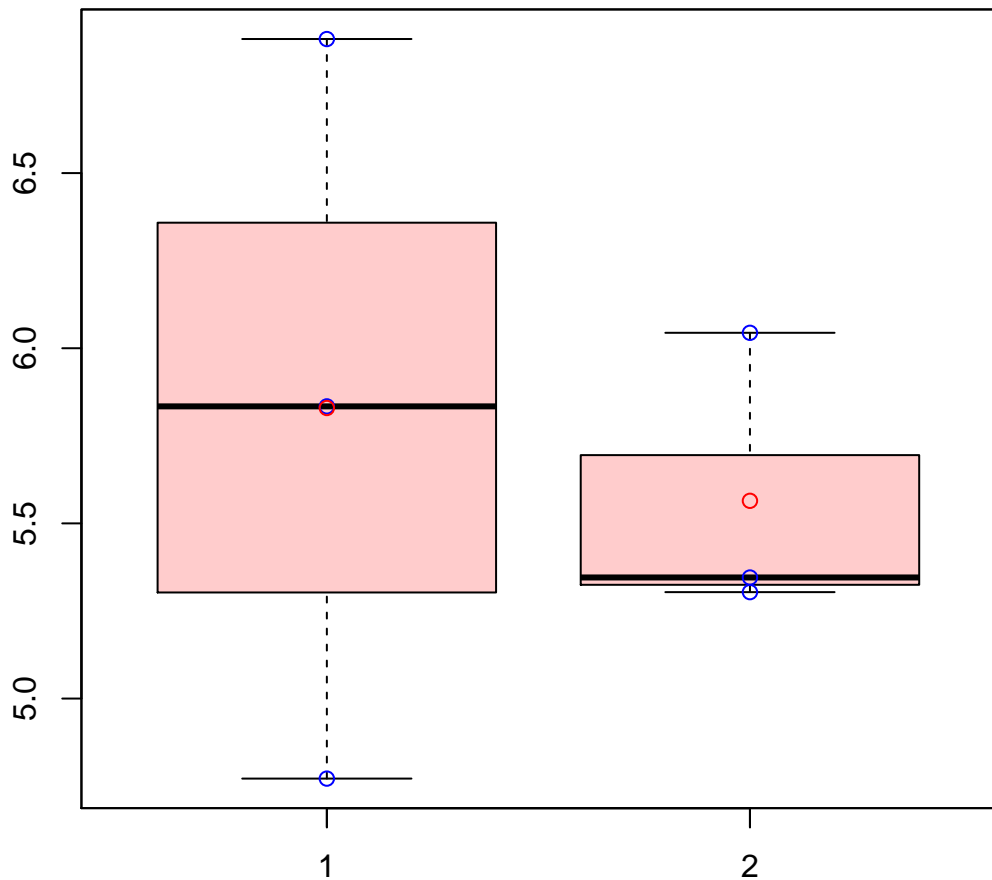

t-Test: p-value = 0.72

# Q5XUV3|Q5XUV3\_WHEAT

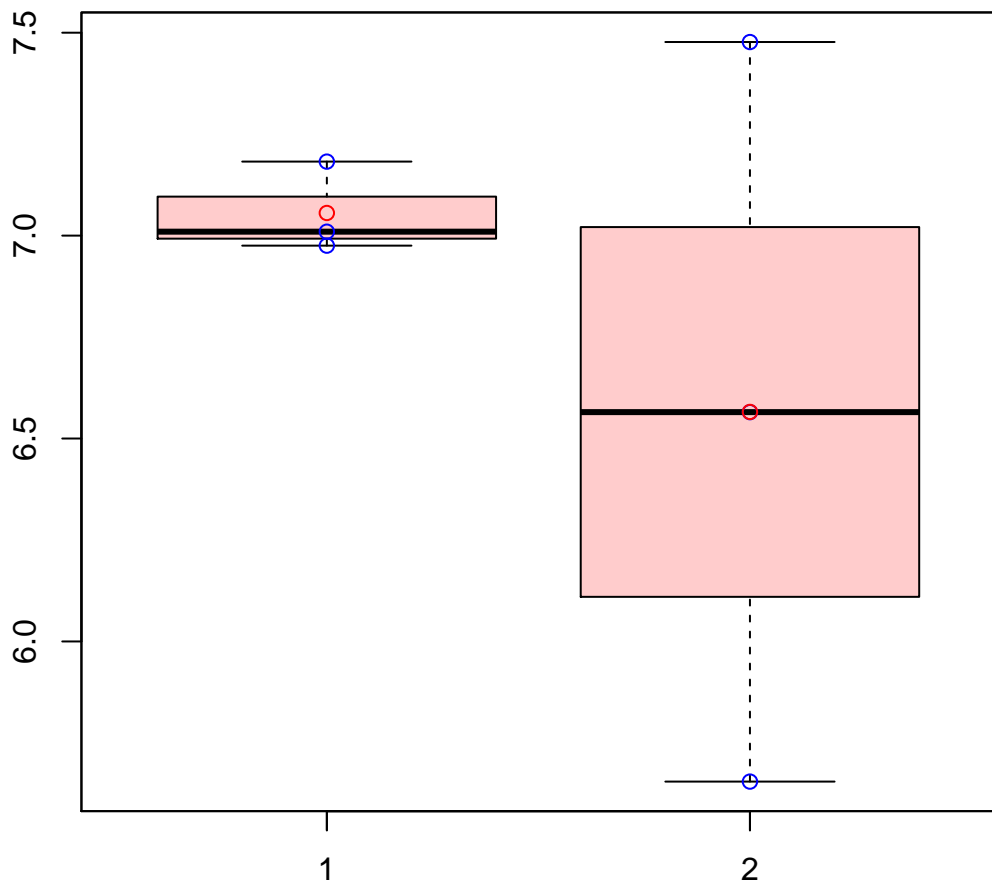

t-Test: p-value = 0.45

# Q5Y8C8|Q5Y8C8\_ORYSJ

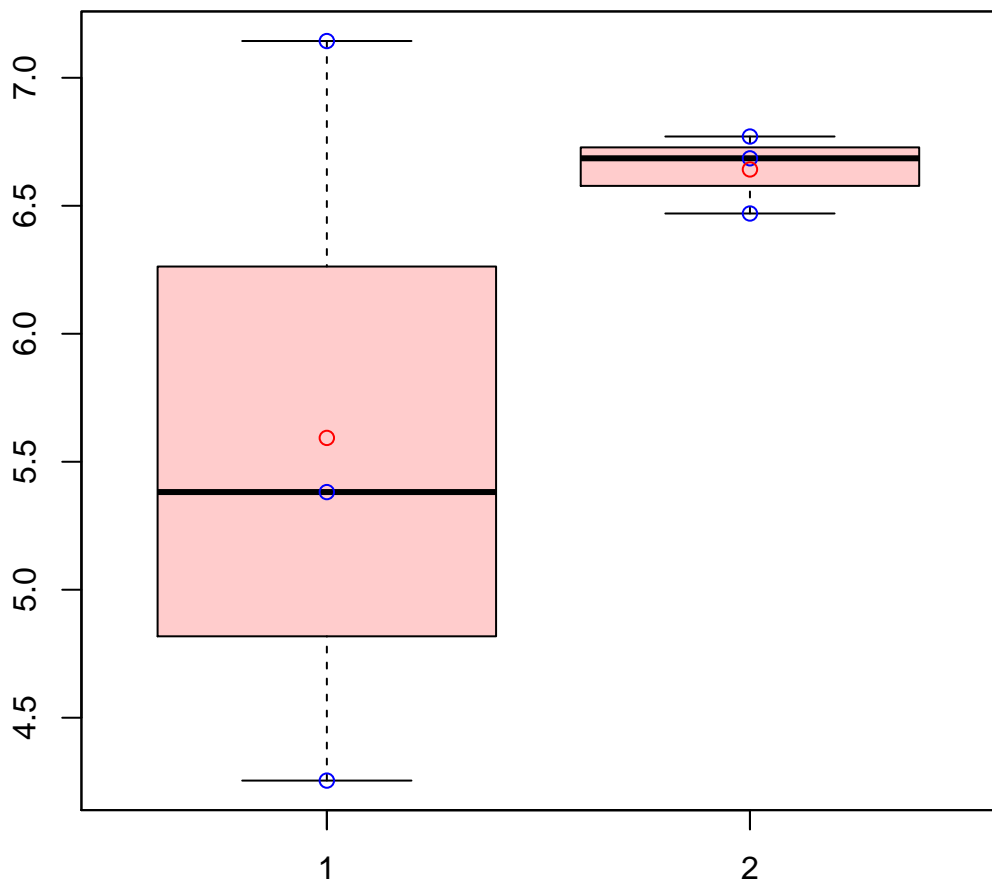

t-Test: p-value = 0.34

# Q5YAF6|Q5YAF6\_9POAL

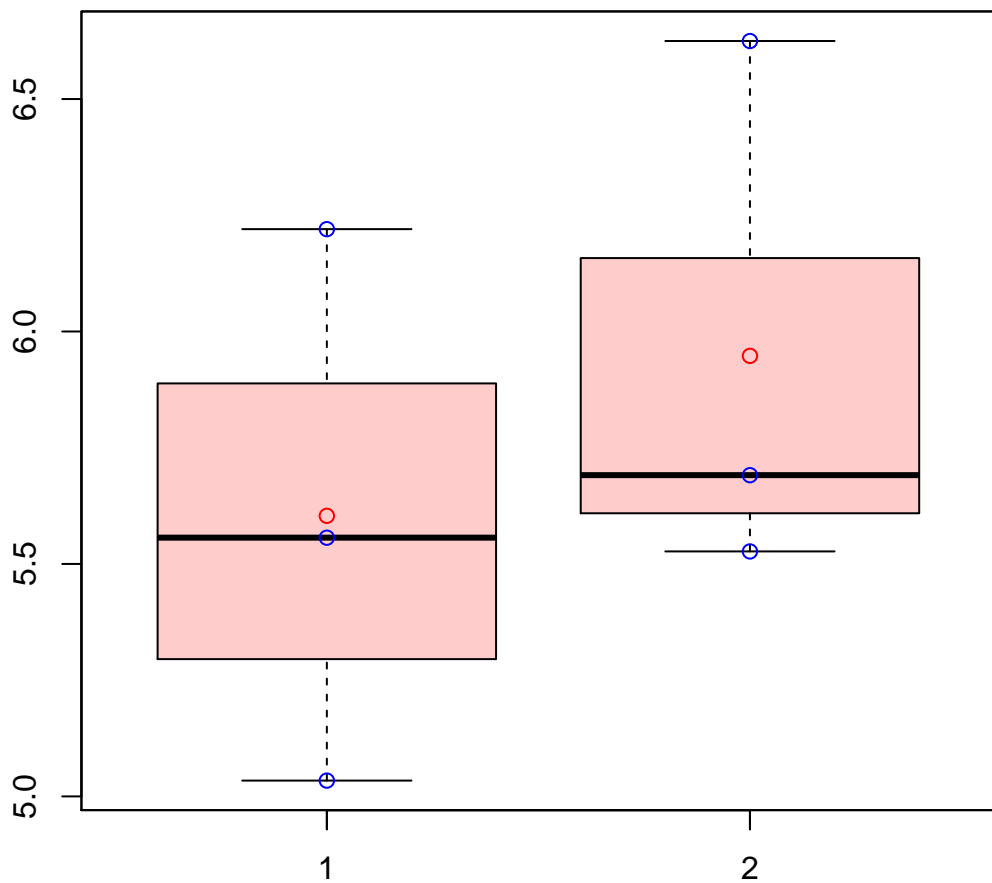

t-Test: p-value = 0.52

# Q5YJR5|Q5YJR5\_HYAOR

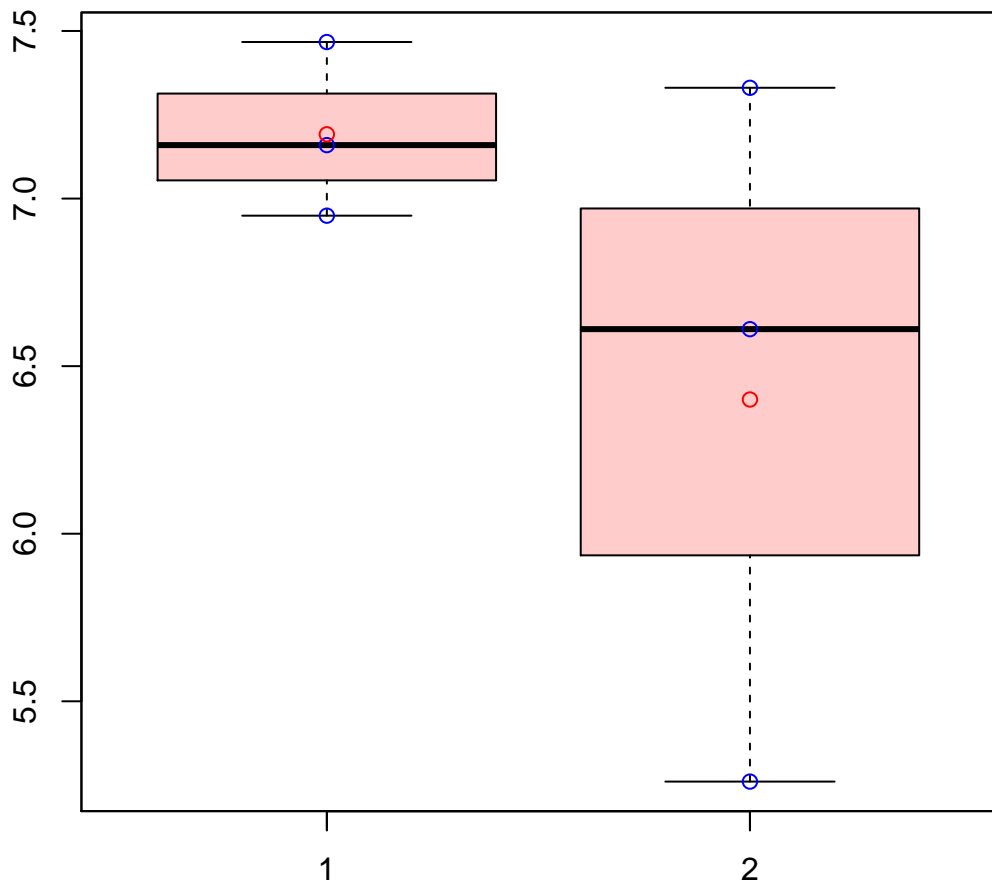

t-Test: p-value = 0.32



# Q5ZAS4|Q5ZAS4\_ORYSJ

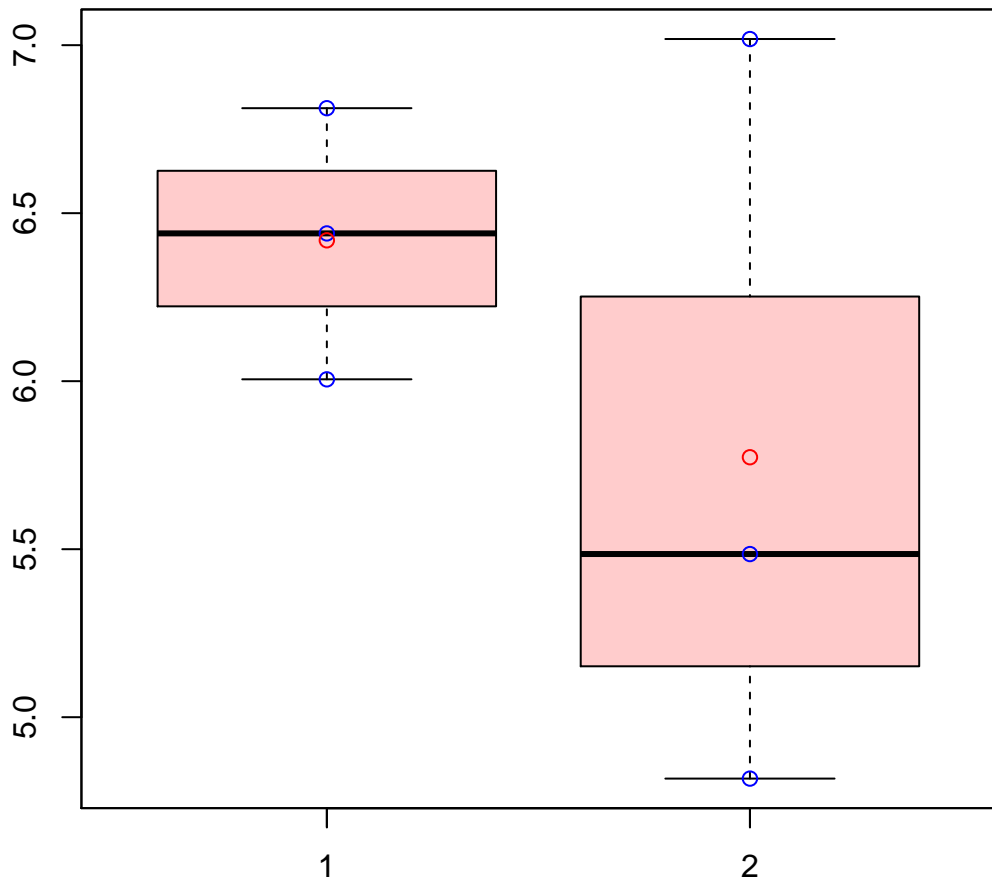

t-Test: p-value = 0.43

# Q60DD9|Q60DD9\_ORYSJ

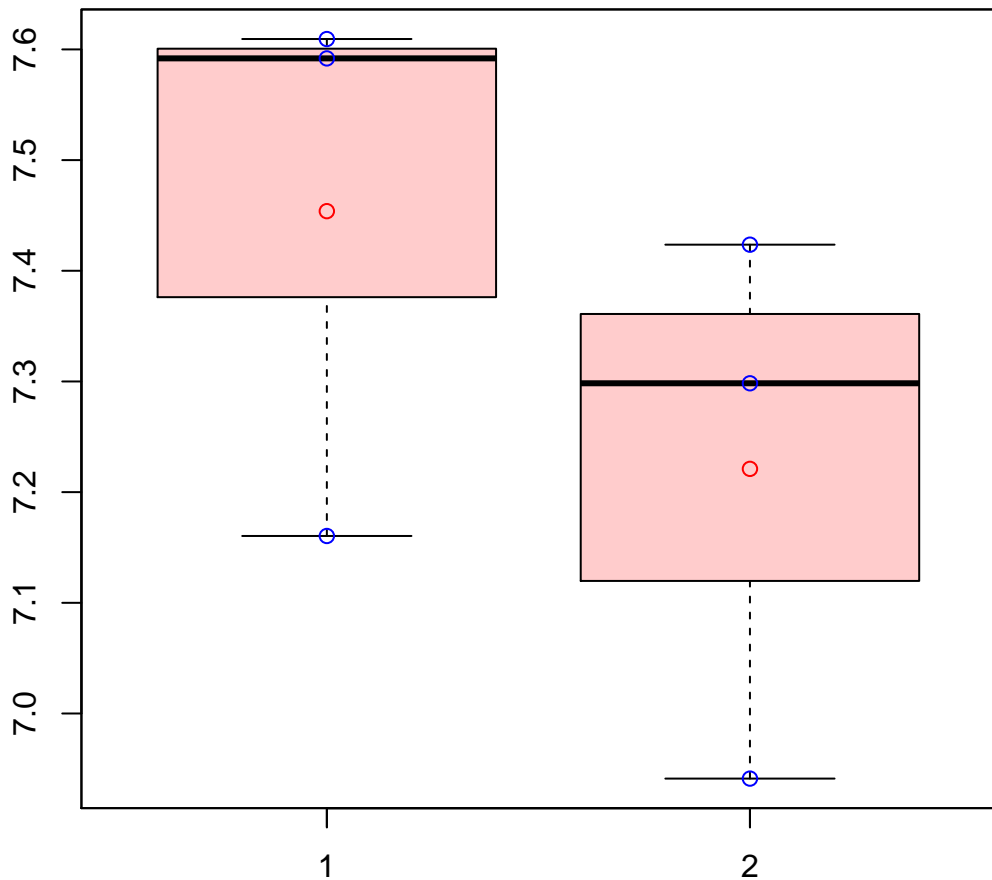

t-Test: p-value = 0.32

# Q60DH6|Q60DH6\_ORYSJ

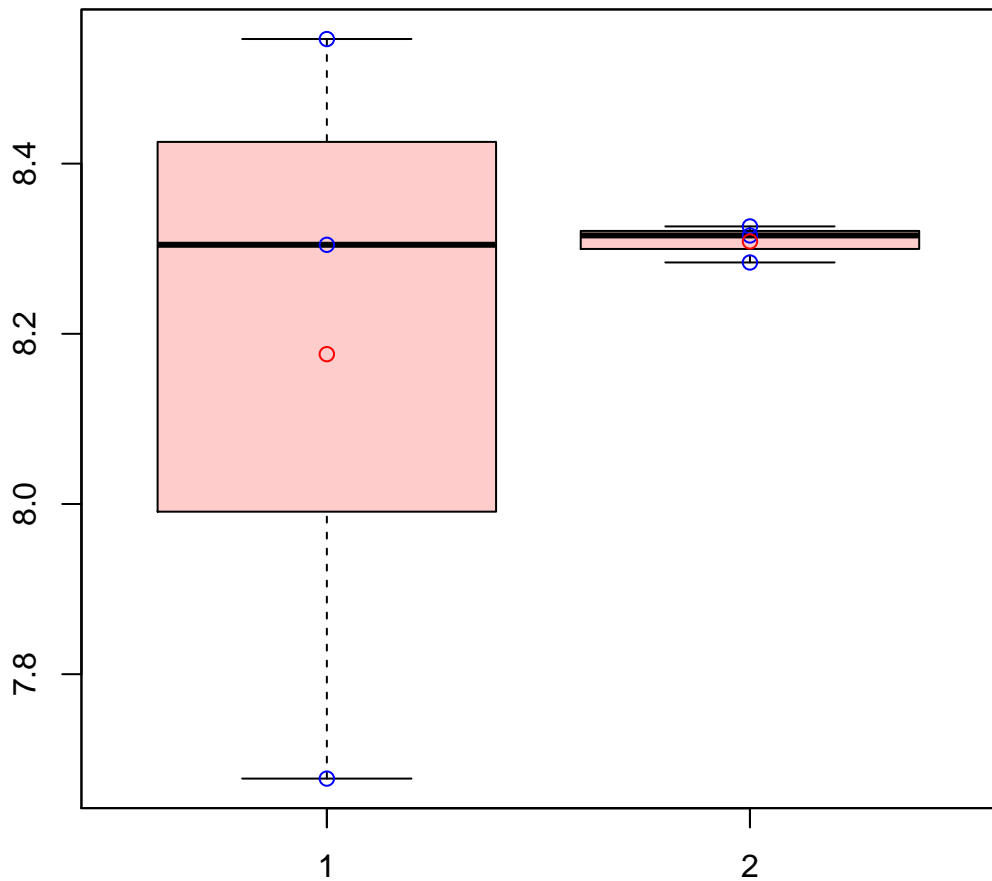

t-Test: p-value = 0.66

# Q60DJ1|Q60DJ1\_ORYSJ

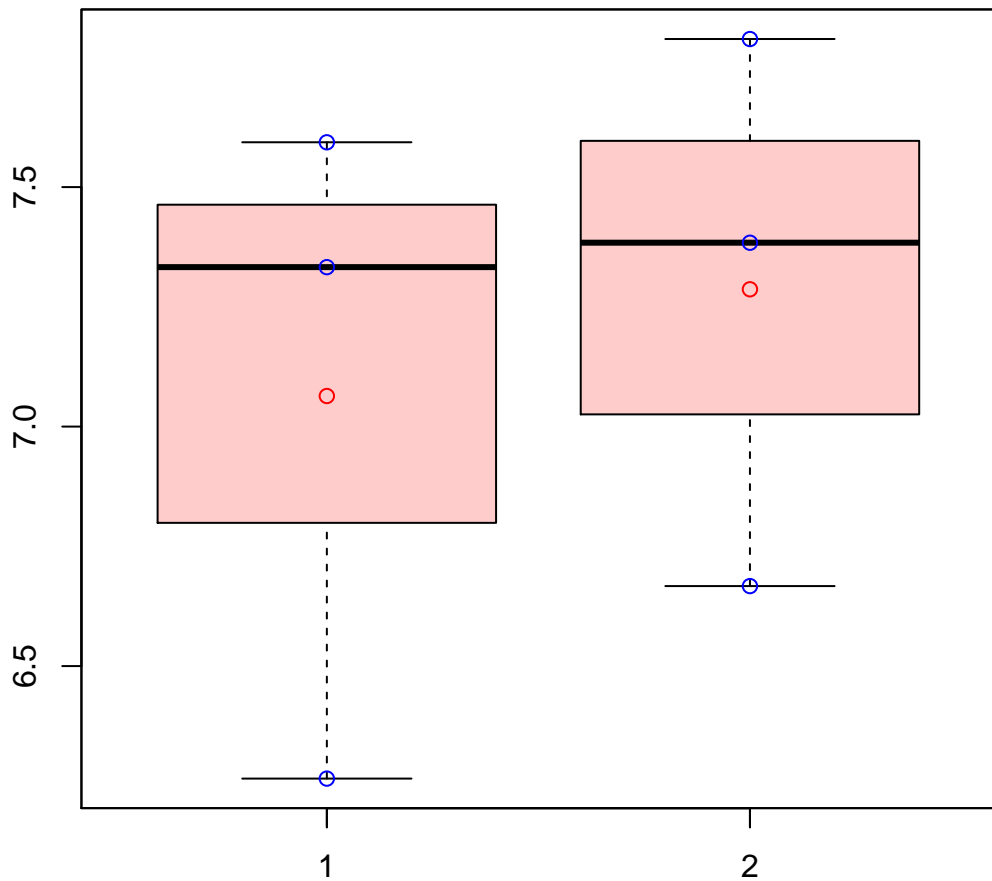

t-Test: p-value = 0.69

# Q60DK7|Q60DK7\_ORYSJ

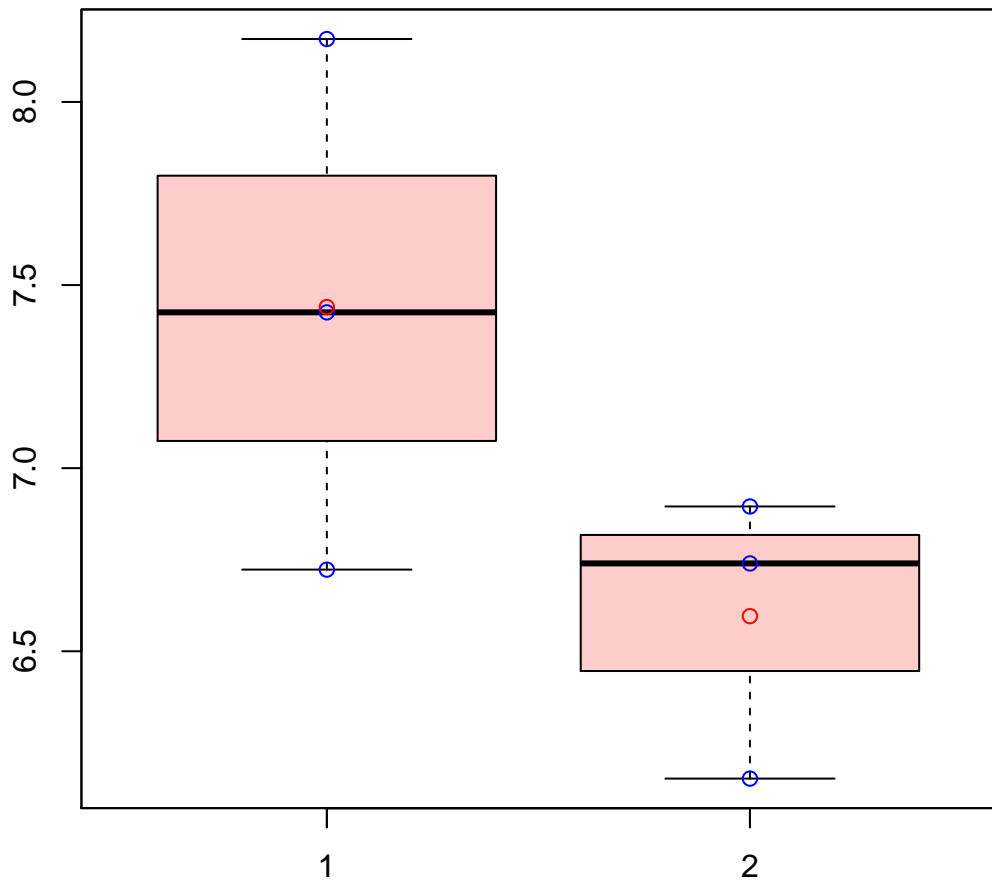

t-Test: p-value = 0.17

# Q60E17|Q60E17\_ORYSJ

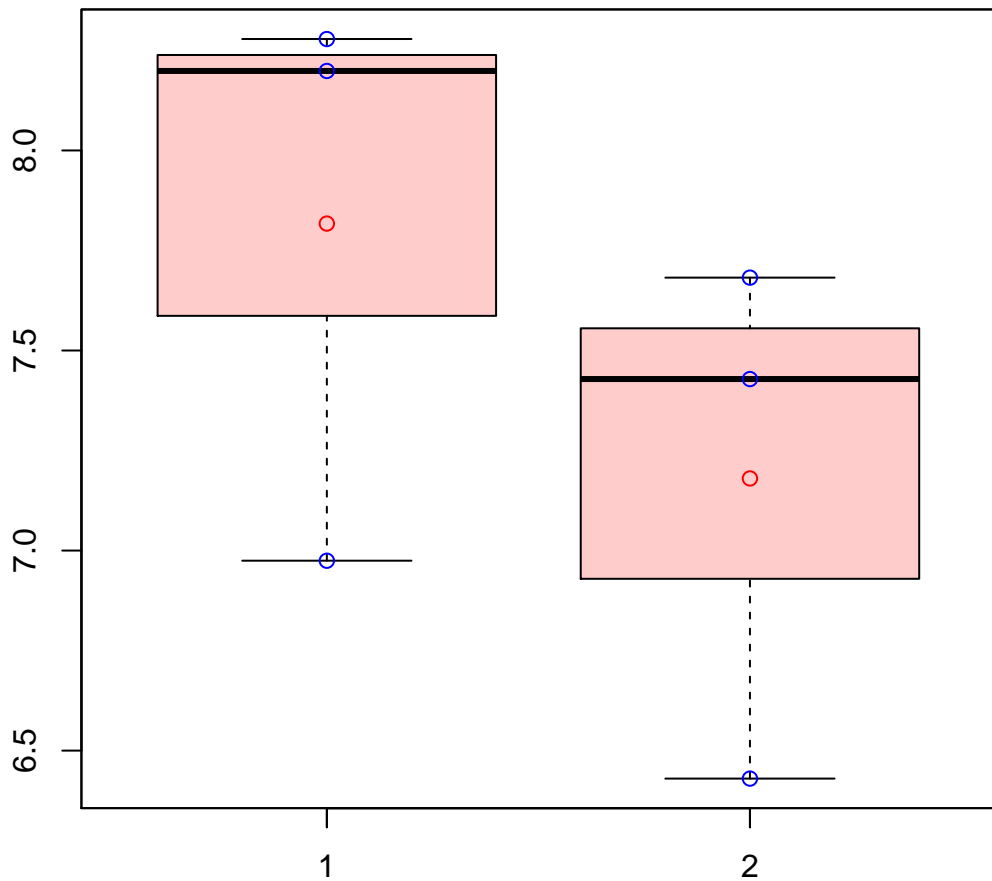

t-Test: p-value = 0.33

# Q60E25|Q60E25\_ORYSJ

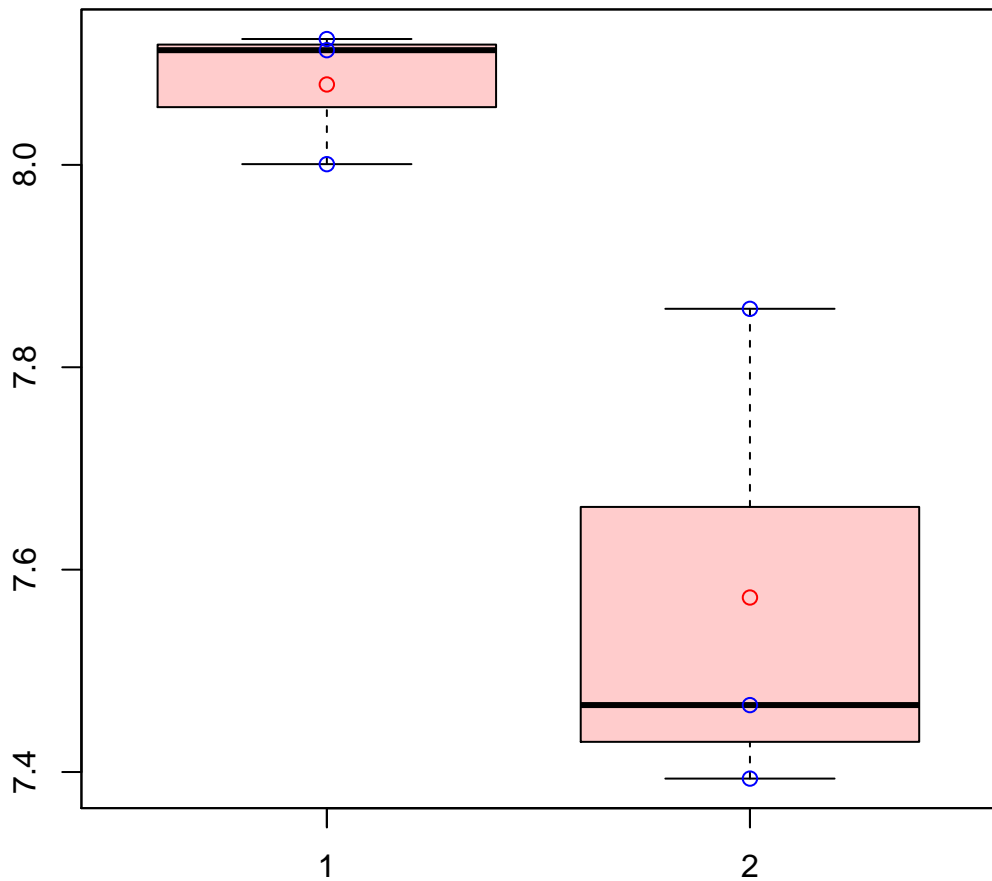

t-Test: p-value = 0.06

# Q60EM9|Q60EM9\_ORYSJ

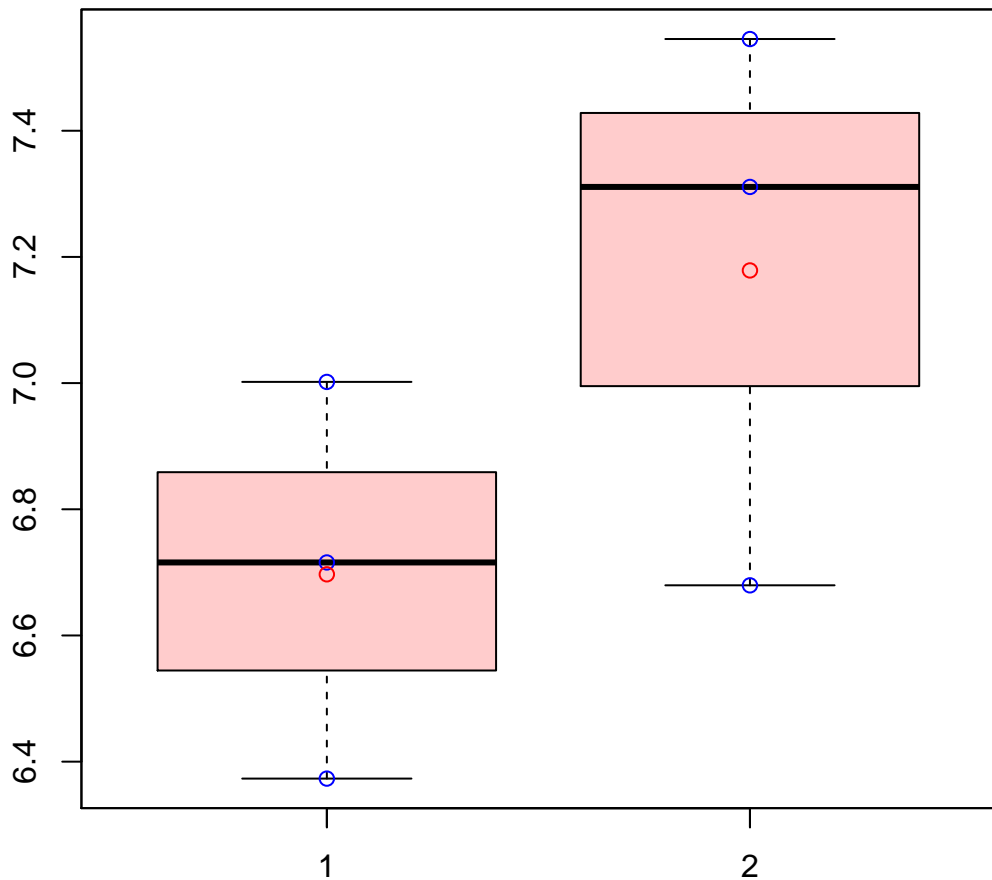

t-Test: p-value = 0.21



# Q60EY9|Q60EY9\_ORYSJ

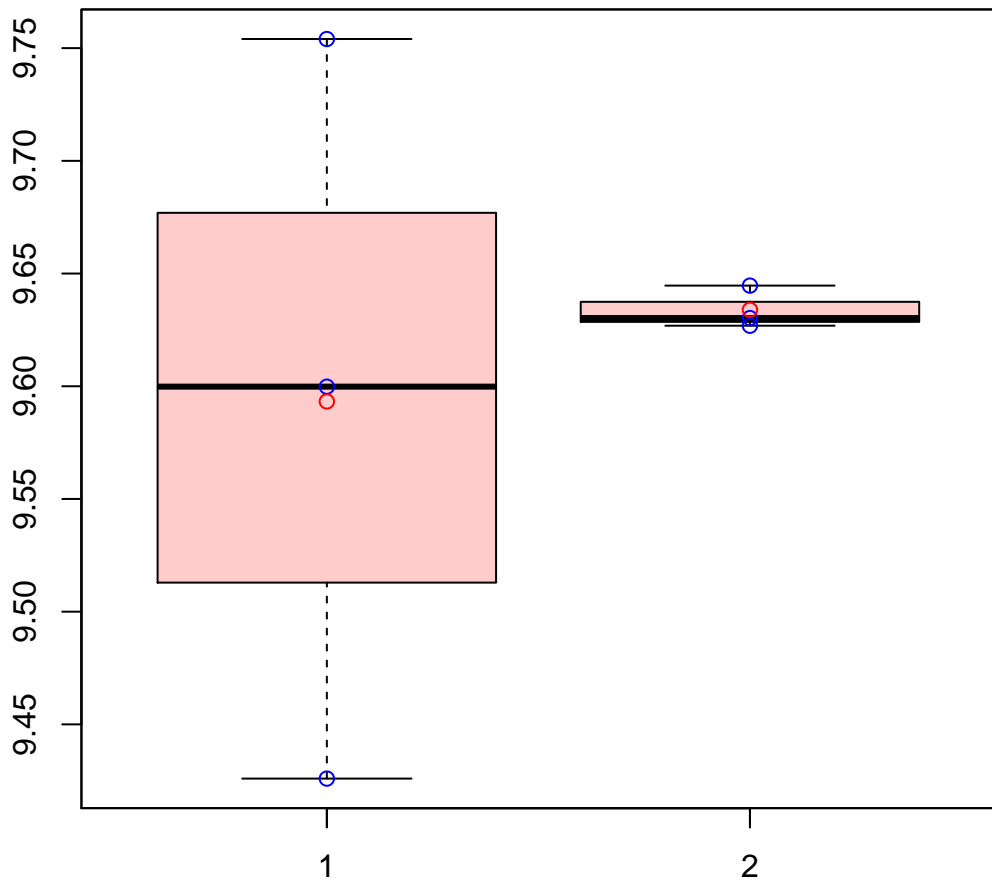

t-Test: p-value = 0.71

# Q60EZ1|Q60EZ1\_ORYSJ

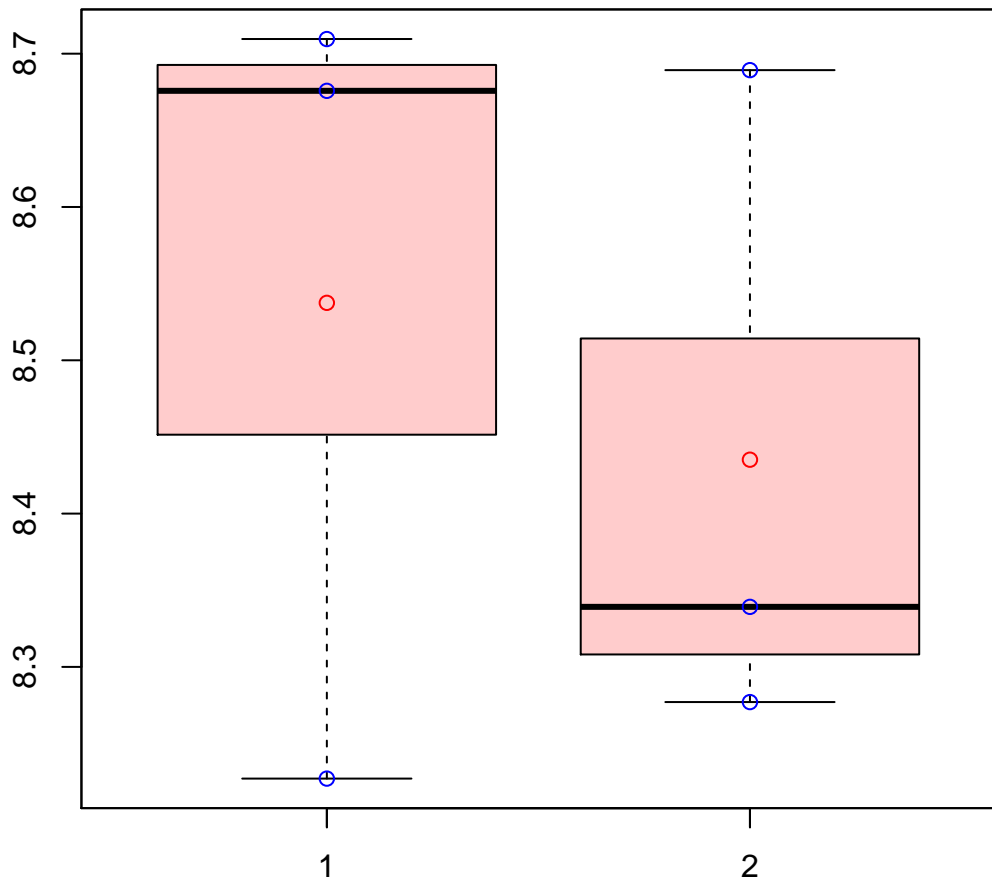

t-Test: p-value = 0.64

# Q60FY3|Q60FY3\_9LILI

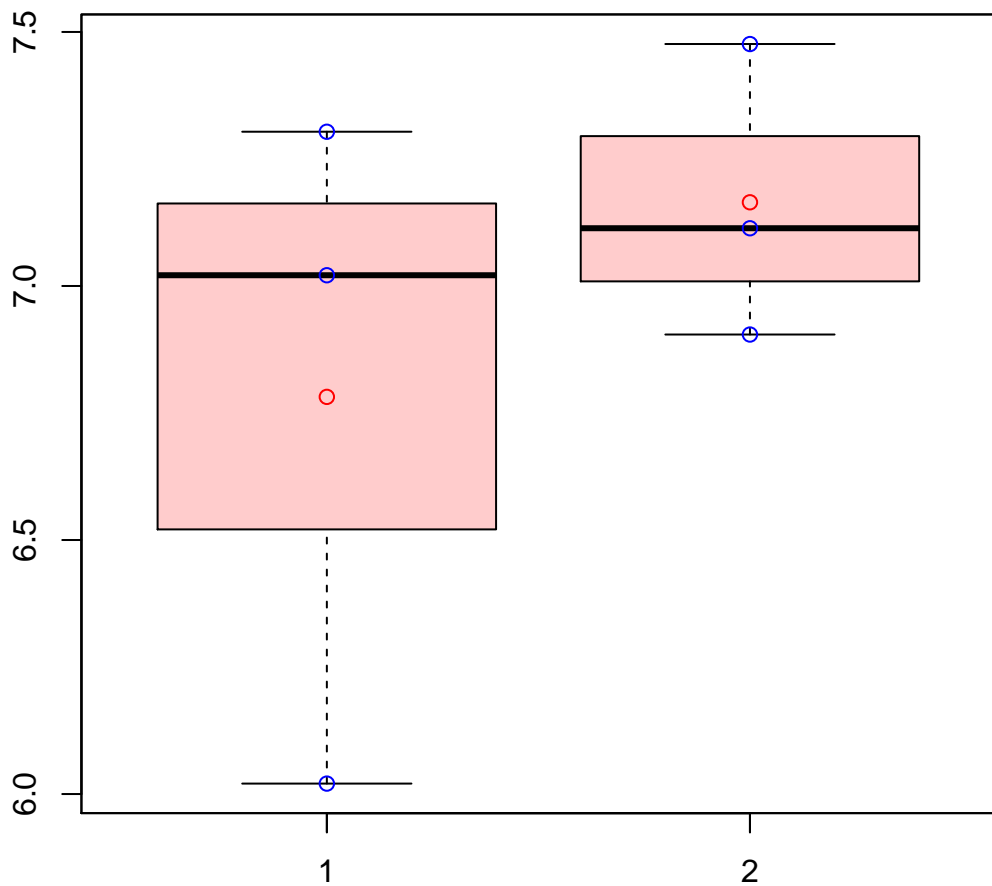

t-Test: p-value = 0.44

# Q655Q5|Q655Q5\_ORYSJ

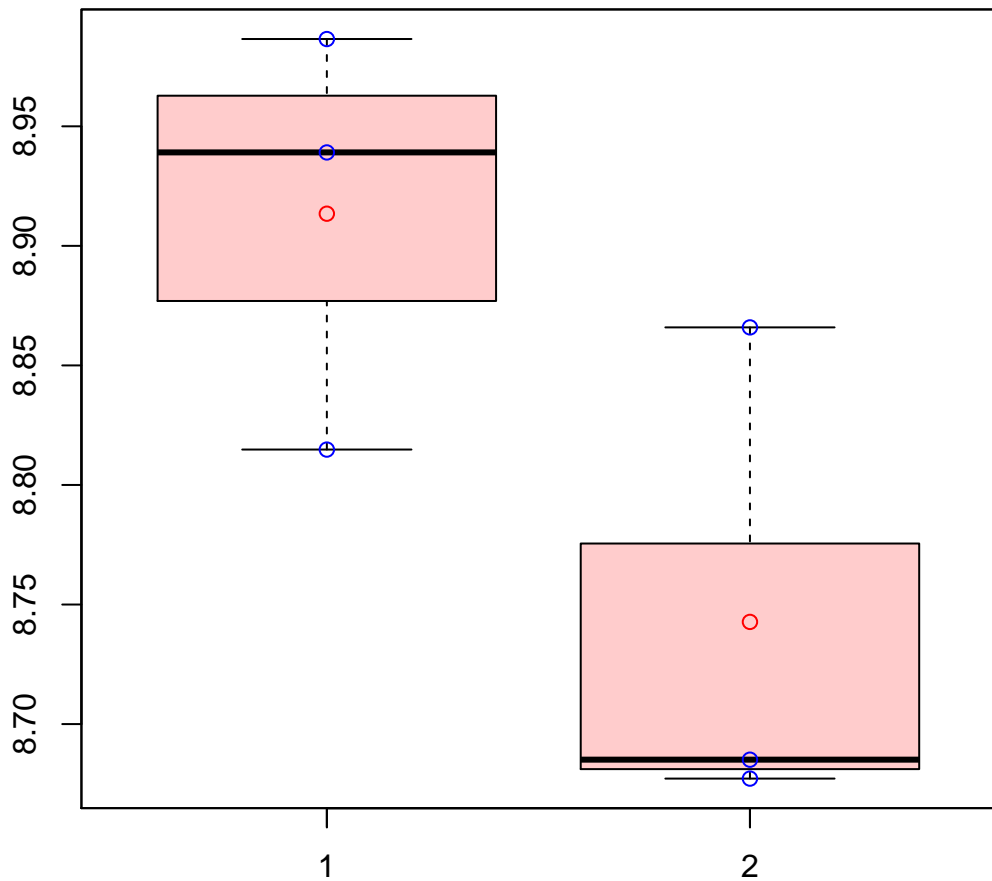

t-Test: p-value = 0.1

# Q655T1|Q655T1\_ORYSJ

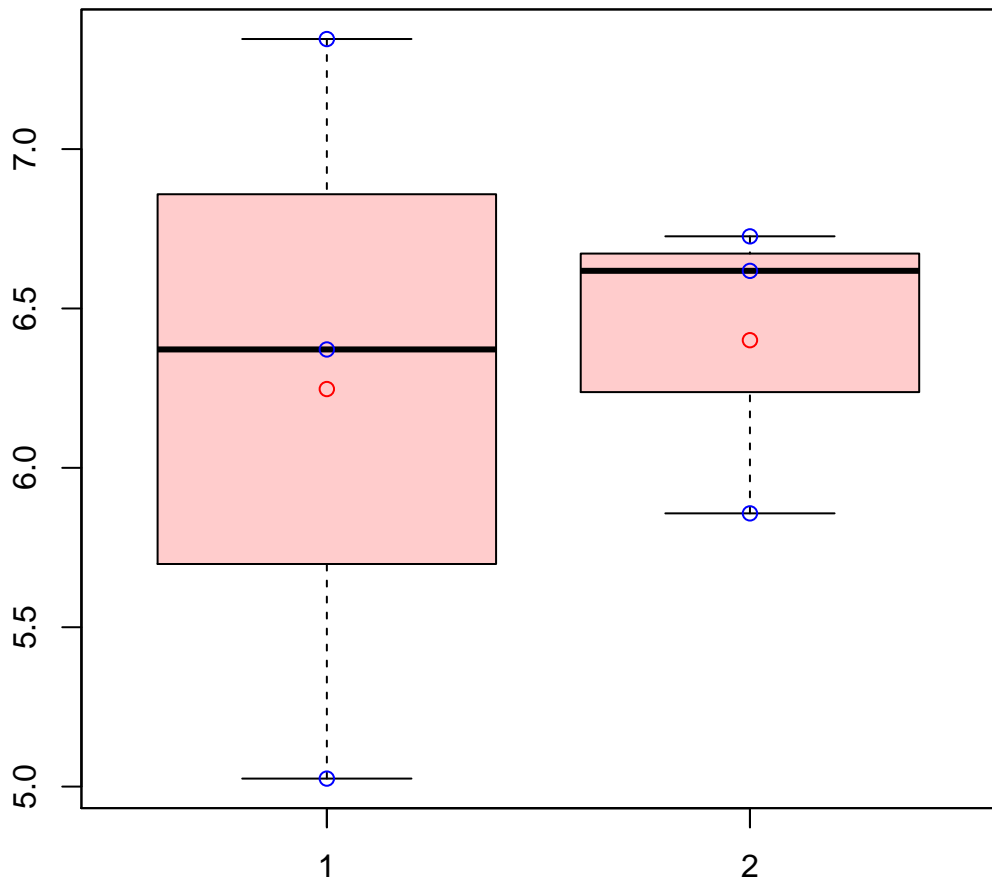

t-Test: p-value = 0.85

# Q657T1|Q657T1\_ORYSJ

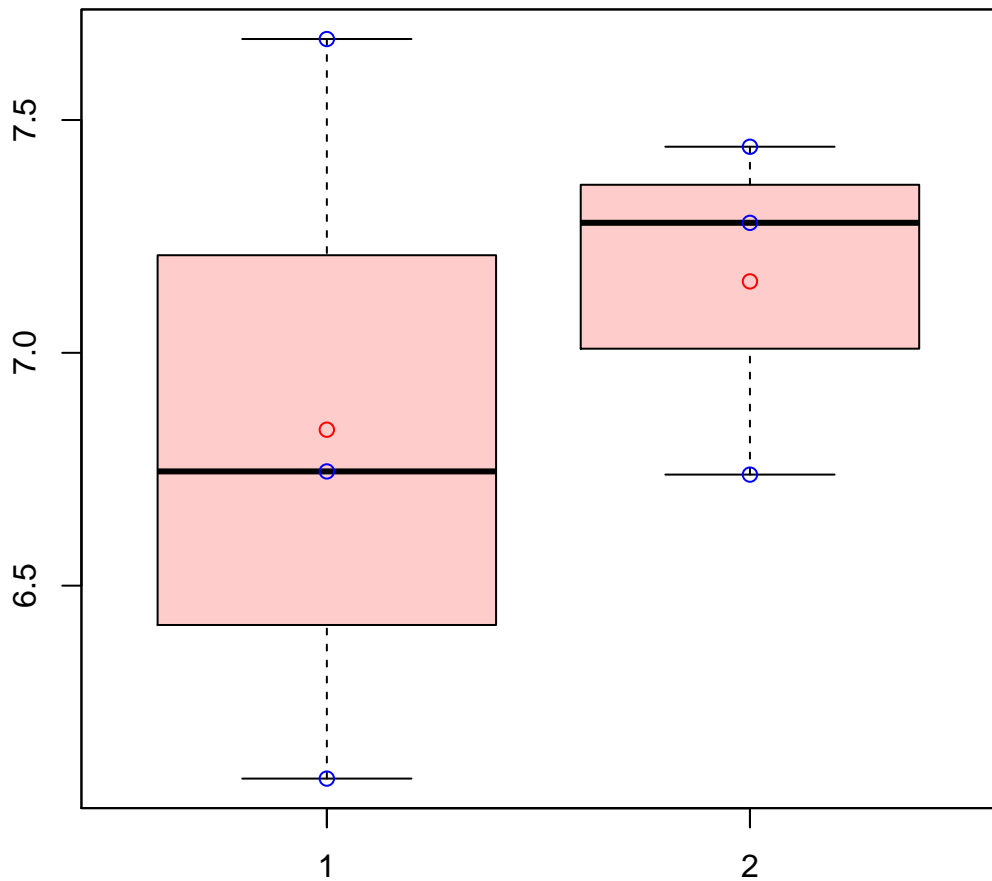

t-Test: p-value = 0.58

# Q66PW9|Q66PW9\_SACOF

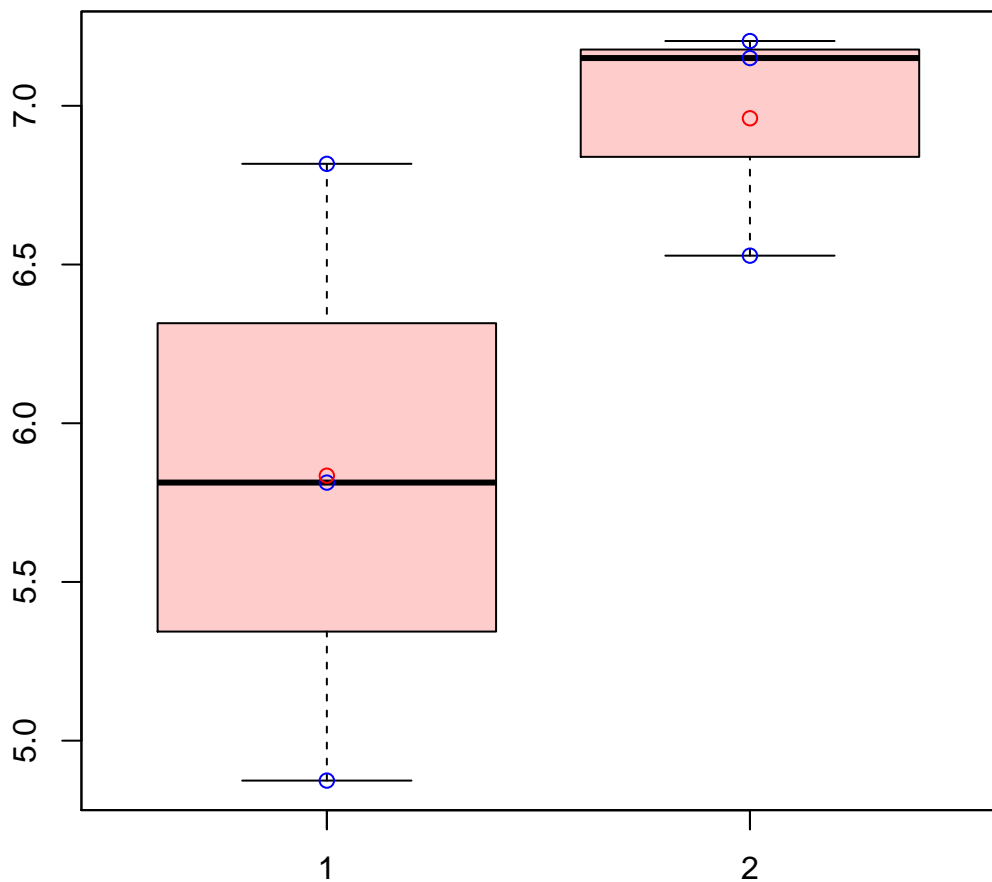

t-Test: p-value = 0.17

# Q672R6|Q672R6\_MAIZE

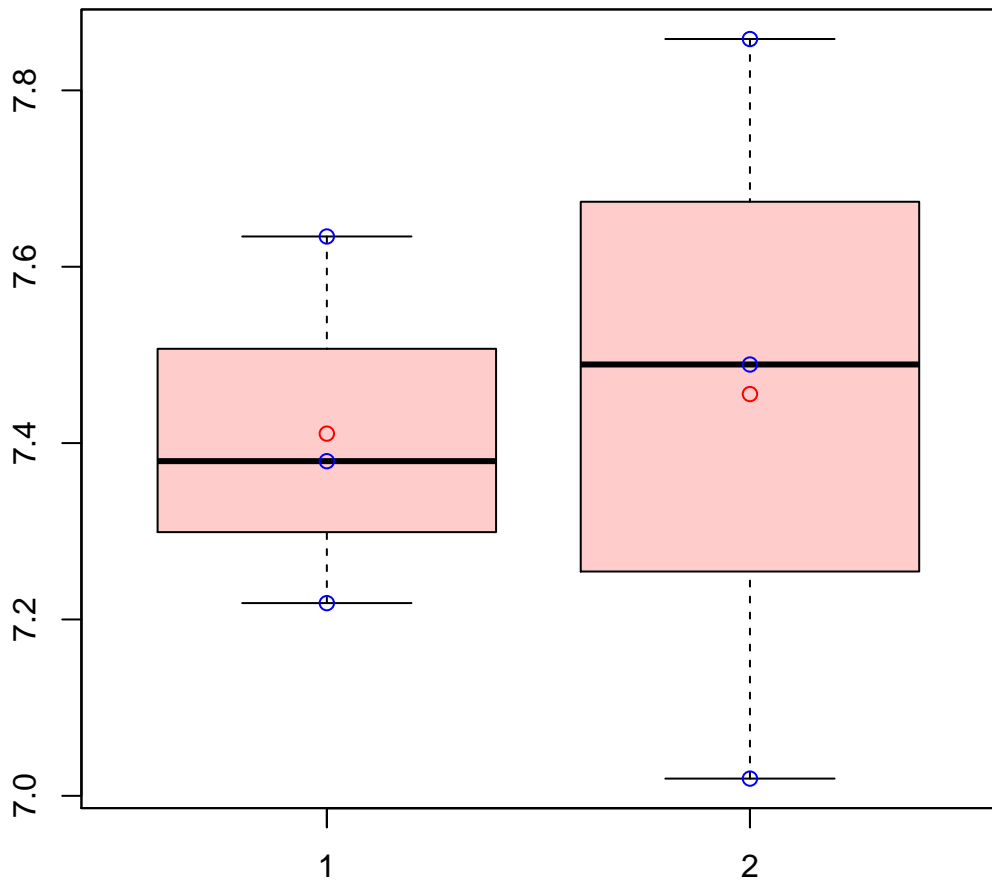

t-Test: p-value = 0.88



# Q673G4|Q673G4\_HORVD

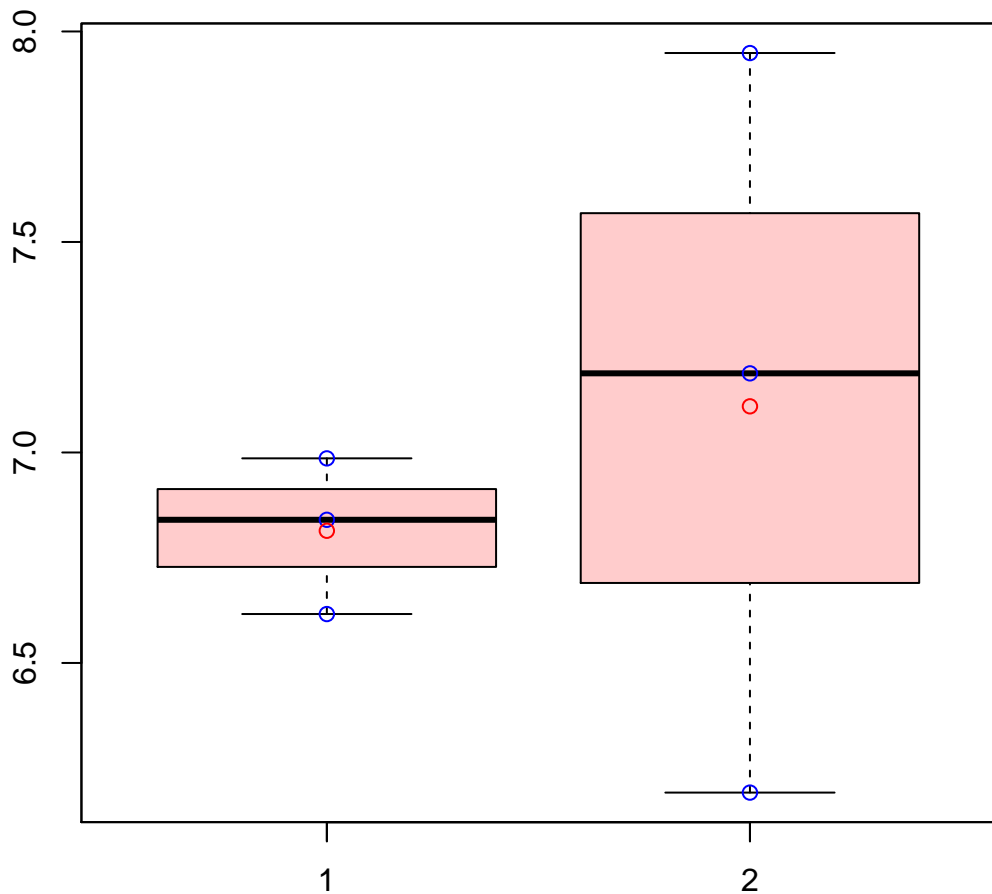

t-Test: p-value = 0.62

# Q677A2|Q677A2\_HYAOR

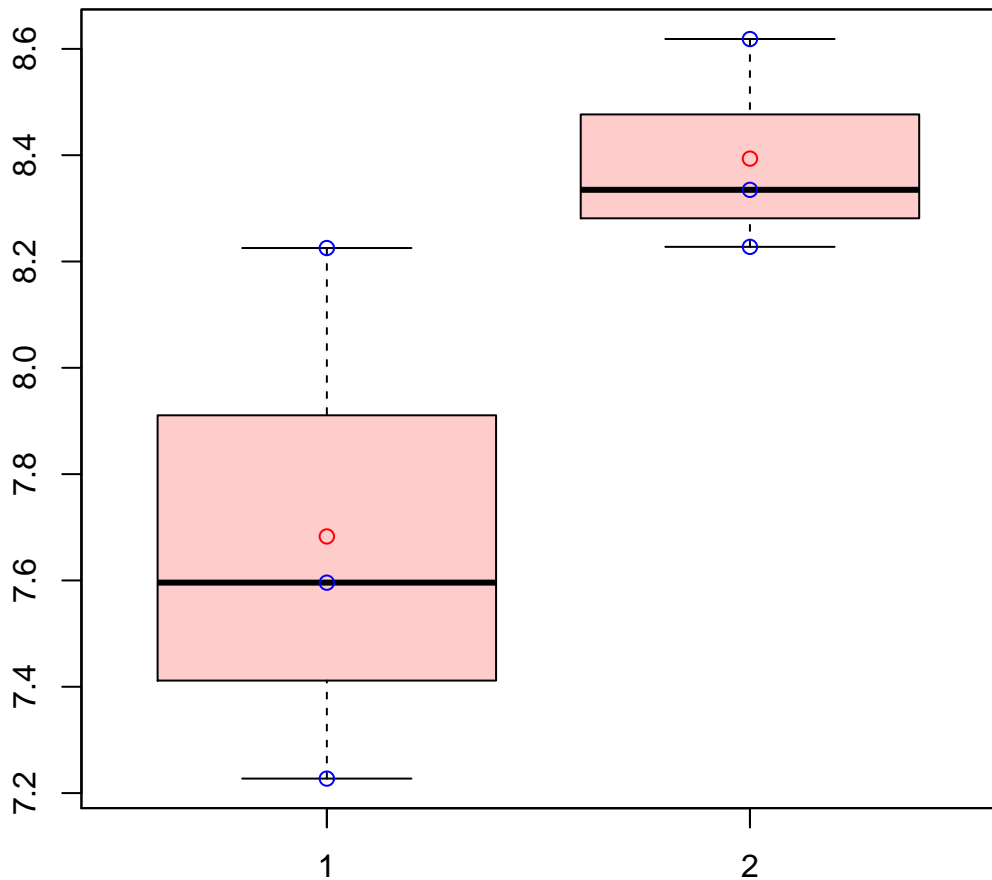

t-Test: p-value = 0.12

# Q677H3|Q677H3\_HYAOR

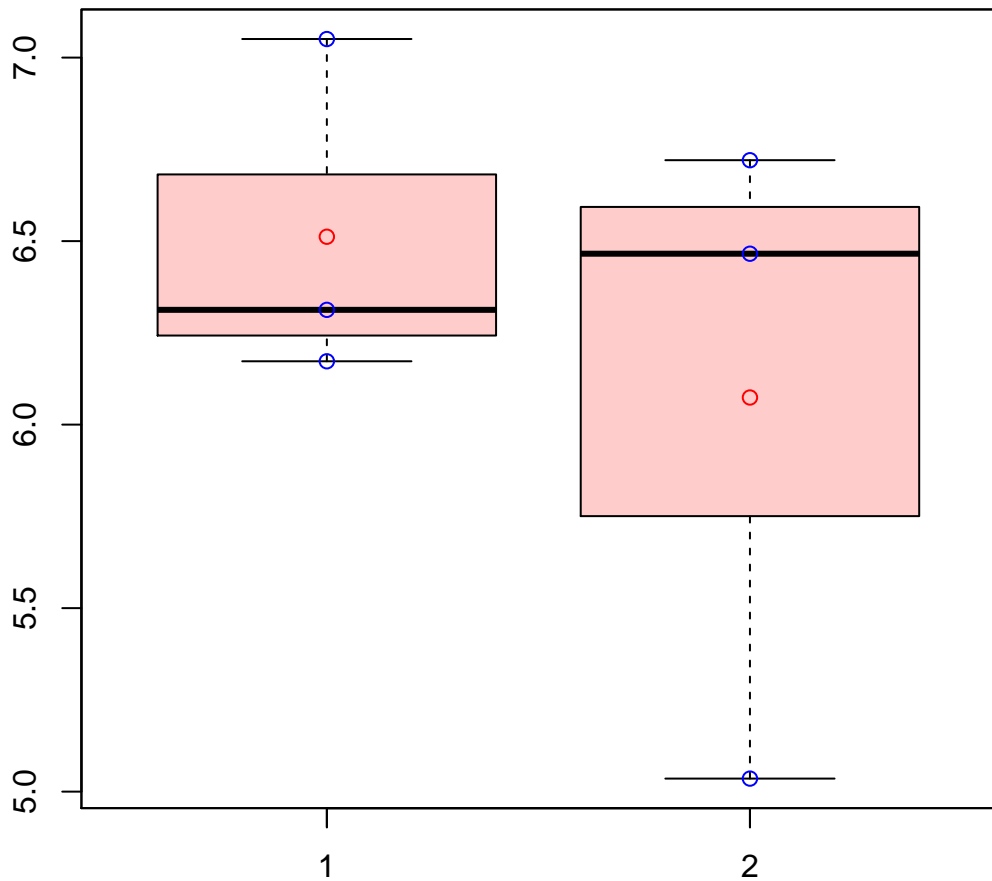

t-Test: p-value = 0.51

# Q67GN7|Q67GN7\_9ASPA

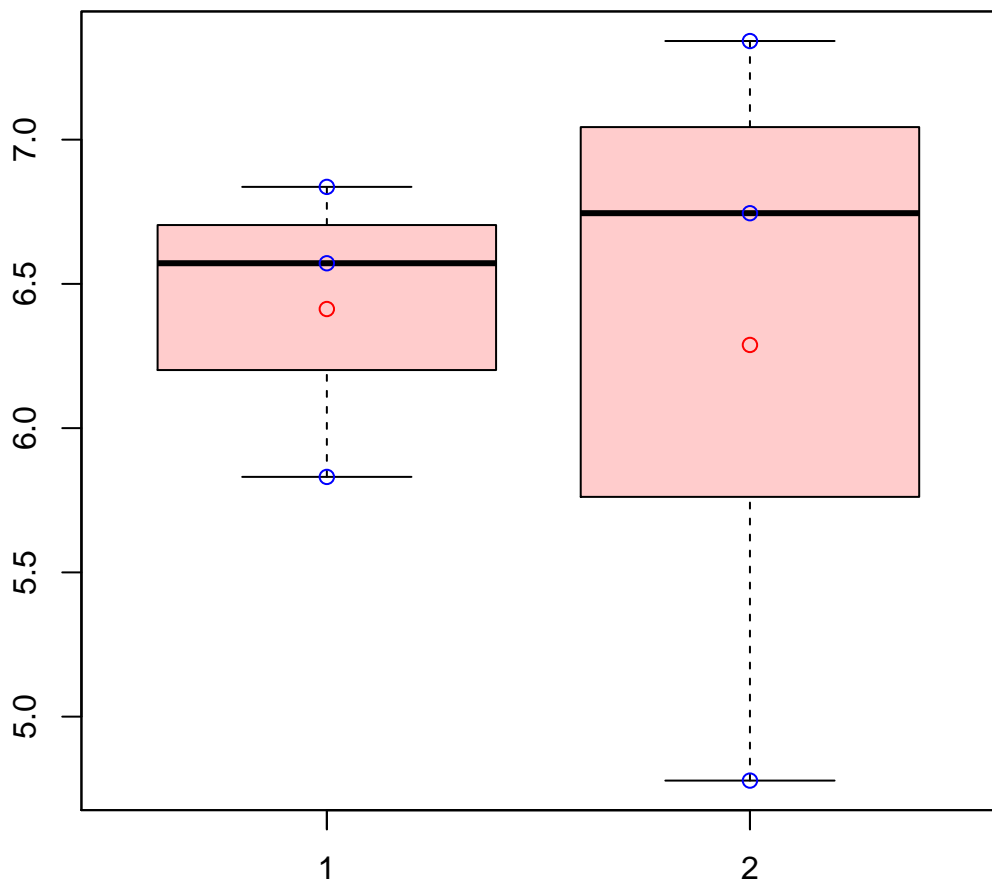

t-Test: p-value = 0.89

# Q67VZ1|Q67VZ1\_ORYSJ

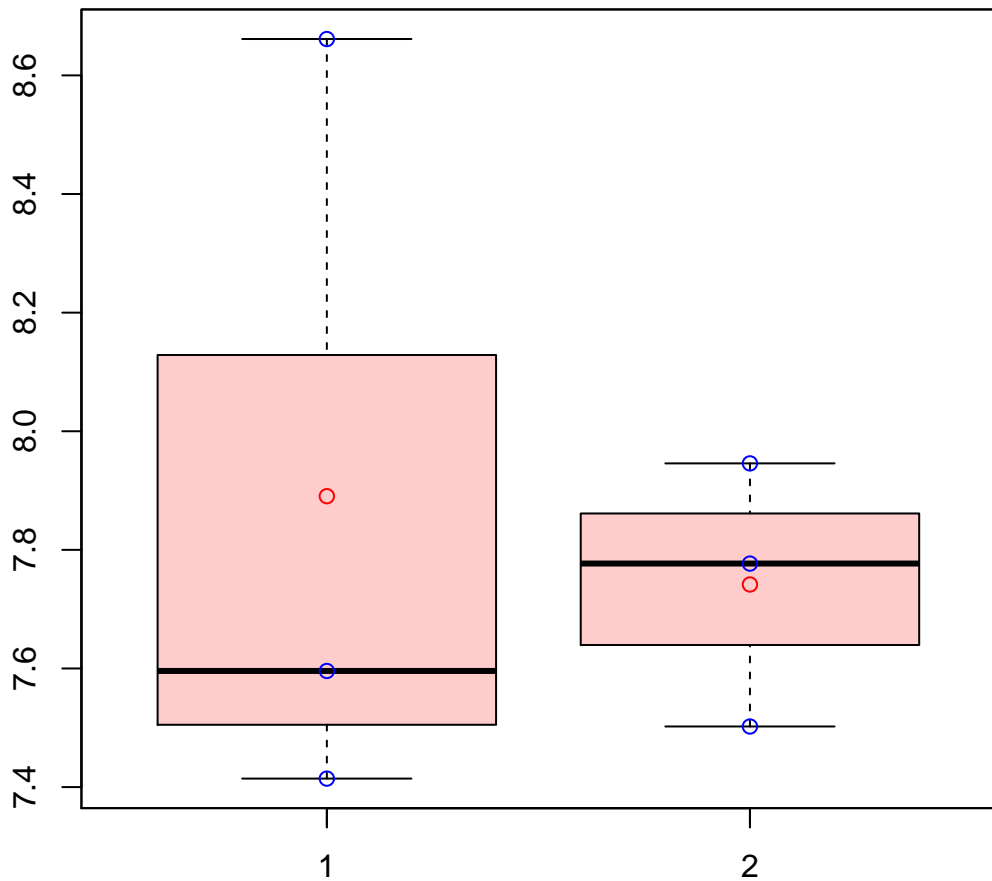

t-Test: p-value = 0.75

# Q688G1|Q688G1\_ORYSJ

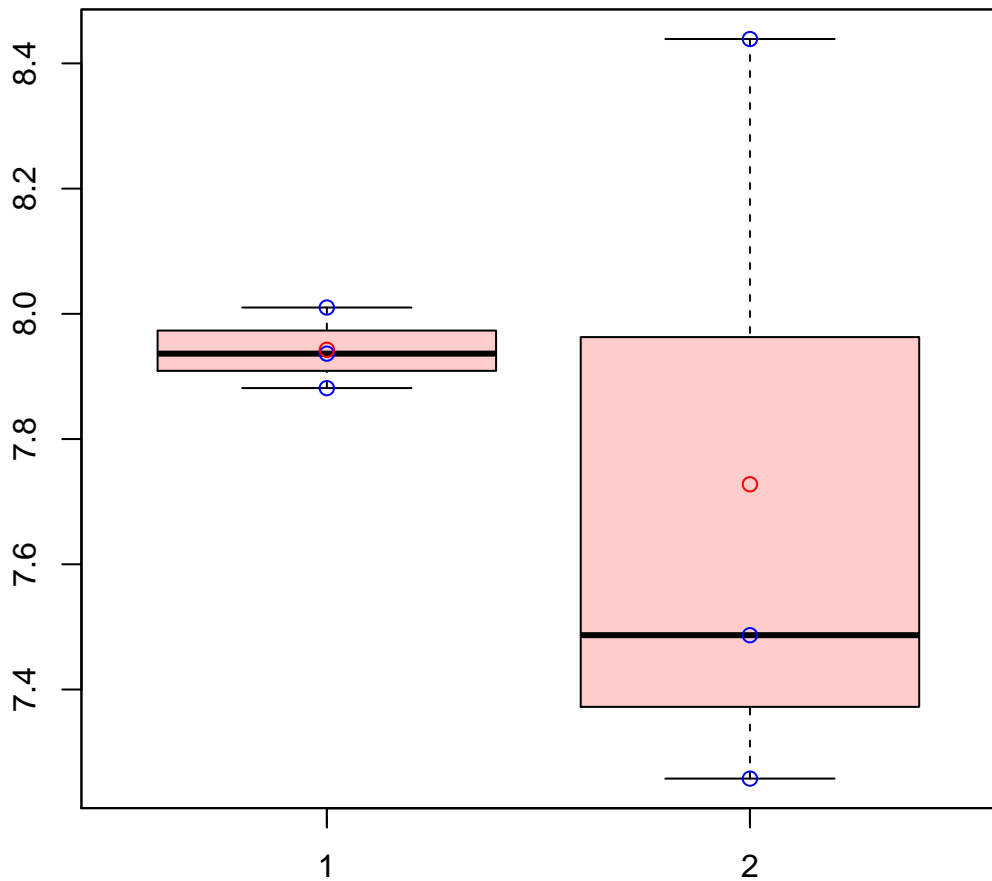

t-Test: p-value = 0.61

# Q688G8|Q688G8\_ORYSJ

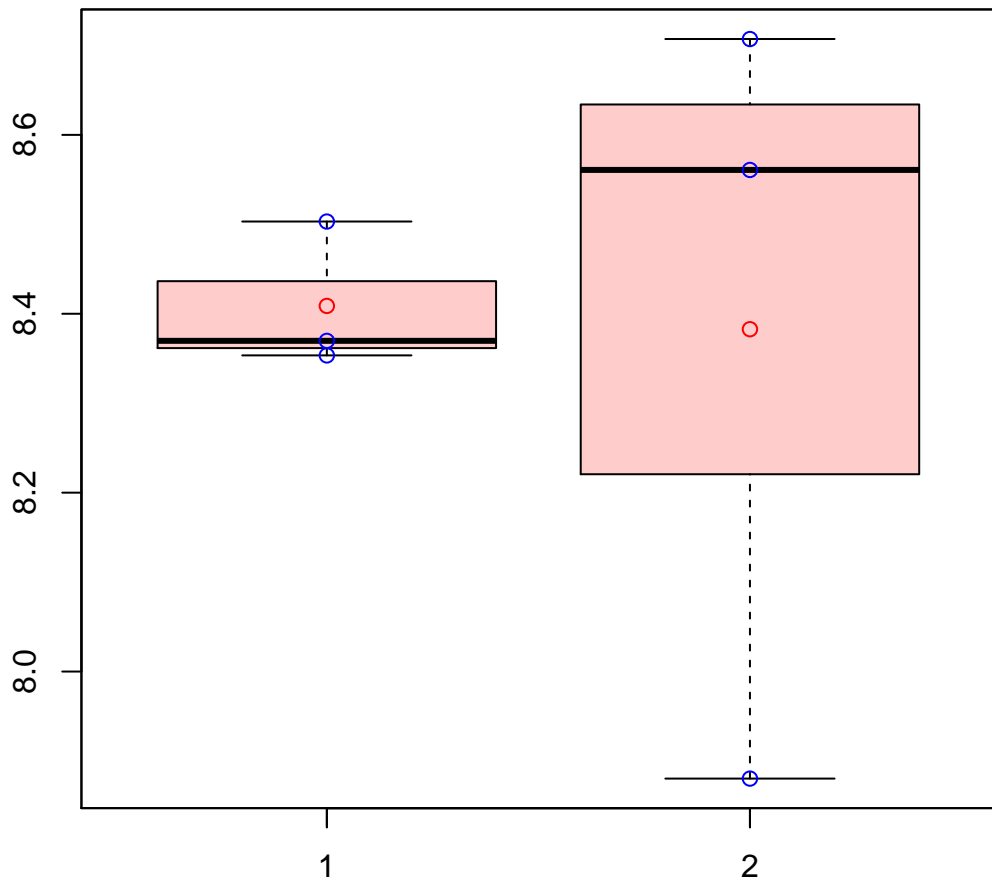

t-Test: p-value = 0.93

# Q688K0|Q688K0\_ORYSJ

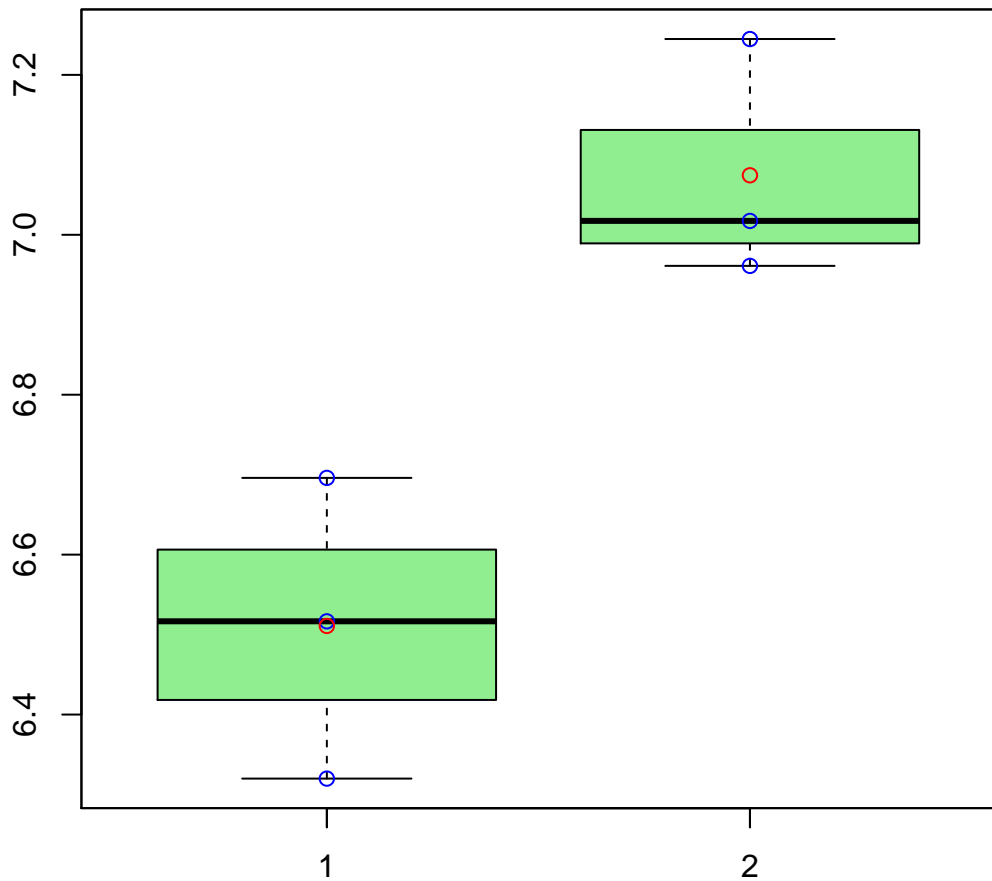

t-Test: p-value = 0.02



# Q69LJ7|Q69LJ7\_ORYSJ

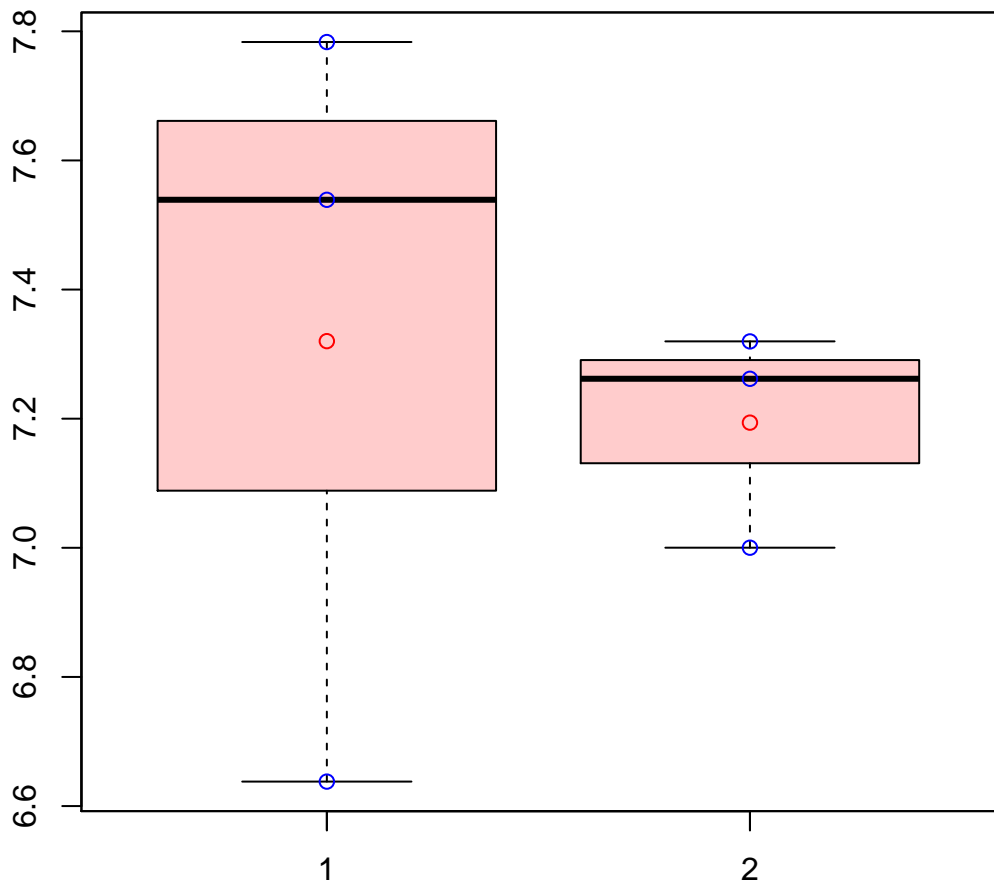

t-Test: p-value = 0.76

# Q69SQ1|Q69SQ1\_ORYSJ

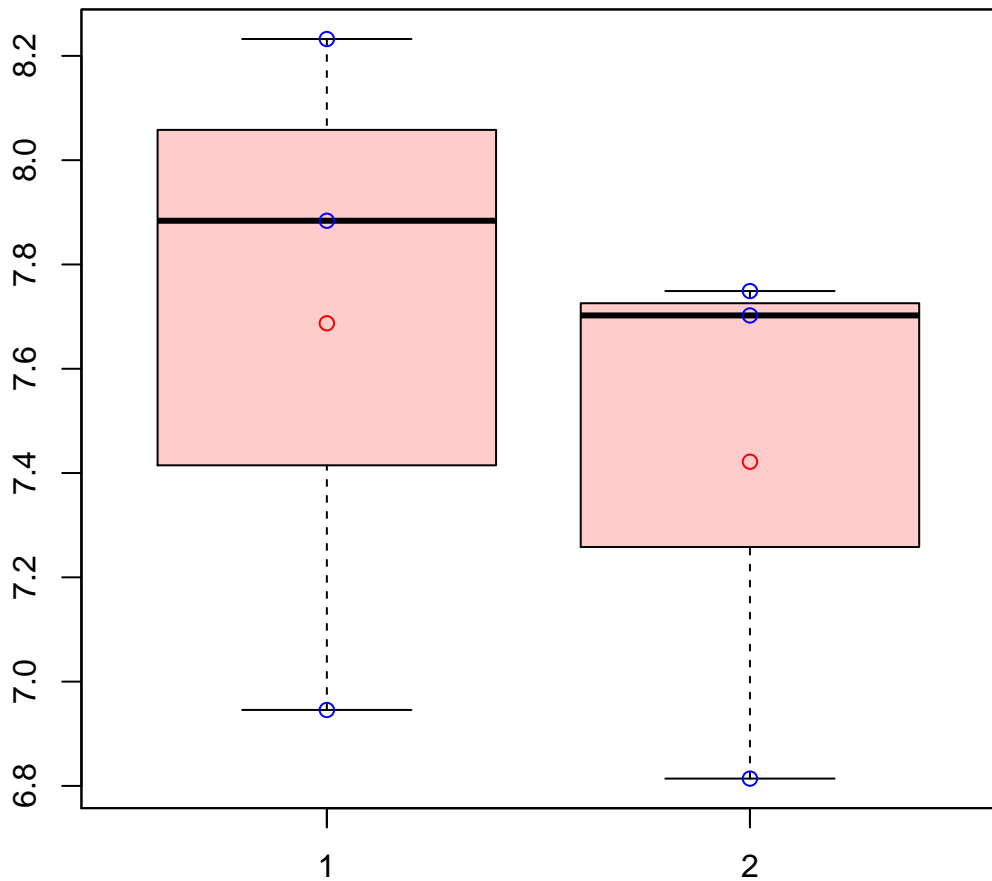

t-Test: p-value = 0.62

# Q6ATH7|Q6ATH7\_ORYSJ

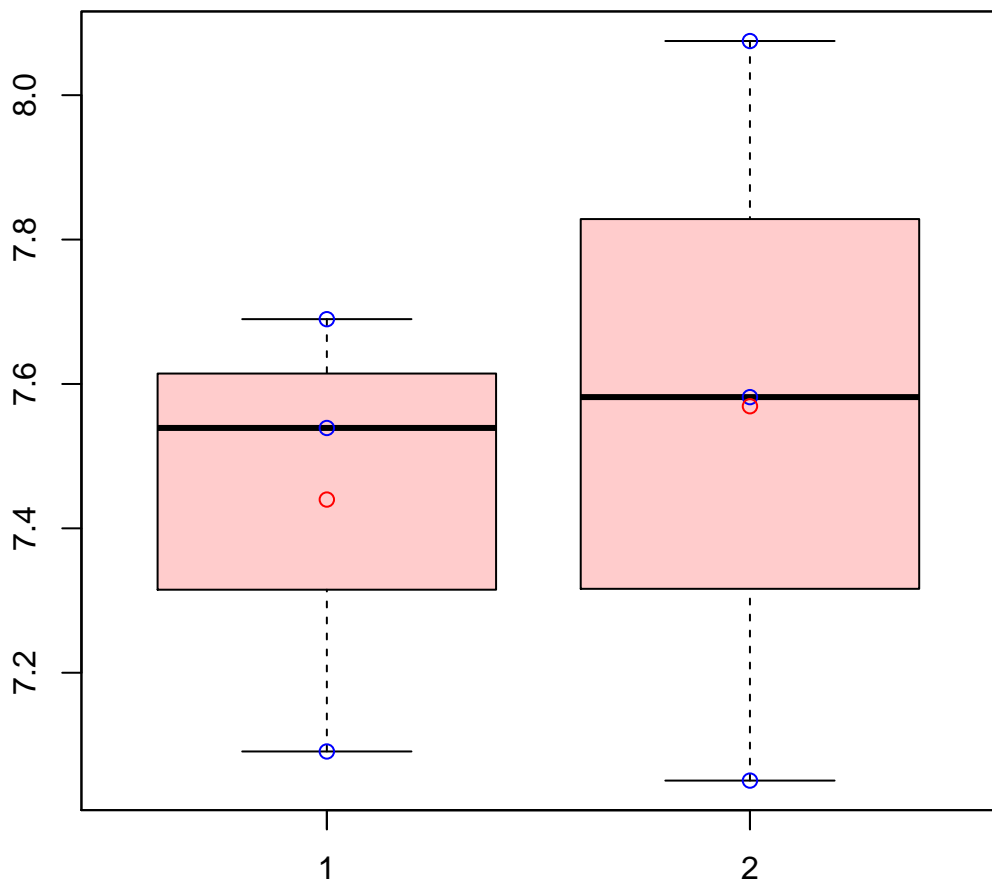

t-Test: p-value = 0.73

# Q6ATM3|Q6ATM3\_ORYSJ

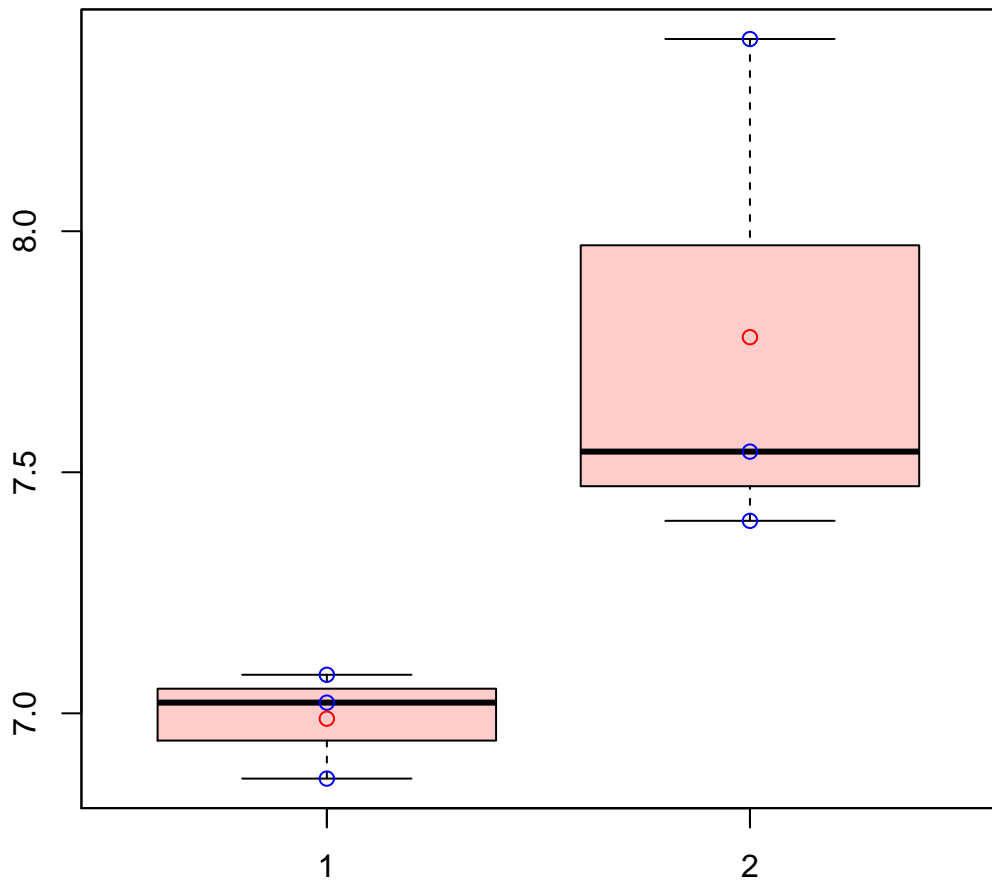

t-Test: p-value = 0.12

# Q6AU31|Q6AU31\_ORYSJ

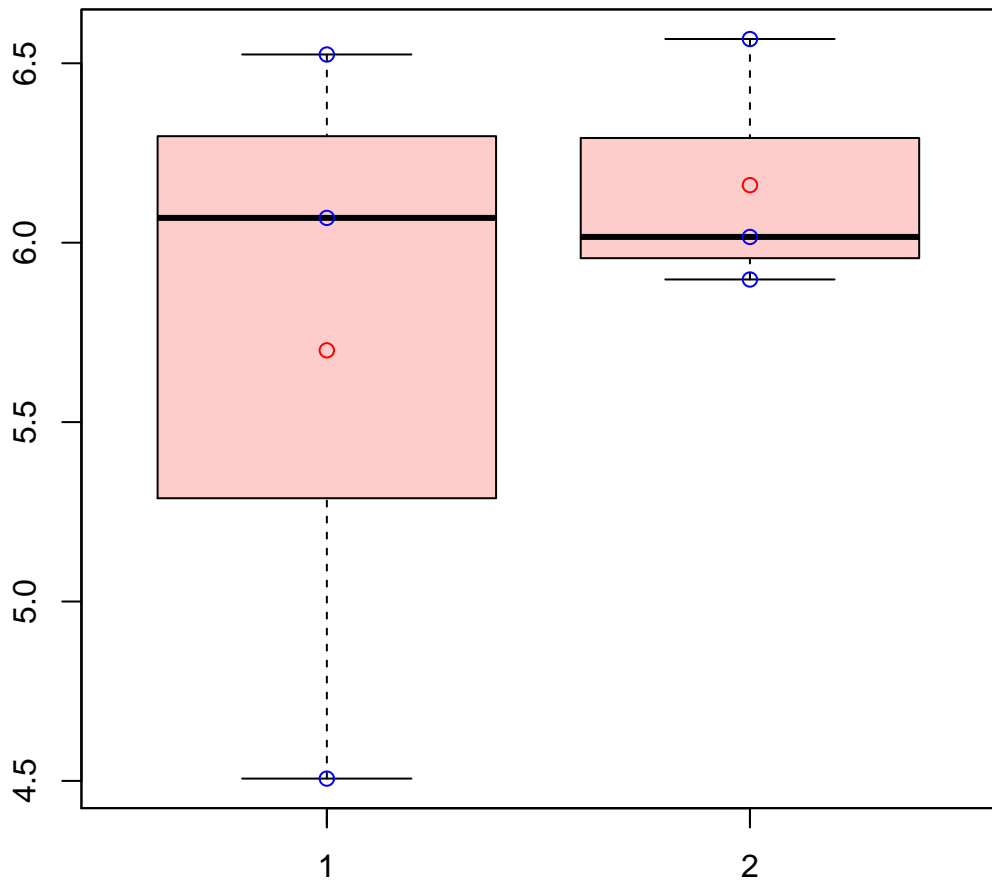

t-Test: p-value = 0.54

# Q6AU86|Q6AU86\_ORYSJ

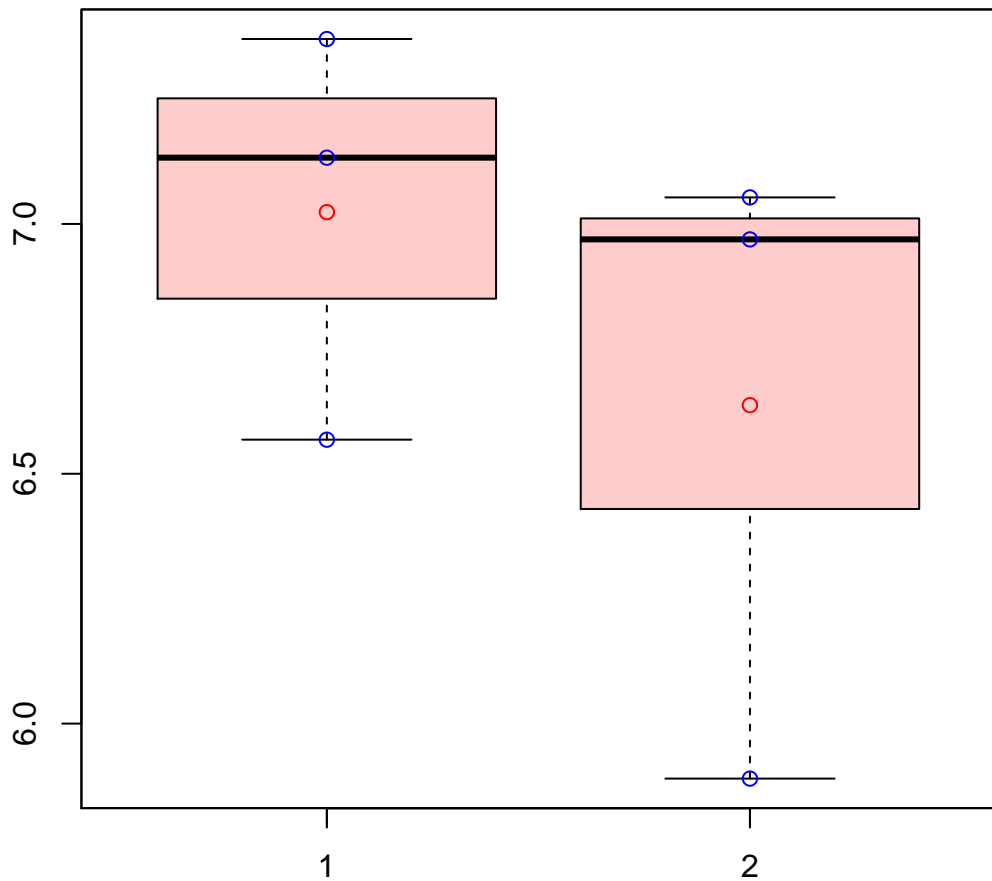

t-Test: p-value = 0.44

# Q6AUC7|Q6AUC7\_ORYSJ

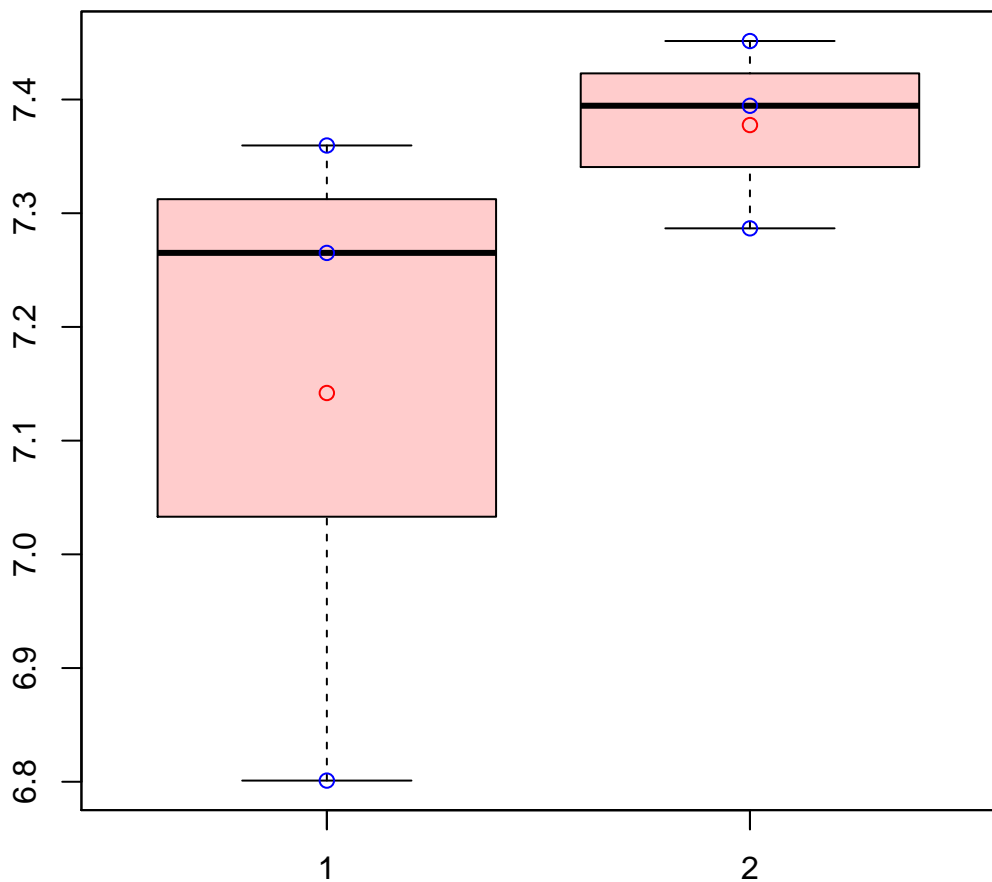

t-Test: p-value = 0.3

# Q6AUQ5|Q6AUQ5\_ORYSJ

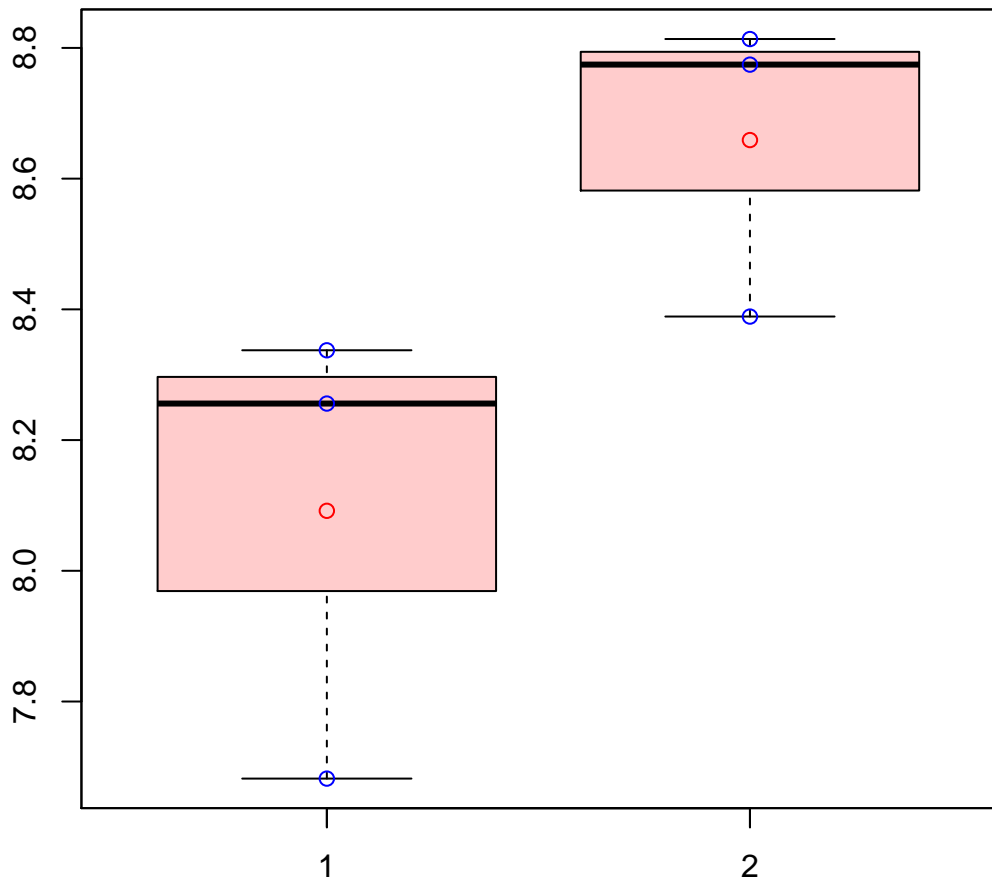

t-Test: p-value = 0.09



# Q6AUT8|Q6AUT8\_ORYSJ

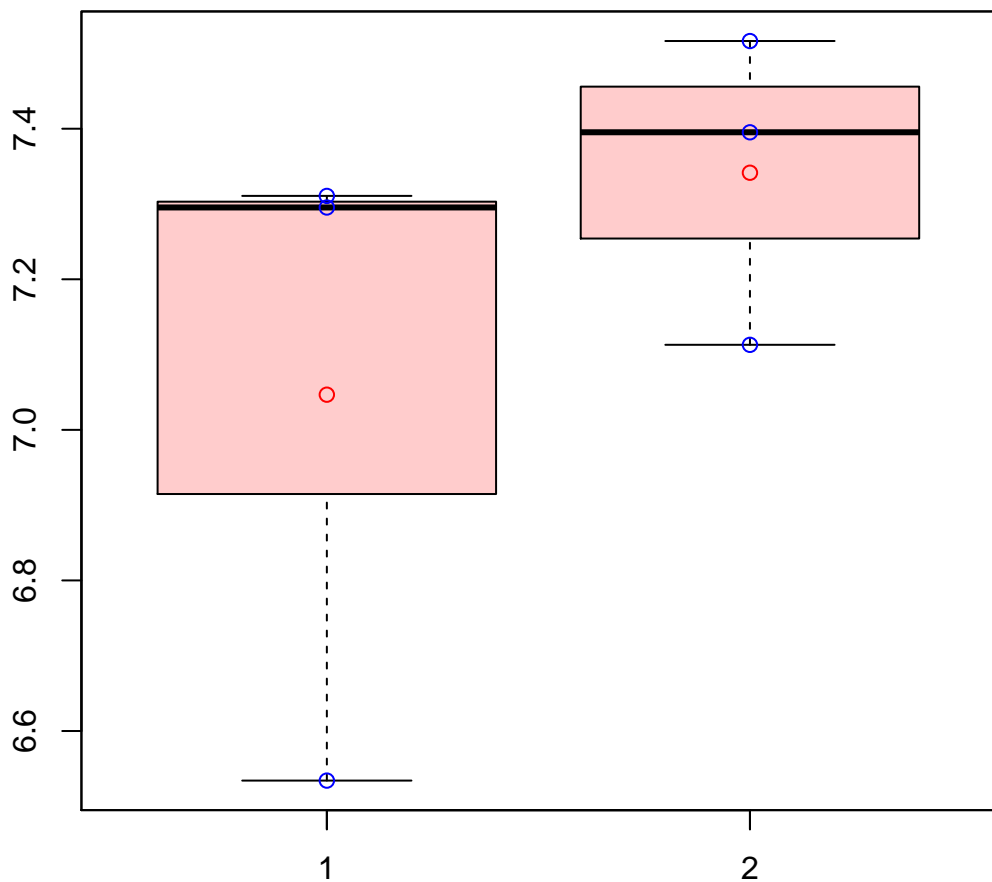

t-Test: p-value = 0.38

# Q6B6M1|Q6B6M1\_HORVU

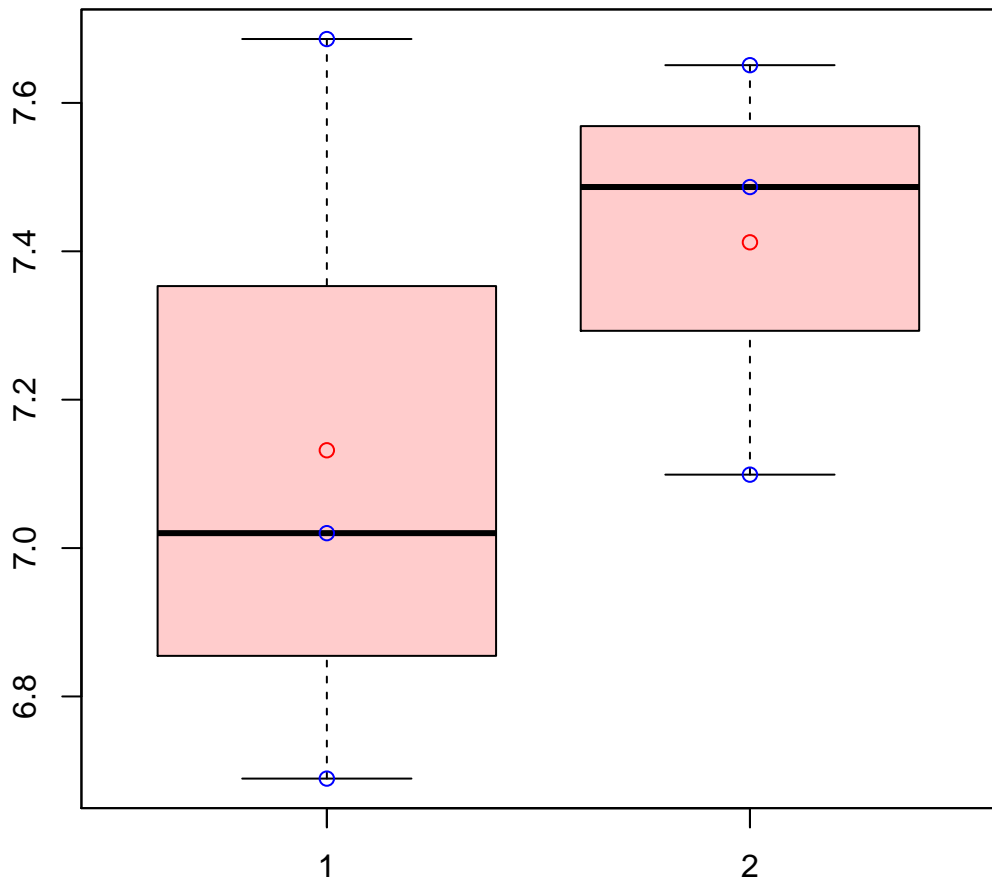

t-Test: p-value = 0.46

# Q6EP57|Q6EP57\_ORYSJ

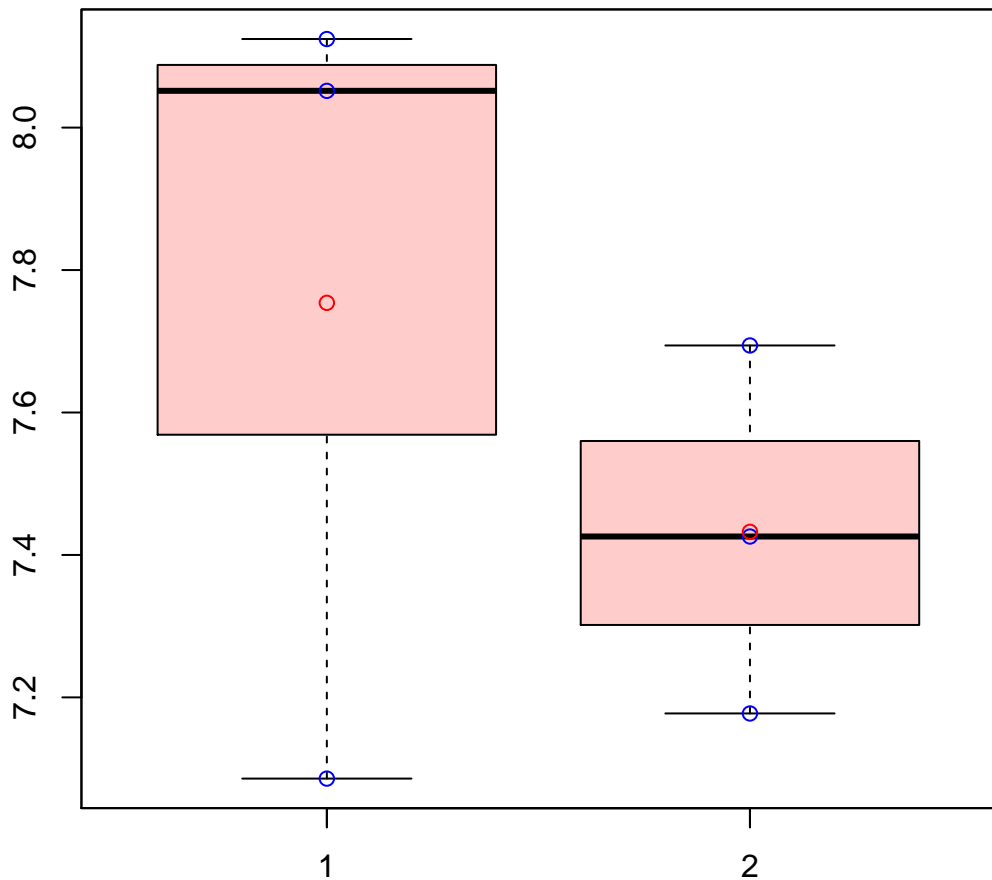

t-Test: p-value = 0.45

# Q6ERW2|Q6ERW2\_ORYSJ

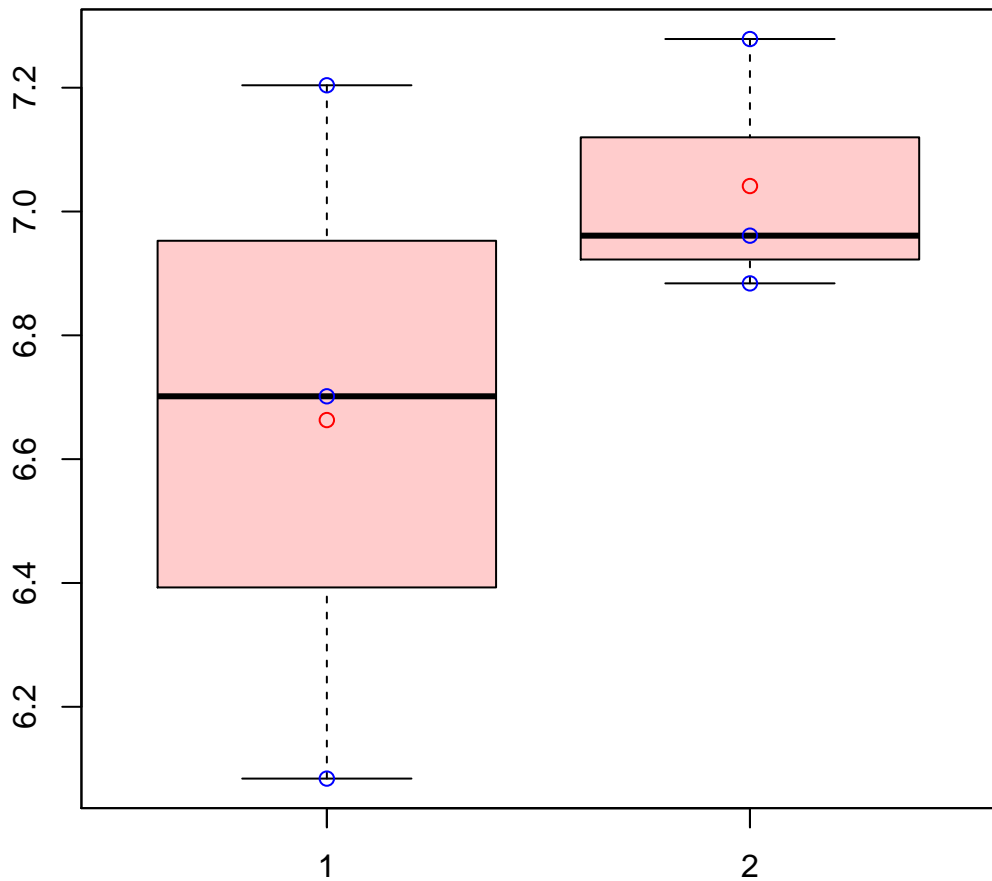

t-Test: p-value = 0.37

# Q6ETI3|Q6ETI3\_ORYSJ

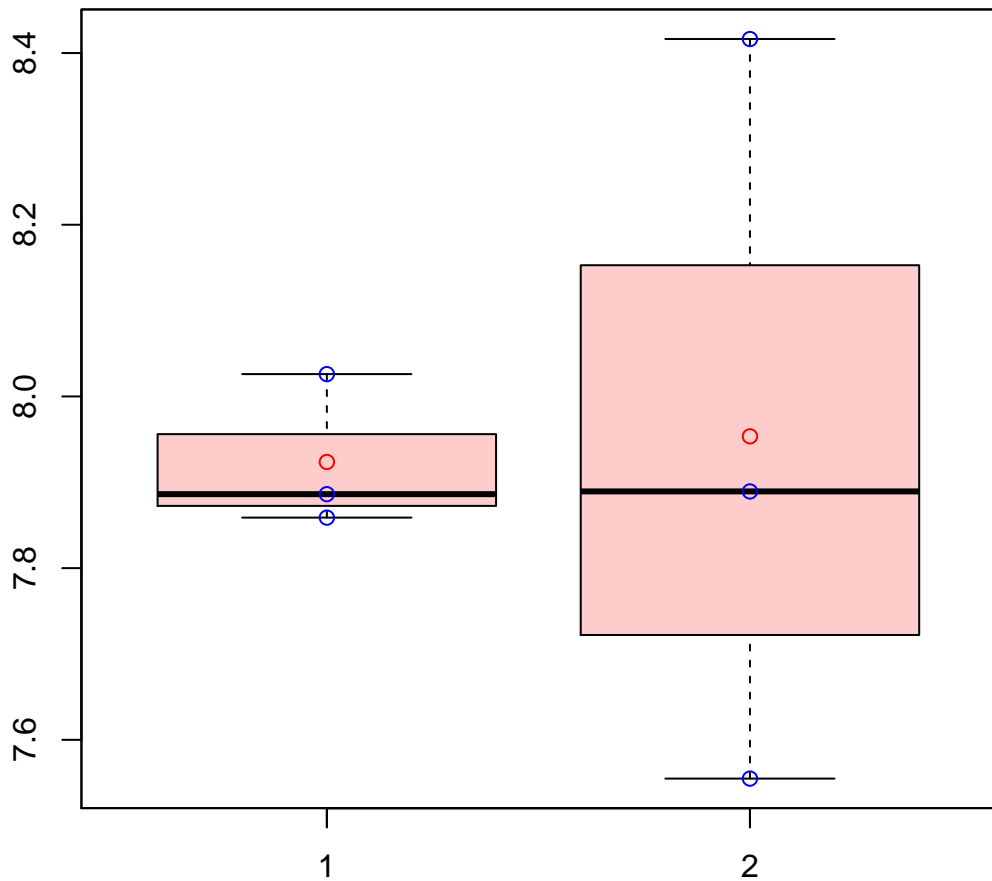

t-Test: p-value = 0.92

# Q6EUQ9|Q6EUQ9\_ORYSJ

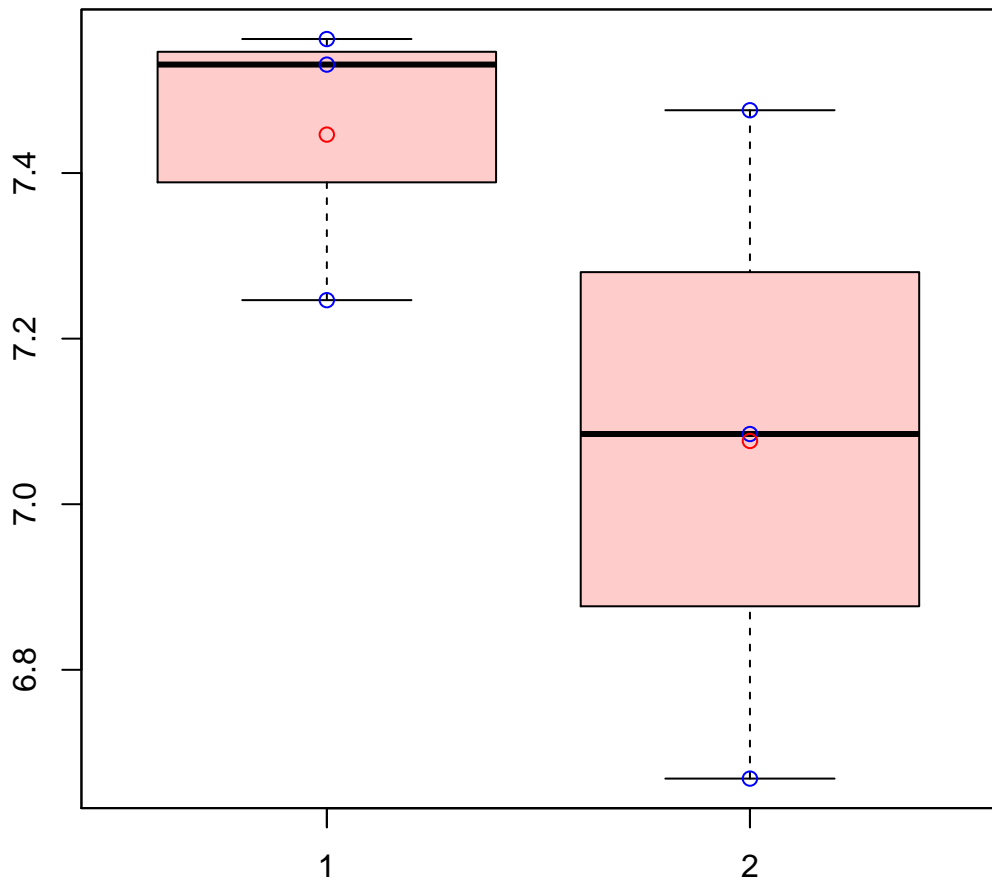

t-Test: p-value = 0.25

# Q6H434|Q6H434\_ORYSJ

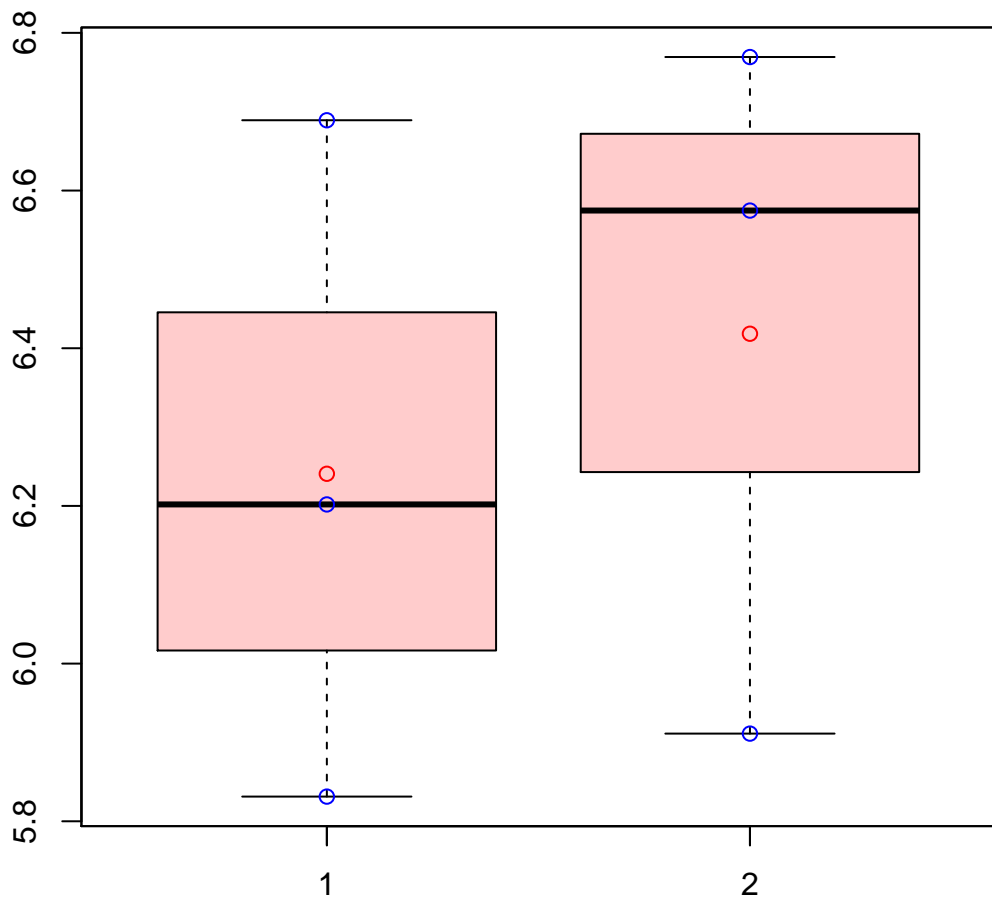

t-Test: p-value = 0.65

# Q6H443|Q6H443\_ORYSJ

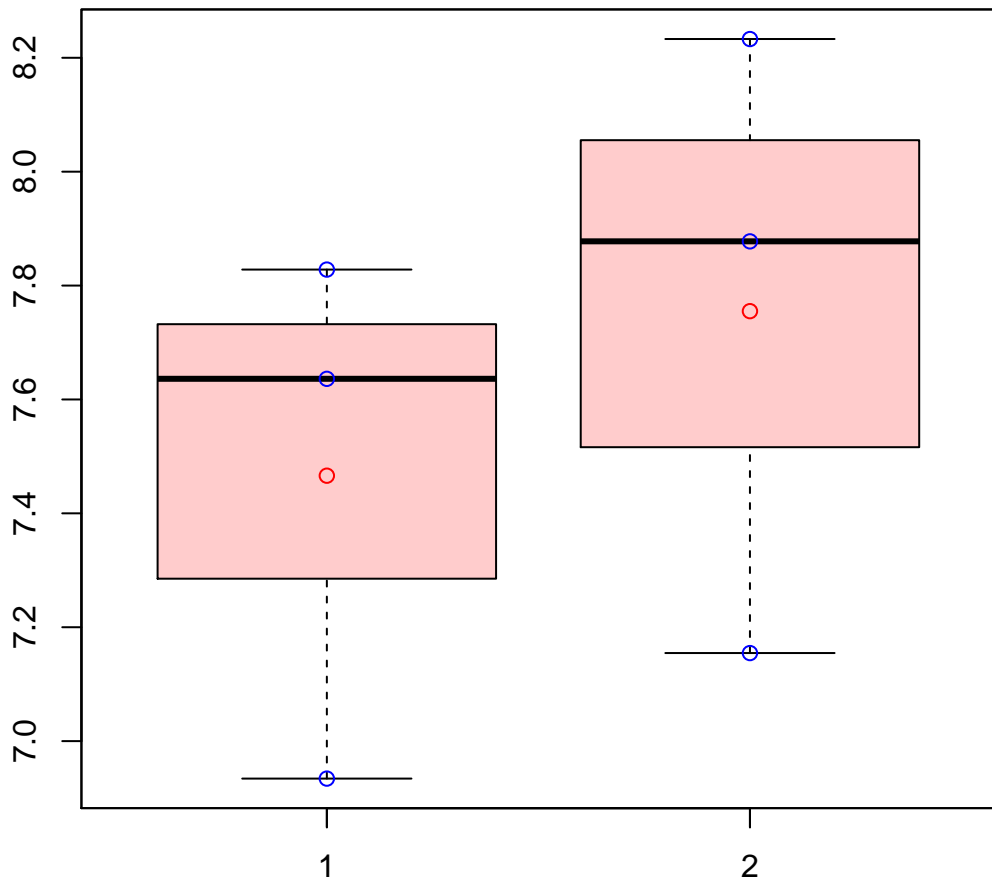

t-Test: p-value = 0.53



# Q6H6W9|Q6H6W9\_ORYSJ

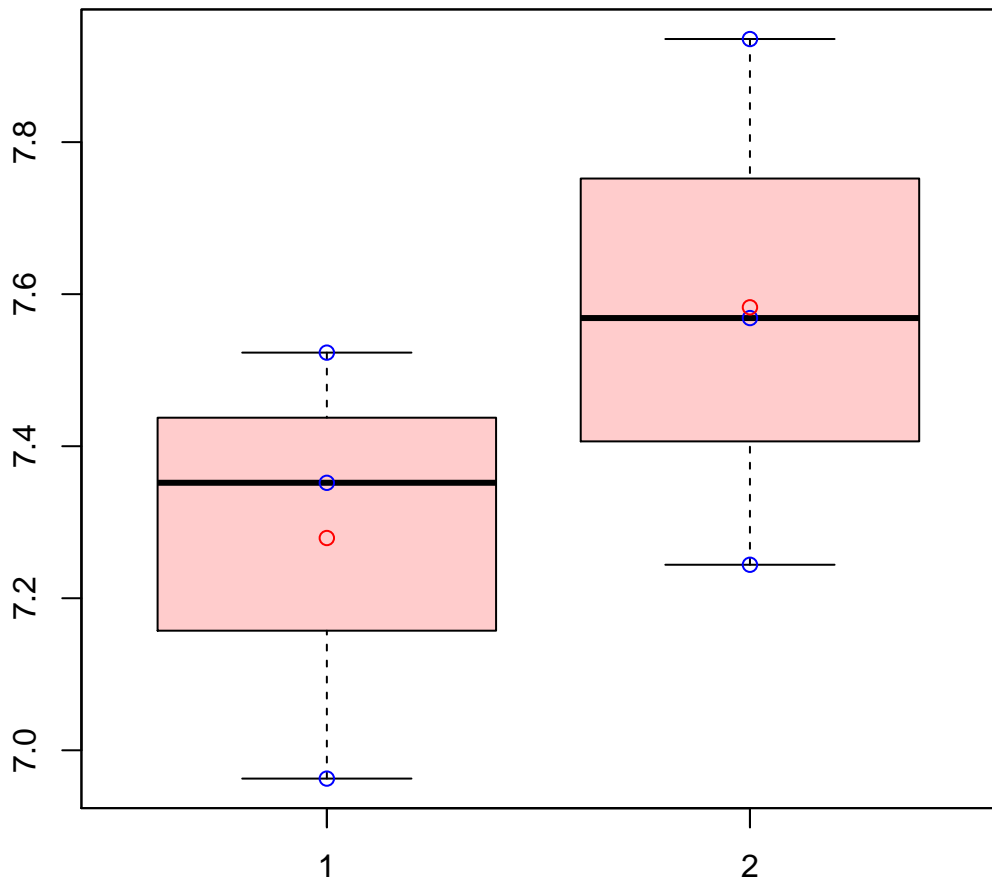

t-Test: p-value = 0.31

# Q6H801|Q6H801\_ORYSJ

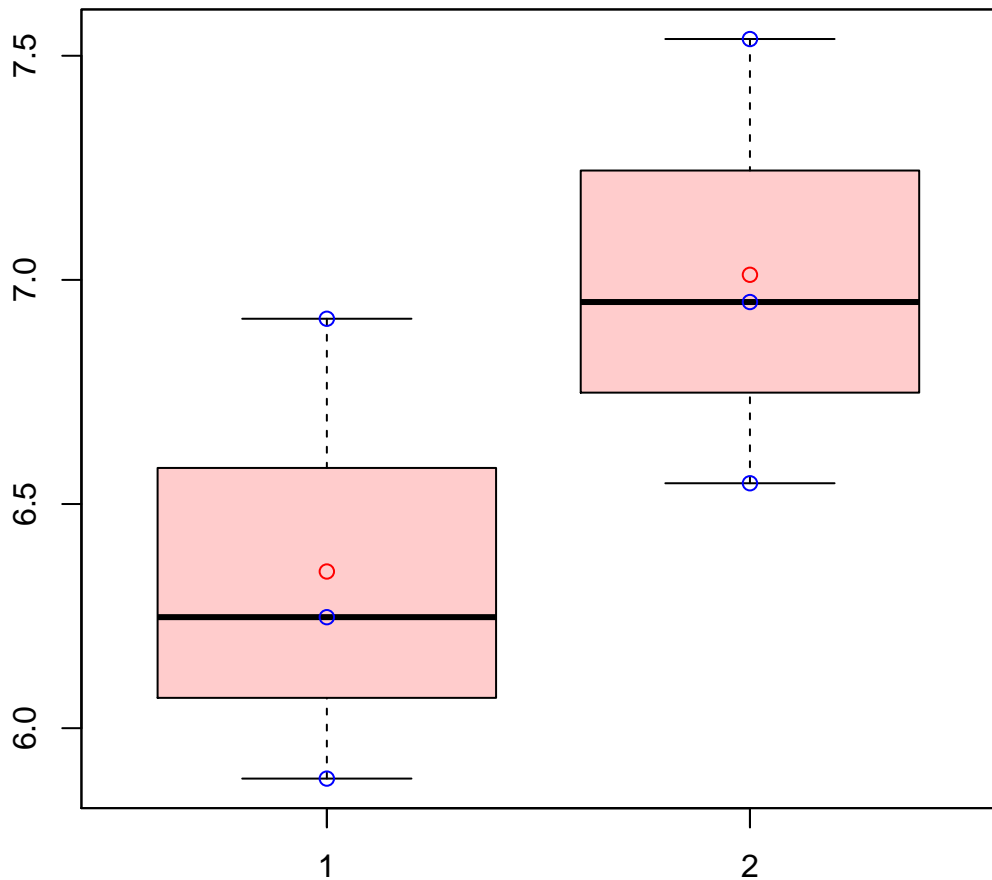

t-Test: p-value = 0.19

# Q6K3N4|Q6K3N4\_ORYSJ

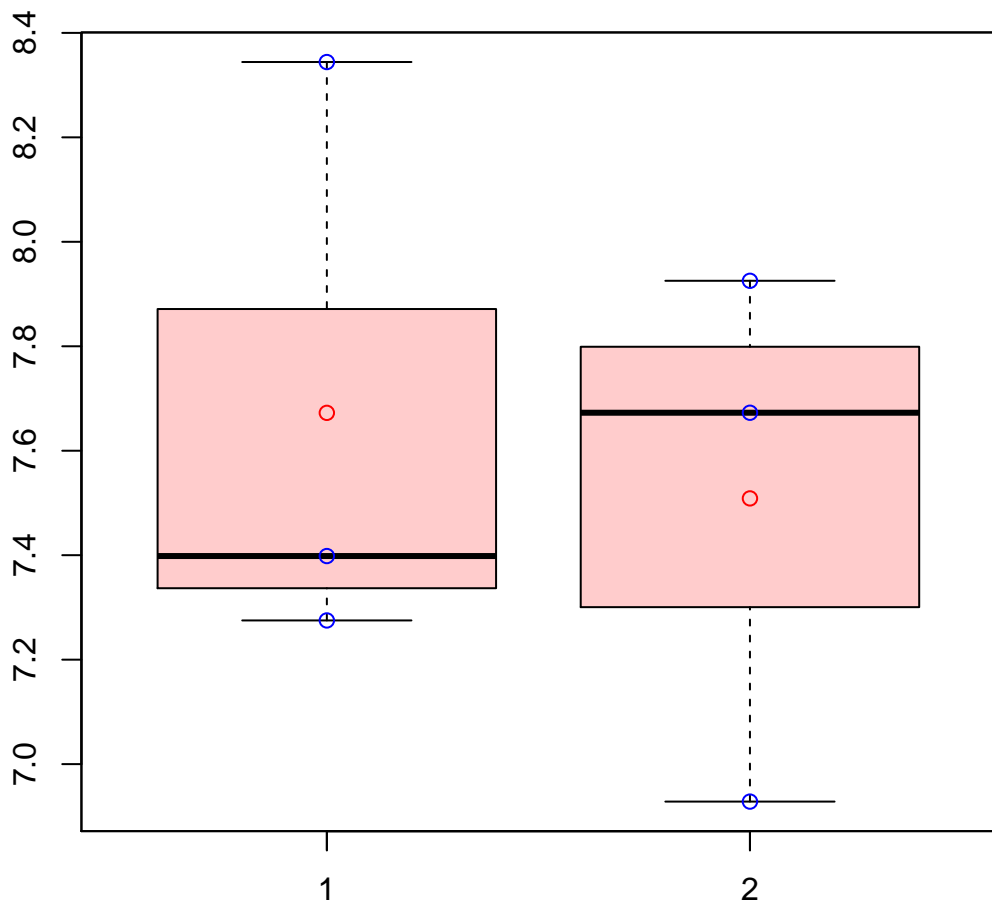

t-Test: p-value = 0.74

# Q6K476|Q6K476\_ORYSJ

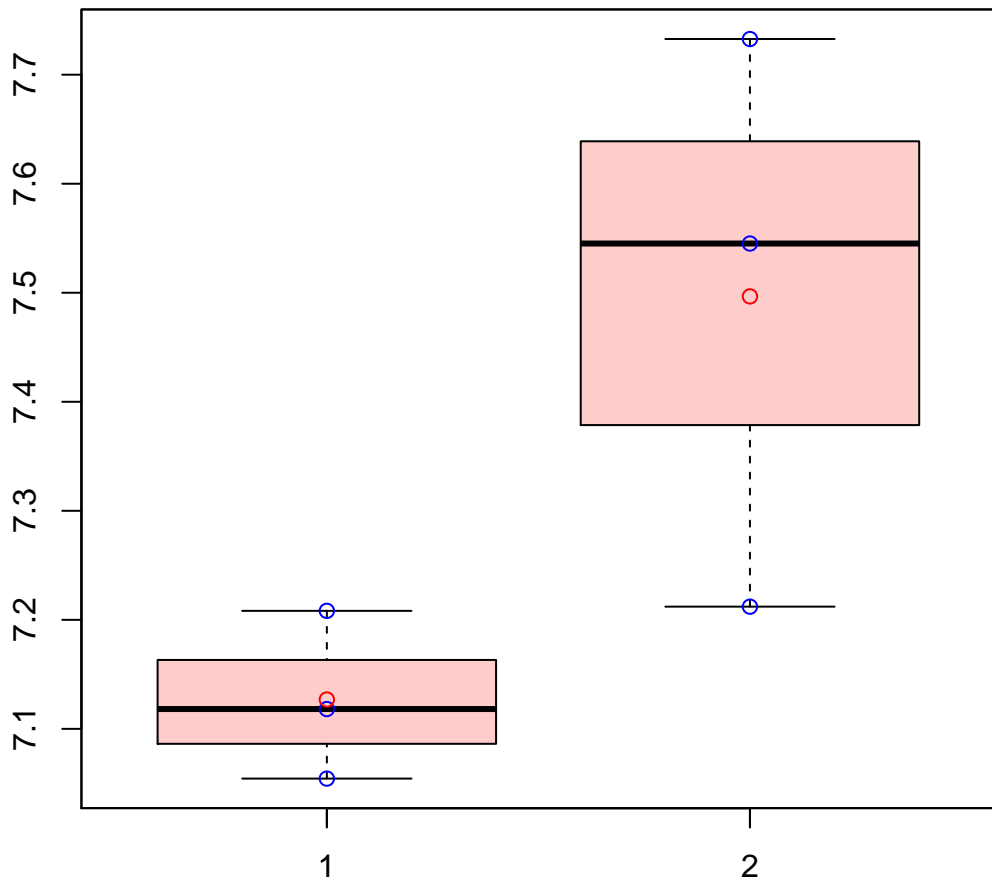

t-Test: p-value = 0.13

# Q6K6U6|Q6K6U6\_ORYSJ

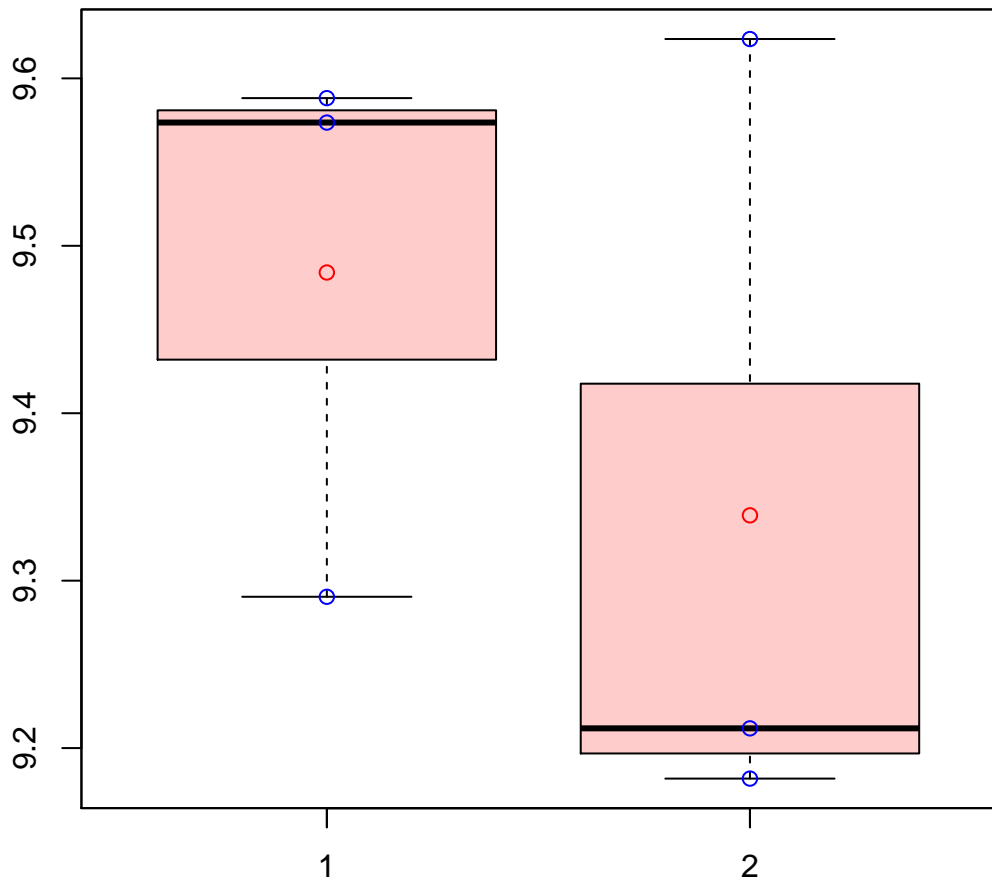

t-Test: p-value = 0.45

# Q6K990|Q6K990\_ORYSJ

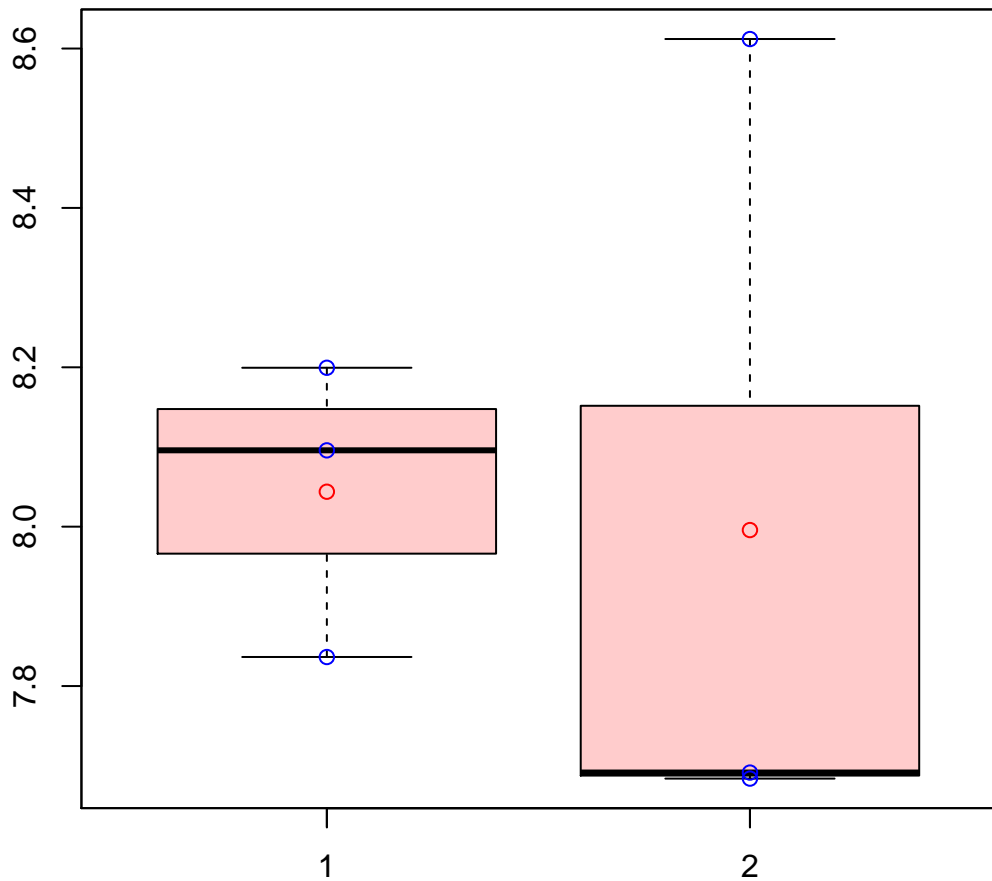

t-Test: p-value = 0.89

# Q6K9D8|Q6K9D8\_ORYSJ

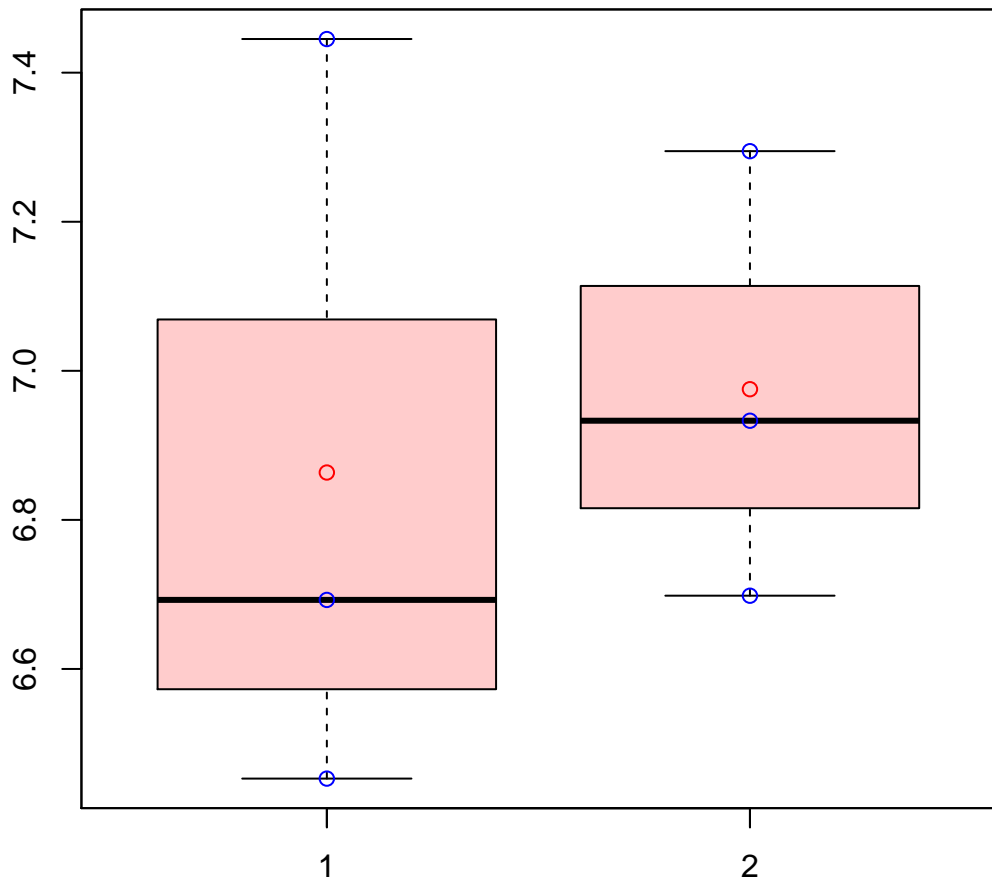

t-Test: p-value = 0.77

# Q6KAB9|Q6KAB9\_ORYSJ

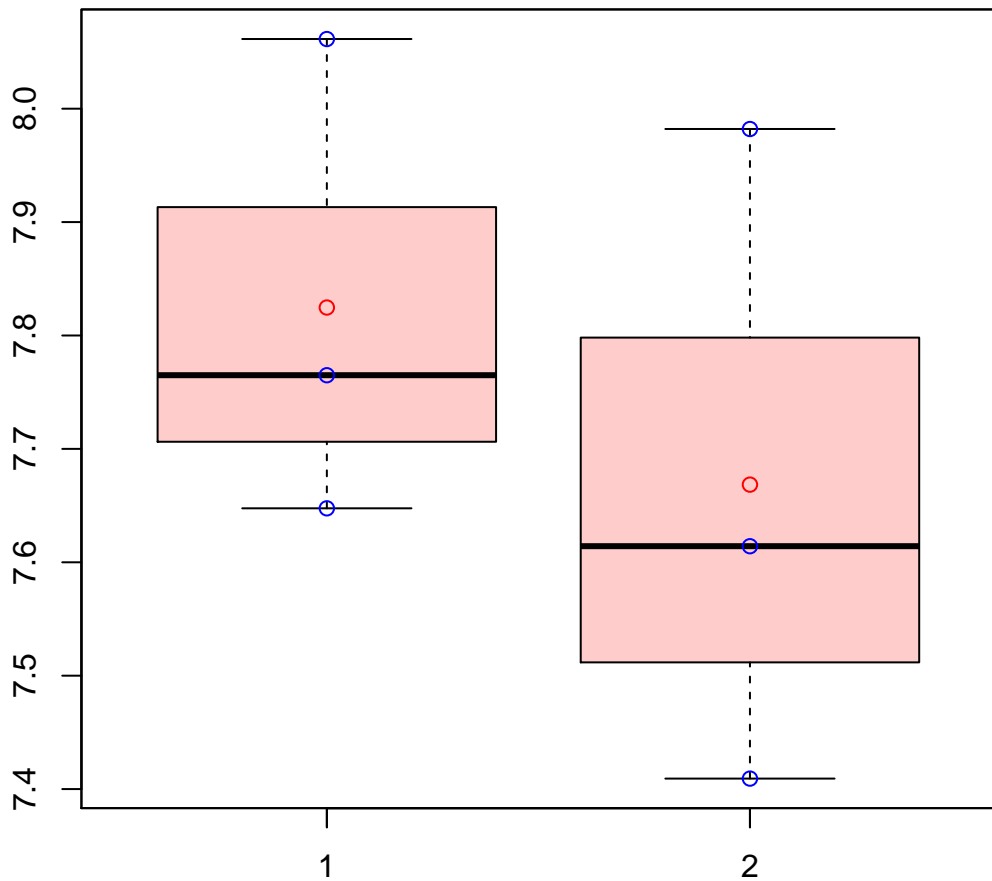

t-Test: p-value = 0.5



# Q6L507|Q6L507\_ORYSJ

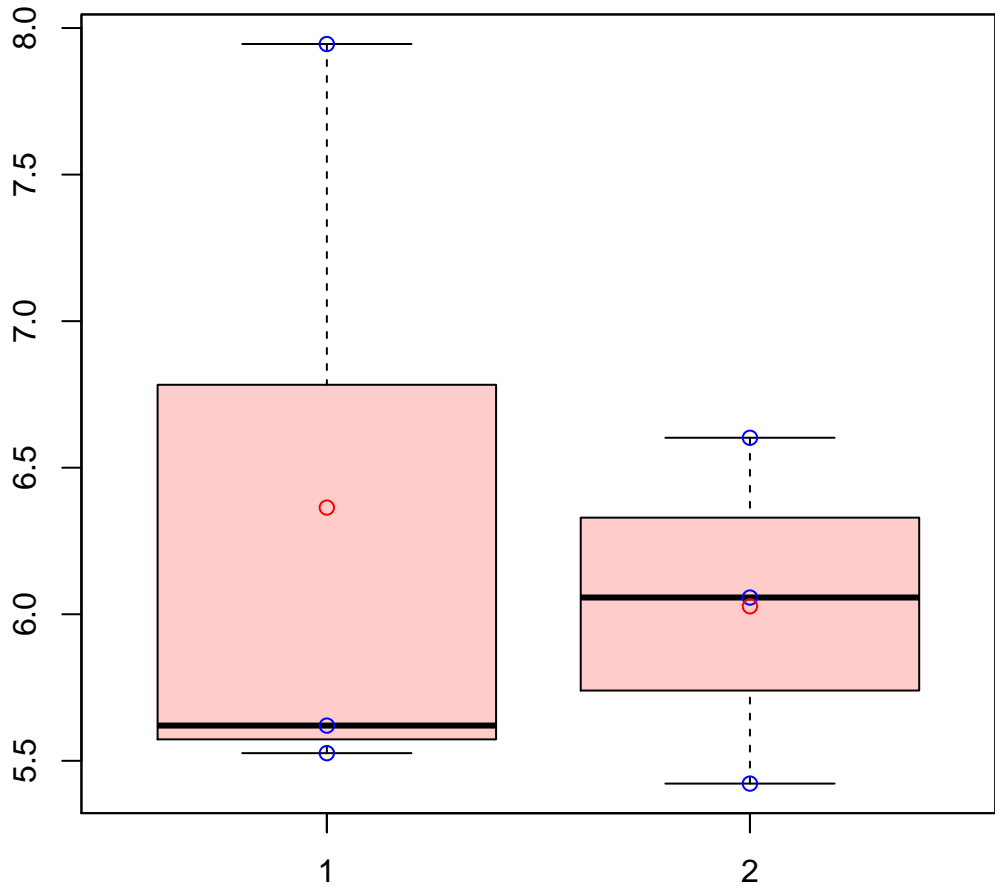

t-Test: p-value = 0.72

# Q6L590|Q6L590\_ORYSJ

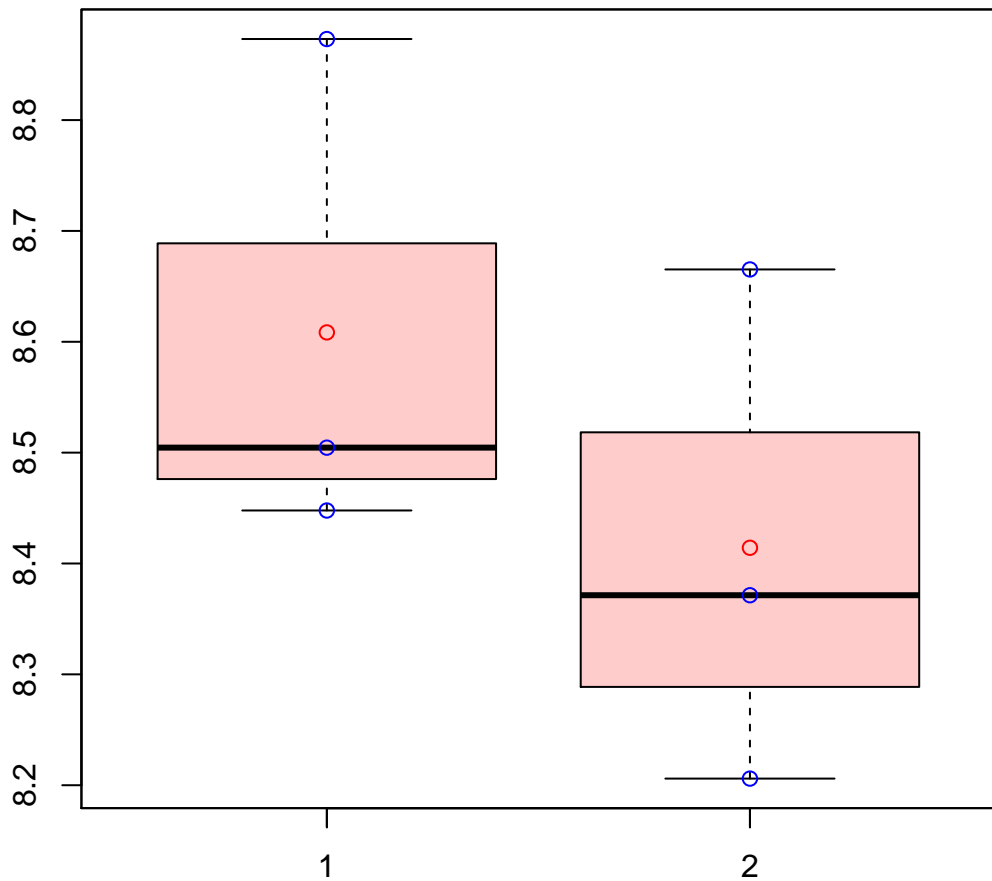

t-Test: p-value = 0.36

# Q6Q297|Q6Q297\_MAIZE

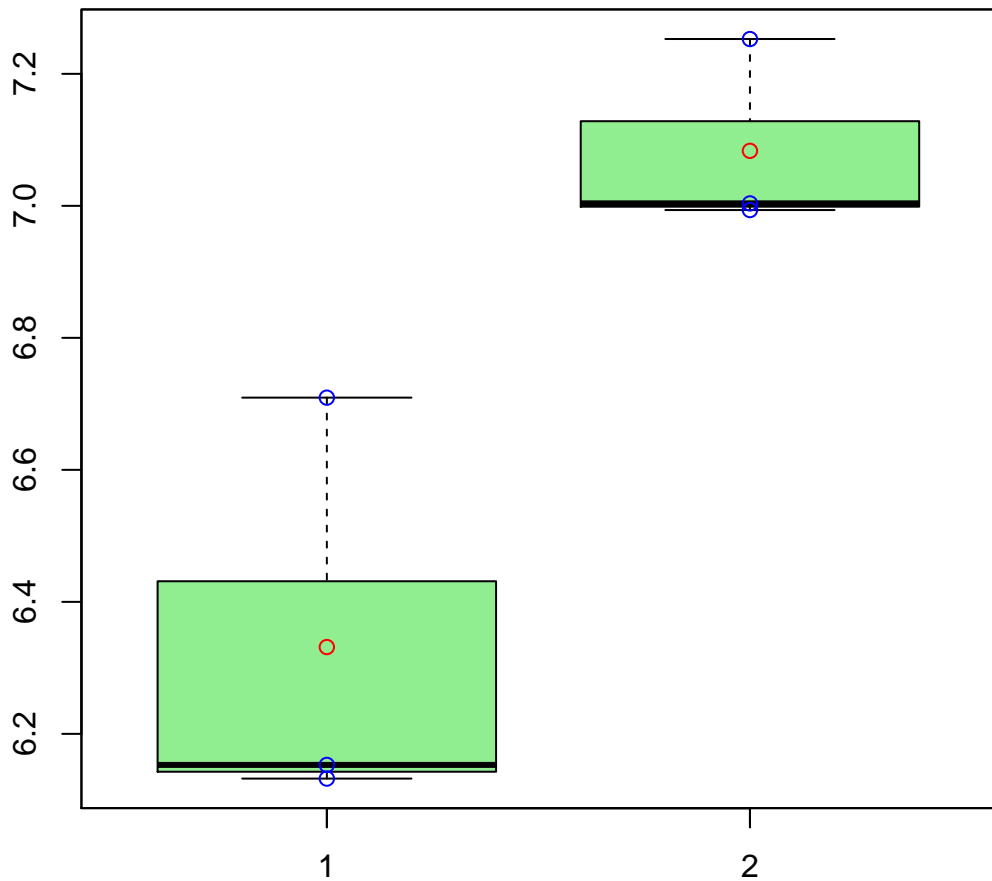

t-Test: p-value = 0.04

# Q6RJ32|Q6RJ32\_9LILI

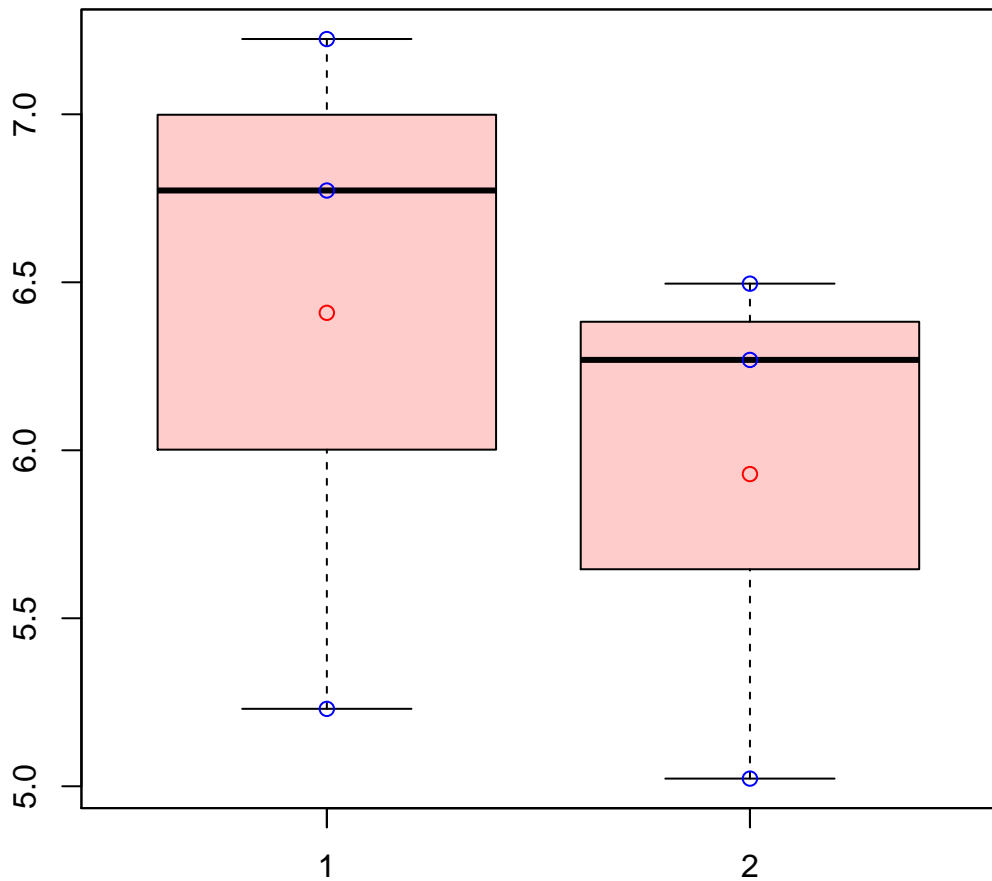

t-Test: p-value = 0.56

# Q6S4P7|Q6S4P7\_SORBI

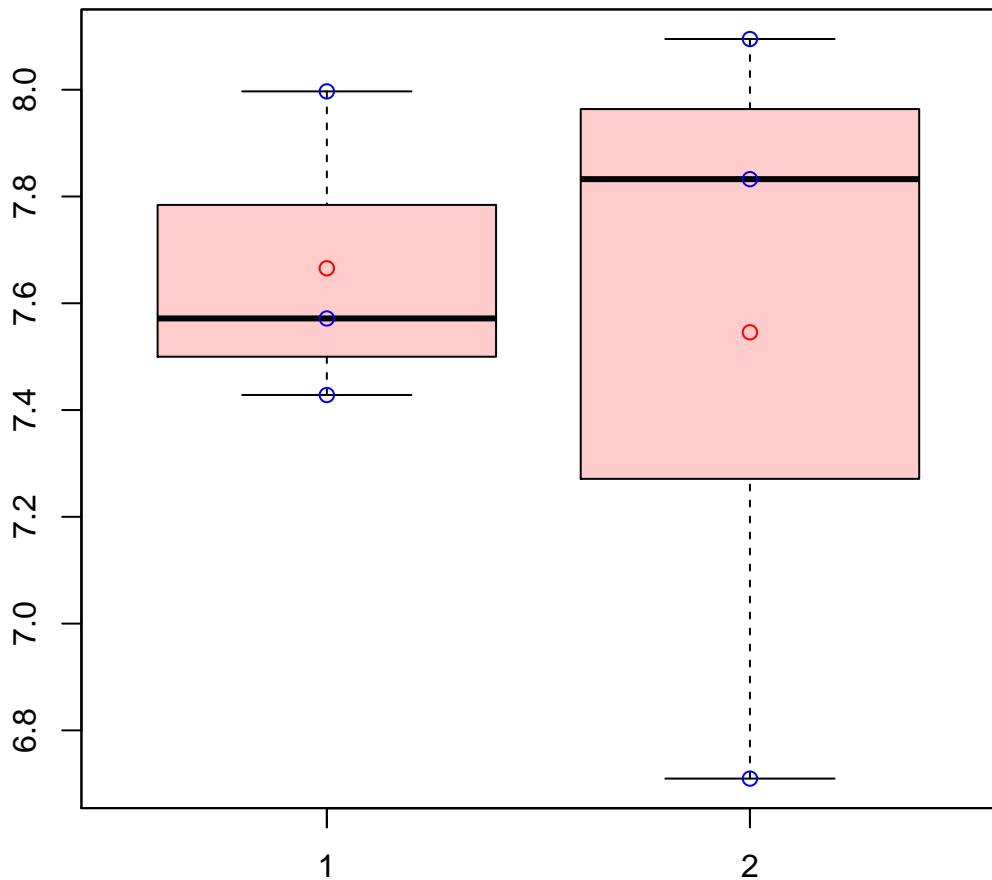

t-Test: p-value = 0.81

# Q6TUC6|Q6TUC6\_ORYSJ

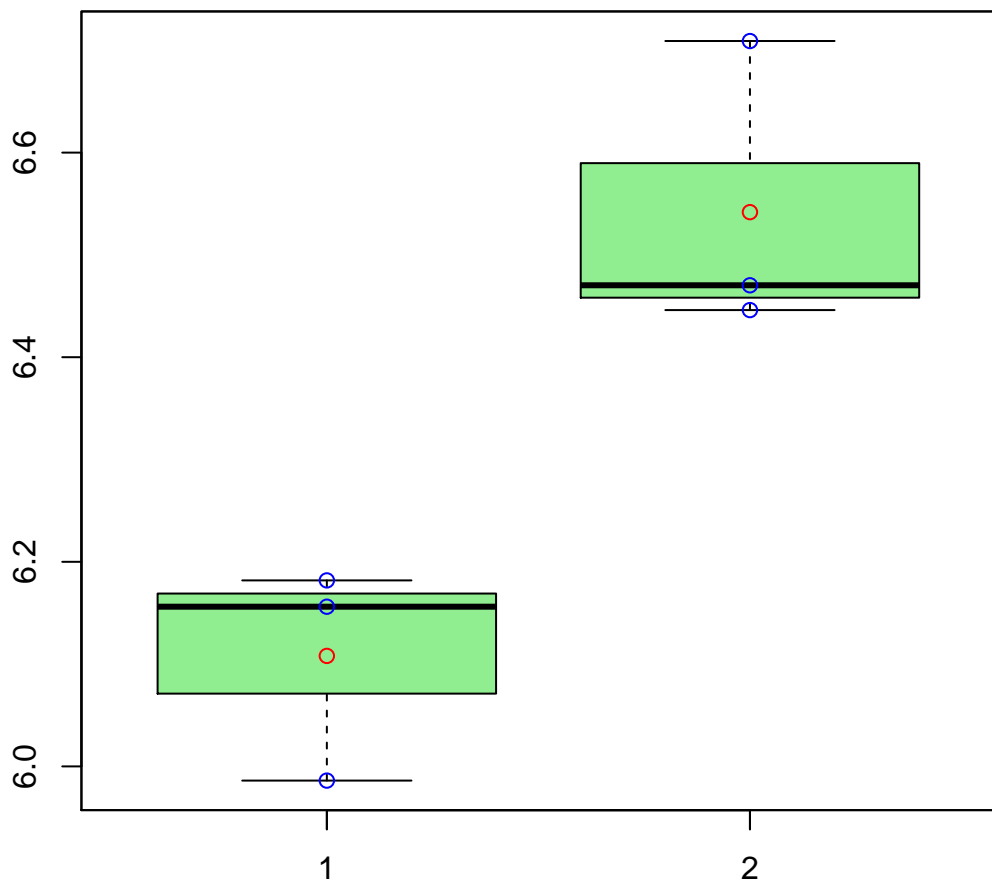

t-Test: p-value = 0.02

# Q6U1E9|Q6U1E9\_9ASPA

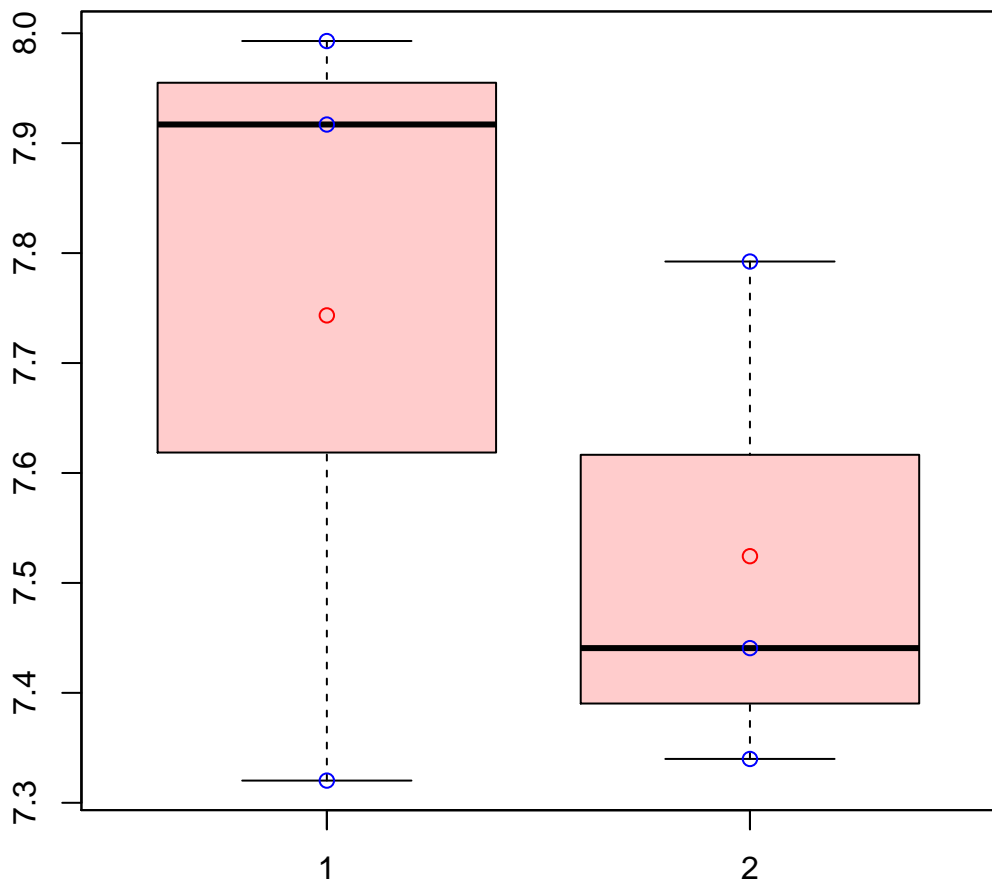

t-Test: p-value = 0.44

# Q6UB39|Q6UB39\_ORYSJ

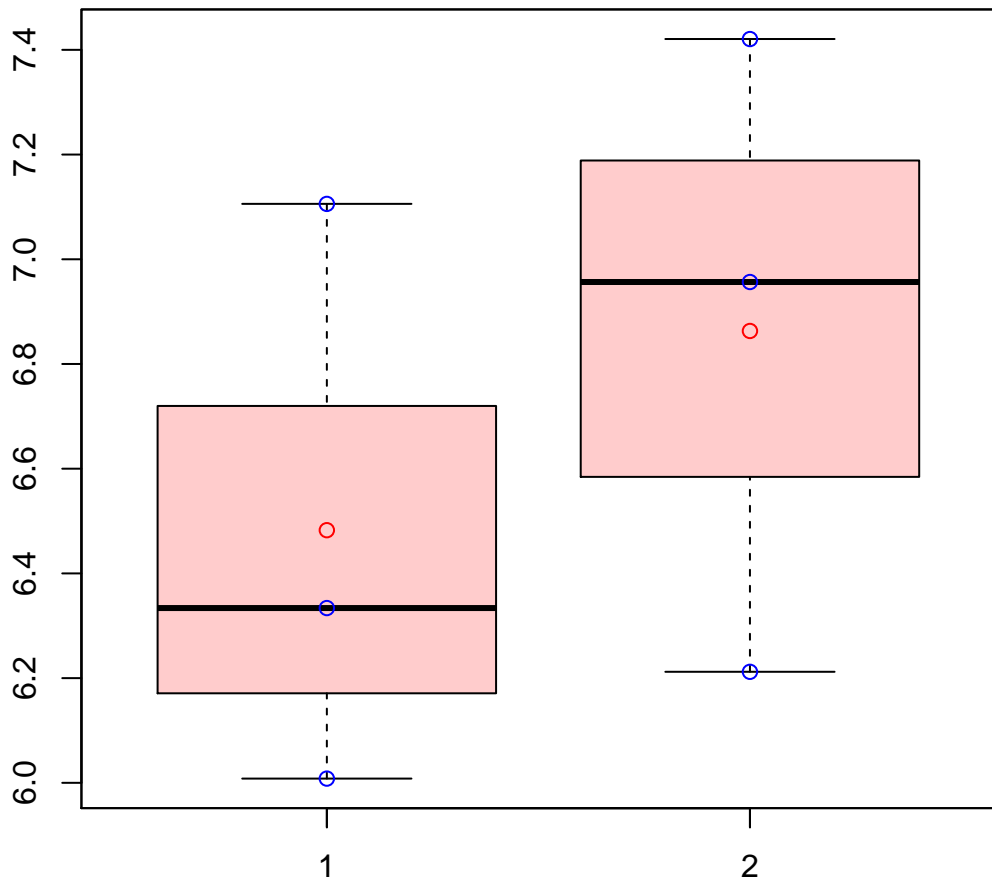

t-Test: p-value = 0.47



# Q6UY81|Q6UY81\_LILLO

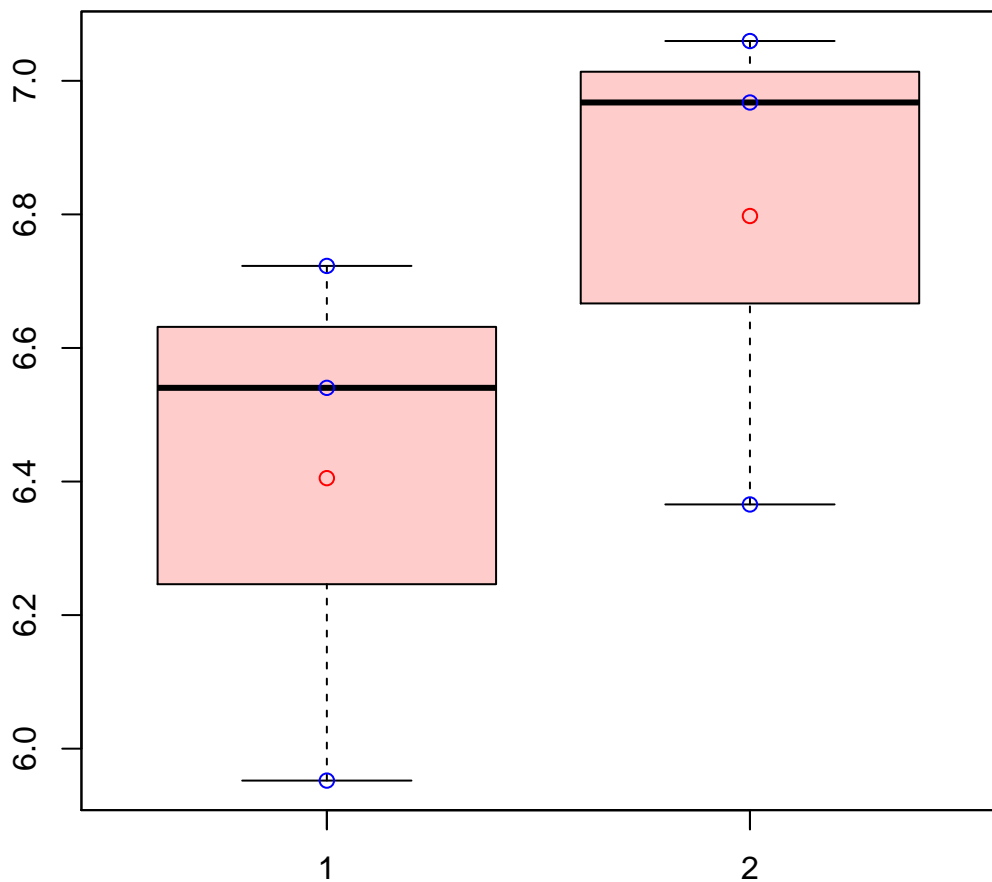

t-Test: p-value = 0.29

# Q6V9T1|Q6V9T1\_ORYSJ

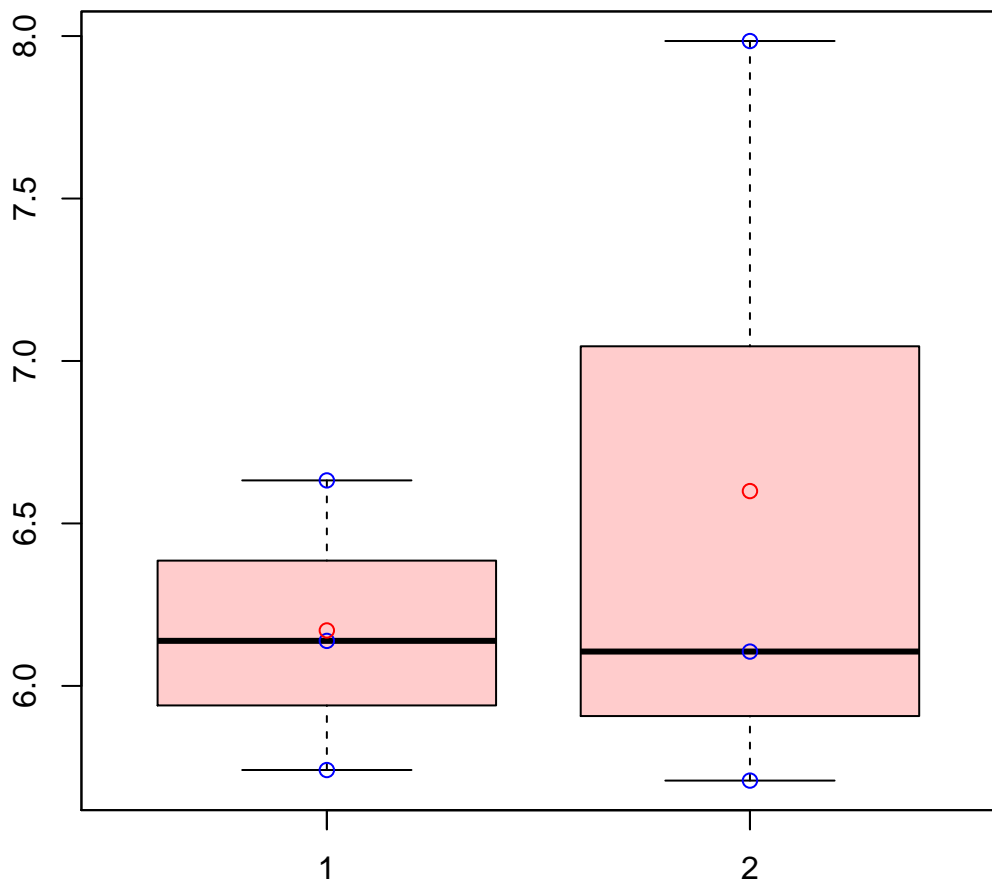

t-Test: p-value = 0.61

# Q6YKA9|Q6YKA9\_WHEAT

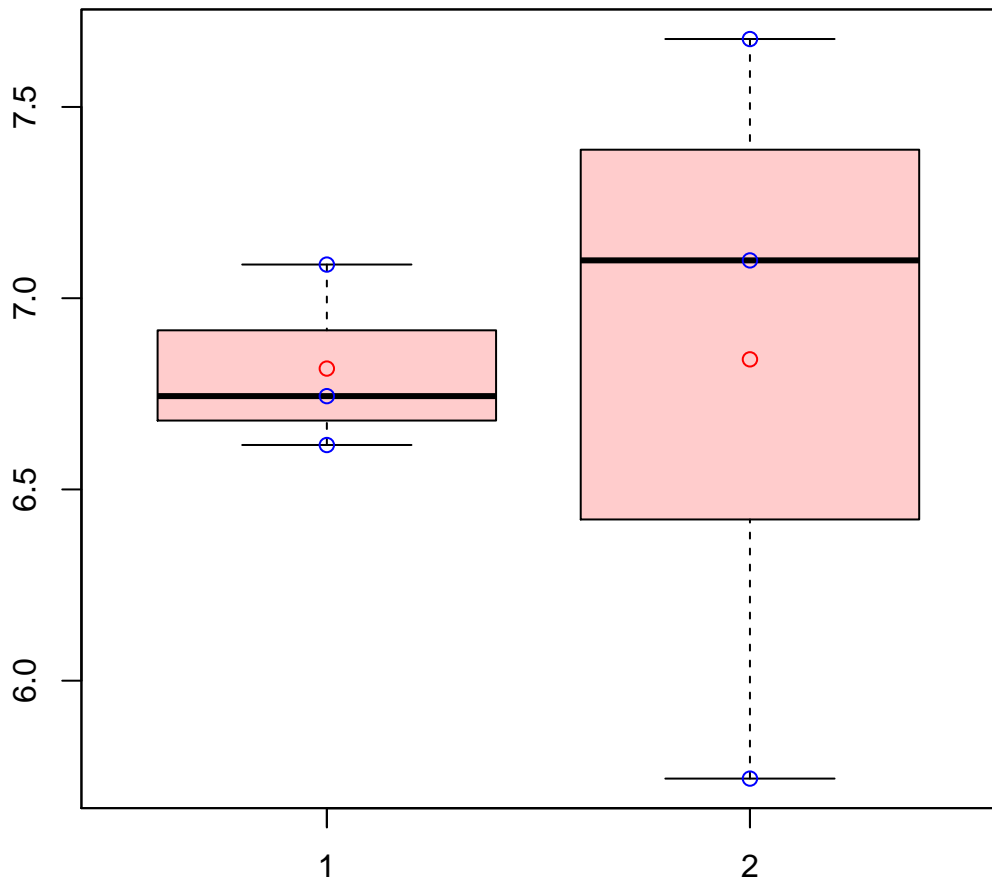

t-Test: p-value = 0.97

# Q6YPG2|Q6YPG2\_ORYSJ

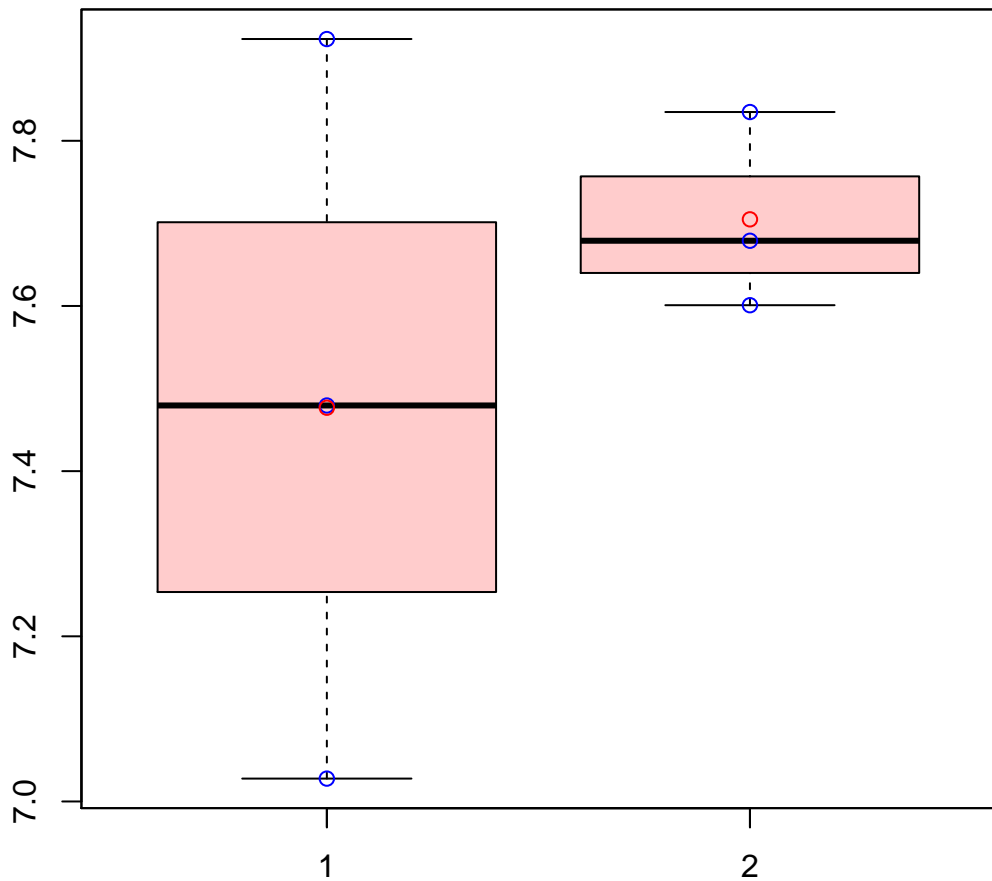

t-Test: p-value = 0.47

# Q6YT61|Q6YT61\_ORYSJ

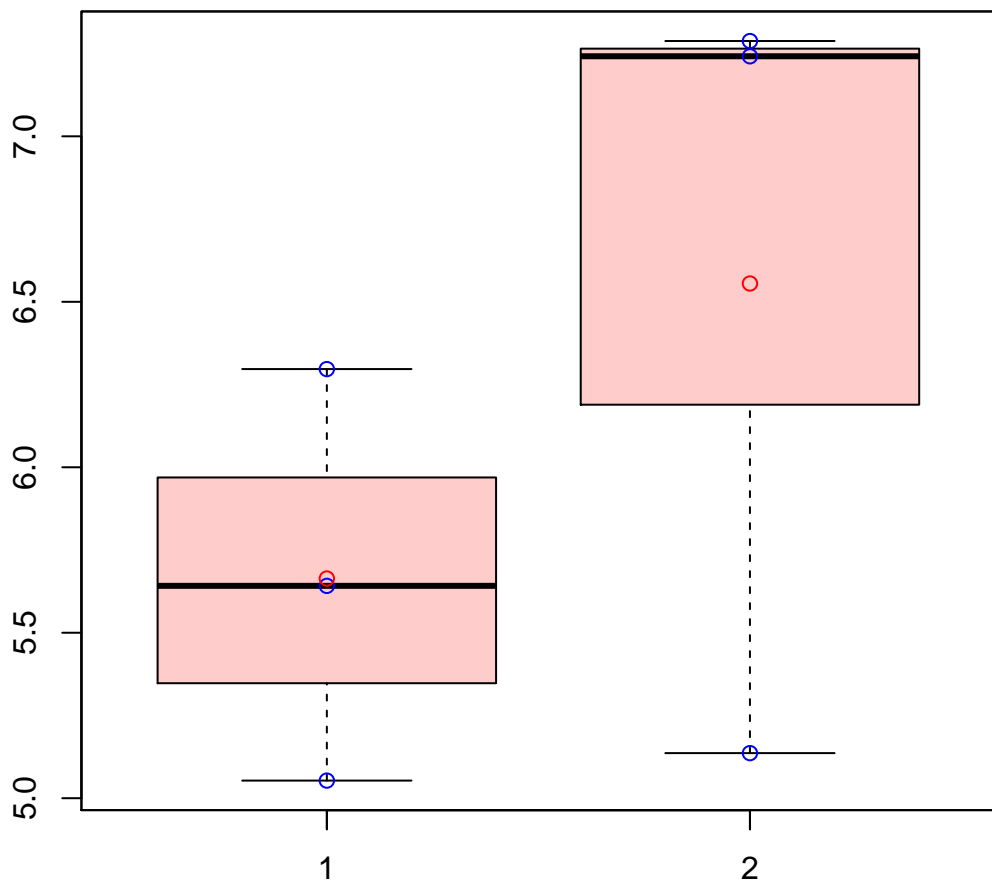

t-Test: p-value = 0.34

# Q6YUA1|Q6YUA1\_ORYSJ

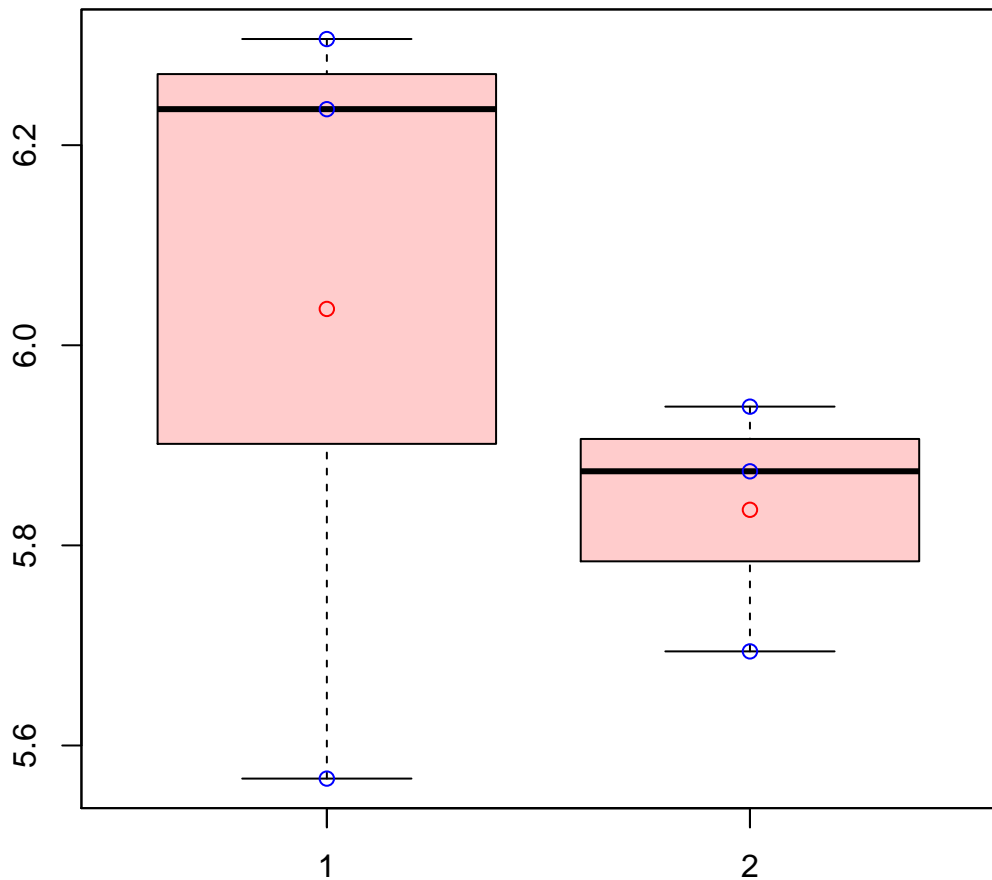

t-Test: p-value = 0.49

# Q6YUL9|Q6YUL9\_ORYSJ

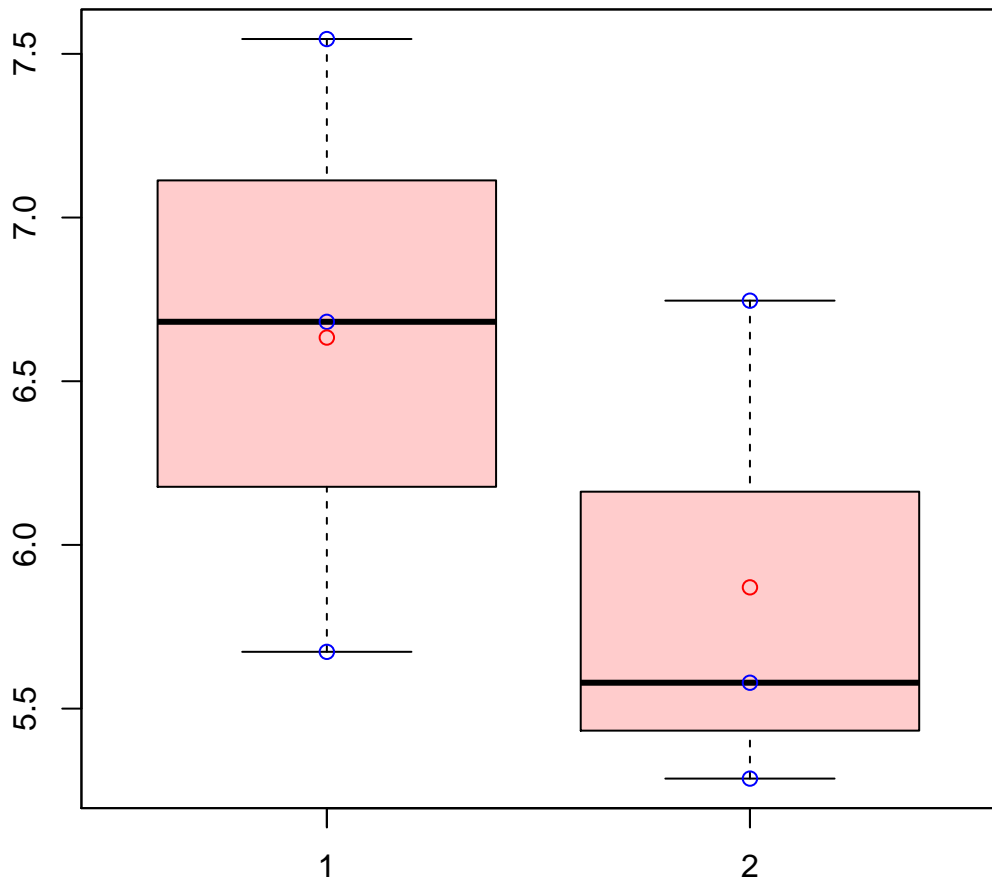

t-Test: p-value = 0.34

# Q6YVL9|Q6YVL9\_ORYSJ

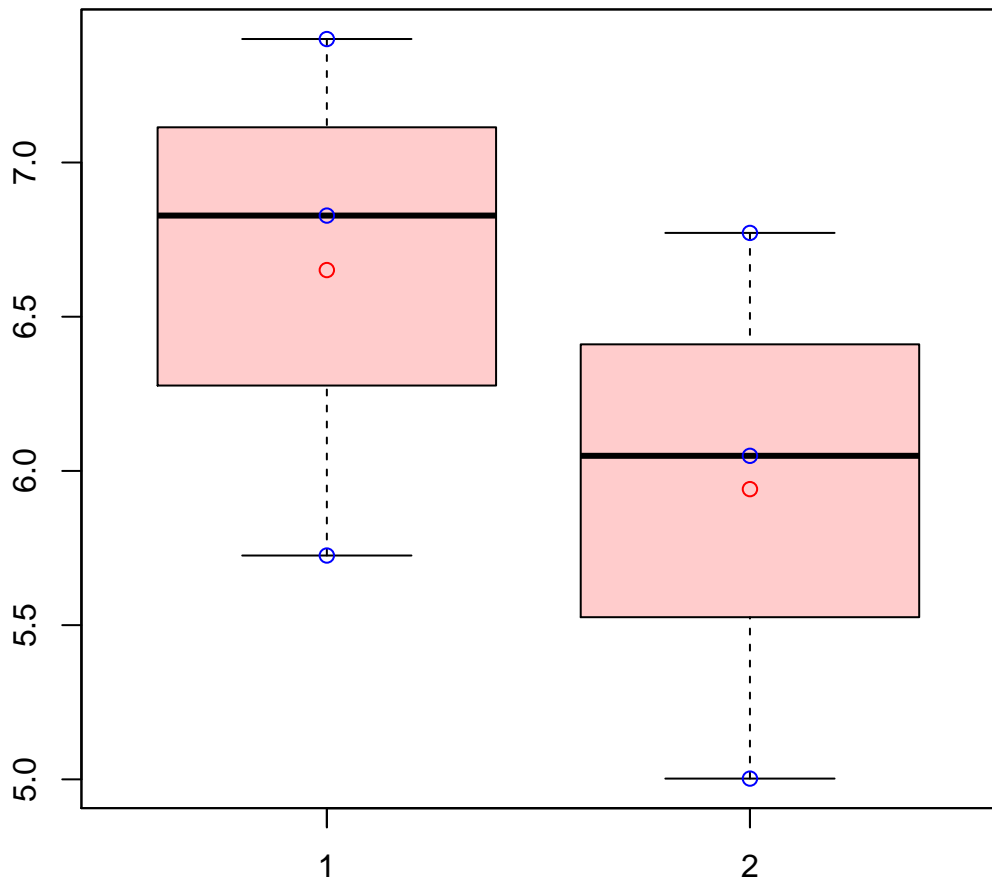

t-Test: p-value = 0.37



# Q6YW78|Q6YW78\_ORYSJ

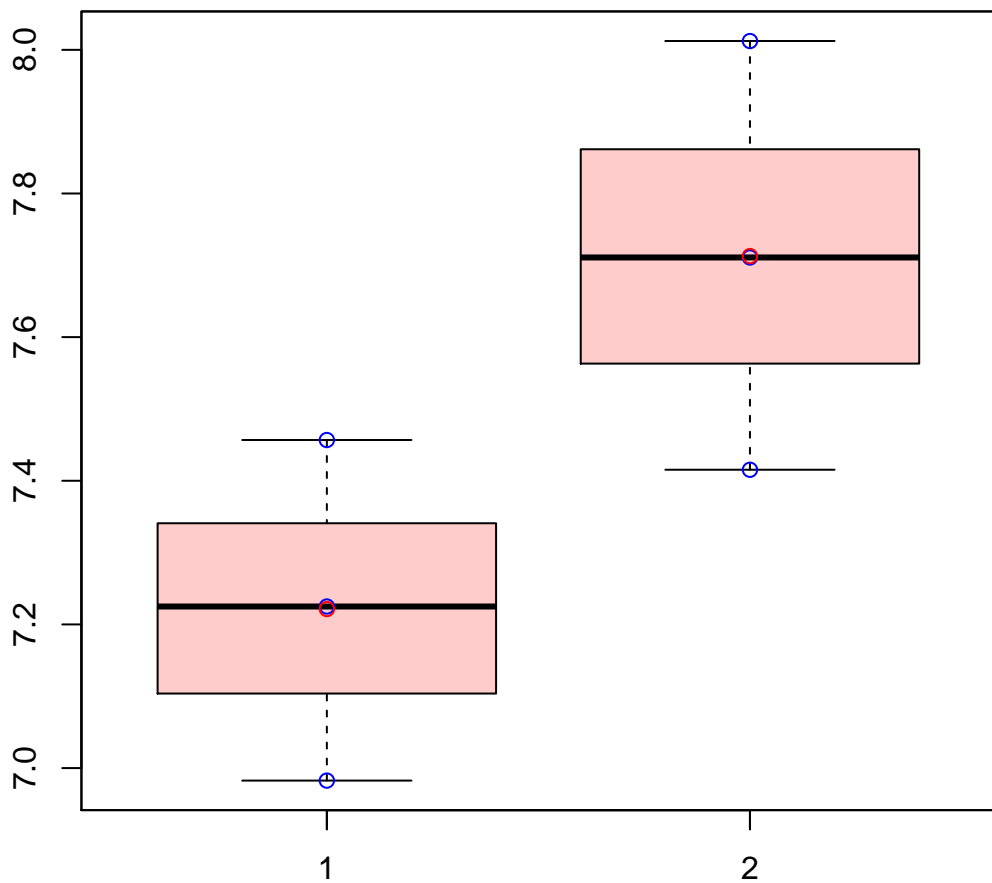

t-Test: p-value = 0.09

# Q6YWZ4|Q6YWZ4\_ORYSJ

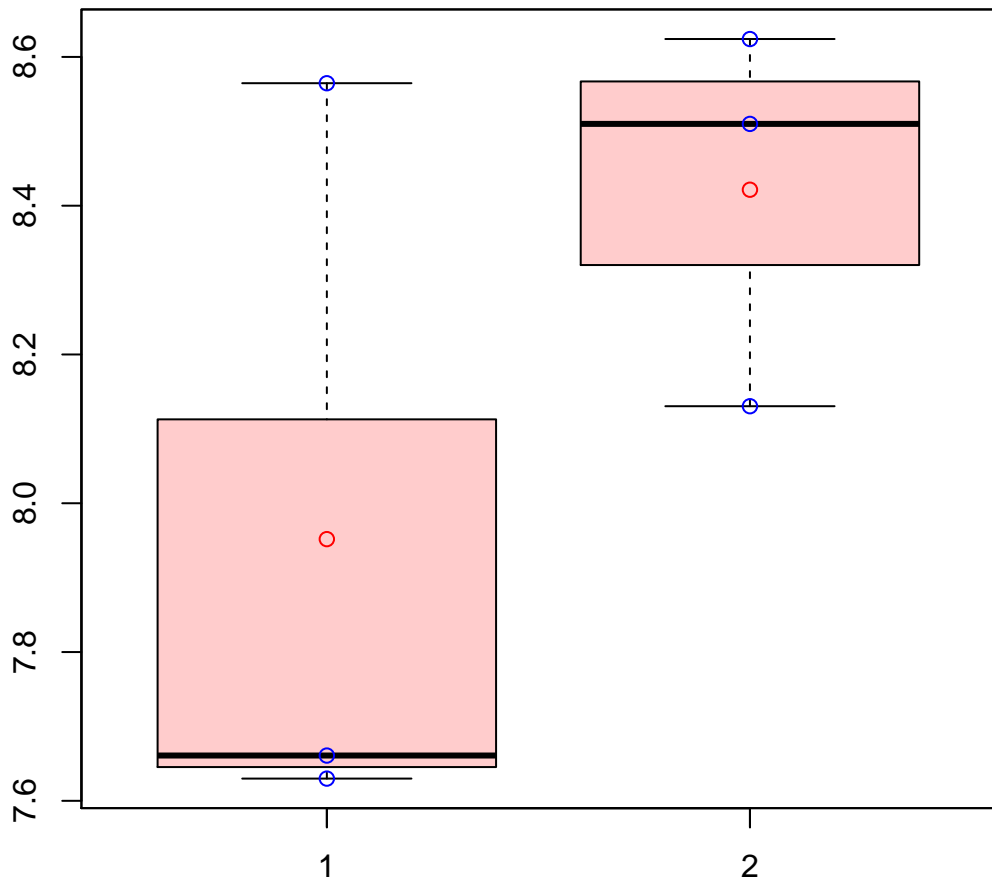

t-Test: p-value = 0.27

# Q6YXI3|Q6YXI3\_ORYSJ

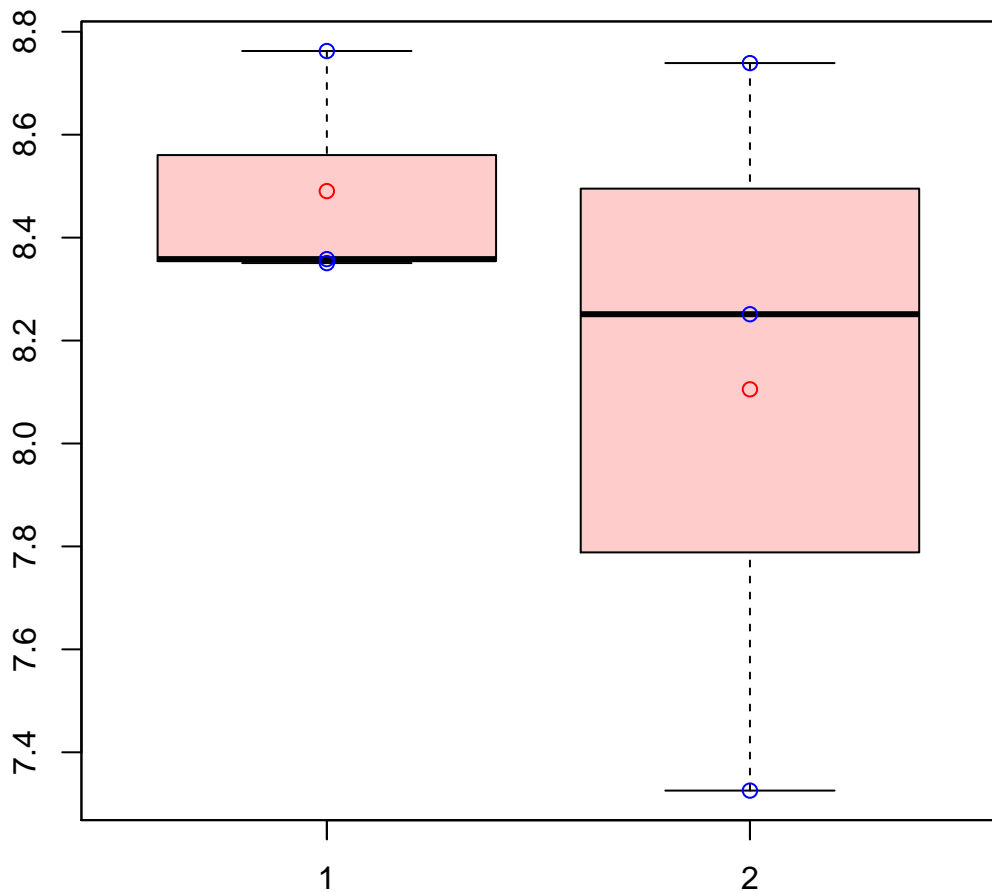

t-Test: p-value = 0.46

# Q6YXT5|Q6YXT5\_ORYSJ

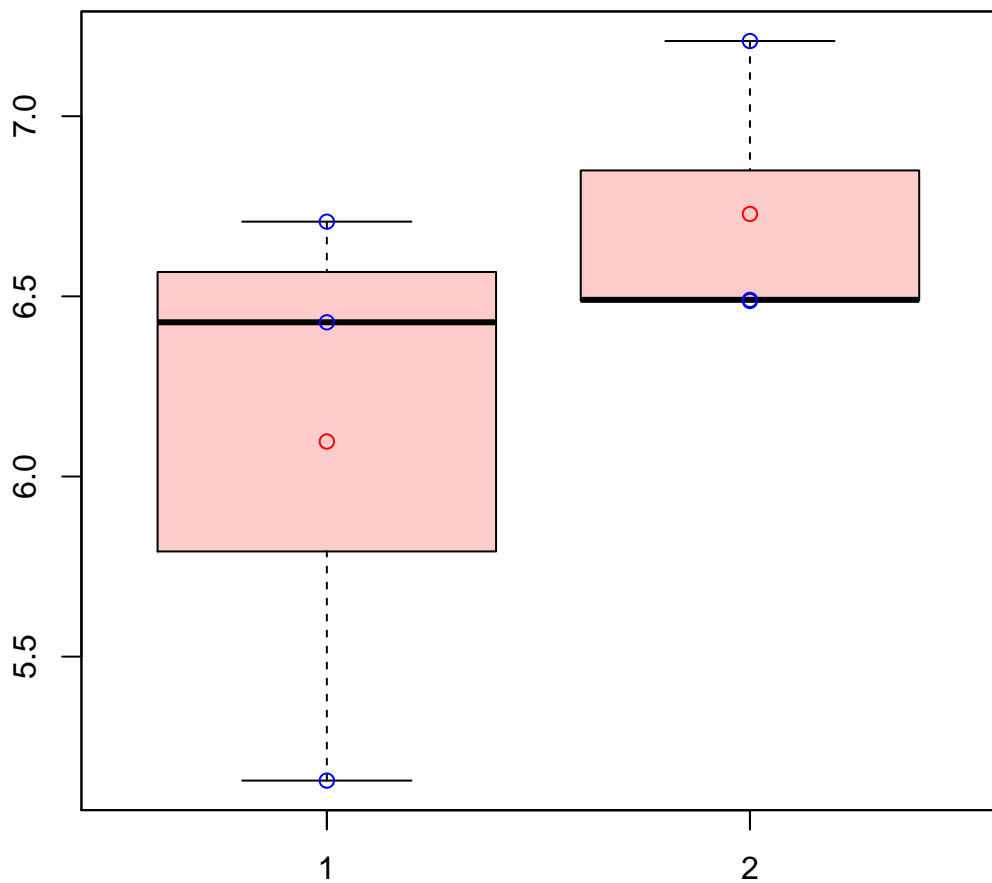

t-Test: p-value = 0.32

# Q6Z058|Q6Z058\_ORYSJ

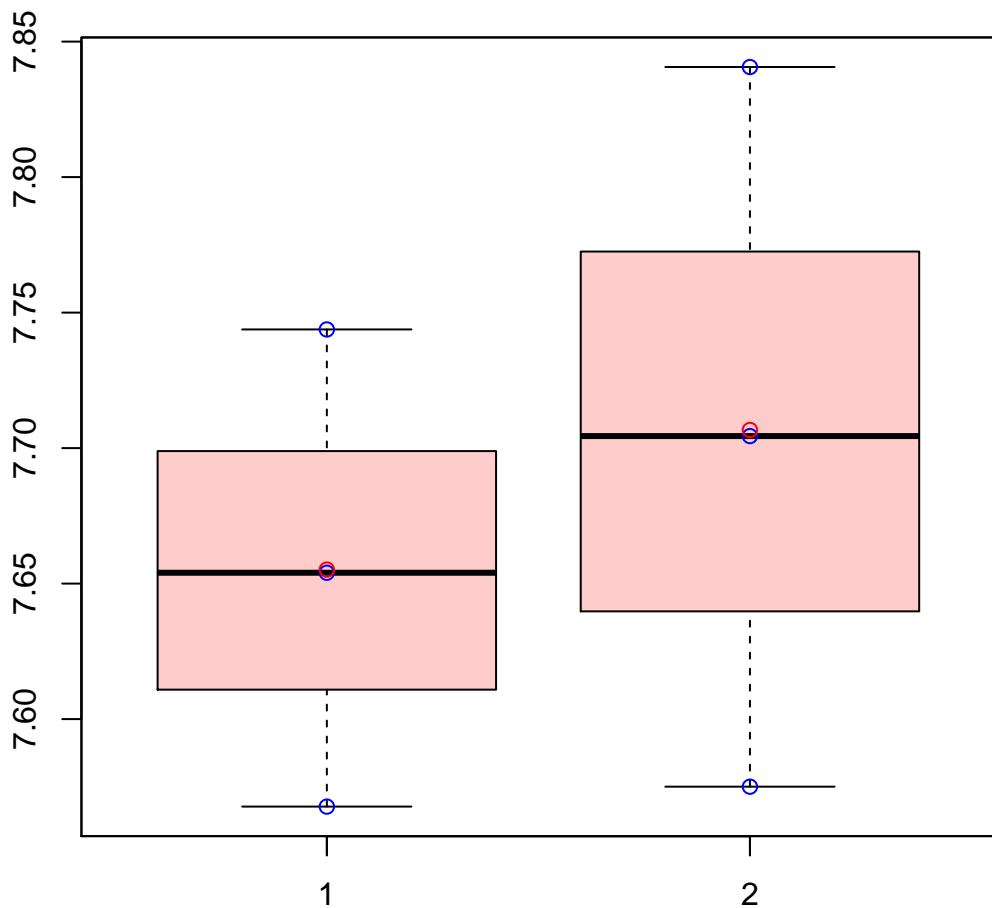

t-Test: p-value = 0.61

# Q6Z0A8|Q6Z0A8\_ORYSJ

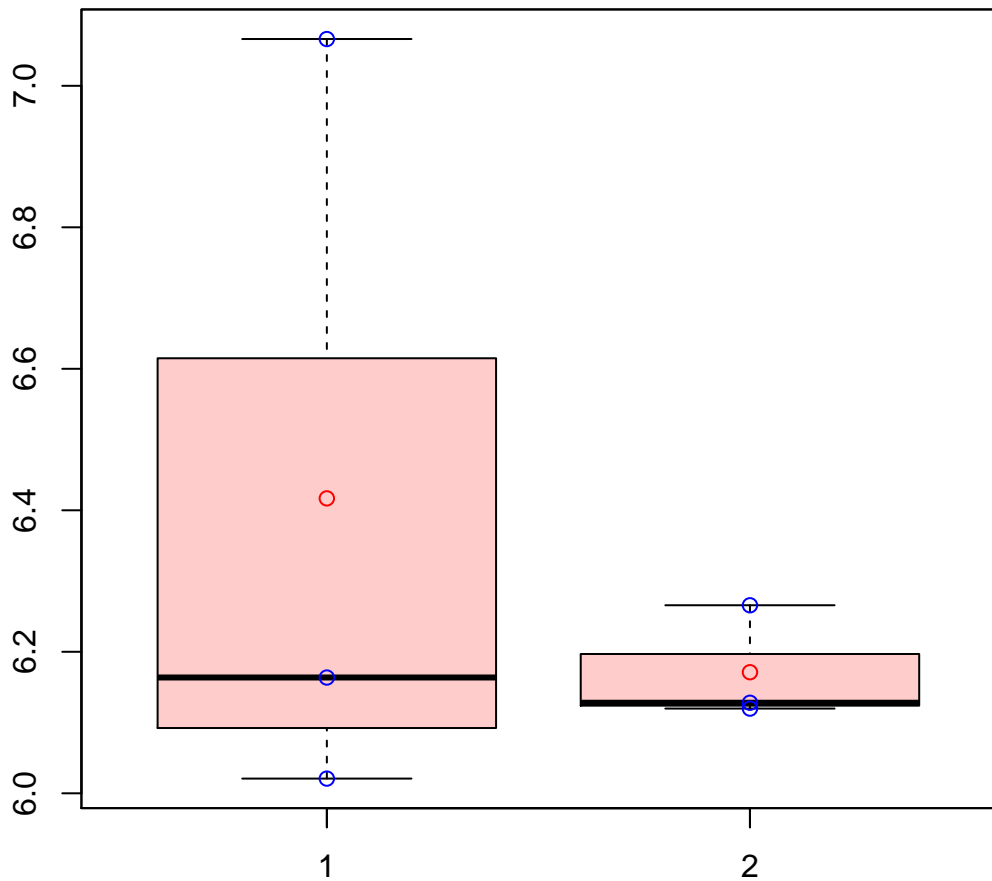

t-Test: p-value = 0.53

# Q6Z0V9|Q6Z0V9\_ORYSJ

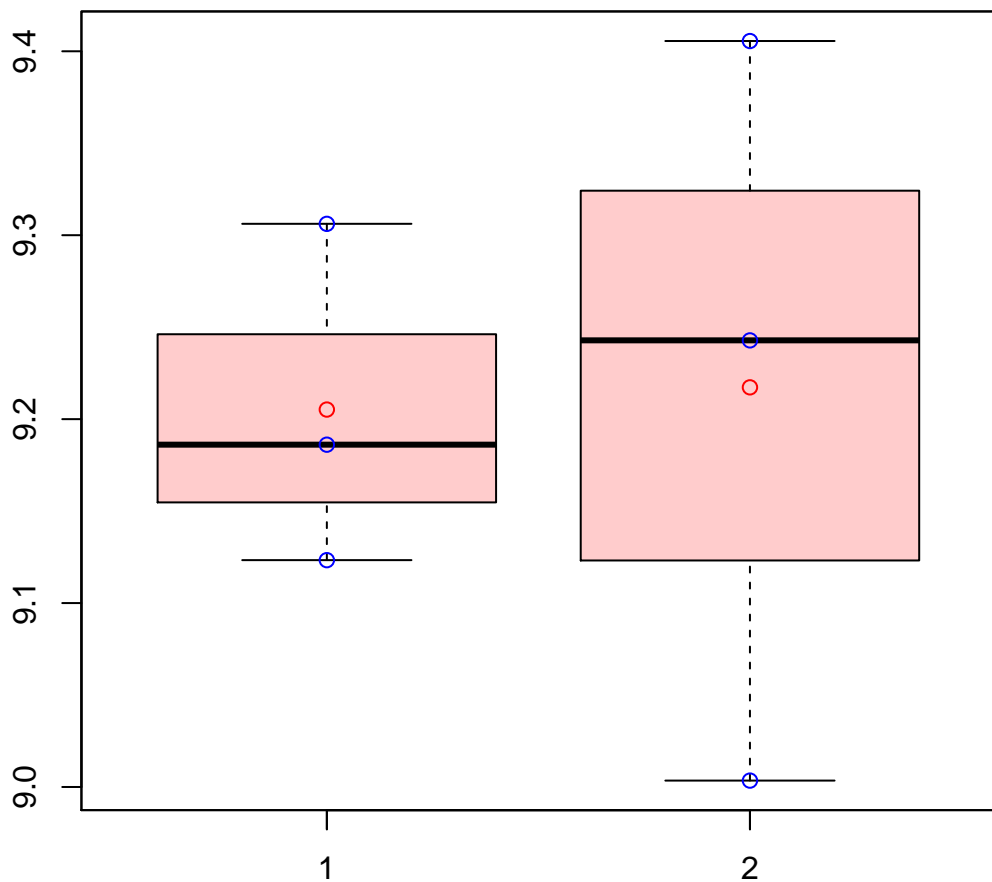

t-Test: p-value = 0.93

# Q6Z1V6|Q6Z1V6\_ORYSJ

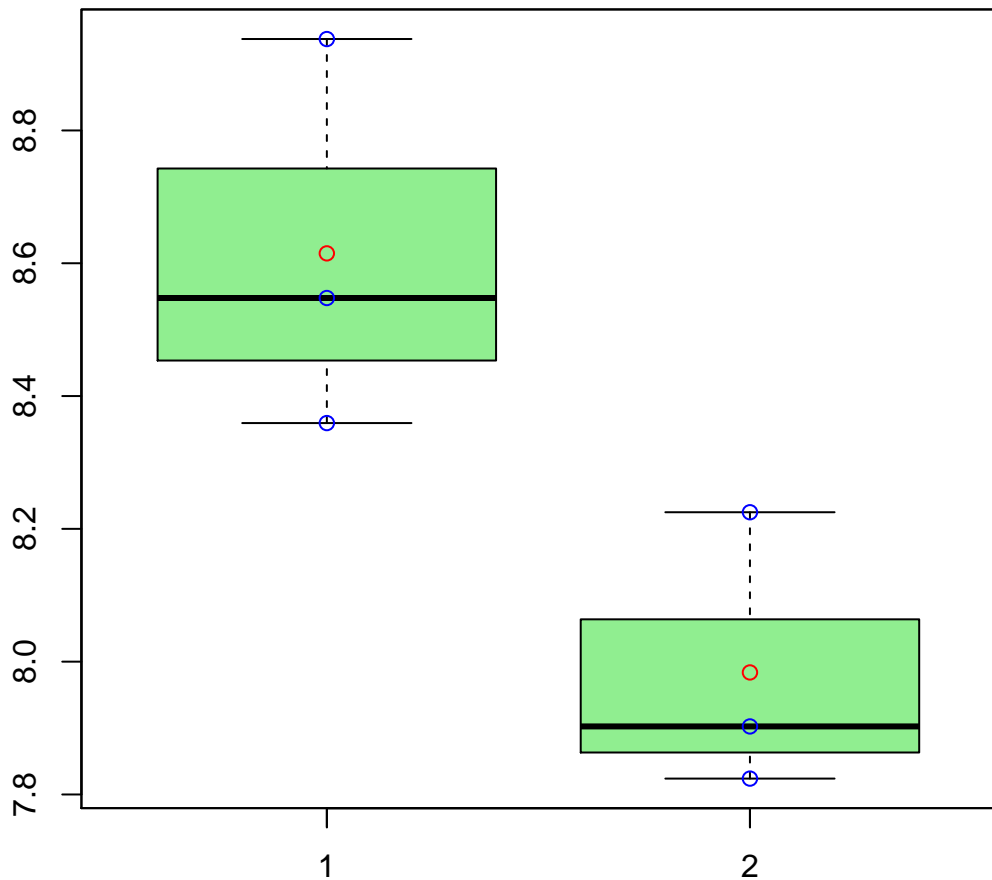

t-Test: p-value = 0.04



# Q6Z3L5|Q6Z3L5\_ORYSJ

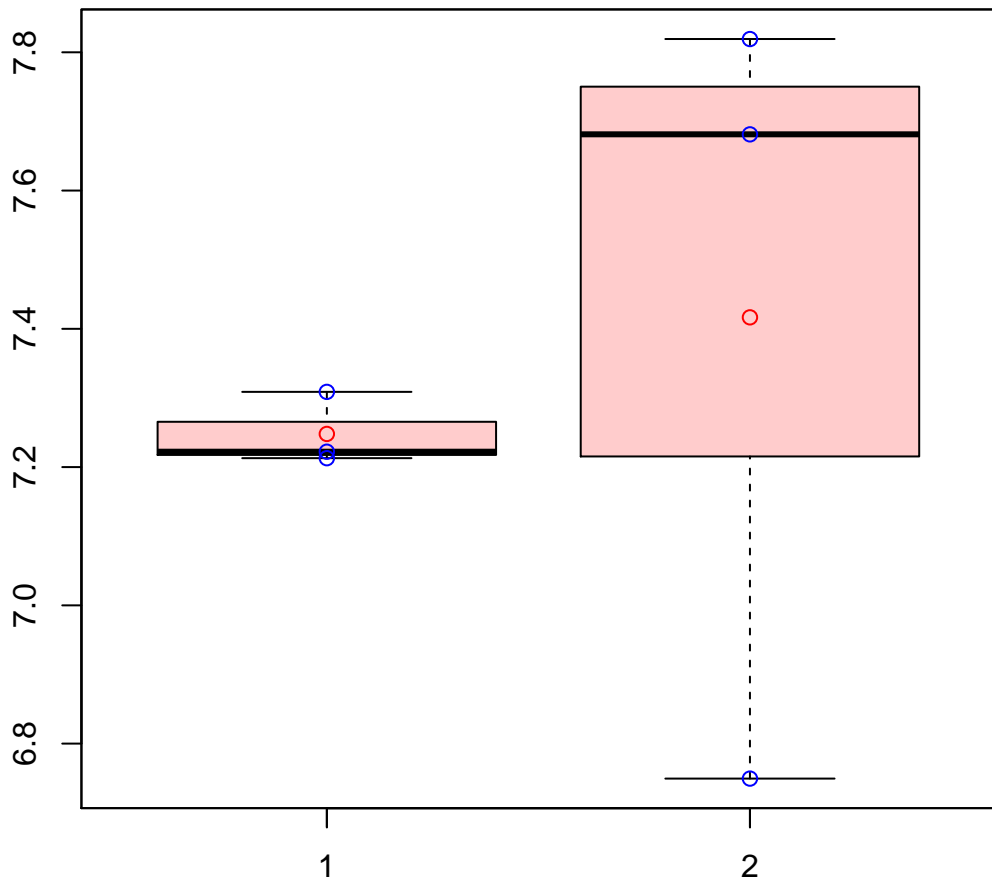

t-Test: p-value = 0.67

# Q6Z3X5|Q6Z3X5\_ORYSJ

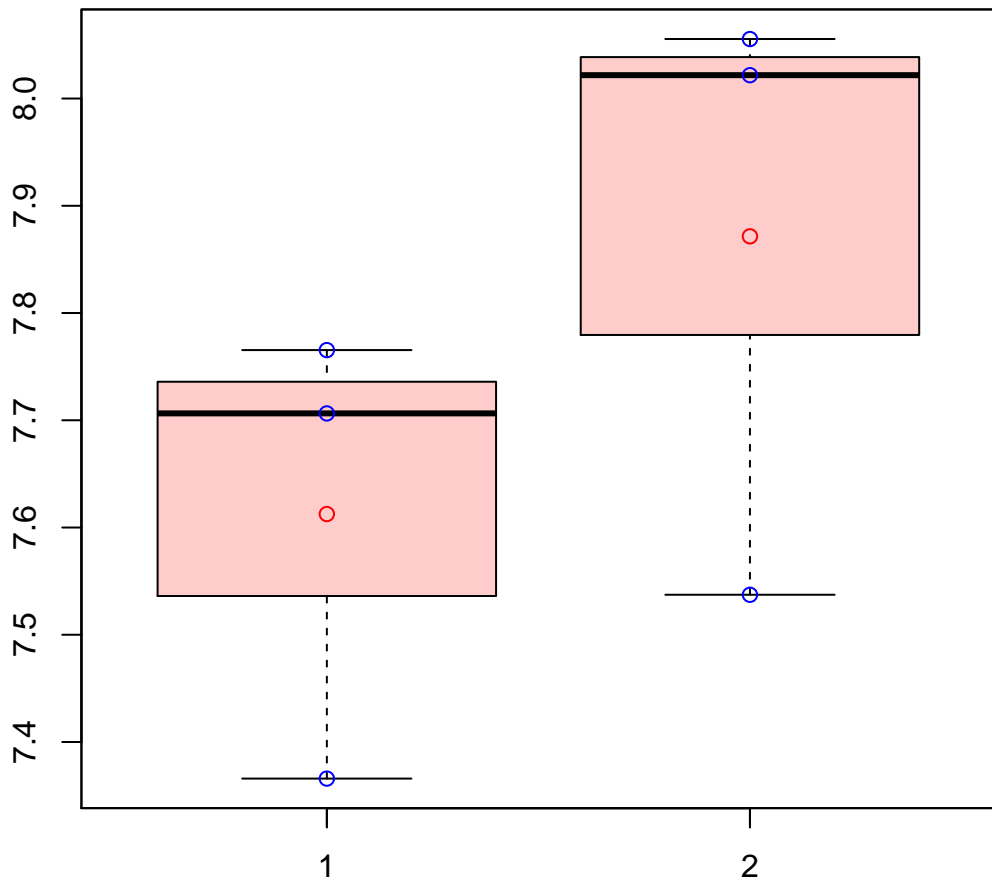

t-Test: p-value = 0.29

# Q6Z407|Q6Z407\_ORYSJ

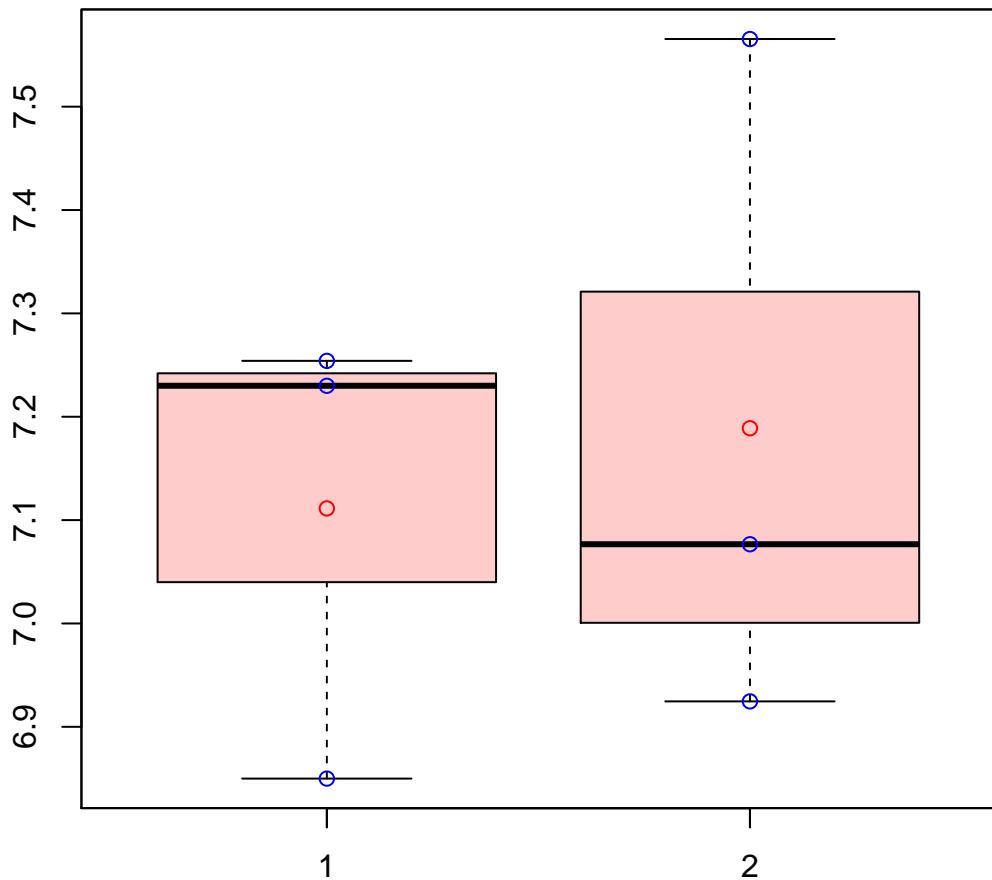

t-Test: p-value = 0.76

# Q6Z7F0|Q6Z7F0\_ORYSJ

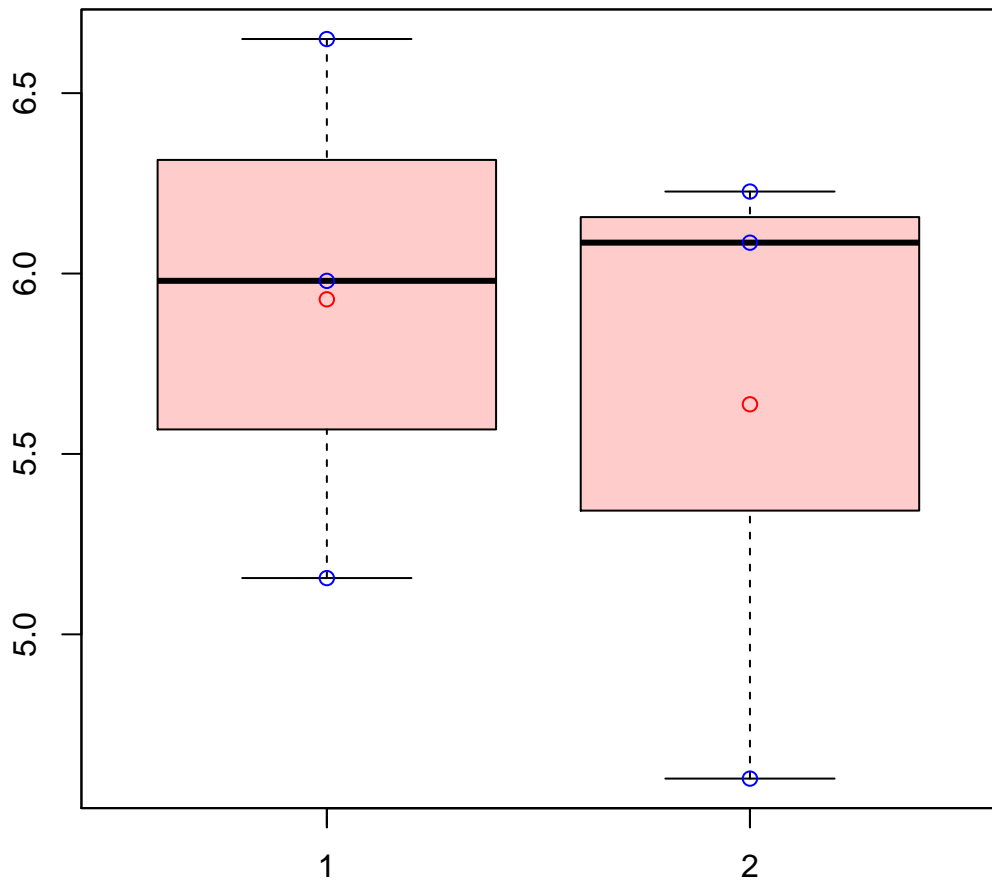

t-Test: p-value = 0.69

# Q6Z8N7|Q6Z8N7\_ORYSJ

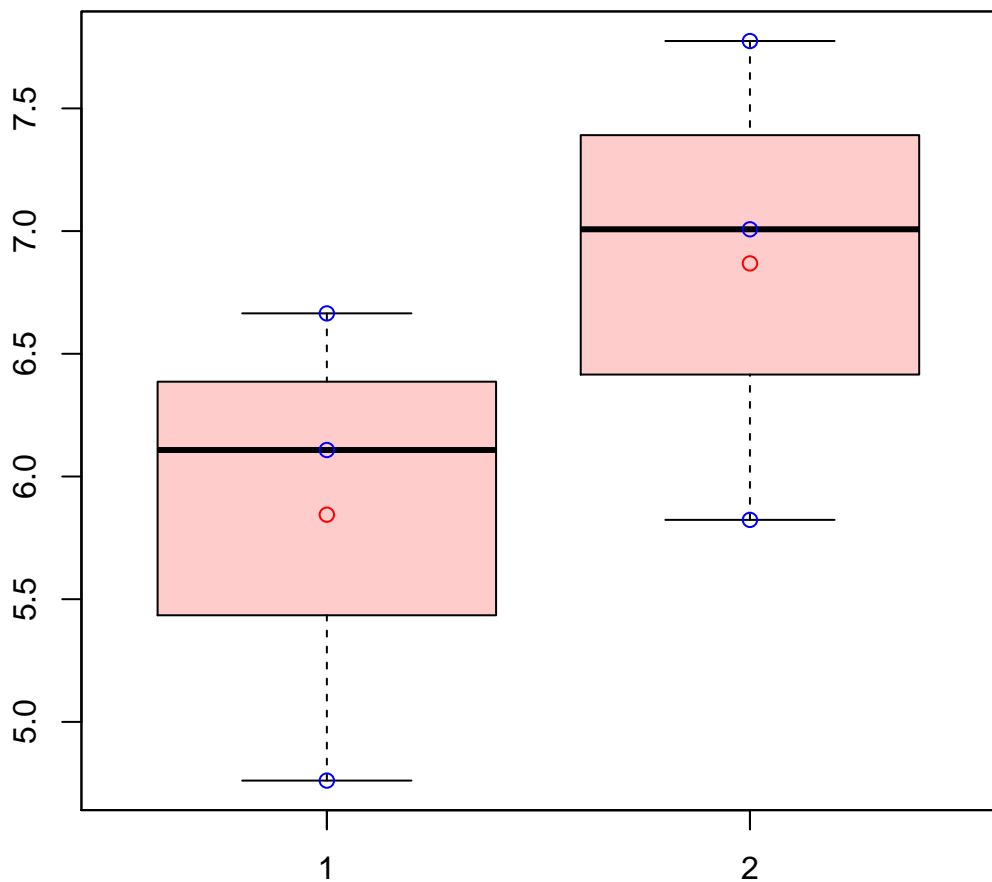

t-Test: p-value = 0.27

# Q6Z8U8|Q6Z8U8\_ORYSJ

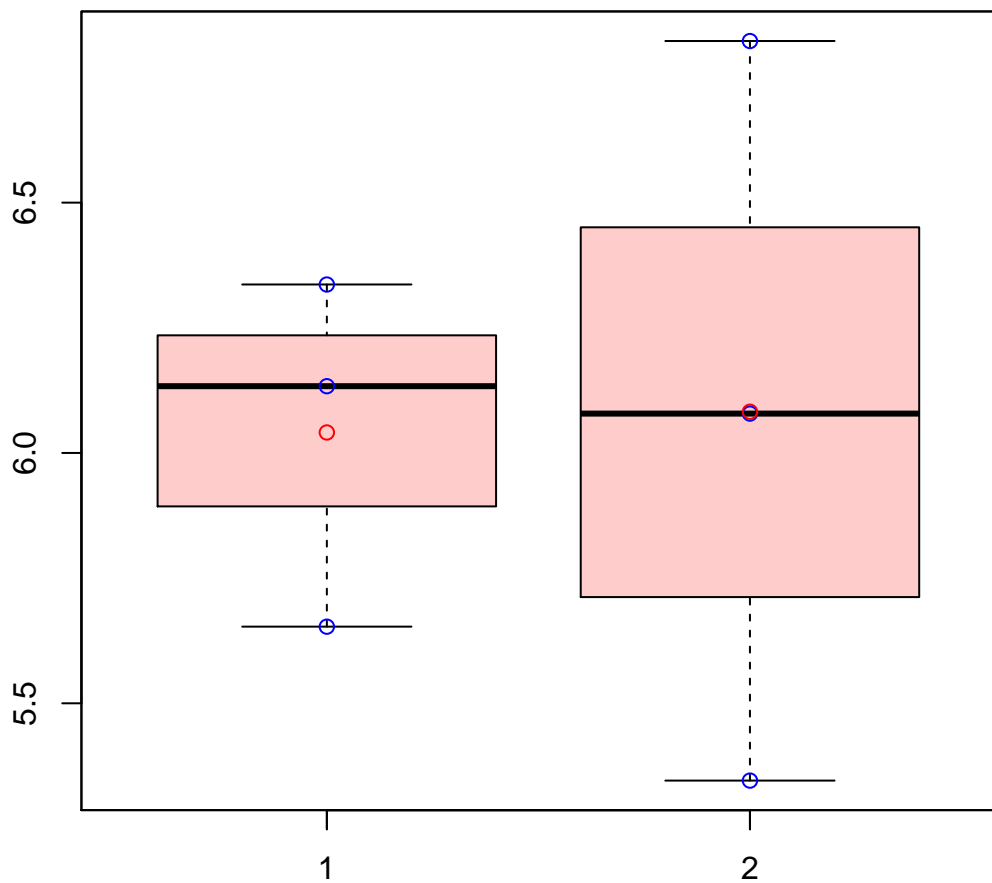

# Q6ZAL4|Q6ZAL4\_ORYSJ

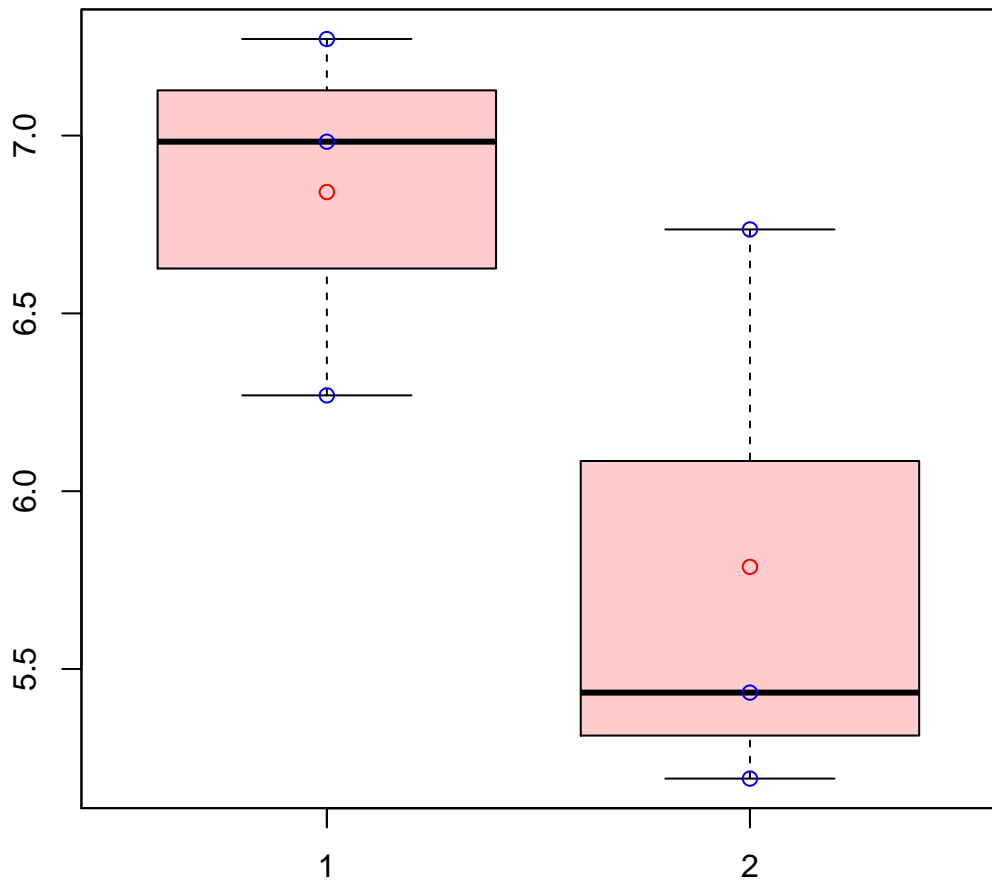

t-Test: p-value = 0.15

# Q6ZAZ0|Q6ZAZ0\_ORYSJ

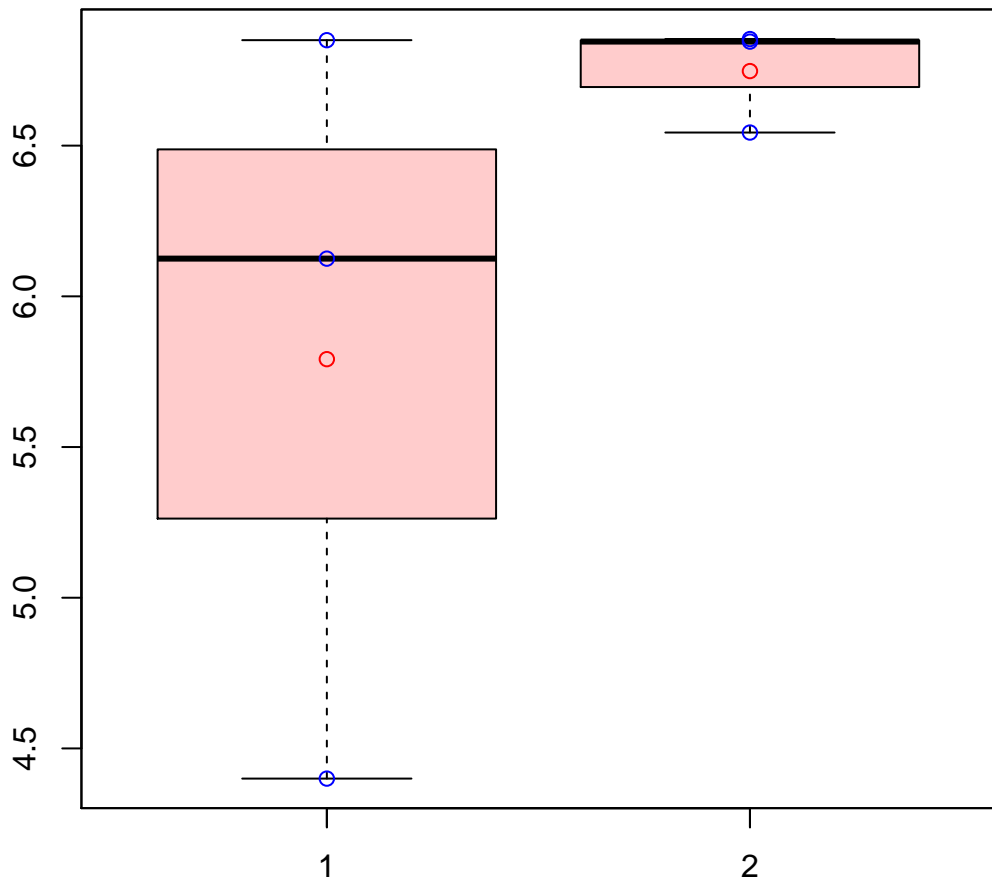

t-Test: p-value = 0.32



# Q6ZBH5|Q6ZBH5\_ORYSJ

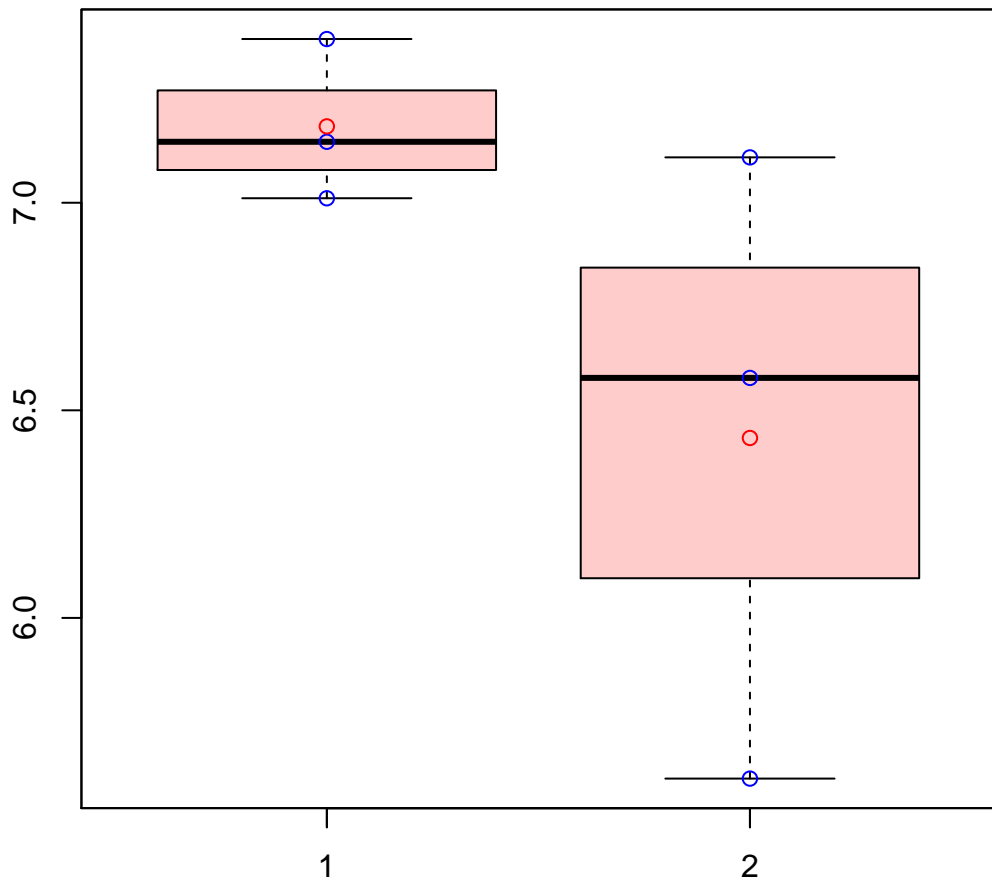

t-Test: p-value = 0.22

# Q6ZF30|Q6ZF30\_ORYSJ

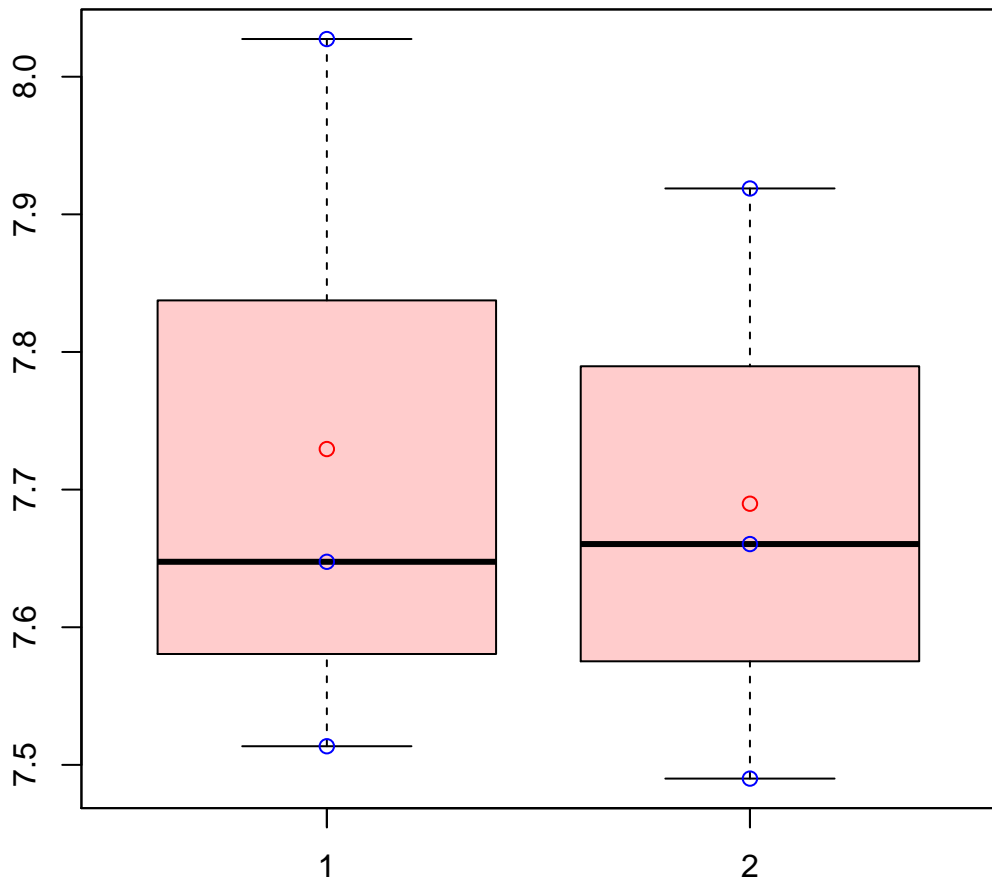

t-Test: p-value = 0.85

# Q6ZFJ4|Q6ZFJ4\_ORYSJ

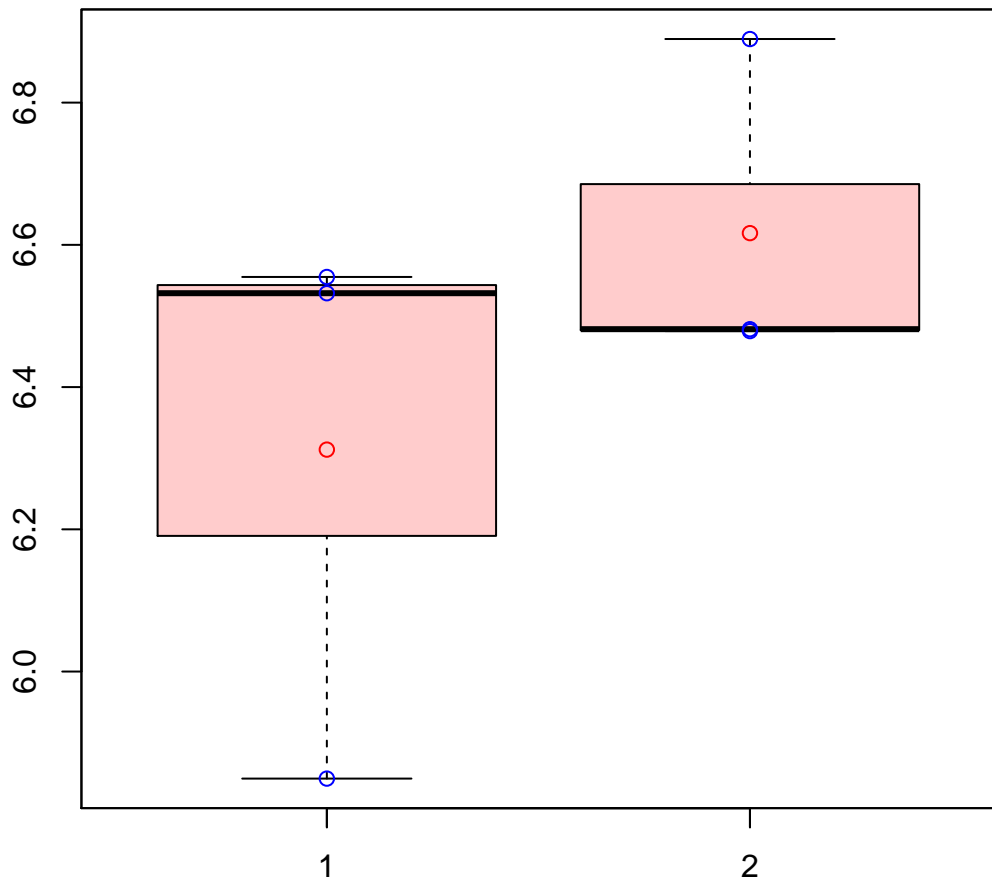

t-Test: p-value = 0.33

# Q6ZFJ5|Q6ZFJ5\_ORYSJ

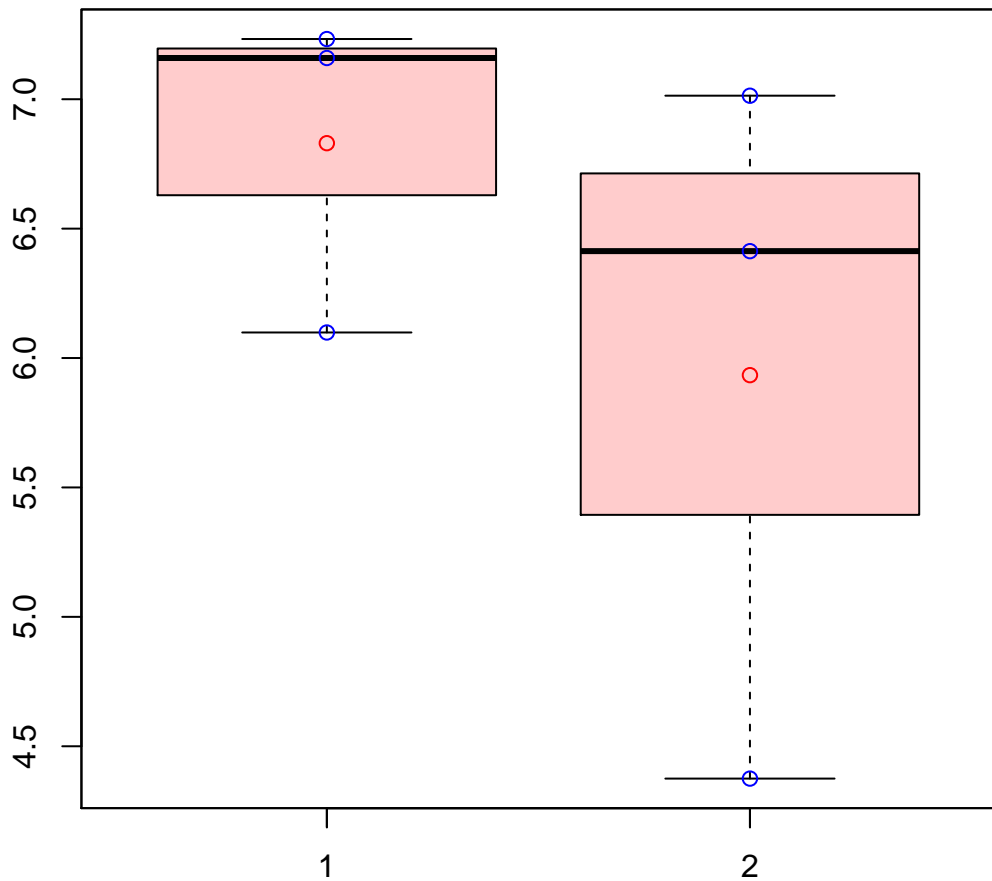

t-Test: p-value = 0.39

# Q6ZFW3|Q6ZFW3\_ORYSJ

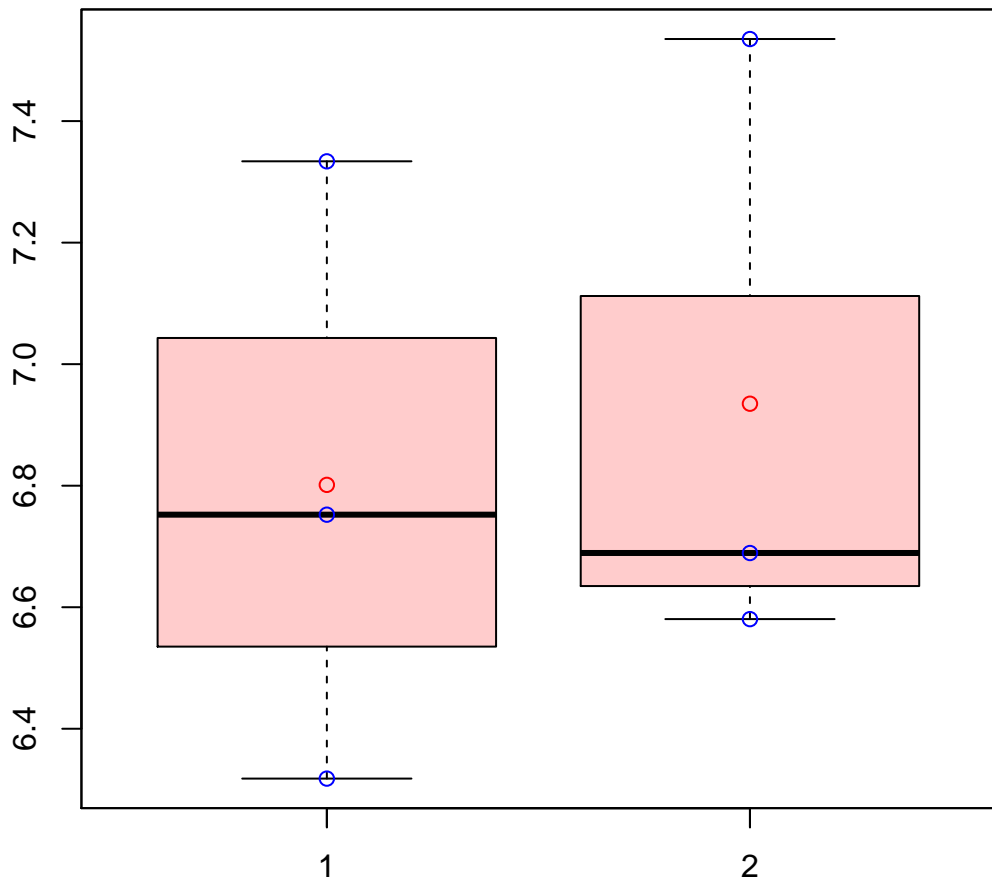

t-Test: p-value = 0.77

# Q6ZFY1|Q6ZFY1\_ORYSJ

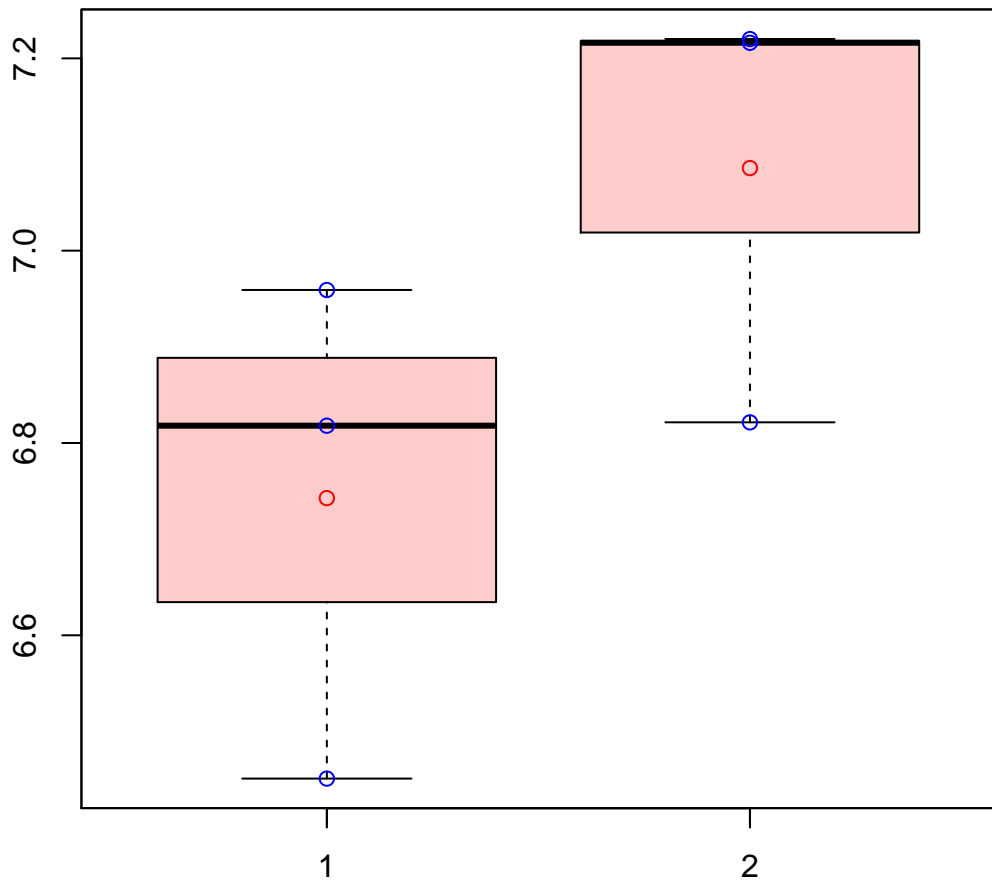

t-Test: p-value = 0.16

# Q6ZG81|Q6ZG81\_ORYSJ

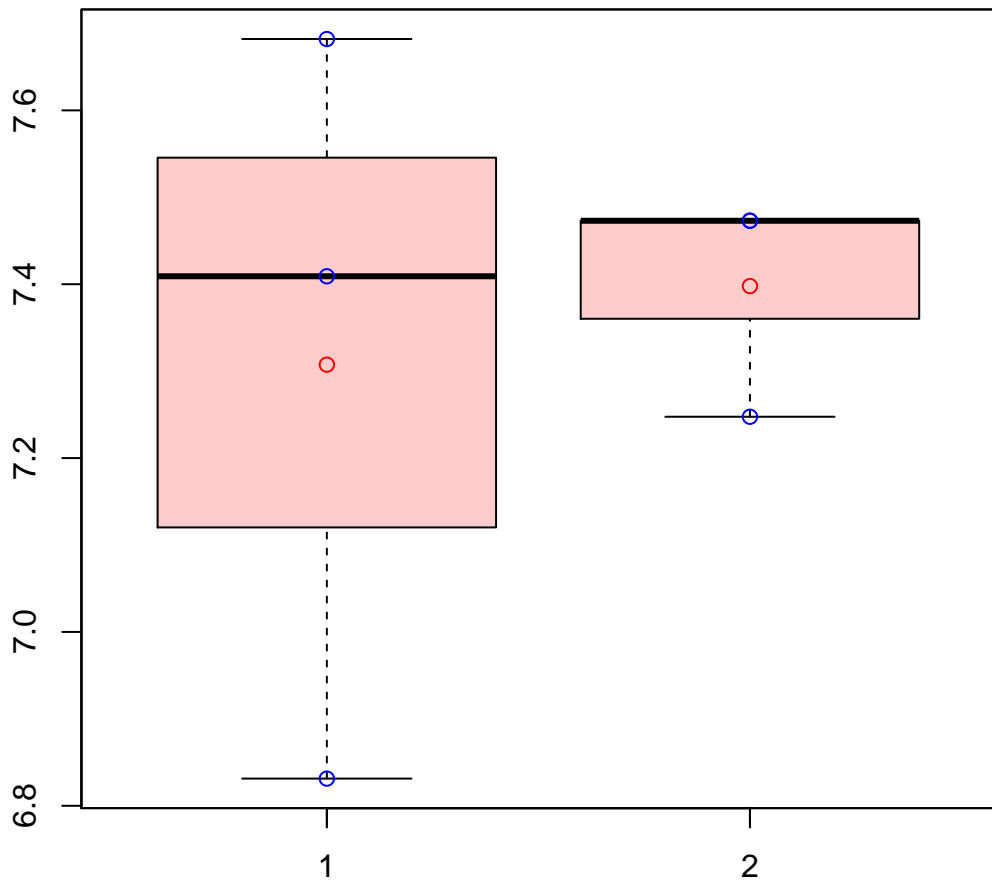

t-Test: p-value = 0.76

# Q6ZHJ9|Q6ZHJ9\_ORYSJ

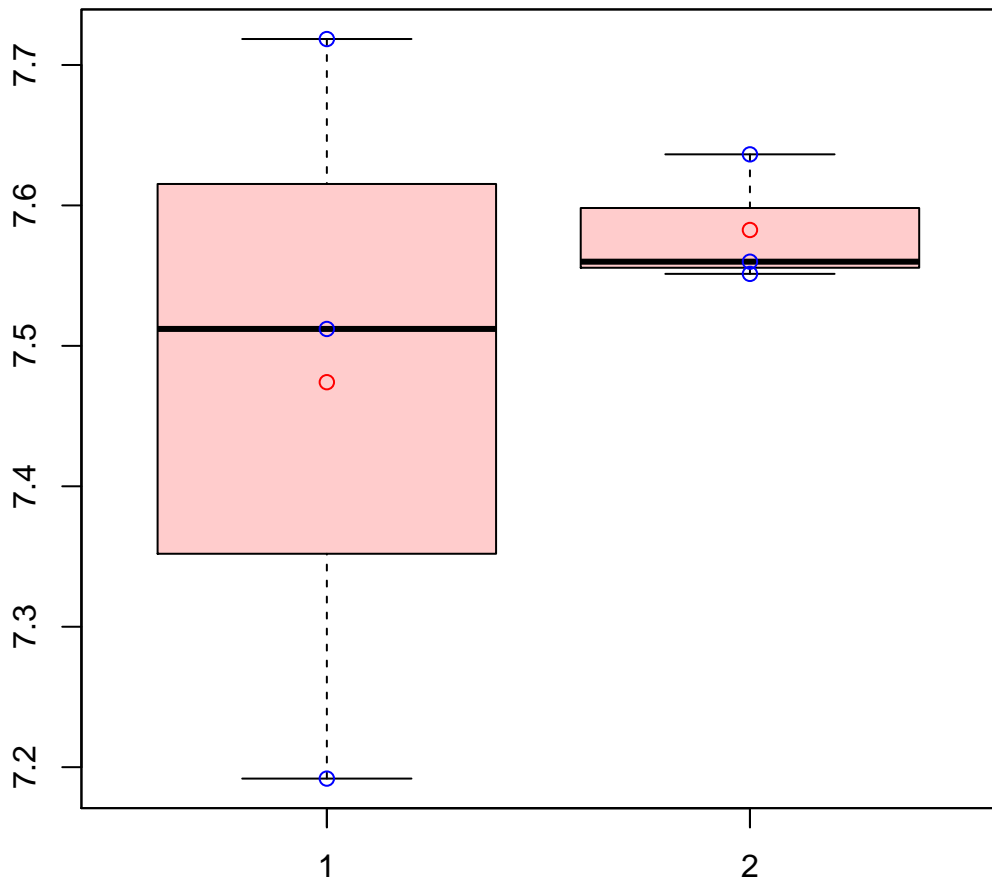

t-Test: p-value = 0.55



# Q6ZIT1|Q6ZIT1\_ORYSJ

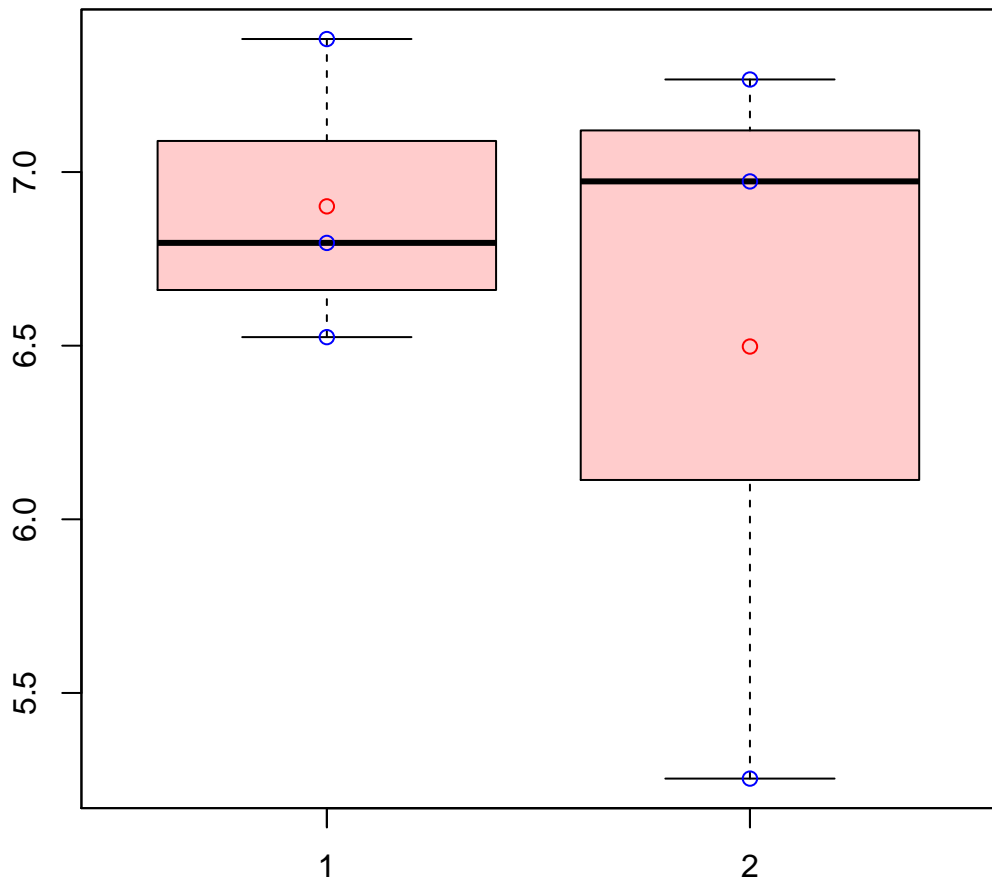

t-Test: p-value = 0.6

# Q6ZJF7|Q6ZJF7\_ORYSJ

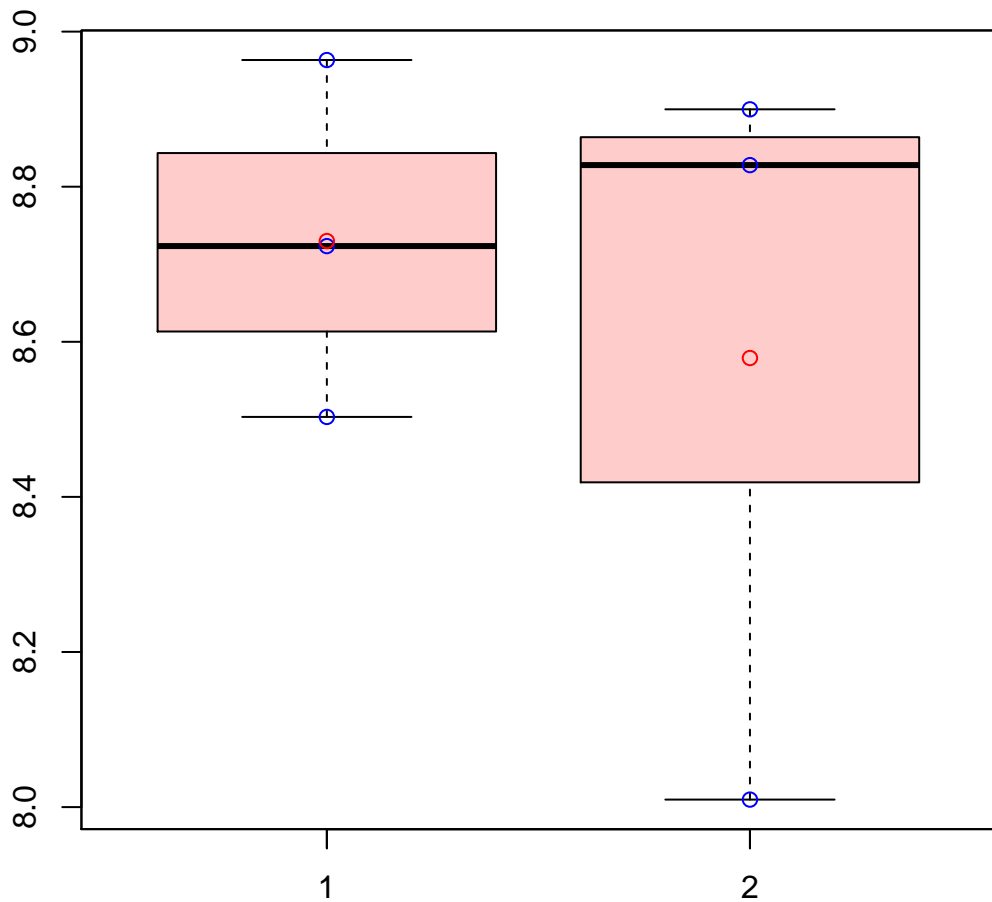

t-Test: p-value = 0.67

# Q6ZL12|Q6ZL12\_ORYSJ

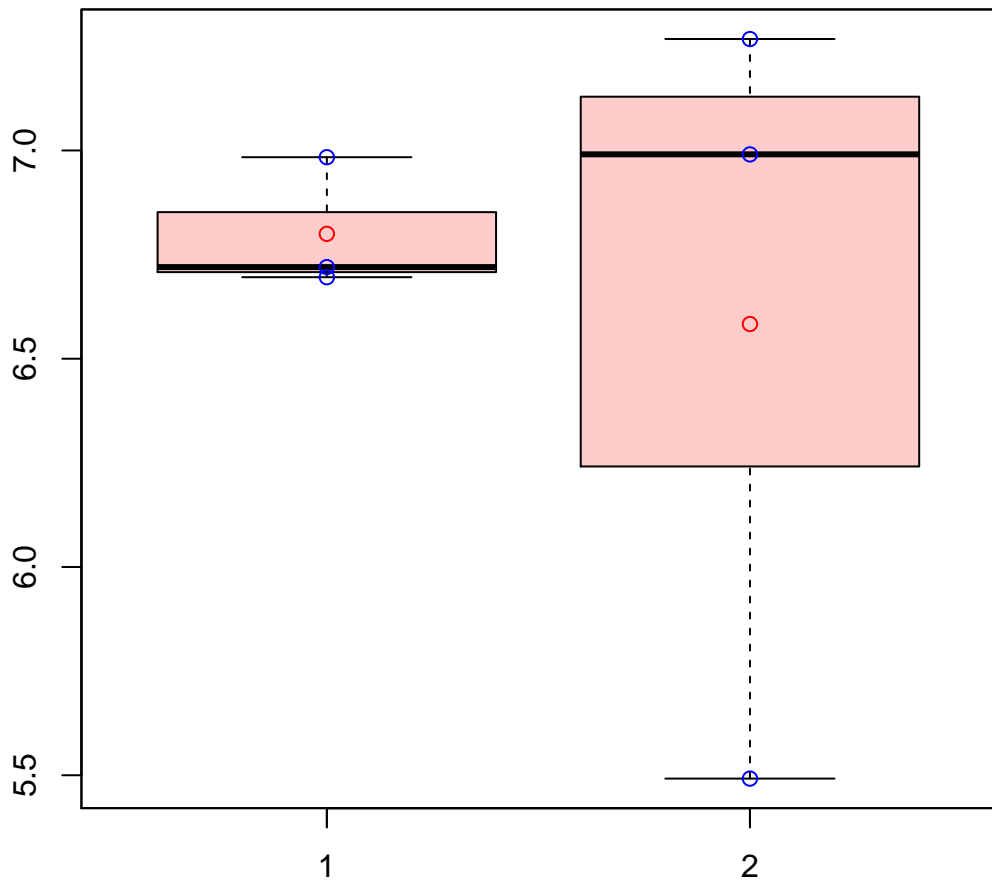

t-Test: p-value = 0.73

# Q6ZL73|Q6ZL73\_ORYSJ

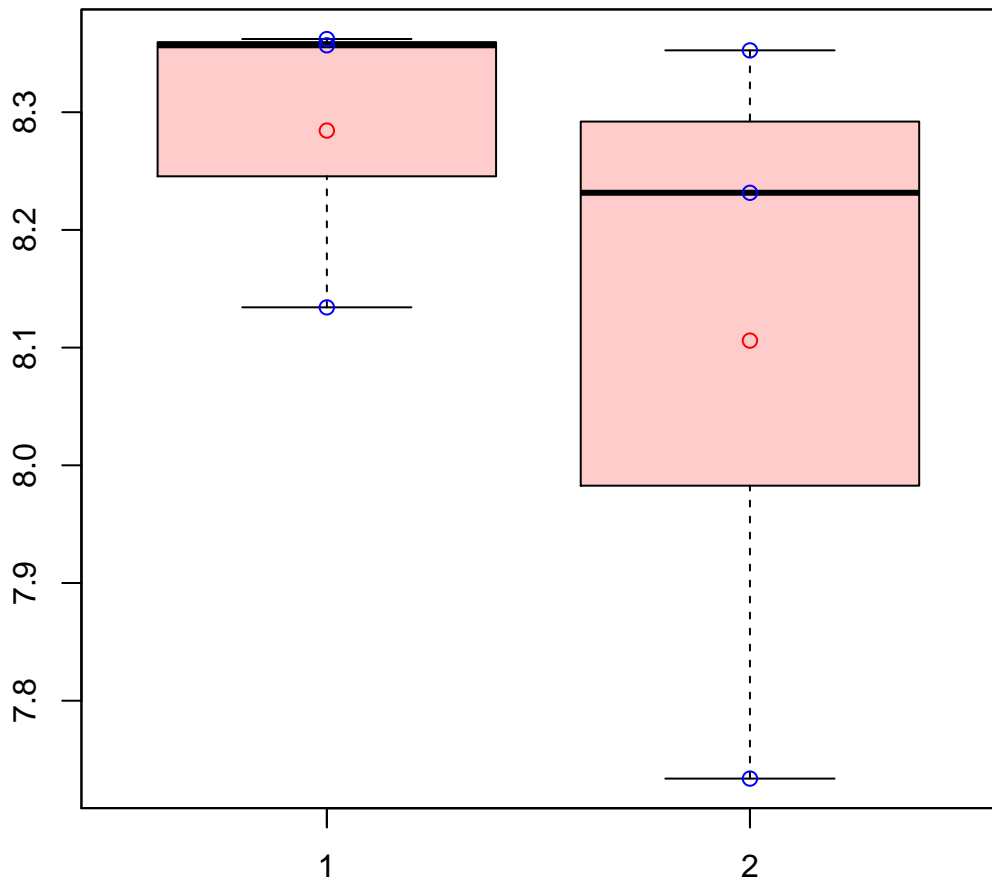

t-Test: p-value = 0.45

# Q70ZL4|Q70ZL4\_9POAL

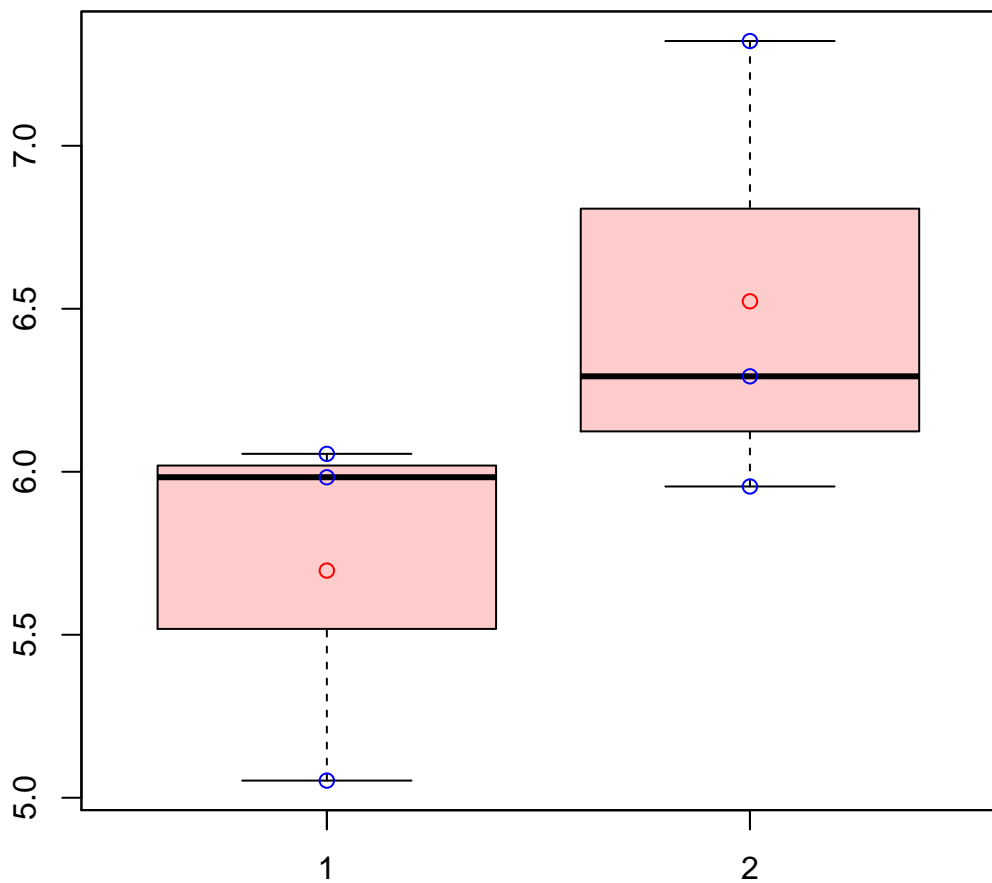

t-Test: p-value = 0.19

# Q75G47|Q75G47\_ORYSJ

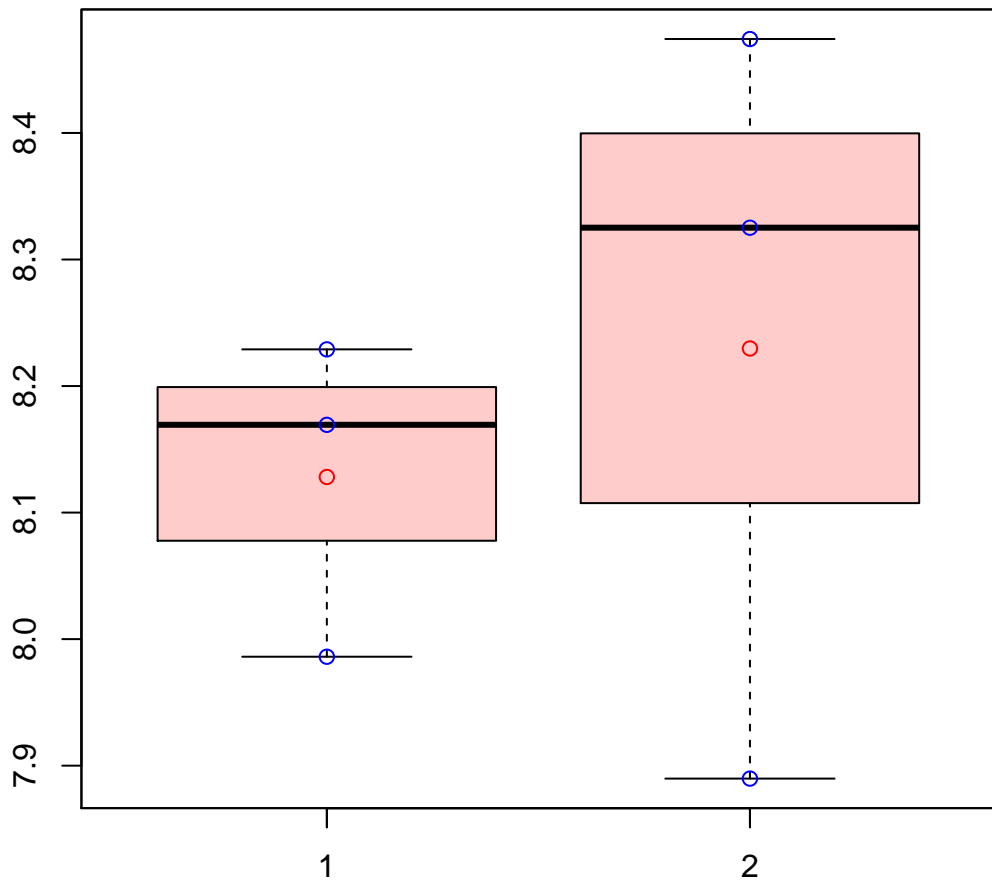

t-Test: p-value = 0.63

# Q75GX5|Q75GX5\_ORYSJ

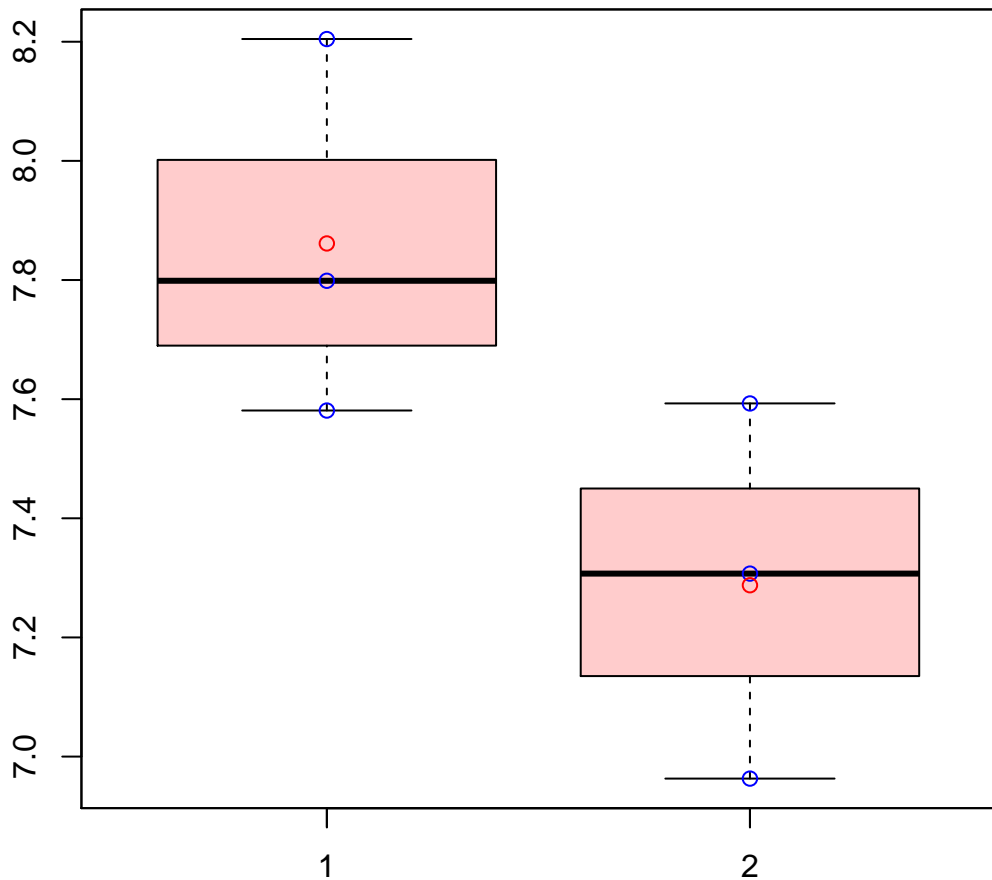

t-Test: p-value = 0.09

# Q75HK1|Q75HK1\_ORYSJ

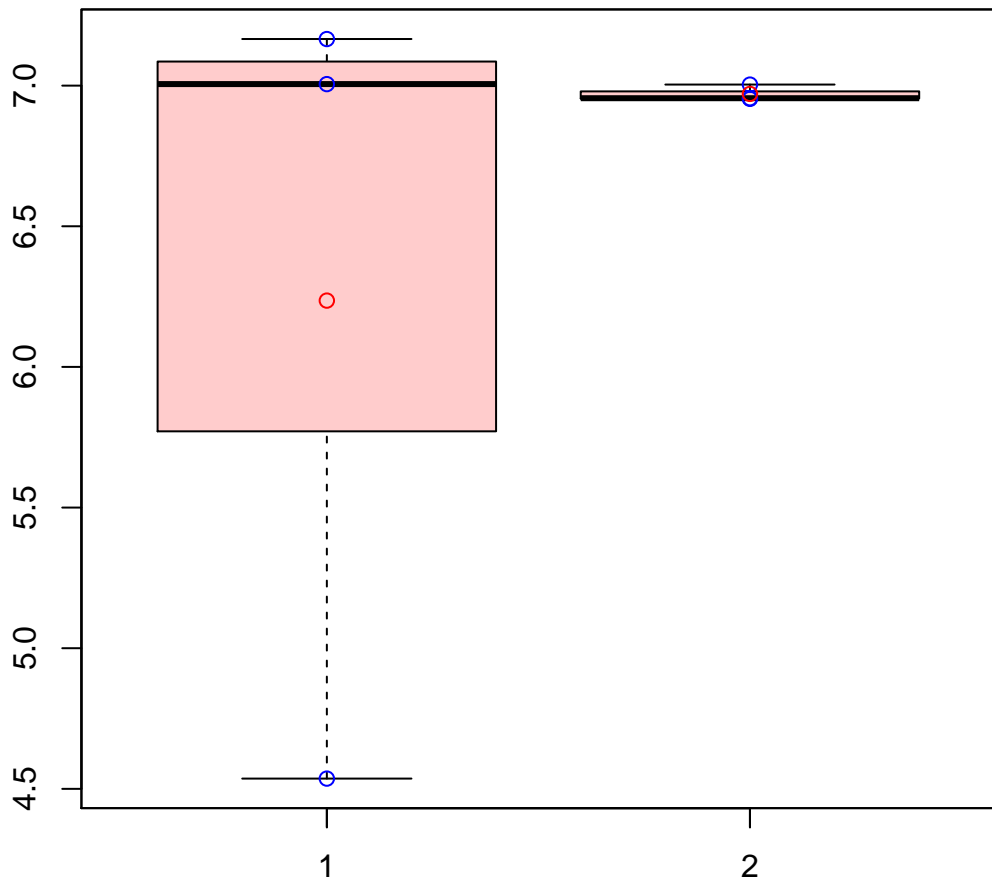

t-Test: p-value = 0.48



# Q75I16|Q75I16\_ORYSJ

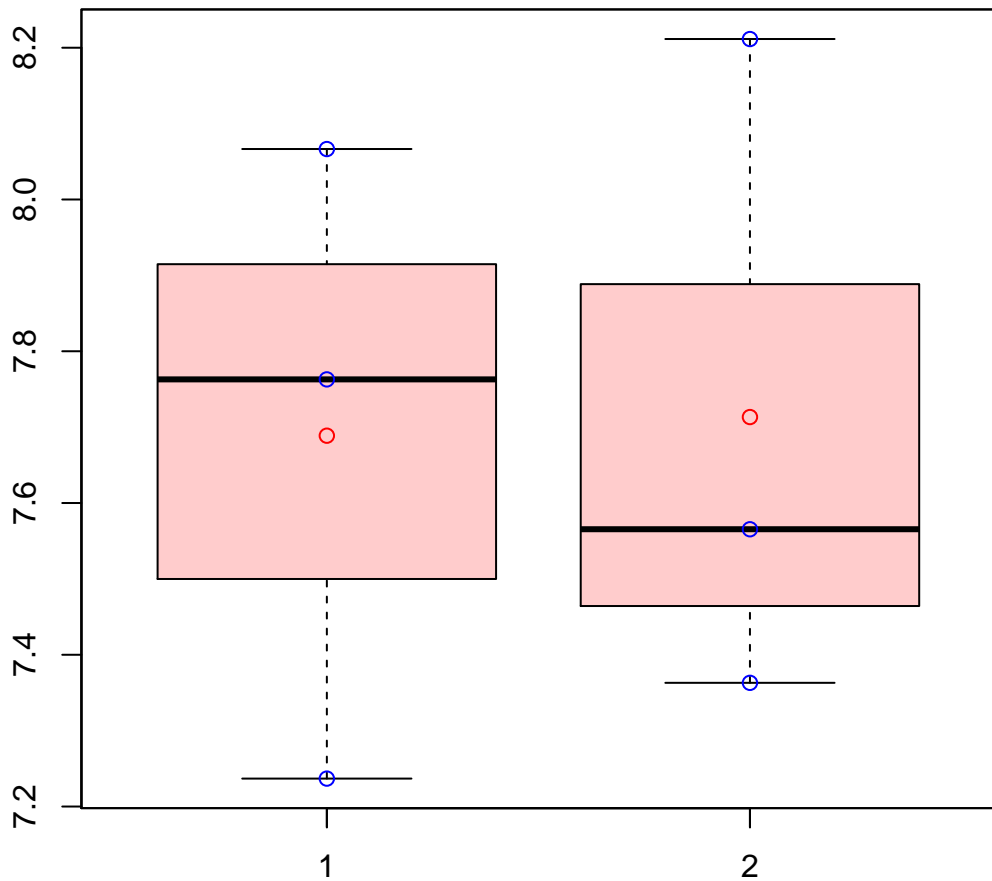

t-Test: p-value = 0.95

# Q75IJ5|Q75IJ5\_ORYSJ

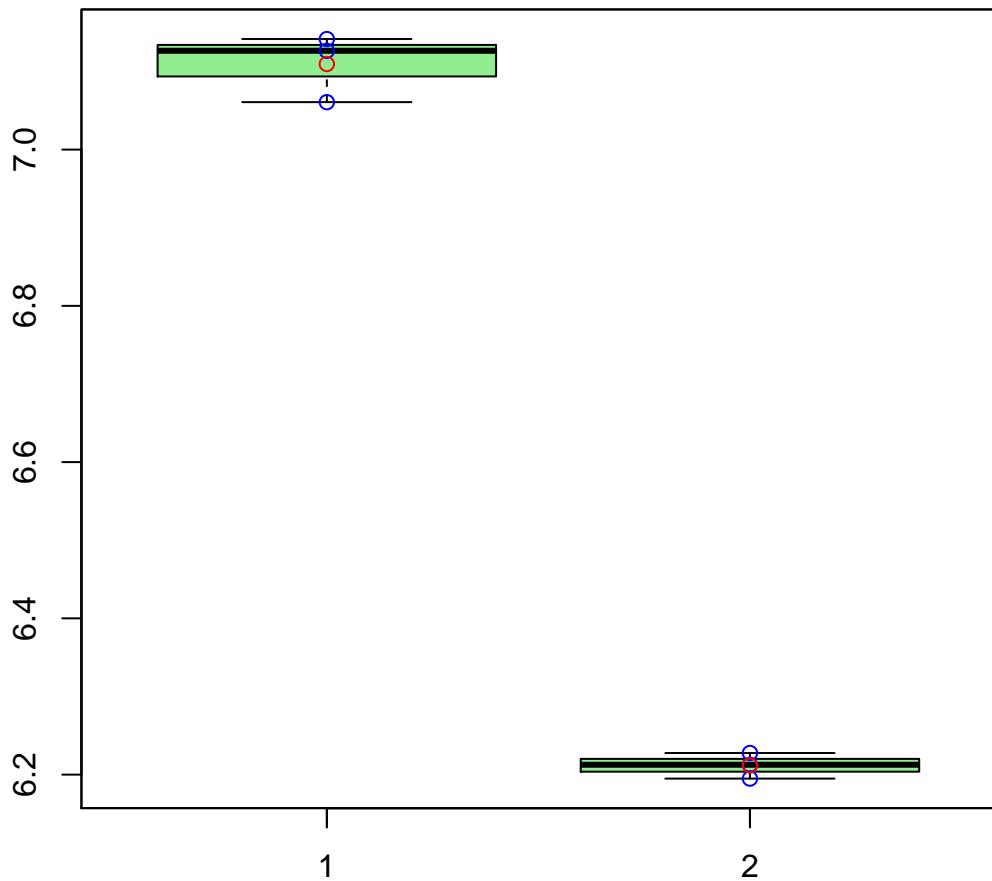

t-Test: p-value = 0

# Q75IL9|Q75IL9\_ORYSJ

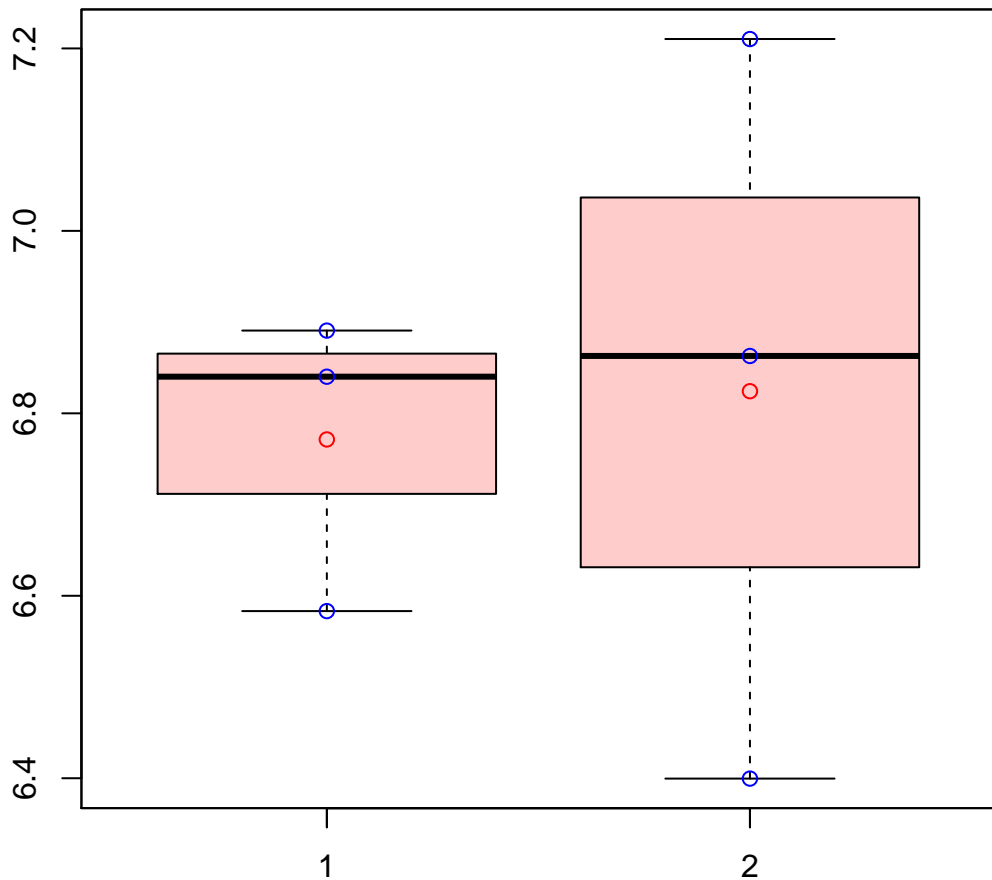

t-Test: p-value = 0.85

# Q75KU6|Q75KU6\_ORYSJ

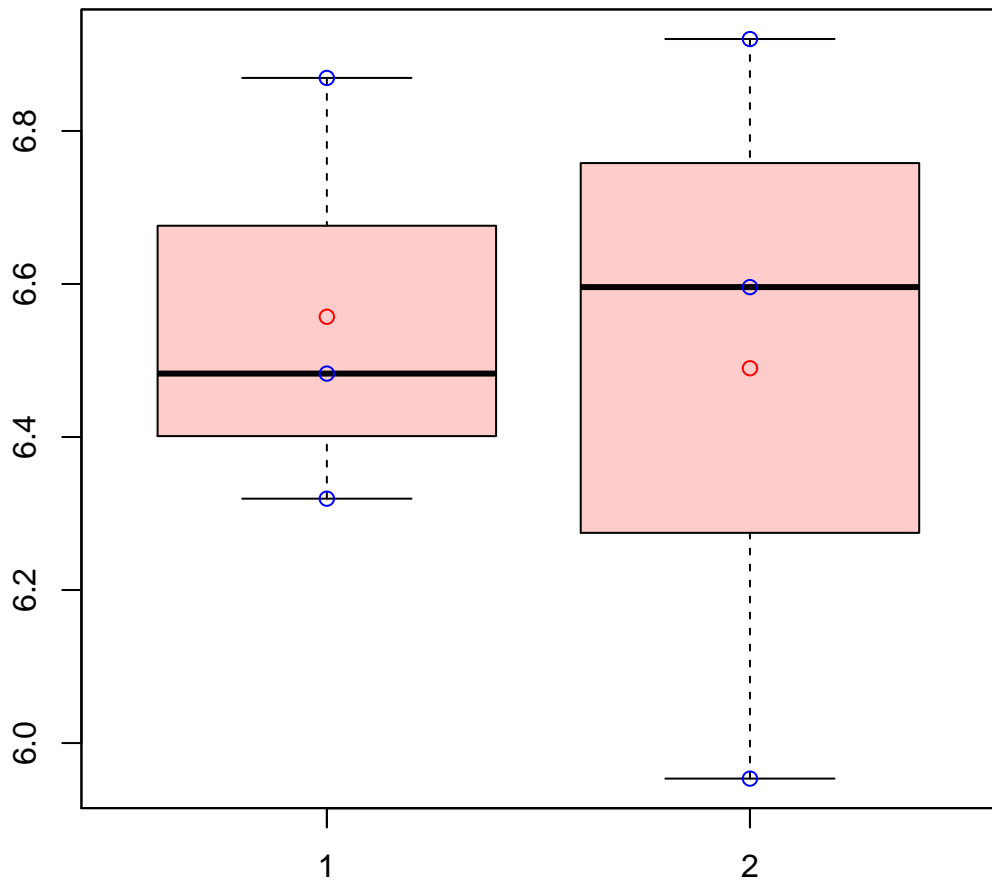

t-Test: p-value = 0.85

# Q75KZ3|Q75KZ3\_ORYSJ

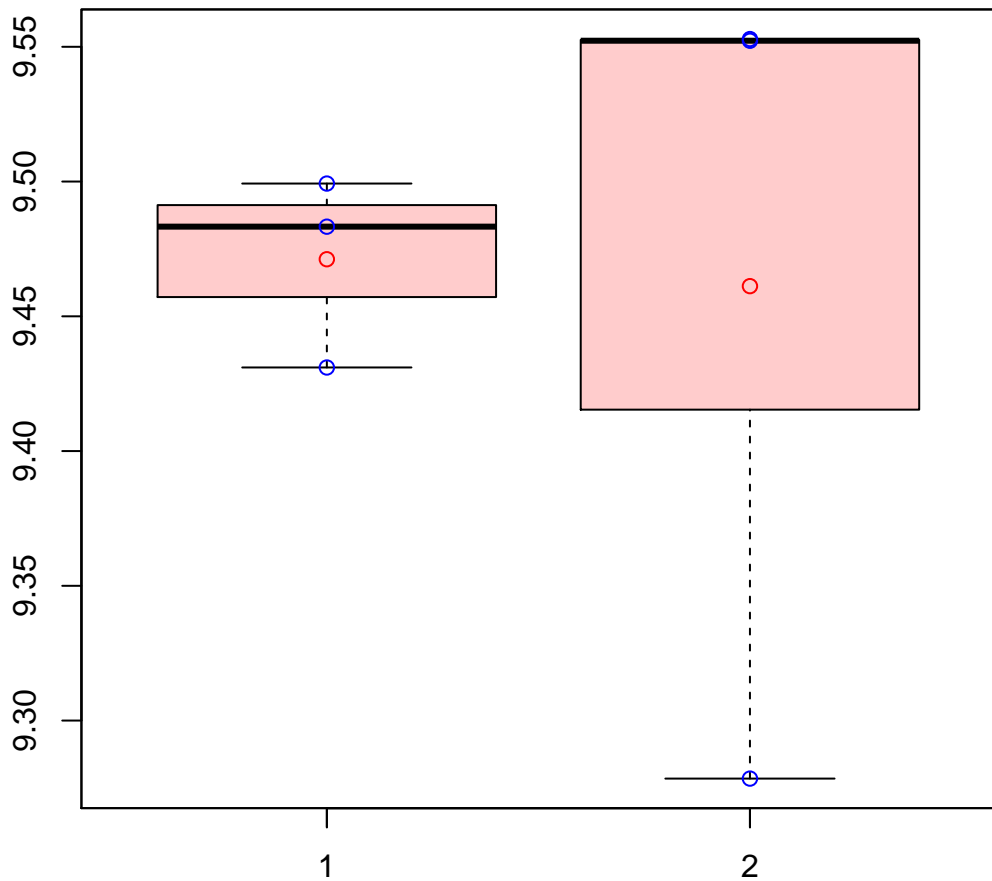

t-Test: p-value = 0.92

# Q75M32|Q75M32\_ORYSJ

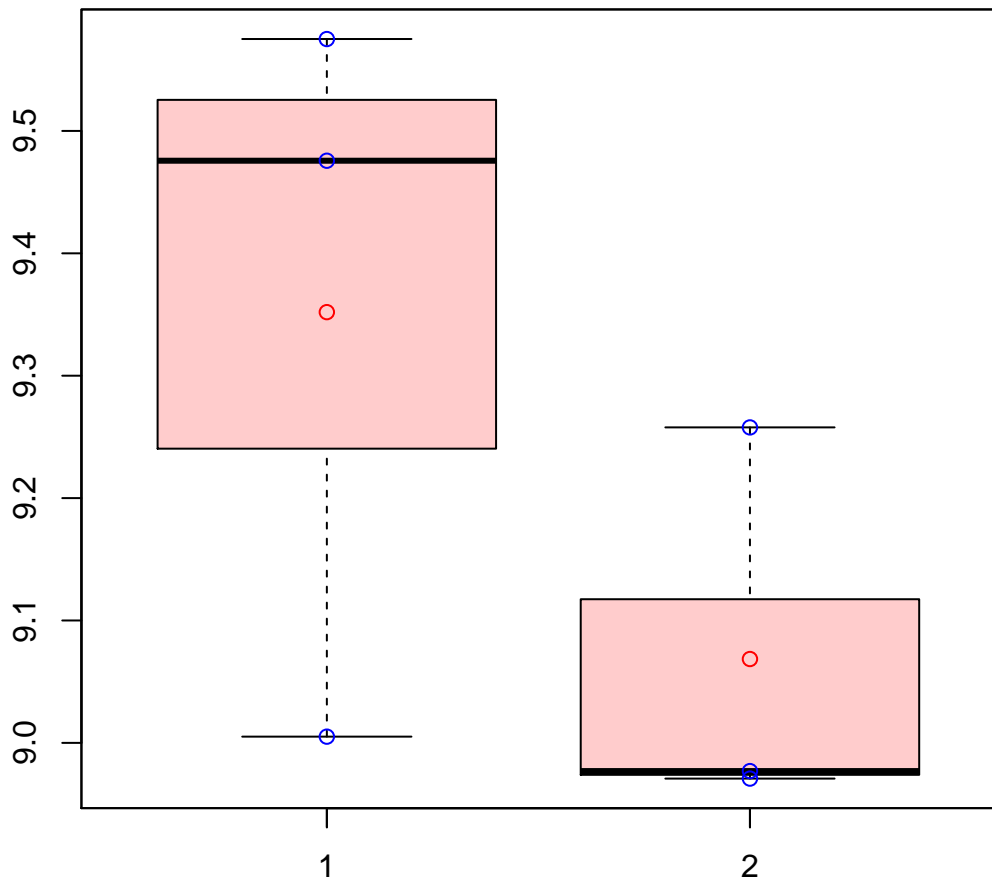

t-Test: p-value = 0.25

# Q75U52|Q75U52\_ORYSJ

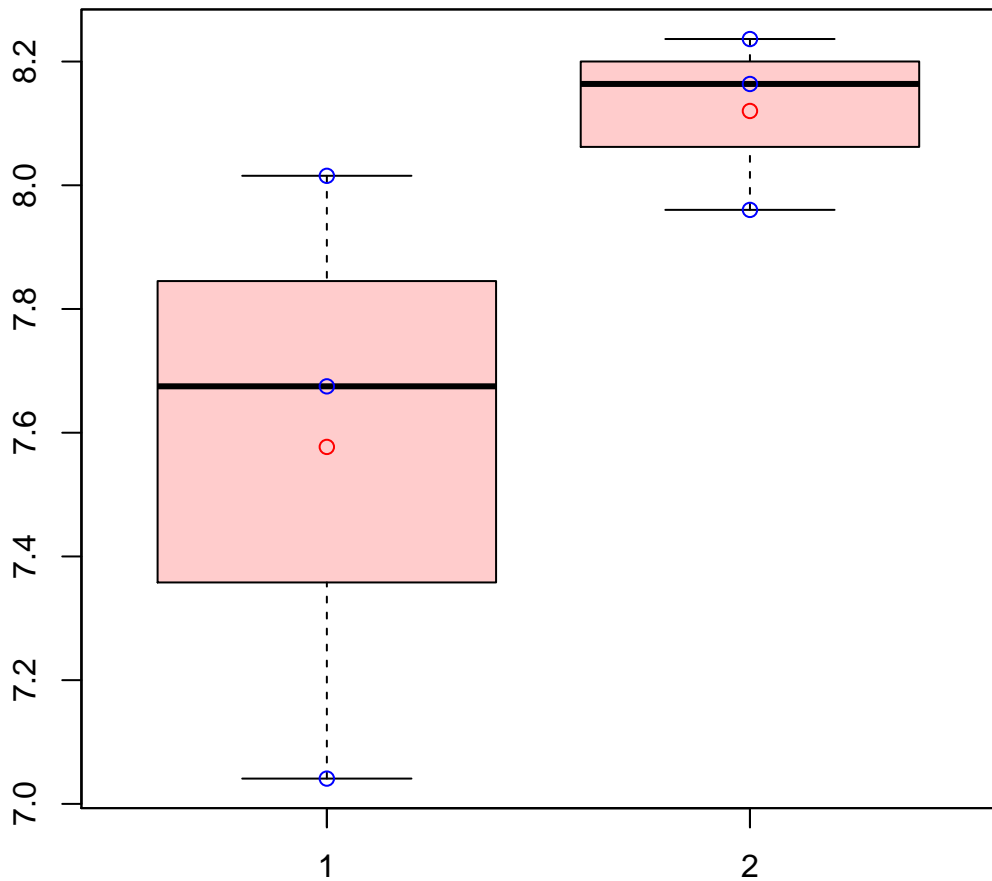

t-Test: p-value = 0.19

# Q7DNB2|Q7DNB2\_ORYSJ

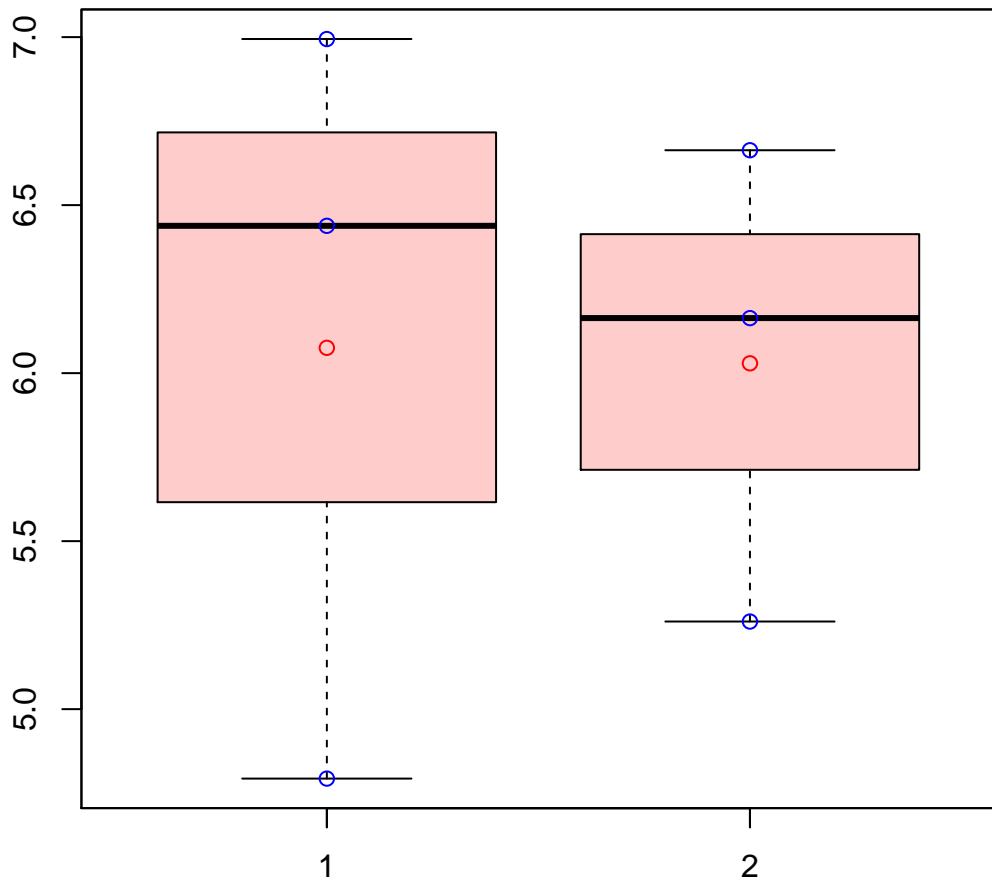

t-Test: p-value = 0.96



# Q7G6C9|Q7G6C9\_ORYSJ

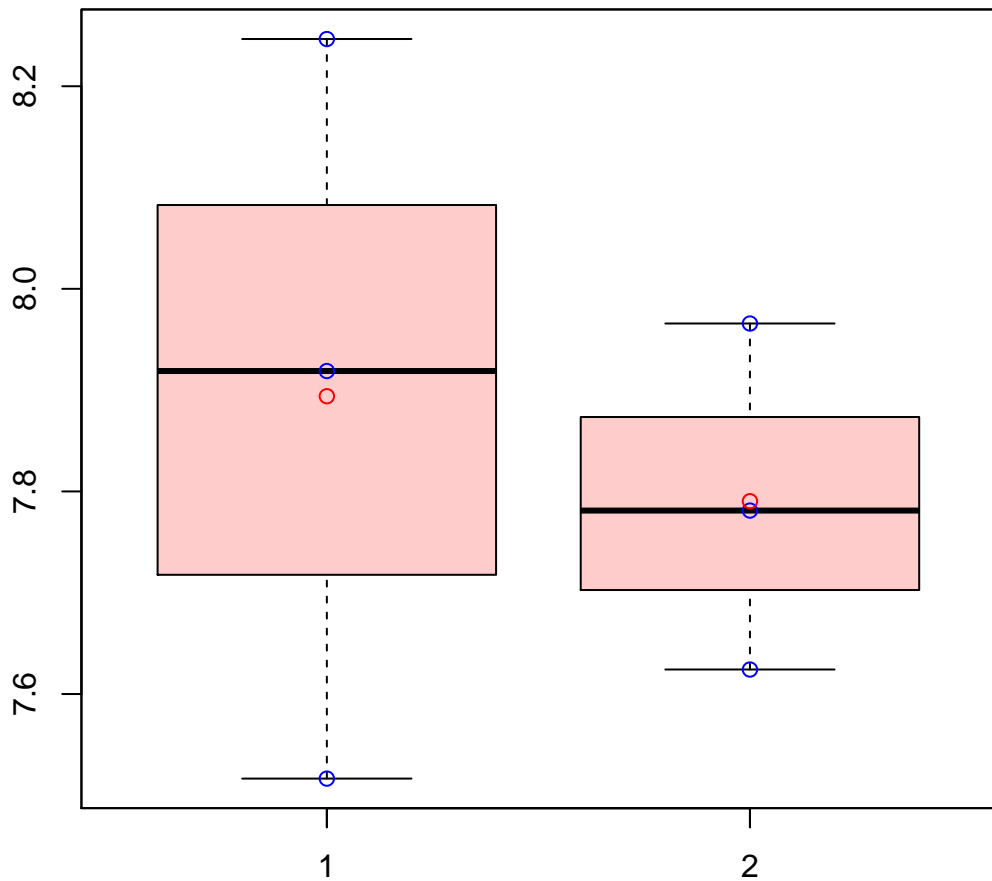

t-Test: p-value = 0.69

# Q7M1Y7|Q7M1Y7\_ORYSA

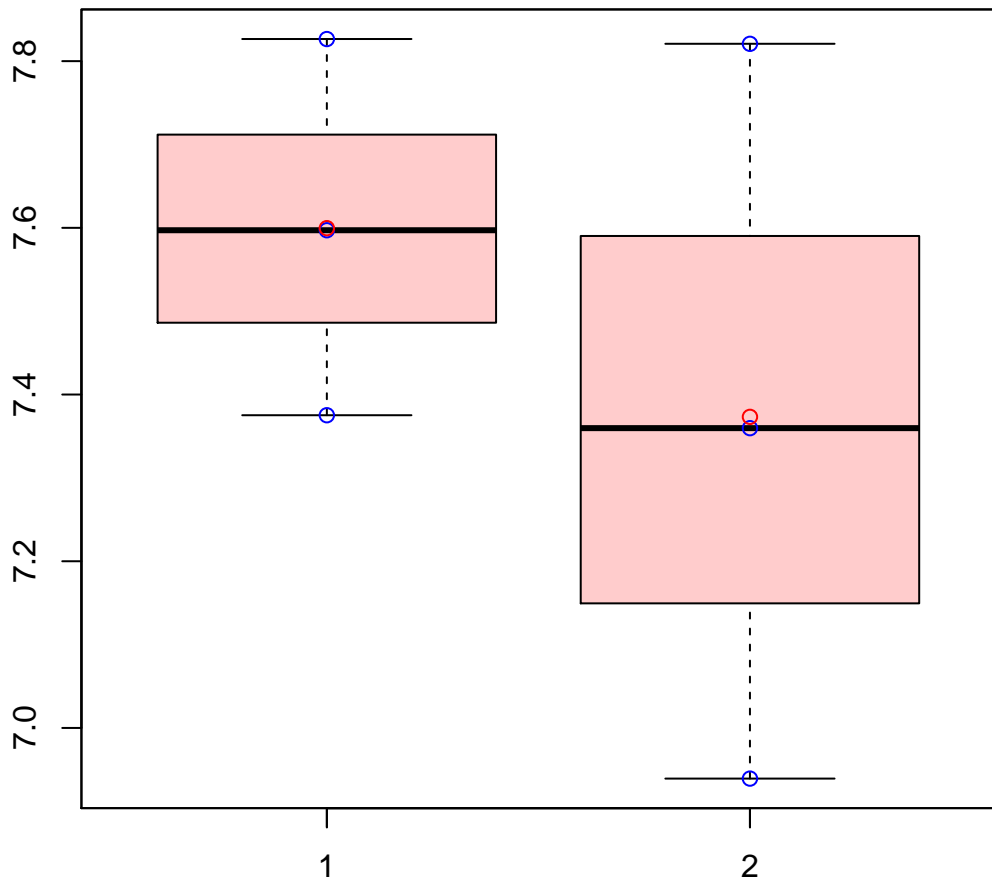

t-Test: p-value = 0.49

# Q7PC91|Q7PC91\_ORYSJ

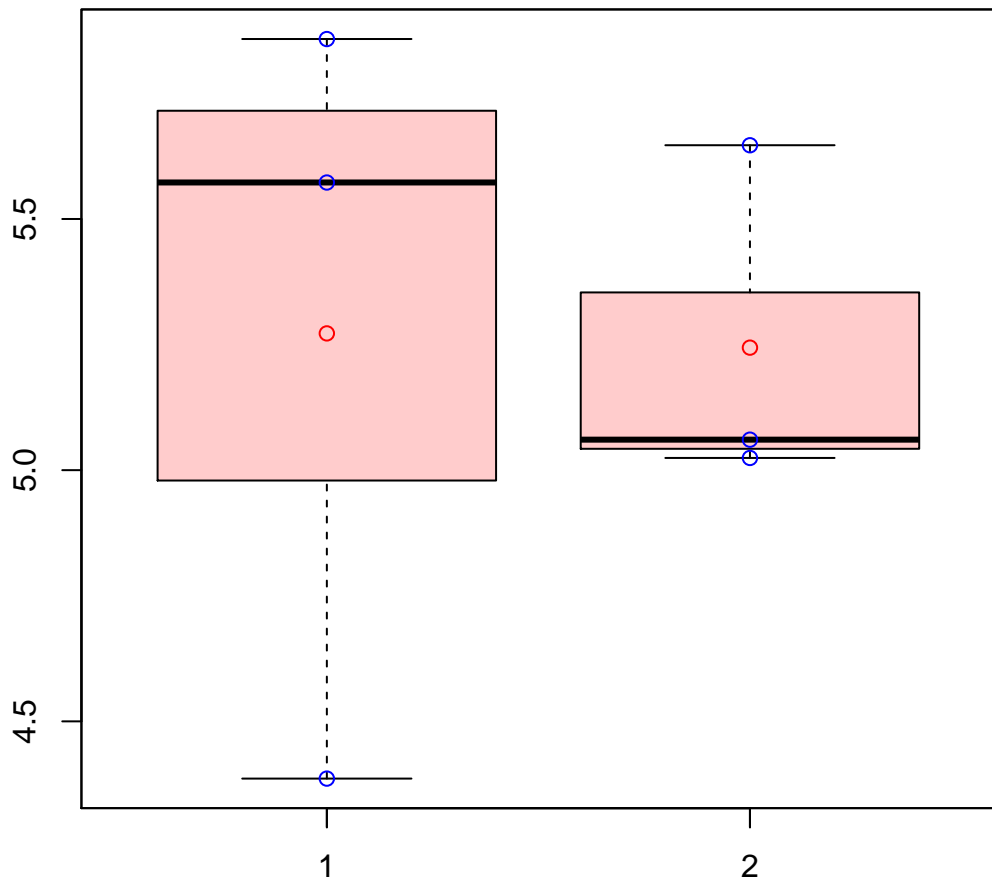

t-Test: p-value = 0.96

# Q7X5X7|Q7X5X7\_ORYSJ

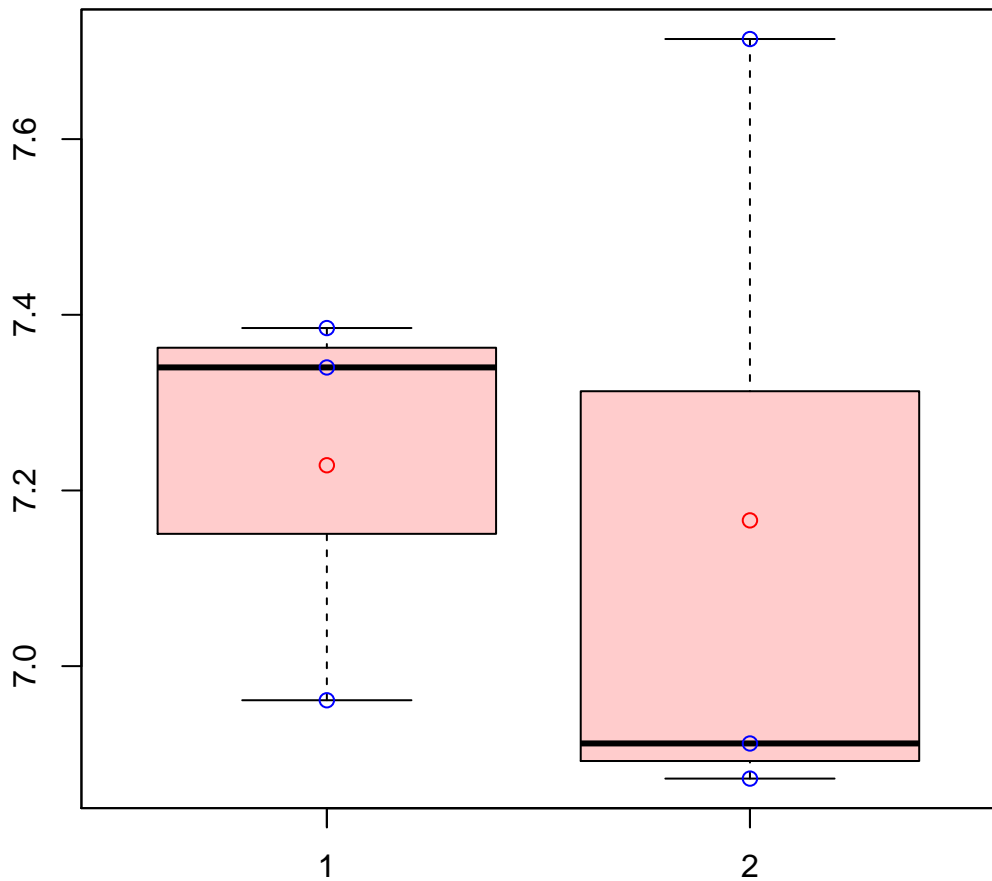

t-Test: p-value = 0.85

# Q7X8A2|Q7X8A2\_ORYSJ

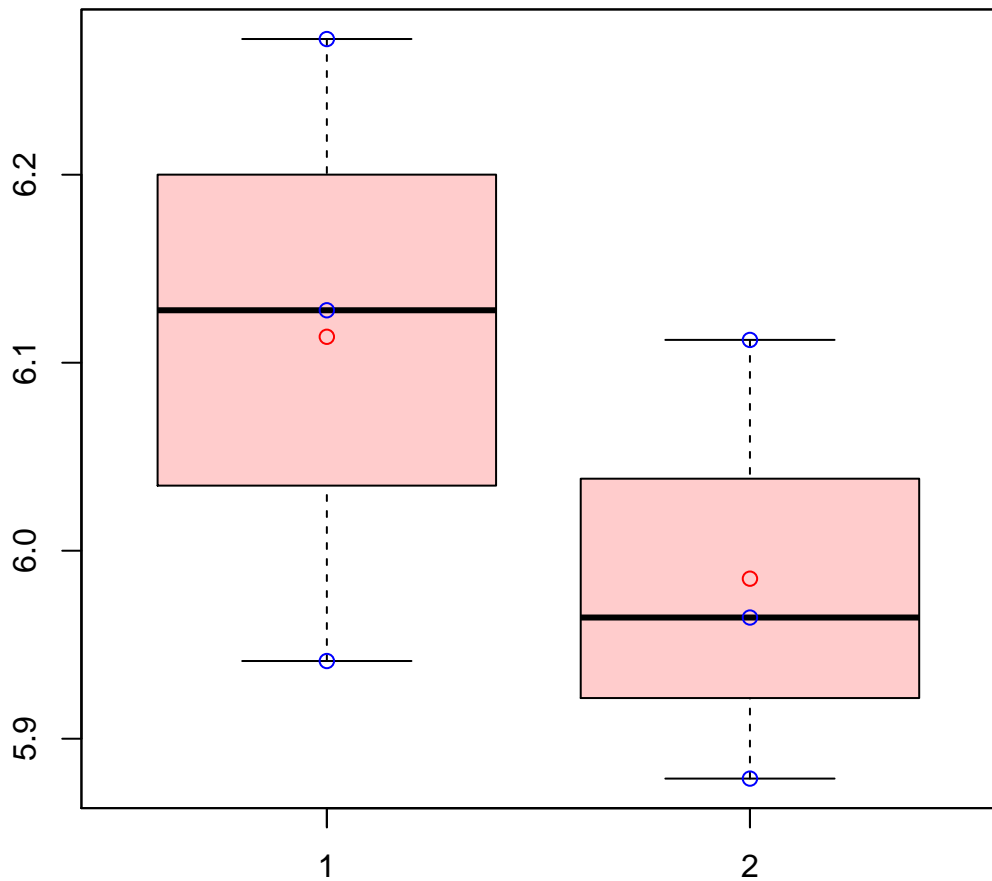

t-Test: p-value = 0.34

# Q7X8G3|Q7X8G3\_ORYSJ

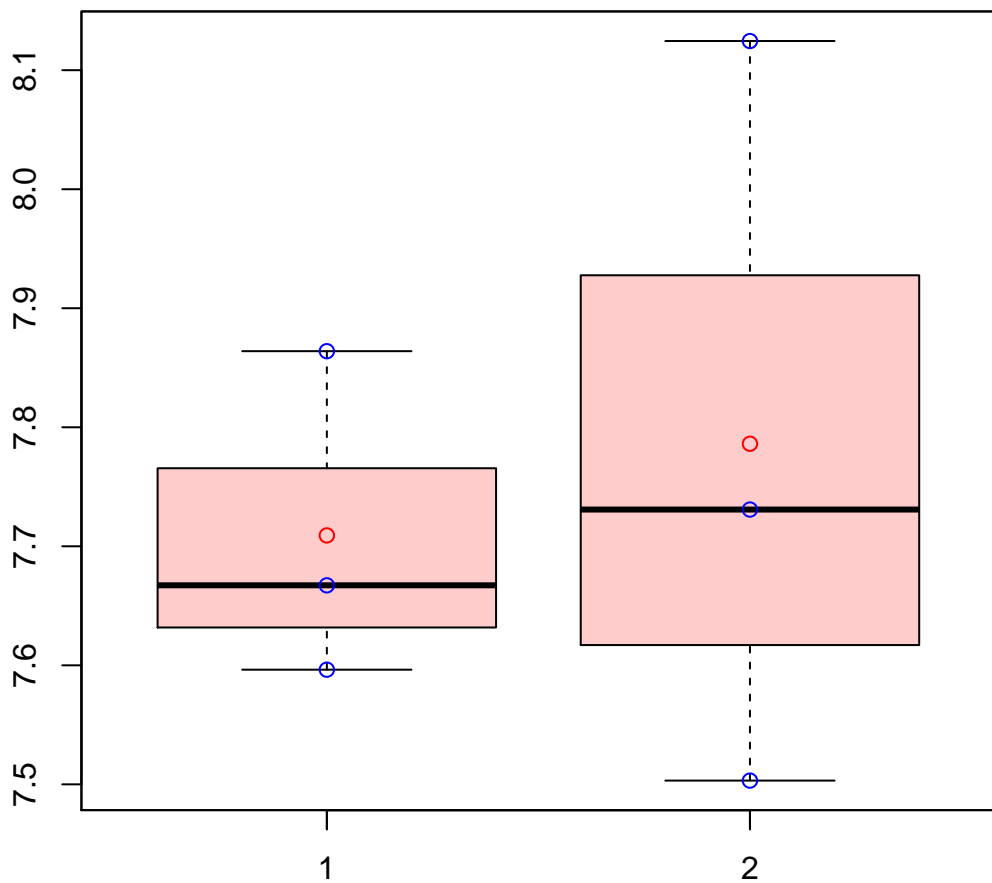

t-Test: p-value = 0.73

# Q7X9A1|Q7X9A1\_DESAN

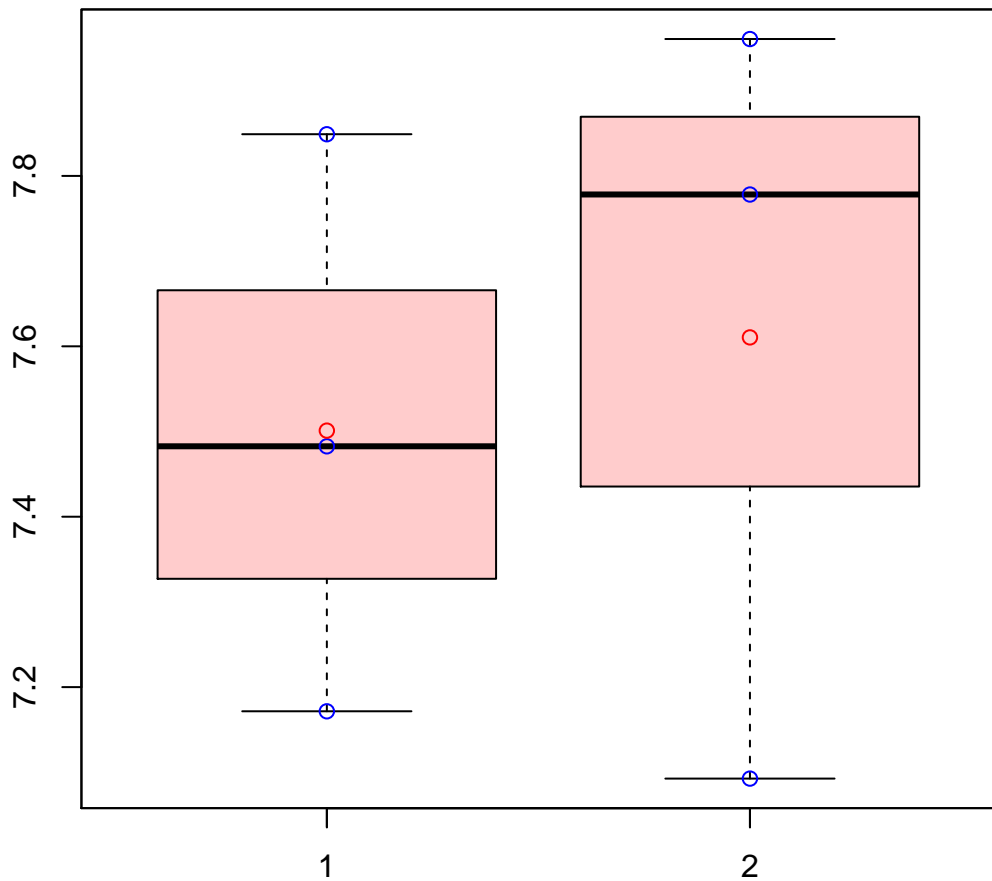

t-Test: p-value = 0.76

# Q7X9K7|Q7X9K7\_WHEAT

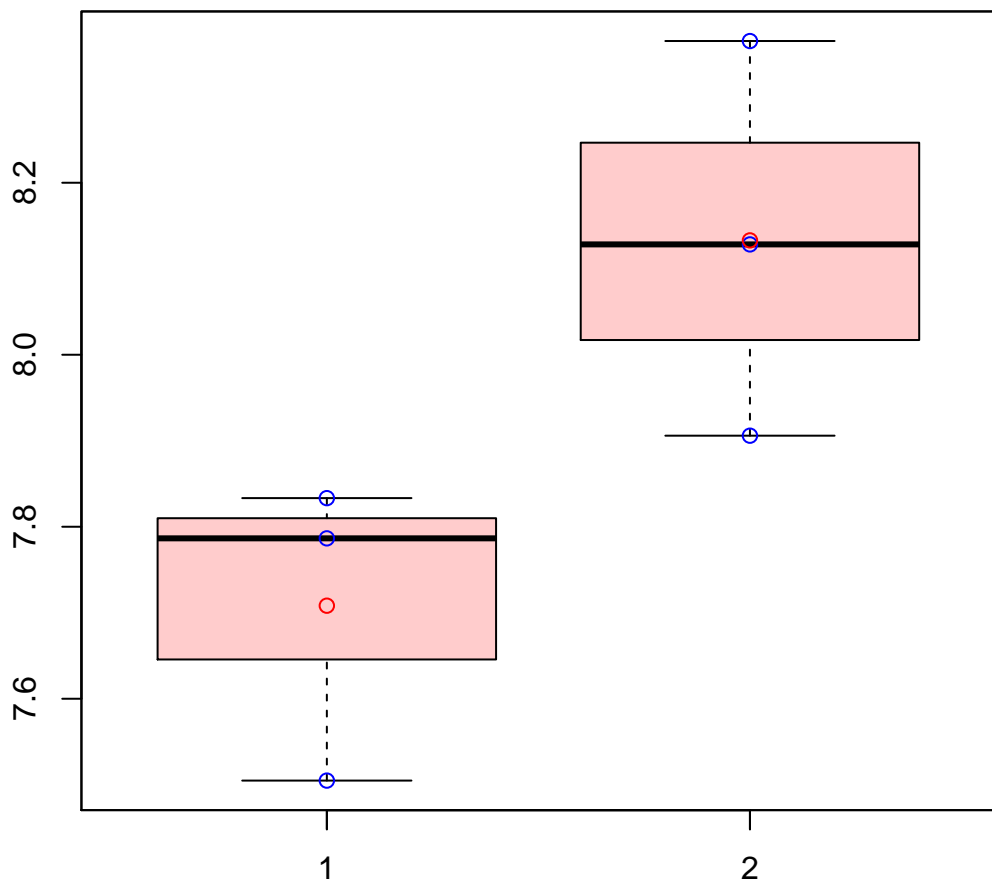

t-Test: p-value = 0.07



# Q7XAF9|Q7XAF9\_MAIZE

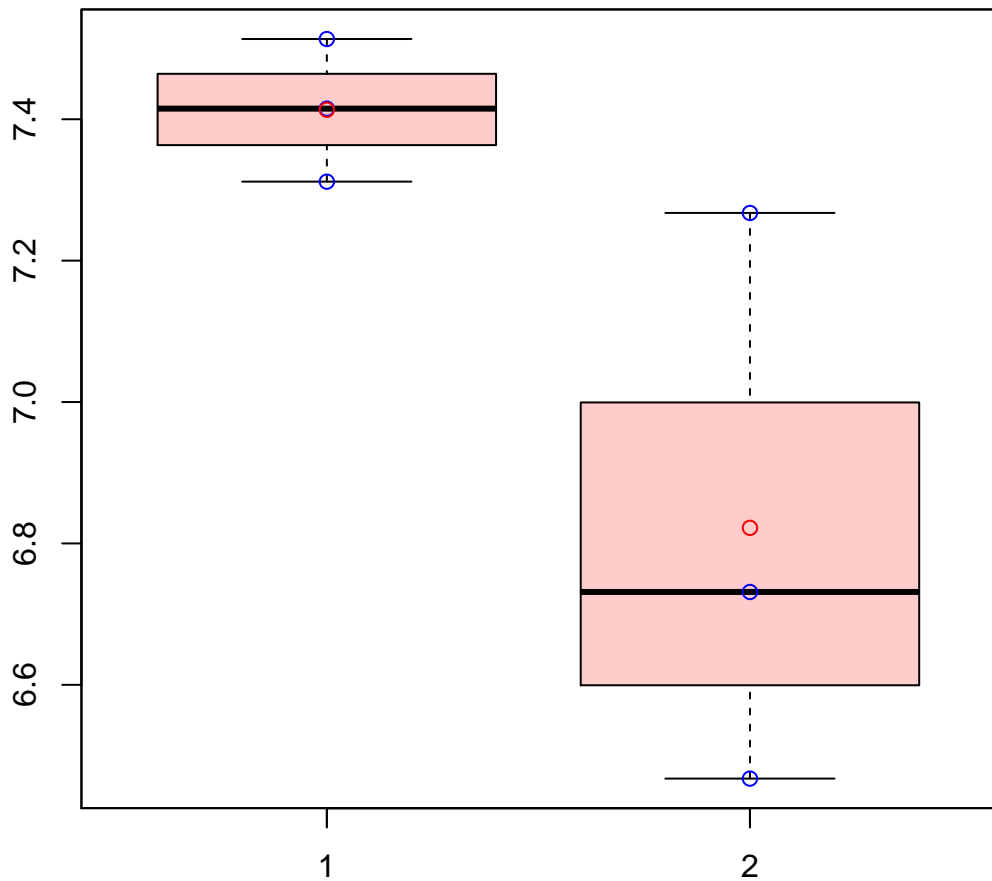

t-Test: p-value = 0.12

# Q7XBA6|Q7XBA6\_ORYSJ

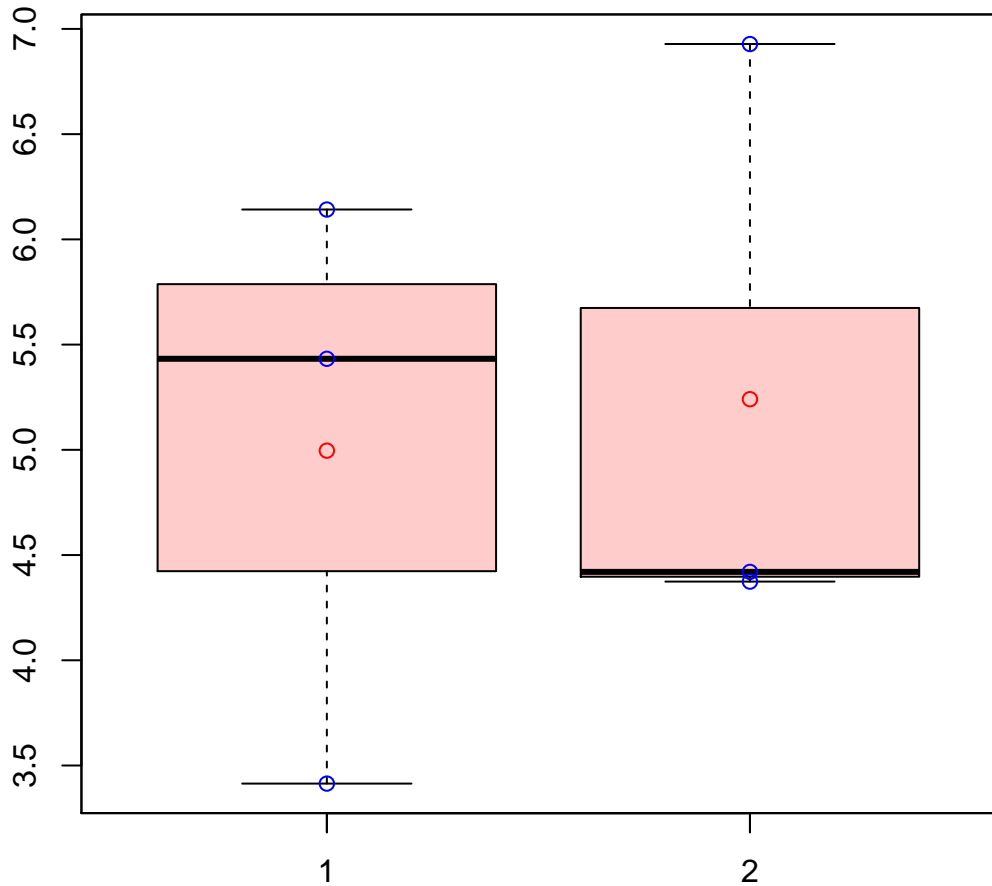

t-Test: p-value = 0.85

# Q7XBD9|Q7XBD9\_MAIZE

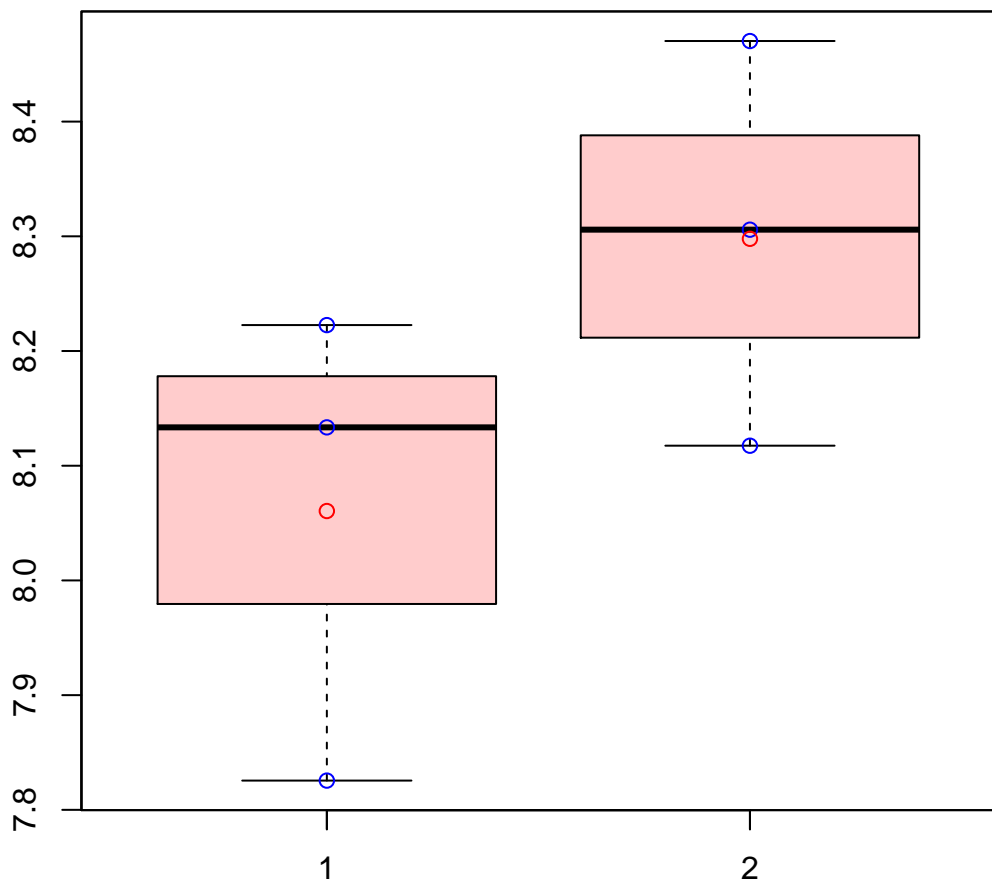

t-Test: p-value = 0.21

# Q7XC31|Q7XC31\_ORYSJ

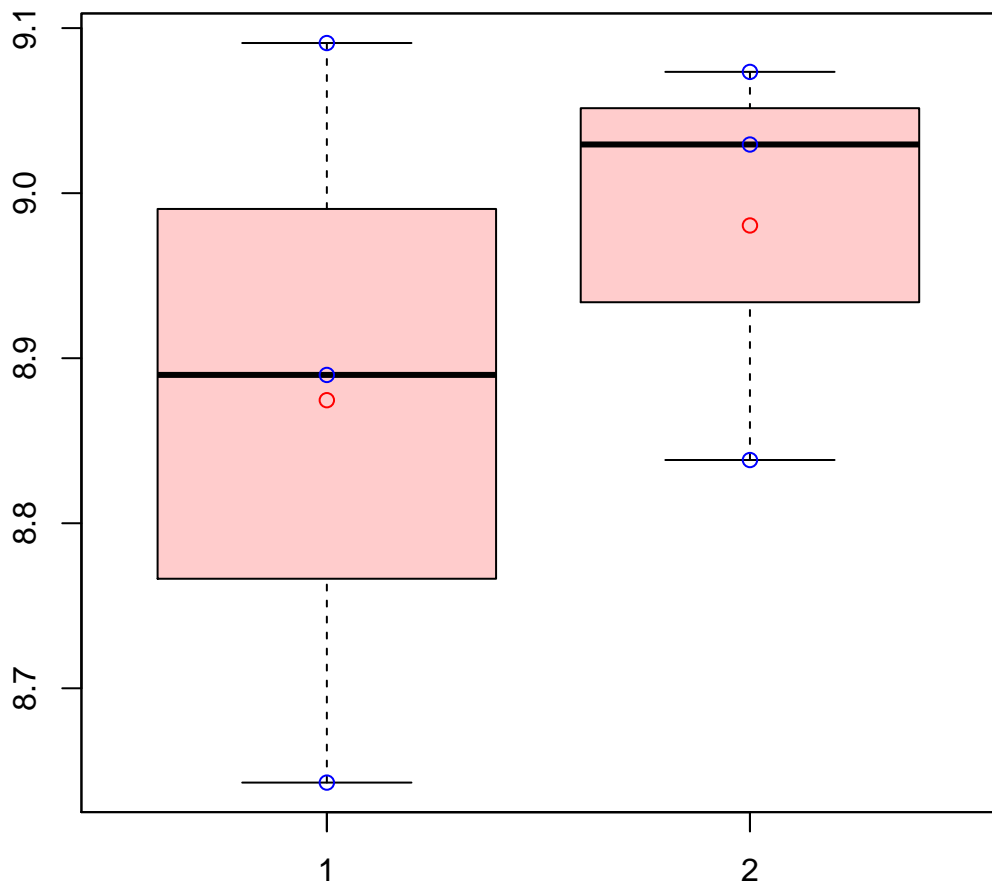

t-Test: p-value = 0.52

# Q7XC87|Q7XC87\_ORYSJ

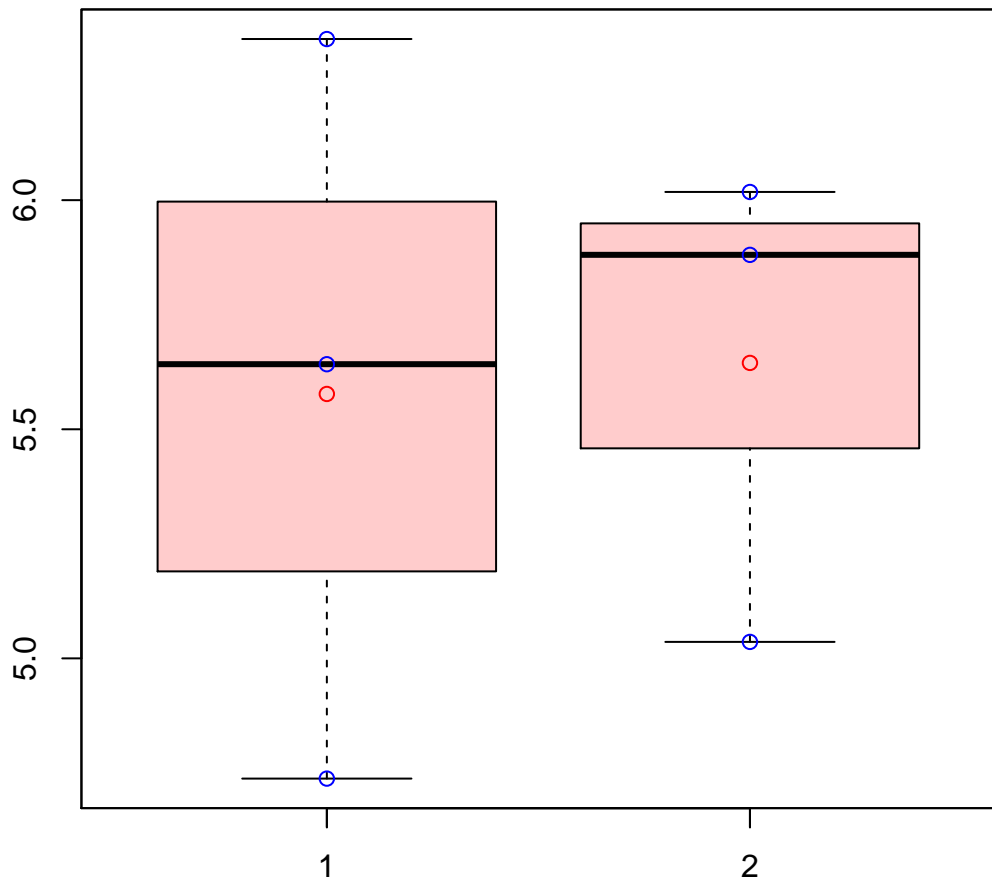

t-Test: p-value = 0.91

# Q7XDP7|Q7XDP7\_ORYSJ

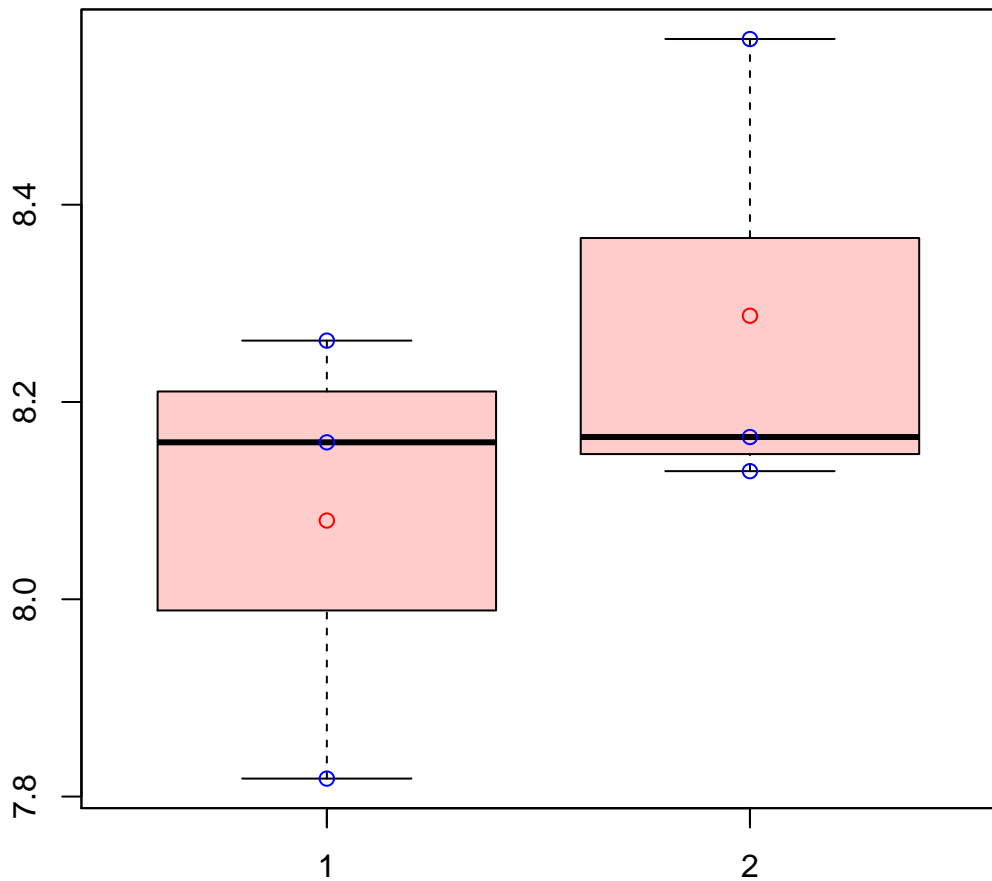

t-Test: p-value = 0.35

# Q7XEI0|Q7XEI0\_ORYSJ

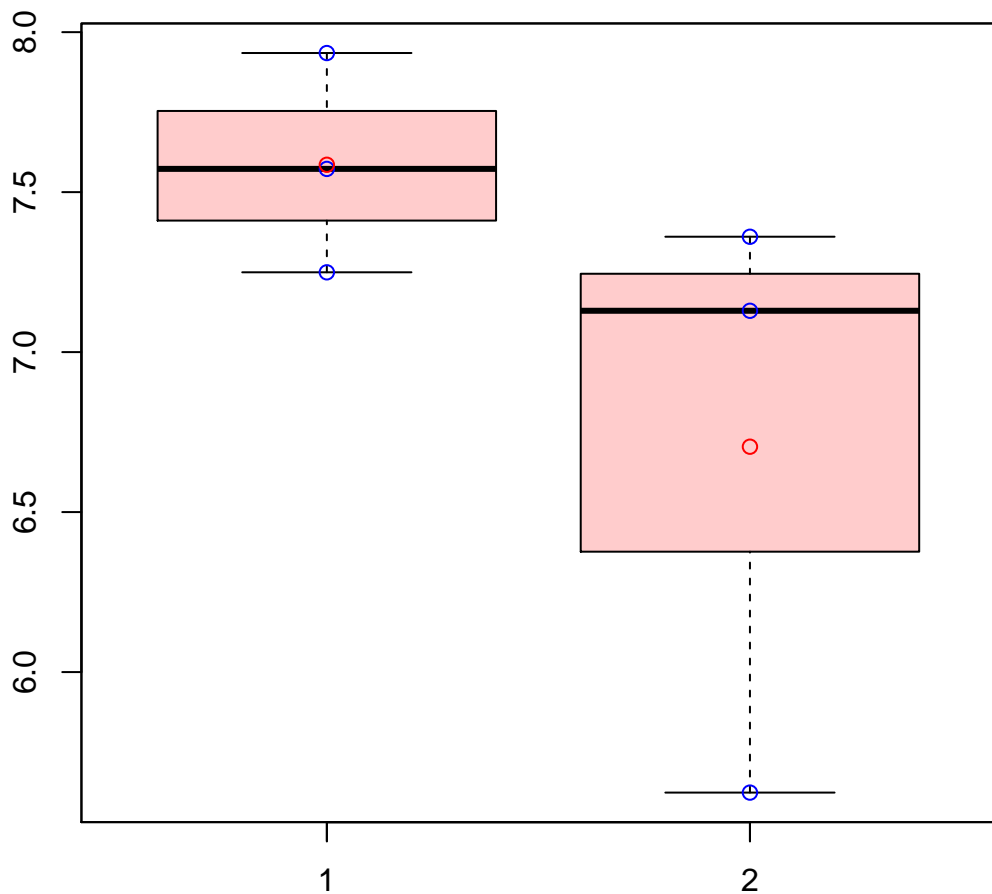

t-Test: p-value = 0.24

# Q7XEK0|Q7XEK0\_ORYSJ

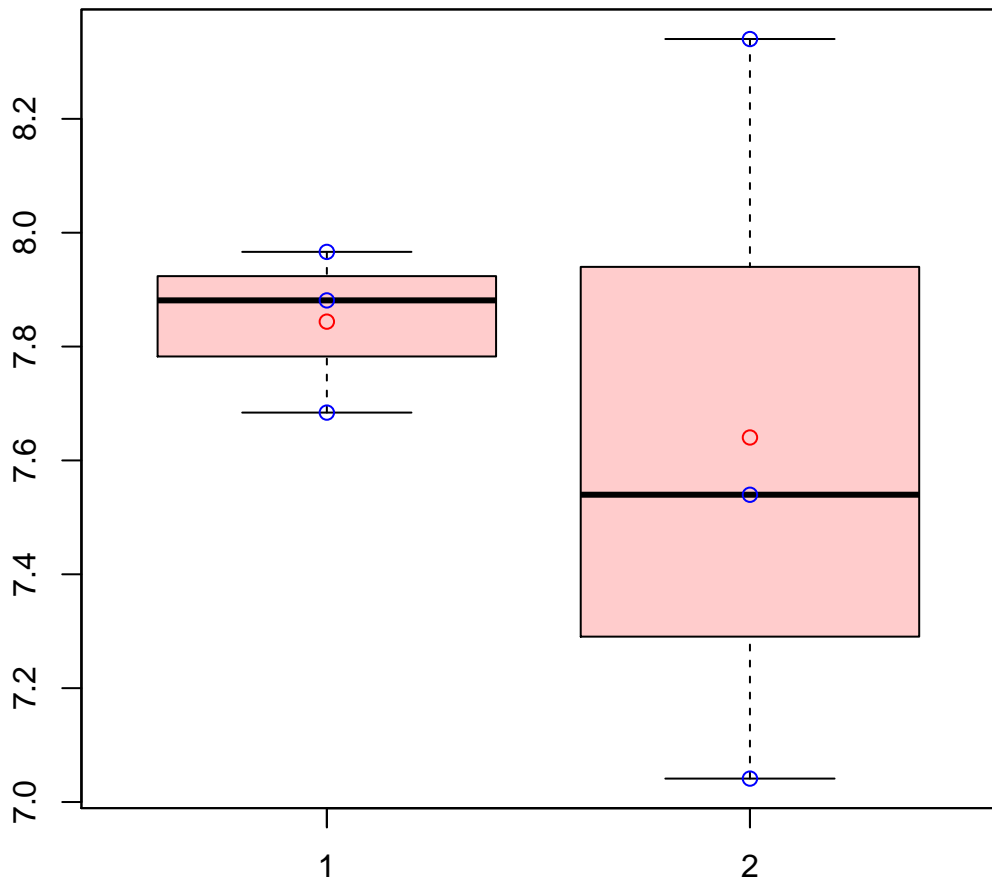

t-Test: p-value = 0.65



# Q7XEM9|Q7XEM9\_ORYSJ

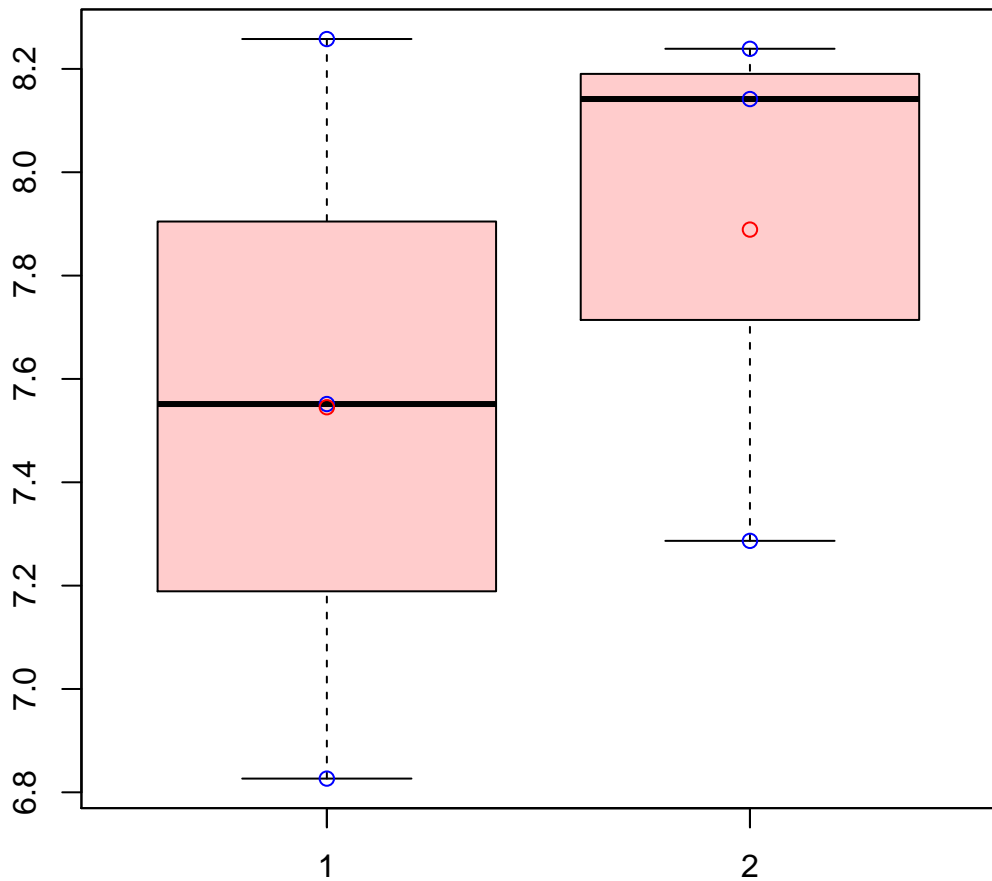

t-Test: p-value = 0.54

# Q7XHL0|Q7XHL0\_ORYSJ

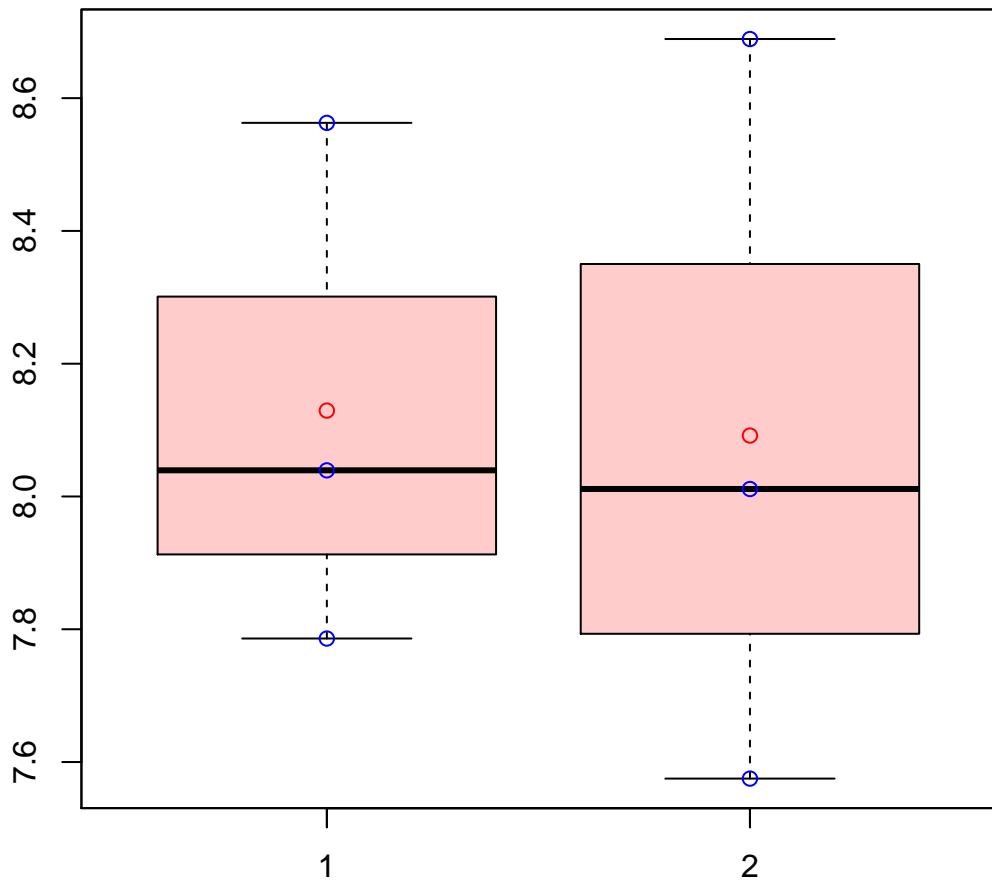

t-Test: p-value = 0.93

# Q7XII9|Q7XII9\_ORYSJ

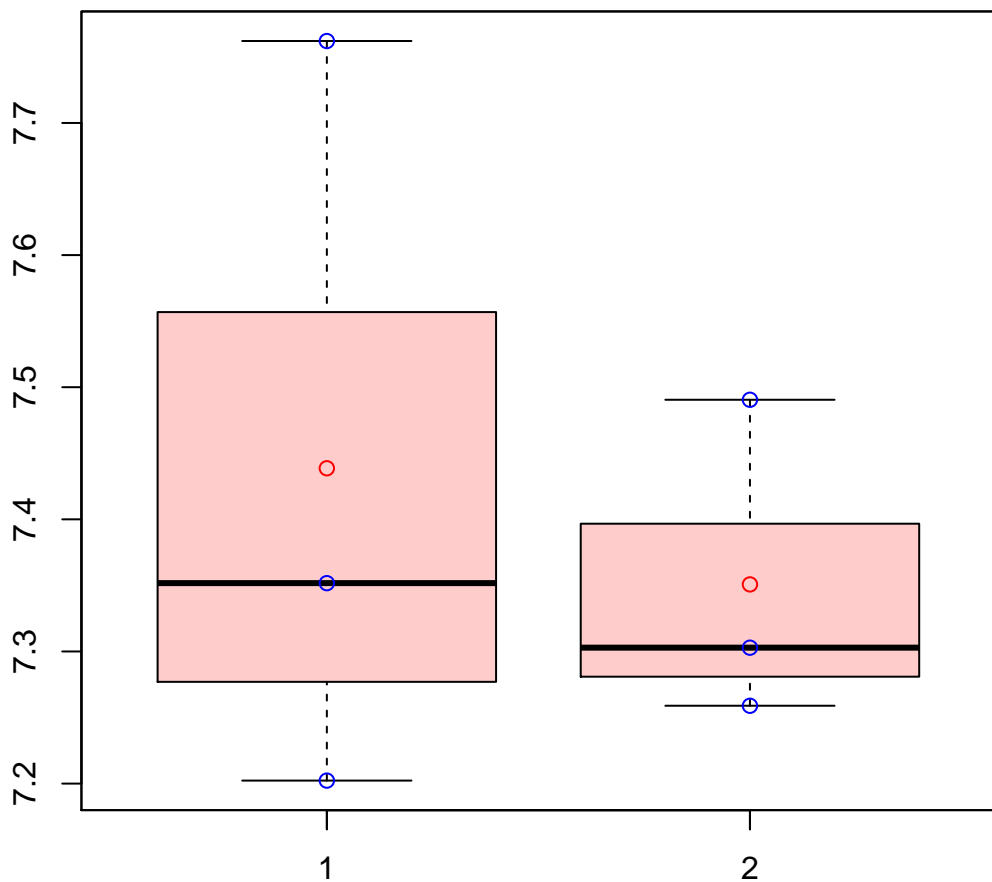

t-Test: p-value = 0.67

# Q7XJI6|Q7XJI6\_WHEAT

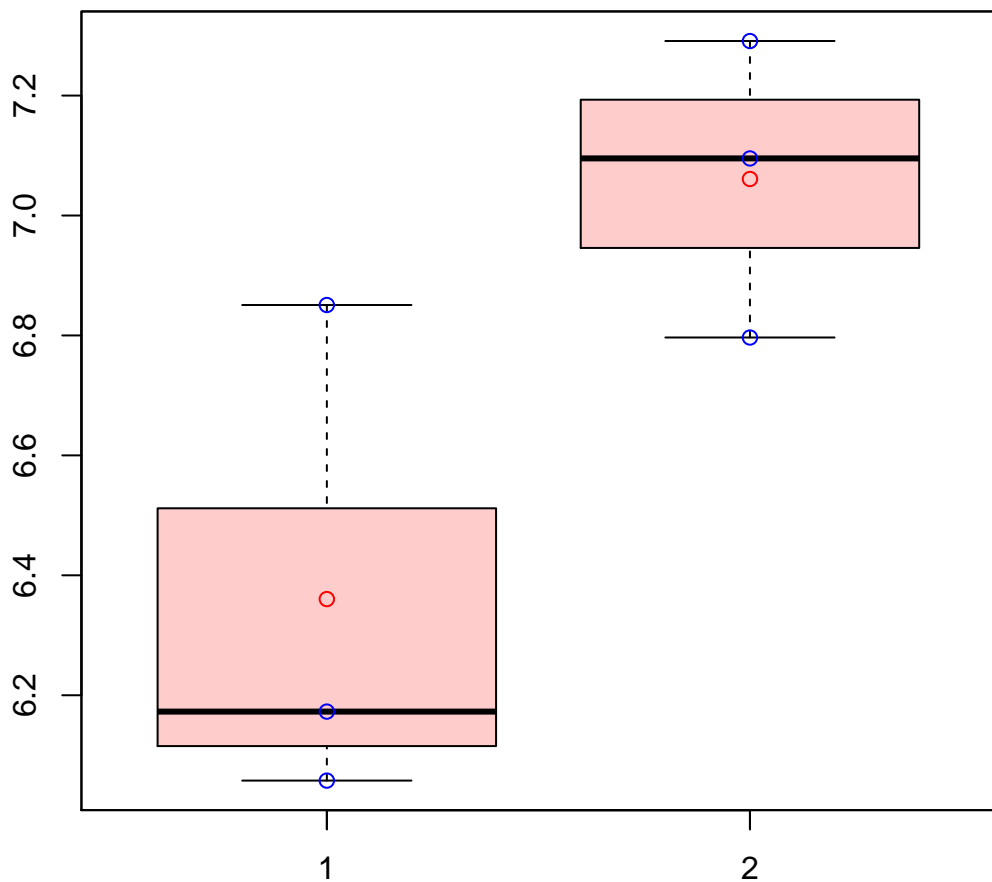

t-Test: p-value = 0.09

# Q7XJJ9|Q7XJJ9\_9POAL

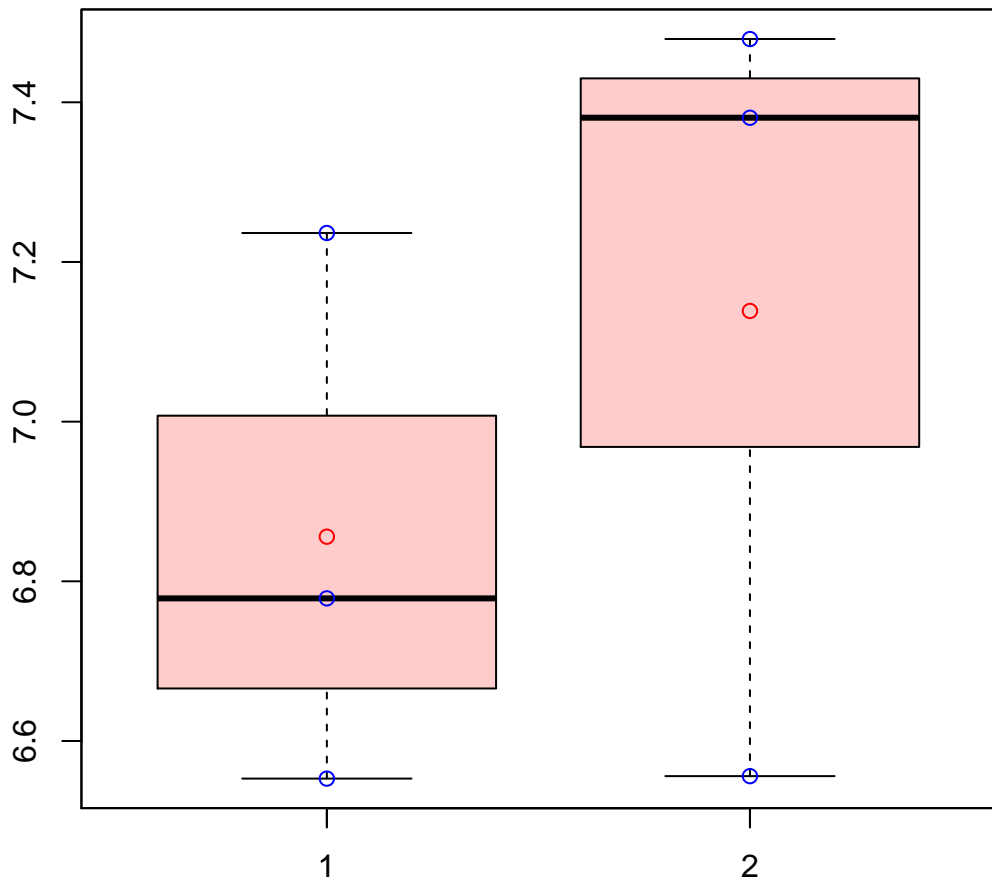

t-Test: p-value = 0.48

# Q7XJK1|Q7XJK1\_9POAL

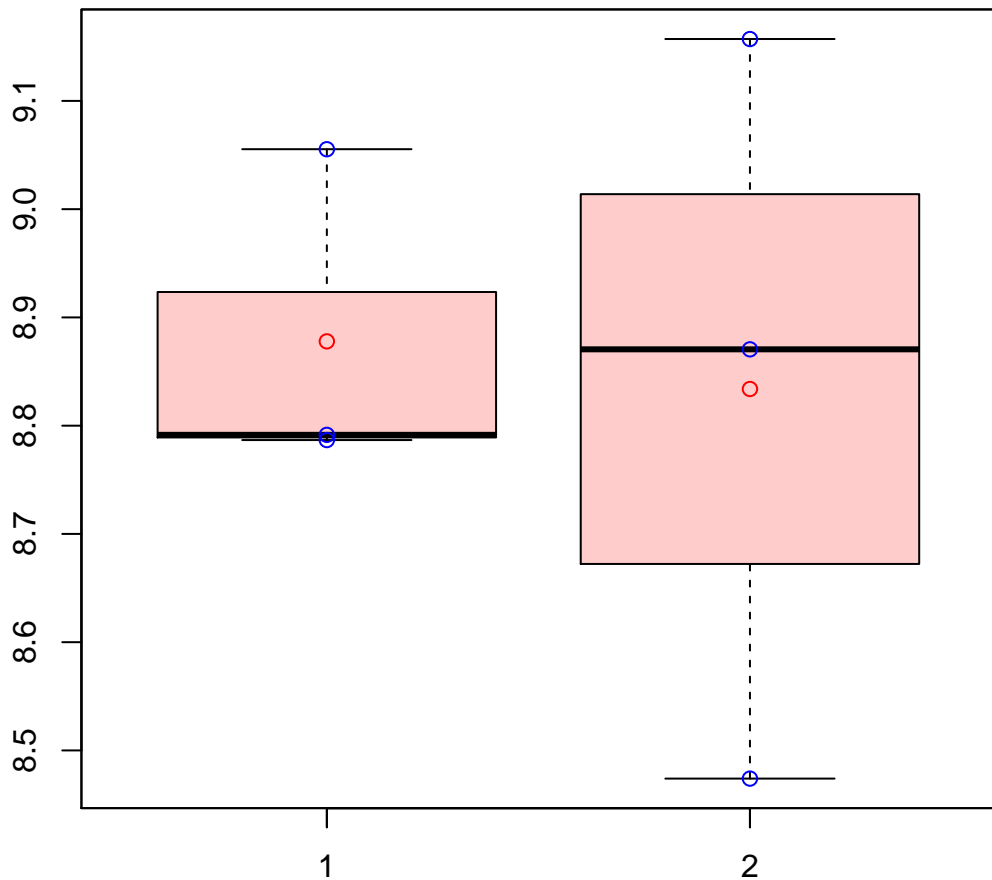

t-Test: p-value = 0.85

# Q7XKU1|Q7XKU1\_ORYSJ

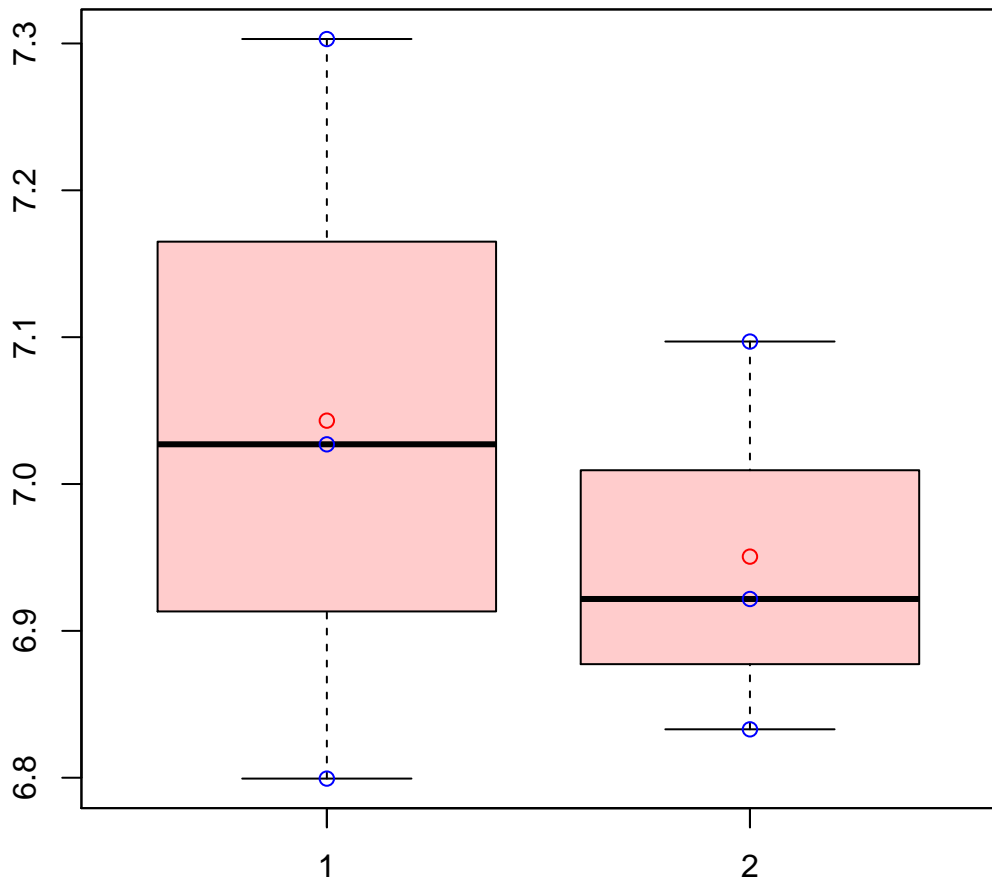

t-Test: p-value = 0.61

# Q7XLA7|Q7XLA7\_ORYSJ

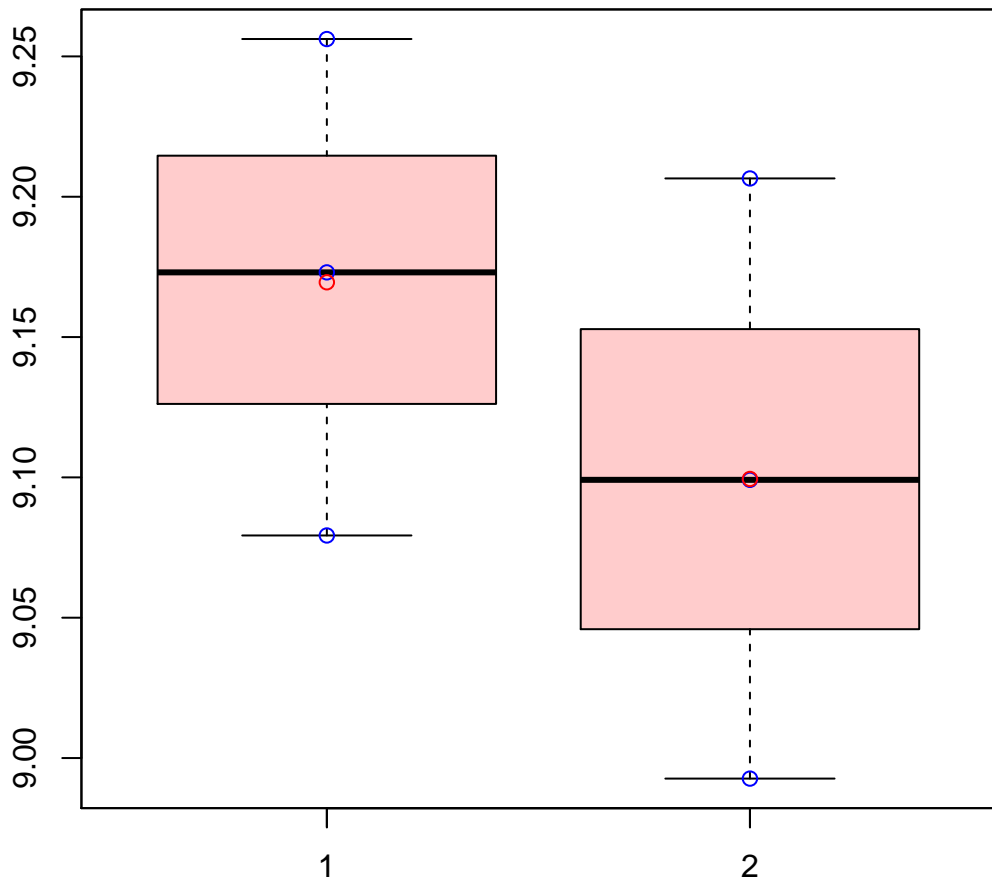

t-Test: p-value = 0.43



# Q7XLL8|Q7XLL8\_ORYSJ

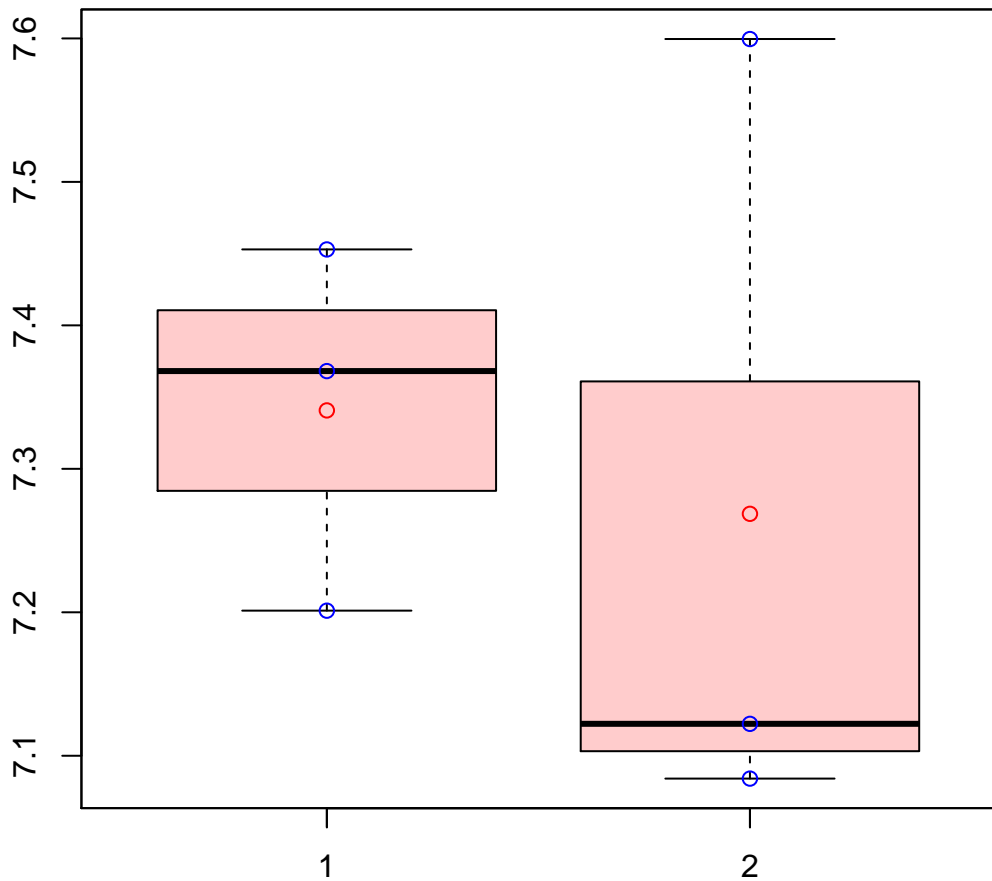

t-Test: p-value = 0.72

# Q7XLT1|Q7XLT1\_ORYSJ

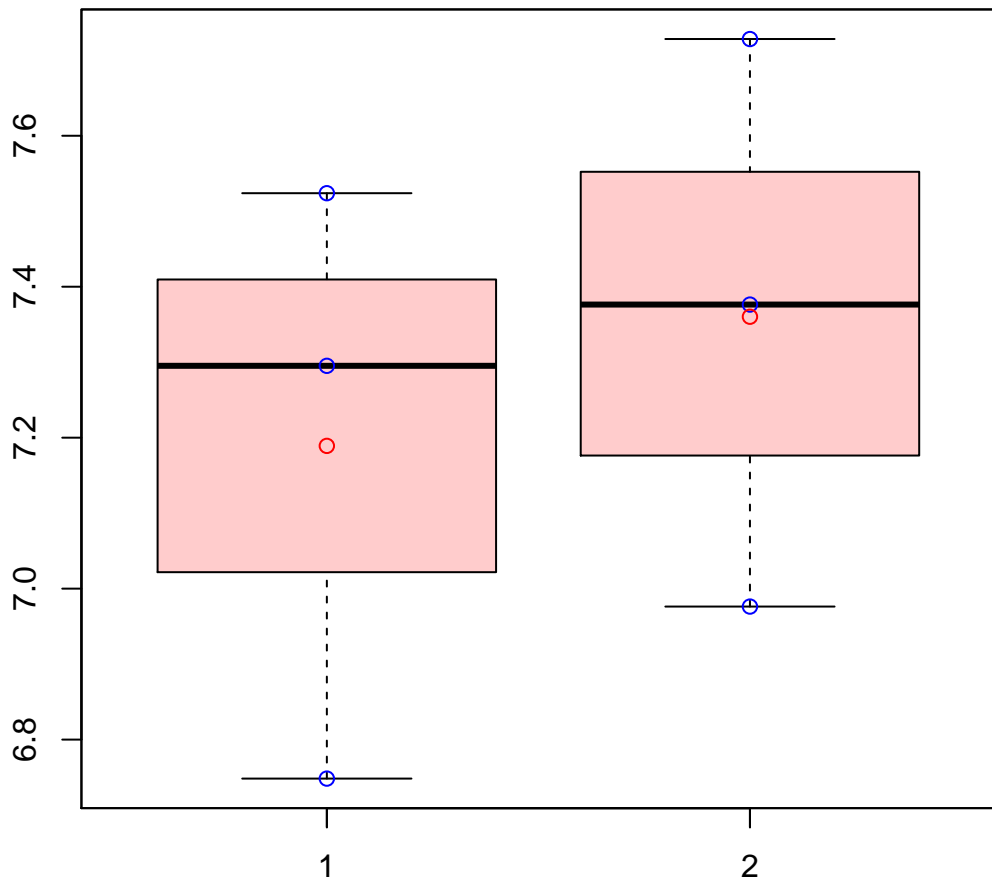

t-Test: p-value = 0.62

# Q7XM03|Q7XM03\_ORYSJ

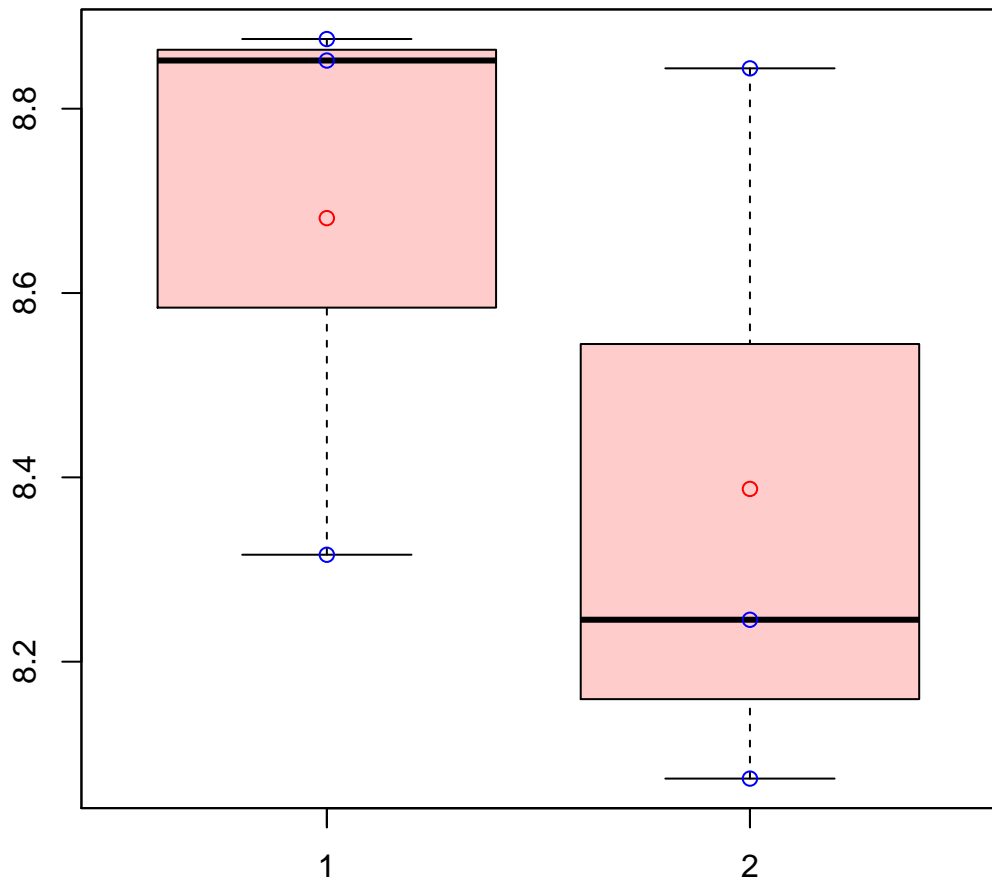

t-Test: p-value = 0.38

# Q7XM86|Q7XM86\_ORYSJ

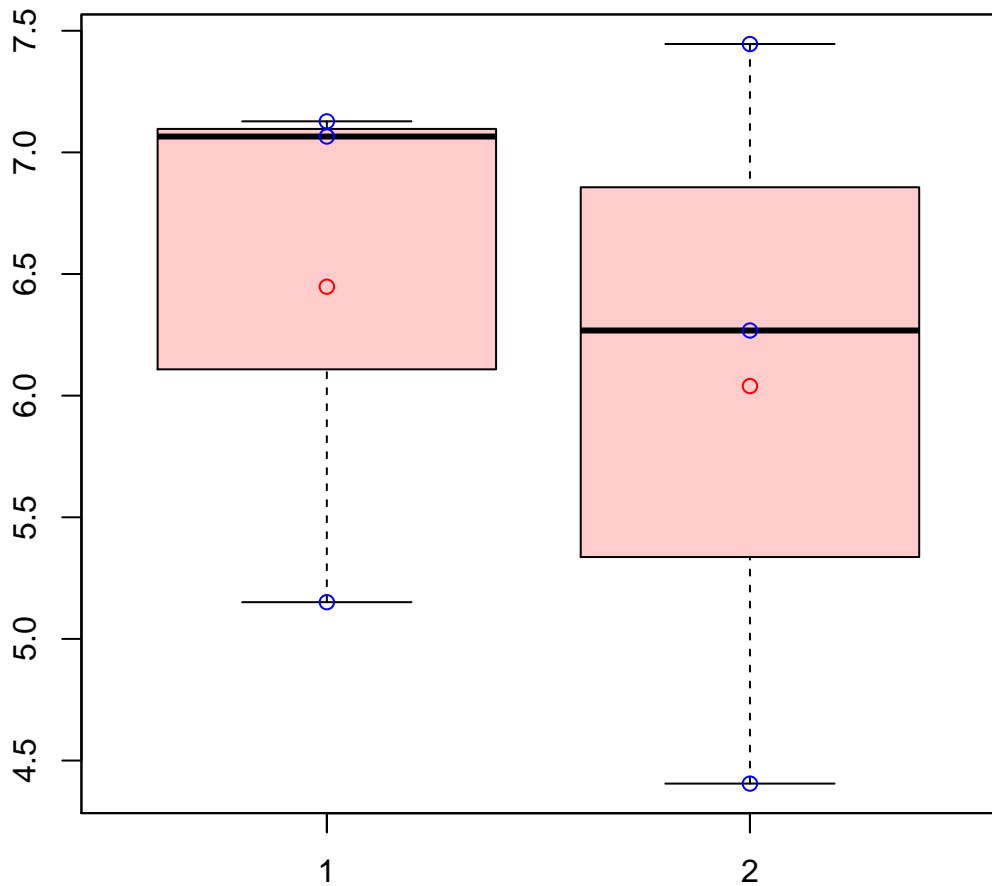

t-Test: p-value = 0.73

# Q7XP07|Q7XP07\_ORYSJ

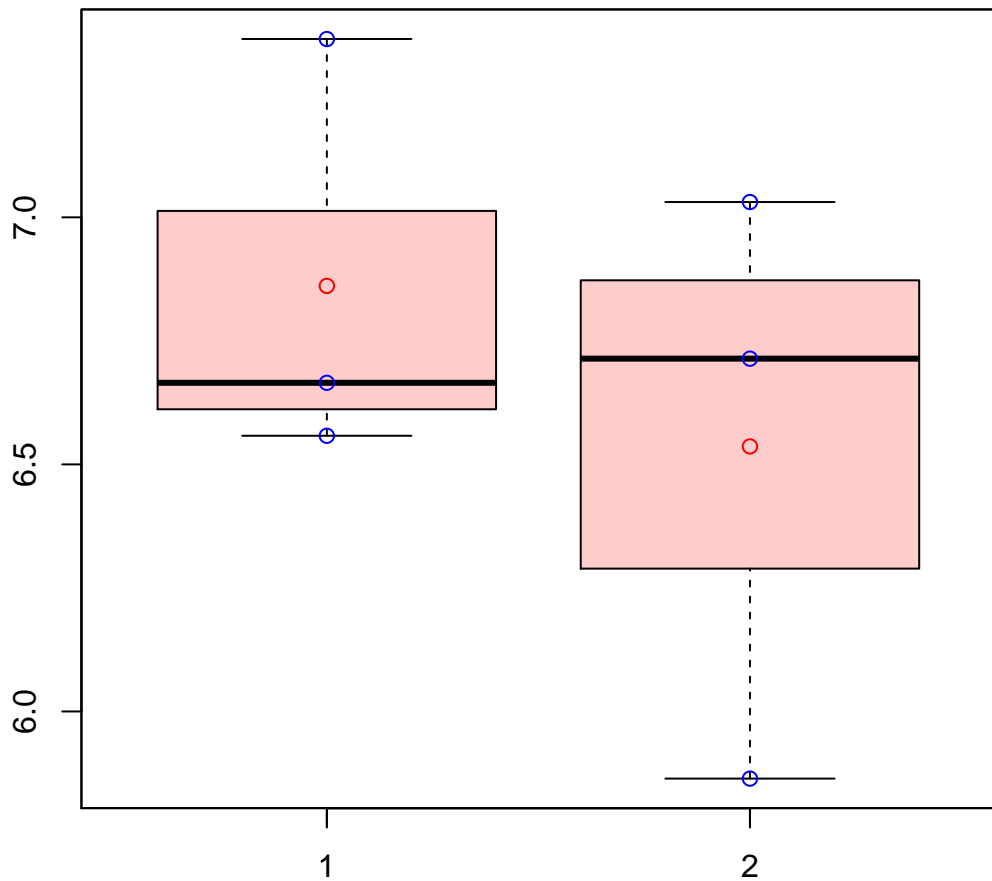

t-Test: p-value = 0.5

# Q7XP71|Q7XP71\_ORYSJ

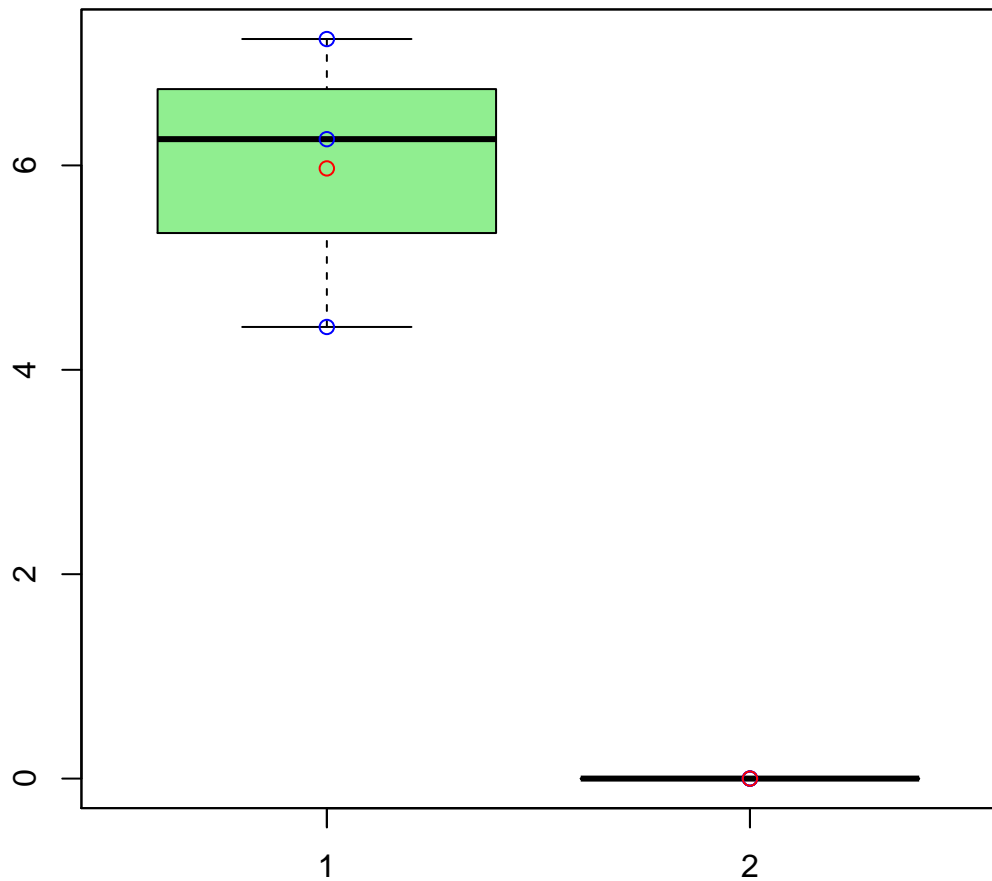

t-Test: p-value = 0.02

# Q7XPH8|Q7XPH8\_ORYSJ

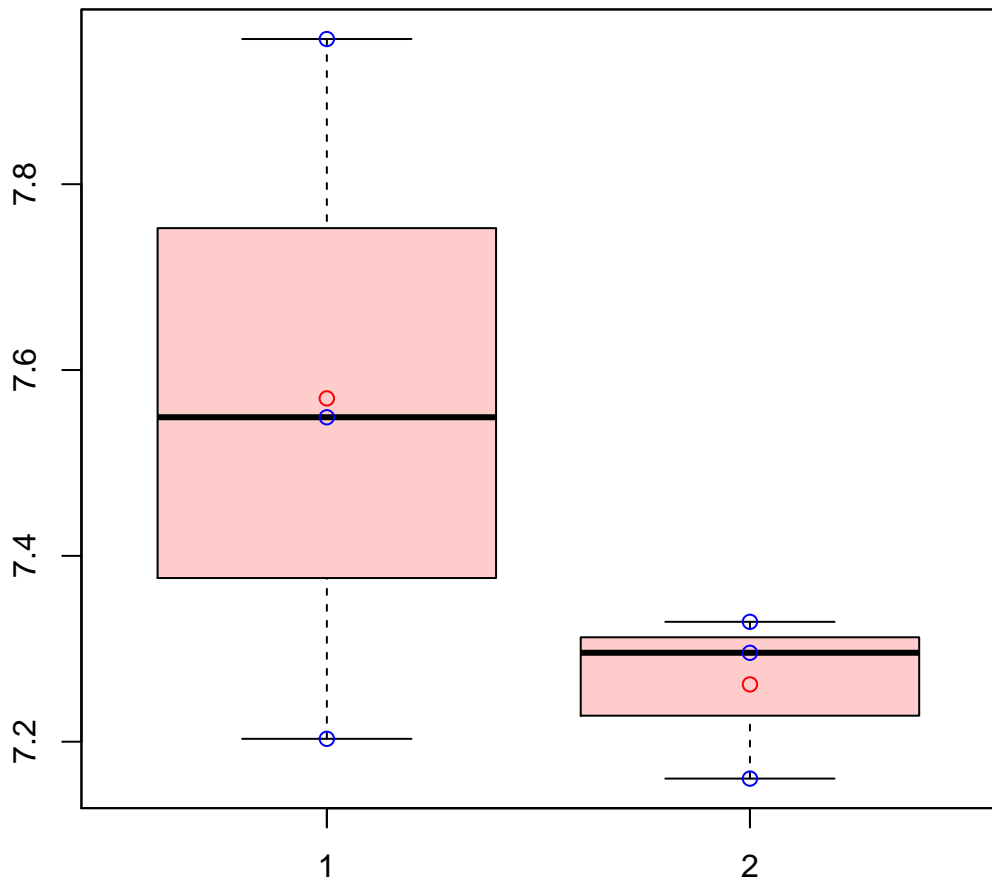

t-Test: p-value = 0.29

# Q7XPT7|Q7XPT7\_ORYSJ

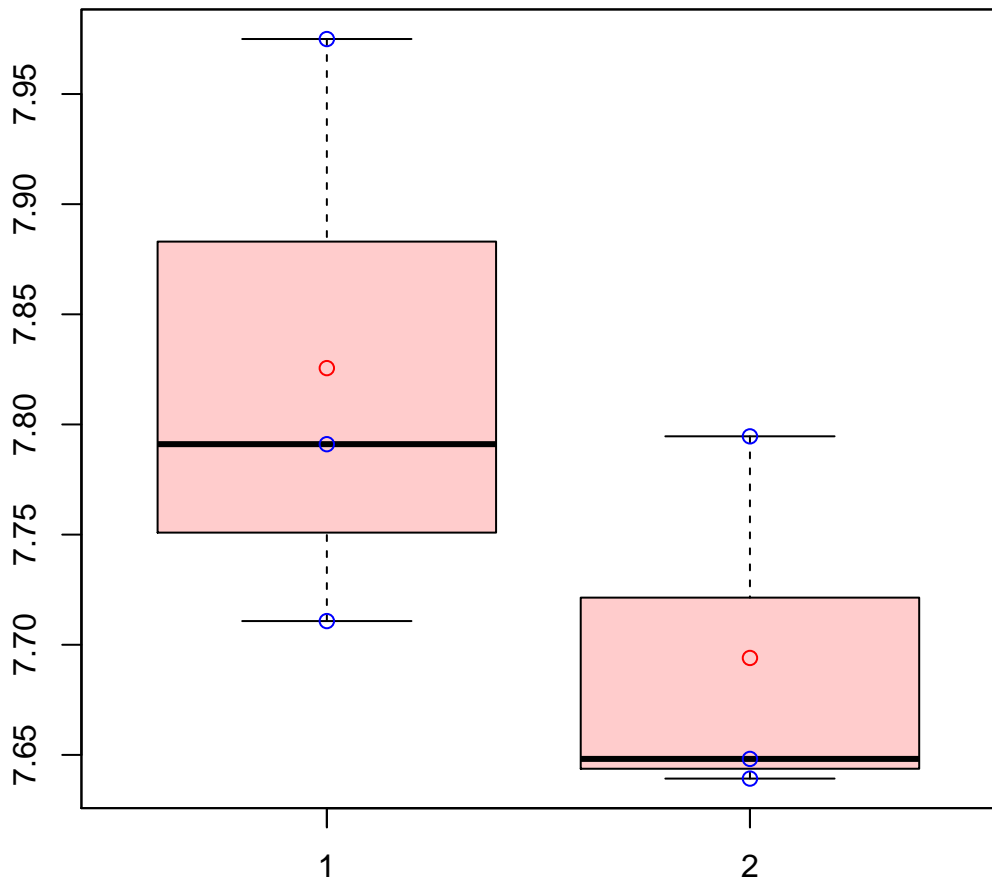

t-Test: p-value = 0.24



# Q7XQQ7|Q7XQQ7\_ORYSJ

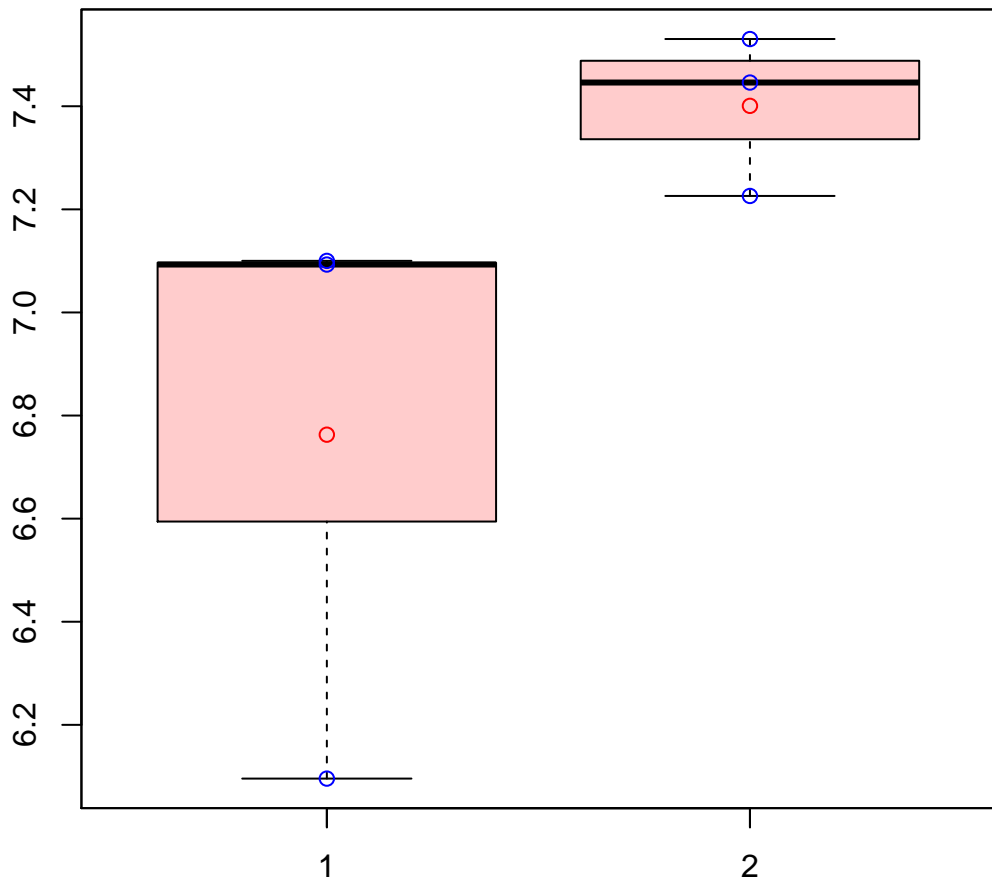

t-Test: p-value = 0.19

# Q7XQU9|Q7XQU9\_ORYSJ

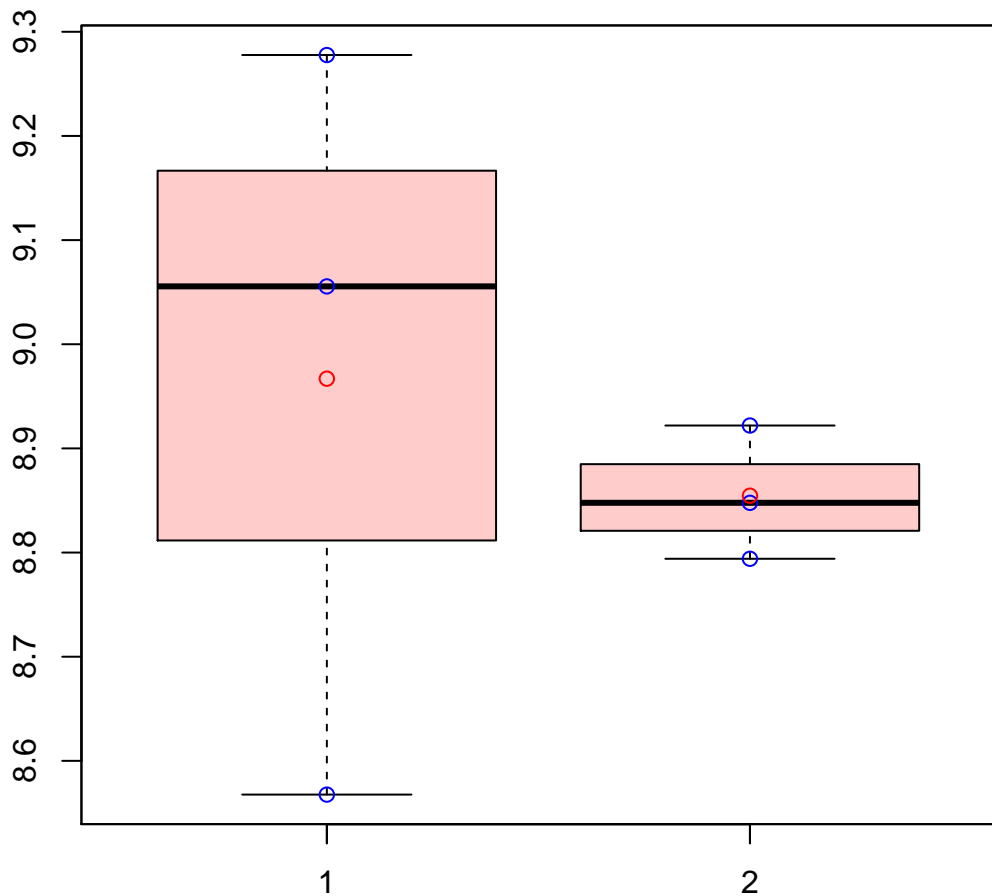

t-Test: p-value = 0.65

**Q7XRL9|Q7XRL9\_ORYSJ**

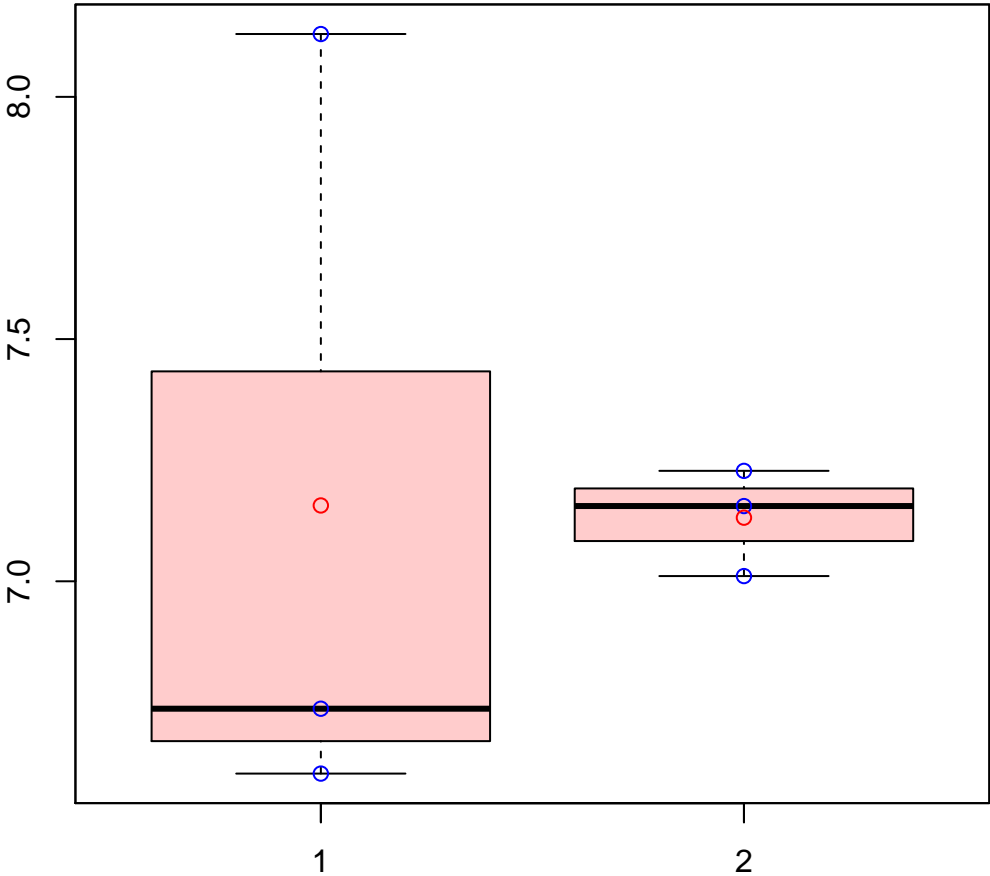

t-Test: p-value = 0.96

# Q7XRT6|Q7XRT6\_ORYSJ

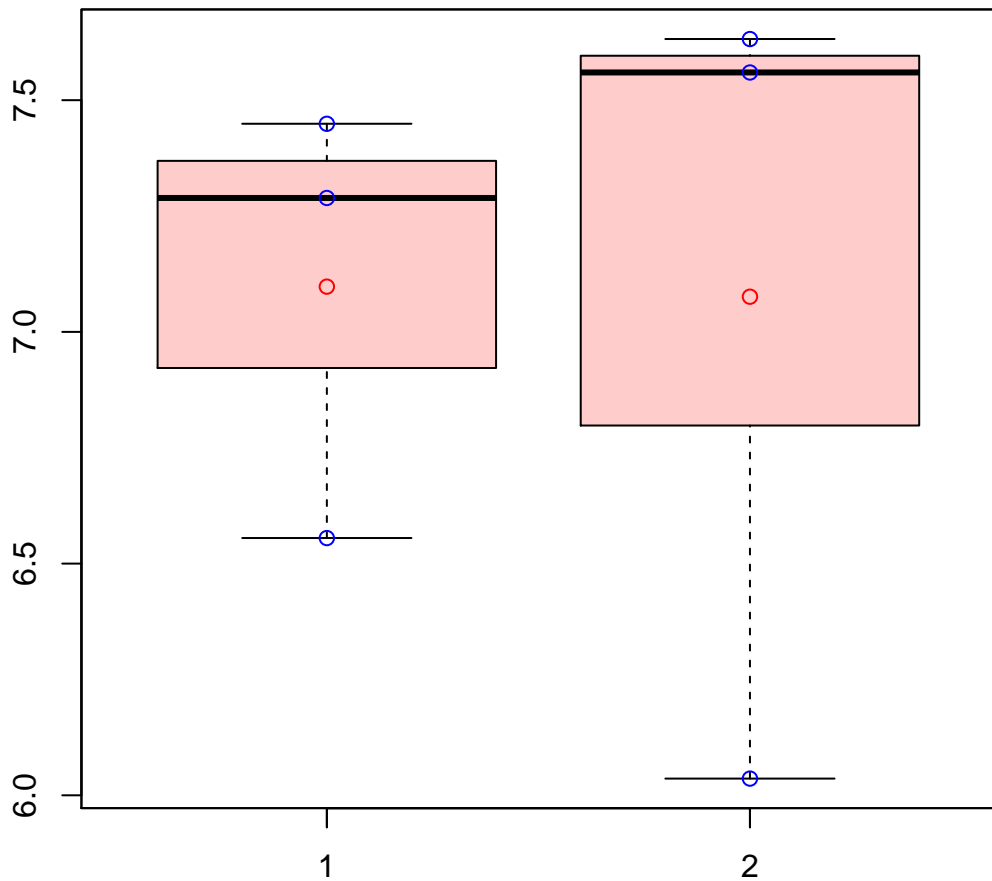

t-Test: p-value = 0.97

# Q7XRV6|Q7XRV6\_ORYSJ

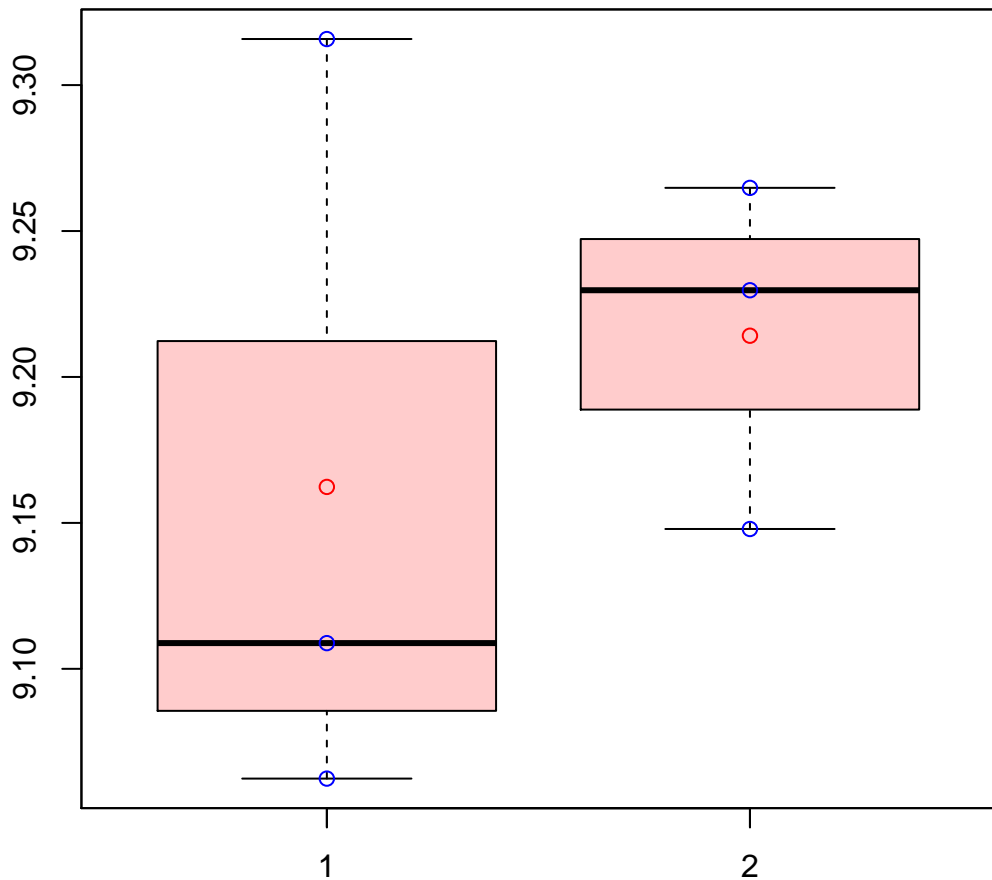

t-Test: p-value = 0.59

# Q7XRY0|Q7XRY0\_ORYSJ

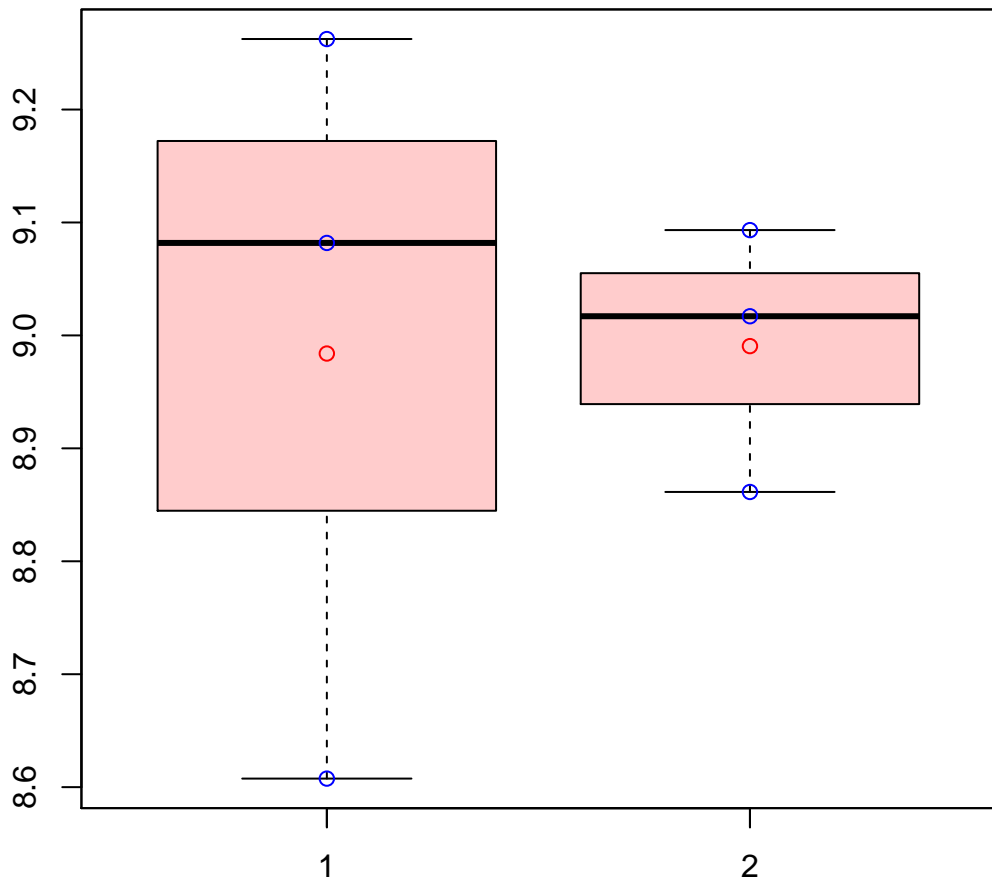

t-Test: p-value = 0.98

# Q7XSS2|Q7XSS2\_ORYSJ

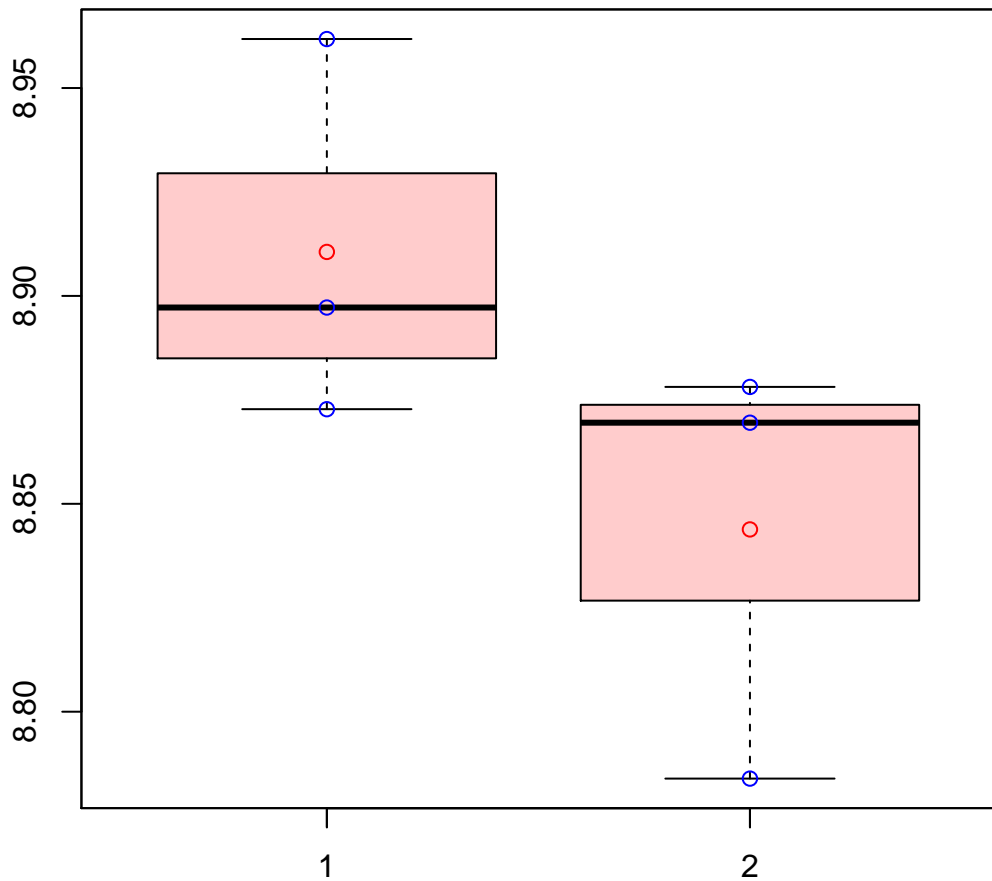

t-Test: p-value = 0.17

# Q7XT72|Q7XT72\_ORYSJ

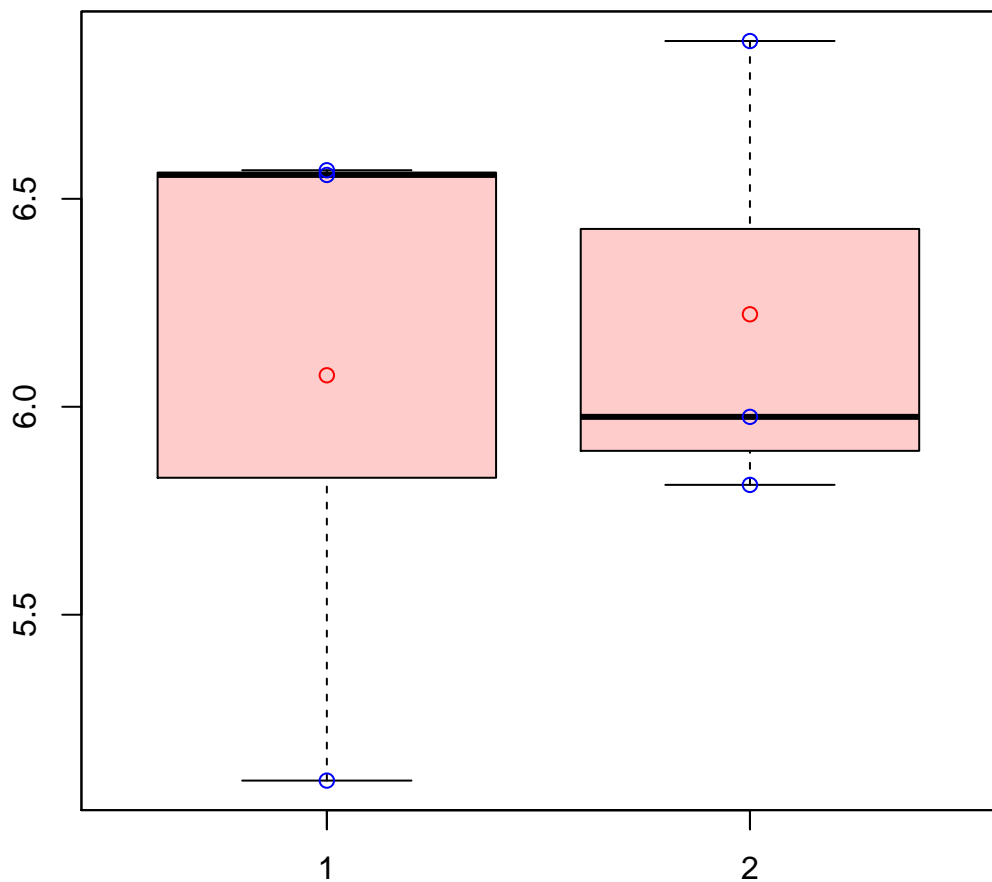

t-Test: p-value = 0.82



# Q7XTR4|Q7XTR4\_ORYSJ

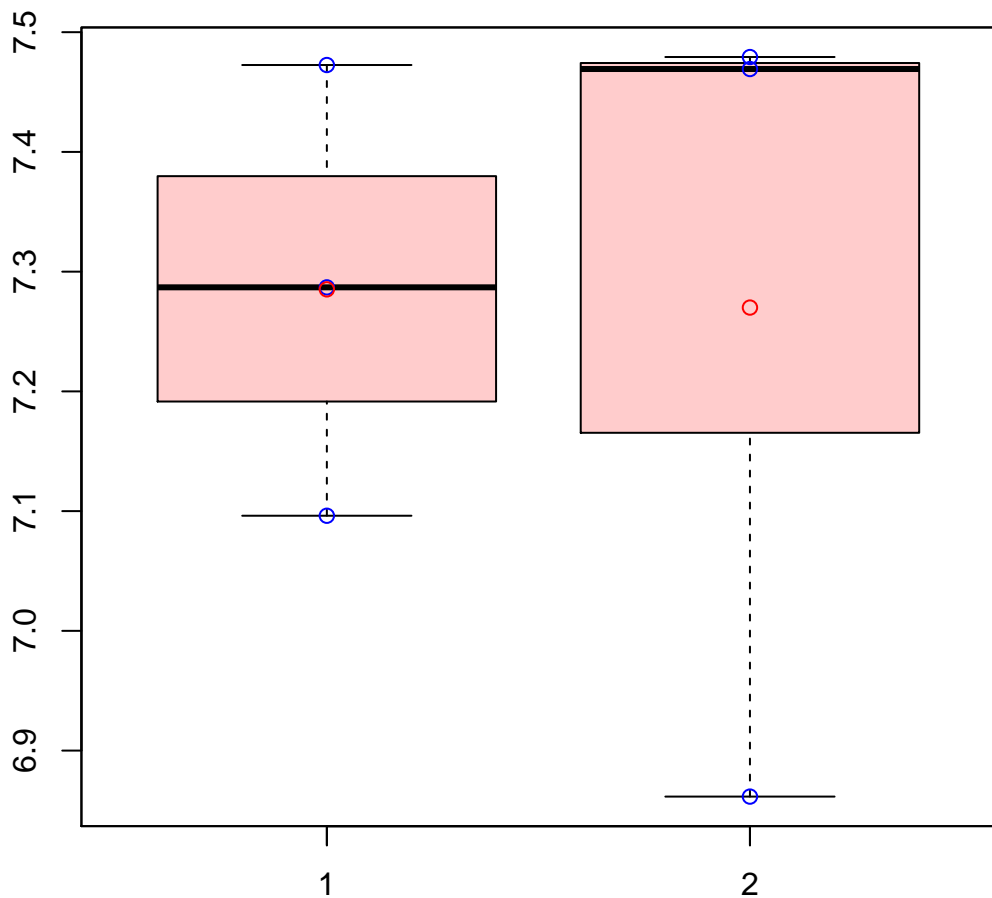

t-Test: p-value = 0.95

# Q7XV85|Q7XV85\_ORYSJ

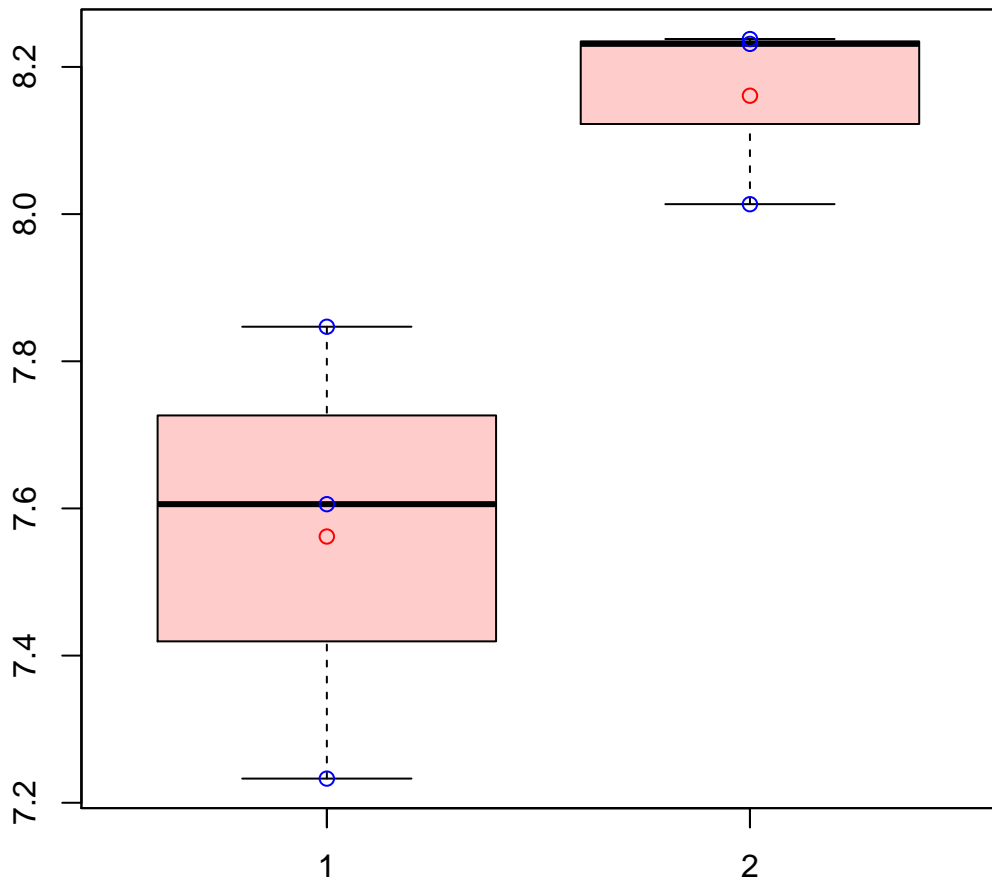

t-Test: p-value = 0.06

# Q7XVA5|Q7XVA5\_ORYSJ

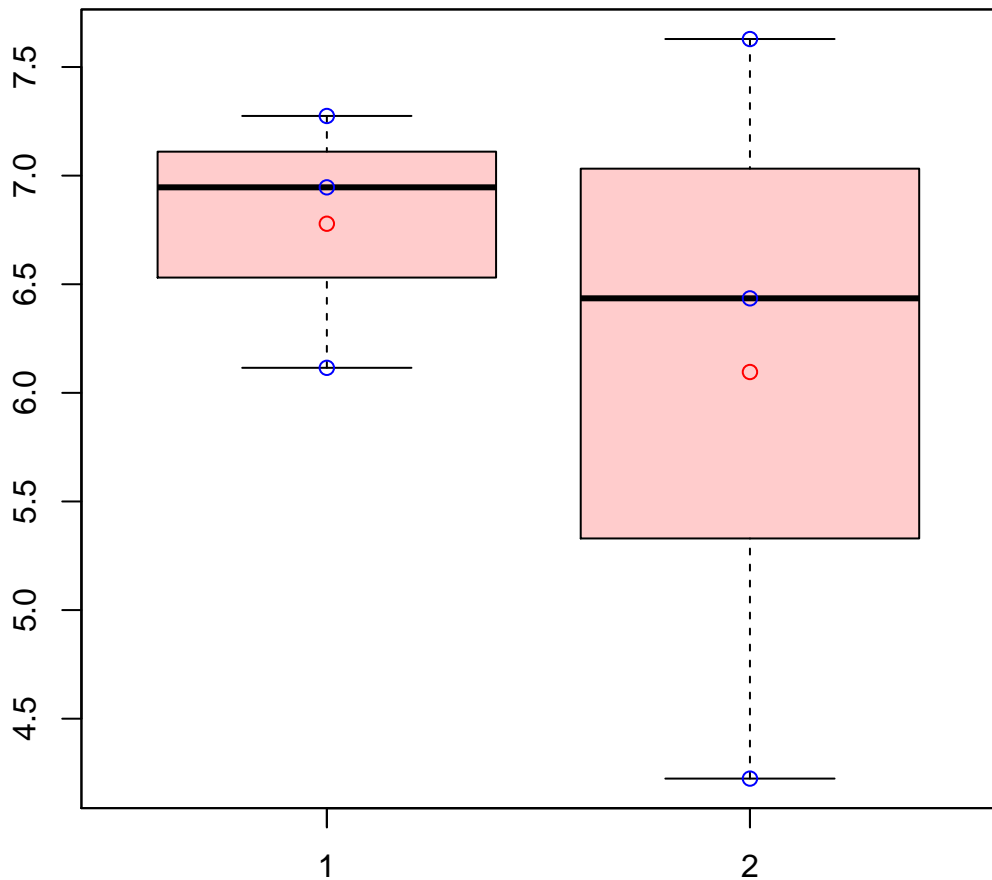

t-Test: p-value = 0.57

# Q7XWN7|Q7XWN7\_ORYSJ

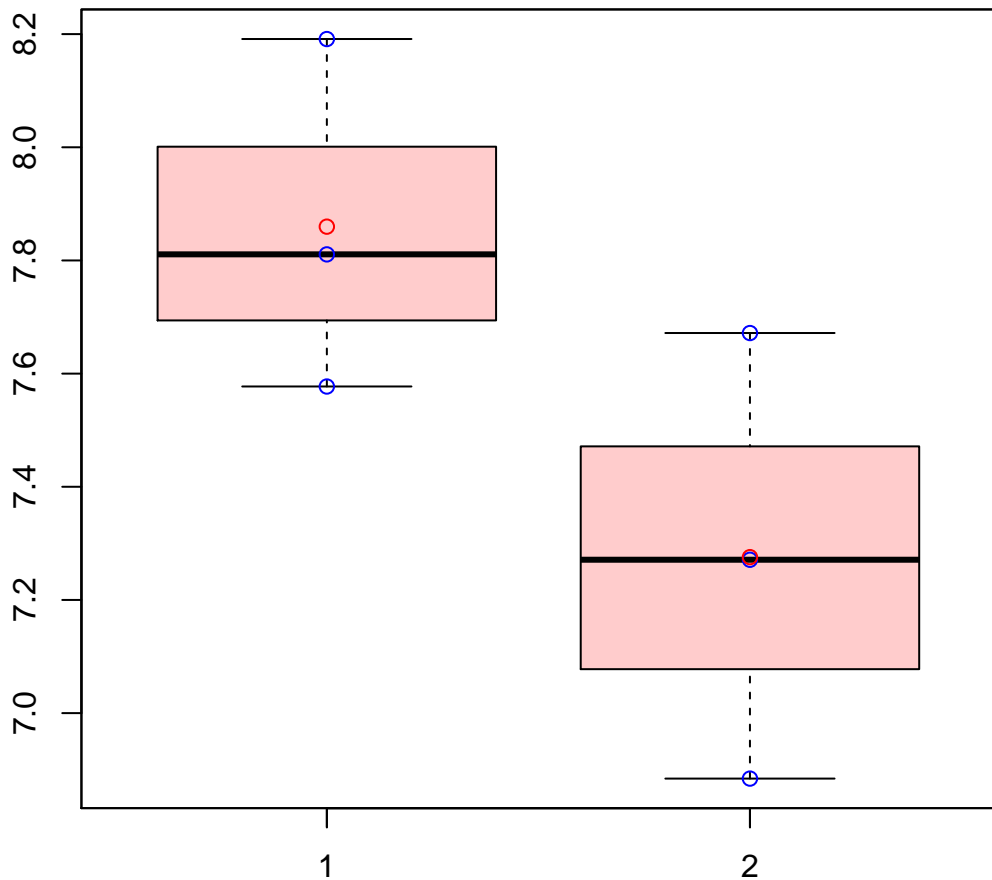

t-Test: p-value = 0.12

# Q7XWP8|Q7XWP8\_ORYSJ

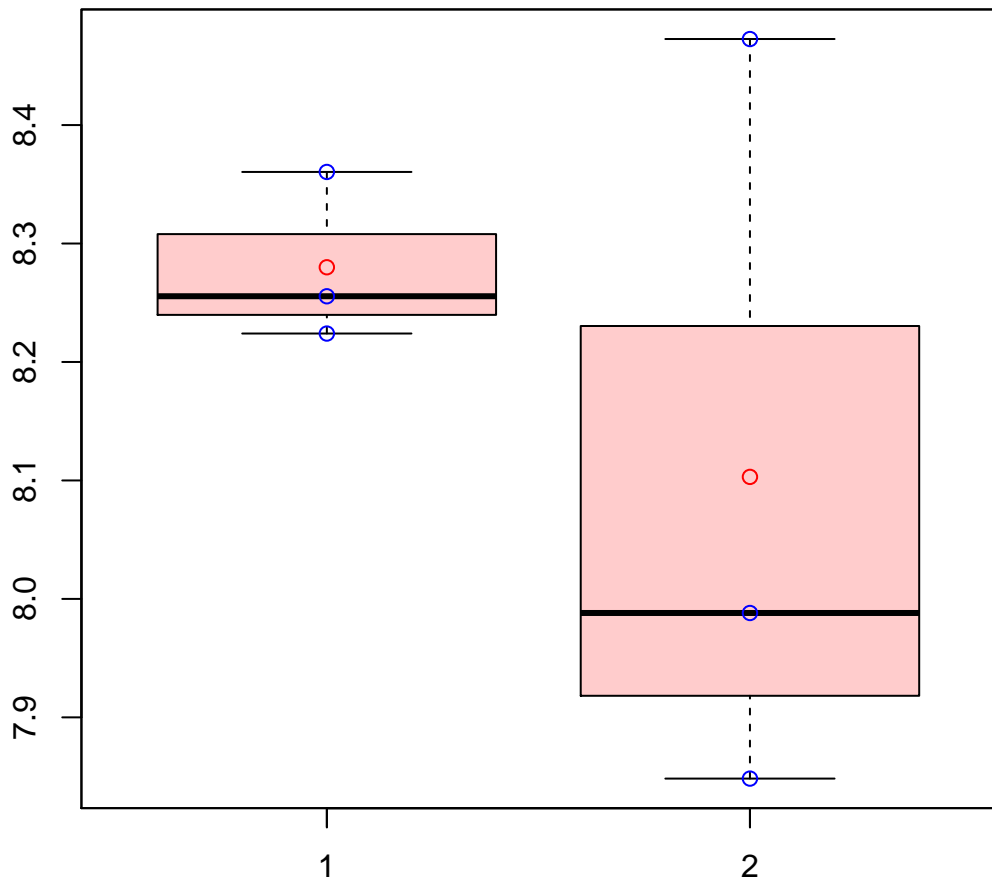

t-Test: p-value = 0.45

# Q7XX52|Q7XX52\_ORYSJ

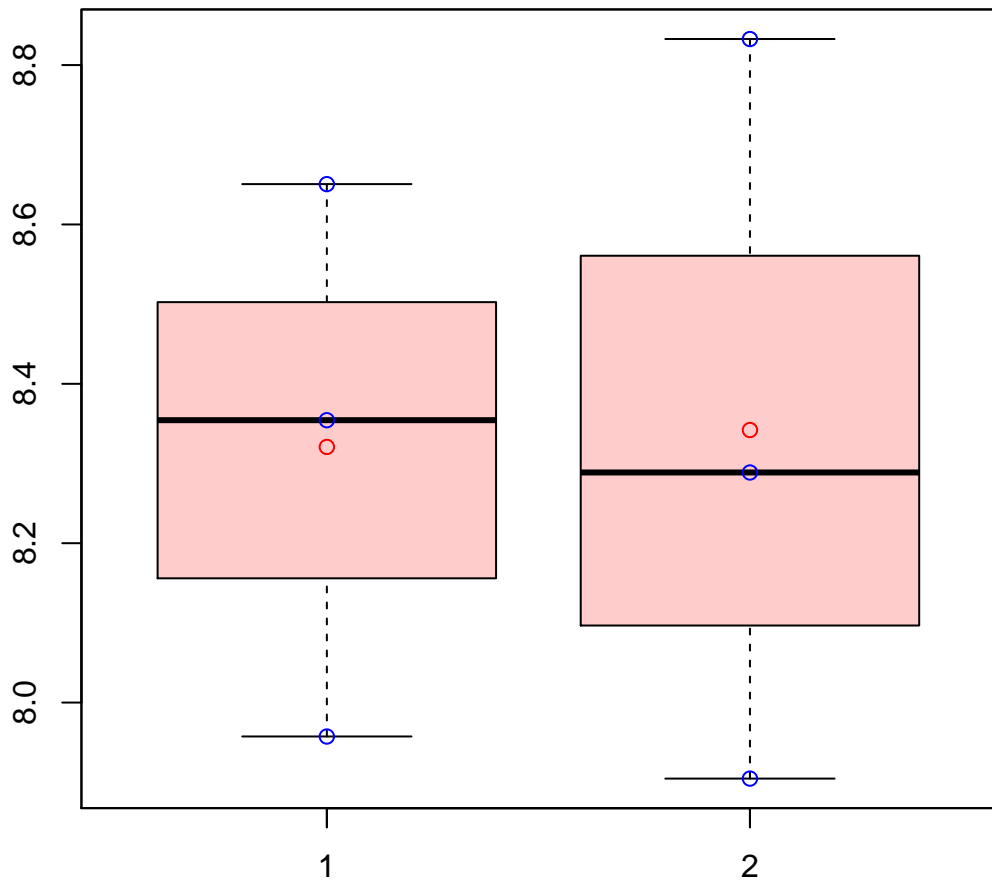

t-Test: p-value = 0.95

# Q7XXD5|Q7XXD5\_ORYSJ

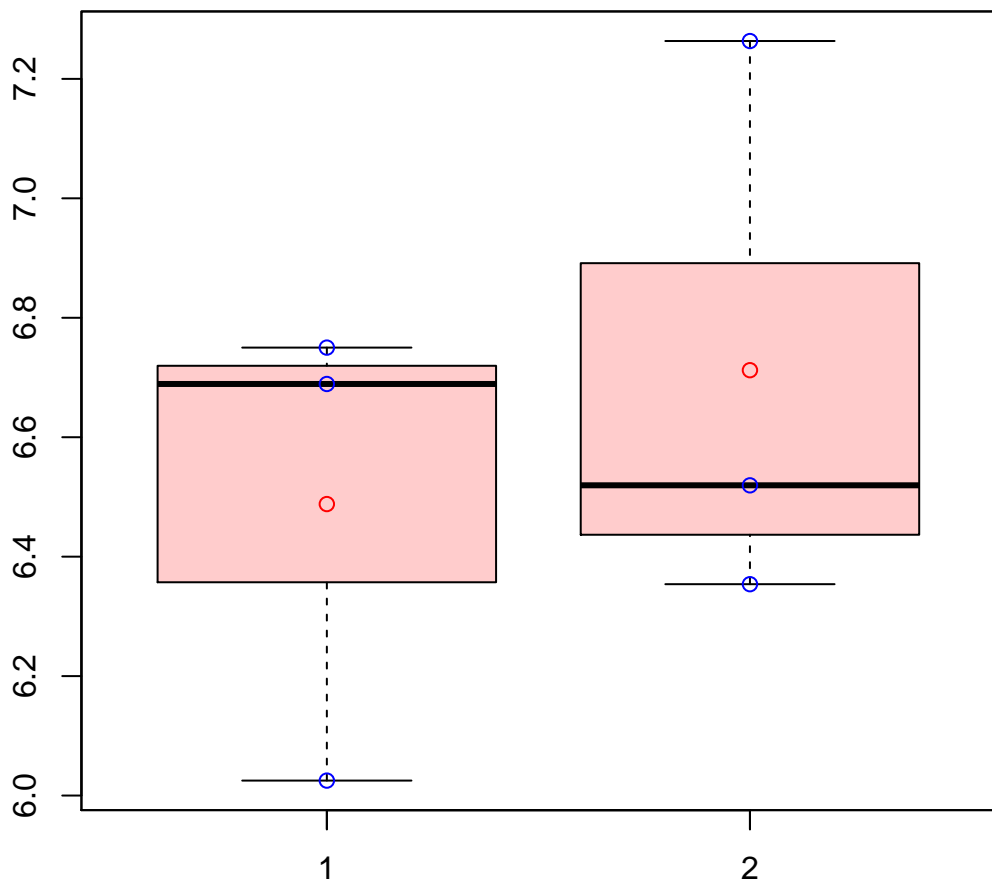

t-Test: p-value = 0.57

# Q7Y1C6|Q7Y1C6\_PENAM

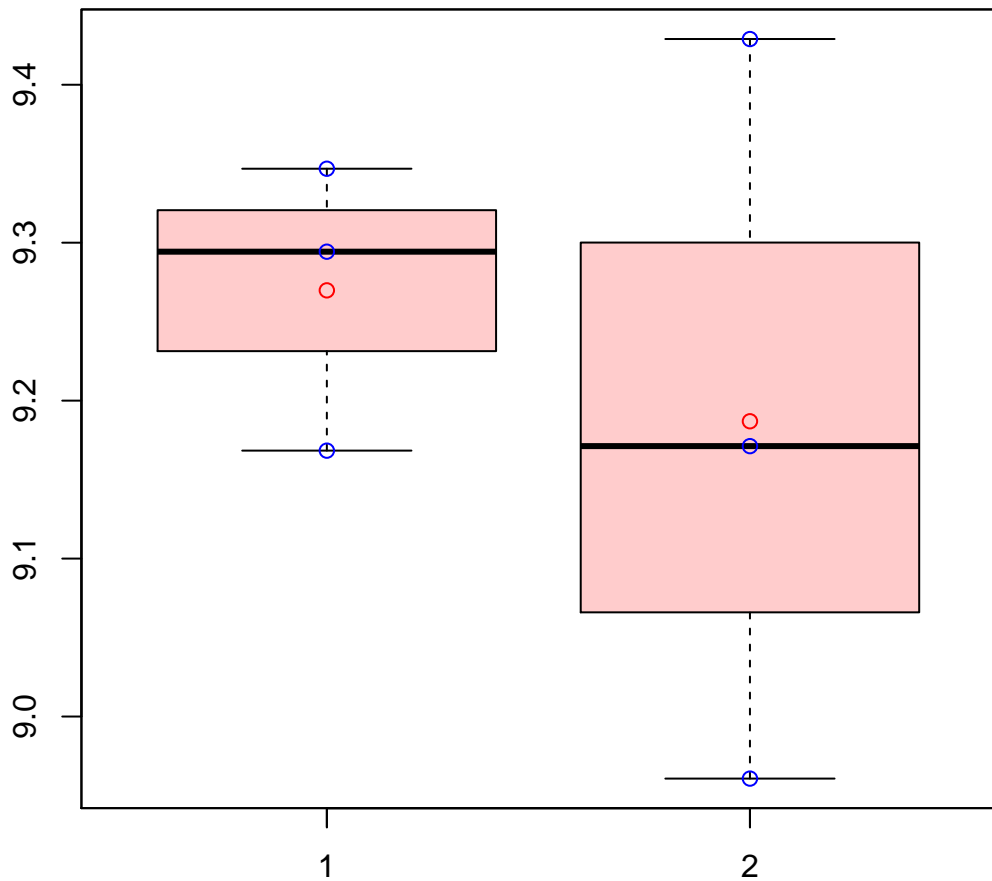

t-Test: p-value = 0.61



# Q7Y1E8|Q7Y1E8\_ORYSJ

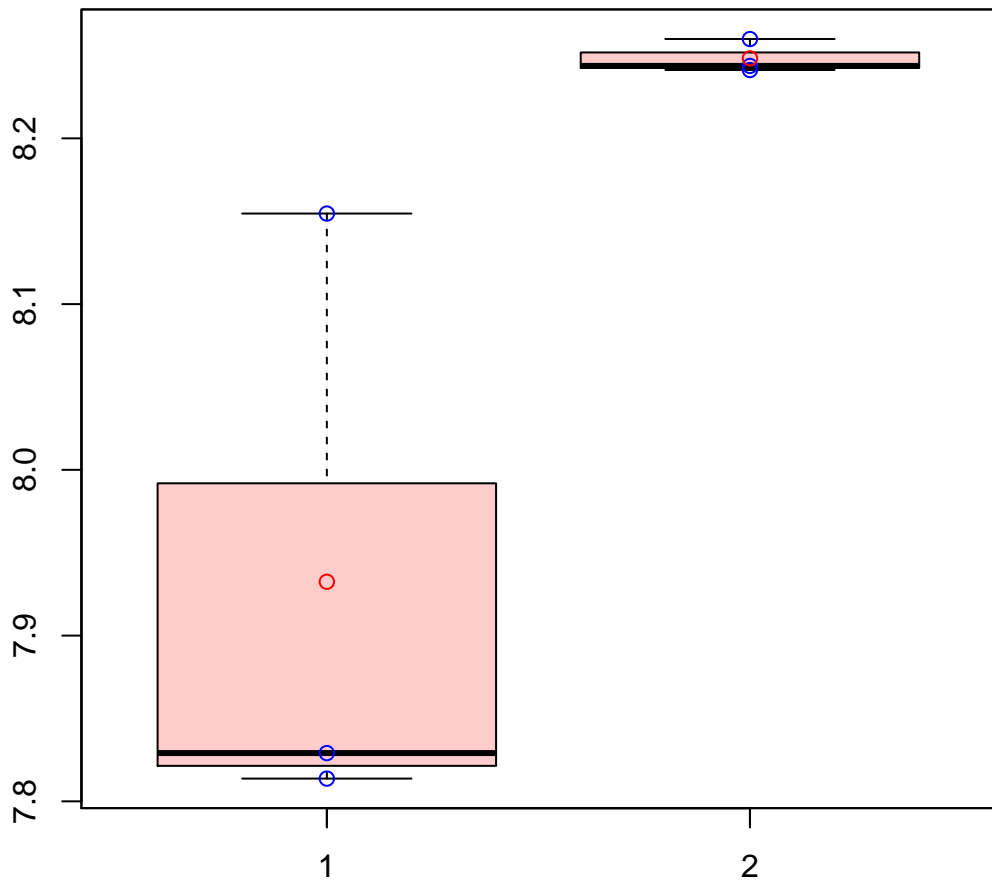

t-Test: p-value = 0.1

# Q7YJL0|Q7YJL0\_9ASPA

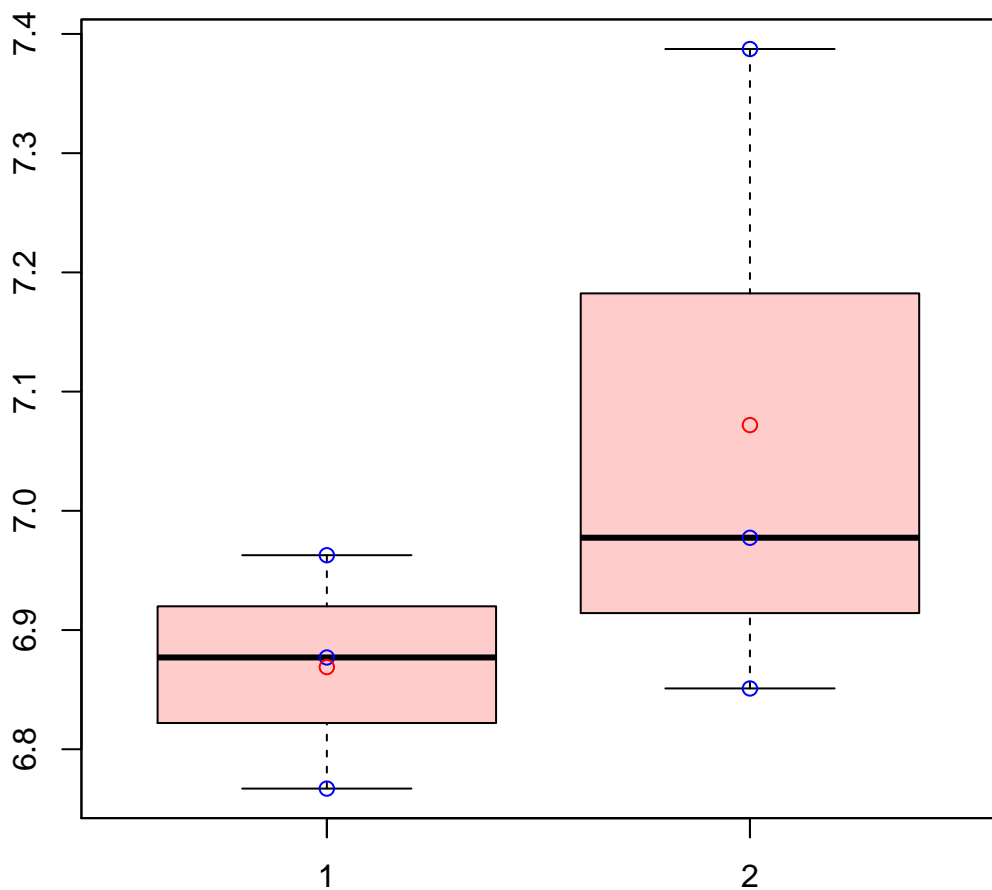

t-Test: p-value = 0.34

# Q84JX6|Q84JX6\_MAIZE

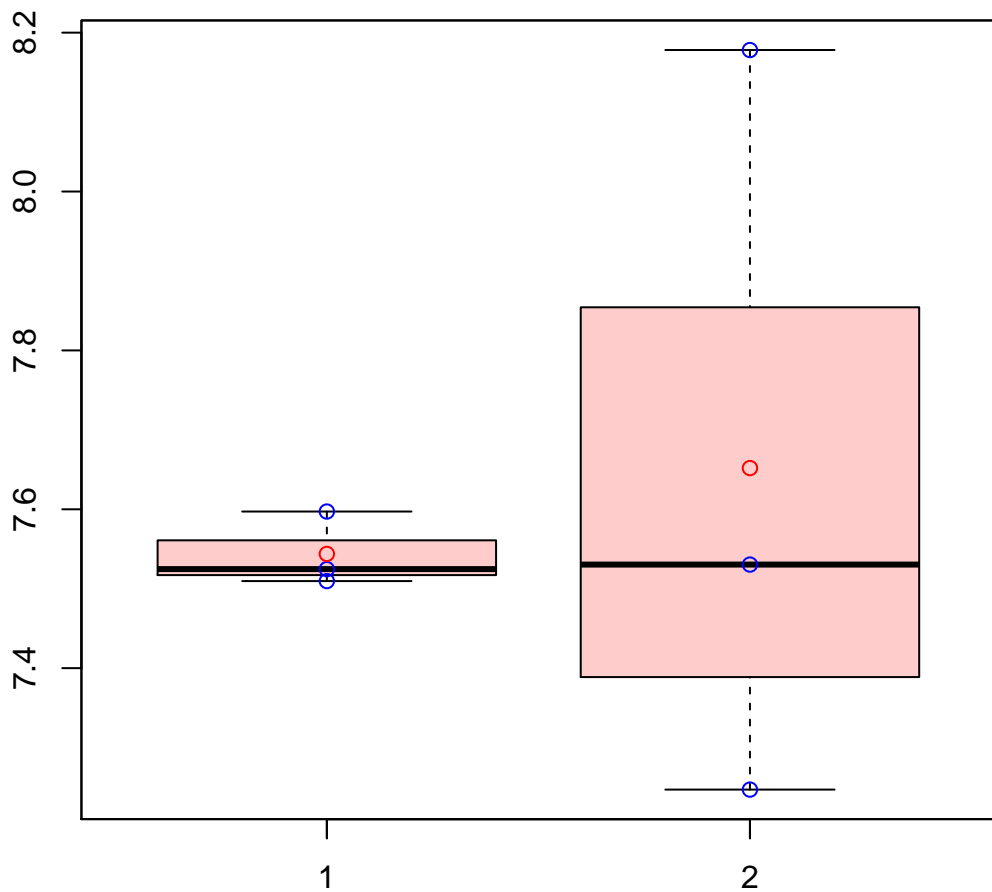

t-Test: p-value = 0.73

# Q84KC0|Q84KC0\_HORVU

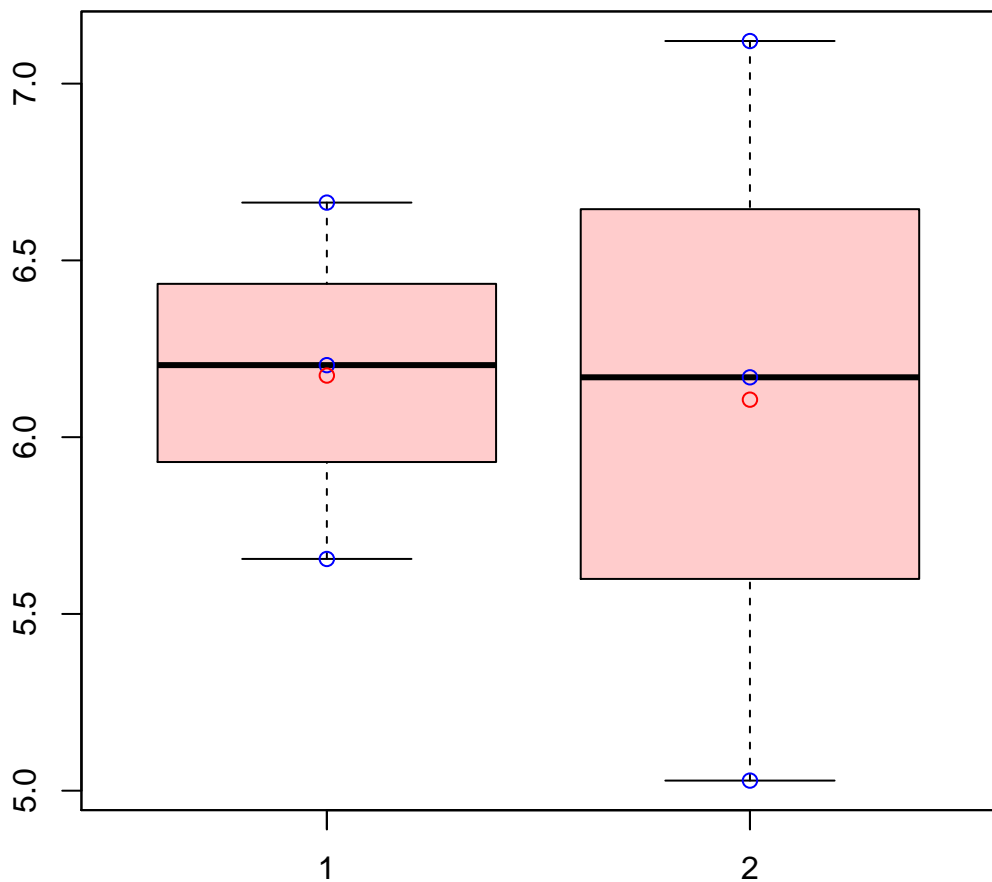

t-Test: p-value = 0.93

# Q84MW6|Q84MW6\_ORYSJ

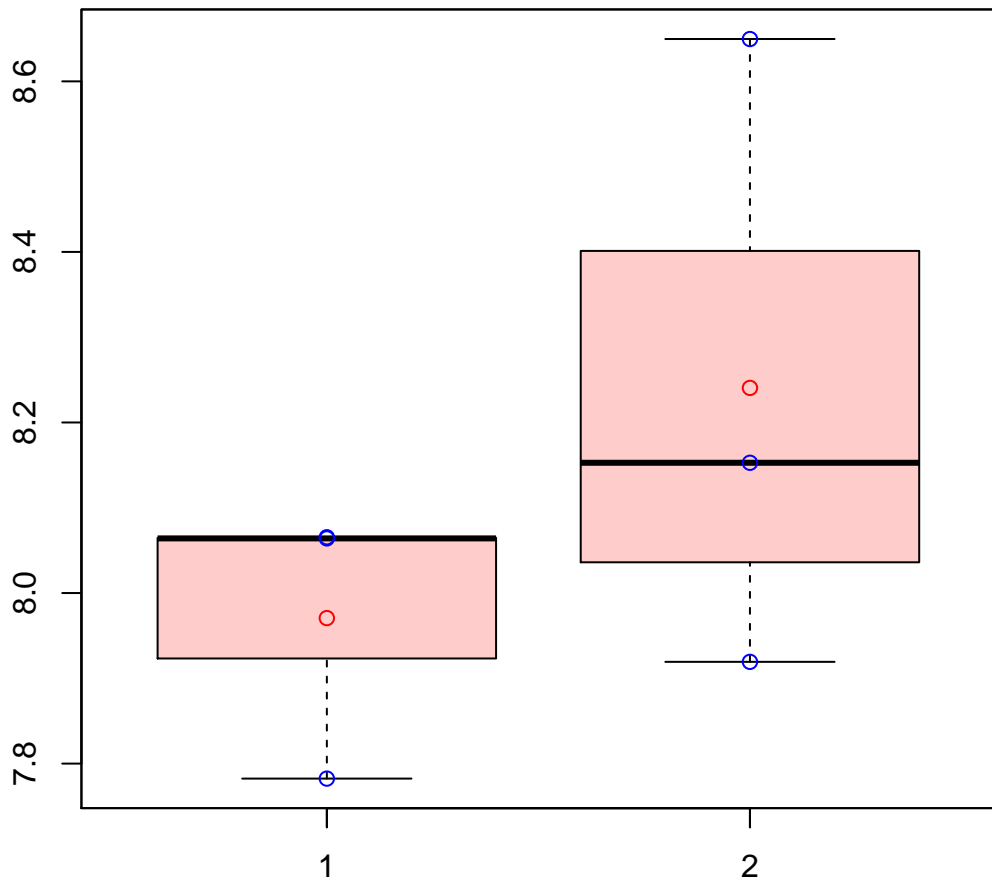

t-Test: p-value = 0.34

# Q84PW3|Q84PW3\_ORYSJ

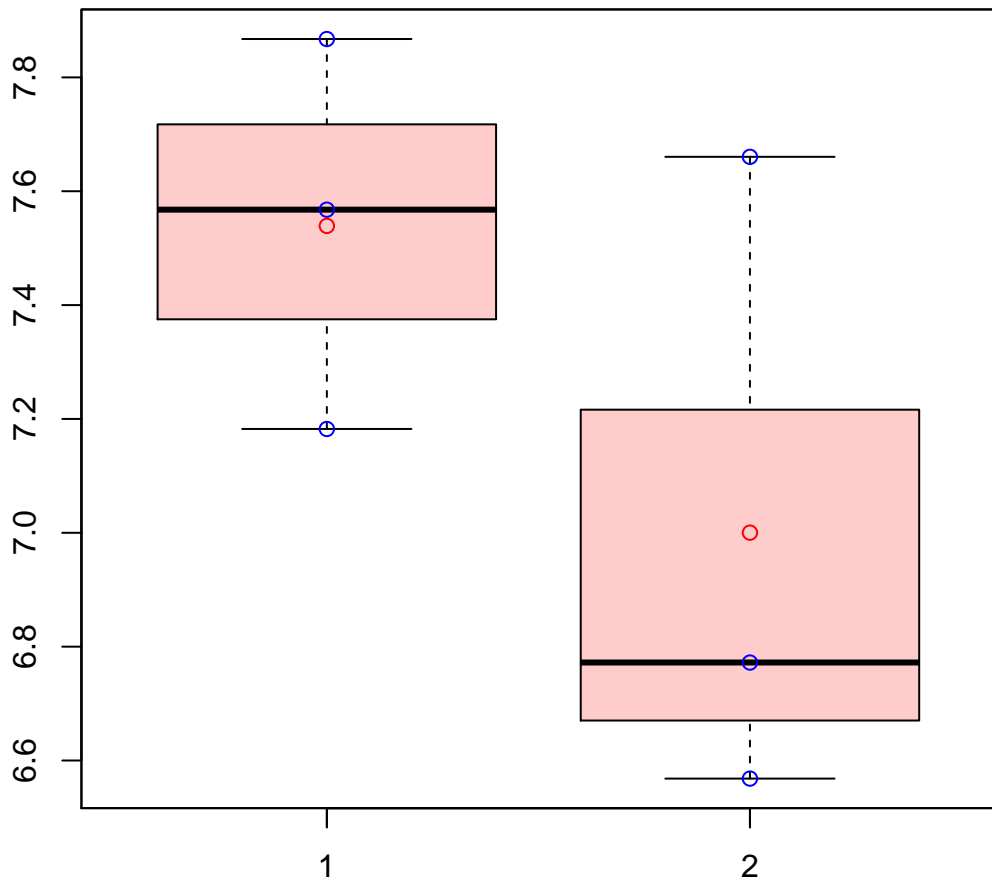

t-Test: p-value = 0.25

# Q84QA8|Q84QA8\_ORYSJ

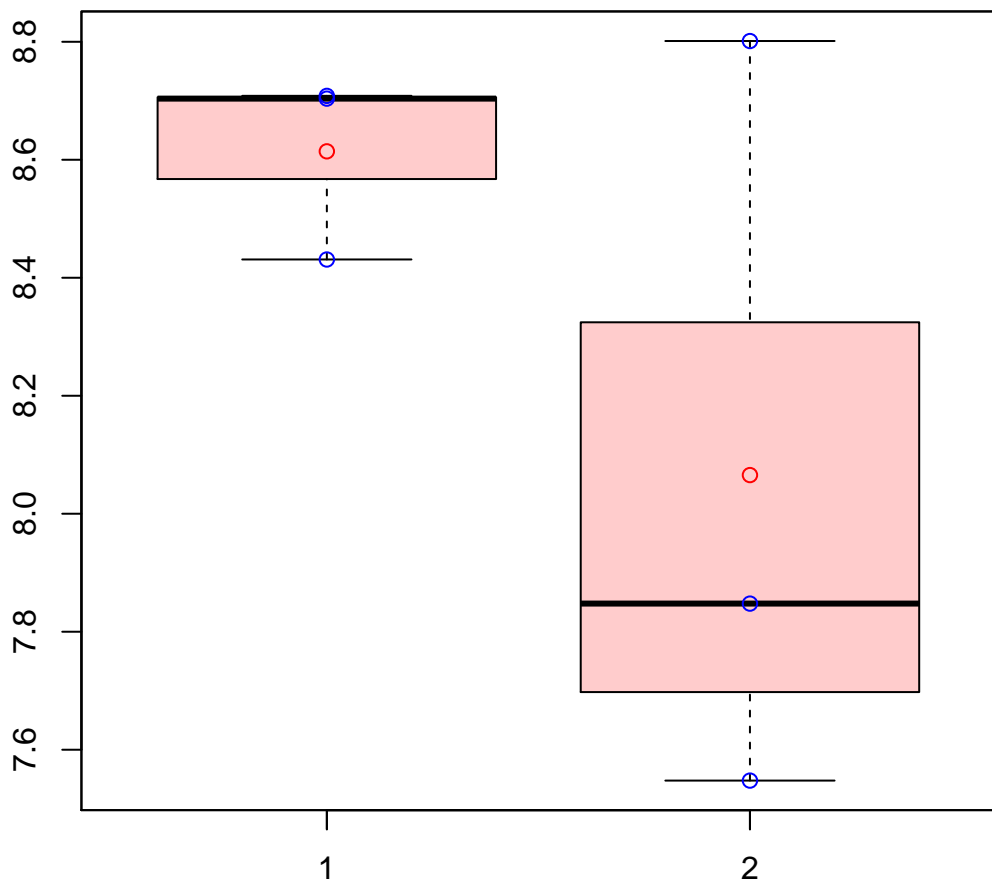

t-Test: p-value = 0.28

# Q84QI7|Q84QI7\_9POAL

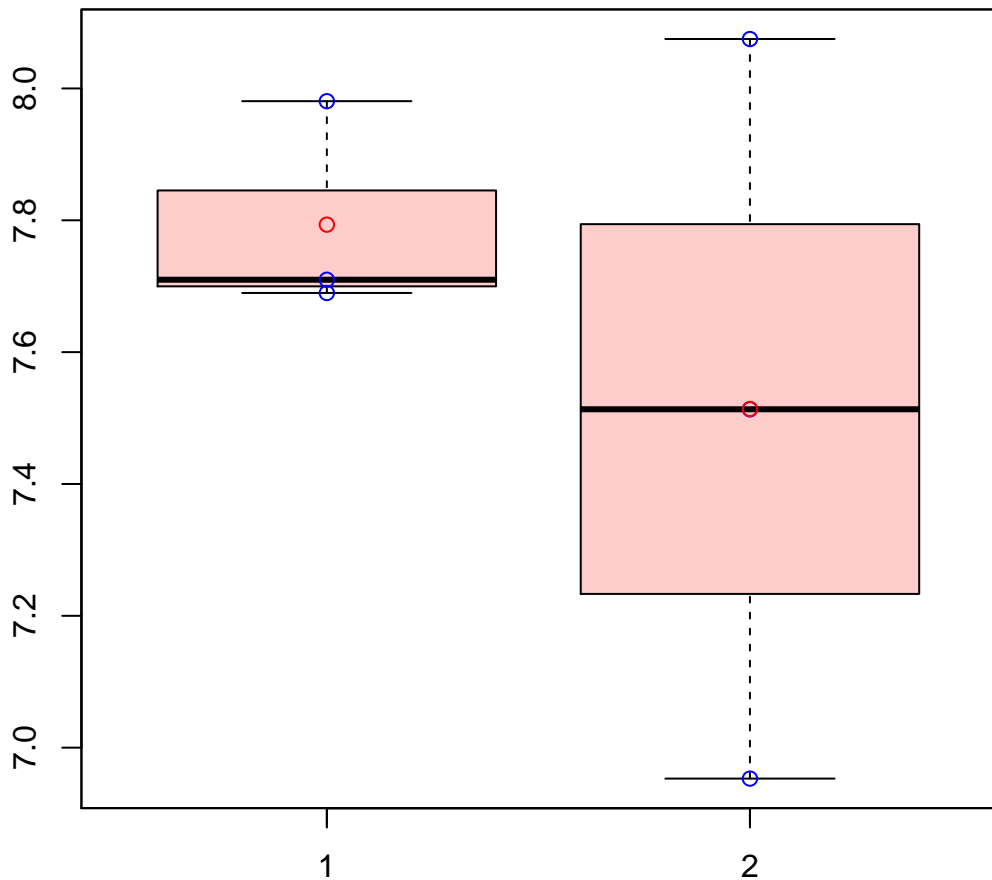

t-Test: p-value = 0.48



# Q84R35|Q84R35\_ORYSJ

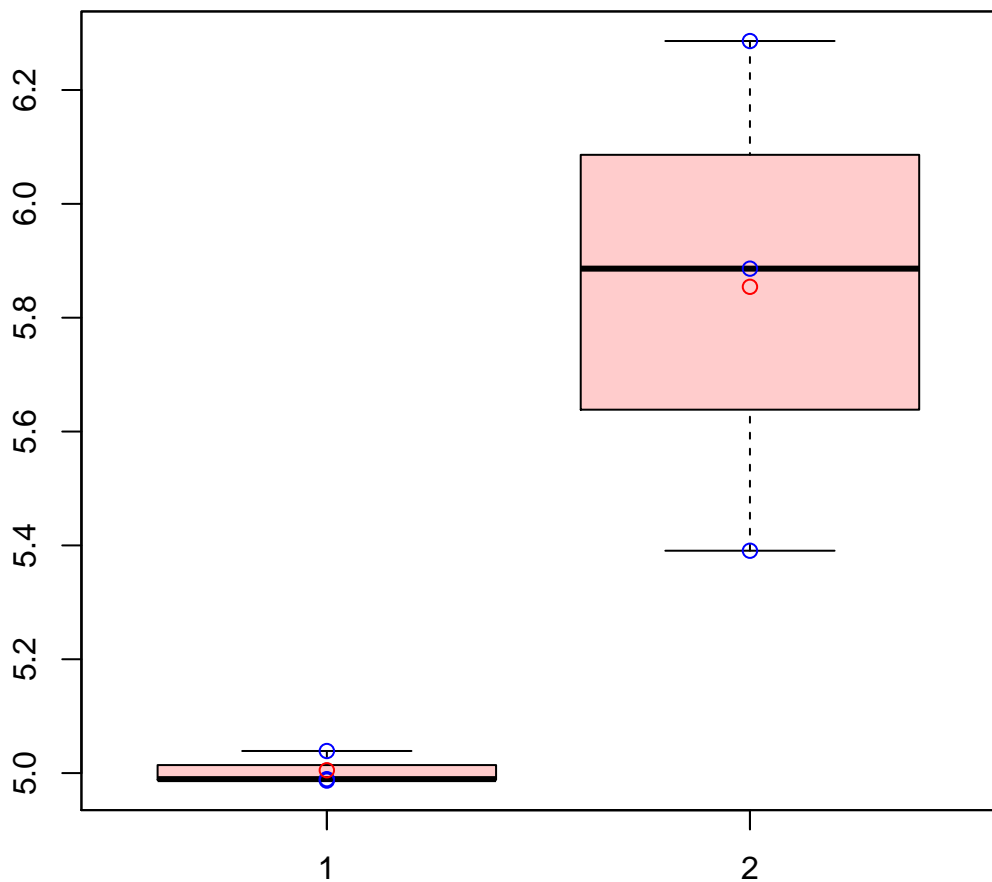

t-Test: p-value = 0.08

# Q84SH2|Q84SH2\_ORYSJ

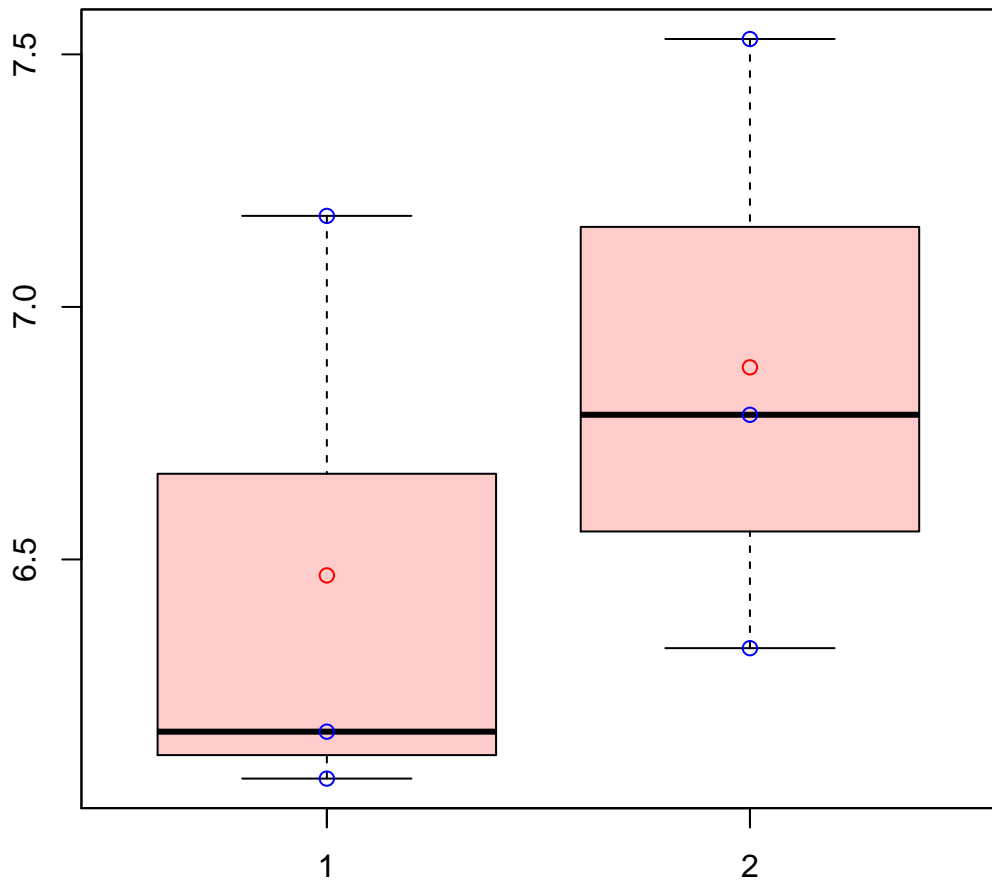

t-Test: p-value = 0.46

# Q84T70|Q84T70\_ORYSJ

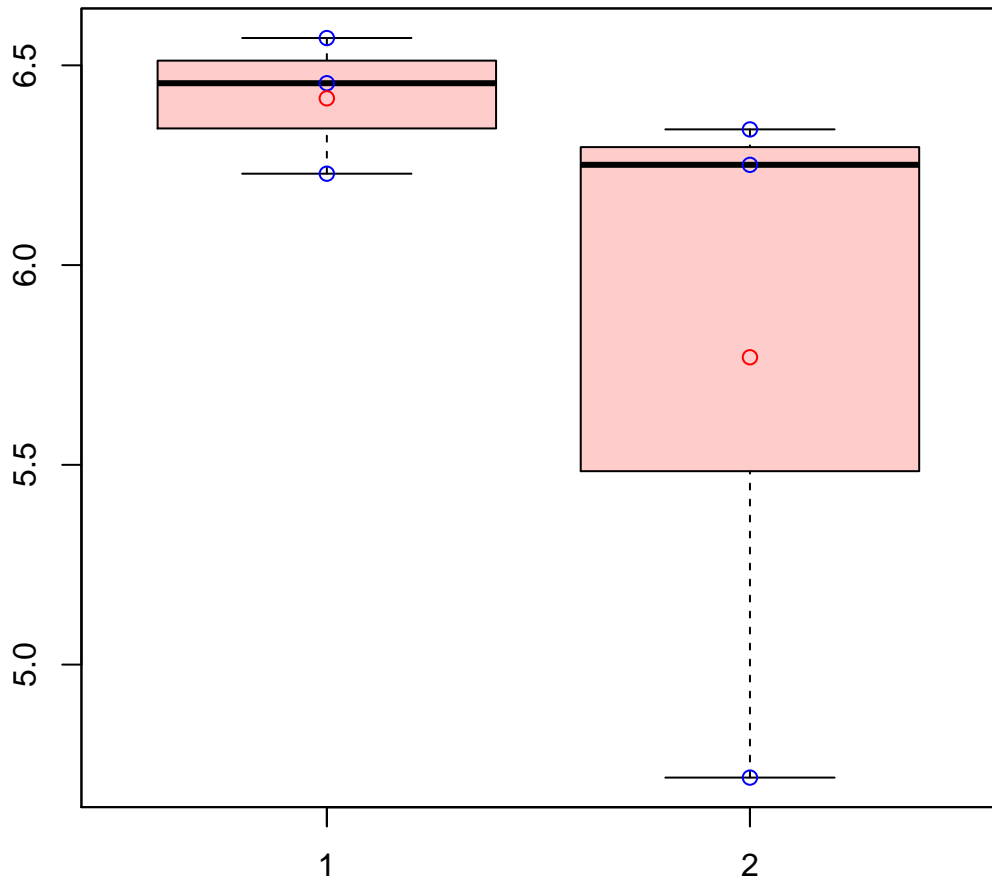

t-Test: p-value = 0.34

# Q84TA3|Q84TA3\_ORYSJ

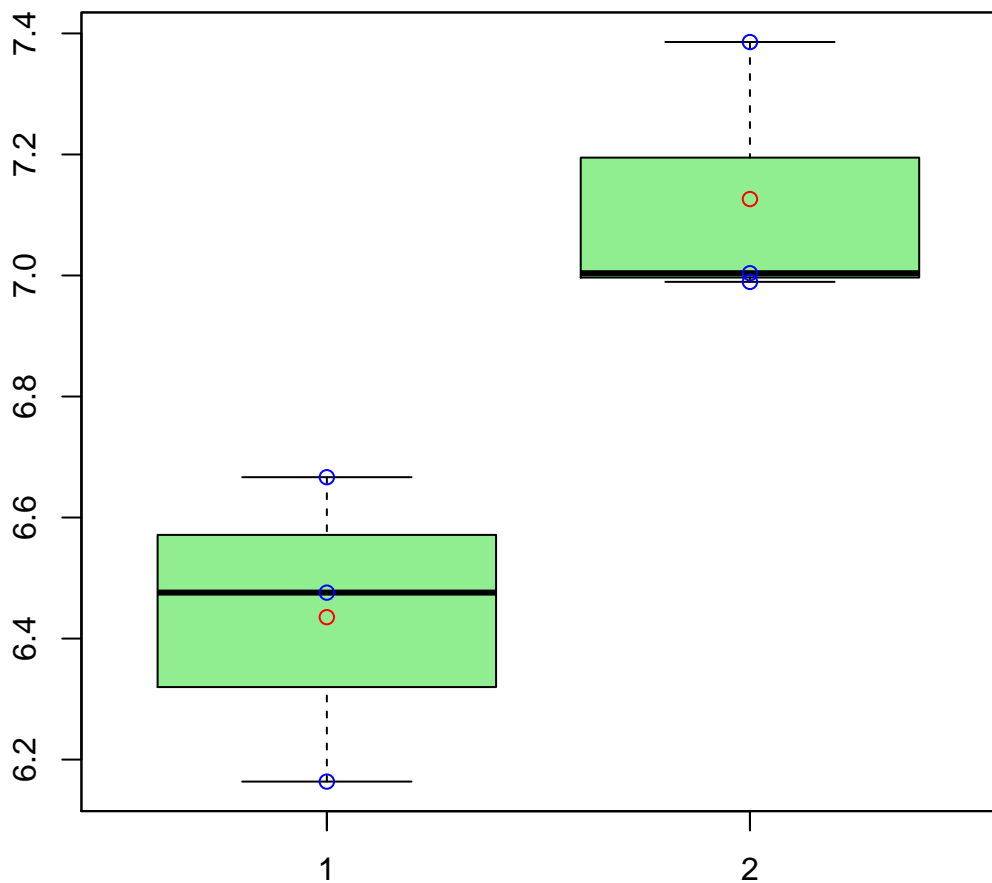

t-Test: p-value = 0.02

# Q84VT4|Q84VT4\_PHAAB

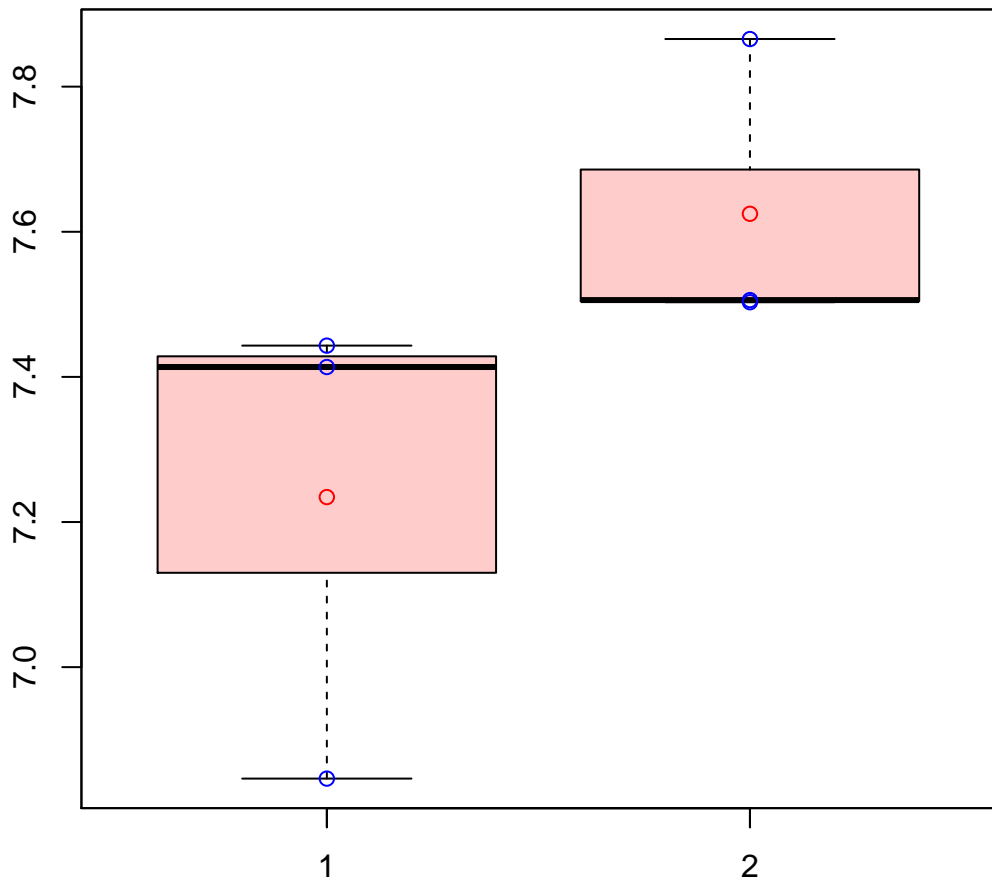

t-Test: p-value = 0.18

# Q85VN4|Q85VN4\_9ASPA

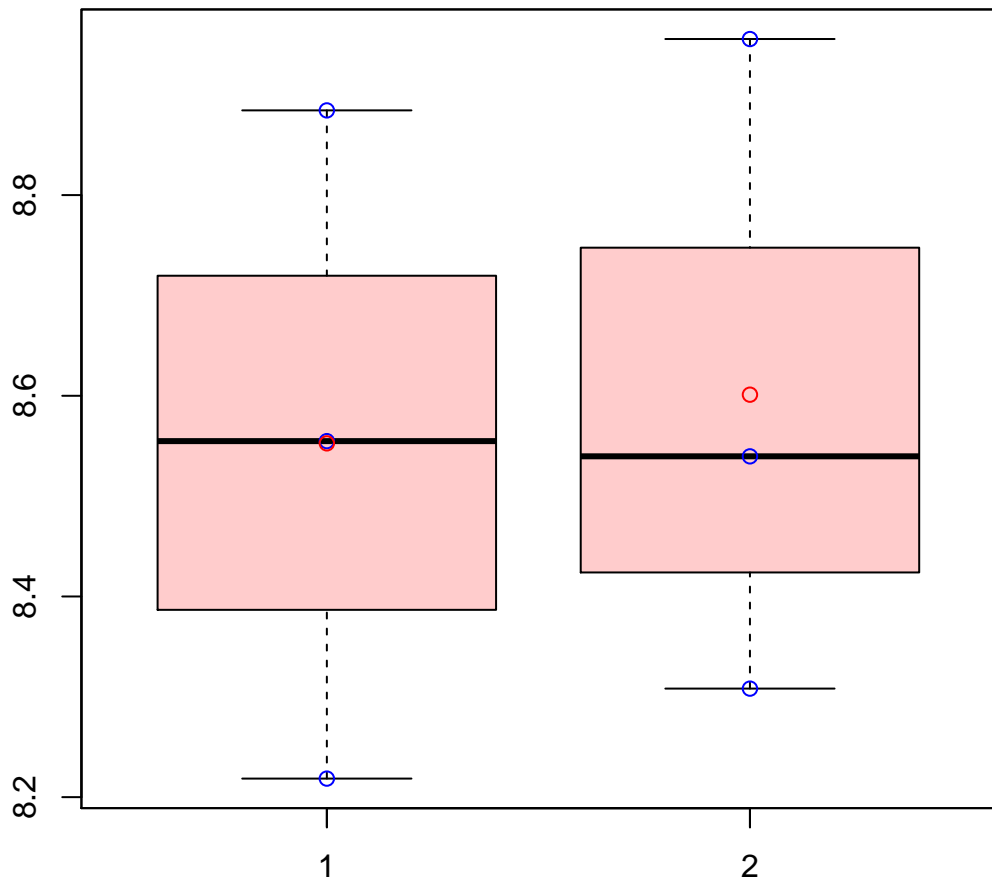

t-Test: p-value = 0.87

# Q8GU65|Q8GU65\_ORYSJ

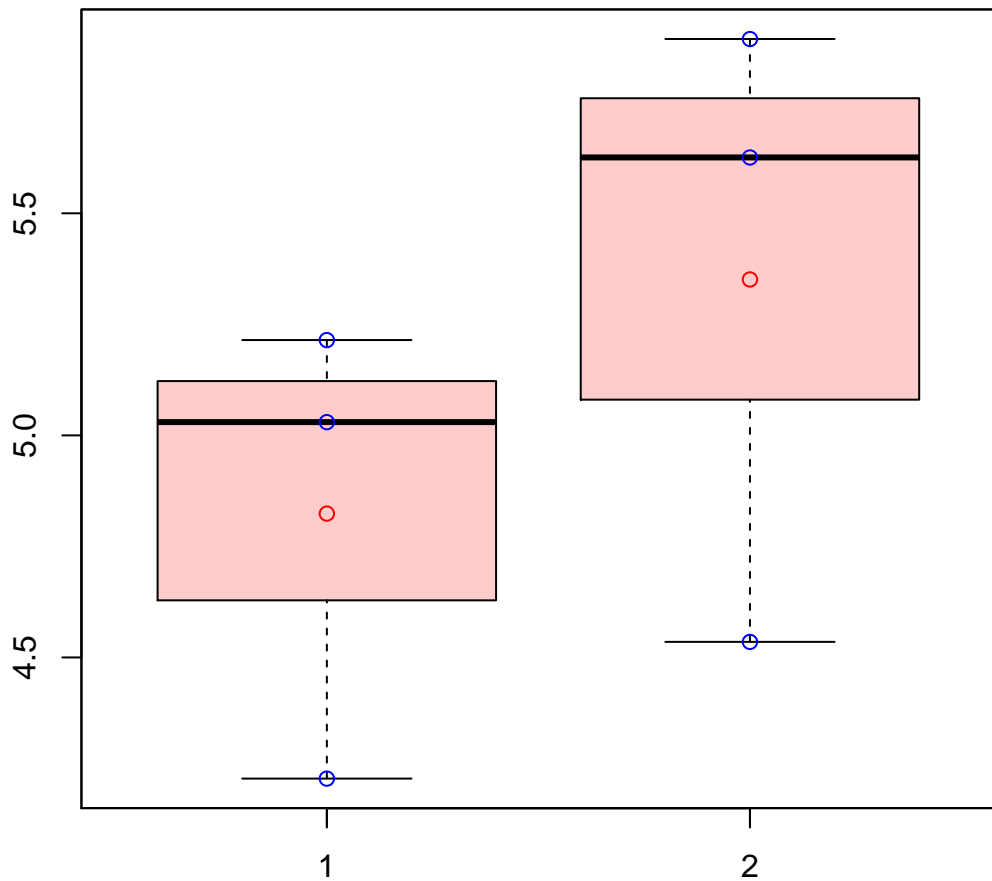

t-Test: p-value = 0.37

# Q8GU79|Q8GU79\_ORYSJ

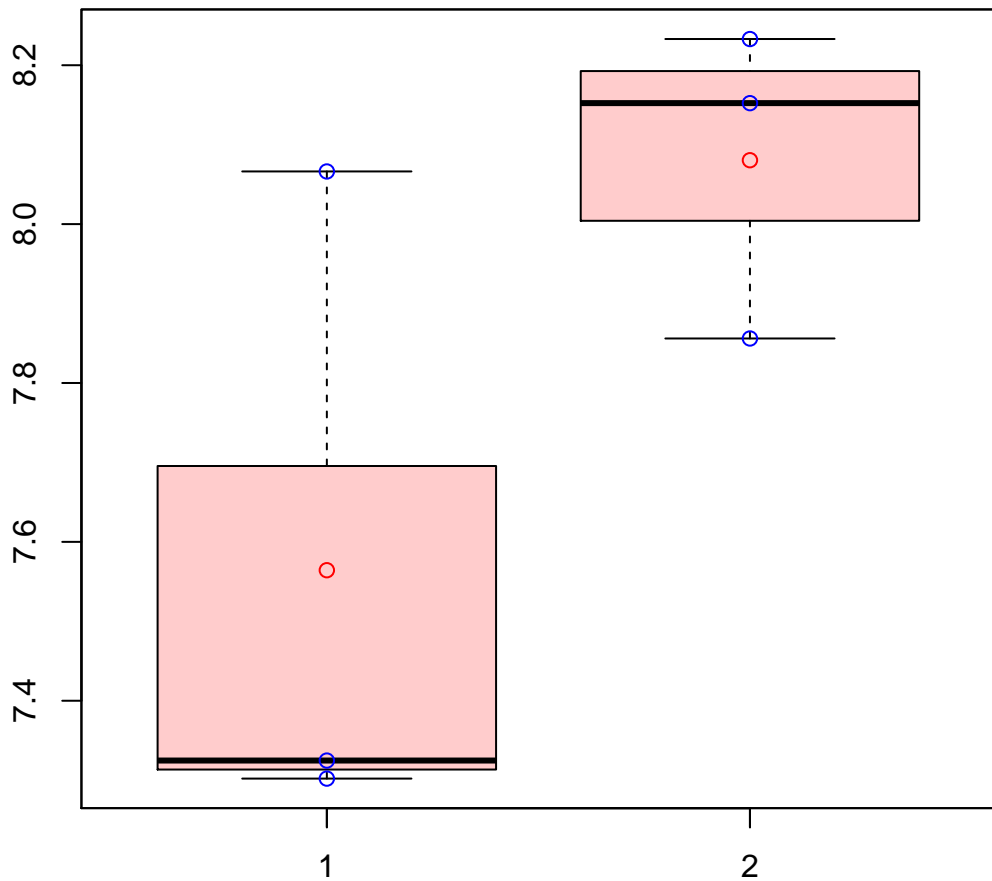

t-Test: p-value = 0.16



# Q8GZC0|Q8GZC0\_WHEAT

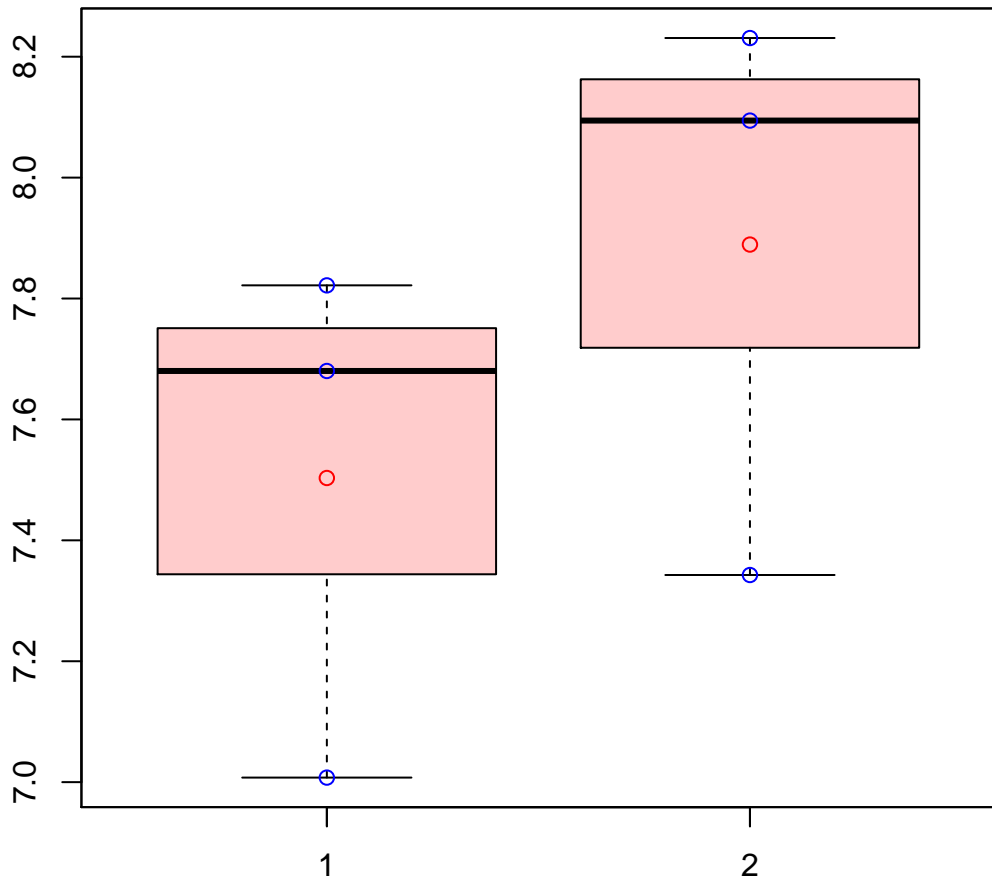

t-Test: p-value = 0.36

# Q8GZR4|Q8GZR4\_HORVD

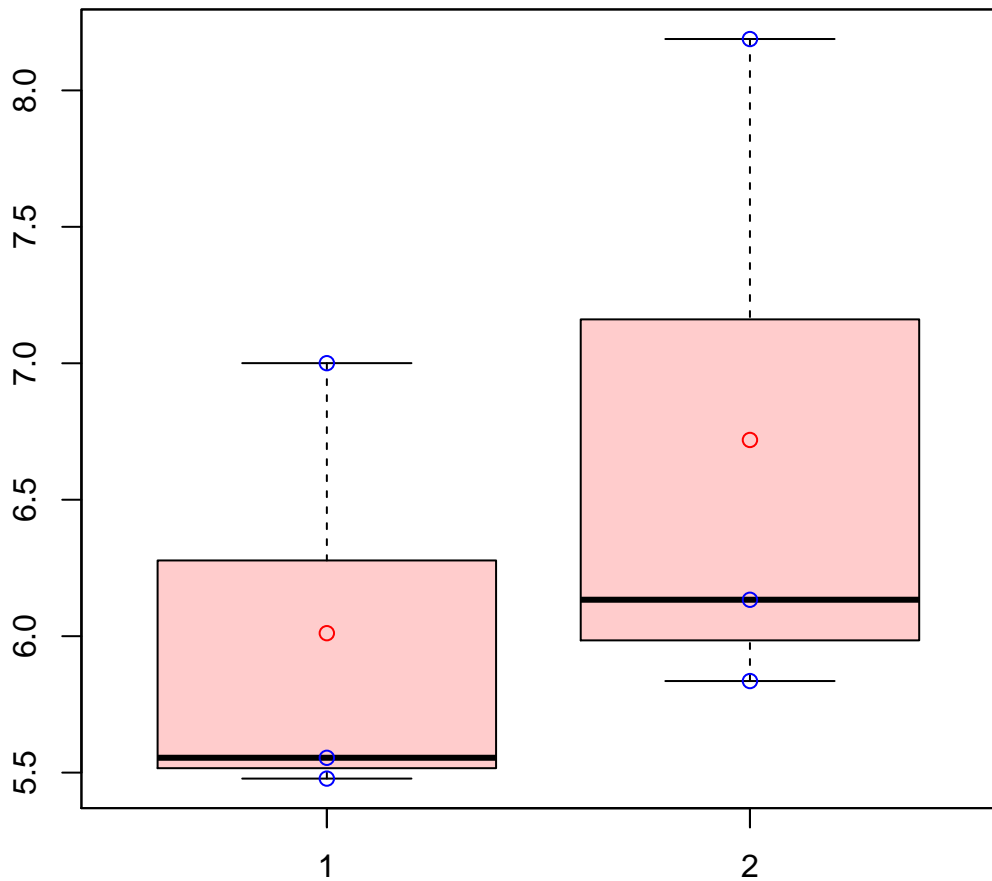

t-Test: p-value = 0.48

# Q8GZY4|Q8GZY4\_ORYSJ

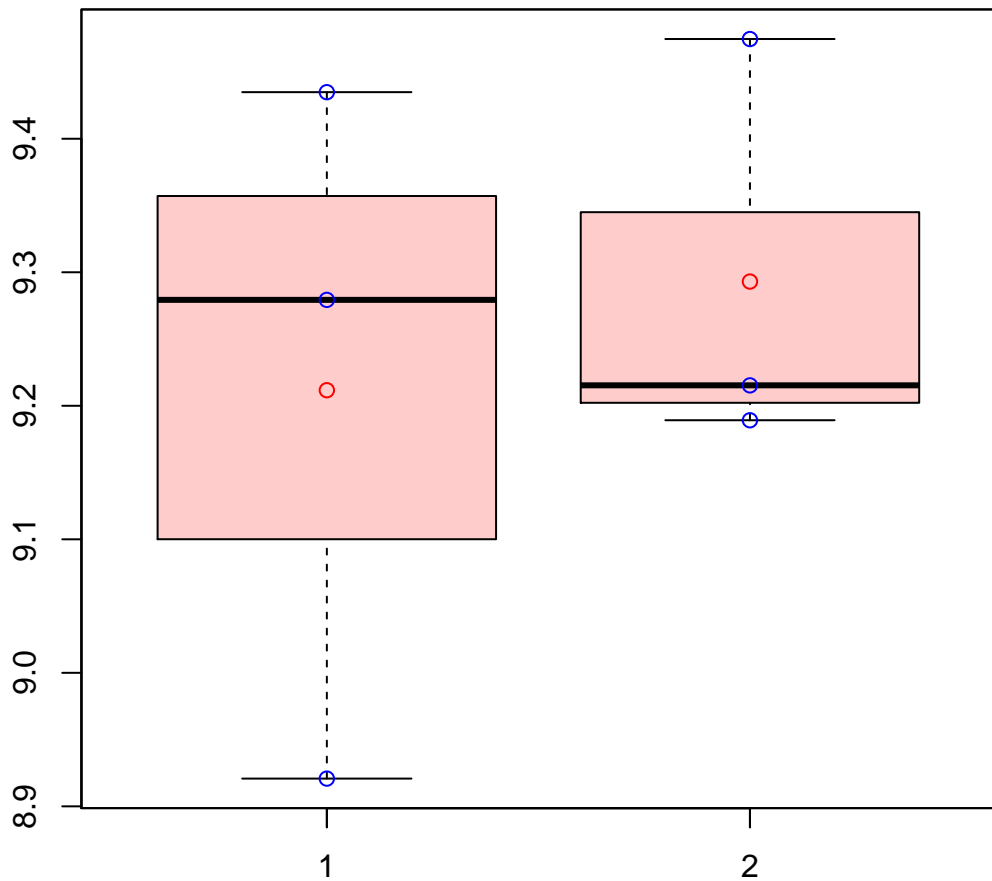

t-Test: p-value = 0.68

# Q8H028|Q8H028\_ORYSJ

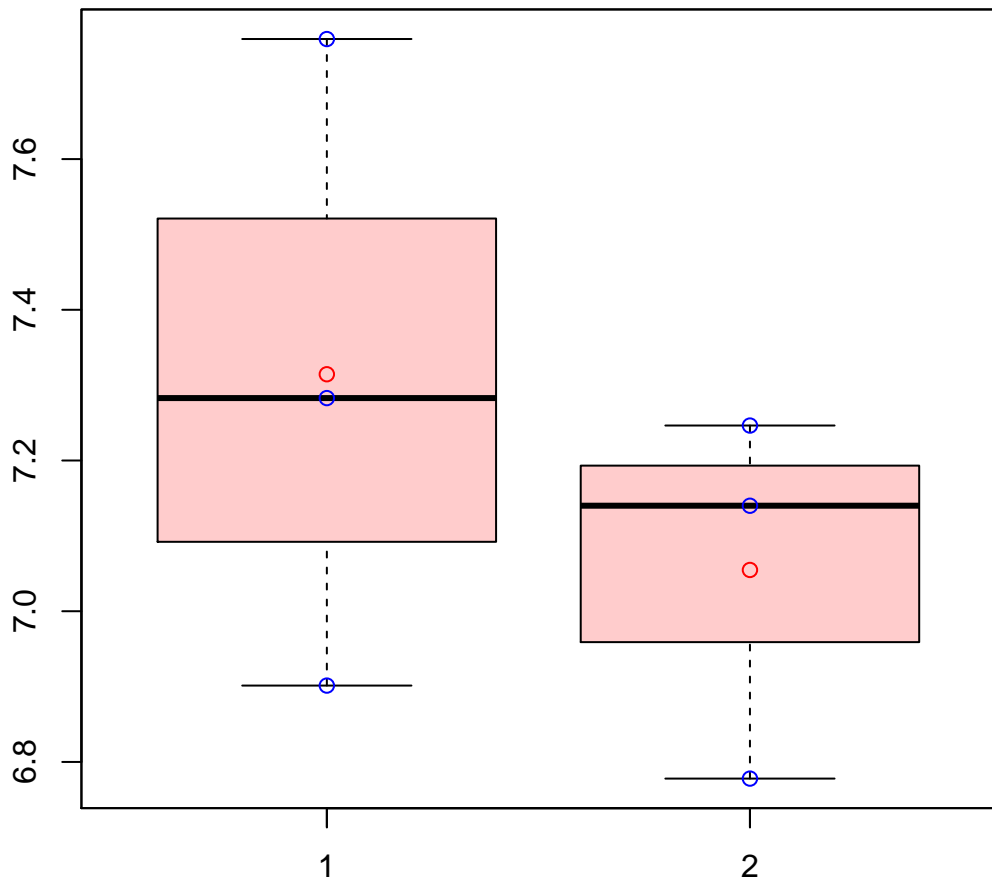

t-Test: p-value = 0.43

# Q8H085|Q8H085\_ORYSJ

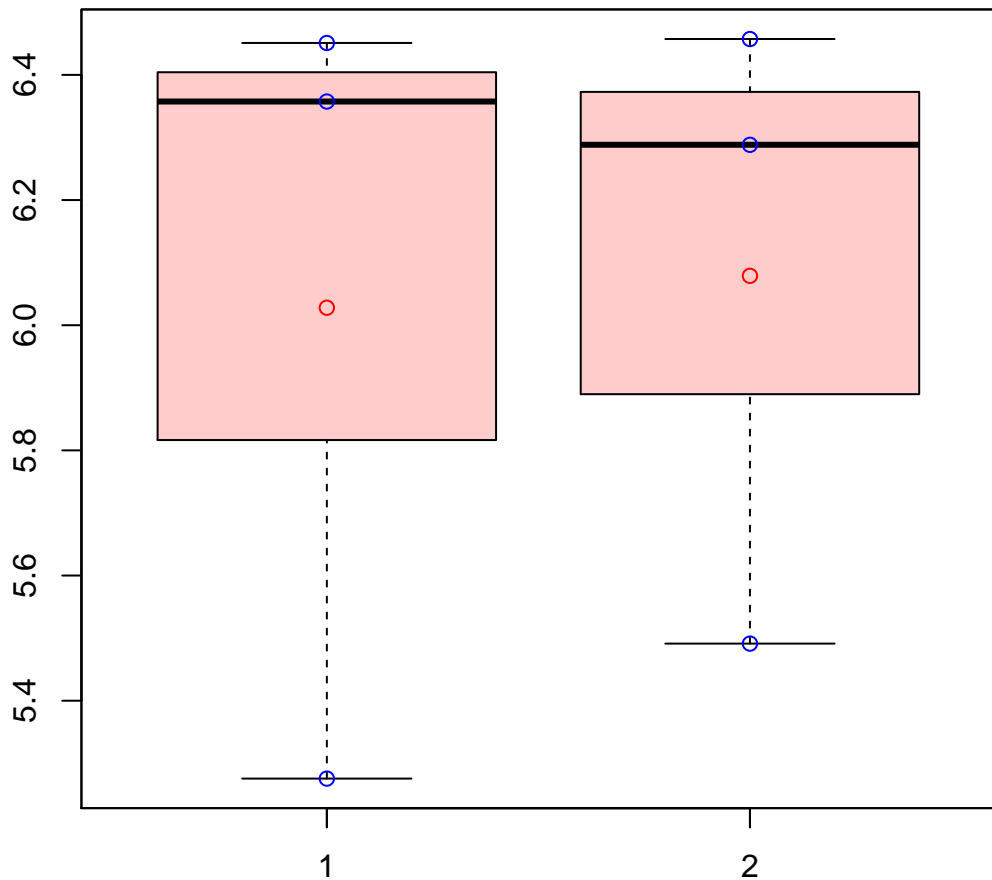

t-Test: p-value = 0.92

# Q8H0Q3|Q8H0Q3\_9POAL

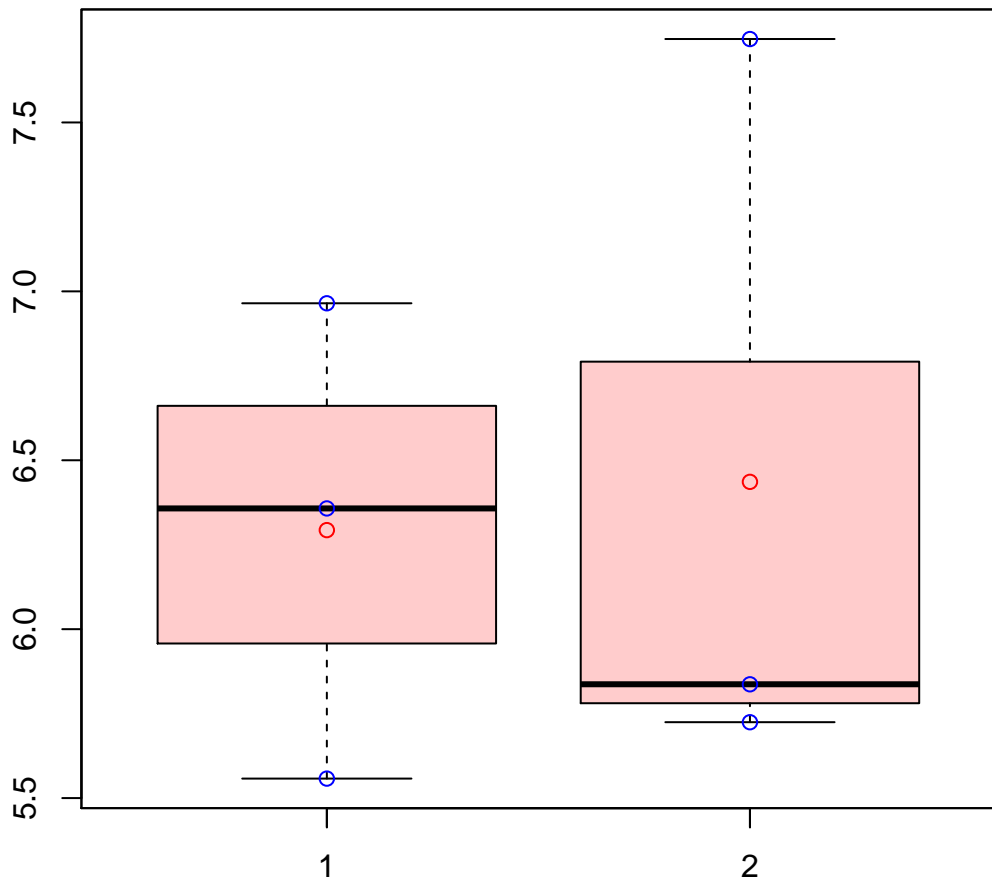

t-Test: p-value = 0.86

# Q8H0R5|Q8H0R5\_9POAL

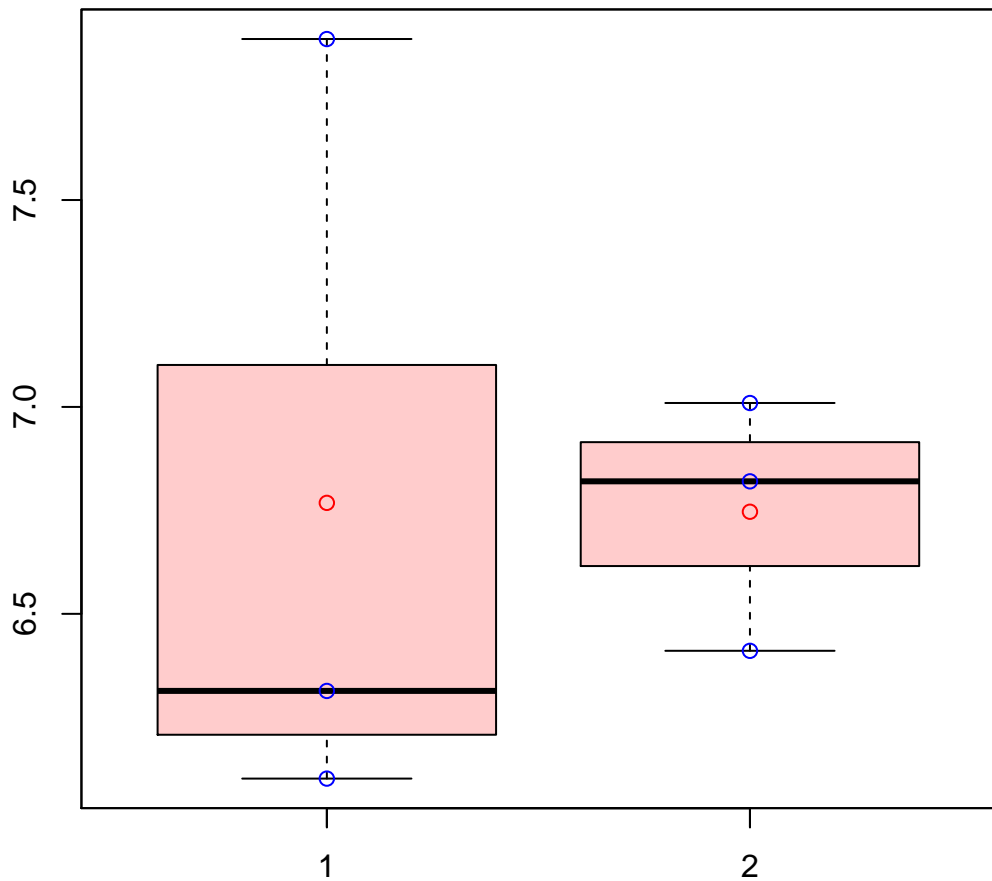

t-Test: p-value = 0.97

# Q8H1X3|Q8H1X3\_9POAL

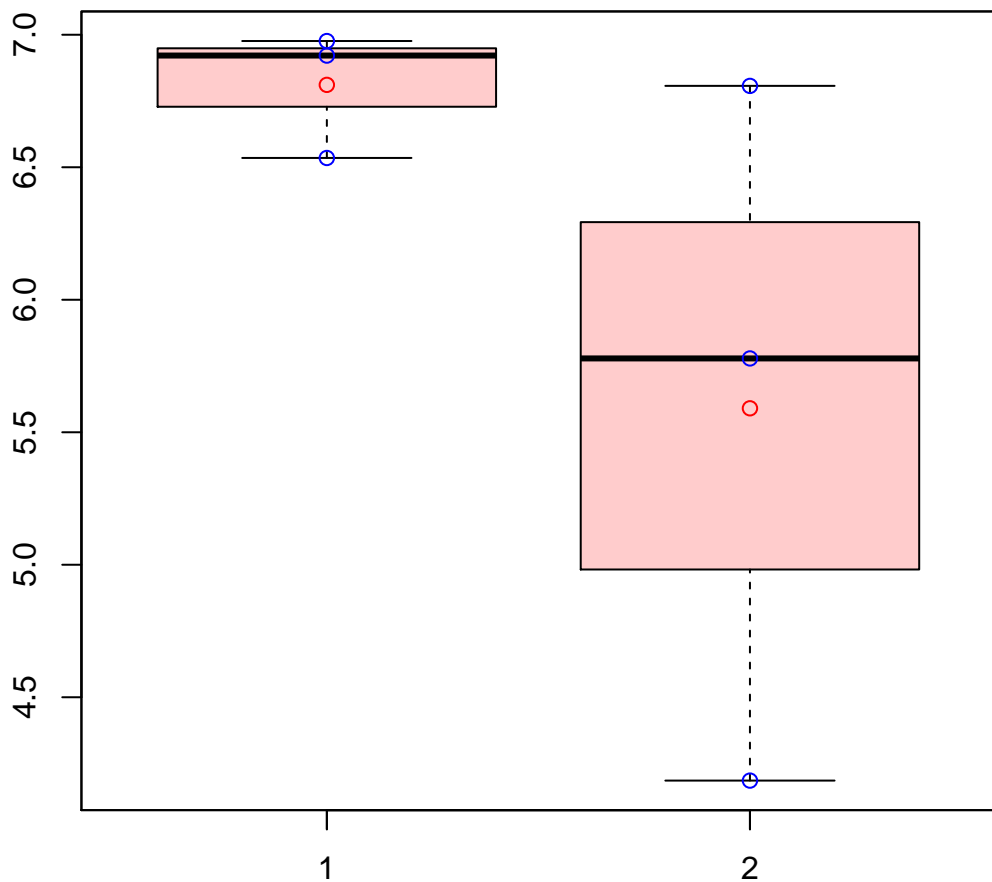

t-Test: p-value = 0.25



# Q8H374|Q8H374\_ORYSJ

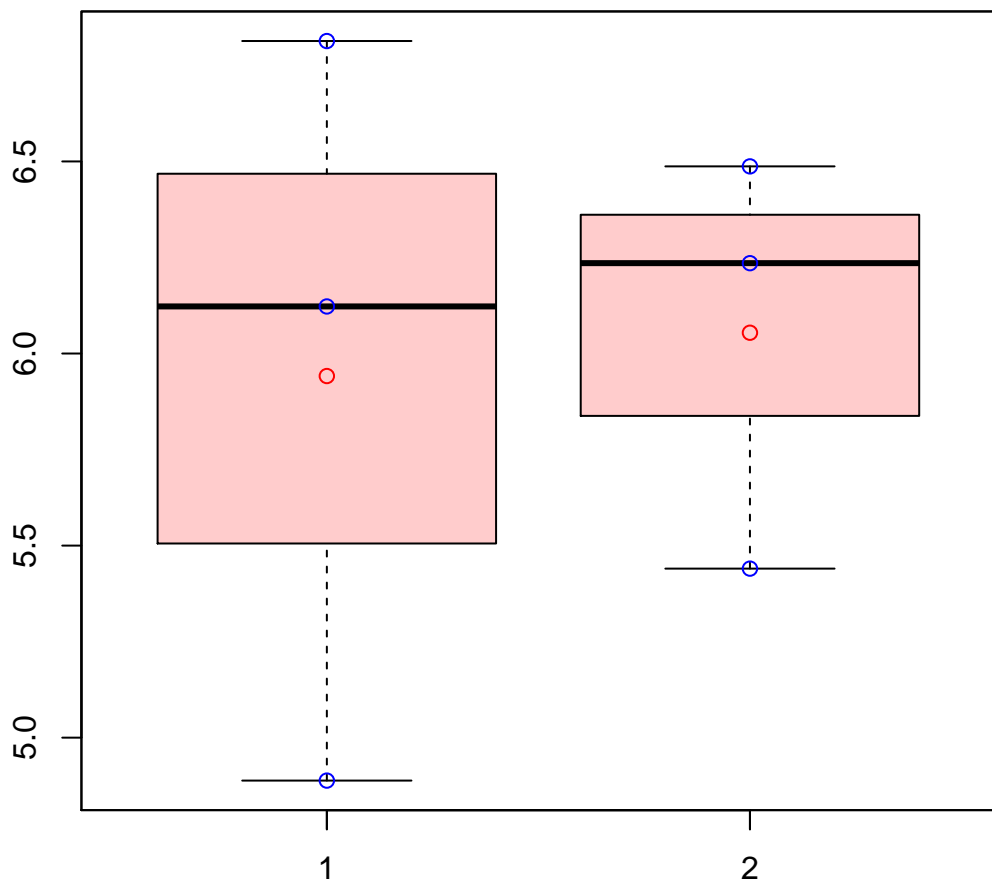

t-Test: p-value = 0.87

# Q8H6A7|Q8H6A7\_ORYSJ

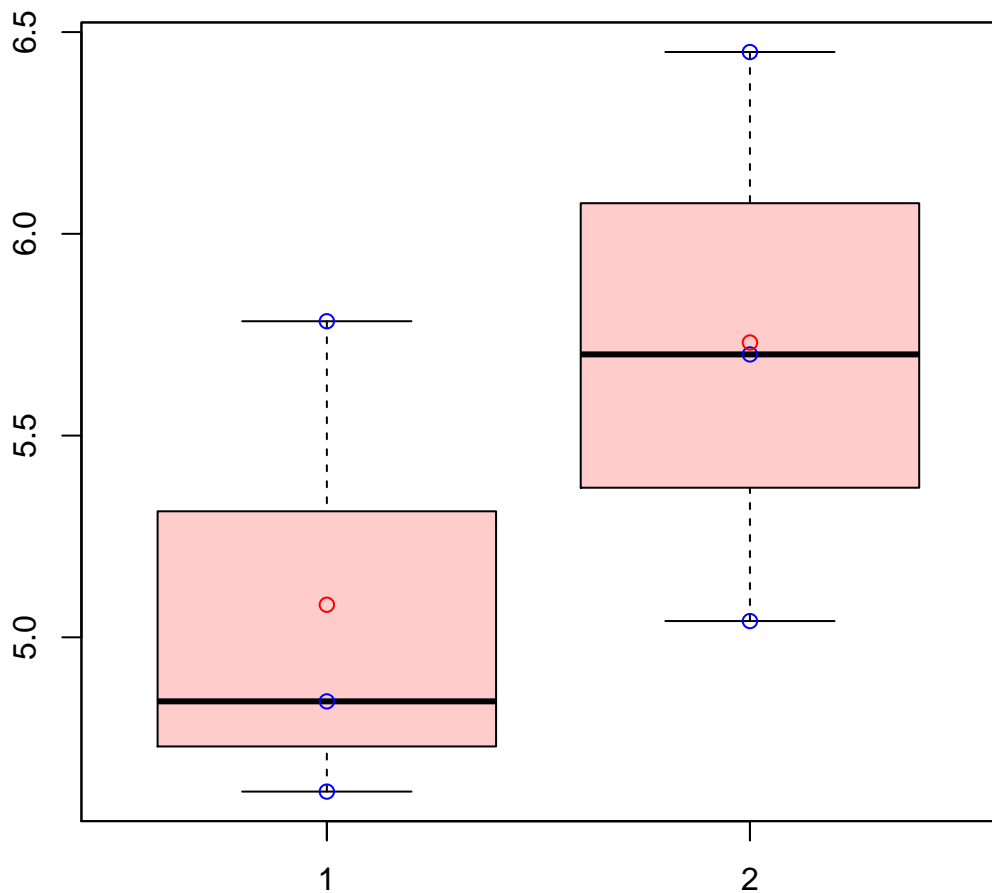

t-Test: p-value = 0.3

# Q8H7V1|Q8H7V1\_ORYSJ

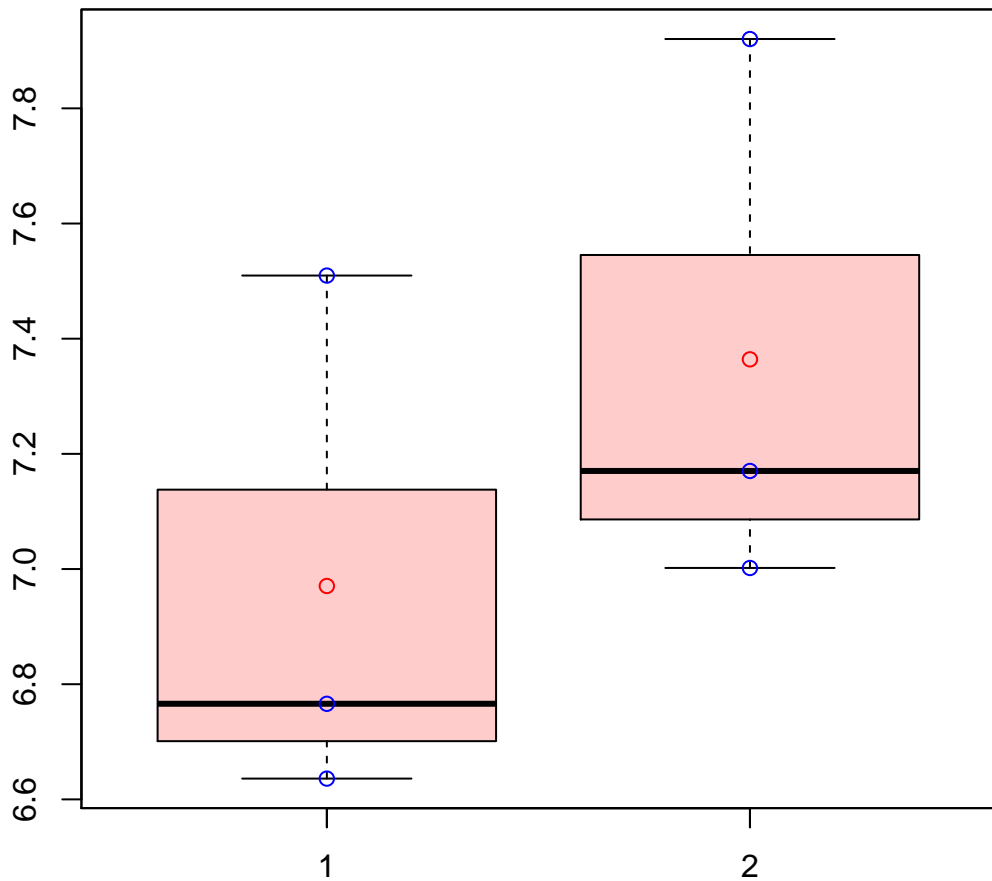

t-Test: p-value = 0.37

# Q8H959|Q8H959\_9POAL

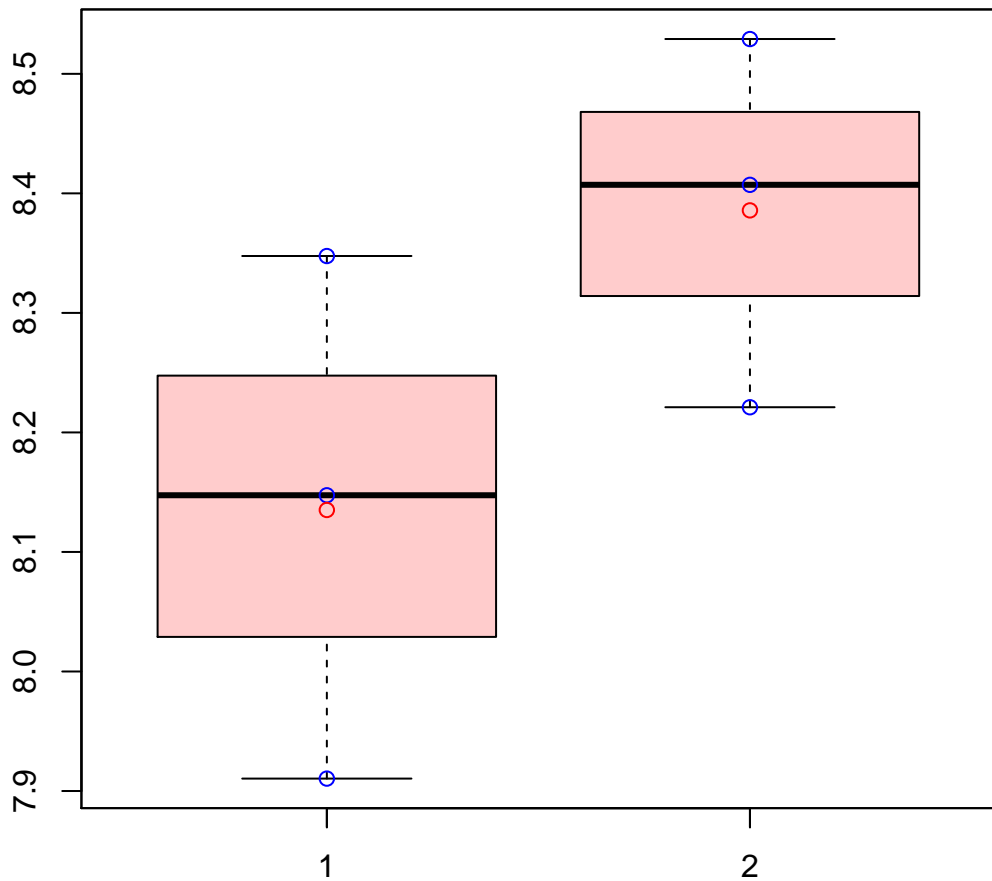

t-Test: p-value = 0.19

# Q8HFC1|Q8HFC1\_9POAL

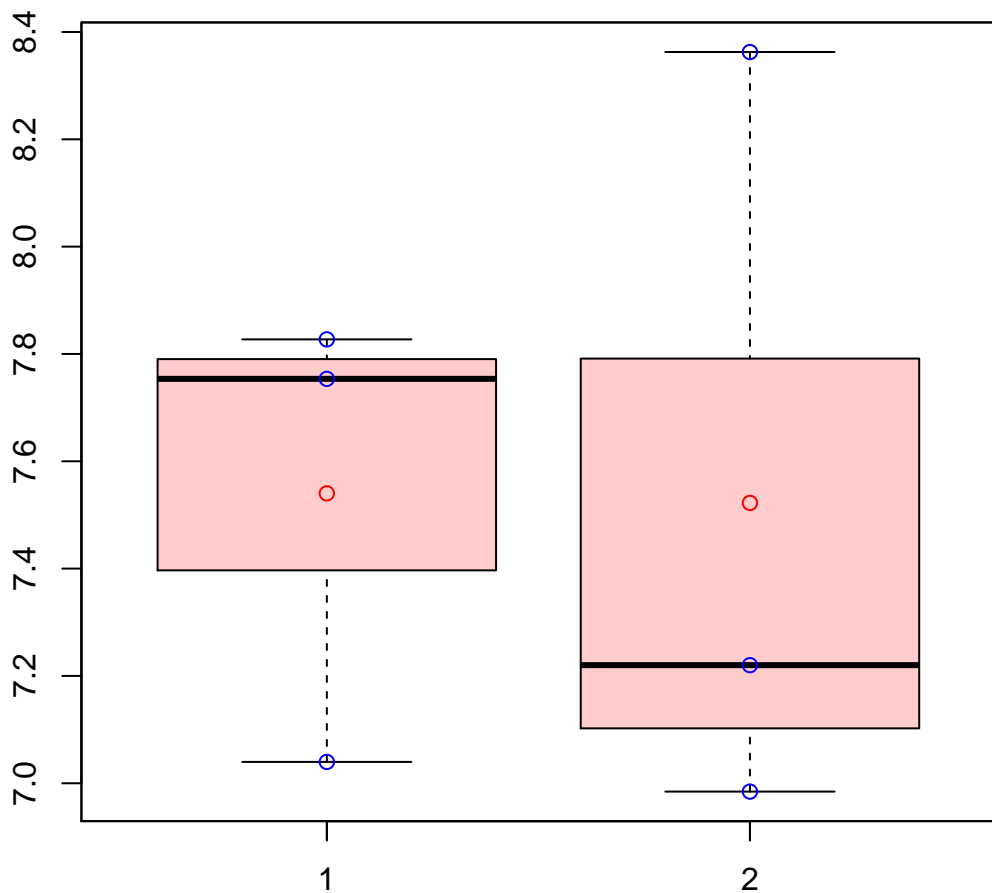

t-Test: p-value = 0.97

# Q8L4N7|Q8L4N7\_ORYSJ

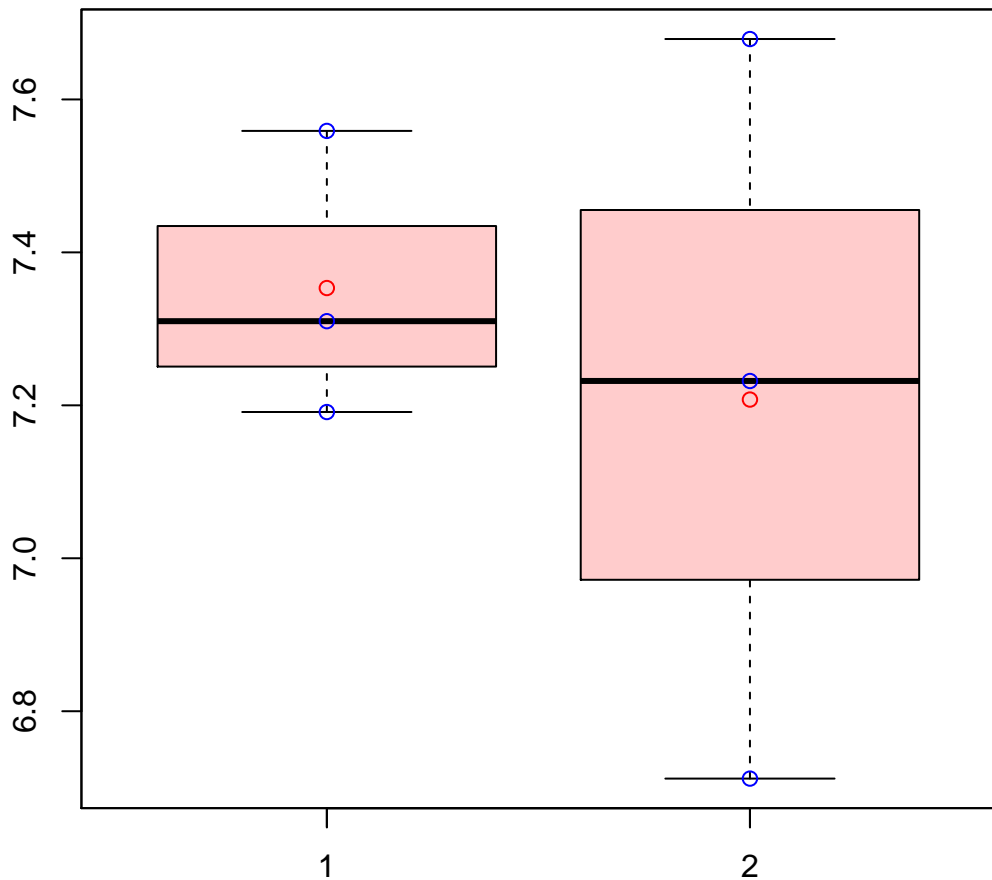

t-Test: p-value = 0.66

# Q8L6C3|Q8L6C3\_SACSP

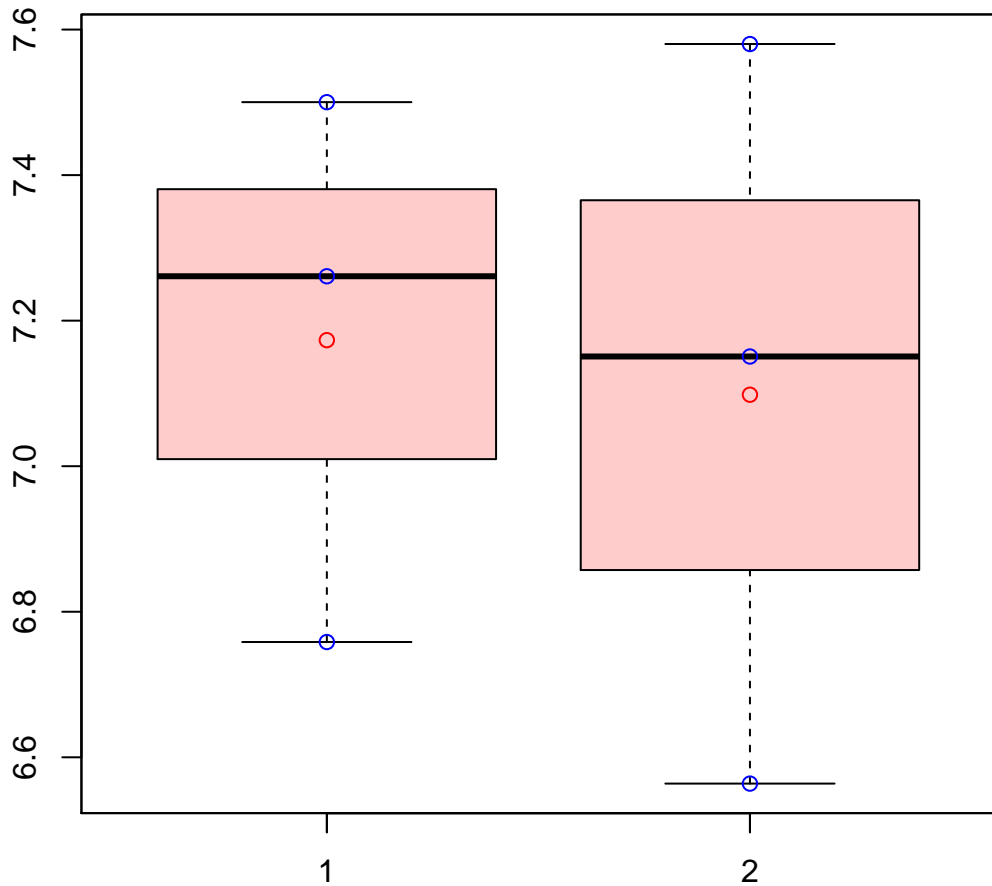

t-Test: p-value = 0.85

# Q8L6I0|Q8L6I0\_ORYSJ

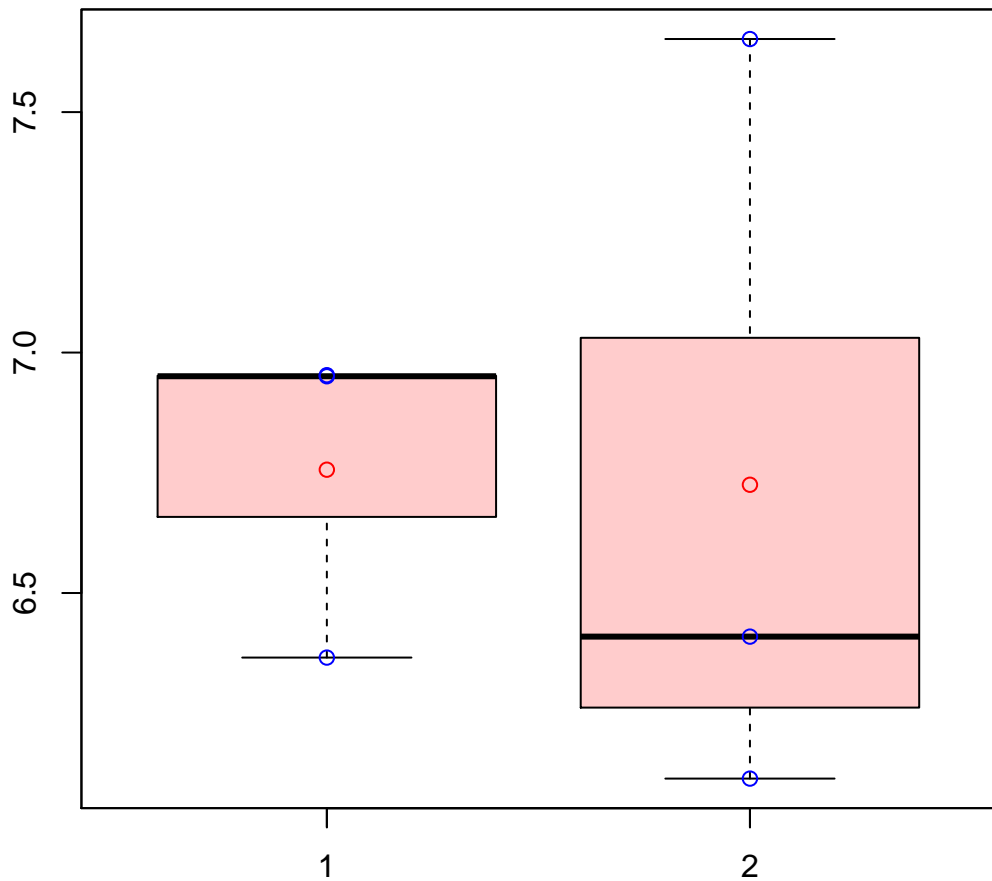

t-Test: p-value = 0.96



# Q8L8I0|Q8L8I0\_ORYSJ

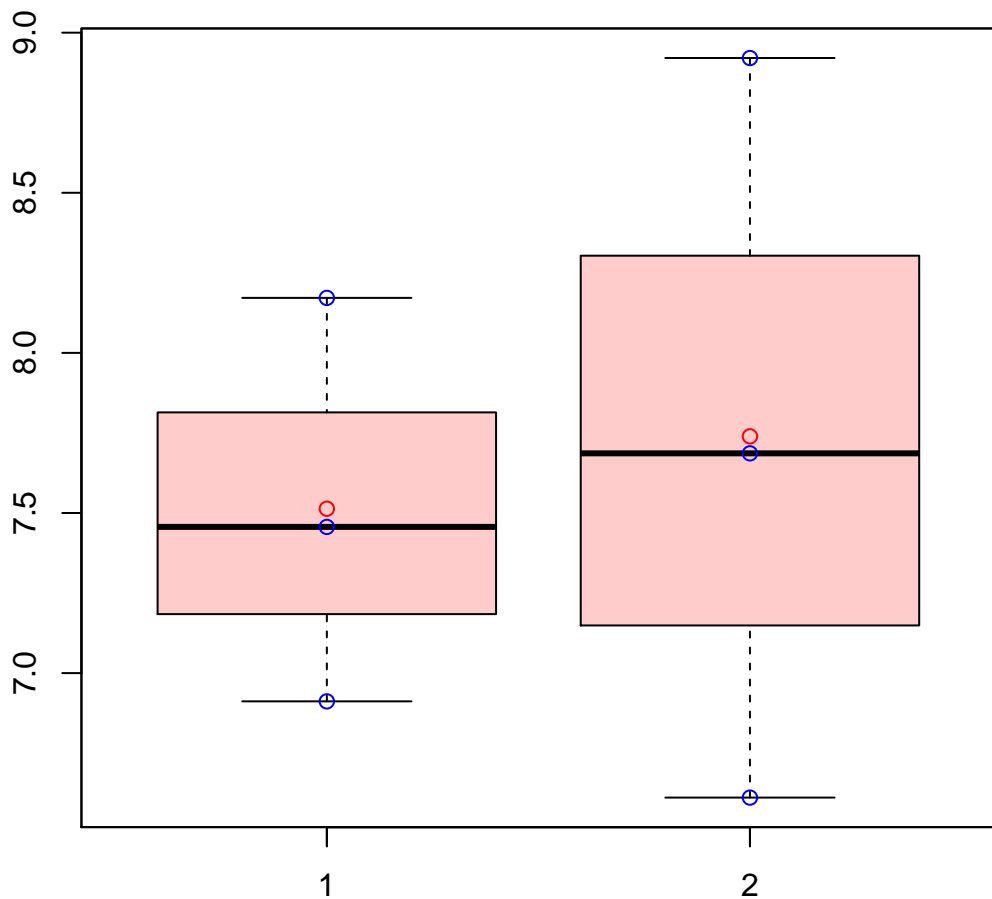

t-Test: p-value = 0.79

# Q8LHI9|Q8LHI9\_ORYSJ

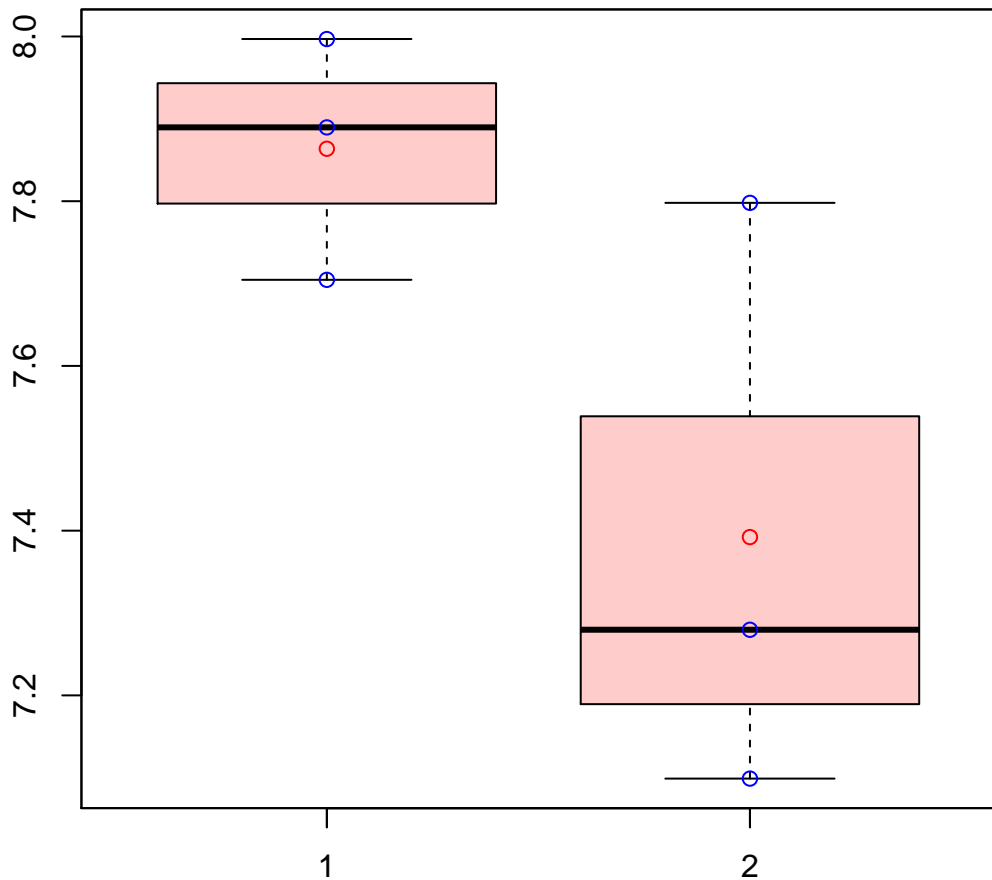

t-Test: p-value = 0.14

# Q8LJT3|Q8LJT3\_ONCHC

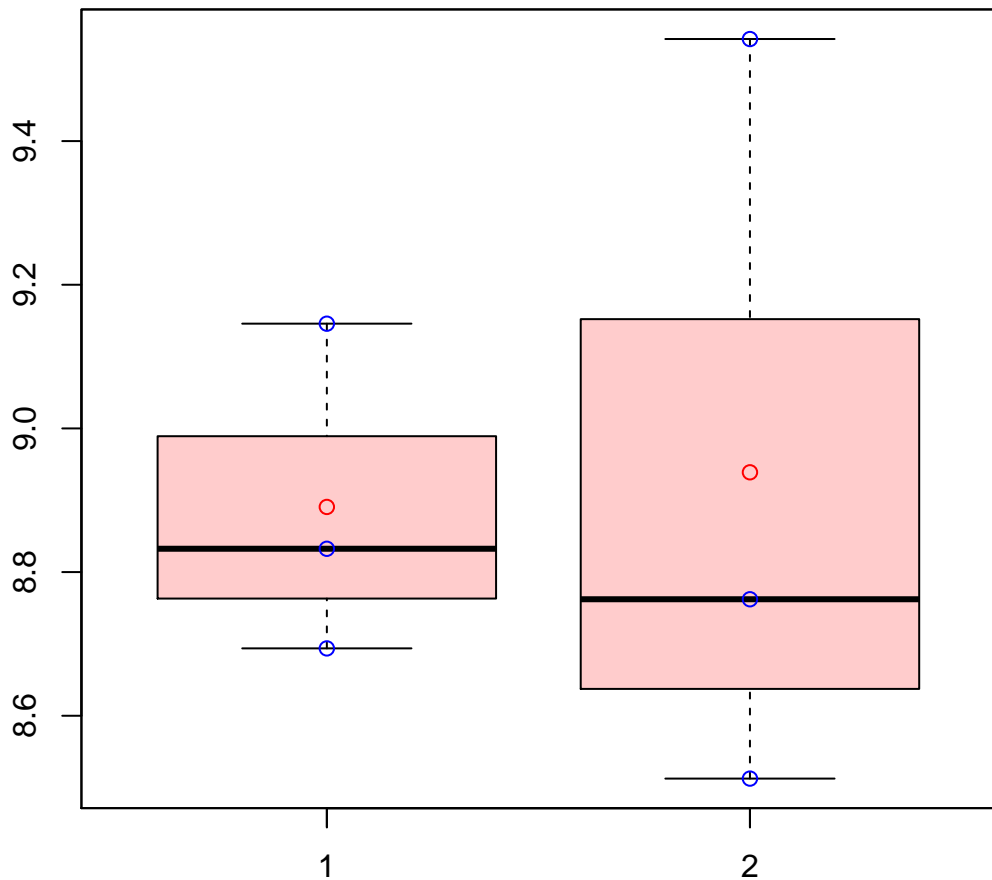

t-Test: p-value = 0.9

# Q8LLA9|Q8LLA9\_HORVU

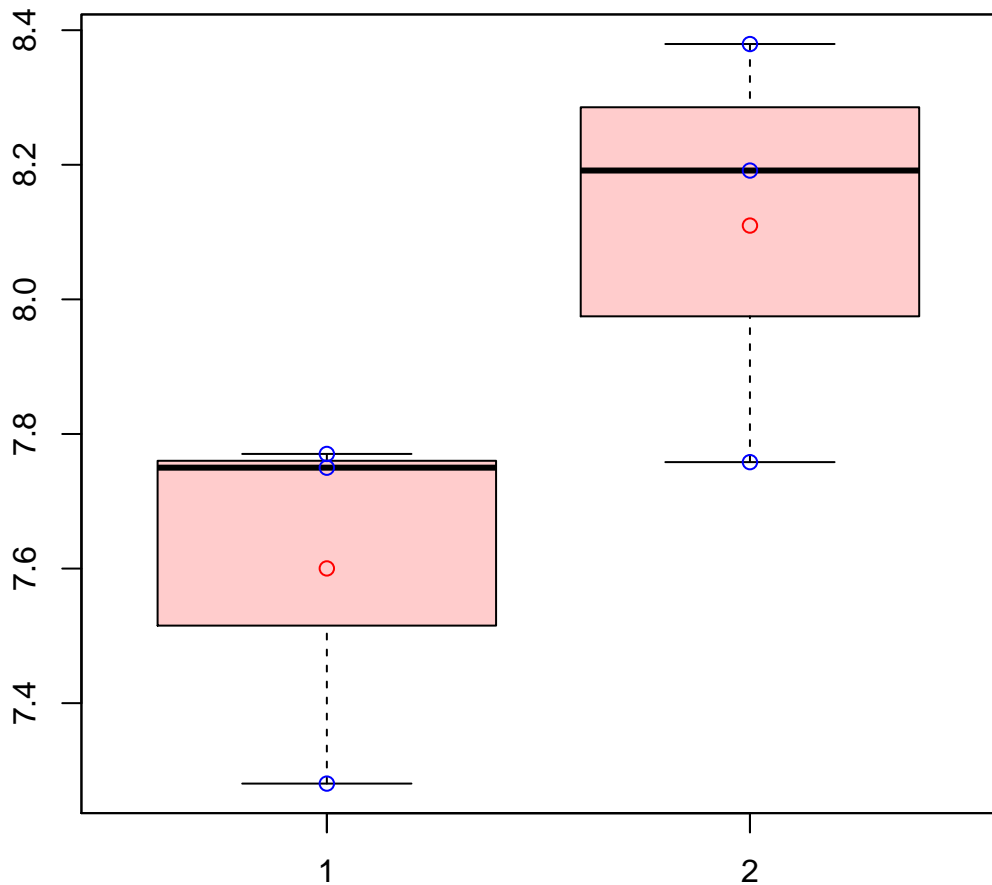

t-Test: p-value = 0.11

# Q8LM34|Q8LM34\_ORYSJ

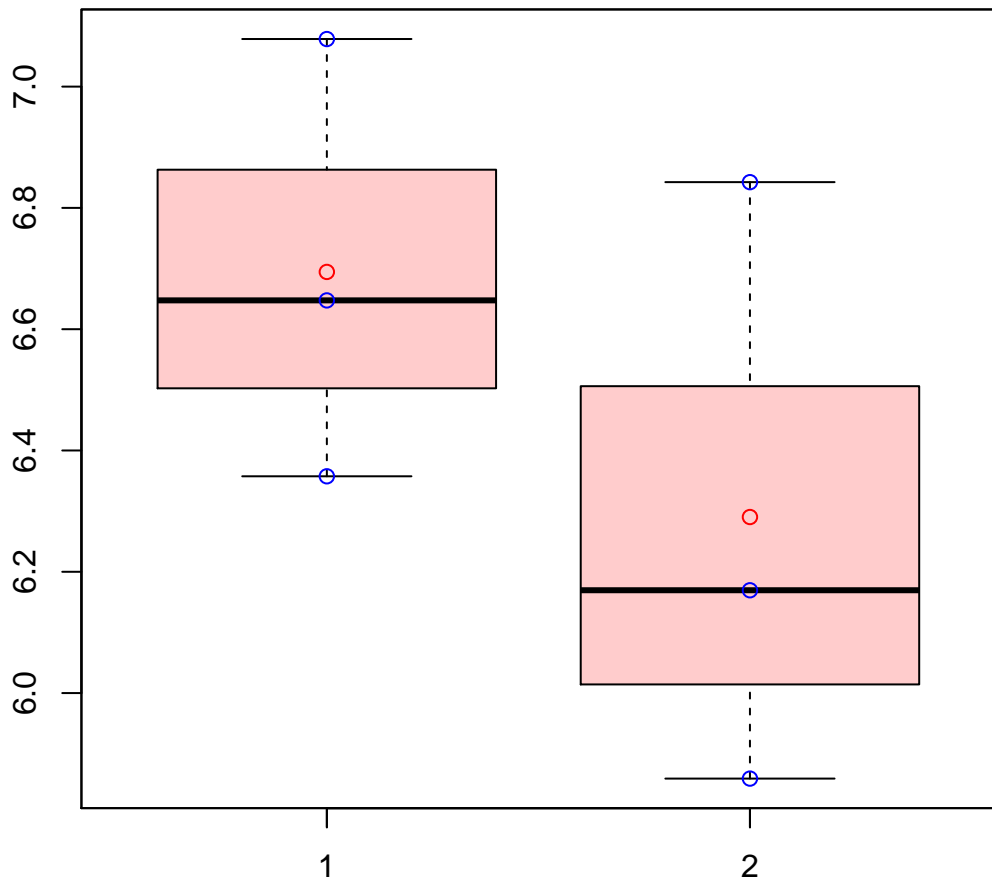

t-Test: p-value = 0.33

# Q8LMC4|Q8LMC4\_ORYSJ

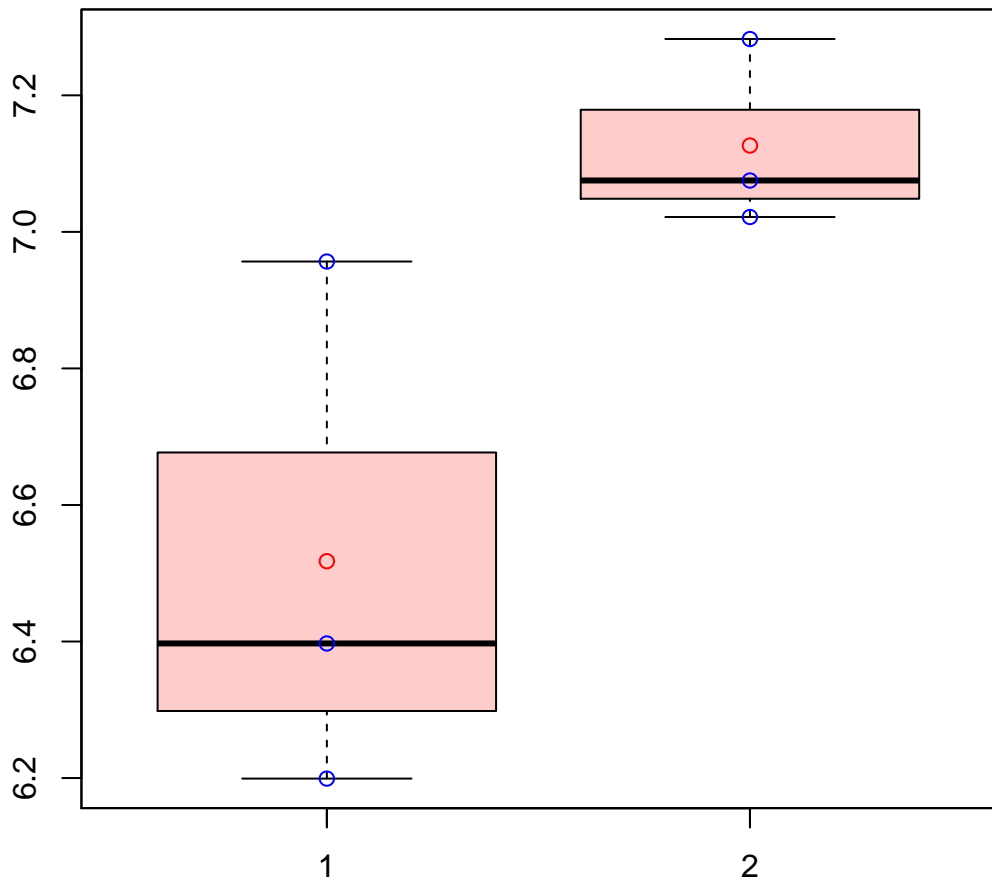

t-Test: p-value = 0.1

# Q8LMR3|Q8LMR3\_ORYSJ

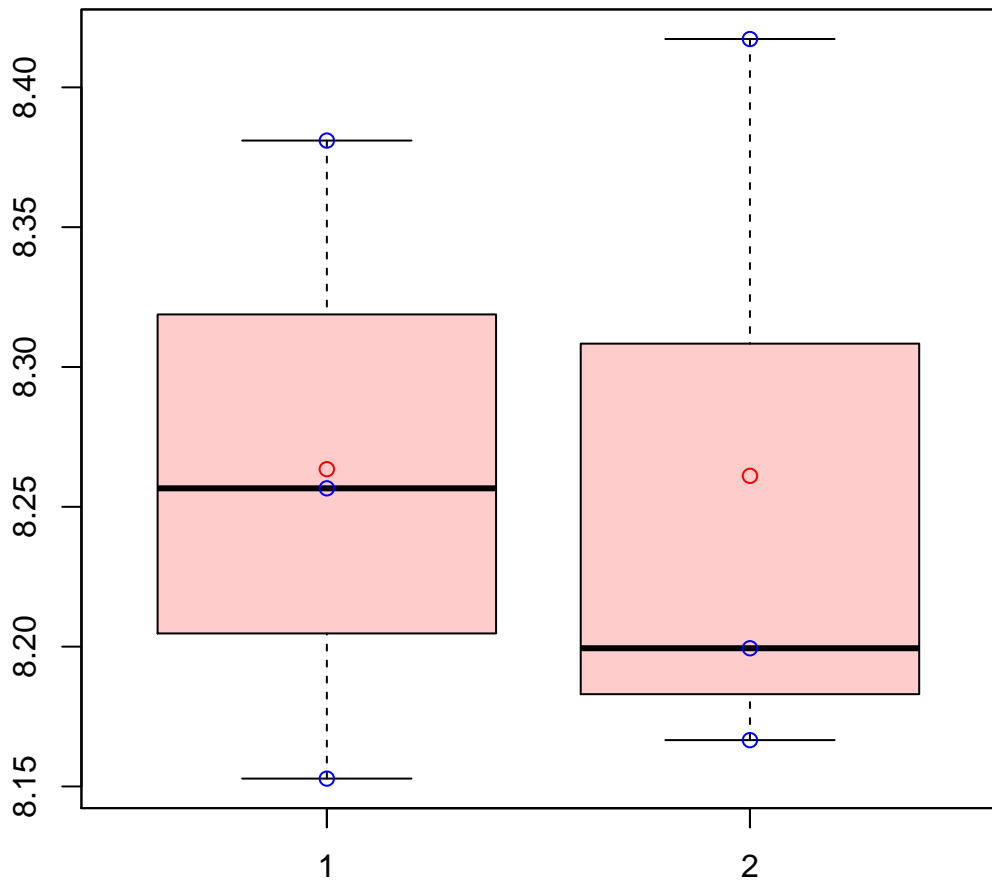

t-Test: p-value = 0.98

# Q8LPA9|Q8LPA9\_HORVU

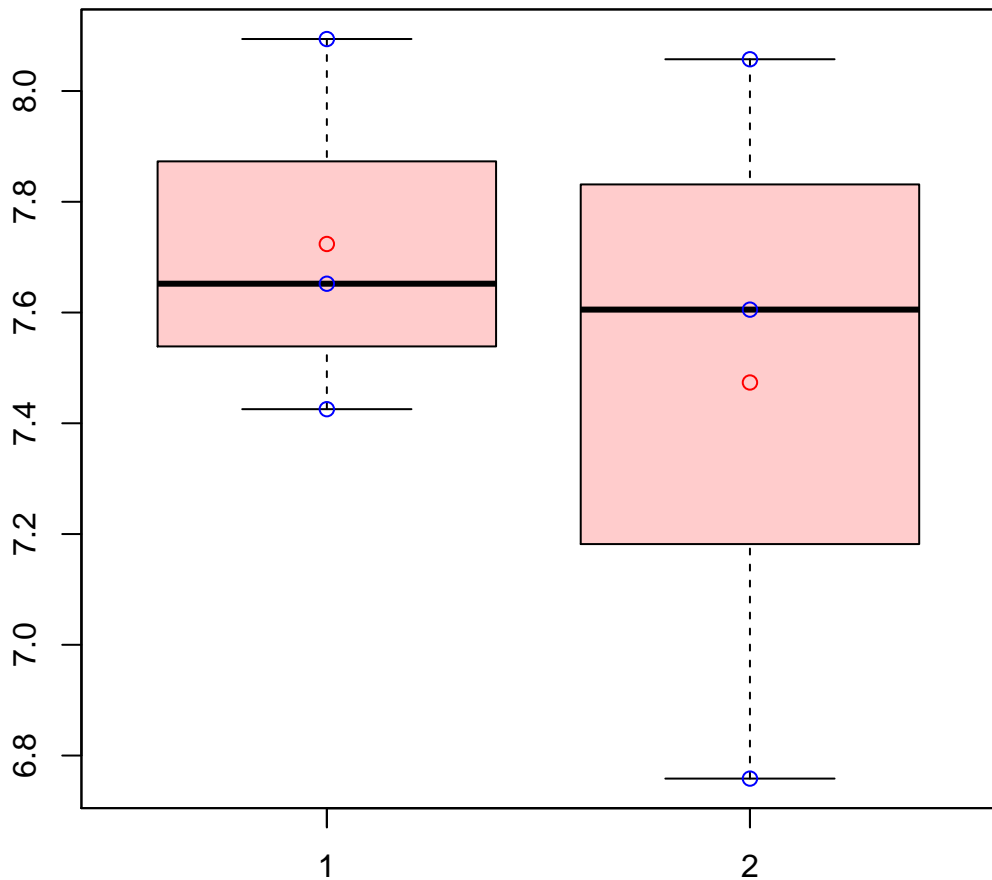

t-Test: p-value = 0.6



# Q8LPU6|Q8LPU6\_MAIZE

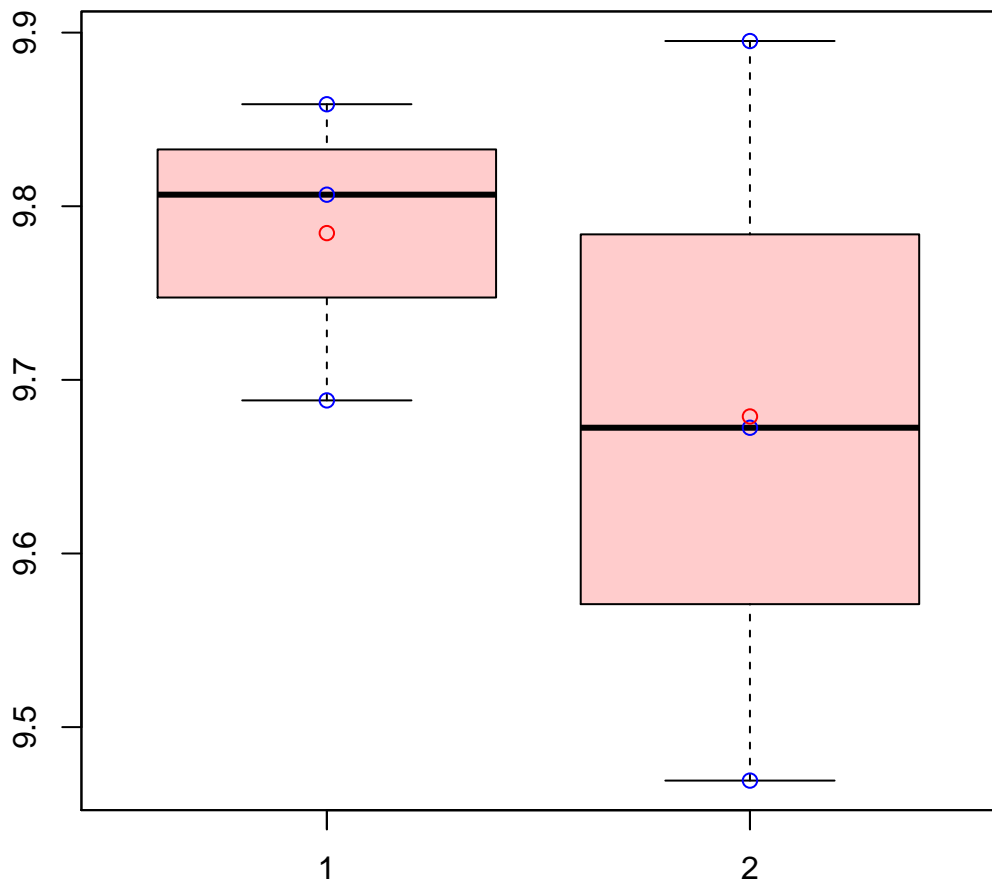

t-Test: p-value = 0.49

# Q8LST4|Q8LST4\_SORBI

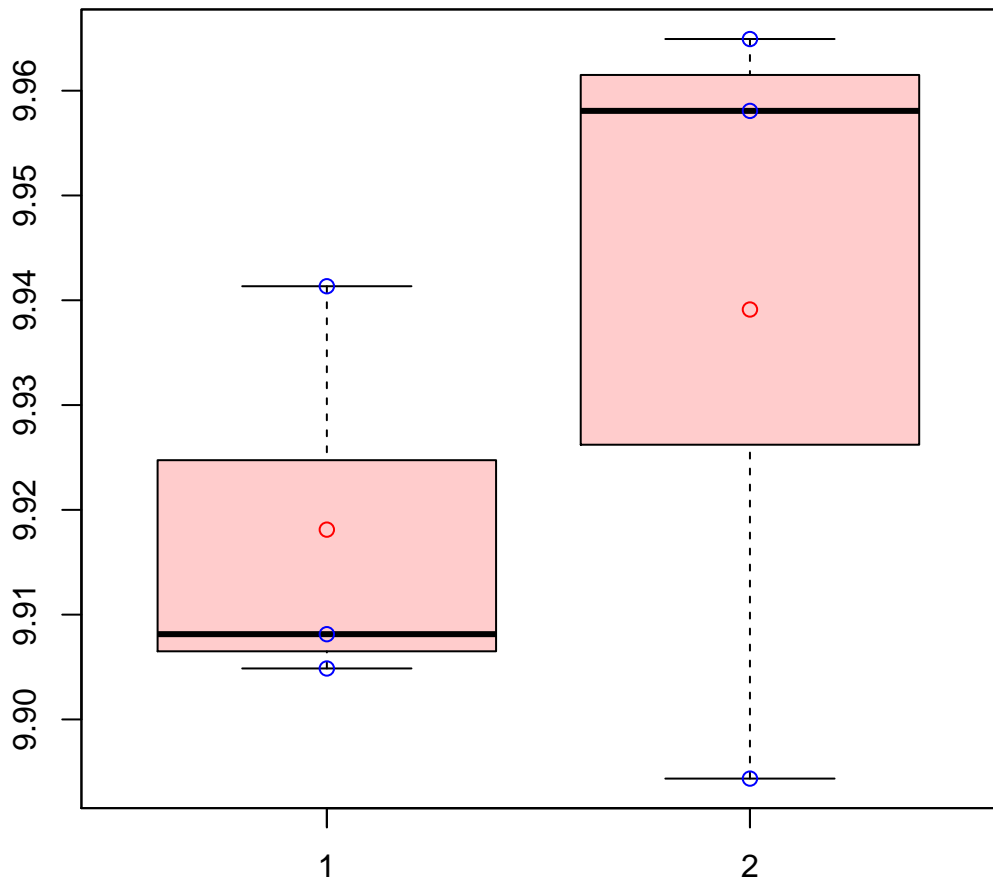

t-Test: p-value = 0.47

# Q8M914|Q8M914\_9POAL

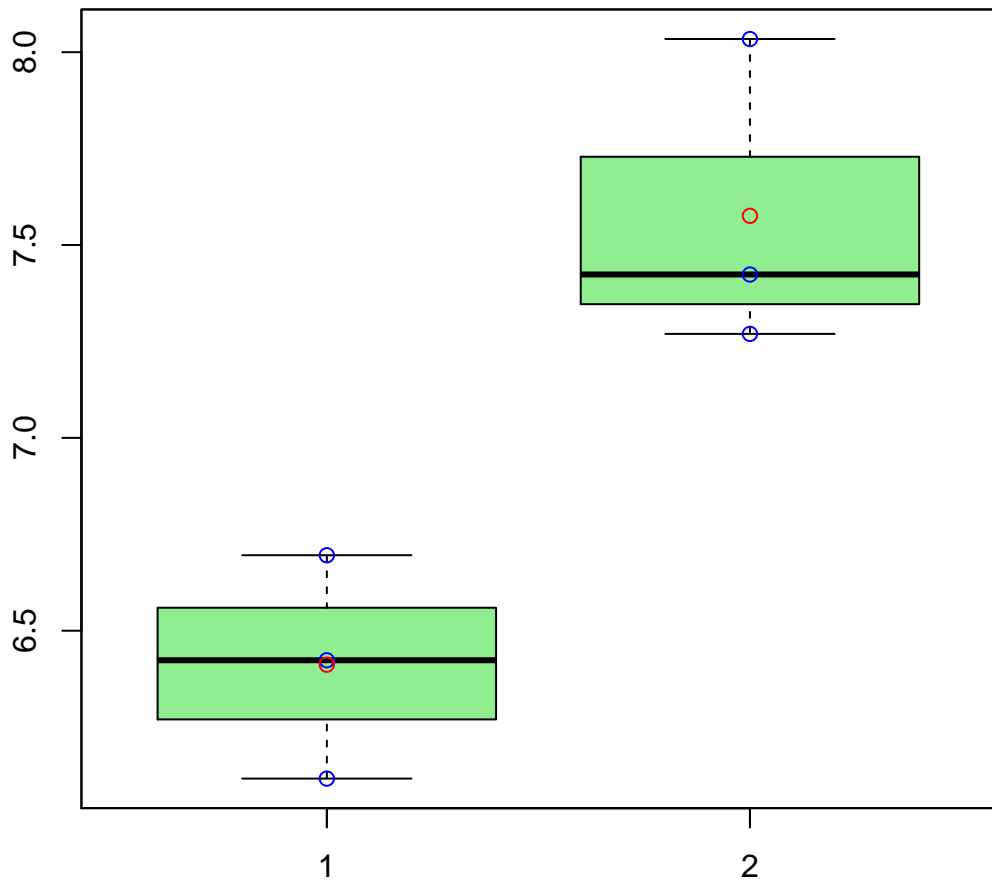

t-Test: p-value = 0.02

# Q8M9C9|Q8M9C9\_9POAL

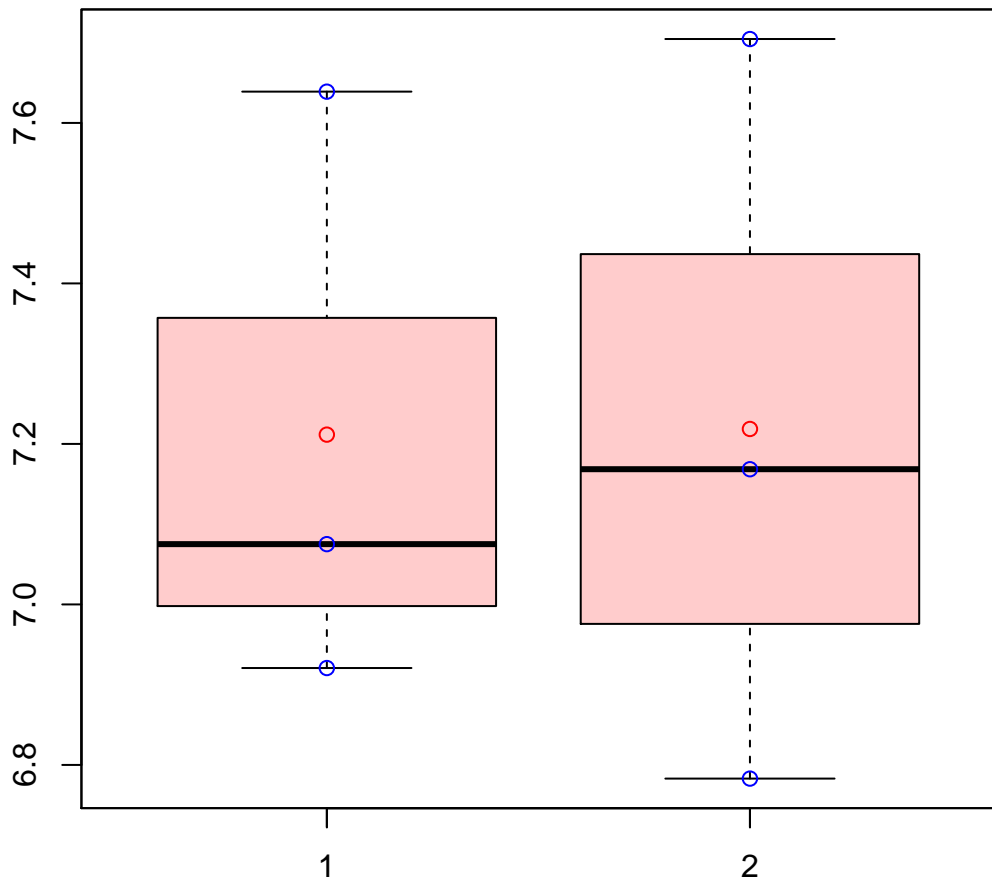

t-Test: p-value = 0.98

# Q8M9S3|Q8M9S3\_9POAL

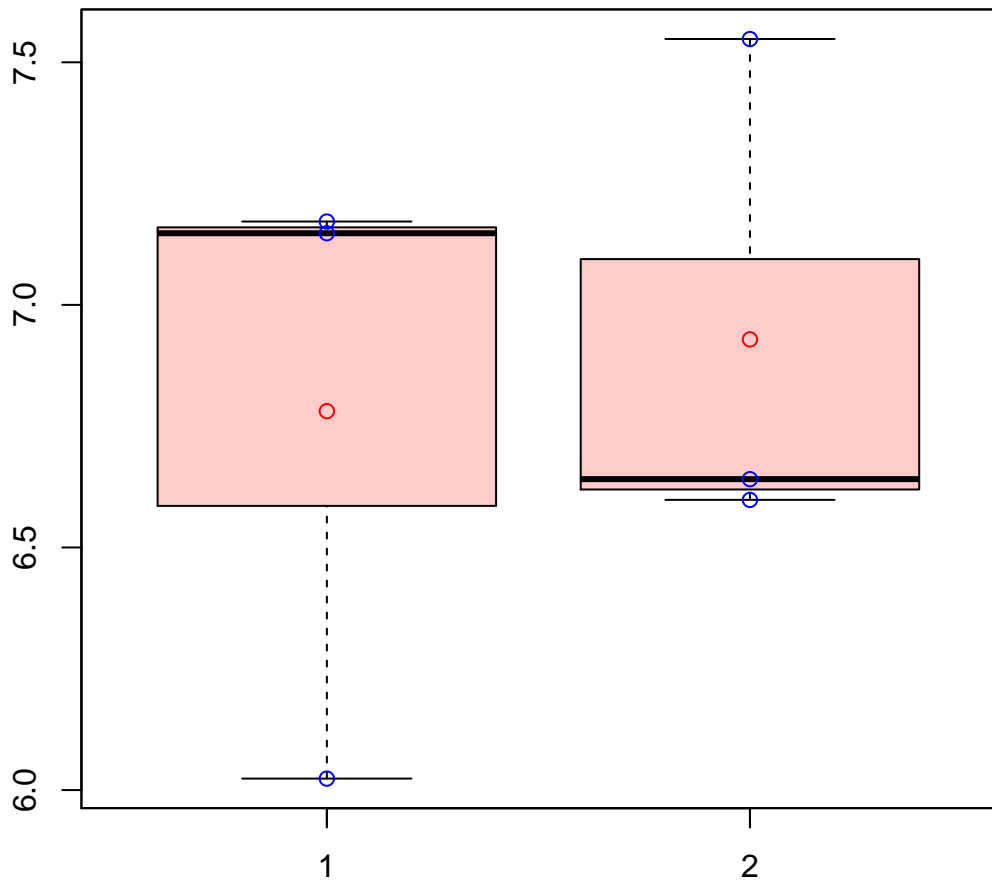

t-Test: p-value = 0.78

# Q8MA62|Q8MA62\_9POAL

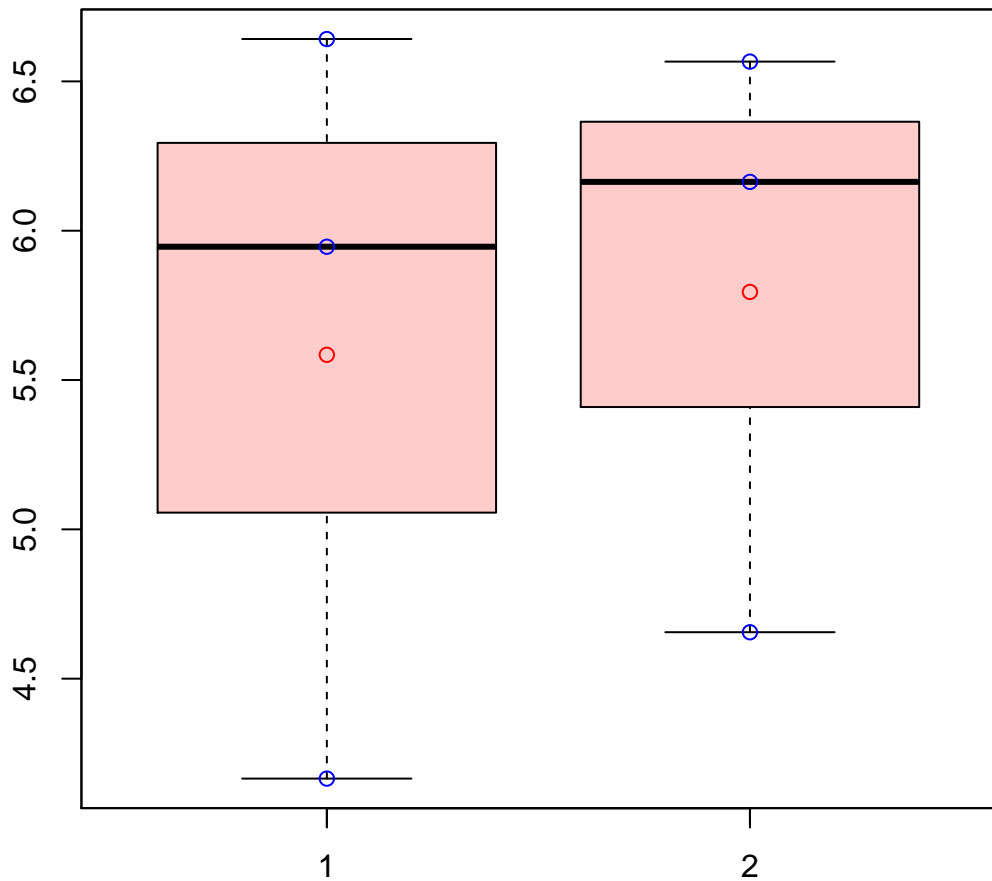

t-Test: p-value = 0.83

# Q8RVZ5|Q8RVZ5\_9POAL

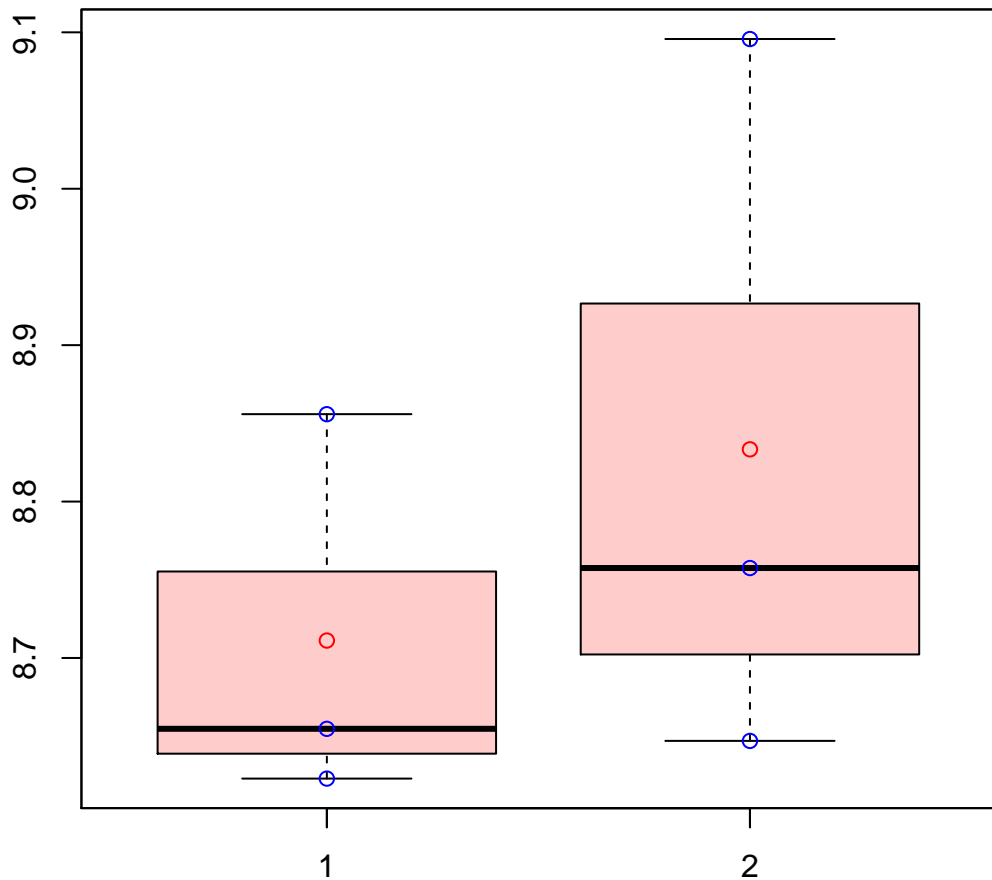

t-Test: p-value = 0.48

# Q8RVZ8|Q8RVZ8\_WHEAT

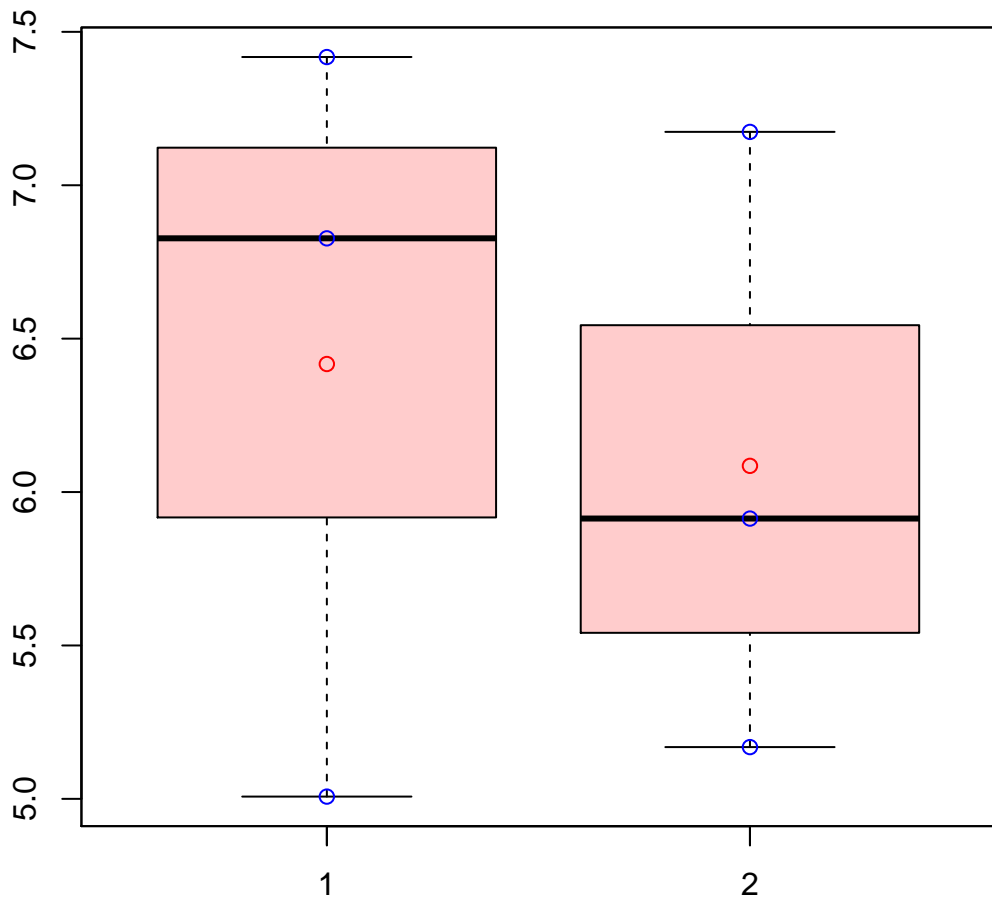

t-Test: p-value = 0.74



# Q8RW26|Q8RW26\_ORYSA

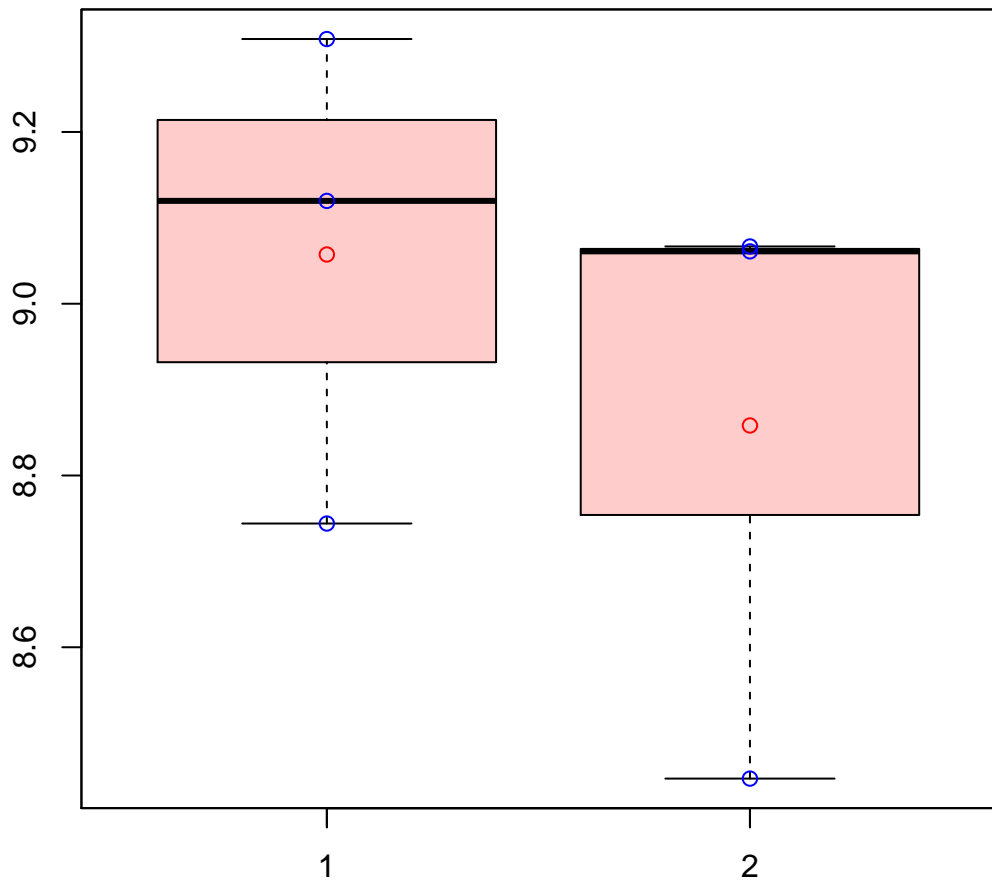

t-Test: p-value = 0.49

# Q8RW27|Q8RW27\_ORYSA

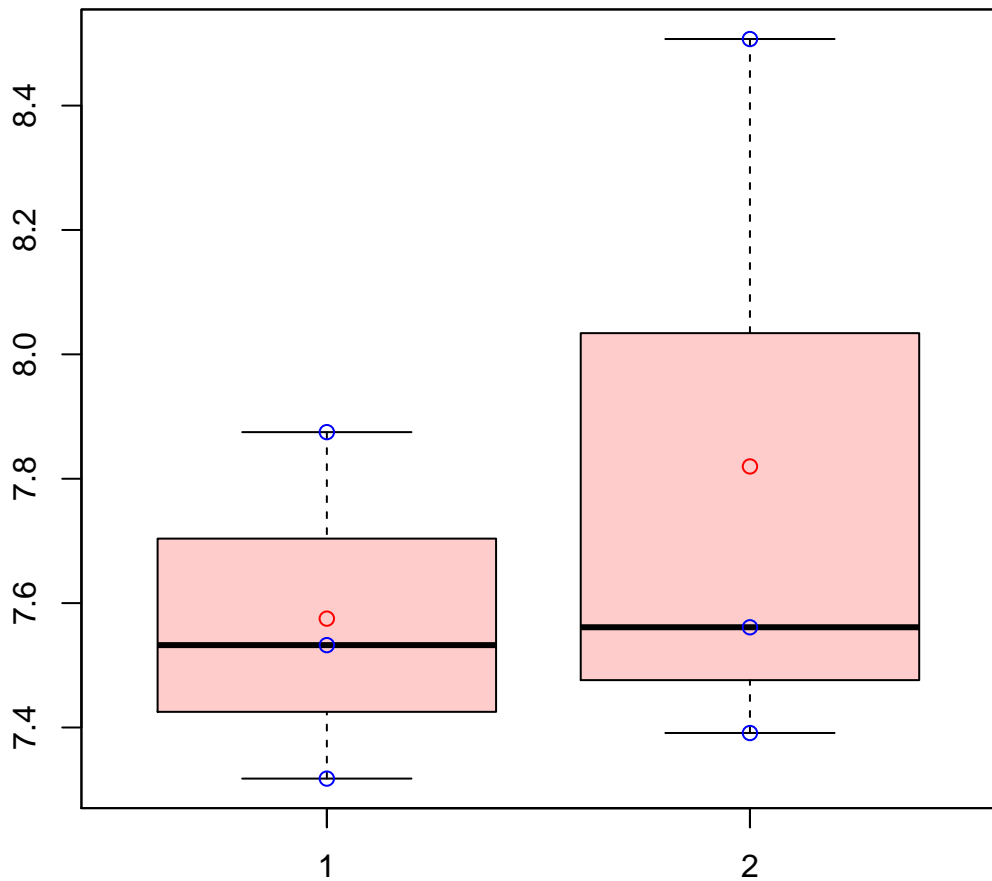

t-Test: p-value = 0.57

# Q8RW32|Q8RW32\_MELRE

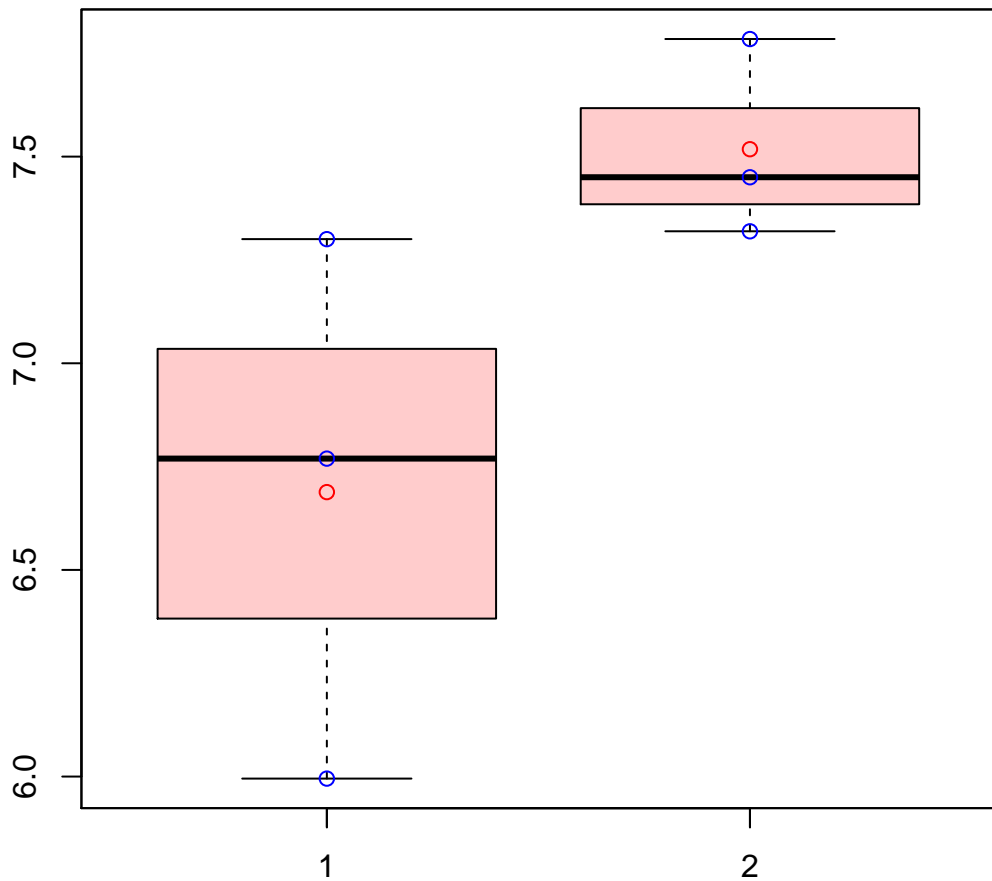

t-Test: p-value = 0.15

# Q8RW52|Q8RW52\_9POAL

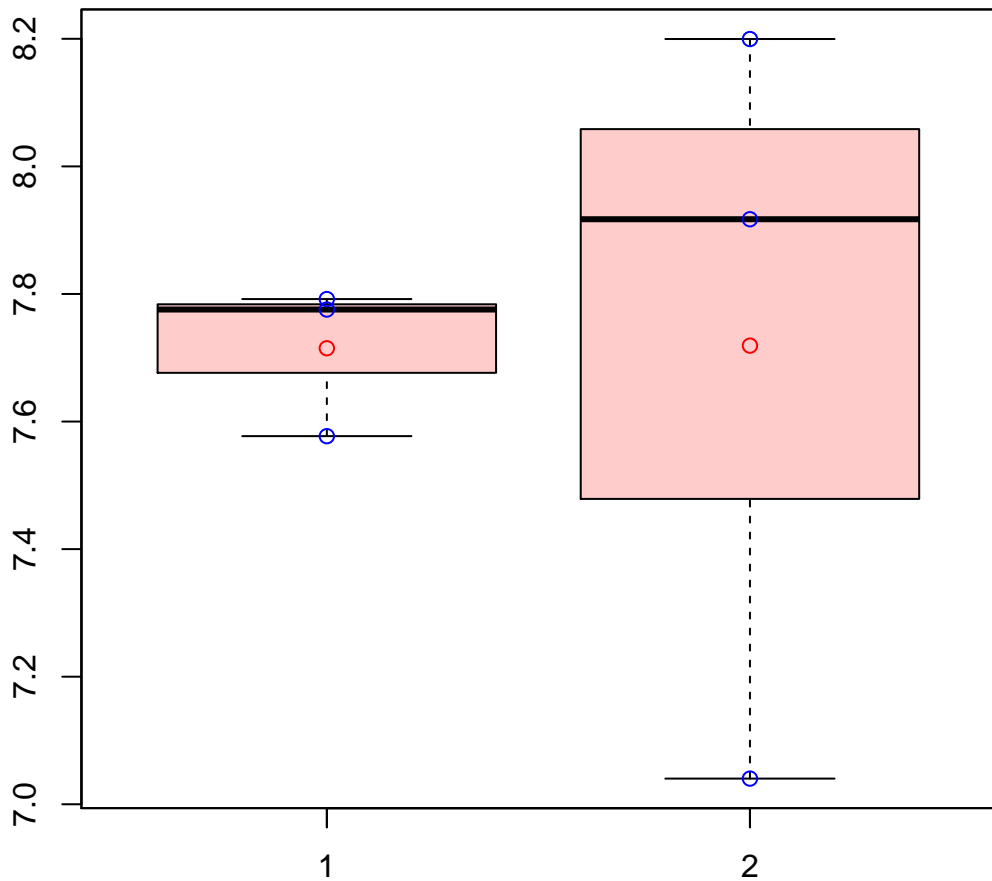

t-Test: p-value = 0.99

# Q8RW56|Q8RW56\_9POAL

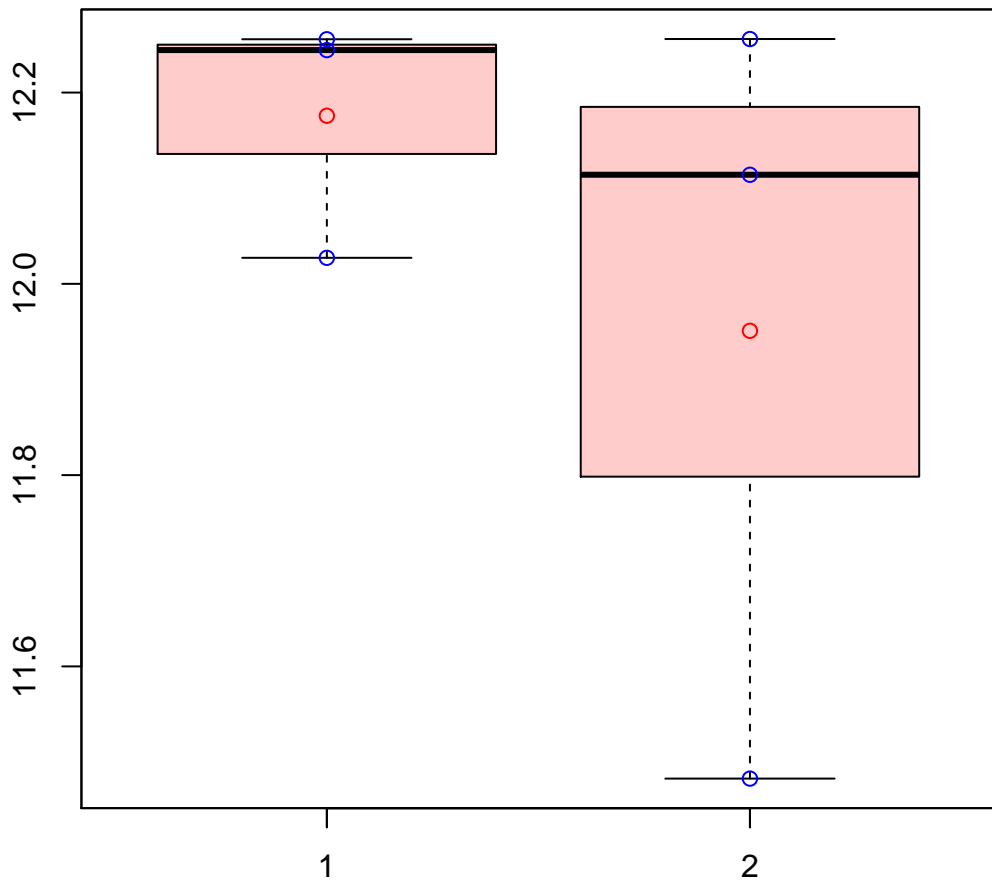

t-Test: p-value = 0.45

# Q8RW85|Q8RW85\_9POAL

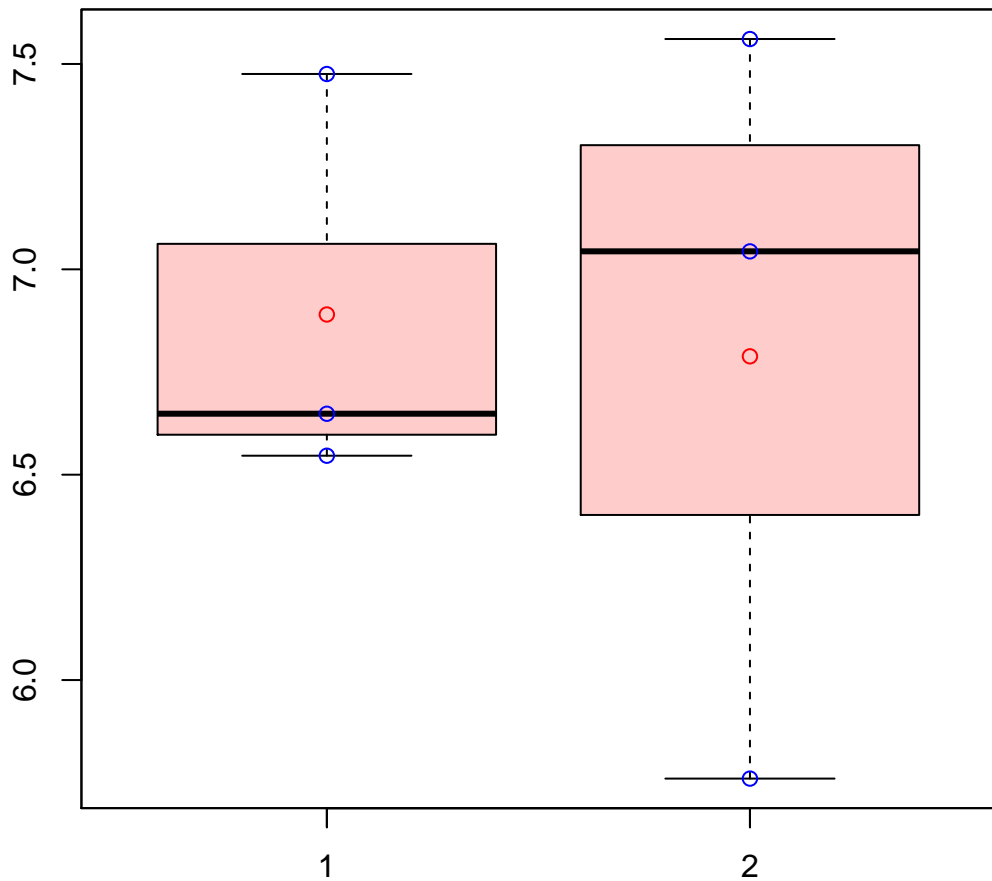

t-Test: p-value = 0.88

# Q8RYB1|Q8RYB1\_WHEAT

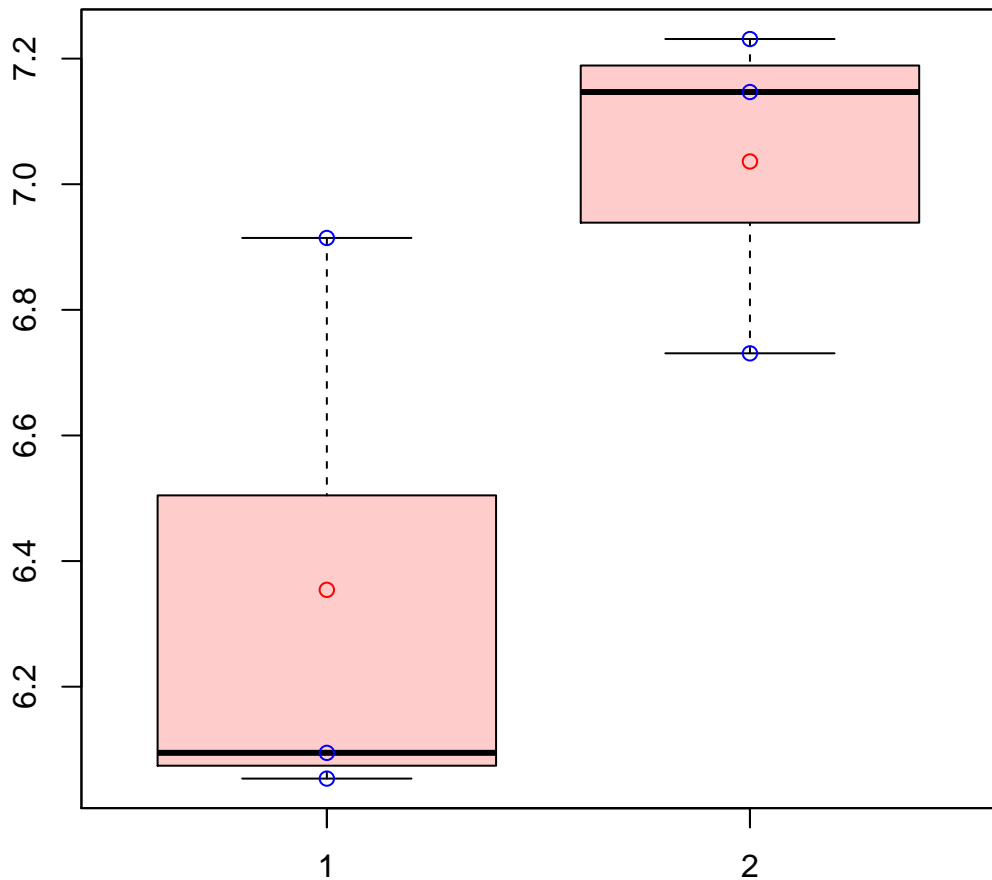

t-Test: p-value = 0.12

# Q8RYY4|Q8RYY4\_ORYSJ

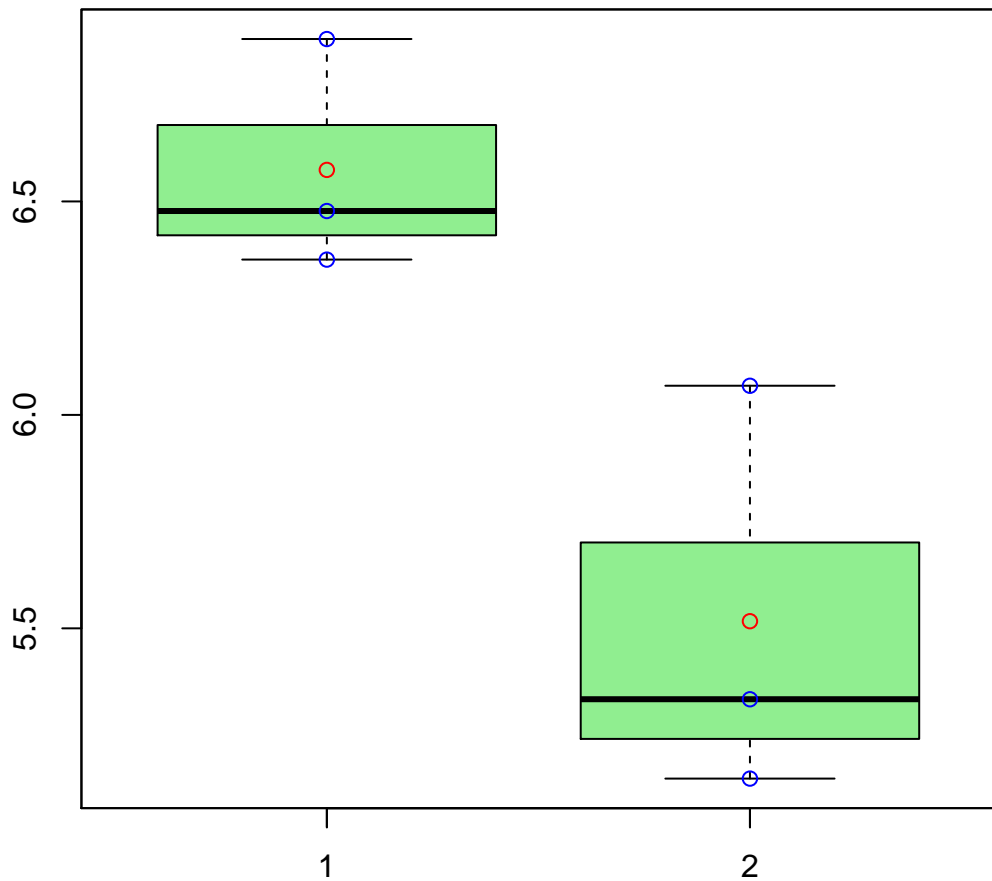

t-Test: p-value = 0.04



# Q8RZZ3|Q8RZZ3\_ORYSJ

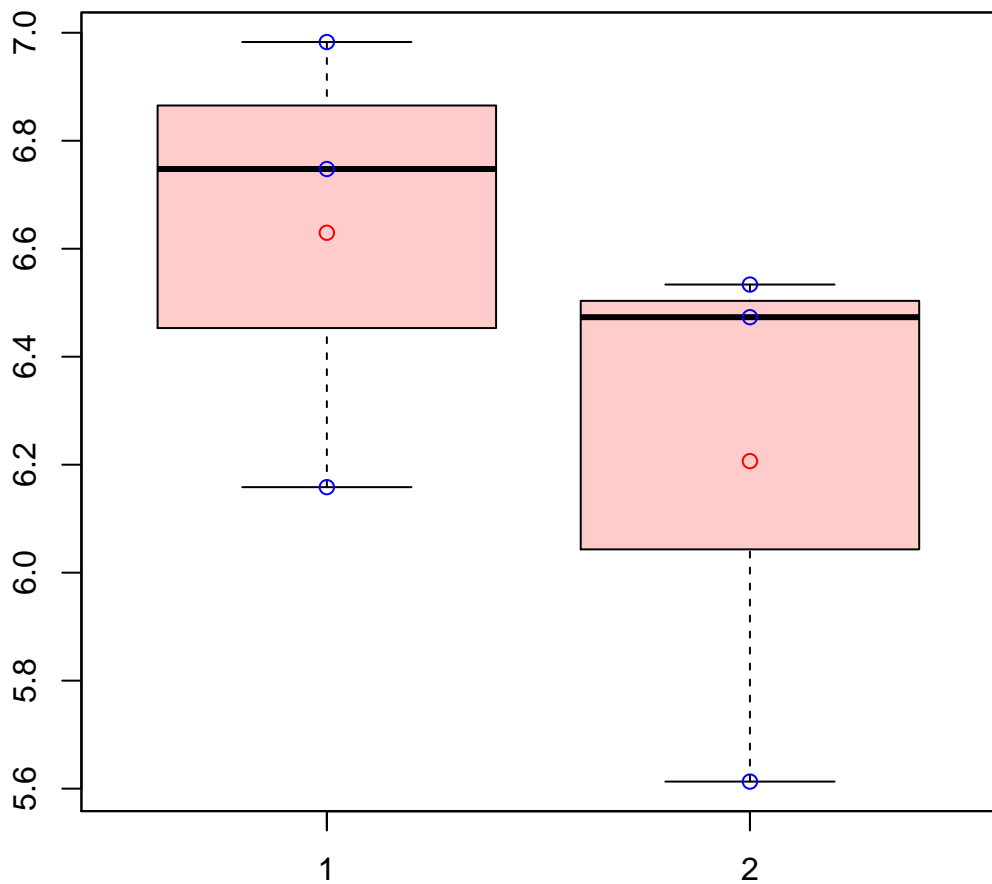

t-Test: p-value = 0.34

# Q8S2F4|Q8S2F4\_ORYSJ

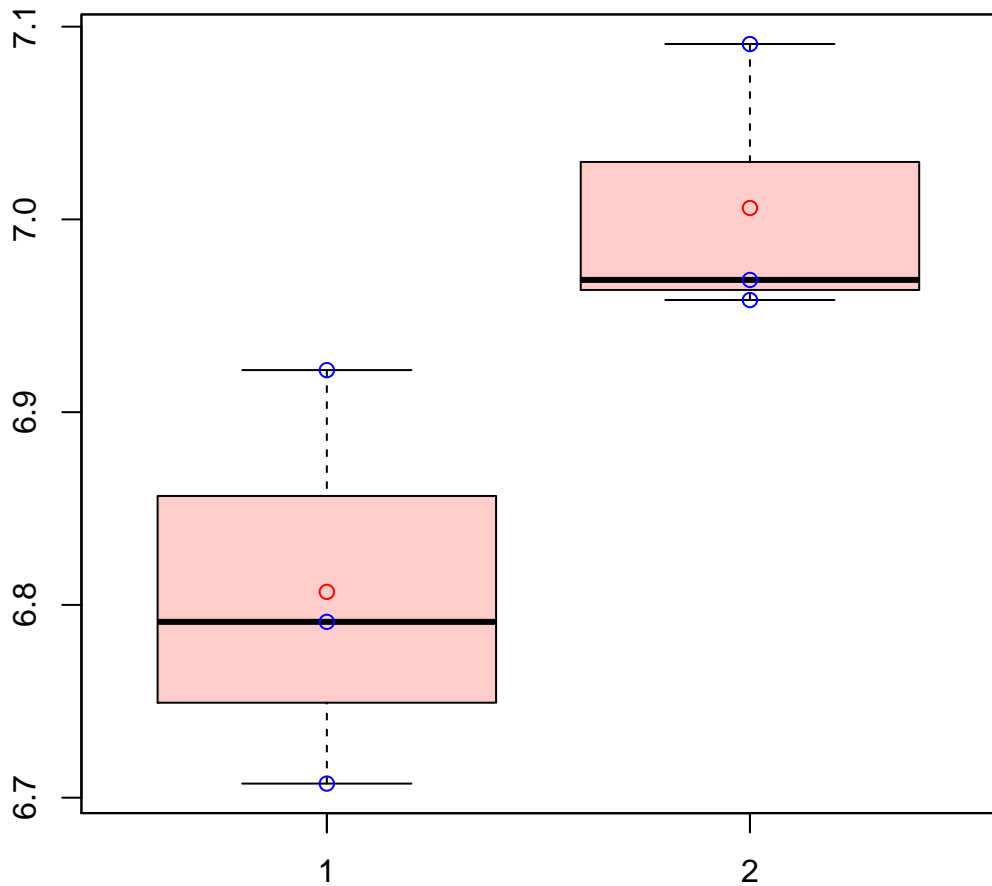

t-Test: p-value = 0.07

# Q8S3V2|Q8S3V2\_SANAU

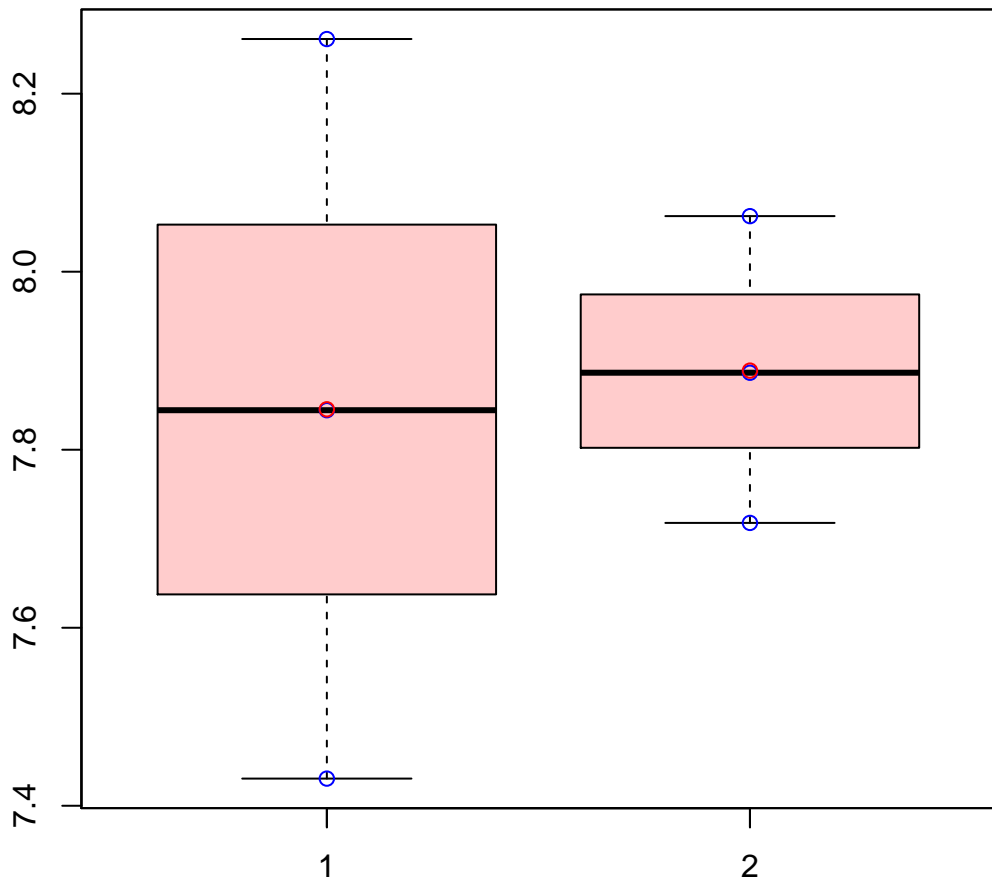

t-Test: p-value = 0.88

# Q8S609|Q8S609\_ORYSJ

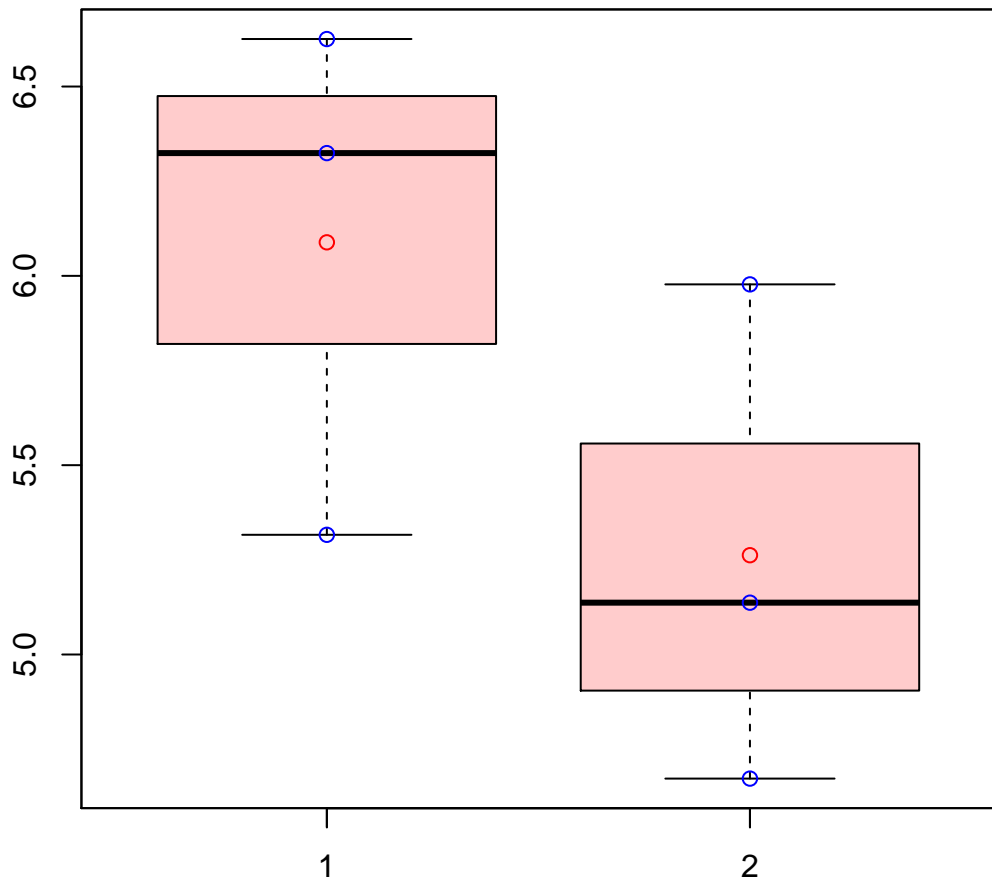

t-Test: p-value = 0.21

# Q8S6P5|Q8S6P5\_ORYSJ

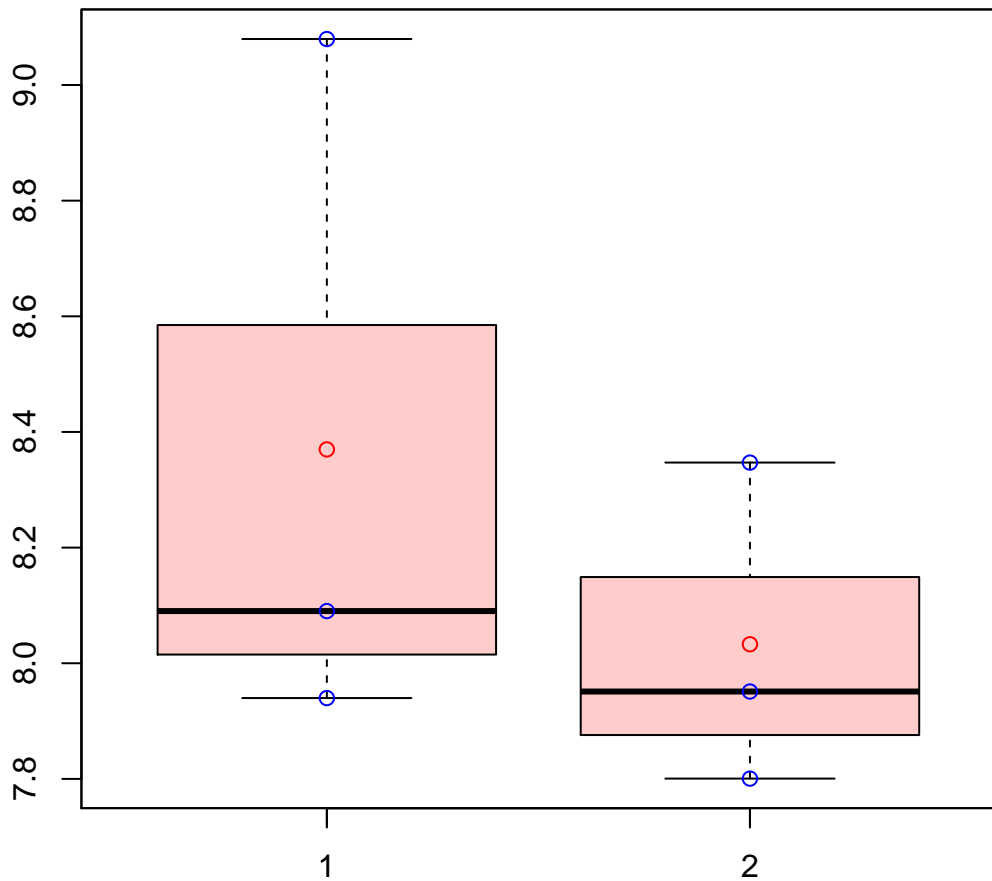

t-Test: p-value = 0.46

# Q8S7H0|Q8S7H0\_ORYSJ

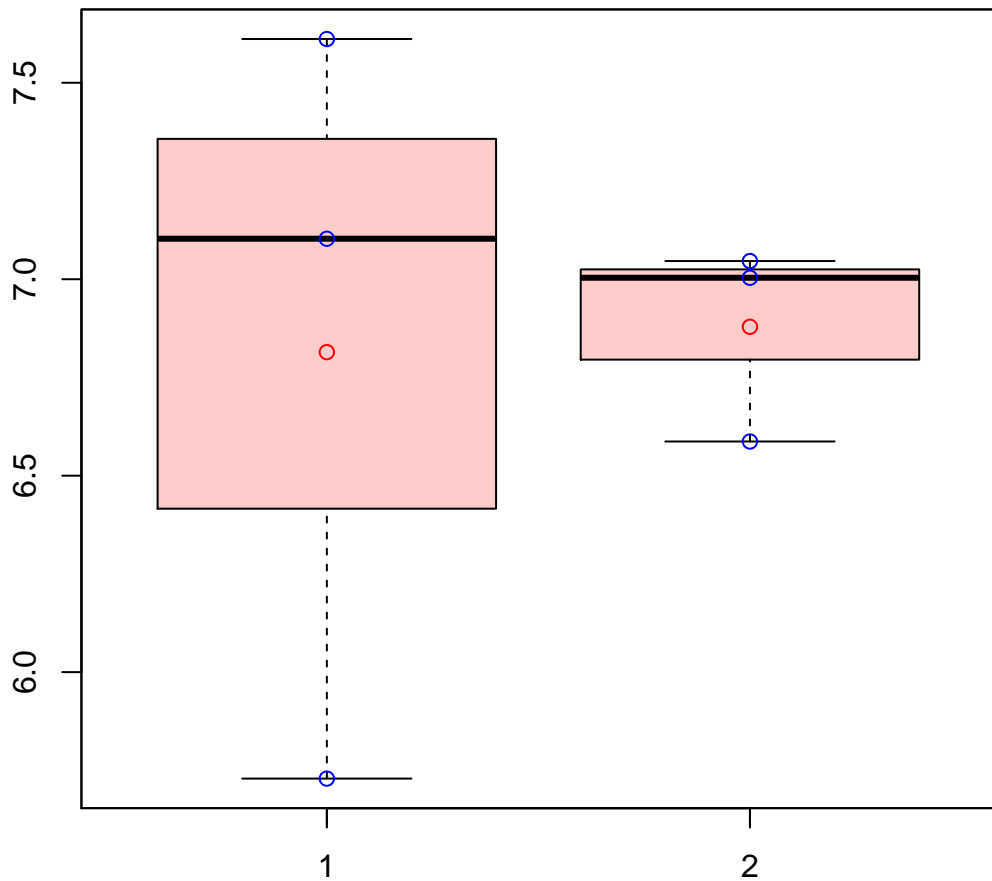

t-Test: p-value = 0.92

# Q8S823|Q8S823\_ORYSJ

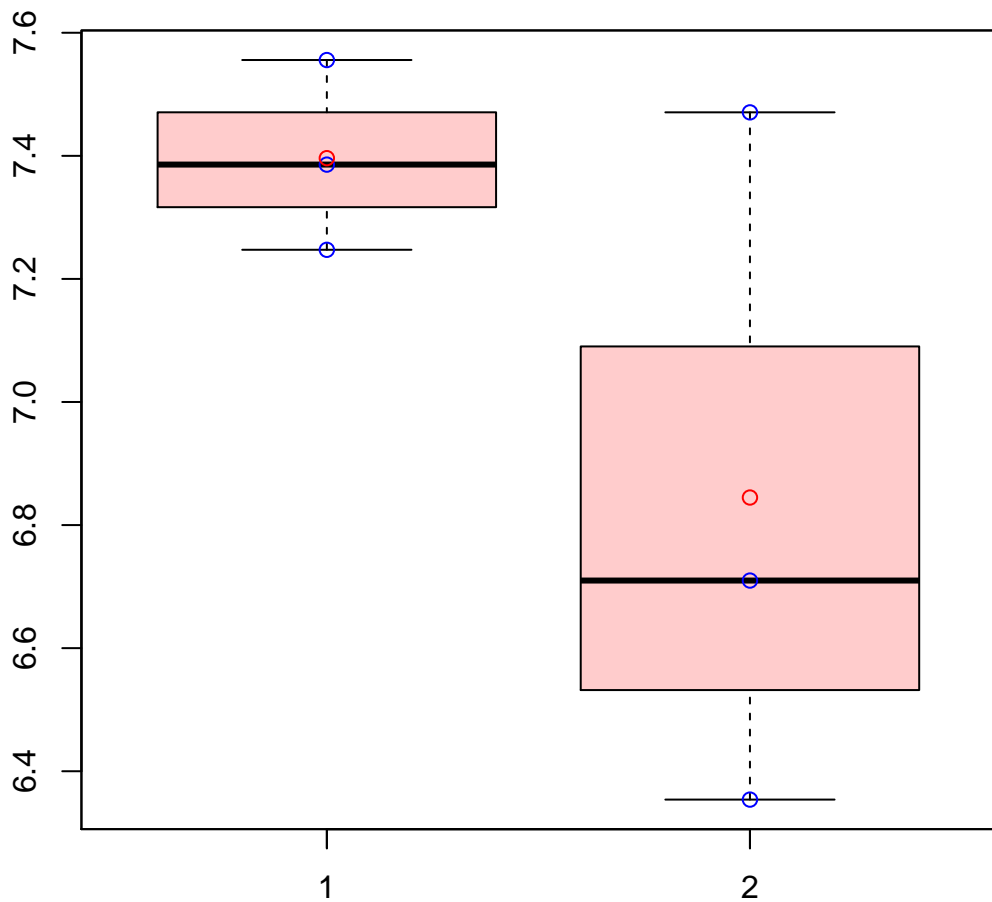

t-Test: p-value = 0.23

# Q8S829|Q8S829\_ORYSJ

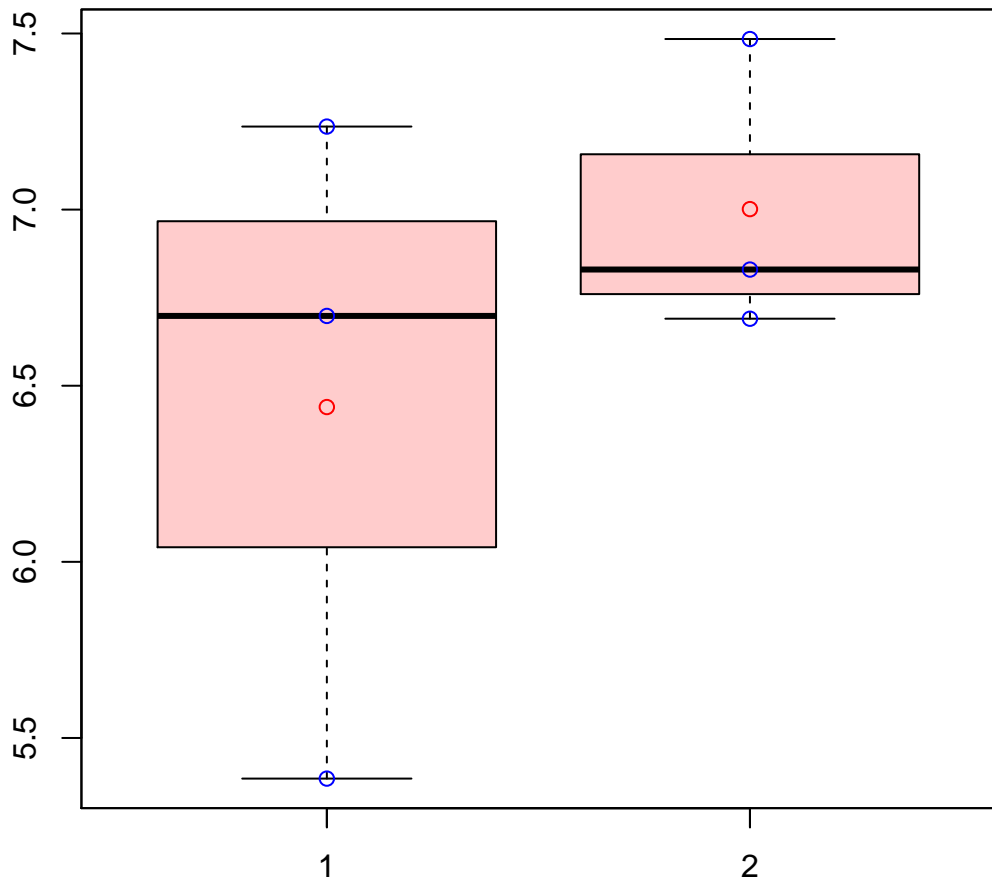

t-Test: p-value = 0.42



# Q8S914|Q8S914\_WHEAT

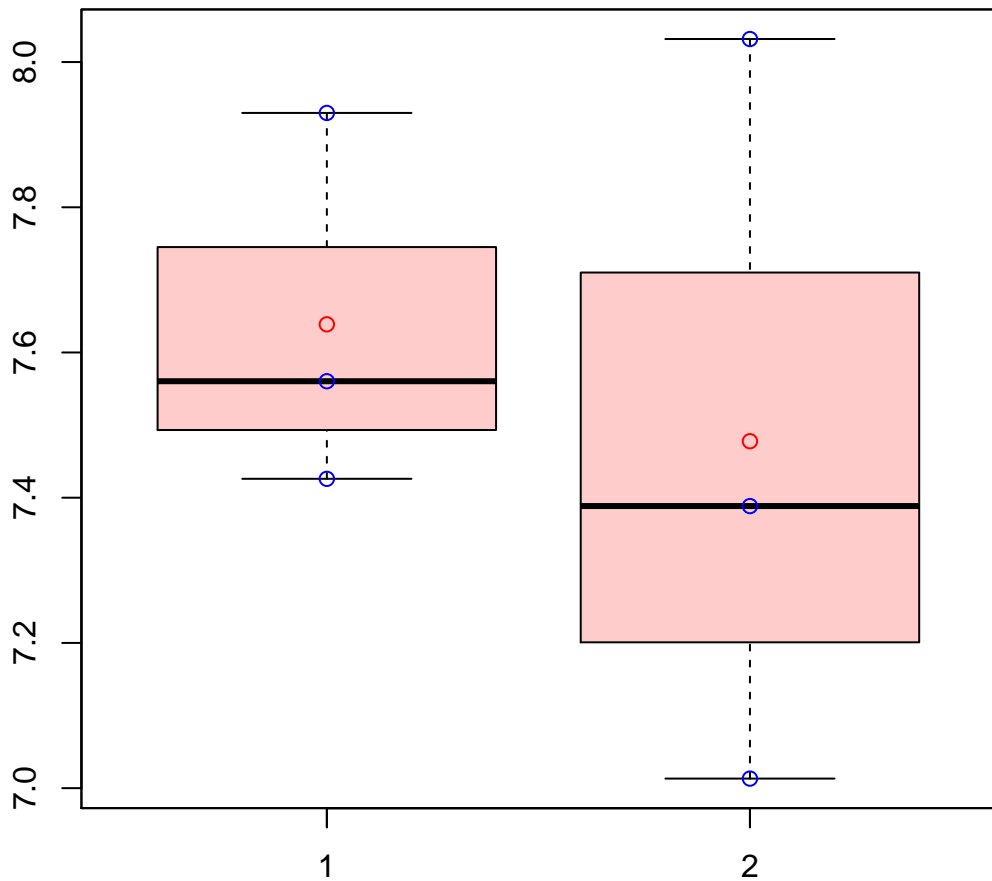

t-Test: p-value = 0.66

# Q8S936|Q8S936\_ORYSA

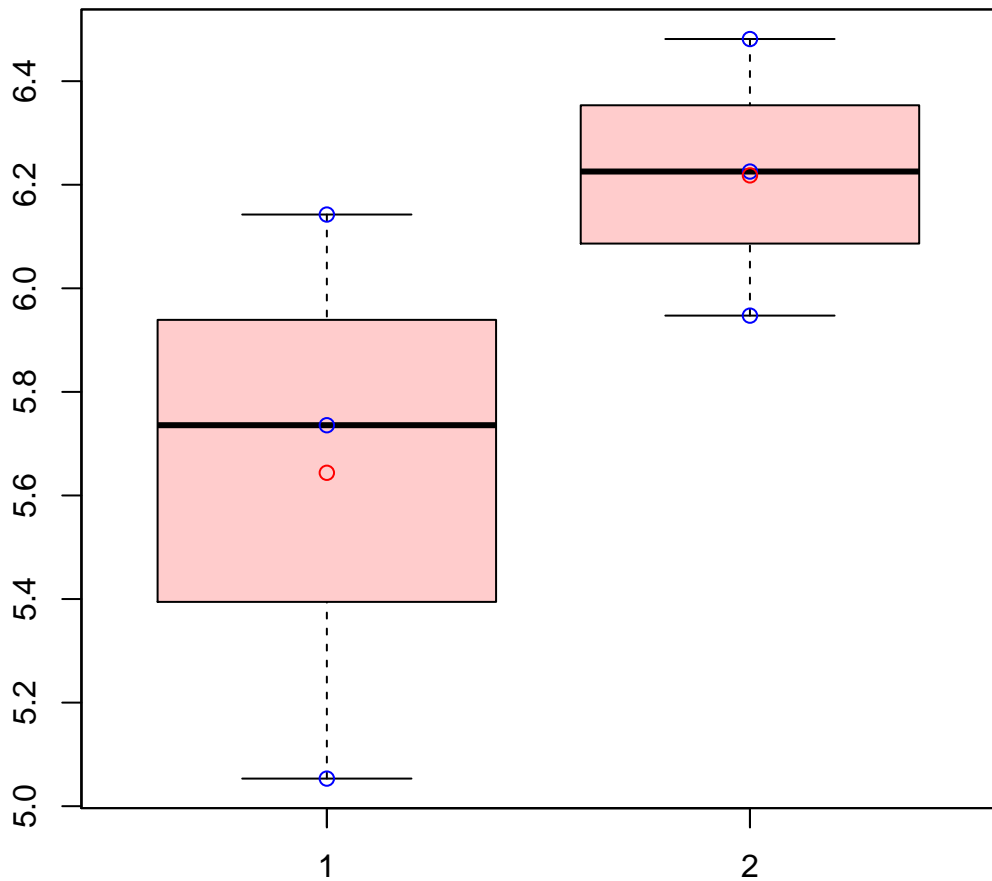

t-Test: p-value = 0.21

# Q8SAT1|Q8SAT1\_SACOF

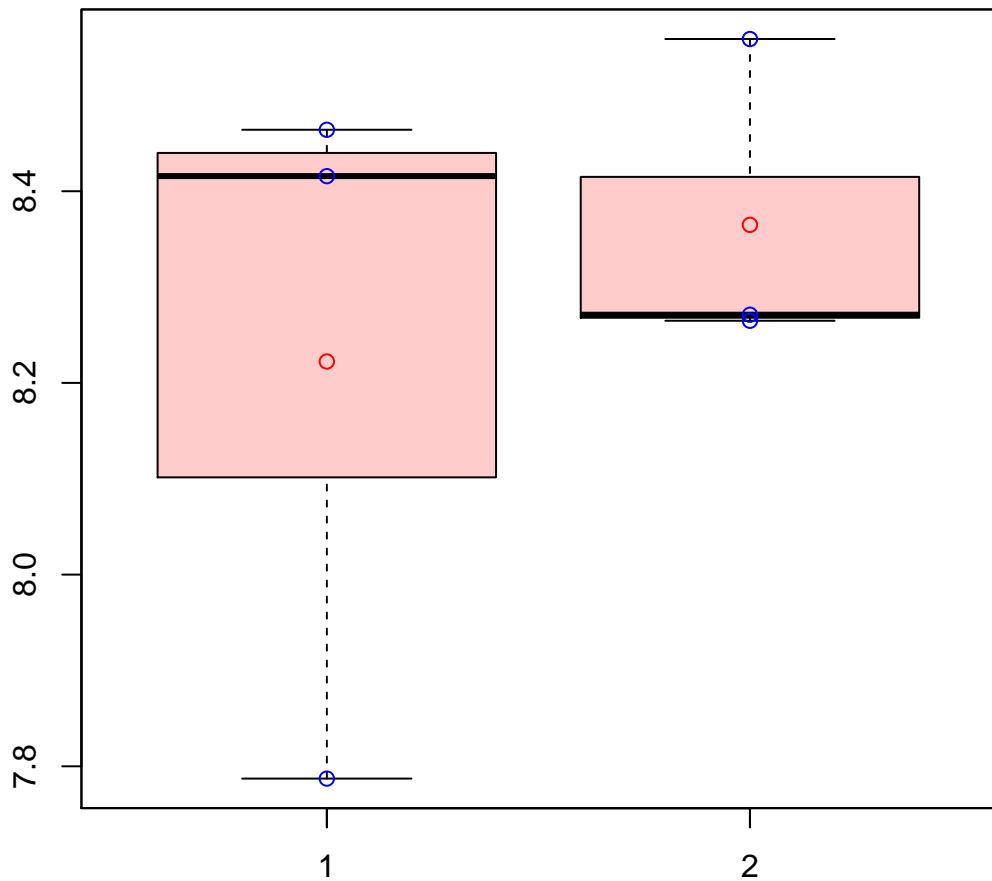

t-Test: p-value = 0.6

# Q8VX35|Q8VX35\_VANPL

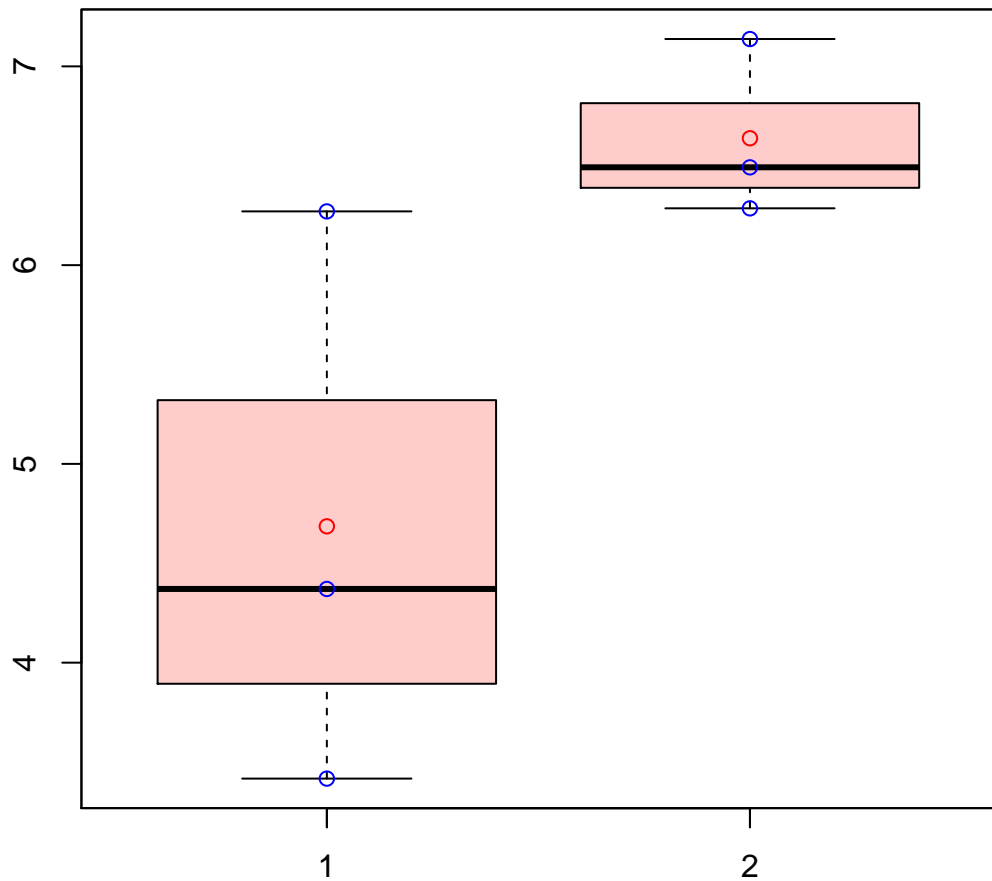

t-Test: p-value = 0.14

# Q8VX70|Q8VX70\_9ASPA

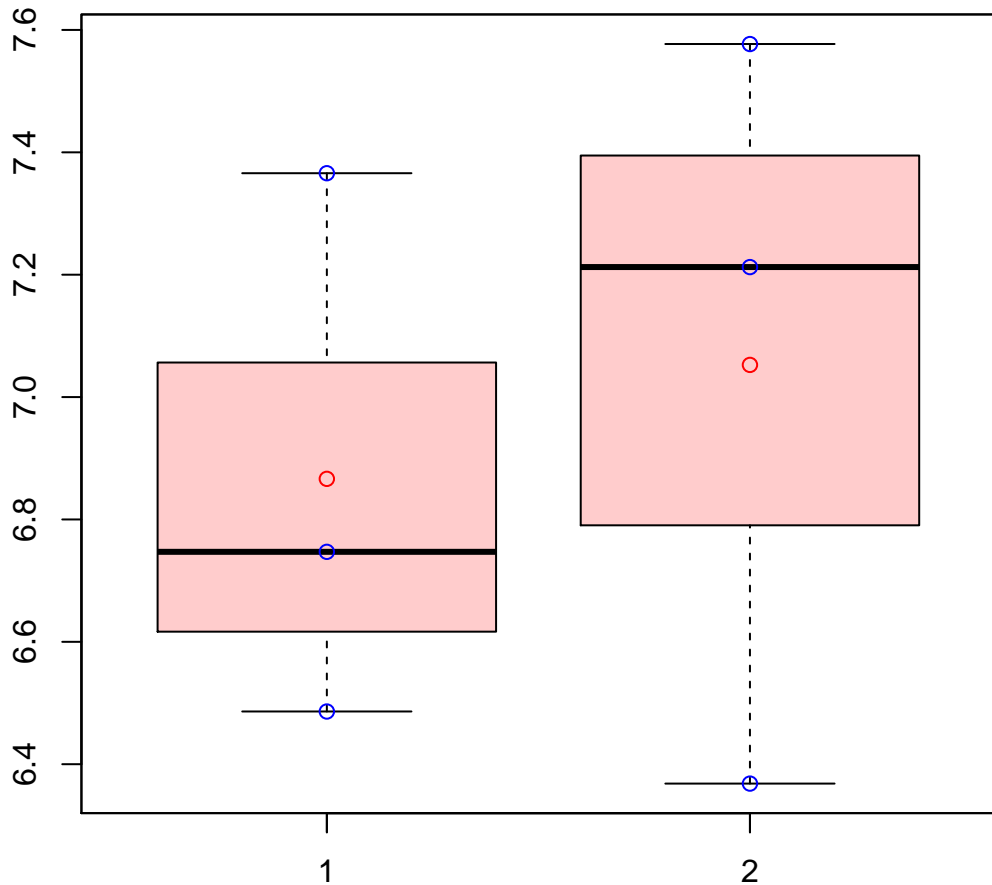

t-Test: p-value = 0.7

# Q8W0E6|Q8W0E6\_ORYSJ

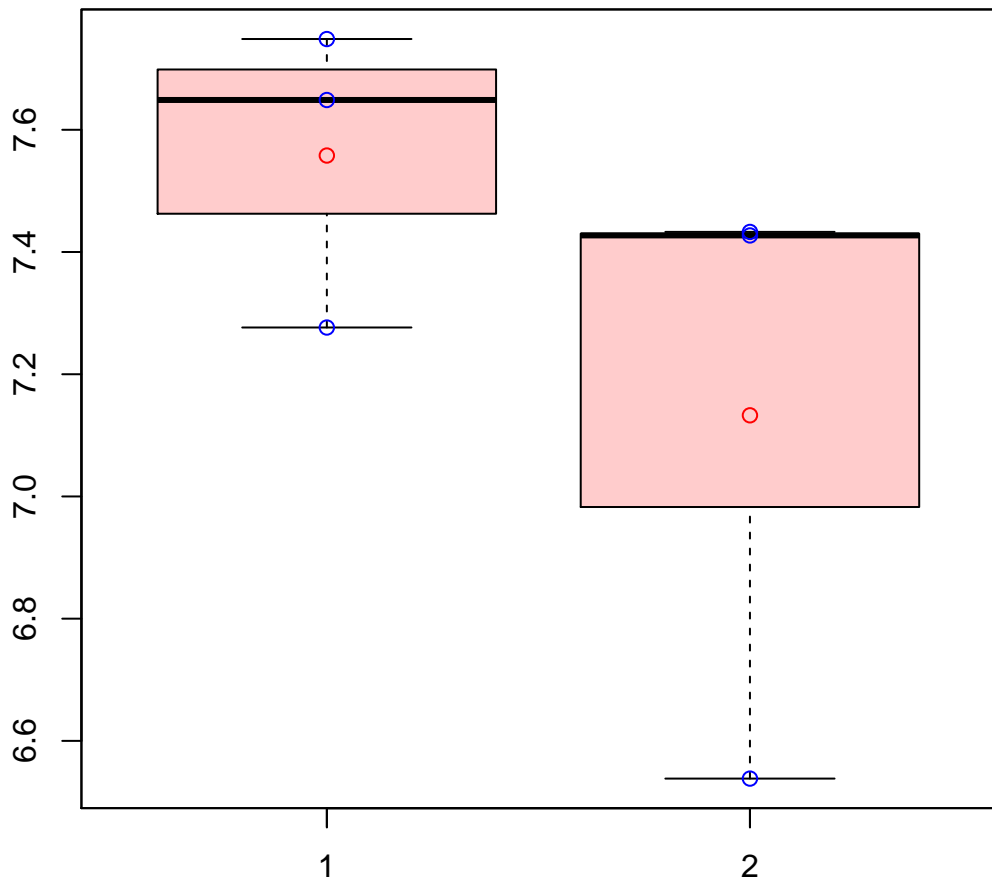

t-Test: p-value = 0.29

# Q8W0W2|Q8W0W2\_ELAOL

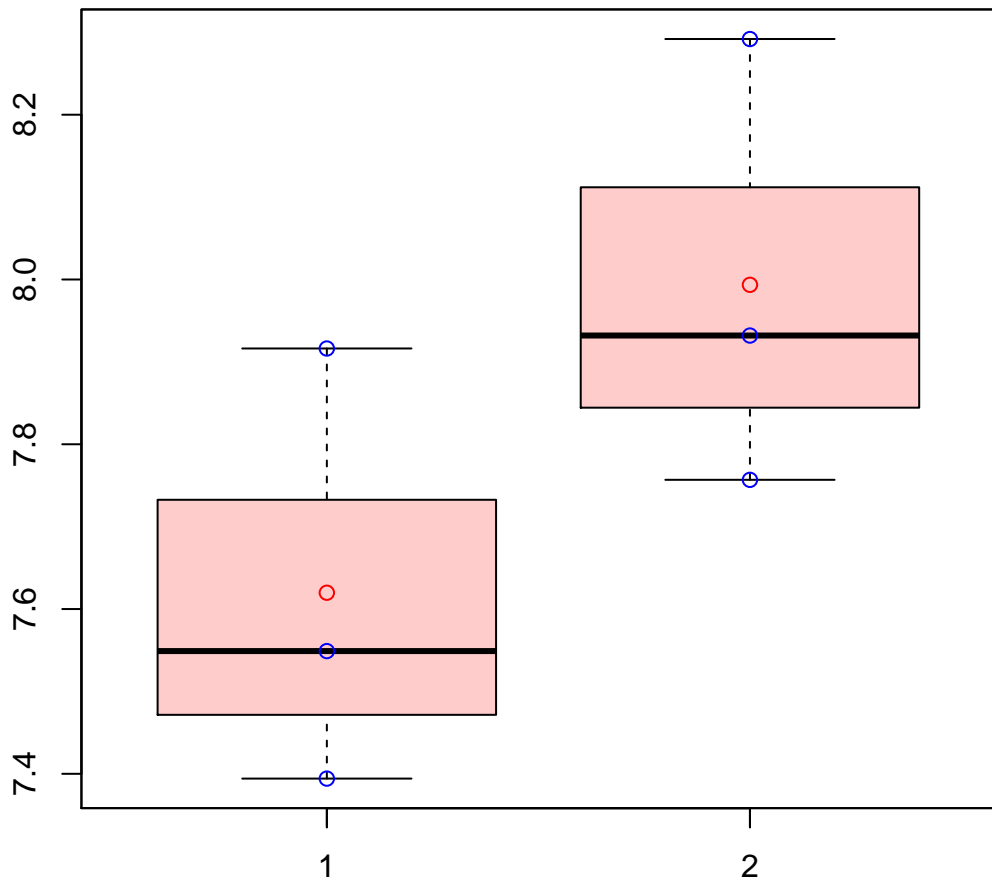

t-Test: p-value = 0.17

# Q8W1D1|Q8W1D1\_MAIZE

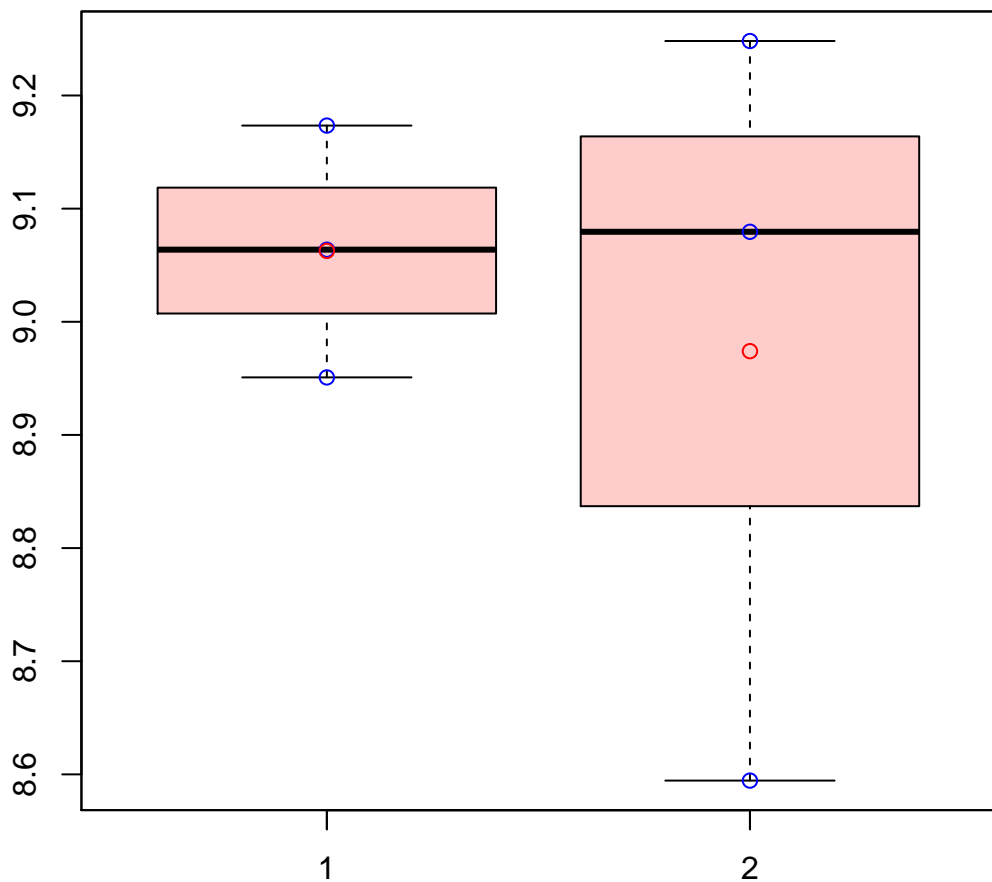

t-Test: p-value = 0.7



# Q8W2Q8|Q8W2Q8\_ORYSJ

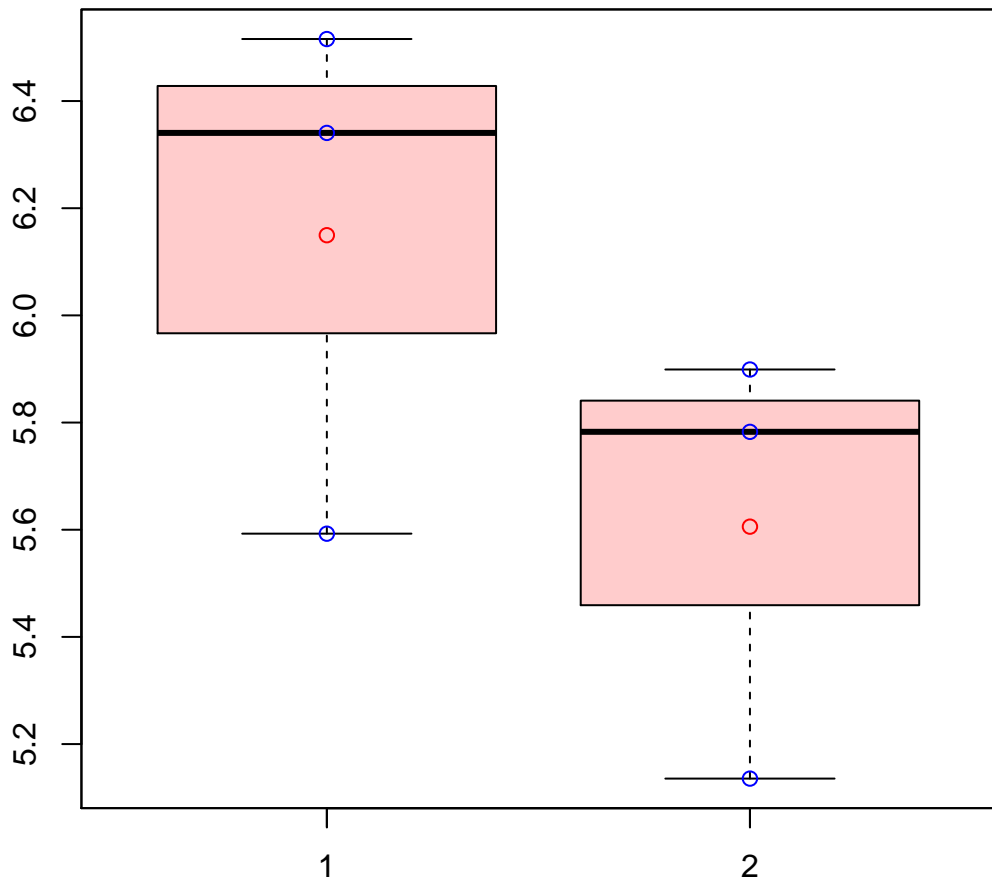

t-Test: p-value = 0.22

# Q8W361|Q8W361\_ORYSJ

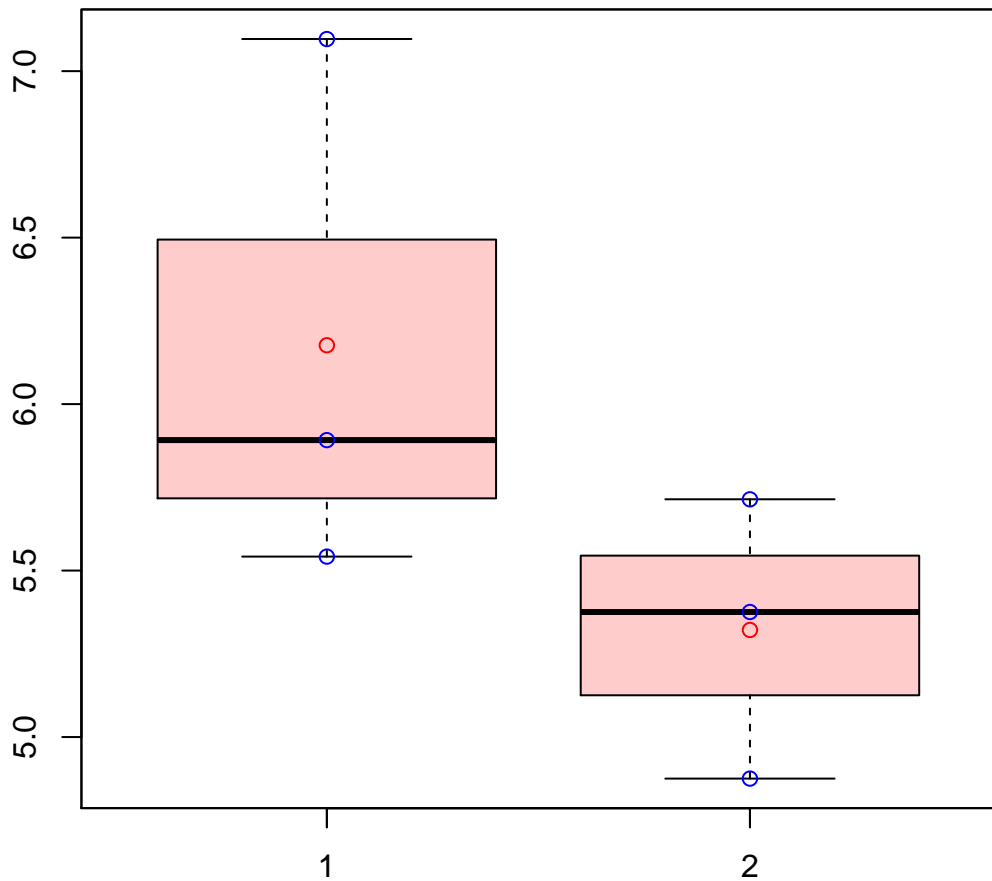

t-Test: p-value = 0.21

# Q8WHH9|Q8WHH9\_LEMTR

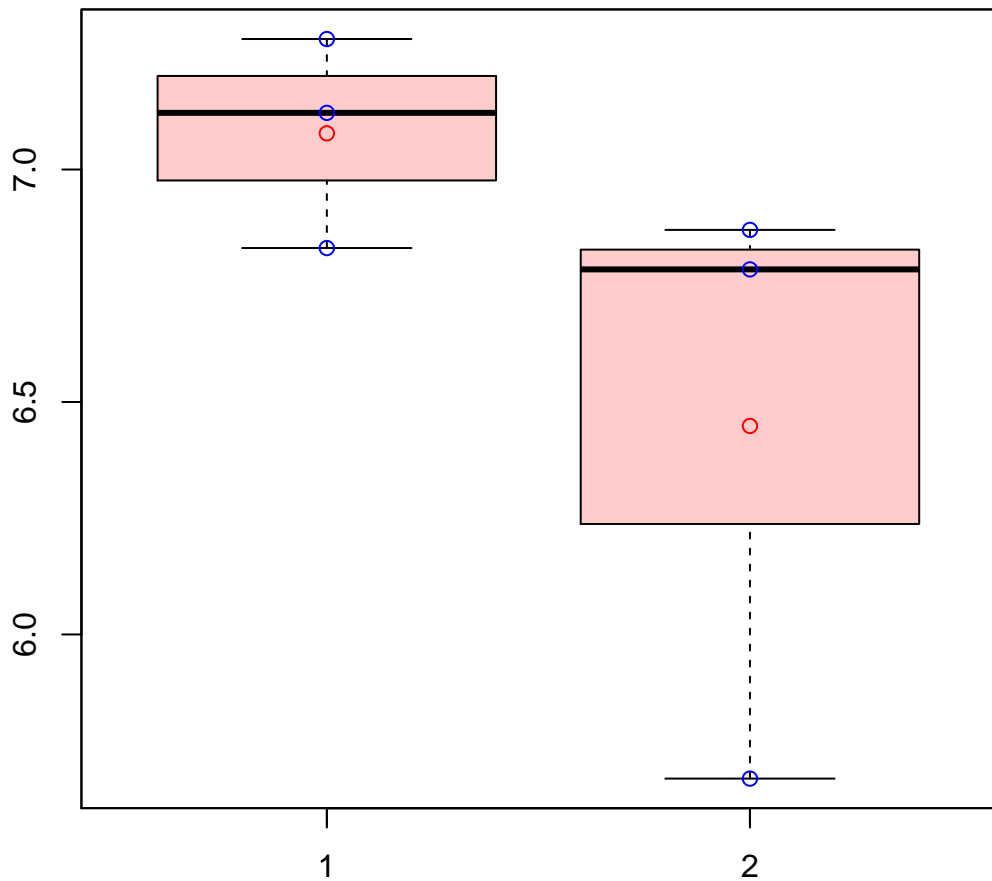

t-Test: p-value = 0.23

# Q8WHK9|Q8WHK9\_9ARAE

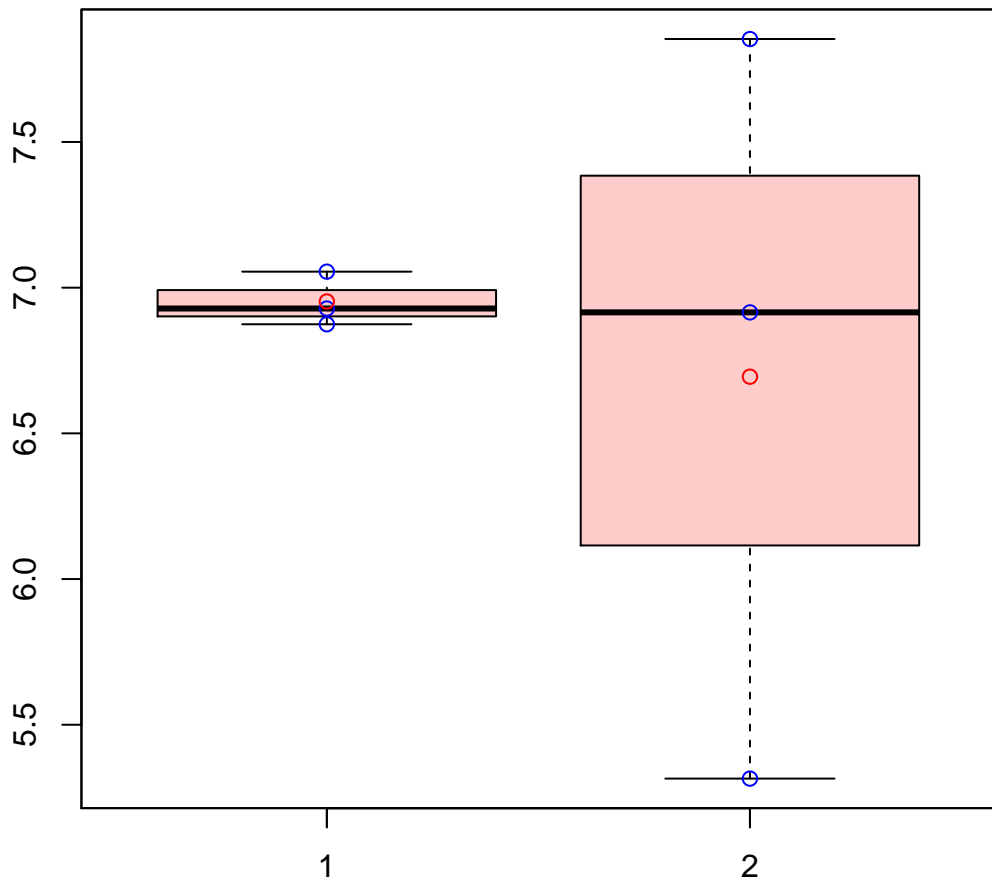

t-Test: p-value = 0.76

# Q8WJX3|Q8WJX3\_AREBU

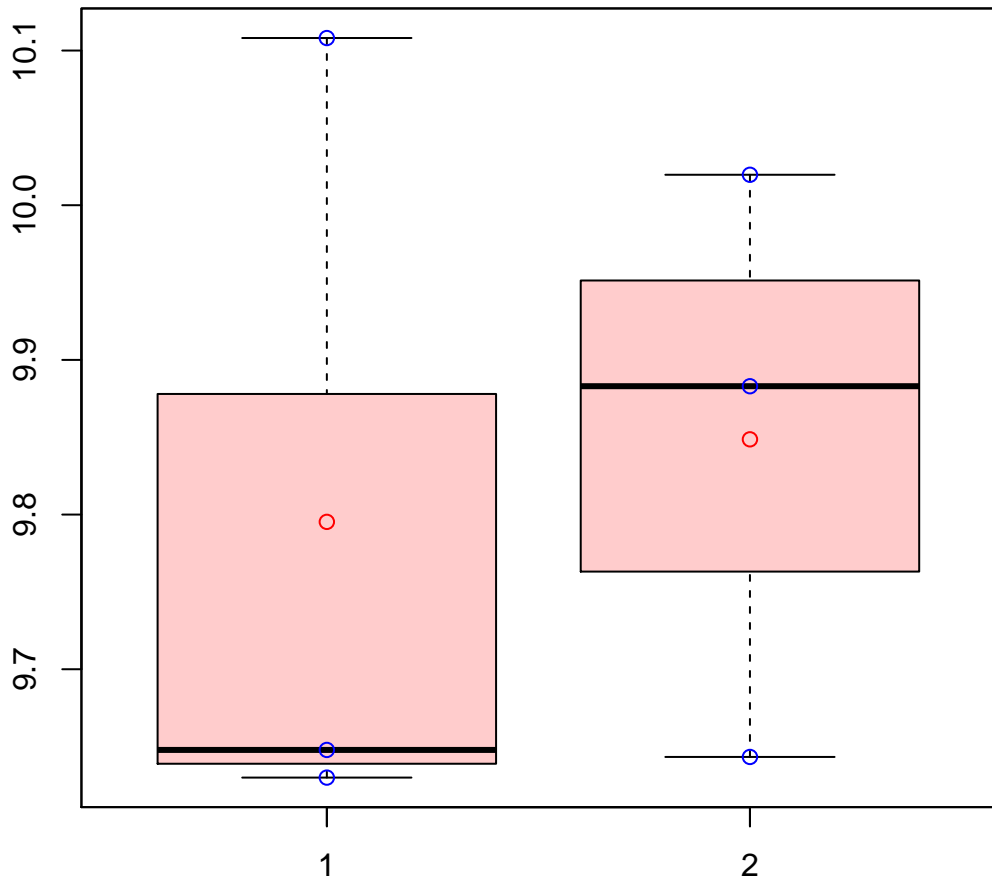

t-Test: p-value = 0.8

# Q8WKN9|Q8WKN9\_9ASPA

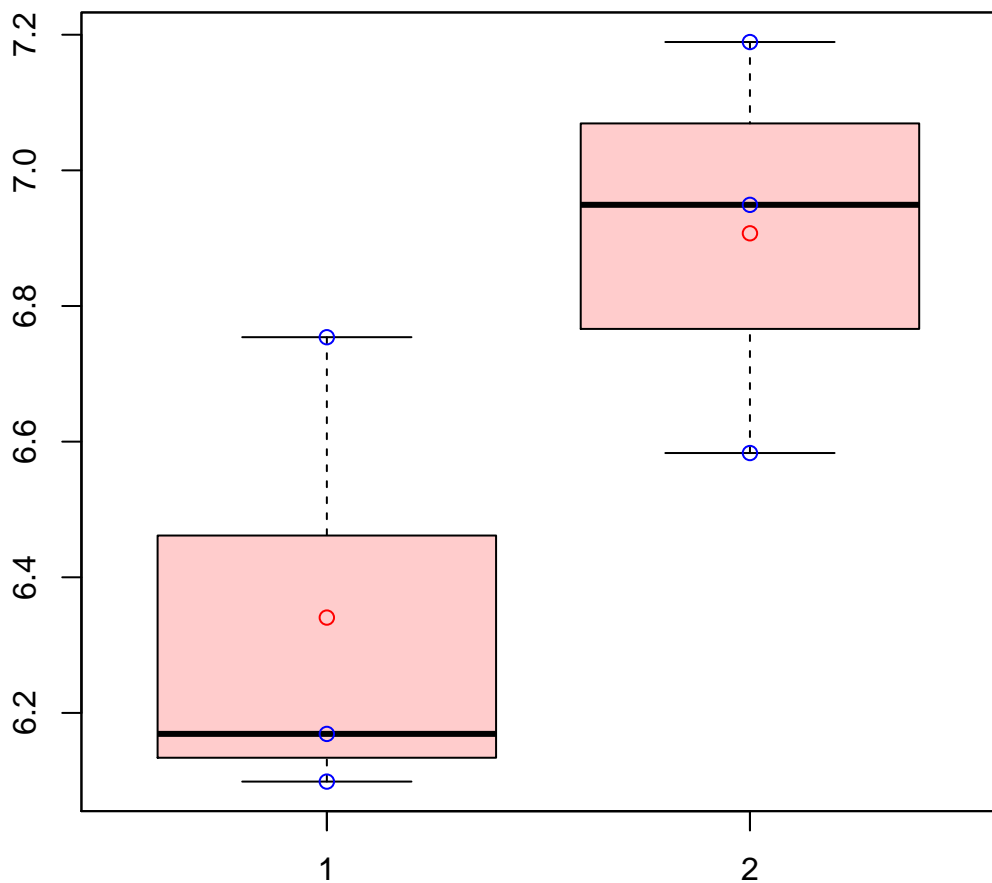

t-Test: p-value = 0.11

# Q93XD9|Q93XD9\_DACGL

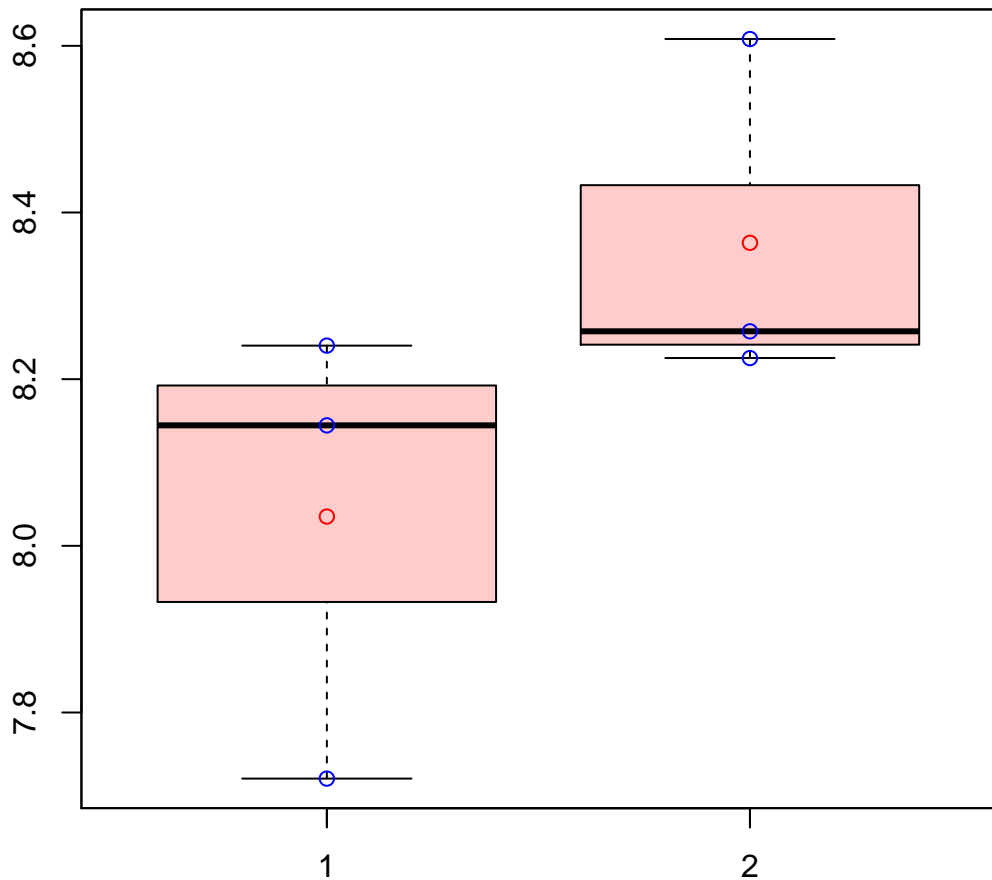

t-Test: p-value = 0.18

# Q93XG8|Q93XG8\_HYDVE

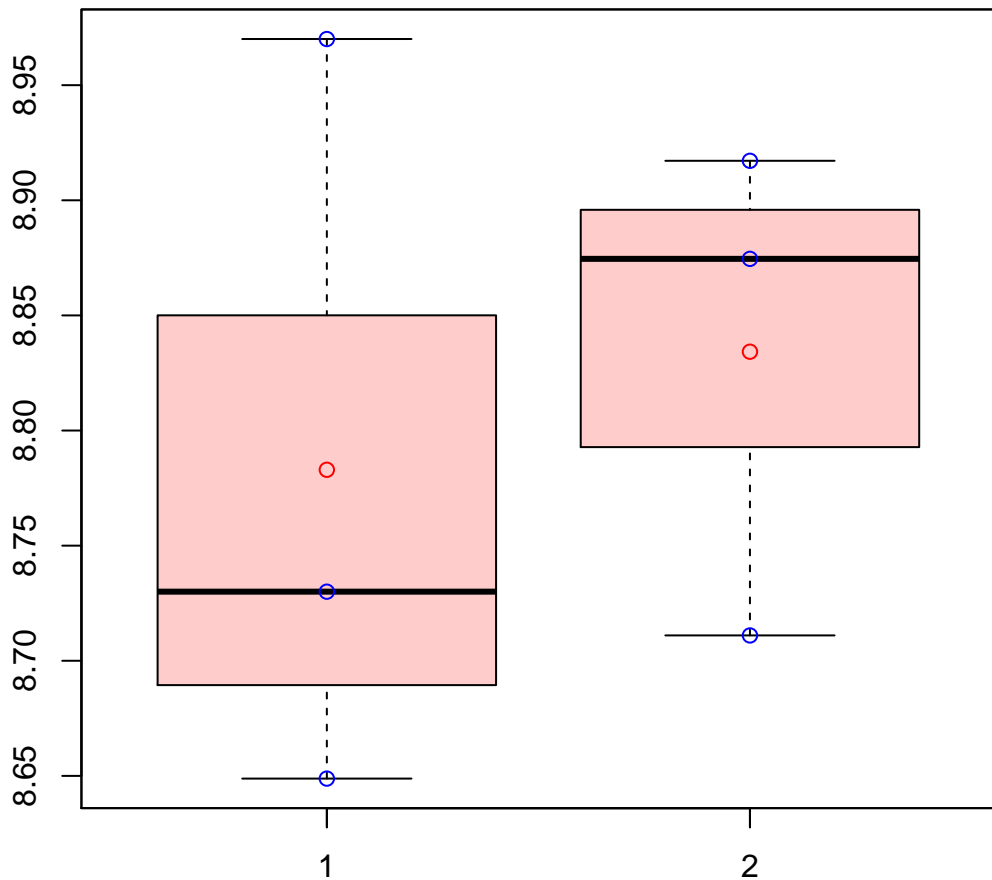

t-Test: p-value = 0.68



# Q93Y69|Q93Y69\_ORYSJ

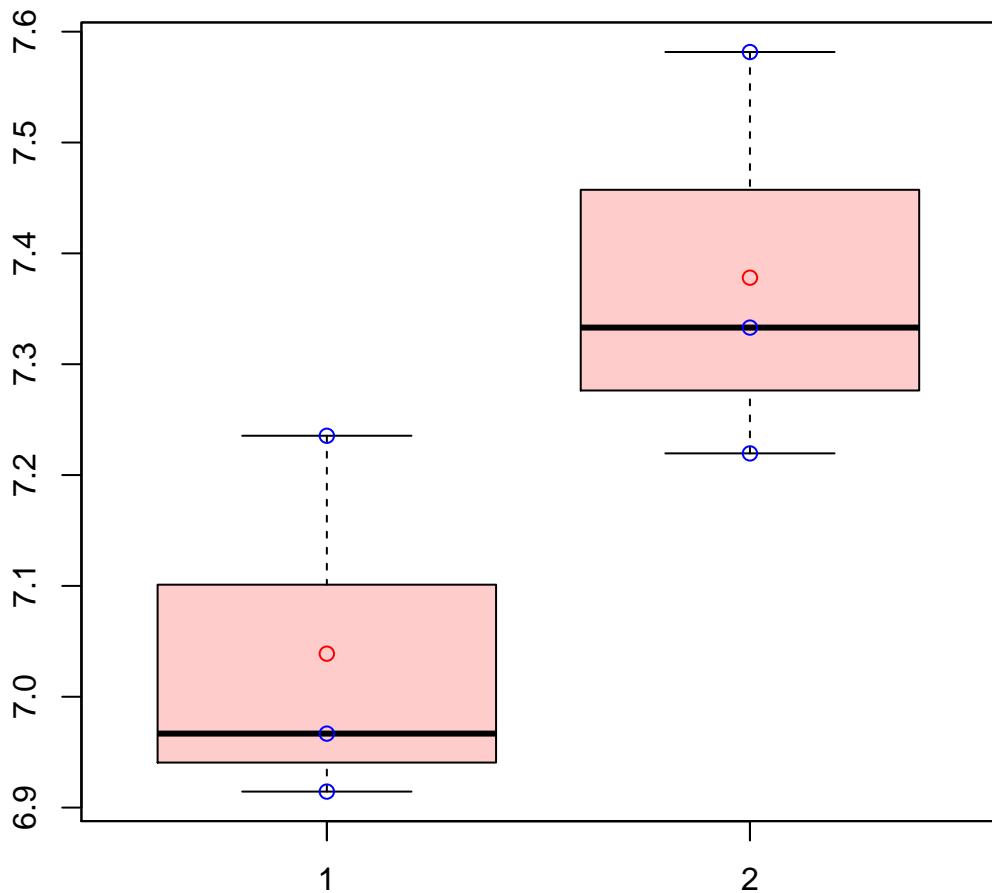

t-Test: p-value = 0.08

# Q943W1|Q943W1\_ORYSJ

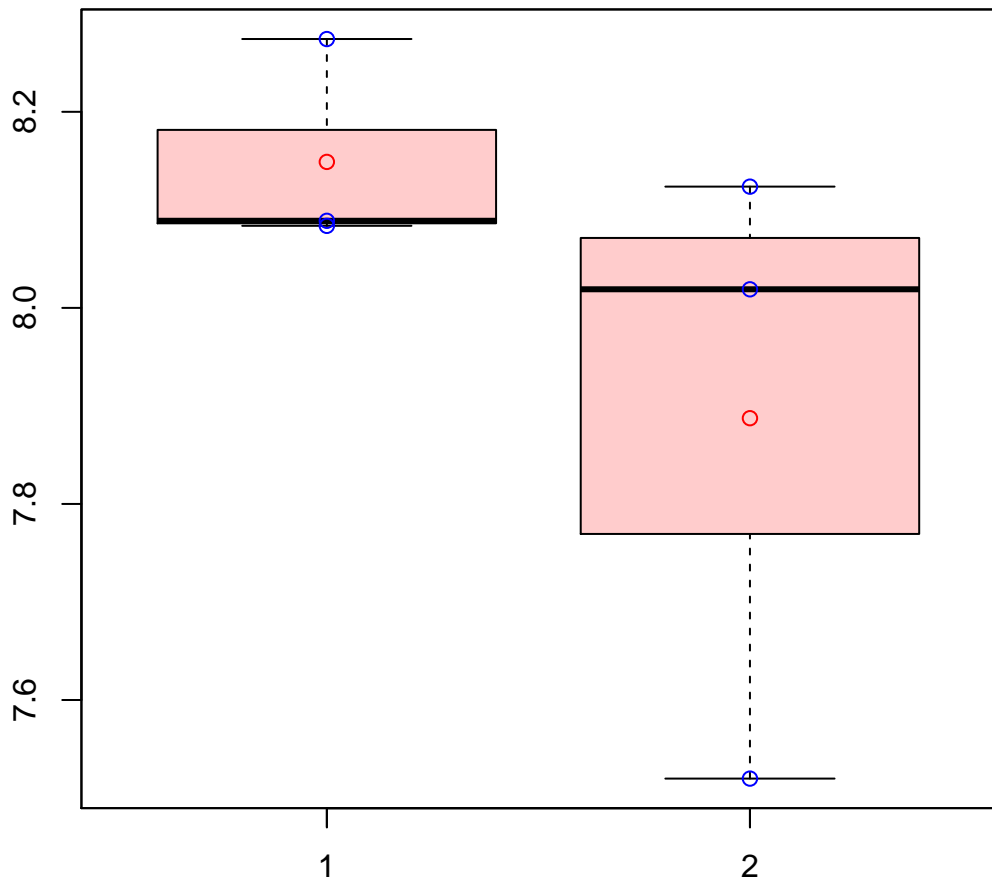

t-Test: p-value = 0.29

# Q944P2|Q944P2\_9LILI

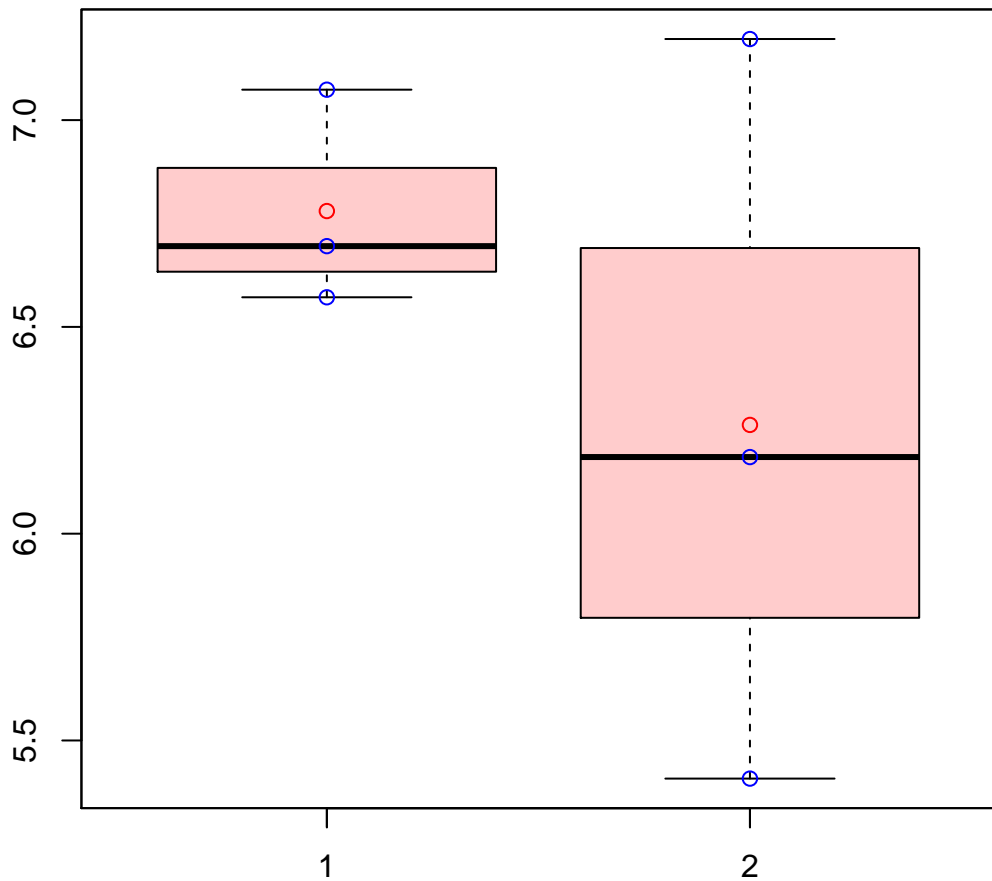

t-Test: p-value = 0.43

# Q947Y7|Q947Y7\_ORYSJ

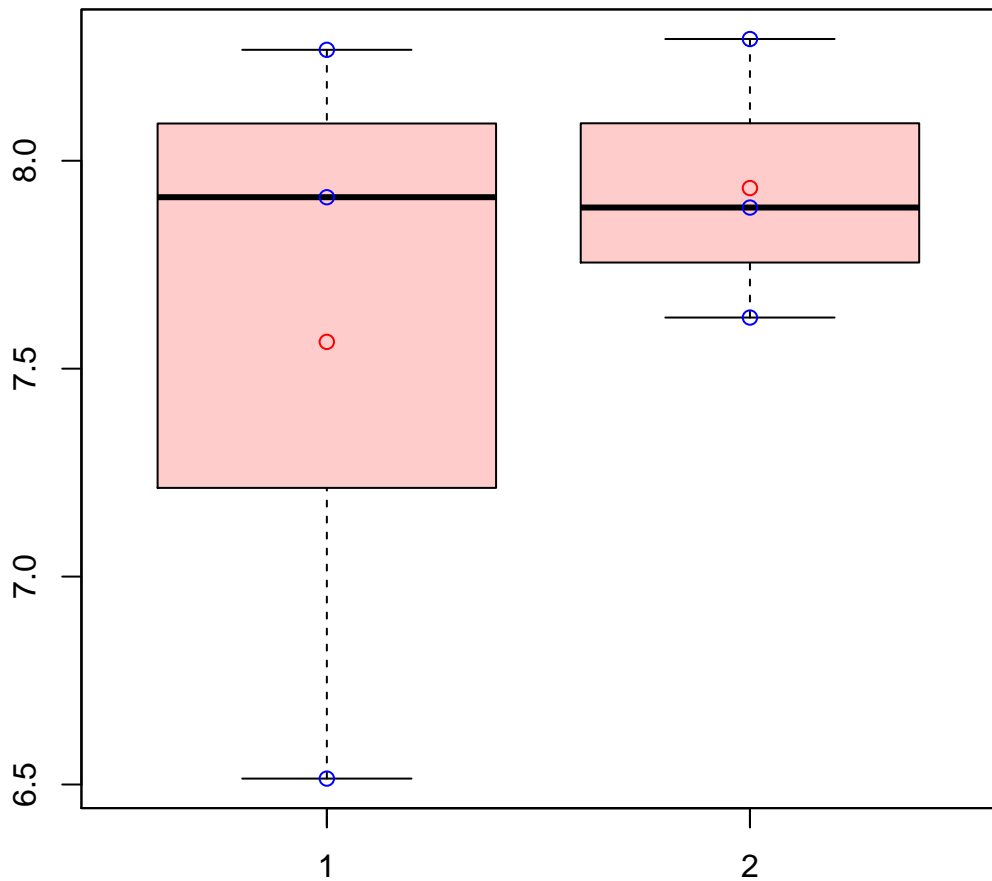

t-Test: p-value = 0.57

# Q949B8|Q949B8\_ORYSA

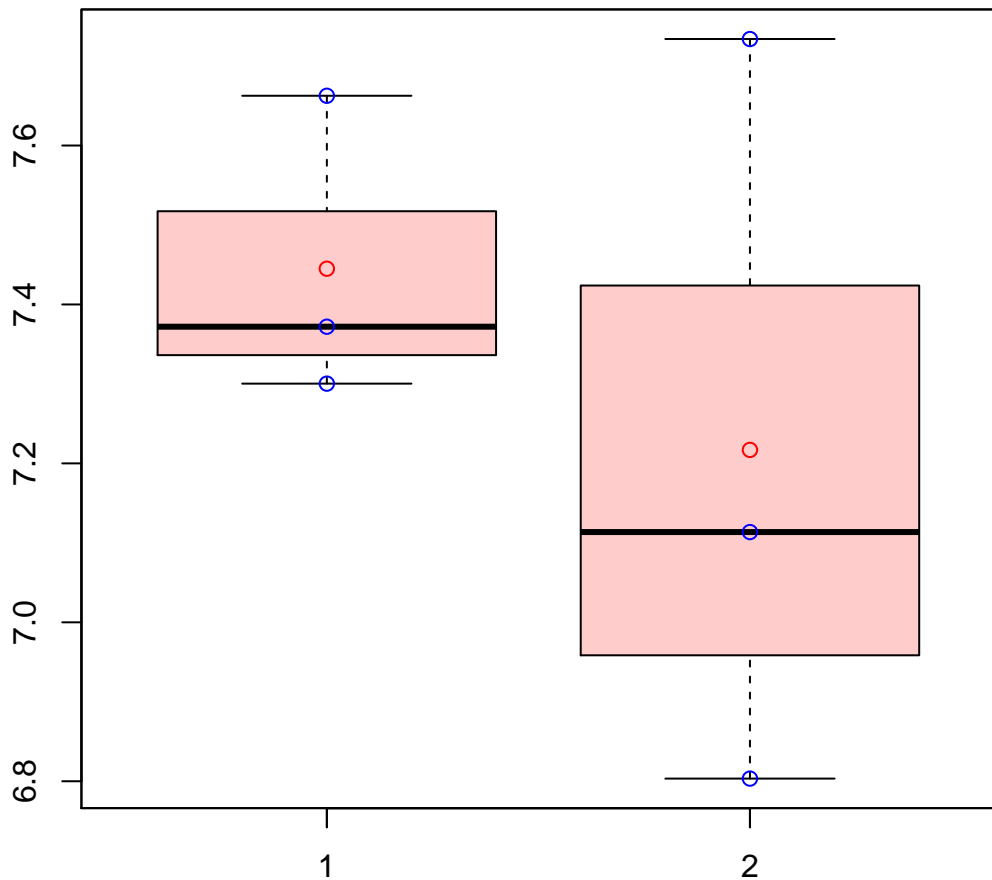

t-Test: p-value = 0.5

# Q94FR6|Q94FR6\_MAIZE

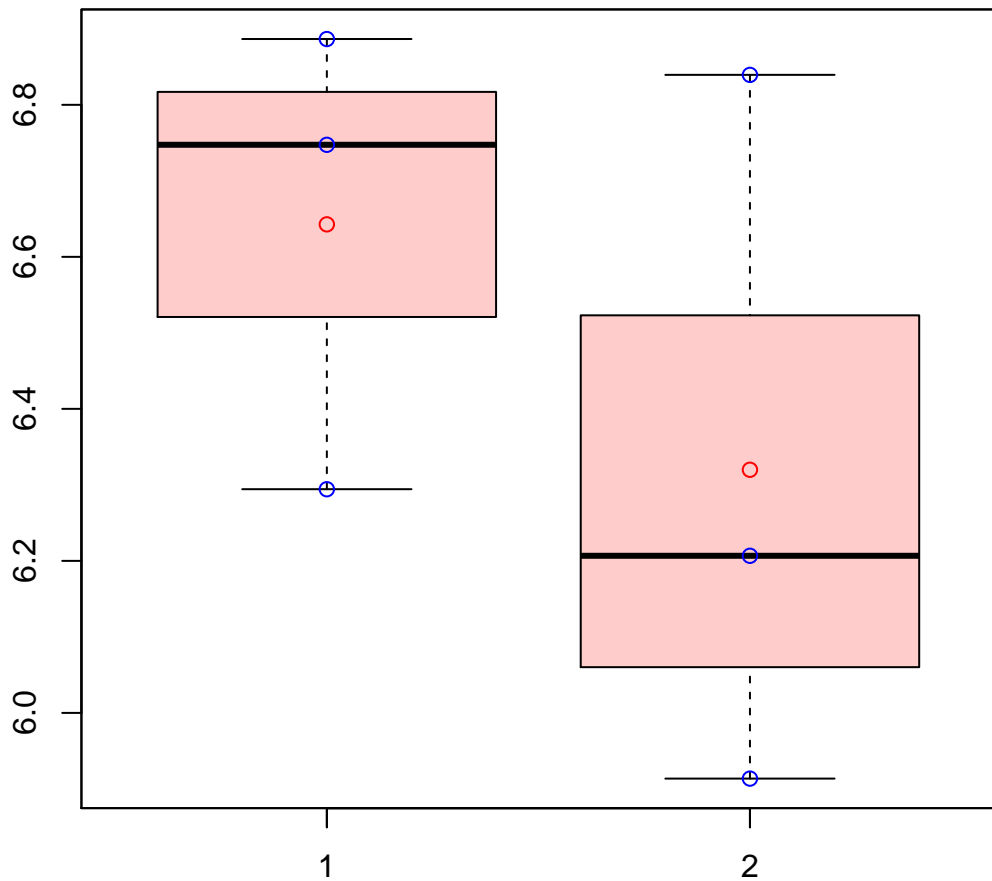

t-Test: p-value = 0.39

# Q94HB8|Q94HB8\_ORYSJ

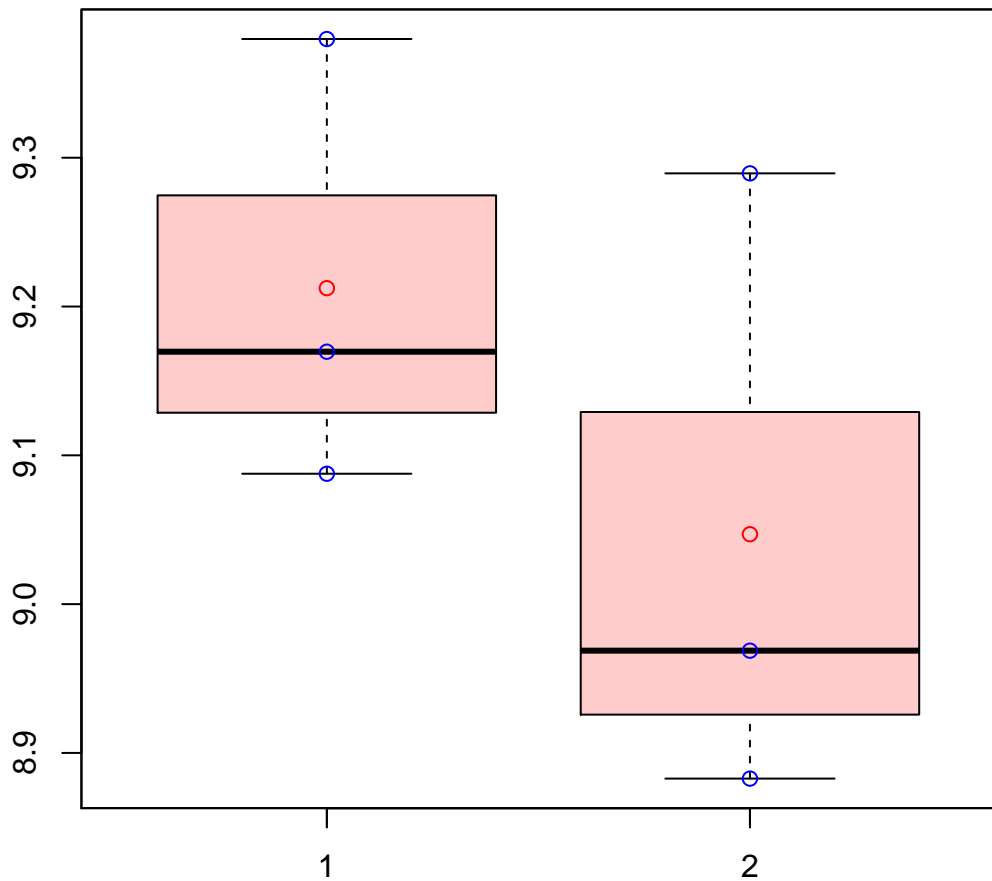

t-Test: p-value = 0.34

# Q94HT9|Q94HT9\_ORYSJ

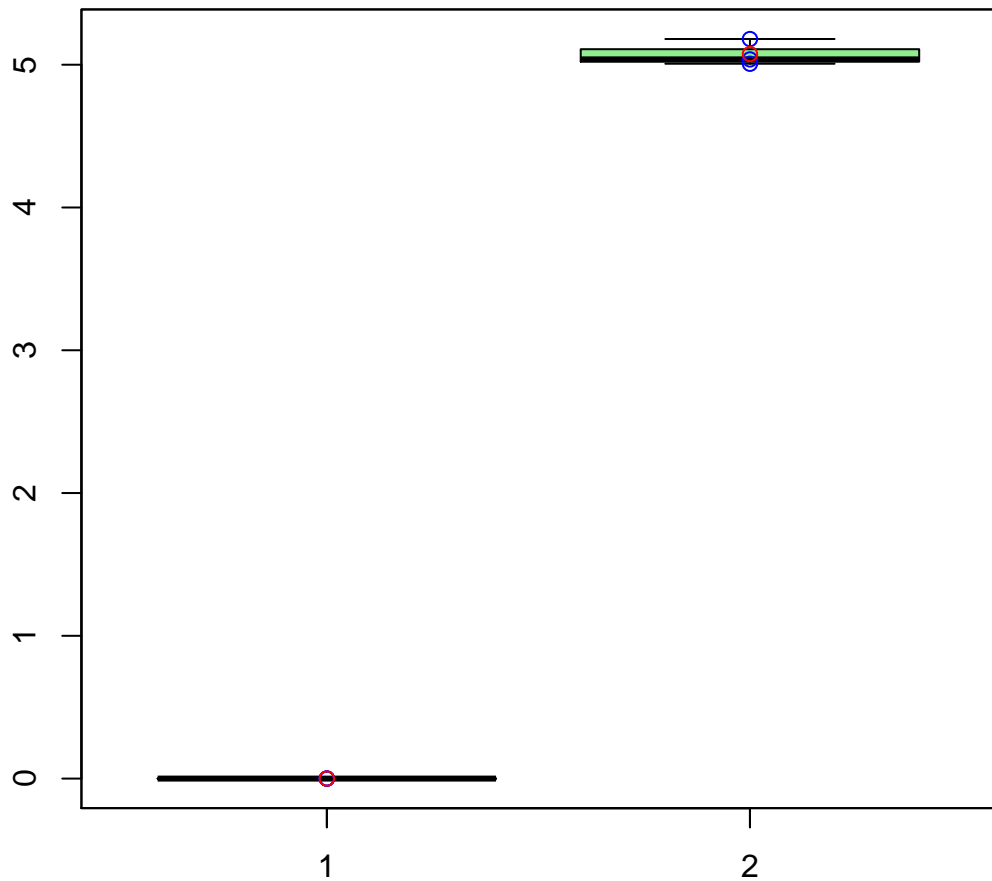

t-Test: p-value = 0



# Q95FI0|Q95FI0\_ZOSNO

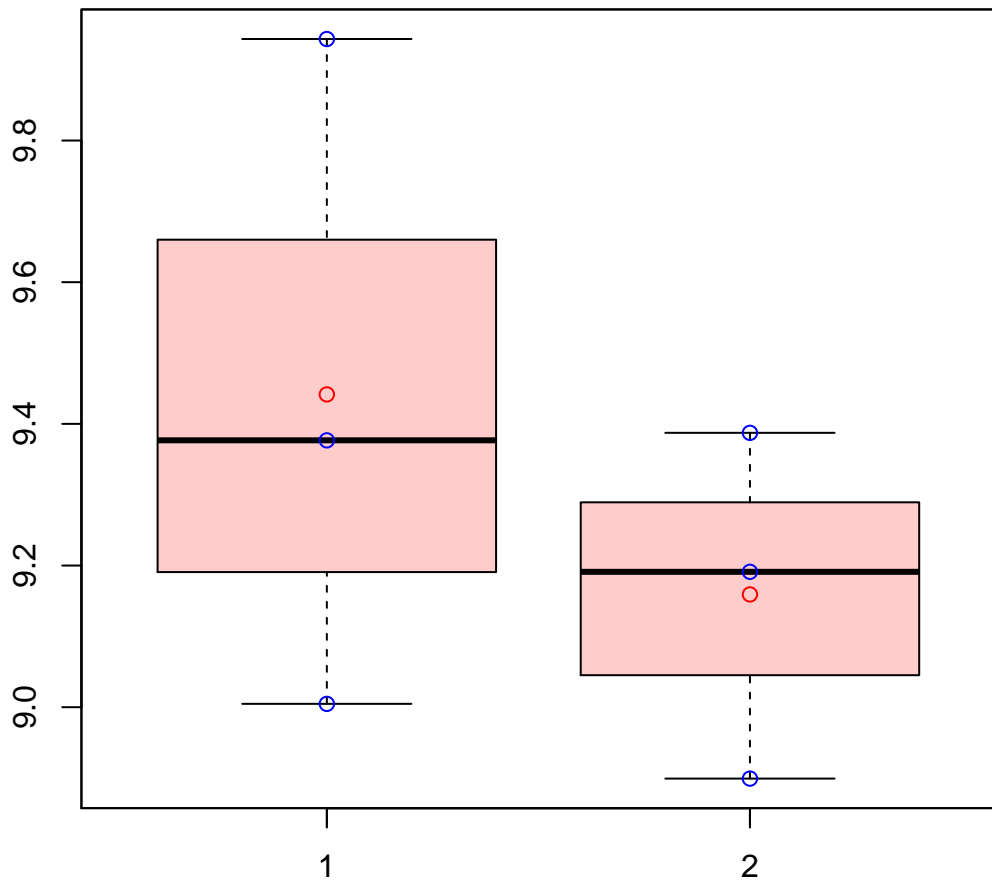

t-Test: p-value = 0.43

# Q96047|Q96047\_NOTBI

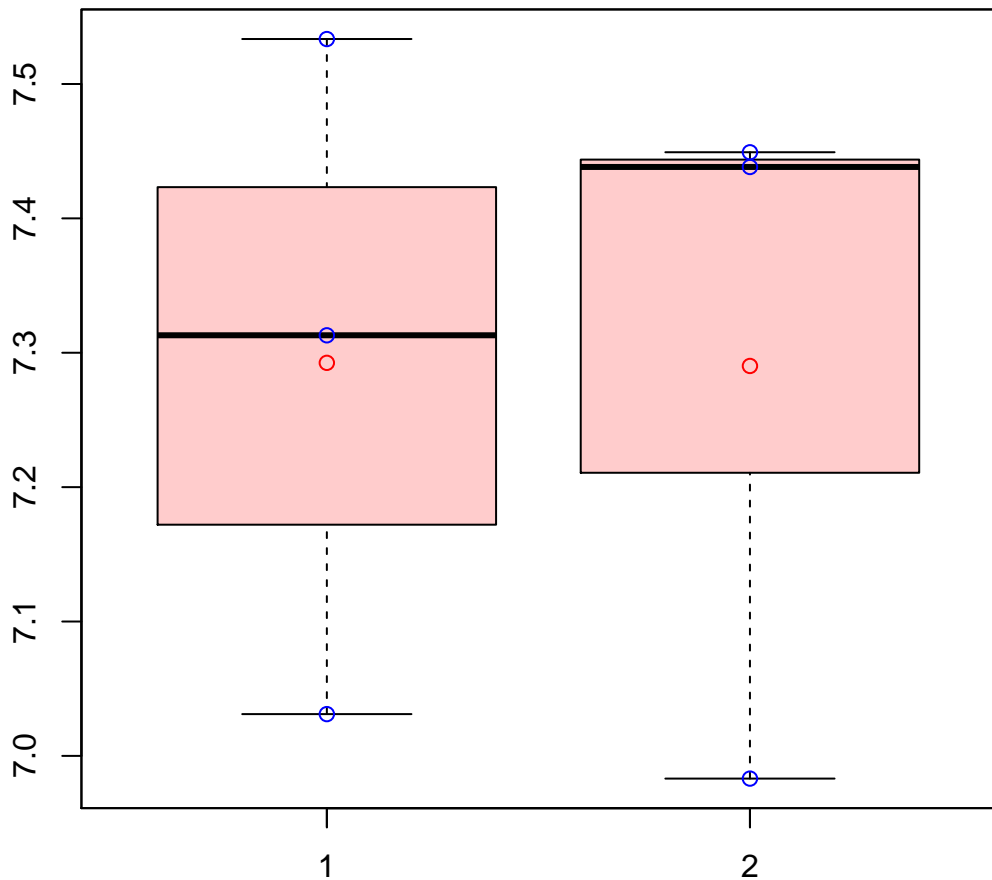

t-Test: p-value = 0.99

# Q9AS80|Q9AS80\_ORYSJ

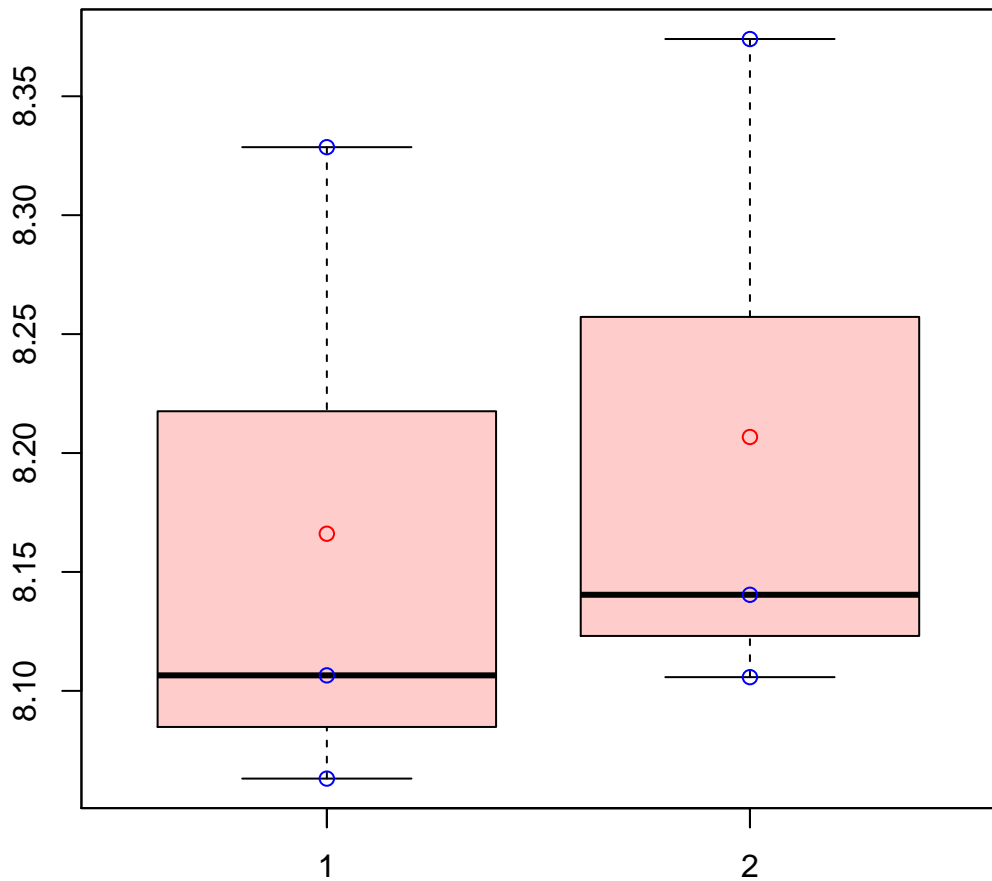

t-Test: p-value = 0.75

# Q9AT73|Q9AT73\_MAIZE

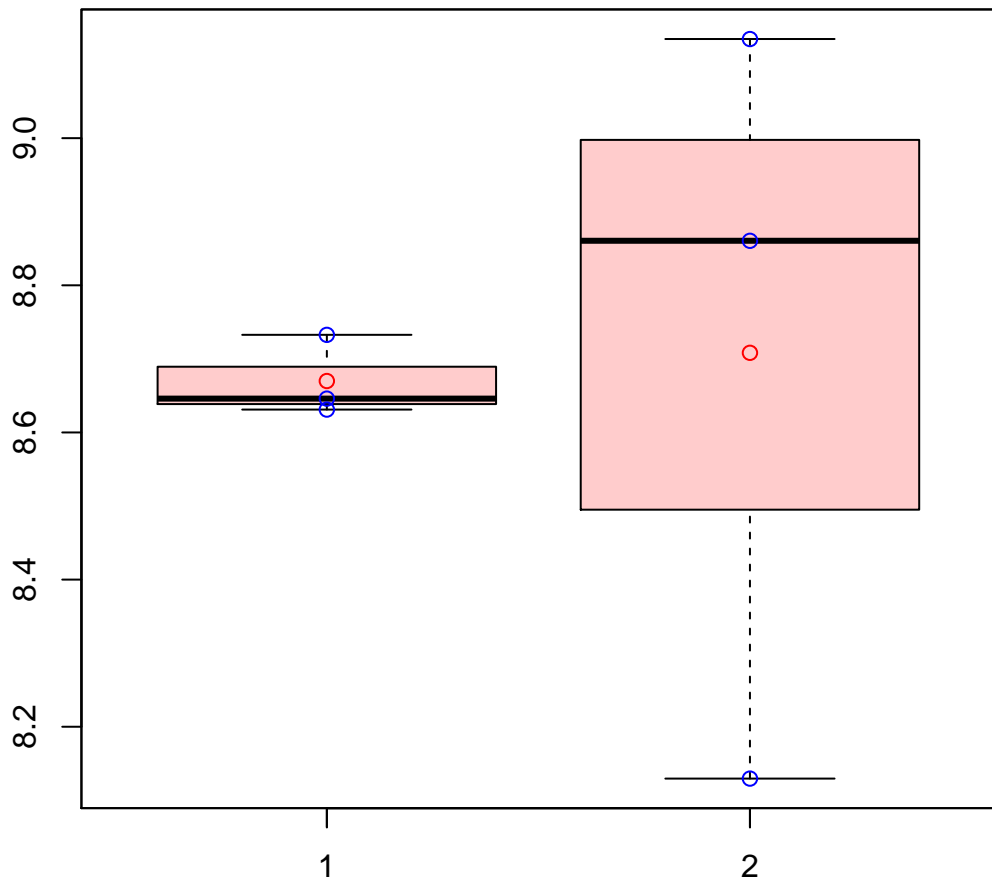

t-Test: p-value = 0.91

# Q9ATB9|Q9ATB9\_ZANAE

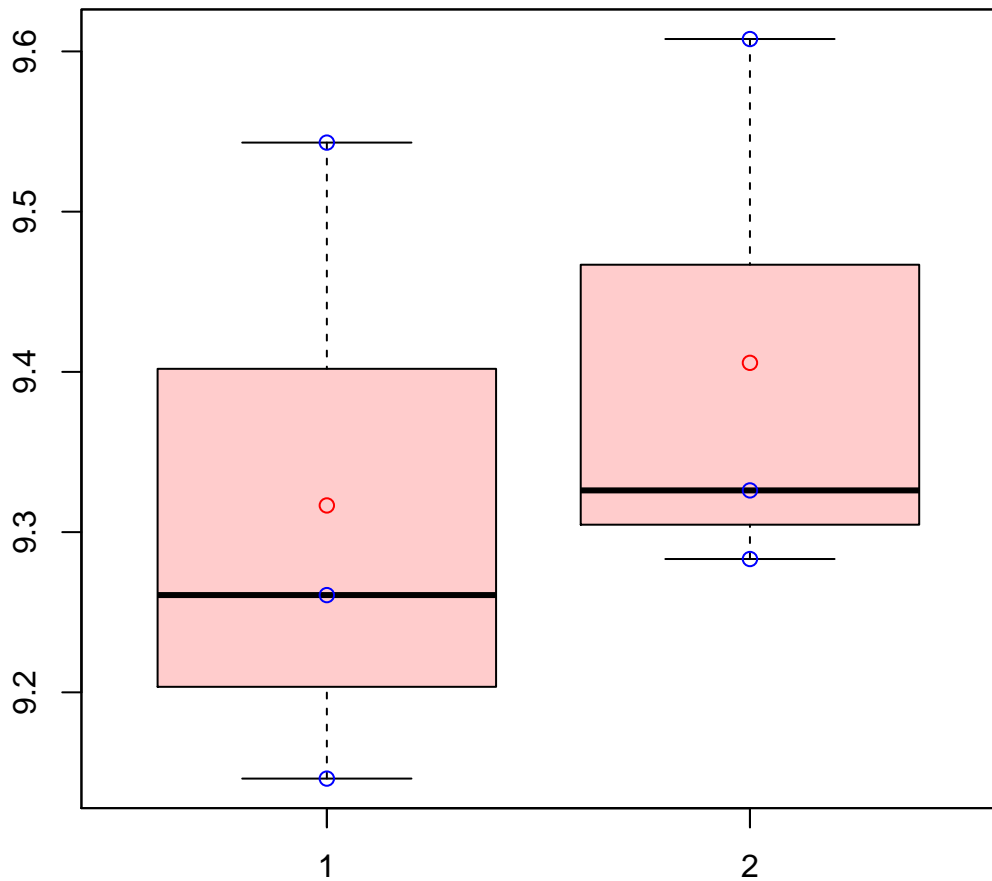

t-Test: p-value = 0.6

# Q9AUM0|Q9AUM0\_ORYSJ

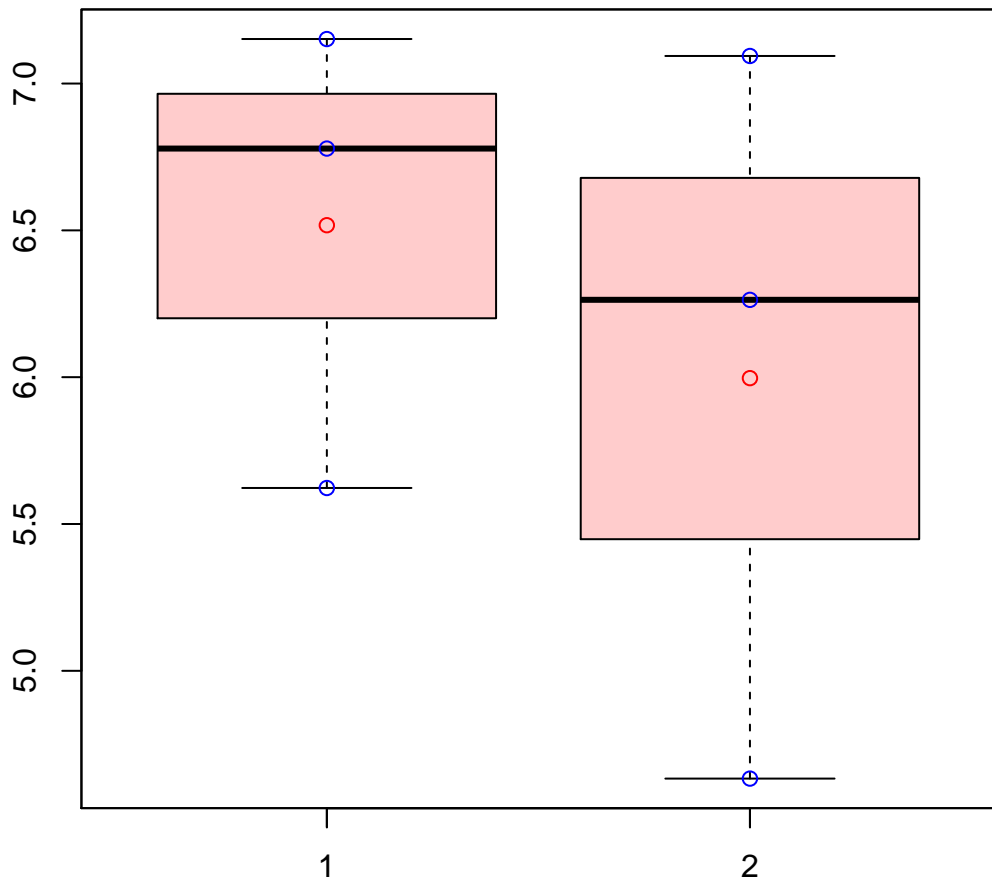

t-Test: p-value = 0.58

# Q9AV32|Q9AV32\_ORYSJ

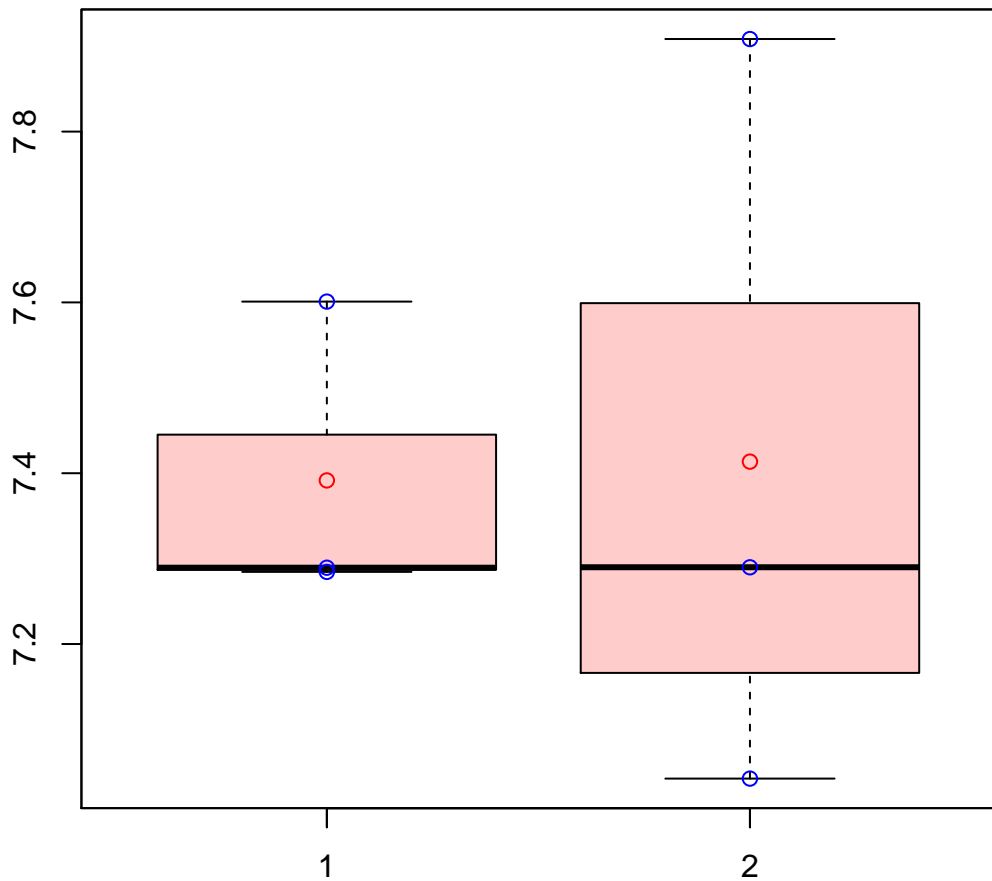

t-Test: p-value = 0.94

# Q9AXE7|Q9AXE7\_ZANAE

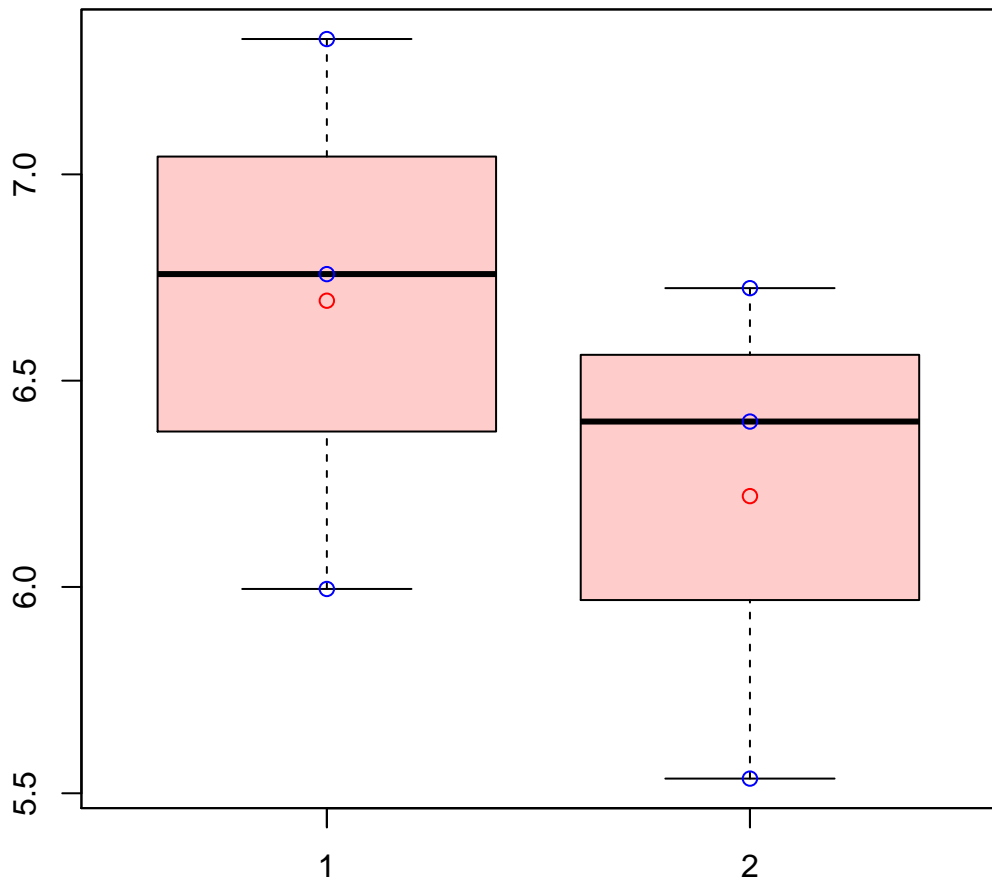

t-Test: p-value = 0.42



# Q9AXS0|Q9AXS0\_POASE

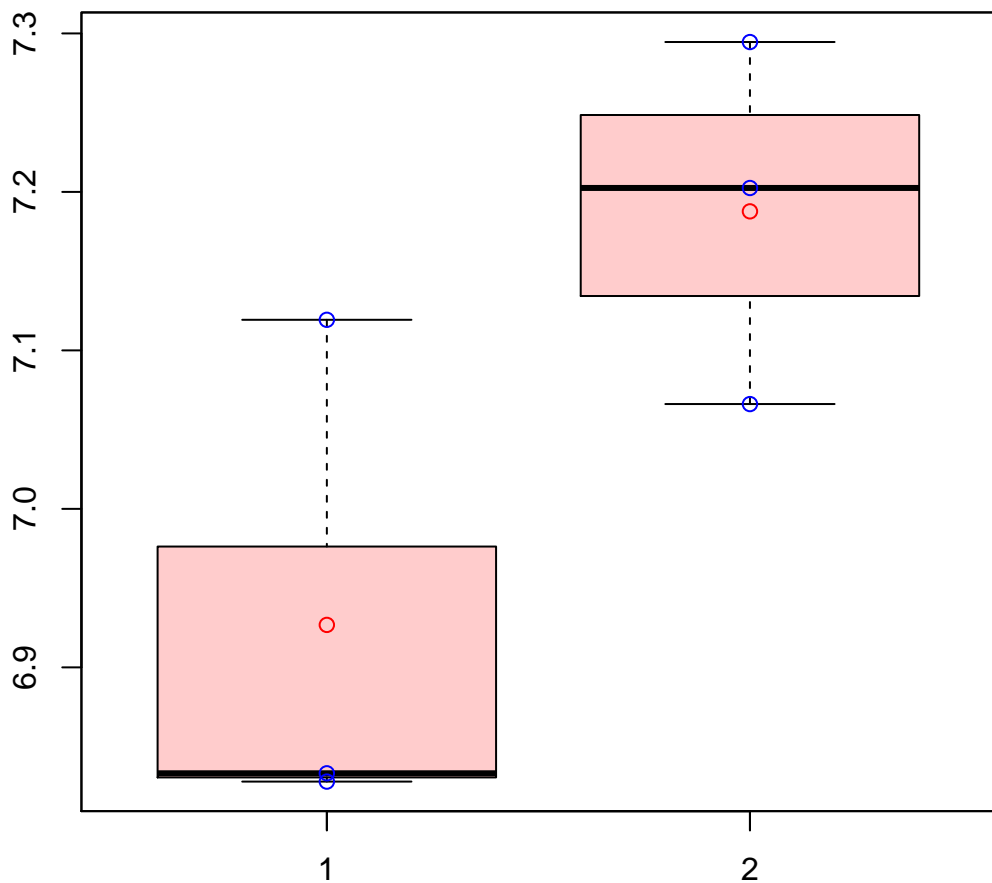

t-Test: p-value = 0.1

# Q9AY51|Q9AY51\_ORYSJ

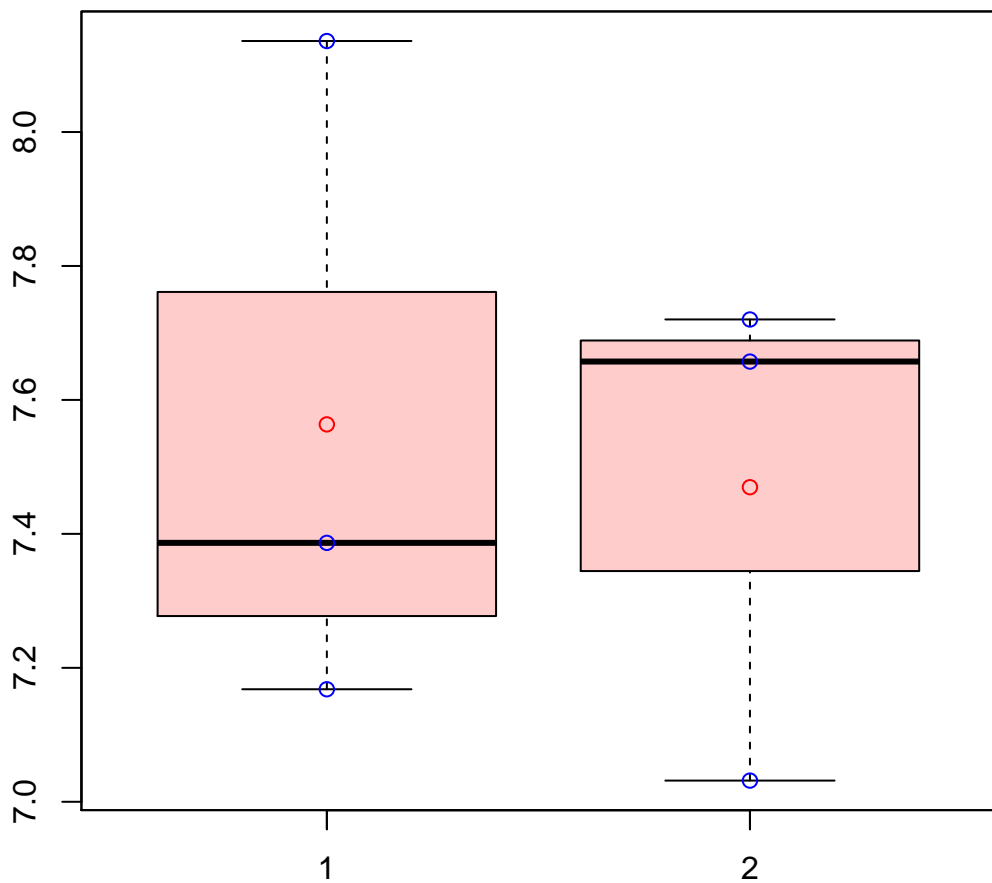

t-Test: p-value = 0.81

# Q9BA71|Q9BA71\_9LILI

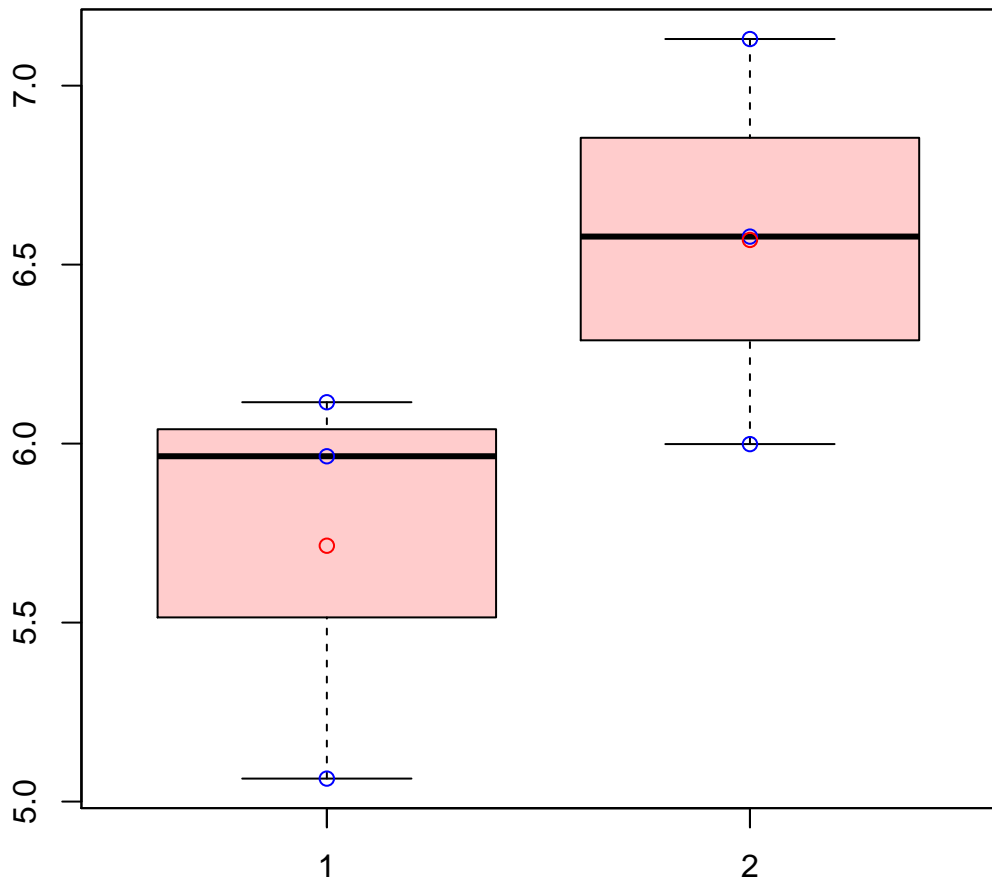

t-Test: p-value = 0.14

# Q9FPE6|Q9FPE6\_ORYSA

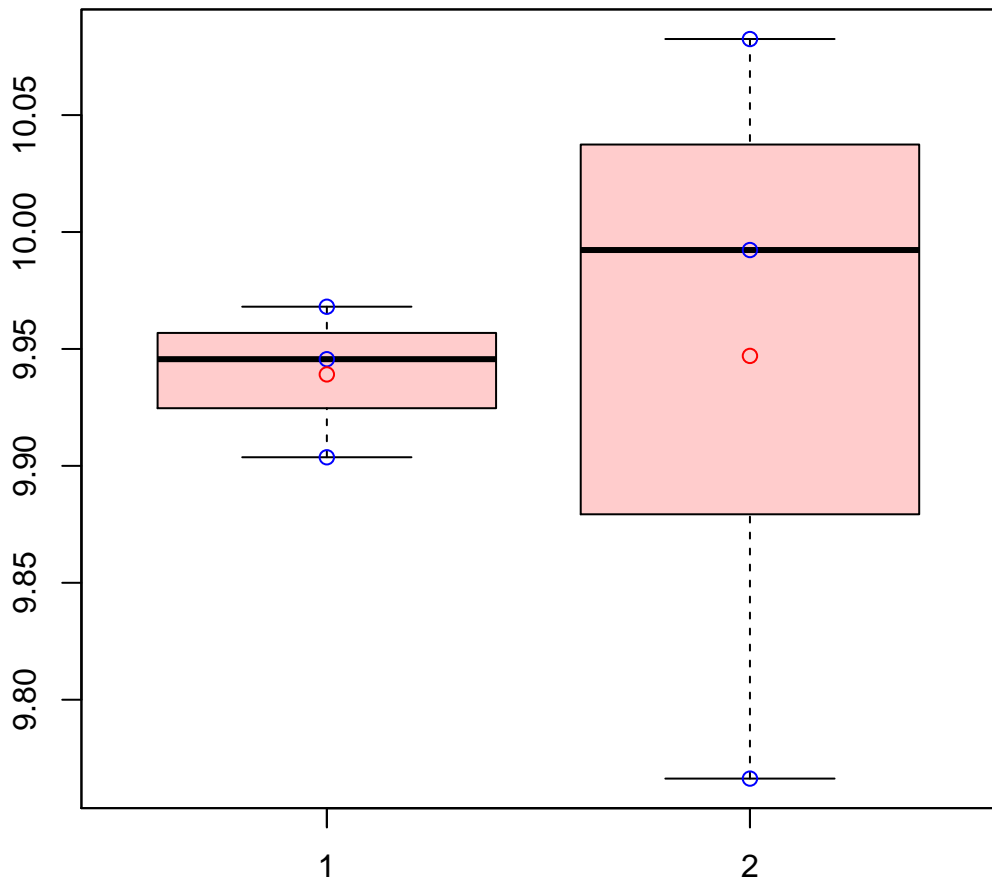

t-Test: p-value = 0.94

# Q9FQ80|Q9FQ80\_9POAL

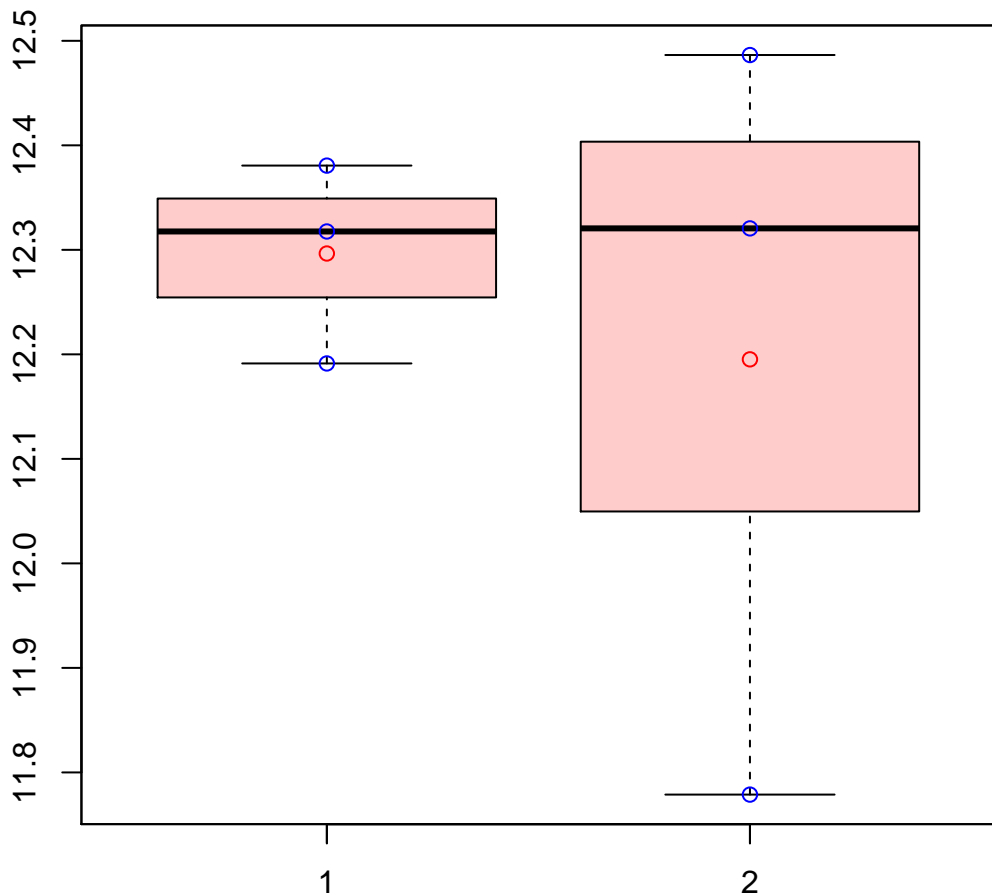

t-Test: p-value = 0.69

# Q9FRJ1|Q9FRJ1\_ORYSJ

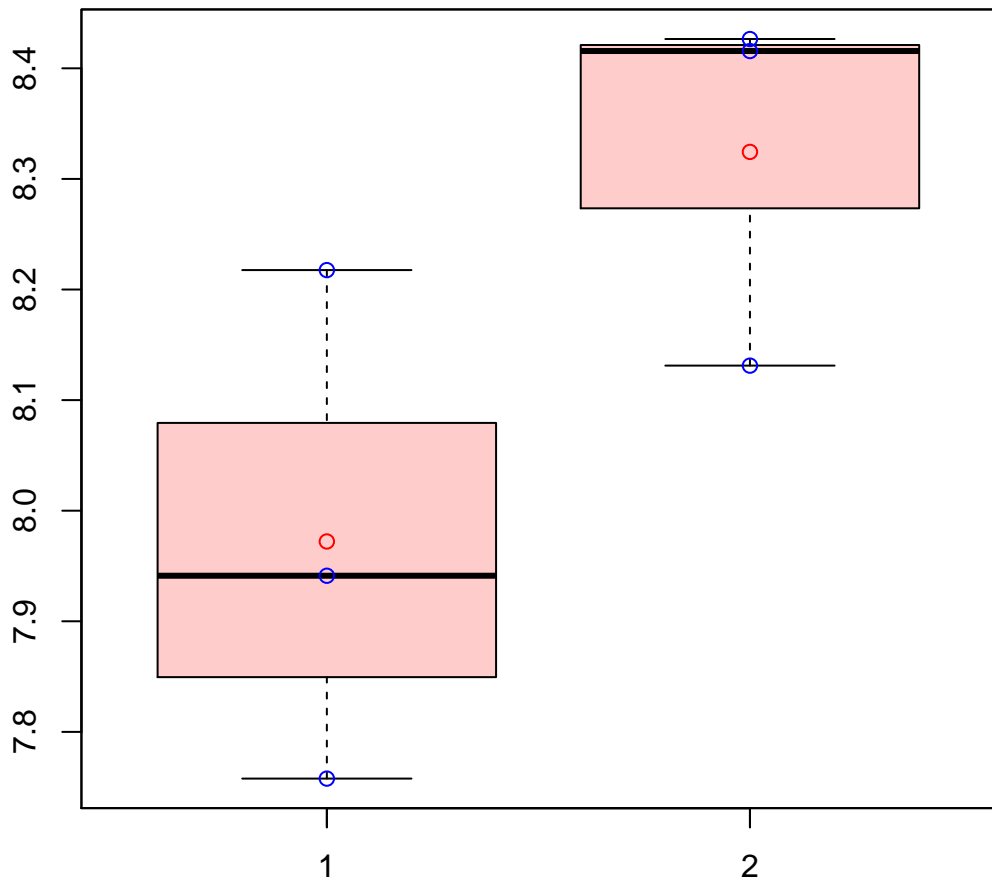

t-Test: p-value = 0.11

# Q9FS96|Q9FS96\_SACOF

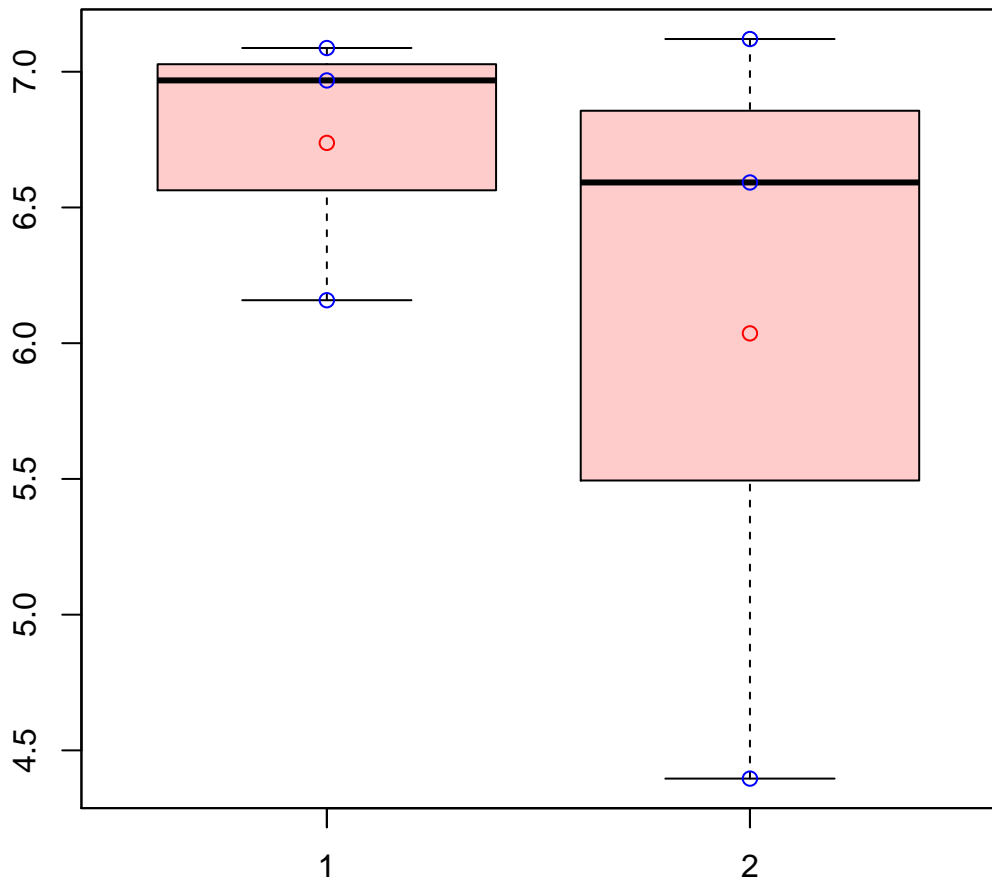

t-Test: p-value = 0.5

# Q9FSX5|Q9FSX5\_COILA

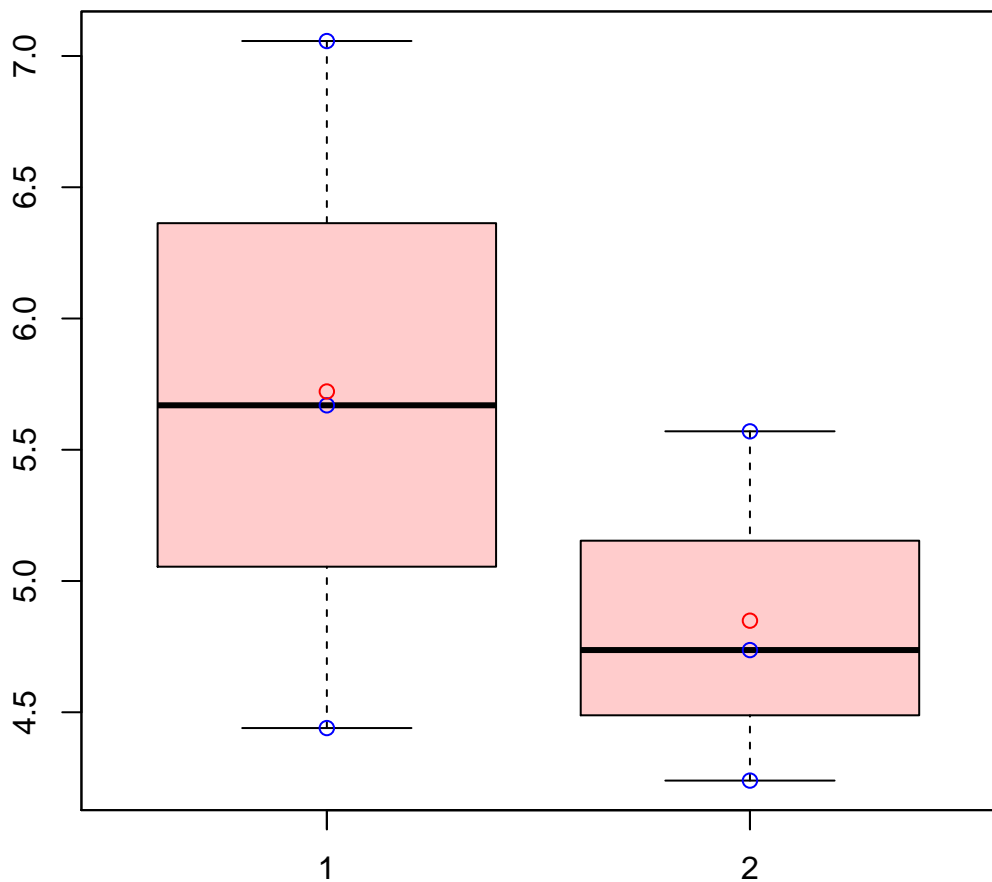

t-Test: p-value = 0.38



# Q9FTT4|Q9FTT4\_ORYSJ

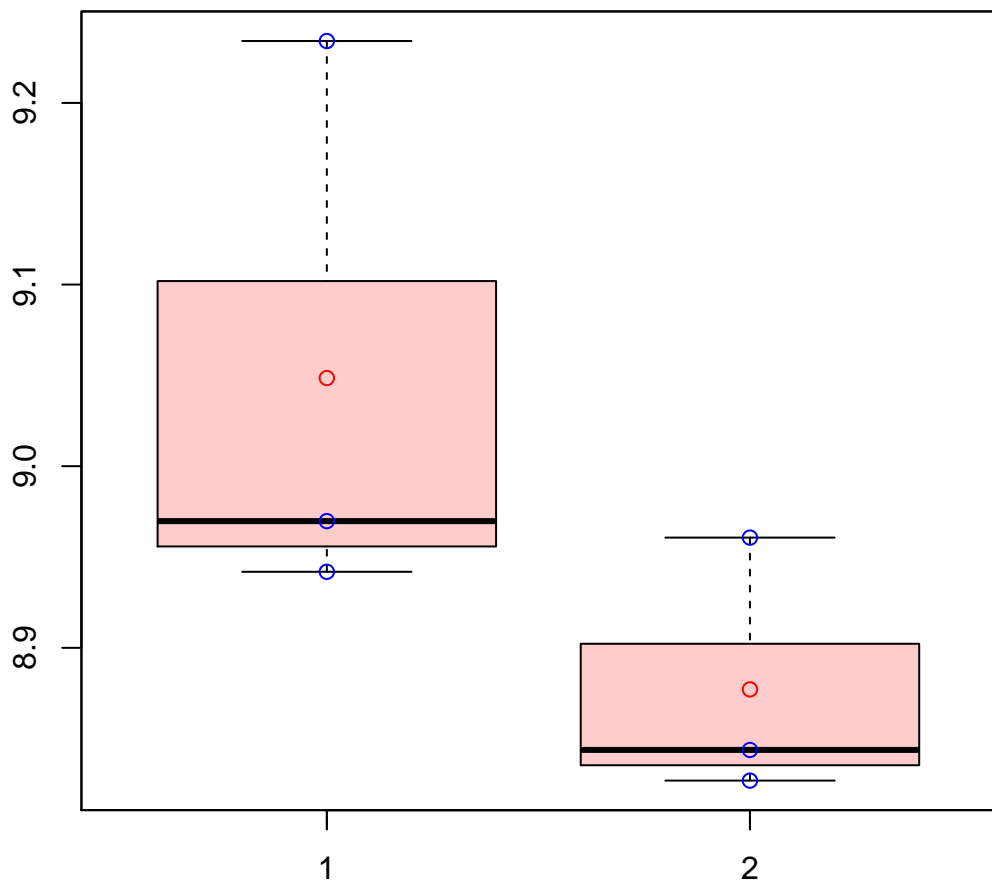

t-Test: p-value = 0.2

# Q9FUN3|Q9FUN3\_ELAGV

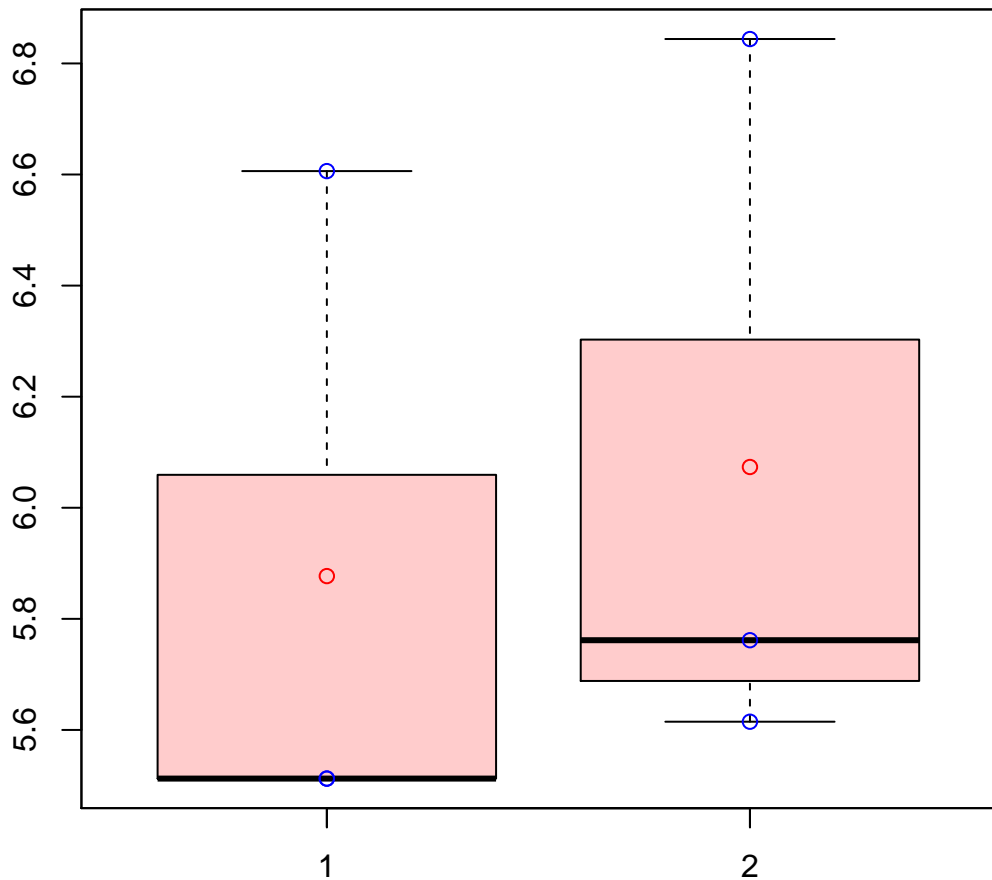

t-Test: p-value = 0.73

# Q9FUZ6|Q9FUZ6\_MAIZE

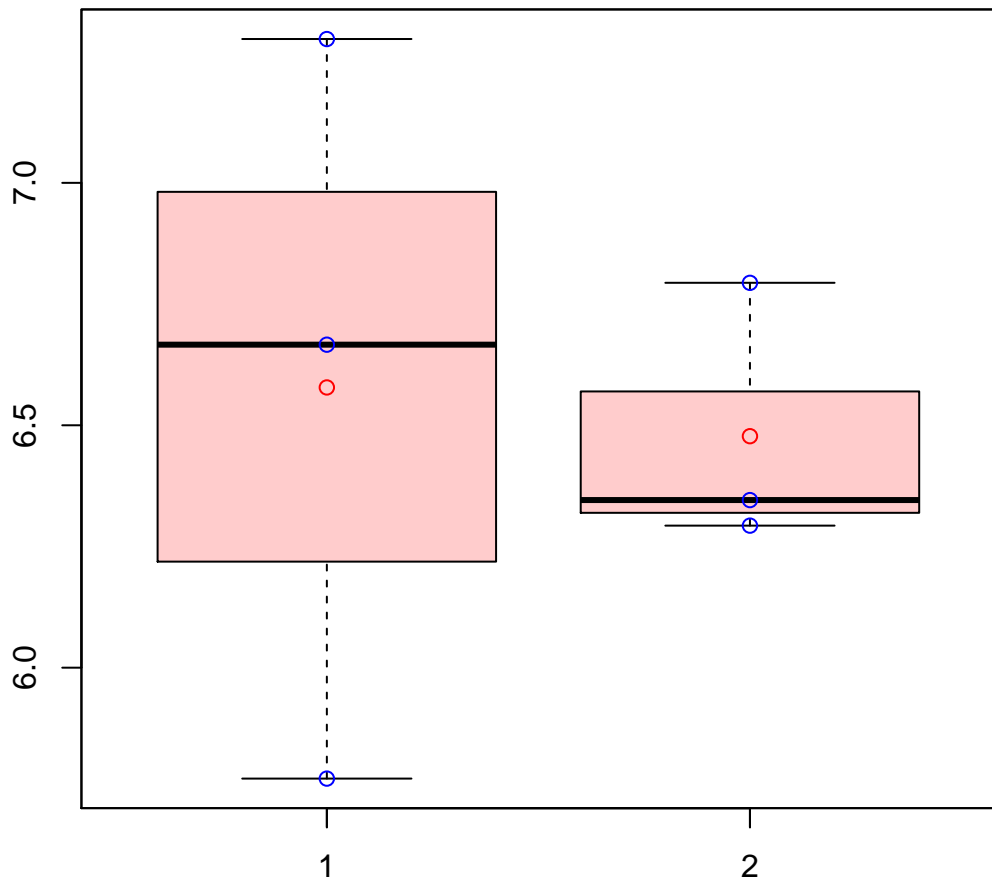

t-Test: p-value = 0.85

# Q9FW51|Q9FW51\_ORYSJ

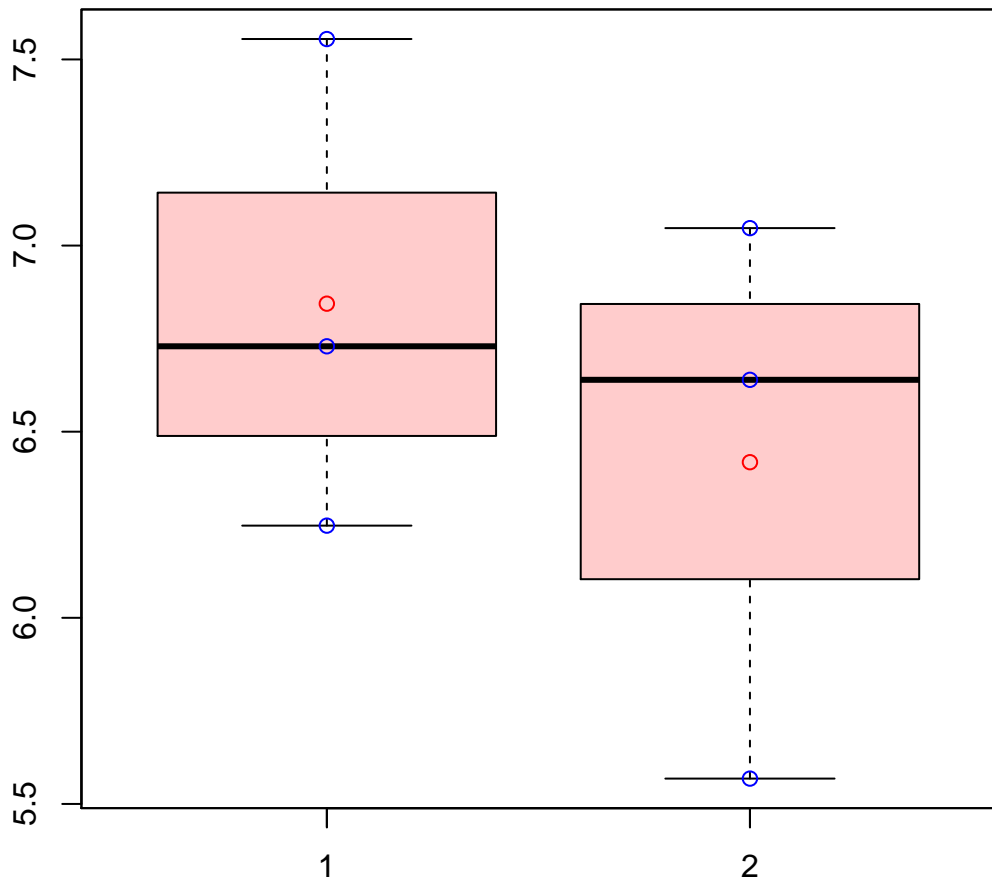

t-Test: p-value = 0.51

# Q9FWV2|Q9FWV2\_ORYSJ

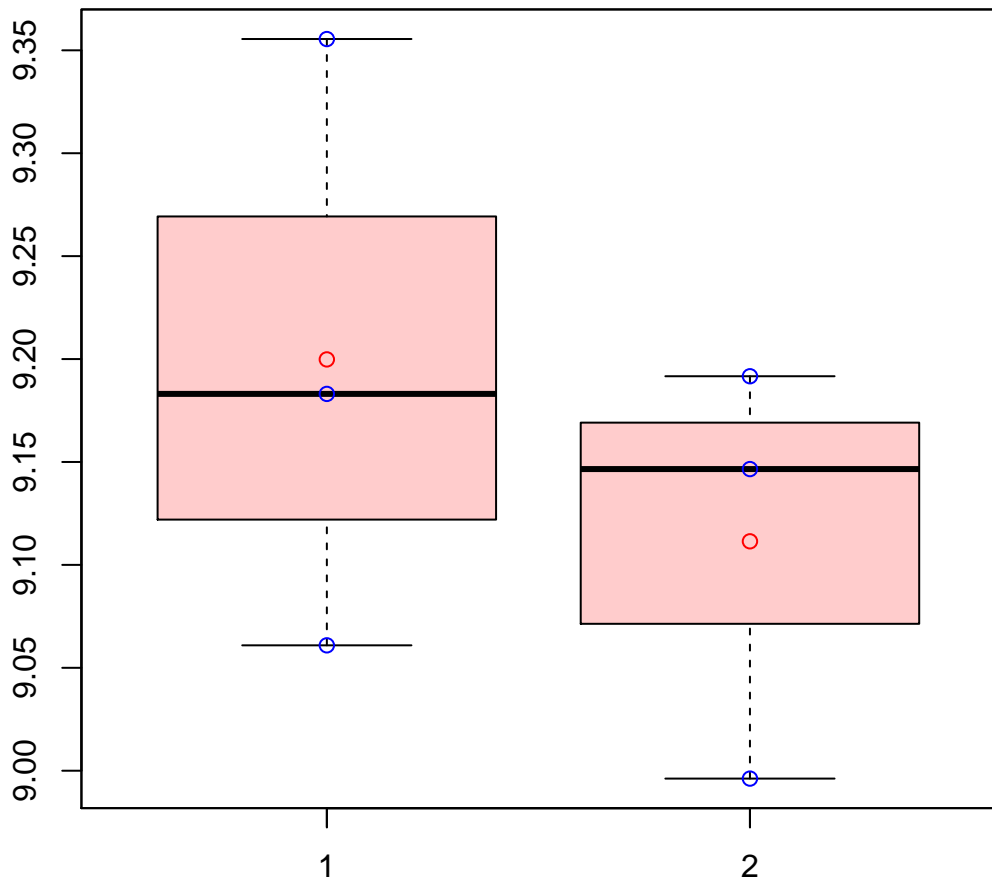

t-Test: p-value = 0.45

# Q9FXQ9|Q9FXQ9\_WHEAT

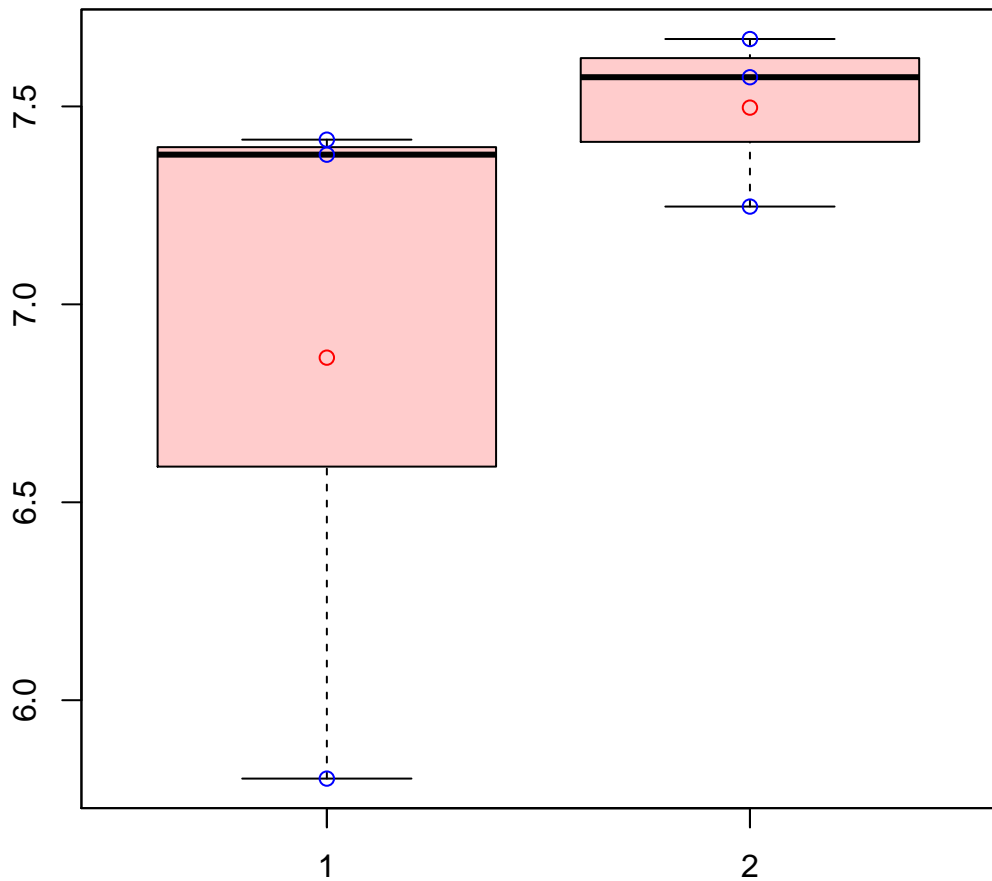

t-Test: p-value = 0.36

# Q9LKM2|Q9LKM2\_ORYSI

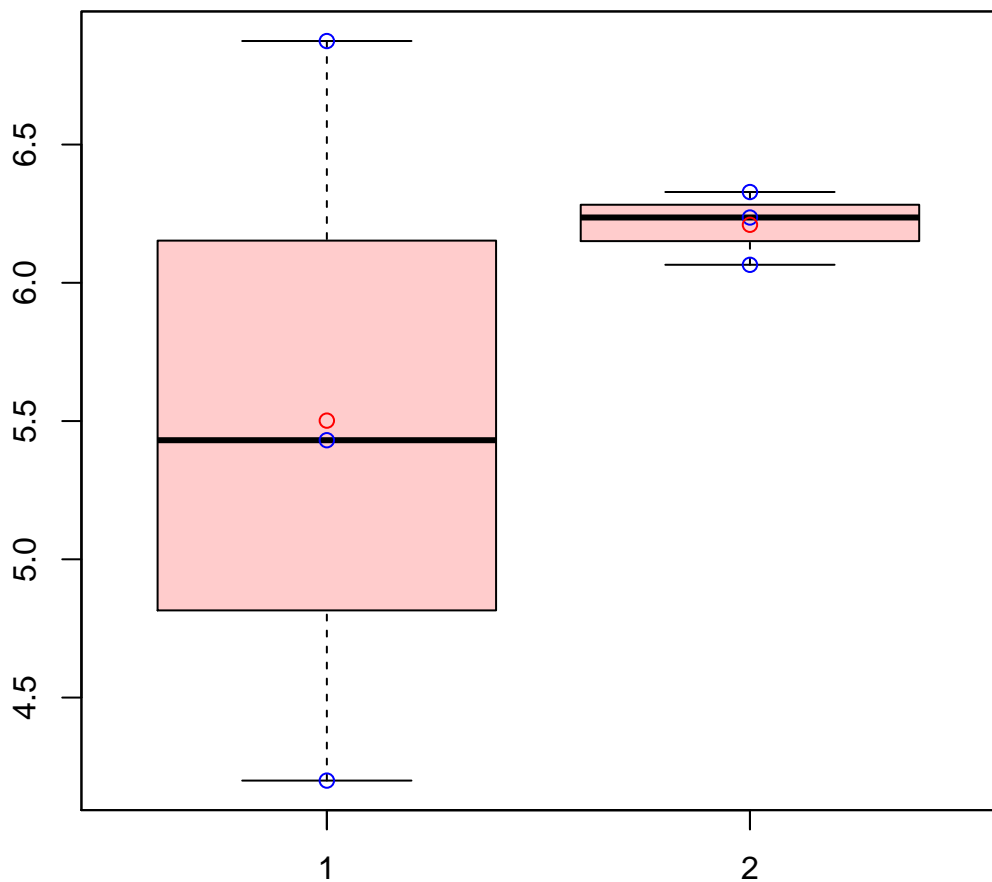

t-Test: p-value = 0.46

# Q9LKY2|Q9LKY2\_MAIZE

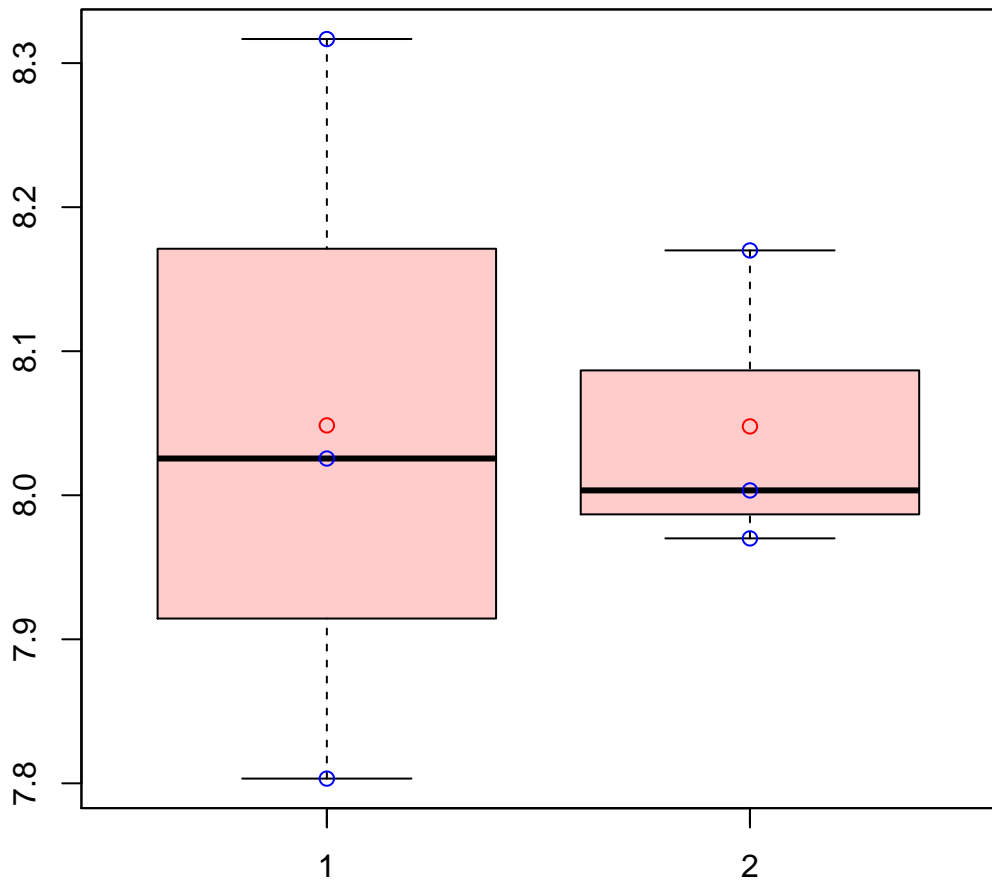

t-Test: p-value = 1



# Q9LLB8|Q9LLB8\_MAIZE

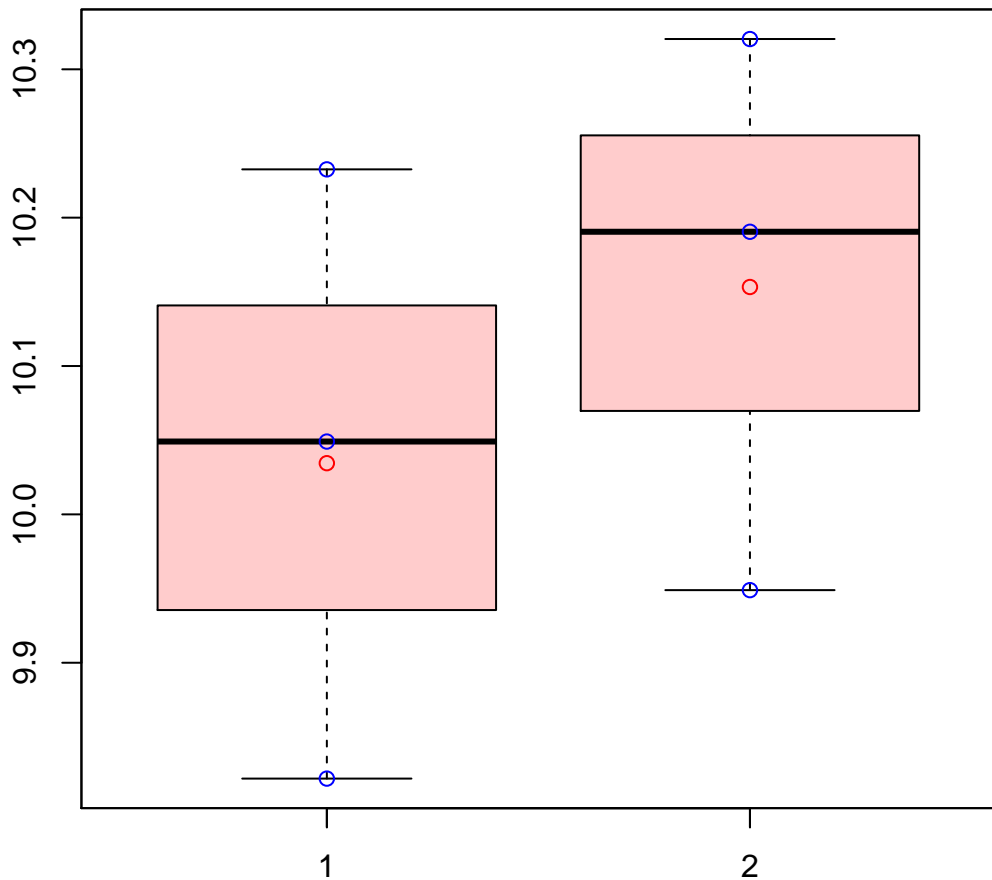

t-Test: p-value = 0.5

# Q9LLD7|Q9LLD7\_AVES

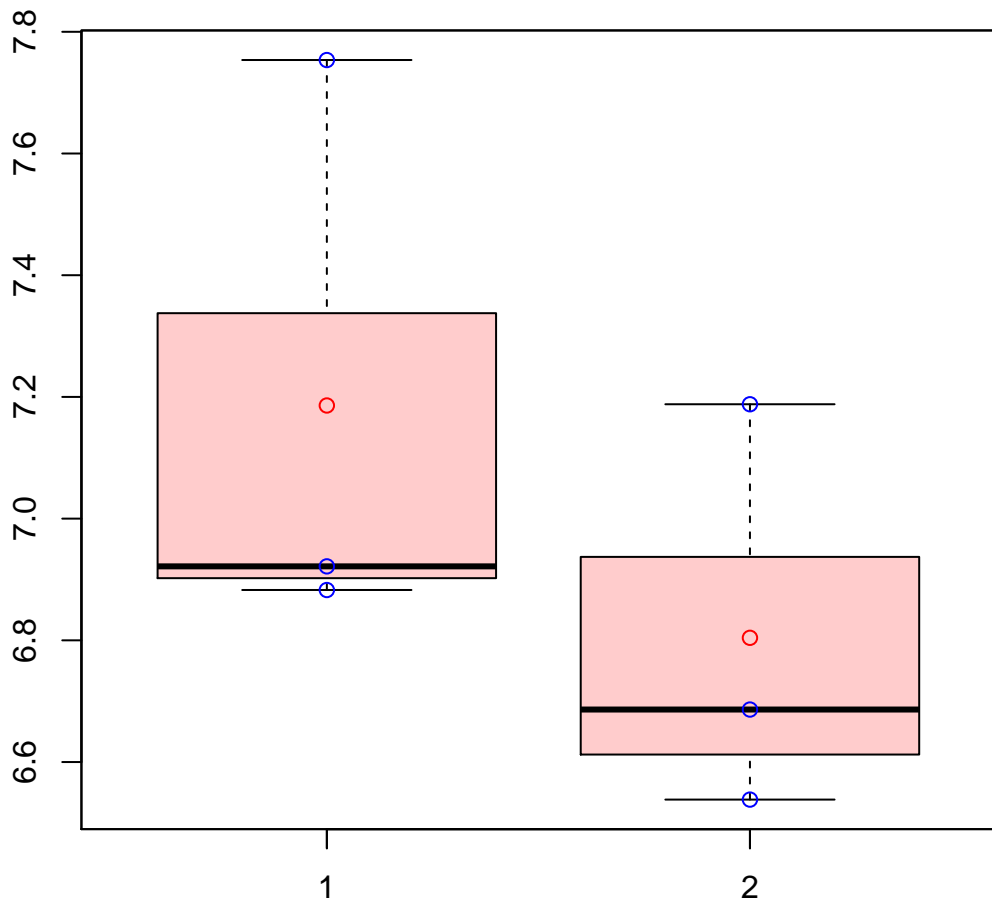

t-Test: p-value = 0.34

# Q9LWT6|Q9LWT6\_ORYSJ

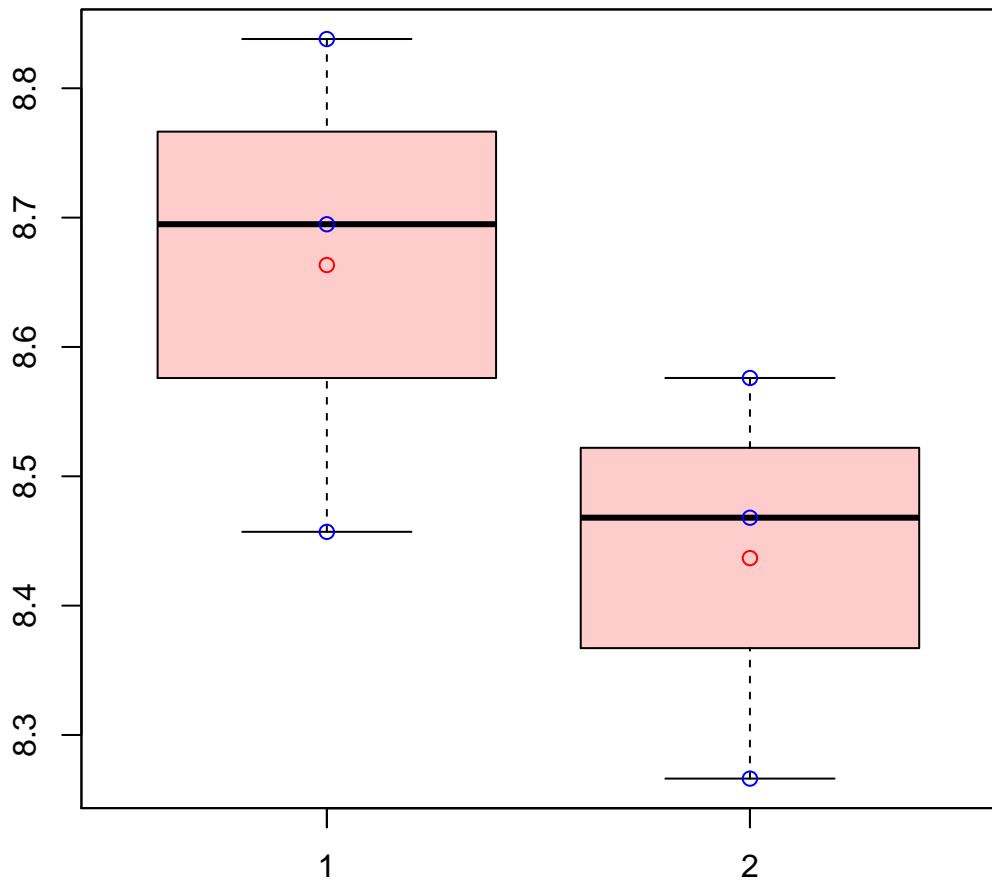

t-Test: p-value = 0.19

# Q9M484|Q9M484\_9ASPA

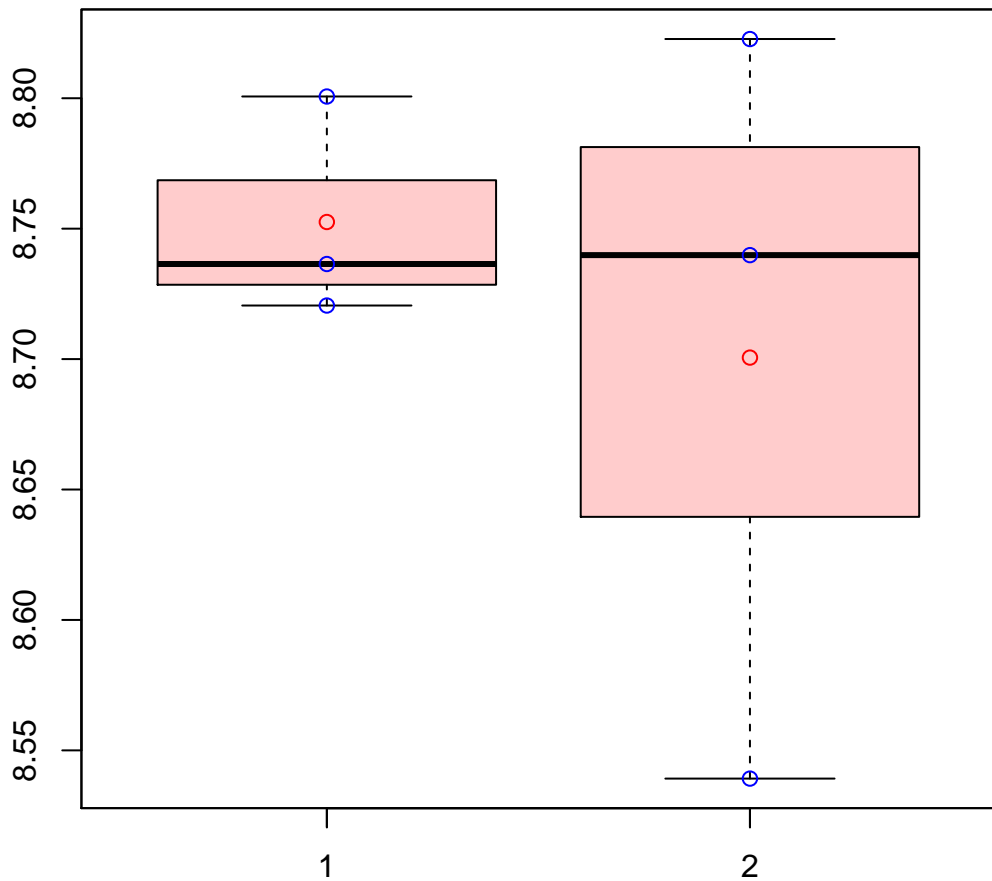

t-Test: p-value = 0.61

# Q9M4S9|Q9M4S9\_ALLCE

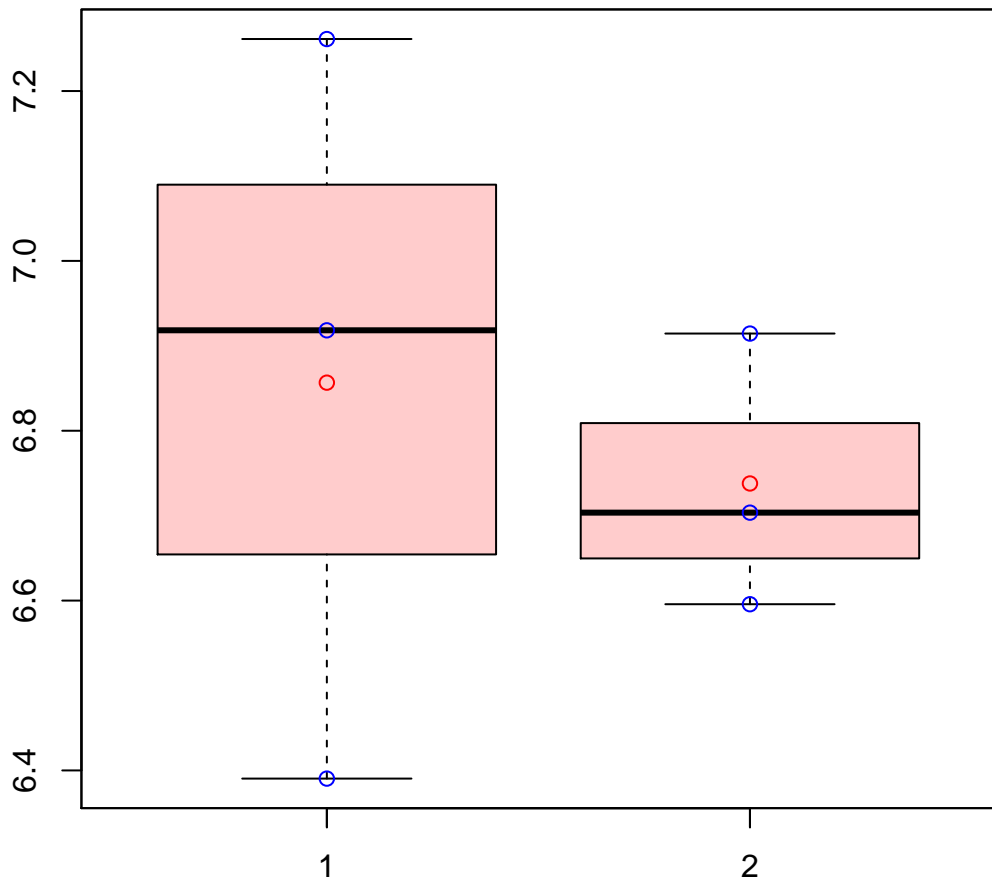

t-Test: p-value = 0.69

# Q9M511|Q9M511\_LILLO

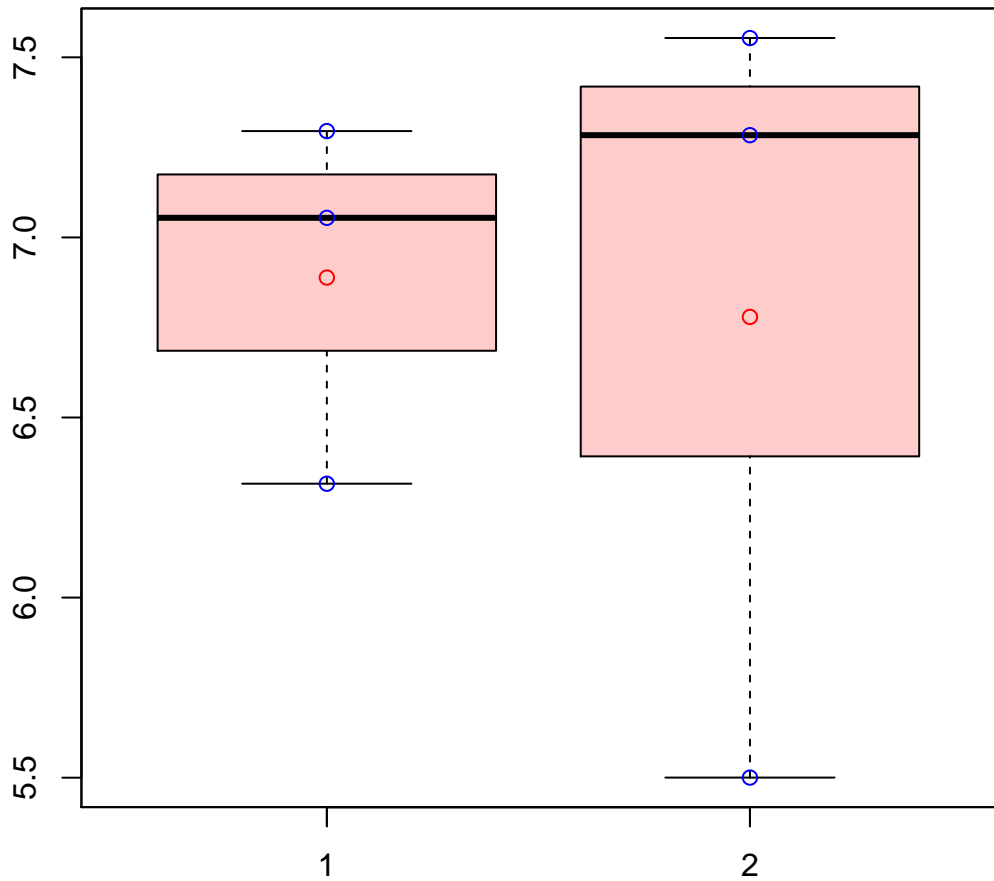

t-Test: p-value = 0.89

# Q9M7E3|Q9M7E3\_MAIZE

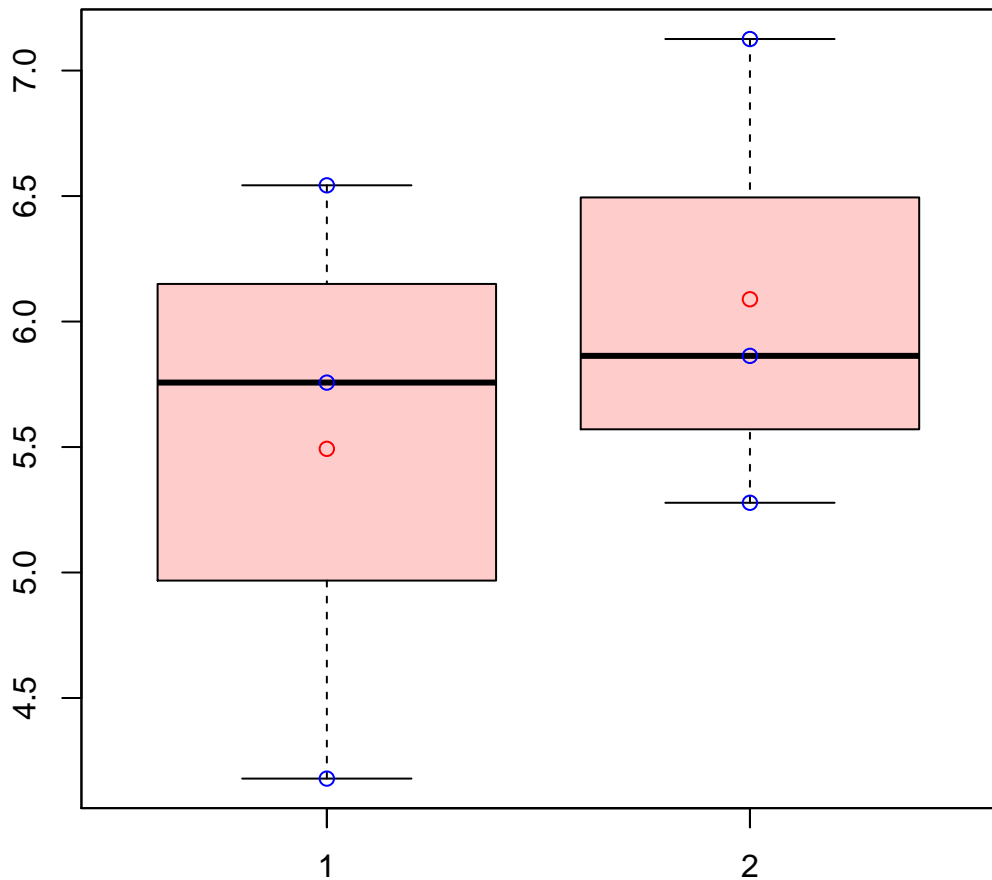

t-Test: p-value = 0.54

# Q9M7E4|Q9M7E4\_MAIZE

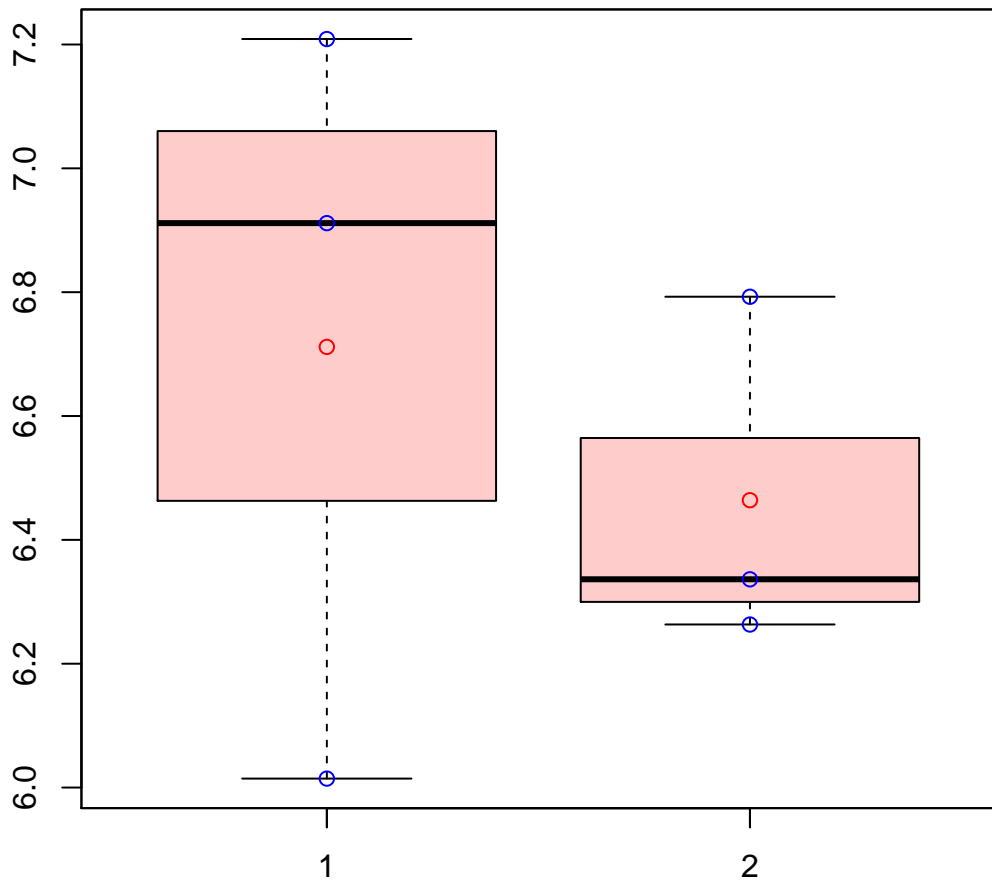

t-Test: p-value = 0.58



# Q9MAZ2|Q9MAZ2\_ALLTU

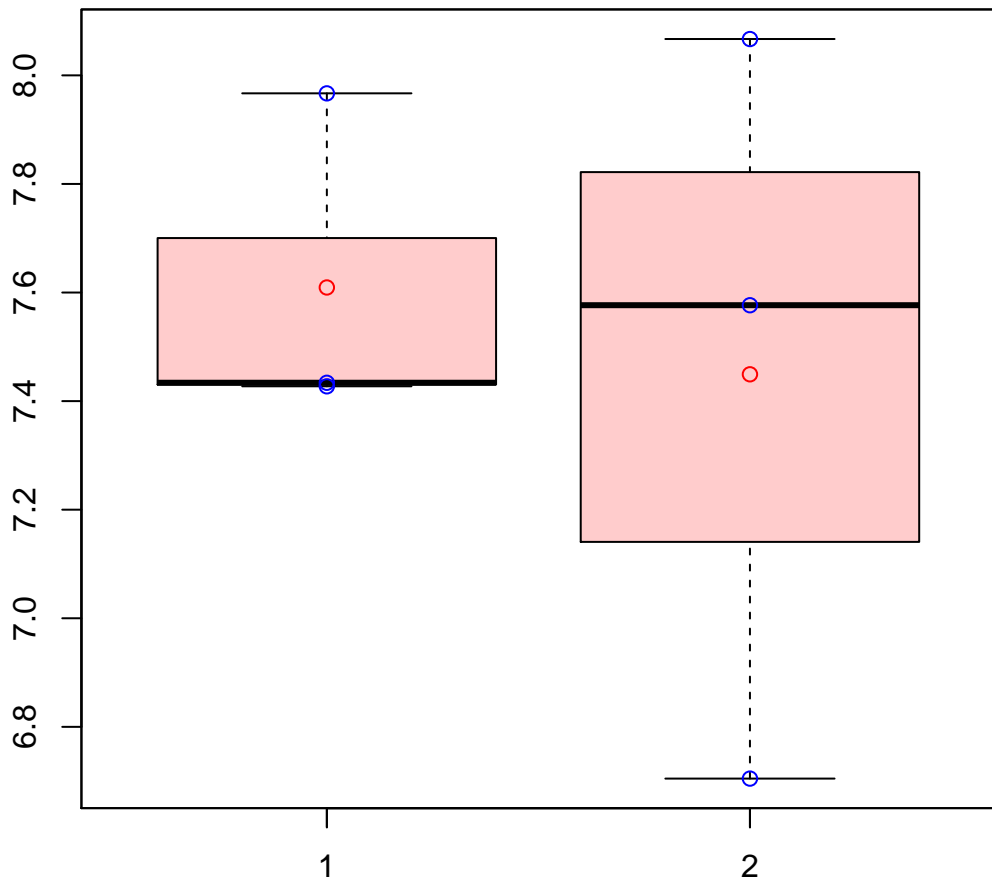

t-Test: p-value = 0.74

# Q9MDQ1|Q9MDQ1\_SORBI

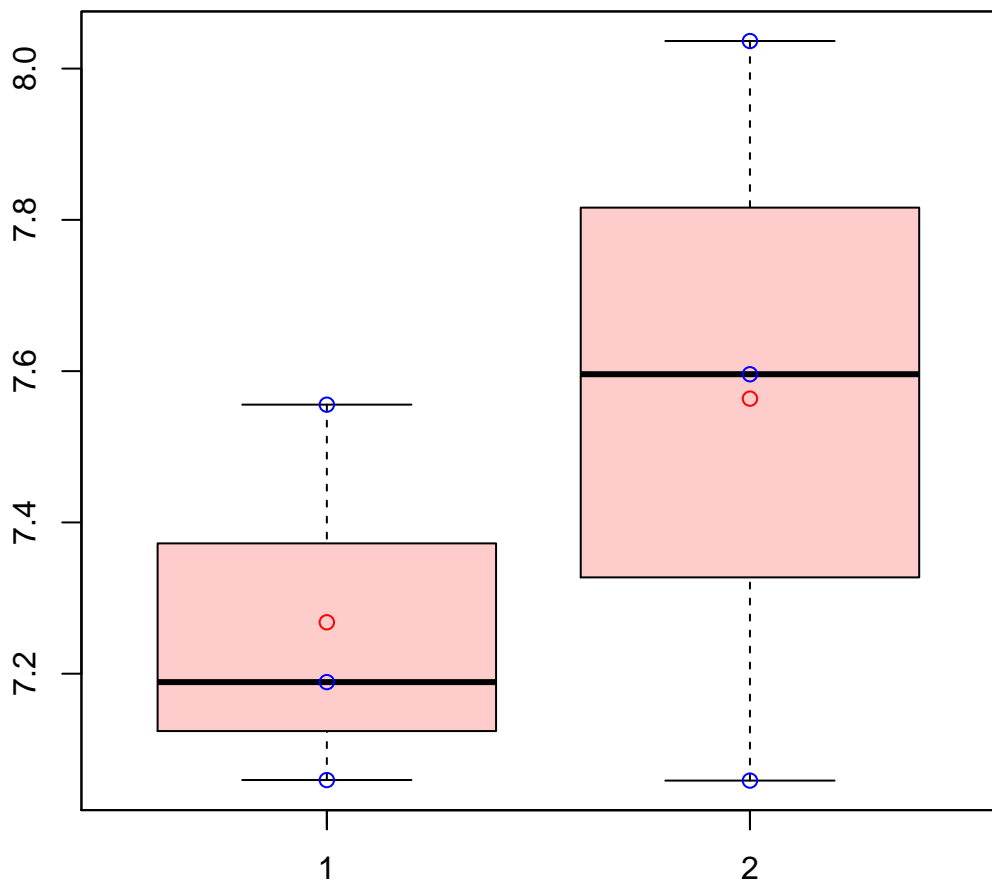

t-Test: p-value = 0.42

# Q9MSY8|Q9MSY8\_9ASPA

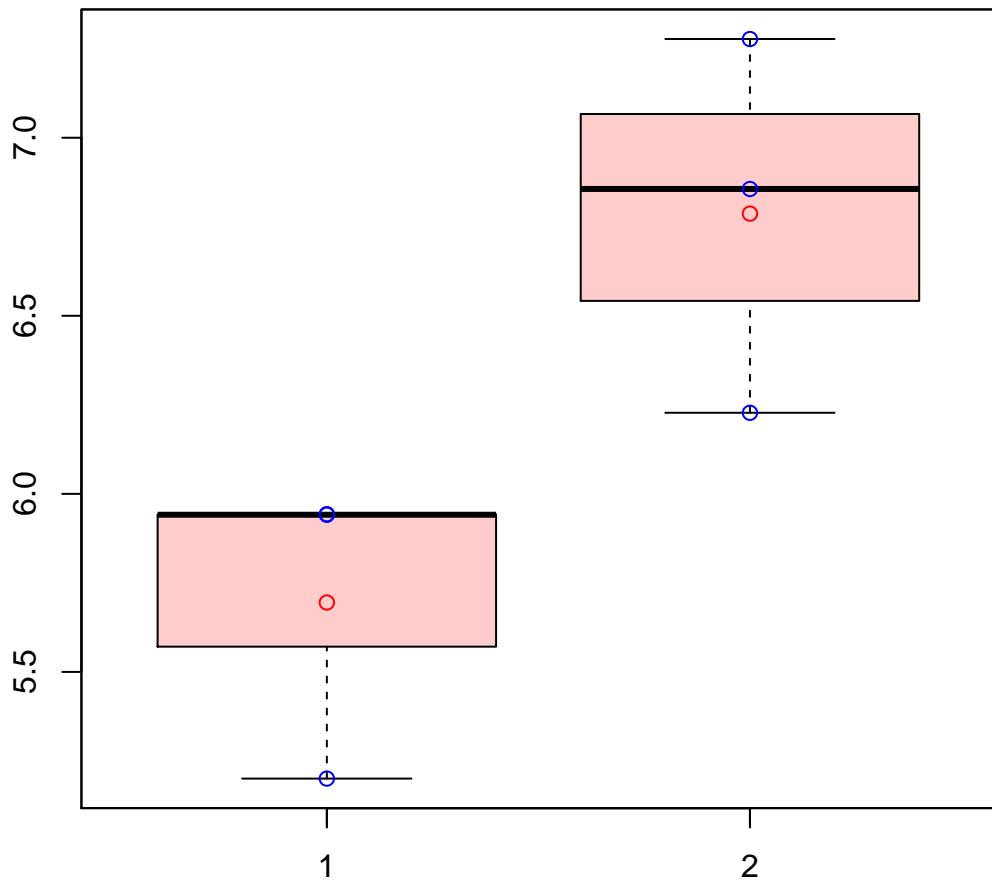

t-Test: p-value = 0.05

# Q9MTV4|Q9MTV4\_9LILI

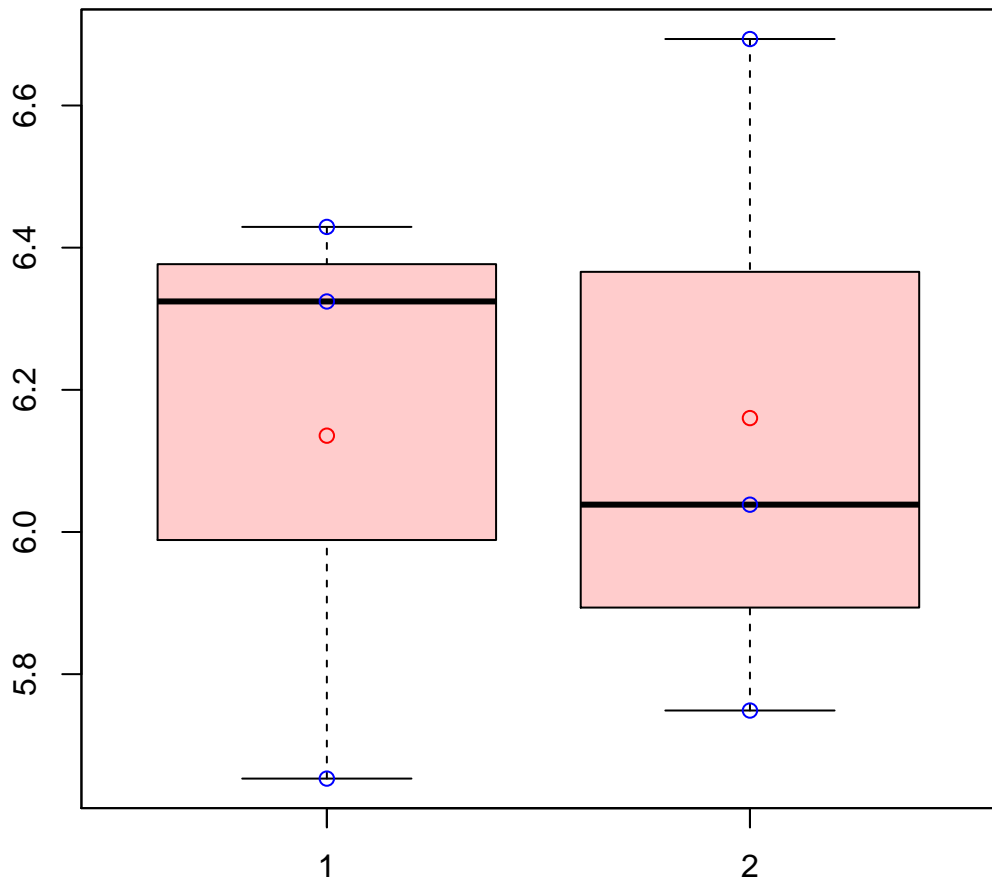

t-Test: p-value = 0.95

# Q9SAS3|Q9SAS3\_WHEAT

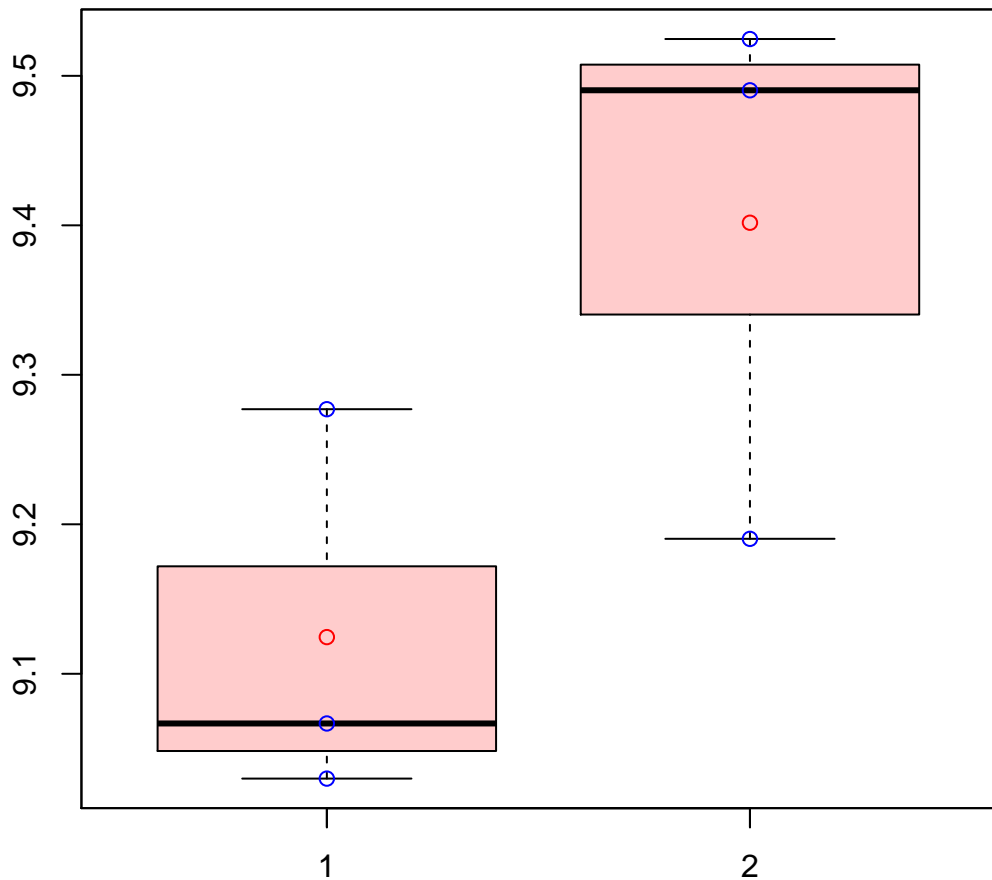

t-Test: p-value = 0.11

# Q9SAU8|Q9SAU8\_WHEAT

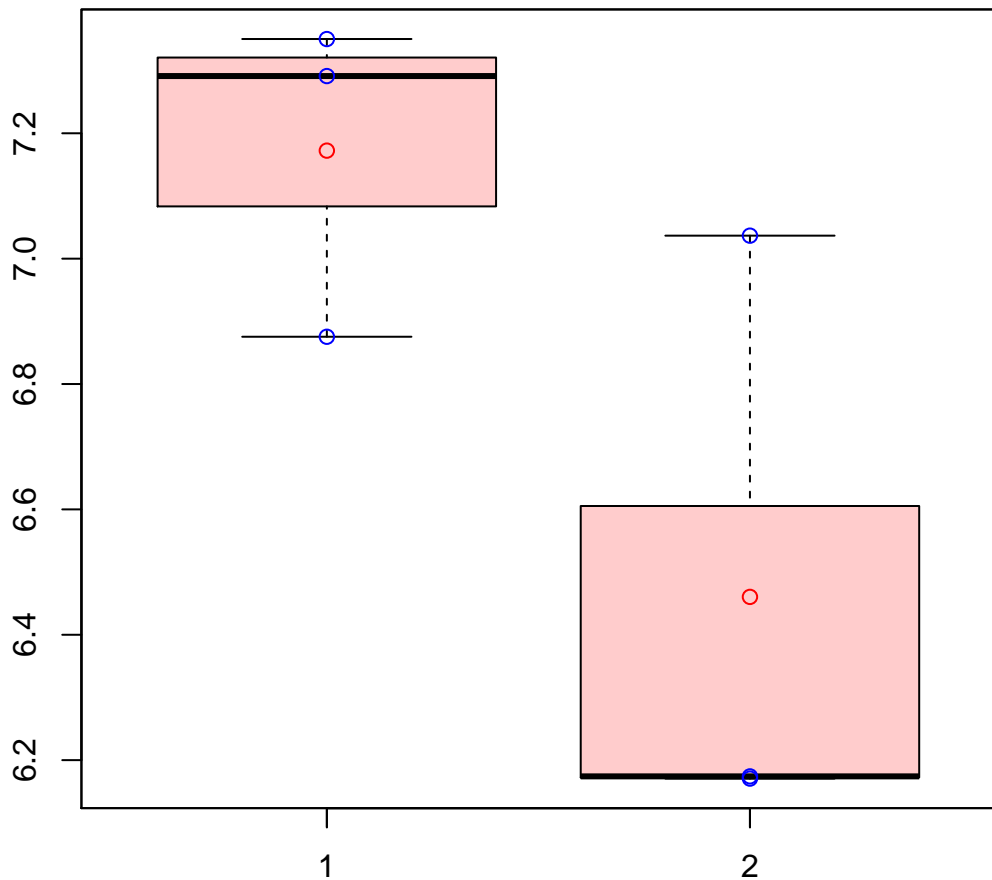

t-Test: p-value = 0.12

# Q9SAZ6|Q9SAZ6\_MAIZE

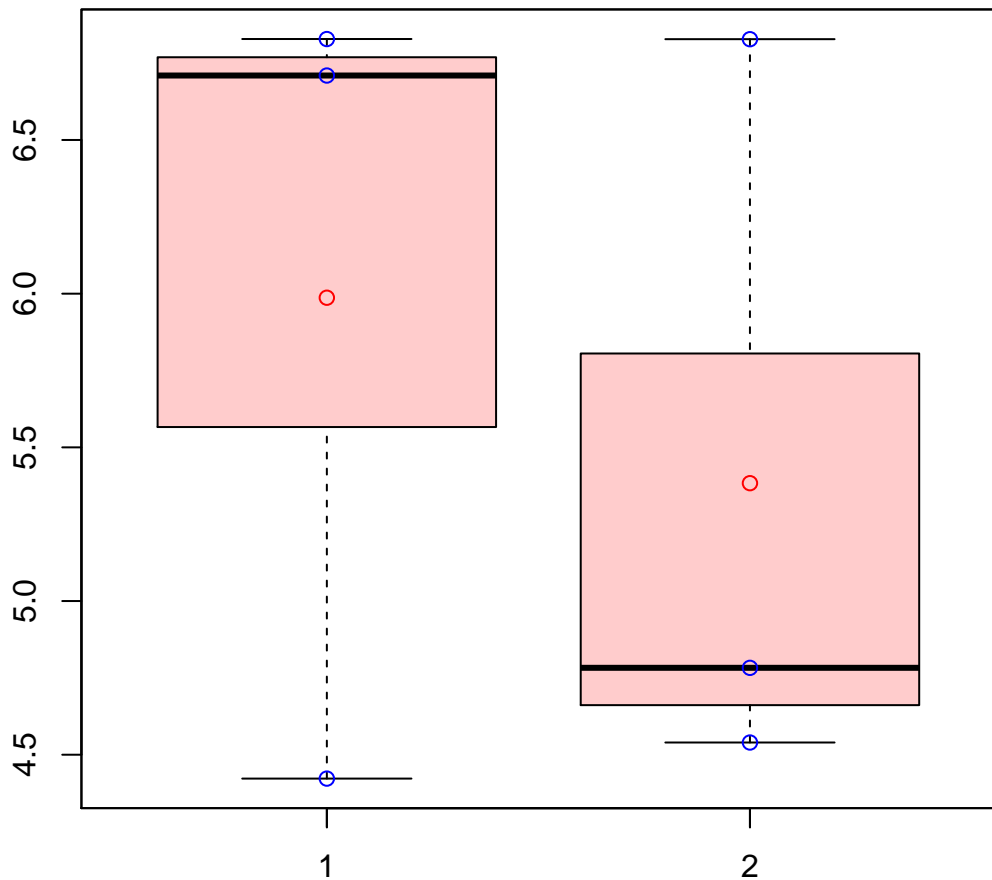

t-Test: p-value = 0.6

# Q9SBJ3|Q9SBJ3\_MAIZE

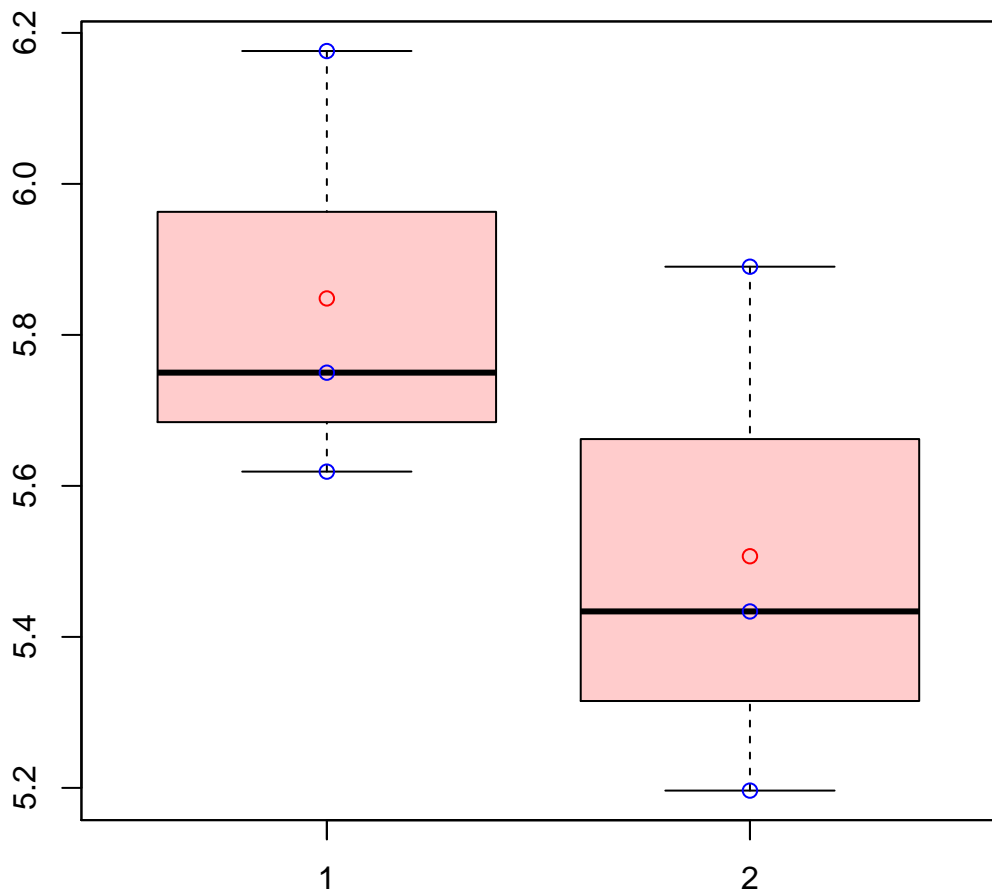

t-Test: p-value = 0.27



# Q9SDG5|Q9SDG5\_ORYSJ

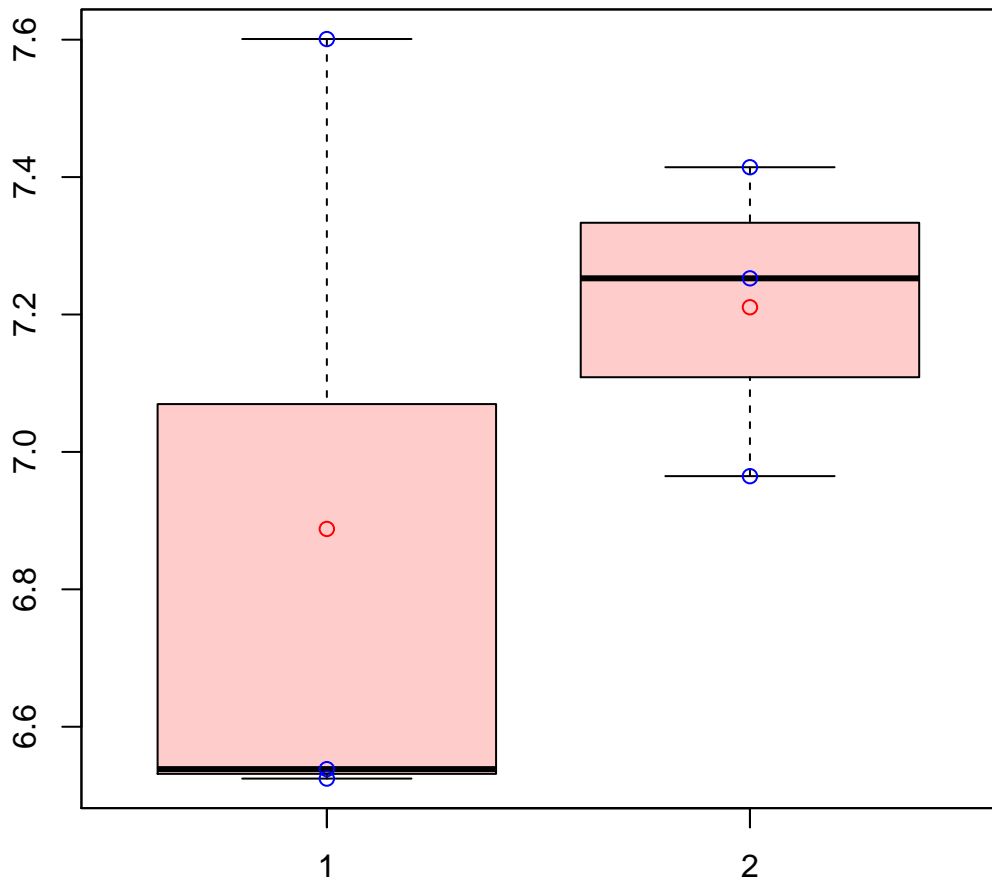

t-Test: p-value = 0.47

# Q9SDJ2|Q9SDJ2\_ORYSJ

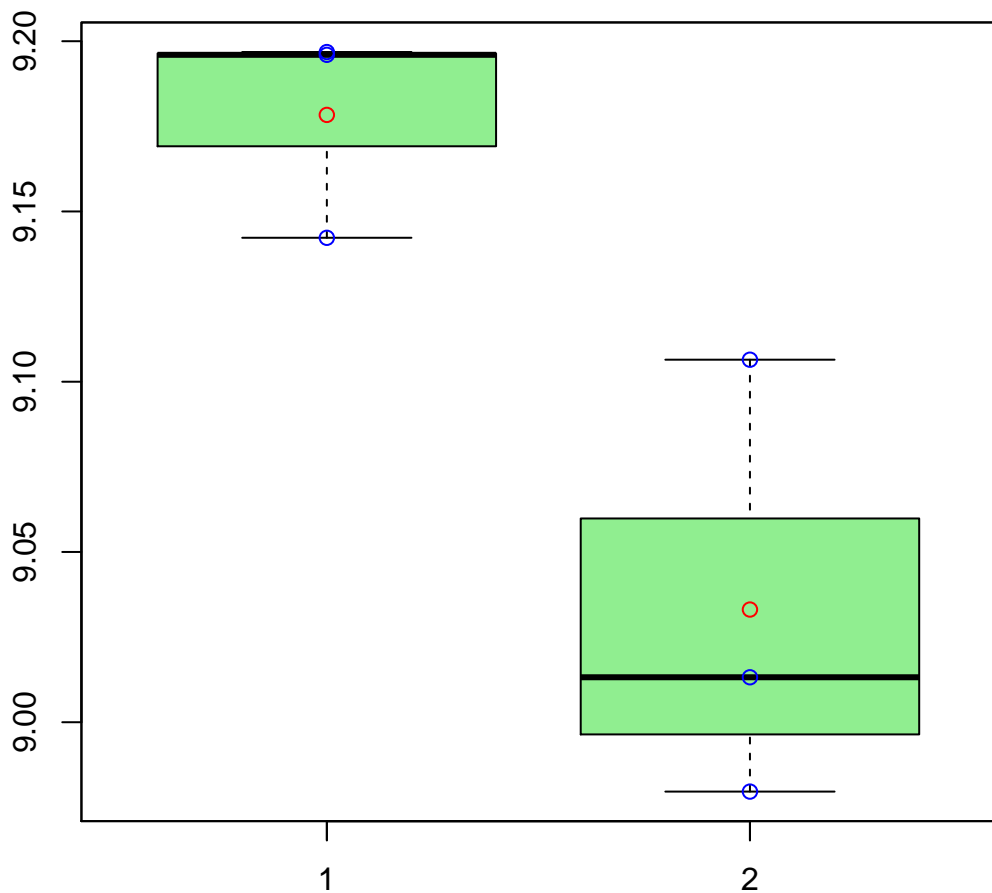

t-Test: p-value = 0.04

# Q9SDP0|Q9SDP0\_ALLCE

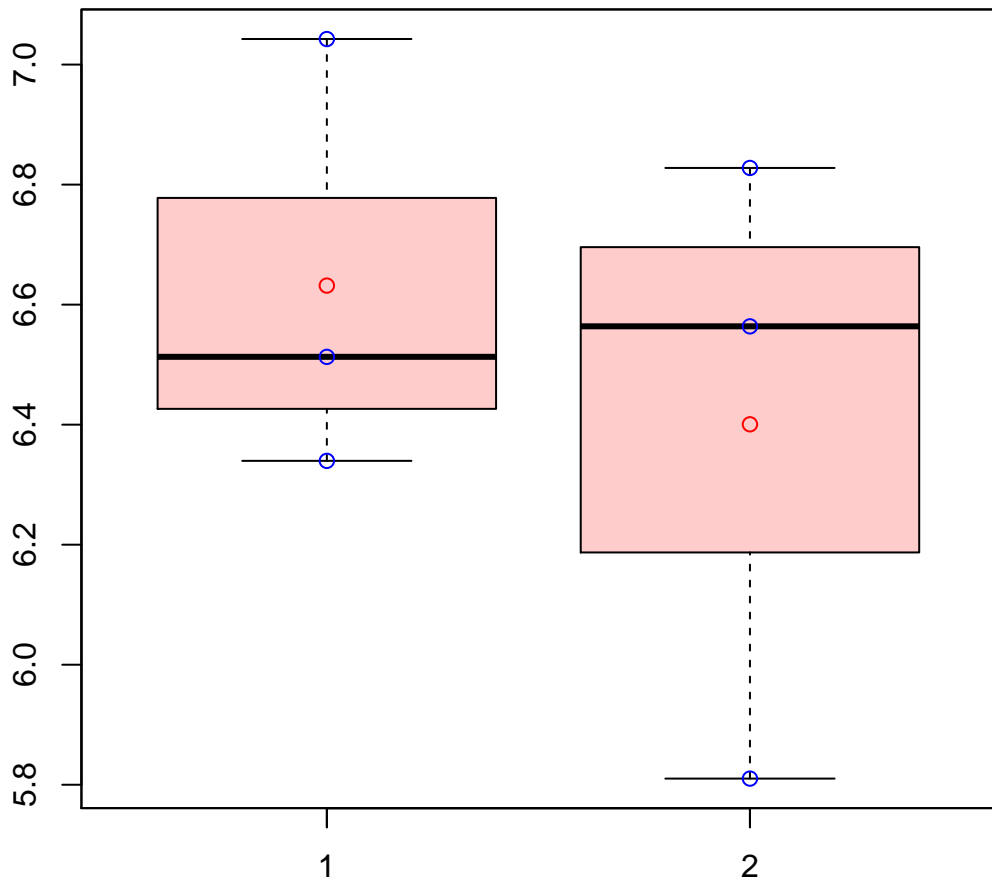

t-Test: p-value = 0.57

# Q9SEF8|Q9SEF8\_ORYSA

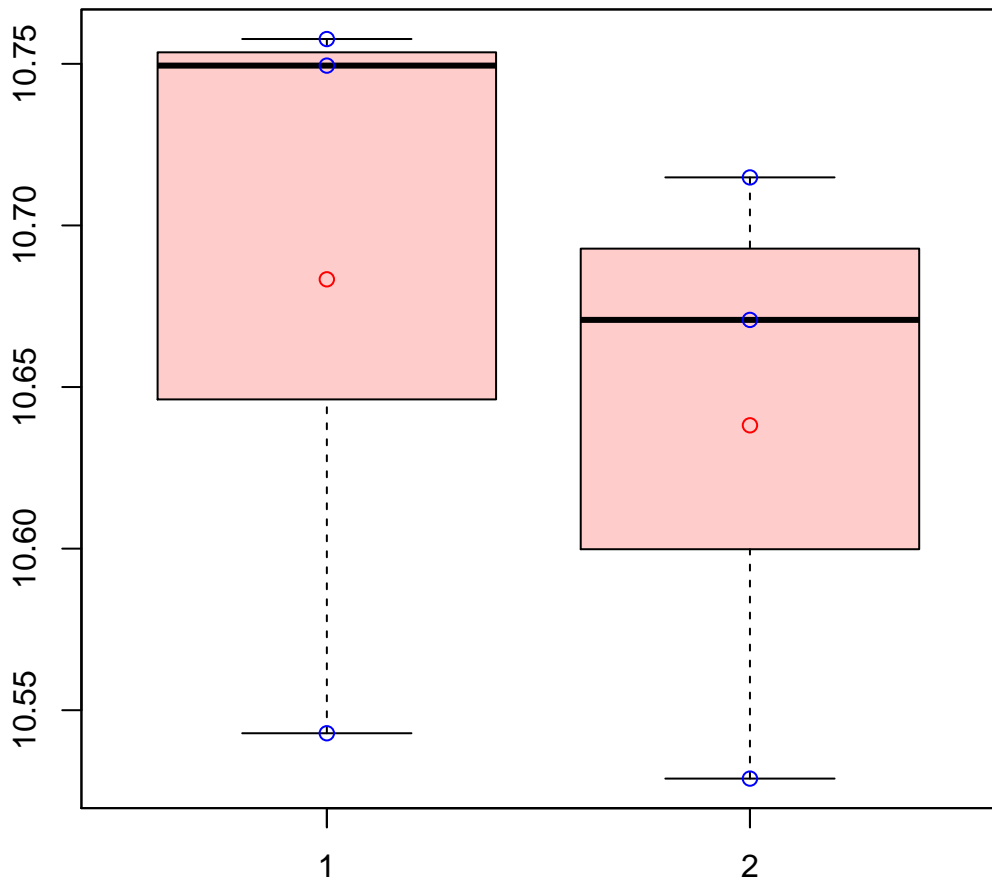

t-Test: p-value = 0.64

# Q9SME6|Q9SME6\_HORVU

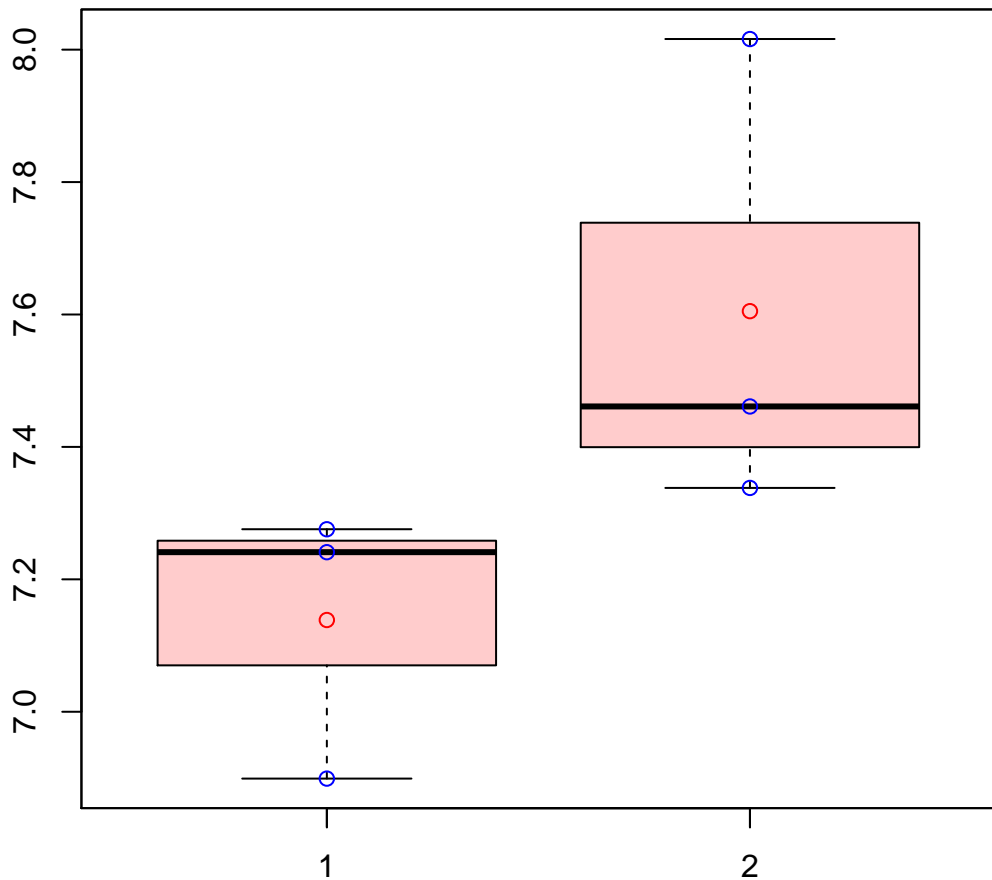

t-Test: p-value = 0.14

# Q9SNK3|Q9SNK3\_ORYSJ

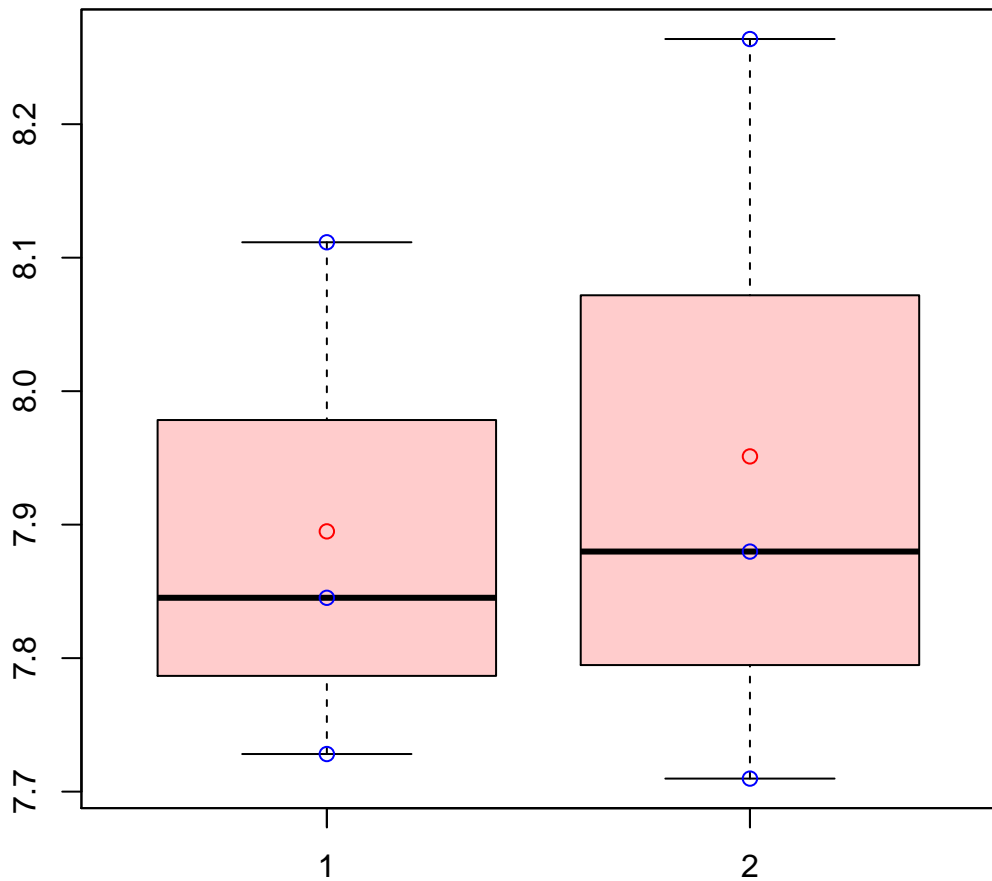

t-Test: p-value = 0.79

# Q9SPA1|Q9SPA1\_LILLO

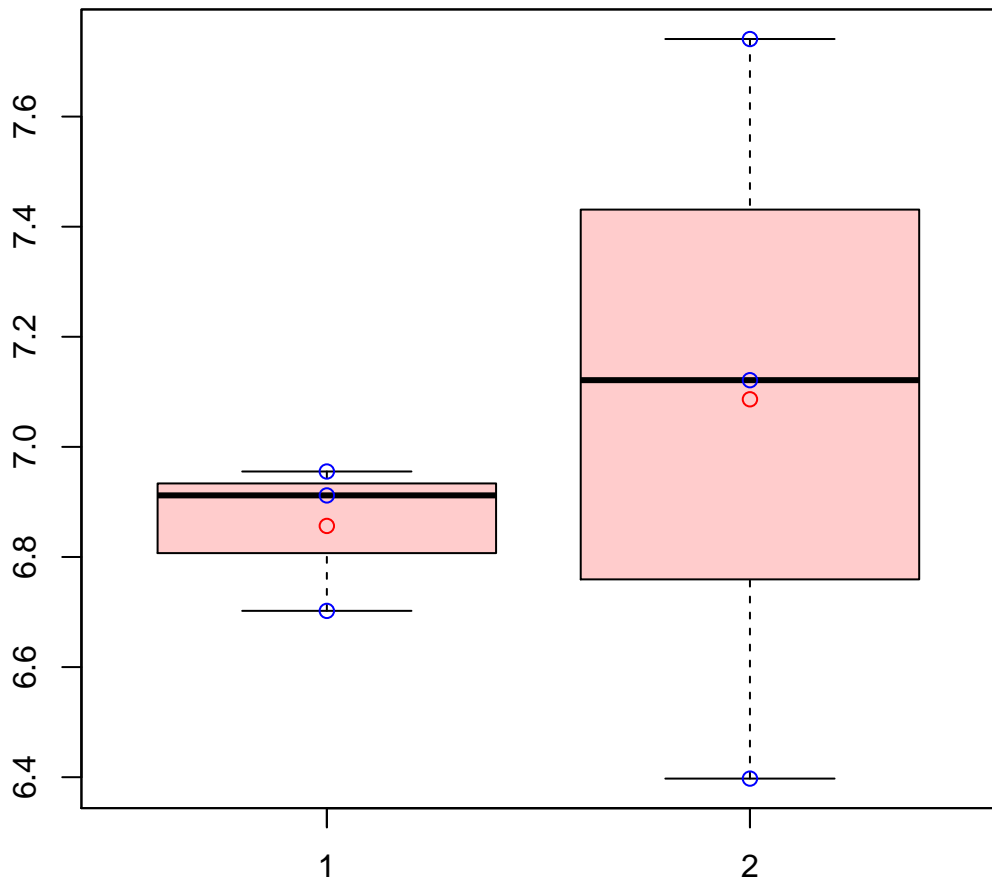

t-Test: p-value = 0.62

# Q9SPD8|Q9SPD8\_MAIZE

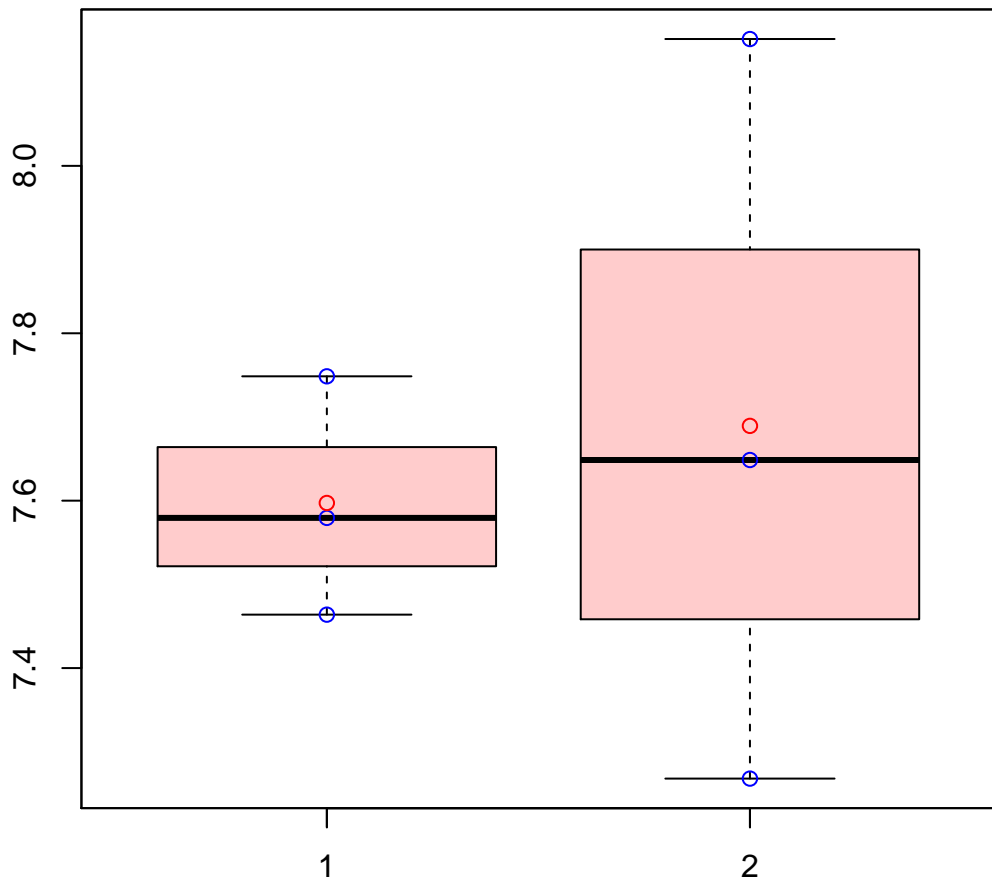

t-Test: p-value = 0.76



# Q9SXI9|Q9SXI9\_ORYSA

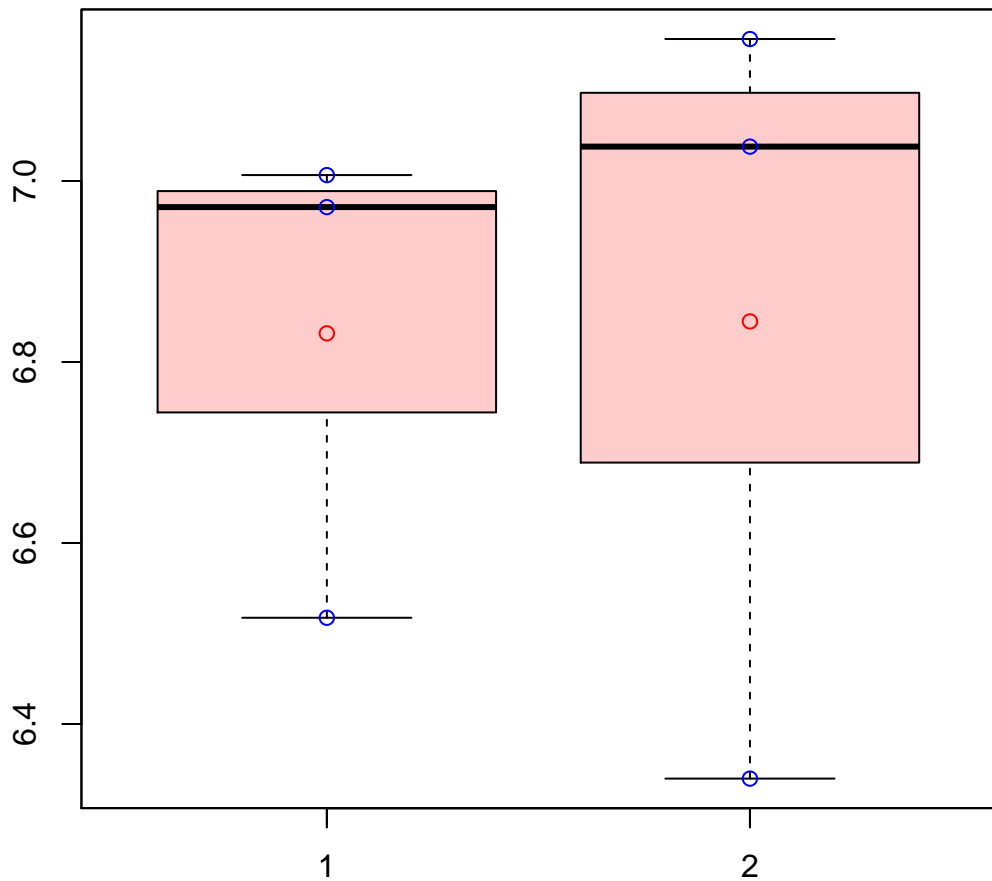

t-Test: p-value = 0.97

# Q9SXX0|Q9SXX0\_ORYSJ

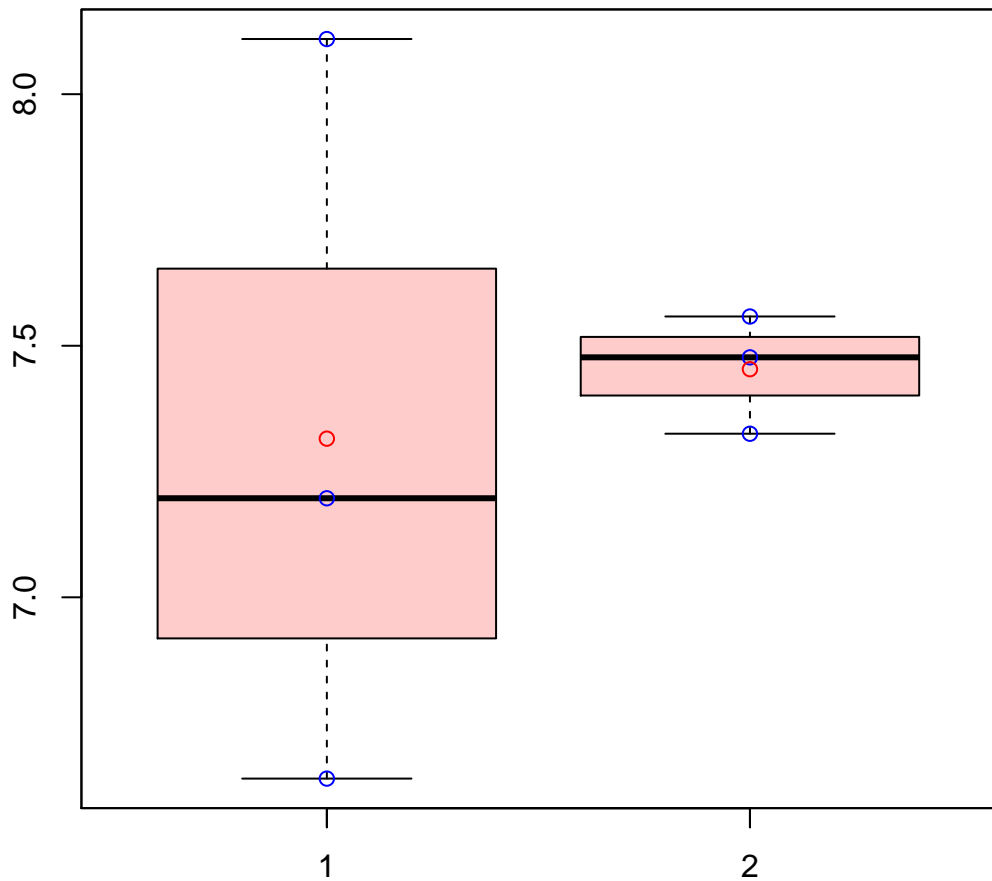

t-Test: p-value = 0.78

# Q9TJV9|Q9TJV9\_NARST

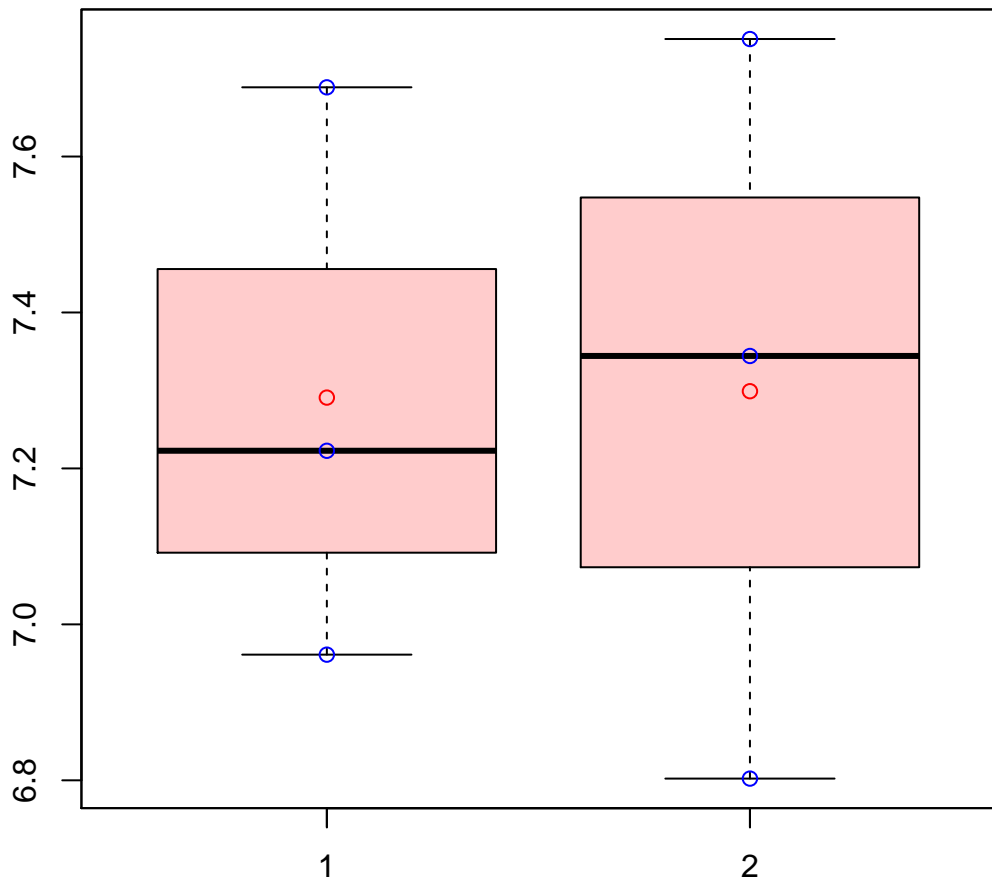

t-Test: p-value = 0.98

# Q9TMU0|Q9TMU0\_COSBA

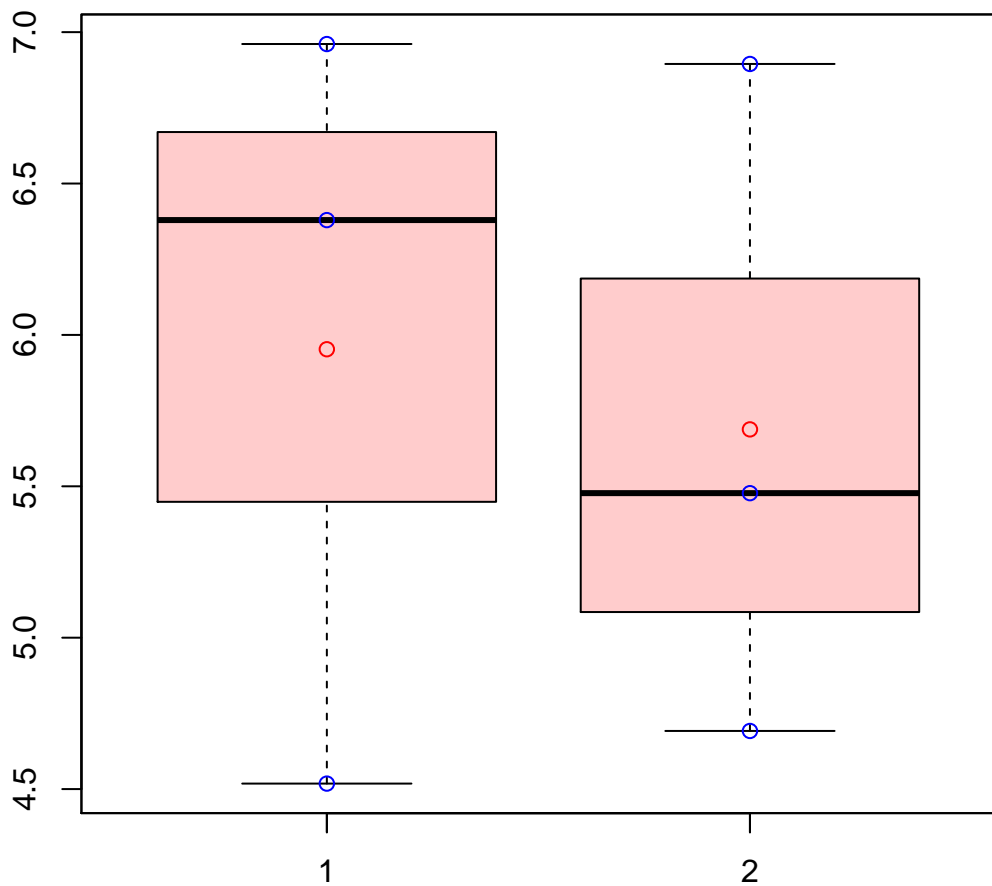

t-Test: p-value = 0.8

# Q9XEM7|Q9XEM7\_ORYSI

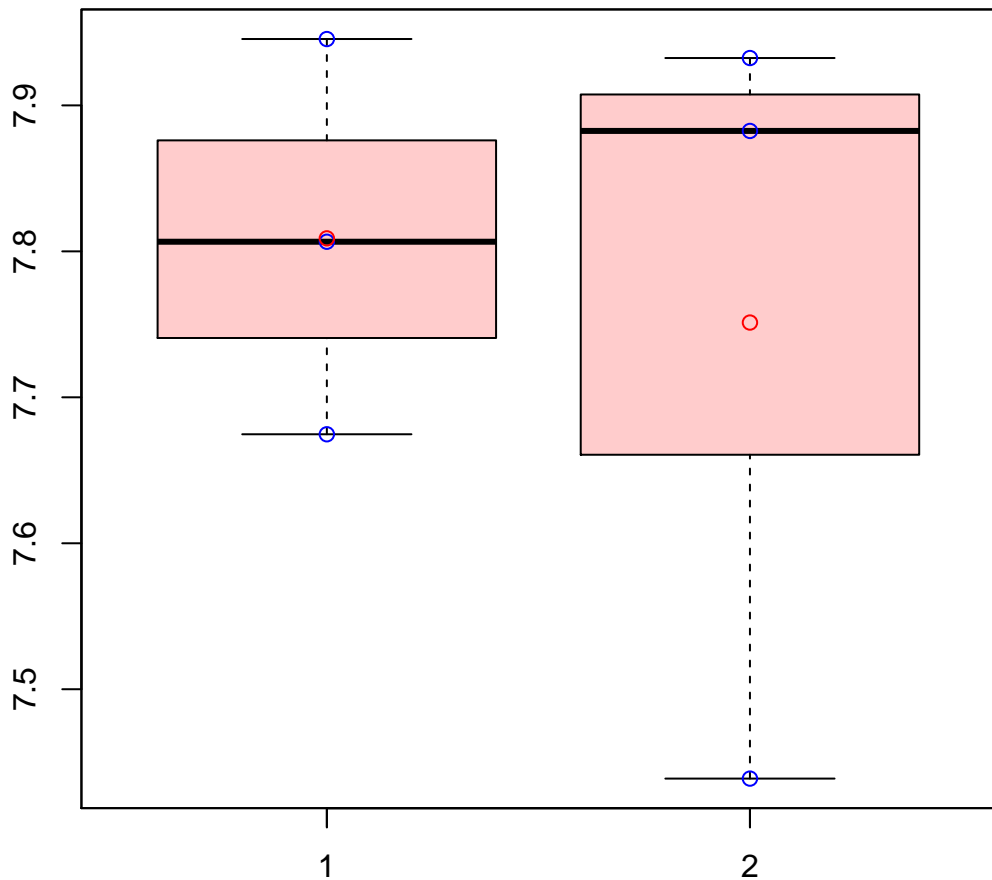

t-Test: p-value = 0.76

# Q9XGU8|Q9XGU8\_ORYSA

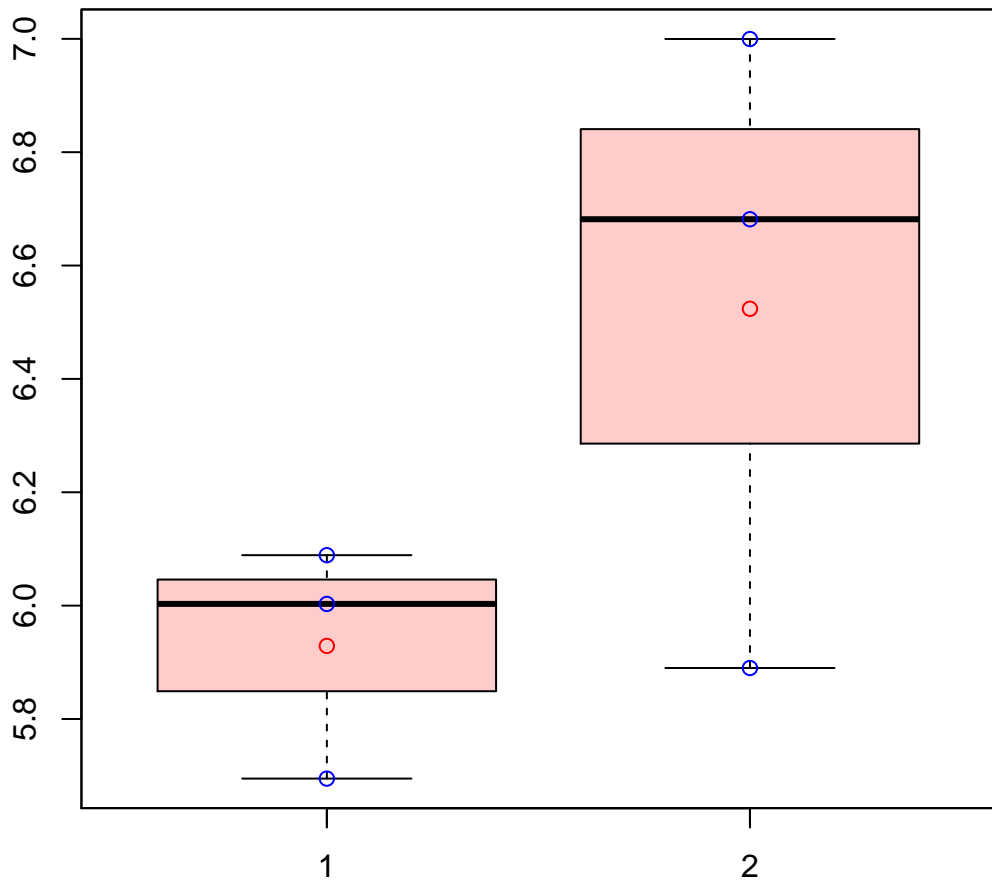

t-Test: p-value = 0.21

# Q9ZNW4|Q9ZNW4\_SORBI

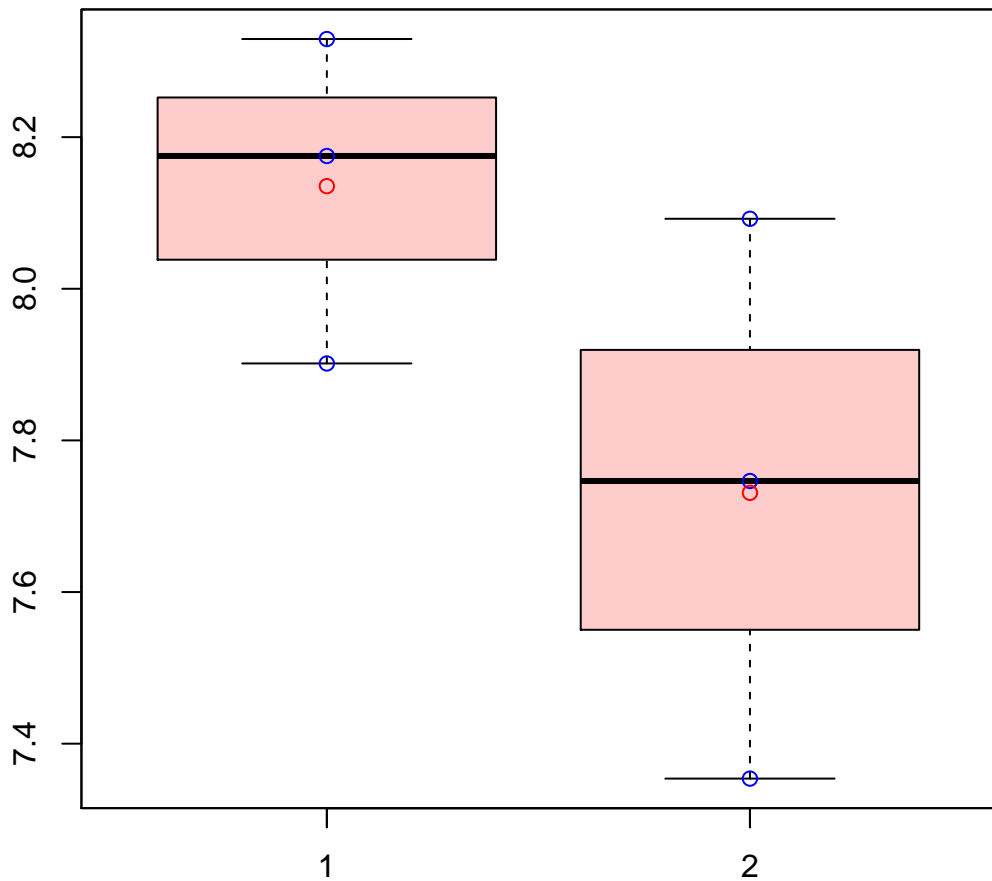

t-Test: p-value = 0.19

# Q9ZPN1|Q9ZPN1\_AVES

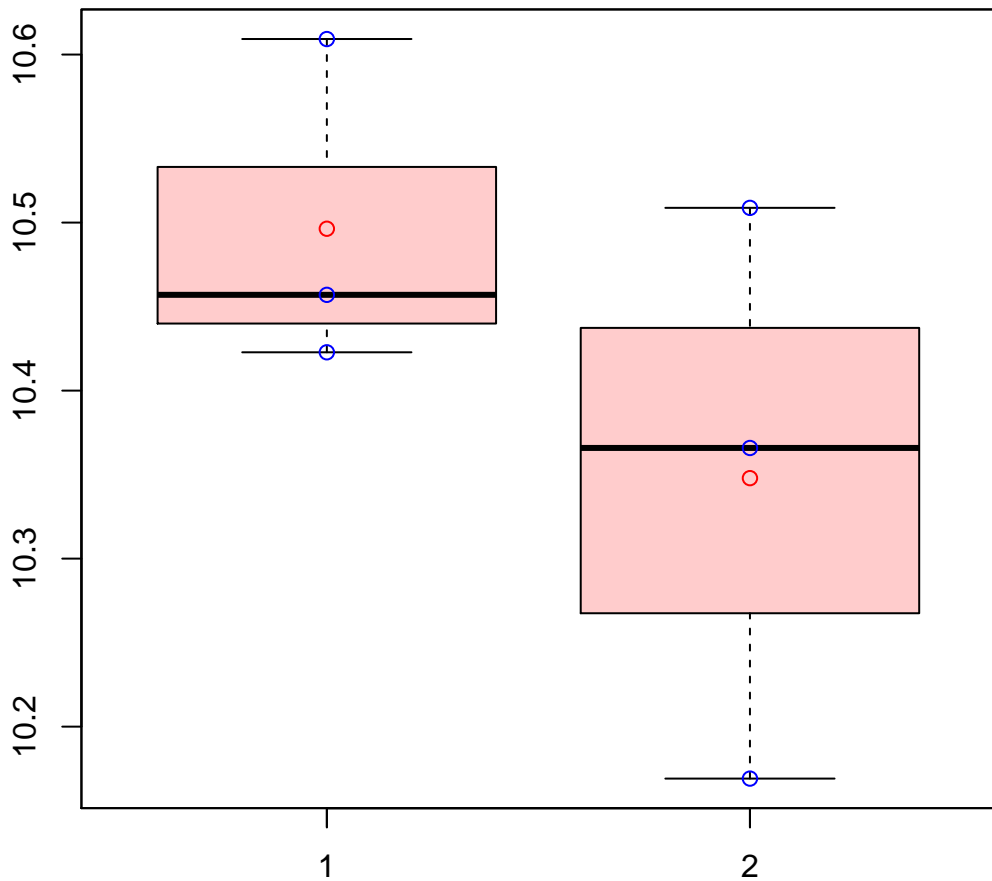

t-Test: p-value = 0.28



# Q9ZQT7|Q9ZQT7\_ORYSA

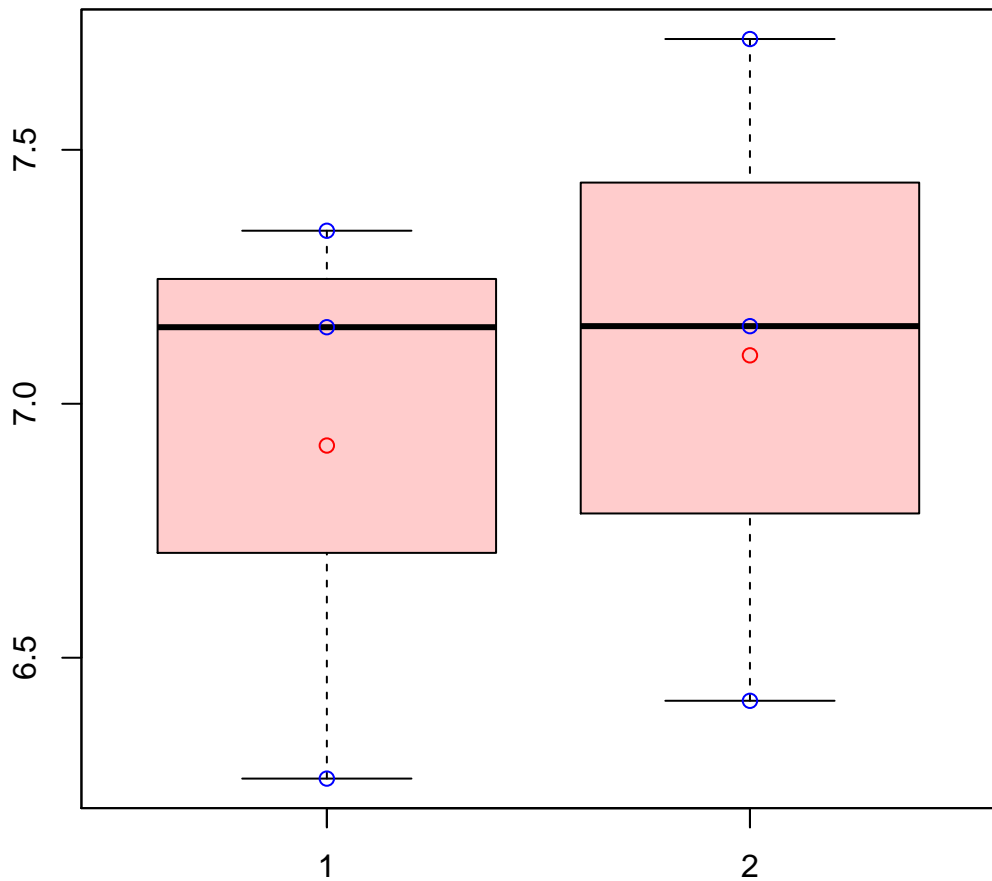

t-Test: p-value = 0.74

# Q9ZSS5|Q9ZSS5\_9POAL

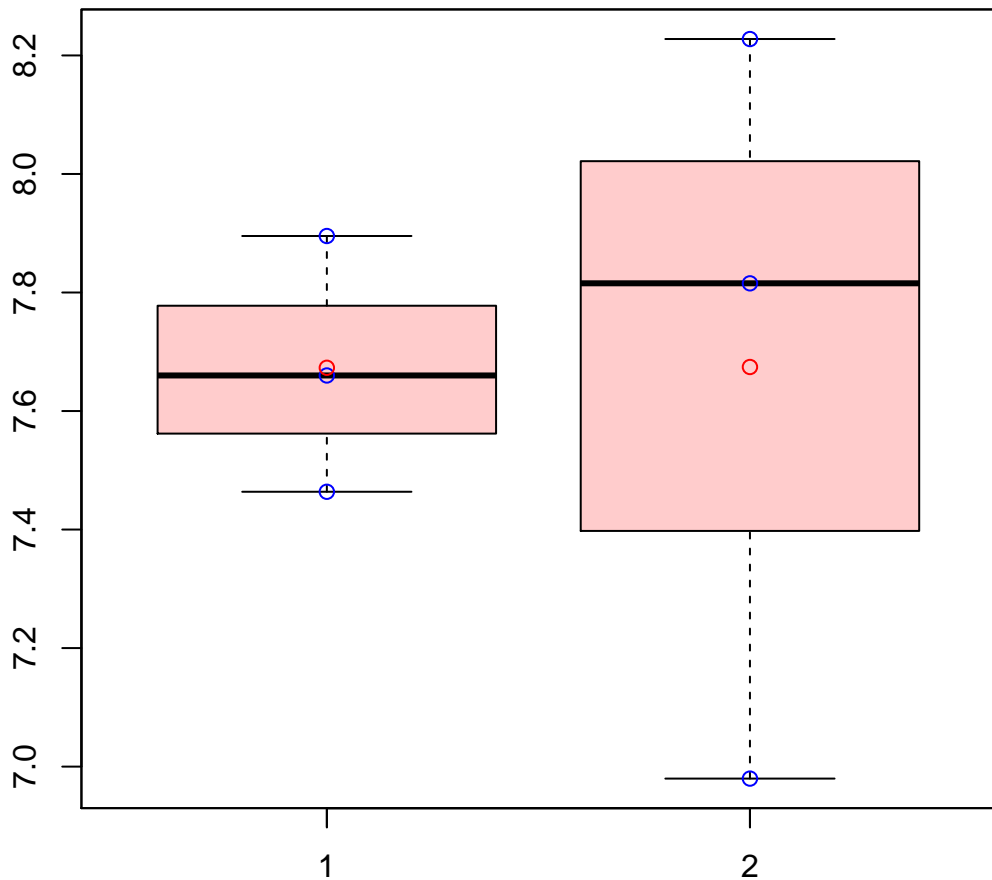

t-Test: p-value = 1

# Q9ZWH7|Q9ZWH7\_ORYSA

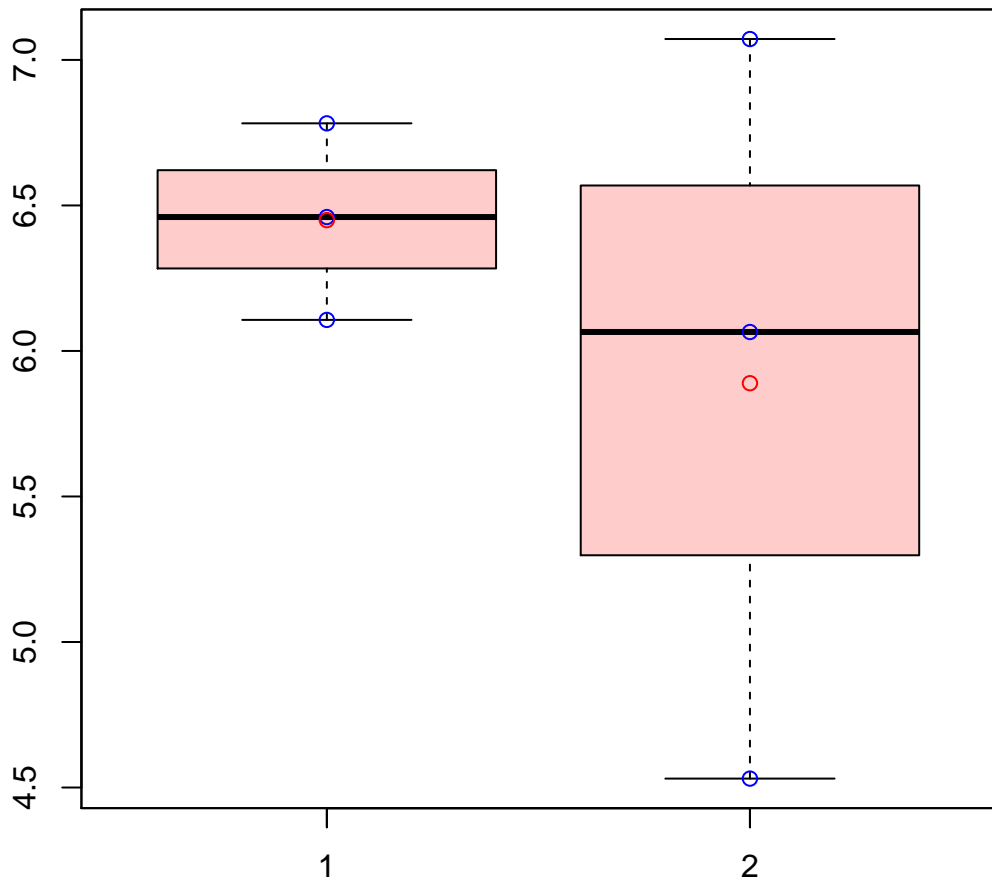

t-Test: p-value = 0.53

# sp|A2XIK9|CHLI\_ORYSI

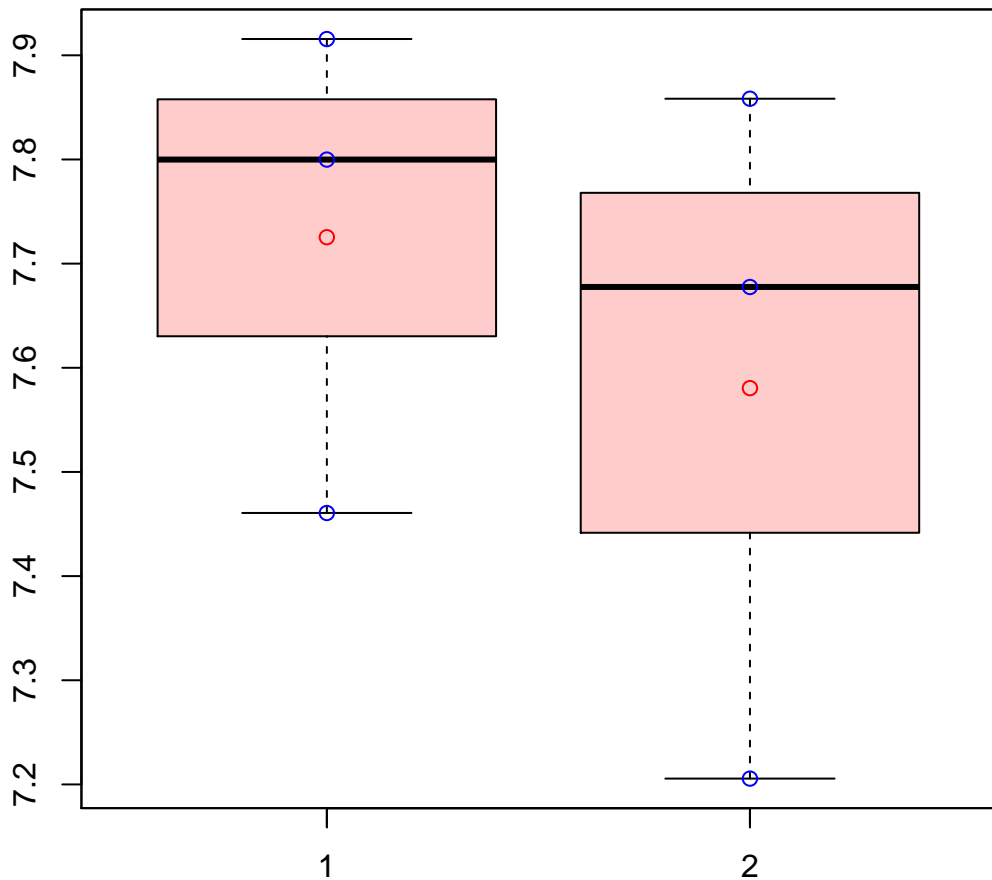

t-Test: p-value = 0.58

# sp|A2YMU2|RRFC\_ORYSI

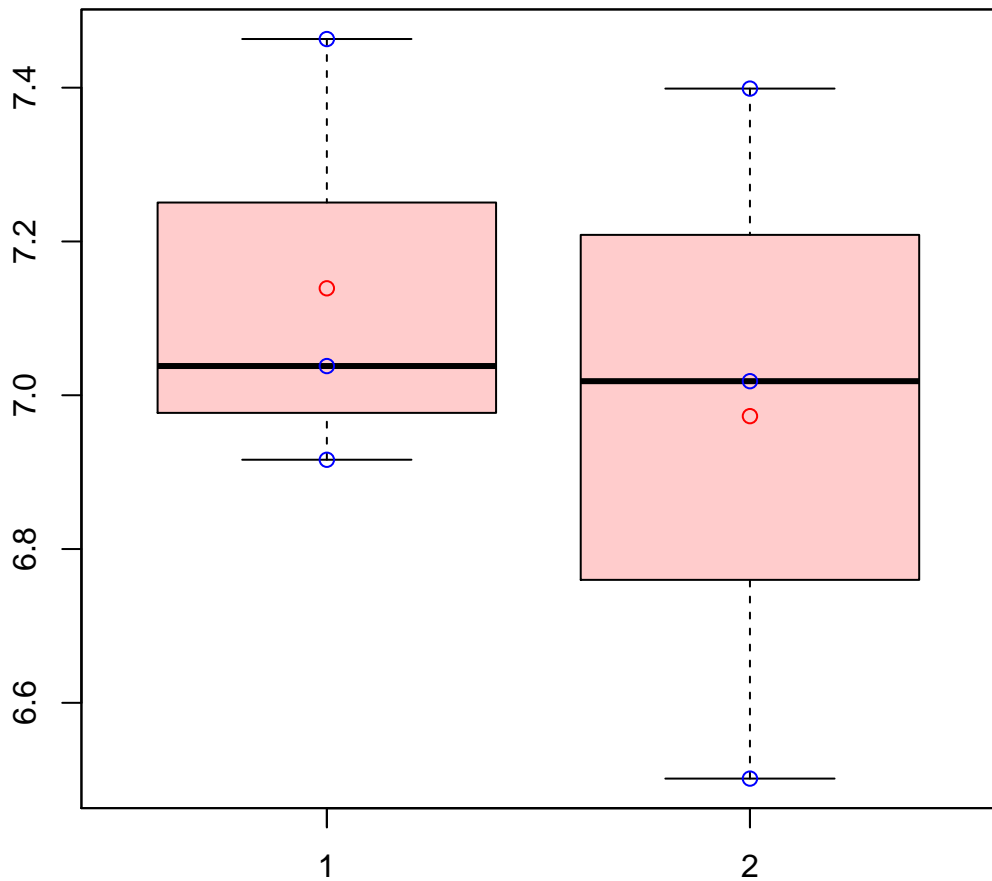

t-Test: p-value = 0.62

# sp|A3C6D7|ACT2\_ORYSJ

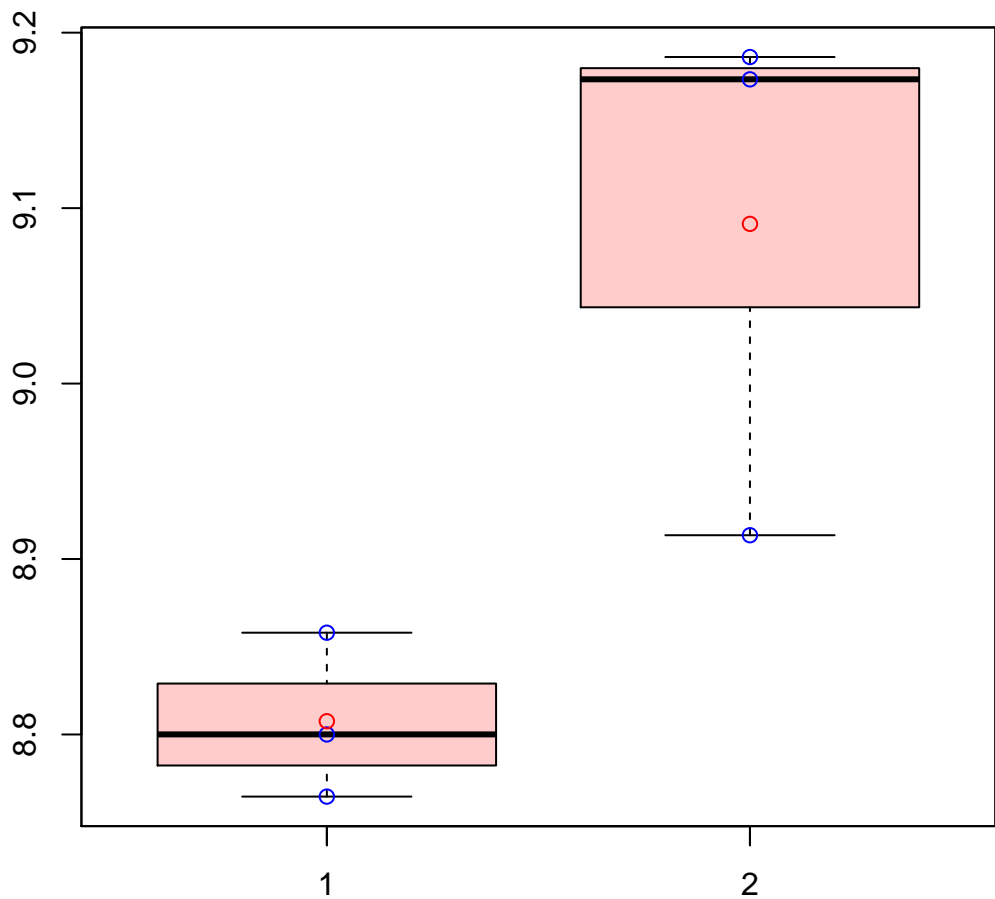

t-Test: p-value = 0.07

# sp|B4G072|BX9\_MAIZE

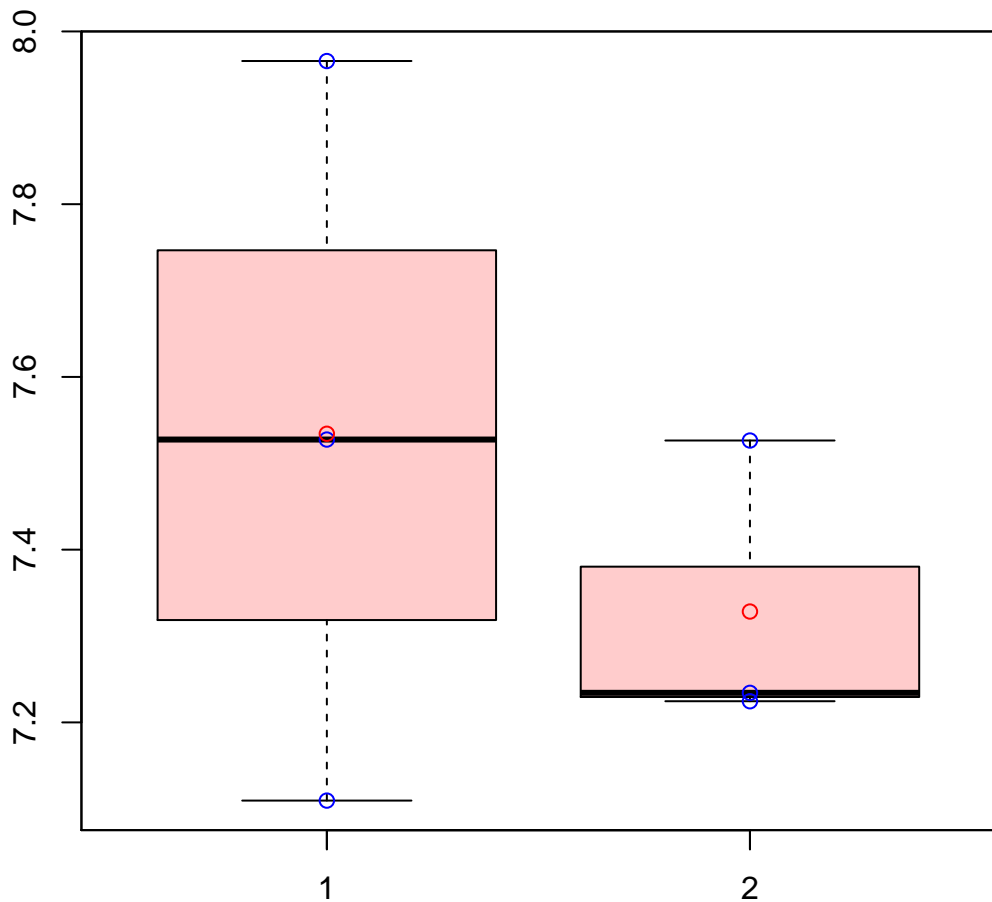

t-Test: p-value = 0.5

# sp|B9G2A8|BIG\_ORYSJ

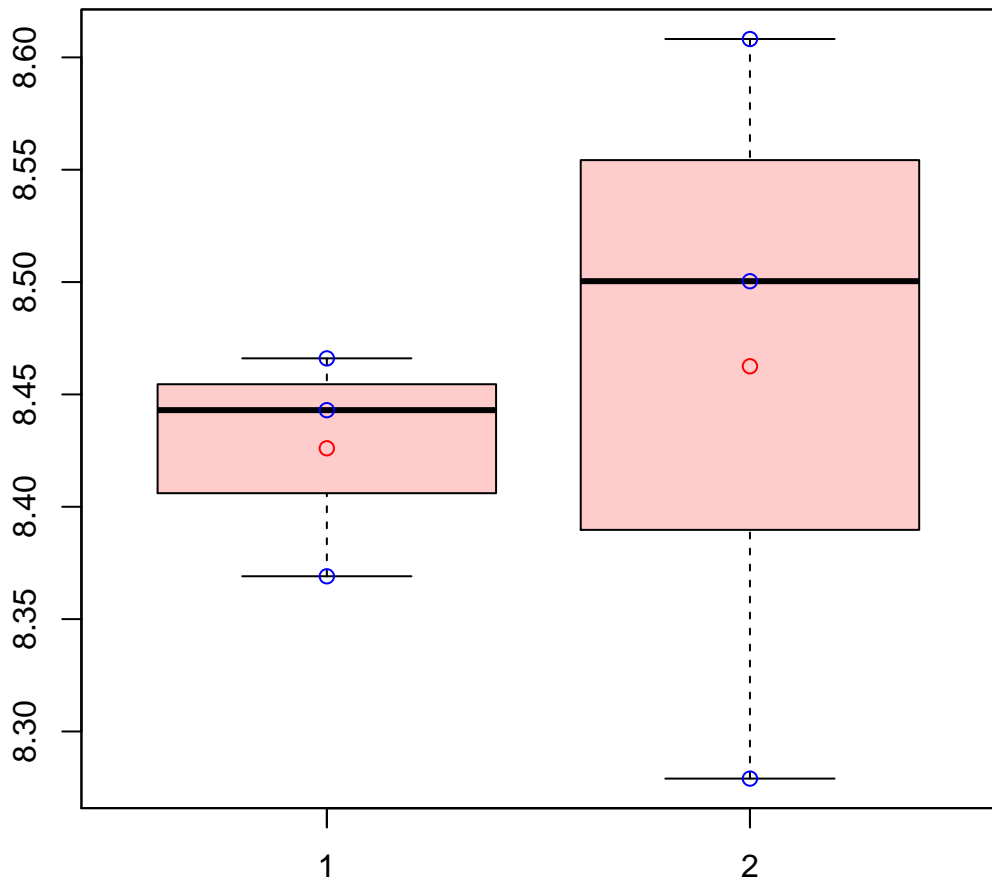

t-Test: p-value = 0.75



# sp|C4IZX0|TATC\_MAIZE

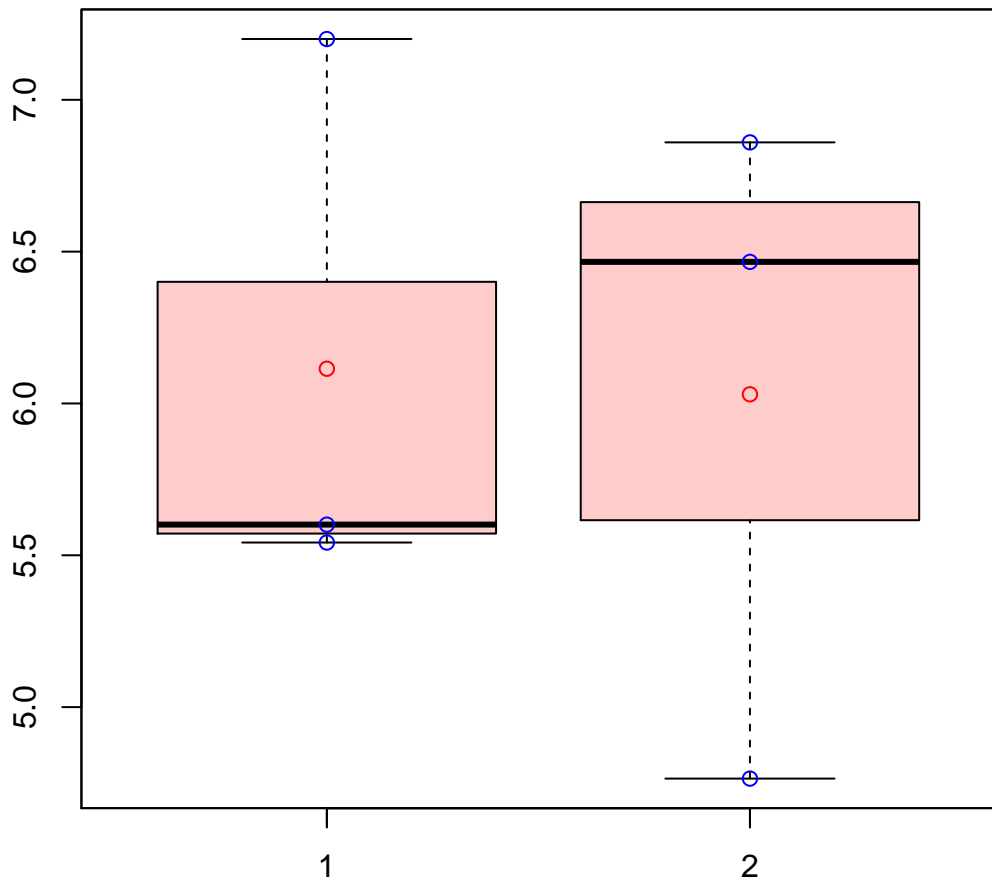

t-Test: p-value = 0.93

# sp|C5WYI7|CYNS\_SORBI

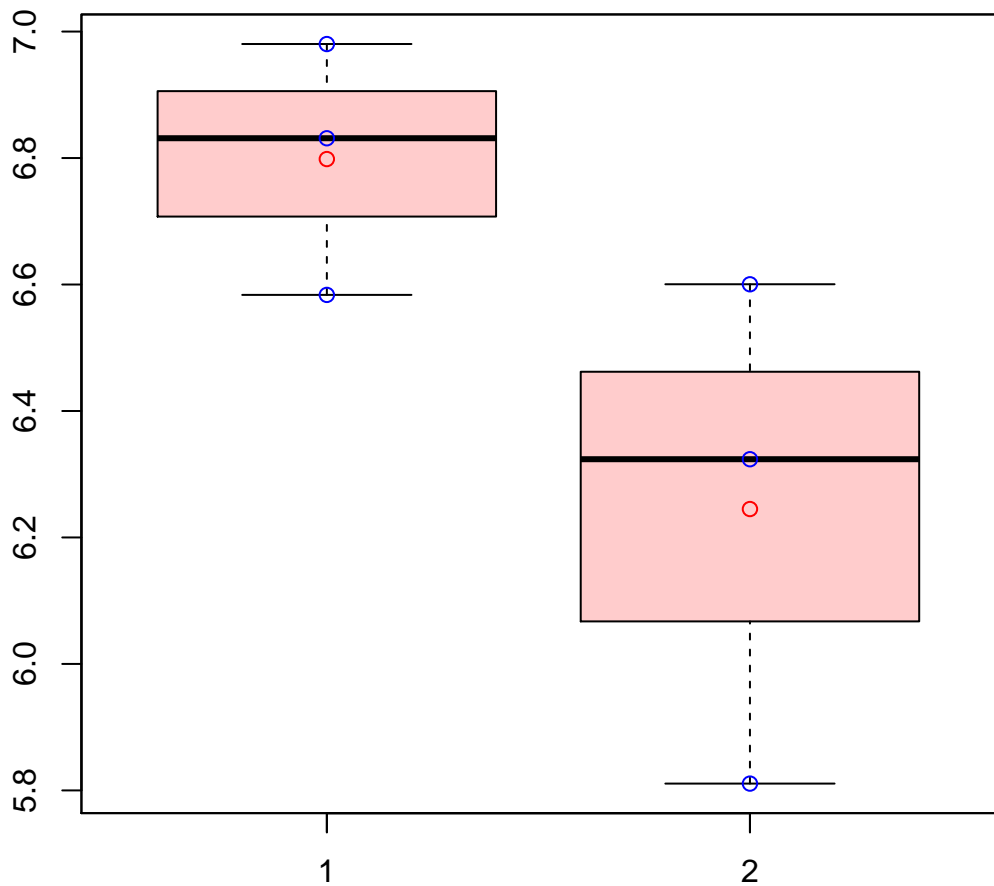

t-Test: p-value = 0.12

# sp|C5Y7C7|CSPLE\_SORBI

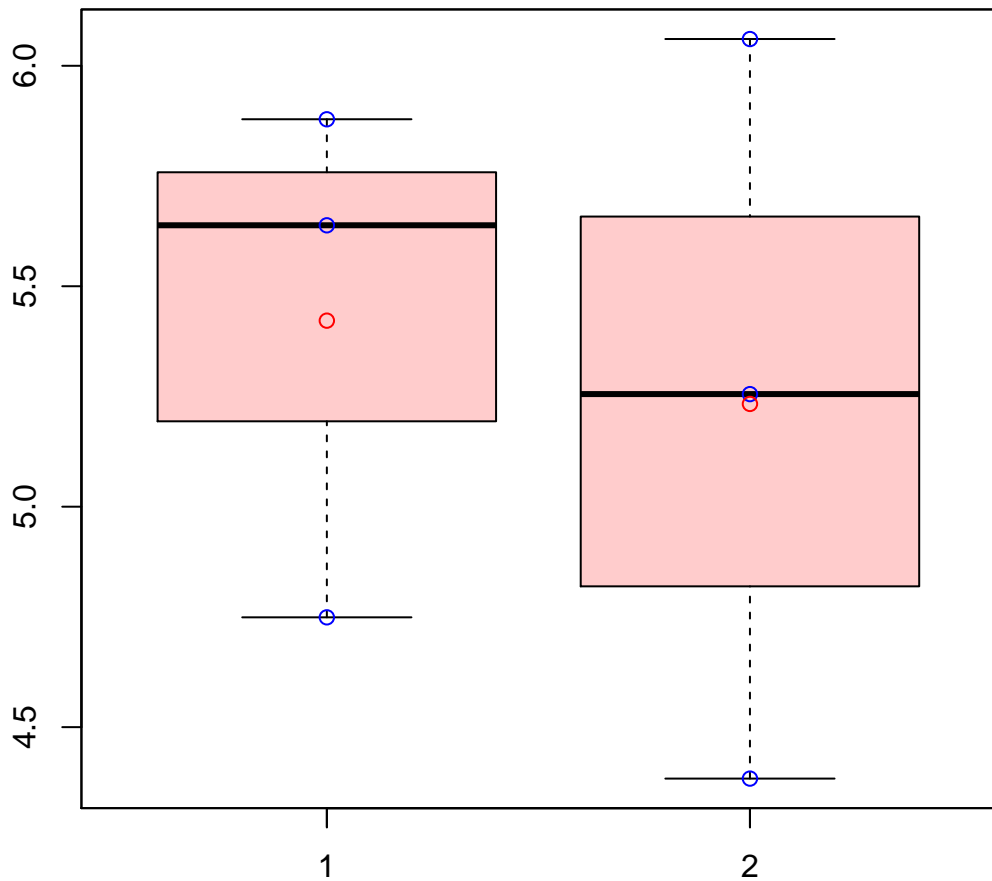

t-Test: p-value = 0.77

# sp|C5YHH7|TPS1\_SORBI

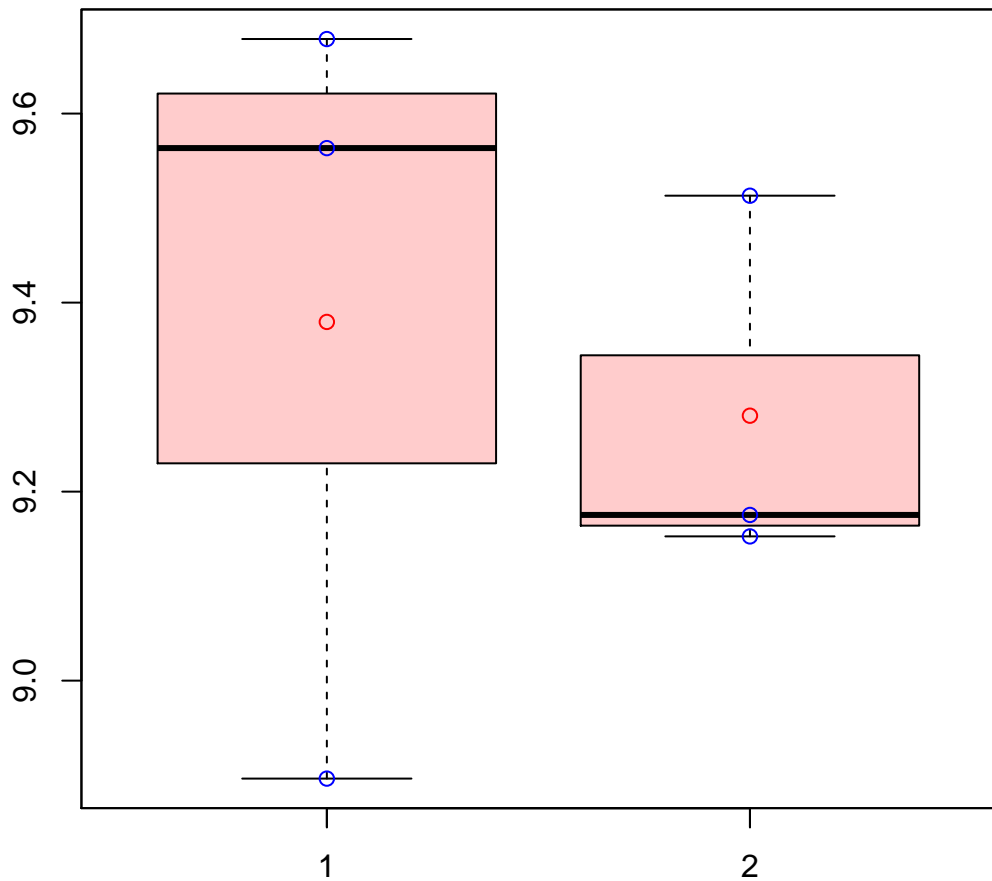

t-Test: p-value = 0.74

# sp|O23813|SIR\_MAIZE

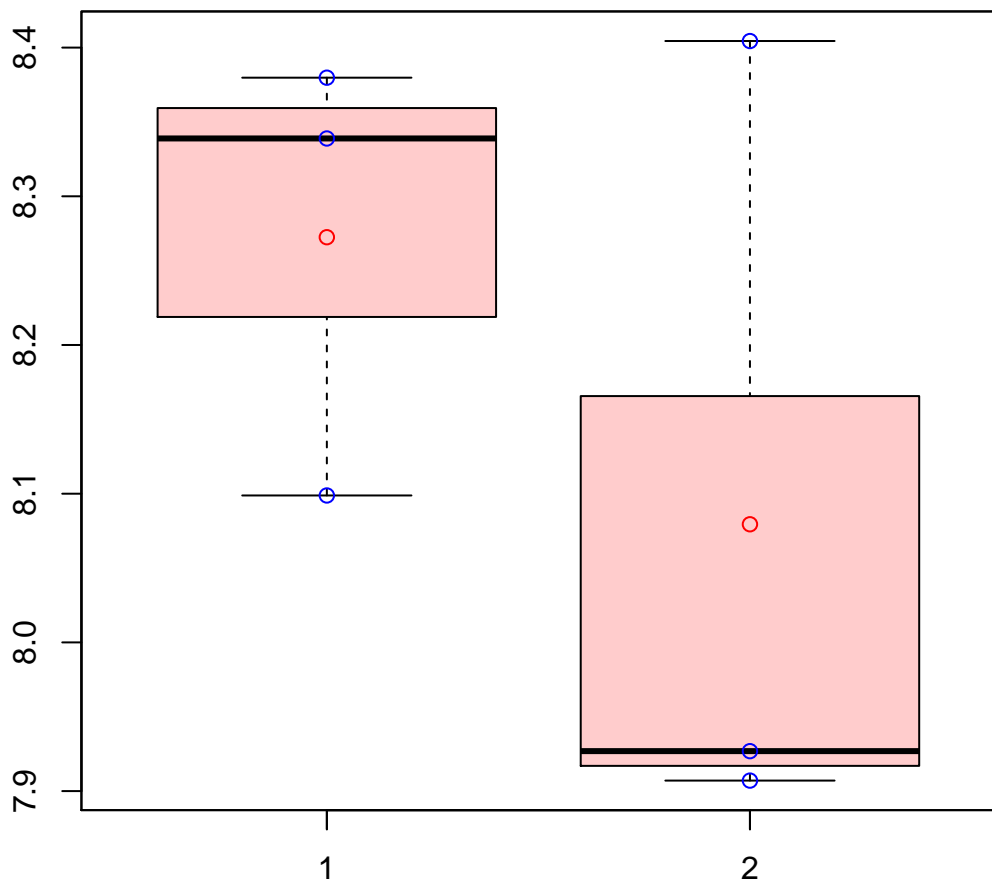

t-Test: p-value = 0.37

# sp|O65175|SODCP\_ZANAE

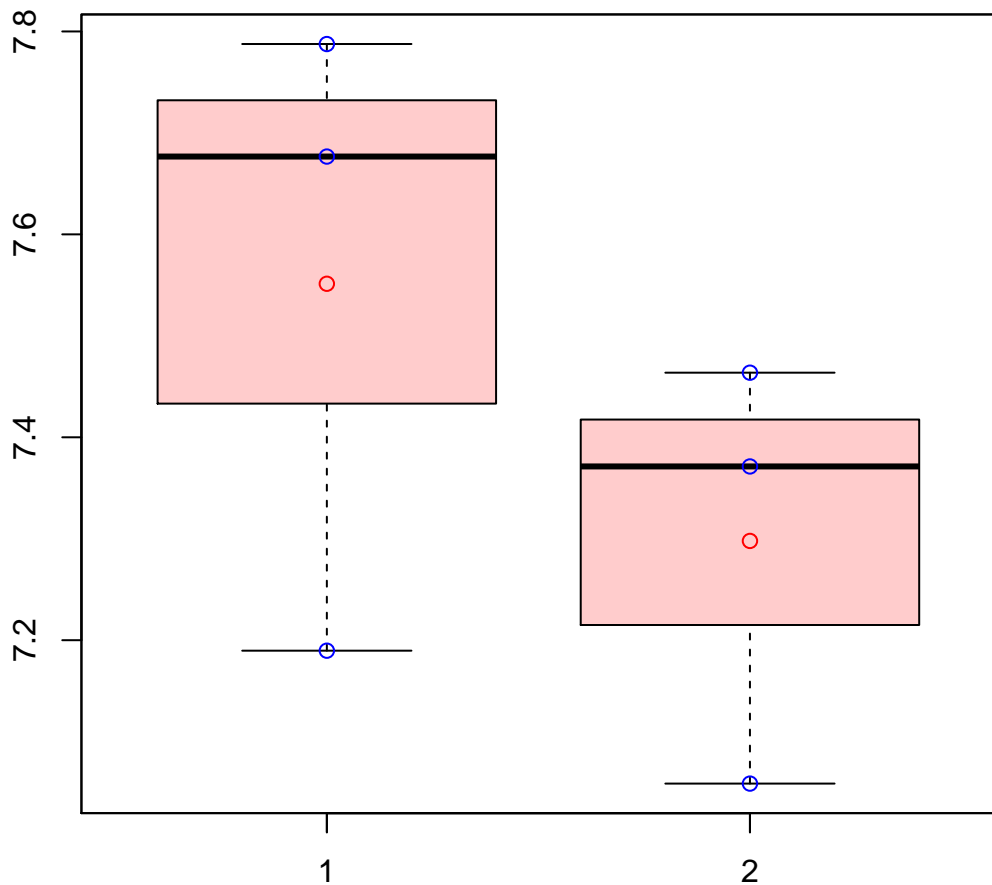

t-Test: p-value = 0.32

# sp|P02276|H2A2\_WHEAT

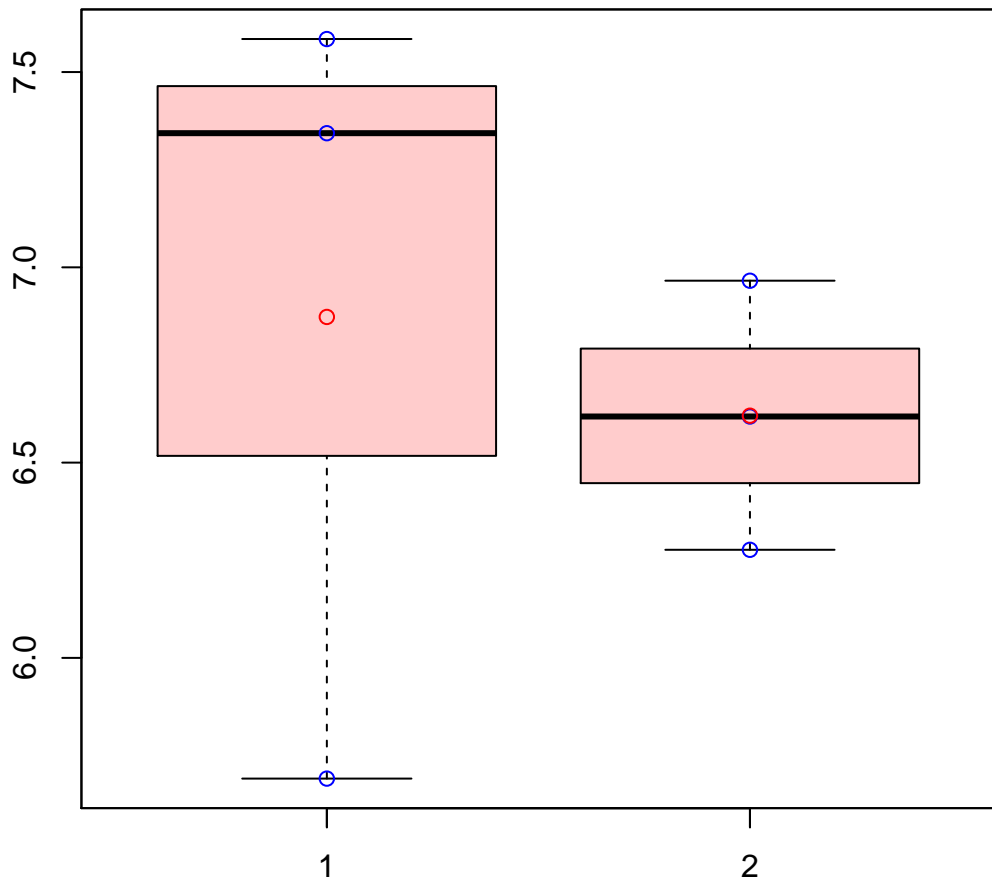

t-Test: p-value = 0.72

# sp|P04464|CALM\_WHEAT

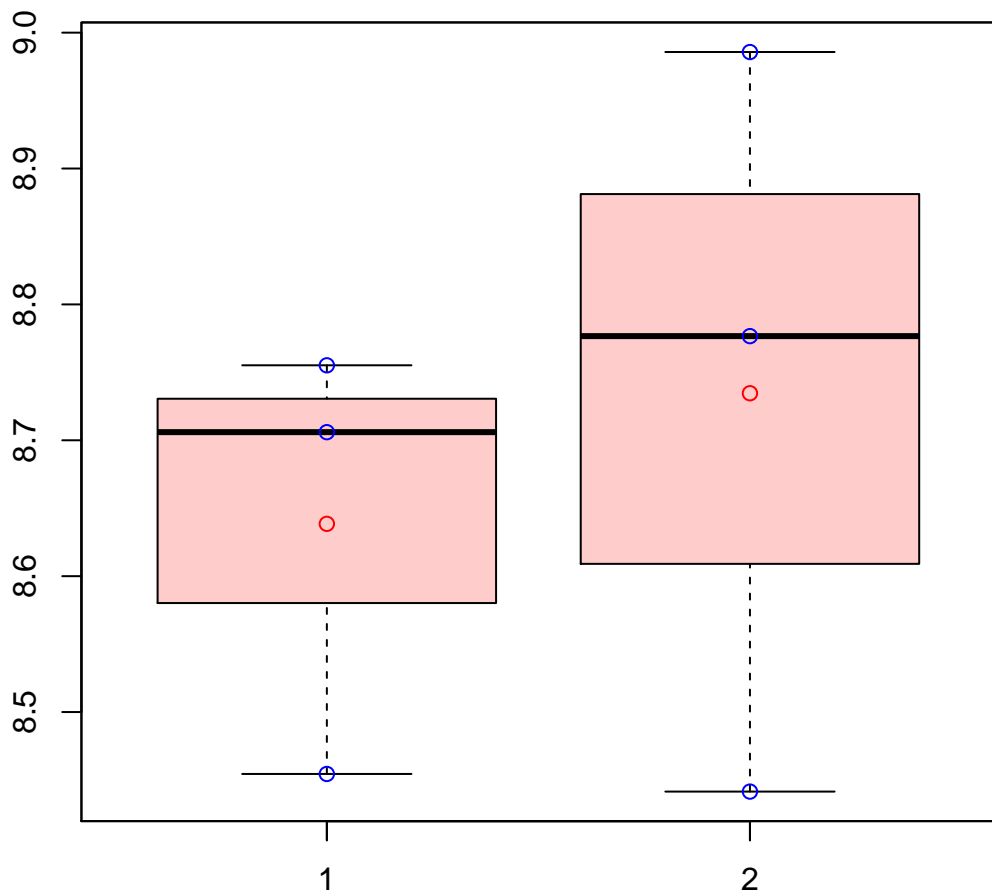

t-Test: p-value = 0.63



# sp|P08823|RUBA\_WHEAT

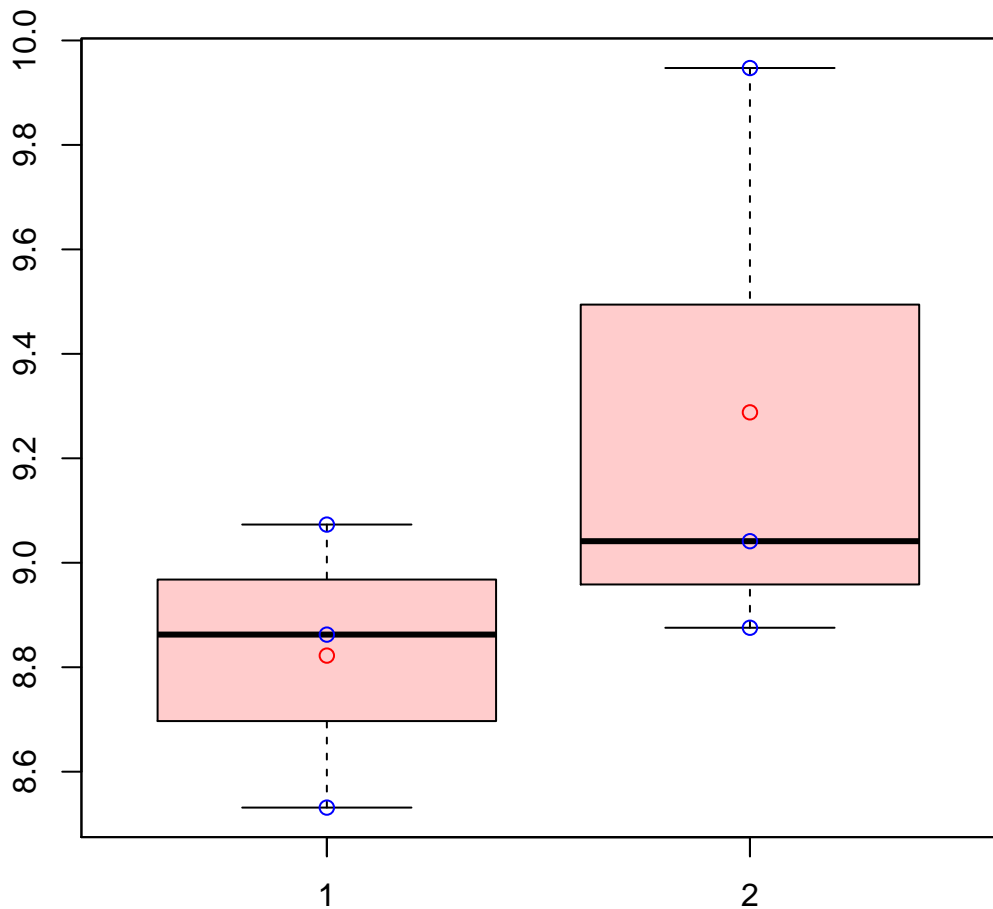

t-Test: p-value = 0.3

# sp|P0C156|ATPF\_SACHY

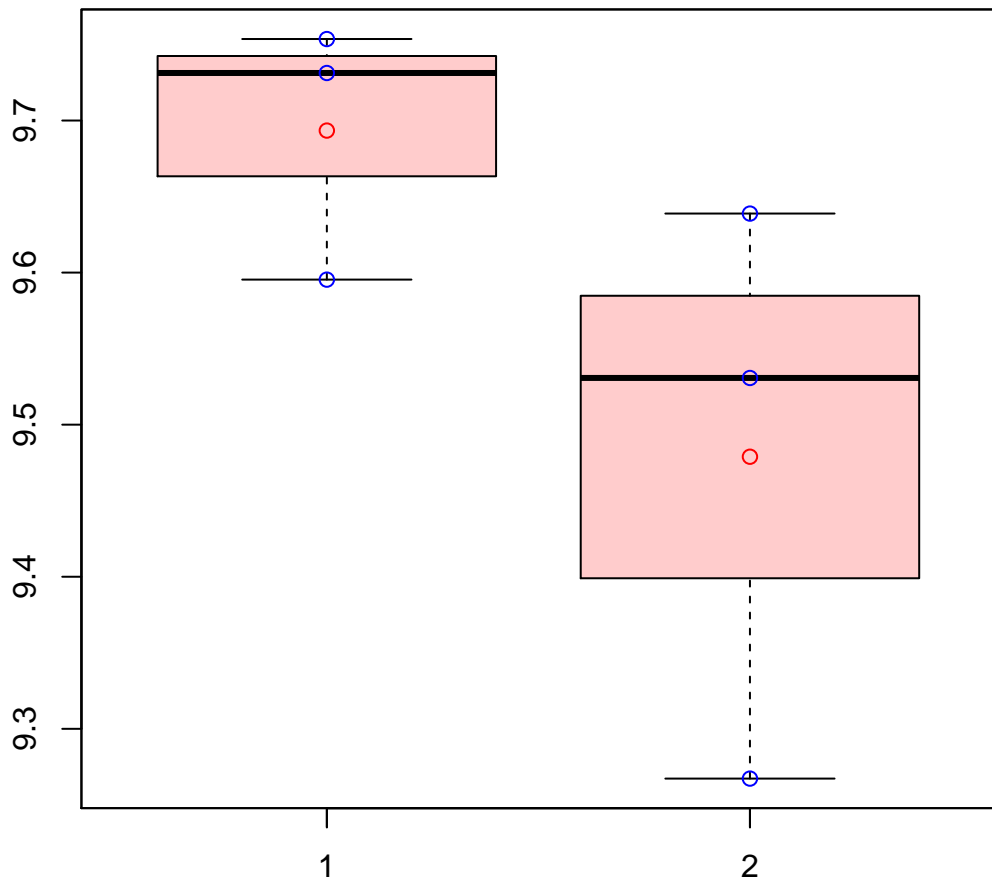

t-Test: p-value = 0.18

# sp|P0C1M0|ATPG\_MAIZE

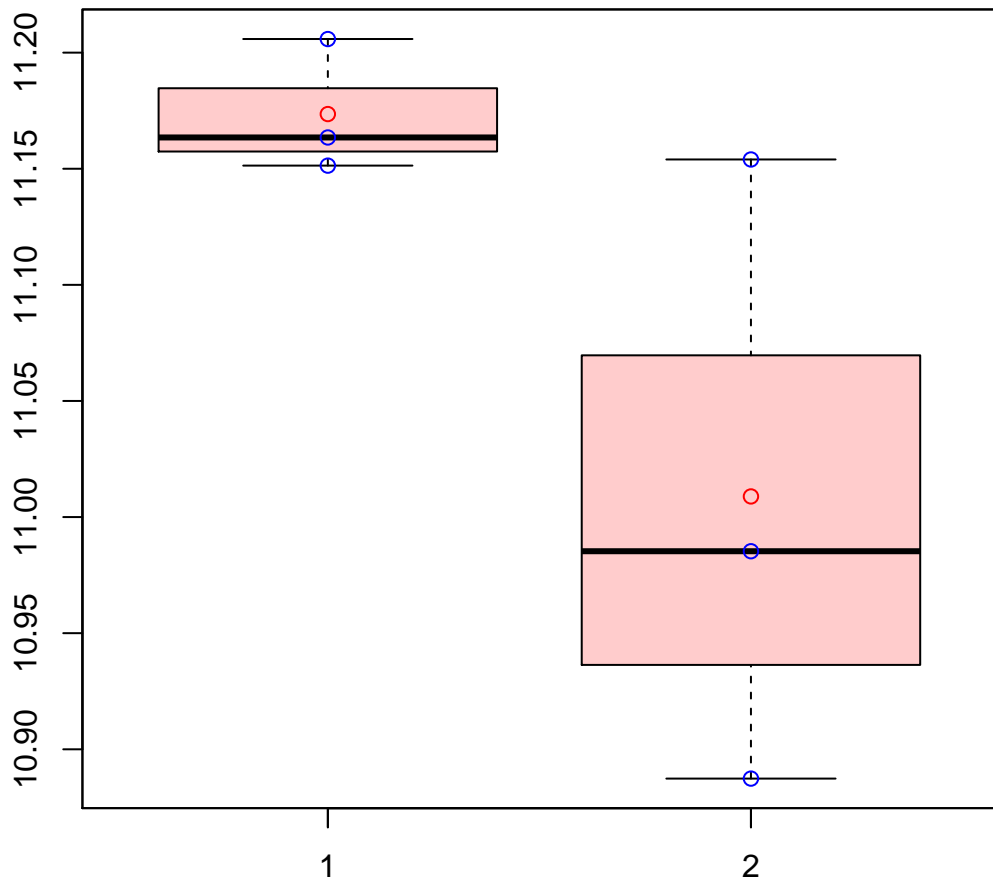

t-Test: p-value = 0.16

# sp|P0C521|ATPAM\_ORYSI

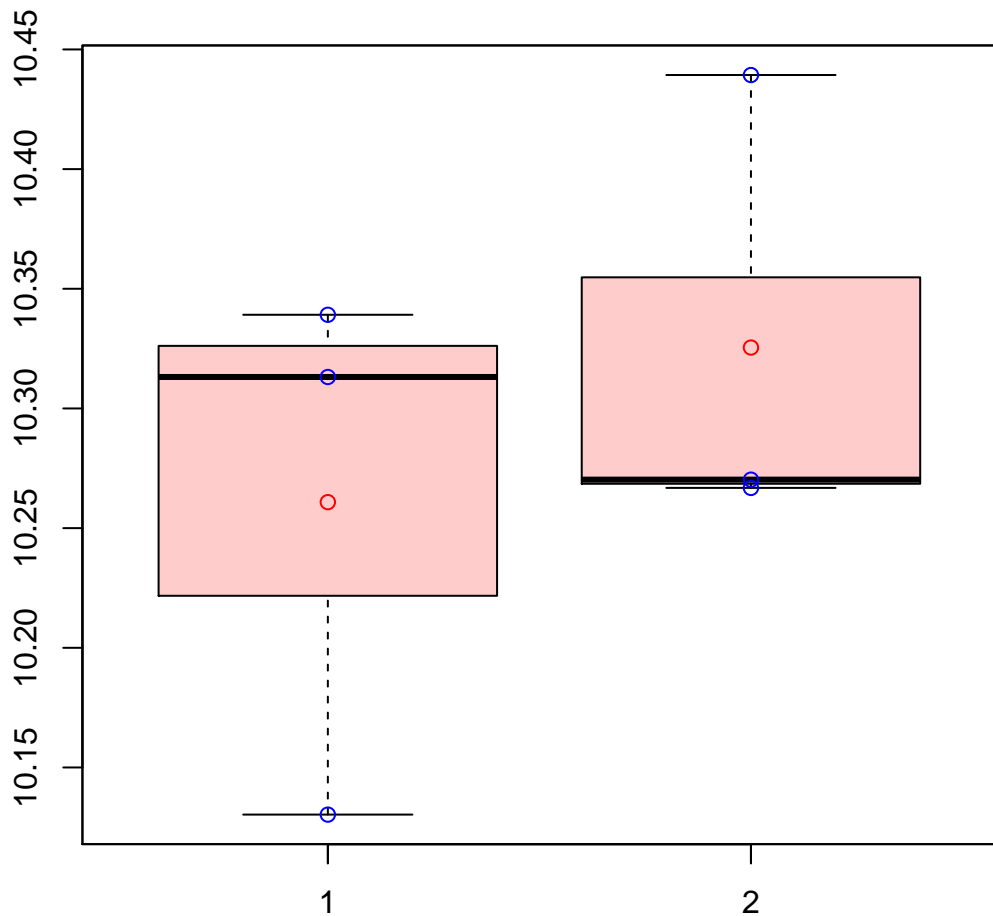

t-Test: p-value = 0.5

# sp|P0CH34|RL40A\_ORYSJ

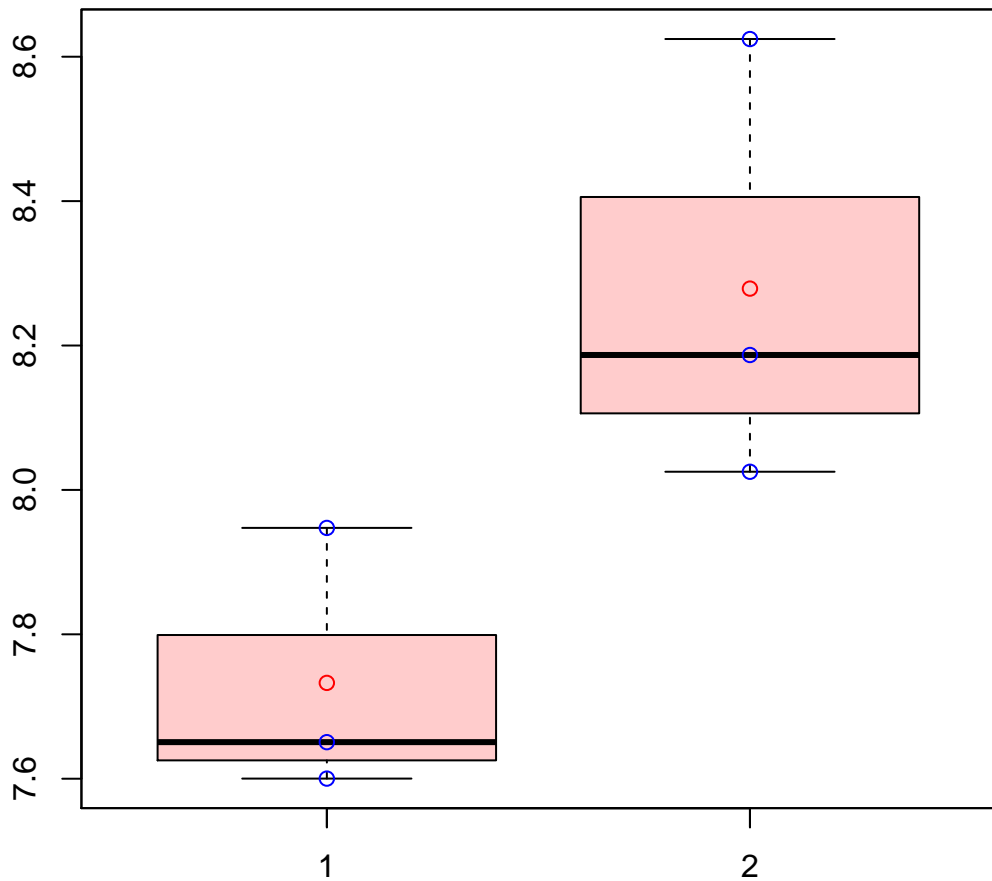

t-Test: p-value = 0.07

# sp|P11143|HSP70\_MAIZE

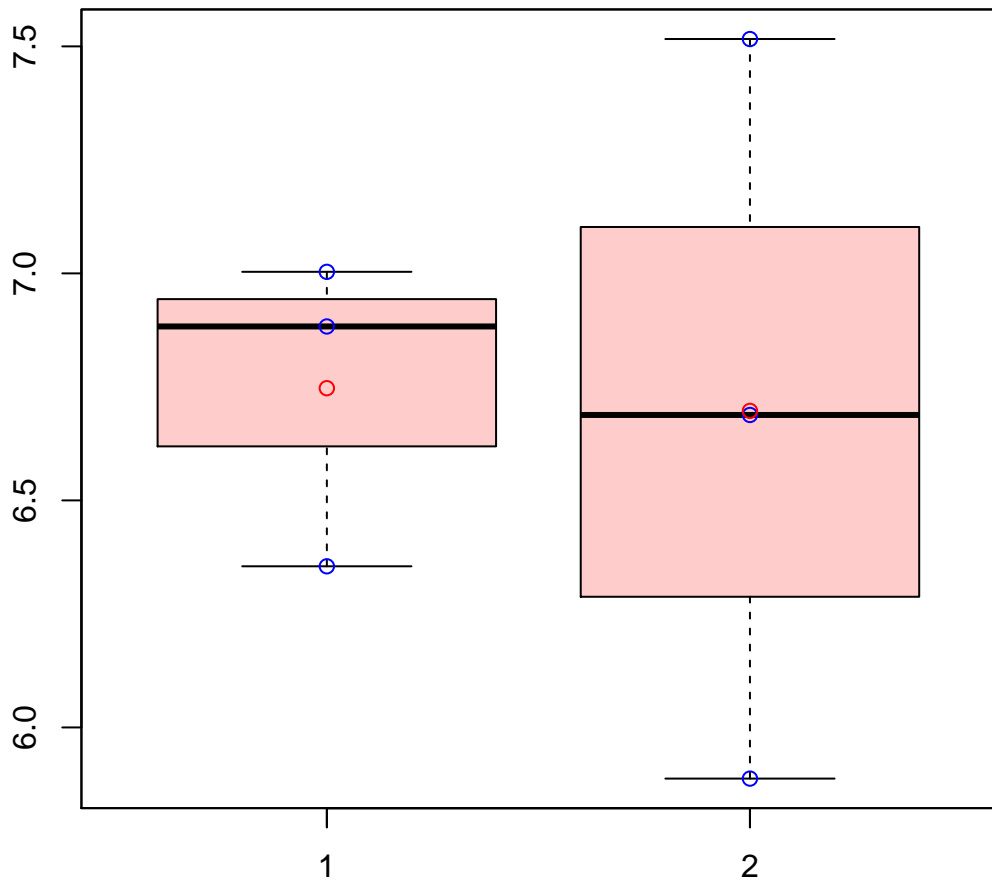

t-Test: p-value = 0.93

# sp|P23225|GLTB\_MAIZE

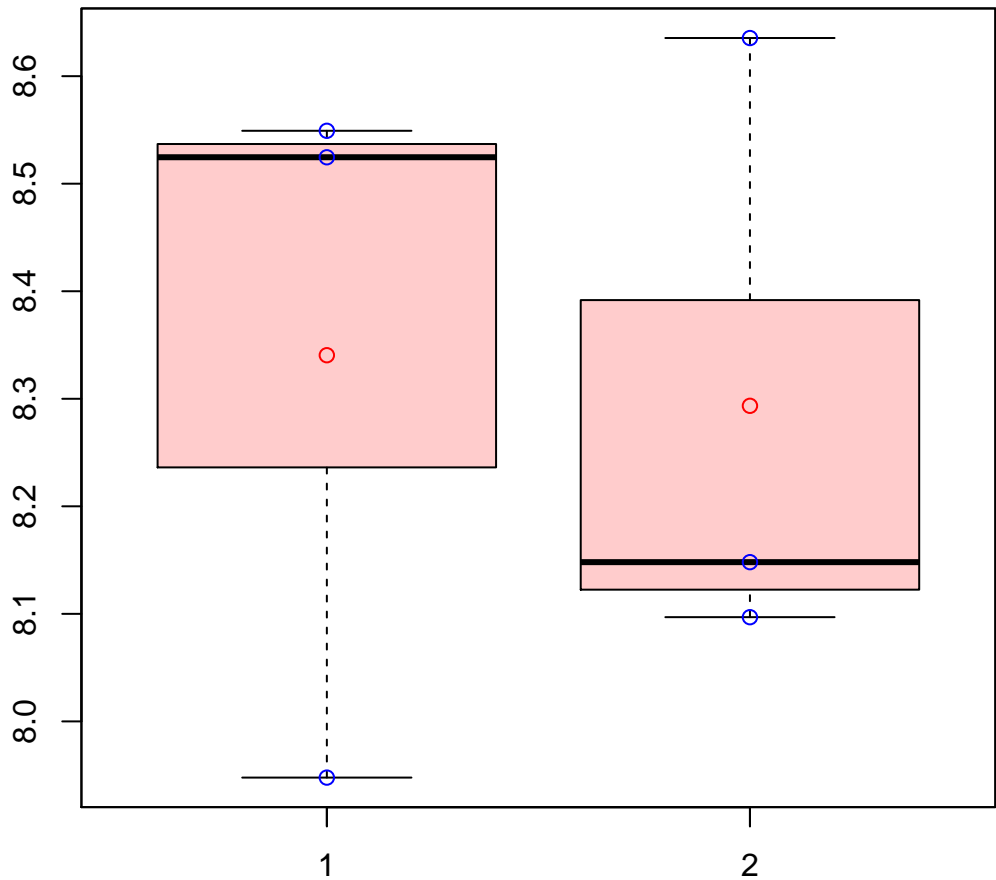

t-Test: p-value = 0.87

# sp|P29195|CAPP1\_SORBI

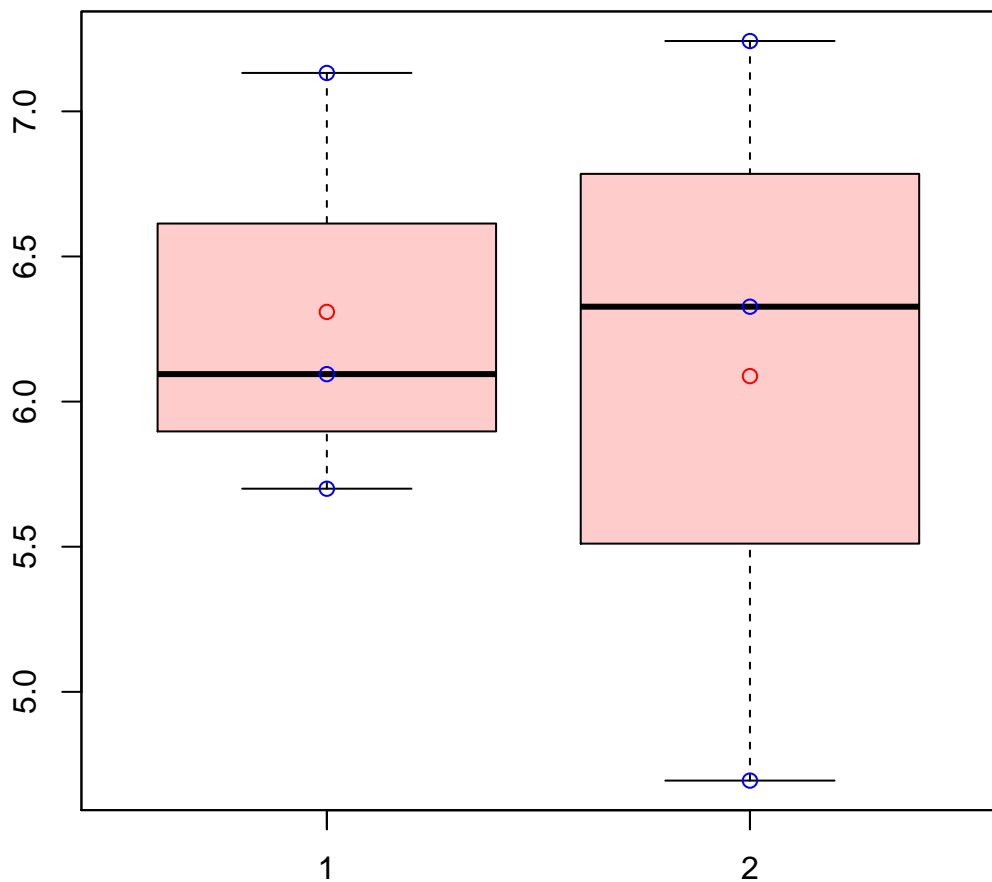

t-Test: p-value = 0.81



# sp|P34106|ALA2\_PANMI

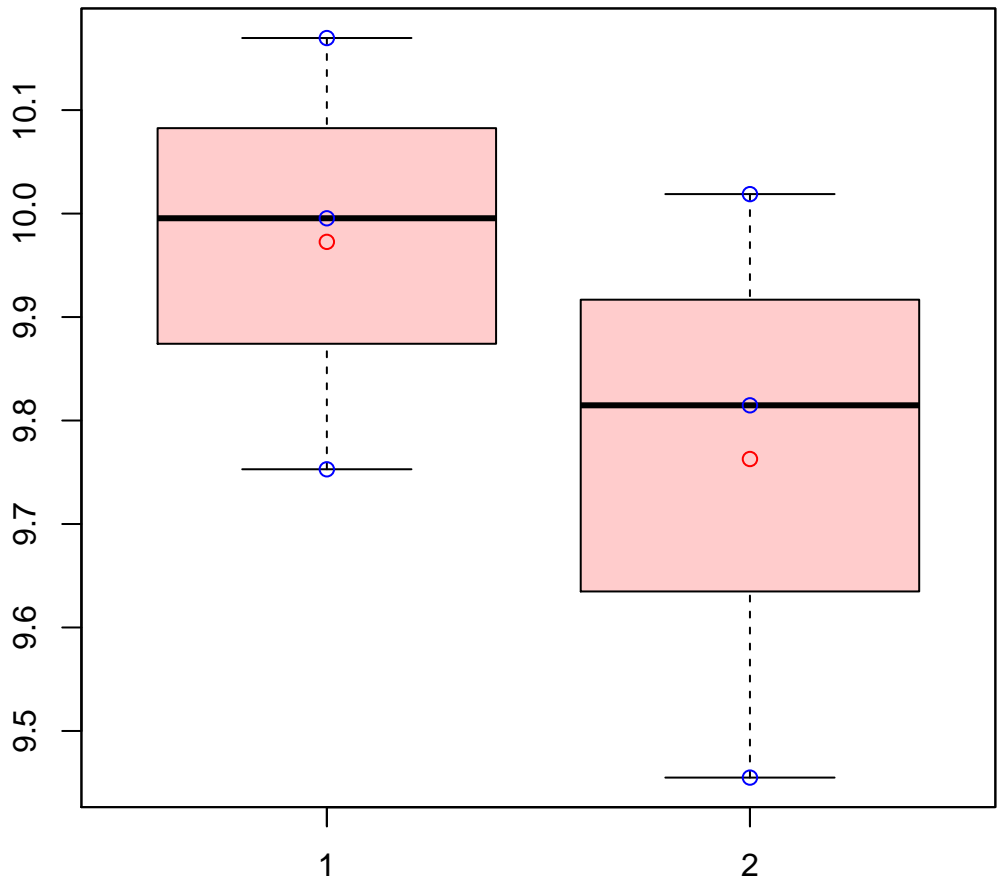

t-Test: p-value = 0.37

# sp|P41095|RLA0\_ORYSJ

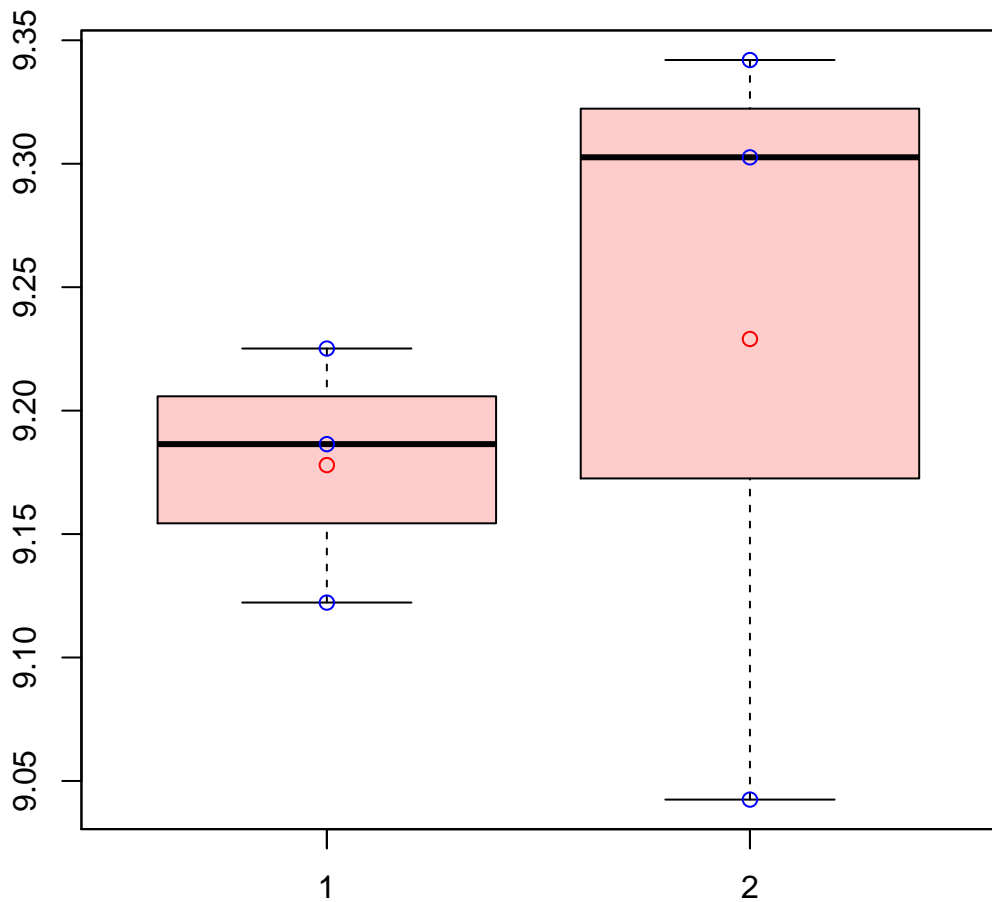

t-Test: p-value = 0.65

# sp|P41979|SODM3\_MAIZE

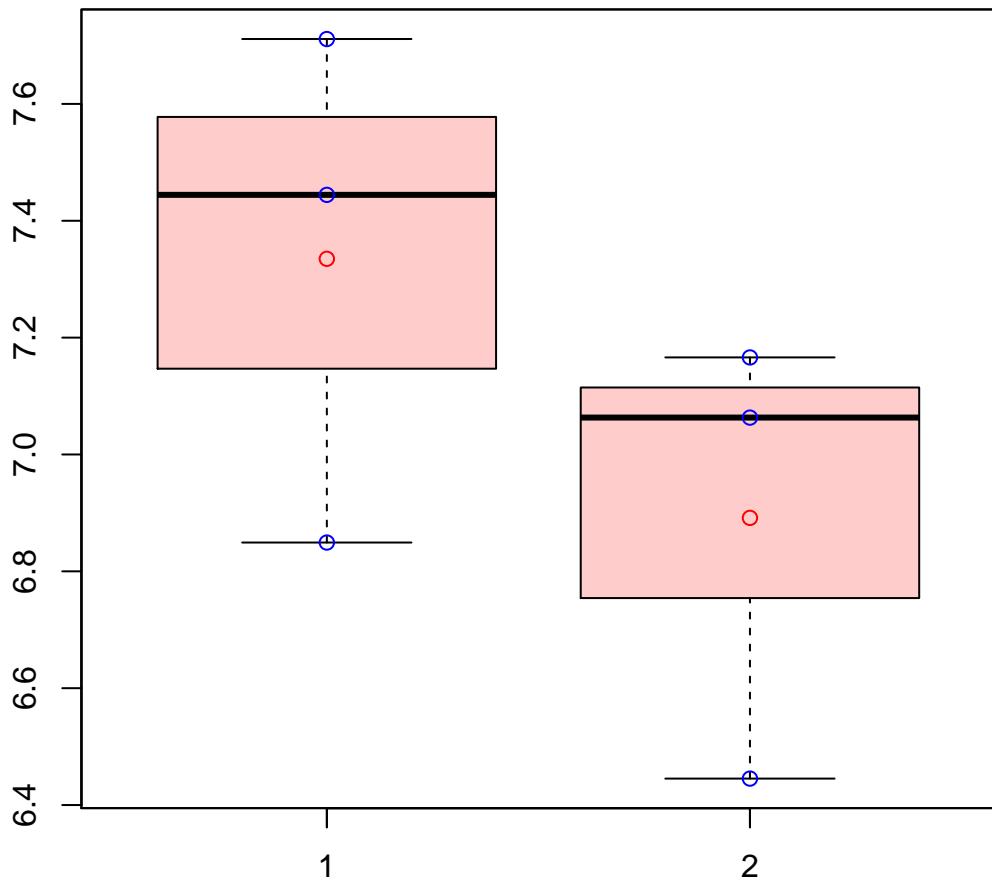

t-Test: p-value = 0.26

# sp|P45633|RL10\_MAIZE

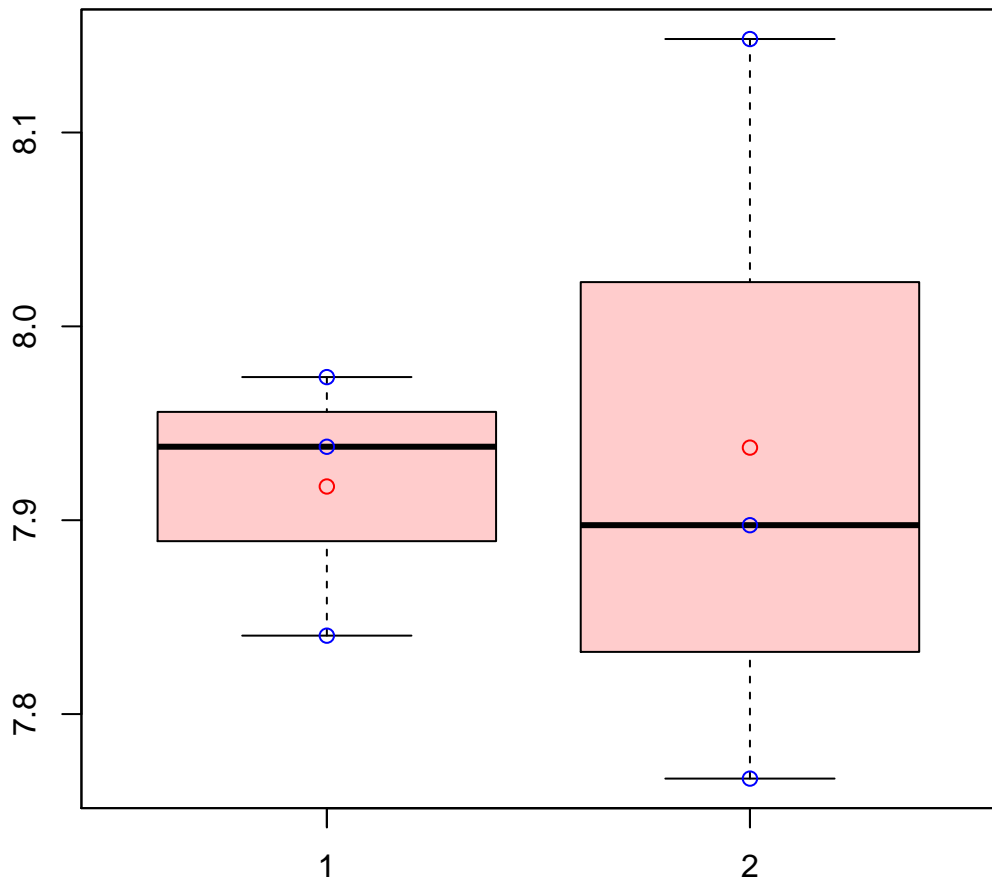

t-Test: p-value = 0.88

# sp|P49080|AKH2\_MAIZE

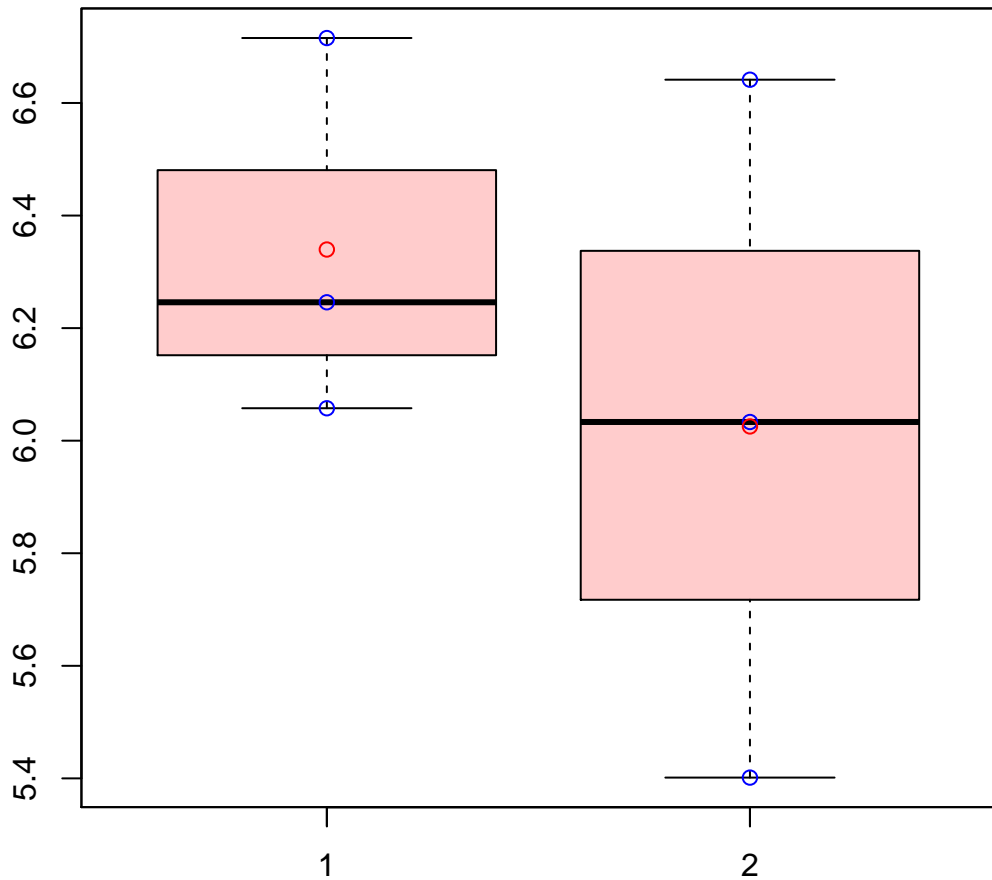

t-Test: p-value = 0.5

# sp|P49105|G6PI\_MAIZE

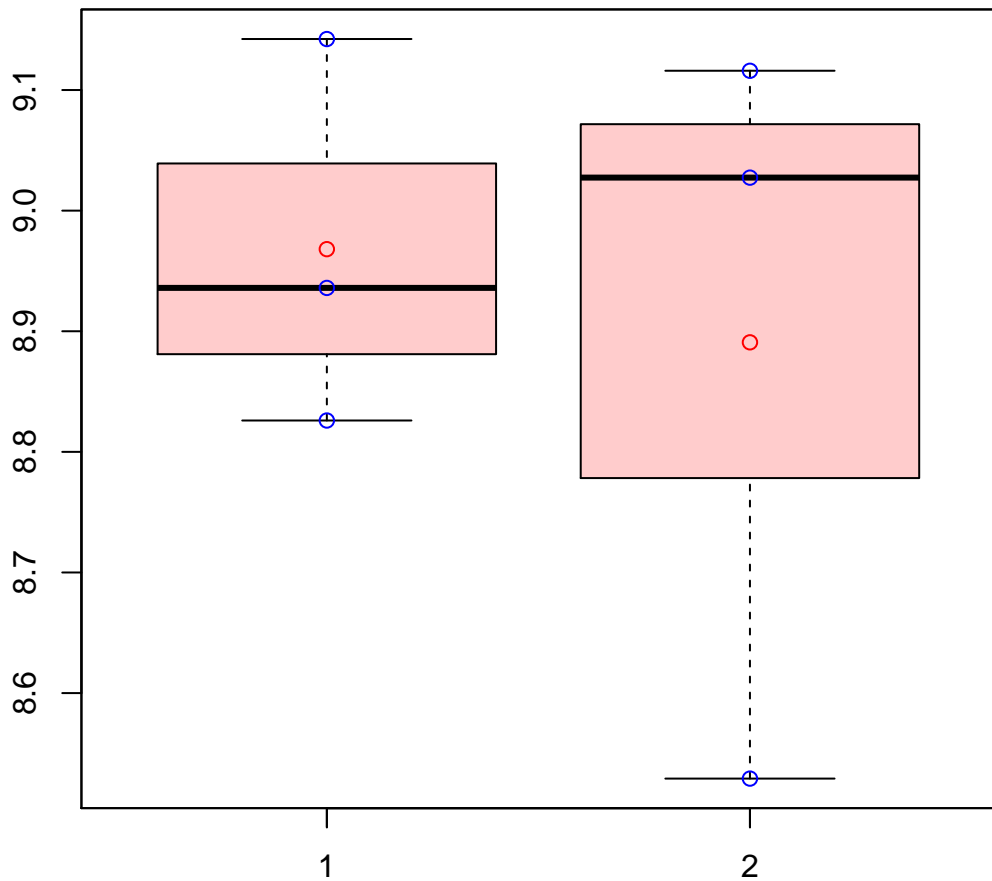

t-Test: p-value = 0.73

# sp|P49106|14331\_MAIZE

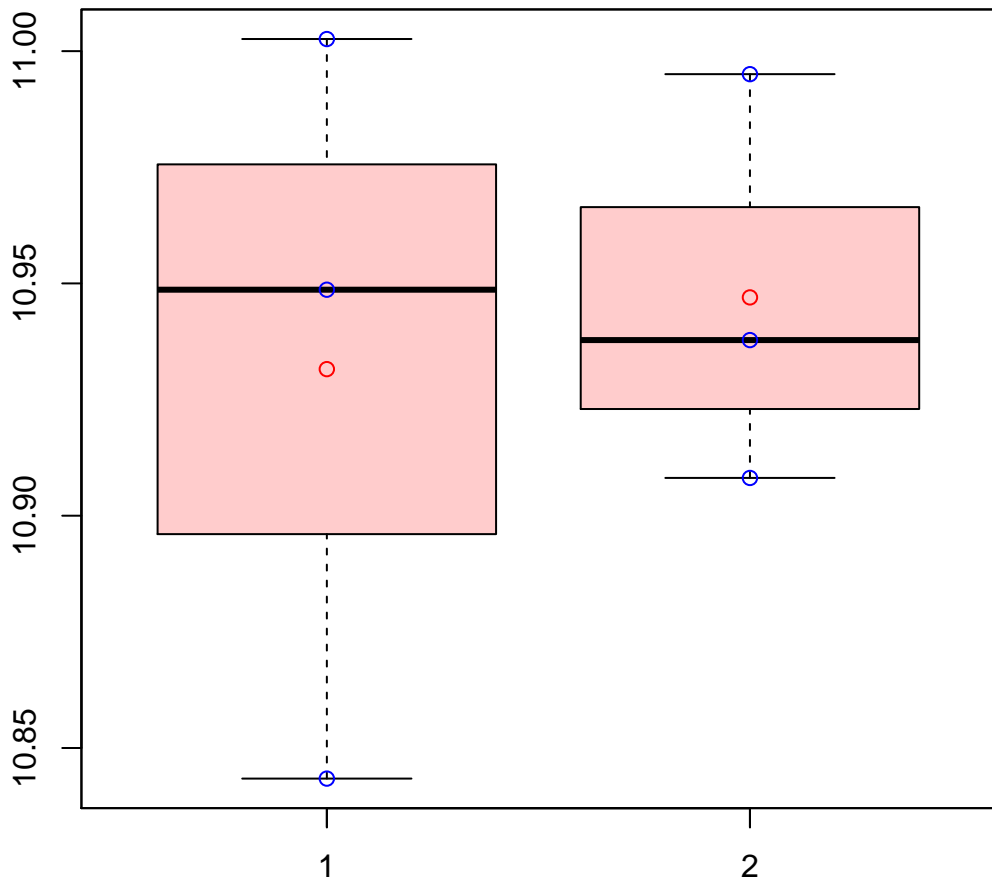

t-Test: p-value = 0.79

# sp|P50249|SAHH\_PHASS

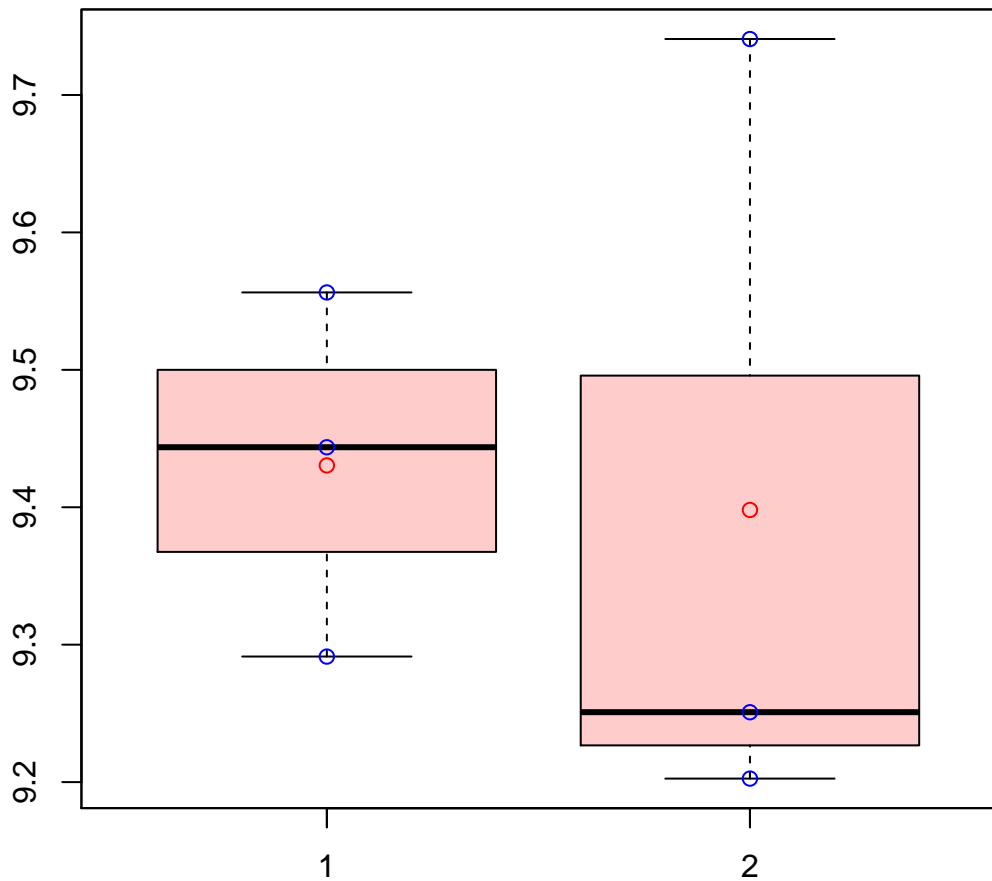

t-Test: p-value = 0.88



# sp|P52894|ALA2\_HORVU

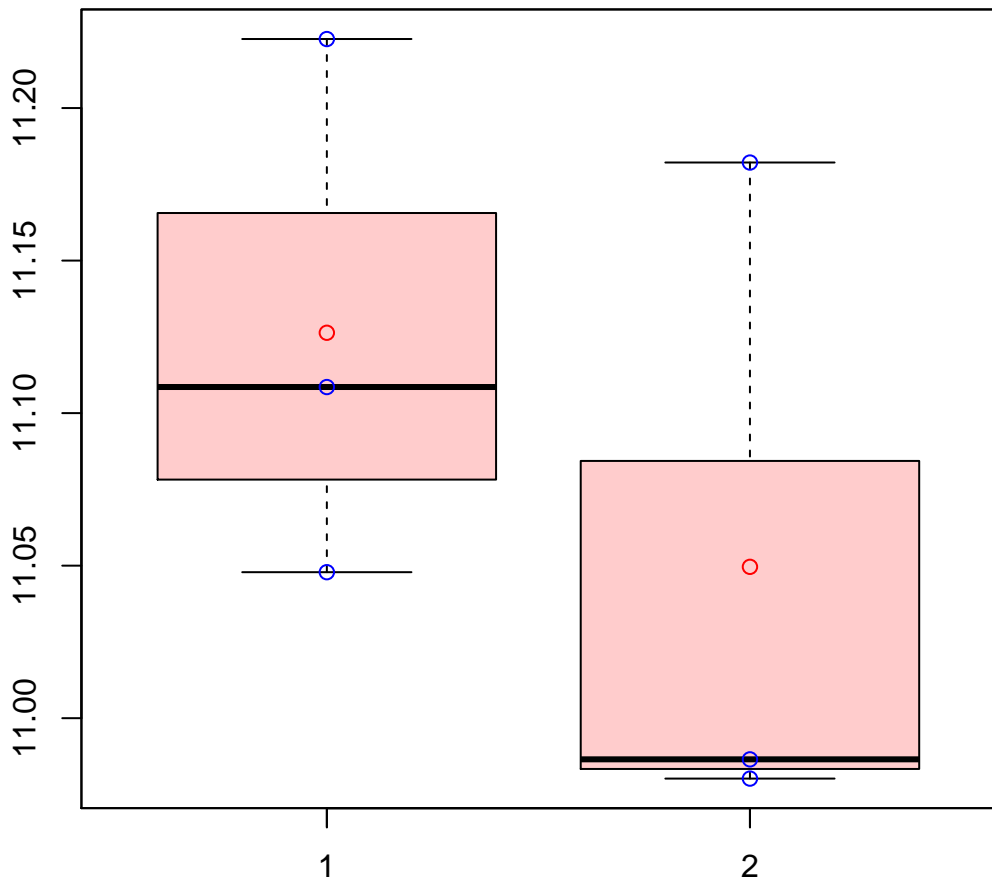

t-Test: p-value = 0.41

# sp|P84187|SGAT\_MAIZE

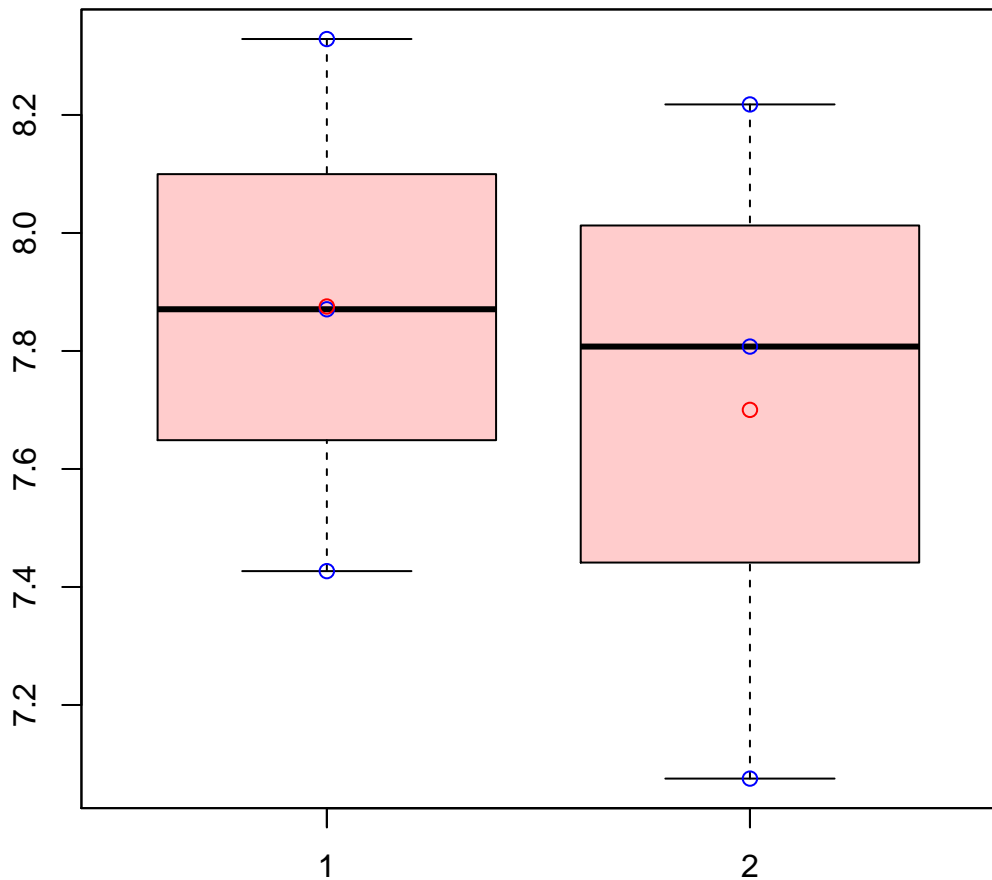

t-Test: p-value = 0.7

# sp|Q01859|ATPBM\_ORYSJ

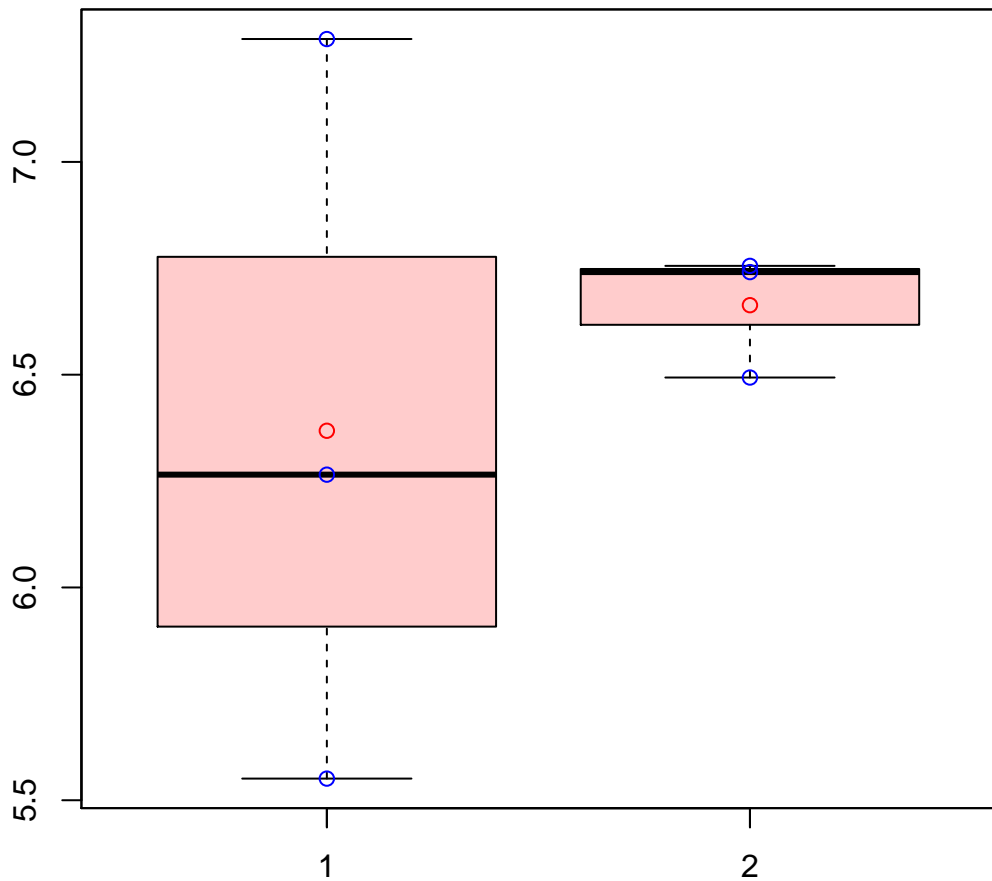

t-Test: p-value = 0.62

# sp|Q03387|IF4G1\_WHEAT

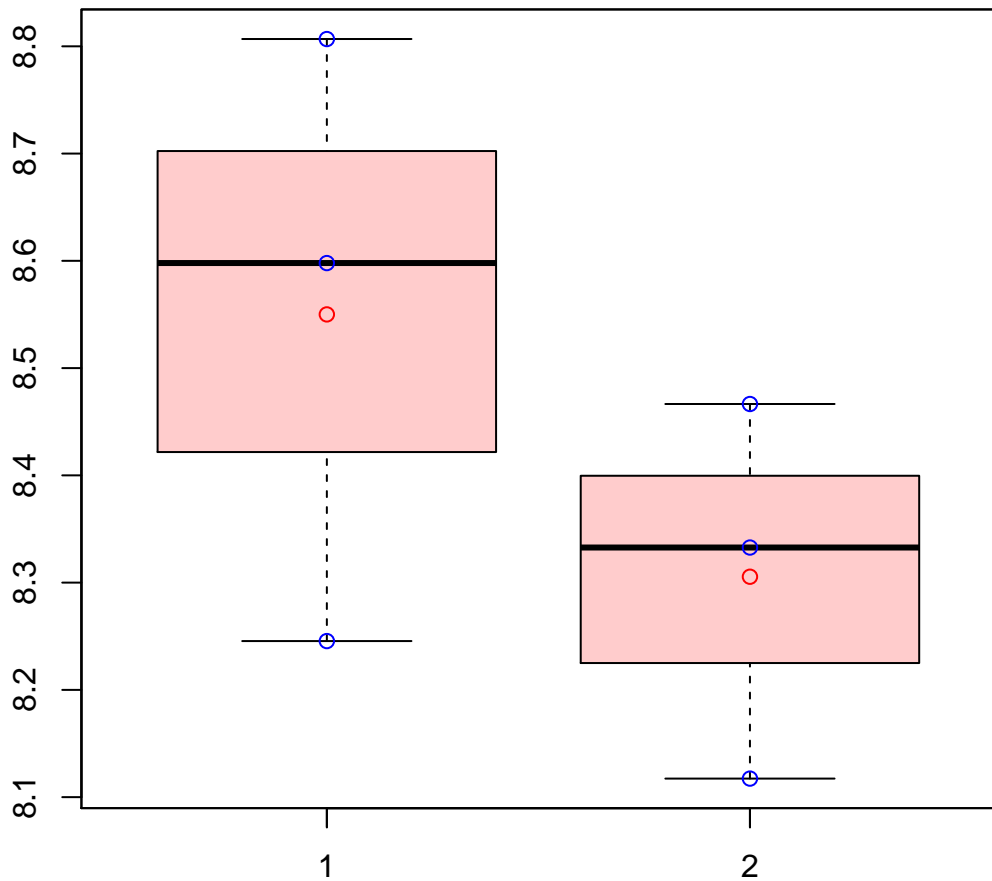

t-Test: p-value = 0.29

# sp|Q08480|KAD2\_ORYSJ

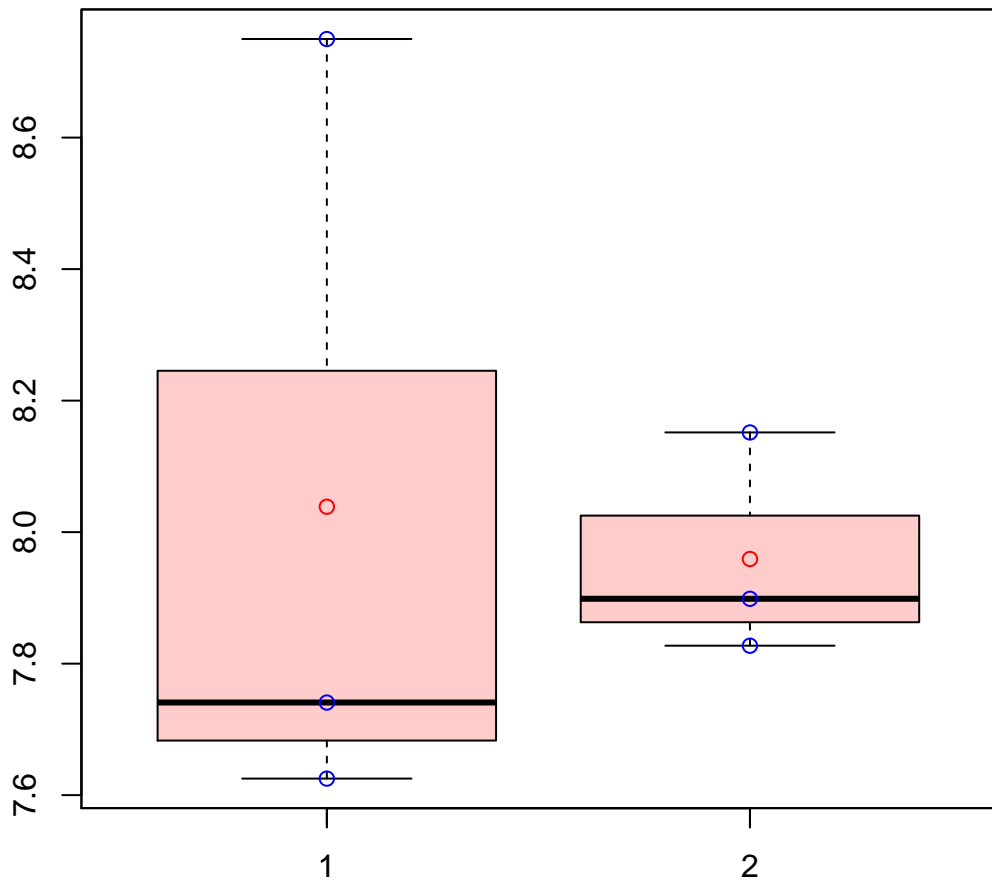

t-Test: p-value = 0.85

# sp|Q0JHF8|F16P2\_ORYSJ

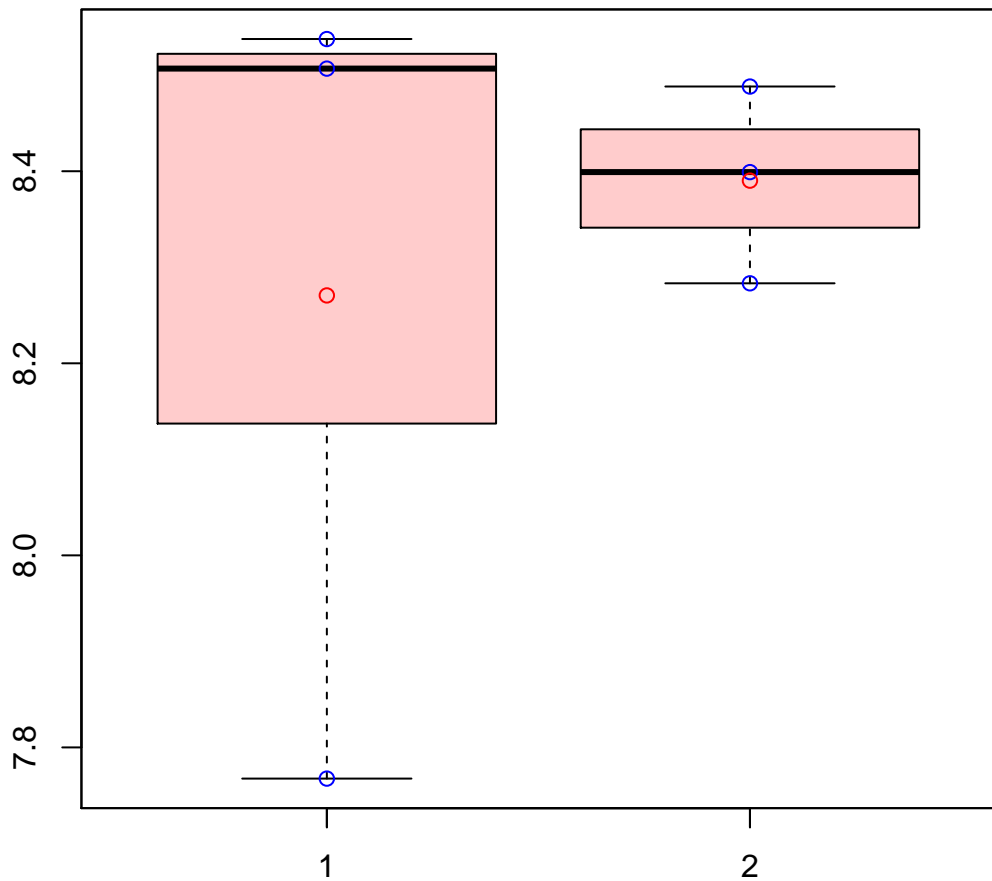

t-Test: p-value = 0.69

# sp|Q2QM69|BQMT2\_ORYSJ

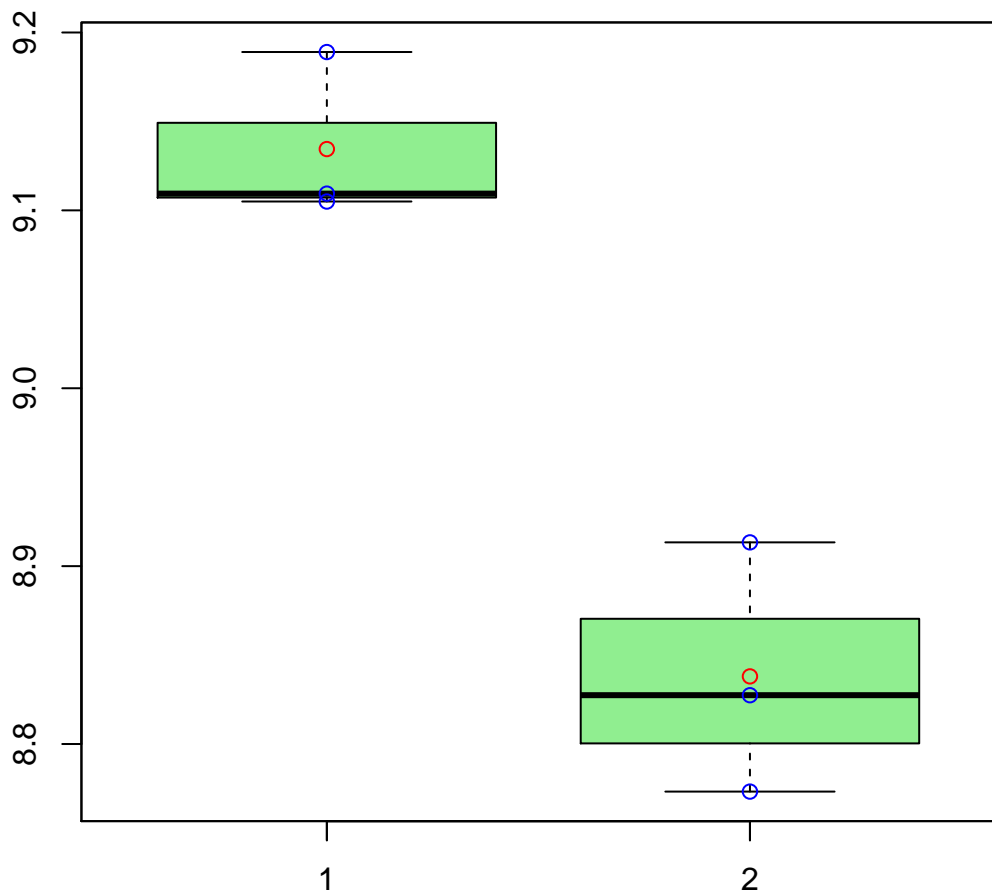

t-Test: p-value = 0.01

# sp|Q41629|ADT1\_WHEAT

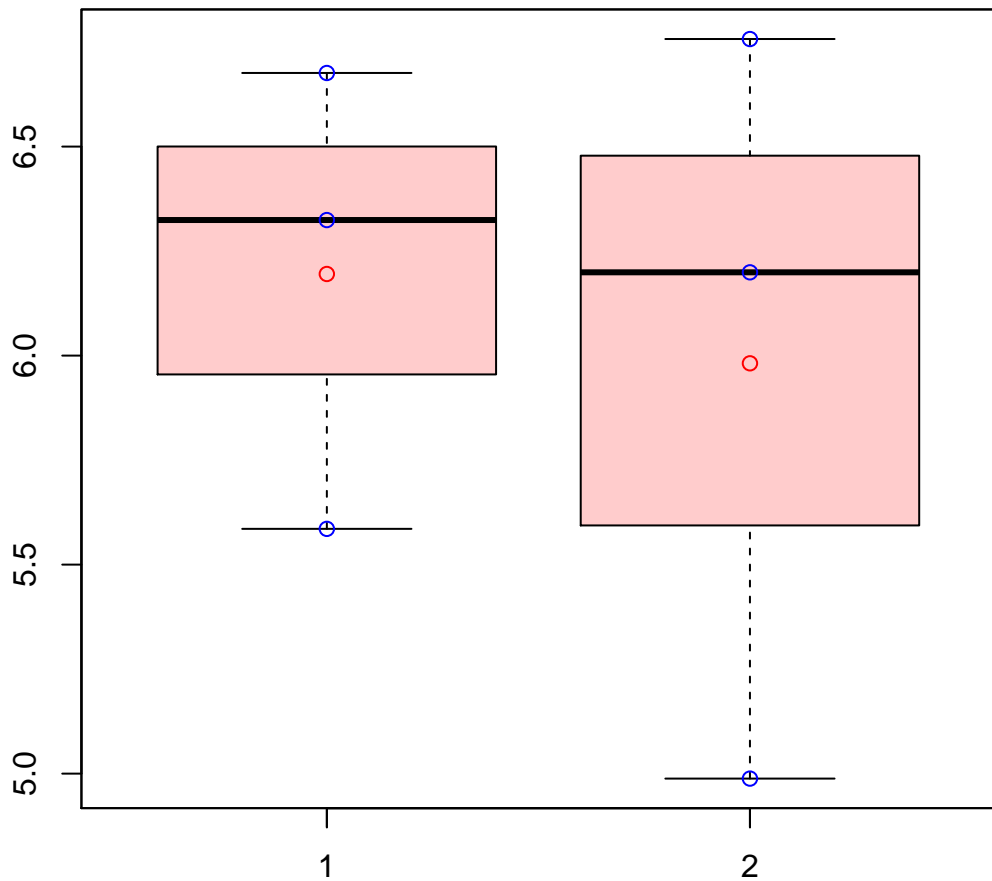

t-Test: p-value = 0.75



# sp|Q41864|TRXM\_MAIZE

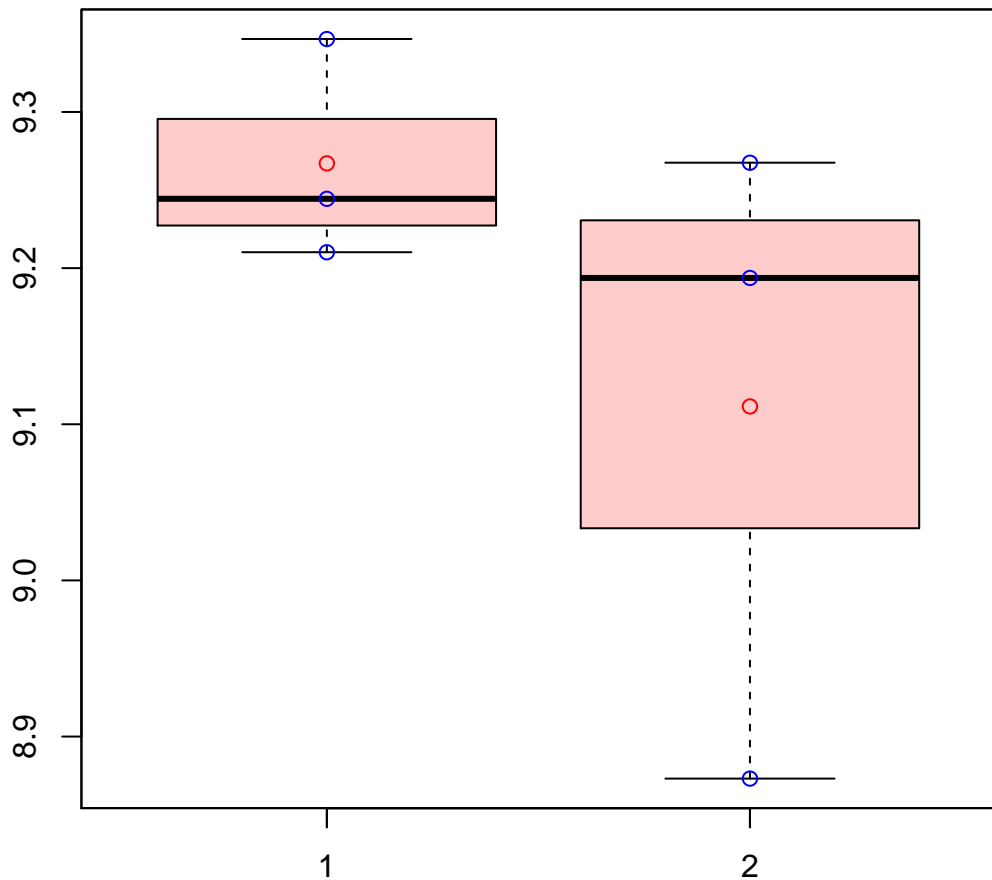

t-Test: p-value = 0.33

# sp|Q43139|F16P2\_SACHY

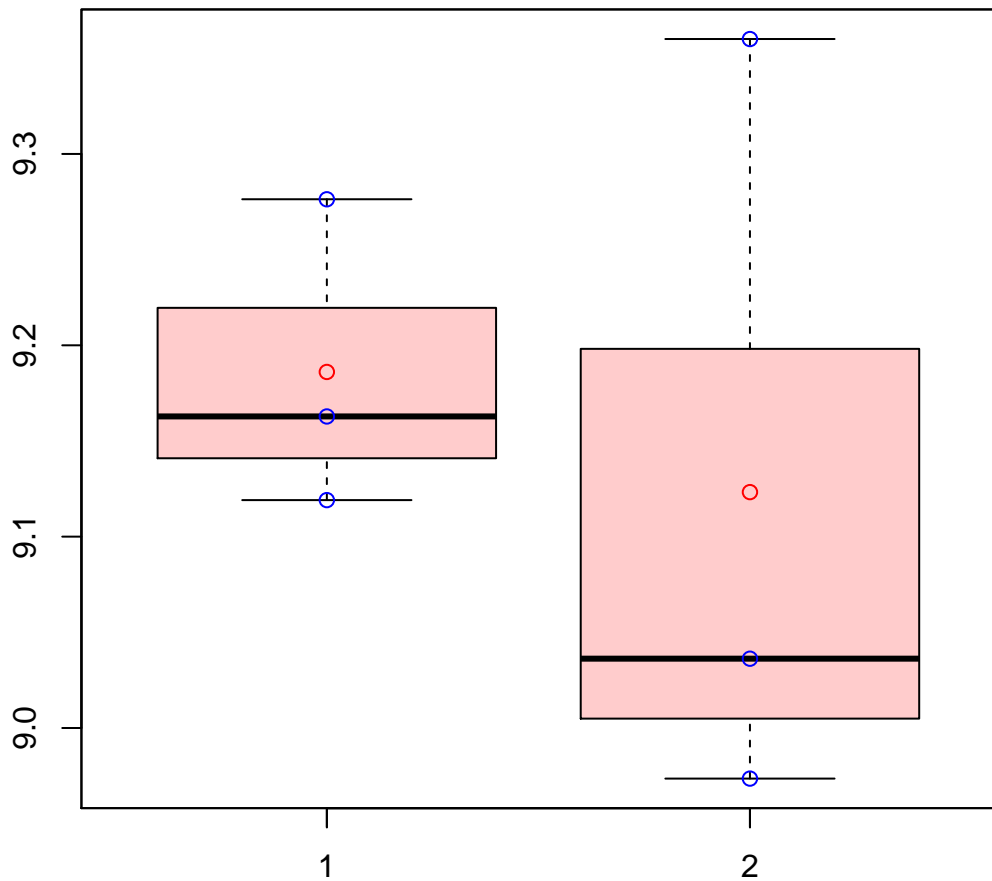

t-Test: p-value = 0.66

# sp|Q43298|CH62\_MAIZE

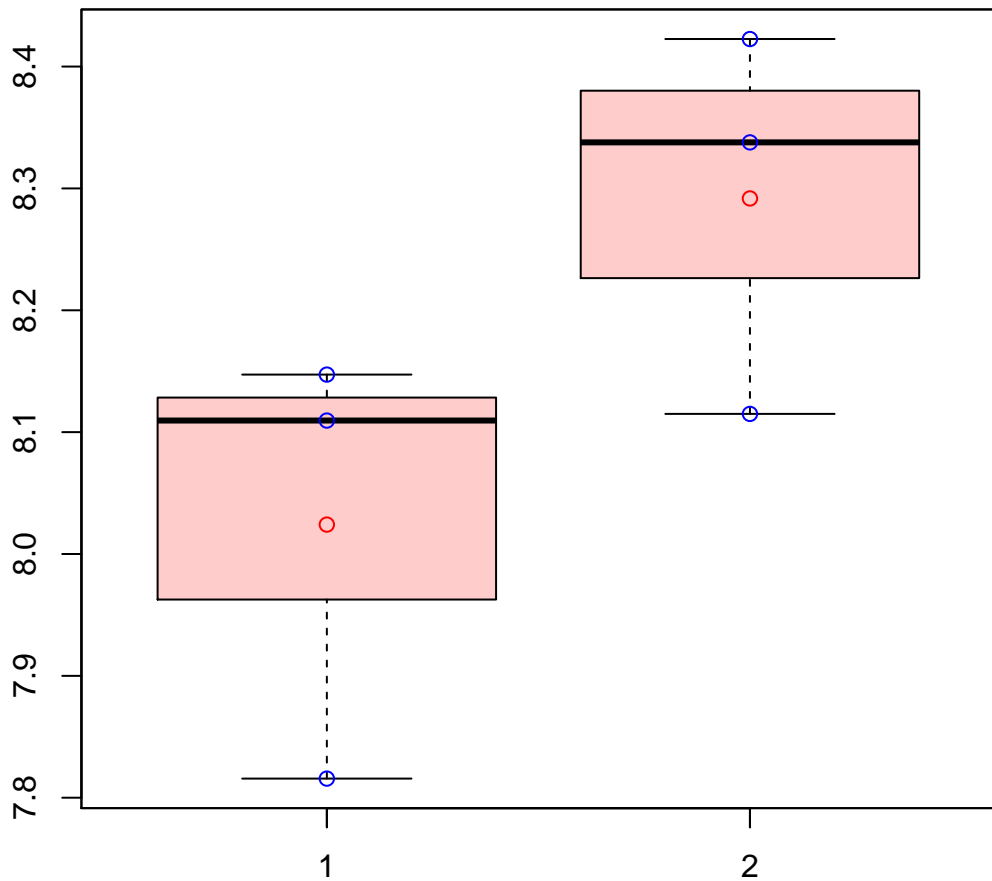

t-Test: p-value = 0.13

# sp|Q53N47|CLPC4\_ORYSJ

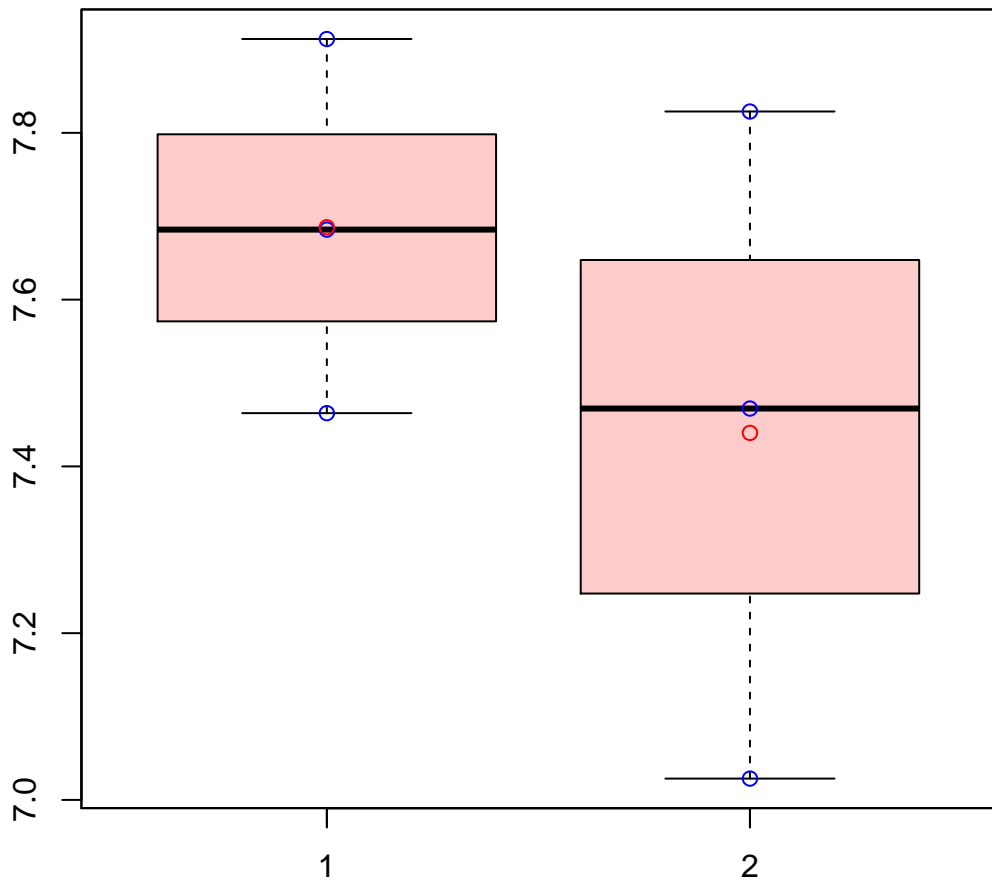

t-Test: p-value = 0.42

# sp|Q53P98|SIPL2\_ORYSJ

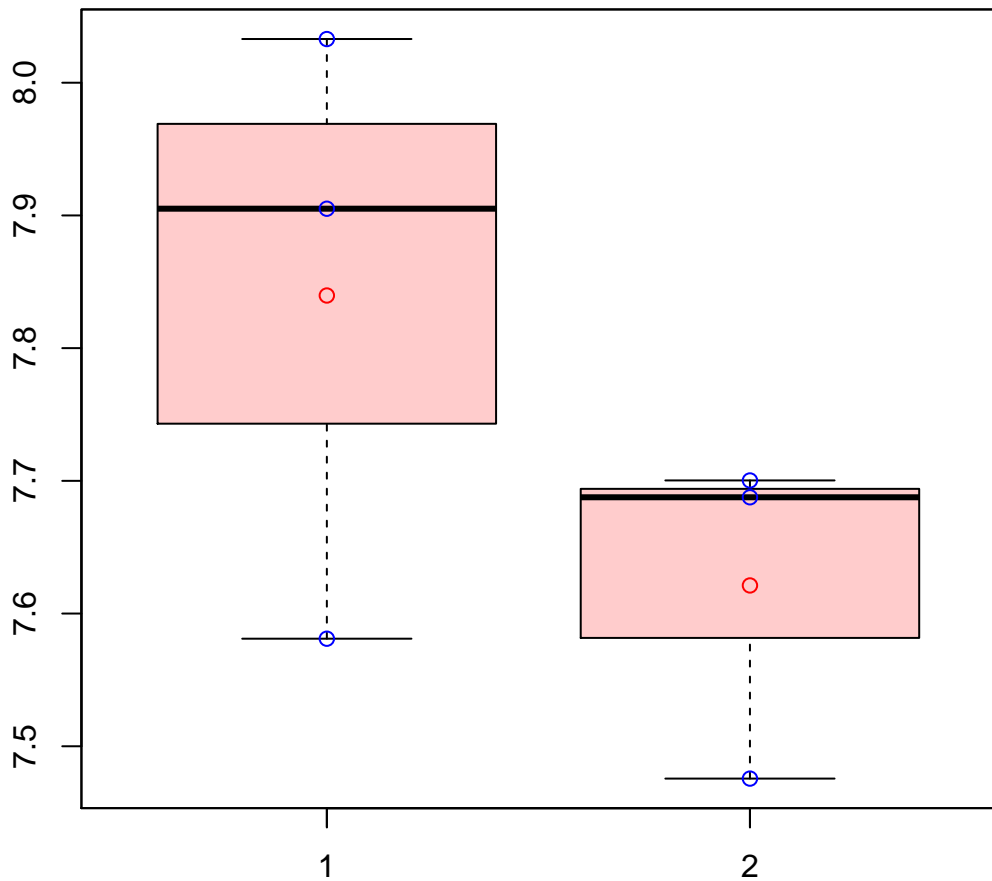

t-Test: p-value = 0.25

# sp|Q5Z987|ATR\_ORYSJ

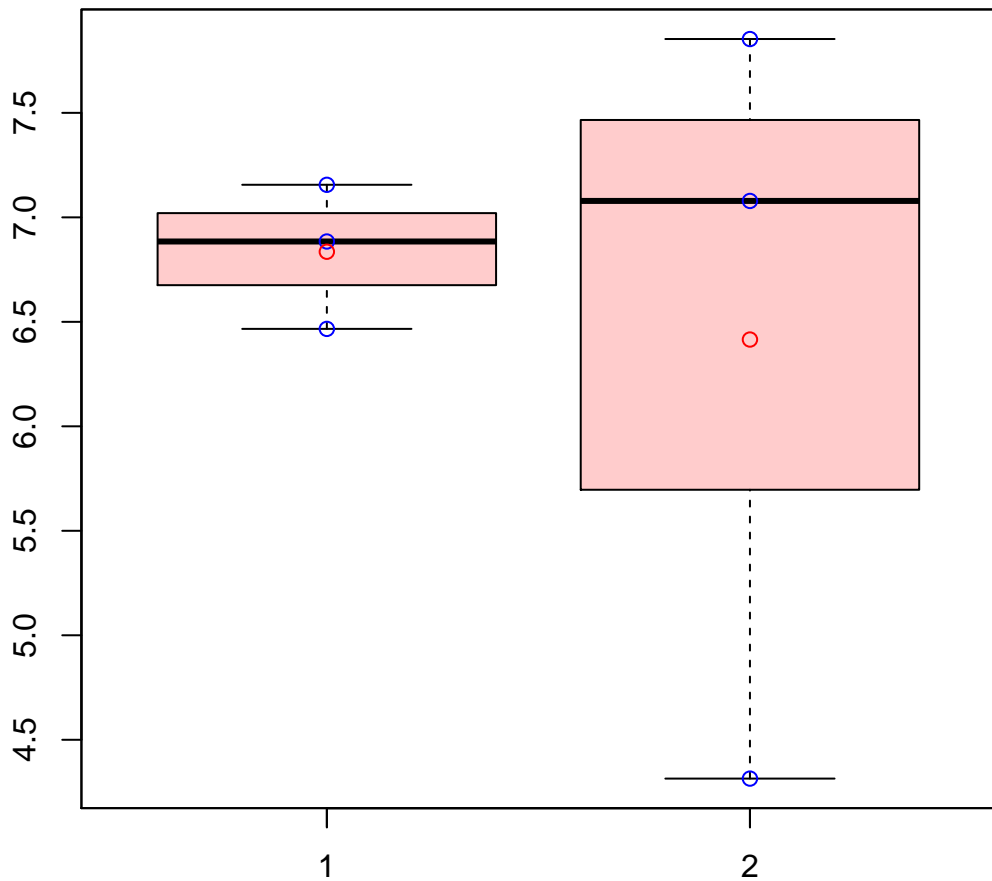

t-Test: p-value = 0.74

# sp|Q6AVA8|PPDK1\_ORYSJ

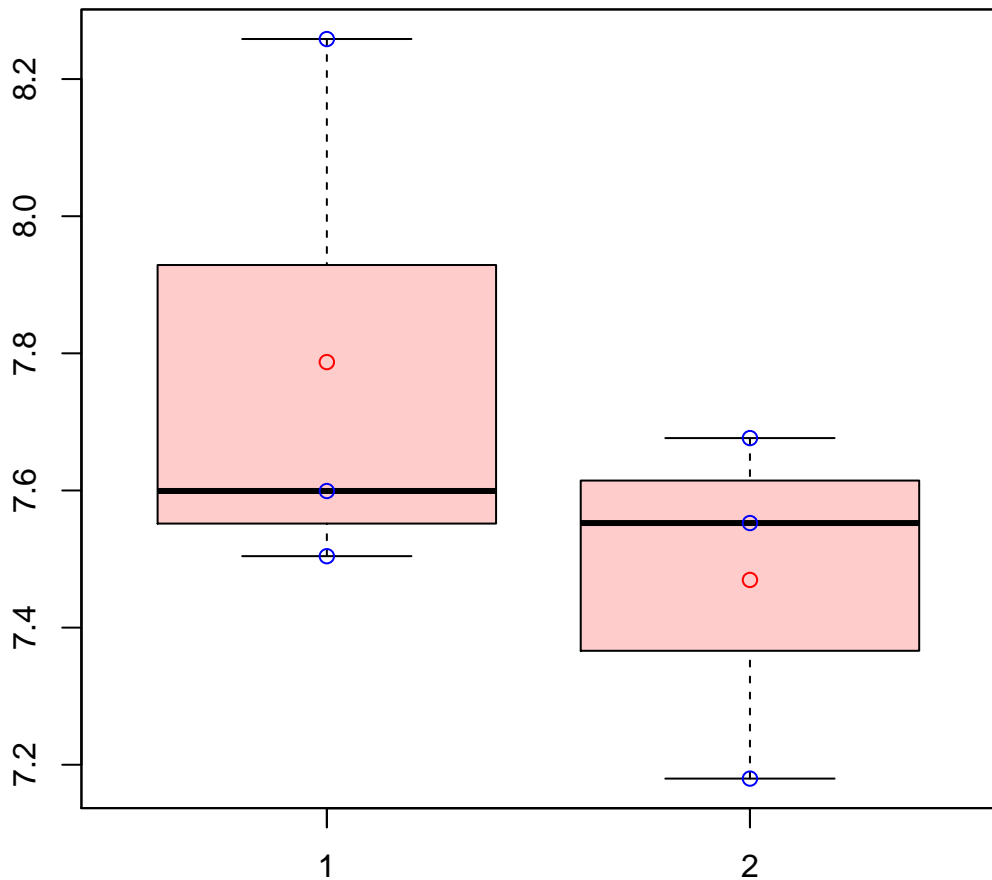

t-Test: p-value = 0.33

# sp|Q6L399|PSAB\_SACHY

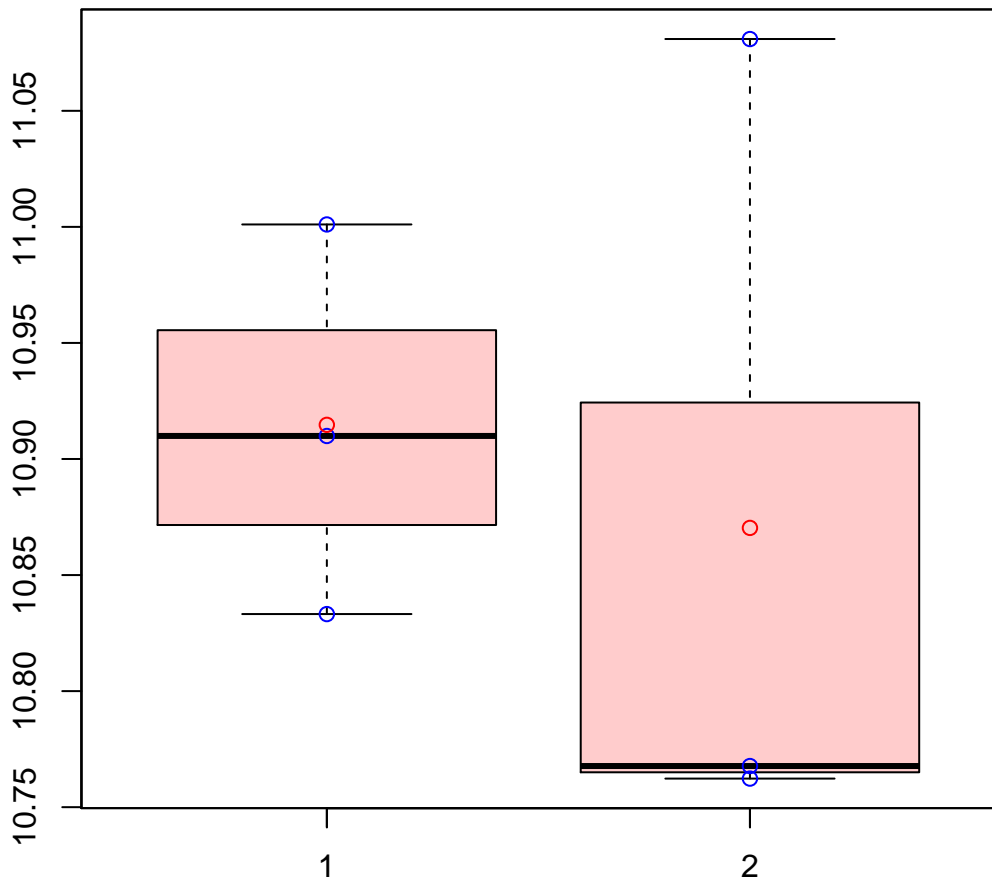

t-Test: p-value = 0.73



# sp|Q6L3A1|ATPA\_SACHY

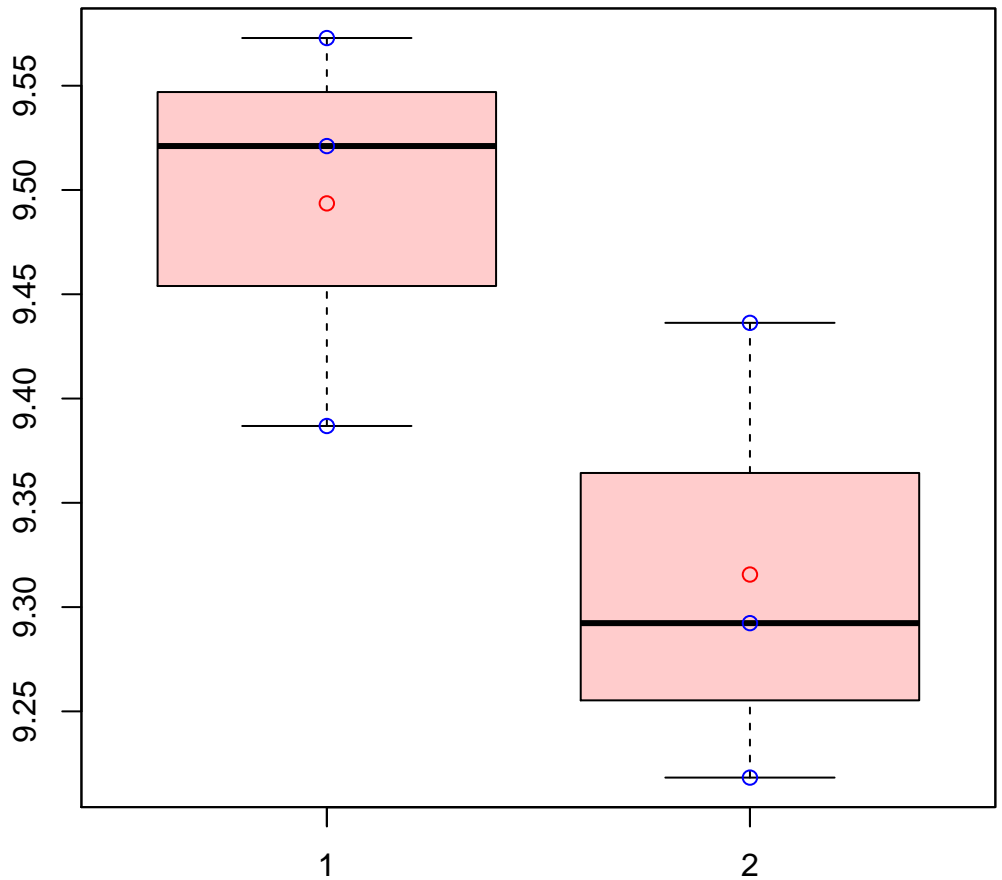

t-Test: p-value = 0.1

# sp|Q6YZX6|ACOC\_ORYSJ

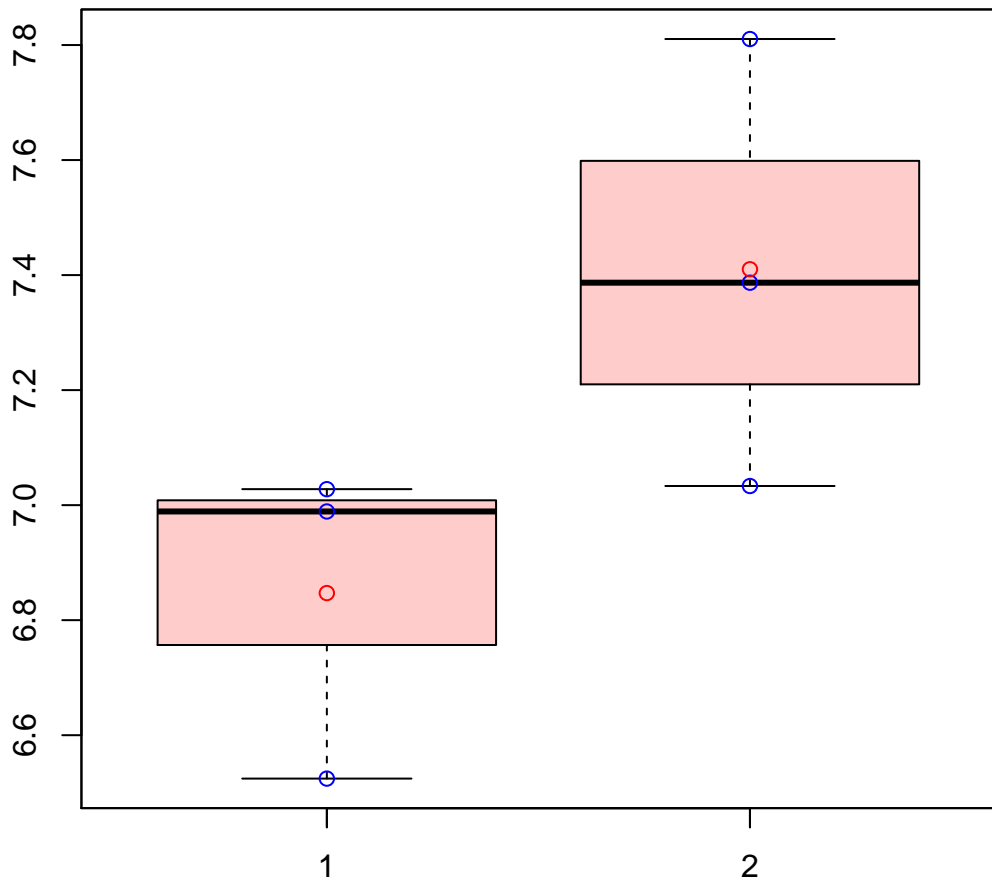

t-Test: p-value = 0.12

# sp|Q6Z382|COPG2\_ORYSJ

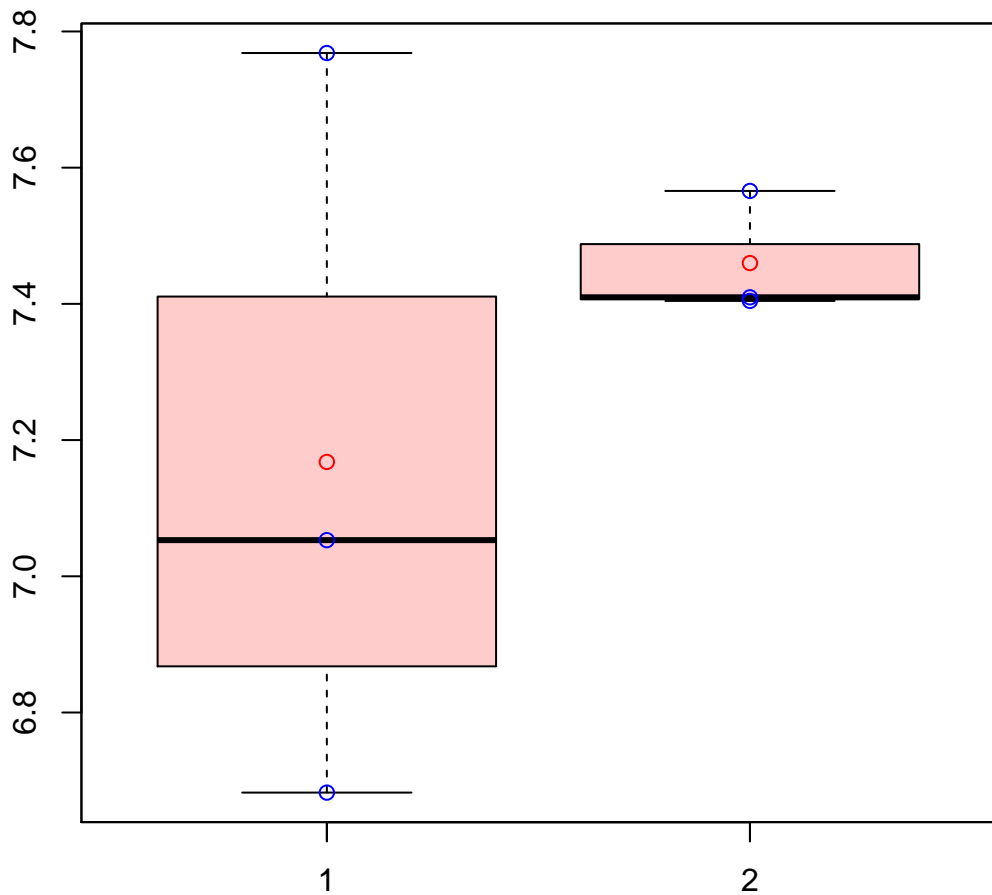

t-Test: p-value = 0.46

# sp|Q6Z9C3|6PGL3\_ORYSJ

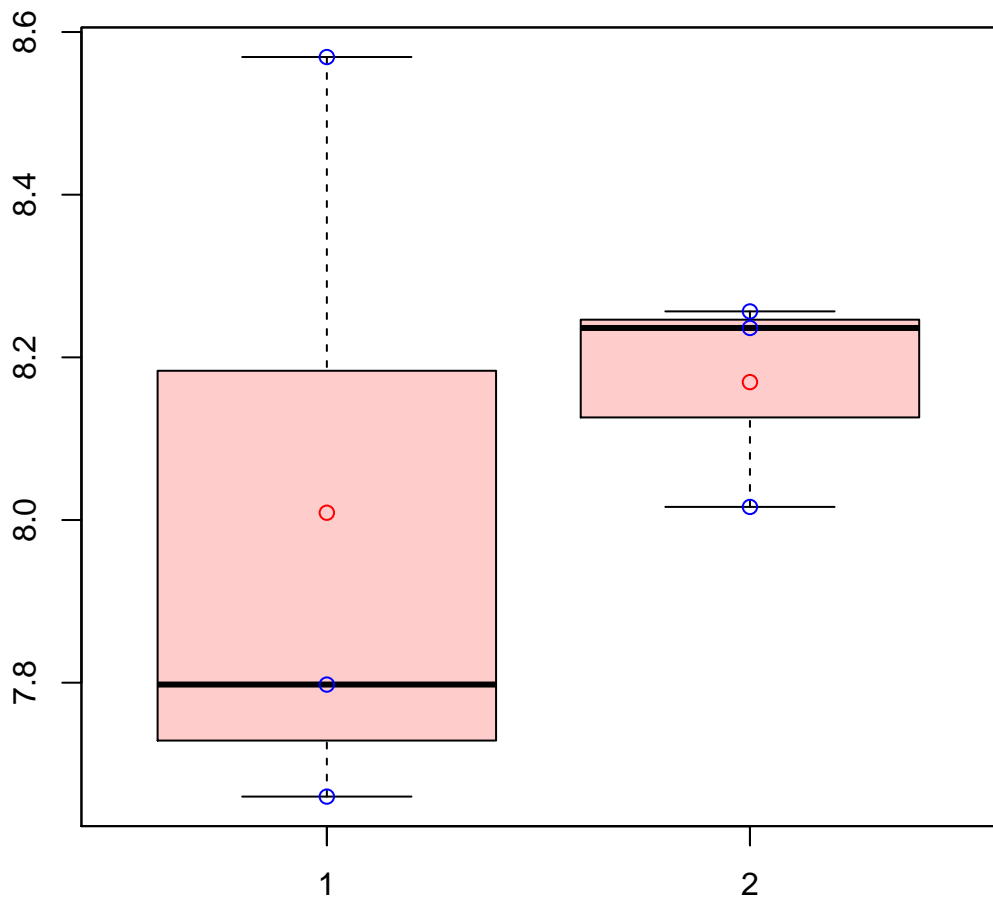

t-Test: p-value = 0.63

# sp|Q75KR1|PPDK2\_ORYSJ

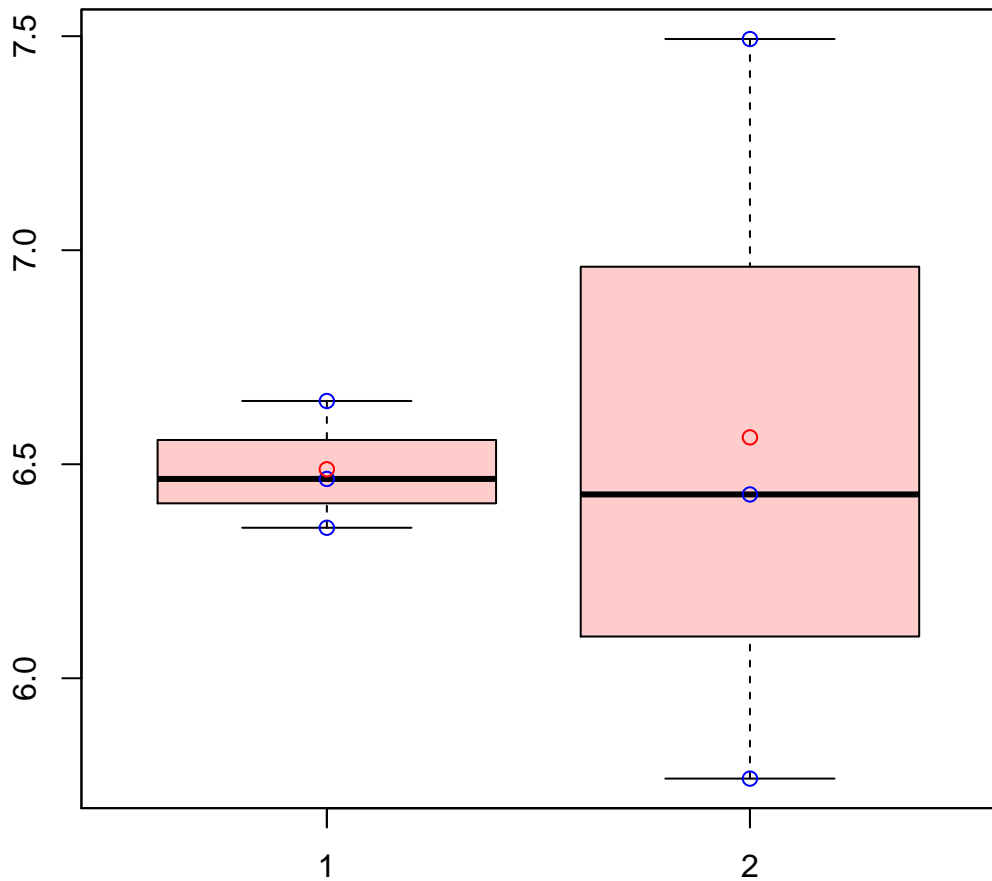

t-Test: p-value = 0.9

# sp|Q7FAH2|G3PC2\_ORYSJ

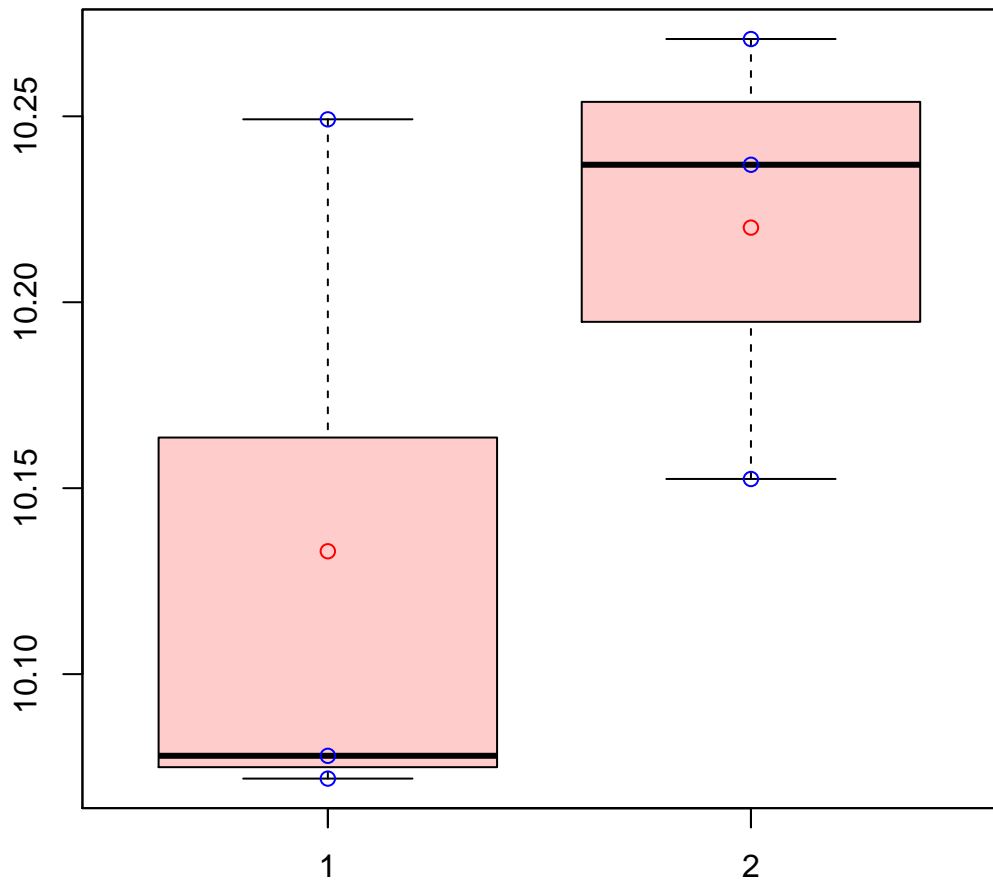

t-Test: p-value = 0.28

# sp|Q8W3D0|PDX12\_ORYSJ

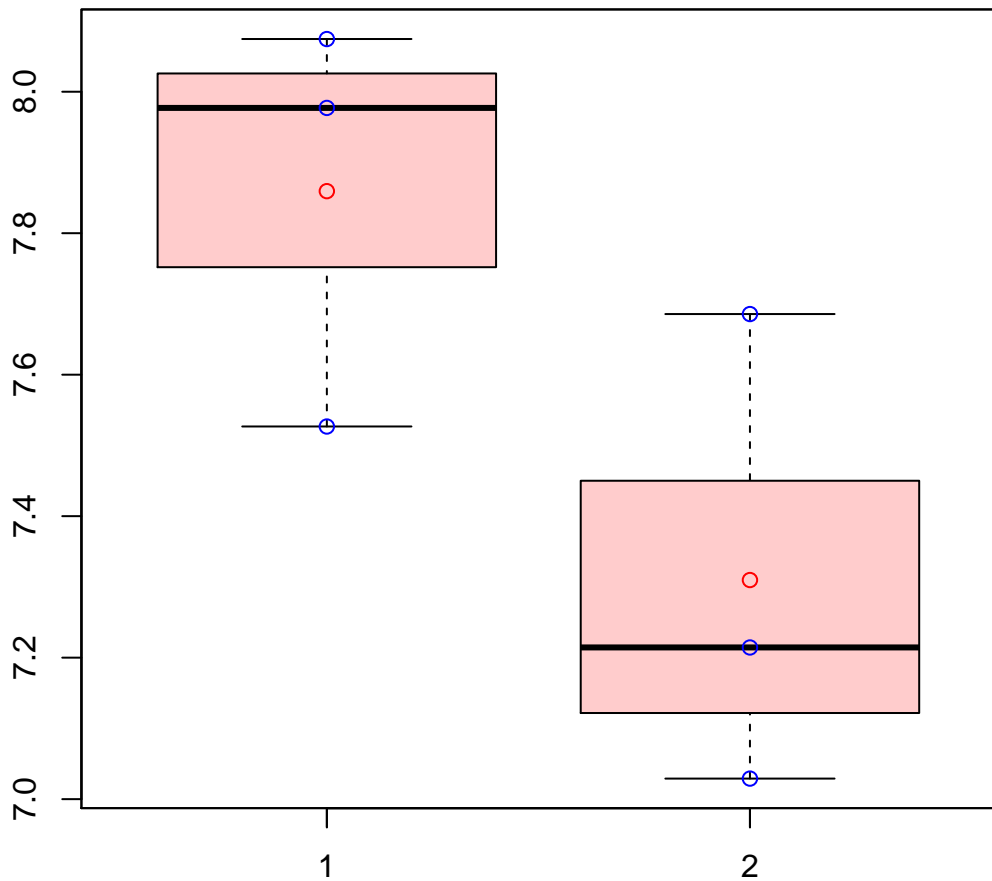

t-Test: p-value = 0.1

# sp|Q93VT8|ACLB1\_ORYSJ

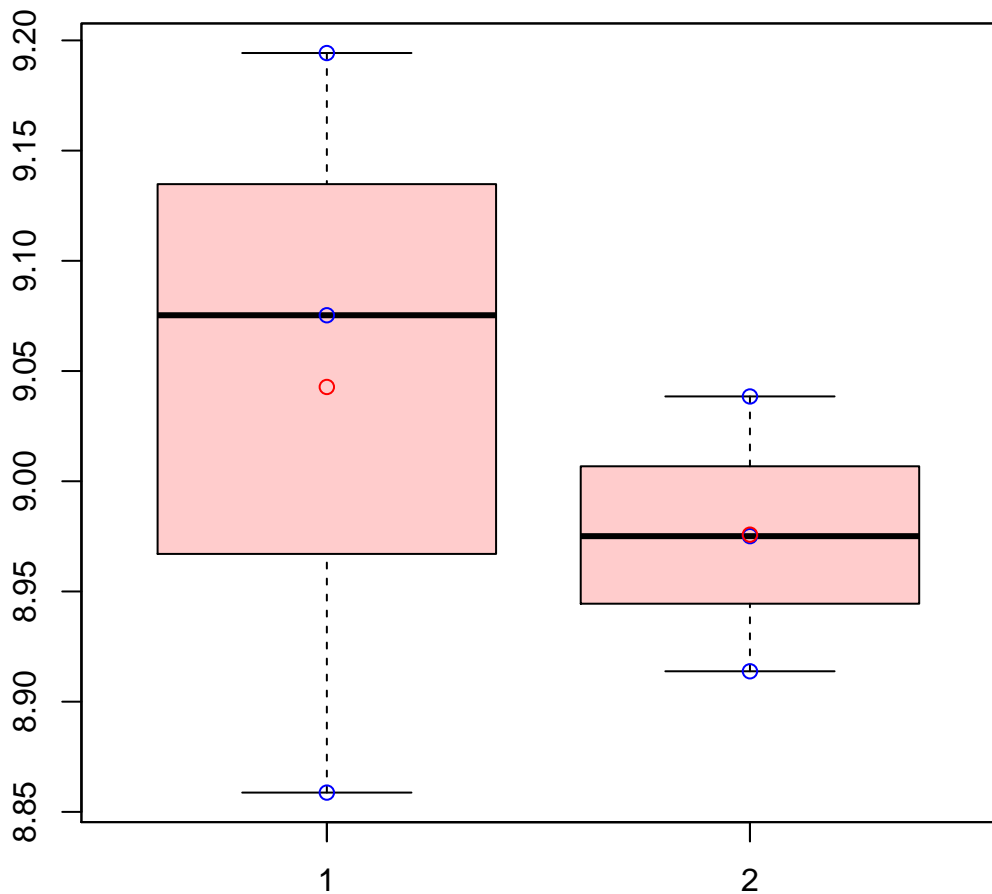

t-Test: p-value = 0.58



# sp|Q943F3|RL18A\_ORYSJ

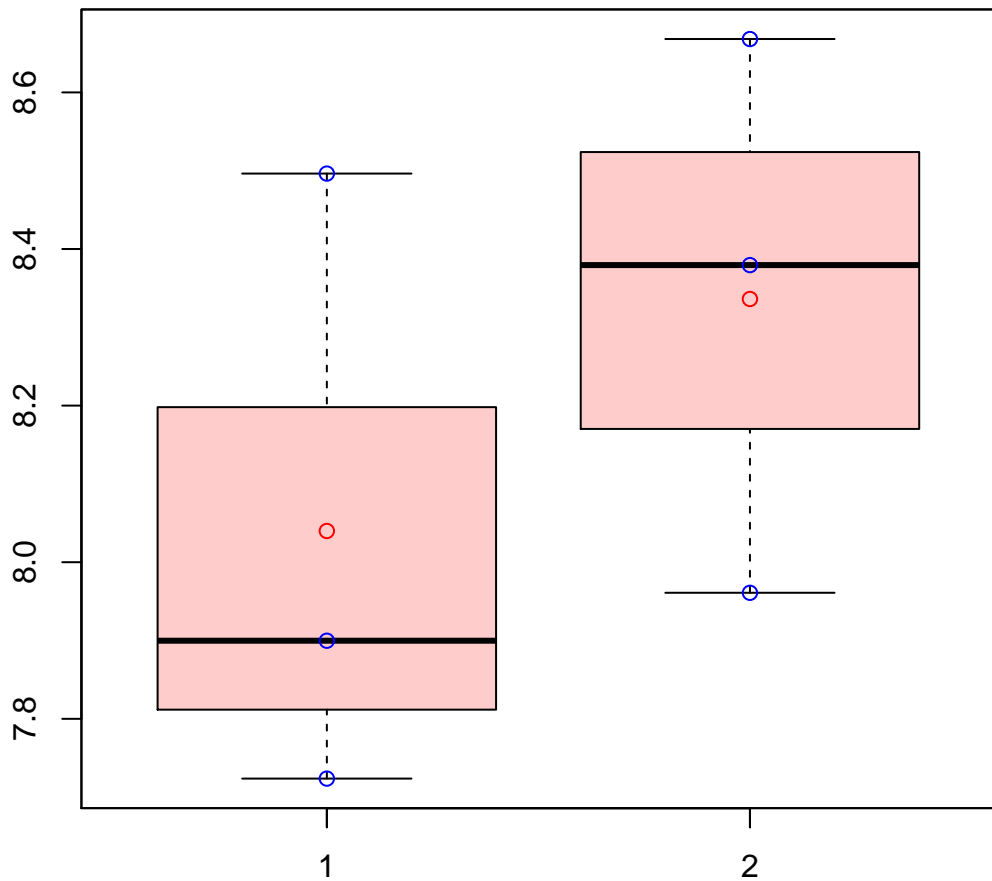

t-Test: p-value = 0.4

# sp|Q9AYP4|RS10\_ORYSJ

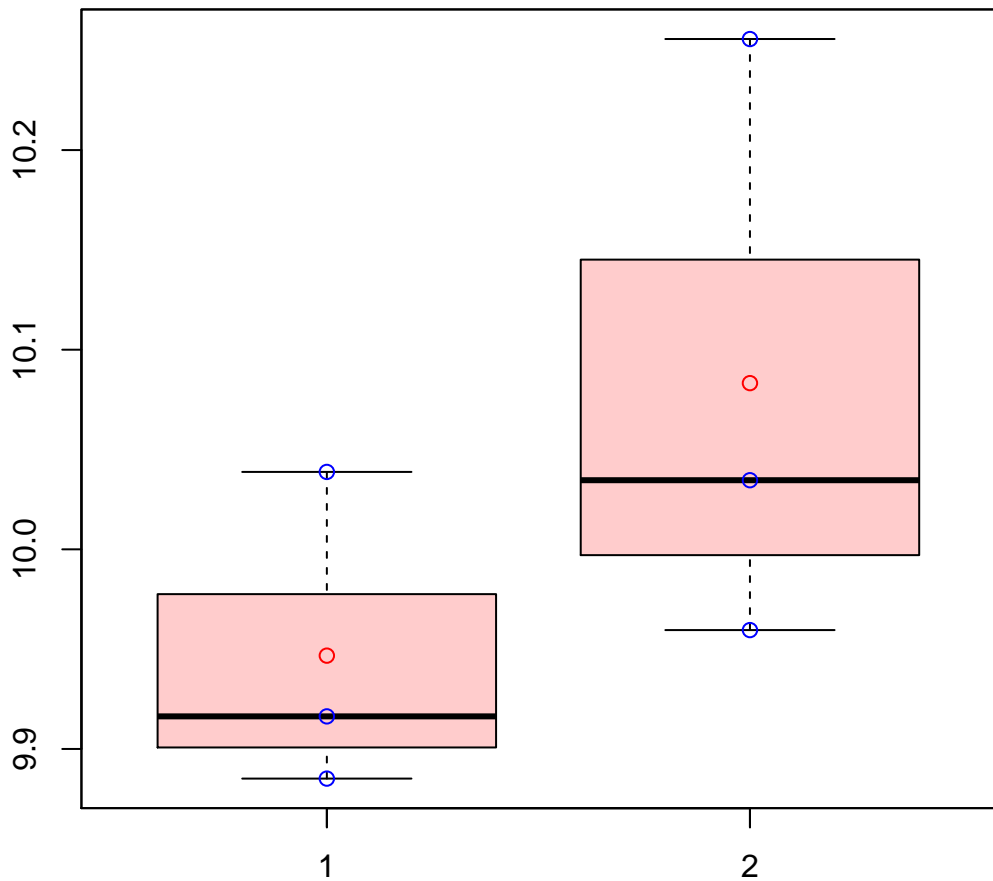

t-Test: p-value = 0.27

# sp|Q9FUZ7|SCR\_MAIZE

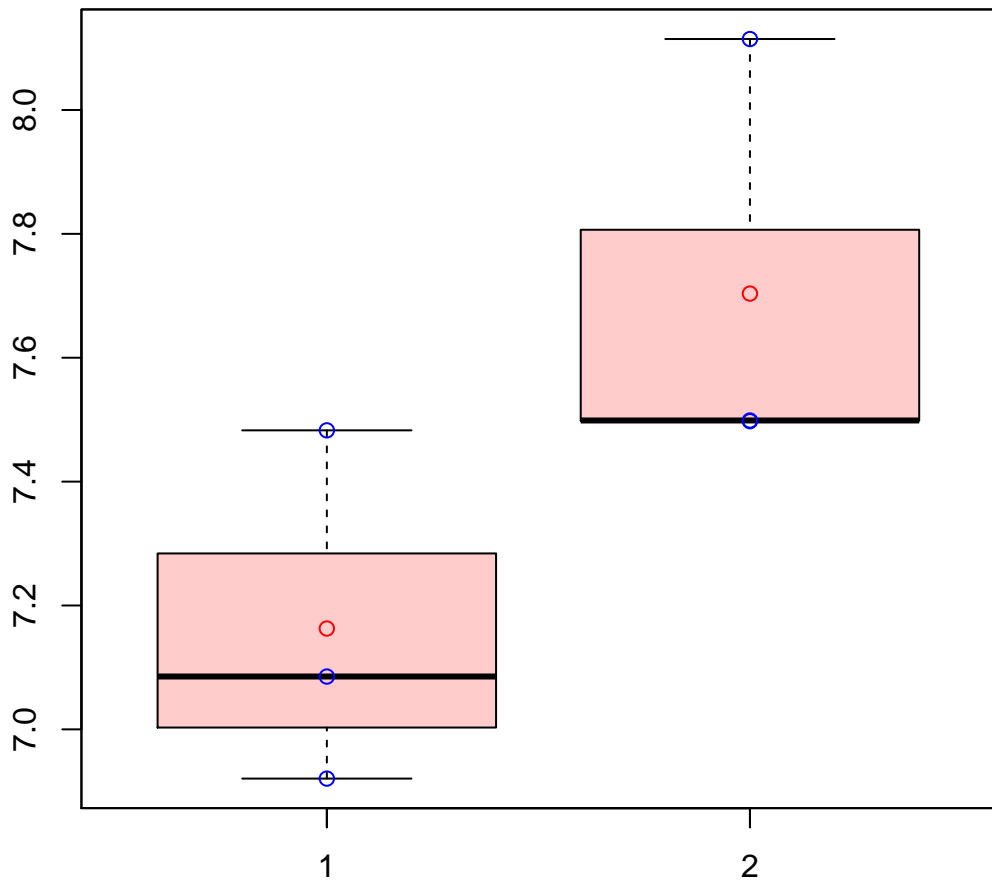

t-Test: p-value = 0.11

# sp|Q9FWK4|CYNS\_ORYSJ

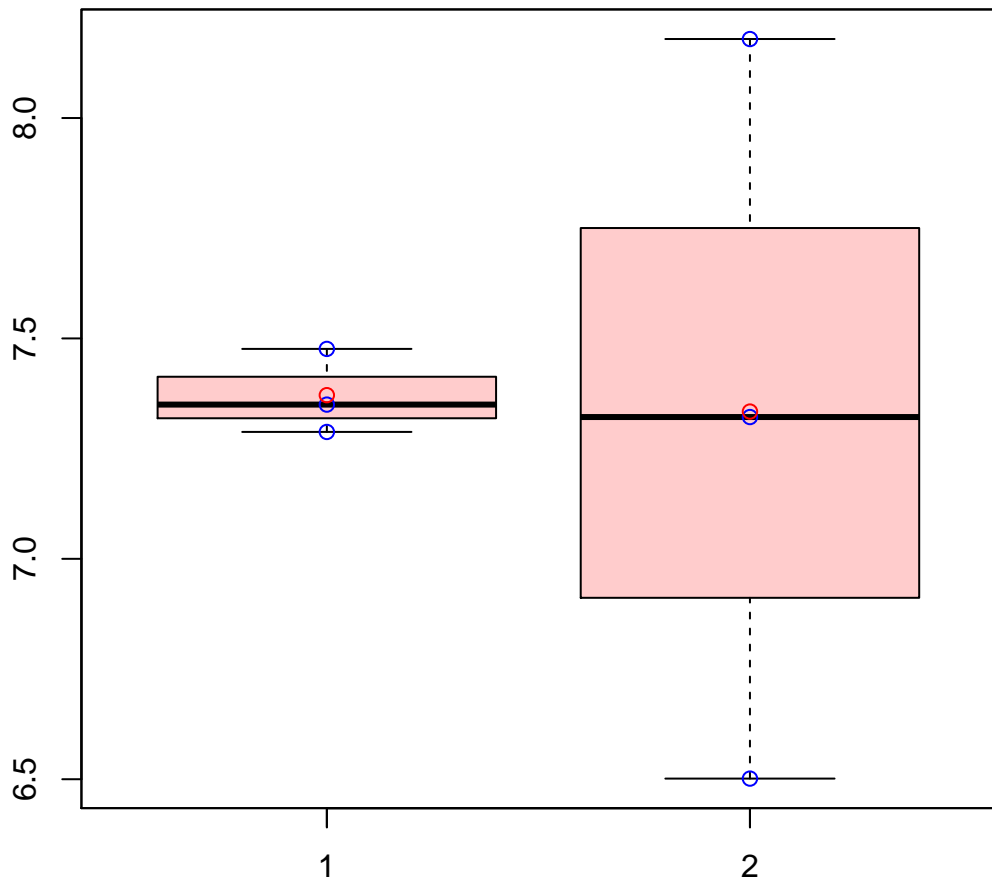

t-Test: p-value = 0.95

# sp|Q9LKJ3|PHSH\_WHEAT

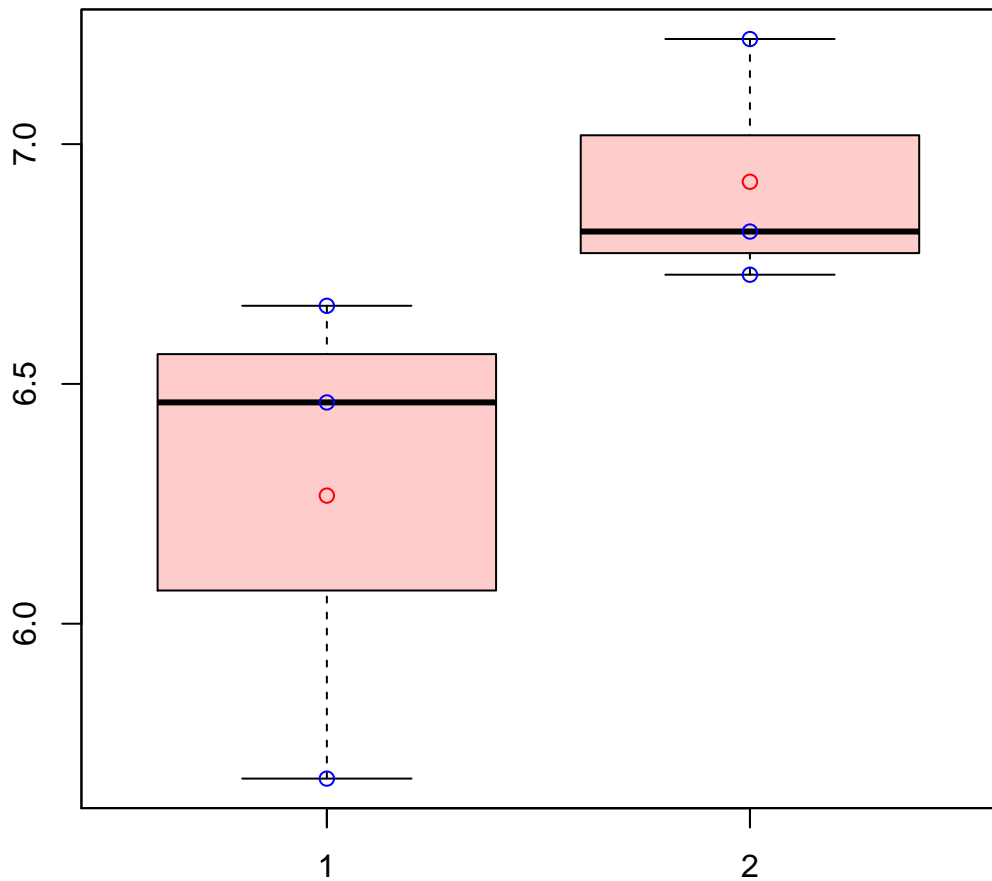

t-Test: p-value = 0.15

# sp|Q9LSU1|PSA5\_ORYSJ

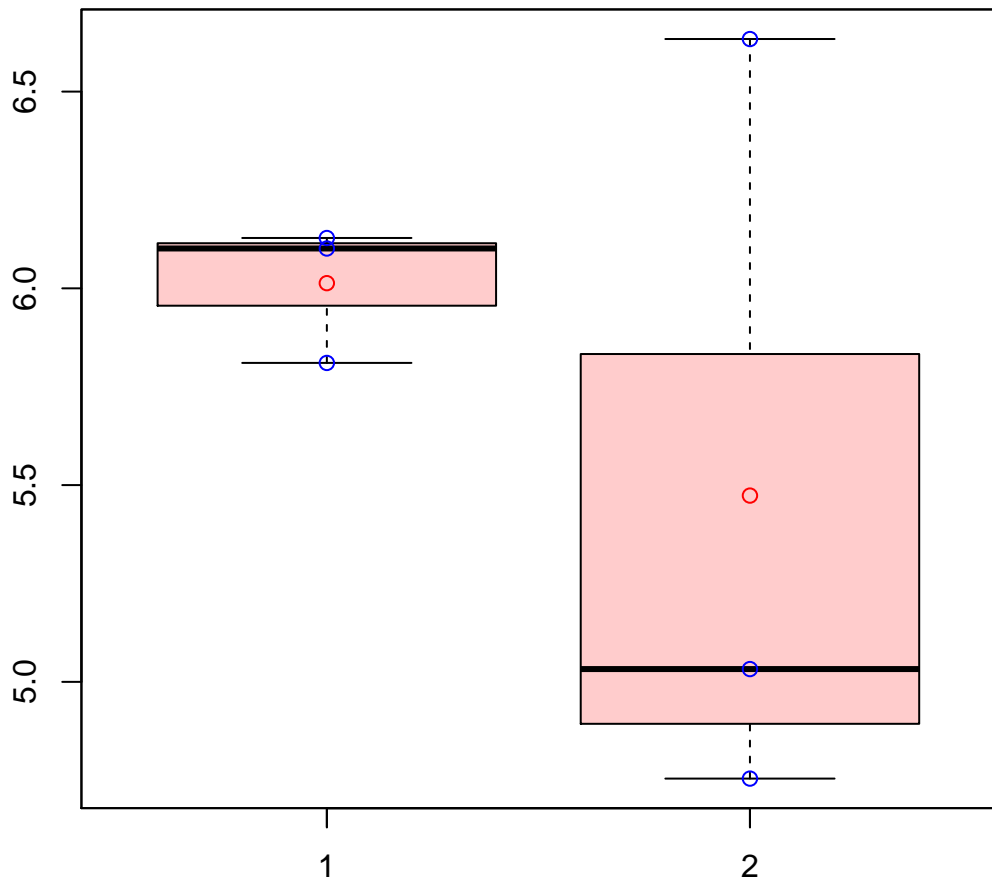

t-Test: p-value = 0.45

# sp|Q9SDX3|UGPA\_MUSAC

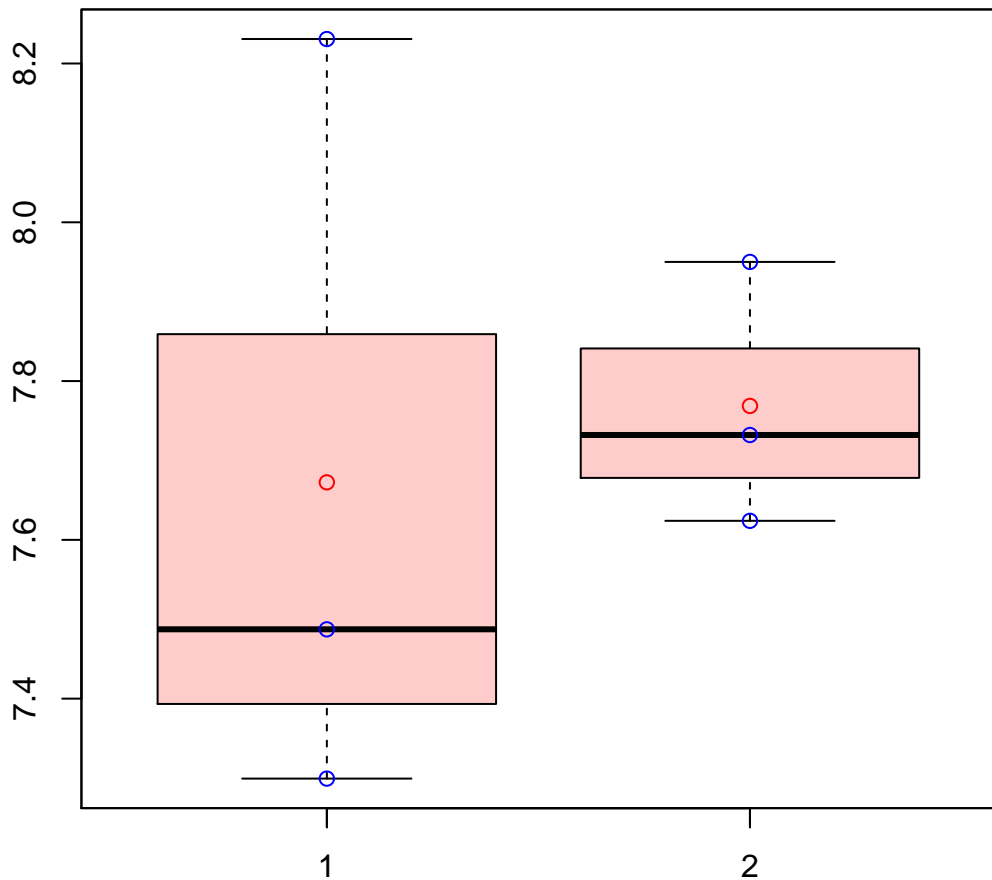

t-Test: p-value = 0.77

# sp|Q9XEA6|CYSK1\_ORYSJ

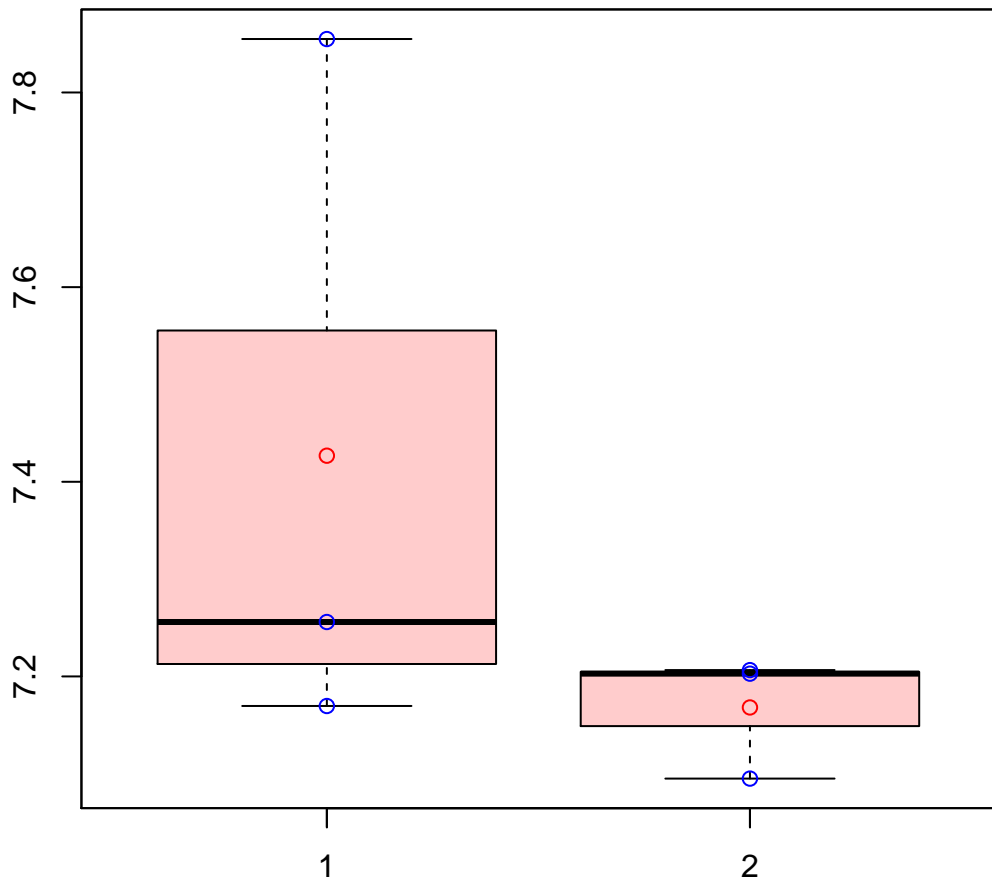

t-Test: p-value = 0.35
