# Supplementary material for: A Proteomic Approach to Investigate the Drought Response in the Orphan Crop Eragrostis tef
Source: Proteomes. 2017 Nov 15;5(4):32. doi: 10.3390/proteomes5040032 (PMC5748567; doi:10.3390/proteomes5040032)
Supplement: Supplementary file 1 [file proteomes-05-00032-s001.zip]

Archive with 16 entries (15 files):
- proteomes-208511 supplementary final/
- proteomes-208511 supplementary final/File S1 Refined and processed list of tef proteins peptides for protviz.xlsx
- proteomes-208511 supplementary final/S2.1 TE dataset (all 5727 proteins with expression values, fold changes and p-values).xlsx
- proteomes-208511 supplementary final/S2.2 TE two group analysis (box-plots).pdf
- proteomes-208511 supplementary final/S2.3 TE-Sanity Check (quality check1).pdf
- proteomes-208511 supplementary final/S2.4 TE-Heatmap- (quality check2).pdf
- proteomes-208511 supplementary final/S3.1 TEU dataset (all 2656 proteins with expression values, fold changes and p-values).xlsx
- proteomes-208511 supplementary final/S3.2 TEU two group analysis (box-plots).pdf
- proteomes-208511 supplementary final/S3.3 TEU-Sanity Check (quality check1).pdf
- proteomes-208511 supplementary final/S3.4 TEU-Heatmap(quality check2).pdf
- proteomes-208511 supplementary final/S4.1 MU dataset (all 4328 proteins with expression values, fold changes and p-values).xlsx
- proteomes-208511 supplementary final/S4.2 MU-two group analysis (boxplots).pdf
- proteomes-208511 supplementary final/S4.3 MU-Sanity Check (quality check1).pdf
- proteomes-208511 supplementary final/S4.4 MU-Heatmap (quality check2).pdf
- proteomes-208511 supplementary final/Summary page of TEF serach with all 12 fractions.pdf
- proteomes-208511 supplementary final/Supplementary Figures and tables.doc
