# Supplementary material for: A Proteomic Approach to Investigate the Drought Response in the Orphan Crop Eragrostis tef
Source: Proteomes. 2017 Nov 15;5(4):32. doi: 10.3390/proteomes5040032 (PMC5748567; doi:10.3390/proteomes5040032)
Supplement: Supplementary file 1 [file proteomes-05-00032-s001.zip › proteomes-208511 supplementary final/File S1 Refined and processed list of tef proteins peptides for protviz.xlsx]

## Sheet: Sheet1
Protein Group	Protein ID	Protein Accession	Peptide	Unique	-10lgP	Mass	ppm	m/z	Z	RT	Scan	#Spec	113	114	115	116	117	118	119	121	Start	End	PTM
2	1	CL367Contig32|CL367Contig32	K.V(+304.20)IATGLPASPGAAVGQIVFTAEDAEAWHAQGK(+304.20).D	N	123.41	3770.01	8.2	755.016	5	52.3	F6:8917	15	3362	2552	7472	4544	3363	2593	4374	3425	323	354	Y
2	1	CL367Contig32|CL367Contig32	R.T(+304.20)ETSPEDVGGMHAAAGILTAR.G	N	117.13	2387.2	8.4	597.812	4	29.53	F6:5501	19	3396	2681	4950	5921	1999	1594	3611	1882	361	381	Y
2	1	CL367Contig32|CL367Contig32	K.F(+304.20)LPIYLGQGILQHDPFEVLDQR.G	N	108.15	2901.56	17.8	726.411	4	60.5	F6:10153	15	207.5	254.25	321	632.75	518.625	164	694.375	250.5	719	740	Y
2	1	CL367Contig32|CL367Contig32	K.V(+304.20)MANADTPEDALAAR.N	N	97.81	1847.93	3.9	616.986	3	29.13	F1:6169	12	2043	894	1717	979.5	395	366.125	1685	468.375	468	482	Y
2	1	CL367Contig32|CL367Contig32	K.D(+304.20)MQDIEFTVQENR.L	N	95.23	1927.92	9.5	643.653	3	37.53	F1:7430	9	1771	1263	2019	1520	1013	1033	2418	2064	250	262	Y
2	1	CL367Contig32|CL367Contig32	K.I(+304.20)AVDMVNEGFVDR.N	N	94.63	1767.91	9.3	590.315	3	41.38	F5:7641	8	1959	2285	2772	2543	1948	1126	2720	1536	281	293	Y
2	1	CL367Contig32|CL367Contig32	K.K(+304.20)LY(+304.20)GEY(+304.20)LVNAQGEDVVAGIR.T	N	91.52	3105.74	6.5	622.16	5	39.07	F9:6931	6	2039	2779	2914	2721	1973	1544	1468	1968	199	218	Y
2	1	CL367Contig32|CL367Contig32	K.K(+304.20)LY(+304.20)GEYLVNAQGEDVVAGIR.T	N	89.19	2801.54	2.9	701.395	4	43.24	F7:8013	11	476.25	936.875	1797	1504	488.5	523.125	766.125	450	199	218	Y
2	1	CL367Contig32|CL367Contig32	R.A(+304.20)MDGLPVTIR.L	N	88.34	1375.77	1.6	459.599	3	36.88	F11:7220	29	150.5	385.375	910.125	971	236	299	353	302	541	550	Y
2	1	CL367Contig32|CL367Contig32	K.V(+304.20)GIC(+45.99)GEHGGEPSSVAFFAK(+304.20).A	N	85.83	2545.28	6	849.439	3	42.6	F8:7905	5	1510	1680	3418	3809	1740	1832	2741	1744	762	780	Y
2	1	CL367Contig32|CL367Contig32	K.M(+304.20)VEPGHLDQLLHPQFEDPSAYK(+304.20).D	N	85.02	3158.62	12.8	790.673	4	42.81	F6:7494	6	2500	2080	4603	3450	1536	1754	1908	2171	299	320	Y
2	1	CL367Contig32|CL367Contig32	K.A(+304.20)GLNYVSC(+45.99)SPFR.V	N	84.53	1662.81	5.4	832.417	2	45.02	F4:8578	5	18500	15080	35460	23240	15150	10020	21510	13340	781	792	Y
2	1	CL367Contig32|CL367Contig32	K.L(+304.20)YGEYLVNAQGEDVVAGIR.T	N	83.82	2369.25	9.3	790.764	3	44.85	F5:8167	4	431.5	848.125	883.5	1074	751.75	462.125	923.25	396	200	218	Y
2	1	CL367Contig32|CL367Contig32	K.M(+304.20)VEPGHLDQLLHPQFEDPSAYK(+304.20)DK(+304.20).V	N	83.45	3705.94	7.1	742.201	5	40.31	F6:7119	13	7641	3680	10080	6617	4432	2320	7586	4096	299	322	Y
2	1	CL367Contig32|CL367Contig32	R.T(+304.20)EHMFFASDER.I	N	81.99	1672.78	9.3	558.605	3	17.96	F6:3764	8	904.625	566.5	1645	852.25	500	671	598	1017	494	504	Y
2	1	CL367Contig32|CL367Contig32	R.L(+304.20)GISYPELTEMQAR.A	N	81.29	1911	5.3	638.011	3	42.39	F6:7430	10	1926	1161	2355	1908	1234	2292	1781	1702	604	617	Y
2	1	CL367Contig32|CL367Contig32	K.L(+304.20)GDPEK(+304.20)PLLLSVR.S	N	80.14	2044.24	10.3	512.072	4	41.45	F11:7906	23	928	1397	1118	1254	844.25	1028	916.5	813.25	14	26	Y
2	1	CL367Contig32|CL367Contig32	K.D(+304.20)QLPQAYEELVENC(+45.99)K(+304.20).I	N	78.02	2432.21	19.2	609.071	4	48.1	F5:8654	6	164.5	162.625	409.25	380.5	609.375	120	600	424	228	242	Y
2	1	CL367Contig32|CL367Contig32	K.I(+304.20)GTMIEIPR.A	N	77.74	1332.77	5.6	445.266	3	40.29	F8:7560	15	404.375	339	1434	378.25	348	989	1202	500	674	682	Y
2	1	CL367Contig32|CL367Contig32	K.M(+304.20)(+15.99)VEPGHLDQLLHPQFEDPSAYK(+304.20)DK(+304.20).V	N	76.97	3721.94	10.1	621.337	6	37.9	F6:6757	5	5232	4965	8945	10010	5806	3148	6860	4443	299	322	Y
2	1	CL367Contig32|CL367Contig32	K.Q(+304.20)YQEVYIEAK(+304.20).G	N	76.11	1878.02	2.8	940.022	2	20.98	F6:4217	11	709.5	1070	2008	2530	1004	203.5	1696	738.125	115	124	Y
2	1	CL367Contig32|CL367Contig32	R.A(+304.20)M(+15.99)DGLPVTIR.L	N	75.49	1391.77	6	464.933	3	20.77	F8:4632	15	440	346	1042	736.125	61.625	191	224.5	657	541	550	Y
2	1	CL367Contig32|CL367Contig32	K.M(+304.20)VEPGHLDQLLHPQFEDPSAY(+304.20)K(+304.20)DK(+304.20).V	N	70.12	4010.14	12.8	573.892	7	39.34	F8:7418	3	4720	3276	5173	7028	2686	2840	4189	3497	299	322	Y
2	1	CL367Contig32|CL367Contig32	K.L(+304.20)SEVNPMLGFR.G	N	69.88	1565.85	6.4	522.96	3	44.49	F8:8189	16	69.25	408	739.25	170.5	353	1037	743.625	222.75	590	600	Y
2	1	CL367Contig32|CL367Contig32	K.D(+304.20)M(+15.99)QDIEFTVQENR.L	N	69.53	1943.91	3.9	972.968	2	23.32	F1:5298	5	343.75	550	762.25	820.125	328.5	633.875	449.5	1079	250	262	Y
2	1	CL367Contig32|CL367Contig32	K.N(+304.20)DTDLTAADLK(+304.20).E	N	68.51	1783.97	5.9	892.996	2	21.76	F1:5064	8	996	643.75	2004	1669	555.75	626.5	2238	820	100	110	Y
2	1	CL367Contig32|CL367Contig32	R.A(+304.20)INQIIGLK(+304.20).G	Y	67.35	1577	1.4	789.509	2	43.49	F4:8348	8	264	192.5	774	804	200.125	1039	921	357.5	157	165	Y
2	1	CL367Contig32|CL367Contig32	R.T(+304.20)PEDLDTM(+15.99)K(+304.20).D	N	67.01	1672.87	12.2	558.637	3	15.32	F5:3688	2	2583	1281	5319	5363	2550	1982	2679	1902	219	227	Y
2	1	CL367Contig32|CL367Contig32	K.Q(+304.20)YQEVY(+304.20)IEAK(+304.20).G	N	66.95	2182.22	16.1	546.572	4	17.25	F9:3655	2	2536	1883	3288	2784	1444	1336	3358	2550	115	124	Y
2	1	CL367Contig32|CL367Contig32	R.F(+304.20)LDMFGNVVLDIPHSLFEEK(+304.20).L	N	66.63	2957.57	10.1	740.408	4	65.85	F6:10989	6	219.5	731.25	226	426	334	61.25	154.5	406	69	88	Y
2	1	CL367Contig32|CL367Contig32	K.G(+304.20)EPFPSDPK(+304.20).K	N	63.34	1580.86	9.9	527.964	3	16.29	F6:3507	11	2916	1319	3992	3309	3019	1388	3392	2114	125	133	Y
2	1	CL367Contig32|CL367Contig32	R.S(+304.20)DFEGIFR.A	N	61.95	1273.66	5.5	637.838	2	32.23	F5:6261	11	16690	15000	31060	23900	9808	9324	21890	15800	533	540	Y
2	1	CL367Contig32|CL367Contig32	R.T(+304.20)EHM(+15.99)FFASDER.I	N	61.68	1688.77	12.2	563.938	3	15.22	F6:3346	2	737.375	506.875	886.375	1472	997.875	644.5	1656	781	494	504	Y
2	1	CL367Contig32|CL367Contig32	K.M(+304.20)VEPGHLDQLLHPQFEDPSAY(+304.20)K(+304.20).D	N	60.77	3462.82	4.3	578.147	6	41.43	F8:7731	3	1342	2088	3640	3265	1630	2216	2104	1442	299	320	Y
2	1	CL367Contig32|CL367Contig32	R.T(+304.20)PEDLDTMK(+304.20).D	N	60.55	1656.87	14.9	553.307	3	17.92	F5:4094	4	1267	1396	2188	2399	1068	614.75	1153	1049	219	227	Y
2	1	CL367Contig32|CL367Contig32	K.M(+304.20)VEPGHLDQLLHPQFED.P	N	59.2	2308.14	3.6	770.39	3	42.83	F5:7860	2	314	289	1480	251.625	385	211	389	570	299	315	Y
2	1	CL367Contig32|CL367Contig32	R.A(+304.20)IFEAAIAM(+15.99)TNQGVQVFPEIMVPLVGTPQELGNQVTLIR.E	N	54.34	4514.42	6.3	903.896	5	63.89	F5:11034	9	228	0	576	298.625	266.875	93	309.25	424.25	618	656	Y
2	1	CL367Contig32|CL367Contig32	K.G(+304.20)TAVNVQTMVFGN.M	N	53.08	1640.84	11.3	821.439	2	42.88	F9:7503	6	248	188.5	704	381	140.5	111	152.5	520	166	178	Y
2	1	CL367Contig32|CL367Contig32	K.I(+304.20)LENHY(+304.20)K(+304.20)DMQDIEFTVQENR.L	N	52.41	3433.79	3.1	687.768	5	40.12	F7:7546	1	1148	828.125	840	382.5	986.875	833.125	1236	770.375	243	262	Y
2	1	CL367Contig32|CL367Contig32	R.F(+304.20)AYDSYR.R	N	52.25	1224.6	7	613.313	2	18.37	F8:4272	11	12710	10920	28370	16650	12410	6938	14380	10560	61	67	Y
2	1	CL367Contig32|CL367Contig32	R.L(+304.20)WMLQC(+45.99)R.S	N	50.03	1298.66	7.7	650.34	2	49.76	F4:9295	3	525.25	1094	2797	1813	505	618	1488	1110	263	269	Y
2	1	CL367Contig32|CL367Contig32	K.I(+304.20)LENHYK(+304.20)DM(+15.99)QDIEFTVQENR.L	N	49.23	3145.59	17.6	787.418	4	31.46	F6:5790	2	900.375	238	512	483	1248	596	1172	83.75	243	262	Y
2	1	CL367Contig32|CL367Contig32	R.N(+304.20)PSTGEK(+304.20).K	N	47.14	1339.74	10.2	447.594	3	10.53	F9:2626	6	683.125	1270	2146	2010	973.75	678	1740	690	192	198	Y
2	1	CL367Contig32|CL367Contig32	R.T(+304.20)PEDLDTMK(+304.20)DQLPQAYEELVENC(+45.99)K(+304.20).I	N	46.71	3766.87	13.7	754.392	5	50.91	F5:9076	13	873	809.625	1928	1280	722	531.25	811.75	644.125	219	242	Y
2	1	CL367Contig32|CL367Contig32	R.T(+304.20)PEDLDTMK(+304.20)DQLPQAY(+304.20)EELVENC(+45.99)K(+304.20).I	N	46.38	4071.07	1	815.222	5	46.99	F5:8488	3	953	876.375	926.25	1180	192.625	627	1440	1216	219	242	Y
2	1	CL367Contig32|CL367Contig32	K.G(+304.20)TAVNVQTMVFGNMGN.T	N	46.37	1942.95	6.3	972.488	2	46.33	F8:8464	3	0	55.875	359.125	87.5	208	276	306	72.75	166	181	Y
2	1	CL367Contig32|CL367Contig32	K.V(+304.20)IATGLPASPGAAVGQ.I	N	45.87	1711.97	1.1	856.994	2	39.44	F8:7432	3	392.375	244	584.625	642.375	219	111.75	468.125	236.5	323	338	Y
2	1	CL367Contig32|CL367Contig32	K.S(+304.20)VAIGETVLHEGDWLSLNGSTGEVILGK(+304.20).Q	N	45.24	3488.89	-7.6	873.222	4	50.36	F5:8993	3	218	0	483	306	291.375	207	325	639.125	414	441	Y
2	1	CL367Contig32|CL367Contig32	K.Q(+304.20)Y(+304.20)QEVYIEAK(+304.20).G	N	44.99	2182.22	3.5	1092.12	2	17.6	F9:3709	1	1460	859	2352	983.25	133.5	735.75	1338	866	115	124	Y
2	1	CL367Contig32|CL367Contig32	Q.G(+304.20)ILQHDPFEVLDQR.G	N	44.91	1970.05	-0.3	657.69	3	42.54	F6:7453	1	203.25	521.375	390	259.125	708.625	608	917.5	240.5	727	740	Y
2	1	CL367Contig32|CL367Contig32	R.T(+304.20)PEDLDTM(+15.99)K(+304.20)DQLPQAYEELVENC(+45.99)K(+304.20).I	N	44.73	3782.87	4.3	946.728	4	46.84	F5:8466	1	936.625	323	1056	497.75	412.875	45.75	155.5	269	219	242	Y
2	1	CL367Contig32|CL367Contig32	K.K(+304.20)LYGEYLVNAQGEDVVAGIR.T	N	44.61	2497.34	13.6	833.466	3	39.7	F6:7028	1	375	360.75	173.5	572	86	398.125	288.875	231.5	199	218	Y
2	1	CL367Contig32|CL367Contig32	N.A(+304.20)QGEDVVAGIR.T	N	44.11	1417.78	6.5	709.901	2	16.77	F5:3917	1	3592	2597	6164	5464	3096	2209	4168	3875	208	218	Y
2	1	CL367Contig32|CL367Contig32	K.G(+304.20)TAVNVQTM.V	N	43.56	1223.64	7.3	612.833	2	18.08	F8:4228	3	1382	1188	1325	1086	1473	770	908.25	752	166	174	Y
2	1	CL367Contig32|CL367Contig32	K.L(+304.20)Y(+304.20)GEYLVNAQGEDVVAGIR.T	N	42.63	2673.45	-3.7	892.153	3	41.53	F6:7302	1	263.875	564	660	455.75	272	123.5	987.5	180.125	200	218	Y
2	1	CL367Contig32|CL367Contig32	K.I(+304.20)LENHYK(+304.20).D	N	42.18	1523.88	7.3	508.971	3	20.05	F12:4346	5	137.5	593.5	202.5	464.75	101.75	0	0	0	243	249	Y
2	1	CL367Contig32|CL367Contig32	N.D(+304.20)TDLTAADLK(+304.20).E	N	41.76	1669.92	-0.1	557.649	3	23.17	F1:5275	2	245.5	143.5	380.625	429.25	350.5	397	351	171.5	101	110	Y
2	1	CL367Contig32|CL367Contig32	R.T(+304.20)GQGAVK(+304.20).I	N	41.49	1267.76	6.1	634.891	2	10.41	F3:3300	2	3176	2913	5104	3835	1057	1896	4416	2109	274	280	Y
2	1	CL367Contig32|CL367Contig32	N.D(+304.20)EVAAGLAAK(+304.20).S	N	41.16	1551.9	6.9	518.31	3	18.47	F5:4181	1	524	1042	768.75	964	448	789.25	1100	648.25	47	56	Y
2	1	CL367Contig32|CL367Contig32	N.V(+304.20)VLDIPHSLFEEK(+304.20).L	N	40.78	2133.22	12.2	534.318	4	44.64	F6:7769	2	1377	698	800.125	1083	579.375	390.375	661.75	1123	76	88	Y
2	1	CL367Contig32|CL367Contig32	K.L(+304.20)GDPEK(+304.20)PLLL.S	N	40.32	1702.04	1.1	568.354	3	39.26	F5:7322	4	1289	714	2399	1202	1216	406	1496	1646	14	23	Y
2	1	CL367Contig32|CL367Contig32	K.K(+304.20)QLELAVR.A	N	39.86	1259.78	10.4	420.939	3	16.92	F2:4374	1	1912	1075	2233	1374	1187	1526	1182	451.625	134	141	Y
2	1	CL367Contig32|CL367Contig32	R.L(+304.20)AAAQVLV.X	N	39.63	1087.69	5.5	544.853	2	43.61	F6:7613	6	1332	659.125	2465	1180	933.5	778	1644	807.25	798	805	Y
2	1	CL367Contig32|CL367Contig32	K.T(+304.20)IDYK(+304.20).I	N	39.45	1246.73	-4.7	416.581	3	15.51	F7:3855	5	962.125	2329	3320	912	1310	1265	2406	1424	669	673	Y
2	1	CL367Contig32|CL367Contig32	R.D(+304.20)DVGK(+304.20).F	N	39.25	1140.65	9.5	571.337	2	11.61	F5:3124	4	11090	8276	15900	17090	12870	4660	14820	8672	714	718	Y
2	1	CL367Contig32|CL367Contig32	Q.G(+304.20)EDVVAGIR.T	N	38.72	1218.68	-1.7	610.347	2	16.69	F5:3905	2	6409	5232	8041	5158	2842	4946	5660	7667	210	218	Y
2	1	CL367Contig32|CL367Contig32	K.L(+304.20)EHMK(+304.20).E	N	38.32	1264.73	-5.3	317.188	4	15.38	F12:3637	2	74.25	47.375	388	520.75	126.25	142	268	285.875	89	93	Y
2	1	CL367Contig32|CL367Contig32	R.V(+304.20)NDAEK(+304.20).S	N	37.61	1282.72	6.5	428.584	3	12.29	F5:3226	5	1552	1233	4166	2527	1880	1332	2672	1744	408	413	Y
2	1	CL367Contig32|CL367Contig32	R.G(+304.20)VGELIK(+304.20).F	N	36.93	1322.83	4.9	662.424	2	22.12	F7:4846	17	2184	1411	2272	3794	1253	1241	3240	2128	741	747	Y
2	1	CL367Contig32|CL367Contig32	K.M(+304.20)(+15.99)VEPGHLDQLLHPQFEDPSAY(+304.20)K(+304.20)DK(+304.20).V	N	36.89	4026.14	4.3	672.033	6	35.83	F8:6890	4	432	447.75	379	856	566.375	174	430	368	299	322	Y
2	1	CL367Contig32|CL367Contig32	N.A(+304.20)DTPEDALAAR.N	N	36.78	1432.74	14.2	478.594	3	18.38	F1:4557	2	549	493	501	550	176	146.5	950	162	472	482	Y
2	1	CL367Contig32|CL367Contig32	D.T(+304.20)PEDALAAR.N	N	36.17	1246.68	4.4	624.348	2	15.49	F5:3715	1	3284	1844	5324	4517	3104	2774	4642	1858	474	482	Y
2	1	CL367Contig32|CL367Contig32	K.G(+304.20)EPFPSDPK(+304.20)K(+304.20).Q	N	35.16	2013.15	4.5	672.06	3	15.28	F8:3806	2	1834	1340	2638	3249	1113	1048	3006	2013	125	134	Y
2	1	CL367Contig32|CL367Contig32	K.V(+304.20)FTAAGK(+304.20).T	N	34.3	1300.79	5.8	651.404	2	19.07	F3:4601	3	2297	2472	3389	2078	1535	1576	4112	2317	662	668	Y
2	1	CL367Contig32|CL367Contig32	K.D(+304.20)AILVR.T	N	34.22	989.612	0.2	495.813	2	17.58	F7:4165	3	3015	1920	4270	3256	2333	3060	2696	1979	355	360	Y
2	1	CL367Contig32|CL367Contig32	R.L(+304.20)GISYPELTEM(+15.99)QAR.A	N	34.11	1927	16	964.521	2	36.85	F6:6599	5	1247	398	1868	1990	850.25	173.5	1468	568.75	604	617	Y
2	1	CL367Contig32|CL367Contig32	R.L(+304.20)WM(+15.99)LQC(+45.99)R.S	N	33.93	1314.65	16.7	439.231	3	44.71	F4:8531	2	318.75	247	614.5	633.5	49.875	208	361	532.75	263	269	Y
2	1	CL367Contig32|CL367Contig32	R.T(+304.20)ETSPEDVGGMHAAAGIL.T	N	33.54	2059.01	4.9	1030.52	2	38.15	F1:7523	4	196.125	135	270	212.625	94	104	267.25	179.25	361	378	Y
2	1	CL367Contig32|CL367Contig32	A.I(+304.20)AMTNQGVQVFPEIMVPLVGTPQELGNQVTLIR.E	N	33.43	3896.12	9.7	975.046	4	59.85	F6:10053	1	154	0	288	43.25	173.5	75	255.375	198.5	624	656	Y
2	1	CL367Contig32|CL367Contig32	K.L(+304.20)EHM(+15.99)K(+304.20).E	N	32.99	1280.73	6.3	427.919	3	11.3	F11:3377	3	2087	346.125	4181	3670	2748	1330	1592	821.75	89	93	Y
2	1	CL367Contig32|CL367Contig32	Q.I(+304.20)VFTAEDAEAWHAQGK(+304.20).D	N	32.49	2380.25	8.1	596.075	4	36.78	F6:6588	2	42.25	902.125	297.5	617.875	317.125	429	564.75	473.75	339	354	Y
2	1	CL367Contig32|CL367Contig32	R.T(+304.20)EHMFFAS.D	N	31.82	1272.61	5.9	637.314	2	27.09	F7:5591	1	1778	1147	3158	2731	1043	1468	2832	774.125	494	501	Y
2	1	CL367Contig32|CL367Contig32	K.L(+304.20)Y(+304.20)GEY(+304.20)LVNAQGEDVVAGIR.T	N	31.62	2977.65	-3.4	745.417	4	38.66	F9:6870	1	118.25	199	860.375	330.5	134.5	65	386	84.25	200	218	Y
2	1	CL367Contig32|CL367Contig32	R.Q(+304.20)NALDR.L	N	30.83	1019.56	9	510.793	2	12.03	F10:3666	2	550	118.875	980	618.25	159	472	546.5	101.25	521	526	Y
2	1	CL367Contig32|CL367Contig32	R.A(+304.20)IFEAAIA.M	N	29.84	1108.64	-5.6	555.323	2	42.06	F5:7744	1	809.5	633.125	183.5	470	350	71.75	888	362.75	618	625	Y
2	1	CL367Contig32|CL367Contig32	K.F(+304.20)ATER.G	N	29.17	926.507	8.5	464.265	2	12.52	F9:2924	6	23660	32590	48340	45220	16880	17550	29310	18580	748	752	Y
2	1	CL367Contig32|CL367Contig32	R.N(+304.20)TAIK(+304.20).M	N	28.44	1153.72	0	577.866	2	12.43	F4:3680	3	328	200.5	1195	719.875	468.25	448	1381	472.75	294	298	Y
2	1	CL367Contig32|CL367Contig32	R.A(+304.20)IFEAAIAMTNQ.G	N	28.25	1582.83	16.3	792.434	2	51.84	F1:9587	1	273	128.5	584	260	572	116.25	146	495	618	629	Y
2	1	CL367Contig32|CL367Contig32	F.M(+304.20)SWVDEVR.Q	N	27.12	1324.67	4.8	663.345	2	32.04	F5:6232	1	325.5	1432	1092	1348	1254	1205	534	1701	457	464	Y
2	1	CL367Contig32|CL367Contig32	R.L(+304.20)LPYQR.S	N	27.03	1092.65	14.6	547.342	2	22.79	F4:5233	4	840.875	451.5	809.375	555	91.25	518	622	342.75	527	532	Y
2	1	CL367Contig32|CL367Contig32	R.F(+304.20)AYDSY(+304.20)R.R	N	26.54	1528.8	5.4	510.611	3	17.78	F3:4407	2	2131	2389	3224	2026	1388	1982	2560	2798	61	67	Y
2	1	CL367Contig32|CL367Contig32	K.T(+304.20)IDY(+304.20)K(+304.20).I	N	25.41	1550.93	6.1	776.476	2	15.59	F2:4174	2	967.5	794	1758	1156	510	189	330	810	669	673	Y
2	1	CL367Contig32|CL367Contig32	R.A(+304.20)IFEAAIAM(+15.99).T	N	25.03	1255.67	8.3	628.849	2	43.42	F1:8320	1	221.625	229.5	365	490	345	274.375	145	849	618	626	Y
2	1	CL367Contig32|CL367Contig32	R.A(+304.20)IFEAAIAM.T	N	24.08	1239.68	14.8	620.856	2	49.42	F5:8852	2	388	64.75	167	198	63.875	69.5	766	390	618	626	Y
2	1	CL367Contig32|CL367Contig32	R.V(+304.20)PIAR.L	N	23.6	858.554	1.5	287.192	3	14.77	F4:4031	2	380	1008	1030	791.5	45	807.5	99.5	234.5	793	797	Y
2	1	CL367Contig32|CL367Contig32	K.L(+304.20)SEVNPM(+15.99).L	N	23.09	1108.57	8.4	555.296	2	19.85	F1:4778	1	225.5	96.25	720	349	183.25	452.75	355	566.5	590	596	Y
2	1	CL367Contig32|CL367Contig32	N.E(+304.20)GFVDR.N	N	22.45	1025.54	8.2	513.781	2	13.96	F5:3477	1	2370	1611	2631	1582	1021	1618	1652	1304	288	293	Y
2	1	CL367Contig32|CL367Contig32	R.A(+304.20)IFEAA.I	N	22.25	924.517	8.5	463.27	2	25.65	F5:5272	1	1027	255.75	778	1337	1350	593.5	886	1470	618	623	Y
2	1	CL367Contig32|CL367Contig32	K.K(+304.20)LY(+304.20)GEYLVN.A	N	21.94	1705.98	3.7	569.668	3	27.87	F9:5250	1	291	199.5	93.5	552	348	600	363.25	148.5	199	207	Y
2	1	CL367Contig32|CL367Contig32	K.Q(+304.20)PLAPPALSGDLGTF.M	N	20.87	1786.97	-2	894.491	2	48.06	F1:9019	1	354	148	865.5	241.5	258.5	164.5	634	318	442	456	Y
2	1	CL367Contig32|CL367Contig32	K.I(+304.20)LENHY(+304.20)K(+304.20).D	N	19.91	1828.08	6.7	610.372	3	16.97	F2:4382	2	287	207.5	766	329	828	159.125	469.25	187.5	243	249	Y
2	1	CL367Contig32|CL367Contig32	H.S(+304.20)LFEEK(+304.20).L	N	18.89	1359.78	9.7	454.27	3	18.62	F6:3863	1	678	121.25	524.375	203.5	485.625	153.625	459.25	852.25	83	88	Y
2	1	CL367Contig32|CL367Contig32	X.G(+304.20)HYLISNR.I	Y	17.25	1262.7	0.5	632.357	2	25.09	F5:5187	1	724	992.75	1940	1752	724	1220	560	1580	807	814	Y
2	1	CL367Contig32|CL367Contig32	A.R(+304.20)GWGK(+304.20).C	N	16.84	1210.73	15.5	404.59	3	15.47	F3:4061	1	1770	1069	1392	769.5	1437	2623	2456	1554	393	397	Y
2	1	CL367Contig32|CL367Contig32	K.M(+304.20)VEPGHLDQL.L	N	16.66	1441.75	7.8	721.887	2	27.04	F5:5480	1	908	60.875	770	859.875	274	234	1024	197	299	308	Y
2	1	CL367Contig32|CL367Contig32	Q.G(+304.20)VQVFPEIMVPLVGTPQELGNQVTLIR.E	N	16.37	3237.8	-1.7	1080.27	3	58.39	F6:9833	1	0	0	79	182.5	118.5	0	0	0	630	656	Y
2	1	CL367Contig32|CL367Contig32	K.G(+304.20)TAVNVQTMVF.G	N	15.89	1469.78	10.1	735.905	2	43.34	F9:7572	2	498	239	465	170	649.5	42.375	458	354.25	166	176	Y
2	1	CL367Contig32|CL367Contig32	R.L(+304.20)WMLQ.C	N	14.72	993.557	-0.3	497.786	2	48.23	F8:8748	3	1040	1060	1004	525.125	379	436.875	843.375	638	263	267	Y
2	1	CL367Contig32|CL367Contig32	K.V(+304.20)GIC(+45.99)GEHGGEPSSVAF.F	N	13.17	1894.88	16.8	948.463	2	40.06	F5:7443	2	571.375	168.75	454	163.5	545.375	397	299	108.5	762	777	Y
2	1	CL367Contig32|CL367Contig32	K.I(+304.20)AVDMVN.E	N	11.38	1064.58	8.9	533.302	2	31.56	F1:6534	1	201.5	612	920.625	1023	724	273	920.5	924	281	287	Y
2	1	CL367Contig32|CL367Contig32	K.L(+304.20)SEVNPM.L	N	10.66	1092.57	4.5	547.297	2	31.24	F1:6486	1	775.5	180.875	661.5	881.875	617.5	272	452	372.5	590	596	Y
2	1	CL367Contig32|CL367Contig32	K.I(+304.20)AVDMVNEGFV.D	N	9.59	1496.78	-1.5	749.396	2	37.15	F5:6998	1	1391	612	901.75	566.25	650	1030	1588	899.5	281	291	Y
2	1	CL367Contig32|CL367Contig32	H.Y(+304.20)LISNR.I	Y	9.26	1068.62	3.5	535.318	2	14.18	F10:3987	1	689.25	718	676	577.375	663.375	351	708	139.625	809	814	Y
2	1	CL367Contig32|CL367Contig32	S.T(+304.20)VRVNDAEK(+304.20).S	N	9.07	1638.94	6.1	547.324	3	22.41	F6:4432	1	123.75	222	611.875	304	406	299	394	513.5	405	413	Y
2	1	CL367Contig32|CL367Contig32	K.M(+304.20)VEPGHLDQLLHPQ.F	N	8.78	1917	9.2	640.014	3	40.9	F7:7663	1	304	146	219.5	126	441.875	129.5	495	447	299	312	Y
2	1	CL367Contig32|CL367Contig32	M.S(+304.20)WVDEVR.Q	N	8.51	1193.63	3.8	597.824	2	19.19	F5:4292	1	2358	1956	1336	1835	2209	1060	2392	3418	458	464	Y
2	1	CL367Contig32|CL367Contig32	N.E(+304.20)GFVDRNTAIK(+304.20).M	N	8.01	1857.05	-15	929.516	2	41.48	F5:7656	1	573.125	392	696.875	1134	290	712	256	380.75	288	298	Y
2	1	CL367Contig32|CL367Contig32	R.T(+304.20)EHMFF.A	N	7.67	1114.54	12.6	558.283	2	30.81	F7:6150	1	844	503.25	1436	1021	1056	708	1220	746.25	494	499	Y
2	1	CL367Contig32|CL367Contig32	K.S(+304.20)GERFAYDSYRR.F	N	7.51	1809.9	-1	604.307	3	16.53	F1:4280	1	421.75	208.5	1006	1251	252	378.625	1272	379	57	68	Y
2	1	CL367Contig32|CL367Contig32	K.L(+304.20)YGEYLV.N	N	7.47	1159.64	6.9	580.83	2	23	F9:4521	1	18980	16970	25330	19480	14420	11840	19960	14300	200	206	Y
2	1	CL367Contig32|CL367Contig32	N.S(+304.20)WDSPR.A	N	6.94	1050.53	-13	526.268	2	15.29	F7:3822	1	728.25	968.5	1529	891	857.75	272	1517	447	146	151	Y
2	1	CL367Contig32|CL367Contig32	R.A(+304.20)VFNSW.D	N	5.95	1026.54	13.2	514.283	2	41.41	F7:7739	1	890.625	770	1494	420	634.75	292.25	940	209	142	147	Y
2	1	CL367Contig32|CL367Contig32	R.T(+304.20)EHMFFA.S	N	5.44	1185.57	19.2	593.806	2	29.84	F7:6004	1	178	264.5	770	517.75	303	148	407	554	494	500	Y
2	1	CL367Contig32|CL367Contig32	K.S(+304.20)GERFAY(+304.20)DSY(+304.20)RR.F	N	5.07	2418.3	8.2	484.671	5	34.55	F11:6869	1	75.75	254	440.75	319.5	360	534	358	331	57	68	Y
2	1	CL367Contig32|CL367Contig32	K.E(+304.20)LVK(+304.20)QYQEVY(+304.20)IEAK(+304.20)GEPFPSDPK(+304.20).K	N	5.04	4214.36	5.2	703.404	6	40.99	F6:7220	1	853.5	778	1636	696.375	442	890.625	1412	732.75	111	133	Y
2	6724	CL11137Contig2|CL11137Contig2	V.V(+304.20)PLAR.A	N	23.6	858.554	1.5	287.192	3	14.77	F4:4031	2	380	1008	1030	791.5	45	807.5	99.5	234.5	117	121	Y
2	6724	CL11137Contig2|CL11137Contig2	S.S(+304.20)LLYK(+304.20).R	N	11.01	1230.77	-4.9	616.389	2	18.55	F3:4523	1	924	508.5	471	553.5	593.25	677.625	1119	576.5	25	29	Y
2	7229	CL6331Contig2|CL6331Contig2	C.Q(+304.20)FDLR.W	N	9.59	981.55	2.3	491.783	2	15.9	F8:3900	1	1410	1506	2015	1508	856	979.25	1558	1205	37	41	Y
2	7229	CL6331Contig2|CL6331Contig2	X.L(+304.20)VY(+304.20)QSR.L	N	8.17	1372.82	-2.5	687.415	2	47.7	F11:8844	1	99.5	233	495	492	560	53.125	579.25	293	275	280	Y
2	9830	CL1Contig6954|CL1Contig6954	L.V(+304.20)PLAR.R	N	23.6	858.554	1.5	287.192	3	14.77	F4:4031	2	380	1008	1030	791.5	45	807.5	99.5	234.5	346	350	Y
2	11739	CL1827Contig2|CL1827Contig2	A.M(+304.20)ELLR.S	N	5.13	964.563	-2.7	483.287	2	18.25	F10:4598	1	284	221	940.75	243	189	530	245	427.75	213	217	Y
3	7	CL367Contig10|CL367Contig10	K.V(+304.20)IATGLPASPGAAVGQIVFTAEDAEAWHAQGK(+304.20).D	N	123.41	3770.01	8.2	755.016	5	52.3	F6:8917	15	3362	2552	7472	4544	3363	2593	4374	3425	633	664	Y
3	7	CL367Contig10|CL367Contig10	R.T(+304.20)ETSPEDVGGMHAAAGILTAR.G	N	117.13	2387.2	8.4	597.812	4	29.53	F6:5501	19	3396	2681	4950	5921	1999	1594	3611	1882	671	691	Y
3	7	CL367Contig10|CL367Contig10	K.F(+304.20)LPIYLGQGILQHDPFEVLDQR.G	N	108.15	2901.56	17.8	726.411	4	60.5	F6:10153	15	207.5	254.25	321	632.75	518.625	164	694.375	250.5	1603	1624	Y
3	7	CL367Contig10|CL367Contig10	K.V(+304.20)MANADTPEDALAAR.N	N	97.81	1847.93	3.9	616.986	3	29.13	F1:6169	12	2043	894	1717	979.5	395	366.125	1685	468.375	778	792	Y
3	7	CL367Contig10|CL367Contig10	K.D(+304.20)MQDIEFTVQENR.L	N	95.23	1927.92	9.5	643.653	3	37.53	F1:7430	9	1771	1263	2019	1520	1013	1033	2418	2064	560	572	Y
3	7	CL367Contig10|CL367Contig10	K.I(+304.20)AVDMVNEGFVDR.N	N	94.63	1767.91	9.3	590.315	3	41.38	F5:7641	8	1959	2285	2772	2543	1948	1126	2720	1536	591	603	Y
3	7	CL367Contig10|CL367Contig10	K.K(+304.20)LY(+304.20)GEY(+304.20)LVNAQGEDVVAGIR.T	N	91.52	3105.74	6.5	622.16	5	39.07	F9:6931	6	2039	2779	2914	2721	1973	1544	1468	1968	509	528	Y
3	7	CL367Contig10|CL367Contig10	K.G(+304.20)ANLAEMASIGLSVPPGFTVSTEAC(+45.99)EQY(+304.20)QIAGK(+304.20).S	N	89.98	4297.2	15.1	860.461	5	51.99	F6:8871	3	1108	672.625	1464	1561	233.625	112	982.875	913.125	121	153	Y
3	7	CL367Contig10|CL367Contig10	K.K(+304.20)LY(+304.20)GEYLVNAQGEDVVAGIR.T	N	89.19	2801.54	2.9	701.395	4	43.24	F7:8013	11	476.25	936.875	1797	1504	488.5	523.125	766.125	450	509	528	Y
3	7	CL367Contig10|CL367Contig10	R.A(+304.20)MDGLPVTIR.L	N	88.34	1375.77	1.6	459.599	3	36.88	F11:7220	29	150.5	385.375	910.125	971	236	299	353	302	851	860	Y
3	7	CL367Contig10|CL367Contig10	K.M(+304.20)VEPGHLDQLLHPQFEDPSAYK(+304.20).D	N	85.02	3158.62	12.8	790.673	4	42.81	F6:7494	6	2500	2080	4603	3450	1536	1754	1908	2171	609	630	Y
3	7	CL367Contig10|CL367Contig10	K.L(+304.20)YGEYLVNAQGEDVVAGIR.T	N	83.82	2369.25	9.3	790.764	3	44.85	F5:8167	4	431.5	848.125	883.5	1074	751.75	462.125	923.25	396	510	528	Y
3	7	CL367Contig10|CL367Contig10	K.M(+304.20)VEPGHLDQLLHPQFEDPSAYK(+304.20)DK(+304.20).V	N	83.45	3705.94	7.1	742.201	5	40.31	F6:7119	13	7641	3680	10080	6617	4432	2320	7586	4096	609	632	Y
3	7	CL367Contig10|CL367Contig10	R.T(+304.20)EHMFFASDER.I	N	81.99	1672.78	9.3	558.605	3	17.96	F6:3764	8	904.625	566.5	1645	852.25	500	671	598	1017	804	814	Y
3	7	CL367Contig10|CL367Contig10	R.L(+304.20)GISYPELTEMQAR.A	N	81.29	1911	5.3	638.011	3	42.39	F6:7430	10	1926	1161	2355	1908	1234	2292	1781	1702	1488	1501	Y
3	7	CL367Contig10|CL367Contig10	K.L(+304.20)GDPEK(+304.20)PLLLSVR.S	N	80.14	2044.24	10.3	512.072	4	41.45	F11:7906	23	928	1397	1118	1254	844.25	1028	916.5	813.25	178	190	Y
3	7	CL367Contig10|CL367Contig10	K.D(+304.20)QLPQAYEELVENC(+45.99)K(+304.20).I	N	78.02	2432.21	19.2	609.071	4	48.1	F5:8654	6	164.5	162.625	409.25	380.5	609.375	120	600	424	538	552	Y
3	7	CL367Contig10|CL367Contig10	K.M(+304.20)(+15.99)VEPGHLDQLLHPQFEDPSAYK(+304.20)DK(+304.20).V	N	76.97	3721.94	10.1	621.337	6	37.9	F6:6757	5	5232	4965	8945	10010	5806	3148	6860	4443	609	632	Y
3	7	CL367Contig10|CL367Contig10	K.Q(+304.20)YQEVYIEAK(+304.20).G	N	76.11	1878.02	2.8	940.022	2	20.98	F6:4217	11	709.5	1070	2008	2530	1004	203.5	1696	738.125	425	434	Y
3	7	CL367Contig10|CL367Contig10	R.A(+304.20)M(+15.99)DGLPVTIR.L	N	75.49	1391.77	6	464.933	3	20.77	F8:4632	15	440	346	1042	736.125	61.625	191	224.5	657	851	860	Y
3	7	CL367Contig10|CL367Contig10	K.M(+304.20)VEPGHLDQLLHPQFEDPSAY(+304.20)K(+304.20)DK(+304.20).V	N	70.12	4010.14	12.8	573.892	7	39.34	F8:7418	3	4720	3276	5173	7028	2686	2840	4189	3497	609	632	Y
3	7	CL367Contig10|CL367Contig10	K.L(+304.20)SEVNPMLGFR.G	N	69.88	1565.85	6.4	522.96	3	44.49	F8:8189	16	69.25	408	739.25	170.5	353	1037	743.625	222.75	900	910	Y
3	7	CL367Contig10|CL367Contig10	K.D(+304.20)M(+15.99)QDIEFTVQENR.L	N	69.53	1943.91	3.9	972.968	2	23.32	F1:5298	5	343.75	550	762.25	820.125	328.5	633.875	449.5	1079	560	572	Y
3	7	CL367Contig10|CL367Contig10	K.N(+304.20)DTDLTAADLK(+304.20).E	N	68.51	1783.97	5.9	892.996	2	21.76	F1:5064	8	996	643.75	2004	1669	555.75	626.5	2238	820	410	420	Y
3	7	CL367Contig10|CL367Contig10	R.T(+304.20)PEDLDTM(+15.99)K(+304.20).D	N	67.01	1672.87	12.2	558.637	3	15.32	F5:3688	2	2583	1281	5319	5363	2550	1982	2679	1902	529	537	Y
3	7	CL367Contig10|CL367Contig10	K.Q(+304.20)YQEVY(+304.20)IEAK(+304.20).G	N	66.95	2182.22	16.1	546.572	4	17.25	F9:3655	2	2536	1883	3288	2784	1444	1336	3358	2550	425	434	Y
3	7	CL367Contig10|CL367Contig10	R.F(+304.20)LDMFGNVVLDIPHSLFEEK(+304.20).L	N	66.63	2957.57	10.1	740.408	4	65.85	F6:10989	6	219.5	731.25	226	426	334	61.25	154.5	406	379	398	Y
3	7	CL367Contig10|CL367Contig10	R.A(+304.20)INQITGLK(+304.20).G	Y	63.7	1564.97	9.6	522.667	3	34.51	F4:6997	15	450	254.5	774.5	926.625	293	134.5	338.875	572	467	475	Y
3	7	CL367Contig10|CL367Contig10	K.G(+304.20)EPFPSDPK(+304.20).K	N	63.34	1580.86	9.9	527.964	3	16.29	F6:3507	11	2916	1319	3992	3309	3019	1388	3392	2114	435	443	Y
3	7	CL367Contig10|CL367Contig10	N.A(+304.20)VADAAPITATK(+304.20).R	N	62.02	1736.02	7.5	579.684	3	16.96	F9:3610	15	902.75	1108	2348	1920	1320	611.25	2308	626.25	86	97	Y
3	7	CL367Contig10|CL367Contig10	R.S(+304.20)DFEGIFR.A	N	61.95	1273.66	5.5	637.838	2	32.23	F5:6261	11	16690	15000	31060	23900	9808	9324	21890	15800	843	850	Y
3	7	CL367Contig10|CL367Contig10	R.T(+304.20)EHM(+15.99)FFASDER.I	N	61.68	1688.77	12.2	563.938	3	15.22	F6:3346	2	737.375	506.875	886.375	1472	997.875	644.5	1656	781	804	814	Y
3	7	CL367Contig10|CL367Contig10	K.M(+304.20)VEPGHLDQLLHPQFEDPSAY(+304.20)K(+304.20).D	N	60.77	3462.82	4.3	578.147	6	41.43	F8:7731	3	1342	2088	3640	3265	1630	2216	2104	1442	609	630	Y
3	7	CL367Contig10|CL367Contig10	R.T(+304.20)PEDLDTMK(+304.20).D	N	60.55	1656.87	14.9	553.307	3	17.92	F5:4094	4	1267	1396	2188	2399	1068	614.75	1153	1049	529	537	Y
3	7	CL367Contig10|CL367Contig10	K.M(+304.20)VEPGHLDQLLHPQFED.P	N	59.2	2308.14	3.6	770.39	3	42.83	F5:7860	2	314	289	1480	251.625	385	211	389	570	609	625	Y
3	7	CL367Contig10|CL367Contig10	K.G(+304.20)TAVNVQTMVFGN.M	N	53.08	1640.84	11.3	821.439	2	42.88	F9:7503	6	248	188.5	704	381	140.5	111	152.5	520	476	488	Y
3	7	CL367Contig10|CL367Contig10	K.I(+304.20)LENHY(+304.20)K(+304.20)DMQDIEFTVQENR.L	N	52.41	3433.79	3.1	687.768	5	40.12	F7:7546	1	1148	828.125	840	382.5	986.875	833.125	1236	770.375	553	572	Y
3	7	CL367Contig10|CL367Contig10	R.F(+304.20)AYDSYR.R	N	52.25	1224.6	7	613.313	2	18.37	F8:4272	11	12710	10920	28370	16650	12410	6938	14380	10560	371	377	Y
3	7	CL367Contig10|CL367Contig10	R.L(+304.20)WMLQC(+45.99)R.S	N	50.03	1298.66	7.7	650.34	2	49.76	F4:9295	3	525.25	1094	2797	1813	505	618	1488	1110	573	579	Y
3	7	CL367Contig10|CL367Contig10	K.I(+304.20)LENHYK(+304.20)DM(+15.99)QDIEFTVQENR.L	N	49.23	3145.59	17.6	787.418	4	31.46	F6:5790	2	900.375	238	512	483	1248	596	1172	83.75	553	572	Y
3	7	CL367Contig10|CL367Contig10	R.V(+304.20)Y(+304.20)VFGK(+304.20).G	N	48.67	1624	6.1	407.009	4	25.07	F4:5575	4	131.5	228	190	556	72.5	78.5	288	174	99	104	Y
3	7	CL367Contig10|CL367Contig10	R.N(+304.20)PSTGEK(+304.20).K	N	47.14	1339.74	10.2	447.594	3	10.53	F9:2626	6	683.125	1270	2146	2010	973.75	678	1740	690	502	508	Y
3	7	CL367Contig10|CL367Contig10	R.T(+304.20)PEDLDTMK(+304.20)DQLPQAYEELVENC(+45.99)K(+304.20).I	N	46.71	3766.87	13.7	754.392	5	50.91	F5:9076	13	873	809.625	1928	1280	722	531.25	811.75	644.125	529	552	Y
3	7	CL367Contig10|CL367Contig10	R.T(+304.20)PEDLDTMK(+304.20)DQLPQAY(+304.20)EELVENC(+45.99)K(+304.20).I	N	46.38	4071.07	1	815.222	5	46.99	F5:8488	3	953	876.375	926.25	1180	192.625	627	1440	1216	529	552	Y
3	7	CL367Contig10|CL367Contig10	K.G(+304.20)TAVNVQTMVFGNMGN.T	N	46.37	1942.95	6.3	972.488	2	46.33	F8:8464	3	0	55.875	359.125	87.5	208	276	306	72.75	476	491	Y
3	7	CL367Contig10|CL367Contig10	K.V(+304.20)IATGLPASPGAAVGQ.I	N	45.87	1711.97	1.1	856.994	2	39.44	F8:7432	3	392.375	244	584.625	642.375	219	111.75	468.125	236.5	633	648	Y
3	7	CL367Contig10|CL367Contig10	R.V(+304.20)YVFGK(+304.20).G	N	45.5	1319.8	-4.1	440.937	3	32.88	F4:6752	7	146.5	152	636	333	159	190	79.5	355	99	104	Y
3	7	CL367Contig10|CL367Contig10	K.S(+304.20)VAIGETVLHEGDWLSLNGSTGEVILGK(+304.20).Q	N	45.24	3488.89	-7.6	873.222	4	50.36	F5:8993	3	218	0	483	306	291.375	207	325	639.125	724	751	Y
3	7	CL367Contig10|CL367Contig10	K.Q(+304.20)Y(+304.20)QEVYIEAK(+304.20).G	N	44.99	2182.22	3.5	1092.12	2	17.6	F9:3709	1	1460	859	2352	983.25	133.5	735.75	1338	866	425	434	Y
3	7	CL367Contig10|CL367Contig10	Q.G(+304.20)ILQHDPFEVLDQR.G	N	44.91	1970.05	-0.3	657.69	3	42.54	F6:7453	1	203.25	521.375	390	259.125	708.625	608	917.5	240.5	1611	1624	Y
3	7	CL367Contig10|CL367Contig10	A.D(+304.20)AAPITATK(+304.20).R	N	44.87	1494.88	-13.7	499.292	3	14.57	F8:3700	3	550.5	720.375	887.25	1732	1531	1294	1816	1048	89	97	Y
3	7	CL367Contig10|CL367Contig10	R.T(+304.20)PEDLDTM(+15.99)K(+304.20)DQLPQAYEELVENC(+45.99)K(+304.20).I	N	44.73	3782.87	4.3	946.728	4	46.84	F5:8466	1	936.625	323	1056	497.75	412.875	45.75	155.5	269	529	552	Y
3	7	CL367Contig10|CL367Contig10	K.K(+304.20)LYGEYLVNAQGEDVVAGIR.T	N	44.61	2497.34	13.6	833.466	3	39.7	F6:7028	1	375	360.75	173.5	572	86	398.125	288.875	231.5	509	528	Y
3	7	CL367Contig10|CL367Contig10	N.A(+304.20)QGEDVVAGIR.T	N	44.11	1417.78	6.5	709.901	2	16.77	F5:3917	1	3592	2597	6164	5464	3096	2209	4168	3875	518	528	Y
3	7	CL367Contig10|CL367Contig10	K.G(+304.20)TAVNVQTM.V	N	43.56	1223.64	7.3	612.833	2	18.08	F8:4228	3	1382	1188	1325	1086	1473	770	908.25	752	476	484	Y
3	7	CL367Contig10|CL367Contig10	K.G(+304.20)K(+304.20)SEGDK(+304.20).T	N	43.47	1631.94	2.7	408.995	4	10.15	F10:3383	3	231.25	252	499.125	206	337.375	298.5	241.5	266	105	111	Y
3	7	CL367Contig10|CL367Contig10	K.L(+304.20)Y(+304.20)GEYLVNAQGEDVVAGIR.T	N	42.63	2673.45	-3.7	892.153	3	41.53	F6:7302	1	263.875	564	660	455.75	272	123.5	987.5	180.125	510	528	Y
3	7	CL367Contig10|CL367Contig10	K.I(+304.20)LENHYK(+304.20).D	N	42.18	1523.88	7.3	508.971	3	20.05	F12:4346	5	137.5	593.5	202.5	464.75	101.75	0	0	0	553	559	Y
3	7	CL367Contig10|CL367Contig10	N.D(+304.20)TDLTAADLK(+304.20).E	N	41.76	1669.92	-0.1	557.649	3	23.17	F1:5275	2	245.5	143.5	380.625	429.25	350.5	397	351	171.5	411	420	Y
3	7	CL367Contig10|CL367Contig10	R.T(+304.20)GQGAVK(+304.20).I	N	41.49	1267.76	6.1	634.891	2	10.41	F3:3300	2	3176	2913	5104	3835	1057	1896	4416	2109	584	590	Y
3	7	CL367Contig10|CL367Contig10	N.D(+304.20)EVAAGLAAK(+304.20).S	N	41.16	1551.9	6.9	518.31	3	18.47	F5:4181	1	524	1042	768.75	964	448	789.25	1100	648.25	211	220	Y
3	7	CL367Contig10|CL367Contig10	N.V(+304.20)VLDIPHSLFEEK(+304.20).L	N	40.78	2133.22	12.2	534.318	4	44.64	F6:7769	2	1377	698	800.125	1083	579.375	390.375	661.75	1123	386	398	Y
3	7	CL367Contig10|CL367Contig10	K.L(+304.20)GDPEK(+304.20)PLLL.S	N	40.32	1702.04	1.1	568.354	3	39.26	F5:7322	4	1289	714	2399	1202	1216	406	1496	1646	178	187	Y
3	7	CL367Contig10|CL367Contig10	K.K(+304.20)QLELAVR.A	N	39.86	1259.78	10.4	420.939	3	16.92	F2:4374	1	1912	1075	2233	1374	1187	1526	1182	451.625	444	451	Y
3	7	CL367Contig10|CL367Contig10	R.D(+304.20)DVGK(+304.20).F	N	39.25	1140.65	9.5	571.337	2	11.61	F5:3124	4	11090	8276	15900	17090	12870	4660	14820	8672	1598	1602	Y
3	7	CL367Contig10|CL367Contig10	Q.G(+304.20)EDVVAGIR.T	N	38.72	1218.68	-1.7	610.347	2	16.69	F5:3905	2	6409	5232	8041	5158	2842	4946	5660	7667	520	528	Y
3	7	CL367Contig10|CL367Contig10	K.L(+304.20)EHMK(+304.20).E	N	38.32	1264.73	-5.3	317.188	4	15.38	F12:3637	2	74.25	47.375	388	520.75	126.25	142	268	285.875	399	403	Y
3	7	CL367Contig10|CL367Contig10	R.V(+304.20)NDAEK(+304.20).S	N	37.61	1282.72	6.5	428.584	3	12.29	F5:3226	5	1552	1233	4166	2527	1880	1332	2672	1744	718	723	Y
3	7	CL367Contig10|CL367Contig10	R.G(+304.20)VGELIK(+304.20).F	N	36.93	1322.83	4.9	662.424	2	22.12	F7:4846	17	2184	1411	2272	3794	1253	1241	3240	2128	1625	1631	Y
3	7	CL367Contig10|CL367Contig10	K.M(+304.20)(+15.99)VEPGHLDQLLHPQFEDPSAY(+304.20)K(+304.20)DK(+304.20).V	N	36.89	4026.14	4.3	672.033	6	35.83	F8:6890	4	432	447.75	379	856	566.375	174	430	368	609	632	Y
3	7	CL367Contig10|CL367Contig10	N.A(+304.20)DTPEDALAAR.N	N	36.78	1432.74	14.2	478.594	3	18.38	F1:4557	2	549	493	501	550	176	146.5	950	162	782	792	Y
3	7	CL367Contig10|CL367Contig10	D.T(+304.20)PEDALAAR.N	N	36.17	1246.68	4.4	624.348	2	15.49	F5:3715	1	3284	1844	5324	4517	3104	2774	4642	1858	784	792	Y
3	7	CL367Contig10|CL367Contig10	K.G(+304.20)EPFPSDPK(+304.20)K(+304.20).Q	N	35.16	2013.15	4.5	672.06	3	15.28	F8:3806	2	1834	1340	2638	3249	1113	1048	3006	2013	435	444	Y
3	7	CL367Contig10|CL367Contig10	K.V(+304.20)FTAAGK(+304.20).T	N	34.3	1300.79	5.8	651.404	2	19.07	F3:4601	3	2297	2472	3389	2078	1535	1576	4112	2317	1546	1552	Y
3	7	CL367Contig10|CL367Contig10	K.D(+304.20)AILVR.T	N	34.22	989.612	0.2	495.813	2	17.58	F7:4165	3	3015	1920	4270	3256	2333	3060	2696	1979	665	670	Y
3	7	CL367Contig10|CL367Contig10	R.L(+304.20)GISYPELTEM(+15.99)QAR.A	N	34.11	1927	16	964.521	2	36.85	F6:6599	5	1247	398	1868	1990	850.25	173.5	1468	568.75	1488	1501	Y
3	7	CL367Contig10|CL367Contig10	R.L(+304.20)WM(+15.99)LQC(+45.99)R.S	N	33.93	1314.65	16.7	439.231	3	44.71	F4:8531	2	318.75	247	614.5	633.5	49.875	208	361	532.75	573	579	Y
3	7	CL367Contig10|CL367Contig10	K.Q(+304.20)LLGGK(+304.20).G	N	33.79	1222.78	0.4	408.599	3	17.33	F4:4415	3	1234	782	2036	1117	644.375	763.625	1440	1152	115	120	Y
3	7	CL367Contig10|CL367Contig10	R.T(+304.20)ETSPEDVGGMHAAAGIL.T	N	33.54	2059.01	4.9	1030.52	2	38.15	F1:7523	4	196.125	135	270	212.625	94	104	267.25	179.25	671	688	Y
3	7	CL367Contig10|CL367Contig10	K.L(+304.20)EHM(+15.99)K(+304.20).E	N	32.99	1280.73	6.3	427.919	3	11.3	F11:3377	3	2087	346.125	4181	3670	2748	1330	1592	821.75	399	403	Y
3	7	CL367Contig10|CL367Contig10	S.T(+304.20)EAC(+45.99)EQYQIAGK(+304.20).S	N	32.63	1994	14.6	665.682	3	25.82	F6:4943	1	170	0	628	347.25	290	176.5	244	341	142	153	Y
3	7	CL367Contig10|CL367Contig10	Q.I(+304.20)VFTAEDAEAWHAQGK(+304.20).D	N	32.49	2380.25	8.1	596.075	4	36.78	F6:6588	2	42.25	902.125	297.5	617.875	317.125	429	564.75	473.75	649	664	Y
3	7	CL367Contig10|CL367Contig10	R.T(+304.20)EHMFFAS.D	N	31.82	1272.61	5.9	637.314	2	27.09	F7:5591	1	1778	1147	3158	2731	1043	1468	2832	774.125	804	811	Y
3	7	CL367Contig10|CL367Contig10	K.L(+304.20)Y(+304.20)GEY(+304.20)LVNAQGEDVVAGIR.T	N	31.62	2977.65	-3.4	745.417	4	38.66	F9:6870	1	118.25	199	860.375	330.5	134.5	65	386	84.25	510	528	Y
3	7	CL367Contig10|CL367Contig10	R.Q(+304.20)NALDR.L	N	30.83	1019.56	9	510.793	2	12.03	F10:3666	2	550	118.875	980	618.25	159	472	546.5	101.25	831	836	Y
3	7	CL367Contig10|CL367Contig10	K.F(+304.20)ATER.G	N	29.17	926.507	8.5	464.265	2	12.52	F9:2924	6	23660	32590	48340	45220	16880	17550	29310	18580	1632	1636	Y
3	7	CL367Contig10|CL367Contig10	R.N(+304.20)TAIK(+304.20).M	N	28.44	1153.72	0	577.866	2	12.43	F4:3680	3	328	200.5	1195	719.875	468.25	448	1381	472.75	604	608	Y
3	7	CL367Contig10|CL367Contig10	F.M(+304.20)SWVDEVR.Q	N	27.12	1324.67	4.8	663.345	2	32.04	F5:6232	1	325.5	1432	1092	1348	1254	1205	534	1701	767	774	Y
3	7	CL367Contig10|CL367Contig10	R.L(+304.20)LPYQR.S	N	27.03	1092.65	14.6	547.342	2	22.79	F4:5233	4	840.875	451.5	809.375	555	91.25	518	622	342.75	837	842	Y
3	7	CL367Contig10|CL367Contig10	R.F(+304.20)AYDSY(+304.20)R.R	N	26.54	1528.8	5.4	510.611	3	17.78	F3:4407	2	2131	2389	3224	2026	1388	1982	2560	2798	371	377	Y
3	7	CL367Contig10|CL367Contig10	K.G(+304.20)ANLAEMA.S	N	24.38	1079.55	11.7	540.79	2	20.71	F5:4528	1	1032	833.5	1815	1118	1592	1526	740	1699	121	128	Y
3	7	CL367Contig10|CL367Contig10	K.L(+304.20)SEVNPM(+15.99).L	N	23.09	1108.57	8.4	555.296	2	19.85	F1:4778	1	225.5	96.25	720	349	183.25	452.75	355	566.5	900	906	Y
3	7	CL367Contig10|CL367Contig10	N.E(+304.20)GFVDR.N	N	22.45	1025.54	8.2	513.781	2	13.96	F5:3477	1	2370	1611	2631	1582	1021	1618	1652	1304	598	603	Y
3	7	CL367Contig10|CL367Contig10	R.A(+304.20)IFEAA.I	N	22.25	924.517	8.5	463.27	2	25.65	F5:5272	1	1027	255.75	778	1337	1350	593.5	886	1470	1502	1507	Y
3	7	CL367Contig10|CL367Contig10	K.K(+304.20)LY(+304.20)GEYLVN.A	N	21.94	1705.98	3.7	569.668	3	27.87	F9:5250	1	291	199.5	93.5	552	348	600	363.25	148.5	509	517	Y
3	7	CL367Contig10|CL367Contig10	M.A(+304.20)GSLR.Q	N	21.61	806.486	-8	404.247	2	11.01	F7:3182	1	227.5	489.25	652.875	1263	227.75	1664	1024	108.25	1654	1658	Y
3	7	CL367Contig10|CL367Contig10	K.Q(+304.20)PLAPPALSGDLGTF.M	N	20.87	1786.97	-2	894.491	2	48.06	F1:9019	1	354	148	865.5	241.5	258.5	164.5	634	318	752	766	Y
3	7	CL367Contig10|CL367Contig10	K.I(+304.20)LENHY(+304.20)K(+304.20).D	N	19.91	1828.08	6.7	610.372	3	16.97	F2:4382	2	287	207.5	766	329	828	159.125	469.25	187.5	553	559	Y
3	7	CL367Contig10|CL367Contig10	H.S(+304.20)LFEEK(+304.20).L	N	18.89	1359.78	9.7	454.27	3	18.62	F6:3863	1	678	121.25	524.375	203.5	485.625	153.625	459.25	852.25	393	398	Y
3	7	CL367Contig10|CL367Contig10	A.R(+304.20)GWGK(+304.20).C	N	16.84	1210.73	15.5	404.59	3	15.47	F3:4061	1	1770	1069	1392	769.5	1437	2623	2456	1554	703	707	Y
3	7	CL367Contig10|CL367Contig10	K.M(+304.20)VEPGHLDQL.L	N	16.66	1441.75	7.8	721.887	2	27.04	F5:5480	1	908	60.875	770	859.875	274	234	1024	197	609	618	Y
3	7	CL367Contig10|CL367Contig10	K.G(+304.20)TAVNVQTMVF.G	N	15.89	1469.78	10.1	735.905	2	43.34	F9:7572	2	498	239	465	170	649.5	42.375	458	354.25	476	486	Y
3	7	CL367Contig10|CL367Contig10	K.R(+304.20)VY(+304.20)VFGK(+304.20).G	N	15.58	1780.1	-8.5	446.028	4	31.81	F5:6197	1	236.625	181.5	465	347	49.5	536.5	151	205.5	98	104	Y
3	7	CL367Contig10|CL367Contig10	R.L(+304.20)WMLQ.C	N	14.72	993.557	-0.3	497.786	2	48.23	F8:8748	3	1040	1060	1004	525.125	379	436.875	843.375	638	573	577	Y
3	7	CL367Contig10|CL367Contig10	R.A(+304.20)M(+15.99)DGK(+304.20).X	N	13.42	1144.63	16	573.33	2	25.07	F9:4831	1	702.25	708.375	1727	588.75	612	952	588.375	616	948	952	Y
3	7	CL367Contig10|CL367Contig10	K.G(+304.20)K(+304.20)SEGDK(+304.20)TMK(+304.20).Q	N	12.03	2296.33	5.3	575.092	4	12.03	F2:3640	1	860	890	1197	1811	940	412.625	1912	1361	105	114	Y
3	7	CL367Contig10|CL367Contig10	K.I(+304.20)AVDMVN.E	N	11.38	1064.58	8.9	533.302	2	31.56	F1:6534	1	201.5	612	920.625	1023	724	273	920.5	924	591	597	Y
3	7	CL367Contig10|CL367Contig10	K.L(+304.20)SEVNPM.L	N	10.66	1092.57	4.5	547.297	2	31.24	F1:6486	1	775.5	180.875	661.5	881.875	617.5	272	452	372.5	900	906	Y
3	7	CL367Contig10|CL367Contig10	X.Y(+304.20)(+304.20)PC(+45.99)YHVDALY(+304.20)M(+15.99)LK(+304.20).E	Y	9.8	2893.54	6.5	579.719	5	34.61	F11:6879	1	691.875	124.25	424.75	624	257	445	227	103	954	966	Y
3	7	CL367Contig10|CL367Contig10	K.I(+304.20)AVDMVNEGFV.D	N	9.59	1496.78	-1.5	749.396	2	37.15	F5:6998	1	1391	612	901.75	566.25	650	1030	1588	899.5	591	601	Y
3	7	CL367Contig10|CL367Contig10	S.T(+304.20)VRVNDAEK(+304.20).S	N	9.07	1638.94	6.1	547.324	3	22.41	F6:4432	1	123.75	222	611.875	304	406	299	394	513.5	715	723	Y
3	7	CL367Contig10|CL367Contig10	K.M(+304.20)VEPGHLDQLLHPQ.F	N	8.78	1917	9.2	640.014	3	40.9	F7:7663	1	304	146	219.5	126	441.875	129.5	495	447	609	622	Y
3	7	CL367Contig10|CL367Contig10	M.S(+304.20)WVDEVR.Q	N	8.51	1193.63	3.8	597.824	2	19.19	F5:4292	1	2358	1956	1336	1835	2209	1060	2392	3418	768	774	Y
3	7	CL367Contig10|CL367Contig10	N.E(+304.20)GFVDRNTAIK(+304.20).M	N	8.01	1857.05	-15	929.516	2	41.48	F5:7656	1	573.125	392	696.875	1134	290	712	256	380.75	598	608	Y
3	7	CL367Contig10|CL367Contig10	A.K(+304.20)AC(+45.99)VIR.S	N	7.83	1038.59	19	520.314	2	15.81	F4:4188	1	956	828.5	1337	960	888	715.25	930	1128	65	70	Y
3	7	CL367Contig10|CL367Contig10	R.T(+304.20)EHMFF.A	N	7.67	1114.54	12.6	558.283	2	30.81	F7:6150	1	844	503.25	1436	1021	1056	708	1220	746.25	804	809	Y
3	7	CL367Contig10|CL367Contig10	K.S(+304.20)GERFAYDSYRR.F	N	7.51	1809.9	-1	604.307	3	16.53	F1:4280	1	421.75	208.5	1006	1251	252	378.625	1272	379	367	378	Y
3	7	CL367Contig10|CL367Contig10	K.L(+304.20)YGEYLV.N	N	7.47	1159.64	6.9	580.83	2	23	F9:4521	1	18980	16970	25330	19480	14420	11840	19960	14300	510	516	Y
3	7	CL367Contig10|CL367Contig10	N.S(+304.20)WDSPR.A	N	6.94	1050.53	-13	526.268	2	15.29	F7:3822	1	728.25	968.5	1529	891	857.75	272	1517	447	456	461	Y
3	7	CL367Contig10|CL367Contig10	A.C(+45.99)(+304.20)EQY(+304.20)QIAGK(+304.20).S	N	6.91	1997.07	-13.2	999.528	2	59.96	F5:10436	2	365	531.125	1877	287	268	291	460.75	377.625	145	153	Y
3	7	CL367Contig10|CL367Contig10	R.A(+304.20)VFNSW.D	N	5.95	1026.54	13.2	514.283	2	41.41	F7:7739	1	890.625	770	1494	420	634.75	292.25	940	209	452	457	Y
3	7	CL367Contig10|CL367Contig10	R.T(+304.20)EHMFFA.S	N	5.44	1185.57	19.2	593.806	2	29.84	F7:6004	1	178	264.5	770	517.75	303	148	407	554	804	810	Y
3	7	CL367Contig10|CL367Contig10	K.S(+304.20)GERFAY(+304.20)DSY(+304.20)RR.F	N	5.07	2418.3	8.2	484.671	5	34.55	F11:6869	1	75.75	254	440.75	319.5	360	534	358	331	367	378	Y
3	7	CL367Contig10|CL367Contig10	K.E(+304.20)LVK(+304.20)QYQEVY(+304.20)IEAK(+304.20)GEPFPSDPK(+304.20).K	N	5.04	4214.36	5.2	703.404	6	40.99	F6:7220	1	853.5	778	1636	696.375	442	890.625	1412	732.75	421	443	Y
3	2152	CL367Contig12|CL367Contig12	N.A(+304.20)VADAAPITATK(+304.20).R	N	62.02	1736.02	7.5	579.684	3	16.96	F9:3610	15	902.75	1108	2348	1920	1320	611.25	2308	626.25	153	164	Y
3	2152	CL367Contig12|CL367Contig12	R.V(+304.20)Y(+304.20)VFGK(+304.20).G	N	48.67	1624	6.1	407.009	4	25.07	F4:5575	4	131.5	228	190	556	72.5	78.5	288	174	166	171	Y
3	2152	CL367Contig12|CL367Contig12	R.V(+304.20)YVFGK(+304.20).G	N	45.5	1319.8	-4.1	440.937	3	32.88	F4:6752	7	146.5	152	636	333	159	190	79.5	355	166	171	Y
3	2152	CL367Contig12|CL367Contig12	A.D(+304.20)AAPITATK(+304.20).R	N	44.87	1494.88	-13.7	499.292	3	14.57	F8:3700	3	550.5	720.375	887.25	1732	1531	1294	1816	1048	156	164	Y
3	2152	CL367Contig12|CL367Contig12	K.R(+304.20)VY(+304.20)VFGK(+304.20).G	N	15.58	1780.1	-8.5	446.028	4	31.81	F5:6197	1	236.625	181.5	465	347	49.5	536.5	151	205.5	165	171	Y
3	2152	CL367Contig12|CL367Contig12	A.K(+304.20)AC(+45.99)VIR.S	N	7.83	1038.59	19	520.314	2	15.81	F4:4188	1	956	828.5	1337	960	888	715.25	930	1128	132	137	Y
3	10957	CL5924Contig4|CL5924Contig4	T.A(+304.20)M(+15.99)DGK(+304.20).D	N	13.42	1144.63	16	573.33	2	25.07	F9:4831	1	702.25	708.375	1727	588.75	612	952	588.375	616	92	96	Y
3	10957	CL5924Contig4|CL5924Contig4	R.E(+304.20)DAAAAIT.A	N	7	1064.56	2.2	533.289	2	29.53	F11:6113	1	354.625	0	115.25	770.375	319	432.25	494	229	84	91	Y
3	11105	CL476Contig8|CL476Contig8	X.W(+304.20)K(+304.20)SNR.A	N	10.71	1297.76	10	649.894	2	27.78	F4:5984	1	122.25	124.5	138	651	124.5	342	434	136	139	143	Y
3	11144	CL322Contig2|CL322Contig2	K.A(+304.20)VQTAQAANMVYVH.A	Y	7.31	1805.93	-1.6	903.973	2	19.58	F5:4353	1	1024	584.625	1730	1229	937	874	384.25	717.875	146	159	Y
3	11144	CL322Contig2|CL322Contig2	R.V(+304.20)SLTR.A	N	6.42	878.544	-12.2	440.274	2	34.83	F3:6966	1	753.5	872.125	1144	664	343	1201	548	1765	587	591	Y
1	2	CAPP12_ERATE|CAPP12_ERATE	R.E(+304.20)LVQEFYETAAEYDIK(+304.20).H	N	99.9	2555.31	7.1	852.785	3	52.91	F1:9747	13	1944	1449	2518	4124	2607	946.125	2302	4632	51	66	Y
1	2	CAPP12_ERATE|CAPP12_ERATE	R.F(+304.20)TAATLEHGMHPPVSPK(+304.20)PEWSK(+304.20).L	N	95.53	3358.81	9.3	672.776	5	40.59	F12:7646	5	2528	2645	3913	2813	1616	1542	5761	2583	824	845	Y
1	2	CAPP12_ERATE|CAPP12_ERATE	K.E(+304.20)LDEALQAEIQAAFR.T	N	94.98	2007.05	10.7	670.032	3	53.95	F1:9904	15	295.75	476.5	374	382.625	262.125	538.25	712.375	643.25	203	217	Y
1	2	CAPP12_ERATE|CAPP12_ERATE	K.H(+304.20)GDFSDEGSAATESDIEETLK(+304.20)R.L	N	94.75	3001.46	8.9	751.379	4	25.59	F5:5262	4	1362	892.75	3470	1630	1197	1921	2964	1224	119	140	Y
1	2	CAPP12_ERATE|CAPP12_ERATE	K.Q(+304.20)QIMVGYSDSGK(+304.20).D	N	93.73	1920.01	5.4	641.015	3	18.78	F8:4333	14	391	486.5	1284	754	591.5	715.5	831.875	354	725	736	Y
1	2	CAPP12_ERATE|CAPP12_ERATE	Y.I(+304.20)ISMATAPSDVLAVELLQR.E	N	92.79	2330.31	3.9	777.781	3	57.57	F6:9710	5	0	0	346.75	61	125.625	248.75	234	408.5	663	681	Y
1	2	CAPP12_ERATE|CAPP12_ERATE	R.H(+304.20)TDAIDAITTHLGIGSYR.E	N	92.36	2244.18	11.6	562.058	4	43.77	F10:8451	6	251.5	580	395	654.5	186.5	363.125	187.75	123.25	592	609	Y
1	2	CAPP12_ERATE|CAPP12_ERATE	S.V(+304.20)TIQGEVIEHSFGEEHLC(+45.99)FR.T	N	91.76	2679.3	12.6	670.842	4	46.37	F7:8482	3	130	357	191	353.125	274.5	151	473	264	800	819	Y
1	2	CAPP12_ERATE|CAPP12_ERATE	K.T(+304.20)IADGVLLDFMR.Q	N	87.09	1653.9	16	552.317	3	53.65	F11:9744	14	325.875	388.25	232.375	529	148	382	265	358.5	560	571	Y
1	2	CAPP12_ERATE|CAPP12_ERATE	K.D(+304.20)ITEDEK(+304.20)K(+304.20)ELDEALQAEIQAAFR.T	N	85.92	3573.91	5.9	894.491	4	49.5	F5:8864	7	9338	6462	12830	9381	5103	5159	11600	7375	195	217	Y
1	2	CAPP12_ERATE|CAPP12_ERATE	R.L(+304.20)RDPYITTLNVFQAYTLK(+304.20).Q	N	83.06	2763.57	9.5	691.906	4	51.62	F3:9490	10	378.25	384	223.5	1411	291.875	99.75	752.25	1423	1086	1103	Y
1	2	CAPP12_ERATE|CAPP12_ERATE	K.Q(+304.20)QIM(+15.99)VGYSDSGK(+304.20).D	N	81.54	1936.01	9.2	646.349	3	16.99	F7:4076	5	520	80.75	196.5	198.5	43	88.5	319.625	48.625	725	736	Y
1	2	CAPP12_ERATE|CAPP12_ERATE	R.Y(+304.20)GMSYFQENIWK(+304.20).G	N	81.11	2173.1	-0.4	1087.56	2	44.73	F9:7780	12	766	1293	4094	3367	1264	441	3920	1867	234	245	Y
1	2	CAPP12_ERATE|CAPP12_ERATE	R.V(+304.20)TLDLLEMVFAK(+304.20).G	N	79.43	1986.16	5.2	663.063	3	61.84	F6:10357	20	1918	1048	1157	2873	1785	266.5	1271	5347	1017	1028	Y
1	2	CAPP12_ERATE|CAPP12_ERATE	R.H(+304.20)TDAIDAITTH.L	N	79.11	1497.77	12.2	500.269	3	16.46	F7:3997	1	514	451.25	1360	891	573.5	248.5	1284	487.75	592	602	Y
1	2	CAPP12_ERATE|CAPP12_ERATE	K.Q(+304.20)QIMVGY(+304.20)SDSGK(+304.20).D	N	78.13	2224.21	16.7	557.07	4	20.96	F2:4980	5	1010	998.625	3335	2734	1124	575.875	3358	1978	725	736	Y
1	2	CAPP12_ERATE|CAPP12_ERATE	K.E(+304.20)MYNEWPFFR.V	N	76.91	1721.81	16	574.954	3	46.97	F6:8118	4	626	512.5	595.5	788	542.5	375	154	756	1007	1016	Y
1	2	CAPP12_ERATE|CAPP12_ERATE	K.E(+304.20)ILESDPYLK(+304.20).Q	N	76.37	1814.02	18.9	605.691	3	33.9	F5:6511	10	3005	2626	6011	10570	4159	2120	4759	2856	1072	1081	Y
1	2	CAPP12_ERATE|CAPP12_ERATE	R.L(+304.20)ADLQNAPASVER.L	N	74.32	1686.92	4.4	563.315	3	26.57	F5:5409	16	2296	759.375	1444	2153	342.5	826	3270	1981	698	710	Y
1	2	CAPP12_ERATE|CAPP12_ERATE	R.E(+304.20)LVQEFY(+304.20)ETAAEYDIK(+304.20).H	N	74.3	2859.51	2	715.888	4	47.63	F5:8584	3	114.5	344	83.5	492	735.5	116.5	676.5	646	51	66	Y
1	2	CAPP12_ERATE|CAPP12_ERATE	R.A(+304.20)QPTPQDEMR.Y	N	71.66	1475.73	7.4	492.921	3	12.9	F5:3317	6	2391	3272	5559	4934	2868	1020	3400	2613	224	233	Y
1	2	CAPP12_ERATE|CAPP12_ERATE	K.L(+304.20)M(+15.99)DEMAVVATEAYR.S	N	70.69	1917.94	4.1	959.983	2	42.86	F5:7865	2	1542	400.875	2475	1135	703.75	675	2189	656	846	859	Y
1	2	CAPP12_ERATE|CAPP12_ERATE	R.Q(+304.20)VSTFGLTLAK(+304.20).L	N	70.06	1772.06	5.9	887.04	2	40.78	F3:7858	5	169.5	178.5	434	130.125	127.5	231.5	201.5	41.75	572	582	Y
1	2	CAPP12_ERATE|CAPP12_ERATE	R.Y(+304.20)GM(+15.99)SYFQENIWK(+304.20).G	N	65.15	2189.1	3.2	730.709	3	41.21	F8:7698	8	302.5	335	1238	494	380	341	509.25	555.5	234	245	Y
1	2	CAPP12_ERATE|CAPP12_ERATE	R.F(+304.20)HLPVWLGVGTAFK(+304.20).S	N	64.21	2179.27	6	545.827	4	51.92	F3:9535	6	112	0	230.875	65.75	149	0	0	0	979	992	Y
1	2	CAPP12_ERATE|CAPP12_ERATE	K.L(+304.20)MDEMAVVATEAY(+304.20)R.S	N	63.68	2206.15	10.4	736.398	3	46.88	F6:8105	2	1415	1592	2164	2235	1500	1300	3380	2440	846	859	Y
1	2	CAPP12_ERATE|CAPP12_ERATE	K.F(+304.20)SSWMGGDR.D	N	63.55	1345.63	4.6	449.554	3	29.27	F9:5460	7	728.375	624	1264	1268	673	239.25	1138	622	416	424	Y
1	2	CAPP12_ERATE|CAPP12_ERATE	K.G(+304.20)IAAGMQNTG.X	N	62.58	1222.62	6.8	612.323	2	16.87	F11:4212	8	670.375	172	523.25	616.125	333	393	62.625	1028	1148	1157	Y
1	2	CAPP12_ERATE|CAPP12_ERATE	R.Y(+304.20)(+304.20)GMSYFQENIWK(+304.20).G	N	62.2	2477.3	7.2	496.471	5	43.69	F2:8398	2	224.25	237	1112	1518	121.75	41.375	1036	1374	234	245	Y
1	2	CAPP12_ERATE|CAPP12_ERATE	R.Q(+304.20)EWLLSELQGK(+304.20).R	N	59.73	1938.09	7.5	647.043	3	45.7	F6:7928	3	921.625	150	336	510.75	157	344	173.5	321.5	617	627	Y
1	2	CAPP12_ERATE|CAPP12_ERATE	K.Q(+304.20)QIM(+15.99)VGY(+304.20)SDSGK(+304.20).D	N	59.41	2240.21	0.1	561.059	4	16.98	F2:4383	1	803.625	776	998	482	136	491	997.5	345.875	725	736	Y
1	2	CAPP12_ERATE|CAPP12_ERATE	K.L(+304.20)TSLDPADAIIVASSFSH.M	N	59.35	2147.14	12.7	1074.59	2	53.93	F5:9528	1	265	259	169	137.5	268	221.5	650.5	46.625	79	96	Y
1	2	CAPP12_ERATE|CAPP12_ERATE	R.A(+304.20)QPTPQDEM(+15.99)R.Y	N	59.29	1491.72	12.5	498.255	3	10.54	F6:2643	6	463.625	217.875	574.375	771.75	167	88.25	244.5	415	224	233	Y
1	2	CAPP12_ERATE|CAPP12_ERATE	R.S(+304.20)ATPETEYGR.M	N	58.35	1413.7	7.1	472.244	3	12.52	F6:2940	4	1470	2850	2668	3021	1719	869.875	2693	1885	874	883	Y
1	2	CAPP12_ERATE|CAPP12_ERATE	R.D(+304.20)VC(+45.99)LLAR.M	N	58.16	1138.61	5.9	380.546	3	31.67	F8:6266	21	265	609.375	753.75	388	399	461.25	735.125	638.375	437	443	Y
1	2	CAPP12_ERATE|CAPP12_ERATE	K.G(+304.20)DPGIAALYDK(+304.20).L	N	57.65	1726.96	5.6	864.492	2	26.32	F6:5019	6	1216	1357	1241	1528	1340	315	1080	1524	1029	1039	Y
1	2	CAPP12_ERATE|CAPP12_ERATE	R.L(+304.20)FSIDWYLNR.I	N	56.99	1629.88	5	815.95	2	53.68	F9:9122	16	1349	1488	2344	2791	792	574	1800	1164	711	720	Y
1	2	CAPP12_ERATE|CAPP12_ERATE	R.F(+304.20)VEYFR.S	N	56.86	1163.62	6.2	582.822	2	38.07	F9:6781	11	7934	6736	15290	9408	4620	3197	10050	8752	868	873	Y
1	2	CAPP12_ERATE|CAPP12_ERATE	K.S(+304.20)LVEVGDK(+304.20).T	N	56.32	1453.85	11.4	485.629	3	17.42	F6:3682	6	26910	19170	40370	34420	21040	14230	38550	22970	552	559	Y
1	2	CAPP12_ERATE|CAPP12_ERATE	K.Y(+304.20)LETQDLLLK(+304.20).I	Y	56.26	1843.08	10.2	461.782	4	41.23	F5:7618	11	598	834	1136	790.875	375	690	766.375	428	1057	1066	Y
1	2	CAPP12_ERATE|CAPP12_ERATE	K.L(+304.20)TFFHGR.G	N	56.09	1180.66	-1.5	394.56	3	27.38	F4:5923	6	198.5	323	461	646	148	357	178	470.25	765	771	Y
1	2	CAPP12_ERATE|CAPP12_ERATE	R.A(+304.20)DELLSAPK(+304.20).K	N	55.11	1550.9	3.7	388.734	4	21.61	F6:4311	12	139.5	52.5	305.875	514.5	190.5	276	314.5	431.5	474	482	Y
1	2	CAPP12_ERATE|CAPP12_ERATE	R.Y(+304.20)GMSY(+304.20)FQENIWK(+304.20).G	N	55.05	2477.3	11.4	496.473	5	43.76	F2:8409	2	475.125	753.75	2298	1606	233.25	588.875	1911	1680	234	245	Y
1	2	CAPP12_ERATE|CAPP12_ERATE	F.S(+304.20)HMLNLANIAEEVQIANR.R	N	54.76	2326.23	15.6	776.43	3	46.11	F8:8431	1	376	423	169.5	141	283	251.75	294.375	267.75	95	112	Y
1	2	CAPP12_ERATE|CAPP12_ERATE	R.L(+304.20)FSIDWY(+304.20)LNR.I	N	54.41	1934.08	8.3	484.531	4	49.72	F3:9200	2	300	332	171.5	593.5	289	114.75	655.5	717.5	711	720	Y
1	2	CAPP12_ERATE|CAPP12_ERATE	R.E(+304.20)LVQEFYETAAEY(+304.20)DIK(+304.20).H	N	53.96	2859.51	7.4	715.891	4	49.05	F5:8796	1	676	1083	870	655.75	188.25	236	253.125	748.25	51	66	Y
1	2	CAPP12_ERATE|CAPP12_ERATE	R.V(+304.20)TPEVTR.D	N	53.76	1104.64	2.9	553.328	2	12.92	F9:2984	8	12770	11520	22690	18680	9572	7389	19160	11100	430	436	Y
1	2	CAPP12_ERATE|CAPP12_ERATE	K.L(+304.20)LVADELK(+304.20)PFGENLR.S	N	53.64	2321.35	13.1	774.799	3	45.14	F6:7844	3	9954	5749	12560	10760	6312	4881	9855	8886	1040	1054	Y
1	2	CAPP12_ERATE|CAPP12_ERATE	H.M(+304.20)(+15.99)LNLANIAEEVQIANR.R	N	53.47	2118.14	14.2	707.062	3	46.68	F6:8075	2	318.5	279	389.5	534	281	301	235.5	161.5	97	112	Y
1	2	CAPP12_ERATE|CAPP12_ERATE	R.N(+304.20)C(+45.99)LTQLYAK(+304.20).D	N	53.01	1706.92	4.8	854.471	2	40.42	F3:7805	4	878.5	382	1341	734	269	385	1468	1446	186	194	Y
1	2	CAPP12_ERATE|CAPP12_ERATE	K.E(+304.20)ILESDPY(+304.20)LK(+304.20).Q	N	52.79	2118.22	8.3	530.566	4	27.11	F6:5137	7	2192	1506	2856	1640	804	882.5	1252	772.5	1072	1081	Y
1	2	CAPP12_ERATE|CAPP12_ERATE	R.A(+304.20)IPSTEPYR.V	N	52.78	1336.72	12.2	446.587	3	15.44	F9:3371	13	1924	2154	4040	4802	3056	524	3665	3360	494	502	Y
1	2	CAPP12_ERATE|CAPP12_ERATE	R.L(+304.20)PYDAPLIK(+304.20).F	N	50.54	1636.99	5.2	546.674	3	41.4	F10:8095	23	568	211.5	1006	350.5	435.75	352.25	454.875	484	267	275	Y
1	2	CAPP12_ERATE|CAPP12_ERATE	R.S(+304.20)VVVK(+304.20)EPR.F	N	49.47	1520.94	7.5	761.482	2	12.97	F3:3686	2	1651	980.625	2618	1590	1034	727	2312	1115	860	867	Y
1	2	CAPP12_ERATE|CAPP12_ERATE	K.S(+304.20)VEEFLEPLEVC(+45.99)Y(+304.20)K(+304.20).S	N	49.37	2642.39	11.8	529.492	5	50.44	F6:8638	4	224	0	788	863.75	450.5	148	304	320	538	551	Y
1	2	CAPP12_ERATE|CAPP12_ERATE	M.L(+304.20)NLANIAEEVQIANR.R	N	48.85	1971.1	15	658.051	3	47.29	F6:8166	2	42	171	698.625	127.75	722.75	229.875	75	443	98	112	Y
1	2	CAPP12_ERATE|CAPP12_ERATE	K.R(+304.20)QEWLLSELQGK(+304.20).R	N	48.56	2094.19	8	524.56	4	39.48	F8:7439	6	461	981.75	989.25	1206	869.25	734	1338	2058	616	627	Y
1	2	CAPP12_ERATE|CAPP12_ERATE	K.H(+304.20)NESK(+304.20)LDALGTK(+304.20).L	N	47.91	2224.28	13.7	557.085	4	16.53	F11:4160	1	799.25	1065	584	616	224.5	381	884	786.375	67	78	Y
1	2	CAPP12_ERATE|CAPP12_ERATE	K.K(+304.20)VSEDDK(+304.20)LVEY(+304.20)DALLIDR.F	N	47.71	3032.7	12.1	607.555	5	39.42	F5:7347	4	1480	994.875	1454	2652	2053	442.5	793	2685	19	36	Y
1	2	CAPP12_ERATE|CAPP12_ERATE	K.L(+304.20)M(+15.99)DEM(+15.99)AVVATEAY(+304.20)R.S	N	47.56	2238.14	16.4	560.551	4	24.94	F6:4811	2	348	150.5	868.625	858.125	558	140	470	425	846	859	Y
1	2	CAPP12_ERATE|CAPP12_ERATE	R.E(+304.20)WPEEK(+304.20).R	N	46.91	1424.77	5.9	475.932	3	15.91	F5:3782	5	4187	5832	11210	10490	4100	4209	5088	4822	610	615	Y
1	2	CAPP12_ERATE|CAPP12_ERATE	R.W(+304.20)RDLLATGFSEIPEK(+304.20).S	N	46.8	2369.31	7.9	593.339	4	47.6	F6:8212	1	446	626.625	1096	182	62.125	86.5	552	83.25	519	533	Y
1	2	CAPP12_ERATE|CAPP12_ERATE	K.G(+304.20)IAAGM(+15.99)QNTG.X	N	46.42	1238.62	5.3	620.319	2	12.68	F7:3431	3	321	118.5	193.875	174.5	234	468	378	279	1148	1157	Y
1	2	CAPP12_ERATE|CAPP12_ERATE	R.R(+304.20)AQPTPQDEMR.Y	N	46.38	1631.83	-1.1	544.95	3	12.34	F10:3712	2	367	92	740	319.625	70.25	259	96.5	498	223	233	Y
1	2	CAPP12_ERATE|CAPP12_ERATE	R.F(+304.20)TAATLEHGM(+15.99)HPPVSPK(+304.20)PEWSK(+304.20).L	N	46.14	3374.81	5.7	675.972	5	36.09	F12:6957	2	1161	907.5	1562	934.625	334.125	311	882	614.5	824	845	Y
1	2	CAPP12_ERATE|CAPP12_ERATE	K.D(+304.20)ITEDEK(+304.20).K	N	45.85	1456.78	9.3	486.604	3	15.12	F1:4070	7	486.875	756.75	1353	1134	1748	303.75	1916	1004	195	201	Y
1	2	CAPP12_ERATE|CAPP12_ERATE	A.N(+304.20)IAEEVQIANR.R	N	44.93	1559.85	16.9	520.967	3	21.76	F6:4334	2	312	0	275.5	264.75	256.625	351.5	47.625	260	102	112	Y
1	2	CAPP12_ERATE|CAPP12_ERATE	K.S(+304.20)AIDK(+304.20)DIK(+304.20).N	N	44.23	1801.09	10.5	901.563	2	14.6	F9:3239	4	4784	5026	8870	9391	4399	1819	8601	5514	993	1000	Y
1	2	CAPP12_ERATE|CAPP12_ERATE	R.D(+304.20)K(+304.20)LYNTSER.W	N	43.85	1732.95	9.4	578.661	3	13.52	F8:3542	3	3254	3372	8385	5429	1530	2348	5264	3915	510	518	Y
1	2	CAPP12_ERATE|CAPP12_ERATE	N.I(+304.20)AEEVQIANR.R	N	43.77	1445.81	8.8	482.948	3	22.69	F6:4474	1	325.25	317.25	226.625	253.5	474	63.5	828	238.375	103	112	Y
1	2	CAPP12_ERATE|CAPP12_ERATE	R.V(+304.20)LAELPSDSFGPY.I	N	42.42	1697.88	7.1	849.952	2	50.71	F1:9418	1	135.5	293	316	349.125	204.25	128.125	230	603.25	650	662	Y
1	2	CAPP12_ERATE|CAPP12_ERATE	K.S(+304.20)IGIDER.L	N	42.04	1092.6	18.7	547.319	2	14.42	F5:3546	6	14170	16540	25230	23190	10440	6976	17980	11810	260	266	Y
1	2	CAPP12_ERATE|CAPP12_ERATE	R.D(+304.20)PNFK(+304.20).V	N	41.55	1227.7	5.1	410.241	3	13.87	F8:3595	7	2632	2757	7066	4700	1940	2700	4664	7107	1107	1111	Y
1	2	CAPP12_ERATE|CAPP12_ERATE	A.T(+304.20)APSDVLAVELLQR.E	N	41.04	1815.04	-3	908.522	2	44.02	F5:8042	2	598	878.5	1762	1504	915.625	1164	1289	1123	668	681	Y
1	2	CAPP12_ERATE|CAPP12_ERATE	N.S(+304.20)TSEYAPGLEDTLIITMK(+304.20).G	N	40.99	2576.38	5.2	859.804	3	45.69	F5:8294	1	255.5	369	458	354	41.125	200.5	165	238.125	1130	1147	Y
1	2	CAPP12_ERATE|CAPP12_ERATE	R.V(+304.20)DTALK(+304.20).S	N	40.75	1253.77	2.4	627.894	2	15.45	F8:3832	7	3599	4482	9651	7597	2446	2498	7761	5984	254	259	Y
1	2	CAPP12_ERATE|CAPP12_ERATE	P.L(+304.20)PVVPLFER.L	N	40.16	1372.83	-0.1	458.618	3	45.95	F9:7962	7	600	371	358	315	210.5	648	212.5	514.875	689	697	Y
1	2	CAPP12_ERATE|CAPP12_ERATE	M.A(+304.20)TAPSDVLAVELLQR.E	N	39.95	1886.07	0.6	944.044	2	44.22	F5:8071	2	638	976.125	959.875	327	249.5	74.25	442	915.375	667	681	Y
1	2	CAPP12_ERATE|CAPP12_ERATE	S.M(+304.20)ATAPSDVLAVELLQR.E	N	38.64	2017.11	-4.4	1009.56	2	47.26	F5:8528	1	774.75	528.875	1098	426.75	522	147.5	843.25	562	666	681	Y
1	2	CAPP12_ERATE|CAPP12_ERATE	R.E(+304.20)C(+45.99)HIR.N	N	38.61	1006.49	0.2	336.505	3	14.47	F12:3500	5	4074	1986	8666	10190	4014	8862	5554	5086	682	686	Y
1	2	CAPP12_ERATE|CAPP12_ERATE	K.L(+304.20)DALGTK(+304.20).L	N	37.34	1324.81	0.5	442.61	3	25.77	F10:5727	12	1859	405	1266	486.5	538	339	1148	536	72	78	Y
1	2	CAPP12_ERATE|CAPP12_ERATE	K.L(+304.20)YNTSER.W	N	37.01	1185.62	8.4	593.824	2	15.06	F10:4120	4	2614	3016	4468	3520	1391	644.125	2960	2880	512	518	Y
1	2	CAPP12_ERATE|CAPP12_ERATE	K.S(+304.20)IGINER.L	N	36.86	1091.62	-2.3	364.879	3	15.44	F10:4177	7	87	791.25	282	1084	338	489.5	318	153	400	406	Y
1	2	CAPP12_ERATE|CAPP12_ERATE	R.V(+304.20)VLGDLR.D	N	36.86	1074.66	7.7	538.344	2	24.17	F8:5142	11	14420	15100	24140	21640	11850	4961	13280	10910	503	509	Y
1	2	CAPP12_ERATE|CAPP12_ERATE	K.G(+304.20)DPGIAALY(+304.20)DK(+304.20).L	N	36.31	2031.16	0.3	508.798	4	22.05	F9:4378	3	1201	626	1046	1415	279	671	330.625	1032	1029	1039	Y
1	2	CAPP12_ERATE|CAPP12_ERATE	K.G(+304.20)DPGIAAL.Y	N	36.06	1016.58	7.7	509.299	2	27.87	F1:5980	1	199.5	518.125	434	507.5	164	1099	553.25	832	1029	1036	Y
1	2	CAPP12_ERATE|CAPP12_ERATE	N.P(+304.20)LPVVPLFER.L	N	35.76	1469.89	10.6	490.974	3	46.83	F9:8094	2	125.5	415.5	395	96.5	50.375	268	214	320	688	697	Y
1	2	CAPP12_ERATE|CAPP12_ERATE	K.I(+304.20)AGHK(+304.20)EILESDPYLK(+304.20).Q	N	35.72	2624.51	10.4	525.916	5	26.84	F8:5542	3	454.375	262	1050	695.375	239.5	57.625	874.625	410	1067	1081	Y
1	2	CAPP12_ERATE|CAPP12_ERATE	K.Q(+304.20)IRDPNFK(+304.20).V	N	34.54	1624.94	5.2	542.657	3	14.79	F3:3959	4	2436	1844	4258	2375	1644	1694	3291	2005	1104	1111	Y
1	2	CAPP12_ERATE|CAPP12_ERATE	K.Y(+304.20)(+304.20)LETQDLLLK(+304.20).I	Y	34.43	2147.28	-7.8	537.823	4	38.34	F8:7268	3	618	399	862	413	717.75	230	514.5	577.75	1057	1066	Y
1	2	CAPP12_ERATE|CAPP12_ERATE	R.S(+304.20)VVVK(+304.20).E	N	33.8	1138.74	-0.4	570.378	2	14.85	F4:4044	1	1929	1454	2472	2442	980.125	1058	1995	1613	860	864	Y
1	2	CAPP12_ERATE|CAPP12_ERATE	R.L(+304.20)RDPYITTLNVFQAY(+304.20).T	N	33.77	2421.34	8.4	485.28	5	48.4	F3:9002	1	297	426.25	316.5	178	227.125	172.25	311.25	128	1086	1100	Y
1	2	CAPP12_ERATE|CAPP12_ERATE	K.E(+304.20)IGK(+304.20)K(+304.20)PEEVFEALK(+304.20).S	N	33.65	2832.68	19.5	473.13	6	40.89	F7:7661	2	1020	959.875	1968	2392	1015	1080	3062	1684	144	157	Y
1	2	CAPP12_ERATE|CAPP12_ERATE	K.Q(+304.20)PPLNK(+304.20).E	N	33.14	1303.8	5.5	435.608	3	13.57	F3:3775	2	1020	1214	2246	1387	810.75	1072	2585	1136	1115	1120	Y
1	2	CAPP12_ERATE|CAPP12_ERATE	R.L(+304.20)SAAWQLY(+304.20)QAQAEVAK(+304.20).V	N	33.04	2688.52	-8.4	673.132	4	45.6	F2:8685	5	77.75	392	471.625	84.5	210	123.25	548.75	106.25	741	756	Y
1	2	CAPP12_ERATE|CAPP12_ERATE	K.Q(+304.20)PPLNK(+304.20)EPANVVQLNSTSEYAPGLEDTLIITMK(+304.20).G	N	32.75	4522.46	0.4	1131.62	4	47.51	F6:8199	5	151.5	43.625	874.875	648	245.5	187.875	786.25	274	1115	1147	Y
1	2	CAPP12_ERATE|CAPP12_ERATE	V.D(+304.20)TALK(+304.20).S	N	29.64	1154.7	-7.7	385.905	3	12.78	F7:3447	3	357	425	462	1302	588	650	934	280.75	255	259	Y
1	2	CAPP12_ERATE|CAPP12_ERATE	R.L(+304.20)RDPYITTLNVF.Q	N	29.02	1754.98	0.7	878.499	2	48.05	F8:8722	7	147	252	461.625	411.25	250.25	86.25	677.875	686.375	1086	1097	Y
1	2	CAPP12_ERATE|CAPP12_ERATE	K.I(+304.20)AGHK(+304.20).E	N	28.24	1132.71	9.5	567.366	2	10.39	F3:3298	1	2331	2505	4218	4625	2744	1044	5264	2113	1067	1071	Y
1	2	CAPP12_ERATE|CAPP12_ERATE	Q.A(+304.20)EVAK(+304.20).V	N	27.61	1124.69	-0.4	375.904	3	11.85	F9:2824	1	381	233	722	757	601.875	570	165	113.75	752	756	Y
1	2	CAPP12_ERATE|CAPP12_ERATE	R.L(+304.20)LAPK(+304.20).K	N	27.61	1148.76	1.3	575.39	2	19.18	F4:4692	5	1316	783.25	1146	1324	682	1164	1383	1724	14	18	Y
1	2	CAPP12_ERATE|CAPP12_ERATE	R.S(+304.20)LLQK(+304.20).H	N	27.06	1195.76	0.4	598.89	2	17.49	F4:4438	1	1262	1136	3759	2148	1718	880	2693	1598	176	180	Y
1	2	CAPP12_ERATE|CAPP12_ERATE	R.R(+304.20)VDTALK(+304.20).S	N	26.25	1409.87	4.9	470.966	3	12.85	F3:3668	2	5676	3920	9445	4599	2850	2944	5943	2509	253	259	Y
1	2	CAPP12_ERATE|CAPP12_ERATE	K.L(+304.20)VEYDALLIDR.F	N	25.87	1622.91	-3.1	812.461	2	46.07	F5:8351	1	890.625	1026	1609	2199	1368	487	627	766	26	36	Y
1	2	CAPP12_ERATE|CAPP12_ERATE	R.T(+304.20)DEVR.R	N	25.82	922.497	-6.8	462.253	2	10.48	F5:2955	2	689	544.5	892	1225	825.25	435.5	1338	286	218	222	Y
1	2	CAPP12_ERATE|CAPP12_ERATE	R.L(+304.20)RDPYITTL.N	N	25.4	1394.8	-0.5	465.941	3	37.43	F8:7131	5	177	573.125	77.5	210.25	74.5	132	62.875	71.5	1086	1094	Y
1	2	CAPP12_ERATE|CAPP12_ERATE	R.V(+304.20)LAELPSDSFGPYIISM.A	N	24.24	2142.12	-0.2	1072.07	2	60.01	F1:10820	1	46.25	49.625	240	96.25	129.75	141.375	60.625	51.5	650	666	Y
1	2	CAPP12_ERATE|CAPP12_ERATE	R.S(+304.20)ATPETEY(+304.20)GR.M	N	24.16	1717.9	6.7	573.644	3	13.2	F8:3494	2	1040	1398	732	1129	1216	1048	1267	678	874	883	Y
1	2	CAPP12_ERATE|CAPP12_ERATE	R.A(+304.20)IPSTEPY(+304.20)R.V	N	23.19	1640.92	5.1	821.473	2	15.53	F3:4070	1	1654	1836	2622	1160	1227	864	2777	1852	494	502	Y
1	2	CAPP12_ERATE|CAPP12_ERATE	K.L(+304.20)Y(+304.20)NTSER.W	N	22.59	1489.82	11.5	497.621	3	13.25	F3:3728	1	2532	2270	3430	3130	1916	1196	2224	1716	512	518	Y
1	2	CAPP12_ERATE|CAPP12_ERATE	D.I(+304.20)EETLK(+304.20).R	N	22.34	1339.81	-19	447.601	3	13.95	F5:3475	1	1740	3912	7543	1692	501	776.25	1176	1079	134	139	Y
1	2	CAPP12_ERATE|CAPP12_ERATE	P.S(+304.20)IDASLR.L	N	22.15	1064.61	11.4	533.317	2	14.87	F9:3281	1	4122	2578	4834	4748	2048	1801	4612	3064	7	13	Y
1	2	CAPP12_ERATE|CAPP12_ERATE	R.F(+304.20)VEY(+304.20)FR.S	N	21.03	1467.82	7.7	490.285	3	40.28	F4:7867	1	422.25	594.625	694	701.75	832	280	696	1156	868	873	Y
1	2	CAPP12_ERATE|CAPP12_ERATE	R.T(+304.20)DEVRR.A	N	20.97	1078.6	4.5	360.542	3	9.65	F10:3308	3	393.25	276.25	289	561	389	468	680.375	508	218	223	Y
1	2	CAPP12_ERATE|CAPP12_ERATE	K.K(+304.20)Y(+304.20)GVK(+304.20).L	N	19.4	1505.95	2.3	377.497	4	12.26	F3:3579	4	8297	7486	12130	11320	3816	5560	10510	5069	760	764	Y
1	2	CAPP12_ERATE|CAPP12_ERATE	R.C(+45.99)(+304.20)NNELR.A	N	17.59	1097.52	3.6	549.77	2	15.88	F10:4242	2	3184	3036	5936	4668	3400	2469	4503	3552	466	471	Y
1	2	CAPP12_ERATE|CAPP12_ERATE	K.L(+304.20)MDEM(+15.99)AVVA.T	N	17.15	1297.65	0.3	649.833	2	36.01	F1:7202	1	587.875	243	433.25	767.125	73	356	492.5	306.25	846	854	Y
1	2	CAPP12_ERATE|CAPP12_ERATE	K.R(+304.20)PLLVADLPVSEEVADVL.G	N	16.89	2238.27	9.1	747.105	3	53.26	F5:9429	2	151.5	134.75	55.875	128.5	99.5	219.25	264	47.625	628	645	Y
1	2	CAPP12_ERATE|CAPP12_ERATE	R.L(+304.20)RDPY(+304.20)ITTL.N	N	16.63	1699	9.1	425.762	4	35.07	F3:7002	1	88.5	0	164	221	99	69.5	48.875	374	1086	1094	Y
1	2	CAPP12_ERATE|CAPP12_ERATE	R.G(+304.20)GGPTHLAILSQPPDTIN.G	N	14.88	2091.12	5.9	698.052	3	39.14	F7:7399	1	160	389.375	472	491	181	496	221	143.5	778	795	Y
1	2	CAPP12_ERATE|CAPP12_ERATE	K.H(+304.20)Y(+304.20)IEFWR.A	N	14.79	1657.91	10.4	553.649	3	25.05	F3:5498	1	138.5	399	546.375	507	367	200	855.625	517	487	493	Y
1	2	CAPP12_ERATE|CAPP12_ERATE	R.D(+304.20)K(+304.20)LY(+304.20)NTSER.W	N	14.49	2037.15	4.1	680.059	3	14.49	F2:4010	1	224	150.5	499.375	49.875	418	382	916.5	87.5	510	518	Y
1	2	CAPP12_ERATE|CAPP12_ERATE	K.E(+304.20)PANVVQLN.S	N	14.38	1286.71	-0.2	644.361	2	23.34	F1:5301	1	495.25	310	519.25	198	470	321.875	304	213.625	1121	1129	Y
1	2	CAPP12_ERATE|CAPP12_ERATE	K.L(+304.20)TSLDPADAIIVAS.S	N	13.89	1688.94	6.6	845.485	2	50.39	F1:9369	1	89	366.25	221.75	640.625	59.25	92	274	41.25	79	92	Y
1	2	CAPP12_ERATE|CAPP12_ERATE	K.V(+304.20)SEDDK(+304.20).L	N	12.21	1299.7	-18.2	650.847	2	20.87	F8:4648	1	2445	1132	3402	3274	2582	2192	2577	1008	20	25	Y
1	2	CAPP12_ERATE|CAPP12_ERATE	E.I(+304.20)QAAFR.T	N	11.93	1008.6	11.2	505.311	2	24.57	F4:5501	2	395.5	0	203	147	564	82	155.25	120.75	212	217	Y
1	2	CAPP12_ERATE|CAPP12_ERATE	K.D(+304.20)ITEDEK(+304.20)K(+304.20).E	N	11.85	1889.07	0.3	473.275	4	14.32	F11:3830	1	2040	325.75	1032	675	918	1476	407.125	840.125	195	202	Y
1	2	CAPP12_ERATE|CAPP12_ERATE	H.P(+304.20)SIDASLR.L	N	11.4	1161.66	8.8	581.843	2	12.93	F3:3679	1	1284	2574	2459	2893	964	2637	2065	1728	6	13	Y
1	2	CAPP12_ERATE|CAPP12_ERATE	K.L(+304.20)LVADELK(+304.20)PFGEN.L	N	10.41	2052.16	-3.7	685.058	3	45	F5:8190	1	617.25	377.25	605.25	1155	458.125	548.25	646	759.25	1040	1052	Y
1	2	CAPP12_ERATE|CAPP12_ERATE	I.D(+304.20)K(+304.20)DIK(+304.20).N	N	8.03	1529.94	5	510.989	3	12.5	F8:3389	1	1788	1903	2174	3889	1810	1758	4000	2489	996	1000	Y
1	2	CAPP12_ERATE|CAPP12_ERATE	K.Q(+304.20)PPLNK(+304.20)EPANVVQLN.S	N	7.87	2268.29	0.2	757.106	3	24.89	F9:4804	1	352.25	0	251	476	303	166	487	169	1115	1129	Y
1	2	CAPP12_ERATE|CAPP12_ERATE	R.L(+304.20)ADLQN.A	N	7.71	976.544	4.1	489.281	2	23.73	F1:5360	1	220	148.5	847	753.125	76	105.25	694	132.25	698	703	Y
1	2	CAPP12_ERATE|CAPP12_ERATE	Q.A(+304.20)Y(+304.20)TLK(+304.20).Q	N	7.65	1506.94	-6.7	503.317	3	32.81	F8:6438	2	424.125	381.125	227.5	80.25	460.75	394	110.25	506	1099	1103	Y
1	2	CAPP12_ERATE|CAPP12_ERATE	E.M(+304.20)RYGM(+15.99)SYFQENIWK(+304.20).G	N	7.4	2476.24	-9.7	620.061	4	43.59	F3:8280	1	532	364	905.5	1384	108.5	666.75	642	514.5	232	245	Y
1	2	CAPP12_ERATE|CAPP12_ERATE	K.F(+304.20)SSWM(+15.99)GGDR.D	N	7.21	1361.63	5.3	681.825	2	20.82	F7:4650	1	696	68	824.25	992.75	754	106.25	628	532	416	424	Y
1	2	CAPP12_ERATE|CAPP12_ERATE	R.E(+304.20)LVQEFY(+304.20)ET.A	N	6.28	1764.93	-4.2	883.468	2	44.87	F5:8170	1	1433	941.25	914.625	622	1186	1467	1052	698	51	59	Y
1	2	CAPP12_ERATE|CAPP12_ERATE	R.L(+304.20)RDPYITTLN.V	N	5.08	1508.85	5.4	755.434	2	28.58	F9:5357	1	189	870.875	179.5	488.75	196.5	167	648	111.25	1086	1095	Y
1	79	CL1Contig1641|CL1Contig1641	R.F(+304.20)TAATLEHGMHPPVSPK(+304.20)PEWSK(+304.20).L	N	95.53	3358.81	9.3	672.776	5	40.59	F12:7646	5	2528	2645	3913	2813	1616	1542	5761	2583	26	47	Y
1	79	CL1Contig1641|CL1Contig1641	X.V(+304.20)TIQGEVIEHSFGEEHLC(+45.99)FR.T	N	91.76	2679.3	12.6	670.842	4	46.37	F7:8482	3	130	357	191	353.125	274.5	151	473	264	2	21	Y
1	79	CL1Contig1641|CL1Contig1641	R.V(+304.20)TLDLLEMVFAK(+304.20).G	N	79.43	1986.16	5.2	663.063	3	61.84	F6:10357	20	1918	1048	1157	2873	1785	266.5	1271	5347	156	167	Y
1	79	CL1Contig1641|CL1Contig1641	K.E(+304.20)MYNEWPFFR.V	N	76.91	1721.81	16	574.954	3	46.97	F6:8118	4	626	512.5	595.5	788	542.5	375	154	756	146	155	Y
1	79	CL1Contig1641|CL1Contig1641	K.E(+304.20)ILESDPYLK(+304.20).Q	N	76.37	1814.02	18.9	605.691	3	33.9	F5:6511	10	3005	2626	6011	10570	4159	2120	4759	2856	248	257	Y
1	79	CL1Contig1641|CL1Contig1641	K.L(+304.20)M(+15.99)DEMAVVATEAYR.S	N	70.69	1917.94	4.1	959.983	2	42.86	F5:7865	2	1542	400.875	2475	1135	703.75	675	2189	656	48	61	Y
1	79	CL1Contig1641|CL1Contig1641	R.F(+304.20)HLPVWLGVGTAFK(+304.20).S	N	64.21	2179.27	6	545.827	4	51.92	F3:9535	6	112	0	230.875	65.75	149	0	0	0	118	131	Y
1	79	CL1Contig1641|CL1Contig1641	K.L(+304.20)MDEMAVVATEAY(+304.20)R.S	N	63.68	2206.15	10.4	736.398	3	46.88	F6:8105	2	1415	1592	2164	2235	1500	1300	3380	2440	48	61	Y
1	79	CL1Contig1641|CL1Contig1641	R.S(+304.20)ATPETEYGR.M	N	58.35	1413.7	7.1	472.244	3	12.52	F6:2940	4	1470	2850	2668	3021	1719	869.875	2693	1885	76	85	Y
1	79	CL1Contig1641|CL1Contig1641	K.G(+304.20)DPGIAALYDK(+304.20).L	N	57.65	1726.96	5.6	864.492	2	26.32	F6:5019	6	1216	1357	1241	1528	1340	315	1080	1524	168	178	Y
1	79	CL1Contig1641|CL1Contig1641	R.F(+304.20)VEYFR.S	N	56.86	1163.62	6.2	582.822	2	38.07	F9:6781	11	7934	6736	15290	9408	4620	3197	10050	8752	70	75	Y
1	79	CL1Contig1641|CL1Contig1641	K.Y(+304.20)LETQDLLLK(+304.20).V	Y	56.26	1843.08	10.2	461.782	4	41.23	F5:7618	11	598	834	1136	790.875	375	690	766.375	428	196	205	Y
1	79	CL1Contig1641|CL1Contig1641	K.L(+304.20)LVADELK(+304.20)PFGENLR.S	N	53.64	2321.35	13.1	774.799	3	45.14	F6:7844	3	9954	5749	12560	10760	6312	4881	9855	8886	179	193	Y
1	79	CL1Contig1641|CL1Contig1641	K.E(+304.20)ILESDPY(+304.20)LK(+304.20).Q	N	52.79	2118.22	8.3	530.566	4	27.11	F6:5137	7	2192	1506	2856	1640	804	882.5	1252	772.5	248	257	Y
1	79	CL1Contig1641|CL1Contig1641	R.S(+304.20)VVVK(+304.20)EPR.F	N	49.47	1520.94	7.5	761.482	2	12.97	F3:3686	2	1651	980.625	2618	1590	1034	727	2312	1115	62	69	Y
1	79	CL1Contig1641|CL1Contig1641	K.L(+304.20)M(+15.99)DEM(+15.99)AVVATEAY(+304.20)R.S	N	47.56	2238.14	16.4	560.551	4	24.94	F6:4811	2	348	150.5	868.625	858.125	558	140	470	425	48	61	Y
1	79	CL1Contig1641|CL1Contig1641	R.F(+304.20)TAATLEHGM(+15.99)HPPVSPK(+304.20)PEWSK(+304.20).L	N	46.14	3374.81	5.7	675.972	5	36.09	F12:6957	2	1161	907.5	1562	934.625	334.125	311	882	614.5	26	47	Y
1	79	CL1Contig1641|CL1Contig1641	K.S(+304.20)AIDK(+304.20)DIK(+304.20).N	N	44.23	1801.09	10.5	901.563	2	14.6	F9:3239	4	4784	5026	8870	9391	4399	1819	8601	5514	132	139	Y
1	79	CL1Contig1641|CL1Contig1641	K.G(+304.20)DPGIAALY(+304.20)DK(+304.20).L	N	36.31	2031.16	0.3	508.798	4	22.05	F9:4378	3	1201	626	1046	1415	279	671	330.625	1032	168	178	Y
1	79	CL1Contig1641|CL1Contig1641	K.G(+304.20)DPGIAAL.Y	N	36.06	1016.58	7.7	509.299	2	27.87	F1:5980	1	199.5	518.125	434	507.5	164	1099	553.25	832	168	175	Y
1	79	CL1Contig1641|CL1Contig1641	Q.I(+304.20)AGHK(+304.20)EILESDPYLK(+304.20).Q	N	35.72	2624.51	10.4	525.916	5	26.84	F8:5542	3	454.375	262	1050	695.375	239.5	57.625	874.625	410	243	257	Y
1	79	CL1Contig1641|CL1Contig1641	K.Y(+304.20)(+304.20)LETQDLLLK(+304.20).V	Y	34.43	2147.28	-7.8	537.823	4	38.34	F8:7268	3	618	399	862	413	717.75	230	514.5	577.75	196	205	Y
1	79	CL1Contig1641|CL1Contig1641	R.S(+304.20)VVVK(+304.20).E	N	33.8	1138.74	-0.4	570.378	2	14.85	F4:4044	1	1929	1454	2472	2442	980.125	1058	1995	1613	62	66	Y
1	79	CL1Contig1641|CL1Contig1641	Q.I(+304.20)AGHK(+304.20).E	N	28.24	1132.71	9.5	567.366	2	10.39	F3:3298	1	2331	2505	4218	4625	2744	1044	5264	2113	243	247	Y
1	79	CL1Contig1641|CL1Contig1641	R.S(+304.20)ATPETEY(+304.20)GR.M	N	24.16	1717.9	6.7	573.644	3	13.2	F8:3494	2	1040	1398	732	1129	1216	1048	1267	678	76	85	Y
1	79	CL1Contig1641|CL1Contig1641	R.F(+304.20)VEY(+304.20)FR.S	N	21.03	1467.82	7.7	490.285	3	40.28	F4:7867	1	422.25	594.625	694	701.75	832	280	696	1156	70	75	Y
1	79	CL1Contig1641|CL1Contig1641	K.L(+304.20)MDEM(+15.99)AVVA.T	N	17.15	1297.65	0.3	649.833	2	36.01	F1:7202	1	587.875	243	433.25	767.125	73	356	492.5	306.25	48	56	Y
1	79	CL1Contig1641|CL1Contig1641	H.Y(+304.20)Y(+304.20)FWK(+304.20).G	Y	11.13	1717.98	5.7	573.67	3	19.58	F2:4773	1	325	340	603	836	635.375	774.25	1116	536	220	224	Y
1	79	CL1Contig1641|CL1Contig1641	K.L(+304.20)LVADELK(+304.20)PFGEN.L	N	10.41	2052.16	-3.7	685.058	3	45	F5:8190	1	617.25	377.25	605.25	1155	458.125	548.25	646	759.25	179	191	Y
1	79	CL1Contig1641|CL1Contig1641	I.D(+304.20)K(+304.20)DIK(+304.20).N	N	8.03	1529.94	5	510.989	3	12.5	F8:3389	1	1788	1903	2174	3889	1810	1758	4000	2489	135	139	Y
1	673	Locus_132_1_5|Locus_132_1_5	R.F(+304.20)TAATLEHGMHPPVSPK(+304.20)PEWSK(+304.20).L	N	95.53	3358.81	9.3	672.776	5	40.59	F12:7646	5	2528	2645	3913	2813	1616	1542	5761	2583	25	46	Y
1	673	Locus_132_1_5|Locus_132_1_5	V(+304.20)TIQGEVIEHSFGEEHLC(+45.99)FR.T	N	91.76	2679.3	12.6	670.842	4	46.37	F7:8482	3	130	357	191	353.125	274.5	151	473	264	1	20	Y
1	673	Locus_132_1_5|Locus_132_1_5	K.L(+304.20)M(+15.99)DEMAVVATEAYR.S	N	70.69	1917.94	4.1	959.983	2	42.86	F5:7865	2	1542	400.875	2475	1135	703.75	675	2189	656	47	60	Y
1	673	Locus_132_1_5|Locus_132_1_5	K.L(+304.20)MDEMAVVATEAY(+304.20)R.S	N	63.68	2206.15	10.4	736.398	3	46.88	F6:8105	2	1415	1592	2164	2235	1500	1300	3380	2440	47	60	Y
1	673	Locus_132_1_5|Locus_132_1_5	R.S(+304.20)ATPETEYGR.M	N	58.35	1413.7	7.1	472.244	3	12.52	F6:2940	4	1470	2850	2668	3021	1719	869.875	2693	1885	75	84	Y
1	673	Locus_132_1_5|Locus_132_1_5	R.F(+304.20)VEYFR.S	N	56.86	1163.62	6.2	582.822	2	38.07	F9:6781	11	7934	6736	15290	9408	4620	3197	10050	8752	69	74	Y
1	673	Locus_132_1_5|Locus_132_1_5	R.S(+304.20)VVVK(+304.20)EPR.F	N	49.47	1520.94	7.5	761.482	2	12.97	F3:3686	2	1651	980.625	2618	1590	1034	727	2312	1115	61	68	Y
1	673	Locus_132_1_5|Locus_132_1_5	K.L(+304.20)M(+15.99)DEM(+15.99)AVVATEAY(+304.20)R.S	N	47.56	2238.14	16.4	560.551	4	24.94	F6:4811	2	348	150.5	868.625	858.125	558	140	470	425	47	60	Y
1	673	Locus_132_1_5|Locus_132_1_5	R.F(+304.20)TAATLEHGM(+15.99)HPPVSPK(+304.20)PEWSK(+304.20).L	N	46.14	3374.81	5.7	675.972	5	36.09	F12:6957	2	1161	907.5	1562	934.625	334.125	311	882	614.5	25	46	Y
1	673	Locus_132_1_5|Locus_132_1_5	R.S(+304.20)VVVK(+304.20).E	N	33.8	1138.74	-0.4	570.378	2	14.85	F4:4044	1	1929	1454	2472	2442	980.125	1058	1995	1613	61	65	Y
1	673	Locus_132_1_5|Locus_132_1_5	R.S(+304.20)ATPETEY(+304.20)GR.M	N	24.16	1717.9	6.7	573.644	3	13.2	F8:3494	2	1040	1398	732	1129	1216	1048	1267	678	75	84	Y
1	673	Locus_132_1_5|Locus_132_1_5	R.F(+304.20)VEY(+304.20)FR.S	N	21.03	1467.82	7.7	490.285	3	40.28	F4:7867	1	422.25	594.625	694	701.75	832	280	696	1156	69	74	Y
1	673	Locus_132_1_5|Locus_132_1_5	K.L(+304.20)MDEM(+15.99)AVVA.T	N	17.15	1297.65	0.3	649.833	2	36.01	F1:7202	1	587.875	243	433.25	767.125	73	356	492.5	306.25	47	55	Y
1	4286	CL7638Contig1|CL7638Contig1	A.A(+304.20)EVAK(+304.20).K	N	27.61	1124.69	-0.4	375.904	3	11.85	F9:2824	1	381	233	722	757	601.875	570	165	113.75	83	87	Y
1	4286	CL7638Contig1|CL7638Contig1	K.G(+304.20)AEK(+304.20)K(+304.20).P	N	14.55	1443.9	2.7	361.984	4	9.5	F2:3261	1	960	1348	2243	1662	434	2012	778.625	592	140	144	Y
1	6512	CL1Contig9703|CL1Contig9703	C.E(+304.20)C(+45.99)HLR.R	N	38.61	1006.49	0.2	336.505	3	14.47	F12:3500	5	4074	1986	8666	10190	4014	8862	5554	5086	50	54	Y
1	6879	CL1Contig4279|CL1Contig4279	T.S(+304.20)LLQK(+304.20).E	N	27.06	1195.76	0.4	598.89	2	17.49	F4:4438	1	1262	1136	3759	2148	1718	880	2693	1598	66	70	Y
1	6879	CL1Contig4279|CL1Contig4279	K.A(+304.20)EGLPPHC(+45.99)GTK(+304.20).M	Y	10.45	1762.92	12.5	353.596	5	10.86	F3:3368	1	1089	400.875	1071	1583	1282	2104	247	628	168	178	Y
1	6879	CL1Contig4279|CL1Contig4279	X.M(+304.20)YLHYK(+304.20).L	Y	8.3	1461.82	3.1	731.917	2	50.99	F6:8721	1	1353	568.625	1992	1227	916.5	644	632.5	488	813	818	Y
1	6879	CL1Contig4279|CL1Contig4279	X.V(+304.20)ENHIYLV.S	Y	6.87	1289.72	-4.4	430.913	3	15.83	F12:3705	1	79.25	56.625	130.5	458.25	238.75	469	294	166	640	647	Y
1	6889	CL1Contig3388|CL1Contig3388	H.D(+304.20)AGQAR.E	N	6.41	920.493	-5.7	461.251	2	22.47	F1:5171	1	552	342.25	293.75	269.75	329	342.375	186	277	589	594	Y
1	7352	CL38Contig44|CL38Contig44	A.E(+304.20)C(+45.99)HLR.G	N	38.61	1006.49	0.2	336.505	3	14.47	F12:3500	5	4074	1986	8666	10190	4014	8862	5554	5086	164	168	Y
1	7352	CL38Contig44|CL38Contig44	D.F(+304.20)IK(+304.20)PGK(+304.20).K	N	6.82	1601.03	-1.8	401.263	4	10.23	F4:3350	1	844	504	586.25	950	530	634.75	518	722	201	206	Y
1	7352	CL38Contig44|CL38Contig44	K.I(+304.20)SLSEF.X	N	6.26	998.554	15.9	500.292	2	39.25	F9:6958	1	1074	626.875	2306	1176	1366	650	1826	916	663	668	Y
1	11927	CL1Contig10662|CL1Contig10662	A.D(+304.20)K(+304.20)DLK(+304.20).R	N	8.03	1529.94	5	510.989	3	12.5	F8:3389	1	1788	1903	2174	3889	1810	1758	4000	2489	441	445	Y
1	11927	CL1Contig10662|CL1Contig10662	V.L(+304.20)EY(+304.20)LK(+304.20).Q	N	7.46	1576.98	-17.5	526.658	3	36.17	F7:6954	1	119.5	204	259	249	124.25	335	534.375	300	357	361	Y
10	6	CL367Contig2|CL367Contig2	K.V(+304.20)IATGLPASPGAAVGQIVFTAEDAEAWHAQGK(+304.20).D	N	123.41	3770.01	8.2	755.016	5	52.3	F6:8917	15	3362	2552	7472	4544	3363	2593	4374	3425	632	663	Y
10	6	CL367Contig2|CL367Contig2	R.T(+304.20)ETSPEDVGGMHAAAGILTAR.G	N	117.13	2387.2	8.4	597.812	4	29.53	F6:5501	19	3396	2681	4950	5921	1999	1594	3611	1882	670	690	Y
10	6	CL367Contig2|CL367Contig2	K.V(+304.20)MANADTPEDALAAR.N	N	97.81	1847.93	3.9	616.986	3	29.13	F1:6169	12	2043	894	1717	979.5	395	366.125	1685	468.375	802	816	Y
10	6	CL367Contig2|CL367Contig2	K.I(+304.20)AVDMVNEGFVDR.N	N	94.63	1767.91	9.3	590.315	3	41.38	F5:7641	8	1959	2285	2772	2543	1948	1126	2720	1536	590	602	Y
10	6	CL367Contig2|CL367Contig2	K.K(+304.20)LY(+304.20)GEY(+304.20)LVNAQGEDVVAGIR.T	N	91.52	3105.74	6.5	622.16	5	39.07	F9:6931	6	2039	2779	2914	2721	1973	1544	1468	1968	508	527	Y
10	6	CL367Contig2|CL367Contig2	K.G(+304.20)ANLAEMASIGLSVPPGFTVSTEAC(+45.99)EQY(+304.20)QIAGK(+304.20).R	N	89.98	4297.2	15.1	860.461	5	51.99	F6:8871	3	1108	672.625	1464	1561	233.625	112	982.875	913.125	211	243	Y
10	6	CL367Contig2|CL367Contig2	K.K(+304.20)LY(+304.20)GEYLVNAQGEDVVAGIR.T	N	89.19	2801.54	2.9	701.395	4	43.24	F7:8013	11	476.25	936.875	1797	1504	488.5	523.125	766.125	450	508	527	Y
10	6	CL367Contig2|CL367Contig2	R.A(+304.20)MDGLPVTIR.L	N	88.34	1375.77	1.6	459.599	3	36.88	F11:7220	29	150.5	385.375	910.125	971	236	299	353	302	875	884	Y
10	6	CL367Contig2|CL367Contig2	K.M(+304.20)VEPGHLDQLLHPQFEDPSAYK(+304.20).D	N	85.02	3158.62	12.8	790.673	4	42.81	F6:7494	6	2500	2080	4603	3450	1536	1754	1908	2171	608	629	Y
10	6	CL367Contig2|CL367Contig2	K.L(+304.20)YGEYLVNAQGEDVVAGIR.T	N	83.82	2369.25	9.3	790.764	3	44.85	F5:8167	4	431.5	848.125	883.5	1074	751.75	462.125	923.25	396	509	527	Y
10	6	CL367Contig2|CL367Contig2	K.M(+304.20)VEPGHLDQLLHPQFEDPSAYK(+304.20)DK(+304.20).V	N	83.45	3705.94	7.1	742.201	5	40.31	F6:7119	13	7641	3680	10080	6617	4432	2320	7586	4096	608	631	Y
10	6	CL367Contig2|CL367Contig2	K.L(+304.20)GDPEK(+304.20)PLLLSVR.S	N	80.14	2044.24	10.3	512.072	4	41.45	F11:7906	23	928	1397	1118	1254	844.25	1028	916.5	813.25	323	335	Y
10	6	CL367Contig2|CL367Contig2	K.D(+304.20)QLPQAYEELVENC(+45.99)K(+304.20).I	N	78.02	2432.21	19.2	609.071	4	48.1	F5:8654	6	164.5	162.625	409.25	380.5	609.375	120	600	424	537	551	Y
10	6	CL367Contig2|CL367Contig2	K.I(+304.20)GTMIEIPR.A	N	77.74	1332.77	5.6	445.266	3	40.29	F8:7560	15	404.375	339	1434	378.25	348	989	1202	500	1009	1017	Y
10	6	CL367Contig2|CL367Contig2	K.M(+304.20)(+15.99)VEPGHLDQLLHPQFEDPSAYK(+304.20)DK(+304.20).V	N	76.97	3721.94	10.1	621.337	6	37.9	F6:6757	5	5232	4965	8945	10010	5806	3148	6860	4443	608	631	Y
10	6	CL367Contig2|CL367Contig2	K.Q(+304.20)YQEVYIEAK(+304.20).G	N	76.11	1878.02	2.8	940.022	2	20.98	F6:4217	11	709.5	1070	2008	2530	1004	203.5	1696	738.125	424	433	Y
10	6	CL367Contig2|CL367Contig2	R.A(+304.20)M(+15.99)DGLPVTIR.L	N	75.49	1391.77	6	464.933	3	20.77	F8:4632	15	440	346	1042	736.125	61.625	191	224.5	657	875	884	Y
10	6	CL367Contig2|CL367Contig2	K.M(+304.20)VEPGHLDQLLHPQFEDPSAY(+304.20)K(+304.20)DK(+304.20).V	N	70.12	4010.14	12.8	573.892	7	39.34	F8:7418	3	4720	3276	5173	7028	2686	2840	4189	3497	608	631	Y
10	6	CL367Contig2|CL367Contig2	K.N(+304.20)DTDLTAADLK(+304.20).E	N	68.51	1783.97	5.9	892.996	2	21.76	F1:5064	8	996	643.75	2004	1669	555.75	626.5	2238	820	409	419	Y
10	6	CL367Contig2|CL367Contig2	R.T(+304.20)PEDLDTM(+15.99)K(+304.20).D	N	67.01	1672.87	12.2	558.637	3	15.32	F5:3688	2	2583	1281	5319	5363	2550	1982	2679	1902	528	536	Y
10	6	CL367Contig2|CL367Contig2	K.Q(+304.20)YQEVY(+304.20)IEAK(+304.20).G	N	66.95	2182.22	16.1	546.572	4	17.25	F9:3655	2	2536	1883	3288	2784	1444	1336	3358	2550	424	433	Y
10	6	CL367Contig2|CL367Contig2	R.F(+304.20)LDMFGNVVLDIPHSLFEEK(+304.20).L	N	66.63	2957.57	10.1	740.408	4	65.85	F6:10989	6	219.5	731.25	226	426	334	61.25	154.5	406	378	397	Y
10	6	CL367Contig2|CL367Contig2	K.G(+304.20)EPFPSDPK(+304.20).K	N	63.34	1580.86	9.9	527.964	3	16.29	F6:3507	11	2916	1319	3992	3309	3019	1388	3392	2114	434	442	Y
10	6	CL367Contig2|CL367Contig2	R.S(+304.20)DFEGIFR.A	N	61.95	1273.66	5.5	637.838	2	32.23	F5:6261	11	16690	15000	31060	23900	9808	9324	21890	15800	867	874	Y
10	6	CL367Contig2|CL367Contig2	K.M(+304.20)VEPGHLDQLLHPQFEDPSAY(+304.20)K(+304.20).D	N	60.77	3462.82	4.3	578.147	6	41.43	F8:7731	3	1342	2088	3640	3265	1630	2216	2104	1442	608	629	Y
10	6	CL367Contig2|CL367Contig2	R.T(+304.20)PEDLDTMK(+304.20).D	N	60.55	1656.87	14.9	553.307	3	17.92	F5:4094	4	1267	1396	2188	2399	1068	614.75	1153	1049	528	536	Y
10	6	CL367Contig2|CL367Contig2	K.M(+304.20)VEPGHLDQLLHPQFED.P	N	59.2	2308.14	3.6	770.39	3	42.83	F5:7860	2	314	289	1480	251.625	385	211	389	570	608	624	Y
10	6	CL367Contig2|CL367Contig2	R.F(+304.20)AYDSYR.R	N	52.25	1224.6	7	613.313	2	18.37	F8:4272	11	12710	10920	28370	16650	12410	6938	14380	10560	370	376	Y
10	6	CL367Contig2|CL367Contig2	R.V(+304.20)Y(+304.20)VFGK(+304.20).G	N	48.67	1624	6.1	407.009	4	25.07	F4:5575	4	131.5	228	190	556	72.5	78.5	288	174	189	194	Y
10	6	CL367Contig2|CL367Contig2	R.N(+304.20)PSTGEK(+304.20).K	N	47.14	1339.74	10.2	447.594	3	10.53	F9:2626	6	683.125	1270	2146	2010	973.75	678	1740	690	501	507	Y
10	6	CL367Contig2|CL367Contig2	R.T(+304.20)PEDLDTMK(+304.20)DQLPQAYEELVENC(+45.99)K(+304.20).I	N	46.71	3766.87	13.7	754.392	5	50.91	F5:9076	13	873	809.625	1928	1280	722	531.25	811.75	644.125	528	551	Y
10	6	CL367Contig2|CL367Contig2	R.T(+304.20)PEDLDTMK(+304.20)DQLPQAY(+304.20)EELVENC(+45.99)K(+304.20).I	N	46.38	4071.07	1	815.222	5	46.99	F5:8488	3	953	876.375	926.25	1180	192.625	627	1440	1216	528	551	Y
10	6	CL367Contig2|CL367Contig2	K.V(+304.20)IATGLPASPGAAVGQ.I	N	45.87	1711.97	1.1	856.994	2	39.44	F8:7432	3	392.375	244	584.625	642.375	219	111.75	468.125	236.5	632	647	Y
10	6	CL367Contig2|CL367Contig2	R.V(+304.20)YVFGK(+304.20).G	N	45.5	1319.8	-4.1	440.937	3	32.88	F4:6752	7	146.5	152	636	333	159	190	79.5	355	189	194	Y
10	6	CL367Contig2|CL367Contig2	K.Q(+304.20)Y(+304.20)QEVYIEAK(+304.20).G	N	44.99	2182.22	3.5	1092.12	2	17.6	F9:3709	1	1460	859	2352	983.25	133.5	735.75	1338	866	424	433	Y
10	6	CL367Contig2|CL367Contig2	R.T(+304.20)PEDLDTM(+15.99)K(+304.20)DQLPQAYEELVENC(+45.99)K(+304.20).I	N	44.73	3782.87	4.3	946.728	4	46.84	F5:8466	1	936.625	323	1056	497.75	412.875	45.75	155.5	269	528	551	Y
10	6	CL367Contig2|CL367Contig2	K.K(+304.20)LYGEYLVNAQGEDVVAGIR.T	N	44.61	2497.34	13.6	833.466	3	39.7	F6:7028	1	375	360.75	173.5	572	86	398.125	288.875	231.5	508	527	Y
10	6	CL367Contig2|CL367Contig2	N.A(+304.20)QGEDVVAGIR.T	N	44.11	1417.78	6.5	709.901	2	16.77	F5:3917	1	3592	2597	6164	5464	3096	2209	4168	3875	517	527	Y
10	6	CL367Contig2|CL367Contig2	K.G(+304.20)K(+304.20)SEGDK(+304.20).T	N	43.47	1631.94	2.7	408.995	4	10.15	F10:3383	3	231.25	252	499.125	206	337.375	298.5	241.5	266	195	201	Y
10	6	CL367Contig2|CL367Contig2	K.L(+304.20)Y(+304.20)GEYLVNAQGEDVVAGIR.T	N	42.63	2673.45	-3.7	892.153	3	41.53	F6:7302	1	263.875	564	660	455.75	272	123.5	987.5	180.125	509	527	Y
10	6	CL367Contig2|CL367Contig2	K.I(+304.20)LENHYK(+304.20).D	N	42.18	1523.88	7.3	508.971	3	20.05	F12:4346	5	137.5	593.5	202.5	464.75	101.75	0	0	0	552	558	Y
10	6	CL367Contig2|CL367Contig2	N.D(+304.20)TDLTAADLK(+304.20).E	N	41.76	1669.92	-0.1	557.649	3	23.17	F1:5275	2	245.5	143.5	380.625	429.25	350.5	397	351	171.5	410	419	Y
10	6	CL367Contig2|CL367Contig2	R.T(+304.20)GQGAVK(+304.20).I	N	41.49	1267.76	6.1	634.891	2	10.41	F3:3300	2	3176	2913	5104	3835	1057	1896	4416	2109	583	589	Y
10	6	CL367Contig2|CL367Contig2	N.D(+304.20)EVAAGLAAK(+304.20).S	N	41.16	1551.9	6.9	518.31	3	18.47	F5:4181	1	524	1042	768.75	964	448	789.25	1100	648.25	356	365	Y
10	6	CL367Contig2|CL367Contig2	N.V(+304.20)VLDIPHSLFEEK(+304.20).L	N	40.78	2133.22	12.2	534.318	4	44.64	F6:7769	2	1377	698	800.125	1083	579.375	390.375	661.75	1123	385	397	Y
10	6	CL367Contig2|CL367Contig2	K.L(+304.20)GDPEK(+304.20)PLLL.S	N	40.32	1702.04	1.1	568.354	3	39.26	F5:7322	4	1289	714	2399	1202	1216	406	1496	1646	323	332	Y
10	6	CL367Contig2|CL367Contig2	K.K(+304.20)QLELAVR.A	N	39.86	1259.78	10.4	420.939	3	16.92	F2:4374	1	1912	1075	2233	1374	1187	1526	1182	451.625	443	450	Y
10	6	CL367Contig2|CL367Contig2	Q.G(+304.20)EDVVAGIR.T	N	38.72	1218.68	-1.7	610.347	2	16.69	F5:3905	2	6409	5232	8041	5158	2842	4946	5660	7667	519	527	Y
10	6	CL367Contig2|CL367Contig2	K.L(+304.20)EHMK(+304.20).E	N	38.32	1264.73	-5.3	317.188	4	15.38	F12:3637	2	74.25	47.375	388	520.75	126.25	142	268	285.875	398	402	Y
10	6	CL367Contig2|CL367Contig2	K.M(+304.20)(+15.99)VEPGHLDQLLHPQFEDPSAY(+304.20)K(+304.20)DK(+304.20).V	N	36.89	4026.14	4.3	672.033	6	35.83	F8:6890	4	432	447.75	379	856	566.375	174	430	368	608	631	Y
10	6	CL367Contig2|CL367Contig2	N.A(+304.20)DTPEDALAAR.N	N	36.78	1432.74	14.2	478.594	3	18.38	F1:4557	2	549	493	501	550	176	146.5	950	162	806	816	Y
10	6	CL367Contig2|CL367Contig2	D.T(+304.20)PEDALAAR.N	N	36.17	1246.68	4.4	624.348	2	15.49	F5:3715	1	3284	1844	5324	4517	3104	2774	4642	1858	808	816	Y
10	6	CL367Contig2|CL367Contig2	K.G(+304.20)EPFPSDPK(+304.20)K(+304.20).Q	N	35.16	2013.15	4.5	672.06	3	15.28	F8:3806	2	1834	1340	2638	3249	1113	1048	3006	2013	434	443	Y
10	6	CL367Contig2|CL367Contig2	K.V(+304.20)FTAAGK(+304.20).P	N	34.3	1300.79	5.8	651.404	2	19.07	F3:4601	3	2297	2472	3389	2078	1535	1576	4112	2317	997	1003	Y
10	6	CL367Contig2|CL367Contig2	K.D(+304.20)AILVR.T	N	34.22	989.612	0.2	495.813	2	17.58	F7:4165	3	3015	1920	4270	3256	2333	3060	2696	1979	664	669	Y
10	6	CL367Contig2|CL367Contig2	K.Q(+304.20)LLGGK(+304.20).G	N	33.79	1222.78	0.4	408.599	3	17.33	F4:4415	3	1234	782	2036	1117	644.375	763.625	1440	1152	205	210	Y
10	6	CL367Contig2|CL367Contig2	R.T(+304.20)ETSPEDVGGMHAAAGIL.T	N	33.54	2059.01	4.9	1030.52	2	38.15	F1:7523	4	196.125	135	270	212.625	94	104	267.25	179.25	670	687	Y
10	6	CL367Contig2|CL367Contig2	K.L(+304.20)EHM(+15.99)K(+304.20).E	N	32.99	1280.73	6.3	427.919	3	11.3	F11:3377	3	2087	346.125	4181	3670	2748	1330	1592	821.75	398	402	Y
10	6	CL367Contig2|CL367Contig2	S.T(+304.20)EAC(+45.99)EQYQIAGK(+304.20).R	N	32.63	1994	14.6	665.682	3	25.82	F6:4943	1	170	0	628	347.25	290	176.5	244	341	232	243	Y
10	6	CL367Contig2|CL367Contig2	Q.I(+304.20)VFTAEDAEAWHAQGK(+304.20).D	N	32.49	2380.25	8.1	596.075	4	36.78	F6:6588	2	42.25	902.125	297.5	617.875	317.125	429	564.75	473.75	648	663	Y
10	6	CL367Contig2|CL367Contig2	K.L(+304.20)Y(+304.20)GEY(+304.20)LVNAQGEDVVAGIR.T	N	31.62	2977.65	-3.4	745.417	4	38.66	F9:6870	1	118.25	199	860.375	330.5	134.5	65	386	84.25	509	527	Y
10	6	CL367Contig2|CL367Contig2	R.Q(+304.20)NALDR.L	N	30.83	1019.56	9	510.793	2	12.03	F10:3666	2	550	118.875	980	618.25	159	472	546.5	101.25	855	860	Y
10	6	CL367Contig2|CL367Contig2	R.E(+304.20)TANK(+304.20).V	N	30.06	1169.68	0	585.845	2	9.78	F9:2514	1	658	852.375	1280	1340	1214	980.25	1248	698.375	992	996	Y
10	6	CL367Contig2|CL367Contig2	R.N(+304.20)TAIK(+304.20).M	N	28.44	1153.72	0	577.866	2	12.43	F4:3680	3	328	200.5	1195	719.875	468.25	448	1381	472.75	603	607	Y
10	6	CL367Contig2|CL367Contig2	F.M(+304.20)SWVDEVR.Q	N	27.12	1324.67	4.8	663.345	2	32.04	F5:6232	1	325.5	1432	1092	1348	1254	1205	534	1701	766	773	Y
10	6	CL367Contig2|CL367Contig2	R.L(+304.20)LPYQR.S	N	27.03	1092.65	14.6	547.342	2	22.79	F4:5233	4	840.875	451.5	809.375	555	91.25	518	622	342.75	861	866	Y
10	6	CL367Contig2|CL367Contig2	R.F(+304.20)AYDSY(+304.20)R.R	N	26.54	1528.8	5.4	510.611	3	17.78	F3:4407	2	2131	2389	3224	2026	1388	1982	2560	2798	370	376	Y
10	6	CL367Contig2|CL367Contig2	K.G(+304.20)ANLAEMA.S	N	24.38	1079.55	11.7	540.79	2	20.71	F5:4528	1	1032	833.5	1815	1118	1592	1526	740	1699	211	218	Y
10	6	CL367Contig2|CL367Contig2	N.E(+304.20)GFVDR.N	N	22.45	1025.54	8.2	513.781	2	13.96	F5:3477	1	2370	1611	2631	1582	1021	1618	1652	1304	597	602	Y
10	6	CL367Contig2|CL367Contig2	K.K(+304.20)LY(+304.20)GEYLVN.A	N	21.94	1705.98	3.7	569.668	3	27.87	F9:5250	1	291	199.5	93.5	552	348	600	363.25	148.5	508	516	Y
10	6	CL367Contig2|CL367Contig2	K.Q(+304.20)PLAPPALSGDLGTF.M	N	20.87	1786.97	-2	894.491	2	48.06	F1:9019	1	354	148	865.5	241.5	258.5	164.5	634	318	751	765	Y
10	6	CL367Contig2|CL367Contig2	K.I(+304.20)LENHY(+304.20)K(+304.20).D	N	19.91	1828.08	6.7	610.372	3	16.97	F2:4382	2	287	207.5	766	329	828	159.125	469.25	187.5	552	558	Y
10	6	CL367Contig2|CL367Contig2	I.E(+304.20)FTVK(+304.20).K	N	19.06	1230.73	-15	616.364	2	16.14	F5:3818	2	1794	1359	2600	2254	1607	2871	2667	1372	564	568	Y
10	6	CL367Contig2|CL367Contig2	H.S(+304.20)LFEEK(+304.20).L	N	18.89	1359.78	9.7	454.27	3	18.62	F6:3863	1	678	121.25	524.375	203.5	485.625	153.625	459.25	852.25	392	397	Y
10	6	CL367Contig2|CL367Contig2	A.R(+304.20)GWGK(+304.20).C	N	16.84	1210.73	15.5	404.59	3	15.47	F3:4061	1	1770	1069	1392	769.5	1437	2623	2456	1554	702	706	Y
10	6	CL367Contig2|CL367Contig2	K.M(+304.20)VEPGHLDQL.L	N	16.66	1441.75	7.8	721.887	2	27.04	F5:5480	1	908	60.875	770	859.875	274	234	1024	197	608	617	Y
10	6	CL367Contig2|CL367Contig2	K.R(+304.20)VY(+304.20)VFGK(+304.20).G	N	15.58	1780.1	-8.5	446.028	4	31.81	F5:6197	1	236.625	181.5	465	347	49.5	536.5	151	205.5	188	194	Y
10	6	CL367Contig2|CL367Contig2	K.G(+304.20)K(+304.20)SEGDK(+304.20)TMK(+304.20).Q	N	12.03	2296.33	5.3	575.092	4	12.03	F2:3640	1	860	890	1197	1811	940	412.625	1912	1361	195	204	Y
10	6	CL367Contig2|CL367Contig2	K.I(+304.20)AVDMVN.E	N	11.38	1064.58	8.9	533.302	2	31.56	F1:6534	1	201.5	612	920.625	1023	724	273	920.5	924	590	596	Y
10	6	CL367Contig2|CL367Contig2	K.L(+304.20)SGSK(+304.20).P	N	10.77	1098.68	-1.7	550.344	2	13.56	F9:3081	1	4108	3424	3211	5154	1728	5297	3592	1902	924	928	Y
10	6	CL367Contig2|CL367Contig2	R.T(+304.20)LFFASDER.I	Y	10.44	1388.72	-11.2	695.359	2	17.03	F1:4355	1	1652	1566	1589	1684	1039	1074	1815	1925	830	838	Y
10	6	CL367Contig2|CL367Contig2	K.I(+304.20)AVDMVNEGFV.D	N	9.59	1496.78	-1.5	749.396	2	37.15	F5:6998	1	1391	612	901.75	566.25	650	1030	1588	899.5	590	600	Y
10	6	CL367Contig2|CL367Contig2	K.M(+304.20)VEPGHLDQLLHPQ.F	N	8.78	1917	9.2	640.014	3	40.9	F7:7663	1	304	146	219.5	126	441.875	129.5	495	447	608	621	Y
10	6	CL367Contig2|CL367Contig2	M.S(+304.20)WVDEVR.Q	N	8.51	1193.63	3.8	597.824	2	19.19	F5:4292	1	2358	1956	1336	1835	2209	1060	2392	3418	767	773	Y
10	6	CL367Contig2|CL367Contig2	N.E(+304.20)GFVDRNTAIK(+304.20).M	N	8.01	1857.05	-15	929.516	2	41.48	F5:7656	1	573.125	392	696.875	1134	290	712	256	380.75	597	607	Y
10	6	CL367Contig2|CL367Contig2	A.K(+304.20)AC(+45.99)VIR.S	N	7.83	1038.59	19	520.314	2	15.81	F4:4188	1	956	828.5	1337	960	888	715.25	930	1128	155	160	Y
10	6	CL367Contig2|CL367Contig2	K.S(+304.20)GERFAYDSYRR.F	N	7.51	1809.9	-1	604.307	3	16.53	F1:4280	1	421.75	208.5	1006	1251	252	378.625	1272	379	366	377	Y
10	6	CL367Contig2|CL367Contig2	K.L(+304.20)YGEYLV.N	N	7.47	1159.64	6.9	580.83	2	23	F9:4521	1	18980	16970	25330	19480	14420	11840	19960	14300	509	515	Y
10	6	CL367Contig2|CL367Contig2	K.V(+304.20)FTAAGK(+304.20)PIDY(+304.20)K(+304.20).I	N	7.26	2525.51	1.9	842.845	3	62.79	F8:11012	2	0	492	429.375	170	114.75	417	268	47	997	1008	Y
10	6	CL367Contig2|CL367Contig2	N.S(+304.20)WDSPR.A	N	6.94	1050.53	-13	526.268	2	15.29	F7:3822	1	728.25	968.5	1529	891	857.75	272	1517	447	455	460	Y
10	6	CL367Contig2|CL367Contig2	A.C(+45.99)(+304.20)EQY(+304.20)QIAGK(+304.20).R	N	6.91	1997.07	-13.2	999.528	2	59.96	F5:10436	2	365	531.125	1877	287	268	291	460.75	377.625	235	243	Y
10	6	CL367Contig2|CL367Contig2	R.A(+304.20)VFNSW.D	N	5.95	1026.54	13.2	514.283	2	41.41	F7:7739	1	890.625	770	1494	420	634.75	292.25	940	209	451	456	Y
10	6	CL367Contig2|CL367Contig2	K.S(+304.20)GERFAY(+304.20)DSY(+304.20)RR.F	N	5.07	2418.3	8.2	484.671	5	34.55	F11:6869	1	75.75	254	440.75	319.5	360	534	358	331	366	377	Y
10	6	CL367Contig2|CL367Contig2	K.E(+304.20)LVK(+304.20)QYQEVY(+304.20)IEAK(+304.20)GEPFPSDPK(+304.20).K	N	5.04	4214.36	5.2	703.404	6	40.99	F6:7220	1	853.5	778	1636	696.375	442	890.625	1412	732.75	420	442	Y
6	3	CAPP3_ERATE|CAPP3_ERATE	R.E(+304.20)LVQEFYETAAEYDIK(+304.20).H	N	99.9	2555.31	7.1	852.785	3	52.91	F1:9747	13	1944	1449	2518	4124	2607	946.125	2302	4632	132	147	Y
6	3	CAPP3_ERATE|CAPP3_ERATE	R.F(+304.20)TAATLEHGMHPPVSPK(+304.20)PEWSK(+304.20).L	N	95.53	3358.81	9.3	672.776	5	40.59	F12:7646	5	2528	2645	3913	2813	1616	1542	5761	2583	987	1008	Y
6	3	CAPP3_ERATE|CAPP3_ERATE	K.E(+304.20)LDEALQAEIQAAFR.T	N	94.98	2007.05	10.7	670.032	3	53.95	F1:9904	15	295.75	476.5	374	382.625	262.125	538.25	712.375	643.25	318	332	Y
6	3	CAPP3_ERATE|CAPP3_ERATE	K.H(+304.20)GDFSDEGSAATESDIEETLK(+304.20)R.L	N	94.75	3001.46	8.9	751.379	4	25.59	F5:5262	4	1362	892.75	3470	1630	1197	1921	2964	1224	200	221	Y
6	3	CAPP3_ERATE|CAPP3_ERATE	K.Q(+304.20)QIMVGYSDSGK(+304.20).D	N	93.73	1920.01	5.4	641.015	3	18.78	F8:4333	14	391	486.5	1284	754	591.5	715.5	831.875	354	888	899	Y
6	3	CAPP3_ERATE|CAPP3_ERATE	Y.I(+304.20)ISMATAPSDVLAVELLQR.E	N	92.79	2330.31	3.9	777.781	3	57.57	F6:9710	5	0	0	346.75	61	125.625	248.75	234	408.5	826	844	Y
6	3	CAPP3_ERATE|CAPP3_ERATE	R.H(+304.20)TDAIDAITTHLGIGSYR.E	N	92.36	2244.18	11.6	562.058	4	43.77	F10:8451	6	251.5	580	395	654.5	186.5	363.125	187.75	123.25	755	772	Y
6	3	CAPP3_ERATE|CAPP3_ERATE	R.V(+304.20)TIQGEVIEHSFGEEHLC(+45.99)FR.T	N	91.76	2679.3	12.6	670.842	4	46.37	F7:8482	3	130	357	191	353.125	274.5	151	473	264	963	982	Y
6	3	CAPP3_ERATE|CAPP3_ERATE	K.T(+304.20)IADGVLLDFMR.Q	N	87.09	1653.9	16	552.317	3	53.65	F11:9744	14	325.875	388.25	232.375	529	148	382	265	358.5	723	734	Y
6	3	CAPP3_ERATE|CAPP3_ERATE	K.D(+304.20)ITEDEK(+304.20)K(+304.20)ELDEALQAEIQAAFR.T	N	85.92	3573.91	5.9	894.491	4	49.5	F5:8864	7	9338	6462	12830	9381	5103	5159	11600	7375	310	332	Y
6	3	CAPP3_ERATE|CAPP3_ERATE	K.Q(+304.20)QIM(+15.99)VGYSDSGK(+304.20).D	N	81.54	1936.01	9.2	646.349	3	16.99	F7:4076	5	520	80.75	196.5	198.5	43	88.5	319.625	48.625	888	899	Y
6	3	CAPP3_ERATE|CAPP3_ERATE	R.Y(+304.20)GMSYFQENIWK(+304.20).G	N	81.11	2173.1	-0.4	1087.56	2	44.73	F9:7780	12	766	1293	4094	3367	1264	441	3920	1867	349	360	Y
6	3	CAPP3_ERATE|CAPP3_ERATE	R.V(+304.20)TLDLLEMVFAK(+304.20).G	N	79.43	1986.16	5.2	663.063	3	61.84	F6:10357	20	1918	1048	1157	2873	1785	266.5	1271	5347	1117	1128	Y
6	3	CAPP3_ERATE|CAPP3_ERATE	R.H(+304.20)TDAIDAITTH.L	N	79.11	1497.77	12.2	500.269	3	16.46	F7:3997	1	514	451.25	1360	891	573.5	248.5	1284	487.75	755	765	Y
6	3	CAPP3_ERATE|CAPP3_ERATE	K.Q(+304.20)QIMVGY(+304.20)SDSGK(+304.20).D	N	78.13	2224.21	16.7	557.07	4	20.96	F2:4980	5	1010	998.625	3335	2734	1124	575.875	3358	1978	888	899	Y
6	3	CAPP3_ERATE|CAPP3_ERATE	K.E(+304.20)MYNEWPFFR.V	N	76.91	1721.81	16	574.954	3	46.97	F6:8118	4	626	512.5	595.5	788	542.5	375	154	756	1107	1116	Y
6	3	CAPP3_ERATE|CAPP3_ERATE	R.L(+304.20)ADLQNAPASVER.L	N	74.32	1686.92	4.4	563.315	3	26.57	F5:5409	16	2296	759.375	1444	2153	342.5	826	3270	1981	861	873	Y
6	3	CAPP3_ERATE|CAPP3_ERATE	R.E(+304.20)LVQEFY(+304.20)ETAAEYDIK(+304.20).H	N	74.3	2859.51	2	715.888	4	47.63	F5:8584	3	114.5	344	83.5	492	735.5	116.5	676.5	646	132	147	Y
6	3	CAPP3_ERATE|CAPP3_ERATE	R.A(+304.20)QPTPQDEMR.Y	N	71.66	1475.73	7.4	492.921	3	12.9	F5:3317	6	2391	3272	5559	4934	2868	1020	3400	2613	339	348	Y
6	3	CAPP3_ERATE|CAPP3_ERATE	K.L(+304.20)M(+15.99)DEMAVVATEAYR.S	N	70.69	1917.94	4.1	959.983	2	42.86	F5:7865	2	1542	400.875	2475	1135	703.75	675	2189	656	1009	1022	Y
6	3	CAPP3_ERATE|CAPP3_ERATE	R.Q(+304.20)VSTFGLTLAK(+304.20).L	N	70.06	1772.06	5.9	887.04	2	40.78	F3:7858	5	169.5	178.5	434	130.125	127.5	231.5	201.5	41.75	735	745	Y
6	3	CAPP3_ERATE|CAPP3_ERATE	R.Y(+304.20)GM(+15.99)SYFQENIWK(+304.20).G	N	65.15	2189.1	3.2	730.709	3	41.21	F8:7698	8	302.5	335	1238	494	380	341	509.25	555.5	349	360	Y
6	3	CAPP3_ERATE|CAPP3_ERATE	R.F(+304.20)HLPVWLGVGTAFK(+304.20).S	N	64.21	2179.27	6	545.827	4	51.92	F3:9535	6	112	0	230.875	65.75	149	0	0	0	1079	1092	Y
6	3	CAPP3_ERATE|CAPP3_ERATE	K.L(+304.20)MDEMAVVATEAY(+304.20)R.S	N	63.68	2206.15	10.4	736.398	3	46.88	F6:8105	2	1415	1592	2164	2235	1500	1300	3380	2440	1009	1022	Y
6	3	CAPP3_ERATE|CAPP3_ERATE	K.F(+304.20)SSWMGGDR.D	N	63.55	1345.63	4.6	449.554	3	29.27	F9:5460	7	728.375	624	1264	1268	673	239.25	1138	622	442	450	Y
6	3	CAPP3_ERATE|CAPP3_ERATE	R.Y(+304.20)(+304.20)GMSYFQENIWK(+304.20).G	N	62.2	2477.3	7.2	496.471	5	43.69	F2:8398	2	224.25	237	1112	1518	121.75	41.375	1036	1374	349	360	Y
6	3	CAPP3_ERATE|CAPP3_ERATE	R.Q(+304.20)EWLLSELQGK(+304.20).R	N	59.73	1938.09	7.5	647.043	3	45.7	F6:7928	3	921.625	150	336	510.75	157	344	173.5	321.5	780	790	Y
6	3	CAPP3_ERATE|CAPP3_ERATE	K.Q(+304.20)QIM(+15.99)VGY(+304.20)SDSGK(+304.20).D	N	59.41	2240.21	0.1	561.059	4	16.98	F2:4383	1	803.625	776	998	482	136	491	997.5	345.875	888	899	Y
6	3	CAPP3_ERATE|CAPP3_ERATE	K.L(+304.20)TSLDPADAIIVASSFSH.M	N	59.35	2147.14	12.7	1074.59	2	53.93	F5:9528	1	265	259	169	137.5	268	221.5	650.5	46.625	160	177	Y
6	3	CAPP3_ERATE|CAPP3_ERATE	R.A(+304.20)QPTPQDEM(+15.99)R.Y	N	59.29	1491.72	12.5	498.255	3	10.54	F6:2643	6	463.625	217.875	574.375	771.75	167	88.25	244.5	415	339	348	Y
6	3	CAPP3_ERATE|CAPP3_ERATE	R.S(+304.20)ATPETEYGR.M	N	58.35	1413.7	7.1	472.244	3	12.52	F6:2940	4	1470	2850	2668	3021	1719	869.875	2693	1885	1037	1046	Y
6	3	CAPP3_ERATE|CAPP3_ERATE	R.D(+304.20)VC(+45.99)LLAR.M	N	58.16	1138.61	5.9	380.546	3	31.67	F8:6266	21	265	609.375	753.75	388	399	461.25	735.125	638.375	463	469	Y
6	3	CAPP3_ERATE|CAPP3_ERATE	R.L(+304.20)FSIDWYLNR.I	N	56.99	1629.88	5	815.95	2	53.68	F9:9122	16	1349	1488	2344	2791	792	574	1800	1164	874	883	Y
6	3	CAPP3_ERATE|CAPP3_ERATE	R.F(+304.20)VEYFR.S	N	56.86	1163.62	6.2	582.822	2	38.07	F9:6781	11	7934	6736	15290	9408	4620	3197	10050	8752	1031	1036	Y
6	3	CAPP3_ERATE|CAPP3_ERATE	K.S(+304.20)LVEVGDK(+304.20).T	N	56.32	1453.85	11.4	485.629	3	17.42	F6:3682	6	26910	19170	40370	34420	21040	14230	38550	22970	715	722	Y
6	3	CAPP3_ERATE|CAPP3_ERATE	K.L(+304.20)TFFHGR.G	N	56.09	1180.66	-1.5	394.56	3	27.38	F4:5923	6	198.5	323	461	646	148	357	178	470.25	928	934	Y
6	3	CAPP3_ERATE|CAPP3_ERATE	R.Y(+304.20)GMSY(+304.20)FQENIWK(+304.20).G	N	55.05	2477.3	11.4	496.473	5	43.76	F2:8409	2	475.125	753.75	2298	1606	233.25	588.875	1911	1680	349	360	Y
6	3	CAPP3_ERATE|CAPP3_ERATE	F.S(+304.20)HMLNLANIAEEVQIANR.R	N	54.76	2326.23	15.6	776.43	3	46.11	F8:8431	1	376	423	169.5	141	283	251.75	294.375	267.75	176	193	Y
6	3	CAPP3_ERATE|CAPP3_ERATE	R.L(+304.20)FSIDWY(+304.20)LNR.I	N	54.41	1934.08	8.3	484.531	4	49.72	F3:9200	2	300	332	171.5	593.5	289	114.75	655.5	717.5	874	883	Y
6	3	CAPP3_ERATE|CAPP3_ERATE	R.E(+304.20)LVQEFYETAAEY(+304.20)DIK(+304.20).H	N	53.96	2859.51	7.4	715.891	4	49.05	F5:8796	1	676	1083	870	655.75	188.25	236	253.125	748.25	132	147	Y
6	3	CAPP3_ERATE|CAPP3_ERATE	R.V(+304.20)TPEVTR.D	N	53.76	1104.64	2.9	553.328	2	12.92	F9:2984	8	12770	11520	22690	18680	9572	7389	19160	11100	456	462	Y
6	3	CAPP3_ERATE|CAPP3_ERATE	H.M(+304.20)(+15.99)LNLANIAEEVQIANR.R	N	53.47	2118.14	14.2	707.062	3	46.68	F6:8075	2	318.5	279	389.5	534	281	301	235.5	161.5	178	193	Y
6	3	CAPP3_ERATE|CAPP3_ERATE	R.A(+304.20)IPSTEPYR.V	N	52.78	1336.72	12.2	446.587	3	15.44	F9:3371	13	1924	2154	4040	4802	3056	524	3665	3360	657	665	Y
6	3	CAPP3_ERATE|CAPP3_ERATE	R.L(+304.20)PYDAPLIK(+304.20).F	N	50.54	1636.99	5.2	546.674	3	41.4	F10:8095	23	568	211.5	1006	350.5	435.75	352.25	454.875	484	382	390	Y
6	3	CAPP3_ERATE|CAPP3_ERATE	R.S(+304.20)VVVK(+304.20)EPR.F	N	49.47	1520.94	7.5	761.482	2	12.97	F3:3686	2	1651	980.625	2618	1590	1034	727	2312	1115	1023	1030	Y
6	3	CAPP3_ERATE|CAPP3_ERATE	K.S(+304.20)VEEFLEPLEVC(+45.99)Y(+304.20)K(+304.20).S	N	49.37	2642.39	11.8	529.492	5	50.44	F6:8638	4	224	0	788	863.75	450.5	148	304	320	701	714	Y
6	3	CAPP3_ERATE|CAPP3_ERATE	M.L(+304.20)NLANIAEEVQIANR.R	N	48.85	1971.1	15	658.051	3	47.29	F6:8166	2	42	171	698.625	127.75	722.75	229.875	75	443	179	193	Y
6	3	CAPP3_ERATE|CAPP3_ERATE	K.R(+304.20)QEWLLSELQGK(+304.20).R	N	48.56	2094.19	8	524.56	4	39.48	F8:7439	6	461	981.75	989.25	1206	869.25	734	1338	2058	779	790	Y
6	3	CAPP3_ERATE|CAPP3_ERATE	K.H(+304.20)NESK(+304.20)LDALGTK(+304.20).L	N	47.91	2224.28	13.7	557.085	4	16.53	F11:4160	1	799.25	1065	584	616	224.5	381	884	786.375	148	159	Y
6	3	CAPP3_ERATE|CAPP3_ERATE	K.K(+304.20)VSEDDK(+304.20)LVEY(+304.20)DALLIDR.F	N	47.71	3032.7	12.1	607.555	5	39.42	F5:7347	4	1480	994.875	1454	2652	2053	442.5	793	2685	100	117	Y
6	3	CAPP3_ERATE|CAPP3_ERATE	K.L(+304.20)M(+15.99)DEM(+15.99)AVVATEAY(+304.20)R.S	N	47.56	2238.14	16.4	560.551	4	24.94	F6:4811	2	348	150.5	868.625	858.125	558	140	470	425	1009	1022	Y
6	3	CAPP3_ERATE|CAPP3_ERATE	R.E(+304.20)WPEEK(+304.20).R	N	46.91	1424.77	5.9	475.932	3	15.91	F5:3782	5	4187	5832	11210	10490	4100	4209	5088	4822	773	778	Y
6	3	CAPP3_ERATE|CAPP3_ERATE	R.W(+304.20)RDLLATGFSEIPEK(+304.20).S	N	46.8	2369.31	7.9	593.339	4	47.6	F6:8212	1	446	626.625	1096	182	62.125	86.5	552	83.25	682	696	Y
6	3	CAPP3_ERATE|CAPP3_ERATE	R.R(+304.20)AQPTPQDEMR.Y	N	46.38	1631.83	-1.1	544.95	3	12.34	F10:3712	2	367	92	740	319.625	70.25	259	96.5	498	338	348	Y
6	3	CAPP3_ERATE|CAPP3_ERATE	R.F(+304.20)TAATLEHGM(+15.99)HPPVSPK(+304.20)PEWSK(+304.20).L	N	46.14	3374.81	5.7	675.972	5	36.09	F12:6957	2	1161	907.5	1562	934.625	334.125	311	882	614.5	987	1008	Y
6	3	CAPP3_ERATE|CAPP3_ERATE	K.D(+304.20)ITEDEK(+304.20).K	N	45.85	1456.78	9.3	486.604	3	15.12	F1:4070	7	486.875	756.75	1353	1134	1748	303.75	1916	1004	310	316	Y
6	3	CAPP3_ERATE|CAPP3_ERATE	A.N(+304.20)IAEEVQIANR.R	N	44.93	1559.85	16.9	520.967	3	21.76	F6:4334	2	312	0	275.5	264.75	256.625	351.5	47.625	260	183	193	Y
6	3	CAPP3_ERATE|CAPP3_ERATE	K.S(+304.20)AIDK(+304.20)DIK(+304.20).N	N	44.23	1801.09	10.5	901.563	2	14.6	F9:3239	4	4784	5026	8870	9391	4399	1819	8601	5514	1093	1100	Y
6	3	CAPP3_ERATE|CAPP3_ERATE	R.D(+304.20)K(+304.20)LYNTSER.W	N	43.85	1732.95	9.4	578.661	3	13.52	F8:3542	3	3254	3372	8385	5429	1530	2348	5264	3915	673	681	Y
6	3	CAPP3_ERATE|CAPP3_ERATE	N.I(+304.20)AEEVQIANR.R	N	43.77	1445.81	8.8	482.948	3	22.69	F6:4474	1	325.25	317.25	226.625	253.5	474	63.5	828	238.375	184	193	Y
6	3	CAPP3_ERATE|CAPP3_ERATE	R.V(+304.20)LAELPSDSFGPY.I	N	42.42	1697.88	7.1	849.952	2	50.71	F1:9418	1	135.5	293	316	349.125	204.25	128.125	230	603.25	813	825	Y
6	3	CAPP3_ERATE|CAPP3_ERATE	K.S(+304.20)IGIDER.L	N	42.04	1092.6	18.7	547.319	2	14.42	F5:3546	6	14170	16540	25230	23190	10440	6976	17980	11810	426	432	Y
6	3	CAPP3_ERATE|CAPP3_ERATE	A.T(+304.20)APSDVLAVELLQR.E	N	41.04	1815.04	-3	908.522	2	44.02	F5:8042	2	598	878.5	1762	1504	915.625	1164	1289	1123	831	844	Y
6	3	CAPP3_ERATE|CAPP3_ERATE	R.V(+304.20)DTALK(+304.20).S	N	40.75	1253.77	2.4	627.894	2	15.45	F8:3832	7	3599	4482	9651	7597	2446	2498	7761	5984	369	374	Y
6	3	CAPP3_ERATE|CAPP3_ERATE	P.L(+304.20)PVVPLFER.L	N	40.16	1372.83	-0.1	458.618	3	45.95	F9:7962	7	600	371	358	315	210.5	648	212.5	514.875	852	860	Y
6	3	CAPP3_ERATE|CAPP3_ERATE	M.A(+304.20)TAPSDVLAVELLQR.E	N	39.95	1886.07	0.6	944.044	2	44.22	F5:8071	2	638	976.125	959.875	327	249.5	74.25	442	915.375	830	844	Y
6	3	CAPP3_ERATE|CAPP3_ERATE	S.M(+304.20)ATAPSDVLAVELLQR.E	N	38.64	2017.11	-4.4	1009.56	2	47.26	F5:8528	1	774.75	528.875	1098	426.75	522	147.5	843.25	562	829	844	Y
6	3	CAPP3_ERATE|CAPP3_ERATE	R.E(+304.20)C(+45.99)HIR.N	N	38.61	1006.49	0.2	336.505	3	14.47	F12:3500	5	4074	1986	8666	10190	4014	8862	5554	5086	845	849	Y
6	3	CAPP3_ERATE|CAPP3_ERATE	K.L(+304.20)DALGTK(+304.20).L	N	37.34	1324.81	0.5	442.61	3	25.77	F10:5727	12	1859	405	1266	486.5	538	339	1148	536	153	159	Y
6	3	CAPP3_ERATE|CAPP3_ERATE	K.L(+304.20)YNTSER.W	N	37.01	1185.62	8.4	593.824	2	15.06	F10:4120	4	2614	3016	4468	3520	1391	644.125	2960	2880	675	681	Y
6	3	CAPP3_ERATE|CAPP3_ERATE	K.S(+304.20)IGINER.L	N	36.86	1091.62	-2.3	364.879	3	15.44	F10:4177	7	87	791.25	282	1084	338	489.5	318	153	375	381	Y
6	3	CAPP3_ERATE|CAPP3_ERATE	K.G(+304.20)DPGIAAL.Y	N	36.06	1016.58	7.7	509.299	2	27.87	F1:5980	1	199.5	518.125	434	507.5	164	1099	553.25	832	1129	1136	Y
6	3	CAPP3_ERATE|CAPP3_ERATE	N.P(+304.20)LPVVPLFER.L	N	35.76	1469.89	10.6	490.974	3	46.83	F9:8094	2	125.5	415.5	395	96.5	50.375	268	214	320	851	860	Y
6	3	CAPP3_ERATE|CAPP3_ERATE	R.S(+304.20)VVVK(+304.20).E	N	33.8	1138.74	-0.4	570.378	2	14.85	F4:4044	1	1929	1454	2472	2442	980.125	1058	1995	1613	1023	1027	Y
6	3	CAPP3_ERATE|CAPP3_ERATE	K.E(+304.20)IGK(+304.20)K(+304.20)PEEVFEALK(+304.20).S	N	33.65	2832.68	19.5	473.13	6	40.89	F7:7661	2	1020	959.875	1968	2392	1015	1080	3062	1684	225	238	Y
6	3	CAPP3_ERATE|CAPP3_ERATE	R.L(+304.20)SAAWQLY(+304.20)QAQAEVAK(+304.20).V	N	33.04	2688.52	-8.4	673.132	4	45.6	F2:8685	5	77.75	392	471.625	84.5	210	123.25	548.75	106.25	904	919	Y
6	3	CAPP3_ERATE|CAPP3_ERATE	R.C(+45.99)(+304.20)NDELR.A	N	31.38	1098.51	6.4	550.263	2	15.1	F5:3652	3	3902	3359	8058	5696	3186	1908	6048	3608	629	634	Y
6	3	CAPP3_ERATE|CAPP3_ERATE	V.D(+304.20)TALK(+304.20).S	N	29.64	1154.7	-7.7	385.905	3	12.78	F7:3447	3	357	425	462	1302	588	650	934	280.75	370	374	Y
6	3	CAPP3_ERATE|CAPP3_ERATE	Q.A(+304.20)EVAK(+304.20).V	N	27.61	1124.69	-0.4	375.904	3	11.85	F9:2824	1	381	233	722	757	601.875	570	165	113.75	915	919	Y
6	3	CAPP3_ERATE|CAPP3_ERATE	R.L(+304.20)LAPK(+304.20).K	N	27.61	1148.76	1.3	575.39	2	19.18	F4:4692	5	1316	783.25	1146	1324	682	1164	1383	1724	95	99	Y
6	3	CAPP3_ERATE|CAPP3_ERATE	R.S(+304.20)LLQK(+304.20).H	N	27.06	1195.76	0.4	598.89	2	17.49	F4:4438	1	1262	1136	3759	2148	1718	880	2693	1598	257	261	Y
6	3	CAPP3_ERATE|CAPP3_ERATE	R.R(+304.20)VDTALK(+304.20).S	N	26.25	1409.87	4.9	470.966	3	12.85	F3:3668	2	5676	3920	9445	4599	2850	2944	5943	2509	368	374	Y
6	3	CAPP3_ERATE|CAPP3_ERATE	K.L(+304.20)VEYDALLIDR.F	N	25.87	1622.91	-3.1	812.461	2	46.07	F5:8351	1	890.625	1026	1609	2199	1368	487	627	766	107	117	Y
6	3	CAPP3_ERATE|CAPP3_ERATE	R.T(+304.20)DEVR.R	N	25.82	922.497	-6.8	462.253	2	10.48	F5:2955	2	689	544.5	892	1225	825.25	435.5	1338	286	333	337	Y
6	3	CAPP3_ERATE|CAPP3_ERATE	K.K(+304.20)YNVK(+304.20).L	N	25.76	1258.78	3	420.6	3	10.99	F3:3388	1	2432	1451	3404	3000	1590	1862	2264	1236	923	927	Y
6	3	CAPP3_ERATE|CAPP3_ERATE	R.V(+304.20)LAELPSDSFGPYIISM.A	N	24.24	2142.12	-0.2	1072.07	2	60.01	F1:10820	1	46.25	49.625	240	96.25	129.75	141.375	60.625	51.5	813	829	Y
6	3	CAPP3_ERATE|CAPP3_ERATE	R.S(+304.20)ATPETEY(+304.20)GR.M	N	24.16	1717.9	6.7	573.644	3	13.2	F8:3494	2	1040	1398	732	1129	1216	1048	1267	678	1037	1046	Y
6	3	CAPP3_ERATE|CAPP3_ERATE	R.A(+304.20)IPSTEPY(+304.20)R.V	N	23.19	1640.92	5.1	821.473	2	15.53	F3:4070	1	1654	1836	2622	1160	1227	864	2777	1852	657	665	Y
6	3	CAPP3_ERATE|CAPP3_ERATE	K.L(+304.20)Y(+304.20)NTSER.W	N	22.59	1489.82	11.5	497.621	3	13.25	F3:3728	1	2532	2270	3430	3130	1916	1196	2224	1716	675	681	Y
6	3	CAPP3_ERATE|CAPP3_ERATE	D.I(+304.20)EETLK(+304.20).R	N	22.34	1339.81	-19	447.601	3	13.95	F5:3475	1	1740	3912	7543	1692	501	776.25	1176	1079	215	220	Y
6	3	CAPP3_ERATE|CAPP3_ERATE	P.S(+304.20)IDASLR.L	N	22.15	1064.61	11.4	533.317	2	14.87	F9:3281	1	4122	2578	4834	4748	2048	1801	4612	3064	88	94	Y
6	3	CAPP3_ERATE|CAPP3_ERATE	R.T(+304.20)DEIRR.A	N	21.29	1092.61	3.7	365.213	3	11.02	F9:2700	1	98	0	771.5	279.875	122	137.5	304	312	521	526	Y
6	3	CAPP3_ERATE|CAPP3_ERATE	R.F(+304.20)VEY(+304.20)FR.S	N	21.03	1467.82	7.7	490.285	3	40.28	F4:7867	1	422.25	594.625	694	701.75	832	280	696	1156	1031	1036	Y
6	3	CAPP3_ERATE|CAPP3_ERATE	R.T(+304.20)DEVRR.A	N	20.97	1078.6	4.5	360.542	3	9.65	F10:3308	3	393.25	276.25	289	561	389	468	680.375	508	333	338	Y
6	3	CAPP3_ERATE|CAPP3_ERATE	E.A(+304.20)VDEK(+304.20).G	N	20.45	1168.68	-16.9	585.338	2	14.91	F6:3299	1	13960	6778	16510	8732	8224	20040	13310	7792	10	14	Y
6	3	CAPP3_ERATE|CAPP3_ERATE	G.V(+304.20)VLDK(+304.20).L	N	20.08	1180.75	-17.1	591.374	2	16.52	F8:3993	1	1336	1798	2654	2365	1700	4113	3417	1721	16	20	Y
6	3	CAPP3_ERATE|CAPP3_ERATE	K.K(+304.20)Y(+304.20)NVK(+304.20).L	N	19.01	1562.98	8.8	522.004	3	13.63	F4:3861	3	1170	1329	976	1344	490.25	786	2000	962	923	927	Y
6	3	CAPP3_ERATE|CAPP3_ERATE	R.C(+45.99)(+304.20)NNELR.A	N	17.59	1097.52	3.6	549.77	2	15.88	F10:4242	2	3184	3036	5936	4668	3400	2469	4503	3552	492	497	Y
6	3	CAPP3_ERATE|CAPP3_ERATE	K.L(+304.20)MDEM(+15.99)AVVA.T	N	17.15	1297.65	0.3	649.833	2	36.01	F1:7202	1	587.875	243	433.25	767.125	73	356	492.5	306.25	1009	1017	Y
6	3	CAPP3_ERATE|CAPP3_ERATE	K.R(+304.20)PLLVADLPVSEEVADVL.G	N	16.89	2238.27	9.1	747.105	3	53.26	F5:9429	2	151.5	134.75	55.875	128.5	99.5	219.25	264	47.625	791	808	Y
6	3	CAPP3_ERATE|CAPP3_ERATE	R.G(+304.20)GGPTHLAILSQPPDTIN.G	N	14.88	2091.12	5.9	698.052	3	39.14	F7:7399	1	160	389.375	472	491	181	496	221	143.5	941	958	Y
6	3	CAPP3_ERATE|CAPP3_ERATE	K.H(+304.20)Y(+304.20)IEFWR.A	N	14.79	1657.91	10.4	553.649	3	25.05	F3:5498	1	138.5	399	546.375	507	367	200	855.625	517	650	656	Y
6	3	CAPP3_ERATE|CAPP3_ERATE	R.D(+304.20)K(+304.20)LY(+304.20)NTSER.W	N	14.49	2037.15	4.1	680.059	3	14.49	F2:4010	1	224	150.5	499.375	49.875	418	382	916.5	87.5	673	681	Y
6	3	CAPP3_ERATE|CAPP3_ERATE	K.L(+304.20)TSLDPADAIIVAS.S	N	13.89	1688.94	6.6	845.485	2	50.39	F1:9369	1	89	366.25	221.75	640.625	59.25	92	274	41.25	160	173	Y
6	3	CAPP3_ERATE|CAPP3_ERATE	K.V(+304.20)SEDDK(+304.20).L	N	12.21	1299.7	-18.2	650.847	2	20.87	F8:4648	1	2445	1132	3402	3274	2582	2192	2577	1008	101	106	Y
6	3	CAPP3_ERATE|CAPP3_ERATE	E.I(+304.20)QAAFR.T	N	11.93	1008.6	11.2	505.311	2	24.57	F4:5501	2	395.5	0	203	147	564	82	155.25	120.75	327	332	Y
6	3	CAPP3_ERATE|CAPP3_ERATE	K.D(+304.20)ITEDEK(+304.20)K(+304.20).E	N	11.85	1889.07	0.3	473.275	4	14.32	F11:3830	1	2040	325.75	1032	675	918	1476	407.125	840.125	310	317	Y
6	3	CAPP3_ERATE|CAPP3_ERATE	H.P(+304.20)SIDASLR.L	N	11.4	1161.66	8.8	581.843	2	12.93	F3:3679	1	1284	2574	2459	2893	964	2637	2065	1728	87	94	Y
6	3	CAPP3_ERATE|CAPP3_ERATE	R.A(+304.20)DELLSTPK(+304.20).K	Y	9.01	1580.91	-4.5	527.976	3	15.97	F6:3458	1	469	612	1585	794	190.5	1331	780	1139	637	645	Y
6	3	CAPP3_ERATE|CAPP3_ERATE	I.D(+304.20)K(+304.20)DIK(+304.20).N	N	8.03	1529.94	5	510.989	3	12.5	F8:3389	1	1788	1903	2174	3889	1810	1758	4000	2489	1096	1100	Y
6	3	CAPP3_ERATE|CAPP3_ERATE	R.L(+304.20)ADLQN.A	N	7.71	976.544	4.1	489.281	2	23.73	F1:5360	1	220	148.5	847	753.125	76	105.25	694	132.25	861	866	Y
6	3	CAPP3_ERATE|CAPP3_ERATE	K.A(+304.20)Y(+304.20)TLK(+304.20).Q	N	7.65	1506.94	-6.7	503.317	3	32.81	F8:6438	2	424.125	381.125	227.5	80.25	460.75	394	110.25	506	1200	1204	Y
6	3	CAPP3_ERATE|CAPP3_ERATE	E.M(+304.20)RYGM(+15.99)SYFQENIWK(+304.20).G	N	7.4	2476.24	-9.7	620.061	4	43.59	F3:8280	1	532	364	905.5	1384	108.5	666.75	642	514.5	347	360	Y
6	3	CAPP3_ERATE|CAPP3_ERATE	K.F(+304.20)SSWM(+15.99)GGDR.D	N	7.21	1361.63	5.3	681.825	2	20.82	F7:4650	1	696	68	824.25	992.75	754	106.25	628	532	442	450	Y
6	3	CAPP3_ERATE|CAPP3_ERATE	R.E(+304.20)LVQEFY(+304.20)ET.A	N	6.28	1764.93	-4.2	883.468	2	44.87	F5:8170	1	1433	941.25	914.625	622	1186	1467	1052	698	132	140	Y
6	3	CAPP3_ERATE|CAPP3_ERATE	F.E(+304.20)LSMWRC(+45.99)NDELR.A	N	5.06	1900.88	18.5	951.467	2	40.31	F1:7848	1	61.625	329.75	1180	714.5	711.75	320	332.75	183	623	634	Y
8	4	CL367Contig7|CL367Contig7	R.T(+304.20)ETSPEDVGGMHAAAGILTAR.G	N	117.13	2387.2	8.4	597.812	4	29.53	F6:5501	19	3396	2681	4950	5921	1999	1594	3611	1882	539	559	Y
8	4	CL367Contig7|CL367Contig7	K.F(+304.20)LPIYLGQGILQHDPFEVLDQR.G	N	108.15	2901.56	17.8	726.411	4	60.5	F6:10153	15	207.5	254.25	321	632.75	518.625	164	694.375	250.5	897	918	Y
8	4	CL367Contig7|CL367Contig7	K.D(+304.20)MQDIEFTVQENR.L	N	95.23	1927.92	9.5	643.653	3	37.53	F1:7430	9	1771	1263	2019	1520	1013	1033	2418	2064	428	440	Y
8	4	CL367Contig7|CL367Contig7	K.I(+304.20)AVDMVNEGFVDR.N	N	94.63	1767.91	9.3	590.315	3	41.38	F5:7641	8	1959	2285	2772	2543	1948	1126	2720	1536	459	471	Y
8	4	CL367Contig7|CL367Contig7	K.K(+304.20)LY(+304.20)GEY(+304.20)LVNAQGEDVVAGIR.T	N	91.52	3105.74	6.5	622.16	5	39.07	F9:6931	6	2039	2779	2914	2721	1973	1544	1468	1968	377	396	Y
8	4	CL367Contig7|CL367Contig7	K.G(+304.20)ANLAEMASIGLSVPPGFTVSTEAC(+45.99)EQY(+304.20)QIAGK(+304.20).S	N	89.98	4297.2	15.1	860.461	5	51.99	F6:8871	3	1108	672.625	1464	1561	233.625	112	982.875	913.125	121	153	Y
8	4	CL367Contig7|CL367Contig7	K.K(+304.20)LY(+304.20)GEYLVNAQGEDVVAGIR.T	N	89.19	2801.54	2.9	701.395	4	43.24	F7:8013	11	476.25	936.875	1797	1504	488.5	523.125	766.125	450	377	396	Y
8	4	CL367Contig7|CL367Contig7	R.A(+304.20)MDGLPVTIR.L	N	88.34	1375.77	1.6	459.599	3	36.88	F11:7220	29	150.5	385.375	910.125	971	236	299	353	302	719	728	Y
8	4	CL367Contig7|CL367Contig7	K.M(+304.20)VEPGHLDQLLHPQFEDPSAYK(+304.20).D	N	85.02	3158.62	12.8	790.673	4	42.81	F6:7494	6	2500	2080	4603	3450	1536	1754	1908	2171	477	498	Y
8	4	CL367Contig7|CL367Contig7	K.L(+304.20)YGEYLVNAQGEDVVAGIR.T	N	83.82	2369.25	9.3	790.764	3	44.85	F5:8167	4	431.5	848.125	883.5	1074	751.75	462.125	923.25	396	378	396	Y
8	4	CL367Contig7|CL367Contig7	K.M(+304.20)VEPGHLDQLLHPQFEDPSAYK(+304.20)DK(+304.20).V	N	83.45	3705.94	7.1	742.201	5	40.31	F6:7119	13	7641	3680	10080	6617	4432	2320	7586	4096	477	500	Y
8	4	CL367Contig7|CL367Contig7	R.L(+304.20)GISYPELTEMQAR.A	N	81.29	1911	5.3	638.011	3	42.39	F6:7430	10	1926	1161	2355	1908	1234	2292	1781	1702	782	795	Y
8	4	CL367Contig7|CL367Contig7	K.L(+304.20)GDPEK(+304.20)PLLLSVR.S	N	80.14	2044.24	10.3	512.072	4	41.45	F11:7906	23	928	1397	1118	1254	844.25	1028	916.5	813.25	178	190	Y
8	4	CL367Contig7|CL367Contig7	K.D(+304.20)QLPQAYEELVENC(+45.99)K(+304.20).I	N	78.02	2432.21	19.2	609.071	4	48.1	F5:8654	6	164.5	162.625	409.25	380.5	609.375	120	600	424	406	420	Y
8	4	CL367Contig7|CL367Contig7	K.I(+304.20)GTMIEIPR.A	N	77.74	1332.77	5.6	445.266	3	40.29	F8:7560	15	404.375	339	1434	378.25	348	989	1202	500	275	283	Y
8	4	CL367Contig7|CL367Contig7	K.M(+304.20)(+15.99)VEPGHLDQLLHPQFEDPSAYK(+304.20)DK(+304.20).V	N	76.97	3721.94	10.1	621.337	6	37.9	F6:6757	5	5232	4965	8945	10010	5806	3148	6860	4443	477	500	Y
8	4	CL367Contig7|CL367Contig7	R.A(+304.20)M(+15.99)DGLPVTIR.L	N	75.49	1391.77	6	464.933	3	20.77	F8:4632	15	440	346	1042	736.125	61.625	191	224.5	657	719	728	Y
8	4	CL367Contig7|CL367Contig7	K.M(+304.20)VEPGHLDQLLHPQFEDPSAY(+304.20)K(+304.20)DK(+304.20).V	N	70.12	4010.14	12.8	573.892	7	39.34	F8:7418	3	4720	3276	5173	7028	2686	2840	4189	3497	477	500	Y
8	4	CL367Contig7|CL367Contig7	K.L(+304.20)SEVNPMLGFR.G	N	69.88	1565.85	6.4	522.96	3	44.49	F8:8189	16	69.25	408	739.25	170.5	353	1037	743.625	222.75	768	778	Y
8	4	CL367Contig7|CL367Contig7	K.D(+304.20)M(+15.99)QDIEFTVQENR.L	N	69.53	1943.91	3.9	972.968	2	23.32	F1:5298	5	343.75	550	762.25	820.125	328.5	633.875	449.5	1079	428	440	Y
8	4	CL367Contig7|CL367Contig7	R.T(+304.20)PEDLDTM(+15.99)K(+304.20).D	N	67.01	1672.87	12.2	558.637	3	15.32	F5:3688	2	2583	1281	5319	5363	2550	1982	2679	1902	397	405	Y
8	4	CL367Contig7|CL367Contig7	R.F(+304.20)LDMFGNVVLDIPHSLFEEK(+304.20).L	N	66.63	2957.57	10.1	740.408	4	65.85	F6:10989	6	219.5	731.25	226	426	334	61.25	154.5	406	233	252	Y
8	4	CL367Contig7|CL367Contig7	N.A(+304.20)VADAAPITATK(+304.20).R	N	62.02	1736.02	7.5	579.684	3	16.96	F9:3610	15	902.75	1108	2348	1920	1320	611.25	2308	626.25	86	97	Y
8	4	CL367Contig7|CL367Contig7	K.M(+304.20)VEPGHLDQLLHPQFEDPSAY(+304.20)K(+304.20).D	N	60.77	3462.82	4.3	578.147	6	41.43	F8:7731	3	1342	2088	3640	3265	1630	2216	2104	1442	477	498	Y
8	4	CL367Contig7|CL367Contig7	R.T(+304.20)PEDLDTMK(+304.20).D	N	60.55	1656.87	14.9	553.307	3	17.92	F5:4094	4	1267	1396	2188	2399	1068	614.75	1153	1049	397	405	Y
8	4	CL367Contig7|CL367Contig7	K.M(+304.20)VEPGHLDQLLHPQFED.P	N	59.2	2308.14	3.6	770.39	3	42.83	F5:7860	2	314	289	1480	251.625	385	211	389	570	477	493	Y
8	4	CL367Contig7|CL367Contig7	K.I(+304.20)LENHY(+304.20)K(+304.20)DMQDIEFTVQENR.L	N	52.41	3433.79	3.1	687.768	5	40.12	F7:7546	1	1148	828.125	840	382.5	986.875	833.125	1236	770.375	421	440	Y
8	4	CL367Contig7|CL367Contig7	R.F(+304.20)AYDSYR.R	N	52.25	1224.6	7	613.313	2	18.37	F8:4272	11	12710	10920	28370	16650	12410	6938	14380	10560	225	231	Y
8	4	CL367Contig7|CL367Contig7	R.L(+304.20)WMLQC(+45.99)R.S	N	50.03	1298.66	7.7	650.34	2	49.76	F4:9295	3	525.25	1094	2797	1813	505	618	1488	1110	441	447	Y
8	4	CL367Contig7|CL367Contig7	K.I(+304.20)LENHYK(+304.20)DM(+15.99)QDIEFTVQENR.L	N	49.23	3145.59	17.6	787.418	4	31.46	F6:5790	2	900.375	238	512	483	1248	596	1172	83.75	421	440	Y
8	4	CL367Contig7|CL367Contig7	R.V(+304.20)Y(+304.20)VFGK(+304.20).G	N	48.67	1624	6.1	407.009	4	25.07	F4:5575	4	131.5	228	190	556	72.5	78.5	288	174	99	104	Y
8	4	CL367Contig7|CL367Contig7	R.N(+304.20)PSTGEK(+304.20).K	N	47.14	1339.74	10.2	447.594	3	10.53	F9:2626	6	683.125	1270	2146	2010	973.75	678	1740	690	370	376	Y
8	4	CL367Contig7|CL367Contig7	R.T(+304.20)PEDLDTMK(+304.20)DQLPQAYEELVENC(+45.99)K(+304.20).I	N	46.71	3766.87	13.7	754.392	5	50.91	F5:9076	13	873	809.625	1928	1280	722	531.25	811.75	644.125	397	420	Y
8	4	CL367Contig7|CL367Contig7	R.T(+304.20)PEDLDTMK(+304.20)DQLPQAY(+304.20)EELVENC(+45.99)K(+304.20).I	N	46.38	4071.07	1	815.222	5	46.99	F5:8488	3	953	876.375	926.25	1180	192.625	627	1440	1216	397	420	Y
8	4	CL367Contig7|CL367Contig7	K.V(+304.20)IATGLPASPGAAVGQ.I	N	45.87	1711.97	1.1	856.994	2	39.44	F8:7432	3	392.375	244	584.625	642.375	219	111.75	468.125	236.5	501	516	Y
8	4	CL367Contig7|CL367Contig7	R.V(+304.20)YVFGK(+304.20).G	N	45.5	1319.8	-4.1	440.937	3	32.88	F4:6752	7	146.5	152	636	333	159	190	79.5	355	99	104	Y
8	4	CL367Contig7|CL367Contig7	K.S(+304.20)VAIGETVLHEGDWLSLNGSTGEVILGK(+304.20).Q	N	45.24	3488.89	-7.6	873.222	4	50.36	F5:8993	3	218	0	483	306	291.375	207	325	639.125	592	619	Y
8	4	CL367Contig7|CL367Contig7	Q.G(+304.20)ILQHDPFEVLDQR.G	N	44.91	1970.05	-0.3	657.69	3	42.54	F6:7453	1	203.25	521.375	390	259.125	708.625	608	917.5	240.5	905	918	Y
8	4	CL367Contig7|CL367Contig7	A.D(+304.20)AAPITATK(+304.20).R	N	44.87	1494.88	-13.7	499.292	3	14.57	F8:3700	3	550.5	720.375	887.25	1732	1531	1294	1816	1048	89	97	Y
8	4	CL367Contig7|CL367Contig7	R.T(+304.20)PEDLDTM(+15.99)K(+304.20)DQLPQAYEELVENC(+45.99)K(+304.20).I	N	44.73	3782.87	4.3	946.728	4	46.84	F5:8466	1	936.625	323	1056	497.75	412.875	45.75	155.5	269	397	420	Y
8	4	CL367Contig7|CL367Contig7	K.K(+304.20)LYGEYLVNAQGEDVVAGIR.T	N	44.61	2497.34	13.6	833.466	3	39.7	F6:7028	1	375	360.75	173.5	572	86	398.125	288.875	231.5	377	396	Y
8	4	CL367Contig7|CL367Contig7	N.A(+304.20)QGEDVVAGIR.T	N	44.11	1417.78	6.5	709.901	2	16.77	F5:3917	1	3592	2597	6164	5464	3096	2209	4168	3875	386	396	Y
8	4	CL367Contig7|CL367Contig7	K.G(+304.20)K(+304.20)SEGDK(+304.20).T	N	43.47	1631.94	2.7	408.995	4	10.15	F10:3383	3	231.25	252	499.125	206	337.375	298.5	241.5	266	105	111	Y
8	4	CL367Contig7|CL367Contig7	K.L(+304.20)Y(+304.20)GEYLVNAQGEDVVAGIR.T	N	42.63	2673.45	-3.7	892.153	3	41.53	F6:7302	1	263.875	564	660	455.75	272	123.5	987.5	180.125	378	396	Y
8	4	CL367Contig7|CL367Contig7	K.I(+304.20)LENHYK(+304.20).D	N	42.18	1523.88	7.3	508.971	3	20.05	F12:4346	5	137.5	593.5	202.5	464.75	101.75	0	0	0	421	427	Y
8	4	CL367Contig7|CL367Contig7	R.T(+304.20)GQGAVK(+304.20).I	N	41.49	1267.76	6.1	634.891	2	10.41	F3:3300	2	3176	2913	5104	3835	1057	1896	4416	2109	452	458	Y
8	4	CL367Contig7|CL367Contig7	N.D(+304.20)EVAAGLAAK(+304.20).S	N	41.16	1551.9	6.9	518.31	3	18.47	F5:4181	1	524	1042	768.75	964	448	789.25	1100	648.25	211	220	Y
8	4	CL367Contig7|CL367Contig7	N.V(+304.20)VLDIPHSLFEEK(+304.20).L	N	40.78	2133.22	12.2	534.318	4	44.64	F6:7769	2	1377	698	800.125	1083	579.375	390.375	661.75	1123	240	252	Y
8	4	CL367Contig7|CL367Contig7	K.L(+304.20)GDPEK(+304.20)PLLL.S	N	40.32	1702.04	1.1	568.354	3	39.26	F5:7322	4	1289	714	2399	1202	1216	406	1496	1646	178	187	Y
8	4	CL367Contig7|CL367Contig7	K.T(+304.20)IDYK(+304.20).I	N	39.45	1246.73	-4.7	416.581	3	15.51	F7:3855	5	962.125	2329	3320	912	1310	1265	2406	1424	270	274	Y
8	4	CL367Contig7|CL367Contig7	R.D(+304.20)DVGK(+304.20).F	N	39.25	1140.65	9.5	571.337	2	11.61	F5:3124	4	11090	8276	15900	17090	12870	4660	14820	8672	892	896	Y
8	4	CL367Contig7|CL367Contig7	Q.G(+304.20)EDVVAGIR.T	N	38.72	1218.68	-1.7	610.347	2	16.69	F5:3905	2	6409	5232	8041	5158	2842	4946	5660	7667	388	396	Y
8	4	CL367Contig7|CL367Contig7	K.L(+304.20)EHMK(+304.20).E	N	38.32	1264.73	-5.3	317.188	4	15.38	F12:3637	2	74.25	47.375	388	520.75	126.25	142	268	285.875	253	257	Y
8	4	CL367Contig7|CL367Contig7	R.V(+304.20)NDAEK(+304.20).S	N	37.61	1282.72	6.5	428.584	3	12.29	F5:3226	5	1552	1233	4166	2527	1880	1332	2672	1744	586	591	Y
8	4	CL367Contig7|CL367Contig7	R.G(+304.20)VGELIK(+304.20).F	N	36.93	1322.83	4.9	662.424	2	22.12	F7:4846	17	2184	1411	2272	3794	1253	1241	3240	2128	919	925	Y
8	4	CL367Contig7|CL367Contig7	K.M(+304.20)(+15.99)VEPGHLDQLLHPQFEDPSAY(+304.20)K(+304.20)DK(+304.20).V	N	36.89	4026.14	4.3	672.033	6	35.83	F8:6890	4	432	447.75	379	856	566.375	174	430	368	477	500	Y
8	4	CL367Contig7|CL367Contig7	K.V(+304.20)FTAAGK(+304.20).T	N	34.3	1300.79	5.8	651.404	2	19.07	F3:4601	3	2297	2472	3389	2078	1535	1576	4112	2317	840	846	Y
8	4	CL367Contig7|CL367Contig7	K.D(+304.20)AILVR.T	N	34.22	989.612	0.2	495.813	2	17.58	F7:4165	3	3015	1920	4270	3256	2333	3060	2696	1979	533	538	Y
8	4	CL367Contig7|CL367Contig7	R.L(+304.20)GISYPELTEM(+15.99)QAR.A	N	34.11	1927	16	964.521	2	36.85	F6:6599	5	1247	398	1868	1990	850.25	173.5	1468	568.75	782	795	Y
8	4	CL367Contig7|CL367Contig7	R.L(+304.20)WM(+15.99)LQC(+45.99)R.S	N	33.93	1314.65	16.7	439.231	3	44.71	F4:8531	2	318.75	247	614.5	633.5	49.875	208	361	532.75	441	447	Y
8	4	CL367Contig7|CL367Contig7	K.Q(+304.20)LLGGK(+304.20).G	N	33.79	1222.78	0.4	408.599	3	17.33	F4:4415	3	1234	782	2036	1117	644.375	763.625	1440	1152	115	120	Y
8	4	CL367Contig7|CL367Contig7	R.T(+304.20)ETSPEDVGGMHAAAGIL.T	N	33.54	2059.01	4.9	1030.52	2	38.15	F1:7523	4	196.125	135	270	212.625	94	104	267.25	179.25	539	556	Y
8	4	CL367Contig7|CL367Contig7	K.L(+304.20)EHM(+15.99)K(+304.20).E	N	32.99	1280.73	6.3	427.919	3	11.3	F11:3377	3	2087	346.125	4181	3670	2748	1330	1592	821.75	253	257	Y
8	4	CL367Contig7|CL367Contig7	S.T(+304.20)EAC(+45.99)EQYQIAGK(+304.20).S	N	32.63	1994	14.6	665.682	3	25.82	F6:4943	1	170	0	628	347.25	290	176.5	244	341	142	153	Y
8	4	CL367Contig7|CL367Contig7	K.L(+304.20)Y(+304.20)GEY(+304.20)LVNAQGEDVVAGIR.T	N	31.62	2977.65	-3.4	745.417	4	38.66	F9:6870	1	118.25	199	860.375	330.5	134.5	65	386	84.25	378	396	Y
8	4	CL367Contig7|CL367Contig7	R.Q(+304.20)NALDR.L	N	30.83	1019.56	9	510.793	2	12.03	F10:3666	2	550	118.875	980	618.25	159	472	546.5	101.25	699	704	Y
8	4	CL367Contig7|CL367Contig7	K.F(+304.20)ATER.G	N	29.17	926.507	8.5	464.265	2	12.52	F9:2924	6	23660	32590	48340	45220	16880	17550	29310	18580	926	930	Y
8	4	CL367Contig7|CL367Contig7	R.N(+304.20)TAIK(+304.20).M	N	28.44	1153.72	0	577.866	2	12.43	F4:3680	3	328	200.5	1195	719.875	468.25	448	1381	472.75	472	476	Y
8	4	CL367Contig7|CL367Contig7	F.M(+304.20)SWVDEVR.Q	N	27.12	1324.67	4.8	663.345	2	32.04	F5:6232	1	325.5	1432	1092	1348	1254	1205	534	1701	635	642	Y
8	4	CL367Contig7|CL367Contig7	R.L(+304.20)LPYQR.S	N	27.03	1092.65	14.6	547.342	2	22.79	F4:5233	4	840.875	451.5	809.375	555	91.25	518	622	342.75	705	710	Y
8	4	CL367Contig7|CL367Contig7	R.F(+304.20)AYDSY(+304.20)R.R	N	26.54	1528.8	5.4	510.611	3	17.78	F3:4407	2	2131	2389	3224	2026	1388	1982	2560	2798	225	231	Y
8	4	CL367Contig7|CL367Contig7	K.T(+304.20)IDY(+304.20)K(+304.20).I	N	25.41	1550.93	6.1	776.476	2	15.59	F2:4174	2	967.5	794	1758	1156	510	189	330	810	270	274	Y
8	4	CL367Contig7|CL367Contig7	K.G(+304.20)ANLAEMA.S	N	24.38	1079.55	11.7	540.79	2	20.71	F5:4528	1	1032	833.5	1815	1118	1592	1526	740	1699	121	128	Y
8	4	CL367Contig7|CL367Contig7	K.L(+304.20)SEVNPM(+15.99).L	N	23.09	1108.57	8.4	555.296	2	19.85	F1:4778	1	225.5	96.25	720	349	183.25	452.75	355	566.5	768	774	Y
8	4	CL367Contig7|CL367Contig7	N.E(+304.20)GFVDR.N	N	22.45	1025.54	8.2	513.781	2	13.96	F5:3477	1	2370	1611	2631	1582	1021	1618	1652	1304	466	471	Y
8	4	CL367Contig7|CL367Contig7	R.A(+304.20)IFEAA.I	N	22.25	924.517	8.5	463.27	2	25.65	F5:5272	1	1027	255.75	778	1337	1350	593.5	886	1470	796	801	Y
8	4	CL367Contig7|CL367Contig7	K.K(+304.20)LY(+304.20)GEYLVN.A	N	21.94	1705.98	3.7	569.668	3	27.87	F9:5250	1	291	199.5	93.5	552	348	600	363.25	148.5	377	385	Y
8	4	CL367Contig7|CL367Contig7	M.A(+304.20)GSLR.Q	N	21.61	806.486	-8	404.247	2	11.01	F7:3182	1	227.5	489.25	652.875	1263	227.75	1664	1024	108.25	948	952	Y
8	4	CL367Contig7|CL367Contig7	K.Q(+304.20)PLAPPALSGDLGTF.M	N	20.87	1786.97	-2	894.491	2	48.06	F1:9019	1	354	148	865.5	241.5	258.5	164.5	634	318	620	634	Y
8	4	CL367Contig7|CL367Contig7	K.I(+304.20)LENHY(+304.20)K(+304.20).D	N	19.91	1828.08	6.7	610.372	3	16.97	F2:4382	2	287	207.5	766	329	828	159.125	469.25	187.5	421	427	Y
8	4	CL367Contig7|CL367Contig7	H.S(+304.20)LFEEK(+304.20).L	N	18.89	1359.78	9.7	454.27	3	18.62	F6:3863	1	678	121.25	524.375	203.5	485.625	153.625	459.25	852.25	247	252	Y
8	4	CL367Contig7|CL367Contig7	N.D(+304.20)TAGK(+304.20).T	N	18.78	1098.64	-9.7	367.217	3	15.7	F8:3870	2	1007	1818	677	1521	794	554	334.125	772	265	269	Y
8	4	CL367Contig7|CL367Contig7	A.R(+304.20)GWGK(+304.20).C	N	16.84	1210.73	15.5	404.59	3	15.47	F3:4061	1	1770	1069	1392	769.5	1437	2623	2456	1554	571	575	Y
8	4	CL367Contig7|CL367Contig7	K.M(+304.20)VEPGHLDQL.L	N	16.66	1441.75	7.8	721.887	2	27.04	F5:5480	1	908	60.875	770	859.875	274	234	1024	197	477	486	Y
8	4	CL367Contig7|CL367Contig7	K.R(+304.20)VY(+304.20)VFGK(+304.20).G	N	15.58	1780.1	-8.5	446.028	4	31.81	F5:6197	1	236.625	181.5	465	347	49.5	536.5	151	205.5	98	104	Y
8	4	CL367Contig7|CL367Contig7	R.L(+304.20)WMLQ.C	N	14.72	993.557	-0.3	497.786	2	48.23	F8:8748	3	1040	1060	1004	525.125	379	436.875	843.375	638	441	445	Y
8	4	CL367Contig7|CL367Contig7	K.G(+304.20)K(+304.20)SEGDK(+304.20)TMK(+304.20).Q	N	12.03	2296.33	5.3	575.092	4	12.03	F2:3640	1	860	890	1197	1811	940	412.625	1912	1361	105	114	Y
8	4	CL367Contig7|CL367Contig7	K.I(+304.20)AVDMVN.E	N	11.38	1064.58	8.9	533.302	2	31.56	F1:6534	1	201.5	612	920.625	1023	724	273	920.5	924	459	465	Y
8	4	CL367Contig7|CL367Contig7	K.L(+304.20)SEVNPM.L	N	10.66	1092.57	4.5	547.297	2	31.24	F1:6486	1	775.5	180.875	661.5	881.875	617.5	272	452	372.5	768	774	Y
8	4	CL367Contig7|CL367Contig7	K.I(+304.20)AVDMVNEGFV.D	N	9.59	1496.78	-1.5	749.396	2	37.15	F5:6998	1	1391	612	901.75	566.25	650	1030	1588	899.5	459	469	Y
8	4	CL367Contig7|CL367Contig7	S.T(+304.20)VRVNDAEK(+304.20).S	N	9.07	1638.94	6.1	547.324	3	22.41	F6:4432	1	123.75	222	611.875	304	406	299	394	513.5	583	591	Y
8	4	CL367Contig7|CL367Contig7	K.M(+304.20)VEPGHLDQLLHPQ.F	N	8.78	1917	9.2	640.014	3	40.9	F7:7663	1	304	146	219.5	126	441.875	129.5	495	447	477	490	Y
8	4	CL367Contig7|CL367Contig7	M.S(+304.20)WVDEVR.Q	N	8.51	1193.63	3.8	597.824	2	19.19	F5:4292	1	2358	1956	1336	1835	2209	1060	2392	3418	636	642	Y
8	4	CL367Contig7|CL367Contig7	N.E(+304.20)GFVDRNTAIK(+304.20).M	N	8.01	1857.05	-15	929.516	2	41.48	F5:7656	1	573.125	392	696.875	1134	290	712	256	380.75	466	476	Y
8	4	CL367Contig7|CL367Contig7	A.K(+304.20)AC(+45.99)VIR.S	N	7.83	1038.59	19	520.314	2	15.81	F4:4188	1	956	828.5	1337	960	888	715.25	930	1128	65	70	Y
8	4	CL367Contig7|CL367Contig7	K.S(+304.20)GERFAYDSYRR.F	N	7.51	1809.9	-1	604.307	3	16.53	F1:4280	1	421.75	208.5	1006	1251	252	378.625	1272	379	221	232	Y
8	4	CL367Contig7|CL367Contig7	K.L(+304.20)YGEYLV.N	N	7.47	1159.64	6.9	580.83	2	23	F9:4521	1	18980	16970	25330	19480	14420	11840	19960	14300	378	384	Y
8	4	CL367Contig7|CL367Contig7	A.C(+45.99)(+304.20)EQY(+304.20)QIAGK(+304.20).S	N	6.91	1997.07	-13.2	999.528	2	59.96	F5:10436	2	365	531.125	1877	287	268	291	460.75	377.625	145	153	Y
8	4	CL367Contig7|CL367Contig7	K.S(+304.20)GERFAY(+304.20)DSY(+304.20)RR.F	N	5.07	2418.3	8.2	484.671	5	34.55	F11:6869	1	75.75	254	440.75	319.5	360	534	358	331	221	232	Y
4	12	CAPP7_ERATE|CAPP7_ERATE	R.F(+304.20)TAATLEHGMHPPVSPK(+304.20)PEWSK(+304.20).L	N	95.53	3358.81	9.3	672.776	5	40.59	F12:7646	5	2528	2645	3913	2813	1616	1542	5761	2583	799	820	Y
4	12	CAPP7_ERATE|CAPP7_ERATE	K.E(+304.20)LDEALQAEIQAAFR.T	N	94.98	2007.05	10.7	670.032	3	53.95	F1:9904	15	295.75	476.5	374	382.625	262.125	538.25	712.375	643.25	75	89	Y
4	12	CAPP7_ERATE|CAPP7_ERATE	K.Q(+304.20)QIMVGYSDSGK(+304.20).D	N	93.73	1920.01	5.4	641.015	3	18.78	F8:4333	14	391	486.5	1284	754	591.5	715.5	831.875	354	700	711	Y
4	12	CAPP7_ERATE|CAPP7_ERATE	Y.I(+304.20)ISMATAPSDVLAVELLQR.E	N	92.79	2330.31	3.9	777.781	3	57.57	F6:9710	5	0	0	346.75	61	125.625	248.75	234	408.5	638	656	Y
4	12	CAPP7_ERATE|CAPP7_ERATE	R.H(+304.20)TDAIDAITTHLGIGSYR.E	N	92.36	2244.18	11.6	562.058	4	43.77	F10:8451	6	251.5	580	395	654.5	186.5	363.125	187.75	123.25	465	482	Y
4	12	CAPP7_ERATE|CAPP7_ERATE	R.V(+304.20)TIQGEVIEHSFGEEHLC(+45.99)FR.T	N	91.76	2679.3	12.6	670.842	4	46.37	F7:8482	3	130	357	191	353.125	274.5	151	473	264	775	794	Y
4	12	CAPP7_ERATE|CAPP7_ERATE	K.T(+304.20)IADGVLLDFMR.Q	N	87.09	1653.9	16	552.317	3	53.65	F11:9744	14	325.875	388.25	232.375	529	148	382	265	358.5	433	444	Y
4	12	CAPP7_ERATE|CAPP7_ERATE	K.D(+304.20)ITEDEK(+304.20)K(+304.20)ELDEALQAEIQAAFR.T	N	85.92	3573.91	5.9	894.491	4	49.5	F5:8864	7	9338	6462	12830	9381	5103	5159	11600	7375	67	89	Y
4	12	CAPP7_ERATE|CAPP7_ERATE	R.L(+304.20)RDPYITTLNVFQAYTLK(+304.20).Q	N	83.06	2763.57	9.5	691.906	4	51.62	F3:9490	10	378.25	384	223.5	1411	291.875	99.75	752.25	1423	1044	1061	Y
4	12	CAPP7_ERATE|CAPP7_ERATE	K.Q(+304.20)QIM(+15.99)VGYSDSGK(+304.20).D	N	81.54	1936.01	9.2	646.349	3	16.99	F7:4076	5	520	80.75	196.5	198.5	43	88.5	319.625	48.625	700	711	Y
4	12	CAPP7_ERATE|CAPP7_ERATE	R.Y(+304.20)GMSYFQENIWK(+304.20).G	N	81.11	2173.1	-0.4	1087.56	2	44.73	F9:7780	12	766	1293	4094	3367	1264	441	3920	1867	106	117	Y
4	12	CAPP7_ERATE|CAPP7_ERATE	R.V(+304.20)TLDLLEMVFAK(+304.20).G	N	79.43	1986.16	5.2	663.063	3	61.84	F6:10357	20	1918	1048	1157	2873	1785	266.5	1271	5347	929	940	Y
4	12	CAPP7_ERATE|CAPP7_ERATE	R.H(+304.20)TDAIDAITTH.L	N	79.11	1497.77	12.2	500.269	3	16.46	F7:3997	1	514	451.25	1360	891	573.5	248.5	1284	487.75	465	475	Y
4	12	CAPP7_ERATE|CAPP7_ERATE	K.Q(+304.20)QIMVGY(+304.20)SDSGK(+304.20).D	N	78.13	2224.21	16.7	557.07	4	20.96	F2:4980	5	1010	998.625	3335	2734	1124	575.875	3358	1978	700	711	Y
4	12	CAPP7_ERATE|CAPP7_ERATE	K.E(+304.20)MYNEWPFFR.V	N	76.91	1721.81	16	574.954	3	46.97	F6:8118	4	626	512.5	595.5	788	542.5	375	154	756	919	928	Y
4	12	CAPP7_ERATE|CAPP7_ERATE	K.E(+304.20)ILESDPYLK(+304.20).Q	N	76.37	1814.02	18.9	605.691	3	33.9	F5:6511	10	3005	2626	6011	10570	4159	2120	4759	2856	1030	1039	Y
4	12	CAPP7_ERATE|CAPP7_ERATE	R.L(+304.20)ADLQNAPASVER.L	N	74.32	1686.92	4.4	563.315	3	26.57	F5:5409	16	2296	759.375	1444	2153	342.5	826	3270	1981	673	685	Y
4	12	CAPP7_ERATE|CAPP7_ERATE	R.A(+304.20)QPTPQDEMR.Y	N	71.66	1475.73	7.4	492.921	3	12.9	F5:3317	6	2391	3272	5559	4934	2868	1020	3400	2613	96	105	Y
4	12	CAPP7_ERATE|CAPP7_ERATE	K.L(+304.20)M(+15.99)DEMAVVATEAYR.S	N	70.69	1917.94	4.1	959.983	2	42.86	F5:7865	2	1542	400.875	2475	1135	703.75	675	2189	656	821	834	Y
4	12	CAPP7_ERATE|CAPP7_ERATE	R.Q(+304.20)VSTFGLTLAK(+304.20).L	N	70.06	1772.06	5.9	887.04	2	40.78	F3:7858	5	169.5	178.5	434	130.125	127.5	231.5	201.5	41.75	445	455	Y
4	12	CAPP7_ERATE|CAPP7_ERATE	K.R(+304.20)QEWLLTELQGK(+304.20).R	N	66.75	2108.21	7.7	703.749	3	38.7	F9:6876	9	1496	678.625	2880	1323	633.125	855.875	1226	1772	591	602	Y
4	12	CAPP7_ERATE|CAPP7_ERATE	R.Y(+304.20)GM(+15.99)SYFQENIWK(+304.20).G	N	65.15	2189.1	3.2	730.709	3	41.21	F8:7698	8	302.5	335	1238	494	380	341	509.25	555.5	106	117	Y
4	12	CAPP7_ERATE|CAPP7_ERATE	R.F(+304.20)HLPVWLGVGTAFK(+304.20).S	N	64.21	2179.27	6	545.827	4	51.92	F3:9535	6	112	0	230.875	65.75	149	0	0	0	891	904	Y
4	12	CAPP7_ERATE|CAPP7_ERATE	K.L(+304.20)MDEMAVVATEAY(+304.20)R.S	N	63.68	2206.15	10.4	736.398	3	46.88	F6:8105	2	1415	1592	2164	2235	1500	1300	3380	2440	821	834	Y
4	12	CAPP7_ERATE|CAPP7_ERATE	K.F(+304.20)SSWMGGDR.D	N	63.55	1345.63	4.6	449.554	3	29.27	F9:5460	7	728.375	624	1264	1268	673	239.25	1138	622	148	156	Y
4	12	CAPP7_ERATE|CAPP7_ERATE	K.Y(+304.20)(+304.20)LETQELLLQIAGHK(+304.20).E	N	62.68	2667.56	11.9	534.525	5	47.26	F12:8658	2	152.5	247.25	705.125	120.25	227	86	443	105	1015	1029	Y
4	12	CAPP7_ERATE|CAPP7_ERATE	K.G(+304.20)IAAGMQNTG.X	N	62.58	1222.62	6.8	612.323	2	16.87	F11:4212	8	670.375	172	523.25	616.125	333	393	62.625	1028	1106	1115	Y
4	12	CAPP7_ERATE|CAPP7_ERATE	R.Y(+304.20)(+304.20)GMSYFQENIWK(+304.20).G	N	62.2	2477.3	7.2	496.471	5	43.69	F2:8398	2	224.25	237	1112	1518	121.75	41.375	1036	1374	106	117	Y
4	12	CAPP7_ERATE|CAPP7_ERATE	R.Q(+304.20)EWLLSELQGK(+304.20).R	N	59.73	1938.09	7.5	647.043	3	45.7	F6:7928	3	921.625	150	336	510.75	157	344	173.5	321.5	490	500	Y
4	12	CAPP7_ERATE|CAPP7_ERATE	K.Q(+304.20)QIM(+15.99)VGY(+304.20)SDSGK(+304.20).D	N	59.41	2240.21	0.1	561.059	4	16.98	F2:4383	1	803.625	776	998	482	136	491	997.5	345.875	700	711	Y
4	12	CAPP7_ERATE|CAPP7_ERATE	R.A(+304.20)QPTPQDEM(+15.99)R.Y	N	59.29	1491.72	12.5	498.255	3	10.54	F6:2643	6	463.625	217.875	574.375	771.75	167	88.25	244.5	415	96	105	Y
4	12	CAPP7_ERATE|CAPP7_ERATE	R.S(+304.20)ATPETEYGR.M	N	58.35	1413.7	7.1	472.244	3	12.52	F6:2940	4	1470	2850	2668	3021	1719	869.875	2693	1885	849	858	Y
4	12	CAPP7_ERATE|CAPP7_ERATE	R.D(+304.20)VC(+45.99)LLAR.M	N	58.16	1138.61	5.9	380.546	3	31.67	F8:6266	21	265	609.375	753.75	388	399	461.25	735.125	638.375	310	316	Y
4	12	CAPP7_ERATE|CAPP7_ERATE	K.G(+304.20)DPGIAALYDK(+304.20).L	N	57.65	1726.96	5.6	864.492	2	26.32	F6:5019	6	1216	1357	1241	1528	1340	315	1080	1524	987	997	Y
4	12	CAPP7_ERATE|CAPP7_ERATE	R.L(+304.20)FSIDWYLNR.I	N	56.99	1629.88	5	815.95	2	53.68	F9:9122	16	1349	1488	2344	2791	792	574	1800	1164	686	695	Y
4	12	CAPP7_ERATE|CAPP7_ERATE	R.F(+304.20)VEYFR.S	N	56.86	1163.62	6.2	582.822	2	38.07	F9:6781	11	7934	6736	15290	9408	4620	3197	10050	8752	843	848	Y
4	12	CAPP7_ERATE|CAPP7_ERATE	K.S(+304.20)LVEVGDK(+304.20).T	N	56.32	1453.85	11.4	485.629	3	17.42	F6:3682	6	26910	19170	40370	34420	21040	14230	38550	22970	425	432	Y
4	12	CAPP7_ERATE|CAPP7_ERATE	K.L(+304.20)TFFHGR.G	N	56.09	1180.66	-1.5	394.56	3	27.38	F4:5923	6	198.5	323	461	646	148	357	178	470.25	740	746	Y
4	12	CAPP7_ERATE|CAPP7_ERATE	R.A(+304.20)DELLSAPK(+304.20).K	N	55.11	1550.9	3.7	388.734	4	21.61	F6:4311	12	139.5	52.5	305.875	514.5	190.5	276	314.5	431.5	347	355	Y
4	12	CAPP7_ERATE|CAPP7_ERATE	R.Y(+304.20)GMSY(+304.20)FQENIWK(+304.20).G	N	55.05	2477.3	11.4	496.473	5	43.76	F2:8409	2	475.125	753.75	2298	1606	233.25	588.875	1911	1680	106	117	Y
4	12	CAPP7_ERATE|CAPP7_ERATE	R.L(+304.20)FSIDWY(+304.20)LNR.I	N	54.41	1934.08	8.3	484.531	4	49.72	F3:9200	2	300	332	171.5	593.5	289	114.75	655.5	717.5	686	695	Y
4	12	CAPP7_ERATE|CAPP7_ERATE	R.V(+304.20)TPEVTR.D	N	53.76	1104.64	2.9	553.328	2	12.92	F9:2984	8	12770	11520	22690	18680	9572	7389	19160	11100	162	168	Y
4	12	CAPP7_ERATE|CAPP7_ERATE	K.L(+304.20)LVADELK(+304.20)PFGENLR.S	N	53.64	2321.35	13.1	774.799	3	45.14	F6:7844	3	9954	5749	12560	10760	6312	4881	9855	8886	998	1012	Y
4	12	CAPP7_ERATE|CAPP7_ERATE	R.N(+304.20)C(+45.99)LTQLYAK(+304.20).D	N	53.01	1706.92	4.8	854.471	2	40.42	F3:7805	4	878.5	382	1341	734	269	385	1468	1446	58	66	Y
4	12	CAPP7_ERATE|CAPP7_ERATE	K.E(+304.20)ILESDPY(+304.20)LK(+304.20).Q	N	52.79	2118.22	8.3	530.566	4	27.11	F6:5137	7	2192	1506	2856	1640	804	882.5	1252	772.5	1030	1039	Y
4	12	CAPP7_ERATE|CAPP7_ERATE	R.A(+304.20)IPSTEPYR.V	N	52.78	1336.72	12.2	446.587	3	15.44	F9:3371	13	1924	2154	4040	4802	3056	524	3665	3360	367	375	Y
4	12	CAPP7_ERATE|CAPP7_ERATE	R.L(+304.20)PYDAPLIK(+304.20).F	N	50.54	1636.99	5.2	546.674	3	41.4	F10:8095	23	568	211.5	1006	350.5	435.75	352.25	454.875	484	139	147	Y
4	12	CAPP7_ERATE|CAPP7_ERATE	R.S(+304.20)VVVK(+304.20)EPR.F	N	49.47	1520.94	7.5	761.482	2	12.97	F3:3686	2	1651	980.625	2618	1590	1034	727	2312	1115	835	842	Y
4	12	CAPP7_ERATE|CAPP7_ERATE	K.S(+304.20)VEEFLEPLEVC(+45.99)Y(+304.20)K(+304.20).S	N	49.37	2642.39	11.8	529.492	5	50.44	F6:8638	4	224	0	788	863.75	450.5	148	304	320	411	424	Y
4	12	CAPP7_ERATE|CAPP7_ERATE	K.R(+304.20)QEWLLSELQGK(+304.20).R	N	48.56	2094.19	8	524.56	4	39.48	F8:7439	6	461	981.75	989.25	1206	869.25	734	1338	2058	489	500	Y
4	12	CAPP7_ERATE|CAPP7_ERATE	K.L(+304.20)M(+15.99)DEM(+15.99)AVVATEAY(+304.20)R.S	N	47.56	2238.14	16.4	560.551	4	24.94	F6:4811	2	348	150.5	868.625	858.125	558	140	470	425	821	834	Y
4	12	CAPP7_ERATE|CAPP7_ERATE	R.E(+304.20)WPEEK(+304.20).R	N	46.91	1424.77	5.9	475.932	3	15.91	F5:3782	5	4187	5832	11210	10490	4100	4209	5088	4822	483	488	Y
4	12	CAPP7_ERATE|CAPP7_ERATE	R.W(+304.20)RDLLATGFSEIPEK(+304.20).S	N	46.8	2369.31	7.9	593.339	4	47.6	F6:8212	1	446	626.625	1096	182	62.125	86.5	552	83.25	392	406	Y
4	12	CAPP7_ERATE|CAPP7_ERATE	K.G(+304.20)IAAGM(+15.99)QNTG.X	N	46.42	1238.62	5.3	620.319	2	12.68	F7:3431	3	321	118.5	193.875	174.5	234	468	378	279	1106	1115	Y
4	12	CAPP7_ERATE|CAPP7_ERATE	R.R(+304.20)AQPTPQDEMR.Y	N	46.38	1631.83	-1.1	544.95	3	12.34	F10:3712	2	367	92	740	319.625	70.25	259	96.5	498	95	105	Y
4	12	CAPP7_ERATE|CAPP7_ERATE	R.F(+304.20)TAATLEHGM(+15.99)HPPVSPK(+304.20)PEWSK(+304.20).L	N	46.14	3374.81	5.7	675.972	5	36.09	F12:6957	2	1161	907.5	1562	934.625	334.125	311	882	614.5	799	820	Y
4	12	CAPP7_ERATE|CAPP7_ERATE	K.D(+304.20)ITEDEK(+304.20).K	N	45.85	1456.78	9.3	486.604	3	15.12	F1:4070	7	486.875	756.75	1353	1134	1748	303.75	1916	1004	67	73	Y
4	12	CAPP7_ERATE|CAPP7_ERATE	K.S(+304.20)AIDK(+304.20)DIK(+304.20).N	N	44.23	1801.09	10.5	901.563	2	14.6	F9:3239	4	4784	5026	8870	9391	4399	1819	8601	5514	905	912	Y
4	12	CAPP7_ERATE|CAPP7_ERATE	R.D(+304.20)K(+304.20)LYNTSER.W	N	43.85	1732.95	9.4	578.661	3	13.52	F8:3542	3	3254	3372	8385	5429	1530	2348	5264	3915	383	391	Y
4	12	CAPP7_ERATE|CAPP7_ERATE	R.V(+304.20)LAELPSDSFGPY.I	N	42.42	1697.88	7.1	849.952	2	50.71	F1:9418	1	135.5	293	316	349.125	204.25	128.125	230	603.25	625	637	Y
4	12	CAPP7_ERATE|CAPP7_ERATE	K.S(+304.20)IGIDER.L	N	42.04	1092.6	18.7	547.319	2	14.42	F5:3546	6	14170	16540	25230	23190	10440	6976	17980	11810	273	279	Y
4	12	CAPP7_ERATE|CAPP7_ERATE	R.D(+304.20)PNFK(+304.20).V	N	41.55	1227.7	5.1	410.241	3	13.87	F8:3595	7	2632	2757	7066	4700	1940	2700	4664	7107	1065	1069	Y
4	12	CAPP7_ERATE|CAPP7_ERATE	A.T(+304.20)APSDVLAVELLQR.E	N	41.04	1815.04	-3	908.522	2	44.02	F5:8042	2	598	878.5	1762	1504	915.625	1164	1289	1123	643	656	Y
4	12	CAPP7_ERATE|CAPP7_ERATE	N.S(+304.20)TSEYAPGLEDTLIITMK(+304.20).G	N	40.99	2576.38	5.2	859.804	3	45.69	F5:8294	1	255.5	369	458	354	41.125	200.5	165	238.125	1088	1105	Y
4	12	CAPP7_ERATE|CAPP7_ERATE	K.Y(+304.20)LETQELLLQIAGHK(+304.20)EILESDPYLK(+304.20).Q	N	40.81	3855.16	8.9	772.047	5	53.28	F6:9064	4	1863	1248	1100	1366	920	1066	3240	1184	1015	1039	Y
4	12	CAPP7_ERATE|CAPP7_ERATE	R.V(+304.20)DTALK(+304.20).S	N	40.75	1253.77	2.4	627.894	2	15.45	F8:3832	7	3599	4482	9651	7597	2446	2498	7761	5984	126	131	Y
4	12	CAPP7_ERATE|CAPP7_ERATE	P.L(+304.20)PVVPLFER.L	N	40.16	1372.83	-0.1	458.618	3	45.95	F9:7962	7	600	371	358	315	210.5	648	212.5	514.875	664	672	Y
4	12	CAPP7_ERATE|CAPP7_ERATE	M.A(+304.20)TAPSDVLAVELLQR.E	N	39.95	1886.07	0.6	944.044	2	44.22	F5:8071	2	638	976.125	959.875	327	249.5	74.25	442	915.375	642	656	Y
4	12	CAPP7_ERATE|CAPP7_ERATE	S.M(+304.20)ATAPSDVLAVELLQR.E	N	38.64	2017.11	-4.4	1009.56	2	47.26	F5:8528	1	774.75	528.875	1098	426.75	522	147.5	843.25	562	641	656	Y
4	12	CAPP7_ERATE|CAPP7_ERATE	R.E(+304.20)C(+45.99)HIR.N	N	38.61	1006.49	0.2	336.505	3	14.47	F12:3500	5	4074	1986	8666	10190	4014	8862	5554	5086	657	661	Y
4	12	CAPP7_ERATE|CAPP7_ERATE	K.L(+304.20)YNTSER.W	N	37.01	1185.62	8.4	593.824	2	15.06	F10:4120	4	2614	3016	4468	3520	1391	644.125	2960	2880	385	391	Y
4	12	CAPP7_ERATE|CAPP7_ERATE	K.S(+304.20)IGINER.L	N	36.86	1091.62	-2.3	364.879	3	15.44	F10:4177	7	87	791.25	282	1084	338	489.5	318	153	132	138	Y
4	12	CAPP7_ERATE|CAPP7_ERATE	K.G(+304.20)DPGIAALY(+304.20)DK(+304.20).L	N	36.31	2031.16	0.3	508.798	4	22.05	F9:4378	3	1201	626	1046	1415	279	671	330.625	1032	987	997	Y
4	12	CAPP7_ERATE|CAPP7_ERATE	K.G(+304.20)DPGIAAL.Y	N	36.06	1016.58	7.7	509.299	2	27.87	F1:5980	1	199.5	518.125	434	507.5	164	1099	553.25	832	987	994	Y
4	12	CAPP7_ERATE|CAPP7_ERATE	N.P(+304.20)LPVVPLFER.L	N	35.76	1469.89	10.6	490.974	3	46.83	F9:8094	2	125.5	415.5	395	96.5	50.375	268	214	320	663	672	Y
4	12	CAPP7_ERATE|CAPP7_ERATE	Q.I(+304.20)AGHK(+304.20)EILESDPYLK(+304.20).Q	N	35.72	2624.51	10.4	525.916	5	26.84	F8:5542	3	454.375	262	1050	695.375	239.5	57.625	874.625	410	1025	1039	Y
4	12	CAPP7_ERATE|CAPP7_ERATE	K.Q(+304.20)IRDPNFK(+304.20).V	N	34.54	1624.94	5.2	542.657	3	14.79	F3:3959	4	2436	1844	4258	2375	1644	1694	3291	2005	1062	1069	Y
4	12	CAPP7_ERATE|CAPP7_ERATE	R.S(+304.20)VVVK(+304.20).E	N	33.8	1138.74	-0.4	570.378	2	14.85	F4:4044	1	1929	1454	2472	2442	980.125	1058	1995	1613	835	839	Y
4	12	CAPP7_ERATE|CAPP7_ERATE	R.L(+304.20)RDPYITTLNVFQAY(+304.20).T	N	33.77	2421.34	8.4	485.28	5	48.4	F3:9002	1	297	426.25	316.5	178	227.125	172.25	311.25	128	1044	1058	Y
4	12	CAPP7_ERATE|CAPP7_ERATE	K.E(+304.20)IGK(+304.20)K(+304.20)PEEVFEALK(+304.20).S	N	33.65	2832.68	19.5	473.13	6	40.89	F7:7661	2	1020	959.875	1968	2392	1015	1080	3062	1684	16	29	Y
4	12	CAPP7_ERATE|CAPP7_ERATE	K.Q(+304.20)PPLNK(+304.20).E	N	33.14	1303.8	5.5	435.608	3	13.57	F3:3775	2	1020	1214	2246	1387	810.75	1072	2585	1136	1073	1078	Y
4	12	CAPP7_ERATE|CAPP7_ERATE	R.L(+304.20)SAAWQLY(+304.20)QAQAEVAK(+304.20).V	N	33.04	2688.52	-8.4	673.132	4	45.6	F2:8685	5	77.75	392	471.625	84.5	210	123.25	548.75	106.25	716	731	Y
4	12	CAPP7_ERATE|CAPP7_ERATE	K.Q(+304.20)PPLNK(+304.20)EPANVVQLNSTSEYAPGLEDTLIITMK(+304.20).G	N	32.75	4522.46	0.4	1131.62	4	47.51	F6:8199	5	151.5	43.625	874.875	648	245.5	187.875	786.25	274	1073	1105	Y
4	12	CAPP7_ERATE|CAPP7_ERATE	V.D(+304.20)TALK(+304.20).S	N	29.64	1154.7	-7.7	385.905	3	12.78	F7:3447	3	357	425	462	1302	588	650	934	280.75	127	131	Y
4	12	CAPP7_ERATE|CAPP7_ERATE	R.L(+304.20)RDPYITTLNVF.Q	N	29.02	1754.98	0.7	878.499	2	48.05	F8:8722	7	147	252	461.625	411.25	250.25	86.25	677.875	686.375	1044	1055	Y
4	12	CAPP7_ERATE|CAPP7_ERATE	Q.I(+304.20)AGHK(+304.20).E	N	28.24	1132.71	9.5	567.366	2	10.39	F3:3298	1	2331	2505	4218	4625	2744	1044	5264	2113	1025	1029	Y
4	12	CAPP7_ERATE|CAPP7_ERATE	Q.A(+304.20)EVAK(+304.20).V	N	27.61	1124.69	-0.4	375.904	3	11.85	F9:2824	1	381	233	722	757	601.875	570	165	113.75	727	731	Y
4	12	CAPP7_ERATE|CAPP7_ERATE	R.S(+304.20)LLQK(+304.20).H	N	27.06	1195.76	0.4	598.89	2	17.49	F4:4438	1	1262	1136	3759	2148	1718	880	2693	1598	48	52	Y
4	12	CAPP7_ERATE|CAPP7_ERATE	R.R(+304.20)VDTALK(+304.20).S	N	26.25	1409.87	4.9	470.966	3	12.85	F3:3668	2	5676	3920	9445	4599	2850	2944	5943	2509	125	131	Y
4	12	CAPP7_ERATE|CAPP7_ERATE	R.T(+304.20)DEVR.R	N	25.82	922.497	-6.8	462.253	2	10.48	F5:2955	2	689	544.5	892	1225	825.25	435.5	1338	286	90	94	Y
4	12	CAPP7_ERATE|CAPP7_ERATE	R.L(+304.20)RDPYITTL.N	N	25.4	1394.8	-0.5	465.941	3	37.43	F8:7131	5	177	573.125	77.5	210.25	74.5	132	62.875	71.5	1044	1052	Y
4	12	CAPP7_ERATE|CAPP7_ERATE	R.V(+304.20)LAELPSDSFGPYIISM.A	N	24.24	2142.12	-0.2	1072.07	2	60.01	F1:10820	1	46.25	49.625	240	96.25	129.75	141.375	60.625	51.5	625	641	Y
4	12	CAPP7_ERATE|CAPP7_ERATE	R.S(+304.20)ATPETEY(+304.20)GR.M	N	24.16	1717.9	6.7	573.644	3	13.2	F8:3494	2	1040	1398	732	1129	1216	1048	1267	678	849	858	Y
4	12	CAPP7_ERATE|CAPP7_ERATE	R.A(+304.20)IPSTEPY(+304.20)R.V	N	23.19	1640.92	5.1	821.473	2	15.53	F3:4070	1	1654	1836	2622	1160	1227	864	2777	1852	367	375	Y
4	12	CAPP7_ERATE|CAPP7_ERATE	K.L(+304.20)Y(+304.20)NTSER.W	N	22.59	1489.82	11.5	497.621	3	13.25	F3:3728	1	2532	2270	3430	3130	1916	1196	2224	1716	385	391	Y
4	12	CAPP7_ERATE|CAPP7_ERATE	D.I(+304.20)EETLK(+304.20).R	N	22.34	1339.81	-19	447.601	3	13.95	F5:3475	1	1740	3912	7543	1692	501	776.25	1176	1079	6	11	Y
4	12	CAPP7_ERATE|CAPP7_ERATE	R.F(+304.20)VEY(+304.20)FR.S	N	21.03	1467.82	7.7	490.285	3	40.28	F4:7867	1	422.25	594.625	694	701.75	832	280	696	1156	843	848	Y
4	12	CAPP7_ERATE|CAPP7_ERATE	R.T(+304.20)DEVRR.A	N	20.97	1078.6	4.5	360.542	3	9.65	F10:3308	3	393.25	276.25	289	561	389	468	680.375	508	90	95	Y
4	12	CAPP7_ERATE|CAPP7_ERATE	K.K(+304.20)Y(+304.20)GVK(+304.20).L	N	19.4	1505.95	2.3	377.497	4	12.26	F3:3579	4	8297	7486	12130	11320	3816	5560	10510	5069	735	739	Y
4	12	CAPP7_ERATE|CAPP7_ERATE	R.C(+45.99)(+304.20)NNELR.A	N	17.59	1097.52	3.6	549.77	2	15.88	F10:4242	2	3184	3036	5936	4668	3400	2469	4503	3552	339	344	Y
4	12	CAPP7_ERATE|CAPP7_ERATE	K.L(+304.20)MDEM(+15.99)AVVA.T	N	17.15	1297.65	0.3	649.833	2	36.01	F1:7202	1	587.875	243	433.25	767.125	73	356	492.5	306.25	821	829	Y
4	12	CAPP7_ERATE|CAPP7_ERATE	K.R(+304.20)PLLVADLPVSEEVADVL.G	N	16.89	2238.27	9.1	747.105	3	53.26	F5:9429	2	151.5	134.75	55.875	128.5	99.5	219.25	264	47.625	603	620	Y
4	12	CAPP7_ERATE|CAPP7_ERATE	R.L(+304.20)RDPY(+304.20)ITTL.N	N	16.63	1699	9.1	425.762	4	35.07	F3:7002	1	88.5	0	164	221	99	69.5	48.875	374	1044	1052	Y
4	12	CAPP7_ERATE|CAPP7_ERATE	R.G(+304.20)GGPTHLAILSQPPDTIN.G	N	14.88	2091.12	5.9	698.052	3	39.14	F7:7399	1	160	389.375	472	491	181	496	221	143.5	753	770	Y
4	12	CAPP7_ERATE|CAPP7_ERATE	K.H(+304.20)Y(+304.20)IEFWR.A	N	14.79	1657.91	10.4	553.649	3	25.05	F3:5498	1	138.5	399	546.375	507	367	200	855.625	517	360	366	Y
4	12	CAPP7_ERATE|CAPP7_ERATE	R.D(+304.20)K(+304.20)LY(+304.20)NTSER.W	N	14.49	2037.15	4.1	680.059	3	14.49	F2:4010	1	224	150.5	499.375	49.875	418	382	916.5	87.5	383	391	Y
4	12	CAPP7_ERATE|CAPP7_ERATE	K.E(+304.20)PANVVQLN.S	N	14.38	1286.71	-0.2	644.361	2	23.34	F1:5301	1	495.25	310	519.25	198	470	321.875	304	213.625	1079	1087	Y
4	12	CAPP7_ERATE|CAPP7_ERATE	K.R(+304.20)PLLVPDLP.V	Y	13.73	1322.82	11.6	331.716	4	6.75	F3:2606	1	308	610.625	790	339.875	726	669.625	424.375	278	501	509	Y
4	12	CAPP7_ERATE|CAPP7_ERATE	E.I(+304.20)QAAFR.T	N	11.93	1008.6	11.2	505.311	2	24.57	F4:5501	2	395.5	0	203	147	564	82	155.25	120.75	84	89	Y
4	12	CAPP7_ERATE|CAPP7_ERATE	K.D(+304.20)ITEDEK(+304.20)K(+304.20).E	N	11.85	1889.07	0.3	473.275	4	14.32	F11:3830	1	2040	325.75	1032	675	918	1476	407.125	840.125	67	74	Y
4	12	CAPP7_ERATE|CAPP7_ERATE	K.L(+304.20)LVADELK(+304.20)PFGEN.L	N	10.41	2052.16	-3.7	685.058	3	45	F5:8190	1	617.25	377.25	605.25	1155	458.125	548.25	646	759.25	998	1010	Y
4	12	CAPP7_ERATE|CAPP7_ERATE	I.D(+304.20)K(+304.20)DIK(+304.20).N	N	8.03	1529.94	5	510.989	3	12.5	F8:3389	1	1788	1903	2174	3889	1810	1758	4000	2489	908	912	Y
4	12	CAPP7_ERATE|CAPP7_ERATE	K.Q(+304.20)PPLNK(+304.20)EPANVVQLN.S	N	7.87	2268.29	0.2	757.106	3	24.89	F9:4804	1	352.25	0	251	476	303	166	487	169	1073	1087	Y
4	12	CAPP7_ERATE|CAPP7_ERATE	R.L(+304.20)ADLQN.A	N	7.71	976.544	4.1	489.281	2	23.73	F1:5360	1	220	148.5	847	753.125	76	105.25	694	132.25	673	678	Y
4	12	CAPP7_ERATE|CAPP7_ERATE	Q.A(+304.20)Y(+304.20)TLK(+304.20).Q	N	7.65	1506.94	-6.7	503.317	3	32.81	F8:6438	2	424.125	381.125	227.5	80.25	460.75	394	110.25	506	1057	1061	Y
4	12	CAPP7_ERATE|CAPP7_ERATE	E.M(+304.20)RYGM(+15.99)SYFQENIWK(+304.20).G	N	7.4	2476.24	-9.7	620.061	4	43.59	F3:8280	1	532	364	905.5	1384	108.5	666.75	642	514.5	104	117	Y
4	12	CAPP7_ERATE|CAPP7_ERATE	K.F(+304.20)SSWM(+15.99)GGDR.D	N	7.21	1361.63	5.3	681.825	2	20.82	F7:4650	1	696	68	824.25	992.75	754	106.25	628	532	148	156	Y
4	12	CAPP7_ERATE|CAPP7_ERATE	R.L(+304.20)RDPYITTLN.V	N	5.08	1508.85	5.4	755.434	2	28.58	F9:5357	1	189	870.875	179.5	488.75	196.5	167	648	111.25	1044	1053	Y
4	36	CL1Contig1418|CL1Contig1418	R.F(+304.20)TAATLEHGMHPPVSPK(+304.20)PEWSK(+304.20).L	N	95.53	3358.81	9.3	672.776	5	40.59	F12:7646	5	2528	2645	3913	2813	1616	1542	5761	2583	25	46	Y
4	36	CL1Contig1418|CL1Contig1418	V(+304.20)TIQGEVIEHSFGEEHLC(+45.99)FR.T	N	91.76	2679.3	12.6	670.842	4	46.37	F7:8482	3	130	357	191	353.125	274.5	151	473	264	1	20	Y
4	36	CL1Contig1418|CL1Contig1418	R.L(+304.20)RDPYITTLNVFQAYTLK(+304.20).Q	N	83.06	2763.57	9.5	691.906	4	51.62	F3:9490	10	378.25	384	223.5	1411	291.875	99.75	752.25	1423	321	338	Y
4	36	CL1Contig1418|CL1Contig1418	R.V(+304.20)TLDLLEMVFAK(+304.20).G	N	79.43	1986.16	5.2	663.063	3	61.84	F6:10357	20	1918	1048	1157	2873	1785	266.5	1271	5347	252	263	Y
4	36	CL1Contig1418|CL1Contig1418	K.E(+304.20)MYNEWPFFR.V	N	76.91	1721.81	16	574.954	3	46.97	F6:8118	4	626	512.5	595.5	788	542.5	375	154	756	242	251	Y
4	36	CL1Contig1418|CL1Contig1418	K.E(+304.20)ILESDPYLK(+304.20).Q	N	76.37	1814.02	18.9	605.691	3	33.9	F5:6511	10	3005	2626	6011	10570	4159	2120	4759	2856	307	316	Y
4	36	CL1Contig1418|CL1Contig1418	K.L(+304.20)M(+15.99)DEMAVVATEAYR.S	N	70.69	1917.94	4.1	959.983	2	42.86	F5:7865	2	1542	400.875	2475	1135	703.75	675	2189	656	47	60	Y
4	36	CL1Contig1418|CL1Contig1418	R.F(+304.20)HLPVWLGVGTAFK(+304.20).S	N	64.21	2179.27	6	545.827	4	51.92	F3:9535	6	112	0	230.875	65.75	149	0	0	0	214	227	Y
4	36	CL1Contig1418|CL1Contig1418	K.L(+304.20)MDEMAVVATEAY(+304.20)R.S	N	63.68	2206.15	10.4	736.398	3	46.88	F6:8105	2	1415	1592	2164	2235	1500	1300	3380	2440	47	60	Y
4	36	CL1Contig1418|CL1Contig1418	K.Y(+304.20)(+304.20)LETQELLLQIAGHK(+304.20).E	N	62.68	2667.56	11.9	534.525	5	47.26	F12:8658	2	152.5	247.25	705.125	120.25	227	86	443	105	292	306	Y
4	36	CL1Contig1418|CL1Contig1418	K.G(+304.20)IAAGMQNTG	N	62.58	1222.62	6.8	612.323	2	16.87	F11:4212	8	670.375	172	523.25	616.125	333	393	62.625	1028	383	392	Y
4	36	CL1Contig1418|CL1Contig1418	R.S(+304.20)ATPETEYGR.M	N	58.35	1413.7	7.1	472.244	3	12.52	F6:2940	4	1470	2850	2668	3021	1719	869.875	2693	1885	75	84	Y
4	36	CL1Contig1418|CL1Contig1418	K.G(+304.20)DPGIAALYDK(+304.20).L	N	57.65	1726.96	5.6	864.492	2	26.32	F6:5019	6	1216	1357	1241	1528	1340	315	1080	1524	264	274	Y
4	36	CL1Contig1418|CL1Contig1418	R.F(+304.20)VEYFR.S	N	56.86	1163.62	6.2	582.822	2	38.07	F9:6781	11	7934	6736	15290	9408	4620	3197	10050	8752	69	74	Y
4	36	CL1Contig1418|CL1Contig1418	K.L(+304.20)LVADELK(+304.20)PFGENLR.S	N	53.64	2321.35	13.1	774.799	3	45.14	F6:7844	3	9954	5749	12560	10760	6312	4881	9855	8886	275	289	Y
4	36	CL1Contig1418|CL1Contig1418	K.E(+304.20)ILESDPY(+304.20)LK(+304.20).Q	N	52.79	2118.22	8.3	530.566	4	27.11	F6:5137	7	2192	1506	2856	1640	804	882.5	1252	772.5	307	316	Y
4	36	CL1Contig1418|CL1Contig1418	R.S(+304.20)VVVK(+304.20)EPR.F	N	49.47	1520.94	7.5	761.482	2	12.97	F3:3686	2	1651	980.625	2618	1590	1034	727	2312	1115	61	68	Y
4	36	CL1Contig1418|CL1Contig1418	K.L(+304.20)M(+15.99)DEM(+15.99)AVVATEAY(+304.20)R.S	N	47.56	2238.14	16.4	560.551	4	24.94	F6:4811	2	348	150.5	868.625	858.125	558	140	470	425	47	60	Y
4	36	CL1Contig1418|CL1Contig1418	K.G(+304.20)IAAGM(+15.99)QNTG	N	46.42	1238.62	5.3	620.319	2	12.68	F7:3431	3	321	118.5	193.875	174.5	234	468	378	279	383	392	Y
4	36	CL1Contig1418|CL1Contig1418	R.F(+304.20)TAATLEHGM(+15.99)HPPVSPK(+304.20)PEWSK(+304.20).L	N	46.14	3374.81	5.7	675.972	5	36.09	F12:6957	2	1161	907.5	1562	934.625	334.125	311	882	614.5	25	46	Y
4	36	CL1Contig1418|CL1Contig1418	K.S(+304.20)AIDK(+304.20)DIK(+304.20).N	N	44.23	1801.09	10.5	901.563	2	14.6	F9:3239	4	4784	5026	8870	9391	4399	1819	8601	5514	228	235	Y
4	36	CL1Contig1418|CL1Contig1418	R.D(+304.20)PNFK(+304.20).V	N	41.55	1227.7	5.1	410.241	3	13.87	F8:3595	7	2632	2757	7066	4700	1940	2700	4664	7107	342	346	Y
4	36	CL1Contig1418|CL1Contig1418	N.S(+304.20)TSEYAPGLEDTLIITMK(+304.20).G	N	40.99	2576.38	5.2	859.804	3	45.69	F5:8294	1	255.5	369	458	354	41.125	200.5	165	238.125	365	382	Y
4	36	CL1Contig1418|CL1Contig1418	K.Y(+304.20)LETQELLLQIAGHK(+304.20)EILESDPYLK(+304.20).Q	N	40.81	3855.16	8.9	772.047	5	53.28	F6:9064	4	1863	1248	1100	1366	920	1066	3240	1184	292	316	Y
4	36	CL1Contig1418|CL1Contig1418	K.G(+304.20)DPGIAALY(+304.20)DK(+304.20).L	N	36.31	2031.16	0.3	508.798	4	22.05	F9:4378	3	1201	626	1046	1415	279	671	330.625	1032	264	274	Y
4	36	CL1Contig1418|CL1Contig1418	K.G(+304.20)DPGIAAL.Y	N	36.06	1016.58	7.7	509.299	2	27.87	F1:5980	1	199.5	518.125	434	507.5	164	1099	553.25	832	264	271	Y
4	36	CL1Contig1418|CL1Contig1418	Q.I(+304.20)AGHK(+304.20)EILESDPYLK(+304.20).Q	N	35.72	2624.51	10.4	525.916	5	26.84	F8:5542	3	454.375	262	1050	695.375	239.5	57.625	874.625	410	302	316	Y
4	36	CL1Contig1418|CL1Contig1418	K.Q(+304.20)IRDPNFK(+304.20).V	N	34.54	1624.94	5.2	542.657	3	14.79	F3:3959	4	2436	1844	4258	2375	1644	1694	3291	2005	339	346	Y
4	36	CL1Contig1418|CL1Contig1418	R.S(+304.20)VVVK(+304.20).E	N	33.8	1138.74	-0.4	570.378	2	14.85	F4:4044	1	1929	1454	2472	2442	980.125	1058	1995	1613	61	65	Y
4	36	CL1Contig1418|CL1Contig1418	R.L(+304.20)RDPYITTLNVFQAY(+304.20).T	N	33.77	2421.34	8.4	485.28	5	48.4	F3:9002	1	297	426.25	316.5	178	227.125	172.25	311.25	128	321	335	Y
4	36	CL1Contig1418|CL1Contig1418	K.Q(+304.20)PPLNK(+304.20).E	N	33.14	1303.8	5.5	435.608	3	13.57	F3:3775	2	1020	1214	2246	1387	810.75	1072	2585	1136	350	355	Y
4	36	CL1Contig1418|CL1Contig1418	K.Q(+304.20)PPLNK(+304.20)EPANVVQLNSTSEYAPGLEDTLIITMK(+304.20).G	N	32.75	4522.46	0.4	1131.62	4	47.51	F6:8199	5	151.5	43.625	874.875	648	245.5	187.875	786.25	274	350	382	Y
4	36	CL1Contig1418|CL1Contig1418	R.L(+304.20)RDPYITTLNVF.Q	N	29.02	1754.98	0.7	878.499	2	48.05	F8:8722	7	147	252	461.625	411.25	250.25	86.25	677.875	686.375	321	332	Y
4	36	CL1Contig1418|CL1Contig1418	Q.I(+304.20)AGHK(+304.20).E	N	28.24	1132.71	9.5	567.366	2	10.39	F3:3298	1	2331	2505	4218	4625	2744	1044	5264	2113	302	306	Y
4	36	CL1Contig1418|CL1Contig1418	R.L(+304.20)RDPYITTL.N	N	25.4	1394.8	-0.5	465.941	3	37.43	F8:7131	5	177	573.125	77.5	210.25	74.5	132	62.875	71.5	321	329	Y
4	36	CL1Contig1418|CL1Contig1418	R.S(+304.20)ATPETEY(+304.20)GR.M	N	24.16	1717.9	6.7	573.644	3	13.2	F8:3494	2	1040	1398	732	1129	1216	1048	1267	678	75	84	Y
4	36	CL1Contig1418|CL1Contig1418	R.F(+304.20)VEY(+304.20)FR.S	N	21.03	1467.82	7.7	490.285	3	40.28	F4:7867	1	422.25	594.625	694	701.75	832	280	696	1156	69	74	Y
4	36	CL1Contig1418|CL1Contig1418	K.L(+304.20)MDEM(+15.99)AVVA.T	N	17.15	1297.65	0.3	649.833	2	36.01	F1:7202	1	587.875	243	433.25	767.125	73	356	492.5	306.25	47	55	Y
4	36	CL1Contig1418|CL1Contig1418	R.L(+304.20)RDPY(+304.20)ITTL.N	N	16.63	1699	9.1	425.762	4	35.07	F3:7002	1	88.5	0	164	221	99	69.5	48.875	374	321	329	Y
4	36	CL1Contig1418|CL1Contig1418	K.E(+304.20)PANVVQLN.S	N	14.38	1286.71	-0.2	644.361	2	23.34	F1:5301	1	495.25	310	519.25	198	470	321.875	304	213.625	356	364	Y
4	36	CL1Contig1418|CL1Contig1418	K.L(+304.20)LVADELK(+304.20)PFGEN.L	N	10.41	2052.16	-3.7	685.058	3	45	F5:8190	1	617.25	377.25	605.25	1155	458.125	548.25	646	759.25	275	287	Y
4	36	CL1Contig1418|CL1Contig1418	I.D(+304.20)K(+304.20)DIK(+304.20).N	N	8.03	1529.94	5	510.989	3	12.5	F8:3389	1	1788	1903	2174	3889	1810	1758	4000	2489	231	235	Y
4	36	CL1Contig1418|CL1Contig1418	K.Q(+304.20)PPLNK(+304.20)EPANVVQLN.S	N	7.87	2268.29	0.2	757.106	3	24.89	F9:4804	1	352.25	0	251	476	303	166	487	169	350	364	Y
4	36	CL1Contig1418|CL1Contig1418	Q.A(+304.20)Y(+304.20)TLK(+304.20).Q	N	7.65	1506.94	-6.7	503.317	3	32.81	F8:6438	2	424.125	381.125	227.5	80.25	460.75	394	110.25	506	334	338	Y
4	36	CL1Contig1418|CL1Contig1418	R.L(+304.20)RDPYITTLN.V	N	5.08	1508.85	5.4	755.434	2	28.58	F9:5357	1	189	870.875	179.5	488.75	196.5	167	648	111.25	321	330	Y
4	38	CL1Contig1420|CL1Contig1420	R.F(+304.20)TAATLEHGMHPPVSPK(+304.20)PEWSK(+304.20).L	N	95.53	3358.81	9.3	672.776	5	40.59	F12:7646	5	2528	2645	3913	2813	1616	1542	5761	2583	25	46	Y
4	38	CL1Contig1420|CL1Contig1420	V(+304.20)TIQGEVIEHSFGEEHLC(+45.99)FR.T	N	91.76	2679.3	12.6	670.842	4	46.37	F7:8482	3	130	357	191	353.125	274.5	151	473	264	1	20	Y
4	38	CL1Contig1420|CL1Contig1420	R.L(+304.20)RDPYITTLNVFQAYTLK(+304.20).Q	N	83.06	2763.57	9.5	691.906	4	51.62	F3:9490	10	378.25	384	223.5	1411	291.875	99.75	752.25	1423	321	338	Y
4	38	CL1Contig1420|CL1Contig1420	R.V(+304.20)TLDLLEMVFAK(+304.20).G	N	79.43	1986.16	5.2	663.063	3	61.84	F6:10357	20	1918	1048	1157	2873	1785	266.5	1271	5347	252	263	Y
4	38	CL1Contig1420|CL1Contig1420	K.E(+304.20)MYNEWPFFR.V	N	76.91	1721.81	16	574.954	3	46.97	F6:8118	4	626	512.5	595.5	788	542.5	375	154	756	242	251	Y
4	38	CL1Contig1420|CL1Contig1420	K.E(+304.20)ILESDPYLK(+304.20).Q	N	76.37	1814.02	18.9	605.691	3	33.9	F5:6511	10	3005	2626	6011	10570	4159	2120	4759	2856	307	316	Y
4	38	CL1Contig1420|CL1Contig1420	K.L(+304.20)M(+15.99)DEMAVVATEAYR.S	N	70.69	1917.94	4.1	959.983	2	42.86	F5:7865	2	1542	400.875	2475	1135	703.75	675	2189	656	47	60	Y
4	38	CL1Contig1420|CL1Contig1420	R.F(+304.20)HLPVWLGVGTAFK(+304.20).S	N	64.21	2179.27	6	545.827	4	51.92	F3:9535	6	112	0	230.875	65.75	149	0	0	0	214	227	Y
4	38	CL1Contig1420|CL1Contig1420	K.L(+304.20)MDEMAVVATEAY(+304.20)R.S	N	63.68	2206.15	10.4	736.398	3	46.88	F6:8105	2	1415	1592	2164	2235	1500	1300	3380	2440	47	60	Y
4	38	CL1Contig1420|CL1Contig1420	K.Y(+304.20)(+304.20)LETQELLLQIAGHK(+304.20).E	N	62.68	2667.56	11.9	534.525	5	47.26	F12:8658	2	152.5	247.25	705.125	120.25	227	86	443	105	292	306	Y
4	38	CL1Contig1420|CL1Contig1420	K.G(+304.20)IAAGMQNTG.X	N	62.58	1222.62	6.8	612.323	2	16.87	F11:4212	8	670.375	172	523.25	616.125	333	393	62.625	1028	383	392	Y
4	38	CL1Contig1420|CL1Contig1420	R.S(+304.20)ATPETEYGR.M	N	58.35	1413.7	7.1	472.244	3	12.52	F6:2940	4	1470	2850	2668	3021	1719	869.875	2693	1885	75	84	Y
4	38	CL1Contig1420|CL1Contig1420	K.G(+304.20)DPGIAALYDK(+304.20).L	N	57.65	1726.96	5.6	864.492	2	26.32	F6:5019	6	1216	1357	1241	1528	1340	315	1080	1524	264	274	Y
4	38	CL1Contig1420|CL1Contig1420	R.F(+304.20)VEYFR.S	N	56.86	1163.62	6.2	582.822	2	38.07	F9:6781	11	7934	6736	15290	9408	4620	3197	10050	8752	69	74	Y
4	38	CL1Contig1420|CL1Contig1420	K.L(+304.20)LVADELK(+304.20)PFGENLR.S	N	53.64	2321.35	13.1	774.799	3	45.14	F6:7844	3	9954	5749	12560	10760	6312	4881	9855	8886	275	289	Y
4	38	CL1Contig1420|CL1Contig1420	K.E(+304.20)ILESDPY(+304.20)LK(+304.20).Q	N	52.79	2118.22	8.3	530.566	4	27.11	F6:5137	7	2192	1506	2856	1640	804	882.5	1252	772.5	307	316	Y
4	38	CL1Contig1420|CL1Contig1420	R.S(+304.20)VVVK(+304.20)EPR.F	N	49.47	1520.94	7.5	761.482	2	12.97	F3:3686	2	1651	980.625	2618	1590	1034	727	2312	1115	61	68	Y
4	38	CL1Contig1420|CL1Contig1420	K.L(+304.20)M(+15.99)DEM(+15.99)AVVATEAY(+304.20)R.S	N	47.56	2238.14	16.4	560.551	4	24.94	F6:4811	2	348	150.5	868.625	858.125	558	140	470	425	47	60	Y
4	38	CL1Contig1420|CL1Contig1420	K.G(+304.20)IAAGM(+15.99)QNTG.X	N	46.42	1238.62	5.3	620.319	2	12.68	F7:3431	3	321	118.5	193.875	174.5	234	468	378	279	383	392	Y
4	38	CL1Contig1420|CL1Contig1420	R.F(+304.20)TAATLEHGM(+15.99)HPPVSPK(+304.20)PEWSK(+304.20).L	N	46.14	3374.81	5.7	675.972	5	36.09	F12:6957	2	1161	907.5	1562	934.625	334.125	311	882	614.5	25	46	Y
4	38	CL1Contig1420|CL1Contig1420	K.S(+304.20)AIDK(+304.20)DIK(+304.20).N	N	44.23	1801.09	10.5	901.563	2	14.6	F9:3239	4	4784	5026	8870	9391	4399	1819	8601	5514	228	235	Y
4	38	CL1Contig1420|CL1Contig1420	R.D(+304.20)PNFK(+304.20).V	N	41.55	1227.7	5.1	410.241	3	13.87	F8:3595	7	2632	2757	7066	4700	1940	2700	4664	7107	342	346	Y
4	38	CL1Contig1420|CL1Contig1420	N.S(+304.20)TSEYAPGLEDTLIITMK(+304.20).G	N	40.99	2576.38	5.2	859.804	3	45.69	F5:8294	1	255.5	369	458	354	41.125	200.5	165	238.125	365	382	Y
4	38	CL1Contig1420|CL1Contig1420	K.Y(+304.20)LETQELLLQIAGHK(+304.20)EILESDPYLK(+304.20).Q	N	40.81	3855.16	8.9	772.047	5	53.28	F6:9064	4	1863	1248	1100	1366	920	1066	3240	1184	292	316	Y
4	38	CL1Contig1420|CL1Contig1420	K.G(+304.20)DPGIAALY(+304.20)DK(+304.20).L	N	36.31	2031.16	0.3	508.798	4	22.05	F9:4378	3	1201	626	1046	1415	279	671	330.625	1032	264	274	Y
4	38	CL1Contig1420|CL1Contig1420	K.G(+304.20)DPGIAAL.Y	N	36.06	1016.58	7.7	509.299	2	27.87	F1:5980	1	199.5	518.125	434	507.5	164	1099	553.25	832	264	271	Y
4	38	CL1Contig1420|CL1Contig1420	Q.I(+304.20)AGHK(+304.20)EILESDPYLK(+304.20).Q	N	35.72	2624.51	10.4	525.916	5	26.84	F8:5542	3	454.375	262	1050	695.375	239.5	57.625	874.625	410	302	316	Y
4	38	CL1Contig1420|CL1Contig1420	K.Q(+304.20)IRDPNFK(+304.20).V	N	34.54	1624.94	5.2	542.657	3	14.79	F3:3959	4	2436	1844	4258	2375	1644	1694	3291	2005	339	346	Y
4	38	CL1Contig1420|CL1Contig1420	R.S(+304.20)VVVK(+304.20).E	N	33.8	1138.74	-0.4	570.378	2	14.85	F4:4044	1	1929	1454	2472	2442	980.125	1058	1995	1613	61	65	Y
4	38	CL1Contig1420|CL1Contig1420	R.L(+304.20)RDPYITTLNVFQAY(+304.20).T	N	33.77	2421.34	8.4	485.28	5	48.4	F3:9002	1	297	426.25	316.5	178	227.125	172.25	311.25	128	321	335	Y
4	38	CL1Contig1420|CL1Contig1420	K.Q(+304.20)PPLNK(+304.20).E	N	33.14	1303.8	5.5	435.608	3	13.57	F3:3775	2	1020	1214	2246	1387	810.75	1072	2585	1136	350	355	Y
4	38	CL1Contig1420|CL1Contig1420	K.Q(+304.20)PPLNK(+304.20)EPANVVQLNSTSEYAPGLEDTLIITMK(+304.20).G	N	32.75	4522.46	0.4	1131.62	4	47.51	F6:8199	5	151.5	43.625	874.875	648	245.5	187.875	786.25	274	350	382	Y
4	38	CL1Contig1420|CL1Contig1420	R.L(+304.20)RDPYITTLNVF.Q	N	29.02	1754.98	0.7	878.499	2	48.05	F8:8722	7	147	252	461.625	411.25	250.25	86.25	677.875	686.375	321	332	Y
4	38	CL1Contig1420|CL1Contig1420	Q.I(+304.20)AGHK(+304.20).E	N	28.24	1132.71	9.5	567.366	2	10.39	F3:3298	1	2331	2505	4218	4625	2744	1044	5264	2113	302	306	Y
4	38	CL1Contig1420|CL1Contig1420	R.L(+304.20)RDPYITTL.N	N	25.4	1394.8	-0.5	465.941	3	37.43	F8:7131	5	177	573.125	77.5	210.25	74.5	132	62.875	71.5	321	329	Y
4	38	CL1Contig1420|CL1Contig1420	R.S(+304.20)ATPETEY(+304.20)GR.M	N	24.16	1717.9	6.7	573.644	3	13.2	F8:3494	2	1040	1398	732	1129	1216	1048	1267	678	75	84	Y
4	38	CL1Contig1420|CL1Contig1420	R.F(+304.20)VEY(+304.20)FR.S	N	21.03	1467.82	7.7	490.285	3	40.28	F4:7867	1	422.25	594.625	694	701.75	832	280	696	1156	69	74	Y
4	38	CL1Contig1420|CL1Contig1420	K.L(+304.20)MDEM(+15.99)AVVA.T	N	17.15	1297.65	0.3	649.833	2	36.01	F1:7202	1	587.875	243	433.25	767.125	73	356	492.5	306.25	47	55	Y
4	38	CL1Contig1420|CL1Contig1420	R.L(+304.20)RDPY(+304.20)ITTL.N	N	16.63	1699	9.1	425.762	4	35.07	F3:7002	1	88.5	0	164	221	99	69.5	48.875	374	321	329	Y
4	38	CL1Contig1420|CL1Contig1420	K.E(+304.20)PANVVQLN.S	N	14.38	1286.71	-0.2	644.361	2	23.34	F1:5301	1	495.25	310	519.25	198	470	321.875	304	213.625	356	364	Y
4	38	CL1Contig1420|CL1Contig1420	K.L(+304.20)LVADELK(+304.20)PFGEN.L	N	10.41	2052.16	-3.7	685.058	3	45	F5:8190	1	617.25	377.25	605.25	1155	458.125	548.25	646	759.25	275	287	Y
4	38	CL1Contig1420|CL1Contig1420	I.D(+304.20)K(+304.20)DIK(+304.20).N	N	8.03	1529.94	5	510.989	3	12.5	F8:3389	1	1788	1903	2174	3889	1810	1758	4000	2489	231	235	Y
4	38	CL1Contig1420|CL1Contig1420	K.Q(+304.20)PPLNK(+304.20)EPANVVQLN.S	N	7.87	2268.29	0.2	757.106	3	24.89	F9:4804	1	352.25	0	251	476	303	166	487	169	350	364	Y
4	38	CL1Contig1420|CL1Contig1420	Q.A(+304.20)Y(+304.20)TLK(+304.20).Q	N	7.65	1506.94	-6.7	503.317	3	32.81	F8:6438	2	424.125	381.125	227.5	80.25	460.75	394	110.25	506	334	338	Y
4	38	CL1Contig1420|CL1Contig1420	R.L(+304.20)RDPYITTLN.V	N	5.08	1508.85	5.4	755.434	2	28.58	F9:5357	1	189	870.875	179.5	488.75	196.5	167	648	111.25	321	330	Y
9	5	CL367Contig23|CL367Contig23	R.T(+304.20)ETSPEDVGGMHAAAGILTAR.G	N	117.13	2387.2	8.4	597.812	4	29.53	F6:5501	19	3396	2681	4950	5921	1999	1594	3611	1882	632	652	Y
9	5	CL367Contig23|CL367Contig23	K.D(+304.20)MQDIEFTVQENR.L	N	95.23	1927.92	9.5	643.653	3	37.53	F1:7430	9	1771	1263	2019	1520	1013	1033	2418	2064	521	533	Y
9	5	CL367Contig23|CL367Contig23	K.I(+304.20)AVDMVNEGFVDR.N	N	94.63	1767.91	9.3	590.315	3	41.38	F5:7641	8	1959	2285	2772	2543	1948	1126	2720	1536	552	564	Y
9	5	CL367Contig23|CL367Contig23	K.K(+304.20)LY(+304.20)GEY(+304.20)LVNAQGEDVVAGIR.T	N	91.52	3105.74	6.5	622.16	5	39.07	F9:6931	6	2039	2779	2914	2721	1973	1544	1468	1968	470	489	Y
9	5	CL367Contig23|CL367Contig23	K.G(+304.20)ANLAEMASIGLSVPPGFTVSTEAC(+45.99)EQY(+304.20)QIAGK(+304.20).S	N	89.98	4297.2	15.1	860.461	5	51.99	F6:8871	3	1108	672.625	1464	1561	233.625	112	982.875	913.125	96	128	Y
9	5	CL367Contig23|CL367Contig23	K.K(+304.20)LY(+304.20)GEYLVNAQGEDVVAGIR.T	N	89.19	2801.54	2.9	701.395	4	43.24	F7:8013	11	476.25	936.875	1797	1504	488.5	523.125	766.125	450	470	489	Y
9	5	CL367Contig23|CL367Contig23	R.A(+304.20)MDGLPVTIR.L	N	88.34	1375.77	1.6	459.599	3	36.88	F11:7220	29	150.5	385.375	910.125	971	236	299	353	302	840	849	Y
9	5	CL367Contig23|CL367Contig23	K.M(+304.20)VEPGHLDQLLHPQFEDPSAYK(+304.20).D	N	85.02	3158.62	12.8	790.673	4	42.81	F6:7494	6	2500	2080	4603	3450	1536	1754	1908	2171	570	591	Y
9	5	CL367Contig23|CL367Contig23	K.L(+304.20)YGEYLVNAQGEDVVAGIR.T	N	83.82	2369.25	9.3	790.764	3	44.85	F5:8167	4	431.5	848.125	883.5	1074	751.75	462.125	923.25	396	471	489	Y
9	5	CL367Contig23|CL367Contig23	K.M(+304.20)VEPGHLDQLLHPQFEDPSAYK(+304.20)DK(+304.20).V	N	83.45	3705.94	7.1	742.201	5	40.31	F6:7119	13	7641	3680	10080	6617	4432	2320	7586	4096	570	593	Y
9	5	CL367Contig23|CL367Contig23	R.L(+304.20)GISYPELTEMQAR.A	N	81.29	1911	5.3	638.011	3	42.39	F6:7430	10	1926	1161	2355	1908	1234	2292	1781	1702	903	916	Y
9	5	CL367Contig23|CL367Contig23	K.L(+304.20)GDPEK(+304.20)PLLLSVR.S	N	80.14	2044.24	10.3	512.072	4	41.45	F11:7906	23	928	1397	1118	1254	844.25	1028	916.5	813.25	153	165	Y
9	5	CL367Contig23|CL367Contig23	K.D(+304.20)QLPQAYEELVENC(+45.99)K(+304.20).I	N	78.02	2432.21	19.2	609.071	4	48.1	F5:8654	6	164.5	162.625	409.25	380.5	609.375	120	600	424	499	513	Y
9	5	CL367Contig23|CL367Contig23	K.M(+304.20)(+15.99)VEPGHLDQLLHPQFEDPSAYK(+304.20)DK(+304.20).V	N	76.97	3721.94	10.1	621.337	6	37.9	F6:6757	5	5232	4965	8945	10010	5806	3148	6860	4443	570	593	Y
9	5	CL367Contig23|CL367Contig23	K.Q(+304.20)YQEVYIEAK(+304.20).G	N	76.11	1878.02	2.8	940.022	2	20.98	F6:4217	11	709.5	1070	2008	2530	1004	203.5	1696	738.125	386	395	Y
9	5	CL367Contig23|CL367Contig23	R.A(+304.20)M(+15.99)DGLPVTIR.L	N	75.49	1391.77	6	464.933	3	20.77	F8:4632	15	440	346	1042	736.125	61.625	191	224.5	657	840	849	Y
9	5	CL367Contig23|CL367Contig23	K.M(+304.20)VEPGHLDQLLHPQFEDPSAY(+304.20)K(+304.20)DK(+304.20).V	N	70.12	4010.14	12.8	573.892	7	39.34	F8:7418	3	4720	3276	5173	7028	2686	2840	4189	3497	570	593	Y
9	5	CL367Contig23|CL367Contig23	K.D(+304.20)M(+15.99)QDIEFTVQENR.L	N	69.53	1943.91	3.9	972.968	2	23.32	F1:5298	5	343.75	550	762.25	820.125	328.5	633.875	449.5	1079	521	533	Y
9	5	CL367Contig23|CL367Contig23	K.N(+304.20)DTDLTAADLK(+304.20).E	N	68.51	1783.97	5.9	892.996	2	21.76	F1:5064	8	996	643.75	2004	1669	555.75	626.5	2238	820	371	381	Y
9	5	CL367Contig23|CL367Contig23	K.Q(+304.20)YQEVY(+304.20)IEAK(+304.20).G	N	66.95	2182.22	16.1	546.572	4	17.25	F9:3655	2	2536	1883	3288	2784	1444	1336	3358	2550	386	395	Y
9	5	CL367Contig23|CL367Contig23	R.F(+304.20)LDMFGNVVLDIPHSLFEEK(+304.20).L	N	66.63	2957.57	10.1	740.408	4	65.85	F6:10989	6	219.5	731.25	226	426	334	61.25	154.5	406	340	359	Y
9	5	CL367Contig23|CL367Contig23	K.G(+304.20)EPFPSDPK(+304.20).K	N	63.34	1580.86	9.9	527.964	3	16.29	F6:3507	11	2916	1319	3992	3309	3019	1388	3392	2114	396	404	Y
9	5	CL367Contig23|CL367Contig23	N.A(+304.20)VADAAPITATK(+304.20).R	N	62.02	1736.02	7.5	579.684	3	16.96	F9:3610	15	902.75	1108	2348	1920	1320	611.25	2308	626.25	61	72	Y
9	5	CL367Contig23|CL367Contig23	R.S(+304.20)DFEGIFR.A	N	61.95	1273.66	5.5	637.838	2	32.23	F5:6261	11	16690	15000	31060	23900	9808	9324	21890	15800	832	839	Y
9	5	CL367Contig23|CL367Contig23	K.M(+304.20)VEPGHLDQLLHPQFEDPSAY(+304.20)K(+304.20).D	N	60.77	3462.82	4.3	578.147	6	41.43	F8:7731	3	1342	2088	3640	3265	1630	2216	2104	1442	570	591	Y
9	5	CL367Contig23|CL367Contig23	K.M(+304.20)VEPGHLDQLLHPQFED.P	N	59.2	2308.14	3.6	770.39	3	42.83	F5:7860	2	314	289	1480	251.625	385	211	389	570	570	586	Y
9	5	CL367Contig23|CL367Contig23	R.A(+304.20)IFEAAIAM(+15.99)TNQGVQVFPEIMVPLVGTPQELGNQVTLIR.E	N	54.34	4514.42	6.3	903.896	5	63.89	F5:11034	9	228	0	576	298.625	266.875	93	309.25	424.25	917	955	Y
9	5	CL367Contig23|CL367Contig23	K.I(+304.20)LENHY(+304.20)K(+304.20)DMQDIEFTVQENR.L	N	52.41	3433.79	3.1	687.768	5	40.12	F7:7546	1	1148	828.125	840	382.5	986.875	833.125	1236	770.375	514	533	Y
9	5	CL367Contig23|CL367Contig23	R.F(+304.20)AYDSYR.R	N	52.25	1224.6	7	613.313	2	18.37	F8:4272	11	12710	10920	28370	16650	12410	6938	14380	10560	332	338	Y
9	5	CL367Contig23|CL367Contig23	R.L(+304.20)WMLQC(+45.99)R.S	N	50.03	1298.66	7.7	650.34	2	49.76	F4:9295	3	525.25	1094	2797	1813	505	618	1488	1110	534	540	Y
9	5	CL367Contig23|CL367Contig23	K.I(+304.20)LENHYK(+304.20)DM(+15.99)QDIEFTVQENR.L	N	49.23	3145.59	17.6	787.418	4	31.46	F6:5790	2	900.375	238	512	483	1248	596	1172	83.75	514	533	Y
9	5	CL367Contig23|CL367Contig23	R.V(+304.20)Y(+304.20)VFGK(+304.20).G	N	48.67	1624	6.1	407.009	4	25.07	F4:5575	4	131.5	228	190	556	72.5	78.5	288	174	74	79	Y
9	5	CL367Contig23|CL367Contig23	R.N(+304.20)PSTGEK(+304.20).K	N	47.14	1339.74	10.2	447.594	3	10.53	F9:2626	6	683.125	1270	2146	2010	973.75	678	1740	690	463	469	Y
9	5	CL367Contig23|CL367Contig23	R.V(+304.20)YVFGK(+304.20).G	N	45.5	1319.8	-4.1	440.937	3	32.88	F4:6752	7	146.5	152	636	333	159	190	79.5	355	74	79	Y
9	5	CL367Contig23|CL367Contig23	K.Q(+304.20)Y(+304.20)QEVYIEAK(+304.20).G	N	44.99	2182.22	3.5	1092.12	2	17.6	F9:3709	1	1460	859	2352	983.25	133.5	735.75	1338	866	386	395	Y
9	5	CL367Contig23|CL367Contig23	Q.G(+304.20)ILQHDPFEVLDQR.G	N	44.91	1970.05	-0.3	657.69	3	42.54	F6:7453	1	203.25	521.375	390	259.125	708.625	608	917.5	240.5	1027	1040	Y
9	5	CL367Contig23|CL367Contig23	A.D(+304.20)AAPITATK(+304.20).R	N	44.87	1494.88	-13.7	499.292	3	14.57	F8:3700	3	550.5	720.375	887.25	1732	1531	1294	1816	1048	64	72	Y
9	5	CL367Contig23|CL367Contig23	K.K(+304.20)LYGEYLVNAQGEDVVAGIR.T	N	44.61	2497.34	13.6	833.466	3	39.7	F6:7028	1	375	360.75	173.5	572	86	398.125	288.875	231.5	470	489	Y
9	5	CL367Contig23|CL367Contig23	N.A(+304.20)QGEDVVAGIR.T	N	44.11	1417.78	6.5	709.901	2	16.77	F5:3917	1	3592	2597	6164	5464	3096	2209	4168	3875	479	489	Y
9	5	CL367Contig23|CL367Contig23	K.G(+304.20)K(+304.20)SEGDK(+304.20).T	N	43.47	1631.94	2.7	408.995	4	10.15	F10:3383	3	231.25	252	499.125	206	337.375	298.5	241.5	266	80	86	Y
9	5	CL367Contig23|CL367Contig23	K.L(+304.20)Y(+304.20)GEYLVNAQGEDVVAGIR.T	N	42.63	2673.45	-3.7	892.153	3	41.53	F6:7302	1	263.875	564	660	455.75	272	123.5	987.5	180.125	471	489	Y
9	5	CL367Contig23|CL367Contig23	K.I(+304.20)LENHYK(+304.20).D	N	42.18	1523.88	7.3	508.971	3	20.05	F12:4346	5	137.5	593.5	202.5	464.75	101.75	0	0	0	514	520	Y
9	5	CL367Contig23|CL367Contig23	N.D(+304.20)TDLTAADLK(+304.20).E	N	41.76	1669.92	-0.1	557.649	3	23.17	F1:5275	2	245.5	143.5	380.625	429.25	350.5	397	351	171.5	372	381	Y
9	5	CL367Contig23|CL367Contig23	R.T(+304.20)GQGAVK(+304.20).I	N	41.49	1267.76	6.1	634.891	2	10.41	F3:3300	2	3176	2913	5104	3835	1057	1896	4416	2109	545	551	Y
9	5	CL367Contig23|CL367Contig23	N.D(+304.20)EVAAGLAAK(+304.20).S	N	41.16	1551.9	6.9	518.31	3	18.47	F5:4181	1	524	1042	768.75	964	448	789.25	1100	648.25	318	327	Y
9	5	CL367Contig23|CL367Contig23	N.V(+304.20)VLDIPHSLFEEK(+304.20).L	N	40.78	2133.22	12.2	534.318	4	44.64	F6:7769	2	1377	698	800.125	1083	579.375	390.375	661.75	1123	347	359	Y
9	5	CL367Contig23|CL367Contig23	K.L(+304.20)GDPEK(+304.20)PLLL.S	N	40.32	1702.04	1.1	568.354	3	39.26	F5:7322	4	1289	714	2399	1202	1216	406	1496	1646	153	162	Y
9	5	CL367Contig23|CL367Contig23	K.K(+304.20)QLELAVR.A	N	39.86	1259.78	10.4	420.939	3	16.92	F2:4374	1	1912	1075	2233	1374	1187	1526	1182	451.625	405	412	Y
9	5	CL367Contig23|CL367Contig23	Q.G(+304.20)EDVVAGIR.T	N	38.72	1218.68	-1.7	610.347	2	16.69	F5:3905	2	6409	5232	8041	5158	2842	4946	5660	7667	481	489	Y
9	5	CL367Contig23|CL367Contig23	K.L(+304.20)EHMK(+304.20).E	N	38.32	1264.73	-5.3	317.188	4	15.38	F12:3637	2	74.25	47.375	388	520.75	126.25	142	268	285.875	360	364	Y
9	5	CL367Contig23|CL367Contig23	R.G(+304.20)VGELIK(+304.20).F	N	36.93	1322.83	4.9	662.424	2	22.12	F7:4846	17	2184	1411	2272	3794	1253	1241	3240	2128	1041	1047	Y
9	5	CL367Contig23|CL367Contig23	K.M(+304.20)(+15.99)VEPGHLDQLLHPQFEDPSAY(+304.20)K(+304.20)DK(+304.20).V	N	36.89	4026.14	4.3	672.033	6	35.83	F8:6890	4	432	447.75	379	856	566.375	174	430	368	570	593	Y
9	5	CL367Contig23|CL367Contig23	K.G(+304.20)EPFPSDPK(+304.20)K(+304.20).Q	N	35.16	2013.15	4.5	672.06	3	15.28	F8:3806	2	1834	1340	2638	3249	1113	1048	3006	2013	396	405	Y
9	5	CL367Contig23|CL367Contig23	K.V(+304.20)FTAAGK(+304.20).T	N	34.3	1300.79	5.8	651.404	2	19.07	F3:4601	3	2297	2472	3389	2078	1535	1576	4112	2317	961	967	Y
9	5	CL367Contig23|CL367Contig23	K.D(+304.20)AILVR.T	N	34.22	989.612	0.2	495.813	2	17.58	F7:4165	3	3015	1920	4270	3256	2333	3060	2696	1979	626	631	Y
9	5	CL367Contig23|CL367Contig23	R.L(+304.20)GISYPELTEM(+15.99)QAR.A	N	34.11	1927	16	964.521	2	36.85	F6:6599	5	1247	398	1868	1990	850.25	173.5	1468	568.75	903	916	Y
9	5	CL367Contig23|CL367Contig23	R.L(+304.20)WM(+15.99)LQC(+45.99)R.S	N	33.93	1314.65	16.7	439.231	3	44.71	F4:8531	2	318.75	247	614.5	633.5	49.875	208	361	532.75	534	540	Y
9	5	CL367Contig23|CL367Contig23	K.Q(+304.20)LLGGK(+304.20).G	N	33.79	1222.78	0.4	408.599	3	17.33	F4:4415	3	1234	782	2036	1117	644.375	763.625	1440	1152	90	95	Y
9	5	CL367Contig23|CL367Contig23	R.T(+304.20)ETSPEDVGGMHAAAGIL.T	N	33.54	2059.01	4.9	1030.52	2	38.15	F1:7523	4	196.125	135	270	212.625	94	104	267.25	179.25	632	649	Y
9	5	CL367Contig23|CL367Contig23	A.I(+304.20)AMTNQGVQVFPEIMVPLVGTPQELGNQVTLIR.E	N	33.43	3896.12	9.7	975.046	4	59.85	F6:10053	1	154	0	288	43.25	173.5	75	255.375	198.5	923	955	Y
9	5	CL367Contig23|CL367Contig23	K.L(+304.20)EHM(+15.99)K(+304.20).E	N	32.99	1280.73	6.3	427.919	3	11.3	F11:3377	3	2087	346.125	4181	3670	2748	1330	1592	821.75	360	364	Y
9	5	CL367Contig23|CL367Contig23	S.T(+304.20)EAC(+45.99)EQYQIAGK(+304.20).S	N	32.63	1994	14.6	665.682	3	25.82	F6:4943	1	170	0	628	347.25	290	176.5	244	341	117	128	Y
9	5	CL367Contig23|CL367Contig23	K.L(+304.20)Y(+304.20)GEY(+304.20)LVNAQGEDVVAGIR.T	N	31.62	2977.65	-3.4	745.417	4	38.66	F9:6870	1	118.25	199	860.375	330.5	134.5	65	386	84.25	471	489	Y
9	5	CL367Contig23|CL367Contig23	R.Q(+304.20)NALDR.L	N	30.83	1019.56	9	510.793	2	12.03	F10:3666	2	550	118.875	980	618.25	159	472	546.5	101.25	820	825	Y
9	5	CL367Contig23|CL367Contig23	R.E(+304.20)TANK(+304.20).V	N	30.06	1169.68	0	585.845	2	9.78	F9:2514	1	658	852.375	1280	1340	1214	980.25	1248	698.375	956	960	Y
9	5	CL367Contig23|CL367Contig23	R.A(+304.20)IFEAAIA.M	N	29.84	1108.64	-5.6	555.323	2	42.06	F5:7744	1	809.5	633.125	183.5	470	350	71.75	888	362.75	917	924	Y
9	5	CL367Contig23|CL367Contig23	K.F(+304.20)ATER.G	N	29.17	926.507	8.5	464.265	2	12.52	F9:2924	6	23660	32590	48340	45220	16880	17550	29310	18580	1048	1052	Y
9	5	CL367Contig23|CL367Contig23	R.N(+304.20)TAIK(+304.20).M	N	28.44	1153.72	0	577.866	2	12.43	F4:3680	3	328	200.5	1195	719.875	468.25	448	1381	472.75	565	569	Y
9	5	CL367Contig23|CL367Contig23	R.A(+304.20)IFEAAIAMTNQ.G	N	28.25	1582.83	16.3	792.434	2	51.84	F1:9587	1	273	128.5	584	260	572	116.25	146	495	917	928	Y
9	5	CL367Contig23|CL367Contig23	F.M(+304.20)SWVDEVR.Q	N	27.12	1324.67	4.8	663.345	2	32.04	F5:6232	1	325.5	1432	1092	1348	1254	1205	534	1701	728	735	Y
9	5	CL367Contig23|CL367Contig23	R.L(+304.20)LPYQR.S	N	27.03	1092.65	14.6	547.342	2	22.79	F4:5233	4	840.875	451.5	809.375	555	91.25	518	622	342.75	826	831	Y
9	5	CL367Contig23|CL367Contig23	R.F(+304.20)AYDSY(+304.20)R.R	N	26.54	1528.8	5.4	510.611	3	17.78	F3:4407	2	2131	2389	3224	2026	1388	1982	2560	2798	332	338	Y
9	5	CL367Contig23|CL367Contig23	R.A(+304.20)IFEAAIAM(+15.99).T	N	25.03	1255.67	8.3	628.849	2	43.42	F1:8320	1	221.625	229.5	365	490	345	274.375	145	849	917	925	Y
9	5	CL367Contig23|CL367Contig23	K.G(+304.20)ANLAEMA.S	N	24.38	1079.55	11.7	540.79	2	20.71	F5:4528	1	1032	833.5	1815	1118	1592	1526	740	1699	96	103	Y
9	5	CL367Contig23|CL367Contig23	R.A(+304.20)IFEAAIAM.T	N	24.08	1239.68	14.8	620.856	2	49.42	F5:8852	2	388	64.75	167	198	63.875	69.5	766	390	917	925	Y
9	5	CL367Contig23|CL367Contig23	N.E(+304.20)GFVDR.N	N	22.45	1025.54	8.2	513.781	2	13.96	F5:3477	1	2370	1611	2631	1582	1021	1618	1652	1304	559	564	Y
9	5	CL367Contig23|CL367Contig23	R.A(+304.20)IFEAA.I	N	22.25	924.517	8.5	463.27	2	25.65	F5:5272	1	1027	255.75	778	1337	1350	593.5	886	1470	917	922	Y
9	5	CL367Contig23|CL367Contig23	K.K(+304.20)LY(+304.20)GEYLVN.A	N	21.94	1705.98	3.7	569.668	3	27.87	F9:5250	1	291	199.5	93.5	552	348	600	363.25	148.5	470	478	Y
9	5	CL367Contig23|CL367Contig23	M.A(+304.20)GSLR.Q	N	21.61	806.486	-8	404.247	2	11.01	F7:3182	1	227.5	489.25	652.875	1263	227.75	1664	1024	108.25	1069	1073	Y
9	5	CL367Contig23|CL367Contig23	K.Q(+304.20)PLAPPALSGDLGTF.M	N	20.87	1786.97	-2	894.491	2	48.06	F1:9019	1	354	148	865.5	241.5	258.5	164.5	634	318	713	727	Y
9	5	CL367Contig23|CL367Contig23	K.I(+304.20)LENHY(+304.20)K(+304.20).D	N	19.91	1828.08	6.7	610.372	3	16.97	F2:4382	2	287	207.5	766	329	828	159.125	469.25	187.5	514	520	Y
9	5	CL367Contig23|CL367Contig23	H.S(+304.20)LFEEK(+304.20).L	N	18.89	1359.78	9.7	454.27	3	18.62	F6:3863	1	678	121.25	524.375	203.5	485.625	153.625	459.25	852.25	354	359	Y
9	5	CL367Contig23|CL367Contig23	A.R(+304.20)GWGK(+304.20).C	N	16.84	1210.73	15.5	404.59	3	15.47	F3:4061	1	1770	1069	1392	769.5	1437	2623	2456	1554	664	668	Y
9	5	CL367Contig23|CL367Contig23	K.M(+304.20)VEPGHLDQL.L	N	16.66	1441.75	7.8	721.887	2	27.04	F5:5480	1	908	60.875	770	859.875	274	234	1024	197	570	579	Y
9	5	CL367Contig23|CL367Contig23	Q.G(+304.20)VQVFPEIMVPLVGTPQELGNQVTLIR.E	N	16.37	3237.8	-1.7	1080.27	3	58.39	F6:9833	1	0	0	79	182.5	118.5	0	0	0	929	955	Y
9	5	CL367Contig23|CL367Contig23	R.V(+304.20)NDAGK(+304.20).V	Y	15.79	1210.7	-3.5	606.356	2	27.05	F9:5127	2	299	581.5	1382	784.125	347	707	700	493	679	684	Y
9	5	CL367Contig23|CL367Contig23	K.R(+304.20)VY(+304.20)VFGK(+304.20).G	N	15.58	1780.1	-8.5	446.028	4	31.81	F5:6197	1	236.625	181.5	465	347	49.5	536.5	151	205.5	73	79	Y
9	5	CL367Contig23|CL367Contig23	R.L(+304.20)WMLQ.C	N	14.72	993.557	-0.3	497.786	2	48.23	F8:8748	3	1040	1060	1004	525.125	379	436.875	843.375	638	534	538	Y
9	5	CL367Contig23|CL367Contig23	X.N(+304.20)LDTM(+15.99)K(+304.20).D	Y	13.85	1344.74	0.5	673.379	2	38.17	F9:6796	2	208.5	243.5	194	201.5	490	285	254	548	493	498	Y
9	5	CL367Contig23|CL367Contig23	K.G(+304.20)K(+304.20)SEGDK(+304.20)TMK(+304.20).Q	N	12.03	2296.33	5.3	575.092	4	12.03	F2:3640	1	860	890	1197	1811	940	412.625	1912	1361	80	89	Y
9	5	CL367Contig23|CL367Contig23	X.N(+304.20)LDTMK(+304.20).D	Y	12.01	1328.75	4.5	665.384	2	30.99	F8:6164	1	890.75	1562	799.75	1158	492	605	904	670	493	498	Y
9	5	CL367Contig23|CL367Contig23	X.N(+304.20)LDTM(+15.99)K(+304.20)DQLPQAY(+304.20)EELVENC(+45.99)K(+304.20).I	Y	11.66	3758.94	-7.5	940.735	4	50.81	F5:9061	1	467	550.5	425	899.75	121.75	179.5	309.625	239	493	513	Y
9	5	CL367Contig23|CL367Contig23	K.I(+304.20)AVDMVN.E	N	11.38	1064.58	8.9	533.302	2	31.56	F1:6534	1	201.5	612	920.625	1023	724	273	920.5	924	552	558	Y
9	5	CL367Contig23|CL367Contig23	K.I(+304.20)AVDMVNEGFV.D	N	9.59	1496.78	-1.5	749.396	2	37.15	F5:6998	1	1391	612	901.75	566.25	650	1030	1588	899.5	552	562	Y
9	5	CL367Contig23|CL367Contig23	K.M(+304.20)VEPGHLDQLLHPQ.F	N	8.78	1917	9.2	640.014	3	40.9	F7:7663	1	304	146	219.5	126	441.875	129.5	495	447	570	583	Y
9	5	CL367Contig23|CL367Contig23	M.S(+304.20)WVDEVR.Q	N	8.51	1193.63	3.8	597.824	2	19.19	F5:4292	1	2358	1956	1336	1835	2209	1060	2392	3418	729	735	Y
9	5	CL367Contig23|CL367Contig23	N.E(+304.20)GFVDRNTAIK(+304.20).M	N	8.01	1857.05	-15	929.516	2	41.48	F5:7656	1	573.125	392	696.875	1134	290	712	256	380.75	559	569	Y
9	5	CL367Contig23|CL367Contig23	A.K(+304.20)AC(+45.99)VIR.S	N	7.83	1038.59	19	520.314	2	15.81	F4:4188	1	956	828.5	1337	960	888	715.25	930	1128	40	45	Y
9	5	CL367Contig23|CL367Contig23	K.S(+304.20)GERFAYDSYRR.F	N	7.51	1809.9	-1	604.307	3	16.53	F1:4280	1	421.75	208.5	1006	1251	252	378.625	1272	379	328	339	Y
9	5	CL367Contig23|CL367Contig23	K.L(+304.20)YGEYLV.N	N	7.47	1159.64	6.9	580.83	2	23	F9:4521	1	18980	16970	25330	19480	14420	11840	19960	14300	471	477	Y
9	5	CL367Contig23|CL367Contig23	N.S(+304.20)WDSPR.A	N	6.94	1050.53	-13	526.268	2	15.29	F7:3822	1	728.25	968.5	1529	891	857.75	272	1517	447	417	422	Y
9	5	CL367Contig23|CL367Contig23	A.C(+45.99)(+304.20)EQY(+304.20)QIAGK(+304.20).S	N	6.91	1997.07	-13.2	999.528	2	59.96	F5:10436	2	365	531.125	1877	287	268	291	460.75	377.625	120	128	Y
9	5	CL367Contig23|CL367Contig23	R.A(+304.20)VFNSW.D	N	5.95	1026.54	13.2	514.283	2	41.41	F7:7739	1	890.625	770	1494	420	634.75	292.25	940	209	413	418	Y
9	5	CL367Contig23|CL367Contig23	K.S(+304.20)GERFAY(+304.20)DSY(+304.20)RR.F	N	5.07	2418.3	8.2	484.671	5	34.55	F11:6869	1	75.75	254	440.75	319.5	360	534	358	331	328	339	Y
9	5	CL367Contig23|CL367Contig23	K.E(+304.20)LVK(+304.20)QYQEVY(+304.20)IEAK(+304.20)GEPFPSDPK(+304.20).K	N	5.04	4214.36	5.2	703.404	6	40.99	F6:7220	1	853.5	778	1636	696.375	442	890.625	1412	732.75	382	404	Y
5	10	CAPP8_ERATE|CAPP8_ERATE	R.F(+304.20)TAATLEHGMHPPVSPK(+304.20)PEWSK(+304.20).L	N	95.53	3358.81	9.3	672.776	5	40.59	F12:7646	5	2528	2645	3913	2813	1616	1542	5761	2583	814	835	Y
5	10	CAPP8_ERATE|CAPP8_ERATE	K.E(+304.20)LDEALQAEIQAAFR.T	N	94.98	2007.05	10.7	670.032	3	53.95	F1:9904	15	295.75	476.5	374	382.625	262.125	538.25	712.375	643.25	145	159	Y
5	10	CAPP8_ERATE|CAPP8_ERATE	K.Q(+304.20)QIMVGYSDSGK(+304.20).D	N	93.73	1920.01	5.4	641.015	3	18.78	F8:4333	14	391	486.5	1284	754	591.5	715.5	831.875	354	715	726	Y
5	10	CAPP8_ERATE|CAPP8_ERATE	R.H(+304.20)TDAIDAITTHLGIGSYR.E	N	92.36	2244.18	11.6	562.058	4	43.77	F10:8451	6	251.5	580	395	654.5	186.5	363.125	187.75	123.25	582	599	Y
5	10	CAPP8_ERATE|CAPP8_ERATE	S.V(+304.20)TIQGEVIEHSFGEEHLC(+45.99)FR.T	N	91.76	2679.3	12.6	670.842	4	46.37	F7:8482	3	130	357	191	353.125	274.5	151	473	264	790	809	Y
5	10	CAPP8_ERATE|CAPP8_ERATE	K.T(+304.20)IADGVLLDFMR.Q	N	87.09	1653.9	16	552.317	3	53.65	F11:9744	14	325.875	388.25	232.375	529	148	382	265	358.5	550	561	Y
5	10	CAPP8_ERATE|CAPP8_ERATE	K.D(+304.20)ITEDEK(+304.20)K(+304.20)ELDEALQAEIQAAFR.T	N	85.92	3573.91	5.9	894.491	4	49.5	F5:8864	7	9338	6462	12830	9381	5103	5159	11600	7375	137	159	Y
5	10	CAPP8_ERATE|CAPP8_ERATE	R.L(+304.20)RDPYITTLNVFQAYTLK(+304.20).Q	N	83.06	2763.57	9.5	691.906	4	51.62	F3:9490	10	378.25	384	223.5	1411	291.875	99.75	752.25	1423	1013	1030	Y
5	10	CAPP8_ERATE|CAPP8_ERATE	K.Q(+304.20)QIM(+15.99)VGYSDSGK(+304.20).D	N	81.54	1936.01	9.2	646.349	3	16.99	F7:4076	5	520	80.75	196.5	198.5	43	88.5	319.625	48.625	715	726	Y
5	10	CAPP8_ERATE|CAPP8_ERATE	R.Y(+304.20)GMSYFQENIWK(+304.20).G	N	81.11	2173.1	-0.4	1087.56	2	44.73	F9:7780	12	766	1293	4094	3367	1264	441	3920	1867	176	187	Y
5	10	CAPP8_ERATE|CAPP8_ERATE	R.V(+304.20)TLDLLEMVFAK(+304.20).G	N	79.43	1986.16	5.2	663.063	3	61.84	F6:10357	20	1918	1048	1157	2873	1785	266.5	1271	5347	944	955	Y
5	10	CAPP8_ERATE|CAPP8_ERATE	R.H(+304.20)TDAIDAITTH.L	N	79.11	1497.77	12.2	500.269	3	16.46	F7:3997	1	514	451.25	1360	891	573.5	248.5	1284	487.75	582	592	Y
5	10	CAPP8_ERATE|CAPP8_ERATE	K.Q(+304.20)QIMVGY(+304.20)SDSGK(+304.20).D	N	78.13	2224.21	16.7	557.07	4	20.96	F2:4980	5	1010	998.625	3335	2734	1124	575.875	3358	1978	715	726	Y
5	10	CAPP8_ERATE|CAPP8_ERATE	K.E(+304.20)MYNEWPFFR.V	N	76.91	1721.81	16	574.954	3	46.97	F6:8118	4	626	512.5	595.5	788	542.5	375	154	756	934	943	Y
5	10	CAPP8_ERATE|CAPP8_ERATE	K.E(+304.20)ILESDPYLK(+304.20).Q	N	76.37	1814.02	18.9	605.691	3	33.9	F5:6511	10	3005	2626	6011	10570	4159	2120	4759	2856	999	1008	Y
5	10	CAPP8_ERATE|CAPP8_ERATE	R.L(+304.20)ADLQNAPASVER.L	N	74.32	1686.92	4.4	563.315	3	26.57	F5:5409	16	2296	759.375	1444	2153	342.5	826	3270	1981	688	700	Y
5	10	CAPP8_ERATE|CAPP8_ERATE	R.A(+304.20)QPTPQDEMR.Y	N	71.66	1475.73	7.4	492.921	3	12.9	F5:3317	6	2391	3272	5559	4934	2868	1020	3400	2613	166	175	Y
5	10	CAPP8_ERATE|CAPP8_ERATE	K.L(+304.20)M(+15.99)DEMAVVATEAYR.S	N	70.69	1917.94	4.1	959.983	2	42.86	F5:7865	2	1542	400.875	2475	1135	703.75	675	2189	656	836	849	Y
5	10	CAPP8_ERATE|CAPP8_ERATE	K.R(+304.20)QEWLLTELQGK(+304.20).R	N	66.75	2108.21	7.7	703.749	3	38.7	F9:6876	9	1496	678.625	2880	1323	633.125	855.875	1226	1772	606	617	Y
5	10	CAPP8_ERATE|CAPP8_ERATE	R.Y(+304.20)GM(+15.99)SYFQENIWK(+304.20).G	N	65.15	2189.1	3.2	730.709	3	41.21	F8:7698	8	302.5	335	1238	494	380	341	509.25	555.5	176	187	Y
5	10	CAPP8_ERATE|CAPP8_ERATE	R.F(+304.20)HLPVWLGVGTAFK(+304.20).S	N	64.21	2179.27	6	545.827	4	51.92	F3:9535	6	112	0	230.875	65.75	149	0	0	0	906	919	Y
5	10	CAPP8_ERATE|CAPP8_ERATE	K.L(+304.20)MDEMAVVATEAY(+304.20)R.S	N	63.68	2206.15	10.4	736.398	3	46.88	F6:8105	2	1415	1592	2164	2235	1500	1300	3380	2440	836	849	Y
5	10	CAPP8_ERATE|CAPP8_ERATE	K.F(+304.20)SSWMGGDR.D	N	63.55	1345.63	4.6	449.554	3	29.27	F9:5460	7	728.375	624	1264	1268	673	239.25	1138	622	218	226	Y
5	10	CAPP8_ERATE|CAPP8_ERATE	K.Y(+304.20)(+304.20)LETQELLLQIAGHK(+304.20).E	N	62.68	2667.56	11.9	534.525	5	47.26	F12:8658	2	152.5	247.25	705.125	120.25	227	86	443	105	984	998	Y
5	10	CAPP8_ERATE|CAPP8_ERATE	K.G(+304.20)IAAGMQNTG.X	N	62.58	1222.62	6.8	612.323	2	16.87	F11:4212	8	670.375	172	523.25	616.125	333	393	62.625	1028	1075	1084	Y
5	10	CAPP8_ERATE|CAPP8_ERATE	R.Y(+304.20)(+304.20)GMSYFQENIWK(+304.20).G	N	62.2	2477.3	7.2	496.471	5	43.69	F2:8398	2	224.25	237	1112	1518	121.75	41.375	1036	1374	176	187	Y
5	10	CAPP8_ERATE|CAPP8_ERATE	K.Q(+304.20)QIM(+15.99)VGY(+304.20)SDSGK(+304.20).D	N	59.41	2240.21	0.1	561.059	4	16.98	F2:4383	1	803.625	776	998	482	136	491	997.5	345.875	715	726	Y
5	10	CAPP8_ERATE|CAPP8_ERATE	R.A(+304.20)QPTPQDEM(+15.99)R.Y	N	59.29	1491.72	12.5	498.255	3	10.54	F6:2643	6	463.625	217.875	574.375	771.75	167	88.25	244.5	415	166	175	Y
5	10	CAPP8_ERATE|CAPP8_ERATE	R.S(+304.20)ATPETEYGR.M	N	58.35	1413.7	7.1	472.244	3	12.52	F6:2940	4	1470	2850	2668	3021	1719	869.875	2693	1885	864	873	Y
5	10	CAPP8_ERATE|CAPP8_ERATE	R.D(+304.20)VC(+45.99)LLAR.M	N	58.16	1138.61	5.9	380.546	3	31.67	F8:6266	21	265	609.375	753.75	388	399	461.25	735.125	638.375	290	296	Y
5	10	CAPP8_ERATE|CAPP8_ERATE	K.G(+304.20)DPGIAALYDK(+304.20).L	N	57.65	1726.96	5.6	864.492	2	26.32	F6:5019	6	1216	1357	1241	1528	1340	315	1080	1524	956	966	Y
5	10	CAPP8_ERATE|CAPP8_ERATE	R.L(+304.20)FSIDWYLNR.I	N	56.99	1629.88	5	815.95	2	53.68	F9:9122	16	1349	1488	2344	2791	792	574	1800	1164	701	710	Y
5	10	CAPP8_ERATE|CAPP8_ERATE	R.F(+304.20)VEYFR.S	N	56.86	1163.62	6.2	582.822	2	38.07	F9:6781	11	7934	6736	15290	9408	4620	3197	10050	8752	858	863	Y
5	10	CAPP8_ERATE|CAPP8_ERATE	K.S(+304.20)LVEVGDK(+304.20).T	N	56.32	1453.85	11.4	485.629	3	17.42	F6:3682	6	26910	19170	40370	34420	21040	14230	38550	22970	542	549	Y
5	10	CAPP8_ERATE|CAPP8_ERATE	K.L(+304.20)TFFHGR.G	N	56.09	1180.66	-1.5	394.56	3	27.38	F4:5923	6	198.5	323	461	646	148	357	178	470.25	755	761	Y
5	10	CAPP8_ERATE|CAPP8_ERATE	R.A(+304.20)DELLSAPK(+304.20).K	N	55.11	1550.9	3.7	388.734	4	21.61	F6:4311	12	139.5	52.5	305.875	514.5	190.5	276	314.5	431.5	327	335	Y
5	10	CAPP8_ERATE|CAPP8_ERATE	R.Y(+304.20)GMSY(+304.20)FQENIWK(+304.20).G	N	55.05	2477.3	11.4	496.473	5	43.76	F2:8409	2	475.125	753.75	2298	1606	233.25	588.875	1911	1680	176	187	Y
5	10	CAPP8_ERATE|CAPP8_ERATE	F.S(+304.20)HMLNLANIAEEVQIANR.R	N	54.76	2326.23	15.6	776.43	3	46.11	F8:8431	1	376	423	169.5	141	283	251.75	294.375	267.75	37	54	Y
5	10	CAPP8_ERATE|CAPP8_ERATE	R.L(+304.20)FSIDWY(+304.20)LNR.I	N	54.41	1934.08	8.3	484.531	4	49.72	F3:9200	2	300	332	171.5	593.5	289	114.75	655.5	717.5	701	710	Y
5	10	CAPP8_ERATE|CAPP8_ERATE	R.V(+304.20)TPEVTR.D	N	53.76	1104.64	2.9	553.328	2	12.92	F9:2984	8	12770	11520	22690	18680	9572	7389	19160	11100	232	238	Y
5	10	CAPP8_ERATE|CAPP8_ERATE	K.L(+304.20)LVADELK(+304.20)PFGENLR.S	N	53.64	2321.35	13.1	774.799	3	45.14	F6:7844	3	9954	5749	12560	10760	6312	4881	9855	8886	967	981	Y
5	10	CAPP8_ERATE|CAPP8_ERATE	H.M(+304.20)(+15.99)LNLANIAEEVQIANR.R	N	53.47	2118.14	14.2	707.062	3	46.68	F6:8075	2	318.5	279	389.5	534	281	301	235.5	161.5	39	54	Y
5	10	CAPP8_ERATE|CAPP8_ERATE	K.E(+304.20)ILESDPY(+304.20)LK(+304.20).Q	N	52.79	2118.22	8.3	530.566	4	27.11	F6:5137	7	2192	1506	2856	1640	804	882.5	1252	772.5	999	1008	Y
5	10	CAPP8_ERATE|CAPP8_ERATE	R.A(+304.20)IPSTEPYR.V	N	52.78	1336.72	12.2	446.587	3	15.44	F9:3371	13	1924	2154	4040	4802	3056	524	3665	3360	484	492	Y
5	10	CAPP8_ERATE|CAPP8_ERATE	R.L(+304.20)PYDAPLIK(+304.20).F	N	50.54	1636.99	5.2	546.674	3	41.4	F10:8095	23	568	211.5	1006	350.5	435.75	352.25	454.875	484	209	217	Y
5	10	CAPP8_ERATE|CAPP8_ERATE	R.S(+304.20)VVVK(+304.20)EPR.F	N	49.47	1520.94	7.5	761.482	2	12.97	F3:3686	2	1651	980.625	2618	1590	1034	727	2312	1115	850	857	Y
5	10	CAPP8_ERATE|CAPP8_ERATE	K.S(+304.20)VEEFLEPLEVC(+45.99)Y(+304.20)K(+304.20).S	N	49.37	2642.39	11.8	529.492	5	50.44	F6:8638	4	224	0	788	863.75	450.5	148	304	320	528	541	Y
5	10	CAPP8_ERATE|CAPP8_ERATE	M.L(+304.20)NLANIAEEVQIANR.R	N	48.85	1971.1	15	658.051	3	47.29	F6:8166	2	42	171	698.625	127.75	722.75	229.875	75	443	40	54	Y
5	10	CAPP8_ERATE|CAPP8_ERATE	K.L(+304.20)M(+15.99)DEM(+15.99)AVVATEAY(+304.20)R.S	N	47.56	2238.14	16.4	560.551	4	24.94	F6:4811	2	348	150.5	868.625	858.125	558	140	470	425	836	849	Y
5	10	CAPP8_ERATE|CAPP8_ERATE	R.W(+304.20)RDLLATGFSEIPEK(+304.20).S	N	46.8	2369.31	7.9	593.339	4	47.6	F6:8212	1	446	626.625	1096	182	62.125	86.5	552	83.25	509	523	Y
5	10	CAPP8_ERATE|CAPP8_ERATE	K.G(+304.20)IAAGM(+15.99)QNTG.X	N	46.42	1238.62	5.3	620.319	2	12.68	F7:3431	3	321	118.5	193.875	174.5	234	468	378	279	1075	1084	Y
5	10	CAPP8_ERATE|CAPP8_ERATE	R.R(+304.20)AQPTPQDEMR.Y	N	46.38	1631.83	-1.1	544.95	3	12.34	F10:3712	2	367	92	740	319.625	70.25	259	96.5	498	165	175	Y
5	10	CAPP8_ERATE|CAPP8_ERATE	R.F(+304.20)TAATLEHGM(+15.99)HPPVSPK(+304.20)PEWSK(+304.20).L	N	46.14	3374.81	5.7	675.972	5	36.09	F12:6957	2	1161	907.5	1562	934.625	334.125	311	882	614.5	814	835	Y
5	10	CAPP8_ERATE|CAPP8_ERATE	K.D(+304.20)ITEDEK(+304.20).K	N	45.85	1456.78	9.3	486.604	3	15.12	F1:4070	7	486.875	756.75	1353	1134	1748	303.75	1916	1004	137	143	Y
5	10	CAPP8_ERATE|CAPP8_ERATE	A.N(+304.20)IAEEVQIANR.R	N	44.93	1559.85	16.9	520.967	3	21.76	F6:4334	2	312	0	275.5	264.75	256.625	351.5	47.625	260	44	54	Y
5	10	CAPP8_ERATE|CAPP8_ERATE	K.S(+304.20)AIDK(+304.20)DIK(+304.20).N	N	44.23	1801.09	10.5	901.563	2	14.6	F9:3239	4	4784	5026	8870	9391	4399	1819	8601	5514	920	927	Y
5	10	CAPP8_ERATE|CAPP8_ERATE	R.D(+304.20)K(+304.20)LYNTSER.W	N	43.85	1732.95	9.4	578.661	3	13.52	F8:3542	3	3254	3372	8385	5429	1530	2348	5264	3915	500	508	Y
5	10	CAPP8_ERATE|CAPP8_ERATE	N.I(+304.20)AEEVQIANR.R	N	43.77	1445.81	8.8	482.948	3	22.69	F6:4474	1	325.25	317.25	226.625	253.5	474	63.5	828	238.375	45	54	Y
5	10	CAPP8_ERATE|CAPP8_ERATE	R.V(+304.20)LAELPSDSFGPY.I	N	42.42	1697.88	7.1	849.952	2	50.71	F1:9418	1	135.5	293	316	349.125	204.25	128.125	230	603.25	640	652	Y
5	10	CAPP8_ERATE|CAPP8_ERATE	R.L(+304.20)DELGAK(+304.20).L	N	42.07	1352.8	4.7	451.943	3	20.21	F5:4454	4	2277	922.875	1805	1502	1134	937	2553	2702	14	20	Y
5	10	CAPP8_ERATE|CAPP8_ERATE	K.S(+304.20)IGIDER.L	N	42.04	1092.6	18.7	547.319	2	14.42	F5:3546	6	14170	16540	25230	23190	10440	6976	17980	11810	252	258	Y
5	10	CAPP8_ERATE|CAPP8_ERATE	R.D(+304.20)PNFK(+304.20).V	N	41.55	1227.7	5.1	410.241	3	13.87	F8:3595	7	2632	2757	7066	4700	1940	2700	4664	7107	1034	1038	Y
5	10	CAPP8_ERATE|CAPP8_ERATE	A.T(+304.20)APSDVLAVELLQR.E	N	41.04	1815.04	-3	908.522	2	44.02	F5:8042	2	598	878.5	1762	1504	915.625	1164	1289	1123	658	671	Y
5	10	CAPP8_ERATE|CAPP8_ERATE	N.S(+304.20)TSEYAPGLEDTLIITMK(+304.20).G	N	40.99	2576.38	5.2	859.804	3	45.69	F5:8294	1	255.5	369	458	354	41.125	200.5	165	238.125	1057	1074	Y
5	10	CAPP8_ERATE|CAPP8_ERATE	K.Y(+304.20)LETQELLLQIAGHK(+304.20)EILESDPYLK(+304.20).Q	N	40.81	3855.16	8.9	772.047	5	53.28	F6:9064	4	1863	1248	1100	1366	920	1066	3240	1184	984	1008	Y
5	10	CAPP8_ERATE|CAPP8_ERATE	R.V(+304.20)DTALK(+304.20).S	N	40.75	1253.77	2.4	627.894	2	15.45	F8:3832	7	3599	4482	9651	7597	2446	2498	7761	5984	196	201	Y
5	10	CAPP8_ERATE|CAPP8_ERATE	P.L(+304.20)PVVPLFER.L	N	40.16	1372.83	-0.1	458.618	3	45.95	F9:7962	7	600	371	358	315	210.5	648	212.5	514.875	679	687	Y
5	10	CAPP8_ERATE|CAPP8_ERATE	T.A(+304.20)TAPSDVLAVELLQR.E	N	39.95	1886.07	0.6	944.044	2	44.22	F5:8071	2	638	976.125	959.875	327	249.5	74.25	442	915.375	657	671	Y
5	10	CAPP8_ERATE|CAPP8_ERATE	R.L(+304.20)VTEIGK(+304.20).K	N	38.97	1366.85	5.3	456.628	3	21.05	F9:4229	6	2251	838	1833	2625	1958	1112	2005	1554	83	89	Y
5	10	CAPP8_ERATE|CAPP8_ERATE	R.E(+304.20)C(+45.99)HIR.N	N	38.61	1006.49	0.2	336.505	3	14.47	F12:3500	5	4074	1986	8666	10190	4014	8862	5554	5086	672	676	Y
5	10	CAPP8_ERATE|CAPP8_ERATE	K.L(+304.20)YNTSER.W	N	37.01	1185.62	8.4	593.824	2	15.06	F10:4120	4	2614	3016	4468	3520	1391	644.125	2960	2880	502	508	Y
5	10	CAPP8_ERATE|CAPP8_ERATE	K.S(+304.20)IGINER.L	N	36.86	1091.62	-2.3	364.879	3	15.44	F10:4177	7	87	791.25	282	1084	338	489.5	318	153	202	208	Y
5	10	CAPP8_ERATE|CAPP8_ERATE	R.V(+304.20)VLGDLR.D	N	36.86	1074.66	7.7	538.344	2	24.17	F8:5142	11	14420	15100	24140	21640	11850	4961	13280	10910	493	499	Y
5	10	CAPP8_ERATE|CAPP8_ERATE	K.G(+304.20)DPGIAALY(+304.20)DK(+304.20).L	N	36.31	2031.16	0.3	508.798	4	22.05	F9:4378	3	1201	626	1046	1415	279	671	330.625	1032	956	966	Y
5	10	CAPP8_ERATE|CAPP8_ERATE	K.G(+304.20)DPGIAAL.Y	N	36.06	1016.58	7.7	509.299	2	27.87	F1:5980	1	199.5	518.125	434	507.5	164	1099	553.25	832	956	963	Y
5	10	CAPP8_ERATE|CAPP8_ERATE	N.P(+304.20)LPVVPLFER.L	N	35.76	1469.89	10.6	490.974	3	46.83	F9:8094	2	125.5	415.5	395	96.5	50.375	268	214	320	678	687	Y
5	10	CAPP8_ERATE|CAPP8_ERATE	Q.I(+304.20)AGHK(+304.20)EILESDPYLK(+304.20).Q	N	35.72	2624.51	10.4	525.916	5	26.84	F8:5542	3	454.375	262	1050	695.375	239.5	57.625	874.625	410	994	1008	Y
5	10	CAPP8_ERATE|CAPP8_ERATE	K.Q(+304.20)IRDPNFK(+304.20).V	N	34.54	1624.94	5.2	542.657	3	14.79	F3:3959	4	2436	1844	4258	2375	1644	1694	3291	2005	1031	1038	Y
5	10	CAPP8_ERATE|CAPP8_ERATE	R.S(+304.20)VVVK(+304.20).E	N	33.8	1138.74	-0.4	570.378	2	14.85	F4:4044	1	1929	1454	2472	2442	980.125	1058	1995	1613	850	854	Y
5	10	CAPP8_ERATE|CAPP8_ERATE	R.L(+304.20)RDPYITTLNVFQAY(+304.20).T	N	33.77	2421.34	8.4	485.28	5	48.4	F3:9002	1	297	426.25	316.5	178	227.125	172.25	311.25	128	1013	1027	Y
5	10	CAPP8_ERATE|CAPP8_ERATE	T.E(+304.20)IGK(+304.20)K(+304.20)PEEVFEALK(+304.20).S	N	33.65	2832.68	19.5	473.13	6	40.89	F7:7661	2	1020	959.875	1968	2392	1015	1080	3062	1684	86	99	Y
5	10	CAPP8_ERATE|CAPP8_ERATE	K.Q(+304.20)PPLNK(+304.20).E	N	33.14	1303.8	5.5	435.608	3	13.57	F3:3775	2	1020	1214	2246	1387	810.75	1072	2585	1136	1042	1047	Y
5	10	CAPP8_ERATE|CAPP8_ERATE	R.L(+304.20)SAAWQLY(+304.20)QAQAEVAK(+304.20).V	N	33.04	2688.52	-8.4	673.132	4	45.6	F2:8685	5	77.75	392	471.625	84.5	210	123.25	548.75	106.25	731	746	Y
5	10	CAPP8_ERATE|CAPP8_ERATE	K.Q(+304.20)PPLNK(+304.20)EPANVVQLNSTSEYAPGLEDTLIITMK(+304.20).G	N	32.75	4522.46	0.4	1131.62	4	47.51	F6:8199	5	151.5	43.625	874.875	648	245.5	187.875	786.25	274	1042	1074	Y
5	10	CAPP8_ERATE|CAPP8_ERATE	R.C(+45.99)(+304.20)NDELR.A	N	31.38	1098.51	6.4	550.263	2	15.1	F5:3652	3	3902	3359	8058	5696	3186	1908	6048	3608	456	461	Y
5	10	CAPP8_ERATE|CAPP8_ERATE	V.D(+304.20)TALK(+304.20).S	N	29.64	1154.7	-7.7	385.905	3	12.78	F7:3447	3	357	425	462	1302	588	650	934	280.75	197	201	Y
5	10	CAPP8_ERATE|CAPP8_ERATE	R.L(+304.20)RDPYITTLNVF.Q	N	29.02	1754.98	0.7	878.499	2	48.05	F8:8722	7	147	252	461.625	411.25	250.25	86.25	677.875	686.375	1013	1024	Y
5	10	CAPP8_ERATE|CAPP8_ERATE	Q.I(+304.20)AGHK(+304.20).E	N	28.24	1132.71	9.5	567.366	2	10.39	F3:3298	1	2331	2505	4218	4625	2744	1044	5264	2113	994	998	Y
5	10	CAPP8_ERATE|CAPP8_ERATE	Q.A(+304.20)EVAK(+304.20).V	N	27.61	1124.69	-0.4	375.904	3	11.85	F9:2824	1	381	233	722	757	601.875	570	165	113.75	742	746	Y
5	10	CAPP8_ERATE|CAPP8_ERATE	R.S(+304.20)LLQK(+304.20).H	N	27.06	1195.76	0.4	598.89	2	17.49	F4:4438	1	1262	1136	3759	2148	1718	880	2693	1598	118	122	Y
5	10	CAPP8_ERATE|CAPP8_ERATE	R.R(+304.20)VDTALK(+304.20).S	N	26.25	1409.87	4.9	470.966	3	12.85	F3:3668	2	5676	3920	9445	4599	2850	2944	5943	2509	195	201	Y
5	10	CAPP8_ERATE|CAPP8_ERATE	R.T(+304.20)DEVR.R	N	25.82	922.497	-6.8	462.253	2	10.48	F5:2955	2	689	544.5	892	1225	825.25	435.5	1338	286	160	164	Y
5	10	CAPP8_ERATE|CAPP8_ERATE	K.K(+304.20)YNVK(+304.20).L	N	25.76	1258.78	3	420.6	3	10.99	F3:3388	1	2432	1451	3404	3000	1590	1862	2264	1236	750	754	Y
5	10	CAPP8_ERATE|CAPP8_ERATE	R.L(+304.20)RDPYITTL.N	N	25.4	1394.8	-0.5	465.941	3	37.43	F8:7131	5	177	573.125	77.5	210.25	74.5	132	62.875	71.5	1013	1021	Y
5	10	CAPP8_ERATE|CAPP8_ERATE	R.S(+304.20)ATPETEY(+304.20)GR.M	N	24.16	1717.9	6.7	573.644	3	13.2	F8:3494	2	1040	1398	732	1129	1216	1048	1267	678	864	873	Y
5	10	CAPP8_ERATE|CAPP8_ERATE	R.A(+304.20)IPSTEPY(+304.20)R.V	N	23.19	1640.92	5.1	821.473	2	15.53	F3:4070	1	1654	1836	2622	1160	1227	864	2777	1852	484	492	Y
5	10	CAPP8_ERATE|CAPP8_ERATE	K.L(+304.20)Y(+304.20)NTSER.W	N	22.59	1489.82	11.5	497.621	3	13.25	F3:3728	1	2532	2270	3430	3130	1916	1196	2224	1716	502	508	Y
5	10	CAPP8_ERATE|CAPP8_ERATE	D.I(+304.20)EETLK(+304.20).R	N	22.34	1339.81	-19	447.601	3	13.95	F5:3475	1	1740	3912	7543	1692	501	776.25	1176	1079	76	81	Y
5	10	CAPP8_ERATE|CAPP8_ERATE	R.F(+304.20)VEY(+304.20)FR.S	N	21.03	1467.82	7.7	490.285	3	40.28	F4:7867	1	422.25	594.625	694	701.75	832	280	696	1156	858	863	Y
5	10	CAPP8_ERATE|CAPP8_ERATE	R.T(+304.20)DEVRR.A	N	20.97	1078.6	4.5	360.542	3	9.65	F10:3308	3	393.25	276.25	289	561	389	468	680.375	508	160	165	Y
5	10	CAPP8_ERATE|CAPP8_ERATE	K.K(+304.20)Y(+304.20)NVK(+304.20).L	N	19.01	1562.98	8.8	522.004	3	13.63	F4:3861	3	1170	1329	976	1344	490.25	786	2000	962	750	754	Y
5	10	CAPP8_ERATE|CAPP8_ERATE	R.C(+45.99)(+304.20)NNELR.A	N	17.59	1097.52	3.6	549.77	2	15.88	F10:4242	2	3184	3036	5936	4668	3400	2469	4503	3552	319	324	Y
5	10	CAPP8_ERATE|CAPP8_ERATE	K.L(+304.20)MDEM(+15.99)AVVA.T	N	17.15	1297.65	0.3	649.833	2	36.01	F1:7202	1	587.875	243	433.25	767.125	73	356	492.5	306.25	836	844	Y
5	10	CAPP8_ERATE|CAPP8_ERATE	K.R(+304.20)PLLVADLPVSEEVADVL.G	N	16.89	2238.27	9.1	747.105	3	53.26	F5:9429	2	151.5	134.75	55.875	128.5	99.5	219.25	264	47.625	618	635	Y
5	10	CAPP8_ERATE|CAPP8_ERATE	R.L(+304.20)RDPY(+304.20)ITTL.N	N	16.63	1699	9.1	425.762	4	35.07	F3:7002	1	88.5	0	164	221	99	69.5	48.875	374	1013	1021	Y
5	10	CAPP8_ERATE|CAPP8_ERATE	R.G(+304.20)GGPTHLAILSQPPDTIN.G	N	14.88	2091.12	5.9	698.052	3	39.14	F7:7399	1	160	389.375	472	491	181	496	221	143.5	768	785	Y
5	10	CAPP8_ERATE|CAPP8_ERATE	K.H(+304.20)Y(+304.20)IEFWR.A	N	14.79	1657.91	10.4	553.649	3	25.05	F3:5498	1	138.5	399	546.375	507	367	200	855.625	517	340	346	Y
5	10	CAPP8_ERATE|CAPP8_ERATE	R.D(+304.20)K(+304.20)LY(+304.20)NTSER.W	N	14.49	2037.15	4.1	680.059	3	14.49	F2:4010	1	224	150.5	499.375	49.875	418	382	916.5	87.5	500	508	Y
5	10	CAPP8_ERATE|CAPP8_ERATE	K.E(+304.20)PANVVQLN.S	N	14.38	1286.71	-0.2	644.361	2	23.34	F1:5301	1	495.25	310	519.25	198	470	321.875	304	213.625	1048	1056	Y
5	10	CAPP8_ERATE|CAPP8_ERATE	E.I(+304.20)QAAFR.T	N	11.93	1008.6	11.2	505.311	2	24.57	F4:5501	2	395.5	0	203	147	564	82	155.25	120.75	154	159	Y
5	10	CAPP8_ERATE|CAPP8_ERATE	K.D(+304.20)ITEDEK(+304.20)K(+304.20).E	N	11.85	1889.07	0.3	473.275	4	14.32	F11:3830	1	2040	325.75	1032	675	918	1476	407.125	840.125	137	144	Y
5	10	CAPP8_ERATE|CAPP8_ERATE	K.L(+304.20)LVADELK(+304.20)PFGEN.L	N	10.41	2052.16	-3.7	685.058	3	45	F5:8190	1	617.25	377.25	605.25	1155	458.125	548.25	646	759.25	967	979	Y
5	10	CAPP8_ERATE|CAPP8_ERATE	I.D(+304.20)K(+304.20)DIK(+304.20).N	N	8.03	1529.94	5	510.989	3	12.5	F8:3389	1	1788	1903	2174	3889	1810	1758	4000	2489	923	927	Y
5	10	CAPP8_ERATE|CAPP8_ERATE	K.Q(+304.20)PPLNK(+304.20)EPANVVQLN.S	N	7.87	2268.29	0.2	757.106	3	24.89	F9:4804	1	352.25	0	251	476	303	166	487	169	1042	1056	Y
5	10	CAPP8_ERATE|CAPP8_ERATE	R.L(+304.20)PY(+304.20)DAASHIK(+304.20).F	N	7.77	2026.18	-9.5	1014.09	2	52.94	F6:9014	2	234	70.5	391	340.625	40.75	108.25	449.875	450	259	268	Y
5	10	CAPP8_ERATE|CAPP8_ERATE	R.L(+304.20)ADLQN.A	N	7.71	976.544	4.1	489.281	2	23.73	F1:5360	1	220	148.5	847	753.125	76	105.25	694	132.25	688	693	Y
5	10	CAPP8_ERATE|CAPP8_ERATE	Q.A(+304.20)Y(+304.20)TLK(+304.20).Q	N	7.65	1506.94	-6.7	503.317	3	32.81	F8:6438	2	424.125	381.125	227.5	80.25	460.75	394	110.25	506	1026	1030	Y
5	10	CAPP8_ERATE|CAPP8_ERATE	E.M(+304.20)RYGM(+15.99)SYFQENIWK(+304.20).G	N	7.4	2476.24	-9.7	620.061	4	43.59	F3:8280	1	532	364	905.5	1384	108.5	666.75	642	514.5	174	187	Y
5	10	CAPP8_ERATE|CAPP8_ERATE	K.F(+304.20)SSWM(+15.99)GGDR.D	N	7.21	1361.63	5.3	681.825	2	20.82	F7:4650	1	696	68	824.25	992.75	754	106.25	628	532	218	226	Y
5	10	CAPP8_ERATE|CAPP8_ERATE	R.L(+304.20)RDPYITTLN.V	N	5.08	1508.85	5.4	755.434	2	28.58	F9:5357	1	189	870.875	179.5	488.75	196.5	167	648	111.25	1013	1022	Y
5	10	CAPP8_ERATE|CAPP8_ERATE	F.E(+304.20)LSMWRC(+45.99)NDELR.A	N	5.06	1900.88	18.5	951.467	2	40.31	F1:7848	1	61.625	329.75	1180	714.5	711.75	320	332.75	183	450	461	Y
7	15	CAPP2_ERATE|CAPP2_ERATE	R.F(+304.20)TAATLEHGMHPPVSPK(+304.20)PEWSK(+304.20).L	N	95.53	3358.81	9.3	672.776	5	40.59	F12:7646	5	2528	2645	3913	2813	1616	1542	5761	2583	814	835	Y
7	15	CAPP2_ERATE|CAPP2_ERATE	K.E(+304.20)LDEALQAEIQAAFR.T	N	94.98	2007.05	10.7	670.032	3	53.95	F1:9904	15	295.75	476.5	374	382.625	262.125	538.25	712.375	643.25	145	159	Y
7	15	CAPP2_ERATE|CAPP2_ERATE	K.Q(+304.20)QIMVGYSDSGK(+304.20).D	N	93.73	1920.01	5.4	641.015	3	18.78	F8:4333	14	391	486.5	1284	754	591.5	715.5	831.875	354	715	726	Y
7	15	CAPP2_ERATE|CAPP2_ERATE	R.H(+304.20)TDAIDAITTHLGIGSYR.E	N	92.36	2244.18	11.6	562.058	4	43.77	F10:8451	6	251.5	580	395	654.5	186.5	363.125	187.75	123.25	582	599	Y
7	15	CAPP2_ERATE|CAPP2_ERATE	S.V(+304.20)TIQGEVIEHSFGEEHLC(+45.99)FR.T	N	91.76	2679.3	12.6	670.842	4	46.37	F7:8482	3	130	357	191	353.125	274.5	151	473	264	790	809	Y
7	15	CAPP2_ERATE|CAPP2_ERATE	K.T(+304.20)IADGVLLDFMR.Q	N	87.09	1653.9	16	552.317	3	53.65	F11:9744	14	325.875	388.25	232.375	529	148	382	265	358.5	550	561	Y
7	15	CAPP2_ERATE|CAPP2_ERATE	K.D(+304.20)ITEDEK(+304.20)K(+304.20)ELDEALQAEIQAAFR.T	N	85.92	3573.91	5.9	894.491	4	49.5	F5:8864	7	9338	6462	12830	9381	5103	5159	11600	7375	137	159	Y
7	15	CAPP2_ERATE|CAPP2_ERATE	R.L(+304.20)RDPYITTLNVFQAYTLK(+304.20).Q	N	83.06	2763.57	9.5	691.906	4	51.62	F3:9490	10	378.25	384	223.5	1411	291.875	99.75	752.25	1423	1013	1030	Y
7	15	CAPP2_ERATE|CAPP2_ERATE	K.Q(+304.20)QIM(+15.99)VGYSDSGK(+304.20).D	N	81.54	1936.01	9.2	646.349	3	16.99	F7:4076	5	520	80.75	196.5	198.5	43	88.5	319.625	48.625	715	726	Y
7	15	CAPP2_ERATE|CAPP2_ERATE	R.Y(+304.20)GMSYFQENIWK(+304.20).G	N	81.11	2173.1	-0.4	1087.56	2	44.73	F9:7780	12	766	1293	4094	3367	1264	441	3920	1867	176	187	Y
7	15	CAPP2_ERATE|CAPP2_ERATE	R.V(+304.20)TLDLLEMVFAK(+304.20).G	N	79.43	1986.16	5.2	663.063	3	61.84	F6:10357	20	1918	1048	1157	2873	1785	266.5	1271	5347	944	955	Y
7	15	CAPP2_ERATE|CAPP2_ERATE	R.H(+304.20)TDAIDAITTH.L	N	79.11	1497.77	12.2	500.269	3	16.46	F7:3997	1	514	451.25	1360	891	573.5	248.5	1284	487.75	582	592	Y
7	15	CAPP2_ERATE|CAPP2_ERATE	K.Q(+304.20)QIMVGY(+304.20)SDSGK(+304.20).D	N	78.13	2224.21	16.7	557.07	4	20.96	F2:4980	5	1010	998.625	3335	2734	1124	575.875	3358	1978	715	726	Y
7	15	CAPP2_ERATE|CAPP2_ERATE	K.E(+304.20)MYNEWPFFR.V	N	76.91	1721.81	16	574.954	3	46.97	F6:8118	4	626	512.5	595.5	788	542.5	375	154	756	934	943	Y
7	15	CAPP2_ERATE|CAPP2_ERATE	K.E(+304.20)ILESDPYLK(+304.20).Q	N	76.37	1814.02	18.9	605.691	3	33.9	F5:6511	10	3005	2626	6011	10570	4159	2120	4759	2856	1213	1222	Y
7	15	CAPP2_ERATE|CAPP2_ERATE	R.L(+304.20)ADLQNAPASVER.L	N	74.32	1686.92	4.4	563.315	3	26.57	F5:5409	16	2296	759.375	1444	2153	342.5	826	3270	1981	688	700	Y
7	15	CAPP2_ERATE|CAPP2_ERATE	R.A(+304.20)QPTPQDEMR.Y	N	71.66	1475.73	7.4	492.921	3	12.9	F5:3317	6	2391	3272	5559	4934	2868	1020	3400	2613	166	175	Y
7	15	CAPP2_ERATE|CAPP2_ERATE	K.R(+304.20)QEWLLTELQGK(+304.20).R	N	66.75	2108.21	7.7	703.749	3	38.7	F9:6876	9	1496	678.625	2880	1323	633.125	855.875	1226	1772	606	617	Y
7	15	CAPP2_ERATE|CAPP2_ERATE	R.Y(+304.20)GM(+15.99)SYFQENIWK(+304.20).G	N	65.15	2189.1	3.2	730.709	3	41.21	F8:7698	8	302.5	335	1238	494	380	341	509.25	555.5	176	187	Y
7	15	CAPP2_ERATE|CAPP2_ERATE	R.F(+304.20)HLPVWLGVGTAFK(+304.20).S	N	64.21	2179.27	6	545.827	4	51.92	F3:9535	6	112	0	230.875	65.75	149	0	0	0	906	919	Y
7	15	CAPP2_ERATE|CAPP2_ERATE	K.F(+304.20)SSWMGGDR.D	N	63.55	1345.63	4.6	449.554	3	29.27	F9:5460	7	728.375	624	1264	1268	673	239.25	1138	622	218	226	Y
7	15	CAPP2_ERATE|CAPP2_ERATE	K.G(+304.20)IAAGMQNTG.X	N	62.58	1222.62	6.8	612.323	2	16.87	F11:4212	8	670.375	172	523.25	616.125	333	393	62.625	1028	1075	1084	Y
7	15	CAPP2_ERATE|CAPP2_ERATE	R.Y(+304.20)(+304.20)GMSYFQENIWK(+304.20).G	N	62.2	2477.3	7.2	496.471	5	43.69	F2:8398	2	224.25	237	1112	1518	121.75	41.375	1036	1374	176	187	Y
7	15	CAPP2_ERATE|CAPP2_ERATE	K.Q(+304.20)QIM(+15.99)VGY(+304.20)SDSGK(+304.20).D	N	59.41	2240.21	0.1	561.059	4	16.98	F2:4383	1	803.625	776	998	482	136	491	997.5	345.875	715	726	Y
7	15	CAPP2_ERATE|CAPP2_ERATE	R.A(+304.20)QPTPQDEM(+15.99)R.Y	N	59.29	1491.72	12.5	498.255	3	10.54	F6:2643	6	463.625	217.875	574.375	771.75	167	88.25	244.5	415	166	175	Y
7	15	CAPP2_ERATE|CAPP2_ERATE	R.S(+304.20)ATPETEYGR.M	N	58.35	1413.7	7.1	472.244	3	12.52	F6:2940	4	1470	2850	2668	3021	1719	869.875	2693	1885	864	873	Y
7	15	CAPP2_ERATE|CAPP2_ERATE	R.D(+304.20)VC(+45.99)LLAR.M	N	58.16	1138.61	5.9	380.546	3	31.67	F8:6266	21	265	609.375	753.75	388	399	461.25	735.125	638.375	290	296	Y
7	15	CAPP2_ERATE|CAPP2_ERATE	K.G(+304.20)DPGIAALYDK(+304.20).L	N	57.65	1726.96	5.6	864.492	2	26.32	F6:5019	6	1216	1357	1241	1528	1340	315	1080	1524	956	966	Y
7	15	CAPP2_ERATE|CAPP2_ERATE	R.L(+304.20)FSIDWYLNR.I	N	56.99	1629.88	5	815.95	2	53.68	F9:9122	16	1349	1488	2344	2791	792	574	1800	1164	701	710	Y
7	15	CAPP2_ERATE|CAPP2_ERATE	R.F(+304.20)VEYFR.S	N	56.86	1163.62	6.2	582.822	2	38.07	F9:6781	11	7934	6736	15290	9408	4620	3197	10050	8752	858	863	Y
7	15	CAPP2_ERATE|CAPP2_ERATE	K.S(+304.20)LVEVGDK(+304.20).T	N	56.32	1453.85	11.4	485.629	3	17.42	F6:3682	6	26910	19170	40370	34420	21040	14230	38550	22970	542	549	Y
7	15	CAPP2_ERATE|CAPP2_ERATE	K.L(+304.20)TFFHGR.G	N	56.09	1180.66	-1.5	394.56	3	27.38	F4:5923	6	198.5	323	461	646	148	357	178	470.25	755	761	Y
7	15	CAPP2_ERATE|CAPP2_ERATE	R.A(+304.20)DELLSAPK(+304.20).K	N	55.11	1550.9	3.7	388.734	4	21.61	F6:4311	12	139.5	52.5	305.875	514.5	190.5	276	314.5	431.5	327	335	Y
7	15	CAPP2_ERATE|CAPP2_ERATE	R.Y(+304.20)GMSY(+304.20)FQENIWK(+304.20).G	N	55.05	2477.3	11.4	496.473	5	43.76	F2:8409	2	475.125	753.75	2298	1606	233.25	588.875	1911	1680	176	187	Y
7	15	CAPP2_ERATE|CAPP2_ERATE	F.S(+304.20)HMLNLANIAEEVQIANR.R	N	54.76	2326.23	15.6	776.43	3	46.11	F8:8431	1	376	423	169.5	141	283	251.75	294.375	267.75	37	54	Y
7	15	CAPP2_ERATE|CAPP2_ERATE	R.L(+304.20)FSIDWY(+304.20)LNR.I	N	54.41	1934.08	8.3	484.531	4	49.72	F3:9200	2	300	332	171.5	593.5	289	114.75	655.5	717.5	701	710	Y
7	15	CAPP2_ERATE|CAPP2_ERATE	R.V(+304.20)TPEVTR.D	N	53.76	1104.64	2.9	553.328	2	12.92	F9:2984	8	12770	11520	22690	18680	9572	7389	19160	11100	232	238	Y
7	15	CAPP2_ERATE|CAPP2_ERATE	K.L(+304.20)LVADELK(+304.20)PFGENLR.S	N	53.64	2321.35	13.1	774.799	3	45.14	F6:7844	3	9954	5749	12560	10760	6312	4881	9855	8886	1181	1195	Y
7	15	CAPP2_ERATE|CAPP2_ERATE	H.M(+304.20)(+15.99)LNLANIAEEVQIANR.R	N	53.47	2118.14	14.2	707.062	3	46.68	F6:8075	2	318.5	279	389.5	534	281	301	235.5	161.5	39	54	Y
7	15	CAPP2_ERATE|CAPP2_ERATE	K.E(+304.20)ILESDPY(+304.20)LK(+304.20).Q	N	52.79	2118.22	8.3	530.566	4	27.11	F6:5137	7	2192	1506	2856	1640	804	882.5	1252	772.5	1213	1222	Y
7	15	CAPP2_ERATE|CAPP2_ERATE	R.A(+304.20)IPSTEPYR.V	N	52.78	1336.72	12.2	446.587	3	15.44	F9:3371	13	1924	2154	4040	4802	3056	524	3665	3360	484	492	Y
7	15	CAPP2_ERATE|CAPP2_ERATE	R.L(+304.20)PYDAPLIK(+304.20).F	N	50.54	1636.99	5.2	546.674	3	41.4	F10:8095	23	568	211.5	1006	350.5	435.75	352.25	454.875	484	209	217	Y
7	15	CAPP2_ERATE|CAPP2_ERATE	R.S(+304.20)VVVK(+304.20)EPR.F	N	49.47	1520.94	7.5	761.482	2	12.97	F3:3686	2	1651	980.625	2618	1590	1034	727	2312	1115	850	857	Y
7	15	CAPP2_ERATE|CAPP2_ERATE	K.S(+304.20)VEEFLEPLEVC(+45.99)Y(+304.20)K(+304.20).S	N	49.37	2642.39	11.8	529.492	5	50.44	F6:8638	4	224	0	788	863.75	450.5	148	304	320	528	541	Y
7	15	CAPP2_ERATE|CAPP2_ERATE	K.L(+304.20)M(+15.99)DEM(+15.99)AVVATDAYR.S	N	49.14	1919.92	9.9	640.988	3	29.92	F1:6288	1	126	0	147.5	109.25	64	67	70.75	138	836	849	Y
7	15	CAPP2_ERATE|CAPP2_ERATE	M.L(+304.20)NLANIAEEVQIANR.R	N	48.85	1971.1	15	658.051	3	47.29	F6:8166	2	42	171	698.625	127.75	722.75	229.875	75	443	40	54	Y
7	15	CAPP2_ERATE|CAPP2_ERATE	K.Y(+304.20)LETEQLLLQIAGHK(+304.20).E	N	47.94	2363.36	8.2	1182.7	2	49.62	F8:8958	4	303.625	462.625	404.75	837.75	167.5	576.5	556.75	484.5	984	998	Y
7	15	CAPP2_ERATE|CAPP2_ERATE	R.W(+304.20)RDLLATGFSEIPEK(+304.20).S	N	46.8	2369.31	7.9	593.339	4	47.6	F6:8212	1	446	626.625	1096	182	62.125	86.5	552	83.25	509	523	Y
7	15	CAPP2_ERATE|CAPP2_ERATE	K.G(+304.20)IAAGM(+15.99)QNTG.X	N	46.42	1238.62	5.3	620.319	2	12.68	F7:3431	3	321	118.5	193.875	174.5	234	468	378	279	1075	1084	Y
7	15	CAPP2_ERATE|CAPP2_ERATE	R.R(+304.20)AQPTPQDEMR.Y	N	46.38	1631.83	-1.1	544.95	3	12.34	F10:3712	2	367	92	740	319.625	70.25	259	96.5	498	165	175	Y
7	15	CAPP2_ERATE|CAPP2_ERATE	R.F(+304.20)TAATLEHGM(+15.99)HPPVSPK(+304.20)PEWSK(+304.20).L	N	46.14	3374.81	5.7	675.972	5	36.09	F12:6957	2	1161	907.5	1562	934.625	334.125	311	882	614.5	814	835	Y
7	15	CAPP2_ERATE|CAPP2_ERATE	K.D(+304.20)ITEDEK(+304.20).K	N	45.85	1456.78	9.3	486.604	3	15.12	F1:4070	7	486.875	756.75	1353	1134	1748	303.75	1916	1004	137	143	Y
7	15	CAPP2_ERATE|CAPP2_ERATE	K.E(+304.20)ILEGDPYLK(+304.20).Q	N	44.96	1784.01	0.4	893.011	2	32.57	F5:6311	3	1174	608	326	850	416	69	315	404	999	1008	Y
7	15	CAPP2_ERATE|CAPP2_ERATE	A.N(+304.20)IAEEVQIANR.R	N	44.93	1559.85	16.9	520.967	3	21.76	F6:4334	2	312	0	275.5	264.75	256.625	351.5	47.625	260	44	54	Y
7	15	CAPP2_ERATE|CAPP2_ERATE	K.S(+304.20)AIDK(+304.20)DIK(+304.20).N	N	44.23	1801.09	10.5	901.563	2	14.6	F9:3239	4	4784	5026	8870	9391	4399	1819	8601	5514	920	927	Y
7	15	CAPP2_ERATE|CAPP2_ERATE	R.D(+304.20)K(+304.20)LYNTSER.W	N	43.85	1732.95	9.4	578.661	3	13.52	F8:3542	3	3254	3372	8385	5429	1530	2348	5264	3915	500	508	Y
7	15	CAPP2_ERATE|CAPP2_ERATE	N.I(+304.20)AEEVQIANR.R	N	43.77	1445.81	8.8	482.948	3	22.69	F6:4474	1	325.25	317.25	226.625	253.5	474	63.5	828	238.375	45	54	Y
7	15	CAPP2_ERATE|CAPP2_ERATE	R.V(+304.20)LAELPSDSFGPY.I	N	42.42	1697.88	7.1	849.952	2	50.71	F1:9418	1	135.5	293	316	349.125	204.25	128.125	230	603.25	640	652	Y
7	15	CAPP2_ERATE|CAPP2_ERATE	R.L(+304.20)DELGAK(+304.20).L	N	42.07	1352.8	4.7	451.943	3	20.21	F5:4454	4	2277	922.875	1805	1502	1134	937	2553	2702	14	20	Y
7	15	CAPP2_ERATE|CAPP2_ERATE	K.S(+304.20)IGIDER.L	N	42.04	1092.6	18.7	547.319	2	14.42	F5:3546	6	14170	16540	25230	23190	10440	6976	17980	11810	252	258	Y
7	15	CAPP2_ERATE|CAPP2_ERATE	R.D(+304.20)PNFK(+304.20).V	N	41.55	1227.7	5.1	410.241	3	13.87	F8:3595	7	2632	2757	7066	4700	1940	2700	4664	7107	1034	1038	Y
7	15	CAPP2_ERATE|CAPP2_ERATE	R.V(+304.20)DTALK(+304.20).S	N	40.75	1253.77	2.4	627.894	2	15.45	F8:3832	7	3599	4482	9651	7597	2446	2498	7761	5984	196	201	Y
7	15	CAPP2_ERATE|CAPP2_ERATE	P.L(+304.20)PVVPLFER.L	N	40.16	1372.83	-0.1	458.618	3	45.95	F9:7962	7	600	371	358	315	210.5	648	212.5	514.875	679	687	Y
7	15	CAPP2_ERATE|CAPP2_ERATE	R.L(+304.20)VTEIGK(+304.20).K	N	38.97	1366.85	5.3	456.628	3	21.05	F9:4229	6	2251	838	1833	2625	1958	1112	2005	1554	83	89	Y
7	15	CAPP2_ERATE|CAPP2_ERATE	R.E(+304.20)C(+45.99)HIR.N	N	38.61	1006.49	0.2	336.505	3	14.47	F12:3500	5	4074	1986	8666	10190	4014	8862	5554	5086	672	676	Y
7	15	CAPP2_ERATE|CAPP2_ERATE	K.L(+304.20)YNTSER.W	N	37.01	1185.62	8.4	593.824	2	15.06	F10:4120	4	2614	3016	4468	3520	1391	644.125	2960	2880	502	508	Y
7	15	CAPP2_ERATE|CAPP2_ERATE	K.S(+304.20)IGINER.L	N	36.86	1091.62	-2.3	364.879	3	15.44	F10:4177	7	87	791.25	282	1084	338	489.5	318	153	202	208	Y
7	15	CAPP2_ERATE|CAPP2_ERATE	R.V(+304.20)VLGDLR.D	N	36.86	1074.66	7.7	538.344	2	24.17	F8:5142	11	14420	15100	24140	21640	11850	4961	13280	10910	493	499	Y
7	15	CAPP2_ERATE|CAPP2_ERATE	K.G(+304.20)DPGIAALY(+304.20)DK(+304.20).L	N	36.31	2031.16	0.3	508.798	4	22.05	F9:4378	3	1201	626	1046	1415	279	671	330.625	1032	956	966	Y
7	15	CAPP2_ERATE|CAPP2_ERATE	K.G(+304.20)DPGIAAL.Y	N	36.06	1016.58	7.7	509.299	2	27.87	F1:5980	1	199.5	518.125	434	507.5	164	1099	553.25	832	956	963	Y
7	15	CAPP2_ERATE|CAPP2_ERATE	N.P(+304.20)LPVVPLFER.L	N	35.76	1469.89	10.6	490.974	3	46.83	F9:8094	2	125.5	415.5	395	96.5	50.375	268	214	320	678	687	Y
7	15	CAPP2_ERATE|CAPP2_ERATE	K.Q(+304.20)IRDPNFK(+304.20).V	N	34.54	1624.94	5.2	542.657	3	14.79	F3:3959	4	2436	1844	4258	2375	1644	1694	3291	2005	1031	1038	Y
7	15	CAPP2_ERATE|CAPP2_ERATE	R.S(+304.20)VVVK(+304.20).E	N	33.8	1138.74	-0.4	570.378	2	14.85	F4:4044	1	1929	1454	2472	2442	980.125	1058	1995	1613	850	854	Y
7	15	CAPP2_ERATE|CAPP2_ERATE	R.L(+304.20)RDPYITTLNVFQAY(+304.20).T	N	33.77	2421.34	8.4	485.28	5	48.4	F3:9002	1	297	426.25	316.5	178	227.125	172.25	311.25	128	1013	1027	Y
7	15	CAPP2_ERATE|CAPP2_ERATE	T.E(+304.20)IGK(+304.20)K(+304.20)PEEVFEALK(+304.20).S	N	33.65	2832.68	19.5	473.13	6	40.89	F7:7661	2	1020	959.875	1968	2392	1015	1080	3062	1684	86	99	Y
7	15	CAPP2_ERATE|CAPP2_ERATE	T.Q(+304.20)PPLNK(+304.20).E	N	33.14	1303.8	5.5	435.608	3	13.57	F3:3775	2	1020	1214	2246	1387	810.75	1072	2585	1136	1042	1047	Y
7	15	CAPP2_ERATE|CAPP2_ERATE	R.L(+304.20)SAAWQLY(+304.20)QAQAEVAK(+304.20).V	N	33.04	2688.52	-8.4	673.132	4	45.6	F2:8685	5	77.75	392	471.625	84.5	210	123.25	548.75	106.25	731	746	Y
7	15	CAPP2_ERATE|CAPP2_ERATE	R.C(+45.99)(+304.20)NDELR.A	N	31.38	1098.51	6.4	550.263	2	15.1	F5:3652	3	3902	3359	8058	5696	3186	1908	6048	3608	456	461	Y
7	15	CAPP2_ERATE|CAPP2_ERATE	V.D(+304.20)TALK(+304.20).S	N	29.64	1154.7	-7.7	385.905	3	12.78	F7:3447	3	357	425	462	1302	588	650	934	280.75	197	201	Y
7	15	CAPP2_ERATE|CAPP2_ERATE	R.L(+304.20)RDPYITTLNVF.Q	N	29.02	1754.98	0.7	878.499	2	48.05	F8:8722	7	147	252	461.625	411.25	250.25	86.25	677.875	686.375	1013	1024	Y
7	15	CAPP2_ERATE|CAPP2_ERATE	Q.I(+304.20)AGHK(+304.20).E	N	28.24	1132.71	9.5	567.366	2	10.39	F3:3298	1	2331	2505	4218	4625	2744	1044	5264	2113	994	998	Y
7	15	CAPP2_ERATE|CAPP2_ERATE	Q.A(+304.20)EVAK(+304.20).V	N	27.61	1124.69	-0.4	375.904	3	11.85	F9:2824	1	381	233	722	757	601.875	570	165	113.75	742	746	Y
7	15	CAPP2_ERATE|CAPP2_ERATE	R.S(+304.20)LLQK(+304.20).H	N	27.06	1195.76	0.4	598.89	2	17.49	F4:4438	1	1262	1136	3759	2148	1718	880	2693	1598	118	122	Y
7	15	CAPP2_ERATE|CAPP2_ERATE	R.R(+304.20)VDTALK(+304.20).S	N	26.25	1409.87	4.9	470.966	3	12.85	F3:3668	2	5676	3920	9445	4599	2850	2944	5943	2509	195	201	Y
7	15	CAPP2_ERATE|CAPP2_ERATE	R.T(+304.20)DEVR.R	N	25.82	922.497	-6.8	462.253	2	10.48	F5:2955	2	689	544.5	892	1225	825.25	435.5	1338	286	160	164	Y
7	15	CAPP2_ERATE|CAPP2_ERATE	K.K(+304.20)YNVK(+304.20).L	N	25.76	1258.78	3	420.6	3	10.99	F3:3388	1	2432	1451	3404	3000	1590	1862	2264	1236	750	754	Y
7	15	CAPP2_ERATE|CAPP2_ERATE	R.L(+304.20)RDPYITTL.N	N	25.4	1394.8	-0.5	465.941	3	37.43	F8:7131	5	177	573.125	77.5	210.25	74.5	132	62.875	71.5	1013	1021	Y
7	15	CAPP2_ERATE|CAPP2_ERATE	K.L(+304.20)LVADDLK(+304.20)PFGEQLR.S	N	24.41	2321.35	3.8	774.792	3	44.36	F6:7726	1	161.5	486	1202	1338	499	132.625	480.5	400	967	981	Y
7	15	CAPP2_ERATE|CAPP2_ERATE	R.S(+304.20)ATPETEY(+304.20)GR.M	N	24.16	1717.9	6.7	573.644	3	13.2	F8:3494	2	1040	1398	732	1129	1216	1048	1267	678	864	873	Y
7	15	CAPP2_ERATE|CAPP2_ERATE	R.A(+304.20)IPSTEPY(+304.20)R.V	N	23.19	1640.92	5.1	821.473	2	15.53	F3:4070	1	1654	1836	2622	1160	1227	864	2777	1852	484	492	Y
7	15	CAPP2_ERATE|CAPP2_ERATE	K.L(+304.20)Y(+304.20)NTSER.W	N	22.59	1489.82	11.5	497.621	3	13.25	F3:3728	1	2532	2270	3430	3130	1916	1196	2224	1716	502	508	Y
7	15	CAPP2_ERATE|CAPP2_ERATE	D.I(+304.20)EETLK(+304.20).R	N	22.34	1339.81	-19	447.601	3	13.95	F5:3475	1	1740	3912	7543	1692	501	776.25	1176	1079	76	81	Y
7	15	CAPP2_ERATE|CAPP2_ERATE	R.F(+304.20)VEY(+304.20)FR.S	N	21.03	1467.82	7.7	490.285	3	40.28	F4:7867	1	422.25	594.625	694	701.75	832	280	696	1156	858	863	Y
7	15	CAPP2_ERATE|CAPP2_ERATE	R.T(+304.20)DEVRR.A	N	20.97	1078.6	4.5	360.542	3	9.65	F10:3308	3	393.25	276.25	289	561	389	468	680.375	508	160	165	Y
7	15	CAPP2_ERATE|CAPP2_ERATE	K.K(+304.20)Y(+304.20)NVK(+304.20).L	N	19.01	1562.98	8.8	522.004	3	13.63	F4:3861	3	1170	1329	976	1344	490.25	786	2000	962	750	754	Y
7	15	CAPP2_ERATE|CAPP2_ERATE	R.C(+45.99)(+304.20)NNELR.A	N	17.59	1097.52	3.6	549.77	2	15.88	F10:4242	2	3184	3036	5936	4668	3400	2469	4503	3552	319	324	Y
7	15	CAPP2_ERATE|CAPP2_ERATE	K.L(+304.20)MDEM(+15.99)AVVA.T	N	17.15	1297.65	0.3	649.833	2	36.01	F1:7202	1	587.875	243	433.25	767.125	73	356	492.5	306.25	836	844	Y
7	15	CAPP2_ERATE|CAPP2_ERATE	K.R(+304.20)PLLVADLPVSEEVADVL.G	N	16.89	2238.27	9.1	747.105	3	53.26	F5:9429	2	151.5	134.75	55.875	128.5	99.5	219.25	264	47.625	618	635	Y
7	15	CAPP2_ERATE|CAPP2_ERATE	R.L(+304.20)RDPY(+304.20)ITTL.N	N	16.63	1699	9.1	425.762	4	35.07	F3:7002	1	88.5	0	164	221	99	69.5	48.875	374	1013	1021	Y
7	15	CAPP2_ERATE|CAPP2_ERATE	R.G(+304.20)GGPTHLAILSQPPDTIN.G	N	14.88	2091.12	5.9	698.052	3	39.14	F7:7399	1	160	389.375	472	491	181	496	221	143.5	768	785	Y
7	15	CAPP2_ERATE|CAPP2_ERATE	K.H(+304.20)Y(+304.20)IEFWR.A	N	14.79	1657.91	10.4	553.649	3	25.05	F3:5498	1	138.5	399	546.375	507	367	200	855.625	517	340	346	Y
7	15	CAPP2_ERATE|CAPP2_ERATE	R.D(+304.20)K(+304.20)LY(+304.20)NTSER.W	N	14.49	2037.15	4.1	680.059	3	14.49	F2:4010	1	224	150.5	499.375	49.875	418	382	916.5	87.5	500	508	Y
7	15	CAPP2_ERATE|CAPP2_ERATE	K.Y(+304.20)LETQELLLQIQGTK(+304.20).E	Y	13.92	2384.37	-3.1	597.097	4	47.66	F5:8588	1	200	828.5	374.375	1050	407.75	515.75	843.875	497.625	1198	1212	Y
7	15	CAPP2_ERATE|CAPP2_ERATE	E.I(+304.20)QAAFR.T	N	11.93	1008.6	11.2	505.311	2	24.57	F4:5501	2	395.5	0	203	147	564	82	155.25	120.75	154	159	Y
7	15	CAPP2_ERATE|CAPP2_ERATE	K.D(+304.20)ITEDEK(+304.20)K(+304.20).E	N	11.85	1889.07	0.3	473.275	4	14.32	F11:3830	1	2040	325.75	1032	675	918	1476	407.125	840.125	137	144	Y
7	15	CAPP2_ERATE|CAPP2_ERATE	K.L(+304.20)LVADELK(+304.20)PFGEN.L	N	10.41	2052.16	-3.7	685.058	3	45	F5:8190	1	617.25	377.25	605.25	1155	458.125	548.25	646	759.25	1181	1193	Y
7	15	CAPP2_ERATE|CAPP2_ERATE	I.D(+304.20)K(+304.20)DIK(+304.20).N	N	8.03	1529.94	5	510.989	3	12.5	F8:3389	1	1788	1903	2174	3889	1810	1758	4000	2489	923	927	Y
7	15	CAPP2_ERATE|CAPP2_ERATE	R.L(+304.20)PY(+304.20)DAASHIK(+304.20).F	N	7.77	2026.18	-9.5	1014.09	2	52.94	F6:9014	2	234	70.5	391	340.625	40.75	108.25	449.875	450	259	268	Y
7	15	CAPP2_ERATE|CAPP2_ERATE	R.L(+304.20)ADLQN.A	N	7.71	976.544	4.1	489.281	2	23.73	F1:5360	1	220	148.5	847	753.125	76	105.25	694	132.25	688	693	Y
7	15	CAPP2_ERATE|CAPP2_ERATE	Q.A(+304.20)Y(+304.20)TLK(+304.20).Q	N	7.65	1506.94	-6.7	503.317	3	32.81	F8:6438	2	424.125	381.125	227.5	80.25	460.75	394	110.25	506	1026	1030	Y
7	15	CAPP2_ERATE|CAPP2_ERATE	E.M(+304.20)RYGM(+15.99)SYFQENIWK(+304.20).G	N	7.4	2476.24	-9.7	620.061	4	43.59	F3:8280	1	532	364	905.5	1384	108.5	666.75	642	514.5	174	187	Y
7	15	CAPP2_ERATE|CAPP2_ERATE	K.F(+304.20)SSWM(+15.99)GGDR.D	N	7.21	1361.63	5.3	681.825	2	20.82	F7:4650	1	696	68	824.25	992.75	754	106.25	628	532	218	226	Y
7	15	CAPP2_ERATE|CAPP2_ERATE	I.Y(+304.20)VSLFQK(+304.20).Y	Y	6.88	1491.88	-18.1	746.934	2	27.99	F6:5269	1	787.75	1598	1973	930.375	1112	1117	1577	849.5	1141	1147	Y
7	15	CAPP2_ERATE|CAPP2_ERATE	R.L(+304.20)RDPYITTLN.V	N	5.08	1508.85	5.4	755.434	2	28.58	F9:5357	1	189	870.875	179.5	488.75	196.5	167	648	111.25	1013	1022	Y
7	15	CAPP2_ERATE|CAPP2_ERATE	F.E(+304.20)LSMWRC(+45.99)NDELR.A	N	5.06	1900.88	18.5	951.467	2	40.31	F1:7848	1	61.625	329.75	1180	714.5	711.75	320	332.75	183	450	461	Y
12	14	CL367Contig22|CL367Contig22	R.T(+304.20)ETSPEDVGGMHAAAGILTAR.G	N	117.13	2387.2	8.4	597.812	4	29.53	F6:5501	19	3396	2681	4950	5921	1999	1594	3611	1882	563	583	Y
12	14	CL367Contig22|CL367Contig22	K.D(+304.20)MQDIEFTVQENR.L	N	95.23	1927.92	9.5	643.653	3	37.53	F1:7430	9	1771	1263	2019	1520	1013	1033	2418	2064	408	420	Y
12	14	CL367Contig22|CL367Contig22	K.I(+304.20)AVDMVNEGFVDR.N	N	94.63	1767.91	9.3	590.315	3	41.38	F5:7641	8	1959	2285	2772	2543	1948	1126	2720	1536	483	495	Y
12	14	CL367Contig22|CL367Contig22	K.K(+304.20)LY(+304.20)GEY(+304.20)LVNAQGEDVVAGIR.T	N	91.52	3105.74	6.5	622.16	5	39.07	F9:6931	6	2039	2779	2914	2721	1973	1544	1468	1968	357	376	Y
12	14	CL367Contig22|CL367Contig22	K.G(+304.20)ANLAEMASIGLSVPPGFTVSTEAC(+45.99)EQY(+304.20)QIAGK(+304.20).S	N	89.98	4297.2	15.1	860.461	5	51.99	F6:8871	3	1108	672.625	1464	1561	233.625	112	982.875	913.125	45	77	Y
12	14	CL367Contig22|CL367Contig22	K.K(+304.20)LY(+304.20)GEYLVNAQGEDVVAGIR.T	N	89.19	2801.54	2.9	701.395	4	43.24	F7:8013	11	476.25	936.875	1797	1504	488.5	523.125	766.125	450	357	376	Y
12	14	CL367Contig22|CL367Contig22	R.A(+304.20)MDGLPVTIR.L	N	88.34	1375.77	1.6	459.599	3	36.88	F11:7220	29	150.5	385.375	910.125	971	236	299	353	302	750	759	Y
12	14	CL367Contig22|CL367Contig22	K.M(+304.20)VEPGHLDQLLHPQFEDPSAYK(+304.20).D	N	85.02	3158.62	12.8	790.673	4	42.81	F6:7494	6	2500	2080	4603	3450	1536	1754	1908	2171	501	522	Y
12	14	CL367Contig22|CL367Contig22	K.L(+304.20)YGEYLVNAQGEDVVAGIR.T	N	83.82	2369.25	9.3	790.764	3	44.85	F5:8167	4	431.5	848.125	883.5	1074	751.75	462.125	923.25	396	358	376	Y
12	14	CL367Contig22|CL367Contig22	K.M(+304.20)VEPGHLDQLLHPQFEDPSAYK(+304.20)DK(+304.20).V	N	83.45	3705.94	7.1	742.201	5	40.31	F6:7119	13	7641	3680	10080	6617	4432	2320	7586	4096	501	524	Y
12	14	CL367Contig22|CL367Contig22	K.L(+304.20)GDPEK(+304.20)PLLLSVR.S	N	80.14	2044.24	10.3	512.072	4	41.45	F11:7906	23	928	1397	1118	1254	844.25	1028	916.5	813.25	171	183	Y
12	14	CL367Contig22|CL367Contig22	K.I(+304.20)GTMIEIPR.A	N	77.74	1332.77	5.6	445.266	3	40.29	F8:7560	15	404.375	339	1434	378.25	348	989	1202	500	884	892	Y
12	14	CL367Contig22|CL367Contig22	K.M(+304.20)(+15.99)VEPGHLDQLLHPQFEDPSAYK(+304.20)DK(+304.20).V	N	76.97	3721.94	10.1	621.337	6	37.9	F6:6757	5	5232	4965	8945	10010	5806	3148	6860	4443	501	524	Y
12	14	CL367Contig22|CL367Contig22	R.A(+304.20)M(+15.99)DGLPVTIR.L	N	75.49	1391.77	6	464.933	3	20.77	F8:4632	15	440	346	1042	736.125	61.625	191	224.5	657	750	759	Y
12	14	CL367Contig22|CL367Contig22	K.M(+304.20)VEPGHLDQLLHPQFEDPSAY(+304.20)K(+304.20)DK(+304.20).V	N	70.12	4010.14	12.8	573.892	7	39.34	F8:7418	3	4720	3276	5173	7028	2686	2840	4189	3497	501	524	Y
12	14	CL367Contig22|CL367Contig22	K.D(+304.20)M(+15.99)QDIEFTVQENR.L	N	69.53	1943.91	3.9	972.968	2	23.32	F1:5298	5	343.75	550	762.25	820.125	328.5	633.875	449.5	1079	408	420	Y
12	14	CL367Contig22|CL367Contig22	K.N(+304.20)DTDLTAADLK(+304.20).E	N	68.51	1783.97	5.9	892.996	2	21.76	F1:5064	8	996	643.75	2004	1669	555.75	626.5	2238	820	257	267	Y
12	14	CL367Contig22|CL367Contig22	R.T(+304.20)PEDLDTM(+15.99)K(+304.20).D	N	67.01	1672.87	12.2	558.637	3	15.32	F5:3688	2	2583	1281	5319	5363	2550	1982	2679	1902	377	385	Y
12	14	CL367Contig22|CL367Contig22	K.G(+304.20)EPFPSDPK(+304.20).K	N	63.34	1580.86	9.9	527.964	3	16.29	F6:3507	11	2916	1319	3992	3309	3019	1388	3392	2114	282	290	Y
12	14	CL367Contig22|CL367Contig22	K.M(+304.20)VEPGHLDQLLHPQFEDPSAY(+304.20)K(+304.20).D	N	60.77	3462.82	4.3	578.147	6	41.43	F8:7731	3	1342	2088	3640	3265	1630	2216	2104	1442	501	522	Y
12	14	CL367Contig22|CL367Contig22	R.T(+304.20)PEDLDTMK(+304.20).D	N	60.55	1656.87	14.9	553.307	3	17.92	F5:4094	4	1267	1396	2188	2399	1068	614.75	1153	1049	377	385	Y
12	14	CL367Contig22|CL367Contig22	K.M(+304.20)VEPGHLDQLLHPQFED.P	N	59.2	2308.14	3.6	770.39	3	42.83	F5:7860	2	314	289	1480	251.625	385	211	389	570	501	517	Y
12	14	CL367Contig22|CL367Contig22	K.I(+304.20)LENHY(+304.20)K(+304.20)DMQDIEFTVQENR.L	N	52.41	3433.79	3.1	687.768	5	40.12	F7:7546	1	1148	828.125	840	382.5	986.875	833.125	1236	770.375	401	420	Y
12	14	CL367Contig22|CL367Contig22	R.F(+304.20)AYDSYR.R	N	52.25	1224.6	7	613.313	2	18.37	F8:4272	11	12710	10920	28370	16650	12410	6938	14380	10560	218	224	Y
12	14	CL367Contig22|CL367Contig22	R.L(+304.20)WMLQC(+45.99)R.S	N	50.03	1298.66	7.7	650.34	2	49.76	F4:9295	3	525.25	1094	2797	1813	505	618	1488	1110	421	427	Y
12	14	CL367Contig22|CL367Contig22	K.I(+304.20)LENHYK(+304.20)DM(+15.99)QDIEFTVQENR.L	N	49.23	3145.59	17.6	787.418	4	31.46	F6:5790	2	900.375	238	512	483	1248	596	1172	83.75	401	420	Y
12	14	CL367Contig22|CL367Contig22	R.V(+304.20)Y(+304.20)VFGK(+304.20).G	N	48.67	1624	6.1	407.009	4	25.07	F4:5575	4	131.5	228	190	556	72.5	78.5	288	174	23	28	Y
12	14	CL367Contig22|CL367Contig22	R.N(+304.20)PSTGEK(+304.20).K	N	47.14	1339.74	10.2	447.594	3	10.53	F9:2626	6	683.125	1270	2146	2010	973.75	678	1740	690	350	356	Y
12	14	CL367Contig22|CL367Contig22	R.V(+304.20)YVFGK(+304.20).G	N	45.5	1319.8	-4.1	440.937	3	32.88	F4:6752	7	146.5	152	636	333	159	190	79.5	355	23	28	Y
12	14	CL367Contig22|CL367Contig22	K.S(+304.20)VAIGETVLHEGDWLSLNGSTGEVILGK(+304.20).Q	N	45.24	3488.89	-7.6	873.222	4	50.36	F5:8993	3	218	0	483	306	291.375	207	325	639.125	616	643	Y
12	14	CL367Contig22|CL367Contig22	K.K(+304.20)LYGEYLVNAQGEDVVAGIR.T	N	44.61	2497.34	13.6	833.466	3	39.7	F6:7028	1	375	360.75	173.5	572	86	398.125	288.875	231.5	357	376	Y
12	14	CL367Contig22|CL367Contig22	N.A(+304.20)QGEDVVAGIR.T	N	44.11	1417.78	6.5	709.901	2	16.77	F5:3917	1	3592	2597	6164	5464	3096	2209	4168	3875	366	376	Y
12	14	CL367Contig22|CL367Contig22	K.G(+304.20)K(+304.20)SEGDK(+304.20).T	N	43.47	1631.94	2.7	408.995	4	10.15	F10:3383	3	231.25	252	499.125	206	337.375	298.5	241.5	266	29	35	Y
12	14	CL367Contig22|CL367Contig22	K.L(+304.20)Y(+304.20)GEYLVNAQGEDVVAGIR.T	N	42.63	2673.45	-3.7	892.153	3	41.53	F6:7302	1	263.875	564	660	455.75	272	123.5	987.5	180.125	358	376	Y
12	14	CL367Contig22|CL367Contig22	K.I(+304.20)LENHYK(+304.20).D	N	42.18	1523.88	7.3	508.971	3	20.05	F12:4346	5	137.5	593.5	202.5	464.75	101.75	0	0	0	401	407	Y
12	14	CL367Contig22|CL367Contig22	N.D(+304.20)TDLTAADLK(+304.20).E	N	41.76	1669.92	-0.1	557.649	3	23.17	F1:5275	2	245.5	143.5	380.625	429.25	350.5	397	351	171.5	258	267	Y
12	14	CL367Contig22|CL367Contig22	R.T(+304.20)GQGAVK(+304.20).I	N	41.49	1267.76	6.1	634.891	2	10.41	F3:3300	2	3176	2913	5104	3835	1057	1896	4416	2109	476	482	Y
12	14	CL367Contig22|CL367Contig22	N.D(+304.20)EVAAGLAAK(+304.20).S	N	41.16	1551.9	6.9	518.31	3	18.47	F5:4181	1	524	1042	768.75	964	448	789.25	1100	648.25	204	213	Y
12	14	CL367Contig22|CL367Contig22	K.L(+304.20)GDPEK(+304.20)PLLL.S	N	40.32	1702.04	1.1	568.354	3	39.26	F5:7322	4	1289	714	2399	1202	1216	406	1496	1646	171	180	Y
12	14	CL367Contig22|CL367Contig22	K.K(+304.20)QLELAVR.A	N	39.86	1259.78	10.4	420.939	3	16.92	F2:4374	1	1912	1075	2233	1374	1187	1526	1182	451.625	291	298	Y
12	14	CL367Contig22|CL367Contig22	Q.G(+304.20)EDVVAGIR.T	N	38.72	1218.68	-1.7	610.347	2	16.69	F5:3905	2	6409	5232	8041	5158	2842	4946	5660	7667	368	376	Y
12	14	CL367Contig22|CL367Contig22	K.L(+304.20)EHMK(+304.20).E	N	38.32	1264.73	-5.3	317.188	4	15.38	F12:3637	2	74.25	47.375	388	520.75	126.25	142	268	285.875	246	250	Y
12	14	CL367Contig22|CL367Contig22	R.V(+304.20)NDAEK(+304.20).S	N	37.61	1282.72	6.5	428.584	3	12.29	F5:3226	5	1552	1233	4166	2527	1880	1332	2672	1744	610	615	Y
12	14	CL367Contig22|CL367Contig22	K.M(+304.20)(+15.99)VEPGHLDQLLHPQFEDPSAY(+304.20)K(+304.20)DK(+304.20).V	N	36.89	4026.14	4.3	672.033	6	35.83	F8:6890	4	432	447.75	379	856	566.375	174	430	368	501	524	Y
12	14	CL367Contig22|CL367Contig22	K.G(+304.20)EPFPSDPK(+304.20)K(+304.20).Q	N	35.16	2013.15	4.5	672.06	3	15.28	F8:3806	2	1834	1340	2638	3249	1113	1048	3006	2013	282	291	Y
12	14	CL367Contig22|CL367Contig22	K.V(+304.20)FTAAGK(+304.20).P	N	34.3	1300.79	5.8	651.404	2	19.07	F3:4601	3	2297	2472	3389	2078	1535	1576	4112	2317	872	878	Y
12	14	CL367Contig22|CL367Contig22	K.D(+304.20)AILVR.T	N	34.22	989.612	0.2	495.813	2	17.58	F7:4165	3	3015	1920	4270	3256	2333	3060	2696	1979	557	562	Y
12	14	CL367Contig22|CL367Contig22	R.L(+304.20)WM(+15.99)LQC(+45.99)R.S	N	33.93	1314.65	16.7	439.231	3	44.71	F4:8531	2	318.75	247	614.5	633.5	49.875	208	361	532.75	421	427	Y
12	14	CL367Contig22|CL367Contig22	K.Q(+304.20)LLGGK(+304.20).G	N	33.79	1222.78	0.4	408.599	3	17.33	F4:4415	3	1234	782	2036	1117	644.375	763.625	1440	1152	39	44	Y
12	14	CL367Contig22|CL367Contig22	R.T(+304.20)ETSPEDVGGMHAAAGIL.T	N	33.54	2059.01	4.9	1030.52	2	38.15	F1:7523	4	196.125	135	270	212.625	94	104	267.25	179.25	563	580	Y
12	14	CL367Contig22|CL367Contig22	K.L(+304.20)EHM(+15.99)K(+304.20).E	N	32.99	1280.73	6.3	427.919	3	11.3	F11:3377	3	2087	346.125	4181	3670	2748	1330	1592	821.75	246	250	Y
12	14	CL367Contig22|CL367Contig22	S.T(+304.20)EAC(+45.99)EQYQIAGK(+304.20).S	N	32.63	1994	14.6	665.682	3	25.82	F6:4943	1	170	0	628	347.25	290	176.5	244	341	66	77	Y
12	14	CL367Contig22|CL367Contig22	Q.I(+304.20)VFTAEDAEAWHAQGK(+304.20).D	N	32.49	2380.25	8.1	596.075	4	36.78	F6:6588	2	42.25	902.125	297.5	617.875	317.125	429	564.75	473.75	541	556	Y
12	14	CL367Contig22|CL367Contig22	K.L(+304.20)Y(+304.20)GEY(+304.20)LVNAQGEDVVAGIR.T	N	31.62	2977.65	-3.4	745.417	4	38.66	F9:6870	1	118.25	199	860.375	330.5	134.5	65	386	84.25	358	376	Y
12	14	CL367Contig22|CL367Contig22	R.Q(+304.20)NALDR.L	N	30.83	1019.56	9	510.793	2	12.03	F10:3666	2	550	118.875	980	618.25	159	472	546.5	101.25	730	735	Y
12	14	CL367Contig22|CL367Contig22	R.N(+304.20)TAIK(+304.20).M	N	28.44	1153.72	0	577.866	2	12.43	F4:3680	3	328	200.5	1195	719.875	468.25	448	1381	472.75	496	500	Y
12	14	CL367Contig22|CL367Contig22	F.M(+304.20)SWVDEVR.Q	N	27.12	1324.67	4.8	663.345	2	32.04	F5:6232	1	325.5	1432	1092	1348	1254	1205	534	1701	664	671	Y
12	14	CL367Contig22|CL367Contig22	R.F(+304.20)AYDSY(+304.20)R.R	N	26.54	1528.8	5.4	510.611	3	17.78	F3:4407	2	2131	2389	3224	2026	1388	1982	2560	2798	218	224	Y
12	14	CL367Contig22|CL367Contig22	K.G(+304.20)ANLAEMA.S	N	24.38	1079.55	11.7	540.79	2	20.71	F5:4528	1	1032	833.5	1815	1118	1592	1526	740	1699	45	52	Y
12	14	CL367Contig22|CL367Contig22	K.L(+304.20)SEVNPM(+15.99).L	N	23.09	1108.57	8.4	555.296	2	19.85	F1:4778	1	225.5	96.25	720	349	183.25	452.75	355	566.5	799	805	Y
12	14	CL367Contig22|CL367Contig22	N.E(+304.20)GFVDR.N	N	22.45	1025.54	8.2	513.781	2	13.96	F5:3477	1	2370	1611	2631	1582	1021	1618	1652	1304	490	495	Y
12	14	CL367Contig22|CL367Contig22	K.K(+304.20)LY(+304.20)GEYLVN.A	N	21.94	1705.98	3.7	569.668	3	27.87	F9:5250	1	291	199.5	93.5	552	348	600	363.25	148.5	357	365	Y
12	14	CL367Contig22|CL367Contig22	K.Q(+304.20)PLAPPALSGDLGTF.M	N	20.87	1786.97	-2	894.491	2	48.06	F1:9019	1	354	148	865.5	241.5	258.5	164.5	634	318	644	658	Y
12	14	CL367Contig22|CL367Contig22	K.I(+304.20)LENHY(+304.20)K(+304.20).D	N	19.91	1828.08	6.7	610.372	3	16.97	F2:4382	2	287	207.5	766	329	828	159.125	469.25	187.5	401	407	Y
12	14	CL367Contig22|CL367Contig22	T.S(+304.20)LFEEK(+304.20).L	N	18.89	1359.78	9.7	454.27	3	18.62	F6:3863	1	678	121.25	524.375	203.5	485.625	153.625	459.25	852.25	240	245	Y
12	14	CL367Contig22|CL367Contig22	A.R(+304.20)GWGK(+304.20).C	N	16.84	1210.73	15.5	404.59	3	15.47	F3:4061	1	1770	1069	1392	769.5	1437	2623	2456	1554	595	599	Y
12	14	CL367Contig22|CL367Contig22	K.M(+304.20)VEPGHLDQL.L	N	16.66	1441.75	7.8	721.887	2	27.04	F5:5480	1	908	60.875	770	859.875	274	234	1024	197	501	510	Y
12	14	CL367Contig22|CL367Contig22	K.R(+304.20)VY(+304.20)VFGK(+304.20).G	N	15.58	1780.1	-8.5	446.028	4	31.81	F5:6197	1	236.625	181.5	465	347	49.5	536.5	151	205.5	22	28	Y
12	14	CL367Contig22|CL367Contig22	R.L(+304.20)WMLQ.C	N	14.72	993.557	-0.3	497.786	2	48.23	F8:8748	3	1040	1060	1004	525.125	379	436.875	843.375	638	421	425	Y
12	14	CL367Contig22|CL367Contig22	K.G(+304.20)K(+304.20)SEGDK(+304.20)TMK(+304.20).Q	N	12.03	2296.33	5.3	575.092	4	12.03	F2:3640	1	860	890	1197	1811	940	412.625	1912	1361	29	38	Y
12	14	CL367Contig22|CL367Contig22	K.E(+304.20)LDY(+304.20)AR.I	N	11.43	1373.77	-2.8	687.888	2	19.7	F1:4755	2	101.25	692	616	201.5	257	693.375	407.75	284.5	696	701	Y
12	14	CL367Contig22|CL367Contig22	K.I(+304.20)AVDMVN.E	N	11.38	1064.58	8.9	533.302	2	31.56	F1:6534	1	201.5	612	920.625	1023	724	273	920.5	924	483	489	Y
12	14	CL367Contig22|CL367Contig22	K.L(+304.20)SEVNPM.L	N	10.66	1092.57	4.5	547.297	2	31.24	F1:6486	1	775.5	180.875	661.5	881.875	617.5	272	452	372.5	799	805	Y
12	14	CL367Contig22|CL367Contig22	K.I(+304.20)AVDMVNEGFV.D	N	9.59	1496.78	-1.5	749.396	2	37.15	F5:6998	1	1391	612	901.75	566.25	650	1030	1588	899.5	483	493	Y
12	14	CL367Contig22|CL367Contig22	X.T(+304.20)VRVNDAEK(+304.20).S	N	9.07	1638.94	6.1	547.324	3	22.41	F6:4432	1	123.75	222	611.875	304	406	299	394	513.5	607	615	Y
12	14	CL367Contig22|CL367Contig22	X.I(+304.20)Y(+304.20)RSRK(+304.20).Q	Y	9.06	1734.09	15.9	579.045	3	27.45	F8:5634	1	85	88.5	323	497.625	309	1122	460.75	75.25	457	462	Y
12	14	CL367Contig22|CL367Contig22	K.M(+304.20)VEPGHLDQLLHPQ.F	N	8.78	1917	9.2	640.014	3	40.9	F7:7663	1	304	146	219.5	126	441.875	129.5	495	447	501	514	Y
12	14	CL367Contig22|CL367Contig22	M.S(+304.20)WVDEVR.Q	N	8.51	1193.63	3.8	597.824	2	19.19	F5:4292	1	2358	1956	1336	1835	2209	1060	2392	3418	665	671	Y
12	14	CL367Contig22|CL367Contig22	N.E(+304.20)GFVDRNTAIK(+304.20).M	N	8.01	1857.05	-15	929.516	2	41.48	F5:7656	1	573.125	392	696.875	1134	290	712	256	380.75	490	500	Y
12	14	CL367Contig22|CL367Contig22	K.S(+304.20)GERFAYDSYRR.F	N	7.51	1809.9	-1	604.307	3	16.53	F1:4280	1	421.75	208.5	1006	1251	252	378.625	1272	379	214	225	Y
12	14	CL367Contig22|CL367Contig22	K.L(+304.20)YGEYLV.N	N	7.47	1159.64	6.9	580.83	2	23	F9:4521	1	18980	16970	25330	19480	14420	11840	19960	14300	358	364	Y
12	14	CL367Contig22|CL367Contig22	C.S(+304.20)LLPDER.I	Y	7.26	1132.63	-16	567.315	2	34.39	F4:6979	1	419.75	347	210	321.25	425.5	301	75	286	707	713	Y
12	14	CL367Contig22|CL367Contig22	K.V(+304.20)FTAAGK(+304.20)PIDY(+304.20)K(+304.20).I	N	7.26	2525.51	1.9	842.845	3	62.79	F8:11012	2	0	492	429.375	170	114.75	417	268	47	872	883	Y
12	14	CL367Contig22|CL367Contig22	A.C(+45.99)(+304.20)EQY(+304.20)QIAGK(+304.20).S	N	6.91	1997.07	-13.2	999.528	2	59.96	F5:10436	2	365	531.125	1877	287	268	291	460.75	377.625	69	77	Y
12	14	CL367Contig22|CL367Contig22	R.V(+304.20)SSNMTPLR.C	Y	6.59	1307.71	16.6	654.874	2	27.95	F7:5720	1	354	280	520.75	293.625	432	443.5	497	226.5	937	945	Y
12	14	CL367Contig22|CL367Contig22	K.S(+304.20)GERFAY(+304.20)DSY(+304.20)RR.F	N	5.07	2418.3	8.2	484.671	5	34.55	F11:6869	1	75.75	254	440.75	319.5	360	534	358	331	214	225	Y
13	11	ATPA6_ERATE|ATPA6_ERATE	R.G(+304.20)YLDSLEIEQVK(+304.20).N	Y	87.63	2001.11	6.8	1001.57	2	40.02	F6:7075	8	1580	1864	4445	3738	2464	1764	2027	2428	444	455	Y
13	11	ATPA6_ERATE|ATPA6_ERATE	R.H(+304.20)TLIIYDDLSK(+304.20).Q	Y	85.04	1925.1	-0.3	963.556	2	33.82	F7:6602	11	114.25	50.375	410.875	306	85.5	149.5	427	327	256	266	Y
13	11	ATPA6_ERATE|ATPA6_ERATE	R.L(+304.20)IESPAPGIISR.R	Y	80.41	1555.92	6.9	519.65	3	37.4	F7:7138	19	910	456.875	764	1049	418.375	343	1040	684.5	129	140	Y
13	11	ATPA6_ERATE|ATPA6_ERATE	K.T(+304.20)FTEQAEILLK(+304.20).E	Y	79.13	1900.1	4.4	951.063	2	41.72	F6:7330	6	1316	1270	3583	2861	1088	1117	3828	1893	481	491	Y
13	11	ATPA6_ERATE|ATPA6_ERATE	K.H(+304.20)LK(+304.20)DTK(+304.20)PQFQEIISSSK(+304.20).T	Y	72.24	3201.86	10.6	641.386	5	29.43	F2:6252	2	1973	1856	3219	2376	1972	289	2559	2209	464	480	Y
13	11	ATPA6_ERATE|ATPA6_ERATE	K.T(+304.20)AVATDTILNQK(+304.20).G	Y	69.43	1882.09	6.7	628.374	3	27.31	F7:5624	18	1079	1296	4510	2166	665.5	1306	2408	1134	177	188	Y
13	11	ATPA6_ERATE|ATPA6_ERATE	R.V(+304.20)VQVGDGIAR.I	Y	64.63	1316.77	5.6	439.932	3	19.82	F7:4500	22	948.625	638.625	1416	622	1107	843.75	704	540.125	32	41	Y
13	11	ATPA6_ERATE|ATPA6_ERATE	K.Q(+304.20)SQSNPLPVEEQVATIY(+304.20)TGTR.G	Y	62.47	2925.55	4.2	732.399	4	39.06	F9:6930	4	512	407.75	835.625	829.625	241.25	361.25	641.625	460.375	423	443	Y
13	11	ATPA6_ERATE|ATPA6_ERATE	R.G(+304.20)EIVASESR.L	Y	60.83	1250.67	9.3	626.349	2	13.55	F5:3415	5	6555	3783	10350	7171	4957	5490	6991	4589	120	128	Y
13	11	ATPA6_ERATE|ATPA6_ERATE	R.V(+304.20)INALAK(+304.20)PIDGR.G	Y	60.1	1874.15	12	469.549	4	39.51	F2:7771	6	142.5	149	446	143	276.25	187.5	225.5	74	108	119	Y
13	11	ATPA6_ERATE|ATPA6_ERATE	R.V(+304.20)GSAAQIK(+304.20).A	Y	55.86	1380.84	6.2	461.291	3	16.22	F4:4248	8	2206	1789	2844	1892	937.5	1604	2322	1692	367	374	Y
13	11	ATPA6_ERATE|ATPA6_ERATE	R.G(+304.20)IALNLESK(+304.20).N	Y	55.81	1551.93	1.2	518.319	3	28.14	F7:5748	18	481	215.5	1258	471.875	336	78.25	583.25	401	62	70	Y
13	11	ATPA6_ERATE|ATPA6_ERATE	K.E(+304.20)AIQEQLER.F	Y	52.89	1418.76	6.4	473.931	3	17.72	F6:3728	9	1544	797.75	1376	1064	622	800.25	1484	799.75	492	500	Y
13	11	ATPA6_ERATE|ATPA6_ERATE	K.N(+304.20)FLDELR.K	Y	52.79	1209.66	4.5	605.84	2	30.65	F5:6022	4	22340	19590	32310	42950	25580	5952	17750	21940	456	462	Y
13	11	ATPA6_ERATE|ATPA6_ERATE	K.V(+304.20)GIENIGR.V	Y	47.33	1160.68	4.6	387.901	3	17.11	F9:3634	10	657	537.375	1033	521.875	652	426.375	378	142.5	24	31	Y
13	11	ATPA6_ERATE|ATPA6_ERATE	K.Q(+304.20)AQAYR.Q	Y	45.87	1039.57	6.2	520.794	2	10.21	F4:3347	1	462	669.75	1006	588	416.5	1005	1226	719.75	267	272	Y
13	11	ATPA6_ERATE|ATPA6_ERATE	K.N(+304.20)FLDELRK(+304.20).H	Y	44.77	1641.96	5	821.989	2	25.65	F9:4918	9	301	483	523.875	906	343	120.5	187	173.5	456	463	Y
13	11	ATPA6_ERATE|ATPA6_ERATE	R.V(+304.20)DEIHK(+304.20).I	Y	44.49	1347.79	7.5	674.906	2	14.23	F8:3649	5	9509	6128	9869	10810	7341	5044	9479	5744	6	11	Y
13	11	ATPA6_ERATE|ATPA6_ERATE	R.E(+304.20)AY(+304.20)PGDVFY(+304.20)LHSR.L	Y	43.08	2465.33	6.7	494.077	5	25.22	F2:5618	3	838.375	334.375	1144	1219	200.25	504	1164	294	285	297	Y
13	11	ATPA6_ERATE|ATPA6_ERATE	R.K(+304.20)VGIENIGR.V	Y	41.82	1288.77	3	430.599	3	15.68	F2:4188	1	857.25	1320	2616	1028	2018	1914	1275	1168	23	31	Y
13	11	ATPA6_ERATE|ATPA6_ERATE	F.A(+304.20)QFASALDK(+304.20).T	Y	41.36	1557.89	11.5	520.309	3	21.63	F9:4315	6	1613	828	2512	2434	674	1350	1950	1465	397	405	Y
13	11	ATPA6_ERATE|ATPA6_ERATE	R.I(+304.20)EQYNR.K	Y	41.36	1125.6	15.3	376.214	3	14.94	F10:4102	2	453.625	699.5	1224	1126	510	744.5	902.375	194	17	22	Y
13	11	ATPA6_ERATE|ATPA6_ERATE	R.I(+304.20)AQIPVSEAY(+304.20)LGR.V	Y	40.69	2024.18	3.5	675.735	3	39.97	F3:7737	7	814.5	600	1074	479	190	634.25	737.125	525.375	95	107	Y
13	11	ATPA6_ERATE|ATPA6_ERATE	R.Q(+304.20)M(+15.99)SLLLR.R	Y	38.52	1179.69	3.2	590.854	2	19.62	F4:4757	2	615	833.5	1632	877.5	553.5	584.5	1002	939.75	273	279	Y
13	11	ATPA6_ERATE|ATPA6_ERATE	R.E(+304.20)LIIGDR.Q	N	38.33	1118.65	9.3	560.34	2	18.77	F5:4228	9	107900	87380	165900	143900	91470	77160	139000	82280	166	172	Y
13	11	ATPA6_ERATE|ATPA6_ERATE	R.Q(+304.20)MSLLLR.R	Y	37.8	1163.69	6.5	582.859	2	38.19	F4:7554	1	1497	2127	3864	2578	984.75	2453	2785	2460	273	279	Y
13	11	ATPA6_ERATE|ATPA6_ERATE	R.F(+304.20)SLQEQT	Y	34.21	1155.6	6.7	578.812	2	21.64	F5:4668	4	1468	1477	1950	1503	1388	1364	1457	1234	501	507	Y
13	11	ATPA6_ERATE|ATPA6_ERATE	R.E(+304.20)AYPGDVFY(+304.20)LH.S	Y	33.02	1918	12.5	640.348	3	33.19	F8:6494	2	252	273	511.875	515.375	538	88	421	247	285	295	Y
13	11	ATPA6_ERATE|ATPA6_ERATE	M.G(+304.20)DGLMIQEGSFVK(+304.20).A	Y	30.44	1988.08	-4.2	663.696	3	33.21	F5:6408	1	484	782	1444	582	574	381.5	802.25	1244	78	90	Y
13	11	ATPA6_ERATE|ATPA6_ERATE	K.Q(+304.20)VAGK(+304.20).L	N	26.66	1109.69	3.2	370.906	3	10.63	F3:3333	1	1217	934	2544	2292	874.375	1156	1211	746.375	378	382	Y
13	11	ATPA6_ERATE|ATPA6_ERATE	R.I(+304.20)EQY(+304.20)NR.K	Y	26.13	1429.8	16	358.464	4	13.51	F3:3767	2	1286	960	2035	753	210	1705	612	434	17	22	Y
13	11	ATPA6_ERATE|ATPA6_ERATE	N.P(+304.20)LPVEEQVATIYTGTR.G	Y	25.17	2077.13	2.2	1039.58	2	43.57	F6:7607	1	550	88	896	1410	563.125	617.125	1500	1010	428	443	Y
13	11	ATPA6_ERATE|ATPA6_ERATE	L.A(+304.20)K(+304.20)PIDGR.G	Y	23.03	1363.83	7.4	455.62	3	10.88	F3:3371	1	2616	1895	5642	3180	3025	2772	2296	2256	113	119	Y
13	11	ATPA6_ERATE|ATPA6_ERATE	R.E(+304.20)AYPGDVF.Y	Y	22.74	1200.59	1.4	601.304	2	35.55	F1:7133	1	451	202	1149	416.75	407	66.25	126.375	279.25	285	292	Y
13	11	ATPA6_ERATE|ATPA6_ERATE	R.V(+304.20)INAL.A	N	22.35	832.527	0.1	417.271	2	30.79	F8:6135	5	664	556.75	1526	1042	411.625	1071	524.5	421.125	108	112	Y
13	11	ATPA6_ERATE|ATPA6_ERATE	R.V(+304.20)INALAK(+304.20).P	Y	19.67	1335.86	7.4	446.297	3	26.24	F3:5677	4	2641	3534	4902	3578	2350	3325	2367	3520	108	114	Y
13	11	ATPA6_ERATE|ATPA6_ERATE	K.L(+304.20)K(+304.20)LELAQFAELQ.A	Y	19.32	2010.19	0.6	671.07	3	49.73	F6:8531	1	399.5	334.375	899.875	870	366	119.25	93	697.875	383	394	Y
13	11	ATPA6_ERATE|ATPA6_ERATE	K.N(+304.20)VGIVL.M	Y	14.61	917.58	-7.2	459.794	2	37.73	F7:7188	1	97	157.75	146.5	340	98.75	919.25	540	336	71	76	Y
13	11	ATPA6_ERATE|ATPA6_ERATE	K.L(+304.20)ELAQFAELQ.A	Y	12.95	1464.81	-2.6	733.409	2	49.55	F1:9244	1	547.75	123	419.5	596.125	306	191.125	86.5	265	385	394	Y
13	11	ATPA6_ERATE|ATPA6_ERATE	V.A(+304.20)GK(+304.20)LK(+304.20).L	N	12.55	1427.94	-6.1	357.991	4	11.4	F3:3449	1	552	1322	1172	1637	1171	728	1556	736.875	380	384	Y
13	11	ATPA6_ERATE|ATPA6_ERATE	R.E(+304.20)RHTLIIYDDLSK(+304.20).Q	Y	11.99	2210.24	-7.6	553.563	4	23.94	F2:5427	1	98.75	0	450	288	346	376	220	52.25	254	266	Y
13	11	ATPA6_ERATE|ATPA6_ERATE	M.S(+304.20)GELVEFAEGTR.G	Y	11.53	1597.82	8.7	799.924	2	30.03	F5:5929	1	676.875	500	1522	161.5	881.5	805	586.25	438	50	61	Y
13	11	ATPA6_ERATE|ATPA6_ERATE	R.I(+304.20)EQYNRK(+304.20).V	Y	8.68	1557.9	-3.9	520.305	3	31.21	F8:6197	1	180	442.5	322	82.25	225.5	316	322.5	594.375	17	23	Y
13	6358	CL99Contig22|CL99Contig22	E.V(+304.20)GVEER.V	N	9.61	991.555	-14.1	496.778	2	17.56	F3:4375	1	480	254	1004	356	540	1214	865.875	788.25	267	272	Y
13	7763	CL1600Contig4|CL1600Contig4	R.G(+304.20)GSGLEAR.V	Y	5.53	1049.57	5.6	525.796	2	22.63	F1:5195	1	130.5	275	537	352	125.25	233.5	121.5	481	220	227	Y
13	8181	CL89Contig18|CL89Contig18	S.S(+304.20)SFTK(+304.20).T	N	9.24	1176.69	-18.5	589.339	2	43.18	F2:8322	2	767.125	904	1440	1596	864.375	1399	1685	724	77	81	Y
13	8181	CL89Contig18|CL89Contig18	R.E(+304.20)QSAIM(+15.99)GIR.K	Y	7.61	1323.71	8.7	331.937	4	10.85	F2:3463	1	302.5	454	369.5	346.25	244.125	725	423	215	368	376	Y
13	8350	CL9224Contig3|CL9224Contig3	D.Q(+304.20)VAGK(+304.20).Q	N	26.66	1109.69	3.2	370.906	3	10.63	F3:3333	1	1217	934	2544	2292	874.375	1156	1211	746.375	318	322	Y
13	8669	CL7553Contig2|CL7553Contig2	R.L(+304.20)HTSR.S	N	8.86	916.534	1.5	459.275	2	33.39	F12:6523	1	306	160.5	405	90.75	448.5	753	321.375	841.125	91	95	Y
13	9387	CL16Contig23|CL16Contig23	A.A(+304.20)TLSR.A	N	5.65	850.513	13.5	426.269	2	11.26	F2:3525	1	1866	1873	2017	2487	1618	1292	2275	1744	55	59	Y
13	11260	CL16Contig12|CL16Contig12	A.A(+304.20)TLSR.A	N	5.65	850.513	13.5	426.269	2	11.26	F2:3525	1	1866	1873	2017	2487	1618	1292	2275	1744	89	93	Y
13	11493	CL11653Contig2|CL11653Contig2	S.F(+304.20)EVER.T	N	6.87	982.534	1.5	492.275	2	14.27	F7:3670	1	2993	3244	7003	4419	2428	3076	4425	2253	53	57	Y
13	11493	CL11653Contig2|CL11653Contig2	R.S(+304.20)FEVER.T	Y	5.96	1069.57	-8.9	535.785	2	22.16	F9:4394	1	1301	886	1169	1248	1308	1132	1865	652	52	57	Y
11	23	RBL3_ERATE|RBL3_ERATE	R.G(+304.20)GLDFTK(+304.20)DDENVNSQPFMR.W	Y	107.92	2777.38	14.1	695.362	4	30.34	F5:5975	14	13880	11060	20820	14700	7552	11260	19790	12450	202	220	Y
11	23	RBL3_ERATE|RBL3_ERATE	K.L(+304.20)TYYTPEYETK(+304.20).D	Y	94.91	2015.06	11	672.702	3	29.16	F6:5445	23	9575	9692	15050	11950	6172	5865	12390	4240	29	39	Y
11	23	RBL3_ERATE|RBL3_ERATE	R.V(+304.20)ALEAC(+45.99)VQAR.N	Y	91.76	1408.74	7.5	470.591	3	40.4	F11:7748	37	1764	1381	3404	4600	1038	1875	3498	1974	429	438	Y
11	23	RBL3_ERATE|RBL3_ERATE	K.G(+304.20)HYLNATAGTC(+45.99)EEMIK(+304.20).R	Y	90.97	2391.17	8.8	598.806	4	40.52	F8:7595	18	4419	576	6625	4894	1705	2838	4139	2280	244	259	Y
11	23	RBL3_ERATE|RBL3_ERATE	K.W(+304.20)SPELAAAC(+45.99)EVWK(+304.20).A	Y	83.17	2143.09	9.5	715.379	3	51.9	F6:8857	15	5667	4571	10160	9009	3852	3751	8239	3870	458	470	Y
11	23	RBL3_ERATE|RBL3_ERATE	R.E(+304.20)LGVPIIMHDYLTGGFTANTSLSNYC(+45.99)R.D	Y	83.01	3321.61	19.7	831.426	4	56.53	F7:10013	4	64	45	379.375	347	146	93.75	273.25	582	266	292	Y
11	23	RBL3_ERATE|RBL3_ERATE	K.G(+304.20)HYLNATAGTC(+45.99)EEM(+15.99)IK(+304.20).R	Y	79.92	2407.17	3.3	602.802	4	27.85	F8:5694	7	706.625	226.125	1235	753.75	1192	224.375	1688	1198	244	259	Y
11	23	RBL3_ERATE|RBL3_ERATE	R.E(+304.20)M(+15.99)TLGFVDLLR.D	Y	79.74	1612.87	11.1	538.638	3	45.89	F5:8323	8	693.5	1713	330.5	881.75	421.25	576	821.75	618.625	347	357	Y
11	23	RBL3_ERATE|RBL3_ERATE	K.G(+304.20)HY(+304.20)LNATAGTC(+45.99)EEM(+15.99)IK(+304.20).R	Y	78.91	2711.37	8	543.285	5	26.9	F11:5718	4	2818	817.625	2605	2084	1807	1612	2751	2363	244	259	Y
11	23	RBL3_ERATE|RBL3_ERATE	K.L(+304.20)TY(+304.20)YTPEYETK(+304.20).D	Y	78.18	2319.26	15.2	580.831	4	30.5	F4:6392	8	620	696	977.125	385	93.75	389.75	250	142	29	39	Y
11	23	RBL3_ERATE|RBL3_ERATE	R.E(+304.20)MTLGFVDLLR.D	Y	77.42	1596.88	10.3	799.455	2	49.67	F5:8890	21	25580	22920	47120	33760	21720	21140	34310	24380	347	357	Y
11	23	RBL3_ERATE|RBL3_ERATE	K.D(+304.20)TDILAAFR.V	Y	76.94	1324.72	4.6	663.372	2	39.95	F5:7426	15	71800	64010	125700	95900	56560	55010	102400	60350	40	48	Y
11	23	RBL3_ERATE|RBL3_ERATE	R.F(+304.20)VFVAEAIYK(+304.20).A	Y	75.42	1794.04	7.2	449.521	4	58.61	F4:10695	30	226.5	257	280	205.5	198.5	141	890.5	193.5	225	234	Y
11	23	RBL3_ERATE|RBL3_ERATE	K.A(+304.20)GVGFQAGVK(+304.20).D	Y	75.35	1540.91	4.5	386.236	4	19	F4:4664	5	709.125	332	1372	489.5	938	161.5	1390	713.375	16	25	Y
11	23	RBL3_ERATE|RBL3_ERATE	K.D(+304.20)DENVNSQPFMR.W	Y	72.19	1754.81	8.3	585.95	3	19.16	F1:4674	5	347	435.5	348.75	60	49	417.75	323.5	452	209	220	Y
11	23	RBL3_ERATE|RBL3_ERATE	R.E(+304.20)LGVPIIMHDYLTGGFTANTSLSNY(+304.20).C	Y	71.31	3320.71	8.5	831.192	4	53.07	F7:9489	6	507	488	2000	432.5	97.75	677.5	866.625	339	266	290	Y
11	23	RBL3_ERATE|RBL3_ERATE	K.L(+304.20)TYYTPEY(+304.20)ETK(+304.20).D	Y	70.56	2319.26	8.9	580.828	4	32.28	F10:6715	7	1210	482	1750	1982	1556	791.5	1649	1522	29	39	Y
11	23	RBL3_ERATE|RBL3_ERATE	K.A(+304.20)QAETGEIK(+304.20).G	Y	70.11	1553.88	4.1	518.968	3	14.44	F7:3695	10	2108	2166	2393	1355	940	1778	1556	606	235	243	Y
11	23	RBL3_ERATE|RBL3_ERATE	R.E(+304.20)LGVPIIMHDYLTGGFTANTSLSNY(+304.20)C(+45.99)R.D	Y	69.84	3625.81	6.1	907.465	4	53.6	F11:9737	7	620	845.125	685.375	1308	1014	316.25	408.125	377	266	292	Y
11	23	RBL3_ERATE|RBL3_ERATE	K.F(+304.20)DFK(+304.20)PVDTIDVSK(+304.20)	Y	67.16	2422.37	16	485.489	5	37.61	F5:7069	10	1428	1565	3808	1908	1823	1007	3177	2152	474	486	Y
11	23	RBL3_ERATE|RBL3_ERATE	R.A(+304.20)M(+15.99)HAVIDR.Q	Y	66.37	1231.66	2.1	411.561	3	10.86	F11:3311	4	878.5	538.75	794	1379	552.25	543.25	222	538	303	310	Y
11	23	RBL3_ERATE|RBL3_ERATE	R.G(+304.20)GLDFTK(+304.20)DDENVNSQPFM(+15.99)R.W	Y	62.57	2793.37	14.6	699.361	4	24.18	F5:5051	9	774.5	407	1002	1378	820.875	766	996	1179	202	220	Y
11	23	RBL3_ERATE|RBL3_ERATE	R.E(+304.20)MTLGFVDLLRDDYIEK(+304.20).D	Y	62.02	2664.42	10.8	667.119	4	50.16	F5:8963	2	327	787.5	908.25	488	544	180.5	752.125	462.75	347	363	Y
11	23	RBL3_ERATE|RBL3_ERATE	R.E(+304.20)LGVPIIMHDY(+304.20)LTGGFTANTSLSNYC(+45.99)R.D	Y	60.23	3625.81	11.6	726.177	5	52.52	F11:9574	4	148.5	0	323	477.375	354	83	162	82.25	266	292	Y
11	23	RBL3_ERATE|RBL3_ERATE	R.A(+304.20)C(+45.99)YEC(+45.99)LR.G	Y	59.24	1252.53	4.4	627.276	2	41.59	F11:7927	16	3574	2781	6304	4350	1884	3595	4464	3227	195	201	Y
11	23	RBL3_ERATE|RBL3_ERATE	R.E(+304.20)M(+15.99)TLGFVDLLRDDYIEK(+304.20).D	Y	58.6	2680.41	1.3	671.111	4	47.48	F5:8562	1	944	716.25	1010	814.5	480	116.75	477.875	719	347	363	Y
11	23	RBL3_ERATE|RBL3_ERATE	R.I(+304.20)PAAYAK(+304.20).T	Y	57.19	1340.82	9.9	447.951	3	18.24	F3:4476	4	30740	24600	47760	38930	23550	24070	47390	22580	147	153	Y
11	23	RBL3_ERATE|RBL3_ERATE	N.A(+304.20)TAGTC(+45.99)EEMIK(+304.20).R	Y	56.57	1806.9	1.6	904.46	2	27.06	F6:5130	2	1180	1358	2542	1315	464	800	1986	789.25	249	259	Y
11	23	RBL3_ERATE|RBL3_ERATE	R.E(+304.20)MTLGFVDLLRDDYIEK(+304.20)DR.S	Y	55.8	2935.55	3.6	588.119	5	48.52	F6:8350	5	1216	1042	847.5	1068	654	1112	1166	1293	347	365	Y
11	23	RBL3_ERATE|RBL3_ERATE	R.D(+304.20)DYIEK(+304.20)DR.S	Y	55.16	1660.88	18.4	416.234	4	14.22	F6:3196	9	2344	1864	3761	2448	1015	2197	1541	2032	358	365	Y
11	23	RBL3_ERATE|RBL3_ERATE	R.E(+304.20)GNEIIR.A	Y	53.75	1133.63	1.2	378.884	3	13.56	F6:3097	6	1840	1574	2942	2803	1526	2144	2014	1435	447	453	Y
11	23	RBL3_ERATE|RBL3_ERATE	K.A(+304.20)IK(+304.20)FDFK(+304.20)PVDTIDVSK(+304.20)	Y	53.02	3038.79	10	608.771	5	39.61	F9:7013	5	3980	3400	4185	3000	2421	3826	7168	3398	471	486	Y
11	23	RBL3_ERATE|RBL3_ERATE	K.N(+304.20)HGMHFR.V	Y	52.64	1201.6	-7.8	401.538	3	10.67	F4:3416	3	2382	1171	2464	1592	869.875	2662	1933	1935	313	319	Y
11	23	RBL3_ERATE|RBL3_ERATE	N.T(+304.20)SLSNYC(+45.99)R.D	Y	52.29	1292.61	3.3	647.315	2	28.81	F4:6139	3	2827	2801	6697	3582	3119	1943	2726	3896	285	292	Y
11	23	RBL3_ERATE|RBL3_ERATE	K.D(+304.20)DENVNSQPFM(+15.99)R.W	Y	50.19	1770.81	6.7	886.418	2	16.08	F1:4213	1	975.375	580	1299	145.5	302	668	537.5	608	209	220	Y
11	23	RBL3_ERATE|RBL3_ERATE	R.E(+304.20)MTLGFVDLLRDDY(+304.20)IEK(+304.20)DR.S	Y	48.19	3239.75	7	648.961	5	45.64	F6:7919	3	3103	2582	3696	2534	966	686	2554	970.875	347	365	Y
11	23	RBL3_ERATE|RBL3_ERATE	T.A(+304.20)GTC(+45.99)EEMIK(+304.20).R	Y	46.65	1634.82	5.1	545.95	3	27.12	F6:5139	2	389	387.5	314.875	586	618	445	381	842	251	259	Y
11	23	RBL3_ERATE|RBL3_ERATE	R.D(+304.20)DYIEK(+304.20).D	Y	43.41	1389.75	8	695.888	2	15.36	F5:3694	4	8518	6305	11930	9394	7989	7277	7136	5424	358	363	Y
11	23	RBL3_ERATE|RBL3_ERATE	R.M(+304.20)SGGDHIHSGTVVGK(+304.20).L	Y	42.1	2089.11	8.5	418.833	5	14.77	F2:4052	5	2165	1903	1758	2045	1503	2028	2956	1297	327	341	Y
11	23	RBL3_ERATE|RBL3_ERATE	R.G(+304.20)GLDFTK(+304.20).D	N	41.54	1344.78	13.7	449.272	3	17.34	F9:3670	8	3287	2950	4720	4018	3148	1761	3714	5189	202	208	Y
11	23	RBL3_ERATE|RBL3_ERATE	A.T(+304.20)AGTC(+45.99)EEMIK(+304.20).R	Y	40.39	1735.87	7.5	579.634	3	26.14	F6:4992	2	559.25	753.5	1196	942.375	309	646.75	1440	850.5	250	259	Y
11	23	RBL3_ERATE|RBL3_ERATE	K.G(+304.20)HY(+304.20)LNATAGTC(+45.99)EEMIK(+304.20).R	Y	40.34	2695.37	6.6	540.086	5	37.88	F11:7370	19	654	232.25	2762	384	576	754.875	1172	788.375	244	259	Y
11	23	RBL3_ERATE|RBL3_ERATE	K.L(+304.20)TY(+304.20)Y(+304.20)TPEYETK(+304.20).D	Y	38.78	2623.46	5.4	438.253	6	24.84	F2:5562	3	188.25	114.5	735.625	236	110.75	297	415	499	29	39	Y
11	23	RBL3_ERATE|RBL3_ERATE	R.V(+304.20)ALEAC(+45.99)VQ.A	Y	37.3	1181.6	-1.2	591.808	2	42.38	F1:8164	2	905.375	690	1416	741	1018	592.25	359.125	444.625	429	436	Y
11	23	RBL3_ERATE|RBL3_ERATE	R.D(+304.20)DYIEK(+304.20)D.R	Y	36.44	1504.78	9.5	502.604	3	17.09	F1:4364	2	669	474.25	606	240.25	380.5	487	512	130.5	358	364	Y
11	23	RBL3_ERATE|RBL3_ERATE	R.A(+304.20)C(+45.99)Y(+304.20)EC(+45.99)LR.G	Y	35.65	1556.73	3.1	390.192	4	31.98	F3:6537	3	902	969	1804	1197	388.25	970.625	808.75	468.625	195	201	Y
11	23	RBL3_ERATE|RBL3_ERATE	R.L(+304.20)EDLR.I	N	34.79	948.549	3.5	475.284	2	17.2	F5:3985	6	36070	36820	70700	56870	32020	29220	46210	31580	142	146	Y
11	23	RBL3_ERATE|RBL3_ERATE	R.E(+304.20)M(+15.99)TLGFVDLLRDDY(+304.20)IEK(+304.20)DR.S	Y	33.96	3255.74	3.6	652.158	5	43.42	F6:7584	2	414	802.625	1573	874	507.5	500	468	65.25	347	365	Y
11	23	RBL3_ERATE|RBL3_ERATE	K.L(+304.20)GLSAK(+304.20).N	N	33.85	1195.76	2.8	299.949	4	18.13	F4:4535	2	360	339.625	1057	644.125	267	484	460	321	185	190	Y
11	23	RBL3_ERATE|RBL3_ERATE	K.F(+304.20)DFK(+304.20)PVDTID.V	Y	32.79	1803.98	9.7	602.338	3	38.81	F5:7252	3	525.25	338.375	643.875	542	603.5	510.125	457	385.5	474	483	Y
11	23	RBL3_ERATE|RBL3_ERATE	R.E(+304.20)MTLGFVDLLRDDY(+304.20)IEK(+304.20).D	Y	32.32	2968.62	6.4	594.735	5	47.69	F6:8226	1	1863	2094	4380	2387	731.625	1414	3817	1746	347	363	Y
11	23	RBL3_ERATE|RBL3_ERATE	K.Y(+304.20)GRPLLGC(+45.99).T	Y	31.72	1227.64	0.8	410.219	3	39.75	F4:7787	1	204.5	508.375	271	298.625	320	237.25	281	155.25	172	179	Y
11	23	RBL3_ERATE|RBL3_ERATE	F.D(+304.20)FK(+304.20)PVDTIDVSK(+304.20)	Y	31.65	2275.3	3.7	569.835	4	24.02	F6:4674	1	1618	511	1450	1569	644	586	1124	1415	475	486	Y
11	23	RBL3_ERATE|RBL3_ERATE	R.A(+304.20)VFAR.E	N	31.46	866.523	14.5	289.852	3	15.17	F4:4092	2	0	442.25	265	690	77.5	1257	631.5	670.375	261	265	Y
11	23	RBL3_ERATE|RBL3_ERATE	R.E(+304.20)LGVPIIMHDY(+304.20)LTGGFTANTSLSNY(+304.20).C	Y	31.28	3624.91	10.3	725.997	5	49.57	F11:9124	2	440.125	638	1028	738.875	420.625	390.875	1045	282.125	266	290	Y
11	23	RBL3_ERATE|RBL3_ERATE	K.G(+304.20)HYLNATAGTC(+45.99)EEM(+15.99)IK(+304.20)R.A	Y	30.39	2563.27	-1.7	641.824	4	29.26	F11:6073	2	100.25	187.5	251.5	119.75	184.5	263	317	140	244	260	Y
11	23	RBL3_ERATE|RBL3_ERATE	R.V(+304.20)ALEAC(+45.99).V	Y	30.37	954.477	6.3	478.249	2	37.32	F1:7399	3	1998	2264	3099	1812	1608	1837	1795	2550	429	434	Y
11	23	RBL3_ERATE|RBL3_ERATE	R.M(+304.20)(+15.99)SGGDHIHSGTVVGK(+304.20).L	Y	26.25	2105.1	2.4	422.029	5	12.45	F12:3195	3	502	652.25	506	758	83.25	176.5	173	452.25	327	341	Y
11	23	RBL3_ERATE|RBL3_ERATE	R.D(+304.20)K(+304.20)LNK(+304.20).Y	N	24.25	1528.95	-6.9	383.243	4	12.92	F7:3467	4	415	107	889.25	1401	511.125	237.5	896	591.25	167	171	Y
11	23	RBL3_ERATE|RBL3_ERATE	A.E(+304.20)AIYK(+304.20).A	N	21.94	1230.73	0.9	616.374	2	14.78	F8:3732	2	5701	4089	6771	7566	4584	4088	4762	6522	230	234	Y
11	23	RBL3_ERATE|RBL3_ERATE	R.A(+304.20)LRLEDLR.I	Y	21.72	1288.77	-1.6	430.597	3	18.76	F9:3884	1	794.125	377.5	458	601.25	846.25	471	1024	642.25	139	146	Y
11	23	RBL3_ERATE|RBL3_ERATE	N.V(+304.20)FGFK(+304.20).A	Y	21.62	1204.73	13.1	402.59	3	32.48	F3:6612	2	759.625	453.5	144.5	886.25	261	60	177	729.5	131	135	Y
11	23	RBL3_ERATE|RBL3_ERATE	R.G(+304.20)GLDFTK(+304.20)DDENVNSQPF.M	Y	20.24	2490.24	8.8	623.572	4	38.74	F1:7612	4	1009	396	1503	893.375	711.625	396	1012	1945	202	218	Y
11	23	RBL3_ERATE|RBL3_ERATE	A.C(+45.99)(+304.20)EVWK(+304.20).A	N	19.9	1317.69	12	440.243	3	24.41	F9:4731	2	511	75.5	1225	668.5	107	618	334	777.625	466	470	Y
11	23	RBL3_ERATE|RBL3_ERATE	R.E(+304.20)LGVPIIM(+15.99)HDY(+304.20)LTGGFTAN.T	Y	19.33	2671.4	9.5	668.864	4	44.25	F7:8165	2	1006	304	361.25	494.25	297	169.5	479.375	353	266	284	Y
11	23	RBL3_ERATE|RBL3_ERATE	R.D(+304.20)DY(+304.20)IEK(+304.20)DR.S	Y	17.81	1965.08	-2.4	983.544	2	13.9	F6:3147	2	428.75	70.5	326	384	500.375	265	256	191.5	358	365	Y
11	23	RBL3_ERATE|RBL3_ERATE	R.E(+304.20)M(+15.99)TLGFVDLLRDDYIEK(+304.20)DR.S	Y	17.2	2951.54	16.3	591.325	5	45.97	F6:7967	1	910	149	546	282	208	518	319	247	347	365	Y
11	23	RBL3_ERATE|RBL3_ERATE	R.G(+304.20)GLDFTK(+304.20)DDENVN.S	Y	15.94	2031.03	-2	1016.52	2	23.09	F1:5264	2	478	391.5	862.125	1076	836	108.25	916	788	202	214	Y
11	23	RBL3_ERATE|RBL3_ERATE	F.Q(+304.20)AGVK(+304.20).D	N	15.4	1109.69	3.5	555.855	2	13.42	F3:3753	2	1979	648	2074	1228	1482	1659	1140	2312	21	25	Y
11	23	RBL3_ERATE|RBL3_ERATE	A.E(+304.20)TGEIK(+304.20).G	Y	14.5	1283.74	-14.5	642.87	2	43.98	F5:8036	1	620	1032	1376	1310	305	516	753.5	817	238	243	Y
11	23	RBL3_ERATE|RBL3_ERATE	K.G(+304.20)HYLNATAG.T	Y	13.83	1206.62	8.9	604.325	2	14.7	F11:3886	1	255.5	190	1079	411	338	142.5	985.25	160	244	252	Y
11	23	RBL3_ERATE|RBL3_ERATE	R.G(+304.20)GLDFTK(+304.20)DD.E	Y	13.67	1574.83	1.8	788.423	2	18.86	F5:4241	1	620	328	1888	1110	574	680	914	826.75	202	210	Y
11	23	RBL3_ERATE|RBL3_ERATE	R.F(+304.20)VFVAE.A	Y	12.39	1014.56	6.3	508.292	2	42.05	F5:7742	1	6893	7325	8528	13390	6157	1874	6246	10260	225	230	Y
11	23	RBL3_ERATE|RBL3_ERATE	K.F(+304.20)DFK(+304.20)PVD.T	Y	9.82	1474.82	7.6	492.617	3	27.95	F6:5263	1	315	50.125	386	607.5	380	795.375	579.75	69.5	474	480	Y
11	23	RBL3_ERATE|RBL3_ERATE	R.I(+304.20)PAAY(+304.20).A	N	8.75	1141.68	6.3	571.853	2	19.42	F3:4654	2	2901	2040	4606	2647	1425	3094	2472	2026	147	151	Y
11	23	RBL3_ERATE|RBL3_ERATE	K.N(+304.20)HGM(+15.99)HFR.V	Y	5.51	1217.6	12	406.878	3	40.63	F2:7940	1	137.5	243.25	459	426.25	259	197.5	61.375	265	313	319	Y
11	23	RBL3_ERATE|RBL3_ERATE	R.D(+304.20)RFVFVAEAIYK(+304.20).A	Y	5.09	2065.17	-6.1	517.297	4	22.22	F11:5013	1	137.5	84.5	528	749.125	200	130.5	42.25	59.75	223	234	Y
11	4515	CL1851Contig1|CL1851Contig1	E.L(+304.20)GLSAK(+304.20).Q	N	33.85	1195.76	2.8	299.949	4	18.13	F4:4535	2	360	339.625	1057	644.125	267	484	460	321	460	465	Y
11	4515	CL1851Contig1|CL1851Contig1	F.V(+304.20)NK(+304.20)GK(+304.20).L	N	9.32	1456.93	9.7	486.656	3	45.72	F3:8599	1	281	756.875	722	630	244.5	268	410.625	822.5	190	194	Y
11	4515	CL1851Contig1|CL1851Contig1	E.N(+304.20)M(+15.99)TTK(+304.20).H	N	7.73	1217.68	3.4	609.849	2	38.15	F2:7568	1	1484	926.25	1282	484	1174	628	1088	1151	180	184	Y
11	4515	CL1851Contig1|CL1851Contig1	V.A(+304.20)AAPR.V	N	6.83	788.476	-2	395.244	2	18.27	F8:4257	2	5013	2912	7263	8785	4803	10280	7502	5150	19	23	Y
11	5169	CL1Contig8167|CL1Contig8167	G.L(+304.20)EDLR.D	N	34.79	948.549	3.5	475.284	2	17.2	F5:3985	6	36070	36820	70700	56870	32020	29220	46210	31580	304	308	Y
11	5169	CL1Contig8167|CL1Contig8167	V.V(+304.20)GVEER.D	N	9.61	991.555	-14.1	496.778	2	17.56	F3:4375	1	480	254	1004	356	540	1214	865.875	788.25	350	355	Y
11	5169	CL1Contig8167|CL1Contig8167	S.S(+304.20)EESK(+304.20).A	N	7.8	1186.65	12.2	594.342	2	22.4	F4:5174	1	219.5	202	426	250.5	551.375	122.25	102.75	269	287	291	Y
11	6867	CL9253Contig2|CL9253Contig2	A.L(+304.20)EDLR.L	N	34.79	948.549	3.5	475.284	2	17.2	F5:3985	6	36070	36820	70700	56870	32020	29220	46210	31580	51	55	Y
11	7047	CL10491Contig1|CL10491Contig1	D.A(+304.20)VFAR.C	N	31.46	866.523	14.5	289.852	3	15.17	F4:4092	2	0	442.25	265	690	77.5	1257	631.5	670.375	16	20	Y
11	7047	CL10491Contig1|CL10491Contig1	R.L(+304.20)WYLQK(+304.20).F	Y	6.27	1457.87	-11	729.937	2	58.13	F8:10250	1	471	88.75	42.875	327.5	223.5	53	209	60.75	249	254	Y
11	7522	isotig10340|isotig10340	A.E(+304.20)ALYK(+304.20).L	N	21.94	1230.73	0.9	616.374	2	14.78	F8:3732	2	5701	4089	6771	7566	4584	4088	4762	6522	277	281	Y
11	7522	isotig10340|isotig10340	D.L(+304.20)IQIIR.N	N	8	1058.71	2.3	530.362	2	49.19	F4:9208	1	676	167	249.5	54.375	337	0	0	0	355	360	Y
11	7522	isotig10340|isotig10340	K.Y(+304.20)(+304.20)DLY(+304.20)GQVAYPK(+304.20).H	N	6.45	2532.44	4.4	634.121	4	36.4	F6:6532	1	176.125	0	174	427.5	237	225.5	172	279.25	192	202	Y
11	7522	isotig10340|isotig10340	R.D(+304.20)EINTTY(+304.20)K(+304.20).I	Y	5.69	1895.06	-0.7	632.694	3	26.84	F7:5554	1	0	197	625.25	50.875	485.5	650	216.375	224.5	9	16	Y
11	9298	CL2523Contig2|CL2523Contig2	I.L(+304.20)EDLR.I	N	34.79	948.549	3.5	475.284	2	17.2	F5:3985	6	36070	36820	70700	56870	32020	29220	46210	31580	499	503	Y
11	9298	CL2523Contig2|CL2523Contig2	K.M(+304.20)(+15.99)DLLK(+304.20).A	N	8.05	1242.74	-15.5	622.366	2	31.14	F9:5741	1	535.125	954	826	1158	172.5	546	450	685	649	653	Y
11	9410	CL1Contig5044|CL1Contig5044	V.E(+304.20)AIYK(+304.20).R	N	21.94	1230.73	0.9	616.374	2	14.78	F8:3732	2	5701	4089	6771	7566	4584	4088	4762	6522	442	446	Y
11	9410	CL1Contig5044|CL1Contig5044	P.A(+304.20)AAPR.L	N	6.83	788.476	-2	395.244	2	18.27	F8:4257	2	5013	2912	7263	8785	4803	10280	7502	5150	22	26	Y
11	9872	CL10242Contig1|CL10242Contig1	H.Q(+304.20)AGVK(+304.20).R	N	15.4	1109.69	3.5	555.855	2	13.42	F3:3753	2	1979	648	2074	1228	1482	1659	1140	2312	80	84	Y
14	8	CL1Contig10680|CL1Contig10680	R.F(+304.20)TAATLEHGMHPPVSPK(+304.20)PEWSK(+304.20).L	N	95.53	3358.81	9.3	672.776	5	40.59	F12:7646	5	2528	2645	3913	2813	1616	1542	5761	2583	163	184	Y
14	8	CL1Contig10680|CL1Contig10680	K.Q(+304.20)QIMVGYSDSGK(+304.20).D	N	93.73	1920.01	5.4	641.015	3	18.78	F8:4333	14	391	486.5	1284	754	591.5	715.5	831.875	354	64	75	Y
14	8	CL1Contig10680|CL1Contig10680	X.I(+304.20)ISMATAPSDVLAVELLQR.E	N	92.79	2330.31	3.9	777.781	3	57.57	F6:9710	5	0	0	346.75	61	125.625	248.75	234	408.5	2	20	Y
14	8	CL1Contig10680|CL1Contig10680	R.V(+304.20)TIQGEVIEHSFGEEHLC(+45.99)FR.T	N	91.76	2679.3	12.6	670.842	4	46.37	F7:8482	3	130	357	191	353.125	274.5	151	473	264	139	158	Y
14	8	CL1Contig10680|CL1Contig10680	R.L(+304.20)RDPYITTLNVFQAYTLK(+304.20).Q	N	83.06	2763.57	9.5	691.906	4	51.62	F3:9490	10	378.25	384	223.5	1411	291.875	99.75	752.25	1423	362	379	Y
14	8	CL1Contig10680|CL1Contig10680	K.Q(+304.20)QIM(+15.99)VGYSDSGK(+304.20).D	N	81.54	1936.01	9.2	646.349	3	16.99	F7:4076	5	520	80.75	196.5	198.5	43	88.5	319.625	48.625	64	75	Y
14	8	CL1Contig10680|CL1Contig10680	R.V(+304.20)TLDLLEMVFAK(+304.20).G	N	79.43	1986.16	5.2	663.063	3	61.84	F6:10357	20	1918	1048	1157	2873	1785	266.5	1271	5347	293	304	Y
14	8	CL1Contig10680|CL1Contig10680	K.Q(+304.20)QIMVGY(+304.20)SDSGK(+304.20).D	N	78.13	2224.21	16.7	557.07	4	20.96	F2:4980	5	1010	998.625	3335	2734	1124	575.875	3358	1978	64	75	Y
14	8	CL1Contig10680|CL1Contig10680	K.E(+304.20)MYNEWPFFR.V	N	76.91	1721.81	16	574.954	3	46.97	F6:8118	4	626	512.5	595.5	788	542.5	375	154	756	283	292	Y
14	8	CL1Contig10680|CL1Contig10680	K.E(+304.20)ILESDPYLK(+304.20).Q	N	76.37	1814.02	18.9	605.691	3	33.9	F5:6511	10	3005	2626	6011	10570	4159	2120	4759	2856	348	357	Y
14	8	CL1Contig10680|CL1Contig10680	R.L(+304.20)ADLQNAPASVER.L	N	74.32	1686.92	4.4	563.315	3	26.57	F5:5409	16	2296	759.375	1444	2153	342.5	826	3270	1981	37	49	Y
14	8	CL1Contig10680|CL1Contig10680	K.L(+304.20)M(+15.99)DEMAVVATEAYR.S	N	70.69	1917.94	4.1	959.983	2	42.86	F5:7865	2	1542	400.875	2475	1135	703.75	675	2189	656	185	198	Y
14	8	CL1Contig10680|CL1Contig10680	R.F(+304.20)HLPVWLGVGTAFK(+304.20).S	N	64.21	2179.27	6	545.827	4	51.92	F3:9535	6	112	0	230.875	65.75	149	0	0	0	255	268	Y
14	8	CL1Contig10680|CL1Contig10680	K.L(+304.20)MDEMAVVATEAY(+304.20)R.S	N	63.68	2206.15	10.4	736.398	3	46.88	F6:8105	2	1415	1592	2164	2235	1500	1300	3380	2440	185	198	Y
14	8	CL1Contig10680|CL1Contig10680	K.Y(+304.20)(+304.20)LETQELLLQIAGHK(+304.20).E	N	62.68	2667.56	11.9	534.525	5	47.26	F12:8658	2	152.5	247.25	705.125	120.25	227	86	443	105	333	347	Y
14	8	CL1Contig10680|CL1Contig10680	K.G(+304.20)IAAGMQNTG.X	N	62.58	1222.62	6.8	612.323	2	16.87	F11:4212	8	670.375	172	523.25	616.125	333	393	62.625	1028	424	433	Y
14	8	CL1Contig10680|CL1Contig10680	K.Q(+304.20)QIM(+15.99)VGY(+304.20)SDSGK(+304.20).D	N	59.41	2240.21	0.1	561.059	4	16.98	F2:4383	1	803.625	776	998	482	136	491	997.5	345.875	64	75	Y
14	8	CL1Contig10680|CL1Contig10680	R.S(+304.20)ATPETEYGR.M	N	58.35	1413.7	7.1	472.244	3	12.52	F6:2940	4	1470	2850	2668	3021	1719	869.875	2693	1885	213	222	Y
14	8	CL1Contig10680|CL1Contig10680	K.G(+304.20)DPGIAALYDK(+304.20).L	N	57.65	1726.96	5.6	864.492	2	26.32	F6:5019	6	1216	1357	1241	1528	1340	315	1080	1524	305	315	Y
14	8	CL1Contig10680|CL1Contig10680	R.L(+304.20)FSIDWYLNR.I	N	56.99	1629.88	5	815.95	2	53.68	F9:9122	16	1349	1488	2344	2791	792	574	1800	1164	50	59	Y
14	8	CL1Contig10680|CL1Contig10680	R.F(+304.20)VEYFR.S	N	56.86	1163.62	6.2	582.822	2	38.07	F9:6781	11	7934	6736	15290	9408	4620	3197	10050	8752	207	212	Y
14	8	CL1Contig10680|CL1Contig10680	K.L(+304.20)TFFHGR.G	N	56.09	1180.66	-1.5	394.56	3	27.38	F4:5923	6	198.5	323	461	646	148	357	178	470.25	104	110	Y
14	8	CL1Contig10680|CL1Contig10680	R.L(+304.20)FSIDWY(+304.20)LNR.I	N	54.41	1934.08	8.3	484.531	4	49.72	F3:9200	2	300	332	171.5	593.5	289	114.75	655.5	717.5	50	59	Y
14	8	CL1Contig10680|CL1Contig10680	K.L(+304.20)LVADELK(+304.20)PFGENLR.S	N	53.64	2321.35	13.1	774.799	3	45.14	F6:7844	3	9954	5749	12560	10760	6312	4881	9855	8886	316	330	Y
14	8	CL1Contig10680|CL1Contig10680	K.E(+304.20)ILESDPY(+304.20)LK(+304.20).Q	N	52.79	2118.22	8.3	530.566	4	27.11	F6:5137	7	2192	1506	2856	1640	804	882.5	1252	772.5	348	357	Y
14	8	CL1Contig10680|CL1Contig10680	R.S(+304.20)VVVK(+304.20)EPR.F	N	49.47	1520.94	7.5	761.482	2	12.97	F3:3686	2	1651	980.625	2618	1590	1034	727	2312	1115	199	206	Y
14	8	CL1Contig10680|CL1Contig10680	K.L(+304.20)M(+15.99)DEM(+15.99)AVVATEAY(+304.20)R.S	N	47.56	2238.14	16.4	560.551	4	24.94	F6:4811	2	348	150.5	868.625	858.125	558	140	470	425	185	198	Y
14	8	CL1Contig10680|CL1Contig10680	K.G(+304.20)IAAGM(+15.99)QNTG.X	N	46.42	1238.62	5.3	620.319	2	12.68	F7:3431	3	321	118.5	193.875	174.5	234	468	378	279	424	433	Y
14	8	CL1Contig10680|CL1Contig10680	R.F(+304.20)TAATLEHGM(+15.99)HPPVSPK(+304.20)PEWSK(+304.20).L	N	46.14	3374.81	5.7	675.972	5	36.09	F12:6957	2	1161	907.5	1562	934.625	334.125	311	882	614.5	163	184	Y
14	8	CL1Contig10680|CL1Contig10680	K.S(+304.20)AIDK(+304.20)DIK(+304.20).N	N	44.23	1801.09	10.5	901.563	2	14.6	F9:3239	4	4784	5026	8870	9391	4399	1819	8601	5514	269	276	Y
14	8	CL1Contig10680|CL1Contig10680	R.D(+304.20)PNFK(+304.20).V	N	41.55	1227.7	5.1	410.241	3	13.87	F8:3595	7	2632	2757	7066	4700	1940	2700	4664	7107	383	387	Y
14	8	CL1Contig10680|CL1Contig10680	A.T(+304.20)APSDVLAVELLQR.E	N	41.04	1815.04	-3	908.522	2	44.02	F5:8042	2	598	878.5	1762	1504	915.625	1164	1289	1123	7	20	Y
14	8	CL1Contig10680|CL1Contig10680	N.S(+304.20)TSEYAPGLEDTLIITMK(+304.20).G	N	40.99	2576.38	5.2	859.804	3	45.69	F5:8294	1	255.5	369	458	354	41.125	200.5	165	238.125	406	423	Y
14	8	CL1Contig10680|CL1Contig10680	K.Y(+304.20)LETQELLLQIAGHK(+304.20)EILESDPYLK(+304.20).Q	N	40.81	3855.16	8.9	772.047	5	53.28	F6:9064	4	1863	1248	1100	1366	920	1066	3240	1184	333	357	Y
14	8	CL1Contig10680|CL1Contig10680	P.L(+304.20)PVVPLFER.L	N	40.16	1372.83	-0.1	458.618	3	45.95	F9:7962	7	600	371	358	315	210.5	648	212.5	514.875	28	36	Y
14	8	CL1Contig10680|CL1Contig10680	M.A(+304.20)TAPSDVLAVELLQR.E	N	39.95	1886.07	0.6	944.044	2	44.22	F5:8071	2	638	976.125	959.875	327	249.5	74.25	442	915.375	6	20	Y
14	8	CL1Contig10680|CL1Contig10680	S.M(+304.20)ATAPSDVLAVELLQR.E	N	38.64	2017.11	-4.4	1009.56	2	47.26	F5:8528	1	774.75	528.875	1098	426.75	522	147.5	843.25	562	5	20	Y
14	8	CL1Contig10680|CL1Contig10680	R.E(+304.20)C(+45.99)HIR.N	N	38.61	1006.49	0.2	336.505	3	14.47	F12:3500	5	4074	1986	8666	10190	4014	8862	5554	5086	21	25	Y
14	8	CL1Contig10680|CL1Contig10680	K.G(+304.20)DPGIAALY(+304.20)DK(+304.20).L	N	36.31	2031.16	0.3	508.798	4	22.05	F9:4378	3	1201	626	1046	1415	279	671	330.625	1032	305	315	Y
14	8	CL1Contig10680|CL1Contig10680	K.G(+304.20)DPGIAAL.Y	N	36.06	1016.58	7.7	509.299	2	27.87	F1:5980	1	199.5	518.125	434	507.5	164	1099	553.25	832	305	312	Y
14	8	CL1Contig10680|CL1Contig10680	N.P(+304.20)LPVVPLFER.L	N	35.76	1469.89	10.6	490.974	3	46.83	F9:8094	2	125.5	415.5	395	96.5	50.375	268	214	320	27	36	Y
14	8	CL1Contig10680|CL1Contig10680	Q.I(+304.20)AGHK(+304.20)EILESDPYLK(+304.20).Q	N	35.72	2624.51	10.4	525.916	5	26.84	F8:5542	3	454.375	262	1050	695.375	239.5	57.625	874.625	410	343	357	Y
14	8	CL1Contig10680|CL1Contig10680	K.Q(+304.20)IRDPNFK(+304.20).V	N	34.54	1624.94	5.2	542.657	3	14.79	F3:3959	4	2436	1844	4258	2375	1644	1694	3291	2005	380	387	Y
14	8	CL1Contig10680|CL1Contig10680	R.S(+304.20)VVVK(+304.20).E	N	33.8	1138.74	-0.4	570.378	2	14.85	F4:4044	1	1929	1454	2472	2442	980.125	1058	1995	1613	199	203	Y
14	8	CL1Contig10680|CL1Contig10680	R.L(+304.20)RDPYITTLNVFQAY(+304.20).T	N	33.77	2421.34	8.4	485.28	5	48.4	F3:9002	1	297	426.25	316.5	178	227.125	172.25	311.25	128	362	376	Y
14	8	CL1Contig10680|CL1Contig10680	K.Q(+304.20)PPLNK(+304.20).E	N	33.14	1303.8	5.5	435.608	3	13.57	F3:3775	2	1020	1214	2246	1387	810.75	1072	2585	1136	391	396	Y
14	8	CL1Contig10680|CL1Contig10680	R.L(+304.20)SAAWQLY(+304.20)QAQAEVAK(+304.20).V	N	33.04	2688.52	-8.4	673.132	4	45.6	F2:8685	5	77.75	392	471.625	84.5	210	123.25	548.75	106.25	80	95	Y
14	8	CL1Contig10680|CL1Contig10680	K.Q(+304.20)PPLNK(+304.20)EPANVVQLNSTSEYAPGLEDTLIITMK(+304.20).G	N	32.75	4522.46	0.4	1131.62	4	47.51	F6:8199	5	151.5	43.625	874.875	648	245.5	187.875	786.25	274	391	423	Y
14	8	CL1Contig10680|CL1Contig10680	R.L(+304.20)RDPYITTLNVF.Q	N	29.02	1754.98	0.7	878.499	2	48.05	F8:8722	7	147	252	461.625	411.25	250.25	86.25	677.875	686.375	362	373	Y
14	8	CL1Contig10680|CL1Contig10680	Q.I(+304.20)AGHK(+304.20).E	N	28.24	1132.71	9.5	567.366	2	10.39	F3:3298	1	2331	2505	4218	4625	2744	1044	5264	2113	343	347	Y
14	8	CL1Contig10680|CL1Contig10680	Q.A(+304.20)EVAK(+304.20).V	N	27.61	1124.69	-0.4	375.904	3	11.85	F9:2824	1	381	233	722	757	601.875	570	165	113.75	91	95	Y
14	8	CL1Contig10680|CL1Contig10680	K.K(+304.20)YNVK(+304.20).L	N	25.76	1258.78	3	420.6	3	10.99	F3:3388	1	2432	1451	3404	3000	1590	1862	2264	1236	99	103	Y
14	8	CL1Contig10680|CL1Contig10680	R.L(+304.20)RDPYITTL.N	N	25.4	1394.8	-0.5	465.941	3	37.43	F8:7131	5	177	573.125	77.5	210.25	74.5	132	62.875	71.5	362	370	Y
14	8	CL1Contig10680|CL1Contig10680	R.S(+304.20)ATPETEY(+304.20)GR.M	N	24.16	1717.9	6.7	573.644	3	13.2	F8:3494	2	1040	1398	732	1129	1216	1048	1267	678	213	222	Y
14	8	CL1Contig10680|CL1Contig10680	R.F(+304.20)VEY(+304.20)FR.S	N	21.03	1467.82	7.7	490.285	3	40.28	F4:7867	1	422.25	594.625	694	701.75	832	280	696	1156	207	212	Y
14	8	CL1Contig10680|CL1Contig10680	K.K(+304.20)Y(+304.20)NVK(+304.20).L	N	19.01	1562.98	8.8	522.004	3	13.63	F4:3861	3	1170	1329	976	1344	490.25	786	2000	962	99	103	Y
14	8	CL1Contig10680|CL1Contig10680	K.L(+304.20)MDEM(+15.99)AVVA.T	N	17.15	1297.65	0.3	649.833	2	36.01	F1:7202	1	587.875	243	433.25	767.125	73	356	492.5	306.25	185	193	Y
14	8	CL1Contig10680|CL1Contig10680	R.L(+304.20)RDPY(+304.20)ITTL.N	N	16.63	1699	9.1	425.762	4	35.07	F3:7002	1	88.5	0	164	221	99	69.5	48.875	374	362	370	Y
14	8	CL1Contig10680|CL1Contig10680	R.G(+304.20)GGPTHLAILSQPPDTIN.G	N	14.88	2091.12	5.9	698.052	3	39.14	F7:7399	1	160	389.375	472	491	181	496	221	143.5	117	134	Y
14	8	CL1Contig10680|CL1Contig10680	K.E(+304.20)PANVVQLN.S	N	14.38	1286.71	-0.2	644.361	2	23.34	F1:5301	1	495.25	310	519.25	198	470	321.875	304	213.625	397	405	Y
14	8	CL1Contig10680|CL1Contig10680	K.L(+304.20)LVADELK(+304.20)PFGEN.L	N	10.41	2052.16	-3.7	685.058	3	45	F5:8190	1	617.25	377.25	605.25	1155	458.125	548.25	646	759.25	316	328	Y
14	8	CL1Contig10680|CL1Contig10680	I.D(+304.20)K(+304.20)DIK(+304.20).N	N	8.03	1529.94	5	510.989	3	12.5	F8:3389	1	1788	1903	2174	3889	1810	1758	4000	2489	272	276	Y
14	8	CL1Contig10680|CL1Contig10680	K.Q(+304.20)PPLNK(+304.20)EPANVVQLN.S	N	7.87	2268.29	0.2	757.106	3	24.89	F9:4804	1	352.25	0	251	476	303	166	487	169	391	405	Y
14	8	CL1Contig10680|CL1Contig10680	R.L(+304.20)ADLQN.A	N	7.71	976.544	4.1	489.281	2	23.73	F1:5360	1	220	148.5	847	753.125	76	105.25	694	132.25	37	42	Y
14	8	CL1Contig10680|CL1Contig10680	Q.A(+304.20)Y(+304.20)TLK(+304.20).Q	N	7.65	1506.94	-6.7	503.317	3	32.81	F8:6438	2	424.125	381.125	227.5	80.25	460.75	394	110.25	506	375	379	Y
14	8	CL1Contig10680|CL1Contig10680	R.L(+304.20)RDPYITTLN.V	N	5.08	1508.85	5.4	755.434	2	28.58	F9:5357	1	189	870.875	179.5	488.75	196.5	167	648	111.25	362	371	Y
25	16	CL36Contig7|CL36Contig7	K.V(+304.20)K(+304.20)PHVLLGLSGVGGIFNEEVLK(+304.20).A	N	106.4	3216.92	7.7	644.396	5	48.62	F11:8982	6	1617	1458	3427	3365	2199	1110	3205	2969	419	440	Y
25	16	CL36Contig7|CL36Contig7	K.S(+304.20)MTEEETIDYVAR.N	Y	83.6	1846.89	6	616.64	3	30.32	F1:6349	6	453.625	900	1956	1057	968	403.5	1688	1579	589	601	Y
25	16	CL36Contig7|CL36Contig7	R.A(+304.20)AVAEDLAEGTSAVGAK(+304.20).E	N	78.97	2167.18	6.8	723.407	3	36.1	F5:6841	4	1815	904	3283	1649	947.25	1326	1592	1744	569	585	Y
25	16	CL36Contig7|CL36Contig7	K.I(+304.20)VVAGAGSAGIGVLNM(+15.99)AK(+304.20).Q	N	75.56	2251.31	3	751.445	3	42.68	F3:8144	2	431	46.125	408	256	93	596	248.125	408	338	355	Y
25	16	CL36Contig7|CL36Contig7	R.N(+304.20)MWYPVYSPLVSDK(+304.20).X	Y	75.25	2306.21	0.8	1154.11	2	45.69	F9:7923	10	177	694	1023	813.875	869.5	298.25	720	335	602	615	Y
25	16	CL36Contig7|CL36Contig7	K.L(+304.20)DVYVAAAGINPQR.V	N	72.98	1789.99	3.5	896.007	2	42.03	F9:7375	11	1730	1937	3470	2986	1742	980	1976	1460	213	226	Y
25	16	CL36Contig7|CL36Contig7	Q.G(+304.20)IIFPEVSSIR.S	N	68.42	1520.88	10.8	507.973	3	42.06	F9:7379	8	878	405.125	1144	607.375	1048	1044	491	1640	546	556	Y
25	16	CL36Contig7|CL36Contig7	K.A(+304.20)VVQFEDFQMK(+304.20).W	N	67.14	1949.04	8.4	650.694	3	40.83	F6:7197	4	993.375	820.5	927.875	616.875	257.875	308.75	964.75	1819	278	288	Y
25	16	CL36Contig7|CL36Contig7	K.V(+304.20)DMIVVTDGSR.I	N	65	1494.8	0.1	748.406	2	34.11	F1:6917	4	819.5	1079	1508	849	288	368	1991	931.25	184	194	Y
25	16	CL36Contig7|CL36Contig7	K.A(+304.20)VVQFEDFQM(+15.99)K(+304.20).W	N	64.71	1965.04	6.2	656.024	3	33.61	F6:6113	3	930.75	439	747.25	456	191.5	235	322	498	278	288	Y
25	16	CL36Contig7|CL36Contig7	R.G(+304.20)EPESVIALAK(+304.20).W	Y	63.8	1721.01	7.4	861.518	2	27.17	F6:5146	7	1822	916.875	3577	2348	1400	482	1989	1629	100	110	Y
25	16	CL36Contig7|CL36Contig7	R.N(+304.20)M(+15.99)WYPVYSPLVSDK(+304.20).X	Y	62.41	2322.21	8.4	775.083	3	42.71	F9:7477	1	138	91.5	192.5	248.5	96.25	187.5	407.25	415	602	615	Y
25	16	CL36Contig7|CL36Contig7	R.L(+304.20)HDRNETLYYR.V	N	62.4	1782.93	7	446.742	4	16.69	F12:3835	1	194	107.875	499.5	423	113	302.5	182.5	288	117	127	Y
25	16	CL36Contig7|CL36Contig7	K.L(+304.20)DVY(+304.20)VAAAGINPQR.V	N	62.02	2094.19	9.2	524.561	4	39.83	F3:7716	2	1334	803.875	1514	1182	680	307	651.75	927.375	213	226	Y
25	16	CL36Contig7|CL36Contig7	K.D(+304.20)K(+304.20)GEMMSMIYNWPAK(+304.20).K	N	59.99	2712.4	5.3	679.112	4	43.59	F9:7608	4	1407	824.125	1927	1036	522.875	1052	1601	1628	168	182	Y
25	16	CL36Contig7|CL36Contig7	R.M(+304.20)PGSSEEQNQFWVLDK(+304.20).D	N	58.89	2502.26	-0.1	835.093	3	41.55	F5:7667	1	514	192	1566	402	564	235.875	493	160.5	361	376	Y
25	16	CL36Contig7|CL36Contig7	K.D(+304.20)LDPAVAR.F	N	54.68	1159.64	-1.2	387.555	3	15.36	F5:3695	4	1284	1222	2476	2039	1122	822.25	1508	1465	386	393	Y
25	16	CL36Contig7|CL36Contig7	R.G(+304.20)NDILNDPWYNK(+304.20).D	Y	52.94	2056.07	-0.1	1029.04	2	35.12	F5:6694	2	102.5	533.75	896.375	396.5	114.5	228.5	549.5	253.5	44	55	Y
25	16	CL36Contig7|CL36Contig7	K.W(+304.20)AFETLQR.Y	N	52.75	1353.73	11.4	452.256	3	32.86	F9:5999	6	979.625	824.875	1093	2065	876	868.75	1894	1455	289	296	Y
25	16	CL36Contig7|CL36Contig7	K.D(+304.20)TAFPLTER.D	Y	52	1352.72	15.1	451.92	3	19.98	F5:4416	4	2100	1470	1887	2690	1404	1203	2001	1922	56	64	Y
25	16	CL36Contig7|CL36Contig7	K.A(+304.20)EC(+45.99)TPEAVFK(+304.20).Y	N	51.55	1747.9	-0.4	437.982	4	33.99	F6:6170	7	249	457	535.5	916	301	256	475	1012	462	471	Y
25	16	CL36Contig7|CL36Contig7	R.A(+304.20)QGRPLEDFNK(+304.20).Q	N	50.73	1882.04	6.5	628.359	3	15.49	F9:3379	4	6191	3935	10780	11120	5315	4098	7440	4439	325	335	Y
25	16	CL36Contig7|CL36Contig7	R.G(+304.20)MYFSAK(+304.20).D	N	50.07	1410.77	8.9	471.268	3	20.17	F3:4766	3	768	438	2261	1344	879.375	404.375	2400	2728	161	167	Y
25	16	CL36Contig7|CL36Contig7	R.M(+304.20)PGSSEEQNQFWVLDK(+304.20)DGLITK(+304.20).G	N	44.33	3433.82	4	687.773	5	42.95	F5:7878	2	705.375	900.75	1069	712	401.875	121.5	2090	1171	361	382	Y
25	16	CL36Contig7|CL36Contig7	K.E(+304.20)SDSPRPAIFAMSNPTTK(+304.20).A	N	40.05	2556.34	1.5	640.092	4	22.69	F9:4474	5	926.625	41.875	852	788.625	883.25	480.125	1054	652.75	444	461	Y
25	16	CL36Contig7|CL36Contig7	R.V(+304.20)MC(+45.99)FEQQYDR.F	Y	39.22	1667.74	4.3	834.879	2	39.02	F6:6925	2	1137	498.375	1290	964.75	524.5	304	882.5	811.5	77	86	Y
25	16	CL36Contig7|CL36Contig7	L.S(+304.20)SSAPVAK(+304.20).G	Y	36.33	1353.8	9.6	677.912	2	11.45	F3:3457	1	1835	1212	2408	1640	624	536	1855	1036	21	28	Y
25	16	CL36Contig7|CL36Contig7	R.F(+304.20)INSYR.S	Y	34.64	1102.6	0.2	552.309	2	20.44	F4:4880	1	438	823.75	882	801.125	324	622	360.125	441	87	92	Y
25	16	CL36Contig7|CL36Contig7	R.G(+304.20)EPESVIAL.A	Y	32	1217.68	-1.2	609.844	2	39.19	F1:7680	1	134.5	367	404	168.5	236.5	386	258	136.5	100	108	Y
25	16	CL36Contig7|CL36Contig7	R.V(+304.20)LIDNIR.D	N	31.2	1145.7	2.8	573.86	2	22.17	F9:4396	6	1823	511	2155	2297	1704	1010	1092	1454	128	134	Y
25	16	CL36Contig7|CL36Contig7	K.D(+304.20)K(+304.20)GEMMSM.I	N	28.22	1535.75	13.2	512.931	3	17.46	F5:4025	1	859.125	308.5	1488	1072	455.75	865.125	903.75	1006	168	175	Y
25	16	CL36Contig7|CL36Contig7	K.Q(+304.20)EMLR.M	N	28.08	979.537	9.1	490.78	2	15.54	F10:4191	2	1061	540.25	938	694	441	1110	804	786.25	356	360	Y
25	16	CL36Contig7|CL36Contig7	K.L(+304.20)YLGLR.Q	Y	26.42	1037.65	6.7	519.835	2	37.11	F4:7391	4	2634	1716	2964	3904	2577	1942	5456	2209	246	251	Y
25	16	CL36Contig7|CL36Contig7	M.I(+304.20)YNWPAK(+304.20).K	N	24.14	1498.87	7.9	500.633	3	31.42	F3:6453	1	315.375	493	702.75	632.75	207.5	674.125	499.25	276	176	182	Y
25	16	CL36Contig7|CL36Contig7	K.S(+304.20)MTEEETIDY(+304.20)VAR.N	Y	15.89	2151.09	-2.4	718.035	3	23.23	F6:4556	1	515.5	265	831	311.125	234.125	496.875	785.25	354	589	601	Y
25	16	CL36Contig7|CL36Contig7	Y.D(+304.20)RFINSY(+304.20)R.S	Y	12.84	1677.93	4	839.976	2	43.66	F1:8356	2	1158	2113	1445	2596	2401	1989	1491	1007	85	92	Y
25	16	CL36Contig7|CL36Contig7	R.R(+304.20)LLSSSAP.V	Y	12.47	1133.67	-14.5	567.832	2	44.01	F12:8163	1	332.75	205.75	572	484.25	117	110.5	112.5	46	18	25	Y
25	16	CL36Contig7|CL36Contig7	K.T(+304.20)RNSM(+15.99)IRY(+304.20)VHSK(+304.20).H	N	12.3	2419.37	-1.2	605.85	4	19.99	F11:4680	1	49.5	185.5	371	74.5	96.625	553.125	68.25	179.5	958	969	Y
25	16	CL36Contig7|CL36Contig7	Q.G(+304.20)IGIPIGK(+304.20).L	N	12.05	1361.87	12.3	454.971	3	27.63	F3:5885	1	317	472	528	491	240	171.5	586	478	205	212	Y
25	16	CL36Contig7|CL36Contig7	T.A(+304.20)ADEVHER.Q	N	11.42	1229.63	14.3	615.829	2	32.98	F7:6475	1	48.625	412	432	904.625	347	549.25	802	265	789	796	Y
25	16	CL36Contig7|CL36Contig7	K.E(+304.20)WQM(+15.99)LTK(+304.20).Q	N	10.46	1558.85	-8.3	780.427	2	21.29	F7:4721	1	646	506	1046	1324	231	275	1380	828.875	757	763	Y
25	16	CL36Contig7|CL36Contig7	V.V(+304.20)APSK(+304.20).A	N	9.97	1108.7	3.3	370.574	3	8.47	F9:2317	1	210	389.75	305.5	247.25	71.25	0	0	0	828	832	Y
25	16	CL36Contig7|CL36Contig7	R.K(+304.20)DLDPAVAR.F	N	8.94	1287.74	-10.4	644.87	2	40.1	F5:7449	1	1113	935	2512	1347	1544	1701	1591	1572	385	393	Y
25	16	CL36Contig7|CL36Contig7	K.E(+304.20)SDSPRPAIF.A	N	8.89	1421.74	0.5	711.878	2	19.68	F5:4369	1	1632	1390	1706	1556	939.25	596.5	1972	1220	444	453	Y
25	16	CL36Contig7|CL36Contig7	R.T(+304.20)VNTM(+15.99)IAT.K	N	8.4	1169.62	-6.5	585.814	2	10.11	F6:2578	1	0	272	635.25	340	864	259	413	171.5	949	956	Y
25	16	CL36Contig7|CL36Contig7	S.I(+304.20)M(+15.99)VK(+304.20)K(+304.20).L	N	7.7	1545.99	-1	387.504	4	40.84	F11:7814	1	91.25	112	348.5	208	614.375	974.25	481.375	52.625	1021	1025	Y
25	16	CL36Contig7|CL36Contig7	E.T(+304.20)LYYRVLIDNIR.D	N	6.7	1842.06	-6	615.024	3	46.44	F1:8777	1	703.25	354	313	442	428	117.25	1456	482	123	134	Y
25	16	CL36Contig7|CL36Contig7	V.M(+304.20)(+15.99)LDVGTNNQK(+304.20).L	N	5.72	1742.93	-3.3	581.983	3	17.98	F6:3766	1	558	271	580	138.375	608.25	701.25	641.5	456.25	231	240	Y
25	16	CL36Contig7|CL36Contig7	R.N(+304.20)ALALPI.S	N	5.32	1014.63	12.7	508.33	2	38.93	F2:7684	1	731.5	535.75	891.75	1120	1054	566	966	567.125	1032	1038	Y
25	16	CL36Contig7|CL36Contig7	K.T(+304.20)ILFISSP.R	N	5.22	1180.7	-18.5	591.344	2	28.33	F9:5319	1	253.5	1036	1481	1086	732	634	973.625	347.25	926	933	Y
25	16	CL36Contig7|CL36Contig7	K.Y(+304.20)(+304.20)VHNTIATK(+304.20).N	Y	5.16	1958.16	-4.5	490.544	4	10.63	F10:3456	1	100	71.5	292	398	204.5	47.125	257	435	731	739	Y
25	54	CL36Contig38|CL36Contig38	K.V(+304.20)K(+304.20)PHVLLGLSGVGGIFNEEVLK(+304.20).A	N	106.4	3216.92	7.7	644.396	5	48.62	F11:8982	6	1617	1458	3427	3365	2199	1110	3205	2969	287	308	Y
25	54	CL36Contig38|CL36Contig38	K.I(+304.20)VVAGAGSAGIGVLNM(+15.99)AK(+304.20).Q	N	75.56	2251.31	3	751.445	3	42.68	F3:8144	2	431	46.125	408	256	93	596	248.125	408	206	223	Y
25	54	CL36Contig38|CL36Contig38	K.L(+304.20)DVYVAAAGINPQR.V	N	72.98	1789.99	3.5	896.007	2	42.03	F9:7375	11	1730	1937	3470	2986	1742	980	1976	1460	81	94	Y
25	54	CL36Contig38|CL36Contig38	K.A(+304.20)VVQFEDFQMK(+304.20).W	N	67.14	1949.04	8.4	650.694	3	40.83	F6:7197	4	993.375	820.5	927.875	616.875	257.875	308.75	964.75	1819	146	156	Y
25	54	CL36Contig38|CL36Contig38	K.V(+304.20)DMIVVTDGSR.I	N	65	1494.8	0.1	748.406	2	34.11	F1:6917	4	819.5	1079	1508	849	288	368	1991	931.25	52	62	Y
25	54	CL36Contig38|CL36Contig38	K.A(+304.20)VVQFEDFQM(+15.99)K(+304.20).W	N	64.71	1965.04	6.2	656.024	3	33.61	F6:6113	3	930.75	439	747.25	456	191.5	235	322	498	146	156	Y
25	54	CL36Contig38|CL36Contig38	K.L(+304.20)DVY(+304.20)VAAAGINPQR.V	N	62.02	2094.19	9.2	524.561	4	39.83	F3:7716	2	1334	803.875	1514	1182	680	307	651.75	927.375	81	94	Y
25	54	CL36Contig38|CL36Contig38	K.D(+304.20)K(+304.20)GEMMSMIYNWPAK(+304.20).K	N	59.99	2712.4	5.3	679.112	4	43.59	F9:7608	4	1407	824.125	1927	1036	522.875	1052	1601	1628	36	50	Y
25	54	CL36Contig38|CL36Contig38	R.M(+304.20)PGSSEEQNQFWVLDK(+304.20).D	N	58.89	2502.26	-0.1	835.093	3	41.55	F5:7667	1	514	192	1566	402	564	235.875	493	160.5	229	244	Y
25	54	CL36Contig38|CL36Contig38	K.D(+304.20)LDPAVAR.F	N	54.68	1159.64	-1.2	387.555	3	15.36	F5:3695	4	1284	1222	2476	2039	1122	822.25	1508	1465	254	261	Y
25	54	CL36Contig38|CL36Contig38	K.W(+304.20)AFETLQR.Y	N	52.75	1353.73	11.4	452.256	3	32.86	F9:5999	6	979.625	824.875	1093	2065	876	868.75	1894	1455	157	164	Y
25	54	CL36Contig38|CL36Contig38	R.A(+304.20)QGRPLEDFNK(+304.20).Q	N	50.73	1882.04	6.5	628.359	3	15.49	F9:3379	4	6191	3935	10780	11120	5315	4098	7440	4439	193	203	Y
25	54	CL36Contig38|CL36Contig38	R.G(+304.20)MYFSAK(+304.20).D	N	50.07	1410.77	8.9	471.268	3	20.17	F3:4766	3	768	438	2261	1344	879.375	404.375	2400	2728	29	35	Y
25	54	CL36Contig38|CL36Contig38	R.M(+304.20)PGSSEEQNQFWVLDK(+304.20)DGLITK(+304.20).G	N	44.33	3433.82	4	687.773	5	42.95	F5:7878	2	705.375	900.75	1069	712	401.875	121.5	2090	1171	229	250	Y
25	54	CL36Contig38|CL36Contig38	K.E(+304.20)SDSPRPAIFAMSNPTTK(+304.20).V	N	40.05	2556.34	1.5	640.092	4	22.69	F9:4474	5	926.625	41.875	852	788.625	883.25	480.125	1054	652.75	312	329	Y
25	54	CL36Contig38|CL36Contig38	K.D(+304.20)K(+304.20)GEMMSM.I	N	28.22	1535.75	13.2	512.931	3	17.46	F5:4025	1	859.125	308.5	1488	1072	455.75	865.125	903.75	1006	36	43	Y
25	54	CL36Contig38|CL36Contig38	K.Q(+304.20)EMLR.M	N	28.08	979.537	9.1	490.78	2	15.54	F10:4191	2	1061	540.25	938	694	441	1110	804	786.25	224	228	Y
25	54	CL36Contig38|CL36Contig38	K.L(+304.20)YLGLR.Q	Y	26.42	1037.65	6.7	519.835	2	37.11	F4:7391	4	2634	1716	2964	3904	2577	1942	5456	2209	114	119	Y
25	54	CL36Contig38|CL36Contig38	M.I(+304.20)YNWPAK(+304.20).K	N	24.14	1498.87	7.9	500.633	3	31.42	F3:6453	1	315.375	493	702.75	632.75	207.5	674.125	499.25	276	44	50	Y
25	54	CL36Contig38|CL36Contig38	Q.G(+304.20)IGIPIGK(+304.20).L	N	12.05	1361.87	12.3	454.971	3	27.63	F3:5885	1	317	472	528	491	240	171.5	586	478	73	80	Y
25	54	CL36Contig38|CL36Contig38	R.K(+304.20)DLDPAVAR.F	N	8.94	1287.74	-10.4	644.87	2	40.1	F5:7449	1	1113	935	2512	1347	1544	1701	1591	1572	253	261	Y
25	54	CL36Contig38|CL36Contig38	K.E(+304.20)SDSPRPAIF.A	N	8.89	1421.74	0.5	711.878	2	19.68	F5:4369	1	1632	1390	1706	1556	939.25	596.5	1972	1220	312	321	Y
25	54	CL36Contig38|CL36Contig38	V.M(+304.20)(+15.99)LDVGTNNQK(+304.20).L	N	5.72	1742.93	-3.3	581.983	3	17.98	F6:3766	1	558	271	580	138.375	608.25	701.25	641.5	456.25	99	108	Y
25	96	CL36Contig11|CL36Contig11	K.V(+304.20)K(+304.20)PHVLLGLSGVGGIFNEEVLK(+304.20).A	N	106.4	3216.92	7.7	644.396	5	48.62	F11:8982	6	1617	1458	3427	3365	2199	1110	3205	2969	152	173	Y
25	96	CL36Contig11|CL36Contig11	K.S(+304.20)MTEEETIDYVAR.N	Y	83.6	1846.89	6	616.64	3	30.32	F1:6349	6	453.625	900	1956	1057	968	403.5	1688	1579	691	703	Y
25	96	CL36Contig11|CL36Contig11	R.A(+304.20)AVAEDLAEGTSAVGAK(+304.20).E	N	78.97	2167.18	6.8	723.407	3	36.1	F5:6841	4	1815	904	3283	1649	947.25	1326	1592	1744	671	687	Y
25	96	CL36Contig11|CL36Contig11	K.I(+304.20)VVAGAGSAGIGVLNM(+15.99)AK(+304.20).Q	N	75.56	2251.31	3	751.445	3	42.68	F3:8144	2	431	46.125	408	256	93	596	248.125	408	71	88	Y
25	96	CL36Contig11|CL36Contig11	R.N(+304.20)MWYPVYSPLVSDK(+304.20).X	Y	75.25	2306.21	0.8	1154.11	2	45.69	F9:7923	10	177	694	1023	813.875	869.5	298.25	720	335	704	717	Y
25	96	CL36Contig11|CL36Contig11	Q.G(+304.20)IIFPEVSSIR.S	N	68.42	1520.88	10.8	507.973	3	42.06	F9:7379	8	878	405.125	1144	607.375	1048	1044	491	1640	648	658	Y
25	96	CL36Contig11|CL36Contig11	K.A(+304.20)VVQFEDFQMK(+304.20).W	N	67.14	1949.04	8.4	650.694	3	40.83	F6:7197	4	993.375	820.5	927.875	616.875	257.875	308.75	964.75	1819	11	21	Y
25	96	CL36Contig11|CL36Contig11	K.A(+304.20)VVQFEDFQM(+15.99)K(+304.20).W	N	64.71	1965.04	6.2	656.024	3	33.61	F6:6113	3	930.75	439	747.25	456	191.5	235	322	498	11	21	Y
25	96	CL36Contig11|CL36Contig11	R.N(+304.20)M(+15.99)WYPVYSPLVSDK(+304.20).X	Y	62.41	2322.21	8.4	775.083	3	42.71	F9:7477	1	138	91.5	192.5	248.5	96.25	187.5	407.25	415	704	717	Y
25	96	CL36Contig11|CL36Contig11	R.M(+304.20)PGSSEEQNQFWVLDK(+304.20).D	N	58.89	2502.26	-0.1	835.093	3	41.55	F5:7667	1	514	192	1566	402	564	235.875	493	160.5	94	109	Y
25	96	CL36Contig11|CL36Contig11	K.D(+304.20)LDPAVAR.F	N	54.68	1159.64	-1.2	387.555	3	15.36	F5:3695	4	1284	1222	2476	2039	1122	822.25	1508	1465	119	126	Y
25	96	CL36Contig11|CL36Contig11	K.W(+304.20)AFETLQR.Y	N	52.75	1353.73	11.4	452.256	3	32.86	F9:5999	6	979.625	824.875	1093	2065	876	868.75	1894	1455	22	29	Y
25	96	CL36Contig11|CL36Contig11	T.A(+304.20)EC(+45.99)TPEAVFK(+304.20).Y	N	51.55	1747.9	-0.4	437.982	4	33.99	F6:6170	7	249	457	535.5	916	301	256	475	1012	536	545	Y
25	96	CL36Contig11|CL36Contig11	R.A(+304.20)QGRPLEDFNK(+304.20).Q	N	50.73	1882.04	6.5	628.359	3	15.49	F9:3379	4	6191	3935	10780	11120	5315	4098	7440	4439	58	68	Y
25	96	CL36Contig11|CL36Contig11	R.M(+304.20)PGSSEEQNQFWVLDK(+304.20)DGLITK(+304.20).G	N	44.33	3433.82	4	687.773	5	42.95	F5:7878	2	705.375	900.75	1069	712	401.875	121.5	2090	1171	94	115	Y
25	96	CL36Contig11|CL36Contig11	K.E(+304.20)SDSPRPAIFAMSNPTTK(+304.20).G	N	40.05	2556.34	1.5	640.092	4	22.69	F9:4474	5	926.625	41.875	852	788.625	883.25	480.125	1054	652.75	495	512	Y
25	96	CL36Contig11|CL36Contig11	K.Q(+304.20)EMLR.M	N	28.08	979.537	9.1	490.78	2	15.54	F10:4191	2	1061	540.25	938	694	441	1110	804	786.25	89	93	Y
25	96	CL36Contig11|CL36Contig11	K.S(+304.20)MTEEETIDY(+304.20)VAR.N	Y	15.89	2151.09	-2.4	718.035	3	23.23	F6:4556	1	515.5	265	831	311.125	234.125	496.875	785.25	354	691	703	Y
25	96	CL36Contig11|CL36Contig11	K.T(+304.20)RNSM(+15.99)IRY(+304.20)VHSK(+304.20).H	N	12.3	2419.37	-1.2	605.85	4	19.99	F11:4680	1	49.5	185.5	371	74.5	96.625	553.125	68.25	179.5	1061	1072	Y
25	96	CL36Contig11|CL36Contig11	T.A(+304.20)ADEVHER.Q	N	11.42	1229.63	14.3	615.829	2	32.98	F7:6475	1	48.625	412	432	904.625	347	549.25	802	265	892	899	Y
25	96	CL36Contig11|CL36Contig11	K.E(+304.20)WQM(+15.99)LTK(+304.20).Q	N	10.46	1558.85	-8.3	780.427	2	21.29	F7:4721	1	646	506	1046	1324	231	275	1380	828.875	860	866	Y
25	96	CL36Contig11|CL36Contig11	R.I(+304.20)SSLHQR.N	N	10.07	1143.66	5.8	572.841	2	19.48	F4:4736	1	823.875	149.5	498	727	277.75	337	225.25	663.25	843	849	Y
25	96	CL36Contig11|CL36Contig11	V.V(+304.20)APSK(+304.20).A	N	9.97	1108.7	3.3	370.574	3	8.47	F9:2317	1	210	389.75	305.5	247.25	71.25	0	0	0	931	935	Y
25	96	CL36Contig11|CL36Contig11	L.M(+304.20)(+15.99)EQEQHY(+304.20)K(+304.20).E	N	9.46	2020.07	8.4	506.028	4	15.75	F4:4179	2	875.125	245.5	911.75	542	942.875	459.375	1001	752	852	859	Y
25	96	CL36Contig11|CL36Contig11	R.K(+304.20)DLDPAVAR.F	N	8.94	1287.74	-10.4	644.87	2	40.1	F5:7449	1	1113	935	2512	1347	1544	1701	1591	1572	118	126	Y
25	96	CL36Contig11|CL36Contig11	K.E(+304.20)SDSPRPAIF.A	N	8.89	1421.74	0.5	711.878	2	19.68	F5:4369	1	1632	1390	1706	1556	939.25	596.5	1972	1220	177	186	Y
25	96	CL36Contig11|CL36Contig11	R.T(+304.20)VNTM(+15.99)IAT.K	N	8.4	1169.62	-6.5	585.814	2	10.11	F6:2578	1	0	272	635.25	340	864	259	413	171.5	1052	1059	Y
25	96	CL36Contig11|CL36Contig11	S.I(+304.20)M(+15.99)VK(+304.20)K(+304.20).L	N	7.7	1545.99	-1	387.504	4	40.84	F11:7814	1	91.25	112	348.5	208	614.375	974.25	481.375	52.625	1124	1128	Y
25	96	CL36Contig11|CL36Contig11	X.L(+304.20)YGTFDDAEFGRPFK(+304.20).D	Y	6.5	2370.24	-1.6	1186.12	2	47.01	F1:8862	1	245.125	332	615.5	578.125	163	354	94	243	315	329	Y
25	96	CL36Contig11|CL36Contig11	L.M(+304.20)EQEQHYK(+304.20).E	N	5.99	1699.87	16.3	850.956	2	39.25	F11:7576	1	263	536	520	96	356	139.375	240.5	42.25	852	859	Y
25	96	CL36Contig11|CL36Contig11	K.I(+304.20)ANATI.C	N	5.6	905.543	-13.8	453.773	2	44.26	F11:8328	1	5300	4716	7988	6666	4086	4714	6760	3206	583	588	Y
25	96	CL36Contig11|CL36Contig11	R.N(+304.20)ALALPI.S	N	5.32	1014.63	12.7	508.33	2	38.93	F2:7684	1	731.5	535.75	891.75	1120	1054	566	966	567.125	1135	1141	Y
25	96	CL36Contig11|CL36Contig11	K.T(+304.20)ILFISSP.R	N	5.22	1180.7	-18.5	591.344	2	28.33	F9:5319	1	253.5	1036	1481	1086	732	634	973.625	347.25	1029	1036	Y
25	179	CL36Contig37|CL36Contig37	K.L(+304.20)DVYVAAAGINPQR.D	N	72.98	1789.99	3.5	896.007	2	42.03	F9:7375	11	1730	1937	3470	2986	1742	980	1976	1460	108	121	Y
25	179	CL36Contig37|CL36Contig37	K.A(+304.20)VVQFEDFQMK(+304.20).W	N	67.14	1949.04	8.4	650.694	3	40.83	F6:7197	4	993.375	820.5	927.875	616.875	257.875	308.75	964.75	1819	214	224	Y
25	179	CL36Contig37|CL36Contig37	K.V(+304.20)DMIVVTDGSR.I	N	65	1494.8	0.1	748.406	2	34.11	F1:6917	4	819.5	1079	1508	849	288	368	1991	931.25	79	89	Y
25	179	CL36Contig37|CL36Contig37	K.A(+304.20)VVQFEDFQM(+15.99)K(+304.20).W	N	64.71	1965.04	6.2	656.024	3	33.61	F6:6113	3	930.75	439	747.25	456	191.5	235	322	498	214	224	Y
25	179	CL36Contig37|CL36Contig37	R.L(+304.20)HDRNETLYYR.V	N	62.4	1782.93	7	446.742	4	16.69	F12:3835	1	194	107.875	499.5	423	113	302.5	182.5	288	12	22	Y
25	179	CL36Contig37|CL36Contig37	K.L(+304.20)DVY(+304.20)VAAAGINPQR.D	N	62.02	2094.19	9.2	524.561	4	39.83	F3:7716	2	1334	803.875	1514	1182	680	307	651.75	927.375	108	121	Y
25	179	CL36Contig37|CL36Contig37	K.D(+304.20)K(+304.20)GEMMSMIYNWPAK(+304.20).K	N	59.99	2712.4	5.3	679.112	4	43.59	F9:7608	4	1407	824.125	1927	1036	522.875	1052	1601	1628	63	77	Y
25	179	CL36Contig37|CL36Contig37	K.W(+304.20)AFETLQR.Y	N	52.75	1353.73	11.4	452.256	3	32.86	F9:5999	6	979.625	824.875	1093	2065	876	868.75	1894	1455	225	232	Y
25	179	CL36Contig37|CL36Contig37	R.A(+304.20)QGRPLEDFNK(+304.20).Q	N	50.73	1882.04	6.5	628.359	3	15.49	F9:3379	4	6191	3935	10780	11120	5315	4098	7440	4439	261	271	Y
25	179	CL36Contig37|CL36Contig37	R.G(+304.20)MYFSAK(+304.20).D	N	50.07	1410.77	8.9	471.268	3	20.17	F3:4766	3	768	438	2261	1344	879.375	404.375	2400	2728	56	62	Y
25	179	CL36Contig37|CL36Contig37	R.V(+304.20)LIDNIR.D	N	31.2	1145.7	2.8	573.86	2	22.17	F9:4396	6	1823	511	2155	2297	1704	1010	1092	1454	23	29	Y
25	179	CL36Contig37|CL36Contig37	K.D(+304.20)K(+304.20)GEMMSM.I	N	28.22	1535.75	13.2	512.931	3	17.46	F5:4025	1	859.125	308.5	1488	1072	455.75	865.125	903.75	1006	63	70	Y
25	179	CL36Contig37|CL36Contig37	K.L(+304.20)YLGLR.Q	Y	26.42	1037.65	6.7	519.835	2	37.11	F4:7391	4	2634	1716	2964	3904	2577	1942	5456	2209	182	187	Y
25	179	CL36Contig37|CL36Contig37	M.I(+304.20)YNWPAK(+304.20).K	N	24.14	1498.87	7.9	500.633	3	31.42	F3:6453	1	315.375	493	702.75	632.75	207.5	674.125	499.25	276	71	77	Y
25	179	CL36Contig37|CL36Contig37	Q.G(+304.20)IGIPIGK(+304.20).L	N	12.05	1361.87	12.3	454.971	3	27.63	F3:5885	1	317	472	528	491	240	171.5	586	478	100	107	Y
25	179	CL36Contig37|CL36Contig37	R.D(+304.20)EK(+304.20)C(+45.99)Y(+304.20)FLSEIER.T	Y	10.25	2489.29	17.3	623.341	4	38.24	F11:7424	1	335.375	92.25	281.5	271	48.625	321	254.5	362	122	133	Y
25	179	CL36Contig37|CL36Contig37	E.T(+304.20)LYYRVLIDNIR.D	N	6.7	1842.06	-6	615.024	3	46.44	F1:8777	1	703.25	354	313	442	428	117.25	1456	482	18	29	Y
25	179	CL36Contig37|CL36Contig37	V.M(+304.20)(+15.99)LDVGTNNQK(+304.20).L	N	5.72	1742.93	-3.3	581.983	3	17.98	F6:3766	1	558	271	580	138.375	608.25	701.25	641.5	456.25	167	176	Y
25	228	Locus_46_2_9|Locus_46_2_9	K.L(+304.20)DVYVAAAGINPQR.D	N	72.98	1789.99	3.5	896.007	2	42.03	F9:7375	11	1730	1937	3470	2986	1742	980	1976	1460	108	121	Y
25	228	Locus_46_2_9|Locus_46_2_9	K.A(+304.20)VVQFEDFQMK(+304.20).W	N	67.14	1949.04	8.4	650.694	3	40.83	F6:7197	4	993.375	820.5	927.875	616.875	257.875	308.75	964.75	1819	276	286	Y
25	228	Locus_46_2_9|Locus_46_2_9	K.V(+304.20)DMIVVTDGSR.I	N	65	1494.8	0.1	748.406	2	34.11	F1:6917	4	819.5	1079	1508	849	288	368	1991	931.25	79	89	Y
25	228	Locus_46_2_9|Locus_46_2_9	K.A(+304.20)VVQFEDFQM(+15.99)K(+304.20).W	N	64.71	1965.04	6.2	656.024	3	33.61	F6:6113	3	930.75	439	747.25	456	191.5	235	322	498	276	286	Y
25	228	Locus_46_2_9|Locus_46_2_9	R.L(+304.20)HDRNETLYYR.V	N	62.4	1782.93	7	446.742	4	16.69	F12:3835	1	194	107.875	499.5	423	113	302.5	182.5	288	12	22	Y
25	228	Locus_46_2_9|Locus_46_2_9	K.L(+304.20)DVY(+304.20)VAAAGINPQR.D	N	62.02	2094.19	9.2	524.561	4	39.83	F3:7716	2	1334	803.875	1514	1182	680	307	651.75	927.375	108	121	Y
25	228	Locus_46_2_9|Locus_46_2_9	K.D(+304.20)K(+304.20)GEMMSMIYNWPAK(+304.20).K	N	59.99	2712.4	5.3	679.112	4	43.59	F9:7608	4	1407	824.125	1927	1036	522.875	1052	1601	1628	63	77	Y
25	228	Locus_46_2_9|Locus_46_2_9	K.W(+304.20)AFETLQR.Y	N	52.75	1353.73	11.4	452.256	3	32.86	F9:5999	6	979.625	824.875	1093	2065	876	868.75	1894	1455	287	294	Y
25	228	Locus_46_2_9|Locus_46_2_9	R.A(+304.20)QGRPLEDFNK(+304.20).Q	N	50.73	1882.04	6.5	628.359	3	15.49	F9:3379	4	6191	3935	10780	11120	5315	4098	7440	4439	323	333	Y
25	228	Locus_46_2_9|Locus_46_2_9	R.G(+304.20)MYFSAK(+304.20).D	N	50.07	1410.77	8.9	471.268	3	20.17	F3:4766	3	768	438	2261	1344	879.375	404.375	2400	2728	56	62	Y
25	228	Locus_46_2_9|Locus_46_2_9	R.V(+304.20)LIDNIR.D	N	31.2	1145.7	2.8	573.86	2	22.17	F9:4396	6	1823	511	2155	2297	1704	1010	1092	1454	23	29	Y
25	228	Locus_46_2_9|Locus_46_2_9	K.D(+304.20)K(+304.20)GEMMSM.I	N	28.22	1535.75	13.2	512.931	3	17.46	F5:4025	1	859.125	308.5	1488	1072	455.75	865.125	903.75	1006	63	70	Y
25	228	Locus_46_2_9|Locus_46_2_9	M.I(+304.20)YNWPAK(+304.20).K	N	24.14	1498.87	7.9	500.633	3	31.42	F3:6453	1	315.375	493	702.75	632.75	207.5	674.125	499.25	276	71	77	Y
25	228	Locus_46_2_9|Locus_46_2_9	K.A(+304.20)TGGQAM(+15.99)C(+45.99)VRY(+304.20)IK(+304.20).H	Y	12.45	2371.28	7.6	593.831	4	41.73	F11:7948	1	104	0	477.375	184.5	105.5	76.75	110	72.5	177	189	Y
25	228	Locus_46_2_9|Locus_46_2_9	Q.G(+304.20)IGIPIGK(+304.20).L	N	12.05	1361.87	12.3	454.971	3	27.63	F3:5885	1	317	472	528	491	240	171.5	586	478	100	107	Y
25	228	Locus_46_2_9|Locus_46_2_9	R.D(+304.20)EK(+304.20)C(+45.99)Y(+304.20)FLSEIER.T	Y	10.25	2489.29	17.3	623.341	4	38.24	F11:7424	1	335.375	92.25	281.5	271	48.625	321	254.5	362	122	133	Y
25	228	Locus_46_2_9|Locus_46_2_9	E.T(+304.20)LYYRVLIDNIR.D	N	6.7	1842.06	-6	615.024	3	46.44	F1:8777	1	703.25	354	313	442	428	117.25	1456	482	18	29	Y
25	675	Locus_1987_2_9|Locus_1987_2_9	K.L(+304.20)DVYVAAAGINPQR.V	N	72.98	1789.99	3.5	896.007	2	42.03	F9:7375	11	1730	1937	3470	2986	1742	980	1976	1460	28	41	Y
25	675	Locus_1987_2_9|Locus_1987_2_9	K.A(+304.20)VVQFEDFQMK(+304.20).W	N	67.14	1949.04	8.4	650.694	3	40.83	F6:7197	4	993.375	820.5	927.875	616.875	257.875	308.75	964.75	1819	93	103	Y
25	675	Locus_1987_2_9|Locus_1987_2_9	K.A(+304.20)VVQFEDFQM(+15.99)K(+304.20).W	N	64.71	1965.04	6.2	656.024	3	33.61	F6:6113	3	930.75	439	747.25	456	191.5	235	322	498	93	103	Y
25	675	Locus_1987_2_9|Locus_1987_2_9	K.L(+304.20)DVY(+304.20)VAAAGINPQR.V	N	62.02	2094.19	9.2	524.561	4	39.83	F3:7716	2	1334	803.875	1514	1182	680	307	651.75	927.375	28	41	Y
25	675	Locus_1987_2_9|Locus_1987_2_9	K.W(+304.20)AFETLQR.Y	N	52.75	1353.73	11.4	452.256	3	32.86	F9:5999	6	979.625	824.875	1093	2065	876	868.75	1894	1455	104	111	Y
25	675	Locus_1987_2_9|Locus_1987_2_9	K.L(+304.20)YLGLR.Q	Y	26.42	1037.65	6.7	519.835	2	37.11	F4:7391	4	2634	1716	2964	3904	2577	1942	5456	2209	61	66	Y
25	675	Locus_1987_2_9|Locus_1987_2_9	Q.G(+304.20)IGIPIGK(+304.20).L	N	12.05	1361.87	12.3	454.971	3	27.63	F3:5885	1	317	472	528	491	240	171.5	586	478	20	27	Y
25	675	Locus_1987_2_9|Locus_1987_2_9	K.L(+304.20)QFEDFQMK(+304.20).W	Y	8.36	1792.95	9.8	598.664	3	47.1	F7:8592	1	314	0	262	332	165.5	180.5	850.625	370	169	177	Y
25	675	Locus_1987_2_9|Locus_1987_2_9	V.M(+304.20)(+15.99)LDVGTNNQK(+304.20).L	N	5.72	1742.93	-3.3	581.983	3	17.98	F6:3766	1	558	271	580	138.375	608.25	701.25	641.5	456.25	46	55	Y
25	704	CL36Contig14|CL36Contig14	K.L(+304.20)DVYVAAAGINPQR.V	N	72.98	1789.99	3.5	896.007	2	42.03	F9:7375	11	1730	1937	3470	2986	1742	980	1976	1460	28	41	Y
25	704	CL36Contig14|CL36Contig14	K.A(+304.20)VVQFEDFQMK(+304.20).W	N	67.14	1949.04	8.4	650.694	3	40.83	F6:7197	4	993.375	820.5	927.875	616.875	257.875	308.75	964.75	1819	93	103	Y
25	704	CL36Contig14|CL36Contig14	K.A(+304.20)VVQFEDFQM(+15.99)K(+304.20).W	N	64.71	1965.04	6.2	656.024	3	33.61	F6:6113	3	930.75	439	747.25	456	191.5	235	322	498	93	103	Y
25	704	CL36Contig14|CL36Contig14	K.L(+304.20)DVY(+304.20)VAAAGINPQR.V	N	62.02	2094.19	9.2	524.561	4	39.83	F3:7716	2	1334	803.875	1514	1182	680	307	651.75	927.375	28	41	Y
25	704	CL36Contig14|CL36Contig14	K.W(+304.20)AFETLQR.Y	N	52.75	1353.73	11.4	452.256	3	32.86	F9:5999	6	979.625	824.875	1093	2065	876	868.75	1894	1455	104	111	Y
25	704	CL36Contig14|CL36Contig14	K.L(+304.20)YLGLR.Q	Y	26.42	1037.65	6.7	519.835	2	37.11	F4:7391	4	2634	1716	2964	3904	2577	1942	5456	2209	61	66	Y
25	704	CL36Contig14|CL36Contig14	Q.G(+304.20)IGIPIGK(+304.20).L	N	12.05	1361.87	12.3	454.971	3	27.63	F3:5885	1	317	472	528	491	240	171.5	586	478	20	27	Y
25	704	CL36Contig14|CL36Contig14	V.M(+304.20)(+15.99)LDVGTNNQK(+304.20).L	N	5.72	1742.93	-3.3	581.983	3	17.98	F6:3766	1	558	271	580	138.375	608.25	701.25	641.5	456.25	46	55	Y
25	716	CL36Contig36|CL36Contig36	K.S(+304.20)MTEEETIDYVAR.N	Y	83.6	1846.89	6	616.64	3	30.32	F1:6349	6	453.625	900	1956	1057	968	403.5	1688	1579	185	197	Y
25	716	CL36Contig36|CL36Contig36	R.A(+304.20)AVAEDLAEGTSAVGAK(+304.20).E	N	78.97	2167.18	6.8	723.407	3	36.1	F5:6841	4	1815	904	3283	1649	947.25	1326	1592	1744	165	181	Y
25	716	CL36Contig36|CL36Contig36	R.N(+304.20)MWYPVYSPLVSDK(+304.20).X	Y	75.25	2306.21	0.8	1154.11	2	45.69	F9:7923	10	177	694	1023	813.875	869.5	298.25	720	335	198	211	Y
25	716	CL36Contig36|CL36Contig36	Q.G(+304.20)IIFPEVSSIR.S	N	68.42	1520.88	10.8	507.973	3	42.06	F9:7379	8	878	405.125	1144	607.375	1048	1044	491	1640	142	152	Y
25	716	CL36Contig36|CL36Contig36	R.N(+304.20)M(+15.99)WYPVYSPLVSDK(+304.20).X	Y	62.41	2322.21	8.4	775.083	3	42.71	F9:7477	1	138	91.5	192.5	248.5	96.25	187.5	407.25	415	198	211	Y
25	716	CL36Contig36|CL36Contig36	X.A(+304.20)EC(+45.99)TPEAVFK(+304.20).Y	N	51.55	1747.9	-0.4	437.982	4	33.99	F6:6170	7	249	457	535.5	916	301	256	475	1012	2	11	Y
25	716	CL36Contig36|CL36Contig36	K.S(+304.20)MTEEETIDY(+304.20)VAR.N	Y	15.89	2151.09	-2.4	718.035	3	23.23	F6:4556	1	515.5	265	831	311.125	234.125	496.875	785.25	354	185	197	Y
25	716	CL36Contig36|CL36Contig36	K.T(+304.20)RNSM(+15.99)IRY(+304.20)VHSK(+304.20).H	N	12.3	2419.37	-1.2	605.85	4	19.99	F11:4680	1	49.5	185.5	371	74.5	96.625	553.125	68.25	179.5	555	566	Y
25	716	CL36Contig36|CL36Contig36	T.A(+304.20)ADEVHER.Q	N	11.42	1229.63	14.3	615.829	2	32.98	F7:6475	1	48.625	412	432	904.625	347	549.25	802	265	386	393	Y
25	716	CL36Contig36|CL36Contig36	K.E(+304.20)WQM(+15.99)LTK(+304.20).Q	N	10.46	1558.85	-8.3	780.427	2	21.29	F7:4721	1	646	506	1046	1324	231	275	1380	828.875	354	360	Y
25	716	CL36Contig36|CL36Contig36	R.I(+304.20)SSLHQR.N	N	10.07	1143.66	5.8	572.841	2	19.48	F4:4736	1	823.875	149.5	498	727	277.75	337	225.25	663.25	337	343	Y
25	716	CL36Contig36|CL36Contig36	V.V(+304.20)APSK(+304.20).A	N	9.97	1108.7	3.3	370.574	3	8.47	F9:2317	1	210	389.75	305.5	247.25	71.25	0	0	0	425	429	Y
25	716	CL36Contig36|CL36Contig36	L.M(+304.20)(+15.99)EQEQHY(+304.20)K(+304.20).E	N	9.46	2020.07	8.4	506.028	4	15.75	F4:4179	2	875.125	245.5	911.75	542	942.875	459.375	1001	752	346	353	Y
25	716	CL36Contig36|CL36Contig36	R.T(+304.20)VNTM(+15.99)IAT.K	N	8.4	1169.62	-6.5	585.814	2	10.11	F6:2578	1	0	272	635.25	340	864	259	413	171.5	546	553	Y
25	716	CL36Contig36|CL36Contig36	N.N(+304.20)M(+15.99)Y(+304.20)LFPGY(+304.20)GK(+304.20).L	Y	7.84	2421.36	9	606.352	4	39.57	F6:7007	1	1068	349.75	455.25	808.5	389	47.625	771.125	321	71	80	Y
25	716	CL36Contig36|CL36Contig36	S.I(+304.20)M(+15.99)VK(+304.20)K(+304.20).L	N	7.7	1545.99	-1	387.504	4	40.84	F11:7814	1	91.25	112	348.5	208	614.375	974.25	481.375	52.625	618	622	Y
25	716	CL36Contig36|CL36Contig36	L.M(+304.20)EQEQHYK(+304.20).E	N	5.99	1699.87	16.3	850.956	2	39.25	F11:7576	1	263	536	520	96	356	139.375	240.5	42.25	346	353	Y
25	716	CL36Contig36|CL36Contig36	K.I(+304.20)ANATI.C	N	5.6	905.543	-13.8	453.773	2	44.26	F11:8328	1	5300	4716	7988	6666	4086	4714	6760	3206	49	54	Y
25	716	CL36Contig36|CL36Contig36	R.N(+304.20)ALALPI.S	N	5.32	1014.63	12.7	508.33	2	38.93	F2:7684	1	731.5	535.75	891.75	1120	1054	566	966	567.125	629	635	Y
25	716	CL36Contig36|CL36Contig36	K.T(+304.20)ILFISSP.R	N	5.22	1180.7	-18.5	591.344	2	28.33	F9:5319	1	253.5	1036	1481	1086	732	634	973.625	347.25	523	530	Y
25	1110	CL36Contig13|CL36Contig13	K.A(+304.20)VVQFEDFQMK(+304.20).W	N	67.14	1949.04	8.4	650.694	3	40.83	F6:7197	4	993.375	820.5	927.875	616.875	257.875	308.75	964.75	1819	48	58	Y
25	1110	CL36Contig13|CL36Contig13	K.A(+304.20)VVQFEDFQM(+15.99)K(+304.20).W	N	64.71	1965.04	6.2	656.024	3	33.61	F6:6113	3	930.75	439	747.25	456	191.5	235	322	498	48	58	Y
25	1110	CL36Contig13|CL36Contig13	K.W(+304.20)AFETLQR.Y	N	52.75	1353.73	11.4	452.256	3	32.86	F9:5999	6	979.625	824.875	1093	2065	876	868.75	1894	1455	59	66	Y
25	1110	CL36Contig13|CL36Contig13	R.A(+304.20)QGRPLEDFNK(+304.20).Q	N	50.73	1882.04	6.5	628.359	3	15.49	F9:3379	4	6191	3935	10780	11120	5315	4098	7440	4439	95	105	Y
25	1110	CL36Contig13|CL36Contig13	K.L(+304.20)YLGLR.Q	Y	26.42	1037.65	6.7	519.835	2	37.11	F4:7391	4	2634	1716	2964	3904	2577	1942	5456	2209	16	21	Y
25	1110	CL36Contig13|CL36Contig13	M(+304.20)(+15.99)LDVGTNNQK(+304.20).L	N	5.72	1742.93	-3.3	581.983	3	17.98	F6:3766	1	558	271	580	138.375	608.25	701.25	641.5	456.25	1	10	Y
25	1269	CL36Contig39|CL36Contig39	K.V(+304.20)K(+304.20)PHVLLGLSGVGGIFNEEVLK(+304.20).A	N	106.4	3216.92	7.7	644.396	5	48.62	F11:8982	6	1617	1458	3427	3365	2199	1110	3205	2969	77	98	Y
25	1269	CL36Contig39|CL36Contig39	K.D(+304.20)LDPAVAR.F	N	54.68	1159.64	-1.2	387.555	3	15.36	F5:3695	4	1284	1222	2476	2039	1122	822.25	1508	1465	11	18	Y
25	1269	CL36Contig39|CL36Contig39	K.E(+304.20)SDSPRPAIFAMSNPTTK(+304.20).A	N	40.05	2556.34	1.5	640.092	4	22.69	F9:4474	5	926.625	41.875	852	788.625	883.25	480.125	1054	652.75	102	119	Y
25	1269	CL36Contig39|CL36Contig39	R.K(+304.20)DLDPAVAR.F	N	8.94	1287.74	-10.4	644.87	2	40.1	F5:7449	1	1113	935	2512	1347	1544	1701	1591	1572	10	18	Y
25	1269	CL36Contig39|CL36Contig39	K.E(+304.20)SDSPRPAIF.A	N	8.89	1421.74	0.5	711.878	2	19.68	F5:4369	1	1632	1390	1706	1556	939.25	596.5	1972	1220	102	111	Y
25	1355	CL36Contig22|CL36Contig22	K.A(+304.20)VVQFEDFQMK(+304.20).W	N	67.14	1949.04	8.4	650.694	3	40.83	F6:7197	4	993.375	820.5	927.875	616.875	257.875	308.75	964.75	1819	53	63	Y
25	1355	CL36Contig22|CL36Contig22	K.A(+304.20)VVQFEDFQM(+15.99)K(+304.20).W	N	64.71	1965.04	6.2	656.024	3	33.61	F6:6113	3	930.75	439	747.25	456	191.5	235	322	498	53	63	Y
25	1355	CL36Contig22|CL36Contig22	K.W(+304.20)AFETLQR.Y	N	52.75	1353.73	11.4	452.256	3	32.86	F9:5999	6	979.625	824.875	1093	2065	876	868.75	1894	1455	64	71	Y
25	1355	CL36Contig22|CL36Contig22	K.L(+304.20)YLGLR.Q	Y	26.42	1037.65	6.7	519.835	2	37.11	F4:7391	4	2634	1716	2964	3904	2577	1942	5456	2209	21	26	Y
25	1355	CL36Contig22|CL36Contig22	V.M(+304.20)(+15.99)LDVGTNNQK(+304.20).L	N	5.72	1742.93	-3.3	581.983	3	17.98	F6:3766	1	558	271	580	138.375	608.25	701.25	641.5	456.25	6	15	Y
25	5760	CL7480Contig2|CL7480Contig2	K.Q(+304.20)EMLR.C	N	28.08	979.537	9.1	490.78	2	15.54	F10:4191	2	1061	540.25	938	694	441	1110	804	786.25	424	428	Y
25	11385	CL47Contig45|CL47Contig45	L.L(+304.20)M(+15.99)VK(+304.20)K(+304.20).T	N	7.7	1545.99	-1	387.504	4	40.84	F11:7814	1	91.25	112	348.5	208	614.375	974.25	481.375	52.625	337	341	Y
25	11385	CL47Contig45|CL47Contig45	R.C(+45.99)(+304.20)AQNLQIK(+304.20).T	N	7.22	1570.87	11.8	786.45	2	44.02	F1:8412	1	724.5	655.25	1123	658.75	689.25	104.5	1446	558.75	555	562	Y
27	61	CL1Contig9325|CL1Contig9325	K.D(+304.20)GIDYAAVTVQLPGGER.V	N	104.41	2064.07	2.4	1033.05	2	41.09	F1:7967	6	1618	1149	2976	1491	314	1012	748	368	277	293	Y
27	61	CL1Contig9325|CL1Contig9325	K.G(+304.20)TGTANQC(+45.99)PTIDGGVDSFPFK(+304.20).S	N	104.4	2765.35	2.9	922.793	3	42.96	F5:7880	4	1054	1318	2422	1936	866	1198	1706	1333	192	212	Y
27	61	CL1Contig9325|CL1Contig9325	R.G(+304.20)GSTGYDNAVALPAGGR.G	N	90.08	1865.95	-2	622.989	3	20.79	F10:4978	10	0	80.5	175.125	266	274	46.875	60.25	47.875	333	349	Y
27	61	CL1Contig9325|CL1Contig9325	K.Q(+304.20)LVATGK(+304.20)PESFGGPFLVPSY(+304.20)R.G	N	85.32	3161.78	9.3	633.37	5	42.33	F3:8091	3	1929	944.375	1630	1752	742.375	1240	2447	1176	302	322	Y
27	61	CL1Contig9325|CL1Contig9325	R.G(+304.20)DEEELVK(+304.20)ENIK(+304.20).N	N	80.78	2314.3	18.1	579.592	4	20.72	F6:4179	3	1305	1669	4100	1688	586.625	1123	2440	1393	350	361	Y
27	61	CL1Contig9325|CL1Contig9325	K.I(+304.20)QGVWYAQLESN	N	77.09	1710.88	6.7	856.455	2	46.6	F1:8801	8	686.375	435	1890	738.75	755	643.5	1831	473.75	408	419	Y
27	61	CL1Contig9325|CL1Contig9325	K.F(+304.20)C(+45.99)LEPTSFTVK(+304.20).A	N	69.3	1925.01	6.2	642.683	3	48.14	F4:9048	14	509.625	268.75	1040	1191	296	176.5	598.5	131	221	231	Y
27	61	CL1Contig9325|CL1Contig9325	K.I(+304.20)QGVWY(+304.20)AQLESN	N	67.31	2015.08	7.2	672.706	3	44.05	F10:8492	6	231	200	213	489.25	199.25	144.5	62.375	327.75	408	419	Y
27	61	CL1Contig9325|CL1Contig9325	R.L(+304.20)TY(+304.20)TLDEIEGPLEVGSDGTLK(+304.20).F	N	66.48	3161.73	5.7	791.445	4	47.27	F5:8530	1	295	1279	734	609.5	164.5	910.5	869.25	309.375	252	272	Y
27	61	CL1Contig9325|CL1Contig9325	K.T(+304.20)YMEVK(+304.20).G	N	64.95	1377.77	8	460.267	3	15.65	F9:3404	15	6589	6843	11380	7068	4880	5550	10620	5168	186	191	Y
27	61	CL1Contig9325|CL1Contig9325	K.N(+304.20)APPEFQK(+304.20).T	N	63.45	1537.86	10.1	513.633	3	15.02	F9:3304	9	4367	6540	7813	6278	4241	6499	9835	6244	238	245	Y
27	61	CL1Contig9325|CL1Contig9325	R.G(+304.20)DEEELVK(+304.20).E	N	61	1525.83	2.4	763.926	2	15.57	F5:3728	5	2992	2206	6056	2897	3460	3702	3934	3586	350	357	Y
27	61	CL1Contig9325|CL1Contig9325	F.E(+304.20)SVQPSDTDLGAK(+304.20).A	N	60.9	1954.04	11.8	489.522	4	17.85	F1:4478	2	824.75	250.5	582.75	562.625	558	838.5	373	550	389	401	Y
27	61	CL1Contig9325|CL1Contig9325	R.G(+304.20)GSTGY(+304.20)DNAVALPAGGR.G	N	58.5	2170.15	6.4	724.395	3	17.05	F3:4298	1	0	242	850.5	540	547.125	560	564	213.5	333	349	Y
27	61	CL1Contig9325|CL1Contig9325	R.V(+304.20)PFLFTVK(+304.20).Q	N	58.3	1557.96	11.5	520.335	3	49.07	F3:9103	15	409	280	969.75	714.75	387.75	674	1079	568	294	301	Y
27	61	CL1Contig9325|CL1Contig9325	K.R(+304.20)LTYDEIQSK(+304.20).T	N	57.72	1860.05	4.1	931.034	2	15.92	F9:3446	10	2912	1667	4232	2724	2204	1804	3448	1644	176	185	Y
27	61	CL1Contig9325|CL1Contig9325	R.L(+304.20)TYDEIQSK(+304.20).T	N	57.28	1703.94	0.7	852.98	2	20.17	F6:4096	5	1306	854.75	2416	1261	1646	1380	2130	486	177	185	Y
27	61	CL1Contig9325|CL1Contig9325	K.T(+304.20)YM(+15.99)EVK(+304.20).G	N	56.64	1393.76	2.6	465.596	3	14.96	F10:4105	3	527.125	279	650	470	462	120.75	552	521.625	186	191	Y
27	61	CL1Contig9325|CL1Contig9325	K.Q(+304.20)LVATGK(+304.20)PESFGGPFLVPSYR.G	N	56.48	2857.58	7.2	572.528	5	44.33	F3:8391	4	206	250	1040	451.5	667.75	908.75	865	274	302	322	Y
27	61	CL1Contig9325|CL1Contig9325	K.D(+304.20)GIDY(+304.20)AAVTVQLPGGER.V	N	55.28	2368.27	6.7	593.08	4	34.37	F6:6227	3	327.375	409.75	1400	255.75	313.5	659.125	502.25	447.625	277	293	Y
27	61	CL1Contig9325|CL1Contig9325	R.G(+304.20)SSFLDPK(+304.20).G	N	54.55	1457.82	14	486.955	3	18.17	F8:4241	8	1350	861.75	1036	1808	1070	1375	1837	1128	323	330	Y
27	61	CL1Contig9325|CL1Contig9325	N.Q(+304.20)C(+45.99)PTIDGGVDSFPFK(+304.20).S	N	50.34	2264.13	8.2	755.724	3	43.5	F5:7962	2	553	254.5	220.5	581.75	365	228.5	178.25	428	198	212	Y
27	61	CL1Contig9325|CL1Contig9325	K.F(+304.20)EEK(+304.20)DGIDY(+304.20)AAVTVQLPGGER.V	N	45.67	3205.72	5.3	642.155	5	38.63	F6:6866	1	600	321	864.25	327	462.125	225	1179	287	273	293	Y
27	61	CL1Contig9325|CL1Contig9325	R.G(+304.20)GSTGY(+304.20)DNAVALPAGGRGDEEELVK(+304.20).E	N	36	3373.77	12.3	675.77	5	22.84	F6:4496	2	966.125	479	898	1268	693	996	1032	612.25	333	357	Y
27	61	CL1Contig9325|CL1Contig9325	K.T(+304.20)Y(+304.20)MEVK(+304.20).G	N	30.49	1681.97	5.9	561.667	3	16.63	F2:4331	2	1725	1277	3264	2139	945.5	2268	4078	1452	186	191	Y
27	61	CL1Contig9325|CL1Contig9325	R.G(+304.20)GSTGYDNAVALPAGGRGDEEELVK(+304.20).E	N	30.48	3069.57	7.6	1024.21	3	25.25	F5:5211	3	1638	448	2060	1626	675.625	822	1598	874.875	333	357	Y
27	61	CL1Contig9325|CL1Contig9325	A.E(+304.20)GIAK(+304.20).N	N	28.88	1124.69	3.7	375.906	3	12.92	F8:3452	2	1679	2253	2087	1387	1248	1660	2029	1728	233	237	Y
27	61	CL1Contig9325|CL1Contig9325	K.E(+304.20)VASK(+304.20).C	N	26.31	1140.69	10.2	381.24	3	11.39	F9:2755	3	351	874.25	1155	708	611.625	278.125	662	460	142	146	Y
27	61	CL1Contig9325|CL1Contig9325	F.L(+304.20)FTVK(+304.20).Q	N	25	1214.77	-9.7	405.928	3	27.96	F3:5934	1	485.75	332	223.5	166.5	479	60.375	71.25	306.5	297	301	Y
27	61	CL1Contig9325|CL1Contig9325	T.D(+304.20)LGAK(+304.20).A	N	21.08	1110.67	10.4	556.351	2	13.02	F7:3483	1	1480	2386	3474	1375	1135	1548	1164	1449	397	401	Y
27	61	CL1Contig9325|CL1Contig9325	K.F(+304.20)C(+45.99)LEPTSF.T	N	18.73	1292.6	14.7	647.318	2	50.25	F1:9349	1	198.5	390	386	414.5	439.125	537.25	490.5	796	221	228	Y
27	61	CL1Contig9325|CL1Contig9325	G.A(+304.20)K(+304.20)APK(+304.20).D	N	15.79	1425.93	9.9	357.493	4	10.8	F4:3436	1	752	643.75	702.75	959.625	718.75	696.5	696	789.75	400	404	Y
27	61	CL1Contig9325|CL1Contig9325	R.V(+304.20)PFLF.T	N	15	925.553	9.5	463.788	2	53.21	F8:9497	2	1079	756.875	1101	912	596.5	1104	978.75	1716	294	298	Y
27	61	CL1Contig9325|CL1Contig9325	S.V(+304.20)SMPSSR.A	N	10.3	1066.57	-0.6	534.292	2	22.21	F1:5131	1	216.5	48.375	316	673.75	424.5	446.25	257	424	108	114	Y
27	61	CL1Contig9325|CL1Contig9325	A.A(+304.20)TLM(+15.99)QPAK(+304.20).I	N	9.32	1482.86	-11.3	742.428	2	16.49	F6:3540	1	1068	1144	2152	914.625	1464	2291	1564	1022	94	101	Y
27	61	CL1Contig9325|CL1Contig9325	G.R(+304.20)ASVSM(+15.99)PSSR.A	N	7.59	1396.73	-12.5	699.366	2	11.84	F5:3158	1	1663	1100	2666	1888	1086	471	1573	1108	105	114	Y
27	61	CL1Contig9325|CL1Contig9325	R.A(+304.20)SSHVAR.A	N	6.94	1030.58	15.7	516.304	2	39.87	F2:7826	1	1368	1056	1809	920	650	1404	1031	525.5	115	121	Y
27	61	CL1Contig9325|CL1Contig9325	P.F(+304.20)LFTVK(+304.20).Q	N	6.39	1361.84	-2.8	454.954	3	43.56	F3:8275	1	922	331	433.5	130	473.5	73.75	467.25	421.5	296	301	Y
27	61	CL1Contig9325|CL1Contig9325	K.F(+304.20)EEK(+304.20)DGIDY(+304.20)A.A	N	5.83	2098.12	12.5	525.544	4	26.31	F11:5629	1	0	331.5	45.375	232.5	149.5	293	46.625	320	273	282	Y
27	65	Locus_206_1_3|Locus_206_1_3	K.D(+304.20)GIDYAAVTVQLPGGER.V	N	104.41	2064.07	2.4	1033.05	2	41.09	F1:7967	6	1618	1149	2976	1491	314	1012	748	368	192	208	Y
27	65	Locus_206_1_3|Locus_206_1_3	K.G(+304.20)TGTANQC(+45.99)PTIDGGVDSFPFK(+304.20).S	N	104.4	2765.35	2.9	922.793	3	42.96	F5:7880	4	1054	1318	2422	1936	866	1198	1706	1333	107	127	Y
27	65	Locus_206_1_3|Locus_206_1_3	R.G(+304.20)GSTGYDNAVALPAGGR.G	N	90.08	1865.95	-2	622.989	3	20.79	F10:4978	10	0	80.5	175.125	266	274	46.875	60.25	47.875	248	264	Y
27	65	Locus_206_1_3|Locus_206_1_3	K.Q(+304.20)LVATGK(+304.20)PESFGGPFLVPSY(+304.20)R.G	N	85.32	3161.78	9.3	633.37	5	42.33	F3:8091	3	1929	944.375	1630	1752	742.375	1240	2447	1176	217	237	Y
27	65	Locus_206_1_3|Locus_206_1_3	R.G(+304.20)DEEELVK(+304.20)ENIK(+304.20).N	N	80.78	2314.3	18.1	579.592	4	20.72	F6:4179	3	1305	1669	4100	1688	586.625	1123	2440	1393	265	276	Y
27	65	Locus_206_1_3|Locus_206_1_3	K.I(+304.20)QGVWYAQLESN	N	77.09	1710.88	6.7	856.455	2	46.6	F1:8801	8	686.375	435	1890	738.75	755	643.5	1831	473.75	441	452	Y
27	65	Locus_206_1_3|Locus_206_1_3	K.F(+304.20)C(+45.99)LEPTSFTVK(+304.20).A	N	69.3	1925.01	6.2	642.683	3	48.14	F4:9048	14	509.625	268.75	1040	1191	296	176.5	598.5	131	136	146	Y
27	65	Locus_206_1_3|Locus_206_1_3	K.I(+304.20)QGVWY(+304.20)AQLESN	N	67.31	2015.08	7.2	672.706	3	44.05	F10:8492	6	231	200	213	489.25	199.25	144.5	62.375	327.75	441	452	Y
27	65	Locus_206_1_3|Locus_206_1_3	R.L(+304.20)TY(+304.20)TLDEIEGPLEVGSDGTLK(+304.20).F	N	66.48	3161.73	5.7	791.445	4	47.27	F5:8530	1	295	1279	734	609.5	164.5	910.5	869.25	309.375	167	187	Y
27	65	Locus_206_1_3|Locus_206_1_3	K.T(+304.20)YMEVK(+304.20).G	N	64.95	1377.77	8	460.267	3	15.65	F9:3404	15	6589	6843	11380	7068	4880	5550	10620	5168	101	106	Y
27	65	Locus_206_1_3|Locus_206_1_3	K.N(+304.20)APPEFQK(+304.20).T	N	63.45	1537.86	10.1	513.633	3	15.02	F9:3304	9	4367	6540	7813	6278	4241	6499	9835	6244	153	160	Y
27	65	Locus_206_1_3|Locus_206_1_3	R.G(+304.20)DEEELVK(+304.20).E	N	61	1525.83	2.4	763.926	2	15.57	F5:3728	5	2992	2206	6056	2897	3460	3702	3934	3586	265	272	Y
27	65	Locus_206_1_3|Locus_206_1_3	F.E(+304.20)SVQPSDTDLGAK(+304.20).A	N	60.9	1954.04	11.8	489.522	4	17.85	F1:4478	2	824.75	250.5	582.75	562.625	558	838.5	373	550	422	434	Y
27	65	Locus_206_1_3|Locus_206_1_3	R.G(+304.20)GSTGY(+304.20)DNAVALPAGGR.G	N	58.5	2170.15	6.4	724.395	3	17.05	F3:4298	1	0	242	850.5	540	547.125	560	564	213.5	248	264	Y
27	65	Locus_206_1_3|Locus_206_1_3	R.V(+304.20)PFLFTVK(+304.20).Q	N	58.3	1557.96	11.5	520.335	3	49.07	F3:9103	15	409	280	969.75	714.75	387.75	674	1079	568	209	216	Y
27	65	Locus_206_1_3|Locus_206_1_3	K.R(+304.20)LTYDEIQSK(+304.20).T	N	57.72	1860.05	4.1	931.034	2	15.92	F9:3446	10	2912	1667	4232	2724	2204	1804	3448	1644	91	100	Y
27	65	Locus_206_1_3|Locus_206_1_3	R.L(+304.20)TYDEIQSK(+304.20).T	N	57.28	1703.94	0.7	852.98	2	20.17	F6:4096	5	1306	854.75	2416	1261	1646	1380	2130	486	92	100	Y
27	65	Locus_206_1_3|Locus_206_1_3	K.T(+304.20)YM(+15.99)EVK(+304.20).G	N	56.64	1393.76	2.6	465.596	3	14.96	F10:4105	3	527.125	279	650	470	462	120.75	552	521.625	101	106	Y
27	65	Locus_206_1_3|Locus_206_1_3	K.Q(+304.20)LVATGK(+304.20)PESFGGPFLVPSYR.G	N	56.48	2857.58	7.2	572.528	5	44.33	F3:8391	4	206	250	1040	451.5	667.75	908.75	865	274	217	237	Y
27	65	Locus_206_1_3|Locus_206_1_3	K.D(+304.20)GIDY(+304.20)AAVTVQLPGGER.V	N	55.28	2368.27	6.7	593.08	4	34.37	F6:6227	3	327.375	409.75	1400	255.75	313.5	659.125	502.25	447.625	192	208	Y
27	65	Locus_206_1_3|Locus_206_1_3	R.G(+304.20)SSFLDPK(+304.20).G	N	54.55	1457.82	14	486.955	3	18.17	F8:4241	8	1350	861.75	1036	1808	1070	1375	1837	1128	238	245	Y
27	65	Locus_206_1_3|Locus_206_1_3	N.Q(+304.20)C(+45.99)PTIDGGVDSFPFK(+304.20).S	N	50.34	2264.13	8.2	755.724	3	43.5	F5:7962	2	553	254.5	220.5	581.75	365	228.5	178.25	428	113	127	Y
27	65	Locus_206_1_3|Locus_206_1_3	K.F(+304.20)EEK(+304.20)DGIDY(+304.20)AAVTVQLPGGER.V	N	45.67	3205.72	5.3	642.155	5	38.63	F6:6866	1	600	321	864.25	327	462.125	225	1179	287	188	208	Y
27	65	Locus_206_1_3|Locus_206_1_3	R.G(+304.20)GSTGY(+304.20)DNAVALPAGGRGDEEELVK(+304.20).E	N	36	3373.77	12.3	675.77	5	22.84	F6:4496	2	966.125	479	898	1268	693	996	1032	612.25	248	272	Y
27	65	Locus_206_1_3|Locus_206_1_3	K.T(+304.20)Y(+304.20)MEVK(+304.20).G	N	30.49	1681.97	5.9	561.667	3	16.63	F2:4331	2	1725	1277	3264	2139	945.5	2268	4078	1452	101	106	Y
27	65	Locus_206_1_3|Locus_206_1_3	R.G(+304.20)GSTGYDNAVALPAGGRGDEEELVK(+304.20).E	N	30.48	3069.57	7.6	1024.21	3	25.25	F5:5211	3	1638	448	2060	1626	675.625	822	1598	874.875	248	272	Y
27	65	Locus_206_1_3|Locus_206_1_3	A.E(+304.20)GIAK(+304.20).N	N	28.88	1124.69	3.7	375.906	3	12.92	F8:3452	2	1679	2253	2087	1387	1248	1660	2029	1728	148	152	Y
27	65	Locus_206_1_3|Locus_206_1_3	K.E(+304.20)VASK(+304.20).C	N	26.31	1140.69	10.2	381.24	3	11.39	F9:2755	3	351	874.25	1155	708	611.625	278.125	662	460	57	61	Y
27	65	Locus_206_1_3|Locus_206_1_3	F.L(+304.20)FTVK(+304.20).Q	N	25	1214.77	-9.7	405.928	3	27.96	F3:5934	1	485.75	332	223.5	166.5	479	60.375	71.25	306.5	212	216	Y
27	65	Locus_206_1_3|Locus_206_1_3	T.D(+304.20)LGAK(+304.20).A	N	21.08	1110.67	10.4	556.351	2	13.02	F7:3483	1	1480	2386	3474	1375	1135	1548	1164	1449	430	434	Y
27	65	Locus_206_1_3|Locus_206_1_3	K.F(+304.20)C(+45.99)LEPTSF.T	N	18.73	1292.6	14.7	647.318	2	50.25	F1:9349	1	198.5	390	386	414.5	439.125	537.25	490.5	796	136	143	Y
27	65	Locus_206_1_3|Locus_206_1_3	G.A(+304.20)K(+304.20)APK(+304.20).D	N	15.79	1425.93	9.9	357.493	4	10.8	F4:3436	1	752	643.75	702.75	959.625	718.75	696.5	696	789.75	433	437	Y
27	65	Locus_206_1_3|Locus_206_1_3	R.V(+304.20)PFLF.T	N	15	925.553	9.5	463.788	2	53.21	F8:9497	2	1079	756.875	1101	912	596.5	1104	978.75	1716	209	213	Y
27	65	Locus_206_1_3|Locus_206_1_3	S.V(+304.20)SMPSSR.A	N	10.3	1066.57	-0.6	534.292	2	22.21	F1:5131	1	216.5	48.375	316	673.75	424.5	446.25	257	424	23	29	Y
27	65	Locus_206_1_3|Locus_206_1_3	A.A(+304.20)TLM(+15.99)QPAK(+304.20).I	N	9.32	1482.86	-11.3	742.428	2	16.49	F6:3540	1	1068	1144	2152	914.625	1464	2291	1564	1022	9	16	Y
27	65	Locus_206_1_3|Locus_206_1_3	G.R(+304.20)ASVSM(+15.99)PSSR.A	N	7.59	1396.73	-12.5	699.366	2	11.84	F5:3158	1	1663	1100	2666	1888	1086	471	1573	1108	20	29	Y
27	65	Locus_206_1_3|Locus_206_1_3	R.A(+304.20)SSHVAR.A	N	6.94	1030.58	15.7	516.304	2	39.87	F2:7826	1	1368	1056	1809	920	650	1404	1031	525.5	30	36	Y
27	65	Locus_206_1_3|Locus_206_1_3	P.F(+304.20)LFTVK(+304.20).Q	N	6.39	1361.84	-2.8	454.954	3	43.56	F3:8275	1	922	331	433.5	130	473.5	73.75	467.25	421.5	211	216	Y
27	65	Locus_206_1_3|Locus_206_1_3	K.F(+304.20)EEK(+304.20)DGIDY(+304.20)A.A	N	5.83	2098.12	12.5	525.544	4	26.31	F11:5629	1	0	331.5	45.375	232.5	149.5	293	46.625	320	188	197	Y
27	92	CL1Contig6000|CL1Contig6000	K.G(+304.20)TGTANQC(+45.99)PTIDGGVDSFPFK(+304.20).S	N	104.4	2765.35	2.9	922.793	3	42.96	F5:7880	4	1054	1318	2422	1936	866	1198	1706	1333	72	92	Y
27	92	CL1Contig6000|CL1Contig6000	R.G(+304.20)GSTGYDNAVALPAGGR.G	N	90.08	1865.95	-2	622.989	3	20.79	F10:4978	10	0	80.5	175.125	266	274	46.875	60.25	47.875	213	229	Y
27	92	CL1Contig6000|CL1Contig6000	K.Q(+304.20)LVATGK(+304.20)PESFGGPFLVPSY(+304.20)R.G	N	85.32	3161.78	9.3	633.37	5	42.33	F3:8091	3	1929	944.375	1630	1752	742.375	1240	2447	1176	182	202	Y
27	92	CL1Contig6000|CL1Contig6000	R.G(+304.20)DEEELVK(+304.20)ENIK(+304.20).N	N	80.78	2314.3	18.1	579.592	4	20.72	F6:4179	3	1305	1669	4100	1688	586.625	1123	2440	1393	230	241	Y
27	92	CL1Contig6000|CL1Contig6000	K.I(+304.20)QGVWYAQLESN	N	77.09	1710.88	6.7	856.455	2	46.6	F1:8801	8	686.375	435	1890	738.75	755	643.5	1831	473.75	288	299	Y
27	92	CL1Contig6000|CL1Contig6000	K.F(+304.20)C(+45.99)LEPTSFTVK(+304.20).A	N	69.3	1925.01	6.2	642.683	3	48.14	F4:9048	14	509.625	268.75	1040	1191	296	176.5	598.5	131	101	111	Y
27	92	CL1Contig6000|CL1Contig6000	K.I(+304.20)QGVWY(+304.20)AQLESN	N	67.31	2015.08	7.2	672.706	3	44.05	F10:8492	6	231	200	213	489.25	199.25	144.5	62.375	327.75	288	299	Y
27	92	CL1Contig6000|CL1Contig6000	R.L(+304.20)TY(+304.20)TLDEIEGPLEVGSDGTLK(+304.20).F	N	66.48	3161.73	5.7	791.445	4	47.27	F5:8530	1	295	1279	734	609.5	164.5	910.5	869.25	309.375	132	152	Y
27	92	CL1Contig6000|CL1Contig6000	K.T(+304.20)YMEVK(+304.20).G	N	64.95	1377.77	8	460.267	3	15.65	F9:3404	15	6589	6843	11380	7068	4880	5550	10620	5168	66	71	Y
27	92	CL1Contig6000|CL1Contig6000	K.N(+304.20)APPEFQK(+304.20).T	N	63.45	1537.86	10.1	513.633	3	15.02	F9:3304	9	4367	6540	7813	6278	4241	6499	9835	6244	118	125	Y
27	92	CL1Contig6000|CL1Contig6000	R.G(+304.20)DEEELVK(+304.20).E	N	61	1525.83	2.4	763.926	2	15.57	F5:3728	5	2992	2206	6056	2897	3460	3702	3934	3586	230	237	Y
27	92	CL1Contig6000|CL1Contig6000	F.E(+304.20)SVQPSDTDLGAK(+304.20).A	N	60.9	1954.04	11.8	489.522	4	17.85	F1:4478	2	824.75	250.5	582.75	562.625	558	838.5	373	550	269	281	Y
27	92	CL1Contig6000|CL1Contig6000	R.G(+304.20)GSTGY(+304.20)DNAVALPAGGR.G	N	58.5	2170.15	6.4	724.395	3	17.05	F3:4298	1	0	242	850.5	540	547.125	560	564	213.5	213	229	Y
27	92	CL1Contig6000|CL1Contig6000	R.V(+304.20)PFLFTVK(+304.20).Q	N	58.3	1557.96	11.5	520.335	3	49.07	F3:9103	15	409	280	969.75	714.75	387.75	674	1079	568	174	181	Y
27	92	CL1Contig6000|CL1Contig6000	K.R(+304.20)LTYDEIQSK(+304.20).T	N	57.72	1860.05	4.1	931.034	2	15.92	F9:3446	10	2912	1667	4232	2724	2204	1804	3448	1644	56	65	Y
27	92	CL1Contig6000|CL1Contig6000	R.L(+304.20)TYDEIQSK(+304.20).T	N	57.28	1703.94	0.7	852.98	2	20.17	F6:4096	5	1306	854.75	2416	1261	1646	1380	2130	486	57	65	Y
27	92	CL1Contig6000|CL1Contig6000	K.T(+304.20)YM(+15.99)EVK(+304.20).G	N	56.64	1393.76	2.6	465.596	3	14.96	F10:4105	3	527.125	279	650	470	462	120.75	552	521.625	66	71	Y
27	92	CL1Contig6000|CL1Contig6000	K.Q(+304.20)LVATGK(+304.20)PESFGGPFLVPSYR.G	N	56.48	2857.58	7.2	572.528	5	44.33	F3:8391	4	206	250	1040	451.5	667.75	908.75	865	274	182	202	Y
27	92	CL1Contig6000|CL1Contig6000	R.G(+304.20)SSFLDPK(+304.20).G	N	54.55	1457.82	14	486.955	3	18.17	F8:4241	8	1350	861.75	1036	1808	1070	1375	1837	1128	203	210	Y
27	92	CL1Contig6000|CL1Contig6000	N.Q(+304.20)C(+45.99)PTIDGGVDSFPFK(+304.20).S	N	50.34	2264.13	8.2	755.724	3	43.5	F5:7962	2	553	254.5	220.5	581.75	365	228.5	178.25	428	78	92	Y
27	92	CL1Contig6000|CL1Contig6000	R.G(+304.20)GSTGY(+304.20)DNAVALPAGGRGDEEELVK(+304.20).E	N	36	3373.77	12.3	675.77	5	22.84	F6:4496	2	966.125	479	898	1268	693	996	1032	612.25	213	237	Y
27	92	CL1Contig6000|CL1Contig6000	K.T(+304.20)Y(+304.20)MEVK(+304.20).G	N	30.49	1681.97	5.9	561.667	3	16.63	F2:4331	2	1725	1277	3264	2139	945.5	2268	4078	1452	66	71	Y
27	92	CL1Contig6000|CL1Contig6000	R.G(+304.20)GSTGYDNAVALPAGGRGDEEELVK(+304.20).E	N	30.48	3069.57	7.6	1024.21	3	25.25	F5:5211	3	1638	448	2060	1626	675.625	822	1598	874.875	213	237	Y
27	92	CL1Contig6000|CL1Contig6000	A.E(+304.20)GIAK(+304.20).N	N	28.88	1124.69	3.7	375.906	3	12.92	F8:3452	2	1679	2253	2087	1387	1248	1660	2029	1728	113	117	Y
27	92	CL1Contig6000|CL1Contig6000	K.E(+304.20)VASK(+304.20).C	N	26.31	1140.69	10.2	381.24	3	11.39	F9:2755	3	351	874.25	1155	708	611.625	278.125	662	460	22	26	Y
27	92	CL1Contig6000|CL1Contig6000	F.L(+304.20)FTVK(+304.20).Q	N	25	1214.77	-9.7	405.928	3	27.96	F3:5934	1	485.75	332	223.5	166.5	479	60.375	71.25	306.5	177	181	Y
27	92	CL1Contig6000|CL1Contig6000	T.D(+304.20)LGAK(+304.20).A	N	21.08	1110.67	10.4	556.351	2	13.02	F7:3483	1	1480	2386	3474	1375	1135	1548	1164	1449	277	281	Y
27	92	CL1Contig6000|CL1Contig6000	K.F(+304.20)C(+45.99)LEPTSF.T	N	18.73	1292.6	14.7	647.318	2	50.25	F1:9349	1	198.5	390	386	414.5	439.125	537.25	490.5	796	101	108	Y
27	92	CL1Contig6000|CL1Contig6000	G.A(+304.20)K(+304.20)APK(+304.20).D	N	15.79	1425.93	9.9	357.493	4	10.8	F4:3436	1	752	643.75	702.75	959.625	718.75	696.5	696	789.75	280	284	Y
27	92	CL1Contig6000|CL1Contig6000	R.V(+304.20)PFLF.T	N	15	925.553	9.5	463.788	2	53.21	F8:9497	2	1079	756.875	1101	912	596.5	1104	978.75	1716	174	178	Y
27	92	CL1Contig6000|CL1Contig6000	P.F(+304.20)LFTVK(+304.20).Q	N	6.39	1361.84	-2.8	454.954	3	43.56	F3:8275	1	922	331	433.5	130	473.5	73.75	467.25	421.5	176	181	Y
27	92	CL1Contig6000|CL1Contig6000	K.F(+304.20)EEK(+304.20)DGIDY(+304.20)A.A	N	5.83	2098.12	12.5	525.544	4	26.31	F11:5629	1	0	331.5	45.375	232.5	149.5	293	46.625	320	153	162	Y
27	103	CL1Contig3953|CL1Contig3953	K.G(+304.20)TGTANQC(+45.99)PTIDGGVDSFPFK(+304.20).S	N	104.4	2765.35	2.9	922.793	3	42.96	F5:7880	4	1054	1318	2422	1936	866	1198	1706	1333	40	60	Y
27	103	CL1Contig3953|CL1Contig3953	R.G(+304.20)GSTGYDNAVALPAGGR.G	N	90.08	1865.95	-2	622.989	3	20.79	F10:4978	10	0	80.5	175.125	266	274	46.875	60.25	47.875	181	197	Y
27	103	CL1Contig3953|CL1Contig3953	K.Q(+304.20)LVATGK(+304.20)PESFGGPFLVPSY(+304.20)R.G	N	85.32	3161.78	9.3	633.37	5	42.33	F3:8091	3	1929	944.375	1630	1752	742.375	1240	2447	1176	150	170	Y
27	103	CL1Contig3953|CL1Contig3953	R.G(+304.20)DEEELVK(+304.20)ENIK(+304.20).N	N	80.78	2314.3	18.1	579.592	4	20.72	F6:4179	3	1305	1669	4100	1688	586.625	1123	2440	1393	198	209	Y
27	103	CL1Contig3953|CL1Contig3953	K.I(+304.20)QGVWYAQLESN	N	77.09	1710.88	6.7	856.455	2	46.6	F1:8801	8	686.375	435	1890	738.75	755	643.5	1831	473.75	256	267	Y
27	103	CL1Contig3953|CL1Contig3953	K.F(+304.20)C(+45.99)LEPTSFTVK(+304.20).A	N	69.3	1925.01	6.2	642.683	3	48.14	F4:9048	14	509.625	268.75	1040	1191	296	176.5	598.5	131	69	79	Y
27	103	CL1Contig3953|CL1Contig3953	K.I(+304.20)QGVWY(+304.20)AQLESN	N	67.31	2015.08	7.2	672.706	3	44.05	F10:8492	6	231	200	213	489.25	199.25	144.5	62.375	327.75	256	267	Y
27	103	CL1Contig3953|CL1Contig3953	R.L(+304.20)TY(+304.20)TLDEIEGPLEVGSDGTLK(+304.20).F	N	66.48	3161.73	5.7	791.445	4	47.27	F5:8530	1	295	1279	734	609.5	164.5	910.5	869.25	309.375	100	120	Y
27	103	CL1Contig3953|CL1Contig3953	K.T(+304.20)YMEVK(+304.20).G	N	64.95	1377.77	8	460.267	3	15.65	F9:3404	15	6589	6843	11380	7068	4880	5550	10620	5168	34	39	Y
27	103	CL1Contig3953|CL1Contig3953	K.N(+304.20)APPEFQK(+304.20).T	N	63.45	1537.86	10.1	513.633	3	15.02	F9:3304	9	4367	6540	7813	6278	4241	6499	9835	6244	86	93	Y
27	103	CL1Contig3953|CL1Contig3953	R.G(+304.20)DEEELVK(+304.20).E	N	61	1525.83	2.4	763.926	2	15.57	F5:3728	5	2992	2206	6056	2897	3460	3702	3934	3586	198	205	Y
27	103	CL1Contig3953|CL1Contig3953	F.E(+304.20)SVQPSDTDLGAK(+304.20).A	N	60.9	1954.04	11.8	489.522	4	17.85	F1:4478	2	824.75	250.5	582.75	562.625	558	838.5	373	550	237	249	Y
27	103	CL1Contig3953|CL1Contig3953	R.G(+304.20)GSTGY(+304.20)DNAVALPAGGR.G	N	58.5	2170.15	6.4	724.395	3	17.05	F3:4298	1	0	242	850.5	540	547.125	560	564	213.5	181	197	Y
27	103	CL1Contig3953|CL1Contig3953	R.V(+304.20)PFLFTVK(+304.20).Q	N	58.3	1557.96	11.5	520.335	3	49.07	F3:9103	15	409	280	969.75	714.75	387.75	674	1079	568	142	149	Y
27	103	CL1Contig3953|CL1Contig3953	K.R(+304.20)LTYDEIQSK(+304.20).T	N	57.72	1860.05	4.1	931.034	2	15.92	F9:3446	10	2912	1667	4232	2724	2204	1804	3448	1644	24	33	Y
27	103	CL1Contig3953|CL1Contig3953	R.L(+304.20)TYDEIQSK(+304.20).T	N	57.28	1703.94	0.7	852.98	2	20.17	F6:4096	5	1306	854.75	2416	1261	1646	1380	2130	486	25	33	Y
27	103	CL1Contig3953|CL1Contig3953	K.T(+304.20)YM(+15.99)EVK(+304.20).G	N	56.64	1393.76	2.6	465.596	3	14.96	F10:4105	3	527.125	279	650	470	462	120.75	552	521.625	34	39	Y
27	103	CL1Contig3953|CL1Contig3953	K.Q(+304.20)LVATGK(+304.20)PESFGGPFLVPSYR.G	N	56.48	2857.58	7.2	572.528	5	44.33	F3:8391	4	206	250	1040	451.5	667.75	908.75	865	274	150	170	Y
27	103	CL1Contig3953|CL1Contig3953	R.G(+304.20)SSFLDPK(+304.20).G	N	54.55	1457.82	14	486.955	3	18.17	F8:4241	8	1350	861.75	1036	1808	1070	1375	1837	1128	171	178	Y
27	103	CL1Contig3953|CL1Contig3953	N.Q(+304.20)C(+45.99)PTIDGGVDSFPFK(+304.20).S	N	50.34	2264.13	8.2	755.724	3	43.5	F5:7962	2	553	254.5	220.5	581.75	365	228.5	178.25	428	46	60	Y
27	103	CL1Contig3953|CL1Contig3953	R.G(+304.20)GSTGY(+304.20)DNAVALPAGGRGDEEELVK(+304.20).E	N	36	3373.77	12.3	675.77	5	22.84	F6:4496	2	966.125	479	898	1268	693	996	1032	612.25	181	205	Y
27	103	CL1Contig3953|CL1Contig3953	K.T(+304.20)Y(+304.20)MEVK(+304.20).G	N	30.49	1681.97	5.9	561.667	3	16.63	F2:4331	2	1725	1277	3264	2139	945.5	2268	4078	1452	34	39	Y
27	103	CL1Contig3953|CL1Contig3953	R.G(+304.20)GSTGYDNAVALPAGGRGDEEELVK(+304.20).E	N	30.48	3069.57	7.6	1024.21	3	25.25	F5:5211	3	1638	448	2060	1626	675.625	822	1598	874.875	181	205	Y
27	103	CL1Contig3953|CL1Contig3953	A.E(+304.20)GIAK(+304.20).N	N	28.88	1124.69	3.7	375.906	3	12.92	F8:3452	2	1679	2253	2087	1387	1248	1660	2029	1728	81	85	Y
27	103	CL1Contig3953|CL1Contig3953	F.L(+304.20)FTVK(+304.20).Q	N	25	1214.77	-9.7	405.928	3	27.96	F3:5934	1	485.75	332	223.5	166.5	479	60.375	71.25	306.5	145	149	Y
27	103	CL1Contig3953|CL1Contig3953	T.D(+304.20)LGAK(+304.20).A	N	21.08	1110.67	10.4	556.351	2	13.02	F7:3483	1	1480	2386	3474	1375	1135	1548	1164	1449	245	249	Y
27	103	CL1Contig3953|CL1Contig3953	K.F(+304.20)C(+45.99)LEPTSF.T	N	18.73	1292.6	14.7	647.318	2	50.25	F1:9349	1	198.5	390	386	414.5	439.125	537.25	490.5	796	69	76	Y
27	103	CL1Contig3953|CL1Contig3953	G.A(+304.20)K(+304.20)APK(+304.20).D	N	15.79	1425.93	9.9	357.493	4	10.8	F4:3436	1	752	643.75	702.75	959.625	718.75	696.5	696	789.75	248	252	Y
27	103	CL1Contig3953|CL1Contig3953	R.V(+304.20)PFLF.T	N	15	925.553	9.5	463.788	2	53.21	F8:9497	2	1079	756.875	1101	912	596.5	1104	978.75	1716	142	146	Y
27	103	CL1Contig3953|CL1Contig3953	K.D(+304.20)GIDYAAVR.C	Y	14.93	1282.68	17.3	642.357	2	25.27	F9:4861	1	850.625	544	2660	1174	812.5	1608	990	1101	125	133	Y
27	103	CL1Contig3953|CL1Contig3953	K.D(+304.20)GIDY(+304.20)AAVR.C	Y	6.81	1586.88	11.5	794.455	2	54.65	F6:9271	1	315	483.875	435	220	371	256	1048	664	125	133	Y
27	103	CL1Contig3953|CL1Contig3953	P.F(+304.20)LFTVK(+304.20).Q	N	6.39	1361.84	-2.8	454.954	3	43.56	F3:8275	1	922	331	433.5	130	473.5	73.75	467.25	421.5	144	149	Y
27	103	CL1Contig3953|CL1Contig3953	K.F(+304.20)EEK(+304.20)DGIDY(+304.20)A.A	N	5.83	2098.12	12.5	525.544	4	26.31	F11:5629	1	0	331.5	45.375	232.5	149.5	293	46.625	320	121	130	Y
27	199	CL1Contig5998|CL1Contig5998	K.G(+304.20)TGTANQC(+45.99)PTIDGGVDSFPFK(+304.20).S	N	104.4	2765.35	2.9	922.793	3	42.96	F5:7880	4	1054	1318	2422	1936	866	1198	1706	1333	72	92	Y
27	199	CL1Contig5998|CL1Contig5998	R.G(+304.20)GSTGYDNAVALPAGGR.G	N	90.08	1865.95	-2	622.989	3	20.79	F10:4978	10	0	80.5	175.125	266	274	46.875	60.25	47.875	213	229	Y
27	199	CL1Contig5998|CL1Contig5998	K.Q(+304.20)LVATGK(+304.20)PESFGGPFLVPSY(+304.20)R.G	N	85.32	3161.78	9.3	633.37	5	42.33	F3:8091	3	1929	944.375	1630	1752	742.375	1240	2447	1176	182	202	Y
27	199	CL1Contig5998|CL1Contig5998	R.G(+304.20)DEEELVK(+304.20)ENIK(+304.20).N	N	80.78	2314.3	18.1	579.592	4	20.72	F6:4179	3	1305	1669	4100	1688	586.625	1123	2440	1393	230	241	Y
27	199	CL1Contig5998|CL1Contig5998	K.I(+304.20)QGVWYAQLESN	N	77.09	1710.88	6.7	856.455	2	46.6	F1:8801	8	686.375	435	1890	738.75	755	643.5	1831	473.75	288	299	Y
27	199	CL1Contig5998|CL1Contig5998	K.F(+304.20)C(+45.99)LEPTSFTVK(+304.20).A	N	69.3	1925.01	6.2	642.683	3	48.14	F4:9048	14	509.625	268.75	1040	1191	296	176.5	598.5	131	101	111	Y
27	199	CL1Contig5998|CL1Contig5998	K.I(+304.20)QGVWY(+304.20)AQLESN	N	67.31	2015.08	7.2	672.706	3	44.05	F10:8492	6	231	200	213	489.25	199.25	144.5	62.375	327.75	288	299	Y
27	199	CL1Contig5998|CL1Contig5998	R.L(+304.20)TY(+304.20)TLDEIEGPLEVGSDGTLK(+304.20).F	N	66.48	3161.73	5.7	791.445	4	47.27	F5:8530	1	295	1279	734	609.5	164.5	910.5	869.25	309.375	132	152	Y
27	199	CL1Contig5998|CL1Contig5998	K.T(+304.20)YMEVK(+304.20).G	N	64.95	1377.77	8	460.267	3	15.65	F9:3404	15	6589	6843	11380	7068	4880	5550	10620	5168	66	71	Y
27	199	CL1Contig5998|CL1Contig5998	K.N(+304.20)APPEFQK(+304.20).T	N	63.45	1537.86	10.1	513.633	3	15.02	F9:3304	9	4367	6540	7813	6278	4241	6499	9835	6244	118	125	Y
27	199	CL1Contig5998|CL1Contig5998	R.G(+304.20)DEEELVK(+304.20).E	N	61	1525.83	2.4	763.926	2	15.57	F5:3728	5	2992	2206	6056	2897	3460	3702	3934	3586	230	237	Y
27	199	CL1Contig5998|CL1Contig5998	F.E(+304.20)SVQPSDTDLGAK(+304.20).A	N	60.9	1954.04	11.8	489.522	4	17.85	F1:4478	2	824.75	250.5	582.75	562.625	558	838.5	373	550	269	281	Y
27	199	CL1Contig5998|CL1Contig5998	R.G(+304.20)GSTGY(+304.20)DNAVALPAGGR.G	N	58.5	2170.15	6.4	724.395	3	17.05	F3:4298	1	0	242	850.5	540	547.125	560	564	213.5	213	229	Y
27	199	CL1Contig5998|CL1Contig5998	R.V(+304.20)PFLFTVK(+304.20).Q	N	58.3	1557.96	11.5	520.335	3	49.07	F3:9103	15	409	280	969.75	714.75	387.75	674	1079	568	174	181	Y
27	199	CL1Contig5998|CL1Contig5998	K.T(+304.20)YM(+15.99)EVK(+304.20).G	N	56.64	1393.76	2.6	465.596	3	14.96	F10:4105	3	527.125	279	650	470	462	120.75	552	521.625	66	71	Y
27	199	CL1Contig5998|CL1Contig5998	K.Q(+304.20)LVATGK(+304.20)PESFGGPFLVPSYR.G	N	56.48	2857.58	7.2	572.528	5	44.33	F3:8391	4	206	250	1040	451.5	667.75	908.75	865	274	182	202	Y
27	199	CL1Contig5998|CL1Contig5998	N.Q(+304.20)C(+45.99)PTIDGGVDSFPFK(+304.20).S	N	50.34	2264.13	8.2	755.724	3	43.5	F5:7962	2	553	254.5	220.5	581.75	365	228.5	178.25	428	78	92	Y
27	199	CL1Contig5998|CL1Contig5998	R.G(+304.20)GSTGY(+304.20)DNAVALPAGGRGDEEELVK(+304.20).E	N	36	3373.77	12.3	675.77	5	22.84	F6:4496	2	966.125	479	898	1268	693	996	1032	612.25	213	237	Y
27	199	CL1Contig5998|CL1Contig5998	K.T(+304.20)Y(+304.20)MEVK(+304.20).G	N	30.49	1681.97	5.9	561.667	3	16.63	F2:4331	2	1725	1277	3264	2139	945.5	2268	4078	1452	66	71	Y
27	199	CL1Contig5998|CL1Contig5998	R.G(+304.20)GSTGYDNAVALPAGGRGDEEELVK(+304.20).E	N	30.48	3069.57	7.6	1024.21	3	25.25	F5:5211	3	1638	448	2060	1626	675.625	822	1598	874.875	213	237	Y
27	199	CL1Contig5998|CL1Contig5998	A.E(+304.20)GIAK(+304.20).N	N	28.88	1124.69	3.7	375.906	3	12.92	F8:3452	2	1679	2253	2087	1387	1248	1660	2029	1728	113	117	Y
27	199	CL1Contig5998|CL1Contig5998	K.E(+304.20)VASK(+304.20).C	N	26.31	1140.69	10.2	381.24	3	11.39	F9:2755	3	351	874.25	1155	708	611.625	278.125	662	460	22	26	Y
27	199	CL1Contig5998|CL1Contig5998	F.L(+304.20)FTVK(+304.20).Q	N	25	1214.77	-9.7	405.928	3	27.96	F3:5934	1	485.75	332	223.5	166.5	479	60.375	71.25	306.5	177	181	Y
27	199	CL1Contig5998|CL1Contig5998	T.D(+304.20)LGAK(+304.20).A	N	21.08	1110.67	10.4	556.351	2	13.02	F7:3483	1	1480	2386	3474	1375	1135	1548	1164	1449	277	281	Y
27	199	CL1Contig5998|CL1Contig5998	K.F(+304.20)C(+45.99)LEPTSF.T	N	18.73	1292.6	14.7	647.318	2	50.25	F1:9349	1	198.5	390	386	414.5	439.125	537.25	490.5	796	101	108	Y
27	199	CL1Contig5998|CL1Contig5998	G.A(+304.20)K(+304.20)APK(+304.20).D	N	15.79	1425.93	9.9	357.493	4	10.8	F4:3436	1	752	643.75	702.75	959.625	718.75	696.5	696	789.75	280	284	Y
27	199	CL1Contig5998|CL1Contig5998	R.V(+304.20)PFLF.T	N	15	925.553	9.5	463.788	2	53.21	F8:9497	2	1079	756.875	1101	912	596.5	1104	978.75	1716	174	178	Y
27	199	CL1Contig5998|CL1Contig5998	P.F(+304.20)LFTVK(+304.20).Q	N	6.39	1361.84	-2.8	454.954	3	43.56	F3:8275	1	922	331	433.5	130	473.5	73.75	467.25	421.5	176	181	Y
27	199	CL1Contig5998|CL1Contig5998	K.F(+304.20)EEK(+304.20)DGIDY(+304.20)A.A	N	5.83	2098.12	12.5	525.544	4	26.31	F11:5629	1	0	331.5	45.375	232.5	149.5	293	46.625	320	153	162	Y
27	5337	CL5396Contig1|CL5396Contig1	A.E(+304.20)GLAK(+304.20).H	N	28.88	1124.69	3.7	375.906	3	12.92	F8:3452	2	1679	2253	2087	1387	1248	1660	2029	1728	126	130	Y
36	73	Locus_49_76_82|Locus_49_76_82	K.D(+304.20)GIDYAAVTVQLPGGER.V	N	104.41	2064.07	2.4	1033.05	2	41.09	F1:7967	6	1618	1149	2976	1491	314	1012	748	368	229	245	Y
36	73	Locus_49_76_82|Locus_49_76_82	K.G(+304.20)TGTANQC(+45.99)PTIDGGVDSFPFK(+304.20).S	N	104.4	2765.35	2.9	922.793	3	42.96	F5:7880	4	1054	1318	2422	1936	866	1198	1706	1333	38	58	Y
36	73	Locus_49_76_82|Locus_49_76_82	R.G(+304.20)GSTGYDNAVALPAGGR.G	N	90.08	1865.95	-2	622.989	3	20.79	F10:4978	10	0	80.5	175.125	266	274	46.875	60.25	47.875	285	301	Y
36	73	Locus_49_76_82|Locus_49_76_82	K.G(+304.20)TGTANQC(+45.99)PTIDGGVESFPFK(+304.20).A	N	88.86	2779.37	7.1	927.469	3	43.6	F6:7612	6	266	407	1589	910.125	526	189.5	582.5	360	144	164	Y
36	73	Locus_49_76_82|Locus_49_76_82	R.G(+304.20)DEEELVK(+304.20)ENIK(+304.20).N	N	80.78	2314.3	18.1	579.592	4	20.72	F6:4179	3	1305	1669	4100	1688	586.625	1123	2440	1393	322	333	Y
36	73	Locus_49_76_82|Locus_49_76_82	K.I(+304.20)QGVWYAQLESN	N	77.09	1710.88	6.7	856.455	2	46.6	F1:8801	8	686.375	435	1890	738.75	755	643.5	1831	473.75	380	391	Y
36	73	Locus_49_76_82|Locus_49_76_82	K.F(+304.20)C(+45.99)LEPTSFTVK(+304.20).A	N	69.3	1925.01	6.2	642.683	3	48.14	F4:9048	14	509.625	268.75	1040	1191	296	176.5	598.5	131	67	77	Y
36	73	Locus_49_76_82|Locus_49_76_82	K.I(+304.20)QGVWY(+304.20)AQLESN	N	67.31	2015.08	7.2	672.706	3	44.05	F10:8492	6	231	200	213	489.25	199.25	144.5	62.375	327.75	380	391	Y
36	73	Locus_49_76_82|Locus_49_76_82	R.L(+304.20)TY(+304.20)TLDEIEGPLEVGSDGTLK(+304.20).F	N	66.48	3161.73	5.7	791.445	4	47.27	F5:8530	1	295	1279	734	609.5	164.5	910.5	869.25	309.375	204	224	Y
36	73	Locus_49_76_82|Locus_49_76_82	K.T(+304.20)YMEVK(+304.20).G	N	64.95	1377.77	8	460.267	3	15.65	F9:3404	15	6589	6843	11380	7068	4880	5550	10620	5168	32	37	Y
[truncated: 33,378 more rows]
