# Supplementary material for: A Proteomic Approach to Investigate the Drought Response in the Orphan Crop Eragrostis tef
Source: Proteomes. 2017 Nov 15;5(4):32. doi: 10.3390/proteomes5040032 (PMC5748567; doi:10.3390/proteomes5040032)
Supplement: Supplementary file 1 [file proteomes-05-00032-s001.zip › proteomes-208511 supplementary final/S2.1 TE dataset (all 5727 proteins with expression values, fold changes and p-values).xlsx]

## Sheet: Sheet1
Protein Id	Hydrated	Dehydrated	Fold change	p-value
CL5492Contig2	10.6998142211972	10.8645805196131	1.0154	0.001
CL1Contig10009	7.2176707165764	8.08739918070618	1.1205	0.001
CL977Contig4	7.70015369720477	7.08368273547197	0.91994	0.001
CL856Contig3	9.16888793839381	9.32873934623647	1.01743	0.001
CL856Contig4	9.16888793839381	9.32873934623647	1.01743	0.001
CL5604Contig1	9.35824576531043	8.93590424632537	0.95487	0.001
CL36Contig35	10.5154827531214	10.3649431386382	0.985684	0.002
CL68Contig25	7.14410496229226	7.72607018932494	1.08146	0.002
CL5457Contig2	9.08576470190657	8.91204425107562	0.98088	0.002
CL2349Contig3	9.77052610092151	9.34696955144044	0.95665	0.002
CL4104Contig2	0.693147180559945	4.6751855340646	6.74487	0.003
CL3156Contig1	0.693147180559945	6.04706234893315	8.72407	0.004
CL6974Contig4	0.693147180559945	6.04706234893315	8.72407	0.004
ENO2_ERATE	11.0073457019495	11.1763022560021	1.01535	0.004
CL11972Contig1	6.22889509153734	1.19476321728711	0.19181	0.004
CL715Contig2	9.0260941013993	9.43095157593385	1.04485	0.004
CL8690Contig2	0.693147180559945	5.3354062987612	7.69736	0.005
CL700Contig3	9.37388082324285	9.12274706372921	0.973209	0.005
CL1942Contig1	0.693147180559945	4.53110699400138	6.53701	0.006
CL2699Contig6	0.693147180559945	4.53110699400138	6.53701	0.006
isotig02308	0.693147180559945	4.53110699400138	6.53701	0.006
CL236Contig6	9.43871982924788	9.17544523382404	0.972107	0.006
CL236Contig5	9.46298426337528	9.20978696463124	0.973243	0.006
CL2976Contig3	0.693147180559945	4.9371610158437	7.12282	0.007
isotig10649	5.32644097770921	0.693147180559945	0.130133	0.007
CL1456Contig11	5.32644097770921	0.693147180559945	0.130133	0.007
CL1456Contig8	5.32644097770921	0.693147180559945	0.130133	0.007
CL2948Contig2	9.851892274016	9.63318171906108	0.9778	0.007
CL68Contig6	0.658812682300617	4.49372980064898	6.82095	0.008
CL8983Contig3	0.658812682300617	4.49372980064898	6.82095	0.008
CL799Contig2	9.35110216958414	9.58241554607049	1.02474	0.008
CL2991Contig2	10.2162791237773	10.2939124811313	1.0076	0.009
CL1595Contig2	4.99332257382322	0.693147180559945	0.138815	0.009
CL13Contig40	8.66030377023647	7.79771688806104	0.900398	0.009
CL7746Contig3	0.693147180559945	5.04407396083158	7.27706	0.013
CL873Contig3	0.693147180559945	5.04407396083158	7.27706	0.013
CL3629Contig1	0.693147180559945	5.13269797598008	7.40492	0.013
CL3629Contig2	0.693147180559945	5.13269797598008	7.40492	0.013
CL7716Contig2	7.78368924822635	7.2500371712834	0.93144	0.013
CL7716Contig3	7.78368924822635	7.2500371712834	0.93144	0.013
CL5492Contig1	10.6629004918315	10.8357471461869	1.01621	0.014
CL2289Contig1	6.60343449411568	7.54814281911537	1.14306	0.014
CL7582Contig1	8.46879003445135	7.75013314680348	0.915141	0.014
CL2761Contig4	8.77991151753467	9.11675639998327	1.03837	0.014
Locus_49_75_82	11.1177897454806	10.9221019338283	0.982399	0.015
CL14686Contig1	5.50894611675124	0.693147180559945	0.125822	0.015
CL1Contig421	7.82710002176439	8.39662511927997	1.07276	0.015
CL2382Contig6	9.39166283478282	8.99463603815003	0.957726	0.015
CL1Contig7756	9.51414426844926	9.76950599185996	1.02684	0.015
CL3374Contig5	0.693147180559945	5.40588131553819	7.79904	0.016
CL57Contig23	0.693147180559945	5.40588131553819	7.79904	0.016
CL1Contig8969	10.5442548355632	10.4031929518723	0.986622	0.016
CL1759Contig3	7.61139880812846	7.18741693923902	0.944296	0.016
CL456Contig16	10.1185078673703	9.94855103316368	0.983203	0.017
CL7534Contig1	7.36464092366635	6.54523903096074	0.888738	0.01
CL4404Contig1	4.74705887538468	6.48883545052126	1.36692	0.017
CL8759Contig1	4.74705887538468	6.48883545052126	1.36692	0.017
CL8759Contig2	4.74705887538468	6.48883545052126	1.36692	0.017
CL7059Contig2	7.99557584595168	7.35664037474115	0.920089	0.017
CL14672Contig1	8.33014519652483	7.86731464418047	0.944439	0.017
CL16131Contig1	8.33014519652483	7.86731464418047	0.944439	0.017
CL9348Contig2	9.06574030300764	8.72723858781877	0.962661	0.017
CL3227Contig1	5.68581903948438	0.693147180559945	0.121908	0.018
CL3227Contig2	5.68581903948438	0.693147180559945	0.121908	0.018
CL58Contig14	5.68581903948438	0.693147180559945	0.121908	0.018
CL58Contig2	5.68581903948438	0.693147180559945	0.121908	0.018
CL1Contig7029	6.93895752460212	7.76266866086527	1.11871	0.018
CL19Contig25	8.92023813808915	8.29023575411342	0.929374	0.01
CL1630Contig1	9.32973302729047	9.12362965370328	0.977909	0.018
CL1042Contig2	9.4098056034073	9.13481947080794	0.970777	0.01
CL1Contig4553	7.1562585226172	7.82405613943999	1.09332	0.019
CL2228Contig1	9.04014719819891	9.19017238888809	1.0166	0.019
isotig23406	10.5925263025133	10.3306594993907	0.975278	0.02
CL3894Contig4	0.693147180559945	5.49190924865303	7.92315	0.021
CL124Contig2	8.29799517899119	8.71640509268153	1.05042	0.021
ENO3_ERATE	10.9595907377632	11.0767519218456	1.01069	0.022
CL1498Contig7	5.55792313268928	6.77435370290527	1.21886	0.022
CL413Contig11	7.17839221698642	7.95854410874008	1.10868	0.022
CL1Contig3562	8.19938180957969	7.53723731045478	0.919245	0.022
CL6495Contig2	8.9057382759111	8.4161685068158	0.945028	0.022
CL3294Contig3	9.36783504230318	9.16992068403986	0.978873	0.022
CL3294Contig4	9.36783504230318	9.16992068403986	0.978873	0.022
CL3294Contig5	9.36783504230318	9.16992068403986	0.978873	0.022
CL3294Contig6	9.36783504230318	9.16992068403986	0.978873	0.022
comp294_c0_seq1	9.36783504230318	9.16992068403986	0.978873	0.022
CL5963Contig1	10.9528726036081	10.8613236519024	0.991642	0.023
CL1888Contig1	11.4039544722619	11.606234076508	1.01774	0.023
CL1888Contig2	11.4039544722619	11.606234076508	1.01774	0.023
CL8805Contig2	9.59956647628799	9.14143687691748	0.952276	0.023
isotig02787	6.53376900759034	7.06383726986398	1.08113	0.024
CL1498Contig4	6.53376900759034	7.06383726986398	1.08113	0.024
CL1498Contig5	6.53376900759034	7.06383726986398	1.08113	0.024
CL5672Contig2	8.49084675172502	8.02833054085733	0.945528	0.024
CL5028Contig3	8.98069419574904	9.20738514678358	1.02524	0.024
CL6932Contig1	9.87446913652268	9.59819387440154	0.972021	0.024
Locus_954_4_4	9.87446913652268	9.59819387440154	0.972021	0.024
SYN3_ERATE	9.96047221033962	9.63937288879545	0.967763	0.024
SYN8_ERATE	9.96047221033962	9.63937288879545	0.967763	0.024
CL327Contig3	7.84519835756054	7.3676536856103	0.939129	0.025
CL1Contig3266	7.89601170303964	7.43493934440553	0.941607	0.025
CL1805Contig10	8.05609332449004	7.56938382753185	0.939585	0.025
CL1805Contig2	8.05609332449004	7.56938382753185	0.939585	0.025
Locus_2288_7_9	9.37577449608895	9.04981535968579	0.965234	0.025
CL415Contig1	6.57568988736222	7.5139492905534	1.14269	0.02
CL2320Contig2	7.26877772001361	6.84946989308275	0.942314	0.026
CL977Contig1	7.26877772001361	6.84946989308275	0.942314	0.026
CL3527Contig4	6.23459523695365	7.61598631586129	1.22157	0.027
CL10226Contig1	8.20598029636159	7.19843162439309	0.877218	0.027
CL2336Contig7	9.33207562199814	9.14737475050791	0.980208	0.027
CL1Contig6763	5.56848852630324	6.634019959852	1.19135	0.028
CL124Contig7	8.82282534319065	9.23968038462397	1.04725	0.02
CL1Contig5286	4.99704509188315	0.693147180559945	0.138711	0.029
CL1Contig5699	4.99704509188315	0.693147180559945	0.138711	0.029
CL1Contig8303	4.99704509188315	0.693147180559945	0.138711	0.029
CL90Contig16	7.59178406480526	8.01815363466384	1.05616	0.029
CL1224Contig6	7.63213573089481	8.20031720912655	1.07445	0.029
CL467Contig12	9.7796062549264	9.57134778686904	0.978705	0.02
CL73Contig10	11.0527322662514	10.9363736501753	0.989472	0.03
CL18849Contig1	5.79066369758587	6.58336952861961	1.13689	0.031
CL3204Contig2	6.50433941803245	5.77359095239934	0.887652	0.031
CL10162Contig3	7.16202443835906	6.23034220428946	0.869914	0.032
CL577Contig14	9.38538333960818	9.55966183081042	1.01857	0.032
CL4737Contig2	9.6471528692632	9.83914555271483	1.0199	0.032
CL5826Contig1	10.3473906037691	10.1812047150039	0.983939	0.033
CL5826Contig2	10.3473906037691	10.1812047150039	0.983939	0.033
CL349Contig4	7.24317651304312	6.70206593754615	0.925294	0.033
CL349Contig7	7.24317651304312	6.70206593754615	0.925294	0.033
CL7Contig43	7.48373043942706	7.28496702572068	0.973441	0.033
CL5942Contig6	9.1897667079113	8.86773269669408	0.964957	0.033
CL6511Contig2	9.82068171888769	9.58416665132913	0.975917	0.033
comp13984_c0_seq1	8.32558948987946	7.84799785794636	0.942636	0.035
CL3496Contig11	10.209872875859	9.96864735797952	0.976373	0.036
CL546Contig2	5.26308627759189	6.1550870703601	1.16948	0.036
CL24657Contig1	7.48198344085824	7.91473373835453	1.05784	0.036
CL7996Contig1	7.48198344085824	7.91473373835453	1.05784	0.036
CL1Contig3395	8.1881311546729	7.4962447058288	0.915501	0.036
CL1Contig3396	8.1881311546729	7.4962447058288	0.915501	0.036
CL1Contig3397	8.1881311546729	7.4962447058288	0.915501	0.036
CL1073Contig1	7.14966968581238	7.786292929556	1.08904	0.037
CL5Contig21	7.72129093425703	8.19284043814443	1.06107	0.037
CL3347Contig4	8.68154451604791	8.99965801800732	1.03664	0.037
CL7405Contig3	10.7142848230994	10.8508965586564	1.01275	0.038
CL4622Contig2	11.0658951157068	10.8820068871827	0.983382	0.038
CL1Contig4279	9.22639840847192	8.88510843830218	0.963009	0.038
CL154Contig2	9.94877388477046	9.69529533039929	0.974522	0.038
CL1Contig4635	6.89636238871747	5.86635513909333	0.850645	0.039
CL1Contig4299	8.27901079897024	7.84152988647948	0.947158	0.039
CL8953Contig2	9.04734027857	8.7977744450333	0.972416	0.039
CL837Contig7	10.7780033056178	10.9615248555715	1.01703	0.04
CL102Contig20	6.34202700213659	7.08106789642511	1.11653	0.041
CL5577Contig3	7.33771146261066	7.83510468920173	1.06779	0.041
CL5380Contig1	8.67472836458993	8.4982576857157	0.979657	0.041
CL3528Contig3	9.23830860343034	8.9497175894559	0.968761	0.041
CL94Contig6	9.48543356993589	9.3303248438374	0.983648	0.041
CL1Contig242	9.78185313573369	9.66861657343938	0.988424	0.041
CL2736Contig1	9.79460524834684	9.65596583867095	0.985845	0.041
CL836Contig11	7.77513354055187	8.37608890018107	1.07729	0.042
CL1Contig7889	8.41955456384612	9.03097612642381	1.07262	0.042
CL2761Contig3	8.5939911206504	8.96856183543515	1.04359	0.042
CL5774Contig2	9.91031631461049	9.77578374104631	0.986425	0.042
CL3496Contig14	10.1585319276961	9.95002112222691	0.979474	0.043
CL3496Contig15	10.1585319276961	9.95002112222691	0.979474	0.043
CL811Contig3	7.46821077156588	6.96012659115369	0.931967	0.043
CL61Contig20	8.15030583407944	8.63837499814895	1.05988	0.043
CL61Contig7	8.15030583407944	8.63837499814895	1.05988	0.043
CL4591Contig2	8.95406442862589	9.17971078282173	1.0252	0.043
Locus_393_4_9	10.9593887147261	10.8068783763648	0.986084	0.044
CL3168Contig2	8.47104706126986	8.06906617979877	0.952546	0.044
CL326Contig6	4.92310073876936	6.55828349351041	1.33214	0.04
CL3687Contig5	4.92310073876936	6.55828349351041	1.33214	0.04
CL4207Contig1	4.92310073876936	6.55828349351041	1.33214	0.04
CL445Contig4	4.92310073876936	6.55828349351041	1.33214	0.04
CL445Contig6	4.92310073876936	6.55828349351041	1.33214	0.04
CL4771Contig3	4.92310073876936	6.55828349351041	1.33214	0.04
CL4956Contig4	4.92310073876936	6.55828349351041	1.33214	0.04
CL522Contig8	4.92310073876936	6.55828349351041	1.33214	0.04
CL6050Contig1	4.92310073876936	6.55828349351041	1.33214	0.04
CL1Contig6871	11.1862569915489	10.9929752424233	0.982721	0.045
CL1Contig7112	8.7469746855666	8.5658244385925	0.97929	0.045
CL1Contig492	9.2417314968863	8.99103745719777	0.972874	0.045
Locus_61_5_6	10.1071984777471	9.92095083993516	0.981573	0.046
CL7668Contig1	6.77415485981578	7.66055966123552	1.13085	0.04
CL7668Contig2	6.77415485981578	7.66055966123552	1.13085	0.04
CL4852Contig2	9.18336045199212	9.67794273045438	1.05386	0.046
CL185Contig19	9.19455744866305	8.92519178801417	0.970704	0.046
CL885Contig1	9.72072657789688	9.54321534101713	0.981739	0.046
CL1Contig5054	7.30029812564814	7.68206590955167	1.05229	0.04
CL136Contig17	7.58221186147332	8.23458897522967	1.08604	0.04
CL2637Contig1	9.84688037422899	10.0553329101377	1.02117	0.047
CL3496Contig13	10.097485506177	9.87886976872951	0.978349	0.048
CL3496Contig17	10.097485506177	9.87886976872951	0.978349	0.048
CL7065Contig1	5.57814883460974	6.49426400521363	1.16423	0.048
CL7065Contig2	5.57814883460974	6.49426400521363	1.16423	0.048
CL680Contig10	7.433989903925	8.05184789749727	1.08311	0.048
CL680Contig5	7.433989903925	8.05184789749727	1.08311	0.048
CL5563Contig3	9.0758160264279	8.84161480372294	0.974195	0.04
isotig08284	10.7567446635448	10.9771207763558	1.02049	0.049
CL785Contig5	7.15680933406807	6.68267941775106	0.933751	0.049
CL321Contig12	8.26707688046545	7.65680866999417	0.926181	0.049
CL4289Contig6	8.29258427458887	8.58212750189585	1.03492	0.049
CL140Contig10	8.98058499443041	9.26828886607813	1.03204	0.049
CL94Contig5	9.48554760985933	9.35155408071344	0.985874	0.049
CL4000Contig1	9.98947680549586	10.2609231930738	1.02717	0.04
CL4000Contig2	9.98947680549586	10.2609231930738	1.02717	0.04
CL4000Contig3	9.98947680549586	10.2609231930738	1.02717	0.04
CL131Contig9	7.76586880128328	7.25155532757007	0.933773	0.05
CL19309Contig1	8.52983158520106	8.2735636845555	0.969956	0.05
CL305Contig27	8.52983158520106	8.2735636845555	0.969956	0.05
CL7612Contig2	8.52983158520106	8.2735636845555	0.969956	0.05
CL236Contig2	8.86420179847399	8.55790377553922	0.965446	0.05
CL236Contig9	8.86420179847399	8.55790377553922	0.965446	0.05
Background proteins
CL10531Contig1	7.56743317886891	8.04064060578104	1.06253	0.051
comp1386_c0_seq1	7.56743317886891	8.04064060578104	1.06253	0.051
CL7Contig31	6.63354857443857	7.51832374766983	1.13338	0.052
CL338Contig6	9.1921291003177	8.89248910501784	0.967403	0.052
CL4928Contig2	7.4999204775025	7.81450062971164	1.04194	0.053
CL4928Contig5	7.4999204775025	7.81450062971164	1.04194	0.053
CL4361Contig1	7.77670296701257	7.503842146086	0.964913	0.053
CL4361Contig2	7.77670296701257	7.503842146086	0.964913	0.053
CL4361Contig3	7.77670296701257	7.503842146086	0.964913	0.053
CL13Contig39	7.83940476261708	7.06006411597722	0.900587	0.053
CL13Contig41	7.83940476261708	7.06006411597722	0.900587	0.053
CL13Contig42	7.83940476261708	7.06006411597722	0.900587	0.053
CL1035Contig6	9.86726015600001	9.70486462979624	0.983542	0.053
CL456Contig1	10.6832911247108	10.4823199306115	0.981188	0.054
CL456Contig4	10.6832911247108	10.4823199306115	0.981188	0.054
CL456Contig5	10.692157231617	10.4865447745088	0.98077	0.054
CL2958Contig2	7.44208188401439	6.95059232482003	0.933958	0.054
CL1710Contig3	9.21295749290657	9.43743529160047	1.02437	0.054
CL7215Contig2	9.35543504466266	9.08763757669603	0.971375	0.054
CL7698Contig1	9.5443222740145	9.24793856022082	0.968947	0.054
CL7698Contig2	9.5443222740145	9.24793856022082	0.968947	0.054
CL4526Contig2	9.88309030395484	9.70375775476255	0.981855	0.054
CL1Contig1151	10.7545028351069	10.5786916316788	0.983652	0.055
CL113Contig3	7.87122811878757	7.26948776556053	0.923552	0.055
CL113Contig4	7.87122811878757	7.26948776556053	0.923552	0.055
CL1679Contig2	8.13005633993903	7.12554989736769	0.876445	0.055
CL1630Contig2	9.42559918207007	9.26271836075477	0.982719	0.055
CL1Contig7911	9.61406824828218	9.44143736172302	0.982044	0.055
CL1Contig1165	10.7702619136011	10.5556102902558	0.98007	0.056
CL1747Contig6	9.35196309931742	9.12125948161732	0.975331	0.056
CL2023Contig1	8.23256093427037	7.74295088049843	0.940528	0.057
CL626Contig3	8.23256093427037	7.74295088049843	0.940528	0.057
CL1553Contig6	8.64599598724087	8.18317124805033	0.946469	0.057
CL1189Contig1	8.94708870510419	8.55594621837061	0.956283	0.057
CL7405Contig1	10.1560580758248	10.3762079258608	1.02168	0.059
CL3942Contig1	7.52077808112888	7.83826751355068	1.04221	0.059
CL1034Contig1	10.2534131221289	10.4352596845197	1.01774	0.06
CL1025Contig3	6.46198708959564	7.7722225859506	1.20276	0.061
CL6530Contig1	10.4320857295336	10.6076778666397	1.01683	0.062
CL6530Contig2	10.4320857295336	10.6076778666397	1.01683	0.062
CL9711Contig2	7.12131788892262	7.70433480460108	1.08187	0.062
CL3452Contig4	7.2119780225703	6.66001921690074	0.923466	0.062
CL4301Contig5	7.2119780225703	6.66001921690074	0.923466	0.062
CL12182Contig1	7.92767921894845	8.41869842096975	1.06194	0.062
CL9068Contig2	5.76643668927138	6.52370439986658	1.13132	0.063
CL1034Contig2	10.3164272633139	10.4924315724545	1.01706	0.064
CL2818Contig11	11.3811483532097	11.2178333874405	0.98565	0.064
CL23599Contig1	7.49159931574889	6.63469584939655	0.885618	0.064
CL6387Contig3	7.81518922861105	8.19858458254556	1.04906	0.064
CL78Contig6	9.0624088800065	8.77910295667473	0.968738	0.064
CL8862Contig2	9.91576795295125	9.96570981830865	1.00504	0.064
FTSH16_ERATE	9.96351990865654	10.0247508647218	1.00615	0.064
CL1Contig3196	11.309637396559	11.1121132633492	0.982535	0.065
comp36065_c0_seq1	8.27795995583094	7.65763843310396	0.925063	0.065
CL16065Contig1	8.27795995583094	7.65763843310396	0.925063	0.065
CL908Contig1	8.79694834966036	9.05092726839633	1.02887	0.065
CL908Contig3	8.79694834966036	9.05092726839633	1.02887	0.065
isotig18887	8.79694834966036	9.05092726839633	1.02887	0.065
CL44Contig17	9.24153724858071	9.05408665790378	0.979717	0.065
CL118Contig5	9.63130318321383	9.93491648059166	1.03152	0.065
CL1Contig2609	9.64490943544831	9.97044948462889	1.03375	0.065
HTPG13_ERATE	10.5767685261442	10.7216248237693	1.0137	0.066
CL9396Contig1	6.29319903356944	7.33959922163308	1.16627	0.06
CL6938Contig1	6.6396692429615	7.36037882549259	1.10855	0.066
CL5342Contig3	8.37803166395446	7.97446591500789	0.95183	0.066
isotig00688	9.7226285240956	9.8696115062505	1.01512	0.066
isotig00708	9.7226285240956	9.8696115062505	1.01512	0.066
CL5839Contig1	8.27975382433995	8.64741810480579	1.04441	0.067
CL230Contig2	8.92863559883067	9.3274247231921	1.04466	0.067
CL230Contig3	8.92863559883067	9.3274247231921	1.04466	0.067
CL3458Contig1	9.24936768575178	9.5621362374103	1.03382	0.067
Locus_471_2_7	10.6912903575516	10.4751740379897	0.979786	0.068
CL1Contig1997	7.8376874702017	8.2258313999316	1.04952	0.068
KAD10_ERATE	8.42551661867909	8.19554867430922	0.972706	0.068
KAD2_ERATE	8.42551661867909	8.19554867430922	0.972706	0.068
CL630Contig2	10.9597165265568	11.0392670212788	1.00726	0.069
CL7364Contig2	7.20569718800692	6.86885169612127	0.953253	0.069
CL744Contig6	7.20569718800692	6.86885169612127	0.953253	0.069
CL7885Contig1	7.20569718800692	6.86885169612127	0.953253	0.069
CL16961Contig1	8.49963420530648	8.09130749253714	0.951959	0.069
CL908Contig2	8.74941822391462	9.05075111112829	1.03444	0.069
CL4285Contig3	8.83588593561159	8.61953367799928	0.975514	0.069
CL2363Contig3	7.48004569366681	7.86061294597377	1.05088	0.071
CL5788Contig2	8.66662302552749	8.55566228849788	0.987197	0.071
CL1747Contig4	9.02399503613783	8.76487921488335	0.971286	0.071
CL2164Contig1	9.66033696222134	9.38758778868899	0.971766	0.071
comp13984_c0_seq2	5.26661760828498	7.04122156918153	1.33695	0.072
CL2045Contig4	5.66058780367123	6.70585674231483	1.18466	0.072
CL14157Contig1	5.66058780367123	6.70585674231483	1.18466	0.072
CL1Contig3205	7.33356604462409	6.83074346067781	0.931435	0.072
CL3446Contig2	8.59989639795582	9.08043665449002	1.05588	0.072
CL21695Contig1	9.09802510856956	9.26906894595827	1.0188	0.072
CL1Contig5106	9.77344684095723	10.1044982549396	1.03387	0.072
CL1Contig9205	9.77344684095723	10.1044982549396	1.03387	0.072
CL1Contig2294	6.91056414863113	6.27185635268853	0.907575	0.073
CL7539Contig3	7.55521392842106	6.43080541444754	0.851174	0.073
CL9372Contig2	9.4043190785823	9.21530053994766	0.979901	0.073
Locus_740_6_7	11.0308761927187	10.8391468543749	0.982619	0.074
CL2291Contig3	7.64729699804545	6.88260406452101	0.900005	0.074
CL3798Contig3	7.64729699804545	6.88260406452101	0.900005	0.074
CL3798Contig5	7.64729699804545	6.88260406452101	0.900005	0.074
CL765Contig11	7.64729699804545	6.88260406452101	0.900005	0.074
CL765Contig2	7.64729699804545	6.88260406452101	0.900005	0.074
CL9949Contig1	7.64729699804545	6.88260406452101	0.900005	0.074
CL1295Contig1	4.87616630842631	6.41661503626964	1.31591	0.076
CL1295Contig2	4.87616630842631	6.41661503626964	1.31591	0.076
CL1295Contig7	4.87616630842631	6.41661503626964	1.31591	0.076
CL3000Contig4	7.42798407807041	8.05680713129177	1.08466	0.076
CL5396Contig1	7.97194421670105	8.2131133157934	1.03025	0.076
FTSH11_ERATE	9.31086732441623	9.09845648696451	0.977187	0.076
CL602Contig14	9.51786140460537	10.0439281104023	1.05527	0.076
CL602Contig8	9.51786140460537	10.0439281104023	1.05527	0.076
CL4084Contig3	7.47994528444326	7.1139882836941	0.951075	0.07
CL4016Contig2	8.78199527193721	9.00286490010885	1.02515	0.077
CL230Contig4	9.69027309349921	9.98231690858252	1.03014	0.077
CL5739Contig1	8.03857944840495	8.71447004958671	1.08408	0.07
CL2521Contig1	10.5449095533999	10.6333298927011	1.00839	0.078
CL2521Contig2	10.5449095533999	10.6333298927011	1.00839	0.078
CL14247Contig1	8.0609848619644	7.61747665918101	0.944981	0.078
CL400Contig10	8.18703942511461	8.31091436366109	1.01513	0.078
CL400Contig11	8.18703942511461	8.31091436366109	1.01513	0.078
CL3336Contig4	8.33743444648615	8.03447340783656	0.963663	0.078
CL3497Contig2	8.71628201741589	8.98415431659524	1.03073	0.078
CL6640Contig1	8.82186635896479	9.14785525110759	1.03695	0.078
CL6640Contig3	8.82186635896479	9.14785525110759	1.03695	0.078
Locus_4256_5_6	9.21625030900275	9.09910344544523	0.987289	0.078
CL4944Contig4	9.51020115704667	9.83477673605816	1.03413	0.078
CL1248Contig10	9.00030980369158	8.69179892805428	0.965722	0.07
CL1248Contig11	9.00030980369158	8.69179892805428	0.965722	0.07
CL70Contig6	10.5123570663942	10.3624191054284	0.985737	0.079
CL1Contig6719	11.1840680117662	10.9726813339712	0.981099	0.079
CL5247Contig1	9.3586339558398	9.61630485075246	1.02753	0.07
CL4685Contig2	9.58287660969813	9.41951085806124	0.982952	0.079
Locus_740_1_7	11.1837393858134	11.0071689924536	0.984212	0.08
CL6320Contig1	8.6975452685368	8.35628707585669	0.960764	0.081
CL1Contig5923	9.28127033228341	9.14433164559161	0.985246	0.081
CL4333Contig2	9.73723298499443	9.90002619058454	1.01672	0.081
CL1Contig6718	11.2277577194864	11.0411921768005	0.983384	0.082
CL1Contig7321	6.65266693818503	7.41783440573981	1.11502	0.082
CL5679Contig2	6.65266693818503	7.41783440573981	1.11502	0.082
CL2219Contig6	8.61080902041375	8.88837564727314	1.03223	0.082
CL5326Contig1	9.00104671773113	8.80108866432768	0.977785	0.082
CL1924Contig1	9.3390576421884	9.74055586943887	1.04299	0.082
CL1Contig10380	9.42050222344404	9.14267804866799	0.970509	0.082
CL953Contig6	6.72743910338558	7.28702926297412	1.08318	0.083
CL1Contig7224	6.87232569940004	7.23122081507829	1.05222	0.083
CL9781Contig2	7.329665873584	6.64453974672578	0.906527	0.083
CL7830Contig1	7.49876194740774	8.02805617380058	1.07058	0.083
CL1Contig167	8.95721078319885	9.19721146581534	1.02679	0.083
CL482Contig10	9.64812806626756	9.36199550876477	0.970343	0.083
CL3785Contig2	9.8997491733787	9.74566629446824	0.984436	0.083
CL6308Contig3	9.08871308984883	8.97860619570059	0.987885	0.084
Locus_2281_8_10	9.32679897766863	9.19901270624159	0.986299	0.084
CL271Contig26	10.0583593599388	9.81648937222658	0.975953	0.085
CL190Contig11	10.9118875680322	10.7615651439091	0.986224	0.085
CL3496Contig9	9.76283739011975	9.63485164123654	0.986891	0.085
CL8734Contig3	6.28937633242081	6.951082878333	1.10521	0.086
CL1Contig8902	6.64344663457504	5.38006727738132	0.809831	0.08
CL94Contig19	6.64344663457504	5.38006727738132	0.809831	0.08
CL1374Contig1	9.28243944254956	9.05929268323174	0.97596	0.086
CL559Contig4	9.74602742758718	10.0692956876467	1.03317	0.086
CL714Contig1	11.1202871749396	11.0647590221162	0.995007	0.087
CL3044Contig4	11.3719675979341	11.1576741001064	0.981156	0.087
CL9Contig72	7.31690467463714	6.73625037491821	0.920642	0.087
CL705Contig3	9.5232585007976	9.81355462025403	1.03048	0.087
CL6066Contig1	10.3897921337515	10.2197392448369	0.983633	0.088
CL3452Contig5	8.37887530125551	7.94801469362406	0.948578	0.08
isotig05819	6.83014540859424	6.29135863082312	0.921116	0.088
CL8223Contig3	7.18842270908305	5.82519391507423	0.810358	0.088
CL950Contig3	7.4762033757043	7.93863014004593	1.06185	0.088
CL95Contig1	7.69152285477841	8.47021033979224	1.10124	0.088
CL1259Contig1	8.84625132755427	9.02209611230175	1.01988	0.088
CL1Contig4166	9.11455481060113	8.83173242450754	0.96897	0.088
isotig04972	9.46356192665062	9.33283773295457	0.986187	0.088
AROB5_ERATE	9.64444974043807	9.91367118975517	1.02791	0.088
CL2289Contig5	7.1836026231825	7.77021708990465	1.08166	0.089
CL20455Contig1	7.74271680191295	8.32051475934547	1.07462	0.089
CL509Contig3	8.91682567623026	8.63337489168662	0.968212	0.089
CL4669Contig1	10.6281485175424	10.763649990815	1.01275	0.091
CL3926Contig1	4.81439462533224	6.00915002493559	1.24816	0.091
CL18449Contig1	7.78353205367162	7.33586677843294	0.942486	0.091
CL1474Contig7	8.22393250040218	7.35209920047782	0.893988	0.091
CL2140Contig2	8.92803060586311	8.59606667343966	0.962818	0.092
comp15916_c0_seq1	6.83610059763996	5.6771725713382	0.830469	0.093
CL317Contig14	8.31042617654659	8.70948361492084	1.04802	0.093
CL450Contig17	8.71396805666099	8.99638769320908	1.03241	0.093
CL310Contig6	8.852289505861	8.63106861485134	0.97501	0.093
CL1Contig1876	9.08275526318089	9.30302535928701	1.02425	0.093
CL1Contig1877	9.08275526318089	9.30302535928701	1.02425	0.093
CL1Contig3736	9.12534661113725	8.90612512765165	0.975977	0.093
CL1335Contig1	9.56782760599255	9.37330117733771	0.979669	0.093
CL6530Contig3	10.4595618210443	10.6282736542232	1.01613	0.094
CL6510Contig2	8.03130022219601	8.35952739241859	1.04087	0.094
CL732Contig12	9.38518051073339	9.25960153403866	0.986619	0.094
CL1Contig4018	11.1092057707233	10.9714504657195	0.9876	0.095
CL2996Contig2	9.26140516694484	9.75409075533881	1.0532	0.095
CL2996Contig5	9.26140516694484	9.75409075533881	1.0532	0.095
CL6019Contig3	6.06841160094013	6.97196930483547	1.1489	0.09
CL630Contig6	10.9703467761106	11.0465894704044	1.00695	0.096
CL828Contig10	6.77523998629608	7.82409169192293	1.15481	0.096
CL828Contig11	6.77523998629608	7.82409169192293	1.15481	0.096
CL828Contig13	6.77523998629608	7.82409169192293	1.15481	0.096
CL828Contig14	6.77523998629608	7.82409169192293	1.15481	0.096
CL828Contig9	6.77523998629608	7.82409169192293	1.15481	0.096
CL2479Contig5	8.10231518503721	7.90737315772189	0.97594	0.096
CL8741Contig2	7.72068271338827	8.39038614464961	1.08674	0.09
CL11887Contig1	7.56534584813595	8.02507251075631	1.06077	0.097
CL11887Contig2	7.56534584813595	8.02507251075631	1.06077	0.097
CL2312Contig2	7.79099040119809	7.52806429396996	0.966253	0.097
CL7394Contig2	7.80583599860992	8.34236184885532	1.06873	0.09
CL8572Contig1	7.83052882192903	8.20050343107036	1.04725	0.09
CL65Contig6	7.84656168465004	8.19231438537505	1.04406	0.09
CL6720Contig1	9.30894481063757	8.98060149385014	0.964728	0.097
CL44Contig5	8.32020317845423	8.01786487969079	0.963662	0.09
CL3032Contig3	8.34666722988964	8.14100740805382	0.97536	0.09
CL1Contig8520	8.47110017325546	7.86571470194215	0.928535	0.09
CL335Contig4	6.32640413189462	6.95670597238434	1.09963	0.098
CL1Contig2103	8.8400329024186	9.19706017119026	1.04039	0.09
CL837Contig2	10.9950445307176	11.1659716538872	1.01555	0.099
CL250Contig12	7.96979197794591	7.39129717292325	0.927414	0.099
CL6373Contig4	8.0032357601912	9.1983773825025	1.14933	0.099
isotig00702	9.81398699669698	9.95903508372766	1.01478	0.09
CL3553Contig2	8.84829872398069	8.47806592266286	0.958158	0.099
CL3704Contig7	8.99122201048423	8.86741901360758	0.986231	0.099
CL1Contig8111	7.22309304676188	7.7431526316701	1.072	0.101
CL4341Contig5	8.52570518856466	8.81350360726705	1.03376	0.101
CL27260Contig1	9.10484287057108	8.75597028390353	0.961683	0.101
CL1Contig7721	9.24292101852465	8.97540535481881	0.971057	0.101
CL1Contig7722	9.24292101852465	8.97540535481881	0.971057	0.101
CL1862Contig2	9.72044328662875	9.92267056468974	1.0208	0.101
Locus_49_80_82	11.1490677636516	10.985925435408	0.985367	0.102
CL999Contig10	5.8426281844461	6.77098489738207	1.15889	0.102
CL999Contig15	5.8426281844461	6.77098489738207	1.15889	0.102
CL999Contig7	5.8426281844461	6.77098489738207	1.15889	0.102
CL999Contig9	5.8426281844461	6.77098489738207	1.15889	0.102
CL1758Contig2	8.35910641201348	8.6849108500906	1.03898	0.102
CL1Contig518	8.61675670553475	8.8823225874705	1.03082	0.102
CL1655Contig1	9.59256825968839	9.25884363002406	0.96521	0.102
CL1655Contig2	9.59256825968839	9.25884363002406	0.96521	0.102
CL7405Contig4	10.4262917624754	10.5855484106223	1.01527	0.103
CL7405Contig6	10.4262917624754	10.5855484106223	1.01527	0.103
PDXS6_ERATE	10.5138542089154	10.2920701006308	0.978906	0.103
CL9224Contig3	8.0894036765049	7.63751791014461	0.944139	0.103
CL44Contig30	9.43937367092992	9.18490432027772	0.973042	0.103
CL4672Contig2	6.46710968970525	7.14007756625776	1.10406	0.104
CL1Contig536	9.23957386733898	9.08705417433394	0.983493	0.104
CL144Contig4	11.4730771501395	11.5864290936942	1.00988	0.105
CL2510Contig1	8.41903457482305	8.76570455594246	1.04118	0.105
CL3287Contig1	8.75013562625952	9.03657595607807	1.03274	0.105
CL1Contig1833	8.90842799523937	9.24209729018332	1.03746	0.105
CL3463Contig7	9.08681568324684	8.85002318033234	0.973941	0.105
CL2996Contig7	9.33109064196118	9.80180772389742	1.05045	0.105
CL4966Contig1	9.33109064196118	9.80180772389742	1.05045	0.105
CL4966Contig5	9.33109064196118	9.80180772389742	1.05045	0.105
CL12233Contig1	9.33109064196118	9.80180772389742	1.05045	0.105
CL12233Contig2	9.33109064196118	9.80180772389742	1.05045	0.105
ATPG7_ERATE	9.42060620998138	9.62278041347444	1.02146	0.105
CL1Contig9639	9.85358335748269	9.99175112407501	1.01402	0.105
CL271Contig23	10.2240508833533	10.0549244684355	0.983458	0.106
CL5215Contig2	7.80172982589146	8.12795136481651	1.04181	0.106
CL122Contig13	8.75894340868962	8.94414854431759	1.02114	0.106
CL5983Contig3	8.76943243840342	8.36780140959019	0.954201	0.106
CL5983Contig5	8.76943243840342	8.36780140959019	0.954201	0.106
CL3130Contig4	9.72723034102679	9.91858840975202	1.01967	0.106
CL3130Contig5	9.72723034102679	9.91858840975202	1.01967	0.106
CL5698Contig2	9.27396559541243	8.9909974025528	0.969488	0.107
CL433Contig3	9.70373869823773	9.85398420505842	1.01548	0.107
Locus_427_1_4	10.30216287755	10.1722073871203	0.987386	0.108
CL3882Contig2	7.8885237551414	6.92386422848194	0.877714	0.108
CL14878Contig1	8.10438749256157	8.50438753268801	1.04936	0.108
CL3162Contig1	5.24305237001911	6.29611452619697	1.20085	0.109
CL750Contig5	7.55250722247587	6.93945548048832	0.918828	0.109
CL2948Contig4	9.77143801925923	9.64496670075631	0.987057	0.109
Locus_246_4_5	12.2269257415419	12.0621025792204	0.98652	0.111
CL4439Contig1	6.98730871917141	7.38175197758788	1.05645	0.111
CL2172Contig2	7.36928466752325	7.84251006589963	1.06422	0.111
CL2172Contig5	7.36928466752325	7.84251006589963	1.06422	0.111
CL8849Contig1	8.06472413346516	8.44660805616161	1.04735	0.111
CL1Contig9208	8.73391021657742	8.27130757712827	0.947034	0.111
CL30Contig20	9.32068989672668	9.09593720778613	0.975887	0.111
CL602Contig6	9.44676906095486	9.94715680113853	1.05297	0.111
CL4328Contig1	10.3893305224796	10.2829388381474	0.98976	0.112
CL4328Contig2	10.3893305224796	10.2829388381474	0.98976	0.112
CL454Contig4	10.5253893505854	10.373114310338	0.985533	0.112
Locus_3778_1_5	10.644725578347	10.8567486036276	1.01992	0.112
CL13802Contig1	7.80886325311424	6.88652965657516	0.881886	0.112
CL8802Contig1	9.92971630049941	9.60793749002372	0.967594	0.112
CL1Contig4896	11.3707916665327	11.2030398919781	0.985247	0.113
CL222Contig13	6.1086485635106	6.95787089617054	1.13902	0.113
CL21841Contig1	8.422900208327	8.07861394040204	0.959125	0.113
CL1040Contig6	6.96224695075438	7.60138956666776	1.0918	0.114
CL5983Contig4	8.76966985269418	8.40239940638157	0.95812	0.114
CL272Contig20	8.84446501806501	9.11057086348216	1.03009	0.114
CL8239Contig1	9.50904438015989	9.1895860604206	0.966405	0.114
CL1723Contig8	9.52420237875796	9.75791994009646	1.02454	0.114
CL1508Contig7	9.59873092377958	9.68742037150735	1.00924	0.114
CL7405Contig7	10.374518165268	10.5213217500507	1.01415	0.115
CL1Contig9607	6.30473771325942	5.06374182232437	0.803165	0.115
CL9686Contig1	7.7528207976997	8.45338467273914	1.09036	0.115
CL9686Contig2	7.7528207976997	8.45338467273914	1.09036	0.115
CL2996Contig4	9.33526477681667	9.81268389505764	1.05114	0.115
CL1723Contig3	9.46817060171311	9.77455855494096	1.03236	0.115
CL1723Contig5	9.46817060171311	9.77455855494096	1.03236	0.115
CL1723Contig6	9.46817060171311	9.77455855494096	1.03236	0.115
CL5782Contig1	7.95605533485463	8.3122079552693	1.04476	0.116
CL5782Contig4	7.95605533485463	8.3122079552693	1.04476	0.116
CL3513Contig2	8.73916413860141	8.47370317873939	0.969624	0.116
GCSP1_ERATE	10.711714978314	10.5387215337126	0.98385	0.117
CL859Contig5	10.7761283031983	10.584451898663	0.982213	0.117
CL17Contig10	7.55099359960883	7.84537162384868	1.03899	0.11
CL1Contig6205	7.9780318627832	8.29237763866107	1.0394	0.117
comp6085_c0_seq16	7.9780318627832	8.29237763866107	1.0394	0.117
CL1Contig2144	7.84702027879635	8.2275657852844	1.0485	0.11
CL1Contig8263	10.9488370605031	10.7611908681865	0.982862	0.118
CL3781Contig2	8.09485961738284	7.2302985493073	0.893196	0.118
CL2733Contig6	8.2108531684646	8.4642433120306	1.03086	0.118
CL1665Contig4	8.41726835086032	8.71749271272636	1.03567	0.118
CL1215Contig3	9.5717861514606	9.36483575418631	0.978379	0.118
CL4685Contig3	9.54915373368941	9.37225318647958	0.981475	0.11
CL1353Contig3	9.64529748527318	9.87881919077425	1.02421	0.11
CL26313Contig1	7.66301537886337	7.40245499675742	0.965998	0.119
CL10077Contig1	8.61192882146035	8.26662621618067	0.959904	0.119
SYN1_ERATE	9.65262450985538	9.22397944936333	0.955593	0.119
CL4656Contig3	6.42782918212067	7.13053000762665	1.10932	0.121
CL6688Contig1	7.68338955210651	8.04401379195734	1.04694	0.121
CL1Contig2108	9.59330445601364	9.28595890954766	0.967962	0.121
CL3835Contig3	7.4222235315546	6.81997171607341	0.918858	0.122
CL13849Contig1	7.43015167305456	6.91789862643078	0.931058	0.122
CL1Contig7106	7.57491287962519	6.97758526068559	0.921144	0.122
CL111Contig6	7.77536223383895	7.4163128903612	0.953822	0.122
CL40Contig12	7.98466140931071	7.67697672249619	0.961466	0.122
CL96Contig3	8.2500312096993	7.46661891875064	0.905041	0.122
CL1002Contig5	8.90295340293533	8.60956202430623	0.967046	0.122
CL24771Contig1	9.48181766471335	9.2451229292105	0.975037	0.122
CL630Contig4	10.2820016095164	10.3873634357003	1.01025	0.123
CL1547Contig5	8.86457385827214	8.42621718931145	0.95055	0.123
CL8050Contig2	9.38198117033809	9.50278410579715	1.01288	0.123
CL376Contig8	8.32555430393993	8.65335649498769	1.03937	0.124
CL376Contig9	8.32555430393993	8.65335649498769	1.03937	0.124
CL15557Contig1	8.3601259752257	8.12323858594289	0.971665	0.124
CL6471Contig2	8.38172683612732	8.62837710407791	1.02943	0.124
CL536Contig5	9.22725670238547	9.05678655376273	0.981525	0.124
CL8522Contig1	9.27562505872097	9.02720544435441	0.973218	0.124
CL1Contig2147	9.51211547917993	9.37804690110421	0.985905	0.124
Locus_62_8_10	9.71752139946805	9.61636541998447	0.98959	0.124
CL4022Contig5	10.3469722491736	10.2801307461072	0.99354	0.125
CL720Contig2	7.91459767639489	8.40737349776026	1.06226	0.125
CL1Contig3657	9.50278476124708	9.32518948783144	0.981311	0.125
CL8929Contig1	9.74204768416163	9.87147839022977	1.01329	0.125
Locus_15480_1_7	7.54139456357941	6.69673360776422	0.887997	0.126
CL3084Contig2	7.63444870160373	7.89729504572492	1.03443	0.126
CL2280Contig1	9.42841519987927	9.18201382246285	0.973866	0.126
CL2280Contig3	9.42841519987927	9.18201382246285	0.973866	0.126
CL1Contig5173	7.57878704542972	8.02246081462677	1.05854	0.12
CL4594Contig1	7.02981969647236	7.52259345772902	1.0701	0.127
CL2047Contig7	7.65957004418265	7.3314193605389	0.957158	0.127
CL4904Contig3	8.64012635939457	9.00447970064607	1.04217	0.127
CL1Contig4488	8.68089187642579	8.351567468468	0.962063	0.127
CL1Contig3738	9.5866975078503	9.34149345303819	0.974422	0.127
CL7405Contig5	10.4620110898845	10.6142176073138	1.01455	0.128
CL287Contig5	11.0861907543059	10.9736481838071	0.989848	0.128
CL155Contig6	8.84283531565281	8.56267345078023	0.968318	0.128
CL1Contig769	9.12176976916493	8.71976294282356	0.955929	0.128
CL3496Contig10	9.67067166931128	9.5353859363739	0.986011	0.128
CL3496Contig7	9.67067166931128	9.5353859363739	0.986011	0.128
CL3496Contig8	9.67067166931128	9.5353859363739	0.986011	0.128
Locus_62_2_10	9.67067166931128	9.5353859363739	0.986011	0.128
CL2031Contig4	9.99877565051049	9.90166613002282	0.990288	0.128
CL6749Contig1	9.03053910582121	9.22299964184199	1.02131	0.12
CL1802Contig13	10.0711967954316	9.91931679922111	0.984919	0.129
CL3394Contig5	10.103625539309	9.93213123278499	0.983026	0.129
CL2756Contig5	9.22289119524181	9.03082277767622	0.979175	0.12
CL211Contig5	9.35953910963172	9.15991229751614	0.978671	0.12
CL1Contig2733	7.45269742461274	7.96218799564	1.06836	0.129
CL1471Contig3	9.79896278482503	10.0835283004518	1.02904	0.12
CL1Contig313	9.2438491082119	9.16089274813661	0.991026	0.129
CL1092Contig1	10.1901926760428	10.3455739236158	1.01525	0.13
CL1092Contig3	10.1901926760428	10.3455739236158	1.01525	0.13
CL1092Contig5	10.1901926760428	10.3455739236158	1.01525	0.13
CL859Contig9	10.7646503319788	10.5959064062835	0.984324	0.131
CL1725Contig2	8.95595969817932	8.72591543947319	0.974314	0.131
CL6476Contig3	8.96917720565802	9.14864701074785	1.02001	0.132
CL903Contig10	6.44596335402152	7.17233510411009	1.11269	0.133
CL1610Contig2	6.95150209811433	5.6028851826146	0.805996	0.133
CL1107Contig1	8.88051807385608	9.05851410339252	1.02004	0.133
CL3759Contig5	9.24089942912826	9.53183774182091	1.03148	0.133
CL9372Contig1	9.38256929229508	9.17564533044127	0.977946	0.133
CL1Contig4250	9.88098846087591	10.1044092572892	1.02261	0.133
CL1Contig10683	11.7197333760333	11.6727169701646	0.995988	0.134
CL8849Contig2	7.90663919730166	8.22936501539668	1.04082	0.134
CL13640Contig1	7.90663919730166	8.22936501539668	1.04082	0.134
CL1224Contig4	8.12699291516297	8.40084633025107	1.0337	0.134
CL682Contig1	8.60572020170807	7.9611492609076	0.9251	0.134
CL786Contig1	8.75854771535813	9.13406558072222	1.04287	0.134
CL786Contig5	8.75854771535813	9.13406558072222	1.04287	0.134
CL10931Contig2	5.46858969763194	6.21065281778911	1.1357	0.13
CL1787Contig2	5.62283570934639	6.03785178669959	1.07381	0.135
CL3918Contig1	9.58516506628098	9.4135623155476	0.982097	0.135
CL7480Contig2	7.12937053732418	7.50276846550399	1.05237	0.136
CL1Contig2390	8.43363216973542	8.08210705770774	0.958319	0.136
CL9165Contig1	9.250546175406	9.49881181328779	1.02684	0.136
CL2026Contig8	9.62533137524632	9.85837941229281	1.02421	0.136
CL2026Contig9	9.62533137524632	9.85837941229281	1.02421	0.136
CL1Contig9286	9.70617975310715	9.90318197020496	1.0203	0.136
CL1Contig1537	10.826740649975	10.9355868200059	1.01005	0.137
CL11974Contig1	8.33403714549226	7.95010021857318	0.953931	0.137
CL8802Contig4	9.82737564318513	9.57125014410993	0.973938	0.137
CL4679Contig4	8.08864095425875	7.66390075125929	0.947489	0.13
CL3496Contig6	10.1782944890661	10.0030308864615	0.982781	0.138
CL1Contig6420	8.12699171007933	7.70856023971167	0.948513	0.13
CL1Contig8193	8.12699171007933	7.70856023971167	0.948513	0.13
CL5140Contig4	8.12699171007933	7.70856023971167	0.948513	0.13
CL7993Contig1	8.12699171007933	7.70856023971167	0.948513	0.13
CL7259Contig2	7.58734978314763	7.08332512256153	0.93357	0.138
CL7955Contig3	7.58734978314763	7.08332512256153	0.93357	0.138
CL115Contig7	8.32548632728959	8.16995622662695	0.981319	0.138
CL5602Contig1	8.88936878469534	8.42068939740098	0.947276	0.13
CL7124Contig2	8.93021647155308	8.39805726100461	0.940409	0.13
CL200Contig7	9.61932011897652	9.85374205074884	1.02437	0.138
CL7827Contig1	9.98668957276201	10.1894942504616	1.02031	0.138
CL1Contig3737	9.35355841044517	9.13456598625921	0.976587	0.13
CL1Contig3739	9.35355841044517	9.13456598625921	0.976587	0.13
Locus_2281_2_10	9.35355841044517	9.13456598625921	0.976587	0.13
Locus_2281_6_10	9.35355841044517	9.13456598625921	0.976587	0.13
CL4395Contig2	6.82809229922922	7.33717509193734	1.07456	0.139
CL14137Contig1	9.52388194710562	9.76335359407171	1.02514	0.139
CL5640Contig1	10.1292817572211	10.2628216629227	1.01318	0.141
CL1Contig82	11.6897461743129	11.6356598729253	0.995373	0.141
CL1Contig9289	11.6897461743129	11.6356598729253	0.995373	0.141
CL1Contig4642	11.7084619437187	11.6642584417409	0.996225	0.14
CL68Contig3	7.52749194010442	6.78039753534931	0.900751	0.141
CL612Contig8	8.7151899093541	8.91594132943947	1.02303	0.141
CL44Contig14	8.86134620489847	8.67010912682108	0.978419	0.141
CL1Contig962	9.07818150193368	8.97510265906696	0.988645	0.142
CL602Contig13	10.3685082169839	10.6942332459503	1.03141	0.143
CL6450Contig1	8.39105259022898	8.04197639496649	0.958399	0.143
CL746Contig3	6.48600496384599	7.4019336861659	1.14122	0.144
CL1722Contig3	6.85531482384636	7.34303534202717	1.07114	0.144
CL8221Contig1	8.00844851424129	8.27051090858249	1.03272	0.144
comp2813_c0_seq5	8.00844851424129	8.27051090858249	1.03272	0.144
CL8773Contig1	8.48582240272419	8.96513997343957	1.05648	0.144
CL3721Contig1	9.2872533468739	9.02520435959603	0.971784	0.144
CL3721Contig4	9.2872533468739	9.02520435959603	0.971784	0.144
CL3721Contig6	9.2872533468739	9.02520435959603	0.971784	0.144
CL6021Contig6	9.67925198629334	9.4504310011374	0.97636	0.144
CL1Contig4265	9.82804657243196	10.0942190434836	1.02708	0.144
CL1Contig8772	9.82804657243196	10.0942190434836	1.02708	0.144
CL1656Contig7	9.926651562663	9.84413151629766	0.991687	0.144
CL3647Contig2	6.7614463611013	7.4256722800546	1.09824	0.145
CL3508Contig1	6.95877631290605	7.55642237572221	1.08588	0.145
CL3947Contig6	7.1224990168129	7.4636565643462	1.0479	0.145
CL52Contig34	7.1224990168129	7.4636565643462	1.0479	0.145
CL3553Contig3	8.1214524025541	7.41809451080902	0.913395	0.145
CL9763Contig2	8.65062203490632	8.25721474685264	0.954523	0.145
CL7Contig25	8.66650811249757	8.28984599208955	0.956538	0.145
CL1658Contig2	10.3843280009823	10.2670760002314	0.988709	0.146
CL1658Contig8	10.3843280009823	10.2670760002314	0.988709	0.146
Locus_618_5_6	10.5893919576577	10.4559195331215	0.987396	0.146
CL3331Contig1	8.61663413742499	8.41462710141347	0.976556	0.146
CL7647Contig1	9.22271508618414	9.31447727337856	1.00995	0.146
CL602Contig10	10.1632706181173	10.5553996856683	1.03858	0.147
CL602Contig5	10.1632706181173	10.5553996856683	1.03858	0.147
CL602Contig7	10.1632706181173	10.5553996856683	1.03858	0.147
CL602Contig9	10.1632706181173	10.5553996856683	1.03858	0.147
CL130Contig16	7.24040465488653	7.68648720232212	1.06161	0.147
CL1808Contig1	8.45151576021119	8.74160979460765	1.03432	0.147
CL11390Contig1	8.45169565798545	8.25569237065052	0.976809	0.147
CL11390Contig2	8.45169565798545	8.25569237065052	0.976809	0.147
CL3916Contig3	8.55211148893635	8.6607748751311	1.01271	0.147
CL307Contig6	9.3329041126874	9.47433843252825	1.01515	0.147
Locus_192_1_6	9.40234204182137	9.73769502348353	1.03567	0.147
CL1Contig4155	5.29878159653224	6.45061277777569	1.21738	0.148
CL6369Contig2	8.57761185087264	8.75337545730568	1.02049	0.14
CL1485Contig10	7.8445654752436	7.39589835788467	0.942805	0.148
CL1Contig8324	9.50642780163276	8.73071626502399	0.918401	0.148
CL1Contig9438	9.50642780163276	8.73071626502399	0.918401	0.148
CL19943Contig1	5.45435305837003	6.67845405786211	1.22443	0.149
CL2026Contig5	9.6068248215271	9.86586409175768	1.02696	0.14
CL3081Contig1	9.60915683394575	9.13364070257932	0.950514	0.14
CL7743Contig1	7.10116431417391	7.55488017295931	1.06389	0.149
CL9Contig20	9.87889626290479	9.75118871124262	0.987073	0.14
CL1723Contig7	9.12781649122585	9.3801339065136	1.02764	0.149
CL2760Contig2	9.92083842858971	9.72392279676551	0.980151	0.14
CL1Contig6829	9.24832527430669	9.44641167224038	1.02142	0.149
CL7396Contig3	9.4474011161471	9.22914879857793	0.976898	0.149
CL1993Contig2	10.1555741926558	9.96542855086312	0.981277	0.151
CL24883Contig1	8.11428232170691	8.50325971260787	1.04794	0.151
CL1Contig4309	9.02031222229333	7.94881489608909	0.881213	0.151
CL2416Contig2	9.19542768964829	8.96088025887326	0.974493	0.151
CL1658Contig11	10.4380071200269	10.3151239296435	0.988227	0.152
CL1658Contig12	10.4380071200269	10.3151239296435	0.988227	0.152
CL1658Contig3	10.4380071200269	10.3151239296435	0.988227	0.152
CL1658Contig4	10.4380071200269	10.3151239296435	0.988227	0.152
CL1658Contig5	10.4380071200269	10.3151239296435	0.988227	0.152
CL1658Contig6	10.4380071200269	10.3151239296435	0.988227	0.152
CL1658Contig9	10.4380071200269	10.3151239296435	0.988227	0.152
CL1Contig733	5.83880043092234	6.95145156672763	1.19056	0.153
Locus_1_26_31	5.83880043092234	6.95145156672763	1.19056	0.153
Locus_1_27_31	5.83880043092234	6.95145156672763	1.19056	0.153
CL41Contig27	7.54699708339411	8.24661863163944	1.0927	0.153
CL41Contig6	7.54699708339411	8.24661863163944	1.0927	0.153
CL210Contig12	9.08674116773014	8.73800801908086	0.961622	0.153
CL460Contig3	8.19242387891849	8.54723180254909	1.04331	0.154
CL1Contig5262	8.5448587150089	8.16055755914887	0.955025	0.154
CL376Contig1	4.90280725651162	5.98140658791361	1.22	0.15
CL376Contig4	4.90280725651162	5.98140658791361	1.22	0.15
CL376Contig5	4.90280725651162	5.98140658791361	1.22	0.15
CL1Contig9587	10.2495175398356	10.3509396743145	1.0099	0.155
CL859Contig6	10.7616444575035	10.5849604172753	0.983582	0.155
CL491Contig4	7.91491809525758	8.22140684280827	1.03872	0.155
CL1Contig4321	8.29399038393429	7.90050879564487	0.952558	0.155
CL2256Contig6	8.75026857162684	8.22240614949668	0.939675	0.155
isotig04974	9.03469674700043	8.81325255215817	0.97549	0.155
isotig04976	9.03469674700043	8.81325255215817	0.97549	0.155
METK4_ERATE	9.21889971007396	9.52712825448591	1.03343	0.155
METK5_ERATE	9.21889971007396	9.52712825448591	1.03343	0.155
CL110Contig26	6.19260857058198	6.99898271394321	1.13022	0.15
CL1Contig873	7.73691777224765	8.10544495982033	1.04763	0.156
CL2789Contig3	9.23680004003831	9.45260994544793	1.02336	0.156
CL1Contig3422	9.44861492358143	9.71802653246723	1.02851	0.156
CL12677Contig1	9.45388094869324	9.35546997784409	0.98959	0.156
CL5539Contig1	10.247536840354	10.4531996452068	1.02007	0.157
CL5348Contig1	7.7900271894087	8.17702341229071	1.04968	0.15
CL853Contig3	8.46263154778788	8.97014786991112	1.05997	0.157
CL1Contig7392	8.53959916375575	8.2603074026072	0.967295	0.157
CL425Contig10	8.55158090913631	8.73953468961496	1.02198	0.157
CL425Contig4	8.55158090913631	8.73953468961496	1.02198	0.157
CL425Contig5	8.55158090913631	8.73953468961496	1.02198	0.157
CL425Contig8	8.55158090913631	8.73953468961496	1.02198	0.157
CL425Contig9	8.55158090913631	8.73953468961496	1.02198	0.157
CL1Contig6932	9.02452202755846	9.29798162981986	1.0303	0.157
CL183Contig5	7.96959535015088	8.34363744366772	1.04693	0.15
CL5199Contig4	9.82999003376871	10.0999789139394	1.02747	0.157
CL6078Contig1	9.89529565733174	10.0412249599275	1.01475	0.157
CL6078Contig6	9.89529565733174	10.0412249599275	1.01475	0.157
CL1Contig6200	8.0407758157976	7.58253937471513	0.943011	0.15
CL7101Contig1	8.0407758157976	7.58253937471513	0.943011	0.15
CL630Contig3	10.2485589191158	10.3320783497105	1.00815	0.158
CL367Contig1	11.9797504126307	11.6605300338391	0.973353	0.158
CL72Contig19	8.36821877612211	7.99676235592715	0.955611	0.15
CL11374Contig1	8.81002897898795	8.96513109122738	1.01761	0.15
CL567Contig3	9.61179509011987	9.84319662187813	1.02407	0.158
CL7562Contig4	9.81036844631518	9.64176707017607	0.982814	0.158
comp11619_c0_seq2	9.81036844631518	9.64176707017607	0.982814	0.158
CL756Contig3	9.98001012368455	9.83944397811785	0.985915	0.158
CL4151Contig2	8.26393541981228	8.46465595869323	1.02429	0.159
CL3243Contig3	8.64119196423822	8.83742137799536	1.02271	0.159
CL3353Contig8	8.64119196423822	8.83742137799536	1.02271	0.159
CL595Contig3	10.2409158768875	10.3707997870397	1.01268	0.16
CL3496Contig3	10.2848865161795	10.0838446519512	0.980453	0.16
CL3496Contig4	10.2848865161795	10.0838446519512	0.980453	0.16
CL3496Contig5	10.2848865161795	10.0838446519512	0.980453	0.16
CL859Contig8	10.124600187496	9.89189556573748	0.977016	0.161
CL10055Contig2	7.66701674784163	8.16178689536843	1.06453	0.161
Locus_14282_2_4	7.66701674784163	8.16178689536843	1.06453	0.161
CL115Contig5	7.78493138611229	8.16696307458548	1.04907	0.161
CL338Contig8	9.0585353792118	8.83219566076201	0.975014	0.161
comp16511_c0_seq6	9.12456644419816	9.31355853650809	1.02071	0.161
CL1802Contig6	9.51186850714316	9.33487216561383	0.981392	0.161
CL4211Contig7	8.81868529749427	8.52251730475555	0.966416	0.162
CL12677Contig2	8.9969227312291	8.77472043040075	0.975302	0.162
CL8050Contig1	9.25342183228757	9.42278855596652	1.0183	0.162
CL1Contig8949	7.23488514948871	7.66596515381404	1.05958	0.163
CL954Contig5	7.23488514948871	7.66596515381404	1.05958	0.163
CL840Contig9	8.07533800510485	7.82877858954672	0.969468	0.163
CL6792Contig2	8.61220614106393	8.32854482786482	0.967063	0.163
CL2965Contig4	10.4560622386859	10.3219978543568	0.987178	0.164
CL3044Contig5	12.1064790888514	11.9444518360837	0.986616	0.164
CL1571Contig5	7.57625384489409	7.82932728631169	1.0334	0.164
CL837Contig1	9.11899449232721	9.43265618982926	1.0344	0.164
CL291Contig6	9.92250266612669	10.0807949294604	1.01595	0.164
CL479Contig1	10.0447111998145	10.1694951919191	1.01242	0.165
CL4022Contig2	10.269102034739	10.1536514166483	0.988757	0.165
PSBA5_ERATE	10.6189247293903	10.4285576757396	0.982073	0.165
CL3323Contig3	7.04587691888176	6.75029865930757	0.958049	0.165
CL3323Contig4	7.04587691888176	6.75029865930757	0.958049	0.165
Locus_9552_1_7	7.04587691888176	6.75029865930757	0.958049	0.165
CL12131Contig1	9.46220748934053	9.23258676018595	0.975733	0.165
CL1578Contig2	6.64169692416187	5.90640707602612	0.889292	0.1
CL1279Contig11	6.73911358149165	5.73648646009729	0.851223	0.166
CL13875Contig1	9.60608364272183	9.46715689245064	0.985538	0.166
CL2055Contig1	7.34664305456055	6.79116894814737	0.924391	0.167
CL2055Contig4	7.34664305456055	6.79116894814737	0.924391	0.167
CL1550Contig1	7.7461199212077	7.41803731942908	0.957646	0.167
isotig01136	8.12847878583083	8.45887944741238	1.04065	0.167
CL1Contig2280	8.21961303105179	7.8373436086701	0.953493	0.167
CL2885Contig3	8.76471219457319	8.96144478004783	1.02245	0.167
CL2885Contig5	8.76471219457319	8.96144478004783	1.02245	0.167
CL3348Contig3	9.78752356094822	9.71377597468825	0.992465	0.167
CL698Contig9	6.83586735891958	6.27986342971433	0.918664	0.168
CL1Contig10334	7.10120894615758	7.66038958729877	1.07874	0.168
CL134Contig12	8.31318558313643	7.95970375547734	0.957479	0.168
CL134Contig6	8.31318558313643	7.95970375547734	0.957479	0.168
Locus_619_2_8	9.24783021858285	9.05097347029364	0.978713	0.168
CL1658Contig10	10.4556038073871	10.327662298741	0.987763	0.169
CL3553Contig1	8.53548543701706	7.93651505260762	0.929826	0.169
CL3553Contig6	8.53548543701706	7.93651505260762	0.929826	0.169
CL5404Contig1	9.43739431854998	9.62758432054924	1.02015	0.169
CL758Contig8	9.67418563106904	9.54329658680313	0.98647	0.169
CL8230Contig1	9.81824954224799	9.97726193557146	1.0162	0.169
CL2031Contig5	10.0145497919066	9.95425757141929	0.99398	0.171
HTPG8_ERATE	10.4886920404255	10.6147351909251	1.01202	0.171
CL66Contig8	11.5346119602227	11.6157499415763	1.00703	0.17
isotig00531	11.5346119602227	11.6157499415763	1.00703	0.17
CL1Contig4810	8.18555202789515	8.57638425168029	1.04775	0.171
CL1Contig4811	8.18555202789515	8.57638425168029	1.04775	0.171
CL1Contig5018	8.18555202789515	8.57638425168029	1.04775	0.171
CL3920Contig2	8.38300807973893	8.58192823272925	1.02373	0.171
CL5317Contig2	8.842524662384	9.10936264578299	1.03018	0.171
CL7941Contig1	9.33730704773438	9.12216940924956	0.976959	0.171
CL5199Contig1	9.79883001778942	10.0729957666934	1.02798	0.171
CL567Contig1	10.3644112597216	10.4768950101688	1.01085	0.172
CL11652Contig2	5.94894731655549	5.3121429912709	0.892955	0.172
CL3697Contig4	6.22560470632488	7.1097712766457	1.14202	0.172
CL100Contig19	8.00487136507216	8.48594095154477	1.0601	0.172
isotig14384	8.41945051498185	8.16091440720939	0.969293	0.172
CL8802Contig2	9.79339940761527	9.53096191756815	0.973203	0.172
CL2546Contig4	10.0529611945837	10.1977856211612	1.01441	0.173
CL1Contig192	11.0634205315987	10.9861682761017	0.993017	0.173
CL10848Contig2	7.33488383034145	8.10281319013262	1.1047	0.1
CL110Contig8	8.19254564952488	8.43811055462887	1.02997	0.173
CL3757Contig1	9.71392506096335	9.34172644509272	0.961684	0.173
CL4548Contig2	7.28504033846654	7.79401285902618	1.06987	0.174
CL939Contig6	8.08174153817799	7.72573081952711	0.955949	0.174
CL190Contig21	11.2135030657042	11.0895760745918	0.988948	0.175
CL99Contig17	6.99698643854656	7.56296403206899	1.08089	0.175
CL99Contig19	6.99698643854656	7.56296403206899	1.08089	0.175
CL99Contig20	6.99698643854656	7.56296403206899	1.08089	0.175
CL99Contig22	6.99698643854656	7.56296403206899	1.08089	0.175
CL1Contig8347	8.91130832988838	8.43557596548756	0.946615	0.175
CL1Contig3898	8.99759154537633	9.17650554848392	1.01988	0.175
Locus_236_4_5	8.99759154537633	9.17650554848392	1.01988	0.175
CL26021Contig1	9.51135217406916	9.33092087843541	0.98103	0.175
CL905Contig3	6.80546879750192	7.31616210595644	1.07504	0.176
CL3496Contig12	9.01003928727471	8.64052008136396	0.958988	0.176
CL7140Contig2	9.09859915624315	8.90472310159269	0.978692	0.176
CL4079Contig2	9.42313823817209	9.17454917094019	0.973619	0.176
CL4079Contig6	9.42313823817209	9.17454917094019	0.973619	0.176
CL8989Contig4	11.0786174493356	10.9554761285279	0.988885	0.177
CL3044Contig3	11.2738065817144	11.0997301926317	0.984559	0.177
Locus_226_6_6	7.30343638417253	7.782687695092	1.06562	0.17
CL2267Contig4	5.63758704548465	6.61354329954573	1.17312	0.177
CL1Contig10045	6.71009994506453	7.28218263067674	1.08526	0.177
CL1Contig2642	6.71009994506453	7.28218263067674	1.08526	0.177
CL1904Contig1	8.79247288712077	8.57538133434454	0.975309	0.177
CL1Contig168	8.83845785901878	9.05595905622076	1.02461	0.177
CL1Contig193	8.83845785901878	9.05595905622076	1.02461	0.177
CL1Contig319	8.83845785901878	9.05595905622076	1.02461	0.177
CL1Contig320	8.83845785901878	9.05595905622076	1.02461	0.177
CL1Contig4405	8.83845785901878	9.05595905622076	1.02461	0.177
CL1Contig4407	8.83845785901878	9.05595905622076	1.02461	0.177
CL7196Contig2	8.91686436211362	9.03912714365047	1.01371	0.177
CL1805Contig11	9.12404884132141	8.96078266378266	0.982106	0.177
CL1805Contig7	9.12404884132141	8.96078266378266	0.982106	0.177
CL1805Contig8	9.12404884132141	8.96078266378266	0.982106	0.177
CL1805Contig9	9.12404884132141	8.96078266378266	0.982106	0.177
CL1Contig4370	9.35394265321238	9.05273922717184	0.967799	0.177
CL1Contig4443	9.35394265321238	9.05273922717184	0.967799	0.177
CL9672Contig3	9.41199023913396	9.13223859516886	0.970277	0.177
CL63Contig30	9.944827196017	9.83819870361576	0.989278	0.177
CL3993Contig4	8.89630233448761	8.51893280484423	0.957581	0.178
CL252Contig2	9.68465993445596	9.56236856700216	0.987373	0.178
CL939Contig1	9.20793334263061	9.08078080156886	0.986191	0.17
CL1Contig1174	9.38036161912569	9.20912507502796	0.981745	0.17
CL1Contig1177	9.38036161912569	9.20912507502796	0.981745	0.17
CL4462Contig2	6.53030391713008	6.11718418555247	0.936738	0.179
CL9863Contig2	6.53030391713008	6.11718418555247	0.936738	0.179
CL4627Contig1	7.39355345168561	7.14765783607216	0.966742	0.179
CL7095Contig1	8.32930130418499	8.66890765021055	1.04077	0.179
CL1172Contig2	9.11970345384062	9.26809284499162	1.01627	0.179
CL9207Contig1	9.35168319455244	9.54351038278828	1.02051	0.179
CL5199Contig3	9.69828438300016	9.98381572803587	1.02944	0.179
CL1601Contig2	8.00368045561411	8.3263059630356	1.04031	0.181
CL1601Contig3	8.00368045561411	8.3263059630356	1.04031	0.181
CL1452Contig8	9.58681438380267	9.3989867562474	0.980408	0.181
CL317Contig5	6.09407729830486	7.22389510921158	1.1854	0.182
CL1Contig4117	10.0321533760833	10.3814590965723	1.03482	0.183
CL7102Contig1	6.91476819184243	7.64879439846617	1.10615	0.183
CL13052Contig1	8.38769468657347	8.04892093364223	0.959611	0.1
isotig00697	9.5735485522928	9.71498264762952	1.01477	0.183
CL9721Contig1	7.78476405144978	7.51258855648505	0.965037	0.184
CL7060Contig1	8.43901333517474	8.71314604694062	1.03248	0.184
CL7060Contig2	8.43901333517474	8.71314604694062	1.03248	0.184
CL44Contig9	8.64755100727063	8.50246569070392	0.983222	0.184
CL1Contig1903	8.52333334160056	8.79042797772752	1.03134	0.1
CL10491Contig1	6.73003584341854	7.52956109556119	1.1188	0.185
CL2237Contig2	7.11714815634655	7.87744170293836	1.10683	0.185
CL3053Contig2	7.80544483960136	7.12501856513465	0.912827	0.185
CL3053Contig4	7.80544483960136	7.12501856513465	0.912827	0.185
CL1Contig3875	6.95944681427479	7.68044733220377	1.1036	0.186
CL12926Contig1	8.29146346481914	7.88362300109068	0.950812	0.186
CL614Contig11	8.297414581189	7.86287919857257	0.94763	0.186
CL7871Contig3	8.60325784652809	8.43771765958296	0.980758	0.186
CL1Contig7684	8.698136785833	9.09404367748723	1.04552	0.1
HTPG4_ERATE	10.5118505455852	10.6328546606563	1.01151	0.187
CL3044Contig1	12.1260490504039	11.9708754816861	0.987203	0.187
CL6796Contig3	6.34538292886303	6.9425902726786	1.09412	0.187
CL595Contig11	7.64302268676974	7.22451076981545	0.945243	0.18
CL1Contig4326	7.57347650549098	6.18626492815801	0.816833	0.187
CL140Contig12	8.91626772569007	8.67276210229452	0.97269	0.187
CL1Contig3719	9.16533351066672	8.84598452610143	0.965157	0.187
CL1658Contig13	10.4139004980339	10.3143569658258	0.990441	0.188
CL1Contig8626	8.31914918630041	8.54783621597909	1.02749	0.18
CL280Contig1	8.64747452936754	8.90079767704735	1.02929	0.18
CL280Contig3	8.64747452936754	8.90079767704735	1.02929	0.18
CL15Contig21	8.2340025066149	8.51916867462542	1.03463	0.188
CL1241Contig2	8.71738285850258	8.54024454480715	0.97968	0.188
CL1005Contig1	10.7909084306828	10.6283705069952	0.984938	0.189
CL1Contig3194	11.0335762083839	10.8481945595645	0.983198	0.189
CL567Contig18	9.41594608871048	9.63508080662192	1.02327	0.18
comp10971_c0_seq1	9.45152633253969	8.79378866310534	0.930409	0.18
CL4928Contig1	6.54677389210102	6.92001716293384	1.05701	0.189
CL5602Contig2	9.77059008873253	9.66495491734055	0.989188	0.18
CL3294Contig7	8.93078121468676	8.79573050964148	0.984878	0.189
CL941Contig7	9.95837945351163	9.85578262655658	0.989697	0.189
CL1Contig1664	7.46359719728826	7.06678039037245	0.946833	0.191
CL22334Contig1	8.46111921802122	8.12438127831816	0.960202	0.191
CL367Contig12	9.18219743634742	9.01519165552057	0.981812	0.191
CL11608Contig1	9.91831342152686	9.78990755242233	0.987054	0.191
CL1Contig8025	10.9620975853897	10.8217639695833	0.987198	0.192
CL1516Contig5	5.49411483591692	6.84732674803549	1.2463	0.192
CL12326Contig1	7.50374152512108	7.75238138098482	1.03314	0.192
CL3721Contig2	9.24308463434961	9.02502160309383	0.976408	0.192
CL2428Contig1	9.59116981988649	9.47244560502666	0.987622	0.192
CL2428Contig3	9.59116981988649	9.47244560502666	0.987622	0.192
CL2Contig165	7.12598235418674	5.59151381380586	0.784666	0.193
Locus_12209_4_6	8.04114174223146	7.74148067006902	0.962734	0.193
CL1Contig2302	8.4388596449115	8.78137413324429	1.04059	0.193
CL6655Contig1	9.47418197466562	9.31927404129461	0.983649	0.193
CL125Contig3	9.48050818506363	9.34560710956742	0.985771	0.193
CL2360Contig1	9.56561511669896	9.39717188955531	0.982391	0.193
CL2360Contig4	9.56561511669896	9.39717188955531	0.982391	0.193
CL2706Contig1	9.66203253811969	9.48609589765161	0.981791	0.193
CL23Contig30	9.45146169598812	9.62466987752554	1.01833	0.1
CL29Contig29	6.17238676445995	5.60710181088397	0.908417	0.194
CL8077Contig3	7.57162328050002	8.12178233430192	1.07266	0.194
CL8077Contig4	7.57162328050002	8.12178233430192	1.07266	0.194
CL1Contig5578	8.66612494793956	8.28217596366278	0.955695	0.194
CL1Contig3740	9.241659953499	9.02506452174159	0.976563	0.194
CL494Contig2	9.32779319974901	9.1513282696699	0.981082	0.194
CL318Contig2	8.08034200071748	8.37202116033938	1.0361	0.195
CL7813Contig4	8.98911183109481	8.81044322458196	0.980124	0.195
CL11160Contig1	9.00984487824658	9.25639192987683	1.02736	0.195
CL3458Contig3	9.08453460929414	9.36427173126362	1.03079	0.195
CL6749Contig2	9.08649604007316	9.26751559756795	1.01992	0.195
CL536Contig6	9.26547914029649	9.12090710101278	0.984397	0.195
CL469Contig10	9.31596752818746	9.1074065726317	0.977613	0.195
CL756Contig4	9.71734624734685	9.56774166503316	0.984604	0.195
CL1965Contig8	6.35994319112309	7.01928334831748	1.10367	0.19
CL20548Contig1	6.35994319112309	7.01928334831748	1.10367	0.19
CL2783Contig7	6.35994319112309	7.01928334831748	1.10367	0.19
CL4467Contig4	6.35994319112309	7.01928334831748	1.10367	0.19
CL4692Contig2	6.35994319112309	7.01928334831748	1.10367	0.19
CL2498Contig1	7.9411983239229	8.29401006269785	1.04443	0.196
CL2498Contig2	7.9411983239229	8.29401006269785	1.04443	0.196
Locus_6550_4_8	7.9411983239229	8.29401006269785	1.04443	0.196
CL1533Contig5	8.75142712436909	8.48053092656358	0.969045	0.196
CL1Contig69	8.83690121275001	8.93050107535109	1.01059	0.196
CL1Contig1981	9.05054962238917	9.19440445501152	1.01589	0.196
CL1335Contig5	9.15800683210916	9.36143075904708	1.02221	0.196
CL1304Contig9	9.29424872676443	9.57845116860252	1.03058	0.196
CL5616Contig2	7.55577091994392	7.02585241108949	0.929866	0.19
CL3376Contig1	7.56700141759824	7.93476850808632	1.0486	0.197
CL4079Contig3	9.37774225531564	9.12489158050847	0.973037	0.197
CL4079Contig4	9.37774225531564	9.12489158050847	0.973037	0.197
CL4079Contig5	9.37774225531564	9.12489158050847	0.973037	0.197
CL2901Contig5	10.0747517325672	9.9425064715845	0.986874	0.198
CL2901Contig6	10.0747517325672	9.9425064715845	0.986874	0.198
CL2901Contig8	10.0747517325672	9.9425064715845	0.986874	0.198
CL1Contig5183	9.87790170026158	9.98780992074158	1.01113	0.1
Locus_12434_1_4	8.81151074059739	8.65816012291966	0.982597	0.198
CL396Contig7	8.95344224373206	8.71103105281512	0.972925	0.19
CL3407Contig3	10.6456307088964	10.8444394391807	1.01868	0.199
CL3044Contig8	12.121968654224	11.9762363293994	0.987978	0.199
CL3384Contig5	7.56993307396241	7.23150133249402	0.955293	0.199
CL2033Contig5	7.94374305886806	8.31470802972371	1.0467	0.199
CL7294Contig1	9.27295661701058	8.51073649474778	0.917802	0.199
CL1685Contig1	9.52980315554319	8.87973897641387	0.931786	0.199
CL1685Contig2	9.52980315554319	8.87973897641387	0.931786	0.199
CL2707Contig1	10.1801711624583	10.2893705328838	1.01073	0.201
CL10274Contig1	9.99931783728326	10.1324608879905	1.01332	0.201
CL8511Contig3	7.83066796504412	7.54778244599162	0.963875	0.202
CL6820Contig1	8.85190937772243	9.12707235128294	1.03109	0.202
CL213Contig1	9.23504686114519	9.48580142311923	1.02715	0.202
CL8239Contig2	9.4096764595328	9.01554159116976	0.958114	0.202
CL1507Contig3	11.2513998990708	11.1477831238029	0.990791	0.203
CL3044Contig11	12.1493423033618	11.9964642764778	0.987417	0.203
CL328Contig6	7.74854407234268	7.40538907886123	0.955714	0.203
CL5395Contig3	9.06133268663089	8.73188175611612	0.963642	0.203
CL323Contig2	9.57654864105497	9.43309146497729	0.98502	0.203
CL66Contig5	9.89916831619865	10.144587225826	1.02479	0.203
CL594Contig6	9.95181494897066	9.76473645689126	0.981202	0.203
CL7919Contig1	7.32640521404655	7.73616008339145	1.05593	0.204
GLYA2_ERATE	8.42333539236593	8.15227108047655	0.96782	0.204
CL5888Contig3	8.47903300073532	8.10145852824071	0.95547	0.204
CL1Contig8732	10.8308932980344	10.9079826131719	1.00712	0.205
CL1662Contig3	8.74013616870925	8.56341381071558	0.97978	0.205
CL1Contig2670	9.49535962005819	9.33510271886555	0.983123	0.205
Locus_2972_3_7	10.9138694899322	10.973091498747	1.00543	0.206
CL3848Contig2	5.74527937807704	6.3435181168993	1.10413	0.206
CL4219Contig3	5.74527937807704	6.3435181168993	1.10413	0.206
CL4033Contig2	6.84587064718286	6.23621019211409	0.910945	0.206
CL871Contig8	7.79547395821697	8.20677421187074	1.05276	0.206
CL7586Contig1	8.31516297657547	8.54398584626095	1.02752	0.206
CL1Contig8436	7.5227803866889	7.78532968742426	1.0349	0.207
CL150Contig11	7.72038783860956	7.96060195662425	1.03111	0.207
CL150Contig15	7.72038783860956	7.96060195662425	1.03111	0.207
CL1891Contig4	7.91448364657049	7.72938538390703	0.976613	0.207
CL1681Contig2	8.97990979476224	8.73282386936356	0.972485	0.207
CL90Contig17	7.65402997012041	8.16587231005693	1.06687	0.208
CL90Contig9	7.65402997012041	8.16587231005693	1.06687	0.208
CL3783Contig1	7.77813758881879	7.39435614564913	0.950659	0.208
CL445Contig3	7.77813758881879	7.39435614564913	0.950659	0.208
CL1Contig10228	7.98134306116608	8.57245169717383	1.07406	0.208
CL3498Contig2	8.08972088648753	8.31453463970054	1.02779	0.208
CL1Contig4865	9.21195909366205	8.89782532012991	0.965899	0.208
CL816Contig2	9.80581728769286	10.0012646353662	1.01993	0.208
CL1984Contig3	10.5843583200898	10.6906594908413	1.01004	0.209
CL1731Contig1	7.58537131399237	7.1825854197344	0.9469	0.209
CL478Contig6	8.19575734098744	7.73308314441194	0.943547	0.209
CL5286Contig1	8.19575734098744	7.73308314441194	0.943547	0.209
CL5286Contig2	8.19575734098744	7.73308314441194	0.943547	0.209
CL10372Contig2	8.19575734098744	7.73308314441194	0.943547	0.209
CL32Contig8	10.7091953651162	10.5613719077597	0.986197	0.211
CL4723Contig3	10.9520954895013	11.0546607444474	1.00936	0.211
comp3282_c0_seq1	7.11477706999071	6.65625716222431	0.935554	0.211
CL50Contig6	9.00199167154984	9.20195846261406	1.02221	0.211
CL4534Contig2	6.93352298674474	7.51068833224086	1.08324	0.212
CL3452Contig1	7.99059663395496	7.60291488465946	0.951483	0.212
CL2214Contig2	9.57664618815461	9.68276290843679	1.01108	0.212
CL18333Contig1	10.0611415539788	9.82425935814929	0.976456	0.213
CL4512Contig1	10.2672019962637	10.4057586283688	1.0135	0.213
CL151Contig13	8.87216700246591	9.00942006017216	1.01547	0.213
CL7873Contig3	7.60807203839623	7.00932215815269	0.921301	0.214
CL133Contig8	7.60807203839623	7.00932215815269	0.921301	0.214
CL3Contig10	7.77995263633113	6.92619516491045	0.890262	0.214
CL12834Contig2	9.04753419803824	9.22268655729556	1.01936	0.214
CL2016Contig2	9.10331008860108	8.89848006590233	0.977499	0.214
CL10106Contig3	9.27678465837023	9.51166290599763	1.02532	0.214
CL584Contig1	8.09951474271228	8.3021028447541	1.02501	0.215
CL376Contig15	8.45547445944661	8.81529813906472	1.04256	0.215
CL1715Contig12	7.46590429090856	7.79675181978206	1.04431	0.216
isotig03755	7.46590429090856	7.79675181978206	1.04431	0.216
CL9417Contig1	7.84916854021286	7.28848563633721	0.928568	0.216
CL66Contig14	11.5353456882895	11.6147202571499	1.00688	0.217
CL66Contig2	11.5353456882895	11.6147202571499	1.00688	0.217
CL1Contig643	7.43498915173018	7.7869450762003	1.04734	0.21
CL3844Contig2	6.563374787641	5.91137684704544	0.900661	0.217
CL2463Contig8	6.99318805431011	7.32949293535073	1.04809	0.217
CL4626Contig3	8.3847521393098	8.04853126848633	0.959901	0.217
CL6858Contig2	7.87101654837775	7.23102819445328	0.918691	0.21
CL333Contig12	7.92864236171397	7.70927971086073	0.972333	0.21
FTSH6_ERATE	9.86795603025896	9.91311568971075	1.00458	0.217
FTSH9_ERATE	9.86795603025896	9.91311568971075	1.00458	0.217
CL4374Contig1	8.47571041415306	8.249730299835	0.973338	0.21
CL4374Contig5	8.47571041415306	8.249730299835	0.973338	0.21
CL34Contig12	8.53387667077153	8.25208799101102	0.96698	0.21
CL8967Contig6	8.58741053394154	8.16158716326682	0.950413	0.21
CL1798Contig1	7.63207073464403	8.02991891923531	1.05213	0.218
CL174Contig1	8.3953655076748	9.01084773889449	1.07331	0.218
CL106Contig4	8.48579603225487	8.64127752408499	1.01832	0.218
isotig01127	8.49810004497222	8.72968387108138	1.02725	0.218
CL3598Contig1	8.50952556218604	8.81573567185387	1.03598	0.218
CL4989Contig1	8.79381629762836	8.98397429769959	1.02162	0.218
CL905Contig1	8.87678993214812	9.0831640241414	1.02325	0.218
CL4769Contig2	9.14107211111879	8.33736222044287	0.912077	0.218
CL138Contig18	9.61467051855159	9.44192885482718	0.982034	0.218
CL5539Contig2	10.6070035128576	10.7477342687936	1.01327	0.219
CL3039Contig1	8.45446901304815	8.78343888214417	1.03891	0.219
CL4333Contig1	9.57366020872428	9.72111139960134	1.0154	0.219
CL4756Contig1	9.57366020872428	9.72111139960134	1.0154	0.219
CL942Contig4	9.72817099346216	9.88772384784071	1.0164	0.219
CL33Contig2	9.98974621269122	9.72704209372314	0.973703	0.21
CL2115Contig1	10.2072092656113	10.1267104286867	0.992114	0.221
CL2115Contig2	10.2072092656113	10.1267104286867	0.992114	0.221
CL2115Contig3	10.2072092656113	10.1267104286867	0.992114	0.221
CL2115Contig4	10.2072092656113	10.1267104286867	0.992114	0.221
CL190Contig5	10.6148773490177	10.489502717069	0.988189	0.221
CL367Contig7	12.9035777046359	12.694553261717	0.983801	0.221
CL99Contig13	6.4277624426444	7.4158611654839	1.15372	0.221
CL6190Contig1	8.31067289804595	8.48447834562154	1.02091	0.221
CL1Contig10682	10.9940287185669	10.8974533608531	0.991216	0.222
CL93Contig11	6.57710425171434	7.0975206383146	1.07913	0.222
CL1917Contig3	7.76723943238157	8.10071371103699	1.04293	0.222
CL6186Contig1	9.02542394189896	8.83031788979761	0.978383	0.222
CL1Contig10037	9.26256241309068	9.45110812503005	1.02036	0.222
CL11607Contig2	9.26256241309068	9.45110812503005	1.02036	0.222
CL2818Contig9	11.9248405153078	11.8040849193274	0.989874	0.223
ATPA6_ERATE	12.8927095460133	12.7782029571108	0.991119	0.223
CL2648Contig2	6.58083118587718	7.18360830200188	1.0916	0.223
CL3868Contig2	6.58083118587718	7.18360830200188	1.0916	0.223
CL5041Contig2	6.58083118587718	7.18360830200188	1.0916	0.223
CL23Contig27	7.90593463265662	7.69175045094785	0.972908	0.223
CL89Contig5	8.45878886678892	8.16358443717694	0.965101	0.223
CL1Contig2451	9.34338569952967	9.65871978524411	1.03375	0.223
CL2013Contig2	7.53108914905894	7.96941941353856	1.0582	0.224
CL46Contig41	8.39532133118953	8.60908198665827	1.02546	0.224
CL2673Contig7	8.32331470499438	8.70379402301445	1.04571	0.225
CL11449Contig1	8.40874613100536	8.60559137631741	1.02341	0.225
CL11449Contig2	8.40874613100536	8.60559137631741	1.02341	0.225
CL1030Contig8	9.41053693316023	9.54954937620813	1.01477	0.225
CL10467Contig1	9.46697791616725	9.26230716322665	0.978381	0.225
FTSH4_ERATE	9.79563135520132	9.84614010659469	1.00516	0.225
CL2217Contig2	9.96725694667844	10.1783351818442	1.02118	0.225
CL7323Contig1	10.764075697876	10.709073617484	0.99489	0.226
CL3249Contig1	6.79607983279957	6.05386610331395	0.890788	0.226
CL406Contig5	8.19207791065064	8.51959161214399	1.03998	0.226
CL1Contig10064	6.91284166669901	6.23079424424896	0.901336	0.22
CL410Contig2	9.65812131786188	9.45746190010698	0.979224	0.226
CL410Contig6	9.65812131786188	9.45746190010698	0.979224	0.226
CL410Contig7	9.65812131786188	9.45746190010698	0.979224	0.226
CL2257Contig9	7.81500431330528	7.34208990625967	0.939486	0.22
CL394Contig12	8.41698328762771	8.63728628041459	1.02617	0.227
CL4029Contig1	9.20516858623873	8.83495876937662	0.959782	0.227
isotig06906	10.2789110818389	10.4320519356725	1.0149	0.228
CL2736Contig3	8.10708175333431	8.43369639967509	1.04029	0.22
CL1Contig1541	10.9039460938404	10.9825759121393	1.00721	0.228
CL9132Contig1	7.17368583467759	6.61094115449568	0.921554	0.228
CL10302Contig1	7.68706134954191	7.39155443694991	0.961558	0.228
CL13261Contig2	7.81314879316632	8.22613545098268	1.05286	0.228
CL9581Contig1	8.70213938852966	8.58375327434938	0.986396	0.228
CL1Contig8980	8.93852049101697	9.05845440335639	1.01342	0.228
CL3785Contig1	9.07239756963479	9.30775869233361	1.02594	0.228
CL9218Contig1	9.60451797202033	9.44482017502895	0.983373	0.228
CL1862Contig1	9.6577067683218	9.83490031755744	1.01835	0.228
CL125Contig2	10.7389239553701	10.6021891953673	0.987267	0.229
CL1Contig4948	9.60035181364499	9.8264664305946	1.02355	0.22
CL1Contig7764	9.60035181364499	9.8264664305946	1.02355	0.22
CL85Contig7	7.36904597572053	7.04994965964724	0.956698	0.229
CL1365Contig1	9.73816555352161	9.60784466451571	0.986618	0.22
CL1365Contig3	9.73816555352161	9.60784466451571	0.986618	0.22
CL1365Contig4	9.73816555352161	9.60784466451571	0.986618	0.22
CL1365Contig6	9.73816555352161	9.60784466451571	0.986618	0.22
CL7473Contig1	8.4225186077462	8.30945554041931	0.986576	0.229
CL1Contig3411	9.27083458975297	9.07800548051795	0.9792	0.229
CL5537Contig4	9.39483640993947	8.96739578852694	0.954503	0.229
LEPA4_ERATE	10.0167131154792	9.96086182816546	0.994424	0.231
CL43Contig4	10.2190097346346	10.3714657150286	1.01492	0.231
CL247Contig1	11.2277861904378	11.3172474082753	1.00797	0.231
CL247Contig3	11.2277861904378	11.3172474082753	1.00797	0.231
CL4662Contig1	7.25384049269501	7.70948028916433	1.06281	0.231
CL3Contig51	8.58346074647221	8.50003662823789	0.990281	0.231
CL3Contig52	8.58346074647221	8.50003662823789	0.990281	0.231
CL138Contig6	8.66218750749514	8.24161001923824	0.951447	0.231
CL5725Contig1	8.7056508039048	9.01181642764308	1.03517	0.231
CL3458Contig2	8.81417745735203	9.04311824236075	1.02597	0.231
CL4723Contig4	11.1614429475024	11.258477634935	1.00869	0.232
CL1723Contig10	6.23437415138097	7.11066844759384	1.14056	0.232
CL194Contig12	8.99902889606628	8.8609188324135	0.984653	0.232
CL885Contig4	9.52404039123763	9.35648938269538	0.982408	0.232
CL1Contig9204	9.7374097287671	9.92043999848531	1.0188	0.232
CL33Contig28	10.0816213970966	9.85028812335698	0.977054	0.233
comp7117_c0_seq2	10.0816213970966	9.85028812335698	0.977054	0.233
comp7117_c0_seq4	10.0816213970966	9.85028812335698	0.977054	0.233
CL36Contig36	10.4924498552559	10.3779215477997	0.989085	0.233
CL5905Contig3	11.137124441583	11.5779115455566	1.03958	0.233
CL5905Contig7	11.137124441583	11.5779115455566	1.03958	0.233
Locus_4972_1_4	11.137124441583	11.5779115455566	1.03958	0.233
CL1545Contig2	5.9333267283827	7.03778515763455	1.18614	0.233
CL1545Contig4	5.9333267283827	7.03778515763455	1.18614	0.233
CL20Contig4	7.61366453681315	7.31598102882867	0.960901	0.233
CL20Contig5	7.61366453681315	7.31598102882867	0.960901	0.233
CL532Contig1	8.75479164378097	8.96043673504277	1.02349	0.233
CL9281Contig2	10.2795949690472	10.4153495064072	1.01321	0.234
CL5539Contig4	10.5681031613879	10.7211404649351	1.01448	0.234
CL2351Contig2	7.9214884459243	8.33709965721259	1.05247	0.234
CL2351Contig4	7.9214884459243	8.33709965721259	1.05247	0.234
CL448Contig4	8.70594292801035	8.48120455514532	0.974186	0.234
CL448Contig5	8.70594292801035	8.48120455514532	0.974186	0.234
CL382Contig7	9.20633813279405	9.38080862559901	1.01895	0.234
CL434Contig1	9.24440896448217	9.49115740695009	1.02669	0.234
CL8989Contig1	10.9434221741456	10.8281530804404	0.989467	0.235
CL1Contig6720	10.9855732424918	10.8527574308793	0.98791	0.235
CL837Contig5	7.35413206290434	7.04589544560739	0.958087	0.235
CL393Contig13	8.65187597788068	8.41703379029862	0.972857	0.235
CL393Contig2	8.65187597788068	8.41703379029862	0.972857	0.235
CL393Contig3	8.65187597788068	8.41703379029862	0.972857	0.235
CL1Contig1577	8.87551394896624	8.65461273045159	0.975111	0.235
CL1Contig1579	8.87551394896624	8.65461273045159	0.975111	0.235
CL1Contig1642	8.87551394896624	8.65461273045159	0.975111	0.235
Locus_15723_4_6	7.81239528392376	7.22015341727146	0.924192	0.236
CL4025Contig1	8.2642081069405	7.66577143669263	0.927587	0.236
CL1Contig5698	6.22800958079908	5.34378471350723	0.858024	0.237
CL322Contig21	8.50726926002153	8.77387817357471	1.03134	0.237
CL629Contig14	8.30313688209772	8.61670717547517	1.03777	0.23
CL1867Contig1	8.64824347445819	8.49588816169942	0.982383	0.23
CL3821Contig1	7.26670068235414	7.66601509313566	1.05495	0.238
CL1Contig2501	8.98089476372778	8.75938405067613	0.975335	0.238
CL5905Contig5	11.0961516934815	11.5422316335261	1.0402	0.239
Locus_1431_4_5	11.0961516934815	11.5422316335261	1.0402	0.239
Locus_1444_3_4	11.0961516934815	11.5422316335261	1.0402	0.239
Locus_4972_3_4	11.0961516934815	11.5422316335261	1.0402	0.239
CL4577Contig1	11.1202210367684	10.9632682383842	0.985886	0.239
CL4577Contig2	11.1202210367684	10.9632682383842	0.985886	0.239
CL6392Contig1	9.49056357637765	9.73016123126224	1.02525	0.23
CL12161Contig1	6.35383197400092	5.37351462479667	0.845712	0.239
CL1Contig7306	7.18249231021973	7.6976598728036	1.07173	0.239
CL3779Contig2	9.8042278541175	9.67559461094555	0.98688	0.23
CL174Contig24	9.09969248367325	9.45192770080932	1.03871	0.239
CL9144Contig1	7.04071815275754	6.66638708472204	0.946833	0.241
comp21949_c0_seq4	7.20557434897783	6.97163948266195	0.967534	0.241
CL7817Contig3	9.23777699033317	8.62683019595195	0.933864	0.241
CL8670Contig4	9.60704643185511	9.80971378171022	1.0211	0.241
CL73Contig3	10.1539472592173	9.99009858019684	0.983864	0.242
CL5286Contig3	8.34325872131397	7.99556854227114	0.958327	0.242
CL3523Contig3	8.77726187799199	9.05667487263256	1.03183	0.242
CL62Contig12	8.80289106644913	8.69689905228205	0.987959	0.242
CL62Contig34	8.80289106644913	8.69689905228205	0.987959	0.242
Locus_9776_3_4	8.80289106644913	8.69689905228205	0.987959	0.242
CL309Contig8	9.08502056135941	8.96781669820155	0.987099	0.242
CL405Contig6	10.5421867458053	10.6977164274658	1.01475	0.243
CL1Contig3083	6.54019947388475	6.88635728227696	1.05293	0.243
CL5582Contig1	7.82329254177998	8.09638002745491	1.03491	0.243
CL5582Contig2	7.82329254177998	8.09638002745491	1.03491	0.243
CL750Contig6	8.01422818464834	7.66791158159758	0.956787	0.243
CL1Contig2254	9.36475129671313	9.22372105267984	0.98494	0.243
CL367Contig32	13.2026402506931	12.9852166754741	0.983532	0.244
CL1Contig4997	7.00927971781959	7.3475219892385	1.04826	0.244
CL6459Contig1	7.00927971781959	7.3475219892385	1.04826	0.244
CL82Contig6	7.64231362189599	7.25544452220413	0.949378	0.244
Locus_13789_3_7	7.64231362189599	7.25544452220413	0.949378	0.244
CL1160Contig1	7.82725027237373	8.08138238197031	1.03247	0.244
CL1Contig2919	8.02084647253329	8.50523953428734	1.06039	0.244
CL1Contig8915	8.02084647253329	8.50523953428734	1.06039	0.244
CL1Contig937	8.02084647253329	8.50523953428734	1.06039	0.244
CL2810Contig1	8.22076165649026	8.40526242442138	1.02244	0.244
CL280Contig14	8.68446508281359	7.98603888735232	0.919578	0.244
CL837Contig4	10.8606079371377	11.0174650930369	1.01444	0.245
CL1Contig3406	9.20213346107793	9.02823982528187	0.981103	0.245
Locus_211_9_10	9.20213346107793	9.02823982528187	0.981103	0.245
isotig21337	9.59374108498357	9.68613690845757	1.00963	0.245
CL1Contig9347	10.743297272398	10.5872944693566	0.985479	0.246
CL5285Contig1	6.82135693700709	7.42515804000105	1.08852	0.246
CL1Contig1998	8.01806486423243	8.46218530120449	1.05539	0.246
Locus_8528_2_5	8.15021111310117	8.54956632881495	1.049	0.246
CL1039Contig2	8.33241908931516	8.68183879092785	1.04193	0.246
CL1152Contig1	8.36027012292191	8.56383252280363	1.02435	0.246
CL1623Contig1	8.63274655517941	8.32984072788627	0.964912	0.246
CL4731Contig3	8.95829043459837	9.19947731650639	1.02692	0.246
CL2416Contig1	9.27362613488025	9.08857324353882	0.980045	0.246
CL1984Contig2	10.5382117999986	10.6307298886251	1.00878	0.247
CL8585Contig3	6.59312398484998	7.24517584772579	1.0989	0.247
CL1911Contig2	8.89982739270125	8.69355042727694	0.976822	0.247
CL1911Contig5	8.89982739270125	8.69355042727694	0.976822	0.247
CL1421Contig2	7.98312125914747	7.45547193217639	0.933904	0.24
CL36Contig12	11.2731700919897	11.1249962458604	0.986856	0.248
CL8663Contig1	8.23179188027071	8.0663133541326	0.979898	0.24
CL1Contig8536	8.24358220021455	8.58295163768544	1.04117	0.24
CL6009Contig2	7.59123038291758	7.93880756761536	1.04579	0.248
CL14493Contig1	8.35948843571516	8.03417538268665	0.961085	0.248
CL1511Contig2	8.79963250580054	8.61931885323512	0.979509	0.248
CL1Contig7807	9.02183801992561	9.28625082360032	1.02931	0.248
CL2690Contig2	9.33481952537314	9.59625061034866	1.02801	0.248
CL2690Contig3	9.33481952537314	9.59625061034866	1.02801	0.248
CL7597Contig1	9.8750091684601	9.69963674027306	0.982241	0.248
CL667Contig9	9.91864833576349	9.65477537251357	0.973396	0.248
CL2252Contig3	10.4362997452781	10.3808079411066	0.994683	0.249
CL3044Contig10	11.415967717511	11.2562056846336	0.986005	0.249
CL514Contig12	9.36890375197075	9.63138445017935	1.02802	0.24
CL2612Contig1	7.44656090040203	7.99255150156357	1.07332	0.249
Locus_11108_5_6	8.29551178231923	8.40355887997219	1.01302	0.249
CL1629Contig9	8.44143649234596	8.13689192749472	0.963923	0.249
isotig05936	8.50882200510206	8.1029149902137	0.952296	0.249
CL1144Contig4	9.88552144178504	10.0123841159174	1.01283	0.24
CL1144Contig5	9.88552144178504	10.0123841159174	1.01283	0.24
CL434Contig11	9.22634173155961	9.45601937400315	1.02489	0.249
CL434Contig2	9.22634173155961	9.45601937400315	1.02489	0.249
CL434Contig3	9.22634173155961	9.45601937400315	1.02489	0.249
CL3456Contig2	9.33117035940115	9.12540878282332	0.977949	0.249
CL3916Contig1	10.2983921271719	10.4234532002379	1.01214	0.251
CL4723Contig2	11.0697143978199	11.1942224359837	1.01125	0.25
CL1Contig3195	11.861438468221	11.7338792206266	0.989246	0.251
CL25025Contig1	7.23545949776063	6.46939459867029	0.894124	0.251
CL2711Contig2	7.92971995383184	7.66401398043119	0.966492	0.251
CL1Contig3958	8.77137812384883	8.53079534908737	0.972572	0.251
CL1Contig4554	8.77137812384883	8.53079534908737	0.972572	0.251
CL1Contig8013	8.77137812384883	8.53079534908737	0.972572	0.251
CL1Contig8014	8.77137812384883	8.53079534908737	0.972572	0.251
CL440Contig6	9.30753727633012	8.94012505959105	0.960525	0.251
CL367Contig10	13.1235102997609	12.9172765576358	0.984285	0.252
CL16694Contig1	8.32377408491683	8.61537224320853	1.03503	0.252
CL1Contig1002	9.23361430848895	8.57347677743608	0.928507	0.252
CL1Contig10513	11.5150296710782	11.607214972069	1.00801	0.253
CL1Contig10514	11.5150296710782	11.607214972069	1.00801	0.253
CL1Contig8705	9.2248665614386	9.13429376589379	0.990182	0.253
CL5379Contig1	9.34454382914245	9.20403999193289	0.984964	0.253
CL274Contig7	10.4149494711409	10.5222349562352	1.0103	0.254
CL1984Contig1	10.5590045433625	10.655802191961	1.00917	0.254
CL1Contig9096	10.6425798771589	10.6984586572489	1.00525	0.254
CL32Contig6	10.871490594121	10.7248513185665	0.986512	0.254
CL1Contig3582	7.20130317284633	6.81615253853882	0.946517	0.254
CL20396Contig1	7.27817337741769	6.68027542595359	0.917851	0.254
isotig06219	7.84895018415688	8.06387226618076	1.02738	0.254
CL9027Contig1	7.9609344872299	7.56710631447626	0.95053	0.254
CL8864Contig3	8.54395951442985	9.04648723044073	1.05882	0.254
CL1251Contig2	8.72693277538602	8.39488970141944	0.961952	0.254
Locus_82_4_4	10.0453068574221	10.2424379380269	1.01962	0.255
RPIA2_ERATE	10.0919452047153	9.97466533075213	0.988379	0.255
comp894_c0_seq3	11.8493492539264	11.7199612307626	0.989081	0.255
CL10869Contig1	8.26286461615036	8.73933706698152	1.05766	0.255
CL4480Contig2	8.28045564300633	8.68749150880325	1.04916	0.255
CL1Contig5727	8.81219201637462	8.98344963249345	1.01943	0.255
CL6242Contig1	9.83709086503422	9.64675778450466	0.980651	0.255
CL9824Contig1	10.5722362475246	10.4903893506865	0.992258	0.256
CL702Contig3	9.29495392729148	9.13161055919271	0.982427	0.256
isotig03618	9.29495392729148	9.13161055919271	0.982427	0.256
CL73Contig17	11.2878279003221	11.2066699726016	0.99281	0.257
CL1Contig3612	7.46427078737903	7.80381060274081	1.04549	0.25
CL1Contig3683	7.46427078737903	7.80381060274081	1.04549	0.25
CL6369Contig5	5.54963523075072	6.54248293378893	1.1789	0.257
CL206Contig8	6.8083115427641	5.67161525596341	0.833043	0.257
isotig03751	8.18397272977461	8.46863202892473	1.03478	0.257
CL6841Contig1	8.63632735993137	8.8453919324681	1.02421	0.257
CL6841Contig3	8.63632735993137	8.8453919324681	1.02421	0.257
CL9116Contig1	8.20412933907079	7.97660539416329	0.972267	0.25
Locus_6504_2_6	7.21791270538803	8.04497402085899	1.11458	0.258
CL3302Contig2	8.32823430909423	8.4959453834423	1.02014	0.258
CL1153Contig1	9.73114560787228	9.6016079683344	0.986688	0.258
CL4723Contig1	11.044405631172	11.1646432699303	1.01089	0.259
CL7140Contig3	9.16047412656893	8.99201819114892	0.981611	0.25
CL7405Contig2	9.03877765466758	8.81505322703464	0.975248	0.259
CL1739Contig2	9.18702124398978	9.40837890311453	1.02409	0.259
CL1269Contig8	10.1503129931706	10.3089544969446	1.01563	0.261
DNAK11_ERATE	11.1054665114256	11.1639918456919	1.00527	0.261
DNAK4_ERATE	11.1054665114256	11.1639918456919	1.00527	0.261
CL2086Contig1	6.16782524319258	5.00475507967068	0.811429	0.2
CL1Contig932	7.05576405411417	6.69470179455805	0.948827	0.261
CL2783Contig1	7.84397310430547	7.62150301591949	0.971638	0.261
CL1044Contig5	7.91560371807031	7.60378553148588	0.960607	0.261
CL111Contig8	7.91560371807031	7.60378553148588	0.960607	0.261
CL3457Contig4	7.91560371807031	7.60378553148588	0.960607	0.261
CL9333Contig2	7.91560371807031	7.60378553148588	0.960607	0.261
Locus_77125_1_1	7.91560371807031	7.60378553148588	0.960607	0.261
CL1Contig37	8.49609133221267	8.26636743797453	0.972961	0.261
CL1Contig38	8.49609133221267	8.26636743797453	0.972961	0.261
CL1030Contig10	9.12264322091559	9.38941167205058	1.02924	0.261
CL10519Contig1	9.12578598410667	9.22129492683993	1.01047	0.261
CL1629Contig6	9.59521489736983	9.74347517986457	1.01545	0.261
CL1Contig5466	10.190094585553	10.4493916363815	1.02545	0.262
CL4506Contig1	5.76776867674986	4.73635069209317	0.821176	0.262
CL1723Contig9	7.52397855565174	7.91107713385021	1.05145	0.262
CL7169Contig2	7.81072768956985	7.20373028990633	0.922287	0.262
CL1Contig36	8.81784233099455	8.60880149816692	0.976293	0.262
Locus_1005_8_11	8.81784233099455	8.60880149816692	0.976293	0.262
CL738Contig9	9.71054032033593	9.5652622338331	0.985039	0.262
CL99Contig26	9.83211224632088	9.66499611014713	0.983003	0.262
CL150Contig14	7.98571596580451	8.16992890779004	1.02307	0.263
CL4731Contig2	9.0048486989519	9.24427019825779	1.02659	0.263
CL7935Contig1	9.03326158996223	8.83533965922952	0.97809	0.263
RS17E6_ERATE	9.7831268506803	9.66014916889461	0.98743	0.263
CL8764Contig1	6.46490334643269	7.11663496439246	1.10081	0.264
CL1847Contig1	8.32842997297044	8.52715805948463	1.02386	0.264
CL1847Contig2	8.32842997297044	8.52715805948463	1.02386	0.264
CL1847Contig4	8.32842997297044	8.52715805948463	1.02386	0.264
CL1177Contig3	10.3466065903567	10.2616775310424	0.991792	0.265
CL1Contig4148	9.19114626366477	9.41617556109647	1.02448	0.265
CL1629Contig1	9.66232528552343	9.79612709038042	1.01385	0.265
CL1629Contig2	9.66232528552343	9.79612709038042	1.01385	0.265
CL5866Contig3	9.85923871779358	10.0702012176388	1.0214	0.265
CL43Contig23	10.2750399711757	10.4219343544152	1.0143	0.266
CL27536Contig1	6.59234025925973	7.16468763991267	1.08682	0.266
CL1Contig4528	8.58626657542028	8.41153762415392	0.97965	0.266
CL3347Contig7	8.76124347966929	8.98497136211119	1.02554	0.266
SYK5_ERATE	8.80868033210804	8.92836980243676	1.01359	0.266
CL2860Contig3	9.3907001946239	9.22850217072304	0.982728	0.266
CL1317Contig2	9.62640695936308	9.84302375823719	1.0225	0.266
CL1317Contig3	9.62640695936308	9.84302375823719	1.0225	0.266
CL5304Contig2	10.0604898956519	9.84294321755822	0.978376	0.267
CL430Contig9	10.0651130855294	10.0192853171837	0.995447	0.267
CL367Contig22	12.5774787886901	12.410223967611	0.986702	0.267
CL1202Contig3	7.71824625382143	7.99880005528241	1.03635	0.267
CL3088Contig1	8.25795070060284	7.88045100123655	0.954287	0.267
CL1Contig178	9.00356309447893	9.1189717601231	1.01282	0.267
CL15444Contig1	8.18242609511965	7.50382040761803	0.917065	0.26
CL2263Contig2	5.69547344404608	6.43684227089021	1.13017	0.268
CL22Contig37	6.73792663931572	7.12237235353013	1.05706	0.268
CL14Contig30	6.73792663931572	7.12237235353013	1.05706	0.268
CL10387Contig2	6.73792663931572	7.12237235353013	1.05706	0.268
CL1322Contig3	7.36280311250074	7.68760118044163	1.04411	0.268
CL42Contig9	8.75636389273914	9.1413530914222	1.04397	0.26
CL1107Contig5	10.2924647598607	10.1998123526034	0.990998	0.269
CL1Contig3243	6.94179194096967	5.55220966028997	0.799824	0.2
CL259Contig3	8.82483822244233	9.0503381882145	1.02555	0.269
CL1Contig8805	9.28475295529498	9.41109179218157	1.01361	0.269
CL28Contig4	9.44931341623081	9.28427427102006	0.982534	0.269
CL1Contig1424	9.60747712613157	9.82680527783502	1.02283	0.269
CL1Contig3153	9.60747712613157	9.82680527783502	1.02283	0.269
CL1Contig3688	9.60747712613157	9.82680527783502	1.02283	0.269
CL1Contig3689	9.60747712613157	9.82680527783502	1.02283	0.269
CL1Contig5606	9.60747712613157	9.82680527783502	1.02283	0.269
CL1Contig5779	9.60747712613157	9.82680527783502	1.02283	0.269
Locus_107_1_4	9.60747712613157	9.82680527783502	1.02283	0.269
CL77Contig18	9.6704959062067	9.80850061690271	1.01427	0.269
CL43Contig11	10.2947062449902	10.4394116208385	1.01406	0.27
CL2827Contig2	8.18414216060364	8.51533699886147	1.04047	0.271
Locus_11848_5_6	9.98245772702999	10.1594915418985	1.01773	0.271
CL1177Contig4	10.495919721161	10.4004732825301	0.990906	0.272
CL2555Contig2	5.81388893853682	6.23791435780922	1.07293	0.273
CL104Contig2	7.86803126505247	8.35087509034867	1.06137	0.273
CL1013Contig4	9.45851394939738	9.24745735570334	0.977686	0.273
CL20Contig1	9.6143751958116	9.76979612166063	1.01617	0.273
CL4510Contig3	10.0878505244777	9.94035173196452	0.985379	0.274
CL7819Contig2	10.1632952268586	10.2103586783011	1.00463	0.274
CL190Contig18	10.9749428820957	10.8717696724902	0.990599	0.274
CL5232Contig4	7.0486441156602	6.75291545340301	0.958045	0.274
CL854Contig7	7.72442041548135	7.53966560712844	0.976082	0.274
CL5734Contig2	8.05498874337895	8.56824372537702	1.06372	0.274
CL5734Contig3	8.05498874337895	8.56824372537702	1.06372	0.274
CL2172Contig1	8.20023803354534	8.44756380148289	1.03016	0.274
CL2172Contig3	8.20023803354534	8.44756380148289	1.03016	0.274
CL2810Contig3	8.77219551177385	8.96014961601843	1.02143	0.274
CL10870Contig1	7.52875489268127	7.82642931702441	1.03954	0.2
CL328Contig4	6.30614063837136	5.46577903978829	0.866739	0.275
CL271Contig24	7.48962984211733	7.99958955052456	1.06809	0.275
CL1997Contig8	8.39469826032704	8.61641251832951	1.02641	0.275
CL10636Contig1	8.64991464644551	8.91567087152331	1.03072	0.275
CL10636Contig2	8.64991464644551	8.91567087152331	1.03072	0.275
Locus_454_4_9	8.69563842812353	9.10105754697513	1.04662	0.275
CL1Contig2371	9.06484125279231	9.29164755783494	1.02502	0.275
CL1Contig8807	9.36503615677611	9.22552195123613	0.985103	0.275
CL1Contig3901	10.0183297477438	9.91470126127852	0.989656	0.276
CL3835Contig2	7.06633994671605	5.98136659289299	0.846459	0.276
CL1Contig5742	9.05285443406535	9.22941349399977	1.0195	0.276
Locus_222_5_11	9.324786885919	9.49146712976779	1.01787	0.276
CL175Contig13	9.46496051156353	9.59151605370125	1.01337	0.276
CL4534Contig1	7.15851008797613	7.64529809673706	1.068	0.27
CL321Contig16	7.61822285179427	8.05191599587105	1.05693	0.277
CL2Contig166	8.10085522566441	8.46593551908856	1.04507	0.277
CL12260Contig1	8.48003825168846	8.16290906582437	0.962603	0.277
CL74Contig2	9.13855572181724	8.8680937688107	0.970404	0.277
CL11653Contig2	9.24426758289759	9.08488162470282	0.982758	0.277
CL3819Contig4	7.95317317254606	8.24309055162332	1.03645	0.27
CL1158Contig2	8.24350669671803	8.54521209751016	1.0366	0.27
CL10823Contig2	6.02872435102686	5.11500294675548	0.848439	0.278
CL226Contig1	7.76633220593048	8.21394478674335	1.05764	0.278
CL226Contig2	7.76633220593048	8.21394478674335	1.05764	0.278
FTSH_ERATE	9.8774297854868	9.82649563793567	0.994843	0.278
CL1495Contig3	10.2041931210179	10.0913096741922	0.988938	0.279
CL1Contig8766	9.15910714213638	8.90323015259255	0.972063	0.27
CL5679Contig1	9.52641267294917	9.75246198990045	1.02373	0.27
CL3231Contig4	7.65876943272568	7.88271906486936	1.02924	0.279
CL3231Contig5	7.65876943272568	7.88271906486936	1.02924	0.279
CL3231Contig7	7.65876943272568	7.88271906486936	1.02924	0.279
CL408Contig3	8.25360647358009	8.0484063839191	0.975138	0.279
CL1135Contig4	9.92886175155018	10.1199637945854	1.01925	0.27
CL1135Contig8	9.92886175155018	10.1199637945854	1.01925	0.27
CL1Contig10463	10.2888065744186	10.1810516484446	0.989527	0.28
CL14Contig12	11.2896539043284	11.5829962013978	1.02598	0.281
SPEE4_ERATE	6.65408180039135	7.12010500777875	1.07004	0.281
CL13126Contig1	7.96506537557344	7.7275902024702	0.970185	0.281
CL2637Contig7	8.8704781867381	9.21019171155352	1.0383	0.281
CL261Contig1	9.95621151046172	10.1933368553844	1.02382	0.281
CL7553Contig2	6.14375219332105	7.08264218143078	1.15282	0.282
CL1758Contig6	7.64792409146331	7.85432666659266	1.02699	0.282
CL922Contig1	9.38294452493396	9.24231870467541	0.985013	0.282
CL43Contig13	10.8444691792	10.9559699821691	1.01028	0.283
CL7109Contig1	6.84306671185918	5.67682759936157	0.829574	0.283
CL3347Contig3	9.45092082369754	9.5207776201022	1.00739	0.283
CL1Contig7241	11.1697678765312	11.04706375795	0.989015	0.284
CL144Contig2	11.4514986359252	11.5405305872001	1.00777	0.284
CL9278Contig2	6.87599406557908	7.3726071739402	1.07222	0.284
CL1Contig3349	7.70346171429218	7.4494381790775	0.967025	0.284
CL2146Contig2	8.32318655409392	8.15209930847025	0.979445	0.284
isotig04020	8.89217207929528	9.00655244903876	1.01286	0.284
CL1330Contig3	9.62284349093445	9.76173573998414	1.01443	0.284
CL1330Contig4	9.62284349093445	9.76173573998414	1.01443	0.284
CL1Contig5950	11.5404095061695	11.6227939769328	1.00714	0.285
CL7159Contig3	8.14265996726664	8.36934278854623	1.02784	0.285
CL1Contig5493	8.677225971683	8.51847910425622	0.981705	0.285
CL1Contig5494	8.677225971683	8.51847910425622	0.981705	0.285
CL6067Contig1	9.89926325649085	9.83550290660427	0.993559	0.285
CL6067Contig2	9.89926325649085	9.83550290660427	0.993559	0.285
CL1Contig3585	7.03955175016156	6.74330611497018	0.957917	0.286
CL5197Contig5	7.03955175016156	6.74330611497018	0.957917	0.286
CL7Contig22	7.03955175016156	6.74330611497018	0.957917	0.286
CL9862Contig1	7.03955175016156	6.74330611497018	0.957917	0.286
CL9862Contig2	7.03955175016156	6.74330611497018	0.957917	0.286
CL9348Contig1	7.74253400087653	7.36007395604991	0.950603	0.286
isotig13959	8.13337277223822	7.67255017473235	0.943342	0.286
CL4854Contig2	8.74405244252532	8.94321178371409	1.02278	0.286
G6PI_ERATE	9.10099170630553	8.90322617677922	0.97827	0.286
CL123Contig10	9.31432008189445	9.20587427863863	0.988357	0.286
CL756Contig2	9.69532896850382	9.53864610914835	0.983839	0.286
CL4092Contig2	9.8224819030172	9.65844358622511	0.9833	0.286
CL4008Contig6	5.89716023710199	6.85609980626178	1.16261	0.287
CL1Contig3076	8.78465768061925	8.43866342934113	0.960614	0.2
CL727Contig5	9.11201879388903	9.23163815188351	1.01313	0.287
CL1Contig1042	9.9235210837112	10.0022414278454	1.00793	0.287
CL15873Contig1	8.3123819329567	7.98253906657138	0.960319	0.28
CL5286Contig4	8.33855605021233	8.13904971658715	0.976074	0.28
CL4406Contig1	5.09237869876729	6.06118459794817	1.19025	0.288
CL4837Contig1	8.5659877443255	8.94765614190681	1.04456	0.288
CL1067Contig15	8.7960121924294	8.85945031470566	1.00721	0.288
CL280Contig6	10.1657530502403	10.2754970327258	1.0108	0.289
CL187Contig7	10.5039663192919	10.5457879560299	1.00398	0.289
CL1637Contig4	9.35792215198537	9.24098507748152	0.987504	0.28
CL14897Contig1	6.37012038366274	6.89561068844605	1.08249	0.289
CL215Contig6	6.93021596193524	6.57433999191564	0.948649	0.289
CL12016Contig1	7.88022148397864	8.34803268742628	1.05937	0.289
CL514Contig2	9.5677564102973	9.76237201910649	1.02034	0.289
CL24991Contig1	9.78975104566233	9.93460408191821	1.0148	0.289
Locus_82_1_4	9.91183543400929	10.1091952871212	1.01991	0.289
CL5816Contig5	9.06011339298475	9.25953843063705	1.02201	0.2
Locus_2388_3_9	7.33518124030827	7.78703253176275	1.0616	0.291
CL7898Contig1	7.89673124782954	7.74745003950469	0.981096	0.291
CL7898Contig3	7.89673124782954	7.74745003950469	0.981096	0.291
CL7196Contig1	9.03181593228427	9.15773347757027	1.01394	0.291
CL7196Contig3	9.03181593228427	9.15773347757027	1.01394	0.291
CL567Contig16	10.7597739584643	10.8159460384432	1.00522	0.292
CL1481Contig1	7.90901005455902	8.21382689074697	1.03854	0.292
CL496Contig4	8.06728414920136	8.25549774800466	1.02333	0.292
CL13434Contig1	8.29289299209021	8.60800761726166	1.038	0.292
CL184Contig7	8.52824751521694	8.30393501535099	0.973698	0.292
CL6947Contig3	9.51658320674844	9.21520430375551	0.968331	0.292
CL1380Contig1	10.0954695758541	10.0390237852132	0.994409	0.293
CL5866Contig2	10.1156585124027	10.2661935469812	1.01488	0.293
CL72Contig20	11.3499434942115	11.445301043072	1.0084	0.293
isotig04693	11.3499434942115	11.445301043072	1.0084	0.293
CL409Contig10	7.45994415977875	7.79797633617205	1.04531	0.293
CL409Contig11	7.45994415977875	7.79797633617205	1.04531	0.293
CL22771Contig1	8.01612513537466	7.21316211813702	0.899832	0.293
CL7425Contig1	8.51268764325969	8.68971132428994	1.0208	0.293
CL44Contig2	8.63037864317563	8.44494377565303	0.978514	0.293
CL44Contig32	8.63037864317563	8.44494377565303	0.978514	0.293
CL44Contig3	8.63037864317563	8.44494377565303	0.978514	0.293
CL13Contig25	8.86944892034624	9.1836644975561	1.03543	0.293
CL7356Contig1	9.35164851002828	9.43751307462413	1.00918	0.293
CL1629Contig7	9.91755166869425	10.0329895009751	1.01164	0.293
CL8239Contig4	9.48213899554021	9.08833707185935	0.958469	0.2
CL7578Contig2	7.40741843515362	7.88694277769659	1.06474	0.295
CL16519Contig1	7.40741843515362	7.88694277769659	1.06474	0.295
CL9403Contig2	8.39650241534547	8.69653172564134	1.03573	0.295
CL12657Contig1	8.52370549743659	8.71001745395835	1.02186	0.295
CL6796Contig2	8.83396413459223	9.26050715786683	1.04828	0.295
CL367Contig2	12.8044282640106	12.6418250812762	0.987301	0.296
CL8214Contig3	6.19331768274123	6.73171830854146	1.08693	0.29
CL6385Contig3	6.44320978307406	7.13319170711379	1.10709	0.29
CL8664Contig1	7.92249431127764	7.65564028685823	0.966317	0.296
CL1Contig7080	7.95995549206337	7.63370066989642	0.959013	0.296
CL7310Contig3	8.09440525924698	7.87879591373517	0.973363	0.296
CL7310Contig4	8.09440525924698	7.87879591373517	0.973363	0.296
CL1666Contig8	8.83655505276914	8.59268248300119	0.972402	0.296
CL28Contig16	9.47645777319811	9.34667278017671	0.986304	0.296
CL1Contig462	9.63636978170198	9.52109721097921	0.988038	0.296
CL28Contig37	9.74254078796802	9.59619168371317	0.984978	0.297
CL2114Contig1	9.98600111109913	9.82101886573518	0.983479	0.297
CL1814Contig1	10.0567327268176	9.91884398956177	0.986289	0.298
CL10057Contig1	7.90354293611428	7.66247312124805	0.969499	0.298
CL8826Contig1	7.90354293611428	7.66247312124805	0.969499	0.298
CL4157Contig1	9.18593335140285	9.00729731434315	0.980553	0.298
CL12405Contig2	9.18593335140285	9.00729731434315	0.980553	0.298
isotig02453	9.36156691168276	9.5330728820627	1.01832	0.298
CL367Contig23	12.9397264547399	12.7592396635963	0.986052	0.299
CL360Contig5	9.35810291387892	9.54533686127038	1.02001	0.29
CL8135Contig2	6.50756903937731	5.66174954905603	0.870025	0.299
CL4351Contig2	7.81667964278662	8.05580937989218	1.03059	0.299
CL1Contig5582	9.83047296065832	9.96165245647069	1.01334	0.29
Locus_4558_1_9	9.99014697889931	9.80518790044946	0.981486	0.2
CL1Contig312	9.70970983488411	9.64974769026614	0.993825	0.299
CL5167Contig2	9.84962140445626	9.76642760049988	0.991554	0.299
CL9259Contig2	7.54380354769338	7.30777501915183	0.968712	0.301
CL4697Contig2	8.48076536252085	8.55377536665687	1.00861	0.301
CL1567Contig2	8.67166779201388	8.75068881856198	1.00911	0.301
CL154Contig18	10.2786940046221	10.1480145910262	0.987286	0.302
CL14Contig20	10.9672417138219	11.2309706177228	1.02405	0.302
CL14759Contig1	5.46450045390206	6.39289323737068	1.1699	0.302
CL10765Contig1	6.87808588172684	7.62883404738512	1.10915	0.302
CL1Contig5786	6.87808588172684	7.62883404738512	1.10915	0.302
CL27217Contig1	6.87808588172684	7.62883404738512	1.10915	0.302
CL4128Contig1	6.87808588172684	7.62883404738512	1.10915	0.302
CL4128Contig3	6.87808588172684	7.62883404738512	1.10915	0.302
CL4379Contig3	6.87808588172684	7.62883404738512	1.10915	0.302
CL4710Contig1	8.53820410199117	8.28817473430983	0.970716	0.302
CL3830Contig3	9.58314366222438	9.49643638602711	0.990952	0.302
CL15398Contig1	7.80752340958167	8.19716086659328	1.04991	0.303
CL105Contig4	7.82122474130014	7.45239741145222	0.952843	0.303
CL993Contig6	8.31234079933342	8.55719101483837	1.02946	0.303
CL16903Contig1	8.35599400712636	8.07939029101225	0.966898	0.303
CL1Contig9432	9.27245858889606	9.0564018818902	0.976699	0.303
CL6622Contig3	5.18981421867588	6.17355080865814	1.18955	0.304
CL172Contig9	7.54550228359199	7.93763548970776	1.05197	0.304
CL2535Contig1	8.17665092160264	8.62888460265758	1.05531	0.304
CL1981Contig1	8.25959588479613	8.44999912613938	1.02305	0.304
CL1Contig5580	8.32473495923915	8.09957702883763	0.972953	0.304
CL1665Contig1	8.85662068233483	8.9904451518362	1.01511	0.305
CL1692Contig5	7.50723268402654	7.93369165612923	1.05681	0.306
CL3889Contig2	8.01620006640773	8.25040188245853	1.02922	0.306
CL5099Contig1	8.01620006640773	8.25040188245853	1.02922	0.306
CL1Contig8622	8.2327232389394	8.00483553910798	0.972319	0.306
CL1332Contig12	8.9774964109622	9.06994936993082	1.0103	0.306
CL2169Contig5	9.00905319452522	9.24846918871889	1.02658	0.306
CL2379Contig3	9.35658892713788	9.24005257857758	0.987545	0.306
CL1010Contig1	9.96229500385163	9.85229238073687	0.988958	0.306
CL1010Contig2	9.96229500385163	9.85229238073687	0.988958	0.306
CL32Contig12	7.27349052138169	6.89972320808949	0.948612	0.307
CL1167Contig2	8.10147692173908	8.48921492475108	1.04786	0.307
CL1004Contig2	8.91985735931124	8.68509169590034	0.973681	0.307
CL322Contig9	8.9501693262801	9.14463545500686	1.02173	0.307
CL82Contig19	9.45442111658476	9.1595532492701	0.968812	0.307
CL5Contig13	7.69701807548574	7.94608678352672	1.03236	0.308
CL5Contig9	7.69701807548574	7.94608678352672	1.03236	0.308
CL3406Contig3	8.09082157169163	7.78063374886599	0.961662	0.308
CL3004Contig1	8.21443899966616	8.14137263271416	0.991105	0.308
CL2853Contig3	9.17057235000019	9.27272052652837	1.01114	0.308
CL2750Contig1	9.46819588691466	9.59751481911284	1.01366	0.308
CL8315Contig1	9.93202595856612	9.57719328512488	0.964274	0.308
CL8315Contig2	9.93202595856612	9.57719328512488	0.964274	0.308
CL4212Contig2	10.1231442165292	10.2670916442677	1.01422	0.309
CL4802Contig1	10.2741895232525	10.3857782151179	1.01086	0.309
CL54Contig14	8.2065352260764	7.74127117365364	0.943306	0.309
CL10079Contig1	8.2283267259192	8.52065890051378	1.03553	0.309
CL52Contig13	8.88549052354204	9.0711104066985	1.02089	0.309
CL813Contig1	8.94473353520441	8.74713955792825	0.977909	0.309
CL3251Contig1	9.35761848162544	9.52377325176668	1.01776	0.309
comp1100_c0_seq1	9.35761848162544	9.52377325176668	1.01776	0.309
CL14Contig29	10.7863434076011	11.0848246319464	1.02767	0.3
CL4534Contig3	11.0422546320916	10.8898879537675	0.986201	0.3
CL7671Contig2	10.1388103973163	9.93585139317843	0.979982	0.311
CL279Contig4	10.4341906791217	10.5716337340763	1.01317	0.311
CL735Contig2	11.1122492629572	11.0329337039585	0.992862	0.31
CL1Contig5998	11.2209375025551	11.2995736394529	1.00701	0.3
CL4163Contig4	6.52972572279786	6.93179958608593	1.06158	0.311
CL1Contig6482	7.66264131514587	8.04440806382891	1.04982	0.311
CL1Contig6484	7.66264131514587	8.04440806382891	1.04982	0.311
CL2694Contig2	7.97358345869349	8.26234880963608	1.03622	0.311
CL7762Contig2	8.39279030484068	8.17026631216897	0.973486	0.311
LEU31_ERATE	8.96191683337882	9.05182853819668	1.01003	0.311
CL610Contig2	9.17783001449939	9.01917168088332	0.982713	0.311
CL5357Contig1	9.53617694122868	9.71702682376717	1.01896	0.311
CL6718Contig3	9.54936050147891	9.42245289390193	0.98671	0.311
CL4837Contig2	10.0338546735469	10.2423232641486	1.02078	0.312
PSB287_ERATE	5.71046032680588	6.33705856134094	1.10973	0.312
CL20405Contig1	7.51320705709419	7.78610795808469	1.03632	0.312
CL4697Contig1	7.9497983431432	8.22261946147852	1.03432	0.312
CL227Contig7	8.01273011723237	8.11542796981496	1.01282	0.312
CL400Contig12	8.01273011723237	8.11542796981496	1.01282	0.312
CL4461Contig1	8.01273011723237	8.11542796981496	1.01282	0.312
CL4461Contig2	8.01273011723237	8.11542796981496	1.01282	0.312
CL7142Contig1	8.01273011723237	8.11542796981496	1.01282	0.312
CL1Contig1299	8.99871190044206	8.78839915768514	0.976629	0.312
CL1Contig1301	8.99871190044206	8.78839915768514	0.976629	0.312
CL3314Contig1	9.94492340076482	10.0311189423235	1.00867	0.312
CL7060Contig3	7.69380411567682	8.00516324265329	1.04047	0.313
CL1269Contig9	9.92853529006918	10.1015464813907	1.01743	0.313
CL3640Contig1	9.95984011691832	10.1636956341632	1.02047	0.313
CL1883Contig3	5.48675219008564	6.3485612514881	1.15707	0.314
CL1883Contig4	5.48675219008564	6.3485612514881	1.15707	0.314
CL183Contig19	8.00614320023632	7.74427925322753	0.967292	0.314
CL58Contig28	8.64968236626122	8.82352369402703	1.0201	0.314
CL1Contig5424	8.73641866146045	8.65851051360078	0.991082	0.314
CL1Contig5103	8.8869851976749	9.21749503039408	1.03719	0.314
CL26305Contig1	6.94531395250969	5.94666624505616	0.856213	0.315
CL1Contig5668	7.00549092689602	6.50885653400294	0.929108	0.315
CL1Contig5669	7.00549092689602	6.50885653400294	0.929108	0.315
CL1Contig9741	7.00549092689602	6.50885653400294	0.929108	0.315
CL533Contig10	7.90304685745892	7.56392364454596	0.95709	0.315
CL533Contig11	7.90304685745892	7.56392364454596	0.95709	0.315
CL5317Contig5	7.91938261222401	8.00682810458472	1.01104	0.315
CL7170Contig2	9.23585120294545	9.1491468825307	0.990612	0.315
CL2442Contig3	9.50696128335597	9.62703883296474	1.01263	0.315
CL5388Contig1	9.59602167483814	9.78187334494526	1.01937	0.315
CL735Contig5	9.69327520772681	9.61755021099896	0.992188	0.315
CL1630Contig4	10.4249984383539	10.3319752693611	0.991077	0.316
Locus_3302_1_8	10.8473839055804	10.7317878838843	0.989343	0.316
CL1507Contig2	10.8473839055804	10.7317878838843	0.989343	0.316
CL567Contig15	5.964519277734	5.16503288431837	0.86596	0.316
CL6109Contig2	6.53000292465341	6.11820160788256	0.936937	0.316
comp16494_c0_seq4	6.7796045010025	6.1575706590905	0.908249	0.316
CL15511Contig1	6.7796045010025	6.1575706590905	0.908249	0.316
CL7361Contig1	7.15940202140627	6.80963792061683	0.951146	0.316
CL2547Contig2	9.50516602987908	9.59766620627437	1.00973	0.316
CL2114Contig2	10.0789582929603	9.93912418896111	0.986126	0.317
CL3947Contig3	7.83060605752438	7.48540864241258	0.955917	0.317
isotig22806	8.66292221580083	8.89764053994887	1.02709	0.317
CL7858Contig1	8.87139038762895	9.11910387295245	1.02792	0.317
CL1620Contig1	9.67255291605101	9.38902148844256	0.970687	0.317
CL4596Contig1	10.3321936750016	10.4115219027844	1.00768	0.318
CL4596Contig2	10.3321936750016	10.4115219027844	1.00768	0.318
CL3978Contig1	8.34263699868947	8.03701178206958	0.963366	0.31
CL3978Contig2	8.34263699868947	8.03701178206958	0.963366	0.31
CL3208Contig3	8.16734873242459	8.45870108559573	1.03567	0.318
CL7175Contig1	8.29773015581438	8.53378188388045	1.02845	0.318
CL582Contig2	8.66905168105363	8.89258410967383	1.02579	0.318
CL2056Contig1	9.84926023585424	9.67949540177011	0.982764	0.318
CL2546Contig5	9.87029037446647	9.94734908667478	1.00781	0.318
CL1533Contig11	8.99702286358132	9.11532212425224	1.01315	0.31
CL136Contig18	7.86294335055205	8.15561090190873	1.03722	0.319
CL1Contig5666	8.26285706630768	8.54677483759814	1.03436	0.319
CL1Contig4675	7.17037573553895	7.54121768891436	1.05172	0.321
CL14Contig2	8.04496771269502	7.59288950801061	0.943806	0.321
CL14Contig4	8.04496771269502	7.59288950801061	0.943806	0.321
CL9341Contig2	6.84875192471493	7.31941091953797	1.06872	0.322
CL6075Contig2	7.84261756663289	8.07548155601504	1.02969	0.322
isotig03756	9.30520963084521	9.13760752860925	0.981988	0.322
CL496Contig6	9.36613991653237	9.4687835192844	1.01096	0.322
SERC2_ERATE	9.45409042509529	9.2892527700735	0.982564	0.322
CL802Contig3	10.2721854317641	10.1787263927149	0.990902	0.323
CL698Contig3	10.4175081260434	10.2790077219253	0.986705	0.323
CL2546Contig1	10.5945977120675	10.7448280974084	1.01418	0.323
CL68Contig32	7.92340411587833	7.5580204608455	0.953886	0.323
CL134Contig4	8.60119969343297	8.35573535691877	0.971462	0.323
CL2037Contig6	9.97498325167418	9.92688812425528	0.995178	0.323
CL516Contig3	10.4795597331937	10.6328159347495	1.01462	0.324
CL516Contig6	10.4795597331937	10.6328159347495	1.01462	0.324
Locus_1651_3_5	10.6107423168586	10.750376481732	1.01316	0.324
CL1567Contig1	7.55043741938014	7.89622695536462	1.0458	0.324
CL7868Contig1	8.26303577593387	8.49865601952123	1.02851	0.324
CL7868Contig2	8.26303577593387	8.49865601952123	1.02851	0.324
CL7868Contig3	8.26303577593387	8.49865601952123	1.02851	0.324
CL737Contig12	8.37929870123415	8.11670896671863	0.968662	0.324
isotig07274	8.71273726095895	8.96619643129533	1.02909	0.324
CL8351Contig3	9.13691699440873	9.29493426720426	1.01729	0.324
CL4Contig5	9.5755246610585	9.72109270268195	1.0152	0.324
Locus_640_3_5	7.08587315768167	7.52881870752484	1.06251	0.325
CL629Contig5	8.50904883157246	8.84485341905385	1.03946	0.325
CL5474Contig2	8.88125131962382	8.77392020667083	0.987915	0.325
CL3743Contig4	8.9423948133402	9.09402788156074	1.01696	0.325
CL7729Contig2	9.28532546483108	9.16849654491815	0.987418	0.325
CL99Contig10	10.7007728460082	10.6033982361577	0.9909	0.326
CL99Contig11	10.7007728460082	10.6033982361577	0.9909	0.326
CL6013Contig1	6.14963457785421	5.26509601922211	0.856164	0.326
CL6013Contig2	6.14963457785421	5.26509601922211	0.856164	0.326
CL632Contig14	7.52730336591842	7.25643512050187	0.964015	0.326
CL632Contig15	7.52730336591842	7.25643512050187	0.964015	0.326
CL1Contig458	8.38881999408287	8.75040750683628	1.0431	0.326
CL3640Contig3	10.2037227121114	10.3989410268561	1.01913	0.327
CL1Contig4816	10.7996797716572	10.8522463574484	1.00487	0.327
Locus_2954_2_10	10.7996797716572	10.8522463574484	1.00487	0.327
CL5503Contig3	9.00970222068879	8.78316756460148	0.974857	0.327
CL420Contig11	9.04624549037779	8.94035326521906	0.988294	0.327
CL1Contig8563	10.004557231397	9.8942767632479	0.988977	0.328
CL5308Contig1	8.42336906774191	8.02561831414859	0.95278	0.32
CL1Contig8960	8.56955195198537	8.33653637478056	0.972809	0.32
Locus_4035_1_7	7.51627734907494	7.27061184395068	0.967316	0.328
CL6963Contig2	9.29930649381907	9.46545792787048	1.01787	0.328
CL155Contig29	9.70111961835894	9.58257437513187	0.98778	0.328
F16PA13_ERATE	10.097732327893	10.1883428105547	1.00897	0.329
CL3019Contig6	10.5863968825704	10.5030111880113	0.992123	0.329
CL2394Contig2	9.60592090484442	9.73875707605931	1.01383	0.32
CL8478Contig1	8.29746902080785	7.96781566038538	0.960271	0.329
CL8478Contig2	8.29746902080785	7.96781566038538	0.960271	0.329
CL1179Contig3	9.86659089877215	10.0298543853706	1.01655	0.329
CL1Contig7383	10.961693882813	11.1189754853814	1.01435	0.331
CL10382Contig4	8.1494523939837	7.98594061978872	0.979936	0.331
CL3239Contig2	8.72813513788046	8.35324649826646	0.957048	0.331
CL63Contig13	9.31355825388963	9.4740101897944	1.01723	0.331
CL63Contig14	9.31355825388963	9.4740101897944	1.01723	0.331
CL826Contig5	9.35798710476785	9.49005719958531	1.01411	0.331
CL2778Contig1	9.4079257730413	9.28261806149892	0.986681	0.331
CL2778Contig5	9.4079257730413	9.28261806149892	0.986681	0.331
CL4Contig24	9.59793077461827	9.736323682578	1.01442	0.331
CL4Contig26	9.59793077461827	9.736323682578	1.01442	0.331
CL4461Contig3	9.77317880249004	9.55413858382111	0.977588	0.331
CL11786Contig1	5.52137074000516	6.36405932298545	1.15262	0.332
CL11786Contig2	5.52137074000516	6.36405932298545	1.15262	0.332
CL4498Contig5	6.81263239187185	7.19194240039255	1.05568	0.332
CL5290Contig2	6.95250560693597	7.48856104934103	1.0771	0.332
CL10865Contig2	7.06233621588596	6.7594331205181	0.95711	0.332
CL14Contig1	8.41762719015275	7.91748861585519	0.940584	0.332
CL475Contig8	8.89181174303181	9.06132347579834	1.01906	0.332
CL10481Contig3	8.94963968432223	9.1434719443405	1.02166	0.332
CL23242Contig1	8.94963968432223	9.1434719443405	1.02166	0.332
CL15Contig32	9.32239417143665	9.17283072501496	0.983957	0.332
Locus_1824_1_8	10.1024258415389	10.2564175875673	1.01524	0.333
CL2681Contig6	4.70100410647459	5.33184342399662	1.13419	0.333
CL5014Contig2	8.0086005838582	7.55456164559455	0.943306	0.333
CL5575Contig1	8.72135596547096	9.03458979348571	1.03592	0.333
CL942Contig3	9.67357787274852	9.78063697456142	1.01107	0.333
CL2409Contig2	9.87660004932196	9.7666497034606	0.988868	0.333
CL5478Contig2	7.82210940624584	7.24035424415054	0.925627	0.334
CL1Contig4041	8.26406226849623	8.60830180919624	1.04166	0.334
CL243Contig5	9.52138314088227	9.68412418473856	1.01709	0.334
CL1Contig4227	9.68364222246764	9.50515978102327	0.981569	0.334
CL2209Contig4	6.84368406442876	7.10210910257721	1.03776	0.335
CL4406Contig4	6.98582196235746	7.38794029137867	1.05756	0.335
CL791Contig3	8.30830100533245	8.22388034364829	0.989839	0.335
CL791Contig9	8.30830100533245	8.22388034364829	0.989839	0.335
CL1533Contig3	8.52821128060853	8.29599070046272	0.97277	0.335
CH601_ERATE	10.0863320242947	10.1524335670395	1.00655	0.336
CL1Contig8937	6.18923224146729	7.30671711360609	1.18055	0.33
CL6898Contig2	6.44166939376254	6.80064915419814	1.05573	0.33
CL1996Contig1	7.20216763348859	6.22582369994209	0.864437	0.336
CL9006Contig1	7.44386594635257	7.10695625146682	0.95474	0.336
CL9758Contig3	7.04184405988657	7.42816246479752	1.05486	0.337
CL1332Contig11	7.93851569390245	8.16953873484961	1.0291	0.337
CL1Contig8954	9.69424515003356	9.88171172494969	1.01934	0.337
CL1629Contig5	9.80010624927738	9.89963877390924	1.01016	0.337
CL1Contig1993	10.6694417606074	10.7215000669847	1.00488	0.338
CL2077Contig3	8.37916573031236	8.56003850394789	1.02159	0.33
CL1130Contig1	8.25496364514625	7.8942477377007	0.956303	0.338
comp7683_c0_seq3	7.02746172115839	7.42272948726278	1.05625	0.339
CL1397Contig2	7.2843918577352	6.88178931603688	0.944731	0.339
CL631Contig13	7.28593733656567	7.56815933805938	1.03874	0.339
CL1853Contig1	8.30433529555865	8.40911564053584	1.01262	0.339
CL4791Contig2	8.66677072011707	9.26403133853527	1.06891	0.339
CL9662Contig1	9.90073094033817	9.9898611049428	1.009	0.33
CL1580Contig2	9.76261995486332	9.84274533122723	1.00821	0.339
CL1Contig3189	9.97792139510875	10.0891989117667	1.01115	0.339
CL462Contig10	5.52904203703083	6.15334030660555	1.11291	0.341
CL462Contig13	5.52904203703083	6.15334030660555	1.11291	0.341
CL4331Contig1	5.56951125331488	6.47618151056304	1.16279	0.341
CL478Contig4	5.56951125331488	6.47618151056304	1.16279	0.341
CL7652Contig3	5.56951125331488	6.47618151056304	1.16279	0.341
CL9463Contig2	5.56951125331488	6.47618151056304	1.16279	0.341
CL898Contig1	7.97732460563269	8.43166799623774	1.05695	0.341
CL4125Contig6	8.49943350690434	8.76831896346737	1.03164	0.341
CL4125Contig9	8.49943350690434	8.76831896346737	1.03164	0.341
Locus_5835_2_9	8.49943350690434	8.76831896346737	1.03164	0.341
CL7965Contig1	8.6708806120548	8.95836406225968	1.03316	0.341
CL7355Contig2	8.17556836265902	8.53455547482904	1.04391	0.342
CL7355Contig4	8.17556836265902	8.53455547482904	1.04391	0.342
CL1414Contig3	8.25608681038899	8.12794881270427	0.98448	0.342
CL17541Contig1	8.32230305142003	7.87149415174228	0.945831	0.342
CL546Contig5	8.8389725980443	9.03422820321053	1.02209	0.342
CL700Contig1	9.98584239324335	9.80636843627387	0.982027	0.342
CL280Contig13	10.8698468945182	10.9168437805553	1.00432	0.343
CL477Contig2	6.1501576538473	6.84750246595161	1.11339	0.343
CL1Contig7266	8.03040407323083	7.76291296240957	0.96669	0.343
CL2047Contig2	8.5685039753272	8.85577972521827	1.03353	0.343
CL1Contig6220	10.8353126101758	10.7221011189902	0.989552	0.344
CL12213Contig1	8.33049892624063	8.01080762818974	0.961624	0.344
CL74Contig6	8.87335387276506	8.63771840631419	0.973445	0.344
CL14Contig23	9.90715777056762	10.232831851023	1.03287	0.344
CL25869Contig1	5.99406303151233	6.7549976967565	1.12695	0.345
CL4150Contig5	5.99406303151233	6.7549976967565	1.12695	0.345
CL4150Contig8	5.99406303151233	6.7549976967565	1.12695	0.345
CL4289Contig2	5.99406303151233	6.7549976967565	1.12695	0.345
CL6441Contig4	5.99406303151233	6.7549976967565	1.12695	0.345
CL7403Contig3	5.99406303151233	6.7549976967565	1.12695	0.345
CL1868Contig3	6.98671068495709	6.28645845631584	0.899774	0.345
CL5460Contig3	6.98671068495709	6.28645845631584	0.899774	0.345
CL7765Contig2	8.80289273379271	8.65019458112997	0.982654	0.345
CL1Contig5659	10.1043049063326	9.93363690086561	0.983109	0.346
CL1Contig3754	11.247645910959	11.3064032487529	1.00522	0.347
CL1Contig3755	11.247645910959	11.3064032487529	1.00522	0.347
CL58Contig7	7.91129315302862	8.27904655903238	1.04648	0.347
CL9Contig4	7.91129315302862	8.27904655903238	1.04648	0.347
Locus_1139_2_3	8.49948555290637	8.14739969111834	0.958576	0.347
CL63Contig17	9.22072910357884	9.38256098492982	1.01755	0.347
CL63Contig2	9.22072910357884	9.38256098492982	1.01755	0.347
CL63Contig4	9.22072910357884	9.38256098492982	1.01755	0.347
CL5104Contig1	8.10745807421865	8.27070892243462	1.02014	0.34
CL3124Contig3	8.6544597546047	9.08446658826667	1.04969	0.34
CL3296Contig4	8.6544597546047	9.08446658826667	1.04969	0.34
CL1201Contig18	7.66476300575514	7.33528036164362	0.957013	0.348
CL1201Contig1	7.66476300575514	7.33528036164362	0.957013	0.348
CL1201Contig20	7.66476300575514	7.33528036164362	0.957013	0.348
Locus_376_8_13	7.66476300575514	7.33528036164362	0.957013	0.348
Locus_542_5_10	7.66476300575514	7.33528036164362	0.957013	0.348
SYP2_ERATE	9.13600708137181	9.67536871588525	1.05904	0.348
CL2623Contig3	9.60185301934745	9.34593036948529	0.973347	0.348
CL1215Contig1	10.0765801061738	10.0031978352831	0.992718	0.349
CL958Contig5	10.389283243103	10.4825212297883	1.00897	0.349
CL3814Contig3	9.30509647349151	9.13858693400875	0.982106	0.34
CL10543Contig3	5.76886647253629	6.03653717824673	1.0464	0.349
CL5827Contig5	9.62507314013275	9.53591784744314	0.990737	0.34
CL5228Contig2	7.37852232066713	7.65164088803704	1.03702	0.349
CL3585Contig2	7.48288361656837	7.19294606102125	0.961253	0.349
CL3068Contig1	9.10927128488473	8.93021129078602	0.980343	0.349
CL8924Contig1	9.19929486787021	9.46267761596904	1.02863	0.349
CL8924Contig2	9.19929486787021	9.46267761596904	1.02863	0.349
CL8924Contig3	9.19929486787021	9.46267761596904	1.02863	0.349
CL8924Contig4	9.19929486787021	9.46267761596904	1.02863	0.349
CL8924Contig5	9.19929486787021	9.46267761596904	1.02863	0.349
Locus_6977_3_3	9.19929486787021	9.46267761596904	1.02863	0.349
CL42Contig15	9.92376321911629	10.0842859560625	1.01618	0.349
CL958Contig1	10.4039358594655	10.4953806231829	1.00879	0.351
CL1Contig3962	6.12698649100957	6.64197421855279	1.08405	0.351
CL2406Contig5	7.7842544703462	8.02887338711964	1.03142	0.351
CL3362Contig3	7.7842544703462	8.02887338711964	1.03142	0.351
CL395Contig1	7.7842544703462	8.02887338711964	1.03142	0.351
CL8208Contig1	8.00077914488907	7.80326544316229	0.975313	0.351
CL8208Contig3	8.00077914488907	7.80326544316229	0.975313	0.351
CL3095Contig1	8.9742506329796	9.14763951380945	1.01932	0.351
CL4211Contig3	9.82647341235109	9.62908779303952	0.979913	0.351
CL54Contig19	9.97780849188576	10.0983534910286	1.01208	0.351
CL103Contig5	10.2990708469093	10.1686445576443	0.987336	0.352
CL1495Contig1	10.4841222614023	10.4420044716625	0.995983	0.352
CL1046Contig12	6.96378195551601	6.47072901192004	0.929198	0.352
CL4375Contig2	8.25447994051777	8.48256115158913	1.02763	0.352
CL5463Contig7	8.48884426041238	7.8058468339353	0.919542	0.352
CL3403Contig1	8.59204672573247	8.36471493238039	0.973542	0.352
CL1851Contig1	9.69725379208005	9.85094349437052	1.01585	0.352
CL7673Contig1	10.2644776129247	10.3746531044753	1.01073	0.353
CL1353Contig2	7.45107064995964	7.65731812005879	1.02768	0.353
CL9881Contig2	8.33928233122429	8.46792249621892	1.01543	0.353
CL120Contig16	9.38673209149395	9.69287230132031	1.03261	0.353
CL251Contig8	10.1066080105573	10.2281342518871	1.01202	0.354
CL4534Contig5	11.2839440209563	11.1452667354182	0.98771	0.354
Locus_2602_2_9	9.53167805216532	9.40551455508661	0.986764	0.354
CL1Contig1710	9.59851012255665	9.50485796034462	0.990243	0.354
CL818Contig7	8.59031680522156	8.75133326250803	1.01874	0.355
CL1493Contig3	9.04665785084783	8.91505944022418	0.985453	0.355
CL228Contig20	9.21029730987149	9.1195024228689	0.990142	0.355
CL612Contig6	10.1206305972131	9.93945603477951	0.982098	0.356
CL5880Contig1	8.29682758684592	8.77819591584367	1.05802	0.356
CL1Contig3430	8.31647286734304	8.58670543400257	1.03249	0.356
CL1Contig8683	8.31647286734304	8.58670543400257	1.03249	0.356
CL4722Contig3	9.0014075588765	9.20675133341027	1.02281	0.356
CL5033Contig3	9.38863282996817	9.46904566703945	1.00856	0.356
CL5866Contig1	9.78080126852662	9.90986015074523	1.0132	0.356
HTPG3_ERATE	10.536631776653	10.5885895032315	1.00493	0.357
CL2252Contig2	10.5729923491377	10.5219550434532	0.995173	0.357
CL1Contig1029	7.36478877811401	7.55026556791668	1.02518	0.35
CL3343Contig4	7.43693946148975	7.71566223896671	1.03748	0.35
Locus_153_4_6	7.43693946148975	7.71566223896671	1.03748	0.35
CL5828Contig1	6.35834613047157	7.02527543431641	1.10489	0.357
CL5828Contig3	6.35834613047157	7.02527543431641	1.10489	0.357
CL49Contig18	8.01025893207763	8.28261262447205	1.034	0.357
CL5848Contig4	8.11428700945859	7.81449436986121	0.963054	0.357
CL1Contig3882	9.03471628507606	9.21910569479679	1.02041	0.357
CL9427Contig2	9.44384412819189	9.53925296954253	1.0101	0.357
CL351Contig1	10.0970133413032	10.2670853140034	1.01684	0.358
CL217Contig3	6.71044682210947	6.31863286879286	0.941611	0.358
CL15554Contig1	6.71044682210947	6.31863286879286	0.941611	0.358
CL1135Contig7	9.80598803198578	9.98426751642129	1.01818	0.358
CL7074Contig4	10.7165879464865	10.6847288583921	0.997027	0.359
CL9430Contig3	9.42815264138343	9.65272365626179	1.02382	0.35
CL1158Contig3	8.53672006164096	8.9079836323946	1.04349	0.359
CL443Contig10	9.24454069859279	9.10109819071984	0.984484	0.359
isotig03753	9.45932976797217	9.37689473769362	0.991285	0.359
CL28Contig15	9.76490258255881	9.6493770224963	0.988169	0.359
CL1Contig5223	10.3927027245225	10.4875429213748	1.00913	0.36
CL1201Contig16	7.3418817137932	6.99641157301681	0.952945	0.361
CL1201Contig19	7.3418817137932	6.99641157301681	0.952945	0.361
Locus_376_5_13	7.3418817137932	6.99641157301681	0.952945	0.361
Locus_376_9_13	7.3418817137932	6.99641157301681	0.952945	0.361
Locus_542_8_10	7.3418817137932	6.99641157301681	0.952945	0.361
CL737Contig1	7.98731380525937	7.71481302589231	0.965883	0.361
CL1Contig5168	9.50559948935871	9.63389387859871	1.0135	0.361
CL781Contig6	8.54583779722491	8.77230381165419	1.0265	0.362
CL7210Contig2	9.28584189715851	9.11231074796613	0.981312	0.362
CL7287Contig3	9.99482036585641	10.0863512949338	1.00916	0.362
CL1719Contig2	7.31730854738958	7.09239557643492	0.969263	0.363
CL189Contig5	7.78133519312534	7.1634500955731	0.920594	0.363
CL1158Contig1	7.84732815912321	8.2680715509866	1.05362	0.363
CL1158Contig4	7.84732815912321	8.2680715509866	1.05362	0.363
CL3661Contig3	8.47553224510984	8.7005899922315	1.02655	0.363
Locus_1972_7_10	9.76269796676979	9.93859718182344	1.01802	0.363
CL12448Contig1	9.9027179270409	9.85215288278029	0.994894	0.363
CL4922Contig4	10.8014084775159	10.9799789664912	1.01653	0.364
CL36Contig11	11.2592840552322	11.1253341609496	0.988103	0.364
CL38Contig16	5.45945121595372	4.67330815742357	0.856003	0.364
CL38Contig19	5.45945121595372	4.67330815742357	0.856003	0.364
CL38Contig20	5.45945121595372	4.67330815742357	0.856003	0.364
CL38Contig22	5.45945121595372	4.67330815742357	0.856003	0.364
CL38Contig31	5.45945121595372	4.67330815742357	0.856003	0.364
CL38Contig32	5.45945121595372	4.67330815742357	0.856003	0.364
Locus_4065_6_12	5.45945121595372	4.67330815742357	0.856003	0.364
CL1Contig9300	5.72098445790997	6.47643325863295	1.13205	0.364
CL8585Contig1	7.99521935775026	8.17218868605443	1.02213	0.364
CL8585Contig2	7.99521935775026	8.17218868605443	1.02213	0.364
CL8123Contig1	8.26989170584729	8.12937969094291	0.983009	0.364
isotig07964	8.86026081669393	8.69913841098771	0.981815	0.364
CL3133Contig1	10.2173277966661	10.0855713572936	0.987105	0.365
CL2892Contig6	6.79919641704716	7.1494936152803	1.05152	0.365
CL6607Contig2	7.83700036400673	7.96751219480071	1.01665	0.365
CL4035Contig2	9.41814150551305	9.6382064989307	1.02337	0.365
CL1423Contig3	9.46955157167391	9.3753926623039	0.990057	0.365
CL1629Contig8	9.76319639773157	9.89796176583926	1.0138	0.365
Locus_30109_4_6	10.5099807934566	10.5566468467895	1.00444	0.366
CL1Contig3193	7.47855351617134	7.93104858577669	1.06051	0.366
CL941Contig2	8.02369391669278	8.32063945694495	1.03701	0.366
CL941Contig4	8.02369391669278	8.32063945694495	1.03701	0.366
CL2706Contig2	9.22931872005772	9.13323317089338	0.989589	0.366
CL1594Contig2	9.23277879105519	9.44859766910774	1.02338	0.366
CL1Contig3953	11.3827498317575	11.4471134690673	1.00565	0.367
CL13605Contig1	7.61396465435747	7.99504077845327	1.05005	0.36
CL5144Contig2	7.86474356882856	8.26452142669686	1.05083	0.36
CL5144Contig3	7.86474356882856	8.26452142669686	1.05083	0.36
CL1Contig693	8.79730146812124	8.57569209460624	0.974809	0.367
CL13244Contig1	9.24998767545898	9.09082939755754	0.982794	0.367
CL1075Contig9	8.05368661365268	8.16197083875718	1.01345	0.36
CL24965Contig1	10.1835011825813	10.4192681476658	1.02315	0.368
CL516Contig13	10.3097089824322	10.4597127555829	1.01455	0.368
CL516Contig1	10.3097089824322	10.4597127555829	1.01455	0.368
CL516Contig4	10.3097089824322	10.4597127555829	1.01455	0.368
CL516Contig7	10.3097089824322	10.4597127555829	1.01455	0.368
Locus_1584_9_10	10.3097089824322	10.4597127555829	1.01455	0.368
CL533Contig12	8.34145874016164	8.16255095452845	0.978552	0.36
CL10027Contig2	5.85631677502914	6.6432953173442	1.13438	0.368
comp13984_c0_seq3	7.10265758893661	6.69517139647439	0.942629	0.368
CL2706Contig3	8.11679546043536	8.45480540818576	1.04164	0.368
CL2172Contig10	8.19113086961706	8.27753586719116	1.01055	0.368
CL20178Contig1	8.35341171246318	8.10354059275983	0.970088	0.368
CL1Contig1307	9.08000020812503	8.92394243255462	0.982813	0.368
CL138Contig9	9.08000020812503	8.92394243255462	0.982813	0.368
[truncated: 3,729 more rows]
