# Supplementary material for: A Proteomic Approach to Investigate the Drought Response in the Orphan Crop Eragrostis tef
Source: Proteomes. 2017 Nov 15;5(4):32. doi: 10.3390/proteomes5040032 (PMC5748567; doi:10.3390/proteomes5040032)
Supplement: Supplementary file 1 [file proteomes-05-00032-s001.zip › proteomes-208511 supplementary final/S3.1 TEU dataset (all 2656 proteins with expression values, fold changes and p-values).xlsx]

## Sheet: Sheet1
Protein Id	Hydrated	Dehydrated	Fold change	p-value
CL111Contig6|CL111Contig6	6.0382211626747	0.881373587019543	0.145966	0.001
CL2546Contig3|CL2546Contig3	7.81894381688528	7.36483165217009	0.941922	0.001
CL8805Contig2|CL8805Contig2	8.96988093344394	7.97996220448698	0.88964	0.001
CL856Contig3|CL856Contig3	9.17124922628265	9.33147754569545	1.01747	0.001
CL5604Contig1|CL5604Contig1	9.35534168024071	8.93647182071268	0.955227	0.001
CL4104Contig2|CL4104Contig2	0.881373587019543	4.67806529666033	5.3077	0.002
CL6845Contig2|CL6845Contig2	5.34697376371815	0.881373587019543	0.164836	0.002
CL2878Contig1|CL2878Contig1	5.42236330869959	0.881373587019543	0.162544	0.002
CL1127Contig6|CL1127Contig6	6.62540899826685	7.32815990773573	1.10607	0.002
CL1042Contig2|CL1042Contig2	9.22271761487321	8.7557285746246	0.949365	0.002
CL1Contig10662|CL1Contig10662	5.90103863232671	6.6318600861598	1.12385	0.004
CL5492Contig2|CL5492Contig2	10.6975945649407	10.8657956581465	1.01572	0.005
CL714Contig6|CL714Contig6	4.93027361507102	6.35055443765436	1.28807	0.005
CL1Contig3694|CL1Contig3694	5.51599468386362	0.881373587019543	0.159785	0.005
CL14878Contig1|CL14878Contig1	6.19550732600901	6.81066564437995	1.09929	0.005
CL6Contig61|CL6Contig61	0.881373587019543	5.09983723341395	5.78624	0.006
CL124Contig7|CL124Contig7	8.03879404786339	8.57453797505973	1.06664	0.006
CL323Contig2|CL323Contig2	8.64295345935951	8.23167270914848	0.952414	0.006
CL2976Contig3|CL2976Contig3	0.881373587019543	4.95030512125988	5.61658	0.007
CL8163Contig2|CL8163Contig2	6.48667756961496	7.47432870027439	1.15226	0.007
CL1Contig8614|CL1Contig8614	7.93809695087616	8.29827513672983	1.04537	0.007
CL2349Contig3|CL2349Contig3	9.76035177860742	9.28753002521018	0.951557	0.007
CL243Contig5|CL243Contig5	8.07959489996811	8.71681427437669	1.07887	0.008
CL5983Contig4|CL5983Contig4	0.881373587019543	4.76077681912669	5.40154	0.01
CL1013Contig3|CL1013Contig3	7.24420342446179	6.05195202602509	0.83542	0.011
CL7060Contig1|CL7060Contig1	7.78430852711258	8.01426919962607	1.02954	0.011
CL1Contig962|CL1Contig962	6.19633324176555	0.881373587019543	0.142241	0.012
SECA9_ERATE|SECA9_ERATE	9.92278824696176	9.67512075490833	0.975041	0.013
CL1Contig7473|CL1Contig7473	0.881373587019543	5.92694152880366	6.72466	0.014
CL394Contig12|CL394Contig12	7.8242673227883	8.39340612705288	1.07274	0.014
CL3513Contig2|CL3513Contig2	8.25747166728526	7.90034415360756	0.956751	0.014
CL16131Contig1|CL16131Contig1	8.33160389688704	7.87300800018312	0.944957	0.014
Locus_2288_7_9|Locus_2288_7_9	9.07473213106349	8.59906892642931	0.947584	0.014
CL1322Contig3|CL1322Contig3	6.26691042811582	6.92239090154883	1.10459	0.015
CL6495Contig2|CL6495Contig2	7.426575779916	6.69836737894846	0.901946	0.015
CL1Contig4551|CL1Contig4551	0.881373587019543	5.40045847117731	6.12732	0.016
CL1Contig8969|CL1Contig8969	10.5097893711824	10.3336457178251	0.98324	0.016
CL1670Contig2|CL1670Contig2	7.43599789712787	6.28325937954957	0.844979	0.016
CL7215Contig2|CL7215Contig2	8.93225188483046	8.42516023624029	0.943229	0.016
CL7068Contig1|CL7068Contig1	0.881373587019543	5.37941596016603	6.10345	0.017
CL682Contig1|CL682Contig1	7.22192850427564	5.72734401275332	0.793049	0.01
CL8133Contig1|CL8133Contig1	7.44108900121069	6.18358815815797	0.831006	0.01
CL14873Contig1|CL14873Contig1	4.94109327821663	0.881373587019543	0.178376	0.017
CL14686Contig1|CL14686Contig1	5.48445462640802	0.881373587019543	0.160704	0.017
CL1759Contig3|CL1759Contig3	5.77651835551819	0.881373587019543	0.152579	0.017
CL1Contig4553|CL1Contig4553	6.71897139038975	7.42434801394413	1.10498	0.017
CL8759Contig1|CL8759Contig1	4.7289806207703	6.49442725967354	1.37332	0.018
CL7716Contig2|CL7716Contig2	7.77775094425096	7.25120955690499	0.932302	0.018
CL2491Contig2|CL2491Contig2	4.92611899333147	0.881373587019543	0.178918	0.019
CL1533Contig11|CL1533Contig11	7.33504578053742	7.77423675132055	1.05988	0.019
CL2706Contig2|CL2706Contig2	7.80723455873843	7.00256796872031	0.896933	0.019
CL4711Contig1|CL4711Contig1	8.09987884631108	7.61302459223047	0.939894	0.019
CL3894Contig4|CL3894Contig4	0.881373587019543	5.50329917836673	6.244	0.021
SPEE4_ERATE|SPEE4_ERATE	5.28453855567977	6.37711848696923	1.20675	0.021
CL1Contig8961|CL1Contig8961	8.17703929016407	7.73537190629735	0.945987	0.021
CL316Contig3|CL316Contig3	5.70302976319662	0.881373587019543	0.154545	0.022
CL1317Contig7|CL1317Contig7	0.881373587019543	4.91780423996846	5.5797	0.023
CL136Contig17|CL136Contig17	5.03102881237627	6.62342772190803	1.31652	0.023
CL1498Contig7|CL1498Contig7	5.51872398934441	6.77797919875693	1.22818	0.024
CL5895Contig4|CL5895Contig4	7.72071455822629	7.95239201846248	1.03001	0.024
CL3294Contig6|CL3294Contig6	9.36532189620723	9.17232810612712	0.979393	0.024
CL4852Contig2|CL4852Contig2	8.90666176705181	9.52037182740134	1.0689	0.025
CL227Contig12|CL227Contig12	7.18959950728929	6.60610913623841	0.918842	0.026
CL1Contig3562|CL1Contig3562	8.19703098399081	7.53585323883844	0.919339	0.026
CL1662Contig3|CL1662Contig3	7.41154048776458	6.69813605731393	0.903744	0.027
CL1805Contig7|CL1805Contig7	8.05427579331304	7.56833289823853	0.939666	0.027
CL154Contig18|CL154Contig18	9.83850091132829	9.60551442148124	0.976319	0.027
CL4000Contig1|CL4000Contig1	9.93645827751065	10.2326594410881	1.02981	0.027
CL61Contig20|CL61Contig20	7.49585621983346	8.09426095594592	1.07983	0.028
CL1Contig7889|CL1Contig7889	8.41702586536311	9.03235047944383	1.0731	0.031
CL714Contig5|CL714Contig5	7.19781601252804	6.92510580688586	0.962112	0.032
CL7534Contig1|CL7534Contig1	7.15420870032671	6.54190698637051	0.914414	0.033
CL433Contig3|CL433Contig3	8.3968826093375	8.55313904549742	1.01861	0.033
CL3204Contig2|CL3204Contig2	6.4959603679007	5.77186601824922	0.888532	0.034
CL909Contig5|CL909Contig5	7.00863827803412	6.24764709317322	0.891421	0.034
CL13655Contig1|CL13655Contig1	5.12729499066622	6.53870187899983	1.27527	0.03
CL44Contig17|CL44Contig17	8.08233243716322	7.90964683301957	0.978634	0.035
CL5788Contig2|CL5788Contig2	8.66993270549501	8.55634693945808	0.986899	0.036
CL612Contig6|CL612Contig6	7.15818431125542	6.76617195523983	0.945236	0.03
CL1Contig3898|CL1Contig3898	7.5429533987785	8.13304109943863	1.07823	0.03
CL1030Contig10|CL1030Contig10	5.795532884643	7.17603453457427	1.2382	0.037
CL338Contig6|CL338Contig6	8.43044528602939	8.16398625147938	0.968393	0.03
CL2Contig153|CL2Contig153	6.14182625700338	6.98067555706209	1.13658	0.038
CL102Contig20|CL102Contig20	6.33053662520524	7.08094331366288	1.11854	0.038
CL10469Contig1|CL10469Contig1	6.58505296749186	5.5374672150768	0.840915	0.038
CL811Contig3|CL811Contig3	7.46206017838859	6.96115493403494	0.932873	0.038
CL1Contig4635|CL1Contig4635	6.88954860959552	5.86850685124854	0.851798	0.039
CL52Contig6|CL52Contig6	7.02767720730031	6.39263421175801	0.909637	0.039
CL2948Contig2|CL2948Contig2	7.98435681119149	7.56279196606906	0.947201	0.039
CL9427Contig2|CL9427Contig2	8.88637789783144	9.07134830652932	1.02082	0.039
Locus_49_80_82|Locus_49_80_82	10.4771474202226	10.3566415945738	0.988498	0.04
CL1371Contig3|CL1371Contig3	5.76418530107499	6.57995784078207	1.14152	0.041
CL1Contig1301|CL1Contig1301	8.44554946799949	8.01386194551265	0.948886	0.041
CL7698Contig2|CL7698Contig2	9.53249710040939	9.17273422372748	0.962259	0.041
CL1Contig4227|CL1Contig4227	8.44045100760062	7.94226536815399	0.940976	0.042
CL1Contig167|CL1Contig167	8.56904239024075	8.92040984991098	1.041	0.042
Locus_471_2_7|Locus_471_2_7	10.3362792884852	10.0994559256914	0.977088	0.043
CL424Contig8|CL424Contig8	6.73423621153102	5.8879286262152	0.874328	0.043
CL321Contig12|CL321Contig12	8.26335814428071	7.65534830963943	0.926421	0.044
CL10226Contig1|CL10226Contig1	8.02310071441512	7.08248006111426	0.882761	0.045
CL1Contig10732|CL1Contig10732	9.10476453071318	9.21884853890746	1.01253	0.045
CL36Contig12|CL36Contig12	8.87235907173928	8.56294829705379	0.965126	0.046
CL3496Contig11|CL3496Contig11	10.1424287613272	9.84204900945958	0.970384	0.047
CL9878Contig2|CL9878Contig2	8.53149960067494	8.27362177258457	0.969773	0.047
CL113Contig3|CL113Contig3	7.86725784747057	7.26767335258508	0.923787	0.048
CL3757Contig1|CL3757Contig1	8.20267990095621	7.53738540533275	0.918893	0.048
CL1Contig2108|CL1Contig2108	9.07408853849007	8.31942758523961	0.916833	0.048
CL5563Contig3|CL5563Contig3	9.02740128787398	8.75731549211465	0.970082	0.04
CL1035Contig6|CL1035Contig6	9.7453173654582	9.57277032602411	0.982294	0.04
CL2414Contig3|CL2414Contig3	6.23600316833386	4.58072919513154	0.734562	0.05
Locus_11848_5_6|Locus_11848_5_6	7.21024197225502	7.67595709528793	1.06459	0.05
Background Proteins
CL3785Contig1|CL3785Contig1	8.77836394116835	9.03534973907476	1.02927	0.051
isotig08284|isotig08284	10.756055224543	10.978957925852	1.02072	0.052
CL6373Contig4|CL6373Contig4	7.7356056479682	8.25890891596665	1.06765	0.052
CL715Contig2|CL715Contig2	7.75080874964947	8.34986454308434	1.07729	0.052
CL4928Contig5|CL4928Contig5	7.48340437385696	7.81392168773956	1.04417	0.054
CL840Contig9|CL840Contig9	7.85035170643285	7.62356352159313	0.971111	0.054
CL7065Contig1|CL7065Contig1	5.52881398849694	6.4875751457199	1.17341	0.056
CL9068Contig2|CL9068Contig2	5.73822398667907	6.53376198832862	1.13864	0.056
CL4425Contig2|CL4425Contig2	5.78016076360566	7.17863548858537	1.24194	0.056
CL1601Contig2|CL1601Contig2	6.908534376525	7.36449267388558	1.066	0.056
CL3044Contig4|CL3044Contig4	8.96386871912688	8.53669684134181	0.952345	0.056
CL2164Contig2|CL2164Contig2	7.25564608010447	7.54712833871894	1.04017	0.057
CL1862Contig2|CL1862Contig2	9.56208472089879	9.84148197840905	1.02922	0.057
CL1Contig1541|CL1Contig1541	9.63017330220035	9.82919527095423	1.02067	0.057
CL1Contig8636|CL1Contig8636	5.02194498732241	5.83417897186516	1.16174	0.058
CL2031Contig5|CL2031Contig5	5.72520170329889	6.90032668304604	1.20525	0.058
CL4531Contig1|CL4531Contig1	7.14995069252428	6.61336052013836	0.924952	0.058
CL1189Contig1|CL1189Contig1	8.94344338761042	8.55484608524387	0.956549	0.058
ENO3_ERATE|ENO3_ERATE	10.8981989597394	11.0179444708707	1.01099	0.059
CL2363Contig3|CL2363Contig3	7.47449852997244	7.86833773855809	1.05269	0.059
CL852Contig5|CL852Contig5	7.77285338109518	7.16606231820161	0.921935	0.059
CL8599Contig1|CL8599Contig1	7.98992808274061	7.41957107452832	0.928616	0.059
CL2761Contig4|CL2761Contig4	8.42555744559499	8.80476256407093	1.04501	0.059
isotig11046|isotig11046	9.42436242008987	9.18843912713166	0.974967	0.059
CL3048Contig2|CL3048Contig2	9.07708668158445	8.82326447004073	0.972037	0.061
Locus_49_76_82|Locus_49_76_82	7.45500257222247	6.5383771646384	0.877046	0.062
CL799Contig2|CL799Contig2	7.53615825260761	7.93310162878605	1.05267	0.062
CL3287Contig1|CL3287Contig1	8.45946865186698	8.70798794714594	1.02938	0.062
CL1Contig4865|CL1Contig4865	8.6776225838556	8.16949376421073	0.941444	0.062
CL14Contig29|CL14Contig29	7.18085515951398	5.68486697679196	0.79167	0.063
CL410Contig2|CL410Contig2	8.23117848004606	7.74674534492198	0.941147	0.063
CL630Contig2|CL630Contig2	10.9574571425412	11.0426808996671	1.00778	0.064
CL9711Contig2|CL9711Contig2	7.1195896162943	7.70437639201457	1.08214	0.064
CL1Contig1997|CL1Contig1997	7.83579650065459	8.2250979183388	1.04968	0.064
HTPG13_ERATE|HTPG13_ERATE	8.36723012093472	8.67788827418035	1.03713	0.064
CL1Contig8606|CL1Contig8606	7.45360165116098	6.46041862917135	0.866751	0.065
LEU34_ERATE|LEU34_ERATE	5.81351073035985	6.28544193953875	1.08118	0.06
AROB5_ERATE|AROB5_ERATE	9.48016277313433	9.78345909315385	1.03199	0.065
CL1Contig5106|CL1Contig5106	9.77180513457149	10.1052761883324	1.03413	0.065
CL2736Contig1|CL2736Contig1	9.79541673203509	9.65832632595269	0.986005	0.066
CL1Contig6720|CL1Contig6720	5.96837397519115	6.46018469867329	1.0824	0.067
Locus_13156_11_12|Locus_13156_11_12	6.27199586433559	7.16352426586988	1.14214	0.067
CL694Contig2|CL694Contig2	7.33231181315069	7.00854312355861	0.955844	0.067
FTSH14_ERATE|FTSH14_ERATE	8.14108198812231	7.76111381887701	0.953327	0.067
CL698Contig2|CL698Contig2	8.06578242239163	7.6135797382504	0.943936	0.06
CL867Contig2|CL867Contig2	6.76891234949802	7.67864924911367	1.1344	0.068
CL1Contig991|CL1Contig991	6.91218110481959	6.27399926837353	0.907673	0.068
CL969Contig4|CL969Contig4	8.2791397561808	7.66277572564782	0.925552	0.068
CL1075Contig9|CL1075Contig9	7.51701382624444	7.69315913252096	1.02343	0.069
CL1Contig1833|CL1Contig1833	7.8591190702203	8.43338199256952	1.07307	0.069
CL5774Contig2|CL5774Contig2	9.87853670723631	9.741571739018	0.986135	0.06
CL1295Contig1|CL1295Contig1	4.84278365195915	6.4247055855746	1.32666	0.071
CL1Contig3205|CL1Contig3205	7.32983946572807	6.82632155752403	0.931306	0.071
CL36Contig11|CL36Contig11	9.61004940701404	9.45225477063921	0.98358	0.071
HTPG11_ERATE|HTPG11_ERATE	9.62797959441771	9.78195705587658	1.01599	0.071
CL6530Contig3|CL6530Contig3	9.85805512698477	10.1675817774967	1.0314	0.071
CL1Contig1151|CL1Contig1151	10.7443323609963	10.5786853395223	0.984583	0.072
CL24883Contig1|CL24883Contig1	7.73680044635029	8.10690450113414	1.04784	0.072
CL1413Contig3|CL1413Contig3	9.13657047005864	8.79427911871134	0.962536	0.072
Locus_4035_1_7|Locus_4035_1_7	7.42014585650832	6.544513074596	0.881993	0.073
CL233Contig18|CL233Contig18	9.5411143633054	9.64346596951882	1.01073	0.073
CL1107Contig5|CL1107Contig5	10.0888405052473	9.93518381850325	0.98477	0.074
CL21697Contig1|CL21697Contig1	5.82940288408118	6.67659001115966	1.14533	0.074
CL437Contig6|CL437Contig6	6.82286044463353	7.2985366656278	1.06972	0.074
CL1853Contig1|CL1853Contig1	7.99436117820956	8.18676459815527	1.02407	0.074
CL513Contig10|CL513Contig10	8.21018985996627	7.88364899572327	0.960227	0.074
CL5348Contig1|CL5348Contig1	6.52512123749928	7.34134636739539	1.12509	0.075
CL3920Contig2|CL3920Contig2	6.74507005132863	7.25728449188964	1.07594	0.075
CL645Contig1|CL645Contig1	7.79265885592782	8.23215581670827	1.0564	0.075
CL456Contig5|CL456Contig5	10.6911300277299	10.4884941205491	0.981046	0.076
CL122Contig13|CL122Contig13	7.49050892159458	8.16632416787639	1.09022	0.076
CL7539Contig3|CL7539Contig3	7.54852134235212	6.44010979978147	0.853162	0.076
CL4328Contig1|CL4328Contig1	10.3700826008515	10.2576062710082	0.989154	0.077
CL1Contig1892|CL1Contig1892	7.15492458993593	7.75023638214121	1.0832	0.07
CL67Contig2|CL67Contig2	6.45968516050582	6.92999389828517	1.07281	0.077
CL6640Contig1|CL6640Contig1	8.81727525649372	9.15002835935145	1.03774	0.07
CL3700Contig1|CL3700Contig1	9.1168032459523	8.75501938754126	0.960317	0.07
CL230Contig4|CL230Contig4	9.68321223868101	9.98205077182537	1.03086	0.07
CL552Contig3|CL552Contig3	7.7497149435601	7.08781924951854	0.914591	0.081
CL2214Contig2|CL2214Contig2	8.92453500207279	9.20013981278304	1.03088	0.081
CL977Contig4|CL977Contig4	6.64330881124524	5.37389379623413	0.808918	0.083
CL9781Contig2|CL9781Contig2	7.32461345909915	6.64465833189237	0.907168	0.083
CL1073Contig4|CL1073Contig4	7.69000646983265	8.03473308106007	1.04483	0.084
CL5326Contig1|CL5326Contig1	9.00026563513441	8.80023317114325	0.977775	0.084
CL162Contig12|CL162Contig12	6.04489904725008	6.97749014262261	1.15428	0.085
CL1Contig10334|CL1Contig10334	6.44319847256256	7.24805051028766	1.12491	0.08
CL13Contig42|CL13Contig42	7.64381735748207	6.87992947240845	0.900065	0.086
CL1349Contig1|CL1349Contig1	7.93403720054242	8.5524600620923	1.07795	0.086
CL233Contig4|CL233Contig4	8.82607841661443	8.61696527081482	0.976307	0.086
CL487Contig5|CL487Contig5	9.05401568262563	9.32647041320592	1.03009	0.086
CL4333Contig2|CL4333Contig2	9.65427332138618	9.83561550807457	1.01878	0.086
CL1Contig6718|CL1Contig6718	11.224980666526	11.0487842520575	0.984303	0.087
CL804Contig4|CL804Contig4	6.17763751131559	6.70685134086005	1.08567	0.087
comp5643_c0_seq23|comp5643_c0_seq23	7.6682075906369	8.03519117351905	1.04786	0.087
CL317Contig14|CL317Contig14	8.30486718815653	8.70953429837806	1.04873	0.087
CL2140Contig2|CL2140Contig2	8.92750589154065	8.60135441437952	0.963467	0.087
CL4380Contig2|CL4380Contig2	0.881373587019543	4.88923134789072	5.54729	0
CL125Contig3|CL125Contig3	6.22321593018377	5.39396379526964	0.866749	0.088
CL2033Contig5|CL2033Contig5	6.7667028272738	7.22780877860451	1.06814	0.088
CL78Contig8|CL78Contig8	7.24124437132165	7.66353858803574	1.05832	0.088
CL1Contig8626|CL1Contig8626	7.33038098143302	7.91831698230228	1.08021	0.088
SYK5_ERATE|SYK5_ERATE	8.70493490830839	8.90447320498863	1.02292	0.088
FTSH11_ERATE|FTSH11_ERATE	9.0794872806278	8.90769731311281	0.981079	0.088
CL4669Contig1|CL4669Contig1	10.6274341278959	10.7676843803867	1.0132	0.09
CL9Contig20|CL9Contig20	6.42757041714019	6.82839385839459	1.06236	0.091
CL8722Contig5|CL8722Contig5	7.52259333710078	6.52355144167204	0.867194	0.091
CL253Contig1|CL253Contig1	8.62148935527369	8.06362181848286	0.935293	0.092
Locus_3778_1_5|Locus_3778_1_5	10.6441334279257	10.8623576283819	1.0205	0.093
CL72Contig9|CL72Contig9	8.35577058224571	7.91381634049138	0.947108	0.094
CL125Contig2|CL125Contig2	9.21886850301106	8.95188576872887	0.97104	0.094
isotig03755|isotig03755	6.20762159073362	7.17643308763168	1.15607	0.095
CL828Contig11|CL828Contig11	6.76551030480827	7.82546603400491	1.15667	0.095
Locus_46_2_9|Locus_46_2_9	5.93861553169383	5.03691589883334	0.848163	0.09
CL2811Contig4|CL2811Contig4	5.37062687499608	6.49781924819063	1.20988	0.097
CL818Contig7|CL818Contig7	6.56313153452221	7.46816775126054	1.1379	0.097
CL413Contig11|CL413Contig11	6.23571462893274	7.25408095009842	1.16331	0.098
CL7099Contig1|CL7099Contig1	8.67348575582177	8.47645803514973	0.977284	0.09
CL2845Contig2|CL2845Contig2	6.88649996317263	6.30112666168971	0.914997	0.098
CL1656Contig7|CL1656Contig7	8.69761549657446	8.50499420151038	0.977854	0.09
CL11887Contig1|CL11887Contig1	7.56262191985014	8.02413751478718	1.06103	0.098
CL711Contig5|CL711Contig5	7.92410322029312	7.47012391983512	0.942709	0.098
CL287Contig5|CL287Contig5	10.9828545344071	10.880841181724	0.990712	0.099
CL450Contig17|CL450Contig17	8.71832735990819	8.99955317982492	1.03226	0.101
CL1747Contig6|CL1747Contig6	9.28754591413043	9.01954332390676	0.971144	0.101
CL1130Contig1|CL1130Contig1	7.03502891144063	6.22474476090593	0.884821	0.102
CL1Contig4521|CL1Contig4521	7.39827846374694	7.19553886203668	0.972596	0.102
CL6511Contig2|CL6511Contig2	9.65952281760092	9.43553648250005	0.976812	0.102
CL10848Contig2|CL10848Contig2	7.32878539434649	8.10328658975104	1.10568	0.103
CL7582Contig1|CL7582Contig1	7.72980801265198	6.29240829162056	0.814045	0.103
CL4854Contig1|CL4854Contig1	6.87670234667157	7.2315460762139	1.0516	0.104
CL4159Contig1|CL4159Contig1	8.72368742934068	9.03036559019589	1.03515	0.104
CL4966Contig1|CL4966Contig1	9.33181638067864	9.79096850847446	1.0492	0.104
CL5494Contig2|CL5494Contig2	6.5322185155109	7.45860991615454	1.14182	0.105
CL3130Contig5|CL3130Contig5	9.72980902205963	9.91904844778638	1.01945	0.105
CL4151Contig2|CL4151Contig2	6.27907502076798	6.68524048628859	1.06469	0.106
CL11294Contig1|CL11294Contig1	8.36344652494579	8.105960091792	0.969213	0.106
CL1Contig3904|CL1Contig3904	8.77119555449159	8.54506825808391	0.974219	0.106
CL3553Contig2|CL3553Contig2	8.84537092863505	8.47505279708807	0.958134	0.106
CL4944Contig4|CL4944Contig4	9.51849967674558	9.84020325490865	1.0338	0.106
CL1800Contig1|CL1800Contig1	6.51750492906684	7.12284494862409	1.09288	0.107
CL2238Contig8|CL2238Contig8	6.55573948762486	5.2230082358447	0.796708	0.107
CL1665Contig5|CL1665Contig5	7.51840848816577	6.44793758941216	0.85762	0.107
CL1879Contig1|CL1879Contig1	7.79578593692103	7.38931084333031	0.94786	0.108
CL3168Contig2|CL3168Contig2	7.80437585562038	7.15732585640262	0.917091	0.108
CL33Contig28|CL33Contig28	7.89091061175437	6.91999190157801	0.876957	0.108
CL1Contig7722|CL1Contig7722	9.23778024913587	8.97537178877397	0.971594	0.108
CL1280Contig2|CL1280Contig2	6.61791391983403	5.96606992266612	0.901503	0.109
CL1679Contig2|CL1679Contig2	7.07910877473525	5.89824481612741	0.83319	0.109
CL222Contig13|CL222Contig13	5.45216697240976	6.20404721351638	1.1379	0.111
CL2102Contig3|CL2102Contig3	7.00533712186166	7.60727865215399	1.08593	0.111
CL26313Contig1|CL26313Contig1	7.65674388795923	7.40393701462442	0.966982	0.111
Locus_2939_8_10|Locus_2939_8_10	8.22416226237913	7.8083514137622	0.94944	0.111
CL1888Contig2|CL1888Contig2	11.327115812482	11.5083989870873	1.016	0.112
CL1Contig518|CL1Contig518	8.62061049485086	8.88960884119349	1.0312	0.112
comp13984_c0_seq2|comp13984_c0_seq2	5.04205121073373	7.03956998281109	1.39617	0.113
ATPG7_ERATE|ATPG7_ERATE	9.41949223660267	9.62290441901339	1.02159	0.113
CL1787Contig2|CL1787Contig2	5.60153733728327	6.04837861317794	1.07977	0.114
CL3835Contig3|CL3835Contig3	7.41596049002478	6.81846660315492	0.919431	0.114
CL4656Contig3|CL4656Contig3	6.41998920557528	7.13514426127784	1.1114	0.115
CL4031Contig2|CL4031Contig2	7.43926028432696	7.8074794810724	1.0495	0.116
CL13802Contig1|CL13802Contig1	7.809844575543	6.87971969045456	0.880904	0.11
CL7942Contig1|CL7942Contig1	8.390837188165	7.90641970103161	0.942268	0.117
CL1723Contig5|CL1723Contig5	9.4646515548587	9.78143965460462	1.03347	0.117
CL8989Contig4|CL8989Contig4	10.9745673973153	10.8055575341934	0.9846	0.118
CL15398Contig1|CL15398Contig1	7.048298788052	7.74324122728115	1.0986	0.118
CL1085Contig2|CL1085Contig2	8.85942971293881	8.40438529182311	0.948637	0.118
CL2164Contig1|CL2164Contig1	8.95547062768861	8.76497538725357	0.978729	0.119
CL1Contig192|CL1Contig192	9.95959167016319	9.70585557583925	0.974523	0.11
CL2382Contig6|CL2382Contig6	8.76795783669528	8.29712856298671	0.946301	0.121
CL2733Contig6|CL2733Contig6	8.10933226849873	8.3701692983902	1.03217	0.122
CL577Contig14|CL577Contig14	9.32880159851537	9.50083829689293	1.01844	0.122
CL3394Contig5|CL3394Contig5	10.0876925925395	9.92451315746832	0.983824	0.123
CL471Contig7|CL471Contig7	5.53902244616063	6.5739857686043	1.18685	0.123
CL82Contig12|CL82Contig12	6.38049934799039	5.75482952037334	0.90194	0.123
CL13640Contig1|CL13640Contig1	7.90452566156434	8.23035931561832	1.04122	0.124
CL9686Contig2|CL9686Contig2	5.3988430787446	6.36401681568329	1.17877	0.12
CL572Contig4|CL572Contig4	7.54664474158888	6.99745814483216	0.927228	0.125
CL291Contig6|CL291Contig6	9.62072433725393	9.84939484966009	1.02377	0.125
CL271Contig23|CL271Contig23	10.2216251455667	10.0551169651562	0.98371	0.126
CL23599Contig1|CL23599Contig1	6.59733558568516	5.28664466838352	0.80133	0.126
Locus_15480_1_7|Locus_15480_1_7	7.53500009178901	6.69945239560932	0.889111	0.126
CL4854Contig2|CL4854Contig2	7.88924460522049	8.31959781399191	1.05455	0.126
CL3785Contig2|CL3785Contig2	6.46132619381634	5.67933014657322	0.878973	0.127
CL7996Contig1|CL7996Contig1	6.96013628964332	7.64509878637143	1.09841	0.127
CL27260Contig1|CL27260Contig1	9.10772451886247	8.75670370410724	0.961459	0.127
CL10931Contig2|CL10931Contig2	5.45005302692177	6.20910124653946	1.13927	0.128
CL24771Contig1|CL24771Contig1	9.48931696912071	9.2462011357499	0.97438	0.128
HTPG8_ERATE|HTPG8_ERATE	10.4869425954176	10.6146309924264	1.01218	0.129
CL1Contig9286|CL1Contig9286	9.57315180840648	9.75297334387858	1.01878	0.12
CL2958Contig2|CL2958Contig2	7.0011786159036	6.36314714370949	0.908868	0.129
CL781Contig6|CL781Contig6	7.09052924500776	7.91470398263652	1.11624	0.129
CL78Contig11|CL78Contig11	7.51766795583051	7.01307517314315	0.932879	0.129
CL11608Contig1|CL11608Contig1	8.96743164841159	8.72912367772826	0.973425	0.129
CL7170Contig2|CL7170Contig2	9.0604685262726	8.9199362093649	0.98449	0.129
CL1798Contig1|CL1798Contig1	7.15616429545677	7.72781966327494	1.07988	0.131
CL4737Contig2|CL4737Contig2	9.42404169504451	9.60433369420233	1.01913	0.131
GCSP1_ERATE|GCSP1_ERATE	10.7109897023109	10.5404325967991	0.984076	0.132
ISPG3_ERATE|ISPG3_ERATE	6.10001786237792	6.741932747506	1.10523	0.132
CL876Contig4|CL876Contig4	7.62221091347938	7.86043054589527	1.03125	0.132
CL6749Contig1|CL6749Contig1	9.02983811147244	9.22786373941539	1.02193	0.132
CL141Contig6|CL141Contig6	9.07532919833674	8.87939296048305	0.97841	0.132
CL84Contig6|CL84Contig6	7.64717319913045	7.07930810130645	0.925742	0.133
CL1Contig4018|CL1Contig4018	8.10417277660227	8.46685228049027	1.04475	0.133
CL42Contig7|CL42Contig7	8.36201868767382	8.07587211674316	0.96578	0.133
CL8050Contig1|CL8050Contig1	9.10199269179735	9.28508770138224	1.02012	0.136
CL950Contig3|CL950Contig3	6.11867023904687	6.74700539067876	1.10269	0.137
CL3820Contig1|CL3820Contig1	7.97647889840107	8.43962222333518	1.05806	0.13
CL15557Contig1|CL15557Contig1	8.35999474036042	8.12282095511643	0.97163	0.13
Locus_5765_3_5|Locus_5765_3_5	6.97964457491002	7.73340538799859	1.10799	0.138
CL2948Contig4|CL2948Contig4	9.75281872149176	9.6291347931178	0.987318	0.138
CL5159Contig4|CL5159Contig4	5.86511774457323	6.18914400126716	1.05525	0.139
CL7674Contig2|CL7674Contig2	6.491224807274	5.80081760253887	0.89364	0.139
CL821Contig2|CL821Contig2	7.04737994457322	7.4966422536344	1.06375	0.141
CL3081Contig1|CL3081Contig1	9.60069208369571	9.13525434930116	0.95152	0.141
CL7211Contig1|CL7211Contig1	6.8715078760728	7.43310411281303	1.08173	0.142
CL87Contig25|CL87Contig25	7.65909259719878	7.29645258445594	0.952652	0.142
CL4211Contig7|CL4211Contig7	7.17175289240011	5.83596728720859	0.813743	0.144
CL1056Contig5|CL1056Contig5	8.00379247769993	8.23213091826341	1.02853	0.144
CL5602Contig2|CL5602Contig2	9.2236877454582	9.3141417495185	1.00981	0.144
CL1Contig2253|CL1Contig2253	6.53100526387495	7.1299952981305	1.09171	0.145
CL2449Contig1|CL2449Contig1	6.16407734762218	6.76110133725664	1.09686	0.14
comp2813_c0_seq5|comp2813_c0_seq5	8.007638416426	8.27123550057116	1.03292	0.146
CL7074Contig4|CL7074Contig4	10.2937291186764	10.1133467905589	0.982476	0.147
CL1Contig3402|CL1Contig3402	7.5801157753551	7.08972245953596	0.935305	0.14
CL14897Contig1|CL14897Contig1	5.85972678838407	6.65930062173038	1.13645	0.147
CL973Contig2|CL973Contig2	7.5013892932631	7.84110117846471	1.04529	0.147
CL8773Contig1|CL8773Contig1	8.48724620503976	8.96739030835963	1.05657	0.147
comp10971_c0_seq1|comp10971_c0_seq1	8.99445195593634	7.94910972254269	0.883779	0.147
CL19943Contig1|CL19943Contig1	5.4667219283529	6.67929422137024	1.22181	0.148
CL1580Contig2|CL1580Contig2	7.57539165390774	7.68375266361869	1.0143	0.148
CL5538Contig2|CL5538Contig2	7.79134501980729	8.03120385483974	1.03079	0.148
CL746Contig3|CL746Contig3	6.48136528246081	7.40549567924832	1.14258	0.149
CL6391Contig3|CL6391Contig3	7.04851891889275	6.33735157294204	0.899104	0.149
CL7110Contig2|CL7110Contig2	7.25626603321318	7.60043533372288	1.04743	0.149
CL310Contig6|CL310Contig6	8.13146885165776	8.2481568558877	1.01435	0.149
CL155Contig6|CL155Contig6	7.51798024590141	6.90347318660152	0.918262	0.151
CL2510Contig1|CL2510Contig1	8.284083651536	8.57634363744401	1.03528	0.151
CL478Contig2|CL478Contig2	6.18055466096623	7.00350375663732	1.13315	0.152
CL200Contig7|CL200Contig7	8.55570347610528	8.92739743787545	1.04344	0.152
CL5167Contig2|CL5167Contig2	9.62649057399654	9.44487845581296	0.981134	0.153
CL7830Contig1|CL7830Contig1	7.40664815295776	7.76910514781409	1.04894	0.154
CL491Contig4|CL491Contig4	7.7732332997525	8.13467334933859	1.0465	0.154
CL1261Contig10|CL1261Contig10	6.88959716122087	5.53361067436102	0.803183	0.155
isotig04972|isotig04972	7.6658052550392	6.46737035328899	0.843665	0.155
CL1Contig1174|CL1Contig1174	8.94391771539585	8.43724602145592	0.94335	0.155
DNAK4_ERATE|DNAK4_ERATE	9.62784254472182	9.83691443022312	1.02172	0.155
CL475Contig8|CL475Contig8	5.97195361491522	7.06355709205792	1.18279	0.15
CL3508Contig1|CL3508Contig1	6.95531219966017	7.55401980167262	1.08608	0.156
CL1Contig873|CL1Contig873	7.73771585419302	8.10580196765033	1.04757	0.156
CL99Contig10|CL99Contig10	8.6485456087849	8.20466914315518	0.948676	0.156
CL1Contig9639|CL1Contig9639	6.19946112420292	6.97148881255521	1.12453	0.157
CL1Contig8022|CL1Contig8022	7.91321226888058	8.28349760391958	1.04679	0.15
CL6078Contig6|CL6078Contig6	9.89555370485762	10.0381139828894	1.01441	0.157
CL190Contig21|CL190Contig21	10.3444858700829	10.2416357466413	0.990057	0.158
CL32Contig4|CL32Contig4	6.69806314115025	7.09890941861608	1.05985	0.158
CL922Contig1|CL922Contig1	7.03448702691989	6.21293285624881	0.883211	0.158
FTSH15_ERATE|FTSH15_ERATE	7.36789699025859	7.00871842830998	0.951251	0.158
CL908Contig3|CL908Contig3	7.76418942596632	8.06266623613587	1.03844	0.158
CL1Contig2254|CL1Contig2254	9.30764302333663	9.15457122467794	0.983554	0.158
CL10763Contig1|CL10763Contig1	6.69255867118885	7.17682909996822	1.07236	0.159
CL1279Contig11|CL1279Contig11	6.74114686811179	5.72576872838179	0.849376	0.159
CL8351Contig3|CL8351Contig3	7.39957834267018	7.85561628680711	1.06163	0.159
CL4723Contig1|CL4723Contig1	8.55500200341219	8.77567411263062	1.02579	0.159
CL367Contig10|CL367Contig10	10.1995814753186	10.0628608389962	0.986595	0.161
CL10587Contig2|CL10587Contig2	6.30938016658683	6.89345108208695	1.09257	0.161
CL280Contig2|CL280Contig2	9.17644540708613	8.84333480834198	0.963699	0.161
CL1432Contig6|CL1432Contig6	9.27296489324945	9.63229000794455	1.03875	0.161
CL632Contig14|CL632Contig14	6.73102298450327	6.10934612621136	0.90764	0.163
CL2360Contig4|CL2360Contig4	7.48000192484148	7.77084925706215	1.03888	0.163
CL2055Contig4|CL2055Contig4	7.34897142309615	6.78790511527539	0.923654	0.164
CL1Contig3740|CL1Contig3740	7.77207760001634	7.03657006012972	0.905365	0.164
CL3721Contig1|CL3721Contig1	9.28904460520073	9.03246450243198	0.972378	0.164
CL5946Contig1|CL5946Contig1	6.4363399030285	7.08136029963969	1.10022	0.165
CL1Contig4265|CL1Contig4265	8.32305432121879	8.69186313367293	1.04431	0.165
CL434Contig1|CL434Contig1	4.93741175061732	6.07435597883633	1.23027	0.166
CL99Contig22|CL99Contig22	6.99146585020157	7.55646027993531	1.08081	0.167
CL6820Contig1|CL6820Contig1	8.114819512871	8.51473954293049	1.04928	0.167
CL72Contig20|CL72Contig20	8.99470735837634	9.22996579191147	1.02616	0.167
CL2965Contig4|CL2965Contig4	10.4535244065821	10.3243294897041	0.987641	0.168
CL3697Contig4|CL3697Contig4	6.20268735064638	7.11904185943114	1.14774	0.168
CL187Contig12|CL187Contig12	6.58187945533944	5.76045610674921	0.875199	0.168
CL519Contig19|CL519Contig19	7.16524938249738	6.47629557121176	0.903848	0.168
CL2256Contig6|CL2256Contig6	8.74825522951207	8.23086110553277	0.940857	0.168
CL1569Contig2|CL1569Contig2	9.05726422739514	8.80072404589888	0.971676	0.16
CL1Contig5223|CL1Contig5223	7.17568805813103	7.81733168415862	1.08942	0.169
CL186Contig6|CL186Contig6	7.72138731172264	7.36918933235321	0.954387	0.169
CL1Contig4897|CL1Contig4897	8.21112392570371	8.03068870237118	0.978026	0.169
CL1Contig8167|CL1Contig8167	6.58811182205814	5.66579158653607	0.860002	0.171
CL1Contig9096|CL1Contig9096	6.64296049045291	7.69970011942411	1.15908	0.171
CL7647Contig1|CL7647Contig1	9.13169315847605	9.24212407484617	1.01209	0.171
CL5Contig21|CL5Contig21	6.67666409046358	7.38279478220392	1.10576	0.172
CL1Contig8366|CL1Contig8366	8.23485826579182	7.89608189173664	0.958861	0.172
CL859Contig6|CL859Contig6	10.7623814022865	10.5868773118448	0.983693	0.173
CL4548Contig2|CL4548Contig2	7.27941470044885	7.79407818006521	1.0707	0.173
CL1Contig2302|CL1Contig2302	8.43885659350034	8.788344497121	1.04141	0.173
CL1353Contig3|CL1353Contig3	9.0594347252502	9.30069759735371	1.02663	0.173
PSBA5_ERATE|PSBA5_ERATE	10.6168196041387	10.4299924843728	0.982403	0.175
CL297Contig14|CL297Contig14	9.01045440142283	8.73535661650491	0.969469	0.175
CL8522Contig1|CL8522Contig1	9.23051459177747	8.90866283966168	0.965132	0.175
CL2494Contig1|CL2494Contig1	6.04252156547991	6.49899505844696	1.07554	0.17
CL1Contig8722|CL1Contig8722	7.6293002673822	6.51677389707491	0.854177	0.1
CL6796Contig3|CL6796Contig3	6.33357250521309	6.9405709093599	1.09584	0.176
CL408Contig3|CL408Contig3	7.96157685552813	7.71341404830196	0.96883	0.176
CL8741Contig2|CL8741Contig2	6.83782842661523	7.62517290441069	1.11515	0.177
CL632Contig9|CL632Contig9	8.03918465436419	7.70365942932349	0.958264	0.177
CL4626Contig3|CL4626Contig3	8.07604665830163	7.66497059802729	0.949099	0.177
CL7356Contig1|CL7356Contig1	8.79161329764537	8.96099548435944	1.01927	0.177
CL5199Contig1|CL5199Contig1	8.80805902213625	9.18033743854576	1.04227	0.177
CL374Contig4|CL374Contig4	9.07360663772002	8.92206008910923	0.983298	0.177
CL1464Contig1|CL1464Contig1	5.89829376713051	6.73586908983523	1.142	0.178
CL3162Contig3|CL3162Contig3	7.10202394895278	6.36766361500685	0.896598	0.178
CL890Contig6|CL890Contig6	6.56144399128919	7.07159820682271	1.07775	0.179
CL2237Contig2|CL2237Contig2	7.12039558918083	7.883643100778	1.10719	0.179
CL1Contig1664|CL1Contig1664	7.45961728422477	7.06749470517883	0.947434	0.179
CL1Contig4811|CL1Contig4811	8.18466542906707	8.57720155537482	1.04796	0.179
CL2026Contig8|CL2026Contig8	9.44015605040591	9.69369155341484	1.02686	0.179
CL2267Contig4|CL2267Contig4	5.59478054814994	6.60631225010264	1.1808	0.181
CL426Contig5|CL426Contig5	7.39681638607759	7.92666638706669	1.07163	0.181
CL699Contig6|CL699Contig6	8.65835971423854	8.88218428009731	1.02585	0.181
CL9337Contig1|CL9337Contig1	7.86754446162105	7.62926595340846	0.969714	0.182
CL12677Contig1|CL12677Contig1	9.45154721100539	9.3587029401255	0.990177	0.182
CL5999Contig1|CL5999Contig1	6.70744469848278	7.28307599418516	1.08582	0.183
Locus_30109_4_6|Locus_30109_4_6	10.4540367926107	10.5696416733463	1.01106	0.184
CL5963Contig1|CL5963Contig1	10.731661370508	10.6246579887111	0.990029	0.184
CL3806Contig1|CL3806Contig1	6.59278814172593	5.55996161193844	0.84334	0.184
CL16961Contig1|CL16961Contig1	8.3571399573448	8.00461543006163	0.957818	0.184
CL1Contig1039|CL1Contig1039	6.57328985178462	5.46724005414896	0.831736	0.185
CL1Contig5400|CL1Contig5400	9.51943292520622	9.77395625881485	1.02674	0.185
CL700Contig1|CL700Contig1	9.91420762610532	9.69522544221433	0.977912	0.185
CL1Contig1184|CL1Contig1184	6.01477368862515	6.81274429014177	1.13267	0.186
CL2172Contig10|CL2172Contig10	7.0970033499119	6.5900776130392	0.928572	0.186
CL8802Contig1|CL8802Contig1	9.82683865125401	9.49627545571859	0.966361	0.186
CL4022Contig2|CL4022Contig2	10.2680530085726	10.1549604617772	0.988986	0.187
CL1471Contig3|CL1471Contig3	6.34797551464318	7.29750487849735	1.14958	0.187
CL1Contig4370|CL1Contig4370	9.35165901954603	9.05600944978466	0.968385	0.187
CL4512Contig1|CL4512Contig1	10.2629395560665	10.4040073062147	1.01375	0.188
GLYA3_ERATE|GLYA3_ERATE	8.2371568695619	7.91888808853862	0.961362	0.18
CL96Contig3|CL96Contig3	6.99303792357676	6.533451378207	0.934279	0.188
CL226Contig3|CL226Contig3	7.79565025652839	7.1674451806853	0.919416	0.188
FTSH16_ERATE|FTSH16_ERATE	8.18262113898321	8.54672310743522	1.0445	0.188
CL9207Contig1|CL9207Contig1	9.34865248385168	9.5470566178767	1.02122	0.18
CL2Contig165|CL2Contig165	7.12156470723789	5.61639624206321	0.788646	0.189
CL4723Contig2|CL4723Contig2	7.36725516868515	7.65154667775082	1.03859	0.189
CL3993Contig4|CL3993Contig4	8.24343293845679	7.53642416537805	0.914234	0.189
CL280Contig3|CL280Contig3	8.64226963267088	8.89945286916476	1.02976	0.189
CL1Contig5367|CL1Contig5367	7.27444975398558	6.72376275873597	0.924298	0.191
CL939Contig6|CL939Contig6	8.07517075121951	7.72192152189306	0.956255	0.191
CL499Contig3|CL499Contig3	8.09018149541119	7.91732395796671	0.978634	0.191
CL9103Contig2|CL9103Contig2	8.27097633068972	8.4725362900005	1.02437	0.191
CL351Contig1|CL351Contig1	5.31771168798838	6.4208410736704	1.20744	0.192
CL532Contig4|CL532Contig4	8.71054976735728	8.47397460087534	0.97284	0.192
CL1Contig10090|CL1Contig10090	8.08873444239092	7.91728810480347	0.978804	0.193
CL8239Contig4|CL8239Contig4	9.45038293792818	9.01945932275587	0.954401	0.193
CL8230Contig1|CL8230Contig1	9.58440703226212	9.73156727224618	1.01535	0.193
CL24Contig15|CL24Contig15	7.72522387000035	7.50784110264997	0.971861	0.194
CL6654Contig2|CL6654Contig2	8.47230672018977	8.08170794587958	0.953897	0.194
CL4710Contig1|CL4710Contig1	8.43649816684621	8.05639553551536	0.954945	0.195
CL2416Contig1|CL2416Contig1	9.06728595359848	8.73914583623879	0.963811	0.195
CL1Contig8436|CL1Contig8436	7.51844938336959	7.78682898445168	1.0357	0.196
CL4285Contig3|CL4285Contig3	7.14675446249745	6.37678426866638	0.892263	0.19
CL1Contig280|CL1Contig280	9.48743643271504	9.37351756446891	0.987993	0.197
CL7673Contig1|CL7673Contig1	6.38741769808221	6.89687482271272	1.07976	0.198
CL2Contig104|CL2Contig104	6.93535252185625	6.50344762604709	0.937724	0.198
CL4279Contig2|CL4279Contig2	8.96043123581226	9.34241897693827	1.04263	0.198
CL1Contig7383|CL1Contig7383	8.86874846844309	9.26746527252879	1.04496	0.199
CL7827Contig1|CL7827Contig1	9.92661339623846	10.1296194483314	1.02045	0.19
CL169Contig11|CL169Contig11	9.95888733470647	10.0490573799091	1.00905	0.199
CL1Contig3243|CL1Contig3243	6.93933497293112	5.56536954050538	0.802003	0.201
PYRE7_ERATE|PYRE7_ERATE	9.05155171286109	8.83182359427216	0.975725	0.201
CL1Contig3737|CL1Contig3737	9.32536251624963	9.13424672935276	0.979506	0.201
CL3916Contig1|CL3916Contig1	9.94664236156879	10.1280012526379	1.01823	0.201
CL1304Contig9|CL1304Contig9	5.85783841614116	6.89552044839306	1.17714	0.202
CL4505Contig5|CL4505Contig5	7.36651818830639	6.87242372471949	0.932927	0.202
CL1Contig5582|CL1Contig5582	8.15360309713257	8.57950250378445	1.05223	0.203
CL4029Contig1|CL4029Contig1	9.13619727062524	8.77468016777392	0.96043	0.203
CL1636Contig2|CL1636Contig2	10.8393242792562	10.9332940833267	1.00867	0.204
CL70Contig5|CL70Contig5	10.9761514363409	10.8930316622381	0.992427	0.204
CL1Contig8308|CL1Contig8308	6.58644788177576	6.05114597242493	0.918727	0.205
CL12834Contig2|CL12834Contig2	9.04385264340216	9.22087824268609	1.01957	0.205
CL10106Contig3|CL10106Contig3	9.27102869186264	9.51091979245777	1.02588	0.205
CL1Contig8536|CL1Contig8536	5.42115167918971	6.67375571954472	1.23106	0.206
CL9974Contig1|CL9974Contig1	6.63207303670038	7.06121337313459	1.06471	0.206
CL512Contig4|CL512Contig4	8.15892758937559	7.673666094409	0.940524	0.206
CL1317Contig2|CL1317Contig2	9.40595197624815	9.62310262661264	1.02309	0.206
Locus_2972_3_7|Locus_2972_3_7	8.65385374241933	8.89566844061773	1.02794	0.207
CL4549Contig4|CL4549Contig4	5.92961497010688	6.51844905811661	1.0993	0.208
CL2689Contig2|CL2689Contig2	7.74023777073997	8.07462464152946	1.0432	0.209
CL4577Contig2|CL4577Contig2	10.0444789163442	9.81719667908752	0.977372	0.2
CL9281Contig2|CL9281Contig2	10.2806793853136	10.4160531915587	1.01317	0.2
CL66Contig8|CL66Contig8	11.5158944620458	11.5944422857209	1.00682	0.21
CL10274Contig1|CL10274Contig1	9.1772077423469	9.02099386792334	0.982978	0.211
CL2013Contig2|CL2013Contig2	7.52504356916324	7.96704678109931	1.05874	0.212
ATPA6_ERATE|ATPA6_ERATE	12.9008984424799	12.7816061497372	0.990753	0.2
CL4622Contig2|CL4622Contig2	10.7105214788833	10.54751732734	0.984781	0.213
CL1507Contig3|CL1507Contig3	11.2271170189096	11.120178147013	0.990475	0.213
CL93Contig11|CL93Contig11	6.57246018546005	7.10067370174777	1.08037	0.213
CL1860Contig3|CL1860Contig3	7.97233966934075	7.75935081396687	0.973284	0.213
CL2868Contig3|CL2868Contig3	6.15975528917825	5.04477554574491	0.81899	0.214
CL5640Contig1|CL5640Contig1	9.47744605024233	9.65740388299204	1.01899	0.214
CL66Contig14|CL66Contig14	6.7428536211066	5.65310777270778	0.838385	0.215
CL1731Contig1|CL1731Contig1	7.58157683633221	7.1851965696112	0.947718	0.215
CL376Contig15|CL376Contig15	8.44838964102441	8.82037219330537	1.04403	0.215
CL3347Contig4|CL3347Contig4	6.76390588354246	7.49338198701544	1.10785	0.216
CL328Contig6|CL328Contig6	7.74204572193798	7.40373088454619	0.956302	0.216
CL8148Contig2|CL8148Contig2	8.63698383434418	8.92601491204834	1.03346	0.216
CL2707Contig1|CL2707Contig1	10.1772598453724	10.2888997346688	1.01097	0.217
CL11137Contig2|CL11137Contig2	6.91801890841344	7.33738231802313	1.06062	0.217
CL2806Contig1|CL2806Contig1	8.90451123462938	9.17994926627838	1.03093	0.217
CL41Contig27|CL41Contig27	6.24610762086524	7.29434225115767	1.16782	0.218
CL122Contig9|CL122Contig9	7.57610597455695	8.09887094607657	1.069	0.218
CL7817Contig3|CL7817Contig3	8.7719688135995	7.78315436163621	0.887276	0.21
CL2351Contig4|CL2351Contig4	7.91062660798434	8.34142596916495	1.05446	0.218
CL2126Contig1|CL2126Contig1	7.98209061446731	7.78462961872531	0.975262	0.218
Locus_927_3_10|Locus_927_3_10	8.00328796885946	8.16925205476677	1.02074	0.218
CL8849Contig1|CL8849Contig1	6.02654055948187	6.75420237458391	1.12074	0.219
CL1Contig5476|CL1Contig5476	7.60627185945129	7.00935056700785	0.921522	0.219
CL9662Contig1|CL9662Contig1	8.5362371509034	8.84161269349127	1.03577	0.219
CL211Contig5|CL211Contig5	8.68863697070318	8.48456684740901	0.976513	0.219
CL3458Contig2|CL3458Contig2	8.81205333525049	9.04535937969549	1.02648	0.219
CL1508Contig7|CL1508Contig7	9.26277914454272	9.44982194845067	1.02019	0.219
CL7668Contig2|CL7668Contig2	6.57175776074843	7.18060988305858	1.09265	0.221
CL9417Contig1|CL9417Contig1	7.84242468174788	7.28878621212979	0.929405	0.221
CL106Contig4|CL106Contig4	8.48939612762757	8.64121109124878	1.01788	0.221
CL2463Contig4|CL2463Contig4	6.37687710047314	5.51966943957338	0.865576	0.222
CL99Contig13|CL99Contig13	6.42691619450791	7.41774883529945	1.15417	0.222
CL5203Contig2|CL5203Contig2	8.2009024608859	8.62800709798444	1.05208	0.222
CL16120Contig1|CL16120Contig1	8.20593496733137	8.72711298697339	1.06351	0.222
CL7473Contig1|CL7473Contig1	8.42296011511871	8.31492864901335	0.987174	0.223
CL175Contig13|CL175Contig13	7.26953101927954	7.69443540644	1.05845	0.224
CL2331Contig2|CL2331Contig2	7.1218534401411	6.01544480034394	0.844646	0.225
CL2217Contig2|CL2217Contig2	9.96418539055243	10.1829191407022	1.02195	0.225
CL4723Contig4|CL4723Contig4	11.0520301143613	11.1512633243338	1.00898	0.226
CL5905Contig3|CL5905Contig3	11.1345848991225	11.5791788922116	1.03993	0.226
CL13Contig25|CL13Contig25	6.56307302862685	6.20793268471855	0.945888	0.22
CL2128Contig2|CL2128Contig2	6.57455340423794	7.51378938093241	1.14286	0.22
CL3249Contig1|CL3249Contig1	6.79914943650159	6.05534709113582	0.890604	0.226
CL8663Contig1|CL8663Contig1	8.22827206870652	8.06862132989404	0.980597	0.226
CL1Contig10380|CL1Contig10380	8.6231870671652	8.48330578799933	0.983778	0.226
CL1Contig9227|CL1Contig9227	7.27470283139909	5.93812198128667	0.81627	0.22
CL1772Contig7|CL1772Contig7	7.4740376284549	7.02878506237622	0.940427	0.22
CL72Contig6|CL72Contig6	6.77208838100468	6.12073658511222	0.903818	0.227
CL4722Contig3|CL4722Contig3	8.80837192253795	9.12011882430758	1.03539	0.227
CL3614Contig5|CL3614Contig5	9.32901340170934	9.49974475251912	1.0183	0.227
CL7671Contig2|CL7671Contig2	9.44840422022079	9.06875153973725	0.959818	0.227
CL514Contig12|CL514Contig12	9.36614456950092	9.63226951978177	1.02841	0.229
CL2031Contig4|CL2031Contig4	9.75538770388054	9.50773479469139	0.974614	0.229
CL1Contig10682|CL1Contig10682	10.2182813690686	10.0665317009187	0.985149	0.23
CL3452Contig5|CL3452Contig5	7.98377588829645	7.60302785613423	0.95231	0.231
CL1545Contig2|CL1545Contig2	5.91633033078408	7.0378156331342	1.18956	0.232
CL1785Contig4|CL1785Contig4	7.8433529957587	8.3229143648342	1.06114	0.232
CL5539Contig4|CL5539Contig4	9.78922652854143	9.95747029720924	1.01719	0.232
CL2016Contig2|CL2016Contig2	7.08479830279131	6.67587687882893	0.942282	0.233
CL11390Contig2|CL11390Contig2	8.11203239334273	7.75015196213081	0.95539	0.233
CL12260Contig1|CL12260Contig1	8.39879723900126	8.01924671836796	0.954809	0.233
CL36Contig37|CL36Contig37	5.50396217864865	6.42303922933518	1.16698	0.234
CL5144Contig2|CL5144Contig2	7.62245043856817	8.02133296899732	1.05233	0.234
CL1Contig8014|CL1Contig8014	8.77019060281243	8.53260637098107	0.97291	0.234
CL3406Contig3|CL3406Contig3	7.54339364780846	6.90103796680889	0.914845	0.235
CL9672Contig2|CL9672Contig2	9.43077704971662	9.19708308248081	0.97522	0.235
CL1144Contig4|CL1144Contig4	9.88353017430816	10.01140636955	1.01294	0.235
CL7597Contig1|CL7597Contig1	4.61041639797217	5.95140771586548	1.29086	0.236
isotig05526|isotig05526	5.88802345287152	6.59838088785307	1.12064	0.236
CL884Contig4|CL884Contig4	7.36130657432945	7.69683340353466	1.04558	0.236
CAPP2_ERATE|CAPP2_ERATE	8.90675815961345	8.70216490638561	0.977029	0.236
CL5285Contig1|CL5285Contig1	6.79827967966551	7.43242490333405	1.09328	0.237
CL3821Contig1|CL3821Contig1	7.26216298945584	7.66787343711746	1.05587	0.237
CL24998Contig1|CL24998Contig1	7.33900496197178	7.78522788258115	1.0608	0.237
CL1945Contig11|CL1945Contig11	7.79587542481071	7.29546197279835	0.93581	0.237
CL247Contig1|CL247Contig1	9.83044831300658	9.93872928805911	1.01101	0.237
CL1Contig5876|CL1Contig5876	8.80139110425097	8.96779119328899	1.01891	0.23
CL1Contig2588|CL1Contig2588	9.18055154008225	9.07016770989401	0.987976	0.238
CL1Contig3422|CL1Contig3422	9.27680795006131	9.48687704327715	1.02264	0.238
CL1Contig3083|CL1Contig3083	6.53298771315116	6.88323213165184	1.05361	0.239
CL1004Contig1|CL1004Contig1	7.10733343062047	7.6585188685873	1.07755	0.239
CL1269Contig8|CL1269Contig8	10.1470059353004	10.3098710041355	1.01605	0.241
CL2316Contig1|CL2316Contig1	6.27583263296468	5.7283790606004	0.912768	0.241
CL629Contig14|CL629Contig14	8.30142749503993	8.61898025578326	1.03825	0.241
CL1Contig7807|CL1Contig7807	9.02138368852981	9.28698566582402	1.02944	0.241
CL1Contig3195|CL1Contig3195	11.8593138788788	11.7355642037515	0.989565	0.242
CL567Contig16|CL567Contig16	10.756632361683	10.823474423585	1.00621	0.243
isotig18981|isotig18981	6.42437968638425	6.85012495365115	1.06627	0.243
CL6459Contig1|CL6459Contig1	7.01119246636229	7.34732487489571	1.04794	0.243
CL298Contig4|CL298Contig4	7.91889745127316	8.29788802363065	1.04786	0.243
CL6841Contig3|CL6841Contig3	8.63705868938842	8.84393245254279	1.02395	0.243
CL405Contig6|CL405Contig6	10.540653016262	10.7058242472681	1.01567	0.244
CL12161Contig1|CL12161Contig1	6.34583321576645	5.39965236861058	0.850897	0.244
CL1Contig3612|CL1Contig3612	7.46090053377201	7.80694572704913	1.04638	0.244
CL3641Contig4|CL3641Contig4	5.41838262148342	6.16274130963121	1.13738	0.24
CL9963Contig1|CL9963Contig1	5.80169258003636	6.70165381612778	1.15512	0.245
CL2519Contig2|CL2519Contig2	7.6675799374868	8.1968201071632	1.06902	0.245
CL4697Contig4|CL4697Contig4	8.17004603761096	7.94756795937742	0.972769	0.245
CL144Contig2|CL144Contig2	7.84021353044771	7.36954062440436	0.939967	0.246
CL3456Contig2|CL3456Contig2	9.33114264794428	9.12839151492048	0.978272	0.246
CL9027Contig1|CL9027Contig1	7.95387070091211	7.56389297204436	0.95097	0.247
CL2034Contig1|CL2034Contig1	8.74301290608113	8.85908537921164	1.01328	0.247
CL3755Contig1|CL3755Contig1	10.3656576230457	10.2347470543896	0.987371	0.248
Locus_2016_8_9|Locus_2016_8_9	7.44701394851138	7.99888470849474	1.07411	0.248
CL1945Contig3|CL1945Contig3	8.48829481976877	8.85723782361092	1.04346	0.248
Locus_1972_7_10|Locus_1972_7_10	8.92353780522137	9.20232443793604	1.03124	0.24
Locus_618_5_6|Locus_618_5_6	10.2883354366467	10.1081582262677	0.982487	0.249
CL3231Contig2|CL3231Contig2	7.65607135086094	7.88416726517961	1.02979	0.249
CL2353Contig2|CL2353Contig2	7.88069160874922	8.04893978922843	1.02135	0.249
CL43Contig13|CL43Contig13	10.8461218204877	10.9594739760181	1.01045	0.25
CL2467Contig1|CL2467Contig1	9.18074550675385	8.96350612274225	0.976338	0.251
CL9218Contig1|CL9218Contig1	9.51283085813584	9.28436684589251	0.975984	0.251
Locus_4256_5_6|Locus_4256_5_6	8.74451176411419	8.53280007930264	0.975789	0.252
CL1Contig9347|CL1Contig9347	10.6426063953274	10.4780109597873	0.984534	0.253
CL1Contig7306|CL1Contig7306	7.18526034031189	7.69367016798195	1.07076	0.253
CL6369Contig5|CL6369Contig5	5.52990143958832	6.5326572220405	1.18133	0.254
CL206Contig8|CL206Contig8	6.80828448379438	5.68840248775421	0.835512	0.254
CL1Contig5742|CL1Contig5742	8.75494256890098	8.97019023218213	1.02459	0.254
CL1Contig4250|CL1Contig4250	7.90313919908276	8.15307006059086	1.03162	0.255
CL2252Contig4|CL2252Contig4	8.27557487388797	8.39272529742864	1.01416	0.255
CL595Contig3|CL595Contig3	8.84593897537799	8.9599103891309	1.01288	0.255
CL367Contig32|CL367Contig32	13.2021387029895	12.9918832453298	0.984074	0.256
CL1Contig769|CL1Contig769	7.12703157863916	5.78806297895071	0.812128	0.256
CL1Contig7611|CL1Contig7611	7.06281835522883	6.27452609312835	0.888388	0.25
CL25025Contig1|CL25025Contig1	7.23338103304549	6.46899455068119	0.894325	0.25
CL1Contig294|CL1Contig294	8.25451991929645	8.49763922852525	1.02945	0.258
CL20Contig1|CL20Contig1	9.51682218571663	9.66076053310643	1.01512	0.25
CL7941Contig1|CL7941Contig1	7.20146148676166	6.5020712471745	0.902882	0.259
CL5866Contig2|CL5866Contig2	9.98427263953451	10.1571137058872	1.01731	0.259
CL1630Contig4|CL1630Contig4	10.2412120797847	10.1349698718307	0.989626	0.26
isotig13959|isotig13959	7.80494794241227	7.20122191544243	0.922648	0.261
SYP2_ERATE|SYP2_ERATE	8.47589358999832	9.35801390402738	1.10407	0.261
CL199Contig3|CL199Contig3	6.6648904794687	7.11946830364213	1.0682	0.262
CL38Contig44|CL38Contig44	8.36440788313355	8.14844913466971	0.974181	0.262
CL4802Contig1|CL4802Contig1	6.74885761377396	7.28579662307313	1.07956	0.263
CL2228Contig1|CL2228Contig1	7.65244349045137	7.95509951685497	1.03955	0.263
CL233Contig7|CL233Contig7	7.7434304211569	7.19856838342624	0.929636	0.263
CL234Contig1|CL234Contig1	8.00707167035211	8.37953288468496	1.04652	0.263
CL4506Contig1|CL4506Contig1	5.7776693672314	4.77489860813896	0.82644	0.264
CL20396Contig1|CL20396Contig1	7.27558604315627	6.68342478358172	0.91861	0.264
CL1067Contig15|CL1067Contig15	8.79440109839336	8.85851508585632	1.00729	0.264
CL5975Contig8|CL5975Contig8	6.49675850824289	5.8225147400836	0.896218	0.265
CL8388Contig1|CL8388Contig1	6.85147137504933	7.25799941151388	1.05933	0.265
VATA23_ERATE|VATA23_ERATE	8.7776636342456	8.65999427002917	0.986594	0.265
CL4510Contig3|CL4510Contig3	9.72874090263394	9.58185053846384	0.984901	0.265
CL5304Contig2|CL5304Contig2	10.0361578088788	9.81637174811013	0.978101	0.266
CL8764Contig1|CL8764Contig1	6.4536238722461	7.11425365339026	1.10237	0.26
CL3647Contig2|CL3647Contig2	6.75637483713043	7.19854092071754	1.06544	0.266
CL2172Contig3|CL2172Contig3	8.19657328694635	8.44684855821254	1.03053	0.266
CL1Contig1673|CL1Contig1673	6.95249029393005	6.3619313337603	0.915058	0.26
CL506Contig2|CL506Contig2	7.48021596566	7.92324784384251	1.05923	0.26
Locus_83_4_5|Locus_83_4_5	5.38939650919824	6.33560970693923	1.17557	0.267
CL5454Contig2|CL5454Contig2	7.72246992774826	8.01047627538688	1.03729	0.26
CL837Contig5|CL837Contig5	7.35137782432317	7.05339795836984	0.959466	0.267
CL3302Contig2|CL3302Contig2	8.07651106680187	8.28269583220021	1.02553	0.267
CL4025Contig1|CL4025Contig1	8.17978103669221	7.50234064178509	0.917181	0.267
CL1997Contig8|CL1997Contig8	8.33223331902475	8.56850138711994	1.02836	0.267
CL8953Contig2|CL8953Contig2	8.3958848266923	8.15034462143144	0.970755	0.267
CL1034Contig1|CL1034Contig1	9.77969946269401	9.91964655454247	1.01431	0.267
CL3819Contig4|CL3819Contig4	7.95095393715197	8.23778032275089	1.03607	0.268
Locus_454_4_9|Locus_454_4_9	8.69527808321668	9.09826767182165	1.04635	0.268
CL2306Contig1|CL2306Contig1	7.3165080313787	7.63048046140286	1.04291	0.269
CL1135Contig4|CL1135Contig4	9.93123430590965	10.1209797252422	1.01911	0.269
CL1521Contig4|CL1521Contig4	7.13067375798597	6.5027906793133	0.911946	0.2
CL909Contig7|CL909Contig7	5.8490527088895	6.86720379256735	1.17407	0.271
CL6858Contig3|CL6858Contig3	8.89669490955553	9.08035853358102	1.02064	0.271
comp21949_c0_seq4|comp21949_c0_seq4	7.19658116504138	6.97555040805473	0.969287	0.272
CL58Contig38|CL58Contig38	7.68420456273826	8.01788146247164	1.04342	0.272
CYNS15_ERATE|CYNS15_ERATE	7.88967101582091	7.55412447882086	0.95747	0.272
CL1Contig4078|CL1Contig4078	6.56762146917973	7.08301543853016	1.07847	0.273
CL714Contig2|CL714Contig2	6.32493425433355	5.95303727731533	0.941201	0.274
CL1Contig2203|CL1Contig2203	5.50850990638754	6.27455733407077	1.13907	0.27
CL115Contig5|CL115Contig5	5.81321169759143	6.27424902492172	1.07931	0.275
CL5839Contig1|CL5839Contig1	7.40408050874084	7.89430324851325	1.06621	0.275
CL68Contig32|CL68Contig32	7.54264839682481	6.90694566840196	0.915719	0.275
CL6193Contig3|CL6193Contig3	5.44796744330583	6.28384818434998	1.15343	0.276
CL215Contig6|CL215Contig6	6.93358368262834	6.57190982740384	0.947837	0.276
CL5175Contig1|CL5175Contig1	7.5012666961717	7.15816934308634	0.954261	0.276
CL4406Contig4|CL4406Contig4	4.86615527644374	6.05869402783154	1.24507	0.277
CL3523Contig3|CL3523Contig3	8.6811488353737	8.94815805263456	1.03076	0.277
CL1658Contig13|CL1658Contig13	6.76949059101278	7.22592990176006	1.06743	0.278
CL3458Contig1|CL3458Contig1	8.75098959585121	9.0342118202418	1.03236	0.27
CL2810Contig3|CL2810Contig3	8.76744187916989	8.963578247805	1.02237	0.27
CL4906Contig2|CL4906Contig2	7.91940542365333	7.66608964938991	0.968013	0.278
CL1005Contig1|CL1005Contig1	10.202356434175	10.0405088985593	0.984136	0.279
CL7553Contig2|CL7553Contig2	6.10719925704338	7.07809513720614	1.15898	0.279
CL99Contig18|CL99Contig18	6.78940366265806	6.17879001514516	0.910064	0.279
CL2146Contig2|CL2146Contig2	7.11541637246195	5.93994401485458	0.834799	0.279
CL2948Contig6|CL2948Contig6	7.81091943022479	7.31707971114528	0.936776	0.279
CL7310Contig4|CL7310Contig4	8.09539676733976	7.88013391713234	0.973409	0.279
CL8214Contig3|CL8214Contig3	6.17317883480937	6.72788842890536	1.08986	0.281
CL3498Contig2|CL3498Contig2	6.60712547680909	7.21331673796267	1.09175	0.282
CL7425Contig1|CL7425Contig1	8.51743194228075	8.68912834773147	1.02016	0.282
CL280Contig8|CL280Contig8	7.09041659384948	7.36361449353974	1.03853	0.283
CL3104Contig2|CL3104Contig2	8.5804326513183	8.36735650107933	0.975167	0.283
CL2750Contig1|CL2750Contig1	9.46636742507218	9.60120995132716	1.01424	0.283
CL6655Contig5|CL6655Contig5	10.3140081048414	10.1686218855687	0.985904	0.285
CL5361Contig3|CL5361Contig3	7.34707218414495	7.81760391437612	1.06404	0.285
CL3646Contig2|CL3646Contig2	5.9245018814013	6.37891425709032	1.0767	0.28
CL20644Contig1|CL20644Contig1	6.76745139527754	6.42721229128617	0.949724	0.286
CL478Contig1|CL478Contig1	8.51397131642568	8.34679149380762	0.980364	0.286
CL2970Contig1|CL2970Contig1	6.8733217852282	7.44059992232295	1.08253	0.28
CL11653Contig2|CL11653Contig2	9.24821503422473	9.08398472748414	0.982242	0.286
CL1526Contig4|CL1526Contig4	7.35024016503253	7.83979846040954	1.0666	0.28
CL107Contig5|CL107Contig5	7.0597417934435	7.40031061753527	1.04824	0.287
RPIA2_ERATE|RPIA2_ERATE	10.0906872273077	9.97850600005635	0.988883	0.288
CL1495Contig3|CL1495Contig3	10.2000109239775	10.0922183024267	0.989432	0.288
CL667Contig9|CL667Contig9	8.51648110436333	8.24422297529045	0.968032	0.28
CL1309Contig10|CL1309Contig10	5.51543082352011	6.36195812103507	1.15348	0.288
CL1984Contig1|CL1984Contig1	8.3015242727328	8.84741622683785	1.06576	0.288
CL12175Contig2|CL12175Contig2	5.73949653048854	6.04740171137836	1.05365	0.289
CL785Contig6|CL785Contig6	7.04095609403001	6.39328746883076	0.908014	0.289
CL990Contig6|CL990Contig6	7.40182707231811	6.65815805967038	0.899529	0.289
CL4229Contig1|CL4229Contig1	7.80825698059991	8.28297638742455	1.0608	0.289
CL184Contig7|CL184Contig7	8.08262910506942	7.75052722148999	0.958912	0.289
CL4212Contig2|CL4212Contig2	10.1218608943174	10.2678243899378	1.01442	0.291
CL123Contig15|CL123Contig15	7.6462706499916	7.24425429921336	0.947423	0.291
CL443Contig10|CL443Contig10	7.89423769282731	7.45372515980973	0.944198	0.291
CL72Contig3|CL72Contig3	8.11284729078343	7.58846031497753	0.935363	0.291
CL2115Contig3|CL2115Contig3	10.1721273991605	10.1031877063417	0.993223	0.292
CL4Contig32|CL4Contig32	4.96419297494843	6.01776460525515	1.21223	0.292
CL6864Contig2|CL6864Contig2	6.79512889859912	7.39371215496562	1.08809	0.292
CL4499Contig3|CL4499Contig3	7.27370967800912	6.79344088887296	0.933972	0.292
CL1Contig2670|CL1Contig2670	9.29676805049541	9.12829647314526	0.981878	0.2
Locus_78_1_2|Locus_78_1_2	5.86280996875729	6.92991872747961	1.18201	0.293
CL138Contig8|CL138Contig8	7.240098619254	7.63027674241124	1.05389	0.293
CL35Contig7|CL35Contig7	8.52691866120167	8.4444041888592	0.990323	0.293
CL264Contig10|CL264Contig10	5.08211915810158	5.74020918710962	1.12949	0.294
CL6622Contig3|CL6622Contig3	5.15941188125217	6.18252612240381	1.1983	0.294
CL5082Contig6|CL5082Contig6	6.35501445970242	5.24303370667144	0.825023	0.295
CL5Contig9|CL5Contig9	7.69362544769642	7.94531642638271	1.03271	0.295
CL854Contig7|CL854Contig7	7.71732576193994	7.53878568789846	0.976865	0.295
Locus_1987_2_9|Locus_1987_2_9	6.10186780762833	6.65886375285819	1.09128	0.29
CL14759Contig1|CL14759Contig1	5.46012396804523	6.40277332603743	1.17264	0.296
CL2535Contig1|CL2535Contig1	6.60359903386401	7.13741049160614	1.08084	0.29
CL7638Contig2|CL7638Contig2	7.22068285043858	7.04510537036175	0.975684	0.296
CL172Contig9|CL172Contig9	7.53812011693138	7.93535407676905	1.0527	0.296
CL4837Contig2|CL4837Contig2	10.0310497008402	10.2423655799568	1.02107	0.297
CL837Contig4|CL837Contig4	10.3819409718912	10.5466596779958	1.01587	0.297
CL7130Contig2|CL7130Contig2	5.4846255560668	6.60419998640726	1.20413	0.297
CL10162Contig3|CL10162Contig3	6.14302087855711	5.44844934540679	0.886933	0.298
comp1100_c0_seq1|comp1100_c0_seq1	9.35809083266415	9.52608161687287	1.01795	0.29
CL100Contig19|CL100Contig19	7.05468946988346	6.29198997727911	0.891888	0.299
CL7060Contig3|CL7060Contig3	7.68983330387791	8.00763474249522	1.04133	0.299
CL1Contig4948|CL1Contig4948	8.46957940924119	8.73376087327027	1.03119	0.299
CL816Contig2|CL816Contig2	8.62083691574198	8.88751505768792	1.03093	0.299
CL1Contig1044|CL1Contig1044	9.15820073655535	9.01322767312221	0.98417	0.299
CL1Contig1042|CL1Contig1042	9.92205063796121	10.0038539848754	1.00824	0.299
CL1Contig7241|CL1Contig7241	11.1692320603774	11.0480852358279	0.989154	0.301
CL9403Contig2|CL9403Contig2	8.28785715296668	8.60815181244451	1.03865	0.301
CL396Contig7|CL396Contig7	8.55134723020418	8.34280674907514	0.975613	0.301
PSB287_ERATE|PSB287_ERATE	5.66189721526779	6.33045066353034	1.11808	0.302
Locus_3532_1_8|Locus_3532_1_8	8.07051355484923	8.3817041993901	1.03856	0.302
CL6512Contig2|CL6512Contig2	8.37172994003307	8.51431597097943	1.01703	0.302
CL943Contig2|CL943Contig2	8.48678973724278	8.16120485080867	0.961636	0.303
CL21Contig27|CL21Contig27	7.46141055044667	7.85433228416576	1.05266	0.304
CL567Contig3|CL567Contig3	9.01657338428802	9.18520256308222	1.0187	0.304
CL7175Contig1|CL7175Contig1	8.29422752913383	8.53177333063521	1.02864	0.305
RS17E6_ERATE|RS17E6_ERATE	9.78188426182992	9.66204809482119	0.987749	0.305
CL123Contig14|CL123Contig14	5.87093832663395	6.75819517402591	1.15113	0.306
CL432Contig5|CL432Contig5	6.04401224459629	6.94677551247797	1.14936	0.306
CL3044Contig10|CL3044Contig10	11.4058272551779	11.2637778339321	0.987546	0.307
CL629Contig5|CL629Contig5	6.9160363615024	7.15193446022234	1.03411	0.307
CL582Contig2|CL582Contig2	7.07032809296565	6.60767677516206	0.934564	0.307
CL1Contig8164|CL1Contig8164	8.93973459788382	8.79301812970423	0.983588	0.307
CL2379Contig3|CL2379Contig3	9.35722192484755	9.24151075054502	0.987634	0.307
CL735Contig2|CL735Contig2	11.0013005503682	10.9186478416293	0.992487	0.308
CL1Contig4834|CL1Contig4834	5.43961110945217	6.22349875333643	1.14411	0.308
CL1883Contig4|CL1883Contig4	5.46523265976095	6.34656214602118	1.16126	0.308
CL1Contig4279|CL1Contig4279	8.62179642011634	8.13485642507128	0.943522	0.308
CL434Contig3|CL434Contig3	8.83506963630159	9.05325425347656	1.0247	0.308
CL1Contig5461|CL1Contig5461	9.13295638800183	8.90017982815574	0.974512	0.308
CL1322Contig5|CL1322Contig5	7.76497953857353	8.12940357540011	1.04693	0.309
CL1847Contig1|CL1847Contig1	8.00077175866461	8.30972827242331	1.03862	0.309
CL2818Contig9|CL2818Contig9	11.9111541211837	11.8178098730112	0.992163	0.3
CL6021Contig6|CL6021Contig6	9.24805231613712	9.07569345134164	0.981363	0.311
CL255Contig7|CL255Contig7	5.13918068776454	5.89286898907907	1.14666	0.312
CL105Contig4|CL105Contig4	7.82082896498531	7.45624486451496	0.953383	0.312
CL28Contig15|CL28Contig15	8.99674130894788	8.84906522166462	0.983586	0.312
CL1Contig950|CL1Contig950	7.06105514656457	6.53353012127213	0.925291	0.313
CL6340Contig4|CL6340Contig4	9.9712933402254	9.87570982322767	0.990414	0.314
CL1Contig458|CL1Contig458	6.50614638609572	6.98740656566495	1.07397	0.315
CL533Contig10|CL533Contig10	7.90121814524695	7.56221972143882	0.957095	0.315
CL1Contig36|CL1Contig36	8.69381717787829	8.49261426201418	0.976857	0.315
comp7683_c0_seq3|comp7683_c0_seq3	6.30249786614524	6.75971297868834	1.07255	0.316
CL10079Contig1|CL10079Contig1	8.23075497244507	8.51456660139185	1.03448	0.316
CL1285Contig3|CL1285Contig3	7.23610267863603	7.69595902721505	1.06355	0.31
CL1567Contig1|CL1567Contig1	7.55019415565204	7.89591963127087	1.04579	0.31
CL1Contig5189|CL1Contig5189	7.89984453741242	7.56473578262618	0.95758	0.317
CL9120Contig5|CL9120Contig5	8.30511667848663	8.62689909805563	1.03875	0.31
CL11181Contig1|CL11181Contig1	7.90807916544446	7.53052659945332	0.952257	0.318
CL11786Contig2|CL11786Contig2	5.49315075900123	6.37537175603194	1.1606	0.319
CL1851Contig1|CL1851Contig1	9.62700370724885	9.82496161089071	1.02056	0.31
CL1Contig5507|CL1Contig5507	5.94711798939054	5.14802501140581	0.865634	0.321
CL123Contig21|CL123Contig21	8.74177152377338	8.55813286015815	0.978993	0.321
CL5370Contig2|CL5370Contig2	4.0118189178881	5.24707867773735	1.30791	0.322
CL3743Contig4|CL3743Contig4	6.76377222321237	7.07801912064495	1.04646	0.323
CL1332Contig11|CL1332Contig11	7.93726539139822	8.17152751815904	1.02951	0.323
CL1452Contig2|CL1452Contig2	8.4878607393248	8.31794379458793	0.979981	0.323
Locus_2281_8_10|Locus_2281_8_10	7.0961743667006	6.1604481902361	0.868137	0.324
CL2778Contig5|CL2778Contig5	7.99263633045772	7.6716094387831	0.959835	0.324
HPPA7_ERATE|HPPA7_ERATE	8.18200581905281	7.91446935769209	0.967302	0.324
CL72Contig8|CL72Contig8	8.77508702865848	8.46812714087215	0.965019	0.324
CL1248Contig11|CL1248Contig11	5.54484786043538	6.48227807330622	1.16906	0.325
CL5379Contig1|CL5379Contig1	9.28688194335881	9.17623238148048	0.988085	0.325
CL12182Contig1|CL12182Contig1	6.04967351767575	6.76190555398962	1.11773	0.32
F16PA13_ERATE|F16PA13_ERATE	10.095759314365	10.1916524897029	1.0095	0.326
CL2209Contig4|CL2209Contig4	6.84136970456199	7.10226676240164	1.03814	0.32
Locus_8175_4_5|Locus_8175_4_5	7.17416350188611	6.89368868310035	0.960905	0.32
CL6947Contig3|CL6947Contig3	6.67289596259624	6.26436257122387	0.938777	0.327
CL1725Contig2|CL1725Contig2	8.18916088927998	7.80111654655152	0.952615	0.327
CL1Contig3056|CL1Contig3056	8.31405617663852	8.15316051391781	0.980648	0.327
CL9881Contig2|CL9881Contig2	8.33414896509976	8.47065965942345	1.01638	0.327
CL1Contig3411|CL1Contig3411	9.00497746024359	8.88028951037245	0.986153	0.327
G6PI_ERATE|G6PI_ERATE	5.99036981779131	6.48886745637167	1.08322	0.328
CL2546Contig1|CL2546Contig1	10.5826032345461	10.7256918387686	1.01352	0.329
CL1307Contig3|CL1307Contig3	6.73870424809128	5.92367428885079	0.879052	0.329
CL7457Contig2|CL7457Contig2	6.81162962624708	6.39805778589969	0.939284	0.329
CL1629Contig7|CL1629Contig7	9.75873583154388	9.90066593032682	1.01454	0.32
CL13746Contig1|CL13746Contig1	10.059505600011	10.1673802306404	1.01072	0.331
CL4498Contig5|CL4498Contig5	6.80987247792981	7.19919607186339	1.05717	0.331
CL16095Contig1|CL16095Contig1	7.55678698597295	7.28628491028698	0.964204	0.331
CL3947Contig3|CL3947Contig3	7.8296111893037	7.48940924083789	0.956549	0.331
CL4Contig5|CL4Contig5	9.57222099356565	9.72295654464899	1.01575	0.331
CL1Contig8937|CL1Contig8937	6.19806282793187	7.30583395033801	1.17873	0.332
CL1Contig2999|CL1Contig2999	7.60544782264367	7.40837681524564	0.974088	0.333
CL7196Contig2|CL7196Contig2	7.92238410759324	8.06161423976267	1.01757	0.333
CL35Contig17|CL35Contig17	8.50267298068943	8.71660826952903	1.02516	0.333
CL1172Contig2|CL1172Contig2	8.96834848421675	9.12125615807485	1.01705	0.333
CL614Contig11|CL614Contig11	6.67628565700999	5.90993178241534	0.885213	0.334
CL5734Contig5|CL5734Contig5	6.72769045967073	7.00053126492877	1.04055	0.334
CL629Contig13|CL629Contig13	6.77431809566718	6.17216941849307	0.911113	0.334
CL5827Contig1|CL5827Contig1	9.62264549743752	9.53678561791056	0.991077	0.334
CL1Contig1002|CL1Contig1002	5.83408965162156	6.57028899138487	1.12619	0.335
CL5866Contig3|CL5866Contig3	6.96585507324369	7.42667624795013	1.06615	0.335
CL1354Contig10|CL1354Contig10	7.14677742759324	6.80735476226196	0.952507	0.335
CL367Contig7|CL367Contig7	7.47801514658926	6.96159091047108	0.930941	0.335
CL1867Contig1|CL1867Contig1	8.07597208749137	7.84647582496915	0.971583	0.335
CL6796Contig2|CL6796Contig2	8.63971059145003	9.09971060014682	1.05324	0.335
CL2533Contig1|CL2533Contig1	8.68377262507918	8.86809458456204	1.02123	0.335
CL802Contig3|CL802Contig3	10.1972695756493	10.0938874293345	0.989862	0.336
CL1996Contig1|CL1996Contig1	7.19351721266297	6.22552596736507	0.865436	0.336
CL5228Contig2|CL5228Contig2	7.37357232951112	7.65577149194453	1.03827	0.336
CL5880Contig1|CL5880Contig1	8.18127557405804	8.71927580610193	1.06576	0.336
CL1629Contig1|CL1629Contig1	7.18959843691659	7.47163604407306	1.03923	0.33
CL23Contig30|CL23Contig30	5.54256889516726	6.19575944998865	1.11785	0.338
CL1852Contig1|CL1852Contig1	8.70480064912495	8.98941531842705	1.0327	0.33
CL471Contig6|CL471Contig6	9.04612180408731	8.84721288216999	0.978012	0.33
isotig04028|isotig04028	6.55417194324481	5.56377663268091	0.848891	0.339
CL400Contig10|CL400Contig10	6.25835450986149	6.57530349748843	1.05064	0.341
CL3978Contig2|CL3978Contig2	6.30724122504995	6.59415563730716	1.04549	0.341
CL6178Contig2|CL6178Contig2	8.24299983285198	8.01044215378148	0.971787	0.341
CL52Contig13|CL52Contig13	8.5148597383226	8.75528622304987	1.02824	0.341
CL2690Contig2|CL2690Contig2	8.93230326988226	9.09950239606101	1.01872	0.341
CL13Contig10|CL13Contig10	10.9988795613973	10.7881287093814	0.980839	0.342
CL1119Contig4|CL1119Contig4	8.85950176384009	8.99948420895546	1.0158	0.342
CL261Contig1|CL261Contig1	9.45517884175415	9.77059470426641	1.03336	0.342
CL6898Contig2|CL6898Contig2	6.43624344210346	6.79899884274651	1.05636	0.343
CL9307Contig1|CL9307Contig1	6.97516149616371	6.42537364209221	0.921179	0.343
CL433Contig1|CL433Contig1	7.12783287224538	6.67345343518938	0.936253	0.343
CL1808Contig1|CL1808Contig1	7.83570096243413	8.06162622784633	1.02883	0.343
CL1Contig955|CL1Contig955	7.03766066502125	7.42568276280482	1.05514	0.344
CL2521Contig2|CL2521Contig2	9.60724467220373	9.72667727896026	1.01243	0.344
CL12448Contig1|CL12448Contig1	9.80342935307244	9.7326163197564	0.992777	0.344
CL5014Contig2|CL5014Contig2	5.86478878874986	6.30511935958465	1.07508	0.345
CL8478Contig2|CL8478Contig2	8.29198313695559	7.97635882319231	0.961936	0.345
CL1Contig7806|CL1Contig7806	7.292651260151	6.36160941271749	0.872331	0.346
CL3068Contig1|CL3068Contig1	9.11038411659947	8.93161254482223	0.980377	0.346
CL213Contig1|CL213Contig1	7.48723681150395	7.88431861844813	1.05303	0.347
CL1179Contig2|CL1179Contig2	7.5828161161685	7.85927212977655	1.03646	0.347
CL6067Contig1|CL6067Contig1	9.83035401094122	9.76454057595449	0.993305	0.347
CL4Contig27|CL4Contig27	6.90074669718137	6.40774291665714	0.928558	0.348
CL2259Contig1|CL2259Contig1	9.04129199218586	8.86407888705009	0.9804	0.348
CL6927Contig2|CL6927Contig2	7.04783100049088	7.35690288045609	1.04385	0.349
CL1224Contig2|CL1224Contig2	7.16324868170661	7.34151890342574	1.02489	0.349
CL7140Contig3|CL7140Contig3	7.35577505510009	7.06822418614767	0.960908	0.349
FTSH7_ERATE|FTSH7_ERATE	8.3348883879566	7.96937130928652	0.956146	0.349
CAPP3_ERATE|CAPP3_ERATE	10.6855618846668	10.8455418833197	1.01497	0.35
CL1Contig3755|CL1Contig3755	11.2461657327425	11.3069905559219	1.00541	0.351
CL1Contig805|CL1Contig805	5.95935337487221	5.28501814806356	0.886844	0.351
CL1353Contig2|CL1353Contig2	7.4466462339563	7.66163441256055	1.02887	0.352
CL1Contig10228|CL1Contig10228	7.79025303542363	8.26482722337733	1.06092	0.352
CL941Contig2|CL941Contig2	8.01829149071864	8.32323592718018	1.03803	0.352
CL1390Contig4|CL1390Contig4	9.95628751265554	9.83793600798751	0.988113	0.352
CL3336Contig5|CL3336Contig5	5.91895178357021	6.68842217888196	1.13	0.353
Locus_1225_11_12|Locus_1225_11_12	6.84747695749234	6.16587472579064	0.900459	0.353
CL3500Contig2|CL3500Contig2	6.85628380030262	7.10080670322439	1.03566	0.353
CL1158Contig2|CL1158Contig2	7.84960443576075	8.27135882506124	1.05373	0.354
CL514Contig2|CL514Contig2	8.28989119044675	8.04441329982566	0.970388	0.354
CL3463Contig4|CL3463Contig4	7.62460051682891	7.41742204227975	0.972828	0.355
CL5380Contig1|CL5380Contig1	8.36331246573778	8.2164366807591	0.982438	0.355
CL2766Contig3|CL2766Contig3	6.16778187725371	7.01187242551792	1.13685	0.356
CL607Contig1|CL607Contig1	6.92670987123394	6.54235779413312	0.944512	0.356
CL1215Contig1|CL1215Contig1	10.0731662110846	10.0042521674783	0.993159	0.358
CL1Contig3657|CL1Contig3657	8.17047802328825	7.82729639329789	0.957997	0.35
CL360Contig5|CL360Contig5	7.27153730186576	7.48353265295855	1.02915	0.358
CL7813Contig4|CL7813Contig4	8.92920456190634	8.81315597664399	0.987003	0.358
CL1217Contig3|CL1217Contig3	7.42125163069387	7.74696187914387	1.04389	0.359
CL1976Contig2|CL1976Contig2	10.6490483829205	10.5880852134629	0.994275	0.36
CL3801Contig1|CL3801Contig1	5.93678087224898	6.3296900894323	1.06618	0.361
CL6509Contig1|CL6509Contig1	7.93575238467316	8.22134060738191	1.03599	0.361
CL567Contig8|CL567Contig8	8.97413051632383	8.82379934438188	0.983248	0.361
CL8315Contig1|CL8315Contig1	9.89869476314669	9.58649189685284	0.96846	0.361
CL495Contig2|CL495Contig2	7.05003131132696	6.65473993128404	0.943931	0.362
CL1010Contig2|CL1010Contig2	8.48116375776395	8.22694645869721	0.970026	0.362
CL10027Contig2|CL10027Contig2	5.83307465867739	6.6362207027415	1.13769	0.363
CL8133Contig2|CL8133Contig2	7.32585100759957	7.64493121711556	1.04356	0.363
CL1152Contig2|CL1152Contig2	7.67863422036713	8.0510679073717	1.0485	0.364
CL3942Contig1|CL3942Contig1	6.60172661230257	6.95999532608846	1.05427	0.365
CL42Contig15|CL42Contig15	6.91902419400925	7.38976861386876	1.06804	0.365
CL2033Contig4|CL2033Contig4	7.24460624770819	6.76834914506403	0.93426	0.365
CL14247Contig2|CL14247Contig2	8.12412684741032	8.45638762690393	1.0409	0.365
CL6199Contig1|CL6199Contig1	5.87621326472251	6.7525692797515	1.14914	0.366
CL837Contig2|CL837Contig2	9.45539832995282	9.56909159048879	1.01202	0.366
Locus_2004_9_11|Locus_2004_9_11	7.93241123425867	8.15852947608135	1.02851	0.36
CL280Contig14|CL280Contig14	7.98753741387105	7.33217214451693	0.917952	0.36
CL3348Contig3|CL3348Contig3	8.43925945967313	8.61061632762387	1.0203	0.368
CL3347Contig3|CL3347Contig3	9.17206469814286	9.27057211655422	1.01074	0.368
CL1Contig8103|CL1Contig8103	7.10143936119556	7.41724585869309	1.04447	0.369
CL1241Contig2|CL1241Contig2	7.22154906551724	6.90483245877864	0.956143	0.369
CL1981Contig1|CL1981Contig1	8.26060951799377	8.42915087129273	1.0204	0.369
CL7529Contig1|CL7529Contig1	10.432180920812	10.3272080343459	0.989938	0.37
CL3000Contig4|CL3000Contig4	6.27663124874756	6.66033357072699	1.06113	0.371
CL1Contig7829|CL1Contig7829	8.10985368848107	7.76623431405952	0.957629	0.371
CL516Contig3|CL516Contig3	9.75765494684777	9.86439554051159	1.01094	0.371
CL762Contig13|CL762Contig13	5.75809706517041	6.46330748082448	1.12247	0.372
CL3239Contig2|CL3239Contig2	8.20753374979047	7.83074050022948	0.954092	0.372
CL2970Contig3|CL2970Contig3	5.74074107419118	6.55490981714848	1.14182	0.373
CL1984Contig3|CL1984Contig3	6.79731099766914	7.22882974094936	1.06348	0.373
CL161Contig10|CL161Contig10	8.37002163740785	8.10648154886096	0.968514	0.373
CL114Contig10|CL114Contig10	8.88400803370406	8.75591205765259	0.985581	0.374
CL1Contig7467|CL1Contig7467	9.74211183267466	9.56515467066902	0.981836	0.374
CL1Contig5434|CL1Contig5434	10.4970029182728	10.5477526363896	1.00483	0.375
CL1Contig313|CL1Contig313	5.57974297639733	4.98771445061714	0.893897	0.375
CL5492Contig1|CL5492Contig1	6.69111253726648	7.07456480119761	1.05731	0.375
CL1Contig10707|CL1Contig10707	6.69287667603097	7.04185817973671	1.05214	0.375
CL2Contig37|CL2Contig37	7.32817964508924	6.83528653992435	0.93274	0.375
CL1Contig5313|CL1Contig5313	7.55281045496721	7.27733586768716	0.963527	0.375
CL187Contig7|CL187Contig7	9.12836520751498	9.23563934295587	1.01175	0.375
CL9209Contig1|CL9209Contig1	6.56220288476576	7.20653487525783	1.09819	0.37
comp11559_c0_seq6|comp11559_c0_seq6	6.13124618852644	6.45755927701477	1.05322	0.376
CL4079Contig2|CL4079Contig2	6.6769055438987	6.93975637991839	1.03937	0.37
CL1349Contig2|CL1349Contig2	8.26906961711052	8.04975814397837	0.973478	0.376
CL20178Contig1|CL20178Contig1	8.35577278564274	8.1079649731483	0.970343	0.376
CL1Contig3397|CL1Contig3397	7.27056868419629	6.76455675273507	0.930403	0.377
CL2990Contig3|CL2990Contig3	7.7728999959365	8.05011981337547	1.03566	0.377
CL1365Contig1|CL1365Contig1	9.20880763283676	9.02876693485783	0.980449	0.377
CL973Contig4|CL973Contig4	9.90594365261049	9.75804458000183	0.98507	0.377
CL722Contig8|CL722Contig8	7.38252959842655	7.87888041508755	1.06723	0.378
SERC2_ERATE|SERC2_ERATE	8.99841929370722	8.80176610835344	0.978146	0.378
CL2114Contig2|CL2114Contig2	10.0308249272306	9.89139882722067	0.9861	0.379
CL1309Contig5|CL1309Contig5	5.68902153304717	6.42643232211762	1.12962	0.379
CL1Contig7080|CL1Contig7080	7.95731734743143	7.63421719908592	0.959396	0.3
CL1Contig6172|CL1Contig6172	6.2303438183532	7.1080698058426	1.14088	0.379
CL9372Contig2|CL9372Contig2	7.32387947710254	6.58860640451091	0.899606	0.379
CL980Contig6|CL980Contig6	7.81784848853532	7.37041152096933	0.942767	0.379
CL2067Contig3|CL2067Contig3	8.41788812734555	8.73035457794876	1.03712	0.379
CL4125Contig1|CL4125Contig1	8.82188054703249	9.00009462323434	1.0202	0.379
CL4443Contig1|CL4443Contig1	8.92166934382582	9.0891827785883	1.01878	0.379
CL1054Contig1|CL1054Contig1	7.52344887055726	7.94815570216965	1.05645	0.381
CL7965Contig3|CL7965Contig3	7.99984073698	8.21644121731225	1.02708	0.381
CL1Contig4654|CL1Contig4654	8.68942892009023	8.4530354739143	0.972795	0.381
CL2396Contig3|CL2396Contig3	9.38119116519496	9.50111514266212	1.01278	0.381
CL11160Contig1|CL11160Contig1	8.25851694863474	8.50340923262495	1.02965	0.3
CL1Contig849|CL1Contig849	6.14836106993043	7.10187749067398	1.15508	0.382
CL1924Contig1|CL1924Contig1	8.83890228620488	8.97921864997295	1.01587	0.382
isotig01136|isotig01136	6.69412353307896	7.21103139775348	1.07722	0.383
CL939Contig1|CL939Contig1	7.5705529639072	7.21923027503807	0.953594	0.383
CL8156Contig1|CL8156Contig1	8.12335236568033	8.3655270366885	1.02981	0.383
CL1531Contig5|CL1531Contig5	7.06848226881532	7.41354704932705	1.04882	0.384
CL1Contig4295|CL1Contig4295	7.46835870533354	7.27142225257318	0.973631	0.384
isotig08027|isotig08027	4.87284618325611	5.52941541415275	1.13474	0.38
CL2396Contig1|CL2396Contig1	9.81239653705659	9.63938241668642	0.982368	0.384
CL7590Contig1|CL7590Contig1	7.38498987921589	6.82013513934317	0.923513	0.385
CL5680Contig4|CL5680Contig4	8.00879795672988	8.31417623945488	1.03813	0.385
CL73Contig17|CL73Contig17	11.2105391316483	11.1547907758483	0.995027	0.386
CL7355Contig4|CL7355Contig4	6.80861775511489	7.25702293373098	1.06586	0.386
CL210Contig7|CL210Contig7	6.82611589314887	6.35784736365435	0.9314	0.386
Locus_246_4_5|Locus_246_4_5	11.7850853973814	11.6780011560515	0.990914	0.387
CL818Contig5|CL818Contig5	8.7972968526294	8.46373420255454	0.962084	0.388
CL590Contig1|CL590Contig1	8.84309066174528	9.05744172652929	1.02424	0.388
CL60Contig22|CL60Contig22	9.13368774479122	9.41197455298995	1.03047	0.388
CL782Contig5|CL782Contig5	11.1341420333038	11.282706863559	1.01334	0.389
CL2847Contig4|CL2847Contig4	9.4534292207787	9.33261541006326	0.98722	0.38
CL136Contig18|CL136Contig18	6.61142458290196	6.14826370328792	0.929945	0.389
CL3598Contig1|CL3598Contig1	7.64494980815952	7.93818099180273	1.03836	0.389
CL7142Contig2|CL7142Contig2	8.1888498534265	8.42900401472297	1.02933	0.389
CL6720Contig1|CL6720Contig1	8.56542141025591	8.3774508605318	0.978055	0.389
CL1Contig3189|CL1Contig3189	9.93602014265026	10.0304318359848	1.0095	0.389
isotig00702|isotig00702	6.20557743478426	6.58581792805051	1.06127	0.391
CL1Contig1125|CL1Contig1125	7.02000122662971	6.75139828142003	0.961737	0.391
CL10869Contig1|CL10869Contig1	7.69480895486729	8.0584794738046	1.04726	0.391
CL4653Contig4|CL4653Contig4	7.76764562015768	8.01197526297606	1.03145	0.391
CL1523Contig5|CL1523Contig5	8.25311293147062	7.97165104486126	0.965896	0.392
CL3336Contig4|CL3336Contig4	7.42934774783728	7.04859876619046	0.948751	0.393
CL11398Contig2|CL11398Contig2	9.52019597657538	9.36201504085806	0.983385	0.393
CL120Contig26|CL120Contig26	6.53539504923587	6.86067862706196	1.04977	0.394
CL10481Contig3|CL10481Contig3	8.40774632451116	8.62356073570244	1.02567	0.394
CL1Contig4249|CL1Contig4249	6.43079864917831	5.87750998707274	0.913963	0.395
isotig20927|isotig20927	7.27435537910751	7.55550663615102	1.03865	0.395
CL1326Contig6|CL1326Contig6	8.26882426803201	7.93591990587461	0.95974	0.395
CL410Contig15|CL410Contig15	8.63699936494231	8.26706280738259	0.957168	0.395
CL2017Contig4|CL2017Contig4	8.64504948259775	8.54522779303682	0.988453	0.395
CL9278Contig2|CL9278Contig2	6.04937782591427	6.53530121025833	1.08033	0.396
isotig22806|isotig22806	6.59925513653719	6.25750821354641	0.948214	0.396
CL5782Contig1|CL5782Contig1	7.34583278955015	7.65925061580255	1.04267	0.396
CH604_ERATE|CH604_ERATE	10.7401278618965	10.6405659528815	0.99073	0.397
isotig34100|isotig34100	7.17111977886433	7.63446384692772	1.06461	0.39
CL1839Contig1|CL1839Contig1	7.00195470214309	7.5278304830966	1.0751	0.398
CL1666Contig7|CL1666Contig7	8.71970742647561	8.54584130505964	0.980061	0.39
isotig03753|isotig03753	7.47698619634172	7.73214028676767	1.03413	0.398
CL737Contig11|CL737Contig11	7.61143250935404	7.17706696373721	0.942932	0.398
CL28Contig17|CL28Contig17	7.65032391473726	7.84572810293066	1.02554	0.398
CL519Contig15|CL519Contig15	8.09189950009364	7.54614441267233	0.932555	0.399
CL6331Contig2|CL6331Contig2	8.19712318480937	8.00782801505316	0.976907	0.399
CL1Contig5950|CL1Contig5950	8.93673575322161	8.8121876939851	0.986063	0.399
CL316Contig2|CL316Contig2	5.2779212784666	6.09948025167023	1.15566	0.401
CL1Contig9083|CL1Contig9083	8.36168673953429	8.01206625749307	0.958188	0.401
CL911Contig4|CL911Contig4	9.36183324556557	9.47636324418831	1.01223	0.402
CL4534Contig6|CL4534Contig6	11.0866775819542	10.9652827026941	0.98905	0.403
Locus_543_17_19|Locus_543_17_19	8.58837823590261	8.87645483051309	1.03354	0.403
CL1Contig10114|CL1Contig10114	9.6768950547069	9.59285911273594	0.991316	0.403
CL6392Contig4|CL6392Contig4	9.88641359686786	10.0195989962925	1.01347	0.403
CL1Contig5815|CL1Contig5815	10.3219087914889	10.4123170653119	1.00876	0.404
CL1Contig152|CL1Contig152	7.37227264412101	7.0473349396794	0.955924	0.404
CL612Contig8|CL612Contig8	8.12881178456442	8.29800838538267	1.02081	0.404
CL5185Contig3|CL5185Contig3	8.46302599037617	8.71329115380913	1.02957	0.404
CL24843Contig1|CL24843Contig1	8.54451768771031	8.70714822752458	1.01903	0.404
CL4Contig24|CL4Contig24	6.5965956508301	7.08937292571239	1.0747	0.405
CL26770Contig1|CL26770Contig1	7.63548141675997	7.52526800379551	0.985566	0.405
CL993Contig6|CL993Contig6	7.9780955317765	8.15724866862745	1.02246	0.405
CL477Contig1|CL477Contig1	8.76598008650963	8.97209789198486	1.02351	0.405
CL3217Contig1|CL3217Contig1	9.99246707462679	10.0329693859848	1.00405	0.405
CL2332Contig2|CL2332Contig2	6.13057286764429	5.44918655085545	0.888854	0.406
CL1Contig4357|CL1Contig4357	7.31818018633529	7.04932408081475	0.963262	0.406
CL7994Contig1|CL7994Contig1	5.89283311884796	6.49051595011009	1.10143	0.408
CL7437Contig1|CL7437Contig1	8.75077086113182	8.89631338175609	1.01663	0.408
isotig06277|isotig06277	8.87265319248584	8.48975578655855	0.956845	0.408
CL10171Contig2|CL10171Contig2	9.64482380147439	9.76095414462848	1.01204	0.408
CL602Contig2|CL602Contig2	11.0924112689358	11.2310063596012	1.01249	0.409
CL8819Contig1|CL8819Contig1	7.54389263994814	7.77203499458371	1.03024	0.409
CL2268Contig1|CL2268Contig1	8.14353092142607	8.04440283275328	0.987827	0.409
CL3720Contig1|CL3720Contig1	8.22255664761648	8.02477895587548	0.975947	0.409
CL1Contig9949|CL1Contig9949	9.14976939125871	8.85171772806875	0.967425	0.409
CL10037Contig1|CL10037Contig1	9.93576345293899	10.1508058943674	1.02164	0.409
CL430Contig10|CL430Contig10	10.1303884775728	10.1044324017258	0.997438	0.4
CL2805Contig2|CL2805Contig2	7.08281965942677	6.68369119168708	0.943648	0.411
CL2160Contig4|CL2160Contig4	10.5379182533881	10.5800439662247	1.004	0.412
CL1Contig4339|CL1Contig4339	7.47412707972661	7.7293751879815	1.03415	0.412
CL337Contig7|CL337Contig7	7.9764339424278	7.4418807585444	0.932983	0.412
CL2760Contig2|CL2760Contig2	9.56158777027044	9.32151688978932	0.974892	0.412
CL253Contig5|CL253Contig5	7.95620272725113	7.63971469054491	0.960221	0.413
CL183Contig14|CL183Contig14	8.5341309270981	8.74406407349333	1.0246	0.413
CL2756Contig5|CL2756Contig5	8.78721200124933	8.61687686373356	0.980616	0.413
CL4534Contig5|CL4534Contig5	9.98284328938908	9.84377161715647	0.986069	0.413
CL714Contig1|CL714Contig1	11.0731318039923	11.0526508512879	0.99815	0.414
Locus_6504_2_6|Locus_6504_2_6	7.20766786274654	7.86056961486641	1.09058	0.414
CL9375Contig2|CL9375Contig2	7.29122162452256	6.66975608626819	0.914765	0.414
CL1Contig4896|CL1Contig4896	9.90388504306834	9.74872777067144	0.984334	0.414
CL1114Contig3|CL1114Contig3	8.46023180471802	8.35163878529842	0.987164	0.415
CL1Contig10683|CL1Contig10683	8.55608820724691	8.66543360063647	1.01278	0.415
CL22781Contig1|CL22781Contig1	8.62934187528499	8.1464948756463	0.944046	0.415
CL379Contig2|CL379Contig2	8.99312279130281	9.2952311327355	1.03359	0.415
CL499Contig1|CL499Contig1	6.4406144532441	7.11605574280753	1.10487	0.41
CL387Contig18|CL387Contig18	7.96045863956448	8.2492701904949	1.03628	0.416
CL1676Contig8|CL1676Contig8	8.08443287641036	8.2036960951716	1.01475	0.416
Locus_82_4_4|Locus_82_4_4	8.17039020416387	8.29909362176254	1.01575	0.416
CL1Contig4417|CL1Contig4417	8.35822958984152	8.0799999285478	0.966712	0.416
CL1Contig6220|CL1Contig6220	10.819831407943	10.7158364710757	0.990388	0.417
CL1679Contig3|CL1679Contig3	6.08772406607156	5.33517353068339	0.876382	0.417
Locus_1113_2_2|Locus_1113_2_2	6.28758497147787	6.91687468115301	1.10008	0.417
CL895Contig4|CL895Contig4	6.34953883942315	6.60073122670988	1.03956	0.417
Locus_619_2_8|Locus_619_2_8	6.39571422763153	5.63283023683836	0.88072	0.417
CL1Contig3349|CL1Contig3349	6.56469223675005	6.18894060675906	0.942762	0.417
CL22334Contig1|CL22334Contig1	7.67188780612884	7.49483904236509	0.976922	0.41
CL1Contig3953|CL1Contig3953	8.08519530508266	8.2577659194375	1.02134	0.41
CL1Contig5500|CL1Contig5500	5.87386036663794	6.44885524644661	1.09789	0.418
CL8516Contig2|CL8516Contig2	7.14200117186053	7.83716418685177	1.09733	0.418
CL1Contig5004|CL1Contig5004	7.88234921934925	7.68638870491907	0.975139	0.418
CL3123Contig2|CL3123Contig2	9.15207922099483	9.31090992934566	1.01735	0.41
CL1510Contig1|CL1510Contig1	5.84251377554249	6.04253420701521	1.03424	0.419
CL1Contig4324|CL1Contig4324	8.36291355668851	8.06946702353761	0.964911	0.419
CL1938Contig2|CL1938Contig2	8.88995277724202	8.97058509534594	1.00907	0.419
CL7796Contig2|CL7796Contig2	8.93565716894894	9.18777446383366	1.02821	0.419
CL5544Contig1|CL5544Contig1	7.676405049018	7.13389650422596	0.929328	0.421
CL4509Contig1|CL4509Contig1	7.71875992477755	7.26684125251829	0.941452	0.421
CL7530Contig3|CL7530Contig3	7.89984582424376	8.13406726871108	1.02965	0.421
comp1287_c0_seq1|comp1287_c0_seq1	8.5030993370316	8.30901868080672	0.977175	0.421
CL1436Contig1|CL1436Contig1	9.18292774153918	9.2710368427728	1.00959	0.421
CL1802Contig13|CL1802Contig13	9.355577340712	9.24857452042174	0.988563	0.421
TAL9_ERATE|TAL9_ERATE	9.14258063495665	9.24658948376546	1.01138	0.422
CH601_ERATE|CH601_ERATE	9.86185409592466	9.93751904027017	1.00767	0.422
CL1Contig1061|CL1Contig1061	7.65203386319316	7.41018483169236	0.968394	0.423
CL1183Contig5|CL1183Contig5	7.76061412456093	7.95297565473147	1.02479	0.423
CL2382Contig9|CL2382Contig9	7.89231648475049	7.4551184775046	0.944605	0.424
CL10114Contig2|CL10114Contig2	8.315144021873	8.10035180416457	0.974169	0.424
CL138Contig9|CL138Contig9	9.07684229297754	8.92713480888251	0.983507	0.424
CL54Contig14|CL54Contig14	6.20304231514496	5.60054071191237	0.90287	0.425
comp1325_c0_seq38|comp1325_c0_seq38	7.67532439586931	7.32681147337736	0.954593	0.425
CL1102Contig2|CL1102Contig2	10.4808310124141	10.3951212789014	0.991822	0.426
CL1871Contig4|CL1871Contig4	9.36180863506022	9.53204146159563	1.01818	0.426
CL8967Contig6|CL8967Contig6	7.55214325497909	7.20177420245385	0.953607	0.42
CL14137Contig1|CL14137Contig1	6.3727485384343	6.60230053055674	1.03602	0.427
CL320Contig1|CL320Contig1	6.83661307785592	6.44856527617831	0.94324	0.427
CL1Contig6610|CL1Contig6610	7.4785846484739	7.69853374033465	1.02941	0.427
CL104Contig2|CL104Contig2	7.71787370773579	8.03562468345168	1.04117	0.427
CL3092Contig3|CL3092Contig3	7.69373333720823	7.85421204820268	1.02086	0.428
CL27895Contig1|CL27895Contig1	5.73038232657736	5.9544764574196	1.03911	0.429
CL3455Contig2|CL3455Contig2	9.65896669771531	9.7721825901606	1.01172	0.42
CL1Contig10616|CL1Contig10616	6.9477237580943	7.24367274289385	1.0426	0.429
CL292Contig4|CL292Contig4	7.15289454320567	7.51671015138861	1.05086	0.429
Locus_1811_4_10|Locus_1811_4_10	10.3400910635312	10.4613814787635	1.01173	0.431
CL1094Contig10|CL1094Contig10	5.13161627455758	6.21185510754775	1.21051	0.431
CL1Contig772|CL1Contig772	6.18822476346001	6.68223380625881	1.07983	0.431
CL625Contig6|CL625Contig6	8.14455182886346	7.89394461544887	0.96923	0.431
CL36Contig36|CL36Contig36	6.89392543572386	6.04313173629744	0.876588	0.432
CL926Contig6|CL926Contig6	7.41878037840589	6.83196227247152	0.920901	0.433
CL11374Contig2|CL11374Contig2	7.87598558308096	8.11774790641487	1.0307	0.434
CL3640Contig3|CL3640Contig3	10.0236615260233	10.204650411643	1.01806	0.435
CL1658Contig10|CL1658Contig10	7.46612635388651	7.17103988335214	0.960477	0.435
CL1Contig2724|CL1Contig2724	8.67899902688041	8.51284778106063	0.980856	0.435
CL126Contig14|CL126Contig14	6.08148468337518	6.40947723152601	1.05393	0.43
CL142Contig16|CL142Contig16	7.72489317735203	7.2530021366581	0.938913	0.436
CL2695Contig1|CL2695Contig1	6.53880476197848	6.2068682869401	0.949236	0.437
CL2032Contig1|CL2032Contig1	6.66042165221436	6.19015492989531	0.929394	0.437
CL2442Contig6|CL2442Contig6	8.56919561908116	8.47215124886075	0.988675	0.43
CL7347Contig2|CL7347Contig2	8.62028545124819	8.31935226382225	0.96509	0.43
CL10865Contig2|CL10865Contig2	6.23643526218606	5.94102971911488	0.952632	0.438
CL4919Contig1|CL4919Contig1	8.56665531211132	8.42623749244227	0.983609	0.438
CL3496Contig6|CL3496Contig6	6.19063778294322	6.75634422637421	1.09138	0.439
CL858Contig7|CL858Contig7	8.96374377103629	8.85260339842838	0.987601	0.439
CL721Contig4|CL721Contig4	9.41117971691077	9.5148103934036	1.01101	0.439
DNAK1_ERATE|DNAK1_ERATE	10.5479175387481	10.653829295868	1.01004	0.441
CL120Contig16|CL120Contig16	7.93883002512011	8.13652180684662	1.0249	0.441
CL9361Contig1|CL9361Contig1	8.32776934259108	8.17482313752662	0.981634	0.441
CL1Contig1272|CL1Contig1272	9.42184897189786	9.48555453735687	1.00676	0.442
CL7405Contig5|CL7405Contig5	10.2676587829284	10.3792071753628	1.01086	0.443
CL5040Contig1|CL5040Contig1	7.75922041867386	7.91491357729401	1.02007	0.443
CL32Contig1|CL32Contig1	7.99037769708741	8.1850986556889	1.02437	0.443
CL3095Contig1|CL3095Contig1	8.17353638740472	8.36059450076591	1.02289	0.443
CL17541Contig1|CL17541Contig1	7.84754790386505	7.43764949588769	0.947767	0.444
CL2631Contig5|CL2631Contig5	8.32212899298639	8.53165333265046	1.02518	0.444
CL4596Contig1|CL4596Contig1	10.2958833676027	10.368798482053	1.00708	0.445
CL678Contig5|CL678Contig5	9.30116149600195	9.17618958316137	0.986564	0.445
CL1Contig6583|CL1Contig6583	9.34008605593	9.42837458928138	1.00945	0.445
CL1Contig5972|CL1Contig5972	9.89302968470861	9.99508420015866	1.01032	0.445
CL12277Contig2|CL12277Contig2	6.34307627006366	5.95532224883425	0.93887	0.446
CL637Contig1|CL637Contig1	6.92051513794971	7.40355496434183	1.0698	0.446
CL821Contig1|CL821Contig1	7.91732151225422	8.17220035085321	1.03219	0.446
CL1367Contig5|CL1367Contig5	8.90013517612356	8.69747113899484	0.977229	0.446
FTSH_ERATE|FTSH_ERATE	9.70763895911028	9.65103767800728	0.994169	0.447
isotig07921|isotig07921	7.0355670373598	6.79046785692484	0.965163	0.448
Locus_2388_3_9|Locus_2388_3_9	7.28296685772901	7.5941714682843	1.04273	0.448
CL5581Contig1|CL5581Contig1	7.87551352555637	8.19891758178479	1.04106	0.448
CL6385Contig2|CL6385Contig2	8.14563340948738	8.43048056612934	1.03497	0.448
CL9364Contig1|CL9364Contig1	8.15060084885234	8.42065465355564	1.03313	0.448
CL555Contig8|CL555Contig8	8.9647264831913	8.79032334875113	0.980546	0.448
CL1448Contig5|CL1448Contig5	5.59710700342679	5.31533387061701	0.949657	0.449
CL2026Contig5|CL2026Contig5	5.75196756877445	6.40207463173775	1.11302	0.449
Locus_748_6_7|Locus_748_6_7	7.00733363653598	6.40368264482788	0.913854	0.449
CL1Contig6825|CL1Contig6825	8.9385513748393	8.76455673568821	0.980534	0.449
CL1Contig3640|CL1Contig3640	5.26523901389303	5.80468305368079	1.10245	0.452
CL1371Contig5|CL1371Contig5	7.43376964860847	8.10075919335998	1.08972	0.452
CL1589Contig3|CL1589Contig3	7.99708586676106	8.22507745386827	1.02851	0.452
CL4255Contig2|CL4255Contig2	9.44481078636989	9.52197946056535	1.00817	0.452
CL5463Contig7|CL5463Contig7	7.14634876604852	6.16771944331453	0.863059	0.453
CL3643Contig4|CL3643Contig4	5.87017420514239	6.14576156751718	1.04695	0.454
CL402Contig2|CL402Contig2	6.03635661366712	6.52379559503096	1.08075	0.454
CL1162Contig4|CL1162Contig4	6.16648080442931	6.58654128031858	1.06812	0.454
CL2728Contig3|CL2728Contig3	8.49788547949717	8.02379147666151	0.94421	0.454
CL1027Contig6|CL1027Contig6	6.15968783022204	6.5019855369212	1.05557	0.45
CL2781Contig1|CL2781Contig1	6.78156161148172	6.48641568993718	0.956478	0.45
CL2860Contig2|CL2860Contig2	8.72475957032644	8.80814790488925	1.00956	0.456
CL1758Contig4|CL1758Contig4	6.30034069607251	6.71750352273333	1.06621	0.457
CL280Contig21|CL280Contig21	8.43849841613951	8.25819176046743	0.978633	0.457
CL2336Contig7|CL2336Contig7	5.51285456539651	6.20597707879559	1.12573	0.458
CL1Contig1641|CL1Contig1641	7.16166538323202	7.35869100623142	1.02751	0.458
CL5046Contig1|CL5046Contig1	7.93222069347743	6.818536378066	0.8596	0.458
CL3504Contig1|CL3504Contig1	9.0873287120149	9.19033122953724	1.01133	0.458
CL1262Contig13|CL1262Contig13	8.95772323987513	8.85013397954428	0.987989	0.45
CL1Contig10463|CL1Contig10463	9.29593186745564	9.15792741217671	0.985154	0.45
CL10896Contig1|CL10896Contig1	6.37077281879785	6.05050690222421	0.949729	0.459
CL1994Contig1|CL1994Contig1	9.6381009995919	9.9055973392634	1.02775	0.45
CL1331Contig1|CL1331Contig1	6.40866450039651	6.78514920752143	1.05875	0.459
CL32Contig8|CL32Contig8	8.18544971278018	8.24982304341727	1.00786	0.459
RSMG8_ERATE|RSMG8_ERATE	8.71744445173063	8.5231511731582	0.977712	0.459
CL1Contig874|CL1Contig874	5.74336607447942	6.21324157747708	1.08181	0.461
CL5547Contig4|CL5547Contig4	6.38377327658078	5.98108363239171	0.93692	0.461
CL679Contig5|CL679Contig5	7.42879597073801	7.35402977902995	0.989936	0.461
CL5Contig53|CL5Contig53	9.98827018242839	10.1021844294645	1.0114	0.463
CL14Contig24|CL14Contig24	11.3085012528403	11.5182513197777	1.01855	0.464
Locus_8528_2_5|Locus_8528_2_5	7.23858558134408	6.93487164867815	0.958042	0.464
CL1Contig4117|CL1Contig4117	7.63760930589475	7.79693072624397	1.02086	0.464
CL1414Contig3|CL1414Contig3	7.93918506921604	7.78722167206107	0.980859	0.464
CL1Contig3901|CL1Contig3901	9.0827904214203	8.9559769899161	0.986038	0.464
Locus_65_7_13|Locus_65_7_13	6.55828281049641	7.10797158985695	1.08382	0.4
CL376Contig3|CL376Contig3	5.71572292400424	5.19579845474837	0.909036	0.46
CL248Contig2|CL248Contig2	7.99599353124079	8.11895787526078	1.01538	0.465
CL2394Contig2|CL2394Contig2	8.42561308990637	8.63328192622648	1.02465	0.465
CL6341Contig1|CL6341Contig1	9.26114670533048	9.39055772211748	1.01397	0.465
CL4562Contig6|CL4562Contig6	10.0986715289832	9.96672000490499	0.986934	0.466
CL5946Contig3|CL5946Contig3	6.77395282365947	7.24301292890385	1.06924	0.466
CL1Contig1082|CL1Contig1082	7.9888144327102	7.86121766166145	0.984028	0.466
CL374Contig2|CL374Contig2	9.40058242117118	9.11159187369406	0.969258	0.466
HPPA4_ERATE|HPPA4_ERATE	11.4222326377736	11.5158901196603	1.0082	0.467
CL153Contig9|CL153Contig9	7.74298160917981	6.77435254743399	0.874902	0.46
CL2425Contig4|CL2425Contig4	7.91497820090912	7.77690832868346	0.982556	0.46
CL3074Contig4|CL3074Contig4	8.01742413313783	8.41088205594353	1.04908	0.46
CL1498Contig4|CL1498Contig4	5.89382633430763	5.37292571654066	0.911619	0.468
Locus_15723_4_6|Locus_15723_4_6	7.02427435971238	6.60996646621724	0.941018	0.468
CL370Contig5|CL370Contig5	6.13887560475779	6.61781632487364	1.07802	0.469
CL1734Contig4|CL1734Contig4	7.93550443565344	7.69354170812685	0.969509	0.469
CL454Contig4|CL454Contig4	8.08596885081531	8.19258327432934	1.01319	0.469
Locus_44_9_9|Locus_44_9_9	10.9697291212599	10.8722897869352	0.991117	0.471
CL1923Contig1|CL1923Contig1	6.67697150294042	6.39128429359092	0.957213	0.471
CL266Contig11|CL266Contig11	7.45758136488673	7.71198830437337	1.03411	0.471
CL13Contig8|CL13Contig8	7.63626102204765	7.35000491571822	0.962514	0.471
CL1830Contig7|CL1830Contig7	8.21186388790991	8.06002772185547	0.98151	0.471
CL7342Contig1|CL7342Contig1	7.11162299692991	6.76800526680712	0.951682	0.472
CL13319Contig2|CL13319Contig2	9.52372083475435	9.75825768989711	1.02463	0.472
CL508Contig2|CL508Contig2	6.22144824658973	6.61023593936913	1.06249	0.473
CL1328Contig3|CL1328Contig3	7.48864321657622	7.26712422444323	0.970419	0.473
isotig07055|isotig07055	7.96681480539452	7.79185992291094	0.97804	0.473
CL3523Contig5|CL3523Contig5	6.0923484332143	6.60635399524578	1.08437	0.474
CL2357Contig8|CL2357Contig8	7.46884560490263	7.73828117129079	1.03607	0.4
Locus_2954_3_10|Locus_2954_3_10	10.7230454638973	10.7607786742797	1.00352	0.475
CL3130Contig3|CL3130Contig3	7.20132039194829	6.83599754389093	0.94927	0.475
CL6320Contig1|CL6320Contig1	8.24733192684902	8.08949231892948	0.980862	0.475
CL2047Contig1|CL2047Contig1	8.4763689115916	8.39688529125843	0.990623	0.475
CL309Contig8|CL309Contig8	8.88008681968331	8.78345343094863	0.989118	0.475
CL1497Contig2|CL1497Contig2	10.2199750889112	10.1396938562374	0.992145	0.476
CL190Contig3|CL190Contig3	10.9205691433553	11.0397205544053	1.01091	0.476
CL931Contig6|CL931Contig6	6.8988103099774	7.25570440817515	1.05173	0.476
CL1596Contig3|CL1596Contig3	7.13207541781343	7.40683169209995	1.03852	0.476
Locus_4333_6_8|Locus_4333_6_8	6.66848857663144	7.16476766196435	1.07442	0.477
CL1107Contig3|CL1107Contig3	7.77651304225283	7.98571938142805	1.0269	0.4
CL32Contig17|CL32Contig17	8.4519268308721	8.38578832203852	0.992175	0.47
CL1774Contig1|CL1774Contig1	6.01069795875089	6.7172834466483	1.11755	0.478
CL9242Contig1|CL9242Contig1	7.53090300816071	7.7078787024492	1.0235	0.478
CL5888Contig3|CL5888Contig3	7.67279793332147	7.4621105871891	0.972541	0.478
CL10667Contig2|CL10667Contig2	8.79570055903832	8.97082023405471	1.01991	0.47
CL4510Contig5|CL4510Contig5	8.44801100637069	8.58528910313666	1.01625	0.478
isotig23406|isotig23406	9.30738951129982	9.11867626349457	0.979724	0.478
CYNS14_ERATE|CYNS14_ERATE	8.95314026037228	9.10665683983077	1.01715	0.47
CL1629Contig9|CL1629Contig9	7.2292136393854	6.81085512230602	0.942129	0.479
CL188Contig21|CL188Contig21	9.82826215346429	9.68354779017551	0.985276	0.47
CL1937Contig7|CL1937Contig7	9.05858837867	9.25612183219906	1.02181	0.479
CL4208Contig1|CL4208Contig1	6.67049259687542	7.01188161018192	1.05118	0.481
CL4628Contig2|CL4628Contig2	9.29895826745944	9.44506199687964	1.01571	0.481
CL608Contig1|CL608Contig1	6.91031907545098	6.4981810611322	0.940359	0.482
CL3545Contig2|CL3545Contig2	7.03336829455403	6.72043160483033	0.955507	0.482
CL9960Contig2|CL9960Contig2	7.25125598689435	7.6288000056424	1.05207	0.482
CL5342Contig3|CL5342Contig3	7.61802250226765	7.30804047899299	0.959309	0.482
CL9159Contig1|CL9159Contig1	8.90650919910572	8.81025471229709	0.989193	0.482
Locus_2984_2_9|Locus_2984_2_9	7.99899500801964	7.77209915524468	0.971634	0.483
CL14225Contig1|CL14225Contig1	8.51554383707818	8.36642047665149	0.982488	0.483
CL4904Contig3|CL4904Contig3	8.06478738839857	8.31098810874679	1.03053	0.484
CL3494Contig6|CL3494Contig6	8.47706993909014	8.23135783776815	0.971015	0.484
CL8722Contig2|CL8722Contig2	10.3547653482649	10.2021328257478	0.98526	0.485
CL1Contig8421|CL1Contig8421	6.68195181252567	6.91629294817206	1.03507	0.485
CL4527Contig3|CL4527Contig3	5.89313132088624	6.25743622875265	1.06182	0.486
CL786Contig5|CL786Contig5	6.85833532707389	7.15607360960923	1.04341	0.486
CL11175Contig2|CL11175Contig2	7.69142055805002	7.42849380003464	0.965816	0.486
CL63Contig22|CL63Contig22	10.4080873317317	10.4445724780201	1.00351	0.487
CL913Contig1|CL913Contig1	5.90088282304404	6.24426359864695	1.05819	0.488
CL1739Contig2|CL1739Contig2	6.96484330615283	7.41227881952564	1.06424	0.488
isotig10340|isotig10340	7.34153103621403	6.99953014938882	0.953416	0.488
CL820Contig1|CL820Contig1	7.95571156722152	8.17199670394088	1.02719	0.488
CL4731Contig2|CL4731Contig2	8.63772905780406	8.81011320792925	1.01996	0.488
CL5082Contig1|CL5082Contig1	8.91737748527125	9.00240566249032	1.00954	0.48
CL12771Contig1|CL12771Contig1	6.43514905868631	6.8613745754634	1.06623	0.489
CL653Contig4|CL653Contig4	6.81701414049586	6.32522454242339	0.927859	0.489
CL6407Contig3|CL6407Contig3	8.03510600746865	7.91203189830938	0.984683	0.489
Locus_7869_3_11|Locus_7869_3_11	8.41614663896407	8.18567349894359	0.972615	0.489
CL1125Contig1|CL1125Contig1	6.16387073782117	6.80594136392501	1.10417	0.491
CL1264Contig6|CL1264Contig6	6.82446497992138	6.27356730420545	0.919276	0.491
Locus_6980_3_5|Locus_6980_3_5	6.34461278255762	5.94448950064131	0.936935	0.492
CL5Contig54|CL5Contig54	7.12018709205258	7.25642722122448	1.01913	0.492
CL750Contig4|CL750Contig4	9.00848760970987	8.87165696903855	0.984811	0.492
CL1Contig10150|CL1Contig10150	9.56436478633918	9.51586884154934	0.99493	0.492
CL1Contig2784|CL1Contig2784	7.16443241982335	7.33263549878045	1.02348	0.493
CL1Contig8329|CL1Contig8329	8.30646043526709	8.57840632133713	1.03274	0.494
CL1Contig69|CL1Contig69	8.31781844323479	8.10821596603519	0.974801	0.494
CL1224Contig6|CL1224Contig6	6.34226915976058	6.68082588920707	1.05338	0.495
CL1630Contig2|CL1630Contig2	5.86742972190422	6.29420860571054	1.07274	0.49
CL711Contig2|CL711Contig2	9.06087562087284	9.25740553589668	1.02169	0.495
CL7321Contig3|CL7321Contig3	9.77315423338287	9.84506534779575	1.00736	0.495
CL451Contig7|CL451Contig7	6.34671184402128	6.02567490139546	0.949417	0.49
CL1889Contig3|CL1889Contig3	7.16984521636267	6.67740142797362	0.931317	0.496
CL4734Contig2|CL4734Contig2	8.21366462596483	8.04747815218821	0.979767	0.496
CL1Contig929|CL1Contig929	6.30495850158389	5.7341222613171	0.909462	0.497
CL12285Contig1|CL12285Contig1	8.17627886580754	7.91219209826156	0.967701	0.497
CL1217Contig4|CL1217Contig4	9.6887562317741	9.55919814671884	0.986628	0.497
CL1878Contig4|CL1878Contig4	5.33297501545194	5.85745289543349	1.09835	0.498
CL7247Contig4|CL7247Contig4	6.71685398599079	6.33188281330957	0.942686	0.499
CL2077Contig3|CL2077Contig3	8.28025151382217	8.45713211204084	1.02136	0.499
CL1Contig4611|CL1Contig4611	8.62511850275231	8.81381956904934	1.02188	0.499
CL12000Contig1|CL12000Contig1	8.88670536818958	9.06388722390616	1.01994	0.499
CL1330Contig3|CL1330Contig3	8.93701118164858	9.10321246735892	1.0186	0.499
CL1010Contig4|CL1010Contig4	9.79309479327845	9.8642916601144	1.00727	0.499
CL34Contig30|CL34Contig30	5.57833169611632	6.10243360697925	1.09395	0.501
CL8278Contig1|CL8278Contig1	7.59910504588095	7.07325929963201	0.930802	0.501
CL728Contig5|CL728Contig5	8.70407129343226	8.78183205468708	1.00893	0.502
CL6510Contig2|CL6510Contig2	6.23895907582706	5.70090245773028	0.913759	0.503
ACSF1_ERATE|ACSF1_ERATE	7.18091224508893	6.40667633166118	0.892181	0.503
CL2637Contig2|CL2637Contig2	8.6250772850299	8.54925604771343	0.991209	0.503
CL1Contig5659|CL1Contig5659	9.8825114789109	9.71809991347417	0.983363	0.503
CL16703Contig1|CL16703Contig1	4.84017341947804	5.35936546989889	1.10727	0.504
CL10874Contig1|CL10874Contig1	5.46520806446532	5.92785241601944	1.08465	0.504
CL13950Contig1|CL13950Contig1	7.35496180921832	6.97781814817748	0.948723	0.504
CL6517Contig3|CL6517Contig3	10.5634425419965	10.6830059136122	1.01132	0.505
CL6Contig21|CL6Contig21	5.69709240961458	6.32093508355759	1.1095	0.506
CL12213Contig1|CL12213Contig1	7.45887011118254	6.97767242938729	0.935487	0.506
CL8238Contig4|CL8238Contig4	8.4665055599429	8.63604299910946	1.02002	0.506
CL2901Contig12|CL2901Contig12	10.2883426807561	10.2040115277764	0.991803	0.507
CL2419Contig5|CL2419Contig5	10.617021975919	10.566492218929	0.995241	0.507
DNAJ13_ERATE|DNAJ13_ERATE	7.84139335588585	7.62911034768611	0.972928	0.507
CL2277Contig3|CL2277Contig3	8.94951901198949	9.07846597546687	1.01441	0.508
CL9274Contig2|CL9274Contig2	9.57330154090065	9.63288103259354	1.00622	0.508
isotig09880|isotig09880	6.77095372473803	6.30316342467725	0.930912	0.509
Locus_3637_9_10|Locus_3637_9_10	7.83568748919758	7.54438748422203	0.962824	0.509
CL4562Contig7|CL4562Contig7	8.229356047837	8.04130128635818	0.977148	0.509
CL975Contig6|CL975Contig6	10.1653086820684	10.4627582259198	1.02926	0.5
CL1165Contig1|CL1165Contig1	10.5105428881381	10.5695286928074	1.00561	0.511
CL381Contig12|CL381Contig12	5.90689439412508	6.43432557482527	1.08929	0.511
CL1228Contig9|CL1228Contig9	6.99610672478128	6.47986637083091	0.92621	0.512
CL74Contig10|CL74Contig10	7.66127882405159	7.29753645272419	0.952522	0.512
CL4Contig54|CL4Contig54	8.78026864367329	8.52127405707948	0.970503	0.512
CL3699Contig7|CL3699Contig7	6.9629878612145	7.12064685462436	1.02264	0.513
CL7837Contig2|CL7837Contig2	8.46223277361219	8.65403975546222	1.02267	0.514
CL36Contig7|CL36Contig7	11.6181598300426	11.4944916744281	0.989356	0.515
CL7898Contig1|CL7898Contig1	6.58846878277165	6.87220980109402	1.04307	0.515
CL5635Contig1|CL5635Contig1	7.91492244068905	7.67881626440782	0.970169	0.516
CL44Contig31|CL44Contig31	8.7655317126329	9.08292673844538	1.03621	0.516
CL11513Contig1|CL11513Contig1	6.97604788566456	6.70873904956466	0.961682	0.51
CL7819Contig2|CL7819Contig2	10.0824500747401	10.1059874593034	1.00233	0.517
CL332Contig2|CL332Contig2	6.70047308093558	6.43428156020995	0.960273	0.517
CL4491Contig4|CL4491Contig4	8.36672670145139	8.44817927404318	1.00974	0.517
CL1156Contig3|CL1156Contig3	9.12730247213149	9.29638506462043	1.01852	0.517
CL1950Contig4|CL1950Contig4	5.68938270916907	5.99056514820491	1.05294	0.518
CL1Contig10599|CL1Contig10599	5.87455117628682	6.18414151155007	1.0527	0.518
CL687Contig1|CL687Contig1	5.99703162843808	6.59261391287794	1.09931	0.518
CL4Contig15|CL4Contig15	6.68143235365513	7.04973903424791	1.05512	0.518
CL81Contig24|CL81Contig24	7.65635707595733	7.38936944738221	0.965129	0.518
CL6695Contig2|CL6695Contig2	9.35310842563857	9.45967637497195	1.01139	0.518
CL103Contig6|CL103Contig6	10.2363930057164	10.1369537185117	0.990286	0.519
CL8550Contig2|CL8550Contig2	6.23463514312141	6.4341186785545	1.032	0.519
CL5169Contig3|CL5169Contig3	6.42431894938486	6.16987234772138	0.960393	0.519
CL2060Contig3|CL2060Contig3	9.66689382737277	9.58778066536846	0.991816	0.51
CL2634Contig2|CL2634Contig2	6.73525644022726	6.93368003407208	1.02946	0.519
CL494Contig2|CL494Contig2	7.41625250011705	7.24383627583726	0.976752	0.519
CL1594Contig2|CL1594Contig2	9.08330133553575	9.26614394875811	1.02013	0.519
CL5388Contig1|CL5388Contig1	9.08805933176971	9.01073918537326	0.991492	0.519
CL1456Contig4|CL1456Contig4	6.27639119368131	5.94637162552648	0.947419	0.521
CL579Contig13|CL579Contig13	5.9336420305799	6.39935813363934	1.07849	0.522
CL4791Contig2|CL4791Contig2	6.57521651125167	6.06902367276873	0.923015	0.523
CL5065Contig5|CL5065Contig5	6.92189112355975	6.64891803904612	0.960564	0.523
CL27Contig20|CL27Contig20	6.10433951977308	5.74830958521408	0.941676	0.524
CL430Contig11|CL430Contig11	7.07832224821798	6.75015681298469	0.953638	0.524
CL8430Contig2|CL8430Contig2	7.30181537277724	7.54622826914873	1.03347	0.524
CL1742Contig1|CL1742Contig1	8.89346997315251	8.74660033977486	0.983486	0.525
CL140Contig12|CL140Contig12	6.70483043947071	7.01295568265561	1.04596	0.52
CL54Contig19|CL54Contig19	9.71606763107468	9.80364009782043	1.00901	0.526
CL2419Contig3|CL2419Contig3	5.81114233054087	6.10576603900998	1.0507	0.527
CL1202Contig3|CL1202Contig3	7.09997669361164	7.36366643842389	1.03714	0.527
CL1Contig9973|CL1Contig9973	9.62672626727499	9.51947467357295	0.988859	0.527
CL2420Contig3|CL2420Contig3	8.93111684896844	9.01224329212872	1.00908	0.528
CL11931Contig1|CL11931Contig1	9.04734911421971	8.8581611973906	0.979089	0.528
HEM31_ERATE|HEM31_ERATE	9.65697709537125	9.51133483420755	0.984918	0.52
CL700Contig3|CL700Contig3	6.60231201012317	6.88134858475411	1.04226	0.529
CL4361Contig1|CL4361Contig1	7.15060924136986	6.89768014937836	0.964628	0.529
CL162Contig2|CL162Contig2	8.19684811685922	8.00794802622702	0.976955	0.529
CL1Contig7667|CL1Contig7667	8.08311354375	8.20607185465561	1.01521	0.531
CL7539Contig2|CL7539Contig2	8.63986108775397	8.54167395357772	0.988636	0.531
CL118Contig5|CL118Contig5	8.74756506862622	8.90843764984699	1.01839	0.531
CL3278Contig2|CL3278Contig2	10.1930632406351	10.1476563247608	0.995545	0.532
CL4602Contig3|CL4602Contig3	5.81491870926432	5.44985912738834	0.93722	0.532
CL1332Contig12|CL1332Contig12	6.83194090086633	6.18467247440488	0.905258	0.532
CL367Contig2|CL367Contig2	9.64566019312036	9.76326060962927	1.01219	0.532
CL1087Contig7|CL1087Contig7	12.0369448395719	11.9487447964562	0.992673	0.533
CL335Contig5|CL335Contig5	7.36497987557594	7.60295587226343	1.03231	0.533
CL4221Contig2|CL4221Contig2	7.7509237678652	7.65534068475167	0.987668	0.533
CL95Contig4|CL95Contig4	8.70815018345961	8.85594655628069	1.01697	0.533
CL4375Contig1|CL4375Contig1	5.98287529985592	5.44322082592853	0.9098	0.534
CL2280Contig1|CL2280Contig1	7.8817303136018	8.06908933209394	1.02377	0.534
Locus_6091_1_8|Locus_6091_1_8	8.62575622980687	8.86432323414456	1.02766	0.534
CL4790Contig2|CL4790Contig2	5.71175100413521	6.41173366715106	1.12255	0.53
CL75Contig19|CL75Contig19	5.83770037704678	6.33453942522272	1.08511	0.53
CL1424Contig4|CL1424Contig4	6.15309234815923	6.64610414731604	1.08012	0.53
CL1218Contig1|CL1218Contig1	7.20883798095251	7.54208513325435	1.04623	0.536
CL1655Contig2|CL1655Contig2	7.52151021981161	6.81336547932772	0.905851	0.536
CL368Contig5|CL368Contig5	7.99223862538563	8.11819840343311	1.01576	0.536
CL3290Contig3|CL3290Contig3	6.83105427434697	6.60211562408395	0.966486	0.53
CL786Contig3|CL786Contig3	6.8460598898415	7.1996503828096	1.05165	0.53
CL3976Contig1|CL3976Contig1	7.20507530731592	7.40900861512763	1.0283	0.53
CL1158Contig3|CL1158Contig3	5.98037842693116	6.35956848889486	1.06341	0.537
CL10279Contig1|CL10279Contig1	6.11033463111753	6.5746499833625	1.07599	0.537
CL1Contig462|CL1Contig462	6.50065714634114	7.09297209295407	1.09112	0.537
CL579Contig2|CL579Contig2	7.55730965310772	7.71216016924301	1.02049	0.537
CL1995Contig2|CL1995Contig2	7.70408876930217	7.80507242050807	1.01311	0.537
CL3496Contig3|CL3496Contig3	8.71747555384464	8.48341187856301	0.97315	0.537
CL7549Contig1|CL7549Contig1	8.77646518163371	8.68071069642496	0.98909	0.537
CL4035Contig2|CL4035Contig2	9.08737803285553	9.26812334012816	1.01989	0.537
CL34Contig20|CL34Contig20	9.32107568662803	9.48116588157198	1.01718	0.537
CL1Contig4020|CL1Contig4020	9.33268424449107	9.25948941939222	0.992157	0.537
CL5454Contig6|CL5454Contig6	8.0758091268675	8.2374861572672	1.02002	0.53
CL1Contig9243|CL1Contig9243	7.90962118510422	8.11951607454161	1.02654	0.538
CL1Contig5494|CL1Contig5494	8.47136317908902	8.34926733214534	0.985587	0.538
CL2470Contig2|CL2470Contig2	9.6724911015087	9.59189437366815	0.991667	0.538
CL4341Contig5|CL4341Contig5	6.05685394895625	5.8341221325601	0.963226	0.539
CL8517Contig3|CL8517Contig3	7.51962597958671	7.7864568818967	1.03548	0.539
CL1Contig1045|CL1Contig1045	8.34665293673003	8.05717225371035	0.965318	0.539
CL44Contig24|CL44Contig24	5.8191813111404	6.24183131028322	1.07263	0.541
CL16903Contig1|CL16903Contig1	6.19392240319935	5.93202766886755	0.957717	0.541
CL1Contig8638|CL1Contig8638	6.45407866475184	6.28043147823688	0.973095	0.541
CL2230Contig4|CL2230Contig4	8.25347751689284	8.05453747167145	0.975896	0.541
CL367Contig23|CL367Contig23	8.38014558219895	8.28366746699275	0.988487	0.541
CL7586Contig1|CL7586Contig1	7.52376275240676	7.32411394896405	0.973464	0.543
CL1Contig2154|CL1Contig2154	8.29329634549856	8.13306930960392	0.98068	0.543
CL7287Contig3|CL7287Contig3	9.63785748167652	9.75420764897306	1.01207	0.543
CL4927Contig4|CL4927Contig4	10.5961490818014	10.5433499023633	0.995017	0.544
CL47Contig45|CL47Contig45	7.32001531106575	6.7823955165887	0.926555	0.544
CL4918Contig2|CL4918Contig2	8.39148813894936	8.57617632374411	1.02201	0.544
CL1Contig9148|CL1Contig9148	11.0807977877605	10.9781922417369	0.99074	0.545
CL10661Contig2|CL10661Contig2	5.65210457696014	6.24157432948861	1.10429	0.545
CL5513Contig2|CL5513Contig2	7.16395471775306	7.34705378088561	1.02556	0.545
CL7210Contig2|CL7210Contig2	7.3441585059937	7.59431550711605	1.03406	0.545
CL2014Contig4|CL2014Contig4	8.75753310671876	8.69985902296356	0.993414	0.545
CL18099Contig1|CL18099Contig1	9.71066823338293	9.77255957775152	1.00637	0.545
Locus_6732_3_10|Locus_6732_3_10	6.24656184359469	5.70353820672543	0.913068	0.546
CL394Contig2|CL394Contig2	6.74880631429928	6.20528373801681	0.919464	0.546
CL2064Contig2|CL2064Contig2	6.82852037930005	6.96953025416605	1.02065	0.54
CL1Contig5173|CL1Contig5173	5.79410951563031	6.39961839098838	1.1045	0.548
CL5734Contig3|CL5734Contig3	6.99283228327983	7.46282433100904	1.06721	0.548
Locus_2965_1_3|Locus_2965_1_3	7.04444552208517	7.32981099406134	1.04051	0.548
CL6491Contig4|CL6491Contig4	7.86194037706849	7.61509870084492	0.968603	0.548
CL9239Contig1|CL9239Contig1	8.50893990453323	8.77556035493285	1.03133	0.548
CL2442Contig3|CL2442Contig3	8.75490869923319	8.64055916123319	0.986939	0.548
CL6443Contig4|CL6443Contig4	8.9811022319961	9.1533966994133	1.01918	0.548
CL4443Contig2|CL4443Contig2	9.16390921392493	9.07413214551126	0.990203	0.548
CAPP12_ERATE|CAPP12_ERATE	13.1997476544317	13.0491310658762	0.988589	0.549
CL1353Contig1|CL1353Contig1	6.84035809201198	7.11431907208992	1.04005	0.549
CL2764Contig1|CL2764Contig1	7.73079963760053	7.98036789333253	1.03228	0.549
Locus_7356_1_2|Locus_7356_1_2	9.00081837646572	8.8741405483522	0.985926	0.549
CL1Contig472|CL1Contig472	5.33801750603876	5.65925577818399	1.06018	0.551
comp8394_c0_seq2|comp8394_c0_seq2	7.25225610051391	6.88280953790506	0.949058	0.551
THF13_ERATE|THF13_ERATE	10.0368230459791	9.97844675228492	0.994184	0.552
CL72Contig23|CL72Contig23	11.5059622486102	11.5660200023973	1.00522	0.552
CL1Contig6426|CL1Contig6426	6.7451212535366	7.14642245304191	1.0595	0.552
CL859Contig9|CL859Contig9	7.14203964557869	6.96977205494014	0.97588	0.553
CL1034Contig5|CL1034Contig5	9.26728610135237	9.10643244418383	0.982643	0.553
CL2284Contig3|CL2284Contig3	9.90325001131939	9.96592898946463	1.00633	0.553
CL1085Contig7|CL1085Contig7	6.80895830042929	6.42901527980506	0.9442	0.554
CL4084Contig3|CL4084Contig3	6.87827057030752	6.55987357222216	0.95371	0.554
CL5317Contig2|CL5317Contig2	5.47369087604266	5.81623878883187	1.06258	0.55
CL201Contig7|CL201Contig7	6.30715554442008	6.49287507696611	1.02945	0.555
CL6483Contig3|CL6483Contig3	6.74932077214622	6.36130399539969	0.94251	0.555
CL1Contig5183|CL1Contig5183	6.8077647806935	7.23078245617719	1.06214	0.555
CL10481Contig2|CL10481Contig2	8.27793463854196	8.41990584540827	1.01715	0.555
CL821Contig3|CL821Contig3	10.582973117838	10.64246201479	1.00562	0.556
isotig07688|isotig07688	5.95411495599583	5.57331911736865	0.936045	0.556
CL11604Contig1|CL11604Contig1	8.69433420646883	8.83967220228222	1.01672	0.556
CL12131Contig1|CL12131Contig1	8.83807900996831	8.72437351898322	0.987135	0.556
CL3854Contig6|CL3854Contig6	9.6746901372316	9.55704895803091	0.98784	0.556
CL9053Contig1|CL9053Contig1	5.29641505644275	5.73748718948338	1.08328	0.557
CL174Contig19|CL174Contig19	5.44435281870696	5.96906306872433	1.09638	0.557
isotig21337|isotig21337	6.75461992551934	6.95022219716394	1.02896	0.557
CL7092Contig1|CL7092Contig1	6.83864634321668	7.16487931229306	1.0477	0.557
CL30Contig20|CL30Contig20	7.44879197779594	7.25182668319108	0.973557	0.557
CL18569Contig1|CL18569Contig1	7.8946850094581	7.71969521864918	0.977834	0.55
CL1448Contig6|CL1448Contig6	8.21980345760442	8.48943046494741	1.0328	0.55
CL997Contig5|CL997Contig5	7.2607261733715	7.50721098726986	1.03395	0.558
CL5220Contig4|CL5220Contig4	6.8353881401406	6.39201537634667	0.935136	0.559
CL5357Contig1|CL5357Contig1	7.8083522201606	8.14103658348257	1.04261	0.559
CL487Contig9|CL487Contig9	10.4408042094771	10.5276258979499	1.00832	0.56
CL6706Contig1|CL6706Contig1	5.24931099634973	5.7285610683012	1.0913	0.562
CL1Contig4389|CL1Contig4389	7.08148236046878	6.84065965545936	0.965993	0.562
CL1620Contig1|CL1620Contig1	8.7355364191879	8.50394542763567	0.973489	0.562
VATA8_ERATE|VATA8_ERATE	11.1499427797643	11.1918685164214	1.00376	0.563
CL7748Contig2|CL7748Contig2	8.68617345608668	8.43491933453058	0.971074	0.563
CL144Contig4|CL144Contig4	10.8580781709703	10.8915412345406	1.00308	0.564
CL1Contig2712|CL1Contig2712	5.6701658030927	6.3081886399277	1.11252	0.565
CL460Contig3|CL460Contig3	6.25527860060564	6.59592173598269	1.05446	0.566
CL7130Contig5|CL7130Contig5	8.4195525179013	8.63670203006921	1.02579	0.566
CL1Contig1692|CL1Contig1692	9.41518983595954	9.33246879469665	0.991214	0.566
CL7561Contig2|CL7561Contig2	7.5590289389487	7.42782622663007	0.982643	0.56
CL3896Contig4|CL3896Contig4	6.34274193935911	5.9101235090307	0.931793	0.567
CL1889Contig4|CL1889Contig4	7.22839984891193	7.39554361380569	1.02312	0.567
CL382Contig7|CL382Contig7	7.80422760892189	7.93705539787104	1.01702	0.567
CL3523Contig7|CL3523Contig7	6.0798988988123	6.53945660947711	1.07559	0.568
CL969Contig2|CL969Contig2	7.67214404602436	7.33770096742781	0.956408	0.568
CL6532Contig2|CL6532Contig2	9.92852219790467	9.84006463646424	0.991091	0.568
Locus_1783_2_10|Locus_1783_2_10	11.1955578618031	11.1264047377686	0.993823	0.569
CL11312Contig1|CL11312Contig1	8.65879475189589	8.56582068741827	0.989262	0.569
CL18333Contig1|CL18333Contig1	9.78365052525391	9.64951679000506	0.98629	0.569
CL5097Contig3|CL5097Contig3	6.93620149115649	7.12095096356617	1.02664	0.571
CL6522Contig2|CL6522Contig2	8.72372727677419	8.59328680416856	0.985048	0.571
CL2110Contig5|CL2110Contig5	7.14140245774115	7.36090960569281	1.03074	0.572
CL7997Contig2|CL7997Contig2	9.28166126123457	9.41491155525425	1.01436	0.572
CL6056Contig6|CL6056Contig6	10.6143381926954	10.7119688945861	1.0092	0.573
CL1Contig31|CL1Contig31	6.42814730223859	6.9662470862084	1.08371	0.573
CL4163Contig2|CL4163Contig2	8.05385541625826	8.11434503695213	1.00751	0.573
CL15348Contig1|CL15348Contig1	8.70380278407976	8.85754709902619	1.01766	0.573
Locus_2602_2_9|Locus_2602_2_9	8.15375824414585	7.97726945203684	0.978355	0.574
CL1Contig6129|CL1Contig6129	9.95161024881427	10.0138615771854	1.00626	0.574
CL1Contig5923|CL1Contig5923	7.75388096600044	7.61960844885789	0.982683	0.575
CL4857Contig3|CL4857Contig3	8.14778649215086	8.33779969407064	1.02332	0.575
CL86Contig4|CL86Contig4	9.50082192402393	9.42650547207057	0.992178	0.575
VATB2_ERATE|VATB2_ERATE	10.052033287608	10.1181198535617	1.00657	0.576
CL1Contig5337|CL1Contig5337	10.5017075369008	10.4297393361099	0.993147	0.576
CL1911Contig2|CL1911Contig2	5.88342745414619	6.27689618775292	1.06688	0.576
CL1Contig178|CL1Contig178	7.24935541479892	7.4302755683917	1.02496	0.576
CL1Contig9208|CL1Contig9208	7.97250434815829	7.74044358313961	0.970892	0.576
CL8618Contig2|CL8618Contig2	8.56078844931318	8.73749148215336	1.02064	0.576
CL172Contig3|CL172Contig3	9.91522747634557	9.86170947742627	0.994602	0.576
CL1309Contig18|CL1309Contig18	11.738010973855	11.6608645202105	0.993428	0.577
Locus_1430_4_6|Locus_1430_4_6	7.29721026166456	7.52290719492694	1.03093	0.57
CL147Contig1|CL147Contig1	7.4700790907044	7.69000605529308	1.02944	0.57
CL1452Contig10|CL1452Contig10	6.83876965325758	7.28039559557974	1.06458	0.577
CL1481Contig1|CL1481Contig1	7.33213101415892	7.50072449536811	1.02299	0.577
CL7710Contig2|CL7710Contig2	7.93591319140362	8.08153432380623	1.01835	0.57
CL1569Contig3|CL1569Contig3	9.73603167119853	9.81383586739349	1.00799	0.577
CL2095Contig2|CL2095Contig2	11.1692004444899	11.139480324072	0.997339	0.578
CL6773Contig2|CL6773Contig2	8.66355245230373	8.44471600702972	0.974741	0.57
CL10608Contig1|CL10608Contig1	7.78035164994333	7.68974290540749	0.988354	0.578
ENO2_ERATE|ENO2_ERATE	9.67569795317165	9.75077957994097	1.00776	0.578
CL1939Contig3|CL1939Contig3	9.52769262557108	9.43231669483262	0.98999	0.57
CL1Contig8766|CL1Contig8766	5.95693381266855	6.45073197775825	1.08289	0.579
CL16118Contig1|CL16118Contig1	7.15046886958418	7.47448613299289	1.04531	0.579
CL1259Contig1|CL1259Contig1	8.30237632875563	8.36883930527494	1.00801	0.579
CL1153Contig4|CL1153Contig4	8.59598474243825	8.5059193873119	0.989522	0.579
CL884Contig2|CL884Contig2	9.83033761292365	9.77610726830887	0.994483	0.579
CL1Contig653|CL1Contig653	5.76550022388355	6.3069222223164	1.09391	0.581
CL1Contig4041|CL1Contig4041	6.73549260595196	6.17959268645957	0.917467	0.581
Locus_12209_4_6|Locus_12209_4_6	6.84441703005088	6.3764937808199	0.931634	0.581
CL1002Contig6|CL1002Contig6	8.90397826776072	8.98332748178983	1.00891	0.581
CL3723Contig1|CL3723Contig1	10.1023561494542	10.0544330529964	0.995256	0.582
CL6513Contig1|CL6513Contig1	9.3952901496627	9.28183973126391	0.987925	0.582
CL2813Contig3|CL2813Contig3	7.08052834099988	7.31797714925626	1.03354	0.583
ATPB5_ERATE|ATPB5_ERATE	7.71732518354878	7.5922041899669	0.983787	0.583
CL70Contig6|CL70Contig6	8.18068146446241	8.084287851604	0.988217	0.583
CL2200Contig4|CL2200Contig4	7.56532220995144	7.72017905656011	1.02047	0.584
CL10841Contig2|CL10841Contig2	8.29943085348725	8.468413861005	1.02036	0.584
CL1309Contig9|CL1309Contig9	8.34531801829927	8.05677793943823	0.965425	0.584
CL9459Contig2|CL9459Contig2	8.55879441397667	8.29078328726335	0.968686	0.5
CL3573Contig2|CL3573Contig2	7.759029605565	7.87084970664745	1.01441	0.585
CL6633Contig2|CL6633Contig2	8.6611673633379	8.73783787576735	1.00885	0.585
CL7548Contig3|CL7548Contig3	9.6808778318142	9.64140482065118	0.995923	0.585
CL652Contig3|CL652Contig3	5.90113279123925	6.4010235637288	1.08471	0.586
CL3449Contig3|CL3449Contig3	6.56460092521745	6.23277084470147	0.949452	0.586
CL3315Contig3|CL3315Contig3	7.05945597583078	7.2043454702453	1.02052	0.58
CL4881Contig1|CL4881Contig1	7.44126580038885	7.60256724970209	1.02168	0.587
HPPA2_ERATE|HPPA2_ERATE	7.46025359574874	7.64129284959383	1.02427	0.587
CL4478Contig2|CL4478Contig2	8.81991976849895	8.65024024619962	0.980762	0.587
CL9129Contig2|CL9129Contig2	7.99653002888074	8.12152291076114	1.01563	0.58
CL4092Contig2|CL4092Contig2	7.24919722801517	7.45207243810302	1.02799	0.588
CL4071Contig2|CL4071Contig2	7.40492971246329	7.61483938399727	1.02835	0.588
CL1251Contig2|CL1251Contig2	8.05097541590468	7.75981668060836	0.963836	0.588
CL953Contig5|CL953Contig5	9.03518197506963	9.11319190610974	1.00863	0.58
CL11043Contig1|CL11043Contig1	9.48910335981545	9.35753309625989	0.986135	0.589
CL19554Contig1|CL19554Contig1	6.20327212694759	6.65410399219986	1.07268	0.591
CL413Contig9|CL413Contig9	6.65731320803978	6.9172710547392	1.03905	0.591
CL8072Contig2|CL8072Contig2	8.26872613639312	8.09437925112305	0.978915	0.591
CL1Contig906|CL1Contig906	6.21642536494864	6.61824103459169	1.06464	0.592
CL244Contig9|CL244Contig9	7.25787060802928	7.4467160693313	1.02602	0.592
CL2474Contig3|CL2474Contig3	7.31603207875869	7.52626054889783	1.02874	0.592
CL9282Contig1|CL9282Contig1	10.7041623856302	10.7883530911223	1.00787	0.593
CL9662Contig5|CL9662Contig5	11.2382268581559	11.171348376473	0.994049	0.593
CL914Contig2|CL914Contig2	6.90521656651363	6.50242565203051	0.941669	0.593
CL23Contig27|CL23Contig27	7.17368842960272	6.98318401304203	0.973444	0.593
CL5095Contig1|CL5095Contig1	7.87624722437439	7.7037690673898	0.978101	0.593
CL2909Contig5|CL2909Contig5	8.12953610993003	7.81871378749857	0.961766	0.593
CL1Contig7578|CL1Contig7578	9.17469369882614	9.30115836476286	1.01378	0.593
CL1224Contig8|CL1224Contig8	9.51494752096334	9.58868836737993	1.00775	0.593
CL5458Contig2|CL5458Contig2	8.42032328915159	8.27472338958273	0.982709	0.594
CAPP5_ERATE|CAPP5_ERATE	10.0222748364113	10.0764906537238	1.00541	0.595
CL7288Contig1|CL7288Contig1	10.1044183376845	10.2056351599268	1.01002	0.595
CL1Contig8222|CL1Contig8222	9.56151863477	9.6655171795469	1.01088	0.5
CL3625Contig2|CL3625Contig2	8.51552697270081	8.64147008745927	1.01479	0.595
CAPP7_ERATE|CAPP7_ERATE	8.80103803281328	8.90352226631936	1.01164	0.595
CL13Contig53|CL13Contig53	7.65285794312301	7.49604973266073	0.97951	0.596
CL1200Contig1|CL1200Contig1	7.2886368894723	7.01497233469628	0.962453	0.59
CL4534Contig3|CL4534Contig3	6.04570665908262	5.74682398476109	0.950563	0.597
CL1Contig590|CL1Contig590	6.35836670643563	6.55981937646756	1.03168	0.597
CL506Contig6|CL506Contig6	7.031268539459	6.78979663954591	0.965657	0.597
CL1Contig8954|CL1Contig8954	7.13732539454383	6.88648255354001	0.964855	0.597
CL5741Contig2|CL5741Contig2	10.0350181480707	9.99742861744855	0.996254	0.598
CL14251Contig1|CL14251Contig1	6.68534576040533	6.43961473948187	0.963243	0.598
CL92Contig10|CL92Contig10	7.63380301692007	7.92318798522703	1.03791	0.598
CL13969Contig1|CL13969Contig1	7.89582469008631	8.07018188174475	1.02208	0.599
CL3487Contig4|CL3487Contig4	7.02143341833829	7.30300682442327	1.0401	0.601
CL8690Contig3|CL8690Contig3	8.32403359192085	8.20342110359161	0.98551	0.601
CL2465Contig1|CL2465Contig1	8.91697031752595	8.81912348216313	0.989027	0.601
AMPA9_ERATE|AMPA9_ERATE	10.6080574661086	10.6534915391804	1.00428	0.602
CL1309Contig8|CL1309Contig8	7.00064874576071	6.56727502135008	0.938095	0.602
CL3155Contig3|CL3155Contig3	8.46562958447481	8.58930271445598	1.01461	0.602
CL12496Contig1|CL12496Contig1	7.2809523099849	6.96690998801767	0.956868	0.603
CL1Contig2953|CL1Contig2953	7.7330634647728	7.90536637306352	1.02228	0.603
CL1481Contig2|CL1481Contig2	9.10890627185102	9.24819218152129	1.01529	0.603
CL3019Contig8|CL3019Contig8	10.6156978465056	10.5730235234131	0.99598	0.604
CL182Contig4|CL182Contig4	8.32639401501784	8.12456484191362	0.97576	0.604
CL692Contig1|CL692Contig1	9.24109225485088	9.13110042439063	0.988098	0.604
CL3779Contig2|CL3779Contig2	9.26087350225521	9.2164423032111	0.995202	0.604
CL2017Contig1|CL2017Contig1	9.79606923143391	9.67019276593714	0.98715	0.604
CL4922Contig4|CL4922Contig4	9.93146616011691	10.0042149095025	1.00733	0.604
Locus_7184_13_13|Locus_7184_13_13	7.48357636639045	7.80547343557252	1.04301	0.605
isotig21147|isotig21147	7.75302698841991	8.02746018236457	1.0354	0.605
CL4760Contig2|CL4760Contig2	6.63567745259066	6.88944555627991	1.03824	0.607
CL251Contig8|CL251Contig8	6.96471063155433	6.71301820283302	0.963862	0.607
CL2195Contig1|CL2195Contig1	7.06213550639464	6.74883706139424	0.955637	0.607
CL465Contig6|CL465Contig6	7.46081191396345	7.56313826579847	1.01372	0.607
CL7194Contig2|CL7194Contig2	7.6331138170449	7.45309510671238	0.976416	0.607
CL11329Contig1|CL11329Contig1	9.22478905778366	9.29207241066567	1.00729	0.607
CL8166Contig2|CL8166Contig2	9.10191379335023	9.24667088736312	1.0159	0.608
CL3013Contig5|CL3013Contig5	9.98190061404723	9.8291743874487	0.9847	0.608
CL393Contig4|CL393Contig4	6.99195674304851	6.76999658189812	0.968255	0.609
CL1Contig2856|CL1Contig2856	7.4795018498905	7.34274444572938	0.981716	0.609
CL7562Contig4|CL7562Contig4	6.20606870757822	5.82909945156735	0.939258	0.611
CL2892Contig5|CL2892Contig5	6.36081340081378	6.62682639683166	1.04182	0.611
CL2891Contig4|CL2891Contig4	9.08724020634453	8.96626578146874	0.986687	0.611
CL886Contig5|CL886Contig5	7.37181060735708	7.72522964558163	1.04794	0.612
CL1328Contig5|CL1328Contig5	10.5076432220068	10.5424143006463	1.00331	0.613
CL78Contig33|CL78Contig33	10.640276751849	10.6897329344462	1.00465	0.613
KAD2_ERATE|KAD2_ERATE	6.74533690238781	6.53899362329363	0.969409	0.613
CL7396Contig3|CL7396Contig3	8.24190521506166	8.0688069917171	0.978998	0.613
CL1215Contig3|CL1215Contig3	8.07131562013268	7.93243129790959	0.982793	0.615
CL3395Contig1|CL3395Contig1	8.4571002964875	8.52992463857365	1.00861	0.615
CL2060Contig1|CL2060Contig1	8.49242310789712	8.39091973170405	0.988048	0.615
CL11027Contig1|CL11027Contig1	8.50781234015273	8.39185636660707	0.986371	0.615
CL1Contig3490|CL1Contig3490	6.84301404075094	6.41605762551851	0.937607	0.616
CL123Contig27|CL123Contig27	7.3818714494013	7.27953006795454	0.986136	0.616
CL8482Contig1|CL8482Contig1	7.95787508208226	8.16074771675586	1.02549	0.616
CL7952Contig3|CL7952Contig3	8.40674390024151	8.50677380119877	1.0119	0.616
CL10646Contig2|CL10646Contig2	8.50543765986546	8.59875659512657	1.01097	0.616
CL2160Contig2|CL2160Contig2	7.78519681083762	8.03001309989135	1.03145	0.61
CL1802Contig1|CL1802Contig1	8.29544475893016	8.1031920198238	0.976824	0.617
CL1Contig6238|CL1Contig6238	9.34480593394962	9.22301543681181	0.986967	0.617
CL9973Contig2|CL9973Contig2	9.52205469562826	9.39822905467831	0.986996	0.617
CL4647Contig2|CL4647Contig2	8.48278743674325	8.29182196922759	0.977488	0.61
CL7555Contig2|CL7555Contig2	6.08395510575811	5.86710365087658	0.964357	0.618
CL7568Contig1|CL7568Contig1	7.24682065325575	7.07337409640216	0.976066	0.618
CL3525Contig4|CL3525Contig4	8.84653300334357	8.96483376226811	1.01337	0.61
CL72Contig5|CL72Contig5	6.20029962136396	6.53939029490493	1.05469	0.619
CL1547Contig5|CL1547Contig5	6.39010723764265	5.8498665820013	0.915457	0.619
CL3133Contig1|CL3133Contig1	9.74245558171202	9.64457279933155	0.989953	0.61
CL10533Contig2|CL10533Contig2	7.55268123190322	7.30237181996036	0.966858	0.619
CL10344Contig2|CL10344Contig2	8.16840990888756	8.02878021326779	0.982906	0.619
CL6029Contig4|CL6029Contig4	6.43482154414549	6.58303270911537	1.02303	0.621
CL430Contig2|CL430Contig2	7.5115594697894	7.66512469627722	1.02044	0.621
CL7773Contig2|CL7773Contig2	9.8177372930078	9.91888493554591	1.0103	0.621
CL8861Contig2|CL8861Contig2	6.21555268962914	5.74125985095097	0.923693	0.622
CL304Contig9|CL304Contig9	7.53913429633739	7.28532045863366	0.966334	0.622
CL1002Contig4|CL1002Contig4	7.93507849068077	8.16612505782308	1.02912	0.622
CL961Contig3|CL961Contig3	8.22485531775727	8.3282611570944	1.01257	0.622
CL1Contig3533|CL1Contig3533	7.39137514421358	7.23068136936306	0.978259	0.623
CL3136Contig6|CL3136Contig6	7.49814514737292	7.65171083971609	1.02048	0.623
CL905Contig3|CL905Contig3	6.19143481317368	5.87113165420535	0.948267	0.624
CL155Contig29|CL155Contig29	9.25712968667998	9.16829337011352	0.990403	0.624
CL78Contig14|CL78Contig14	9.38527645041548	9.49430796767725	1.01162	0.624
CL8056Contig1|CL8056Contig1	7.04255777123982	6.9483865037634	0.986628	0.625
LEU31_ERATE|LEU31_ERATE	8.48369129235309	8.4171911832487	0.992161	0.625
CL3911Contig5|CL3911Contig5	5.06043588718755	5.58746780958441	1.10415	0.627
CL595Contig11|CL595Contig11	7.06689125237896	6.81060808453083	0.963735	0.627
CL15Contig21|CL15Contig21	7.55454091074629	7.77975850360548	1.02981	0.627
CL535Contig1|CL535Contig1	8.07648201423385	7.91713655239687	0.98027	0.627
CL4211Contig3|CL4211Contig3	9.35671255932581	9.2056336663538	0.983853	0.627
CL130Contig16|CL130Contig16	5.41557043388772	5.91633081839833	1.09247	0.628
CL151Contig1|CL151Contig1	6.84342842158119	7.15289825333799	1.04522	0.628
CL321Contig14|CL321Contig14	6.955298578573	6.68113467498007	0.960582	0.628
CL3318Contig4|CL3318Contig4	6.9791783283294	6.77150685718446	0.970244	0.628
CL3600Contig2|CL3600Contig2	7.20078527521151	7.25915189279657	1.00811	0.628
CL2026Contig3|CL2026Contig3	7.75034424564106	7.54908517249693	0.974032	0.628
CL2733Contig3|CL2733Contig3	8.32443425709525	8.22636697680132	0.988219	0.628
CL1Contig4424|CL1Contig4424	9.47880322651263	9.55503969715677	1.00804	0.628
CL1Contig7948|CL1Contig7948	10.8539172500615	10.7537372195645	0.99077	0.629
VATE8_ERATE|VATE8_ERATE	9.42520492185841	9.38970753994222	0.996234	0.62
CL5109Contig1|CL5109Contig1	6.65884252524862	6.3259797171682	0.950012	0.629
CL2479Contig7|CL2479Contig7	7.08954165673252	7.25699456383241	1.02362	0.631
CL3878Contig1|CL3878Contig1	8.01547652301264	7.8837802405746	0.98357	0.631
NDK2_ERATE|NDK2_ERATE	9.42331578305632	9.5198550099387	1.01024	0.631
CL5482Contig2|CL5482Contig2	6.67925268936683	6.86531540061369	1.02786	0.632
CL3024Contig1|CL3024Contig1	8.49389145242917	8.58551576400945	1.01079	0.632
CL9662Contig4|CL9662Contig4	8.90177808037941	8.79408843420349	0.987902	0.632
CL339Contig4|CL339Contig4	9.15806219349728	9.25467161757291	1.01055	0.632
CL325Contig1|CL325Contig1	9.95838905678677	9.90137828040641	0.994275	0.632
CL11549Contig1|CL11549Contig1	6.83107284018555	6.72567804561657	0.984571	0.633
CL2623Contig2|CL2623Contig2	8.20110350210271	8.32987461225156	1.0157	0.633
CL639Contig1|CL639Contig1	9.25154441252746	9.17415446049294	0.991635	0.633
CL17087Contig1|CL17087Contig1	6.46969621632111	5.9468868637034	0.919191	0.634
CL1Contig8182|CL1Contig8182	6.70488951357282	6.58059723596584	0.981462	0.634
CL1062Contig5|CL1062Contig5	6.88534134997945	7.18382283537703	1.04335	0.635
CL1Contig8577|CL1Contig8577	9.43339775214053	9.38388833095828	0.994752	0.635
CL2170Contig1|CL2170Contig1	7.12652357772856	6.96603746075623	0.97748	0.636
CL2004Contig6|CL2004Contig6	8.53146145366137	8.60464214632329	1.00858	0.636
CL6832Contig2|CL6832Contig2	9.50184663623937	9.41034485277355	0.99037	0.636
PGK5_ERATE|PGK5_ERATE	10.9376998306251	10.9027581516241	0.996805	0.637
Locus_153_4_6|Locus_153_4_6	7.1663730298884	7.36100707211235	1.02716	0.637
CL1092Contig2|CL1092Contig2	7.43826194757031	7.19680110814039	0.967538	0.637
CL72Contig17|CL72Contig17	7.84984276522541	7.98990214457629	1.01784	0.63
CL1Contig6731|CL1Contig6731	8.54309773209374	8.44458602276218	0.988469	0.637
CL23003Contig1|CL23003Contig1	7.67631774785385	7.74920883650623	1.0095	0.638
CL485Contig4|CL485Contig4	8.29281246012624	8.42493250188693	1.01593	0.638
CL6938Contig2|CL6938Contig2	5.4653069536471	5.10428289708077	0.933943	0.639
CL1Contig10324|CL1Contig10324	5.74363234697772	6.13282325595964	1.06776	0.639
CL2486Contig1|CL2486Contig1	8.59695319572387	8.36968324971066	0.973564	0.639
CL2827Contig2|CL2827Contig2	6.65760853138453	6.82150250651744	1.02462	0.641
CL5816Contig5|CL5816Contig5	7.17612360083519	7.13358659225356	0.994072	0.642
CL5197Contig1|CL5197Contig1	6.15020490194238	6.04118973642599	0.982275	0.643
CL602Contig13|CL602Contig13	8.67936253864297	8.5996188619618	0.990812	0.643
CL1Contig1926|CL1Contig1926	9.85356462575707	9.97712091939814	1.01254	0.644
CL3442Contig1|CL3442Contig1	6.68621136100135	7.00546997966959	1.04775	0.645
CL1Contig1382|CL1Contig1382	6.85451518685788	6.36059718772144	0.927943	0.645
CL3168Contig1|CL3168Contig1	8.48080296257246	8.55662324097855	1.00894	0.645
CL6060Contig1|CL6060Contig1	7.15940923168491	7.4504885170712	1.04066	0.646
CL38Contig39|CL38Contig39	7.36806542647794	7.12110835239777	0.966483	0.64
CL138Contig6|CL138Contig6	7.64773737246366	7.36884869414164	0.963533	0.647
CL1658Contig8|CL1658Contig8	8.24731494444082	8.29230032570785	1.00545	0.647
CL1Contig3480|CL1Contig3480	8.40011407692901	8.57025235868422	1.02025	0.647
CL7088Contig3|CL7088Contig3	9.08839898022751	9.16375103782258	1.00829	0.647
CL1Contig10368|CL1Contig10368	10.5743867236352	10.7704019823716	1.01854	0.648
CL1030Contig8|CL1030Contig8	8.68687127948563	8.82045798071171	1.01538	0.64
CL4310Contig2|CL4310Contig2	8.87590205993114	8.92755288249622	1.00582	0.648
CL448Contig7|CL448Contig7	9.03041452890128	8.9619197455672	0.992415	0.648
CL2617Contig3|CL2617Contig3	9.49000464724064	9.56666485061996	1.00808	0.64
CL1629Contig5|CL1629Contig5	8.06958132065452	7.95736111878526	0.986093	0.649
CL7159Contig3|CL7159Contig3	8.08920989936174	8.1871748249015	1.01211	0.649
CL194Contig12|CL194Contig12	6.64021519611469	6.28646974969661	0.946727	0.651
CL3297Contig4|CL3297Contig4	8.42056148148082	8.21853071749792	0.976007	0.651
CL1Contig9442|CL1Contig9442	5.98603490852803	6.07393005051392	1.01468	0.652
CL18Contig23|CL18Contig23	7.04669432274445	7.35913424936984	1.04434	0.652
CL10863Contig2|CL10863Contig2	7.5056215480683	7.32185809888061	0.975517	0.652
CL1Contig4319|CL1Contig4319	7.95073459407144	7.83300509446713	0.985193	0.652
CL2Contig29|CL2Contig29	8.41019176011666	8.27229149389249	0.983603	0.652
CL1Contig9810|CL1Contig9810	7.15216861437781	7.27329670349024	1.01694	0.653
CL7228Contig2|CL7228Contig2	7.31527999658205	7.47861812988094	1.02233	0.653
CL1Contig7165|CL1Contig7165	11.9303765416853	11.9634158818028	1.00277	0.654
CL78Contig4|CL78Contig4	5.70136023788999	6.07887972747387	1.06622	0.654
CL1Contig749|CL1Contig749	7.26439908232913	7.42598745538691	1.02224	0.654
CL1Contig3719|CL1Contig3719	7.38513940558618	7.25475394528758	0.982345	0.654
CL362Contig10|CL362Contig10	7.45021660036502	7.27090479412648	0.975932	0.654
CL12723Contig1|CL12723Contig1	6.35850502074101	6.04908338055107	0.951337	0.655
SERC6_ERATE|SERC6_ERATE	6.3937849009196	6.68758539690458	1.04595	0.655
CL8012Contig2|CL8012Contig2	8.03645344289061	8.14555460269231	1.01358	0.655
isotig21390|isotig21390	8.42155461175531	8.31822383401578	0.98773	0.655
CL1Contig4836|CL1Contig4836	8.43491328630229	8.34404718338028	0.989227	0.655
CL5636Contig2|CL5636Contig2	8.59718954326776	8.72386190674391	1.01473	0.655
CL73Contig10|CL73Contig10	9.31618463475204	9.3867443221386	1.00757	0.655
CL476Contig8|CL476Contig8	5.99072033782156	6.30669636229863	1.05274	0.65
CL363Contig4|CL363Contig4	6.5613357584001	6.85519749889322	1.04479	0.65
CL1Contig4111|CL1Contig4111	7.48708862716456	7.72355757676605	1.03158	0.656
CL958Contig1|CL958Contig1	6.98234171181563	6.59132678478621	0.943999	0.65
CL1450Contig2|CL1450Contig2	6.36290135581823	5.95107989653269	0.935278	0.657
CL1Contig3244|CL1Contig3244	7.57147286919985	7.4339364418013	0.981835	0.657
CL2222Contig1|CL2222Contig1	8.67609269758541	8.56264131406128	0.986924	0.65
CL1Contig8732|CL1Contig8732	7.50510392465023	7.12673011346689	0.949584	0.658
CL4310Contig1|CL4310Contig1	8.84609482738058	8.75686684471701	0.989913	0.658
CL242Contig13|CL242Contig13	7.99868146465364	8.1326116978983	1.01674	0.659
CL8028Contig1|CL8028Contig1	6.04533589993703	6.35240052311469	1.05079	0.661
CL678Contig11|CL678Contig11	7.16688642721577	7.27216805353034	1.01469	0.661
CL1953Contig2|CL1953Contig2	6.95729746311822	6.82622145610531	0.98116	0.662
CL4374Contig5|CL4374Contig5	6.4141982209892	6.63523742994117	1.03446	0.663
CL107Contig15|CL107Contig15	6.86094076108463	7.05721759235437	1.02861	0.663
CL5474Contig2|CL5474Contig2	7.30011616330674	7.5346212245742	1.03212	0.663
CL8929Contig1|CL8929Contig1	7.98118839063923	8.10124252467142	1.01504	0.663
CL5895Contig5|CL5895Contig5	9.64321041357309	9.580979349587	0.993547	0.663
CL9217Contig2|CL9217Contig2	5.8057720704419	6.13040590522418	1.05592	0.664
CL3640Contig1|CL3640Contig1	7.35190853322334	7.2054467700916	0.980078	0.664
CL772Contig7|CL772Contig7	9.13902510899572	9.05347773175428	0.990639	0.664
CL796Contig10|CL796Contig10	10.0144087184051	10.0689618589835	1.00545	0.665
CL560Contig2|CL560Contig2	10.6723240096492	10.6554798564925	0.998422	0.665
CL3844Contig2|CL3844Contig2	5.38550581784573	5.062957713424	0.940108	0.665
CL124Contig2|CL124Contig2	6.77726597446948	6.65220986318113	0.981548	0.665
CL4510Contig4|CL4510Contig4	6.87546667635888	7.05825178991015	1.02659	0.665
CL7134Contig4|CL7134Contig4	8.05726139703666	7.82761740682952	0.971499	0.665
CL2916Contig2|CL2916Contig2	8.57620071512814	8.40815931350106	0.980406	0.665
CL510Contig10|CL510Contig10	9.23506385912636	9.19154935775543	0.995288	0.665
CL1Contig8936|CL1Contig8936	7.87040824073814	7.9824389724804	1.01423	0.666
CL2414Contig2|CL2414Contig2	7.11091004863912	7.31028062263776	1.02804	0.66
CL7Contig54|CL7Contig54	9.12881731203646	9.17898692422762	1.0055	0.667
CL1Contig3371|CL1Contig3371	7.16292742443636	6.99402562862355	0.97642	0.668
CL1Contig10521|CL1Contig10521	7.21781893077377	7.33985591001078	1.01691	0.668
CL108Contig8|CL108Contig8	8.31625494217972	8.42079262661192	1.01257	0.668
CL1Contig229|CL1Contig229	6.9211348507054	7.1387298391092	1.03144	0.6
CL4594Contig1|CL4594Contig1	6.19224171869018	6.4219671154814	1.0371	0.669
CL806Contig11|CL806Contig11	6.27124927759954	5.85604391497298	0.933792	0.669
CL2186Contig8|CL2186Contig8	6.75587144183474	6.51125475953217	0.963792	0.669
CL3783Contig6|CL3783Contig6	8.59523060373506	8.45163219292258	0.983293	0.669
CL711Contig1|CL711Contig1	7.06699355300702	6.83410468625284	0.967046	0.6
CL898Contig7|CL898Contig7	10.2220418023145	10.1929833413183	0.997157	0.672
CL1772Contig1|CL1772Contig1	7.42063758566475	7.17063320232337	0.96631	0.673
CL2Contig5|CL2Contig5	9.23054676171292	9.28338231880339	1.00572	0.673
CL1Contig8622|CL1Contig8622	7.47174070772914	7.30554564717671	0.977757	0.6
CL9518Contig2|CL9518Contig2	7.86011839411818	8.00269173400168	1.01814	0.674
CL3641Contig5|CL3641Contig5	11.2443655365913	11.2585695891249	1.00126	0.675
CL12558Contig1|CL12558Contig1	7.2833434755429	7.46748978428176	1.02528	0.675
CL702Contig1|CL702Contig1	7.85338188710244	7.73760691431634	0.985258	0.675
CL7267Contig2|CL7267Contig2	9.50189143846538	9.56703127180199	1.00686	0.675
CL718Contig4|CL718Contig4	5.87361404406626	6.08835959624891	1.03656	0.676
CL2752Contig3|CL2752Contig3	6.59069322465725	6.68663986883691	1.01456	0.676
CL943Contig4|CL943Contig4	7.51267495869677	6.87415612770341	0.915008	0.676
CL1402Contig4|CL1402Contig4	8.04881045310945	7.88797802745106	0.980018	0.676
CL1Contig9325|CL1Contig9325	11.5098259550753	11.5395702846184	1.00258	0.677
CL7Contig23|CL7Contig23	7.1195046624344	7.2846536404782	1.0232	0.67
CL120Contig9|CL120Contig9	7.44782227735811	7.32902623264571	0.98405	0.67
CL54Contig24|CL54Contig24	5.19547994638777	5.51844823604764	1.06216	0.677
CL21379Contig1|CL21379Contig1	5.79188528946879	6.10126058510234	1.05342	0.677
CL1Contig9677|CL1Contig9677	7.74206854343546	7.59902106627376	0.981523	0.67
CL861Contig6|CL861Contig6	7.76847818868364	7.56492956191797	0.973798	0.67
CL1309Contig7|CL1309Contig7	8.09612406363127	8.19627151867531	1.01237	0.67
CL2714Contig5|CL2714Contig5	10.1249240954125	10.0456362580768	0.992169	0.678
CL1497Contig5|CL1497Contig5	6.26163207520855	6.5616538374294	1.04791	0.678
CL3990Contig1|CL3990Contig1	9.10736633549714	9.20846092571578	1.0111	0.678
CL4685Contig2|CL4685Contig2	9.11477544418411	9.07631261946821	0.99578	0.67
CL1Contig8980|CL1Contig8980	5.7903040542981	6.13371646301176	1.05931	0.679
CL2096Contig3|CL2096Contig3	6.16441069705212	6.28808214150399	1.02006	0.679
CL1Contig3038|CL1Contig3038	6.90945796041091	6.71634787902267	0.972051	0.679
CL1Contig240|CL1Contig240	9.3096789978623	9.4423229005675	1.01425	0.679
CL1861Contig5|CL1861Contig5	9.48328666813688	9.42437023822186	0.993787	0.679
CL7124Contig2|CL7124Contig2	6.32785564637691	5.96714116167959	0.942996	0.682
CL1Contig8683|CL1Contig8683	7.58391188533679	7.82262278197275	1.03148	0.682
CL1Contig7472|CL1Contig7472	9.77177275133266	9.73520314144403	0.996258	0.682
CL100Contig5|CL100Contig5	6.79579184091763	6.52341952207076	0.95992	0.683
CL8570Contig1|CL8570Contig1	8.61106707981003	8.50780660311975	0.988008	0.683
Locus_4532_4_11|Locus_4532_4_11	7.02803750370834	6.81060575895948	0.969062	0.684
CL175Contig4|CL175Contig4	7.94834236112186	8.05012030844023	1.0128	0.684
CL1177Contig6|CL1177Contig6	9.69923001565588	9.7291114972316	1.00308	0.685
CL714Contig7|CL714Contig7	10.1426486090655	10.0854637378434	0.994362	0.686
CL630Contig6|CL630Contig6	6.3037239999727	6.13751533040167	0.973633	0.68
CL1982Contig3|CL1982Contig3	6.75458703263591	6.58758953992487	0.975276	0.686
CL1785Contig3|CL1785Contig3	8.14181397451331	7.98778308563795	0.981082	0.686
CL78Contig26|CL78Contig26	7.62425292357025	7.38240599749065	0.968279	0.68
CL89Contig18|CL89Contig18	7.99694433108176	8.09657634887007	1.01246	0.68
CL1Contig8595|CL1Contig8595	8.09351807458107	7.93075689896186	0.97989	0.68
CL1Contig2558|CL1Contig2558	8.1267101519624	8.01487771745382	0.986239	0.68
CL11382Contig2|CL11382Contig2	7.07246750936282	6.63439364511109	0.938059	0.688
isotig16381|isotig16381	9.21774973734883	9.12132306560417	0.989539	0.68
CL3106Contig1|CL3106Contig1	7.73274949034518	7.59306743210456	0.981936	0.689
CL454Contig8|CL454Contig8	8.77827737691961	8.72067676447559	0.993438	0.691
CL738Contig9|CL738Contig9	9.41380204110338	9.36245728369205	0.994546	0.691
CL5924Contig4|CL5924Contig4	6.26559470916091	6.60253914898346	1.05378	0.692
CL1Contig9182|CL1Contig9182	7.45695918693437	7.30977593348793	0.980262	0.692
CL2847Contig5|CL2847Contig5	5.71700100832274	5.99109986114	1.04794	0.693
CL4703Contig4|CL4703Contig4	7.54630431346743	7.39447627303658	0.97988	0.693
CL1Contig1769|CL1Contig1769	8.08764680465549	7.94699193636048	0.982609	0.693
CL280Contig6|CL280Contig6	8.30368616720781	8.21691116324678	0.98955	0.693
CL1Contig8483|CL1Contig8483	9.02906457408889	9.10478883593765	1.00839	0.694
CL1Contig7168|CL1Contig7168	10.6299673484782	10.6028675903768	0.997451	0.695
CL3352Contig1|CL3352Contig1	6.38764638130131	6.02457393105843	0.94316	0.695
CL4589Contig3|CL4589Contig3	9.62096216371772	9.68123331915941	1.00626	0.6
Locus_740_1_7|Locus_740_1_7	6.49229657887477	6.74133323269175	1.03836	0.696
CL36Contig40|CL36Contig40	6.54301411780927	6.40096154813077	0.978289	0.696
CL3075Contig1|CL3075Contig1	10.0272643083783	9.97263294494287	0.994552	0.697
CL63Contig31|CL63Contig31	10.0666358861914	10.1050187604641	1.00381	0.698
CL2238Contig9|CL2238Contig9	11.4217738355852	11.3522203093052	0.99391	0.698
CL2575Contig2|CL2575Contig2	6.32762301317066	6.07354357734681	0.959846	0.698
CL6165Contig1|CL6165Contig1	8.82174184886868	8.75712086173355	0.992675	0.69
CL274Contig7|CL274Contig7	9.66863495089904	9.71997391554313	1.00531	0.698
CL7405Contig3|CL7405Contig3	9.31948349565016	9.3730297836445	1.00575	0.69
CL16110Contig1|CL16110Contig1	6.48105033977314	6.3833400723252	0.984924	0.699
CL6873Contig1|CL6873Contig1	7.04022392567927	6.89042474392651	0.978722	0.699
CL1Contig526|CL1Contig526	11.8732691275086	11.8391329921721	0.997125	0.701
CL5199Contig4|CL5199Contig4	5.90895333253506	6.28402527195261	1.06348	0.701
CL1805Contig1|CL1805Contig1	5.87900933141354	6.18349571632089	1.05179	0.702
CL1Contig1165|CL1Contig1165	6.14462802140611	6.33530323905809	1.03103	0.702
CL12009Contig2|CL12009Contig2	6.98794827077183	7.16398794180469	1.02519	0.702
CL1904Contig4|CL1904Contig4	8.96048435096407	9.01673525550819	1.00628	0.702
CL782Contig7|CL782Contig7	6.06189866178895	6.49684424782887	1.07175	0.703
CL8013Contig3|CL8013Contig3	6.89665002039208	6.64656910887871	0.963739	0.703
CL8780Contig2|CL8780Contig2	7.3148792751216	7.44004406209709	1.01711	0.703
CL1Contig538|CL1Contig538	8.35548752862902	8.26539559830636	0.989218	0.704
CL1Contig423|CL1Contig423	9.18631285165634	9.11825414595645	0.992591	0.704
CL8147Contig2|CL8147Contig2	6.21379735216276	6.43794097113646	1.03607	0.706
CL1984Contig4|CL1984Contig4	10.3418489317214	10.3741866524138	1.00313	0.707
CL1397Contig1|CL1397Contig1	10.6979333962811	10.6658149659429	0.996998	0.707
CL2396Contig9|CL2396Contig9	6.05660479459428	6.30253762588499	1.04061	0.708
CL3534Contig2|CL3534Contig2	7.1190814495394	6.93123985666415	0.973614	0.708
CL2640Contig8|CL2640Contig8	7.69873597139137	7.58491395478998	0.985215	0.708
isotig04017|isotig04017	8.64697325783689	8.73146241427857	1.00977	0.708
CL1499Contig5|CL1499Contig5	7.95892286810481	7.85213923112843	0.986583	0.709
CL1Contig8539|CL1Contig8539	10.7667819290256	10.8643490723706	1.00906	0.7
CL8862Contig2|CL8862Contig2	6.75654867014683	6.6418148650355	0.983019	0.711
isotig11290|isotig11290	7.78672790291678	7.57504592126267	0.972815	0.711
CL1Contig5466|CL1Contig5466	6.95257956867601	7.15190443136293	1.02867	0.712
ISPG1_ERATE|ISPG1_ERATE	9.08912659184898	9.19112797668278	1.01122	0.712
CL180Contig23|CL180Contig23	9.47990877788005	9.42418952266891	0.994122	0.712
CL110Contig8|CL110Contig8	6.34537657790436	5.96315522066436	0.939764	0.713
Locus_5081_2_10|Locus_5081_2_10	7.4605430618087	7.37834140075978	0.988982	0.713
CL607Contig2|CL607Contig2	8.62537902102477	8.52930346506688	0.988861	0.713
CL397Contig8|CL397Contig8	8.96996834430976	8.88177109864957	0.990167	0.713
CL1040Contig8|CL1040Contig8	9.25611879551631	9.34164168775675	1.00924	0.713
ATPB10_ERATE|ATPB10_ERATE	11.1795627564121	11.2120878505284	1.00291	0.714
CL73Contig3|CL73Contig3	7.61589526171319	7.76092747002147	1.01904	0.714
CL8996Contig2|CL8996Contig2	8.24230805827351	8.0925777550609	0.981834	0.714
CL2289Contig5|CL2289Contig5	6.23212208118579	5.95576578703436	0.955656	0.715
CL6470Contig1|CL6470Contig1	10.5275011753796	10.5549740447639	1.00261	0.716
CL10491Contig1|CL10491Contig1	5.40748170612684	4.98731117432656	0.922298	0.716
CL942Contig4|CL942Contig4	8.63498364933435	8.75282070834116	1.01365	0.716
CL99Contig6|CL99Contig6	10.9004725958101	10.8694723176403	0.997156	0.717
CL2716Contig2|CL2716Contig2	7.10988064399377	6.94552605078032	0.976884	0.71
CL6235Contig1|CL6235Contig1	7.37238970614452	7.55344088904338	1.02456	0.71
CL63Contig29|CL63Contig29	7.38347807722234	7.53372487450427	1.02035	0.717
CL130Contig11|CL130Contig11	7.47457518534305	7.34274164820585	0.982362	0.717
CL1889Contig6|CL1889Contig6	8.39608357858013	8.50569690415907	1.01306	0.71
CL4281Contig1|CL4281Contig1	8.56887487867518	8.64313214077099	1.00867	0.71
CL4704Contig1|CL4704Contig1	6.96489299080633	6.78011303132496	0.97347	0.718
CL1375Contig6|CL1375Contig6	8.60166486660673	8.68063167518883	1.00918	0.718
CL5091Contig2|CL5091Contig2	8.63168491878468	8.57159409837158	0.993038	0.719
CL653Contig2|CL653Contig2	6.7507169442053	6.63029881831993	0.982162	0.721
CL2637Contig1|CL2637Contig1	8.34261337898868	8.46276554582316	1.0144	0.721
CL6851Contig4|CL6851Contig4	9.85583271584742	9.88648276023229	1.00311	0.721
CL5663Contig1|CL5663Contig1	6.23707652460805	5.92189389828512	0.949466	0.722
CL13136Contig1|CL13136Contig1	6.47429947731353	6.69525863510449	1.03413	0.722
CL853Contig3|CL853Contig3	7.44073674262432	7.30325758229253	0.981523	0.723
CL1Contig9204|CL1Contig9204	7.79397793600007	7.69525750297781	0.987334	0.723
CL8050Contig2|CL8050Contig2	8.1104697619591	8.01887915639344	0.988707	0.723
CL3476Contig1|CL3476Contig1	7.53041893567463	7.3701766220433	0.978721	0.724
CL5445Contig1|CL5445Contig1	7.86660715885238	7.98336556088244	1.01484	0.724
CL16Contig23|CL16Contig23	8.24045143069259	8.16466315408761	0.990803	0.724
CL1Contig1644|CL1Contig1644	10.6551750798252	10.7021485761481	1.00441	0.725
HTPG9_ERATE|HTPG9_ERATE	11.1422072016087	11.1734918038141	1.00281	0.725
Locus_1138_1_3|Locus_1138_1_3	6.91346862603433	6.62924317889281	0.958888	0.725
CL1Contig6054|CL1Contig6054	9.58275856973143	9.52459408897042	0.99393	0.725
CL6468Contig2|CL6468Contig2	10.4332108617553	10.3946560155079	0.996305	0.726
Locus_4547_2_11|Locus_4547_2_11	10.9541114345514	11.0009720618591	1.00428	0.726
CL5033Contig2|CL5033Contig2	6.13535175614139	5.85473009963041	0.954262	0.72
CL526Contig1|CL526Contig1	5.88879515056088	5.51332466666923	0.93624	0.726
CL1476Contig3|CL1476Contig3	6.29905117415499	6.71359568274399	1.06581	0.726
CL1Contig3882|CL1Contig3882	6.91205325959555	6.74229916091039	0.975441	0.726
CL3535Contig7|CL3535Contig7	7.10025985325905	6.80638325569872	0.95861	0.727
CL2122Contig3|CL2122Contig3	8.28887481383277	8.11985871672676	0.979609	0.727
CL1087Contig8|CL1087Contig8	9.4548554941104	9.40596366314206	0.994829	0.727
RBL3_ERATE|RBL3_ERATE	13.3280849208805	13.3045142548046	0.998232	0.728
CL220Contig7|CL220Contig7	6.89152476591595	7.15840112110131	1.03873	0.728
CL1Contig9221|CL1Contig9221	8.26607582522769	8.38635123626519	1.01455	0.728
CL14245Contig1|CL14245Contig1	8.85080486385092	8.94254418983506	1.01037	0.72
Locus_5770_2_2|Locus_5770_2_2	9.21296344444456	9.34938304301052	1.01481	0.728
CL1Contig936|CL1Contig936	9.57250258793338	9.63801744869913	1.00684	0.72
CL993Contig9|CL993Contig9	8.08249044717405	7.97065167870996	0.986163	0.729
CL500Contig8|CL500Contig8	8.95238826306	8.99425936793419	1.00468	0.729
CL2638Contig2|CL2638Contig2	9.51302914456036	9.48403704567465	0.996952	0.729
CL1Contig3535|CL1Contig3535	5.91763433818511	5.74529178759784	0.970876	0.731
CL1322Contig2|CL1322Contig2	7.41825228309482	7.62386299565698	1.02772	0.731
CL46Contig19|CL46Contig19	7.86083587174403	8.00601399248328	1.01847	0.731
CL3021Contig2|CL3021Contig2	9.00667103770058	8.95943667983182	0.994756	0.731
CL1800Contig6|CL1800Contig6	9.60498188909971	9.66812529747338	1.00657	0.731
CL417Contig5|CL417Contig5	6.33996789718909	6.08564678979283	0.959886	0.732
CL1Contig414|CL1Contig414	6.4151293179171	6.61526489759708	1.0312	0.732
CL2275Contig2|CL2275Contig2	9.17069639521747	9.34357684225561	1.01885	0.732
CL5257Contig1|CL5257Contig1	6.27635882044234	6.09698753848895	0.971421	0.733
CL1862Contig1|CL1862Contig1	6.37091690259408	6.08588186130421	0.95526	0.733
CL168Contig6|CL168Contig6	7.13102583122013	6.97985671159771	0.978801	0.734
CL74Contig2|CL74Contig2	7.73852865614661	7.53101325738786	0.973184	0.734
CL289Contig4|CL289Contig4	6.28047810987412	6.0243053210716	0.959211	0.735
CL2058Contig6|CL2058Contig6	6.58729588873923	6.70972622171868	1.01859	0.735
CL820Contig8|CL820Contig8	8.43624858015026	8.35052618018335	0.989839	0.736
CL1Contig2836|CL1Contig2836	6.95439348089594	6.76864560072503	0.973291	0.737
CL1034Contig2|CL1034Contig2	7.49770875155989	7.57827925337181	1.01075	0.737
CL561Contig7|CL561Contig7	7.542520218515	7.62094331511337	1.0104	0.737
CL13040Contig1|CL13040Contig1	8.8360536972983	8.77618386820542	0.993224	0.737
CL2620Contig3|CL2620Contig3	10.4109077809434	10.4235418729601	1.00121	0.738
CL769Contig3|CL769Contig3	6.3303032978644	6.61026008903498	1.04422	0.738
CL1Contig7659|CL1Contig7659	7.544626905155	7.35228263666311	0.974506	0.739
Locus_217_3_7|Locus_217_3_7	10.708756684128	10.6741404268306	0.996767	0.741
CL76Contig17|CL76Contig17	6.01934795280446	5.74677946153631	0.954718	0.741
CL7729Contig2|CL7729Contig2	7.52603396245245	7.33803034373479	0.97502	0.741
CL1678Contig3|CL1678Contig3	7.83286018701201	7.67608265450593	0.979985	0.742
CL3489Contig3|CL3489Contig3	8.02305371815609	7.93748200954664	0.989334	0.742
CL5856Contig1|CL5856Contig1	10.3416703803149	10.2903987150822	0.995042	0.743
CL1Contig45|CL1Contig45	6.4635632222154	6.33842196271469	0.980639	0.743
CL1Contig2604|CL1Contig2604	8.94718154276904	9.05033178560867	1.01153	0.743
isotig32319|isotig32319	9.35256537547305	9.24099160733901	0.98807	0.743
CL1493Contig1|CL1493Contig1	9.58386135936965	9.61744102586595	1.0035	0.743
CL9165Contig1|CL9165Contig1	6.6526080078481	6.40427639467874	0.962672	0.744
CL5031Contig5|CL5031Contig5	8.76059107332051	8.67443847830259	0.990166	0.744
CL883Contig2|CL883Contig2	9.85105265609828	9.78580647202683	0.993377	0.744
CL5973Contig1|CL5973Contig1	8.63470066718326	8.67806975846464	1.00502	0.745
CL9910Contig1|CL9910Contig1	10.3026920843651	10.2799571886709	0.997793	0.746
CL750Contig10|CL750Contig10	7.82543521888549	7.8801540486443	1.00699	0.747
CL4416Contig5|CL4416Contig5	7.81602483898082	7.87516307247355	1.00757	0.74
CL360Contig2|CL360Contig2	8.68919551554027	8.56328153712091	0.985509	0.748
CL3147Contig6|CL3147Contig6	8.87382294989003	8.94824112916148	1.00839	0.74
Locus_222_5_11|Locus_222_5_11	6.42164321852985	6.60845042709538	1.02909	0.749
CL5535Contig1|CL5535Contig1	8.2244005014284	8.12598115365733	0.988033	0.749
CL1452Contig5|CL1452Contig5	8.26888033401132	8.18543946766395	0.989909	0.749
CL4274Contig1|CL4274Contig1	8.27244837149152	8.33535444030812	1.0076	0.749
CL9824Contig3|CL9824Contig3	10.9400097157765	10.9199800492985	0.998169	0.751
G6PI3_ERATE|G6PI3_ERATE	9.84912259681087	9.8104644859342	0.996075	0.751
CL11731Contig1|CL11731Contig1	6.36273865352408	6.54625864879301	1.02884	0.752
CL122Contig8|CL122Contig8	6.47600657084322	6.2128874131162	0.95937	0.752
CL24991Contig1|CL24991Contig1	6.60018559080835	6.51223025824022	0.986674	0.752
CL2635Contig2|CL2635Contig2	7.01097930141389	6.86035629200003	0.978516	0.752
CL1Contig1915|CL1Contig1915	7.62061242800207	7.42696686070624	0.974589	0.752
CL4592Contig2|CL4592Contig2	7.87259632961283	7.93837924003207	1.00836	0.752
CL860Contig4|CL860Contig4	8.59791848700446	8.52957772511421	0.992051	0.752
[truncated: 658 more rows]
