# Supplementary material for: A Proteomic Approach to Investigate the Drought Response in the Orphan Crop Eragrostis tef
Source: Proteomes. 2017 Nov 15;5(4):32. doi: 10.3390/proteomes5040032 (PMC5748567; doi:10.3390/proteomes5040032)
Supplement: Supplementary file 1 [file proteomes-05-00032-s001.zip › proteomes-208511 supplementary final/S4.1 MU dataset (all 4328 proteins with expression values, fold changes and p-values).xlsx]

## Sheet: Sheet1
Protein Id	Hydrated	Dehydrated	Fold change	p-value
A3BY14|A3BY14_ORYSJ	6.33268739754667	7.2963347778174	1.15217	0.001
M0SLX3|M0SLX3_MUSAM	1	5.8112744154426	5.81127	0.002
H6WCP2|H6WCP2_SECCE	5.67027289434927	6.92410072786329	1.22112	0.002
I1R1T6|I1R1T6_ORYGL	5.93633933386917	7.07457304151485	1.19174	0.002
M0RYP4|M0RYP4_MUSAM	8.96840459296245	7.98144487731182	0.889951	0.002
A2YVN3|A2YVN3_ORYSI	7.16488185486717	6.49054786066644	0.905883	0.003
M0TFQ1|M0TFQ1_MUSAM	7.89161229649407	8.43744678468496	1.06917	0.003
J3LTP8|J3LTP8_ORYBR	4.66358211068238	1	0.214427	0.004
J3NA21|J3NA21_ORYBR	4.94158599174653	6.34822408824708	1.28465	0.004
I1GKL4|I1GKL4_BRADI	5.48396033172957	1	0.18235	0.004
Q40693|Q40693_ORYSA	5.56876258035408	1	0.179573	0.004
K3ZXX1|K3ZXX1_SETIT	5.69970072802475	1	0.175448	0.004
K3Z4Y8|K3Z4Y8_SETIT	6.11009784523112	6.93962221111486	1.13576	0.004
J7F224|J7F224_ORYSI	6.17736849092886	1	0.161881	0.004
K7V3R8|K7V3R8_MAIZE	7.40226697027087	6.13888090220117	0.829324	0.004
J3L4S9|J3L4S9_ORYBR	8.29883756457171	8.84074617410553	1.0653	0.004
K3YHA5|K3YHA5_SETIT	4.77009199691868	1	0.20964	0.005
I1HY72|I1HY72_BRADI	6.13912360485727	1	0.16289	0.005
A7DX42|A7DX42_9POAL	8.09524604431135	7.28929639057658	0.900442	0.005
F2EE28|F2EE28_HORVD	1	5.26848789370828	5.26849	0.006
sp|Q2QM69|BQMT2_ORYSJ	9.13447638067294	8.83802525511024	0.967546	0.006
B8YAB7|B8YAB7_9POAL	1	5.46819318527795	5.46819	0.007
K7UL12|K7UL12_MAIZE	6.58768666809863	7.66133556823715	1.16298	0.007
M0S163|M0S163_MUSAM	8.17106039977226	8.66986608467452	1.06105	0.007
H6UDT9|H6UDT9_9ARAE	5.29725176013046	1	0.188777	0.008
I1PWQ2|I1PWQ2_ORYGL	6.69529768059815	7.52293249054964	1.12361	0.008
Q09EN6|Q09EN6_TRIDA	8.23603820253438	8.68765062609308	1.05483	0.008
C5WRI0|C5WRI0_SORBI	1	4.99869449136053	4.99869	0.009
M8AZH0|M8AZH0_TRIUA	10.800869504642	10.9450227677481	1.01335	0.009
C5XWE5|C5XWE5_SORBI	9.76006478441706	9.94834439488697	1.01929	0.009
K4APG4|K4APG4_SETIT	1	5.25012207362469	5.25012	0.011
D6C788|D6C788_9POAL	5.20320038909988	1	0.192189	0.011
K7TWX2|K7TWX2_MAIZE	6.76931910856478	5.28969092802221	0.781421	0.011
J3KWV6|J3KWV6_ORYBR	6.92850867362918	6.21811677640286	0.897468	0.011
I1P1A2|I1P1A2_ORYGL	7.34031533381351	7.84119748267982	1.06824	0.011
M0YEW4|M0YEW4_HORVD	7.40796867541072	6.83382343743608	0.922496	0.011
C0P5W4|C0P5W4_MAIZE	7.44249252674697	6.18622605250135	0.831204	0.011
K7V3Y4|K7V3Y4_MAIZE	7.9554185439817	8.16754950953284	1.02666	0.011
M8B2N0|M8B2N0_AEGTA	8.32760079052973	8.53069182654343	1.02439	0.011
M8BP49|M8BP49_AEGTA	1	5.38255467554046	5.38255	0.012
C5XWJ8|C5XWJ8_SORBI	1	5.43355946593928	5.43356	0.012
Q0DF89|Q0DF89_ORYSJ	5.49057913507767	1	0.18213	0.012
J3N642|J3N642_ORYBR	6.42209117565642	4.79651505087485	0.746877	0.012
B9EUA8|B9EUA8_ORYSJ	6.97655857269646	5.74811648006099	0.823919	0.012
B9F6D9|B9F6D9_ORYSJ	7.00631002764167	5.94702755673155	0.84881	0.012
M0WSZ3|M0WSZ3_HORVD	7.64773695599629	6.97785930684473	0.912408	0.012
B9G402|B9G402_ORYSJ	8.31984383298522	7.86694536254782	0.945564	0.012
I1HQV5|I1HQV5_BRADI	4.93355276095151	1	0.202694	0.013
B8BH08|B8BH08_ORYSI	6.21713914151452	7.16647236630257	1.1527	0.013
J3LQZ7|J3LQZ7_ORYBR	6.82635649962072	7.57832917689004	1.11016	0.013
F4Y5B3|F4Y5B3_TRIDC	7.33608951070924	5.95591993045517	0.811866	0.014
B4FM07|B4FM07_MAIZE	7.65422406479394	7.13857663574785	0.932632	0.014
K3XID0|K3XID0_SETIT	4.91474571175851	1	0.203469	0.01
Q2R2U7|Q2R2U7_ORYSJ	5.4894629119673	1	0.182167	0.01
Q0IPN8|Q0IPN8_ORYSJ	5.23833153386714	1	0.1909	0.015
Q2EZ09|Q2EZ09_ORYSI	5.56356530551283	6.74403690785344	1.21218	0.015
B5AMJ8|B5AMJ8_MAIZE	7.81914526397872	8.5060737577631	1.08785	0.015
A2X358|A2X358_ORYSI	9.0675520717028	8.377932651893	0.923946	0.015
I1HPZ8|I1HPZ8_BRADI	5.03007674399464	6.76827844345862	1.34556	0.016
C5YTE5|C5YTE5_SORBI	5.70287575854474	1	0.17535	0.016
M7ZWS2|M7ZWS2_TRIUA	6.92255902425928	7.5409002697431	1.08932	0.01
K3YEI2|K3YEI2_SETIT	7.19388696499757	7.6553856963329	1.06415	0.01
Q6TUC6|Q6TUC6_ORYSJ	6.10803249818997	6.54182156058577	1.07102	0.017
Q688K0|Q688K0_ORYSJ	6.51083786157781	7.07445342722571	1.08657	0.017
F2D6T1|F2D6T1_HORVD	8.28494738960327	8.62240028019341	1.04073	0.017
J3MU66|J3MU66_ORYBR	8.52350065814926	9.12491011727199	1.07056	0.017
I1PYX0|I1PYX0_ORYGL	8.98988646086543	9.27186791913213	1.03137	0.017
B4FAE5|B4FAE5_MAIZE	5.19117045592437	1	0.192635	0.018
M0U0B7|M0U0B7_MUSAM	6.63147493840175	5.53077461490658	0.834019	0.018
J3LZ24|J3LZ24_ORYBR	7.56765773885522	7.84699752116127	1.03691	0.018
F2D6S1|F2D6S1_HORVD	7.80931935670473	7.00395646313033	0.896872	0.018
K4AI98|K4AI98_SETIT	8.65976209085317	8.41555699279207	0.9718	0.018
K3XM31|K3XM31_SETIT	8.95796351657514	9.3547541960291	1.04429	0.01
K3Z686|K3Z686_SETIT	9.35469785220721	9.10171	0.972956	0.01
I1NU41|I1NU41_ORYGL	5.66372258579225	1	0.176562	0.019
Q7XP71|Q7XP71_ORYSJ	5.97107350796615	1	0.167474	0.019
Q8M914|Q8M914_9POAL	6.41195661637135	7.57576867121004	1.18151	0.019
M7Z1H8|M7Z1H8_TRIUA	7.18600237656096	6.34704306745342	0.883251	0.019
H6T2S0|H6T2S0_9POAL	7.66225308408363	8.18872807947661	1.06871	0.019
K4A8N1|K4A8N1_SETIT	7.65364973284373	7.98127261816611	1.04281	0.021
F2EBB5|F2EBB5_HORVD	8.21720212573959	7.72134546267172	0.939656	0.021
M8CMG6|M8CMG6_AEGTA	5.07013376027801	1	0.197233	0.022
B8AKV0|B8AKV0_ORYSI	7.34979062337403	6.98429	0.950271	0.022
C5YBL4|C5YBL4_SORBI	7.66843270536389	8.35452389397631	1.08947	0.022
J3KZC5|J3KZC5_ORYBR	7.82635651798883	8.32035285044769	1.06312	0.022
K3Y5D4|K3Y5D4_SETIT	8.36535320539721	8.67606161585353	1.03714	0.022
I1Q436|I1Q436_ORYGL	9.03772998397543	9.31739565360409	1.03094	0.022
I1IP77|I1IP77_BRADI	6.64036760600771	5.6343820774939	0.848505	0.023
C5XKF4|C5XKF4_SORBI	6.73826920579521	5.98678705155221	0.888475	0.023
K3XG60|K3XG60_SETIT	7.91929083921152	8.43450319001528	1.06506	0.023
A7DX76|A7DX76_9POAL	6.47050260728845	4.95756810969331	0.76618	0.024
E0WCS9|E0WCS9_9POAL	7.95525516617006	7.02368622592808	0.882899	0.024
F2E4B4|F2E4B4_HORVD	5.67755608271286	6.79553669777593	1.19691	0.025
Q84TA3|Q84TA3_ORYSJ	6.43544189469727	7.12634689935684	1.10736	0.025
J3LEH7|J3LEH7_ORYBR	6.59911722601789	7.01577090097874	1.06314	0.02
K4AMW7|K4AMW7_SETIT	7.24265737468467	6.70342686143308	0.925548	0.026
M0YAF5|M0YAF5_HORVD	7.77510362453096	6.79832191082031	0.874371	0.026
I1I0K8|I1I0K8_BRADI	6.81529527062648	5.7483088406488	0.843442	0.02
B4FQ90|B4FQ90_MAIZE	7.0770379140177	7.65043375957911	1.08102	0.02
A2Y6W7|A2Y6W7_ORYSI	7.68632087148639	8.31821902669743	1.08221	0.027
K3XDR1|K3XDR1_SETIT	7.7670267329829	7.2062180451953	0.927796	0.028
M0SYI2|M0SYI2_MUSAM	8.36639687034964	8.86370621299326	1.05944	0.028
K3XE49|K3XE49_SETIT	9.43723073164976	9.09973680634109	0.964238	0.02
C5WYH9|C5WYH9_SORBI	7.22240090338079	7.65460299083949	1.05984	0.029
K6Z6J1|K6Z6J1_PHLPR	7.41232093994446	6.70273538129514	0.904269	0.029
F2CTM7|F2CTM7_HORVD	8.09984483797951	8.36722112777142	1.03301	0.029
B8Y2W7|B8Y2W7_FESAR	8.98907942020539	8.52323121592693	0.948176	0.029
K3YQN8|K3YQN8_SETIT	10.3198732116577	10.5077025301733	1.0182	0.031
C5Z2G8|C5Z2G8_SORBI	6.08331910111059	4.65494343435869	0.765198	0.031
K7TZY7|K7TZY7_MAIZE	10.3732896550086	10.2226091290955	0.985474	0.032
K3Z4G5|K3Z4G5_SETIT	10.763612882151	10.9044103455889	1.01308	0.032
Q5SBT2|Q5SBT2_9POAL	6.37109242758165	7.19232330349351	1.1289	0.032
K3XUT7|K3XUT7_SETIT	4.86447093791514	6.2860393576782	1.29223	0.033
K7TM76|K7TM76_MAIZE	1	5.13941663338246	5.13942	0.034
B8A2B4|B8A2B4_MAIZE	5.08009181535323	7.12183354133322	1.40191	0.034
I1HEZ1|I1HEZ1_BRADI	6.61832122484711	5.64168685015053	0.852435	0.036
C5YNB9|C5YNB9_SORBI	8.99132002930174	8.70918329680491	0.968621	0.036
C7J7J1|C7J7J1_ORYSJ	9.34929986410666	8.9901187593977	0.961582	0.036
M0TC33|M0TC33_MUSAM	5.79342682639475	7.17327031094122	1.23817	0.037
M7Z031|M7Z031_TRIUA	6.13828079066245	6.98242669239613	1.13752	0.037
K3YTT8|K3YTT8_SETIT	6.58251319126353	5.5299354732813	0.840095	0.037
C5YHN2|C5YHN2_SORBI	6.90414101645563	4.90132496697787	0.709911	0.037
M7ZWJ0|M7ZWJ0_TRIUA	7.68182474001221	8.0430231095134	1.04702	0.037
J3NAA0|J3NAA0_ORYBR	8.01296246067246	7.51770344568913	0.938193	0.037
M0SUI3|M0SUI3_MUSAM	7.89629340243015	7.44073154531942	0.942307	0.03
K3ZRY2|K3ZRY2_SETIT	5.86437455541789	6.64425045146926	1.13299	0.038
B9F8C3|B9F8C3_ORYSJ	6.42199213859923	5.1878096809471	0.807819	0.038
M0U0C4|M0U0C4_MUSAM	7.23060504789875	7.63559381108678	1.05601	0.038
K3ZIK0|K3ZIK0_SETIT	7.43179430911529	7.81448774975381	1.05149	0.038
M0TZF6|M0TZF6_MUSAM	8.29212994416309	7.90474990825453	0.953283	0.038
F1DI22|F1DI22_PENAM	9.16600265613033	9.75654579185173	1.06443	0.038
K3YWM5|K3YWM5_SETIT	9.76778369373273	9.63571621479196	0.986479	0.038
J3NDJ0|J3NDJ0_ORYBR	9.8100780803037	9.85016484966565	1.00409	0.038
B3SHC6|B3SHC6_9POAL	8.04087452316659	7.52855051085444	0.936285	0.039
K3YL45|K3YL45_SETIT	10.015744141617	9.91401477664921	0.989843	0.041
Q6Q297|Q6Q297_MAIZE	6.33154658789097	7.083373799202	1.11874	0.041
K7UU03|K7UU03_MAIZE	6.73738361358348	7.32349876588289	1.08699	0.041
B6SYK7|B6SYK7_MAIZE	7.05371878302216	7.69359505452095	1.09071	0.041
F8U875|F8U875_AMOKO	7.37403579631698	6.41496324520583	0.869939	0.041
I1I2I7|I1I2I7_BRADI	9.15726756263444	8.88401704138875	0.97016	0.041
K3YJA1|K3YJA1_SETIT	9.50423071489395	9.75079423027684	1.02594	0.041
J3NCI1|J3NCI1_ORYBR	6.37657782945727	7.09191502340324	1.11218	0.042
M7ZF75|M7ZF75_TRIUA	6.83023129733484	7.8644477391216	1.15142	0.042
M0SDW7|M0SDW7_MUSAM	8.98951527621292	8.37347571130326	0.931471	0.042
C0PP08|C0PP08_MAIZE	5.98099121178737	7.03736584576455	1.17662	0.043
Q8RYY4|Q8RYY4_ORYSJ	6.57396434439295	5.51676949547241	0.839185	0.043
Q5JK51|Q5JK51_ORYSJ	7.27098509443233	7.88520941237595	1.08448	0.043
J3L4R5|J3L4R5_ORYBR	8.42419061088852	8.9334310902722	1.06045	0.043
Q9SDJ2|Q9SDJ2_ORYSJ	9.17836841385704	9.03310096477819	0.984173	0.044
I1IF76|I1IF76_BRADI	9.89144177599038	9.71047806178928	0.981705	0.044
N1QQ42|N1QQ42_AEGTA	5.06587267674329	6.37286718714048	1.258	0.04
Q5MD10|Q5MD10_SACOF	10.0181081220116	9.68625870406627	0.966875	0.045
Q0D574|Q0D574_ORYSJ	6.82068839382745	7.62743925495491	1.11828	0.045
M0VAF3|M0VAF3_HORVD	7.26559378383518	6.69477900481037	0.921436	0.045
F2CXC6|F2CXC6_HORVD	8.01258074929351	7.08531972791245	0.884274	0.045
Q6Z1V6|Q6Z1V6_ORYSJ	8.61489736882509	7.98381858572773	0.926746	0.045
C5WWE2|C5WWE2_SORBI	6.38752538521193	4.96293412099492	0.776973	0.04
M8BG98|M8BG98_AEGTA	6.65955063930025	6.0800451766161	0.912981	0.04
B6TV07|B6TV07_MAIZE	6.76136054991678	7.45003249144844	1.10185	0.046
E9KJF9|E9KJF9_9POAL	6.77731956613395	7.83063297725133	1.15542	0.046
M0U3I3|M0U3I3_MUSAM	7.0638706702305	6.17083283071787	0.873577	0.046
K4AD01|K4AD01_SETIT	7.66191689416052	8.20771550567561	1.07124	0.046
C5X3Z0|C5X3Z0_SORBI	7.67424053623786	7.06361473101383	0.920432	0.046
M0WBU8|M0WBU8_HORVD	8.07884317202181	7.67007499206813	0.949403	0.047
M8C7G4|M8C7G4_AEGTA	9.99094801551184	10.2548832502915	1.02642	0.047
K7AF06|K7AF06_PHLPR	5.33966748922482	6.83986137586178	1.28095	0.048
J3M442|J3M442_ORYBR	8.45902477008262	7.82417947234799	0.924951	0.048
J3KZJ0|J3KZJ0_ORYBR	8.60537231386215	7.86523017620766	0.913991	0.048
M0RV12|M0RV12_MUSAM	8.95023410299472	8.55131285219549	0.955429	0.048
J3MGQ3|J3MGQ3_ORYBR	6.98143361229523	7.85668009960694	1.12537	0.049
M0S1D8|M0S1D8_MUSAM	7.69149842424237	6.72774448661749	0.874699	0.049
M7ZWK6|M7ZWK6_TRIUA	8.61807231203622	8.19475122991763	0.95088	0.049
Q94HT9|Q94HT9_ORYSJ	1	5.07479385852034	5.07479	0.05
K3Z133|K3Z133_SETIT	9.82712367414089	9.63432100415528	0.980381	0.05
Background proteins
C0HIR4|C0HIR4_MAIZE	7.05368514759893	6.75262499490714	0.957319	0.051
K4ALQ0|K4ALQ0_SETIT	8.99474582514575	9.25039834398918	1.02842	0.051
B5QSJ9|B5QSJ9_SETVI	9.34307000876564	9.59339563464479	1.02679	0.051
Q9MSY8|Q9MSY8_9ASPA	5.69496402354493	6.78699278673571	1.19175	0.052
M0SIC8|M0SIC8_MUSAM	7.23070823036396	7.96578727402037	1.10166	0.052
K3Z6F2|K3Z6F2_SETIT	7.65663562495323	7.34311645985057	0.959053	0.052
F2D4I8|F2D4I8_HORVD	9.07169811188223	8.32087449061035	0.917235	0.052
K4A5C8|K4A5C8_SETIT	7.65861826991746	8.11828368094698	1.06002	0.053
I1IJF5|I1IJF5_BRADI	8.16423164776489	7.91983647983286	0.970065	0.053
F2CYU4|F2CYU4_HORVD	4.91855117635969	6.72680699946067	1.36764	0.054
J3KZR9|J3KZR9_ORYBR	7.5511495439443	7.16351337619208	0.948665	0.054
M0U0C6|M0U0C6_MUSAM	8.60019327632948	8.13924103861653	0.946402	0.054
C0P5Y3|C0P5Y3_MAIZE	8.93537545120766	8.51450966384212	0.952899	0.054
B9EY00|B9EY00_ORYSJ	5.53040174432405	7.03501724697593	1.27206	0.055
I1H4K1|I1H4K1_BRADI	7.57908476689971	6.74833701695733	0.890389	0.055
M8C2G8|M8C2G8_AEGTA	8.53386549423473	8.27000645790158	0.969081	0.055
I1IBR3|I1IBR3_BRADI	5.74145679947655	6.53615123193452	1.13841	0.056
C5XNA4|C5XNA4_SORBI	7.01538652190133	7.62602327746155	1.08704	0.056
M7YGN6|M7YGN6_TRIUA	6.16757109079273	6.92064436892188	1.1221	0.057
I1NXV1|I1NXV1_ORYGL	6.83276296056663	5.71784641655147	0.836828	0.057
C0PMC5|C0PMC5_MAIZE	10.3415605151277	10.5167343710815	1.01694	0.058
K3Z5U9|K3Z5U9_SETIT	10.8169001139856	10.6273930203018	0.98248	0.058
K3ZW88|K3ZW88_SETIT	8.12286224058075	7.60017465365834	0.935652	0.05
Q5NAR2|Q5NAR2_ORYSJ	5.01712428798275	5.83158747392892	1.16234	0.058
B8BH86|B8BH86_ORYSI	5.94530848834736	4.77728853390152	0.803539	0.058
I1NR66|I1NR66_ORYGL	6.6911656950673	6.20790838935498	0.927777	0.058
A1Y9I7|A1Y9I7_MAIZE	8.25786407477492	8.02885807652125	0.972268	0.058
C5Y5Z4|C5Y5Z4_SORBI	6.40286266384347	6.7132385674906	1.04847	0.059
M0TX42|M0TX42_MUSAM	7.47397718157482	7.86681444474794	1.05256	0.061
M0TXG4|M0TXG4_MUSAM	8.7727272749901	8.23355658145858	0.93854	0.061
I1GUH7|I1GUH7_BRADI	7.05631578350457	7.50796122060444	1.06401	0.062
K3XQZ1|K3XQZ1_SETIT	7.34937962308663	6.86414294936791	0.933976	0.062
Q7XV85|Q7XV85_ORYSJ	7.56187796461931	8.1609423720406	1.07922	0.062
M0VRC5|M0VRC5_HORVD	7.913718218762	7.32622000650307	0.925762	0.062
C5WYU4|C5WYU4_SORBI	9.13280827293513	9.4581851512916	1.03563	0.062
C5YU66|C5YU66_SORBI	9.13534023748029	8.81146905156261	0.964547	0.062
I1NT64|I1NT64_ORYGL	5.06123007248756	6.29165487079091	1.24311	0.063
M0S6H1|M0S6H1_MUSAM	5.9692514276901	6.46039572645345	1.08228	0.063
B6T3B2|B6T3B2_MAIZE	7.45551635323545	6.53939723777225	0.877122	0.063
Q60E25|Q60E25_ORYSJ	8.07948384761929	7.57248966922651	0.937249	0.063
K3XXE5|K3XXE5_SETIT	9.85980247441977	9.61744273233849	0.975419	0.063
M0TT93|M0TT93_MUSAM	6.42612942371093	7.07851941883352	1.10152	0.064
B8BND7|B8BND7_ORYSI	7.76165624218845	8.3241789432687	1.07247	0.064
B6U6P6|B6U6P6_MAIZE	8.26927909760187	8.42963040238241	1.01939	0.064
B4FZ37|B4FZ37_MAIZE	8.43616758116951	6.49752438320885	0.770199	0.064
H8WFY5|H8WFY5_PHRAU	8.79274161119509	8.52749383135034	0.969833	0.064
Q2QZI0|Q2QZI0_ORYSJ	8.86283773572653	8.58433757534095	0.968577	0.064
J3MLZ6|J3MLZ6_ORYBR	10.6037092954368	10.3952203192988	0.980338	0.065
I1I1X8|I1I1X8_BRADI	6.44858094979069	7.0300819447842	1.09018	0.065
K7UZT6|K7UZT6_MAIZE	6.6978200108928	5.72862851044962	0.855297	0.065
B9G7S3|B9G7S3_ORYSJ	6.98592134050027	5.98894723228964	0.857288	0.065
K3Z3N3|K3Z3N3_SETIT	7.31572239483898	7.85554826307482	1.07379	0.065
G4WMV6|G4WMV6_WOLAR	9.07664885154585	9.32401606141172	1.02725	0.065
Q8S2F4|Q8S2F4_ORYSJ	6.8067911763588	7.00592884616946	1.02926	0.066
F2E4N4|F2E4N4_HORVD	7.45388867652429	6.46085386054925	0.866776	0.066
C5X3W1|C5X3W1_SORBI	5.49154389166334	6.49015285504765	1.18184	0.067
Q40785|Q40785_CENCI	6.52042108829899	5.13359227953035	0.78731	0.067
M0TSL8|M0TSL8_MUSAM	6.56958850771756	7.50023975152307	1.14166	0.067
K3YNU4|K3YNU4_SETIT	6.79690296104121	7.63845536348214	1.12381	0.067
C5YXY3|C5YXY3_SORBI	8.08374521470703	8.54477937642	1.05703	0.067
K4AF25|K4AF25_SETIT	8.14003300285922	8.35239630893875	1.02609	0.067
O82073|O82073_WHEAT	8.72353193119635	8.99996403548428	1.03169	0.067
F8S8C7|F8S8C7_9POAL	9.44300738782488	9.070179822488	0.960518	0.067
M0SWI1|M0SWI1_MUSAM	7.98525902181218	7.42222824043059	0.929491	0.06
I1I284|I1I284_BRADI	8.01335368388695	8.66991248220058	1.08193	0.06
M7Y700|M7Y700_TRIUA	7.35955674723276	6.52734449811528	0.886921	0.068
F2DCJ3|F2DCJ3_HORVD	7.58003618682689	8.05308875786651	1.06241	0.068
Q7X9K7|Q7X9K7_WHEAT	7.70823059307752	8.13300969676864	1.05511	0.068
M0TXL2|M0TXL2_MUSAM	7.84178259079141	8.22413616450977	1.04876	0.068
F2CQV1|F2CQV1_HORVD	8.82626636661015	8.55083108585021	0.968794	0.06
M0U3W7|M0U3W7_MUSAM	4.20349320914318	5.65951562222393	1.34638	0.069
Q40709|Q40709_ORYSJ	4.94955721623626	6.14908477935776	1.24235	0.069
I1J037|I1J037_BRADI	6.40590995238016	5.72142273950768	0.893148	0.069
C0HER4|C0HER4_MAIZE	7.07967597042099	5.93696916907166	0.838593	0.069
K3ZH13|K3ZH13_SETIT	8.38463128149241	8.73143701372424	1.04136	0.069
M0RWJ1|M0RWJ1_MUSAM	6.09530660345601	4.93156877972343	0.809076	0.071
B9F1T3|B9F1T3_ORYSJ	5.30393667243899	6.47796080647669	1.22135	0.072
K3ZP32|K3ZP32_SETIT	6.34613522716251	6.95738259945516	1.09632	0.072
sp|P0CH34|RL40A_ORYSJ	7.73276767805542	8.27887600970169	1.07062	0.072
M0U8E1|M0U8E1_MUSAM	6.58795888823137	6.09001151809149	0.924416	0.073
C1JJS6|C1JJS6_MUSAC	7.75774824996503	6.86894017026394	0.88543	0.073
J3M702|J3M702_ORYBR	8.04041243827104	8.32198319072344	1.03502	0.073
K7TR72|K7TR72_MAIZE	8.09657573545715	7.94749783751642	0.981588	0.073
K3Y6S4|K3Y6S4_SETIT	8.25901520234655	8.42922888590138	1.02061	0.073
G9C355|G9C355_ORYMI	8.43320327421358	8.67827508703137	1.02906	0.073
B9EXF2|B9EXF2_ORYSJ	6.86658101641459	6.3079683093621	0.918648	0.074
K3XGN3|K3XGN3_SETIT	7.53449006326476	6.70481777194582	0.889883	0.074
M7ZC95|M7ZC95_TRIUA	7.71150101634542	7.24451343754729	0.939443	0.075
sp|A3C6D7|ACT2_ORYSJ	8.80755058473702	9.09103622582263	1.03219	0.075
A7DXD9|A7DXD9_TRARA	9.69961938310068	9.14521549767351	0.942843	0.075
M8BSG2|M8BSG2_AEGTA	7.59092414528773	7.19440545141397	0.947764	0.076
Q10SM8|Q10SM8_ORYSJ	7.42036464553296	8.02616051378015	1.08164	0.07
E0Y9Y5|E0Y9Y5_ORYNI	6.33671121670099	6.73848914142547	1.0634	0.077
M0UB14|M0UB14_MUSAM	7.07603040102575	7.58766070141931	1.0723	0.077
M7ZD99|M7ZD99_TRIUA	6.0903084343321	6.75112949404264	1.1085	0.078
J3LH12|J3LH12_ORYBR	7.46153455890185	6.18888778443668	0.829439	0.078
M0S2U5|M0S2U5_MUSAM	8.08561609851032	7.54873889719521	0.933601	0.078
C5YN46|C5YN46_SORBI	7.15574455951173	7.74159208848829	1.08187	0.079
M0SI37|M0SI37_MUSAM	7.39029755648639	6.11061173694748	0.826842	0.079
N1QSR9|N1QSR9_AEGTA	8.24692888347276	8.83763389772819	1.07163	0.079
B8B8V3|B8B8V3_ORYSI	8.31727021229412	8.01903366201596	0.964142	0.079
J3LIP5|J3LIP5_ORYBR	8.41386422550541	8.66842134849134	1.03025	0.079
B6SSN3|B6SSN3_MAIZE	9.90023578345745	9.62830123114563	0.972533	0.079
B6TN03|B6TN03_MAIZE	4.77547501361684	5.62124041042632	1.17711	0.081
Q84R35|Q84R35_ORYSJ	5.0050311395525	5.85430640665227	1.16968	0.081
Q93Y69|Q93Y69_ORYSJ	7.03889214169947	7.37807839624617	1.04819	0.081
M0RTC1|M0RTC1_MUSAM	7.44089905773599	6.81262190693378	0.915564	0.081
M7Y7Y8|M7Y7Y8_TRIUA	7.54995593774415	6.43602758337259	0.852459	0.081
C5XJT8|C5XJT8_SORBI	7.743346394079	8.31965312594953	1.07443	0.081
K3XXN9|K3XXN9_SETIT	8.44697084325414	7.94984094409584	0.941147	0.081
C5YEW8|C5YEW8_SORBI	5.13475852421614	6.55237966441591	1.27608	0.082
A1YR13|A1YR13_ORYSA	6.04516476600754	6.98076781330667	1.15477	0.082
K3YRC2|K3YRC2_SETIT	6.64097873188858	5.37378753327238	0.809186	0.082
F2DXQ4|F2DXQ4_HORVD	8.55978853010506	8.03751138824903	0.938985	0.082
B9G476|B9G476_ORYSJ	9.34846919733939	9.6329934743542	1.03044	0.082
A2WZV1|A2WZV1_ORYSI	9.97518485442168	10.1361747628278	1.01614	0.082
H6SX61|H6SX61_9POAL	4.17500448506631	5.46082867767679	1.30798	0.083
F2E8G3|F2E8G3_HORVD	6.04668670036305	6.79873003714946	1.12437	0.083
M8AJR3|M8AJR3_TRIUA	6.3904258434622	7.44897052599215	1.16565	0.083
B6TRK5|B6TRK5_MAIZE	6.76472409370041	5.82584445325886	0.861209	0.083
C5WNJ9|C5WNJ9_SORBI	7.64338455994674	6.87959723080412	0.900072	0.083
Q01HI3|Q01HI3_ORYSA	8.08588833739904	8.36747731294304	1.03482	0.083
M7Z405|M7Z405_TRIUA	5.2359242251681	6.72489213932655	1.28438	0.085
K3ZR74|K3ZR74_SETIT	7.11558429579991	7.62055150489991	1.07097	0.085
C5WZ62|C5WZ62_SORBI	8.1484544627345	7.27413232874325	0.892701	0.085
K3ZTK0|K3ZTK0_SETIT	9.1406145533452	8.82322287219752	0.965277	0.085
F2E4Q3|F2E4Q3_HORVD	6.25784817340419	5.15771118663376	0.824199	0.086
Q7XJI6|Q7XJI6_WHEAT	6.36040272915905	7.06091960983615	1.11014	0.086
Q2R2G1|Q2R2G1_ORYSJ	7.08579870259186	7.49766443064825	1.05813	0.086
M8CFS7|M8CFS7_AEGTA	7.54451351021646	7.01502529473367	0.929818	0.086
K4AEB2|K4AEB2_SETIT	7.55386150003904	6.88674537457633	0.911685	0.086
J3LMB4|J3LMB4_ORYBR	9.31433832453363	9.49353930617589	1.01924	0.086
D2IX41|D2IX41_PANVG	7.64976641280615	6.89203277029384	0.900947	0.08
C0P5C0|C0P5C0_MAIZE	6.86176038671746	7.1664802436499	1.04441	0.087
B3SH73|B3SH73_9POAL	8.26859823710367	7.73569742665102	0.935551	0.087
C0PE12|C0PE12_MAIZE	7.83716364465071	7.21595449212524	0.920735	0.08
M0SPZ8|M0SPZ8_MUSAM	6.32481633852201	6.85147311001513	1.08327	0.088
C5XJZ3|C5XJZ3_SORBI	8.81714962963667	8.48260010754132	0.962057	0.088
C5XR33|C5XR33_SORBI	8.95644201774036	8.63286986837933	0.963873	0.08
I1HJ07|I1HJ07_BRADI	5.80706235029718	6.86698885181557	1.18252	0.089
M8BUX4|M8BUX4_AEGTA	6.22473353718936	5.38633176361889	0.865311	0.089
M8AW39|M8AW39_AEGTA	6.82832142532118	6.3004119801265	0.922688	0.089
K4A4R1|K4A4R1_SETIT	8.91661463351001	8.4402192988771	0.946572	0.089
K7UJ60|K7UJ60_MAIZE	8.99779214671943	8.43758542277959	0.93774	0.089
K3XME8|K3XME8_SETIT	10.0584291119633	9.86261114480512	0.980532	0.09
M8ARH5|M8ARH5_AEGTA	10.3448854140427	10.5330291346058	1.01819	0.09
I1H9M8|I1H9M8_BRADI	10.1102219249926	10.3349154812526	1.02222	0.091
K4A5E0|K4A5E0_SETIT	7.45475184332172	8.00865514255688	1.0743	0.091
G3KB87|G3KB87_9ASPA	7.66817104574728	8.02806157744616	1.04693	0.091
K3Z8B7|K3Z8B7_SETIT	8.28520529773104	7.70566461485385	0.930051	0.091
B3VTC0|B3VTC0_SORBI	5.58671338445121	6.93197324115731	1.2408	0.092
I1P8M6|I1P8M6_ORYGL	6.23452797265707	7.25617946091171	1.16387	0.092
M0U1N2|M0U1N2_MUSAM	8.36413545715843	7.77337167465131	0.929369	0.092
C5XUD5|C5XUD5_SORBI	6.0234591737958	6.87956595265178	1.14213	0.093
M0XFC8|M0XFC8_HORVD	6.54701883625783	7.02235843234236	1.0726	0.093
B5KVP8|B5KVP8_TRITU	6.65462761241422	7.3159149746395	1.09937	0.093
Q6YW78|Q6YW78_ORYSJ	7.22144707653905	7.7128516073504	1.06805	0.093
K3YAR4|K3YAR4_SETIT	7.23454767123388	7.59584690508016	1.04994	0.093
Q6AUQ5|Q6AUQ5_ORYSJ	8.09179375040778	8.65904986246678	1.0701	0.093
C5Y9I0|C5Y9I0_SORBI	10.8609805326032	10.9914215885093	1.01201	0.094
K4A868|K4A868_SETIT	5.84914752400278	6.98615720949358	1.19439	0.094
K3XJY6|K3XJY6_SETIT	6.38866264105764	5.19883450998574	0.813759	0.094
M0RVA6|M0RVA6_MUSAM	6.87622548297228	5.93782341384142	0.863529	0.095
M7YJH4|M7YJH4_TRIUA	7.0936517771779	7.5165217324062	1.05961	0.095
M0YH60|M0YH60_HORVD	7.21919332496512	6.85275217922048	0.949241	0.095
M0W080|M0W080_HORVD	7.37775246250583	6.91002029441433	0.936602	0.095
G3M3G8|G3M3G8_9POAL	8.30169454426311	8.61703970767813	1.03799	0.095
M7YQS3|M7YQS3_TRIUA	6.40032949596927	5.3539732378111	0.836515	0.096
M0SGS9|M0SGS9_MUSAM	6.55258280116308	5.54720248804088	0.846567	0.096
K3XKA7|K3XKA7_SETIT	8.1529766859961	8.71997878405065	1.06955	0.096
B9GDC3|B9GDC3_ORYSJ	8.36156914981803	8.10083117751483	0.968817	0.096
M8C4I1|M8C4I1_AEGTA	8.48404322071105	8.74595886639233	1.03087	0.096
J3N643|J3N643_ORYBR	6.93700251476214	6.21930540947896	0.896541	0.09
H2FAG0|H2FAG0_ALOVR	10.2966449305905	10.0838745428222	0.979336	0.097
B4FRE2|B4FRE2_MAIZE	7.28739267219664	7.56673077559347	1.03833	0.09
J3L014|J3L014_ORYBR	6.55215321246597	7.47387918623926	1.14068	0.097
J3LUT2|J3LUT2_ORYBR	8.23048063309031	8.3920969896795	1.01964	0.097
Q75GX5|Q75GX5_ORYSJ	7.86140783707694	7.28771116904327	0.927024	0.09
M8B220|M8B220_AEGTA	8.71247927996239	8.49405931389204	0.97493	0.097
Q9AXS0|Q9AXS0_POASE	6.92680340490291	7.1877345701382	1.03767	0.098
M7Z3V3|M7Z3V3_TRIUA	7.72021213009589	6.93076335817076	0.897743	0.098
K3XUY8|K3XUY8_SETIT	8.37584781648583	7.59363326135599	0.906611	0.098
M0XSE5|M0XSE5_HORVD	10.2962116378137	10.1183003868586	0.982721	0.099
A2X7U3|A2X7U3_ORYSI	6.08521368307966	7.1247621939841	1.17083	0.099
M7ZR60|M7ZR60_TRIUA	6.83521496280589	5.67866838672482	0.830796	0.099
C5Y1T6|C5Y1T6_SORBI	7.75645303495711	7.14568931023829	0.921257	0.099
I1HA01|I1HA01_BRADI	7.80266424948574	7.31475840566181	0.937469	0.099
C5Y5H9|C5Y5H9_SORBI	7.90656479353446	8.28102792730276	1.04736	0.099
J3LHX2|J3LHX2_ORYBR	6.4252039011661	6.05253448110805	0.941999	0.101
J3NCA7|J3NCA7_ORYBR	8.44852905017692	8.69872389706095	1.02961	0.101
K7U850|K7U850_MAIZE	10.0636621363316	10.1882260327121	1.01238	0.102
sp|Q8W3D0|PDX12_ORYSJ	7.85946305331651	7.30974048055062	0.930056	0.102
Q655Q5|Q655Q5_ORYSJ	8.91347053117379	8.74274561552337	0.980846	0.102
C5YG29|C5YG29_SORBI	10.2015973987075	10.0118178709523	0.981397	0.103
Q8LMC4|Q8LMC4_ORYSJ	6.51768114417478	7.1265373640306	1.09342	0.103
M8BI90|M8BI90_AEGTA	6.9615899778063	5.92185776184264	0.850647	0.103
K3YUK4|K3YUK4_SETIT	7.10379266338201	7.60891269486046	1.07111	0.103
M8CET9|M8CET9_AEGTA	10.3640223110919	10.2390834829199	0.987945	0.104
B4FVN3|B4FVN3_MAIZE	6.44394096652673	5.40647972920054	0.839002	0.104
I1GVU6|I1GVU6_BRADI	6.68160745714575	6.0871766137892	0.911035	0.104
M0SGU9|M0SGU9_MUSAM	7.60787770578533	8.05339811002692	1.05856	0.104
Q7Y1E8|Q7Y1E8_ORYSJ	7.93249339686295	8.24829033612404	1.03981	0.104
M0STU0|M0STU0_MUSAM	8.04723116984195	7.60222815676234	0.944701	0.104
M7YEF5|M7YEF5_TRIUA	8.268692404537	7.89520613573767	0.954831	0.104
M0SDS2|M0SDS2_MUSAM	8.6296293479803	8.35848494571299	0.96858	0.104
F2EG22|F2EG22_HORVD	7.80077684228883	8.21969821810648	1.0537	0.105
sp|Q6L3A1|ATPA_SACHY	9.49359289454377	9.31562638495657	0.981254	0.105
I1Q7A9|I1Q7A9_ORYGL	10.0040699716355	9.79037271357822	0.978639	0.106
K7VQ65|K7VQ65_MAIZE	11.4319875301261	11.5366910298378	1.00916	0.106
K4A676|K4A676_SETIT	7.26618930633972	6.35431883358281	0.874505	0.106
Q8LLA9|Q8LLA9_HORVU	7.60027108496863	8.10969846522357	1.06703	0.106
Q9FRJ1|Q9FRJ1_ORYSJ	7.97218660824916	8.32445365458166	1.04419	0.106
Q5N7I5|Q5N7I5_ORYSJ	8.96513070955795	8.59222246423614	0.958405	0.106
B4FWG2|B4FWG2_MAIZE	10.2087568449327	10.011159690427	0.980644	0.107
K3ZVI3|K3ZVI3_SETIT	7.00576239088907	7.61796137563343	1.08739	0.107
M8C2V4|M8C2V4_AEGTA	7.68727969025552	8.46497461277136	1.10117	0.107
K3XFZ2|K3XFZ2_SETIT	8.3375527207504	7.99811951072759	0.959289	0.107
C5WVU9|C5WVU9_SORBI	8.53954356465189	8.8149648827011	1.03225	0.107
M0TG28|M0TG28_MUSAM	6.22585820672147	6.97449992740124	1.12025	0.108
Q8WKN9|Q8WKN9_9ASPA	6.34063194300119	6.90722509738715	1.08936	0.108
I7HIR1|I7HIR1_ORYSJ	7.61975993313452	7.92320253317359	1.03982	0.108
J3LIT5|J3LIT5_ORYBR	8.01502269076643	7.64837496578214	0.954255	0.108
B9FZ94|B9FZ94_ORYSJ	8.37349864800009	8.6259399140696	1.03015	0.109
Q9SAS3|Q9SAS3_WHEAT	9.12455028571603	9.40176143745495	1.03038	0.109
J3LIJ0|J3LIJ0_ORYBR	9.83363692473582	9.66436410337367	0.982786	0.109
B4G0A6|B4G0A6_MAIZE	6.88135823114568	6.30040747252989	0.915576	0.111
M8A354|M8A354_TRIUA	7.13788186183887	7.73148490450682	1.08316	0.111
J3MHA1|J3MHA1_ORYBR	7.5201587098705	7.11890562339491	0.946643	0.111
C5Y1I6|C5Y1I6_SORBI	7.73326721419554	8.08863513269311	1.04595	0.111
J3L6P0|J3L6P0_ORYBR	9.36540182462648	9.14539110088608	0.976508	0.111
I1H2H9|I1H2H9_BRADI	9.74959619441981	9.60096874071561	0.984756	0.111
H8WFY4|H8WFY4_9POAL	10.4444539886603	10.2832785286041	0.984568	0.112
Q25AK8|Q25AK8_ORYSA	6.90817898754351	5.69977022537875	0.825076	0.112
J9QDZ6|J9QDZ6_9POAL	6.57909523428012	5.68929826850814	0.864754	0.113
C0HE90|C0HE90_MAIZE	6.66260371545625	5.36104026230687	0.804646	0.113
M0UHI0|M0UHI0_HORVD	6.30313015747912	5.04139820881814	0.799825	0.114
sp|Q9FUZ7|SCR_MAIZE	7.16288780523698	7.70362988270677	1.07549	0.114
I1IES0|I1IES0_BRADI	7.73353500374256	8.45149135349294	1.09284	0.114
K3Z472|K3Z472_SETIT	7.77411473350352	8.20953311432271	1.05601	0.114
I1Q7Z4|I1Q7Z4_ORYGL	8.06154167565562	7.68126630587896	0.952828	0.114
Q2QNF3|Q2QNF3_ORYSJ	8.31612485918395	7.97129847629318	0.958535	0.114
J3MYH1|J3MYH1_ORYBR	5.5363734331223	6.85935056782374	1.23896	0.11
B6U4D3|B6U4D3_MAIZE	6.03800887574899	7.37177855972081	1.2209	0.115
Q9SAU8|Q9SAU8_WHEAT	7.17236253268177	6.46046999511663	0.900745	0.116
B3FTS3|B3FTS3_9LILI	7.22377995601883	6.12758016277929	0.848251	0.116
M8BGA1|M8BGA1_AEGTA	7.79111429518713	7.38767417532198	0.948218	0.116
A2Y0K6|A2Y0K6_ORYSI	7.97880082429587	7.28948340497305	0.913606	0.116
M7Z6W6|M7Z6W6_TRIUA	8.51885574660932	7.80021885430327	0.915642	0.116
K3YJ28|K3YJ28_SETIT	8.70474286317149	9.00951015307262	1.03501	0.116
J3NA27|J3NA27_ORYBR	7.08892031392217	7.86167994761619	1.10901	0.11
F8RS89|F8RS89_ELECO	12.8693586061057	12.7476994734713	0.990547	0.117
K3YWR3|K3YWR3_SETIT	6.97587579370145	7.80823673000869	1.11932	0.117
M0XP75|M0XP75_HORVD	7.04879008535496	7.74446946345199	1.09869	0.117
C5XSE2|C5XSE2_SORBI	7.07360771322992	6.28208852922047	0.888102	0.117
C7S853|C7S853_SECCE	7.52200625829159	6.97693953884941	0.927537	0.117
E9RJM8|E9RJM8_PANMI	7.80893768814483	6.87932846286337	0.880956	0.11
B8BB35|B8BB35_ORYSI	7.83410754369337	7.38296163331394	0.942413	0.11
Q0DPZ0|Q0DPZ0_ORYSJ	7.8892860478749	6.92351589468594	0.877585	0.11
G3ETN8|G3ETN8_9LILI	9.98180963236898	9.78659720441018	0.980443	0.117
A2ZQV4|A2ZQV4_ORYSJ	6.38159811015031	5.74997722816974	0.901025	0.118
B9FCW9|B9FCW9_ORYSJ	6.59661600746121	7.23415933559931	1.09665	0.118
L7WLJ8|L7WLJ8_MAIZE	7.09506110255337	6.41858918624396	0.904656	0.118
B4FRZ2|B4FRZ2_MAIZE	7.55765942689004	7.02945619758957	0.93011	0.118
Q7XWN7|Q7XWN7_ORYSJ	7.85978614074825	7.27570616121673	0.925688	0.118
A3CA11|A3CA11_ORYSJ	8.34996549973514	8.05645563005008	0.964849	0.118
I1HHL5|I1HHL5_BRADI	9.29625482695424	9.5140648127645	1.02343	0.118
K4A4N3|K4A4N3_SETIT	9.48067775736419	9.6420410917247	1.01702	0.118
sp|Q6YZX6|ACOC_ORYSJ	6.84713567595298	7.41017858552283	1.08223	0.119
K3ZZ46|K3ZZ46_SETIT	7.07416369470273	7.70137032285658	1.08866	0.119
M7Z8Q3|M7Z8Q3_TRIUA	7.91079493363918	8.12369895178603	1.02691	0.119
B7FF22|B7FF22_MAIZE	8.37442348897917	7.96415542388518	0.951009	0.119
A2ZBM0|A2ZBM0_ORYSI	5.74722248599045	6.95909272580996	1.21086	0.121
C5WZ45|C5WZ45_SORBI	6.74890854919659	7.1537576773511	1.05999	0.121
Q6ATM3|Q6ATM3_ORYSJ	6.98895193512012	7.78029479641348	1.11323	0.121
Q7XAF9|Q7XAF9_MAIZE	7.41341593771229	6.82208865772092	0.920236	0.121
Q677A2|Q677A2_HYAOR	7.68286880783737	8.39365611195805	1.09252	0.121
M8AYS8|M8AYS8_AEGTA	6.38179974069332	8.34455938276213	1.30756	0.122
K3XFL3|K3XFL3_SETIT	6.83734254773169	6.34883720753118	0.928553	0.122
I1H680|I1H680_BRADI	6.96246046172362	7.52343193560631	1.08057	0.122
M0VS38|M0VS38_HORVD	7.13879395139009	6.76534363356592	0.947687	0.122
J3LNW6|J3LNW6_ORYBR	8.25742311903564	8.56265086390661	1.03696	0.122
H6T3K4|H6T3K4_9POAL	9.18670583255307	9.03367426149623	0.983342	0.122
B8BL48|B8BL48_ORYSI	4.8841575324766	6.2211930010184	1.27375	0.123
K3XS36|K3XS36_SETIT	5.09466650201539	5.8391989578141	1.14614	0.123
F2DEB3|F2DEB3_HORVD	7.20306648676966	6.07562052477537	0.843477	0.123
I1H0F2|I1H0F2_BRADI	8.12798675043406	8.53983914324804	1.05067	0.123
M8BWQ5|M8BWQ5_AEGTA	8.33219247064773	7.8882642002214	0.946721	0.123
K3YJP2|K3YJP2_SETIT	8.8211020712347	8.38898305699024	0.951013	0.123
sp|C5WYI7|CYNS_SORBI	6.79838714523585	6.2449836034217	0.918598	0.124
J3MN04|J3MN04_ORYBR	8.99294180521795	9.27486375847829	1.03135	0.124
M0VFD8|M0VFD8_HORVD	5.9177694747842	5.36982620898526	0.907407	0.125
B8A7P4|B8A7P4_ORYSI	5.69959837033648	6.7043919887166	1.17629	0.12
G0YYE5|G0YYE5_9LILI	7.09306375326535	7.77426632880381	1.09604	0.125
B6SJW5|B6SJW5_MAIZE	7.7240801466934	8.37837951271041	1.08471	0.125
M7YZ66|M7YZ66_TRIUA	8.4763407708657	8.7419476259356	1.03134	0.125
B8AFN5|B8AFN5_ORYSI	5.94834371409488	7.4683897292083	1.25554	0.12
Q8RYB1|Q8RYB1_WHEAT	6.35428881956109	7.03626407490143	1.10733	0.12
K3YEX4|K3YEX4_SETIT	6.07757008501842	7.00098890681557	1.15194	0.126
J3N960|J3N960_ORYBR	6.2918253501875	5.65603485793587	0.89895	0.126
K3YBT5|K3YBT5_SETIT	6.7039453211299	5.2552262387178	0.783901	0.126
A3AKE9|A3AKE9_ORYSJ	8.53066518680975	8.14968460768267	0.95534	0.126
I1HKJ4|I1HKJ4_BRADI	7.67402845768977	7.997856391547	1.0422	0.12
M9T6Y7|M9T6Y7_TRIDB	6.87517011426391	7.33097873527088	1.0663	0.127
Q6K476|Q6K476_ORYSJ	7.1269400585766	7.49665501727457	1.05188	0.127
Q5JNS5|Q5JNS5_ORYSJ	8.01337596523146	7.52553582797612	0.939122	0.127
B8ADI2|B8ADI2_ORYSI	8.40550926859155	8.76892995090707	1.04324	0.127
B4F8Q3|B4F8Q3_MAIZE	5.83966255981688	7.13495020367795	1.22181	0.128
I1H117|I1H117_BRADI	8.68143500634969	8.18231935759797	0.942508	0.12
C0P2Y3|C0P2Y3_MAIZE	6.9326654783993	7.41515787992624	1.0696	0.128
C0JAC0|C0JAC0_ORYCO	7.64280829584311	8.02658498326407	1.05021	0.128
sp|Q43298|CH62_MAIZE	8.02415344763668	8.29179394529668	1.03335	0.128
I1IWF2|I1IWF2_BRADI	9.13915683559799	9.3201179701932	1.0198	0.12
M8ARQ2|M8ARQ2_AEGTA	9.18918519273492	9.00416678501347	0.979866	0.12
J3NDZ3|J3NDZ3_ORYBR	9.26378669012661	9.03223501954545	0.975005	0.12
K7AK25|K7AK25_PHLPR	5.59290066248241	6.94120293063552	1.24107	0.129
J3NCL3|J3NCL3_ORYBR	6.49417684107399	5.89254571833521	0.907358	0.129
K3XX87|K3XX87_SETIT	9.34896965653461	9.63620116906681	1.03072	0.129
K3XV32|K3XV32_SETIT	9.69278372543602	9.52977019504235	0.983182	0.129
K3ZDA7|K3ZDA7_SETIT	9.7257236479461	9.45143501232057	0.971798	0.129
K3XGX7|K3XGX7_SETIT	7.97228463200349	8.47219897512607	1.06271	0.131
F2DEY7|F2DEY7_HORVD	8.58113156643797	8.18528981606832	0.953871	0.131
B8AYE1|B8AYE1_ORYSI	6.95901400310587	7.41835910004593	1.06601	0.132
B6TGT0|B6TGT0_MAIZE	7.0661529300289	6.38559328192406	0.903687	0.133
B6SUV6|B6SUV6_MAIZE	8.2780726741289	8.7536595411224	1.05745	0.133
K7UJ05|K7UJ05_MAIZE	9.36658842976735	9.50951059298202	1.01526	0.133
K7N8A9|K7N8A9_ELAGV	6.74414409896263	5.97981272769091	0.886667	0.134
K3XDS5|K3XDS5_SETIT	6.94107424260679	5.56360475695297	0.801548	0.134
C0JW71|C0JW71_PENAM	6.99845456859355	6.35977001483425	0.908739	0.134
F2EAC5|F2EAC5_HORVD	8.53043823275342	8.74091458724643	1.02467	0.134
M0SC84|M0SC84_MUSAM	6.58689527550934	7.04996700398361	1.0703	0.135
Q2QTJ7|Q2QTJ7_ORYSJ	5.75144087114413	6.55456062999957	1.13964	0.13
M0SGU1|M0SGU1_MUSAM	7.60593182296557	7.23654632271008	0.951435	0.135
C5XT06|C5XT06_SORBI	9.7825868274435	10.0430740344478	1.02663	0.135
B9FAN3|B9FAN3_ORYSJ	9.93119774493923	9.57410111001293	0.964043	0.135
B8BK04|B8BK04_ORYSI	4.56640385663183	6.02222707105004	1.31881	0.136
Q8VX35|Q8VX35_VANPL	4.68600231039743	6.63856606483382	1.41668	0.136
A2ZRK6|A2ZRK6_ORYSJ	6.47088876270374	7.30533655413076	1.12895	0.13
A3AXK2|A3AXK2_ORYSJ	5.9410060456294	5.23291483058182	0.880813	0.136
Q2QUN0|Q2QUN0_ORYSJ	6.0872868801756	6.89952002668549	1.13343	0.136
B8AJG5|B8AJG5_ORYSI	6.38663378422171	6.9381110636902	1.08635	0.136
M7Z141|M7Z141_TRIUA	7.17650365426179	7.57094887513335	1.05496	0.136
F2DT83|F2DT83_HORVD	8.46249129047296	7.1489117785351	0.844776	0.136
B6TID5|B6TID5_MAIZE	7.08859339566502	7.56450000742064	1.06714	0.13
K3ZWD0|K3ZWD0_SETIT	10.2649398714578	10.4343268869945	1.0165	0.137
M0SX71|M0SX71_MUSAM	7.23508837532018	7.02340703090636	0.970742	0.13
K3XEI1|K3XEI1_SETIT	7.10463805671258	7.61007144075249	1.07114	0.137
C5WNV6|C5WNV6_SORBI	7.76403569841589	7.51250043829771	0.967603	0.137
M0RNE8|M0RNE8_MUSAM	8.2601346436559	8.01793258939645	0.970678	0.137
K3Y5B2|K3Y5B2_SETIT	6.86762010644156	7.28130999829833	1.06024	0.138
C0P4U8|C0P4U8_MAIZE	6.95868888863928	6.14290895247906	0.882768	0.138
I1HCH2|I1HCH2_BRADI	7.03538752842602	6.27521543483189	0.89195	0.138
C5YFR0|C5YFR0_SORBI	7.60118582138315	7.04929838883234	0.927395	0.138
I1IIU6|I1IIU6_BRADI	8.55815027873425	8.01428850925068	0.936451	0.138
I1NP13|I1NP13_ORYGL	9.76925518433348	10.0074028377593	1.02438	0.138
I1QQA9|I1QQA9_ORYGL	9.11658144977683	8.75210987771209	0.960021	0.13
Q9BA71|Q9BA71_9LILI	5.71483562547428	6.56907741474328	1.14948	0.139
M0U2D0|M0U2D0_MUSAM	6.73083917019448	5.79651383334571	0.861187	0.139
A2XEB3|A2XEB3_ORYSI	7.60276178051869	8.03163479398041	1.05641	0.139
B6SWT3|B6SWT3_MAIZE	7.95438805403326	8.48581138942289	1.06681	0.139
H8WG19|H8WG19_9POAL	9.19732848354482	8.93986259332088	0.972006	0.139
M8AMH4|M8AMH4_TRIUA	9.2891752779834	9.04944136326202	0.974192	0.139
C8XTZ7|C8XTZ7_COILA	10.3125862706258	10.0579158129793	0.975305	0.14
M7ZB77|M7ZB77_TRIUA	6.65533002663411	7.31040765183516	1.09843	0.141
Q8LHI9|Q8LHI9_ORYSJ	7.86370856439083	7.39223776492876	0.940045	0.141
C5YG34|C5YG34_SORBI	8.3704164331299	8.01315466986097	0.957319	0.141
I1HF60|I1HF60_BRADI	8.85933482940106	9.0648691907859	1.0232	0.141
B9FNB5|B9FNB5_ORYSJ	6.48646543413674	5.8047302073498	0.894899	0.142
Q9SME6|Q9SME6_HORVU	7.13860215529924	7.60508652392275	1.06535	0.142
M7ZE80|M7ZE80_TRIUA	8.30356165055668	8.75201719675363	1.05401	0.142
H9BG21|H9BG21_WHEAT	6.03919086517856	6.71112142085709	1.11126	0.143
M0TCX9|M0TCX9_MUSAM	7.99277972953124	7.51814846613552	0.940617	0.143
I1PGJ3|I1PGJ3_ORYGL	6.42852116528032	7.06061970574172	1.09833	0.144
M0RNY5|M0RNY5_MUSAM	7.90533040829543	8.39767097655361	1.06228	0.144
K7TUN9|K7TUN9_MAIZE	7.9112508586802	7.2801714450466	0.92023	0.144
H9A099|H9A099_9POAL	9.37289368201271	9.19031445241254	0.980521	0.144
C5Z5N9|C5Z5N9_SORBI	6.0225952219078	6.80216602459661	1.12944	0.145
J3MNA4|J3MNA4_ORYBR	6.12966632274217	6.75884215449088	1.10264	0.145
K3ZDL0|K3ZDL0_SETIT	5.6531849711707	6.69029995303613	1.18346	0.14
K3XW75|K3XW75_SETIT	7.61892783202303	7.86758030088675	1.03264	0.145
M8BTQ8|M8BTQ8_AEGTA	7.83695698372686	8.24157542817448	1.05163	0.145
G9HY80|G9HY80_9ORYZ	9.72228812199473	9.49135539108329	0.976247	0.145
H6T068|H6T068_9POAL	10.3554102255445	10.2008066872212	0.98507	0.146
M8BRP5|M8BRP5_AEGTA	6.17049486452985	6.76311088274006	1.09604	0.146
K4A699|K4A699_SETIT	9.26562875050919	9.02900438980315	0.974462	0.146
J3LAI4|J3LAI4_ORYBR	4.7000145865592	6.04498958320953	1.28616	0.1
J3LBA3|J3LBA3_ORYBR	7.42296658365051	6.39177581322403	0.861081	0.14
B8BE03|B8BE03_ORYSI	5.46123518778869	6.68270998256288	1.22366	0.147
M8C7A2|M8C7A2_AEGTA	7.80898519418279	7.16126487236626	0.917054	0.14
K4A4N4|K4A4N4_SETIT	7.84513715486306	8.20756158020852	1.0462	0.14
A6MZM7|A6MZM7_ORYSI	9.13424530762592	9.35904949029858	1.02461	0.147
I1NWQ5|I1NWQ5_ORYGL	9.34401730847206	9.54922131253408	1.02196	0.147
I1GLJ7|I1GLJ7_BRADI	6.03521089106191	6.54701594929115	1.0848	0.148
J3LY95|J3LY95_ORYBR	8.56709690119748	8.17464629932748	0.954191	0.148
K3Y8C6|K3Y8C6_SETIT	9.74683095405976	9.95409914588565	1.02127	0.148
sp|Q9LKJ3|PHSH_WHEAT	6.26711655463336	6.92156269824175	1.10443	0.149
Q8RW32|Q8RW32_MELRE	6.68829014756892	7.51798960492589	1.12405	0.149
Q6ZAL4|Q6ZAL4_ORYSJ	6.84128823163238	5.78725497749624	0.845931	0.149
B4FSM5|B4FSM5_MAIZE	7.77720259152802	8.05931948874751	1.03627	0.149
K4AD35|K4AD35_SETIT	9.80660771216662	9.98351923664775	1.01804	0.149
C5YCZ2|C5YCZ2_SORBI	9.93413786989196	9.82244761763184	0.988757	0.149
K7WGK8|K7WGK8_MAIZE	6.58788887224214	7.39039973026068	1.12182	0.151
K3XK17|K3XK17_SETIT	7.96471004899596	8.32775614413583	1.04558	0.151
M0U0I0|M0U0I0_MUSAM	8.77185667697288	8.93394324431813	1.01848	0.151
K7VIM1|K7VIM1_MAIZE	5.26415799603883	6.39909722602748	1.2156	0.152
I1H4L2|I1H4L2_BRADI	7.35355722991838	7.74532738180005	1.05328	0.152
C5Y688|C5Y688_SORBI	5.2744079173286	6.22934272762785	1.18105	0.1
C5NNR0|C5NNR0_ORYSI	7.54000853349788	7.85763746840923	1.04213	0.152
A5Y429|A5Y429_SORBI	8.59936507880594	7.21111188054052	0.838563	0.152
C0PM74|C0PM74_MAIZE	6.36202869717507	5.32482054290827	0.836969	0.153
M0YPG1|M0YPG1_HORVD	7.86793022347567	7.15950523040216	0.90996	0.153
K3XIE6|K3XIE6_SETIT	8.81254423598394	8.42795313697365	0.956359	0.153
H6SWW4|H6SWW4_ELECO	9.6111221968638	9.29824082846528	0.967446	0.153
K3XGQ9|K3XGQ9_SETIT	7.01585738649532	7.61541278140288	1.08546	0.154
I1HW10|I1HW10_BRADI	7.32949380732945	7.75165584387727	1.0576	0.154
C5YI11|C5YI11_SORBI	6.64756500305598	6.06464095466119	0.91231	0.155
B4F9G8|B4F9G8_MAIZE	6.91463114391091	5.24825065388716	0.759007	0.155
I1H3G7|I1H3G7_BRADI	7.22773546770836	6.64113913965911	0.918841	0.155
B5AKW1|B5AKW1_PENAM	7.68468953075318	7.36539210163017	0.95845	0.155
M0RN55|M0RN55_MUSAM	8.05744916340479	8.26486140577439	1.02574	0.155
C5YCY4|C5YCY4_SORBI	5.89985098675056	5.11249482741073	0.866546	0.15
K3Y7N9|K3Y7N9_SETIT	9.60657224311247	9.74882818626774	1.01481	0.155
M7YLI6|M7YLI6_TRIUA	6.52585313612503	7.13003734064993	1.09258	0.156
M0S7B5|M0S7B5_MUSAM	7.66788398923176	7.10611286042768	0.926737	0.156
F8V327|F8V327_ELECO	8.17998013122603	8.48872396517756	1.03774	0.156
H6T2Y9|H6T2Y9_9POAL	7.26980127712802	6.87658755227242	0.945911	0.15
F2DCE3|F2DCE3_HORVD	5.83150707752073	6.64307485174146	1.13917	0.157
K3YAJ8|K3YAJ8_SETIT	9.3220260734881	9.51512667326585	1.02071	0.157
M0RVU1|M0RVU1_MUSAM	6.5818353900802	6.9927628724487	1.06243	0.158
Q2TR75|Q2TR75_9LILI	6.81455610993809	5.84160603755055	0.857225	0.158
C5Z5R1|C5Z5R1_SORBI	8.78246178595293	9.09189890265275	1.03523	0.158
C0KTA6|C0KTA6_WHEAT	5.37959568845244	6.49664500900134	1.20765	0.159
Q0IR42|Q0IR42_ORYSJ	5.63234417406653	6.38045259734542	1.13282	0.159
A1X810|A1X810_HORVD	6.44811184804002	6.84396644405772	1.06139	0.159
C5YG66|C5YG66_SORBI	7.84599232275524	8.39603307939452	1.0701	0.159
K7WEG0|K7WEG0_MAIZE	6.02718501134008	6.90407399579317	1.14549	0.161
B6TIP7|B6TIP7_MAIZE	6.17174681698216	7.27304233926341	1.17844	0.161
B9FSU4|B9FSU4_ORYSJ	7.54462537543468	8.11782115471703	1.07597	0.161
M0SEQ7|M0SEQ7_MUSAM	8.63805386828253	8.38445000920911	0.970641	0.161
Q10JD1|Q10JD1_ORYSJ	9.94029037245799	10.0252607444277	1.00855	0.161
M0T7J5|M0T7J5_MUSAM	7.36498118809753	6.92474651862744	0.940226	0.162
J3MGJ5|J3MGJ5_ORYBR	7.76282946889423	7.28917888606728	0.938985	0.162
K4A5M6|K4A5M6_SETIT	8.43689857276307	7.94261800032729	0.941414	0.162
B4F8N3|B4F8N3_MAIZE	10.1500477415435	9.99490574214096	0.984715	0.163
C5Y6Y1|C5Y6Y1_SORBI	6.33824376672748	6.91138935371931	1.09043	0.1
M0TWQ0|M0TWQ0_MUSAM	5.76176758223837	6.82996531930377	1.18539	0.163
M7Z1V0|M7Z1V0_TRIUA	7.40558490938759	6.42186341281718	0.867165	0.163
sp|P0C1M0|ATPG_MAIZE	11.1735661807117	11.0088961372247	0.985263	0.164
Q6ZFY1|Q6ZFY1_ORYSJ	6.74271693560752	7.08594667102681	1.0509	0.164
I1PPD5|I1PPD5_ORYGL	7.49189674295171	6.78896245959619	0.906174	0.164
M7ZYZ3|M7ZYZ3_TRIUA	7.66109793657076	8.15695438120956	1.06472	0.164
I1NYQ5|I1NYQ5_ORYGL	8.5257273150341	8.72712175169716	1.02362	0.164
C5YU58|C5YU58_SORBI	8.54733374609214	8.76040540584396	1.02493	0.164
I1IIN2|I1IIN2_BRADI	6.07504474773524	6.58900593716313	1.0846	0.165
M0V752|M0V752_HORVD	5.61601031151891	6.82418396389019	1.21513	0.16
Q8GU79|Q8GU79_ORYSJ	7.56435241130551	8.08042372987357	1.06822	0.165
B9EY87|B9EY87_ORYSJ	8.03369521682109	7.58636104496042	0.944318	0.165
K3Y598|K3Y598_SETIT	5.72256216398863	6.84988117196003	1.197	0.166
A2XHR5|A2XHR5_ORYSI	6.29283392115815	5.62728272204291	0.894237	0.166
K6Z775|K6Z775_PHLPR	6.80051605440028	7.16597167140054	1.05374	0.166
F2DEG3|F2DEG3_HORVD	6.95961114161944	7.47385945825079	1.07389	0.166
F2E2T6|F2E2T6_HORVD	7.16958182050554	6.1870004804027	0.862951	0.166
H6SZA3|H6SZA3_9POAL	7.40350815023726	7.89256447880717	1.06606	0.166
K3XQY1|K3XQY1_SETIT	7.44625228409062	7.09350273437284	0.952627	0.166
Q8W0W2|Q8W0W2_ELAOL	7.61982504121438	7.99358376056266	1.04905	0.166
K9J8W8|K9J8W8_9POAL	7.68612921563569	6.83712182530192	0.88954	0.166
K3XHR6|K3XHR6_SETIT	8.10849569828816	8.63126684505689	1.06447	0.166
B8BL47|B8BL47_ORYSI	6.24578426993884	6.54701103827876	1.04823	0.167
E9NM57|E9NM57_MUSAC	9.25329412104898	9.41171095867828	1.01712	0.167
I1GPV3|I1GPV3_BRADI	8.13601540717497	7.89122102614787	0.969912	0.16
I1P5C9|I1P5C9_ORYGL	6.60451037706106	6.16236367589636	0.933054	0.168
I1IAG9|I1IAG9_BRADI	6.94344799249639	7.74014662198742	1.11474	0.1
K4AA31|K4AA31_SETIT	5.21263191430924	6.03119342498845	1.15703	0.169
C5YGH8|C5YGH8_SORBI	5.4583961499853	6.29234201977669	1.15278	0.169
B6TMP9|B6TMP9_MAIZE	6.51156963484393	6.91526819530241	1.062	0.169
M8CGV9|M8CGV9_AEGTA	5.29574634582606	6.13946709382369	1.15932	0.171
N1QZ67|N1QZ67_AEGTA	6.15200044020584	7.01512115437666	1.1403	0.171
M8BY33|M8BY33_AEGTA	6.82347554076754	7.42973184560604	1.08885	0.171
A2YNQ0|A2YNQ0_ORYSI	7.26434609113418	7.73284703837938	1.06449	0.171
H9CDF6|H9CDF6_WHEAT	8.43668886986272	8.79324288439697	1.04226	0.171
Q60DK7|Q60DK7_ORYSJ	7.44011414028617	6.59586428987221	0.886527	0.172
I1H6R7|I1H6R7_BRADI	8.17337132287446	8.44382749794203	1.03309	0.172
J3L3E8|J3L3E8_ORYBR	9.67029661410928	9.46709956339833	0.978988	0.172
M7ZJZ8|M7ZJZ8_TRIUA	5.25870547262735	6.1529719329465	1.17005	0.173
Q66PW9|Q66PW9_SACOF	5.83488807538253	6.96082420792279	1.19297	0.173
B8A2J8|B8A2J8_MAIZE	5.87248020706224	6.72445920203094	1.14508	0.173
G8XUN1|G8XUN1_COILA	6.12220149261036	7.02019193391798	1.14668	0.173
J3LF31|J3LF31_ORYBR	7.36497623571087	6.74193393474395	0.915405	0.1
M0WE03|M0WE03_HORVD	6.52194701114458	6.12539174510982	0.939197	0.173
Q5Q0X7|Q5Q0X7_SACOF	8.57831643918767	8.84697823933226	1.03132	0.173
C5XGI2|C5XGI2_SORBI	8.74167135865701	8.23536343417553	0.942081	0.173
Q7XSS2|Q7XSS2_ORYSJ	8.91058249781198	8.84384670675129	0.992511	0.173
I1PFR1|I1PFR1_ORYGL	8.93763903575302	8.60570787137173	0.962861	0.173
J3LEE7|J3LEE7_ORYBR	5.20130466619743	6.66438598933404	1.28129	0.174
K3ZDL5|K3ZDL5_SETIT	6.55517802644981	7.0738439897228	1.07912	0.174
C1K5B8|C1K5B8_WHEAT	7.58592311395269	7.14975327471676	0.942503	0.174
M8BCY6|M8BCY6_AEGTA	9.3323613456737	9.60974435976471	1.02972	0.174
Q2NNC0|Q2NNC0_ELAGV	6.32013009096742	7.11029676119371	1.12502	0.175
B4FWP0|B4FWP0_MAIZE	7.03744253309487	7.65768750304462	1.08813	0.175
M0SGU6|M0SGU6_MUSAM	8.02124624631943	8.18991868372694	1.02103	0.175
M0VU69|M0VU69_HORVD	8.38518290338068	8.87381929776866	1.05827	0.175
Q52NW0|Q52NW0_ECHCG	8.90179132945014	8.57793189056673	0.963619	0.175
K4A8P9|K4A8P9_SETIT	9.83813705200349	10.0680626168455	1.02337	0.175
C5XKU8|C5XKU8_SORBI	6.44454068911953	5.75824993540884	0.893508	0.17
J3MFM1|J3MFM1_ORYBR	6.50180173631844	6.29791509144975	0.968642	0.17
D2SSP8|D2SSP8_9ARAE	5.6594974519619	4.72059799848884	0.834102	0.176
M8BZ92|M8BZ92_AEGTA	6.10990112529113	6.67645521197051	1.09273	0.176
B6TI65|B6TI65_MAIZE	6.90534228457888	6.22931506221603	0.902101	0.176
I1GQN7|I1GQN7_BRADI	7.12884683874994	7.76765075932215	1.08961	0.176
B4FR27|B4FR27_MAIZE	7.38062644999942	7.86477937260796	1.0656	0.176
Q84VT4|Q84VT4_PHAAB	7.23440371553446	7.62482942437879	1.05397	0.177
I1I3T4|I1I3T4_BRADI	5.95188679679589	5.44138438550569	0.914228	0.178
M0UIF1|M0UIF1_HORVD	6.0764995747952	7.22486759085544	1.18899	0.178
F8S892|F8S892_9POAL	6.9231410929847	6.20773168157954	0.896664	0.178
I1PXN2|I1PXN2_ORYGL	7.37693344612032	7.04874774902763	0.955512	0.178
M0X5B1|M0X5B1_HORVD	7.90753293469752	7.1841663358048	0.908522	0.178
E1UHL3|E1UHL3_MUSBA	8.03304296791385	7.78368798750908	0.968959	0.178
B9F1Z3|B9F1Z3_ORYSJ	6.78385151906382	5.99252099936553	0.883351	0.179
B8AC95|B8AC95_ORYSI	7.29827727510565	7.89770185409312	1.08213	0.179
K7VDG3|K7VDG3_MAIZE	7.47546565451009	6.95813867419253	0.930797	0.179
K7VXL2|K7VXL2_MAIZE	10.1986796299395	10.3019922062049	1.01013	0.181
K7U4E3|K7U4E3_MAIZE	7.17851335745255	7.62682270781133	1.06245	0.181
I1IZH5|I1IZH5_BRADI	8.64389939467465	8.96331167312842	1.03695	0.181
J3LDS5|J3LDS5_ORYBR	6.34555840817796	7.29910836514467	1.15027	0.182
C5YSU1|C5YSU1_SORBI	6.55296901611158	5.62427557016914	0.858279	0.182
C5XV73|C5XV73_SORBI	6.73846033051603	7.63879397695811	1.13361	0.182
Q5QMQ3|Q5QMQ3_ORYSJ	6.91010309752391	7.64824148149844	1.10682	0.182
M8B0Q6|M8B0Q6_AEGTA	7.80873825037336	8.23146553803434	1.05414	0.182
I1GN45|I1GN45_BRADI	8.04974863331586	7.60575603499683	0.944844	0.182
sp|P0C156|ATPF_SACHY	9.69341459624904	9.47894082495056	0.977874	0.182
B6TAJ3|B6TAJ3_MAIZE	5.36254642331403	6.47017232700647	1.20655	0.183
Q2R355|Q2R355_ORYSJ	5.41512384676997	6.18310662105135	1.14182	0.183
K3YLC2|K3YLC2_SETIT	6.12202785742512	5.3062681501356	0.86675	0.183
N1QX89|N1QX89_AEGTA	6.14462490137244	7.09809296479695	1.15517	0.183
M0T7P0|M0T7P0_MUSAM	6.50245733673032	5.90944118836834	0.908801	0.183
F2D2S6|F2D2S6_HORVD	6.67853793578998	5.50611683994131	0.824449	0.183
I1Q8A1|I1Q8A1_ORYGL	6.68758856023878	7.3580104569321	1.10025	0.183
C5X998|C5X998_SORBI	6.70084332867246	7.27861392158993	1.08622	0.183
Q93XD9|Q93XD9_DACGL	8.03517605987203	8.36365443448046	1.04088	0.183
M0U366|M0U366_MUSAM	8.94080621473012	8.7900033805802	0.983133	0.183
H8WFY6|H8WFY6_ELEIN	9.10940726378386	8.97293242263881	0.985018	0.183
H8WFP3|H8WFP3_9POAL	6.49693349418872	5.89158823621098	0.906826	0.184
M8AS79|M8AS79_AEGTA	6.58822252590389	5.56829900436542	0.84519	0.184
I2DBG6|I2DBG6_ORYSI	6.920251950784	6.15704979583446	0.889715	0.184
B9FXA7|B9FXA7_ORYSJ	9.65823102380125	9.78056088042951	1.01267	0.184
A2XR63|A2XR63_ORYSI	9.77311003619819	9.57235257564913	0.979458	0.184
B8AG42|B8AG42_ORYSI	6.95884400601976	7.68922334150558	1.10496	0.185
C0PHT2|C0PHT2_MAIZE	5.78229561488599	6.41568292643827	1.10954	0.18
H6T0N3|H6T0N3_9POAL	8.57943180132315	8.03846473879392	0.936946	0.185
I1I867|I1I867_BRADI	9.42861978469708	9.89834711702776	1.04982	0.185
K7UDL4|K7UDL4_MAIZE	6.1645437847071	6.85861127538203	1.11259	0.18
K3YQ87|K3YQ87_SETIT	6.38460581855611	7.07457194547165	1.10807	0.18
M0UTN4|M0UTN4_HORVD	6.63400901943186	7.33513185033576	1.10569	0.186
I1IAW5|I1IAW5_BRADI	8.47082176372484	8.26408632910359	0.975594	0.186
M0Z9N8|M0Z9N8_HORVD	8.815499376148	9.00588250001937	1.0216	0.186
B8XF08|B8XF08_ONCHC	7.08921440625654	6.30565197275665	0.889471	0.18
Q0KKZ5|Q0KKZ5_ZOSMR	7.55642511141778	7.8052053624269	1.03292	0.18
Q6H801|Q6H801_ORYSJ	6.34953488192559	7.01144457270329	1.10425	0.187
B8AJN3|B8AJN3_ORYSI	6.62740636609951	5.64356886315338	0.85155	0.187
Q2RA00|Q2RA00_ORYSJ	7.65443247508221	7.03704373925741	0.919342	0.187
M7YSK0|M7YSK0_TRIUA	7.90469838065878	8.36307473234256	1.05799	0.187
C5XU80|C5XU80_SORBI	8.14926671093493	7.75807127681358	0.951996	0.187
M0TNC0|M0TNC0_MUSAM	8.90811536791293	9.08380676737431	1.01972	0.187
M0UG80|M0UG80_HORVD	9.28466276037508	9.05070183702677	0.974801	0.187
K3ZAL8|K3ZAL8_SETIT	8.22110764791532	8.58834126844729	1.04467	0.18
C5X5E2|C5X5E2_SORBI	8.23213655597055	7.89510418427522	0.959059	0.18
J3XLN1|J3XLN1_9ASPA	5.43808221836384	6.84474325380936	1.25867	0.188
C5Z915|C5Z915_SORBI	7.38877746292736	7.14825575225009	0.967448	0.188
B7ED25|B7ED25_ORYSJ	8.10431871194802	8.42608489664099	1.0397	0.188
M7Z617|M7Z617_TRIUA	7.17303183554422	5.76864566653418	0.804213	0.189
Q8H959|Q8H959_9POAL	8.13514362201103	8.38578421661901	1.03081	0.189
J3MM13|J3MM13_ORYBR	9.83982124633027	9.7446875242986	0.990332	0.189
F2DL49|F2DL49_HORVD	6.6731363656601	6.30786003260749	0.945262	0.191
Q75U52|Q75U52_ORYSJ	7.57708571073613	8.12015191375177	1.07167	0.191
J3LSN2|J3LSN2_ORYBR	7.68914969595015	6.68483743781244	0.869386	0.191
M0TVY0|M0TVY0_MUSAM	7.91045978679989	7.47813158253444	0.945347	0.191
I1NP22|I1NP22_ORYGL	7.99315669771485	8.44558637442126	1.0566	0.191
M0W276|M0W276_HORVD	8.2254554610159	7.6740050718216	0.932958	0.191
C5YV18|C5YV18_SORBI	5.57900600938847	4.62314781400283	0.828669	0.192
F2DLG2|F2DLG2_HORVD	7.14721064035814	6.37734032728305	0.892284	0.192
C5YSP7|C5YSP7_SORBI	7.24604978583685	6.74753774640339	0.931202	0.192
B9GAQ9|B9GAQ9_ORYSJ	7.36069846509147	7.64579721824555	1.03873	0.192
Q9LWT6|Q9LWT6_ORYSJ	8.66335064501543	8.43677467772739	0.973847	0.192
A2XMH6|A2XMH6_ORYSI	9.25538126048836	9.4642501936141	1.02257	0.192
Q70ZL4|Q70ZL4_9POAL	5.69697541631821	6.52304761856269	1.145	0.193
I1NUL6|I1NUL6_ORYGL	7.52839446072477	7.05204373923738	0.936726	0.193
K3Y6Q3|K3Y6Q3_SETIT	7.00625692368354	6.4308942752538	0.917879	0.194
J3LXA1|J3LXA1_ORYBR	7.02229606434987	6.64436364296749	0.946181	0.194
Q9ZNW4|Q9ZNW4_SORBI	8.13536659783145	7.73092028060924	0.950285	0.194
M0SIG5|M0SIG5_MUSAM	6.56610278930274	6.83581886924276	1.04108	0.195
M0SJS0|M0SJS0_MUSAM	6.61142472489803	5.40120653672597	0.81695	0.195
K4QSB8|K4QSB8_9POAL	6.92905496980071	7.46150265925989	1.07684	0.195
J3M133|J3M133_ORYBR	8.43172121379329	8.00016647146064	0.948818	0.195
K3ZTF4|K3ZTF4_SETIT	9.58932267514791	9.85927783328857	1.02815	0.1
I1QHY3|I1QHY3_ORYGL	6.38944974450765	7.16934609869813	1.12206	0.19
G0Y3G1|G0Y3G1_9ASPA	6.29777976646049	7.29344347539952	1.1581	0.196
I1HP17|I1HP17_BRADI	7.2976335659823	6.84333055798673	0.937747	0.196
Q7XQQ7|Q7XQQ7_ORYSJ	6.7629342151448	7.40080971803863	1.09432	0.19
K7TYG1|K7TYG1_MAIZE	7.93064126570567	7.5431885520409	0.951145	0.196
M7Z831|M7Z831_TRIUA	9.22351973042075	8.97302535120367	0.972842	0.196
C0PCQ6|C0PCQ6_MAIZE	5.72976313404172	6.64366764192394	1.1595	0.197
B6SZC2|B6SZC2_MAIZE	7.5929455944409	7.12982928160364	0.939007	0.197
C5YQV9|C5YQV9_SORBI	8.05434986111999	7.79839931054342	0.968222	0.197
K3ZJ82|K3ZJ82_SETIT	7.21514510844823	6.48022710228375	0.898142	0.198
M8C1C7|M8C1C7_AEGTA	7.34285602266555	6.97092665650723	0.949348	0.198
I1HG63|I1HG63_BRADI	9.07727517846735	9.45555729817209	1.04167	0.198
C5WPF7|C5WPF7_SORBI	7.36655626214618	6.8766880523115	0.933501	0.199
D8WQU0|D8WQU0_ERATE	7.77443611548553	7.44216492652808	0.957261	0.199
J3M272|J3M272_ORYBR	7.80910137167285	8.17028895631987	1.04625	0.199
Q9FTT4|Q9FTT4_ORYSJ	9.04857279352702	8.87713531622383	0.981054	0.199
D8L9G6|D8L9G6_WHEAT	7.25034148320323	6.44606394182548	0.88907	0.201
I1R596|I1R596_ORYGL	7.4241150675788	7.03268177294379	0.947275	0.201
M0TK75|M0TK75_MUSAM	7.93584756435624	7.24841081340489	0.913376	0.201
F2CXX0|F2CXX0_HORVD	8.00236478922539	7.40448251817012	0.925287	0.201
F2DCW6|F2DCW6_HORVD	5.28926063062366	6.41069097169769	1.21202	0.202
B4FRX4|B4FRX4_MAIZE	5.78829491207242	4.94437140860141	0.854202	0.202
I1HX14|I1HX14_BRADI	6.5644037277139	7.10305680735839	1.08206	0.202
I1H3U0|I1H3U0_BRADI	6.77045290918887	7.97411742952539	1.17778	0.202
O04372|O04372_ASPOF	7.3379033248686	7.97405744413696	1.08669	0.202
C5WWT1|C5WWT1_SORBI	8.11154227027244	7.39418763058283	0.911564	0.202
C5XF87|C5XF87_SORBI	6.22107889206484	6.81245676873224	1.09506	0.203
I1NWA5|I1NWA5_ORYGL	7.91741173354491	7.48532991418281	0.945426	0.203
I1IS83|I1IS83_BRADI	9.14706854671819	8.99936271007725	0.983852	0.203
K3Z3H4|K3Z3H4_SETIT	10.0784325862006	9.91145364238204	0.983432	0.204
H2FAV5|H2FAV5_ALOVR	6.52043275025157	7.22989552397082	1.10881	0.204
K3ZTD5|K3ZTD5_SETIT	7.2389607740775	6.66539928266708	0.920767	0.204
M0T6D5|M0T6D5_MUSAM	7.52454216750267	7.82899192354342	1.04046	0.204
A2YNU0|A2YNU0_ORYSI	7.70298555879654	7.90377050571484	1.02607	0.204
M0RVS9|M0RVS9_MUSAM	8.69645420300646	8.96325279011101	1.03068	0.204
J3LSJ3|J3LSJ3_ORYBR	8.91299398417821	9.2636987469224	1.03935	0.204
K3YSK5|K3YSK5_SETIT	9.2375423359225	8.97445035547416	0.971519	0.204
K3XT03|K3XT03_SETIT	9.45133120095715	9.65250382828519	1.02129	0.204
Q8W361|Q8W361_ORYSJ	6.17679025669126	5.3216497753165	0.861556	0.205
B9G7K8|B9G7K8_ORYSJ	7.50204232939668	7.77558557159147	1.03646	0.205
I1NY63|I1NY63_ORYGL	8.00278915247109	7.82678237045468	0.978007	0.205
I1HKT1|I1HKT1_BRADI	8.33446238846356	8.52245517176688	1.02256	0.205
M0UM98|M0UM98_HORVD	9.02649804465889	8.88104574136786	0.983886	0.205
Q8S936|Q8S936_ORYSA	5.6438167640281	6.21807209559126	1.10175	0.206
Q9XGU8|Q9XGU8_ORYSA	5.92896875761884	6.5238015461686	1.10033	0.206
M0WXQ5|M0WXQ5_HORVD	8.60198581776216	8.44366672898604	0.981595	0.206
C5XQ07|C5XQ07_SORBI	5.38009265590518	6.46940616589272	1.20247	0.207
Q2QPC0|Q2QPC0_ORYSJ	7.48558471743055	7.2144619843689	0.963781	0.207
M0WB80|M0WB80_HORVD	7.75356879790254	7.29946868713277	0.941433	0.207
J3LK85|J3LK85_ORYBR	9.07989285546369	8.80525136063569	0.969753	0.207
Q8S609|Q8S609_ORYSJ	6.08861662725443	5.26227121003316	0.86428	0.208
K7VUV0|K7VUV0_MAIZE	6.31962456350817	5.46004018954403	0.863982	0.208
C5X8I1|C5X8I1_SORBI	7.00607368483301	7.62125957920452	1.08781	0.208
F8RYE6|F8RYE6_9POAL	7.10871250753197	6.65704731590162	0.936463	0.208
C5X7U3|C5X7U3_SORBI	7.27853865029573	7.06928066055488	0.97125	0.208
Q2R9J3|Q2R9J3_ORYSJ	6.1680321807767	5.03028600293578	0.815541	0.209
I1HB43|I1HB43_BRADI	6.22789994746089	6.83761022402851	1.0979	0.209
B6UB87|B6UB87_MAIZE	7.08962591192956	7.42763635705569	1.04768	0.209
B4FIL5|B4FIL5_MAIZE	7.79053195735819	7.36443169044275	0.945305	0.209
C5XZB6|C5XZB6_SORBI	7.9767977806965	8.19533871549365	1.0274	0.209
Q7XBD9|Q7XBD9_MAIZE	8.06053405253207	8.29784765164338	1.02944	0.209
M0RNL4|M0RNL4_MUSAM	8.19287239906221	7.67133140644291	0.936342	0.209
K3Z913|K3Z913_SETIT	10.3488307281818	10.2315799290703	0.98867	0.2
I1GQ19|I1GQ19_BRADI	7.16577547276667	6.7467320164975	0.941522	0.211
H9A044|H9A044_9POAL	7.77993640279414	7.25432144628766	0.93244	0.211
B6SIG5|B6SIG5_MAIZE	9.4075519664988	9.59644205469305	1.02008	0.212
A2X0J1|A2X0J1_ORYSI	6.00670787445625	6.79394130562577	1.13106	0.213
I1QKC3|I1QKC3_ORYGL	6.79675499881886	7.17459234605227	1.05559	0.213
C4J3S6|C4J3S6_MAIZE	7.06637249682327	6.29356023599348	0.890635	0.213
C0P2Y6|C0P2Y6_MAIZE	7.67865366303683	8.20199783183804	1.06816	0.213
M0T8D1|M0T8D1_MUSAM	7.79896953316716	8.15282682966385	1.04537	0.213
K7VC25|K7VC25_MAIZE	7.81948978051548	7.09773239587505	0.907698	0.213
C5XTP0|C5XTP0_SORBI	9.35261326468191	9.10507048497457	0.973532	0.213
J3ND71|J3ND71_ORYBR	7.73330108768108	6.9338576048595	0.896623	0.214
M8BNT6|M8BNT6_AEGTA	8.30487892026941	8.56325792442624	1.03111	0.214
M0X9F6|M0X9F6_HORVD	8.51348142304082	8.28123180268119	0.97272	0.214
J3MW45|J3MW45_ORYBR	9.26027940183161	9.69971019800106	1.04745	0.214
J3LNL5|J3LNL5_ORYBR	5.24537491688129	6.21581092524114	1.18501	0.21
C5XTY9|C5XTY9_SORBI	8.42033452366007	8.31902863967458	0.987969	0.215
J3KYT6|J3KYT6_ORYBR	8.98392158108455	8.79482806187932	0.978952	0.215
K4AER4|K4AER4_SETIT	9.07013010285656	8.98171248871971	0.990252	0.215
M0XGX0|M0XGX0_HORVD	5.83986581281702	7.20108961022416	1.23309	0.216
Q60EM9|Q60EM9_ORYSJ	6.69692974932435	7.17860130367964	1.07192	0.21
M0XR68|M0XR68_HORVD	7.20007301732692	6.17273602740846	0.857316	0.216
A2Z893|A2Z893_ORYSI	8.53540602187363	8.8443273449241	1.03619	0.216
K3YJ57|K3YJ57_SETIT	8.83752077103699	9.12296213797381	1.0323	0.216
M8AD97|M8AD97_TRIUA	7.27181391215128	6.7152079081155	0.923457	0.21
K3XJ85|K3XJ85_SETIT	5.59394864679483	6.58596270863696	1.17734	0.217
Q8W2Q8|Q8W2Q8_ORYSJ	6.14964256448035	5.60580861352314	0.911567	0.217
B5WX84|B5WX84_9ARAE	6.51127382083329	5.37929955856701	0.826152	0.217
J3LWU6|J3LWU6_ORYBR	7.53110315519893	8.0223998828846	1.06524	0.217
K3YZE3|K3YZE3_SETIT	7.60937088183222	7.00793290839795	0.920961	0.217
J3LM63|J3LM63_ORYBR	8.05011264735339	7.52934735870187	0.93531	0.217
D3KY86|D3KY86_ANACO	9.16980429316136	8.95168069161419	0.976213	0.217
B8AN78|B8AN78_ORYSI	5.06666485515648	6.28288535940129	1.24004	0.218
M8BZX4|M8BZX4_AEGTA	6.29475018497967	5.51669766659017	0.876397	0.218
K7TYC6|K7TYC6_MAIZE	7.11999603118379	6.55936277739831	0.921259	0.218
J3MUS5|J3MUS5_ORYBR	8.33885268826533	8.63752795815395	1.03582	0.218
B9G011|B9G011_ORYSJ	9.14830823953323	8.84410716863518	0.966748	0.21
C5XT25|C5XT25_SORBI	7.05156980790871	7.7939463875007	1.10528	0.219
K7UIA4|K7UIA4_MAIZE	7.22290854611922	7.85679144136722	1.08776	0.219
J3N359|J3N359_ORYBR	8.25333424483969	8.47374333268123	1.02671	0.219
F2D609|F2D609_HORVD	8.50959952792185	8.28184613584751	0.973236	0.219
M0S9V6|M0S9V6_MUSAM	8.73744428669265	8.41281013660256	0.962846	0.219
M0XD11|M0XD11_HORVD	7.57505098739743	7.82845139944047	1.03345	0.221
M0W967|M0W967_HORVD	8.40486872939204	8.60175152752402	1.02342	0.221
B1P2H4|B1P2H4_MAIZE	8.74254424502376	8.37823081833314	0.958329	0.221
M7YPN4|M7YPN4_TRIUA	5.39779769126128	6.13154033504476	1.13593	0.222
M8A322|M8A322_TRIUA	7.51178785147372	8.02202225293481	1.06792	0.222
J3LJM1|J3LJM1_ORYBR	7.62095433553023	7.0933922671154	0.930775	0.222
J3N075|J3N075_ORYBR	7.44871886324144	6.95583378857279	0.93383	0.223
I1PK82|I1PK82_ORYGL	7.97877817091037	8.24447839645977	1.0333	0.223
N1QWJ4|N1QWJ4_AEGTA	9.00023315846509	9.18647221674875	1.02069	0.223
M8A7W2|M8A7W2_TRIUA	6.56223224633271	6.21282886989786	0.946755	0.224
M7Z581|M7Z581_TRIUA	6.88850861849142	6.28593416536385	0.912525	0.224
M0SCE3|M0SCE3_MUSAM	6.97043613899146	7.71155707963333	1.10632	0.224
N1R0X0|N1R0X0_AEGTA	7.08043277628543	7.52863268869111	1.0633	0.224
Q6ZBH5|Q6ZBH5_ORYSJ	7.18398120995338	6.43349187824023	0.895533	0.224
I1HAX5|I1HAX5_BRADI	7.21517639195741	6.6033971027097	0.915209	0.224
C5Z9C5|C5Z9C5_SORBI	7.34137031208553	7.6793151245843	1.04603	0.224
J3N4U9|J3N4U9_ORYBR	8.04267053468281	7.3987106520808	0.919932	0.224
C5YPL6|C5YPL6_SORBI	6.89025475583694	7.34005240227386	1.06528	0.225
I1HVV6|I1HVV6_BRADI	7.09846084098044	6.44645724114915	0.908149	0.225
J3LQE7|J3LQE7_ORYBR	7.27552200136217	6.86120545887729	0.943053	0.225
J3LAT7|J3LAT7_ORYBR	7.64803886564137	8.00875397729909	1.04716	0.225
C5XTZ4|C5XTZ4_SORBI	9.09196701755084	9.18431619154086	1.01016	0.225
I1P543|I1P543_ORYGL	6.5994878822347	6.11720089468745	0.926921	0.22
M0TPB5|M0TPB5_MUSAM	7.04499675655313	7.40854431018896	1.0516	0.226
A2XED7|A2XED7_ORYSI	7.15366584277609	7.65868462048405	1.0706	0.226
A2ZX46|A2ZX46_ORYSJ	7.1803011545637	6.49806896755502	0.904986	0.226
A3BU91|A3BU91_ORYSJ	7.44764533968343	7.09167467606528	0.952204	0.226
F2EFM4|F2EFM4_HORVD	7.47337961082244	7.9043000958078	1.05766	0.226
I1H8G4|I1H8G4_BRADI	7.51689321498901	7.80249772852283	1.038	0.226
M8C0P4|M8C0P4_AEGTA	7.94571491721903	7.6026972375717	0.95683	0.226
B9ETS8|B9ETS8_ORYSJ	7.05308885437564	7.39829300443309	1.04894	0.22
M0SQS4|M0SQS4_MUSAM	7.2334877318532	6.78065404147715	0.937398	0.22
I1NZI0|I1NZI0_ORYGL	7.32680735173698	7.76676739022926	1.06005	0.22
C5Y3G3|C5Y3G3_SORBI	6.2750586631498	6.96180436932487	1.10944	0.227
B8AKV2|B8AKV2_ORYSI	6.91589907831803	7.19471461664519	1.04032	0.227
M0U7M4|M0U7M4_MUSAM	7.41571522802804	6.93632360987612	0.935355	0.227
C5YEA9|C5YEA9_SORBI	7.77353160798235	6.96686858898086	0.89623	0.227
M0YMZ1|M0YMZ1_HORVD	8.08726332507765	7.74388336511404	0.957541	0.227
B6TJ90|B6TJ90_MAIZE	10.9438463863956	11.3341519534141	1.03566	0.228
C0PDX2|C0PDX2_MAIZE	8.39497570007931	9.01010518507945	1.07327	0.22
C5XWR4|C5XWR4_SORBI	8.32646583122342	7.92149443506127	0.951363	0.228
B9FJU9|B9FJU9_ORYSJ	8.98125311113776	8.65660758765163	0.963853	0.228
J3MXZ6|J3MXZ6_ORYBR	6.25811579858452	5.72440422455125	0.914717	0.229
K3ZVC8|K3ZVC8_SETIT	6.50140512454086	6.86055076204508	1.05524	0.229
B8BDV7|B8BDV7_ORYSI	6.7496547215969	7.39186369305444	1.09515	0.229
Q49HE4|Q49HE4_MAIZE	6.79585658664665	6.05160867858963	0.890485	0.229
M0TJC4|M0TJC4_MUSAM	8.3275483744851	8.53535483526922	1.02495	0.229
B6T9P4|B6T9P4_MAIZE	5.76742947311444	6.39627015647372	1.10903	0.231
I1PGT2|I1PGT2_ORYGL	7.99645290006801	8.37934025584575	1.04788	0.231
J3L7S4|J3L7S4_ORYBR	8.22949724276649	8.76757312430639	1.06538	0.231
K3XVN4|K3XVN4_SETIT	8.6687701949189	8.47396102169916	0.977527	0.231
B9GDU8|B9GDU8_ORYSJ	5.36228254326399	6.2811029197358	1.17135	0.232
Q31999|Q31999_9LILI	6.6943400876758	6.11789676829347	0.913891	0.232
C5XPT2|C5XPT2_SORBI	6.8038814173745	7.59866516255016	1.11681	0.232
Q8S823|Q8S823_ORYSJ	7.39629002745661	6.84483723822848	0.925442	0.232
F2DSA4|F2DSA4_HORVD	7.8662753768835	7.42915192056349	0.944431	0.232
K3ZW63|K3ZW63_SETIT	10.6795758445188	10.469131095114	0.980295	0.233
I6QQ39|I6QQ39_WHEAT	7.28776633789763	6.65660104336279	0.913394	0.233
M0TR36|M0TR36_MUSAM	7.96084124294765	8.22515599862137	1.0332	0.233
Q8WHH9|Q8WHH9_LEMTR	7.07791177758732	6.44847377822596	0.91107	0.234
I1IFK6|I1IFK6_BRADI	7.91388846677722	8.29735523381566	1.04845	0.234
B4FUH2|B4FUH2_MAIZE	10.4784480555159	10.3674924286772	0.989411	0.235
I1H0F4|I1H0F4_BRADI	6.87089718650312	7.20902619409597	1.04921	0.235
M8BXK7|M8BXK7_AEGTA	5.71194768184934	4.8476090700878	0.848679	0.23
Q10RP0|Q10RP0_ORYSJ	7.31699699112511	7.85691635974499	1.07379	0.235
K4AEU5|K4AEU5_SETIT	8.95553879519852	8.51243104630735	0.950521	0.235
A2XMI9|A2XMI9_ORYSI	9.27961835457878	9.55948625154482	1.03016	0.235
M0SJ90|M0SJ90_MUSAM	6.01208372760136	6.97075902447473	1.15946	0.23
F2DQT4|F2DQT4_HORVD	5.10007213672568	5.86286425232323	1.14956	0.236
B2LHT7|B2LHT7_9POAL	5.68324070710775	6.42792700555488	1.13103	0.236
B8Q6N8|B8Q6N8_BAMOL	6.15069196729266	6.61517771374726	1.07552	0.236
K3ZVD1|K3ZVD1_SETIT	6.39049662905905	6.99344802494221	1.09435	0.236
Q2QXA4|Q2QXA4_ORYSJ	6.68984955582516	7.36100262729571	1.10032	0.236
M0T4Q0|M0T4Q0_MUSAM	6.9972721352646	7.27309454193224	1.03942	0.23
I1HYA2|I1HYA2_BRADI	7.53188551242462	7.95830637758826	1.05662	0.23
G1FBB8|G1FBB8_9ARAE	5.39888510223941	6.1789495211895	1.14449	0.237
B8B098|B8B098_ORYSI	7.55630482163659	7.10643587988169	0.940464	0.23
Q38JE6|Q38JE6_SORBI	5.86397257500557	6.59137255898262	1.12405	0.237
I1IHD0|I1IHD0_BRADI	8.48850225558141	8.74632152854116	1.03037	0.237
B8ADJ4|B8ADJ4_ORYSI	8.07700185029139	8.44712562094589	1.04582	0.23
K7U135|K7U135_MAIZE	5.3610673421973	6.10122985920505	1.13806	0.238
J3MS74|J3MS74_ORYBR	7.16794115738165	6.62297515063794	0.923972	0.238
A2YJ49|A2YJ49_ORYSI	7.32552973868262	6.96514356986458	0.950804	0.238
K3XXF5|K3XXF5_SETIT	9.13062783605417	8.95737205656996	0.981025	0.238
C0PMI3|C0PMI3_MAIZE	9.13619650758986	8.95046218873813	0.97967	0.238
M0SHT5|M0SHT5_MUSAM	7.04263627528281	6.67040095112827	0.947145	0.239
K3YS75|K3YS75_SETIT	7.51210435947607	7.1591198270949	0.953011	0.239
M8B1Z5|M8B1Z5_AEGTA	8.91857903175938	9.09164044237694	1.0194	0.239
I1R0S0|I1R0S0_ORYGL	5.40286599877654	6.36141015395723	1.17741	0.241
I1PLW8|I1PLW8_ORYGL	6.42073360430609	6.94707247640987	1.08197	0.241
Q01HR0|Q01HR0_ORYSA	6.61640392938994	5.56459698401832	0.84103	0.241
K3YGL2|K3YGL2_SETIT	7.18931757565489	7.62394097945187	1.06045	0.241
J3M226|J3M226_ORYBR	8.6291369737668	8.99125465218978	1.04196	0.241
M7YXG7|M7YXG7_TRIUA	6.72827770286638	7.54561350283801	1.12148	0.242
L7S1T0|L7S1T0_MUSAC	7.48647555520941	8.00218193788367	1.06889	0.242
Q7XEI0|Q7XEI0_ORYSJ	7.58562525772279	6.70439502673922	0.883829	0.242
Q7XPT7|Q7XPT7_ORYSJ	7.82559318194156	7.6940217542955	0.983187	0.242
M0SE13|M0SE13_MUSAM	8.76444529897634	8.51289237945476	0.971298	0.242
M0TIX0|M0TIX0_MUSAM	6.67009570465009	7.00374945303899	1.05002	0.243
M0U6J8|M0U6J8_MUSAM	8.36727728201852	7.99017892753263	0.954932	0.243
K7TIB4|K7TIB4_MAIZE	8.74686733290684	8.27276498387964	0.945797	0.243
A2Y092|A2Y092_ORYSI	8.88816154761984	8.64167602746078	0.972268	0.243
K3Z6T3|K3Z6T3_SETIT	6.23545043917804	6.84894037855205	1.09839	0.244
J3LHG3|J3LHG3_ORYBR	6.35924804955696	5.79472849760456	0.911229	0.244
K7UVD7|K7UVD7_MAIZE	7.33559999452379	7.76592283999478	1.05866	0.244
J3MVF6|J3MVF6_ORYBR	7.39497383668002	6.98455810716324	0.944501	0.244
J3L4T4|J3L4T4_ORYBR	8.03020681746471	8.31609462725749	1.0356	0.244
A7DX18|A7DX18_9POAL	8.70906425212722	8.88491922923043	1.02019	0.244
C3SAE1|C3SAE1_BRADI	5.45577271079404	6.18814403533164	1.13424	0.24
M8CW07|M8CW07_AEGTA	8.19271343910464	7.89694761855381	0.963899	0.245
J3LZF9|J3LZF9_ORYBR	6.43405057297689	6.86691027039914	1.06728	0.24
M8CGM8|M8CGM8_AEGTA	6.53997672477549	6.08317380069809	0.930152	0.24
M0W0L9|M0W0L9_HORVD	5.896160171923	5.36451543282751	0.909832	0.246
D1MPT2|D1MPT2_ROYRE	7.25998742451177	7.69608609330372	1.06007	0.246
sp|Q53P98|SIPL2_ORYSJ	7.83968936601568	7.62119467562831	0.97213	0.246
C5WNE7|C5WNE7_SORBI	8.52595549899008	8.23798605330766	0.966224	0.246
J3LI94|J3LI94_ORYBR	6.96166402553649	7.67537014338358	1.10252	0.24
M8CAR8|M8CAR8_AEGTA	6.30651344588045	5.19535426690295	0.823808	0.247
M0YFR8|M0YFR8_HORVD	6.58071954810444	7.09202373954398	1.0777	0.247
N1R3A7|N1R3A7_AEGTA	6.6120543901349	5.69709111341123	0.861622	0.247
C4J320|C4J320_MAIZE	8.0735025395021	8.41635495588297	1.04247	0.247
E5LAH2|E5LAH2_9POAL	8.08715355470745	7.75447557737721	0.958863	0.247
C5YXG7|C5YXG7_SORBI	8.49485647977259	8.75522633234004	1.03065	0.247
J3LBU0|J3LBU0_ORYBR	8.14930860338117	8.38646644696773	1.0291	0.24
C0PGP7|C0PGP7_MAIZE	6.79682438518773	6.45973802301027	0.950405	0.248
Q8H1X3|Q8H1X3_9POAL	6.81093197584344	5.5904390595059	0.820804	0.248
M8BN03|M8BN03_AEGTA	7.67525155406501	7.38063543574707	0.961615	0.248
I1GS77|I1GS77_BRADI	7.75534438497451	7.97195225854766	1.02793	0.248
C5YGJ2|C5YGJ2_SORBI	8.24920374810539	8.61127252269307	1.04389	0.248
B6SUM9|B6SUM9_MAIZE	8.4079129345278	8.06171195076312	0.958824	0.248
J3LAG7|J3LAG7_ORYBR	9.32691198254468	9.04986838891048	0.970296	0.24
B9F5K9|B9F5K9_ORYSJ	6.87682342004872	6.49597864641992	0.944619	0.249
I1R392|I1R392_ORYGL	7.44083813734149	7.11331529140806	0.955983	0.249
Q75M32|Q75M32_ORYSJ	9.35195145457043	9.06852486524488	0.969693	0.249
Q4JIY1|Q4JIY1_ECHCG	10.8859615693507	10.6509884140247	0.978415	0.25
I1HEM6|I1HEM6_BRADI	6.05692317582292	7.19706907188845	1.18824	0.251
M8AT16|M8AT16_TRIUA	5.69264913356384	6.96040902692273	1.2227	0.252
I1HQI4|I1HQI4_BRADI	6.80651536208032	5.69210374825001	0.836273	0.252
M0U1Y7|M0U1Y7_MUSAM	8.65026783539171	8.83311764137025	1.02114	0.252
K3YA18|K3YA18_SETIT	7.02322528925975	6.7150282425479	0.956117	0.253
Q43057|Q43057_PANMI	7.22893399441087	5.90155131893705	0.816379	0.253
F8RS09|F8RS09_9POAL	9.546155209228	9.41579217448238	0.986344	0.253
M0TJ06|M0TJ06_MUSAM	6.59649949888077	5.79249495823724	0.878116	0.254
C4J9M7|C4J9M7_MAIZE	7.28495186976941	7.70481582641043	1.05763	0.254
C3W5J0|C3W5J0_ELAOL	7.41649389789587	6.89246468796042	0.929343	0.254
Q84PW3|Q84PW3_ORYSJ	7.53914323216729	7.00029160935812	0.928526	0.254
Q10HT1|Q10HT1_ORYSJ	9.90416351707909	9.83206029625011	0.99272	0.254
M0U1K9|M0U1K9_MUSAM	5.66016131998452	6.22979069191602	1.10064	0.25
M0SDL4|M0SDL4_MUSAM	7.02484556339358	7.15899890162049	1.0191	0.255
B6TQG0|B6TQG0_MAIZE	7.50820127198669	6.84904129890896	0.912208	0.255
B6T3F2|B6T3F2_MAIZE	5.80053715847704	6.24352662279813	1.07637	0.25
B8AQR3|B8AQR3_ORYSI	8.82424101393019	8.93795253432854	1.01289	0.255
M0RH23|M0RH23_MUSAM	6.78505592402984	7.1449996691001	1.05305	0.256
K4AD25|K4AD25_SETIT	7.42766093047139	7.08974079812483	0.954505	0.256
Q6EUQ9|Q6EUQ9_ORYSJ	7.44647107309018	7.07643365852903	0.950307	0.25
M0T8I6|M0T8I6_MUSAM	7.74834820126507	7.1968689509538	0.928826	0.257
Q33AJ4|Q33AJ4_ORYSJ	8.59708535895206	8.84077818126608	1.02835	0.257
K3Z7Y4|K3Z7Y4_SETIT	8.74864558962331	8.90991218576385	1.01843	0.25
K4A4V3|K4A4V3_SETIT	8.76624234746742	8.50185068484853	0.96984	0.25
M8AUW8|M8AUW8_TRIUA	8.45014497485825	8.65247262725387	1.02394	0.258
F2DDB8|F2DDB8_HORVD	6.25934588274218	6.82685730312032	1.09067	0.259
M0SLS3|M0SLS3_MUSAM	7.34079398873356	7.6774474002701	1.04586	0.259
K3Y4N3|K3Y4N3_SETIT	7.63836958168455	7.36070705664963	0.963649	0.259
B8A7T6|B8A7T6_ORYSI	8.50495009834447	8.58808442436713	1.00977	0.259
M0S0G6|M0S0G6_MUSAM	5.60686177940226	4.69556674768417	0.837468	0.261
M8BLB8|M8BLB8_AEGTA	7.38696323808443	7.88424674254289	1.06732	0.261
M8BLD4|M8BLD4_AEGTA	8.09030659096718	8.48260544406953	1.04849	0.261
F2CTY5|F2CTY5_HORVD	8.80305358322295	8.65721701115383	0.983433	0.261
I1HIB3|I1HIB3_BRADI	7.75018912507902	8.06918085298317	1.04116	0.262
K3YL88|K3YL88_SETIT	8.67509820029816	8.81612664427717	1.01626	0.262
K7UTZ2|K7UTZ2_MAIZE	9.84474230031566	10.0245781090438	1.01827	0.262
M0S2J6|M0S2J6_MUSAM	6.02707931897973	6.82864832102175	1.13299	0.263
sp|P41979|SODM3_MAIZE	7.33490581811589	6.89150086960715	0.939549	0.263
M0T458|M0T458_MUSAM	7.44744512006474	6.73462085639498	0.904286	0.263
K7TW55|K7TW55_MAIZE	8.75626027307453	8.51033756608415	0.971915	0.263
N1QWI2|N1QWI2_AEGTA	8.79494177754885	8.59698208309029	0.977492	0.263
M0T2W8|M0T2W8_MUSAM	8.86564546985966	9.08919063834494	1.02521	0.263
F5BYH1|F5BYH1_ONCHC	6.0673059845443	6.9438336205111	1.14447	0.264
C7J2L0|C7J2L0_ORYSJ	6.84770149594403	7.55614269193763	1.10346	0.264
K3Z7A5|K3Z7A5_SETIT	7.11564114545163	7.3088835408331	1.02716	0.264
B8ALM9|B8ALM9_ORYSI	7.41724488172081	6.9446692743023	0.936287	0.264
M8CER6|M8CER6_AEGTA	6.49270589369549	5.65942069794663	0.871658	0.2
H8WFY7|H8WFY7_9POAL	12.707978133766	12.5127866631051	0.98464	0.265
F2DZL0|F2DZL0_HORVD	6.46106299428576	7.11971196947977	1.10194	0.265
K3ZII1|K3ZII1_SETIT	7.50957021781486	7.98923477756599	1.06387	0.265
K3XWS2|K3XWS2_SETIT	7.61805968568723	8.10676833730044	1.06415	0.265
Q6YWZ4|Q6YWZ4_ORYSJ	7.95182066400803	8.42153321781299	1.05907	0.265
B7SA66|B7SA66_DACGL	8.34713744466896	8.62358797894628	1.03312	0.265
C5YFS4|C5YFS4_SORBI	9.42588396143947	9.59661800795251	1.01811	0.265
K3XJR1|K3XJR1_SETIT	6.21092731377526	6.75457600974892	1.08753	0.26
J3MIJ1|J3MIJ1_ORYBR	6.94784786549453	7.65671679824913	1.10203	0.266
B9FBH7|B9FBH7_ORYSJ	7.26617559811469	6.21489834195391	0.855319	0.266
N1QU93|N1QU93_AEGTA	7.45332097228408	6.97883005385542	0.936338	0.266
J3KY89|J3KY89_ORYBR	6.93655111504996	6.05226797974475	0.872518	0.26
sp|Q9AYP4|RS10_ORYSJ	9.94675812336444	10.0832720770142	1.01372	0.266
I1GPB7|I1GPB7_BRADI	7.27270144284227	8.49808642544112	1.16849	0.26
M7YMT4|M7YMT4_TRIUA	7.43633009987608	8.00203516076402	1.07607	0.26
J3L9E8|J3L9E8_ORYBR	5.05732049661717	6.14023895396554	1.21413	0.267
K3YPP4|K3YPP4_SETIT	6.29294459806364	7.04371834640069	1.1193	0.267
H2FB91|H2FB91_9ASPA	7.94816192390717	8.15125305548033	1.02555	0.267
Q43532|Q43532_LILLO	7.96951921270476	8.47093024970247	1.06292	0.267
C5XVY5|C5XVY5_SORBI	9.43716601447986	9.20754291537098	0.975668	0.267
F2DMC3|F2DMC3_HORVD	7.95584668348672	7.45483568593303	0.937026	0.26
M0URS7|M0URS7_HORVD	8.35894272680988	8.52888340371664	1.02033	0.26
B8BIA0|B8BIA0_ORYSI	5.19804275575992	6.26102455758869	1.2045	0.268
Q9SBJ3|Q9SBJ3_MAIZE	5.8483142063476	5.50685030481887	0.941613	0.268
I1PCX2|I1PCX2_ORYGL	6.71647123398111	5.8752066451605	0.874746	0.268
C0SJP3|C0SJP3_ELEIN	9.55360344207833	9.32736776519897	0.976319	0.268
I1I4R5|I1I4R5_BRADI	10.5888406907773	10.4124038286226	0.983337	0.269
J3NCC7|J3NCC7_ORYBR	5.70356765183546	4.89041004368499	0.85743	0.269
I1QSF0|I1QSF0_ORYGL	6.37935515061575	7.12130380983618	1.1163	0.269
M8AUZ0|M8AUZ0_AEGTA	7.5151381984312	6.57850423267583	0.875367	0.269
I1GRS0|I1GRS0_BRADI	7.62756452305759	7.95046085704731	1.04233	0.269
F8RS92|F8RS92_9POAL	8.42087839964607	8.72528351696172	1.03615	0.269
B3TNA0|B3TNA0_BRADI	9.79121806438035	9.97953301768552	1.01923	0.269
D8WQW6|D8WQW6_NARST	7.16156159890734	6.65092700586671	0.928698	0.2
M8BFB9|M8BFB9_AEGTA	6.57509823104221	6.21024205249198	0.944509	0.271
C5XEU1|C5XEU1_SORBI	6.84557505403981	7.42842949657869	1.08514	0.271
A2ZLM3|A2ZLM3_ORYSI	7.93851137665367	8.26830442588235	1.04154	0.271
J3NA78|J3NA78_ORYBR	8.2030246933224	7.59444308924806	0.92581	0.271
K4ADN7|K4ADN7_SETIT	9.69046977418084	9.91477701287293	1.02315	0.271
F2EHI7|F2EHI7_HORVD	5.75482878073405	5.19883554184313	0.903387	0.272
A9L9X2|A9L9X2_LOLRI	5.81282804582154	6.27683831215757	1.07983	0.272
M0SHM1|M0SHM1_MUSAM	8.33837309564713	8.94804151624782	1.07312	0.272
F2CRJ8|F2CRJ8_HORVD	9.21181166555312	8.88970944102788	0.965034	0.272
K3XX34|K3XX34_SETIT	7.30339828188439	6.78438075167867	0.928935	0.2
C5WWD3|C5WWD3_SORBI	8.10004827586019	7.82381309954475	0.965897	0.273
I1PWN0|I1PWN0_ORYGL	9.02717625315986	8.85473246915119	0.980897	0.273
I1HF62|I1HF62_BRADI	5.93213186949196	6.51190033225845	1.09773	0.274
I1HGV6|I1HGV6_BRADI	7.11952770267385	6.75094136772658	0.948229	0.274
F2D9C0|F2D9C0_HORVD	7.66194588582524	7.99181229967902	1.04305	0.274
M0TZX8|M0TZX8_MUSAM	7.83690062799237	8.40572762553239	1.07258	0.274
I1GUX0|I1GUX0_BRADI	7.85654635162798	7.50155279098371	0.954816	0.274
F2CZL9|F2CZL9_HORVD	7.01342044336305	6.24265084115895	0.890101	0.275
A2YXU4|A2YXU4_ORYSI	7.07078541935448	7.49756223251927	1.06036	0.275
G2XKA2|G2XKA2_9ASPA	7.51831587607971	7.27724570781719	0.967936	0.275
A2WP76|A2WP76_ORYSI	7.5700637020594	8.05714991240528	1.06434	0.275
K3Z448|K3Z448_SETIT	7.74762638526265	7.19248875372354	0.928347	0.275
Q6Z8N7|Q6Z8N7_ORYSJ	5.84456557445909	6.86842573268519	1.17518	0.27
I1Q2B1|I1Q2B1_ORYGL	5.9000202633936	7.04664117397759	1.19434	0.27
I1HMN2|I1HMN2_BRADI	6.55416365814282	5.43130671494874	0.82868	0.27
B9FPK8|B9FPK8_ORYSJ	6.01469725839542	7.24779251513233	1.20501	0.276
F2E5M4|F2E5M4_HORVD	7.52217922192172	7.87045451172319	1.0463	0.276
A7DXD2|A7DXD2_9POAL	8.05391500045638	7.81415714490127	0.970231	0.276
C1JXQ0|C1JXQ0_ZEALU	8.80350106542848	8.39198009708089	0.953255	0.276
F2D5A5|F2D5A5_HORVD	5.55726533924165	6.41866042164616	1.155	0.277
I1IWP7|I1IWP7_BRADI	6.20132932650405	5.58644521714817	0.900846	0.277
J3MIM1|J3MIM1_ORYBR	8.4259611232921	8.08929959171338	0.960045	0.277
M0XMU4|M0XMU4_HORVD	9.4718848196847	9.78997809946299	1.03358	0.277
Q9ZPN1|Q9ZPN1_AVESA	10.4963553151254	10.3479093176843	0.985857	0.278
B9FJK5|B9FJK5_ORYSJ	6.08353723333195	7.07799139552969	1.16347	0.278
B8A293|B8A293_MAIZE	6.89909951653972	7.43046215551909	1.07702	0.278
M7ZKG2|M7ZKG2_TRIUA	7.08944572302223	7.36798165963216	1.03929	0.278
A2X6L9|A2X6L9_ORYSI	7.73580371210847	8.09375391601281	1.04627	0.278
I1I518|I1I518_BRADI	8.79653318741874	9.50479027405547	1.08052	0.278
F2DEW5|F2DEW5_HORVD	9.37076943659261	9.33128044501053	0.995786	0.27
M8A948|M8A948_TRIUA	6.06531686409847	6.76805671630859	1.11586	0.279
C5XIY9|C5XIY9_SORBI	6.90745769626342	7.33645021712328	1.06211	0.279
J3MR49|J3MR49_ORYBR	7.62233085192887	7.38366558508759	0.968689	0.279
J3MB11|J3MB11_ORYBR	6.56111064903651	6.02397555508966	0.918134	0.281
M0U310|M0U310_MUSAM	7.53224177193027	7.87168504571272	1.04507	0.281
C7J891|C7J891_ORYSJ	7.61819515400144	7.04226881132663	0.924401	0.281
F2DUB8|F2DUB8_HORVD	7.8401440299347	7.17644299288702	0.915346	0.281
Q84QA8|Q84QA8_ORYSJ	8.61434269248169	8.06557382451639	0.936296	0.281
I1IIQ9|I1IIQ9_BRADI	8.86525793876112	8.68872540357622	0.980087	0.281
I1HPT3|I1HPT3_BRADI	8.89281136608025	9.1146278812609	1.02494	0.281
A9NJ56|A9NJ56_HORVD	6.77052789743261	6.42509882280471	0.94898	0.282
I1IAY9|I1IAY9_BRADI	7.0816472956967	6.46808539521327	0.913359	0.282
sp|Q7FAH2|G3PC2_ORYSJ	10.1330478495165	10.2200801328337	1.00859	0.283
A2X6W1|A2X6W1_ORYSI	6.29241334709297	6.68118730437388	1.06178	0.283
M8B4C2|M8B4C2_AEGTA	6.83227276139053	6.20970002075863	0.908878	0.283
M0XTM4|M0XTM4_HORVD	7.30636245480282	7.70424532417858	1.05446	0.283
I1I2L9|I1I2L9_BRADI	7.38878687052441	7.74230536296993	1.04785	0.283
I1J1I2|I1J1I2_BRADI	7.7730152979174	7.33709813142146	0.943919	0.283
B8AKX5|B8AKX5_ORYSI	5.73284283464329	6.49126460399045	1.13229	0.284
M0SXW4|M0SXW4_MUSAM	5.76149839151769	6.48959262665837	1.12637	0.284
K3ZQV5|K3ZQV5_SETIT	7.8514079628858	7.46596490298634	0.950908	0.284
M0U771|M0U771_MUSAM	8.37751746661281	8.70480871301258	1.03907	0.284
I1ITB7|I1ITB7_BRADI	6.28936896344525	5.4832754731731	0.871832	0.285
Q6UY81|Q6UY81_LILLO	6.4051340469688	6.79763309245717	1.06128	0.285
I1IET3|I1IET3_BRADI	6.89029244853896	7.2386058320735	1.05055	0.285
B9TST3|B9TST3_MAIZE	7.74224645895903	7.28507334617928	0.940951	0.286
M7ZM61|M7ZM61_TRIUA	8.02319224726319	7.20313956039187	0.89779	0.286
sp|Q03387|IF4G1_WHEAT	8.5500858576522	8.30552442362645	0.971397	0.286
I1P3U8|I1P3U8_ORYGL	9.66374302518987	9.33990697305648	0.96649	0.286
Q0JGI9|Q0JGI9_ORYSJ	7.35867362789748	6.92052978935393	0.940459	0.28
F2D7G7|F2D7G7_HORVD	6.15690625090625	6.96744557281839	1.13165	0.287
J3MLQ1|J3MLQ1_ORYBR	8.25365495227914	7.43676912885885	0.901027	0.287
M7YIU9|M7YIU9_TRIUA	10.1941086053248	10.0403472092735	0.984917	0.288
K3YT19|K3YT19_SETIT	6.51155173541429	6.93654270526111	1.06527	0.288
J3LUA5|J3LUA5_ORYBR	7.58062028834676	7.29300627626275	0.962059	0.288
Q6Z3X5|Q6Z3X5_ORYSJ	7.61257708436573	7.87152568207724	1.03402	0.288
B6T2L2|B6T2L2_MAIZE	9.67199057881272	9.42871985486252	0.974848	0.28
K3YHJ0|K3YHJ0_SETIT	7.21179356517326	7.10552604609315	0.985265	0.289
G9C2Y5|G9C2Y5_ORYPU	7.32719218587469	7.84789508968792	1.07106	0.289
I1QLF6|I1QLF6_ORYGL	7.45508727137064	7.98455245507482	1.07102	0.289
B8B877|B8B877_ORYSI	6.33494136897769	5.95755820953118	0.940428	0.291
Q8W0E6|Q8W0E6_ORYSJ	7.5579370407537	7.13279221623534	0.943749	0.291
Q7XPH8|Q7XPH8_ORYSJ	7.56949711646112	7.26167945801316	0.959334	0.291
B9ESY0|B9ESY0_ORYSJ	6.13248900884565	6.52333327510069	1.06373	0.292
M0V292|M0V292_HORVD	7.43643021972966	7.8140479947502	1.05078	0.292
K3XN85|K3XN85_SETIT	7.82011132860856	7.41167220983899	0.947771	0.292
I1IRS6|I1IRS6_BRADI	5.79751066552936	6.45681576046738	1.11372	0.293
M7Y5E9|M7Y5E9_TRIUA	5.96946958710475	6.93990481874609	1.16257	0.293
M0T5K0|M0T5K0_MUSAM	8.39696314117118	8.51458754582302	1.01401	0.293
F2D4W1|F2D4W1_HORVD	8.84297307511818	9.16813635821908	1.03677	0.293
D1MY57|D1MY57_9POAL	8.94559788031568	8.75035345907585	0.978174	0.293
J3LKP4|J3LKP4_ORYBR	6.61981908271081	7.03454995590653	1.06265	0.294
M0SKT9|M0SKT9_MUSAM	7.37991911126082	6.96621422750043	0.943942	0.294
Q943W1|Q943W1_ORYSJ	8.14894611632594	7.88749674203822	0.967916	0.294
Q0DI63|Q0DI63_ORYSJ	4.96026325773007	6.01742938096357	1.21313	0.29
K3XLN8|K3XLN8_SETIT	5.64712795071242	6.33152930663324	1.12119	0.295
M0TTD9|M0TTD9_MUSAM	7.03865051185324	6.38877175646036	0.90767	0.295
F8UCF0|F8UCF0_ALLCE	7.82203690500893	7.53955676525396	0.963887	0.295
C0P9K2|C0P9K2_MAIZE	10.1974653268983	10.3053354424576	1.01058	0.296
M8ATS8|M8ATS8_AEGTA	4.85638686422429	5.75490442523387	1.18502	0.296
I1GL21|I1GL21_BRADI	6.79948755650823	6.47315158549523	0.952006	0.29
C5XPF6|C5XPF6_SORBI	7.06463302271024	7.53265192932221	1.06625	0.29
I1GMI4|I1GMI4_BRADI	7.06813825600569	6.28534024939438	0.88925	0.29
A3AEJ1|A3AEJ1_ORYSJ	7.14470404730045	6.36635396523343	0.891059	0.29
M0WE56|M0WE56_HORVD	6.07270420077683	6.47835808692702	1.0668	0.297
K6ZXY9|K6ZXY9_PHLPR	6.3368697667204	7.16979261376822	1.13144	0.297
M0VMS6|M0VMS6_HORVD	6.96097073294595	7.52119678514999	1.08048	0.297
C5YK79|C5YK79_SORBI	8.09998529692711	7.88075679978791	0.972935	0.297
Q8H6A7|Q8H6A7_ORYSJ	5.08079481145174	5.73070650535142	1.12792	0.298
K3YTN3|K3YTN3_SETIT	5.72244230590306	6.69345563594482	1.16969	0.298
F2DIT5|F2DIT5_HORVD	6.11963629567236	6.58796031537758	1.07653	0.298
I1HEG7|I1HEG7_BRADI	6.74929713526644	7.13173752941736	1.05666	0.298
F8RXJ0|F8RXJ0_9POAL	7.24061282147828	6.60923752780274	0.912801	0.298
M8CDW2|M8CDW2_AEGTA	7.62589664207669	7.35570349383064	0.964569	0.298
B8B893|B8B893_ORYSI	7.73804097099969	7.36688457742019	0.952035	0.298
B7ZZ42|B7ZZ42_MAIZE	7.76683411768614	8.2997045327465	1.06861	0.298
I1HKI2|I1HKI2_BRADI	8.25853674451846	8.50015043776117	1.02926	0.298
B6U980|B6U980_MAIZE	10.8102422076457	10.6244815219968	0.982816	0.299
J9WR50|J9WR50_9POAL	6.03025135210775	6.6311370816365	1.09965	0.299
I1I1N5|I1I1N5_BRADI	7.19000908945413	6.79450305377709	0.944992	0.299
J3MKT6|J3MKT6_ORYBR	7.46608965360886	7.89846947909094	1.05791	0.299
K3ZQ78|K3ZQ78_SETIT	7.91243116841331	7.65947592680141	0.968031	0.299
M0SLI1|M0SLI1_MUSAM	8.06262656650304	7.67445901369828	0.951856	0.299
F2E0C0|F2E0C0_HORVD	9.86541926033678	10.2293112014127	1.03689	0.299
M7YXE0|M7YXE0_TRIUA	6.91731214779681	5.88427672751525	0.850659	0.301
B6TGL7|B6TGL7_MAIZE	7.39313964529018	6.9276828094659	0.937042	0.301
K3YVA3|K3YVA3_SETIT	7.61070500087543	7.98214042446851	1.0488	0.301
C5XSW9|C5XSW9_SORBI	9.26876553571245	9.14928846167185	0.98711	0.301
J3M7F0|J3M7F0_ORYBR	6.44075294362321	5.96425057592358	0.926018	0.302
M0RQE4|M0RQE4_MUSAM	6.44689334517107	5.97525446918383	0.926842	0.302
K3YID5|K3YID5_SETIT	7.57907233059014	8.24567401623148	1.08795	0.302
B8BLP4|B8BLP4_ORYSI	7.61026190118889	7.82821661759643	1.02864	0.302
J3M1V0|J3M1V0_ORYBR	7.86204694492152	8.1151247421349	1.03219	0.302
M0T017|M0T017_MUSAM	8.68446492334207	8.75246505995718	1.00783	0.302
B6TNA7|B6TNA7_MAIZE	6.86717471860273	7.14362105380486	1.04026	0.303
Q53MP1|Q53MP1_ORYSJ	7.03967617608501	7.63687349919449	1.08483	0.303
O24345|O24345_SORBI	10.4045816769481	10.4994807675721	1.00912	0.304
M7ZF50|M7ZF50_TRIUA	5.84275472427102	6.58797551799815	1.12755	0.304
Q6AUC7|Q6AUC7_ORYSJ	7.14191750850603	7.37755975775388	1.03299	0.304
B9GCM0|B9GCM0_ORYSJ	7.34473252976642	6.75657092490003	0.919921	0.304
I1I3H9|I1I3H9_BRADI	9.89048769075825	9.81200468333743	0.992065	0.304
B3TM10|B3TM10_ELAGV	5.85403534805759	6.70611033886306	1.14555	0.305
A7DX63|A7DX63_IMPCY	6.39141247854782	6.9704889676325	1.0906	0.305
C5YSM6|C5YSM6_SORBI	7.07992175313531	6.17275980515985	0.871868	0.305
B8BFI8|B8BFI8_ORYSI	8.00111552472629	8.25732005640809	1.03202	0.305
J3N6E7|J3N6E7_ORYBR	4.45638279647431	5.33038249010363	1.19612	0.306
C5YXJ1|C5YXJ1_SORBI	7.00631885607197	7.53828148125384	1.07593	0.306
D4N3W3|D4N3W3_ORYBR	7.21691472563123	5.96328237888968	0.826292	0.306
M0S1C3|M0S1C3_MUSAM	7.90643686051392	7.66978669601199	0.970069	0.306
A2YUU5|A2YUU5_ORYSI	8.59995929915432	7.93246106739484	0.922384	0.306
O04818|O04818_SPOST	9.21489999246741	9.50571110611654	1.03156	0.306
K3ZR52|K3ZR52_SETIT	5.88250488546503	6.6982256690253	1.13867	0.307
J3LQJ1|J3LQJ1_ORYBR	6.34064510738002	5.42308643689079	0.855289	0.307
I1QFV7|I1QFV7_ORYGL	7.42709701496746	7.12081084097608	0.958761	0.307
M0T9Q4|M0T9Q4_MUSAM	7.57170389181719	7.80866736063516	1.0313	0.307
B9FLI4|B9FLI4_ORYSJ	7.74503637470336	8.37951090816331	1.08192	0.307
J3LYC6|J3LYC6_ORYBR	8.30024612503199	7.9120292423428	0.953228	0.307
J3LIB5|J3LIB5_ORYBR	8.30108954533211	8.6272864654492	1.0393	0.307
I1QUF6|I1QUF6_ORYGL	9.78052369604035	9.66094171600659	0.987773	0.307
M7YQB5|M7YQB5_TRIUA	6.97293104297842	7.16661892093796	1.02778	0.308
M0SMK9|M0SMK9_MUSAM	7.18724440102253	6.66924991986952	0.927929	0.308
M0VQZ7|M0VQZ7_HORVD	7.85749139692367	8.14377134586153	1.03643	0.308
Q6H6W9|Q6H6W9_ORYSJ	7.27926144973892	7.58276445048406	1.04169	0.309
F2D5A1|F2D5A1_HORVD	7.88944716565701	7.61376672447857	0.965057	0.309
J3LF89|J3LF89_ORYBR	6.18458668203828	6.78029349347989	1.09632	0.311
O23927|O23927_9POAL	9.06000213390257	8.8458882087857	0.976367	0.311
M8CEN7|M8CEN7_AEGTA	6.34284019697095	5.65829884143052	0.892077	0.312
K3ZVZ9|K3ZVZ9_SETIT	6.57028448945556	7.06885877888826	1.07588	0.312
C5X1Q1|C5X1Q1_SORBI	7.94249518646366	8.36079432584741	1.05267	0.312
B4FHH2|B4FHH2_MAIZE	4.5351696294688	5.24198431315099	1.15585	0.313
M0TMJ8|M0TMJ8_MUSAM	4.98864582218059	5.36856419531808	1.07616	0.313
I1HF19|I1HF19_BRADI	5.63544095715078	6.52156342950899	1.15724	0.313
M0SI69|M0SI69_MUSAM	7.2279450044941	6.77126676088598	0.936818	0.313
M0XBI3|M0XBI3_HORVD	8.55593017006988	8.76258655118871	1.02415	0.313
M0RZV1|M0RZV1_MUSAM	8.77759923750558	8.94480698261829	1.01905	0.313
J3LG45|J3LG45_ORYBR	10.3577231286151	10.1348571666358	0.978483	0.314
M0TFC3|M0TFC3_MUSAM	6.55776961783941	6.21863239441207	0.948285	0.314
M0T1S1|M0T1S1_MUSAM	4.0003068072696	5.24864086463482	1.31206	0.315
M8BU46|M8BU46_AEGTA	6.55416986102324	6.83329144542338	1.04259	0.315
I1IDX6|I1IDX6_BRADI	8.08016488635693	8.30966825449231	1.0284	0.315
I1IWT7|I1IWT7_BRADI	8.28838911982187	7.86513535929313	0.948934	0.315
C4J4M8|C4J4M8_MAIZE	5.70744270955102	6.50583633065205	1.13989	0.316
B6TRV8|B6TRV8_MAIZE	7.24507226412282	7.66090404854322	1.0574	0.316
I1IZW3|I1IZW3_BRADI	7.72486696385049	7.93302965002699	1.02695	0.316
M0V0S4|M0V0S4_HORVD	7.96691565179779	7.48456775489486	0.939456	0.316
M0UWD2|M0UWD2_HORVD	7.51456976313441	7.79339007228176	1.0371	0.31
N1QQC6|N1QQC6_AEGTA	6.33979414492912	5.62113759719261	0.886644	0.317
K7TWP1|K7TWP1_MAIZE	6.55415854358931	6.30362379974958	0.961775	0.317
Q0JC94|Q0JC94_ORYSJ	7.66356229302488	8.04371555852273	1.04961	0.317
M8A2D7|M8A2D7_TRIUA	9.29295056707054	9.08350451923958	0.977462	0.317
I1IAB3|I1IAB3_BRADI	7.95630169186965	8.34331088282973	1.04864	0.31
M7ZYP1|M7ZYP1_TRIUA	7.97687728219829	8.38251014455486	1.05085	0.31
Q6ZAZ0|Q6ZAZ0_ORYSJ	5.79168260011496	6.74749580695072	1.16503	0.318
I1IXJ2|I1IXJ2_BRADI	6.18381059227228	5.36348204498551	0.867343	0.318
D9ZHB9|D9ZHB9_MUSAC	6.60879552962699	7.32824576336706	1.10886	0.318
A1XC19|A1XC19_WHEAT	6.67933128003261	7.07105078908776	1.05865	0.318
A2X1X4|A2X1X4_ORYSI	7.75659505888203	7.31291827904932	0.9428	0.318
F2D2M0|F2D2M0_HORVD	7.92144402782998	8.18246225131866	1.03295	0.318
B8AN26|B8AN26_ORYSI	8.6734771834977	8.8447647768432	1.01975	0.318
M0WLI6|M0WLI6_HORVD	9.9055640421717	9.70066867302245	0.979315	0.318
C5WY19|C5WY19_SORBI	6.83911136833749	6.27186419607393	0.917058	0.319
I1IEK0|I1IEK0_BRADI	6.99682816893314	6.2081995423901	0.887288	0.319
B9GD29|B9GD29_ORYSJ	7.01333460403306	6.51560789298379	0.929031	0.319
C5Z4M6|C5Z4M6_SORBI	7.27336474774216	6.9813202320521	0.959847	0.319
K7UFB4|K7UFB4_MAIZE	7.65946846611387	7.32788227705308	0.956709	0.319
C5YKK8|C5YKK8_SORBI	9.81576742691132	9.95174444996194	1.01385	0.319
B9FW82|B9FW82_ORYSJ	10.1282711796586	10.2833072455307	1.01531	0.32
K7US98|K7US98_MAIZE	5.11296684491224	5.92949338584239	1.1597	0.321
N1QZH0|N1QZH0_AEGTA	5.87051242668016	6.45394592279296	1.09938	0.321
B9FND8|B9FND8_ORYSJ	6.81345632248325	6.25498941764407	0.918035	0.321
M0XW11|M0XW11_HORVD	7.07096620350663	6.82281073419319	0.964905	0.321
Q5YJR5|Q5YJR5_HYAOR	7.19185569104654	6.40045988231655	0.889959	0.321
K3ZA66|K3ZA66_SETIT	8.02000304022571	7.72099192529462	0.962717	0.321
B6TL24|B6TL24_MAIZE	9.58636221329046	9.33087890225945	0.973349	0.321
A2XE00|A2XE00_ORYSI	5.75220144664935	6.03721593190599	1.04955	0.322
Q60DD9|Q60DD9_ORYSJ	7.45390557662694	7.2210577322969	0.968762	0.322
I1GXL1|I1GXL1_BRADI	5.48530854422943	6.26205342549957	1.1416	0.323
K7TPL8|K7TPL8_MAIZE	6.25317772473525	6.58124830376741	1.05246	0.323
M7ZL97|M7ZL97_TRIUA	7.58895175826948	7.28147976671537	0.959484	0.323
Q41786|Q41786_MAIZE	7.89412213642527	7.40918054311701	0.938569	0.323
K7V9V6|K7V9V6_MAIZE	7.90222782946231	8.28183988799248	1.04804	0.323
I1QZ81|I1QZ81_ORYGL	8.19938166092586	8.46510120917514	1.03241	0.323
C5WZF8|C5WZF8_SORBI	9.41963127342237	9.53759033909059	1.01252	0.323
J3MAH0|J3MAH0_ORYBR	5.49830736310373	6.16546768409982	1.12134	0.324
Q6YXT5|Q6YXT5_ORYSJ	6.09711992228651	6.7287265565882	1.10359	0.324
M0YQL4|M0YQL4_HORVD	6.35411052147105	6.84083708252734	1.0766	0.324
C5X6G9|C5X6G9_SORBI	7.16172657831615	6.94476375947076	0.969705	0.324
J3NFE1|J3NFE1_ORYBR	7.45485792002656	7.12285538405681	0.955465	0.324
sp|O65175|SODCP_ZANAE	7.55133176284988	7.29788374291196	0.966437	0.324
H6T2S5|H6T2S5_9POAL	8.05403057511487	7.85597427611154	0.975409	0.324
K3XIJ1|K3XIJ1_SETIT	8.15133369176005	8.37272108953742	1.02716	0.324
A3BS75|A3BS75_ORYSJ	6.33888588940941	6.78289230329153	1.07004	0.325
M0U382|M0U382_MUSAM	7.11626621740232	7.79355908838891	1.09518	0.325
C5YBV1|C5YBV1_SORBI	7.52055121178517	6.86403512994947	0.912704	0.325
J3ND99|J3ND99_ORYBR	5.86846785716088	6.62025561375906	1.12811	0.32
B9FNC7|B9FNC7_ORYSJ	5.99801604384803	6.9374852496085	1.15663	0.326
M8BVZ7|M8BVZ7_AEGTA	6.07418938917086	5.20203379973596	0.856416	0.326
K7TPT9|K7TPT9_MAIZE	6.85621286687655	5.86922905949294	0.856045	0.326
K7VTA2|K7VTA2_MAIZE	7.18885972113576	7.55902544736561	1.05149	0.326
J3M5V2|J3M5V2_ORYBR	6.72398682441314	7.00326094956006	1.04153	0.32
Q60E17|Q60E17_ORYSJ	7.81727849872902	7.18032437720511	0.91852	0.326
C5XEP2|C5XEP2_SORBI	8.14934173193712	7.78408501445409	0.95518	0.326
A2YBG0|A2YBG0_ORYSI	9.60419352714033	9.34080536631428	0.972576	0.326
B8BMP3|B8BMP3_ORYSI	7.16286134350549	7.70338546139793	1.07546	0.32
I1HEP2|I1HEP2_BRADI	5.30777634320258	6.05699406305721	1.14115	0.327
J3M6R7|J3M6R7_ORYBR	7.77517511651861	7.94317909570622	1.02161	0.327
I1Q8W4|I1Q8W4_ORYGL	7.88546189368603	8.05698913961184	1.02175	0.327
A3RG90|A3RG90_LILLO	7.86083130441472	8.1930932667777	1.04227	0.32
C4J4B7|C4J4B7_MAIZE	9.12896881771486	8.95140235631233	0.980549	0.327
sp|Q41864|TRXM_MAIZE	9.2671010127461	9.11143712486828	0.983203	0.327
K3Z5K2|K3Z5K2_SETIT	9.4228729421048	9.29615758006954	0.986552	0.327
N1QYY7|N1QYY7_AEGTA	5.96791995208179	6.50258532336954	1.08959	0.328
Q8LM34|Q8LM34_ORYSJ	6.69448934250422	6.29034872704208	0.939631	0.328
F2D4X0|F2D4X0_HORVD	6.9905790813497	6.13928294616267	0.878222	0.328
M7Z227|M7Z227_TRIUA	7.09010940947007	7.43963316701205	1.0493	0.328
M0RRK7|M0RRK7_MUSAM	7.49358920725525	7.77585881190977	1.03767	0.328
K3ZHV8|K3ZHV8_SETIT	8.38291337883223	7.90449398096999	0.942929	0.328
B4FW57|B4FW57_MAIZE	8.71405853094504	8.81451938590094	1.01153	0.328
J3KXI4|J3KXI4_ORYBR	8.92849989870107	8.52613766884871	0.954935	0.328
N1QUA9|N1QUA9_AEGTA	9.26398370696613	9.14544966233374	0.987205	0.328
B6SZH7|B6SZH7_MAIZE	6.74779375804183	7.28479667016109	1.07958	0.329
M0UCA4|M0UCA4_MUSAM	6.98138331535004	7.25062329988379	1.03857	0.329
M0S8F7|M0S8F7_MUSAM	7.11160568087798	6.6526727244671	0.935467	0.329
M0UCJ4|M0UCJ4_MUSAM	7.51960204955399	7.79607696655049	1.03677	0.329
K3YPH1|K3YPH1_SETIT	7.78730390280975	7.29866931467493	0.937252	0.329
M0WNH7|M0WNH7_HORVD	8.15103000815289	7.94789708518722	0.975079	0.329
I1HFU7|I1HFU7_BRADI	8.56375948277167	8.78172731639627	1.02545	0.329
M0T132|M0T132_MUSAM	10.3834791592381	10.1966693305876	0.982009	0.33
H6T028|H6T028_9POAL	10.8302773408073	10.7131125873812	0.989182	0.331
M0RM88|M0RM88_MUSAM	6.77147928986166	6.16680605555792	0.910703	0.331
B9G3U8|B9G3U8_ORYSJ	6.91011225392807	7.23712815639714	1.04732	0.331
K3ZH29|K3ZH29_SETIT	7.69996707542965	7.85914009673569	1.02067	0.331
sp|Q6AVA8|PPDK1_ORYSJ	7.78728996710882	7.46959580474704	0.959204	0.331
K3Z3I6|K3Z3I6_SETIT	8.18607374179271	7.77926981922877	0.950305	0.331
M0T269|M0T269_MUSAM	8.35207994880003	8.1638588468967	0.977464	0.331
M0WEI4|M0WEI4_HORVD	8.44181844990936	8.19059987012182	0.970241	0.331
B4FAF5|B4FAF5_MAIZE	9.71365366590407	9.57751539148866	0.985985	0.331
I1HNP7|I1HNP7_BRADI	5.8656283361947	6.30676844015149	1.07521	0.332
C0P978|C0P978_MAIZE	6.03182651387248	5.34689934118263	0.886448	0.332
G9HXQ7|G9HXQ7_9ORYZ	6.93479805539988	6.25911005532039	0.902566	0.332
K3YYJ7|K3YYJ7_SETIT	7.49948693847859	7.88228526845116	1.05104	0.332
Q2QWM7|Q2QWM7_ORYSJ	7.70613489024417	7.20278214880214	0.934682	0.332
B8ACP4|B8ACP4_ORYSI	8.65708208056755	9.08896899098768	1.04989	0.332
Q0DTE0|Q0DTE0_ORYSJ	6.11100187441351	6.65217693355774	1.08856	0.333
M8BLX2|M8BLX2_AEGTA	6.7188614870453	6.33541250723372	0.942929	0.333
J3LLG1|J3LLG1_ORYBR	7.36312644079789	7.62527132163853	1.0356	0.333
M0Z1M7|M0Z1M7_HORVD	7.55669460929761	7.2868245139268	0.964287	0.333
Q6ZFJ4|Q6ZFJ4_ORYSJ	6.31213365033403	6.61654036761593	1.04823	0.334
J7FTL2|J7FTL2_9LILI	6.39759298073184	5.93183332028406	0.927198	0.334
Q41798|Q41798_MAIZE	6.95603401779939	6.01849184224314	0.865219	0.334
C5YM25|C5YM25_SORBI	5.59558606814195	6.69709186447942	1.19685	0.33
A0EVI4|A0EVI4_MAIZE	7.28396688777038	7.64693441404239	1.04983	0.335
Q8RZZ3|Q8RZZ3_ORYSJ	6.62965581951327	6.20665982994365	0.936196	0.336
A2WLB3|A2WLB3_ORYSI	7.87817766784766	7.58957623683492	0.963367	0.336
M0SME2|M0SME2_MUSAM	7.88587073792334	7.41050593359346	0.939719	0.336
B8AK27|B8AK27_ORYSI	6.91151524621771	7.25280857510768	1.04938	0.33
C5YU53|C5YU53_SORBI	7.57266419056152	7.36874391986476	0.973072	0.33
M0VXQ1|M0VXQ1_HORVD	5.96674346125611	6.7626251448202	1.13339	0.337
Q7YJL0|Q7YJL0_9ASPA	6.86893492773688	7.07193670886599	1.02955	0.337
J3KY93|J3KY93_ORYBR	7.50003801921284	7.01495890380628	0.935323	0.337
M0SW70|M0SW70_MUSAM	8.64346091565698	8.31308875000412	0.961778	0.337
M0SD30|M0SD30_MUSAM	8.17779078852192	8.73394374911162	1.06801	0.33
Q5Y8C8|Q5Y8C8_ORYSJ	5.59326136568226	6.6420277320867	1.18751	0.338
F2D807|F2D807_HORVD	6.23891338961396	5.9574534575611	0.954886	0.338
M0Z0U7|M0Z0U7_HORVD	6.66870096359223	6.07650159076672	0.911197	0.338
Q9LLD7|Q9LLD7_AVESA	7.18598206416979	6.80419953833928	0.946871	0.338
M7YDV2|M7YDV2_TRIUA	7.49783155524135	6.22202132738782	0.829843	0.338
K3ZW27|K3ZW27_SETIT	8.6128150846563	8.36541285619079	0.971275	0.338
Q2QMF7|Q2QMF7_ORYSJ	9.31309430262981	9.14385317504178	0.981828	0.33
Q1ZZ94|Q1ZZ94_ZINOF	7.24360349444408	7.54919861915571	1.04219	0.339
Q7X8A2|Q7X8A2_ORYSJ	6.11379949308431	5.98513099962307	0.978954	0.341
M0RJV3|M0RJV3_MUSAM	7.28195227057358	6.97265729689702	0.957526	0.341
M0S283|M0S283_MUSAM	7.5607547187573	7.08285275519212	0.936792	0.341
Q84MW6|Q84MW6_ORYSJ	7.97065039095875	8.24057437971685	1.03386	0.341
L7TVF2|L7TVF2_9POAL	8.08819131811046	8.36763458328932	1.03455	0.341
C5XEI1|C5XEI1_SORBI	8.16432949305457	7.81777042404562	0.957552	0.341
K3Z7Q4|K3Z7Q4_SETIT	9.97367775310005	9.87641964067125	0.990249	0.341
J3LS55|J3LS55_ORYBR	10.5528729868205	10.4296997853177	0.988328	0.342
F8UAA7|F8UAA7_9ASPA	7.02967533284093	7.30098210228935	1.03859	0.342
M8AK21|M8AK21_AEGTA	9.15129366890351	8.75589285374883	0.956793	0.342
Q94HB8|Q94HB8_ORYSJ	9.21235691946525	9.04700161545511	0.982051	0.342
I1H1C9|I1H1C9_BRADI	5.27813252798495	6.0445275981382	1.1452	0.343
Q84T70|Q84T70_ORYSJ	6.41748467472563	5.76929585986867	0.898996	0.343
Q10G29|Q10G29_ORYSJ	8.22086138567095	7.88912593336372	0.959647	0.343
C5YLV3|C5YLV3_SORBI	8.62401340639843	8.38025644403458	0.971735	0.343
B8BNQ4|B8BNQ4_ORYSI	8.66924704893407	8.80803326229717	1.01601	0.343
C7BF73|C7BF73_DENLA	11.2393242873326	11.1447993780218	0.99159	0.344
H8PFB5|H8PFB5_9POAL	6.33878619816896	5.66888829229331	0.894318	0.344
Q2QLT1|Q2QLT1_ORYSJ	6.91100342144051	7.04804168076131	1.01983	0.344
F2D3L2|F2D3L2_HORVD	7.12527435613066	6.82157607787474	0.957377	0.344
M0TEP9|M0TEP9_MUSAM	7.22719329016073	7.45318258272758	1.03127	0.344
K3XWW9|K3XWW9_SETIT	9.5837232679508	9.74519578790295	1.01685	0.344
Q6YT61|Q6YT61_ORYSJ	5.66391101372508	6.5554059761976	1.1574	0.345
K3Z4X2|K3Z4X2_SETIT	5.76024867039639	6.76039409887253	1.17363	0.345
Q0DS66|Q0DS66_ORYSJ	7.69293129005198	7.97838821290133	1.03711	0.345
I1QI08|I1QI08_ORYGL	8.05746555759291	7.80875376078288	0.969133	0.345
C5XN42|C5XN42_SORBI	8.80660071366007	8.63504630981694	0.98052	0.345
I1P2X2|I1P2X2_ORYGL	6.3210951962505	5.77901489267793	0.914243	0.34
E9KIQ1|E9KIQ1_ORYSJ	5.60569369950355	5.96375735177066	1.06387	0.346
M0T6G5|M0T6G5_MUSAM	5.7123485392753	4.88143240527347	0.85454	0.346
Q6YUL9|Q6YUL9_ORYSJ	6.63347230749188	5.87050907078909	0.884983	0.34
M8CM50|M8CM50_AEGTA	6.4806777474515	6.99911251919614	1.08	0.346
I1I8C5|I1I8C5_BRADI	7.03464893160882	7.2154648592791	1.0257	0.346
C5XXD7|C5XXD7_SORBI	6.79210564495879	6.51550109304698	0.959276	0.34
Q7XDP7|Q7XDP7_ORYSJ	8.07986342628599	8.28746786154759	1.02569	0.346
I1PCJ8|I1PCJ8_ORYGL	8.65543494946386	8.42490743633521	0.973366	0.346
K3YTJ5|K3YTJ5_SETIT	8.68838483336131	8.45513441392687	0.973154	0.346
M0U2Y5|M0U2Y5_MUSAM	6.95576863363762	6.41529307837944	0.922298	0.34
M7YZG7|M7YZG7_TRIUA	7.04314141364036	6.29158740597826	0.893293	0.34
G8CN62|G8CN62_AEGLO	6.19214805194456	7.00992938694907	1.13207	0.347
I1H0K5|I1H0K5_BRADI	6.91585157883391	7.35760642195086	1.06388	0.347
M0S4C8|M0S4C8_MUSAM	7.13611756299984	7.64561297054552	1.0714	0.347
M0TKD3|M0TKD3_MUSAM	7.91348473961142	7.49030976362112	0.946525	0.347
K3ZRI5|K3ZRI5_SETIT	9.20060836967644	8.97327027404345	0.975291	0.347
M0S5L9|M0S5L9_MUSAM	8.00497792953002	7.71840499894871	0.964201	0.34
K3YI45|K3YI45_SETIT	7.28354675257127	7.59392378218832	1.04261	0.348
F2CVK1|F2CVK1_HORVD	7.6919235502409	8.02680501197174	1.04354	0.348
F2D6B1|F2D6B1_HORVD	8.90401843026831	8.72538822839983	0.979938	0.348
I1P262|I1P262_ORYGL	8.92976182378378	9.21126860444414	1.03152	0.348
I1PM02|I1PM02_ORYGL	7.12685646748761	6.67595931658122	0.936733	0.349
B8AJB1|B8AJB1_ORYSI	7.6076827077047	7.39761457180597	0.972387	0.349
K3YHS8|K3YHS8_SETIT	7.81504951485056	7.269518672474	0.930195	0.349
B8BG59|B8BG59_ORYSI	5.1825523745718	6.36339981338748	1.22785	0.351
F2E071|F2E071_HORVD	6.51416662819498	6.89099523232539	1.05785	0.351
H2KWR6|H2KWR6_ORYSJ	8.0922357755881	7.91817961171888	0.978491	0.351
K7AKA8|K7AKA8_PHLPR	6.3858508632901	5.93544697909927	0.929468	0.352
I1H3L2|I1H3L2_BRADI	6.96050742868888	6.69694872678509	0.962135	0.352
E1XUD2|E1XUD2_9POAL	7.08345569461282	7.47104799203656	1.05472	0.352
M0SK54|M0SK54_MUSAM	7.4736859032822	7.80625291211349	1.0445	0.352
K7VBB4|K7VBB4_MAIZE	8.0954190894811	7.94168127475612	0.981009	0.352
M0TMD0|M0TMD0_MUSAM	8.11494002915975	8.45768445481193	1.04224	0.352
B6RQL6|B6RQL6_9POAL	6.99066752844634	7.4789277505073	1.06984	0.353
sp|Q9XEA6|CYSK1_ORYSJ	7.42683334581238	7.16814240912247	0.965168	0.353
I1HTQ8|I1HTQ8_BRADI	7.99067064613196	7.40774349050504	0.927049	0.353
C5XBW6|C5XBW6_SORBI	8.31929484104958	8.11452746305734	0.975386	0.353
B4FVD5|B4FVD5_MAIZE	8.33372950450217	8.1418874701746	0.97698	0.353
M0SFS9|M0SFS9_MUSAM	9.11408488103175	9.24960356422335	1.01487	0.353
I1IG93|I1IG93_BRADI	8.35613611847175	8.1252317085014	0.972367	0.354
J3N219|J3N219_ORYBR	8.63015999566983	8.88116704727151	1.02908	0.354
B8ARP6|B8ARP6_ORYSI	8.63370515633542	8.31996650470755	0.963661	0.354
K3XFF2|K3XFF2_SETIT	5.2788293248707	6.4806723458664	1.22767	0.355
C5XW31|C5XW31_SORBI	6.41483057043253	5.74243979375535	0.895182	0.355
K3YMA8|K3YMA8_SETIT	6.65629139004242	7.12239937529335	1.07003	0.355
M0TQB3|M0TQB3_MUSAM	6.90478091550287	6.42826454520317	0.930987	0.355
I1PDS2|I1PDS2_ORYGL	6.98406977465614	6.29399027681157	0.901192	0.355
A3CE41|A3CE41_ORYSJ	7.32793187624787	7.72148860673891	1.05371	0.355
C0PBY7|C0PBY7_MAIZE	7.33710424266489	6.85235110426702	0.933931	0.355
C5Z876|C5Z876_SORBI	7.87625129052223	8.19723489907168	1.04075	0.355
M8B3Q2|M8B3Q2_AEGTA	5.60486098263957	6.6844510944767	1.19262	0.3
J3MZ59|J3MZ59_ORYBR	10.1680375440923	10.3270463727978	1.01564	0.356
C5YLB7|C5YLB7_SORBI	6.15282084418552	7.0128945718196	1.13979	0.35
M9VE05|M9VE05_ECHCG	8.04397553989048	8.20976073584624	1.02061	0.356
H8WFY8|H8WFY8_9POAL	8.89591301908811	8.71524262540538	0.979691	0.356
J3L9R9|J3L9R9_ORYBR	7.614620087453	7.03028961388812	0.923262	0.35
Q9FXQ9|Q9FXQ9_WHEAT	6.86542982711721	7.49702512506044	1.092	0.357
O23928|O23928_9POAL	7.2563667397747	6.98912874778624	0.963172	0.357
N1QSQ8|N1QSQ8_AEGTA	7.78721311315345	7.38525749249087	0.948383	0.357
I1HM81|I1HM81_BRADI	8.42357328520963	8.09975764421823	0.961558	0.357
E5FQ64|E5FQ64_PENAM	9.00490210802976	9.21484614321246	1.02331	0.357
I1HDL9|I1HDL9_BRADI	10.1749552809527	10.6060061763953	1.04236	0.358
M0SWR0|M0SWR0_MUSAM	8.18709365082426	8.50292611813738	1.03858	0.35
M0TK53|M0TK53_MUSAM	6.23887740971768	5.46150414339515	0.875399	0.358
I1HKJ9|I1HKJ9_BRADI	6.92461621133731	7.23784541865295	1.04523	0.358
I1QLJ6|I1QLJ6_ORYGL	7.28468726338743	6.65163389870542	0.913098	0.358
C4J316|C4J316_MAIZE	7.64528479125387	8.11434784865647	1.06135	0.358
B6TPG2|B6TPG2_MAIZE	8.66353788963295	8.90276984237175	1.02761	0.358
M0V3W4|M0V3W4_HORVD	6.82591365753385	6.22430470087345	0.911864	0.359
M8C3H7|M8C3H7_AEGTA	8.61642492685671	8.35776326547521	0.96998	0.359
K3XKG7|K3XKG7_SETIT	6.13404605922578	7.10622896409669	1.15849	0.3
B8AAS6|B8AAS6_ORYSI	6.09068423548302	5.58009336742292	0.916169	0.361
M0S0N5|M0S0N5_MUSAM	6.94678697391569	6.52788832903571	0.939699	0.361
I1P5Y9|I1P5Y9_ORYGL	7.20985285983609	7.00136682787283	0.971083	0.361
M0RJL4|M0RJL4_MUSAM	7.30094331486012	6.95950346948374	0.953233	0.361
Q0Q6S3|Q0Q6S3_LILLO	7.32651032416122	6.86989691048863	0.937677	0.361
M0TQJ7|M0TQJ7_MUSAM	8.37440929355662	8.1652504438423	0.975024	0.361
M0WWI0|M0WWI0_HORVD	6.60928756509386	6.05154161300689	0.915612	0.362
M0Y1F6|M0Y1F6_HORVD	7.48071354097451	6.66618603946133	0.891116	0.362
M0RHL9|M0RHL9_MUSAM	7.96330730403782	6.98064737686718	0.876602	0.362
C5Y1T5|C5Y1T5_SORBI	8.76694794890091	8.58755243796329	0.979537	0.362
M0RF29|M0RF29_MUSAM	7.45722624439053	6.80992762768945	0.913198	0.363
J3NCD2|J3NCD2_ORYBR	8.60101438679924	8.00893502069371	0.931162	0.363
Q6L590|Q6L590_ORYSJ	8.60848780846499	8.41421273119937	0.977432	0.363
J3LDT4|J3LDT4_ORYBR	7.68627925088106	8.00790788603306	1.04184	0.364
J3LFK6|J3LFK6_ORYBR	8.03331731570212	7.60628170110356	0.946842	0.364
N1R361|N1R361_AEGTA	8.67795828685233	8.78824834868633	1.01271	0.364
K4A5F5|K4A5F5_SETIT	8.72340154058709	8.51271610332157	0.975848	0.364
J3MBG7|J3MBG7_ORYBR	9.06110630371535	8.85172634189286	0.976892	0.364
I1GWN9|I1GWN9_BRADI	5.87276711450374	5.334580488858	0.908359	0.365
C5NNS6|C5NNS6_ORYSI	6.26212127685969	6.74900028985723	1.07775	0.365
F2E2I3|F2E2I3_HORVD	7.36746108948595	7.64272654566647	1.03736	0.365
E2CU71|E2CU71_ORYMI	8.03096505269726	8.26100264232417	1.02864	0.365
J7I008|J7I008_9POAL	8.26845640429316	8.0700602804978	0.976006	0.365
M0RNH3|M0RNH3_MUSAM	8.50256772339807	8.27633593502595	0.973393	0.365
J3LIS2|J3LIS2_ORYBR	9.99550148131804	9.83509176197741	0.983952	0.365
M0TQE3|M0TQE3_MUSAM	6.9625678590226	7.17130962454708	1.02998	0.366
K3Y7D2|K3Y7D2_SETIT	7.52799735398847	7.74475089956147	1.02879	0.366
K4A7B1|K4A7B1_SETIT	7.978390449077	7.57829665693673	0.949853	0.366
K3Z5T8|K3Z5T8_SETIT	8.32654317542283	8.03969758974895	0.96555	0.366
K3XVR5|K3XVR5_SETIT	7.15872478794228	6.58383106856186	0.919693	0.36
H6SWW3|H6SWW3_9POAL	7.22888309569386	6.65802332462345	0.921031	0.36
Q8GZC0|Q8GZC0_WHEAT	7.50317606935598	7.88932240649626	1.05146	0.36
K3Z7L3|K3Z7L3_SETIT	6.35512732472668	5.71673692566787	0.899547	0.367
Q6ERW2|Q6ERW2_ORYSJ	6.66318040295656	7.04120477332867	1.05673	0.367
M0U511|M0U511_MUSAM	7.49547103819133	7.07909873423668	0.94445	0.367
M0TYD4|M0TYD4_MUSAM	8.3000309798835	7.96265119911437	0.959352	0.367
C5XUC3|C5XUC3_SORBI	9.39004207544754	9.68130250827275	1.03102	0.367
sp|P34106|ALA2_PANMI	9.97267279949744	9.76282495280652	0.978958	0.367
A1XKB3|A1XKB3_9ARAE	8.08013614227698	7.84210813624616	0.970542	0.36
K3Z2R8|K3Z2R8_SETIT	11.2365787401241	11.1902129695718	0.995874	0.368
Q8GU65|Q8GU65_ORYSJ	4.8239227039913	5.35109000519556	1.10928	0.368
B8BFE8|B8BFE8_ORYSI	6.43841578217026	6.78467375499261	1.05378	0.368
M0RY86|M0RY86_MUSAM	6.75348232350771	5.82503582393068	0.862523	0.368
I1H1Z7|I1H1Z7_BRADI	8.59765341099704	8.4434147835736	0.98206	0.368
K3YS38|K3YS38_SETIT	9.08235328931218	8.77860245924288	0.966556	0.36
J3MHP1|J3MHP1_ORYBR	9.56178175557504	9.40339326133868	0.983435	0.36
M7ZV19|M7ZV19_TRIUA	6.98666647693373	6.63533460953247	0.949714	0.369
B4F7T8|B4F7T8_MAIZE	7.05843297191568	6.15340925439011	0.871781	0.369
K3ZXQ0|K3ZXQ0_SETIT	9.66509279731236	9.80909730107387	1.0149	0.369
K3Z7T1|K3Z7T1_SETIT	7.07777869516281	6.74572059660446	0.953084	0.3
B8A7J5|B8A7J5_ORYSI	6.63898727994281	6.18894025494294	0.932211	0.371
K3Y2G0|K3Y2G0_SETIT	6.76101474551664	7.1703029166104	1.06054	0.371
K4A515|K4A515_SETIT	7.92930039546081	8.21557187249946	1.0361	0.371
B6T6V3|B6T6V3_MAIZE	7.97561354285459	7.72194663129163	0.968195	0.371
K3XEW6|K3XEW6_SETIT	8.26136797583144	8.42859116314307	1.02024	0.371
sp|O23813|SIR_MAIZE	8.27249931142851	8.0794570968882	0.976665	0.371
K7VC37|K7VC37_MAIZE	8.57596825387415	8.23519382759922	0.960264	0.371
Q8H7V1|Q8H7V1_ORYSJ	6.97060965033926	7.36419770539421	1.05646	0.372
I1I508|I1I508_BRADI	7.03021851205138	6.57480026748047	0.93522	0.372
C5XEW1|C5XEW1_SORBI	7.39207590041502	7.70653721931165	1.04254	0.372
C5XIE3|C5XIE3_SORBI	7.64770171601115	7.33244738468879	0.958778	0.372
K3Z8Q5|K3Z8Q5_SETIT	8.15645284827956	8.29200337171564	1.01662	0.372
K7TX67|K7TX67_MAIZE	9.50612964054063	9.67674930074899	1.01795	0.372
M0TMV8|M0TMV8_MUSAM	9.97030047970577	10.0853769062618	1.01154	0.372
I1HLM0|I1HLM0_BRADI	6.62139226537	7.18637445535414	1.08533	0.373
J3L7P7|J3L7P7_ORYBR	7.92946157683947	7.72302920511644	0.973966	0.373
M0RTS3|M0RTS3_MUSAM	9.03944910536818	9.22621241595925	1.02066	0.373
B8AL92|B8AL92_ORYSI	6.55659821421421	6.98616727595552	1.06552	0.374
Q6YVL9|Q6YVL9_ORYSJ	6.65134225971307	5.94110625136981	0.893219	0.374
K3XVP0|K3XVP0_SETIT	7.30475478070453	6.7508611577261	0.924174	0.374
A5GZ73|A5GZ73_MAIZE	7.10513799685312	6.63237024016894	0.933461	0.375
B8B6D2|B8B6D2_ORYSI	9.93242874991206	9.70810642118454	0.977415	0.375
M0TCG9|M0TCG9_MUSAM	6.56689757077008	7.20734458139612	1.09753	0.37
B6T2W9|B6T2W9_MAIZE	6.29176513738884	7.1287065507912	1.13302	0.376
M7ZGE7|M7ZGE7_TRIUA	6.67952402818771	6.89270229841453	1.03192	0.376
J3MZK9|J3MZK9_ORYBR	8.22831161629854	7.94677803567671	0.965785	0.376
M0TT66|M0TT66_MUSAM	9.11140595819835	8.87747267819202	0.974325	0.376
B6TFB8|B6TFB8_MAIZE	9.48252847250995	9.83116323654801	1.03677	0.376
C0K6P8|C0K6P8_9ASPA	7.22590394234371	7.51769925904258	1.04038	0.37
K4AAJ8|K4AAJ8_SETIT	7.459729691895	7.77090953600614	1.04171	0.37
M0SIL9|M0SIL9_MUSAM	6.6358489724526	6.39766417872899	0.964106	0.377
M0S620|M0S620_MUSAM	6.72128627147529	6.28015422706317	0.934368	0.377
I1HYD4|I1HYD4_BRADI	9.41003330553914	9.26635223069664	0.984731	0.377
K7U863|K7U863_MAIZE	8.4649652421552	8.71009948101648	1.02896	0.37
J3M024|J3M024_ORYBR	5.56132887388152	6.37045718946203	1.14549	0.378
B6T147|B6T147_MAIZE	8.60426636370328	8.79212791816837	1.02183	0.37
C5G5X5|C5G5X5_MAIZE	6.46570377821268	7.03904631004193	1.08867	0.378
Q6AUT8|Q6AUT8_ORYSJ	7.04676646251427	7.34156456610949	1.04183	0.378
K3ZIS7|K3ZIS7_SETIT	7.57697098149252	7.26822094536142	0.959252	0.378
M0UAB0|M0UAB0_MUSAM	8.80538066116964	8.59468999704135	0.976073	0.37
J9QCY8|J9QCY8_9POAL	8.60687103927606	8.46589218801937	0.98362	0.378
F2DT51|F2DT51_HORVD	8.65413498542555	8.44125230951437	0.975401	0.378
K6ZYU6|K6ZYU6_PHLPR	7.91432311663633	8.23679754024234	1.04075	0.3
B8B6B4|B8B6B4_ORYSI	6.33831370733783	6.88742755292725	1.08663	0.379
M0VU12|M0VU12_HORVD	6.41565211838506	5.7254303926987	0.892416	0.379
C5XPC6|C5XPC6_SORBI	11.2091855407045	11.4637926234836	1.02271	0.381
Q0DIR7|Q0DIR7_ORYSJ	7.20623779529952	6.89284055972796	0.95651	0.381
B9GCR7|B9GCR7_ORYSJ	7.61561129775846	7.1688706504466	0.941339	0.381
J3LQ64|J3LQ64_ORYBR	7.63575049983578	7.06883740758177	0.925755	0.381
F2EKI5|F2EKI5_HORVD	7.75333061410147	8.16875653823886	1.05358	0.381
Q7XM03|Q7XM03_ORYSJ	8.68131564466958	8.3874934940785	0.966155	0.381
K3XPQ3|K3XPQ3_SETIT	8.79311988869848	8.42826180739422	0.958506	0.381
M8A8I0|M8A8I0_TRIUA	9.79933767880084	9.92092439232568	1.01241	0.381
J3M0Z3|J3M0Z3_ORYBR	7.10325522214279	6.70758114055415	0.944297	0.382
Q5RZZ9|Q5RZZ9_9POAL	8.3359569363016	8.1107059929201	0.972978	0.382
Q3SAW0|Q3SAW0_COCNU	9.18658383905135	9.00049617535997	0.979744	0.382
K3YBW9|K3YBW9_SETIT	5.7680617048203	6.48314519100079	1.12397	0.383
Q5VMZ7|Q5VMZ7_ORYSJ	7.26383913008058	7.01608255595402	0.965892	0.383
I1I2U3|I1I2U3_BRADI	7.5740880033616	7.03302492235152	0.928564	0.383
M8D8M6|M8D8M6_AEGTA	7.72343317690376	7.29426138414754	0.944433	0.383
K3ZTH9|K3ZTH9_SETIT	7.91592732304716	8.17199437872905	1.03235	0.383
C5X2G7|C5X2G7_SORBI	8.2277071795535	8.48047159402368	1.03072	0.383
D5LVZ2|D5LVZ2_9POAL	6.28256623242028	5.59872390972082	0.891152	0.384
K3XEI9|K3XEI9_SETIT	7.84542564794599	7.76133191107917	0.989281	0.384
Q9FSX5|Q9FSX5_COILA	5.72207434000699	4.84898674336961	0.847418	0.38
I1ITS3|I1ITS3_BRADI	7.99018067893443	8.19985417917666	1.02624	0.385
M0WW06|M0WW06_HORVD	8.6782699048474	8.88688605565837	1.02404	0.385
B6T4U8|B6T4U8_MAIZE	8.89453969530966	8.9767363164613	1.00924	0.385
I1Q4A0|I1Q4A0_ORYGL	5.98595541878742	6.54653295638748	1.09365	0.38
K7VG66|K7VG66_MAIZE	6.4782298271268	5.62121737549692	0.867709	0.386
Q337E9|Q337E9_ORYSJ	6.66433996755085	7.13786089034319	1.07105	0.386
M0Y5V0|M0Y5V0_HORVD	7.02042866576036	6.59229744555676	0.939016	0.386
I0J189|I0J189_ORYBR	7.22553752491226	6.10042825498697	0.844287	0.386
B9EY99|B9EY99_ORYSJ	7.98649403866781	8.17342257134842	1.02341	0.386
B3SHF5|B3SHF5_9POAL	5.38023116394089	4.79298172614936	0.890851	0.387
F2DGA0|F2DGA0_HORVD	6.63063562487252	6.96519934034666	1.05046	0.387
Q94FR6|Q94FR6_MAIZE	6.64275873651493	6.31990380712395	0.951397	0.387
Q6ZFJ5|Q6ZFJ5_ORYSJ	6.83023210242329	5.93395572563671	0.868778	0.387
K4AAS7|K4AAS7_SETIT	7.2804562556737	6.58927443656809	0.905063	0.387
Q10QW8|Q10QW8_ORYSJ	8.77338513000601	8.92436320651942	1.01721	0.3
K4AAE2|K4AAE2_SETIT	7.40836803578817	7.09377927546254	0.957536	0.387
C5XPP3|C5XPP3_SORBI	7.7483109191354	7.85340877800106	1.01356	0.387
sp|P08823|RUBA_WHEAT	8.82231808161475	9.28806156909766	1.05279	0.3
C5Z3P7|C5Z3P7_SORBI	5.14469260969963	5.89239997647822	1.14534	0.388
K3XL87|K3XL87_SETIT	6.47965537078577	6.85223731017532	1.0575	0.388
H2KX87|H2KX87_ORYSJ	6.88266278945213	7.27752645266826	1.05737	0.388
B6SUC4|B6SUC4_MAIZE	9.08025179226908	8.91107685303811	0.981369	0.388
B4FZP0|B4FZP0_MAIZE	9.51351341437481	9.63132173321771	1.01238	0.38
C5WN48|C5WN48_SORBI	6.4024199109263	6.60811579384985	1.03213	0.389
C5X7F7|C5X7F7_SORBI	6.96976330924476	6.48102359577975	0.929877	0.389
C5X4S0|C5X4S0_SORBI	7.03530552250627	5.74434481665273	0.816503	0.389
B8ARY5|B8ARY5_ORYSI	7.04168750660213	7.41205834225442	1.0526	0.389
J3LV03|J3LV03_ORYBR	7.56490542591858	6.86612471448082	0.907629	0.389
I1HZX4|I1HZX4_BRADI	7.90792644216749	7.57295257195548	0.957641	0.389
Q4U400|Q4U400_WHEAT	8.09635095119715	7.84518818778903	0.968978	0.389
M0TV42|M0TV42_MUSAM	8.20860914666088	8.31694541388327	1.0132	0.389
J3M3E1|J3M3E1_ORYBR	8.65306590277543	8.73655370985256	1.00965	0.389
I1J1Z7|I1J1Z7_BRADI	8.71425484935302	8.95664969145769	1.02782	0.389
F8RT42|F8RT42_9ASPA	8.87347992348866	8.98469157856559	1.01253	0.389
K7ST04|K7ST04_9POAL	6.53010119953061	7.00099605606681	1.07211	0.391
A2Z043|A2Z043_ORYSI	6.66695356099026	5.8379474962797	0.875654	0.391
A2YUJ4|A2YUJ4_ORYSI	7.321114576902	7.5175769835944	1.02684	0.391
H6WBW9|H6WBW9_9LILI	7.43365845273147	7.08682497909642	0.953343	0.391
F2E8E3|F2E8E3_HORVD	7.54573578518416	7.09641365111525	0.940454	0.391
J3M019|J3M019_ORYBR	7.78510584015268	7.48245192677819	0.961124	0.391
F2EFA8|F2EFA8_HORVD	6.80904522745087	7.25448618545426	1.06542	0.392
M1JYJ5|M1JYJ5_9LILI	8.38852737944056	7.9733599211344	0.950508	0.392
H6SYI9|H6SYI9_ELECO	9.16368230585159	9.05448456101181	0.988084	0.392
M7YGC6|M7YGC6_TRIUA	9.65596688774712	9.48650350911184	0.98245	0.392
F2DDE9|F2DDE9_HORVD	6.28063966498064	6.6294048461714	1.05553	0.393
K7UFW0|K7UFW0_MAIZE	7.40978425858577	6.96343479353051	0.939762	0.393
K3YQ03|K3YQ03_SETIT	8.61425596359369	8.71997818126415	1.01227	0.393
M7ZSN5|M7ZSN5_TRIUA	9.07404107424473	8.757542108554	0.96512	0.393
F2DXP4|F2DXP4_HORVD	7.27450695696189	7.09422643577997	0.975217	0.394
K7VQC2|K7VQC2_MAIZE	8.52916648983368	8.33766413716331	0.977547	0.394
I1QIU8|I1QIU8_ORYGL	8.75812975326695	8.91200079172107	1.01757	0.394
K3YIQ0|K3YIQ0_SETIT	5.99082130996043	6.78554169342276	1.13266	0.395
M0T7H3|M0T7H3_MUSAM	7.01162238159183	7.45508605162973	1.06325	0.395
B6RFC4|B6RFC4_TRIDC	7.27185870931788	6.98127284916955	0.96004	0.395
B6UF55|B6UF55_MAIZE	7.47324993578302	7.76982023445938	1.03968	0.395
B9FAZ4|B9FAZ4_ORYSJ	6.23581826515854	6.84353513836955	1.09746	0.39
I1ICW6|I1ICW6_BRADI	6.5141947809647	5.97065393568979	0.916561	0.396
I1QYP6|I1QYP6_ORYGL	6.76909993097853	7.28304588114287	1.07593	0.396
H6SYR5|H6SYR5_LILSU	7.95589892587369	7.65276655097354	0.961898	0.396
B6TG70|B6TG70_MAIZE	7.98908325700582	8.24360508544577	1.03186	0.396
sp|Q943F3|RL18A_ORYSJ	8.03992810650494	8.33619469835613	1.03685	0.396
K3ZJT4|K3ZJT4_SETIT	6.89667345028937	7.36937181580913	1.06854	0.39
J3MFW6|J3MFW6_ORYBR	7.62428407531758	7.71804700353032	1.0123	0.39
Q2XX14|Q2XX14_ZEAMP	7.05227570572156	7.78306815952846	1.10363	0.397
B4F837|B4F837_MAIZE	7.28095578193599	7.65879254653461	1.05189	0.397
B7EW17|B7EW17_ORYSJ	8.27821583082923	8.46690818015096	1.02279	0.39
A2YUJ1|A2YUJ1_ORYSI	8.40600037375785	8.05315500412505	0.958025	0.39
D3JJB8|D3JJB8_TYPLA	9.87363335043369	9.81167901245109	0.993725	0.3
C5XBM3|C5XBM3_SORBI	7.89467878061236	7.63652895324111	0.967301	0.398
M8AN75|M8AN75_TRIUA	7.95291091983949	8.15836273037534	1.02583	0.398
K4ADY4|K4ADY4_SETIT	10.6601526752653	10.5696560787158	0.991511	0.399
J3MN27|J3MN27_ORYBR	5.39157156657021	6.09506567572642	1.13048	0.399
A2ZRW5|A2ZRW5_ORYSJ	5.59076053877906	6.10951149896309	1.09279	0.399
I1R276|I1R276_ORYGL	6.38498804664913	7.01051808704412	1.09797	0.399
K4AFG0|K4AFG0_SETIT	6.62390374554852	6.20182869847698	0.93628	0.399
B9FS66|B9FS66_ORYSJ	7.86252912611049	8.17829179153514	1.04016	0.399
B8B7R8|B8B7R8_ORYSI	8.57577180596066	8.80230592745757	1.02642	0.399
M7ZT78|M7ZT78_TRIUA	5.78107139464546	6.34607778384807	1.09773	0.401
I1IT98|I1IT98_BRADI	7.75486750761663	8.06825005705771	1.04041	0.401
C6G4L5|C6G4L5_9ASPA	6.12767732473158	5.63560119098238	0.919696	0.402
Q10QU8|Q10QU8_ORYSJ	6.9960045520876	7.23702997709105	1.03445	0.402
Q2QUI9|Q2QUI9_ORYSJ	7.21866353373633	7.7806329677633	1.07785	0.402
B8A021|B8A021_MAIZE	7.46252677715895	6.9876844246249	0.93637	0.402
F2EAG4|F2EAG4_HORVD	7.47927129389166	7.72568927542862	1.03295	0.402
I1PFC8|I1PFC8_ORYGL	8.42807667126734	8.64329882172836	1.02554	0.402
A2YSS8|A2YSS8_ORYSI	9.54147262074429	9.67368672954803	1.01386	0.402
M8AN94|M8AN94_AEGTA	8.61855837144892	8.77937053159808	1.01866	0.403
M0TE03|M0TE03_MUSAM	9.51980505911628	9.40017590729479	0.987434	0.403
J3NBZ0|J3NBZ0_ORYBR	9.71991950034079	9.89305092164513	1.01781	0.403
M0T3L3|M0T3L3_MUSAM	7.30967232371757	7.53182755729306	1.03039	0.404
K3YZ47|K3YZ47_SETIT	8.92524238536514	9.07693937961307	1.017	0.404
I1H2M7|I1H2M7_BRADI	6.05850917679724	6.53637376135374	1.07887	0.405
I1I412|I1I412_BRADI	6.3862409346776	6.99927879729755	1.09599	0.405
M0TV25|M0TV25_MUSAM	6.44483295686154	7.11866182953782	1.10455	0.405
M8BLA5|M8BLA5_AEGTA	7.11488780613898	7.40459049975321	1.04072	0.405
B6TB75|B6TB75_MAIZE	7.68966133380544	7.84371757294428	1.02003	0.405
C5Y5Q8|C5Y5Q8_SORBI	10.8341076848731	10.7452945219846	0.991802	0.406
M8BFU2|M8BFU2_AEGTA	5.67305589006839	6.48492964079455	1.14311	0.406
I1IY80|I1IY80_BRADI	8.3596454406686	8.51911724803352	1.01908	0.406
M8A2E3|M8A2E3_TRIUA	7.26110656302399	7.51264086730536	1.03464	0.407
B9FGE6|B9FGE6_ORYSJ	7.80648887314515	8.05766007184747	1.03217	0.407
B6SZJ3|B6SZJ3_MAIZE	9.7013079145502	9.54360678286823	0.983744	0.407
K3XVH0|K3XVH0_SETIT	11.1266363048944	11.0133340498342	0.989817	0.408
K3XRL7|K3XRL7_SETIT	6.5392110074748	7.20040733469109	1.10111	0.408
I1NKA8|I1NKA8_ORYGL	6.76485120638452	7.1507669702454	1.05705	0.408
B9F5Z4|B9F5Z4_ORYSJ	6.6279529029897	7.56093994870405	1.14077	0.409
B6STN4|B6STN4_MAIZE	6.51409039458679	5.99528243502347	0.920356	0.411
B8Y2Y8|B8Y2Y8_FESAR	7.10511336155514	6.47043494337041	0.910673	0.411
J3LB65|J3LB65_ORYBR	8.15898291089509	8.65662452679548	1.06099	0.411
K7TSP8|K7TSP8_MAIZE	8.15723511686033	8.33238685710043	1.02147	0.412
Q01MK8|Q01MK8_ORYSA	5.33061014477637	5.8954910516587	1.10597	0.413
M8ALL6|M8ALL6_AEGTA	6.6361462910798	7.10989199492827	1.07139	0.413
K4A4T4|K4A4T4_SETIT	6.77557855915969	7.09299117129297	1.04685	0.413
M0SMU9|M0SMU9_MUSAM	7.06240733853347	7.7174052593172	1.09274	0.413
Q42391|Q42391_PANMI	9.56567796753569	9.27387297210692	0.969495	0.413
M7ZXX2|M7ZXX2_TRIUA	8.08537648503215	8.33768422084857	1.03121	0.414
F2CYX9|F2CYX9_HORVD	8.4955821880921	8.31675678172496	0.978951	0.414
sp|P52894|ALA2_HORVU	11.1263447934412	11.0496173732387	0.993104	0.415
I1IUV0|I1IUV0_BRADI	5.32437795450467	6.17166066914664	1.15913	0.41
M0TV84|M0TV84_MUSAM	6.07756897574773	6.52383768487778	1.07343	0.415
I1IZF2|I1IZF2_BRADI	7.24077992149714	6.9065127658219	0.953835	0.415
M7YZ91|M7YZ91_TRIUA	7.7627217949419	8.01605882532519	1.03264	0.415
J3KUW0|J3KUW0_ORYBR	6.78921510155423	7.41077431700088	1.09155	0.416
A4ZYQ0|A4ZYQ0_PENAM	7.26640113686572	7.5081453236338	1.03327	0.416
J3MSX1|J3MSX1_ORYBR	7.60760315948056	7.91875757409614	1.0409	0.416
M0Y5F6|M0Y5F6_HORVD	8.09385726299081	7.87907942354027	0.973464	0.416
C5WQX5|C5WQX5_SORBI	8.50265339016942	8.28421350033638	0.974309	0.416
M0S8D7|M0S8D7_MUSAM	8.53374447517989	8.410897087826	0.985605	0.416
B9F4E7|B9F4E7_ORYSJ	7.37039130033889	7.62134522143628	1.03405	0.41
I1H6W1|I1H6W1_BRADI	5.98908965202586	5.34817314359305	0.892986	0.417
C7IWS8|C7IWS8_ORYSJ	5.99967404222056	5.56365594374167	0.927326	0.417
J3LCC3|J3LCC3_ORYBR	6.69570626332284	7.38205335248777	1.10251	0.417
I1Q9C2|I1Q9C2_ORYGL	7.14220525114298	7.84077791703773	1.09781	0.417
J3LKR0|J3LKR0_ORYBR	7.80661373155462	7.57342890199676	0.97013	0.41
I1HGQ8|I1HGQ8_BRADI	8.33774311123528	8.61234330840604	1.03293	0.417
M0XS28|M0XS28_HORVD	8.61577686949168	8.1922122239873	0.950838	0.41
A2ZU69|A2ZU69_ORYSJ	6.2108567464354	5.58600095528024	0.899393	0.418
I1GR17|I1GR17_BRADI	6.38919183614085	6.83163082407327	1.06925	0.418
Q9AXE7|Q9AXE7_ZANAE	6.69384813269821	6.22027786617576	0.929253	0.418
Q4FCW1|Q4FCW1_SACOF	7.30453676847476	7.72903474865457	1.05811	0.418
sp|Q53N47|CLPC4_ORYSJ	7.68679884843509	7.44020909166231	0.96792	0.418
F2E720|F2E720_HORVD	6.256547149981	6.57538443296057	1.05096	0.419
B8B0C7|B8B0C7_ORYSI	9.62704491806088	9.89015307897639	1.02733	0.41
N1QVK0|N1QVK0_AEGTA	6.7944893142522	6.38834808558604	0.940225	0.419
C5YJV9|C5YJV9_SORBI	7.25542924733464	7.46360761661199	1.02869	0.419
B8Q5I1|B8Q5I1_TRIMO	7.36922470553123	7.76292109373853	1.05342	0.419
C5Z147|C5Z147_SORBI	7.60932572002627	7.79798532338944	1.02479	0.419
B8AVU6|B8AVU6_ORYSI	7.07904174001822	6.68509073515635	0.94435	0.421
K7UFU7|K7UFU7_MAIZE	7.1969871668479	7.56548297510386	1.0512	0.421
C0HHR4|C0HHR4_MAIZE	11.343733344231	11.4757614184165	1.01164	0.422
F2D4C4|F2D4C4_HORVD	5.89281018506352	5.11065546079588	0.86727	0.422
Q9MDQ1|Q9MDQ1_SORBI	7.26799934490135	7.56369374006446	1.04068	0.422
C5WT08|C5WT08_SORBI	8.32021206764467	8.10207824198938	0.973783	0.422
G3EFI2|G3EFI2_PANVG	6.87245992928049	7.31702314703216	1.06469	0.423
B6SV64|B6SV64_MAIZE	7.11905993487239	6.70090833380031	0.941263	0.423
G9JKH7|G9JKH7_9LILI	6.28896709623654	6.78853263559776	1.07944	0.424
C5X8D0|C5X8D0_SORBI	6.54481483691565	6.91659263205361	1.0568	0.424
A2YZX0|A2YZX0_ORYSI	8.35371581473468	8.16148979555067	0.976989	0.424
J3N279|J3N279_ORYBR	8.35845029146286	8.11064296264375	0.970352	0.424
Q8S829|Q8S829_ORYSJ	6.43957445344207	7.00149254089235	1.08726	0.425
N1QSP3|N1QSP3_AEGTA	7.68865244097036	8.02329386914875	1.04352	0.425
M0X710|M0X710_HORVD	5.88132735543477	6.3421810238827	1.07836	0.42
I7D7M9|I7D7M9_ALLCE	9.32724825025532	9.49371858999015	1.01785	0.425
Q5VNT5|Q5VNT5_ORYSJ	6.08115296910962	6.40981171290806	1.05405	0.426
F2E645|F2E645_HORVD	6.57109975142822	6.09563260113452	0.927643	0.426
B6SR15|B6SR15_MAIZE	6.68142162889352	7.03016290269447	1.0522	0.426
Q944P2|Q944P2_9LILI	6.78016082309751	6.26307867337999	0.923736	0.426
K7VH97|K7VH97_MAIZE	7.36748203490167	7.05889015707141	0.958114	0.426
I1IVV3|I1IVV3_BRADI	7.55998398374586	7.41182685302606	0.980402	0.426
F2DIS9|F2DIS9_HORVD	8.20160656885908	8.07932711438528	0.985091	0.426
C5WRT7|C5WRT7_SORBI	8.27271620284384	8.56982929171274	1.03591	0.426
A2YML2|A2YML2_ORYSI	8.73212719874807	8.49799039945646	0.973187	0.426
I1PF60|I1PF60_ORYGL	6.92430641366083	6.72543324947712	0.971279	0.42
Q95FI0|Q95FI0_ZOSNO	9.44160055946823	9.15924515849804	0.970095	0.426
M7Z036|M7Z036_TRIUA	9.49561193045321	9.34928639427663	0.98459	0.426
B9FQ61|B9FQ61_ORYSJ	6.29561866473053	6.08985659256403	0.967317	0.427
Q8H028|Q8H028_ORYSJ	7.31451696897333	7.05479649415914	0.964492	0.427
M0RMI5|M0RMI5_MUSAM	7.32278599977207	7.6837685142013	1.0493	0.427
G3LT25|G3LT25_WHEAT	7.50558444468672	7.27960323690683	0.969892	0.427
K4A6N2|K4A6N2_SETIT	7.64960116188127	7.44796097983123	0.97364	0.427
J3LW12|J3LW12_ORYBR	8.50672929359477	8.43683155054456	0.991783	0.427
I1HRJ6|I1HRJ6_BRADI	8.88965584022289	8.68315088857341	0.97677	0.427
M0U5L7|M0U5L7_MUSAM	7.89493446693392	8.13646464235674	1.03059	0.42
C5YBP4|C5YBP4_SORBI	9.74232879777861	9.60217515273252	0.985614	0.427
K3Y7S0|K3Y7S0_SETIT	11.3242118529954	11.2470757608949	0.993188	0.428
J3N6N4|J3N6N4_ORYBR	5.26313749564808	6.05271651602933	1.15002	0.428
I1HX67|I1HX67_BRADI	8.53108727674383	8.72641921296778	1.0229	0.42
J3MYE2|J3MYE2_ORYBR	6.37009195555693	5.83877361998468	0.916592	0.428
A3ALE5|A3ALE5_ORYSJ	7.53637095203456	7.75303225409093	1.02875	0.428
Q53NQ5|Q53NQ5_ORYSJ	8.03285565435195	7.831767499239	0.974967	0.428
K3YRA7|K3YRA7_SETIT	8.58329634765407	8.84048319677986	1.02996	0.428
J3MIZ4|J3MIZ4_ORYBR	8.61257986314282	8.46533074458106	0.982903	0.428
B3SHD1|B3SHD1_9POAL	9.02588536529163	9.19649813155968	1.0189	0.428
K3YGB5|K3YGB5_SETIT	9.68804344869709	9.74867233468773	1.00626	0.428
I1I0D3|I1I0D3_BRADI	9.0453056346679	9.22664506649627	1.02005	0.42
C5YUN5|C5YUN5_SORBI	7.3448675901464	7.17255582455727	0.97654	0.429
K3XJL5|K3XJL5_SETIT	7.78539867499704	7.28578514648918	0.935827	0.429
I1HF32|I1HF32_BRADI	9.49686556260318	9.63871426800462	1.01494	0.429
K3ZAW7|K3ZAW7_SETIT	6.67449618734849	7.25389002144196	1.08681	0.431
A5A5E7|A5A5E7_MAIZE	6.97458276550771	6.578321893396	0.943185	0.431
I1P3V7|I1P3V7_ORYGL	7.97288920351368	8.24854599609691	1.03457	0.431
K3YP74|K3YP74_SETIT	8.54029331060696	8.7957257633102	1.02991	0.431
K3Z5G6|K3Z5G6_SETIT	8.79824449792882	8.90498452109146	1.01213	0.431
Q5ZAS4|Q5ZAS4_ORYSJ	6.41930834673213	5.77374290384042	0.899434	0.432
B4F9P7|B4F9P7_MAIZE	6.6901020340584	6.08545881998294	0.909621	0.432
K3YUS1|K3YUS1_SETIT	10.7701968389737	10.6697841175107	0.990677	0.433
J3LE59|J3LE59_ORYBR	6.75159024175573	7.52280316462043	1.11423	0.433
Q7XLA7|Q7XLA7_ORYSJ	9.16951930842494	9.09944510944881	0.992358	0.433
I1R5M7|I1R5M7_ORYGL	5.4425320272153	6.14645099623289	1.12934	0.435
M8AVF4|M8AVF4_AEGTA	7.55242712847909	7.08563418889496	0.938193	0.435
B6U4A3|B6U4A3_MAIZE	7.90016358720422	8.11647061061831	1.02738	0.435
F2D643|F2D643_HORVD	5.83569526651473	6.5344639111435	1.11974	0.43
C5YZM7|C5YZM7_SORBI	8.76884263188401	8.5044783603417	0.969852	0.435
M8BW02|M8BW02_AEGTA	7.76863434754637	7.45595222951729	0.959751	0.436
I1HYL4|I1HYL4_BRADI	7.8124151202053	8.00421288442779	1.02455	0.436
B6TPW9|B6TPW9_MAIZE	9.03945921830456	8.88957668223196	0.983419	0.436
M0TW38|M0TW38_MUSAM	6.32928396208879	5.78761067903341	0.914418	0.437
B8B0V0|B8B0V0_ORYSI	7.12178587460283	6.67341312469976	0.937042	0.437
K3YS33|K3YS33_SETIT	10.9269573718457	10.8694215457497	0.994735	0.438
I1IBP6|I1IBP6_BRADI	6.6089153222913	6.99801651691346	1.05888	0.438
M0WWN5|M0WWN5_HORVD	7.12453923476679	7.29712046798554	1.02422	0.438
M8C2N4|M8C2N4_AEGTA	9.21458383552773	8.97711195629073	0.974229	0.438
Q60FY3|Q60FY3_9LILI	6.78178029483113	7.16478795855654	1.05648	0.439
B8AY31|B8AY31_ORYSI	7.67137141658069	7.05171488226795	0.919225	0.439
G3EFC4|G3EFC4_PANVG	8.05209140575914	7.82520098407121	0.971822	0.439
I1I9Y4|I1I9Y4_BRADI	6.43418008200439	7.07258109863421	1.09922	0.441
Q6AU86|Q6AU86_ORYSJ	7.02367286214571	6.63738906974212	0.945003	0.441
J3M9Z0|J3M9Z0_ORYBR	8.94591695627225	9.08512322810652	1.01556	0.441
C5YMX6|C5YMX6_SORBI	9.27406242006828	9.17096479334913	0.988883	0.442
C0P530|C0P530_MAIZE	10.4280045076023	10.4659993528679	1.00364	0.443
B9FYJ2|B9FYJ2_ORYSJ	5.84068893055493	6.30316411159499	1.07918	0.443
K4ACZ1|K4ACZ1_SETIT	6.79650677185178	6.12048371381811	0.900534	0.443
Q6U1E9|Q6U1E9_9ASPA	7.74336981586447	7.52432270560643	0.971712	0.443
I1H940|I1H940_BRADI	8.17218865552307	7.96325536419722	0.974434	0.443
M0RR84|M0RR84_MUSAM	9.02637920799634	9.21960723682067	1.02141	0.443
K3YTN2|K3YTN2_SETIT	10.1866316107876	10.3131191119921	1.01242	0.444
I1IAA5|I1IAA5_BRADI	10.9265572827813	10.8877297711022	0.996447	0.444
H6T039|H6T039_9POAL	6.49543607045266	6.17182212669874	0.950178	0.444
I1Q526|I1Q526_ORYGL	8.12434822921144	8.21570541484494	1.01124	0.444
K3ZIS5|K3ZIS5_SETIT	8.22684204052088	8.38177258199656	1.01883	0.444
M8AE33|M8AE33_TRIUA	6.06429878385617	6.67220690557782	1.10024	0.445
K3Z7G1|K3Z7G1_SETIT	7.14224527182522	7.59536288899743	1.06344	0.445
J3MB20|J3MB20_ORYBR	7.63792003003442	7.93558338168263	1.03897	0.445
J3N008|J3N008_ORYBR	8.08558232978556	8.44402612054913	1.04433	0.445
F2D2B6|F2D2B6_HORVD	8.31032056717423	8.12266844560347	0.977419	0.445
K7TZB8|K7TZB8_MAIZE	8.56848000319345	8.68923376702503	1.01409	0.445
J3LAY5|J3LAY5_ORYBR	8.95005822986372	8.82423873037143	0.985942	0.445
B8AZ97|B8AZ97_ORYSI	6.16327521309197	6.99346869331397	1.1347	0.44
C5XBF0|C5XBF0_SORBI	7.6526521296374	7.30147118864975	0.95411	0.446
I1GSE4|I1GSE4_BRADI	6.85710475242334	7.31014325299559	1.06607	0.44
I1IWW5|I1IWW5_BRADI	9.52303229297343	9.63282016938121	1.01153	0.446
K7U658|K7U658_MAIZE	7.13614189817256	6.55494932213441	0.918556	0.44
F2EJ93|F2EJ93_HORVD	7.15864099262724	6.66249615776453	0.930693	0.44
D5HQI9|D5HQI9_ANOMA	7.39145781237618	7.05734367144711	0.954797	0.44
K3Y3N4|K3Y3N4_SETIT	7.51606942929047	7.35521738302472	0.978599	0.44
B8AQ08|B8AQ08_ORYSI	6.39747297635868	6.78612741092079	1.06075	0.447
N1R4R9|N1R4R9_AEGTA	7.07957251157824	7.28830262248529	1.02948	0.447
B4FN63|B4FN63_MAIZE	7.71739168638053	7.91153038899701	1.02516	0.44
A2YKJ8|A2YKJ8_ORYSI	7.35105684545313	7.8009471172886	1.0612	0.447
K3YPB4|K3YPB4_SETIT	7.77015353181856	7.41080094840598	0.953752	0.447
Q2R3E6|Q2R3E6_ORYSJ	7.89168441101805	7.64506990611609	0.96875	0.44
I1I0L3|I1I0L3_BRADI	9.13600607850969	9.35644900921567	1.02413	0.447
Q8RW56|Q8RW56_9POAL	12.1757826425765	11.9509097297604	0.981531	0.448
A2YV93|A2YV93_ORYSI	5.92822111661587	6.75386453150098	1.13927	0.448
A2Y2Y4|A2Y2Y4_ORYSI	6.56640484332805	6.16309370149059	0.93858	0.448
Q9FWV2|Q9FWV2_ORYSJ	9.19983061840035	9.11146487853195	0.990395	0.448
J3LST2|J3LST2_ORYBR	9.4212849813387	9.59127468570363	1.01804	0.448
A2Y7R0|A2Y7R0_ORYSI	7.61437111066052	7.34782057091238	0.964994	0.449
I1H7H9|I1H7H9_BRADI	8.75264177332216	8.90488221454962	1.01739	0.449
I1R509|I1R509_ORYGL	6.69151556673646	6.45644053927398	0.96487	0.451
B6TV58|B6TV58_MAIZE	7.53008924351824	7.85860246272686	1.04363	0.451
A2XM47|A2XM47_ORYSI	6.71794279427279	6.23564925276565	0.928208	0.452
I1IV81|I1IV81_BRADI	7.58319918567316	7.21943684733187	0.95203	0.452
K7W6R8|K7W6R8_MAIZE	7.79662588595476	7.40739175602053	0.950077	0.452
Q5VMF8|Q5VMF8_ORYSJ	7.91819672963412	7.77478168853789	0.981888	0.452
I1HIS2|I1HIS2_BRADI	8.8907383878217	8.64434946723547	0.972287	0.452
K7UVS4|K7UVS4_MAIZE	5.812835010647	6.40751104071607	1.1023	0.453
C5X2E3|C5X2E3_SORBI	6.20505093619802	7.00329218811736	1.12864	0.453
K3XLX3|K3XLX3_SETIT	6.21452257401364	6.93788574000528	1.1164	0.453
B8AYT8|B8AYT8_ORYSI	8.24894742409601	8.45541054931154	1.02503	0.453
Q08G39|Q08G39_WHEAT	8.40753478225496	7.71227332440008	0.917305	0.453
B8AVI5|B8AVI5_ORYSI	8.94117456459939	9.1183371999699	1.01981	0.453
Q6K6U6|Q6K6U6_ORYSJ	9.48407179534753	9.33902832523468	0.984707	0.453
Q0E3X0|Q0E3X0_ORYSJ	6.12868966972736	6.58994617678199	1.07526	0.454
M7YTL8|M7YTL8_TRIUA	6.5711431283304	6.91211041761954	1.05189	0.454
I1IVH2|I1IVH2_BRADI	6.67471359594898	6.91662114485297	1.03624	0.454
Q6ZL73|Q6ZL73_ORYSJ	8.28441165713006	8.10598388608586	0.978462	0.454
sp|Q9LSU1|PSA5_ORYSJ	6.01326612348402	5.47343710958173	0.910227	0.455
M7YK14|M7YK14_TRIUA	6.04064013364754	6.52103729372735	1.07953	0.455
B9EUG2|B9EUG2_ORYSJ	6.93525450773874	7.0994856304211	1.02368	0.455
M0TAI9|M0TAI9_MUSAM	6.98179079176182	7.33436399570934	1.0505	0.455
M0SN63|M0SN63_MUSAM	5.73348514371954	5.94690545872432	1.03722	0.45
Q9LKM2|Q9LKM2_ORYSI	5.50164468400722	6.20994805076907	1.12874	0.456
H2FDV5|H2FDV5_9ASPA	6.50686623588847	6.01671245427288	0.924671	0.456
M0U875|M0U875_MUSAM	6.73699135392091	6.26143654120506	0.929411	0.456
I1Q915|I1Q915_ORYGL	6.98171510999001	6.58009998856199	0.942476	0.456
Q6YXI3|Q6YXI3_ORYSJ	8.49045574187603	8.10531593814076	0.954639	0.456
Q43271|Q43271_MAIZE	6.95426231597078	7.34168699138676	1.05571	0.45
Q5XUV3|Q5XUV3_WHEAT	7.05582847995087	6.56561312649292	0.930523	0.45
Q84SH2|Q84SH2_ORYSJ	6.46851952380545	6.88042489816652	1.06368	0.457
B7SB29|B7SB29_9POAL	6.86427935727705	6.52662074942549	0.950809	0.457
sp|Q6Z382|COPG2_ORYSJ	7.16795745164347	7.45995480582449	1.04074	0.457
Q6EP57|Q6EP57_ORYSJ	7.75400418663629	7.43250024094932	0.958537	0.45
M0T4F8|M0T4F8_MUSAM	8.95755671994675	8.78725057072081	0.980987	0.457
Q7XWP8|Q7XWP8_ORYSJ	8.27997638877624	8.10302162026986	0.978629	0.45
C5WT59|C5WT59_SORBI	8.30367000917957	8.5785504597529	1.0331	0.45
B4FT19|B4FT19_MAIZE	8.64448423770352	8.41811984053312	0.973814	0.45
M0YDA0|M0YDA0_HORVD	6.64235642416818	6.39293447664161	0.96245	0.458
K7UZK4|K7UZK4_MAIZE	6.99912224694849	7.25149863538993	1.03606	0.458
Q3ZPP0|Q3ZPP0_9ASPA	7.04605665722865	7.3917199127633	1.04906	0.458
M8A4U3|M8A4U3_TRIUA	8.2592076629545	8.40170102151562	1.01725	0.458
Q8S6P5|Q8S6P5_ORYSJ	8.36987480368879	8.03290786382608	0.959741	0.458
B9A8E4|B9A8E4_WHEAT	8.58532976434375	8.44425428852657	0.983568	0.458
Q53LU9|Q53LU9_ORYSJ	6.54542188752078	7.04845226552761	1.07685	0.459
J3MTC7|J3MTC7_ORYBR	7.69253655206936	8.20023999725803	1.066	0.459
C5Y356|C5Y356_SORBI	6.1151939276155	6.46106435558691	1.05656	0.4
M0RPG0|M0RPG0_MUSAM	6.82761292079264	7.25953567389352	1.06326	0.461
M0S044|M0S044_MUSAM	6.92777702496392	7.11545326283643	1.02709	0.461
M0X7Y6|M0X7Y6_HORVD	7.56770382402161	7.78965975985619	1.02933	0.461
I1ITE2|I1ITE2_BRADI	6.28201361591389	6.63756719049887	1.0566	0.462
I1IXX4|I1IXX4_BRADI	7.88847836240194	8.09057844688958	1.02562	0.462
M7YXN3|M7YXN3_TRIUA	7.92165390984234	6.81453320866323	0.860241	0.462
C5XAT4|C5XAT4_SORBI	6.51936035659686	6.03670538137417	0.925966	0.463
C5XA56|C5XA56_SORBI	6.91161516595002	6.61238588321773	0.956706	0.463
B6UC34|B6UC34_MAIZE	7.04878295497474	6.62694710932783	0.940155	0.463
Q6B6M1|Q6B6M1_HORVU	7.13185888328786	7.41216495404946	1.0393	0.463
M0RQN5|M0RQN5_MUSAM	7.15498906746651	7.4654112194615	1.04339	0.463
K3Z512|K3Z512_SETIT	8.15495283807654	7.614184448736	0.933688	0.463
M0V9H3|M0V9H3_HORVD	8.20949102348471	8.34513178876865	1.01652	0.463
F2CS63|F2CS63_HORVD	8.28183280142947	8.10250936927575	0.978347	0.463
K3Y6A9|K3Y6A9_SETIT	8.81952506349245	8.76138235481282	0.993408	0.463
O82578|O82578_MAIZE	6.43693050372841	7.21442474214422	1.12079	0.4
M8B121|M8B121_AEGTA	5.40582476045666	6.26511897858405	1.15896	0.464
M7ZWN3|M7ZWN3_TRIUA	6.48267810466449	7.04992578275762	1.0875	0.464
I1HDI2|I1HDI2_BRADI	7.32767152803388	7.63331252905871	1.04171	0.464
M0SIL2|M0SIL2_MUSAM	7.34140610528216	7.67755391703564	1.04579	0.464
G3KB83|G3KB83_9ASPA	9.02611135090687	8.47859182612728	0.93934	0.464
Q5U1H0|Q5U1H0_ORYSJ	5.4319182426605	6.20932480703409	1.14312	0.46
F2CQH7|F2CQH7_HORVD	6.50180711979725	5.83737130835336	0.897808	0.465
F2CXH4|F2CXH4_HORVD	6.70626978297242	6.36280813159549	0.948785	0.465
B6T5S8|B6T5S8_MAIZE	6.98707032886327	6.38972498723375	0.914507	0.465
C0PHD4|C0PHD4_MAIZE	7.09801880826549	7.46640282817025	1.0519	0.465
J3M4D6|J3M4D6_ORYBR	7.15637300400727	7.34055795165727	1.02574	0.465
B8Y2Y4|B8Y2Y4_FESAR	7.32724039283834	7.05726371596394	0.963154	0.465
M8BWI0|M8BWI0_AEGTA	8.75316043443804	8.91763619113152	1.01879	0.465
C5X6V7|C5X6V7_SORBI	9.20550556744492	9.31227459016531	1.0116	0.465
M0YJF4|M0YJF4_HORVD	9.52725146016176	9.70094719898002	1.01823	0.465
K3YUP7|K3YUP7_SETIT	10.4158031366238	10.4575928840359	1.00401	0.466
C7SN44|C7SN44_9POAL	6.3289723143142	5.95484011219393	0.940886	0.46
H2FDX6|H2FDX6_9ASPA	6.44511533882438	6.83140373095382	1.05994	0.46
J3L589|J3L589_ORYBR	7.64767910135554	7.46144516758968	0.975648	0.466
B6TWW1|B6TWW1_MAIZE	7.86776731703273	8.06871599609631	1.02554	0.466
I1H1Z5|I1H1Z5_BRADI	7.92490977919893	7.48633982827383	0.944659	0.466
K3YJN1|K3YJN1_SETIT	8.27048036821989	8.44188351890928	1.02072	0.466
K4A5A5|K4A5A5_SETIT	8.30393992970782	8.05240180779541	0.969709	0.466
B8A158|B8A158_MAIZE	7.49215505139118	7.14115414965249	0.953151	0.46
M8CNU2|M8CNU2_AEGTA	6.46335403227538	6.06539328210586	0.938428	0.467
K7TKN0|K7TKN0_MAIZE	6.75134466115881	7.17447380124401	1.06267	0.467
K3Z812|K3Z812_SETIT	7.11933628810918	7.58292206029291	1.06512	0.467
I1HZJ4|I1HZJ4_BRADI	7.77872802324157	7.52076595217756	0.966837	0.46
Q8LST4|Q8LST4_SORBI	9.91811418942073	9.93911969212527	1.00212	0.467
M0TRR4|M0TRR4_MUSAM	8.08424749811986	7.83708367656363	0.969426	0.46
C5Y1Z6|C5Y1Z6_SORBI	6.31628453664514	6.74008843753104	1.0671	0.468
B6T2R0|B6T2R0_MAIZE	8.6750065711021	8.29051270966463	0.955678	0.46
Q9SDG5|Q9SDG5_ORYSJ	6.88795122911849	7.21060272892602	1.04684	0.468
J3MSP3|J3MSP3_ORYBR	7.38189909445497	7.69876075042633	1.04292	0.468
B9F1I6|B9F1I6_ORYSJ	8.31217470254595	8.53379433314271	1.02666	0.468
B6T7D4|B6T7D4_MAIZE	9.08548991434748	8.8707003452931	0.976359	0.468
D3K4E0|D3K4E0_HORVU	9.44978818972511	9.33163284778811	0.987497	0.468
K4A6U9|K4A6U9_SETIT	6.93873478320718	6.48473892372304	0.934571	0.4
K7UKK5|K7UKK5_MAIZE	5.66053780207834	6.21340219734026	1.09767	0.469
H6T072|H6T072_9POAL	6.37762894972042	6.62233637387549	1.03837	0.469
J3LI24|J3LI24_ORYBR	7.02342878278036	6.60798254607465	0.940849	0.469
F2DD93|F2DD93_HORVD	8.92297289865442	9.01327117344327	1.01012	0.469
M0TMB2|M0TMB2_MUSAM	9.25961754119611	9.37734887423875	1.01271	0.469
I1HZ62|I1HZ62_BRADI	9.72330298017634	9.64613534471836	0.992064	0.469
C5WR49|C5WR49_SORBI	8.04124722804851	8.33361617498575	1.03636	0.471
I1HIL9|I1HIL9_BRADI	8.71398553030242	8.51628214347042	0.977312	0.471
C0P8F3|C0P8F3_MAIZE	7.19931979892068	6.34146704503977	0.880843	0.4
J7IBM0|J7IBM0_TRAPA	5.91240233501194	6.29682056239055	1.06502	0.472
K3ZVP6|K3ZVP6_SETIT	6.12616949071506	5.56578309694742	0.908526	0.472
Q6UB39|Q6UB39_ORYSJ	6.48259269510729	6.86311566625384	1.0587	0.472
M0ZCR1|M0ZCR1_HORVD	6.61483163814109	6.28994453009232	0.950885	0.472
Q2QN12|Q2QN12_ORYSJ	6.6788971085809	6.39207243490138	0.957055	0.472
K3Y6V4|K3Y6V4_SETIT	7.24120049551221	6.93965848436733	0.958357	0.472
K4A5L2|K4A5L2_SETIT	7.65521543461201	7.15126775401798	0.934169	0.472
M0RHX6|M0RHX6_MUSAM	8.37854587655442	7.99862290298065	0.954655	0.472
[truncated: 2,329 more rows]
