# Supplementary figures and images for: A Proteomic Approach to Investigate the Drought Response in the Orphan Crop Eragrostis tef
Source: MDPI journal article supplement (doi:10.3390/proteomes5040032), 2017-11-15

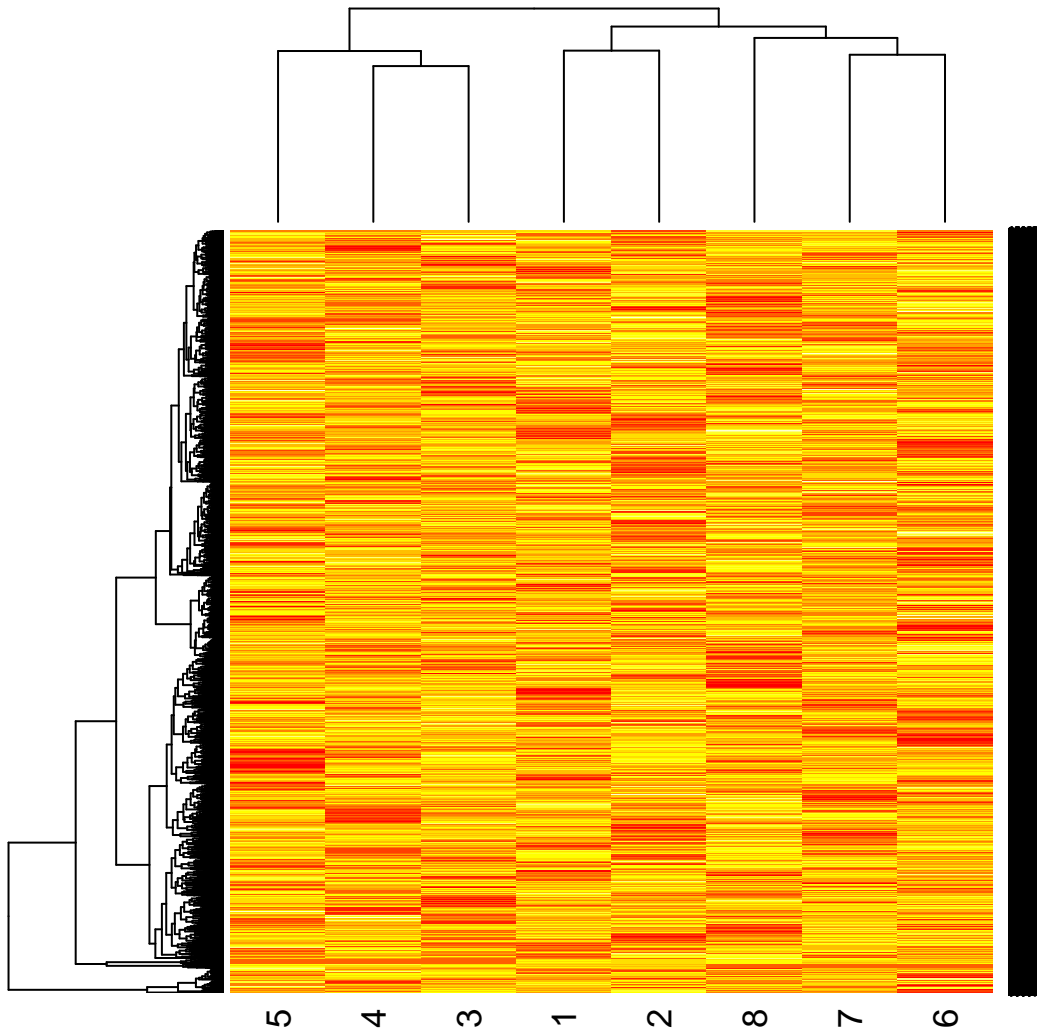

Supplement: s1 [file s1]

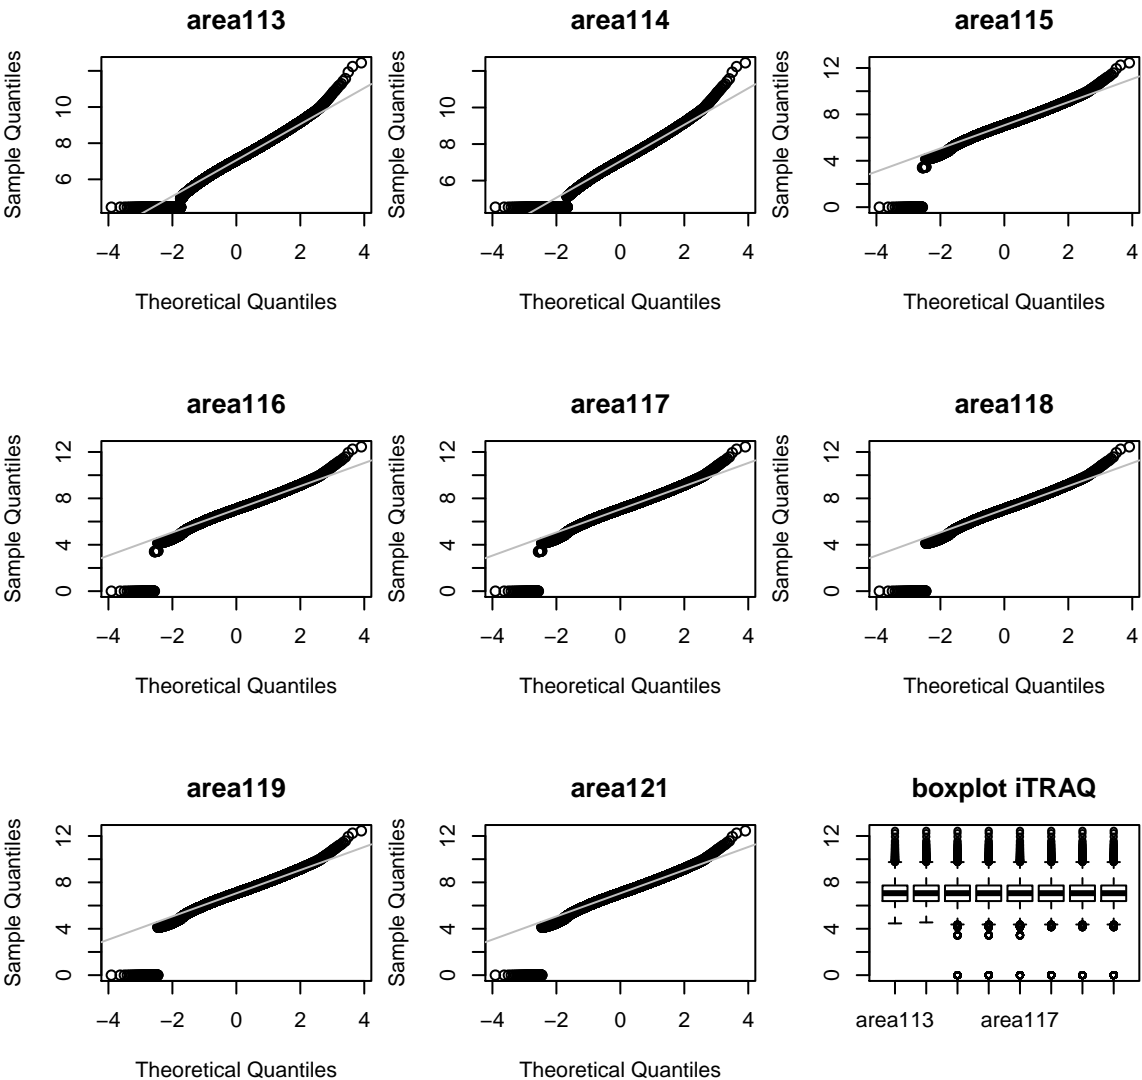

Supplement: s1 [file s1]

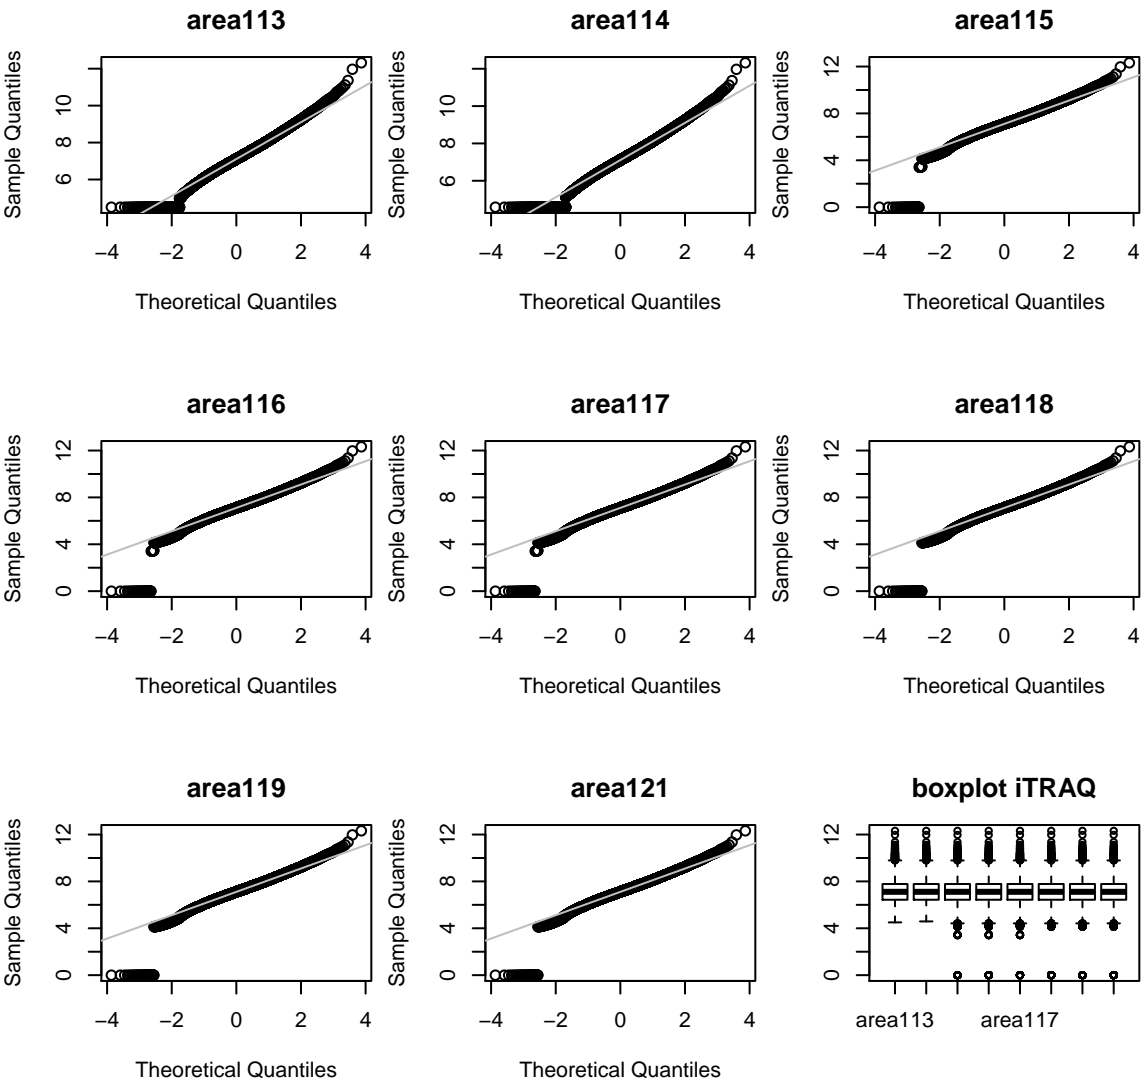

Supplement: s1 [file s1]

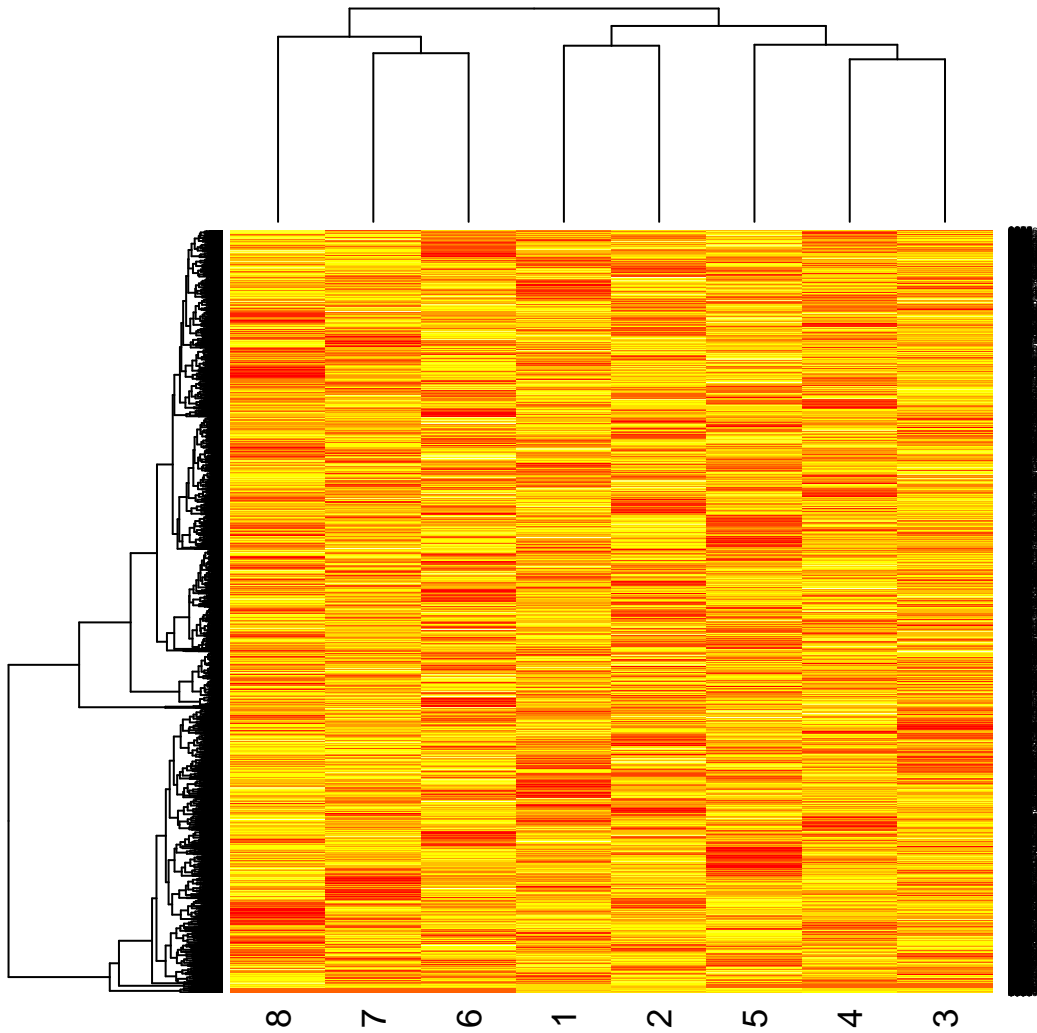

Supplement: s1 [file s1]

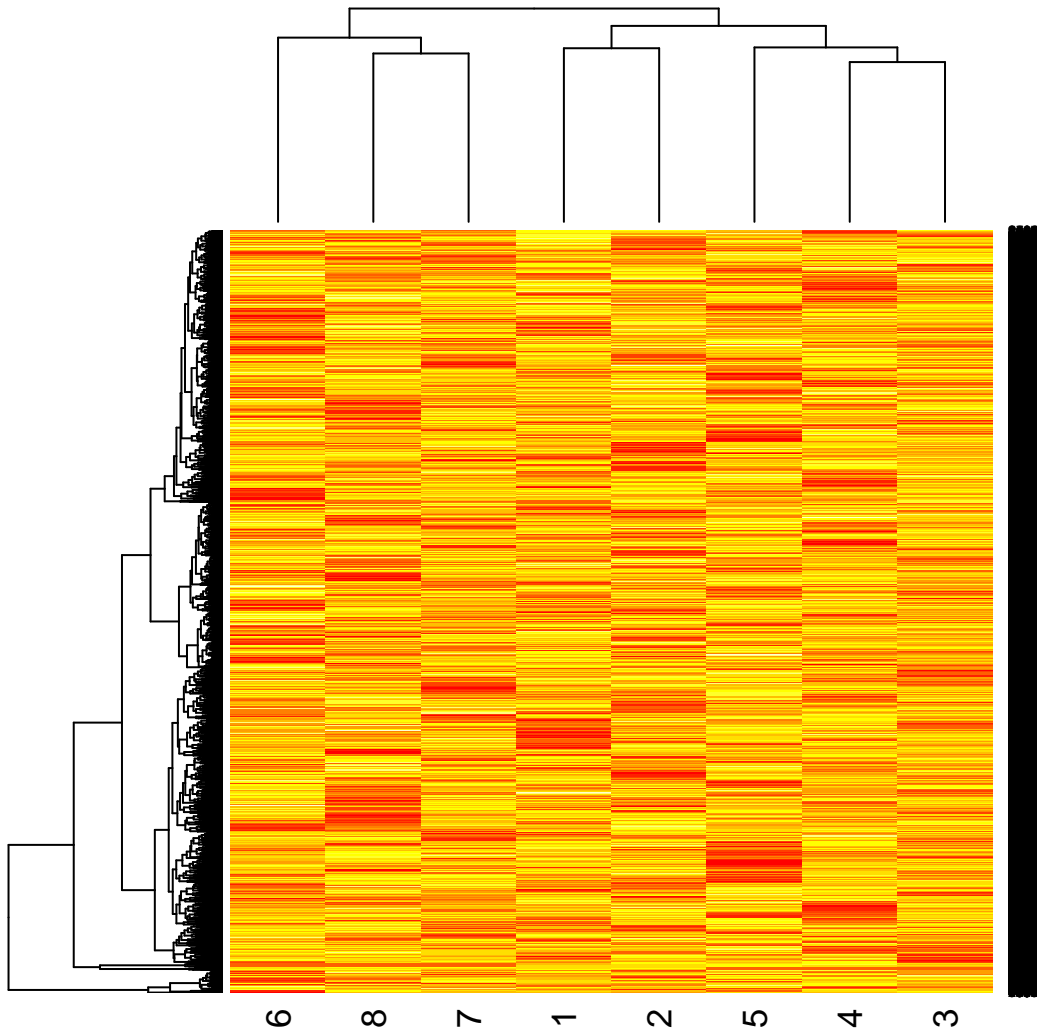

Supplement: s1 [file s1]

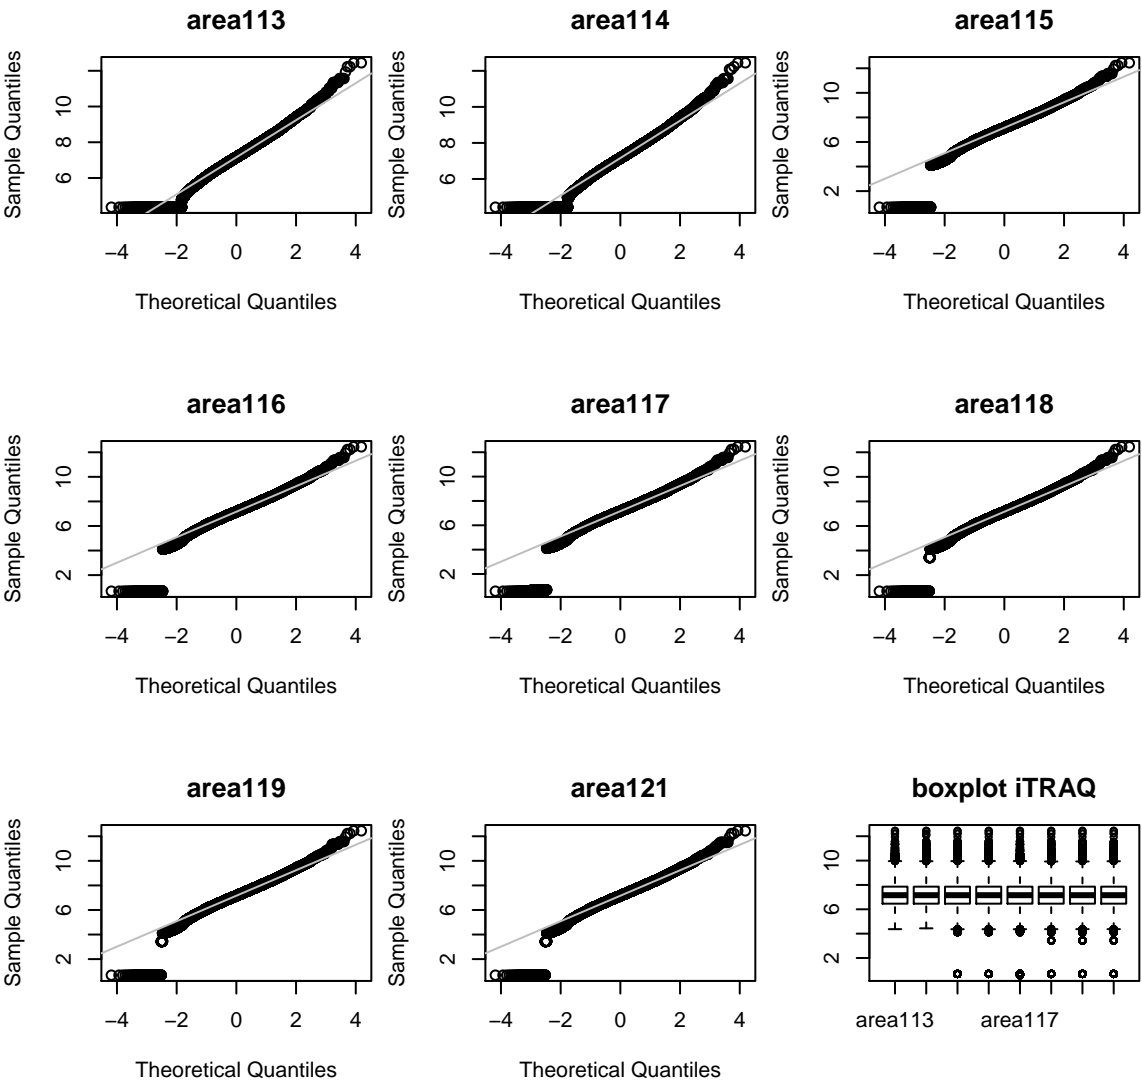

Supplement: s1 [file s1]
